# Supplementary material for: mQTL-seq delineates functionally relevant candidate gene harbouring a major QTL regulating pod number in chickpea
Source: PubMed Central journal article supplement — DNA Res. 2015 Dec 19;23(1):53–65. doi: 10.1093/dnares/dsv036 (PMC4755527; doi:10.1093/dnares/dsv036), 2015-12-19
Supplement: supp_dsv036_dsv036supp_table6.pdf [file supp_dsv036_dsv036supp_table6.pdf]

**Table S6:** SNPs differentiating low pod number-containing parental accession (ILWC 46) and homozygous bulk (LPNB) of mapping population (Pusa 256 x ILWC 46) from reference *kabuli* accession (CDC Frontier)

| SNPs IDs         | Chromosome IDs | Chromosomes     | Physical positions (bp) | CDC Frontier (Reference genome) | (ILWC46 & LPNB) | NCBI SNPdb Accession IDs |
|------------------|----------------|-----------------|-------------------------|---------------------------------|-----------------|--------------------------|
| SNP_P4_1_288     | NC_021160.1    | Ca_kabuli_chr01 | 288                     | CC                              | AA              | 1946717530               |
| SNP_P4_2_331     | NC_021160.1    | Ca_kabuli_chr01 | 331                     | AA                              | GG              | 1946717532               |
| SNP_P4_3_341     | NC_021160.1    | Ca_kabuli_chr01 | 341                     | CC                              | AA              | 1946717534               |
| SNP_P4_4_893     | NC_021160.1    | Ca_kabuli_chr01 | 893                     | GG                              | TT              | 1946717536               |
| SNP_P4_5_4179    | NC_021160.1    | Ca_kabuli_chr01 | 4179                    | TT                              | CC              | 1946717538               |
| SNP_P4_6_4728    | NC_021160.1    | Ca_kabuli_chr01 | 4728                    | TT                              | GG              | 1946717540               |
| SNP_P4_7_4786    | NC_021160.1    | Ca_kabuli_chr01 | 4786                    | CC                              | GG              | 1946717542               |
| SNP_P4_8_8959    | NC_021160.1    | Ca_kabuli_chr01 | 8959                    | CC                              | AA              | 1946717544               |
| SNP_P4_9_8968    | NC_021160.1    | Ca_kabuli_chr01 | 8968                    | GG                              | AA              | 1946717546               |
| SNP_P4_10_9338   | NC_021160.1    | Ca_kabuli_chr01 | 9338                    | GG                              | AA              | 1946717548               |
| SNP_P4_11_13820  | NC_021160.1    | Ca_kabuli_chr01 | 13820                   | CC                              | GG              | 1946717550               |
| SNP_P4_12_14072  | NC_021160.1    | Ca_kabuli_chr01 | 14072                   | TT                              | CC              | 1946717552               |
| SNP_P4_13_14155  | NC_021160.1    | Ca_kabuli_chr01 | 14155                   | AA                              | GG              | 1946717554               |
| SNP_P4_14_14189  | NC_021160.1    | Ca_kabuli_chr01 | 14189                   | TT                              | CC              | 1946717556               |
| SNP_P4_15_14216  | NC_021160.1    | Ca_kabuli_chr01 | 14216                   | CC                              | AA              | 1946717558               |
| SNP_P4_16_14973  | NC_021160.1    | Ca_kabuli_chr01 | 14973                   | GG                              | AA              | 1946717560               |
| SNP_P4_17_17801  | NC_021160.1    | Ca_kabuli_chr01 | 17801                   | TT                              | CC              | 1946717562               |
| SNP_P4_20_18899  | NC_021160.1    | Ca_kabuli_chr01 | 18899                   | CC                              | TT              | 1946717564               |
| SNP_P4_21_18902  | NC_021160.1    | Ca_kabuli_chr01 | 18902                   | AA                              | GG              | 1946717566               |
| SNP_P4_22_18957  | NC_021160.1    | Ca_kabuli_chr01 | 18957                   | AA                              | CC              | 1946717568               |
| SNP_P4_24_19418  | NC_021160.1    | Ca_kabuli_chr01 | 19418                   | GG                              | AA              | 1946717570               |
| SNP_P4_25_24714  | NC_021160.1    | Ca_kabuli_chr01 | 24714                   | GG                              | AA              | 1946717572               |
| SNP_P4_26_32005  | NC_021160.1    | Ca_kabuli_chr01 | 32005                   | TT                              | CC              | 1946717574               |
| SNP_P4_29_85282  | NC_021160.1    | Ca_kabuli_chr01 | 85282                   | GG                              | AA              | 1946717576               |
| SNP_P4_31_112224 | NC_021160.1    | Ca_kabuli_chr01 | 112224                  | CC                              | TT              | 1946717578               |
| SNP_P4_32_117177 | NC_021160.1    | Ca_kabuli_chr01 | 117177                  | AA                              | TT              | 1946717580               |
| SNP_P4_33_117178 | NC_021160.1    | Ca_kabuli_chr01 | 117178                  | GG                              | TT              | 1946717582               |
| SNP_P4_34_117506 | NC_021160.1    | Ca_kabuli_chr01 | 117506                  | AA                              | GG              | 1946717584               |
| SNP_P4_35_124852 | NC_021160.1    | Ca_kabuli_chr01 | 124852                  | AA                              | GG              | 1946717587               |
| SNP_P4_36_125036 | NC_021160.1    | Ca_kabuli_chr01 | 125036                  | AA                              | GG              | 1946717589               |
| SNP_P4_37_125312 | NC_021160.1    | Ca_kabuli_chr01 | 125312                  | CC                              | TT              | 1946717591               |
| SNP_P4_38_125491 | NC_021160.1    | Ca_kabuli_chr01 | 125491                  | TT                              | CC              | 1946717593               |
| SNP_P4_39_150106 | NC_021160.1    | Ca_kabuli_chr01 | 150106                  | CC                              | TT              | 1946717595               |
| SNP_P4_40_185546 | NC_021160.1    | Ca_kabuli_chr01 | 185546                  | CC                              | TT              | 1946717597               |
| SNP_P4_41_186463 | NC_021160.1    | Ca_kabuli_chr01 | 186463                  | TT                              | GG              | 1946717599               |
| SNP_P4_43_186550 | NC_021160.1    | Ca_kabuli_chr01 | 186550                  | GG                              | AA              | 1946717602               |
| SNP_P4_44_186564 | NC_021160.1    | Ca_kabuli_chr01 | 186564                  | AA                              | TT              | 1946717604               |
| SNP_P4_45_186626 | NC_021160.1    | Ca_kabuli_chr01 | 186626                  | TT                              | CC              | 1946717606               |
| SNP_P4_46_186725 | NC_021160.1    | Ca_kabuli_chr01 | 186725                  | GG                              | TT              | 1946717608               |

| SNPs IDs         | Chromosome IDs | Chromosomes     | Physical positions (bp) | CDC Frontier (Reference genome) | (ILWC46 & LPNB) | NCBI SNPdb Accession IDs |
|------------------|----------------|-----------------|-------------------------|---------------------------------|-----------------|--------------------------|
| SNP_P4_47_186749 | NC_021160.1    | Ca_kabuli_chr01 | 186749                  | GG                              | AA              | 1946717610               |
| SNP_P4_48_186788 | NC_021160.1    | Ca_kabuli_chr01 | 186788                  | AA                              | CC              | 1946717612               |
| SNP_P4_50_186964 | NC_021160.1    | Ca_kabuli_chr01 | 186964                  | CC                              | GG              | 1946717614               |
| SNP_P4_51_186979 | NC_021160.1    | Ca_kabuli_chr01 | 186979                  | CC                              | TT              | 1946717616               |
| SNP_P4_52_194511 | NC_021160.1    | Ca_kabuli_chr01 | 194511                  | CC                              | TT              | 1946717618               |
| SNP_P4_53_194590 | NC_021160.1    | Ca_kabuli_chr01 | 194590                  | AA                              | TT              | 1946717620               |
| SNP_P4_54_194625 | NC_021160.1    | Ca_kabuli_chr01 | 194625                  | TT                              | AA              | 1946717622               |
| SNP_P4_55_201924 | NC_021160.1    | Ca_kabuli_chr01 | 201924                  | CC                              | AA              | 1946717624               |
| SNP_P4_56_225609 | NC_021160.1    | Ca_kabuli_chr01 | 225609                  | AA                              | TT              | 1946717626               |
| SNP_P4_58_242677 | NC_021160.1    | Ca_kabuli_chr01 | 242677                  | TT                              | AA              | 1946717628               |
| SNP_P4_59_249828 | NC_021160.1    | Ca_kabuli_chr01 | 249828                  | CC                              | TT              | 1946717630               |
| SNP_P4_61_265045 | NC_021160.1    | Ca_kabuli_chr01 | 265045                  | GG                              | AA              | 1946717632               |
| SNP_P4_62_281255 | NC_021160.1    | Ca_kabuli_chr01 | 281255                  | GG                              | AA              | 1946717634               |
| SNP_P4_63_281389 | NC_021160.1    | Ca_kabuli_chr01 | 281389                  | CC                              | AA              | 1946717636               |
| SNP_P4_64_291985 | NC_021160.1    | Ca_kabuli_chr01 | 291985                  | CC                              | TT              | 1946717638               |
| SNP_P4_65_308419 | NC_021160.1    | Ca_kabuli_chr01 | 308419                  | TT                              | GG              | 1946717640               |
| SNP_P4_66_308422 | NC_021160.1    | Ca_kabuli_chr01 | 308422                  | AA                              | TT              | 1946717642               |
| SNP_P4_67_308455 | NC_021160.1    | Ca_kabuli_chr01 | 308455                  | CC                              | AA              | 1946717644               |
| SNP_P4_68_333937 | NC_021160.1    | Ca_kabuli_chr01 | 333937                  | AA                              | GG              | 1946717646               |
| SNP_P4_69_337059 | NC_021160.1    | Ca_kabuli_chr01 | 337059                  | CC                              | TT              | 1946717648               |
| SNP_P4_70_337978 | NC_021160.1    | Ca_kabuli_chr01 | 337978                  | TT                              | GG              | 1946717650               |
| SNP_P4_71_338206 | NC_021160.1    | Ca_kabuli_chr01 | 338206                  | GG                              | AA              | 1946717652               |
| SNP_P4_72_338694 | NC_021160.1    | Ca_kabuli_chr01 | 338694                  | AA                              | TT              | 1946717654               |
| SNP_P4_73_338707 | NC_021160.1    | Ca_kabuli_chr01 | 338707                  | CC                              | AA              | 1946717656               |
| SNP_P4_74_338735 | NC_021160.1    | Ca_kabuli_chr01 | 338735                  | AA                              | TT              | 1946717658               |
| SNP_P4_75_338739 | NC_021160.1    | Ca_kabuli_chr01 | 338739                  | TT                              | AA              | 1946717660               |
| SNP_P4_77_338960 | NC_021160.1    | Ca_kabuli_chr01 | 338960                  | AA                              | CC              | 1946717662               |
| SNP_P4_78_340257 | NC_021160.1    | Ca_kabuli_chr01 | 340257                  | AA                              | GG              | 1946717664               |
| SNP_P4_79_340410 | NC_021160.1    | Ca_kabuli_chr01 | 340410                  | GG                              | AA              | 1946717666               |
| SNP_P4_80_340436 | NC_021160.1    | Ca_kabuli_chr01 | 340436                  | AA                              | GG              | 1946717668               |
| SNP_P4_81_341433 | NC_021160.1    | Ca_kabuli_chr01 | 341433                  | GG                              | AA              | 1946717670               |
| SNP_P4_82_343222 | NC_021160.1    | Ca_kabuli_chr01 | 343222                  | TT                              | GG              | 1946717672               |
| SNP_P4_83_343268 | NC_021160.1    | Ca_kabuli_chr01 | 343268                  | TT                              | AA              | 1946717674               |
| SNP_P4_84_343401 | NC_021160.1    | Ca_kabuli_chr01 | 343401                  | GG                              | AA              | 1946717676               |
| SNP_P4_86_345393 | NC_021160.1    | Ca_kabuli_chr01 | 345393                  | CC                              | GG              | 1946717678               |
| SNP_P4_87_345433 | NC_021160.1    | Ca_kabuli_chr01 | 345433                  | AA                              | GG              | 1946717680               |
| SNP_P4_89_346827 | NC_021160.1    | Ca_kabuli_chr01 | 346827                  | AA                              | TT              | 1946717682               |
| SNP_P4_90_346893 | NC_021160.1    | Ca_kabuli_chr01 | 346893                  | GG                              | AA              | 1946717685               |
| SNP_P4_92_350384 | NC_021160.1    | Ca_kabuli_chr01 | 350384                  | TT                              | CC              | 1946717687               |
| SNP_P4_93_350494 | NC_021160.1    | Ca_kabuli_chr01 | 350494                  | AA                              | GG              | 1946717689               |
| SNP_P4_94_350547 | NC_021160.1    | Ca_kabuli_chr01 | 350547                  | TT                              | GG              | 1946717691               |
| SNP_P4_95_351632 | NC_021160.1    | Ca_kabuli_chr01 | 351632                  | GG                              | AA              | 1946717692               |

| SNPs IDs          | Chromosome IDs | Chromosomes     | Physical positions (bp) | CDC Frontier (Reference genome) | (ILWC46 & LPNB) | NCBI SNPdb Accession IDs |
|-------------------|----------------|-----------------|-------------------------|---------------------------------|-----------------|--------------------------|
| SNP_P4_96_353155  | NC_021160.1    | Ca_kabuli_chr01 | 353155                  | AA                              | TT              | 1946717694               |
| SNP_P4_97_353172  | NC_021160.1    | Ca_kabuli_chr01 | 353172                  | TT                              | AA              | 1946717696               |
| SNP_P4_98_353185  | NC_021160.1    | Ca_kabuli_chr01 | 353185                  | TT                              | GG              | 1946717698               |
| SNP_P4_99_353416  | NC_021160.1    | Ca_kabuli_chr01 | 353416                  | AA                              | CC              | 1946717700               |
| SNP_P4_100_354813 | NC_021160.1    | Ca_kabuli_chr01 | 354813                  | TT                              | GG              | 1946717702               |
| SNP_P4_101_355537 | NC_021160.1    | Ca_kabuli_chr01 | 355537                  | AA                              | GG              | 1946717705               |
| SNP_P4_103_355829 | NC_021160.1    | Ca_kabuli_chr01 | 355829                  | AA                              | GG              | 1946717707               |
| SNP_P4_105_355915 | NC_021160.1    | Ca_kabuli_chr01 | 355915                  | TT                              | CC              | 1946717709               |
| SNP_P4_106_358741 | NC_021160.1    | Ca_kabuli_chr01 | 358741                  | GG                              | AA              | 1946717711               |
| SNP_P4_107_358914 | NC_021160.1    | Ca_kabuli_chr01 | 358914                  | CC                              | TT              | 1946717713               |
| SNP_P4_108_361037 | NC_021160.1    | Ca_kabuli_chr01 | 361037                  | CC                              | GG              | 1946717715               |
| SNP_P4_109_361496 | NC_021160.1    | Ca_kabuli_chr01 | 361496                  | GG                              | CC              | 1946717717               |
| SNP_P4_110_361711 | NC_021160.1    | Ca_kabuli_chr01 | 361711                  | AA                              | GG              | 1946717719               |
| SNP_P4_111_362134 | NC_021160.1    | Ca_kabuli_chr01 | 362134                  | CC                              | GG              | 1946717721               |
| SNP_P4_112_362179 | NC_021160.1    | Ca_kabuli_chr01 | 362179                  | TT                              | CC              | 1946717723               |
| SNP_P4_113_362204 | NC_021160.1    | Ca_kabuli_chr01 | 362204                  | GG                              | AA              | 1946717725               |
| SNP_P4_114_362213 | NC_021160.1    | Ca_kabuli_chr01 | 362213                  | TT                              | GG              | 1946717727               |
| SNP_P4_115_362224 | NC_021160.1    | Ca_kabuli_chr01 | 362224                  | CC                              | TT              | 1946717729               |
| SNP_P4_116_362402 | NC_021160.1    | Ca_kabuli_chr01 | 362402                  | AA                              | GG              | 1946717731               |
| SNP_P4_117_362444 | NC_021160.1    | Ca_kabuli_chr01 | 362444                  | CC                              | TT              | 1946717733               |
| SNP_P4_118_362448 | NC_021160.1    | Ca_kabuli_chr01 | 362448                  | GG                              | AA              | 1946717735               |
| SNP_P4_119_362449 | NC_021160.1    | Ca_kabuli_chr01 | 362449                  | GG                              | AA              | 1946717737               |
| SNP_P4_120_362542 | NC_021160.1    | Ca_kabuli_chr01 | 362542                  | AA                              | GG              | 1946717739               |
| SNP_P4_121_362570 | NC_021160.1    | Ca_kabuli_chr01 | 362570                  | CC                              | TT              | 1946717741               |
| SNP_P4_122_362709 | NC_021160.1    | Ca_kabuli_chr01 | 362709                  | GG                              | AA              | 1946717743               |
| SNP_P4_123_362902 | NC_021160.1    | Ca_kabuli_chr01 | 362902                  | GG                              | AA              | 1946717745               |
| SNP_P4_124_362963 | NC_021160.1    | Ca_kabuli_chr01 | 362963                  | CC                              | TT              | 1946717747               |
| SNP_P4_125_363094 | NC_021160.1    | Ca_kabuli_chr01 | 363094                  | GG                              | AA              | 1946717750               |
| SNP_P4_126_363176 | NC_021160.1    | Ca_kabuli_chr01 | 363176                  | CC                              | TT              | 1946717752               |
| SNP_P4_127_363192 | NC_021160.1    | Ca_kabuli_chr01 | 363192                  | TT                              | CC              | 1946717754               |
| SNP_P4_128_363201 | NC_021160.1    | Ca_kabuli_chr01 | 363201                  | GG                              | AA              | 1946717756               |
| SNP_P4_129_363402 | NC_021160.1    | Ca_kabuli_chr01 | 363402                  | TT                              | CC              | 1946717758               |
| SNP_P4_130_363425 | NC_021160.1    | Ca_kabuli_chr01 | 363425                  | GG                              | TT              | 1946717760               |
| SNP_P4_131_363450 | NC_021160.1    | Ca_kabuli_chr01 | 363450                  | GG                              | AA              | 1946717762               |
| SNP_P4_132_363624 | NC_021160.1    | Ca_kabuli_chr01 | 363624                  | AA                              | GG              | 1946717764               |
| SNP_P4_133_363648 | NC_021160.1    | Ca_kabuli_chr01 | 363648                  | CC                              | TT              | 1946717766               |
| SNP_P4_134_363704 | NC_021160.1    | Ca_kabuli_chr01 | 363704                  | TT                              | AA              | 1946717768               |
| SNP_P4_135_363717 | NC_021160.1    | Ca_kabuli_chr01 | 363717                  | TT                              | CC              | 1946717770               |
| SNP_P4_136_363785 | NC_021160.1    | Ca_kabuli_chr01 | 363785                  | GG                              | AA              | 1946717772               |
| SNP_P4_137_364043 | NC_021160.1    | Ca_kabuli_chr01 | 364043                  | TT                              | GG              | 1946717774               |
| SNP_P4_138_368850 | NC_021160.1    | Ca_kabuli_chr01 | 368850                  | CC                              | AA              | 1946717776               |
| SNP_P4_139_368860 | NC_021160.1    | Ca_kabuli_chr01 | 368860                  | AA                              | GG              | 1946717779               |

| SNPs IDs          | Chromosome IDs | Chromosomes     | Physical positions (bp) | CDC Frontier (Reference genome) | (ILWC46 & LPNB) | NCBI SNPdb Accession IDs |
|-------------------|----------------|-----------------|-------------------------|---------------------------------|-----------------|--------------------------|
| SNP_P4_140_369014 | NC_021160.1    | Ca_kabuli_chr01 | 369014                  | AA                              | GG              | 1946717781               |
| SNP_P4_142_370904 | NC_021160.1    | Ca_kabuli_chr01 | 370904                  | GG                              | CC              | 1946717783               |
| SNP_P4_143_370909 | NC_021160.1    | Ca_kabuli_chr01 | 370909                  | GG                              | CC              | 1946717785               |
| SNP_P4_144_370914 | NC_021160.1    | Ca_kabuli_chr01 | 370914                  | CC                              | GG              | 1946717787               |
| SNP_P4_145_370935 | NC_021160.1    | Ca_kabuli_chr01 | 370935                  | AA                              | CC              | 1946717789               |
| SNP_P4_146_371566 | NC_021160.1    | Ca_kabuli_chr01 | 371566                  | CC                              | TT              | 1946717791               |
| SNP_P4_147_371768 | NC_021160.1    | Ca_kabuli_chr01 | 371768                  | CC                              | TT              | 1946717793               |
| SNP_P4_148_373578 | NC_021160.1    | Ca_kabuli_chr01 | 373578                  | CC                              | TT              | 1946717795               |
| SNP_P4_151_374791 | NC_021160.1    | Ca_kabuli_chr01 | 374791                  | CC                              | TT              | 1946717797               |
| SNP_P4_152_377399 | NC_021160.1    | Ca_kabuli_chr01 | 377399                  | CC                              | GG              | 1946717799               |
| SNP_P4_153_377433 | NC_021160.1    | Ca_kabuli_chr01 | 377433                  | GG                              | AA              | 1946717801               |
| SNP_P4_154_377449 | NC_021160.1    | Ca_kabuli_chr01 | 377449                  | GG                              | TT              | 1946717803               |
| SNP_P4_155_377599 | NC_021160.1    | Ca_kabuli_chr01 | 377599                  | AA                              | GG              | 1946717805               |
| SNP_P4_156_377751 | NC_021160.1    | Ca_kabuli_chr01 | 377751                  | GG                              | AA              | 1946717808               |
| SNP_P4_158_377798 | NC_021160.1    | Ca_kabuli_chr01 | 377798                  | TT                              | AA              | 1946717810               |
| SNP_P4_159_379304 | NC_021160.1    | Ca_kabuli_chr01 | 379304                  | CC                              | TT              | 1946717812               |
| SNP_P4_160_380949 | NC_021160.1    | Ca_kabuli_chr01 | 380949                  | TT                              | AA              | 1946717814               |
| SNP_P4_161_380999 | NC_021160.1    | Ca_kabuli_chr01 | 380999                  | AA                              | TT              | 1946717816               |
| SNP_P4_162_381248 | NC_021160.1    | Ca_kabuli_chr01 | 381248                  | TT                              | CC              | 1946717818               |
| SNP_P4_163_383615 | NC_021160.1    | Ca_kabuli_chr01 | 383615                  | TT                              | AA              | 1946717820               |
| SNP_P4_164_385646 | NC_021160.1    | Ca_kabuli_chr01 | 385646                  | CC                              | TT              | 1946717823               |
| SNP_P4_165_385674 | NC_021160.1    | Ca_kabuli_chr01 | 385674                  | CC                              | TT              | 1946717825               |
| SNP_P4_166_385705 | NC_021160.1    | Ca_kabuli_chr01 | 385705                  | AA                              | GG              | 1946717827               |
| SNP_P4_167_385706 | NC_021160.1    | Ca_kabuli_chr01 | 385706                  | AA                              | GG              | 1946717829               |
| SNP_P4_168_385734 | NC_021160.1    | Ca_kabuli_chr01 | 385734                  | TT                              | GG              | 1946717831               |
| SNP_P4_169_386635 | NC_021160.1    | Ca_kabuli_chr01 | 386635                  | CC                              | TT              | 1946717833               |
| SNP_P4_170_386673 | NC_021160.1    | Ca_kabuli_chr01 | 386673                  | AA                              | CC              | 1946717835               |
| SNP_P4_171_389327 | NC_021160.1    | Ca_kabuli_chr01 | 389327                  | CC                              | GG              | 1946717837               |
| SNP_P4_173_390594 | NC_021160.1    | Ca_kabuli_chr01 | 390594                  | GG                              | AA              | 1946717839               |
| SNP_P4_174_392215 | NC_021160.1    | Ca_kabuli_chr01 | 392215                  | CC                              | TT              | 1946717841               |
| SNP_P4_175_392221 | NC_021160.1    | Ca_kabuli_chr01 | 392221                  | TT                              | CC              | 1946717843               |
| SNP_P4_176_392227 | NC_021160.1    | Ca_kabuli_chr01 | 392227                  | CC                              | GG              | 1946717845               |
| SNP_P4_178_393871 | NC_021160.1    | Ca_kabuli_chr01 | 393871                  | GG                              | AA              | 1946717847               |
| SNP_P4_179_394549 | NC_021160.1    | Ca_kabuli_chr01 | 394549                  | TT                              | CC              | 1946717849               |
| SNP_P4_180_395277 | NC_021160.1    | Ca_kabuli_chr01 | 395277                  | TT                              | AA              | 1946717851               |
| SNP_P4_181_395293 | NC_021160.1    | Ca_kabuli_chr01 | 395293                  | AA                              | GG              | 1946717853               |
| SNP_P4_182_400528 | NC_021160.1    | Ca_kabuli_chr01 | 400528                  | CC                              | AA              | 1946717855               |
| SNP_P4_183_400537 | NC_021160.1    | Ca_kabuli_chr01 | 400537                  | CC                              | AA              | 1946717857               |
| SNP_P4_184_400556 | NC_021160.1    | Ca_kabuli_chr01 | 400556                  | AA                              | CC              | 1946717859               |
| SNP_P4_185_400570 | NC_021160.1    | Ca_kabuli_chr01 | 400570                  | AA                              | TT              | 1946717861               |
| SNP_P4_186_400573 | NC_021160.1    | Ca_kabuli_chr01 | 400573                  | AA                              | GG              | 1946717863               |
| SNP_P4_187_400963 | NC_021160.1    | Ca_kabuli_chr01 | 400963                  | AA                              | TT              | 1946717865               |



| SNPs IDs          | Chromosome IDs | Chromosomes     | Physical positions (bp) | CDC Frontier (Reference genome) | (ILWC46 & LPNB) | NCBI SNPdb Accession IDs |
|-------------------|----------------|-----------------|-------------------------|---------------------------------|-----------------|--------------------------|
| SNP_P4_189_401583 | NC_021160.1    | Ca_kabuli_chr01 | 401583                  | TT                              | AA              | 1946717867               |
| SNP_P4_190_401612 | NC_021160.1    | Ca_kabuli_chr01 | 401612                  | TT                              | CC              | 1946717869               |
| SNP_P4_191_401649 | NC_021160.1    | Ca_kabuli_chr01 | 401649                  | AA                              | TT              | 1946717871               |
| SNP_P4_192_401813 | NC_021160.1    | Ca_kabuli_chr01 | 401813                  | GG                              | AA              | 1946717874               |
| SNP_P4_193_402916 | NC_021160.1    | Ca_kabuli_chr01 | 402916                  | GG                              | AA              | 1946717876               |
| SNP_P4_194_402935 | NC_021160.1    | Ca_kabuli_chr01 | 402935                  | AA                              | CC              | 1946717878               |
| SNP_P4_195_402973 | NC_021160.1    | Ca_kabuli_chr01 | 402973                  | AA                              | TT              | 1946717880               |
| SNP_P4_196_402979 | NC_021160.1    | Ca_kabuli_chr01 | 402979                  | CC                              | TT              | 1946717882               |
| SNP_P4_197_402993 | NC_021160.1    | Ca_kabuli_chr01 | 402993                  | GG                              | TT              | 1946717884               |
| SNP_P4_199_403281 | NC_021160.1    | Ca_kabuli_chr01 | 403281                  | GG                              | AA              | 1946717886               |
| SNP_P4_200_403413 | NC_021160.1    | Ca_kabuli_chr01 | 403413                  | GG                              | AA              | 1946717888               |
| SNP_P4_201_403423 | NC_021160.1    | Ca_kabuli_chr01 | 403423                  | AA                              | CC              | 1946717890               |
| SNP_P4_202_403453 | NC_021160.1    | Ca_kabuli_chr01 | 403453                  | GG                              | AA              | 1946717892               |
| SNP_P4_203_403741 | NC_021160.1    | Ca_kabuli_chr01 | 403741                  | AA                              | CC              | 1946717894               |
| SNP_P4_204_403742 | NC_021160.1    | Ca_kabuli_chr01 | 403742                  | AA                              | GG              | 1946717896               |
| SNP_P4_205_403779 | NC_021160.1    | Ca_kabuli_chr01 | 403779                  | GG                              | AA              | 1946717898               |
| SNP_P4_206_403809 | NC_021160.1    | Ca_kabuli_chr01 | 403809                  | CC                              | AA              | 1946717900               |
| SNP_P4_207_403930 | NC_021160.1    | Ca_kabuli_chr01 | 403930                  | CC                              | GG              | 1946717902               |
| SNP_P4_208_403936 | NC_021160.1    | Ca_kabuli_chr01 | 403936                  | TT                              | CC              | 1946717904               |
| SNP_P4_209_403942 | NC_021160.1    | Ca_kabuli_chr01 | 403942                  | TT                              | CC              | 1946717906               |
| SNP_P4_211_404178 | NC_021160.1    | Ca_kabuli_chr01 | 404178                  | CC                              | TT              | 1946717908               |
| SNP_P4_212_404239 | NC_021160.1    | Ca_kabuli_chr01 | 404239                  | GG                              | TT              | 1946717910               |
| SNP_P4_213_404244 | NC_021160.1    | Ca_kabuli_chr01 | 404244                  | AA                              | CC              | 1946717912               |
| SNP_P4_214_404289 | NC_021160.1    | Ca_kabuli_chr01 | 404289                  | TT                              | CC              | 1946717914               |
| SNP_P4_215_404589 | NC_021160.1    | Ca_kabuli_chr01 | 404589                  | AA                              | TT              | 1946717916               |
| SNP_P4_216_404603 | NC_021160.1    | Ca_kabuli_chr01 | 404603                  | CC                              | AA              | 1946717918               |
| SNP_P4_217_404800 | NC_021160.1    | Ca_kabuli_chr01 | 404800                  | GG                              | AA              | 1946717920               |
| SNP_P4_218_405890 | NC_021160.1    | Ca_kabuli_chr01 | 405890                  | TT                              | CC              | 1946717922               |
| SNP_P4_220_407312 | NC_021160.1    | Ca_kabuli_chr01 | 407312                  | AA                              | GG              | 1946717924               |
| SNP_P4_221_407494 | NC_021160.1    | Ca_kabuli_chr01 | 407494                  | AA                              | CC              | 1946717926               |
| SNP_P4_222_407967 | NC_021160.1    | Ca_kabuli_chr01 | 407967                  | TT                              | GG              | 1946717928               |
| SNP_P4_223_407978 | NC_021160.1    | Ca_kabuli_chr01 | 407978                  | CC                              | TT              | 1946717930               |
| SNP_P4_224_408010 | NC_021160.1    | Ca_kabuli_chr01 | 408010                  | GG                              | AA              | 1946717932               |
| SNP_P4_225_408809 | NC_021160.1    | Ca_kabuli_chr01 | 408809                  | GG                              | TT              | 1946717935               |
| SNP_P4_226_408827 | NC_021160.1    | Ca_kabuli_chr01 | 408827                  | GG                              | AA              | 1946717937               |
| SNP_P4_227_408828 | NC_021160.1    | Ca_kabuli_chr01 | 408828                  | TT                              | GG              | 1946717939               |
| SNP_P4_228_408834 | NC_021160.1    | Ca_kabuli_chr01 | 408834                  | GG                              | AA              | 1946717941               |
| SNP_P4_229_408865 | NC_021160.1    | Ca_kabuli_chr01 | 408865                  | TT                              | CC              | 1946717943               |
| SNP_P4_230_408899 | NC_021160.1    | Ca_kabuli_chr01 | 408899                  | GG                              | TT              | 1946717945               |
| SNP_P4_232_409937 | NC_021160.1    | Ca_kabuli_chr01 | 409937                  | CC                              | AA              | 1946717947               |
| SNP_P4_233_409948 | NC_021160.1    | Ca_kabuli_chr01 | 409948                  | GG                              | CC              | 1946717949               |
| SNP_P4_234_410091 | NC_021160.1    | Ca_kabuli_chr01 | 410091                  | CC                              | GG              | 1946717951               |

| SNPs IDs          | Chromosome IDs | Chromosomes     | Physical positions (bp) | CDC Frontier (Reference genome) | (ILWC46 & LPNB) | NCBI SNPdb Accession IDs |
|-------------------|----------------|-----------------|-------------------------|---------------------------------|-----------------|--------------------------|
| SNP_P4_235_410277 | NC_021160.1    | Ca_kabuli_chr01 | 410277                  | AA                              | TT              | 1946717953               |
| SNP_P4_236_410328 | NC_021160.1    | Ca_kabuli_chr01 | 410328                  | TT                              | AA              | 1946717955               |
| SNP_P4_237_410333 | NC_021160.1    | Ca_kabuli_chr01 | 410333                  | GG                              | AA              | 1946717957               |
| SNP_P4_238_411006 | NC_021160.1    | Ca_kabuli_chr01 | 411006                  | GG                              | AA              | 1946717959               |
| SNP_P4_239_413310 | NC_021160.1    | Ca_kabuli_chr01 | 413310                  | AA                              | GG              | 1946717961               |
| SNP_P4_241_414047 | NC_021160.1    | Ca_kabuli_chr01 | 414047                  | AA                              | GG              | 1946717963               |
| SNP_P4_242_416404 | NC_021160.1    | Ca_kabuli_chr01 | 416404                  | CC                              | AA              | 1946717964               |
| SNP_P4_243_416634 | NC_021160.1    | Ca_kabuli_chr01 | 416634                  | TT                              | CC              | 1946717966               |
| SNP_P4_244_417413 | NC_021160.1    | Ca_kabuli_chr01 | 417413                  | TT                              | CC              | 1946717968               |
| SNP_P4_245_417724 | NC_021160.1    | Ca_kabuli_chr01 | 417724                  | AA                              | TT              | 1946717970               |
| SNP_P4_248_417921 | NC_021160.1    | Ca_kabuli_chr01 | 417921                  | GG                              | TT              | 1946717972               |
| SNP_P4_249_417933 | NC_021160.1    | Ca_kabuli_chr01 | 417933                  | AA                              | CC              | 1946717974               |
| SNP_P4_250_417993 | NC_021160.1    | Ca_kabuli_chr01 | 417993                  | GG                              | AA              | 1946717976               |
| SNP_P4_251_418023 | NC_021160.1    | Ca_kabuli_chr01 | 418023                  | CC                              | AA              | 1946717978               |
| SNP_P4_252_418033 | NC_021160.1    | Ca_kabuli_chr01 | 418033                  | CC                              | TT              | 1946717980               |
| SNP_P4_253_418043 | NC_021160.1    | Ca_kabuli_chr01 | 418043                  | CC                              | AA              | 1946717982               |
| SNP_P4_254_418118 | NC_021160.1    | Ca_kabuli_chr01 | 418118                  | TT                              | CC              | 1946717984               |
| SNP_P4_255_418435 | NC_021160.1    | Ca_kabuli_chr01 | 418435                  | AA                              | GG              | 1946717986               |
| SNP_P4_256_418555 | NC_021160.1    | Ca_kabuli_chr01 | 418555                  | GG                              | AA              | 1946717988               |
| SNP_P4_257_418578 | NC_021160.1    | Ca_kabuli_chr01 | 418578                  | AA                              | GG              | 1946717990               |
| SNP_P4_258_418610 | NC_021160.1    | Ca_kabuli_chr01 | 418610                  | GG                              | TT              | 1946717992               |
| SNP_P4_259_418625 | NC_021160.1    | Ca_kabuli_chr01 | 418625                  | CC                              | TT              | 1946717994               |
| SNP_P4_260_418964 | NC_021160.1    | Ca_kabuli_chr01 | 418964                  | AA                              | CC              | 1946717996               |
| SNP_P4_261_418977 | NC_021160.1    | Ca_kabuli_chr01 | 418977                  | AA                              | GG              | 1946717998               |
| SNP_P4_262_419020 | NC_021160.1    | Ca_kabuli_chr01 | 419020                  | AA                              | GG              | 1946718000               |
| SNP_P4_263_419255 | NC_021160.1    | Ca_kabuli_chr01 | 419255                  | CC                              | TT              | 1946718003               |
| SNP_P4_264_419287 | NC_021160.1    | Ca_kabuli_chr01 | 419287                  | AA                              | GG              | 1946718005               |
| SNP_P4_265_419305 | NC_021160.1    | Ca_kabuli_chr01 | 419305                  | CC                              | TT              | 1946718007               |
| SNP_P4_266_419335 | NC_021160.1    | Ca_kabuli_chr01 | 419335                  | CC                              | TT              | 1946718009               |
| SNP_P4_267_419339 | NC_021160.1    | Ca_kabuli_chr01 | 419339                  | AA                              | CC              | 1946718011               |
| SNP_P4_268_419417 | NC_021160.1    | Ca_kabuli_chr01 | 419417                  | AA                              | GG              | 1946718013               |
| SNP_P4_269_421745 | NC_021160.1    | Ca_kabuli_chr01 | 421745                  | GG                              | AA              | 1946718015               |
| SNP_P4_270_422611 | NC_021160.1    | Ca_kabuli_chr01 | 422611                  | GG                              | AA              | 1946718017               |
| SNP_P4_271_422617 | NC_021160.1    | Ca_kabuli_chr01 | 422617                  | GG                              | AA              | 1946718019               |
| SNP_P4_272_422798 | NC_021160.1    | Ca_kabuli_chr01 | 422798                  | CC                              | GG              | 1946718021               |
| SNP_P4_273_422846 | NC_021160.1    | Ca_kabuli_chr01 | 422846                  | AA                              | TT              | 1946718023               |
| SNP_P4_274_422848 | NC_021160.1    | Ca_kabuli_chr01 | 422848                  | GG                              | AA              | 1946718025               |
| SNP_P4_275_422930 | NC_021160.1    | Ca_kabuli_chr01 | 422930                  | TT                              | GG              | 1946718027               |
| SNP_P4_276_423005 | NC_021160.1    | Ca_kabuli_chr01 | 423005                  | CC                              | TT              | 1946718029               |
| SNP_P4_277_423367 | NC_021160.1    | Ca_kabuli_chr01 | 423367                  | GG                              | CC              | 1946718031               |
| SNP_P4_278_423568 | NC_021160.1    | Ca_kabuli_chr01 | 423568                  | GG                              | AA              | 1946718033               |
| SNP_P4_279_423911 | NC_021160.1    | Ca_kabuli_chr01 | 423911                  | TT                              | AA              | 1946718035               |

| SNPs IDs           | Chromosome IDs | Chromosomes     | Physical positions (bp) | CDC Frontier (Reference genome) | (ILWC46 & LPNB) | NCBI SNPdb Accession IDs |
|--------------------|----------------|-----------------|-------------------------|---------------------------------|-----------------|--------------------------|
| SNP_P4_280_424146  | NC_021160.1    | Ca_kabuli_chr01 | 424146                  | TT                              | CC              | 1946718037               |
| SNP_P4_281_424200  | NC_021160.1    | Ca_kabuli_chr01 | 424200                  | TT                              | AA              | 1946718039               |
| SNP_P4_282_424230  | NC_021160.1    | Ca_kabuli_chr01 | 424230                  | CC                              | GG              | 1946718041               |
| SNP_P4_283_424805  | NC_021160.1    | Ca_kabuli_chr01 | 424805                  | AA                              | GG              | 1946718043               |
| SNP_P4_284_425388  | NC_021160.1    | Ca_kabuli_chr01 | 425388                  | TT                              | AA              | 1946718045               |
| SNP_P4_285_425453  | NC_021160.1    | Ca_kabuli_chr01 | 425453                  | GG                              | AA              | 1946718047               |
| SNP_P4_286_425598  | NC_021160.1    | Ca_kabuli_chr01 | 425598                  | AA                              | GG              | 1946718049               |
| SNP_P4_288_426167  | NC_021160.1    | Ca_kabuli_chr01 | 426167                  | AA                              | GG              | 1946718051               |
| SNP_P4_290_430448  | NC_021160.1    | Ca_kabuli_chr01 | 430448                  | TT                              | CC              | 1946718053               |
| SNP_P4_291_430458  | NC_021160.1    | Ca_kabuli_chr01 | 430458                  | CC                              | TT              | 1946718055               |
| SNP_P4_292_430735  | NC_021160.1    | Ca_kabuli_chr01 | 430735                  | GG                              | AA              | 1946718057               |
| SNP_P4_293_431646  | NC_021160.1    | Ca_kabuli_chr01 | 431646                  | AA                              | GG              | 1946718059               |
| SNP_P4_294_431978  | NC_021160.1    | Ca_kabuli_chr01 | 431978                  | AA                              | GG              | 1946718061               |
| SNP_P4_296_432259  | NC_021160.1    | Ca_kabuli_chr01 | 432259                  | AA                              | GG              | 1946718063               |
| SNP_P4_297_454406  | NC_021160.1    | Ca_kabuli_chr01 | 454406                  | AA                              | GG              | 1946718065               |
| SNP_P4_298_459399  | NC_021160.1    | Ca_kabuli_chr01 | 459399                  | CC                              | TT              | 1946718067               |
| SNP_P4_299_473084  | NC_021160.1    | Ca_kabuli_chr01 | 473084                  | GG                              | AA              | 1946718069               |
| SNP_P4_300_476676  | NC_021160.1    | Ca_kabuli_chr01 | 476676                  | AA                              | GG              | 1946718074               |
| SNP_P4_301_502524  | NC_021160.1    | Ca_kabuli_chr01 | 502524                  | GG                              | AA              | 1946718080               |
| SNP_P4_302_546092  | NC_021160.1    | Ca_kabuli_chr01 | 546092                  | GG                              | AA              | 1946718082               |
| SNP_P4_303_546093  | NC_021160.1    | Ca_kabuli_chr01 | 546093                  | GG                              | AA              | 1946718084               |
| SNP_P4_304_546096  | NC_021160.1    | Ca_kabuli_chr01 | 546096                  | AA                              | TT              | 1946718086               |
| SNP_P4_305_562868  | NC_021160.1    | Ca_kabuli_chr01 | 562868                  | CC                              | TT              | 1946718088               |
| SNP_P4_307_676003  | NC_021160.1    | Ca_kabuli_chr01 | 676003                  | TT                              | GG              | 1946718090               |
| SNP_P4_308_697933  | NC_021160.1    | Ca_kabuli_chr01 | 697933                  | AA                              | TT              | 1946718092               |
| SNP_P4_310_805256  | NC_021160.1    | Ca_kabuli_chr01 | 805256                  | GG                              | AA              | 1946718094               |
| SNP_P4_311_811565  | NC_021160.1    | Ca_kabuli_chr01 | 811565                  | GG                              | AA              | 1946718096               |
| SNP_P4_312_852414  | NC_021160.1    | Ca_kabuli_chr01 | 852414                  | TT                              | CC              | 1946718098               |
| SNP_P4_313_884497  | NC_021160.1    | Ca_kabuli_chr01 | 884497                  | AA                              | GG              | 1946718100               |
| SNP_P4_314_894157  | NC_021160.1    | Ca_kabuli_chr01 | 894157                  | GG                              | AA              | 1946718102               |
| SNP_P4_315_894161  | NC_021160.1    | Ca_kabuli_chr01 | 894161                  | AA                              | TT              | 1946718104               |
| SNP_P4_316_939317  | NC_021160.1    | Ca_kabuli_chr01 | 939317                  | CC                              | TT              | 1946718106               |
| SNP_P4_317_946348  | NC_021160.1    | Ca_kabuli_chr01 | 946348                  | AA                              | GG              | 1946718108               |
| SNP_P4_319_1021803 | NC_021160.1    | Ca_kabuli_chr01 | 1021803                 | AA                              | TT              | 1946718110               |
| SNP_P4_320_1048663 | NC_021160.1    | Ca_kabuli_chr01 | 1048663                 | TT                              | CC              | 1946718112               |
| SNP_P4_322_1098042 | NC_021160.1    | Ca_kabuli_chr01 | 1098042                 | AA                              | GG              | 1946718114               |
| SNP_P4_323_1125210 | NC_021160.1    | Ca_kabuli_chr01 | 1125210                 | GG                              | CC              | 1946718116               |
| SNP_P4_324_1143403 | NC_021160.1    | Ca_kabuli_chr01 | 1143403                 | CC                              | TT              | 1946718118               |
| SNP_P4_325_1145180 | NC_021160.1    | Ca_kabuli_chr01 | 1145180                 | AA                              | GG              | 1946718121               |
| SNP_P4_326_1145182 | NC_021160.1    | Ca_kabuli_chr01 | 1145182                 | TT                              | GG              | 1946718123               |
| SNP_P4_328_1159904 | NC_021160.1    | Ca_kabuli_chr01 | 1159904                 | TT                              | CC              | 1946718125               |
| SNP_P4_329_1169866 | NC_021160.1    | Ca_kabuli_chr01 | 1169866                 | TT                              | AA              | 1946718127               |

| SNPs IDs           | Chromosome IDs | Chromosomes     | Physical positions (bp) | CDC Frontier (Reference genome) | (ILWC46 & LPNB) | NCBI SNPdb Accession IDs |
|--------------------|----------------|-----------------|-------------------------|---------------------------------|-----------------|--------------------------|
| SNP_P4_330_1169870 | NC_021160.1    | Ca_kabuli_chr01 | 1169870                 | TT                              | AA              | 1946718129               |
| SNP_P4_331_1177786 | NC_021160.1    | Ca_kabuli_chr01 | 1177786                 | TT                              | AA              | 1946718131               |
| SNP_P4_332_1186112 | NC_021160.1    | Ca_kabuli_chr01 | 1186112                 | AA                              | GG              | 1946718133               |
| SNP_P4_333_1192830 | NC_021160.1    | Ca_kabuli_chr01 | 1192830                 | CC                              | TT              | 1946718135               |
| SNP_P4_334_1192835 | NC_021160.1    | Ca_kabuli_chr01 | 1192835                 | CC                              | AA              | 1946718137               |
| SNP_P4_335_1201584 | NC_021160.1    | Ca_kabuli_chr01 | 1201584                 | AA                              | GG              | 1946718139               |
| SNP_P4_336_1202750 | NC_021160.1    | Ca_kabuli_chr01 | 1202750                 | GG                              | TT              | 1946718142               |
| SNP_P4_337_1208857 | NC_021160.1    | Ca_kabuli_chr01 | 1208857                 | GG                              | AA              | 1946718145               |
| SNP_P4_338_1209154 | NC_021160.1    | Ca_kabuli_chr01 | 1209154                 | TT                              | CC              | 1946718147               |
| SNP_P4_339_1210062 | NC_021160.1    | Ca_kabuli_chr01 | 1210062                 | GG                              | TT              | 1946718149               |
| SNP_P4_340_1228300 | NC_021160.1    | Ca_kabuli_chr01 | 1228300                 | GG                              | AA              | 1946718151               |
| SNP_P4_341_1230289 | NC_021160.1    | Ca_kabuli_chr01 | 1230289                 | GG                              | AA              | 1946718154               |
| SNP_P4_342_1233390 | NC_021160.1    | Ca_kabuli_chr01 | 1233390                 | AA                              | GG              | 1946718156               |
| SNP_P4_343_1308962 | NC_021160.1    | Ca_kabuli_chr01 | 1308962                 | CC                              | TT              | 1946718158               |
| SNP_P4_344_1331845 | NC_021160.1    | Ca_kabuli_chr01 | 1331845                 | CC                              | TT              | 1946718160               |
| SNP_P4_345_1347563 | NC_021160.1    | Ca_kabuli_chr01 | 1347563                 | TT                              | CC              | 1946718162               |
| SNP_P4_346_1349492 | NC_021160.1    | Ca_kabuli_chr01 | 1349492                 | GG                              | AA              | 1946718164               |
| SNP_P4_347_1361395 | NC_021160.1    | Ca_kabuli_chr01 | 1361395                 | TT                              | AA              | 1946718166               |
| SNP_P4_349_1371789 | NC_021160.1    | Ca_kabuli_chr01 | 1371789                 | CC                              | TT              | 1946718168               |
| SNP_P4_350_1371791 | NC_021160.1    | Ca_kabuli_chr01 | 1371791                 | TT                              | GG              | 1946718170               |
| SNP_P4_351_1377085 | NC_021160.1    | Ca_kabuli_chr01 | 1377085                 | TT                              | CC              | 1946718172               |
| SNP_P4_355_1409346 | NC_021160.1    | Ca_kabuli_chr01 | 1409346                 | AA                              | TT              | 1946718175               |
| SNP_P4_356_1464119 | NC_021160.1    | Ca_kabuli_chr01 | 1464119                 | AA                              | CC              | 1946718177               |
| SNP_P4_357_1542701 | NC_021160.1    | Ca_kabuli_chr01 | 1542701                 | CC                              | TT              | 1946718179               |
| SNP_P4_358_1572340 | NC_021160.1    | Ca_kabuli_chr01 | 1572340                 | CC                              | TT              | 1946718181               |
| SNP_P4_359_1619322 | NC_021160.1    | Ca_kabuli_chr01 | 1619322                 | CC                              | TT              | 1946718183               |
| SNP_P4_360_1619648 | NC_021160.1    | Ca_kabuli_chr01 | 1619648                 | AA                              | GG              | 1946718185               |
| SNP_P4_361_1648320 | NC_021160.1    | Ca_kabuli_chr01 | 1648320                 | TT                              | CC              | 1946718187               |
| SNP_P4_362_1657206 | NC_021160.1    | Ca_kabuli_chr01 | 1657206                 | CC                              | TT              | 1946718189               |
| SNP_P4_363_1686137 | NC_021160.1    | Ca_kabuli_chr01 | 1686137                 | GG                              | AA              | 1946718191               |
| SNP_P4_364_1687884 | NC_021160.1    | Ca_kabuli_chr01 | 1687884                 | TT                              | CC              | 1946718193               |
| SNP_P4_365_1687993 | NC_021160.1    | Ca_kabuli_chr01 | 1687993                 | AA                              | GG              | 1946718195               |
| SNP_P4_368_1723136 | NC_021160.1    | Ca_kabuli_chr01 | 1723136                 | TT                              | CC              | 1946718197               |
| SNP_P4_369_1732647 | NC_021160.1    | Ca_kabuli_chr01 | 1732647                 | CC                              | TT              | 1946718199               |
| SNP_P4_370_1732667 | NC_021160.1    | Ca_kabuli_chr01 | 1732667                 | GG                              | AA              | 1946718201               |
| SNP_P4_371_1734275 | NC_021160.1    | Ca_kabuli_chr01 | 1734275                 | AA                              | CC              | 1946718203               |
| SNP_P4_372_1734298 | NC_021160.1    | Ca_kabuli_chr01 | 1734298                 | GG                              | AA              | 1946718205               |
| SNP_P4_373_1734654 | NC_021160.1    | Ca_kabuli_chr01 | 1734654                 | AA                              | TT              | 1946718207               |
| SNP_P4_374_1734690 | NC_021160.1    | Ca_kabuli_chr01 | 1734690                 | CC                              | TT              | 1946718209               |
| SNP_P4_375_1734696 | NC_021160.1    | Ca_kabuli_chr01 | 1734696                 | TT                              | CC              | 1946718211               |
| SNP_P4_376_1735237 | NC_021160.1    | Ca_kabuli_chr01 | 1735237                 | TT                              | CC              | 1946718213               |
| SNP_P4_377_1735527 | NC_021160.1    | Ca_kabuli_chr01 | 1735527                 | AA                              | GG              | 1946718215               |

| SNPs IDs           | Chromosome IDs | Chromosomes     | Physical positions (bp) | CDC Frontier (Reference genome) | (ILWC46 & LPNB) | NCBI SNPdb Accession IDs |
|--------------------|----------------|-----------------|-------------------------|---------------------------------|-----------------|--------------------------|
| SNP_P4_378_1735533 | NC_021160.1    | Ca_kabuli_chr01 | 1735533                 | GG                              | AA              | 1946718217               |
| SNP_P4_379_1735546 | NC_021160.1    | Ca_kabuli_chr01 | 1735546                 | TT                              | CC              | 1946718219               |
| SNP_P4_380_1739883 | NC_021160.1    | Ca_kabuli_chr01 | 1739883                 | AA                              | CC              | 1946718221               |
| SNP_P4_381_1741406 | NC_021160.1    | Ca_kabuli_chr01 | 1741406                 | CC                              | AA              | 1946718223               |
| SNP_P4_382_1741702 | NC_021160.1    | Ca_kabuli_chr01 | 1741702                 | GG                              | AA              | 1946718225               |
| SNP_P4_383_1742261 | NC_021160.1    | Ca_kabuli_chr01 | 1742261                 | GG                              | TT              | 1946718227               |
| SNP_P4_384_1742621 | NC_021160.1    | Ca_kabuli_chr01 | 1742621                 | GG                              | TT              | 1946718229               |
| SNP_P4_385_1742938 | NC_021160.1    | Ca_kabuli_chr01 | 1742938                 | TT                              | AA              | 1946718230               |
| SNP_P4_386_1743213 | NC_021160.1    | Ca_kabuli_chr01 | 1743213                 | AA                              | GG              | 1946718232               |
| SNP_P4_387_1743651 | NC_021160.1    | Ca_kabuli_chr01 | 1743651                 | AA                              | TT              | 1946718234               |
| SNP_P4_388_1743860 | NC_021160.1    | Ca_kabuli_chr01 | 1743860                 | GG                              | TT              | 1946718236               |
| SNP_P4_389_1743863 | NC_021160.1    | Ca_kabuli_chr01 | 1743863                 | TT                              | CC              | 1946718238               |
| SNP_P4_390_1744811 | NC_021160.1    | Ca_kabuli_chr01 | 1744811                 | GG                              | AA              | 1946718240               |
| SNP_P4_392_1744841 | NC_021160.1    | Ca_kabuli_chr01 | 1744841                 | CC                              | TT              | 1946718242               |
| SNP_P4_393_1744889 | NC_021160.1    | Ca_kabuli_chr01 | 1744889                 | CC                              | TT              | 1946718244               |
| SNP_P4_394_1744911 | NC_021160.1    | Ca_kabuli_chr01 | 1744911                 | AA                              | CC              | 1946718246               |
| SNP_P4_395_1744923 | NC_021160.1    | Ca_kabuli_chr01 | 1744923                 | GG                              | AA              | 1946718248               |
| SNP_P4_397_1745063 | NC_021160.1    | Ca_kabuli_chr01 | 1745063                 | GG                              | AA              | 1946718250               |
| SNP_P4_399_1745940 | NC_021160.1    | Ca_kabuli_chr01 | 1745940                 | GG                              | CC              | 1946718252               |
| SNP_P4_400_1745997 | NC_021160.1    | Ca_kabuli_chr01 | 1745997                 | CC                              | TT              | 1946718254               |
| SNP_P4_401_1746129 | NC_021160.1    | Ca_kabuli_chr01 | 1746129                 | TT                              | GG              | 1946718256               |
| SNP_P4_402_1746195 | NC_021160.1    | Ca_kabuli_chr01 | 1746195                 | TT                              | GG              | 1946718258               |
| SNP_P4_404_1746298 | NC_021160.1    | Ca_kabuli_chr01 | 1746298                 | AA                              | TT              | 1946718260               |
| SNP_P4_405_1757035 | NC_021160.1    | Ca_kabuli_chr01 | 1757035                 | GG                              | AA              | 1946718262               |
| SNP_P4_406_1763726 | NC_021160.1    | Ca_kabuli_chr01 | 1763726                 | GG                              | AA              | 1946718264               |
| SNP_P4_407_1767256 | NC_021160.1    | Ca_kabuli_chr01 | 1767256                 | AA                              | GG              | 1946718266               |
| SNP_P4_408_1777520 | NC_021160.1    | Ca_kabuli_chr01 | 1777520                 | CC                              | TT              | 1946718268               |
| SNP_P4_411_1777857 | NC_021160.1    | Ca_kabuli_chr01 | 1777857                 | CC                              | TT              | 1946718270               |
| SNP_P4_412_1778647 | NC_021160.1    | Ca_kabuli_chr01 | 1778647                 | AA                              | TT              | 1946718272               |
| SNP_P4_413_1778682 | NC_021160.1    | Ca_kabuli_chr01 | 1778682                 | TT                              | GG              | 1946718274               |
| SNP_P4_415_1779251 | NC_021160.1    | Ca_kabuli_chr01 | 1779251                 | TT                              | CC              | 1946718276               |
| SNP_P4_416_1780191 | NC_021160.1    | Ca_kabuli_chr01 | 1780191                 | TT                              | CC              | 1946718278               |
| SNP_P4_418_1780413 | NC_021160.1    | Ca_kabuli_chr01 | 1780413                 | TT                              | AA              | 1946718280               |
| SNP_P4_419_1780439 | NC_021160.1    | Ca_kabuli_chr01 | 1780439                 | TT                              | CC              | 1946718282               |
| SNP_P4_420_1780467 | NC_021160.1    | Ca_kabuli_chr01 | 1780467                 | AA                              | GG              | 1946718284               |
| SNP_P4_421_1780478 | NC_021160.1    | Ca_kabuli_chr01 | 1780478                 | TT                              | AA              | 1946718286               |
| SNP_P4_422_1781013 | NC_021160.1    | Ca_kabuli_chr01 | 1781013                 | GG                              | AA              | 1946718288               |
| SNP_P4_423_1781018 | NC_021160.1    | Ca_kabuli_chr01 | 1781018                 | TT                              | AA              | 1946718290               |
| SNP_P4_424_1783094 | NC_021160.1    | Ca_kabuli_chr01 | 1783094                 | GG                              | AA              | 1946718292               |
| SNP_P4_425_1783280 | NC_021160.1    | Ca_kabuli_chr01 | 1783280                 | CC                              | AA              | 1946718294               |
| SNP_P4_426_1783388 | NC_021160.1    | Ca_kabuli_chr01 | 1783388                 | AA                              | CC              | 1946718296               |
| SNP_P4_427_1783389 | NC_021160.1    | Ca_kabuli_chr01 | 1783389                 | GG                              | AA              | 1946718298               |

| SNPs IDs           | Chromosome IDs | Chromosomes     | Physical positions (bp) | CDC Frontier (Reference genome) | (ILWC46 & LPNB) | NCBI SNPdb Accession IDs |
|--------------------|----------------|-----------------|-------------------------|---------------------------------|-----------------|--------------------------|
| SNP_P4_428_1783415 | NC_021160.1    | Ca_kabuli_chr01 | 1783415                 | TT                              | CC              | 1946718300               |
| SNP_P4_429_1785122 | NC_021160.1    | Ca_kabuli_chr01 | 1785122                 | TT                              | CC              | 1946718302               |
| SNP_P4_432_1787949 | NC_021160.1    | Ca_kabuli_chr01 | 1787949                 | CC                              | TT              | 1946718304               |
| SNP_P4_433_1788244 | NC_021160.1    | Ca_kabuli_chr01 | 1788244                 | CC                              | GG              | 1946718306               |
| SNP_P4_434_1788958 | NC_021160.1    | Ca_kabuli_chr01 | 1788958                 | AA                              | TT              | 1946718308               |
| SNP_P4_435_1788992 | NC_021160.1    | Ca_kabuli_chr01 | 1788992                 | TT                              | CC              | 1946718310               |
| SNP_P4_436_1788999 | NC_021160.1    | Ca_kabuli_chr01 | 1788999                 | TT                              | GG              | 1946718312               |
| SNP_P4_437_1789010 | NC_021160.1    | Ca_kabuli_chr01 | 1789010                 | GG                              | AA              | 1946718314               |
| SNP_P4_439_1789266 | NC_021160.1    | Ca_kabuli_chr01 | 1789266                 | TT                              | CC              | 1946718316               |
| SNP_P4_440_1789721 | NC_021160.1    | Ca_kabuli_chr01 | 1789721                 | AA                              | GG              | 1946718318               |
| SNP_P4_441_1793011 | NC_021160.1    | Ca_kabuli_chr01 | 1793011                 | TT                              | AA              | 1946718320               |
| SNP_P4_442_1793256 | NC_021160.1    | Ca_kabuli_chr01 | 1793256                 | CC                              | TT              | 1946718322               |
| SNP_P4_443_1793260 | NC_021160.1    | Ca_kabuli_chr01 | 1793260                 | GG                              | TT              | 1946718323               |
| SNP_P4_444_1794616 | NC_021160.1    | Ca_kabuli_chr01 | 1794616                 | GG                              | AA              | 1946718325               |
| SNP_P4_445_1794637 | NC_021160.1    | Ca_kabuli_chr01 | 1794637                 | AA                              | GG              | 1946718327               |
| SNP_P4_446_1794821 | NC_021160.1    | Ca_kabuli_chr01 | 1794821                 | AA                              | TT              | 1946718329               |
| SNP_P4_447_1794926 | NC_021160.1    | Ca_kabuli_chr01 | 1794926                 | TT                              | AA              | 1946718331               |
| SNP_P4_448_1795453 | NC_021160.1    | Ca_kabuli_chr01 | 1795453                 | CC                              | TT              | 1946718333               |
| SNP_P4_449_1796411 | NC_021160.1    | Ca_kabuli_chr01 | 1796411                 | AA                              | GG              | 1946718335               |
| SNP_P4_450_1796785 | NC_021160.1    | Ca_kabuli_chr01 | 1796785                 | TT                              | CC              | 1946718337               |
| SNP_P4_452_1802075 | NC_021160.1    | Ca_kabuli_chr01 | 1802075                 | TT                              | CC              | 1946718339               |
| SNP_P4_453_1802462 | NC_021160.1    | Ca_kabuli_chr01 | 1802462                 | TT                              | CC              | 1946718341               |
| SNP_P4_454_1803214 | NC_021160.1    | Ca_kabuli_chr01 | 1803214                 | CC                              | TT              | 1946718343               |
| SNP_P4_455_1803230 | NC_021160.1    | Ca_kabuli_chr01 | 1803230                 | AA                              | GG              | 1946718345               |
| SNP_P4_456_1803257 | NC_021160.1    | Ca_kabuli_chr01 | 1803257                 | GG                              | CC              | 1946718347               |
| SNP_P4_457_1803273 | NC_021160.1    | Ca_kabuli_chr01 | 1803273                 | TT                              | CC              | 1946718349               |
| SNP_P4_459_1804537 | NC_021160.1    | Ca_kabuli_chr01 | 1804537                 | CC                              | AA              | 1946718351               |
| SNP_P4_461_1805231 | NC_021160.1    | Ca_kabuli_chr01 | 1805231                 | AA                              | CC              | 1946718353               |
| SNP_P4_462_1805369 | NC_021160.1    | Ca_kabuli_chr01 | 1805369                 | AA                              | TT              | 1946718355               |
| SNP_P4_463_1805381 | NC_021160.1    | Ca_kabuli_chr01 | 1805381                 | AA                              | GG              | 1946718357               |
| SNP_P4_464_1805383 | NC_021160.1    | Ca_kabuli_chr01 | 1805383                 | AA                              | TT              | 1946718359               |
| SNP_P4_465_1805624 | NC_021160.1    | Ca_kabuli_chr01 | 1805624                 | AA                              | TT              | 1946718361               |
| SNP_P4_466_1805738 | NC_021160.1    | Ca_kabuli_chr01 | 1805738                 | CC                              | TT              | 1946718363               |
| SNP_P4_467_1805743 | NC_021160.1    | Ca_kabuli_chr01 | 1805743                 | AA                              | GG              | 1946718365               |
| SNP_P4_468_1805769 | NC_021160.1    | Ca_kabuli_chr01 | 1805769                 | AA                              | GG              | 1946718367               |
| SNP_P4_469_1805893 | NC_021160.1    | Ca_kabuli_chr01 | 1805893                 | GG                              | TT              | 1946718369               |
| SNP_P4_470_1805906 | NC_021160.1    | Ca_kabuli_chr01 | 1805906                 | GG                              | TT              | 1946718371               |
| SNP_P4_471_1806248 | NC_021160.1    | Ca_kabuli_chr01 | 1806248                 | GG                              | TT              | 1946718373               |
| SNP_P4_472_1806264 | NC_021160.1    | Ca_kabuli_chr01 | 1806264                 | TT                              | CC              | 1946718375               |
| SNP_P4_473_1806526 | NC_021160.1    | Ca_kabuli_chr01 | 1806526                 | AA                              | TT              | 1946718377               |
| SNP_P4_474_1806985 | NC_021160.1    | Ca_kabuli_chr01 | 1806985                 | AA                              | GG              | 1946718379               |
| SNP_P4_475_1806997 | NC_021160.1    | Ca_kabuli_chr01 | 1806997                 | TT                              | AA              | 1946718381               |

| SNPs IDs           | Chromosome IDs | Chromosomes     | Physical positions (bp) | CDC Frontier (Reference genome) | (ILWC46 & LPNB) | NCBI SNPdb Accession IDs |
|--------------------|----------------|-----------------|-------------------------|---------------------------------|-----------------|--------------------------|
| SNP_P4_476_1807020 | NC_021160.1    | Ca_kabuli_chr01 | 1807020                 | GG                              | AA              | 1946718383               |
| SNP_P4_477_1807309 | NC_021160.1    | Ca_kabuli_chr01 | 1807309                 | GG                              | AA              | 1946718385               |
| SNP_P4_478_1807316 | NC_021160.1    | Ca_kabuli_chr01 | 1807316                 | CC                              | GG              | 1946718387               |
| SNP_P4_479_1807317 | NC_021160.1    | Ca_kabuli_chr01 | 1807317                 | AA                              | GG              | 1946718389               |
| SNP_P4_480_1807318 | NC_021160.1    | Ca_kabuli_chr01 | 1807318                 | CC                              | TT              | 1946718391               |
| SNP_P4_481_1807342 | NC_021160.1    | Ca_kabuli_chr01 | 1807342                 | TT                              | CC              | 1946718393               |
| SNP_P4_482_1807689 | NC_021160.1    | Ca_kabuli_chr01 | 1807689                 | AA                              | GG              | 1946718395               |
| SNP_P4_483_1807694 | NC_021160.1    | Ca_kabuli_chr01 | 1807694                 | TT                              | CC              | 1946718397               |
| SNP_P4_484_1807701 | NC_021160.1    | Ca_kabuli_chr01 | 1807701                 | TT                              | CC              | 1946718399               |
| SNP_P4_485_1807926 | NC_021160.1    | Ca_kabuli_chr01 | 1807926                 | AA                              | TT              | 1946718401               |
| SNP_P4_486_1807936 | NC_021160.1    | Ca_kabuli_chr01 | 1807936                 | CC                              | AA              | 1946718403               |
| SNP_P4_487_1807945 | NC_021160.1    | Ca_kabuli_chr01 | 1807945                 | GG                              | CC              | 1946718405               |
| SNP_P4_488_1808763 | NC_021160.1    | Ca_kabuli_chr01 | 1808763                 | TT                              | CC              | 1946718407               |
| SNP_P4_489_1811050 | NC_021160.1    | Ca_kabuli_chr01 | 1811050                 | TT                              | CC              | 1946718409               |
| SNP_P4_490_1811555 | NC_021160.1    | Ca_kabuli_chr01 | 1811555                 | TT                              | CC              | 1946718411               |
| SNP_P4_491_1811565 | NC_021160.1    | Ca_kabuli_chr01 | 1811565                 | CC                              | TT              | 1946718413               |
| SNP_P4_492_1811580 | NC_021160.1    | Ca_kabuli_chr01 | 1811580                 | CC                              | AA              | 1946718415               |
| SNP_P4_493_1813059 | NC_021160.1    | Ca_kabuli_chr01 | 1813059                 | AA                              | TT              | 1946718417               |
| SNP_P4_494_1813097 | NC_021160.1    | Ca_kabuli_chr01 | 1813097                 | AA                              | TT              | 1946718419               |
| SNP_P4_495_1813109 | NC_021160.1    | Ca_kabuli_chr01 | 1813109                 | TT                              | GG              | 1946718421               |
| SNP_P4_496_1814033 | NC_021160.1    | Ca_kabuli_chr01 | 1814033                 | AA                              | GG              | 1946718422               |
| SNP_P4_497_1816987 | NC_021160.1    | Ca_kabuli_chr01 | 1816987                 | AA                              | GG              | 1946718423               |
| SNP_P4_498_1817280 | NC_021160.1    | Ca_kabuli_chr01 | 1817280                 | CC                              | AA              | 1946718424               |
| SNP_P4_499_1817338 | NC_021160.1    | Ca_kabuli_chr01 | 1817338                 | TT                              | AA              | 1946718426               |
| SNP_P4_500_1817350 | NC_021160.1    | Ca_kabuli_chr01 | 1817350                 | AA                              | TT              | 1946718428               |
| SNP_P4_501_1817568 | NC_021160.1    | Ca_kabuli_chr01 | 1817568                 | AA                              | GG              | 1946718431               |
| SNP_P4_502_1818016 | NC_021160.1    | Ca_kabuli_chr01 | 1818016                 | TT                              | AA              | 1946718433               |
| SNP_P4_503_1818017 | NC_021160.1    | Ca_kabuli_chr01 | 1818017                 | GG                              | TT              | 1946718435               |
| SNP_P4_504_1818023 | NC_021160.1    | Ca_kabuli_chr01 | 1818023                 | AA                              | CC              | 1946718437               |
| SNP_P4_505_1818035 | NC_021160.1    | Ca_kabuli_chr01 | 1818035                 | CC                              | GG              | 1946718439               |
| SNP_P4_506_1818290 | NC_021160.1    | Ca_kabuli_chr01 | 1818290                 | TT                              | CC              | 1946718441               |
| SNP_P4_507_1818773 | NC_021160.1    | Ca_kabuli_chr01 | 1818773                 | CC                              | TT              | 1946718443               |
| SNP_P4_508_1819182 | NC_021160.1    | Ca_kabuli_chr01 | 1819182                 | CC                              | TT              | 1946718445               |
| SNP_P4_509_1819185 | NC_021160.1    | Ca_kabuli_chr01 | 1819185                 | TT                              | AA              | 1946718447               |
| SNP_P4_510_1819202 | NC_021160.1    | Ca_kabuli_chr01 | 1819202                 | AA                              | GG              | 1946718449               |
| SNP_P4_511_1819347 | NC_021160.1    | Ca_kabuli_chr01 | 1819347                 | GG                              | CC              | 1946718451               |
| SNP_P4_512_1819624 | NC_021160.1    | Ca_kabuli_chr01 | 1819624                 | AA                              | TT              | 1946718453               |
| SNP_P4_513_1820550 | NC_021160.1    | Ca_kabuli_chr01 | 1820550                 | TT                              | GG              | 1946718455               |
| SNP_P4_514_1820590 | NC_021160.1    | Ca_kabuli_chr01 | 1820590                 | AA                              | TT              | 1946718457               |
| SNP_P4_515_1821121 | NC_021160.1    | Ca_kabuli_chr01 | 1821121                 | GG                              | CC              | 1946718459               |
| SNP_P4_516_1821280 | NC_021160.1    | Ca_kabuli_chr01 | 1821280                 | AA                              | TT              | 1946718462               |
| SNP_P4_517_1821551 | NC_021160.1    | Ca_kabuli_chr01 | 1821551                 | AA                              | TT              | 1946718464               |

| SNPs IDs           | Chromosome IDs | Chromosomes     | Physical positions (bp) | CDC Frontier (Reference genome) | (ILWC46 & LPNB) | NCBI SNPdb Accession IDs |
|--------------------|----------------|-----------------|-------------------------|---------------------------------|-----------------|--------------------------|
| SNP_P4_519_1822408 | NC_021160.1    | Ca_kabuli_chr01 | 1822408                 | TT                              | AA              | 1946718466               |
| SNP_P4_523_1824412 | NC_021160.1    | Ca_kabuli_chr01 | 1824412                 | TT                              | GG              | 1946718468               |
| SNP_P4_524_1826421 | NC_021160.1    | Ca_kabuli_chr01 | 1826421                 | TT                              | AA              | 1946718470               |
| SNP_P4_526_1836111 | NC_021160.1    | Ca_kabuli_chr01 | 1836111                 | TT                              | AA              | 1946718472               |
| SNP_P4_527_1836363 | NC_021160.1    | Ca_kabuli_chr01 | 1836363                 | TT                              | AA              | 1946718474               |
| SNP_P4_529_1836480 | NC_021160.1    | Ca_kabuli_chr01 | 1836480                 | AA                              | TT              | 1946718476               |
| SNP_P4_530_1836534 | NC_021160.1    | Ca_kabuli_chr01 | 1836534                 | TT                              | GG              | 1946718478               |
| SNP_P4_531_1836739 | NC_021160.1    | Ca_kabuli_chr01 | 1836739                 | CC                              | TT              | 1946718480               |
| SNP_P4_533_1836817 | NC_021160.1    | Ca_kabuli_chr01 | 1836817                 | AA                              | TT              | 1946718482               |
| SNP_P4_534_1836918 | NC_021160.1    | Ca_kabuli_chr01 | 1836918                 | TT                              | AA              | 1946718484               |
| SNP_P4_535_1837125 | NC_021160.1    | Ca_kabuli_chr01 | 1837125                 | GG                              | AA              | 1946718486               |
| SNP_P4_536_1839038 | NC_021160.1    | Ca_kabuli_chr01 | 1839038                 | GG                              | TT              | 1946718488               |
| SNP_P4_537_1839051 | NC_021160.1    | Ca_kabuli_chr01 | 1839051                 | TT                              | CC              | 1946718490               |
| SNP_P4_538_1839607 | NC_021160.1    | Ca_kabuli_chr01 | 1839607                 | AA                              | GG              | 1946718492               |
| SNP_P4_539_1840158 | NC_021160.1    | Ca_kabuli_chr01 | 1840158                 | AA                              | TT              | 1946718495               |
| SNP_P4_540_1840433 | NC_021160.1    | Ca_kabuli_chr01 | 1840433                 | CC                              | TT              | 1946718497               |
| SNP_P4_541_1840799 | NC_021160.1    | Ca_kabuli_chr01 | 1840799                 | AA                              | CC              | 1946718499               |
| SNP_P4_542_1840818 | NC_021160.1    | Ca_kabuli_chr01 | 1840818                 | CC                              | TT              | 1946718501               |
| SNP_P4_543_1840824 | NC_021160.1    | Ca_kabuli_chr01 | 1840824                 | AA                              | GG              | 1946718503               |
| SNP_P4_544_1840901 | NC_021160.1    | Ca_kabuli_chr01 | 1840901                 | AA                              | CC              | 1946718505               |
| SNP_P4_545_1840967 | NC_021160.1    | Ca_kabuli_chr01 | 1840967                 | CC                              | AA              | 1946718507               |
| SNP_P4_546_1840971 | NC_021160.1    | Ca_kabuli_chr01 | 1840971                 | TT                              | CC              | 1946718509               |
| SNP_P4_547_1840980 | NC_021160.1    | Ca_kabuli_chr01 | 1840980                 | TT                              | CC              | 1946718511               |
| SNP_P4_549_1841306 | NC_021160.1    | Ca_kabuli_chr01 | 1841306                 | GG                              | TT              | 1946718513               |
| SNP_P4_550_1841321 | NC_021160.1    | Ca_kabuli_chr01 | 1841321                 | AA                              | GG              | 1946718515               |
| SNP_P4_551_1841324 | NC_021160.1    | Ca_kabuli_chr01 | 1841324                 | TT                              | CC              | 1946718517               |
| SNP_P4_552_1841325 | NC_021160.1    | Ca_kabuli_chr01 | 1841325                 | CC                              | GG              | 1946718519               |
| SNP_P4_553_1841358 | NC_021160.1    | Ca_kabuli_chr01 | 1841358                 | AA                              | CC              | 1946718521               |
| SNP_P4_554_1841377 | NC_021160.1    | Ca_kabuli_chr01 | 1841377                 | TT                              | AA              | 1946718523               |
| SNP_P4_556_1841497 | NC_021160.1    | Ca_kabuli_chr01 | 1841497                 | CC                              | AA              | 1946718525               |
| SNP_P4_557_1845199 | NC_021160.1    | Ca_kabuli_chr01 | 1845199                 | CC                              | TT              | 1946718527               |
| SNP_P4_560_1847566 | NC_021160.1    | Ca_kabuli_chr01 | 1847566                 | TT                              | CC              | 1946718529               |
| SNP_P4_561_1847704 | NC_021160.1    | Ca_kabuli_chr01 | 1847704                 | TT                              | CC              | 1946718531               |
| SNP_P4_563_1848157 | NC_021160.1    | Ca_kabuli_chr01 | 1848157                 | TT                              | AA              | 1946718533               |
| SNP_P4_564_1848158 | NC_021160.1    | Ca_kabuli_chr01 | 1848158                 | TT                              | CC              | 1946718535               |
| SNP_P4_565_1848188 | NC_021160.1    | Ca_kabuli_chr01 | 1848188                 | GG                              | AA              | 1946718537               |
| SNP_P4_566_1848332 | NC_021160.1    | Ca_kabuli_chr01 | 1848332                 | TT                              | CC              | 1946718540               |
| SNP_P4_567_1848347 | NC_021160.1    | Ca_kabuli_chr01 | 1848347                 | AA                              | GG              | 1946718542               |
| SNP_P4_568_1848351 | NC_021160.1    | Ca_kabuli_chr01 | 1848351                 | GG                              | TT              | 1946718544               |
| SNP_P4_569_1848759 | NC_021160.1    | Ca_kabuli_chr01 | 1848759                 | TT                              | CC              | 1946718546               |
| SNP_P4_571_1850736 | NC_021160.1    | Ca_kabuli_chr01 | 1850736                 | TT                              | GG              | 1946718549               |
| SNP_P4_572_1850870 | NC_021160.1    | Ca_kabuli_chr01 | 1850870                 | TT                              | CC              | 1946718551               |



| SNPs IDs           | Chromosome IDs | Chromosomes     | Physical positions (bp) | CDC Frontier (Reference genome) | (ILWC46 & LPNB) | NCBI SNPdb Accession IDs |
|--------------------|----------------|-----------------|-------------------------|---------------------------------|-----------------|--------------------------|
| SNP_P4_573_1850872 | NC_021160.1    | Ca_kabuli_chr01 | 1850872                 | AA                              | GG              | 1946718553               |
| SNP_P4_574_1851196 | NC_021160.1    | Ca_kabuli_chr01 | 1851196                 | GG                              | AA              | 1946718555               |
| SNP_P4_575_1851403 | NC_021160.1    | Ca_kabuli_chr01 | 1851403                 | AA                              | TT              | 1946718557               |
| SNP_P4_576_1851565 | NC_021160.1    | Ca_kabuli_chr01 | 1851565                 | TT                              | AA              | 1946718559               |
| SNP_P4_577_1851578 | NC_021160.1    | Ca_kabuli_chr01 | 1851578                 | GG                              | AA              | 1946718561               |
| SNP_P4_578_1852464 | NC_021160.1    | Ca_kabuli_chr01 | 1852464                 | CC                              | TT              | 1946718563               |
| SNP_P4_580_1852687 | NC_021160.1    | Ca_kabuli_chr01 | 1852687                 | TT                              | CC              | 1946718565               |
| SNP_P4_582_1852886 | NC_021160.1    | Ca_kabuli_chr01 | 1852886                 | TT                              | AA              | 1946718567               |
| SNP_P4_583_1852937 | NC_021160.1    | Ca_kabuli_chr01 | 1852937                 | GG                              | AA              | 1946718569               |
| SNP_P4_584_1852948 | NC_021160.1    | Ca_kabuli_chr01 | 1852948                 | AA                              | TT              | 1946718571               |
| SNP_P4_585_1852953 | NC_021160.1    | Ca_kabuli_chr01 | 1852953                 | CC                              | AA              | 1946718573               |
| SNP_P4_586_1852967 | NC_021160.1    | Ca_kabuli_chr01 | 1852967                 | GG                              | AA              | 1946718575               |
| SNP_P4_587_1853759 | NC_021160.1    | Ca_kabuli_chr01 | 1853759                 | TT                              | AA              | 1946718577               |
| SNP_P4_588_1856176 | NC_021160.1    | Ca_kabuli_chr01 | 1856176                 | TT                              | CC              | 1946718579               |
| SNP_P4_589_1856227 | NC_021160.1    | Ca_kabuli_chr01 | 1856227                 | GG                              | AA              | 1946718581               |
| SNP_P4_591_1856294 | NC_021160.1    | Ca_kabuli_chr01 | 1856294                 | AA                              | TT              | 1946718583               |
| SNP_P4_592_1856423 | NC_021160.1    | Ca_kabuli_chr01 | 1856423                 | TT                              | AA              | 1946718585               |
| SNP_P4_593_1856496 | NC_021160.1    | Ca_kabuli_chr01 | 1856496                 | AA                              | CC              | 1946718587               |
| SNP_P4_594_1857837 | NC_021160.1    | Ca_kabuli_chr01 | 1857837                 | AA                              | TT              | 1946718589               |
| SNP_P4_595_1857860 | NC_021160.1    | Ca_kabuli_chr01 | 1857860                 | CC                              | TT              | 1946718591               |
| SNP_P4_596_1858064 | NC_021160.1    | Ca_kabuli_chr01 | 1858064                 | TT                              | AA              | 1946718593               |
| SNP_P4_597_1858073 | NC_021160.1    | Ca_kabuli_chr01 | 1858073                 | TT                              | CC              | 1946718595               |
| SNP_P4_598_1858078 | NC_021160.1    | Ca_kabuli_chr01 | 1858078                 | CC                              | TT              | 1946718597               |
| SNP_P4_599_1858084 | NC_021160.1    | Ca_kabuli_chr01 | 1858084                 | TT                              | CC              | 1946718599               |
| SNP_P4_600_1858226 | NC_021160.1    | Ca_kabuli_chr01 | 1858226                 | AA                              | GG              | 1946718601               |
| SNP_P4_601_1858600 | NC_021160.1    | Ca_kabuli_chr01 | 1858600                 | AA                              | GG              | 1946718603               |
| SNP_P4_602_1858608 | NC_021160.1    | Ca_kabuli_chr01 | 1858608                 | AA                              | TT              | 1946718605               |
| SNP_P4_603_1859659 | NC_021160.1    | Ca_kabuli_chr01 | 1859659                 | GG                              | TT              | 1946718606               |
| SNP_P4_604_1860132 | NC_021160.1    | Ca_kabuli_chr01 | 1860132                 | AA                              | GG              | 1946718608               |
| SNP_P4_605_1860514 | NC_021160.1    | Ca_kabuli_chr01 | 1860514                 | TT                              | AA              | 1946718610               |
| SNP_P4_607_1860808 | NC_021160.1    | Ca_kabuli_chr01 | 1860808                 | AA                              | CC              | 1946718612               |
| SNP_P4_608_1860960 | NC_021160.1    | Ca_kabuli_chr01 | 1860960                 | GG                              | AA              | 1946718614               |
| SNP_P4_609_1862533 | NC_021160.1    | Ca_kabuli_chr01 | 1862533                 | CC                              | AA              | 1946718616               |
| SNP_P4_610_1862568 | NC_021160.1    | Ca_kabuli_chr01 | 1862568                 | GG                              | AA              | 1946718618               |
| SNP_P4_611_1863369 | NC_021160.1    | Ca_kabuli_chr01 | 1863369                 | TT                              | CC              | 1946718620               |
| SNP_P4_612_1864397 | NC_021160.1    | Ca_kabuli_chr01 | 1864397                 | AA                              | GG              | 1946718622               |
| SNP_P4_613_1864909 | NC_021160.1    | Ca_kabuli_chr01 | 1864909                 | TT                              | GG              | 1946718624               |
| SNP_P4_614_1869287 | NC_021160.1    | Ca_kabuli_chr01 | 1869287                 | TT                              | CC              | 1946718626               |
| SNP_P4_615_1869845 | NC_021160.1    | Ca_kabuli_chr01 | 1869845                 | GG                              | AA              | 1946718629               |
| SNP_P4_616_1869849 | NC_021160.1    | Ca_kabuli_chr01 | 1869849                 | TT                              | CC              | 1946718631               |
| SNP_P4_617_1869864 | NC_021160.1    | Ca_kabuli_chr01 | 1869864                 | CC                              | AA              | 1946718633               |
| SNP_P4_618_1869865 | NC_021160.1    | Ca_kabuli_chr01 | 1869865                 | AA                              | GG              | 1946718635               |

| SNPs IDs           | Chromosome IDs | Chromosomes     | Physical positions (bp) | CDC Frontier (Reference genome) | (ILWC46 & LPNB) | NCBI SNPdb Accession IDs |
|--------------------|----------------|-----------------|-------------------------|---------------------------------|-----------------|--------------------------|
| SNP_P4_619_1870202 | NC_021160.1    | Ca_kabuli_chr01 | 1870202                 | TT                              | CC              | 1946718637               |
| SNP_P4_620_1870245 | NC_021160.1    | Ca_kabuli_chr01 | 1870245                 | TT                              | AA              | 1946718639               |
| SNP_P4_621_1872314 | NC_021160.1    | Ca_kabuli_chr01 | 1872314                 | TT                              | CC              | 1946718641               |
| SNP_P4_622_1873131 | NC_021160.1    | Ca_kabuli_chr01 | 1873131                 | TT                              | CC              | 1946718643               |
| SNP_P4_623_1874435 | NC_021160.1    | Ca_kabuli_chr01 | 1874435                 | TT                              | AA              | 1946718645               |
| SNP_P4_624_1874440 | NC_021160.1    | Ca_kabuli_chr01 | 1874440                 | TT                              | AA              | 1946718647               |
| SNP_P4_625_1875844 | NC_021160.1    | Ca_kabuli_chr01 | 1875844                 | CC                              | TT              | 1946718649               |
| SNP_P4_626_1876104 | NC_021160.1    | Ca_kabuli_chr01 | 1876104                 | TT                              | AA              | 1946718651               |
| SNP_P4_628_1876553 | NC_021160.1    | Ca_kabuli_chr01 | 1876553                 | AA                              | GG              | 1946718652               |
| SNP_P4_629_1876567 | NC_021160.1    | Ca_kabuli_chr01 | 1876567                 | TT                              | AA              | 1946718654               |
| SNP_P4_630_1878597 | NC_021160.1    | Ca_kabuli_chr01 | 1878597                 | TT                              | CC              | 1946718656               |
| SNP_P4_631_1878628 | NC_021160.1    | Ca_kabuli_chr01 | 1878628                 | GG                              | AA              | 1946718658               |
| SNP_P4_632_1878793 | NC_021160.1    | Ca_kabuli_chr01 | 1878793                 | CC                              | GG              | 1946718660               |
| SNP_P4_633_1878834 | NC_021160.1    | Ca_kabuli_chr01 | 1878834                 | GG                              | CC              | 1946718662               |
| SNP_P4_634_1878874 | NC_021160.1    | Ca_kabuli_chr01 | 1878874                 | CC                              | GG              | 1946718664               |
| SNP_P4_635_1880954 | NC_021160.1    | Ca_kabuli_chr01 | 1880954                 | GG                              | AA              | 1946718666               |
| SNP_P4_636_1881134 | NC_021160.1    | Ca_kabuli_chr01 | 1881134                 | GG                              | AA              | 1946718668               |
| SNP_P4_637_1881147 | NC_021160.1    | Ca_kabuli_chr01 | 1881147                 | AA                              | CC              | 1946718670               |
| SNP_P4_638_1881773 | NC_021160.1    | Ca_kabuli_chr01 | 1881773                 | CC                              | AA              | 1946718672               |
| SNP_P4_639_1881776 | NC_021160.1    | Ca_kabuli_chr01 | 1881776                 | CC                              | TT              | 1946718674               |
| SNP_P4_640_1881941 | NC_021160.1    | Ca_kabuli_chr01 | 1881941                 | TT                              | CC              | 1946718676               |
| SNP_P4_641_1882350 | NC_021160.1    | Ca_kabuli_chr01 | 1882350                 | AA                              | TT              | 1946718678               |
| SNP_P4_642_1882530 | NC_021160.1    | Ca_kabuli_chr01 | 1882530                 | GG                              | CC              | 1946718680               |
| SNP_P4_644_1882611 | NC_021160.1    | Ca_kabuli_chr01 | 1882611                 | TT                              | CC              | 1946718682               |
| SNP_P4_645_1883718 | NC_021160.1    | Ca_kabuli_chr01 | 1883718                 | TT                              | AA              | 1946718684               |
| SNP_P4_646_1888214 | NC_021160.1    | Ca_kabuli_chr01 | 1888214                 | CC                              | AA              | 1946718686               |
| SNP_P4_647_1888913 | NC_021160.1    | Ca_kabuli_chr01 | 1888913                 | AA                              | CC              | 1946718688               |
| SNP_P4_648_1888924 | NC_021160.1    | Ca_kabuli_chr01 | 1888924                 | GG                              | AA              | 1946718690               |
| SNP_P4_649_1889831 | NC_021160.1    | Ca_kabuli_chr01 | 1889831                 | GG                              | AA              | 1946718692               |
| SNP_P4_650_1896828 | NC_021160.1    | Ca_kabuli_chr01 | 1896828                 | TT                              | AA              | 1946718694               |
| SNP_P4_651_1898518 | NC_021160.1    | Ca_kabuli_chr01 | 1898518                 | AA                              | GG              | 1946718696               |
| SNP_P4_652_1899701 | NC_021160.1    | Ca_kabuli_chr01 | 1899701                 | TT                              | AA              | 1946718698               |
| SNP_P4_653_1901243 | NC_021160.1    | Ca_kabuli_chr01 | 1901243                 | GG                              | AA              | 1946718700               |
| SNP_P4_654_1901283 | NC_021160.1    | Ca_kabuli_chr01 | 1901283                 | AA                              | GG              | 1946718703               |
| SNP_P4_655_1901506 | NC_021160.1    | Ca_kabuli_chr01 | 1901506                 | TT                              | CC              | 1946718705               |
| SNP_P4_656_1902178 | NC_021160.1    | Ca_kabuli_chr01 | 1902178                 | GG                              | AA              | 1946718707               |
| SNP_P4_657_1902346 | NC_021160.1    | Ca_kabuli_chr01 | 1902346                 | AA                              | GG              | 1946718709               |
| SNP_P4_658_1902640 | NC_021160.1    | Ca_kabuli_chr01 | 1902640                 | CC                              | TT              | 1946718711               |
| SNP_P4_659_1902999 | NC_021160.1    | Ca_kabuli_chr01 | 1902999                 | CC                              | TT              | 1946718713               |
| SNP_P4_660_1903137 | NC_021160.1    | Ca_kabuli_chr01 | 1903137                 | TT                              | CC              | 1946718715               |
| SNP_P4_661_1903165 | NC_021160.1    | Ca_kabuli_chr01 | 1903165                 | TT                              | GG              | 1946718717               |
| SNP_P4_662_1903277 | NC_021160.1    | Ca_kabuli_chr01 | 1903277                 | CC                              | TT              | 1946718719               |

| SNPs IDs           | Chromosome IDs | Chromosomes     | Physical positions (bp) | CDC Frontier (Reference genome) | (ILWC46 & LPNB) | NCBI SNPdb Accession IDs |
|--------------------|----------------|-----------------|-------------------------|---------------------------------|-----------------|--------------------------|
| SNP_P4_663_1904365 | NC_021160.1    | Ca_kabuli_chr01 | 1904365                 | AA                              | GG              | 1946718721               |
| SNP_P4_664_1904391 | NC_021160.1    | Ca_kabuli_chr01 | 1904391                 | GG                              | AA              | 1946718724               |
| SNP_P4_665_1904956 | NC_021160.1    | Ca_kabuli_chr01 | 1904956                 | AA                              | GG              | 1946718726               |
| SNP_P4_666_1907595 | NC_021160.1    | Ca_kabuli_chr01 | 1907595                 | AA                              | GG              | 1946718728               |
| SNP_P4_668_1907937 | NC_021160.1    | Ca_kabuli_chr01 | 1907937                 | AA                              | TT              | 1946718730               |
| SNP_P4_669_1907957 | NC_021160.1    | Ca_kabuli_chr01 | 1907957                 | CC                              | TT              | 1946718732               |
| SNP_P4_672_1912504 | NC_021160.1    | Ca_kabuli_chr01 | 1912504                 | CC                              | TT              | 1946718734               |
| SNP_P4_673_1912514 | NC_021160.1    | Ca_kabuli_chr01 | 1912514                 | TT                              | CC              | 1946718736               |
| SNP_P4_674_1912749 | NC_021160.1    | Ca_kabuli_chr01 | 1912749                 | TT                              | AA              | 1946718738               |
| SNP_P4_675_1913620 | NC_021160.1    | Ca_kabuli_chr01 | 1913620                 | AA                              | GG              | 1946718740               |
| SNP_P4_676_1913667 | NC_021160.1    | Ca_kabuli_chr01 | 1913667                 | GG                              | AA              | 1946718742               |
| SNP_P4_678_1914115 | NC_021160.1    | Ca_kabuli_chr01 | 1914115                 | AA                              | GG              | 1946718744               |
| SNP_P4_679_1914403 | NC_021160.1    | Ca_kabuli_chr01 | 1914403                 | AA                              | CC              | 1946718746               |
| SNP_P4_680_1914475 | NC_021160.1    | Ca_kabuli_chr01 | 1914475                 | CC                              | TT              | 1946718748               |
| SNP_P4_681_1914639 | NC_021160.1    | Ca_kabuli_chr01 | 1914639                 | TT                              | AA              | 1946718750               |
| SNP_P4_682_1914702 | NC_021160.1    | Ca_kabuli_chr01 | 1914702                 | TT                              | CC              | 1946718752               |
| SNP_P4_683_1914775 | NC_021160.1    | Ca_kabuli_chr01 | 1914775                 | AA                              | GG              | 1946718754               |
| SNP_P4_684_1914879 | NC_021160.1    | Ca_kabuli_chr01 | 1914879                 | TT                              | AA              | 1946718755               |
| SNP_P4_685_1914990 | NC_021160.1    | Ca_kabuli_chr01 | 1914990                 | CC                              | TT              | 1946718757               |
| SNP_P4_686_1915050 | NC_021160.1    | Ca_kabuli_chr01 | 1915050                 | GG                              | AA              | 1946718759               |
| SNP_P4_687_1915166 | NC_021160.1    | Ca_kabuli_chr01 | 1915166                 | AA                              | GG              | 1946718761               |
| SNP_P4_688_1915184 | NC_021160.1    | Ca_kabuli_chr01 | 1915184                 | TT                              | CC              | 1946718763               |
| SNP_P4_690_1915307 | NC_021160.1    | Ca_kabuli_chr01 | 1915307                 | CC                              | TT              | 1946718765               |
| SNP_P4_691_1915308 | NC_021160.1    | Ca_kabuli_chr01 | 1915308                 | GG                              | AA              | 1946718767               |
| SNP_P4_692_1915762 | NC_021160.1    | Ca_kabuli_chr01 | 1915762                 | CC                              | GG              | 1946718769               |
| SNP_P4_693_1915783 | NC_021160.1    | Ca_kabuli_chr01 | 1915783                 | CC                              | TT              | 1946718771               |
| SNP_P4_694_1916096 | NC_021160.1    | Ca_kabuli_chr01 | 1916096                 | CC                              | AA              | 1946718773               |
| SNP_P4_695_1916102 | NC_021160.1    | Ca_kabuli_chr01 | 1916102                 | CC                              | TT              | 1946718775               |
| SNP_P4_696_1917563 | NC_021160.1    | Ca_kabuli_chr01 | 1917563                 | AA                              | TT              | 1946718777               |
| SNP_P4_697_1922161 | NC_021160.1    | Ca_kabuli_chr01 | 1922161                 | CC                              | TT              | 1946718779               |
| SNP_P4_698_1925368 | NC_021160.1    | Ca_kabuli_chr01 | 1925368                 | AA                              | CC              | 1946718781               |
| SNP_P4_699_1926213 | NC_021160.1    | Ca_kabuli_chr01 | 1926213                 | AA                              | GG              | 1946718783               |
| SNP_P4_700_1926377 | NC_021160.1    | Ca_kabuli_chr01 | 1926377                 | CC                              | TT              | 1946718785               |
| SNP_P4_701_1926433 | NC_021160.1    | Ca_kabuli_chr01 | 1926433                 | AA                              | CC              | 1946718787               |
| SNP_P4_702_1927368 | NC_021160.1    | Ca_kabuli_chr01 | 1927368                 | CC                              | GG              | 1946718789               |
| SNP_P4_703_1928106 | NC_021160.1    | Ca_kabuli_chr01 | 1928106                 | CC                              | AA              | 1946718791               |
| SNP_P4_704_1928397 | NC_021160.1    | Ca_kabuli_chr01 | 1928397                 | TT                              | CC              | 1946718793               |
| SNP_P4_705_1928402 | NC_021160.1    | Ca_kabuli_chr01 | 1928402                 | TT                              | CC              | 1946718795               |
| SNP_P4_707_1930725 | NC_021160.1    | Ca_kabuli_chr01 | 1930725                 | CC                              | TT              | 1946718797               |
| SNP_P4_708_1933576 | NC_021160.1    | Ca_kabuli_chr01 | 1933576                 | CC                              | TT              | 1946718799               |
| SNP_P4_709_1935988 | NC_021160.1    | Ca_kabuli_chr01 | 1935988                 | TT                              | CC              | 1946718801               |
| SNP_P4_710_1936712 | NC_021160.1    | Ca_kabuli_chr01 | 1936712                 | TT                              | AA              | 1946718803               |

| SNPs IDs           | Chromosome IDs | Chromosomes     | Physical positions (bp) | CDC Frontier (Reference genome) | (ILWC46 & LPNB) | NCBI SNPdb Accession IDs |
|--------------------|----------------|-----------------|-------------------------|---------------------------------|-----------------|--------------------------|
| SNP_P4_711_1937270 | NC_021160.1    | Ca_kabuli_chr01 | 1937270                 | AA                              | CC              | 1946718805               |
| SNP_P4_712_1940906 | NC_021160.1    | Ca_kabuli_chr01 | 1940906                 | AA                              | GG              | 1946718807               |
| SNP_P4_713_1940909 | NC_021160.1    | Ca_kabuli_chr01 | 1940909                 | CC                              | TT              | 1946718809               |
| SNP_P4_714_1941964 | NC_021160.1    | Ca_kabuli_chr01 | 1941964                 | AA                              | CC              | 1946718811               |
| SNP_P4_715_1944289 | NC_021160.1    | Ca_kabuli_chr01 | 1944289                 | AA                              | GG              | 1946718813               |
| SNP_P4_716_1944290 | NC_021160.1    | Ca_kabuli_chr01 | 1944290                 | GG                              | CC              | 1946718815               |
| SNP_P4_717_1944294 | NC_021160.1    | Ca_kabuli_chr01 | 1944294                 | AA                              | GG              | 1946718817               |
| SNP_P4_719_1945067 | NC_021160.1    | Ca_kabuli_chr01 | 1945067                 | CC                              | TT              | 1946718819               |
| SNP_P4_720_1949826 | NC_021160.1    | Ca_kabuli_chr01 | 1949826                 | AA                              | CC              | 1946718820               |
| SNP_P4_721_1950170 | NC_021160.1    | Ca_kabuli_chr01 | 1950170                 | CC                              | TT              | 1946718822               |
| SNP_P4_722_1950201 | NC_021160.1    | Ca_kabuli_chr01 | 1950201                 | AA                              | GG              | 1946718824               |
| SNP_P4_723_1950336 | NC_021160.1    | Ca_kabuli_chr01 | 1950336                 | AA                              | GG              | 1946718826               |
| SNP_P4_724_1952449 | NC_021160.1    | Ca_kabuli_chr01 | 1952449                 | AA                              | GG              | 1946718828               |
| SNP_P4_725_1952498 | NC_021160.1    | Ca_kabuli_chr01 | 1952498                 | TT                              | AA              | 1946718830               |
| SNP_P4_726_1953482 | NC_021160.1    | Ca_kabuli_chr01 | 1953482                 | TT                              | GG              | 1946718832               |
| SNP_P4_727_1953634 | NC_021160.1    | Ca_kabuli_chr01 | 1953634                 | TT                              | CC              | 1946718834               |
| SNP_P4_728_1953902 | NC_021160.1    | Ca_kabuli_chr01 | 1953902                 | AA                              | GG              | 1946718836               |
| SNP_P4_729_1953910 | NC_021160.1    | Ca_kabuli_chr01 | 1953910                 | GG                              | AA              | 1946718838               |
| SNP_P4_730_1954455 | NC_021160.1    | Ca_kabuli_chr01 | 1954455                 | AA                              | TT              | 1946718840               |
| SNP_P4_731_1954456 | NC_021160.1    | Ca_kabuli_chr01 | 1954456                 | TT                              | CC              | 1946718842               |
| SNP_P4_732_1955024 | NC_021160.1    | Ca_kabuli_chr01 | 1955024                 | CC                              | GG              | 1946718844               |
| SNP_P4_733_1955917 | NC_021160.1    | Ca_kabuli_chr01 | 1955917                 | AA                              | GG              | 1946718846               |
| SNP_P4_734_1960008 | NC_021160.1    | Ca_kabuli_chr01 | 1960008                 | CC                              | GG              | 1946718848               |
| SNP_P4_735_1964306 | NC_021160.1    | Ca_kabuli_chr01 | 1964306                 | CC                              | TT              | 1946718850               |
| SNP_P4_736_1964320 | NC_021160.1    | Ca_kabuli_chr01 | 1964320                 | AA                              | GG              | 1946718852               |
| SNP_P4_737_1964324 | NC_021160.1    | Ca_kabuli_chr01 | 1964324                 | TT                              | CC              | 1946718854               |
| SNP_P4_739_1964422 | NC_021160.1    | Ca_kabuli_chr01 | 1964422                 | CC                              | GG              | 1946718856               |
| SNP_P4_740_1964434 | NC_021160.1    | Ca_kabuli_chr01 | 1964434                 | CC                              | TT              | 1946718858               |
| SNP_P4_741_1965956 | NC_021160.1    | Ca_kabuli_chr01 | 1965956                 | GG                              | AA              | 1946718860               |
| SNP_P4_742_1965979 | NC_021160.1    | Ca_kabuli_chr01 | 1965979                 | TT                              | GG              | 1946718862               |
| SNP_P4_743_1966028 | NC_021160.1    | Ca_kabuli_chr01 | 1966028                 | CC                              | AA              | 1946718864               |
| SNP_P4_744_1966074 | NC_021160.1    | Ca_kabuli_chr01 | 1966074                 | GG                              | AA              | 1946718866               |
| SNP_P4_746_1966277 | NC_021160.1    | Ca_kabuli_chr01 | 1966277                 | GG                              | CC              | 1946718868               |
| SNP_P4_748_1968173 | NC_021160.1    | Ca_kabuli_chr01 | 1968173                 | GG                              | AA              | 1946718870               |
| SNP_P4_749_1969790 | NC_021160.1    | Ca_kabuli_chr01 | 1969790                 | TT                              | CC              | 1946718872               |
| SNP_P4_750_1969815 | NC_021160.1    | Ca_kabuli_chr01 | 1969815                 | GG                              | AA              | 1946718874               |
| SNP_P4_751_1969825 | NC_021160.1    | Ca_kabuli_chr01 | 1969825                 | AA                              | GG              | 1946718876               |
| SNP_P4_752_1969881 | NC_021160.1    | Ca_kabuli_chr01 | 1969881                 | CC                              | TT              | 1946718878               |
| SNP_P4_754_1970410 | NC_021160.1    | Ca_kabuli_chr01 | 1970410                 | AA                              | TT              | 1946718880               |
| SNP_P4_755_1971011 | NC_021160.1    | Ca_kabuli_chr01 | 1971011                 | AA                              | GG              | 1946718882               |
| SNP_P4_756_1971071 | NC_021160.1    | Ca_kabuli_chr01 | 1971071                 | CC                              | TT              | 1946718884               |
| SNP_P4_757_1971167 | NC_021160.1    | Ca_kabuli_chr01 | 1971167                 | TT                              | CC              | 1946718886               |

| SNPs IDs           | Chromosome IDs | Chromosomes     | Physical positions (bp) | CDC Frontier (Reference genome) | (ILWC46 & LPNB) | NCBI SNPdb Accession IDs |
|--------------------|----------------|-----------------|-------------------------|---------------------------------|-----------------|--------------------------|
| SNP_P4_759_1971601 | NC_021160.1    | Ca_kabuli_chr01 | 1971601                 | AA                              | TT              | 1946718888               |
| SNP_P4_760_1971698 | NC_021160.1    | Ca_kabuli_chr01 | 1971698                 | CC                              | TT              | 1946718890               |
| SNP_P4_761_1971713 | NC_021160.1    | Ca_kabuli_chr01 | 1971713                 | AA                              | TT              | 1946718892               |
| SNP_P4_762_1971893 | NC_021160.1    | Ca_kabuli_chr01 | 1971893                 | CC                              | AA              | 1946718894               |
| SNP_P4_763_1971910 | NC_021160.1    | Ca_kabuli_chr01 | 1971910                 | GG                              | TT              | 1946718896               |
| SNP_P4_764_1971913 | NC_021160.1    | Ca_kabuli_chr01 | 1971913                 | AA                              | CC              | 1946718898               |
| SNP_P4_766_1974276 | NC_021160.1    | Ca_kabuli_chr01 | 1974276                 | TT                              | GG              | 1946718900               |
| SNP_P4_767_1974883 | NC_021160.1    | Ca_kabuli_chr01 | 1974883                 | TT                              | CC              | 1946718902               |
| SNP_P4_768_1974884 | NC_021160.1    | Ca_kabuli_chr01 | 1974884                 | AA                              | GG              | 1946718904               |
| SNP_P4_769_1975258 | NC_021160.1    | Ca_kabuli_chr01 | 1975258                 | CC                              | TT              | 1946718906               |
| SNP_P4_770_1975796 | NC_021160.1    | Ca_kabuli_chr01 | 1975796                 | GG                              | TT              | 1946718908               |
| SNP_P4_771_1977009 | NC_021160.1    | Ca_kabuli_chr01 | 1977009                 | AA                              | GG              | 1946718910               |
| SNP_P4_772_1977191 | NC_021160.1    | Ca_kabuli_chr01 | 1977191                 | TT                              | AA              | 1946718912               |
| SNP_P4_773_1977217 | NC_021160.1    | Ca_kabuli_chr01 | 1977217                 | AA                              | GG              | 1946718914               |
| SNP_P4_774_1979140 | NC_021160.1    | Ca_kabuli_chr01 | 1979140                 | AA                              | CC              | 1946718917               |
| SNP_P4_775_1979177 | NC_021160.1    | Ca_kabuli_chr01 | 1979177                 | AA                              | GG              | 1946718919               |
| SNP_P4_776_1980356 | NC_021160.1    | Ca_kabuli_chr01 | 1980356                 | TT                              | GG              | 1946718921               |
| SNP_P4_777_1980378 | NC_021160.1    | Ca_kabuli_chr01 | 1980378                 | TT                              | GG              | 1946718923               |
| SNP_P4_778_1980382 | NC_021160.1    | Ca_kabuli_chr01 | 1980382                 | AA                              | CC              | 1946718925               |
| SNP_P4_779_1980604 | NC_021160.1    | Ca_kabuli_chr01 | 1980604                 | AA                              | TT              | 1946718927               |
| SNP_P4_780_1980689 | NC_021160.1    | Ca_kabuli_chr01 | 1980689                 | AA                              | GG              | 1946718929               |
| SNP_P4_781_1980829 | NC_021160.1    | Ca_kabuli_chr01 | 1980829                 | GG                              | AA              | 1946718931               |
| SNP_P4_782_1981199 | NC_021160.1    | Ca_kabuli_chr01 | 1981199                 | CC                              | AA              | 1946718933               |
| SNP_P4_783_1981229 | NC_021160.1    | Ca_kabuli_chr01 | 1981229                 | AA                              | GG              | 1946718935               |
| SNP_P4_784_1981231 | NC_021160.1    | Ca_kabuli_chr01 | 1981231                 | GG                              | AA              | 1946718937               |
| SNP_P4_785_1981256 | NC_021160.1    | Ca_kabuli_chr01 | 1981256                 | GG                              | AA              | 1946718939               |
| SNP_P4_786_1981388 | NC_021160.1    | Ca_kabuli_chr01 | 1981388                 | TT                              | AA              | 1946718941               |
| SNP_P4_787_1981399 | NC_021160.1    | Ca_kabuli_chr01 | 1981399                 | AA                              | GG              | 1946718942               |
| SNP_P4_789_1982440 | NC_021160.1    | Ca_kabuli_chr01 | 1982440                 | AA                              | GG              | 1946718944               |
| SNP_P4_790_1982462 | NC_021160.1    | Ca_kabuli_chr01 | 1982462                 | GG                              | TT              | 1946718946               |
| SNP_P4_791_1982778 | NC_021160.1    | Ca_kabuli_chr01 | 1982778                 | TT                              | GG              | 1946718948               |
| SNP_P4_792_1982855 | NC_021160.1    | Ca_kabuli_chr01 | 1982855                 | TT                              | CC              | 1946718950               |
| SNP_P4_793_1983566 | NC_021160.1    | Ca_kabuli_chr01 | 1983566                 | AA                              | GG              | 1946718952               |
| SNP_P4_794_1983733 | NC_021160.1    | Ca_kabuli_chr01 | 1983733                 | CC                              | TT              | 1946718954               |
| SNP_P4_795_1983957 | NC_021160.1    | Ca_kabuli_chr01 | 1983957                 | CC                              | TT              | 1946718956               |
| SNP_P4_796_1983981 | NC_021160.1    | Ca_kabuli_chr01 | 1983981                 | TT                              | AA              | 1946718958               |
| SNP_P4_797_1983991 | NC_021160.1    | Ca_kabuli_chr01 | 1983991                 | GG                              | AA              | 1946718960               |
| SNP_P4_798_1984016 | NC_021160.1    | Ca_kabuli_chr01 | 1984016                 | CC                              | AA              | 1946718962               |
| SNP_P4_799_1984028 | NC_021160.1    | Ca_kabuli_chr01 | 1984028                 | AA                              | CC              | 1946718964               |
| SNP_P4_800_1984029 | NC_021160.1    | Ca_kabuli_chr01 | 1984029                 | AA                              | TT              | 1946718966               |
| SNP_P4_801_1984301 | NC_021160.1    | Ca_kabuli_chr01 | 1984301                 | AA                              | TT              | 1946718968               |
| SNP_P4_802_1984344 | NC_021160.1    | Ca_kabuli_chr01 | 1984344                 | AA                              | GG              | 1946718970               |

| SNPs IDs           | Chromosome IDs | Chromosomes     | Physical positions (bp) | CDC Frontier (Reference genome) | (ILWC46 & LPNB) | NCBI SNPdb Accession IDs |
|--------------------|----------------|-----------------|-------------------------|---------------------------------|-----------------|--------------------------|
| SNP_P4_803_1984384 | NC_021160.1    | Ca_kabuli_chr01 | 1984384                 | TT                              | CC              | 1946718972               |
| SNP_P4_804_1984386 | NC_021160.1    | Ca_kabuli_chr01 | 1984386                 | TT                              | AA              | 1946718973               |
| SNP_P4_805_1984404 | NC_021160.1    | Ca_kabuli_chr01 | 1984404                 | AA                              | CC              | 1946718975               |
| SNP_P4_806_1984500 | NC_021160.1    | Ca_kabuli_chr01 | 1984500                 | CC                              | TT              | 1946718977               |
| SNP_P4_807_1984508 | NC_021160.1    | Ca_kabuli_chr01 | 1984508                 | TT                              | CC              | 1946718979               |
| SNP_P4_808_1984589 | NC_021160.1    | Ca_kabuli_chr01 | 1984589                 | TT                              | CC              | 1946718981               |
| SNP_P4_809_1984668 | NC_021160.1    | Ca_kabuli_chr01 | 1984668                 | CC                              | TT              | 1946718983               |
| SNP_P4_810_1984797 | NC_021160.1    | Ca_kabuli_chr01 | 1984797                 | CC                              | TT              | 1946718985               |
| SNP_P4_811_1984861 | NC_021160.1    | Ca_kabuli_chr01 | 1984861                 | GG                              | AA              | 1946718987               |
| SNP_P4_812_1984927 | NC_021160.1    | Ca_kabuli_chr01 | 1984927                 | TT                              | CC              | 1946718989               |
| SNP_P4_813_1984963 | NC_021160.1    | Ca_kabuli_chr01 | 1984963                 | CC                              | TT              | 1946718991               |
| SNP_P4_814_1985850 | NC_021160.1    | Ca_kabuli_chr01 | 1985850                 | TT                              | GG              | 1946718993               |
| SNP_P4_816_1986445 | NC_021160.1    | Ca_kabuli_chr01 | 1986445                 | CC                              | AA              | 1946718995               |
| SNP_P4_817_1986593 | NC_021160.1    | Ca_kabuli_chr01 | 1986593                 | TT                              | CC              | 1946718997               |
| SNP_P4_818_1986647 | NC_021160.1    | Ca_kabuli_chr01 | 1986647                 | AA                              | TT              | 1946718999               |
| SNP_P4_820_1988129 | NC_021160.1    | Ca_kabuli_chr01 | 1988129                 | AA                              | TT              | 1946719001               |
| SNP_P4_821_1988954 | NC_021160.1    | Ca_kabuli_chr01 | 1988954                 | TT                              | AA              | 1946719002               |
| SNP_P4_823_1989099 | NC_021160.1    | Ca_kabuli_chr01 | 1989099                 | AA                              | CC              | 1946719004               |
| SNP_P4_824_1989313 | NC_021160.1    | Ca_kabuli_chr01 | 1989313                 | GG                              | CC              | 1946719006               |
| SNP_P4_825_1989336 | NC_021160.1    | Ca_kabuli_chr01 | 1989336                 | TT                              | CC              | 1946719008               |
| SNP_P4_826_1989808 | NC_021160.1    | Ca_kabuli_chr01 | 1989808                 | CC                              | TT              | 1946719010               |
| SNP_P4_828_1991152 | NC_021160.1    | Ca_kabuli_chr01 | 1991152                 | TT                              | CC              | 1946719012               |
| SNP_P4_829_1992692 | NC_021160.1    | Ca_kabuli_chr01 | 1992692                 | AA                              | TT              | 1946719014               |
| SNP_P4_830_1993458 | NC_021160.1    | Ca_kabuli_chr01 | 1993458                 | GG                              | AA              | 1946719016               |
| SNP_P4_831_1993460 | NC_021160.1    | Ca_kabuli_chr01 | 1993460                 | TT                              | AA              | 1946719018               |
| SNP_P4_832_1993653 | NC_021160.1    | Ca_kabuli_chr01 | 1993653                 | AA                              | GG              | 1946719020               |
| SNP_P4_833_1993740 | NC_021160.1    | Ca_kabuli_chr01 | 1993740                 | CC                              | AA              | 1946719022               |
| SNP_P4_834_1993952 | NC_021160.1    | Ca_kabuli_chr01 | 1993952                 | GG                              | AA              | 1946719024               |
| SNP_P4_835_1994104 | NC_021160.1    | Ca_kabuli_chr01 | 1994104                 | TT                              | GG              | 1946719026               |
| SNP_P4_836_1994983 | NC_021160.1    | Ca_kabuli_chr01 | 1994983                 | TT                              | CC              | 1946719028               |
| SNP_P4_837_1995190 | NC_021160.1    | Ca_kabuli_chr01 | 1995190                 | AA                              | GG              | 1946719030               |
| SNP_P4_838_1995217 | NC_021160.1    | Ca_kabuli_chr01 | 1995217                 | AA                              | GG              | 1946719032               |
| SNP_P4_839_1996164 | NC_021160.1    | Ca_kabuli_chr01 | 1996164                 | AA                              | GG              | 1946719033               |
| SNP_P4_840_1996192 | NC_021160.1    | Ca_kabuli_chr01 | 1996192                 | TT                              | GG              | 1946719035               |
| SNP_P4_841_1996195 | NC_021160.1    | Ca_kabuli_chr01 | 1996195                 | AA                              | GG              | 1946719037               |
| SNP_P4_842_1996204 | NC_021160.1    | Ca_kabuli_chr01 | 1996204                 | TT                              | CC              | 1946719039               |
| SNP_P4_843_1996210 | NC_021160.1    | Ca_kabuli_chr01 | 1996210                 | GG                              | AA              | 1946719041               |
| SNP_P4_844_1996220 | NC_021160.1    | Ca_kabuli_chr01 | 1996220                 | GG                              | CC              | 1946719043               |
| SNP_P4_845_1996443 | NC_021160.1    | Ca_kabuli_chr01 | 1996443                 | CC                              | TT              | 1946719045               |
| SNP_P4_846_1996705 | NC_021160.1    | Ca_kabuli_chr01 | 1996705                 | AA                              | GG              | 1946719047               |
| SNP_P4_847_1996900 | NC_021160.1    | Ca_kabuli_chr01 | 1996900                 | AA                              | GG              | 1946719049               |
| SNP_P4_848_1997580 | NC_021160.1    | Ca_kabuli_chr01 | 1997580                 | TT                              | GG              | 1946719051               |

| SNPs IDs           | Chromosome IDs | Chromosomes     | Physical positions (bp) | CDC Frontier (Reference genome) | (ILWC46 & LPNB) | NCBI SNPdb Accession IDs |
|--------------------|----------------|-----------------|-------------------------|---------------------------------|-----------------|--------------------------|
| SNP_P4_849_1997585 | NC_021160.1    | Ca_kabuli_chr01 | 1997585                 | AA                              | GG              | 1946719053               |
| SNP_P4_851_1998553 | NC_021160.1    | Ca_kabuli_chr01 | 1998553                 | GG                              | TT              | 1946719055               |
| SNP_P4_852_1998743 | NC_021160.1    | Ca_kabuli_chr01 | 1998743                 | TT                              | AA              | 1946719057               |
| SNP_P4_853_1998895 | NC_021160.1    | Ca_kabuli_chr01 | 1998895                 | CC                              | TT              | 1946719059               |
| SNP_P4_855_1999142 | NC_021160.1    | Ca_kabuli_chr01 | 1999142                 | GG                              | AA              | 1946719061               |
| SNP_P4_856_1999213 | NC_021160.1    | Ca_kabuli_chr01 | 1999213                 | AA                              | TT              | 1946719062               |
| SNP_P4_858_1999743 | NC_021160.1    | Ca_kabuli_chr01 | 1999743                 | TT                              | GG              | 1946719064               |
| SNP_P4_859_1999877 | NC_021160.1    | Ca_kabuli_chr01 | 1999877                 | TT                              | CC              | 1946719066               |
| SNP_P4_860_1999908 | NC_021160.1    | Ca_kabuli_chr01 | 1999908                 | AA                              | TT              | 1946719067               |
| SNP_P4_861_1999917 | NC_021160.1    | Ca_kabuli_chr01 | 1999917                 | AA                              | TT              | 1946719068               |
| SNP_P4_862_1999925 | NC_021160.1    | Ca_kabuli_chr01 | 1999925                 | TT                              | AA              | 1946719069               |
| SNP_P4_863_1999940 | NC_021160.1    | Ca_kabuli_chr01 | 1999940                 | GG                              | TT              | 1946719070               |
| SNP_P4_865_2000241 | NC_021160.1    | Ca_kabuli_chr01 | 2000241                 | TT                              | CC              | 1946719071               |
| SNP_P4_866_2000242 | NC_021160.1    | Ca_kabuli_chr01 | 2000242                 | CC                              | GG              | 1946719072               |
| SNP_P4_867_2001361 | NC_021160.1    | Ca_kabuli_chr01 | 2001361                 | AA                              | CC              | 1946719073               |
| SNP_P4_868_2001524 | NC_021160.1    | Ca_kabuli_chr01 | 2001524                 | GG                              | AA              | 1946719074               |
| SNP_P4_869_2001574 | NC_021160.1    | Ca_kabuli_chr01 | 2001574                 | GG                              | TT              | 1946719075               |
| SNP_P4_871_2001600 | NC_021160.1    | Ca_kabuli_chr01 | 2001600                 | TT                              | CC              | 1946719076               |
| SNP_P4_872_2001749 | NC_021160.1    | Ca_kabuli_chr01 | 2001749                 | AA                              | CC              | 1946719077               |
| SNP_P4_873_2001767 | NC_021160.1    | Ca_kabuli_chr01 | 2001767                 | CC                              | AA              | 1946719078               |
| SNP_P4_875_2002140 | NC_021160.1    | Ca_kabuli_chr01 | 2002140                 | GG                              | CC              | 1946719079               |
| SNP_P4_876_2003252 | NC_021160.1    | Ca_kabuli_chr01 | 2003252                 | TT                              | AA              | 1946719080               |
| SNP_P4_877_2003480 | NC_021160.1    | Ca_kabuli_chr01 | 2003480                 | CC                              | TT              | 1946719081               |
| SNP_P4_878_2003585 | NC_021160.1    | Ca_kabuli_chr01 | 2003585                 | TT                              | CC              | 1946719082               |
| SNP_P4_879_2003586 | NC_021160.1    | Ca_kabuli_chr01 | 2003586                 | TT                              | GG              | 1946719083               |
| SNP_P4_880_2004231 | NC_021160.1    | Ca_kabuli_chr01 | 2004231                 | TT                              | CC              | 1946719085               |
| SNP_P4_881_2004256 | NC_021160.1    | Ca_kabuli_chr01 | 2004256                 | CC                              | AA              | 1946719087               |
| SNP_P4_882_2004281 | NC_021160.1    | Ca_kabuli_chr01 | 2004281                 | AA                              | GG              | 1946719089               |
| SNP_P4_885_2004925 | NC_021160.1    | Ca_kabuli_chr01 | 2004925                 | CC                              | TT              | 1946719091               |
| SNP_P4_886_2005396 | NC_021160.1    | Ca_kabuli_chr01 | 2005396                 | GG                              | AA              | 1946719093               |
| SNP_P4_887_2005450 | NC_021160.1    | Ca_kabuli_chr01 | 2005450                 | AA                              | TT              | 1946719095               |
| SNP_P4_888_2006335 | NC_021160.1    | Ca_kabuli_chr01 | 2006335                 | CC                              | TT              | 1946719097               |
| SNP_P4_889_2006576 | NC_021160.1    | Ca_kabuli_chr01 | 2006576                 | TT                              | CC              | 1946719099               |
| SNP_P4_890_2006613 | NC_021160.1    | Ca_kabuli_chr01 | 2006613                 | CC                              | TT              | 1946719101               |
| SNP_P4_891_2006618 | NC_021160.1    | Ca_kabuli_chr01 | 2006618                 | GG                              | AA              | 1946719103               |
| SNP_P4_892_2006631 | NC_021160.1    | Ca_kabuli_chr01 | 2006631                 | TT                              | GG              | 1946719105               |
| SNP_P4_893_2006636 | NC_021160.1    | Ca_kabuli_chr01 | 2006636                 | TT                              | AA              | 1946719107               |
| SNP_P4_894_2006648 | NC_021160.1    | Ca_kabuli_chr01 | 2006648                 | CC                              | TT              | 1946719109               |
| SNP_P4_896_2006837 | NC_021160.1    | Ca_kabuli_chr01 | 2006837                 | CC                              | TT              | 1946719111               |
| SNP_P4_897_2006857 | NC_021160.1    | Ca_kabuli_chr01 | 2006857                 | TT                              | CC              | 1946719113               |
| SNP_P4_898_2006938 | NC_021160.1    | Ca_kabuli_chr01 | 2006938                 | AA                              | CC              | 1946719116               |
| SNP_P4_899_2006984 | NC_021160.1    | Ca_kabuli_chr01 | 2006984                 | TT                              | CC              | 1946719119               |

| SNPs IDs           | Chromosome IDs | Chromosomes     | Physical positions (bp) | CDC Frontier (Reference genome) | (ILWC46 & LPNB) | NCBI SNPdb Accession IDs |
|--------------------|----------------|-----------------|-------------------------|---------------------------------|-----------------|--------------------------|
| SNP_P4_900_2007000 | NC_021160.1    | Ca_kabuli_chr01 | 2007000                 | CC                              | AA              | 1946719122               |
| SNP_P4_901_2007826 | NC_021160.1    | Ca_kabuli_chr01 | 2007826                 | TT                              | CC              | 1946719125               |
| SNP_P4_902_2007845 | NC_021160.1    | Ca_kabuli_chr01 | 2007845                 | TT                              | CC              | 1946719127               |
| SNP_P4_903_2007879 | NC_021160.1    | Ca_kabuli_chr01 | 2007879                 | TT                              | GG              | 1946719129               |
| SNP_P4_904_2007903 | NC_021160.1    | Ca_kabuli_chr01 | 2007903                 | CC                              | TT              | 1946719131               |
| SNP_P4_905_2007918 | NC_021160.1    | Ca_kabuli_chr01 | 2007918                 | CC                              | TT              | 1946719133               |
| SNP_P4_906_2007928 | NC_021160.1    | Ca_kabuli_chr01 | 2007928                 | GG                              | TT              | 1946719135               |
| SNP_P4_907_2008087 | NC_021160.1    | Ca_kabuli_chr01 | 2008087                 | AA                              | GG              | 1946719137               |
| SNP_P4_908_2008088 | NC_021160.1    | Ca_kabuli_chr01 | 2008088                 | CC                              | TT              | 1946719139               |
| SNP_P4_909_2008350 | NC_021160.1    | Ca_kabuli_chr01 | 2008350                 | TT                              | CC              | 1946719141               |
| SNP_P4_910_2008687 | NC_021160.1    | Ca_kabuli_chr01 | 2008687                 | AA                              | CC              | 1946719143               |
| SNP_P4_911_2008688 | NC_021160.1    | Ca_kabuli_chr01 | 2008688                 | AA                              | TT              | 1946719145               |
| SNP_P4_912_2008916 | NC_021160.1    | Ca_kabuli_chr01 | 2008916                 | TT                              | AA              | 1946719147               |
| SNP_P4_913_2011348 | NC_021160.1    | Ca_kabuli_chr01 | 2011348                 | TT                              | CC              | 1946719149               |
| SNP_P4_914_2011569 | NC_021160.1    | Ca_kabuli_chr01 | 2011569                 | CC                              | TT              | 1946719151               |
| SNP_P4_915_2011571 | NC_021160.1    | Ca_kabuli_chr01 | 2011571                 | GG                              | AA              | 1946719153               |
| SNP_P4_916_2011818 | NC_021160.1    | Ca_kabuli_chr01 | 2011818                 | GG                              | TT              | 1946719155               |
| SNP_P4_917_2011968 | NC_021160.1    | Ca_kabuli_chr01 | 2011968                 | AA                              | GG              | 1946719157               |
| SNP_P4_918_2012740 | NC_021160.1    | Ca_kabuli_chr01 | 2012740                 | CC                              | GG              | 1946719159               |
| SNP_P4_919_2014171 | NC_021160.1    | Ca_kabuli_chr01 | 2014171                 | AA                              | GG              | 1946719161               |
| SNP_P4_920_2014176 | NC_021160.1    | Ca_kabuli_chr01 | 2014176                 | TT                              | GG              | 1946719163               |
| SNP_P4_921_2014485 | NC_021160.1    | Ca_kabuli_chr01 | 2014485                 | AA                              | GG              | 1946719165               |
| SNP_P4_923_2015657 | NC_021160.1    | Ca_kabuli_chr01 | 2015657                 | GG                              | AA              | 1946719167               |
| SNP_P4_924_2015716 | NC_021160.1    | Ca_kabuli_chr01 | 2015716                 | CC                              | TT              | 1946719169               |
| SNP_P4_925_2016096 | NC_021160.1    | Ca_kabuli_chr01 | 2016096                 | AA                              | CC              | 1946719171               |
| SNP_P4_926_2016656 | NC_021160.1    | Ca_kabuli_chr01 | 2016656                 | CC                              | TT              | 1946719173               |
| SNP_P4_927_2018189 | NC_021160.1    | Ca_kabuli_chr01 | 2018189                 | GG                              | AA              | 1946719175               |
| SNP_P4_928_2018262 | NC_021160.1    | Ca_kabuli_chr01 | 2018262                 | CC                              | TT              | 1946719177               |
| SNP_P4_930_2018337 | NC_021160.1    | Ca_kabuli_chr01 | 2018337                 | AA                              | TT              | 1946719179               |
| SNP_P4_931_2018349 | NC_021160.1    | Ca_kabuli_chr01 | 2018349                 | AA                              | GG              | 1946719181               |
| SNP_P4_932_2018355 | NC_021160.1    | Ca_kabuli_chr01 | 2018355                 | AA                              | TT              | 1946719183               |
| SNP_P4_933_2018587 | NC_021160.1    | Ca_kabuli_chr01 | 2018587                 | TT                              | CC              | 1946719185               |
| SNP_P4_935_2018710 | NC_021160.1    | Ca_kabuli_chr01 | 2018710                 | GG                              | AA              | 1946719187               |
| SNP_P4_936_2018721 | NC_021160.1    | Ca_kabuli_chr01 | 2018721                 | AA                              | TT              | 1946719189               |
| SNP_P4_937_2018929 | NC_021160.1    | Ca_kabuli_chr01 | 2018929                 | AA                              | GG              | 1946719191               |
| SNP_P4_938_2018930 | NC_021160.1    | Ca_kabuli_chr01 | 2018930                 | TT                              | GG              | 1946719193               |
| SNP_P4_939_2018968 | NC_021160.1    | Ca_kabuli_chr01 | 2018968                 | CC                              | TT              | 1946719195               |
| SNP_P4_940_2019073 | NC_021160.1    | Ca_kabuli_chr01 | 2019073                 | CC                              | TT              | 1946719197               |
| SNP_P4_941_2019088 | NC_021160.1    | Ca_kabuli_chr01 | 2019088                 | CC                              | TT              | 1946719199               |
| SNP_P4_942_2019280 | NC_021160.1    | Ca_kabuli_chr01 | 2019280                 | CC                              | TT              | 1946719201               |
| SNP_P4_943_2021732 | NC_021160.1    | Ca_kabuli_chr01 | 2021732                 | TT                              | AA              | 1946719203               |
| SNP_P4_945_2023348 | NC_021160.1    | Ca_kabuli_chr01 | 2023348                 | CC                              | AA              | 1946719205               |



| SNPs IDs           | Chromosome IDs | Chromosomes     | Physical positions (bp) | CDC Frontier (Reference genome) | (ILWC46 & LPNB) | NCBI SNPdb Accession IDs |
|--------------------|----------------|-----------------|-------------------------|---------------------------------|-----------------|--------------------------|
| SNP_P4_946_2023355 | NC_021160.1    | Ca_kabuli_chr01 | 2023355                 | AA                              | GG              | 1946719207               |
| SNP_P4_947_2023579 | NC_021160.1    | Ca_kabuli_chr01 | 2023579                 | GG                              | AA              | 1946719209               |
| SNP_P4_948_2023593 | NC_021160.1    | Ca_kabuli_chr01 | 2023593                 | CC                              | GG              | 1946719211               |
| SNP_P4_949_2023811 | NC_021160.1    | Ca_kabuli_chr01 | 2023811                 | GG                              | CC              | 1946719214               |
| SNP_P4_950_2023846 | NC_021160.1    | Ca_kabuli_chr01 | 2023846                 | CC                              | GG              | 1946719216               |
| SNP_P4_951_2023868 | NC_021160.1    | Ca_kabuli_chr01 | 2023868                 | GG                              | TT              | 1946719218               |
| SNP_P4_953_2023927 | NC_021160.1    | Ca_kabuli_chr01 | 2023927                 | TT                              | GG              | 1946719220               |
| SNP_P4_954_2024412 | NC_021160.1    | Ca_kabuli_chr01 | 2024412                 | AA                              | GG              | 1946719222               |
| SNP_P4_955_2024423 | NC_021160.1    | Ca_kabuli_chr01 | 2024423                 | AA                              | GG              | 1946719224               |
| SNP_P4_956_2024442 | NC_021160.1    | Ca_kabuli_chr01 | 2024442                 | CC                              | TT              | 1946719226               |
| SNP_P4_957_2024480 | NC_021160.1    | Ca_kabuli_chr01 | 2024480                 | GG                              | AA              | 1946719228               |
| SNP_P4_958_2027546 | NC_021160.1    | Ca_kabuli_chr01 | 2027546                 | AA                              | GG              | 1946719230               |
| SNP_P4_959_2028825 | NC_021160.1    | Ca_kabuli_chr01 | 2028825                 | AA                              | TT              | 1946719232               |
| SNP_P4_960_2028884 | NC_021160.1    | Ca_kabuli_chr01 | 2028884                 | CC                              | TT              | 1946719234               |
| SNP_P4_962_2030442 | NC_021160.1    | Ca_kabuli_chr01 | 2030442                 | CC                              | TT              | 1946719236               |
| SNP_P4_963_2030453 | NC_021160.1    | Ca_kabuli_chr01 | 2030453                 | AA                              | CC              | 1946719238               |
| SNP_P4_964_2030620 | NC_021160.1    | Ca_kabuli_chr01 | 2030620                 | TT                              | CC              | 1946719240               |
| SNP_P4_965_2030630 | NC_021160.1    | Ca_kabuli_chr01 | 2030630                 | GG                              | AA              | 1946719242               |
| SNP_P4_966_2030644 | NC_021160.1    | Ca_kabuli_chr01 | 2030644                 | GG                              | AA              | 1946719244               |
| SNP_P4_967_2030650 | NC_021160.1    | Ca_kabuli_chr01 | 2030650                 | GG                              | AA              | 1946719246               |
| SNP_P4_968_2032788 | NC_021160.1    | Ca_kabuli_chr01 | 2032788                 | AA                              | GG              | 1946719248               |
| SNP_P4_969_2032805 | NC_021160.1    | Ca_kabuli_chr01 | 2032805                 | CC                              | TT              | 1946719250               |
| SNP_P4_970_2042810 | NC_021160.1    | Ca_kabuli_chr01 | 2042810                 | CC                              | TT              | 1946719252               |
| SNP_P4_971_2042894 | NC_021160.1    | Ca_kabuli_chr01 | 2042894                 | TT                              | AA              | 1946719254               |
| SNP_P4_972_2043078 | NC_021160.1    | Ca_kabuli_chr01 | 2043078                 | AA                              | GG              | 1946719256               |
| SNP_P4_973_2043455 | NC_021160.1    | Ca_kabuli_chr01 | 2043455                 | AA                              | TT              | 1946719258               |
| SNP_P4_974_2043893 | NC_021160.1    | Ca_kabuli_chr01 | 2043893                 | TT                              | GG              | 1946719260               |
| SNP_P4_975_2044474 | NC_021160.1    | Ca_kabuli_chr01 | 2044474                 | AA                              | GG              | 1946719262               |
| SNP_P4_976_2044512 | NC_021160.1    | Ca_kabuli_chr01 | 2044512                 | AA                              | GG              | 1946719264               |
| SNP_P4_977_2044684 | NC_021160.1    | Ca_kabuli_chr01 | 2044684                 | GG                              | AA              | 1946719266               |
| SNP_P4_978_2044693 | NC_021160.1    | Ca_kabuli_chr01 | 2044693                 | AA                              | GG              | 1946719268               |
| SNP_P4_979_2044717 | NC_021160.1    | Ca_kabuli_chr01 | 2044717                 | TT                              | AA              | 1946719270               |
| SNP_P4_980_2044723 | NC_021160.1    | Ca_kabuli_chr01 | 2044723                 | CC                              | TT              | 1946719272               |
| SNP_P4_981_2049729 | NC_021160.1    | Ca_kabuli_chr01 | 2049729                 | GG                              | AA              | 1946719274               |
| SNP_P4_982_2049763 | NC_021160.1    | Ca_kabuli_chr01 | 2049763                 | CC                              | TT              | 1946719276               |
| SNP_P4_983_2049766 | NC_021160.1    | Ca_kabuli_chr01 | 2049766                 | AA                              | CC              | 1946719278               |
| SNP_P4_984_2049767 | NC_021160.1    | Ca_kabuli_chr01 | 2049767                 | TT                              | CC              | 1946719280               |
| SNP_P4_985_2049859 | NC_021160.1    | Ca_kabuli_chr01 | 2049859                 | GG                              | AA              | 1946719282               |
| SNP_P4_986_2049887 | NC_021160.1    | Ca_kabuli_chr01 | 2049887                 | AA                              | TT              | 1946719284               |
| SNP_P4_987_2049927 | NC_021160.1    | Ca_kabuli_chr01 | 2049927                 | CC                              | TT              | 1946719286               |
| SNP_P4_988_2050835 | NC_021160.1    | Ca_kabuli_chr01 | 2050835                 | GG                              | TT              | 1946719288               |
| SNP_P4_989_2051225 | NC_021160.1    | Ca_kabuli_chr01 | 2051225                 | GG                              | TT              | 1946719290               |

| SNPs IDs            | Chromosome IDs | Chromosomes     | Physical positions (bp) | CDC Frontier (Reference genome) | (ILWC46 & LPNB) | NCBI SNPdb Accession IDs |
|---------------------|----------------|-----------------|-------------------------|---------------------------------|-----------------|--------------------------|
| SNP_P4_990_2051278  | NC_021160.1    | Ca_kabuli_chr01 | 2051278                 | CC                              | TT              | 1946719292               |
| SNP_P4_991_2054795  | NC_021160.1    | Ca_kabuli_chr01 | 2054795                 | TT                              | GG              | 1946719294               |
| SNP_P4_992_2054859  | NC_021160.1    | Ca_kabuli_chr01 | 2054859                 | TT                              | GG              | 1946719296               |
| SNP_P4_993_2054871  | NC_021160.1    | Ca_kabuli_chr01 | 2054871                 | TT                              | CC              | 1946719298               |
| SNP_P4_994_2055193  | NC_021160.1    | Ca_kabuli_chr01 | 2055193                 | GG                              | AA              | 1946719300               |
| SNP_P4_995_2055194  | NC_021160.1    | Ca_kabuli_chr01 | 2055194                 | CC                              | TT              | 1946719302               |
| SNP_P4_996_2055311  | NC_021160.1    | Ca_kabuli_chr01 | 2055311                 | GG                              | AA              | 1946719304               |
| SNP_P4_997_2055316  | NC_021160.1    | Ca_kabuli_chr01 | 2055316                 | CC                              | TT              | 1946719306               |
| SNP_P4_998_2055318  | NC_021160.1    | Ca_kabuli_chr01 | 2055318                 | GG                              | AA              | 1946719308               |
| SNP_P4_999_2055474  | NC_021160.1    | Ca_kabuli_chr01 | 2055474                 | AA                              | GG              | 1946719310               |
| SNP_P4_1000_2055540 | NC_021160.1    | Ca_kabuli_chr01 | 2055540                 | CC                              | TT              | 1946719312               |
| SNP_P4_1001_2055558 | NC_021160.1    | Ca_kabuli_chr01 | 2055558                 | CC                              | AA              | 1946719314               |
| SNP_P4_1003_2055920 | NC_021160.1    | Ca_kabuli_chr01 | 2055920                 | TT                              | GG              | 1946719316               |
| SNP_P4_1004_2056260 | NC_021160.1    | Ca_kabuli_chr01 | 2056260                 | TT                              | AA              | 1946719318               |
| SNP_P4_1005_2056326 | NC_021160.1    | Ca_kabuli_chr01 | 2056326                 | AA                              | GG              | 1946719320               |
| SNP_P4_1006_2056581 | NC_021160.1    | Ca_kabuli_chr01 | 2056581                 | GG                              | AA              | 1946719323               |
| SNP_P4_1007_2056708 | NC_021160.1    | Ca_kabuli_chr01 | 2056708                 | CC                              | TT              | 1946719325               |
| SNP_P4_1008_2056806 | NC_021160.1    | Ca_kabuli_chr01 | 2056806                 | AA                              | GG              | 1946719327               |
| SNP_P4_1009_2057134 | NC_021160.1    | Ca_kabuli_chr01 | 2057134                 | AA                              | GG              | 1946719329               |
| SNP_P4_1010_2057142 | NC_021160.1    | Ca_kabuli_chr01 | 2057142                 | AA                              | GG              | 1946719331               |
| SNP_P4_1012_2057389 | NC_021160.1    | Ca_kabuli_chr01 | 2057389                 | CC                              | TT              | 1946719333               |
| SNP_P4_1013_2057430 | NC_021160.1    | Ca_kabuli_chr01 | 2057430                 | CC                              | TT              | 1946719335               |
| SNP_P4_1014_2058526 | NC_021160.1    | Ca_kabuli_chr01 | 2058526                 | GG                              | AA              | 1946719337               |
| SNP_P4_1015_2058541 | NC_021160.1    | Ca_kabuli_chr01 | 2058541                 | GG                              | AA              | 1946719339               |
| SNP_P4_1017_2058749 | NC_021160.1    | Ca_kabuli_chr01 | 2058749                 | AA                              | GG              | 1946719341               |
| SNP_P4_1019_2058874 | NC_021160.1    | Ca_kabuli_chr01 | 2058874                 | TT                              | GG              | 1946719342               |
| SNP_P4_1020_2058965 | NC_021160.1    | Ca_kabuli_chr01 | 2058965                 | CC                              | TT              | 1946719344               |
| SNP_P4_1021_2058969 | NC_021160.1    | Ca_kabuli_chr01 | 2058969                 | GG                              | AA              | 1946719346               |
| SNP_P4_1022_2058988 | NC_021160.1    | Ca_kabuli_chr01 | 2058988                 | AA                              | GG              | 1946719348               |
| SNP_P4_1023_2059011 | NC_021160.1    | Ca_kabuli_chr01 | 2059011                 | GG                              | AA              | 1946719350               |
| SNP_P4_1024_2059032 | NC_021160.1    | Ca_kabuli_chr01 | 2059032                 | GG                              | AA              | 1946719352               |
| SNP_P4_1025_2059065 | NC_021160.1    | Ca_kabuli_chr01 | 2059065                 | GG                              | AA              | 1946719354               |
| SNP_P4_1026_2059085 | NC_021160.1    | Ca_kabuli_chr01 | 2059085                 | GG                              | TT              | 1946719356               |
| SNP_P4_1027_2059357 | NC_021160.1    | Ca_kabuli_chr01 | 2059357                 | CC                              | TT              | 1946719358               |
| SNP_P4_1028_2059365 | NC_021160.1    | Ca_kabuli_chr01 | 2059365                 | AA                              | GG              | 1946719360               |
| SNP_P4_1029_2066014 | NC_021160.1    | Ca_kabuli_chr01 | 2066014                 | CC                              | TT              | 1946719362               |
| SNP_P4_1030_2066160 | NC_021160.1    | Ca_kabuli_chr01 | 2066160                 | TT                              | GG              | 1946719364               |
| SNP_P4_1031_2066214 | NC_021160.1    | Ca_kabuli_chr01 | 2066214                 | AA                              | GG              | 1946719366               |
| SNP_P4_1032_2067552 | NC_021160.1    | Ca_kabuli_chr01 | 2067552                 | GG                              | TT              | 1946719368               |
| SNP_P4_1033_2067569 | NC_021160.1    | Ca_kabuli_chr01 | 2067569                 | TT                              | GG              | 1946719370               |
| SNP_P4_1034_2067974 | NC_021160.1    | Ca_kabuli_chr01 | 2067974                 | TT                              | GG              | 1946719372               |
| SNP_P4_1036_2071879 | NC_021160.1    | Ca_kabuli_chr01 | 2071879                 | CC                              | TT              | 1946719374               |

| SNPs IDs            | Chromosome IDs | Chromosomes     | Physical positions (bp) | CDC Frontier (Reference genome) | (ILWC46 & LPNB) | NCBI SNPdb Accession IDs |
|---------------------|----------------|-----------------|-------------------------|---------------------------------|-----------------|--------------------------|
| SNP_P4_1037_2072806 | NC_021160.1    | Ca_kabuli_chr01 | 2072806                 | CC                              | TT              | 1946719376               |
| SNP_P4_1038_2073062 | NC_021160.1    | Ca_kabuli_chr01 | 2073062                 | GG                              | AA              | 1946719378               |
| SNP_P4_1039_2073955 | NC_021160.1    | Ca_kabuli_chr01 | 2073955                 | AA                              | GG              | 1946719380               |
| SNP_P4_1041_2074332 | NC_021160.1    | Ca_kabuli_chr01 | 2074332                 | AA                              | GG              | 1946719382               |
| SNP_P4_1042_2074334 | NC_021160.1    | Ca_kabuli_chr01 | 2074334                 | CC                              | GG              | 1946719384               |
| SNP_P4_1043_2074820 | NC_021160.1    | Ca_kabuli_chr01 | 2074820                 | TT                              | AA              | 1946719386               |
| SNP_P4_1044_2074826 | NC_021160.1    | Ca_kabuli_chr01 | 2074826                 | CC                              | TT              | 1946719388               |
| SNP_P4_1045_2074830 | NC_021160.1    | Ca_kabuli_chr01 | 2074830                 | AA                              | GG              | 1946719390               |
| SNP_P4_1046_2080686 | NC_021160.1    | Ca_kabuli_chr01 | 2080686                 | CC                              | AA              | 1946719392               |
| SNP_P4_1047_2080876 | NC_021160.1    | Ca_kabuli_chr01 | 2080876                 | CC                              | TT              | 1946719394               |
| SNP_P4_1048_2081015 | NC_021160.1    | Ca_kabuli_chr01 | 2081015                 | GG                              | AA              | 1946719396               |
| SNP_P4_1049_2081036 | NC_021160.1    | Ca_kabuli_chr01 | 2081036                 | CC                              | TT              | 1946719398               |
| SNP_P4_1050_2081050 | NC_021160.1    | Ca_kabuli_chr01 | 2081050                 | AA                              | CC              | 1946719401               |
| SNP_P4_1051_2081797 | NC_021160.1    | Ca_kabuli_chr01 | 2081797                 | TT                              | CC              | 1946719403               |
| SNP_P4_1052_2081815 | NC_021160.1    | Ca_kabuli_chr01 | 2081815                 | CC                              | TT              | 1946719405               |
| SNP_P4_1053_2081846 | NC_021160.1    | Ca_kabuli_chr01 | 2081846                 | CC                              | AA              | 1946719407               |
| SNP_P4_1054_2082093 | NC_021160.1    | Ca_kabuli_chr01 | 2082093                 | AA                              | TT              | 1946719409               |
| SNP_P4_1055_2082801 | NC_021160.1    | Ca_kabuli_chr01 | 2082801                 | AA                              | GG              | 1946719411               |
| SNP_P4_1056_2083003 | NC_021160.1    | Ca_kabuli_chr01 | 2083003                 | CC                              | GG              | 1946719413               |
| SNP_P4_1057_2085321 | NC_021160.1    | Ca_kabuli_chr01 | 2085321                 | CC                              | AA              | 1946719415               |
| SNP_P4_1058_2085395 | NC_021160.1    | Ca_kabuli_chr01 | 2085395                 | GG                              | AA              | 1946719417               |
| SNP_P4_1060_2085445 | NC_021160.1    | Ca_kabuli_chr01 | 2085445                 | AA                              | GG              | 1946719419               |
| SNP_P4_1061_2085661 | NC_021160.1    | Ca_kabuli_chr01 | 2085661                 | CC                              | TT              | 1946719421               |
| SNP_P4_1062_2085688 | NC_021160.1    | Ca_kabuli_chr01 | 2085688                 | GG                              | AA              | 1946719423               |
| SNP_P4_1063_2085820 | NC_021160.1    | Ca_kabuli_chr01 | 2085820                 | TT                              | CC              | 1946719425               |
| SNP_P4_1064_2085839 | NC_021160.1    | Ca_kabuli_chr01 | 2085839                 | GG                              | AA              | 1946719427               |
| SNP_P4_1066_2085910 | NC_021160.1    | Ca_kabuli_chr01 | 2085910                 | CC                              | AA              | 1946719430               |
| SNP_P4_1067_2085937 | NC_021160.1    | Ca_kabuli_chr01 | 2085937                 | AA                              | GG              | 1946719432               |
| SNP_P4_1070_2089075 | NC_021160.1    | Ca_kabuli_chr01 | 2089075                 | TT                              | AA              | 1946719434               |
| SNP_P4_1071_2090531 | NC_021160.1    | Ca_kabuli_chr01 | 2090531                 | CC                              | GG              | 1946719436               |
| SNP_P4_1072_2090848 | NC_021160.1    | Ca_kabuli_chr01 | 2090848                 | AA                              | GG              | 1946719438               |
| SNP_P4_1073_2090872 | NC_021160.1    | Ca_kabuli_chr01 | 2090872                 | GG                              | AA              | 1946719440               |
| SNP_P4_1075_2091350 | NC_021160.1    | Ca_kabuli_chr01 | 2091350                 | TT                              | CC              | 1946719442               |
| SNP_P4_1076_2091561 | NC_021160.1    | Ca_kabuli_chr01 | 2091561                 | GG                              | CC              | 1946719444               |
| SNP_P4_1077_2095150 | NC_021160.1    | Ca_kabuli_chr01 | 2095150                 | GG                              | TT              | 1946719446               |
| SNP_P4_1078_2095300 | NC_021160.1    | Ca_kabuli_chr01 | 2095300                 | AA                              | TT              | 1946719448               |
| SNP_P4_1079_2095325 | NC_021160.1    | Ca_kabuli_chr01 | 2095325                 | AA                              | GG              | 1946719450               |
| SNP_P4_1080_2095407 | NC_021160.1    | Ca_kabuli_chr01 | 2095407                 | GG                              | TT              | 1946719452               |
| SNP_P4_1081_2095538 | NC_021160.1    | Ca_kabuli_chr01 | 2095538                 | AA                              | GG              | 1946719454               |
| SNP_P4_1082_2095918 | NC_021160.1    | Ca_kabuli_chr01 | 2095918                 | AA                              | GG              | 1946719456               |
| SNP_P4_1083_2097231 | NC_021160.1    | Ca_kabuli_chr01 | 2097231                 | TT                              | CC              | 1946719458               |
| SNP_P4_1085_2098364 | NC_021160.1    | Ca_kabuli_chr01 | 2098364                 | CC                              | TT              | 1946719460               |

| SNPs IDs            | Chromosome IDs | Chromosomes     | Physical positions (bp) | CDC Frontier (Reference genome) | (ILWC46 & LPNB) | NCBI SNPdb Accession IDs |
|---------------------|----------------|-----------------|-------------------------|---------------------------------|-----------------|--------------------------|
| SNP_P4_1086_2098906 | NC_021160.1    | Ca_kabuli_chr01 | 2098906                 | GG                              | CC              | 1946719462               |
| SNP_P4_1087_2098911 | NC_021160.1    | Ca_kabuli_chr01 | 2098911                 | AA                              | TT              | 1946719464               |
| SNP_P4_1088_2099029 | NC_021160.1    | Ca_kabuli_chr01 | 2099029                 | GG                              | TT              | 1946719466               |
| SNP_P4_1089_2099708 | NC_021160.1    | Ca_kabuli_chr01 | 2099708                 | TT                              | CC              | 1946719468               |
| SNP_P4_1091_2099966 | NC_021160.1    | Ca_kabuli_chr01 | 2099966                 | GG                              | AA              | 1946719471               |
| SNP_P4_1092_2100735 | NC_021160.1    | Ca_kabuli_chr01 | 2100735                 | TT                              | CC              | 1946719473               |
| SNP_P4_1093_2100766 | NC_021160.1    | Ca_kabuli_chr01 | 2100766                 | AA                              | GG              | 1946719475               |
| SNP_P4_1094_2101046 | NC_021160.1    | Ca_kabuli_chr01 | 2101046                 | TT                              | AA              | 1946719477               |
| SNP_P4_1095_2106219 | NC_021160.1    | Ca_kabuli_chr01 | 2106219                 | AA                              | GG              | 1946719479               |
| SNP_P4_1098_2113196 | NC_021160.1    | Ca_kabuli_chr01 | 2113196                 | TT                              | AA              | 1946719481               |
| SNP_P4_1099_2113204 | NC_021160.1    | Ca_kabuli_chr01 | 2113204                 | AA                              | GG              | 1946719483               |
| SNP_P4_1100_2113229 | NC_021160.1    | Ca_kabuli_chr01 | 2113229                 | AA                              | GG              | 1946719485               |
| SNP_P4_1101_2114162 | NC_021160.1    | Ca_kabuli_chr01 | 2114162                 | TT                              | CC              | 1946719487               |
| SNP_P4_1102_2114820 | NC_021160.1    | Ca_kabuli_chr01 | 2114820                 | TT                              | CC              | 1946719489               |
| SNP_P4_1104_2115116 | NC_021160.1    | Ca_kabuli_chr01 | 2115116                 | GG                              | CC              | 1946719491               |
| SNP_P4_1105_2115154 | NC_021160.1    | Ca_kabuli_chr01 | 2115154                 | CC                              | TT              | 1946719493               |
| SNP_P4_1106_2115185 | NC_021160.1    | Ca_kabuli_chr01 | 2115185                 | CC                              | TT              | 1946719495               |
| SNP_P4_1107_2115330 | NC_021160.1    | Ca_kabuli_chr01 | 2115330                 | CC                              | TT              | 1946719497               |
| SNP_P4_1108_2115429 | NC_021160.1    | Ca_kabuli_chr01 | 2115429                 | TT                              | AA              | 1946719499               |
| SNP_P4_1109_2115485 | NC_021160.1    | Ca_kabuli_chr01 | 2115485                 | TT                              | CC              | 1946719501               |
| SNP_P4_1110_2116491 | NC_021160.1    | Ca_kabuli_chr01 | 2116491                 | TT                              | AA              | 1946719503               |
| SNP_P4_1111_2116504 | NC_021160.1    | Ca_kabuli_chr01 | 2116504                 | CC                              | TT              | 1946719505               |
| SNP_P4_1112_2116539 | NC_021160.1    | Ca_kabuli_chr01 | 2116539                 | GG                              | AA              | 1946719507               |
| SNP_P4_1113_2116540 | NC_021160.1    | Ca_kabuli_chr01 | 2116540                 | AA                              | GG              | 1946719509               |
| SNP_P4_1115_2116613 | NC_021160.1    | Ca_kabuli_chr01 | 2116613                 | AA                              | TT              | 1946719511               |
| SNP_P4_1116_2117635 | NC_021160.1    | Ca_kabuli_chr01 | 2117635                 | GG                              | AA              | 1946719513               |
| SNP_P4_1117_2119014 | NC_021160.1    | Ca_kabuli_chr01 | 2119014                 | GG                              | TT              | 1946719515               |
| SNP_P4_1118_2119065 | NC_021160.1    | Ca_kabuli_chr01 | 2119065                 | TT                              | GG              | 1946719517               |
| SNP_P4_1119_2119069 | NC_021160.1    | Ca_kabuli_chr01 | 2119069                 | TT                              | GG              | 1946719519               |
| SNP_P4_1120_2119159 | NC_021160.1    | Ca_kabuli_chr01 | 2119159                 | TT                              | CC              | 1946719521               |
| SNP_P4_1121_2119208 | NC_021160.1    | Ca_kabuli_chr01 | 2119208                 | CC                              | TT              | 1946719523               |
| SNP_P4_1122_2119239 | NC_021160.1    | Ca_kabuli_chr01 | 2119239                 | TT                              | AA              | 1946719525               |
| SNP_P4_1123_2119246 | NC_021160.1    | Ca_kabuli_chr01 | 2119246                 | GG                              | AA              | 1946719527               |
| SNP_P4_1124_2119284 | NC_021160.1    | Ca_kabuli_chr01 | 2119284                 | GG                              | TT              | 1946719529               |
| SNP_P4_1125_2119290 | NC_021160.1    | Ca_kabuli_chr01 | 2119290                 | GG                              | AA              | 1946719531               |
| SNP_P4_1126_2119310 | NC_021160.1    | Ca_kabuli_chr01 | 2119310                 | AA                              | GG              | 1946719533               |
| SNP_P4_1127_2119311 | NC_021160.1    | Ca_kabuli_chr01 | 2119311                 | TT                              | AA              | 1946719535               |
| SNP_P4_1128_2119327 | NC_021160.1    | Ca_kabuli_chr01 | 2119327                 | GG                              | TT              | 1946719537               |
| SNP_P4_1129_2119475 | NC_021160.1    | Ca_kabuli_chr01 | 2119475                 | TT                              | CC              | 1946719539               |
| SNP_P4_1130_2119597 | NC_021160.1    | Ca_kabuli_chr01 | 2119597                 | GG                              | TT              | 1946719541               |
| SNP_P4_1131_2119604 | NC_021160.1    | Ca_kabuli_chr01 | 2119604                 | GG                              | AA              | 1946719543               |
| SNP_P4_1132_2120028 | NC_021160.1    | Ca_kabuli_chr01 | 2120028                 | GG                              | AA              | 1946719545               |

| SNPs IDs            | Chromosome IDs | Chromosomes     | Physical positions (bp) | CDC Frontier (Reference genome) | (ILWC46 & LPNB) | NCBI SNPdb Accession IDs |
|---------------------|----------------|-----------------|-------------------------|---------------------------------|-----------------|--------------------------|
| SNP_P4_1133_2120232 | NC_021160.1    | Ca_kabuli_chr01 | 2120232                 | AA                              | GG              | 1946719548               |
| SNP_P4_1134_2120241 | NC_021160.1    | Ca_kabuli_chr01 | 2120241                 | TT                              | CC              | 1946719550               |
| SNP_P4_1135_2120475 | NC_021160.1    | Ca_kabuli_chr01 | 2120475                 | CC                              | AA              | 1946719552               |
| SNP_P4_1136_2120536 | NC_021160.1    | Ca_kabuli_chr01 | 2120536                 | AA                              | GG              | 1946719554               |
| SNP_P4_1138_2120573 | NC_021160.1    | Ca_kabuli_chr01 | 2120573                 | GG                              | CC              | 1946719556               |
| SNP_P4_1139_2121207 | NC_021160.1    | Ca_kabuli_chr01 | 2121207                 | CC                              | GG              | 1946719558               |
| SNP_P4_1140_2121211 | NC_021160.1    | Ca_kabuli_chr01 | 2121211                 | GG                              | AA              | 1946719560               |
| SNP_P4_1141_2121216 | NC_021160.1    | Ca_kabuli_chr01 | 2121216                 | TT                              | GG              | 1946719562               |
| SNP_P4_1142_2121236 | NC_021160.1    | Ca_kabuli_chr01 | 2121236                 | TT                              | CC              | 1946719564               |
| SNP_P4_1143_2121237 | NC_021160.1    | Ca_kabuli_chr01 | 2121237                 | TT                              | GG              | 1946719566               |
| SNP_P4_1144_2121258 | NC_021160.1    | Ca_kabuli_chr01 | 2121258                 | AA                              | TT              | 1946719568               |
| SNP_P4_1145_2121319 | NC_021160.1    | Ca_kabuli_chr01 | 2121319                 | GG                              | AA              | 1946719571               |
| SNP_P4_1146_2121359 | NC_021160.1    | Ca_kabuli_chr01 | 2121359                 | CC                              | TT              | 1946719573               |
| SNP_P4_1147_2121380 | NC_021160.1    | Ca_kabuli_chr01 | 2121380                 | AA                              | TT              | 1946719575               |
| SNP_P4_1148_2124581 | NC_021160.1    | Ca_kabuli_chr01 | 2124581                 | AA                              | GG              | 1946719577               |
| SNP_P4_1149_2126286 | NC_021160.1    | Ca_kabuli_chr01 | 2126286                 | AA                              | GG              | 1946719579               |
| SNP_P4_1151_2130846 | NC_021160.1    | Ca_kabuli_chr01 | 2130846                 | GG                              | AA              | 1946719581               |
| SNP_P4_1152_2131107 | NC_021160.1    | Ca_kabuli_chr01 | 2131107                 | TT                              | GG              | 1946719583               |
| SNP_P4_1154_2131625 | NC_021160.1    | Ca_kabuli_chr01 | 2131625                 | GG                              | AA              | 1946719585               |
| SNP_P4_1155_2131662 | NC_021160.1    | Ca_kabuli_chr01 | 2131662                 | TT                              | CC              | 1946719587               |
| SNP_P4_1158_2131940 | NC_021160.1    | Ca_kabuli_chr01 | 2131940                 | GG                              | AA              | 1946719589               |
| SNP_P4_1159_2131955 | NC_021160.1    | Ca_kabuli_chr01 | 2131955                 | TT                              | GG              | 1946719591               |
| SNP_P4_1160_2131997 | NC_021160.1    | Ca_kabuli_chr01 | 2131997                 | GG                              | AA              | 1946719593               |
| SNP_P4_1162_2132110 | NC_021160.1    | Ca_kabuli_chr01 | 2132110                 | TT                              | CC              | 1946719595               |
| SNP_P4_1163_2132115 | NC_021160.1    | Ca_kabuli_chr01 | 2132115                 | GG                              | TT              | 1946719597               |
| SNP_P4_1164_2132123 | NC_021160.1    | Ca_kabuli_chr01 | 2132123                 | TT                              | GG              | 1946719599               |
| SNP_P4_1165_2132153 | NC_021160.1    | Ca_kabuli_chr01 | 2132153                 | CC                              | TT              | 1946719601               |
| SNP_P4_1166_2132206 | NC_021160.1    | Ca_kabuli_chr01 | 2132206                 | CC                              | TT              | 1946719603               |
| SNP_P4_1167_2132219 | NC_021160.1    | Ca_kabuli_chr01 | 2132219                 | GG                              | AA              | 1946719605               |
| SNP_P4_1168_2133026 | NC_021160.1    | Ca_kabuli_chr01 | 2133026                 | AA                              | GG              | 1946719607               |
| SNP_P4_1169_2133055 | NC_021160.1    | Ca_kabuli_chr01 | 2133055                 | GG                              | AA              | 1946719609               |
| SNP_P4_1170_2133070 | NC_021160.1    | Ca_kabuli_chr01 | 2133070                 | CC                              | TT              | 1946719611               |
| SNP_P4_1171_2133193 | NC_021160.1    | Ca_kabuli_chr01 | 2133193                 | AA                              | GG              | 1946719613               |
| SNP_P4_1172_2133210 | NC_021160.1    | Ca_kabuli_chr01 | 2133210                 | AA                              | GG              | 1946719615               |
| SNP_P4_1173_2133225 | NC_021160.1    | Ca_kabuli_chr01 | 2133225                 | GG                              | TT              | 1946719617               |
| SNP_P4_1174_2133262 | NC_021160.1    | Ca_kabuli_chr01 | 2133262                 | GG                              | AA              | 1946719619               |
| SNP_P4_1175_2133362 | NC_021160.1    | Ca_kabuli_chr01 | 2133362                 | TT                              | CC              | 1946719621               |
| SNP_P4_1176_2133566 | NC_021160.1    | Ca_kabuli_chr01 | 2133566                 | AA                              | TT              | 1946719623               |
| SNP_P4_1177_2134636 | NC_021160.1    | Ca_kabuli_chr01 | 2134636                 | GG                              | AA              | 1946719625               |
| SNP_P4_1178_2134671 | NC_021160.1    | Ca_kabuli_chr01 | 2134671                 | GG                              | TT              | 1946719627               |
| SNP_P4_1179_2134733 | NC_021160.1    | Ca_kabuli_chr01 | 2134733                 | GG                              | TT              | 1946719629               |
| SNP_P4_1180_2134784 | NC_021160.1    | Ca_kabuli_chr01 | 2134784                 | CC                              | TT              | 1946719631               |

| SNPs IDs            | Chromosome IDs | Chromosomes     | Physical positions (bp) | CDC Frontier (Reference genome) | (ILWC46 & LPNB) | NCBI SNPdb Accession IDs |
|---------------------|----------------|-----------------|-------------------------|---------------------------------|-----------------|--------------------------|
| SNP_P4_1181_2134817 | NC_021160.1    | Ca_kabuli_chr01 | 2134817                 | AA                              | TT              | 1946719633               |
| SNP_P4_1182_2134872 | NC_021160.1    | Ca_kabuli_chr01 | 2134872                 | TT                              | CC              | 1946719635               |
| SNP_P4_1183_2134876 | NC_021160.1    | Ca_kabuli_chr01 | 2134876                 | GG                              | TT              | 1946719637               |
| SNP_P4_1184_2134916 | NC_021160.1    | Ca_kabuli_chr01 | 2134916                 | TT                              | AA              | 1946719639               |
| SNP_P4_1185_2134919 | NC_021160.1    | Ca_kabuli_chr01 | 2134919                 | AA                              | TT              | 1946719641               |
| SNP_P4_1186_2134941 | NC_021160.1    | Ca_kabuli_chr01 | 2134941                 | CC                              | AA              | 1946719643               |
| SNP_P4_1187_2134961 | NC_021160.1    | Ca_kabuli_chr01 | 2134961                 | GG                              | AA              | 1946719645               |
| SNP_P4_1188_2134993 | NC_021160.1    | Ca_kabuli_chr01 | 2134993                 | GG                              | AA              | 1946719647               |
| SNP_P4_1189_2135080 | NC_021160.1    | Ca_kabuli_chr01 | 2135080                 | CC                              | AA              | 1946719649               |
| SNP_P4_1190_2135082 | NC_021160.1    | Ca_kabuli_chr01 | 2135082                 | GG                              | CC              | 1946719651               |
| SNP_P4_1192_2137960 | NC_021160.1    | Ca_kabuli_chr01 | 2137960                 | AA                              | GG              | 1946719653               |
| SNP_P4_1193_2139666 | NC_021160.1    | Ca_kabuli_chr01 | 2139666                 | GG                              | CC              | 1946719655               |
| SNP_P4_1194_2139711 | NC_021160.1    | Ca_kabuli_chr01 | 2139711                 | CC                              | TT              | 1946719657               |
| SNP_P4_1195_2139824 | NC_021160.1    | Ca_kabuli_chr01 | 2139824                 | TT                              | GG              | 1946719659               |
| SNP_P4_1196_2139854 | NC_021160.1    | Ca_kabuli_chr01 | 2139854                 | CC                              | TT              | 1946719661               |
| SNP_P4_1197_2140192 | NC_021160.1    | Ca_kabuli_chr01 | 2140192                 | AA                              | CC              | 1946719663               |
| SNP_P4_1198_2153309 | NC_021160.1    | Ca_kabuli_chr01 | 2153309                 | TT                              | CC              | 1946719665               |
| SNP_P4_1199_2165951 | NC_021160.1    | Ca_kabuli_chr01 | 2165951                 | CC                              | AA              | 1946719667               |
| SNP_P4_1200_2185160 | NC_021160.1    | Ca_kabuli_chr01 | 2185160                 | TT                              | GG              | 1946719669               |
| SNP_P4_1201_2196219 | NC_021160.1    | Ca_kabuli_chr01 | 2196219                 | TT                              | AA              | 1946719671               |
| SNP_P4_1202_2199559 | NC_021160.1    | Ca_kabuli_chr01 | 2199559                 | TT                              | CC              | 1946719673               |
| SNP_P4_1204_2215541 | NC_021160.1    | Ca_kabuli_chr01 | 2215541                 | GG                              | CC              | 1946719675               |
| SNP_P4_1205_2215542 | NC_021160.1    | Ca_kabuli_chr01 | 2215542                 | TT                              | AA              | 1946719677               |
| SNP_P4_1206_2215554 | NC_021160.1    | Ca_kabuli_chr01 | 2215554                 | GG                              | TT              | 1946719679               |
| SNP_P4_1207_2215558 | NC_021160.1    | Ca_kabuli_chr01 | 2215558                 | TT                              | CC              | 1946719681               |
| SNP_P4_1208_2215586 | NC_021160.1    | Ca_kabuli_chr01 | 2215586                 | GG                              | AA              | 1946719683               |
| SNP_P4_1209_2215713 | NC_021160.1    | Ca_kabuli_chr01 | 2215713                 | AA                              | TT              | 1946719685               |
| SNP_P4_1210_2216539 | NC_021160.1    | Ca_kabuli_chr01 | 2216539                 | CC                              | AA              | 1946719687               |
| SNP_P4_1211_2216547 | NC_021160.1    | Ca_kabuli_chr01 | 2216547                 | GG                              | CC              | 1946719689               |
| SNP_P4_1212_2217570 | NC_021160.1    | Ca_kabuli_chr01 | 2217570                 | AA                              | TT              | 1946719691               |
| SNP_P4_1215_2222062 | NC_021160.1    | Ca_kabuli_chr01 | 2222062                 | GG                              | AA              | 1946719693               |
| SNP_P4_1216_2222075 | NC_021160.1    | Ca_kabuli_chr01 | 2222075                 | TT                              | CC              | 1946719695               |
| SNP_P4_1217_2222085 | NC_021160.1    | Ca_kabuli_chr01 | 2222085                 | CC                              | AA              | 1946719697               |
| SNP_P4_1219_2224249 | NC_021160.1    | Ca_kabuli_chr01 | 2224249                 | AA                              | GG              | 1946719699               |
| SNP_P4_1220_2224498 | NC_021160.1    | Ca_kabuli_chr01 | 2224498                 | CC                              | TT              | 1946719702               |
| SNP_P4_1221_2224760 | NC_021160.1    | Ca_kabuli_chr01 | 2224760                 | CC                              | TT              | 1946719704               |
| SNP_P4_1222_2225583 | NC_021160.1    | Ca_kabuli_chr01 | 2225583                 | CC                              | GG              | 1946719706               |
| SNP_P4_1223_2225676 | NC_021160.1    | Ca_kabuli_chr01 | 2225676                 | AA                              | GG              | 1946719708               |
| SNP_P4_1224_2225735 | NC_021160.1    | Ca_kabuli_chr01 | 2225735                 | TT                              | AA              | 1946719710               |
| SNP_P4_1225_2226972 | NC_021160.1    | Ca_kabuli_chr01 | 2226972                 | TT                              | CC              | 1946719712               |
| SNP_P4_1226_2227206 | NC_021160.1    | Ca_kabuli_chr01 | 2227206                 | TT                              | CC              | 1946719714               |
| SNP_P4_1227_2227962 | NC_021160.1    | Ca_kabuli_chr01 | 2227962                 | GG                              | TT              | 1946719716               |

| SNPs IDs            | Chromosome IDs | Chromosomes     | Physical positions (bp) | CDC Frontier (Reference genome) | (ILWC46 & LPNB) | NCBI SNPdb Accession IDs |
|---------------------|----------------|-----------------|-------------------------|---------------------------------|-----------------|--------------------------|
| SNP_P4_1228_2228217 | NC_021160.1    | Ca_kabuli_chr01 | 2228217                 | TT                              | CC              | 1946719718               |
| SNP_P4_1229_2228322 | NC_021160.1    | Ca_kabuli_chr01 | 2228322                 | GG                              | AA              | 1946719720               |
| SNP_P4_1230_2228323 | NC_021160.1    | Ca_kabuli_chr01 | 2228323                 | GG                              | TT              | 1946719722               |
| SNP_P4_1231_2228324 | NC_021160.1    | Ca_kabuli_chr01 | 2228324                 | TT                              | AA              | 1946719724               |
| SNP_P4_1232_2228429 | NC_021160.1    | Ca_kabuli_chr01 | 2228429                 | GG                              | TT              | 1946719726               |
| SNP_P4_1233_2228451 | NC_021160.1    | Ca_kabuli_chr01 | 2228451                 | AA                              | TT              | 1946719728               |
| SNP_P4_1234_2228545 | NC_021160.1    | Ca_kabuli_chr01 | 2228545                 | GG                              | AA              | 1946719730               |
| SNP_P4_1235_2228596 | NC_021160.1    | Ca_kabuli_chr01 | 2228596                 | TT                              | CC              | 1946719732               |
| SNP_P4_1236_2228607 | NC_021160.1    | Ca_kabuli_chr01 | 2228607                 | TT                              | AA              | 1946719734               |
| SNP_P4_1237_2228943 | NC_021160.1    | Ca_kabuli_chr01 | 2228943                 | CC                              | TT              | 1946719736               |
| SNP_P4_1238_2228958 | NC_021160.1    | Ca_kabuli_chr01 | 2228958                 | GG                              | AA              | 1946719738               |
| SNP_P4_1239_2230258 | NC_021160.1    | Ca_kabuli_chr01 | 2230258                 | AA                              | GG              | 1946719739               |
| SNP_P4_1240_2230563 | NC_021160.1    | Ca_kabuli_chr01 | 2230563                 | GG                              | AA              | 1946719741               |
| SNP_P4_1241_2230689 | NC_021160.1    | Ca_kabuli_chr01 | 2230689                 | GG                              | TT              | 1946719743               |
| SNP_P4_1242_2230844 | NC_021160.1    | Ca_kabuli_chr01 | 2230844                 | TT                              | AA              | 1946719745               |
| SNP_P4_1243_2230865 | NC_021160.1    | Ca_kabuli_chr01 | 2230865                 | GG                              | AA              | 1946719747               |
| SNP_P4_1244_2230887 | NC_021160.1    | Ca_kabuli_chr01 | 2230887                 | CC                              | TT              | 1946719749               |
| SNP_P4_1245_2230951 | NC_021160.1    | Ca_kabuli_chr01 | 2230951                 | TT                              | CC              | 1946719751               |
| SNP_P4_1246_2231417 | NC_021160.1    | Ca_kabuli_chr01 | 2231417                 | GG                              | AA              | 1946719753               |
| SNP_P4_1247_2231618 | NC_021160.1    | Ca_kabuli_chr01 | 2231618                 | AA                              | GG              | 1946719756               |
| SNP_P4_1248_2231681 | NC_021160.1    | Ca_kabuli_chr01 | 2231681                 | CC                              | TT              | 1946719758               |
| SNP_P4_1249_2231683 | NC_021160.1    | Ca_kabuli_chr01 | 2231683                 | GG                              | AA              | 1946719760               |
| SNP_P4_1250_2231939 | NC_021160.1    | Ca_kabuli_chr01 | 2231939                 | TT                              | GG              | 1946719762               |
| SNP_P4_1251_2232436 | NC_021160.1    | Ca_kabuli_chr01 | 2232436                 | CC                              | AA              | 1946719764               |
| SNP_P4_1252_2232438 | NC_021160.1    | Ca_kabuli_chr01 | 2232438                 | AA                              | TT              | 1946719766               |
| SNP_P4_1254_2233207 | NC_021160.1    | Ca_kabuli_chr01 | 2233207                 | AA                              | GG              | 1946719768               |
| SNP_P4_1255_2235641 | NC_021160.1    | Ca_kabuli_chr01 | 2235641                 | TT                              | AA              | 1946719770               |
| SNP_P4_1256_2235652 | NC_021160.1    | Ca_kabuli_chr01 | 2235652                 | GG                              | TT              | 1946719772               |
| SNP_P4_1257_2235820 | NC_021160.1    | Ca_kabuli_chr01 | 2235820                 | CC                              | GG              | 1946719774               |
| SNP_P4_1258_2235826 | NC_021160.1    | Ca_kabuli_chr01 | 2235826                 | TT                              | CC              | 1946719776               |
| SNP_P4_1259_2236347 | NC_021160.1    | Ca_kabuli_chr01 | 2236347                 | AA                              | TT              | 1946719778               |
| SNP_P4_1260_2236495 | NC_021160.1    | Ca_kabuli_chr01 | 2236495                 | GG                              | TT              | 1946719780               |
| SNP_P4_1261_2236501 | NC_021160.1    | Ca_kabuli_chr01 | 2236501                 | TT                              | CC              | 1946719782               |
| SNP_P4_1262_2236690 | NC_021160.1    | Ca_kabuli_chr01 | 2236690                 | GG                              | CC              | 1946719784               |
| SNP_P4_1263_2237388 | NC_021160.1    | Ca_kabuli_chr01 | 2237388                 | GG                              | AA              | 1946719786               |
| SNP_P4_1264_2237527 | NC_021160.1    | Ca_kabuli_chr01 | 2237527                 | GG                              | TT              | 1946719788               |
| SNP_P4_1265_2237589 | NC_021160.1    | Ca_kabuli_chr01 | 2237589                 | GG                              | CC              | 1946719790               |
| SNP_P4_1266_2237792 | NC_021160.1    | Ca_kabuli_chr01 | 2237792                 | AA                              | TT              | 1946719792               |
| SNP_P4_1267_2240218 | NC_021160.1    | Ca_kabuli_chr01 | 2240218                 | AA                              | GG              | 1946719794               |
| SNP_P4_1268_2240287 | NC_021160.1    | Ca_kabuli_chr01 | 2240287                 | GG                              | TT              | 1946719796               |
| SNP_P4_1269_2243882 | NC_021160.1    | Ca_kabuli_chr01 | 2243882                 | TT                              | AA              | 1946719798               |
| SNP_P4_1270_2243895 | NC_021160.1    | Ca_kabuli_chr01 | 2243895                 | CC                              | TT              | 1946719800               |

| SNPs IDs            | Chromosome IDs | Chromosomes     | Physical positions (bp) | CDC Frontier (Reference genome) | (ILWC46 & LPNB) | NCBI SNPdb Accession IDs |
|---------------------|----------------|-----------------|-------------------------|---------------------------------|-----------------|--------------------------|
| SNP_P4_1271_2243899 | NC_021160.1    | Ca_kabuli_chr01 | 2243899                 | GG                              | TT              | 1946719802               |
| SNP_P4_1272_2243984 | NC_021160.1    | Ca_kabuli_chr01 | 2243984                 | CC                              | GG              | 1946719804               |
| SNP_P4_1275_2245257 | NC_021160.1    | Ca_kabuli_chr01 | 2245257                 | CC                              | TT              | 1946719806               |
| SNP_P4_1276_2245286 | NC_021160.1    | Ca_kabuli_chr01 | 2245286                 | TT                              | AA              | 1946719808               |
| SNP_P4_1277_2245553 | NC_021160.1    | Ca_kabuli_chr01 | 2245553                 | GG                              | AA              | 1946719810               |
| SNP_P4_1278_2245555 | NC_021160.1    | Ca_kabuli_chr01 | 2245555                 | TT                              | CC              | 1946719812               |
| SNP_P4_1279_2245605 | NC_021160.1    | Ca_kabuli_chr01 | 2245605                 | AA                              | TT              | 1946719814               |
| SNP_P4_1280_2245622 | NC_021160.1    | Ca_kabuli_chr01 | 2245622                 | CC                              | TT              | 1946719816               |
| SNP_P4_1281_2245624 | NC_021160.1    | Ca_kabuli_chr01 | 2245624                 | CC                              | GG              | 1946719818               |
| SNP_P4_1282_2245823 | NC_021160.1    | Ca_kabuli_chr01 | 2245823                 | AA                              | GG              | 1946719820               |
| SNP_P4_1283_2245830 | NC_021160.1    | Ca_kabuli_chr01 | 2245830                 | CC                              | AA              | 1946719822               |
| SNP_P4_1285_2245875 | NC_021160.1    | Ca_kabuli_chr01 | 2245875                 | CC                              | TT              | 1946719824               |
| SNP_P4_1286_2245941 | NC_021160.1    | Ca_kabuli_chr01 | 2245941                 | GG                              | AA              | 1946719826               |
| SNP_P4_1287_2246160 | NC_021160.1    | Ca_kabuli_chr01 | 2246160                 | AA                              | GG              | 1946719828               |
| SNP_P4_1288_2246207 | NC_021160.1    | Ca_kabuli_chr01 | 2246207                 | AA                              | GG              | 1946719830               |
| SNP_P4_1289_2246226 | NC_021160.1    | Ca_kabuli_chr01 | 2246226                 | AA                              | CC              | 1946719832               |
| SNP_P4_1290_2246228 | NC_021160.1    | Ca_kabuli_chr01 | 2246228                 | TT                              | CC              | 1946719834               |
| SNP_P4_1291_2246230 | NC_021160.1    | Ca_kabuli_chr01 | 2246230                 | CC                              | TT              | 1946719836               |
| SNP_P4_1292_2247605 | NC_021160.1    | Ca_kabuli_chr01 | 2247605                 | AA                              | GG              | 1946719838               |
| SNP_P4_1293_2247653 | NC_021160.1    | Ca_kabuli_chr01 | 2247653                 | AA                              | GG              | 1946719840               |
| SNP_P4_1295_2247717 | NC_021160.1    | Ca_kabuli_chr01 | 2247717                 | TT                              | GG              | 1946719842               |
| SNP_P4_1296_2247960 | NC_021160.1    | Ca_kabuli_chr01 | 2247960                 | CC                              | AA              | 1946719844               |
| SNP_P4_1297_2248062 | NC_021160.1    | Ca_kabuli_chr01 | 2248062                 | GG                              | AA              | 1946719846               |
| SNP_P4_1298_2248077 | NC_021160.1    | Ca_kabuli_chr01 | 2248077                 | AA                              | GG              | 1946719848               |
| SNP_P4_1299_2248178 | NC_021160.1    | Ca_kabuli_chr01 | 2248178                 | CC                              | GG              | 1946719850               |
| SNP_P4_1300_2248193 | NC_021160.1    | Ca_kabuli_chr01 | 2248193                 | TT                              | CC              | 1946719852               |
| SNP_P4_1301_2248234 | NC_021160.1    | Ca_kabuli_chr01 | 2248234                 | CC                              | TT              | 1946719854               |
| SNP_P4_1302_2248249 | NC_021160.1    | Ca_kabuli_chr01 | 2248249                 | GG                              | AA              | 1946719856               |
| SNP_P4_1303_2248445 | NC_021160.1    | Ca_kabuli_chr01 | 2248445                 | GG                              | AA              | 1946719858               |
| SNP_P4_1305_2248518 | NC_021160.1    | Ca_kabuli_chr01 | 2248518                 | TT                              | CC              | 1946719860               |
| SNP_P4_1306_2249751 | NC_021160.1    | Ca_kabuli_chr01 | 2249751                 | GG                              | CC              | 1946719862               |
| SNP_P4_1307_2249910 | NC_021160.1    | Ca_kabuli_chr01 | 2249910                 | CC                              | TT              | 1946719864               |
| SNP_P4_1308_2249932 | NC_021160.1    | Ca_kabuli_chr01 | 2249932                 | AA                              | GG              | 1946719866               |
| SNP_P4_1309_2249952 | NC_021160.1    | Ca_kabuli_chr01 | 2249952                 | GG                              | AA              | 1946719868               |
| SNP_P4_1310_2249997 | NC_021160.1    | Ca_kabuli_chr01 | 2249997                 | CC                              | TT              | 1946719870               |
| SNP_P4_1311_2250263 | NC_021160.1    | Ca_kabuli_chr01 | 2250263                 | CC                              | TT              | 1946719872               |
| SNP_P4_1313_2250928 | NC_021160.1    | Ca_kabuli_chr01 | 2250928                 | TT                              | CC              | 1946719874               |
| SNP_P4_1315_2251190 | NC_021160.1    | Ca_kabuli_chr01 | 2251190                 | GG                              | AA              | 1946719876               |
| SNP_P4_1316_2251257 | NC_021160.1    | Ca_kabuli_chr01 | 2251257                 | GG                              | AA              | 1946719878               |
| SNP_P4_1317_2251258 | NC_021160.1    | Ca_kabuli_chr01 | 2251258                 | TT                              | GG              | 1946719880               |
| SNP_P4_1318_2251262 | NC_021160.1    | Ca_kabuli_chr01 | 2251262                 | CC                              | TT              | 1946719882               |
| SNP_P4_1319_2251290 | NC_021160.1    | Ca_kabuli_chr01 | 2251290                 | CC                              | AA              | 1946719884               |



| SNPs IDs            | Chromosome IDs | Chromosomes     | Physical positions (bp) | CDC Frontier (Reference genome) | (ILWC46 & LPNB) | NCBI SNPdb Accession IDs |
|---------------------|----------------|-----------------|-------------------------|---------------------------------|-----------------|--------------------------|
| SNP_P4_1320_2251455 | NC_021160.1    | Ca_kabuli_chr01 | 2251455                 | GG                              | CC              | 1946719886               |
| SNP_P4_1321_2251502 | NC_021160.1    | Ca_kabuli_chr01 | 2251502                 | CC                              | TT              | 1946719888               |
| SNP_P4_1322_2251817 | NC_021160.1    | Ca_kabuli_chr01 | 2251817                 | TT                              | GG              | 1946719890               |
| SNP_P4_1324_2252343 | NC_021160.1    | Ca_kabuli_chr01 | 2252343                 | GG                              | TT              | 1946719892               |
| SNP_P4_1325_2252377 | NC_021160.1    | Ca_kabuli_chr01 | 2252377                 | AA                              | GG              | 1946719894               |
| SNP_P4_1326_2252716 | NC_021160.1    | Ca_kabuli_chr01 | 2252716                 | CC                              | TT              | 1946719896               |
| SNP_P4_1327_2252742 | NC_021160.1    | Ca_kabuli_chr01 | 2252742                 | GG                              | AA              | 1946719898               |
| SNP_P4_1328_2253334 | NC_021160.1    | Ca_kabuli_chr01 | 2253334                 | AA                              | TT              | 1946719900               |
| SNP_P4_1329_2254400 | NC_021160.1    | Ca_kabuli_chr01 | 2254400                 | GG                              | CC              | 1946719902               |
| SNP_P4_1330_2254565 | NC_021160.1    | Ca_kabuli_chr01 | 2254565                 | TT                              | CC              | 1946719904               |
| SNP_P4_1331_2254581 | NC_021160.1    | Ca_kabuli_chr01 | 2254581                 | CC                              | TT              | 1946719906               |
| SNP_P4_1333_2254692 | NC_021160.1    | Ca_kabuli_chr01 | 2254692                 | TT                              | CC              | 1946719908               |
| SNP_P4_1334_2254999 | NC_021160.1    | Ca_kabuli_chr01 | 2254999                 | CC                              | TT              | 1946719910               |
| SNP_P4_1335_2255010 | NC_021160.1    | Ca_kabuli_chr01 | 2255010                 | GG                              | AA              | 1946719912               |
| SNP_P4_1336_2255019 | NC_021160.1    | Ca_kabuli_chr01 | 2255019                 | TT                              | CC              | 1946719914               |
| SNP_P4_1337_2256151 | NC_021160.1    | Ca_kabuli_chr01 | 2256151                 | CC                              | TT              | 1946719916               |
| SNP_P4_1338_2256152 | NC_021160.1    | Ca_kabuli_chr01 | 2256152                 | AA                              | GG              | 1946719918               |
| SNP_P4_1339_2256208 | NC_021160.1    | Ca_kabuli_chr01 | 2256208                 | TT                              | CC              | 1946719920               |
| SNP_P4_1340_2256393 | NC_021160.1    | Ca_kabuli_chr01 | 2256393                 | CC                              | TT              | 1946719922               |
| SNP_P4_1342_2256474 | NC_021160.1    | Ca_kabuli_chr01 | 2256474                 | CC                              | TT              | 1946719924               |
| SNP_P4_1343_2256475 | NC_021160.1    | Ca_kabuli_chr01 | 2256475                 | AA                              | GG              | 1946719926               |
| SNP_P4_1344_2256504 | NC_021160.1    | Ca_kabuli_chr01 | 2256504                 | GG                              | AA              | 1946719928               |
| SNP_P4_1345_2256512 | NC_021160.1    | Ca_kabuli_chr01 | 2256512                 | GG                              | AA              | 1946719930               |
| SNP_P4_1346_2256527 | NC_021160.1    | Ca_kabuli_chr01 | 2256527                 | AA                              | GG              | 1946719932               |
| SNP_P4_1347_2256529 | NC_021160.1    | Ca_kabuli_chr01 | 2256529                 | AA                              | GG              | 1946719934               |
| SNP_P4_1348_2256548 | NC_021160.1    | Ca_kabuli_chr01 | 2256548                 | AA                              | CC              | 1946719936               |
| SNP_P4_1349_2256600 | NC_021160.1    | Ca_kabuli_chr01 | 2256600                 | AA                              | GG              | 1946719938               |
| SNP_P4_1350_2256622 | NC_021160.1    | Ca_kabuli_chr01 | 2256622                 | GG                              | AA              | 1946719940               |
| SNP_P4_1352_2256686 | NC_021160.1    | Ca_kabuli_chr01 | 2256686                 | GG                              | AA              | 1946719942               |
| SNP_P4_1353_2257008 | NC_021160.1    | Ca_kabuli_chr01 | 2257008                 | AA                              | GG              | 1946719944               |
| SNP_P4_1354_2257197 | NC_021160.1    | Ca_kabuli_chr01 | 2257197                 | CC                              | TT              | 1946719946               |
| SNP_P4_1355_2257422 | NC_021160.1    | Ca_kabuli_chr01 | 2257422                 | TT                              | GG              | 1946719948               |
| SNP_P4_1356_2257552 | NC_021160.1    | Ca_kabuli_chr01 | 2257552                 | AA                              | TT              | 1946719949               |
| SNP_P4_1357_2257554 | NC_021160.1    | Ca_kabuli_chr01 | 2257554                 | AA                              | TT              | 1946719951               |
| SNP_P4_1358_2257590 | NC_021160.1    | Ca_kabuli_chr01 | 2257590                 | GG                              | TT              | 1946719953               |
| SNP_P4_1359_2257721 | NC_021160.1    | Ca_kabuli_chr01 | 2257721                 | TT                              | CC              | 1946719955               |
| SNP_P4_1360_2257744 | NC_021160.1    | Ca_kabuli_chr01 | 2257744                 | AA                              | GG              | 1946719957               |
| SNP_P4_1361_2257759 | NC_021160.1    | Ca_kabuli_chr01 | 2257759                 | GG                              | AA              | 1946719959               |
| SNP_P4_1363_2257870 | NC_021160.1    | Ca_kabuli_chr01 | 2257870                 | AA                              | GG              | 1946719961               |
| SNP_P4_1364_2257881 | NC_021160.1    | Ca_kabuli_chr01 | 2257881                 | TT                              | CC              | 1946719963               |
| SNP_P4_1365_2257889 | NC_021160.1    | Ca_kabuli_chr01 | 2257889                 | AA                              | GG              | 1946719965               |
| SNP_P4_1366_2257913 | NC_021160.1    | Ca_kabuli_chr01 | 2257913                 | TT                              | GG              | 1946719967               |

| SNPs IDs            | Chromosome IDs | Chromosomes     | Physical positions (bp) | CDC Frontier (Reference genome) | (ILWC46 & LPNB) | NCBI SNPdb Accession IDs |
|---------------------|----------------|-----------------|-------------------------|---------------------------------|-----------------|--------------------------|
| SNP_P4_1367_2257924 | NC_021160.1    | Ca_kabuli_chr01 | 2257924                 | TT                              | CC              | 1946719969               |
| SNP_P4_1368_2257985 | NC_021160.1    | Ca_kabuli_chr01 | 2257985                 | AA                              | GG              | 1946719971               |
| SNP_P4_1370_2258015 | NC_021160.1    | Ca_kabuli_chr01 | 2258015                 | CC                              | GG              | 1946719973               |
| SNP_P4_1372_2258195 | NC_021160.1    | Ca_kabuli_chr01 | 2258195                 | AA                              | GG              | 1946719975               |
| SNP_P4_1373_2261551 | NC_021160.1    | Ca_kabuli_chr01 | 2261551                 | CC                              | AA              | 1946719977               |
| SNP_P4_1374_2262189 | NC_021160.1    | Ca_kabuli_chr01 | 2262189                 | TT                              | GG              | 1946719979               |
| SNP_P4_1375_2262999 | NC_021160.1    | Ca_kabuli_chr01 | 2262999                 | AA                              | TT              | 1946719981               |
| SNP_P4_1377_2263791 | NC_021160.1    | Ca_kabuli_chr01 | 2263791                 | GG                              | AA              | 1946719983               |
| SNP_P4_1378_2263908 | NC_021160.1    | Ca_kabuli_chr01 | 2263908                 | GG                              | TT              | 1946719985               |
| SNP_P4_1379_2263920 | NC_021160.1    | Ca_kabuli_chr01 | 2263920                 | CC                              | GG              | 1946719987               |
| SNP_P4_1380_2263934 | NC_021160.1    | Ca_kabuli_chr01 | 2263934                 | AA                              | GG              | 1946719989               |
| SNP_P4_1381_2263939 | NC_021160.1    | Ca_kabuli_chr01 | 2263939                 | CC                              | GG              | 1946719991               |
| SNP_P4_1383_2264642 | NC_021160.1    | Ca_kabuli_chr01 | 2264642                 | GG                              | AA              | 1946719993               |
| SNP_P4_1384_2264647 | NC_021160.1    | Ca_kabuli_chr01 | 2264647                 | GG                              | AA              | 1946719995               |
| SNP_P4_1385_2264786 | NC_021160.1    | Ca_kabuli_chr01 | 2264786                 | GG                              | AA              | 1946719997               |
| SNP_P4_1386_2264799 | NC_021160.1    | Ca_kabuli_chr01 | 2264799                 | AA                              | TT              | 1946719999               |
| SNP_P4_1387_2264872 | NC_021160.1    | Ca_kabuli_chr01 | 2264872                 | TT                              | CC              | 1946720001               |
| SNP_P4_1388_2264874 | NC_021160.1    | Ca_kabuli_chr01 | 2264874                 | GG                              | TT              | 1946720003               |
| SNP_P4_1389_2264878 | NC_021160.1    | Ca_kabuli_chr01 | 2264878                 | AA                              | CC              | 1946720005               |
| SNP_P4_1390_2264895 | NC_021160.1    | Ca_kabuli_chr01 | 2264895                 | AA                              | GG              | 1946720007               |
| SNP_P4_1391_2264963 | NC_021160.1    | Ca_kabuli_chr01 | 2264963                 | GG                              | AA              | 1946720008               |
| SNP_P4_1392_2265087 | NC_021160.1    | Ca_kabuli_chr01 | 2265087                 | CC                              | GG              | 1946720010               |
| SNP_P4_1393_2265098 | NC_021160.1    | Ca_kabuli_chr01 | 2265098                 | AA                              | GG              | 1946720012               |
| SNP_P4_1394_2265120 | NC_021160.1    | Ca_kabuli_chr01 | 2265120                 | GG                              | AA              | 1946720014               |
| SNP_P4_1395_2265125 | NC_021160.1    | Ca_kabuli_chr01 | 2265125                 | GG                              | CC              | 1946720016               |
| SNP_P4_1396_2265132 | NC_021160.1    | Ca_kabuli_chr01 | 2265132                 | AA                              | GG              | 1946720018               |
| SNP_P4_1397_2265250 | NC_021160.1    | Ca_kabuli_chr01 | 2265250                 | AA                              | TT              | 1946720020               |
| SNP_P4_1398_2265448 | NC_021160.1    | Ca_kabuli_chr01 | 2265448                 | GG                              | AA              | 1946720022               |
| SNP_P4_1399_2265964 | NC_021160.1    | Ca_kabuli_chr01 | 2265964                 | CC                              | TT              | 1946720024               |
| SNP_P4_1400_2266040 | NC_021160.1    | Ca_kabuli_chr01 | 2266040                 | AA                              | GG              | 1946720026               |
| SNP_P4_1401_2270366 | NC_021160.1    | Ca_kabuli_chr01 | 2270366                 | GG                              | TT              | 1946720028               |
| SNP_P4_1402_2270435 | NC_021160.1    | Ca_kabuli_chr01 | 2270435                 | GG                              | TT              | 1946720031               |
| SNP_P4_1403_2271253 | NC_021160.1    | Ca_kabuli_chr01 | 2271253                 | CC                              | TT              | 1946720032               |
| SNP_P4_1404_2271254 | NC_021160.1    | Ca_kabuli_chr01 | 2271254                 | TT                              | CC              | 1946720034               |
| SNP_P4_1405_2272460 | NC_021160.1    | Ca_kabuli_chr01 | 2272460                 | CC                              | AA              | 1946720036               |
| SNP_P4_1406_2272485 | NC_021160.1    | Ca_kabuli_chr01 | 2272485                 | TT                              | GG              | 1946720038               |
| SNP_P4_1407_2272486 | NC_021160.1    | Ca_kabuli_chr01 | 2272486                 | TT                              | AA              | 1946720040               |
| SNP_P4_1409_2278290 | NC_021160.1    | Ca_kabuli_chr01 | 2278290                 | TT                              | GG              | 1946720042               |
| SNP_P4_1411_2278368 | NC_021160.1    | Ca_kabuli_chr01 | 2278368                 | AA                              | CC              | 1946720044               |
| SNP_P4_1412_2278951 | NC_021160.1    | Ca_kabuli_chr01 | 2278951                 | TT                              | CC              | 1946720046               |
| SNP_P4_1413_2279127 | NC_021160.1    | Ca_kabuli_chr01 | 2279127                 | AA                              | TT              | 1946720048               |
| SNP_P4_1414_2279431 | NC_021160.1    | Ca_kabuli_chr01 | 2279431                 | AA                              | TT              | 1946720050               |

| SNPs IDs            | Chromosome IDs | Chromosomes     | Physical positions (bp) | CDC Frontier (Reference genome) | (ILWC46 & LPNB) | NCBI SNPdb Accession IDs |
|---------------------|----------------|-----------------|-------------------------|---------------------------------|-----------------|--------------------------|
| SNP_P4_1415_2279436 | NC_021160.1    | Ca_kabuli_chr01 | 2279436                 | CC                              | GG              | 1946720052               |
| SNP_P4_1417_2280160 | NC_021160.1    | Ca_kabuli_chr01 | 2280160                 | AA                              | GG              | 1946720054               |
| SNP_P4_1418_2280478 | NC_021160.1    | Ca_kabuli_chr01 | 2280478                 | AA                              | CC              | 1946720056               |
| SNP_P4_1419_2280735 | NC_021160.1    | Ca_kabuli_chr01 | 2280735                 | TT                              | GG              | 1946720059               |
| SNP_P4_1420_2280748 | NC_021160.1    | Ca_kabuli_chr01 | 2280748                 | GG                              | AA              | 1946720061               |
| SNP_P4_1421_2282954 | NC_021160.1    | Ca_kabuli_chr01 | 2282954                 | GG                              | TT              | 1946720063               |
| SNP_P4_1422_2283126 | NC_021160.1    | Ca_kabuli_chr01 | 2283126                 | GG                              | TT              | 1946720065               |
| SNP_P4_1423_2283131 | NC_021160.1    | Ca_kabuli_chr01 | 2283131                 | CC                              | GG              | 1946720067               |
| SNP_P4_1424_2283134 | NC_021160.1    | Ca_kabuli_chr01 | 2283134                 | TT                              | AA              | 1946720069               |
| SNP_P4_1425_2283961 | NC_021160.1    | Ca_kabuli_chr01 | 2283961                 | GG                              | TT              | 1946720071               |
| SNP_P4_1426_2284161 | NC_021160.1    | Ca_kabuli_chr01 | 2284161                 | AA                              | TT              | 1946720073               |
| SNP_P4_1427_2284175 | NC_021160.1    | Ca_kabuli_chr01 | 2284175                 | AA                              | TT              | 1946720075               |
| SNP_P4_1428_2284192 | NC_021160.1    | Ca_kabuli_chr01 | 2284192                 | GG                              | TT              | 1946720077               |
| SNP_P4_1429_2284212 | NC_021160.1    | Ca_kabuli_chr01 | 2284212                 | TT                              | CC              | 1946720079               |
| SNP_P4_1430_2284441 | NC_021160.1    | Ca_kabuli_chr01 | 2284441                 | GG                              | CC              | 1946720081               |
| SNP_P4_1431_2284745 | NC_021160.1    | Ca_kabuli_chr01 | 2284745                 | TT                              | AA              | 1946720083               |
| SNP_P4_1432_2284940 | NC_021160.1    | Ca_kabuli_chr01 | 2284940                 | GG                              | AA              | 1946720085               |
| SNP_P4_1433_2285879 | NC_021160.1    | Ca_kabuli_chr01 | 2285879                 | GG                              | AA              | 1946720087               |
| SNP_P4_1434_2286488 | NC_021160.1    | Ca_kabuli_chr01 | 2286488                 | AA                              | GG              | 1946720089               |
| SNP_P4_1435_2289052 | NC_021160.1    | Ca_kabuli_chr01 | 2289052                 | AA                              | CC              | 1946720091               |
| SNP_P4_1436_2290039 | NC_021160.1    | Ca_kabuli_chr01 | 2290039                 | TT                              | AA              | 1946720093               |
| SNP_P4_1437_2290092 | NC_021160.1    | Ca_kabuli_chr01 | 2290092                 | AA                              | GG              | 1946720095               |
| SNP_P4_1438_2290932 | NC_021160.1    | Ca_kabuli_chr01 | 2290932                 | AA                              | GG              | 1946720097               |
| SNP_P4_1439_2291280 | NC_021160.1    | Ca_kabuli_chr01 | 2291280                 | TT                              | GG              | 1946720099               |
| SNP_P4_1441_2292486 | NC_021160.1    | Ca_kabuli_chr01 | 2292486                 | AA                              | CC              | 1946720102               |
| SNP_P4_1442_2292528 | NC_021160.1    | Ca_kabuli_chr01 | 2292528                 | GG                              | AA              | 1946720104               |
| SNP_P4_1443_2294335 | NC_021160.1    | Ca_kabuli_chr01 | 2294335                 | AA                              | GG              | 1946720106               |
| SNP_P4_1444_2295175 | NC_021160.1    | Ca_kabuli_chr01 | 2295175                 | GG                              | AA              | 1946720108               |
| SNP_P4_1445_2296470 | NC_021160.1    | Ca_kabuli_chr01 | 2296470                 | TT                              | CC              | 1946720110               |
| SNP_P4_1446_2297773 | NC_021160.1    | Ca_kabuli_chr01 | 2297773                 | TT                              | CC              | 1946720113               |
| SNP_P4_1447_2298212 | NC_021160.1    | Ca_kabuli_chr01 | 2298212                 | AA                              | CC              | 1946720115               |
| SNP_P4_1451_2299435 | NC_021160.1    | Ca_kabuli_chr01 | 2299435                 | TT                              | AA              | 1946720117               |
| SNP_P4_1452_2299436 | NC_021160.1    | Ca_kabuli_chr01 | 2299436                 | TT                              | AA              | 1946720119               |
| SNP_P4_1453_2299437 | NC_021160.1    | Ca_kabuli_chr01 | 2299437                 | TT                              | AA              | 1946720121               |
| SNP_P4_1454_2299438 | NC_021160.1    | Ca_kabuli_chr01 | 2299438                 | TT                              | AA              | 1946720123               |
| SNP_P4_1455_2299443 | NC_021160.1    | Ca_kabuli_chr01 | 2299443                 | AA                              | GG              | 1946720125               |
| SNP_P4_1456_2299658 | NC_021160.1    | Ca_kabuli_chr01 | 2299658                 | TT                              | CC              | 1946720127               |
| SNP_P4_1457_2299709 | NC_021160.1    | Ca_kabuli_chr01 | 2299709                 | TT                              | AA              | 1946720129               |
| SNP_P4_1458_2299856 | NC_021160.1    | Ca_kabuli_chr01 | 2299856                 | TT                              | AA              | 1946720131               |
| SNP_P4_1459_2299886 | NC_021160.1    | Ca_kabuli_chr01 | 2299886                 | AA                              | TT              | 1946720133               |
| SNP_P4_1460_2299913 | NC_021160.1    | Ca_kabuli_chr01 | 2299913                 | AA                              | TT              | 1946720134               |
| SNP_P4_1461_2300013 | NC_021160.1    | Ca_kabuli_chr01 | 2300013                 | AA                              | TT              | 1946720136               |

| SNPs IDs            | Chromosome IDs | Chromosomes     | Physical positions (bp) | CDC Frontier (Reference genome) | (ILWC46 & LPNB) | NCBI SNPdb Accession IDs |
|---------------------|----------------|-----------------|-------------------------|---------------------------------|-----------------|--------------------------|
| SNP_P4_1462_2300218 | NC_021160.1    | Ca_kabuli_chr01 | 2300218                 | TT                              | GG              | 1946720138               |
| SNP_P4_1463_2300234 | NC_021160.1    | Ca_kabuli_chr01 | 2300234                 | TT                              | GG              | 1946720140               |
| SNP_P4_1465_2300989 | NC_021160.1    | Ca_kabuli_chr01 | 2300989                 | GG                              | AA              | 1946720142               |
| SNP_P4_1466_2300999 | NC_021160.1    | Ca_kabuli_chr01 | 2300999                 | AA                              | TT              | 1946720144               |
| SNP_P4_1467_2301035 | NC_021160.1    | Ca_kabuli_chr01 | 2301035                 | GG                              | AA              | 1946720146               |
| SNP_P4_1468_2301583 | NC_021160.1    | Ca_kabuli_chr01 | 2301583                 | CC                              | AA              | 1946720148               |
| SNP_P4_1470_2301685 | NC_021160.1    | Ca_kabuli_chr01 | 2301685                 | TT                              | GG              | 1946720150               |
| SNP_P4_1471_2301950 | NC_021160.1    | Ca_kabuli_chr01 | 2301950                 | CC                              | AA              | 1946720152               |
| SNP_P4_1472_2302070 | NC_021160.1    | Ca_kabuli_chr01 | 2302070                 | TT                              | CC              | 1946720154               |
| SNP_P4_1473_2302078 | NC_021160.1    | Ca_kabuli_chr01 | 2302078                 | CC                              | TT              | 1946720156               |
| SNP_P4_1474_2302096 | NC_021160.1    | Ca_kabuli_chr01 | 2302096                 | AA                              | TT              | 1946720158               |
| SNP_P4_1475_2302235 | NC_021160.1    | Ca_kabuli_chr01 | 2302235                 | AA                              | TT              | 1946720160               |
| SNP_P4_1476_2302236 | NC_021160.1    | Ca_kabuli_chr01 | 2302236                 | CC                              | TT              | 1946720162               |
| SNP_P4_1477_2304877 | NC_021160.1    | Ca_kabuli_chr01 | 2304877                 | AA                              | CC              | 1946720164               |
| SNP_P4_1478_2304966 | NC_021160.1    | Ca_kabuli_chr01 | 2304966                 | AA                              | GG              | 1946720166               |
| SNP_P4_1479_2305246 | NC_021160.1    | Ca_kabuli_chr01 | 2305246                 | TT                              | AA              | 1946720168               |
| SNP_P4_1480_2305477 | NC_021160.1    | Ca_kabuli_chr01 | 2305477                 | CC                              | TT              | 1946720170               |
| SNP_P4_1481_2306002 | NC_021160.1    | Ca_kabuli_chr01 | 2306002                 | GG                              | AA              | 1946720172               |
| SNP_P4_1482_2306340 | NC_021160.1    | Ca_kabuli_chr01 | 2306340                 | TT                              | CC              | 1946720174               |
| SNP_P4_1483_2308810 | NC_021160.1    | Ca_kabuli_chr01 | 2308810                 | TT                              | CC              | 1946720176               |
| SNP_P4_1484_2308960 | NC_021160.1    | Ca_kabuli_chr01 | 2308960                 | TT                              | CC              | 1946720178               |
| SNP_P4_1485_2309306 | NC_021160.1    | Ca_kabuli_chr01 | 2309306                 | AA                              | GG              | 1946720180               |
| SNP_P4_1486_2310300 | NC_021160.1    | Ca_kabuli_chr01 | 2310300                 | TT                              | CC              | 1946720183               |
| SNP_P4_1487_2310660 | NC_021160.1    | Ca_kabuli_chr01 | 2310660                 | AA                              | CC              | 1946720185               |
| SNP_P4_1488_2310671 | NC_021160.1    | Ca_kabuli_chr01 | 2310671                 | AA                              | GG              | 1946720187               |
| SNP_P4_1489_2310685 | NC_021160.1    | Ca_kabuli_chr01 | 2310685                 | GG                              | TT              | 1946720189               |
| SNP_P4_1491_2313742 | NC_021160.1    | Ca_kabuli_chr01 | 2313742                 | CC                              | TT              | 1946720191               |
| SNP_P4_1492_2315178 | NC_021160.1    | Ca_kabuli_chr01 | 2315178                 | TT                              | CC              | 1946720193               |
| SNP_P4_1494_2316418 | NC_021160.1    | Ca_kabuli_chr01 | 2316418                 | TT                              | CC              | 1946720195               |
| SNP_P4_1495_2316464 | NC_021160.1    | Ca_kabuli_chr01 | 2316464                 | TT                              | AA              | 1946720197               |
| SNP_P4_1496_2316602 | NC_021160.1    | Ca_kabuli_chr01 | 2316602                 | TT                              | CC              | 1946720199               |
| SNP_P4_1498_2316817 | NC_021160.1    | Ca_kabuli_chr01 | 2316817                 | TT                              | CC              | 1946720201               |
| SNP_P4_1499_2316825 | NC_021160.1    | Ca_kabuli_chr01 | 2316825                 | CC                              | AA              | 1946720203               |
| SNP_P4_1501_2317125 | NC_021160.1    | Ca_kabuli_chr01 | 2317125                 | GG                              | AA              | 1946720205               |
| SNP_P4_1502_2317154 | NC_021160.1    | Ca_kabuli_chr01 | 2317154                 | TT                              | GG              | 1946720207               |
| SNP_P4_1503_2317439 | NC_021160.1    | Ca_kabuli_chr01 | 2317439                 | TT                              | AA              | 1946720209               |
| SNP_P4_1504_2317443 | NC_021160.1    | Ca_kabuli_chr01 | 2317443                 | TT                              | AA              | 1946720211               |
| SNP_P4_1505_2317656 | NC_021160.1    | Ca_kabuli_chr01 | 2317656                 | AA                              | GG              | 1946720213               |
| SNP_P4_1508_2321428 | NC_021160.1    | Ca_kabuli_chr01 | 2321428                 | AA                              | TT              | 1946720215               |
| SNP_P4_1509_2323146 | NC_021160.1    | Ca_kabuli_chr01 | 2323146                 | GG                              | AA              | 1946720217               |
| SNP_P4_1511_2324363 | NC_021160.1    | Ca_kabuli_chr01 | 2324363                 | TT                              | CC              | 1946720219               |
| SNP_P4_1512_2324373 | NC_021160.1    | Ca_kabuli_chr01 | 2324373                 | CC                              | GG              | 1946720221               |

| SNPs IDs            | Chromosome IDs | Chromosomes     | Physical positions (bp) | CDC Frontier (Reference genome) | (ILWC46 & LPNB) | NCBI SNPdb Accession IDs |
|---------------------|----------------|-----------------|-------------------------|---------------------------------|-----------------|--------------------------|
| SNP_P4_1513_2324409 | NC_021160.1    | Ca_kabuli_chr01 | 2324409                 | AA                              | TT              | 1946720223               |
| SNP_P4_1515_2326582 | NC_021160.1    | Ca_kabuli_chr01 | 2326582                 | CC                              | TT              | 1946720225               |
| SNP_P4_1516_2327838 | NC_021160.1    | Ca_kabuli_chr01 | 2327838                 | TT                              | CC              | 1946720228               |
| SNP_P4_1517_2327985 | NC_021160.1    | Ca_kabuli_chr01 | 2327985                 | TT                              | CC              | 1946720230               |
| SNP_P4_1518_2328342 | NC_021160.1    | Ca_kabuli_chr01 | 2328342                 | TT                              | GG              | 1946720232               |
| SNP_P4_1519_2328717 | NC_021160.1    | Ca_kabuli_chr01 | 2328717                 | CC                              | TT              | 1946720234               |
| SNP_P4_1520_2330615 | NC_021160.1    | Ca_kabuli_chr01 | 2330615                 | GG                              | AA              | 1946720236               |
| SNP_P4_1521_2332267 | NC_021160.1    | Ca_kabuli_chr01 | 2332267                 | AA                              | GG              | 1946720238               |
| SNP_P4_1522_2332278 | NC_021160.1    | Ca_kabuli_chr01 | 2332278                 | AA                              | TT              | 1946720240               |
| SNP_P4_1523_2332284 | NC_021160.1    | Ca_kabuli_chr01 | 2332284                 | AA                              | CC              | 1946720242               |
| SNP_P4_1524_2332293 | NC_021160.1    | Ca_kabuli_chr01 | 2332293                 | AA                              | CC              | 1946720244               |
| SNP_P4_1527_2334228 | NC_021160.1    | Ca_kabuli_chr01 | 2334228                 | CC                              | AA              | 1946720246               |
| SNP_P4_1528_2334484 | NC_021160.1    | Ca_kabuli_chr01 | 2334484                 | TT                              | CC              | 1946720248               |
| SNP_P4_1529_2334492 | NC_021160.1    | Ca_kabuli_chr01 | 2334492                 | GG                              | AA              | 1946720250               |
| SNP_P4_1530_2334982 | NC_021160.1    | Ca_kabuli_chr01 | 2334982                 | TT                              | CC              | 1946720252               |
| SNP_P4_1531_2336821 | NC_021160.1    | Ca_kabuli_chr01 | 2336821                 | TT                              | CC              | 1946720254               |
| SNP_P4_1532_2336824 | NC_021160.1    | Ca_kabuli_chr01 | 2336824                 | AA                              | TT              | 1946720256               |
| SNP_P4_1533_2336856 | NC_021160.1    | Ca_kabuli_chr01 | 2336856                 | CC                              | TT              | 1946720258               |
| SNP_P4_1534_2337111 | NC_021160.1    | Ca_kabuli_chr01 | 2337111                 | AA                              | GG              | 1946720260               |
| SNP_P4_1536_2337432 | NC_021160.1    | Ca_kabuli_chr01 | 2337432                 | GG                              | TT              | 1946720262               |
| SNP_P4_1537_2338997 | NC_021160.1    | Ca_kabuli_chr01 | 2338997                 | TT                              | GG              | 1946720264               |
| SNP_P4_1538_2339366 | NC_021160.1    | Ca_kabuli_chr01 | 2339366                 | GG                              | TT              | 1946720266               |
| SNP_P4_1540_2341448 | NC_021160.1    | Ca_kabuli_chr01 | 2341448                 | GG                              | AA              | 1946720268               |
| SNP_P4_1542_2341945 | NC_021160.1    | Ca_kabuli_chr01 | 2341945                 | GG                              | AA              | 1946720270               |
| SNP_P4_1543_2343203 | NC_021160.1    | Ca_kabuli_chr01 | 2343203                 | TT                              | GG              | 1946720273               |
| SNP_P4_1544_2343224 | NC_021160.1    | Ca_kabuli_chr01 | 2343224                 | AA                              | GG              | 1946720275               |
| SNP_P4_1545_2343235 | NC_021160.1    | Ca_kabuli_chr01 | 2343235                 | GG                              | TT              | 1946720278               |
| SNP_P4_1546_2343249 | NC_021160.1    | Ca_kabuli_chr01 | 2343249                 | AA                              | CC              | 1946720280               |
| SNP_P4_1547_2343271 | NC_021160.1    | Ca_kabuli_chr01 | 2343271                 | TT                              | CC              | 1946720282               |
| SNP_P4_1548_2343390 | NC_021160.1    | Ca_kabuli_chr01 | 2343390                 | AA                              | CC              | 1946720284               |
| SNP_P4_1549_2343749 | NC_021160.1    | Ca_kabuli_chr01 | 2343749                 | CC                              | TT              | 1946720286               |
| SNP_P4_1550_2343864 | NC_021160.1    | Ca_kabuli_chr01 | 2343864                 | GG                              | AA              | 1946720288               |
| SNP_P4_1551_2344153 | NC_021160.1    | Ca_kabuli_chr01 | 2344153                 | GG                              | AA              | 1946720290               |
| SNP_P4_1552_2346083 | NC_021160.1    | Ca_kabuli_chr01 | 2346083                 | GG                              | AA              | 1946720292               |
| SNP_P4_1554_2347328 | NC_021160.1    | Ca_kabuli_chr01 | 2347328                 | TT                              | CC              | 1946720294               |
| SNP_P4_1557_2347550 | NC_021160.1    | Ca_kabuli_chr01 | 2347550                 | GG                              | CC              | 1946720296               |
| SNP_P4_1559_2347986 | NC_021160.1    | Ca_kabuli_chr01 | 2347986                 | GG                              | AA              | 1946720298               |
| SNP_P4_1560_2348148 | NC_021160.1    | Ca_kabuli_chr01 | 2348148                 | GG                              | AA              | 1946720300               |
| SNP_P4_1561_2348236 | NC_021160.1    | Ca_kabuli_chr01 | 2348236                 | GG                              | AA              | 1946720302               |
| SNP_P4_1563_2348888 | NC_021160.1    | Ca_kabuli_chr01 | 2348888                 | GG                              | AA              | 1946720303               |
| SNP_P4_1564_2349129 | NC_021160.1    | Ca_kabuli_chr01 | 2349129                 | AA                              | GG              | 1946720305               |
| SNP_P4_1565_2349729 | NC_021160.1    | Ca_kabuli_chr01 | 2349729                 | GG                              | AA              | 1946720307               |

| SNPs IDs            | Chromosome IDs | Chromosomes     | Physical positions (bp) | CDC Frontier (Reference genome) | (ILWC46 & LPNB) | NCBI SNPdb Accession IDs |
|---------------------|----------------|-----------------|-------------------------|---------------------------------|-----------------|--------------------------|
| SNP_P4_1566_2350039 | NC_021160.1    | Ca_kabuli_chr01 | 2350039                 | GG                              | CC              | 1946720309               |
| SNP_P4_1567_2351655 | NC_021160.1    | Ca_kabuli_chr01 | 2351655                 | TT                              | CC              | 1946720311               |
| SNP_P4_1569_2351725 | NC_021160.1    | Ca_kabuli_chr01 | 2351725                 | TT                              | CC              | 1946720313               |
| SNP_P4_1570_2351729 | NC_021160.1    | Ca_kabuli_chr01 | 2351729                 | TT                              | CC              | 1946720315               |
| SNP_P4_1571_2351911 | NC_021160.1    | Ca_kabuli_chr01 | 2351911                 | GG                              | TT              | 1946720317               |
| SNP_P4_1572_2351938 | NC_021160.1    | Ca_kabuli_chr01 | 2351938                 | AA                              | GG              | 1946720319               |
| SNP_P4_1573_2351972 | NC_021160.1    | Ca_kabuli_chr01 | 2351972                 | TT                              | CC              | 1946720321               |
| SNP_P4_1574_2351998 | NC_021160.1    | Ca_kabuli_chr01 | 2351998                 | TT                              | CC              | 1946720323               |
| SNP_P4_1575_2352186 | NC_021160.1    | Ca_kabuli_chr01 | 2352186                 | TT                              | GG              | 1946720324               |
| SNP_P4_1576_2352266 | NC_021160.1    | Ca_kabuli_chr01 | 2352266                 | CC                              | TT              | 1946720326               |
| SNP_P4_1577_2352415 | NC_021160.1    | Ca_kabuli_chr01 | 2352415                 | GG                              | AA              | 1946720329               |
| SNP_P4_1578_2352476 | NC_021160.1    | Ca_kabuli_chr01 | 2352476                 | CC                              | TT              | 1946720331               |
| SNP_P4_1579_2352868 | NC_021160.1    | Ca_kabuli_chr01 | 2352868                 | TT                              | AA              | 1946720333               |
| SNP_P4_1580_2352884 | NC_021160.1    | Ca_kabuli_chr01 | 2352884                 | TT                              | CC              | 1946720335               |
| SNP_P4_1581_2353788 | NC_021160.1    | Ca_kabuli_chr01 | 2353788                 | CC                              | TT              | 1946720337               |
| SNP_P4_1582_2354838 | NC_021160.1    | Ca_kabuli_chr01 | 2354838                 | GG                              | CC              | 1946720339               |
| SNP_P4_1583_2357683 | NC_021160.1    | Ca_kabuli_chr01 | 2357683                 | CC                              | AA              | 1946720341               |
| SNP_P4_1585_2359045 | NC_021160.1    | Ca_kabuli_chr01 | 2359045                 | GG                              | AA              | 1946720343               |
| SNP_P4_1587_2360198 | NC_021160.1    | Ca_kabuli_chr01 | 2360198                 | TT                              | CC              | 1946720346               |
| SNP_P4_1588_2360202 | NC_021160.1    | Ca_kabuli_chr01 | 2360202                 | AA                              | TT              | 1946720348               |
| SNP_P4_1589_2360215 | NC_021160.1    | Ca_kabuli_chr01 | 2360215                 | TT                              | CC              | 1946720350               |
| SNP_P4_1590_2360551 | NC_021160.1    | Ca_kabuli_chr01 | 2360551                 | AA                              | GG              | 1946720352               |
| SNP_P4_1591_2363668 | NC_021160.1    | Ca_kabuli_chr01 | 2363668                 | GG                              | TT              | 1946720354               |
| SNP_P4_1592_2363941 | NC_021160.1    | Ca_kabuli_chr01 | 2363941                 | CC                              | TT              | 1946720356               |
| SNP_P4_1593_2364004 | NC_021160.1    | Ca_kabuli_chr01 | 2364004                 | GG                              | TT              | 1946720358               |
| SNP_P4_1594_2364196 | NC_021160.1    | Ca_kabuli_chr01 | 2364196                 | GG                              | AA              | 1946720360               |
| SNP_P4_1595_2364502 | NC_021160.1    | Ca_kabuli_chr01 | 2364502                 | GG                              | AA              | 1946720362               |
| SNP_P4_1596_2364523 | NC_021160.1    | Ca_kabuli_chr01 | 2364523                 | CC                              | GG              | 1946720364               |
| SNP_P4_1597_2364753 | NC_021160.1    | Ca_kabuli_chr01 | 2364753                 | TT                              | CC              | 1946720366               |
| SNP_P4_1598_2365587 | NC_021160.1    | Ca_kabuli_chr01 | 2365587                 | CC                              | GG              | 1946720368               |
| SNP_P4_1599_2367210 | NC_021160.1    | Ca_kabuli_chr01 | 2367210                 | GG                              | AA              | 1946720370               |
| SNP_P4_1600_2367255 | NC_021160.1    | Ca_kabuli_chr01 | 2367255                 | TT                              | CC              | 1946720372               |
| SNP_P4_1601_2368107 | NC_021160.1    | Ca_kabuli_chr01 | 2368107                 | GG                              | AA              | 1946720375               |
| SNP_P4_1602_2368140 | NC_021160.1    | Ca_kabuli_chr01 | 2368140                 | CC                              | TT              | 1946720377               |
| SNP_P4_1603_2368144 | NC_021160.1    | Ca_kabuli_chr01 | 2368144                 | CC                              | TT              | 1946720379               |
| SNP_P4_1604_2368150 | NC_021160.1    | Ca_kabuli_chr01 | 2368150                 | AA                              | TT              | 1946720381               |
| SNP_P4_1605_2368664 | NC_021160.1    | Ca_kabuli_chr01 | 2368664                 | CC                              | TT              | 1946720383               |
| SNP_P4_1606_2368908 | NC_021160.1    | Ca_kabuli_chr01 | 2368908                 | GG                              | TT              | 1946720385               |
| SNP_P4_1607_2368921 | NC_021160.1    | Ca_kabuli_chr01 | 2368921                 | TT                              | CC              | 1946720387               |
| SNP_P4_1608_2368981 | NC_021160.1    | Ca_kabuli_chr01 | 2368981                 | GG                              | AA              | 1946720389               |
| SNP_P4_1611_2369613 | NC_021160.1    | Ca_kabuli_chr01 | 2369613                 | TT                              | CC              | 1946720391               |
| SNP_P4_1612_2369684 | NC_021160.1    | Ca_kabuli_chr01 | 2369684                 | TT                              | AA              | 1946720393               |

| SNPs IDs            | Chromosome IDs | Chromosomes     | Physical positions (bp) | CDC Frontier (Reference genome) | (ILWC46 & LPNB) | NCBI SNPdb Accession IDs |
|---------------------|----------------|-----------------|-------------------------|---------------------------------|-----------------|--------------------------|
| SNP_P4_1615_2372454 | NC_021160.1    | Ca_kabuli_chr01 | 2372454                 | CC                              | TT              | 1946720395               |
| SNP_P4_1616_2372521 | NC_021160.1    | Ca_kabuli_chr01 | 2372521                 | AA                              | GG              | 1946720397               |
| SNP_P4_1617_2373480 | NC_021160.1    | Ca_kabuli_chr01 | 2373480                 | TT                              | GG              | 1946720399               |
| SNP_P4_1618_2373735 | NC_021160.1    | Ca_kabuli_chr01 | 2373735                 | TT                              | AA              | 1946720401               |
| SNP_P4_1619_2374913 | NC_021160.1    | Ca_kabuli_chr01 | 2374913                 | TT                              | AA              | 1946720403               |
| SNP_P4_1620_2374935 | NC_021160.1    | Ca_kabuli_chr01 | 2374935                 | CC                              | TT              | 1946720405               |
| SNP_P4_1621_2374967 | NC_021160.1    | Ca_kabuli_chr01 | 2374967                 | TT                              | CC              | 1946720407               |
| SNP_P4_1622_2375206 | NC_021160.1    | Ca_kabuli_chr01 | 2375206                 | CC                              | GG              | 1946720409               |
| SNP_P4_1623_2375250 | NC_021160.1    | Ca_kabuli_chr01 | 2375250                 | CC                              | TT              | 1946720411               |
| SNP_P4_1624_2375294 | NC_021160.1    | Ca_kabuli_chr01 | 2375294                 | AA                              | TT              | 1946720413               |
| SNP_P4_1625_2375461 | NC_021160.1    | Ca_kabuli_chr01 | 2375461                 | TT                              | CC              | 1946720415               |
| SNP_P4_1626_2376990 | NC_021160.1    | Ca_kabuli_chr01 | 2376990                 | CC                              | TT              | 1946720417               |
| SNP_P4_1627_2376996 | NC_021160.1    | Ca_kabuli_chr01 | 2376996                 | TT                              | CC              | 1946720419               |
| SNP_P4_1628_2378344 | NC_021160.1    | Ca_kabuli_chr01 | 2378344                 | CC                              | AA              | 1946720421               |
| SNP_P4_1629_2378405 | NC_021160.1    | Ca_kabuli_chr01 | 2378405                 | GG                              | TT              | 1946720423               |
| SNP_P4_1630_2378411 | NC_021160.1    | Ca_kabuli_chr01 | 2378411                 | CC                              | GG              | 1946720425               |
| SNP_P4_1631_2378412 | NC_021160.1    | Ca_kabuli_chr01 | 2378412                 | CC                              | TT              | 1946720427               |
| SNP_P4_1632_2378917 | NC_021160.1    | Ca_kabuli_chr01 | 2378917                 | GG                              | AA              | 1946720430               |
| SNP_P4_1633_2378966 | NC_021160.1    | Ca_kabuli_chr01 | 2378966                 | AA                              | TT              | 1946720432               |
| SNP_P4_1634_2378971 | NC_021160.1    | Ca_kabuli_chr01 | 2378971                 | CC                              | AA              | 1946720434               |
| SNP_P4_1636_2379378 | NC_021160.1    | Ca_kabuli_chr01 | 2379378                 | GG                              | TT              | 1946720436               |
| SNP_P4_1638_2380205 | NC_021160.1    | Ca_kabuli_chr01 | 2380205                 | TT                              | AA              | 1946720438               |
| SNP_P4_1639_2380218 | NC_021160.1    | Ca_kabuli_chr01 | 2380218                 | CC                              | AA              | 1946720440               |
| SNP_P4_1640_2380223 | NC_021160.1    | Ca_kabuli_chr01 | 2380223                 | AA                              | TT              | 1946720442               |
| SNP_P4_1641_2380256 | NC_021160.1    | Ca_kabuli_chr01 | 2380256                 | TT                              | AA              | 1946720445               |
| SNP_P4_1642_2380300 | NC_021160.1    | Ca_kabuli_chr01 | 2380300                 | CC                              | TT              | 1946720447               |
| SNP_P4_1643_2380505 | NC_021160.1    | Ca_kabuli_chr01 | 2380505                 | TT                              | AA              | 1946720449               |
| SNP_P4_1644_2380508 | NC_021160.1    | Ca_kabuli_chr01 | 2380508                 | AA                              | CC              | 1946720451               |
| SNP_P4_1645_2380541 | NC_021160.1    | Ca_kabuli_chr01 | 2380541                 | GG                              | AA              | 1946720453               |
| SNP_P4_1646_2380561 | NC_021160.1    | Ca_kabuli_chr01 | 2380561                 | TT                              | AA              | 1946720455               |
| SNP_P4_1647_2380616 | NC_021160.1    | Ca_kabuli_chr01 | 2380616                 | AA                              | GG              | 1946720457               |
| SNP_P4_1648_2381328 | NC_021160.1    | Ca_kabuli_chr01 | 2381328                 | AA                              | CC              | 1946720459               |
| SNP_P4_1649_2382060 | NC_021160.1    | Ca_kabuli_chr01 | 2382060                 | CC                              | TT              | 1946720461               |
| SNP_P4_1650_2382086 | NC_021160.1    | Ca_kabuli_chr01 | 2382086                 | TT                              | CC              | 1946720463               |
| SNP_P4_1651_2382113 | NC_021160.1    | Ca_kabuli_chr01 | 2382113                 | AA                              | GG              | 1946720465               |
| SNP_P4_1652_2382961 | NC_021160.1    | Ca_kabuli_chr01 | 2382961                 | AA                              | GG              | 1946720467               |
| SNP_P4_1653_2385354 | NC_021160.1    | Ca_kabuli_chr01 | 2385354                 | CC                              | TT              | 1946720469               |
| SNP_P4_1654_2385374 | NC_021160.1    | Ca_kabuli_chr01 | 2385374                 | GG                              | AA              | 1946720471               |
| SNP_P4_1655_2385568 | NC_021160.1    | Ca_kabuli_chr01 | 2385568                 | GG                              | CC              | 1946720473               |
| SNP_P4_1656_2386674 | NC_021160.1    | Ca_kabuli_chr01 | 2386674                 | GG                              | AA              | 1946720475               |
| SNP_P4_1657_2395884 | NC_021160.1    | Ca_kabuli_chr01 | 2395884                 | TT                              | GG              | 1946720476               |
| SNP_P4_1658_2396963 | NC_021160.1    | Ca_kabuli_chr01 | 2396963                 | TT                              | CC              | 1946720478               |

| SNPs IDs            | Chromosome IDs | Chromosomes     | Physical positions (bp) | CDC Frontier (Reference genome) | (ILWC46 & LPNB) | NCBI SNPdb Accession IDs |
|---------------------|----------------|-----------------|-------------------------|---------------------------------|-----------------|--------------------------|
| SNP_P4_1660_2399776 | NC_021160.1    | Ca_kabuli_chr01 | 2399776                 | GG                              | CC              | 1946720480               |
| SNP_P4_1661_2400182 | NC_021160.1    | Ca_kabuli_chr01 | 2400182                 | AA                              | TT              | 1946720482               |
| SNP_P4_1662_2400188 | NC_021160.1    | Ca_kabuli_chr01 | 2400188                 | GG                              | TT              | 1946720484               |
| SNP_P4_1663_2400213 | NC_021160.1    | Ca_kabuli_chr01 | 2400213                 | AA                              | TT              | 1946720486               |
| SNP_P4_1664_2400248 | NC_021160.1    | Ca_kabuli_chr01 | 2400248                 | CC                              | AA              | 1946720488               |
| SNP_P4_1665_2402464 | NC_021160.1    | Ca_kabuli_chr01 | 2402464                 | GG                              | AA              | 1946720490               |
| SNP_P4_1666_2403337 | NC_021160.1    | Ca_kabuli_chr01 | 2403337                 | AA                              | GG              | 1946720492               |
| SNP_P4_1668_2406121 | NC_021160.1    | Ca_kabuli_chr01 | 2406121                 | GG                              | CC              | 1946720494               |
| SNP_P4_1669_2406125 | NC_021160.1    | Ca_kabuli_chr01 | 2406125                 | CC                              | AA              | 1946720496               |
| SNP_P4_1670_2406428 | NC_021160.1    | Ca_kabuli_chr01 | 2406428                 | GG                              | CC              | 1946720498               |
| SNP_P4_1671_2406584 | NC_021160.1    | Ca_kabuli_chr01 | 2406584                 | GG                              | CC              | 1946720500               |
| SNP_P4_1672_2406588 | NC_021160.1    | Ca_kabuli_chr01 | 2406588                 | CC                              | TT              | 1946720502               |
| SNP_P4_1673_2406635 | NC_021160.1    | Ca_kabuli_chr01 | 2406635                 | AA                              | GG              | 1946720504               |
| SNP_P4_1674_2406983 | NC_021160.1    | Ca_kabuli_chr01 | 2406983                 | CC                              | TT              | 1946720506               |
| SNP_P4_1676_2408255 | NC_021160.1    | Ca_kabuli_chr01 | 2408255                 | CC                              | TT              | 1946720508               |
| SNP_P4_1677_2408289 | NC_021160.1    | Ca_kabuli_chr01 | 2408289                 | AA                              | GG              | 1946720510               |
| SNP_P4_1678_2408297 | NC_021160.1    | Ca_kabuli_chr01 | 2408297                 | CC                              | TT              | 1946720512               |
| SNP_P4_1679_2408300 | NC_021160.1    | Ca_kabuli_chr01 | 2408300                 | TT                              | CC              | 1946720514               |
| SNP_P4_1680_2408710 | NC_021160.1    | Ca_kabuli_chr01 | 2408710                 | TT                              | CC              | 1946720516               |
| SNP_P4_1681_2408731 | NC_021160.1    | Ca_kabuli_chr01 | 2408731                 | AA                              | GG              | 1946720518               |
| SNP_P4_1682_2408883 | NC_021160.1    | Ca_kabuli_chr01 | 2408883                 | GG                              | AA              | 1946720520               |
| SNP_P4_1683_2408886 | NC_021160.1    | Ca_kabuli_chr01 | 2408886                 | AA                              | TT              | 1946720522               |
| SNP_P4_1684_2408946 | NC_021160.1    | Ca_kabuli_chr01 | 2408946                 | GG                              | CC              | 1946720524               |
| SNP_P4_1686_2410132 | NC_021160.1    | Ca_kabuli_chr01 | 2410132                 | GG                              | TT              | 1946720526               |
| SNP_P4_1687_2410493 | NC_021160.1    | Ca_kabuli_chr01 | 2410493                 | CC                              | TT              | 1946720528               |
| SNP_P4_1688_2410513 | NC_021160.1    | Ca_kabuli_chr01 | 2410513                 | AA                              | GG              | 1946720530               |
| SNP_P4_1689_2410648 | NC_021160.1    | Ca_kabuli_chr01 | 2410648                 | CC                              | GG              | 1946720532               |
| SNP_P4_1690_2410813 | NC_021160.1    | Ca_kabuli_chr01 | 2410813                 | GG                              | AA              | 1946720535               |
| SNP_P4_1691_2410914 | NC_021160.1    | Ca_kabuli_chr01 | 2410914                 | AA                              | CC              | 1946720537               |
| SNP_P4_1692_2410939 | NC_021160.1    | Ca_kabuli_chr01 | 2410939                 | TT                              | AA              | 1946720539               |
| SNP_P4_1693_2411350 | NC_021160.1    | Ca_kabuli_chr01 | 2411350                 | TT                              | GG              | 1946720540               |
| SNP_P4_1694_2411545 | NC_021160.1    | Ca_kabuli_chr01 | 2411545                 | TT                              | AA              | 1946720542               |
| SNP_P4_1695_2411658 | NC_021160.1    | Ca_kabuli_chr01 | 2411658                 | TT                              | CC              | 1946720545               |
| SNP_P4_1697_2412114 | NC_021160.1    | Ca_kabuli_chr01 | 2412114                 | TT                              | GG              | 1946720547               |
| SNP_P4_1698_2412122 | NC_021160.1    | Ca_kabuli_chr01 | 2412122                 | TT                              | CC              | 1946720549               |
| SNP_P4_1699_2412125 | NC_021160.1    | Ca_kabuli_chr01 | 2412125                 | GG                              | AA              | 1946720551               |
| SNP_P4_1700_2412146 | NC_021160.1    | Ca_kabuli_chr01 | 2412146                 | GG                              | TT              | 1946720553               |
| SNP_P4_1701_2412249 | NC_021160.1    | Ca_kabuli_chr01 | 2412249                 | AA                              | GG              | 1946720555               |
| SNP_P4_1704_2413424 | NC_021160.1    | Ca_kabuli_chr01 | 2413424                 | GG                              | AA              | 1946720557               |
| SNP_P4_1705_2414253 | NC_021160.1    | Ca_kabuli_chr01 | 2414253                 | TT                              | AA              | 1946720559               |
| SNP_P4_1706_2414516 | NC_021160.1    | Ca_kabuli_chr01 | 2414516                 | AA                              | TT              | 1946720561               |
| SNP_P4_1707_2415235 | NC_021160.1    | Ca_kabuli_chr01 | 2415235                 | CC                              | TT              | 1946720562               |



| SNPs IDs            | Chromosome IDs | Chromosomes     | Physical positions (bp) | CDC Frontier (Reference genome) | (ILWC46 & LPNB) | NCBI SNPdb Accession IDs |
|---------------------|----------------|-----------------|-------------------------|---------------------------------|-----------------|--------------------------|
| SNP_P4_1709_2415448 | NC_021160.1    | Ca_kabuli_chr01 | 2415448                 | AA                              | CC              | 1946720564               |
| SNP_P4_1711_2416118 | NC_021160.1    | Ca_kabuli_chr01 | 2416118                 | AA                              | CC              | 1946720566               |
| SNP_P4_1714_2416541 | NC_021160.1    | Ca_kabuli_chr01 | 2416541                 | CC                              | TT              | 1946720568               |
| SNP_P4_1715_2416826 | NC_021160.1    | Ca_kabuli_chr01 | 2416826                 | TT                              | CC              | 1946720570               |
| SNP_P4_1717_2417619 | NC_021160.1    | Ca_kabuli_chr01 | 2417619                 | CC                              | TT              | 1946720571               |
| SNP_P4_1718_2418985 | NC_021160.1    | Ca_kabuli_chr01 | 2418985                 | TT                              | AA              | 1946720572               |
| SNP_P4_1719_2419322 | NC_021160.1    | Ca_kabuli_chr01 | 2419322                 | TT                              | CC              | 1946720573               |
| SNP_P4_1720_2420574 | NC_021160.1    | Ca_kabuli_chr01 | 2420574                 | CC                              | TT              | 1946720574               |
| SNP_P4_1721_2424140 | NC_021160.1    | Ca_kabuli_chr01 | 2424140                 | CC                              | TT              | 1946720576               |
| SNP_P4_1722_2429335 | NC_021160.1    | Ca_kabuli_chr01 | 2429335                 | AA                              | TT              | 1946720578               |
| SNP_P4_1723_2429343 | NC_021160.1    | Ca_kabuli_chr01 | 2429343                 | CC                              | TT              | 1946720580               |
| SNP_P4_1724_2429597 | NC_021160.1    | Ca_kabuli_chr01 | 2429597                 | CC                              | TT              | 1946720582               |
| SNP_P4_1725_2429643 | NC_021160.1    | Ca_kabuli_chr01 | 2429643                 | CC                              | TT              | 1946720584               |
| SNP_P4_1726_2429645 | NC_021160.1    | Ca_kabuli_chr01 | 2429645                 | TT                              | CC              | 1946720586               |
| SNP_P4_1727_2429654 | NC_021160.1    | Ca_kabuli_chr01 | 2429654                 | GG                              | TT              | 1946720588               |
| SNP_P4_1728_2429673 | NC_021160.1    | Ca_kabuli_chr01 | 2429673                 | AA                              | TT              | 1946720590               |
| SNP_P4_1729_2429686 | NC_021160.1    | Ca_kabuli_chr01 | 2429686                 | AA                              | TT              | 1946720592               |
| SNP_P4_1730_2429896 | NC_021160.1    | Ca_kabuli_chr01 | 2429896                 | GG                              | AA              | 1946720594               |
| SNP_P4_1731_2429913 | NC_021160.1    | Ca_kabuli_chr01 | 2429913                 | CC                              | TT              | 1946720596               |
| SNP_P4_1732_2429919 | NC_021160.1    | Ca_kabuli_chr01 | 2429919                 | TT                              | CC              | 1946720598               |
| SNP_P4_1733_2429980 | NC_021160.1    | Ca_kabuli_chr01 | 2429980                 | CC                              | AA              | 1946720600               |
| SNP_P4_1734_2430220 | NC_021160.1    | Ca_kabuli_chr01 | 2430220                 | TT                              | CC              | 1946720602               |
| SNP_P4_1735_2430225 | NC_021160.1    | Ca_kabuli_chr01 | 2430225                 | AA                              | GG              | 1946720605               |
| SNP_P4_1736_2430431 | NC_021160.1    | Ca_kabuli_chr01 | 2430431                 | GG                              | AA              | 1946720607               |
| SNP_P4_1737_2430499 | NC_021160.1    | Ca_kabuli_chr01 | 2430499                 | GG                              | CC              | 1946720609               |
| SNP_P4_1738_2431345 | NC_021160.1    | Ca_kabuli_chr01 | 2431345                 | AA                              | GG              | 1946720611               |
| SNP_P4_1739_2431366 | NC_021160.1    | Ca_kabuli_chr01 | 2431366                 | GG                              | AA              | 1946720614               |
| SNP_P4_1742_2431679 | NC_021160.1    | Ca_kabuli_chr01 | 2431679                 | TT                              | AA              | 1946720616               |
| SNP_P4_1743_2431689 | NC_021160.1    | Ca_kabuli_chr01 | 2431689                 | GG                              | AA              | 1946720618               |
| SNP_P4_1744_2432376 | NC_021160.1    | Ca_kabuli_chr01 | 2432376                 | AA                              | GG              | 1946720620               |
| SNP_P4_1745_2432710 | NC_021160.1    | Ca_kabuli_chr01 | 2432710                 | AA                              | CC              | 1946720622               |
| SNP_P4_1746_2432715 | NC_021160.1    | Ca_kabuli_chr01 | 2432715                 | TT                              | CC              | 1946720624               |
| SNP_P4_1747_2432891 | NC_021160.1    | Ca_kabuli_chr01 | 2432891                 | CC                              | AA              | 1946720626               |
| SNP_P4_1748_2432959 | NC_021160.1    | Ca_kabuli_chr01 | 2432959                 | GG                              | TT              | 1946720628               |
| SNP_P4_1749_2433310 | NC_021160.1    | Ca_kabuli_chr01 | 2433310                 | AA                              | CC              | 1946720630               |
| SNP_P4_1750_2433403 | NC_021160.1    | Ca_kabuli_chr01 | 2433403                 | CC                              | TT              | 1946720632               |
| SNP_P4_1751_2433565 | NC_021160.1    | Ca_kabuli_chr01 | 2433565                 | AA                              | TT              | 1946720634               |
| SNP_P4_1752_2434103 | NC_021160.1    | Ca_kabuli_chr01 | 2434103                 | CC                              | TT              | 1946720636               |
| SNP_P4_1753_2434727 | NC_021160.1    | Ca_kabuli_chr01 | 2434727                 | TT                              | AA              | 1946720638               |
| SNP_P4_1754_2434757 | NC_021160.1    | Ca_kabuli_chr01 | 2434757                 | AA                              | TT              | 1946720640               |
| SNP_P4_1755_2434760 | NC_021160.1    | Ca_kabuli_chr01 | 2434760                 | AA                              | GG              | 1946720642               |
| SNP_P4_1757_2434887 | NC_021160.1    | Ca_kabuli_chr01 | 2434887                 | GG                              | TT              | 1946720644               |

| SNPs IDs            | Chromosome IDs | Chromosomes     | Physical positions (bp) | CDC Frontier (Reference genome) | (ILWC46 & LPNB) | NCBI SNPdb Accession IDs |
|---------------------|----------------|-----------------|-------------------------|---------------------------------|-----------------|--------------------------|
| SNP_P4_1758_2434904 | NC_021160.1    | Ca_kabuli_chr01 | 2434904                 | TT                              | CC              | 1946720646               |
| SNP_P4_1759_2435026 | NC_021160.1    | Ca_kabuli_chr01 | 2435026                 | GG                              | AA              | 1946720648               |
| SNP_P4_1760_2435149 | NC_021160.1    | Ca_kabuli_chr01 | 2435149                 | GG                              | AA              | 1946720650               |
| SNP_P4_1761_2435228 | NC_021160.1    | Ca_kabuli_chr01 | 2435228                 | GG                              | AA              | 1946720652               |
| SNP_P4_1762_2435296 | NC_021160.1    | Ca_kabuli_chr01 | 2435296                 | AA                              | GG              | 1946720654               |
| SNP_P4_1763_2436361 | NC_021160.1    | Ca_kabuli_chr01 | 2436361                 | CC                              | TT              | 1946720656               |
| SNP_P4_1765_2436555 | NC_021160.1    | Ca_kabuli_chr01 | 2436555                 | TT                              | CC              | 1946720658               |
| SNP_P4_1766_2436596 | NC_021160.1    | Ca_kabuli_chr01 | 2436596                 | CC                              | TT              | 1946720660               |
| SNP_P4_1767_2437893 | NC_021160.1    | Ca_kabuli_chr01 | 2437893                 | GG                              | TT              | 1946720662               |
| SNP_P4_1768_2437900 | NC_021160.1    | Ca_kabuli_chr01 | 2437900                 | TT                              | CC              | 1946720663               |
| SNP_P4_1769_2438553 | NC_021160.1    | Ca_kabuli_chr01 | 2438553                 | GG                              | CC              | 1946720665               |
| SNP_P4_1770_2438555 | NC_021160.1    | Ca_kabuli_chr01 | 2438555                 | TT                              | CC              | 1946720667               |
| SNP_P4_1771_2438848 | NC_021160.1    | Ca_kabuli_chr01 | 2438848                 | TT                              | CC              | 1946720669               |
| SNP_P4_1772_2439915 | NC_021160.1    | Ca_kabuli_chr01 | 2439915                 | GG                              | AA              | 1946720671               |
| SNP_P4_1773_2439917 | NC_021160.1    | Ca_kabuli_chr01 | 2439917                 | AA                              | GG              | 1946720673               |
| SNP_P4_1775_2440590 | NC_021160.1    | Ca_kabuli_chr01 | 2440590                 | CC                              | TT              | 1946720675               |
| SNP_P4_1776_2440912 | NC_021160.1    | Ca_kabuli_chr01 | 2440912                 | TT                              | AA              | 1946720677               |
| SNP_P4_1777_2441198 | NC_021160.1    | Ca_kabuli_chr01 | 2441198                 | TT                              | CC              | 1946720679               |
| SNP_P4_1778_2441256 | NC_021160.1    | Ca_kabuli_chr01 | 2441256                 | AA                              | GG              | 1946720681               |
| SNP_P4_1779_2441393 | NC_021160.1    | Ca_kabuli_chr01 | 2441393                 | GG                              | CC              | 1946720683               |
| SNP_P4_1780_2441418 | NC_021160.1    | Ca_kabuli_chr01 | 2441418                 | GG                              | AA              | 1946720685               |
| SNP_P4_1781_2441452 | NC_021160.1    | Ca_kabuli_chr01 | 2441452                 | GG                              | CC              | 1946720687               |
| SNP_P4_1782_2441470 | NC_021160.1    | Ca_kabuli_chr01 | 2441470                 | GG                              | AA              | 1946720689               |
| SNP_P4_1783_2441587 | NC_021160.1    | Ca_kabuli_chr01 | 2441587                 | TT                              | AA              | 1946720691               |
| SNP_P4_1784_2441589 | NC_021160.1    | Ca_kabuli_chr01 | 2441589                 | CC                              | TT              | 1946720693               |
| SNP_P4_1785_2441649 | NC_021160.1    | Ca_kabuli_chr01 | 2441649                 | TT                              | GG              | 1946720695               |
| SNP_P4_1786_2441856 | NC_021160.1    | Ca_kabuli_chr01 | 2441856                 | TT                              | CC              | 1946720697               |
| SNP_P4_1787_2442289 | NC_021160.1    | Ca_kabuli_chr01 | 2442289                 | GG                              | AA              | 1946720699               |
| SNP_P4_1788_2443575 | NC_021160.1    | Ca_kabuli_chr01 | 2443575                 | CC                              | GG              | 1946720701               |
| SNP_P4_1789_2443814 | NC_021160.1    | Ca_kabuli_chr01 | 2443814                 | AA                              | GG              | 1946720703               |
| SNP_P4_1791_2445605 | NC_021160.1    | Ca_kabuli_chr01 | 2445605                 | CC                              | TT              | 1946720705               |
| SNP_P4_1792_2445675 | NC_021160.1    | Ca_kabuli_chr01 | 2445675                 | AA                              | CC              | 1946720707               |
| SNP_P4_1793_2448039 | NC_021160.1    | Ca_kabuli_chr01 | 2448039                 | AA                              | CC              | 1946720709               |
| SNP_P4_1794_2448176 | NC_021160.1    | Ca_kabuli_chr01 | 2448176                 | GG                              | AA              | 1946720710               |
| SNP_P4_1795_2448191 | NC_021160.1    | Ca_kabuli_chr01 | 2448191                 | TT                              | AA              | 1946720712               |
| SNP_P4_1796_2448214 | NC_021160.1    | Ca_kabuli_chr01 | 2448214                 | CC                              | TT              | 1946720714               |
| SNP_P4_1798_2448299 | NC_021160.1    | Ca_kabuli_chr01 | 2448299                 | GG                              | AA              | 1946720716               |
| SNP_P4_1799_2448311 | NC_021160.1    | Ca_kabuli_chr01 | 2448311                 | AA                              | CC              | 1946720718               |
| SNP_P4_1800_2448322 | NC_021160.1    | Ca_kabuli_chr01 | 2448322                 | GG                              | AA              | 1946720720               |
| SNP_P4_1801_2448419 | NC_021160.1    | Ca_kabuli_chr01 | 2448419                 | AA                              | GG              | 1946720722               |
| SNP_P4_1802_2448790 | NC_021160.1    | Ca_kabuli_chr01 | 2448790                 | CC                              | TT              | 1946720724               |
| SNP_P4_1803_2448798 | NC_021160.1    | Ca_kabuli_chr01 | 2448798                 | GG                              | AA              | 1946720726               |

| SNPs IDs            | Chromosome IDs | Chromosomes     | Physical positions (bp) | CDC Frontier (Reference genome) | (ILWC46 & LPNB) | NCBI SNPdb Accession IDs |
|---------------------|----------------|-----------------|-------------------------|---------------------------------|-----------------|--------------------------|
| SNP_P4_1804_2448863 | NC_021160.1    | Ca_kabuli_chr01 | 2448863                 | AA                              | TT              | 1946720728               |
| SNP_P4_1805_2448873 | NC_021160.1    | Ca_kabuli_chr01 | 2448873                 | CC                              | TT              | 1946720730               |
| SNP_P4_1807_2449352 | NC_021160.1    | Ca_kabuli_chr01 | 2449352                 | CC                              | AA              | 1946720732               |
| SNP_P4_1808_2449397 | NC_021160.1    | Ca_kabuli_chr01 | 2449397                 | AA                              | GG              | 1946720734               |
| SNP_P4_1809_2451185 | NC_021160.1    | Ca_kabuli_chr01 | 2451185                 | TT                              | CC              | 1946720736               |
| SNP_P4_1810_2451188 | NC_021160.1    | Ca_kabuli_chr01 | 2451188                 | TT                              | CC              | 1946720738               |
| SNP_P4_1812_2452591 | NC_021160.1    | Ca_kabuli_chr01 | 2452591                 | GG                              | AA              | 1946720740               |
| SNP_P4_1813_2452592 | NC_021160.1    | Ca_kabuli_chr01 | 2452592                 | AA                              | GG              | 1946720742               |
| SNP_P4_1814_2452687 | NC_021160.1    | Ca_kabuli_chr01 | 2452687                 | TT                              | GG              | 1946720744               |
| SNP_P4_1815_2452976 | NC_021160.1    | Ca_kabuli_chr01 | 2452976                 | AA                              | GG              | 1946720746               |
| SNP_P4_1816_2453047 | NC_021160.1    | Ca_kabuli_chr01 | 2453047                 | TT                              | CC              | 1946720748               |
| SNP_P4_1817_2453247 | NC_021160.1    | Ca_kabuli_chr01 | 2453247                 | TT                              | CC              | 1946720750               |
| SNP_P4_1818_2453249 | NC_021160.1    | Ca_kabuli_chr01 | 2453249                 | CC                              | TT              | 1946720752               |
| SNP_P4_1819_2453290 | NC_021160.1    | Ca_kabuli_chr01 | 2453290                 | AA                              | GG              | 1946720754               |
| SNP_P4_1820_2453299 | NC_021160.1    | Ca_kabuli_chr01 | 2453299                 | TT                              | CC              | 1946720756               |
| SNP_P4_1821_2453724 | NC_021160.1    | Ca_kabuli_chr01 | 2453724                 | CC                              | TT              | 1946720758               |
| SNP_P4_1822_2453728 | NC_021160.1    | Ca_kabuli_chr01 | 2453728                 | AA                              | GG              | 1946720760               |
| SNP_P4_1823_2453788 | NC_021160.1    | Ca_kabuli_chr01 | 2453788                 | CC                              | TT              | 1946720762               |
| SNP_P4_1824_2454076 | NC_021160.1    | Ca_kabuli_chr01 | 2454076                 | TT                              | GG              | 1946720764               |
| SNP_P4_1825_2454128 | NC_021160.1    | Ca_kabuli_chr01 | 2454128                 | GG                              | TT              | 1946720766               |
| SNP_P4_1826_2454129 | NC_021160.1    | Ca_kabuli_chr01 | 2454129                 | TT                              | GG              | 1946720768               |
| SNP_P4_1827_2454156 | NC_021160.1    | Ca_kabuli_chr01 | 2454156                 | TT                              | AA              | 1946720770               |
| SNP_P4_1828_2454189 | NC_021160.1    | Ca_kabuli_chr01 | 2454189                 | CC                              | GG              | 1946720772               |
| SNP_P4_1829_2454204 | NC_021160.1    | Ca_kabuli_chr01 | 2454204                 | CC                              | TT              | 1946720774               |
| SNP_P4_1832_2454729 | NC_021160.1    | Ca_kabuli_chr01 | 2454729                 | AA                              | TT              | 1946720777               |
| SNP_P4_1833_2454741 | NC_021160.1    | Ca_kabuli_chr01 | 2454741                 | TT                              | AA              | 1946720779               |
| SNP_P4_1834_2454764 | NC_021160.1    | Ca_kabuli_chr01 | 2454764                 | GG                              | AA              | 1946720781               |
| SNP_P4_1835_2454797 | NC_021160.1    | Ca_kabuli_chr01 | 2454797                 | TT                              | AA              | 1946720783               |
| SNP_P4_1836_2455904 | NC_021160.1    | Ca_kabuli_chr01 | 2455904                 | CC                              | TT              | 1946720785               |
| SNP_P4_1837_2455937 | NC_021160.1    | Ca_kabuli_chr01 | 2455937                 | TT                              | AA              | 1946720787               |
| SNP_P4_1838_2455955 | NC_021160.1    | Ca_kabuli_chr01 | 2455955                 | CC                              | AA              | 1946720789               |
| SNP_P4_1839_2457446 | NC_021160.1    | Ca_kabuli_chr01 | 2457446                 | GG                              | AA              | 1946720791               |
| SNP_P4_1840_2457853 | NC_021160.1    | Ca_kabuli_chr01 | 2457853                 | AA                              | GG              | 1946720793               |
| SNP_P4_1841_2463108 | NC_021160.1    | Ca_kabuli_chr01 | 2463108                 | AA                              | GG              | 1946720795               |
| SNP_P4_1842_2463541 | NC_021160.1    | Ca_kabuli_chr01 | 2463541                 | CC                              | TT              | 1946720797               |
| SNP_P4_1843_2463571 | NC_021160.1    | Ca_kabuli_chr01 | 2463571                 | GG                              | TT              | 1946720799               |
| SNP_P4_1845_2463714 | NC_021160.1    | Ca_kabuli_chr01 | 2463714                 | TT                              | CC              | 1946720801               |
| SNP_P4_1846_2464010 | NC_021160.1    | Ca_kabuli_chr01 | 2464010                 | CC                              | TT              | 1946720803               |
| SNP_P4_1847_2465418 | NC_021160.1    | Ca_kabuli_chr01 | 2465418                 | CC                              | TT              | 1946720805               |
| SNP_P4_1848_2465423 | NC_021160.1    | Ca_kabuli_chr01 | 2465423                 | TT                              | CC              | 1946720807               |
| SNP_P4_1849_2465927 | NC_021160.1    | Ca_kabuli_chr01 | 2465927                 | AA                              | GG              | 1946720809               |
| SNP_P4_1850_2466158 | NC_021160.1    | Ca_kabuli_chr01 | 2466158                 | GG                              | AA              | 1946720810               |

| SNPs IDs            | Chromosome IDs | Chromosomes     | Physical positions (bp) | CDC Frontier (Reference genome) | (ILWC46 & LPNB) | NCBI SNPdb Accession IDs |
|---------------------|----------------|-----------------|-------------------------|---------------------------------|-----------------|--------------------------|
| SNP_P4_1851_2466165 | NC_021160.1    | Ca_kabuli_chr01 | 2466165                 | CC                              | AA              | 1946720812               |
| SNP_P4_1852_2466395 | NC_021160.1    | Ca_kabuli_chr01 | 2466395                 | AA                              | GG              | 1946720814               |
| SNP_P4_1853_2466399 | NC_021160.1    | Ca_kabuli_chr01 | 2466399                 | TT                              | CC              | 1946720816               |
| SNP_P4_1854_2466413 | NC_021160.1    | Ca_kabuli_chr01 | 2466413                 | CC                              | TT              | 1946720818               |
| SNP_P4_1855_2466430 | NC_021160.1    | Ca_kabuli_chr01 | 2466430                 | AA                              | GG              | 1946720820               |
| SNP_P4_1856_2466454 | NC_021160.1    | Ca_kabuli_chr01 | 2466454                 | TT                              | CC              | 1946720822               |
| SNP_P4_1857_2469990 | NC_021160.1    | Ca_kabuli_chr01 | 2469990                 | AA                              | GG              | 1946720824               |
| SNP_P4_1858_2470040 | NC_021160.1    | Ca_kabuli_chr01 | 2470040                 | AA                              | CC              | 1946720826               |
| SNP_P4_1859_2470386 | NC_021160.1    | Ca_kabuli_chr01 | 2470386                 | AA                              | GG              | 1946720828               |
| SNP_P4_1860_2470428 | NC_021160.1    | Ca_kabuli_chr01 | 2470428                 | GG                              | CC              | 1946720830               |
| SNP_P4_1861_2470784 | NC_021160.1    | Ca_kabuli_chr01 | 2470784                 | TT                              | AA              | 1946720832               |
| SNP_P4_1863_2470856 | NC_021160.1    | Ca_kabuli_chr01 | 2470856                 | CC                              | TT              | 1946720834               |
| SNP_P4_1864_2470875 | NC_021160.1    | Ca_kabuli_chr01 | 2470875                 | TT                              | AA              | 1946720836               |
| SNP_P4_1865_2471235 | NC_021160.1    | Ca_kabuli_chr01 | 2471235                 | TT                              | CC              | 1946720838               |
| SNP_P4_1866_2471240 | NC_021160.1    | Ca_kabuli_chr01 | 2471240                 | CC                              | AA              | 1946720840               |
| SNP_P4_1867_2471262 | NC_021160.1    | Ca_kabuli_chr01 | 2471262                 | CC                              | TT              | 1946720842               |
| SNP_P4_1868_2471287 | NC_021160.1    | Ca_kabuli_chr01 | 2471287                 | CC                              | GG              | 1946720844               |
| SNP_P4_1869_2471437 | NC_021160.1    | Ca_kabuli_chr01 | 2471437                 | AA                              | GG              | 1946720846               |
| SNP_P4_1870_2471443 | NC_021160.1    | Ca_kabuli_chr01 | 2471443                 | TT                              | CC              | 1946720848               |
| SNP_P4_1872_2471544 | NC_021160.1    | Ca_kabuli_chr01 | 2471544                 | CC                              | TT              | 1946720850               |
| SNP_P4_1873_2471807 | NC_021160.1    | Ca_kabuli_chr01 | 2471807                 | CC                              | GG              | 1946720852               |
| SNP_P4_1874_2474493 | NC_021160.1    | Ca_kabuli_chr01 | 2474493                 | CC                              | TT              | 1946720854               |
| SNP_P4_1875_2474858 | NC_021160.1    | Ca_kabuli_chr01 | 2474858                 | CC                              | TT              | 1946720856               |
| SNP_P4_1876_2474859 | NC_021160.1    | Ca_kabuli_chr01 | 2474859                 | AA                              | GG              | 1946720858               |
| SNP_P4_1878_2475461 | NC_021160.1    | Ca_kabuli_chr01 | 2475461                 | GG                              | AA              | 1946720860               |
| SNP_P4_1879_2475471 | NC_021160.1    | Ca_kabuli_chr01 | 2475471                 | TT                              | CC              | 1946720862               |
| SNP_P4_1880_2477299 | NC_021160.1    | Ca_kabuli_chr01 | 2477299                 | AA                              | GG              | 1946720864               |
| SNP_P4_1881_2477335 | NC_021160.1    | Ca_kabuli_chr01 | 2477335                 | GG                              | CC              | 1946720866               |
| SNP_P4_1882_2477336 | NC_021160.1    | Ca_kabuli_chr01 | 2477336                 | CC                              | AA              | 1946720868               |
| SNP_P4_1883_2477369 | NC_021160.1    | Ca_kabuli_chr01 | 2477369                 | GG                              | AA              | 1946720870               |
| SNP_P4_1884_2477581 | NC_021160.1    | Ca_kabuli_chr01 | 2477581                 | CC                              | TT              | 1946720872               |
| SNP_P4_1885_2477712 | NC_021160.1    | Ca_kabuli_chr01 | 2477712                 | TT                              | GG              | 1946720874               |
| SNP_P4_1886_2477720 | NC_021160.1    | Ca_kabuli_chr01 | 2477720                 | GG                              | AA              | 1946720876               |
| SNP_P4_1887_2496138 | NC_021160.1    | Ca_kabuli_chr01 | 2496138                 | CC                              | TT              | 1946720878               |
| SNP_P4_1889_2527674 | NC_021160.1    | Ca_kabuli_chr01 | 2527674                 | CC                              | TT              | 1946720880               |
| SNP_P4_1890_2533908 | NC_021160.1    | Ca_kabuli_chr01 | 2533908                 | TT                              | GG              | 1946720882               |
| SNP_P4_1891_2535901 | NC_021160.1    | Ca_kabuli_chr01 | 2535901                 | CC                              | TT              | 1946720884               |
| SNP_P4_1892_2545109 | NC_021160.1    | Ca_kabuli_chr01 | 2545109                 | CC                              | GG              | 1946720886               |
| SNP_P4_1893_2546070 | NC_021160.1    | Ca_kabuli_chr01 | 2546070                 | GG                              | TT              | 1946720888               |
| SNP_P4_1894_2547430 | NC_021160.1    | Ca_kabuli_chr01 | 2547430                 | GG                              | AA              | 1946720890               |
| SNP_P4_1896_2560421 | NC_021160.1    | Ca_kabuli_chr01 | 2560421                 | GG                              | CC              | 1946720892               |
| SNP_P4_1897_2561227 | NC_021160.1    | Ca_kabuli_chr01 | 2561227                 | AA                              | CC              | 1946720894               |

| SNPs IDs            | Chromosome IDs | Chromosomes     | Physical positions (bp) | CDC Frontier (Reference genome) | (ILWC46 & LPNB) | NCBI SNPdb Accession IDs |
|---------------------|----------------|-----------------|-------------------------|---------------------------------|-----------------|--------------------------|
| SNP_P4_1898_2572677 | NC_021160.1    | Ca_kabuli_chr01 | 2572677                 | AA                              | TT              | 1946720896               |
| SNP_P4_1900_2591918 | NC_021160.1    | Ca_kabuli_chr01 | 2591918                 | GG                              | CC              | 1946720898               |
| SNP_P4_1901_2591941 | NC_021160.1    | Ca_kabuli_chr01 | 2591941                 | CC                              | GG              | 1946720900               |
| SNP_P4_1902_2591946 | NC_021160.1    | Ca_kabuli_chr01 | 2591946                 | GG                              | AA              | 1946720902               |
| SNP_P4_1903_2594316 | NC_021160.1    | Ca_kabuli_chr01 | 2594316                 | AA                              | TT              | 1946720904               |
| SNP_P4_1904_2602735 | NC_021160.1    | Ca_kabuli_chr01 | 2602735                 | GG                              | AA              | 1946720906               |
| SNP_P4_1906_2616547 | NC_021160.1    | Ca_kabuli_chr01 | 2616547                 | TT                              | AA              | 1946720908               |
| SNP_P4_1907_2619505 | NC_021160.1    | Ca_kabuli_chr01 | 2619505                 | GG                              | AA              | 1946720910               |
| SNP_P4_1908_2622512 | NC_021160.1    | Ca_kabuli_chr01 | 2622512                 | GG                              | AA              | 1946720912               |
| SNP_P4_1909_2623032 | NC_021160.1    | Ca_kabuli_chr01 | 2623032                 | CC                              | AA              | 1946720914               |
| SNP_P4_1910_2624219 | NC_021160.1    | Ca_kabuli_chr01 | 2624219                 | AA                              | CC              | 1946720916               |
| SNP_P4_1911_2637174 | NC_021160.1    | Ca_kabuli_chr01 | 2637174                 | AA                              | GG              | 1946720918               |
| SNP_P4_1912_2637176 | NC_021160.1    | Ca_kabuli_chr01 | 2637176                 | TT                              | CC              | 1946720920               |
| SNP_P4_1913_2637183 | NC_021160.1    | Ca_kabuli_chr01 | 2637183                 | CC                              | TT              | 1946720922               |
| SNP_P4_1914_2637201 | NC_021160.1    | Ca_kabuli_chr01 | 2637201                 | AA                              | TT              | 1946720924               |
| SNP_P4_1915_2643758 | NC_021160.1    | Ca_kabuli_chr01 | 2643758                 | CC                              | TT              | 1946720926               |
| SNP_P4_1916_2643958 | NC_021160.1    | Ca_kabuli_chr01 | 2643958                 | CC                              | AA              | 1946720928               |
| SNP_P4_1917_2646988 | NC_021160.1    | Ca_kabuli_chr01 | 2646988                 | AA                              | TT              | 1946720930               |
| SNP_P4_1918_2647059 | NC_021160.1    | Ca_kabuli_chr01 | 2647059                 | CC                              | TT              | 1946720932               |
| SNP_P4_1919_2647255 | NC_021160.1    | Ca_kabuli_chr01 | 2647255                 | CC                              | TT              | 1946720934               |
| SNP_P4_1920_2650443 | NC_021160.1    | Ca_kabuli_chr01 | 2650443                 | GG                              | AA              | 1946720936               |
| SNP_P4_1921_2650448 | NC_021160.1    | Ca_kabuli_chr01 | 2650448                 | GG                              | AA              | 1946720938               |
| SNP_P4_1922_2651244 | NC_021160.1    | Ca_kabuli_chr01 | 2651244                 | TT                              | CC              | 1946720940               |
| SNP_P4_1923_2651437 | NC_021160.1    | Ca_kabuli_chr01 | 2651437                 | GG                              | AA              | 1946720942               |
| SNP_P4_1924_2651444 | NC_021160.1    | Ca_kabuli_chr01 | 2651444                 | CC                              | TT              | 1946720944               |
| SNP_P4_1925_2651445 | NC_021160.1    | Ca_kabuli_chr01 | 2651445                 | AA                              | GG              | 1946720946               |
| SNP_P4_1926_2651487 | NC_021160.1    | Ca_kabuli_chr01 | 2651487                 | TT                              | CC              | 1946720948               |
| SNP_P4_1927_2651532 | NC_021160.1    | Ca_kabuli_chr01 | 2651532                 | TT                              | AA              | 1946720950               |
| SNP_P4_1928_2651537 | NC_021160.1    | Ca_kabuli_chr01 | 2651537                 | CC                              | TT              | 1946720952               |
| SNP_P4_1929_2652977 | NC_021160.1    | Ca_kabuli_chr01 | 2652977                 | GG                              | AA              | 1946720953               |
| SNP_P4_1931_2655183 | NC_021160.1    | Ca_kabuli_chr01 | 2655183                 | CC                              | TT              | 1946720955               |
| SNP_P4_1933_2655692 | NC_021160.1    | Ca_kabuli_chr01 | 2655692                 | GG                              | CC              | 1946720957               |
| SNP_P4_1934_2655716 | NC_021160.1    | Ca_kabuli_chr01 | 2655716                 | TT                              | CC              | 1946720959               |
| SNP_P4_1935_2655717 | NC_021160.1    | Ca_kabuli_chr01 | 2655717                 | AA                              | GG              | 1946720961               |
| SNP_P4_1936_2655722 | NC_021160.1    | Ca_kabuli_chr01 | 2655722                 | TT                              | CC              | 1946720963               |
| SNP_P4_1937_2655744 | NC_021160.1    | Ca_kabuli_chr01 | 2655744                 | TT                              | CC              | 1946720965               |
| SNP_P4_1938_2656460 | NC_021160.1    | Ca_kabuli_chr01 | 2656460                 | AA                              | GG              | 1946720967               |
| SNP_P4_1940_2656519 | NC_021160.1    | Ca_kabuli_chr01 | 2656519                 | TT                              | CC              | 1946720969               |
| SNP_P4_1941_2656917 | NC_021160.1    | Ca_kabuli_chr01 | 2656917                 | TT                              | CC              | 1946720971               |
| SNP_P4_1943_2658991 | NC_021160.1    | Ca_kabuli_chr01 | 2658991                 | CC                              | TT              | 1946720974               |
| SNP_P4_1945_2659344 | NC_021160.1    | Ca_kabuli_chr01 | 2659344                 | TT                              | CC              | 1946720976               |
| SNP_P4_1946_2659352 | NC_021160.1    | Ca_kabuli_chr01 | 2659352                 | TT                              | GG              | 1946720978               |

| SNPs IDs            | Chromosome IDs | Chromosomes     | Physical positions (bp) | CDC Frontier (Reference genome) | (ILWC46 & LPNB) | NCBI SNPdb Accession IDs |
|---------------------|----------------|-----------------|-------------------------|---------------------------------|-----------------|--------------------------|
| SNP_P4_1947_2659369 | NC_021160.1    | Ca_kabuli_chr01 | 2659369                 | GG                              | AA              | 1946720980               |
| SNP_P4_1948_2659385 | NC_021160.1    | Ca_kabuli_chr01 | 2659385                 | GG                              | AA              | 1946720982               |
| SNP_P4_1950_2659993 | NC_021160.1    | Ca_kabuli_chr01 | 2659993                 | CC                              | TT              | 1946720984               |
| SNP_P4_1951_2660058 | NC_021160.1    | Ca_kabuli_chr01 | 2660058                 | AA                              | GG              | 1946720985               |
| SNP_P4_1952_2660070 | NC_021160.1    | Ca_kabuli_chr01 | 2660070                 | TT                              | CC              | 1946720987               |
| SNP_P4_1953_2661102 | NC_021160.1    | Ca_kabuli_chr01 | 2661102                 | TT                              | AA              | 1946720989               |
| SNP_P4_1954_2661153 | NC_021160.1    | Ca_kabuli_chr01 | 2661153                 | AA                              | CC              | 1946720991               |
| SNP_P4_1955_2661237 | NC_021160.1    | Ca_kabuli_chr01 | 2661237                 | AA                              | TT              | 1946720993               |
| SNP_P4_1956_2661239 | NC_021160.1    | Ca_kabuli_chr01 | 2661239                 | AA                              | GG              | 1946720995               |
| SNP_P4_1957_2661245 | NC_021160.1    | Ca_kabuli_chr01 | 2661245                 | GG                              | AA              | 1946720997               |
| SNP_P4_1958_2661259 | NC_021160.1    | Ca_kabuli_chr01 | 2661259                 | TT                              | AA              | 1946720999               |
| SNP_P4_1959_2661266 | NC_021160.1    | Ca_kabuli_chr01 | 2661266                 | TT                              | CC              | 1946721001               |
| SNP_P4_1960_2661268 | NC_021160.1    | Ca_kabuli_chr01 | 2661268                 | GG                              | AA              | 1946721003               |
| SNP_P4_1961_2661297 | NC_021160.1    | Ca_kabuli_chr01 | 2661297                 | GG                              | AA              | 1946721005               |
| SNP_P4_1962_2661315 | NC_021160.1    | Ca_kabuli_chr01 | 2661315                 | CC                              | TT              | 1946721007               |
| SNP_P4_1964_2661527 | NC_021160.1    | Ca_kabuli_chr01 | 2661527                 | GG                              | AA              | 1946721009               |
| SNP_P4_1965_2661534 | NC_021160.1    | Ca_kabuli_chr01 | 2661534                 | CC                              | TT              | 1946721011               |
| SNP_P4_1966_2661567 | NC_021160.1    | Ca_kabuli_chr01 | 2661567                 | AA                              | GG              | 1946721014               |
| SNP_P4_1967_2661575 | NC_021160.1    | Ca_kabuli_chr01 | 2661575                 | TT                              | CC              | 1946721016               |
| SNP_P4_1968_2661619 | NC_021160.1    | Ca_kabuli_chr01 | 2661619                 | TT                              | CC              | 1946721018               |
| SNP_P4_1969_2661714 | NC_021160.1    | Ca_kabuli_chr01 | 2661714                 | CC                              | AA              | 1946721020               |
| SNP_P4_1970_2661896 | NC_021160.1    | Ca_kabuli_chr01 | 2661896                 | GG                              | AA              | 1946721022               |
| SNP_P4_1971_2661905 | NC_021160.1    | Ca_kabuli_chr01 | 2661905                 | AA                              | GG              | 1946721024               |
| SNP_P4_1972_2661909 | NC_021160.1    | Ca_kabuli_chr01 | 2661909                 | AA                              | GG              | 1946721026               |
| SNP_P4_1974_2663798 | NC_021160.1    | Ca_kabuli_chr01 | 2663798                 | CC                              | AA              | 1946721029               |
| SNP_P4_1976_2664804 | NC_021160.1    | Ca_kabuli_chr01 | 2664804                 | TT                              | CC              | 1946721031               |
| SNP_P4_1977_2665011 | NC_021160.1    | Ca_kabuli_chr01 | 2665011                 | TT                              | CC              | 1946721033               |
| SNP_P4_1978_2665045 | NC_021160.1    | Ca_kabuli_chr01 | 2665045                 | AA                              | GG              | 1946721035               |
| SNP_P4_1979_2665877 | NC_021160.1    | Ca_kabuli_chr01 | 2665877                 | AA                              | GG              | 1946721037               |
| SNP_P4_1980_2666168 | NC_021160.1    | Ca_kabuli_chr01 | 2666168                 | TT                              | GG              | 1946721039               |
| SNP_P4_1981_2666249 | NC_021160.1    | Ca_kabuli_chr01 | 2666249                 | TT                              | AA              | 1946721041               |
| SNP_P4_1983_2667229 | NC_021160.1    | Ca_kabuli_chr01 | 2667229                 | GG                              | AA              | 1946721043               |
| SNP_P4_1984_2667902 | NC_021160.1    | Ca_kabuli_chr01 | 2667902                 | AA                              | GG              | 1946721045               |
| SNP_P4_1985_2667903 | NC_021160.1    | Ca_kabuli_chr01 | 2667903                 | CC                              | AA              | 1946721047               |
| SNP_P4_1986_2667933 | NC_021160.1    | Ca_kabuli_chr01 | 2667933                 | GG                              | AA              | 1946721049               |
| SNP_P4_1988_2668184 | NC_021160.1    | Ca_kabuli_chr01 | 2668184                 | TT                              | CC              | 1946721051               |
| SNP_P4_1989_2668554 | NC_021160.1    | Ca_kabuli_chr01 | 2668554                 | AA                              | GG              | 1946721053               |
| SNP_P4_1990_2669221 | NC_021160.1    | Ca_kabuli_chr01 | 2669221                 | GG                              | TT              | 1946721055               |
| SNP_P4_1991_2669222 | NC_021160.1    | Ca_kabuli_chr01 | 2669222                 | AA                              | TT              | 1946721057               |
| SNP_P4_1992_2669250 | NC_021160.1    | Ca_kabuli_chr01 | 2669250                 | CC                              | TT              | 1946721059               |
| SNP_P4_1994_2669386 | NC_021160.1    | Ca_kabuli_chr01 | 2669386                 | CC                              | TT              | 1946721061               |
| SNP_P4_1995_2669394 | NC_021160.1    | Ca_kabuli_chr01 | 2669394                 | AA                              | GG              | 1946721063               |

| SNPs IDs            | Chromosome IDs | Chromosomes     | Physical positions (bp) | CDC Frontier (Reference genome) | (ILWC46 & LPNB) | NCBI SNPdb Accession IDs |
|---------------------|----------------|-----------------|-------------------------|---------------------------------|-----------------|--------------------------|
| SNP_P4_1996_2669565 | NC_021160.1    | Ca_kabuli_chr01 | 2669565                 | AA                              | TT              | 1946721065               |
| SNP_P4_1997_2669572 | NC_021160.1    | Ca_kabuli_chr01 | 2669572                 | TT                              | CC              | 1946721067               |
| SNP_P4_1998_2669844 | NC_021160.1    | Ca_kabuli_chr01 | 2669844                 | CC                              | TT              | 1946721069               |
| SNP_P4_2000_2671988 | NC_021160.1    | Ca_kabuli_chr01 | 2671988                 | TT                              | CC              | 1946721071               |
| SNP_P4_2001_2672088 | NC_021160.1    | Ca_kabuli_chr01 | 2672088                 | CC                              | GG              | 1946721073               |
| SNP_P4_2002_2672089 | NC_021160.1    | Ca_kabuli_chr01 | 2672089                 | GG                              | TT              | 1946721075               |
| SNP_P4_2003_2672128 | NC_021160.1    | Ca_kabuli_chr01 | 2672128                 | GG                              | CC              | 1946721077               |
| SNP_P4_2004_2673535 | NC_021160.1    | Ca_kabuli_chr01 | 2673535                 | GG                              | AA              | 1946721080               |
| SNP_P4_2005_2673538 | NC_021160.1    | Ca_kabuli_chr01 | 2673538                 | TT                              | AA              | 1946721082               |
| SNP_P4_2006_2673600 | NC_021160.1    | Ca_kabuli_chr01 | 2673600                 | AA                              | CC              | 1946721084               |
| SNP_P4_2007_2673780 | NC_021160.1    | Ca_kabuli_chr01 | 2673780                 | TT                              | AA              | 1946721086               |
| SNP_P4_2008_2673786 | NC_021160.1    | Ca_kabuli_chr01 | 2673786                 | TT                              | AA              | 1946721088               |
| SNP_P4_2009_2673838 | NC_021160.1    | Ca_kabuli_chr01 | 2673838                 | GG                              | AA              | 1946721090               |
| SNP_P4_2010_2673853 | NC_021160.1    | Ca_kabuli_chr01 | 2673853                 | CC                              | TT              | 1946721092               |
| SNP_P4_2011_2673896 | NC_021160.1    | Ca_kabuli_chr01 | 2673896                 | GG                              | TT              | 1946721094               |
| SNP_P4_2012_2673969 | NC_021160.1    | Ca_kabuli_chr01 | 2673969                 | CC                              | AA              | 1946721096               |
| SNP_P4_2013_2674128 | NC_021160.1    | Ca_kabuli_chr01 | 2674128                 | AA                              | CC              | 1946721098               |
| SNP_P4_2014_2674501 | NC_021160.1    | Ca_kabuli_chr01 | 2674501                 | TT                              | CC              | 1946721100               |
| SNP_P4_2016_2674754 | NC_021160.1    | Ca_kabuli_chr01 | 2674754                 | TT                              | AA              | 1946721102               |
| SNP_P4_2017_2676058 | NC_021160.1    | Ca_kabuli_chr01 | 2676058                 | GG                              | AA              | 1946721104               |
| SNP_P4_2019_2677069 | NC_021160.1    | Ca_kabuli_chr01 | 2677069                 | AA                              | TT              | 1946721107               |
| SNP_P4_2020_2677876 | NC_021160.1    | Ca_kabuli_chr01 | 2677876                 | CC                              | TT              | 1946721109               |
| SNP_P4_2021_2678287 | NC_021160.1    | Ca_kabuli_chr01 | 2678287                 | AA                              | TT              | 1946721111               |
| SNP_P4_2022_2678805 | NC_021160.1    | Ca_kabuli_chr01 | 2678805                 | GG                              | AA              | 1946721113               |
| SNP_P4_2024_2679046 | NC_021160.1    | Ca_kabuli_chr01 | 2679046                 | TT                              | CC              | 1946721115               |
| SNP_P4_2025_2679064 | NC_021160.1    | Ca_kabuli_chr01 | 2679064                 | CC                              | TT              | 1946721117               |
| SNP_P4_2026_2679075 | NC_021160.1    | Ca_kabuli_chr01 | 2679075                 | AA                              | TT              | 1946721119               |
| SNP_P4_2027_2679085 | NC_021160.1    | Ca_kabuli_chr01 | 2679085                 | CC                              | TT              | 1946721121               |
| SNP_P4_2028_2679123 | NC_021160.1    | Ca_kabuli_chr01 | 2679123                 | CC                              | AA              | 1946721124               |
| SNP_P4_2029_2679527 | NC_021160.1    | Ca_kabuli_chr01 | 2679527                 | AA                              | TT              | 1946721126               |
| SNP_P4_2030_2679942 | NC_021160.1    | Ca_kabuli_chr01 | 2679942                 | AA                              | TT              | 1946721128               |
| SNP_P4_2031_2682074 | NC_021160.1    | Ca_kabuli_chr01 | 2682074                 | TT                              | AA              | 1946721130               |
| SNP_P4_2032_2682379 | NC_021160.1    | Ca_kabuli_chr01 | 2682379                 | GG                              | AA              | 1946721132               |
| SNP_P4_2033_2682381 | NC_021160.1    | Ca_kabuli_chr01 | 2682381                 | GG                              | AA              | 1946721134               |
| SNP_P4_2034_2682387 | NC_021160.1    | Ca_kabuli_chr01 | 2682387                 | GG                              | CC              | 1946721136               |
| SNP_P4_2035_2682402 | NC_021160.1    | Ca_kabuli_chr01 | 2682402                 | TT                              | CC              | 1946721138               |
| SNP_P4_2036_2682404 | NC_021160.1    | Ca_kabuli_chr01 | 2682404                 | TT                              | CC              | 1946721140               |
| SNP_P4_2037_2682405 | NC_021160.1    | Ca_kabuli_chr01 | 2682405                 | AA                              | GG              | 1946721142               |
| SNP_P4_2038_2682411 | NC_021160.1    | Ca_kabuli_chr01 | 2682411                 | TT                              | AA              | 1946721144               |
| SNP_P4_2039_2684830 | NC_021160.1    | Ca_kabuli_chr01 | 2684830                 | TT                              | CC              | 1946721146               |
| SNP_P4_2040_2684836 | NC_021160.1    | Ca_kabuli_chr01 | 2684836                 | AA                              | TT              | 1946721148               |
| SNP_P4_2041_2684843 | NC_021160.1    | Ca_kabuli_chr01 | 2684843                 | CC                              | GG              | 1946721150               |

| SNPs IDs            | Chromosome IDs | Chromosomes     | Physical positions (bp) | CDC Frontier (Reference genome) | (ILWC46 & LPNB) | NCBI SNPdb Accession IDs |
|---------------------|----------------|-----------------|-------------------------|---------------------------------|-----------------|--------------------------|
| SNP_P4_2042_2685095 | NC_021160.1    | Ca_kabuli_chr01 | 2685095                 | TT                              | AA              | 1946721152               |
| SNP_P4_2043_2685099 | NC_021160.1    | Ca_kabuli_chr01 | 2685099                 | CC                              | AA              | 1946721154               |
| SNP_P4_2044_2685126 | NC_021160.1    | Ca_kabuli_chr01 | 2685126                 | AA                              | TT              | 1946721156               |
| SNP_P4_2045_2685143 | NC_021160.1    | Ca_kabuli_chr01 | 2685143                 | GG                              | AA              | 1946721159               |
| SNP_P4_2046_2686205 | NC_021160.1    | Ca_kabuli_chr01 | 2686205                 | CC                              | TT              | 1946721161               |
| SNP_P4_2049_2687189 | NC_021160.1    | Ca_kabuli_chr01 | 2687189                 | GG                              | CC              | 1946721163               |
| SNP_P4_2050_2688639 | NC_021160.1    | Ca_kabuli_chr01 | 2688639                 | GG                              | AA              | 1946721165               |
| SNP_P4_2052_2692124 | NC_021160.1    | Ca_kabuli_chr01 | 2692124                 | TT                              | CC              | 1946721167               |
| SNP_P4_2054_2692373 | NC_021160.1    | Ca_kabuli_chr01 | 2692373                 | TT                              | CC              | 1946721169               |
| SNP_P4_2055_2692408 | NC_021160.1    | Ca_kabuli_chr01 | 2692408                 | AA                              | GG              | 1946721171               |
| SNP_P4_2056_2692422 | NC_021160.1    | Ca_kabuli_chr01 | 2692422                 | TT                              | CC              | 1946721173               |
| SNP_P4_2057_2692561 | NC_021160.1    | Ca_kabuli_chr01 | 2692561                 | CC                              | GG              | 1946721175               |
| SNP_P4_2058_2692718 | NC_021160.1    | Ca_kabuli_chr01 | 2692718                 | CC                              | AA              | 1946721177               |
| SNP_P4_2059_2692759 | NC_021160.1    | Ca_kabuli_chr01 | 2692759                 | GG                              | AA              | 1946721179               |
| SNP_P4_2060_2692775 | NC_021160.1    | Ca_kabuli_chr01 | 2692775                 | AA                              | TT              | 1946721181               |
| SNP_P4_2063_2694279 | NC_021160.1    | Ca_kabuli_chr01 | 2694279                 | CC                              | GG              | 1946721183               |
| SNP_P4_2064_2695079 | NC_021160.1    | Ca_kabuli_chr01 | 2695079                 | AA                              | GG              | 1946721185               |
| SNP_P4_2065_2695115 | NC_021160.1    | Ca_kabuli_chr01 | 2695115                 | AA                              | GG              | 1946721187               |
| SNP_P4_2066_2695205 | NC_021160.1    | Ca_kabuli_chr01 | 2695205                 | CC                              | GG              | 1946721189               |
| SNP_P4_2067_2695539 | NC_021160.1    | Ca_kabuli_chr01 | 2695539                 | CC                              | GG              | 1946721191               |
| SNP_P4_2068_2697954 | NC_021160.1    | Ca_kabuli_chr01 | 2697954                 | TT                              | CC              | 1946721193               |
| SNP_P4_2069_2697961 | NC_021160.1    | Ca_kabuli_chr01 | 2697961                 | CC                              | TT              | 1946721195               |
| SNP_P4_2070_2700457 | NC_021160.1    | Ca_kabuli_chr01 | 2700457                 | AA                              | CC              | 1946721197               |
| SNP_P4_2071_2700477 | NC_021160.1    | Ca_kabuli_chr01 | 2700477                 | CC                              | TT              | 1946721199               |
| SNP_P4_2072_2700529 | NC_021160.1    | Ca_kabuli_chr01 | 2700529                 | AA                              | GG              | 1946721201               |
| SNP_P4_2073_2700554 | NC_021160.1    | Ca_kabuli_chr01 | 2700554                 | AA                              | CC              | 1946721203               |
| SNP_P4_2074_2700555 | NC_021160.1    | Ca_kabuli_chr01 | 2700555                 | CC                              | TT              | 1946721205               |
| SNP_P4_2075_2700744 | NC_021160.1    | Ca_kabuli_chr01 | 2700744                 | GG                              | AA              | 1946721207               |
| SNP_P4_2076_2700759 | NC_021160.1    | Ca_kabuli_chr01 | 2700759                 | AA                              | GG              | 1946721209               |
| SNP_P4_2077_2700766 | NC_021160.1    | Ca_kabuli_chr01 | 2700766                 | CC                              | TT              | 1946721211               |
| SNP_P4_2078_2700774 | NC_021160.1    | Ca_kabuli_chr01 | 2700774                 | TT                              | CC              | 1946721213               |
| SNP_P4_2079_2700776 | NC_021160.1    | Ca_kabuli_chr01 | 2700776                 | GG                              | AA              | 1946721215               |
| SNP_P4_2080_2700815 | NC_021160.1    | Ca_kabuli_chr01 | 2700815                 | AA                              | GG              | 1946721217               |
| SNP_P4_2081_2700821 | NC_021160.1    | Ca_kabuli_chr01 | 2700821                 | GG                              | AA              | 1946721219               |
| SNP_P4_2082_2700867 | NC_021160.1    | Ca_kabuli_chr01 | 2700867                 | GG                              | AA              | 1946721221               |
| SNP_P4_2083_2700926 | NC_021160.1    | Ca_kabuli_chr01 | 2700926                 | AA                              | GG              | 1946721223               |
| SNP_P4_2084_2700932 | NC_021160.1    | Ca_kabuli_chr01 | 2700932                 | CC                              | AA              | 1946721225               |
| SNP_P4_2085_2700998 | NC_021160.1    | Ca_kabuli_chr01 | 2700998                 | CC                              | GG              | 1946721227               |
| SNP_P4_2086_2701000 | NC_021160.1    | Ca_kabuli_chr01 | 2701000                 | TT                              | AA              | 1946721230               |
| SNP_P4_2087_2701012 | NC_021160.1    | Ca_kabuli_chr01 | 2701012                 | CC                              | GG              | 1946721232               |
| SNP_P4_2088_2701240 | NC_021160.1    | Ca_kabuli_chr01 | 2701240                 | AA                              | TT              | 1946721234               |
| SNP_P4_2089_2703473 | NC_021160.1    | Ca_kabuli_chr01 | 2703473                 | TT                              | GG              | 1946721236               |



| SNPs IDs            | Chromosome IDs | Chromosomes     | Physical positions (bp) | CDC Frontier (Reference genome) | (ILWC46 & LPNB) | NCBI SNPdb Accession IDs |
|---------------------|----------------|-----------------|-------------------------|---------------------------------|-----------------|--------------------------|
| SNP_P4_2090_2703684 | NC_021160.1    | Ca_kabuli_chr01 | 2703684                 | TT                              | CC              | 1946721238               |
| SNP_P4_2091_2703709 | NC_021160.1    | Ca_kabuli_chr01 | 2703709                 | TT                              | GG              | 1946721240               |
| SNP_P4_2092_2703719 | NC_021160.1    | Ca_kabuli_chr01 | 2703719                 | AA                              | CC              | 1946721242               |
| SNP_P4_2093_2703720 | NC_021160.1    | Ca_kabuli_chr01 | 2703720                 | AA                              | CC              | 1946721244               |
| SNP_P4_2094_2703728 | NC_021160.1    | Ca_kabuli_chr01 | 2703728                 | AA                              | GG              | 1946721246               |
| SNP_P4_2095_2703729 | NC_021160.1    | Ca_kabuli_chr01 | 2703729                 | CC                              | TT              | 1946721248               |
| SNP_P4_2096_2703802 | NC_021160.1    | Ca_kabuli_chr01 | 2703802                 | GG                              | AA              | 1946721250               |
| SNP_P4_2097_2704041 | NC_021160.1    | Ca_kabuli_chr01 | 2704041                 | CC                              | TT              | 1946721252               |
| SNP_P4_2099_2704240 | NC_021160.1    | Ca_kabuli_chr01 | 2704240                 | AA                              | GG              | 1946721254               |
| SNP_P4_2100_2704247 | NC_021160.1    | Ca_kabuli_chr01 | 2704247                 | AA                              | GG              | 1946721256               |
| SNP_P4_2101_2704782 | NC_021160.1    | Ca_kabuli_chr01 | 2704782                 | TT                              | AA              | 1946721258               |
| SNP_P4_2102_2708464 | NC_021160.1    | Ca_kabuli_chr01 | 2708464                 | GG                              | AA              | 1946721260               |
| SNP_P4_2103_2712070 | NC_021160.1    | Ca_kabuli_chr01 | 2712070                 | AA                              | CC              | 1946721262               |
| SNP_P4_2104_2712087 | NC_021160.1    | Ca_kabuli_chr01 | 2712087                 | GG                              | AA              | 1946721264               |
| SNP_P4_2105_2712089 | NC_021160.1    | Ca_kabuli_chr01 | 2712089                 | AA                              | CC              | 1946721266               |
| SNP_P4_2106_2720332 | NC_021160.1    | Ca_kabuli_chr01 | 2720332                 | CC                              | TT              | 1946721268               |
| SNP_P4_2107_2724251 | NC_021160.1    | Ca_kabuli_chr01 | 2724251                 | TT                              | GG              | 1946721270               |
| SNP_P4_2109_2726742 | NC_021160.1    | Ca_kabuli_chr01 | 2726742                 | TT                              | CC              | 1946721272               |
| SNP_P4_2111_2728114 | NC_021160.1    | Ca_kabuli_chr01 | 2728114                 | TT                              | CC              | 1946721275               |
| SNP_P4_2112_2728115 | NC_021160.1    | Ca_kabuli_chr01 | 2728115                 | TT                              | GG              | 1946721277               |
| SNP_P4_2113_2728144 | NC_021160.1    | Ca_kabuli_chr01 | 2728144                 | GG                              | CC              | 1946721279               |
| SNP_P4_2114_2728152 | NC_021160.1    | Ca_kabuli_chr01 | 2728152                 | CC                              | TT              | 1946721281               |
| SNP_P4_2115_2728154 | NC_021160.1    | Ca_kabuli_chr01 | 2728154                 | AA                              | CC              | 1946721283               |
| SNP_P4_2116_2728536 | NC_021160.1    | Ca_kabuli_chr01 | 2728536                 | AA                              | GG              | 1946721285               |
| SNP_P4_2117_2728645 | NC_021160.1    | Ca_kabuli_chr01 | 2728645                 | GG                              | CC              | 1946721288               |
| SNP_P4_2118_2728894 | NC_021160.1    | Ca_kabuli_chr01 | 2728894                 | TT                              | GG              | 1946721290               |
| SNP_P4_2119_2728912 | NC_021160.1    | Ca_kabuli_chr01 | 2728912                 | GG                              | TT              | 1946721293               |
| SNP_P4_2120_2729015 | NC_021160.1    | Ca_kabuli_chr01 | 2729015                 | CC                              | AA              | 1946721295               |
| SNP_P4_2121_2729053 | NC_021160.1    | Ca_kabuli_chr01 | 2729053                 | GG                              | TT              | 1946721297               |
| SNP_P4_2122_2730646 | NC_021160.1    | Ca_kabuli_chr01 | 2730646                 | CC                              | GG              | 1946721300               |
| SNP_P4_2123_2730812 | NC_021160.1    | Ca_kabuli_chr01 | 2730812                 | TT                              | AA              | 1946721302               |
| SNP_P4_2124_2731100 | NC_021160.1    | Ca_kabuli_chr01 | 2731100                 | AA                              | GG              | 1946721304               |
| SNP_P4_2126_2745748 | NC_021160.1    | Ca_kabuli_chr01 | 2745748                 | TT                              | CC              | 1946721306               |
| SNP_P4_2127_2745771 | NC_021160.1    | Ca_kabuli_chr01 | 2745771                 | CC                              | TT              | 1946721308               |
| SNP_P4_2128_2760060 | NC_021160.1    | Ca_kabuli_chr01 | 2760060                 | CC                              | TT              | 1946721310               |
| SNP_P4_2129_2760063 | NC_021160.1    | Ca_kabuli_chr01 | 2760063                 | AA                              | TT              | 1946721312               |
| SNP_P4_2130_2760343 | NC_021160.1    | Ca_kabuli_chr01 | 2760343                 | CC                              | TT              | 1946721314               |
| SNP_P4_2131_2760369 | NC_021160.1    | Ca_kabuli_chr01 | 2760369                 | TT                              | CC              | 1946721316               |
| SNP_P4_2132_2760373 | NC_021160.1    | Ca_kabuli_chr01 | 2760373                 | TT                              | AA              | 1946721318               |
| SNP_P4_2133_2760468 | NC_021160.1    | Ca_kabuli_chr01 | 2760468                 | GG                              | AA              | 1946721320               |
| SNP_P4_2134_2760801 | NC_021160.1    | Ca_kabuli_chr01 | 2760801                 | GG                              | AA              | 1946721322               |
| SNP_P4_2135_2760809 | NC_021160.1    | Ca_kabuli_chr01 | 2760809                 | CC                              | AA              | 1946721324               |

| SNPs IDs            | Chromosome IDs | Chromosomes     | Physical positions (bp) | CDC Frontier (Reference genome) | (ILWC46 & LPNB) | NCBI SNPdb Accession IDs |
|---------------------|----------------|-----------------|-------------------------|---------------------------------|-----------------|--------------------------|
| SNP_P4_2136_2761078 | NC_021160.1    | Ca_kabuli_chr01 | 2761078                 | TT                              | AA              | 1946721326               |
| SNP_P4_2137_2761106 | NC_021160.1    | Ca_kabuli_chr01 | 2761106                 | AA                              | GG              | 1946721328               |
| SNP_P4_2139_2761154 | NC_021160.1    | Ca_kabuli_chr01 | 2761154                 | AA                              | TT              | 1946721330               |
| SNP_P4_2140_2761252 | NC_021160.1    | Ca_kabuli_chr01 | 2761252                 | TT                              | GG              | 1946721332               |
| SNP_P4_2141_2761371 | NC_021160.1    | Ca_kabuli_chr01 | 2761371                 | TT                              | AA              | 1946721334               |
| SNP_P4_2142_2761693 | NC_021160.1    | Ca_kabuli_chr01 | 2761693                 | CC                              | TT              | 1946721336               |
| SNP_P4_2143_2762093 | NC_021160.1    | Ca_kabuli_chr01 | 2762093                 | GG                              | CC              | 1946721338               |
| SNP_P4_2144_2762111 | NC_021160.1    | Ca_kabuli_chr01 | 2762111                 | TT                              | CC              | 1946721340               |
| SNP_P4_2145_2762112 | NC_021160.1    | Ca_kabuli_chr01 | 2762112                 | AA                              | TT              | 1946721342               |
| SNP_P4_2146_2762167 | NC_021160.1    | Ca_kabuli_chr01 | 2762167                 | TT                              | CC              | 1946721344               |
| SNP_P4_2147_2762420 | NC_021160.1    | Ca_kabuli_chr01 | 2762420                 | AA                              | CC              | 1946721346               |
| SNP_P4_2149_2762581 | NC_021160.1    | Ca_kabuli_chr01 | 2762581                 | AA                              | GG              | 1946721348               |
| SNP_P4_2150_2762586 | NC_021160.1    | Ca_kabuli_chr01 | 2762586                 | GG                              | TT              | 1946721350               |
| SNP_P4_2151_2762629 | NC_021160.1    | Ca_kabuli_chr01 | 2762629                 | GG                              | AA              | 1946721352               |
| SNP_P4_2152_2764070 | NC_021160.1    | Ca_kabuli_chr01 | 2764070                 | TT                              | AA              | 1946721354               |
| SNP_P4_2153_2764672 | NC_021160.1    | Ca_kabuli_chr01 | 2764672                 | GG                              | TT              | 1946721356               |
| SNP_P4_2154_2765239 | NC_021160.1    | Ca_kabuli_chr01 | 2765239                 | TT                              | CC              | 1946721358               |
| SNP_P4_2155_2765296 | NC_021160.1    | Ca_kabuli_chr01 | 2765296                 | CC                              | GG              | 1946721360               |
| SNP_P4_2157_2765330 | NC_021160.1    | Ca_kabuli_chr01 | 2765330                 | GG                              | TT              | 1946721362               |
| SNP_P4_2159_2765580 | NC_021160.1    | Ca_kabuli_chr01 | 2765580                 | GG                              | AA              | 1946721364               |
| SNP_P4_2160_2765588 | NC_021160.1    | Ca_kabuli_chr01 | 2765588                 | GG                              | AA              | 1946721366               |
| SNP_P4_2161_2765595 | NC_021160.1    | Ca_kabuli_chr01 | 2765595                 | TT                              | CC              | 1946721368               |
| SNP_P4_2163_2765852 | NC_021160.1    | Ca_kabuli_chr01 | 2765852                 | CC                              | TT              | 1946721370               |
| SNP_P4_2164_2765862 | NC_021160.1    | Ca_kabuli_chr01 | 2765862                 | CC                              | TT              | 1946721372               |
| SNP_P4_2169_2766718 | NC_021160.1    | Ca_kabuli_chr01 | 2766718                 | TT                              | AA              | 1946721374               |
| SNP_P4_2170_2766738 | NC_021160.1    | Ca_kabuli_chr01 | 2766738                 | GG                              | AA              | 1946721375               |
| SNP_P4_2171_2766974 | NC_021160.1    | Ca_kabuli_chr01 | 2766974                 | TT                              | AA              | 1946721377               |
| SNP_P4_2172_2769065 | NC_021160.1    | Ca_kabuli_chr01 | 2769065                 | AA                              | GG              | 1946721379               |
| SNP_P4_2173_2769134 | NC_021160.1    | Ca_kabuli_chr01 | 2769134                 | AA                              | GG              | 1946721381               |
| SNP_P4_2174_2769156 | NC_021160.1    | Ca_kabuli_chr01 | 2769156                 | CC                              | TT              | 1946721383               |
| SNP_P4_2175_2769332 | NC_021160.1    | Ca_kabuli_chr01 | 2769332                 | AA                              | GG              | 1946721385               |
| SNP_P4_2176_2769374 | NC_021160.1    | Ca_kabuli_chr01 | 2769374                 | GG                              | AA              | 1946721387               |
| SNP_P4_2177_2772515 | NC_021160.1    | Ca_kabuli_chr01 | 2772515                 | GG                              | AA              | 1946721389               |
| SNP_P4_2178_2772709 | NC_021160.1    | Ca_kabuli_chr01 | 2772709                 | CC                              | GG              | 1946721391               |
| SNP_P4_2180_2772936 | NC_021160.1    | Ca_kabuli_chr01 | 2772936                 | GG                              | CC              | 1946721393               |
| SNP_P4_2181_2772957 | NC_021160.1    | Ca_kabuli_chr01 | 2772957                 | CC                              | TT              | 1946721395               |
| SNP_P4_2182_2773060 | NC_021160.1    | Ca_kabuli_chr01 | 2773060                 | AA                              | GG              | 1946721397               |
| SNP_P4_2183_2773117 | NC_021160.1    | Ca_kabuli_chr01 | 2773117                 | TT                              | AA              | 1946721399               |
| SNP_P4_2184_2773144 | NC_021160.1    | Ca_kabuli_chr01 | 2773144                 | TT                              | GG              | 1946721401               |
| SNP_P4_2185_2773267 | NC_021160.1    | Ca_kabuli_chr01 | 2773267                 | GG                              | TT              | 1946721403               |
| SNP_P4_2186_2774646 | NC_021160.1    | Ca_kabuli_chr01 | 2774646                 | AA                              | GG              | 1946721405               |
| SNP_P4_2187_2778169 | NC_021160.1    | Ca_kabuli_chr01 | 2778169                 | AA                              | GG              | 1946721407               |

| SNPs IDs            | Chromosome IDs | Chromosomes     | Physical positions (bp) | CDC Frontier (Reference genome) | (ILWC46 & LPNB) | NCBI SNPdb Accession IDs |
|---------------------|----------------|-----------------|-------------------------|---------------------------------|-----------------|--------------------------|
| SNP_P4_2188_2781750 | NC_021160.1    | Ca_kabuli_chr01 | 2781750                 | TT                              | CC              | 1946721409               |
| SNP_P4_2189_2782318 | NC_021160.1    | Ca_kabuli_chr01 | 2782318                 | GG                              | AA              | 1946721411               |
| SNP_P4_2190_2787651 | NC_021160.1    | Ca_kabuli_chr01 | 2787651                 | CC                              | TT              | 1946721413               |
| SNP_P4_2191_2789656 | NC_021160.1    | Ca_kabuli_chr01 | 2789656                 | AA                              | TT              | 1946721415               |
| SNP_P4_2192_2790504 | NC_021160.1    | Ca_kabuli_chr01 | 2790504                 | CC                              | TT              | 1946721417               |
| SNP_P4_2195_2791745 | NC_021160.1    | Ca_kabuli_chr01 | 2791745                 | GG                              | AA              | 1946721419               |
| SNP_P4_2196_2791756 | NC_021160.1    | Ca_kabuli_chr01 | 2791756                 | CC                              | TT              | 1946721421               |
| SNP_P4_2197_2791758 | NC_021160.1    | Ca_kabuli_chr01 | 2791758                 | TT                              | CC              | 1946721424               |
| SNP_P4_2198_2795899 | NC_021160.1    | Ca_kabuli_chr01 | 2795899                 | AA                              | TT              | 1946721426               |
| SNP_P4_2199_2795912 | NC_021160.1    | Ca_kabuli_chr01 | 2795912                 | CC                              | TT              | 1946721428               |
| SNP_P4_2200_2795927 | NC_021160.1    | Ca_kabuli_chr01 | 2795927                 | AA                              | GG              | 1946721430               |
| SNP_P4_2201_2795960 | NC_021160.1    | Ca_kabuli_chr01 | 2795960                 | CC                              | TT              | 1946721432               |
| SNP_P4_2202_2796205 | NC_021160.1    | Ca_kabuli_chr01 | 2796205                 | AA                              | GG              | 1946721434               |
| SNP_P4_2204_2796687 | NC_021160.1    | Ca_kabuli_chr01 | 2796687                 | GG                              | AA              | 1946721436               |
| SNP_P4_2206_2797295 | NC_021160.1    | Ca_kabuli_chr01 | 2797295                 | CC                              | TT              | 1946721438               |
| SNP_P4_2208_2797340 | NC_021160.1    | Ca_kabuli_chr01 | 2797340                 | AA                              | GG              | 1946721439               |
| SNP_P4_2209_2797524 | NC_021160.1    | Ca_kabuli_chr01 | 2797524                 | TT                              | CC              | 1946721440               |
| SNP_P4_2210_2797528 | NC_021160.1    | Ca_kabuli_chr01 | 2797528                 | GG                              | AA              | 1946721441               |
| SNP_P4_2211_2797531 | NC_021160.1    | Ca_kabuli_chr01 | 2797531                 | GG                              | AA              | 1946721442               |
| SNP_P4_2212_2797550 | NC_021160.1    | Ca_kabuli_chr01 | 2797550                 | AA                              | GG              | 1946721443               |
| SNP_P4_2213_2797602 | NC_021160.1    | Ca_kabuli_chr01 | 2797602                 | GG                              | AA              | 1946721444               |
| SNP_P4_2214_2797661 | NC_021160.1    | Ca_kabuli_chr01 | 2797661                 | GG                              | AA              | 1946721445               |
| SNP_P4_2216_2797704 | NC_021160.1    | Ca_kabuli_chr01 | 2797704                 | TT                              | AA              | 1946721446               |
| SNP_P4_2219_2799231 | NC_021160.1    | Ca_kabuli_chr01 | 2799231                 | CC                              | TT              | 1946721447               |
| SNP_P4_2220_2799259 | NC_021160.1    | Ca_kabuli_chr01 | 2799259                 | GG                              | AA              | 1946721449               |
| SNP_P4_2221_2799262 | NC_021160.1    | Ca_kabuli_chr01 | 2799262                 | TT                              | AA              | 1946721451               |
| SNP_P4_2222_2799304 | NC_021160.1    | Ca_kabuli_chr01 | 2799304                 | TT                              | AA              | 1946721453               |
| SNP_P4_2223_2800520 | NC_021160.1    | Ca_kabuli_chr01 | 2800520                 | GG                              | AA              | 1946721455               |
| SNP_P4_2224_2802101 | NC_021160.1    | Ca_kabuli_chr01 | 2802101                 | AA                              | GG              | 1946721457               |
| SNP_P4_2225_2802110 | NC_021160.1    | Ca_kabuli_chr01 | 2802110                 | CC                              | TT              | 1946721459               |
| SNP_P4_2226_2802115 | NC_021160.1    | Ca_kabuli_chr01 | 2802115                 | GG                              | AA              | 1946721460               |
| SNP_P4_2227_2802134 | NC_021160.1    | Ca_kabuli_chr01 | 2802134                 | GG                              | AA              | 1946721463               |
| SNP_P4_2229_2802340 | NC_021160.1    | Ca_kabuli_chr01 | 2802340                 | CC                              | TT              | 1946721465               |
| SNP_P4_2230_2802348 | NC_021160.1    | Ca_kabuli_chr01 | 2802348                 | CC                              | AA              | 1946721467               |
| SNP_P4_2231_2802352 | NC_021160.1    | Ca_kabuli_chr01 | 2802352                 | CC                              | AA              | 1946721469               |
| SNP_P4_2232_2802354 | NC_021160.1    | Ca_kabuli_chr01 | 2802354                 | CC                              | GG              | 1946721471               |
| SNP_P4_2233_2802362 | NC_021160.1    | Ca_kabuli_chr01 | 2802362                 | GG                              | CC              | 1946721473               |
| SNP_P4_2235_2802664 | NC_021160.1    | Ca_kabuli_chr01 | 2802664                 | AA                              | GG              | 1946721475               |
| SNP_P4_2236_2802799 | NC_021160.1    | Ca_kabuli_chr01 | 2802799                 | AA                              | TT              | 1946721476               |
| SNP_P4_2237_2802800 | NC_021160.1    | Ca_kabuli_chr01 | 2802800                 | GG                              | AA              | 1946721478               |
| SNP_P4_2238_2802834 | NC_021160.1    | Ca_kabuli_chr01 | 2802834                 | GG                              | AA              | 1946721480               |
| SNP_P4_2239_2802867 | NC_021160.1    | Ca_kabuli_chr01 | 2802867                 | AA                              | GG              | 1946721482               |

| SNPs IDs            | Chromosome IDs | Chromosomes     | Physical positions (bp) | CDC Frontier (Reference genome) | (ILWC46 & LPNB) | NCBI SNPdb Accession IDs |
|---------------------|----------------|-----------------|-------------------------|---------------------------------|-----------------|--------------------------|
| SNP_P4_2240_2802901 | NC_021160.1    | Ca_kabuli_chr01 | 2802901                 | AA                              | GG              | 1946721484               |
| SNP_P4_2241_2802950 | NC_021160.1    | Ca_kabuli_chr01 | 2802950                 | AA                              | GG              | 1946721486               |
| SNP_P4_2242_2802952 | NC_021160.1    | Ca_kabuli_chr01 | 2802952                 | CC                              | AA              | 1946721488               |
| SNP_P4_2243_2803016 | NC_021160.1    | Ca_kabuli_chr01 | 2803016                 | AA                              | GG              | 1946721490               |
| SNP_P4_2244_2803054 | NC_021160.1    | Ca_kabuli_chr01 | 2803054                 | CC                              | TT              | 1946721491               |
| SNP_P4_2245_2803069 | NC_021160.1    | Ca_kabuli_chr01 | 2803069                 | TT                              | CC              | 1946721492               |
| SNP_P4_2246_2803129 | NC_021160.1    | Ca_kabuli_chr01 | 2803129                 | CC                              | TT              | 1946721494               |
| SNP_P4_2247_2803154 | NC_021160.1    | Ca_kabuli_chr01 | 2803154                 | GG                              | AA              | 1946721495               |
| SNP_P4_2248_2803181 | NC_021160.1    | Ca_kabuli_chr01 | 2803181                 | CC                              | TT              | 1946721496               |
| SNP_P4_2249_2803183 | NC_021160.1    | Ca_kabuli_chr01 | 2803183                 | GG                              | AA              | 1946721498               |
| SNP_P4_2250_2803184 | NC_021160.1    | Ca_kabuli_chr01 | 2803184                 | CC                              | TT              | 1946721500               |
| SNP_P4_2251_2803286 | NC_021160.1    | Ca_kabuli_chr01 | 2803286                 | AA                              | GG              | 1946721502               |
| SNP_P4_2252_2803326 | NC_021160.1    | Ca_kabuli_chr01 | 2803326                 | AA                              | GG              | 1946721504               |
| SNP_P4_2254_2803391 | NC_021160.1    | Ca_kabuli_chr01 | 2803391                 | GG                              | AA              | 1946721506               |
| SNP_P4_2256_2803410 | NC_021160.1    | Ca_kabuli_chr01 | 2803410                 | TT                              | AA              | 1946721508               |
| SNP_P4_2257_2803436 | NC_021160.1    | Ca_kabuli_chr01 | 2803436                 | CC                              | TT              | 1946721510               |
| SNP_P4_2258_2803440 | NC_021160.1    | Ca_kabuli_chr01 | 2803440                 | AA                              | GG              | 1946721512               |
| SNP_P4_2259_2803480 | NC_021160.1    | Ca_kabuli_chr01 | 2803480                 | AA                              | CC              | 1946721514               |
| SNP_P4_2260_2803483 | NC_021160.1    | Ca_kabuli_chr01 | 2803483                 | GG                              | AA              | 1946721516               |
| SNP_P4_2262_2809445 | NC_021160.1    | Ca_kabuli_chr01 | 2809445                 | AA                              | TT              | 1946721518               |
| SNP_P4_2263_2810473 | NC_021160.1    | Ca_kabuli_chr01 | 2810473                 | GG                              | AA              | 1946721519               |
| SNP_P4_2264_2810476 | NC_021160.1    | Ca_kabuli_chr01 | 2810476                 | GG                              | AA              | 1946721521               |
| SNP_P4_2266_2814016 | NC_021160.1    | Ca_kabuli_chr01 | 2814016                 | TT                              | GG              | 1946721523               |
| SNP_P4_2267_2814429 | NC_021160.1    | Ca_kabuli_chr01 | 2814429                 | AA                              | GG              | 1946721525               |
| SNP_P4_2268_2814901 | NC_021160.1    | Ca_kabuli_chr01 | 2814901                 | CC                              | AA              | 1946721527               |
| SNP_P4_2269_2814918 | NC_021160.1    | Ca_kabuli_chr01 | 2814918                 | TT                              | CC              | 1946721529               |
| SNP_P4_2270_2814921 | NC_021160.1    | Ca_kabuli_chr01 | 2814921                 | TT                              | CC              | 1946721531               |
| SNP_P4_2271_2814948 | NC_021160.1    | Ca_kabuli_chr01 | 2814948                 | CC                              | TT              | 1946721533               |
| SNP_P4_2272_2814972 | NC_021160.1    | Ca_kabuli_chr01 | 2814972                 | TT                              | CC              | 1946721535               |
| SNP_P4_2274_2815008 | NC_021160.1    | Ca_kabuli_chr01 | 2815008                 | AA                              | TT              | 1946721537               |
| SNP_P4_2275_2815010 | NC_021160.1    | Ca_kabuli_chr01 | 2815010                 | AA                              | CC              | 1946721539               |
| SNP_P4_2276_2815135 | NC_021160.1    | Ca_kabuli_chr01 | 2815135                 | TT                              | CC              | 1946721542               |
| SNP_P4_2277_2815211 | NC_021160.1    | Ca_kabuli_chr01 | 2815211                 | CC                              | GG              | 1946721544               |
| SNP_P4_2278_2826745 | NC_021160.1    | Ca_kabuli_chr01 | 2826745                 | CC                              | TT              | 1946721546               |
| SNP_P4_2279_2826768 | NC_021160.1    | Ca_kabuli_chr01 | 2826768                 | GG                              | AA              | 1946721548               |
| SNP_P4_2282_2827594 | NC_021160.1    | Ca_kabuli_chr01 | 2827594                 | GG                              | AA              | 1946721550               |
| SNP_P4_2283_2829335 | NC_021160.1    | Ca_kabuli_chr01 | 2829335                 | TT                              | CC              | 1946721552               |
| SNP_P4_2284_2829336 | NC_021160.1    | Ca_kabuli_chr01 | 2829336                 | TT                              | CC              | 1946721554               |
| SNP_P4_2286_2829923 | NC_021160.1    | Ca_kabuli_chr01 | 2829923                 | AA                              | TT              | 1946721556               |
| SNP_P4_2287_2830065 | NC_021160.1    | Ca_kabuli_chr01 | 2830065                 | GG                              | AA              | 1946721558               |
| SNP_P4_2288_2830832 | NC_021160.1    | Ca_kabuli_chr01 | 2830832                 | AA                              | GG              | 1946721560               |
| SNP_P4_2289_2830842 | NC_021160.1    | Ca_kabuli_chr01 | 2830842                 | GG                              | AA              | 1946721562               |

| SNPs IDs            | Chromosome IDs | Chromosomes     | Physical positions (bp) | CDC Frontier (Reference genome) | (ILWC46 & LPNB) | NCBI SNPdb Accession IDs |
|---------------------|----------------|-----------------|-------------------------|---------------------------------|-----------------|--------------------------|
| SNP_P4_2290_2830873 | NC_021160.1    | Ca_kabuli_chr01 | 2830873                 | TT                              | CC              | 1946721565               |
| SNP_P4_2291_2830932 | NC_021160.1    | Ca_kabuli_chr01 | 2830932                 | CC                              | TT              | 1946721567               |
| SNP_P4_2292_2830942 | NC_021160.1    | Ca_kabuli_chr01 | 2830942                 | CC                              | TT              | 1946721569               |
| SNP_P4_2293_2830960 | NC_021160.1    | Ca_kabuli_chr01 | 2830960                 | AA                              | TT              | 1946721571               |
| SNP_P4_2294_2831002 | NC_021160.1    | Ca_kabuli_chr01 | 2831002                 | GG                              | CC              | 1946721573               |
| SNP_P4_2295_2831200 | NC_021160.1    | Ca_kabuli_chr01 | 2831200                 | GG                              | AA              | 1946721575               |
| SNP_P4_2296_2831409 | NC_021160.1    | Ca_kabuli_chr01 | 2831409                 | AA                              | CC              | 1946721577               |
| SNP_P4_2297_2831436 | NC_021160.1    | Ca_kabuli_chr01 | 2831436                 | AA                              | GG              | 1946721579               |
| SNP_P4_2300_2834171 | NC_021160.1    | Ca_kabuli_chr01 | 2834171                 | GG                              | AA              | 1946721581               |
| SNP_P4_2301_2834216 | NC_021160.1    | Ca_kabuli_chr01 | 2834216                 | TT                              | AA              | 1946721583               |
| SNP_P4_2302_2834456 | NC_021160.1    | Ca_kabuli_chr01 | 2834456                 | AA                              | TT              | 1946721585               |
| SNP_P4_2303_2835580 | NC_021160.1    | Ca_kabuli_chr01 | 2835580                 | AA                              | GG              | 1946721587               |
| SNP_P4_2305_2837698 | NC_021160.1    | Ca_kabuli_chr01 | 2837698                 | GG                              | TT              | 1946721589               |
| SNP_P4_2306_2838219 | NC_021160.1    | Ca_kabuli_chr01 | 2838219                 | CC                              | GG              | 1946721592               |
| SNP_P4_2307_2838540 | NC_021160.1    | Ca_kabuli_chr01 | 2838540                 | AA                              | TT              | 1946721594               |
| SNP_P4_2309_2841105 | NC_021160.1    | Ca_kabuli_chr01 | 2841105                 | CC                              | TT              | 1946721596               |
| SNP_P4_2311_2843461 | NC_021160.1    | Ca_kabuli_chr01 | 2843461                 | CC                              | AA              | 1946721597               |
| SNP_P4_2312_2843462 | NC_021160.1    | Ca_kabuli_chr01 | 2843462                 | CC                              | TT              | 1946721599               |
| SNP_P4_2314_2843493 | NC_021160.1    | Ca_kabuli_chr01 | 2843493                 | AA                              | GG              | 1946721602               |
| SNP_P4_2316_2844373 | NC_021160.1    | Ca_kabuli_chr01 | 2844373                 | CC                              | TT              | 1946721604               |
| SNP_P4_2317_2844831 | NC_021160.1    | Ca_kabuli_chr01 | 2844831                 | AA                              | TT              | 1946721606               |
| SNP_P4_2318_2844960 | NC_021160.1    | Ca_kabuli_chr01 | 2844960                 | GG                              | AA              | 1946721608               |
| SNP_P4_2319_2844963 | NC_021160.1    | Ca_kabuli_chr01 | 2844963                 | AA                              | GG              | 1946721610               |
| SNP_P4_2320_2844978 | NC_021160.1    | Ca_kabuli_chr01 | 2844978                 | TT                              | AA              | 1946721612               |
| SNP_P4_2321_2844999 | NC_021160.1    | Ca_kabuli_chr01 | 2844999                 | AA                              | TT              | 1946721615               |
| SNP_P4_2322_2845017 | NC_021160.1    | Ca_kabuli_chr01 | 2845017                 | AA                              | GG              | 1946721617               |
| SNP_P4_2323_2845033 | NC_021160.1    | Ca_kabuli_chr01 | 2845033                 | GG                              | AA              | 1946721619               |
| SNP_P4_2325_2845126 | NC_021160.1    | Ca_kabuli_chr01 | 2845126                 | GG                              | AA              | 1946721621               |
| SNP_P4_2326_2845148 | NC_021160.1    | Ca_kabuli_chr01 | 2845148                 | GG                              | AA              | 1946721623               |
| SNP_P4_2328_2845192 | NC_021160.1    | Ca_kabuli_chr01 | 2845192                 | TT                              | CC              | 1946721625               |
| SNP_P4_2329_2845301 | NC_021160.1    | Ca_kabuli_chr01 | 2845301                 | TT                              | CC              | 1946721627               |
| SNP_P4_2330_2845341 | NC_021160.1    | Ca_kabuli_chr01 | 2845341                 | CC                              | TT              | 1946721629               |
| SNP_P4_2332_2845454 | NC_021160.1    | Ca_kabuli_chr01 | 2845454                 | TT                              | AA              | 1946721631               |
| SNP_P4_2333_2845460 | NC_021160.1    | Ca_kabuli_chr01 | 2845460                 | TT                              | CC              | 1946721633               |
| SNP_P4_2334_2845465 | NC_021160.1    | Ca_kabuli_chr01 | 2845465                 | CC                              | GG              | 1946721636               |
| SNP_P4_2335_2845491 | NC_021160.1    | Ca_kabuli_chr01 | 2845491                 | AA                              | CC              | 1946721638               |
| SNP_P4_2336_2845526 | NC_021160.1    | Ca_kabuli_chr01 | 2845526                 | TT                              | GG              | 1946721640               |
| SNP_P4_2337_2845665 | NC_021160.1    | Ca_kabuli_chr01 | 2845665                 | CC                              | GG              | 1946721642               |
| SNP_P4_2338_2845669 | NC_021160.1    | Ca_kabuli_chr01 | 2845669                 | TT                              | AA              | 1946721644               |
| SNP_P4_2339_2845827 | NC_021160.1    | Ca_kabuli_chr01 | 2845827                 | AA                              | GG              | 1946721646               |
| SNP_P4_2340_2845882 | NC_021160.1    | Ca_kabuli_chr01 | 2845882                 | AA                              | GG              | 1946721648               |
| SNP_P4_2341_2845909 | NC_021160.1    | Ca_kabuli_chr01 | 2845909                 | CC                              | TT              | 1946721650               |

| SNPs IDs            | Chromosome IDs | Chromosomes     | Physical positions (bp) | CDC Frontier (Reference genome) | (ILWC46 & LPNB) | NCBI SNPdb Accession IDs |
|---------------------|----------------|-----------------|-------------------------|---------------------------------|-----------------|--------------------------|
| SNP_P4_2342_2845919 | NC_021160.1    | Ca_kabuli_chr01 | 2845919                 | AA                              | CC              | 1946721653               |
| SNP_P4_2345_2846225 | NC_021160.1    | Ca_kabuli_chr01 | 2846225                 | GG                              | AA              | 1946721655               |
| SNP_P4_2346_2847790 | NC_021160.1    | Ca_kabuli_chr01 | 2847790                 | TT                              | CC              | 1946721657               |
| SNP_P4_2347_2848032 | NC_021160.1    | Ca_kabuli_chr01 | 2848032                 | GG                              | AA              | 1946721659               |
| SNP_P4_2348_2849389 | NC_021160.1    | Ca_kabuli_chr01 | 2849389                 | GG                              | AA              | 1946721661               |
| SNP_P4_2349_2849395 | NC_021160.1    | Ca_kabuli_chr01 | 2849395                 | AA                              | GG              | 1946721663               |
| SNP_P4_2350_2849901 | NC_021160.1    | Ca_kabuli_chr01 | 2849901                 | AA                              | GG              | 1946721666               |
| SNP_P4_2351_2849939 | NC_021160.1    | Ca_kabuli_chr01 | 2849939                 | CC                              | TT              | 1946721668               |
| SNP_P4_2352_2849977 | NC_021160.1    | Ca_kabuli_chr01 | 2849977                 | GG                              | AA              | 1946721669               |
| SNP_P4_2353_2851732 | NC_021160.1    | Ca_kabuli_chr01 | 2851732                 | AA                              | GG              | 1946721670               |
| SNP_P4_2354_2852034 | NC_021160.1    | Ca_kabuli_chr01 | 2852034                 | CC                              | AA              | 1946721671               |
| SNP_P4_2355_2852721 | NC_021160.1    | Ca_kabuli_chr01 | 2852721                 | TT                              | AA              | 1946721672               |
| SNP_P4_2356_2855927 | NC_021160.1    | Ca_kabuli_chr01 | 2855927                 | AA                              | TT              | 1946721673               |
| SNP_P4_2357_2856003 | NC_021160.1    | Ca_kabuli_chr01 | 2856003                 | CC                              | TT              | 1946721675               |
| SNP_P4_2358_2856079 | NC_021160.1    | Ca_kabuli_chr01 | 2856079                 | TT                              | GG              | 1946721677               |
| SNP_P4_2359_2858621 | NC_021160.1    | Ca_kabuli_chr01 | 2858621                 | CC                              | TT              | 1946721679               |
| SNP_P4_2360_2858679 | NC_021160.1    | Ca_kabuli_chr01 | 2858679                 | AA                              | GG              | 1946721681               |
| SNP_P4_2361_2858706 | NC_021160.1    | Ca_kabuli_chr01 | 2858706                 | TT                              | AA              | 1946721683               |
| SNP_P4_2362_2859581 | NC_021160.1    | Ca_kabuli_chr01 | 2859581                 | CC                              | TT              | 1946721686               |
| SNP_P4_2363_2859603 | NC_021160.1    | Ca_kabuli_chr01 | 2859603                 | GG                              | AA              | 1946721688               |
| SNP_P4_2364_2859917 | NC_021160.1    | Ca_kabuli_chr01 | 2859917                 | AA                              | GG              | 1946721690               |
| SNP_P4_2365_2860225 | NC_021160.1    | Ca_kabuli_chr01 | 2860225                 | AA                              | GG              | 1946721692               |
| SNP_P4_2367_2863303 | NC_021160.1    | Ca_kabuli_chr01 | 2863303                 | AA                              | GG              | 1946721694               |
| SNP_P4_2368_2863671 | NC_021160.1    | Ca_kabuli_chr01 | 2863671                 | AA                              | GG              | 1946721697               |
| SNP_P4_2369_2864825 | NC_021160.1    | Ca_kabuli_chr01 | 2864825                 | CC                              | GG              | 1946721699               |
| SNP_P4_2370_2866955 | NC_021160.1    | Ca_kabuli_chr01 | 2866955                 | TT                              | AA              | 1946721702               |
| SNP_P4_2372_2867172 | NC_021160.1    | Ca_kabuli_chr01 | 2867172                 | GG                              | CC              | 1946721706               |
| SNP_P4_2374_2867229 | NC_021160.1    | Ca_kabuli_chr01 | 2867229                 | GG                              | TT              | 1946721708               |
| SNP_P4_2375_2867693 | NC_021160.1    | Ca_kabuli_chr01 | 2867693                 | AA                              | GG              | 1946721710               |
| SNP_P4_2376_2867707 | NC_021160.1    | Ca_kabuli_chr01 | 2867707                 | AA                              | GG              | 1946721713               |
| SNP_P4_2377_2867709 | NC_021160.1    | Ca_kabuli_chr01 | 2867709                 | TT                              | CC              | 1946721715               |
| SNP_P4_2378_2867730 | NC_021160.1    | Ca_kabuli_chr01 | 2867730                 | AA                              | GG              | 1946721717               |
| SNP_P4_2379_2867736 | NC_021160.1    | Ca_kabuli_chr01 | 2867736                 | CC                              | AA              | 1946721719               |
| SNP_P4_2380_2867746 | NC_021160.1    | Ca_kabuli_chr01 | 2867746                 | CC                              | TT              | 1946721721               |
| SNP_P4_2381_2867758 | NC_021160.1    | Ca_kabuli_chr01 | 2867758                 | GG                              | AA              | 1946721723               |
| SNP_P4_2382_2867784 | NC_021160.1    | Ca_kabuli_chr01 | 2867784                 | TT                              | CC              | 1946721725               |
| SNP_P4_2383_2867805 | NC_021160.1    | Ca_kabuli_chr01 | 2867805                 | CC                              | AA              | 1946721727               |
| SNP_P4_2385_2868991 | NC_021160.1    | Ca_kabuli_chr01 | 2868991                 | GG                              | TT              | 1946721729               |
| SNP_P4_2386_2869887 | NC_021160.1    | Ca_kabuli_chr01 | 2869887                 | GG                              | CC              | 1946721731               |
| SNP_P4_2387_2872251 | NC_021160.1    | Ca_kabuli_chr01 | 2872251                 | TT                              | CC              | 1946721733               |
| SNP_P4_2388_2872477 | NC_021160.1    | Ca_kabuli_chr01 | 2872477                 | AA                              | GG              | 1946721735               |
| SNP_P4_2389_2874401 | NC_021160.1    | Ca_kabuli_chr01 | 2874401                 | CC                              | TT              | 1946721737               |

| SNPs IDs            | Chromosome IDs | Chromosomes     | Physical positions (bp) | CDC Frontier (Reference genome) | (ILWC46 & LPNB) | NCBI SNPdb Accession IDs |
|---------------------|----------------|-----------------|-------------------------|---------------------------------|-----------------|--------------------------|
| SNP_P4_2390_2874413 | NC_021160.1    | Ca_kabuli_chr01 | 2874413                 | GG                              | TT              | 1946721739               |
| SNP_P4_2391_2874433 | NC_021160.1    | Ca_kabuli_chr01 | 2874433                 | TT                              | CC              | 1946721741               |
| SNP_P4_2392_2874766 | NC_021160.1    | Ca_kabuli_chr01 | 2874766                 | CC                              | TT              | 1946721743               |
| SNP_P4_2393_2874775 | NC_021160.1    | Ca_kabuli_chr01 | 2874775                 | CC                              | AA              | 1946721745               |
| SNP_P4_2394_2874807 | NC_021160.1    | Ca_kabuli_chr01 | 2874807                 | TT                              | CC              | 1946721747               |
| SNP_P4_2396_2875048 | NC_021160.1    | Ca_kabuli_chr01 | 2875048                 | GG                              | AA              | 1946721749               |
| SNP_P4_2397_2875087 | NC_021160.1    | Ca_kabuli_chr01 | 2875087                 | AA                              | TT              | 1946721751               |
| SNP_P4_2399_2875922 | NC_021160.1    | Ca_kabuli_chr01 | 2875922                 | AA                              | GG              | 1946721753               |
| SNP_P4_2400_2875929 | NC_021160.1    | Ca_kabuli_chr01 | 2875929                 | CC                              | GG              | 1946721755               |
| SNP_P4_2401_2877105 | NC_021160.1    | Ca_kabuli_chr01 | 2877105                 | AA                              | TT              | 1946721757               |
| SNP_P4_2402_2877106 | NC_021160.1    | Ca_kabuli_chr01 | 2877106                 | AA                              | GG              | 1946721759               |
| SNP_P4_2403_2877114 | NC_021160.1    | Ca_kabuli_chr01 | 2877114                 | CC                              | TT              | 1946721761               |
| SNP_P4_2404_2877136 | NC_021160.1    | Ca_kabuli_chr01 | 2877136                 | TT                              | AA              | 1946721763               |
| SNP_P4_2405_2877148 | NC_021160.1    | Ca_kabuli_chr01 | 2877148                 | CC                              | GG              | 1946721765               |
| SNP_P4_2406_2877159 | NC_021160.1    | Ca_kabuli_chr01 | 2877159                 | GG                              | TT              | 1946721767               |
| SNP_P4_2409_2877483 | NC_021160.1    | Ca_kabuli_chr01 | 2877483                 | AA                              | CC              | 1946721769               |
| SNP_P4_2410_2877501 | NC_021160.1    | Ca_kabuli_chr01 | 2877501                 | CC                              | TT              | 1946721771               |
| SNP_P4_2411_2877502 | NC_021160.1    | Ca_kabuli_chr01 | 2877502                 | AA                              | GG              | 1946721773               |
| SNP_P4_2412_2877725 | NC_021160.1    | Ca_kabuli_chr01 | 2877725                 | TT                              | GG              | 1946721775               |
| SNP_P4_2413_2877885 | NC_021160.1    | Ca_kabuli_chr01 | 2877885                 | GG                              | AA              | 1946721777               |
| SNP_P4_2414_2877886 | NC_021160.1    | Ca_kabuli_chr01 | 2877886                 | AA                              | GG              | 1946721780               |
| SNP_P4_2415_2877889 | NC_021160.1    | Ca_kabuli_chr01 | 2877889                 | TT                              | AA              | 1946721782               |
| SNP_P4_2416_2878145 | NC_021160.1    | Ca_kabuli_chr01 | 2878145                 | CC                              | TT              | 1946721784               |
| SNP_P4_2417_2878479 | NC_021160.1    | Ca_kabuli_chr01 | 2878479                 | TT                              | CC              | 1946721786               |
| SNP_P4_2418_2878534 | NC_021160.1    | Ca_kabuli_chr01 | 2878534                 | TT                              | CC              | 1946721788               |
| SNP_P4_2419_2878542 | NC_021160.1    | Ca_kabuli_chr01 | 2878542                 | TT                              | CC              | 1946721790               |
| SNP_P4_2420_2878566 | NC_021160.1    | Ca_kabuli_chr01 | 2878566                 | TT                              | CC              | 1946721792               |
| SNP_P4_2421_2878914 | NC_021160.1    | Ca_kabuli_chr01 | 2878914                 | GG                              | CC              | 1946721794               |
| SNP_P4_2422_2878939 | NC_021160.1    | Ca_kabuli_chr01 | 2878939                 | GG                              | TT              | 1946721796               |
| SNP_P4_2423_2880909 | NC_021160.1    | Ca_kabuli_chr01 | 2880909                 | CC                              | AA              | 1946721798               |
| SNP_P4_2424_2880939 | NC_021160.1    | Ca_kabuli_chr01 | 2880939                 | CC                              | TT              | 1946721800               |
| SNP_P4_2425_2881323 | NC_021160.1    | Ca_kabuli_chr01 | 2881323                 | AA                              | GG              | 1946721802               |
| SNP_P4_2426_2882277 | NC_021160.1    | Ca_kabuli_chr01 | 2882277                 | CC                              | TT              | 1946721804               |
| SNP_P4_2427_2882418 | NC_021160.1    | Ca_kabuli_chr01 | 2882418                 | GG                              | AA              | 1946721807               |
| SNP_P4_2428_2883473 | NC_021160.1    | Ca_kabuli_chr01 | 2883473                 | GG                              | TT              | 1946721809               |
| SNP_P4_2429_2883479 | NC_021160.1    | Ca_kabuli_chr01 | 2883479                 | CC                              | AA              | 1946721811               |
| SNP_P4_2430_2883684 | NC_021160.1    | Ca_kabuli_chr01 | 2883684                 | GG                              | TT              | 1946721813               |
| SNP_P4_2431_2883793 | NC_021160.1    | Ca_kabuli_chr01 | 2883793                 | CC                              | GG              | 1946721815               |
| SNP_P4_2432_2883865 | NC_021160.1    | Ca_kabuli_chr01 | 2883865                 | GG                              | CC              | 1946721817               |
| SNP_P4_2433_2883872 | NC_021160.1    | Ca_kabuli_chr01 | 2883872                 | TT                              | GG              | 1946721819               |
| SNP_P4_2435_2884056 | NC_021160.1    | Ca_kabuli_chr01 | 2884056                 | AA                              | GG              | 1946721821               |
| SNP_P4_2436_2884070 | NC_021160.1    | Ca_kabuli_chr01 | 2884070                 | GG                              | AA              | 1946721823               |

| SNPs IDs            | Chromosome IDs | Chromosomes     | Physical positions (bp) | CDC Frontier (Reference genome) | (ILWC46 & LPNB) | NCBI SNPdb Accession IDs |
|---------------------|----------------|-----------------|-------------------------|---------------------------------|-----------------|--------------------------|
| SNP_P4_2437_2884144 | NC_021160.1    | Ca_kabuli_chr01 | 2884144                 | TT                              | GG              | 1946721825               |
| SNP_P4_2438_2884174 | NC_021160.1    | Ca_kabuli_chr01 | 2884174                 | TT                              | CC              | 1946721827               |
| SNP_P4_2439_2884185 | NC_021160.1    | Ca_kabuli_chr01 | 2884185                 | CC                              | AA              | 1946721829               |
| SNP_P4_2440_2884200 | NC_021160.1    | Ca_kabuli_chr01 | 2884200                 | CC                              | AA              | 1946721831               |
| SNP_P4_2442_2884476 | NC_021160.1    | Ca_kabuli_chr01 | 2884476                 | CC                              | TT              | 1946721833               |
| SNP_P4_2443_2884477 | NC_021160.1    | Ca_kabuli_chr01 | 2884477                 | AA                              | GG              | 1946721836               |
| SNP_P4_2444_2884616 | NC_021160.1    | Ca_kabuli_chr01 | 2884616                 | AA                              | GG              | 1946721838               |
| SNP_P4_2445_2884626 | NC_021160.1    | Ca_kabuli_chr01 | 2884626                 | AA                              | TT              | 1946721840               |
| SNP_P4_2446_2884710 | NC_021160.1    | Ca_kabuli_chr01 | 2884710                 | GG                              | TT              | 1946721842               |
| SNP_P4_2447_2884713 | NC_021160.1    | Ca_kabuli_chr01 | 2884713                 | GG                              | TT              | 1946721844               |
| SNP_P4_2448_2884747 | NC_021160.1    | Ca_kabuli_chr01 | 2884747                 | AA                              | GG              | 1946721846               |
| SNP_P4_2449_2884748 | NC_021160.1    | Ca_kabuli_chr01 | 2884748                 | CC                              | GG              | 1946721848               |
| SNP_P4_2450_2884774 | NC_021160.1    | Ca_kabuli_chr01 | 2884774                 | AA                              | GG              | 1946721850               |
| SNP_P4_2451_2884775 | NC_021160.1    | Ca_kabuli_chr01 | 2884775                 | TT                              | GG              | 1946721852               |
| SNP_P4_2452_2884788 | NC_021160.1    | Ca_kabuli_chr01 | 2884788                 | TT                              | AA              | 1946721854               |
| SNP_P4_2454_2884895 | NC_021160.1    | Ca_kabuli_chr01 | 2884895                 | TT                              | CC              | 1946721856               |
| SNP_P4_2455_2884915 | NC_021160.1    | Ca_kabuli_chr01 | 2884915                 | AA                              | GG              | 1946721859               |
| SNP_P4_2456_2884918 | NC_021160.1    | Ca_kabuli_chr01 | 2884918                 | GG                              | AA              | 1946721861               |
| SNP_P4_2457_2884926 | NC_021160.1    | Ca_kabuli_chr01 | 2884926                 | TT                              | CC              | 1946721863               |
| SNP_P4_2458_2884997 | NC_021160.1    | Ca_kabuli_chr01 | 2884997                 | CC                              | TT              | 1946721865               |
| SNP_P4_2459_2885013 | NC_021160.1    | Ca_kabuli_chr01 | 2885013                 | GG                              | AA              | 1946721867               |
| SNP_P4_2460_2885111 | NC_021160.1    | Ca_kabuli_chr01 | 2885111                 | AA                              | GG              | 1946721869               |
| SNP_P4_2461_2885175 | NC_021160.1    | Ca_kabuli_chr01 | 2885175                 | TT                              | CC              | 1946721871               |
| SNP_P4_2462_2885242 | NC_021160.1    | Ca_kabuli_chr01 | 2885242                 | AA                              | CC              | 1946721873               |
| SNP_P4_2463_2885262 | NC_021160.1    | Ca_kabuli_chr01 | 2885262                 | TT                              | CC              | 1946721875               |
| SNP_P4_2464_2885302 | NC_021160.1    | Ca_kabuli_chr01 | 2885302                 | GG                              | CC              | 1946721877               |
| SNP_P4_2465_2885317 | NC_021160.1    | Ca_kabuli_chr01 | 2885317                 | TT                              | AA              | 1946721879               |
| SNP_P4_2466_2885321 | NC_021160.1    | Ca_kabuli_chr01 | 2885321                 | AA                              | CC              | 1946721881               |
| SNP_P4_2467_2885347 | NC_021160.1    | Ca_kabuli_chr01 | 2885347                 | GG                              | AA              | 1946721884               |
| SNP_P4_2469_2885395 | NC_021160.1    | Ca_kabuli_chr01 | 2885395                 | GG                              | AA              | 1946721886               |
| SNP_P4_2470_2885508 | NC_021160.1    | Ca_kabuli_chr01 | 2885508                 | TT                              | CC              | 1946721888               |
| SNP_P4_2471_2885525 | NC_021160.1    | Ca_kabuli_chr01 | 2885525                 | TT                              | CC              | 1946721890               |
| SNP_P4_2472_2885531 | NC_021160.1    | Ca_kabuli_chr01 | 2885531                 | CC                              | TT              | 1946721892               |
| SNP_P4_2473_2885580 | NC_021160.1    | Ca_kabuli_chr01 | 2885580                 | AA                              | GG              | 1946721894               |
| SNP_P4_2474_2885673 | NC_021160.1    | Ca_kabuli_chr01 | 2885673                 | CC                              | GG              | 1946721896               |
| SNP_P4_2475_2885849 | NC_021160.1    | Ca_kabuli_chr01 | 2885849                 | TT                              | CC              | 1946721898               |
| SNP_P4_2476_2885860 | NC_021160.1    | Ca_kabuli_chr01 | 2885860                 | AA                              | CC              | 1946721901               |
| SNP_P4_2477_2885882 | NC_021160.1    | Ca_kabuli_chr01 | 2885882                 | GG                              | AA              | 1946721903               |
| SNP_P4_2478_2885892 | NC_021160.1    | Ca_kabuli_chr01 | 2885892                 | TT                              | AA              | 1946721905               |
| SNP_P4_2479_2886289 | NC_021160.1    | Ca_kabuli_chr01 | 2886289                 | TT                              | AA              | 1946721907               |
| SNP_P4_2480_2886297 | NC_021160.1    | Ca_kabuli_chr01 | 2886297                 | TT                              | CC              | 1946721909               |
| SNP_P4_2481_2886555 | NC_021160.1    | Ca_kabuli_chr01 | 2886555                 | TT                              | CC              | 1946721912               |



| SNPs IDs            | Chromosome IDs | Chromosomes     | Physical positions (bp) | CDC Frontier (Reference genome) | (ILWC46 & LPNB) | NCBI SNPdb Accession IDs |
|---------------------|----------------|-----------------|-------------------------|---------------------------------|-----------------|--------------------------|
| SNP_P4_2483_2887020 | NC_021160.1    | Ca_kabuli_chr01 | 2887020                 | TT                              | CC              | 1946721914               |
| SNP_P4_2484_2887036 | NC_021160.1    | Ca_kabuli_chr01 | 2887036                 | TT                              | CC              | 1946721916               |
| SNP_P4_2485_2887058 | NC_021160.1    | Ca_kabuli_chr01 | 2887058                 | AA                              | GG              | 1946721918               |
| SNP_P4_2486_2887061 | NC_021160.1    | Ca_kabuli_chr01 | 2887061                 | AA                              | TT              | 1946721920               |
| SNP_P4_2487_2887067 | NC_021160.1    | Ca_kabuli_chr01 | 2887067                 | TT                              | CC              | 1946721924               |
| SNP_P4_2488_2887085 | NC_021160.1    | Ca_kabuli_chr01 | 2887085                 | CC                              | TT              | 1946721926               |
| SNP_P4_2489_2887091 | NC_021160.1    | Ca_kabuli_chr01 | 2887091                 | CC                              | TT              | 1946721928               |
| SNP_P4_2490_2887372 | NC_021160.1    | Ca_kabuli_chr01 | 2887372                 | CC                              | TT              | 1946721931               |
| SNP_P4_2491_2887723 | NC_021160.1    | Ca_kabuli_chr01 | 2887723                 | CC                              | TT              | 1946721933               |
| SNP_P4_2492_2888500 | NC_021160.1    | Ca_kabuli_chr01 | 2888500                 | GG                              | AA              | 1946721935               |
| SNP_P4_2493_2889572 | NC_021160.1    | Ca_kabuli_chr01 | 2889572                 | GG                              | CC              | 1946721937               |
| SNP_P4_2494_2890064 | NC_021160.1    | Ca_kabuli_chr01 | 2890064                 | AA                              | GG              | 1946721939               |
| SNP_P4_2495_2890067 | NC_021160.1    | Ca_kabuli_chr01 | 2890067                 | GG                              | AA              | 1946721941               |
| SNP_P4_2496_2890093 | NC_021160.1    | Ca_kabuli_chr01 | 2890093                 | AA                              | TT              | 1946721943               |
| SNP_P4_2498_2890131 | NC_021160.1    | Ca_kabuli_chr01 | 2890131                 | GG                              | AA              | 1946721945               |
| SNP_P4_2499_2891798 | NC_021160.1    | Ca_kabuli_chr01 | 2891798                 | GG                              | TT              | 1946721947               |
| SNP_P4_2500_2892192 | NC_021160.1    | Ca_kabuli_chr01 | 2892192                 | GG                              | TT              | 1946721949               |
| SNP_P4_2501_2892256 | NC_021160.1    | Ca_kabuli_chr01 | 2892256                 | AA                              | GG              | 1946721951               |
| SNP_P4_2502_2892561 | NC_021160.1    | Ca_kabuli_chr01 | 2892561                 | CC                              | AA              | 1946721953               |
| SNP_P4_2503_2896647 | NC_021160.1    | Ca_kabuli_chr01 | 2896647                 | GG                              | AA              | 1946721955               |
| SNP_P4_2504_2896714 | NC_021160.1    | Ca_kabuli_chr01 | 2896714                 | AA                              | GG              | 1946721957               |
| SNP_P4_2505_2897983 | NC_021160.1    | Ca_kabuli_chr01 | 2897983                 | GG                              | AA              | 1946721959               |
| SNP_P4_2506_2898055 | NC_021160.1    | Ca_kabuli_chr01 | 2898055                 | TT                              | CC              | 1946721961               |
| SNP_P4_2507_2898138 | NC_021160.1    | Ca_kabuli_chr01 | 2898138                 | TT                              | CC              | 1946721963               |
| SNP_P4_2509_2899524 | NC_021160.1    | Ca_kabuli_chr01 | 2899524                 | AA                              | GG              | 1946721965               |
| SNP_P4_2510_2899525 | NC_021160.1    | Ca_kabuli_chr01 | 2899525                 | CC                              | AA              | 1946721967               |
| SNP_P4_2511_2899817 | NC_021160.1    | Ca_kabuli_chr01 | 2899817                 | AA                              | GG              | 1946721969               |
| SNP_P4_2513_2899928 | NC_021160.1    | Ca_kabuli_chr01 | 2899928                 | CC                              | AA              | 1946721971               |
| SNP_P4_2514_2900124 | NC_021160.1    | Ca_kabuli_chr01 | 2900124                 | CC                              | TT              | 1946721973               |
| SNP_P4_2516_2900515 | NC_021160.1    | Ca_kabuli_chr01 | 2900515                 | TT                              | CC              | 1946721975               |
| SNP_P4_2518_2901094 | NC_021160.1    | Ca_kabuli_chr01 | 2901094                 | AA                              | GG              | 1946721977               |
| SNP_P4_2519_2901128 | NC_021160.1    | Ca_kabuli_chr01 | 2901128                 | GG                              | AA              | 1946721979               |
| SNP_P4_2521_2901730 | NC_021160.1    | Ca_kabuli_chr01 | 2901730                 | AA                              | GG              | 1946721981               |
| SNP_P4_2522_2901732 | NC_021160.1    | Ca_kabuli_chr01 | 2901732                 | CC                              | TT              | 1946721983               |
| SNP_P4_2523_2901979 | NC_021160.1    | Ca_kabuli_chr01 | 2901979                 | CC                              | GG              | 1946721984               |
| SNP_P4_2524_2902130 | NC_021160.1    | Ca_kabuli_chr01 | 2902130                 | TT                              | CC              | 1946721986               |
| SNP_P4_2525_2902262 | NC_021160.1    | Ca_kabuli_chr01 | 2902262                 | CC                              | TT              | 1946721988               |
| SNP_P4_2526_2903058 | NC_021160.1    | Ca_kabuli_chr01 | 2903058                 | TT                              | AA              | 1946721990               |
| SNP_P4_2527_2903059 | NC_021160.1    | Ca_kabuli_chr01 | 2903059                 | CC                              | AA              | 1946721992               |
| SNP_P4_2528_2903095 | NC_021160.1    | Ca_kabuli_chr01 | 2903095                 | GG                              | TT              | 1946721994               |
| SNP_P4_2529_2904078 | NC_021160.1    | Ca_kabuli_chr01 | 2904078                 | CC                              | AA              | 1946721996               |
| SNP_P4_2531_2904636 | NC_021160.1    | Ca_kabuli_chr01 | 2904636                 | CC                              | TT              | 1946721998               |

| SNPs IDs            | Chromosome IDs | Chromosomes     | Physical positions (bp) | CDC Frontier (Reference genome) | (ILWC46 & LPNB) | NCBI SNPdb Accession IDs |
|---------------------|----------------|-----------------|-------------------------|---------------------------------|-----------------|--------------------------|
| SNP_P4_2532_2904638 | NC_021160.1    | Ca_kabuli_chr01 | 2904638                 | AA                              | TT              | 1946722000               |
| SNP_P4_2534_2906045 | NC_021160.1    | Ca_kabuli_chr01 | 2906045                 | GG                              | CC              | 1946722002               |
| SNP_P4_2535_2910853 | NC_021160.1    | Ca_kabuli_chr01 | 2910853                 | CC                              | GG              | 1946722004               |
| SNP_P4_2536_2912807 | NC_021160.1    | Ca_kabuli_chr01 | 2912807                 | GG                              | CC              | 1946722006               |
| SNP_P4_2538_2915248 | NC_021160.1    | Ca_kabuli_chr01 | 2915248                 | CC                              | AA              | 1946722008               |
| SNP_P4_2539_2916491 | NC_021160.1    | Ca_kabuli_chr01 | 2916491                 | GG                              | AA              | 1946722010               |
| SNP_P4_2540_2917242 | NC_021160.1    | Ca_kabuli_chr01 | 2917242                 | GG                              | AA              | 1946722012               |
| SNP_P4_2542_2918834 | NC_021160.1    | Ca_kabuli_chr01 | 2918834                 | CC                              | AA              | 1946722014               |
| SNP_P4_2543_2918856 | NC_021160.1    | Ca_kabuli_chr01 | 2918856                 | CC                              | TT              | 1946722016               |
| SNP_P4_2544_2919032 | NC_021160.1    | Ca_kabuli_chr01 | 2919032                 | GG                              | CC              | 1946722018               |
| SNP_P4_2546_2920251 | NC_021160.1    | Ca_kabuli_chr01 | 2920251                 | CC                              | TT              | 1946722020               |
| SNP_P4_2547_2920346 | NC_021160.1    | Ca_kabuli_chr01 | 2920346                 | TT                              | GG              | 1946722022               |
| SNP_P4_2548_2920366 | NC_021160.1    | Ca_kabuli_chr01 | 2920366                 | GG                              | CC              | 1946722024               |
| SNP_P4_2550_2921694 | NC_021160.1    | Ca_kabuli_chr01 | 2921694                 | AA                              | TT              | 1946722026               |
| SNP_P4_2552_2921879 | NC_021160.1    | Ca_kabuli_chr01 | 2921879                 | AA                              | CC              | 1946722027               |
| SNP_P4_2553_2921885 | NC_021160.1    | Ca_kabuli_chr01 | 2921885                 | CC                              | TT              | 1946722029               |
| SNP_P4_2555_2921940 | NC_021160.1    | Ca_kabuli_chr01 | 2921940                 | CC                              | AA              | 1946722031               |
| SNP_P4_2556_2921949 | NC_021160.1    | Ca_kabuli_chr01 | 2921949                 | CC                              | TT              | 1946722033               |
| SNP_P4_2557_2921969 | NC_021160.1    | Ca_kabuli_chr01 | 2921969                 | GG                              | AA              | 1946722035               |
| SNP_P4_2558_2922717 | NC_021160.1    | Ca_kabuli_chr01 | 2922717                 | AA                              | GG              | 1946722037               |
| SNP_P4_2561_2923118 | NC_021160.1    | Ca_kabuli_chr01 | 2923118                 | TT                              | CC              | 1946722039               |
| SNP_P4_2563_2923287 | NC_021160.1    | Ca_kabuli_chr01 | 2923287                 | TT                              | AA              | 1946722041               |
| SNP_P4_2564_2923803 | NC_021160.1    | Ca_kabuli_chr01 | 2923803                 | TT                              | CC              | 1946722043               |
| SNP_P4_2565_2923805 | NC_021160.1    | Ca_kabuli_chr01 | 2923805                 | AA                              | GG              | 1946722045               |
| SNP_P4_2566_2923853 | NC_021160.1    | Ca_kabuli_chr01 | 2923853                 | CC                              | GG              | 1946722047               |
| SNP_P4_2569_2924034 | NC_021160.1    | Ca_kabuli_chr01 | 2924034                 | CC                              | AA              | 1946722049               |
| SNP_P4_2570_2924074 | NC_021160.1    | Ca_kabuli_chr01 | 2924074                 | CC                              | AA              | 1946722051               |
| SNP_P4_2572_2924591 | NC_021160.1    | Ca_kabuli_chr01 | 2924591                 | CC                              | AA              | 1946722053               |
| SNP_P4_2574_2924959 | NC_021160.1    | Ca_kabuli_chr01 | 2924959                 | CC                              | TT              | 1946722055               |
| SNP_P4_2575_2924987 | NC_021160.1    | Ca_kabuli_chr01 | 2924987                 | CC                              | TT              | 1946722057               |
| SNP_P4_2576_2926978 | NC_021160.1    | Ca_kabuli_chr01 | 2926978                 | GG                              | TT              | 1946722059               |
| SNP_P4_2577_2927445 | NC_021160.1    | Ca_kabuli_chr01 | 2927445                 | CC                              | TT              | 1946722061               |
| SNP_P4_2579_2927769 | NC_021160.1    | Ca_kabuli_chr01 | 2927769                 | AA                              | TT              | 1946722062               |
| SNP_P4_2580_2927770 | NC_021160.1    | Ca_kabuli_chr01 | 2927770                 | AA                              | TT              | 1946722064               |
| SNP_P4_2581_2927907 | NC_021160.1    | Ca_kabuli_chr01 | 2927907                 | AA                              | TT              | 1946722066               |
| SNP_P4_2583_2932738 | NC_021160.1    | Ca_kabuli_chr01 | 2932738                 | GG                              | TT              | 1946722068               |
| SNP_P4_2584_2933024 | NC_021160.1    | Ca_kabuli_chr01 | 2933024                 | TT                              | AA              | 1946722070               |
| SNP_P4_2585_2933054 | NC_021160.1    | Ca_kabuli_chr01 | 2933054                 | GG                              | AA              | 1946722072               |
| SNP_P4_2586_2933083 | NC_021160.1    | Ca_kabuli_chr01 | 2933083                 | TT                              | CC              | 1946722074               |
| SNP_P4_2588_2934079 | NC_021160.1    | Ca_kabuli_chr01 | 2934079                 | GG                              | AA              | 1946722076               |
| SNP_P4_2589_2934136 | NC_021160.1    | Ca_kabuli_chr01 | 2934136                 | TT                              | CC              | 1946722078               |
| SNP_P4_2591_2935376 | NC_021160.1    | Ca_kabuli_chr01 | 2935376                 | CC                              | TT              | 1946722080               |

| SNPs IDs            | Chromosome IDs | Chromosomes     | Physical positions (bp) | CDC Frontier (Reference genome) | (ILWC46 & LPNB) | NCBI SNPdb Accession IDs |
|---------------------|----------------|-----------------|-------------------------|---------------------------------|-----------------|--------------------------|
| SNP_P4_2592_2936230 | NC_021160.1    | Ca_kabuli_chr01 | 2936230                 | TT                              | CC              | 1946722082               |
| SNP_P4_2595_2939267 | NC_021160.1    | Ca_kabuli_chr01 | 2939267                 | AA                              | GG              | 1946722084               |
| SNP_P4_2596_2939292 | NC_021160.1    | Ca_kabuli_chr01 | 2939292                 | CC                              | TT              | 1946722086               |
| SNP_P4_2597_2939352 | NC_021160.1    | Ca_kabuli_chr01 | 2939352                 | CC                              | TT              | 1946722088               |
| SNP_P4_2598_2939673 | NC_021160.1    | Ca_kabuli_chr01 | 2939673                 | TT                              | AA              | 1946722090               |
| SNP_P4_2599_2940888 | NC_021160.1    | Ca_kabuli_chr01 | 2940888                 | GG                              | TT              | 1946722092               |
| SNP_P4_2600_2940909 | NC_021160.1    | Ca_kabuli_chr01 | 2940909                 | AA                              | GG              | 1946722094               |
| SNP_P4_2601_2941019 | NC_021160.1    | Ca_kabuli_chr01 | 2941019                 | TT                              | CC              | 1946722096               |
| SNP_P4_2602_2941070 | NC_021160.1    | Ca_kabuli_chr01 | 2941070                 | TT                              | CC              | 1946722098               |
| SNP_P4_2603_2941711 | NC_021160.1    | Ca_kabuli_chr01 | 2941711                 | CC                              | AA              | 1946722099               |
| SNP_P4_2604_2944579 | NC_021160.1    | Ca_kabuli_chr01 | 2944579                 | GG                              | AA              | 1946722101               |
| SNP_P4_2605_2944580 | NC_021160.1    | Ca_kabuli_chr01 | 2944580                 | TT                              | AA              | 1946722103               |
| SNP_P4_2607_2945278 | NC_021160.1    | Ca_kabuli_chr01 | 2945278                 | CC                              | TT              | 1946722105               |
| SNP_P4_2608_2945495 | NC_021160.1    | Ca_kabuli_chr01 | 2945495                 | TT                              | GG              | 1946722107               |
| SNP_P4_2609_2947568 | NC_021160.1    | Ca_kabuli_chr01 | 2947568                 | TT                              | AA              | 1946722109               |
| SNP_P4_2610_2949838 | NC_021160.1    | Ca_kabuli_chr01 | 2949838                 | TT                              | AA              | 1946722111               |
| SNP_P4_2611_2949849 | NC_021160.1    | Ca_kabuli_chr01 | 2949849                 | AA                              | TT              | 1946722113               |
| SNP_P4_2612_2949853 | NC_021160.1    | Ca_kabuli_chr01 | 2949853                 | TT                              | GG              | 1946722115               |
| SNP_P4_2613_2949915 | NC_021160.1    | Ca_kabuli_chr01 | 2949915                 | TT                              | CC              | 1946722117               |
| SNP_P4_2614_2951404 | NC_021160.1    | Ca_kabuli_chr01 | 2951404                 | CC                              | TT              | 1946722119               |
| SNP_P4_2615_2952435 | NC_021160.1    | Ca_kabuli_chr01 | 2952435                 | CC                              | TT              | 1946722121               |
| SNP_P4_2618_2954251 | NC_021160.1    | Ca_kabuli_chr01 | 2954251                 | CC                              | TT              | 1946722123               |
| SNP_P4_2619_2954254 | NC_021160.1    | Ca_kabuli_chr01 | 2954254                 | AA                              | GG              | 1946722125               |
| SNP_P4_2620_2954306 | NC_021160.1    | Ca_kabuli_chr01 | 2954306                 | AA                              | GG              | 1946722127               |
| SNP_P4_2621_2954747 | NC_021160.1    | Ca_kabuli_chr01 | 2954747                 | GG                              | AA              | 1946722129               |
| SNP_P4_2622_2955252 | NC_021160.1    | Ca_kabuli_chr01 | 2955252                 | CC                              | TT              | 1946722130               |
| SNP_P4_2623_2955268 | NC_021160.1    | Ca_kabuli_chr01 | 2955268                 | GG                              | TT              | 1946722132               |
| SNP_P4_2624_2955404 | NC_021160.1    | Ca_kabuli_chr01 | 2955404                 | TT                              | CC              | 1946722134               |
| SNP_P4_2625_2955442 | NC_021160.1    | Ca_kabuli_chr01 | 2955442                 | TT                              | AA              | 1946722136               |
| SNP_P4_2626_2955460 | NC_021160.1    | Ca_kabuli_chr01 | 2955460                 | TT                              | AA              | 1946722138               |
| SNP_P4_2627_2955464 | NC_021160.1    | Ca_kabuli_chr01 | 2955464                 | CC                              | TT              | 1946722140               |
| SNP_P4_2628_2955466 | NC_021160.1    | Ca_kabuli_chr01 | 2955466                 | GG                              | AA              | 1946722142               |
| SNP_P4_2629_2955479 | NC_021160.1    | Ca_kabuli_chr01 | 2955479                 | TT                              | CC              | 1946722144               |
| SNP_P4_2630_2955494 | NC_021160.1    | Ca_kabuli_chr01 | 2955494                 | TT                              | CC              | 1946722146               |
| SNP_P4_2631_2955509 | NC_021160.1    | Ca_kabuli_chr01 | 2955509                 | AA                              | GG              | 1946722148               |
| SNP_P4_2632_2955743 | NC_021160.1    | Ca_kabuli_chr01 | 2955743                 | AA                              | GG              | 1946722149               |
| SNP_P4_2634_2955783 | NC_021160.1    | Ca_kabuli_chr01 | 2955783                 | AA                              | GG              | 1946722151               |
| SNP_P4_2635_2955841 | NC_021160.1    | Ca_kabuli_chr01 | 2955841                 | CC                              | GG              | 1946722153               |
| SNP_P4_2637_2956638 | NC_021160.1    | Ca_kabuli_chr01 | 2956638                 | TT                              | GG              | 1946722155               |
| SNP_P4_2639_2956690 | NC_021160.1    | Ca_kabuli_chr01 | 2956690                 | CC                              | TT              | 1946722157               |
| SNP_P4_2640_2956697 | NC_021160.1    | Ca_kabuli_chr01 | 2956697                 | TT                              | CC              | 1946722159               |
| SNP_P4_2641_2957759 | NC_021160.1    | Ca_kabuli_chr01 | 2957759                 | AA                              | GG              | 1946722161               |

| SNPs IDs            | Chromosome IDs | Chromosomes     | Physical positions (bp) | CDC Frontier (Reference genome) | (ILWC46 & LPNB) | NCBI SNPdb Accession IDs |
|---------------------|----------------|-----------------|-------------------------|---------------------------------|-----------------|--------------------------|
| SNP_P4_2642_2957785 | NC_021160.1    | Ca_kabuli_chr01 | 2957785                 | AA                              | GG              | 1946722163               |
| SNP_P4_2643_2957892 | NC_021160.1    | Ca_kabuli_chr01 | 2957892                 | CC                              | AA              | 1946722165               |
| SNP_P4_2644_2957972 | NC_021160.1    | Ca_kabuli_chr01 | 2957972                 | GG                              | CC              | 1946722167               |
| SNP_P4_2646_2958296 | NC_021160.1    | Ca_kabuli_chr01 | 2958296                 | AA                              | GG              | 1946722173               |
| SNP_P4_2647_2958332 | NC_021160.1    | Ca_kabuli_chr01 | 2958332                 | TT                              | GG              | 1946722175               |
| SNP_P4_2648_2958385 | NC_021160.1    | Ca_kabuli_chr01 | 2958385                 | TT                              | AA              | 1946722177               |
| SNP_P4_2649_2958512 | NC_021160.1    | Ca_kabuli_chr01 | 2958512                 | GG                              | TT              | 1946722179               |
| SNP_P4_2650_2959656 | NC_021160.1    | Ca_kabuli_chr01 | 2959656                 | AA                              | GG              | 1946722181               |
| SNP_P4_2653_2960599 | NC_021160.1    | Ca_kabuli_chr01 | 2960599                 | GG                              | AA              | 1946722183               |
| SNP_P4_2655_2960673 | NC_021160.1    | Ca_kabuli_chr01 | 2960673                 | GG                              | AA              | 1946722185               |
| SNP_P4_2657_2961019 | NC_021160.1    | Ca_kabuli_chr01 | 2961019                 | TT                              | AA              | 1946722187               |
| SNP_P4_2659_2961534 | NC_021160.1    | Ca_kabuli_chr01 | 2961534                 | GG                              | AA              | 1946722189               |
| SNP_P4_2663_2963203 | NC_021160.1    | Ca_kabuli_chr01 | 2963203                 | GG                              | AA              | 1946722191               |
| SNP_P4_2665_2963250 | NC_021160.1    | Ca_kabuli_chr01 | 2963250                 | AA                              | TT              | 1946722193               |
| SNP_P4_2666_2963365 | NC_021160.1    | Ca_kabuli_chr01 | 2963365                 | GG                              | AA              | 1946722194               |
| SNP_P4_2667_2963377 | NC_021160.1    | Ca_kabuli_chr01 | 2963377                 | AA                              | TT              | 1946722196               |
| SNP_P4_2668_2963585 | NC_021160.1    | Ca_kabuli_chr01 | 2963585                 | TT                              | CC              | 1946722198               |
| SNP_P4_2669_2963589 | NC_021160.1    | Ca_kabuli_chr01 | 2963589                 | AA                              | GG              | 1946722200               |
| SNP_P4_2670_2963641 | NC_021160.1    | Ca_kabuli_chr01 | 2963641                 | TT                              | CC              | 1946722202               |
| SNP_P4_2671_2963642 | NC_021160.1    | Ca_kabuli_chr01 | 2963642                 | AA                              | CC              | 1946722204               |
| SNP_P4_2672_2964234 | NC_021160.1    | Ca_kabuli_chr01 | 2964234                 | AA                              | GG              | 1946722206               |
| SNP_P4_2673_2964842 | NC_021160.1    | Ca_kabuli_chr01 | 2964842                 | AA                              | GG              | 1946722208               |
| SNP_P4_2674_2966124 | NC_021160.1    | Ca_kabuli_chr01 | 2966124                 | AA                              | CC              | 1946722210               |
| SNP_P4_2675_2966143 | NC_021160.1    | Ca_kabuli_chr01 | 2966143                 | GG                              | AA              | 1946722212               |
| SNP_P4_2678_2966454 | NC_021160.1    | Ca_kabuli_chr01 | 2966454                 | TT                              | GG              | 1946722214               |
| SNP_P4_2679_2966508 | NC_021160.1    | Ca_kabuli_chr01 | 2966508                 | CC                              | TT              | 1946722216               |
| SNP_P4_2680_2966687 | NC_021160.1    | Ca_kabuli_chr01 | 2966687                 | CC                              | TT              | 1946722218               |
| SNP_P4_2681_2966721 | NC_021160.1    | Ca_kabuli_chr01 | 2966721                 | CC                              | GG              | 1946722221               |
| SNP_P4_2682_2966734 | NC_021160.1    | Ca_kabuli_chr01 | 2966734                 | TT                              | CC              | 1946722223               |
| SNP_P4_2683_2968107 | NC_021160.1    | Ca_kabuli_chr01 | 2968107                 | TT                              | CC              | 1946722225               |
| SNP_P4_2684_2969398 | NC_021160.1    | Ca_kabuli_chr01 | 2969398                 | AA                              | GG              | 1946722227               |
| SNP_P4_2685_2969410 | NC_021160.1    | Ca_kabuli_chr01 | 2969410                 | CC                              | TT              | 1946722229               |
| SNP_P4_2687_2969729 | NC_021160.1    | Ca_kabuli_chr01 | 2969729                 | GG                              | TT              | 1946722231               |
| SNP_P4_2688_2969917 | NC_021160.1    | Ca_kabuli_chr01 | 2969917                 | TT                              | CC              | 1946722233               |
| SNP_P4_2689_2970006 | NC_021160.1    | Ca_kabuli_chr01 | 2970006                 | AA                              | GG              | 1946722235               |
| SNP_P4_2692_2970507 | NC_021160.1    | Ca_kabuli_chr01 | 2970507                 | TT                              | CC              | 1946722237               |
| SNP_P4_2693_2971273 | NC_021160.1    | Ca_kabuli_chr01 | 2971273                 | AA                              | GG              | 1946722239               |
| SNP_P4_2694_2975203 | NC_021160.1    | Ca_kabuli_chr01 | 2975203                 | AA                              | GG              | 1946722240               |
| SNP_P4_2696_2975505 | NC_021160.1    | Ca_kabuli_chr01 | 2975505                 | TT                              | CC              | 1946722242               |
| SNP_P4_2697_2975509 | NC_021160.1    | Ca_kabuli_chr01 | 2975509                 | AA                              | TT              | 1946722244               |
| SNP_P4_2698_2975736 | NC_021160.1    | Ca_kabuli_chr01 | 2975736                 | AA                              | GG              | 1946722246               |
| SNP_P4_2699_2975976 | NC_021160.1    | Ca_kabuli_chr01 | 2975976                 | GG                              | AA              | 1946722248               |

| SNPs IDs            | Chromosome IDs | Chromosomes     | Physical positions (bp) | CDC Frontier (Reference genome) | (ILWC46 & LPNB) | NCBI SNPdb Accession IDs |
|---------------------|----------------|-----------------|-------------------------|---------------------------------|-----------------|--------------------------|
| SNP_P4_2700_2976587 | NC_021160.1    | Ca_kabuli_chr01 | 2976587                 | TT                              | AA              | 1946722250               |
| SNP_P4_2701_2976615 | NC_021160.1    | Ca_kabuli_chr01 | 2976615                 | GG                              | CC              | 1946722252               |
| SNP_P4_2702_2976891 | NC_021160.1    | Ca_kabuli_chr01 | 2976891                 | GG                              | AA              | 1946722254               |
| SNP_P4_2703_2976929 | NC_021160.1    | Ca_kabuli_chr01 | 2976929                 | CC                              | TT              | 1946722256               |
| SNP_P4_2704_2976932 | NC_021160.1    | Ca_kabuli_chr01 | 2976932                 | GG                              | AA              | 1946722258               |
| SNP_P4_2705_2977447 | NC_021160.1    | Ca_kabuli_chr01 | 2977447                 | TT                              | GG              | 1946722260               |
| SNP_P4_2708_2980826 | NC_021160.1    | Ca_kabuli_chr01 | 2980826                 | GG                              | CC              | 1946722262               |
| SNP_P4_2710_2988170 | NC_021160.1    | Ca_kabuli_chr01 | 2988170                 | TT                              | GG              | 1946722264               |
| SNP_P4_2711_2991103 | NC_021160.1    | Ca_kabuli_chr01 | 2991103                 | AA                              | GG              | 1946722266               |
| SNP_P4_2713_2993814 | NC_021160.1    | Ca_kabuli_chr01 | 2993814                 | AA                              | CC              | 1946722268               |
| SNP_P4_2714_2993830 | NC_021160.1    | Ca_kabuli_chr01 | 2993830                 | TT                              | AA              | 1946722270               |
| SNP_P4_2715_2994160 | NC_021160.1    | Ca_kabuli_chr01 | 2994160                 | TT                              | GG              | 1946722272               |
| SNP_P4_2718_2994472 | NC_021160.1    | Ca_kabuli_chr01 | 2994472                 | TT                              | AA              | 1946722274               |
| SNP_P4_2720_3000217 | NC_021160.1    | Ca_kabuli_chr01 | 3000217                 | CC                              | TT              | 1946722276               |
| SNP_P4_2721_3003156 | NC_021160.1    | Ca_kabuli_chr01 | 3003156                 | AA                              | GG              | 1946722278               |
| SNP_P4_2722_3004344 | NC_021160.1    | Ca_kabuli_chr01 | 3004344                 | AA                              | GG              | 1946722280               |
| SNP_P4_2723_3004720 | NC_021160.1    | Ca_kabuli_chr01 | 3004720                 | GG                              | CC              | 1946722282               |
| SNP_P4_2724_3010481 | NC_021160.1    | Ca_kabuli_chr01 | 3010481                 | GG                              | CC              | 1946722284               |
| SNP_P4_2725_3011791 | NC_021160.1    | Ca_kabuli_chr01 | 3011791                 | CC                              | TT              | 1946722286               |
| SNP_P4_2727_3014797 | NC_021160.1    | Ca_kabuli_chr01 | 3014797                 | GG                              | AA              | 1946722288               |
| SNP_P4_2728_3014850 | NC_021160.1    | Ca_kabuli_chr01 | 3014850                 | AA                              | GG              | 1946722290               |
| SNP_P4_2729_3014915 | NC_021160.1    | Ca_kabuli_chr01 | 3014915                 | AA                              | GG              | 1946722292               |
| SNP_P4_2730_3015632 | NC_021160.1    | Ca_kabuli_chr01 | 3015632                 | AA                              | GG              | 1946722296               |
| SNP_P4_2731_3016414 | NC_021160.1    | Ca_kabuli_chr01 | 3016414                 | AA                              | GG              | 1946722300               |
| SNP_P4_2732_3016434 | NC_021160.1    | Ca_kabuli_chr01 | 3016434                 | CC                              | TT              | 1946722302               |
| SNP_P4_2733_3016436 | NC_021160.1    | Ca_kabuli_chr01 | 3016436                 | CC                              | TT              | 1946722303               |
| SNP_P4_2734_3016616 | NC_021160.1    | Ca_kabuli_chr01 | 3016616                 | AA                              | TT              | 1946722305               |
| SNP_P4_2737_3016778 | NC_021160.1    | Ca_kabuli_chr01 | 3016778                 | AA                              | CC              | 1946722307               |
| SNP_P4_2738_3016922 | NC_021160.1    | Ca_kabuli_chr01 | 3016922                 | CC                              | AA              | 1946722309               |
| SNP_P4_2740_3017086 | NC_021160.1    | Ca_kabuli_chr01 | 3017086                 | TT                              | CC              | 1946722311               |
| SNP_P4_2741_3017638 | NC_021160.1    | Ca_kabuli_chr01 | 3017638                 | TT                              | CC              | 1946722313               |
| SNP_P4_2742_3017707 | NC_021160.1    | Ca_kabuli_chr01 | 3017707                 | TT                              | CC              | 1946722315               |
| SNP_P4_2744_3018850 | NC_021160.1    | Ca_kabuli_chr01 | 3018850                 | AA                              | GG              | 1946722317               |
| SNP_P4_2745_3019641 | NC_021160.1    | Ca_kabuli_chr01 | 3019641                 | AA                              | GG              | 1946722319               |
| SNP_P4_2746_3019661 | NC_021160.1    | Ca_kabuli_chr01 | 3019661                 | TT                              | CC              | 1946722321               |
| SNP_P4_2747_3019684 | NC_021160.1    | Ca_kabuli_chr01 | 3019684                 | CC                              | TT              | 1946722323               |
| SNP_P4_2748_3019717 | NC_021160.1    | Ca_kabuli_chr01 | 3019717                 | CC                              | TT              | 1946722325               |
| SNP_P4_2749_3019739 | NC_021160.1    | Ca_kabuli_chr01 | 3019739                 | AA                              | GG              | 1946722327               |
| SNP_P4_2752_3020410 | NC_021160.1    | Ca_kabuli_chr01 | 3020410                 | CC                              | TT              | 1946722329               |
| SNP_P4_2753_3020486 | NC_021160.1    | Ca_kabuli_chr01 | 3020486                 | AA                              | GG              | 1946722331               |
| SNP_P4_2754_3020504 | NC_021160.1    | Ca_kabuli_chr01 | 3020504                 | CC                              | AA              | 1946722334               |
| SNP_P4_2755_3020522 | NC_021160.1    | Ca_kabuli_chr01 | 3020522                 | GG                              | AA              | 1946722336               |

| SNPs IDs            | Chromosome IDs | Chromosomes     | Physical positions (bp) | CDC Frontier (Reference genome) | (ILWC46 & LPNB) | NCBI SNPdb Accession IDs |
|---------------------|----------------|-----------------|-------------------------|---------------------------------|-----------------|--------------------------|
| SNP_P4_2756_3020670 | NC_021160.1    | Ca_kabuli_chr01 | 3020670                 | GG                              | AA              | 1946722338               |
| SNP_P4_2757_3020686 | NC_021160.1    | Ca_kabuli_chr01 | 3020686                 | GG                              | TT              | 1946722340               |
| SNP_P4_2760_3020932 | NC_021160.1    | Ca_kabuli_chr01 | 3020932                 | TT                              | GG              | 1946722342               |
| SNP_P4_2761_3020972 | NC_021160.1    | Ca_kabuli_chr01 | 3020972                 | GG                              | AA              | 1946722344               |
| SNP_P4_2762_3020987 | NC_021160.1    | Ca_kabuli_chr01 | 3020987                 | GG                              | AA              | 1946722346               |
| SNP_P4_2763_3021023 | NC_021160.1    | Ca_kabuli_chr01 | 3021023                 | TT                              | AA              | 1946722348               |
| SNP_P4_2764_3021042 | NC_021160.1    | Ca_kabuli_chr01 | 3021042                 | TT                              | AA              | 1946722350               |
| SNP_P4_2765_3021078 | NC_021160.1    | Ca_kabuli_chr01 | 3021078                 | AA                              | TT              | 1946722352               |
| SNP_P4_2766_3021123 | NC_021160.1    | Ca_kabuli_chr01 | 3021123                 | AA                              | TT              | 1946722354               |
| SNP_P4_2767_3021262 | NC_021160.1    | Ca_kabuli_chr01 | 3021262                 | TT                              | CC              | 1946722356               |
| SNP_P4_2768_3021272 | NC_021160.1    | Ca_kabuli_chr01 | 3021272                 | TT                              | AA              | 1946722358               |
| SNP_P4_2769_3021291 | NC_021160.1    | Ca_kabuli_chr01 | 3021291                 | TT                              | CC              | 1946722360               |
| SNP_P4_2770_3021293 | NC_021160.1    | Ca_kabuli_chr01 | 3021293                 | AA                              | GG              | 1946722362               |
| SNP_P4_2771_3021368 | NC_021160.1    | Ca_kabuli_chr01 | 3021368                 | GG                              | TT              | 1946722364               |
| SNP_P4_2772_3021379 | NC_021160.1    | Ca_kabuli_chr01 | 3021379                 | GG                              | AA              | 1946722366               |
| SNP_P4_2773_3025557 | NC_021160.1    | Ca_kabuli_chr01 | 3025557                 | TT                              | CC              | 1946722367               |
| SNP_P4_2774_3025874 | NC_021160.1    | Ca_kabuli_chr01 | 3025874                 | GG                              | AA              | 1946722369               |
| SNP_P4_2776_3025909 | NC_021160.1    | Ca_kabuli_chr01 | 3025909                 | CC                              | TT              | 1946722371               |
| SNP_P4_2778_3026222 | NC_021160.1    | Ca_kabuli_chr01 | 3026222                 | TT                              | CC              | 1946722373               |
| SNP_P4_2779_3027043 | NC_021160.1    | Ca_kabuli_chr01 | 3027043                 | AA                              | TT              | 1946722375               |
| SNP_P4_2780_3027744 | NC_021160.1    | Ca_kabuli_chr01 | 3027744                 | AA                              | TT              | 1946722377               |
| SNP_P4_2781_3027918 | NC_021160.1    | Ca_kabuli_chr01 | 3027918                 | CC                              | AA              | 1946722379               |
| SNP_P4_2782_3029032 | NC_021160.1    | Ca_kabuli_chr01 | 3029032                 | AA                              | GG              | 1946722381               |
| SNP_P4_2783_3029067 | NC_021160.1    | Ca_kabuli_chr01 | 3029067                 | GG                              | AA              | 1946722383               |
| SNP_P4_2784_3030253 | NC_021160.1    | Ca_kabuli_chr01 | 3030253                 | GG                              | AA              | 1946722385               |
| SNP_P4_2786_3030457 | NC_021160.1    | Ca_kabuli_chr01 | 3030457                 | CC                              | GG              | 1946722387               |
| SNP_P4_2787_3030475 | NC_021160.1    | Ca_kabuli_chr01 | 3030475                 | TT                              | CC              | 1946722389               |
| SNP_P4_2788_3030576 | NC_021160.1    | Ca_kabuli_chr01 | 3030576                 | TT                              | CC              | 1946722391               |
| SNP_P4_2789_3030603 | NC_021160.1    | Ca_kabuli_chr01 | 3030603                 | TT                              | AA              | 1946722393               |
| SNP_P4_2790_3030787 | NC_021160.1    | Ca_kabuli_chr01 | 3030787                 | TT                              | AA              | 1946722395               |
| SNP_P4_2792_3032514 | NC_021160.1    | Ca_kabuli_chr01 | 3032514                 | TT                              | AA              | 1946722397               |
| SNP_P4_2793_3032630 | NC_021160.1    | Ca_kabuli_chr01 | 3032630                 | GG                              | TT              | 1946722399               |
| SNP_P4_2794_3032816 | NC_021160.1    | Ca_kabuli_chr01 | 3032816                 | AA                              | TT              | 1946722401               |
| SNP_P4_2795_3033060 | NC_021160.1    | Ca_kabuli_chr01 | 3033060                 | AA                              | GG              | 1946722403               |
| SNP_P4_2796_3033133 | NC_021160.1    | Ca_kabuli_chr01 | 3033133                 | TT                              | CC              | 1946722404               |
| SNP_P4_2797_3033190 | NC_021160.1    | Ca_kabuli_chr01 | 3033190                 | CC                              | TT              | 1946722406               |
| SNP_P4_2799_3033272 | NC_021160.1    | Ca_kabuli_chr01 | 3033272                 | TT                              | CC              | 1946722408               |
| SNP_P4_2800_3033294 | NC_021160.1    | Ca_kabuli_chr01 | 3033294                 | AA                              | TT              | 1946722410               |
| SNP_P4_2801_3033452 | NC_021160.1    | Ca_kabuli_chr01 | 3033452                 | TT                              | CC              | 1946722412               |
| SNP_P4_2802_3033459 | NC_021160.1    | Ca_kabuli_chr01 | 3033459                 | TT                              | GG              | 1946722414               |
| SNP_P4_2803_3033631 | NC_021160.1    | Ca_kabuli_chr01 | 3033631                 | CC                              | GG              | 1946722416               |
| SNP_P4_2804_3033788 | NC_021160.1    | Ca_kabuli_chr01 | 3033788                 | GG                              | AA              | 1946722418               |

| SNPs IDs            | Chromosome IDs | Chromosomes     | Physical positions (bp) | CDC Frontier (Reference genome) | (ILWC46 & LPNB) | NCBI SNPdb Accession IDs |
|---------------------|----------------|-----------------|-------------------------|---------------------------------|-----------------|--------------------------|
| SNP_P4_2805_3035060 | NC_021160.1    | Ca_kabuli_chr01 | 3035060                 | AA                              | TT              | 1946722420               |
| SNP_P4_2806_3035096 | NC_021160.1    | Ca_kabuli_chr01 | 3035096                 | CC                              | TT              | 1946722422               |
| SNP_P4_2807_3035394 | NC_021160.1    | Ca_kabuli_chr01 | 3035394                 | GG                              | TT              | 1946722424               |
| SNP_P4_2808_3036074 | NC_021160.1    | Ca_kabuli_chr01 | 3036074                 | TT                              | AA              | 1946722426               |
| SNP_P4_2811_3036587 | NC_021160.1    | Ca_kabuli_chr01 | 3036587                 | AA                              | CC              | 1946722428               |
| SNP_P4_2812_3036604 | NC_021160.1    | Ca_kabuli_chr01 | 3036604                 | TT                              | AA              | 1946722430               |
| SNP_P4_2814_3039133 | NC_021160.1    | Ca_kabuli_chr01 | 3039133                 | TT                              | CC              | 1946722432               |
| SNP_P4_2815_3039962 | NC_021160.1    | Ca_kabuli_chr01 | 3039962                 | CC                              | AA              | 1946722434               |
| SNP_P4_2817_3040181 | NC_021160.1    | Ca_kabuli_chr01 | 3040181                 | TT                              | CC              | 1946722436               |
| SNP_P4_2818_3041740 | NC_021160.1    | Ca_kabuli_chr01 | 3041740                 | CC                              | AA              | 1946722438               |
| SNP_P4_2820_3043442 | NC_021160.1    | Ca_kabuli_chr01 | 3043442                 | AA                              | GG              | 1946722440               |
| SNP_P4_2822_3044017 | NC_021160.1    | Ca_kabuli_chr01 | 3044017                 | AA                              | GG              | 1946722442               |
| SNP_P4_2823_3044241 | NC_021160.1    | Ca_kabuli_chr01 | 3044241                 | TT                              | CC              | 1946722444               |
| SNP_P4_2824_3044537 | NC_021160.1    | Ca_kabuli_chr01 | 3044537                 | AA                              | GG              | 1946722446               |
| SNP_P4_2825_3045645 | NC_021160.1    | Ca_kabuli_chr01 | 3045645                 | AA                              | TT              | 1946722448               |
| SNP_P4_2826_3046044 | NC_021160.1    | Ca_kabuli_chr01 | 3046044                 | AA                              | GG              | 1946722450               |
| SNP_P4_2827_3046963 | NC_021160.1    | Ca_kabuli_chr01 | 3046963                 | TT                              | AA              | 1946722452               |
| SNP_P4_2828_3047634 | NC_021160.1    | Ca_kabuli_chr01 | 3047634                 | GG                              | AA              | 1946722455               |
| SNP_P4_2829_3047946 | NC_021160.1    | Ca_kabuli_chr01 | 3047946                 | CC                              | GG              | 1946722457               |
| SNP_P4_2830_3048772 | NC_021160.1    | Ca_kabuli_chr01 | 3048772                 | CC                              | TT              | 1946722459               |
| SNP_P4_2831_3049728 | NC_021160.1    | Ca_kabuli_chr01 | 3049728                 | AA                              | TT              | 1946722461               |
| SNP_P4_2832_3050113 | NC_021160.1    | Ca_kabuli_chr01 | 3050113                 | AA                              | TT              | 1946722463               |
| SNP_P4_2833_3050568 | NC_021160.1    | Ca_kabuli_chr01 | 3050568                 | CC                              | TT              | 1946722466               |
| SNP_P4_2834_3050572 | NC_021160.1    | Ca_kabuli_chr01 | 3050572                 | AA                              | GG              | 1946722468               |
| SNP_P4_2835_3050959 | NC_021160.1    | Ca_kabuli_chr01 | 3050959                 | TT                              | AA              | 1946722470               |
| SNP_P4_2836_3050989 | NC_021160.1    | Ca_kabuli_chr01 | 3050989                 | CC                              | AA              | 1946722472               |
| SNP_P4_2837_3051082 | NC_021160.1    | Ca_kabuli_chr01 | 3051082                 | CC                              | TT              | 1946722474               |
| SNP_P4_2838_3051093 | NC_021160.1    | Ca_kabuli_chr01 | 3051093                 | AA                              | GG              | 1946722476               |
| SNP_P4_2839_3051133 | NC_021160.1    | Ca_kabuli_chr01 | 3051133                 | CC                              | GG              | 1946722478               |
| SNP_P4_2841_3051254 | NC_021160.1    | Ca_kabuli_chr01 | 3051254                 | TT                              | CC              | 1946722480               |
| SNP_P4_2842_3051276 | NC_021160.1    | Ca_kabuli_chr01 | 3051276                 | TT                              | GG              | 1946722482               |
| SNP_P4_2844_3051921 | NC_021160.1    | Ca_kabuli_chr01 | 3051921                 | AA                              | GG              | 1946722484               |
| SNP_P4_2845_3052360 | NC_021160.1    | Ca_kabuli_chr01 | 3052360                 | CC                              | GG              | 1946722486               |
| SNP_P4_2846_3053286 | NC_021160.1    | Ca_kabuli_chr01 | 3053286                 | TT                              | CC              | 1946722488               |
| SNP_P4_2847_3053287 | NC_021160.1    | Ca_kabuli_chr01 | 3053287                 | TT                              | CC              | 1946722490               |
| SNP_P4_2848_3053293 | NC_021160.1    | Ca_kabuli_chr01 | 3053293                 | AA                              | CC              | 1946722492               |
| SNP_P4_2849_3054361 | NC_021160.1    | Ca_kabuli_chr01 | 3054361                 | GG                              | TT              | 1946722494               |
| SNP_P4_2850_3054563 | NC_021160.1    | Ca_kabuli_chr01 | 3054563                 | CC                              | TT              | 1946722496               |
| SNP_P4_2851_3054695 | NC_021160.1    | Ca_kabuli_chr01 | 3054695                 | GG                              | AA              | 1946722498               |
| SNP_P4_2852_3054913 | NC_021160.1    | Ca_kabuli_chr01 | 3054913                 | AA                              | GG              | 1946722500               |
| SNP_P4_2853_3055105 | NC_021160.1    | Ca_kabuli_chr01 | 3055105                 | AA                              | GG              | 1946722502               |
| SNP_P4_2854_3061649 | NC_021160.1    | Ca_kabuli_chr01 | 3061649                 | CC                              | TT              | 1946722504               |

| SNPs IDs            | Chromosome IDs | Chromosomes     | Physical positions (bp) | CDC Frontier (Reference genome) | (ILWC46 & LPNB) | NCBI SNPdb Accession IDs |
|---------------------|----------------|-----------------|-------------------------|---------------------------------|-----------------|--------------------------|
| SNP_P4_2855_3061695 | NC_021160.1    | Ca_kabuli_chr01 | 3061695                 | TT                              | CC              | 1946722506               |
| SNP_P4_2856_3061717 | NC_021160.1    | Ca_kabuli_chr01 | 3061717                 | TT                              | CC              | 1946722508               |
| SNP_P4_2857_3062252 | NC_021160.1    | Ca_kabuli_chr01 | 3062252                 | CC                              | TT              | 1946722509               |
| SNP_P4_2858_3065073 | NC_021160.1    | Ca_kabuli_chr01 | 3065073                 | GG                              | AA              | 1946722511               |
| SNP_P4_2859_3065216 | NC_021160.1    | Ca_kabuli_chr01 | 3065216                 | CC                              | AA              | 1946722513               |
| SNP_P4_2861_3068464 | NC_021160.1    | Ca_kabuli_chr01 | 3068464                 | AA                              | GG              | 1946722515               |
| SNP_P4_2862_3069575 | NC_021160.1    | Ca_kabuli_chr01 | 3069575                 | CC                              | AA              | 1946722517               |
| SNP_P4_2863_3070231 | NC_021160.1    | Ca_kabuli_chr01 | 3070231                 | TT                              | CC              | 1946722519               |
| SNP_P4_2864_3071007 | NC_021160.1    | Ca_kabuli_chr01 | 3071007                 | GG                              | TT              | 1946722521               |
| SNP_P4_2865_3071056 | NC_021160.1    | Ca_kabuli_chr01 | 3071056                 | GG                              | AA              | 1946722523               |
| SNP_P4_2866_3071158 | NC_021160.1    | Ca_kabuli_chr01 | 3071158                 | GG                              | AA              | 1946722525               |
| SNP_P4_2867_3071269 | NC_021160.1    | Ca_kabuli_chr01 | 3071269                 | AA                              | GG              | 1946722527               |
| SNP_P4_2869_3071435 | NC_021160.1    | Ca_kabuli_chr01 | 3071435                 | CC                              | TT              | 1946722529               |
| SNP_P4_2870_3071702 | NC_021160.1    | Ca_kabuli_chr01 | 3071702                 | AA                              | CC              | 1946722531               |
| SNP_P4_2871_3072284 | NC_021160.1    | Ca_kabuli_chr01 | 3072284                 | GG                              | AA              | 1946722533               |
| SNP_P4_2872_3072499 | NC_021160.1    | Ca_kabuli_chr01 | 3072499                 | TT                              | CC              | 1946722535               |
| SNP_P4_2873_3072500 | NC_021160.1    | Ca_kabuli_chr01 | 3072500                 | CC                              | AA              | 1946722538               |
| SNP_P4_2874_3072560 | NC_021160.1    | Ca_kabuli_chr01 | 3072560                 | AA                              | GG              | 1946722540               |
| SNP_P4_2876_3074526 | NC_021160.1    | Ca_kabuli_chr01 | 3074526                 | TT                              | CC              | 1946722542               |
| SNP_P4_2877_3074596 | NC_021160.1    | Ca_kabuli_chr01 | 3074596                 | GG                              | AA              | 1946722544               |
| SNP_P4_2878_3074599 | NC_021160.1    | Ca_kabuli_chr01 | 3074599                 | GG                              | TT              | 1946722546               |
| SNP_P4_2880_3074863 | NC_021160.1    | Ca_kabuli_chr01 | 3074863                 | AA                              | TT              | 1946722549               |
| SNP_P4_2881_3074897 | NC_021160.1    | Ca_kabuli_chr01 | 3074897                 | GG                              | CC              | 1946722551               |
| SNP_P4_2882_3074967 | NC_021160.1    | Ca_kabuli_chr01 | 3074967                 | AA                              | GG              | 1946722553               |
| SNP_P4_2884_3075053 | NC_021160.1    | Ca_kabuli_chr01 | 3075053                 | TT                              | AA              | 1946722555               |
| SNP_P4_2885_3075073 | NC_021160.1    | Ca_kabuli_chr01 | 3075073                 | TT                              | AA              | 1946722557               |
| SNP_P4_2886_3075228 | NC_021160.1    | Ca_kabuli_chr01 | 3075228                 | CC                              | TT              | 1946722560               |
| SNP_P4_2888_3075363 | NC_021160.1    | Ca_kabuli_chr01 | 3075363                 | GG                              | AA              | 1946722562               |
| SNP_P4_2890_3077250 | NC_021160.1    | Ca_kabuli_chr01 | 3077250                 | TT                              | AA              | 1946722564               |
| SNP_P4_2891_3079217 | NC_021160.1    | Ca_kabuli_chr01 | 3079217                 | TT                              | AA              | 1946722566               |
| SNP_P4_2892_3079234 | NC_021160.1    | Ca_kabuli_chr01 | 3079234                 | TT                              | CC              | 1946722568               |
| SNP_P4_2893_3079281 | NC_021160.1    | Ca_kabuli_chr01 | 3079281                 | TT                              | CC              | 1946722570               |
| SNP_P4_2894_3079286 | NC_021160.1    | Ca_kabuli_chr01 | 3079286                 | TT                              | CC              | 1946722572               |
| SNP_P4_2895_3079294 | NC_021160.1    | Ca_kabuli_chr01 | 3079294                 | AA                              | GG              | 1946722574               |
| SNP_P4_2896_3079297 | NC_021160.1    | Ca_kabuli_chr01 | 3079297                 | TT                              | CC              | 1946722576               |
| SNP_P4_2897_3079319 | NC_021160.1    | Ca_kabuli_chr01 | 3079319                 | CC                              | TT              | 1946722578               |
| SNP_P4_2898_3079415 | NC_021160.1    | Ca_kabuli_chr01 | 3079415                 | AA                              | GG              | 1946722580               |
| SNP_P4_2899_3079459 | NC_021160.1    | Ca_kabuli_chr01 | 3079459                 | TT                              | CC              | 1946722582               |
| SNP_P4_2900_3079498 | NC_021160.1    | Ca_kabuli_chr01 | 3079498                 | AA                              | TT              | 1946722584               |
| SNP_P4_2902_3079566 | NC_021160.1    | Ca_kabuli_chr01 | 3079566                 | TT                              | CC              | 1946722586               |
| SNP_P4_2903_3079576 | NC_021160.1    | Ca_kabuli_chr01 | 3079576                 | TT                              | CC              | 1946722588               |
| SNP_P4_2904_3079608 | NC_021160.1    | Ca_kabuli_chr01 | 3079608                 | GG                              | AA              | 1946722590               |



| SNPs IDs            | Chromosome IDs | Chromosomes     | Physical positions (bp) | CDC Frontier (Reference genome) | (ILWC46 & LPNB) | NCBI SNPdb Accession IDs |
|---------------------|----------------|-----------------|-------------------------|---------------------------------|-----------------|--------------------------|
| SNP_P4_2905_3079917 | NC_021160.1    | Ca_kabuli_chr01 | 3079917                 | GG                              | AA              | 1946722592               |
| SNP_P4_2906_3079930 | NC_021160.1    | Ca_kabuli_chr01 | 3079930                 | CC                              | TT              | 1946722594               |
| SNP_P4_2907_3079936 | NC_021160.1    | Ca_kabuli_chr01 | 3079936                 | GG                              | AA              | 1946722596               |
| SNP_P4_2909_3081108 | NC_021160.1    | Ca_kabuli_chr01 | 3081108                 | TT                              | CC              | 1946722598               |
| SNP_P4_2910_3081112 | NC_021160.1    | Ca_kabuli_chr01 | 3081112                 | TT                              | CC              | 1946722600               |
| SNP_P4_2911_3081126 | NC_021160.1    | Ca_kabuli_chr01 | 3081126                 | GG                              | TT              | 1946722602               |
| SNP_P4_2912_3081130 | NC_021160.1    | Ca_kabuli_chr01 | 3081130                 | CC                              | TT              | 1946722604               |
| SNP_P4_2914_3081410 | NC_021160.1    | Ca_kabuli_chr01 | 3081410                 | CC                              | TT              | 1946722606               |
| SNP_P4_2915_3081430 | NC_021160.1    | Ca_kabuli_chr01 | 3081430                 | GG                              | AA              | 1946722608               |
| SNP_P4_2916_3082462 | NC_021160.1    | Ca_kabuli_chr01 | 3082462                 | GG                              | AA              | 1946722610               |
| SNP_P4_2917_3082811 | NC_021160.1    | Ca_kabuli_chr01 | 3082811                 | CC                              | TT              | 1946722611               |
| SNP_P4_2918_3082818 | NC_021160.1    | Ca_kabuli_chr01 | 3082818                 | GG                              | TT              | 1946722613               |
| SNP_P4_2919_3083192 | NC_021160.1    | Ca_kabuli_chr01 | 3083192                 | GG                              | CC              | 1946722615               |
| SNP_P4_2920_3084854 | NC_021160.1    | Ca_kabuli_chr01 | 3084854                 | CC                              | TT              | 1946722617               |
| SNP_P4_2921_3085875 | NC_021160.1    | Ca_kabuli_chr01 | 3085875                 | TT                              | CC              | 1946722619               |
| SNP_P4_2922_3086075 | NC_021160.1    | Ca_kabuli_chr01 | 3086075                 | CC                              | TT              | 1946722621               |
| SNP_P4_2923_3086079 | NC_021160.1    | Ca_kabuli_chr01 | 3086079                 | AA                              | GG              | 1946722623               |
| SNP_P4_2924_3086158 | NC_021160.1    | Ca_kabuli_chr01 | 3086158                 | AA                              | CC              | 1946722625               |
| SNP_P4_2925_3086160 | NC_021160.1    | Ca_kabuli_chr01 | 3086160                 | AA                              | TT              | 1946722627               |
| SNP_P4_2926_3086299 | NC_021160.1    | Ca_kabuli_chr01 | 3086299                 | AA                              | GG              | 1946722630               |
| SNP_P4_2927_3086641 | NC_021160.1    | Ca_kabuli_chr01 | 3086641                 | CC                              | TT              | 1946722632               |
| SNP_P4_2928_3087463 | NC_021160.1    | Ca_kabuli_chr01 | 3087463                 | AA                              | TT              | 1946722635               |
| SNP_P4_2930_3087820 | NC_021160.1    | Ca_kabuli_chr01 | 3087820                 | GG                              | TT              | 1946722637               |
| SNP_P4_2931_3087923 | NC_021160.1    | Ca_kabuli_chr01 | 3087923                 | TT                              | CC              | 1946722641               |
| SNP_P4_2932_3087939 | NC_021160.1    | Ca_kabuli_chr01 | 3087939                 | TT                              | AA              | 1946722643               |
| SNP_P4_2933_3087940 | NC_021160.1    | Ca_kabuli_chr01 | 3087940                 | GG                              | TT              | 1946722645               |
| SNP_P4_2936_3088582 | NC_021160.1    | Ca_kabuli_chr01 | 3088582                 | GG                              | AA              | 1946722647               |
| SNP_P4_2937_3088612 | NC_021160.1    | Ca_kabuli_chr01 | 3088612                 | TT                              | CC              | 1946722648               |
| SNP_P4_2938_3088669 | NC_021160.1    | Ca_kabuli_chr01 | 3088669                 | GG                              | CC              | 1946722650               |
| SNP_P4_2939_3088749 | NC_021160.1    | Ca_kabuli_chr01 | 3088749                 | TT                              | GG              | 1946722652               |
| SNP_P4_2943_3089496 | NC_021160.1    | Ca_kabuli_chr01 | 3089496                 | TT                              | AA              | 1946722654               |
| SNP_P4_2944_3089500 | NC_021160.1    | Ca_kabuli_chr01 | 3089500                 | CC                              | TT              | 1946722656               |
| SNP_P4_2945_3089524 | NC_021160.1    | Ca_kabuli_chr01 | 3089524                 | GG                              | AA              | 1946722658               |
| SNP_P4_2946_3089557 | NC_021160.1    | Ca_kabuli_chr01 | 3089557                 | AA                              | TT              | 1946722660               |
| SNP_P4_2947_3089583 | NC_021160.1    | Ca_kabuli_chr01 | 3089583                 | GG                              | AA              | 1946722662               |
| SNP_P4_2948_3089625 | NC_021160.1    | Ca_kabuli_chr01 | 3089625                 | AA                              | CC              | 1946722664               |
| SNP_P4_2949_3089688 | NC_021160.1    | Ca_kabuli_chr01 | 3089688                 | GG                              | AA              | 1946722666               |
| SNP_P4_2950_3089710 | NC_021160.1    | Ca_kabuli_chr01 | 3089710                 | TT                              | CC              | 1946722668               |
| SNP_P4_2951_3089712 | NC_021160.1    | Ca_kabuli_chr01 | 3089712                 | AA                              | GG              | 1946722670               |
| SNP_P4_2953_3091567 | NC_021160.1    | Ca_kabuli_chr01 | 3091567                 | TT                              | CC              | 1946722672               |
| SNP_P4_2955_3094131 | NC_021160.1    | Ca_kabuli_chr01 | 3094131                 | AA                              | CC              | 1946722674               |
| SNP_P4_2956_3094326 | NC_021160.1    | Ca_kabuli_chr01 | 3094326                 | AA                              | TT              | 1946722676               |

| SNPs IDs            | Chromosome IDs | Chromosomes     | Physical positions (bp) | CDC Frontier (Reference genome) | (ILWC46 & LPNB) | NCBI SNPdb Accession IDs |
|---------------------|----------------|-----------------|-------------------------|---------------------------------|-----------------|--------------------------|
| SNP_P4_2957_3094328 | NC_021160.1    | Ca_kabuli_chr01 | 3094328                 | AA                              | TT              | 1946722678               |
| SNP_P4_2958_3094329 | NC_021160.1    | Ca_kabuli_chr01 | 3094329                 | AA                              | TT              | 1946722680               |
| SNP_P4_2959_3094641 | NC_021160.1    | Ca_kabuli_chr01 | 3094641                 | AA                              | GG              | 1946722682               |
| SNP_P4_2960_3094799 | NC_021160.1    | Ca_kabuli_chr01 | 3094799                 | CC                              | TT              | 1946722684               |
| SNP_P4_2961_3094961 | NC_021160.1    | Ca_kabuli_chr01 | 3094961                 | CC                              | TT              | 1946722686               |
| SNP_P4_2963_3096277 | NC_021160.1    | Ca_kabuli_chr01 | 3096277                 | TT                              | CC              | 1946722688               |
| SNP_P4_2964_3096285 | NC_021160.1    | Ca_kabuli_chr01 | 3096285                 | GG                              | AA              | 1946722690               |
| SNP_P4_2965_3096379 | NC_021160.1    | Ca_kabuli_chr01 | 3096379                 | CC                              | AA              | 1946722692               |
| SNP_P4_2967_3098946 | NC_021160.1    | Ca_kabuli_chr01 | 3098946                 | AA                              | GG              | 1946722694               |
| SNP_P4_2968_3099385 | NC_021160.1    | Ca_kabuli_chr01 | 3099385                 | TT                              | CC              | 1946722696               |
| SNP_P4_2969_3100353 | NC_021160.1    | Ca_kabuli_chr01 | 3100353                 | AA                              | GG              | 1946722698               |
| SNP_P4_2970_3100382 | NC_021160.1    | Ca_kabuli_chr01 | 3100382                 | CC                              | GG              | 1946722700               |
| SNP_P4_2971_3101925 | NC_021160.1    | Ca_kabuli_chr01 | 3101925                 | CC                              | TT              | 1946722701               |
| SNP_P4_2973_3105831 | NC_021160.1    | Ca_kabuli_chr01 | 3105831                 | CC                              | TT              | 1946722703               |
| SNP_P4_2974_3107069 | NC_021160.1    | Ca_kabuli_chr01 | 3107069                 | GG                              | CC              | 1946722705               |
| SNP_P4_2975_3107186 | NC_021160.1    | Ca_kabuli_chr01 | 3107186                 | GG                              | CC              | 1946722707               |
| SNP_P4_2978_3108876 | NC_021160.1    | Ca_kabuli_chr01 | 3108876                 | CC                              | TT              | 1946722709               |
| SNP_P4_2979_3108963 | NC_021160.1    | Ca_kabuli_chr01 | 3108963                 | AA                              | GG              | 1946722712               |
| SNP_P4_2980_3109145 | NC_021160.1    | Ca_kabuli_chr01 | 3109145                 | CC                              | GG              | 1946722714               |
| SNP_P4_2982_3110927 | NC_021160.1    | Ca_kabuli_chr01 | 3110927                 | TT                              | CC              | 1946722716               |
| SNP_P4_2983_3112244 | NC_021160.1    | Ca_kabuli_chr01 | 3112244                 | TT                              | CC              | 1946722718               |
| SNP_P4_2984_3112309 | NC_021160.1    | Ca_kabuli_chr01 | 3112309                 | AA                              | CC              | 1946722720               |
| SNP_P4_2986_3112624 | NC_021160.1    | Ca_kabuli_chr01 | 3112624                 | TT                              | CC              | 1946722722               |
| SNP_P4_2988_3114303 | NC_021160.1    | Ca_kabuli_chr01 | 3114303                 | TT                              | CC              | 1946722724               |
| SNP_P4_2989_3115159 | NC_021160.1    | Ca_kabuli_chr01 | 3115159                 | CC                              | TT              | 1946722726               |
| SNP_P4_2990_3117181 | NC_021160.1    | Ca_kabuli_chr01 | 3117181                 | TT                              | CC              | 1946722728               |
| SNP_P4_2991_3117200 | NC_021160.1    | Ca_kabuli_chr01 | 3117200                 | TT                              | CC              | 1946722730               |
| SNP_P4_2992_3117261 | NC_021160.1    | Ca_kabuli_chr01 | 3117261                 | TT                              | CC              | 1946722732               |
| SNP_P4_2993_3118009 | NC_021160.1    | Ca_kabuli_chr01 | 3118009                 | CC                              | GG              | 1946722734               |
| SNP_P4_2994_3118668 | NC_021160.1    | Ca_kabuli_chr01 | 3118668                 | GG                              | AA              | 1946722736               |
| SNP_P4_2995_3118670 | NC_021160.1    | Ca_kabuli_chr01 | 3118670                 | TT                              | CC              | 1946722738               |
| SNP_P4_2996_3118681 | NC_021160.1    | Ca_kabuli_chr01 | 3118681                 | CC                              | TT              | 1946722740               |
| SNP_P4_2999_3119781 | NC_021160.1    | Ca_kabuli_chr01 | 3119781                 | CC                              | GG              | 1946722742               |
| SNP_P4_3000_3120092 | NC_021160.1    | Ca_kabuli_chr01 | 3120092                 | TT                              | CC              | 1946722744               |
| SNP_P4_3001_3120165 | NC_021160.1    | Ca_kabuli_chr01 | 3120165                 | CC                              | AA              | 1946722746               |
| SNP_P4_3002_3121567 | NC_021160.1    | Ca_kabuli_chr01 | 3121567                 | TT                              | CC              | 1946722748               |
| SNP_P4_3003_3123653 | NC_021160.1    | Ca_kabuli_chr01 | 3123653                 | TT                              | GG              | 1946722750               |
| SNP_P4_3004_3123997 | NC_021160.1    | Ca_kabuli_chr01 | 3123997                 | CC                              | GG              | 1946722752               |
| SNP_P4_3005_3124020 | NC_021160.1    | Ca_kabuli_chr01 | 3124020                 | GG                              | CC              | 1946722754               |
| SNP_P4_3006_3124065 | NC_021160.1    | Ca_kabuli_chr01 | 3124065                 | AA                              | GG              | 1946722756               |
| SNP_P4_3008_3124087 | NC_021160.1    | Ca_kabuli_chr01 | 3124087                 | TT                              | CC              | 1946722758               |
| SNP_P4_3009_3124193 | NC_021160.1    | Ca_kabuli_chr01 | 3124193                 | TT                              | GG              | 1946722760               |

| SNPs IDs            | Chromosome IDs | Chromosomes     | Physical positions (bp) | CDC Frontier (Reference genome) | (ILWC46 & LPNB) | NCBI SNPdb Accession IDs |
|---------------------|----------------|-----------------|-------------------------|---------------------------------|-----------------|--------------------------|
| SNP_P4_3010_3124284 | NC_021160.1    | Ca_kabuli_chr01 | 3124284                 | TT                              | CC              | 1946722762               |
| SNP_P4_3011_3124431 | NC_021160.1    | Ca_kabuli_chr01 | 3124431                 | GG                              | AA              | 1946722764               |
| SNP_P4_3013_3125080 | NC_021160.1    | Ca_kabuli_chr01 | 3125080                 | TT                              | CC              | 1946722766               |
| SNP_P4_3014_3125193 | NC_021160.1    | Ca_kabuli_chr01 | 3125193                 | GG                              | AA              | 1946722768               |
| SNP_P4_3015_3125194 | NC_021160.1    | Ca_kabuli_chr01 | 3125194                 | TT                              | CC              | 1946722770               |
| SNP_P4_3016_3125238 | NC_021160.1    | Ca_kabuli_chr01 | 3125238                 | TT                              | AA              | 1946722772               |
| SNP_P4_3017_3125259 | NC_021160.1    | Ca_kabuli_chr01 | 3125259                 | CC                              | TT              | 1946722774               |
| SNP_P4_3018_3125715 | NC_021160.1    | Ca_kabuli_chr01 | 3125715                 | AA                              | TT              | 1946722776               |
| SNP_P4_3019_3125890 | NC_021160.1    | Ca_kabuli_chr01 | 3125890                 | GG                              | AA              | 1946722778               |
| SNP_P4_3022_3126793 | NC_021160.1    | Ca_kabuli_chr01 | 3126793                 | CC                              | AA              | 1946722780               |
| SNP_P4_3024_3126831 | NC_021160.1    | Ca_kabuli_chr01 | 3126831                 | AA                              | GG              | 1946722782               |
| SNP_P4_3025_3126940 | NC_021160.1    | Ca_kabuli_chr01 | 3126940                 | TT                              | AA              | 1946722784               |
| SNP_P4_3026_3127002 | NC_021160.1    | Ca_kabuli_chr01 | 3127002                 | GG                              | TT              | 1946722786               |
| SNP_P4_3027_3127159 | NC_021160.1    | Ca_kabuli_chr01 | 3127159                 | GG                              | AA              | 1946722788               |
| SNP_P4_3028_3127608 | NC_021160.1    | Ca_kabuli_chr01 | 3127608                 | AA                              | GG              | 1946722790               |
| SNP_P4_3029_3127626 | NC_021160.1    | Ca_kabuli_chr01 | 3127626                 | CC                              | TT              | 1946722792               |
| SNP_P4_3030_3127627 | NC_021160.1    | Ca_kabuli_chr01 | 3127627                 | AA                              | TT              | 1946722794               |
| SNP_P4_3031_3127633 | NC_021160.1    | Ca_kabuli_chr01 | 3127633                 | TT                              | GG              | 1946722796               |
| SNP_P4_3032_3129433 | NC_021160.1    | Ca_kabuli_chr01 | 3129433                 | TT                              | CC              | 1946722798               |
| SNP_P4_3033_3129496 | NC_021160.1    | Ca_kabuli_chr01 | 3129496                 | TT                              | AA              | 1946722800               |
| SNP_P4_3034_3130134 | NC_021160.1    | Ca_kabuli_chr01 | 3130134                 | CC                              | TT              | 1946722802               |
| SNP_P4_3036_3130373 | NC_021160.1    | Ca_kabuli_chr01 | 3130373                 | TT                              | CC              | 1946722804               |
| SNP_P4_3037_3130382 | NC_021160.1    | Ca_kabuli_chr01 | 3130382                 | CC                              | TT              | 1946722807               |
| SNP_P4_3038_3130385 | NC_021160.1    | Ca_kabuli_chr01 | 3130385                 | AA                              | GG              | 1946722808               |
| SNP_P4_3039_3130386 | NC_021160.1    | Ca_kabuli_chr01 | 3130386                 | TT                              | CC              | 1946722809               |
| SNP_P4_3040_3130753 | NC_021160.1    | Ca_kabuli_chr01 | 3130753                 | CC                              | TT              | 1946722810               |
| SNP_P4_3041_3130769 | NC_021160.1    | Ca_kabuli_chr01 | 3130769                 | TT                              | AA              | 1946722811               |
| SNP_P4_3042_3130785 | NC_021160.1    | Ca_kabuli_chr01 | 3130785                 | CC                              | AA              | 1946722812               |
| SNP_P4_3043_3130786 | NC_021160.1    | Ca_kabuli_chr01 | 3130786                 | GG                              | AA              | 1946722813               |
| SNP_P4_3044_3130801 | NC_021160.1    | Ca_kabuli_chr01 | 3130801                 | GG                              | AA              | 1946722814               |
| SNP_P4_3045_3130815 | NC_021160.1    | Ca_kabuli_chr01 | 3130815                 | CC                              | TT              | 1946722815               |
| SNP_P4_3046_3130833 | NC_021160.1    | Ca_kabuli_chr01 | 3130833                 | TT                              | AA              | 1946722816               |
| SNP_P4_3047_3130845 | NC_021160.1    | Ca_kabuli_chr01 | 3130845                 | CC                              | TT              | 1946722817               |
| SNP_P4_3048_3131068 | NC_021160.1    | Ca_kabuli_chr01 | 3131068                 | CC                              | TT              | 1946722818               |
| SNP_P4_3050_3131351 | NC_021160.1    | Ca_kabuli_chr01 | 3131351                 | AA                              | TT              | 1946722819               |
| SNP_P4_3051_3131597 | NC_021160.1    | Ca_kabuli_chr01 | 3131597                 | AA                              | GG              | 1946722820               |
| SNP_P4_3052_3132376 | NC_021160.1    | Ca_kabuli_chr01 | 3132376                 | GG                              | AA              | 1946722821               |
| SNP_P4_3053_3132377 | NC_021160.1    | Ca_kabuli_chr01 | 3132377                 | AA                              | GG              | 1946722822               |
| SNP_P4_3054_3132386 | NC_021160.1    | Ca_kabuli_chr01 | 3132386                 | AA                              | CC              | 1946722823               |
| SNP_P4_3055_3132395 | NC_021160.1    | Ca_kabuli_chr01 | 3132395                 | CC                              | TT              | 1946722824               |
| SNP_P4_3056_3132425 | NC_021160.1    | Ca_kabuli_chr01 | 3132425                 | AA                              | GG              | 1946722825               |
| SNP_P4_3057_3132655 | NC_021160.1    | Ca_kabuli_chr01 | 3132655                 | CC                              | GG              | 1946722826               |

| SNPs IDs            | Chromosome IDs | Chromosomes     | Physical positions (bp) | CDC Frontier (Reference genome) | (ILWC46 & LPNB) | NCBI SNPdb Accession IDs |
|---------------------|----------------|-----------------|-------------------------|---------------------------------|-----------------|--------------------------|
| SNP_P4_3058_3132671 | NC_021160.1    | Ca_kabuli_chr01 | 3132671                 | GG                              | AA              | 1946722827               |
| SNP_P4_3059_3132922 | NC_021160.1    | Ca_kabuli_chr01 | 3132922                 | TT                              | AA              | 1946722828               |
| SNP_P4_3060_3133214 | NC_021160.1    | Ca_kabuli_chr01 | 3133214                 | GG                              | AA              | 1946722829               |
| SNP_P4_3061_3133394 | NC_021160.1    | Ca_kabuli_chr01 | 3133394                 | GG                              | TT              | 1946722830               |
| SNP_P4_3062_3133449 | NC_021160.1    | Ca_kabuli_chr01 | 3133449                 | AA                              | CC              | 1946722831               |
| SNP_P4_3063_3133458 | NC_021160.1    | Ca_kabuli_chr01 | 3133458                 | CC                              | TT              | 1946722832               |
| SNP_P4_3065_3133586 | NC_021160.1    | Ca_kabuli_chr01 | 3133586                 | GG                              | AA              | 1946722833               |
| SNP_P4_3066_3133763 | NC_021160.1    | Ca_kabuli_chr01 | 3133763                 | AA                              | GG              | 1946722834               |
| SNP_P4_3067_3133802 | NC_021160.1    | Ca_kabuli_chr01 | 3133802                 | AA                              | TT              | 1946722835               |
| SNP_P4_3068_3133832 | NC_021160.1    | Ca_kabuli_chr01 | 3133832                 | GG                              | TT              | 1946722836               |
| SNP_P4_3069_3134129 | NC_021160.1    | Ca_kabuli_chr01 | 3134129                 | AA                              | GG              | 1946722837               |
| SNP_P4_3070_3134158 | NC_021160.1    | Ca_kabuli_chr01 | 3134158                 | CC                              | AA              | 1946722838               |
| SNP_P4_3071_3134162 | NC_021160.1    | Ca_kabuli_chr01 | 3134162                 | TT                              | CC              | 1946722839               |
| SNP_P4_3072_3134455 | NC_021160.1    | Ca_kabuli_chr01 | 3134455                 | AA                              | CC              | 1946722841               |
| SNP_P4_3073_3135077 | NC_021160.1    | Ca_kabuli_chr01 | 3135077                 | AA                              | CC              | 1946722843               |
| SNP_P4_3075_3136229 | NC_021160.1    | Ca_kabuli_chr01 | 3136229                 | GG                              | TT              | 1946722845               |
| SNP_P4_3076_3136285 | NC_021160.1    | Ca_kabuli_chr01 | 3136285                 | CC                              | TT              | 1946722847               |
| SNP_P4_3077_3137051 | NC_021160.1    | Ca_kabuli_chr01 | 3137051                 | CC                              | TT              | 1946722849               |
| SNP_P4_3078_3137080 | NC_021160.1    | Ca_kabuli_chr01 | 3137080                 | TT                              | CC              | 1946722851               |
| SNP_P4_3080_3138483 | NC_021160.1    | Ca_kabuli_chr01 | 3138483                 | AA                              | GG              | 1946722853               |
| SNP_P4_3081_3138515 | NC_021160.1    | Ca_kabuli_chr01 | 3138515                 | AA                              | TT              | 1946722855               |
| SNP_P4_3082_3138522 | NC_021160.1    | Ca_kabuli_chr01 | 3138522                 | AA                              | TT              | 1946722857               |
| SNP_P4_3083_3138523 | NC_021160.1    | Ca_kabuli_chr01 | 3138523                 | AA                              | TT              | 1946722859               |
| SNP_P4_3084_3138524 | NC_021160.1    | Ca_kabuli_chr01 | 3138524                 | AA                              | TT              | 1946722861               |
| SNP_P4_3085_3138525 | NC_021160.1    | Ca_kabuli_chr01 | 3138525                 | AA                              | TT              | 1946722863               |
| SNP_P4_3086_3139111 | NC_021160.1    | Ca_kabuli_chr01 | 3139111                 | CC                              | TT              | 1946722865               |
| SNP_P4_3087_3139896 | NC_021160.1    | Ca_kabuli_chr01 | 3139896                 | GG                              | CC              | 1946722867               |
| SNP_P4_3088_3146365 | NC_021160.1    | Ca_kabuli_chr01 | 3146365                 | TT                              | CC              | 1946722869               |
| SNP_P4_3089_3147290 | NC_021160.1    | Ca_kabuli_chr01 | 3147290                 | AA                              | GG              | 1946722871               |
| SNP_P4_3091_3148684 | NC_021160.1    | Ca_kabuli_chr01 | 3148684                 | TT                              | CC              | 1946722873               |
| SNP_P4_3092_3148741 | NC_021160.1    | Ca_kabuli_chr01 | 3148741                 | CC                              | GG              | 1946722875               |
| SNP_P4_3095_3150293 | NC_021160.1    | Ca_kabuli_chr01 | 3150293                 | TT                              | CC              | 1946722877               |
| SNP_P4_3096_3151284 | NC_021160.1    | Ca_kabuli_chr01 | 3151284                 | TT                              | CC              | 1946722880               |
| SNP_P4_3097_3152105 | NC_021160.1    | Ca_kabuli_chr01 | 3152105                 | TT                              | GG              | 1946722882               |
| SNP_P4_3098_3152793 | NC_021160.1    | Ca_kabuli_chr01 | 3152793                 | GG                              | AA              | 1946722885               |
| SNP_P4_3099_3152811 | NC_021160.1    | Ca_kabuli_chr01 | 3152811                 | CC                              | AA              | 1946722887               |
| SNP_P4_3100_3153130 | NC_021160.1    | Ca_kabuli_chr01 | 3153130                 | AA                              | GG              | 1946722889               |
| SNP_P4_3101_3153144 | NC_021160.1    | Ca_kabuli_chr01 | 3153144                 | CC                              | TT              | 1946722891               |
| SNP_P4_3102_3153649 | NC_021160.1    | Ca_kabuli_chr01 | 3153649                 | AA                              | TT              | 1946722893               |
| SNP_P4_3103_3153776 | NC_021160.1    | Ca_kabuli_chr01 | 3153776                 | GG                              | TT              | 1946722895               |
| SNP_P4_3104_3153790 | NC_021160.1    | Ca_kabuli_chr01 | 3153790                 | AA                              | GG              | 1946722897               |
| SNP_P4_3105_3153791 | NC_021160.1    | Ca_kabuli_chr01 | 3153791                 | TT                              | GG              | 1946722899               |

| SNPs IDs            | Chromosome IDs | Chromosomes     | Physical positions (bp) | CDC Frontier (Reference genome) | (ILWC46 & LPNB) | NCBI SNPdb Accession IDs |
|---------------------|----------------|-----------------|-------------------------|---------------------------------|-----------------|--------------------------|
| SNP_P4_3106_3154072 | NC_021160.1    | Ca_kabuli_chr01 | 3154072                 | CC                              | AA              | 1946722901               |
| SNP_P4_3107_3155230 | NC_021160.1    | Ca_kabuli_chr01 | 3155230                 | AA                              | TT              | 1946722903               |
| SNP_P4_3108_3155451 | NC_021160.1    | Ca_kabuli_chr01 | 3155451                 | AA                              | TT              | 1946722905               |
| SNP_P4_3109_3155752 | NC_021160.1    | Ca_kabuli_chr01 | 3155752                 | AA                              | GG              | 1946722906               |
| SNP_P4_3110_3155833 | NC_021160.1    | Ca_kabuli_chr01 | 3155833                 | AA                              | TT              | 1946722908               |
| SNP_P4_3114_3157169 | NC_021160.1    | Ca_kabuli_chr01 | 3157169                 | AA                              | GG              | 1946722910               |
| SNP_P4_3115_3157226 | NC_021160.1    | Ca_kabuli_chr01 | 3157226                 | GG                              | AA              | 1946722912               |
| SNP_P4_3116_3161265 | NC_021160.1    | Ca_kabuli_chr01 | 3161265                 | CC                              | TT              | 1946722915               |
| SNP_P4_3117_3165674 | NC_021160.1    | Ca_kabuli_chr01 | 3165674                 | CC                              | AA              | 1946722917               |
| SNP_P4_3118_3188666 | NC_021160.1    | Ca_kabuli_chr01 | 3188666                 | TT                              | AA              | 1946722919               |
| SNP_P4_3119_3191585 | NC_021160.1    | Ca_kabuli_chr01 | 3191585                 | GG                              | AA              | 1946722921               |
| SNP_P4_3120_3195950 | NC_021160.1    | Ca_kabuli_chr01 | 3195950                 | AA                              | CC              | 1946722923               |
| SNP_P4_3121_3195956 | NC_021160.1    | Ca_kabuli_chr01 | 3195956                 | CC                              | TT              | 1946722925               |
| SNP_P4_3122_3195972 | NC_021160.1    | Ca_kabuli_chr01 | 3195972                 | AA                              | CC              | 1946722927               |
| SNP_P4_3123_3196100 | NC_021160.1    | Ca_kabuli_chr01 | 3196100                 | CC                              | TT              | 1946722929               |
| SNP_P4_3125_3225974 | NC_021160.1    | Ca_kabuli_chr01 | 3225974                 | GG                              | AA              | 1946722931               |
| SNP_P4_3126_3245354 | NC_021160.1    | Ca_kabuli_chr01 | 3245354                 | AA                              | TT              | 1946722933               |
| SNP_P4_3127_3255353 | NC_021160.1    | Ca_kabuli_chr01 | 3255353                 | CC                              | GG              | 1946722935               |
| SNP_P4_3128_3262562 | NC_021160.1    | Ca_kabuli_chr01 | 3262562                 | AA                              | TT              | 1946722937               |
| SNP_P4_3129_3274530 | NC_021160.1    | Ca_kabuli_chr01 | 3274530                 | AA                              | TT              | 1946722939               |
| SNP_P4_3130_3278252 | NC_021160.1    | Ca_kabuli_chr01 | 3278252                 | GG                              | TT              | 1946722941               |
| SNP_P4_3131_3284864 | NC_021160.1    | Ca_kabuli_chr01 | 3284864                 | CC                              | TT              | 1946722943               |
| SNP_P4_3134_3287628 | NC_021160.1    | Ca_kabuli_chr01 | 3287628                 | AA                              | CC              | 1946722945               |
| SNP_P4_3135_3287632 | NC_021160.1    | Ca_kabuli_chr01 | 3287632                 | AA                              | CC              | 1946722947               |
| SNP_P4_3136_3288484 | NC_021160.1    | Ca_kabuli_chr01 | 3288484                 | AA                              | CC              | 1946722949               |
| SNP_P4_3137_3289613 | NC_021160.1    | Ca_kabuli_chr01 | 3289613                 | AA                              | GG              | 1946722951               |
| SNP_P4_3138_3289615 | NC_021160.1    | Ca_kabuli_chr01 | 3289615                 | AA                              | TT              | 1946722953               |
| SNP_P4_3139_3289718 | NC_021160.1    | Ca_kabuli_chr01 | 3289718                 | TT                              | GG              | 1946722955               |
| SNP_P4_3140_3289719 | NC_021160.1    | Ca_kabuli_chr01 | 3289719                 | AA                              | TT              | 1946722957               |
| SNP_P4_3141_3314037 | NC_021160.1    | Ca_kabuli_chr01 | 3314037                 | CC                              | GG              | 1946722959               |
| SNP_P4_3142_3314071 | NC_021160.1    | Ca_kabuli_chr01 | 3314071                 | GG                              | TT              | 1946722961               |
| SNP_P4_3144_3322503 | NC_021160.1    | Ca_kabuli_chr01 | 3322503                 | TT                              | CC              | 1946722962               |
| SNP_P4_3145_3324490 | NC_021160.1    | Ca_kabuli_chr01 | 3324490                 | AA                              | GG              | 1946722963               |
| SNP_P4_3146_3325769 | NC_021160.1    | Ca_kabuli_chr01 | 3325769                 | AA                              | GG              | 1946722964               |
| SNP_P4_3148_3330608 | NC_021160.1    | Ca_kabuli_chr01 | 3330608                 | CC                              | TT              | 1946722965               |
| SNP_P4_3149_3330610 | NC_021160.1    | Ca_kabuli_chr01 | 3330610                 | AA                              | GG              | 1946722966               |
| SNP_P4_3150_3341148 | NC_021160.1    | Ca_kabuli_chr01 | 3341148                 | AA                              | GG              | 1946722967               |
| SNP_P4_3152_3398007 | NC_021160.1    | Ca_kabuli_chr01 | 3398007                 | CC                              | TT              | 1946722968               |
| SNP_P4_3153_3415176 | NC_021160.1    | Ca_kabuli_chr01 | 3415176                 | CC                              | AA              | 1946722969               |
| SNP_P4_3154_3417467 | NC_021160.1    | Ca_kabuli_chr01 | 3417467                 | AA                              | GG              | 1946722970               |
| SNP_P4_3155_3432187 | NC_021160.1    | Ca_kabuli_chr01 | 3432187                 | TT                              | CC              | 1946722971               |
| SNP_P4_3156_3456582 | NC_021160.1    | Ca_kabuli_chr01 | 3456582                 | TT                              | CC              | 1946722972               |

| SNPs IDs            | Chromosome IDs | Chromosomes     | Physical positions (bp) | CDC Frontier (Reference genome) | (ILWC46 & LPNB) | NCBI SNPdb Accession IDs |
|---------------------|----------------|-----------------|-------------------------|---------------------------------|-----------------|--------------------------|
| SNP_P4_3157_3456589 | NC_021160.1    | Ca_kabuli_chr01 | 3456589                 | TT                              | CC              | 1946722973               |
| SNP_P4_3158_3456621 | NC_021160.1    | Ca_kabuli_chr01 | 3456621                 | AA                              | GG              | 1946722974               |
| SNP_P4_3159_3456739 | NC_021160.1    | Ca_kabuli_chr01 | 3456739                 | TT                              | GG              | 1946722975               |
| SNP_P4_3160_3456794 | NC_021160.1    | Ca_kabuli_chr01 | 3456794                 | AA                              | TT              | 1946722976               |
| SNP_P4_3161_3456839 | NC_021160.1    | Ca_kabuli_chr01 | 3456839                 | GG                              | TT              | 1946722977               |
| SNP_P4_3162_3479780 | NC_021160.1    | Ca_kabuli_chr01 | 3479780                 | TT                              | AA              | 1946722978               |
| SNP_P4_3163_3512296 | NC_021160.1    | Ca_kabuli_chr01 | 3512296                 | CC                              | TT              | 1946722979               |
| SNP_P4_3164_3518124 | NC_021160.1    | Ca_kabuli_chr01 | 3518124                 | CC                              | AA              | 1946722980               |
| SNP_P4_3165_3518202 | NC_021160.1    | Ca_kabuli_chr01 | 3518202                 | AA                              | GG              | 1946722981               |
| SNP_P4_3166_3518631 | NC_021160.1    | Ca_kabuli_chr01 | 3518631                 | TT                              | CC              | 1946722982               |
| SNP_P4_3167_3518891 | NC_021160.1    | Ca_kabuli_chr01 | 3518891                 | GG                              | CC              | 1946722983               |
| SNP_P4_3168_3518927 | NC_021160.1    | Ca_kabuli_chr01 | 3518927                 | TT                              | GG              | 1946722984               |
| SNP_P4_3170_3600648 | NC_021160.1    | Ca_kabuli_chr01 | 3600648                 | AA                              | TT              | 1946722985               |
| SNP_P4_3171_3629038 | NC_021160.1    | Ca_kabuli_chr01 | 3629038                 | AA                              | GG              | 1946722986               |
| SNP_P4_3173_3640090 | NC_021160.1    | Ca_kabuli_chr01 | 3640090                 | TT                              | CC              | 1946722987               |
| SNP_P4_3176_3678428 | NC_021160.1    | Ca_kabuli_chr01 | 3678428                 | AA                              | TT              | 1946722988               |
| SNP_P4_3177_3678430 | NC_021160.1    | Ca_kabuli_chr01 | 3678430                 | TT                              | AA              | 1946722989               |
| SNP_P4_3178_3695299 | NC_021160.1    | Ca_kabuli_chr01 | 3695299                 | AA                              | GG              | 1946722990               |
| SNP_P4_3180_3713673 | NC_021160.1    | Ca_kabuli_chr01 | 3713673                 | TT                              | CC              | 1946722991               |
| SNP_P4_3182_3722777 | NC_021160.1    | Ca_kabuli_chr01 | 3722777                 | AA                              | GG              | 1946722992               |
| SNP_P4_3183_3757944 | NC_021160.1    | Ca_kabuli_chr01 | 3757944                 | GG                              | AA              | 1946722993               |
| SNP_P4_3184_3758069 | NC_021160.1    | Ca_kabuli_chr01 | 3758069                 | CC                              | TT              | 1946722994               |
| SNP_P4_3185_3758323 | NC_021160.1    | Ca_kabuli_chr01 | 3758323                 | GG                              | AA              | 1946722995               |
| SNP_P4_3186_3758370 | NC_021160.1    | Ca_kabuli_chr01 | 3758370                 | GG                              | TT              | 1946722996               |
| SNP_P4_3188_3767882 | NC_021160.1    | Ca_kabuli_chr01 | 3767882                 | TT                              | CC              | 1946722997               |
| SNP_P4_3189_3769569 | NC_021160.1    | Ca_kabuli_chr01 | 3769569                 | GG                              | AA              | 1946722998               |
| SNP_P4_3190_3782047 | NC_021160.1    | Ca_kabuli_chr01 | 3782047                 | GG                              | TT              | 1946722999               |
| SNP_P4_3191_3783144 | NC_021160.1    | Ca_kabuli_chr01 | 3783144                 | AA                              | CC              | 1946723000               |
| SNP_P4_3192_3783483 | NC_021160.1    | Ca_kabuli_chr01 | 3783483                 | TT                              | AA              | 1946723001               |
| SNP_P4_3193_3783527 | NC_021160.1    | Ca_kabuli_chr01 | 3783527                 | TT                              | AA              | 1946723002               |
| SNP_P4_3194_3783528 | NC_021160.1    | Ca_kabuli_chr01 | 3783528                 | TT                              | AA              | 1946723003               |
| SNP_P4_3196_3783646 | NC_021160.1    | Ca_kabuli_chr01 | 3783646                 | GG                              | TT              | 1946723004               |
| SNP_P4_3198_3790862 | NC_021160.1    | Ca_kabuli_chr01 | 3790862                 | GG                              | AA              | 1946723005               |
| SNP_P4_3199_3809258 | NC_021160.1    | Ca_kabuli_chr01 | 3809258                 | TT                              | CC              | 1946723006               |
| SNP_P4_3200_3821115 | NC_021160.1    | Ca_kabuli_chr01 | 3821115                 | TT                              | GG              | 1946723007               |
| SNP_P4_3202_3823993 | NC_021160.1    | Ca_kabuli_chr01 | 3823993                 | TT                              | CC              | 1946723008               |
| SNP_P4_3203_3836804 | NC_021160.1    | Ca_kabuli_chr01 | 3836804                 | TT                              | AA              | 1946723009               |
| SNP_P4_3204_3848296 | NC_021160.1    | Ca_kabuli_chr01 | 3848296                 | AA                              | GG              | 1946723010               |
| SNP_P4_3205_3856206 | NC_021160.1    | Ca_kabuli_chr01 | 3856206                 | TT                              | CC              | 1946723011               |
| SNP_P4_3206_3865732 | NC_021160.1    | Ca_kabuli_chr01 | 3865732                 | TT                              | GG              | 1946723012               |
| SNP_P4_3207_3886218 | NC_021160.1    | Ca_kabuli_chr01 | 3886218                 | AA                              | TT              | 1946723013               |
| SNP_P4_3208_3929921 | NC_021160.1    | Ca_kabuli_chr01 | 3929921                 | AA                              | TT              | 1946723014               |

| SNPs IDs            | Chromosome IDs | Chromosomes     | Physical positions (bp) | CDC Frontier (Reference genome) | (ILWC46 & LPNB) | NCBI SNPdb Accession IDs |
|---------------------|----------------|-----------------|-------------------------|---------------------------------|-----------------|--------------------------|
| SNP_P4_3209_3936152 | NC_021160.1    | Ca_kabuli_chr01 | 3936152                 | TT                              | CC              | 1946723015               |
| SNP_P4_3210_3958762 | NC_021160.1    | Ca_kabuli_chr01 | 3958762                 | CC                              | TT              | 1946723016               |
| SNP_P4_3212_4053445 | NC_021160.1    | Ca_kabuli_chr01 | 4053445                 | CC                              | TT              | 1946723017               |
| SNP_P4_3213_4063179 | NC_021160.1    | Ca_kabuli_chr01 | 4063179                 | TT                              | AA              | 1946723018               |
| SNP_P4_3214_4090400 | NC_021160.1    | Ca_kabuli_chr01 | 4090400                 | AA                              | TT              | 1946723019               |
| SNP_P4_3215_4142618 | NC_021160.1    | Ca_kabuli_chr01 | 4142618                 | TT                              | AA              | 1946723020               |
| SNP_P4_3217_4153720 | NC_021160.1    | Ca_kabuli_chr01 | 4153720                 | GG                              | AA              | 1946723021               |
| SNP_P4_3218_4157786 | NC_021160.1    | Ca_kabuli_chr01 | 4157786                 | TT                              | CC              | 1946723022               |
| SNP_P4_3219_4158790 | NC_021160.1    | Ca_kabuli_chr01 | 4158790                 | TT                              | GG              | 1946723023               |
| SNP_P4_3220_4159049 | NC_021160.1    | Ca_kabuli_chr01 | 4159049                 | GG                              | TT              | 1946723024               |
| SNP_P4_3221_4159068 | NC_021160.1    | Ca_kabuli_chr01 | 4159068                 | AA                              | GG              | 1946723025               |
| SNP_P4_3222_4159378 | NC_021160.1    | Ca_kabuli_chr01 | 4159378                 | TT                              | GG              | 1946723026               |
| SNP_P4_3223_4159731 | NC_021160.1    | Ca_kabuli_chr01 | 4159731                 | AA                              | GG              | 1946723027               |
| SNP_P4_3224_4160339 | NC_021160.1    | Ca_kabuli_chr01 | 4160339                 | GG                              | AA              | 1946723028               |
| SNP_P4_3225_4160959 | NC_021160.1    | Ca_kabuli_chr01 | 4160959                 | AA                              | TT              | 1946723029               |
| SNP_P4_3226_4161012 | NC_021160.1    | Ca_kabuli_chr01 | 4161012                 | TT                              | CC              | 1946723030               |
| SNP_P4_3227_4165848 | NC_021160.1    | Ca_kabuli_chr01 | 4165848                 | TT                              | CC              | 1946723031               |
| SNP_P4_3228_4168102 | NC_021160.1    | Ca_kabuli_chr01 | 4168102                 | AA                              | CC              | 1946723032               |
| SNP_P4_3229_4169793 | NC_021160.1    | Ca_kabuli_chr01 | 4169793                 | TT                              | CC              | 1946723033               |
| SNP_P4_3231_4173998 | NC_021160.1    | Ca_kabuli_chr01 | 4173998                 | AA                              | CC              | 1946723035               |
| SNP_P4_3232_4176358 | NC_021160.1    | Ca_kabuli_chr01 | 4176358                 | TT                              | CC              | 1946723038               |
| SNP_P4_3235_4229220 | NC_021160.1    | Ca_kabuli_chr01 | 4229220                 | CC                              | TT              | 1946723040               |
| SNP_P4_3236_4229231 | NC_021160.1    | Ca_kabuli_chr01 | 4229231                 | CC                              | TT              | 1946723042               |
| SNP_P4_3237_4229411 | NC_021160.1    | Ca_kabuli_chr01 | 4229411                 | GG                              | AA              | 1946723044               |
| SNP_P4_3238_4230132 | NC_021160.1    | Ca_kabuli_chr01 | 4230132                 | GG                              | TT              | 1946723046               |
| SNP_P4_3239_4234957 | NC_021160.1    | Ca_kabuli_chr01 | 4234957                 | TT                              | CC              | 1946723048               |
| SNP_P4_3240_4237189 | NC_021160.1    | Ca_kabuli_chr01 | 4237189                 | TT                              | CC              | 1946723050               |
| SNP_P4_3241_4237650 | NC_021160.1    | Ca_kabuli_chr01 | 4237650                 | TT                              | AA              | 1946723052               |
| SNP_P4_3242_4237736 | NC_021160.1    | Ca_kabuli_chr01 | 4237736                 | CC                              | TT              | 1946723054               |
| SNP_P4_3243_4239971 | NC_021160.1    | Ca_kabuli_chr01 | 4239971                 | GG                              | TT              | 1946723056               |
| SNP_P4_3244_4239994 | NC_021160.1    | Ca_kabuli_chr01 | 4239994                 | AA                              | GG              | 1946723059               |
| SNP_P4_3245_4240044 | NC_021160.1    | Ca_kabuli_chr01 | 4240044                 | AA                              | GG              | 1946723061               |
| SNP_P4_3246_4240196 | NC_021160.1    | Ca_kabuli_chr01 | 4240196                 | CC                              | TT              | 1946723063               |
| SNP_P4_3247_4240236 | NC_021160.1    | Ca_kabuli_chr01 | 4240236                 | GG                              | AA              | 1946723065               |
| SNP_P4_3248_4240259 | NC_021160.1    | Ca_kabuli_chr01 | 4240259                 | TT                              | CC              | 1946723067               |
| SNP_P4_3249_4240299 | NC_021160.1    | Ca_kabuli_chr01 | 4240299                 | TT                              | CC              | 1946723069               |
| SNP_P4_3250_4240691 | NC_021160.1    | Ca_kabuli_chr01 | 4240691                 | CC                              | GG              | 1946723071               |
| SNP_P4_3251_4240695 | NC_021160.1    | Ca_kabuli_chr01 | 4240695                 | CC                              | TT              | 1946723073               |
| SNP_P4_3252_4240796 | NC_021160.1    | Ca_kabuli_chr01 | 4240796                 | TT                              | CC              | 1946723075               |
| SNP_P4_3253_4240797 | NC_021160.1    | Ca_kabuli_chr01 | 4240797                 | CC                              | TT              | 1946723077               |
| SNP_P4_3254_4240800 | NC_021160.1    | Ca_kabuli_chr01 | 4240800                 | GG                              | AA              | 1946723079               |
| SNP_P4_3255_4240850 | NC_021160.1    | Ca_kabuli_chr01 | 4240850                 | CC                              | GG              | 1946723081               |

| SNPs IDs            | Chromosome IDs | Chromosomes     | Physical positions (bp) | CDC Frontier (Reference genome) | (ILWC46 & LPNB) | NCBI SNPdb Accession IDs |
|---------------------|----------------|-----------------|-------------------------|---------------------------------|-----------------|--------------------------|
| SNP_P4_3256_4240859 | NC_021160.1    | Ca_kabuli_chr01 | 4240859                 | GG                              | AA              | 1946723083               |
| SNP_P4_3257_4240891 | NC_021160.1    | Ca_kabuli_chr01 | 4240891                 | TT                              | CC              | 1946723085               |
| SNP_P4_3258_4240976 | NC_021160.1    | Ca_kabuli_chr01 | 4240976                 | TT                              | CC              | 1946723087               |
| SNP_P4_3260_4241084 | NC_021160.1    | Ca_kabuli_chr01 | 4241084                 | GG                              | AA              | 1946723089               |
| SNP_P4_3261_4241099 | NC_021160.1    | Ca_kabuli_chr01 | 4241099                 | AA                              | GG              | 1946723092               |
| SNP_P4_3262_4241155 | NC_021160.1    | Ca_kabuli_chr01 | 4241155                 | GG                              | TT              | 1946723094               |
| SNP_P4_3263_4241204 | NC_021160.1    | Ca_kabuli_chr01 | 4241204                 | TT                              | CC              | 1946723096               |
| SNP_P4_3264_4241334 | NC_021160.1    | Ca_kabuli_chr01 | 4241334                 | CC                              | TT              | 1946723099               |
| SNP_P4_3265_4250973 | NC_021160.1    | Ca_kabuli_chr01 | 4250973                 | TT                              | CC              | 1946723101               |
| SNP_P4_3266_4252708 | NC_021160.1    | Ca_kabuli_chr01 | 4252708                 | AA                              | CC              | 1946723103               |
| SNP_P4_3267_4253345 | NC_021160.1    | Ca_kabuli_chr01 | 4253345                 | GG                              | AA              | 1946723105               |
| SNP_P4_3268_4253989 | NC_021160.1    | Ca_kabuli_chr01 | 4253989                 | GG                              | AA              | 1946723107               |
| SNP_P4_3269_4257891 | NC_021160.1    | Ca_kabuli_chr01 | 4257891                 | AA                              | GG              | 1946723109               |
| SNP_P4_3271_4261651 | NC_021160.1    | Ca_kabuli_chr01 | 4261651                 | CC                              | TT              | 1946723111               |
| SNP_P4_3272_4263352 | NC_021160.1    | Ca_kabuli_chr01 | 4263352                 | GG                              | AA              | 1946723113               |
| SNP_P4_3273_4266140 | NC_021160.1    | Ca_kabuli_chr01 | 4266140                 | TT                              | AA              | 1946723115               |
| SNP_P4_3274_4277958 | NC_021160.1    | Ca_kabuli_chr01 | 4277958                 | AA                              | GG              | 1946723117               |
| SNP_P4_3275_4280322 | NC_021160.1    | Ca_kabuli_chr01 | 4280322                 | CC                              | TT              | 1946723119               |
| SNP_P4_3276_4287878 | NC_021160.1    | Ca_kabuli_chr01 | 4287878                 | CC                              | GG              | 1946723121               |
| SNP_P4_3277_4288598 | NC_021160.1    | Ca_kabuli_chr01 | 4288598                 | CC                              | AA              | 1946723123               |
| SNP_P4_3279_4314640 | NC_021160.1    | Ca_kabuli_chr01 | 4314640                 | TT                              | CC              | 1946723125               |
| SNP_P4_3281_4329178 | NC_021160.1    | Ca_kabuli_chr01 | 4329178                 | TT                              | GG              | 1946723127               |
| SNP_P4_3282_4356018 | NC_021160.1    | Ca_kabuli_chr01 | 4356018                 | GG                              | CC              | 1946723129               |
| SNP_P4_3283_4370230 | NC_021160.1    | Ca_kabuli_chr01 | 4370230                 | CC                              | TT              | 1946723131               |
| SNP_P4_3284_4387548 | NC_021160.1    | Ca_kabuli_chr01 | 4387548                 | TT                              | GG              | 1946723133               |
| SNP_P4_3285_4387553 | NC_021160.1    | Ca_kabuli_chr01 | 4387553                 | CC                              | GG              | 1946723135               |
| SNP_P4_3286_4395430 | NC_021160.1    | Ca_kabuli_chr01 | 4395430                 | GG                              | CC              | 1946723137               |
| SNP_P4_3287_4412721 | NC_021160.1    | Ca_kabuli_chr01 | 4412721                 | TT                              | GG              | 1946723139               |
| SNP_P4_3288_4412742 | NC_021160.1    | Ca_kabuli_chr01 | 4412742                 | TT                              | AA              | 1946723141               |
| SNP_P4_3289_4435104 | NC_021160.1    | Ca_kabuli_chr01 | 4435104                 | GG                              | AA              | 1946723143               |
| SNP_P4_3290_4435290 | NC_021160.1    | Ca_kabuli_chr01 | 4435290                 | TT                              | CC              | 1946723145               |
| SNP_P4_3291_4435322 | NC_021160.1    | Ca_kabuli_chr01 | 4435322                 | AA                              | GG              | 1946723147               |
| SNP_P4_3292_4444566 | NC_021160.1    | Ca_kabuli_chr01 | 4444566                 | AA                              | TT              | 1946723149               |
| SNP_P4_3293_4448068 | NC_021160.1    | Ca_kabuli_chr01 | 4448068                 | CC                              | AA              | 1946723151               |
| SNP_P4_3294_4458258 | NC_021160.1    | Ca_kabuli_chr01 | 4458258                 | GG                              | AA              | 1946723153               |
| SNP_P4_3295_4458259 | NC_021160.1    | Ca_kabuli_chr01 | 4458259                 | AA                              | TT              | 1946723155               |
| SNP_P4_3296_4458261 | NC_021160.1    | Ca_kabuli_chr01 | 4458261                 | GG                              | AA              | 1946723158               |
| SNP_P4_3297_4458314 | NC_021160.1    | Ca_kabuli_chr01 | 4458314                 | CC                              | GG              | 1946723160               |
| SNP_P4_3298_4458340 | NC_021160.1    | Ca_kabuli_chr01 | 4458340                 | AA                              | GG              | 1946723162               |
| SNP_P4_3299_4458341 | NC_021160.1    | Ca_kabuli_chr01 | 4458341                 | TT                              | CC              | 1946723164               |
| SNP_P4_3301_4515753 | NC_021160.1    | Ca_kabuli_chr01 | 4515753                 | GG                              | AA              | 1946723166               |
| SNP_P4_3302_4539412 | NC_021160.1    | Ca_kabuli_chr01 | 4539412                 | CC                              | TT              | 1946723168               |



| SNPs IDs            | Chromosome IDs | Chromosomes     | Physical positions (bp) | CDC Frontier (Reference genome) | (ILWC46 & LPNB) | NCBI SNPdb Accession IDs |
|---------------------|----------------|-----------------|-------------------------|---------------------------------|-----------------|--------------------------|
| SNP_P4_3303_4539424 | NC_021160.1    | Ca_kabuli_chr01 | 4539424                 | TT                              | CC              | 1946723170               |
| SNP_P4_3304_4541430 | NC_021160.1    | Ca_kabuli_chr01 | 4541430                 | TT                              | GG              | 1946723172               |
| SNP_P4_3305_4548025 | NC_021160.1    | Ca_kabuli_chr01 | 4548025                 | TT                              | AA              | 1946723174               |
| SNP_P4_3306_4555984 | NC_021160.1    | Ca_kabuli_chr01 | 4555984                 | TT                              | GG              | 1946723176               |
| SNP_P4_3308_4613093 | NC_021160.1    | Ca_kabuli_chr01 | 4613093                 | AA                              | TT              | 1946723178               |
| SNP_P4_3309_4614433 | NC_021160.1    | Ca_kabuli_chr01 | 4614433                 | CC                              | TT              | 1946723180               |
| SNP_P4_3310_4645462 | NC_021160.1    | Ca_kabuli_chr01 | 4645462                 | AA                              | GG              | 1946723182               |
| SNP_P4_3312_4649591 | NC_021160.1    | Ca_kabuli_chr01 | 4649591                 | AA                              | GG              | 1946723184               |
| SNP_P4_3313_4667968 | NC_021160.1    | Ca_kabuli_chr01 | 4667968                 | GG                              | AA              | 1946723186               |
| SNP_P4_3314_4668573 | NC_021160.1    | Ca_kabuli_chr01 | 4668573                 | TT                              | AA              | 1946723188               |
| SNP_P4_3315_4680078 | NC_021160.1    | Ca_kabuli_chr01 | 4680078                 | TT                              | CC              | 1946723190               |
| SNP_P4_3316_4691092 | NC_021160.1    | Ca_kabuli_chr01 | 4691092                 | AA                              | GG              | 1946723192               |
| SNP_P4_3317_4694064 | NC_021160.1    | Ca_kabuli_chr01 | 4694064                 | GG                              | AA              | 1946723194               |
| SNP_P4_3318_4694098 | NC_021160.1    | Ca_kabuli_chr01 | 4694098                 | CC                              | TT              | 1946723196               |
| SNP_P4_3319_4712062 | NC_021160.1    | Ca_kabuli_chr01 | 4712062                 | AA                              | GG              | 1946723198               |
| SNP_P4_3320_4712617 | NC_021160.1    | Ca_kabuli_chr01 | 4712617                 | GG                              | AA              | 1946723200               |
| SNP_P4_3321_4712637 | NC_021160.1    | Ca_kabuli_chr01 | 4712637                 | TT                              | AA              | 1946723202               |
| SNP_P4_3322_4712644 | NC_021160.1    | Ca_kabuli_chr01 | 4712644                 | AA                              | GG              | 1946723204               |
| SNP_P4_3323_4712684 | NC_021160.1    | Ca_kabuli_chr01 | 4712684                 | AA                              | TT              | 1946723207               |
| SNP_P4_3324_4712829 | NC_021160.1    | Ca_kabuli_chr01 | 4712829                 | CC                              | TT              | 1946723209               |
| SNP_P4_3325_4712830 | NC_021160.1    | Ca_kabuli_chr01 | 4712830                 | AA                              | GG              | 1946723211               |
| SNP_P4_3326_4712845 | NC_021160.1    | Ca_kabuli_chr01 | 4712845                 | CC                              | GG              | 1946723213               |
| SNP_P4_3327_4713019 | NC_021160.1    | Ca_kabuli_chr01 | 4713019                 | AA                              | GG              | 1946723215               |
| SNP_P4_3328_4713028 | NC_021160.1    | Ca_kabuli_chr01 | 4713028                 | CC                              | TT              | 1946723217               |
| SNP_P4_3329_4713347 | NC_021160.1    | Ca_kabuli_chr01 | 4713347                 | GG                              | AA              | 1946723219               |
| SNP_P4_3330_4713995 | NC_021160.1    | Ca_kabuli_chr01 | 4713995                 | GG                              | AA              | 1946723221               |
| SNP_P4_3331_4714009 | NC_021160.1    | Ca_kabuli_chr01 | 4714009                 | GG                              | AA              | 1946723223               |
| SNP_P4_3332_4714020 | NC_021160.1    | Ca_kabuli_chr01 | 4714020                 | GG                              | AA              | 1946723225               |
| SNP_P4_3333_4714028 | NC_021160.1    | Ca_kabuli_chr01 | 4714028                 | AA                              | CC              | 1946723227               |
| SNP_P4_3334_4714094 | NC_021160.1    | Ca_kabuli_chr01 | 4714094                 | GG                              | TT              | 1946723229               |
| SNP_P4_3335_4714132 | NC_021160.1    | Ca_kabuli_chr01 | 4714132                 | GG                              | TT              | 1946723231               |
| SNP_P4_3336_4716136 | NC_021160.1    | Ca_kabuli_chr01 | 4716136                 | TT                              | CC              | 1946723233               |
| SNP_P4_3337_4717542 | NC_021160.1    | Ca_kabuli_chr01 | 4717542                 | CC                              | TT              | 1946723235               |
| SNP_P4_3338_4717769 | NC_021160.1    | Ca_kabuli_chr01 | 4717769                 | TT                              | CC              | 1946723237               |
| SNP_P4_3339_4718350 | NC_021160.1    | Ca_kabuli_chr01 | 4718350                 | CC                              | AA              | 1946723239               |
| SNP_P4_3341_4719711 | NC_021160.1    | Ca_kabuli_chr01 | 4719711                 | GG                              | AA              | 1946723241               |
| SNP_P4_3343_4720401 | NC_021160.1    | Ca_kabuli_chr01 | 4720401                 | GG                              | AA              | 1946723243               |
| SNP_P4_3346_4720752 | NC_021160.1    | Ca_kabuli_chr01 | 4720752                 | AA                              | CC              | 1946723246               |
| SNP_P4_3348_4721483 | NC_021160.1    | Ca_kabuli_chr01 | 4721483                 | GG                              | TT              | 1946723248               |
| SNP_P4_3349_4721544 | NC_021160.1    | Ca_kabuli_chr01 | 4721544                 | AA                              | TT              | 1946723250               |
| SNP_P4_3350_4721593 | NC_021160.1    | Ca_kabuli_chr01 | 4721593                 | CC                              | AA              | 1946723252               |
| SNP_P4_3351_4724009 | NC_021160.1    | Ca_kabuli_chr01 | 4724009                 | GG                              | TT              | 1946723254               |

| SNPs IDs            | Chromosome IDs | Chromosomes     | Physical positions (bp) | CDC Frontier (Reference genome) | (ILWC46 & LPNB) | NCBI SNPdb Accession IDs |
|---------------------|----------------|-----------------|-------------------------|---------------------------------|-----------------|--------------------------|
| SNP_P4_3352_4724011 | NC_021160.1    | Ca_kabuli_chr01 | 4724011                 | GG                              | CC              | 1946723256               |
| SNP_P4_3354_4728275 | NC_021160.1    | Ca_kabuli_chr01 | 4728275                 | GG                              | AA              | 1946723258               |
| SNP_P4_3355_4728559 | NC_021160.1    | Ca_kabuli_chr01 | 4728559                 | GG                              | AA              | 1946723260               |
| SNP_P4_3356_4735709 | NC_021160.1    | Ca_kabuli_chr01 | 4735709                 | CC                              | TT              | 1946723262               |
| SNP_P4_3357_4741659 | NC_021160.1    | Ca_kabuli_chr01 | 4741659                 | AA                              | TT              | 1946723264               |
| SNP_P4_3358_4741695 | NC_021160.1    | Ca_kabuli_chr01 | 4741695                 | AA                              | TT              | 1946723266               |
| SNP_P4_3359_4742079 | NC_021160.1    | Ca_kabuli_chr01 | 4742079                 | AA                              | GG              | 1946723268               |
| SNP_P4_3360_4742080 | NC_021160.1    | Ca_kabuli_chr01 | 4742080                 | GG                              | TT              | 1946723270               |
| SNP_P4_3362_4742723 | NC_021160.1    | Ca_kabuli_chr01 | 4742723                 | AA                              | GG              | 1946723272               |
| SNP_P4_3363_4743825 | NC_021160.1    | Ca_kabuli_chr01 | 4743825                 | AA                              | GG              | 1946723274               |
| SNP_P4_3364_4744502 | NC_021160.1    | Ca_kabuli_chr01 | 4744502                 | CC                              | TT              | 1946723276               |
| SNP_P4_3365_4745135 | NC_021160.1    | Ca_kabuli_chr01 | 4745135                 | AA                              | TT              | 1946723278               |
| SNP_P4_3366_4762154 | NC_021160.1    | Ca_kabuli_chr01 | 4762154                 | AA                              | TT              | 1946723280               |
| SNP_P4_3368_4780345 | NC_021160.1    | Ca_kabuli_chr01 | 4780345                 | GG                              | TT              | 1946723282               |
| SNP_P4_3369_4784330 | NC_021160.1    | Ca_kabuli_chr01 | 4784330                 | CC                              | TT              | 1946723284               |
| SNP_P4_3370_4784680 | NC_021160.1    | Ca_kabuli_chr01 | 4784680                 | CC                              | AA              | 1946723286               |
| SNP_P4_3371_4800842 | NC_021160.1    | Ca_kabuli_chr01 | 4800842                 | GG                              | AA              | 1946723288               |
| SNP_P4_3373_4808920 | NC_021160.1    | Ca_kabuli_chr01 | 4808920                 | GG                              | CC              | 1946723290               |
| SNP_P4_3374_4808927 | NC_021160.1    | Ca_kabuli_chr01 | 4808927                 | AA                              | GG              | 1946723292               |
| SNP_P4_3376_4809276 | NC_021160.1    | Ca_kabuli_chr01 | 4809276                 | CC                              | TT              | 1946723295               |
| SNP_P4_3377_4819295 | NC_021160.1    | Ca_kabuli_chr01 | 4819295                 | GG                              | AA              | 1946723297               |
| SNP_P4_3378_4854921 | NC_021160.1    | Ca_kabuli_chr01 | 4854921                 | AA                              | TT              | 1946723299               |
| SNP_P4_3379_4896281 | NC_021160.1    | Ca_kabuli_chr01 | 4896281                 | TT                              | AA              | 1946723301               |
| SNP_P4_3380_4896291 | NC_021160.1    | Ca_kabuli_chr01 | 4896291                 | AA                              | GG              | 1946723303               |
| SNP_P4_3381_4896756 | NC_021160.1    | Ca_kabuli_chr01 | 4896756                 | TT                              | CC              | 1946723305               |
| SNP_P4_3382_4899805 | NC_021160.1    | Ca_kabuli_chr01 | 4899805                 | CC                              | TT              | 1946723307               |
| SNP_P4_3384_4900077 | NC_021160.1    | Ca_kabuli_chr01 | 4900077                 | TT                              | CC              | 1946723309               |
| SNP_P4_3386_4900256 | NC_021160.1    | Ca_kabuli_chr01 | 4900256                 | AA                              | TT              | 1946723311               |
| SNP_P4_3389_4900659 | NC_021160.1    | Ca_kabuli_chr01 | 4900659                 | AA                              | GG              | 1946723313               |
| SNP_P4_3390_4900697 | NC_021160.1    | Ca_kabuli_chr01 | 4900697                 | CC                              | TT              | 1946723315               |
| SNP_P4_3391_4900727 | NC_021160.1    | Ca_kabuli_chr01 | 4900727                 | CC                              | TT              | 1946723317               |
| SNP_P4_3392_4900887 | NC_021160.1    | Ca_kabuli_chr01 | 4900887                 | GG                              | CC              | 1946723319               |
| SNP_P4_3393_4906248 | NC_021160.1    | Ca_kabuli_chr01 | 4906248                 | TT                              | CC              | 1946723321               |
| SNP_P4_3394_4906252 | NC_021160.1    | Ca_kabuli_chr01 | 4906252                 | GG                              | CC              | 1946723323               |
| SNP_P4_3395_4906279 | NC_021160.1    | Ca_kabuli_chr01 | 4906279                 | GG                              | AA              | 1946723325               |
| SNP_P4_3396_4906307 | NC_021160.1    | Ca_kabuli_chr01 | 4906307                 | GG                              | AA              | 1946723327               |
| SNP_P4_3397_4906318 | NC_021160.1    | Ca_kabuli_chr01 | 4906318                 | CC                              | TT              | 1946723329               |
| SNP_P4_3398_4906332 | NC_021160.1    | Ca_kabuli_chr01 | 4906332                 | TT                              | CC              | 1946723331               |
| SNP_P4_3399_4906531 | NC_021160.1    | Ca_kabuli_chr01 | 4906531                 | AA                              | GG              | 1946723333               |
| SNP_P4_3400_4906532 | NC_021160.1    | Ca_kabuli_chr01 | 4906532                 | GG                              | CC              | 1946723335               |
| SNP_P4_3401_4906626 | NC_021160.1    | Ca_kabuli_chr01 | 4906626                 | AA                              | TT              | 1946723337               |
| SNP_P4_3402_4906629 | NC_021160.1    | Ca_kabuli_chr01 | 4906629                 | CC                              | GG              | 1946723339               |

| SNPs IDs            | Chromosome IDs | Chromosomes     | Physical positions (bp) | CDC Frontier (Reference genome) | (ILWC46 & LPNB) | NCBI SNPdb Accession IDs |
|---------------------|----------------|-----------------|-------------------------|---------------------------------|-----------------|--------------------------|
| SNP_P4_3403_4906673 | NC_021160.1    | Ca_kabuli_chr01 | 4906673                 | TT                              | AA              | 1946723341               |
| SNP_P4_3404_4906689 | NC_021160.1    | Ca_kabuli_chr01 | 4906689                 | TT                              | GG              | 1946723343               |
| SNP_P4_3405_4906691 | NC_021160.1    | Ca_kabuli_chr01 | 4906691                 | TT                              | CC              | 1946723345               |
| SNP_P4_3406_4906854 | NC_021160.1    | Ca_kabuli_chr01 | 4906854                 | AA                              | GG              | 1946723347               |
| SNP_P4_3407_4906863 | NC_021160.1    | Ca_kabuli_chr01 | 4906863                 | GG                              | TT              | 1946723349               |
| SNP_P4_3408_4907987 | NC_021160.1    | Ca_kabuli_chr01 | 4907987                 | TT                              | CC              | 1946723351               |
| SNP_P4_3409_4908263 | NC_021160.1    | Ca_kabuli_chr01 | 4908263                 | CC                              | AA              | 1946723353               |
| SNP_P4_3410_4908732 | NC_021160.1    | Ca_kabuli_chr01 | 4908732                 | AA                              | TT              | 1946723355               |
| SNP_P4_3411_4908733 | NC_021160.1    | Ca_kabuli_chr01 | 4908733                 | CC                              | AA              | 1946723357               |
| SNP_P4_3412_4908770 | NC_021160.1    | Ca_kabuli_chr01 | 4908770                 | AA                              | GG              | 1946723359               |
| SNP_P4_3413_4908772 | NC_021160.1    | Ca_kabuli_chr01 | 4908772                 | CC                              | TT              | 1946723361               |
| SNP_P4_3414_4908884 | NC_021160.1    | Ca_kabuli_chr01 | 4908884                 | CC                              | TT              | 1946723363               |
| SNP_P4_3415_4908939 | NC_021160.1    | Ca_kabuli_chr01 | 4908939                 | TT                              | CC              | 1946723364               |
| SNP_P4_3416_4908940 | NC_021160.1    | Ca_kabuli_chr01 | 4908940                 | TT                              | GG              | 1946723366               |
| SNP_P4_3417_4916548 | NC_021160.1    | Ca_kabuli_chr01 | 4916548                 | AA                              | GG              | 1946723368               |
| SNP_P4_3418_4933962 | NC_021160.1    | Ca_kabuli_chr01 | 4933962                 | AA                              | CC              | 1946723370               |
| SNP_P4_3419_4933963 | NC_021160.1    | Ca_kabuli_chr01 | 4933963                 | CC                              | GG              | 1946723372               |
| SNP_P4_3420_4933982 | NC_021160.1    | Ca_kabuli_chr01 | 4933982                 | CC                              | GG              | 1946723374               |
| SNP_P4_3421_4933983 | NC_021160.1    | Ca_kabuli_chr01 | 4933983                 | CC                              | GG              | 1946723376               |
| SNP_P4_3422_4934187 | NC_021160.1    | Ca_kabuli_chr01 | 4934187                 | AA                              | GG              | 1946723378               |
| SNP_P4_3423_4934210 | NC_021160.1    | Ca_kabuli_chr01 | 4934210                 | TT                              | GG              | 1946723380               |
| SNP_P4_3424_4940016 | NC_021160.1    | Ca_kabuli_chr01 | 4940016                 | CC                              | GG              | 1946723382               |
| SNP_P4_3425_4956833 | NC_021160.1    | Ca_kabuli_chr01 | 4956833                 | CC                              | TT              | 1946723384               |
| SNP_P4_3427_4965746 | NC_021160.1    | Ca_kabuli_chr01 | 4965746                 | GG                              | AA              | 1946723386               |
| SNP_P4_3428_4965816 | NC_021160.1    | Ca_kabuli_chr01 | 4965816                 | GG                              | AA              | 1946723388               |
| SNP_P4_3431_4971228 | NC_021160.1    | Ca_kabuli_chr01 | 4971228                 | CC                              | TT              | 1946723390               |
| SNP_P4_3432_4972096 | NC_021160.1    | Ca_kabuli_chr01 | 4972096                 | TT                              | CC              | 1946723392               |
| SNP_P4_3433_4972116 | NC_021160.1    | Ca_kabuli_chr01 | 4972116                 | CC                              | TT              | 1946723394               |
| SNP_P4_3435_4975362 | NC_021160.1    | Ca_kabuli_chr01 | 4975362                 | AA                              | TT              | 1946723396               |
| SNP_P4_3436_4983318 | NC_021160.1    | Ca_kabuli_chr01 | 4983318                 | CC                              | GG              | 1946723398               |
| SNP_P4_3437_4983319 | NC_021160.1    | Ca_kabuli_chr01 | 4983319                 | AA                              | TT              | 1946723400               |
| SNP_P4_3438_5016248 | NC_021160.1    | Ca_kabuli_chr01 | 5016248                 | AA                              | GG              | 1946723402               |
| SNP_P4_3439_5016659 | NC_021160.1    | Ca_kabuli_chr01 | 5016659                 | CC                              | TT              | 1946723404               |
| SNP_P4_3440_5024400 | NC_021160.1    | Ca_kabuli_chr01 | 5024400                 | TT                              | CC              | 1946723406               |
| SNP_P4_3441_5026204 | NC_021160.1    | Ca_kabuli_chr01 | 5026204                 | AA                              | GG              | 1946723408               |
| SNP_P4_3442_5027314 | NC_021160.1    | Ca_kabuli_chr01 | 5027314                 | GG                              | AA              | 1946723409               |
| SNP_P4_3443_5040476 | NC_021160.1    | Ca_kabuli_chr01 | 5040476                 | TT                              | CC              | 1946723411               |
| SNP_P4_3444_5040908 | NC_021160.1    | Ca_kabuli_chr01 | 5040908                 | CC                              | TT              | 1946723413               |
| SNP_P4_3445_5040942 | NC_021160.1    | Ca_kabuli_chr01 | 5040942                 | CC                              | TT              | 1946723415               |
| SNP_P4_3447_5172596 | NC_021160.1    | Ca_kabuli_chr01 | 5172596                 | AA                              | GG              | 1946723417               |
| SNP_P4_3449_5180865 | NC_021160.1    | Ca_kabuli_chr01 | 5180865                 | AA                              | TT              | 1946723419               |
| SNP_P4_3450_5197154 | NC_021160.1    | Ca_kabuli_chr01 | 5197154                 | CC                              | GG              | 1946723421               |

| SNPs IDs            | Chromosome IDs | Chromosomes     | Physical positions (bp) | CDC Frontier (Reference genome) | (ILWC46 & LPNB) | NCBI SNPdb Accession IDs |
|---------------------|----------------|-----------------|-------------------------|---------------------------------|-----------------|--------------------------|
| SNP_P4_3451_5197211 | NC_021160.1    | Ca_kabuli_chr01 | 5197211                 | AA                              | GG              | 1946723423               |
| SNP_P4_3452_5207359 | NC_021160.1    | Ca_kabuli_chr01 | 5207359                 | GG                              | AA              | 1946723425               |
| SNP_P4_3453_5243859 | NC_021160.1    | Ca_kabuli_chr01 | 5243859                 | TT                              | AA              | 1946723427               |
| SNP_P4_3454_5254662 | NC_021160.1    | Ca_kabuli_chr01 | 5254662                 | TT                              | CC              | 1946723429               |
| SNP_P4_3455_5255007 | NC_021160.1    | Ca_kabuli_chr01 | 5255007                 | CC                              | TT              | 1946723431               |
| SNP_P4_3456_5255049 | NC_021160.1    | Ca_kabuli_chr01 | 5255049                 | TT                              | CC              | 1946723433               |
| SNP_P4_3457_5255065 | NC_021160.1    | Ca_kabuli_chr01 | 5255065                 | GG                              | AA              | 1946723435               |
| SNP_P4_3458_5255066 | NC_021160.1    | Ca_kabuli_chr01 | 5255066                 | AA                              | GG              | 1946723437               |
| SNP_P4_3459_5262653 | NC_021160.1    | Ca_kabuli_chr01 | 5262653                 | GG                              | AA              | 1946723439               |
| SNP_P4_3460_5262658 | NC_021160.1    | Ca_kabuli_chr01 | 5262658                 | AA                              | TT              | 1946723441               |
| SNP_P4_3461_5262660 | NC_021160.1    | Ca_kabuli_chr01 | 5262660                 | AA                              | GG              | 1946723443               |
| SNP_P4_3462_5273285 | NC_021160.1    | Ca_kabuli_chr01 | 5273285                 | TT                              | AA              | 1946723445               |
| SNP_P4_3465_5310819 | NC_021160.1    | Ca_kabuli_chr01 | 5310819                 | GG                              | TT              | 1946723447               |
| SNP_P4_3466_5312554 | NC_021160.1    | Ca_kabuli_chr01 | 5312554                 | CC                              | AA              | 1946723449               |
| SNP_P4_3467_5312691 | NC_021160.1    | Ca_kabuli_chr01 | 5312691                 | GG                              | AA              | 1946723451               |
| SNP_P4_3468_5312756 | NC_021160.1    | Ca_kabuli_chr01 | 5312756                 | AA                              | GG              | 1946723453               |
| SNP_P4_3469_5315132 | NC_021160.1    | Ca_kabuli_chr01 | 5315132                 | TT                              | AA              | 1946723455               |
| SNP_P4_3470_5345623 | NC_021160.1    | Ca_kabuli_chr01 | 5345623                 | GG                              | TT              | 1946723457               |
| SNP_P4_3471_5347141 | NC_021160.1    | Ca_kabuli_chr01 | 5347141                 | GG                              | AA              | 1946723459               |
| SNP_P4_3472_5347181 | NC_021160.1    | Ca_kabuli_chr01 | 5347181                 | AA                              | GG              | 1946723461               |
| SNP_P4_3473_5348104 | NC_021160.1    | Ca_kabuli_chr01 | 5348104                 | AA                              | TT              | 1946723463               |
| SNP_P4_3474_5348883 | NC_021160.1    | Ca_kabuli_chr01 | 5348883                 | AA                              | GG              | 1946723465               |
| SNP_P4_3475_5348895 | NC_021160.1    | Ca_kabuli_chr01 | 5348895                 | CC                              | TT              | 1946723467               |
| SNP_P4_3476_5349271 | NC_021160.1    | Ca_kabuli_chr01 | 5349271                 | GG                              | AA              | 1946723469               |
| SNP_P4_3477_5349295 | NC_021160.1    | Ca_kabuli_chr01 | 5349295                 | AA                              | TT              | 1946723471               |
| SNP_P4_3478_5349964 | NC_021160.1    | Ca_kabuli_chr01 | 5349964                 | CC                              | TT              | 1946723473               |
| SNP_P4_3479_5349998 | NC_021160.1    | Ca_kabuli_chr01 | 5349998                 | AA                              | GG              | 1946723475               |
| SNP_P4_3480_5350003 | NC_021160.1    | Ca_kabuli_chr01 | 5350003                 | TT                              | CC              | 1946723477               |
| SNP_P4_3481_5350009 | NC_021160.1    | Ca_kabuli_chr01 | 5350009                 | AA                              | TT              | 1946723479               |
| SNP_P4_3482_5350042 | NC_021160.1    | Ca_kabuli_chr01 | 5350042                 | TT                              | CC              | 1946723481               |
| SNP_P4_3483_5350144 | NC_021160.1    | Ca_kabuli_chr01 | 5350144                 | TT                              | AA              | 1946723483               |
| SNP_P4_3484_5350342 | NC_021160.1    | Ca_kabuli_chr01 | 5350342                 | AA                              | GG              | 1946723485               |
| SNP_P4_3485_5350388 | NC_021160.1    | Ca_kabuli_chr01 | 5350388                 | GG                              | AA              | 1946723487               |
| SNP_P4_3487_5352165 | NC_021160.1    | Ca_kabuli_chr01 | 5352165                 | AA                              | GG              | 1946723489               |
| SNP_P4_3488_5357253 | NC_021160.1    | Ca_kabuli_chr01 | 5357253                 | CC                              | AA              | 1946723491               |
| SNP_P4_3489_5357420 | NC_021160.1    | Ca_kabuli_chr01 | 5357420                 | TT                              | GG              | 1946723493               |
| SNP_P4_3490_5357484 | NC_021160.1    | Ca_kabuli_chr01 | 5357484                 | TT                              | CC              | 1946723495               |
| SNP_P4_3491_5357884 | NC_021160.1    | Ca_kabuli_chr01 | 5357884                 | CC                              | TT              | 1946723497               |
| SNP_P4_3492_5357894 | NC_021160.1    | Ca_kabuli_chr01 | 5357894                 | TT                              | AA              | 1946723499               |
| SNP_P4_3493_5359109 | NC_021160.1    | Ca_kabuli_chr01 | 5359109                 | TT                              | CC              | 1946723501               |
| SNP_P4_3494_5359148 | NC_021160.1    | Ca_kabuli_chr01 | 5359148                 | TT                              | GG              | 1946723503               |
| SNP_P4_3495_5366042 | NC_021160.1    | Ca_kabuli_chr01 | 5366042                 | AA                              | TT              | 1946723505               |

| SNPs IDs            | Chromosome IDs | Chromosomes     | Physical positions (bp) | CDC Frontier (Reference genome) | (ILWC46 & LPNB) | NCBI SNPdb Accession IDs |
|---------------------|----------------|-----------------|-------------------------|---------------------------------|-----------------|--------------------------|
| SNP_P4_3496_5366612 | NC_021160.1    | Ca_kabuli_chr01 | 5366612                 | TT                              | CC              | 1946723506               |
| SNP_P4_3497_5366634 | NC_021160.1    | Ca_kabuli_chr01 | 5366634                 | CC                              | AA              | 1946723508               |
| SNP_P4_3498_5366836 | NC_021160.1    | Ca_kabuli_chr01 | 5366836                 | GG                              | AA              | 1946723510               |
| SNP_P4_3499_5366866 | NC_021160.1    | Ca_kabuli_chr01 | 5366866                 | TT                              | GG              | 1946723512               |
| SNP_P4_3500_5367164 | NC_021160.1    | Ca_kabuli_chr01 | 5367164                 | CC                              | TT              | 1946723514               |
| SNP_P4_3501_5367308 | NC_021160.1    | Ca_kabuli_chr01 | 5367308                 | CC                              | TT              | 1946723516               |
| SNP_P4_3502_5371366 | NC_021160.1    | Ca_kabuli_chr01 | 5371366                 | TT                              | GG              | 1946723518               |
| SNP_P4_3503_5371581 | NC_021160.1    | Ca_kabuli_chr01 | 5371581                 | AA                              | TT              | 1946723520               |
| SNP_P4_3504_5373260 | NC_021160.1    | Ca_kabuli_chr01 | 5373260                 | AA                              | GG              | 1946723522               |
| SNP_P4_3505_5373317 | NC_021160.1    | Ca_kabuli_chr01 | 5373317                 | TT                              | CC              | 1946723524               |
| SNP_P4_3506_5376134 | NC_021160.1    | Ca_kabuli_chr01 | 5376134                 | CC                              | TT              | 1946723526               |
| SNP_P4_3507_5376583 | NC_021160.1    | Ca_kabuli_chr01 | 5376583                 | CC                              | GG              | 1946723528               |
| SNP_P4_3508_5376643 | NC_021160.1    | Ca_kabuli_chr01 | 5376643                 | AA                              | GG              | 1946723530               |
| SNP_P4_3509_5376907 | NC_021160.1    | Ca_kabuli_chr01 | 5376907                 | CC                              | TT              | 1946723532               |
| SNP_P4_3510_5382883 | NC_021160.1    | Ca_kabuli_chr01 | 5382883                 | GG                              | TT              | 1946723534               |
| SNP_P4_3511_5384623 | NC_021160.1    | Ca_kabuli_chr01 | 5384623                 | AA                              | GG              | 1946723536               |
| SNP_P4_3512_5389446 | NC_021160.1    | Ca_kabuli_chr01 | 5389446                 | CC                              | TT              | 1946723538               |
| SNP_P4_3513_5390021 | NC_021160.1    | Ca_kabuli_chr01 | 5390021                 | TT                              | GG              | 1946723540               |
| SNP_P4_3514_5390197 | NC_021160.1    | Ca_kabuli_chr01 | 5390197                 | CC                              | TT              | 1946723542               |
| SNP_P4_3515_5391024 | NC_021160.1    | Ca_kabuli_chr01 | 5391024                 | TT                              | GG              | 1946723544               |
| SNP_P4_3516_5391902 | NC_021160.1    | Ca_kabuli_chr01 | 5391902                 | AA                              | GG              | 1946723546               |
| SNP_P4_3517_5391917 | NC_021160.1    | Ca_kabuli_chr01 | 5391917                 | TT                              | CC              | 1946723548               |
| SNP_P4_3518_5392111 | NC_021160.1    | Ca_kabuli_chr01 | 5392111                 | GG                              | AA              | 1946723550               |
| SNP_P4_3520_5393520 | NC_021160.1    | Ca_kabuli_chr01 | 5393520                 | AA                              | TT              | 1946723552               |
| SNP_P4_3521_5394157 | NC_021160.1    | Ca_kabuli_chr01 | 5394157                 | CC                              | AA              | 1946723554               |
| SNP_P4_3522_5394529 | NC_021160.1    | Ca_kabuli_chr01 | 5394529                 | TT                              | GG              | 1946723556               |
| SNP_P4_3523_5397721 | NC_021160.1    | Ca_kabuli_chr01 | 5397721                 | AA                              | GG              | 1946723558               |
| SNP_P4_3524_5397950 | NC_021160.1    | Ca_kabuli_chr01 | 5397950                 | TT                              | AA              | 1946723560               |
| SNP_P4_3525_5398271 | NC_021160.1    | Ca_kabuli_chr01 | 5398271                 | CC                              | TT              | 1946723562               |
| SNP_P4_3526_5398291 | NC_021160.1    | Ca_kabuli_chr01 | 5398291                 | CC                              | TT              | 1946723564               |
| SNP_P4_3527_5398297 | NC_021160.1    | Ca_kabuli_chr01 | 5398297                 | TT                              | CC              | 1946723566               |
| SNP_P4_3528_5398304 | NC_021160.1    | Ca_kabuli_chr01 | 5398304                 | TT                              | CC              | 1946723568               |
| SNP_P4_3529_5402297 | NC_021160.1    | Ca_kabuli_chr01 | 5402297                 | TT                              | AA              | 1946723570               |
| SNP_P4_3530_5402317 | NC_021160.1    | Ca_kabuli_chr01 | 5402317                 | AA                              | GG              | 1946723572               |
| SNP_P4_3531_5402927 | NC_021160.1    | Ca_kabuli_chr01 | 5402927                 | CC                              | AA              | 1946723574               |
| SNP_P4_3532_5407067 | NC_021160.1    | Ca_kabuli_chr01 | 5407067                 | AA                              | CC              | 1946723576               |
| SNP_P4_3533_5413538 | NC_021160.1    | Ca_kabuli_chr01 | 5413538                 | TT                              | CC              | 1946723578               |
| SNP_P4_3534_5414531 | NC_021160.1    | Ca_kabuli_chr01 | 5414531                 | TT                              | CC              | 1946723580               |
| SNP_P4_3535_5414651 | NC_021160.1    | Ca_kabuli_chr01 | 5414651                 | GG                              | AA              | 1946723582               |
| SNP_P4_3536_5417061 | NC_021160.1    | Ca_kabuli_chr01 | 5417061                 | TT                              | AA              | 1946723584               |
| SNP_P4_3537_5417095 | NC_021160.1    | Ca_kabuli_chr01 | 5417095                 | CC                              | AA              | 1946723586               |
| SNP_P4_3538_5417096 | NC_021160.1    | Ca_kabuli_chr01 | 5417096                 | AA                              | TT              | 1946723588               |

| SNPs IDs            | Chromosome IDs | Chromosomes     | Physical positions (bp) | CDC Frontier (Reference genome) | (ILWC46 & LPNB) | NCBI SNPdb Accession IDs |
|---------------------|----------------|-----------------|-------------------------|---------------------------------|-----------------|--------------------------|
| SNP_P4_3539_5417122 | NC_021160.1    | Ca_kabuli_chr01 | 5417122                 | CC                              | TT              | 1946723590               |
| SNP_P4_3540_5417348 | NC_021160.1    | Ca_kabuli_chr01 | 5417348                 | TT                              | AA              | 1946723592               |
| SNP_P4_3541_5417477 | NC_021160.1    | Ca_kabuli_chr01 | 5417477                 | AA                              | GG              | 1946723594               |
| SNP_P4_3543_5417868 | NC_021160.1    | Ca_kabuli_chr01 | 5417868                 | GG                              | AA              | 1946723596               |
| SNP_P4_3545_5419724 | NC_021160.1    | Ca_kabuli_chr01 | 5419724                 | AA                              | GG              | 1946723598               |
| SNP_P4_3546_5419731 | NC_021160.1    | Ca_kabuli_chr01 | 5419731                 | AA                              | TT              | 1946723600               |
| SNP_P4_3547_5419778 | NC_021160.1    | Ca_kabuli_chr01 | 5419778                 | TT                              | CC              | 1946723602               |
| SNP_P4_3548_5419785 | NC_021160.1    | Ca_kabuli_chr01 | 5419785                 | GG                              | AA              | 1946723604               |
| SNP_P4_3550_5420264 | NC_021160.1    | Ca_kabuli_chr01 | 5420264                 | AA                              | GG              | 1946723606               |
| SNP_P4_3551_5420394 | NC_021160.1    | Ca_kabuli_chr01 | 5420394                 | CC                              | TT              | 1946723608               |
| SNP_P4_3552_5421113 | NC_021160.1    | Ca_kabuli_chr01 | 5421113                 | AA                              | TT              | 1946723610               |
| SNP_P4_3553_5421119 | NC_021160.1    | Ca_kabuli_chr01 | 5421119                 | AA                              | TT              | 1946723612               |
| SNP_P4_3554_5421123 | NC_021160.1    | Ca_kabuli_chr01 | 5421123                 | AA                              | TT              | 1946723614               |
| SNP_P4_3555_5423349 | NC_021160.1    | Ca_kabuli_chr01 | 5423349                 | AA                              | GG              | 1946723616               |
| SNP_P4_3556_5423443 | NC_021160.1    | Ca_kabuli_chr01 | 5423443                 | GG                              | AA              | 1946723618               |
| SNP_P4_3557_5425388 | NC_021160.1    | Ca_kabuli_chr01 | 5425388                 | TT                              | AA              | 1946723620               |
| SNP_P4_3559_5426591 | NC_021160.1    | Ca_kabuli_chr01 | 5426591                 | TT                              | AA              | 1946723622               |
| SNP_P4_3560_5426592 | NC_021160.1    | Ca_kabuli_chr01 | 5426592                 | TT                              | CC              | 1946723624               |
| SNP_P4_3561_5426681 | NC_021160.1    | Ca_kabuli_chr01 | 5426681                 | GG                              | AA              | 1946723626               |
| SNP_P4_3562_5426968 | NC_021160.1    | Ca_kabuli_chr01 | 5426968                 | AA                              | GG              | 1946723628               |
| SNP_P4_3565_5428968 | NC_021160.1    | Ca_kabuli_chr01 | 5428968                 | AA                              | GG              | 1946723630               |
| SNP_P4_3566_5429055 | NC_021160.1    | Ca_kabuli_chr01 | 5429055                 | CC                              | TT              | 1946723632               |
| SNP_P4_3567_5429079 | NC_021160.1    | Ca_kabuli_chr01 | 5429079                 | GG                              | AA              | 1946723634               |
| SNP_P4_3568_5430535 | NC_021160.1    | Ca_kabuli_chr01 | 5430535                 | AA                              | CC              | 1946723636               |
| SNP_P4_3569_5431564 | NC_021160.1    | Ca_kabuli_chr01 | 5431564                 | CC                              | TT              | 1946723638               |
| SNP_P4_3570_5433130 | NC_021160.1    | Ca_kabuli_chr01 | 5433130                 | GG                              | AA              | 1946723640               |
| SNP_P4_3571_5433173 | NC_021160.1    | Ca_kabuli_chr01 | 5433173                 | AA                              | GG              | 1946723642               |
| SNP_P4_3572_5433377 | NC_021160.1    | Ca_kabuli_chr01 | 5433377                 | TT                              | CC              | 1946723644               |
| SNP_P4_3573_5433573 | NC_021160.1    | Ca_kabuli_chr01 | 5433573                 | AA                              | GG              | 1946723646               |
| SNP_P4_3575_5440636 | NC_021160.1    | Ca_kabuli_chr01 | 5440636                 | GG                              | TT              | 1946723648               |
| SNP_P4_3576_5440685 | NC_021160.1    | Ca_kabuli_chr01 | 5440685                 | TT                              | GG              | 1946723650               |
| SNP_P4_3577_5440759 | NC_021160.1    | Ca_kabuli_chr01 | 5440759                 | GG                              | AA              | 1946723652               |
| SNP_P4_3578_5440763 | NC_021160.1    | Ca_kabuli_chr01 | 5440763                 | TT                              | AA              | 1946723654               |
| SNP_P4_3579_5440955 | NC_021160.1    | Ca_kabuli_chr01 | 5440955                 | AA                              | GG              | 1946723656               |
| SNP_P4_3580_5440974 | NC_021160.1    | Ca_kabuli_chr01 | 5440974                 | AA                              | GG              | 1946723658               |
| SNP_P4_3581_5446251 | NC_021160.1    | Ca_kabuli_chr01 | 5446251                 | GG                              | AA              | 1946723660               |
| SNP_P4_3582_5446440 | NC_021160.1    | Ca_kabuli_chr01 | 5446440                 | TT                              | GG              | 1946723662               |
| SNP_P4_3583_5446441 | NC_021160.1    | Ca_kabuli_chr01 | 5446441                 | TT                              | CC              | 1946723664               |
| SNP_P4_3584_5446443 | NC_021160.1    | Ca_kabuli_chr01 | 5446443                 | TT                              | GG              | 1946723666               |
| SNP_P4_3585_5446455 | NC_021160.1    | Ca_kabuli_chr01 | 5446455                 | CC                              | GG              | 1946723668               |
| SNP_P4_3586_5446467 | NC_021160.1    | Ca_kabuli_chr01 | 5446467                 | CC                              | TT              | 1946723670               |
| SNP_P4_3588_5447025 | NC_021160.1    | Ca_kabuli_chr01 | 5447025                 | GG                              | TT              | 1946723672               |

| SNPs IDs            | Chromosome IDs | Chromosomes     | Physical positions (bp) | CDC Frontier (Reference genome) | (ILWC46 & LPNB) | NCBI SNPdb Accession IDs |
|---------------------|----------------|-----------------|-------------------------|---------------------------------|-----------------|--------------------------|
| SNP_P4_3589_5447397 | NC_021160.1    | Ca_kabuli_chr01 | 5447397                 | TT                              | GG              | 1946723673               |
| SNP_P4_3590_5447405 | NC_021160.1    | Ca_kabuli_chr01 | 5447405                 | AA                              | TT              | 1946723675               |
| SNP_P4_3591_5447452 | NC_021160.1    | Ca_kabuli_chr01 | 5447452                 | AA                              | GG              | 1946723677               |
| SNP_P4_3592_5447529 | NC_021160.1    | Ca_kabuli_chr01 | 5447529                 | GG                              | AA              | 1946723679               |
| SNP_P4_3593_5447544 | NC_021160.1    | Ca_kabuli_chr01 | 5447544                 | AA                              | GG              | 1946723680               |
| SNP_P4_3594_5447566 | NC_021160.1    | Ca_kabuli_chr01 | 5447566                 | CC                              | TT              | 1946723681               |
| SNP_P4_3595_5447578 | NC_021160.1    | Ca_kabuli_chr01 | 5447578                 | TT                              | CC              | 1946723682               |
| SNP_P4_3596_5447606 | NC_021160.1    | Ca_kabuli_chr01 | 5447606                 | CC                              | TT              | 1946723684               |
| SNP_P4_3597_5447765 | NC_021160.1    | Ca_kabuli_chr01 | 5447765                 | AA                              | GG              | 1946723686               |
| SNP_P4_3598_5449641 | NC_021160.1    | Ca_kabuli_chr01 | 5449641                 | TT                              | CC              | 1946723688               |
| SNP_P4_3599_5449674 | NC_021160.1    | Ca_kabuli_chr01 | 5449674                 | CC                              | AA              | 1946723690               |
| SNP_P4_3600_5449968 | NC_021160.1    | Ca_kabuli_chr01 | 5449968                 | TT                              | CC              | 1946723692               |
| SNP_P4_3601_5452542 | NC_021160.1    | Ca_kabuli_chr01 | 5452542                 | TT                              | CC              | 1946723693               |
| SNP_P4_3602_5452780 | NC_021160.1    | Ca_kabuli_chr01 | 5452780                 | CC                              | AA              | 1946723695               |
| SNP_P4_3603_5452786 | NC_021160.1    | Ca_kabuli_chr01 | 5452786                 | CC                              | AA              | 1946723697               |
| SNP_P4_3604_5453005 | NC_021160.1    | Ca_kabuli_chr01 | 5453005                 | CC                              | GG              | 1946723699               |
| SNP_P4_3605_5453109 | NC_021160.1    | Ca_kabuli_chr01 | 5453109                 | CC                              | TT              | 1946723701               |
| SNP_P4_3606_5453110 | NC_021160.1    | Ca_kabuli_chr01 | 5453110                 | AA                              | TT              | 1946723703               |
| SNP_P4_3607_5453487 | NC_021160.1    | Ca_kabuli_chr01 | 5453487                 | CC                              | GG              | 1946723705               |
| SNP_P4_3608_5453500 | NC_021160.1    | Ca_kabuli_chr01 | 5453500                 | TT                              | CC              | 1946723707               |
| SNP_P4_3609_5454449 | NC_021160.1    | Ca_kabuli_chr01 | 5454449                 | CC                              | TT              | 1946723709               |
| SNP_P4_3610_5454564 | NC_021160.1    | Ca_kabuli_chr01 | 5454564                 | CC                              | GG              | 1946723711               |
| SNP_P4_3611_5454566 | NC_021160.1    | Ca_kabuli_chr01 | 5454566                 | TT                              | GG              | 1946723713               |
| SNP_P4_3613_5454611 | NC_021160.1    | Ca_kabuli_chr01 | 5454611                 | TT                              | GG              | 1946723714               |
| SNP_P4_3615_5457860 | NC_021160.1    | Ca_kabuli_chr01 | 5457860                 | GG                              | AA              | 1946723716               |
| SNP_P4_3616_5457904 | NC_021160.1    | Ca_kabuli_chr01 | 5457904                 | AA                              | TT              | 1946723718               |
| SNP_P4_3617_5457923 | NC_021160.1    | Ca_kabuli_chr01 | 5457923                 | CC                              | TT              | 1946723720               |
| SNP_P4_3618_5457941 | NC_021160.1    | Ca_kabuli_chr01 | 5457941                 | CC                              | AA              | 1946723722               |
| SNP_P4_3619_5460714 | NC_021160.1    | Ca_kabuli_chr01 | 5460714                 | CC                              | TT              | 1946723724               |
| SNP_P4_3620_5460745 | NC_021160.1    | Ca_kabuli_chr01 | 5460745                 | GG                              | TT              | 1946723726               |
| SNP_P4_3621_5463849 | NC_021160.1    | Ca_kabuli_chr01 | 5463849                 | CC                              | GG              | 1946723728               |
| SNP_P4_3622_5463854 | NC_021160.1    | Ca_kabuli_chr01 | 5463854                 | AA                              | GG              | 1946723730               |
| SNP_P4_3623_5463941 | NC_021160.1    | Ca_kabuli_chr01 | 5463941                 | GG                              | AA              | 1946723732               |
| SNP_P4_3624_5463980 | NC_021160.1    | Ca_kabuli_chr01 | 5463980                 | TT                              | AA              | 1946723734               |
| SNP_P4_3625_5464054 | NC_021160.1    | Ca_kabuli_chr01 | 5464054                 | TT                              | CC              | 1946723736               |
| SNP_P4_3626_5464062 | NC_021160.1    | Ca_kabuli_chr01 | 5464062                 | CC                              | TT              | 1946723738               |
| SNP_P4_3627_5464133 | NC_021160.1    | Ca_kabuli_chr01 | 5464133                 | TT                              | CC              | 1946723740               |
| SNP_P4_3628_5464161 | NC_021160.1    | Ca_kabuli_chr01 | 5464161                 | TT                              | GG              | 1946723741               |
| SNP_P4_3629_5464228 | NC_021160.1    | Ca_kabuli_chr01 | 5464228                 | CC                              | TT              | 1946723743               |
| SNP_P4_3631_5464264 | NC_021160.1    | Ca_kabuli_chr01 | 5464264                 | TT                              | CC              | 1946723745               |
| SNP_P4_3632_5464267 | NC_021160.1    | Ca_kabuli_chr01 | 5464267                 | AA                              | GG              | 1946723747               |
| SNP_P4_3633_5464274 | NC_021160.1    | Ca_kabuli_chr01 | 5464274                 | CC                              | TT              | 1946723749               |

| SNPs IDs            | Chromosome IDs | Chromosomes     | Physical positions (bp) | CDC Frontier (Reference genome) | (ILWC46 & LPNB) | NCBI SNPdb Accession IDs |
|---------------------|----------------|-----------------|-------------------------|---------------------------------|-----------------|--------------------------|
| SNP_P4_3634_5464342 | NC_021160.1    | Ca_kabuli_chr01 | 5464342                 | AA                              | GG              | 1946723751               |
| SNP_P4_3635_5464360 | NC_021160.1    | Ca_kabuli_chr01 | 5464360                 | GG                              | CC              | 1946723753               |
| SNP_P4_3636_5464393 | NC_021160.1    | Ca_kabuli_chr01 | 5464393                 | CC                              | TT              | 1946723755               |
| SNP_P4_3637_5464407 | NC_021160.1    | Ca_kabuli_chr01 | 5464407                 | AA                              | GG              | 1946723757               |
| SNP_P4_3638_5469360 | NC_021160.1    | Ca_kabuli_chr01 | 5469360                 | GG                              | AA              | 1946723759               |
| SNP_P4_3639_5469381 | NC_021160.1    | Ca_kabuli_chr01 | 5469381                 | GG                              | AA              | 1946723761               |
| SNP_P4_3640_5469410 | NC_021160.1    | Ca_kabuli_chr01 | 5469410                 | AA                              | GG              | 1946723763               |
| SNP_P4_3641_5472777 | NC_021160.1    | Ca_kabuli_chr01 | 5472777                 | TT                              | CC              | 1946723765               |
| SNP_P4_3642_5472822 | NC_021160.1    | Ca_kabuli_chr01 | 5472822                 | CC                              | GG              | 1946723767               |
| SNP_P4_3643_5476384 | NC_021160.1    | Ca_kabuli_chr01 | 5476384                 | AA                              | GG              | 1946723769               |
| SNP_P4_3644_5480029 | NC_021160.1    | Ca_kabuli_chr01 | 5480029                 | TT                              | GG              | 1946723771               |
| SNP_P4_3645_5481831 | NC_021160.1    | Ca_kabuli_chr01 | 5481831                 | GG                              | AA              | 1946723773               |
| SNP_P4_3646_5482284 | NC_021160.1    | Ca_kabuli_chr01 | 5482284                 | GG                              | AA              | 1946723775               |
| SNP_P4_3648_5482991 | NC_021160.1    | Ca_kabuli_chr01 | 5482991                 | CC                              | AA              | 1946723777               |
| SNP_P4_3649_5483040 | NC_021160.1    | Ca_kabuli_chr01 | 5483040                 | GG                              | AA              | 1946723779               |
| SNP_P4_3650_5484034 | NC_021160.1    | Ca_kabuli_chr01 | 5484034                 | AA                              | GG              | 1946723781               |
| SNP_P4_3651_5484248 | NC_021160.1    | Ca_kabuli_chr01 | 5484248                 | TT                              | CC              | 1946723782               |
| SNP_P4_3653_5485340 | NC_021160.1    | Ca_kabuli_chr01 | 5485340                 | AA                              | TT              | 1946723784               |
| SNP_P4_3654_5487434 | NC_021160.1    | Ca_kabuli_chr01 | 5487434                 | GG                              | AA              | 1946723786               |
| SNP_P4_3655_5487759 | NC_021160.1    | Ca_kabuli_chr01 | 5487759                 | CC                              | TT              | 1946723788               |
| SNP_P4_3656_5488698 | NC_021160.1    | Ca_kabuli_chr01 | 5488698                 | GG                              | AA              | 1946723790               |
| SNP_P4_3657_5493831 | NC_021160.1    | Ca_kabuli_chr01 | 5493831                 | TT                              | AA              | 1946723792               |
| SNP_P4_3659_5498404 | NC_021160.1    | Ca_kabuli_chr01 | 5498404                 | AA                              | TT              | 1946723794               |
| SNP_P4_3660_5498559 | NC_021160.1    | Ca_kabuli_chr01 | 5498559                 | GG                              | AA              | 1946723796               |
| SNP_P4_3662_5498986 | NC_021160.1    | Ca_kabuli_chr01 | 5498986                 | GG                              | TT              | 1946723798               |
| SNP_P4_3663_5500258 | NC_021160.1    | Ca_kabuli_chr01 | 5500258                 | CC                              | TT              | 1946723800               |
| SNP_P4_3665_5500953 | NC_021160.1    | Ca_kabuli_chr01 | 5500953                 | CC                              | GG              | 1946723802               |
| SNP_P4_3666_5500993 | NC_021160.1    | Ca_kabuli_chr01 | 5500993                 | CC                              | TT              | 1946723804               |
| SNP_P4_3667_5501814 | NC_021160.1    | Ca_kabuli_chr01 | 5501814                 | CC                              | TT              | 1946723806               |
| SNP_P4_3668_5502442 | NC_021160.1    | Ca_kabuli_chr01 | 5502442                 | AA                              | GG              | 1946723808               |
| SNP_P4_3669_5508786 | NC_021160.1    | Ca_kabuli_chr01 | 5508786                 | TT                              | CC              | 1946723810               |
| SNP_P4_3670_5508889 | NC_021160.1    | Ca_kabuli_chr01 | 5508889                 | TT                              | CC              | 1946723812               |
| SNP_P4_3671_5508980 | NC_021160.1    | Ca_kabuli_chr01 | 5508980                 | AA                              | TT              | 1946723814               |
| SNP_P4_3672_5509752 | NC_021160.1    | Ca_kabuli_chr01 | 5509752                 | AA                              | GG              | 1946723816               |
| SNP_P4_3673_5511614 | NC_021160.1    | Ca_kabuli_chr01 | 5511614                 | CC                              | TT              | 1946723818               |
| SNP_P4_3674_5511919 | NC_021160.1    | Ca_kabuli_chr01 | 5511919                 | CC                              | TT              | 1946723820               |
| SNP_P4_3675_5511968 | NC_021160.1    | Ca_kabuli_chr01 | 5511968                 | AA                              | CC              | 1946723822               |
| SNP_P4_3676_5513214 | NC_021160.1    | Ca_kabuli_chr01 | 5513214                 | GG                              | AA              | 1946723824               |
| SNP_P4_3677_5513292 | NC_021160.1    | Ca_kabuli_chr01 | 5513292                 | CC                              | TT              | 1946723826               |
| SNP_P4_3678_5514122 | NC_021160.1    | Ca_kabuli_chr01 | 5514122                 | CC                              | TT              | 1946723828               |
| SNP_P4_3679_5515026 | NC_021160.1    | Ca_kabuli_chr01 | 5515026                 | TT                              | CC              | 1946723830               |
| SNP_P4_3680_5516843 | NC_021160.1    | Ca_kabuli_chr01 | 5516843                 | TT                              | AA              | 1946723832               |



| SNPs IDs            | Chromosome IDs | Chromosomes     | Physical positions (bp) | CDC Frontier (Reference genome) | (ILWC46 & LPNB) | NCBI SNPdb Accession IDs |
|---------------------|----------------|-----------------|-------------------------|---------------------------------|-----------------|--------------------------|
| SNP_P4_3681_5517123 | NC_021160.1    | Ca_kabuli_chr01 | 5517123                 | AA                              | TT              | 1946723834               |
| SNP_P4_3682_5518134 | NC_021160.1    | Ca_kabuli_chr01 | 5518134                 | AA                              | CC              | 1946723836               |
| SNP_P4_3683_5519577 | NC_021160.1    | Ca_kabuli_chr01 | 5519577                 | CC                              | TT              | 1946723838               |
| SNP_P4_3684_5519675 | NC_021160.1    | Ca_kabuli_chr01 | 5519675                 | AA                              | TT              | 1946723840               |
| SNP_P4_3685_5520179 | NC_021160.1    | Ca_kabuli_chr01 | 5520179                 | TT                              | CC              | 1946723842               |
| SNP_P4_3686_5520448 | NC_021160.1    | Ca_kabuli_chr01 | 5520448                 | CC                              | TT              | 1946723844               |
| SNP_P4_3687_5520460 | NC_021160.1    | Ca_kabuli_chr01 | 5520460                 | CC                              | AA              | 1946723846               |
| SNP_P4_3688_5520478 | NC_021160.1    | Ca_kabuli_chr01 | 5520478                 | CC                              | TT              | 1946723848               |
| SNP_P4_3689_5520618 | NC_021160.1    | Ca_kabuli_chr01 | 5520618                 | TT                              | CC              | 1946723850               |
| SNP_P4_3690_5520765 | NC_021160.1    | Ca_kabuli_chr01 | 5520765                 | CC                              | TT              | 1946723852               |
| SNP_P4_3691_5520830 | NC_021160.1    | Ca_kabuli_chr01 | 5520830                 | TT                              | AA              | 1946723854               |
| SNP_P4_3692_5520934 | NC_021160.1    | Ca_kabuli_chr01 | 5520934                 | TT                              | CC              | 1946723856               |
| SNP_P4_3693_5530610 | NC_021160.1    | Ca_kabuli_chr01 | 5530610                 | AA                              | CC              | 1946723858               |
| SNP_P4_3694_5530639 | NC_021160.1    | Ca_kabuli_chr01 | 5530639                 | CC                              | GG              | 1946723860               |
| SNP_P4_3696_5544156 | NC_021160.1    | Ca_kabuli_chr01 | 5544156                 | GG                              | AA              | 1946723862               |
| SNP_P4_3697_5559703 | NC_021160.1    | Ca_kabuli_chr01 | 5559703                 | TT                              | CC              | 1946723864               |
| SNP_P4_3698_5571755 | NC_021160.1    | Ca_kabuli_chr01 | 5571755                 | AA                              | GG              | 1946723866               |
| SNP_P4_3699_5588858 | NC_021160.1    | Ca_kabuli_chr01 | 5588858                 | CC                              | GG              | 1946723868               |
| SNP_P4_3700_5598597 | NC_021160.1    | Ca_kabuli_chr01 | 5598597                 | CC                              | GG              | 1946723870               |
| SNP_P4_3701_5618859 | NC_021160.1    | Ca_kabuli_chr01 | 5618859                 | AA                              | CC              | 1946723872               |
| SNP_P4_3702_5664260 | NC_021160.1    | Ca_kabuli_chr01 | 5664260                 | GG                              | CC              | 1946723874               |
| SNP_P4_3703_5676437 | NC_021160.1    | Ca_kabuli_chr01 | 5676437                 | GG                              | TT              | 1946723876               |
| SNP_P4_3704_5677519 | NC_021160.1    | Ca_kabuli_chr01 | 5677519                 | CC                              | TT              | 1946723878               |
| SNP_P4_3705_5741451 | NC_021160.1    | Ca_kabuli_chr01 | 5741451                 | TT                              | CC              | 1946723880               |
| SNP_P4_3706_5743745 | NC_021160.1    | Ca_kabuli_chr01 | 5743745                 | AA                              | TT              | 1946723882               |
| SNP_P4_3707_5786698 | NC_021160.1    | Ca_kabuli_chr01 | 5786698                 | AA                              | TT              | 1946723884               |
| SNP_P4_3708_5793534 | NC_021160.1    | Ca_kabuli_chr01 | 5793534                 | CC                              | TT              | 1946723886               |
| SNP_P4_3709_5793912 | NC_021160.1    | Ca_kabuli_chr01 | 5793912                 | GG                              | CC              | 1946723888               |
| SNP_P4_3710_5794717 | NC_021160.1    | Ca_kabuli_chr01 | 5794717                 | CC                              | TT              | 1946723890               |
| SNP_P4_3711_5803260 | NC_021160.1    | Ca_kabuli_chr01 | 5803260                 | GG                              | AA              | 1946723892               |
| SNP_P4_3712_5803429 | NC_021160.1    | Ca_kabuli_chr01 | 5803429                 | TT                              | AA              | 1946723894               |
| SNP_P4_3713_5803435 | NC_021160.1    | Ca_kabuli_chr01 | 5803435                 | AA                              | CC              | 1946723896               |
| SNP_P4_3715_5803850 | NC_021160.1    | Ca_kabuli_chr01 | 5803850                 | GG                              | AA              | 1946723898               |
| SNP_P4_3716_5804028 | NC_021160.1    | Ca_kabuli_chr01 | 5804028                 | GG                              | AA              | 1946723900               |
| SNP_P4_3718_5804227 | NC_021160.1    | Ca_kabuli_chr01 | 5804227                 | GG                              | AA              | 1946723902               |
| SNP_P4_3719_5804381 | NC_021160.1    | Ca_kabuli_chr01 | 5804381                 | TT                              | AA              | 1946723904               |
| SNP_P4_3720_5819238 | NC_021160.1    | Ca_kabuli_chr01 | 5819238                 | AA                              | TT              | 1946723906               |
| SNP_P4_3721_5819239 | NC_021160.1    | Ca_kabuli_chr01 | 5819239                 | TT                              | CC              | 1946723908               |
| SNP_P4_3722_5821799 | NC_021160.1    | Ca_kabuli_chr01 | 5821799                 | GG                              | AA              | 1946723910               |
| SNP_P4_3723_5851277 | NC_021160.1    | Ca_kabuli_chr01 | 5851277                 | CC                              | TT              | 1946723912               |
| SNP_P4_3726_5897722 | NC_021160.1    | Ca_kabuli_chr01 | 5897722                 | TT                              | CC              | 1946723914               |
| SNP_P4_3727_5897738 | NC_021160.1    | Ca_kabuli_chr01 | 5897738                 | GG                              | TT              | 1946723916               |

| SNPs IDs            | Chromosome IDs | Chromosomes     | Physical positions (bp) | CDC Frontier (Reference genome) | (ILWC46 & LPNB) | NCBI SNPdb Accession IDs |
|---------------------|----------------|-----------------|-------------------------|---------------------------------|-----------------|--------------------------|
| SNP_P4_3728_5897855 | NC_021160.1    | Ca_kabuli_chr01 | 5897855                 | AA                              | GG              | 1946723918               |
| SNP_P4_3729_5929653 | NC_021160.1    | Ca_kabuli_chr01 | 5929653                 | CC                              | TT              | 1946723920               |
| SNP_P4_3730_5929654 | NC_021160.1    | Ca_kabuli_chr01 | 5929654                 | CC                              | TT              | 1946723922               |
| SNP_P4_3731_5941313 | NC_021160.1    | Ca_kabuli_chr01 | 5941313                 | GG                              | AA              | 1946723924               |
| SNP_P4_3732_5947623 | NC_021160.1    | Ca_kabuli_chr01 | 5947623                 | AA                              | GG              | 1946723926               |
| SNP_P4_3734_5960997 | NC_021160.1    | Ca_kabuli_chr01 | 5960997                 | AA                              | GG              | 1946723928               |
| SNP_P4_3735_5960998 | NC_021160.1    | Ca_kabuli_chr01 | 5960998                 | TT                              | AA              | 1946723930               |
| SNP_P4_3736_5965904 | NC_021160.1    | Ca_kabuli_chr01 | 5965904                 | TT                              | GG              | 1946723932               |
| SNP_P4_3737_5977977 | NC_021160.1    | Ca_kabuli_chr01 | 5977977                 | TT                              | CC              | 1946723934               |
| SNP_P4_3738_5986521 | NC_021160.1    | Ca_kabuli_chr01 | 5986521                 | AA                              | TT              | 1946723936               |
| SNP_P4_3739_5986743 | NC_021160.1    | Ca_kabuli_chr01 | 5986743                 | GG                              | AA              | 1946723938               |
| SNP_P4_3740_5986798 | NC_021160.1    | Ca_kabuli_chr01 | 5986798                 | AA                              | GG              | 1946723940               |
| SNP_P4_3743_6072357 | NC_021160.1    | Ca_kabuli_chr01 | 6072357                 | AA                              | TT              | 1946723942               |
| SNP_P4_3744_6072384 | NC_021160.1    | Ca_kabuli_chr01 | 6072384                 | GG                              | AA              | 1946723944               |
| SNP_P4_3745_6072387 | NC_021160.1    | Ca_kabuli_chr01 | 6072387                 | CC                              | TT              | 1946723946               |
| SNP_P4_3746_6073037 | NC_021160.1    | Ca_kabuli_chr01 | 6073037                 | CC                              | TT              | 1946723948               |
| SNP_P4_3747_6079193 | NC_021160.1    | Ca_kabuli_chr01 | 6079193                 | AA                              | GG              | 1946723950               |
| SNP_P4_3748_6106211 | NC_021160.1    | Ca_kabuli_chr01 | 6106211                 | CC                              | TT              | 1946723952               |
| SNP_P4_3749_6106227 | NC_021160.1    | Ca_kabuli_chr01 | 6106227                 | AA                              | GG              | 1946723954               |
| SNP_P4_3750_6106315 | NC_021160.1    | Ca_kabuli_chr01 | 6106315                 | CC                              | TT              | 1946723956               |
| SNP_P4_3751_6106328 | NC_021160.1    | Ca_kabuli_chr01 | 6106328                 | TT                              | CC              | 1946723958               |
| SNP_P4_3752_6106338 | NC_021160.1    | Ca_kabuli_chr01 | 6106338                 | AA                              | TT              | 1946723960               |
| SNP_P4_3753_6106339 | NC_021160.1    | Ca_kabuli_chr01 | 6106339                 | GG                              | CC              | 1946723962               |
| SNP_P4_3754_6106351 | NC_021160.1    | Ca_kabuli_chr01 | 6106351                 | AA                              | TT              | 1946723964               |
| SNP_P4_3755_6106470 | NC_021160.1    | Ca_kabuli_chr01 | 6106470                 | TT                              | CC              | 1946723966               |
| SNP_P4_3756_6106533 | NC_021160.1    | Ca_kabuli_chr01 | 6106533                 | TT                              | CC              | 1946723968               |
| SNP_P4_3757_6106563 | NC_021160.1    | Ca_kabuli_chr01 | 6106563                 | TT                              | GG              | 1946723970               |
| SNP_P4_3758_6106564 | NC_021160.1    | Ca_kabuli_chr01 | 6106564                 | AA                              | GG              | 1946723972               |
| SNP_P4_3759_6108839 | NC_021160.1    | Ca_kabuli_chr01 | 6108839                 | AA                              | TT              | 1946723975               |
| SNP_P4_3760_6108840 | NC_021160.1    | Ca_kabuli_chr01 | 6108840                 | CC                              | AA              | 1946723976               |
| SNP_P4_3761_6110318 | NC_021160.1    | Ca_kabuli_chr01 | 6110318                 | CC                              | TT              | 1946723978               |
| SNP_P4_3762_6110578 | NC_021160.1    | Ca_kabuli_chr01 | 6110578                 | TT                              | GG              | 1946723980               |
| SNP_P4_3763_6121023 | NC_021160.1    | Ca_kabuli_chr01 | 6121023                 | AA                              | GG              | 1946723982               |
| SNP_P4_3764_6123387 | NC_021160.1    | Ca_kabuli_chr01 | 6123387                 | GG                              | AA              | 1946723985               |
| SNP_P4_3765_6123408 | NC_021160.1    | Ca_kabuli_chr01 | 6123408                 | TT                              | CC              | 1946723987               |
| SNP_P4_3766_6124326 | NC_021160.1    | Ca_kabuli_chr01 | 6124326                 | GG                              | AA              | 1946723989               |
| SNP_P4_3767_6124329 | NC_021160.1    | Ca_kabuli_chr01 | 6124329                 | AA                              | GG              | 1946723991               |
| SNP_P4_3768_6126128 | NC_021160.1    | Ca_kabuli_chr01 | 6126128                 | TT                              | CC              | 1946723993               |
| SNP_P4_3769_6126129 | NC_021160.1    | Ca_kabuli_chr01 | 6126129                 | GG                              | AA              | 1946723995               |
| SNP_P4_3770_6128144 | NC_021160.1    | Ca_kabuli_chr01 | 6128144                 | CC                              | TT              | 1946723997               |
| SNP_P4_3771_6128160 | NC_021160.1    | Ca_kabuli_chr01 | 6128160                 | TT                              | CC              | 1946723999               |
| SNP_P4_3772_6128213 | NC_021160.1    | Ca_kabuli_chr01 | 6128213                 | TT                              | CC              | 1946724001               |

| SNPs IDs            | Chromosome IDs | Chromosomes     | Physical positions (bp) | CDC Frontier (Reference genome) | (ILWC46 & LPNB) | NCBI SNPdb Accession IDs |
|---------------------|----------------|-----------------|-------------------------|---------------------------------|-----------------|--------------------------|
| SNP_P4_3773_6128769 | NC_021160.1    | Ca_kabuli_chr01 | 6128769                 | CC                              | AA              | 1946724003               |
| SNP_P4_3775_6129198 | NC_021160.1    | Ca_kabuli_chr01 | 6129198                 | CC                              | TT              | 1946724005               |
| SNP_P4_3776_6129253 | NC_021160.1    | Ca_kabuli_chr01 | 6129253                 | GG                              | AA              | 1946724007               |
| SNP_P4_3777_6129408 | NC_021160.1    | Ca_kabuli_chr01 | 6129408                 | GG                              | AA              | 1946724009               |
| SNP_P4_3778_6129419 | NC_021160.1    | Ca_kabuli_chr01 | 6129419                 | CC                              | TT              | 1946724010               |
| SNP_P4_3779_6129458 | NC_021160.1    | Ca_kabuli_chr01 | 6129458                 | CC                              | TT              | 1946724012               |
| SNP_P4_3780_6129476 | NC_021160.1    | Ca_kabuli_chr01 | 6129476                 | AA                              | GG              | 1946724014               |
| SNP_P4_3781_6129563 | NC_021160.1    | Ca_kabuli_chr01 | 6129563                 | AA                              | TT              | 1946724016               |
| SNP_P4_3782_6129585 | NC_021160.1    | Ca_kabuli_chr01 | 6129585                 | AA                              | CC              | 1946724018               |
| SNP_P4_3783_6129787 | NC_021160.1    | Ca_kabuli_chr01 | 6129787                 | GG                              | AA              | 1946724020               |
| SNP_P4_3784_6129802 | NC_021160.1    | Ca_kabuli_chr01 | 6129802                 | TT                              | CC              | 1946724022               |
| SNP_P4_3786_6130939 | NC_021160.1    | Ca_kabuli_chr01 | 6130939                 | AA                              | GG              | 1946724024               |
| SNP_P4_3787_6131261 | NC_021160.1    | Ca_kabuli_chr01 | 6131261                 | CC                              | TT              | 1946724026               |
| SNP_P4_3788_6132629 | NC_021160.1    | Ca_kabuli_chr01 | 6132629                 | GG                              | AA              | 1946724028               |
| SNP_P4_3789_6133452 | NC_021160.1    | Ca_kabuli_chr01 | 6133452                 | TT                              | GG              | 1946724030               |
| SNP_P4_3790_6133482 | NC_021160.1    | Ca_kabuli_chr01 | 6133482                 | TT                              | GG              | 1946724032               |
| SNP_P4_3791_6133501 | NC_021160.1    | Ca_kabuli_chr01 | 6133501                 | TT                              | CC              | 1946724034               |
| SNP_P4_3792_6133508 | NC_021160.1    | Ca_kabuli_chr01 | 6133508                 | TT                              | CC              | 1946724036               |
| SNP_P4_3793_6133695 | NC_021160.1    | Ca_kabuli_chr01 | 6133695                 | GG                              | TT              | 1946724038               |
| SNP_P4_3794_6133725 | NC_021160.1    | Ca_kabuli_chr01 | 6133725                 | AA                              | GG              | 1946724040               |
| SNP_P4_3795_6133730 | NC_021160.1    | Ca_kabuli_chr01 | 6133730                 | AA                              | TT              | 1946724042               |
| SNP_P4_3796_6133867 | NC_021160.1    | Ca_kabuli_chr01 | 6133867                 | AA                              | TT              | 1946724044               |
| SNP_P4_3797_6134048 | NC_021160.1    | Ca_kabuli_chr01 | 6134048                 | AA                              | GG              | 1946724046               |
| SNP_P4_3799_6135289 | NC_021160.1    | Ca_kabuli_chr01 | 6135289                 | AA                              | GG              | 1946724047               |
| SNP_P4_3800_6136601 | NC_021160.1    | Ca_kabuli_chr01 | 6136601                 | AA                              | CC              | 1946724049               |
| SNP_P4_3801_6136617 | NC_021160.1    | Ca_kabuli_chr01 | 6136617                 | AA                              | GG              | 1946724051               |
| SNP_P4_3802_6136858 | NC_021160.1    | Ca_kabuli_chr01 | 6136858                 | CC                              | GG              | 1946724053               |
| SNP_P4_3803_6137892 | NC_021160.1    | Ca_kabuli_chr01 | 6137892                 | TT                              | CC              | 1946724055               |
| SNP_P4_3804_6137930 | NC_021160.1    | Ca_kabuli_chr01 | 6137930                 | CC                              | TT              | 1946724057               |
| SNP_P4_3805_6137964 | NC_021160.1    | Ca_kabuli_chr01 | 6137964                 | GG                              | TT              | 1946724059               |
| SNP_P4_3806_6137970 | NC_021160.1    | Ca_kabuli_chr01 | 6137970                 | TT                              | CC              | 1946724061               |
| SNP_P4_3807_6138019 | NC_021160.1    | Ca_kabuli_chr01 | 6138019                 | TT                              | CC              | 1946724063               |
| SNP_P4_3808_6138159 | NC_021160.1    | Ca_kabuli_chr01 | 6138159                 | AA                              | GG              | 1946724065               |
| SNP_P4_3809_6138175 | NC_021160.1    | Ca_kabuli_chr01 | 6138175                 | TT                              | CC              | 1946724067               |
| SNP_P4_3810_6138210 | NC_021160.1    | Ca_kabuli_chr01 | 6138210                 | CC                              | TT              | 1946724069               |
| SNP_P4_3811_6138250 | NC_021160.1    | Ca_kabuli_chr01 | 6138250                 | GG                              | AA              | 1946724071               |
| SNP_P4_3813_6138366 | NC_021160.1    | Ca_kabuli_chr01 | 6138366                 | AA                              | TT              | 1946724072               |
| SNP_P4_3814_6138442 | NC_021160.1    | Ca_kabuli_chr01 | 6138442                 | GG                              | AA              | 1946724074               |
| SNP_P4_3815_6138460 | NC_021160.1    | Ca_kabuli_chr01 | 6138460                 | CC                              | AA              | 1946724076               |
| SNP_P4_3816_6138484 | NC_021160.1    | Ca_kabuli_chr01 | 6138484                 | AA                              | GG              | 1946724078               |
| SNP_P4_3817_6138510 | NC_021160.1    | Ca_kabuli_chr01 | 6138510                 | GG                              | TT              | 1946724080               |
| SNP_P4_3818_6138537 | NC_021160.1    | Ca_kabuli_chr01 | 6138537                 | TT                              | CC              | 1946724082               |

| SNPs IDs            | Chromosome IDs | Chromosomes     | Physical positions (bp) | CDC Frontier (Reference genome) | (ILWC46 & LPNB) | NCBI SNPdb Accession IDs |
|---------------------|----------------|-----------------|-------------------------|---------------------------------|-----------------|--------------------------|
| SNP_P4_3819_6138840 | NC_021160.1    | Ca_kabuli_chr01 | 6138840                 | GG                              | AA              | 1946724084               |
| SNP_P4_3820_6138857 | NC_021160.1    | Ca_kabuli_chr01 | 6138857                 | CC                              | TT              | 1946724086               |
| SNP_P4_3821_6141833 | NC_021160.1    | Ca_kabuli_chr01 | 6141833                 | CC                              | GG              | 1946724088               |
| SNP_P4_3822_6141938 | NC_021160.1    | Ca_kabuli_chr01 | 6141938                 | AA                              | TT              | 1946724090               |
| SNP_P4_3823_6141952 | NC_021160.1    | Ca_kabuli_chr01 | 6141952                 | CC                              | TT              | 1946724092               |
| SNP_P4_3824_6142386 | NC_021160.1    | Ca_kabuli_chr01 | 6142386                 | TT                              | GG              | 1946724094               |
| SNP_P4_3825_6143940 | NC_021160.1    | Ca_kabuli_chr01 | 6143940                 | CC                              | AA              | 1946724096               |
| SNP_P4_3826_6145607 | NC_021160.1    | Ca_kabuli_chr01 | 6145607                 | TT                              | CC              | 1946724098               |
| SNP_P4_3827_6147792 | NC_021160.1    | Ca_kabuli_chr01 | 6147792                 | AA                              | TT              | 1946724100               |
| SNP_P4_3828_6147805 | NC_021160.1    | Ca_kabuli_chr01 | 6147805                 | AA                              | CC              | 1946724102               |
| SNP_P4_3829_6147828 | NC_021160.1    | Ca_kabuli_chr01 | 6147828                 | TT                              | GG              | 1946724104               |
| SNP_P4_3830_6147837 | NC_021160.1    | Ca_kabuli_chr01 | 6147837                 | GG                              | TT              | 1946724106               |
| SNP_P4_3832_6148366 | NC_021160.1    | Ca_kabuli_chr01 | 6148366                 | GG                              | AA              | 1946724108               |
| SNP_P4_3833_6148922 | NC_021160.1    | Ca_kabuli_chr01 | 6148922                 | GG                              | AA              | 1946724110               |
| SNP_P4_3834_6148961 | NC_021160.1    | Ca_kabuli_chr01 | 6148961                 | TT                              | CC              | 1946724112               |
| SNP_P4_3836_6149516 | NC_021160.1    | Ca_kabuli_chr01 | 6149516                 | GG                              | CC              | 1946724114               |
| SNP_P4_3837_6149576 | NC_021160.1    | Ca_kabuli_chr01 | 6149576                 | TT                              | CC              | 1946724115               |
| SNP_P4_3838_6149652 | NC_021160.1    | Ca_kabuli_chr01 | 6149652                 | CC                              | AA              | 1946724117               |
| SNP_P4_3839_6150034 | NC_021160.1    | Ca_kabuli_chr01 | 6150034                 | TT                              | CC              | 1946724119               |
| SNP_P4_3840_6150056 | NC_021160.1    | Ca_kabuli_chr01 | 6150056                 | TT                              | CC              | 1946724121               |
| SNP_P4_3841_6150161 | NC_021160.1    | Ca_kabuli_chr01 | 6150161                 | TT                              | CC              | 1946724123               |
| SNP_P4_3842_6151269 | NC_021160.1    | Ca_kabuli_chr01 | 6151269                 | AA                              | CC              | 1946724125               |
| SNP_P4_3843_6151625 | NC_021160.1    | Ca_kabuli_chr01 | 6151625                 | GG                              | TT              | 1946724127               |
| SNP_P4_3844_6154062 | NC_021160.1    | Ca_kabuli_chr01 | 6154062                 | CC                              | TT              | 1946724129               |
| SNP_P4_3845_6154066 | NC_021160.1    | Ca_kabuli_chr01 | 6154066                 | CC                              | TT              | 1946724131               |
| SNP_P4_3846_6154168 | NC_021160.1    | Ca_kabuli_chr01 | 6154168                 | CC                              | TT              | 1946724133               |
| SNP_P4_3847_6157493 | NC_021160.1    | Ca_kabuli_chr01 | 6157493                 | GG                              | AA              | 1946724135               |
| SNP_P4_3848_6157514 | NC_021160.1    | Ca_kabuli_chr01 | 6157514                 | AA                              | GG              | 1946724137               |
| SNP_P4_3849_6157531 | NC_021160.1    | Ca_kabuli_chr01 | 6157531                 | CC                              | TT              | 1946724139               |
| SNP_P4_3850_6157538 | NC_021160.1    | Ca_kabuli_chr01 | 6157538                 | GG                              | AA              | 1946724141               |
| SNP_P4_3851_6157544 | NC_021160.1    | Ca_kabuli_chr01 | 6157544                 | AA                              | GG              | 1946724143               |
| SNP_P4_3852_6157565 | NC_021160.1    | Ca_kabuli_chr01 | 6157565                 | GG                              | AA              | 1946724145               |
| SNP_P4_3853_6157583 | NC_021160.1    | Ca_kabuli_chr01 | 6157583                 | TT                              | CC              | 1946724147               |
| SNP_P4_3857_6158461 | NC_021160.1    | Ca_kabuli_chr01 | 6158461                 | CC                              | AA              | 1946724149               |
| SNP_P4_3858_6158601 | NC_021160.1    | Ca_kabuli_chr01 | 6158601                 | TT                              | CC              | 1946724151               |
| SNP_P4_3859_6158602 | NC_021160.1    | Ca_kabuli_chr01 | 6158602                 | CC                              | TT              | 1946724153               |
| SNP_P4_3860_6158780 | NC_021160.1    | Ca_kabuli_chr01 | 6158780                 | GG                              | AA              | 1946724155               |
| SNP_P4_3861_6159040 | NC_021160.1    | Ca_kabuli_chr01 | 6159040                 | GG                              | AA              | 1946724157               |
| SNP_P4_3862_6159045 | NC_021160.1    | Ca_kabuli_chr01 | 6159045                 | AA                              | GG              | 1946724159               |
| SNP_P4_3863_6159049 | NC_021160.1    | Ca_kabuli_chr01 | 6159049                 | TT                              | CC              | 1946724161               |
| SNP_P4_3864_6159335 | NC_021160.1    | Ca_kabuli_chr01 | 6159335                 | GG                              | AA              | 1946724163               |
| SNP_P4_3865_6160664 | NC_021160.1    | Ca_kabuli_chr01 | 6160664                 | TT                              | CC              | 1946724165               |

| SNPs IDs            | Chromosome IDs | Chromosomes     | Physical positions (bp) | CDC Frontier (Reference genome) | (ILWC46 & LPNB) | NCBI SNPdb Accession IDs |
|---------------------|----------------|-----------------|-------------------------|---------------------------------|-----------------|--------------------------|
| SNP_P4_3866_6161969 | NC_021160.1    | Ca_kabuli_chr01 | 6161969                 | TT                              | AA              | 1946724167               |
| SNP_P4_3867_6161970 | NC_021160.1    | Ca_kabuli_chr01 | 6161970                 | GG                              | AA              | 1946724169               |
| SNP_P4_3868_6161973 | NC_021160.1    | Ca_kabuli_chr01 | 6161973                 | TT                              | CC              | 1946724171               |
| SNP_P4_3869_6161983 | NC_021160.1    | Ca_kabuli_chr01 | 6161983                 | CC                              | TT              | 1946724173               |
| SNP_P4_3872_6167788 | NC_021160.1    | Ca_kabuli_chr01 | 6167788                 | TT                              | AA              | 1946724175               |
| SNP_P4_3873_6167793 | NC_021160.1    | Ca_kabuli_chr01 | 6167793                 | AA                              | TT              | 1946724177               |
| SNP_P4_3874_6167799 | NC_021160.1    | Ca_kabuli_chr01 | 6167799                 | CC                              | TT              | 1946724179               |
| SNP_P4_3875_6168251 | NC_021160.1    | Ca_kabuli_chr01 | 6168251                 | CC                              | TT              | 1946724181               |
| SNP_P4_3876_6171141 | NC_021160.1    | Ca_kabuli_chr01 | 6171141                 | TT                              | GG              | 1946724183               |
| SNP_P4_3877_6173871 | NC_021160.1    | Ca_kabuli_chr01 | 6173871                 | AA                              | GG              | 1946724185               |
| SNP_P4_3878_6174296 | NC_021160.1    | Ca_kabuli_chr01 | 6174296                 | TT                              | AA              | 1946724187               |
| SNP_P4_3879_6174575 | NC_021160.1    | Ca_kabuli_chr01 | 6174575                 | GG                              | CC              | 1946724189               |
| SNP_P4_3880_6176562 | NC_021160.1    | Ca_kabuli_chr01 | 6176562                 | GG                              | AA              | 1946724191               |
| SNP_P4_3881_6176898 | NC_021160.1    | Ca_kabuli_chr01 | 6176898                 | CC                              | TT              | 1946724193               |
| SNP_P4_3882_6176916 | NC_021160.1    | Ca_kabuli_chr01 | 6176916                 | CC                              | TT              | 1946724195               |
| SNP_P4_3883_6177486 | NC_021160.1    | Ca_kabuli_chr01 | 6177486                 | CC                              | AA              | 1946724197               |
| SNP_P4_3884_6178055 | NC_021160.1    | Ca_kabuli_chr01 | 6178055                 | CC                              | TT              | 1946724199               |
| SNP_P4_3886_6190645 | NC_021160.1    | Ca_kabuli_chr01 | 6190645                 | CC                              | AA              | 1946724201               |
| SNP_P4_3887_6190712 | NC_021160.1    | Ca_kabuli_chr01 | 6190712                 | AA                              | CC              | 1946724203               |
| SNP_P4_3888_6193249 | NC_021160.1    | Ca_kabuli_chr01 | 6193249                 | GG                              | AA              | 1946724205               |
| SNP_P4_3889_6193698 | NC_021160.1    | Ca_kabuli_chr01 | 6193698                 | AA                              | GG              | 1946724207               |
| SNP_P4_3890_6193716 | NC_021160.1    | Ca_kabuli_chr01 | 6193716                 | GG                              | AA              | 1946724208               |
| SNP_P4_3891_6201310 | NC_021160.1    | Ca_kabuli_chr01 | 6201310                 | TT                              | CC              | 1946724210               |
| SNP_P4_3892_6201354 | NC_021160.1    | Ca_kabuli_chr01 | 6201354                 | AA                              | GG              | 1946724212               |
| SNP_P4_3893_6201697 | NC_021160.1    | Ca_kabuli_chr01 | 6201697                 | GG                              | AA              | 1946724214               |
| SNP_P4_3894_6201917 | NC_021160.1    | Ca_kabuli_chr01 | 6201917                 | TT                              | CC              | 1946724216               |
| SNP_P4_3895_6201992 | NC_021160.1    | Ca_kabuli_chr01 | 6201992                 | AA                              | TT              | 1946724218               |
| SNP_P4_3896_6201998 | NC_021160.1    | Ca_kabuli_chr01 | 6201998                 | CC                              | AA              | 1946724220               |
| SNP_P4_3897_6202237 | NC_021160.1    | Ca_kabuli_chr01 | 6202237                 | GG                              | AA              | 1946724222               |
| SNP_P4_3898_6202279 | NC_021160.1    | Ca_kabuli_chr01 | 6202279                 | GG                              | CC              | 1946724224               |
| SNP_P4_3900_6202766 | NC_021160.1    | Ca_kabuli_chr01 | 6202766                 | TT                              | AA              | 1946724225               |
| SNP_P4_3902_6205079 | NC_021160.1    | Ca_kabuli_chr01 | 6205079                 | AA                              | GG              | 1946724227               |
| SNP_P4_3904_6205421 | NC_021160.1    | Ca_kabuli_chr01 | 6205421                 | AA                              | GG              | 1946724229               |
| SNP_P4_3905_6205506 | NC_021160.1    | Ca_kabuli_chr01 | 6205506                 | CC                              | TT              | 1946724231               |
| SNP_P4_3906_6205630 | NC_021160.1    | Ca_kabuli_chr01 | 6205630                 | GG                              | AA              | 1946724233               |
| SNP_P4_3907_6206101 | NC_021160.1    | Ca_kabuli_chr01 | 6206101                 | GG                              | TT              | 1946724235               |
| SNP_P4_3908_6206224 | NC_021160.1    | Ca_kabuli_chr01 | 6206224                 | AA                              | GG              | 1946724236               |
| SNP_P4_3909_6206426 | NC_021160.1    | Ca_kabuli_chr01 | 6206426                 | CC                              | TT              | 1946724237               |
| SNP_P4_3910_6206449 | NC_021160.1    | Ca_kabuli_chr01 | 6206449                 | CC                              | TT              | 1946724238               |
| SNP_P4_3911_6206458 | NC_021160.1    | Ca_kabuli_chr01 | 6206458                 | GG                              | AA              | 1946724239               |
| SNP_P4_3912_6206465 | NC_021160.1    | Ca_kabuli_chr01 | 6206465                 | CC                              | TT              | 1946724240               |
| SNP_P4_3913_6206495 | NC_021160.1    | Ca_kabuli_chr01 | 6206495                 | TT                              | CC              | 1946724242               |

| SNPs IDs            | Chromosome IDs | Chromosomes     | Physical positions (bp) | CDC Frontier (Reference genome) | (ILWC46 & LPNB) | NCBI SNPdb Accession IDs |
|---------------------|----------------|-----------------|-------------------------|---------------------------------|-----------------|--------------------------|
| SNP_P4_3914_6206543 | NC_021160.1    | Ca_kabuli_chr01 | 6206543                 | AA                              | CC              | 1946724244               |
| SNP_P4_3915_6216123 | NC_021160.1    | Ca_kabuli_chr01 | 6216123                 | CC                              | TT              | 1946724246               |
| SNP_P4_3916_6216673 | NC_021160.1    | Ca_kabuli_chr01 | 6216673                 | TT                              | CC              | 1946724248               |
| SNP_P4_3918_6216705 | NC_021160.1    | Ca_kabuli_chr01 | 6216705                 | TT                              | CC              | 1946724250               |
| SNP_P4_3919_6216746 | NC_021160.1    | Ca_kabuli_chr01 | 6216746                 | GG                              | TT              | 1946724252               |
| SNP_P4_3920_6221323 | NC_021160.1    | Ca_kabuli_chr01 | 6221323                 | AA                              | CC              | 1946724254               |
| SNP_P4_3921_6221595 | NC_021160.1    | Ca_kabuli_chr01 | 6221595                 | CC                              | TT              | 1946724256               |
| SNP_P4_3922_6222208 | NC_021160.1    | Ca_kabuli_chr01 | 6222208                 | GG                              | AA              | 1946724258               |
| SNP_P4_3923_6222935 | NC_021160.1    | Ca_kabuli_chr01 | 6222935                 | TT                              | AA              | 1946724260               |
| SNP_P4_3924_6223606 | NC_021160.1    | Ca_kabuli_chr01 | 6223606                 | AA                              | TT              | 1946724262               |
| SNP_P4_3925_6225563 | NC_021160.1    | Ca_kabuli_chr01 | 6225563                 | TT                              | CC              | 1946724264               |
| SNP_P4_3926_6226165 | NC_021160.1    | Ca_kabuli_chr01 | 6226165                 | CC                              | GG              | 1946724267               |
| SNP_P4_3927_6232085 | NC_021160.1    | Ca_kabuli_chr01 | 6232085                 | AA                              | GG              | 1946724269               |
| SNP_P4_3928_6232110 | NC_021160.1    | Ca_kabuli_chr01 | 6232110                 | AA                              | GG              | 1946724271               |
| SNP_P4_3930_6234534 | NC_021160.1    | Ca_kabuli_chr01 | 6234534                 | GG                              | CC              | 1946724273               |
| SNP_P4_3931_6255112 | NC_021160.1    | Ca_kabuli_chr01 | 6255112                 | AA                              | TT              | 1946724275               |
| SNP_P4_3932_6255346 | NC_021160.1    | Ca_kabuli_chr01 | 6255346                 | TT                              | CC              | 1946724277               |
| SNP_P4_3933_6255856 | NC_021160.1    | Ca_kabuli_chr01 | 6255856                 | TT                              | GG              | 1946724279               |
| SNP_P4_3934_6255860 | NC_021160.1    | Ca_kabuli_chr01 | 6255860                 | AA                              | CC              | 1946724281               |
| SNP_P4_3935_6257359 | NC_021160.1    | Ca_kabuli_chr01 | 6257359                 | AA                              | GG              | 1946724283               |
| SNP_P4_3936_6259419 | NC_021160.1    | Ca_kabuli_chr01 | 6259419                 | GG                              | TT              | 1946724285               |
| SNP_P4_3937_6260670 | NC_021160.1    | Ca_kabuli_chr01 | 6260670                 | GG                              | AA              | 1946724287               |
| SNP_P4_3938_6260713 | NC_021160.1    | Ca_kabuli_chr01 | 6260713                 | GG                              | AA              | 1946724289               |
| SNP_P4_3939_6260734 | NC_021160.1    | Ca_kabuli_chr01 | 6260734                 | CC                              | TT              | 1946724291               |
| SNP_P4_3940_6262529 | NC_021160.1    | Ca_kabuli_chr01 | 6262529                 | TT                              | GG              | 1946724293               |
| SNP_P4_3941_6263170 | NC_021160.1    | Ca_kabuli_chr01 | 6263170                 | CC                              | AA              | 1946724295               |
| SNP_P4_3942_6265122 | NC_021160.1    | Ca_kabuli_chr01 | 6265122                 | GG                              | AA              | 1946724297               |
| SNP_P4_3944_6267669 | NC_021160.1    | Ca_kabuli_chr01 | 6267669                 | AA                              | GG              | 1946724299               |
| SNP_P4_3946_6267711 | NC_021160.1    | Ca_kabuli_chr01 | 6267711                 | AA                              | GG              | 1946724301               |
| SNP_P4_3947_6267722 | NC_021160.1    | Ca_kabuli_chr01 | 6267722                 | AA                              | GG              | 1946724303               |
| SNP_P4_3948_6268503 | NC_021160.1    | Ca_kabuli_chr01 | 6268503                 | AA                              | TT              | 1946724305               |
| SNP_P4_3949_6268514 | NC_021160.1    | Ca_kabuli_chr01 | 6268514                 | TT                              | CC              | 1946724307               |
| SNP_P4_3950_6268519 | NC_021160.1    | Ca_kabuli_chr01 | 6268519                 | CC                              | TT              | 1946724309               |
| SNP_P4_3951_6270501 | NC_021160.1    | Ca_kabuli_chr01 | 6270501                 | CC                              | TT              | 1946724311               |
| SNP_P4_3952_6271265 | NC_021160.1    | Ca_kabuli_chr01 | 6271265                 | GG                              | AA              | 1946724313               |
| SNP_P4_3953_6276219 | NC_021160.1    | Ca_kabuli_chr01 | 6276219                 | AA                              | CC              | 1946724315               |
| SNP_P4_3954_6276782 | NC_021160.1    | Ca_kabuli_chr01 | 6276782                 | GG                              | AA              | 1946724317               |
| SNP_P4_3955_6279440 | NC_021160.1    | Ca_kabuli_chr01 | 6279440                 | AA                              | GG              | 1946724319               |
| SNP_P4_3956_6279445 | NC_021160.1    | Ca_kabuli_chr01 | 6279445                 | AA                              | TT              | 1946724321               |
| SNP_P4_3957_6279503 | NC_021160.1    | Ca_kabuli_chr01 | 6279503                 | CC                              | GG              | 1946724323               |
| SNP_P4_3959_6280109 | NC_021160.1    | Ca_kabuli_chr01 | 6280109                 | GG                              | TT              | 1946724325               |
| SNP_P4_3960_6281101 | NC_021160.1    | Ca_kabuli_chr01 | 6281101                 | GG                              | AA              | 1946724327               |

| SNPs IDs            | Chromosome IDs | Chromosomes     | Physical positions (bp) | CDC Frontier (Reference genome) | (ILWC46 & LPNB) | NCBI SNPdb Accession IDs |
|---------------------|----------------|-----------------|-------------------------|---------------------------------|-----------------|--------------------------|
| SNP_P4_3961_6281812 | NC_021160.1    | Ca_kabuli_chr01 | 6281812                 | GG                              | AA              | 1946724329               |
| SNP_P4_3962_6281948 | NC_021160.1    | Ca_kabuli_chr01 | 6281948                 | TT                              | GG              | 1946724330               |
| SNP_P4_3963_6282018 | NC_021160.1    | Ca_kabuli_chr01 | 6282018                 | AA                              | GG              | 1946724332               |
| SNP_P4_3964_6282198 | NC_021160.1    | Ca_kabuli_chr01 | 6282198                 | CC                              | TT              | 1946724334               |
| SNP_P4_3965_6282332 | NC_021160.1    | Ca_kabuli_chr01 | 6282332                 | TT                              | CC              | 1946724336               |
| SNP_P4_3966_6282339 | NC_021160.1    | Ca_kabuli_chr01 | 6282339                 | GG                              | AA              | 1946724338               |
| SNP_P4_3967_6282379 | NC_021160.1    | Ca_kabuli_chr01 | 6282379                 | TT                              | AA              | 1946724340               |
| SNP_P4_3968_6282973 | NC_021160.1    | Ca_kabuli_chr01 | 6282973                 | AA                              | GG              | 1946724342               |
| SNP_P4_3969_6284983 | NC_021160.1    | Ca_kabuli_chr01 | 6284983                 | TT                              | CC              | 1946724344               |
| SNP_P4_3970_6286190 | NC_021160.1    | Ca_kabuli_chr01 | 6286190                 | GG                              | AA              | 1946724346               |
| SNP_P4_3971_6287076 | NC_021160.1    | Ca_kabuli_chr01 | 6287076                 | CC                              | AA              | 1946724348               |
| SNP_P4_3972_6287176 | NC_021160.1    | Ca_kabuli_chr01 | 6287176                 | GG                              | TT              | 1946724351               |
| SNP_P4_3973_6288048 | NC_021160.1    | Ca_kabuli_chr01 | 6288048                 | AA                              | GG              | 1946724353               |
| SNP_P4_3974_6288062 | NC_021160.1    | Ca_kabuli_chr01 | 6288062                 | CC                              | TT              | 1946724355               |
| SNP_P4_3975_6288614 | NC_021160.1    | Ca_kabuli_chr01 | 6288614                 | CC                              | GG              | 1946724357               |
| SNP_P4_3976_6288893 | NC_021160.1    | Ca_kabuli_chr01 | 6288893                 | TT                              | AA              | 1946724359               |
| SNP_P4_3977_6289556 | NC_021160.1    | Ca_kabuli_chr01 | 6289556                 | CC                              | TT              | 1946724361               |
| SNP_P4_3978_6290278 | NC_021160.1    | Ca_kabuli_chr01 | 6290278                 | GG                              | AA              | 1946724363               |
| SNP_P4_3979_6290613 | NC_021160.1    | Ca_kabuli_chr01 | 6290613                 | AA                              | GG              | 1946724365               |
| SNP_P4_3980_6291369 | NC_021160.1    | Ca_kabuli_chr01 | 6291369                 | TT                              | GG              | 1946724367               |
| SNP_P4_3981_6291381 | NC_021160.1    | Ca_kabuli_chr01 | 6291381                 | TT                              | CC              | 1946724369               |
| SNP_P4_3982_6291480 | NC_021160.1    | Ca_kabuli_chr01 | 6291480                 | AA                              | GG              | 1946724371               |
| SNP_P4_3983_6291650 | NC_021160.1    | Ca_kabuli_chr01 | 6291650                 | GG                              | CC              | 1946724373               |
| SNP_P4_3984_6292693 | NC_021160.1    | Ca_kabuli_chr01 | 6292693                 | GG                              | AA              | 1946724375               |
| SNP_P4_3985_6292856 | NC_021160.1    | Ca_kabuli_chr01 | 6292856                 | TT                              | AA              | 1946724377               |
| SNP_P4_3986_6292859 | NC_021160.1    | Ca_kabuli_chr01 | 6292859                 | CC                              | AA              | 1946724379               |
| SNP_P4_3987_6292894 | NC_021160.1    | Ca_kabuli_chr01 | 6292894                 | TT                              | CC              | 1946724381               |
| SNP_P4_3988_6292898 | NC_021160.1    | Ca_kabuli_chr01 | 6292898                 | AA                              | GG              | 1946724383               |
| SNP_P4_3989_6293000 | NC_021160.1    | Ca_kabuli_chr01 | 6293000                 | GG                              | AA              | 1946724385               |
| SNP_P4_3991_6295108 | NC_021160.1    | Ca_kabuli_chr01 | 6295108                 | AA                              | CC              | 1946724387               |
| SNP_P4_3992_6295970 | NC_021160.1    | Ca_kabuli_chr01 | 6295970                 | AA                              | TT              | 1946724389               |
| SNP_P4_3993_6296082 | NC_021160.1    | Ca_kabuli_chr01 | 6296082                 | GG                              | AA              | 1946724391               |
| SNP_P4_3994_6296083 | NC_021160.1    | Ca_kabuli_chr01 | 6296083                 | TT                              | AA              | 1946724393               |
| SNP_P4_3995_6296124 | NC_021160.1    | Ca_kabuli_chr01 | 6296124                 | GG                              | TT              | 1946724395               |
| SNP_P4_3996_6298006 | NC_021160.1    | Ca_kabuli_chr01 | 6298006                 | TT                              | CC              | 1946724397               |
| SNP_P4_3997_6298028 | NC_021160.1    | Ca_kabuli_chr01 | 6298028                 | GG                              | TT              | 1946724399               |
| SNP_P4_3998_6298099 | NC_021160.1    | Ca_kabuli_chr01 | 6298099                 | GG                              | AA              | 1946724401               |
| SNP_P4_3999_6299231 | NC_021160.1    | Ca_kabuli_chr01 | 6299231                 | AA                              | GG              | 1946724403               |
| SNP_P4_4000_6299234 | NC_021160.1    | Ca_kabuli_chr01 | 6299234                 | CC                              | TT              | 1946724405               |
| SNP_P4_4001_6299236 | NC_021160.1    | Ca_kabuli_chr01 | 6299236                 | CC                              | TT              | 1946724407               |
| SNP_P4_4002_6299237 | NC_021160.1    | Ca_kabuli_chr01 | 6299237                 | CC                              | TT              | 1946724409               |
| SNP_P4_4003_6299258 | NC_021160.1    | Ca_kabuli_chr01 | 6299258                 | TT                              | CC              | 1946724411               |

| SNPs IDs            | Chromosome IDs | Chromosomes     | Physical positions (bp) | CDC Frontier (Reference genome) | (ILWC46 & LPNB) | NCBI SNPdb Accession IDs |
|---------------------|----------------|-----------------|-------------------------|---------------------------------|-----------------|--------------------------|
| SNP_P4_4004_6299314 | NC_021160.1    | Ca_kabuli_chr01 | 6299314                 | AA                              | GG              | 1946724413               |
| SNP_P4_4005_6299604 | NC_021160.1    | Ca_kabuli_chr01 | 6299604                 | GG                              | AA              | 1946724415               |
| SNP_P4_4006_6299632 | NC_021160.1    | Ca_kabuli_chr01 | 6299632                 | TT                              | AA              | 1946724416               |
| SNP_P4_4007_6299885 | NC_021160.1    | Ca_kabuli_chr01 | 6299885                 | TT                              | CC              | 1946724418               |
| SNP_P4_4008_6299912 | NC_021160.1    | Ca_kabuli_chr01 | 6299912                 | TT                              | GG              | 1946724420               |
| SNP_P4_4009_6300288 | NC_021160.1    | Ca_kabuli_chr01 | 6300288                 | AA                              | TT              | 1946724422               |
| SNP_P4_4010_6300354 | NC_021160.1    | Ca_kabuli_chr01 | 6300354                 | AA                              | GG              | 1946724424               |
| SNP_P4_4011_6300485 | NC_021160.1    | Ca_kabuli_chr01 | 6300485                 | GG                              | AA              | 1946724426               |
| SNP_P4_4012_6302026 | NC_021160.1    | Ca_kabuli_chr01 | 6302026                 | CC                              | AA              | 1946724428               |
| SNP_P4_4013_6302029 | NC_021160.1    | Ca_kabuli_chr01 | 6302029                 | CC                              | TT              | 1946724430               |
| SNP_P4_4014_6302599 | NC_021160.1    | Ca_kabuli_chr01 | 6302599                 | TT                              | GG              | 1946724432               |
| SNP_P4_4015_6303379 | NC_021160.1    | Ca_kabuli_chr01 | 6303379                 | CC                              | AA              | 1946724434               |
| SNP_P4_4016_6303438 | NC_021160.1    | Ca_kabuli_chr01 | 6303438                 | AA                              | CC              | 1946724436               |
| SNP_P4_4017_6303828 | NC_021160.1    | Ca_kabuli_chr01 | 6303828                 | CC                              | TT              | 1946724438               |
| SNP_P4_4018_6304085 | NC_021160.1    | Ca_kabuli_chr01 | 6304085                 | AA                              | GG              | 1946724440               |
| SNP_P4_4019_6304090 | NC_021160.1    | Ca_kabuli_chr01 | 6304090                 | GG                              | TT              | 1946724442               |
| SNP_P4_4020_6304130 | NC_021160.1    | Ca_kabuli_chr01 | 6304130                 | TT                              | AA              | 1946724444               |
| SNP_P4_4021_6304169 | NC_021160.1    | Ca_kabuli_chr01 | 6304169                 | CC                              | AA              | 1946724446               |
| SNP_P4_4022_6304357 | NC_021160.1    | Ca_kabuli_chr01 | 6304357                 | TT                              | CC              | 1946724448               |
| SNP_P4_4023_6304391 | NC_021160.1    | Ca_kabuli_chr01 | 6304391                 | GG                              | CC              | 1946724450               |
| SNP_P4_4024_6304484 | NC_021160.1    | Ca_kabuli_chr01 | 6304484                 | TT                              | CC              | 1946724452               |
| SNP_P4_4025_6304983 | NC_021160.1    | Ca_kabuli_chr01 | 6304983                 | CC                              | TT              | 1946724454               |
| SNP_P4_4026_6305214 | NC_021160.1    | Ca_kabuli_chr01 | 6305214                 | CC                              | TT              | 1946724455               |
| SNP_P4_4027_6305238 | NC_021160.1    | Ca_kabuli_chr01 | 6305238                 | TT                              | CC              | 1946724457               |
| SNP_P4_4028_6305407 | NC_021160.1    | Ca_kabuli_chr01 | 6305407                 | CC                              | GG              | 1946724459               |
| SNP_P4_4029_6305484 | NC_021160.1    | Ca_kabuli_chr01 | 6305484                 | TT                              | AA              | 1946724461               |
| SNP_P4_4030_6305590 | NC_021160.1    | Ca_kabuli_chr01 | 6305590                 | CC                              | GG              | 1946724463               |
| SNP_P4_4032_6306743 | NC_021160.1    | Ca_kabuli_chr01 | 6306743                 | TT                              | AA              | 1946724465               |
| SNP_P4_4033_6306770 | NC_021160.1    | Ca_kabuli_chr01 | 6306770                 | AA                              | GG              | 1946724467               |
| SNP_P4_4034_6306777 | NC_021160.1    | Ca_kabuli_chr01 | 6306777                 | CC                              | AA              | 1946724469               |
| SNP_P4_4035_6306791 | NC_021160.1    | Ca_kabuli_chr01 | 6306791                 | TT                              | CC              | 1946724471               |
| SNP_P4_4037_6307052 | NC_021160.1    | Ca_kabuli_chr01 | 6307052                 | CC                              | TT              | 1946724473               |
| SNP_P4_4039_6311349 | NC_021160.1    | Ca_kabuli_chr01 | 6311349                 | AA                              | CC              | 1946724474               |
| SNP_P4_4041_6313101 | NC_021160.1    | Ca_kabuli_chr01 | 6313101                 | AA                              | GG              | 1946724476               |
| SNP_P4_4043_6313974 | NC_021160.1    | Ca_kabuli_chr01 | 6313974                 | AA                              | TT              | 1946724478               |
| SNP_P4_4044_6313992 | NC_021160.1    | Ca_kabuli_chr01 | 6313992                 | TT                              | GG              | 1946724480               |
| SNP_P4_4045_6319513 | NC_021160.1    | Ca_kabuli_chr01 | 6319513                 | GG                              | CC              | 1946724482               |
| SNP_P4_4046_6322285 | NC_021160.1    | Ca_kabuli_chr01 | 6322285                 | CC                              | TT              | 1946724484               |
| SNP_P4_4047_6323028 | NC_021160.1    | Ca_kabuli_chr01 | 6323028                 | GG                              | AA              | 1946724486               |
| SNP_P4_4048_6323232 | NC_021160.1    | Ca_kabuli_chr01 | 6323232                 | CC                              | TT              | 1946724488               |
| SNP_P4_4049_6323254 | NC_021160.1    | Ca_kabuli_chr01 | 6323254                 | CC                              | AA              | 1946724490               |
| SNP_P4_4050_6323322 | NC_021160.1    | Ca_kabuli_chr01 | 6323322                 | GG                              | AA              | 1946724492               |



| SNPs IDs            | Chromosome IDs | Chromosomes     | Physical positions (bp) | CDC Frontier (Reference genome) | (ILWC46 & LPNB) | NCBI SNPdb Accession IDs |
|---------------------|----------------|-----------------|-------------------------|---------------------------------|-----------------|--------------------------|
| SNP_P4_4051_6323326 | NC_021160.1    | Ca_kabuli_chr01 | 6323326                 | CC                              | TT              | 1946724494               |
| SNP_P4_4052_6323337 | NC_021160.1    | Ca_kabuli_chr01 | 6323337                 | AA                              | TT              | 1946724496               |
| SNP_P4_4053_6323348 | NC_021160.1    | Ca_kabuli_chr01 | 6323348                 | GG                              | AA              | 1946724498               |
| SNP_P4_4054_6325436 | NC_021160.1    | Ca_kabuli_chr01 | 6325436                 | GG                              | AA              | 1946724500               |
| SNP_P4_4055_6325472 | NC_021160.1    | Ca_kabuli_chr01 | 6325472                 | CC                              | TT              | 1946724502               |
| SNP_P4_4056_6325497 | NC_021160.1    | Ca_kabuli_chr01 | 6325497                 | AA                              | GG              | 1946724504               |
| SNP_P4_4057_6325530 | NC_021160.1    | Ca_kabuli_chr01 | 6325530                 | GG                              | TT              | 1946724506               |
| SNP_P4_4058_6325540 | NC_021160.1    | Ca_kabuli_chr01 | 6325540                 | TT                              | GG              | 1946724508               |
| SNP_P4_4059_6325554 | NC_021160.1    | Ca_kabuli_chr01 | 6325554                 | TT                              | GG              | 1946724510               |
| SNP_P4_4060_6326344 | NC_021160.1    | Ca_kabuli_chr01 | 6326344                 | TT                              | AA              | 1946724512               |
| SNP_P4_4061_6326345 | NC_021160.1    | Ca_kabuli_chr01 | 6326345                 | AA                              | TT              | 1946724514               |
| SNP_P4_4062_6326437 | NC_021160.1    | Ca_kabuli_chr01 | 6326437                 | AA                              | TT              | 1946724516               |
| SNP_P4_4063_6326459 | NC_021160.1    | Ca_kabuli_chr01 | 6326459                 | AA                              | GG              | 1946724518               |
| SNP_P4_4064_6326496 | NC_021160.1    | Ca_kabuli_chr01 | 6326496                 | CC                              | TT              | 1946724520               |
| SNP_P4_4065_6326617 | NC_021160.1    | Ca_kabuli_chr01 | 6326617                 | GG                              | AA              | 1946724522               |
| SNP_P4_4066_6326674 | NC_021160.1    | Ca_kabuli_chr01 | 6326674                 | TT                              | CC              | 1946724524               |
| SNP_P4_4067_6326757 | NC_021160.1    | Ca_kabuli_chr01 | 6326757                 | TT                              | CC              | 1946724526               |
| SNP_P4_4068_6326887 | NC_021160.1    | Ca_kabuli_chr01 | 6326887                 | GG                              | AA              | 1946724528               |
| SNP_P4_4069_6326898 | NC_021160.1    | Ca_kabuli_chr01 | 6326898                 | GG                              | AA              | 1946724530               |
| SNP_P4_4070_6326931 | NC_021160.1    | Ca_kabuli_chr01 | 6326931                 | GG                              | TT              | 1946724532               |
| SNP_P4_4071_6326934 | NC_021160.1    | Ca_kabuli_chr01 | 6326934                 | CC                              | TT              | 1946724534               |
| SNP_P4_4072_6326962 | NC_021160.1    | Ca_kabuli_chr01 | 6326962                 | AA                              | GG              | 1946724536               |
| SNP_P4_4073_6327709 | NC_021160.1    | Ca_kabuli_chr01 | 6327709                 | GG                              | TT              | 1946724537               |
| SNP_P4_4074_6330278 | NC_021160.1    | Ca_kabuli_chr01 | 6330278                 | GG                              | TT              | 1946724539               |
| SNP_P4_4075_6330316 | NC_021160.1    | Ca_kabuli_chr01 | 6330316                 | GG                              | AA              | 1946724541               |
| SNP_P4_4076_6331188 | NC_021160.1    | Ca_kabuli_chr01 | 6331188                 | TT                              | CC              | 1946724543               |
| SNP_P4_4078_6332807 | NC_021160.1    | Ca_kabuli_chr01 | 6332807                 | TT                              | AA              | 1946724545               |
| SNP_P4_4079_6335087 | NC_021160.1    | Ca_kabuli_chr01 | 6335087                 | TT                              | CC              | 1946724547               |
| SNP_P4_4080_6335143 | NC_021160.1    | Ca_kabuli_chr01 | 6335143                 | GG                              | AA              | 1946724549               |
| SNP_P4_4081_6335408 | NC_021160.1    | Ca_kabuli_chr01 | 6335408                 | GG                              | AA              | 1946724551               |
| SNP_P4_4082_6336477 | NC_021160.1    | Ca_kabuli_chr01 | 6336477                 | AA                              | GG              | 1946724553               |
| SNP_P4_4083_6336516 | NC_021160.1    | Ca_kabuli_chr01 | 6336516                 | TT                              | CC              | 1946724555               |
| SNP_P4_4084_6336548 | NC_021160.1    | Ca_kabuli_chr01 | 6336548                 | CC                              | AA              | 1946724557               |
| SNP_P4_4085_6336550 | NC_021160.1    | Ca_kabuli_chr01 | 6336550                 | AA                              | GG              | 1946724559               |
| SNP_P4_4086_6338638 | NC_021160.1    | Ca_kabuli_chr01 | 6338638                 | AA                              | CC              | 1946724561               |
| SNP_P4_4088_6344682 | NC_021160.1    | Ca_kabuli_chr01 | 6344682                 | AA                              | GG              | 1946724563               |
| SNP_P4_4089_6344950 | NC_021160.1    | Ca_kabuli_chr01 | 6344950                 | CC                              | GG              | 1946724565               |
| SNP_P4_4091_6352294 | NC_021160.1    | Ca_kabuli_chr01 | 6352294                 | GG                              | AA              | 1946724567               |
| SNP_P4_4092_6352318 | NC_021160.1    | Ca_kabuli_chr01 | 6352318                 | GG                              | AA              | 1946724569               |
| SNP_P4_4093_6352324 | NC_021160.1    | Ca_kabuli_chr01 | 6352324                 | GG                              | AA              | 1946724571               |
| SNP_P4_4094_6352598 | NC_021160.1    | Ca_kabuli_chr01 | 6352598                 | GG                              | CC              | 1946724573               |
| SNP_P4_4095_6353652 | NC_021160.1    | Ca_kabuli_chr01 | 6353652                 | TT                              | CC              | 1946724575               |

| SNPs IDs            | Chromosome IDs | Chromosomes     | Physical positions (bp) | CDC Frontier (Reference genome) | (ILWC46 & LPNB) | NCBI SNPdb Accession IDs |
|---------------------|----------------|-----------------|-------------------------|---------------------------------|-----------------|--------------------------|
| SNP_P4_4096_6353953 | NC_021160.1    | Ca_kabuli_chr01 | 6353953                 | TT                              | CC              | 1946724577               |
| SNP_P4_4097_6358933 | NC_021160.1    | Ca_kabuli_chr01 | 6358933                 | TT                              | CC              | 1946724579               |
| SNP_P4_4098_6358961 | NC_021160.1    | Ca_kabuli_chr01 | 6358961                 | GG                              | AA              | 1946724581               |
| SNP_P4_4099_6359322 | NC_021160.1    | Ca_kabuli_chr01 | 6359322                 | TT                              | CC              | 1946724583               |
| SNP_P4_4100_6359324 | NC_021160.1    | Ca_kabuli_chr01 | 6359324                 | TT                              | CC              | 1946724585               |
| SNP_P4_4101_6359891 | NC_021160.1    | Ca_kabuli_chr01 | 6359891                 | TT                              | AA              | 1946724587               |
| SNP_P4_4102_6359900 | NC_021160.1    | Ca_kabuli_chr01 | 6359900                 | CC                              | AA              | 1946724589               |
| SNP_P4_4103_6359966 | NC_021160.1    | Ca_kabuli_chr01 | 6359966                 | TT                              | CC              | 1946724591               |
| SNP_P4_4104_6360672 | NC_021160.1    | Ca_kabuli_chr01 | 6360672                 | AA                              | GG              | 1946724592               |
| SNP_P4_4105_6360839 | NC_021160.1    | Ca_kabuli_chr01 | 6360839                 | TT                              | GG              | 1946724594               |
| SNP_P4_4106_6362535 | NC_021160.1    | Ca_kabuli_chr01 | 6362535                 | CC                              | TT              | 1946724596               |
| SNP_P4_4107_6362550 | NC_021160.1    | Ca_kabuli_chr01 | 6362550                 | TT                              | CC              | 1946724598               |
| SNP_P4_4108_6362574 | NC_021160.1    | Ca_kabuli_chr01 | 6362574                 | CC                              | TT              | 1946724600               |
| SNP_P4_4109_6362575 | NC_021160.1    | Ca_kabuli_chr01 | 6362575                 | TT                              | CC              | 1946724602               |
| SNP_P4_4110_6362802 | NC_021160.1    | Ca_kabuli_chr01 | 6362802                 | CC                              | AA              | 1946724604               |
| SNP_P4_4111_6362804 | NC_021160.1    | Ca_kabuli_chr01 | 6362804                 | TT                              | CC              | 1946724606               |
| SNP_P4_4112_6362807 | NC_021160.1    | Ca_kabuli_chr01 | 6362807                 | TT                              | CC              | 1946724608               |
| SNP_P4_4113_6362829 | NC_021160.1    | Ca_kabuli_chr01 | 6362829                 | GG                              | AA              | 1946724610               |
| SNP_P4_4114_6363152 | NC_021160.1    | Ca_kabuli_chr01 | 6363152                 | TT                              | CC              | 1946724612               |
| SNP_P4_4115_6363173 | NC_021160.1    | Ca_kabuli_chr01 | 6363173                 | CC                              | TT              | 1946724614               |
| SNP_P4_4116_6367123 | NC_021160.1    | Ca_kabuli_chr01 | 6367123                 | GG                              | AA              | 1946724615               |
| SNP_P4_4117_6367139 | NC_021160.1    | Ca_kabuli_chr01 | 6367139                 | AA                              | GG              | 1946724617               |
| SNP_P4_4118_6367305 | NC_021160.1    | Ca_kabuli_chr01 | 6367305                 | GG                              | AA              | 1946724620               |
| SNP_P4_4119_6367762 | NC_021160.1    | Ca_kabuli_chr01 | 6367762                 | TT                              | CC              | 1946724622               |
| SNP_P4_4120_6367777 | NC_021160.1    | Ca_kabuli_chr01 | 6367777                 | CC                              | TT              | 1946724624               |
| SNP_P4_4121_6367779 | NC_021160.1    | Ca_kabuli_chr01 | 6367779                 | AA                              | GG              | 1946724626               |
| SNP_P4_4122_6367783 | NC_021160.1    | Ca_kabuli_chr01 | 6367783                 | GG                              | AA              | 1946724628               |
| SNP_P4_4123_6367961 | NC_021160.1    | Ca_kabuli_chr01 | 6367961                 | GG                              | AA              | 1946724630               |
| SNP_P4_4124_6367975 | NC_021160.1    | Ca_kabuli_chr01 | 6367975                 | CC                              | TT              | 1946724632               |
| SNP_P4_4125_6368018 | NC_021160.1    | Ca_kabuli_chr01 | 6368018                 | TT                              | CC              | 1946724633               |
| SNP_P4_4126_6368322 | NC_021160.1    | Ca_kabuli_chr01 | 6368322                 | TT                              | AA              | 1946724635               |
| SNP_P4_4127_6368345 | NC_021160.1    | Ca_kabuli_chr01 | 6368345                 | GG                              | AA              | 1946724637               |
| SNP_P4_4128_6368349 | NC_021160.1    | Ca_kabuli_chr01 | 6368349                 | GG                              | AA              | 1946724639               |
| SNP_P4_4129_6369757 | NC_021160.1    | Ca_kabuli_chr01 | 6369757                 | GG                              | TT              | 1946724641               |
| SNP_P4_4130_6369813 | NC_021160.1    | Ca_kabuli_chr01 | 6369813                 | TT                              | CC              | 1946724643               |
| SNP_P4_4131_6373353 | NC_021160.1    | Ca_kabuli_chr01 | 6373353                 | GG                              | AA              | 1946724645               |
| SNP_P4_4132_6373560 | NC_021160.1    | Ca_kabuli_chr01 | 6373560                 | TT                              | GG              | 1946724647               |
| SNP_P4_4133_6373562 | NC_021160.1    | Ca_kabuli_chr01 | 6373562                 | CC                              | AA              | 1946724649               |
| SNP_P4_4134_6373590 | NC_021160.1    | Ca_kabuli_chr01 | 6373590                 | GG                              | AA              | 1946724651               |
| SNP_P4_4135_6373639 | NC_021160.1    | Ca_kabuli_chr01 | 6373639                 | AA                              | TT              | 1946724653               |
| SNP_P4_4136_6374088 | NC_021160.1    | Ca_kabuli_chr01 | 6374088                 | TT                              | CC              | 1946724655               |
| SNP_P4_4137_6374209 | NC_021160.1    | Ca_kabuli_chr01 | 6374209                 | TT                              | CC              | 1946724657               |

| SNPs IDs            | Chromosome IDs | Chromosomes     | Physical positions (bp) | CDC Frontier (Reference genome) | (ILWC46 & LPNB) | NCBI SNPdb Accession IDs |
|---------------------|----------------|-----------------|-------------------------|---------------------------------|-----------------|--------------------------|
| SNP_P4_4138_6374324 | NC_021160.1    | Ca_kabuli_chr01 | 6374324                 | TT                              | GG              | 1946724659               |
| SNP_P4_4140_6375126 | NC_021160.1    | Ca_kabuli_chr01 | 6375126                 | TT                              | CC              | 1946724660               |
| SNP_P4_4141_6375154 | NC_021160.1    | Ca_kabuli_chr01 | 6375154                 | CC                              | TT              | 1946724662               |
| SNP_P4_4143_6383800 | NC_021160.1    | Ca_kabuli_chr01 | 6383800                 | TT                              | CC              | 1946724664               |
| SNP_P4_4144_6383877 | NC_021160.1    | Ca_kabuli_chr01 | 6383877                 | CC                              | TT              | 1946724666               |
| SNP_P4_4145_6383921 | NC_021160.1    | Ca_kabuli_chr01 | 6383921                 | CC                              | TT              | 1946724668               |
| SNP_P4_4146_6383922 | NC_021160.1    | Ca_kabuli_chr01 | 6383922                 | CC                              | AA              | 1946724670               |
| SNP_P4_4147_6383995 | NC_021160.1    | Ca_kabuli_chr01 | 6383995                 | GG                              | AA              | 1946724672               |
| SNP_P4_4149_6385673 | NC_021160.1    | Ca_kabuli_chr01 | 6385673                 | AA                              | GG              | 1946724674               |
| SNP_P4_4150_6385694 | NC_021160.1    | Ca_kabuli_chr01 | 6385694                 | TT                              | CC              | 1946724676               |
| SNP_P4_4151_6386013 | NC_021160.1    | Ca_kabuli_chr01 | 6386013                 | GG                              | AA              | 1946724678               |
| SNP_P4_4152_6386057 | NC_021160.1    | Ca_kabuli_chr01 | 6386057                 | GG                              | AA              | 1946724680               |
| SNP_P4_4153_6386551 | NC_021160.1    | Ca_kabuli_chr01 | 6386551                 | GG                              | TT              | 1946724682               |
| SNP_P4_4154_6393012 | NC_021160.1    | Ca_kabuli_chr01 | 6393012                 | CC                              | TT              | 1946724684               |
| SNP_P4_4155_6393335 | NC_021160.1    | Ca_kabuli_chr01 | 6393335                 | TT                              | AA              | 1946724686               |
| SNP_P4_4156_6394314 | NC_021160.1    | Ca_kabuli_chr01 | 6394314                 | AA                              | GG              | 1946724688               |
| SNP_P4_4157_6394333 | NC_021160.1    | Ca_kabuli_chr01 | 6394333                 | GG                              | AA              | 1946724690               |
| SNP_P4_4158_6394347 | NC_021160.1    | Ca_kabuli_chr01 | 6394347                 | TT                              | CC              | 1946724692               |
| SNP_P4_4159_6394370 | NC_021160.1    | Ca_kabuli_chr01 | 6394370                 | CC                              | TT              | 1946724694               |
| SNP_P4_4160_6394389 | NC_021160.1    | Ca_kabuli_chr01 | 6394389                 | TT                              | CC              | 1946724696               |
| SNP_P4_4161_6394401 | NC_021160.1    | Ca_kabuli_chr01 | 6394401                 | TT                              | CC              | 1946724698               |
| SNP_P4_4162_6394419 | NC_021160.1    | Ca_kabuli_chr01 | 6394419                 | TT                              | CC              | 1946724700               |
| SNP_P4_4163_6394460 | NC_021160.1    | Ca_kabuli_chr01 | 6394460                 | AA                              | GG              | 1946724702               |
| SNP_P4_4164_6394568 | NC_021160.1    | Ca_kabuli_chr01 | 6394568                 | AA                              | GG              | 1946724704               |
| SNP_P4_4165_6394600 | NC_021160.1    | Ca_kabuli_chr01 | 6394600                 | TT                              | CC              | 1946724706               |
| SNP_P4_4166_6394606 | NC_021160.1    | Ca_kabuli_chr01 | 6394606                 | AA                              | GG              | 1946724708               |
| SNP_P4_4167_6394706 | NC_021160.1    | Ca_kabuli_chr01 | 6394706                 | TT                              | CC              | 1946724710               |
| SNP_P4_4168_6394725 | NC_021160.1    | Ca_kabuli_chr01 | 6394725                 | AA                              | CC              | 1946724712               |
| SNP_P4_4169_6394742 | NC_021160.1    | Ca_kabuli_chr01 | 6394742                 | AA                              | CC              | 1946724714               |
| SNP_P4_4170_6394844 | NC_021160.1    | Ca_kabuli_chr01 | 6394844                 | CC                              | TT              | 1946724716               |
| SNP_P4_4171_6398517 | NC_021160.1    | Ca_kabuli_chr01 | 6398517                 | CC                              | TT              | 1946724718               |
| SNP_P4_4172_6401514 | NC_021160.1    | Ca_kabuli_chr01 | 6401514                 | AA                              | CC              | 1946724720               |
| SNP_P4_4173_6401520 | NC_021160.1    | Ca_kabuli_chr01 | 6401520                 | TT                              | AA              | 1946724722               |
| SNP_P4_4175_6407412 | NC_021160.1    | Ca_kabuli_chr01 | 6407412                 | TT                              | AA              | 1946724724               |
| SNP_P4_4176_6407475 | NC_021160.1    | Ca_kabuli_chr01 | 6407475                 | GG                              | TT              | 1946724726               |
| SNP_P4_4177_6407490 | NC_021160.1    | Ca_kabuli_chr01 | 6407490                 | TT                              | GG              | 1946724728               |
| SNP_P4_4178_6407492 | NC_021160.1    | Ca_kabuli_chr01 | 6407492                 | CC                              | TT              | 1946724730               |
| SNP_P4_4179_6407740 | NC_021160.1    | Ca_kabuli_chr01 | 6407740                 | AA                              | CC              | 1946724732               |
| SNP_P4_4180_6408465 | NC_021160.1    | Ca_kabuli_chr01 | 6408465                 | GG                              | TT              | 1946724734               |
| SNP_P4_4181_6408536 | NC_021160.1    | Ca_kabuli_chr01 | 6408536                 | GG                              | TT              | 1946724736               |
| SNP_P4_4182_6408804 | NC_021160.1    | Ca_kabuli_chr01 | 6408804                 | GG                              | AA              | 1946724738               |
| SNP_P4_4183_6413536 | NC_021160.1    | Ca_kabuli_chr01 | 6413536                 | AA                              | GG              | 1946724740               |

| SNPs IDs            | Chromosome IDs | Chromosomes     | Physical positions (bp) | CDC Frontier (Reference genome) | (ILWC46 & LPNB) | NCBI SNPdb Accession IDs |
|---------------------|----------------|-----------------|-------------------------|---------------------------------|-----------------|--------------------------|
| SNP_P4_4184_6415141 | NC_021160.1    | Ca_kabuli_chr01 | 6415141                 | GG                              | CC              | 1946724742               |
| SNP_P4_4185_6415402 | NC_021160.1    | Ca_kabuli_chr01 | 6415402                 | AA                              | GG              | 1946724744               |
| SNP_P4_4188_6426144 | NC_021160.1    | Ca_kabuli_chr01 | 6426144                 | AA                              | TT              | 1946724746               |
| SNP_P4_4189_6427419 | NC_021160.1    | Ca_kabuli_chr01 | 6427419                 | AA                              | GG              | 1946724748               |
| SNP_P4_4190_6427663 | NC_021160.1    | Ca_kabuli_chr01 | 6427663                 | CC                              | TT              | 1946724750               |
| SNP_P4_4191_6427666 | NC_021160.1    | Ca_kabuli_chr01 | 6427666                 | GG                              | TT              | 1946724752               |
| SNP_P4_4192_6430590 | NC_021160.1    | Ca_kabuli_chr01 | 6430590                 | CC                              | TT              | 1946724754               |
| SNP_P4_4193_6430611 | NC_021160.1    | Ca_kabuli_chr01 | 6430611                 | CC                              | AA              | 1946724756               |
| SNP_P4_4194_6431015 | NC_021160.1    | Ca_kabuli_chr01 | 6431015                 | CC                              | TT              | 1946724758               |
| SNP_P4_4195_6431096 | NC_021160.1    | Ca_kabuli_chr01 | 6431096                 | AA                              | GG              | 1946724761               |
| SNP_P4_4196_6431716 | NC_021160.1    | Ca_kabuli_chr01 | 6431716                 | CC                              | TT              | 1946724763               |
| SNP_P4_4197_6432942 | NC_021160.1    | Ca_kabuli_chr01 | 6432942                 | AA                              | TT              | 1946724765               |
| SNP_P4_4198_6433264 | NC_021160.1    | Ca_kabuli_chr01 | 6433264                 | TT                              | CC              | 1946724767               |
| SNP_P4_4199_6433883 | NC_021160.1    | Ca_kabuli_chr01 | 6433883                 | AA                              | GG              | 1946724769               |
| SNP_P4_4200_6433975 | NC_021160.1    | Ca_kabuli_chr01 | 6433975                 | GG                              | AA              | 1946724771               |
| SNP_P4_4201_6434056 | NC_021160.1    | Ca_kabuli_chr01 | 6434056                 | CC                              | TT              | 1946724774               |
| SNP_P4_4202_6434103 | NC_021160.1    | Ca_kabuli_chr01 | 6434103                 | CC                              | AA              | 1946724776               |
| SNP_P4_4203_6434104 | NC_021160.1    | Ca_kabuli_chr01 | 6434104                 | GG                              | TT              | 1946724778               |
| SNP_P4_4204_6434144 | NC_021160.1    | Ca_kabuli_chr01 | 6434144                 | CC                              | TT              | 1946724780               |
| SNP_P4_4205_6434226 | NC_021160.1    | Ca_kabuli_chr01 | 6434226                 | TT                              | CC              | 1946724782               |
| SNP_P4_4206_6434337 | NC_021160.1    | Ca_kabuli_chr01 | 6434337                 | TT                              | AA              | 1946724784               |
| SNP_P4_4207_6434353 | NC_021160.1    | Ca_kabuli_chr01 | 6434353                 | TT                              | CC              | 1946724786               |
| SNP_P4_4208_6434382 | NC_021160.1    | Ca_kabuli_chr01 | 6434382                 | CC                              | TT              | 1946724788               |
| SNP_P4_4209_6434985 | NC_021160.1    | Ca_kabuli_chr01 | 6434985                 | TT                              | AA              | 1946724790               |
| SNP_P4_4210_6435554 | NC_021160.1    | Ca_kabuli_chr01 | 6435554                 | TT                              | CC              | 1946724792               |
| SNP_P4_4211_6435821 | NC_021160.1    | Ca_kabuli_chr01 | 6435821                 | GG                              | AA              | 1946724794               |
| SNP_P4_4212_6437062 | NC_021160.1    | Ca_kabuli_chr01 | 6437062                 | CC                              | TT              | 1946724796               |
| SNP_P4_4213_6438563 | NC_021160.1    | Ca_kabuli_chr01 | 6438563                 | CC                              | GG              | 1946724798               |
| SNP_P4_4214_6439464 | NC_021160.1    | Ca_kabuli_chr01 | 6439464                 | CC                              | AA              | 1946724800               |
| SNP_P4_4215_6444045 | NC_021160.1    | Ca_kabuli_chr01 | 6444045                 | GG                              | AA              | 1946724802               |
| SNP_P4_4216_6444288 | NC_021160.1    | Ca_kabuli_chr01 | 6444288                 | CC                              | TT              | 1946724804               |
| SNP_P4_4217_6444293 | NC_021160.1    | Ca_kabuli_chr01 | 6444293                 | CC                              | GG              | 1946724806               |
| SNP_P4_4218_6444767 | NC_021160.1    | Ca_kabuli_chr01 | 6444767                 | AA                              | GG              | 1946724808               |
| SNP_P4_4219_6444768 | NC_021160.1    | Ca_kabuli_chr01 | 6444768                 | GG                              | AA              | 1946724811               |
| SNP_P4_4220_6444776 | NC_021160.1    | Ca_kabuli_chr01 | 6444776                 | CC                              | TT              | 1946724813               |
| SNP_P4_4221_6444867 | NC_021160.1    | Ca_kabuli_chr01 | 6444867                 | CC                              | AA              | 1946724815               |
| SNP_P4_4222_6444901 | NC_021160.1    | Ca_kabuli_chr01 | 6444901                 | CC                              | TT              | 1946724817               |
| SNP_P4_4223_6444930 | NC_021160.1    | Ca_kabuli_chr01 | 6444930                 | GG                              | AA              | 1946724819               |
| SNP_P4_4224_6445059 | NC_021160.1    | Ca_kabuli_chr01 | 6445059                 | TT                              | AA              | 1946724821               |
| SNP_P4_4225_6445281 | NC_021160.1    | Ca_kabuli_chr01 | 6445281                 | TT                              | CC              | 1946724823               |
| SNP_P4_4226_6445284 | NC_021160.1    | Ca_kabuli_chr01 | 6445284                 | AA                              | GG              | 1946724825               |
| SNP_P4_4227_6445407 | NC_021160.1    | Ca_kabuli_chr01 | 6445407                 | CC                              | TT              | 1946724827               |

| SNPs IDs            | Chromosome IDs | Chromosomes     | Physical positions (bp) | CDC Frontier (Reference genome) | (ILWC46 & LPNB) | NCBI SNPdb Accession IDs |
|---------------------|----------------|-----------------|-------------------------|---------------------------------|-----------------|--------------------------|
| SNP_P4_4228_6445421 | NC_021160.1    | Ca_kabuli_chr01 | 6445421                 | GG                              | AA              | 1946724829               |
| SNP_P4_4229_6445422 | NC_021160.1    | Ca_kabuli_chr01 | 6445422                 | TT                              | CC              | 1946724831               |
| SNP_P4_4230_6445429 | NC_021160.1    | Ca_kabuli_chr01 | 6445429                 | TT                              | CC              | 1946724833               |
| SNP_P4_4231_6445927 | NC_021160.1    | Ca_kabuli_chr01 | 6445927                 | TT                              | CC              | 1946724835               |
| SNP_P4_4232_6446104 | NC_021160.1    | Ca_kabuli_chr01 | 6446104                 | CC                              | TT              | 1946724837               |
| SNP_P4_4233_6446200 | NC_021160.1    | Ca_kabuli_chr01 | 6446200                 | CC                              | TT              | 1946724839               |
| SNP_P4_4234_6446213 | NC_021160.1    | Ca_kabuli_chr01 | 6446213                 | TT                              | CC              | 1946724841               |
| SNP_P4_4235_6452981 | NC_021160.1    | Ca_kabuli_chr01 | 6452981                 | GG                              | CC              | 1946724843               |
| SNP_P4_4236_6453725 | NC_021160.1    | Ca_kabuli_chr01 | 6453725                 | GG                              | TT              | 1946724845               |
| SNP_P4_4237_6454182 | NC_021160.1    | Ca_kabuli_chr01 | 6454182                 | GG                              | AA              | 1946724847               |
| SNP_P4_4238_6457940 | NC_021160.1    | Ca_kabuli_chr01 | 6457940                 | TT                              | CC              | 1946724849               |
| SNP_P4_4239_6458382 | NC_021160.1    | Ca_kabuli_chr01 | 6458382                 | AA                              | GG              | 1946724851               |
| SNP_P4_4240_6459084 | NC_021160.1    | Ca_kabuli_chr01 | 6459084                 | GG                              | TT              | 1946724853               |
| SNP_P4_4241_6459091 | NC_021160.1    | Ca_kabuli_chr01 | 6459091                 | GG                              | AA              | 1946724855               |
| SNP_P4_4242_6459114 | NC_021160.1    | Ca_kabuli_chr01 | 6459114                 | TT                              | AA              | 1946724857               |
| SNP_P4_4243_6459131 | NC_021160.1    | Ca_kabuli_chr01 | 6459131                 | TT                              | CC              | 1946724859               |
| SNP_P4_4244_6459473 | NC_021160.1    | Ca_kabuli_chr01 | 6459473                 | AA                              | GG              | 1946724861               |
| SNP_P4_4245_6459482 | NC_021160.1    | Ca_kabuli_chr01 | 6459482                 | TT                              | GG              | 1946724862               |
| SNP_P4_4246_6460298 | NC_021160.1    | Ca_kabuli_chr01 | 6460298                 | CC                              | TT              | 1946724864               |
| SNP_P4_4247_6460488 | NC_021160.1    | Ca_kabuli_chr01 | 6460488                 | AA                              | CC              | 1946724866               |
| SNP_P4_4248_6460713 | NC_021160.1    | Ca_kabuli_chr01 | 6460713                 | TT                              | CC              | 1946724868               |
| SNP_P4_4249_6460714 | NC_021160.1    | Ca_kabuli_chr01 | 6460714                 | TT                              | CC              | 1946724870               |
| SNP_P4_4250_6460718 | NC_021160.1    | Ca_kabuli_chr01 | 6460718                 | CC                              | AA              | 1946724872               |
| SNP_P4_4251_6460982 | NC_021160.1    | Ca_kabuli_chr01 | 6460982                 | CC                              | TT              | 1946724874               |
| SNP_P4_4252_6461734 | NC_021160.1    | Ca_kabuli_chr01 | 6461734                 | AA                              | GG              | 1946724876               |
| SNP_P4_4253_6463219 | NC_021160.1    | Ca_kabuli_chr01 | 6463219                 | AA                              | GG              | 1946724878               |
| SNP_P4_4254_6463893 | NC_021160.1    | Ca_kabuli_chr01 | 6463893                 | AA                              | GG              | 1946724880               |
| SNP_P4_4255_6464200 | NC_021160.1    | Ca_kabuli_chr01 | 6464200                 | CC                              | TT              | 1946724882               |
| SNP_P4_4256_6465572 | NC_021160.1    | Ca_kabuli_chr01 | 6465572                 | AA                              | TT              | 1946724884               |
| SNP_P4_4257_6466149 | NC_021160.1    | Ca_kabuli_chr01 | 6466149                 | AA                              | GG              | 1946724886               |
| SNP_P4_4258_6466231 | NC_021160.1    | Ca_kabuli_chr01 | 6466231                 | GG                              | AA              | 1946724888               |
| SNP_P4_4259_6466705 | NC_021160.1    | Ca_kabuli_chr01 | 6466705                 | TT                              | AA              | 1946724890               |
| SNP_P4_4260_6466751 | NC_021160.1    | Ca_kabuli_chr01 | 6466751                 | CC                              | GG              | 1946724892               |
| SNP_P4_4261_6469951 | NC_021160.1    | Ca_kabuli_chr01 | 6469951                 | GG                              | AA              | 1946724894               |
| SNP_P4_4262_6472054 | NC_021160.1    | Ca_kabuli_chr01 | 6472054                 | GG                              | AA              | 1946724896               |
| SNP_P4_4263_6472294 | NC_021160.1    | Ca_kabuli_chr01 | 6472294                 | TT                              | CC              | 1946724898               |
| SNP_P4_4264_6472299 | NC_021160.1    | Ca_kabuli_chr01 | 6472299                 | GG                              | AA              | 1946724900               |
| SNP_P4_4265_6472300 | NC_021160.1    | Ca_kabuli_chr01 | 6472300                 | AA                              | GG              | 1946724902               |
| SNP_P4_4266_6472485 | NC_021160.1    | Ca_kabuli_chr01 | 6472485                 | AA                              | GG              | 1946724904               |
| SNP_P4_4268_6475120 | NC_021160.1    | Ca_kabuli_chr01 | 6475120                 | GG                              | AA              | 1946724906               |
| SNP_P4_4269_6475755 | NC_021160.1    | Ca_kabuli_chr01 | 6475755                 | AA                              | GG              | 1946724908               |
| SNP_P4_4270_6476040 | NC_021160.1    | Ca_kabuli_chr01 | 6476040                 | TT                              | GG              | 1946724910               |

| SNPs IDs            | Chromosome IDs | Chromosomes     | Physical positions (bp) | CDC Frontier (Reference genome) | (ILWC46 & LPNB) | NCBI SNPdb Accession IDs |
|---------------------|----------------|-----------------|-------------------------|---------------------------------|-----------------|--------------------------|
| SNP_P4_4271_6476334 | NC_021160.1    | Ca_kabuli_chr01 | 6476334                 | TT                              | CC              | 1946724912               |
| SNP_P4_4272_6476391 | NC_021160.1    | Ca_kabuli_chr01 | 6476391                 | CC                              | TT              | 1946724914               |
| SNP_P4_4273_6476421 | NC_021160.1    | Ca_kabuli_chr01 | 6476421                 | TT                              | AA              | 1946724916               |
| SNP_P4_4274_6476660 | NC_021160.1    | Ca_kabuli_chr01 | 6476660                 | GG                              | AA              | 1946724917               |
| SNP_P4_4275_6476750 | NC_021160.1    | Ca_kabuli_chr01 | 6476750                 | AA                              | TT              | 1946724919               |
| SNP_P4_4276_6476769 | NC_021160.1    | Ca_kabuli_chr01 | 6476769                 | GG                              | AA              | 1946724922               |
| SNP_P4_4277_6476805 | NC_021160.1    | Ca_kabuli_chr01 | 6476805                 | TT                              | CC              | 1946724924               |
| SNP_P4_4278_6478736 | NC_021160.1    | Ca_kabuli_chr01 | 6478736                 | AA                              | GG              | 1946724926               |
| SNP_P4_4279_6479035 | NC_021160.1    | Ca_kabuli_chr01 | 6479035                 | GG                              | AA              | 1946724928               |
| SNP_P4_4280_6479061 | NC_021160.1    | Ca_kabuli_chr01 | 6479061                 | AA                              | TT              | 1946724930               |
| SNP_P4_4281_6479067 | NC_021160.1    | Ca_kabuli_chr01 | 6479067                 | AA                              | TT              | 1946724932               |
| SNP_P4_4282_6481157 | NC_021160.1    | Ca_kabuli_chr01 | 6481157                 | CC                              | TT              | 1946724934               |
| SNP_P4_4283_6481477 | NC_021160.1    | Ca_kabuli_chr01 | 6481477                 | TT                              | CC              | 1946724936               |
| SNP_P4_4284_6481815 | NC_021160.1    | Ca_kabuli_chr01 | 6481815                 | CC                              | AA              | 1946724938               |
| SNP_P4_4285_6482100 | NC_021160.1    | Ca_kabuli_chr01 | 6482100                 | GG                              | TT              | 1946724940               |
| SNP_P4_4286_6482592 | NC_021160.1    | Ca_kabuli_chr01 | 6482592                 | CC                              | AA              | 1946724942               |
| SNP_P4_4287_6482940 | NC_021160.1    | Ca_kabuli_chr01 | 6482940                 | GG                              | CC              | 1946724944               |
| SNP_P4_4288_6483969 | NC_021160.1    | Ca_kabuli_chr01 | 6483969                 | CC                              | TT              | 1946724946               |
| SNP_P4_4289_6484016 | NC_021160.1    | Ca_kabuli_chr01 | 6484016                 | AA                              | CC              | 1946724948               |
| SNP_P4_4290_6484033 | NC_021160.1    | Ca_kabuli_chr01 | 6484033                 | TT                              | CC              | 1946724950               |
| SNP_P4_4291_6484083 | NC_021160.1    | Ca_kabuli_chr01 | 6484083                 | AA                              | CC              | 1946724952               |
| SNP_P4_4292_6484103 | NC_021160.1    | Ca_kabuli_chr01 | 6484103                 | TT                              | GG              | 1946724954               |
| SNP_P4_4293_6484401 | NC_021160.1    | Ca_kabuli_chr01 | 6484401                 | TT                              | AA              | 1946724956               |
| SNP_P4_4294_6484635 | NC_021160.1    | Ca_kabuli_chr01 | 6484635                 | TT                              | CC              | 1946724958               |
| SNP_P4_4295_6484797 | NC_021160.1    | Ca_kabuli_chr01 | 6484797                 | GG                              | AA              | 1946724961               |
| SNP_P4_4296_6486056 | NC_021160.1    | Ca_kabuli_chr01 | 6486056                 | AA                              | GG              | 1946724963               |
| SNP_P4_4297_6486350 | NC_021160.1    | Ca_kabuli_chr01 | 6486350                 | TT                              | CC              | 1946724965               |
| SNP_P4_4298_6486730 | NC_021160.1    | Ca_kabuli_chr01 | 6486730                 | CC                              | TT              | 1946724967               |
| SNP_P4_4299_6487135 | NC_021160.1    | Ca_kabuli_chr01 | 6487135                 | TT                              | GG              | 1946724969               |
| SNP_P4_4300_6487198 | NC_021160.1    | Ca_kabuli_chr01 | 6487198                 | AA                              | GG              | 1946724971               |
| SNP_P4_4301_6488126 | NC_021160.1    | Ca_kabuli_chr01 | 6488126                 | GG                              | TT              | 1946724973               |
| SNP_P4_4302_6488144 | NC_021160.1    | Ca_kabuli_chr01 | 6488144                 | CC                              | TT              | 1946724975               |
| SNP_P4_4303_6488782 | NC_021160.1    | Ca_kabuli_chr01 | 6488782                 | GG                              | AA              | 1946724977               |
| SNP_P4_4304_6488802 | NC_021160.1    | Ca_kabuli_chr01 | 6488802                 | AA                              | GG              | 1946724979               |
| SNP_P4_4305_6488848 | NC_021160.1    | Ca_kabuli_chr01 | 6488848                 | AA                              | GG              | 1946724981               |
| SNP_P4_4306_6488910 | NC_021160.1    | Ca_kabuli_chr01 | 6488910                 | TT                              | CC              | 1946724983               |
| SNP_P4_4307_6488916 | NC_021160.1    | Ca_kabuli_chr01 | 6488916                 | AA                              | GG              | 1946724985               |
| SNP_P4_4308_6488947 | NC_021160.1    | Ca_kabuli_chr01 | 6488947                 | GG                              | TT              | 1946724987               |
| SNP_P4_4309_6489676 | NC_021160.1    | Ca_kabuli_chr01 | 6489676                 | AA                              | TT              | 1946724989               |
| SNP_P4_4310_6489712 | NC_021160.1    | Ca_kabuli_chr01 | 6489712                 | GG                              | AA              | 1946724991               |
| SNP_P4_4312_6490788 | NC_021160.1    | Ca_kabuli_chr01 | 6490788                 | TT                              | CC              | 1946724993               |
| SNP_P4_4313_6490813 | NC_021160.1    | Ca_kabuli_chr01 | 6490813                 | GG                              | AA              | 1946724995               |

| SNPs IDs            | Chromosome IDs | Chromosomes     | Physical positions (bp) | CDC Frontier (Reference genome) | (ILWC46 & LPNB) | NCBI SNPdb Accession IDs |
|---------------------|----------------|-----------------|-------------------------|---------------------------------|-----------------|--------------------------|
| SNP_P4_4314_6491632 | NC_021160.1    | Ca_kabuli_chr01 | 6491632                 | GG                              | AA              | 1946724997               |
| SNP_P4_4315_6491927 | NC_021160.1    | Ca_kabuli_chr01 | 6491927                 | TT                              | GG              | 1946724999               |
| SNP_P4_4316_6491933 | NC_021160.1    | Ca_kabuli_chr01 | 6491933                 | TT                              | CC              | 1946725001               |
| SNP_P4_4317_6492531 | NC_021160.1    | Ca_kabuli_chr01 | 6492531                 | CC                              | AA              | 1946725002               |
| SNP_P4_4318_6492546 | NC_021160.1    | Ca_kabuli_chr01 | 6492546                 | CC                              | AA              | 1946725004               |
| SNP_P4_4319_6492887 | NC_021160.1    | Ca_kabuli_chr01 | 6492887                 | TT                              | GG              | 1946725006               |
| SNP_P4_4320_6508888 | NC_021160.1    | Ca_kabuli_chr01 | 6508888                 | CC                              | AA              | 1946725008               |
| SNP_P4_4321_6508894 | NC_021160.1    | Ca_kabuli_chr01 | 6508894                 | CC                              | AA              | 1946725010               |
| SNP_P4_4322_6510479 | NC_021160.1    | Ca_kabuli_chr01 | 6510479                 | AA                              | GG              | 1946725012               |
| SNP_P4_4323_6510513 | NC_021160.1    | Ca_kabuli_chr01 | 6510513                 | CC                              | TT              | 1946725014               |
| SNP_P4_4324_6510940 | NC_021160.1    | Ca_kabuli_chr01 | 6510940                 | CC                              | TT              | 1946725016               |
| SNP_P4_4325_6511426 | NC_021160.1    | Ca_kabuli_chr01 | 6511426                 | TT                              | AA              | 1946725018               |
| SNP_P4_4326_6511442 | NC_021160.1    | Ca_kabuli_chr01 | 6511442                 | AA                              | GG              | 1946725020               |
| SNP_P4_4327_6512022 | NC_021160.1    | Ca_kabuli_chr01 | 6512022                 | TT                              | CC              | 1946725022               |
| SNP_P4_4328_6512030 | NC_021160.1    | Ca_kabuli_chr01 | 6512030                 | GG                              | CC              | 1946725024               |
| SNP_P4_4329_6512031 | NC_021160.1    | Ca_kabuli_chr01 | 6512031                 | GG                              | AA              | 1946725026               |
| SNP_P4_4331_6512349 | NC_021160.1    | Ca_kabuli_chr01 | 6512349                 | TT                              | CC              | 1946725028               |
| SNP_P4_4332_6512926 | NC_021160.1    | Ca_kabuli_chr01 | 6512926                 | CC                              | GG              | 1946725030               |
| SNP_P4_4333_6513083 | NC_021160.1    | Ca_kabuli_chr01 | 6513083                 | GG                              | AA              | 1946725032               |
| SNP_P4_4334_6513187 | NC_021160.1    | Ca_kabuli_chr01 | 6513187                 | GG                              | AA              | 1946725034               |
| SNP_P4_4335_6513211 | NC_021160.1    | Ca_kabuli_chr01 | 6513211                 | CC                              | TT              | 1946725036               |
| SNP_P4_4336_6513797 | NC_021160.1    | Ca_kabuli_chr01 | 6513797                 | GG                              | CC              | 1946725038               |
| SNP_P4_4337_6514670 | NC_021160.1    | Ca_kabuli_chr01 | 6514670                 | CC                              | TT              | 1946725040               |
| SNP_P4_4338_6515976 | NC_021160.1    | Ca_kabuli_chr01 | 6515976                 | TT                              | CC              | 1946725042               |
| SNP_P4_4339_6516976 | NC_021160.1    | Ca_kabuli_chr01 | 6516976                 | TT                              | GG              | 1946725044               |
| SNP_P4_4340_6516991 | NC_021160.1    | Ca_kabuli_chr01 | 6516991                 | GG                              | TT              | 1946725046               |
| SNP_P4_4341_6516994 | NC_021160.1    | Ca_kabuli_chr01 | 6516994                 | AA                              | GG              | 1946725048               |
| SNP_P4_4342_6517013 | NC_021160.1    | Ca_kabuli_chr01 | 6517013                 | GG                              | AA              | 1946725050               |
| SNP_P4_4343_6517022 | NC_021160.1    | Ca_kabuli_chr01 | 6517022                 | GG                              | AA              | 1946725052               |
| SNP_P4_4344_6518597 | NC_021160.1    | Ca_kabuli_chr01 | 6518597                 | AA                              | GG              | 1946725055               |
| SNP_P4_4345_6518839 | NC_021160.1    | Ca_kabuli_chr01 | 6518839                 | AA                              | TT              | 1946725057               |
| SNP_P4_4346_6522797 | NC_021160.1    | Ca_kabuli_chr01 | 6522797                 | AA                              | TT              | 1946725059               |
| SNP_P4_4348_6523636 | NC_021160.1    | Ca_kabuli_chr01 | 6523636                 | CC                              | TT              | 1946725061               |
| SNP_P4_4349_6523646 | NC_021160.1    | Ca_kabuli_chr01 | 6523646                 | TT                              | CC              | 1946725063               |
| SNP_P4_4350_6524009 | NC_021160.1    | Ca_kabuli_chr01 | 6524009                 | CC                              | TT              | 1946725065               |
| SNP_P4_4351_6525541 | NC_021160.1    | Ca_kabuli_chr01 | 6525541                 | CC                              | TT              | 1946725067               |
| SNP_P4_4352_6526023 | NC_021160.1    | Ca_kabuli_chr01 | 6526023                 | AA                              | GG              | 1946725069               |
| SNP_P4_4353_6527019 | NC_021160.1    | Ca_kabuli_chr01 | 6527019                 | TT                              | CC              | 1946725071               |
| SNP_P4_4354_6529107 | NC_021160.1    | Ca_kabuli_chr01 | 6529107                 | AA                              | GG              | 1946725073               |
| SNP_P4_4355_6529173 | NC_021160.1    | Ca_kabuli_chr01 | 6529173                 | CC                              | TT              | 1946725075               |
| SNP_P4_4356_6529422 | NC_021160.1    | Ca_kabuli_chr01 | 6529422                 | AA                              | TT              | 1946725077               |
| SNP_P4_4357_6531402 | NC_021160.1    | Ca_kabuli_chr01 | 6531402                 | TT                              | CC              | 1946725078               |

| SNPs IDs            | Chromosome IDs | Chromosomes     | Physical positions (bp) | CDC Frontier (Reference genome) | (ILWC46 & LPNB) | NCBI SNPdb Accession IDs |
|---------------------|----------------|-----------------|-------------------------|---------------------------------|-----------------|--------------------------|
| SNP_P4_4358_6531429 | NC_021160.1    | Ca_kabuli_chr01 | 6531429                 | CC                              | TT              | 1946725080               |
| SNP_P4_4359_6531456 | NC_021160.1    | Ca_kabuli_chr01 | 6531456                 | TT                              | CC              | 1946725082               |
| SNP_P4_4360_6532130 | NC_021160.1    | Ca_kabuli_chr01 | 6532130                 | GG                              | AA              | 1946725084               |
| SNP_P4_4361_6532261 | NC_021160.1    | Ca_kabuli_chr01 | 6532261                 | TT                              | AA              | 1946725086               |
| SNP_P4_4362_6533054 | NC_021160.1    | Ca_kabuli_chr01 | 6533054                 | CC                              | AA              | 1946725088               |
| SNP_P4_4363_6533087 | NC_021160.1    | Ca_kabuli_chr01 | 6533087                 | AA                              | GG              | 1946725090               |
| SNP_P4_4364_6533407 | NC_021160.1    | Ca_kabuli_chr01 | 6533407                 | TT                              | CC              | 1946725092               |
| SNP_P4_4365_6533489 | NC_021160.1    | Ca_kabuli_chr01 | 6533489                 | GG                              | AA              | 1946725094               |
| SNP_P4_4366_6534226 | NC_021160.1    | Ca_kabuli_chr01 | 6534226                 | AA                              | GG              | 1946725096               |
| SNP_P4_4367_6534911 | NC_021160.1    | Ca_kabuli_chr01 | 6534911                 | CC                              | AA              | 1946725098               |
| SNP_P4_4368_6535179 | NC_021160.1    | Ca_kabuli_chr01 | 6535179                 | CC                              | TT              | 1946725100               |
| SNP_P4_4369_6536251 | NC_021160.1    | Ca_kabuli_chr01 | 6536251                 | CC                              | TT              | 1946725102               |
| SNP_P4_4370_6536285 | NC_021160.1    | Ca_kabuli_chr01 | 6536285                 | CC                              | GG              | 1946725104               |
| SNP_P4_4371_6536290 | NC_021160.1    | Ca_kabuli_chr01 | 6536290                 | GG                              | AA              | 1946725106               |
| SNP_P4_4372_6536537 | NC_021160.1    | Ca_kabuli_chr01 | 6536537                 | CC                              | AA              | 1946725108               |
| SNP_P4_4373_6537832 | NC_021160.1    | Ca_kabuli_chr01 | 6537832                 | TT                              | CC              | 1946725110               |
| SNP_P4_4374_6538485 | NC_021160.1    | Ca_kabuli_chr01 | 6538485                 | AA                              | GG              | 1946725112               |
| SNP_P4_4377_6538849 | NC_021160.1    | Ca_kabuli_chr01 | 6538849                 | TT                              | CC              | 1946725114               |
| SNP_P4_4378_6538850 | NC_021160.1    | Ca_kabuli_chr01 | 6538850                 | TT                              | GG              | 1946725116               |
| SNP_P4_4379_6539469 | NC_021160.1    | Ca_kabuli_chr01 | 6539469                 | TT                              | CC              | 1946725118               |
| SNP_P4_4380_6541211 | NC_021160.1    | Ca_kabuli_chr01 | 6541211                 | AA                              | CC              | 1946725119               |
| SNP_P4_4381_6541674 | NC_021160.1    | Ca_kabuli_chr01 | 6541674                 | CC                              | AA              | 1946725121               |
| SNP_P4_4382_6541781 | NC_021160.1    | Ca_kabuli_chr01 | 6541781                 | GG                              | AA              | 1946725123               |
| SNP_P4_4383_6541910 | NC_021160.1    | Ca_kabuli_chr01 | 6541910                 | AA                              | TT              | 1946725125               |
| SNP_P4_4384_6542820 | NC_021160.1    | Ca_kabuli_chr01 | 6542820                 | AA                              | GG              | 1946725127               |
| SNP_P4_4385_6543011 | NC_021160.1    | Ca_kabuli_chr01 | 6543011                 | AA                              | GG              | 1946725129               |
| SNP_P4_4386_6543154 | NC_021160.1    | Ca_kabuli_chr01 | 6543154                 | GG                              | AA              | 1946725131               |
| SNP_P4_4387_6544257 | NC_021160.1    | Ca_kabuli_chr01 | 6544257                 | GG                              | CC              | 1946725133               |
| SNP_P4_4388_6544461 | NC_021160.1    | Ca_kabuli_chr01 | 6544461                 | TT                              | AA              | 1946725135               |
| SNP_P4_4389_6544511 | NC_021160.1    | Ca_kabuli_chr01 | 6544511                 | CC                              | GG              | 1946725137               |
| SNP_P4_4390_6544569 | NC_021160.1    | Ca_kabuli_chr01 | 6544569                 | GG                              | AA              | 1946725139               |
| SNP_P4_4391_6546601 | NC_021160.1    | Ca_kabuli_chr01 | 6546601                 | CC                              | TT              | 1946725141               |
| SNP_P4_4392_6546978 | NC_021160.1    | Ca_kabuli_chr01 | 6546978                 | CC                              | TT              | 1946725143               |
| SNP_P4_4393_6546988 | NC_021160.1    | Ca_kabuli_chr01 | 6546988                 | AA                              | GG              | 1946725145               |
| SNP_P4_4394_6547382 | NC_021160.1    | Ca_kabuli_chr01 | 6547382                 | AA                              | CC              | 1946725147               |
| SNP_P4_4395_6553018 | NC_021160.1    | Ca_kabuli_chr01 | 6553018                 | TT                              | GG              | 1946725149               |
| SNP_P4_4396_6553423 | NC_021160.1    | Ca_kabuli_chr01 | 6553423                 | CC                              | GG              | 1946725151               |
| SNP_P4_4397_6553497 | NC_021160.1    | Ca_kabuli_chr01 | 6553497                 | GG                              | AA              | 1946725153               |
| SNP_P4_4398_6553555 | NC_021160.1    | Ca_kabuli_chr01 | 6553555                 | AA                              | GG              | 1946725155               |
| SNP_P4_4399_6554029 | NC_021160.1    | Ca_kabuli_chr01 | 6554029                 | AA                              | CC              | 1946725157               |
| SNP_P4_4401_6589459 | NC_021160.1    | Ca_kabuli_chr01 | 6589459                 | CC                              | TT              | 1946725159               |
| SNP_P4_4402_6589594 | NC_021160.1    | Ca_kabuli_chr01 | 6589594                 | AA                              | CC              | 1946725162               |



| SNPs IDs            | Chromosome IDs | Chromosomes     | Physical positions (bp) | CDC Frontier (Reference genome) | (ILWC46 & LPNB) | NCBI SNPdb Accession IDs |
|---------------------|----------------|-----------------|-------------------------|---------------------------------|-----------------|--------------------------|
| SNP_P4_4404_6620799 | NC_021160.1    | Ca_kabuli_chr01 | 6620799                 | GG                              | AA              | 1946725164               |
| SNP_P4_4405_6646161 | NC_021160.1    | Ca_kabuli_chr01 | 6646161                 | TT                              | CC              | 1946725166               |
| SNP_P4_4406_6646178 | NC_021160.1    | Ca_kabuli_chr01 | 6646178                 | TT                              | CC              | 1946725168               |
| SNP_P4_4407_6646179 | NC_021160.1    | Ca_kabuli_chr01 | 6646179                 | GG                              | CC              | 1946725170               |
| SNP_P4_4408_6693768 | NC_021160.1    | Ca_kabuli_chr01 | 6693768                 | TT                              | GG              | 1946725172               |
| SNP_P4_4409_6694522 | NC_021160.1    | Ca_kabuli_chr01 | 6694522                 | TT                              | CC              | 1946725174               |
| SNP_P4_4410_6694524 | NC_021160.1    | Ca_kabuli_chr01 | 6694524                 | AA                              | GG              | 1946725176               |
| SNP_P4_4411_6697393 | NC_021160.1    | Ca_kabuli_chr01 | 6697393                 | GG                              | AA              | 1946725178               |
| SNP_P4_4413_6744329 | NC_021160.1    | Ca_kabuli_chr01 | 6744329                 | GG                              | TT              | 1946725180               |
| SNP_P4_4414_6756569 | NC_021160.1    | Ca_kabuli_chr01 | 6756569                 | AA                              | CC              | 1946725182               |
| SNP_P4_4415_6757056 | NC_021160.1    | Ca_kabuli_chr01 | 6757056                 | GG                              | AA              | 1946725183               |
| SNP_P4_4416_6773045 | NC_021160.1    | Ca_kabuli_chr01 | 6773045                 | AA                              | CC              | 1946725185               |
| SNP_P4_4417_6775793 | NC_021160.1    | Ca_kabuli_chr01 | 6775793                 | TT                              | CC              | 1946725187               |
| SNP_P4_4418_6775821 | NC_021160.1    | Ca_kabuli_chr01 | 6775821                 | CC                              | TT              | 1946725189               |
| SNP_P4_4419_6775889 | NC_021160.1    | Ca_kabuli_chr01 | 6775889                 | AA                              | GG              | 1946725191               |
| SNP_P4_4420_6776210 | NC_021160.1    | Ca_kabuli_chr01 | 6776210                 | AA                              | GG              | 1946725193               |
| SNP_P4_4421_6778035 | NC_021160.1    | Ca_kabuli_chr01 | 6778035                 | TT                              | CC              | 1946725195               |
| SNP_P4_4422_6778075 | NC_021160.1    | Ca_kabuli_chr01 | 6778075                 | TT                              | AA              | 1946725197               |
| SNP_P4_4423_6778094 | NC_021160.1    | Ca_kabuli_chr01 | 6778094                 | AA                              | GG              | 1946725199               |
| SNP_P4_4424_6778128 | NC_021160.1    | Ca_kabuli_chr01 | 6778128                 | AA                              | GG              | 1946725201               |
| SNP_P4_4425_6778168 | NC_021160.1    | Ca_kabuli_chr01 | 6778168                 | CC                              | TT              | 1946725203               |
| SNP_P4_4426_6778488 | NC_021160.1    | Ca_kabuli_chr01 | 6778488                 | GG                              | TT              | 1946725205               |
| SNP_P4_4427_6778498 | NC_021160.1    | Ca_kabuli_chr01 | 6778498                 | TT                              | GG              | 1946725207               |
| SNP_P4_4428_6778517 | NC_021160.1    | Ca_kabuli_chr01 | 6778517                 | CC                              | TT              | 1946725209               |
| SNP_P4_4429_6779880 | NC_021160.1    | Ca_kabuli_chr01 | 6779880                 | AA                              | GG              | 1946725211               |
| SNP_P4_4431_6826377 | NC_021160.1    | Ca_kabuli_chr01 | 6826377                 | TT                              | CC              | 1946725213               |
| SNP_P4_4432_6826437 | NC_021160.1    | Ca_kabuli_chr01 | 6826437                 | AA                              | CC              | 1946725215               |
| SNP_P4_4433_6858819 | NC_021160.1    | Ca_kabuli_chr01 | 6858819                 | TT                              | AA              | 1946725216               |
| SNP_P4_4434_6869736 | NC_021160.1    | Ca_kabuli_chr01 | 6869736                 | CC                              | GG              | 1946725218               |
| SNP_P4_4437_7016200 | NC_021160.1    | Ca_kabuli_chr01 | 7016200                 | TT                              | CC              | 1946725220               |
| SNP_P4_4439_7022495 | NC_021160.1    | Ca_kabuli_chr01 | 7022495                 | CC                              | GG              | 1946725222               |
| SNP_P4_4440_7076158 | NC_021160.1    | Ca_kabuli_chr01 | 7076158                 | TT                              | AA              | 1946725224               |
| SNP_P4_4441_7076159 | NC_021160.1    | Ca_kabuli_chr01 | 7076159                 | CC                              | AA              | 1946725226               |
| SNP_P4_4444_7095225 | NC_021160.1    | Ca_kabuli_chr01 | 7095225                 | CC                              | TT              | 1946725228               |
| SNP_P4_4446_7116283 | NC_021160.1    | Ca_kabuli_chr01 | 7116283                 | TT                              | GG              | 1946725230               |
| SNP_P4_4448_7130491 | NC_021160.1    | Ca_kabuli_chr01 | 7130491                 | CC                              | TT              | 1946725232               |
| SNP_P4_4449_7154793 | NC_021160.1    | Ca_kabuli_chr01 | 7154793                 | AA                              | CC              | 1946725234               |
| SNP_P4_4450_7154857 | NC_021160.1    | Ca_kabuli_chr01 | 7154857                 | TT                              | CC              | 1946725236               |
| SNP_P4_4451_7174375 | NC_021160.1    | Ca_kabuli_chr01 | 7174375                 | AA                              | GG              | 1946725238               |
| SNP_P4_4452_7174376 | NC_021160.1    | Ca_kabuli_chr01 | 7174376                 | TT                              | CC              | 1946725239               |
| SNP_P4_4453_7187276 | NC_021160.1    | Ca_kabuli_chr01 | 7187276                 | TT                              | CC              | 1946725241               |
| SNP_P4_4454_7212004 | NC_021160.1    | Ca_kabuli_chr01 | 7212004                 | CC                              | TT              | 1946725243               |

| SNPs IDs            | Chromosome IDs | Chromosomes     | Physical positions (bp) | CDC Frontier (Reference genome) | (ILWC46 & LPNB) | NCBI SNPdb Accession IDs |
|---------------------|----------------|-----------------|-------------------------|---------------------------------|-----------------|--------------------------|
| SNP_P4_4457_7245784 | NC_021160.1    | Ca_kabuli_chr01 | 7245784                 | GG                              | AA              | 1946725245               |
| SNP_P4_4459_7294737 | NC_021160.1    | Ca_kabuli_chr01 | 7294737                 | CC                              | TT              | 1946725247               |
| SNP_P4_4460_7298873 | NC_021160.1    | Ca_kabuli_chr01 | 7298873                 | AA                              | GG              | 1946725249               |
| SNP_P4_4461_7316209 | NC_021160.1    | Ca_kabuli_chr01 | 7316209                 | GG                              | AA              | 1946725251               |
| SNP_P4_4462_7316981 | NC_021160.1    | Ca_kabuli_chr01 | 7316981                 | CC                              | TT              | 1946725252               |
| SNP_P4_4463_7319221 | NC_021160.1    | Ca_kabuli_chr01 | 7319221                 | GG                              | TT              | 1946725254               |
| SNP_P4_4464_7320713 | NC_021160.1    | Ca_kabuli_chr01 | 7320713                 | CC                              | TT              | 1946725256               |
| SNP_P4_4465_7320813 | NC_021160.1    | Ca_kabuli_chr01 | 7320813                 | TT                              | GG              | 1946725258               |
| SNP_P4_4466_7347573 | NC_021160.1    | Ca_kabuli_chr01 | 7347573                 | GG                              | TT              | 1946725260               |
| SNP_P4_4467_7378088 | NC_021160.1    | Ca_kabuli_chr01 | 7378088                 | CC                              | TT              | 1946725262               |
| SNP_P4_4468_7385381 | NC_021160.1    | Ca_kabuli_chr01 | 7385381                 | GG                              | TT              | 1946725264               |
| SNP_P4_4469_7396971 | NC_021160.1    | Ca_kabuli_chr01 | 7396971                 | CC                              | AA              | 1946725266               |
| SNP_P4_4470_7406160 | NC_021160.1    | Ca_kabuli_chr01 | 7406160                 | CC                              | GG              | 1946725268               |
| SNP_P4_4471_7406219 | NC_021160.1    | Ca_kabuli_chr01 | 7406219                 | AA                              | CC              | 1946725270               |
| SNP_P4_4472_7406228 | NC_021160.1    | Ca_kabuli_chr01 | 7406228                 | TT                              | CC              | 1946725272               |
| SNP_P4_4473_7415640 | NC_021160.1    | Ca_kabuli_chr01 | 7415640                 | TT                              | AA              | 1946725274               |
| SNP_P4_4474_7418142 | NC_021160.1    | Ca_kabuli_chr01 | 7418142                 | GG                              | AA              | 1946725276               |
| SNP_P4_4476_7424873 | NC_021160.1    | Ca_kabuli_chr01 | 7424873                 | AA                              | GG              | 1946725278               |
| SNP_P4_4477_7433105 | NC_021160.1    | Ca_kabuli_chr01 | 7433105                 | AA                              | TT              | 1946725280               |
| SNP_P4_4478_7443334 | NC_021160.1    | Ca_kabuli_chr01 | 7443334                 | CC                              | TT              | 1946725282               |
| SNP_P4_4479_7493347 | NC_021160.1    | Ca_kabuli_chr01 | 7493347                 | TT                              | CC              | 1946725284               |
| SNP_P4_4480_7499259 | NC_021160.1    | Ca_kabuli_chr01 | 7499259                 | CC                              | TT              | 1946725286               |
| SNP_P4_4481_7518441 | NC_021160.1    | Ca_kabuli_chr01 | 7518441                 | TT                              | CC              | 1946725288               |
| SNP_P4_4482_7539018 | NC_021160.1    | Ca_kabuli_chr01 | 7539018                 | GG                              | AA              | 1946725290               |
| SNP_P4_4483_7544224 | NC_021160.1    | Ca_kabuli_chr01 | 7544224                 | GG                              | AA              | 1946725291               |
| SNP_P4_4485_7590948 | NC_021160.1    | Ca_kabuli_chr01 | 7590948                 | GG                              | TT              | 1946725293               |
| SNP_P4_4486_7590976 | NC_021160.1    | Ca_kabuli_chr01 | 7590976                 | AA                              | GG              | 1946725295               |
| SNP_P4_4487_7590994 | NC_021160.1    | Ca_kabuli_chr01 | 7590994                 | CC                              | TT              | 1946725297               |
| SNP_P4_4488_7590999 | NC_021160.1    | Ca_kabuli_chr01 | 7590999                 | GG                              | TT              | 1946725299               |
| SNP_P4_4489_7591009 | NC_021160.1    | Ca_kabuli_chr01 | 7591009                 | CC                              | TT              | 1946725301               |
| SNP_P4_4490_7591010 | NC_021160.1    | Ca_kabuli_chr01 | 7591010                 | CC                              | TT              | 1946725302               |
| SNP_P4_4491_7591307 | NC_021160.1    | Ca_kabuli_chr01 | 7591307                 | TT                              | CC              | 1946725303               |
| SNP_P4_4492_7591535 | NC_021160.1    | Ca_kabuli_chr01 | 7591535                 | AA                              | GG              | 1946725304               |
| SNP_P4_4493_7591536 | NC_021160.1    | Ca_kabuli_chr01 | 7591536                 | CC                              | TT              | 1946725305               |
| SNP_P4_4494_7591542 | NC_021160.1    | Ca_kabuli_chr01 | 7591542                 | GG                              | AA              | 1946725306               |
| SNP_P4_4495_7591548 | NC_021160.1    | Ca_kabuli_chr01 | 7591548                 | GG                              | CC              | 1946725307               |
| SNP_P4_4496_7591589 | NC_021160.1    | Ca_kabuli_chr01 | 7591589                 | GG                              | AA              | 1946725308               |
| SNP_P4_4497_7591623 | NC_021160.1    | Ca_kabuli_chr01 | 7591623                 | CC                              | TT              | 1946725309               |
| SNP_P4_4498_7591627 | NC_021160.1    | Ca_kabuli_chr01 | 7591627                 | GG                              | AA              | 1946725311               |
| SNP_P4_4499_7591823 | NC_021160.1    | Ca_kabuli_chr01 | 7591823                 | CC                              | GG              | 1946725313               |
| SNP_P4_4500_7591824 | NC_021160.1    | Ca_kabuli_chr01 | 7591824                 | CC                              | TT              | 1946725315               |
| SNP_P4_4501_7591874 | NC_021160.1    | Ca_kabuli_chr01 | 7591874                 | AA                              | GG              | 1946725317               |

| SNPs IDs            | Chromosome IDs | Chromosomes     | Physical positions (bp) | CDC Frontier (Reference genome) | (ILWC46 & LPNB) | NCBI SNPdb Accession IDs |
|---------------------|----------------|-----------------|-------------------------|---------------------------------|-----------------|--------------------------|
| SNP_P4_4502_7591896 | NC_021160.1    | Ca_kabuli_chr01 | 7591896                 | GG                              | AA              | 1946725319               |
| SNP_P4_4503_7618279 | NC_021160.1    | Ca_kabuli_chr01 | 7618279                 | GG                              | AA              | 1946725321               |
| SNP_P4_4505_7629992 | NC_021160.1    | Ca_kabuli_chr01 | 7629992                 | TT                              | AA              | 1946725323               |
| SNP_P4_4506_7630242 | NC_021160.1    | Ca_kabuli_chr01 | 7630242                 | GG                              | CC              | 1946725325               |
| SNP_P4_4507_7630353 | NC_021160.1    | Ca_kabuli_chr01 | 7630353                 | CC                              | AA              | 1946725327               |
| SNP_P4_4508_7630356 | NC_021160.1    | Ca_kabuli_chr01 | 7630356                 | TT                              | AA              | 1946725329               |
| SNP_P4_4509_7630368 | NC_021160.1    | Ca_kabuli_chr01 | 7630368                 | TT                              | AA              | 1946725331               |
| SNP_P4_4511_7630876 | NC_021160.1    | Ca_kabuli_chr01 | 7630876                 | GG                              | CC              | 1946725333               |
| SNP_P4_4512_7630965 | NC_021160.1    | Ca_kabuli_chr01 | 7630965                 | GG                              | CC              | 1946725335               |
| SNP_P4_4513_7634531 | NC_021160.1    | Ca_kabuli_chr01 | 7634531                 | CC                              | TT              | 1946725337               |
| SNP_P4_4516_7635730 | NC_021160.1    | Ca_kabuli_chr01 | 7635730                 | TT                              | AA              | 1946725339               |
| SNP_P4_4517_7635771 | NC_021160.1    | Ca_kabuli_chr01 | 7635771                 | TT                              | CC              | 1946725341               |
| SNP_P4_4518_7635788 | NC_021160.1    | Ca_kabuli_chr01 | 7635788                 | CC                              | TT              | 1946725343               |
| SNP_P4_4519_7635846 | NC_021160.1    | Ca_kabuli_chr01 | 7635846                 | GG                              | CC              | 1946725345               |
| SNP_P4_4520_7635850 | NC_021160.1    | Ca_kabuli_chr01 | 7635850                 | TT                              | AA              | 1946725347               |
| SNP_P4_4521_7635852 | NC_021160.1    | Ca_kabuli_chr01 | 7635852                 | CC                              | TT              | 1946725349               |
| SNP_P4_4522_7635865 | NC_021160.1    | Ca_kabuli_chr01 | 7635865                 | AA                              | GG              | 1946725351               |
| SNP_P4_4523_7635880 | NC_021160.1    | Ca_kabuli_chr01 | 7635880                 | CC                              | TT              | 1946725353               |
| SNP_P4_4524_7635895 | NC_021160.1    | Ca_kabuli_chr01 | 7635895                 | TT                              | CC              | 1946725355               |
| SNP_P4_4525_7635928 | NC_021160.1    | Ca_kabuli_chr01 | 7635928                 | CC                              | TT              | 1946725357               |
| SNP_P4_4526_7635942 | NC_021160.1    | Ca_kabuli_chr01 | 7635942                 | AA                              | GG              | 1946725358               |
| SNP_P4_4527_7636134 | NC_021160.1    | Ca_kabuli_chr01 | 7636134                 | TT                              | CC              | 1946725360               |
| SNP_P4_4528_7637041 | NC_021160.1    | Ca_kabuli_chr01 | 7637041                 | TT                              | CC              | 1946725362               |
| SNP_P4_4529_7637056 | NC_021160.1    | Ca_kabuli_chr01 | 7637056                 | GG                              | TT              | 1946725364               |
| SNP_P4_4530_7637191 | NC_021160.1    | Ca_kabuli_chr01 | 7637191                 | GG                              | AA              | 1946725366               |
| SNP_P4_4531_7637221 | NC_021160.1    | Ca_kabuli_chr01 | 7637221                 | GG                              | AA              | 1946725368               |
| SNP_P4_4532_7637265 | NC_021160.1    | Ca_kabuli_chr01 | 7637265                 | GG                              | AA              | 1946725370               |
| SNP_P4_4533_7637301 | NC_021160.1    | Ca_kabuli_chr01 | 7637301                 | GG                              | AA              | 1946725372               |
| SNP_P4_4534_7637307 | NC_021160.1    | Ca_kabuli_chr01 | 7637307                 | GG                              | AA              | 1946725374               |
| SNP_P4_4535_7637329 | NC_021160.1    | Ca_kabuli_chr01 | 7637329                 | TT                              | AA              | 1946725376               |
| SNP_P4_4536_7637351 | NC_021160.1    | Ca_kabuli_chr01 | 7637351                 | GG                              | AA              | 1946725378               |
| SNP_P4_4537_7637396 | NC_021160.1    | Ca_kabuli_chr01 | 7637396                 | TT                              | CC              | 1946725380               |
| SNP_P4_4538_7637412 | NC_021160.1    | Ca_kabuli_chr01 | 7637412                 | CC                              | GG              | 1946725382               |
| SNP_P4_4539_7637498 | NC_021160.1    | Ca_kabuli_chr01 | 7637498                 | AA                              | CC              | 1946725384               |
| SNP_P4_4540_7637718 | NC_021160.1    | Ca_kabuli_chr01 | 7637718                 | GG                              | CC              | 1946725386               |
| SNP_P4_4541_7637751 | NC_021160.1    | Ca_kabuli_chr01 | 7637751                 | CC                              | TT              | 1946725388               |
| SNP_P4_4542_7637763 | NC_021160.1    | Ca_kabuli_chr01 | 7637763                 | CC                              | TT              | 1946725390               |
| SNP_P4_4543_7637973 | NC_021160.1    | Ca_kabuli_chr01 | 7637973                 | CC                              | GG              | 1946725392               |
| SNP_P4_4544_7637984 | NC_021160.1    | Ca_kabuli_chr01 | 7637984                 | TT                              | AA              | 1946725394               |
| SNP_P4_4545_7638361 | NC_021160.1    | Ca_kabuli_chr01 | 7638361                 | TT                              | CC              | 1946725396               |
| SNP_P4_4546_7638582 | NC_021160.1    | Ca_kabuli_chr01 | 7638582                 | GG                              | AA              | 1946725398               |
| SNP_P4_4547_7638663 | NC_021160.1    | Ca_kabuli_chr01 | 7638663                 | CC                              | AA              | 1946725400               |

| SNPs IDs            | Chromosome IDs | Chromosomes     | Physical positions (bp) | CDC Frontier (Reference genome) | (ILWC46 & LPNB) | NCBI SNPdb Accession IDs |
|---------------------|----------------|-----------------|-------------------------|---------------------------------|-----------------|--------------------------|
| SNP_P4_4548_7638736 | NC_021160.1    | Ca_kabuli_chr01 | 7638736                 | AA                              | TT              | 1946725402               |
| SNP_P4_4549_7638858 | NC_021160.1    | Ca_kabuli_chr01 | 7638858                 | TT                              | CC              | 1946725404               |
| SNP_P4_4550_7638859 | NC_021160.1    | Ca_kabuli_chr01 | 7638859                 | CC                              | TT              | 1946725406               |
| SNP_P4_4551_7638891 | NC_021160.1    | Ca_kabuli_chr01 | 7638891                 | CC                              | TT              | 1946725408               |
| SNP_P4_4552_7638907 | NC_021160.1    | Ca_kabuli_chr01 | 7638907                 | GG                              | AA              | 1946725411               |
| SNP_P4_4553_7639071 | NC_021160.1    | Ca_kabuli_chr01 | 7639071                 | CC                              | AA              | 1946725413               |
| SNP_P4_4554_7639097 | NC_021160.1    | Ca_kabuli_chr01 | 7639097                 | CC                              | TT              | 1946725415               |
| SNP_P4_4555_7640371 | NC_021160.1    | Ca_kabuli_chr01 | 7640371                 | AA                              | TT              | 1946725417               |
| SNP_P4_4556_7640614 | NC_021160.1    | Ca_kabuli_chr01 | 7640614                 | CC                              | GG              | 1946725419               |
| SNP_P4_4557_7641894 | NC_021160.1    | Ca_kabuli_chr01 | 7641894                 | GG                              | AA              | 1946725421               |
| SNP_P4_4558_7641913 | NC_021160.1    | Ca_kabuli_chr01 | 7641913                 | GG                              | TT              | 1946725423               |
| SNP_P4_4560_7643483 | NC_021160.1    | Ca_kabuli_chr01 | 7643483                 | CC                              | TT              | 1946725425               |
| SNP_P4_4561_7647872 | NC_021160.1    | Ca_kabuli_chr01 | 7647872                 | TT                              | CC              | 1946725427               |
| SNP_P4_4562_7648078 | NC_021160.1    | Ca_kabuli_chr01 | 7648078                 | TT                              | CC              | 1946725429               |
| SNP_P4_4563_7648094 | NC_021160.1    | Ca_kabuli_chr01 | 7648094                 | GG                              | AA              | 1946725431               |
| SNP_P4_4564_7648096 | NC_021160.1    | Ca_kabuli_chr01 | 7648096                 | GG                              | AA              | 1946725433               |
| SNP_P4_4565_7648118 | NC_021160.1    | Ca_kabuli_chr01 | 7648118                 | AA                              | CC              | 1946725435               |
| SNP_P4_4566_7648119 | NC_021160.1    | Ca_kabuli_chr01 | 7648119                 | AA                              | GG              | 1946725437               |
| SNP_P4_4567_7648219 | NC_021160.1    | Ca_kabuli_chr01 | 7648219                 | CC                              | TT              | 1946725439               |
| SNP_P4_4568_7648220 | NC_021160.1    | Ca_kabuli_chr01 | 7648220                 | GG                              | TT              | 1946725441               |
| SNP_P4_4570_7649150 | NC_021160.1    | Ca_kabuli_chr01 | 7649150                 | TT                              | AA              | 1946725443               |
| SNP_P4_4572_7651709 | NC_021160.1    | Ca_kabuli_chr01 | 7651709                 | AA                              | CC              | 1946725445               |
| SNP_P4_4573_7652089 | NC_021160.1    | Ca_kabuli_chr01 | 7652089                 | CC                              | TT              | 1946725447               |
| SNP_P4_4574_7653116 | NC_021160.1    | Ca_kabuli_chr01 | 7653116                 | AA                              | GG              | 1946725449               |
| SNP_P4_4575_7653157 | NC_021160.1    | Ca_kabuli_chr01 | 7653157                 | TT                              | CC              | 1946725451               |
| SNP_P4_4576_7654085 | NC_021160.1    | Ca_kabuli_chr01 | 7654085                 | AA                              | GG              | 1946725453               |
| SNP_P4_4577_7654103 | NC_021160.1    | Ca_kabuli_chr01 | 7654103                 | CC                              | GG              | 1946725455               |
| SNP_P4_4578_7654251 | NC_021160.1    | Ca_kabuli_chr01 | 7654251                 | GG                              | AA              | 1946725457               |
| SNP_P4_4579_7654295 | NC_021160.1    | Ca_kabuli_chr01 | 7654295                 | AA                              | CC              | 1946725459               |
| SNP_P4_4580_7654311 | NC_021160.1    | Ca_kabuli_chr01 | 7654311                 | CC                              | TT              | 1946725461               |
| SNP_P4_4581_7654462 | NC_021160.1    | Ca_kabuli_chr01 | 7654462                 | CC                              | TT              | 1946725463               |
| SNP_P4_4582_7654475 | NC_021160.1    | Ca_kabuli_chr01 | 7654475                 | GG                              | AA              | 1946725465               |
| SNP_P4_4583_7654476 | NC_021160.1    | Ca_kabuli_chr01 | 7654476                 | GG                              | TT              | 1946725467               |
| SNP_P4_4584_7655038 | NC_021160.1    | Ca_kabuli_chr01 | 7655038                 | CC                              | TT              | 1946725469               |
| SNP_P4_4585_7655040 | NC_021160.1    | Ca_kabuli_chr01 | 7655040                 | CC                              | AA              | 1946725471               |
| SNP_P4_4586_7655369 | NC_021160.1    | Ca_kabuli_chr01 | 7655369                 | GG                              | CC              | 1946725473               |
| SNP_P4_4587_7655825 | NC_021160.1    | Ca_kabuli_chr01 | 7655825                 | GG                              | AA              | 1946725475               |
| SNP_P4_4588_7655906 | NC_021160.1    | Ca_kabuli_chr01 | 7655906                 | TT                              | CC              | 1946725477               |
| SNP_P4_4589_7656466 | NC_021160.1    | Ca_kabuli_chr01 | 7656466                 | AA                              | GG              | 1946725479               |
| SNP_P4_4590_7656848 | NC_021160.1    | Ca_kabuli_chr01 | 7656848                 | TT                              | CC              | 1946725481               |
| SNP_P4_4591_7657279 | NC_021160.1    | Ca_kabuli_chr01 | 7657279                 | AA                              | CC              | 1946725483               |
| SNP_P4_4592_7657363 | NC_021160.1    | Ca_kabuli_chr01 | 7657363                 | TT                              | AA              | 1946725485               |

| SNPs IDs            | Chromosome IDs | Chromosomes     | Physical positions (bp) | CDC Frontier (Reference genome) | (ILWC46 & LPNB) | NCBI SNPdb Accession IDs |
|---------------------|----------------|-----------------|-------------------------|---------------------------------|-----------------|--------------------------|
| SNP_P4_4593_7657364 | NC_021160.1    | Ca_kabuli_chr01 | 7657364                 | AA                              | TT              | 1946725487               |
| SNP_P4_4594_7657380 | NC_021160.1    | Ca_kabuli_chr01 | 7657380                 | AA                              | GG              | 1946725489               |
| SNP_P4_4596_7657458 | NC_021160.1    | Ca_kabuli_chr01 | 7657458                 | GG                              | AA              | 1946725491               |
| SNP_P4_4597_7657491 | NC_021160.1    | Ca_kabuli_chr01 | 7657491                 | AA                              | TT              | 1946725494               |
| SNP_P4_4598_7657744 | NC_021160.1    | Ca_kabuli_chr01 | 7657744                 | CC                              | AA              | 1946725496               |
| SNP_P4_4599_7658107 | NC_021160.1    | Ca_kabuli_chr01 | 7658107                 | CC                              | TT              | 1946725498               |
| SNP_P4_4600_7659797 | NC_021160.1    | Ca_kabuli_chr01 | 7659797                 | CC                              | GG              | 1946725500               |
| SNP_P4_4601_7659831 | NC_021160.1    | Ca_kabuli_chr01 | 7659831                 | AA                              | GG              | 1946725502               |
| SNP_P4_4602_7660541 | NC_021160.1    | Ca_kabuli_chr01 | 7660541                 | AA                              | CC              | 1946725504               |
| SNP_P4_4603_7661186 | NC_021160.1    | Ca_kabuli_chr01 | 7661186                 | TT                              | AA              | 1946725506               |
| SNP_P4_4605_7661355 | NC_021160.1    | Ca_kabuli_chr01 | 7661355                 | AA                              | GG              | 1946725508               |
| SNP_P4_4606_7661375 | NC_021160.1    | Ca_kabuli_chr01 | 7661375                 | CC                              | TT              | 1946725510               |
| SNP_P4_4607_7661387 | NC_021160.1    | Ca_kabuli_chr01 | 7661387                 | TT                              | CC              | 1946725512               |
| SNP_P4_4608_7661390 | NC_021160.1    | Ca_kabuli_chr01 | 7661390                 | GG                              | AA              | 1946725514               |
| SNP_P4_4609_7661592 | NC_021160.1    | Ca_kabuli_chr01 | 7661592                 | TT                              | CC              | 1946725516               |
| SNP_P4_4610_7661656 | NC_021160.1    | Ca_kabuli_chr01 | 7661656                 | CC                              | TT              | 1946725518               |
| SNP_P4_4611_7661980 | NC_021160.1    | Ca_kabuli_chr01 | 7661980                 | GG                              | AA              | 1946725520               |
| SNP_P4_4612_7663630 | NC_021160.1    | Ca_kabuli_chr01 | 7663630                 | GG                              | AA              | 1946725522               |
| SNP_P4_4613_7663656 | NC_021160.1    | Ca_kabuli_chr01 | 7663656                 | AA                              | CC              | 1946725524               |
| SNP_P4_4614_7663697 | NC_021160.1    | Ca_kabuli_chr01 | 7663697                 | GG                              | CC              | 1946725526               |
| SNP_P4_4615_7663858 | NC_021160.1    | Ca_kabuli_chr01 | 7663858                 | CC                              | TT              | 1946725528               |
| SNP_P4_4616_7664918 | NC_021160.1    | Ca_kabuli_chr01 | 7664918                 | CC                              | TT              | 1946725530               |
| SNP_P4_4617_7664958 | NC_021160.1    | Ca_kabuli_chr01 | 7664958                 | GG                              | CC              | 1946725532               |
| SNP_P4_4618_7665522 | NC_021160.1    | Ca_kabuli_chr01 | 7665522                 | GG                              | AA              | 1946725534               |
| SNP_P4_4619_7665939 | NC_021160.1    | Ca_kabuli_chr01 | 7665939                 | CC                              | GG              | 1946725536               |
| SNP_P4_4620_7668337 | NC_021160.1    | Ca_kabuli_chr01 | 7668337                 | GG                              | AA              | 1946725538               |
| SNP_P4_4621_7668692 | NC_021160.1    | Ca_kabuli_chr01 | 7668692                 | TT                              | CC              | 1946725541               |
| SNP_P4_4623_7668786 | NC_021160.1    | Ca_kabuli_chr01 | 7668786                 | AA                              | GG              | 1946725543               |
| SNP_P4_4624_7669641 | NC_021160.1    | Ca_kabuli_chr01 | 7669641                 | GG                              | AA              | 1946725545               |
| SNP_P4_4625_7670252 | NC_021160.1    | Ca_kabuli_chr01 | 7670252                 | TT                              | CC              | 1946725547               |
| SNP_P4_4626_7670256 | NC_021160.1    | Ca_kabuli_chr01 | 7670256                 | CC                              | TT              | 1946725549               |
| SNP_P4_4627_7671284 | NC_021160.1    | Ca_kabuli_chr01 | 7671284                 | GG                              | AA              | 1946725551               |
| SNP_P4_4628_7671516 | NC_021160.1    | Ca_kabuli_chr01 | 7671516                 | CC                              | TT              | 1946725553               |
| SNP_P4_4629_7671549 | NC_021160.1    | Ca_kabuli_chr01 | 7671549                 | AA                              | CC              | 1946725555               |
| SNP_P4_4630_7671562 | NC_021160.1    | Ca_kabuli_chr01 | 7671562                 | CC                              | AA              | 1946725557               |
| SNP_P4_4631_7671697 | NC_021160.1    | Ca_kabuli_chr01 | 7671697                 | CC                              | TT              | 1946725559               |
| SNP_P4_4632_7672549 | NC_021160.1    | Ca_kabuli_chr01 | 7672549                 | AA                              | GG              | 1946725561               |
| SNP_P4_4633_7672691 | NC_021160.1    | Ca_kabuli_chr01 | 7672691                 | GG                              | AA              | 1946725563               |
| SNP_P4_4634_7672694 | NC_021160.1    | Ca_kabuli_chr01 | 7672694                 | AA                              | GG              | 1946725565               |
| SNP_P4_4636_7673010 | NC_021160.1    | Ca_kabuli_chr01 | 7673010                 | TT                              | AA              | 1946725567               |
| SNP_P4_4637_7673047 | NC_021160.1    | Ca_kabuli_chr01 | 7673047                 | CC                              | AA              | 1946725569               |
| SNP_P4_4638_7673066 | NC_021160.1    | Ca_kabuli_chr01 | 7673066                 | AA                              | GG              | 1946725571               |

| SNPs IDs            | Chromosome IDs | Chromosomes     | Physical positions (bp) | CDC Frontier (Reference genome) | (ILWC46 & LPNB) | NCBI SNPdb Accession IDs |
|---------------------|----------------|-----------------|-------------------------|---------------------------------|-----------------|--------------------------|
| SNP_P4_4639_7673092 | NC_021160.1    | Ca_kabuli_chr01 | 7673092                 | CC                              | TT              | 1946725573               |
| SNP_P4_4640_7673118 | NC_021160.1    | Ca_kabuli_chr01 | 7673118                 | TT                              | CC              | 1946725575               |
| SNP_P4_4641_7674881 | NC_021160.1    | Ca_kabuli_chr01 | 7674881                 | TT                              | CC              | 1946725577               |
| SNP_P4_4642_7676136 | NC_021160.1    | Ca_kabuli_chr01 | 7676136                 | AA                              | TT              | 1946725579               |
| SNP_P4_4643_7676165 | NC_021160.1    | Ca_kabuli_chr01 | 7676165                 | CC                              | TT              | 1946725581               |
| SNP_P4_4644_7676166 | NC_021160.1    | Ca_kabuli_chr01 | 7676166                 | AA                              | GG              | 1946725583               |
| SNP_P4_4645_7676893 | NC_021160.1    | Ca_kabuli_chr01 | 7676893                 | AA                              | TT              | 1946725585               |
| SNP_P4_4646_7676955 | NC_021160.1    | Ca_kabuli_chr01 | 7676955                 | TT                              | CC              | 1946725587               |
| SNP_P4_4647_7676963 | NC_021160.1    | Ca_kabuli_chr01 | 7676963                 | CC                              | TT              | 1946725589               |
| SNP_P4_4648_7676964 | NC_021160.1    | Ca_kabuli_chr01 | 7676964                 | CC                              | TT              | 1946725591               |
| SNP_P4_4650_7677803 | NC_021160.1    | Ca_kabuli_chr01 | 7677803                 | AA                              | GG              | 1946725593               |
| SNP_P4_4652_7679328 | NC_021160.1    | Ca_kabuli_chr01 | 7679328                 | AA                              | GG              | 1946725595               |
| SNP_P4_4654_7679574 | NC_021160.1    | Ca_kabuli_chr01 | 7679574                 | AA                              | GG              | 1946725597               |
| SNP_P4_4656_7682115 | NC_021160.1    | Ca_kabuli_chr01 | 7682115                 | CC                              | TT              | 1946725599               |
| SNP_P4_4657_7685409 | NC_021160.1    | Ca_kabuli_chr01 | 7685409                 | CC                              | AA              | 1946725600               |
| SNP_P4_4658_7686542 | NC_021160.1    | Ca_kabuli_chr01 | 7686542                 | AA                              | TT              | 1946725602               |
| SNP_P4_4659_7686543 | NC_021160.1    | Ca_kabuli_chr01 | 7686543                 | CC                              | TT              | 1946725604               |
| SNP_P4_4660_7686840 | NC_021160.1    | Ca_kabuli_chr01 | 7686840                 | TT                              | CC              | 1946725606               |
| SNP_P4_4661_7686883 | NC_021160.1    | Ca_kabuli_chr01 | 7686883                 | CC                              | TT              | 1946725608               |
| SNP_P4_4662_7687634 | NC_021160.1    | Ca_kabuli_chr01 | 7687634                 | CC                              | TT              | 1946725610               |
| SNP_P4_4663_7687637 | NC_021160.1    | Ca_kabuli_chr01 | 7687637                 | CC                              | TT              | 1946725612               |
| SNP_P4_4664_7687650 | NC_021160.1    | Ca_kabuli_chr01 | 7687650                 | TT                              | CC              | 1946725614               |
| SNP_P4_4665_7687651 | NC_021160.1    | Ca_kabuli_chr01 | 7687651                 | CC                              | TT              | 1946725616               |
| SNP_P4_4666_7687930 | NC_021160.1    | Ca_kabuli_chr01 | 7687930                 | GG                              | AA              | 1946725618               |
| SNP_P4_4667_7687959 | NC_021160.1    | Ca_kabuli_chr01 | 7687959                 | CC                              | GG              | 1946725620               |
| SNP_P4_4668_7687963 | NC_021160.1    | Ca_kabuli_chr01 | 7687963                 | AA                              | CC              | 1946725622               |
| SNP_P4_4669_7687975 | NC_021160.1    | Ca_kabuli_chr01 | 7687975                 | AA                              | TT              | 1946725624               |
| SNP_P4_4670_7688019 | NC_021160.1    | Ca_kabuli_chr01 | 7688019                 | CC                              | TT              | 1946725626               |
| SNP_P4_4671_7688061 | NC_021160.1    | Ca_kabuli_chr01 | 7688061                 | CC                              | TT              | 1946725628               |
| SNP_P4_4672_7690890 | NC_021160.1    | Ca_kabuli_chr01 | 7690890                 | TT                              | CC              | 1946725630               |
| SNP_P4_4673_7692175 | NC_021160.1    | Ca_kabuli_chr01 | 7692175                 | TT                              | CC              | 1946725632               |
| SNP_P4_4674_7695511 | NC_021160.1    | Ca_kabuli_chr01 | 7695511                 | AA                              | GG              | 1946725634               |
| SNP_P4_4675_7699379 | NC_021160.1    | Ca_kabuli_chr01 | 7699379                 | CC                              | TT              | 1946725636               |
| SNP_P4_4676_7700003 | NC_021160.1    | Ca_kabuli_chr01 | 7700003                 | AA                              | TT              | 1946725638               |
| SNP_P4_4677_7701657 | NC_021160.1    | Ca_kabuli_chr01 | 7701657                 | AA                              | TT              | 1946725640               |
| SNP_P4_4678_7701659 | NC_021160.1    | Ca_kabuli_chr01 | 7701659                 | AA                              | TT              | 1946725641               |
| SNP_P4_4679_7701661 | NC_021160.1    | Ca_kabuli_chr01 | 7701661                 | TT                              | CC              | 1946725643               |
| SNP_P4_4680_7701667 | NC_021160.1    | Ca_kabuli_chr01 | 7701667                 | AA                              | GG              | 1946725645               |
| SNP_P4_4681_7701708 | NC_021160.1    | Ca_kabuli_chr01 | 7701708                 | TT                              | AA              | 1946725647               |
| SNP_P4_4682_7701833 | NC_021160.1    | Ca_kabuli_chr01 | 7701833                 | AA                              | GG              | 1946725649               |
| SNP_P4_4684_7702196 | NC_021160.1    | Ca_kabuli_chr01 | 7702196                 | AA                              | TT              | 1946725651               |
| SNP_P4_4685_7703430 | NC_021160.1    | Ca_kabuli_chr01 | 7703430                 | CC                              | GG              | 1946725653               |

| SNPs IDs            | Chromosome IDs | Chromosomes     | Physical positions (bp) | CDC Frontier (Reference genome) | (ILWC46 & LPNB) | NCBI SNPdb Accession IDs |
|---------------------|----------------|-----------------|-------------------------|---------------------------------|-----------------|--------------------------|
| SNP_P4_4686_7703438 | NC_021160.1    | Ca_kabuli_chr01 | 7703438                 | TT                              | CC              | 1946725655               |
| SNP_P4_4687_7703706 | NC_021160.1    | Ca_kabuli_chr01 | 7703706                 | GG                              | AA              | 1946725656               |
| SNP_P4_4688_7703707 | NC_021160.1    | Ca_kabuli_chr01 | 7703707                 | CC                              | TT              | 1946725658               |
| SNP_P4_4689_7703718 | NC_021160.1    | Ca_kabuli_chr01 | 7703718                 | CC                              | TT              | 1946725660               |
| SNP_P4_4690_7703741 | NC_021160.1    | Ca_kabuli_chr01 | 7703741                 | AA                              | TT              | 1946725662               |
| SNP_P4_4691_7703749 | NC_021160.1    | Ca_kabuli_chr01 | 7703749                 | GG                              | AA              | 1946725664               |
| SNP_P4_4692_7703773 | NC_021160.1    | Ca_kabuli_chr01 | 7703773                 | AA                              | GG              | 1946725666               |
| SNP_P4_4693_7703904 | NC_021160.1    | Ca_kabuli_chr01 | 7703904                 | GG                              | AA              | 1946725668               |
| SNP_P4_4694_7703919 | NC_021160.1    | Ca_kabuli_chr01 | 7703919                 | AA                              | GG              | 1946725670               |
| SNP_P4_4695_7703936 | NC_021160.1    | Ca_kabuli_chr01 | 7703936                 | AA                              | GG              | 1946725672               |
| SNP_P4_4696_7703937 | NC_021160.1    | Ca_kabuli_chr01 | 7703937                 | GG                              | AA              | 1946725674               |
| SNP_P4_4697_7703989 | NC_021160.1    | Ca_kabuli_chr01 | 7703989                 | GG                              | AA              | 1946725676               |
| SNP_P4_4698_7704038 | NC_021160.1    | Ca_kabuli_chr01 | 7704038                 | CC                              | GG              | 1946725678               |
| SNP_P4_4699_7704207 | NC_021160.1    | Ca_kabuli_chr01 | 7704207                 | AA                              | TT              | 1946725680               |
| SNP_P4_4700_7704217 | NC_021160.1    | Ca_kabuli_chr01 | 7704217                 | AA                              | GG              | 1946725682               |
| SNP_P4_4701_7704416 | NC_021160.1    | Ca_kabuli_chr01 | 7704416                 | AA                              | GG              | 1946725684               |
| SNP_P4_4702_7704439 | NC_021160.1    | Ca_kabuli_chr01 | 7704439                 | CC                              | TT              | 1946725686               |
| SNP_P4_4703_7704470 | NC_021160.1    | Ca_kabuli_chr01 | 7704470                 | GG                              | AA              | 1946725688               |
| SNP_P4_4704_7704482 | NC_021160.1    | Ca_kabuli_chr01 | 7704482                 | CC                              | AA              | 1946725690               |
| SNP_P4_4705_7704487 | NC_021160.1    | Ca_kabuli_chr01 | 7704487                 | TT                              | AA              | 1946725692               |
| SNP_P4_4707_7705657 | NC_021160.1    | Ca_kabuli_chr01 | 7705657                 | GG                              | AA              | 1946725694               |
| SNP_P4_4708_7705701 | NC_021160.1    | Ca_kabuli_chr01 | 7705701                 | TT                              | CC              | 1946725696               |
| SNP_P4_4709_7705926 | NC_021160.1    | Ca_kabuli_chr01 | 7705926                 | GG                              | CC              | 1946725698               |
| SNP_P4_4710_7706913 | NC_021160.1    | Ca_kabuli_chr01 | 7706913                 | GG                              | AA              | 1946725700               |
| SNP_P4_4711_7706914 | NC_021160.1    | Ca_kabuli_chr01 | 7706914                 | AA                              | TT              | 1946725702               |
| SNP_P4_4712_7707178 | NC_021160.1    | Ca_kabuli_chr01 | 7707178                 | TT                              | AA              | 1946725704               |
| SNP_P4_4713_7707689 | NC_021160.1    | Ca_kabuli_chr01 | 7707689                 | TT                              | CC              | 1946725706               |
| SNP_P4_4714_7707692 | NC_021160.1    | Ca_kabuli_chr01 | 7707692                 | TT                              | GG              | 1946725708               |
| SNP_P4_4715_7707733 | NC_021160.1    | Ca_kabuli_chr01 | 7707733                 | TT                              | AA              | 1946725710               |
| SNP_P4_4716_7710554 | NC_021160.1    | Ca_kabuli_chr01 | 7710554                 | GG                              | TT              | 1946725711               |
| SNP_P4_4717_7710613 | NC_021160.1    | Ca_kabuli_chr01 | 7710613                 | GG                              | AA              | 1946725713               |
| SNP_P4_4718_7711696 | NC_021160.1    | Ca_kabuli_chr01 | 7711696                 | TT                              | AA              | 1946725716               |
| SNP_P4_4719_7712277 | NC_021160.1    | Ca_kabuli_chr01 | 7712277                 | TT                              | AA              | 1946725718               |
| SNP_P4_4720_7712303 | NC_021160.1    | Ca_kabuli_chr01 | 7712303                 | CC                              | TT              | 1946725720               |
| SNP_P4_4721_7712376 | NC_021160.1    | Ca_kabuli_chr01 | 7712376                 | TT                              | CC              | 1946725722               |
| SNP_P4_4722_7712469 | NC_021160.1    | Ca_kabuli_chr01 | 7712469                 | AA                              | GG              | 1946725724               |
| SNP_P4_4723_7712470 | NC_021160.1    | Ca_kabuli_chr01 | 7712470                 | AA                              | TT              | 1946725726               |
| SNP_P4_4724_7712485 | NC_021160.1    | Ca_kabuli_chr01 | 7712485                 | TT                              | CC              | 1946725728               |
| SNP_P4_4725_7712590 | NC_021160.1    | Ca_kabuli_chr01 | 7712590                 | TT                              | CC              | 1946725730               |
| SNP_P4_4726_7712606 | NC_021160.1    | Ca_kabuli_chr01 | 7712606                 | GG                              | AA              | 1946725732               |
| SNP_P4_4727_7712804 | NC_021160.1    | Ca_kabuli_chr01 | 7712804                 | TT                              | GG              | 1946725734               |
| SNP_P4_4728_7713071 | NC_021160.1    | Ca_kabuli_chr01 | 7713071                 | CC                              | TT              | 1946725736               |

| SNPs IDs            | Chromosome IDs | Chromosomes     | Physical positions (bp) | CDC Frontier (Reference genome) | (ILWC46 & LPNB) | NCBI SNPdb Accession IDs |
|---------------------|----------------|-----------------|-------------------------|---------------------------------|-----------------|--------------------------|
| SNP_P4_4729_7713302 | NC_021160.1    | Ca_kabuli_chr01 | 7713302                 | TT                              | GG              | 1946725738               |
| SNP_P4_4730_7713352 | NC_021160.1    | Ca_kabuli_chr01 | 7713352                 | GG                              | TT              | 1946725740               |
| SNP_P4_4731_7713353 | NC_021160.1    | Ca_kabuli_chr01 | 7713353                 | TT                              | AA              | 1946725742               |
| SNP_P4_4732_7713372 | NC_021160.1    | Ca_kabuli_chr01 | 7713372                 | TT                              | AA              | 1946725744               |
| SNP_P4_4734_7713725 | NC_021160.1    | Ca_kabuli_chr01 | 7713725                 | CC                              | GG              | 1946725746               |
| SNP_P4_4735_7714585 | NC_021160.1    | Ca_kabuli_chr01 | 7714585                 | GG                              | AA              | 1946725748               |
| SNP_P4_4736_7716234 | NC_021160.1    | Ca_kabuli_chr01 | 7716234                 | GG                              | AA              | 1946725750               |
| SNP_P4_4737_7720447 | NC_021160.1    | Ca_kabuli_chr01 | 7720447                 | CC                              | TT              | 1946725752               |
| SNP_P4_4738_7720450 | NC_021160.1    | Ca_kabuli_chr01 | 7720450                 | AA                              | TT              | 1946725754               |
| SNP_P4_4740_7720685 | NC_021160.1    | Ca_kabuli_chr01 | 7720685                 | CC                              | TT              | 1946725756               |
| SNP_P4_4741_7720724 | NC_021160.1    | Ca_kabuli_chr01 | 7720724                 | TT                              | CC              | 1946725758               |
| SNP_P4_4742_7720750 | NC_021160.1    | Ca_kabuli_chr01 | 7720750                 | AA                              | GG              | 1946725760               |
| SNP_P4_4744_7721071 | NC_021160.1    | Ca_kabuli_chr01 | 7721071                 | TT                              | CC              | 1946725762               |
| SNP_P4_4745_7722844 | NC_021160.1    | Ca_kabuli_chr01 | 7722844                 | CC                              | TT              | 1946725764               |
| SNP_P4_4746_7724319 | NC_021160.1    | Ca_kabuli_chr01 | 7724319                 | CC                              | TT              | 1946725766               |
| SNP_P4_4747_7725136 | NC_021160.1    | Ca_kabuli_chr01 | 7725136                 | GG                              | CC              | 1946725768               |
| SNP_P4_4748_7725154 | NC_021160.1    | Ca_kabuli_chr01 | 7725154                 | CC                              | TT              | 1946725770               |
| SNP_P4_4749_7725374 | NC_021160.1    | Ca_kabuli_chr01 | 7725374                 | CC                              | TT              | 1946725772               |
| SNP_P4_4750_7725610 | NC_021160.1    | Ca_kabuli_chr01 | 7725610                 | TT                              | AA              | 1946725774               |
| SNP_P4_4751_7726090 | NC_021160.1    | Ca_kabuli_chr01 | 7726090                 | GG                              | AA              | 1946725776               |
| SNP_P4_4755_7726689 | NC_021160.1    | Ca_kabuli_chr01 | 7726689                 | GG                              | AA              | 1946725778               |
| SNP_P4_4756_7728497 | NC_021160.1    | Ca_kabuli_chr01 | 7728497                 | AA                              | GG              | 1946725780               |
| SNP_P4_4757_7728925 | NC_021160.1    | Ca_kabuli_chr01 | 7728925                 | GG                              | AA              | 1946725782               |
| SNP_P4_4758_7729033 | NC_021160.1    | Ca_kabuli_chr01 | 7729033                 | TT                              | CC              | 1946725784               |
| SNP_P4_4759_7729034 | NC_021160.1    | Ca_kabuli_chr01 | 7729034                 | GG                              | TT              | 1946725786               |
| SNP_P4_4760_7729038 | NC_021160.1    | Ca_kabuli_chr01 | 7729038                 | GG                              | AA              | 1946725788               |
| SNP_P4_4761_7729076 | NC_021160.1    | Ca_kabuli_chr01 | 7729076                 | GG                              | AA              | 1946725790               |
| SNP_P4_4762_7729697 | NC_021160.1    | Ca_kabuli_chr01 | 7729697                 | GG                              | AA              | 1946725792               |
| SNP_P4_4763_7729816 | NC_021160.1    | Ca_kabuli_chr01 | 7729816                 | TT                              | CC              | 1946725794               |
| SNP_P4_4764_7730612 | NC_021160.1    | Ca_kabuli_chr01 | 7730612                 | GG                              | AA              | 1946725796               |
| SNP_P4_4765_7730616 | NC_021160.1    | Ca_kabuli_chr01 | 7730616                 | CC                              | AA              | 1946725798               |
| SNP_P4_4766_7730715 | NC_021160.1    | Ca_kabuli_chr01 | 7730715                 | TT                              | CC              | 1946725800               |
| SNP_P4_4767_7730884 | NC_021160.1    | Ca_kabuli_chr01 | 7730884                 | TT                              | CC              | 1946725802               |
| SNP_P4_4768_7730979 | NC_021160.1    | Ca_kabuli_chr01 | 7730979                 | GG                              | AA              | 1946725804               |
| SNP_P4_4769_7730994 | NC_021160.1    | Ca_kabuli_chr01 | 7730994                 | GG                              | TT              | 1946725806               |
| SNP_P4_4770_7731070 | NC_021160.1    | Ca_kabuli_chr01 | 7731070                 | CC                              | TT              | 1946725807               |
| SNP_P4_4771_7731089 | NC_021160.1    | Ca_kabuli_chr01 | 7731089                 | AA                              | TT              | 1946725809               |
| SNP_P4_4772_7731203 | NC_021160.1    | Ca_kabuli_chr01 | 7731203                 | AA                              | TT              | 1946725811               |
| SNP_P4_4773_7731329 | NC_021160.1    | Ca_kabuli_chr01 | 7731329                 | CC                              | GG              | 1946725813               |
| SNP_P4_4774_7731810 | NC_021160.1    | Ca_kabuli_chr01 | 7731810                 | CC                              | TT              | 1946725815               |
| SNP_P4_4775_7731819 | NC_021160.1    | Ca_kabuli_chr01 | 7731819                 | GG                              | TT              | 1946725817               |
| SNP_P4_4776_7732997 | NC_021160.1    | Ca_kabuli_chr01 | 7732997                 | CC                              | TT              | 1946725819               |



| SNPs IDs            | Chromosome IDs | Chromosomes     | Physical positions (bp) | CDC Frontier (Reference genome) | (ILWC46 & LPNB) | NCBI SNPdb Accession IDs |
|---------------------|----------------|-----------------|-------------------------|---------------------------------|-----------------|--------------------------|
| SNP_P4_4777_7733395 | NC_021160.1    | Ca_kabuli_chr01 | 7733395                 | CC                              | TT              | 1946725821               |
| SNP_P4_4778_7733470 | NC_021160.1    | Ca_kabuli_chr01 | 7733470                 | GG                              | AA              | 1946725823               |
| SNP_P4_4779_7733590 | NC_021160.1    | Ca_kabuli_chr01 | 7733590                 | CC                              | AA              | 1946725825               |
| SNP_P4_4780_7733740 | NC_021160.1    | Ca_kabuli_chr01 | 7733740                 | CC                              | TT              | 1946725827               |
| SNP_P4_4781_7734168 | NC_021160.1    | Ca_kabuli_chr01 | 7734168                 | CC                              | AA              | 1946725829               |
| SNP_P4_4782_7734221 | NC_021160.1    | Ca_kabuli_chr01 | 7734221                 | AA                              | TT              | 1946725831               |
| SNP_P4_4783_7741187 | NC_021160.1    | Ca_kabuli_chr01 | 7741187                 | CC                              | TT              | 1946725833               |
| SNP_P4_4785_7745740 | NC_021160.1    | Ca_kabuli_chr01 | 7745740                 | GG                              | CC              | 1946725835               |
| SNP_P4_4786_7745743 | NC_021160.1    | Ca_kabuli_chr01 | 7745743                 | AA                              | CC              | 1946725837               |
| SNP_P4_4787_7745754 | NC_021160.1    | Ca_kabuli_chr01 | 7745754                 | TT                              | CC              | 1946725839               |
| SNP_P4_4788_7745767 | NC_021160.1    | Ca_kabuli_chr01 | 7745767                 | CC                              | TT              | 1946725841               |
| SNP_P4_4789_7745785 | NC_021160.1    | Ca_kabuli_chr01 | 7745785                 | AA                              | GG              | 1946725843               |
| SNP_P4_4790_7745810 | NC_021160.1    | Ca_kabuli_chr01 | 7745810                 | CC                              | AA              | 1946725845               |
| SNP_P4_4791_7746050 | NC_021160.1    | Ca_kabuli_chr01 | 7746050                 | CC                              | AA              | 1946725847               |
| SNP_P4_4792_7746285 | NC_021160.1    | Ca_kabuli_chr01 | 7746285                 | AA                              | CC              | 1946725849               |
| SNP_P4_4793_7746325 | NC_021160.1    | Ca_kabuli_chr01 | 7746325                 | GG                              | AA              | 1946725851               |
| SNP_P4_4794_7746358 | NC_021160.1    | Ca_kabuli_chr01 | 7746358                 | TT                              | CC              | 1946725853               |
| SNP_P4_4795_7746363 | NC_021160.1    | Ca_kabuli_chr01 | 7746363                 | GG                              | CC              | 1946725855               |
| SNP_P4_4796_7746444 | NC_021160.1    | Ca_kabuli_chr01 | 7746444                 | AA                              | GG              | 1946725857               |
| SNP_P4_4797_7746448 | NC_021160.1    | Ca_kabuli_chr01 | 7746448                 | TT                              | CC              | 1946725859               |
| SNP_P4_4798_7746471 | NC_021160.1    | Ca_kabuli_chr01 | 7746471                 | AA                              | CC              | 1946725861               |
| SNP_P4_4799_7746622 | NC_021160.1    | Ca_kabuli_chr01 | 7746622                 | GG                              | AA              | 1946725863               |
| SNP_P4_4800_7746639 | NC_021160.1    | Ca_kabuli_chr01 | 7746639                 | AA                              | GG              | 1946725865               |
| SNP_P4_4801_7746786 | NC_021160.1    | Ca_kabuli_chr01 | 7746786                 | AA                              | GG              | 1946725867               |
| SNP_P4_4802_7746827 | NC_021160.1    | Ca_kabuli_chr01 | 7746827                 | AA                              | TT              | 1946725869               |
| SNP_P4_4803_7746938 | NC_021160.1    | Ca_kabuli_chr01 | 7746938                 | CC                              | AA              | 1946725871               |
| SNP_P4_4804_7748376 | NC_021160.1    | Ca_kabuli_chr01 | 7748376                 | AA                              | GG              | 1946725873               |
| SNP_P4_4805_7748382 | NC_021160.1    | Ca_kabuli_chr01 | 7748382                 | AA                              | GG              | 1946725875               |
| SNP_P4_4806_7748383 | NC_021160.1    | Ca_kabuli_chr01 | 7748383                 | AA                              | CC              | 1946725877               |
| SNP_P4_4807_7748400 | NC_021160.1    | Ca_kabuli_chr01 | 7748400                 | CC                              | TT              | 1946725879               |
| SNP_P4_4808_7748404 | NC_021160.1    | Ca_kabuli_chr01 | 7748404                 | CC                              | TT              | 1946725881               |
| SNP_P4_4810_7748640 | NC_021160.1    | Ca_kabuli_chr01 | 7748640                 | AA                              | GG              | 1946725883               |
| SNP_P4_4811_7749545 | NC_021160.1    | Ca_kabuli_chr01 | 7749545                 | CC                              | GG              | 1946725885               |
| SNP_P4_4812_7749725 | NC_021160.1    | Ca_kabuli_chr01 | 7749725                 | GG                              | CC              | 1946725887               |
| SNP_P4_4813_7749882 | NC_021160.1    | Ca_kabuli_chr01 | 7749882                 | AA                              | TT              | 1946725889               |
| SNP_P4_4814_7750068 | NC_021160.1    | Ca_kabuli_chr01 | 7750068                 | GG                              | AA              | 1946725891               |
| SNP_P4_4817_7751965 | NC_021160.1    | Ca_kabuli_chr01 | 7751965                 | GG                              | CC              | 1946725893               |
| SNP_P4_4818_7752405 | NC_021160.1    | Ca_kabuli_chr01 | 7752405                 | TT                              | CC              | 1946725895               |
| SNP_P4_4819_7752424 | NC_021160.1    | Ca_kabuli_chr01 | 7752424                 | GG                              | AA              | 1946725897               |
| SNP_P4_4820_7752507 | NC_021160.1    | Ca_kabuli_chr01 | 7752507                 | AA                              | GG              | 1946725900               |
| SNP_P4_4821_7752718 | NC_021160.1    | Ca_kabuli_chr01 | 7752718                 | CC                              | AA              | 1946725902               |
| SNP_P4_4822_7752977 | NC_021160.1    | Ca_kabuli_chr01 | 7752977                 | GG                              | AA              | 1946725904               |

| SNPs IDs            | Chromosome IDs | Chromosomes     | Physical positions (bp) | CDC Frontier (Reference genome) | (ILWC46 & LPNB) | NCBI SNPdb Accession IDs |
|---------------------|----------------|-----------------|-------------------------|---------------------------------|-----------------|--------------------------|
| SNP_P4_4823_7753010 | NC_021160.1    | Ca_kabuli_chr01 | 7753010                 | TT                              | AA              | 1946725906               |
| SNP_P4_4824_7753042 | NC_021160.1    | Ca_kabuli_chr01 | 7753042                 | TT                              | GG              | 1946725908               |
| SNP_P4_4825_7753188 | NC_021160.1    | Ca_kabuli_chr01 | 7753188                 | TT                              | CC              | 1946725910               |
| SNP_P4_4826_7753225 | NC_021160.1    | Ca_kabuli_chr01 | 7753225                 | AA                              | GG              | 1946725912               |
| SNP_P4_4827_7753369 | NC_021160.1    | Ca_kabuli_chr01 | 7753369                 | TT                              | CC              | 1946725914               |
| SNP_P4_4828_7753417 | NC_021160.1    | Ca_kabuli_chr01 | 7753417                 | TT                              | GG              | 1946725916               |
| SNP_P4_4829_7753501 | NC_021160.1    | Ca_kabuli_chr01 | 7753501                 | TT                              | CC              | 1946725918               |
| SNP_P4_4830_7753688 | NC_021160.1    | Ca_kabuli_chr01 | 7753688                 | GG                              | CC              | 1946725920               |
| SNP_P4_4831_7753772 | NC_021160.1    | Ca_kabuli_chr01 | 7753772                 | TT                              | GG              | 1946725922               |
| SNP_P4_4832_7753862 | NC_021160.1    | Ca_kabuli_chr01 | 7753862                 | TT                              | CC              | 1946725924               |
| SNP_P4_4833_7754605 | NC_021160.1    | Ca_kabuli_chr01 | 7754605                 | GG                              | AA              | 1946725926               |
| SNP_P4_4834_7754607 | NC_021160.1    | Ca_kabuli_chr01 | 7754607                 | GG                              | AA              | 1946725928               |
| SNP_P4_4835_7756902 | NC_021160.1    | Ca_kabuli_chr01 | 7756902                 | GG                              | AA              | 1946725930               |
| SNP_P4_4836_7760516 | NC_021160.1    | Ca_kabuli_chr01 | 7760516                 | TT                              | CC              | 1946725932               |
| SNP_P4_4837_7760728 | NC_021160.1    | Ca_kabuli_chr01 | 7760728                 | CC                              | TT              | 1946725934               |
| SNP_P4_4838_7763052 | NC_021160.1    | Ca_kabuli_chr01 | 7763052                 | CC                              | TT              | 1946725936               |
| SNP_P4_4839_7763076 | NC_021160.1    | Ca_kabuli_chr01 | 7763076                 | TT                              | AA              | 1946725938               |
| SNP_P4_4840_7763378 | NC_021160.1    | Ca_kabuli_chr01 | 7763378                 | TT                              | AA              | 1946725940               |
| SNP_P4_4842_7773056 | NC_021160.1    | Ca_kabuli_chr01 | 7773056                 | AA                              | GG              | 1946725943               |
| SNP_P4_4843_7773151 | NC_021160.1    | Ca_kabuli_chr01 | 7773151                 | TT                              | CC              | 1946725945               |
| SNP_P4_4844_7773183 | NC_021160.1    | Ca_kabuli_chr01 | 7773183                 | AA                              | GG              | 1946725947               |
| SNP_P4_4845_7773204 | NC_021160.1    | Ca_kabuli_chr01 | 7773204                 | TT                              | CC              | 1946725949               |
| SNP_P4_4846_7773402 | NC_021160.1    | Ca_kabuli_chr01 | 7773402                 | TT                              | CC              | 1946725951               |
| SNP_P4_4847_7773799 | NC_021160.1    | Ca_kabuli_chr01 | 7773799                 | CC                              | TT              | 1946725953               |
| SNP_P4_4848_7774610 | NC_021160.1    | Ca_kabuli_chr01 | 7774610                 | AA                              | TT              | 1946725955               |
| SNP_P4_4849_7774982 | NC_021160.1    | Ca_kabuli_chr01 | 7774982                 | GG                              | AA              | 1946725957               |
| SNP_P4_4850_7775039 | NC_021160.1    | Ca_kabuli_chr01 | 7775039                 | GG                              | AA              | 1946725959               |
| SNP_P4_4852_7775145 | NC_021160.1    | Ca_kabuli_chr01 | 7775145                 | TT                              | CC              | 1946725961               |
| SNP_P4_4853_7775162 | NC_021160.1    | Ca_kabuli_chr01 | 7775162                 | CC                              | TT              | 1946725963               |
| SNP_P4_4854_7775178 | NC_021160.1    | Ca_kabuli_chr01 | 7775178                 | TT                              | CC              | 1946725966               |
| SNP_P4_4855_7775191 | NC_021160.1    | Ca_kabuli_chr01 | 7775191                 | CC                              | AA              | 1946725968               |
| SNP_P4_4856_7775342 | NC_021160.1    | Ca_kabuli_chr01 | 7775342                 | GG                              | TT              | 1946725970               |
| SNP_P4_4857_7775385 | NC_021160.1    | Ca_kabuli_chr01 | 7775385                 | TT                              | GG              | 1946725972               |
| SNP_P4_4858_7776525 | NC_021160.1    | Ca_kabuli_chr01 | 7776525                 | AA                              | TT              | 1946725974               |
| SNP_P4_4859_7776917 | NC_021160.1    | Ca_kabuli_chr01 | 7776917                 | GG                              | TT              | 1946725976               |
| SNP_P4_4860_7777580 | NC_021160.1    | Ca_kabuli_chr01 | 7777580                 | TT                              | GG              | 1946725978               |
| SNP_P4_4861_7777585 | NC_021160.1    | Ca_kabuli_chr01 | 7777585                 | AA                              | TT              | 1946725980               |
| SNP_P4_4862_7777649 | NC_021160.1    | Ca_kabuli_chr01 | 7777649                 | TT                              | CC              | 1946725982               |
| SNP_P4_4863_7777658 | NC_021160.1    | Ca_kabuli_chr01 | 7777658                 | GG                              | TT              | 1946725984               |
| SNP_P4_4864_7777823 | NC_021160.1    | Ca_kabuli_chr01 | 7777823                 | AA                              | TT              | 1946725986               |
| SNP_P4_4865_7777845 | NC_021160.1    | Ca_kabuli_chr01 | 7777845                 | AA                              | GG              | 1946725988               |
| SNP_P4_4866_7777964 | NC_021160.1    | Ca_kabuli_chr01 | 7777964                 | CC                              | AA              | 1946725990               |

| SNPs IDs            | Chromosome IDs | Chromosomes     | Physical positions (bp) | CDC Frontier (Reference genome) | (ILWC46 & LPNB) | NCBI SNPdb Accession IDs |
|---------------------|----------------|-----------------|-------------------------|---------------------------------|-----------------|--------------------------|
| SNP_P4_4867_777969  | NC_021160.1    | Ca_kabuli_chr01 | 777969                  | CC                              | TT              | 1946725992               |
| SNP_P4_4868_7778082 | NC_021160.1    | Ca_kabuli_chr01 | 7778082                 | AA                              | GG              | 1946725994               |
| SNP_P4_4869_7778083 | NC_021160.1    | Ca_kabuli_chr01 | 7778083                 | CC                              | TT              | 1946725996               |
| SNP_P4_4870_7778084 | NC_021160.1    | Ca_kabuli_chr01 | 7778084                 | TT                              | CC              | 1946725998               |
| SNP_P4_4871_7778098 | NC_021160.1    | Ca_kabuli_chr01 | 7778098                 | AA                              | TT              | 1946726000               |
| SNP_P4_4872_7778874 | NC_021160.1    | Ca_kabuli_chr01 | 7778874                 | TT                              | CC              | 1946726002               |
| SNP_P4_4873_7778887 | NC_021160.1    | Ca_kabuli_chr01 | 7778887                 | TT                              | AA              | 1946726004               |
| SNP_P4_4874_7778896 | NC_021160.1    | Ca_kabuli_chr01 | 7778896                 | CC                              | AA              | 1946726006               |
| SNP_P4_4875_7779006 | NC_021160.1    | Ca_kabuli_chr01 | 7779006                 | CC                              | GG              | 1946726008               |
| SNP_P4_4877_7781861 | NC_021160.1    | Ca_kabuli_chr01 | 7781861                 | AA                              | GG              | 1946726010               |
| SNP_P4_4878_7781942 | NC_021160.1    | Ca_kabuli_chr01 | 7781942                 | GG                              | TT              | 1946726012               |
| SNP_P4_4880_7782512 | NC_021160.1    | Ca_kabuli_chr01 | 7782512                 | AA                              | TT              | 1946726014               |
| SNP_P4_4881_7782514 | NC_021160.1    | Ca_kabuli_chr01 | 7782514                 | CC                              | TT              | 1946726016               |
| SNP_P4_4882_7782518 | NC_021160.1    | Ca_kabuli_chr01 | 7782518                 | TT                              | AA              | 1946726018               |
| SNP_P4_4883_7783016 | NC_021160.1    | Ca_kabuli_chr01 | 7783016                 | CC                              | TT              | 1946726020               |
| SNP_P4_4884_7783104 | NC_021160.1    | Ca_kabuli_chr01 | 7783104                 | GG                              | AA              | 1946726022               |
| SNP_P4_4885_7783108 | NC_021160.1    | Ca_kabuli_chr01 | 7783108                 | AA                              | GG              | 1946726024               |
| SNP_P4_4887_7783250 | NC_021160.1    | Ca_kabuli_chr01 | 7783250                 | TT                              | GG              | 1946726026               |
| SNP_P4_4888_7783313 | NC_021160.1    | Ca_kabuli_chr01 | 7783313                 | TT                              | AA              | 1946726028               |
| SNP_P4_4889_7783314 | NC_021160.1    | Ca_kabuli_chr01 | 7783314                 | TT                              | CC              | 1946726030               |
| SNP_P4_4890_7783343 | NC_021160.1    | Ca_kabuli_chr01 | 7783343                 | TT                              | GG              | 1946726032               |
| SNP_P4_4892_7783386 | NC_021160.1    | Ca_kabuli_chr01 | 7783386                 | TT                              | CC              | 1946726034               |
| SNP_P4_4893_7783388 | NC_021160.1    | Ca_kabuli_chr01 | 7783388                 | TT                              | CC              | 1946726036               |
| SNP_P4_4894_7783930 | NC_021160.1    | Ca_kabuli_chr01 | 7783930                 | CC                              | GG              | 1946726038               |
| SNP_P4_4895_7784894 | NC_021160.1    | Ca_kabuli_chr01 | 7784894                 | CC                              | TT              | 1946726040               |
| SNP_P4_4896_7784910 | NC_021160.1    | Ca_kabuli_chr01 | 7784910                 | TT                              | CC              | 1946726042               |
| SNP_P4_4897_7784964 | NC_021160.1    | Ca_kabuli_chr01 | 7784964                 | CC                              | AA              | 1946726044               |
| SNP_P4_4898_7785060 | NC_021160.1    | Ca_kabuli_chr01 | 7785060                 | TT                              | CC              | 1946726046               |
| SNP_P4_4899_7785150 | NC_021160.1    | Ca_kabuli_chr01 | 7785150                 | AA                              | GG              | 1946726048               |
| SNP_P4_4900_7785262 | NC_021160.1    | Ca_kabuli_chr01 | 7785262                 | CC                              | AA              | 1946726050               |
| SNP_P4_4901_7785279 | NC_021160.1    | Ca_kabuli_chr01 | 7785279                 | CC                              | GG              | 1946726052               |
| SNP_P4_4902_7785391 | NC_021160.1    | Ca_kabuli_chr01 | 7785391                 | TT                              | CC              | 1946726054               |
| SNP_P4_4903_7786602 | NC_021160.1    | Ca_kabuli_chr01 | 7786602                 | CC                              | GG              | 1946726056               |
| SNP_P4_4905_7787899 | NC_021160.1    | Ca_kabuli_chr01 | 7787899                 | CC                              | TT              | 1946726058               |
| SNP_P4_4906_7788101 | NC_021160.1    | Ca_kabuli_chr01 | 7788101                 | GG                              | CC              | 1946726060               |
| SNP_P4_4907_7788235 | NC_021160.1    | Ca_kabuli_chr01 | 7788235                 | AA                              | CC              | 1946726062               |
| SNP_P4_4908_7788253 | NC_021160.1    | Ca_kabuli_chr01 | 7788253                 | TT                              | CC              | 1946726064               |
| SNP_P4_4909_7789390 | NC_021160.1    | Ca_kabuli_chr01 | 7789390                 | AA                              | GG              | 1946726066               |
| SNP_P4_4910_7789398 | NC_021160.1    | Ca_kabuli_chr01 | 7789398                 | CC                              | TT              | 1946726068               |
| SNP_P4_4911_7789422 | NC_021160.1    | Ca_kabuli_chr01 | 7789422                 | AA                              | GG              | 1946726070               |
| SNP_P4_4912_7789430 | NC_021160.1    | Ca_kabuli_chr01 | 7789430                 | TT                              | CC              | 1946726072               |
| SNP_P4_4913_7789464 | NC_021160.1    | Ca_kabuli_chr01 | 7789464                 | GG                              | AA              | 1946726074               |

| SNPs IDs            | Chromosome IDs | Chromosomes     | Physical positions (bp) | CDC Frontier (Reference genome) | (ILWC46 & LPNB) | NCBI SNPdb Accession IDs |
|---------------------|----------------|-----------------|-------------------------|---------------------------------|-----------------|--------------------------|
| SNP_P4_4914_7792317 | NC_021160.1    | Ca_kabuli_chr01 | 7792317                 | AA                              | GG              | 1946726076               |
| SNP_P4_4915_7792596 | NC_021160.1    | Ca_kabuli_chr01 | 7792596                 | TT                              | GG              | 1946726078               |
| SNP_P4_4916_7792608 | NC_021160.1    | Ca_kabuli_chr01 | 7792608                 | TT                              | CC              | 1946726080               |
| SNP_P4_4917_7792628 | NC_021160.1    | Ca_kabuli_chr01 | 7792628                 | TT                              | CC              | 1946726083               |
| SNP_P4_4918_7803044 | NC_021160.1    | Ca_kabuli_chr01 | 7803044                 | TT                              | CC              | 1946726085               |
| SNP_P4_4919_7805649 | NC_021160.1    | Ca_kabuli_chr01 | 7805649                 | CC                              | TT              | 1946726087               |
| SNP_P4_4920_7806052 | NC_021160.1    | Ca_kabuli_chr01 | 7806052                 | AA                              | GG              | 1946726089               |
| SNP_P4_4921_7806398 | NC_021160.1    | Ca_kabuli_chr01 | 7806398                 | CC                              | TT              | 1946726091               |
| SNP_P4_4922_7806612 | NC_021160.1    | Ca_kabuli_chr01 | 7806612                 | CC                              | TT              | 1946726093               |
| SNP_P4_4923_7806638 | NC_021160.1    | Ca_kabuli_chr01 | 7806638                 | TT                              | GG              | 1946726095               |
| SNP_P4_4924_7806645 | NC_021160.1    | Ca_kabuli_chr01 | 7806645                 | TT                              | AA              | 1946726097               |
| SNP_P4_4925_7806917 | NC_021160.1    | Ca_kabuli_chr01 | 7806917                 | AA                              | TT              | 1946726099               |
| SNP_P4_4926_7807749 | NC_021160.1    | Ca_kabuli_chr01 | 7807749                 | GG                              | AA              | 1946726101               |
| SNP_P4_4927_7809854 | NC_021160.1    | Ca_kabuli_chr01 | 7809854                 | GG                              | AA              | 1946726103               |
| SNP_P4_4929_7811026 | NC_021160.1    | Ca_kabuli_chr01 | 7811026                 | CC                              | GG              | 1946726105               |
| SNP_P4_4930_7811890 | NC_021160.1    | Ca_kabuli_chr01 | 7811890                 | CC                              | TT              | 1946726107               |
| SNP_P4_4931_7811891 | NC_021160.1    | Ca_kabuli_chr01 | 7811891                 | AA                              | GG              | 1946726109               |
| SNP_P4_4932_7812464 | NC_021160.1    | Ca_kabuli_chr01 | 7812464                 | CC                              | GG              | 1946726112               |
| SNP_P4_4933_7813576 | NC_021160.1    | Ca_kabuli_chr01 | 7813576                 | AA                              | GG              | 1946726114               |
| SNP_P4_4935_7816569 | NC_021160.1    | Ca_kabuli_chr01 | 7816569                 | GG                              | AA              | 1946726116               |
| SNP_P4_4936_7817238 | NC_021160.1    | Ca_kabuli_chr01 | 7817238                 | AA                              | GG              | 1946726118               |
| SNP_P4_4937_7819432 | NC_021160.1    | Ca_kabuli_chr01 | 7819432                 | CC                              | TT              | 1946726120               |
| SNP_P4_4938_7819487 | NC_021160.1    | Ca_kabuli_chr01 | 7819487                 | GG                              | CC              | 1946726122               |
| SNP_P4_4939_7819975 | NC_021160.1    | Ca_kabuli_chr01 | 7819975                 | TT                              | CC              | 1946726124               |
| SNP_P4_4940_7820167 | NC_021160.1    | Ca_kabuli_chr01 | 7820167                 | TT                              | CC              | 1946726126               |
| SNP_P4_4941_7820181 | NC_021160.1    | Ca_kabuli_chr01 | 7820181                 | AA                              | TT              | 1946726128               |
| SNP_P4_4942_7821433 | NC_021160.1    | Ca_kabuli_chr01 | 7821433                 | CC                              | AA              | 1946726130               |
| SNP_P4_4943_7821473 | NC_021160.1    | Ca_kabuli_chr01 | 7821473                 | GG                              | TT              | 1946726132               |
| SNP_P4_4944_7823316 | NC_021160.1    | Ca_kabuli_chr01 | 7823316                 | AA                              | GG              | 1946726134               |
| SNP_P4_4946_7824292 | NC_021160.1    | Ca_kabuli_chr01 | 7824292                 | CC                              | AA              | 1946726136               |
| SNP_P4_4947_7824316 | NC_021160.1    | Ca_kabuli_chr01 | 7824316                 | GG                              | AA              | 1946726138               |
| SNP_P4_4949_7824467 | NC_021160.1    | Ca_kabuli_chr01 | 7824467                 | AA                              | TT              | 1946726140               |
| SNP_P4_4950_7824652 | NC_021160.1    | Ca_kabuli_chr01 | 7824652                 | CC                              | GG              | 1946726142               |
| SNP_P4_4951_7836859 | NC_021160.1    | Ca_kabuli_chr01 | 7836859                 | GG                              | TT              | 1946726144               |
| SNP_P4_4952_7840640 | NC_021160.1    | Ca_kabuli_chr01 | 7840640                 | GG                              | TT              | 1946726146               |
| SNP_P4_4953_7840890 | NC_021160.1    | Ca_kabuli_chr01 | 7840890                 | TT                              | GG              | 1946726148               |
| SNP_P4_4954_7841694 | NC_021160.1    | Ca_kabuli_chr01 | 7841694                 | GG                              | AA              | 1946726150               |
| SNP_P4_4955_7843862 | NC_021160.1    | Ca_kabuli_chr01 | 7843862                 | GG                              | AA              | 1946726152               |
| SNP_P4_4956_7844788 | NC_021160.1    | Ca_kabuli_chr01 | 7844788                 | CC                              | TT              | 1946726154               |
| SNP_P4_4957_7846989 | NC_021160.1    | Ca_kabuli_chr01 | 7846989                 | CC                              | AA              | 1946726157               |
| SNP_P4_4958_7847161 | NC_021160.1    | Ca_kabuli_chr01 | 7847161                 | AA                              | GG              | 1946726159               |
| SNP_P4_4959_7847499 | NC_021160.1    | Ca_kabuli_chr01 | 7847499                 | GG                              | AA              | 1946726161               |

| SNPs IDs            | Chromosome IDs | Chromosomes     | Physical positions (bp) | CDC Frontier (Reference genome) | (ILWC46 & LPNB) | NCBI SNPdb Accession IDs |
|---------------------|----------------|-----------------|-------------------------|---------------------------------|-----------------|--------------------------|
| SNP_P4_4960_7847506 | NC_021160.1    | Ca_kabuli_chr01 | 7847506                 | CC                              | AA              | 1946726163               |
| SNP_P4_4961_7847568 | NC_021160.1    | Ca_kabuli_chr01 | 7847568                 | GG                              | AA              | 1946726165               |
| SNP_P4_4962_7847583 | NC_021160.1    | Ca_kabuli_chr01 | 7847583                 | CC                              | GG              | 1946726167               |
| SNP_P4_4963_7854301 | NC_021160.1    | Ca_kabuli_chr01 | 7854301                 | AA                              | GG              | 1946726169               |
| SNP_P4_4964_7858531 | NC_021160.1    | Ca_kabuli_chr01 | 7858531                 | AA                              | GG              | 1946726171               |
| SNP_P4_4966_7858582 | NC_021160.1    | Ca_kabuli_chr01 | 7858582                 | CC                              | AA              | 1946726173               |
| SNP_P4_4967_7860023 | NC_021160.1    | Ca_kabuli_chr01 | 7860023                 | AA                              | TT              | 1946726175               |
| SNP_P4_4968_7862818 | NC_021160.1    | Ca_kabuli_chr01 | 7862818                 | GG                              | TT              | 1946726177               |
| SNP_P4_4969_7862819 | NC_021160.1    | Ca_kabuli_chr01 | 7862819                 | AA                              | GG              | 1946726179               |
| SNP_P4_4970_7862838 | NC_021160.1    | Ca_kabuli_chr01 | 7862838                 | GG                              | AA              | 1946726181               |
| SNP_P4_4971_7862848 | NC_021160.1    | Ca_kabuli_chr01 | 7862848                 | GG                              | AA              | 1946726183               |
| SNP_P4_4972_7862870 | NC_021160.1    | Ca_kabuli_chr01 | 7862870                 | GG                              | TT              | 1946726185               |
| SNP_P4_4973_7862871 | NC_021160.1    | Ca_kabuli_chr01 | 7862871                 | AA                              | GG              | 1946726187               |
| SNP_P4_4974_7863111 | NC_021160.1    | Ca_kabuli_chr01 | 7863111                 | TT                              | CC              | 1946726189               |
| SNP_P4_4975_7863112 | NC_021160.1    | Ca_kabuli_chr01 | 7863112                 | TT                              | AA              | 1946726191               |
| SNP_P4_4976_7863183 | NC_021160.1    | Ca_kabuli_chr01 | 7863183                 | TT                              | AA              | 1946726193               |
| SNP_P4_4977_7863194 | NC_021160.1    | Ca_kabuli_chr01 | 7863194                 | TT                              | CC              | 1946726195               |
| SNP_P4_4978_7863205 | NC_021160.1    | Ca_kabuli_chr01 | 7863205                 | GG                              | AA              | 1946726197               |
| SNP_P4_4979_7863250 | NC_021160.1    | Ca_kabuli_chr01 | 7863250                 | GG                              | AA              | 1946726199               |
| SNP_P4_4981_7865781 | NC_021160.1    | Ca_kabuli_chr01 | 7865781                 | TT                              | CC              | 1946726201               |
| SNP_P4_4982_7865837 | NC_021160.1    | Ca_kabuli_chr01 | 7865837                 | AA                              | CC              | 1946726203               |
| SNP_P4_4983_7865863 | NC_021160.1    | Ca_kabuli_chr01 | 7865863                 | AA                              | CC              | 1946726205               |
| SNP_P4_4984_7865938 | NC_021160.1    | Ca_kabuli_chr01 | 7865938                 | GG                              | CC              | 1946726207               |
| SNP_P4_4985_7865951 | NC_021160.1    | Ca_kabuli_chr01 | 7865951                 | TT                              | CC              | 1946726209               |
| SNP_P4_4986_7865993 | NC_021160.1    | Ca_kabuli_chr01 | 7865993                 | TT                              | AA              | 1946726211               |
| SNP_P4_4987_7866015 | NC_021160.1    | Ca_kabuli_chr01 | 7866015                 | GG                              | CC              | 1946726214               |
| SNP_P4_4988_7866041 | NC_021160.1    | Ca_kabuli_chr01 | 7866041                 | AA                              | TT              | 1946726216               |
| SNP_P4_4989_7866043 | NC_021160.1    | Ca_kabuli_chr01 | 7866043                 | TT                              | GG              | 1946726218               |
| SNP_P4_4990_7866044 | NC_021160.1    | Ca_kabuli_chr01 | 7866044                 | GG                              | AA              | 1946726220               |
| SNP_P4_4991_7866051 | NC_021160.1    | Ca_kabuli_chr01 | 7866051                 | GG                              | AA              | 1946726222               |
| SNP_P4_4992_7866066 | NC_021160.1    | Ca_kabuli_chr01 | 7866066                 | GG                              | TT              | 1946726224               |
| SNP_P4_4993_7866099 | NC_021160.1    | Ca_kabuli_chr01 | 7866099                 | CC                              | TT              | 1946726226               |
| SNP_P4_4994_7866103 | NC_021160.1    | Ca_kabuli_chr01 | 7866103                 | GG                              | AA              | 1946726228               |
| SNP_P4_4995_7866108 | NC_021160.1    | Ca_kabuli_chr01 | 7866108                 | GG                              | AA              | 1946726230               |
| SNP_P4_4996_7866113 | NC_021160.1    | Ca_kabuli_chr01 | 7866113                 | CC                              | AA              | 1946726232               |
| SNP_P4_4997_7866132 | NC_021160.1    | Ca_kabuli_chr01 | 7866132                 | CC                              | GG              | 1946726234               |
| SNP_P4_4998_7866135 | NC_021160.1    | Ca_kabuli_chr01 | 7866135                 | AA                              | TT              | 1946726236               |
| SNP_P4_4999_7866140 | NC_021160.1    | Ca_kabuli_chr01 | 7866140                 | GG                              | AA              | 1946726238               |
| SNP_P4_5000_7866155 | NC_021160.1    | Ca_kabuli_chr01 | 7866155                 | TT                              | CC              | 1946726240               |
| SNP_P4_5001_7866306 | NC_021160.1    | Ca_kabuli_chr01 | 7866306                 | TT                              | CC              | 1946726242               |
| SNP_P4_5002_7866325 | NC_021160.1    | Ca_kabuli_chr01 | 7866325                 | GG                              | AA              | 1946726244               |
| SNP_P4_5003_7866368 | NC_021160.1    | Ca_kabuli_chr01 | 7866368                 | TT                              | GG              | 1946726246               |

| SNPs IDs            | Chromosome IDs | Chromosomes     | Physical positions (bp) | CDC Frontier (Reference genome) | (ILWC46 & LPNB) | NCBI SNPdb Accession IDs |
|---------------------|----------------|-----------------|-------------------------|---------------------------------|-----------------|--------------------------|
| SNP_P4_5004_7866757 | NC_021160.1    | Ca_kabuli_chr01 | 7866757                 | AA                              | TT              | 1946726248               |
| SNP_P4_5005_7866778 | NC_021160.1    | Ca_kabuli_chr01 | 7866778                 | AA                              | GG              | 1946726250               |
| SNP_P4_5006_7868712 | NC_021160.1    | Ca_kabuli_chr01 | 7868712                 | CC                              | AA              | 1946726252               |
| SNP_P4_5007_7868784 | NC_021160.1    | Ca_kabuli_chr01 | 7868784                 | TT                              | CC              | 1946726254               |
| SNP_P4_5008_7870637 | NC_021160.1    | Ca_kabuli_chr01 | 7870637                 | AA                              | CC              | 1946726256               |
| SNP_P4_5009_7870694 | NC_021160.1    | Ca_kabuli_chr01 | 7870694                 | CC                              | GG              | 1946726258               |
| SNP_P4_5010_7874610 | NC_021160.1    | Ca_kabuli_chr01 | 7874610                 | GG                              | AA              | 1946726260               |
| SNP_P4_5011_7874664 | NC_021160.1    | Ca_kabuli_chr01 | 7874664                 | TT                              | CC              | 1946726262               |
| SNP_P4_5012_7874668 | NC_021160.1    | Ca_kabuli_chr01 | 7874668                 | TT                              | CC              | 1946726264               |
| SNP_P4_5013_7884157 | NC_021160.1    | Ca_kabuli_chr01 | 7884157                 | TT                              | GG              | 1946726266               |
| SNP_P4_5015_7884593 | NC_021160.1    | Ca_kabuli_chr01 | 7884593                 | CC                              | TT              | 1946726267               |
| SNP_P4_5016_7884872 | NC_021160.1    | Ca_kabuli_chr01 | 7884872                 | AA                              | GG              | 1946726268               |
| SNP_P4_5017_7885369 | NC_021160.1    | Ca_kabuli_chr01 | 7885369                 | TT                              | CC              | 1946726269               |
| SNP_P4_5018_7885370 | NC_021160.1    | Ca_kabuli_chr01 | 7885370                 | CC                              | AA              | 1946726271               |
| SNP_P4_5019_7885431 | NC_021160.1    | Ca_kabuli_chr01 | 7885431                 | AA                              | CC              | 1946726273               |
| SNP_P4_5021_7886020 | NC_021160.1    | Ca_kabuli_chr01 | 7886020                 | AA                              | CC              | 1946726275               |
| SNP_P4_5022_7886096 | NC_021160.1    | Ca_kabuli_chr01 | 7886096                 | AA                              | GG              | 1946726277               |
| SNP_P4_5023_7887370 | NC_021160.1    | Ca_kabuli_chr01 | 7887370                 | AA                              | GG              | 1946726279               |
| SNP_P4_5024_7888155 | NC_021160.1    | Ca_kabuli_chr01 | 7888155                 | AA                              | GG              | 1946726281               |
| SNP_P4_5025_7888176 | NC_021160.1    | Ca_kabuli_chr01 | 7888176                 | GG                              | TT              | 1946726283               |
| SNP_P4_5026_7888184 | NC_021160.1    | Ca_kabuli_chr01 | 7888184                 | CC                              | TT              | 1946726285               |
| SNP_P4_5027_7888206 | NC_021160.1    | Ca_kabuli_chr01 | 7888206                 | GG                              | AA              | 1946726287               |
| SNP_P4_5028_7888224 | NC_021160.1    | Ca_kabuli_chr01 | 7888224                 | AA                              | GG              | 1946726289               |
| SNP_P4_5029_7888284 | NC_021160.1    | Ca_kabuli_chr01 | 7888284                 | TT                              | CC              | 1946726291               |
| SNP_P4_5031_7888401 | NC_021160.1    | Ca_kabuli_chr01 | 7888401                 | CC                              | TT              | 1946726293               |
| SNP_P4_5032_7888597 | NC_021160.1    | Ca_kabuli_chr01 | 7888597                 | CC                              | GG              | 1946726295               |
| SNP_P4_5033_7888794 | NC_021160.1    | Ca_kabuli_chr01 | 7888794                 | TT                              | AA              | 1946726297               |
| SNP_P4_5034_7888856 | NC_021160.1    | Ca_kabuli_chr01 | 7888856                 | TT                              | CC              | 1946726299               |
| SNP_P4_5035_7888888 | NC_021160.1    | Ca_kabuli_chr01 | 7888888                 | AA                              | GG              | 1946726301               |
| SNP_P4_5036_7889206 | NC_021160.1    | Ca_kabuli_chr01 | 7889206                 | TT                              | CC              | 1946726303               |
| SNP_P4_5037_7889746 | NC_021160.1    | Ca_kabuli_chr01 | 7889746                 | GG                              | AA              | 1946726305               |
| SNP_P4_5038_7889761 | NC_021160.1    | Ca_kabuli_chr01 | 7889761                 | TT                              | AA              | 1946726307               |
| SNP_P4_5039_7889771 | NC_021160.1    | Ca_kabuli_chr01 | 7889771                 | GG                              | AA              | 1946726309               |
| SNP_P4_5040_7889796 | NC_021160.1    | Ca_kabuli_chr01 | 7889796                 | TT                              | CC              | 1946726311               |
| SNP_P4_5041_7889980 | NC_021160.1    | Ca_kabuli_chr01 | 7889980                 | TT                              | CC              | 1946726313               |
| SNP_P4_5042_7890247 | NC_021160.1    | Ca_kabuli_chr01 | 7890247                 | TT                              | CC              | 1946726315               |
| SNP_P4_5043_7890252 | NC_021160.1    | Ca_kabuli_chr01 | 7890252                 | TT                              | CC              | 1946726317               |
| SNP_P4_5044_7890258 | NC_021160.1    | Ca_kabuli_chr01 | 7890258                 | CC                              | AA              | 1946726319               |
| SNP_P4_5045_7891147 | NC_021160.1    | Ca_kabuli_chr01 | 7891147                 | TT                              | CC              | 1946726320               |
| SNP_P4_5046_7891157 | NC_021160.1    | Ca_kabuli_chr01 | 7891157                 | CC                              | AA              | 1946726321               |
| SNP_P4_5047_7891211 | NC_021160.1    | Ca_kabuli_chr01 | 7891211                 | TT                              | CC              | 1946726322               |
| SNP_P4_5048_7891691 | NC_021160.1    | Ca_kabuli_chr01 | 7891691                 | GG                              | AA              | 1946726323               |

| SNPs IDs            | Chromosome IDs | Chromosomes     | Physical positions (bp) | CDC Frontier (Reference genome) | (ILWC46 & LPNB) | NCBI SNPdb Accession IDs |
|---------------------|----------------|-----------------|-------------------------|---------------------------------|-----------------|--------------------------|
| SNP_P4_5049_7891694 | NC_021160.1    | Ca_kabuli_chr01 | 7891694                 | AA                              | GG              | 1946726324               |
| SNP_P4_5050_7893237 | NC_021160.1    | Ca_kabuli_chr01 | 7893237                 | CC                              | TT              | 1946726326               |
| SNP_P4_5051_7893241 | NC_021160.1    | Ca_kabuli_chr01 | 7893241                 | TT                              | CC              | 1946726328               |
| SNP_P4_5052_7893284 | NC_021160.1    | Ca_kabuli_chr01 | 7893284                 | CC                              | TT              | 1946726330               |
| SNP_P4_5053_7893331 | NC_021160.1    | Ca_kabuli_chr01 | 7893331                 | GG                              | AA              | 1946726332               |
| SNP_P4_5054_7893334 | NC_021160.1    | Ca_kabuli_chr01 | 7893334                 | AA                              | CC              | 1946726334               |
| SNP_P4_5055_7893340 | NC_021160.1    | Ca_kabuli_chr01 | 7893340                 | TT                              | AA              | 1946726336               |
| SNP_P4_5056_7893350 | NC_021160.1    | Ca_kabuli_chr01 | 7893350                 | TT                              | AA              | 1946726338               |
| SNP_P4_5057_7893507 | NC_021160.1    | Ca_kabuli_chr01 | 7893507                 | CC                              | TT              | 1946726340               |
| SNP_P4_5058_7893549 | NC_021160.1    | Ca_kabuli_chr01 | 7893549                 | AA                              | GG              | 1946726342               |
| SNP_P4_5059_7894037 | NC_021160.1    | Ca_kabuli_chr01 | 7894037                 | GG                              | CC              | 1946726344               |
| SNP_P4_5060_7894076 | NC_021160.1    | Ca_kabuli_chr01 | 7894076                 | GG                              | AA              | 1946726346               |
| SNP_P4_5061_7894339 | NC_021160.1    | Ca_kabuli_chr01 | 7894339                 | AA                              | GG              | 1946726348               |
| SNP_P4_5062_7895020 | NC_021160.1    | Ca_kabuli_chr01 | 7895020                 | TT                              | CC              | 1946726350               |
| SNP_P4_5063_7895067 | NC_021160.1    | Ca_kabuli_chr01 | 7895067                 | GG                              | AA              | 1946726352               |
| SNP_P4_5064_7895217 | NC_021160.1    | Ca_kabuli_chr01 | 7895217                 | AA                              | TT              | 1946726354               |
| SNP_P4_5065_7895218 | NC_021160.1    | Ca_kabuli_chr01 | 7895218                 | TT                              | AA              | 1946726356               |
| SNP_P4_5066_7895508 | NC_021160.1    | Ca_kabuli_chr01 | 7895508                 | CC                              | AA              | 1946726357               |
| SNP_P4_5067_7895616 | NC_021160.1    | Ca_kabuli_chr01 | 7895616                 | AA                              | GG              | 1946726359               |
| SNP_P4_5068_7895850 | NC_021160.1    | Ca_kabuli_chr01 | 7895850                 | AA                              | TT              | 1946726361               |
| SNP_P4_5069_7895896 | NC_021160.1    | Ca_kabuli_chr01 | 7895896                 | CC                              | TT              | 1946726363               |
| SNP_P4_5070_7896951 | NC_021160.1    | Ca_kabuli_chr01 | 7896951                 | CC                              | AA              | 1946726365               |
| SNP_P4_5071_7897658 | NC_021160.1    | Ca_kabuli_chr01 | 7897658                 | GG                              | AA              | 1946726367               |
| SNP_P4_5072_7898029 | NC_021160.1    | Ca_kabuli_chr01 | 7898029                 | GG                              | CC              | 1946726369               |
| SNP_P4_5073_7898825 | NC_021160.1    | Ca_kabuli_chr01 | 7898825                 | CC                              | TT              | 1946726371               |
| SNP_P4_5074_7899521 | NC_021160.1    | Ca_kabuli_chr01 | 7899521                 | CC                              | TT              | 1946726373               |
| SNP_P4_5075_7899530 | NC_021160.1    | Ca_kabuli_chr01 | 7899530                 | CC                              | TT              | 1946726375               |
| SNP_P4_5076_7899572 | NC_021160.1    | Ca_kabuli_chr01 | 7899572                 | GG                              | AA              | 1946726377               |
| SNP_P4_5077_7899804 | NC_021160.1    | Ca_kabuli_chr01 | 7899804                 | TT                              | AA              | 1946726378               |
| SNP_P4_5078_7899818 | NC_021160.1    | Ca_kabuli_chr01 | 7899818                 | CC                              | GG              | 1946726380               |
| SNP_P4_5079_7900432 | NC_021160.1    | Ca_kabuli_chr01 | 7900432                 | TT                              | AA              | 1946726382               |
| SNP_P4_5080_7900536 | NC_021160.1    | Ca_kabuli_chr01 | 7900536                 | CC                              | TT              | 1946726384               |
| SNP_P4_5081_7900868 | NC_021160.1    | Ca_kabuli_chr01 | 7900868                 | AA                              | GG              | 1946726386               |
| SNP_P4_5082_7901506 | NC_021160.1    | Ca_kabuli_chr01 | 7901506                 | TT                              | CC              | 1946726388               |
| SNP_P4_5083_7901565 | NC_021160.1    | Ca_kabuli_chr01 | 7901565                 | GG                              | AA              | 1946726390               |
| SNP_P4_5084_7901620 | NC_021160.1    | Ca_kabuli_chr01 | 7901620                 | TT                              | CC              | 1946726392               |
| SNP_P4_5085_7901644 | NC_021160.1    | Ca_kabuli_chr01 | 7901644                 | TT                              | CC              | 1946726394               |
| SNP_P4_5086_7901970 | NC_021160.1    | Ca_kabuli_chr01 | 7901970                 | GG                              | AA              | 1946726396               |
| SNP_P4_5087_7902005 | NC_021160.1    | Ca_kabuli_chr01 | 7902005                 | GG                              | AA              | 1946726398               |
| SNP_P4_5088_7904346 | NC_021160.1    | Ca_kabuli_chr01 | 7904346                 | AA                              | GG              | 1946726400               |
| SNP_P4_5089_7905136 | NC_021160.1    | Ca_kabuli_chr01 | 7905136                 | TT                              | CC              | 1946726402               |
| SNP_P4_5090_7905147 | NC_021160.1    | Ca_kabuli_chr01 | 7905147                 | AA                              | CC              | 1946726404               |

| SNPs IDs            | Chromosome IDs | Chromosomes     | Physical positions (bp) | CDC Frontier (Reference genome) | (ILWC46 & LPNB) | NCBI SNPdb Accession IDs |
|---------------------|----------------|-----------------|-------------------------|---------------------------------|-----------------|--------------------------|
| SNP_P4_5091_7905362 | NC_021160.1    | Ca_kabuli_chr01 | 7905362                 | AA                              | GG              | 1946726406               |
| SNP_P4_5092_7909905 | NC_021160.1    | Ca_kabuli_chr01 | 7909905                 | GG                              | AA              | 1946726408               |
| SNP_P4_5093_7909965 | NC_021160.1    | Ca_kabuli_chr01 | 7909965                 | GG                              | AA              | 1946726410               |
| SNP_P4_5094_7911176 | NC_021160.1    | Ca_kabuli_chr01 | 7911176                 | AA                              | GG              | 1946726412               |
| SNP_P4_5095_7911550 | NC_021160.1    | Ca_kabuli_chr01 | 7911550                 | TT                              | CC              | 1946726414               |
| SNP_P4_5096_7911644 | NC_021160.1    | Ca_kabuli_chr01 | 7911644                 | AA                              | GG              | 1946726416               |
| SNP_P4_5097_7912961 | NC_021160.1    | Ca_kabuli_chr01 | 7912961                 | AA                              | GG              | 1946726418               |
| SNP_P4_5098_7913472 | NC_021160.1    | Ca_kabuli_chr01 | 7913472                 | CC                              | TT              | 1946726420               |
| SNP_P4_5099_7913584 | NC_021160.1    | Ca_kabuli_chr01 | 7913584                 | CC                              | TT              | 1946726422               |
| SNP_P4_5100_7913613 | NC_021160.1    | Ca_kabuli_chr01 | 7913613                 | AA                              | GG              | 1946726424               |
| SNP_P4_5102_7914115 | NC_021160.1    | Ca_kabuli_chr01 | 7914115                 | TT                              | GG              | 1946726426               |
| SNP_P4_5103_7914119 | NC_021160.1    | Ca_kabuli_chr01 | 7914119                 | TT                              | CC              | 1946726428               |
| SNP_P4_5104_7914143 | NC_021160.1    | Ca_kabuli_chr01 | 7914143                 | TT                              | CC              | 1946726430               |
| SNP_P4_5106_7914206 | NC_021160.1    | Ca_kabuli_chr01 | 7914206                 | TT                              | CC              | 1946726432               |
| SNP_P4_5107_7914223 | NC_021160.1    | Ca_kabuli_chr01 | 7914223                 | CC                              | TT              | 1946726434               |
| SNP_P4_5108_7914278 | NC_021160.1    | Ca_kabuli_chr01 | 7914278                 | CC                              | TT              | 1946726436               |
| SNP_P4_5109_7914347 | NC_021160.1    | Ca_kabuli_chr01 | 7914347                 | TT                              | CC              | 1946726438               |
| SNP_P4_5110_7914405 | NC_021160.1    | Ca_kabuli_chr01 | 7914405                 | GG                              | CC              | 1946726440               |
| SNP_P4_5112_7914456 | NC_021160.1    | Ca_kabuli_chr01 | 7914456                 | CC                              | TT              | 1946726442               |
| SNP_P4_5113_7914496 | NC_021160.1    | Ca_kabuli_chr01 | 7914496                 | GG                              | AA              | 1946726444               |
| SNP_P4_5114_7914503 | NC_021160.1    | Ca_kabuli_chr01 | 7914503                 | AA                              | GG              | 1946726446               |
| SNP_P4_5115_7914504 | NC_021160.1    | Ca_kabuli_chr01 | 7914504                 | AA                              | GG              | 1946726448               |
| SNP_P4_5116_7914513 | NC_021160.1    | Ca_kabuli_chr01 | 7914513                 | GG                              | TT              | 1946726450               |
| SNP_P4_5117_7917518 | NC_021160.1    | Ca_kabuli_chr01 | 7917518                 | AA                              | GG              | 1946726452               |
| SNP_P4_5118_7917535 | NC_021160.1    | Ca_kabuli_chr01 | 7917535                 | CC                              | TT              | 1946726454               |
| SNP_P4_5119_7917561 | NC_021160.1    | Ca_kabuli_chr01 | 7917561                 | AA                              | CC              | 1946726456               |
| SNP_P4_5120_7917568 | NC_021160.1    | Ca_kabuli_chr01 | 7917568                 | CC                              | TT              | 1946726458               |
| SNP_P4_5121_7917611 | NC_021160.1    | Ca_kabuli_chr01 | 7917611                 | GG                              | AA              | 1946726460               |
| SNP_P4_5122_7917811 | NC_021160.1    | Ca_kabuli_chr01 | 7917811                 | GG                              | AA              | 1946726462               |
| SNP_P4_5123_7917852 | NC_021160.1    | Ca_kabuli_chr01 | 7917852                 | AA                              | GG              | 1946726464               |
| SNP_P4_5124_7917860 | NC_021160.1    | Ca_kabuli_chr01 | 7917860                 | AA                              | GG              | 1946726466               |
| SNP_P4_5125_7917924 | NC_021160.1    | Ca_kabuli_chr01 | 7917924                 | GG                              | TT              | 1946726468               |
| SNP_P4_5126_7918197 | NC_021160.1    | Ca_kabuli_chr01 | 7918197                 | GG                              | AA              | 1946726470               |
| SNP_P4_5127_7918198 | NC_021160.1    | Ca_kabuli_chr01 | 7918198                 | GG                              | CC              | 1946726472               |
| SNP_P4_5128_7918217 | NC_021160.1    | Ca_kabuli_chr01 | 7918217                 | GG                              | AA              | 1946726474               |
| SNP_P4_5129_7918243 | NC_021160.1    | Ca_kabuli_chr01 | 7918243                 | AA                              | TT              | 1946726476               |
| SNP_P4_5130_7918787 | NC_021160.1    | Ca_kabuli_chr01 | 7918787                 | TT                              | AA              | 1946726478               |
| SNP_P4_5131_7918795 | NC_021160.1    | Ca_kabuli_chr01 | 7918795                 | AA                              | CC              | 1946726480               |
| SNP_P4_5132_7918807 | NC_021160.1    | Ca_kabuli_chr01 | 7918807                 | TT                              | CC              | 1946726482               |
| SNP_P4_5133_7921282 | NC_021160.1    | Ca_kabuli_chr01 | 7921282                 | TT                              | GG              | 1946726484               |
| SNP_P4_5134_7921284 | NC_021160.1    | Ca_kabuli_chr01 | 7921284                 | AA                              | GG              | 1946726486               |
| SNP_P4_5135_7921289 | NC_021160.1    | Ca_kabuli_chr01 | 7921289                 | AA                              | GG              | 1946726488               |



| SNPs IDs            | Chromosome IDs | Chromosomes     | Physical positions (bp) | CDC Frontier (Reference genome) | (ILWC46 & LPNB) | NCBI SNPdb Accession IDs |
|---------------------|----------------|-----------------|-------------------------|---------------------------------|-----------------|--------------------------|
| SNP_P4_5136_7923854 | NC_021160.1    | Ca_kabuli_chr01 | 7923854                 | GG                              | TT              | 1946726490               |
| SNP_P4_5137_7924886 | NC_021160.1    | Ca_kabuli_chr01 | 7924886                 | TT                              | GG              | 1946726492               |
| SNP_P4_5138_7925147 | NC_021160.1    | Ca_kabuli_chr01 | 7925147                 | TT                              | CC              | 1946726494               |
| SNP_P4_5139_7926068 | NC_021160.1    | Ca_kabuli_chr01 | 7926068                 | TT                              | CC              | 1946726496               |
| SNP_P4_5140_7926106 | NC_021160.1    | Ca_kabuli_chr01 | 7926106                 | CC                              | TT              | 1946726498               |
| SNP_P4_5141_7926146 | NC_021160.1    | Ca_kabuli_chr01 | 7926146                 | GG                              | AA              | 1946726500               |
| SNP_P4_5142_7926662 | NC_021160.1    | Ca_kabuli_chr01 | 7926662                 | GG                              | AA              | 1946726502               |
| SNP_P4_5143_7926802 | NC_021160.1    | Ca_kabuli_chr01 | 7926802                 | AA                              | GG              | 1946726504               |
| SNP_P4_5144_7926824 | NC_021160.1    | Ca_kabuli_chr01 | 7926824                 | AA                              | TT              | 1946726506               |
| SNP_P4_5145_7926882 | NC_021160.1    | Ca_kabuli_chr01 | 7926882                 | AA                              | TT              | 1946726508               |
| SNP_P4_5146_7926919 | NC_021160.1    | Ca_kabuli_chr01 | 7926919                 | CC                              | TT              | 1946726510               |
| SNP_P4_5148_7927526 | NC_021160.1    | Ca_kabuli_chr01 | 7927526                 | AA                              | GG              | 1946726512               |
| SNP_P4_5149_7928773 | NC_021160.1    | Ca_kabuli_chr01 | 7928773                 | GG                              | AA              | 1946726514               |
| SNP_P4_5150_7928791 | NC_021160.1    | Ca_kabuli_chr01 | 7928791                 | CC                              | TT              | 1946726516               |
| SNP_P4_5151_7929240 | NC_021160.1    | Ca_kabuli_chr01 | 7929240                 | AA                              | GG              | 1946726518               |
| SNP_P4_5153_7929542 | NC_021160.1    | Ca_kabuli_chr01 | 7929542                 | GG                              | AA              | 1946726520               |
| SNP_P4_5155_7930703 | NC_021160.1    | Ca_kabuli_chr01 | 7930703                 | CC                              | TT              | 1946726522               |
| SNP_P4_5156_7930784 | NC_021160.1    | Ca_kabuli_chr01 | 7930784                 | TT                              | CC              | 1946726524               |
| SNP_P4_5157_7930815 | NC_021160.1    | Ca_kabuli_chr01 | 7930815                 | TT                              | AA              | 1946726526               |
| SNP_P4_5158_7930977 | NC_021160.1    | Ca_kabuli_chr01 | 7930977                 | AA                              | TT              | 1946726528               |
| SNP_P4_5159_7931007 | NC_021160.1    | Ca_kabuli_chr01 | 7931007                 | CC                              | TT              | 1946726530               |
| SNP_P4_5160_7931014 | NC_021160.1    | Ca_kabuli_chr01 | 7931014                 | AA                              | TT              | 1946726532               |
| SNP_P4_5161_7932687 | NC_021160.1    | Ca_kabuli_chr01 | 7932687                 | GG                              | CC              | 1946726534               |
| SNP_P4_5162_7932773 | NC_021160.1    | Ca_kabuli_chr01 | 7932773                 | CC                              | AA              | 1946726536               |
| SNP_P4_5163_7932774 | NC_021160.1    | Ca_kabuli_chr01 | 7932774                 | AA                              | TT              | 1946726538               |
| SNP_P4_5164_7932888 | NC_021160.1    | Ca_kabuli_chr01 | 7932888                 | GG                              | AA              | 1946726540               |
| SNP_P4_5167_7933315 | NC_021160.1    | Ca_kabuli_chr01 | 7933315                 | AA                              | GG              | 1946726542               |
| SNP_P4_5168_7934734 | NC_021160.1    | Ca_kabuli_chr01 | 7934734                 | AA                              | TT              | 1946726544               |
| SNP_P4_5169_7935016 | NC_021160.1    | Ca_kabuli_chr01 | 7935016                 | GG                              | AA              | 1946726545               |
| SNP_P4_5170_7935063 | NC_021160.1    | Ca_kabuli_chr01 | 7935063                 | GG                              | TT              | 1946726547               |
| SNP_P4_5171_7937938 | NC_021160.1    | Ca_kabuli_chr01 | 7937938                 | CC                              | AA              | 1946726549               |
| SNP_P4_5172_7937953 | NC_021160.1    | Ca_kabuli_chr01 | 7937953                 | TT                              | AA              | 1946726551               |
| SNP_P4_5173_7940489 | NC_021160.1    | Ca_kabuli_chr01 | 7940489                 | CC                              | TT              | 1946726553               |
| SNP_P4_5174_7941272 | NC_021160.1    | Ca_kabuli_chr01 | 7941272                 | GG                              | AA              | 1946726555               |
| SNP_P4_5175_7941617 | NC_021160.1    | Ca_kabuli_chr01 | 7941617                 | AA                              | GG              | 1946726557               |
| SNP_P4_5176_7941886 | NC_021160.1    | Ca_kabuli_chr01 | 7941886                 | AA                              | TT              | 1946726559               |
| SNP_P4_5177_7942609 | NC_021160.1    | Ca_kabuli_chr01 | 7942609                 | GG                              | AA              | 1946726561               |
| SNP_P4_5178_7942610 | NC_021160.1    | Ca_kabuli_chr01 | 7942610                 | TT                              | GG              | 1946726563               |
| SNP_P4_5179_7942923 | NC_021160.1    | Ca_kabuli_chr01 | 7942923                 | AA                              | GG              | 1946726565               |
| SNP_P4_5180_7942932 | NC_021160.1    | Ca_kabuli_chr01 | 7942932                 | AA                              | CC              | 1946726567               |
| SNP_P4_5181_7945914 | NC_021160.1    | Ca_kabuli_chr01 | 7945914                 | CC                              | TT              | 1946726569               |
| SNP_P4_5182_7946179 | NC_021160.1    | Ca_kabuli_chr01 | 7946179                 | TT                              | CC              | 1946726571               |

| SNPs IDs            | Chromosome IDs | Chromosomes     | Physical positions (bp) | CDC Frontier (Reference genome) | (ILWC46 & LPNB) | NCBI SNPdb Accession IDs |
|---------------------|----------------|-----------------|-------------------------|---------------------------------|-----------------|--------------------------|
| SNP_P4_5183_7946433 | NC_021160.1    | Ca_kabuli_chr01 | 7946433                 | CC                              | TT              | 1946726573               |
| SNP_P4_5185_7947498 | NC_021160.1    | Ca_kabuli_chr01 | 7947498                 | GG                              | AA              | 1946726575               |
| SNP_P4_5186_7947895 | NC_021160.1    | Ca_kabuli_chr01 | 7947895                 | AA                              | GG              | 1946726577               |
| SNP_P4_5187_7947992 | NC_021160.1    | Ca_kabuli_chr01 | 7947992                 | AA                              | GG              | 1946726579               |
| SNP_P4_5188_7948000 | NC_021160.1    | Ca_kabuli_chr01 | 7948000                 | GG                              | AA              | 1946726580               |
| SNP_P4_5190_7949554 | NC_021160.1    | Ca_kabuli_chr01 | 7949554                 | AA                              | TT              | 1946726582               |
| SNP_P4_5192_7950420 | NC_021160.1    | Ca_kabuli_chr01 | 7950420                 | TT                              | AA              | 1946726584               |
| SNP_P4_5193_7950433 | NC_021160.1    | Ca_kabuli_chr01 | 7950433                 | CC                              | GG              | 1946726586               |
| SNP_P4_5194_7950460 | NC_021160.1    | Ca_kabuli_chr01 | 7950460                 | CC                              | GG              | 1946726588               |
| SNP_P4_5195_7950482 | NC_021160.1    | Ca_kabuli_chr01 | 7950482                 | CC                              | GG              | 1946726590               |
| SNP_P4_5196_7950489 | NC_021160.1    | Ca_kabuli_chr01 | 7950489                 | AA                              | CC              | 1946726592               |
| SNP_P4_5197_7950493 | NC_021160.1    | Ca_kabuli_chr01 | 7950493                 | TT                              | GG              | 1946726594               |
| SNP_P4_5199_7950826 | NC_021160.1    | Ca_kabuli_chr01 | 7950826                 | AA                              | GG              | 1946726596               |
| SNP_P4_5201_7952082 | NC_021160.1    | Ca_kabuli_chr01 | 7952082                 | TT                              | AA              | 1946726598               |
| SNP_P4_5202_7952416 | NC_021160.1    | Ca_kabuli_chr01 | 7952416                 | AA                              | GG              | 1946726600               |
| SNP_P4_5204_7952948 | NC_021160.1    | Ca_kabuli_chr01 | 7952948                 | GG                              | AA              | 1946726602               |
| SNP_P4_5206_7953083 | NC_021160.1    | Ca_kabuli_chr01 | 7953083                 | AA                              | TT              | 1946726604               |
| SNP_P4_5207_7953154 | NC_021160.1    | Ca_kabuli_chr01 | 7953154                 | TT                              | GG              | 1946726606               |
| SNP_P4_5208_7953155 | NC_021160.1    | Ca_kabuli_chr01 | 7953155                 | CC                              | AA              | 1946726608               |
| SNP_P4_5209_7953194 | NC_021160.1    | Ca_kabuli_chr01 | 7953194                 | CC                              | TT              | 1946726610               |
| SNP_P4_5210_7953219 | NC_021160.1    | Ca_kabuli_chr01 | 7953219                 | CC                              | GG              | 1946726612               |
| SNP_P4_5212_7953360 | NC_021160.1    | Ca_kabuli_chr01 | 7953360                 | GG                              | AA              | 1946726614               |
| SNP_P4_5213_7953364 | NC_021160.1    | Ca_kabuli_chr01 | 7953364                 | CC                              | AA              | 1946726616               |
| SNP_P4_5214_7953537 | NC_021160.1    | Ca_kabuli_chr01 | 7953537                 | AA                              | GG              | 1946726618               |
| SNP_P4_5215_7953849 | NC_021160.1    | Ca_kabuli_chr01 | 7953849                 | TT                              | CC              | 1946726620               |
| SNP_P4_5216_7953882 | NC_021160.1    | Ca_kabuli_chr01 | 7953882                 | AA                              | GG              | 1946726622               |
| SNP_P4_5217_7953883 | NC_021160.1    | Ca_kabuli_chr01 | 7953883                 | GG                              | AA              | 1946726624               |
| SNP_P4_5218_7953887 | NC_021160.1    | Ca_kabuli_chr01 | 7953887                 | TT                              | GG              | 1946726626               |
| SNP_P4_5219_7953917 | NC_021160.1    | Ca_kabuli_chr01 | 7953917                 | CC                              | TT              | 1946726628               |
| SNP_P4_5220_7953920 | NC_021160.1    | Ca_kabuli_chr01 | 7953920                 | GG                              | AA              | 1946726630               |
| SNP_P4_5221_7954051 | NC_021160.1    | Ca_kabuli_chr01 | 7954051                 | GG                              | AA              | 1946726632               |
| SNP_P4_5222_7954065 | NC_021160.1    | Ca_kabuli_chr01 | 7954065                 | TT                              | CC              | 1946726634               |
| SNP_P4_5223_7954455 | NC_021160.1    | Ca_kabuli_chr01 | 7954455                 | TT                              | CC              | 1946726636               |
| SNP_P4_5224_7955058 | NC_021160.1    | Ca_kabuli_chr01 | 7955058                 | AA                              | TT              | 1946726638               |
| SNP_P4_5225_7956380 | NC_021160.1    | Ca_kabuli_chr01 | 7956380                 | TT                              | CC              | 1946726641               |
| SNP_P4_5226_7957684 | NC_021160.1    | Ca_kabuli_chr01 | 7957684                 | CC                              | GG              | 1946726643               |
| SNP_P4_5227_7958254 | NC_021160.1    | Ca_kabuli_chr01 | 7958254                 | GG                              | AA              | 1946726645               |
| SNP_P4_5228_7958289 | NC_021160.1    | Ca_kabuli_chr01 | 7958289                 | AA                              | GG              | 1946726646               |
| SNP_P4_5229_7959151 | NC_021160.1    | Ca_kabuli_chr01 | 7959151                 | AA                              | GG              | 1946726648               |
| SNP_P4_5231_7959399 | NC_021160.1    | Ca_kabuli_chr01 | 7959399                 | GG                              | AA              | 1946726650               |
| SNP_P4_5232_7959413 | NC_021160.1    | Ca_kabuli_chr01 | 7959413                 | GG                              | AA              | 1946726652               |
| SNP_P4_5233_7959457 | NC_021160.1    | Ca_kabuli_chr01 | 7959457                 | TT                              | GG              | 1946726654               |

| SNPs IDs            | Chromosome IDs | Chromosomes     | Physical positions (bp) | CDC Frontier (Reference genome) | (ILWC46 & LPNB) | NCBI SNPdb Accession IDs |
|---------------------|----------------|-----------------|-------------------------|---------------------------------|-----------------|--------------------------|
| SNP_P4_5236_7960899 | NC_021160.1    | Ca_kabuli_chr01 | 7960899                 | AA                              | GG              | 1946726656               |
| SNP_P4_5237_7961205 | NC_021160.1    | Ca_kabuli_chr01 | 7961205                 | CC                              | TT              | 1946726658               |
| SNP_P4_5239_7961436 | NC_021160.1    | Ca_kabuli_chr01 | 7961436                 | CC                              | TT              | 1946726660               |
| SNP_P4_5240_7961526 | NC_021160.1    | Ca_kabuli_chr01 | 7961526                 | TT                              | CC              | 1946726662               |
| SNP_P4_5241_7961731 | NC_021160.1    | Ca_kabuli_chr01 | 7961731                 | CC                              | TT              | 1946726664               |
| SNP_P4_5242_7961732 | NC_021160.1    | Ca_kabuli_chr01 | 7961732                 | AA                              | CC              | 1946726666               |
| SNP_P4_5243_7962039 | NC_021160.1    | Ca_kabuli_chr01 | 7962039                 | GG                              | AA              | 1946726668               |
| SNP_P4_5244_7962068 | NC_021160.1    | Ca_kabuli_chr01 | 7962068                 | AA                              | GG              | 1946726670               |
| SNP_P4_5245_7962694 | NC_021160.1    | Ca_kabuli_chr01 | 7962694                 | CC                              | TT              | 1946726672               |
| SNP_P4_5246_7963030 | NC_021160.1    | Ca_kabuli_chr01 | 7963030                 | TT                              | AA              | 1946726674               |
| SNP_P4_5247_7963260 | NC_021160.1    | Ca_kabuli_chr01 | 7963260                 | GG                              | AA              | 1946726676               |
| SNP_P4_5248_7963261 | NC_021160.1    | Ca_kabuli_chr01 | 7963261                 | AA                              | GG              | 1946726678               |
| SNP_P4_5249_7965350 | NC_021160.1    | Ca_kabuli_chr01 | 7965350                 | TT                              | GG              | 1946726680               |
| SNP_P4_5251_7965672 | NC_021160.1    | Ca_kabuli_chr01 | 7965672                 | AA                              | GG              | 1946726682               |
| SNP_P4_5252_7967552 | NC_021160.1    | Ca_kabuli_chr01 | 7967552                 | AA                              | GG              | 1946726684               |
| SNP_P4_5253_7967577 | NC_021160.1    | Ca_kabuli_chr01 | 7967577                 | AA                              | TT              | 1946726686               |
| SNP_P4_5254_7967639 | NC_021160.1    | Ca_kabuli_chr01 | 7967639                 | AA                              | CC              | 1946726688               |
| SNP_P4_5255_7967810 | NC_021160.1    | Ca_kabuli_chr01 | 7967810                 | AA                              | TT              | 1946726690               |
| SNP_P4_5256_7967835 | NC_021160.1    | Ca_kabuli_chr01 | 7967835                 | TT                              | CC              | 1946726692               |
| SNP_P4_5257_7967879 | NC_021160.1    | Ca_kabuli_chr01 | 7967879                 | TT                              | CC              | 1946726694               |
| SNP_P4_5258_7967906 | NC_021160.1    | Ca_kabuli_chr01 | 7967906                 | TT                              | CC              | 1946726696               |
| SNP_P4_5259_7968051 | NC_021160.1    | Ca_kabuli_chr01 | 7968051                 | GG                              | TT              | 1946726698               |
| SNP_P4_5260_7969218 | NC_021160.1    | Ca_kabuli_chr01 | 7969218                 | TT                              | CC              | 1946726699               |
| SNP_P4_5261_7969591 | NC_021160.1    | Ca_kabuli_chr01 | 7969591                 | TT                              | CC              | 1946726701               |
| SNP_P4_5262_7969702 | NC_021160.1    | Ca_kabuli_chr01 | 7969702                 | TT                              | GG              | 1946726703               |
| SNP_P4_5263_7970041 | NC_021160.1    | Ca_kabuli_chr01 | 7970041                 | TT                              | AA              | 1946726705               |
| SNP_P4_5264_7970055 | NC_021160.1    | Ca_kabuli_chr01 | 7970055                 | AA                              | GG              | 1946726707               |
| SNP_P4_5265_7970800 | NC_021160.1    | Ca_kabuli_chr01 | 7970800                 | CC                              | TT              | 1946726709               |
| SNP_P4_5267_7972089 | NC_021160.1    | Ca_kabuli_chr01 | 7972089                 | AA                              | TT              | 1946726711               |
| SNP_P4_5268_7973218 | NC_021160.1    | Ca_kabuli_chr01 | 7973218                 | GG                              | AA              | 1946726713               |
| SNP_P4_5269_7973226 | NC_021160.1    | Ca_kabuli_chr01 | 7973226                 | GG                              | TT              | 1946726715               |
| SNP_P4_5270_7973267 | NC_021160.1    | Ca_kabuli_chr01 | 7973267                 | GG                              | TT              | 1946726717               |
| SNP_P4_5271_7974596 | NC_021160.1    | Ca_kabuli_chr01 | 7974596                 | TT                              | CC              | 1946726719               |
| SNP_P4_5272_7974600 | NC_021160.1    | Ca_kabuli_chr01 | 7974600                 | CC                              | TT              | 1946726721               |
| SNP_P4_5273_7974614 | NC_021160.1    | Ca_kabuli_chr01 | 7974614                 | TT                              | CC              | 1946726723               |
| SNP_P4_5274_7974657 | NC_021160.1    | Ca_kabuli_chr01 | 7974657                 | CC                              | TT              | 1946726725               |
| SNP_P4_5275_7974729 | NC_021160.1    | Ca_kabuli_chr01 | 7974729                 | CC                              | TT              | 1946726727               |
| SNP_P4_5276_7974847 | NC_021160.1    | Ca_kabuli_chr01 | 7974847                 | CC                              | TT              | 1946726729               |
| SNP_P4_5277_7974848 | NC_021160.1    | Ca_kabuli_chr01 | 7974848                 | AA                              | GG              | 1946726730               |
| SNP_P4_5278_7974875 | NC_021160.1    | Ca_kabuli_chr01 | 7974875                 | GG                              | AA              | 1946726732               |
| SNP_P4_5279_7974888 | NC_021160.1    | Ca_kabuli_chr01 | 7974888                 | AA                              | GG              | 1946726734               |
| SNP_P4_5280_7974978 | NC_021160.1    | Ca_kabuli_chr01 | 7974978                 | TT                              | GG              | 1946726736               |

| SNPs IDs            | Chromosome IDs | Chromosomes     | Physical positions (bp) | CDC Frontier (Reference genome) | (ILWC46 & LPNB) | NCBI SNPdb Accession IDs |
|---------------------|----------------|-----------------|-------------------------|---------------------------------|-----------------|--------------------------|
| SNP_P4_5281_7974995 | NC_021160.1    | Ca_kabuli_chr01 | 7974995                 | GG                              | AA              | 1946726738               |
| SNP_P4_5282_7975003 | NC_021160.1    | Ca_kabuli_chr01 | 7975003                 | TT                              | CC              | 1946726740               |
| SNP_P4_5283_7975020 | NC_021160.1    | Ca_kabuli_chr01 | 7975020                 | GG                              | AA              | 1946726742               |
| SNP_P4_5284_7975670 | NC_021160.1    | Ca_kabuli_chr01 | 7975670                 | AA                              | GG              | 1946726744               |
| SNP_P4_5285_7975804 | NC_021160.1    | Ca_kabuli_chr01 | 7975804                 | AA                              | GG              | 1946726746               |
| SNP_P4_5286_7975810 | NC_021160.1    | Ca_kabuli_chr01 | 7975810                 | GG                              | AA              | 1946726748               |
| SNP_P4_5287_7975845 | NC_021160.1    | Ca_kabuli_chr01 | 7975845                 | TT                              | CC              | 1946726750               |
| SNP_P4_5288_7975846 | NC_021160.1    | Ca_kabuli_chr01 | 7975846                 | CC                              | TT              | 1946726752               |
| SNP_P4_5289_7975924 | NC_021160.1    | Ca_kabuli_chr01 | 7975924                 | TT                              | CC              | 1946726754               |
| SNP_P4_5290_7975932 | NC_021160.1    | Ca_kabuli_chr01 | 7975932                 | CC                              | TT              | 1946726756               |
| SNP_P4_5291_7976524 | NC_021160.1    | Ca_kabuli_chr01 | 7976524                 | CC                              | GG              | 1946726758               |
| SNP_P4_5292_7976531 | NC_021160.1    | Ca_kabuli_chr01 | 7976531                 | TT                              | GG              | 1946726760               |
| SNP_P4_5293_7976539 | NC_021160.1    | Ca_kabuli_chr01 | 7976539                 | AA                              | CC              | 1946726761               |
| SNP_P4_5294_7976867 | NC_021160.1    | Ca_kabuli_chr01 | 7976867                 | CC                              | TT              | 1946726763               |
| SNP_P4_5295_7976870 | NC_021160.1    | Ca_kabuli_chr01 | 7976870                 | CC                              | AA              | 1946726765               |
| SNP_P4_5296_7979770 | NC_021160.1    | Ca_kabuli_chr01 | 7979770                 | GG                              | AA              | 1946726767               |
| SNP_P4_5297_7980027 | NC_021160.1    | Ca_kabuli_chr01 | 7980027                 | AA                              | TT              | 1946726769               |
| SNP_P4_5298_7980032 | NC_021160.1    | Ca_kabuli_chr01 | 7980032                 | AA                              | TT              | 1946726771               |
| SNP_P4_5299_7980295 | NC_021160.1    | Ca_kabuli_chr01 | 7980295                 | TT                              | CC              | 1946726773               |
| SNP_P4_5300_7980328 | NC_021160.1    | Ca_kabuli_chr01 | 7980328                 | AA                              | GG              | 1946726775               |
| SNP_P4_5301_7980333 | NC_021160.1    | Ca_kabuli_chr01 | 7980333                 | AA                              | GG              | 1946726777               |
| SNP_P4_5302_7980458 | NC_021160.1    | Ca_kabuli_chr01 | 7980458                 | GG                              | CC              | 1946726779               |
| SNP_P4_5303_7980488 | NC_021160.1    | Ca_kabuli_chr01 | 7980488                 | TT                              | CC              | 1946726781               |
| SNP_P4_5304_7980542 | NC_021160.1    | Ca_kabuli_chr01 | 7980542                 | TT                              | CC              | 1946726783               |
| SNP_P4_5306_7981667 | NC_021160.1    | Ca_kabuli_chr01 | 7981667                 | TT                              | GG              | 1946726785               |
| SNP_P4_5307_7981693 | NC_021160.1    | Ca_kabuli_chr01 | 7981693                 | GG                              | AA              | 1946726787               |
| SNP_P4_5308_7981747 | NC_021160.1    | Ca_kabuli_chr01 | 7981747                 | CC                              | TT              | 1946726789               |
| SNP_P4_5309_7981771 | NC_021160.1    | Ca_kabuli_chr01 | 7981771                 | AA                              | CC              | 1946726791               |
| SNP_P4_5310_7981912 | NC_021160.1    | Ca_kabuli_chr01 | 7981912                 | AA                              | TT              | 1946726794               |
| SNP_P4_5311_7981917 | NC_021160.1    | Ca_kabuli_chr01 | 7981917                 | CC                              | TT              | 1946726796               |
| SNP_P4_5312_7983322 | NC_021160.1    | Ca_kabuli_chr01 | 7983322                 | AA                              | GG              | 1946726798               |
| SNP_P4_5313_7983359 | NC_021160.1    | Ca_kabuli_chr01 | 7983359                 | AA                              | GG              | 1946726800               |
| SNP_P4_5314_7983480 | NC_021160.1    | Ca_kabuli_chr01 | 7983480                 | GG                              | TT              | 1946726802               |
| SNP_P4_5315_7983723 | NC_021160.1    | Ca_kabuli_chr01 | 7983723                 | CC                              | AA              | 1946726804               |
| SNP_P4_5317_7984672 | NC_021160.1    | Ca_kabuli_chr01 | 7984672                 | TT                              | CC              | 1946726806               |
| SNP_P4_5318_7985441 | NC_021160.1    | Ca_kabuli_chr01 | 7985441                 | CC                              | TT              | 1946726808               |
| SNP_P4_5319_7986952 | NC_021160.1    | Ca_kabuli_chr01 | 7986952                 | GG                              | TT              | 1946726810               |
| SNP_P4_5320_7987647 | NC_021160.1    | Ca_kabuli_chr01 | 7987647                 | CC                              | GG              | 1946726812               |
| SNP_P4_5321_7987970 | NC_021160.1    | Ca_kabuli_chr01 | 7987970                 | TT                              | AA              | 1946726814               |
| SNP_P4_5322_7987973 | NC_021160.1    | Ca_kabuli_chr01 | 7987973                 | TT                              | AA              | 1946726816               |
| SNP_P4_5323_7988004 | NC_021160.1    | Ca_kabuli_chr01 | 7988004                 | AA                              | TT              | 1946726818               |
| SNP_P4_5326_7988396 | NC_021160.1    | Ca_kabuli_chr01 | 7988396                 | AA                              | CC              | 1946726820               |

| SNPs IDs            | Chromosome IDs | Chromosomes     | Physical positions (bp) | CDC Frontier (Reference genome) | (ILWC46 & LPNB) | NCBI SNPdb Accession IDs |
|---------------------|----------------|-----------------|-------------------------|---------------------------------|-----------------|--------------------------|
| SNP_P4_5327_7988403 | NC_021160.1    | Ca_kabuli_chr01 | 7988403                 | CC                              | AA              | 1946726822               |
| SNP_P4_5328_7988663 | NC_021160.1    | Ca_kabuli_chr01 | 7988663                 | GG                              | AA              | 1946726824               |
| SNP_P4_5329_7988712 | NC_021160.1    | Ca_kabuli_chr01 | 7988712                 | TT                              | AA              | 1946726826               |
| SNP_P4_5330_7988792 | NC_021160.1    | Ca_kabuli_chr01 | 7988792                 | GG                              | AA              | 1946726828               |
| SNP_P4_5334_7992348 | NC_021160.1    | Ca_kabuli_chr01 | 7992348                 | TT                              | AA              | 1946726830               |
| SNP_P4_5335_7992456 | NC_021160.1    | Ca_kabuli_chr01 | 7992456                 | AA                              | TT              | 1946726832               |
| SNP_P4_5337_7993569 | NC_021160.1    | Ca_kabuli_chr01 | 7993569                 | AA                              | GG              | 1946726834               |
| SNP_P4_5338_7993574 | NC_021160.1    | Ca_kabuli_chr01 | 7993574                 | TT                              | CC              | 1946726836               |
| SNP_P4_5339_7994286 | NC_021160.1    | Ca_kabuli_chr01 | 7994286                 | TT                              | AA              | 1946726838               |
| SNP_P4_5340_7994299 | NC_021160.1    | Ca_kabuli_chr01 | 7994299                 | CC                              | GG              | 1946726840               |
| SNP_P4_5342_7994689 | NC_021160.1    | Ca_kabuli_chr01 | 7994689                 | GG                              | AA              | 1946726842               |
| SNP_P4_5343_7994715 | NC_021160.1    | Ca_kabuli_chr01 | 7994715                 | AA                              | GG              | 1946726844               |
| SNP_P4_5344_7994727 | NC_021160.1    | Ca_kabuli_chr01 | 7994727                 | AA                              | GG              | 1946726846               |
| SNP_P4_5345_7995640 | NC_021160.1    | Ca_kabuli_chr01 | 7995640                 | TT                              | CC              | 1946726848               |
| SNP_P4_5346_7995648 | NC_021160.1    | Ca_kabuli_chr01 | 7995648                 | CC                              | TT              | 1946726850               |
| SNP_P4_5347_7995669 | NC_021160.1    | Ca_kabuli_chr01 | 7995669                 | TT                              | CC              | 1946726852               |
| SNP_P4_5351_7995881 | NC_021160.1    | Ca_kabuli_chr01 | 7995881                 | CC                              | TT              | 1946726854               |
| SNP_P4_5352_7995912 | NC_021160.1    | Ca_kabuli_chr01 | 7995912                 | CC                              | TT              | 1946726856               |
| SNP_P4_5353_7996055 | NC_021160.1    | Ca_kabuli_chr01 | 7996055                 | CC                              | AA              | 1946726858               |
| SNP_P4_5354_7996105 | NC_021160.1    | Ca_kabuli_chr01 | 7996105                 | AA                              | GG              | 1946726860               |
| SNP_P4_5355_7996372 | NC_021160.1    | Ca_kabuli_chr01 | 7996372                 | TT                              | CC              | 1946726862               |
| SNP_P4_5357_7996661 | NC_021160.1    | Ca_kabuli_chr01 | 7996661                 | GG                              | AA              | 1946726864               |
| SNP_P4_5358_7998523 | NC_021160.1    | Ca_kabuli_chr01 | 7998523                 | TT                              | AA              | 1946726866               |
| SNP_P4_5360_8002686 | NC_021160.1    | Ca_kabuli_chr01 | 8002686                 | TT                              | CC              | 1946726868               |
| SNP_P4_5361_8002688 | NC_021160.1    | Ca_kabuli_chr01 | 8002688                 | AA                              | TT              | 1946726870               |
| SNP_P4_5362_8003462 | NC_021160.1    | Ca_kabuli_chr01 | 8003462                 | CC                              | TT              | 1946726872               |
| SNP_P4_5363_8003469 | NC_021160.1    | Ca_kabuli_chr01 | 8003469                 | TT                              | AA              | 1946726874               |
| SNP_P4_5364_8003470 | NC_021160.1    | Ca_kabuli_chr01 | 8003470                 | TT                              | AA              | 1946726876               |
| SNP_P4_5365_8003489 | NC_021160.1    | Ca_kabuli_chr01 | 8003489                 | CC                              | AA              | 1946726878               |
| SNP_P4_5366_8003616 | NC_021160.1    | Ca_kabuli_chr01 | 8003616                 | AA                              | TT              | 1946726881               |
| SNP_P4_5368_8003788 | NC_021160.1    | Ca_kabuli_chr01 | 8003788                 | CC                              | TT              | 1946726883               |
| SNP_P4_5370_8003897 | NC_021160.1    | Ca_kabuli_chr01 | 8003897                 | AA                              | CC              | 1946726885               |
| SNP_P4_5372_8004041 | NC_021160.1    | Ca_kabuli_chr01 | 8004041                 | GG                              | AA              | 1946726887               |
| SNP_P4_5374_8004100 | NC_021160.1    | Ca_kabuli_chr01 | 8004100                 | CC                              | TT              | 1946726889               |
| SNP_P4_5375_8004300 | NC_021160.1    | Ca_kabuli_chr01 | 8004300                 | TT                              | GG              | 1946726891               |
| SNP_P4_5376_8004322 | NC_021160.1    | Ca_kabuli_chr01 | 8004322                 | AA                              | GG              | 1946726893               |
| SNP_P4_5378_8004784 | NC_021160.1    | Ca_kabuli_chr01 | 8004784                 | TT                              | AA              | 1946726895               |
| SNP_P4_5379_8005090 | NC_021160.1    | Ca_kabuli_chr01 | 8005090                 | GG                              | CC              | 1946726897               |
| SNP_P4_5380_8005123 | NC_021160.1    | Ca_kabuli_chr01 | 8005123                 | GG                              | CC              | 1946726899               |
| SNP_P4_5381_8006844 | NC_021160.1    | Ca_kabuli_chr01 | 8006844                 | GG                              | TT              | 1946726901               |
| SNP_P4_5382_8007126 | NC_021160.1    | Ca_kabuli_chr01 | 8007126                 | AA                              | CC              | 1946726903               |
| SNP_P4_5383_8007461 | NC_021160.1    | Ca_kabuli_chr01 | 8007461                 | GG                              | AA              | 1946726905               |

| SNPs IDs            | Chromosome IDs | Chromosomes     | Physical positions (bp) | CDC Frontier (Reference genome) | (ILWC46 & LPNB) | NCBI SNPdb Accession IDs |
|---------------------|----------------|-----------------|-------------------------|---------------------------------|-----------------|--------------------------|
| SNP_P4_5384_8007616 | NC_021160.1    | Ca_kabuli_chr01 | 8007616                 | GG                              | AA              | 1946726907               |
| SNP_P4_5385_8008649 | NC_021160.1    | Ca_kabuli_chr01 | 8008649                 | GG                              | AA              | 1946726909               |
| SNP_P4_5386_8008720 | NC_021160.1    | Ca_kabuli_chr01 | 8008720                 | AA                              | GG              | 1946726911               |
| SNP_P4_5387_8008754 | NC_021160.1    | Ca_kabuli_chr01 | 8008754                 | TT                              | CC              | 1946726913               |
| SNP_P4_5388_8008800 | NC_021160.1    | Ca_kabuli_chr01 | 8008800                 | TT                              | CC              | 1946726915               |
| SNP_P4_5389_8008838 | NC_021160.1    | Ca_kabuli_chr01 | 8008838                 | GG                              | AA              | 1946726917               |
| SNP_P4_5390_8008878 | NC_021160.1    | Ca_kabuli_chr01 | 8008878                 | AA                              | GG              | 1946726919               |
| SNP_P4_5391_8009594 | NC_021160.1    | Ca_kabuli_chr01 | 8009594                 | AA                              | TT              | 1946726921               |
| SNP_P4_5392_8009657 | NC_021160.1    | Ca_kabuli_chr01 | 8009657                 | AA                              | CC              | 1946726923               |
| SNP_P4_5393_8009762 | NC_021160.1    | Ca_kabuli_chr01 | 8009762                 | CC                              | TT              | 1946726925               |
| SNP_P4_5394_8009928 | NC_021160.1    | Ca_kabuli_chr01 | 8009928                 | CC                              | TT              | 1946726927               |
| SNP_P4_5395_8009962 | NC_021160.1    | Ca_kabuli_chr01 | 8009962                 | TT                              | GG              | 1946726929               |
| SNP_P4_5396_8010154 | NC_021160.1    | Ca_kabuli_chr01 | 8010154                 | AA                              | GG              | 1946726931               |
| SNP_P4_5397_8010253 | NC_021160.1    | Ca_kabuli_chr01 | 8010253                 | CC                              | TT              | 1946726932               |
| SNP_P4_5398_8011033 | NC_021160.1    | Ca_kabuli_chr01 | 8011033                 | CC                              | TT              | 1946726934               |
| SNP_P4_5399_8011349 | NC_021160.1    | Ca_kabuli_chr01 | 8011349                 | TT                              | CC              | 1946726936               |
| SNP_P4_5400_8011546 | NC_021160.1    | Ca_kabuli_chr01 | 8011546                 | AA                              | TT              | 1946726938               |
| SNP_P4_5401_8012755 | NC_021160.1    | Ca_kabuli_chr01 | 8012755                 | TT                              | GG              | 1946726940               |
| SNP_P4_5402_8012757 | NC_021160.1    | Ca_kabuli_chr01 | 8012757                 | CC                              | TT              | 1946726942               |
| SNP_P4_5403_8014862 | NC_021160.1    | Ca_kabuli_chr01 | 8014862                 | AA                              | TT              | 1946726944               |
| SNP_P4_5404_8015135 | NC_021160.1    | Ca_kabuli_chr01 | 8015135                 | CC                              | TT              | 1946726946               |
| SNP_P4_5406_8017989 | NC_021160.1    | Ca_kabuli_chr01 | 8017989                 | AA                              | GG              | 1946726948               |
| SNP_P4_5407_8018001 | NC_021160.1    | Ca_kabuli_chr01 | 8018001                 | AA                              | GG              | 1946726949               |
| SNP_P4_5408_8018011 | NC_021160.1    | Ca_kabuli_chr01 | 8018011                 | TT                              | AA              | 1946726952               |
| SNP_P4_5410_8018054 | NC_021160.1    | Ca_kabuli_chr01 | 8018054                 | AA                              | TT              | 1946726954               |
| SNP_P4_5412_8018330 | NC_021160.1    | Ca_kabuli_chr01 | 8018330                 | AA                              | GG              | 1946726955               |
| SNP_P4_5413_8018348 | NC_021160.1    | Ca_kabuli_chr01 | 8018348                 | AA                              | CC              | 1946726957               |
| SNP_P4_5414_8018402 | NC_021160.1    | Ca_kabuli_chr01 | 8018402                 | GG                              | AA              | 1946726959               |
| SNP_P4_5415_8019194 | NC_021160.1    | Ca_kabuli_chr01 | 8019194                 | TT                              | CC              | 1946726961               |
| SNP_P4_5416_8019206 | NC_021160.1    | Ca_kabuli_chr01 | 8019206                 | AA                              | GG              | 1946726963               |
| SNP_P4_5417_8019335 | NC_021160.1    | Ca_kabuli_chr01 | 8019335                 | TT                              | CC              | 1946726965               |
| SNP_P4_5418_8020219 | NC_021160.1    | Ca_kabuli_chr01 | 8020219                 | AA                              | GG              | 1946726967               |
| SNP_P4_5419_8020258 | NC_021160.1    | Ca_kabuli_chr01 | 8020258                 | GG                              | AA              | 1946726969               |
| SNP_P4_5421_8020378 | NC_021160.1    | Ca_kabuli_chr01 | 8020378                 | TT                              | CC              | 1946726971               |
| SNP_P4_5422_8020607 | NC_021160.1    | Ca_kabuli_chr01 | 8020607                 | TT                              | CC              | 1946726973               |
| SNP_P4_5423_8020616 | NC_021160.1    | Ca_kabuli_chr01 | 8020616                 | TT                              | CC              | 1946726975               |
| SNP_P4_5424_8021535 | NC_021160.1    | Ca_kabuli_chr01 | 8021535                 | AA                              | GG              | 1946726977               |
| SNP_P4_5426_8021625 | NC_021160.1    | Ca_kabuli_chr01 | 8021625                 | AA                              | CC              | 1946726979               |
| SNP_P4_5427_8021855 | NC_021160.1    | Ca_kabuli_chr01 | 8021855                 | AA                              | CC              | 1946726981               |
| SNP_P4_5428_8022118 | NC_021160.1    | Ca_kabuli_chr01 | 8022118                 | GG                              | TT              | 1946726983               |
| SNP_P4_5429_8022125 | NC_021160.1    | Ca_kabuli_chr01 | 8022125                 | CC                              | GG              | 1946726985               |
| SNP_P4_5430_8022435 | NC_021160.1    | Ca_kabuli_chr01 | 8022435                 | AA                              | GG              | 1946726987               |

| SNPs IDs            | Chromosome IDs | Chromosomes     | Physical positions (bp) | CDC Frontier (Reference genome) | (ILWC46 & LPNB) | NCBI SNPdb Accession IDs |
|---------------------|----------------|-----------------|-------------------------|---------------------------------|-----------------|--------------------------|
| SNP_P4_5431_8023044 | NC_021160.1    | Ca_kabuli_chr01 | 8023044                 | TT                              | CC              | 1946726989               |
| SNP_P4_5432_8023456 | NC_021160.1    | Ca_kabuli_chr01 | 8023456                 | TT                              | CC              | 1946726991               |
| SNP_P4_5433_8023466 | NC_021160.1    | Ca_kabuli_chr01 | 8023466                 | GG                              | AA              | 1946726993               |
| SNP_P4_5434_8023687 | NC_021160.1    | Ca_kabuli_chr01 | 8023687                 | CC                              | TT              | 1946726995               |
| SNP_P4_5435_8023733 | NC_021160.1    | Ca_kabuli_chr01 | 8023733                 | GG                              | AA              | 1946726997               |
| SNP_P4_5436_8023743 | NC_021160.1    | Ca_kabuli_chr01 | 8023743                 | TT                              | CC              | 1946726999               |
| SNP_P4_5437_8023760 | NC_021160.1    | Ca_kabuli_chr01 | 8023760                 | CC                              | TT              | 1946727001               |
| SNP_P4_5438_8023860 | NC_021160.1    | Ca_kabuli_chr01 | 8023860                 | AA                              | GG              | 1946727003               |
| SNP_P4_5439_8023974 | NC_021160.1    | Ca_kabuli_chr01 | 8023974                 | GG                              | AA              | 1946727005               |
| SNP_P4_5440_8025831 | NC_021160.1    | Ca_kabuli_chr01 | 8025831                 | CC                              | AA              | 1946727007               |
| SNP_P4_5441_8025871 | NC_021160.1    | Ca_kabuli_chr01 | 8025871                 | GG                              | AA              | 1946727009               |
| SNP_P4_5442_8025959 | NC_021160.1    | Ca_kabuli_chr01 | 8025959                 | GG                              | AA              | 1946727011               |
| SNP_P4_5443_8026034 | NC_021160.1    | Ca_kabuli_chr01 | 8026034                 | GG                              | AA              | 1946727013               |
| SNP_P4_5444_8028325 | NC_021160.1    | Ca_kabuli_chr01 | 8028325                 | TT                              | CC              | 1946727015               |
| SNP_P4_5445_8028589 | NC_021160.1    | Ca_kabuli_chr01 | 8028589                 | TT                              | GG              | 1946727017               |
| SNP_P4_5446_8029271 | NC_021160.1    | Ca_kabuli_chr01 | 8029271                 | GG                              | CC              | 1946727019               |
| SNP_P4_5447_8029426 | NC_021160.1    | Ca_kabuli_chr01 | 8029426                 | AA                              | GG              | 1946727021               |
| SNP_P4_5448_8029435 | NC_021160.1    | Ca_kabuli_chr01 | 8029435                 | CC                              | TT              | 1946727023               |
| SNP_P4_5449_8029456 | NC_021160.1    | Ca_kabuli_chr01 | 8029456                 | GG                              | AA              | 1946727025               |
| SNP_P4_5450_8029674 | NC_021160.1    | Ca_kabuli_chr01 | 8029674                 | TT                              | CC              | 1946727027               |
| SNP_P4_5451_8029678 | NC_021160.1    | Ca_kabuli_chr01 | 8029678                 | TT                              | CC              | 1946727029               |
| SNP_P4_5452_8029980 | NC_021160.1    | Ca_kabuli_chr01 | 8029980                 | CC                              | TT              | 1946727031               |
| SNP_P4_5453_8029990 | NC_021160.1    | Ca_kabuli_chr01 | 8029990                 | AA                              | GG              | 1946727033               |
| SNP_P4_5454_8030027 | NC_021160.1    | Ca_kabuli_chr01 | 8030027                 | AA                              | GG              | 1946727035               |
| SNP_P4_5455_8030106 | NC_021160.1    | Ca_kabuli_chr01 | 8030106                 | GG                              | AA              | 1946727037               |
| SNP_P4_5456_8030943 | NC_021160.1    | Ca_kabuli_chr01 | 8030943                 | TT                              | CC              | 1946727039               |
| SNP_P4_5457_8031285 | NC_021160.1    | Ca_kabuli_chr01 | 8031285                 | TT                              | AA              | 1946727041               |
| SNP_P4_5461_8032723 | NC_021160.1    | Ca_kabuli_chr01 | 8032723                 | CC                              | AA              | 1946727043               |
| SNP_P4_5464_8033532 | NC_021160.1    | Ca_kabuli_chr01 | 8033532                 | GG                              | TT              | 1946727045               |
| SNP_P4_5465_8033544 | NC_021160.1    | Ca_kabuli_chr01 | 8033544                 | AA                              | GG              | 1946727047               |
| SNP_P4_5466_8034478 | NC_021160.1    | Ca_kabuli_chr01 | 8034478                 | GG                              | AA              | 1946727049               |
| SNP_P4_5467_8034606 | NC_021160.1    | Ca_kabuli_chr01 | 8034606                 | CC                              | TT              | 1946727051               |
| SNP_P4_5468_8034738 | NC_021160.1    | Ca_kabuli_chr01 | 8034738                 | CC                              | GG              | 1946727053               |
| SNP_P4_5469_8034775 | NC_021160.1    | Ca_kabuli_chr01 | 8034775                 | AA                              | GG              | 1946727055               |
| SNP_P4_5470_8035034 | NC_021160.1    | Ca_kabuli_chr01 | 8035034                 | TT                              | GG              | 1946727057               |
| SNP_P4_5471_8035730 | NC_021160.1    | Ca_kabuli_chr01 | 8035730                 | AA                              | CC              | 1946727059               |
| SNP_P4_5472_8036403 | NC_021160.1    | Ca_kabuli_chr01 | 8036403                 | AA                              | GG              | 1946727061               |
| SNP_P4_5473_8037593 | NC_021160.1    | Ca_kabuli_chr01 | 8037593                 | CC                              | TT              | 1946727063               |
| SNP_P4_5474_8038097 | NC_021160.1    | Ca_kabuli_chr01 | 8038097                 | TT                              | GG              | 1946727065               |
| SNP_P4_5475_8038220 | NC_021160.1    | Ca_kabuli_chr01 | 8038220                 | TT                              | GG              | 1946727067               |
| SNP_P4_5477_8039385 | NC_021160.1    | Ca_kabuli_chr01 | 8039385                 | GG                              | TT              | 1946727069               |
| SNP_P4_5478_8039387 | NC_021160.1    | Ca_kabuli_chr01 | 8039387                 | AA                              | CC              | 1946727071               |

| SNPs IDs            | Chromosome IDs | Chromosomes     | Physical positions (bp) | CDC Frontier (Reference genome) | (ILWC46 & LPNB) | NCBI SNPdb Accession IDs |
|---------------------|----------------|-----------------|-------------------------|---------------------------------|-----------------|--------------------------|
| SNP_P4_5479_8039411 | NC_021160.1    | Ca_kabuli_chr01 | 8039411                 | GG                              | AA              | 1946727072               |
| SNP_P4_5480_8040576 | NC_021160.1    | Ca_kabuli_chr01 | 8040576                 | GG                              | AA              | 1946727074               |
| SNP_P4_5481_8040594 | NC_021160.1    | Ca_kabuli_chr01 | 8040594                 | AA                              | GG              | 1946727076               |
| SNP_P4_5482_8040781 | NC_021160.1    | Ca_kabuli_chr01 | 8040781                 | TT                              | GG              | 1946727078               |
| SNP_P4_5483_8041038 | NC_021160.1    | Ca_kabuli_chr01 | 8041038                 | AA                              | CC              | 1946727080               |
| SNP_P4_5484_8041056 | NC_021160.1    | Ca_kabuli_chr01 | 8041056                 | AA                              | TT              | 1946727082               |
| SNP_P4_5485_8041076 | NC_021160.1    | Ca_kabuli_chr01 | 8041076                 | CC                              | AA              | 1946727084               |
| SNP_P4_5487_8041316 | NC_021160.1    | Ca_kabuli_chr01 | 8041316                 | GG                              | CC              | 1946727086               |
| SNP_P4_5488_8041334 | NC_021160.1    | Ca_kabuli_chr01 | 8041334                 | GG                              | CC              | 1946727088               |
| SNP_P4_5490_8041935 | NC_021160.1    | Ca_kabuli_chr01 | 8041935                 | TT                              | CC              | 1946727090               |
| SNP_P4_5491_8042416 | NC_021160.1    | Ca_kabuli_chr01 | 8042416                 | CC                              | AA              | 1946727092               |
| SNP_P4_5492_8042422 | NC_021160.1    | Ca_kabuli_chr01 | 8042422                 | TT                              | CC              | 1946727094               |
| SNP_P4_5493_8042858 | NC_021160.1    | Ca_kabuli_chr01 | 8042858                 | CC                              | TT              | 1946727096               |
| SNP_P4_5494_8042874 | NC_021160.1    | Ca_kabuli_chr01 | 8042874                 | TT                              | CC              | 1946727098               |
| SNP_P4_5495_8042888 | NC_021160.1    | Ca_kabuli_chr01 | 8042888                 | AA                              | GG              | 1946727100               |
| SNP_P4_5496_8042899 | NC_021160.1    | Ca_kabuli_chr01 | 8042899                 | CC                              | TT              | 1946727102               |
| SNP_P4_5497_8043076 | NC_021160.1    | Ca_kabuli_chr01 | 8043076                 | GG                              | AA              | 1946727103               |
| SNP_P4_5498_8043484 | NC_021160.1    | Ca_kabuli_chr01 | 8043484                 | GG                              | AA              | 1946727105               |
| SNP_P4_5499_8043485 | NC_021160.1    | Ca_kabuli_chr01 | 8043485                 | CC                              | AA              | 1946727107               |
| SNP_P4_5500_8043565 | NC_021160.1    | Ca_kabuli_chr01 | 8043565                 | AA                              | TT              | 1946727109               |
| SNP_P4_5501_8043624 | NC_021160.1    | Ca_kabuli_chr01 | 8043624                 | AA                              | GG              | 1946727111               |
| SNP_P4_5502_8045139 | NC_021160.1    | Ca_kabuli_chr01 | 8045139                 | GG                              | TT              | 1946727113               |
| SNP_P4_5503_8045915 | NC_021160.1    | Ca_kabuli_chr01 | 8045915                 | AA                              | GG              | 1946727115               |
| SNP_P4_5504_8048269 | NC_021160.1    | Ca_kabuli_chr01 | 8048269                 | TT                              | AA              | 1946727117               |
| SNP_P4_5505_8048270 | NC_021160.1    | Ca_kabuli_chr01 | 8048270                 | TT                              | AA              | 1946727119               |
| SNP_P4_5506_8048271 | NC_021160.1    | Ca_kabuli_chr01 | 8048271                 | TT                              | AA              | 1946727121               |
| SNP_P4_5507_8048726 | NC_021160.1    | Ca_kabuli_chr01 | 8048726                 | GG                              | AA              | 1946727123               |
| SNP_P4_5509_8054262 | NC_021160.1    | Ca_kabuli_chr01 | 8054262                 | CC                              | TT              | 1946727125               |
| SNP_P4_5510_8061379 | NC_021160.1    | Ca_kabuli_chr01 | 8061379                 | TT                              | GG              | 1946727127               |
| SNP_P4_5511_8062134 | NC_021160.1    | Ca_kabuli_chr01 | 8062134                 | AA                              | GG              | 1946727129               |
| SNP_P4_5512_8062380 | NC_021160.1    | Ca_kabuli_chr01 | 8062380                 | TT                              | CC              | 1946727131               |
| SNP_P4_5513_8062413 | NC_021160.1    | Ca_kabuli_chr01 | 8062413                 | TT                              | CC              | 1946727133               |
| SNP_P4_5514_8062493 | NC_021160.1    | Ca_kabuli_chr01 | 8062493                 | CC                              | TT              | 1946727135               |
| SNP_P4_5515_8062494 | NC_021160.1    | Ca_kabuli_chr01 | 8062494                 | TT                              | GG              | 1946727137               |
| SNP_P4_5516_8062691 | NC_021160.1    | Ca_kabuli_chr01 | 8062691                 | TT                              | CC              | 1946727139               |
| SNP_P4_5517_8062746 | NC_021160.1    | Ca_kabuli_chr01 | 8062746                 | GG                              | AA              | 1946727141               |
| SNP_P4_5518_8062795 | NC_021160.1    | Ca_kabuli_chr01 | 8062795                 | GG                              | AA              | 1946727143               |
| SNP_P4_5520_8062895 | NC_021160.1    | Ca_kabuli_chr01 | 8062895                 | AA                              | TT              | 1946727145               |
| SNP_P4_5521_8062900 | NC_021160.1    | Ca_kabuli_chr01 | 8062900                 | TT                              | AA              | 1946727147               |
| SNP_P4_5522_8062980 | NC_021160.1    | Ca_kabuli_chr01 | 8062980                 | AA                              | GG              | 1946727149               |
| SNP_P4_5524_8065133 | NC_021160.1    | Ca_kabuli_chr01 | 8065133                 | CC                              | AA              | 1946727150               |
| SNP_P4_5525_8065161 | NC_021160.1    | Ca_kabuli_chr01 | 8065161                 | GG                              | CC              | 1946727152               |



| SNPs IDs            | Chromosome IDs | Chromosomes     | Physical positions (bp) | CDC Frontier (Reference genome) | (ILWC46 & LPNB) | NCBI SNPdb Accession IDs |
|---------------------|----------------|-----------------|-------------------------|---------------------------------|-----------------|--------------------------|
| SNP_P4_5526_8065170 | NC_021160.1    | Ca_kabuli_chr01 | 8065170                 | AA                              | GG              | 1946727154               |
| SNP_P4_5527_8065181 | NC_021160.1    | Ca_kabuli_chr01 | 8065181                 | TT                              | AA              | 1946727156               |
| SNP_P4_5528_8065462 | NC_021160.1    | Ca_kabuli_chr01 | 8065462                 | TT                              | GG              | 1946727158               |
| SNP_P4_5529_8065474 | NC_021160.1    | Ca_kabuli_chr01 | 8065474                 | AA                              | GG              | 1946727160               |
| SNP_P4_5530_8072893 | NC_021160.1    | Ca_kabuli_chr01 | 8072893                 | CC                              | AA              | 1946727162               |
| SNP_P4_5531_8072915 | NC_021160.1    | Ca_kabuli_chr01 | 8072915                 | AA                              | GG              | 1946727164               |
| SNP_P4_5532_8073252 | NC_021160.1    | Ca_kabuli_chr01 | 8073252                 | GG                              | CC              | 1946727166               |
| SNP_P4_5533_8074389 | NC_021160.1    | Ca_kabuli_chr01 | 8074389                 | TT                              | CC              | 1946727168               |
| SNP_P4_5534_8074907 | NC_021160.1    | Ca_kabuli_chr01 | 8074907                 | AA                              | GG              | 1946727170               |
| SNP_P4_5535_8075082 | NC_021160.1    | Ca_kabuli_chr01 | 8075082                 | AA                              | GG              | 1946727172               |
| SNP_P4_5536_8075742 | NC_021160.1    | Ca_kabuli_chr01 | 8075742                 | GG                              | TT              | 1946727174               |
| SNP_P4_5537_8076012 | NC_021160.1    | Ca_kabuli_chr01 | 8076012                 | TT                              | AA              | 1946727176               |
| SNP_P4_5538_8079254 | NC_021160.1    | Ca_kabuli_chr01 | 8079254                 | GG                              | AA              | 1946727178               |
| SNP_P4_5539_8079461 | NC_021160.1    | Ca_kabuli_chr01 | 8079461                 | AA                              | CC              | 1946727180               |
| SNP_P4_5540_8079775 | NC_021160.1    | Ca_kabuli_chr01 | 8079775                 | TT                              | GG              | 1946727182               |
| SNP_P4_5541_8088308 | NC_021160.1    | Ca_kabuli_chr01 | 8088308                 | AA                              | CC              | 1946727183               |
| SNP_P4_5542_8088337 | NC_021160.1    | Ca_kabuli_chr01 | 8088337                 | TT                              | AA              | 1946727185               |
| SNP_P4_5543_8089219 | NC_021160.1    | Ca_kabuli_chr01 | 8089219                 | TT                              | CC              | 1946727187               |
| SNP_P4_5545_8090564 | NC_021160.1    | Ca_kabuli_chr01 | 8090564                 | CC                              | GG              | 1946727189               |
| SNP_P4_5546_8090567 | NC_021160.1    | Ca_kabuli_chr01 | 8090567                 | GG                              | AA              | 1946727191               |
| SNP_P4_5547_8090941 | NC_021160.1    | Ca_kabuli_chr01 | 8090941                 | AA                              | GG              | 1946727193               |
| SNP_P4_5549_8091200 | NC_021160.1    | Ca_kabuli_chr01 | 8091200                 | TT                              | CC              | 1946727195               |
| SNP_P4_5550_8091509 | NC_021160.1    | Ca_kabuli_chr01 | 8091509                 | TT                              | GG              | 1946727197               |
| SNP_P4_5552_8091560 | NC_021160.1    | Ca_kabuli_chr01 | 8091560                 | TT                              | AA              | 1946727199               |
| SNP_P4_5553_8091565 | NC_021160.1    | Ca_kabuli_chr01 | 8091565                 | AA                              | TT              | 1946727201               |
| SNP_P4_5554_8091692 | NC_021160.1    | Ca_kabuli_chr01 | 8091692                 | TT                              | GG              | 1946727203               |
| SNP_P4_5555_8091707 | NC_021160.1    | Ca_kabuli_chr01 | 8091707                 | CC                              | TT              | 1946727205               |
| SNP_P4_5556_8091717 | NC_021160.1    | Ca_kabuli_chr01 | 8091717                 | CC                              | TT              | 1946727207               |
| SNP_P4_5557_8091739 | NC_021160.1    | Ca_kabuli_chr01 | 8091739                 | GG                              | AA              | 1946727209               |
| SNP_P4_5558_8092256 | NC_021160.1    | Ca_kabuli_chr01 | 8092256                 | AA                              | TT              | 1946727211               |
| SNP_P4_5559_8092263 | NC_021160.1    | Ca_kabuli_chr01 | 8092263                 | CC                              | GG              | 1946727213               |
| SNP_P4_5560_8093457 | NC_021160.1    | Ca_kabuli_chr01 | 8093457                 | AA                              | TT              | 1946727215               |
| SNP_P4_5561_8093682 | NC_021160.1    | Ca_kabuli_chr01 | 8093682                 | GG                              | AA              | 1946727217               |
| SNP_P4_5562_8093686 | NC_021160.1    | Ca_kabuli_chr01 | 8093686                 | GG                              | AA              | 1946727219               |
| SNP_P4_5563_8093712 | NC_021160.1    | Ca_kabuli_chr01 | 8093712                 | AA                              | GG              | 1946727221               |
| SNP_P4_5564_8093753 | NC_021160.1    | Ca_kabuli_chr01 | 8093753                 | CC                              | TT              | 1946727223               |
| SNP_P4_5565_8093765 | NC_021160.1    | Ca_kabuli_chr01 | 8093765                 | TT                              | CC              | 1946727225               |
| SNP_P4_5566_8093768 | NC_021160.1    | Ca_kabuli_chr01 | 8093768                 | GG                              | CC              | 1946727227               |
| SNP_P4_5567_8093934 | NC_021160.1    | Ca_kabuli_chr01 | 8093934                 | AA                              | TT              | 1946727229               |
| SNP_P4_5568_8093943 | NC_021160.1    | Ca_kabuli_chr01 | 8093943                 | GG                              | TT              | 1946727231               |
| SNP_P4_5569_8094064 | NC_021160.1    | Ca_kabuli_chr01 | 8094064                 | TT                              | CC              | 1946727233               |
| SNP_P4_5571_8094323 | NC_021160.1    | Ca_kabuli_chr01 | 8094323                 | TT                              | CC              | 1946727235               |

| SNPs IDs            | Chromosome IDs | Chromosomes     | Physical positions (bp) | CDC Frontier (Reference genome) | (ILWC46 & LPNB) | NCBI SNPdb Accession IDs |
|---------------------|----------------|-----------------|-------------------------|---------------------------------|-----------------|--------------------------|
| SNP_P4_5572_8094439 | NC_021160.1    | Ca_kabuli_chr01 | 8094439                 | TT                              | CC              | 1946727237               |
| SNP_P4_5573_8094461 | NC_021160.1    | Ca_kabuli_chr01 | 8094461                 | TT                              | CC              | 1946727239               |
| SNP_P4_5574_8094489 | NC_021160.1    | Ca_kabuli_chr01 | 8094489                 | TT                              | CC              | 1946727241               |
| SNP_P4_5575_8094662 | NC_021160.1    | Ca_kabuli_chr01 | 8094662                 | TT                              | CC              | 1946727243               |
| SNP_P4_5576_8094663 | NC_021160.1    | Ca_kabuli_chr01 | 8094663                 | CC                              | TT              | 1946727245               |
| SNP_P4_5577_8094668 | NC_021160.1    | Ca_kabuli_chr01 | 8094668                 | GG                              | CC              | 1946727247               |
| SNP_P4_5578_8094670 | NC_021160.1    | Ca_kabuli_chr01 | 8094670                 | GG                              | AA              | 1946727249               |
| SNP_P4_5579_8094760 | NC_021160.1    | Ca_kabuli_chr01 | 8094760                 | TT                              | CC              | 1946727251               |
| SNP_P4_5580_8096667 | NC_021160.1    | Ca_kabuli_chr01 | 8096667                 | CC                              | AA              | 1946727253               |
| SNP_P4_5581_8096670 | NC_021160.1    | Ca_kabuli_chr01 | 8096670                 | GG                              | AA              | 1946727255               |
| SNP_P4_5582_8098153 | NC_021160.1    | Ca_kabuli_chr01 | 8098153                 | AA                              | GG              | 1946727257               |
| SNP_P4_5583_8098164 | NC_021160.1    | Ca_kabuli_chr01 | 8098164                 | GG                              | AA              | 1946727259               |
| SNP_P4_5584_8099626 | NC_021160.1    | Ca_kabuli_chr01 | 8099626                 | GG                              | TT              | 1946727261               |
| SNP_P4_5585_8099714 | NC_021160.1    | Ca_kabuli_chr01 | 8099714                 | AA                              | GG              | 1946727263               |
| SNP_P4_5586_8099754 | NC_021160.1    | Ca_kabuli_chr01 | 8099754                 | TT                              | CC              | 1946727266               |
| SNP_P4_5588_8101187 | NC_021160.1    | Ca_kabuli_chr01 | 8101187                 | CC                              | AA              | 1946727268               |
| SNP_P4_5589_8101240 | NC_021160.1    | Ca_kabuli_chr01 | 8101240                 | GG                              | AA              | 1946727271               |
| SNP_P4_5591_8101314 | NC_021160.1    | Ca_kabuli_chr01 | 8101314                 | AA                              | GG              | 1946727273               |
| SNP_P4_5592_8101390 | NC_021160.1    | Ca_kabuli_chr01 | 8101390                 | CC                              | TT              | 1946727274               |
| SNP_P4_5593_8101394 | NC_021160.1    | Ca_kabuli_chr01 | 8101394                 | GG                              | AA              | 1946727276               |
| SNP_P4_5594_8101395 | NC_021160.1    | Ca_kabuli_chr01 | 8101395                 | GG                              | AA              | 1946727278               |
| SNP_P4_5595_8101510 | NC_021160.1    | Ca_kabuli_chr01 | 8101510                 | AA                              | CC              | 1946727280               |
| SNP_P4_5596_8101524 | NC_021160.1    | Ca_kabuli_chr01 | 8101524                 | CC                              | GG              | 1946727282               |
| SNP_P4_5597_8101605 | NC_021160.1    | Ca_kabuli_chr01 | 8101605                 | TT                              | CC              | 1946727284               |
| SNP_P4_5598_8101606 | NC_021160.1    | Ca_kabuli_chr01 | 8101606                 | CC                              | AA              | 1946727286               |
| SNP_P4_5599_8101609 | NC_021160.1    | Ca_kabuli_chr01 | 8101609                 | CC                              | TT              | 1946727288               |
| SNP_P4_5600_8101610 | NC_021160.1    | Ca_kabuli_chr01 | 8101610                 | GG                              | AA              | 1946727290               |
| SNP_P4_5601_8101918 | NC_021160.1    | Ca_kabuli_chr01 | 8101918                 | TT                              | GG              | 1946727292               |
| SNP_P4_5602_8101922 | NC_021160.1    | Ca_kabuli_chr01 | 8101922                 | GG                              | TT              | 1946727294               |
| SNP_P4_5603_8101924 | NC_021160.1    | Ca_kabuli_chr01 | 8101924                 | AA                              | TT              | 1946727296               |
| SNP_P4_5605_8102663 | NC_021160.1    | Ca_kabuli_chr01 | 8102663                 | CC                              | TT              | 1946727298               |
| SNP_P4_5606_8102664 | NC_021160.1    | Ca_kabuli_chr01 | 8102664                 | GG                              | AA              | 1946727300               |
| SNP_P4_5607_8102669 | NC_021160.1    | Ca_kabuli_chr01 | 8102669                 | TT                              | CC              | 1946727302               |
| SNP_P4_5608_8102731 | NC_021160.1    | Ca_kabuli_chr01 | 8102731                 | TT                              | AA              | 1946727304               |
| SNP_P4_5609_8102733 | NC_021160.1    | Ca_kabuli_chr01 | 8102733                 | TT                              | CC              | 1946727305               |
| SNP_P4_5610_8104600 | NC_021160.1    | Ca_kabuli_chr01 | 8104600                 | TT                              | AA              | 1946727307               |
| SNP_P4_5611_8104622 | NC_021160.1    | Ca_kabuli_chr01 | 8104622                 | CC                              | GG              | 1946727309               |
| SNP_P4_5612_8104672 | NC_021160.1    | Ca_kabuli_chr01 | 8104672                 | AA                              | TT              | 1946727311               |
| SNP_P4_5613_8105625 | NC_021160.1    | Ca_kabuli_chr01 | 8105625                 | TT                              | CC              | 1946727313               |
| SNP_P4_5614_8106672 | NC_021160.1    | Ca_kabuli_chr01 | 8106672                 | AA                              | GG              | 1946727315               |
| SNP_P4_5615_8106699 | NC_021160.1    | Ca_kabuli_chr01 | 8106699                 | GG                              | AA              | 1946727316               |
| SNP_P4_5616_8106776 | NC_021160.1    | Ca_kabuli_chr01 | 8106776                 | CC                              | TT              | 1946727317               |

| SNPs IDs            | Chromosome IDs | Chromosomes     | Physical positions (bp) | CDC Frontier (Reference genome) | (ILWC46 & LPNB) | NCBI SNPdb Accession IDs |
|---------------------|----------------|-----------------|-------------------------|---------------------------------|-----------------|--------------------------|
| SNP_P4_5617_8106828 | NC_021160.1    | Ca_kabuli_chr01 | 8106828                 | AA                              | TT              | 1946727318               |
| SNP_P4_5618_8106832 | NC_021160.1    | Ca_kabuli_chr01 | 8106832                 | TT                              | CC              | 1946727319               |
| SNP_P4_5619_8106848 | NC_021160.1    | Ca_kabuli_chr01 | 8106848                 | AA                              | CC              | 1946727321               |
| SNP_P4_5620_8106873 | NC_021160.1    | Ca_kabuli_chr01 | 8106873                 | GG                              | AA              | 1946727323               |
| SNP_P4_5621_8106909 | NC_021160.1    | Ca_kabuli_chr01 | 8106909                 | TT                              | GG              | 1946727325               |
| SNP_P4_5622_8106928 | NC_021160.1    | Ca_kabuli_chr01 | 8106928                 | GG                              | TT              | 1946727327               |
| SNP_P4_5623_8106930 | NC_021160.1    | Ca_kabuli_chr01 | 8106930                 | CC                              | TT              | 1946727329               |
| SNP_P4_5624_8106999 | NC_021160.1    | Ca_kabuli_chr01 | 8106999                 | CC                              | TT              | 1946727331               |
| SNP_P4_5626_8108014 | NC_021160.1    | Ca_kabuli_chr01 | 8108014                 | CC                              | TT              | 1946727333               |
| SNP_P4_5627_8108699 | NC_021160.1    | Ca_kabuli_chr01 | 8108699                 | AA                              | CC              | 1946727335               |
| SNP_P4_5628_8109959 | NC_021160.1    | Ca_kabuli_chr01 | 8109959                 | AA                              | GG              | 1946727337               |
| SNP_P4_5629_8111588 | NC_021160.1    | Ca_kabuli_chr01 | 8111588                 | GG                              | AA              | 1946727339               |
| SNP_P4_5630_8113398 | NC_021160.1    | Ca_kabuli_chr01 | 8113398                 | CC                              | GG              | 1946727341               |
| SNP_P4_5631_8113449 | NC_021160.1    | Ca_kabuli_chr01 | 8113449                 | TT                              | AA              | 1946727343               |
| SNP_P4_5632_8114997 | NC_021160.1    | Ca_kabuli_chr01 | 8114997                 | TT                              | GG              | 1946727345               |
| SNP_P4_5633_8115156 | NC_021160.1    | Ca_kabuli_chr01 | 8115156                 | AA                              | GG              | 1946727347               |
| SNP_P4_5635_8116643 | NC_021160.1    | Ca_kabuli_chr01 | 8116643                 | TT                              | AA              | 1946727349               |
| SNP_P4_5636_8116667 | NC_021160.1    | Ca_kabuli_chr01 | 8116667                 | AA                              | GG              | 1946727351               |
| SNP_P4_5637_8116704 | NC_021160.1    | Ca_kabuli_chr01 | 8116704                 | AA                              | GG              | 1946727353               |
| SNP_P4_5638_8116736 | NC_021160.1    | Ca_kabuli_chr01 | 8116736                 | GG                              | AA              | 1946727355               |
| SNP_P4_5639_8116801 | NC_021160.1    | Ca_kabuli_chr01 | 8116801                 | AA                              | TT              | 1946727357               |
| SNP_P4_5640_8116827 | NC_021160.1    | Ca_kabuli_chr01 | 8116827                 | AA                              | TT              | 1946727359               |
| SNP_P4_5642_8117263 | NC_021160.1    | Ca_kabuli_chr01 | 8117263                 | CC                              | TT              | 1946727361               |
| SNP_P4_5643_8117509 | NC_021160.1    | Ca_kabuli_chr01 | 8117509                 | GG                              | AA              | 1946727363               |
| SNP_P4_5644_8117942 | NC_021160.1    | Ca_kabuli_chr01 | 8117942                 | TT                              | CC              | 1946727365               |
| SNP_P4_5645_8118063 | NC_021160.1    | Ca_kabuli_chr01 | 8118063                 | GG                              | AA              | 1946727367               |
| SNP_P4_5646_8118064 | NC_021160.1    | Ca_kabuli_chr01 | 8118064                 | GG                              | AA              | 1946727369               |
| SNP_P4_5647_8118096 | NC_021160.1    | Ca_kabuli_chr01 | 8118096                 | TT                              | CC              | 1946727371               |
| SNP_P4_5648_8118671 | NC_021160.1    | Ca_kabuli_chr01 | 8118671                 | AA                              | CC              | 1946727373               |
| SNP_P4_5649_8121710 | NC_021160.1    | Ca_kabuli_chr01 | 8121710                 | AA                              | TT              | 1946727375               |
| SNP_P4_5650_8122330 | NC_021160.1    | Ca_kabuli_chr01 | 8122330                 | CC                              | TT              | 1946727377               |
| SNP_P4_5651_8123767 | NC_021160.1    | Ca_kabuli_chr01 | 8123767                 | GG                              | AA              | 1946727379               |
| SNP_P4_5652_8123781 | NC_021160.1    | Ca_kabuli_chr01 | 8123781                 | CC                              | GG              | 1946727381               |
| SNP_P4_5653_8123865 | NC_021160.1    | Ca_kabuli_chr01 | 8123865                 | TT                              | GG              | 1946727383               |
| SNP_P4_5654_8123877 | NC_021160.1    | Ca_kabuli_chr01 | 8123877                 | TT                              | CC              | 1946727385               |
| SNP_P4_5656_8124173 | NC_021160.1    | Ca_kabuli_chr01 | 8124173                 | AA                              | CC              | 1946727387               |
| SNP_P4_5657_8124184 | NC_021160.1    | Ca_kabuli_chr01 | 8124184                 | AA                              | TT              | 1946727389               |
| SNP_P4_5658_8124667 | NC_021160.1    | Ca_kabuli_chr01 | 8124667                 | TT                              | CC              | 1946727391               |
| SNP_P4_5659_8124679 | NC_021160.1    | Ca_kabuli_chr01 | 8124679                 | GG                              | AA              | 1946727394               |
| SNP_P4_5660_8124713 | NC_021160.1    | Ca_kabuli_chr01 | 8124713                 | AA                              | GG              | 1946727396               |
| SNP_P4_5661_8124754 | NC_021160.1    | Ca_kabuli_chr01 | 8124754                 | GG                              | AA              | 1946727398               |
| SNP_P4_5662_8125002 | NC_021160.1    | Ca_kabuli_chr01 | 8125002                 | GG                              | AA              | 1946727400               |

| SNPs IDs            | Chromosome IDs | Chromosomes     | Physical positions (bp) | CDC Frontier (Reference genome) | (ILWC46 & LPNB) | NCBI SNPdb Accession IDs |
|---------------------|----------------|-----------------|-------------------------|---------------------------------|-----------------|--------------------------|
| SNP_P4_5663_8125515 | NC_021160.1    | Ca_kabuli_chr01 | 8125515                 | AA                              | CC              | 1946727402               |
| SNP_P4_5664_8125585 | NC_021160.1    | Ca_kabuli_chr01 | 8125585                 | AA                              | GG              | 1946727404               |
| SNP_P4_5665_8126025 | NC_021160.1    | Ca_kabuli_chr01 | 8126025                 | AA                              | GG              | 1946727406               |
| SNP_P4_5666_8126030 | NC_021160.1    | Ca_kabuli_chr01 | 8126030                 | GG                              | AA              | 1946727408               |
| SNP_P4_5667_8126031 | NC_021160.1    | Ca_kabuli_chr01 | 8126031                 | AA                              | GG              | 1946727410               |
| SNP_P4_5668_8126037 | NC_021160.1    | Ca_kabuli_chr01 | 8126037                 | AA                              | GG              | 1946727412               |
| SNP_P4_5669_8126188 | NC_021160.1    | Ca_kabuli_chr01 | 8126188                 | AA                              | TT              | 1946727414               |
| SNP_P4_5670_8126199 | NC_021160.1    | Ca_kabuli_chr01 | 8126199                 | AA                              | TT              | 1946727416               |
| SNP_P4_5671_8127143 | NC_021160.1    | Ca_kabuli_chr01 | 8127143                 | TT                              | CC              | 1946727418               |
| SNP_P4_5672_8127802 | NC_021160.1    | Ca_kabuli_chr01 | 8127802                 | CC                              | AA              | 1946727420               |
| SNP_P4_5673_8127840 | NC_021160.1    | Ca_kabuli_chr01 | 8127840                 | TT                              | CC              | 1946727422               |
| SNP_P4_5674_8128119 | NC_021160.1    | Ca_kabuli_chr01 | 8128119                 | GG                              | CC              | 1946727424               |
| SNP_P4_5675_8128122 | NC_021160.1    | Ca_kabuli_chr01 | 8128122                 | GG                              | TT              | 1946727426               |
| SNP_P4_5676_8128130 | NC_021160.1    | Ca_kabuli_chr01 | 8128130                 | AA                              | GG              | 1946727428               |
| SNP_P4_5677_8128134 | NC_021160.1    | Ca_kabuli_chr01 | 8128134                 | CC                              | AA              | 1946727430               |
| SNP_P4_5678_8130119 | NC_021160.1    | Ca_kabuli_chr01 | 8130119                 | AA                              | TT              | 1946727432               |
| SNP_P4_5680_8130303 | NC_021160.1    | Ca_kabuli_chr01 | 8130303                 | GG                              | AA              | 1946727434               |
| SNP_P4_5682_8131250 | NC_021160.1    | Ca_kabuli_chr01 | 8131250                 | TT                              | AA              | 1946727436               |
| SNP_P4_5683_8131270 | NC_021160.1    | Ca_kabuli_chr01 | 8131270                 | AA                              | CC              | 1946727438               |
| SNP_P4_5684_8131293 | NC_021160.1    | Ca_kabuli_chr01 | 8131293                 | AA                              | GG              | 1946727440               |
| SNP_P4_5685_8131436 | NC_021160.1    | Ca_kabuli_chr01 | 8131436                 | CC                              | GG              | 1946727442               |
| SNP_P4_5686_8131450 | NC_021160.1    | Ca_kabuli_chr01 | 8131450                 | TT                              | AA              | 1946727444               |
| SNP_P4_5687_8131454 | NC_021160.1    | Ca_kabuli_chr01 | 8131454                 | GG                              | CC              | 1946727446               |
| SNP_P4_5688_8131499 | NC_021160.1    | Ca_kabuli_chr01 | 8131499                 | TT                              | CC              | 1946727448               |
| SNP_P4_5689_8131511 | NC_021160.1    | Ca_kabuli_chr01 | 8131511                 | CC                              | TT              | 1946727450               |
| SNP_P4_5690_8131684 | NC_021160.1    | Ca_kabuli_chr01 | 8131684                 | AA                              | GG              | 1946727452               |
| SNP_P4_5691_8131703 | NC_021160.1    | Ca_kabuli_chr01 | 8131703                 | AA                              | CC              | 1946727454               |
| SNP_P4_5692_8132176 | NC_021160.1    | Ca_kabuli_chr01 | 8132176                 | AA                              | CC              | 1946727456               |
| SNP_P4_5693_8132190 | NC_021160.1    | Ca_kabuli_chr01 | 8132190                 | TT                              | CC              | 1946727458               |
| SNP_P4_5694_8133060 | NC_021160.1    | Ca_kabuli_chr01 | 8133060                 | AA                              | CC              | 1946727460               |
| SNP_P4_5695_8133066 | NC_021160.1    | Ca_kabuli_chr01 | 8133066                 | TT                              | CC              | 1946727462               |
| SNP_P4_5696_8133097 | NC_021160.1    | Ca_kabuli_chr01 | 8133097                 | TT                              | CC              | 1946727464               |
| SNP_P4_5697_8133163 | NC_021160.1    | Ca_kabuli_chr01 | 8133163                 | CC                              | TT              | 1946727466               |
| SNP_P4_5698_8133892 | NC_021160.1    | Ca_kabuli_chr01 | 8133892                 | CC                              | TT              | 1946727468               |
| SNP_P4_5699_8133912 | NC_021160.1    | Ca_kabuli_chr01 | 8133912                 | CC                              | TT              | 1946727470               |
| SNP_P4_5701_8134134 | NC_021160.1    | Ca_kabuli_chr01 | 8134134                 | CC                              | GG              | 1946727472               |
| SNP_P4_5702_8134171 | NC_021160.1    | Ca_kabuli_chr01 | 8134171                 | CC                              | TT              | 1946727474               |
| SNP_P4_5703_8134179 | NC_021160.1    | Ca_kabuli_chr01 | 8134179                 | TT                              | AA              | 1946727476               |
| SNP_P4_5704_8136425 | NC_021160.1    | Ca_kabuli_chr01 | 8136425                 | AA                              | GG              | 1946727478               |
| SNP_P4_5705_8136429 | NC_021160.1    | Ca_kabuli_chr01 | 8136429                 | TT                              | CC              | 1946727481               |
| SNP_P4_5706_8136598 | NC_021160.1    | Ca_kabuli_chr01 | 8136598                 | GG                              | AA              | 1946727483               |
| SNP_P4_5707_8136603 | NC_021160.1    | Ca_kabuli_chr01 | 8136603                 | GG                              | AA              | 1946727485               |

| SNPs IDs            | Chromosome IDs | Chromosomes     | Physical positions (bp) | CDC Frontier (Reference genome) | (ILWC46 & LPNB) | NCBI SNPdb Accession IDs |
|---------------------|----------------|-----------------|-------------------------|---------------------------------|-----------------|--------------------------|
| SNP_P4_5708_8136605 | NC_021160.1    | Ca_kabuli_chr01 | 8136605                 | TT                              | CC              | 1946727487               |
| SNP_P4_5709_8136614 | NC_021160.1    | Ca_kabuli_chr01 | 8136614                 | TT                              | CC              | 1946727489               |
| SNP_P4_5710_8136615 | NC_021160.1    | Ca_kabuli_chr01 | 8136615                 | CC                              | TT              | 1946727491               |
| SNP_P4_5711_8136824 | NC_021160.1    | Ca_kabuli_chr01 | 8136824                 | AA                              | TT              | 1946727493               |
| SNP_P4_5712_8136977 | NC_021160.1    | Ca_kabuli_chr01 | 8136977                 | CC                              | TT              | 1946727495               |
| SNP_P4_5713_8142816 | NC_021160.1    | Ca_kabuli_chr01 | 8142816                 | CC                              | AA              | 1946727497               |
| SNP_P4_5714_8142826 | NC_021160.1    | Ca_kabuli_chr01 | 8142826                 | GG                              | TT              | 1946727499               |
| SNP_P4_5715_8143673 | NC_021160.1    | Ca_kabuli_chr01 | 8143673                 | TT                              | GG              | 1946727501               |
| SNP_P4_5716_8143678 | NC_021160.1    | Ca_kabuli_chr01 | 8143678                 | TT                              | CC              | 1946727503               |
| SNP_P4_5717_8143703 | NC_021160.1    | Ca_kabuli_chr01 | 8143703                 | AA                              | GG              | 1946727505               |
| SNP_P4_5718_8143731 | NC_021160.1    | Ca_kabuli_chr01 | 8143731                 | GG                              | AA              | 1946727507               |
| SNP_P4_5719_8143745 | NC_021160.1    | Ca_kabuli_chr01 | 8143745                 | CC                              | TT              | 1946727509               |
| SNP_P4_5720_8143946 | NC_021160.1    | Ca_kabuli_chr01 | 8143946                 | AA                              | GG              | 1946727511               |
| SNP_P4_5721_8150251 | NC_021160.1    | Ca_kabuli_chr01 | 8150251                 | TT                              | AA              | 1946727513               |
| SNP_P4_5722_8150630 | NC_021160.1    | Ca_kabuli_chr01 | 8150630                 | CC                              | AA              | 1946727515               |
| SNP_P4_5723_8151197 | NC_021160.1    | Ca_kabuli_chr01 | 8151197                 | AA                              | GG              | 1946727517               |
| SNP_P4_5724_8155933 | NC_021160.1    | Ca_kabuli_chr01 | 8155933                 | TT                              | CC              | 1946727519               |
| SNP_P4_5725_8159745 | NC_021160.1    | Ca_kabuli_chr01 | 8159745                 | GG                              | AA              | 1946727521               |
| SNP_P4_5726_8159777 | NC_021160.1    | Ca_kabuli_chr01 | 8159777                 | AA                              | GG              | 1946727524               |
| SNP_P4_5727_8163143 | NC_021160.1    | Ca_kabuli_chr01 | 8163143                 | AA                              | GG              | 1946727526               |
| SNP_P4_5728_8170936 | NC_021160.1    | Ca_kabuli_chr01 | 8170936                 | TT                              | CC              | 1946727528               |
| SNP_P4_5729_8180770 | NC_021160.1    | Ca_kabuli_chr01 | 8180770                 | AA                              | GG              | 1946727530               |
| SNP_P4_5730_8185932 | NC_021160.1    | Ca_kabuli_chr01 | 8185932                 | AA                              | TT              | 1946727532               |
| SNP_P4_5731_8193461 | NC_021160.1    | Ca_kabuli_chr01 | 8193461                 | CC                              | AA              | 1946727534               |
| SNP_P4_5732_8197698 | NC_021160.1    | Ca_kabuli_chr01 | 8197698                 | AA                              | TT              | 1946727536               |
| SNP_P4_5733_8245974 | NC_021160.1    | Ca_kabuli_chr01 | 8245974                 | CC                              | TT              | 1946727538               |
| SNP_P4_5734_8247975 | NC_021160.1    | Ca_kabuli_chr01 | 8247975                 | TT                              | CC              | 1946727540               |
| SNP_P4_5736_8281001 | NC_021160.1    | Ca_kabuli_chr01 | 8281001                 | TT                              | AA              | 1946727542               |
| SNP_P4_5737_8281005 | NC_021160.1    | Ca_kabuli_chr01 | 8281005                 | TT                              | CC              | 1946727544               |
| SNP_P4_5738_8318379 | NC_021160.1    | Ca_kabuli_chr01 | 8318379                 | GG                              | AA              | 1946727546               |
| SNP_P4_5739_8318430 | NC_021160.1    | Ca_kabuli_chr01 | 8318430                 | AA                              | GG              | 1946727548               |
| SNP_P4_5740_8318469 | NC_021160.1    | Ca_kabuli_chr01 | 8318469                 | TT                              | GG              | 1946727551               |
| SNP_P4_5742_8319459 | NC_021160.1    | Ca_kabuli_chr01 | 8319459                 | AA                              | GG              | 1946727553               |
| SNP_P4_5743_8321965 | NC_021160.1    | Ca_kabuli_chr01 | 8321965                 | AA                              | GG              | 1946727555               |
| SNP_P4_5745_8336331 | NC_021160.1    | Ca_kabuli_chr01 | 8336331                 | TT                              | GG              | 1946727557               |
| SNP_P4_5746_8336335 | NC_021160.1    | Ca_kabuli_chr01 | 8336335                 | TT                              | GG              | 1946727559               |
| SNP_P4_5749_8407457 | NC_021160.1    | Ca_kabuli_chr01 | 8407457                 | GG                              | AA              | 1946727561               |
| SNP_P4_5750_8415316 | NC_021160.1    | Ca_kabuli_chr01 | 8415316                 | CC                              | GG              | 1946727563               |
| SNP_P4_5751_8415326 | NC_021160.1    | Ca_kabuli_chr01 | 8415326                 | GG                              | TT              | 1946727565               |
| SNP_P4_5752_8415385 | NC_021160.1    | Ca_kabuli_chr01 | 8415385                 | AA                              | GG              | 1946727567               |
| SNP_P4_5753_8415394 | NC_021160.1    | Ca_kabuli_chr01 | 8415394                 | CC                              | TT              | 1946727569               |
| SNP_P4_5754_8415470 | NC_021160.1    | Ca_kabuli_chr01 | 8415470                 | GG                              | AA              | 1946727571               |

| SNPs IDs            | Chromosome IDs | Chromosomes     | Physical positions (bp) | CDC Frontier (Reference genome) | (ILWC46 & LPNB) | NCBI SNPdb Accession IDs |
|---------------------|----------------|-----------------|-------------------------|---------------------------------|-----------------|--------------------------|
| SNP_P4_5756_8415763 | NC_021160.1    | Ca_kabuli_chr01 | 8415763                 | AA                              | TT              | 1946727573               |
| SNP_P4_5757_8425932 | NC_021160.1    | Ca_kabuli_chr01 | 8425932                 | CC                              | TT              | 1946727575               |
| SNP_P4_5758_8425933 | NC_021160.1    | Ca_kabuli_chr01 | 8425933                 | AA                              | CC              | 1946727577               |
| SNP_P4_5759_8427327 | NC_021160.1    | Ca_kabuli_chr01 | 8427327                 | TT                              | CC              | 1946727580               |
| SNP_P4_5760_8427394 | NC_021160.1    | Ca_kabuli_chr01 | 8427394                 | AA                              | TT              | 1946727582               |
| SNP_P4_5761_8427564 | NC_021160.1    | Ca_kabuli_chr01 | 8427564                 | CC                              | AA              | 1946727584               |
| SNP_P4_5762_8427606 | NC_021160.1    | Ca_kabuli_chr01 | 8427606                 | TT                              | GG              | 1946727586               |
| SNP_P4_5763_8427825 | NC_021160.1    | Ca_kabuli_chr01 | 8427825                 | CC                              | TT              | 1946727587               |
| SNP_P4_5764_8428083 | NC_021160.1    | Ca_kabuli_chr01 | 8428083                 | TT                              | CC              | 1946727588               |
| SNP_P4_5765_8428095 | NC_021160.1    | Ca_kabuli_chr01 | 8428095                 | AA                              | GG              | 1946727589               |
| SNP_P4_5766_8428141 | NC_021160.1    | Ca_kabuli_chr01 | 8428141                 | TT                              | CC              | 1946727590               |
| SNP_P4_5767_8430402 | NC_021160.1    | Ca_kabuli_chr01 | 8430402                 | CC                              | TT              | 1946727591               |
| SNP_P4_5769_8430599 | NC_021160.1    | Ca_kabuli_chr01 | 8430599                 | TT                              | AA              | 1946727592               |
| SNP_P4_5770_8430606 | NC_021160.1    | Ca_kabuli_chr01 | 8430606                 | AA                              | GG              | 1946727593               |
| SNP_P4_5771_8433034 | NC_021160.1    | Ca_kabuli_chr01 | 8433034                 | CC                              | GG              | 1946727594               |
| SNP_P4_5773_8434679 | NC_021160.1    | Ca_kabuli_chr01 | 8434679                 | TT                              | CC              | 1946727595               |
| SNP_P4_5774_8434873 | NC_021160.1    | Ca_kabuli_chr01 | 8434873                 | CC                              | TT              | 1946727596               |
| SNP_P4_5775_8434909 | NC_021160.1    | Ca_kabuli_chr01 | 8434909                 | GG                              | TT              | 1946727597               |
| SNP_P4_5776_8434995 | NC_021160.1    | Ca_kabuli_chr01 | 8434995                 | AA                              | GG              | 1946727598               |
| SNP_P4_5777_8435015 | NC_021160.1    | Ca_kabuli_chr01 | 8435015                 | GG                              | AA              | 1946727599               |
| SNP_P4_5778_8435018 | NC_021160.1    | Ca_kabuli_chr01 | 8435018                 | AA                              | GG              | 1946727600               |
| SNP_P4_5779_8435028 | NC_021160.1    | Ca_kabuli_chr01 | 8435028                 | TT                              | AA              | 1946727601               |
| SNP_P4_5780_8435109 | NC_021160.1    | Ca_kabuli_chr01 | 8435109                 | TT                              | CC              | 1946727602               |
| SNP_P4_5781_8435167 | NC_021160.1    | Ca_kabuli_chr01 | 8435167                 | GG                              | AA              | 1946727603               |
| SNP_P4_5783_8439624 | NC_021160.1    | Ca_kabuli_chr01 | 8439624                 | CC                              | AA              | 1946727605               |
| SNP_P4_5784_8445825 | NC_021160.1    | Ca_kabuli_chr01 | 8445825                 | AA                              | GG              | 1946727607               |
| SNP_P4_5785_8467452 | NC_021160.1    | Ca_kabuli_chr01 | 8467452                 | TT                              | CC              | 1946727609               |
| SNP_P4_5786_8482778 | NC_021160.1    | Ca_kabuli_chr01 | 8482778                 | TT                              | CC              | 1946727611               |
| SNP_P4_5787_8511952 | NC_021160.1    | Ca_kabuli_chr01 | 8511952                 | CC                              | GG              | 1946727613               |
| SNP_P4_5788_8514793 | NC_021160.1    | Ca_kabuli_chr01 | 8514793                 | CC                              | GG              | 1946727615               |
| SNP_P4_5789_8515287 | NC_021160.1    | Ca_kabuli_chr01 | 8515287                 | GG                              | AA              | 1946727617               |
| SNP_P4_5790_8558380 | NC_021160.1    | Ca_kabuli_chr01 | 8558380                 | CC                              | GG              | 1946727619               |
| SNP_P4_5791_8566494 | NC_021160.1    | Ca_kabuli_chr01 | 8566494                 | CC                              | GG              | 1946727621               |
| SNP_P4_5792_8575110 | NC_021160.1    | Ca_kabuli_chr01 | 8575110                 | AA                              | CC              | 1946727623               |
| SNP_P4_5794_8596181 | NC_021160.1    | Ca_kabuli_chr01 | 8596181                 | TT                              | CC              | 1946727625               |
| SNP_P4_5795_8621401 | NC_021160.1    | Ca_kabuli_chr01 | 8621401                 | AA                              | TT              | 1946727627               |
| SNP_P4_5796_8659427 | NC_021160.1    | Ca_kabuli_chr01 | 8659427                 | TT                              | CC              | 1946727629               |
| SNP_P4_5797_8659443 | NC_021160.1    | Ca_kabuli_chr01 | 8659443                 | GG                              | TT              | 1946727631               |
| SNP_P4_5798_8659875 | NC_021160.1    | Ca_kabuli_chr01 | 8659875                 | GG                              | AA              | 1946727633               |
| SNP_P4_5799_8660773 | NC_021160.1    | Ca_kabuli_chr01 | 8660773                 | CC                              | TT              | 1946727635               |
| SNP_P4_5800_8661179 | NC_021160.1    | Ca_kabuli_chr01 | 8661179                 | AA                              | GG              | 1946727637               |
| SNP_P4_5801_8661667 | NC_021160.1    | Ca_kabuli_chr01 | 8661667                 | AA                              | GG              | 1946727640               |

| SNPs IDs            | Chromosome IDs | Chromosomes     | Physical positions (bp) | CDC Frontier (Reference genome) | (ILWC46 & LPNB) | NCBI SNPdb Accession IDs |
|---------------------|----------------|-----------------|-------------------------|---------------------------------|-----------------|--------------------------|
| SNP_P4_5802_8685734 | NC_021160.1    | Ca_kabuli_chr01 | 8685734                 | CC                              | TT              | 1946727642               |
| SNP_P4_5803_8687044 | NC_021160.1    | Ca_kabuli_chr01 | 8687044                 | AA                              | GG              | 1946727644               |
| SNP_P4_5804_8714406 | NC_021160.1    | Ca_kabuli_chr01 | 8714406                 | TT                              | AA              | 1946727645               |
| SNP_P4_5805_8731335 | NC_021160.1    | Ca_kabuli_chr01 | 8731335                 | CC                              | TT              | 1946727647               |
| SNP_P4_5806_8797851 | NC_021160.1    | Ca_kabuli_chr01 | 8797851                 | CC                              | TT              | 1946727649               |
| SNP_P4_5807_8797893 | NC_021160.1    | Ca_kabuli_chr01 | 8797893                 | TT                              | AA              | 1946727651               |
| SNP_P4_5808_8797898 | NC_021160.1    | Ca_kabuli_chr01 | 8797898                 | CC                              | TT              | 1946727653               |
| SNP_P4_5809_8799626 | NC_021160.1    | Ca_kabuli_chr01 | 8799626                 | TT                              | CC              | 1946727656               |
| SNP_P4_5810_8835306 | NC_021160.1    | Ca_kabuli_chr01 | 8835306                 | CC                              | TT              | 1946727658               |
| SNP_P4_5812_8879006 | NC_021160.1    | Ca_kabuli_chr01 | 8879006                 | AA                              | GG              | 1946727660               |
| SNP_P4_5813_8883318 | NC_021160.1    | Ca_kabuli_chr01 | 8883318                 | CC                              | TT              | 1946727662               |
| SNP_P4_5815_8909430 | NC_021160.1    | Ca_kabuli_chr01 | 8909430                 | AA                              | CC              | 1946727664               |
| SNP_P4_5816_8909441 | NC_021160.1    | Ca_kabuli_chr01 | 8909441                 | AA                              | CC              | 1946727666               |
| SNP_P4_5817_8984325 | NC_021160.1    | Ca_kabuli_chr01 | 8984325                 | TT                              | CC              | 1946727668               |
| SNP_P4_5818_9013283 | NC_021160.1    | Ca_kabuli_chr01 | 9013283                 | AA                              | GG              | 1946727670               |
| SNP_P4_5819_9023011 | NC_021160.1    | Ca_kabuli_chr01 | 9023011                 | GG                              | AA              | 1946727672               |
| SNP_P4_5820_9082410 | NC_021160.1    | Ca_kabuli_chr01 | 9082410                 | GG                              | AA              | 1946727674               |
| SNP_P4_5822_9107888 | NC_021160.1    | Ca_kabuli_chr01 | 9107888                 | GG                              | AA              | 1946727676               |
| SNP_P4_5824_9148295 | NC_021160.1    | Ca_kabuli_chr01 | 9148295                 | AA                              | CC              | 1946727678               |
| SNP_P4_5827_9232817 | NC_021160.1    | Ca_kabuli_chr01 | 9232817                 | CC                              | TT              | 1946727680               |
| SNP_P4_5828_9232818 | NC_021160.1    | Ca_kabuli_chr01 | 9232818                 | TT                              | GG              | 1946727682               |
| SNP_P4_5829_9233030 | NC_021160.1    | Ca_kabuli_chr01 | 9233030                 | AA                              | CC              | 1946727684               |
| SNP_P4_5830_9233050 | NC_021160.1    | Ca_kabuli_chr01 | 9233050                 | TT                              | CC              | 1946727686               |
| SNP_P4_5831_9233058 | NC_021160.1    | Ca_kabuli_chr01 | 9233058                 | TT                              | CC              | 1946727688               |
| SNP_P4_5832_9233077 | NC_021160.1    | Ca_kabuli_chr01 | 9233077                 | CC                              | TT              | 1946727690               |
| SNP_P4_5833_9233093 | NC_021160.1    | Ca_kabuli_chr01 | 9233093                 | CC                              | TT              | 1946727692               |
| SNP_P4_5834_9233104 | NC_021160.1    | Ca_kabuli_chr01 | 9233104                 | CC                              | TT              | 1946727694               |
| SNP_P4_5835_9233112 | NC_021160.1    | Ca_kabuli_chr01 | 9233112                 | TT                              | CC              | 1946727696               |
| SNP_P4_5836_9233120 | NC_021160.1    | Ca_kabuli_chr01 | 9233120                 | CC                              | TT              | 1946727698               |
| SNP_P4_5837_9233261 | NC_021160.1    | Ca_kabuli_chr01 | 9233261                 | CC                              | TT              | 1946727700               |
| SNP_P4_5838_9233276 | NC_021160.1    | Ca_kabuli_chr01 | 9233276                 | CC                              | TT              | 1946727702               |
| SNP_P4_5839_9233287 | NC_021160.1    | Ca_kabuli_chr01 | 9233287                 | CC                              | AA              | 1946727704               |
| SNP_P4_5840_9233305 | NC_021160.1    | Ca_kabuli_chr01 | 9233305                 | CC                              | TT              | 1946727706               |
| SNP_P4_5841_9233316 | NC_021160.1    | Ca_kabuli_chr01 | 9233316                 | TT                              | CC              | 1946727708               |
| SNP_P4_5842_9233391 | NC_021160.1    | Ca_kabuli_chr01 | 9233391                 | TT                              | CC              | 1946727710               |
| SNP_P4_5843_9233489 | NC_021160.1    | Ca_kabuli_chr01 | 9233489                 | GG                              | AA              | 1946727712               |
| SNP_P4_5844_9233679 | NC_021160.1    | Ca_kabuli_chr01 | 9233679                 | GG                              | AA              | 1946727714               |
| SNP_P4_5845_9233682 | NC_021160.1    | Ca_kabuli_chr01 | 9233682                 | GG                              | TT              | 1946727716               |
| SNP_P4_5846_9233773 | NC_021160.1    | Ca_kabuli_chr01 | 9233773                 | GG                              | AA              | 1946727718               |
| SNP_P4_5847_9233774 | NC_021160.1    | Ca_kabuli_chr01 | 9233774                 | CC                              | TT              | 1946727720               |
| SNP_P4_5849_9233913 | NC_021160.1    | Ca_kabuli_chr01 | 9233913                 | TT                              | AA              | 1946727722               |
| SNP_P4_5850_9233918 | NC_021160.1    | Ca_kabuli_chr01 | 9233918                 | TT                              | AA              | 1946727724               |

| SNPs IDs            | Chromosome IDs | Chromosomes     | Physical positions (bp) | CDC Frontier (Reference genome) | (ILWC46 & LPNB) | NCBI SNPdb Accession IDs |
|---------------------|----------------|-----------------|-------------------------|---------------------------------|-----------------|--------------------------|
| SNP_P4_5851_9233982 | NC_021160.1    | Ca_kabuli_chr01 | 9233982                 | CC                              | TT              | 1946727726               |
| SNP_P4_5852_9233989 | NC_021160.1    | Ca_kabuli_chr01 | 9233989                 | TT                              | GG              | 1946727728               |
| SNP_P4_5853_9233999 | NC_021160.1    | Ca_kabuli_chr01 | 9233999                 | TT                              | CC              | 1946727730               |
| SNP_P4_5854_9234006 | NC_021160.1    | Ca_kabuli_chr01 | 9234006                 | AA                              | CC              | 1946727732               |
| SNP_P4_5855_9234009 | NC_021160.1    | Ca_kabuli_chr01 | 9234009                 | AA                              | GG              | 1946727734               |
| SNP_P4_5856_9236408 | NC_021160.1    | Ca_kabuli_chr01 | 9236408                 | TT                              | GG              | 1946727736               |
| SNP_P4_5857_9236467 | NC_021160.1    | Ca_kabuli_chr01 | 9236467                 | AA                              | TT              | 1946727738               |
| SNP_P4_5858_9241237 | NC_021160.1    | Ca_kabuli_chr01 | 9241237                 | TT                              | CC              | 1946727740               |
| SNP_P4_5859_9242572 | NC_021160.1    | Ca_kabuli_chr01 | 9242572                 | CC                              | TT              | 1946727742               |
| SNP_P4_5861_9306444 | NC_021160.1    | Ca_kabuli_chr01 | 9306444                 | GG                              | TT              | 1946727743               |
| SNP_P4_5862_9307811 | NC_021160.1    | Ca_kabuli_chr01 | 9307811                 | GG                              | AA              | 1946727745               |
| SNP_P4_5863_9322082 | NC_021160.1    | Ca_kabuli_chr01 | 9322082                 | TT                              | AA              | 1946727746               |
| SNP_P4_5864_9322091 | NC_021160.1    | Ca_kabuli_chr01 | 9322091                 | CC                              | AA              | 1946727748               |
| SNP_P4_5865_9322231 | NC_021160.1    | Ca_kabuli_chr01 | 9322231                 | GG                              | TT              | 1946727750               |
| SNP_P4_5866_9322316 | NC_021160.1    | Ca_kabuli_chr01 | 9322316                 | GG                              | AA              | 1946727752               |
| SNP_P4_5867_9322349 | NC_021160.1    | Ca_kabuli_chr01 | 9322349                 | AA                              | GG              | 1946727754               |
| SNP_P4_5868_9322364 | NC_021160.1    | Ca_kabuli_chr01 | 9322364                 | AA                              | GG              | 1946727756               |
| SNP_P4_5869_9322381 | NC_021160.1    | Ca_kabuli_chr01 | 9322381                 | AA                              | TT              | 1946727758               |
| SNP_P4_5870_9322389 | NC_021160.1    | Ca_kabuli_chr01 | 9322389                 | TT                              | GG              | 1946727760               |
| SNP_P4_5872_9326630 | NC_021160.1    | Ca_kabuli_chr01 | 9326630                 | GG                              | AA              | 1946727762               |
| SNP_P4_5873_9336395 | NC_021160.1    | Ca_kabuli_chr01 | 9336395                 | AA                              | CC              | 1946727764               |
| SNP_P4_5874_9351385 | NC_021160.1    | Ca_kabuli_chr01 | 9351385                 | CC                              | TT              | 1946727766               |
| SNP_P4_5875_9354739 | NC_021160.1    | Ca_kabuli_chr01 | 9354739                 | TT                              | CC              | 1946727768               |
| SNP_P4_5877_9356955 | NC_021160.1    | Ca_kabuli_chr01 | 9356955                 | TT                              | CC              | 1946727770               |
| SNP_P4_5879_9404407 | NC_021160.1    | Ca_kabuli_chr01 | 9404407                 | AA                              | GG              | 1946727772               |
| SNP_P4_5880_9436861 | NC_021160.1    | Ca_kabuli_chr01 | 9436861                 | AA                              | CC              | 1946727773               |
| SNP_P4_5881_9446508 | NC_021160.1    | Ca_kabuli_chr01 | 9446508                 | GG                              | AA              | 1946727775               |
| SNP_P4_5882_9457095 | NC_021160.1    | Ca_kabuli_chr01 | 9457095                 | AA                              | CC              | 1946727777               |
| SNP_P4_5883_9457098 | NC_021160.1    | Ca_kabuli_chr01 | 9457098                 | TT                              | GG              | 1946727779               |
| SNP_P4_5884_9470634 | NC_021160.1    | Ca_kabuli_chr01 | 9470634                 | AA                              | TT              | 1946727781               |
| SNP_P4_5885_9480442 | NC_021160.1    | Ca_kabuli_chr01 | 9480442                 | TT                              | CC              | 1946727783               |
| SNP_P4_5886_9489835 | NC_021160.1    | Ca_kabuli_chr01 | 9489835                 | GG                              | AA              | 1946727785               |
| SNP_P4_5887_9489836 | NC_021160.1    | Ca_kabuli_chr01 | 9489836                 | CC                              | AA              | 1946727787               |
| SNP_P4_5889_9510869 | NC_021160.1    | Ca_kabuli_chr01 | 9510869                 | CC                              | TT              | 1946727789               |
| SNP_P4_5890_9511659 | NC_021160.1    | Ca_kabuli_chr01 | 9511659                 | GG                              | AA              | 1946727791               |
| SNP_P4_5891_9511672 | NC_021160.1    | Ca_kabuli_chr01 | 9511672                 | TT                              | AA              | 1946727793               |
| SNP_P4_5893_9511719 | NC_021160.1    | Ca_kabuli_chr01 | 9511719                 | TT                              | CC              | 1946727794               |
| SNP_P4_5895_9516443 | NC_021160.1    | Ca_kabuli_chr01 | 9516443                 | TT                              | AA              | 1946727796               |
| SNP_P4_5896_9526471 | NC_021160.1    | Ca_kabuli_chr01 | 9526471                 | TT                              | AA              | 1946727798               |
| SNP_P4_5897_9526474 | NC_021160.1    | Ca_kabuli_chr01 | 9526474                 | TT                              | GG              | 1946727800               |
| SNP_P4_5898_9586285 | NC_021160.1    | Ca_kabuli_chr01 | 9586285                 | CC                              | TT              | 1946727802               |
| SNP_P4_5899_9601892 | NC_021160.1    | Ca_kabuli_chr01 | 9601892                 | GG                              | AA              | 1946727804               |



| SNPs IDs             | Chromosome IDs | Chromosomes     | Physical positions (bp) | CDC Frontier (Reference genome) | (ILWC46 & LPNB) | NCBI SNPdb Accession IDs |
|----------------------|----------------|-----------------|-------------------------|---------------------------------|-----------------|--------------------------|
| SNP_P4_5900_9614091  | NC_021160.1    | Ca_kabuli_chr01 | 9614091                 | GG                              | TT              | 1946727806               |
| SNP_P4_5901_9628175  | NC_021160.1    | Ca_kabuli_chr01 | 9628175                 | TT                              | CC              | 1946727808               |
| SNP_P4_5902_9643590  | NC_021160.1    | Ca_kabuli_chr01 | 9643590                 | GG                              | AA              | 1946727810               |
| SNP_P4_5905_9687150  | NC_021160.1    | Ca_kabuli_chr01 | 9687150                 | AA                              | GG              | 1946727812               |
| SNP_P4_5906_9691118  | NC_021160.1    | Ca_kabuli_chr01 | 9691118                 | GG                              | AA              | 1946727814               |
| SNP_P4_5907_9710482  | NC_021160.1    | Ca_kabuli_chr01 | 9710482                 | AA                              | TT              | 1946727816               |
| SNP_P4_5908_9710485  | NC_021160.1    | Ca_kabuli_chr01 | 9710485                 | TT                              | CC              | 1946727818               |
| SNP_P4_5909_9761975  | NC_021160.1    | Ca_kabuli_chr01 | 9761975                 | TT                              | AA              | 1946727820               |
| SNP_P4_5910_9774720  | NC_021160.1    | Ca_kabuli_chr01 | 9774720                 | AA                              | GG              | 1946727822               |
| SNP_P4_5911_9795988  | NC_021160.1    | Ca_kabuli_chr01 | 9795988                 | TT                              | CC              | 1946727824               |
| SNP_P4_5912_9814778  | NC_021160.1    | Ca_kabuli_chr01 | 9814778                 | CC                              | TT              | 1946727826               |
| SNP_P4_5913_9814783  | NC_021160.1    | Ca_kabuli_chr01 | 9814783                 | CC                              | TT              | 1946727828               |
| SNP_P4_5914_9821582  | NC_021160.1    | Ca_kabuli_chr01 | 9821582                 | TT                              | AA              | 1946727829               |
| SNP_P4_5918_9871699  | NC_021160.1    | Ca_kabuli_chr01 | 9871699                 | CC                              | TT              | 1946727913               |
| SNP_P4_5919_9871706  | NC_021160.1    | Ca_kabuli_chr01 | 9871706                 | TT                              | CC              | 1946727915               |
| SNP_P4_5920_9872004  | NC_021160.1    | Ca_kabuli_chr01 | 9872004                 | GG                              | TT              | 1946727918               |
| SNP_P4_5921_9872050  | NC_021160.1    | Ca_kabuli_chr01 | 9872050                 | CC                              | AA              | 1946727920               |
| SNP_P4_5922_9872096  | NC_021160.1    | Ca_kabuli_chr01 | 9872096                 | TT                              | CC              | 1946727922               |
| SNP_P4_5923_9874164  | NC_021160.1    | Ca_kabuli_chr01 | 9874164                 | TT                              | CC              | 1946727924               |
| SNP_P4_5924_9874192  | NC_021160.1    | Ca_kabuli_chr01 | 9874192                 | TT                              | AA              | 1946727926               |
| SNP_P4_5925_9882598  | NC_021160.1    | Ca_kabuli_chr01 | 9882598                 | TT                              | CC              | 1946727928               |
| SNP_P4_5926_9930340  | NC_021160.1    | Ca_kabuli_chr01 | 9930340                 | TT                              | CC              | 1946727930               |
| SNP_P4_5928_9943419  | NC_021160.1    | Ca_kabuli_chr01 | 9943419                 | GG                              | AA              | 1946727932               |
| SNP_P4_5929_9947980  | NC_021160.1    | Ca_kabuli_chr01 | 9947980                 | CC                              | TT              | 1946727934               |
| SNP_P4_5932_9967265  | NC_021160.1    | Ca_kabuli_chr01 | 9967265                 | GG                              | AA              | 1946727936               |
| SNP_P4_5933_9983903  | NC_021160.1    | Ca_kabuli_chr01 | 9983903                 | GG                              | AA              | 1946727938               |
| SNP_P4_5934_9994531  | NC_021160.1    | Ca_kabuli_chr01 | 9994531                 | AA                              | GG              | 1946727940               |
| SNP_P4_5936_10014996 | NC_021160.1    | Ca_kabuli_chr01 | 10014996                | AA                              | GG              | 1946727942               |
| SNP_P4_5937_10014999 | NC_021160.1    | Ca_kabuli_chr01 | 10014999                | TT                              | CC              | 1946727944               |
| SNP_P4_5939_10017847 | NC_021160.1    | Ca_kabuli_chr01 | 10017847                | GG                              | AA              | 1946727946               |
| SNP_P4_5940_10036603 | NC_021160.1    | Ca_kabuli_chr01 | 10036603                | AA                              | GG              | 1946727948               |
| SNP_P4_5945_10072103 | NC_021160.1    | Ca_kabuli_chr01 | 10072103                | TT                              | AA              | 1946727950               |
| SNP_P4_5946_10072267 | NC_021160.1    | Ca_kabuli_chr01 | 10072267                | GG                              | AA              | 1946727952               |
| SNP_P4_5947_10072410 | NC_021160.1    | Ca_kabuli_chr01 | 10072410                | AA                              | GG              | 1946727954               |
| SNP_P4_5948_10077249 | NC_021160.1    | Ca_kabuli_chr01 | 10077249                | TT                              | AA              | 1946727956               |
| SNP_P4_5949_10085809 | NC_021160.1    | Ca_kabuli_chr01 | 10085809                | CC                              | GG              | 1946727958               |
| SNP_P4_5950_10085810 | NC_021160.1    | Ca_kabuli_chr01 | 10085810                | CC                              | TT              | 1946727960               |
| SNP_P4_5951_10090731 | NC_021160.1    | Ca_kabuli_chr01 | 10090731                | AA                              | CC              | 1946727962               |
| SNP_P4_5952_10091146 | NC_021160.1    | Ca_kabuli_chr01 | 10091146                | AA                              | GG              | 1946727963               |
| SNP_P4_5954_10102140 | NC_021160.1    | Ca_kabuli_chr01 | 10102140                | AA                              | GG              | 1946727965               |
| SNP_P4_5956_10116310 | NC_021160.1    | Ca_kabuli_chr01 | 10116310                | AA                              | GG              | 1946727967               |
| SNP_P4_5957_10116323 | NC_021160.1    | Ca_kabuli_chr01 | 10116323                | AA                              | GG              | 1946727969               |

| SNPs IDs             | Chromosome IDs | Chromosomes     | Physical positions (bp) | CDC Frontier (Reference genome) | (ILWC46 & LPNB) | NCBI SNPdb Accession IDs |
|----------------------|----------------|-----------------|-------------------------|---------------------------------|-----------------|--------------------------|
| SNP_P4_5958_10116349 | NC_021160.1    | Ca_kabuli_chr01 | 10116349                | TT                              | CC              | 1946727971               |
| SNP_P4_5959_10116353 | NC_021160.1    | Ca_kabuli_chr01 | 10116353                | AA                              | GG              | 1946727973               |
| SNP_P4_5960_10119171 | NC_021160.1    | Ca_kabuli_chr01 | 10119171                | AA                              | GG              | 1946727975               |
| SNP_P4_5961_10188120 | NC_021160.1    | Ca_kabuli_chr01 | 10188120                | CC                              | GG              | 1946727977               |
| SNP_P4_5962_10190686 | NC_021160.1    | Ca_kabuli_chr01 | 10190686                | TT                              | GG              | 1946727979               |
| SNP_P4_5963_10190689 | NC_021160.1    | Ca_kabuli_chr01 | 10190689                | AA                              | GG              | 1946727981               |
| SNP_P4_5964_10199763 | NC_021160.1    | Ca_kabuli_chr01 | 10199763                | CC                              | TT              | 1946727983               |
| SNP_P4_5965_10231784 | NC_021160.1    | Ca_kabuli_chr01 | 10231784                | CC                              | TT              | 1946727985               |
| SNP_P4_5966_10234271 | NC_021160.1    | Ca_kabuli_chr01 | 10234271                | AA                              | TT              | 1946727987               |
| SNP_P4_5967_10237344 | NC_021160.1    | Ca_kabuli_chr01 | 10237344                | CC                              | GG              | 1946727989               |
| SNP_P4_5968_10256061 | NC_021160.1    | Ca_kabuli_chr01 | 10256061                | AA                              | GG              | 1946727991               |
| SNP_P4_5970_10285446 | NC_021160.1    | Ca_kabuli_chr01 | 10285446                | CC                              | TT              | 1946727993               |
| SNP_P4_5971_10345078 | NC_021160.1    | Ca_kabuli_chr01 | 10345078                | CC                              | AA              | 1946727995               |
| SNP_P4_5972_10345118 | NC_021160.1    | Ca_kabuli_chr01 | 10345118                | CC                              | TT              | 1946727997               |
| SNP_P4_5974_10367101 | NC_021160.1    | Ca_kabuli_chr01 | 10367101                | AA                              | GG              | 1946727999               |
| SNP_P4_5975_10418064 | NC_021160.1    | Ca_kabuli_chr01 | 10418064                | TT                              | GG              | 1946728001               |
| SNP_P4_5976_10418082 | NC_021160.1    | Ca_kabuli_chr01 | 10418082                | CC                              | TT              | 1946728003               |
| SNP_P4_5977_10418100 | NC_021160.1    | Ca_kabuli_chr01 | 10418100                | AA                              | TT              | 1946728005               |
| SNP_P4_5981_10489857 | NC_021160.1    | Ca_kabuli_chr01 | 10489857                | AA                              | TT              | 1946728006               |
| SNP_P4_5982_10489931 | NC_021160.1    | Ca_kabuli_chr01 | 10489931                | AA                              | TT              | 1946728008               |
| SNP_P4_5983_10508424 | NC_021160.1    | Ca_kabuli_chr01 | 10508424                | TT                              | GG              | 1946728010               |
| SNP_P4_5986_10544577 | NC_021160.1    | Ca_kabuli_chr01 | 10544577                | GG                              | CC              | 1946728012               |
| SNP_P4_5987_10576598 | NC_021160.1    | Ca_kabuli_chr01 | 10576598                | TT                              | GG              | 1946728014               |
| SNP_P4_5988_10577344 | NC_021160.1    | Ca_kabuli_chr01 | 10577344                | GG                              | AA              | 1946728016               |
| SNP_P4_5989_10577389 | NC_021160.1    | Ca_kabuli_chr01 | 10577389                | TT                              | CC              | 1946728018               |
| SNP_P4_5990_10577503 | NC_021160.1    | Ca_kabuli_chr01 | 10577503                | CC                              | GG              | 1946728020               |
| SNP_P4_5991_10577586 | NC_021160.1    | Ca_kabuli_chr01 | 10577586                | AA                              | GG              | 1946728022               |
| SNP_P4_5992_10577932 | NC_021160.1    | Ca_kabuli_chr01 | 10577932                | CC                              | TT              | 1946728023               |
| SNP_P4_5993_10578019 | NC_021160.1    | Ca_kabuli_chr01 | 10578019                | TT                              | GG              | 1946728025               |
| SNP_P4_5994_10586902 | NC_021160.1    | Ca_kabuli_chr01 | 10586902                | CC                              | AA              | 1946728027               |
| SNP_P4_5995_10619942 | NC_021160.1    | Ca_kabuli_chr01 | 10619942                | CC                              | TT              | 1946728029               |
| SNP_P4_5996_10626384 | NC_021160.1    | Ca_kabuli_chr01 | 10626384                | AA                              | CC              | 1946728031               |
| SNP_P4_5998_10732181 | NC_021160.1    | Ca_kabuli_chr01 | 10732181                | AA                              | GG              | 1946728033               |
| SNP_P4_6000_10756172 | NC_021160.1    | Ca_kabuli_chr01 | 10756172                | GG                              | AA              | 1946728035               |
| SNP_P4_6001_10781922 | NC_021160.1    | Ca_kabuli_chr01 | 10781922                | TT                              | CC              | 1946728037               |
| SNP_P4_6002_10795881 | NC_021160.1    | Ca_kabuli_chr01 | 10795881                | CC                              | TT              | 1946728039               |
| SNP_P4_6005_10829213 | NC_021160.1    | Ca_kabuli_chr01 | 10829213                | TT                              | CC              | 1946728041               |
| SNP_P4_6006_10829268 | NC_021160.1    | Ca_kabuli_chr01 | 10829268                | CC                              | TT              | 1946728043               |
| SNP_P4_6007_10829595 | NC_021160.1    | Ca_kabuli_chr01 | 10829595                | TT                              | CC              | 1946728045               |
| SNP_P4_6008_10846274 | NC_021160.1    | Ca_kabuli_chr01 | 10846274                | AA                              | TT              | 1946728047               |
| SNP_P4_6010_10855340 | NC_021160.1    | Ca_kabuli_chr01 | 10855340                | TT                              | AA              | 1946728049               |
| SNP_P4_6011_10856482 | NC_021160.1    | Ca_kabuli_chr01 | 10856482                | TT                              | CC              | 1946728051               |

| SNPs IDs             | Chromosome IDs | Chromosomes     | Physical positions (bp) | CDC Frontier (Reference genome) | (ILWC46 & LPNB) | NCBI SNPdb Accession IDs |
|----------------------|----------------|-----------------|-------------------------|---------------------------------|-----------------|--------------------------|
| SNP_P4_6012_10856530 | NC_021160.1    | Ca_kabuli_chr01 | 10856530                | TT                              | CC              | 1946728053               |
| SNP_P4_6013_10856558 | NC_021160.1    | Ca_kabuli_chr01 | 10856558                | AA                              | CC              | 1946728055               |
| SNP_P4_6014_10856577 | NC_021160.1    | Ca_kabuli_chr01 | 10856577                | CC                              | TT              | 1946728057               |
| SNP_P4_6015_10856583 | NC_021160.1    | Ca_kabuli_chr01 | 10856583                | TT                              | GG              | 1946728059               |
| SNP_P4_6016_10856593 | NC_021160.1    | Ca_kabuli_chr01 | 10856593                | AA                              | GG              | 1946728062               |
| SNP_P4_6017_10856616 | NC_021160.1    | Ca_kabuli_chr01 | 10856616                | TT                              | GG              | 1946728064               |
| SNP_P4_6018_10856841 | NC_021160.1    | Ca_kabuli_chr01 | 10856841                | AA                              | GG              | 1946728066               |
| SNP_P4_6019_10856862 | NC_021160.1    | Ca_kabuli_chr01 | 10856862                | AA                              | GG              | 1946728068               |
| SNP_P4_6020_10856912 | NC_021160.1    | Ca_kabuli_chr01 | 10856912                | AA                              | GG              | 1946728070               |
| SNP_P4_6021_10856913 | NC_021160.1    | Ca_kabuli_chr01 | 10856913                | CC                              | AA              | 1946728072               |
| SNP_P4_6022_10862664 | NC_021160.1    | Ca_kabuli_chr01 | 10862664                | GG                              | CC              | 1946728074               |
| SNP_P4_6023_10867095 | NC_021160.1    | Ca_kabuli_chr01 | 10867095                | CC                              | TT              | 1946728076               |
| SNP_P4_6024_10898096 | NC_021160.1    | Ca_kabuli_chr01 | 10898096                | AA                              | CC              | 1946728078               |
| SNP_P4_6025_10916429 | NC_021160.1    | Ca_kabuli_chr01 | 10916429                | AA                              | GG              | 1946728080               |
| SNP_P4_6026_10916453 | NC_021160.1    | Ca_kabuli_chr01 | 10916453                | TT                              | CC              | 1946728082               |
| SNP_P4_6027_10916473 | NC_021160.1    | Ca_kabuli_chr01 | 10916473                | TT                              | CC              | 1946728084               |
| SNP_P4_6028_10916477 | NC_021160.1    | Ca_kabuli_chr01 | 10916477                | TT                              | AA              | 1946728086               |
| SNP_P4_6029_10916575 | NC_021160.1    | Ca_kabuli_chr01 | 10916575                | CC                              | AA              | 1946728088               |
| SNP_P4_6030_10916585 | NC_021160.1    | Ca_kabuli_chr01 | 10916585                | TT                              | CC              | 1946728090               |
| SNP_P4_6031_10916654 | NC_021160.1    | Ca_kabuli_chr01 | 10916654                | TT                              | CC              | 1946728091               |
| SNP_P4_6032_10916672 | NC_021160.1    | Ca_kabuli_chr01 | 10916672                | AA                              | CC              | 1946728093               |
| SNP_P4_6033_10916765 | NC_021160.1    | Ca_kabuli_chr01 | 10916765                | CC                              | AA              | 1946728095               |
| SNP_P4_6034_10921417 | NC_021160.1    | Ca_kabuli_chr01 | 10921417                | TT                              | CC              | 1946728097               |
| SNP_P4_6035_10936167 | NC_021160.1    | Ca_kabuli_chr01 | 10936167                | AA                              | TT              | 1946728099               |
| SNP_P4_6036_10958841 | NC_021160.1    | Ca_kabuli_chr01 | 10958841                | AA                              | TT              | 1946728101               |
| SNP_P4_6037_11023123 | NC_021160.1    | Ca_kabuli_chr01 | 11023123                | CC                              | TT              | 1946728103               |
| SNP_P4_6038_11023605 | NC_021160.1    | Ca_kabuli_chr01 | 11023605                | AA                              | GG              | 1946728105               |
| SNP_P4_6039_11104389 | NC_021160.1    | Ca_kabuli_chr01 | 11104389                | AA                              | GG              | 1946728107               |
| SNP_P4_6040_11112572 | NC_021160.1    | Ca_kabuli_chr01 | 11112572                | AA                              | CC              | 1946728109               |
| SNP_P4_6041_11126547 | NC_021160.1    | Ca_kabuli_chr01 | 11126547                | CC                              | TT              | 1946728112               |
| SNP_P4_6047_11169380 | NC_021160.1    | Ca_kabuli_chr01 | 11169380                | CC                              | TT              | 1946728114               |
| SNP_P4_6048_11176118 | NC_021160.1    | Ca_kabuli_chr01 | 11176118                | CC                              | AA              | 1946728118               |
| SNP_P4_6050_11214205 | NC_021160.1    | Ca_kabuli_chr01 | 11214205                | TT                              | CC              | 1946728121               |
| SNP_P4_6051_11217838 | NC_021160.1    | Ca_kabuli_chr01 | 11217838                | AA                              | GG              | 1946728123               |
| SNP_P4_6052_11217846 | NC_021160.1    | Ca_kabuli_chr01 | 11217846                | TT                              | CC              | 1946728125               |
| SNP_P4_6053_11217858 | NC_021160.1    | Ca_kabuli_chr01 | 11217858                | CC                              | TT              | 1946728127               |
| SNP_P4_6054_11217866 | NC_021160.1    | Ca_kabuli_chr01 | 11217866                | TT                              | GG              | 1946728129               |
| SNP_P4_6055_11218110 | NC_021160.1    | Ca_kabuli_chr01 | 11218110                | CC                              | TT              | 1946728131               |
| SNP_P4_6056_11218149 | NC_021160.1    | Ca_kabuli_chr01 | 11218149                | TT                              | CC              | 1946728132               |
| SNP_P4_6057_11232275 | NC_021160.1    | Ca_kabuli_chr01 | 11232275                | GG                              | TT              | 1946728134               |
| SNP_P4_6058_11232283 | NC_021160.1    | Ca_kabuli_chr01 | 11232283                | CC                              | TT              | 1946728136               |
| SNP_P4_6060_11255784 | NC_021160.1    | Ca_kabuli_chr01 | 11255784                | TT                              | CC              | 1946728138               |

| SNPs IDs             | Chromosome IDs | Chromosomes     | Physical positions (bp) | CDC Frontier (Reference genome) | (ILWC46 & LPNB) | NCBI SNPdb Accession IDs |
|----------------------|----------------|-----------------|-------------------------|---------------------------------|-----------------|--------------------------|
| SNP_P4_6061_11259251 | NC_021160.1    | Ca_kabuli_chr01 | 11259251                | GG                              | AA              | 1946728140               |
| SNP_P4_6062_11263476 | NC_021160.1    | Ca_kabuli_chr01 | 11263476                | TT                              | GG              | 1946728142               |
| SNP_P4_6063_11288041 | NC_021160.1    | Ca_kabuli_chr01 | 11288041                | CC                              | AA              | 1946728144               |
| SNP_P4_6064_11297868 | NC_021160.1    | Ca_kabuli_chr01 | 11297868                | AA                              | TT              | 1946728146               |
| SNP_P4_6065_11301553 | NC_021160.1    | Ca_kabuli_chr01 | 11301553                | TT                              | GG              | 1946728148               |
| SNP_P4_6066_11302636 | NC_021160.1    | Ca_kabuli_chr01 | 11302636                | CC                              | TT              | 1946728150               |
| SNP_P4_6067_11302697 | NC_021160.1    | Ca_kabuli_chr01 | 11302697                | AA                              | GG              | 1946728152               |
| SNP_P4_6068_11302753 | NC_021160.1    | Ca_kabuli_chr01 | 11302753                | CC                              | TT              | 1946728154               |
| SNP_P4_6069_11302901 | NC_021160.1    | Ca_kabuli_chr01 | 11302901                | TT                              | GG              | 1946728156               |
| SNP_P4_6070_11302902 | NC_021160.1    | Ca_kabuli_chr01 | 11302902                | GG                              | TT              | 1946728157               |
| SNP_P4_6071_11302905 | NC_021160.1    | Ca_kabuli_chr01 | 11302905                | AA                              | TT              | 1946728159               |
| SNP_P4_6072_11303113 | NC_021160.1    | Ca_kabuli_chr01 | 11303113                | CC                              | TT              | 1946728161               |
| SNP_P4_6073_11340986 | NC_021160.1    | Ca_kabuli_chr01 | 11340986                | CC                              | TT              | 1946728163               |
| SNP_P4_6074_11341189 | NC_021160.1    | Ca_kabuli_chr01 | 11341189                | GG                              | AA              | 1946728165               |
| SNP_P4_6075_11341201 | NC_021160.1    | Ca_kabuli_chr01 | 11341201                | AA                              | GG              | 1946728167               |
| SNP_P4_6076_11341208 | NC_021160.1    | Ca_kabuli_chr01 | 11341208                | TT                              | CC              | 1946728169               |
| SNP_P4_6077_11341209 | NC_021160.1    | Ca_kabuli_chr01 | 11341209                | GG                              | AA              | 1946728171               |
| SNP_P4_6078_11341253 | NC_021160.1    | Ca_kabuli_chr01 | 11341253                | GG                              | AA              | 1946728173               |
| SNP_P4_6079_11341264 | NC_021160.1    | Ca_kabuli_chr01 | 11341264                | TT                              | AA              | 1946728175               |
| SNP_P4_6080_11341341 | NC_021160.1    | Ca_kabuli_chr01 | 11341341                | GG                              | AA              | 1946728177               |
| SNP_P4_6081_11346375 | NC_021160.1    | Ca_kabuli_chr01 | 11346375                | GG                              | AA              | 1946728179               |
| SNP_P4_6082_11347294 | NC_021160.1    | Ca_kabuli_chr01 | 11347294                | CC                              | TT              | 1946728181               |
| SNP_P4_6084_11383103 | NC_021160.1    | Ca_kabuli_chr01 | 11383103                | AA                              | GG              | 1946728183               |
| SNP_P4_6085_11383121 | NC_021160.1    | Ca_kabuli_chr01 | 11383121                | AA                              | GG              | 1946728184               |
| SNP_P4_6086_11396899 | NC_021160.1    | Ca_kabuli_chr01 | 11396899                | AA                              | GG              | 1946728186               |
| SNP_P4_6087_11396912 | NC_021160.1    | Ca_kabuli_chr01 | 11396912                | TT                              | CC              | 1946728188               |
| SNP_P4_6088_11396922 | NC_021160.1    | Ca_kabuli_chr01 | 11396922                | AA                              | GG              | 1946728190               |
| SNP_P4_6089_11415195 | NC_021160.1    | Ca_kabuli_chr01 | 11415195                | AA                              | GG              | 1946728192               |
| SNP_P4_6090_11415378 | NC_021160.1    | Ca_kabuli_chr01 | 11415378                | TT                              | CC              | 1946728194               |
| SNP_P4_6092_11431493 | NC_021160.1    | Ca_kabuli_chr01 | 11431493                | AA                              | CC              | 1946728196               |
| SNP_P4_6093_11434581 | NC_021160.1    | Ca_kabuli_chr01 | 11434581                | TT                              | CC              | 1946728198               |
| SNP_P4_6094_11447068 | NC_021160.1    | Ca_kabuli_chr01 | 11447068                | CC                              | AA              | 1946728200               |
| SNP_P4_6095_11466924 | NC_021160.1    | Ca_kabuli_chr01 | 11466924                | TT                              | CC              | 1946728202               |
| SNP_P4_6096_11477958 | NC_021160.1    | Ca_kabuli_chr01 | 11477958                | GG                              | CC              | 1946728204               |
| SNP_P4_6097_11496236 | NC_021160.1    | Ca_kabuli_chr01 | 11496236                | TT                              | AA              | 1946728206               |
| SNP_P4_6098_11516582 | NC_021160.1    | Ca_kabuli_chr01 | 11516582                | TT                              | CC              | 1946728208               |
| SNP_P4_6099_11517715 | NC_021160.1    | Ca_kabuli_chr01 | 11517715                | GG                              | AA              | 1946728210               |
| SNP_P4_6100_11517991 | NC_021160.1    | Ca_kabuli_chr01 | 11517991                | TT                              | CC              | 1946728212               |
| SNP_P4_6103_11562068 | NC_021160.1    | Ca_kabuli_chr01 | 11562068                | AA                              | TT              | 1946728214               |
| SNP_P4_6105_11570566 | NC_021160.1    | Ca_kabuli_chr01 | 11570566                | GG                              | AA              | 1946728216               |
| SNP_P4_6106_11575568 | NC_021160.1    | Ca_kabuli_chr01 | 11575568                | TT                              | CC              | 1946728218               |
| SNP_P4_6107_11641580 | NC_021160.1    | Ca_kabuli_chr01 | 11641580                | CC                              | TT              | 1946728220               |

| SNPs IDs             | Chromosome IDs | Chromosomes     | Physical positions (bp) | CDC Frontier (Reference genome) | (ILWC46 & LPNB) | NCBI SNPdb Accession IDs |
|----------------------|----------------|-----------------|-------------------------|---------------------------------|-----------------|--------------------------|
| SNP_P4_6108_11651637 | NC_021160.1    | Ca_kabuli_chr01 | 11651637                | GG                              | AA              | 1946728222               |
| SNP_P4_6109_11653981 | NC_021160.1    | Ca_kabuli_chr01 | 11653981                | GG                              | AA              | 1946728224               |
| SNP_P4_6110_11668944 | NC_021160.1    | Ca_kabuli_chr01 | 11668944                | TT                              | CC              | 1946728226               |
| SNP_P4_6111_11735094 | NC_021160.1    | Ca_kabuli_chr01 | 11735094                | GG                              | AA              | 1946728228               |
| SNP_P4_6112_11735134 | NC_021160.1    | Ca_kabuli_chr01 | 11735134                | GG                              | AA              | 1946728230               |
| SNP_P4_6115_11768346 | NC_021160.1    | Ca_kabuli_chr01 | 11768346                | TT                              | AA              | 1946728232               |
| SNP_P4_6117_11809827 | NC_021160.1    | Ca_kabuli_chr01 | 11809827                | GG                              | AA              | 1946728234               |
| SNP_P4_6118_11858083 | NC_021160.1    | Ca_kabuli_chr01 | 11858083                | GG                              | TT              | 1946728236               |
| SNP_P4_6119_11858108 | NC_021160.1    | Ca_kabuli_chr01 | 11858108                | GG                              | AA              | 1946728238               |
| SNP_P4_6120_11858150 | NC_021160.1    | Ca_kabuli_chr01 | 11858150                | GG                              | AA              | 1946728240               |
| SNP_P4_6121_11860863 | NC_021160.1    | Ca_kabuli_chr01 | 11860863                | GG                              | TT              | 1946728241               |
| SNP_P4_6122_11927853 | NC_021160.1    | Ca_kabuli_chr01 | 11927853                | CC                              | AA              | 1946728243               |
| SNP_P4_6123_11930518 | NC_021160.1    | Ca_kabuli_chr01 | 11930518                | GG                              | AA              | 1946728245               |
| SNP_P4_6124_11930532 | NC_021160.1    | Ca_kabuli_chr01 | 11930532                | CC                              | AA              | 1946728247               |
| SNP_P4_6125_11930535 | NC_021160.1    | Ca_kabuli_chr01 | 11930535                | CC                              | TT              | 1946728249               |
| SNP_P4_6127_11945747 | NC_021160.1    | Ca_kabuli_chr01 | 11945747                | CC                              | TT              | 1946728251               |
| SNP_P4_6129_11978867 | NC_021160.1    | Ca_kabuli_chr01 | 11978867                | TT                              | CC              | 1946728253               |
| SNP_P4_6130_12060026 | NC_021160.1    | Ca_kabuli_chr01 | 12060026                | TT                              | AA              | 1946728255               |
| SNP_P4_6131_12091787 | NC_021160.1    | Ca_kabuli_chr01 | 12091787                | GG                              | AA              | 1946728257               |
| SNP_P4_6132_12102738 | NC_021160.1    | Ca_kabuli_chr01 | 12102738                | TT                              | CC              | 1946728259               |
| SNP_P4_6133_12110121 | NC_021160.1    | Ca_kabuli_chr01 | 12110121                | AA                              | TT              | 1946728261               |
| SNP_P4_6137_12144154 | NC_021160.1    | Ca_kabuli_chr01 | 12144154                | GG                              | AA              | 1946728263               |
| SNP_P4_6138_12158643 | NC_021160.1    | Ca_kabuli_chr01 | 12158643                | GG                              | AA              | 1946728265               |
| SNP_P4_6139_12180660 | NC_021160.1    | Ca_kabuli_chr01 | 12180660                | TT                              | CC              | 1946728267               |
| SNP_P4_6140_12208185 | NC_021160.1    | Ca_kabuli_chr01 | 12208185                | TT                              | GG              | 1946728268               |
| SNP_P4_6141_12208200 | NC_021160.1    | Ca_kabuli_chr01 | 12208200                | TT                              | GG              | 1946728270               |
| SNP_P4_6142_12208201 | NC_021160.1    | Ca_kabuli_chr01 | 12208201                | GG                              | AA              | 1946728272               |
| SNP_P4_6143_12218230 | NC_021160.1    | Ca_kabuli_chr01 | 12218230                | AA                              | GG              | 1946728274               |
| SNP_P4_6145_12260585 | NC_021160.1    | Ca_kabuli_chr01 | 12260585                | TT                              | GG              | 1946728276               |
| SNP_P4_6146_12310101 | NC_021160.1    | Ca_kabuli_chr01 | 12310101                | AA                              | GG              | 1946728278               |
| SNP_P4_6148_12322202 | NC_021160.1    | Ca_kabuli_chr01 | 12322202                | GG                              | AA              | 1946728280               |
| SNP_P4_6149_12343824 | NC_021160.1    | Ca_kabuli_chr01 | 12343824                | AA                              | CC              | 1946728282               |
| SNP_P4_6150_12344692 | NC_021160.1    | Ca_kabuli_chr01 | 12344692                | GG                              | CC              | 1946728284               |
| SNP_P4_6152_12354577 | NC_021160.1    | Ca_kabuli_chr01 | 12354577                | GG                              | AA              | 1946728286               |
| SNP_P4_6153_12365816 | NC_021160.1    | Ca_kabuli_chr01 | 12365816                | CC                              | TT              | 1946728288               |
| SNP_P4_6154_12366213 | NC_021160.1    | Ca_kabuli_chr01 | 12366213                | CC                              | TT              | 1946728290               |
| SNP_P4_6155_12372332 | NC_021160.1    | Ca_kabuli_chr01 | 12372332                | GG                              | CC              | 1946728292               |
| SNP_P4_6156_12377270 | NC_021160.1    | Ca_kabuli_chr01 | 12377270                | TT                              | CC              | 1946728294               |
| SNP_P4_6157_12392243 | NC_021160.1    | Ca_kabuli_chr01 | 12392243                | AA                              | CC              | 1946728296               |
| SNP_P4_6158_12392292 | NC_021160.1    | Ca_kabuli_chr01 | 12392292                | TT                              | CC              | 1946728298               |
| SNP_P4_6159_12392364 | NC_021160.1    | Ca_kabuli_chr01 | 12392364                | CC                              | TT              | 1946728300               |
| SNP_P4_6160_12398542 | NC_021160.1    | Ca_kabuli_chr01 | 12398542                | AA                              | GG              | 1946728302               |

| SNPs IDs             | Chromosome IDs | Chromosomes     | Physical positions (bp) | CDC Frontier (Reference genome) | (ILWC46 & LPNB) | NCBI SNPdb Accession IDs |
|----------------------|----------------|-----------------|-------------------------|---------------------------------|-----------------|--------------------------|
| SNP_P4_6162_12422536 | NC_021160.1    | Ca_kabuli_chr01 | 12422536                | TT                              | CC              | 1946728304               |
| SNP_P4_6163_12422552 | NC_021160.1    | Ca_kabuli_chr01 | 12422552                | AA                              | GG              | 1946728306               |
| SNP_P4_6164_12429296 | NC_021160.1    | Ca_kabuli_chr01 | 12429296                | CC                              | TT              | 1946728308               |
| SNP_P4_6165_12438262 | NC_021160.1    | Ca_kabuli_chr01 | 12438262                | CC                              | TT              | 1946728310               |
| SNP_P4_6166_12444374 | NC_021160.1    | Ca_kabuli_chr01 | 12444374                | CC                              | AA              | 1946728312               |
| SNP_P4_6167_12464146 | NC_021160.1    | Ca_kabuli_chr01 | 12464146                | GG                              | CC              | 1946728314               |
| SNP_P4_6168_12465301 | NC_021160.1    | Ca_kabuli_chr01 | 12465301                | CC                              | TT              | 1946728316               |
| SNP_P4_6169_12473338 | NC_021160.1    | Ca_kabuli_chr01 | 12473338                | TT                              | CC              | 1946728318               |
| SNP_P4_6170_12531507 | NC_021160.1    | Ca_kabuli_chr01 | 12531507                | AA                              | TT              | 1946728320               |
| SNP_P4_6172_12551793 | NC_021160.1    | Ca_kabuli_chr01 | 12551793                | AA                              | GG              | 1946728322               |
| SNP_P4_6173_12572939 | NC_021160.1    | Ca_kabuli_chr01 | 12572939                | TT                              | CC              | 1946728324               |
| SNP_P4_6175_12585307 | NC_021160.1    | Ca_kabuli_chr01 | 12585307                | TT                              | CC              | 1946728326               |
| SNP_P4_6177_12616099 | NC_021160.1    | Ca_kabuli_chr01 | 12616099                | AA                              | GG              | 1946728328               |
| SNP_P4_6178_12616999 | NC_021160.1    | Ca_kabuli_chr01 | 12616999                | GG                              | TT              | 1946728330               |
| SNP_P4_6179_12620322 | NC_021160.1    | Ca_kabuli_chr01 | 12620322                | AA                              | GG              | 1946728332               |
| SNP_P4_6180_12624921 | NC_021160.1    | Ca_kabuli_chr01 | 12624921                | AA                              | GG              | 1946728334               |
| SNP_P4_6181_12625900 | NC_021160.1    | Ca_kabuli_chr01 | 12625900                | GG                              | AA              | 1946728336               |
| SNP_P4_6182_12629456 | NC_021160.1    | Ca_kabuli_chr01 | 12629456                | TT                              | CC              | 1946728338               |
| SNP_P4_6183_12630751 | NC_021160.1    | Ca_kabuli_chr01 | 12630751                | TT                              | GG              | 1946728340               |
| SNP_P4_6184_12630789 | NC_021160.1    | Ca_kabuli_chr01 | 12630789                | TT                              | CC              | 1946728342               |
| SNP_P4_6185_12631249 | NC_021160.1    | Ca_kabuli_chr01 | 12631249                | GG                              | TT              | 1946728344               |
| SNP_P4_6186_12644694 | NC_021160.1    | Ca_kabuli_chr01 | 12644694                | AA                              | TT              | 1946728346               |
| SNP_P4_6188_12644747 | NC_021160.1    | Ca_kabuli_chr01 | 12644747                | AA                              | GG              | 1946728348               |
| SNP_P4_6189_12644761 | NC_021160.1    | Ca_kabuli_chr01 | 12644761                | CC                              | TT              | 1946728350               |
| SNP_P4_6191_12645042 | NC_021160.1    | Ca_kabuli_chr01 | 12645042                | CC                              | TT              | 1946728352               |
| SNP_P4_6192_12645047 | NC_021160.1    | Ca_kabuli_chr01 | 12645047                | AA                              | GG              | 1946728354               |
| SNP_P4_6193_12654407 | NC_021160.1    | Ca_kabuli_chr01 | 12654407                | AA                              | GG              | 1946728356               |
| SNP_P4_6194_12654442 | NC_021160.1    | Ca_kabuli_chr01 | 12654442                | AA                              | GG              | 1946728358               |
| SNP_P4_6195_12665204 | NC_021160.1    | Ca_kabuli_chr01 | 12665204                | TT                              | AA              | 1946728360               |
| SNP_P4_6196_12665269 | NC_021160.1    | Ca_kabuli_chr01 | 12665269                | TT                              | CC              | 1946728362               |
| SNP_P4_6198_12685661 | NC_021160.1    | Ca_kabuli_chr01 | 12685661                | GG                              | AA              | 1946728364               |
| SNP_P4_6201_12699961 | NC_021160.1    | Ca_kabuli_chr01 | 12699961                | AA                              | GG              | 1946728366               |
| SNP_P4_6202_12716587 | NC_021160.1    | Ca_kabuli_chr01 | 12716587                | TT                              | AA              | 1946728368               |
| SNP_P4_6204_12747221 | NC_021160.1    | Ca_kabuli_chr01 | 12747221                | TT                              | AA              | 1946728370               |
| SNP_P4_6206_12767427 | NC_021160.1    | Ca_kabuli_chr01 | 12767427                | GG                              | TT              | 1946728372               |
| SNP_P4_6207_12767631 | NC_021160.1    | Ca_kabuli_chr01 | 12767631                | TT                              | CC              | 1946728374               |
| SNP_P4_6209_12773165 | NC_021160.1    | Ca_kabuli_chr01 | 12773165                | GG                              | AA              | 1946728376               |
| SNP_P4_6210_12773171 | NC_021160.1    | Ca_kabuli_chr01 | 12773171                | TT                              | CC              | 1946728378               |
| SNP_P4_6211_12773215 | NC_021160.1    | Ca_kabuli_chr01 | 12773215                | GG                              | AA              | 1946728380               |
| SNP_P4_6212_12773348 | NC_021160.1    | Ca_kabuli_chr01 | 12773348                | CC                              | TT              | 1946728382               |
| SNP_P4_6213_12773394 | NC_021160.1    | Ca_kabuli_chr01 | 12773394                | AA                              | TT              | 1946728384               |
| SNP_P4_6214_12773616 | NC_021160.1    | Ca_kabuli_chr01 | 12773616                | TT                              | AA              | 1946728386               |

| SNPs IDs             | Chromosome IDs | Chromosomes     | Physical positions (bp) | CDC Frontier (Reference genome) | (ILWC46 & LPNB) | NCBI SNPdb Accession IDs |
|----------------------|----------------|-----------------|-------------------------|---------------------------------|-----------------|--------------------------|
| SNP_P4_6215_12773711 | NC_021160.1    | Ca_kabuli_chr01 | 12773711                | AA                              | GG              | 1946728388               |
| SNP_P4_6216_12773735 | NC_021160.1    | Ca_kabuli_chr01 | 12773735                | GG                              | TT              | 1946728390               |
| SNP_P4_6218_12774350 | NC_021160.1    | Ca_kabuli_chr01 | 12774350                | TT                              | AA              | 1946728392               |
| SNP_P4_6219_12774355 | NC_021160.1    | Ca_kabuli_chr01 | 12774355                | AA                              | TT              | 1946728395               |
| SNP_P4_6220_12774649 | NC_021160.1    | Ca_kabuli_chr01 | 12774649                | AA                              | CC              | 1946728397               |
| SNP_P4_6221_12776043 | NC_021160.1    | Ca_kabuli_chr01 | 12776043                | CC                              | TT              | 1946728399               |
| SNP_P4_6223_12776248 | NC_021160.1    | Ca_kabuli_chr01 | 12776248                | CC                              | TT              | 1946728401               |
| SNP_P4_6224_12776486 | NC_021160.1    | Ca_kabuli_chr01 | 12776486                | CC                              | TT              | 1946728403               |
| SNP_P4_6225_12776516 | NC_021160.1    | Ca_kabuli_chr01 | 12776516                | TT                              | GG              | 1946728405               |
| SNP_P4_6226_12776733 | NC_021160.1    | Ca_kabuli_chr01 | 12776733                | TT                              | CC              | 1946728407               |
| SNP_P4_6227_12777414 | NC_021160.1    | Ca_kabuli_chr01 | 12777414                | CC                              | TT              | 1946728410               |
| SNP_P4_6228_12778096 | NC_021160.1    | Ca_kabuli_chr01 | 12778096                | AA                              | TT              | 1946728413               |
| SNP_P4_6229_12778163 | NC_021160.1    | Ca_kabuli_chr01 | 12778163                | CC                              | TT              | 1946728416               |
| SNP_P4_6230_12778174 | NC_021160.1    | Ca_kabuli_chr01 | 12778174                | CC                              | AA              | 1946728419               |
| SNP_P4_6231_12778193 | NC_021160.1    | Ca_kabuli_chr01 | 12778193                | TT                              | CC              | 1946728422               |
| SNP_P4_6232_12778200 | NC_021160.1    | Ca_kabuli_chr01 | 12778200                | TT                              | CC              | 1946728425               |
| SNP_P4_6233_12778204 | NC_021160.1    | Ca_kabuli_chr01 | 12778204                | TT                              | AA              | 1946728427               |
| SNP_P4_6234_12778356 | NC_021160.1    | Ca_kabuli_chr01 | 12778356                | GG                              | AA              | 1946728430               |
| SNP_P4_6235_12778379 | NC_021160.1    | Ca_kabuli_chr01 | 12778379                | GG                              | CC              | 1946728432               |
| SNP_P4_6236_12778424 | NC_021160.1    | Ca_kabuli_chr01 | 12778424                | AA                              | GG              | 1946728433               |
| SNP_P4_6237_12778443 | NC_021160.1    | Ca_kabuli_chr01 | 12778443                | TT                              | AA              | 1946728435               |
| SNP_P4_6238_12780855 | NC_021160.1    | Ca_kabuli_chr01 | 12780855                | CC                              | TT              | 1946728437               |
| SNP_P4_6239_12782185 | NC_021160.1    | Ca_kabuli_chr01 | 12782185                | CC                              | GG              | 1946728439               |
| SNP_P4_6240_12782225 | NC_021160.1    | Ca_kabuli_chr01 | 12782225                | TT                              | AA              | 1946728441               |
| SNP_P4_6241_12782247 | NC_021160.1    | Ca_kabuli_chr01 | 12782247                | TT                              | CC              | 1946728443               |
| SNP_P4_6242_12783183 | NC_021160.1    | Ca_kabuli_chr01 | 12783183                | CC                              | AA              | 1946728445               |
| SNP_P4_6244_12790871 | NC_021160.1    | Ca_kabuli_chr01 | 12790871                | AA                              | GG              | 1946728447               |
| SNP_P4_6245_12790874 | NC_021160.1    | Ca_kabuli_chr01 | 12790874                | TT                              | CC              | 1946728449               |
| SNP_P4_6247_12792034 | NC_021160.1    | Ca_kabuli_chr01 | 12792034                | CC                              | TT              | 1946728451               |
| SNP_P4_6248_12792039 | NC_021160.1    | Ca_kabuli_chr01 | 12792039                | AA                              | TT              | 1946728453               |
| SNP_P4_6250_12831140 | NC_021160.1    | Ca_kabuli_chr01 | 12831140                | CC                              | TT              | 1946728455               |
| SNP_P4_6251_12863143 | NC_021160.1    | Ca_kabuli_chr01 | 12863143                | AA                              | CC              | 1946728457               |
| SNP_P4_6252_12876380 | NC_021160.1    | Ca_kabuli_chr01 | 12876380                | GG                              | AA              | 1946728459               |
| SNP_P4_6254_12894057 | NC_021160.1    | Ca_kabuli_chr01 | 12894057                | GG                              | AA              | 1946728461               |
| SNP_P4_6255_12895063 | NC_021160.1    | Ca_kabuli_chr01 | 12895063                | AA                              | GG              | 1946728463               |
| SNP_P4_6256_12896138 | NC_021160.1    | Ca_kabuli_chr01 | 12896138                | TT                              | CC              | 1946728465               |
| SNP_P4_6257_12926600 | NC_021160.1    | Ca_kabuli_chr01 | 12926600                | AA                              | GG              | 1946728467               |
| SNP_P4_6258_12926604 | NC_021160.1    | Ca_kabuli_chr01 | 12926604                | AA                              | GG              | 1946728469               |
| SNP_P4_6259_12926610 | NC_021160.1    | Ca_kabuli_chr01 | 12926610                | AA                              | GG              | 1946728471               |
| SNP_P4_6260_12926639 | NC_021160.1    | Ca_kabuli_chr01 | 12926639                | AA                              | GG              | 1946728473               |
| SNP_P4_6261_12927337 | NC_021160.1    | Ca_kabuli_chr01 | 12927337                | TT                              | GG              | 1946728475               |
| SNP_P4_6262_12934095 | NC_021160.1    | Ca_kabuli_chr01 | 12934095                | TT                              | AA              | 1946728477               |

| SNPs IDs             | Chromosome IDs | Chromosomes     | Physical positions (bp) | CDC Frontier (Reference genome) | (ILWC46 & LPNB) | NCBI SNPdb Accession IDs |
|----------------------|----------------|-----------------|-------------------------|---------------------------------|-----------------|--------------------------|
| SNP_P4_6263_12947088 | NC_021160.1    | Ca_kabuli_chr01 | 12947088                | CC                              | AA              | 1946728479               |
| SNP_P4_6264_12947096 | NC_021160.1    | Ca_kabuli_chr01 | 12947096                | AA                              | GG              | 1946728481               |
| SNP_P4_6265_12947160 | NC_021160.1    | Ca_kabuli_chr01 | 12947160                | GG                              | AA              | 1946728483               |
| SNP_P4_6266_12947164 | NC_021160.1    | Ca_kabuli_chr01 | 12947164                | TT                              | CC              | 1946728485               |
| SNP_P4_6267_12947312 | NC_021160.1    | Ca_kabuli_chr01 | 12947312                | AA                              | CC              | 1946728487               |
| SNP_P4_6268_12947342 | NC_021160.1    | Ca_kabuli_chr01 | 12947342                | GG                              | AA              | 1946728489               |
| SNP_P4_6269_12947368 | NC_021160.1    | Ca_kabuli_chr01 | 12947368                | CC                              | TT              | 1946728491               |
| SNP_P4_6270_12947398 | NC_021160.1    | Ca_kabuli_chr01 | 12947398                | GG                              | AA              | 1946728492               |
| SNP_P4_6271_12947448 | NC_021160.1    | Ca_kabuli_chr01 | 12947448                | CC                              | TT              | 1946728494               |
| SNP_P4_6272_12947468 | NC_021160.1    | Ca_kabuli_chr01 | 12947468                | CC                              | TT              | 1946728496               |
| SNP_P4_6273_12947486 | NC_021160.1    | Ca_kabuli_chr01 | 12947486                | AA                              | GG              | 1946728498               |
| SNP_P4_6274_12947534 | NC_021160.1    | Ca_kabuli_chr01 | 12947534                | CC                              | TT              | 1946728500               |
| SNP_P4_6275_12947539 | NC_021160.1    | Ca_kabuli_chr01 | 12947539                | GG                              | AA              | 1946728502               |
| SNP_P4_6276_12947557 | NC_021160.1    | Ca_kabuli_chr01 | 12947557                | AA                              | GG              | 1946728504               |
| SNP_P4_6278_12947755 | NC_021160.1    | Ca_kabuli_chr01 | 12947755                | TT                              | CC              | 1946728506               |
| SNP_P4_6279_12948065 | NC_021160.1    | Ca_kabuli_chr01 | 12948065                | AA                              | GG              | 1946728508               |
| SNP_P4_6280_12950524 | NC_021160.1    | Ca_kabuli_chr01 | 12950524                | AA                              | GG              | 1946728510               |
| SNP_P4_6282_12950567 | NC_021160.1    | Ca_kabuli_chr01 | 12950567                | TT                              | CC              | 1946728512               |
| SNP_P4_6283_12950572 | NC_021160.1    | Ca_kabuli_chr01 | 12950572                | GG                              | AA              | 1946728514               |
| SNP_P4_6284_12950905 | NC_021160.1    | Ca_kabuli_chr01 | 12950905                | CC                              | TT              | 1946728516               |
| SNP_P4_6285_12950906 | NC_021160.1    | Ca_kabuli_chr01 | 12950906                | TT                              | CC              | 1946728518               |
| SNP_P4_6286_12950909 | NC_021160.1    | Ca_kabuli_chr01 | 12950909                | CC                              | GG              | 1946728520               |
| SNP_P4_6287_12950918 | NC_021160.1    | Ca_kabuli_chr01 | 12950918                | TT                              | CC              | 1946728522               |
| SNP_P4_6288_12950936 | NC_021160.1    | Ca_kabuli_chr01 | 12950936                | AA                              | GG              | 1946728524               |
| SNP_P4_6289_12955860 | NC_021160.1    | Ca_kabuli_chr01 | 12955860                | AA                              | GG              | 1946728526               |
| SNP_P4_6292_12956062 | NC_021160.1    | Ca_kabuli_chr01 | 12956062                | TT                              | AA              | 1946728528               |
| SNP_P4_6293_12956156 | NC_021160.1    | Ca_kabuli_chr01 | 12956156                | CC                              | AA              | 1946728530               |
| SNP_P4_6295_12956302 | NC_021160.1    | Ca_kabuli_chr01 | 12956302                | CC                              | TT              | 1946728532               |
| SNP_P4_6296_12956336 | NC_021160.1    | Ca_kabuli_chr01 | 12956336                | GG                              | AA              | 1946728534               |
| SNP_P4_6297_12956354 | NC_021160.1    | Ca_kabuli_chr01 | 12956354                | AA                              | GG              | 1946728536               |
| SNP_P4_6298_12956372 | NC_021160.1    | Ca_kabuli_chr01 | 12956372                | AA                              | GG              | 1946728538               |
| SNP_P4_6300_12956703 | NC_021160.1    | Ca_kabuli_chr01 | 12956703                | AA                              | GG              | 1946728540               |
| SNP_P4_6301_12956801 | NC_021160.1    | Ca_kabuli_chr01 | 12956801                | TT                              | CC              | 1946728542               |
| SNP_P4_6302_12956869 | NC_021160.1    | Ca_kabuli_chr01 | 12956869                | AA                              | GG              | 1946728544               |
| SNP_P4_6303_12958113 | NC_021160.1    | Ca_kabuli_chr01 | 12958113                | TT                              | CC              | 1946728546               |
| SNP_P4_6304_12973854 | NC_021160.1    | Ca_kabuli_chr01 | 12973854                | AA                              | CC              | 1946728548               |
| SNP_P4_6305_12979286 | NC_021160.1    | Ca_kabuli_chr01 | 12979286                | CC                              | TT              | 1946728550               |
| SNP_P4_6306_12979331 | NC_021160.1    | Ca_kabuli_chr01 | 12979331                | CC                              | TT              | 1946728552               |
| SNP_P4_6307_12979534 | NC_021160.1    | Ca_kabuli_chr01 | 12979534                | TT                              | CC              | 1946728554               |
| SNP_P4_6308_12984099 | NC_021160.1    | Ca_kabuli_chr01 | 12984099                | CC                              | TT              | 1946728556               |
| SNP_P4_6309_12984100 | NC_021160.1    | Ca_kabuli_chr01 | 12984100                | GG                              | AA              | 1946728559               |
| SNP_P4_6310_12984194 | NC_021160.1    | Ca_kabuli_chr01 | 12984194                | GG                              | AA              | 1946728561               |



| SNPs IDs             | Chromosome IDs | Chromosomes     | Physical positions (bp) | CDC Frontier (Reference genome) | (ILWC46 & LPNB) | NCBI SNPdb Accession IDs |
|----------------------|----------------|-----------------|-------------------------|---------------------------------|-----------------|--------------------------|
| SNP_P4_6311_12984213 | NC_021160.1    | Ca_kabuli_chr01 | 12984213                | GG                              | AA              | 1946728563               |
| SNP_P4_6312_12984258 | NC_021160.1    | Ca_kabuli_chr01 | 12984258                | GG                              | AA              | 1946728565               |
| SNP_P4_6314_12991478 | NC_021160.1    | Ca_kabuli_chr01 | 12991478                | TT                              | AA              | 1946728567               |
| SNP_P4_6315_13005740 | NC_021160.1    | Ca_kabuli_chr01 | 13005740                | GG                              | AA              | 1946728569               |
| SNP_P4_6316_13006291 | NC_021160.1    | Ca_kabuli_chr01 | 13006291                | CC                              | TT              | 1946728571               |
| SNP_P4_6317_13007347 | NC_021160.1    | Ca_kabuli_chr01 | 13007347                | TT                              | AA              | 1946728573               |
| SNP_P4_6318_13007352 | NC_021160.1    | Ca_kabuli_chr01 | 13007352                | AA                              | GG              | 1946728575               |
| SNP_P4_6319_13007480 | NC_021160.1    | Ca_kabuli_chr01 | 13007480                | GG                              | AA              | 1946728577               |
| SNP_P4_6321_13007590 | NC_021160.1    | Ca_kabuli_chr01 | 13007590                | CC                              | AA              | 1946728579               |
| SNP_P4_6322_13007861 | NC_021160.1    | Ca_kabuli_chr01 | 13007861                | TT                              | GG              | 1946728581               |
| SNP_P4_6323_13008096 | NC_021160.1    | Ca_kabuli_chr01 | 13008096                | CC                              | TT              | 1946728583               |
| SNP_P4_6324_13008103 | NC_021160.1    | Ca_kabuli_chr01 | 13008103                | CC                              | TT              | 1946728585               |
| SNP_P4_6325_13008184 | NC_021160.1    | Ca_kabuli_chr01 | 13008184                | TT                              | CC              | 1946728587               |
| SNP_P4_6326_13008220 | NC_021160.1    | Ca_kabuli_chr01 | 13008220                | CC                              | TT              | 1946728589               |
| SNP_P4_6327_13008592 | NC_021160.1    | Ca_kabuli_chr01 | 13008592                | CC                              | AA              | 1946728591               |
| SNP_P4_6328_13008921 | NC_021160.1    | Ca_kabuli_chr01 | 13008921                | TT                              | CC              | 1946728593               |
| SNP_P4_6329_13009200 | NC_021160.1    | Ca_kabuli_chr01 | 13009200                | AA                              | CC              | 1946728594               |
| SNP_P4_6330_13009592 | NC_021160.1    | Ca_kabuli_chr01 | 13009592                | GG                              | AA              | 1946728596               |
| SNP_P4_6331_13012157 | NC_021160.1    | Ca_kabuli_chr01 | 13012157                | CC                              | TT              | 1946728598               |
| SNP_P4_6333_13012574 | NC_021160.1    | Ca_kabuli_chr01 | 13012574                | TT                              | CC              | 1946728600               |
| SNP_P4_6334_13012935 | NC_021160.1    | Ca_kabuli_chr01 | 13012935                | AA                              | TT              | 1946728602               |
| SNP_P4_6335_13014333 | NC_021160.1    | Ca_kabuli_chr01 | 13014333                | GG                              | AA              | 1946728604               |
| SNP_P4_6336_13014360 | NC_021160.1    | Ca_kabuli_chr01 | 13014360                | AA                              | GG              | 1946728606               |
| SNP_P4_6337_13014373 | NC_021160.1    | Ca_kabuli_chr01 | 13014373                | TT                              | CC              | 1946728608               |
| SNP_P4_6338_13014374 | NC_021160.1    | Ca_kabuli_chr01 | 13014374                | TT                              | GG              | 1946728610               |
| SNP_P4_6339_13024000 | NC_021160.1    | Ca_kabuli_chr01 | 13024000                | CC                              | TT              | 1946728612               |
| SNP_P4_6340_13049053 | NC_021160.1    | Ca_kabuli_chr01 | 13049053                | CC                              | TT              | 1946728614               |
| SNP_P4_6341_13069193 | NC_021160.1    | Ca_kabuli_chr01 | 13069193                | AA                              | GG              | 1946728616               |
| SNP_P4_6342_13087254 | NC_021160.1    | Ca_kabuli_chr01 | 13087254                | GG                              | CC              | 1946728618               |
| SNP_P4_6343_13097917 | NC_021160.1    | Ca_kabuli_chr01 | 13097917                | TT                              | AA              | 1946728620               |
| SNP_P4_6344_13124920 | NC_021160.1    | Ca_kabuli_chr01 | 13124920                | CC                              | TT              | 1946728622               |
| SNP_P4_6345_13124956 | NC_021160.1    | Ca_kabuli_chr01 | 13124956                | CC                              | TT              | 1946728624               |
| SNP_P4_6346_13174737 | NC_021160.1    | Ca_kabuli_chr01 | 13174737                | CC                              | TT              | 1946728626               |
| SNP_P4_6347_13187766 | NC_021160.1    | Ca_kabuli_chr01 | 13187766                | TT                              | AA              | 1946728628               |
| SNP_P4_6348_13190277 | NC_021160.1    | Ca_kabuli_chr01 | 13190277                | TT                              | CC              | 1946728630               |
| SNP_P4_6349_13196233 | NC_021160.1    | Ca_kabuli_chr01 | 13196233                | AA                              | TT              | 1946728632               |
| SNP_P4_6350_13212187 | NC_021160.1    | Ca_kabuli_chr01 | 13212187                | AA                              | TT              | 1946728634               |
| SNP_P4_6352_13274667 | NC_021160.1    | Ca_kabuli_chr01 | 13274667                | TT                              | CC              | 1946728636               |
| SNP_P4_6353_13278139 | NC_021160.1    | Ca_kabuli_chr01 | 13278139                | GG                              | AA              | 1946728638               |
| SNP_P4_6354_13283885 | NC_021160.1    | Ca_kabuli_chr01 | 13283885                | AA                              | TT              | 1946728640               |
| SNP_P4_6356_13303775 | NC_021160.1    | Ca_kabuli_chr01 | 13303775                | CC                              | TT              | 1946728642               |
| SNP_P4_6357_13303779 | NC_021160.1    | Ca_kabuli_chr01 | 13303779                | TT                              | AA              | 1946728644               |

| SNPs IDs             | Chromosome IDs | Chromosomes     | Physical positions (bp) | CDC Frontier (Reference genome) | (ILWC46 & LPNB) | NCBI SNPdb Accession IDs |
|----------------------|----------------|-----------------|-------------------------|---------------------------------|-----------------|--------------------------|
| SNP_P4_6358_13312947 | NC_021160.1    | Ca_kabuli_chr01 | 13312947                | AA                              | TT              | 1946728646               |
| SNP_P4_6359_13315152 | NC_021160.1    | Ca_kabuli_chr01 | 13315152                | TT                              | CC              | 1946728648               |
| SNP_P4_6360_13315153 | NC_021160.1    | Ca_kabuli_chr01 | 13315153                | AA                              | GG              | 1946728650               |
| SNP_P4_6362_13342389 | NC_021160.1    | Ca_kabuli_chr01 | 13342389                | TT                              | AA              | 1946728652               |
| SNP_P4_6363_13342393 | NC_021160.1    | Ca_kabuli_chr01 | 13342393                | AA                              | TT              | 1946728654               |
| SNP_P4_6364_13387244 | NC_021160.1    | Ca_kabuli_chr01 | 13387244                | AA                              | GG              | 1946728656               |
| SNP_P4_6365_13387701 | NC_021160.1    | Ca_kabuli_chr01 | 13387701                | AA                              | CC              | 1946728658               |
| SNP_P4_6366_13387706 | NC_021160.1    | Ca_kabuli_chr01 | 13387706                | AA                              | GG              | 1946728660               |
| SNP_P4_6369_13534338 | NC_021160.1    | Ca_kabuli_chr01 | 13534338                | AA                              | TT              | 1946728662               |
| SNP_P4_6370_13548879 | NC_021160.1    | Ca_kabuli_chr01 | 13548879                | GG                              | AA              | 1946728664               |
| SNP_P4_6371_13548973 | NC_021160.1    | Ca_kabuli_chr01 | 13548973                | AA                              | CC              | 1946728666               |
| SNP_P4_6372_13570757 | NC_021160.1    | Ca_kabuli_chr01 | 13570757                | TT                              | CC              | 1946728668               |
| SNP_P4_6374_13598885 | NC_021160.1    | Ca_kabuli_chr01 | 13598885                | AA                              | GG              | 1946728670               |
| SNP_P4_6375_13661039 | NC_021160.1    | Ca_kabuli_chr01 | 13661039                | TT                              | CC              | 1946728672               |
| SNP_P4_6377_13671469 | NC_021160.1    | Ca_kabuli_chr01 | 13671469                | AA                              | CC              | 1946728674               |
| SNP_P4_6378_13671652 | NC_021160.1    | Ca_kabuli_chr01 | 13671652                | CC                              | TT              | 1946728676               |
| SNP_P4_6379_13671693 | NC_021160.1    | Ca_kabuli_chr01 | 13671693                | AA                              | GG              | 1946728678               |
| SNP_P4_6380_13671745 | NC_021160.1    | Ca_kabuli_chr01 | 13671745                | AA                              | CC              | 1946728680               |
| SNP_P4_6381_13671762 | NC_021160.1    | Ca_kabuli_chr01 | 13671762                | CC                              | AA              | 1946728682               |
| SNP_P4_6382_13671803 | NC_021160.1    | Ca_kabuli_chr01 | 13671803                | AA                              | GG              | 1946728684               |
| SNP_P4_6384_13675523 | NC_021160.1    | Ca_kabuli_chr01 | 13675523                | AA                              | GG              | 1946728686               |
| SNP_P4_6386_13676224 | NC_021160.1    | Ca_kabuli_chr01 | 13676224                | CC                              | AA              | 1946728688               |
| SNP_P4_6389_13676284 | NC_021160.1    | Ca_kabuli_chr01 | 13676284                | CC                              | AA              | 1946728690               |
| SNP_P4_6390_13676455 | NC_021160.1    | Ca_kabuli_chr01 | 13676455                | TT                              | CC              | 1946728692               |
| SNP_P4_6392_13676534 | NC_021160.1    | Ca_kabuli_chr01 | 13676534                | CC                              | TT              | 1946728694               |
| SNP_P4_6394_13677284 | NC_021160.1    | Ca_kabuli_chr01 | 13677284                | TT                              | AA              | 1946728696               |
| SNP_P4_6398_13678797 | NC_021160.1    | Ca_kabuli_chr01 | 13678797                | GG                              | AA              | 1946728698               |
| SNP_P4_6399_13679252 | NC_021160.1    | Ca_kabuli_chr01 | 13679252                | CC                              | AA              | 1946728700               |
| SNP_P4_6400_13679280 | NC_021160.1    | Ca_kabuli_chr01 | 13679280                | AA                              | GG              | 1946728702               |
| SNP_P4_6401_13679364 | NC_021160.1    | Ca_kabuli_chr01 | 13679364                | CC                              | AA              | 1946728704               |
| SNP_P4_6403_13679837 | NC_021160.1    | Ca_kabuli_chr01 | 13679837                | CC                              | TT              | 1946728706               |
| SNP_P4_6404_13680539 | NC_021160.1    | Ca_kabuli_chr01 | 13680539                | CC                              | GG              | 1946728708               |
| SNP_P4_6406_13682311 | NC_021160.1    | Ca_kabuli_chr01 | 13682311                | CC                              | TT              | 1946728710               |
| SNP_P4_6407_13682344 | NC_021160.1    | Ca_kabuli_chr01 | 13682344                | AA                              | CC              | 1946728712               |
| SNP_P4_6408_13682666 | NC_021160.1    | Ca_kabuli_chr01 | 13682666                | TT                              | AA              | 1946728714               |
| SNP_P4_6409_13683550 | NC_021160.1    | Ca_kabuli_chr01 | 13683550                | AA                              | TT              | 1946728716               |
| SNP_P4_6410_13683607 | NC_021160.1    | Ca_kabuli_chr01 | 13683607                | CC                              | TT              | 1946728718               |
| SNP_P4_6411_13683611 | NC_021160.1    | Ca_kabuli_chr01 | 13683611                | GG                              | AA              | 1946728720               |
| SNP_P4_6412_13684399 | NC_021160.1    | Ca_kabuli_chr01 | 13684399                | TT                              | AA              | 1946728722               |
| SNP_P4_6413_13684641 | NC_021160.1    | Ca_kabuli_chr01 | 13684641                | GG                              | AA              | 1946728724               |
| SNP_P4_6414_13685187 | NC_021160.1    | Ca_kabuli_chr01 | 13685187                | CC                              | AA              | 1946728726               |
| SNP_P4_6415_13685298 | NC_021160.1    | Ca_kabuli_chr01 | 13685298                | GG                              | TT              | 1946728729               |

| SNPs IDs             | Chromosome IDs | Chromosomes     | Physical positions (bp) | CDC Frontier (Reference genome) | (ILWC46 & LPNB) | NCBI SNPdb Accession IDs |
|----------------------|----------------|-----------------|-------------------------|---------------------------------|-----------------|--------------------------|
| SNP_P4_6416_13685304 | NC_021160.1    | Ca_kabuli_chr01 | 13685304                | GG                              | TT              | 1946728731               |
| SNP_P4_6418_13685782 | NC_021160.1    | Ca_kabuli_chr01 | 13685782                | CC                              | GG              | 1946728733               |
| SNP_P4_6419_13685822 | NC_021160.1    | Ca_kabuli_chr01 | 13685822                | CC                              | TT              | 1946728735               |
| SNP_P4_6420_13686297 | NC_021160.1    | Ca_kabuli_chr01 | 13686297                | AA                              | TT              | 1946728737               |
| SNP_P4_6422_13686712 | NC_021160.1    | Ca_kabuli_chr01 | 13686712                | TT                              | GG              | 1946728739               |
| SNP_P4_6424_13686770 | NC_021160.1    | Ca_kabuli_chr01 | 13686770                | AA                              | GG              | 1946728741               |
| SNP_P4_6425_13688181 | NC_021160.1    | Ca_kabuli_chr01 | 13688181                | AA                              | TT              | 1946728743               |
| SNP_P4_6426_13688196 | NC_021160.1    | Ca_kabuli_chr01 | 13688196                | GG                              | AA              | 1946728745               |
| SNP_P4_6427_13688346 | NC_021160.1    | Ca_kabuli_chr01 | 13688346                | CC                              | TT              | 1946728747               |
| SNP_P4_6428_13688348 | NC_021160.1    | Ca_kabuli_chr01 | 13688348                | GG                              | AA              | 1946728749               |
| SNP_P4_6429_13688589 | NC_021160.1    | Ca_kabuli_chr01 | 13688589                | GG                              | AA              | 1946728751               |
| SNP_P4_6430_13689461 | NC_021160.1    | Ca_kabuli_chr01 | 13689461                | TT                              | CC              | 1946728753               |
| SNP_P4_6431_13689847 | NC_021160.1    | Ca_kabuli_chr01 | 13689847                | AA                              | GG              | 1946728755               |
| SNP_P4_6432_13690050 | NC_021160.1    | Ca_kabuli_chr01 | 13690050                | TT                              | CC              | 1946728757               |
| SNP_P4_6433_13690094 | NC_021160.1    | Ca_kabuli_chr01 | 13690094                | GG                              | AA              | 1946728759               |
| SNP_P4_6434_13690203 | NC_021160.1    | Ca_kabuli_chr01 | 13690203                | AA                              | TT              | 1946728761               |
| SNP_P4_6435_13690207 | NC_021160.1    | Ca_kabuli_chr01 | 13690207                | AA                              | TT              | 1946728763               |
| SNP_P4_6437_13691139 | NC_021160.1    | Ca_kabuli_chr01 | 13691139                | GG                              | TT              | 1946728765               |
| SNP_P4_6438_13691392 | NC_021160.1    | Ca_kabuli_chr01 | 13691392                | AA                              | GG              | 1946728767               |
| SNP_P4_6439_13693497 | NC_021160.1    | Ca_kabuli_chr01 | 13693497                | CC                              | GG              | 1946728769               |
| SNP_P4_6440_13693542 | NC_021160.1    | Ca_kabuli_chr01 | 13693542                | AA                              | TT              | 1946728771               |
| SNP_P4_6441_13693610 | NC_021160.1    | Ca_kabuli_chr01 | 13693610                | CC                              | TT              | 1946728773               |
| SNP_P4_6442_13693633 | NC_021160.1    | Ca_kabuli_chr01 | 13693633                | TT                              | AA              | 1946728775               |
| SNP_P4_6443_13693781 | NC_021160.1    | Ca_kabuli_chr01 | 13693781                | TT                              | AA              | 1946728777               |
| SNP_P4_6444_13693827 | NC_021160.1    | Ca_kabuli_chr01 | 13693827                | CC                              | AA              | 1946728779               |
| SNP_P4_6445_13694557 | NC_021160.1    | Ca_kabuli_chr01 | 13694557                | AA                              | GG              | 1946728781               |
| SNP_P4_6446_13694567 | NC_021160.1    | Ca_kabuli_chr01 | 13694567                | GG                              | AA              | 1946728783               |
| SNP_P4_6447_13694603 | NC_021160.1    | Ca_kabuli_chr01 | 13694603                | GG                              | AA              | 1946728785               |
| SNP_P4_6448_13694630 | NC_021160.1    | Ca_kabuli_chr01 | 13694630                | AA                              | GG              | 1946728787               |
| SNP_P4_6449_13695708 | NC_021160.1    | Ca_kabuli_chr01 | 13695708                | TT                              | AA              | 1946728789               |
| SNP_P4_6450_13695729 | NC_021160.1    | Ca_kabuli_chr01 | 13695729                | AA                              | TT              | 1946728791               |
| SNP_P4_6451_13695847 | NC_021160.1    | Ca_kabuli_chr01 | 13695847                | AA                              | GG              | 1946728793               |
| SNP_P4_6452_13695900 | NC_021160.1    | Ca_kabuli_chr01 | 13695900                | GG                              | AA              | 1946728795               |
| SNP_P4_6453_13696344 | NC_021160.1    | Ca_kabuli_chr01 | 13696344                | CC                              | TT              | 1946728797               |
| SNP_P4_6456_13699547 | NC_021160.1    | Ca_kabuli_chr01 | 13699547                | AA                              | GG              | 1946728800               |
| SNP_P4_6457_13699742 | NC_021160.1    | Ca_kabuli_chr01 | 13699742                | AA                              | GG              | 1946728802               |
| SNP_P4_6458_13700704 | NC_021160.1    | Ca_kabuli_chr01 | 13700704                | CC                              | TT              | 1946728804               |
| SNP_P4_6459_13700713 | NC_021160.1    | Ca_kabuli_chr01 | 13700713                | TT                              | AA              | 1946728806               |
| SNP_P4_6460_13701790 | NC_021160.1    | Ca_kabuli_chr01 | 13701790                | GG                              | AA              | 1946728808               |
| SNP_P4_6462_13701877 | NC_021160.1    | Ca_kabuli_chr01 | 13701877                | TT                              | GG              | 1946728810               |
| SNP_P4_6463_13702627 | NC_021160.1    | Ca_kabuli_chr01 | 13702627                | CC                              | AA              | 1946728811               |
| SNP_P4_6464_13703097 | NC_021160.1    | Ca_kabuli_chr01 | 13703097                | CC                              | GG              | 1946728813               |

| SNPs IDs             | Chromosome IDs | Chromosomes     | Physical positions (bp) | CDC Frontier (Reference genome) | (ILWC46 & LPNB) | NCBI SNPdb Accession IDs |
|----------------------|----------------|-----------------|-------------------------|---------------------------------|-----------------|--------------------------|
| SNP_P4_6465_13703140 | NC_021160.1    | Ca_kabuli_chr01 | 13703140                | GG                              | AA              | 1946728815               |
| SNP_P4_6466_13704004 | NC_021160.1    | Ca_kabuli_chr01 | 13704004                | GG                              | AA              | 1946728817               |
| SNP_P4_6467_13704327 | NC_021160.1    | Ca_kabuli_chr01 | 13704327                | CC                              | TT              | 1946728819               |
| SNP_P4_6468_13704371 | NC_021160.1    | Ca_kabuli_chr01 | 13704371                | CC                              | AA              | 1946728821               |
| SNP_P4_6469_13704631 | NC_021160.1    | Ca_kabuli_chr01 | 13704631                | CC                              | TT              | 1946728823               |
| SNP_P4_6471_13704744 | NC_021160.1    | Ca_kabuli_chr01 | 13704744                | GG                              | TT              | 1946728825               |
| SNP_P4_6472_13710442 | NC_021160.1    | Ca_kabuli_chr01 | 13710442                | CC                              | TT              | 1946728827               |
| SNP_P4_6475_13731556 | NC_021160.1    | Ca_kabuli_chr01 | 13731556                | GG                              | AA              | 1946728829               |
| SNP_P4_6476_13745197 | NC_021160.1    | Ca_kabuli_chr01 | 13745197                | CC                              | TT              | 1946728831               |
| SNP_P4_6477_13745718 | NC_021160.1    | Ca_kabuli_chr01 | 13745718                | TT                              | CC              | 1946728833               |
| SNP_P4_6478_13748101 | NC_021160.1    | Ca_kabuli_chr01 | 13748101                | AA                              | TT              | 1946728835               |
| SNP_P4_6480_13748781 | NC_021160.1    | Ca_kabuli_chr01 | 13748781                | AA                              | TT              | 1946728837               |
| SNP_P4_6483_13769176 | NC_021160.1    | Ca_kabuli_chr01 | 13769176                | TT                              | AA              | 1946728839               |
| SNP_P4_6485_13800669 | NC_021160.1    | Ca_kabuli_chr01 | 13800669                | GG                              | TT              | 1946728841               |
| SNP_P4_6487_13885927 | NC_021160.1    | Ca_kabuli_chr01 | 13885927                | CC                              | GG              | 1946728843               |
| SNP_P4_6488_13902821 | NC_021160.1    | Ca_kabuli_chr01 | 13902821                | GG                              | AA              | 1946728845               |
| SNP_P4_6489_13903291 | NC_021160.1    | Ca_kabuli_chr01 | 13903291                | AA                              | TT              | 1946728847               |
| SNP_P4_6490_13903314 | NC_021160.1    | Ca_kabuli_chr01 | 13903314                | AA                              | GG              | 1946728849               |
| SNP_P4_6491_13903319 | NC_021160.1    | Ca_kabuli_chr01 | 13903319                | CC                              | AA              | 1946728850               |
| SNP_P4_6492_13903378 | NC_021160.1    | Ca_kabuli_chr01 | 13903378                | TT                              | CC              | 1946728852               |
| SNP_P4_6493_13921243 | NC_021160.1    | Ca_kabuli_chr01 | 13921243                | GG                              | AA              | 1946728854               |
| SNP_P4_6494_13921517 | NC_021160.1    | Ca_kabuli_chr01 | 13921517                | GG                              | AA              | 1946728856               |
| SNP_P4_6495_13921530 | NC_021160.1    | Ca_kabuli_chr01 | 13921530                | AA                              | TT              | 1946728858               |
| SNP_P4_6497_13939772 | NC_021160.1    | Ca_kabuli_chr01 | 13939772                | TT                              | CC              | 1946728860               |
| SNP_P4_6498_13960731 | NC_021160.1    | Ca_kabuli_chr01 | 13960731                | GG                              | AA              | 1946728862               |
| SNP_P4_6499_13960994 | NC_021160.1    | Ca_kabuli_chr01 | 13960994                | GG                              | TT              | 1946728864               |
| SNP_P4_6500_13961023 | NC_021160.1    | Ca_kabuli_chr01 | 13961023                | GG                              | AA              | 1946728867               |
| SNP_P4_6501_13961054 | NC_021160.1    | Ca_kabuli_chr01 | 13961054                | GG                              | AA              | 1946728869               |
| SNP_P4_6502_13961089 | NC_021160.1    | Ca_kabuli_chr01 | 13961089                | AA                              | GG              | 1946728871               |
| SNP_P4_6503_13966040 | NC_021160.1    | Ca_kabuli_chr01 | 13966040                | AA                              | GG              | 1946728873               |
| SNP_P4_6504_14010880 | NC_021160.1    | Ca_kabuli_chr01 | 14010880                | TT                              | CC              | 1946728875               |
| SNP_P4_6505_14011319 | NC_021160.1    | Ca_kabuli_chr01 | 14011319                | AA                              | CC              | 1946728877               |
| SNP_P4_6506_14013687 | NC_021160.1    | Ca_kabuli_chr01 | 14013687                | CC                              | AA              | 1946728879               |
| SNP_P4_6507_14024367 | NC_021160.1    | Ca_kabuli_chr01 | 14024367                | TT                              | CC              | 1946728881               |
| SNP_P4_6508_14037732 | NC_021160.1    | Ca_kabuli_chr01 | 14037732                | CC                              | TT              | 1946728883               |
| SNP_P4_6509_14059017 | NC_021160.1    | Ca_kabuli_chr01 | 14059017                | CC                              | TT              | 1946728885               |
| SNP_P4_6510_14059911 | NC_021160.1    | Ca_kabuli_chr01 | 14059911                | AA                              | GG              | 1946728887               |
| SNP_P4_6511_14062041 | NC_021160.1    | Ca_kabuli_chr01 | 14062041                | TT                              | CC              | 1946728889               |
| SNP_P4_6512_14062744 | NC_021160.1    | Ca_kabuli_chr01 | 14062744                | GG                              | AA              | 1946728891               |
| SNP_P4_6513_14066918 | NC_021160.1    | Ca_kabuli_chr01 | 14066918                | CC                              | GG              | 1946728893               |
| SNP_P4_6514_14079439 | NC_021160.1    | Ca_kabuli_chr01 | 14079439                | GG                              | AA              | 1946728895               |
| SNP_P4_6515_14106609 | NC_021160.1    | Ca_kabuli_chr01 | 14106609                | AA                              | TT              | 1946728897               |

| SNPs IDs             | Chromosome IDs | Chromosomes     | Physical positions (bp) | CDC Frontier (Reference genome) | (ILWC46 & LPNB) | NCBI SNPdb Accession IDs |
|----------------------|----------------|-----------------|-------------------------|---------------------------------|-----------------|--------------------------|
| SNP_P4_6516_14126072 | NC_021160.1    | Ca_kabuli_chr01 | 14126072                | TT                              | CC              | 1946728899               |
| SNP_P4_6517_14131061 | NC_021160.1    | Ca_kabuli_chr01 | 14131061                | GG                              | AA              | 1946728901               |
| SNP_P4_6518_14151607 | NC_021160.1    | Ca_kabuli_chr01 | 14151607                | CC                              | GG              | 1946728903               |
| SNP_P4_6519_14175125 | NC_021160.1    | Ca_kabuli_chr01 | 14175125                | GG                              | AA              | 1946728905               |
| SNP_P4_6520_14207015 | NC_021160.1    | Ca_kabuli_chr01 | 14207015                | AA                              | GG              | 1946728907               |
| SNP_P4_6521_14207229 | NC_021160.1    | Ca_kabuli_chr01 | 14207229                | AA                              | TT              | 1946728909               |
| SNP_P4_6522_14207388 | NC_021160.1    | Ca_kabuli_chr01 | 14207388                | AA                              | GG              | 1946728911               |
| SNP_P4_6523_14207527 | NC_021160.1    | Ca_kabuli_chr01 | 14207527                | GG                              | AA              | 1946728913               |
| SNP_P4_6524_14207546 | NC_021160.1    | Ca_kabuli_chr01 | 14207546                | CC                              | AA              | 1946728915               |
| SNP_P4_6525_14209683 | NC_021160.1    | Ca_kabuli_chr01 | 14209683                | TT                              | AA              | 1946728917               |
| SNP_P4_6526_14209737 | NC_021160.1    | Ca_kabuli_chr01 | 14209737                | TT                              | AA              | 1946728919               |
| SNP_P4_6527_14209762 | NC_021160.1    | Ca_kabuli_chr01 | 14209762                | TT                              | GG              | 1946728921               |
| SNP_P4_6528_14209764 | NC_021160.1    | Ca_kabuli_chr01 | 14209764                | GG                              | AA              | 1946728923               |
| SNP_P4_6529_14209774 | NC_021160.1    | Ca_kabuli_chr01 | 14209774                | GG                              | AA              | 1946728925               |
| SNP_P4_6530_14209786 | NC_021160.1    | Ca_kabuli_chr01 | 14209786                | AA                              | GG              | 1946728927               |
| SNP_P4_6531_14209806 | NC_021160.1    | Ca_kabuli_chr01 | 14209806                | AA                              | GG              | 1946728929               |
| SNP_P4_6532_14209815 | NC_021160.1    | Ca_kabuli_chr01 | 14209815                | AA                              | GG              | 1946728931               |
| SNP_P4_6533_14209821 | NC_021160.1    | Ca_kabuli_chr01 | 14209821                | CC                              | GG              | 1946728933               |
| SNP_P4_6534_14209825 | NC_021160.1    | Ca_kabuli_chr01 | 14209825                | TT                              | GG              | 1946728935               |
| SNP_P4_6535_14209840 | NC_021160.1    | Ca_kabuli_chr01 | 14209840                | AA                              | GG              | 1946728937               |
| SNP_P4_6536_14209862 | NC_021160.1    | Ca_kabuli_chr01 | 14209862                | TT                              | AA              | 1946728939               |
| SNP_P4_6537_14209877 | NC_021160.1    | Ca_kabuli_chr01 | 14209877                | AA                              | TT              | 1946728941               |
| SNP_P4_6538_14209890 | NC_021160.1    | Ca_kabuli_chr01 | 14209890                | CC                              | AA              | 1946728943               |
| SNP_P4_6539_14209903 | NC_021160.1    | Ca_kabuli_chr01 | 14209903                | AA                              | GG              | 1946728945               |
| SNP_P4_6540_14209905 | NC_021160.1    | Ca_kabuli_chr01 | 14209905                | GG                              | TT              | 1946728947               |
| SNP_P4_6541_14209940 | NC_021160.1    | Ca_kabuli_chr01 | 14209940                | AA                              | TT              | 1946728949               |
| SNP_P4_6542_14209943 | NC_021160.1    | Ca_kabuli_chr01 | 14209943                | TT                              | AA              | 1946728951               |
| SNP_P4_6543_14210042 | NC_021160.1    | Ca_kabuli_chr01 | 14210042                | AA                              | CC              | 1946728953               |
| SNP_P4_6544_14210121 | NC_021160.1    | Ca_kabuli_chr01 | 14210121                | AA                              | TT              | 1946728955               |
| SNP_P4_6545_14210128 | NC_021160.1    | Ca_kabuli_chr01 | 14210128                | CC                              | TT              | 1946728957               |
| SNP_P4_6546_14210134 | NC_021160.1    | Ca_kabuli_chr01 | 14210134                | AA                              | CC              | 1946728959               |
| SNP_P4_6547_14210192 | NC_021160.1    | Ca_kabuli_chr01 | 14210192                | AA                              | CC              | 1946728961               |
| SNP_P4_6548_14210194 | NC_021160.1    | Ca_kabuli_chr01 | 14210194                | CC                              | TT              | 1946728963               |
| SNP_P4_6549_14210195 | NC_021160.1    | Ca_kabuli_chr01 | 14210195                | AA                              | GG              | 1946728965               |
| SNP_P4_6550_14210197 | NC_021160.1    | Ca_kabuli_chr01 | 14210197                | AA                              | GG              | 1946728967               |
| SNP_P4_6551_14210206 | NC_021160.1    | Ca_kabuli_chr01 | 14210206                | GG                              | AA              | 1946728969               |
| SNP_P4_6552_14210210 | NC_021160.1    | Ca_kabuli_chr01 | 14210210                | CC                              | GG              | 1946728971               |
| SNP_P4_6553_14210221 | NC_021160.1    | Ca_kabuli_chr01 | 14210221                | CC                              | TT              | 1946728974               |
| SNP_P4_6554_14210224 | NC_021160.1    | Ca_kabuli_chr01 | 14210224                | AA                              | TT              | 1946728976               |
| SNP_P4_6555_14210227 | NC_021160.1    | Ca_kabuli_chr01 | 14210227                | TT                              | CC              | 1946728979               |
| SNP_P4_6556_14210232 | NC_021160.1    | Ca_kabuli_chr01 | 14210232                | TT                              | CC              | 1946728981               |
| SNP_P4_6557_14210275 | NC_021160.1    | Ca_kabuli_chr01 | 14210275                | CC                              | TT              | 1946728984               |

| SNPs IDs             | Chromosome IDs | Chromosomes     | Physical positions (bp) | CDC Frontier (Reference genome) | (ILWC46 & LPNB) | NCBI SNPdb Accession IDs |
|----------------------|----------------|-----------------|-------------------------|---------------------------------|-----------------|--------------------------|
| SNP_P4_6558_14210278 | NC_021160.1    | Ca_kabuli_chr01 | 14210278                | CC                              | TT              | 1946728987               |
| SNP_P4_6559_14210327 | NC_021160.1    | Ca_kabuli_chr01 | 14210327                | GG                              | AA              | 1946728989               |
| SNP_P4_6560_14210389 | NC_021160.1    | Ca_kabuli_chr01 | 14210389                | CC                              | GG              | 1946728991               |
| SNP_P4_6561_14221104 | NC_021160.1    | Ca_kabuli_chr01 | 14221104                | TT                              | CC              | 1946728993               |
| SNP_P4_6562_14244775 | NC_021160.1    | Ca_kabuli_chr01 | 14244775                | GG                              | TT              | 1946728995               |
| SNP_P4_6563_14244789 | NC_021160.1    | Ca_kabuli_chr01 | 14244789                | AA                              | TT              | 1946728997               |
| SNP_P4_6564_14244799 | NC_021160.1    | Ca_kabuli_chr01 | 14244799                | AA                              | TT              | 1946728999               |
| SNP_P4_6565_14244816 | NC_021160.1    | Ca_kabuli_chr01 | 14244816                | CC                              | TT              | 1946729001               |
| SNP_P4_6567_14339192 | NC_021160.1    | Ca_kabuli_chr01 | 14339192                | TT                              | GG              | 1946729003               |
| SNP_P4_6568_14339224 | NC_021160.1    | Ca_kabuli_chr01 | 14339224                | AA                              | TT              | 1946729005               |
| SNP_P4_6569_14339229 | NC_021160.1    | Ca_kabuli_chr01 | 14339229                | AA                              | GG              | 1946729006               |
| SNP_P4_6571_14382149 | NC_021160.1    | Ca_kabuli_chr01 | 14382149                | TT                              | CC              | 1946729008               |
| SNP_P4_6572_14382367 | NC_021160.1    | Ca_kabuli_chr01 | 14382367                | TT                              | CC              | 1946729010               |
| SNP_P4_6573_14382370 | NC_021160.1    | Ca_kabuli_chr01 | 14382370                | TT                              | CC              | 1946729012               |
| SNP_P4_6574_14382402 | NC_021160.1    | Ca_kabuli_chr01 | 14382402                | CC                              | TT              | 1946729014               |
| SNP_P4_6575_14382424 | NC_021160.1    | Ca_kabuli_chr01 | 14382424                | AA                              | GG              | 1946729016               |
| SNP_P4_6576_14382512 | NC_021160.1    | Ca_kabuli_chr01 | 14382512                | TT                              | CC              | 1946729018               |
| SNP_P4_6577_14382549 | NC_021160.1    | Ca_kabuli_chr01 | 14382549                | AA                              | CC              | 1946729020               |
| SNP_P4_6578_14382550 | NC_021160.1    | Ca_kabuli_chr01 | 14382550                | TT                              | CC              | 1946729022               |
| SNP_P4_6579_14382563 | NC_021160.1    | Ca_kabuli_chr01 | 14382563                | AA                              | TT              | 1946729024               |
| SNP_P4_6580_14382564 | NC_021160.1    | Ca_kabuli_chr01 | 14382564                | TT                              | GG              | 1946729026               |
| SNP_P4_6581_14382565 | NC_021160.1    | Ca_kabuli_chr01 | 14382565                | CC                              | AA              | 1946729028               |
| SNP_P4_6582_14382606 | NC_021160.1    | Ca_kabuli_chr01 | 14382606                | GG                              | AA              | 1946729030               |
| SNP_P4_6583_14382747 | NC_021160.1    | Ca_kabuli_chr01 | 14382747                | CC                              | TT              | 1946729032               |
| SNP_P4_6584_14382751 | NC_021160.1    | Ca_kabuli_chr01 | 14382751                | CC                              | TT              | 1946729034               |
| SNP_P4_6585_14382753 | NC_021160.1    | Ca_kabuli_chr01 | 14382753                | GG                              | CC              | 1946729036               |
| SNP_P4_6586_14382806 | NC_021160.1    | Ca_kabuli_chr01 | 14382806                | TT                              | GG              | 1946729038               |
| SNP_P4_6587_14382813 | NC_021160.1    | Ca_kabuli_chr01 | 14382813                | CC                              | GG              | 1946729040               |
| SNP_P4_6588_14382827 | NC_021160.1    | Ca_kabuli_chr01 | 14382827                | CC                              | TT              | 1946729042               |
| SNP_P4_6592_14483788 | NC_021160.1    | Ca_kabuli_chr01 | 14483788                | TT                              | GG              | 1946729044               |
| SNP_P4_6593_14495605 | NC_021160.1    | Ca_kabuli_chr01 | 14495605                | GG                              | CC              | 1946729046               |
| SNP_P4_6595_14542132 | NC_021160.1    | Ca_kabuli_chr01 | 14542132                | CC                              | TT              | 1946729048               |
| SNP_P4_6596_14542153 | NC_021160.1    | Ca_kabuli_chr01 | 14542153                | GG                              | TT              | 1946729050               |
| SNP_P4_6600_14670788 | NC_021160.1    | Ca_kabuli_chr01 | 14670788                | AA                              | CC              | 1946729052               |
| SNP_P4_6601_14671105 | NC_021160.1    | Ca_kabuli_chr01 | 14671105                | AA                              | GG              | 1946729054               |
| SNP_P4_6602_14686158 | NC_021160.1    | Ca_kabuli_chr01 | 14686158                | AA                              | TT              | 1946729056               |
| SNP_P4_6603_14693359 | NC_021160.1    | Ca_kabuli_chr01 | 14693359                | AA                              | GG              | 1946729058               |
| SNP_P4_6604_14702639 | NC_021160.1    | Ca_kabuli_chr01 | 14702639                | GG                              | AA              | 1946729060               |
| SNP_P4_6605_14765822 | NC_021160.1    | Ca_kabuli_chr01 | 14765822                | TT                              | AA              | 1946729062               |
| SNP_P4_6606_14766146 | NC_021160.1    | Ca_kabuli_chr01 | 14766146                | GG                              | AA              | 1946729064               |
| SNP_P4_6607_14767582 | NC_021160.1    | Ca_kabuli_chr01 | 14767582                | TT                              | CC              | 1946729066               |
| SNP_P4_6608_14769542 | NC_021160.1    | Ca_kabuli_chr01 | 14769542                | CC                              | TT              | 1946729067               |

| SNPs IDs             | Chromosome IDs | Chromosomes     | Physical positions (bp) | CDC Frontier (Reference genome) | (ILWC46 & LPNB) | NCBI SNPdb Accession IDs |
|----------------------|----------------|-----------------|-------------------------|---------------------------------|-----------------|--------------------------|
| SNP_P4_6609_14771058 | NC_021160.1    | Ca_kabuli_chr01 | 14771058                | AA                              | GG              | 1946729069               |
| SNP_P4_6612_14842691 | NC_021160.1    | Ca_kabuli_chr01 | 14842691                | AA                              | GG              | 1946729071               |
| SNP_P4_6613_14842803 | NC_021160.1    | Ca_kabuli_chr01 | 14842803                | AA                              | CC              | 1946729073               |
| SNP_P4_6614_14843014 | NC_021160.1    | Ca_kabuli_chr01 | 14843014                | TT                              | AA              | 1946729075               |
| SNP_P4_6615_14843027 | NC_021160.1    | Ca_kabuli_chr01 | 14843027                | TT                              | AA              | 1946729077               |
| SNP_P4_6616_14843212 | NC_021160.1    | Ca_kabuli_chr01 | 14843212                | GG                              | AA              | 1946729079               |
| SNP_P4_6617_14843227 | NC_021160.1    | Ca_kabuli_chr01 | 14843227                | TT                              | AA              | 1946729081               |
| SNP_P4_6618_14844046 | NC_021160.1    | Ca_kabuli_chr01 | 14844046                | CC                              | TT              | 1946729083               |
| SNP_P4_6619_14848575 | NC_021160.1    | Ca_kabuli_chr01 | 14848575                | TT                              | CC              | 1946729085               |
| SNP_P4_6620_14863453 | NC_021160.1    | Ca_kabuli_chr01 | 14863453                | AA                              | GG              | 1946729087               |
| SNP_P4_6621_14866741 | NC_021160.1    | Ca_kabuli_chr01 | 14866741                | AA                              | GG              | 1946729089               |
| SNP_P4_6622_14891102 | NC_021160.1    | Ca_kabuli_chr01 | 14891102                | TT                              | AA              | 1946729091               |
| SNP_P4_6623_14891115 | NC_021160.1    | Ca_kabuli_chr01 | 14891115                | AA                              | CC              | 1946729092               |
| SNP_P4_6625_14891375 | NC_021160.1    | Ca_kabuli_chr01 | 14891375                | TT                              | GG              | 1946729094               |
| SNP_P4_6627_14908788 | NC_021160.1    | Ca_kabuli_chr01 | 14908788                | TT                              | CC              | 1946729096               |
| SNP_P4_6628_14970549 | NC_021160.1    | Ca_kabuli_chr01 | 14970549                | AA                              | TT              | 1946729098               |
| SNP_P4_6629_14974631 | NC_021160.1    | Ca_kabuli_chr01 | 14974631                | AA                              | CC              | 1946729100               |
| SNP_P4_6630_14976759 | NC_021160.1    | Ca_kabuli_chr01 | 14976759                | AA                              | TT              | 1946729102               |
| SNP_P4_6631_14991023 | NC_021160.1    | Ca_kabuli_chr01 | 14991023                | AA                              | GG              | 1946729104               |
| SNP_P4_6632_14995637 | NC_021160.1    | Ca_kabuli_chr01 | 14995637                | CC                              | TT              | 1946729106               |
| SNP_P4_6633_14995683 | NC_021160.1    | Ca_kabuli_chr01 | 14995683                | TT                              | GG              | 1946729108               |
| SNP_P4_6636_14996172 | NC_021160.1    | Ca_kabuli_chr01 | 14996172                | GG                              | TT              | 1946729110               |
| SNP_P4_6638_14998429 | NC_021160.1    | Ca_kabuli_chr01 | 14998429                | TT                              | CC              | 1946729112               |
| SNP_P4_6639_14998744 | NC_021160.1    | Ca_kabuli_chr01 | 14998744                | GG                              | AA              | 1946729114               |
| SNP_P4_6640_15030170 | NC_021160.1    | Ca_kabuli_chr01 | 15030170                | TT                              | AA              | 1946729116               |
| SNP_P4_6641_15031800 | NC_021160.1    | Ca_kabuli_chr01 | 15031800                | GG                              | AA              | 1946729117               |
| SNP_P4_6642_15037287 | NC_021160.1    | Ca_kabuli_chr01 | 15037287                | CC                              | TT              | 1946729119               |
| SNP_P4_6644_15043194 | NC_021160.1    | Ca_kabuli_chr01 | 15043194                | GG                              | AA              | 1946729121               |
| SNP_P4_6645_15060895 | NC_021160.1    | Ca_kabuli_chr01 | 15060895                | CC                              | TT              | 1946729123               |
| SNP_P4_6646_15065815 | NC_021160.1    | Ca_kabuli_chr01 | 15065815                | CC                              | TT              | 1946729125               |
| SNP_P4_6647_15065859 | NC_021160.1    | Ca_kabuli_chr01 | 15065859                | TT                              | AA              | 1946729127               |
| SNP_P4_6648_15065889 | NC_021160.1    | Ca_kabuli_chr01 | 15065889                | CC                              | TT              | 1946729129               |
| SNP_P4_6649_15066012 | NC_021160.1    | Ca_kabuli_chr01 | 15066012                | AA                              | CC              | 1946729131               |
| SNP_P4_6650_15134847 | NC_021160.1    | Ca_kabuli_chr01 | 15134847                | CC                              | AA              | 1946729133               |
| SNP_P4_6652_15142156 | NC_021160.1    | Ca_kabuli_chr01 | 15142156                | TT                              | CC              | 1946729135               |
| SNP_P4_6656_15199346 | NC_021160.1    | Ca_kabuli_chr01 | 15199346                | TT                              | AA              | 1946729137               |
| SNP_P4_6657_15226973 | NC_021160.1    | Ca_kabuli_chr01 | 15226973                | CC                              | TT              | 1946729139               |
| SNP_P4_6658_15238370 | NC_021160.1    | Ca_kabuli_chr01 | 15238370                | AA                              | TT              | 1946729141               |
| SNP_P4_6659_15245564 | NC_021160.1    | Ca_kabuli_chr01 | 15245564                | TT                              | CC              | 1946729143               |
| SNP_P4_6660_15245605 | NC_021160.1    | Ca_kabuli_chr01 | 15245605                | CC                              | AA              | 1946729145               |
| SNP_P4_6661_15245633 | NC_021160.1    | Ca_kabuli_chr01 | 15245633                | AA                              | GG              | 1946729147               |
| SNP_P4_6662_15245649 | NC_021160.1    | Ca_kabuli_chr01 | 15245649                | GG                              | TT              | 1946729149               |

| SNPs IDs             | Chromosome IDs | Chromosomes     | Physical positions (bp) | CDC Frontier (Reference genome) | (ILWC46 & LPNB) | NCBI SNPdb Accession IDs |
|----------------------|----------------|-----------------|-------------------------|---------------------------------|-----------------|--------------------------|
| SNP_P4_6663_15245656 | NC_021160.1    | Ca_kabuli_chr01 | 15245656                | TT                              | GG              | 1946729151               |
| SNP_P4_6664_15245689 | NC_021160.1    | Ca_kabuli_chr01 | 15245689                | TT                              | GG              | 1946729152               |
| SNP_P4_6666_15247299 | NC_021160.1    | Ca_kabuli_chr01 | 15247299                | TT                              | CC              | 1946729154               |
| SNP_P4_6667_15247304 | NC_021160.1    | Ca_kabuli_chr01 | 15247304                | AA                              | GG              | 1946729156               |
| SNP_P4_6668_15247352 | NC_021160.1    | Ca_kabuli_chr01 | 15247352                | AA                              | CC              | 1946729158               |
| SNP_P4_6669_15247364 | NC_021160.1    | Ca_kabuli_chr01 | 15247364                | GG                              | AA              | 1946729160               |
| SNP_P4_6670_15247382 | NC_021160.1    | Ca_kabuli_chr01 | 15247382                | AA                              | GG              | 1946729162               |
| SNP_P4_6671_15247385 | NC_021160.1    | Ca_kabuli_chr01 | 15247385                | GG                              | AA              | 1946729164               |
| SNP_P4_6672_15247407 | NC_021160.1    | Ca_kabuli_chr01 | 15247407                | AA                              | GG              | 1946729166               |
| SNP_P4_6673_15247420 | NC_021160.1    | Ca_kabuli_chr01 | 15247420                | AA                              | CC              | 1946729168               |
| SNP_P4_6674_15247433 | NC_021160.1    | Ca_kabuli_chr01 | 15247433                | AA                              | GG              | 1946729170               |
| SNP_P4_6675_15247587 | NC_021160.1    | Ca_kabuli_chr01 | 15247587                | CC                              | AA              | 1946729172               |
| SNP_P4_6676_15247600 | NC_021160.1    | Ca_kabuli_chr01 | 15247600                | TT                              | CC              | 1946729174               |
| SNP_P4_6677_15247606 | NC_021160.1    | Ca_kabuli_chr01 | 15247606                | CC                              | TT              | 1946729177               |
| SNP_P4_6678_15247615 | NC_021160.1    | Ca_kabuli_chr01 | 15247615                | TT                              | CC              | 1946729179               |
| SNP_P4_6679_15247732 | NC_021160.1    | Ca_kabuli_chr01 | 15247732                | AA                              | TT              | 1946729181               |
| SNP_P4_6680_15247807 | NC_021160.1    | Ca_kabuli_chr01 | 15247807                | TT                              | CC              | 1946729183               |
| SNP_P4_6681_15247820 | NC_021160.1    | Ca_kabuli_chr01 | 15247820                | GG                              | CC              | 1946729185               |
| SNP_P4_6682_15247822 | NC_021160.1    | Ca_kabuli_chr01 | 15247822                | TT                              | CC              | 1946729187               |
| SNP_P4_6683_15247832 | NC_021160.1    | Ca_kabuli_chr01 | 15247832                | AA                              | CC              | 1946729189               |
| SNP_P4_6684_15251856 | NC_021160.1    | Ca_kabuli_chr01 | 15251856                | TT                              | CC              | 1946729190               |
| SNP_P4_6685_15311438 | NC_021160.1    | Ca_kabuli_chr01 | 15311438                | TT                              | AA              | 1946729192               |
| SNP_P4_6686_15311447 | NC_021160.1    | Ca_kabuli_chr01 | 15311447                | AA                              | GG              | 1946729194               |
| SNP_P4_6687_15336808 | NC_021160.1    | Ca_kabuli_chr01 | 15336808                | AA                              | CC              | 1946729196               |
| SNP_P4_6688_15380192 | NC_021160.1    | Ca_kabuli_chr01 | 15380192                | TT                              | CC              | 1946729198               |
| SNP_P4_6689_15391859 | NC_021160.1    | Ca_kabuli_chr01 | 15391859                | CC                              | TT              | 1946729200               |
| SNP_P4_6690_15393274 | NC_021160.1    | Ca_kabuli_chr01 | 15393274                | CC                              | TT              | 1946729202               |
| SNP_P4_6691_15396678 | NC_021160.1    | Ca_kabuli_chr01 | 15396678                | AA                              | GG              | 1946729204               |
| SNP_P4_6692_15401540 | NC_021160.1    | Ca_kabuli_chr01 | 15401540                | GG                              | AA              | 1946729206               |
| SNP_P4_6693_15423066 | NC_021160.1    | Ca_kabuli_chr01 | 15423066                | CC                              | TT              | 1946729208               |
| SNP_P4_6694_15450240 | NC_021160.1    | Ca_kabuli_chr01 | 15450240                | TT                              | GG              | 1946729210               |
| SNP_P4_6695_15466176 | NC_021160.1    | Ca_kabuli_chr01 | 15466176                | TT                              | CC              | 1946729212               |
| SNP_P4_6696_15466179 | NC_021160.1    | Ca_kabuli_chr01 | 15466179                | TT                              | CC              | 1946729214               |
| SNP_P4_6697_15468523 | NC_021160.1    | Ca_kabuli_chr01 | 15468523                | CC                              | TT              | 1946729216               |
| SNP_P4_6698_15476242 | NC_021160.1    | Ca_kabuli_chr01 | 15476242                | GG                              | CC              | 1946729218               |
| SNP_P4_6699_15500646 | NC_021160.1    | Ca_kabuli_chr01 | 15500646                | GG                              | AA              | 1946729220               |
| SNP_P4_6700_15508165 | NC_021160.1    | Ca_kabuli_chr01 | 15508165                | GG                              | AA              | 1946729222               |
| SNP_P4_6701_15508441 | NC_021160.1    | Ca_kabuli_chr01 | 15508441                | CC                              | TT              | 1946729225               |
| SNP_P4_6702_15508482 | NC_021160.1    | Ca_kabuli_chr01 | 15508482                | GG                              | TT              | 1946729227               |
| SNP_P4_6703_15508536 | NC_021160.1    | Ca_kabuli_chr01 | 15508536                | TT                              | CC              | 1946729229               |
| SNP_P4_6704_15508786 | NC_021160.1    | Ca_kabuli_chr01 | 15508786                | CC                              | GG              | 1946729231               |
| SNP_P4_6705_15526470 | NC_021160.1    | Ca_kabuli_chr01 | 15526470                | CC                              | AA              | 1946729233               |



| SNPs IDs             | Chromosome IDs | Chromosomes     | Physical positions (bp) | CDC Frontier (Reference genome) | (ILWC46 & LPNB) | NCBI SNPdb Accession IDs |
|----------------------|----------------|-----------------|-------------------------|---------------------------------|-----------------|--------------------------|
| SNP_P4_6707_15577955 | NC_021160.1    | Ca_kabuli_chr01 | 15577955                | AA                              | GG              | 1946729235               |
| SNP_P4_6709_15579565 | NC_021160.1    | Ca_kabuli_chr01 | 15579565                | TT                              | GG              | 1946729237               |
| SNP_P4_6710_15579781 | NC_021160.1    | Ca_kabuli_chr01 | 15579781                | CC                              | GG              | 1946729239               |
| SNP_P4_6711_15580174 | NC_021160.1    | Ca_kabuli_chr01 | 15580174                | TT                              | AA              | 1946729241               |
| SNP_P4_6712_15589269 | NC_021160.1    | Ca_kabuli_chr01 | 15589269                | AA                              | GG              | 1946729243               |
| SNP_P4_6713_15615459 | NC_021160.1    | Ca_kabuli_chr01 | 15615459                | GG                              | AA              | 1946729245               |
| SNP_P4_6714_15631931 | NC_021160.1    | Ca_kabuli_chr01 | 15631931                | AA                              | CC              | 1946729247               |
| SNP_P4_6715_15657090 | NC_021160.1    | Ca_kabuli_chr01 | 15657090                | CC                              | TT              | 1946729248               |
| SNP_P4_6716_15657129 | NC_021160.1    | Ca_kabuli_chr01 | 15657129                | TT                              | CC              | 1946729250               |
| SNP_P4_6717_15657163 | NC_021160.1    | Ca_kabuli_chr01 | 15657163                | CC                              | TT              | 1946729252               |
| SNP_P4_6718_15659500 | NC_021160.1    | Ca_kabuli_chr01 | 15659500                | TT                              | CC              | 1946729254               |
| SNP_P4_6719_15667528 | NC_021160.1    | Ca_kabuli_chr01 | 15667528                | AA                              | CC              | 1946729256               |
| SNP_P4_6720_15667544 | NC_021160.1    | Ca_kabuli_chr01 | 15667544                | AA                              | GG              | 1946729258               |
| SNP_P4_6721_15667571 | NC_021160.1    | Ca_kabuli_chr01 | 15667571                | CC                              | TT              | 1946729260               |
| SNP_P4_6722_15714125 | NC_021160.1    | Ca_kabuli_chr01 | 15714125                | CC                              | TT              | 1946729262               |
| SNP_P4_6723_15714153 | NC_021160.1    | Ca_kabuli_chr01 | 15714153                | TT                              | CC              | 1946729264               |
| SNP_P4_6724_15714932 | NC_021160.1    | Ca_kabuli_chr01 | 15714932                | GG                              | AA              | 1946729266               |
| SNP_P4_6725_15714934 | NC_021160.1    | Ca_kabuli_chr01 | 15714934                | GG                              | AA              | 1946729268               |
| SNP_P4_6726_15716165 | NC_021160.1    | Ca_kabuli_chr01 | 15716165                | AA                              | CC              | 1946729270               |
| SNP_P4_6727_15716208 | NC_021160.1    | Ca_kabuli_chr01 | 15716208                | TT                              | CC              | 1946729272               |
| SNP_P4_6728_15716621 | NC_021160.1    | Ca_kabuli_chr01 | 15716621                | TT                              | CC              | 1946729274               |
| SNP_P4_6729_15725490 | NC_021160.1    | Ca_kabuli_chr01 | 15725490                | GG                              | TT              | 1946729276               |
| SNP_P4_6730_15774414 | NC_021160.1    | Ca_kabuli_chr01 | 15774414                | TT                              | CC              | 1946729278               |
| SNP_P4_6731_15774846 | NC_021160.1    | Ca_kabuli_chr01 | 15774846                | AA                              | GG              | 1946729280               |
| SNP_P4_6732_15775173 | NC_021160.1    | Ca_kabuli_chr01 | 15775173                | CC                              | TT              | 1946729282               |
| SNP_P4_6733_15805306 | NC_021160.1    | Ca_kabuli_chr01 | 15805306                | TT                              | CC              | 1946729284               |
| SNP_P4_6734_15820687 | NC_021160.1    | Ca_kabuli_chr01 | 15820687                | CC                              | AA              | 1946729286               |
| SNP_P4_6736_15848552 | NC_021160.1    | Ca_kabuli_chr01 | 15848552                | AA                              | GG              | 1946729288               |
| SNP_P4_6737_15849319 | NC_021160.1    | Ca_kabuli_chr01 | 15849319                | CC                              | TT              | 1946729290               |
| SNP_P4_6739_15851675 | NC_021160.1    | Ca_kabuli_chr01 | 15851675                | GG                              | AA              | 1946729292               |
| SNP_P4_6740_15852887 | NC_021160.1    | Ca_kabuli_chr01 | 15852887                | AA                              | GG              | 1946729294               |
| SNP_P4_6741_15857251 | NC_021160.1    | Ca_kabuli_chr01 | 15857251                | TT                              | CC              | 1946729296               |
| SNP_P4_6742_15862538 | NC_021160.1    | Ca_kabuli_chr01 | 15862538                | GG                              | TT              | 1946729298               |
| SNP_P4_6744_15870883 | NC_021160.1    | Ca_kabuli_chr01 | 15870883                | TT                              | CC              | 1946729300               |
| SNP_P4_6745_15871782 | NC_021160.1    | Ca_kabuli_chr01 | 15871782                | TT                              | GG              | 1946729302               |
| SNP_P4_6747_15872364 | NC_021160.1    | Ca_kabuli_chr01 | 15872364                | GG                              | CC              | 1946729304               |
| SNP_P4_6748_15875604 | NC_021160.1    | Ca_kabuli_chr01 | 15875604                | AA                              | TT              | 1946729306               |
| SNP_P4_6749_15876582 | NC_021160.1    | Ca_kabuli_chr01 | 15876582                | TT                              | AA              | 1946729308               |
| SNP_P4_6750_15878912 | NC_021160.1    | Ca_kabuli_chr01 | 15878912                | TT                              | AA              | 1946729310               |
| SNP_P4_6751_15897879 | NC_021160.1    | Ca_kabuli_chr01 | 15897879                | GG                              | AA              | 1946729312               |
| SNP_P4_6752_15899705 | NC_021160.1    | Ca_kabuli_chr01 | 15899705                | CC                              | AA              | 1946729314               |
| SNP_P4_6754_15941156 | NC_021160.1    | Ca_kabuli_chr01 | 15941156                | TT                              | CC              | 1946729316               |

| SNPs IDs             | Chromosome IDs | Chromosomes     | Physical positions (bp) | CDC Frontier (Reference genome) | (ILWC46 & LPNB) | NCBI SNPdb Accession IDs |
|----------------------|----------------|-----------------|-------------------------|---------------------------------|-----------------|--------------------------|
| SNP_P4_6755_15947794 | NC_021160.1    | Ca_kabuli_chr01 | 15947794                | GG                              | AA              | 1946729318               |
| SNP_P4_6757_15975977 | NC_021160.1    | Ca_kabuli_chr01 | 15975977                | TT                              | CC              | 1946729320               |
| SNP_P4_6758_16011000 | NC_021160.1    | Ca_kabuli_chr01 | 16011000                | GG                              | AA              | 1946729322               |
| SNP_P4_6759_16013567 | NC_021160.1    | Ca_kabuli_chr01 | 16013567                | AA                              | GG              | 1946729324               |
| SNP_P4_6760_16019946 | NC_021160.1    | Ca_kabuli_chr01 | 16019946                | GG                              | AA              | 1946729326               |
| SNP_P4_6761_16022194 | NC_021160.1    | Ca_kabuli_chr01 | 16022194                | GG                              | AA              | 1946729328               |
| SNP_P4_6762_16033422 | NC_021160.1    | Ca_kabuli_chr01 | 16033422                | AA                              | TT              | 1946729330               |
| SNP_P4_6763_16033434 | NC_021160.1    | Ca_kabuli_chr01 | 16033434                | AA                              | TT              | 1946729332               |
| SNP_P4_6764_16035316 | NC_021160.1    | Ca_kabuli_chr01 | 16035316                | TT                              | CC              | 1946729334               |
| SNP_P4_6765_16043608 | NC_021160.1    | Ca_kabuli_chr01 | 16043608                | TT                              | GG              | 1946729336               |
| SNP_P4_6766_16044834 | NC_021160.1    | Ca_kabuli_chr01 | 16044834                | AA                              | CC              | 1946729338               |
| SNP_P4_6767_16047658 | NC_021160.1    | Ca_kabuli_chr01 | 16047658                | GG                              | CC              | 1946729340               |
| SNP_P4_6768_16048569 | NC_021160.1    | Ca_kabuli_chr01 | 16048569                | TT                              | AA              | 1946729342               |
| SNP_P4_6769_16054549 | NC_021160.1    | Ca_kabuli_chr01 | 16054549                | AA                              | GG              | 1946729344               |
| SNP_P4_6770_16064879 | NC_021160.1    | Ca_kabuli_chr01 | 16064879                | TT                              | AA              | 1946729346               |
| SNP_P4_6771_16068203 | NC_021160.1    | Ca_kabuli_chr01 | 16068203                | CC                              | TT              | 1946729348               |
| SNP_P4_6772_16068209 | NC_021160.1    | Ca_kabuli_chr01 | 16068209                | CC                              | GG              | 1946729350               |
| SNP_P4_6773_16068240 | NC_021160.1    | Ca_kabuli_chr01 | 16068240                | CC                              | AA              | 1946729351               |
| SNP_P4_6774_16068265 | NC_021160.1    | Ca_kabuli_chr01 | 16068265                | GG                              | AA              | 1946729353               |
| SNP_P4_6775_16068274 | NC_021160.1    | Ca_kabuli_chr01 | 16068274                | TT                              | CC              | 1946729355               |
| SNP_P4_6776_16069181 | NC_021160.1    | Ca_kabuli_chr01 | 16069181                | CC                              | AA              | 1946729357               |
| SNP_P4_6778_16078189 | NC_021160.1    | Ca_kabuli_chr01 | 16078189                | GG                              | TT              | 1946729359               |
| SNP_P4_6779_16085141 | NC_021160.1    | Ca_kabuli_chr01 | 16085141                | CC                              | TT              | 1946729361               |
| SNP_P4_6780_16085276 | NC_021160.1    | Ca_kabuli_chr01 | 16085276                | AA                              | TT              | 1946729363               |
| SNP_P4_6781_16086269 | NC_021160.1    | Ca_kabuli_chr01 | 16086269                | TT                              | CC              | 1946729365               |
| SNP_P4_6782_16086548 | NC_021160.1    | Ca_kabuli_chr01 | 16086548                | TT                              | CC              | 1946729367               |
| SNP_P4_6783_16086915 | NC_021160.1    | Ca_kabuli_chr01 | 16086915                | GG                              | CC              | 1946729369               |
| SNP_P4_6784_16087033 | NC_021160.1    | Ca_kabuli_chr01 | 16087033                | AA                              | GG              | 1946729371               |
| SNP_P4_6785_16087227 | NC_021160.1    | Ca_kabuli_chr01 | 16087227                | TT                              | CC              | 1946729372               |
| SNP_P4_6786_16087274 | NC_021160.1    | Ca_kabuli_chr01 | 16087274                | GG                              | AA              | 1946729374               |
| SNP_P4_6787_16087344 | NC_021160.1    | Ca_kabuli_chr01 | 16087344                | AA                              | GG              | 1946729376               |
| SNP_P4_6788_16087346 | NC_021160.1    | Ca_kabuli_chr01 | 16087346                | AA                              | GG              | 1946729378               |
| SNP_P4_6789_16087348 | NC_021160.1    | Ca_kabuli_chr01 | 16087348                | GG                              | AA              | 1946729380               |
| SNP_P4_6790_16087350 | NC_021160.1    | Ca_kabuli_chr01 | 16087350                | GG                              | CC              | 1946729382               |
| SNP_P4_6791_16087354 | NC_021160.1    | Ca_kabuli_chr01 | 16087354                | CC                              | AA              | 1946729384               |
| SNP_P4_6792_16087383 | NC_021160.1    | Ca_kabuli_chr01 | 16087383                | TT                              | AA              | 1946729386               |
| SNP_P4_6793_16087412 | NC_021160.1    | Ca_kabuli_chr01 | 16087412                | CC                              | TT              | 1946729388               |
| SNP_P4_6794_16087608 | NC_021160.1    | Ca_kabuli_chr01 | 16087608                | AA                              | GG              | 1946729390               |
| SNP_P4_6795_16088913 | NC_021160.1    | Ca_kabuli_chr01 | 16088913                | AA                              | CC              | 1946729391               |
| SNP_P4_6796_16089047 | NC_021160.1    | Ca_kabuli_chr01 | 16089047                | TT                              | CC              | 1946729393               |
| SNP_P4_6797_16089814 | NC_021160.1    | Ca_kabuli_chr01 | 16089814                | AA                              | TT              | 1946729395               |
| SNP_P4_6798_16089977 | NC_021160.1    | Ca_kabuli_chr01 | 16089977                | GG                              | AA              | 1946729397               |

| SNPs IDs             | Chromosome IDs | Chromosomes     | Physical positions (bp) | CDC Frontier (Reference genome) | (ILWC46 & LPNB) | NCBI SNPdb Accession IDs |
|----------------------|----------------|-----------------|-------------------------|---------------------------------|-----------------|--------------------------|
| SNP_P4_6799_16091001 | NC_021160.1    | Ca_kabuli_chr01 | 16091001                | TT                              | AA              | 1946729399               |
| SNP_P4_6801_16092353 | NC_021160.1    | Ca_kabuli_chr01 | 16092353                | GG                              | AA              | 1946729401               |
| SNP_P4_6802_16092442 | NC_021160.1    | Ca_kabuli_chr01 | 16092442                | GG                              | TT              | 1946729403               |
| SNP_P4_6803_16092679 | NC_021160.1    | Ca_kabuli_chr01 | 16092679                | GG                              | AA              | 1946729405               |
| SNP_P4_6804_16095829 | NC_021160.1    | Ca_kabuli_chr01 | 16095829                | TT                              | AA              | 1946729407               |
| SNP_P4_6805_16096034 | NC_021160.1    | Ca_kabuli_chr01 | 16096034                | GG                              | AA              | 1946729409               |
| SNP_P4_6806_16105353 | NC_021160.1    | Ca_kabuli_chr01 | 16105353                | AA                              | GG              | 1946729411               |
| SNP_P4_6807_16105379 | NC_021160.1    | Ca_kabuli_chr01 | 16105379                | GG                              | AA              | 1946729413               |
| SNP_P4_6808_16105409 | NC_021160.1    | Ca_kabuli_chr01 | 16105409                | CC                              | TT              | 1946729415               |
| SNP_P4_6809_16105424 | NC_021160.1    | Ca_kabuli_chr01 | 16105424                | GG                              | AA              | 1946729417               |
| SNP_P4_6810_16105780 | NC_021160.1    | Ca_kabuli_chr01 | 16105780                | CC                              | AA              | 1946729419               |
| SNP_P4_6811_16105861 | NC_021160.1    | Ca_kabuli_chr01 | 16105861                | CC                              | GG              | 1946729421               |
| SNP_P4_6812_16106277 | NC_021160.1    | Ca_kabuli_chr01 | 16106277                | GG                              | TT              | 1946729423               |
| SNP_P4_6813_16106311 | NC_021160.1    | Ca_kabuli_chr01 | 16106311                | GG                              | AA              | 1946729425               |
| SNP_P4_6814_16107734 | NC_021160.1    | Ca_kabuli_chr01 | 16107734                | AA                              | CC              | 1946729427               |
| SNP_P4_6815_16108072 | NC_021160.1    | Ca_kabuli_chr01 | 16108072                | TT                              | CC              | 1946729429               |
| SNP_P4_6816_16108319 | NC_021160.1    | Ca_kabuli_chr01 | 16108319                | GG                              | AA              | 1946729431               |
| SNP_P4_6817_16111973 | NC_021160.1    | Ca_kabuli_chr01 | 16111973                | AA                              | GG              | 1946729433               |
| SNP_P4_6818_16112160 | NC_021160.1    | Ca_kabuli_chr01 | 16112160                | AA                              | TT              | 1946729435               |
| SNP_P4_6819_16116056 | NC_021160.1    | Ca_kabuli_chr01 | 16116056                | GG                              | AA              | 1946729437               |
| SNP_P4_6820_16116082 | NC_021160.1    | Ca_kabuli_chr01 | 16116082                | TT                              | CC              | 1946729439               |
| SNP_P4_6821_16116096 | NC_021160.1    | Ca_kabuli_chr01 | 16116096                | CC                              | AA              | 1946729441               |
| SNP_P4_6822_16116106 | NC_021160.1    | Ca_kabuli_chr01 | 16116106                | AA                              | GG              | 1946729443               |
| SNP_P4_6823_16117160 | NC_021160.1    | Ca_kabuli_chr01 | 16117160                | CC                              | TT              | 1946729445               |
| SNP_P4_6824_16118148 | NC_021160.1    | Ca_kabuli_chr01 | 16118148                | TT                              | CC              | 1946729446               |
| SNP_P4_6825_16118151 | NC_021160.1    | Ca_kabuli_chr01 | 16118151                | GG                              | TT              | 1946729448               |
| SNP_P4_6827_16118693 | NC_021160.1    | Ca_kabuli_chr01 | 16118693                | TT                              | CC              | 1946729450               |
| SNP_P4_6829_16119912 | NC_021160.1    | Ca_kabuli_chr01 | 16119912                | TT                              | CC              | 1946729452               |
| SNP_P4_6830_16121479 | NC_021160.1    | Ca_kabuli_chr01 | 16121479                | GG                              | CC              | 1946729454               |
| SNP_P4_6831_16121930 | NC_021160.1    | Ca_kabuli_chr01 | 16121930                | CC                              | AA              | 1946729456               |
| SNP_P4_6832_16132790 | NC_021160.1    | Ca_kabuli_chr01 | 16132790                | CC                              | TT              | 1946729458               |
| SNP_P4_6833_16133030 | NC_021160.1    | Ca_kabuli_chr01 | 16133030                | AA                              | TT              | 1946729460               |
| SNP_P4_6834_16133107 | NC_021160.1    | Ca_kabuli_chr01 | 16133107                | CC                              | GG              | 1946729462               |
| SNP_P4_6835_16133154 | NC_021160.1    | Ca_kabuli_chr01 | 16133154                | AA                              | GG              | 1946729464               |
| SNP_P4_6836_16133213 | NC_021160.1    | Ca_kabuli_chr01 | 16133213                | GG                              | CC              | 1946729466               |
| SNP_P4_6837_16134109 | NC_021160.1    | Ca_kabuli_chr01 | 16134109                | CC                              | AA              | 1946729468               |
| SNP_P4_6838_16134131 | NC_021160.1    | Ca_kabuli_chr01 | 16134131                | CC                              | TT              | 1946729470               |
| SNP_P4_6840_16145124 | NC_021160.1    | Ca_kabuli_chr01 | 16145124                | GG                              | AA              | 1946729472               |
| SNP_P4_6841_16145146 | NC_021160.1    | Ca_kabuli_chr01 | 16145146                | GG                              | TT              | 1946729474               |
| SNP_P4_6842_16145206 | NC_021160.1    | Ca_kabuli_chr01 | 16145206                | CC                              | TT              | 1946729476               |
| SNP_P4_6843_16147447 | NC_021160.1    | Ca_kabuli_chr01 | 16147447                | CC                              | GG              | 1946729478               |
| SNP_P4_6844_16154837 | NC_021160.1    | Ca_kabuli_chr01 | 16154837                | GG                              | CC              | 1946729480               |

| SNPs IDs             | Chromosome IDs | Chromosomes     | Physical positions (bp) | CDC Frontier (Reference genome) | (ILWC46 & LPNB) | NCBI SNPdb Accession IDs |
|----------------------|----------------|-----------------|-------------------------|---------------------------------|-----------------|--------------------------|
| SNP_P4_6845_16154849 | NC_021160.1    | Ca_kabuli_chr01 | 16154849                | TT                              | GG              | 1946729482               |
| SNP_P4_6846_16154946 | NC_021160.1    | Ca_kabuli_chr01 | 16154946                | AA                              | GG              | 1946729484               |
| SNP_P4_6847_16154992 | NC_021160.1    | Ca_kabuli_chr01 | 16154992                | TT                              | CC              | 1946729486               |
| SNP_P4_6848_16156322 | NC_021160.1    | Ca_kabuli_chr01 | 16156322                | AA                              | GG              | 1946729488               |
| SNP_P4_6849_16156551 | NC_021160.1    | Ca_kabuli_chr01 | 16156551                | CC                              | GG              | 1946729490               |
| SNP_P4_6851_16156852 | NC_021160.1    | Ca_kabuli_chr01 | 16156852                | AA                              | CC              | 1946729492               |
| SNP_P4_6852_16157167 | NC_021160.1    | Ca_kabuli_chr01 | 16157167                | AA                              | GG              | 1946729494               |
| SNP_P4_6853_16157314 | NC_021160.1    | Ca_kabuli_chr01 | 16157314                | AA                              | GG              | 1946729496               |
| SNP_P4_6854_16159938 | NC_021160.1    | Ca_kabuli_chr01 | 16159938                | TT                              | CC              | 1946729498               |
| SNP_P4_6855_16159949 | NC_021160.1    | Ca_kabuli_chr01 | 16159949                | GG                              | AA              | 1946729500               |
| SNP_P4_6856_16160234 | NC_021160.1    | Ca_kabuli_chr01 | 16160234                | AA                              | GG              | 1946729502               |
| SNP_P4_6858_16160401 | NC_021160.1    | Ca_kabuli_chr01 | 16160401                | CC                              | TT              | 1946729503               |
| SNP_P4_6859_16160748 | NC_021160.1    | Ca_kabuli_chr01 | 16160748                | CC                              | TT              | 1946729505               |
| SNP_P4_6860_16160749 | NC_021160.1    | Ca_kabuli_chr01 | 16160749                | AA                              | TT              | 1946729507               |
| SNP_P4_6861_16160750 | NC_021160.1    | Ca_kabuli_chr01 | 16160750                | AA                              | TT              | 1946729509               |
| SNP_P4_6862_16160751 | NC_021160.1    | Ca_kabuli_chr01 | 16160751                | AA                              | GG              | 1946729511               |
| SNP_P4_6864_16161553 | NC_021160.1    | Ca_kabuli_chr01 | 16161553                | AA                              | TT              | 1946729513               |
| SNP_P4_6865_16161811 | NC_021160.1    | Ca_kabuli_chr01 | 16161811                | AA                              | TT              | 1946729515               |
| SNP_P4_6866_16161832 | NC_021160.1    | Ca_kabuli_chr01 | 16161832                | CC                              | GG              | 1946729517               |
| SNP_P4_6867_16162310 | NC_021160.1    | Ca_kabuli_chr01 | 16162310                | GG                              | TT              | 1946729519               |
| SNP_P4_6868_16162340 | NC_021160.1    | Ca_kabuli_chr01 | 16162340                | GG                              | AA              | 1946729521               |
| SNP_P4_6869_16165659 | NC_021160.1    | Ca_kabuli_chr01 | 16165659                | AA                              | GG              | 1946729523               |
| SNP_P4_6870_16165661 | NC_021160.1    | Ca_kabuli_chr01 | 16165661                | CC                              | TT              | 1946729525               |
| SNP_P4_6871_16166967 | NC_021160.1    | Ca_kabuli_chr01 | 16166967                | TT                              | CC              | 1946729527               |
| SNP_P4_6872_16166975 | NC_021160.1    | Ca_kabuli_chr01 | 16166975                | TT                              | AA              | 1946729529               |
| SNP_P4_6873_16167158 | NC_021160.1    | Ca_kabuli_chr01 | 16167158                | TT                              | AA              | 1946729531               |
| SNP_P4_6874_16168682 | NC_021160.1    | Ca_kabuli_chr01 | 16168682                | AA                              | GG              | 1946729532               |
| SNP_P4_6875_16170026 | NC_021160.1    | Ca_kabuli_chr01 | 16170026                | GG                              | AA              | 1946729534               |
| SNP_P4_6876_16171239 | NC_021160.1    | Ca_kabuli_chr01 | 16171239                | GG                              | AA              | 1946729536               |
| SNP_P4_6877_16171254 | NC_021160.1    | Ca_kabuli_chr01 | 16171254                | AA                              | CC              | 1946729538               |
| SNP_P4_6878_16171256 | NC_021160.1    | Ca_kabuli_chr01 | 16171256                | CC                              | TT              | 1946729540               |
| SNP_P4_6879_16171692 | NC_021160.1    | Ca_kabuli_chr01 | 16171692                | AA                              | GG              | 1946729542               |
| SNP_P4_6880_16171696 | NC_021160.1    | Ca_kabuli_chr01 | 16171696                | CC                              | TT              | 1946729544               |
| SNP_P4_6881_16171713 | NC_021160.1    | Ca_kabuli_chr01 | 16171713                | GG                              | AA              | 1946729546               |
| SNP_P4_6882_16172259 | NC_021160.1    | Ca_kabuli_chr01 | 16172259                | TT                              | CC              | 1946729548               |
| SNP_P4_6883_16172271 | NC_021160.1    | Ca_kabuli_chr01 | 16172271                | TT                              | GG              | 1946729550               |
| SNP_P4_6884_16172618 | NC_021160.1    | Ca_kabuli_chr01 | 16172618                | CC                              | TT              | 1946729552               |
| SNP_P4_6885_16173138 | NC_021160.1    | Ca_kabuli_chr01 | 16173138                | TT                              | CC              | 1946729554               |
| SNP_P4_6886_16173807 | NC_021160.1    | Ca_kabuli_chr01 | 16173807                | CC                              | TT              | 1946729556               |
| SNP_P4_6888_16174663 | NC_021160.1    | Ca_kabuli_chr01 | 16174663                | TT                              | CC              | 1946729558               |
| SNP_P4_6889_16174779 | NC_021160.1    | Ca_kabuli_chr01 | 16174779                | TT                              | CC              | 1946729560               |
| SNP_P4_6890_16176036 | NC_021160.1    | Ca_kabuli_chr01 | 16176036                | GG                              | AA              | 1946729562               |

| SNPs IDs             | Chromosome IDs | Chromosomes     | Physical positions (bp) | CDC Frontier (Reference genome) | (ILWC46 & LPNB) | NCBI SNPdb Accession IDs |
|----------------------|----------------|-----------------|-------------------------|---------------------------------|-----------------|--------------------------|
| SNP_P4_6891_16176058 | NC_021160.1    | Ca_kabuli_chr01 | 16176058                | GG                              | AA              | 1946729564               |
| SNP_P4_6892_16176096 | NC_021160.1    | Ca_kabuli_chr01 | 16176096                | AA                              | GG              | 1946729567               |
| SNP_P4_6893_16176355 | NC_021160.1    | Ca_kabuli_chr01 | 16176355                | AA                              | GG              | 1946729569               |
| SNP_P4_6894_16176411 | NC_021160.1    | Ca_kabuli_chr01 | 16176411                | TT                              | CC              | 1946729571               |
| SNP_P4_6895_16176412 | NC_021160.1    | Ca_kabuli_chr01 | 16176412                | GG                              | AA              | 1946729573               |
| SNP_P4_6897_16178317 | NC_021160.1    | Ca_kabuli_chr01 | 16178317                | GG                              | TT              | 1946729575               |
| SNP_P4_6898_16179684 | NC_021160.1    | Ca_kabuli_chr01 | 16179684                | GG                              | AA              | 1946729577               |
| SNP_P4_6899_16179702 | NC_021160.1    | Ca_kabuli_chr01 | 16179702                | GG                              | AA              | 1946729579               |
| SNP_P4_6900_16179851 | NC_021160.1    | Ca_kabuli_chr01 | 16179851                | AA                              | CC              | 1946729581               |
| SNP_P4_6901_16179857 | NC_021160.1    | Ca_kabuli_chr01 | 16179857                | TT                              | AA              | 1946729583               |
| SNP_P4_6902_16182198 | NC_021160.1    | Ca_kabuli_chr01 | 16182198                | TT                              | AA              | 1946729585               |
| SNP_P4_6903_16182212 | NC_021160.1    | Ca_kabuli_chr01 | 16182212                | GG                              | AA              | 1946729587               |
| SNP_P4_6904_16182216 | NC_021160.1    | Ca_kabuli_chr01 | 16182216                | CC                              | TT              | 1946729589               |
| SNP_P4_6905_16182361 | NC_021160.1    | Ca_kabuli_chr01 | 16182361                | CC                              | TT              | 1946729591               |
| SNP_P4_6906_16182477 | NC_021160.1    | Ca_kabuli_chr01 | 16182477                | CC                              | TT              | 1946729593               |
| SNP_P4_6907_16182496 | NC_021160.1    | Ca_kabuli_chr01 | 16182496                | AA                              | TT              | 1946729595               |
| SNP_P4_6908_16183108 | NC_021160.1    | Ca_kabuli_chr01 | 16183108                | TT                              | CC              | 1946729597               |
| SNP_P4_6909_16185215 | NC_021160.1    | Ca_kabuli_chr01 | 16185215                | TT                              | AA              | 1946729599               |
| SNP_P4_6911_16185354 | NC_021160.1    | Ca_kabuli_chr01 | 16185354                | CC                              | TT              | 1946729602               |
| SNP_P4_6912_16185428 | NC_021160.1    | Ca_kabuli_chr01 | 16185428                | CC                              | TT              | 1946729604               |
| SNP_P4_6913_16186401 | NC_021160.1    | Ca_kabuli_chr01 | 16186401                | AA                              | GG              | 1946729606               |
| SNP_P4_6914_16186416 | NC_021160.1    | Ca_kabuli_chr01 | 16186416                | GG                              | AA              | 1946729608               |
| SNP_P4_6915_16186817 | NC_021160.1    | Ca_kabuli_chr01 | 16186817                | GG                              | TT              | 1946729610               |
| SNP_P4_6917_16189561 | NC_021160.1    | Ca_kabuli_chr01 | 16189561                | AA                              | CC              | 1946729612               |
| SNP_P4_6918_16189785 | NC_021160.1    | Ca_kabuli_chr01 | 16189785                | GG                              | AA              | 1946729614               |
| SNP_P4_6919_16190689 | NC_021160.1    | Ca_kabuli_chr01 | 16190689                | TT                              | AA              | 1946729616               |
| SNP_P4_6920_16193036 | NC_021160.1    | Ca_kabuli_chr01 | 16193036                | CC                              | TT              | 1946729619               |
| SNP_P4_6921_16193056 | NC_021160.1    | Ca_kabuli_chr01 | 16193056                | AA                              | TT              | 1946729620               |
| SNP_P4_6922_16193377 | NC_021160.1    | Ca_kabuli_chr01 | 16193377                | GG                              | AA              | 1946729622               |
| SNP_P4_6923_16193412 | NC_021160.1    | Ca_kabuli_chr01 | 16193412                | CC                              | AA              | 1946729624               |
| SNP_P4_6924_16193741 | NC_021160.1    | Ca_kabuli_chr01 | 16193741                | AA                              | GG              | 1946729627               |
| SNP_P4_6925_16193742 | NC_021160.1    | Ca_kabuli_chr01 | 16193742                | AA                              | GG              | 1946729629               |
| SNP_P4_6926_16193906 | NC_021160.1    | Ca_kabuli_chr01 | 16193906                | TT                              | CC              | 1946729631               |
| SNP_P4_6927_16193907 | NC_021160.1    | Ca_kabuli_chr01 | 16193907                | AA                              | GG              | 1946729633               |
| SNP_P4_6928_16193911 | NC_021160.1    | Ca_kabuli_chr01 | 16193911                | GG                              | AA              | 1946729635               |
| SNP_P4_6929_16194574 | NC_021160.1    | Ca_kabuli_chr01 | 16194574                | AA                              | CC              | 1946729637               |
| SNP_P4_6930_16197252 | NC_021160.1    | Ca_kabuli_chr01 | 16197252                | GG                              | CC              | 1946729639               |
| SNP_P4_6931_16197259 | NC_021160.1    | Ca_kabuli_chr01 | 16197259                | TT                              | CC              | 1946729641               |
| SNP_P4_6932_16197282 | NC_021160.1    | Ca_kabuli_chr01 | 16197282                | GG                              | TT              | 1946729644               |
| SNP_P4_6933_16197686 | NC_021160.1    | Ca_kabuli_chr01 | 16197686                | TT                              | AA              | 1946729646               |
| SNP_P4_6934_16197704 | NC_021160.1    | Ca_kabuli_chr01 | 16197704                | CC                              | TT              | 1946729648               |
| SNP_P4_6935_16197855 | NC_021160.1    | Ca_kabuli_chr01 | 16197855                | CC                              | TT              | 1946729650               |

| SNPs IDs             | Chromosome IDs | Chromosomes     | Physical positions (bp) | CDC Frontier (Reference genome) | (ILWC46 & LPNB) | NCBI SNPdb Accession IDs |
|----------------------|----------------|-----------------|-------------------------|---------------------------------|-----------------|--------------------------|
| SNP_P4_6936_16197992 | NC_021160.1    | Ca_kabuli_chr01 | 16197992                | TT                              | CC              | 1946729652               |
| SNP_P4_6937_16198000 | NC_021160.1    | Ca_kabuli_chr01 | 16198000                | AA                              | TT              | 1946729654               |
| SNP_P4_6938_16198137 | NC_021160.1    | Ca_kabuli_chr01 | 16198137                | CC                              | AA              | 1946729656               |
| SNP_P4_6939_16198142 | NC_021160.1    | Ca_kabuli_chr01 | 16198142                | AA                              | TT              | 1946729658               |
| SNP_P4_6941_16198360 | NC_021160.1    | Ca_kabuli_chr01 | 16198360                | CC                              | TT              | 1946729660               |
| SNP_P4_6942_16198367 | NC_021160.1    | Ca_kabuli_chr01 | 16198367                | GG                              | AA              | 1946729662               |
| SNP_P4_6943_16198433 | NC_021160.1    | Ca_kabuli_chr01 | 16198433                | AA                              | GG              | 1946729664               |
| SNP_P4_6944_16199125 | NC_021160.1    | Ca_kabuli_chr01 | 16199125                | TT                              | CC              | 1946729666               |
| SNP_P4_6945_16199144 | NC_021160.1    | Ca_kabuli_chr01 | 16199144                | GG                              | AA              | 1946729668               |
| SNP_P4_6946_16201546 | NC_021160.1    | Ca_kabuli_chr01 | 16201546                | TT                              | CC              | 1946729670               |
| SNP_P4_6947_16201829 | NC_021160.1    | Ca_kabuli_chr01 | 16201829                | CC                              | TT              | 1946729672               |
| SNP_P4_6948_16201916 | NC_021160.1    | Ca_kabuli_chr01 | 16201916                | GG                              | AA              | 1946729674               |
| SNP_P4_6949_16202217 | NC_021160.1    | Ca_kabuli_chr01 | 16202217                | AA                              | CC              | 1946729676               |
| SNP_P4_6950_16203252 | NC_021160.1    | Ca_kabuli_chr01 | 16203252                | CC                              | TT              | 1946729677               |
| SNP_P4_6951_16204213 | NC_021160.1    | Ca_kabuli_chr01 | 16204213                | GG                              | TT              | 1946729679               |
| SNP_P4_6952_16204651 | NC_021160.1    | Ca_kabuli_chr01 | 16204651                | TT                              | GG              | 1946729681               |
| SNP_P4_6953_16204674 | NC_021160.1    | Ca_kabuli_chr01 | 16204674                | CC                              | TT              | 1946729683               |
| SNP_P4_6954_16204723 | NC_021160.1    | Ca_kabuli_chr01 | 16204723                | CC                              | TT              | 1946729685               |
| SNP_P4_6955_16204728 | NC_021160.1    | Ca_kabuli_chr01 | 16204728                | GG                              | CC              | 1946729687               |
| SNP_P4_6957_16206411 | NC_021160.1    | Ca_kabuli_chr01 | 16206411                | AA                              | CC              | 1946729689               |
| SNP_P4_6959_16206954 | NC_021160.1    | Ca_kabuli_chr01 | 16206954                | GG                              | AA              | 1946729691               |
| SNP_P4_6960_16207661 | NC_021160.1    | Ca_kabuli_chr01 | 16207661                | AA                              | GG              | 1946729693               |
| SNP_P4_6961_16207803 | NC_021160.1    | Ca_kabuli_chr01 | 16207803                | GG                              | AA              | 1946729695               |
| SNP_P4_6964_16208180 | NC_021160.1    | Ca_kabuli_chr01 | 16208180                | TT                              | AA              | 1946729696               |
| SNP_P4_6965_16209099 | NC_021160.1    | Ca_kabuli_chr01 | 16209099                | TT                              | CC              | 1946729698               |
| SNP_P4_6966_16209389 | NC_021160.1    | Ca_kabuli_chr01 | 16209389                | GG                              | AA              | 1946729700               |
| SNP_P4_6967_16210172 | NC_021160.1    | Ca_kabuli_chr01 | 16210172                | CC                              | AA              | 1946729702               |
| SNP_P4_6968_16210394 | NC_021160.1    | Ca_kabuli_chr01 | 16210394                | CC                              | TT              | 1946729704               |
| SNP_P4_6969_16210441 | NC_021160.1    | Ca_kabuli_chr01 | 16210441                | TT                              | CC              | 1946729706               |
| SNP_P4_6970_16210567 | NC_021160.1    | Ca_kabuli_chr01 | 16210567                | CC                              | AA              | 1946729708               |
| SNP_P4_6971_16210673 | NC_021160.1    | Ca_kabuli_chr01 | 16210673                | TT                              | GG              | 1946729710               |
| SNP_P4_6972_16210756 | NC_021160.1    | Ca_kabuli_chr01 | 16210756                | CC                              | TT              | 1946729712               |
| SNP_P4_6974_16210905 | NC_021160.1    | Ca_kabuli_chr01 | 16210905                | TT                              | CC              | 1946729714               |
| SNP_P4_6975_16212960 | NC_021160.1    | Ca_kabuli_chr01 | 16212960                | GG                              | AA              | 1946729716               |
| SNP_P4_6979_16282353 | NC_021160.1    | Ca_kabuli_chr01 | 16282353                | CC                              | TT              | 1946729717               |
| SNP_P4_6980_16285734 | NC_021160.1    | Ca_kabuli_chr01 | 16285734                | CC                              | TT              | 1946729719               |
| SNP_P4_6981_16287892 | NC_021160.1    | Ca_kabuli_chr01 | 16287892                | TT                              | CC              | 1946729721               |
| SNP_P4_6982_16288186 | NC_021160.1    | Ca_kabuli_chr01 | 16288186                | TT                              | CC              | 1946729723               |
| SNP_P4_6983_16293198 | NC_021160.1    | Ca_kabuli_chr01 | 16293198                | GG                              | AA              | 1946729725               |
| SNP_P4_6984_16293701 | NC_021160.1    | Ca_kabuli_chr01 | 16293701                | AA                              | TT              | 1946729727               |
| SNP_P4_6985_16293705 | NC_021160.1    | Ca_kabuli_chr01 | 16293705                | GG                              | AA              | 1946729729               |
| SNP_P4_6986_16301159 | NC_021160.1    | Ca_kabuli_chr01 | 16301159                | AA                              | GG              | 1946729731               |

| SNPs IDs             | Chromosome IDs | Chromosomes     | Physical positions (bp) | CDC Frontier (Reference genome) | (ILWC46 & LPNB) | NCBI SNPdb Accession IDs |
|----------------------|----------------|-----------------|-------------------------|---------------------------------|-----------------|--------------------------|
| SNP_P4_6987_16301410 | NC_021160.1    | Ca_kabuli_chr01 | 16301410                | GG                              | AA              | 1946729733               |
| SNP_P4_6988_16303650 | NC_021160.1    | Ca_kabuli_chr01 | 16303650                | TT                              | CC              | 1946729735               |
| SNP_P4_6989_16305188 | NC_021160.1    | Ca_kabuli_chr01 | 16305188                | TT                              | GG              | 1946729737               |
| SNP_P4_6990_16305189 | NC_021160.1    | Ca_kabuli_chr01 | 16305189                | TT                              | CC              | 1946729738               |
| SNP_P4_6992_16322694 | NC_021160.1    | Ca_kabuli_chr01 | 16322694                | AA                              | GG              | 1946729740               |
| SNP_P4_6993_16332204 | NC_021160.1    | Ca_kabuli_chr01 | 16332204                | GG                              | AA              | 1946729742               |
| SNP_P4_6994_16370921 | NC_021160.1    | Ca_kabuli_chr01 | 16370921                | CC                              | AA              | 1946729744               |
| SNP_P4_6995_16374464 | NC_021160.1    | Ca_kabuli_chr01 | 16374464                | AA                              | CC              | 1946729746               |
| SNP_P4_6996_16374465 | NC_021160.1    | Ca_kabuli_chr01 | 16374465                | TT                              | AA              | 1946729748               |
| SNP_P4_6997_16396279 | NC_021160.1    | Ca_kabuli_chr01 | 16396279                | GG                              | AA              | 1946729750               |
| SNP_P4_6998_16413957 | NC_021160.1    | Ca_kabuli_chr01 | 16413957                | CC                              | TT              | 1946729752               |
| SNP_P4_6999_16438768 | NC_021160.1    | Ca_kabuli_chr01 | 16438768                | AA                              | TT              | 1946729754               |
| SNP_P4_7000_16440008 | NC_021160.1    | Ca_kabuli_chr01 | 16440008                | AA                              | TT              | 1946729756               |
| SNP_P4_7001_16442395 | NC_021160.1    | Ca_kabuli_chr01 | 16442395                | TT                              | GG              | 1946729757               |
| SNP_P4_7003_16444963 | NC_021160.1    | Ca_kabuli_chr01 | 16444963                | TT                              | CC              | 1946729759               |
| SNP_P4_7004_16467447 | NC_021160.1    | Ca_kabuli_chr01 | 16467447                | TT                              | CC              | 1946729761               |
| SNP_P4_7006_16499444 | NC_021160.1    | Ca_kabuli_chr01 | 16499444                | AA                              | GG              | 1946729763               |
| SNP_P4_7007_16535049 | NC_021160.1    | Ca_kabuli_chr01 | 16535049                | TT                              | AA              | 1946729765               |
| SNP_P4_7008_16535999 | NC_021160.1    | Ca_kabuli_chr01 | 16535999                | AA                              | TT              | 1946729767               |
| SNP_P4_7009_16536240 | NC_021160.1    | Ca_kabuli_chr01 | 16536240                | GG                              | TT              | 1946729769               |
| SNP_P4_7011_16620872 | NC_021160.1    | Ca_kabuli_chr01 | 16620872                | AA                              | TT              | 1946729771               |
| SNP_P4_7012_16620907 | NC_021160.1    | Ca_kabuli_chr01 | 16620907                | TT                              | CC              | 1946729773               |
| SNP_P4_7015_16650507 | NC_021160.1    | Ca_kabuli_chr01 | 16650507                | GG                              | AA              | 1946729775               |
| SNP_P4_7016_16670169 | NC_021160.1    | Ca_kabuli_chr01 | 16670169                | TT                              | CC              | 1946729777               |
| SNP_P4_7017_16670195 | NC_021160.1    | Ca_kabuli_chr01 | 16670195                | TT                              | CC              | 1946729779               |
| SNP_P4_7018_16671745 | NC_021160.1    | Ca_kabuli_chr01 | 16671745                | GG                              | CC              | 1946729781               |
| SNP_P4_7019_16679005 | NC_021160.1    | Ca_kabuli_chr01 | 16679005                | TT                              | AA              | 1946729782               |
| SNP_P4_7020_16685988 | NC_021160.1    | Ca_kabuli_chr01 | 16685988                | AA                              | CC              | 1946729784               |
| SNP_P4_7021_16694418 | NC_021160.1    | Ca_kabuli_chr01 | 16694418                | TT                              | CC              | 1946729786               |
| SNP_P4_7022_16694764 | NC_021160.1    | Ca_kabuli_chr01 | 16694764                | TT                              | GG              | 1946729788               |
| SNP_P4_7023_16694808 | NC_021160.1    | Ca_kabuli_chr01 | 16694808                | AA                              | CC              | 1946729790               |
| SNP_P4_7024_16695761 | NC_021160.1    | Ca_kabuli_chr01 | 16695761                | TT                              | CC              | 1946729792               |
| SNP_P4_7025_16696087 | NC_021160.1    | Ca_kabuli_chr01 | 16696087                | GG                              | AA              | 1946729794               |
| SNP_P4_7026_16707863 | NC_021160.1    | Ca_kabuli_chr01 | 16707863                | TT                              | CC              | 1946729797               |
| SNP_P4_7027_16707867 | NC_021160.1    | Ca_kabuli_chr01 | 16707867                | AA                              | CC              | 1946729799               |
| SNP_P4_7028_16720728 | NC_021160.1    | Ca_kabuli_chr01 | 16720728                | GG                              | AA              | 1946729802               |
| SNP_P4_7031_16776196 | NC_021160.1    | Ca_kabuli_chr01 | 16776196                | GG                              | AA              | 1946729804               |
| SNP_P4_7036_16842380 | NC_021160.1    | Ca_kabuli_chr01 | 16842380                | TT                              | CC              | 1946729806               |
| SNP_P4_7037_16844355 | NC_021160.1    | Ca_kabuli_chr01 | 16844355                | CC                              | TT              | 1946729808               |
| SNP_P4_7038_16859108 | NC_021160.1    | Ca_kabuli_chr01 | 16859108                | AA                              | TT              | 1946729809               |
| SNP_P4_7039_16859542 | NC_021160.1    | Ca_kabuli_chr01 | 16859542                | CC                              | TT              | 1946729811               |
| SNP_P4_7041_16875850 | NC_021160.1    | Ca_kabuli_chr01 | 16875850                | AA                              | GG              | 1946729813               |

| SNPs IDs             | Chromosome IDs | Chromosomes     | Physical positions (bp) | CDC Frontier (Reference genome) | (ILWC46 & LPNB) | NCBI SNPdb Accession IDs |
|----------------------|----------------|-----------------|-------------------------|---------------------------------|-----------------|--------------------------|
| SNP_P4_7042_16896364 | NC_021160.1    | Ca_kabuli_chr01 | 16896364                | AA                              | TT              | 1946729815               |
| SNP_P4_7043_16907598 | NC_021160.1    | Ca_kabuli_chr01 | 16907598                | AA                              | GG              | 1946729817               |
| SNP_P4_7044_16912913 | NC_021160.1    | Ca_kabuli_chr01 | 16912913                | TT                              | GG              | 1946729819               |
| SNP_P4_7045_16935314 | NC_021160.1    | Ca_kabuli_chr01 | 16935314                | GG                              | TT              | 1946729821               |
| SNP_P4_7046_16941006 | NC_021160.1    | Ca_kabuli_chr01 | 16941006                | CC                              | TT              | 1946729823               |
| SNP_P4_7048_16948372 | NC_021160.1    | Ca_kabuli_chr01 | 16948372                | GG                              | AA              | 1946729825               |
| SNP_P4_7049_16955618 | NC_021160.1    | Ca_kabuli_chr01 | 16955618                | TT                              | CC              | 1946729827               |
| SNP_P4_7050_16956034 | NC_021160.1    | Ca_kabuli_chr01 | 16956034                | GG                              | AA              | 1946729828               |
| SNP_P4_7052_17030404 | NC_021160.1    | Ca_kabuli_chr01 | 17030404                | GG                              | AA              | 1946729830               |
| SNP_P4_7053_17030944 | NC_021160.1    | Ca_kabuli_chr01 | 17030944                | AA                              | GG              | 1946729832               |
| SNP_P4_7054_17041144 | NC_021160.1    | Ca_kabuli_chr01 | 17041144                | TT                              | AA              | 1946729834               |
| SNP_P4_7055_17097417 | NC_021160.1    | Ca_kabuli_chr01 | 17097417                | GG                              | AA              | 1946729836               |
| SNP_P4_7056_17100878 | NC_021160.1    | Ca_kabuli_chr01 | 17100878                | TT                              | CC              | 1946729838               |
| SNP_P4_7058_17111308 | NC_021160.1    | Ca_kabuli_chr01 | 17111308                | GG                              | AA              | 1946729840               |
| SNP_P4_7059_17124923 | NC_021160.1    | Ca_kabuli_chr01 | 17124923                | CC                              | TT              | 1946729842               |
| SNP_P4_7060_17125087 | NC_021160.1    | Ca_kabuli_chr01 | 17125087                | TT                              | CC              | 1946729844               |
| SNP_P4_7061_17125425 | NC_021160.1    | Ca_kabuli_chr01 | 17125425                | AA                              | GG              | 1946729846               |
| SNP_P4_7062_17125730 | NC_021160.1    | Ca_kabuli_chr01 | 17125730                | TT                              | GG              | 1946729848               |
| SNP_P4_7063_17128078 | NC_021160.1    | Ca_kabuli_chr01 | 17128078                | GG                              | AA              | 1946729850               |
| SNP_P4_7064_17128122 | NC_021160.1    | Ca_kabuli_chr01 | 17128122                | AA                              | TT              | 1946729852               |
| SNP_P4_7065_17128204 | NC_021160.1    | Ca_kabuli_chr01 | 17128204                | TT                              | AA              | 1946729853               |
| SNP_P4_7066_17128237 | NC_021160.1    | Ca_kabuli_chr01 | 17128237                | TT                              | GG              | 1946729855               |
| SNP_P4_7067_17128290 | NC_021160.1    | Ca_kabuli_chr01 | 17128290                | CC                              | TT              | 1946729857               |
| SNP_P4_7068_17128352 | NC_021160.1    | Ca_kabuli_chr01 | 17128352                | GG                              | AA              | 1946729859               |
| SNP_P4_7069_17128370 | NC_021160.1    | Ca_kabuli_chr01 | 17128370                | CC                              | TT              | 1946729861               |
| SNP_P4_7070_17128440 | NC_021160.1    | Ca_kabuli_chr01 | 17128440                | TT                              | CC              | 1946729863               |
| SNP_P4_7071_17132219 | NC_021160.1    | Ca_kabuli_chr01 | 17132219                | TT                              | CC              | 1946729865               |
| SNP_P4_7072_17157687 | NC_021160.1    | Ca_kabuli_chr01 | 17157687                | TT                              | CC              | 1946729867               |
| SNP_P4_7074_17158339 | NC_021160.1    | Ca_kabuli_chr01 | 17158339                | AA                              | GG              | 1946729869               |
| SNP_P4_7075_17159077 | NC_021160.1    | Ca_kabuli_chr01 | 17159077                | GG                              | AA              | 1946729871               |
| SNP_P4_7076_17181782 | NC_021160.1    | Ca_kabuli_chr01 | 17181782                | AA                              | CC              | 1946729873               |
| SNP_P4_7078_17187021 | NC_021160.1    | Ca_kabuli_chr01 | 17187021                | AA                              | TT              | 1946729875               |
| SNP_P4_7079_17187028 | NC_021160.1    | Ca_kabuli_chr01 | 17187028                | AA                              | TT              | 1946729876               |
| SNP_P4_7080_17187029 | NC_021160.1    | Ca_kabuli_chr01 | 17187029                | AA                              | TT              | 1946729878               |
| SNP_P4_7081_17187047 | NC_021160.1    | Ca_kabuli_chr01 | 17187047                | TT                              | GG              | 1946729880               |
| SNP_P4_7082_17187067 | NC_021160.1    | Ca_kabuli_chr01 | 17187067                | AA                              | TT              | 1946729882               |
| SNP_P4_7084_17187542 | NC_021160.1    | Ca_kabuli_chr01 | 17187542                | CC                              | GG              | 1946729884               |
| SNP_P4_7085_17187556 | NC_021160.1    | Ca_kabuli_chr01 | 17187556                | GG                              | AA              | 1946729886               |
| SNP_P4_7086_17187605 | NC_021160.1    | Ca_kabuli_chr01 | 17187605                | TT                              | CC              | 1946729888               |
| SNP_P4_7087_17187619 | NC_021160.1    | Ca_kabuli_chr01 | 17187619                | GG                              | AA              | 1946729890               |
| SNP_P4_7088_17194131 | NC_021160.1    | Ca_kabuli_chr01 | 17194131                | CC                              | AA              | 1946729892               |
| SNP_P4_7089_17196377 | NC_021160.1    | Ca_kabuli_chr01 | 17196377                | TT                              | AA              | 1946729894               |



| SNPs IDs             | Chromosome IDs | Chromosomes     | Physical positions (bp) | CDC Frontier (Reference genome) | (ILWC46 & LPNB) | NCBI SNPdb Accession IDs |
|----------------------|----------------|-----------------|-------------------------|---------------------------------|-----------------|--------------------------|
| SNP_P4_7090_17200122 | NC_021160.1    | Ca_kabuli_chr01 | 17200122                | CC                              | TT              | 1946729896               |
| SNP_P4_7092_17226250 | NC_021160.1    | Ca_kabuli_chr01 | 17226250                | TT                              | GG              | 1946729898               |
| SNP_P4_7094_17236379 | NC_021160.1    | Ca_kabuli_chr01 | 17236379                | CC                              | TT              | 1946729900               |
| SNP_P4_7096_17244512 | NC_021160.1    | Ca_kabuli_chr01 | 17244512                | TT                              | CC              | 1946729902               |
| SNP_P4_7097_17255004 | NC_021160.1    | Ca_kabuli_chr01 | 17255004                | CC                              | AA              | 1946729904               |
| SNP_P4_7098_17255007 | NC_021160.1    | Ca_kabuli_chr01 | 17255007                | AA                              | GG              | 1946729906               |
| SNP_P4_7099_17255014 | NC_021160.1    | Ca_kabuli_chr01 | 17255014                | GG                              | AA              | 1946729908               |
| SNP_P4_7100_17255020 | NC_021160.1    | Ca_kabuli_chr01 | 17255020                | AA                              | GG              | 1946729910               |
| SNP_P4_7101_17255037 | NC_021160.1    | Ca_kabuli_chr01 | 17255037                | TT                              | GG              | 1946729912               |
| SNP_P4_7102_17255046 | NC_021160.1    | Ca_kabuli_chr01 | 17255046                | GG                              | AA              | 1946729914               |
| SNP_P4_7103_17255068 | NC_021160.1    | Ca_kabuli_chr01 | 17255068                | TT                              | CC              | 1946729916               |
| SNP_P4_7104_17255074 | NC_021160.1    | Ca_kabuli_chr01 | 17255074                | GG                              | AA              | 1946729918               |
| SNP_P4_7105_17255075 | NC_021160.1    | Ca_kabuli_chr01 | 17255075                | CC                              | TT              | 1946729920               |
| SNP_P4_7106_17255325 | NC_021160.1    | Ca_kabuli_chr01 | 17255325                | CC                              | AA              | 1946729922               |
| SNP_P4_7108_17303221 | NC_021160.1    | Ca_kabuli_chr01 | 17303221                | TT                              | AA              | 1946729924               |
| SNP_P4_7109_17322614 | NC_021160.1    | Ca_kabuli_chr01 | 17322614                | CC                              | GG              | 1946729926               |
| SNP_P4_7110_17331370 | NC_021160.1    | Ca_kabuli_chr01 | 17331370                | AA                              | GG              | 1946729928               |
| SNP_P4_7111_17337037 | NC_021160.1    | Ca_kabuli_chr01 | 17337037                | TT                              | AA              | 1946729930               |
| SNP_P4_7112_17371107 | NC_021160.1    | Ca_kabuli_chr01 | 17371107                | AA                              | GG              | 1946729932               |
| SNP_P4_7113_17372436 | NC_021160.1    | Ca_kabuli_chr01 | 17372436                | GG                              | AA              | 1946729934               |
| SNP_P4_7114_17372614 | NC_021160.1    | Ca_kabuli_chr01 | 17372614                | CC                              | AA              | 1946729935               |
| SNP_P4_7115_17376791 | NC_021160.1    | Ca_kabuli_chr01 | 17376791                | CC                              | AA              | 1946729937               |
| SNP_P4_7116_17376808 | NC_021160.1    | Ca_kabuli_chr01 | 17376808                | AA                              | TT              | 1946729939               |
| SNP_P4_7117_17409706 | NC_021160.1    | Ca_kabuli_chr01 | 17409706                | TT                              | CC              | 1946729941               |
| SNP_P4_7118_17431627 | NC_021160.1    | Ca_kabuli_chr01 | 17431627                | GG                              | AA              | 1946729943               |
| SNP_P4_7119_17431662 | NC_021160.1    | Ca_kabuli_chr01 | 17431662                | TT                              | CC              | 1946729945               |
| SNP_P4_7121_17442463 | NC_021160.1    | Ca_kabuli_chr01 | 17442463                | CC                              | TT              | 1946729947               |
| SNP_P4_7122_17446289 | NC_021160.1    | Ca_kabuli_chr01 | 17446289                | CC                              | TT              | 1946729949               |
| SNP_P4_7124_17531785 | NC_021160.1    | Ca_kabuli_chr01 | 17531785                | AA                              | CC              | 1946729951               |
| SNP_P4_7125_17535628 | NC_021160.1    | Ca_kabuli_chr01 | 17535628                | TT                              | AA              | 1946729953               |
| SNP_P4_7126_17535630 | NC_021160.1    | Ca_kabuli_chr01 | 17535630                | CC                              | AA              | 1946729955               |
| SNP_P4_7127_17543781 | NC_021160.1    | Ca_kabuli_chr01 | 17543781                | GG                              | AA              | 1946729957               |
| SNP_P4_7128_17543787 | NC_021160.1    | Ca_kabuli_chr01 | 17543787                | AA                              | TT              | 1946729959               |
| SNP_P4_7129_17543789 | NC_021160.1    | Ca_kabuli_chr01 | 17543789                | AA                              | CC              | 1946729961               |
| SNP_P4_7130_17562073 | NC_021160.1    | Ca_kabuli_chr01 | 17562073                | AA                              | GG              | 1946729963               |
| SNP_P4_7131_17566774 | NC_021160.1    | Ca_kabuli_chr01 | 17566774                | GG                              | AA              | 1946729965               |
| SNP_P4_7133_17573953 | NC_021160.1    | Ca_kabuli_chr01 | 17573953                | TT                              | AA              | 1946729967               |
| SNP_P4_7134_17595420 | NC_021160.1    | Ca_kabuli_chr01 | 17595420                | TT                              | AA              | 1946729969               |
| SNP_P4_7135_17595424 | NC_021160.1    | Ca_kabuli_chr01 | 17595424                | TT                              | GG              | 1946729971               |
| SNP_P4_7137_17595651 | NC_021160.1    | Ca_kabuli_chr01 | 17595651                | CC                              | TT              | 1946729973               |
| SNP_P4_7138_17614897 | NC_021160.1    | Ca_kabuli_chr01 | 17614897                | AA                              | TT              | 1946729975               |
| SNP_P4_7139_17621201 | NC_021160.1    | Ca_kabuli_chr01 | 17621201                | AA                              | GG              | 1946729977               |

| SNPs IDs             | Chromosome IDs | Chromosomes     | Physical positions (bp) | CDC Frontier (Reference genome) | (ILWC46 & LPNB) | NCBI SNPdb Accession IDs |
|----------------------|----------------|-----------------|-------------------------|---------------------------------|-----------------|--------------------------|
| SNP_P4_7140_17621202 | NC_021160.1    | Ca_kabuli_chr01 | 17621202                | TT                              | CC              | 1946729979               |
| SNP_P4_7141_17621507 | NC_021160.1    | Ca_kabuli_chr01 | 17621507                | AA                              | TT              | 1946729981               |
| SNP_P4_7142_17621547 | NC_021160.1    | Ca_kabuli_chr01 | 17621547                | GG                              | CC              | 1946729983               |
| SNP_P4_7143_17621565 | NC_021160.1    | Ca_kabuli_chr01 | 17621565                | CC                              | GG              | 1946729985               |
| SNP_P4_7144_17621706 | NC_021160.1    | Ca_kabuli_chr01 | 17621706                | AA                              | TT              | 1946729987               |
| SNP_P4_7145_17621710 | NC_021160.1    | Ca_kabuli_chr01 | 17621710                | CC                              | TT              | 1946729989               |
| SNP_P4_7146_17621739 | NC_021160.1    | Ca_kabuli_chr01 | 17621739                | TT                              | CC              | 1946729991               |
| SNP_P4_7147_17621891 | NC_021160.1    | Ca_kabuli_chr01 | 17621891                | GG                              | AA              | 1946729993               |
| SNP_P4_7148_17623909 | NC_021160.1    | Ca_kabuli_chr01 | 17623909                | TT                              | CC              | 1946729995               |
| SNP_P4_7150_17630677 | NC_021160.1    | Ca_kabuli_chr01 | 17630677                | GG                              | AA              | 1946729997               |
| SNP_P4_7153_17640939 | NC_021160.1    | Ca_kabuli_chr01 | 17640939                | AA                              | GG              | 1946729999               |
| SNP_P4_7154_17646057 | NC_021160.1    | Ca_kabuli_chr01 | 17646057                | GG                              | CC              | 1946730001               |
| SNP_P4_7155_17686127 | NC_021160.1    | Ca_kabuli_chr01 | 17686127                | TT                              | GG              | 1946730003               |
| SNP_P4_7156_17697634 | NC_021160.1    | Ca_kabuli_chr01 | 17697634                | TT                              | CC              | 1946730005               |
| SNP_P4_7158_17707287 | NC_021160.1    | Ca_kabuli_chr01 | 17707287                | CC                              | GG              | 1946730007               |
| SNP_P4_7159_17717087 | NC_021160.1    | Ca_kabuli_chr01 | 17717087                | GG                              | AA              | 1946730010               |
| SNP_P4_7160_17719641 | NC_021160.1    | Ca_kabuli_chr01 | 17719641                | TT                              | GG              | 1946730012               |
| SNP_P4_7161_17745282 | NC_021160.1    | Ca_kabuli_chr01 | 17745282                | TT                              | AA              | 1946730014               |
| SNP_P4_7162_17745284 | NC_021160.1    | Ca_kabuli_chr01 | 17745284                | GG                              | AA              | 1946730016               |
| SNP_P4_7163_17745285 | NC_021160.1    | Ca_kabuli_chr01 | 17745285                | TT                              | AA              | 1946730018               |
| SNP_P4_7164_17808423 | NC_021160.1    | Ca_kabuli_chr01 | 17808423                | GG                              | CC              | 1946730020               |
| SNP_P4_7165_17808709 | NC_021160.1    | Ca_kabuli_chr01 | 17808709                | CC                              | TT              | 1946730022               |
| SNP_P4_7169_17843830 | NC_021160.1    | Ca_kabuli_chr01 | 17843830                | CC                              | TT              | 1946730024               |
| SNP_P4_7170_17898217 | NC_021160.1    | Ca_kabuli_chr01 | 17898217                | CC                              | TT              | 1946730026               |
| SNP_P4_7171_17898331 | NC_021160.1    | Ca_kabuli_chr01 | 17898331                | GG                              | AA              | 1946730028               |
| SNP_P4_7172_17902566 | NC_021160.1    | Ca_kabuli_chr01 | 17902566                | TT                              | GG              | 1946730030               |
| SNP_P4_7173_17902570 | NC_021160.1    | Ca_kabuli_chr01 | 17902570                | AA                              | GG              | 1946730032               |
| SNP_P4_7174_17914335 | NC_021160.1    | Ca_kabuli_chr01 | 17914335                | AA                              | TT              | 1946730034               |
| SNP_P4_7175_17917238 | NC_021160.1    | Ca_kabuli_chr01 | 17917238                | GG                              | AA              | 1946730036               |
| SNP_P4_7177_17938076 | NC_021160.1    | Ca_kabuli_chr01 | 17938076                | TT                              | CC              | 1946730038               |
| SNP_P4_7178_17941037 | NC_021160.1    | Ca_kabuli_chr01 | 17941037                | TT                              | AA              | 1946730040               |
| SNP_P4_7179_17958840 | NC_021160.1    | Ca_kabuli_chr01 | 17958840                | AA                              | GG              | 1946730042               |
| SNP_P4_7180_18006104 | NC_021160.1    | Ca_kabuli_chr01 | 18006104                | AA                              | GG              | 1946730044               |
| SNP_P4_7182_18058026 | NC_021160.1    | Ca_kabuli_chr01 | 18058026                | AA                              | CC              | 1946730046               |
| SNP_P4_7183_18121671 | NC_021160.1    | Ca_kabuli_chr01 | 18121671                | TT                              | AA              | 1946730048               |
| SNP_P4_7184_18121826 | NC_021160.1    | Ca_kabuli_chr01 | 18121826                | TT                              | CC              | 1946730050               |
| SNP_P4_7185_18121831 | NC_021160.1    | Ca_kabuli_chr01 | 18121831                | AA                              | TT              | 1946730052               |
| SNP_P4_7186_18121872 | NC_021160.1    | Ca_kabuli_chr01 | 18121872                | AA                              | GG              | 1946730054               |
| SNP_P4_7187_18122005 | NC_021160.1    | Ca_kabuli_chr01 | 18122005                | TT                              | CC              | 1946730056               |
| SNP_P4_7188_18122007 | NC_021160.1    | Ca_kabuli_chr01 | 18122007                | TT                              | CC              | 1946730058               |
| SNP_P4_7189_18122013 | NC_021160.1    | Ca_kabuli_chr01 | 18122013                | TT                              | CC              | 1946730060               |
| SNP_P4_7190_18122024 | NC_021160.1    | Ca_kabuli_chr01 | 18122024                | AA                              | GG              | 1946730063               |

| SNPs IDs             | Chromosome IDs | Chromosomes     | Physical positions (bp) | CDC Frontier (Reference genome) | (ILWC46 & LPNB) | NCBI SNPdb Accession IDs |
|----------------------|----------------|-----------------|-------------------------|---------------------------------|-----------------|--------------------------|
| SNP_P4_7191_18122027 | NC_021160.1    | Ca_kabuli_chr01 | 18122027                | AA                              | GG              | 1946730065               |
| SNP_P4_7192_18122045 | NC_021160.1    | Ca_kabuli_chr01 | 18122045                | TT                              | CC              | 1946730067               |
| SNP_P4_7193_18122247 | NC_021160.1    | Ca_kabuli_chr01 | 18122247                | TT                              | CC              | 1946730069               |
| SNP_P4_7194_18122264 | NC_021160.1    | Ca_kabuli_chr01 | 18122264                | AA                              | GG              | 1946730071               |
| SNP_P4_7195_18122279 | NC_021160.1    | Ca_kabuli_chr01 | 18122279                | TT                              | GG              | 1946730073               |
| SNP_P4_7197_18182395 | NC_021160.1    | Ca_kabuli_chr01 | 18182395                | TT                              | AA              | 1946730075               |
| SNP_P4_7198_18225044 | NC_021160.1    | Ca_kabuli_chr01 | 18225044                | CC                              | TT              | 1946730077               |
| SNP_P4_7199_18246875 | NC_021160.1    | Ca_kabuli_chr01 | 18246875                | TT                              | CC              | 1946730079               |
| SNP_P4_7200_18279152 | NC_021160.1    | Ca_kabuli_chr01 | 18279152                | TT                              | CC              | 1946730081               |
| SNP_P4_7201_18279233 | NC_021160.1    | Ca_kabuli_chr01 | 18279233                | GG                              | AA              | 1946730083               |
| SNP_P4_7202_18279478 | NC_021160.1    | Ca_kabuli_chr01 | 18279478                | TT                              | CC              | 1946730085               |
| SNP_P4_7203_18295124 | NC_021160.1    | Ca_kabuli_chr01 | 18295124                | GG                              | TT              | 1946730087               |
| SNP_P4_7204_18296907 | NC_021160.1    | Ca_kabuli_chr01 | 18296907                | GG                              | CC              | 1946730089               |
| SNP_P4_7205_18296916 | NC_021160.1    | Ca_kabuli_chr01 | 18296916                | CC                              | AA              | 1946730091               |
| SNP_P4_7206_18297153 | NC_021160.1    | Ca_kabuli_chr01 | 18297153                | GG                              | AA              | 1946730092               |
| SNP_P4_7207_18297178 | NC_021160.1    | Ca_kabuli_chr01 | 18297178                | TT                              | CC              | 1946730093               |
| SNP_P4_7208_18297273 | NC_021160.1    | Ca_kabuli_chr01 | 18297273                | CC                              | TT              | 1946730094               |
| SNP_P4_7210_18298543 | NC_021160.1    | Ca_kabuli_chr01 | 18298543                | GG                              | TT              | 1946730095               |
| SNP_P4_7211_18298548 | NC_021160.1    | Ca_kabuli_chr01 | 18298548                | TT                              | CC              | 1946730096               |
| SNP_P4_7212_18298798 | NC_021160.1    | Ca_kabuli_chr01 | 18298798                | AA                              | TT              | 1946730098               |
| SNP_P4_7213_18299789 | NC_021160.1    | Ca_kabuli_chr01 | 18299789                | TT                              | CC              | 1946730100               |
| SNP_P4_7215_18299933 | NC_021160.1    | Ca_kabuli_chr01 | 18299933                | CC                              | TT              | 1946730102               |
| SNP_P4_7216_18299945 | NC_021160.1    | Ca_kabuli_chr01 | 18299945                | AA                              | CC              | 1946730104               |
| SNP_P4_7217_18299962 | NC_021160.1    | Ca_kabuli_chr01 | 18299962                | TT                              | CC              | 1946730106               |
| SNP_P4_7218_18299987 | NC_021160.1    | Ca_kabuli_chr01 | 18299987                | TT                              | CC              | 1946730108               |
| SNP_P4_7219_18300031 | NC_021160.1    | Ca_kabuli_chr01 | 18300031                | TT                              | AA              | 1946730110               |
| SNP_P4_7220_18300032 | NC_021160.1    | Ca_kabuli_chr01 | 18300032                | AA                              | GG              | 1946730112               |
| SNP_P4_7221_18300065 | NC_021160.1    | Ca_kabuli_chr01 | 18300065                | AA                              | GG              | 1946730114               |
| SNP_P4_7222_18300162 | NC_021160.1    | Ca_kabuli_chr01 | 18300162                | TT                              | CC              | 1946730116               |
| SNP_P4_7223_18300561 | NC_021160.1    | Ca_kabuli_chr01 | 18300561                | TT                              | GG              | 1946730118               |
| SNP_P4_7224_18300578 | NC_021160.1    | Ca_kabuli_chr01 | 18300578                | GG                              | CC              | 1946730120               |
| SNP_P4_7225_18300596 | NC_021160.1    | Ca_kabuli_chr01 | 18300596                | CC                              | TT              | 1946730122               |
| SNP_P4_7228_18301160 | NC_021160.1    | Ca_kabuli_chr01 | 18301160                | TT                              | AA              | 1946730124               |
| SNP_P4_7229_18301178 | NC_021160.1    | Ca_kabuli_chr01 | 18301178                | GG                              | AA              | 1946730126               |
| SNP_P4_7230_18301228 | NC_021160.1    | Ca_kabuli_chr01 | 18301228                | AA                              | GG              | 1946730128               |
| SNP_P4_7231_18301275 | NC_021160.1    | Ca_kabuli_chr01 | 18301275                | GG                              | CC              | 1946730130               |
| SNP_P4_7232_18302162 | NC_021160.1    | Ca_kabuli_chr01 | 18302162                | CC                              | TT              | 1946730132               |
| SNP_P4_7233_18302187 | NC_021160.1    | Ca_kabuli_chr01 | 18302187                | GG                              | AA              | 1946730134               |
| SNP_P4_7234_18302201 | NC_021160.1    | Ca_kabuli_chr01 | 18302201                | TT                              | CC              | 1946730136               |
| SNP_P4_7235_18302220 | NC_021160.1    | Ca_kabuli_chr01 | 18302220                | GG                              | TT              | 1946730138               |
| SNP_P4_7236_18316918 | NC_021160.1    | Ca_kabuli_chr01 | 18316918                | TT                              | CC              | 1946730140               |
| SNP_P4_7237_18316931 | NC_021160.1    | Ca_kabuli_chr01 | 18316931                | TT                              | AA              | 1946730142               |

| SNPs IDs             | Chromosome IDs | Chromosomes     | Physical positions (bp) | CDC Frontier (Reference genome) | (ILWC46 & LPNB) | NCBI SNPdb Accession IDs |
|----------------------|----------------|-----------------|-------------------------|---------------------------------|-----------------|--------------------------|
| SNP_P4_7238_18317626 | NC_021160.1    | Ca_kabuli_chr01 | 18317626                | TT                              | CC              | 1946730144               |
| SNP_P4_7240_18317676 | NC_021160.1    | Ca_kabuli_chr01 | 18317676                | CC                              | AA              | 1946730146               |
| SNP_P4_7241_18317939 | NC_021160.1    | Ca_kabuli_chr01 | 18317939                | GG                              | AA              | 1946730148               |
| SNP_P4_7242_18318994 | NC_021160.1    | Ca_kabuli_chr01 | 18318994                | GG                              | TT              | 1946730150               |
| SNP_P4_7243_18319211 | NC_021160.1    | Ca_kabuli_chr01 | 18319211                | AA                              | TT              | 1946730152               |
| SNP_P4_7244_18319257 | NC_021160.1    | Ca_kabuli_chr01 | 18319257                | GG                              | AA              | 1946730154               |
| SNP_P4_7245_18319264 | NC_021160.1    | Ca_kabuli_chr01 | 18319264                | TT                              | AA              | 1946730156               |
| SNP_P4_7247_18319311 | NC_021160.1    | Ca_kabuli_chr01 | 18319311                | GG                              | AA              | 1946730158               |
| SNP_P4_7248_18319342 | NC_021160.1    | Ca_kabuli_chr01 | 18319342                | TT                              | GG              | 1946730160               |
| SNP_P4_7249_18325628 | NC_021160.1    | Ca_kabuli_chr01 | 18325628                | GG                              | TT              | 1946730162               |
| SNP_P4_7250_18325868 | NC_021160.1    | Ca_kabuli_chr01 | 18325868                | TT                              | GG              | 1946730164               |
| SNP_P4_7252_18325903 | NC_021160.1    | Ca_kabuli_chr01 | 18325903                | AA                              | GG              | 1946730166               |
| SNP_P4_7253_18326309 | NC_021160.1    | Ca_kabuli_chr01 | 18326309                | GG                              | CC              | 1946730168               |
| SNP_P4_7254_18326588 | NC_021160.1    | Ca_kabuli_chr01 | 18326588                | AA                              | TT              | 1946730170               |
| SNP_P4_7255_18326649 | NC_021160.1    | Ca_kabuli_chr01 | 18326649                | AA                              | GG              | 1946730173               |
| SNP_P4_7256_18326831 | NC_021160.1    | Ca_kabuli_chr01 | 18326831                | GG                              | AA              | 1946730175               |
| SNP_P4_7257_18327115 | NC_021160.1    | Ca_kabuli_chr01 | 18327115                | GG                              | TT              | 1946730177               |
| SNP_P4_7258_18327264 | NC_021160.1    | Ca_kabuli_chr01 | 18327264                | GG                              | AA              | 1946730179               |
| SNP_P4_7259_18327274 | NC_021160.1    | Ca_kabuli_chr01 | 18327274                | TT                              | CC              | 1946730181               |
| SNP_P4_7260_18327300 | NC_021160.1    | Ca_kabuli_chr01 | 18327300                | TT                              | AA              | 1946730183               |
| SNP_P4_7261_18327304 | NC_021160.1    | Ca_kabuli_chr01 | 18327304                | AA                              | GG              | 1946730185               |
| SNP_P4_7262_18327379 | NC_021160.1    | Ca_kabuli_chr01 | 18327379                | GG                              | CC              | 1946730187               |
| SNP_P4_7263_18327549 | NC_021160.1    | Ca_kabuli_chr01 | 18327549                | CC                              | AA              | 1946730189               |
| SNP_P4_7264_18327571 | NC_021160.1    | Ca_kabuli_chr01 | 18327571                | GG                              | AA              | 1946730191               |
| SNP_P4_7265_18327577 | NC_021160.1    | Ca_kabuli_chr01 | 18327577                | AA                              | GG              | 1946730193               |
| SNP_P4_7267_18327618 | NC_021160.1    | Ca_kabuli_chr01 | 18327618                | CC                              | TT              | 1946730195               |
| SNP_P4_7268_18327623 | NC_021160.1    | Ca_kabuli_chr01 | 18327623                | GG                              | AA              | 1946730197               |
| SNP_P4_7269_18327706 | NC_021160.1    | Ca_kabuli_chr01 | 18327706                | CC                              | AA              | 1946730199               |
| SNP_P4_7270_18327724 | NC_021160.1    | Ca_kabuli_chr01 | 18327724                | AA                              | GG              | 1946730201               |
| SNP_P4_7271_18327732 | NC_021160.1    | Ca_kabuli_chr01 | 18327732                | AA                              | CC              | 1946730204               |
| SNP_P4_7272_18327747 | NC_021160.1    | Ca_kabuli_chr01 | 18327747                | TT                              | CC              | 1946730206               |
| SNP_P4_7273_18327797 | NC_021160.1    | Ca_kabuli_chr01 | 18327797                | AA                              | CC              | 1946730208               |
| SNP_P4_7274_18327852 | NC_021160.1    | Ca_kabuli_chr01 | 18327852                | CC                              | TT              | 1946730210               |
| SNP_P4_7275_18327889 | NC_021160.1    | Ca_kabuli_chr01 | 18327889                | GG                              | AA              | 1946730212               |
| SNP_P4_7276_18327944 | NC_021160.1    | Ca_kabuli_chr01 | 18327944                | TT                              | AA              | 1946730214               |
| SNP_P4_7277_18327945 | NC_021160.1    | Ca_kabuli_chr01 | 18327945                | CC                              | TT              | 1946730216               |
| SNP_P4_7278_18327946 | NC_021160.1    | Ca_kabuli_chr01 | 18327946                | GG                              | AA              | 1946730218               |
| SNP_P4_7279_18327969 | NC_021160.1    | Ca_kabuli_chr01 | 18327969                | TT                              | CC              | 1946730220               |
| SNP_P4_7280_18328009 | NC_021160.1    | Ca_kabuli_chr01 | 18328009                | CC                              | AA              | 1946730222               |
| SNP_P4_7281_18328012 | NC_021160.1    | Ca_kabuli_chr01 | 18328012                | AA                              | TT              | 1946730224               |
| SNP_P4_7282_18328043 | NC_021160.1    | Ca_kabuli_chr01 | 18328043                | CC                              | TT              | 1946730226               |
| SNP_P4_7283_18328084 | NC_021160.1    | Ca_kabuli_chr01 | 18328084                | GG                              | TT              | 1946730228               |

| SNPs IDs             | Chromosome IDs | Chromosomes     | Physical positions (bp) | CDC Frontier (Reference genome) | (ILWC46 & LPNB) | NCBI SNPdb Accession IDs |
|----------------------|----------------|-----------------|-------------------------|---------------------------------|-----------------|--------------------------|
| SNP_P4_7285_18328245 | NC_021160.1    | Ca_kabuli_chr01 | 18328245                | GG                              | AA              | 1946730230               |
| SNP_P4_7286_18328288 | NC_021160.1    | Ca_kabuli_chr01 | 18328288                | AA                              | TT              | 1946730232               |
| SNP_P4_7288_18328374 | NC_021160.1    | Ca_kabuli_chr01 | 18328374                | GG                              | AA              | 1946730234               |
| SNP_P4_7289_18328735 | NC_021160.1    | Ca_kabuli_chr01 | 18328735                | CC                              | TT              | 1946730236               |
| SNP_P4_7290_18328752 | NC_021160.1    | Ca_kabuli_chr01 | 18328752                | TT                              | CC              | 1946730238               |
| SNP_P4_7291_18328753 | NC_021160.1    | Ca_kabuli_chr01 | 18328753                | CC                              | TT              | 1946730240               |
| SNP_P4_7292_18363694 | NC_021160.1    | Ca_kabuli_chr01 | 18363694                | AA                              | GG              | 1946730242               |
| SNP_P4_7293_18363764 | NC_021160.1    | Ca_kabuli_chr01 | 18363764                | GG                              | AA              | 1946730244               |
| SNP_P4_7294_18363926 | NC_021160.1    | Ca_kabuli_chr01 | 18363926                | CC                              | TT              | 1946730245               |
| SNP_P4_7295_18363952 | NC_021160.1    | Ca_kabuli_chr01 | 18363952                | CC                              | TT              | 1946730247               |
| SNP_P4_7296_18363986 | NC_021160.1    | Ca_kabuli_chr01 | 18363986                | GG                              | AA              | 1946730249               |
| SNP_P4_7297_18363995 | NC_021160.1    | Ca_kabuli_chr01 | 18363995                | GG                              | AA              | 1946730251               |
| SNP_P4_7298_18364006 | NC_021160.1    | Ca_kabuli_chr01 | 18364006                | AA                              | TT              | 1946730253               |
| SNP_P4_7299_18364007 | NC_021160.1    | Ca_kabuli_chr01 | 18364007                | AA                              | GG              | 1946730255               |
| SNP_P4_7300_18364019 | NC_021160.1    | Ca_kabuli_chr01 | 18364019                | TT                              | AA              | 1946730257               |
| SNP_P4_7301_18364025 | NC_021160.1    | Ca_kabuli_chr01 | 18364025                | AA                              | CC              | 1946730259               |
| SNP_P4_7303_18364069 | NC_021160.1    | Ca_kabuli_chr01 | 18364069                | TT                              | AA              | 1946730261               |
| SNP_P4_7304_18364099 | NC_021160.1    | Ca_kabuli_chr01 | 18364099                | CC                              | GG              | 1946730263               |
| SNP_P4_7305_18364106 | NC_021160.1    | Ca_kabuli_chr01 | 18364106                | CC                              | AA              | 1946730265               |
| SNP_P4_7306_18364147 | NC_021160.1    | Ca_kabuli_chr01 | 18364147                | GG                              | AA              | 1946730267               |
| SNP_P4_7307_18364161 | NC_021160.1    | Ca_kabuli_chr01 | 18364161                | AA                              | GG              | 1946730269               |
| SNP_P4_7308_18368773 | NC_021160.1    | Ca_kabuli_chr01 | 18368773                | AA                              | GG              | 1946730271               |
| SNP_P4_7309_18368817 | NC_021160.1    | Ca_kabuli_chr01 | 18368817                | CC                              | GG              | 1946730273               |
| SNP_P4_7311_18407857 | NC_021160.1    | Ca_kabuli_chr01 | 18407857                | TT                              | CC              | 1946730274               |
| SNP_P4_7312_18407876 | NC_021160.1    | Ca_kabuli_chr01 | 18407876                | GG                              | AA              | 1946730276               |
| SNP_P4_7313_18407913 | NC_021160.1    | Ca_kabuli_chr01 | 18407913                | TT                              | CC              | 1946730278               |
| SNP_P4_7314_18407917 | NC_021160.1    | Ca_kabuli_chr01 | 18407917                | GG                              | AA              | 1946730280               |
| SNP_P4_7315_18407938 | NC_021160.1    | Ca_kabuli_chr01 | 18407938                | GG                              | AA              | 1946730282               |
| SNP_P4_7316_18408067 | NC_021160.1    | Ca_kabuli_chr01 | 18408067                | CC                              | AA              | 1946730284               |
| SNP_P4_7317_18408070 | NC_021160.1    | Ca_kabuli_chr01 | 18408070                | TT                              | AA              | 1946730286               |
| SNP_P4_7318_18408104 | NC_021160.1    | Ca_kabuli_chr01 | 18408104                | AA                              | GG              | 1946730288               |
| SNP_P4_7319_18408121 | NC_021160.1    | Ca_kabuli_chr01 | 18408121                | AA                              | GG              | 1946730290               |
| SNP_P4_7320_18418963 | NC_021160.1    | Ca_kabuli_chr01 | 18418963                | CC                              | TT              | 1946730292               |
| SNP_P4_7321_18418967 | NC_021160.1    | Ca_kabuli_chr01 | 18418967                | CC                              | TT              | 1946730294               |
| SNP_P4_7322_18425154 | NC_021160.1    | Ca_kabuli_chr01 | 18425154                | CC                              | TT              | 1946730296               |
| SNP_P4_7323_18425471 | NC_021160.1    | Ca_kabuli_chr01 | 18425471                | TT                              | AA              | 1946730298               |
| SNP_P4_7324_18425563 | NC_021160.1    | Ca_kabuli_chr01 | 18425563                | AA                              | TT              | 1946730300               |
| SNP_P4_7326_18451233 | NC_021160.1    | Ca_kabuli_chr01 | 18451233                | GG                              | AA              | 1946730302               |
| SNP_P4_7327_18452841 | NC_021160.1    | Ca_kabuli_chr01 | 18452841                | AA                              | CC              | 1946730304               |
| SNP_P4_7328_18452867 | NC_021160.1    | Ca_kabuli_chr01 | 18452867                | TT                              | CC              | 1946730306               |
| SNP_P4_7329_18463380 | NC_021160.1    | Ca_kabuli_chr01 | 18463380                | GG                              | AA              | 1946730308               |
| SNP_P4_7330_18465705 | NC_021160.1    | Ca_kabuli_chr01 | 18465705                | TT                              | CC              | 1946730310               |

| SNPs IDs             | Chromosome IDs | Chromosomes     | Physical positions (bp) | CDC Frontier (Reference genome) | (ILWC46 & LPNB) | NCBI SNPdb Accession IDs |
|----------------------|----------------|-----------------|-------------------------|---------------------------------|-----------------|--------------------------|
| SNP_P4_7331_18466077 | NC_021160.1    | Ca_kabuli_chr01 | 18466077                | TT                              | CC              | 1946730312               |
| SNP_P4_7332_18466087 | NC_021160.1    | Ca_kabuli_chr01 | 18466087                | TT                              | CC              | 1946730314               |
| SNP_P4_7333_18466093 | NC_021160.1    | Ca_kabuli_chr01 | 18466093                | TT                              | CC              | 1946730316               |
| SNP_P4_7334_18466115 | NC_021160.1    | Ca_kabuli_chr01 | 18466115                | AA                              | TT              | 1946730318               |
| SNP_P4_7335_18484511 | NC_021160.1    | Ca_kabuli_chr01 | 18484511                | CC                              | TT              | 1946730320               |
| SNP_P4_7336_18518142 | NC_021160.1    | Ca_kabuli_chr01 | 18518142                | CC                              | TT              | 1946730322               |
| SNP_P4_7337_18528801 | NC_021160.1    | Ca_kabuli_chr01 | 18528801                | CC                              | TT              | 1946730324               |
| SNP_P4_7339_18552339 | NC_021160.1    | Ca_kabuli_chr01 | 18552339                | GG                              | AA              | 1946730326               |
| SNP_P4_7340_18563031 | NC_021160.1    | Ca_kabuli_chr01 | 18563031                | TT                              | AA              | 1946730328               |
| SNP_P4_7341_18575931 | NC_021160.1    | Ca_kabuli_chr01 | 18575931                | AA                              | GG              | 1946730330               |
| SNP_P4_7342_18575933 | NC_021160.1    | Ca_kabuli_chr01 | 18575933                | AA                              | GG              | 1946730332               |
| SNP_P4_7343_18582856 | NC_021160.1    | Ca_kabuli_chr01 | 18582856                | GG                              | TT              | 1946730334               |
| SNP_P4_7344_18601088 | NC_021160.1    | Ca_kabuli_chr01 | 18601088                | CC                              | TT              | 1946730336               |
| SNP_P4_7345_18601389 | NC_021160.1    | Ca_kabuli_chr01 | 18601389                | AA                              | GG              | 1946730338               |
| SNP_P4_7346_18609534 | NC_021160.1    | Ca_kabuli_chr01 | 18609534                | TT                              | AA              | 1946730340               |
| SNP_P4_7347_18639684 | NC_021160.1    | Ca_kabuli_chr01 | 18639684                | CC                              | AA              | 1946730343               |
| SNP_P4_7348_18663989 | NC_021160.1    | Ca_kabuli_chr01 | 18663989                | TT                              | CC              | 1946730345               |
| SNP_P4_7349_18665684 | NC_021160.1    | Ca_kabuli_chr01 | 18665684                | TT                              | CC              | 1946730347               |
| SNP_P4_7350_18665687 | NC_021160.1    | Ca_kabuli_chr01 | 18665687                | AA                              | CC              | 1946730349               |
| SNP_P4_7351_18665964 | NC_021160.1    | Ca_kabuli_chr01 | 18665964                | AA                              | TT              | 1946730351               |
| SNP_P4_7352_18668622 | NC_021160.1    | Ca_kabuli_chr01 | 18668622                | TT                              | CC              | 1946730353               |
| SNP_P4_7353_18678219 | NC_021160.1    | Ca_kabuli_chr01 | 18678219                | GG                              | AA              | 1946730355               |
| SNP_P4_7354_18688504 | NC_021160.1    | Ca_kabuli_chr01 | 18688504                | AA                              | GG              | 1946730357               |
| SNP_P4_7356_18708741 | NC_021160.1    | Ca_kabuli_chr01 | 18708741                | TT                              | CC              | 1946730359               |
| SNP_P4_7357_18736511 | NC_021160.1    | Ca_kabuli_chr01 | 18736511                | GG                              | AA              | 1946730361               |
| SNP_P4_7358_18795277 | NC_021160.1    | Ca_kabuli_chr01 | 18795277                | AA                              | GG              | 1946730363               |
| SNP_P4_7359_18824205 | NC_021160.1    | Ca_kabuli_chr01 | 18824205                | TT                              | CC              | 1946730366               |
| SNP_P4_7360_18824447 | NC_021160.1    | Ca_kabuli_chr01 | 18824447                | CC                              | TT              | 1946730368               |
| SNP_P4_7361_18824483 | NC_021160.1    | Ca_kabuli_chr01 | 18824483                | AA                              | GG              | 1946730370               |
| SNP_P4_7362_18824489 | NC_021160.1    | Ca_kabuli_chr01 | 18824489                | TT                              | CC              | 1946730372               |
| SNP_P4_7363_18824543 | NC_021160.1    | Ca_kabuli_chr01 | 18824543                | TT                              | CC              | 1946730374               |
| SNP_P4_7364_18832520 | NC_021160.1    | Ca_kabuli_chr01 | 18832520                | GG                              | TT              | 1946730376               |
| SNP_P4_7365_18839371 | NC_021160.1    | Ca_kabuli_chr01 | 18839371                | TT                              | AA              | 1946730378               |
| SNP_P4_7366_18847928 | NC_021160.1    | Ca_kabuli_chr01 | 18847928                | CC                              | TT              | 1946730380               |
| SNP_P4_7367_18861230 | NC_021160.1    | Ca_kabuli_chr01 | 18861230                | GG                              | AA              | 1946730382               |
| SNP_P4_7368_18868457 | NC_021160.1    | Ca_kabuli_chr01 | 18868457                | AA                              | TT              | 1946730384               |
| SNP_P4_7369_18868484 | NC_021160.1    | Ca_kabuli_chr01 | 18868484                | GG                              | AA              | 1946730386               |
| SNP_P4_7370_18868520 | NC_021160.1    | Ca_kabuli_chr01 | 18868520                | GG                              | AA              | 1946730388               |
| SNP_P4_7371_18868557 | NC_021160.1    | Ca_kabuli_chr01 | 18868557                | TT                              | CC              | 1946730390               |
| SNP_P4_7373_18868667 | NC_021160.1    | Ca_kabuli_chr01 | 18868667                | AA                              | GG              | 1946730392               |
| SNP_P4_7374_18868673 | NC_021160.1    | Ca_kabuli_chr01 | 18868673                | TT                              | GG              | 1946730394               |
| SNP_P4_7375_18868679 | NC_021160.1    | Ca_kabuli_chr01 | 18868679                | AA                              | GG              | 1946730396               |

| SNPs IDs             | Chromosome IDs | Chromosomes     | Physical positions (bp) | CDC Frontier (Reference genome) | (ILWC46 & LPNB) | NCBI SNPdb Accession IDs |
|----------------------|----------------|-----------------|-------------------------|---------------------------------|-----------------|--------------------------|
| SNP_P4_7376_18868684 | NC_021160.1    | Ca_kabuli_chr01 | 18868684                | CC                              | TT              | 1946730398               |
| SNP_P4_7378_18879933 | NC_021160.1    | Ca_kabuli_chr01 | 18879933                | TT                              | CC              | 1946730400               |
| SNP_P4_7379_18880766 | NC_021160.1    | Ca_kabuli_chr01 | 18880766                | GG                              | AA              | 1946730402               |
| SNP_P4_7380_18881034 | NC_021160.1    | Ca_kabuli_chr01 | 18881034                | GG                              | AA              | 1946730404               |
| SNP_P4_7381_18881527 | NC_021160.1    | Ca_kabuli_chr01 | 18881527                | CC                              | GG              | 1946730406               |
| SNP_P4_7382_18881649 | NC_021160.1    | Ca_kabuli_chr01 | 18881649                | AA                              | GG              | 1946730408               |
| SNP_P4_7383_18917171 | NC_021160.1    | Ca_kabuli_chr01 | 18917171                | GG                              | TT              | 1946730410               |
| SNP_P4_7384_18918221 | NC_021160.1    | Ca_kabuli_chr01 | 18918221                | CC                              | TT              | 1946730412               |
| SNP_P4_7385_18966023 | NC_021160.1    | Ca_kabuli_chr01 | 18966023                | TT                              | CC              | 1946730415               |
| SNP_P4_7386_18993363 | NC_021160.1    | Ca_kabuli_chr01 | 18993363                | TT                              | AA              | 1946730416               |
| SNP_P4_7387_19019269 | NC_021160.1    | Ca_kabuli_chr01 | 19019269                | TT                              | CC              | 1946730418               |
| SNP_P4_7388_19019270 | NC_021160.1    | Ca_kabuli_chr01 | 19019270                | TT                              | AA              | 1946730420               |
| SNP_P4_7389_19025169 | NC_021160.1    | Ca_kabuli_chr01 | 19025169                | AA                              | TT              | 1946730422               |
| SNP_P4_7390_19025170 | NC_021160.1    | Ca_kabuli_chr01 | 19025170                | AA                              | TT              | 1946730424               |
| SNP_P4_7391_19025172 | NC_021160.1    | Ca_kabuli_chr01 | 19025172                | CC                              | AA              | 1946730426               |
| SNP_P4_7392_19025173 | NC_021160.1    | Ca_kabuli_chr01 | 19025173                | TT                              | AA              | 1946730428               |
| SNP_P4_7393_19025177 | NC_021160.1    | Ca_kabuli_chr01 | 19025177                | TT                              | CC              | 1946730430               |
| SNP_P4_7396_19025183 | NC_021160.1    | Ca_kabuli_chr01 | 19025183                | GG                              | TT              | 1946730432               |
| SNP_P4_7397_19025184 | NC_021160.1    | Ca_kabuli_chr01 | 19025184                | AA                              | GG              | 1946730434               |
| SNP_P4_7398_19025186 | NC_021160.1    | Ca_kabuli_chr01 | 19025186                | TT                              | CC              | 1946730436               |
| SNP_P4_7399_19057544 | NC_021160.1    | Ca_kabuli_chr01 | 19057544                | CC                              | GG              | 1946730438               |
| SNP_P4_7400_19059862 | NC_021160.1    | Ca_kabuli_chr01 | 19059862                | TT                              | CC              | 1946730440               |
| SNP_P4_7401_19060124 | NC_021160.1    | Ca_kabuli_chr01 | 19060124                | GG                              | AA              | 1946730442               |
| SNP_P4_7402_19068311 | NC_021160.1    | Ca_kabuli_chr01 | 19068311                | AA                              | GG              | 1946730444               |
| SNP_P4_7404_19084367 | NC_021160.1    | Ca_kabuli_chr01 | 19084367                | GG                              | AA              | 1946730446               |
| SNP_P4_7405_19091169 | NC_021160.1    | Ca_kabuli_chr01 | 19091169                | GG                              | AA              | 1946730448               |
| SNP_P4_7407_19094731 | NC_021160.1    | Ca_kabuli_chr01 | 19094731                | TT                              | AA              | 1946730450               |
| SNP_P4_7408_19111747 | NC_021160.1    | Ca_kabuli_chr01 | 19111747                | TT                              | CC              | 1946730452               |
| SNP_P4_7409_19115795 | NC_021160.1    | Ca_kabuli_chr01 | 19115795                | TT                              | CC              | 1946730454               |
| SNP_P4_7410_19116455 | NC_021160.1    | Ca_kabuli_chr01 | 19116455                | TT                              | CC              | 1946730456               |
| SNP_P4_7411_19125145 | NC_021160.1    | Ca_kabuli_chr01 | 19125145                | TT                              | GG              | 1946730458               |
| SNP_P4_7412_19134959 | NC_021160.1    | Ca_kabuli_chr01 | 19134959                | GG                              | AA              | 1946730460               |
| SNP_P4_7413_19135276 | NC_021160.1    | Ca_kabuli_chr01 | 19135276                | GG                              | CC              | 1946730463               |
| SNP_P4_7414_19150701 | NC_021160.1    | Ca_kabuli_chr01 | 19150701                | CC                              | AA              | 1946730465               |
| SNP_P4_7415_19150894 | NC_021160.1    | Ca_kabuli_chr01 | 19150894                | CC                              | TT              | 1946730467               |
| SNP_P4_7416_19150902 | NC_021160.1    | Ca_kabuli_chr01 | 19150902                | CC                              | TT              | 1946730469               |
| SNP_P4_7417_19150905 | NC_021160.1    | Ca_kabuli_chr01 | 19150905                | GG                              | AA              | 1946730471               |
| SNP_P4_7418_19150913 | NC_021160.1    | Ca_kabuli_chr01 | 19150913                | GG                              | AA              | 1946730473               |
| SNP_P4_7419_19150960 | NC_021160.1    | Ca_kabuli_chr01 | 19150960                | GG                              | AA              | 1946730475               |
| SNP_P4_7421_19151000 | NC_021160.1    | Ca_kabuli_chr01 | 19151000                | TT                              | CC              | 1946730477               |
| SNP_P4_7422_19151002 | NC_021160.1    | Ca_kabuli_chr01 | 19151002                | CC                              | AA              | 1946730479               |
| SNP_P4_7423_19151031 | NC_021160.1    | Ca_kabuli_chr01 | 19151031                | AA                              | TT              | 1946730481               |

| SNPs IDs             | Chromosome IDs | Chromosomes     | Physical positions (bp) | CDC Frontier (Reference genome) | (ILWC46 & LPNB) | NCBI SNPdb Accession IDs |
|----------------------|----------------|-----------------|-------------------------|---------------------------------|-----------------|--------------------------|
| SNP_P4_7424_19151037 | NC_021160.1    | Ca_kabuli_chr01 | 19151037                | TT                              | AA              | 1946730483               |
| SNP_P4_7425_19151152 | NC_021160.1    | Ca_kabuli_chr01 | 19151152                | AA                              | TT              | 1946730485               |
| SNP_P4_7426_19151218 | NC_021160.1    | Ca_kabuli_chr01 | 19151218                | CC                              | TT              | 1946730487               |
| SNP_P4_7427_19151235 | NC_021160.1    | Ca_kabuli_chr01 | 19151235                | TT                              | CC              | 1946730489               |
| SNP_P4_7428_19151244 | NC_021160.1    | Ca_kabuli_chr01 | 19151244                | CC                              | TT              | 1946730491               |
| SNP_P4_7429_19153197 | NC_021160.1    | Ca_kabuli_chr01 | 19153197                | TT                              | GG              | 1946730493               |
| SNP_P4_7430_19153223 | NC_021160.1    | Ca_kabuli_chr01 | 19153223                | AA                              | GG              | 1946730495               |
| SNP_P4_7431_19153230 | NC_021160.1    | Ca_kabuli_chr01 | 19153230                | TT                              | CC              | 1946730497               |
| SNP_P4_7432_19263244 | NC_021160.1    | Ca_kabuli_chr01 | 19263244                | AA                              | GG              | 1946730499               |
| SNP_P4_7433_19293957 | NC_021160.1    | Ca_kabuli_chr01 | 19293957                | CC                              | TT              | 1946730501               |
| SNP_P4_7434_19304349 | NC_021160.1    | Ca_kabuli_chr01 | 19304349                | GG                              | AA              | 1946730503               |
| SNP_P4_7435_19307885 | NC_021160.1    | Ca_kabuli_chr01 | 19307885                | TT                              | CC              | 1946730505               |
| SNP_P4_7437_19318639 | NC_021160.1    | Ca_kabuli_chr01 | 19318639                | TT                              | CC              | 1946730507               |
| SNP_P4_7438_19331228 | NC_021160.1    | Ca_kabuli_chr01 | 19331228                | AA                              | TT              | 1946730509               |
| SNP_P4_7439_19332449 | NC_021160.1    | Ca_kabuli_chr01 | 19332449                | GG                              | AA              | 1946730511               |
| SNP_P4_7440_19363829 | NC_021160.1    | Ca_kabuli_chr01 | 19363829                | GG                              | TT              | 1946730513               |
| SNP_P4_7441_19364003 | NC_021160.1    | Ca_kabuli_chr01 | 19364003                | GG                              | TT              | 1946730515               |
| SNP_P4_7442_19412119 | NC_021160.1    | Ca_kabuli_chr01 | 19412119                | GG                              | AA              | 1946730517               |
| SNP_P4_7443_19422222 | NC_021160.1    | Ca_kabuli_chr01 | 19422222                | TT                              | CC              | 1946730519               |
| SNP_P4_7444_19422303 | NC_021160.1    | Ca_kabuli_chr01 | 19422303                | CC                              | AA              | 1946730521               |
| SNP_P4_7445_19422493 | NC_021160.1    | Ca_kabuli_chr01 | 19422493                | TT                              | CC              | 1946730523               |
| SNP_P4_7446_19422853 | NC_021160.1    | Ca_kabuli_chr01 | 19422853                | TT                              | CC              | 1946730526               |
| SNP_P4_7448_19422930 | NC_021160.1    | Ca_kabuli_chr01 | 19422930                | AA                              | GG              | 1946730528               |
| SNP_P4_7450_19423090 | NC_021160.1    | Ca_kabuli_chr01 | 19423090                | AA                              | CC              | 1946730529               |
| SNP_P4_7451_19423192 | NC_021160.1    | Ca_kabuli_chr01 | 19423192                | TT                              | CC              | 1946730531               |
| SNP_P4_7452_19423310 | NC_021160.1    | Ca_kabuli_chr01 | 19423310                | TT                              | GG              | 1946730533               |
| SNP_P4_7453_19424185 | NC_021160.1    | Ca_kabuli_chr01 | 19424185                | CC                              | TT              | 1946730535               |
| SNP_P4_7454_19424307 | NC_021160.1    | Ca_kabuli_chr01 | 19424307                | TT                              | GG              | 1946730537               |
| SNP_P4_7455_19427159 | NC_021160.1    | Ca_kabuli_chr01 | 19427159                | AA                              | GG              | 1946730539               |
| SNP_P4_7456_19427623 | NC_021160.1    | Ca_kabuli_chr01 | 19427623                | TT                              | CC              | 1946730541               |
| SNP_P4_7457_19431345 | NC_021160.1    | Ca_kabuli_chr01 | 19431345                | GG                              | AA              | 1946730543               |
| SNP_P4_7458_19431349 | NC_021160.1    | Ca_kabuli_chr01 | 19431349                | GG                              | AA              | 1946730545               |
| SNP_P4_7459_19431381 | NC_021160.1    | Ca_kabuli_chr01 | 19431381                | TT                              | CC              | 1946730547               |
| SNP_P4_7460_19431426 | NC_021160.1    | Ca_kabuli_chr01 | 19431426                | CC                              | GG              | 1946730549               |
| SNP_P4_7462_19431710 | NC_021160.1    | Ca_kabuli_chr01 | 19431710                | AA                              | TT              | 1946730551               |
| SNP_P4_7463_19436879 | NC_021160.1    | Ca_kabuli_chr01 | 19436879                | GG                              | CC              | 1946730553               |
| SNP_P4_7464_19445947 | NC_021160.1    | Ca_kabuli_chr01 | 19445947                | GG                              | AA              | 1946730555               |
| SNP_P4_7465_19454907 | NC_021160.1    | Ca_kabuli_chr01 | 19454907                | CC                              | TT              | 1946730557               |
| SNP_P4_7467_19474159 | NC_021160.1    | Ca_kabuli_chr01 | 19474159                | AA                              | GG              | 1946730559               |
| SNP_P4_7468_19474207 | NC_021160.1    | Ca_kabuli_chr01 | 19474207                | TT                              | CC              | 1946730561               |
| SNP_P4_7470_19499093 | NC_021160.1    | Ca_kabuli_chr01 | 19499093                | TT                              | AA              | 1946730563               |
| SNP_P4_7471_19499140 | NC_021160.1    | Ca_kabuli_chr01 | 19499140                | CC                              | GG              | 1946730565               |



| SNPs IDs             | Chromosome IDs | Chromosomes     | Physical positions (bp) | CDC Frontier (Reference genome) | (ILWC46 & LPNB) | NCBI SNPdb Accession IDs |
|----------------------|----------------|-----------------|-------------------------|---------------------------------|-----------------|--------------------------|
| SNP_P4_7472_19499186 | NC_021160.1    | Ca_kabuli_chr01 | 19499186                | AA                              | CC              | 1946730567               |
| SNP_P4_7473_19499194 | NC_021160.1    | Ca_kabuli_chr01 | 19499194                | GG                              | TT              | 1946730569               |
| SNP_P4_7474_19499215 | NC_021160.1    | Ca_kabuli_chr01 | 19499215                | AA                              | GG              | 1946730571               |
| SNP_P4_7475_19499229 | NC_021160.1    | Ca_kabuli_chr01 | 19499229                | CC                              | TT              | 1946730573               |
| SNP_P4_7476_19499231 | NC_021160.1    | Ca_kabuli_chr01 | 19499231                | AA                              | TT              | 1946730575               |
| SNP_P4_7477_19499243 | NC_021160.1    | Ca_kabuli_chr01 | 19499243                | AA                              | CC              | 1946730577               |
| SNP_P4_7478_19505878 | NC_021160.1    | Ca_kabuli_chr01 | 19505878                | CC                              | TT              | 1946730579               |
| SNP_P4_7479_19505883 | NC_021160.1    | Ca_kabuli_chr01 | 19505883                | AA                              | TT              | 1946730581               |
| SNP_P4_7480_19505892 | NC_021160.1    | Ca_kabuli_chr01 | 19505892                | TT                              | CC              | 1946730583               |
| SNP_P4_7481_19505945 | NC_021160.1    | Ca_kabuli_chr01 | 19505945                | TT                              | AA              | 1946730585               |
| SNP_P4_7482_19507308 | NC_021160.1    | Ca_kabuli_chr01 | 19507308                | TT                              | CC              | 1946730587               |
| SNP_P4_7483_19507376 | NC_021160.1    | Ca_kabuli_chr01 | 19507376                | AA                              | CC              | 1946730589               |
| SNP_P4_7484_19526652 | NC_021160.1    | Ca_kabuli_chr01 | 19526652                | TT                              | GG              | 1946730591               |
| SNP_P4_7486_19561956 | NC_021160.1    | Ca_kabuli_chr01 | 19561956                | AA                              | CC              | 1946730593               |
| SNP_P4_7487_19619542 | NC_021160.1    | Ca_kabuli_chr01 | 19619542                | TT                              | CC              | 1946730595               |
| SNP_P4_7488_19619554 | NC_021160.1    | Ca_kabuli_chr01 | 19619554                | CC                              | TT              | 1946730597               |
| SNP_P4_7489_19619575 | NC_021160.1    | Ca_kabuli_chr01 | 19619575                | CC                              | TT              | 1946730599               |
| SNP_P4_7490_19619792 | NC_021160.1    | Ca_kabuli_chr01 | 19619792                | AA                              | GG              | 1946730601               |
| SNP_P4_7491_19619915 | NC_021160.1    | Ca_kabuli_chr01 | 19619915                | TT                              | CC              | 1946730603               |
| SNP_P4_7492_19619928 | NC_021160.1    | Ca_kabuli_chr01 | 19619928                | AA                              | GG              | 1946730605               |
| SNP_P4_7493_19619929 | NC_021160.1    | Ca_kabuli_chr01 | 19619929                | TT                              | CC              | 1946730607               |
| SNP_P4_7494_19619954 | NC_021160.1    | Ca_kabuli_chr01 | 19619954                | AA                              | GG              | 1946730609               |
| SNP_P4_7495_19619985 | NC_021160.1    | Ca_kabuli_chr01 | 19619985                | GG                              | AA              | 1946730611               |
| SNP_P4_7496_19619999 | NC_021160.1    | Ca_kabuli_chr01 | 19619999                | CC                              | GG              | 1946730613               |
| SNP_P4_7497_19620012 | NC_021160.1    | Ca_kabuli_chr01 | 19620012                | GG                              | AA              | 1946730615               |
| SNP_P4_7498_19620071 | NC_021160.1    | Ca_kabuli_chr01 | 19620071                | TT                              | AA              | 1946730617               |
| SNP_P4_7499_19626514 | NC_021160.1    | Ca_kabuli_chr01 | 19626514                | AA                              | GG              | 1946730619               |
| SNP_P4_7500_19627543 | NC_021160.1    | Ca_kabuli_chr01 | 19627543                | TT                              | CC              | 1946730621               |
| SNP_P4_7501_19627951 | NC_021160.1    | Ca_kabuli_chr01 | 19627951                | TT                              | CC              | 1946730623               |
| SNP_P4_7502_19628476 | NC_021160.1    | Ca_kabuli_chr01 | 19628476                | CC                              | TT              | 1946730625               |
| SNP_P4_7503_19631708 | NC_021160.1    | Ca_kabuli_chr01 | 19631708                | TT                              | CC              | 1946730627               |
| SNP_P4_7505_19641799 | NC_021160.1    | Ca_kabuli_chr01 | 19641799                | CC                              | TT              | 1946730629               |
| SNP_P4_7506_19645966 | NC_021160.1    | Ca_kabuli_chr01 | 19645966                | AA                              | TT              | 1946730631               |
| SNP_P4_7507_19649710 | NC_021160.1    | Ca_kabuli_chr01 | 19649710                | CC                              | TT              | 1946730633               |
| SNP_P4_7508_19650051 | NC_021160.1    | Ca_kabuli_chr01 | 19650051                | AA                              | GG              | 1946730635               |
| SNP_P4_7509_19652796 | NC_021160.1    | Ca_kabuli_chr01 | 19652796                | TT                              | AA              | 1946730637               |
| SNP_P4_7512_19697171 | NC_021160.1    | Ca_kabuli_chr01 | 19697171                | CC                              | TT              | 1946730639               |
| SNP_P4_7513_19697184 | NC_021160.1    | Ca_kabuli_chr01 | 19697184                | CC                              | TT              | 1946730640               |
| SNP_P4_7514_19697200 | NC_021160.1    | Ca_kabuli_chr01 | 19697200                | AA                              | GG              | 1946730642               |
| SNP_P4_7515_19697553 | NC_021160.1    | Ca_kabuli_chr01 | 19697553                | CC                              | TT              | 1946730644               |
| SNP_P4_7517_19728698 | NC_021160.1    | Ca_kabuli_chr01 | 19728698                | AA                              | GG              | 1946730646               |
| SNP_P4_7518_19742632 | NC_021160.1    | Ca_kabuli_chr01 | 19742632                | CC                              | TT              | 1946730648               |

| SNPs IDs             | Chromosome IDs | Chromosomes     | Physical positions (bp) | CDC Frontier (Reference genome) | (ILWC46 & LPNB) | NCBI SNPdb Accession IDs |
|----------------------|----------------|-----------------|-------------------------|---------------------------------|-----------------|--------------------------|
| SNP_P4_7519_19742669 | NC_021160.1    | Ca_kabuli_chr01 | 19742669                | GG                              | TT              | 1946730650               |
| SNP_P4_7520_19742684 | NC_021160.1    | Ca_kabuli_chr01 | 19742684                | CC                              | TT              | 1946730652               |
| SNP_P4_7521_19742693 | NC_021160.1    | Ca_kabuli_chr01 | 19742693                | GG                              | AA              | 1946730654               |
| SNP_P4_7522_19764066 | NC_021160.1    | Ca_kabuli_chr01 | 19764066                | TT                              | CC              | 1946730656               |
| SNP_P4_7523_19780212 | NC_021160.1    | Ca_kabuli_chr01 | 19780212                | CC                              | GG              | 1946730658               |
| SNP_P4_7524_19792765 | NC_021160.1    | Ca_kabuli_chr01 | 19792765                | AA                              | CC              | 1946730660               |
| SNP_P4_7525_19812909 | NC_021160.1    | Ca_kabuli_chr01 | 19812909                | GG                              | AA              | 1946730662               |
| SNP_P4_7526_19812938 | NC_021160.1    | Ca_kabuli_chr01 | 19812938                | CC                              | TT              | 1946730664               |
| SNP_P4_7527_19812997 | NC_021160.1    | Ca_kabuli_chr01 | 19812997                | CC                              | TT              | 1946730666               |
| SNP_P4_7528_19815338 | NC_021160.1    | Ca_kabuli_chr01 | 19815338                | TT                              | GG              | 1946730668               |
| SNP_P4_7529_19815908 | NC_021160.1    | Ca_kabuli_chr01 | 19815908                | TT                              | CC              | 1946730670               |
| SNP_P4_7530_19832527 | NC_021160.1    | Ca_kabuli_chr01 | 19832527                | AA                              | GG              | 1946730672               |
| SNP_P4_7531_19832954 | NC_021160.1    | Ca_kabuli_chr01 | 19832954                | TT                              | CC              | 1946730674               |
| SNP_P4_7532_19846593 | NC_021160.1    | Ca_kabuli_chr01 | 19846593                | AA                              | TT              | 1946730676               |
| SNP_P4_7533_19846594 | NC_021160.1    | Ca_kabuli_chr01 | 19846594                | TT                              | AA              | 1946730678               |
| SNP_P4_7534_19851384 | NC_021160.1    | Ca_kabuli_chr01 | 19851384                | AA                              | TT              | 1946730680               |
| SNP_P4_7535_19851841 | NC_021160.1    | Ca_kabuli_chr01 | 19851841                | GG                              | AA              | 1946730682               |
| SNP_P4_7537_19855921 | NC_021160.1    | Ca_kabuli_chr01 | 19855921                | AA                              | GG              | 1946730684               |
| SNP_P4_7538_19908881 | NC_021160.1    | Ca_kabuli_chr01 | 19908881                | TT                              | CC              | 1946730686               |
| SNP_P4_7539_19909020 | NC_021160.1    | Ca_kabuli_chr01 | 19909020                | GG                              | AA              | 1946730688               |
| SNP_P4_7540_19909287 | NC_021160.1    | Ca_kabuli_chr01 | 19909287                | GG                              | TT              | 1946730690               |
| SNP_P4_7541_19909293 | NC_021160.1    | Ca_kabuli_chr01 | 19909293                | GG                              | AA              | 1946730692               |
| SNP_P4_7542_19918717 | NC_021160.1    | Ca_kabuli_chr01 | 19918717                | AA                              | GG              | 1946730694               |
| SNP_P4_7543_19931308 | NC_021160.1    | Ca_kabuli_chr01 | 19931308                | GG                              | TT              | 1946730695               |
| SNP_P4_7544_19936497 | NC_021160.1    | Ca_kabuli_chr01 | 19936497                | AA                              | GG              | 1946730697               |
| SNP_P4_7546_19952894 | NC_021160.1    | Ca_kabuli_chr01 | 19952894                | CC                              | TT              | 1946730698               |
| SNP_P4_7547_19956139 | NC_021160.1    | Ca_kabuli_chr01 | 19956139                | AA                              | GG              | 1946730699               |
| SNP_P4_7548_19968815 | NC_021160.1    | Ca_kabuli_chr01 | 19968815                | AA                              | GG              | 1946730700               |
| SNP_P4_7549_19970001 | NC_021160.1    | Ca_kabuli_chr01 | 19970001                | AA                              | GG              | 1946730702               |
| SNP_P4_7550_19995971 | NC_021160.1    | Ca_kabuli_chr01 | 19995971                | AA                              | GG              | 1946730703               |
| SNP_P4_7551_20000869 | NC_021160.1    | Ca_kabuli_chr01 | 20000869                | GG                              | AA              | 1946730705               |
| SNP_P4_7552_20055712 | NC_021160.1    | Ca_kabuli_chr01 | 20055712                | AA                              | GG              | 1946730707               |
| SNP_P4_7553_20072771 | NC_021160.1    | Ca_kabuli_chr01 | 20072771                | TT                              | AA              | 1946730709               |
| SNP_P4_7554_20085134 | NC_021160.1    | Ca_kabuli_chr01 | 20085134                | GG                              | TT              | 1946730711               |
| SNP_P4_7555_20132520 | NC_021160.1    | Ca_kabuli_chr01 | 20132520                | AA                              | GG              | 1946730713               |
| SNP_P4_7556_21570091 | NC_021160.1    | Ca_kabuli_chr01 | 21570091                | CC                              | TT              | 1946730715               |
| SNP_P4_7557_21570093 | NC_021160.1    | Ca_kabuli_chr01 | 21570093                | AA                              | GG              | 1946730717               |
| SNP_P4_7558_21570342 | NC_021160.1    | Ca_kabuli_chr01 | 21570342                | TT                              | CC              | 1946730719               |
| SNP_P4_7559_21570399 | NC_021160.1    | Ca_kabuli_chr01 | 21570399                | TT                              | CC              | 1946730721               |
| SNP_P4_7560_21608399 | NC_021160.1    | Ca_kabuli_chr01 | 21608399                | TT                              | GG              | 1946730723               |
| SNP_P4_7561_21640379 | NC_021160.1    | Ca_kabuli_chr01 | 21640379                | TT                              | AA              | 1946730725               |
| SNP_P4_7562_21647285 | NC_021160.1    | Ca_kabuli_chr01 | 21647285                | GG                              | AA              | 1946730726               |

| SNPs IDs             | Chromosome IDs | Chromosomes     | Physical positions (bp) | CDC Frontier (Reference genome) | (ILWC46 & LPNB) | NCBI SNPdb Accession IDs |
|----------------------|----------------|-----------------|-------------------------|---------------------------------|-----------------|--------------------------|
| SNP_P4_7563_21647895 | NC_021160.1    | Ca_kabuli_chr01 | 21647895                | AA                              | GG              | 1946730727               |
| SNP_P4_7565_21657089 | NC_021160.1    | Ca_kabuli_chr01 | 21657089                | AA                              | GG              | 1946730728               |
| SNP_P4_7566_21657102 | NC_021160.1    | Ca_kabuli_chr01 | 21657102                | AA                              | CC              | 1946730729               |
| SNP_P4_7567_21657337 | NC_021160.1    | Ca_kabuli_chr01 | 21657337                | AA                              | TT              | 1946730731               |
| SNP_P4_7569_21657432 | NC_021160.1    | Ca_kabuli_chr01 | 21657432                | TT                              | CC              | 1946730733               |
| SNP_P4_7570_21657436 | NC_021160.1    | Ca_kabuli_chr01 | 21657436                | AA                              | GG              | 1946730735               |
| SNP_P4_7571_21657559 | NC_021160.1    | Ca_kabuli_chr01 | 21657559                | AA                              | CC              | 1946730737               |
| SNP_P4_7572_21657610 | NC_021160.1    | Ca_kabuli_chr01 | 21657610                | AA                              | GG              | 1946730739               |
| SNP_P4_7573_21657625 | NC_021160.1    | Ca_kabuli_chr01 | 21657625                | AA                              | GG              | 1946730741               |
| SNP_P4_7574_21657643 | NC_021160.1    | Ca_kabuli_chr01 | 21657643                | TT                              | GG              | 1946730743               |
| SNP_P4_7575_21657661 | NC_021160.1    | Ca_kabuli_chr01 | 21657661                | GG                              | TT              | 1946730745               |
| SNP_P4_7576_21657667 | NC_021160.1    | Ca_kabuli_chr01 | 21657667                | GG                              | AA              | 1946730747               |
| SNP_P4_7577_21657697 | NC_021160.1    | Ca_kabuli_chr01 | 21657697                | AA                              | GG              | 1946730749               |
| SNP_P4_7578_21657714 | NC_021160.1    | Ca_kabuli_chr01 | 21657714                | GG                              | AA              | 1946730751               |
| SNP_P4_7580_21657718 | NC_021160.1    | Ca_kabuli_chr01 | 21657718                | CC                              | TT              | 1946730753               |
| SNP_P4_7581_21657732 | NC_021160.1    | Ca_kabuli_chr01 | 21657732                | AA                              | GG              | 1946730755               |
| SNP_P4_7582_21657733 | NC_021160.1    | Ca_kabuli_chr01 | 21657733                | GG                              | AA              | 1946730757               |
| SNP_P4_7583_21657769 | NC_021160.1    | Ca_kabuli_chr01 | 21657769                | GG                              | AA              | 1946730759               |
| SNP_P4_7584_21657787 | NC_021160.1    | Ca_kabuli_chr01 | 21657787                | AA                              | TT              | 1946730760               |
| SNP_P4_7585_21657793 | NC_021160.1    | Ca_kabuli_chr01 | 21657793                | AA                              | GG              | 1946730762               |
| SNP_P4_7586_21657811 | NC_021160.1    | Ca_kabuli_chr01 | 21657811                | AA                              | GG              | 1946730764               |
| SNP_P4_7587_21657817 | NC_021160.1    | Ca_kabuli_chr01 | 21657817                | GG                              | AA              | 1946730766               |
| SNP_P4_7588_21657838 | NC_021160.1    | Ca_kabuli_chr01 | 21657838                | TT                              | CC              | 1946730768               |
| SNP_P4_7589_21657847 | NC_021160.1    | Ca_kabuli_chr01 | 21657847                | TT                              | AA              | 1946730770               |
| SNP_P4_7590_21657850 | NC_021160.1    | Ca_kabuli_chr01 | 21657850                | AA                              | TT              | 1946730772               |
| SNP_P4_7591_21657859 | NC_021160.1    | Ca_kabuli_chr01 | 21657859                | GG                              | AA              | 1946730774               |
| SNP_P4_7592_21662493 | NC_021160.1    | Ca_kabuli_chr01 | 21662493                | GG                              | AA              | 1946730776               |
| SNP_P4_7593_21699877 | NC_021160.1    | Ca_kabuli_chr01 | 21699877                | AA                              | GG              | 1946730778               |
| SNP_P4_7594_21700172 | NC_021160.1    | Ca_kabuli_chr01 | 21700172                | TT                              | CC              | 1946730780               |
| SNP_P4_7596_21749813 | NC_021160.1    | Ca_kabuli_chr01 | 21749813                | AA                              | GG              | 1946730781               |
| SNP_P4_7597_21763125 | NC_021160.1    | Ca_kabuli_chr01 | 21763125                | GG                              | AA              | 1946730783               |
| SNP_P4_7598_21768976 | NC_021160.1    | Ca_kabuli_chr01 | 21768976                | TT                              | CC              | 1946730785               |
| SNP_P4_7599_21777420 | NC_021160.1    | Ca_kabuli_chr01 | 21777420                | AA                              | TT              | 1946730787               |
| SNP_P4_7600_21777576 | NC_021160.1    | Ca_kabuli_chr01 | 21777576                | TT                              | CC              | 1946730789               |
| SNP_P4_7601_21777841 | NC_021160.1    | Ca_kabuli_chr01 | 21777841                | CC                              | AA              | 1946730791               |
| SNP_P4_7602_21777968 | NC_021160.1    | Ca_kabuli_chr01 | 21777968                | AA                              | GG              | 1946730793               |
| SNP_P4_7603_21780626 | NC_021160.1    | Ca_kabuli_chr01 | 21780626                | AA                              | GG              | 1946730795               |
| SNP_P4_7604_21806769 | NC_021160.1    | Ca_kabuli_chr01 | 21806769                | AA                              | GG              | 1946730797               |
| SNP_P4_7605_21806782 | NC_021160.1    | Ca_kabuli_chr01 | 21806782                | TT                              | GG              | 1946730799               |
| SNP_P4_7606_21806783 | NC_021160.1    | Ca_kabuli_chr01 | 21806783                | TT                              | AA              | 1946730801               |
| SNP_P4_7607_21810552 | NC_021160.1    | Ca_kabuli_chr01 | 21810552                | AA                              | GG              | 1946730803               |
| SNP_P4_7608_21810645 | NC_021160.1    | Ca_kabuli_chr01 | 21810645                | TT                              | CC              | 1946730805               |

| SNPs IDs             | Chromosome IDs | Chromosomes     | Physical positions (bp) | CDC Frontier (Reference genome) | (ILWC46 & LPNB) | NCBI SNPdb Accession IDs |
|----------------------|----------------|-----------------|-------------------------|---------------------------------|-----------------|--------------------------|
| SNP_P4_7609_21810649 | NC_021160.1    | Ca_kabuli_chr01 | 21810649                | TT                              | CC              | 1946730807               |
| SNP_P4_7610_21813744 | NC_021160.1    | Ca_kabuli_chr01 | 21813744                | TT                              | AA              | 1946730809               |
| SNP_P4_7612_21873925 | NC_021160.1    | Ca_kabuli_chr01 | 21873925                | GG                              | AA              | 1946730811               |
| SNP_P4_7613_21880190 | NC_021160.1    | Ca_kabuli_chr01 | 21880190                | AA                              | TT              | 1946730813               |
| SNP_P4_7614_21880192 | NC_021160.1    | Ca_kabuli_chr01 | 21880192                | AA                              | TT              | 1946730815               |
| SNP_P4_7615_21883804 | NC_021160.1    | Ca_kabuli_chr01 | 21883804                | AA                              | CC              | 1946730817               |
| SNP_P4_7618_21948954 | NC_021160.1    | Ca_kabuli_chr01 | 21948954                | AA                              | CC              | 1946730819               |
| SNP_P4_7619_21967514 | NC_021160.1    | Ca_kabuli_chr01 | 21967514                | GG                              | AA              | 1946730821               |
| SNP_P4_7620_22019857 | NC_021160.1    | Ca_kabuli_chr01 | 22019857                | GG                              | AA              | 1946730824               |
| SNP_P4_7623_22069342 | NC_021160.1    | Ca_kabuli_chr01 | 22069342                | CC                              | AA              | 1946730826               |
| SNP_P4_7624_22069475 | NC_021160.1    | Ca_kabuli_chr01 | 22069475                | AA                              | GG              | 1946730828               |
| SNP_P4_7625_22070192 | NC_021160.1    | Ca_kabuli_chr01 | 22070192                | AA                              | TT              | 1946730830               |
| SNP_P4_7626_22070203 | NC_021160.1    | Ca_kabuli_chr01 | 22070203                | AA                              | TT              | 1946730832               |
| SNP_P4_7627_22070437 | NC_021160.1    | Ca_kabuli_chr01 | 22070437                | AA                              | GG              | 1946730834               |
| SNP_P4_7628_22070637 | NC_021160.1    | Ca_kabuli_chr01 | 22070637                | AA                              | TT              | 1946730835               |
| SNP_P4_7629_22070648 | NC_021160.1    | Ca_kabuli_chr01 | 22070648                | GG                              | AA              | 1946730837               |
| SNP_P4_7630_22070706 | NC_021160.1    | Ca_kabuli_chr01 | 22070706                | AA                              | TT              | 1946730839               |
| SNP_P4_7631_22070725 | NC_021160.1    | Ca_kabuli_chr01 | 22070725                | TT                              | GG              | 1946730841               |
| SNP_P4_7632_22070779 | NC_021160.1    | Ca_kabuli_chr01 | 22070779                | TT                              | GG              | 1946730843               |
| SNP_P4_7633_22071007 | NC_021160.1    | Ca_kabuli_chr01 | 22071007                | GG                              | CC              | 1946730845               |
| SNP_P4_7634_22071039 | NC_021160.1    | Ca_kabuli_chr01 | 22071039                | TT                              | AA              | 1946730847               |
| SNP_P4_7635_22071052 | NC_021160.1    | Ca_kabuli_chr01 | 22071052                | CC                              | AA              | 1946730849               |
| SNP_P4_7636_22071071 | NC_021160.1    | Ca_kabuli_chr01 | 22071071                | CC                              | TT              | 1946730851               |
| SNP_P4_7637_22071314 | NC_021160.1    | Ca_kabuli_chr01 | 22071314                | CC                              | TT              | 1946730853               |
| SNP_P4_7638_22071320 | NC_021160.1    | Ca_kabuli_chr01 | 22071320                | CC                              | TT              | 1946730855               |
| SNP_P4_7639_22071565 | NC_021160.1    | Ca_kabuli_chr01 | 22071565                | AA                              | GG              | 1946730857               |
| SNP_P4_7640_22071805 | NC_021160.1    | Ca_kabuli_chr01 | 22071805                | GG                              | AA              | 1946730858               |
| SNP_P4_7641_22092000 | NC_021160.1    | Ca_kabuli_chr01 | 22092000                | TT                              | AA              | 1946730860               |
| SNP_P4_7642_22094600 | NC_021160.1    | Ca_kabuli_chr01 | 22094600                | TT                              | CC              | 1946730862               |
| SNP_P4_7644_22100831 | NC_021160.1    | Ca_kabuli_chr01 | 22100831                | AA                              | TT              | 1946730864               |
| SNP_P4_7645_22105441 | NC_021160.1    | Ca_kabuli_chr01 | 22105441                | CC                              | TT              | 1946730866               |
| SNP_P4_7646_22125557 | NC_021160.1    | Ca_kabuli_chr01 | 22125557                | TT                              | GG              | 1946730868               |
| SNP_P4_7647_22125873 | NC_021160.1    | Ca_kabuli_chr01 | 22125873                | CC                              | AA              | 1946730870               |
| SNP_P4_7648_22125892 | NC_021160.1    | Ca_kabuli_chr01 | 22125892                | CC                              | AA              | 1946730872               |
| SNP_P4_7649_22125895 | NC_021160.1    | Ca_kabuli_chr01 | 22125895                | CC                              | TT              | 1946730874               |
| SNP_P4_7650_22125933 | NC_021160.1    | Ca_kabuli_chr01 | 22125933                | GG                              | AA              | 1946730876               |
| SNP_P4_7651_22131043 | NC_021160.1    | Ca_kabuli_chr01 | 22131043                | CC                              | TT              | 1946730878               |
| SNP_P4_7652_22131124 | NC_021160.1    | Ca_kabuli_chr01 | 22131124                | CC                              | TT              | 1946730880               |
| SNP_P4_7653_22131225 | NC_021160.1    | Ca_kabuli_chr01 | 22131225                | CC                              | AA              | 1946730882               |
| SNP_P4_7655_22131347 | NC_021160.1    | Ca_kabuli_chr01 | 22131347                | AA                              | GG              | 1946730884               |
| SNP_P4_7656_22131419 | NC_021160.1    | Ca_kabuli_chr01 | 22131419                | GG                              | AA              | 1946730886               |
| SNP_P4_7657_22131488 | NC_021160.1    | Ca_kabuli_chr01 | 22131488                | CC                              | TT              | 1946730888               |

| SNPs IDs             | Chromosome IDs | Chromosomes     | Physical positions (bp) | CDC Frontier (Reference genome) | (ILWC46 & LPNB) | NCBI SNPdb Accession IDs |
|----------------------|----------------|-----------------|-------------------------|---------------------------------|-----------------|--------------------------|
| SNP_P4_7659_22131677 | NC_021160.1    | Ca_kabuli_chr01 | 22131677                | AA                              | GG              | 1946730890               |
| SNP_P4_7660_22131740 | NC_021160.1    | Ca_kabuli_chr01 | 22131740                | TT                              | CC              | 1946730892               |
| SNP_P4_7661_22131743 | NC_021160.1    | Ca_kabuli_chr01 | 22131743                | TT                              | CC              | 1946730894               |
| SNP_P4_7662_22131861 | NC_021160.1    | Ca_kabuli_chr01 | 22131861                | GG                              | AA              | 1946730895               |
| SNP_P4_7663_22132010 | NC_021160.1    | Ca_kabuli_chr01 | 22132010                | AA                              | CC              | 1946730897               |
| SNP_P4_7665_22132172 | NC_021160.1    | Ca_kabuli_chr01 | 22132172                | AA                              | GG              | 1946730899               |
| SNP_P4_7666_22132229 | NC_021160.1    | Ca_kabuli_chr01 | 22132229                | CC                              | TT              | 1946730901               |
| SNP_P4_7667_22132495 | NC_021160.1    | Ca_kabuli_chr01 | 22132495                | AA                              | GG              | 1946730903               |
| SNP_P4_7668_22132506 | NC_021160.1    | Ca_kabuli_chr01 | 22132506                | CC                              | TT              | 1946730905               |
| SNP_P4_7669_22132542 | NC_021160.1    | Ca_kabuli_chr01 | 22132542                | AA                              | GG              | 1946730907               |
| SNP_P4_7670_22132550 | NC_021160.1    | Ca_kabuli_chr01 | 22132550                | AA                              | TT              | 1946730909               |
| SNP_P4_7671_22132578 | NC_021160.1    | Ca_kabuli_chr01 | 22132578                | CC                              | TT              | 1946730911               |
| SNP_P4_7672_22132899 | NC_021160.1    | Ca_kabuli_chr01 | 22132899                | AA                              | GG              | 1946730913               |
| SNP_P4_7673_22132980 | NC_021160.1    | Ca_kabuli_chr01 | 22132980                | AA                              | GG              | 1946730915               |
| SNP_P4_7674_22133069 | NC_021160.1    | Ca_kabuli_chr01 | 22133069                | GG                              | AA              | 1946730917               |
| SNP_P4_7675_22133117 | NC_021160.1    | Ca_kabuli_chr01 | 22133117                | CC                              | TT              | 1946730919               |
| SNP_P4_7676_22133125 | NC_021160.1    | Ca_kabuli_chr01 | 22133125                | GG                              | AA              | 1946730921               |
| SNP_P4_7677_22133130 | NC_021160.1    | Ca_kabuli_chr01 | 22133130                | AA                              | TT              | 1946730923               |
| SNP_P4_7678_22133140 | NC_021160.1    | Ca_kabuli_chr01 | 22133140                | TT                              | AA              | 1946730925               |
| SNP_P4_7679_22133171 | NC_021160.1    | Ca_kabuli_chr01 | 22133171                | GG                              | AA              | 1946730927               |
| SNP_P4_7680_22133214 | NC_021160.1    | Ca_kabuli_chr01 | 22133214                | TT                              | CC              | 1946730929               |
| SNP_P4_7681_22133318 | NC_021160.1    | Ca_kabuli_chr01 | 22133318                | TT                              | GG              | 1946730931               |
| SNP_P4_7683_22133529 | NC_021160.1    | Ca_kabuli_chr01 | 22133529                | CC                              | TT              | 1946730933               |
| SNP_P4_7684_22133544 | NC_021160.1    | Ca_kabuli_chr01 | 22133544                | CC                              | TT              | 1946730935               |
| SNP_P4_7685_22134728 | NC_021160.1    | Ca_kabuli_chr01 | 22134728                | GG                              | AA              | 1946730937               |
| SNP_P4_7686_22135108 | NC_021160.1    | Ca_kabuli_chr01 | 22135108                | CC                              | TT              | 1946730939               |
| SNP_P4_7687_22135203 | NC_021160.1    | Ca_kabuli_chr01 | 22135203                | AA                              | TT              | 1946730941               |
| SNP_P4_7688_22172555 | NC_021160.1    | Ca_kabuli_chr01 | 22172555                | TT                              | CC              | 1946730943               |
| SNP_P4_7689_22187502 | NC_021160.1    | Ca_kabuli_chr01 | 22187502                | GG                              | AA              | 1946730945               |
| SNP_P4_7690_22192198 | NC_021160.1    | Ca_kabuli_chr01 | 22192198                | CC                              | TT              | 1946730947               |
| SNP_P4_7691_22192215 | NC_021160.1    | Ca_kabuli_chr01 | 22192215                | TT                              | GG              | 1946730949               |
| SNP_P4_7693_22201071 | NC_021160.1    | Ca_kabuli_chr01 | 22201071                | CC                              | AA              | 1946730951               |
| SNP_P4_7694_22201293 | NC_021160.1    | Ca_kabuli_chr01 | 22201293                | TT                              | AA              | 1946730953               |
| SNP_P4_7695_22201309 | NC_021160.1    | Ca_kabuli_chr01 | 22201309                | AA                              | TT              | 1946730955               |
| SNP_P4_7696_22201327 | NC_021160.1    | Ca_kabuli_chr01 | 22201327                | AA                              | CC              | 1946730957               |
| SNP_P4_7698_22241534 | NC_021160.1    | Ca_kabuli_chr01 | 22241534                | TT                              | CC              | 1946730959               |
| SNP_P4_7699_22241602 | NC_021160.1    | Ca_kabuli_chr01 | 22241602                | GG                              | AA              | 1946730961               |
| SNP_P4_7700_22241632 | NC_021160.1    | Ca_kabuli_chr01 | 22241632                | AA                              | GG              | 1946730963               |
| SNP_P4_7701_22241634 | NC_021160.1    | Ca_kabuli_chr01 | 22241634                | GG                              | AA              | 1946730965               |
| SNP_P4_7702_22241848 | NC_021160.1    | Ca_kabuli_chr01 | 22241848                | TT                              | AA              | 1946730967               |
| SNP_P4_7703_22241925 | NC_021160.1    | Ca_kabuli_chr01 | 22241925                | GG                              | TT              | 1946730969               |
| SNP_P4_7704_22242083 | NC_021160.1    | Ca_kabuli_chr01 | 22242083                | AA                              | CC              | 1946730971               |

| SNPs IDs             | Chromosome IDs | Chromosomes     | Physical positions (bp) | CDC Frontier (Reference genome) | (ILWC46 & LPNB) | NCBI SNPdb Accession IDs |
|----------------------|----------------|-----------------|-------------------------|---------------------------------|-----------------|--------------------------|
| SNP_P4_7705_22244563 | NC_021160.1    | Ca_kabuli_chr01 | 22244563                | CC                              | GG              | 1946730973               |
| SNP_P4_7706_22244565 | NC_021160.1    | Ca_kabuli_chr01 | 22244565                | CC                              | TT              | 1946730975               |
| SNP_P4_7707_22244596 | NC_021160.1    | Ca_kabuli_chr01 | 22244596                | TT                              | AA              | 1946730977               |
| SNP_P4_7708_22244666 | NC_021160.1    | Ca_kabuli_chr01 | 22244666                | TT                              | AA              | 1946730979               |
| SNP_P4_7709_22244724 | NC_021160.1    | Ca_kabuli_chr01 | 22244724                | AA                              | GG              | 1946730981               |
| SNP_P4_7710_22244778 | NC_021160.1    | Ca_kabuli_chr01 | 22244778                | CC                              | TT              | 1946730983               |
| SNP_P4_7711_22244797 | NC_021160.1    | Ca_kabuli_chr01 | 22244797                | AA                              | TT              | 1946730985               |
| SNP_P4_7712_22244937 | NC_021160.1    | Ca_kabuli_chr01 | 22244937                | GG                              | AA              | 1946730987               |
| SNP_P4_7713_22244999 | NC_021160.1    | Ca_kabuli_chr01 | 22244999                | TT                              | AA              | 1946730989               |
| SNP_P4_7714_22245000 | NC_021160.1    | Ca_kabuli_chr01 | 22245000                | TT                              | GG              | 1946730991               |
| SNP_P4_7715_22245001 | NC_021160.1    | Ca_kabuli_chr01 | 22245001                | TT                              | GG              | 1946730993               |
| SNP_P4_7716_22245002 | NC_021160.1    | Ca_kabuli_chr01 | 22245002                | GG                              | CC              | 1946730995               |
| SNP_P4_7717_22245071 | NC_021160.1    | Ca_kabuli_chr01 | 22245071                | GG                              | AA              | 1946730997               |
| SNP_P4_7718_22245076 | NC_021160.1    | Ca_kabuli_chr01 | 22245076                | CC                              | AA              | 1946730999               |
| SNP_P4_7719_22245077 | NC_021160.1    | Ca_kabuli_chr01 | 22245077                | CC                              | TT              | 1946731001               |
| SNP_P4_7720_22245096 | NC_021160.1    | Ca_kabuli_chr01 | 22245096                | CC                              | TT              | 1946731003               |
| SNP_P4_7721_22245299 | NC_021160.1    | Ca_kabuli_chr01 | 22245299                | AA                              | CC              | 1946731005               |
| SNP_P4_7723_22266343 | NC_021160.1    | Ca_kabuli_chr01 | 22266343                | AA                              | CC              | 1946731007               |
| SNP_P4_7724_22270895 | NC_021160.1    | Ca_kabuli_chr01 | 22270895                | GG                              | AA              | 1946731009               |
| SNP_P4_7725_22271048 | NC_021160.1    | Ca_kabuli_chr01 | 22271048                | AA                              | GG              | 1946731011               |
| SNP_P4_7726_22285729 | NC_021160.1    | Ca_kabuli_chr01 | 22285729                | TT                              | CC              | 1946731013               |
| SNP_P4_7727_22285765 | NC_021160.1    | Ca_kabuli_chr01 | 22285765                | TT                              | CC              | 1946731015               |
| SNP_P4_7728_22285879 | NC_021160.1    | Ca_kabuli_chr01 | 22285879                | TT                              | GG              | 1946731017               |
| SNP_P4_7729_22286007 | NC_021160.1    | Ca_kabuli_chr01 | 22286007                | AA                              | GG              | 1946731019               |
| SNP_P4_7730_22286009 | NC_021160.1    | Ca_kabuli_chr01 | 22286009                | AA                              | GG              | 1946731021               |
| SNP_P4_7731_22286011 | NC_021160.1    | Ca_kabuli_chr01 | 22286011                | GG                              | AA              | 1946731023               |
| SNP_P4_7732_22293517 | NC_021160.1    | Ca_kabuli_chr01 | 22293517                | AA                              | CC              | 1946731025               |
| SNP_P4_7733_22293747 | NC_021160.1    | Ca_kabuli_chr01 | 22293747                | TT                              | GG              | 1946731027               |
| SNP_P4_7734_22297592 | NC_021160.1    | Ca_kabuli_chr01 | 22297592                | GG                              | AA              | 1946731030               |
| SNP_P4_7735_22306079 | NC_021160.1    | Ca_kabuli_chr01 | 22306079                | TT                              | AA              | 1946731032               |
| SNP_P4_7736_22311368 | NC_021160.1    | Ca_kabuli_chr01 | 22311368                | CC                              | AA              | 1946731034               |
| SNP_P4_7737_22311370 | NC_021160.1    | Ca_kabuli_chr01 | 22311370                | AA                              | GG              | 1946731036               |
| SNP_P4_7738_22326640 | NC_021160.1    | Ca_kabuli_chr01 | 22326640                | TT                              | CC              | 1946731038               |
| SNP_P4_7739_22326644 | NC_021160.1    | Ca_kabuli_chr01 | 22326644                | AA                              | GG              | 1946731040               |
| SNP_P4_7740_22329273 | NC_021160.1    | Ca_kabuli_chr01 | 22329273                | TT                              | CC              | 1946731042               |
| SNP_P4_7741_22329351 | NC_021160.1    | Ca_kabuli_chr01 | 22329351                | TT                              | CC              | 1946731044               |
| SNP_P4_7742_22329665 | NC_021160.1    | Ca_kabuli_chr01 | 22329665                | CC                              | AA              | 1946731046               |
| SNP_P4_7743_22329668 | NC_021160.1    | Ca_kabuli_chr01 | 22329668                | TT                              | CC              | 1946731048               |
| SNP_P4_7744_22329691 | NC_021160.1    | Ca_kabuli_chr01 | 22329691                | CC                              | TT              | 1946731050               |
| SNP_P4_7745_22329707 | NC_021160.1    | Ca_kabuli_chr01 | 22329707                | TT                              | AA              | 1946731052               |
| SNP_P4_7747_22329747 | NC_021160.1    | Ca_kabuli_chr01 | 22329747                | TT                              | CC              | 1946731054               |
| SNP_P4_7748_22349325 | NC_021160.1    | Ca_kabuli_chr01 | 22349325                | AA                              | GG              | 1946731056               |

| SNPs IDs             | Chromosome IDs | Chromosomes     | Physical positions (bp) | CDC Frontier (Reference genome) | (ILWC46 & LPNB) | NCBI SNPdb Accession IDs |
|----------------------|----------------|-----------------|-------------------------|---------------------------------|-----------------|--------------------------|
| SNP_P4_7749_22356150 | NC_021160.1    | Ca_kabuli_chr01 | 22356150                | AA                              | GG              | 1946731058               |
| SNP_P4_7752_22434884 | NC_021160.1    | Ca_kabuli_chr01 | 22434884                | AA                              | GG              | 1946731060               |
| SNP_P4_7753_22444156 | NC_021160.1    | Ca_kabuli_chr01 | 22444156                | GG                              | CC              | 1946731062               |
| SNP_P4_7754_22444159 | NC_021160.1    | Ca_kabuli_chr01 | 22444159                | TT                              | CC              | 1946731064               |
| SNP_P4_7755_22444415 | NC_021160.1    | Ca_kabuli_chr01 | 22444415                | GG                              | AA              | 1946731066               |
| SNP_P4_7756_22489580 | NC_021160.1    | Ca_kabuli_chr01 | 22489580                | AA                              | GG              | 1946731068               |
| SNP_P4_7757_22489604 | NC_021160.1    | Ca_kabuli_chr01 | 22489604                | GG                              | AA              | 1946731070               |
| SNP_P4_7758_22489616 | NC_021160.1    | Ca_kabuli_chr01 | 22489616                | CC                              | TT              | 1946731072               |
| SNP_P4_7759_22510938 | NC_021160.1    | Ca_kabuli_chr01 | 22510938                | AA                              | TT              | 1946731074               |
| SNP_P4_7760_22513603 | NC_021160.1    | Ca_kabuli_chr01 | 22513603                | GG                              | TT              | 1946731076               |
| SNP_P4_7761_22513623 | NC_021160.1    | Ca_kabuli_chr01 | 22513623                | GG                              | AA              | 1946731078               |
| SNP_P4_7762_22525569 | NC_021160.1    | Ca_kabuli_chr01 | 22525569                | GG                              | AA              | 1946731080               |
| SNP_P4_7764_22547089 | NC_021160.1    | Ca_kabuli_chr01 | 22547089                | CC                              | TT              | 1946731082               |
| SNP_P4_7765_22547165 | NC_021160.1    | Ca_kabuli_chr01 | 22547165                | AA                              | GG              | 1946731084               |
| SNP_P4_7766_22554027 | NC_021160.1    | Ca_kabuli_chr01 | 22554027                | TT                              | CC              | 1946731086               |
| SNP_P4_7767_22554028 | NC_021160.1    | Ca_kabuli_chr01 | 22554028                | TT                              | CC              | 1946731088               |
| SNP_P4_7768_22554053 | NC_021160.1    | Ca_kabuli_chr01 | 22554053                | CC                              | TT              | 1946731090               |
| SNP_P4_7769_22554093 | NC_021160.1    | Ca_kabuli_chr01 | 22554093                | TT                              | GG              | 1946731092               |
| SNP_P4_7770_22554103 | NC_021160.1    | Ca_kabuli_chr01 | 22554103                | AA                              | GG              | 1946731094               |
| SNP_P4_7771_22554122 | NC_021160.1    | Ca_kabuli_chr01 | 22554122                | CC                              | TT              | 1946731096               |
| SNP_P4_7772_22554135 | NC_021160.1    | Ca_kabuli_chr01 | 22554135                | TT                              | CC              | 1946731098               |
| SNP_P4_7773_22554161 | NC_021160.1    | Ca_kabuli_chr01 | 22554161                | TT                              | AA              | 1946731100               |
| SNP_P4_7774_22554467 | NC_021160.1    | Ca_kabuli_chr01 | 22554467                | TT                              | CC              | 1946731102               |
| SNP_P4_7775_22554476 | NC_021160.1    | Ca_kabuli_chr01 | 22554476                | GG                              | AA              | 1946731104               |
| SNP_P4_7776_22554513 | NC_021160.1    | Ca_kabuli_chr01 | 22554513                | AA                              | GG              | 1946731106               |
| SNP_P4_7777_22556457 | NC_021160.1    | Ca_kabuli_chr01 | 22556457                | GG                              | TT              | 1946731108               |
| SNP_P4_7778_22572485 | NC_021160.1    | Ca_kabuli_chr01 | 22572485                | CC                              | GG              | 1946731111               |
| SNP_P4_7779_22581367 | NC_021160.1    | Ca_kabuli_chr01 | 22581367                | GG                              | TT              | 1946731113               |
| SNP_P4_7781_22621566 | NC_021160.1    | Ca_kabuli_chr01 | 22621566                | AA                              | TT              | 1946731115               |
| SNP_P4_7782_22631202 | NC_021160.1    | Ca_kabuli_chr01 | 22631202                | AA                              | TT              | 1946731117               |
| SNP_P4_7784_22655787 | NC_021160.1    | Ca_kabuli_chr01 | 22655787                | CC                              | TT              | 1946731119               |
| SNP_P4_7785_22661495 | NC_021160.1    | Ca_kabuli_chr01 | 22661495                | CC                              | AA              | 1946731121               |
| SNP_P4_7786_22663991 | NC_021160.1    | Ca_kabuli_chr01 | 22663991                | TT                              | CC              | 1946731123               |
| SNP_P4_7787_22664001 | NC_021160.1    | Ca_kabuli_chr01 | 22664001                | AA                              | CC              | 1946731125               |
| SNP_P4_7788_22664003 | NC_021160.1    | Ca_kabuli_chr01 | 22664003                | AA                              | CC              | 1946731127               |
| SNP_P4_7789_22664049 | NC_021160.1    | Ca_kabuli_chr01 | 22664049                | AA                              | GG              | 1946731129               |
| SNP_P4_7790_22664245 | NC_021160.1    | Ca_kabuli_chr01 | 22664245                | GG                              | AA              | 1946731131               |
| SNP_P4_7791_22705348 | NC_021160.1    | Ca_kabuli_chr01 | 22705348                | TT                              | AA              | 1946731133               |
| SNP_P4_7792_22734242 | NC_021160.1    | Ca_kabuli_chr01 | 22734242                | GG                              | AA              | 1946731136               |
| SNP_P4_7794_22738733 | NC_021160.1    | Ca_kabuli_chr01 | 22738733                | TT                              | AA              | 1946731138               |
| SNP_P4_7795_22738734 | NC_021160.1    | Ca_kabuli_chr01 | 22738734                | TT                              | GG              | 1946731140               |
| SNP_P4_7796_22770046 | NC_021160.1    | Ca_kabuli_chr01 | 22770046                | TT                              | CC              | 1946731142               |

| SNPs IDs             | Chromosome IDs | Chromosomes     | Physical positions (bp) | CDC Frontier (Reference genome) | (ILWC46 & LPNB) | NCBI SNPdb Accession IDs |
|----------------------|----------------|-----------------|-------------------------|---------------------------------|-----------------|--------------------------|
| SNP_P4_7797_22770378 | NC_021160.1    | Ca_kabuli_chr01 | 22770378                | TT                              | GG              | 1946731144               |
| SNP_P4_7798_22770385 | NC_021160.1    | Ca_kabuli_chr01 | 22770385                | GG                              | AA              | 1946731145               |
| SNP_P4_7799_22770401 | NC_021160.1    | Ca_kabuli_chr01 | 22770401                | TT                              | CC              | 1946731147               |
| SNP_P4_7800_22782654 | NC_021160.1    | Ca_kabuli_chr01 | 22782654                | AA                              | GG              | 1946731149               |
| SNP_P4_7801_22798840 | NC_021160.1    | Ca_kabuli_chr01 | 22798840                | TT                              | GG              | 1946731151               |
| SNP_P4_7802_22807464 | NC_021160.1    | Ca_kabuli_chr01 | 22807464                | CC                              | TT              | 1946731153               |
| SNP_P4_7803_22825241 | NC_021160.1    | Ca_kabuli_chr01 | 22825241                | AA                              | CC              | 1946731155               |
| SNP_P4_7804_22853181 | NC_021160.1    | Ca_kabuli_chr01 | 22853181                | TT                              | AA              | 1946731157               |
| SNP_P4_7805_22855438 | NC_021160.1    | Ca_kabuli_chr01 | 22855438                | AA                              | GG              | 1946731159               |
| SNP_P4_7806_22863489 | NC_021160.1    | Ca_kabuli_chr01 | 22863489                | CC                              | TT              | 1946731161               |
| SNP_P4_7807_22866754 | NC_021160.1    | Ca_kabuli_chr01 | 22866754                | TT                              | AA              | 1946731163               |
| SNP_P4_7808_22883244 | NC_021160.1    | Ca_kabuli_chr01 | 22883244                | TT                              | CC              | 1946731165               |
| SNP_P4_7809_22884913 | NC_021160.1    | Ca_kabuli_chr01 | 22884913                | TT                              | CC              | 1946731168               |
| SNP_P4_7810_22885235 | NC_021160.1    | Ca_kabuli_chr01 | 22885235                | GG                              | AA              | 1946731170               |
| SNP_P4_7811_22885240 | NC_021160.1    | Ca_kabuli_chr01 | 22885240                | TT                              | CC              | 1946731172               |
| SNP_P4_7812_22885285 | NC_021160.1    | Ca_kabuli_chr01 | 22885285                | CC                              | GG              | 1946731174               |
| SNP_P4_7813_22885764 | NC_021160.1    | Ca_kabuli_chr01 | 22885764                | TT                              | CC              | 1946731176               |
| SNP_P4_7814_22885779 | NC_021160.1    | Ca_kabuli_chr01 | 22885779                | TT                              | GG              | 1946731178               |
| SNP_P4_7815_22885790 | NC_021160.1    | Ca_kabuli_chr01 | 22885790                | AA                              | TT              | 1946731180               |
| SNP_P4_7817_22885881 | NC_021160.1    | Ca_kabuli_chr01 | 22885881                | TT                              | AA              | 1946731182               |
| SNP_P4_7818_22885882 | NC_021160.1    | Ca_kabuli_chr01 | 22885882                | AA                              | TT              | 1946731184               |
| SNP_P4_7819_22886047 | NC_021160.1    | Ca_kabuli_chr01 | 22886047                | CC                              | TT              | 1946731186               |
| SNP_P4_7821_22886144 | NC_021160.1    | Ca_kabuli_chr01 | 22886144                | AA                              | GG              | 1946731188               |
| SNP_P4_7822_22886154 | NC_021160.1    | Ca_kabuli_chr01 | 22886154                | AA                              | TT              | 1946731190               |
| SNP_P4_7823_22886166 | NC_021160.1    | Ca_kabuli_chr01 | 22886166                | AA                              | GG              | 1946731192               |
| SNP_P4_7824_22886176 | NC_021160.1    | Ca_kabuli_chr01 | 22886176                | AA                              | GG              | 1946731194               |
| SNP_P4_7825_22896208 | NC_021160.1    | Ca_kabuli_chr01 | 22896208                | CC                              | TT              | 1946731196               |
| SNP_P4_7826_22896231 | NC_021160.1    | Ca_kabuli_chr01 | 22896231                | AA                              | TT              | 1946731198               |
| SNP_P4_7827_22896289 | NC_021160.1    | Ca_kabuli_chr01 | 22896289                | CC                              | TT              | 1946731200               |
| SNP_P4_7828_22896663 | NC_021160.1    | Ca_kabuli_chr01 | 22896663                | CC                              | AA              | 1946731203               |
| SNP_P4_7829_22896744 | NC_021160.1    | Ca_kabuli_chr01 | 22896744                | CC                              | TT              | 1946731205               |
| SNP_P4_7831_22896931 | NC_021160.1    | Ca_kabuli_chr01 | 22896931                | GG                              | TT              | 1946731207               |
| SNP_P4_7832_22896981 | NC_021160.1    | Ca_kabuli_chr01 | 22896981                | TT                              | GG              | 1946731209               |
| SNP_P4_7833_22897036 | NC_021160.1    | Ca_kabuli_chr01 | 22897036                | CC                              | GG              | 1946731211               |
| SNP_P4_7834_22897071 | NC_021160.1    | Ca_kabuli_chr01 | 22897071                | TT                              | CC              | 1946731213               |
| SNP_P4_7835_22897129 | NC_021160.1    | Ca_kabuli_chr01 | 22897129                | GG                              | AA              | 1946731215               |
| SNP_P4_7836_22897143 | NC_021160.1    | Ca_kabuli_chr01 | 22897143                | GG                              | CC              | 1946731217               |
| SNP_P4_7837_22897164 | NC_021160.1    | Ca_kabuli_chr01 | 22897164                | CC                              | AA              | 1946731220               |
| SNP_P4_7838_22897196 | NC_021160.1    | Ca_kabuli_chr01 | 22897196                | TT                              | CC              | 1946731222               |
| SNP_P4_7839_22897222 | NC_021160.1    | Ca_kabuli_chr01 | 22897222                | CC                              | GG              | 1946731224               |
| SNP_P4_7840_22897393 | NC_021160.1    | Ca_kabuli_chr01 | 22897393                | AA                              | TT              | 1946731226               |
| SNP_P4_7841_22897719 | NC_021160.1    | Ca_kabuli_chr01 | 22897719                | TT                              | GG              | 1946731228               |



| SNPs IDs             | Chromosome IDs | Chromosomes     | Physical positions (bp) | CDC Frontier (Reference genome) | (ILWC46 & LPNB) | NCBI SNPdb Accession IDs |
|----------------------|----------------|-----------------|-------------------------|---------------------------------|-----------------|--------------------------|
| SNP_P4_7842_22897735 | NC_021160.1    | Ca_kabuli_chr01 | 22897735                | AA                              | GG              | 1946731230               |
| SNP_P4_7843_22898059 | NC_021160.1    | Ca_kabuli_chr01 | 22898059                | AA                              | GG              | 1946731232               |
| SNP_P4_7844_22898278 | NC_021160.1    | Ca_kabuli_chr01 | 22898278                | GG                              | AA              | 1946731234               |
| SNP_P4_7845_22943723 | NC_021160.1    | Ca_kabuli_chr01 | 22943723                | CC                              | GG              | 1946731236               |
| SNP_P4_7846_22943735 | NC_021160.1    | Ca_kabuli_chr01 | 22943735                | TT                              | GG              | 1946731238               |
| SNP_P4_7847_22944187 | NC_021160.1    | Ca_kabuli_chr01 | 22944187                | TT                              | GG              | 1946731240               |
| SNP_P4_7849_22944208 | NC_021160.1    | Ca_kabuli_chr01 | 22944208                | AA                              | GG              | 1946731242               |
| SNP_P4_7850_22944221 | NC_021160.1    | Ca_kabuli_chr01 | 22944221                | GG                              | CC              | 1946731244               |
| SNP_P4_7851_22944245 | NC_021160.1    | Ca_kabuli_chr01 | 22944245                | TT                              | GG              | 1946731246               |
| SNP_P4_7852_22971265 | NC_021160.1    | Ca_kabuli_chr01 | 22971265                | TT                              | CC              | 1946731248               |
| SNP_P4_7853_23005996 | NC_021160.1    | Ca_kabuli_chr01 | 23005996                | GG                              | AA              | 1946731251               |
| SNP_P4_7854_23006480 | NC_021160.1    | Ca_kabuli_chr01 | 23006480                | GG                              | AA              | 1946731253               |
| SNP_P4_7855_23006518 | NC_021160.1    | Ca_kabuli_chr01 | 23006518                | CC                              | AA              | 1946731255               |
| SNP_P4_7856_23006551 | NC_021160.1    | Ca_kabuli_chr01 | 23006551                | CC                              | TT              | 1946731257               |
| SNP_P4_7857_23006786 | NC_021160.1    | Ca_kabuli_chr01 | 23006786                | AA                              | TT              | 1946731259               |
| SNP_P4_7858_23006787 | NC_021160.1    | Ca_kabuli_chr01 | 23006787                | AA                              | CC              | 1946731261               |
| SNP_P4_7859_23006879 | NC_021160.1    | Ca_kabuli_chr01 | 23006879                | GG                              | AA              | 1946731263               |
| SNP_P4_7860_23011673 | NC_021160.1    | Ca_kabuli_chr01 | 23011673                | AA                              | GG              | 1946731265               |
| SNP_P4_7861_23038325 | NC_021160.1    | Ca_kabuli_chr01 | 23038325                | TT                              | AA              | 1946731267               |
| SNP_P4_7862_23040304 | NC_021160.1    | Ca_kabuli_chr01 | 23040304                | TT                              | CC              | 1946731269               |
| SNP_P4_7863_23040308 | NC_021160.1    | Ca_kabuli_chr01 | 23040308                | TT                              | GG              | 1946731271               |
| SNP_P4_7864_23057802 | NC_021160.1    | Ca_kabuli_chr01 | 23057802                | GG                              | AA              | 1946731273               |
| SNP_P4_7865_23067412 | NC_021160.1    | Ca_kabuli_chr01 | 23067412                | AA                              | TT              | 1946731275               |
| SNP_P4_7866_23068676 | NC_021160.1    | Ca_kabuli_chr01 | 23068676                | AA                              | GG              | 1946731277               |
| SNP_P4_7867_23068699 | NC_021160.1    | Ca_kabuli_chr01 | 23068699                | AA                              | GG              | 1946731279               |
| SNP_P4_7868_23071096 | NC_021160.1    | Ca_kabuli_chr01 | 23071096                | AA                              | CC              | 1946731281               |
| SNP_P4_7869_23079034 | NC_021160.1    | Ca_kabuli_chr01 | 23079034                | CC                              | TT              | 1946731284               |
| SNP_P4_7870_23082955 | NC_021160.1    | Ca_kabuli_chr01 | 23082955                | GG                              | AA              | 1946731286               |
| SNP_P4_7871_23082985 | NC_021160.1    | Ca_kabuli_chr01 | 23082985                | AA                              | GG              | 1946731288               |
| SNP_P4_7872_23084088 | NC_021160.1    | Ca_kabuli_chr01 | 23084088                | CC                              | TT              | 1946731291               |
| SNP_P4_7873_23087801 | NC_021160.1    | Ca_kabuli_chr01 | 23087801                | TT                              | AA              | 1946731293               |
| SNP_P4_7874_23087807 | NC_021160.1    | Ca_kabuli_chr01 | 23087807                | TT                              | CC              | 1946731295               |
| SNP_P4_7875_23087877 | NC_021160.1    | Ca_kabuli_chr01 | 23087877                | GG                              | CC              | 1946731297               |
| SNP_P4_7876_23087966 | NC_021160.1    | Ca_kabuli_chr01 | 23087966                | TT                              | CC              | 1946731299               |
| SNP_P4_7877_23087987 | NC_021160.1    | Ca_kabuli_chr01 | 23087987                | TT                              | CC              | 1946731301               |
| SNP_P4_7878_23127971 | NC_021160.1    | Ca_kabuli_chr01 | 23127971                | GG                              | AA              | 1946731303               |
| SNP_P4_7880_23153888 | NC_021160.1    | Ca_kabuli_chr01 | 23153888                | AA                              | GG              | 1946731305               |
| SNP_P4_7881_23167910 | NC_021160.1    | Ca_kabuli_chr01 | 23167910                | AA                              | GG              | 1946731307               |
| SNP_P4_7882_23183689 | NC_021160.1    | Ca_kabuli_chr01 | 23183689                | TT                              | CC              | 1946731309               |
| SNP_P4_7885_23201185 | NC_021160.1    | Ca_kabuli_chr01 | 23201185                | GG                              | AA              | 1946731311               |
| SNP_P4_7886_23218183 | NC_021160.1    | Ca_kabuli_chr01 | 23218183                | TT                              | AA              | 1946731313               |
| SNP_P4_7888_23238559 | NC_021160.1    | Ca_kabuli_chr01 | 23238559                | CC                              | AA              | 1946731315               |

| SNPs IDs             | Chromosome IDs | Chromosomes     | Physical positions (bp) | CDC Frontier (Reference genome) | (ILWC46 & LPNB) | NCBI SNPdb Accession IDs |
|----------------------|----------------|-----------------|-------------------------|---------------------------------|-----------------|--------------------------|
| SNP_P4_7890_23247561 | NC_021160.1    | Ca_kabuli_chr01 | 23247561                | TT                              | CC              | 1946731317               |
| SNP_P4_7891_23247565 | NC_021160.1    | Ca_kabuli_chr01 | 23247565                | GG                              | TT              | 1946731319               |
| SNP_P4_7892_23249005 | NC_021160.1    | Ca_kabuli_chr01 | 23249005                | CC                              | AA              | 1946731321               |
| SNP_P4_7893_23250013 | NC_021160.1    | Ca_kabuli_chr01 | 23250013                | AA                              | GG              | 1946731323               |
| SNP_P4_7895_23270236 | NC_021160.1    | Ca_kabuli_chr01 | 23270236                | AA                              | GG              | 1946731324               |
| SNP_P4_7896_23285385 | NC_021160.1    | Ca_kabuli_chr01 | 23285385                | GG                              | AA              | 1946731326               |
| SNP_P4_7897_23300203 | NC_021160.1    | Ca_kabuli_chr01 | 23300203                | AA                              | TT              | 1946731328               |
| SNP_P4_7899_23307530 | NC_021160.1    | Ca_kabuli_chr01 | 23307530                | GG                              | TT              | 1946731330               |
| SNP_P4_7901_23359542 | NC_021160.1    | Ca_kabuli_chr01 | 23359542                | TT                              | AA              | 1946731332               |
| SNP_P4_7902_23392230 | NC_021160.1    | Ca_kabuli_chr01 | 23392230                | TT                              | GG              | 1946731334               |
| SNP_P4_7903_23392383 | NC_021160.1    | Ca_kabuli_chr01 | 23392383                | AA                              | GG              | 1946731336               |
| SNP_P4_7904_23397348 | NC_021160.1    | Ca_kabuli_chr01 | 23397348                | AA                              | GG              | 1946731338               |
| SNP_P4_7905_23426516 | NC_021160.1    | Ca_kabuli_chr01 | 23426516                | GG                              | AA              | 1946731340               |
| SNP_P4_7906_23426520 | NC_021160.1    | Ca_kabuli_chr01 | 23426520                | TT                              | GG              | 1946731342               |
| SNP_P4_7907_23426547 | NC_021160.1    | Ca_kabuli_chr01 | 23426547                | GG                              | TT              | 1946731344               |
| SNP_P4_7908_23426575 | NC_021160.1    | Ca_kabuli_chr01 | 23426575                | TT                              | AA              | 1946731346               |
| SNP_P4_7909_23426605 | NC_021160.1    | Ca_kabuli_chr01 | 23426605                | TT                              | CC              | 1946731348               |
| SNP_P4_7911_23426725 | NC_021160.1    | Ca_kabuli_chr01 | 23426725                | TT                              | CC              | 1946731350               |
| SNP_P4_7912_23426775 | NC_021160.1    | Ca_kabuli_chr01 | 23426775                | CC                              | AA              | 1946731352               |
| SNP_P4_7913_23426817 | NC_021160.1    | Ca_kabuli_chr01 | 23426817                | TT                              | AA              | 1946731354               |
| SNP_P4_7914_23426885 | NC_021160.1    | Ca_kabuli_chr01 | 23426885                | GG                              | AA              | 1946731356               |
| SNP_P4_7915_23426985 | NC_021160.1    | Ca_kabuli_chr01 | 23426985                | AA                              | TT              | 1946731358               |
| SNP_P4_7916_23427002 | NC_021160.1    | Ca_kabuli_chr01 | 23427002                | CC                              | TT              | 1946731360               |
| SNP_P4_7917_23427008 | NC_021160.1    | Ca_kabuli_chr01 | 23427008                | AA                              | GG              | 1946731362               |
| SNP_P4_7918_23427924 | NC_021160.1    | Ca_kabuli_chr01 | 23427924                | CC                              | TT              | 1946731364               |
| SNP_P4_7919_23433544 | NC_021160.1    | Ca_kabuli_chr01 | 23433544                | AA                              | TT              | 1946731366               |
| SNP_P4_7920_23433553 | NC_021160.1    | Ca_kabuli_chr01 | 23433553                | GG                              | AA              | 1946731368               |
| SNP_P4_7921_23433901 | NC_021160.1    | Ca_kabuli_chr01 | 23433901                | GG                              | AA              | 1946731370               |
| SNP_P4_7922_23445553 | NC_021160.1    | Ca_kabuli_chr01 | 23445553                | AA                              | GG              | 1946731372               |
| SNP_P4_7924_23480598 | NC_021160.1    | Ca_kabuli_chr01 | 23480598                | GG                              | AA              | 1946731374               |
| SNP_P4_7926_23496219 | NC_021160.1    | Ca_kabuli_chr01 | 23496219                | CC                              | GG              | 1946731376               |
| SNP_P4_7928_23523179 | NC_021160.1    | Ca_kabuli_chr01 | 23523179                | AA                              | GG              | 1946731378               |
| SNP_P4_7929_23526129 | NC_021160.1    | Ca_kabuli_chr01 | 23526129                | AA                              | GG              | 1946731380               |
| SNP_P4_7930_23535461 | NC_021160.1    | Ca_kabuli_chr01 | 23535461                | TT                              | CC              | 1946731382               |
| SNP_P4_7931_23540078 | NC_021160.1    | Ca_kabuli_chr01 | 23540078                | TT                              | CC              | 1946731384               |
| SNP_P4_7932_23540107 | NC_021160.1    | Ca_kabuli_chr01 | 23540107                | TT                              | GG              | 1946731386               |
| SNP_P4_7933_23540370 | NC_021160.1    | Ca_kabuli_chr01 | 23540370                | TT                              | GG              | 1946731388               |
| SNP_P4_7934_23541918 | NC_021160.1    | Ca_kabuli_chr01 | 23541918                | AA                              | GG              | 1946731390               |
| SNP_P4_7935_23541920 | NC_021160.1    | Ca_kabuli_chr01 | 23541920                | AA                              | CC              | 1946731392               |
| SNP_P4_7936_23551984 | NC_021160.1    | Ca_kabuli_chr01 | 23551984                | TT                              | CC              | 1946731394               |
| SNP_P4_7940_23577718 | NC_021160.1    | Ca_kabuli_chr01 | 23577718                | TT                              | CC              | 1946731396               |
| SNP_P4_7941_23580318 | NC_021160.1    | Ca_kabuli_chr01 | 23580318                | GG                              | AA              | 1946731398               |

| SNPs IDs             | Chromosome IDs | Chromosomes     | Physical positions (bp) | CDC Frontier (Reference genome) | (ILWC46 & LPNB) | NCBI SNPdb Accession IDs |
|----------------------|----------------|-----------------|-------------------------|---------------------------------|-----------------|--------------------------|
| SNP_P4_7942_23580360 | NC_021160.1    | Ca_kabuli_chr01 | 23580360                | TT                              | CC              | 1946731400               |
| SNP_P4_7943_23580732 | NC_021160.1    | Ca_kabuli_chr01 | 23580732                | GG                              | AA              | 1946731402               |
| SNP_P4_7945_23616042 | NC_021160.1    | Ca_kabuli_chr01 | 23616042                | GG                              | TT              | 1946731404               |
| SNP_P4_7947_23627464 | NC_021160.1    | Ca_kabuli_chr01 | 23627464                | TT                              | CC              | 1946731406               |
| SNP_P4_7949_23641499 | NC_021160.1    | Ca_kabuli_chr01 | 23641499                | AA                              | CC              | 1946731408               |
| SNP_P4_7950_23643793 | NC_021160.1    | Ca_kabuli_chr01 | 23643793                | AA                              | TT              | 1946731411               |
| SNP_P4_7951_23661808 | NC_021160.1    | Ca_kabuli_chr01 | 23661808                | TT                              | CC              | 1946731413               |
| SNP_P4_7952_23669270 | NC_021160.1    | Ca_kabuli_chr01 | 23669270                | AA                              | CC              | 1946731415               |
| SNP_P4_7953_23669290 | NC_021160.1    | Ca_kabuli_chr01 | 23669290                | AA                              | GG              | 1946731417               |
| SNP_P4_7954_23669354 | NC_021160.1    | Ca_kabuli_chr01 | 23669354                | GG                              | AA              | 1946731419               |
| SNP_P4_7955_23669359 | NC_021160.1    | Ca_kabuli_chr01 | 23669359                | CC                              | AA              | 1946731421               |
| SNP_P4_7956_23669674 | NC_021160.1    | Ca_kabuli_chr01 | 23669674                | GG                              | TT              | 1946731423               |
| SNP_P4_7957_23669950 | NC_021160.1    | Ca_kabuli_chr01 | 23669950                | AA                              | CC              | 1946731425               |
| SNP_P4_7958_23689639 | NC_021160.1    | Ca_kabuli_chr01 | 23689639                | CC                              | GG              | 1946731427               |
| SNP_P4_7959_23697682 | NC_021160.1    | Ca_kabuli_chr01 | 23697682                | CC                              | TT              | 1946731429               |
| SNP_P4_7960_23697729 | NC_021160.1    | Ca_kabuli_chr01 | 23697729                | TT                              | AA              | 1946731431               |
| SNP_P4_7961_23698007 | NC_021160.1    | Ca_kabuli_chr01 | 23698007                | AA                              | GG              | 1946731433               |
| SNP_P4_7962_23699320 | NC_021160.1    | Ca_kabuli_chr01 | 23699320                | TT                              | AA              | 1946731435               |
| SNP_P4_7963_23699355 | NC_021160.1    | Ca_kabuli_chr01 | 23699355                | GG                              | AA              | 1946731437               |
| SNP_P4_7964_23707079 | NC_021160.1    | Ca_kabuli_chr01 | 23707079                | TT                              | CC              | 1946731439               |
| SNP_P4_7965_23720917 | NC_021160.1    | Ca_kabuli_chr01 | 23720917                | AA                              | CC              | 1946731441               |
| SNP_P4_7966_23721196 | NC_021160.1    | Ca_kabuli_chr01 | 23721196                | TT                              | CC              | 1946731443               |
| SNP_P4_7967_23721197 | NC_021160.1    | Ca_kabuli_chr01 | 23721197                | TT                              | AA              | 1946731445               |
| SNP_P4_7968_23722738 | NC_021160.1    | Ca_kabuli_chr01 | 23722738                | GG                              | TT              | 1946731447               |
| SNP_P4_7969_23722746 | NC_021160.1    | Ca_kabuli_chr01 | 23722746                | GG                              | CC              | 1946731449               |
| SNP_P4_7970_23748141 | NC_021160.1    | Ca_kabuli_chr01 | 23748141                | AA                              | GG              | 1946731451               |
| SNP_P4_7971_23751831 | NC_021160.1    | Ca_kabuli_chr01 | 23751831                | GG                              | AA              | 1946731453               |
| SNP_P4_7972_23755516 | NC_021160.1    | Ca_kabuli_chr01 | 23755516                | CC                              | TT              | 1946731455               |
| SNP_P4_7973_23755530 | NC_021160.1    | Ca_kabuli_chr01 | 23755530                | CC                              | TT              | 1946731457               |
| SNP_P4_7974_23755532 | NC_021160.1    | Ca_kabuli_chr01 | 23755532                | CC                              | TT              | 1946731460               |
| SNP_P4_7975_23756155 | NC_021160.1    | Ca_kabuli_chr01 | 23756155                | GG                              | AA              | 1946731462               |
| SNP_P4_7976_23782439 | NC_021160.1    | Ca_kabuli_chr01 | 23782439                | TT                              | CC              | 1946731464               |
| SNP_P4_7977_23782451 | NC_021160.1    | Ca_kabuli_chr01 | 23782451                | TT                              | CC              | 1946731466               |
| SNP_P4_7978_23782511 | NC_021160.1    | Ca_kabuli_chr01 | 23782511                | AA                              | GG              | 1946731468               |
| SNP_P4_7979_23782512 | NC_021160.1    | Ca_kabuli_chr01 | 23782512                | GG                              | AA              | 1946731470               |
| SNP_P4_7980_23782533 | NC_021160.1    | Ca_kabuli_chr01 | 23782533                | GG                              | AA              | 1946731472               |
| SNP_P4_7981_23782551 | NC_021160.1    | Ca_kabuli_chr01 | 23782551                | GG                              | AA              | 1946731474               |
| SNP_P4_7982_23782558 | NC_021160.1    | Ca_kabuli_chr01 | 23782558                | CC                              | GG              | 1946731476               |
| SNP_P4_7983_23782559 | NC_021160.1    | Ca_kabuli_chr01 | 23782559                | CC                              | AA              | 1946731478               |
| SNP_P4_7984_23782887 | NC_021160.1    | Ca_kabuli_chr01 | 23782887                | GG                              | CC              | 1946731480               |
| SNP_P4_7985_23782896 | NC_021160.1    | Ca_kabuli_chr01 | 23782896                | AA                              | GG              | 1946731482               |
| SNP_P4_7986_23782925 | NC_021160.1    | Ca_kabuli_chr01 | 23782925                | AA                              | TT              | 1946731484               |

| SNPs IDs             | Chromosome IDs | Chromosomes     | Physical positions (bp) | CDC Frontier (Reference genome) | (ILWC46 & LPNB) | NCBI SNPdb Accession IDs |
|----------------------|----------------|-----------------|-------------------------|---------------------------------|-----------------|--------------------------|
| SNP_P4_7987_23782955 | NC_021160.1    | Ca_kabuli_chr01 | 23782955                | TT                              | GG              | 1946731486               |
| SNP_P4_7988_23783693 | NC_021160.1    | Ca_kabuli_chr01 | 23783693                | TT                              | CC              | 1946731488               |
| SNP_P4_7990_23784996 | NC_021160.1    | Ca_kabuli_chr01 | 23784996                | GG                              | AA              | 1946731490               |
| SNP_P4_7991_23785030 | NC_021160.1    | Ca_kabuli_chr01 | 23785030                | GG                              | CC              | 1946731492               |
| SNP_P4_7992_23823218 | NC_021160.1    | Ca_kabuli_chr01 | 23823218                | AA                              | GG              | 1946731494               |
| SNP_P4_7993_23824100 | NC_021160.1    | Ca_kabuli_chr01 | 23824100                | TT                              | GG              | 1946731496               |
| SNP_P4_7994_23838600 | NC_021160.1    | Ca_kabuli_chr01 | 23838600                | TT                              | CC              | 1946731498               |
| SNP_P4_7995_23838664 | NC_021160.1    | Ca_kabuli_chr01 | 23838664                | GG                              | TT              | 1946731500               |
| SNP_P4_7996_23838714 | NC_021160.1    | Ca_kabuli_chr01 | 23838714                | GG                              | TT              | 1946731502               |
| SNP_P4_7997_23838758 | NC_021160.1    | Ca_kabuli_chr01 | 23838758                | TT                              | GG              | 1946731504               |
| SNP_P4_7999_23877820 | NC_021160.1    | Ca_kabuli_chr01 | 23877820                | TT                              | AA              | 1946731506               |
| SNP_P4_8000_23884163 | NC_021160.1    | Ca_kabuli_chr01 | 23884163                | TT                              | CC              | 1946731508               |
| SNP_P4_8001_23884165 | NC_021160.1    | Ca_kabuli_chr01 | 23884165                | TT                              | GG              | 1946731510               |
| SNP_P4_8002_23887129 | NC_021160.1    | Ca_kabuli_chr01 | 23887129                | TT                              | CC              | 1946731512               |
| SNP_P4_8004_23892501 | NC_021160.1    | Ca_kabuli_chr01 | 23892501                | TT                              | CC              | 1946731514               |
| SNP_P4_8005_23897553 | NC_021160.1    | Ca_kabuli_chr01 | 23897553                | AA                              | TT              | 1946731516               |
| SNP_P4_8006_23919533 | NC_021160.1    | Ca_kabuli_chr01 | 23919533                | AA                              | GG              | 1946731518               |
| SNP_P4_8007_23921504 | NC_021160.1    | Ca_kabuli_chr01 | 23921504                | CC                              | TT              | 1946731520               |
| SNP_P4_8008_23962283 | NC_021160.1    | Ca_kabuli_chr01 | 23962283                | AA                              | GG              | 1946731522               |
| SNP_P4_8009_23966795 | NC_021160.1    | Ca_kabuli_chr01 | 23966795                | AA                              | GG              | 1946731524               |
| SNP_P4_8011_23966848 | NC_021160.1    | Ca_kabuli_chr01 | 23966848                | AA                              | GG              | 1946731526               |
| SNP_P4_8012_23967267 | NC_021160.1    | Ca_kabuli_chr01 | 23967267                | CC                              | TT              | 1946731528               |
| SNP_P4_8013_23978919 | NC_021160.1    | Ca_kabuli_chr01 | 23978919                | CC                              | TT              | 1946731530               |
| SNP_P4_8014_23978928 | NC_021160.1    | Ca_kabuli_chr01 | 23978928                | AA                              | GG              | 1946731532               |
| SNP_P4_8015_23998474 | NC_021160.1    | Ca_kabuli_chr01 | 23998474                | GG                              | CC              | 1946731534               |
| SNP_P4_8016_24005173 | NC_021160.1    | Ca_kabuli_chr01 | 24005173                | TT                              | CC              | 1946731536               |
| SNP_P4_8017_24012369 | NC_021160.1    | Ca_kabuli_chr01 | 24012369                | TT                              | GG              | 1946731538               |
| SNP_P4_8018_24027154 | NC_021160.1    | Ca_kabuli_chr01 | 24027154                | CC                              | TT              | 1946731540               |
| SNP_P4_8019_24030435 | NC_021160.1    | Ca_kabuli_chr01 | 24030435                | GG                              | CC              | 1946731542               |
| SNP_P4_8020_24030467 | NC_021160.1    | Ca_kabuli_chr01 | 24030467                | CC                              | TT              | 1946731544               |
| SNP_P4_8022_24030577 | NC_021160.1    | Ca_kabuli_chr01 | 24030577                | CC                              | TT              | 1946731545               |
| SNP_P4_8024_24031058 | NC_021160.1    | Ca_kabuli_chr01 | 24031058                | CC                              | TT              | 1946731547               |
| SNP_P4_8025_24031098 | NC_021160.1    | Ca_kabuli_chr01 | 24031098                | AA                              | GG              | 1946731549               |
| SNP_P4_8026_24031141 | NC_021160.1    | Ca_kabuli_chr01 | 24031141                | CC                              | TT              | 1946731551               |
| SNP_P4_8027_24031144 | NC_021160.1    | Ca_kabuli_chr01 | 24031144                | TT                              | CC              | 1946731553               |
| SNP_P4_8028_24031231 | NC_021160.1    | Ca_kabuli_chr01 | 24031231                | AA                              | GG              | 1946731555               |
| SNP_P4_8029_24031378 | NC_021160.1    | Ca_kabuli_chr01 | 24031378                | AA                              | GG              | 1946731557               |
| SNP_P4_8030_24035037 | NC_021160.1    | Ca_kabuli_chr01 | 24035037                | GG                              | AA              | 1946731559               |
| SNP_P4_8031_24035057 | NC_021160.1    | Ca_kabuli_chr01 | 24035057                | AA                              | TT              | 1946731561               |
| SNP_P4_8032_24035417 | NC_021160.1    | Ca_kabuli_chr01 | 24035417                | AA                              | GG              | 1946731563               |
| SNP_P4_8033_24035470 | NC_021160.1    | Ca_kabuli_chr01 | 24035470                | TT                              | CC              | 1946731565               |
| SNP_P4_8034_24035478 | NC_021160.1    | Ca_kabuli_chr01 | 24035478                | AA                              | GG              | 1946731566               |

| SNPs IDs             | Chromosome IDs | Chromosomes     | Physical positions (bp) | CDC Frontier (Reference genome) | (ILWC46 & LPNB) | NCBI SNPdb Accession IDs |
|----------------------|----------------|-----------------|-------------------------|---------------------------------|-----------------|--------------------------|
| SNP_P4_8035_24035483 | NC_021160.1    | Ca_kabuli_chr01 | 24035483                | TT                              | CC              | 1946731568               |
| SNP_P4_8036_24035488 | NC_021160.1    | Ca_kabuli_chr01 | 24035488                | AA                              | GG              | 1946731570               |
| SNP_P4_8037_24035503 | NC_021160.1    | Ca_kabuli_chr01 | 24035503                | CC                              | GG              | 1946731572               |
| SNP_P4_8038_24035521 | NC_021160.1    | Ca_kabuli_chr01 | 24035521                | AA                              | CC              | 1946731574               |
| SNP_P4_8039_24035673 | NC_021160.1    | Ca_kabuli_chr01 | 24035673                | TT                              | CC              | 1946731576               |
| SNP_P4_8040_24035676 | NC_021160.1    | Ca_kabuli_chr01 | 24035676                | TT                              | CC              | 1946731578               |
| SNP_P4_8041_24035767 | NC_021160.1    | Ca_kabuli_chr01 | 24035767                | TT                              | CC              | 1946731580               |
| SNP_P4_8042_24035781 | NC_021160.1    | Ca_kabuli_chr01 | 24035781                | TT                              | GG              | 1946731582               |
| SNP_P4_8043_24036171 | NC_021160.1    | Ca_kabuli_chr01 | 24036171                | TT                              | AA              | 1946731584               |
| SNP_P4_8044_24040486 | NC_021160.1    | Ca_kabuli_chr01 | 24040486                | GG                              | CC              | 1946731586               |
| SNP_P4_8045_24044391 | NC_021160.1    | Ca_kabuli_chr01 | 24044391                | CC                              | TT              | 1946731588               |
| SNP_P4_8049_24143322 | NC_021160.1    | Ca_kabuli_chr01 | 24143322                | GG                              | AA              | 1946731590               |
| SNP_P4_8050_24145634 | NC_021160.1    | Ca_kabuli_chr01 | 24145634                | TT                              | CC              | 1946731592               |
| SNP_P4_8051_24172058 | NC_021160.1    | Ca_kabuli_chr01 | 24172058                | AA                              | GG              | 1946731594               |
| SNP_P4_8052_24179555 | NC_021160.1    | Ca_kabuli_chr01 | 24179555                | AA                              | GG              | 1946731596               |
| SNP_P4_8053_24194344 | NC_021160.1    | Ca_kabuli_chr01 | 24194344                | TT                              | CC              | 1946731598               |
| SNP_P4_8054_24194346 | NC_021160.1    | Ca_kabuli_chr01 | 24194346                | GG                              | AA              | 1946731600               |
| SNP_P4_8055_24194457 | NC_021160.1    | Ca_kabuli_chr01 | 24194457                | AA                              | TT              | 1946731602               |
| SNP_P4_8056_24194687 | NC_021160.1    | Ca_kabuli_chr01 | 24194687                | CC                              | TT              | 1946731604               |
| SNP_P4_8057_24194706 | NC_021160.1    | Ca_kabuli_chr01 | 24194706                | AA                              | CC              | 1946731606               |
| SNP_P4_8058_24194751 | NC_021160.1    | Ca_kabuli_chr01 | 24194751                | TT                              | CC              | 1946731609               |
| SNP_P4_8059_24194761 | NC_021160.1    | Ca_kabuli_chr01 | 24194761                | AA                              | GG              | 1946731611               |
| SNP_P4_8060_24198487 | NC_021160.1    | Ca_kabuli_chr01 | 24198487                | GG                              | AA              | 1946731613               |
| SNP_P4_8062_24228569 | NC_021160.1    | Ca_kabuli_chr01 | 24228569                | GG                              | TT              | 1946731615               |
| SNP_P4_8063_24252100 | NC_021160.1    | Ca_kabuli_chr01 | 24252100                | CC                              | TT              | 1946731617               |
| SNP_P4_8064_24255810 | NC_021160.1    | Ca_kabuli_chr01 | 24255810                | CC                              | TT              | 1946731619               |
| SNP_P4_8065_24255992 | NC_021160.1    | Ca_kabuli_chr01 | 24255992                | GG                              | AA              | 1946731621               |
| SNP_P4_8066_24255994 | NC_021160.1    | Ca_kabuli_chr01 | 24255994                | AA                              | GG              | 1946731623               |
| SNP_P4_8067_24256029 | NC_021160.1    | Ca_kabuli_chr01 | 24256029                | AA                              | TT              | 1946731625               |
| SNP_P4_8068_24256034 | NC_021160.1    | Ca_kabuli_chr01 | 24256034                | TT                              | CC              | 1946731627               |
| SNP_P4_8069_24256102 | NC_021160.1    | Ca_kabuli_chr01 | 24256102                | AA                              | GG              | 1946731629               |
| SNP_P4_8070_24268003 | NC_021160.1    | Ca_kabuli_chr01 | 24268003                | AA                              | GG              | 1946731631               |
| SNP_P4_8072_24292723 | NC_021160.1    | Ca_kabuli_chr01 | 24292723                | TT                              | CC              | 1946731633               |
| SNP_P4_8073_24301183 | NC_021160.1    | Ca_kabuli_chr01 | 24301183                | CC                              | AA              | 1946731635               |
| SNP_P4_8075_24317013 | NC_021160.1    | Ca_kabuli_chr01 | 24317013                | AA                              | GG              | 1946731637               |
| SNP_P4_8076_24331376 | NC_021160.1    | Ca_kabuli_chr01 | 24331376                | AA                              | GG              | 1946731639               |
| SNP_P4_8077_24331533 | NC_021160.1    | Ca_kabuli_chr01 | 24331533                | AA                              | GG              | 1946731641               |
| SNP_P4_8078_24331583 | NC_021160.1    | Ca_kabuli_chr01 | 24331583                | AA                              | GG              | 1946731643               |
| SNP_P4_8079_24331593 | NC_021160.1    | Ca_kabuli_chr01 | 24331593                | GG                              | AA              | 1946731645               |
| SNP_P4_8080_24331600 | NC_021160.1    | Ca_kabuli_chr01 | 24331600                | AA                              | GG              | 1946731647               |
| SNP_P4_8081_24369517 | NC_021160.1    | Ca_kabuli_chr01 | 24369517                | AA                              | GG              | 1946731649               |
| SNP_P4_8082_24377334 | NC_021160.1    | Ca_kabuli_chr01 | 24377334                | TT                              | CC              | 1946731651               |

| SNPs IDs             | Chromosome IDs | Chromosomes     | Physical positions (bp) | CDC Frontier (Reference genome) | (ILWC46 & LPNB) | NCBI SNPdb Accession IDs |
|----------------------|----------------|-----------------|-------------------------|---------------------------------|-----------------|--------------------------|
| SNP_P4_8083_24405943 | NC_021160.1    | Ca_kabuli_chr01 | 24405943                | CC                              | TT              | 1946731653               |
| SNP_P4_8084_24474539 | NC_021160.1    | Ca_kabuli_chr01 | 24474539                | TT                              | GG              | 1946731655               |
| SNP_P4_8086_24501773 | NC_021160.1    | Ca_kabuli_chr01 | 24501773                | AA                              | CC              | 1946731657               |
| SNP_P4_8087_24502055 | NC_021160.1    | Ca_kabuli_chr01 | 24502055                | AA                              | CC              | 1946731659               |
| SNP_P4_8088_24502323 | NC_021160.1    | Ca_kabuli_chr01 | 24502323                | TT                              | CC              | 1946731661               |
| SNP_P4_8089_24508584 | NC_021160.1    | Ca_kabuli_chr01 | 24508584                | AA                              | GG              | 1946731663               |
| SNP_P4_8090_24522080 | NC_021160.1    | Ca_kabuli_chr01 | 24522080                | CC                              | TT              | 1946731665               |
| SNP_P4_8091_24543871 | NC_021160.1    | Ca_kabuli_chr01 | 24543871                | TT                              | GG              | 1946731667               |
| SNP_P4_8092_24592227 | NC_021160.1    | Ca_kabuli_chr01 | 24592227                | AA                              | GG              | 1946731669               |
| SNP_P4_8093_24592252 | NC_021160.1    | Ca_kabuli_chr01 | 24592252                | AA                              | TT              | 1946731671               |
| SNP_P4_8094_24592270 | NC_021160.1    | Ca_kabuli_chr01 | 24592270                | GG                              | AA              | 1946731673               |
| SNP_P4_8095_24597511 | NC_021160.1    | Ca_kabuli_chr01 | 24597511                | TT                              | CC              | 1946731675               |
| SNP_P4_8096_24597906 | NC_021160.1    | Ca_kabuli_chr01 | 24597906                | TT                              | AA              | 1946731677               |
| SNP_P4_8097_24598952 | NC_021160.1    | Ca_kabuli_chr01 | 24598952                | TT                              | CC              | 1946731679               |
| SNP_P4_8098_24601791 | NC_021160.1    | Ca_kabuli_chr01 | 24601791                | AA                              | TT              | 1946731681               |
| SNP_P4_8099_24603254 | NC_021160.1    | Ca_kabuli_chr01 | 24603254                | TT                              | CC              | 1946731683               |
| SNP_P4_8100_24603276 | NC_021160.1    | Ca_kabuli_chr01 | 24603276                | TT                              | CC              | 1946731685               |
| SNP_P4_8101_24603693 | NC_021160.1    | Ca_kabuli_chr01 | 24603693                | TT                              | CC              | 1946731687               |
| SNP_P4_8102_24606854 | NC_021160.1    | Ca_kabuli_chr01 | 24606854                | GG                              | AA              | 1946731689               |
| SNP_P4_8103_24607200 | NC_021160.1    | Ca_kabuli_chr01 | 24607200                | AA                              | CC              | 1946731691               |
| SNP_P4_8104_24607256 | NC_021160.1    | Ca_kabuli_chr01 | 24607256                | CC                              | TT              | 1946731692               |
| SNP_P4_8105_24607540 | NC_021160.1    | Ca_kabuli_chr01 | 24607540                | TT                              | CC              | 1946731694               |
| SNP_P4_8106_24607544 | NC_021160.1    | Ca_kabuli_chr01 | 24607544                | AA                              | TT              | 1946731696               |
| SNP_P4_8107_24607546 | NC_021160.1    | Ca_kabuli_chr01 | 24607546                | AA                              | GG              | 1946731698               |
| SNP_P4_8108_24607558 | NC_021160.1    | Ca_kabuli_chr01 | 24607558                | TT                              | GG              | 1946731700               |
| SNP_P4_8109_24607568 | NC_021160.1    | Ca_kabuli_chr01 | 24607568                | AA                              | CC              | 1946731702               |
| SNP_P4_8110_24607596 | NC_021160.1    | Ca_kabuli_chr01 | 24607596                | AA                              | GG              | 1946731704               |
| SNP_P4_8111_24607613 | NC_021160.1    | Ca_kabuli_chr01 | 24607613                | AA                              | TT              | 1946731706               |
| SNP_P4_8112_24607617 | NC_021160.1    | Ca_kabuli_chr01 | 24607617                | GG                              | AA              | 1946731708               |
| SNP_P4_8113_24610727 | NC_021160.1    | Ca_kabuli_chr01 | 24610727                | GG                              | AA              | 1946731710               |
| SNP_P4_8114_24610731 | NC_021160.1    | Ca_kabuli_chr01 | 24610731                | CC                              | TT              | 1946731712               |
| SNP_P4_8115_24610753 | NC_021160.1    | Ca_kabuli_chr01 | 24610753                | CC                              | TT              | 1946731714               |
| SNP_P4_8116_24610754 | NC_021160.1    | Ca_kabuli_chr01 | 24610754                | GG                              | CC              | 1946731716               |
| SNP_P4_8119_24626603 | NC_021160.1    | Ca_kabuli_chr01 | 24626603                | TT                              | AA              | 1946731718               |
| SNP_P4_8120_24626891 | NC_021160.1    | Ca_kabuli_chr01 | 24626891                | AA                              | TT              | 1946731720               |
| SNP_P4_8121_24626977 | NC_021160.1    | Ca_kabuli_chr01 | 24626977                | GG                              | CC              | 1946731722               |
| SNP_P4_8123_24636477 | NC_021160.1    | Ca_kabuli_chr01 | 24636477                | AA                              | TT              | 1946731724               |
| SNP_P4_8124_24636480 | NC_021160.1    | Ca_kabuli_chr01 | 24636480                | TT                              | AA              | 1946731726               |
| SNP_P4_8126_24636505 | NC_021160.1    | Ca_kabuli_chr01 | 24636505                | TT                              | GG              | 1946731728               |
| SNP_P4_8127_24636508 | NC_021160.1    | Ca_kabuli_chr01 | 24636508                | CC                              | TT              | 1946731730               |
| SNP_P4_8128_24640490 | NC_021160.1    | Ca_kabuli_chr01 | 24640490                | CC                              | TT              | 1946731732               |
| SNP_P4_8130_24651925 | NC_021160.1    | Ca_kabuli_chr01 | 24651925                | TT                              | CC              | 1946731734               |

| SNPs IDs             | Chromosome IDs | Chromosomes     | Physical positions (bp) | CDC Frontier (Reference genome) | (ILWC46 & LPNB) | NCBI SNPdb Accession IDs |
|----------------------|----------------|-----------------|-------------------------|---------------------------------|-----------------|--------------------------|
| SNP_P4_8131_24723512 | NC_021160.1    | Ca_kabuli_chr01 | 24723512                | TT                              | GG              | 1946731736               |
| SNP_P4_8132_24723857 | NC_021160.1    | Ca_kabuli_chr01 | 24723857                | TT                              | CC              | 1946731738               |
| SNP_P4_8133_24741576 | NC_021160.1    | Ca_kabuli_chr01 | 24741576                | AA                              | GG              | 1946731740               |
| SNP_P4_8135_24771237 | NC_021160.1    | Ca_kabuli_chr01 | 24771237                | CC                              | TT              | 1946731742               |
| SNP_P4_8136_24771611 | NC_021160.1    | Ca_kabuli_chr01 | 24771611                | TT                              | GG              | 1946731744               |
| SNP_P4_8137_24771612 | NC_021160.1    | Ca_kabuli_chr01 | 24771612                | TT                              | GG              | 1946731746               |
| SNP_P4_8138_24778464 | NC_021160.1    | Ca_kabuli_chr01 | 24778464                | AA                              | CC              | 1946731749               |
| SNP_P4_8139_24787529 | NC_021160.1    | Ca_kabuli_chr01 | 24787529                | CC                              | TT              | 1946731751               |
| SNP_P4_8142_24819535 | NC_021160.1    | Ca_kabuli_chr01 | 24819535                | TT                              | CC              | 1946731753               |
| SNP_P4_8143_24847267 | NC_021160.1    | Ca_kabuli_chr01 | 24847267                | AA                              | GG              | 1946731755               |
| SNP_P4_8144_24873694 | NC_021160.1    | Ca_kabuli_chr01 | 24873694                | AA                              | GG              | 1946731757               |
| SNP_P4_8145_24912699 | NC_021160.1    | Ca_kabuli_chr01 | 24912699                | TT                              | CC              | 1946731759               |
| SNP_P4_8146_24913525 | NC_021160.1    | Ca_kabuli_chr01 | 24913525                | AA                              | GG              | 1946731761               |
| SNP_P4_8147_24916302 | NC_021160.1    | Ca_kabuli_chr01 | 24916302                | AA                              | CC              | 1946731763               |
| SNP_P4_8148_24916324 | NC_021160.1    | Ca_kabuli_chr01 | 24916324                | TT                              | CC              | 1946731765               |
| SNP_P4_8149_24917106 | NC_021160.1    | Ca_kabuli_chr01 | 24917106                | AA                              | GG              | 1946731767               |
| SNP_P4_8150_24918659 | NC_021160.1    | Ca_kabuli_chr01 | 24918659                | TT                              | CC              | 1946731769               |
| SNP_P4_8152_24966826 | NC_021160.1    | Ca_kabuli_chr01 | 24966826                | AA                              | CC              | 1946731771               |
| SNP_P4_8153_24967197 | NC_021160.1    | Ca_kabuli_chr01 | 24967197                | AA                              | TT              | 1946731773               |
| SNP_P4_8154_25014375 | NC_021160.1    | Ca_kabuli_chr01 | 25014375                | TT                              | CC              | 1946731775               |
| SNP_P4_8155_25024887 | NC_021160.1    | Ca_kabuli_chr01 | 25024887                | GG                              | AA              | 1946731777               |
| SNP_P4_8156_25037706 | NC_021160.1    | Ca_kabuli_chr01 | 25037706                | AA                              | GG              | 1946731779               |
| SNP_P4_8157_25046613 | NC_021160.1    | Ca_kabuli_chr01 | 25046613                | CC                              | TT              | 1946731781               |
| SNP_P4_8158_25057980 | NC_021160.1    | Ca_kabuli_chr01 | 25057980                | GG                              | CC              | 1946731783               |
| SNP_P4_8159_25058069 | NC_021160.1    | Ca_kabuli_chr01 | 25058069                | GG                              | AA              | 1946731785               |
| SNP_P4_8160_25058117 | NC_021160.1    | Ca_kabuli_chr01 | 25058117                | GG                              | AA              | 1946731787               |
| SNP_P4_8161_25058248 | NC_021160.1    | Ca_kabuli_chr01 | 25058248                | AA                              | GG              | 1946731790               |
| SNP_P4_8162_25058249 | NC_021160.1    | Ca_kabuli_chr01 | 25058249                | AA                              | GG              | 1946731792               |
| SNP_P4_8163_25058362 | NC_021160.1    | Ca_kabuli_chr01 | 25058362                | AA                              | CC              | 1946731794               |
| SNP_P4_8164_25058373 | NC_021160.1    | Ca_kabuli_chr01 | 25058373                | TT                              | AA              | 1946731796               |
| SNP_P4_8165_25059092 | NC_021160.1    | Ca_kabuli_chr01 | 25059092                | GG                              | CC              | 1946731798               |
| SNP_P4_8166_25059111 | NC_021160.1    | Ca_kabuli_chr01 | 25059111                | AA                              | TT              | 1946731800               |
| SNP_P4_8168_25079429 | NC_021160.1    | Ca_kabuli_chr01 | 25079429                | AA                              | GG              | 1946731802               |
| SNP_P4_8169_25098559 | NC_021160.1    | Ca_kabuli_chr01 | 25098559                | AA                              | GG              | 1946731804               |
| SNP_P4_8170_25098593 | NC_021160.1    | Ca_kabuli_chr01 | 25098593                | TT                              | AA              | 1946731806               |
| SNP_P4_8171_25098606 | NC_021160.1    | Ca_kabuli_chr01 | 25098606                | CC                              | AA              | 1946731808               |
| SNP_P4_8173_25130212 | NC_021160.1    | Ca_kabuli_chr01 | 25130212                | CC                              | AA              | 1946731810               |
| SNP_P4_8174_25130214 | NC_021160.1    | Ca_kabuli_chr01 | 25130214                | GG                              | AA              | 1946731812               |
| SNP_P4_8177_25185624 | NC_021160.1    | Ca_kabuli_chr01 | 25185624                | AA                              | GG              | 1946731814               |
| SNP_P4_8178_25185627 | NC_021160.1    | Ca_kabuli_chr01 | 25185627                | CC                              | TT              | 1946731816               |
| SNP_P4_8179_25209722 | NC_021160.1    | Ca_kabuli_chr01 | 25209722                | AA                              | TT              | 1946731818               |
| SNP_P4_8180_25209980 | NC_021160.1    | Ca_kabuli_chr01 | 25209980                | GG                              | TT              | 1946731820               |

| SNPs IDs             | Chromosome IDs | Chromosomes     | Physical positions (bp) | CDC Frontier (Reference genome) | (ILWC46 & LPNB) | NCBI SNPdb Accession IDs |
|----------------------|----------------|-----------------|-------------------------|---------------------------------|-----------------|--------------------------|
| SNP_P4_8181_25233425 | NC_021160.1    | Ca_kabuli_chr01 | 25233425                | AA                              | GG              | 1946731822               |
| SNP_P4_8182_25234184 | NC_021160.1    | Ca_kabuli_chr01 | 25234184                | TT                              | CC              | 1946731824               |
| SNP_P4_8183_25234279 | NC_021160.1    | Ca_kabuli_chr01 | 25234279                | TT                              | CC              | 1946731826               |
| SNP_P4_8184_25234352 | NC_021160.1    | Ca_kabuli_chr01 | 25234352                | GG                              | AA              | 1946731828               |
| SNP_P4_8185_25248751 | NC_021160.1    | Ca_kabuli_chr01 | 25248751                | CC                              | TT              | 1946731830               |
| SNP_P4_8186_25262325 | NC_021160.1    | Ca_kabuli_chr01 | 25262325                | CC                              | TT              | 1946731832               |
| SNP_P4_8187_25272285 | NC_021160.1    | Ca_kabuli_chr01 | 25272285                | GG                              | AA              | 1946731834               |
| SNP_P4_8188_25296114 | NC_021160.1    | Ca_kabuli_chr01 | 25296114                | TT                              | CC              | 1946731836               |
| SNP_P4_8189_25296171 | NC_021160.1    | Ca_kabuli_chr01 | 25296171                | TT                              | AA              | 1946731838               |
| SNP_P4_8190_25296409 | NC_021160.1    | Ca_kabuli_chr01 | 25296409                | CC                              | TT              | 1946731840               |
| SNP_P4_8192_25296532 | NC_021160.1    | Ca_kabuli_chr01 | 25296532                | CC                              | TT              | 1946731842               |
| SNP_P4_8193_25296685 | NC_021160.1    | Ca_kabuli_chr01 | 25296685                | AA                              | GG              | 1946731844               |
| SNP_P4_8195_25353631 | NC_021160.1    | Ca_kabuli_chr01 | 25353631                | AA                              | TT              | 1946731846               |
| SNP_P4_8197_25358964 | NC_021160.1    | Ca_kabuli_chr01 | 25358964                | AA                              | TT              | 1946731848               |
| SNP_P4_8198_25373788 | NC_021160.1    | Ca_kabuli_chr01 | 25373788                | GG                              | TT              | 1946731850               |
| SNP_P4_8199_25373824 | NC_021160.1    | Ca_kabuli_chr01 | 25373824                | AA                              | GG              | 1946731852               |
| SNP_P4_8200_25373876 | NC_021160.1    | Ca_kabuli_chr01 | 25373876                | CC                              | AA              | 1946731854               |
| SNP_P4_8201_25374298 | NC_021160.1    | Ca_kabuli_chr01 | 25374298                | TT                              | AA              | 1946731857               |
| SNP_P4_8202_25374337 | NC_021160.1    | Ca_kabuli_chr01 | 25374337                | CC                              | TT              | 1946731859               |
| SNP_P4_8203_25380923 | NC_021160.1    | Ca_kabuli_chr01 | 25380923                | CC                              | AA              | 1946731860               |
| SNP_P4_8204_25381737 | NC_021160.1    | Ca_kabuli_chr01 | 25381737                | CC                              | TT              | 1946731862               |
| SNP_P4_8205_25381860 | NC_021160.1    | Ca_kabuli_chr01 | 25381860                | TT                              | CC              | 1946731864               |
| SNP_P4_8207_25382445 | NC_021160.1    | Ca_kabuli_chr01 | 25382445                | GG                              | TT              | 1946731866               |
| SNP_P4_8208_25382447 | NC_021160.1    | Ca_kabuli_chr01 | 25382447                | TT                              | CC              | 1946731868               |
| SNP_P4_8209_25382597 | NC_021160.1    | Ca_kabuli_chr01 | 25382597                | GG                              | AA              | 1946731870               |
| SNP_P4_8210_25382604 | NC_021160.1    | Ca_kabuli_chr01 | 25382604                | TT                              | AA              | 1946731872               |
| SNP_P4_8211_25387739 | NC_021160.1    | Ca_kabuli_chr01 | 25387739                | AA                              | CC              | 1946731874               |
| SNP_P4_8212_25387743 | NC_021160.1    | Ca_kabuli_chr01 | 25387743                | GG                              | CC              | 1946731876               |
| SNP_P4_8213_25402587 | NC_021160.1    | Ca_kabuli_chr01 | 25402587                | TT                              | CC              | 1946731878               |
| SNP_P4_8214_25410971 | NC_021160.1    | Ca_kabuli_chr01 | 25410971                | GG                              | AA              | 1946731880               |
| SNP_P4_8215_25413547 | NC_021160.1    | Ca_kabuli_chr01 | 25413547                | GG                              | TT              | 1946731882               |
| SNP_P4_8218_25450220 | NC_021160.1    | Ca_kabuli_chr01 | 25450220                | AA                              | TT              | 1946731884               |
| SNP_P4_8219_25452169 | NC_021160.1    | Ca_kabuli_chr01 | 25452169                | CC                              | AA              | 1946731886               |
| SNP_P4_8220_25460258 | NC_021160.1    | Ca_kabuli_chr01 | 25460258                | GG                              | AA              | 1946731888               |
| SNP_P4_8221_25469463 | NC_021160.1    | Ca_kabuli_chr01 | 25469463                | AA                              | GG              | 1946731890               |
| SNP_P4_8223_25505430 | NC_021160.1    | Ca_kabuli_chr01 | 25505430                | TT                              | AA              | 1946731892               |
| SNP_P4_8224_25505434 | NC_021160.1    | Ca_kabuli_chr01 | 25505434                | AA                              | GG              | 1946731894               |
| SNP_P4_8225_25505774 | NC_021160.1    | Ca_kabuli_chr01 | 25505774                | TT                              | CC              | 1946731896               |
| SNP_P4_8226_25505965 | NC_021160.1    | Ca_kabuli_chr01 | 25505965                | GG                              | TT              | 1946731898               |
| SNP_P4_8227_25507417 | NC_021160.1    | Ca_kabuli_chr01 | 25507417                | TT                              | CC              | 1946731900               |
| SNP_P4_8228_25507696 | NC_021160.1    | Ca_kabuli_chr01 | 25507696                | TT                              | CC              | 1946731902               |
| SNP_P4_8231_25510060 | NC_021160.1    | Ca_kabuli_chr01 | 25510060                | AA                              | GG              | 1946731904               |



| SNPs IDs             | Chromosome IDs | Chromosomes     | Physical positions (bp) | CDC Frontier (Reference genome) | (ILWC46 & LPNB) | NCBI SNPdb Accession IDs |
|----------------------|----------------|-----------------|-------------------------|---------------------------------|-----------------|--------------------------|
| SNP_P4_8232_25511413 | NC_021160.1    | Ca_kabuli_chr01 | 25511413                | TT                              | GG              | 1946731905               |
| SNP_P4_8233_25511419 | NC_021160.1    | Ca_kabuli_chr01 | 25511419                | CC                              | TT              | 1946731907               |
| SNP_P4_8234_25511478 | NC_021160.1    | Ca_kabuli_chr01 | 25511478                | TT                              | CC              | 1946731909               |
| SNP_P4_8235_25528126 | NC_021160.1    | Ca_kabuli_chr01 | 25528126                | TT                              | CC              | 1946731911               |
| SNP_P4_8237_25547451 | NC_021160.1    | Ca_kabuli_chr01 | 25547451                | AA                              | GG              | 1946731913               |
| SNP_P4_8238_25549185 | NC_021160.1    | Ca_kabuli_chr01 | 25549185                | TT                              | GG              | 1946731915               |
| SNP_P4_8239_25549189 | NC_021160.1    | Ca_kabuli_chr01 | 25549189                | TT                              | AA              | 1946731917               |
| SNP_P4_8240_25549471 | NC_021160.1    | Ca_kabuli_chr01 | 25549471                | TT                              | CC              | 1946731919               |
| SNP_P4_8241_25571945 | NC_021160.1    | Ca_kabuli_chr01 | 25571945                | CC                              | AA              | 1946731921               |
| SNP_P4_8242_25571968 | NC_021160.1    | Ca_kabuli_chr01 | 25571968                | AA                              | GG              | 1946731923               |
| SNP_P4_8243_25572027 | NC_021160.1    | Ca_kabuli_chr01 | 25572027                | AA                              | GG              | 1946731925               |
| SNP_P4_8244_25572031 | NC_021160.1    | Ca_kabuli_chr01 | 25572031                | TT                              | AA              | 1946731927               |
| SNP_P4_8246_25584050 | NC_021160.1    | Ca_kabuli_chr01 | 25584050                | AA                              | GG              | 1946731929               |
| SNP_P4_8247_25584093 | NC_021160.1    | Ca_kabuli_chr01 | 25584093                | GG                              | AA              | 1946731931               |
| SNP_P4_8248_25592786 | NC_021160.1    | Ca_kabuli_chr01 | 25592786                | CC                              | TT              | 1946731933               |
| SNP_P4_8249_25608434 | NC_021160.1    | Ca_kabuli_chr01 | 25608434                | TT                              | CC              | 1946731935               |
| SNP_P4_8250_25612830 | NC_021160.1    | Ca_kabuli_chr01 | 25612830                | TT                              | AA              | 1946731937               |
| SNP_P4_8251_25612843 | NC_021160.1    | Ca_kabuli_chr01 | 25612843                | TT                              | CC              | 1946731939               |
| SNP_P4_8252_25612844 | NC_021160.1    | Ca_kabuli_chr01 | 25612844                | TT                              | AA              | 1946731941               |
| SNP_P4_8253_25612893 | NC_021160.1    | Ca_kabuli_chr01 | 25612893                | GG                              | CC              | 1946731943               |
| SNP_P4_8254_25613079 | NC_021160.1    | Ca_kabuli_chr01 | 25613079                | AA                              | TT              | 1946731945               |
| SNP_P4_8255_25613089 | NC_021160.1    | Ca_kabuli_chr01 | 25613089                | AA                              | GG              | 1946731947               |
| SNP_P4_8256_25613107 | NC_021160.1    | Ca_kabuli_chr01 | 25613107                | AA                              | GG              | 1946731949               |
| SNP_P4_8257_25613205 | NC_021160.1    | Ca_kabuli_chr01 | 25613205                | AA                              | CC              | 1946731951               |
| SNP_P4_8258_25613238 | NC_021160.1    | Ca_kabuli_chr01 | 25613238                | AA                              | GG              | 1946731953               |
| SNP_P4_8259_25639893 | NC_021160.1    | Ca_kabuli_chr01 | 25639893                | AA                              | GG              | 1946731955               |
| SNP_P4_8260_25651123 | NC_021160.1    | Ca_kabuli_chr01 | 25651123                | TT                              | CC              | 1946731957               |
| SNP_P4_8261_25668097 | NC_021160.1    | Ca_kabuli_chr01 | 25668097                | TT                              | CC              | 1946731959               |
| SNP_P4_8262_25668103 | NC_021160.1    | Ca_kabuli_chr01 | 25668103                | TT                              | CC              | 1946731961               |
| SNP_P4_8263_25670122 | NC_021160.1    | Ca_kabuli_chr01 | 25670122                | TT                              | CC              | 1946731963               |
| SNP_P4_8264_25670134 | NC_021160.1    | Ca_kabuli_chr01 | 25670134                | AA                              | GG              | 1946731965               |
| SNP_P4_8265_25670143 | NC_021160.1    | Ca_kabuli_chr01 | 25670143                | GG                              | AA              | 1946731967               |
| SNP_P4_8266_25670146 | NC_021160.1    | Ca_kabuli_chr01 | 25670146                | CC                              | TT              | 1946731969               |
| SNP_P4_8267_25681649 | NC_021160.1    | Ca_kabuli_chr01 | 25681649                | AA                              | GG              | 1946731971               |
| SNP_P4_8268_25690483 | NC_021160.1    | Ca_kabuli_chr01 | 25690483                | CC                              | TT              | 1946731973               |
| SNP_P4_8269_25692597 | NC_021160.1    | Ca_kabuli_chr01 | 25692597                | AA                              | TT              | 1946731975               |
| SNP_P4_8270_25694332 | NC_021160.1    | Ca_kabuli_chr01 | 25694332                | TT                              | CC              | 1946731977               |
| SNP_P4_8271_25700356 | NC_021160.1    | Ca_kabuli_chr01 | 25700356                | TT                              | GG              | 1946731979               |
| SNP_P4_8272_25700359 | NC_021160.1    | Ca_kabuli_chr01 | 25700359                | AA                              | GG              | 1946731981               |
| SNP_P4_8273_25707980 | NC_021160.1    | Ca_kabuli_chr01 | 25707980                | CC                              | TT              | 1946731983               |
| SNP_P4_8274_25714882 | NC_021160.1    | Ca_kabuli_chr01 | 25714882                | AA                              | GG              | 1946731985               |
| SNP_P4_8275_25760955 | NC_021160.1    | Ca_kabuli_chr01 | 25760955                | GG                              | CC              | 1946731987               |

| SNPs IDs             | Chromosome IDs | Chromosomes     | Physical positions (bp) | CDC Frontier (Reference genome) | (ILWC46 & LPNB) | NCBI SNPdb Accession IDs |
|----------------------|----------------|-----------------|-------------------------|---------------------------------|-----------------|--------------------------|
| SNP_P4_8276_25769069 | NC_021160.1    | Ca_kabuli_chr01 | 25769069                | TT                              | CC              | 1946731989               |
| SNP_P4_8277_25770285 | NC_021160.1    | Ca_kabuli_chr01 | 25770285                | CC                              | TT              | 1946731991               |
| SNP_P4_8278_25770287 | NC_021160.1    | Ca_kabuli_chr01 | 25770287                | GG                              | AA              | 1946731993               |
| SNP_P4_8279_25770304 | NC_021160.1    | Ca_kabuli_chr01 | 25770304                | TT                              | CC              | 1946731995               |
| SNP_P4_8280_25778810 | NC_021160.1    | Ca_kabuli_chr01 | 25778810                | AA                              | CC              | 1946731997               |
| SNP_P4_8282_25786446 | NC_021160.1    | Ca_kabuli_chr01 | 25786446                | CC                              | TT              | 1946731999               |
| SNP_P4_8283_25796334 | NC_021160.1    | Ca_kabuli_chr01 | 25796334                | AA                              | GG              | 1946732001               |
| SNP_P4_8284_25798141 | NC_021160.1    | Ca_kabuli_chr01 | 25798141                | GG                              | TT              | 1946732003               |
| SNP_P4_8285_25798471 | NC_021160.1    | Ca_kabuli_chr01 | 25798471                | GG                              | AA              | 1946732005               |
| SNP_P4_8287_25802413 | NC_021160.1    | Ca_kabuli_chr01 | 25802413                | CC                              | TT              | 1946732007               |
| SNP_P4_8288_25802448 | NC_021160.1    | Ca_kabuli_chr01 | 25802448                | GG                              | AA              | 1946732009               |
| SNP_P4_8289_25802460 | NC_021160.1    | Ca_kabuli_chr01 | 25802460                | GG                              | AA              | 1946732011               |
| SNP_P4_8290_25802461 | NC_021160.1    | Ca_kabuli_chr01 | 25802461                | AA                              | GG              | 1946732013               |
| SNP_P4_8292_25820077 | NC_021160.1    | Ca_kabuli_chr01 | 25820077                | CC                              | AA              | 1946732015               |
| SNP_P4_8293_25824861 | NC_021160.1    | Ca_kabuli_chr01 | 25824861                | TT                              | GG              | 1946732017               |
| SNP_P4_8294_25824930 | NC_021160.1    | Ca_kabuli_chr01 | 25824930                | TT                              | CC              | 1946732019               |
| SNP_P4_8295_25824937 | NC_021160.1    | Ca_kabuli_chr01 | 25824937                | TT                              | CC              | 1946732021               |
| SNP_P4_8296_25824956 | NC_021160.1    | Ca_kabuli_chr01 | 25824956                | TT                              | CC              | 1946732023               |
| SNP_P4_8297_25824984 | NC_021160.1    | Ca_kabuli_chr01 | 25824984                | GG                              | TT              | 1946732025               |
| SNP_P4_8298_25824989 | NC_021160.1    | Ca_kabuli_chr01 | 25824989                | GG                              | AA              | 1946732027               |
| SNP_P4_8299_25824995 | NC_021160.1    | Ca_kabuli_chr01 | 25824995                | CC                              | TT              | 1946732029               |
| SNP_P4_8300_25825009 | NC_021160.1    | Ca_kabuli_chr01 | 25825009                | TT                              | GG              | 1946732031               |
| SNP_P4_8301_25825037 | NC_021160.1    | Ca_kabuli_chr01 | 25825037                | CC                              | TT              | 1946732033               |
| SNP_P4_8302_25825678 | NC_021160.1    | Ca_kabuli_chr01 | 25825678                | GG                              | AA              | 1946732035               |
| SNP_P4_8303_25829455 | NC_021160.1    | Ca_kabuli_chr01 | 25829455                | CC                              | TT              | 1946732037               |
| SNP_P4_8304_25832940 | NC_021160.1    | Ca_kabuli_chr01 | 25832940                | TT                              | CC              | 1946732039               |
| SNP_P4_8305_25832941 | NC_021160.1    | Ca_kabuli_chr01 | 25832941                | TT                              | GG              | 1946732041               |
| SNP_P4_8306_25833239 | NC_021160.1    | Ca_kabuli_chr01 | 25833239                | CC                              | TT              | 1946732043               |
| SNP_P4_8307_25834665 | NC_021160.1    | Ca_kabuli_chr01 | 25834665                | CC                              | TT              | 1946732045               |
| SNP_P4_8308_25837300 | NC_021160.1    | Ca_kabuli_chr01 | 25837300                | AA                              | GG              | 1946732047               |
| SNP_P4_8309_25837634 | NC_021160.1    | Ca_kabuli_chr01 | 25837634                | AA                              | GG              | 1946732049               |
| SNP_P4_8311_25853318 | NC_021160.1    | Ca_kabuli_chr01 | 25853318                | GG                              | AA              | 1946732051               |
| SNP_P4_8313_25890677 | NC_021160.1    | Ca_kabuli_chr01 | 25890677                | AA                              | GG              | 1946732053               |
| SNP_P4_8314_25898798 | NC_021160.1    | Ca_kabuli_chr01 | 25898798                | AA                              | TT              | 1946732055               |
| SNP_P4_8315_25901535 | NC_021160.1    | Ca_kabuli_chr01 | 25901535                | TT                              | AA              | 1946732057               |
| SNP_P4_8316_25909057 | NC_021160.1    | Ca_kabuli_chr01 | 25909057                | CC                              | AA              | 1946732059               |
| SNP_P4_8319_26014191 | NC_021160.1    | Ca_kabuli_chr01 | 26014191                | CC                              | TT              | 1946732061               |
| SNP_P4_8320_26014195 | NC_021160.1    | Ca_kabuli_chr01 | 26014195                | TT                              | AA              | 1946732063               |
| SNP_P4_8321_26014202 | NC_021160.1    | Ca_kabuli_chr01 | 26014202                | TT                              | CC              | 1946732065               |
| SNP_P4_8322_26014210 | NC_021160.1    | Ca_kabuli_chr01 | 26014210                | TT                              | CC              | 1946732067               |
| SNP_P4_8323_26014596 | NC_021160.1    | Ca_kabuli_chr01 | 26014596                | TT                              | AA              | 1946732069               |
| SNP_P4_8324_26046991 | NC_021160.1    | Ca_kabuli_chr01 | 26046991                | AA                              | GG              | 1946732071               |

| SNPs IDs             | Chromosome IDs | Chromosomes     | Physical positions (bp) | CDC Frontier (Reference genome) | (ILWC46 & LPNB) | NCBI SNPdb Accession IDs |
|----------------------|----------------|-----------------|-------------------------|---------------------------------|-----------------|--------------------------|
| SNP_P4_8325_26049366 | NC_021160.1    | Ca_kabuli_chr01 | 26049366                | AA                              | TT              | 1946732073               |
| SNP_P4_8326_26050639 | NC_021160.1    | Ca_kabuli_chr01 | 26050639                | TT                              | AA              | 1946732075               |
| SNP_P4_8327_26066911 | NC_021160.1    | Ca_kabuli_chr01 | 26066911                | TT                              | AA              | 1946732076               |
| SNP_P4_8328_26074555 | NC_021160.1    | Ca_kabuli_chr01 | 26074555                | CC                              | TT              | 1946732078               |
| SNP_P4_8329_26075262 | NC_021160.1    | Ca_kabuli_chr01 | 26075262                | AA                              | GG              | 1946732080               |
| SNP_P4_8330_26075334 | NC_021160.1    | Ca_kabuli_chr01 | 26075334                | CC                              | TT              | 1946732082               |
| SNP_P4_8331_26075335 | NC_021160.1    | Ca_kabuli_chr01 | 26075335                | AA                              | GG              | 1946732084               |
| SNP_P4_8332_26075351 | NC_021160.1    | Ca_kabuli_chr01 | 26075351                | CC                              | TT              | 1946732086               |
| SNP_P4_8333_26075501 | NC_021160.1    | Ca_kabuli_chr01 | 26075501                | CC                              | TT              | 1946732088               |
| SNP_P4_8334_26075553 | NC_021160.1    | Ca_kabuli_chr01 | 26075553                | GG                              | AA              | 1946732090               |
| SNP_P4_8335_26075565 | NC_021160.1    | Ca_kabuli_chr01 | 26075565                | AA                              | GG              | 1946732092               |
| SNP_P4_8337_26075799 | NC_021160.1    | Ca_kabuli_chr01 | 26075799                | AA                              | GG              | 1946732094               |
| SNP_P4_8338_26077437 | NC_021160.1    | Ca_kabuli_chr01 | 26077437                | AA                              | GG              | 1946732096               |
| SNP_P4_8339_26077443 | NC_021160.1    | Ca_kabuli_chr01 | 26077443                | GG                              | AA              | 1946732098               |
| SNP_P4_8340_26077467 | NC_021160.1    | Ca_kabuli_chr01 | 26077467                | AA                              | GG              | 1946732099               |
| SNP_P4_8341_26077473 | NC_021160.1    | Ca_kabuli_chr01 | 26077473                | GG                              | AA              | 1946732101               |
| SNP_P4_8342_26077512 | NC_021160.1    | Ca_kabuli_chr01 | 26077512                | TT                              | CC              | 1946732103               |
| SNP_P4_8343_26077521 | NC_021160.1    | Ca_kabuli_chr01 | 26077521                | CC                              | TT              | 1946732105               |
| SNP_P4_8344_26077524 | NC_021160.1    | Ca_kabuli_chr01 | 26077524                | TT                              | CC              | 1946732107               |
| SNP_P4_8345_26077688 | NC_021160.1    | Ca_kabuli_chr01 | 26077688                | TT                              | CC              | 1946732109               |
| SNP_P4_8346_26079108 | NC_021160.1    | Ca_kabuli_chr01 | 26079108                | TT                              | CC              | 1946732111               |
| SNP_P4_8347_26091944 | NC_021160.1    | Ca_kabuli_chr01 | 26091944                | GG                              | AA              | 1946732113               |
| SNP_P4_8349_26099401 | NC_021160.1    | Ca_kabuli_chr01 | 26099401                | CC                              | AA              | 1946732115               |
| SNP_P4_8350_26099439 | NC_021160.1    | Ca_kabuli_chr01 | 26099439                | CC                              | AA              | 1946732117               |
| SNP_P4_8351_26099447 | NC_021160.1    | Ca_kabuli_chr01 | 26099447                | CC                              | TT              | 1946732119               |
| SNP_P4_8352_26108615 | NC_021160.1    | Ca_kabuli_chr01 | 26108615                | CC                              | AA              | 1946732121               |
| SNP_P4_8353_26112718 | NC_021160.1    | Ca_kabuli_chr01 | 26112718                | GG                              | CC              | 1946732123               |
| SNP_P4_8354_26121124 | NC_021160.1    | Ca_kabuli_chr01 | 26121124                | CC                              | TT              | 1946732125               |
| SNP_P4_8355_26125777 | NC_021160.1    | Ca_kabuli_chr01 | 26125777                | GG                              | CC              | 1946732127               |
| SNP_P4_8356_26125826 | NC_021160.1    | Ca_kabuli_chr01 | 26125826                | TT                              | GG              | 1946732129               |
| SNP_P4_8357_26125845 | NC_021160.1    | Ca_kabuli_chr01 | 26125845                | GG                              | AA              | 1946732131               |
| SNP_P4_8358_26125855 | NC_021160.1    | Ca_kabuli_chr01 | 26125855                | AA                              | GG              | 1946732133               |
| SNP_P4_8359_26125886 | NC_021160.1    | Ca_kabuli_chr01 | 26125886                | AA                              | GG              | 1946732135               |
| SNP_P4_8360_26125906 | NC_021160.1    | Ca_kabuli_chr01 | 26125906                | CC                              | AA              | 1946732137               |
| SNP_P4_8361_26125918 | NC_021160.1    | Ca_kabuli_chr01 | 26125918                | AA                              | TT              | 1946732139               |
| SNP_P4_8362_26125956 | NC_021160.1    | Ca_kabuli_chr01 | 26125956                | CC                              | TT              | 1946732141               |
| SNP_P4_8363_26134503 | NC_021160.1    | Ca_kabuli_chr01 | 26134503                | TT                              | CC              | 1946732143               |
| SNP_P4_8364_26142774 | NC_021160.1    | Ca_kabuli_chr01 | 26142774                | AA                              | CC              | 1946732145               |
| SNP_P4_8365_26142783 | NC_021160.1    | Ca_kabuli_chr01 | 26142783                | GG                              | AA              | 1946732147               |
| SNP_P4_8366_26143694 | NC_021160.1    | Ca_kabuli_chr01 | 26143694                | GG                              | AA              | 1946732149               |
| SNP_P4_8367_26143696 | NC_021160.1    | Ca_kabuli_chr01 | 26143696                | GG                              | AA              | 1946732152               |
| SNP_P4_8368_26155179 | NC_021160.1    | Ca_kabuli_chr01 | 26155179                | AA                              | TT              | 1946732154               |

| SNPs IDs             | Chromosome IDs | Chromosomes     | Physical positions (bp) | CDC Frontier (Reference genome) | (ILWC46 & LPNB) | NCBI SNPdb Accession IDs |
|----------------------|----------------|-----------------|-------------------------|---------------------------------|-----------------|--------------------------|
| SNP_P4_8369_26163509 | NC_021160.1    | Ca_kabuli_chr01 | 26163509                | TT                              | AA              | 1946732156               |
| SNP_P4_8370_26163510 | NC_021160.1    | Ca_kabuli_chr01 | 26163510                | CC                              | TT              | 1946732158               |
| SNP_P4_8371_26173792 | NC_021160.1    | Ca_kabuli_chr01 | 26173792                | GG                              | AA              | 1946732160               |
| SNP_P4_8372_26189903 | NC_021160.1    | Ca_kabuli_chr01 | 26189903                | AA                              | CC              | 1946732162               |
| SNP_P4_8373_26189906 | NC_021160.1    | Ca_kabuli_chr01 | 26189906                | TT                              | AA              | 1946732164               |
| SNP_P4_8374_26202148 | NC_021160.1    | Ca_kabuli_chr01 | 26202148                | TT                              | AA              | 1946732166               |
| SNP_P4_8375_26202266 | NC_021160.1    | Ca_kabuli_chr01 | 26202266                | AA                              | TT              | 1946732168               |
| SNP_P4_8376_26202524 | NC_021160.1    | Ca_kabuli_chr01 | 26202524                | TT                              | GG              | 1946732170               |
| SNP_P4_8377_26202911 | NC_021160.1    | Ca_kabuli_chr01 | 26202911                | TT                              | AA              | 1946732172               |
| SNP_P4_8378_26203013 | NC_021160.1    | Ca_kabuli_chr01 | 26203013                | TT                              | CC              | 1946732174               |
| SNP_P4_8379_26203069 | NC_021160.1    | Ca_kabuli_chr01 | 26203069                | GG                              | AA              | 1946732176               |
| SNP_P4_8380_26203073 | NC_021160.1    | Ca_kabuli_chr01 | 26203073                | CC                              | TT              | 1946732178               |
| SNP_P4_8381_26204070 | NC_021160.1    | Ca_kabuli_chr01 | 26204070                | GG                              | AA              | 1946732180               |
| SNP_P4_8382_26210734 | NC_021160.1    | Ca_kabuli_chr01 | 26210734                | AA                              | CC              | 1946732182               |
| SNP_P4_8383_26220941 | NC_021160.1    | Ca_kabuli_chr01 | 26220941                | GG                              | AA              | 1946732184               |
| SNP_P4_8384_26223091 | NC_021160.1    | Ca_kabuli_chr01 | 26223091                | TT                              | AA              | 1946732186               |
| SNP_P4_8385_26223142 | NC_021160.1    | Ca_kabuli_chr01 | 26223142                | CC                              | TT              | 1946732188               |
| SNP_P4_8386_26223303 | NC_021160.1    | Ca_kabuli_chr01 | 26223303                | GG                              | AA              | 1946732190               |
| SNP_P4_8387_26231032 | NC_021160.1    | Ca_kabuli_chr01 | 26231032                | GG                              | AA              | 1946732192               |
| SNP_P4_8388_26245860 | NC_021160.1    | Ca_kabuli_chr01 | 26245860                | TT                              | CC              | 1946732194               |
| SNP_P4_8389_26245915 | NC_021160.1    | Ca_kabuli_chr01 | 26245915                | TT                              | CC              | 1946732196               |
| SNP_P4_8390_26245928 | NC_021160.1    | Ca_kabuli_chr01 | 26245928                | GG                              | AA              | 1946732198               |
| SNP_P4_8391_26245970 | NC_021160.1    | Ca_kabuli_chr01 | 26245970                | AA                              | TT              | 1946732200               |
| SNP_P4_8392_26246189 | NC_021160.1    | Ca_kabuli_chr01 | 26246189                | CC                              | TT              | 1946732202               |
| SNP_P4_8393_26246231 | NC_021160.1    | Ca_kabuli_chr01 | 26246231                | AA                              | GG              | 1946732204               |
| SNP_P4_8394_26246369 | NC_021160.1    | Ca_kabuli_chr01 | 26246369                | AA                              | GG              | 1946732206               |
| SNP_P4_8395_26246535 | NC_021160.1    | Ca_kabuli_chr01 | 26246535                | GG                              | AA              | 1946732208               |
| SNP_P4_8396_26246604 | NC_021160.1    | Ca_kabuli_chr01 | 26246604                | TT                              | CC              | 1946732210               |
| SNP_P4_8397_26246629 | NC_021160.1    | Ca_kabuli_chr01 | 26246629                | GG                              | CC              | 1946732212               |
| SNP_P4_8398_26246636 | NC_021160.1    | Ca_kabuli_chr01 | 26246636                | AA                              | CC              | 1946732214               |
| SNP_P4_8399_26246699 | NC_021160.1    | Ca_kabuli_chr01 | 26246699                | TT                              | CC              | 1946732217               |
| SNP_P4_8400_26246714 | NC_021160.1    | Ca_kabuli_chr01 | 26246714                | TT                              | AA              | 1946732219               |
| SNP_P4_8401_26247165 | NC_021160.1    | Ca_kabuli_chr01 | 26247165                | GG                              | AA              | 1946732221               |
| SNP_P4_8402_26247575 | NC_021160.1    | Ca_kabuli_chr01 | 26247575                | CC                              | TT              | 1946732223               |
| SNP_P4_8403_26247595 | NC_021160.1    | Ca_kabuli_chr01 | 26247595                | TT                              | CC              | 1946732225               |
| SNP_P4_8404_26252038 | NC_021160.1    | Ca_kabuli_chr01 | 26252038                | AA                              | CC              | 1946732227               |
| SNP_P4_8405_26252041 | NC_021160.1    | Ca_kabuli_chr01 | 26252041                | AA                              | TT              | 1946732229               |
| SNP_P4_8406_26259718 | NC_021160.1    | Ca_kabuli_chr01 | 26259718                | TT                              | AA              | 1946732231               |
| SNP_P4_8407_26271845 | NC_021160.1    | Ca_kabuli_chr01 | 26271845                | GG                              | AA              | 1946732233               |
| SNP_P4_8408_26278583 | NC_021160.1    | Ca_kabuli_chr01 | 26278583                | AA                              | GG              | 1946732235               |
| SNP_P4_8409_26291561 | NC_021160.1    | Ca_kabuli_chr01 | 26291561                | TT                              | CC              | 1946732237               |
| SNP_P4_8410_26291618 | NC_021160.1    | Ca_kabuli_chr01 | 26291618                | AA                              | GG              | 1946732239               |

| SNPs IDs             | Chromosome IDs | Chromosomes     | Physical positions (bp) | CDC Frontier (Reference genome) | (ILWC46 & LPNB) | NCBI SNPdb Accession IDs |
|----------------------|----------------|-----------------|-------------------------|---------------------------------|-----------------|--------------------------|
| SNP_P4_8411_26291639 | NC_021160.1    | Ca_kabuli_chr01 | 26291639                | GG                              | CC              | 1946732241               |
| SNP_P4_8412_26291644 | NC_021160.1    | Ca_kabuli_chr01 | 26291644                | AA                              | TT              | 1946732243               |
| SNP_P4_8413_26298160 | NC_021160.1    | Ca_kabuli_chr01 | 26298160                | GG                              | TT              | 1946732245               |
| SNP_P4_8414_26298181 | NC_021160.1    | Ca_kabuli_chr01 | 26298181                | AA                              | GG              | 1946732247               |
| SNP_P4_8415_26298196 | NC_021160.1    | Ca_kabuli_chr01 | 26298196                | TT                              | CC              | 1946732249               |
| SNP_P4_8416_26298198 | NC_021160.1    | Ca_kabuli_chr01 | 26298198                | GG                              | AA              | 1946732251               |
| SNP_P4_8417_26298211 | NC_021160.1    | Ca_kabuli_chr01 | 26298211                | TT                              | AA              | 1946732253               |
| SNP_P4_8418_26298217 | NC_021160.1    | Ca_kabuli_chr01 | 26298217                | TT                              | GG              | 1946732255               |
| SNP_P4_8419_26298223 | NC_021160.1    | Ca_kabuli_chr01 | 26298223                | CC                              | TT              | 1946732257               |
| SNP_P4_8420_26298226 | NC_021160.1    | Ca_kabuli_chr01 | 26298226                | AA                              | TT              | 1946732259               |
| SNP_P4_8421_26298494 | NC_021160.1    | Ca_kabuli_chr01 | 26298494                | CC                              | TT              | 1946732261               |
| SNP_P4_8422_26301927 | NC_021160.1    | Ca_kabuli_chr01 | 26301927                | TT                              | CC              | 1946732263               |
| SNP_P4_8423_26302138 | NC_021160.1    | Ca_kabuli_chr01 | 26302138                | CC                              | TT              | 1946732265               |
| SNP_P4_8424_26302144 | NC_021160.1    | Ca_kabuli_chr01 | 26302144                | CC                              | GG              | 1946732267               |
| SNP_P4_8425_26302948 | NC_021160.1    | Ca_kabuli_chr01 | 26302948                | CC                              | TT              | 1946732269               |
| SNP_P4_8426_26303076 | NC_021160.1    | Ca_kabuli_chr01 | 26303076                | AA                              | GG              | 1946732271               |
| SNP_P4_8427_26308980 | NC_021160.1    | Ca_kabuli_chr01 | 26308980                | AA                              | GG              | 1946732273               |
| SNP_P4_8428_26309217 | NC_021160.1    | Ca_kabuli_chr01 | 26309217                | GG                              | CC              | 1946732275               |
| SNP_P4_8429_26309225 | NC_021160.1    | Ca_kabuli_chr01 | 26309225                | TT                              | AA              | 1946732277               |
| SNP_P4_8430_26309251 | NC_021160.1    | Ca_kabuli_chr01 | 26309251                | TT                              | CC              | 1946732279               |
| SNP_P4_8431_26309253 | NC_021160.1    | Ca_kabuli_chr01 | 26309253                | CC                              | TT              | 1946732281               |
| SNP_P4_8432_26309292 | NC_021160.1    | Ca_kabuli_chr01 | 26309292                | AA                              | GG              | 1946732283               |
| SNP_P4_8433_26309293 | NC_021160.1    | Ca_kabuli_chr01 | 26309293                | CC                              | TT              | 1946732285               |
| SNP_P4_8434_26309302 | NC_021160.1    | Ca_kabuli_chr01 | 26309302                | TT                              | GG              | 1946732287               |
| SNP_P4_8435_26309347 | NC_021160.1    | Ca_kabuli_chr01 | 26309347                | AA                              | GG              | 1946732290               |
| SNP_P4_8436_26309355 | NC_021160.1    | Ca_kabuli_chr01 | 26309355                | CC                              | GG              | 1946732292               |
| SNP_P4_8437_26309367 | NC_021160.1    | Ca_kabuli_chr01 | 26309367                | GG                              | AA              | 1946732294               |
| SNP_P4_8438_26309592 | NC_021160.1    | Ca_kabuli_chr01 | 26309592                | TT                              | GG              | 1946732296               |
| SNP_P4_8439_26318797 | NC_021160.1    | Ca_kabuli_chr01 | 26318797                | GG                              | AA              | 1946732298               |
| SNP_P4_8440_26325883 | NC_021160.1    | Ca_kabuli_chr01 | 26325883                | TT                              | CC              | 1946732299               |
| SNP_P4_8441_26331153 | NC_021160.1    | Ca_kabuli_chr01 | 26331153                | AA                              | GG              | 1946732300               |
| SNP_P4_8442_26341944 | NC_021160.1    | Ca_kabuli_chr01 | 26341944                | GG                              | AA              | 1946732301               |
| SNP_P4_8443_26348023 | NC_021160.1    | Ca_kabuli_chr01 | 26348023                | AA                              | GG              | 1946732302               |
| SNP_P4_8444_26348027 | NC_021160.1    | Ca_kabuli_chr01 | 26348027                | TT                              | CC              | 1946732304               |
| SNP_P4_8445_26352687 | NC_021160.1    | Ca_kabuli_chr01 | 26352687                | TT                              | GG              | 1946732306               |
| SNP_P4_8448_26362603 | NC_021160.1    | Ca_kabuli_chr01 | 26362603                | TT                              | CC              | 1946732308               |
| SNP_P4_8449_26366587 | NC_021160.1    | Ca_kabuli_chr01 | 26366587                | AA                              | CC              | 1946732310               |
| SNP_P4_8451_26380742 | NC_021160.1    | Ca_kabuli_chr01 | 26380742                | TT                              | CC              | 1946732312               |
| SNP_P4_8452_26399852 | NC_021160.1    | Ca_kabuli_chr01 | 26399852                | TT                              | CC              | 1946732314               |
| SNP_P4_8453_26407617 | NC_021160.1    | Ca_kabuli_chr01 | 26407617                | CC                              | TT              | 1946732316               |
| SNP_P4_8454_26407632 | NC_021160.1    | Ca_kabuli_chr01 | 26407632                | CC                              | TT              | 1946732318               |
| SNP_P4_8455_26438192 | NC_021160.1    | Ca_kabuli_chr01 | 26438192                | AA                              | GG              | 1946732320               |

| SNPs IDs             | Chromosome IDs | Chromosomes     | Physical positions (bp) | CDC Frontier (Reference genome) | (ILWC46 & LPNB) | NCBI SNPdb Accession IDs |
|----------------------|----------------|-----------------|-------------------------|---------------------------------|-----------------|--------------------------|
| SNP_P4_8456_26439011 | NC_021160.1    | Ca_kabuli_chr01 | 26439011                | CC                              | TT              | 1946732321               |
| SNP_P4_8457_26439182 | NC_021160.1    | Ca_kabuli_chr01 | 26439182                | TT                              | AA              | 1946732324               |
| SNP_P4_8458_26439191 | NC_021160.1    | Ca_kabuli_chr01 | 26439191                | AA                              | GG              | 1946732326               |
| SNP_P4_8462_26489583 | NC_021160.1    | Ca_kabuli_chr01 | 26489583                | GG                              | AA              | 1946732328               |
| SNP_P4_8463_26489584 | NC_021160.1    | Ca_kabuli_chr01 | 26489584                | TT                              | CC              | 1946732330               |
| SNP_P4_8464_26489614 | NC_021160.1    | Ca_kabuli_chr01 | 26489614                | CC                              | TT              | 1946732332               |
| SNP_P4_8465_26496861 | NC_021160.1    | Ca_kabuli_chr01 | 26496861                | AA                              | CC              | 1946732334               |
| SNP_P4_8466_26496897 | NC_021160.1    | Ca_kabuli_chr01 | 26496897                | TT                              | CC              | 1946732336               |
| SNP_P4_8467_26497224 | NC_021160.1    | Ca_kabuli_chr01 | 26497224                | TT                              | CC              | 1946732338               |
| SNP_P4_8468_26502764 | NC_021160.1    | Ca_kabuli_chr01 | 26502764                | GG                              | AA              | 1946732340               |
| SNP_P4_8469_26578768 | NC_021160.1    | Ca_kabuli_chr01 | 26578768                | TT                              | AA              | 1946732342               |
| SNP_P4_8470_26590725 | NC_021160.1    | Ca_kabuli_chr01 | 26590725                | TT                              | CC              | 1946732344               |
| SNP_P4_8471_26590779 | NC_021160.1    | Ca_kabuli_chr01 | 26590779                | CC                              | TT              | 1946732346               |
| SNP_P4_8472_26590900 | NC_021160.1    | Ca_kabuli_chr01 | 26590900                | TT                              | GG              | 1946732348               |
| SNP_P4_8473_26591096 | NC_021160.1    | Ca_kabuli_chr01 | 26591096                | AA                              | GG              | 1946732350               |
| SNP_P4_8474_26591111 | NC_021160.1    | Ca_kabuli_chr01 | 26591111                | AA                              | CC              | 1946732352               |
| SNP_P4_8475_26593052 | NC_021160.1    | Ca_kabuli_chr01 | 26593052                | CC                              | TT              | 1946732354               |
| SNP_P4_8476_26593093 | NC_021160.1    | Ca_kabuli_chr01 | 26593093                | AA                              | GG              | 1946732356               |
| SNP_P4_8478_26611341 | NC_021160.1    | Ca_kabuli_chr01 | 26611341                | GG                              | AA              | 1946732358               |
| SNP_P4_8479_26611349 | NC_021160.1    | Ca_kabuli_chr01 | 26611349                | GG                              | AA              | 1946732360               |
| SNP_P4_8480_26627042 | NC_021160.1    | Ca_kabuli_chr01 | 26627042                | TT                              | CC              | 1946732362               |
| SNP_P4_8482_26649470 | NC_021160.1    | Ca_kabuli_chr01 | 26649470                | AA                              | TT              | 1946732364               |
| SNP_P4_8483_26650372 | NC_021160.1    | Ca_kabuli_chr01 | 26650372                | TT                              | AA              | 1946732366               |
| SNP_P4_8484_26650373 | NC_021160.1    | Ca_kabuli_chr01 | 26650373                | TT                              | GG              | 1946732368               |
| SNP_P4_8486_26656962 | NC_021160.1    | Ca_kabuli_chr01 | 26656962                | GG                              | AA              | 1946732370               |
| SNP_P4_8487_26656981 | NC_021160.1    | Ca_kabuli_chr01 | 26656981                | AA                              | GG              | 1946732372               |
| SNP_P4_8488_26657116 | NC_021160.1    | Ca_kabuli_chr01 | 26657116                | AA                              | GG              | 1946732374               |
| SNP_P4_8489_26657125 | NC_021160.1    | Ca_kabuli_chr01 | 26657125                | TT                              | AA              | 1946732376               |
| SNP_P4_8490_26657126 | NC_021160.1    | Ca_kabuli_chr01 | 26657126                | TT                              | CC              | 1946732378               |
| SNP_P4_8491_26660661 | NC_021160.1    | Ca_kabuli_chr01 | 26660661                | CC                              | TT              | 1946732380               |
| SNP_P4_8492_26660893 | NC_021160.1    | Ca_kabuli_chr01 | 26660893                | AA                              | TT              | 1946732383               |
| SNP_P4_8493_26672602 | NC_021160.1    | Ca_kabuli_chr01 | 26672602                | TT                              | CC              | 1946732385               |
| SNP_P4_8494_26682972 | NC_021160.1    | Ca_kabuli_chr01 | 26682972                | TT                              | GG              | 1946732387               |
| SNP_P4_8496_26691640 | NC_021160.1    | Ca_kabuli_chr01 | 26691640                | AA                              | CC              | 1946732389               |
| SNP_P4_8497_26691649 | NC_021160.1    | Ca_kabuli_chr01 | 26691649                | GG                              | TT              | 1946732391               |
| SNP_P4_8499_26757110 | NC_021160.1    | Ca_kabuli_chr01 | 26757110                | CC                              | AA              | 1946732393               |
| SNP_P4_8500_26805457 | NC_021160.1    | Ca_kabuli_chr01 | 26805457                | AA                              | GG              | 1946732395               |
| SNP_P4_8501_26820177 | NC_021160.1    | Ca_kabuli_chr01 | 26820177                | GG                              | CC              | 1946732397               |
| SNP_P4_8502_26864258 | NC_021160.1    | Ca_kabuli_chr01 | 26864258                | TT                              | GG              | 1946732399               |
| SNP_P4_8503_26868620 | NC_021160.1    | Ca_kabuli_chr01 | 26868620                | AA                              | CC              | 1946732401               |
| SNP_P4_8504_26875710 | NC_021160.1    | Ca_kabuli_chr01 | 26875710                | TT                              | GG              | 1946732403               |
| SNP_P4_8505_26875711 | NC_021160.1    | Ca_kabuli_chr01 | 26875711                | TT                              | AA              | 1946732405               |

| SNPs IDs             | Chromosome IDs | Chromosomes     | Physical positions (bp) | CDC Frontier (Reference genome) | (ILWC46 & LPNB) | NCBI SNPdb Accession IDs |
|----------------------|----------------|-----------------|-------------------------|---------------------------------|-----------------|--------------------------|
| SNP_P4_8508_26892981 | NC_021160.1    | Ca_kabuli_chr01 | 26892981                | AA                              | GG              | 1946732407               |
| SNP_P4_8510_26896086 | NC_021160.1    | Ca_kabuli_chr01 | 26896086                | AA                              | GG              | 1946732409               |
| SNP_P4_8511_26898061 | NC_021160.1    | Ca_kabuli_chr01 | 26898061                | AA                              | CC              | 1946732411               |
| SNP_P4_8512_26900117 | NC_021160.1    | Ca_kabuli_chr01 | 26900117                | GG                              | AA              | 1946732413               |
| SNP_P4_8513_26936492 | NC_021160.1    | Ca_kabuli_chr01 | 26936492                | GG                              | AA              | 1946732415               |
| SNP_P4_8514_26943429 | NC_021160.1    | Ca_kabuli_chr01 | 26943429                | CC                              | TT              | 1946732417               |
| SNP_P4_8517_26983031 | NC_021160.1    | Ca_kabuli_chr01 | 26983031                | CC                              | TT              | 1946732419               |
| SNP_P4_8518_26997294 | NC_021160.1    | Ca_kabuli_chr01 | 26997294                | CC                              | TT              | 1946732421               |
| SNP_P4_8519_26997552 | NC_021160.1    | Ca_kabuli_chr01 | 26997552                | GG                              | AA              | 1946732423               |
| SNP_P4_8520_27038871 | NC_021160.1    | Ca_kabuli_chr01 | 27038871                | GG                              | CC              | 1946732425               |
| SNP_P4_8521_27059024 | NC_021160.1    | Ca_kabuli_chr01 | 27059024                | TT                              | CC              | 1946732427               |
| SNP_P4_8522_27059039 | NC_021160.1    | Ca_kabuli_chr01 | 27059039                | TT                              | CC              | 1946732429               |
| SNP_P4_8523_27059084 | NC_021160.1    | Ca_kabuli_chr01 | 27059084                | CC                              | TT              | 1946732431               |
| SNP_P4_8524_27059089 | NC_021160.1    | Ca_kabuli_chr01 | 27059089                | GG                              | AA              | 1946732434               |
| SNP_P4_8525_27059202 | NC_021160.1    | Ca_kabuli_chr01 | 27059202                | TT                              | GG              | 1946732436               |
| SNP_P4_8526_27059448 | NC_021160.1    | Ca_kabuli_chr01 | 27059448                | TT                              | AA              | 1946732438               |
| SNP_P4_8527_27081034 | NC_021160.1    | Ca_kabuli_chr01 | 27081034                | TT                              | CC              | 1946732440               |
| SNP_P4_8528_27088065 | NC_021160.1    | Ca_kabuli_chr01 | 27088065                | GG                              | AA              | 1946732442               |
| SNP_P4_8529_27106868 | NC_021160.1    | Ca_kabuli_chr01 | 27106868                | GG                              | AA              | 1946732444               |
| SNP_P4_8530_27107113 | NC_021160.1    | Ca_kabuli_chr01 | 27107113                | GG                              | TT              | 1946732446               |
| SNP_P4_8531_27107114 | NC_021160.1    | Ca_kabuli_chr01 | 27107114                | TT                              | AA              | 1946732448               |
| SNP_P4_8532_27107180 | NC_021160.1    | Ca_kabuli_chr01 | 27107180                | AA                              | GG              | 1946732450               |
| SNP_P4_8533_27107189 | NC_021160.1    | Ca_kabuli_chr01 | 27107189                | AA                              | TT              | 1946732452               |
| SNP_P4_8534_27107190 | NC_021160.1    | Ca_kabuli_chr01 | 27107190                | TT                              | GG              | 1946732454               |
| SNP_P4_8535_27107206 | NC_021160.1    | Ca_kabuli_chr01 | 27107206                | AA                              | GG              | 1946732456               |
| SNP_P4_8536_27107208 | NC_021160.1    | Ca_kabuli_chr01 | 27107208                | GG                              | AA              | 1946732458               |
| SNP_P4_8537_27107218 | NC_021160.1    | Ca_kabuli_chr01 | 27107218                | TT                              | CC              | 1946732460               |
| SNP_P4_8538_27107225 | NC_021160.1    | Ca_kabuli_chr01 | 27107225                | AA                              | GG              | 1946732462               |
| SNP_P4_8539_27107264 | NC_021160.1    | Ca_kabuli_chr01 | 27107264                | CC                              | TT              | 1946732464               |
| SNP_P4_8540_27126034 | NC_021160.1    | Ca_kabuli_chr01 | 27126034                | GG                              | AA              | 1946732466               |
| SNP_P4_8541_27126100 | NC_021160.1    | Ca_kabuli_chr01 | 27126100                | GG                              | AA              | 1946732468               |
| SNP_P4_8542_27126493 | NC_021160.1    | Ca_kabuli_chr01 | 27126493                | GG                              | AA              | 1946732470               |
| SNP_P4_8543_27139899 | NC_021160.1    | Ca_kabuli_chr01 | 27139899                | TT                              | CC              | 1946732472               |
| SNP_P4_8544_27140854 | NC_021160.1    | Ca_kabuli_chr01 | 27140854                | TT                              | CC              | 1946732474               |
| SNP_P4_8545_27143521 | NC_021160.1    | Ca_kabuli_chr01 | 27143521                | TT                              | CC              | 1946732476               |
| SNP_P4_8546_27143553 | NC_021160.1    | Ca_kabuli_chr01 | 27143553                | TT                              | CC              | 1946732478               |
| SNP_P4_8549_27160673 | NC_021160.1    | Ca_kabuli_chr01 | 27160673                | AA                              | CC              | 1946732480               |
| SNP_P4_8550_27160694 | NC_021160.1    | Ca_kabuli_chr01 | 27160694                | AA                              | GG              | 1946732482               |
| SNP_P4_8551_27160710 | NC_021160.1    | Ca_kabuli_chr01 | 27160710                | GG                              | AA              | 1946732484               |
| SNP_P4_8552_27160730 | NC_021160.1    | Ca_kabuli_chr01 | 27160730                | TT                              | CC              | 1946732486               |
| SNP_P4_8553_27160775 | NC_021160.1    | Ca_kabuli_chr01 | 27160775                | CC                              | TT              | 1946732488               |
| SNP_P4_8555_27190600 | NC_021160.1    | Ca_kabuli_chr01 | 27190600                | CC                              | TT              | 1946732489               |

| SNPs IDs             | Chromosome IDs | Chromosomes     | Physical positions (bp) | CDC Frontier (Reference genome) | (ILWC46 & LPNB) | NCBI SNPdb Accession IDs |
|----------------------|----------------|-----------------|-------------------------|---------------------------------|-----------------|--------------------------|
| SNP_P4_8556_27203799 | NC_021160.1    | Ca_kabuli_chr01 | 27203799                | AA                              | GG              | 1946732491               |
| SNP_P4_8558_27208544 | NC_021160.1    | Ca_kabuli_chr01 | 27208544                | AA                              | GG              | 1946732493               |
| SNP_P4_8559_27211213 | NC_021160.1    | Ca_kabuli_chr01 | 27211213                | CC                              | AA              | 1946732495               |
| SNP_P4_8560_27232175 | NC_021160.1    | Ca_kabuli_chr01 | 27232175                | AA                              | TT              | 1946732497               |
| SNP_P4_8561_27232179 | NC_021160.1    | Ca_kabuli_chr01 | 27232179                | CC                              | TT              | 1946732499               |
| SNP_P4_8563_27234063 | NC_021160.1    | Ca_kabuli_chr01 | 27234063                | GG                              | AA              | 1946732501               |
| SNP_P4_8564_27234064 | NC_021160.1    | Ca_kabuli_chr01 | 27234064                | GG                              | AA              | 1946732503               |
| SNP_P4_8565_27234072 | NC_021160.1    | Ca_kabuli_chr01 | 27234072                | AA                              | TT              | 1946732505               |
| SNP_P4_8566_27235170 | NC_021160.1    | Ca_kabuli_chr01 | 27235170                | TT                              | CC              | 1946732507               |
| SNP_P4_8567_27254598 | NC_021160.1    | Ca_kabuli_chr01 | 27254598                | AA                              | GG              | 1946732509               |
| SNP_P4_8568_27254606 | NC_021160.1    | Ca_kabuli_chr01 | 27254606                | CC                              | GG              | 1946732511               |
| SNP_P4_8569_27254653 | NC_021160.1    | Ca_kabuli_chr01 | 27254653                | GG                              | AA              | 1946732513               |
| SNP_P4_8570_27254667 | NC_021160.1    | Ca_kabuli_chr01 | 27254667                | AA                              | GG              | 1946732515               |
| SNP_P4_8571_27254703 | NC_021160.1    | Ca_kabuli_chr01 | 27254703                | AA                              | GG              | 1946732517               |
| SNP_P4_8572_27254710 | NC_021160.1    | Ca_kabuli_chr01 | 27254710                | TT                              | CC              | 1946732519               |
| SNP_P4_8573_27254727 | NC_021160.1    | Ca_kabuli_chr01 | 27254727                | AA                              | GG              | 1946732521               |
| SNP_P4_8574_27254732 | NC_021160.1    | Ca_kabuli_chr01 | 27254732                | TT                              | CC              | 1946732523               |
| SNP_P4_8575_27255058 | NC_021160.1    | Ca_kabuli_chr01 | 27255058                | GG                              | AA              | 1946732525               |
| SNP_P4_8576_27255076 | NC_021160.1    | Ca_kabuli_chr01 | 27255076                | TT                              | GG              | 1946732527               |
| SNP_P4_8577_27259930 | NC_021160.1    | Ca_kabuli_chr01 | 27259930                | CC                              | TT              | 1946732529               |
| SNP_P4_8578_27263682 | NC_021160.1    | Ca_kabuli_chr01 | 27263682                | AA                              | GG              | 1946732531               |
| SNP_P4_8579_27263704 | NC_021160.1    | Ca_kabuli_chr01 | 27263704                | AA                              | GG              | 1946732533               |
| SNP_P4_8580_27263791 | NC_021160.1    | Ca_kabuli_chr01 | 27263791                | CC                              | TT              | 1946732535               |
| SNP_P4_8581_27263955 | NC_021160.1    | Ca_kabuli_chr01 | 27263955                | AA                              | CC              | 1946732537               |
| SNP_P4_8582_27264023 | NC_021160.1    | Ca_kabuli_chr01 | 27264023                | CC                              | AA              | 1946732539               |
| SNP_P4_8583_27264040 | NC_021160.1    | Ca_kabuli_chr01 | 27264040                | AA                              | GG              | 1946732542               |
| SNP_P4_8584_27264069 | NC_021160.1    | Ca_kabuli_chr01 | 27264069                | AA                              | CC              | 1946732544               |
| SNP_P4_8585_27264125 | NC_021160.1    | Ca_kabuli_chr01 | 27264125                | TT                              | CC              | 1946732546               |
| SNP_P4_8586_27264187 | NC_021160.1    | Ca_kabuli_chr01 | 27264187                | GG                              | AA              | 1946732548               |
| SNP_P4_8587_27264234 | NC_021160.1    | Ca_kabuli_chr01 | 27264234                | GG                              | AA              | 1946732550               |
| SNP_P4_8588_27264854 | NC_021160.1    | Ca_kabuli_chr01 | 27264854                | TT                              | GG              | 1946732552               |
| SNP_P4_8589_27267874 | NC_021160.1    | Ca_kabuli_chr01 | 27267874                | GG                              | AA              | 1946732554               |
| SNP_P4_8590_27282619 | NC_021160.1    | Ca_kabuli_chr01 | 27282619                | AA                              | TT              | 1946732556               |
| SNP_P4_8591_27282641 | NC_021160.1    | Ca_kabuli_chr01 | 27282641                | TT                              | GG              | 1946732558               |
| SNP_P4_8592_27282654 | NC_021160.1    | Ca_kabuli_chr01 | 27282654                | AA                              | GG              | 1946732560               |
| SNP_P4_8593_27282683 | NC_021160.1    | Ca_kabuli_chr01 | 27282683                | TT                              | CC              | 1946732562               |
| SNP_P4_8594_27282716 | NC_021160.1    | Ca_kabuli_chr01 | 27282716                | CC                              | TT              | 1946732564               |
| SNP_P4_8595_27282731 | NC_021160.1    | Ca_kabuli_chr01 | 27282731                | GG                              | AA              | 1946732566               |
| SNP_P4_8596_27282736 | NC_021160.1    | Ca_kabuli_chr01 | 27282736                | AA                              | TT              | 1946732568               |
| SNP_P4_8599_27282961 | NC_021160.1    | Ca_kabuli_chr01 | 27282961                | CC                              | TT              | 1946732570               |
| SNP_P4_8600_27296905 | NC_021160.1    | Ca_kabuli_chr01 | 27296905                | TT                              | CC              | 1946732572               |
| SNP_P4_8601_27296909 | NC_021160.1    | Ca_kabuli_chr01 | 27296909                | AA                              | CC              | 1946732574               |



| SNPs IDs             | Chromosome IDs | Chromosomes     | Physical positions (bp) | CDC Frontier (Reference genome) | (ILWC46 & LPNB) | NCBI SNPdb Accession IDs |
|----------------------|----------------|-----------------|-------------------------|---------------------------------|-----------------|--------------------------|
| SNP_P4_8602_27296910 | NC_021160.1    | Ca_kabuli_chr01 | 27296910                | AA                              | GG              | 1946732576               |
| SNP_P4_8603_27296921 | NC_021160.1    | Ca_kabuli_chr01 | 27296921                | GG                              | CC              | 1946732578               |
| SNP_P4_8604_27296939 | NC_021160.1    | Ca_kabuli_chr01 | 27296939                | TT                              | CC              | 1946732580               |
| SNP_P4_8605_27296968 | NC_021160.1    | Ca_kabuli_chr01 | 27296968                | TT                              | AA              | 1946732582               |
| SNP_P4_8606_27297104 | NC_021160.1    | Ca_kabuli_chr01 | 27297104                | TT                              | CC              | 1946732584               |
| SNP_P4_8608_27300714 | NC_021160.1    | Ca_kabuli_chr01 | 27300714                | AA                              | CC              | 1946732586               |
| SNP_P4_8609_27300848 | NC_021160.1    | Ca_kabuli_chr01 | 27300848                | TT                              | CC              | 1946732588               |
| SNP_P4_8610_27301072 | NC_021160.1    | Ca_kabuli_chr01 | 27301072                | AA                              | GG              | 1946732590               |
| SNP_P4_8611_27301079 | NC_021160.1    | Ca_kabuli_chr01 | 27301079                | TT                              | CC              | 1946732592               |
| SNP_P4_8612_27301390 | NC_021160.1    | Ca_kabuli_chr01 | 27301390                | AA                              | GG              | 1946732594               |
| SNP_P4_8613_27301438 | NC_021160.1    | Ca_kabuli_chr01 | 27301438                | GG                              | TT              | 1946732596               |
| SNP_P4_8614_27305761 | NC_021160.1    | Ca_kabuli_chr01 | 27305761                | CC                              | AA              | 1946732598               |
| SNP_P4_8615_27320057 | NC_021160.1    | Ca_kabuli_chr01 | 27320057                | CC                              | TT              | 1946732600               |
| SNP_P4_8616_27320063 | NC_021160.1    | Ca_kabuli_chr01 | 27320063                | AA                              | GG              | 1946732601               |
| SNP_P4_8618_27320561 | NC_021160.1    | Ca_kabuli_chr01 | 27320561                | TT                              | CC              | 1946732604               |
| SNP_P4_8619_27320573 | NC_021160.1    | Ca_kabuli_chr01 | 27320573                | CC                              | TT              | 1946732606               |
| SNP_P4_8620_27320641 | NC_021160.1    | Ca_kabuli_chr01 | 27320641                | TT                              | CC              | 1946732609               |
| SNP_P4_8621_27320642 | NC_021160.1    | Ca_kabuli_chr01 | 27320642                | TT                              | AA              | 1946732611               |
| SNP_P4_8623_27320651 | NC_021160.1    | Ca_kabuli_chr01 | 27320651                | GG                              | AA              | 1946732614               |
| SNP_P4_8624_27320653 | NC_021160.1    | Ca_kabuli_chr01 | 27320653                | TT                              | CC              | 1946732616               |
| SNP_P4_8625_27320661 | NC_021160.1    | Ca_kabuli_chr01 | 27320661                | TT                              | GG              | 1946732619               |
| SNP_P4_8626_27320670 | NC_021160.1    | Ca_kabuli_chr01 | 27320670                | TT                              | CC              | 1946732622               |
| SNP_P4_8627_27320987 | NC_021160.1    | Ca_kabuli_chr01 | 27320987                | AA                              | GG              | 1946732624               |
| SNP_P4_8628_27348313 | NC_021160.1    | Ca_kabuli_chr01 | 27348313                | GG                              | AA              | 1946732626               |
| SNP_P4_8629_27348878 | NC_021160.1    | Ca_kabuli_chr01 | 27348878                | GG                              | TT              | 1946732628               |
| SNP_P4_8630_27365367 | NC_021160.1    | Ca_kabuli_chr01 | 27365367                | AA                              | TT              | 1946732630               |
| SNP_P4_8631_27365890 | NC_021160.1    | Ca_kabuli_chr01 | 27365890                | CC                              | GG              | 1946732632               |
| SNP_P4_8632_27366486 | NC_021160.1    | Ca_kabuli_chr01 | 27366486                | TT                              | AA              | 1946732634               |
| SNP_P4_8633_27377080 | NC_021160.1    | Ca_kabuli_chr01 | 27377080                | AA                              | GG              | 1946732636               |
| SNP_P4_8634_27377086 | NC_021160.1    | Ca_kabuli_chr01 | 27377086                | CC                              | AA              | 1946732638               |
| SNP_P4_8635_27377104 | NC_021160.1    | Ca_kabuli_chr01 | 27377104                | AA                              | TT              | 1946732640               |
| SNP_P4_8636_27394081 | NC_021160.1    | Ca_kabuli_chr01 | 27394081                | AA                              | CC              | 1946732642               |
| SNP_P4_8637_27403158 | NC_021160.1    | Ca_kabuli_chr01 | 27403158                | CC                              | AA              | 1946732644               |
| SNP_P4_8638_27403397 | NC_021160.1    | Ca_kabuli_chr01 | 27403397                | AA                              | TT              | 1946732646               |
| SNP_P4_8639_27403436 | NC_021160.1    | Ca_kabuli_chr01 | 27403436                | TT                              | GG              | 1946732648               |
| SNP_P4_8640_27403444 | NC_021160.1    | Ca_kabuli_chr01 | 27403444                | CC                              | AA              | 1946732650               |
| SNP_P4_8641_27403500 | NC_021160.1    | Ca_kabuli_chr01 | 27403500                | AA                              | CC              | 1946732652               |
| SNP_P4_8642_27403604 | NC_021160.1    | Ca_kabuli_chr01 | 27403604                | AA                              | GG              | 1946732654               |
| SNP_P4_8643_27403646 | NC_021160.1    | Ca_kabuli_chr01 | 27403646                | AA                              | CC              | 1946732656               |
| SNP_P4_8644_27403757 | NC_021160.1    | Ca_kabuli_chr01 | 27403757                | GG                              | AA              | 1946732658               |
| SNP_P4_8645_27406594 | NC_021160.1    | Ca_kabuli_chr01 | 27406594                | AA                              | CC              | 1946732660               |
| SNP_P4_8646_27417976 | NC_021160.1    | Ca_kabuli_chr01 | 27417976                | TT                              | CC              | 1946732662               |

| SNPs IDs             | Chromosome IDs | Chromosomes     | Physical positions (bp) | CDC Frontier (Reference genome) | (ILWC46 & LPNB) | NCBI SNPdb Accession IDs |
|----------------------|----------------|-----------------|-------------------------|---------------------------------|-----------------|--------------------------|
| SNP_P4_8647_27418715 | NC_021160.1    | Ca_kabuli_chr01 | 27418715                | TT                              | AA              | 1946732664               |
| SNP_P4_8648_27419709 | NC_021160.1    | Ca_kabuli_chr01 | 27419709                | AA                              | TT              | 1946732666               |
| SNP_P4_8649_27419966 | NC_021160.1    | Ca_kabuli_chr01 | 27419966                | TT                              | AA              | 1946732668               |
| SNP_P4_8650_27420007 | NC_021160.1    | Ca_kabuli_chr01 | 27420007                | CC                              | AA              | 1946732670               |
| SNP_P4_8651_27420014 | NC_021160.1    | Ca_kabuli_chr01 | 27420014                | TT                              | AA              | 1946732672               |
| SNP_P4_8652_27420020 | NC_021160.1    | Ca_kabuli_chr01 | 27420020                | CC                              | TT              | 1946732674               |
| SNP_P4_8653_27421407 | NC_021160.1    | Ca_kabuli_chr01 | 27421407                | AA                              | TT              | 1946732676               |
| SNP_P4_8654_27421414 | NC_021160.1    | Ca_kabuli_chr01 | 27421414                | CC                              | AA              | 1946732678               |
| SNP_P4_8655_27433834 | NC_021160.1    | Ca_kabuli_chr01 | 27433834                | GG                              | CC              | 1946732680               |
| SNP_P4_8656_27448849 | NC_021160.1    | Ca_kabuli_chr01 | 27448849                | AA                              | TT              | 1946732682               |
| SNP_P4_8657_27448854 | NC_021160.1    | Ca_kabuli_chr01 | 27448854                | AA                              | GG              | 1946732684               |
| SNP_P4_8658_27511567 | NC_021160.1    | Ca_kabuli_chr01 | 27511567                | AA                              | TT              | 1946732686               |
| SNP_P4_8659_27534551 | NC_021160.1    | Ca_kabuli_chr01 | 27534551                | CC                              | TT              | 1946732688               |
| SNP_P4_8660_27534555 | NC_021160.1    | Ca_kabuli_chr01 | 27534555                | AA                              | TT              | 1946732690               |
| SNP_P4_8661_27564545 | NC_021160.1    | Ca_kabuli_chr01 | 27564545                | AA                              | GG              | 1946732692               |
| SNP_P4_8662_27596426 | NC_021160.1    | Ca_kabuli_chr01 | 27596426                | GG                              | AA              | 1946732694               |
| SNP_P4_8663_27596427 | NC_021160.1    | Ca_kabuli_chr01 | 27596427                | CC                              | TT              | 1946732696               |
| SNP_P4_8665_27597049 | NC_021160.1    | Ca_kabuli_chr01 | 27597049                | AA                              | TT              | 1946732698               |
| SNP_P4_8666_27597070 | NC_021160.1    | Ca_kabuli_chr01 | 27597070                | GG                              | AA              | 1946732699               |
| SNP_P4_8668_27597542 | NC_021160.1    | Ca_kabuli_chr01 | 27597542                | GG                              | CC              | 1946732701               |
| SNP_P4_8669_27597550 | NC_021160.1    | Ca_kabuli_chr01 | 27597550                | TT                              | CC              | 1946732703               |
| SNP_P4_8670_27597581 | NC_021160.1    | Ca_kabuli_chr01 | 27597581                | AA                              | GG              | 1946732705               |
| SNP_P4_8671_27637343 | NC_021160.1    | Ca_kabuli_chr01 | 27637343                | TT                              | AA              | 1946732707               |
| SNP_P4_8672_27637393 | NC_021160.1    | Ca_kabuli_chr01 | 27637393                | CC                              | TT              | 1946732709               |
| SNP_P4_8673_27637395 | NC_021160.1    | Ca_kabuli_chr01 | 27637395                | AA                              | TT              | 1946732711               |
| SNP_P4_8674_27637415 | NC_021160.1    | Ca_kabuli_chr01 | 27637415                | GG                              | AA              | 1946732713               |
| SNP_P4_8675_27637424 | NC_021160.1    | Ca_kabuli_chr01 | 27637424                | TT                              | AA              | 1946732715               |
| SNP_P4_8676_27637644 | NC_021160.1    | Ca_kabuli_chr01 | 27637644                | TT                              | AA              | 1946732717               |
| SNP_P4_8677_27637675 | NC_021160.1    | Ca_kabuli_chr01 | 27637675                | TT                              | CC              | 1946732719               |
| SNP_P4_8681_27666919 | NC_021160.1    | Ca_kabuli_chr01 | 27666919                | TT                              | CC              | 1946732721               |
| SNP_P4_8682_27674588 | NC_021160.1    | Ca_kabuli_chr01 | 27674588                | TT                              | CC              | 1946732723               |
| SNP_P4_8683_27689180 | NC_021160.1    | Ca_kabuli_chr01 | 27689180                | TT                              | CC              | 1946732725               |
| SNP_P4_8684_27689211 | NC_021160.1    | Ca_kabuli_chr01 | 27689211                | AA                              | GG              | 1946732727               |
| SNP_P4_8685_27689262 | NC_021160.1    | Ca_kabuli_chr01 | 27689262                | TT                              | GG              | 1946732729               |
| SNP_P4_8686_27689307 | NC_021160.1    | Ca_kabuli_chr01 | 27689307                | CC                              | TT              | 1946732731               |
| SNP_P4_8687_27689308 | NC_021160.1    | Ca_kabuli_chr01 | 27689308                | AA                              | CC              | 1946732733               |
| SNP_P4_8688_27689579 | NC_021160.1    | Ca_kabuli_chr01 | 27689579                | AA                              | GG              | 1946732735               |
| SNP_P4_8689_27689593 | NC_021160.1    | Ca_kabuli_chr01 | 27689593                | TT                              | CC              | 1946732737               |
| SNP_P4_8690_27689600 | NC_021160.1    | Ca_kabuli_chr01 | 27689600                | AA                              | GG              | 1946732739               |
| SNP_P4_8691_27689622 | NC_021160.1    | Ca_kabuli_chr01 | 27689622                | AA                              | GG              | 1946732741               |
| SNP_P4_8692_27702846 | NC_021160.1    | Ca_kabuli_chr01 | 27702846                | CC                              | AA              | 1946732743               |
| SNP_P4_8694_27763030 | NC_021160.1    | Ca_kabuli_chr01 | 27763030                | CC                              | TT              | 1946732745               |

| SNPs IDs             | Chromosome IDs | Chromosomes     | Physical positions (bp) | CDC Frontier (Reference genome) | (ILWC46 & LPNB) | NCBI SNPdb Accession IDs |
|----------------------|----------------|-----------------|-------------------------|---------------------------------|-----------------|--------------------------|
| SNP_P4_8695_27768306 | NC_021160.1    | Ca_kabuli_chr01 | 27768306                | CC                              | GG              | 1946732747               |
| SNP_P4_8696_27770386 | NC_021160.1    | Ca_kabuli_chr01 | 27770386                | AA                              | GG              | 1946732749               |
| SNP_P4_8697_27770589 | NC_021160.1    | Ca_kabuli_chr01 | 27770589                | AA                              | GG              | 1946732751               |
| SNP_P4_8698_27770662 | NC_021160.1    | Ca_kabuli_chr01 | 27770662                | AA                              | GG              | 1946732753               |
| SNP_P4_8699_27770680 | NC_021160.1    | Ca_kabuli_chr01 | 27770680                | AA                              | GG              | 1946732755               |
| SNP_P4_8700_27772990 | NC_021160.1    | Ca_kabuli_chr01 | 27772990                | AA                              | CC              | 1946732757               |
| SNP_P4_8701_27773061 | NC_021160.1    | Ca_kabuli_chr01 | 27773061                | GG                              | AA              | 1946732759               |
| SNP_P4_8702_27773141 | NC_021160.1    | Ca_kabuli_chr01 | 27773141                | CC                              | TT              | 1946732761               |
| SNP_P4_8703_27773147 | NC_021160.1    | Ca_kabuli_chr01 | 27773147                | TT                              | CC              | 1946732763               |
| SNP_P4_8704_27773283 | NC_021160.1    | Ca_kabuli_chr01 | 27773283                | GG                              | TT              | 1946732765               |
| SNP_P4_8705_27773318 | NC_021160.1    | Ca_kabuli_chr01 | 27773318                | TT                              | CC              | 1946732767               |
| SNP_P4_8706_27773686 | NC_021160.1    | Ca_kabuli_chr01 | 27773686                | TT                              | AA              | 1946732769               |
| SNP_P4_8707_27773802 | NC_021160.1    | Ca_kabuli_chr01 | 27773802                | AA                              | GG              | 1946732771               |
| SNP_P4_8708_27799705 | NC_021160.1    | Ca_kabuli_chr01 | 27799705                | CC                              | TT              | 1946732773               |
| SNP_P4_8709_27800079 | NC_021160.1    | Ca_kabuli_chr01 | 27800079                | AA                              | GG              | 1946732775               |
| SNP_P4_8710_27800090 | NC_021160.1    | Ca_kabuli_chr01 | 27800090                | GG                              | CC              | 1946732777               |
| SNP_P4_8711_27819057 | NC_021160.1    | Ca_kabuli_chr01 | 27819057                | AA                              | CC              | 1946732779               |
| SNP_P4_8712_27819088 | NC_021160.1    | Ca_kabuli_chr01 | 27819088                | GG                              | AA              | 1946732782               |
| SNP_P4_8713_27819248 | NC_021160.1    | Ca_kabuli_chr01 | 27819248                | TT                              | CC              | 1946732784               |
| SNP_P4_8714_27819287 | NC_021160.1    | Ca_kabuli_chr01 | 27819287                | GG                              | AA              | 1946732786               |
| SNP_P4_8715_27819303 | NC_021160.1    | Ca_kabuli_chr01 | 27819303                | TT                              | CC              | 1946732788               |
| SNP_P4_8716_27820872 | NC_021160.1    | Ca_kabuli_chr01 | 27820872                | AA                              | GG              | 1946732790               |
| SNP_P4_8717_27820879 | NC_021160.1    | Ca_kabuli_chr01 | 27820879                | GG                              | AA              | 1946732792               |
| SNP_P4_8718_27832449 | NC_021160.1    | Ca_kabuli_chr01 | 27832449                | GG                              | AA              | 1946732794               |
| SNP_P4_8719_27833378 | NC_021160.1    | Ca_kabuli_chr01 | 27833378                | TT                              | CC              | 1946732796               |
| SNP_P4_8720_27838713 | NC_021160.1    | Ca_kabuli_chr01 | 27838713                | CC                              | TT              | 1946732798               |
| SNP_P4_8722_27850324 | NC_021160.1    | Ca_kabuli_chr01 | 27850324                | CC                              | TT              | 1946732800               |
| SNP_P4_8724_27857598 | NC_021160.1    | Ca_kabuli_chr01 | 27857598                | CC                              | TT              | 1946732802               |
| SNP_P4_8725_27863513 | NC_021160.1    | Ca_kabuli_chr01 | 27863513                | AA                              | GG              | 1946732804               |
| SNP_P4_8726_27895706 | NC_021160.1    | Ca_kabuli_chr01 | 27895706                | CC                              | TT              | 1946732806               |
| SNP_P4_8727_27896115 | NC_021160.1    | Ca_kabuli_chr01 | 27896115                | GG                              | AA              | 1946732808               |
| SNP_P4_8728_27896228 | NC_021160.1    | Ca_kabuli_chr01 | 27896228                | TT                              | CC              | 1946732810               |
| SNP_P4_8729_27896236 | NC_021160.1    | Ca_kabuli_chr01 | 27896236                | GG                              | AA              | 1946732812               |
| SNP_P4_8730_27904692 | NC_021160.1    | Ca_kabuli_chr01 | 27904692                | CC                              | TT              | 1946732814               |
| SNP_P4_8731_27904706 | NC_021160.1    | Ca_kabuli_chr01 | 27904706                | CC                              | GG              | 1946732816               |
| SNP_P4_8732_27904729 | NC_021160.1    | Ca_kabuli_chr01 | 27904729                | AA                              | GG              | 1946732818               |
| SNP_P4_8733_27914865 | NC_021160.1    | Ca_kabuli_chr01 | 27914865                | CC                              | TT              | 1946732820               |
| SNP_P4_8734_27977413 | NC_021160.1    | Ca_kabuli_chr01 | 27977413                | CC                              | TT              | 1946732822               |
| SNP_P4_8735_27978900 | NC_021160.1    | Ca_kabuli_chr01 | 27978900                | AA                              | CC              | 1946732824               |
| SNP_P4_8736_28010557 | NC_021160.1    | Ca_kabuli_chr01 | 28010557                | GG                              | AA              | 1946732826               |
| SNP_P4_8737_28010612 | NC_021160.1    | Ca_kabuli_chr01 | 28010612                | TT                              | CC              | 1946732828               |
| SNP_P4_8738_28010626 | NC_021160.1    | Ca_kabuli_chr01 | 28010626                | CC                              | TT              | 1946732830               |

| SNPs IDs             | Chromosome IDs | Chromosomes     | Physical positions (bp) | CDC Frontier (Reference genome) | (ILWC46 & LPNB) | NCBI SNPdb Accession IDs |
|----------------------|----------------|-----------------|-------------------------|---------------------------------|-----------------|--------------------------|
| SNP_P4_8739_28010806 | NC_021160.1    | Ca_kabuli_chr01 | 28010806                | GG                              | AA              | 1946732832               |
| SNP_P4_8740_28010833 | NC_021160.1    | Ca_kabuli_chr01 | 28010833                | TT                              | CC              | 1946732834               |
| SNP_P4_8741_28014881 | NC_021160.1    | Ca_kabuli_chr01 | 28014881                | CC                              | TT              | 1946732836               |
| SNP_P4_8742_28014896 | NC_021160.1    | Ca_kabuli_chr01 | 28014896                | CC                              | TT              | 1946732838               |
| SNP_P4_8743_28014938 | NC_021160.1    | Ca_kabuli_chr01 | 28014938                | GG                              | AA              | 1946732840               |
| SNP_P4_8744_28015301 | NC_021160.1    | Ca_kabuli_chr01 | 28015301                | CC                              | TT              | 1946732842               |
| SNP_P4_8746_28024302 | NC_021160.1    | Ca_kabuli_chr01 | 28024302                | TT                              | CC              | 1946732844               |
| SNP_P4_8747_28024583 | NC_021160.1    | Ca_kabuli_chr01 | 28024583                | GG                              | AA              | 1946732846               |
| SNP_P4_8748_28024593 | NC_021160.1    | Ca_kabuli_chr01 | 28024593                | CC                              | TT              | 1946732848               |
| SNP_P4_8750_28041741 | NC_021160.1    | Ca_kabuli_chr01 | 28041741                | TT                              | CC              | 1946732850               |
| SNP_P4_8751_28043627 | NC_021160.1    | Ca_kabuli_chr01 | 28043627                | CC                              | TT              | 1946732852               |
| SNP_P4_8752_28044236 | NC_021160.1    | Ca_kabuli_chr01 | 28044236                | CC                              | TT              | 1946732854               |
| SNP_P4_8753_28047420 | NC_021160.1    | Ca_kabuli_chr01 | 28047420                | TT                              | GG              | 1946732856               |
| SNP_P4_8754_28047422 | NC_021160.1    | Ca_kabuli_chr01 | 28047422                | GG                              | AA              | 1946732858               |
| SNP_P4_8755_28047425 | NC_021160.1    | Ca_kabuli_chr01 | 28047425                | GG                              | AA              | 1946732861               |
| SNP_P4_8756_28057086 | NC_021160.1    | Ca_kabuli_chr01 | 28057086                | AA                              | GG              | 1946732863               |
| SNP_P4_8757_28086024 | NC_021160.1    | Ca_kabuli_chr01 | 28086024                | GG                              | AA              | 1946732865               |
| SNP_P4_8758_28095427 | NC_021160.1    | Ca_kabuli_chr01 | 28095427                | TT                              | GG              | 1946732867               |
| SNP_P4_8759_28095879 | NC_021160.1    | Ca_kabuli_chr01 | 28095879                | AA                              | GG              | 1946732869               |
| SNP_P4_8760_28095891 | NC_021160.1    | Ca_kabuli_chr01 | 28095891                | CC                              | TT              | 1946732871               |
| SNP_P4_8761_28096172 | NC_021160.1    | Ca_kabuli_chr01 | 28096172                | GG                              | AA              | 1946732873               |
| SNP_P4_8762_28096207 | NC_021160.1    | Ca_kabuli_chr01 | 28096207                | AA                              | GG              | 1946732874               |
| SNP_P4_8763_28096208 | NC_021160.1    | Ca_kabuli_chr01 | 28096208                | AA                              | TT              | 1946732876               |
| SNP_P4_8764_28096256 | NC_021160.1    | Ca_kabuli_chr01 | 28096256                | TT                              | CC              | 1946732878               |
| SNP_P4_8765_28096322 | NC_021160.1    | Ca_kabuli_chr01 | 28096322                | GG                              | TT              | 1946732880               |
| SNP_P4_8766_28171032 | NC_021160.1    | Ca_kabuli_chr01 | 28171032                | CC                              | TT              | 1946732882               |
| SNP_P4_8767_28195222 | NC_021160.1    | Ca_kabuli_chr01 | 28195222                | GG                              | TT              | 1946732884               |
| SNP_P4_8768_28248634 | NC_021160.1    | Ca_kabuli_chr01 | 28248634                | TT                              | GG              | 1946732886               |
| SNP_P4_8769_28270685 | NC_021160.1    | Ca_kabuli_chr01 | 28270685                | CC                              | GG              | 1946732888               |
| SNP_P4_8770_28270688 | NC_021160.1    | Ca_kabuli_chr01 | 28270688                | TT                              | AA              | 1946732890               |
| SNP_P4_8771_28270690 | NC_021160.1    | Ca_kabuli_chr01 | 28270690                | AA                              | TT              | 1946732892               |
| SNP_P4_8772_28295994 | NC_021160.1    | Ca_kabuli_chr01 | 28295994                | AA                              | CC              | 1946732894               |
| SNP_P4_8773_28306843 | NC_021160.1    | Ca_kabuli_chr01 | 28306843                | TT                              | AA              | 1946732896               |
| SNP_P4_8774_28316175 | NC_021160.1    | Ca_kabuli_chr01 | 28316175                | AA                              | CC              | 1946732898               |
| SNP_P4_8775_28316207 | NC_021160.1    | Ca_kabuli_chr01 | 28316207                | AA                              | GG              | 1946732900               |
| SNP_P4_8776_28316309 | NC_021160.1    | Ca_kabuli_chr01 | 28316309                | TT                              | CC              | 1946732902               |
| SNP_P4_8777_28316330 | NC_021160.1    | Ca_kabuli_chr01 | 28316330                | CC                              | TT              | 1946732904               |
| SNP_P4_8778_28316575 | NC_021160.1    | Ca_kabuli_chr01 | 28316575                | TT                              | CC              | 1946732906               |
| SNP_P4_8779_28318496 | NC_021160.1    | Ca_kabuli_chr01 | 28318496                | CC                              | GG              | 1946732907               |
| SNP_P4_8782_28346379 | NC_021160.1    | Ca_kabuli_chr01 | 28346379                | CC                              | TT              | 1946732909               |
| SNP_P4_8783_28353602 | NC_021160.1    | Ca_kabuli_chr01 | 28353602                | TT                              | CC              | 1946732911               |
| SNP_P4_8784_28354417 | NC_021160.1    | Ca_kabuli_chr01 | 28354417                | CC                              | TT              | 1946732913               |

| SNPs IDs             | Chromosome IDs | Chromosomes     | Physical positions (bp) | CDC Frontier (Reference genome) | (ILWC46 & LPNB) | NCBI SNPdb Accession IDs |
|----------------------|----------------|-----------------|-------------------------|---------------------------------|-----------------|--------------------------|
| SNP_P4_8785_28383202 | NC_021160.1    | Ca_kabuli_chr01 | 28383202                | GG                              | TT              | 1946732915               |
| SNP_P4_8786_28386352 | NC_021160.1    | Ca_kabuli_chr01 | 28386352                | TT                              | GG              | 1946732917               |
| SNP_P4_8787_28434673 | NC_021160.1    | Ca_kabuli_chr01 | 28434673                | AA                              | GG              | 1946732919               |
| SNP_P4_8789_28449322 | NC_021160.1    | Ca_kabuli_chr01 | 28449322                | AA                              | GG              | 1946732921               |
| SNP_P4_8790_28449331 | NC_021160.1    | Ca_kabuli_chr01 | 28449331                | AA                              | GG              | 1946732923               |
| SNP_P4_8791_28449352 | NC_021160.1    | Ca_kabuli_chr01 | 28449352                | TT                              | GG              | 1946732925               |
| SNP_P4_8792_28449407 | NC_021160.1    | Ca_kabuli_chr01 | 28449407                | GG                              | TT              | 1946732926               |
| SNP_P4_8793_28449457 | NC_021160.1    | Ca_kabuli_chr01 | 28449457                | AA                              | GG              | 1946732928               |
| SNP_P4_8794_28449474 | NC_021160.1    | Ca_kabuli_chr01 | 28449474                | TT                              | CC              | 1946732930               |
| SNP_P4_8795_28449562 | NC_021160.1    | Ca_kabuli_chr01 | 28449562                | AA                              | GG              | 1946732932               |
| SNP_P4_8796_28449597 | NC_021160.1    | Ca_kabuli_chr01 | 28449597                | AA                              | CC              | 1946732934               |
| SNP_P4_8797_28449611 | NC_021160.1    | Ca_kabuli_chr01 | 28449611                | AA                              | GG              | 1946732936               |
| SNP_P4_8798_28449676 | NC_021160.1    | Ca_kabuli_chr01 | 28449676                | AA                              | GG              | 1946732938               |
| SNP_P4_8799_28449773 | NC_021160.1    | Ca_kabuli_chr01 | 28449773                | TT                              | CC              | 1946732940               |
| SNP_P4_8800_28449779 | NC_021160.1    | Ca_kabuli_chr01 | 28449779                | AA                              | GG              | 1946732942               |
| SNP_P4_8801_28449793 | NC_021160.1    | Ca_kabuli_chr01 | 28449793                | AA                              | GG              | 1946732944               |
| SNP_P4_8802_28449806 | NC_021160.1    | Ca_kabuli_chr01 | 28449806                | CC                              | GG              | 1946732946               |
| SNP_P4_8803_28449869 | NC_021160.1    | Ca_kabuli_chr01 | 28449869                | TT                              | CC              | 1946732948               |
| SNP_P4_8804_28449959 | NC_021160.1    | Ca_kabuli_chr01 | 28449959                | AA                              | GG              | 1946732950               |
| SNP_P4_8806_28468135 | NC_021160.1    | Ca_kabuli_chr01 | 28468135                | CC                              | AA              | 1946732952               |
| SNP_P4_8807_28468299 | NC_021160.1    | Ca_kabuli_chr01 | 28468299                | CC                              | AA              | 1946732954               |
| SNP_P4_8808_28468336 | NC_021160.1    | Ca_kabuli_chr01 | 28468336                | AA                              | TT              | 1946732956               |
| SNP_P4_8809_28468426 | NC_021160.1    | Ca_kabuli_chr01 | 28468426                | AA                              | CC              | 1946732958               |
| SNP_P4_8810_28469091 | NC_021160.1    | Ca_kabuli_chr01 | 28469091                | TT                              | AA              | 1946732960               |
| SNP_P4_8811_28484200 | NC_021160.1    | Ca_kabuli_chr01 | 28484200                | TT                              | AA              | 1946732962               |
| SNP_P4_8813_28550166 | NC_021160.1    | Ca_kabuli_chr01 | 28550166                | CC                              | AA              | 1946732964               |
| SNP_P4_8814_28550290 | NC_021160.1    | Ca_kabuli_chr01 | 28550290                | TT                              | CC              | 1946732966               |
| SNP_P4_8815_28550403 | NC_021160.1    | Ca_kabuli_chr01 | 28550403                | TT                              | GG              | 1946732968               |
| SNP_P4_8816_28550404 | NC_021160.1    | Ca_kabuli_chr01 | 28550404                | GG                              | AA              | 1946732971               |
| SNP_P4_8818_28550422 | NC_021160.1    | Ca_kabuli_chr01 | 28550422                | GG                              | AA              | 1946732973               |
| SNP_P4_8819_28550467 | NC_021160.1    | Ca_kabuli_chr01 | 28550467                | AA                              | TT              | 1946732975               |
| SNP_P4_8820_28550468 | NC_021160.1    | Ca_kabuli_chr01 | 28550468                | TT                              | CC              | 1946732976               |
| SNP_P4_8821_28550494 | NC_021160.1    | Ca_kabuli_chr01 | 28550494                | AA                              | CC              | 1946732979               |
| SNP_P4_8822_28585900 | NC_021160.1    | Ca_kabuli_chr01 | 28585900                | GG                              | TT              | 1946732982               |
| SNP_P4_8823_28587352 | NC_021160.1    | Ca_kabuli_chr01 | 28587352                | TT                              | AA              | 1946732984               |
| SNP_P4_8824_28598863 | NC_021160.1    | Ca_kabuli_chr01 | 28598863                | AA                              | GG              | 1946732986               |
| SNP_P4_8825_28628201 | NC_021160.1    | Ca_kabuli_chr01 | 28628201                | GG                              | AA              | 1946732988               |
| SNP_P4_8826_28635984 | NC_021160.1    | Ca_kabuli_chr01 | 28635984                | AA                              | CC              | 1946732990               |
| SNP_P4_8828_28662559 | NC_021160.1    | Ca_kabuli_chr01 | 28662559                | AA                              | CC              | 1946732992               |
| SNP_P4_8829_28665096 | NC_021160.1    | Ca_kabuli_chr01 | 28665096                | GG                              | AA              | 1946732995               |
| SNP_P4_8830_28665877 | NC_021160.1    | Ca_kabuli_chr01 | 28665877                | GG                              | AA              | 1946732997               |
| SNP_P4_8831_28666374 | NC_021160.1    | Ca_kabuli_chr01 | 28666374                | CC                              | TT              | 1946732999               |

| SNPs IDs             | Chromosome IDs | Chromosomes     | Physical positions (bp) | CDC Frontier (Reference genome) | (ILWC46 & LPNB) | NCBI SNPdb Accession IDs |
|----------------------|----------------|-----------------|-------------------------|---------------------------------|-----------------|--------------------------|
| SNP_P4_8832_28666384 | NC_021160.1    | Ca_kabuli_chr01 | 28666384                | GG                              | AA              | 1946733001               |
| SNP_P4_8833_28666712 | NC_021160.1    | Ca_kabuli_chr01 | 28666712                | AA                              | GG              | 1946733003               |
| SNP_P4_8834_28666768 | NC_021160.1    | Ca_kabuli_chr01 | 28666768                | AA                              | GG              | 1946733004               |
| SNP_P4_8835_28666779 | NC_021160.1    | Ca_kabuli_chr01 | 28666779                | CC                              | TT              | 1946733006               |
| SNP_P4_8836_28670672 | NC_021160.1    | Ca_kabuli_chr01 | 28670672                | AA                              | CC              | 1946733008               |
| SNP_P4_8837_28670674 | NC_021160.1    | Ca_kabuli_chr01 | 28670674                | AA                              | GG              | 1946733010               |
| SNP_P4_8839_28693051 | NC_021160.1    | Ca_kabuli_chr01 | 28693051                | TT                              | CC              | 1946733012               |
| SNP_P4_8842_28723469 | NC_021160.1    | Ca_kabuli_chr01 | 28723469                | TT                              | AA              | 1946733014               |
| SNP_P4_8843_28756297 | NC_021160.1    | Ca_kabuli_chr01 | 28756297                | TT                              | CC              | 1946733016               |
| SNP_P4_8844_28793776 | NC_021160.1    | Ca_kabuli_chr01 | 28793776                | AA                              | GG              | 1946733018               |
| SNP_P4_8845_28793899 | NC_021160.1    | Ca_kabuli_chr01 | 28793899                | CC                              | TT              | 1946733020               |
| SNP_P4_8846_28807607 | NC_021160.1    | Ca_kabuli_chr01 | 28807607                | AA                              | TT              | 1946733022               |
| SNP_P4_8847_28807772 | NC_021160.1    | Ca_kabuli_chr01 | 28807772                | AA                              | CC              | 1946733024               |
| SNP_P4_8848_28819408 | NC_021160.1    | Ca_kabuli_chr01 | 28819408                | CC                              | GG              | 1946733026               |
| SNP_P4_8849_28826413 | NC_021160.1    | Ca_kabuli_chr01 | 28826413                | TT                              | AA              | 1946733028               |
| SNP_P4_8850_28840344 | NC_021160.1    | Ca_kabuli_chr01 | 28840344                | AA                              | CC              | 1946733030               |
| SNP_P4_8851_28853154 | NC_021160.1    | Ca_kabuli_chr01 | 28853154                | AA                              | GG              | 1946733032               |
| SNP_P4_8852_28863493 | NC_021160.1    | Ca_kabuli_chr01 | 28863493                | GG                              | AA              | 1946733034               |
| SNP_P4_8853_28891060 | NC_021160.1    | Ca_kabuli_chr01 | 28891060                | AA                              | GG              | 1946733036               |
| SNP_P4_8854_28891076 | NC_021160.1    | Ca_kabuli_chr01 | 28891076                | AA                              | GG              | 1946733038               |
| SNP_P4_8855_28891079 | NC_021160.1    | Ca_kabuli_chr01 | 28891079                | GG                              | TT              | 1946733040               |
| SNP_P4_8856_28891083 | NC_021160.1    | Ca_kabuli_chr01 | 28891083                | AA                              | GG              | 1946733042               |
| SNP_P4_8857_28891438 | NC_021160.1    | Ca_kabuli_chr01 | 28891438                | CC                              | TT              | 1946733044               |
| SNP_P4_8858_28891481 | NC_021160.1    | Ca_kabuli_chr01 | 28891481                | CC                              | TT              | 1946733046               |
| SNP_P4_8859_28891489 | NC_021160.1    | Ca_kabuli_chr01 | 28891489                | GG                              | AA              | 1946733049               |
| SNP_P4_8860_28892184 | NC_021160.1    | Ca_kabuli_chr01 | 28892184                | TT                              | AA              | 1946733051               |
| SNP_P4_8861_28902893 | NC_021160.1    | Ca_kabuli_chr01 | 28902893                | TT                              | GG              | 1946733053               |
| SNP_P4_8862_28903265 | NC_021160.1    | Ca_kabuli_chr01 | 28903265                | TT                              | GG              | 1946733055               |
| SNP_P4_8864_28903337 | NC_021160.1    | Ca_kabuli_chr01 | 28903337                | AA                              | TT              | 1946733057               |
| SNP_P4_8866_28905200 | NC_021160.1    | Ca_kabuli_chr01 | 28905200                | GG                              | TT              | 1946733059               |
| SNP_P4_8867_28905217 | NC_021160.1    | Ca_kabuli_chr01 | 28905217                | GG                              | AA              | 1946733061               |
| SNP_P4_8868_28905278 | NC_021160.1    | Ca_kabuli_chr01 | 28905278                | TT                              | AA              | 1946733063               |
| SNP_P4_8869_28905307 | NC_021160.1    | Ca_kabuli_chr01 | 28905307                | GG                              | AA              | 1946733065               |
| SNP_P4_8870_28905318 | NC_021160.1    | Ca_kabuli_chr01 | 28905318                | AA                              | TT              | 1946733067               |
| SNP_P4_8871_28905356 | NC_021160.1    | Ca_kabuli_chr01 | 28905356                | CC                              | AA              | 1946733069               |
| SNP_P4_8872_28905378 | NC_021160.1    | Ca_kabuli_chr01 | 28905378                | CC                              | TT              | 1946733071               |
| SNP_P4_8873_28905393 | NC_021160.1    | Ca_kabuli_chr01 | 28905393                | TT                              | CC              | 1946733073               |
| SNP_P4_8874_28905422 | NC_021160.1    | Ca_kabuli_chr01 | 28905422                | AA                              | GG              | 1946733075               |
| SNP_P4_8875_28905426 | NC_021160.1    | Ca_kabuli_chr01 | 28905426                | GG                              | AA              | 1946733077               |
| SNP_P4_8876_28905467 | NC_021160.1    | Ca_kabuli_chr01 | 28905467                | AA                              | CC              | 1946733079               |
| SNP_P4_8877_28905490 | NC_021160.1    | Ca_kabuli_chr01 | 28905490                | CC                              | AA              | 1946733081               |
| SNP_P4_8878_28905531 | NC_021160.1    | Ca_kabuli_chr01 | 28905531                | CC                              | TT              | 1946733083               |

| SNPs IDs             | Chromosome IDs | Chromosomes     | Physical positions (bp) | CDC Frontier (Reference genome) | (ILWC46 & LPNB) | NCBI SNPdb Accession IDs |
|----------------------|----------------|-----------------|-------------------------|---------------------------------|-----------------|--------------------------|
| SNP_P4_8879_28905542 | NC_021160.1    | Ca_kabuli_chr01 | 28905542                | TT                              | CC              | 1946733085               |
| SNP_P4_8880_28905560 | NC_021160.1    | Ca_kabuli_chr01 | 28905560                | TT                              | CC              | 1946733087               |
| SNP_P4_8881_28905606 | NC_021160.1    | Ca_kabuli_chr01 | 28905606                | AA                              | GG              | 1946733089               |
| SNP_P4_8882_28905638 | NC_021160.1    | Ca_kabuli_chr01 | 28905638                | GG                              | AA              | 1946733091               |
| SNP_P4_8883_28905770 | NC_021160.1    | Ca_kabuli_chr01 | 28905770                | TT                              | GG              | 1946733093               |
| SNP_P4_8884_28905795 | NC_021160.1    | Ca_kabuli_chr01 | 28905795                | GG                              | AA              | 1946733095               |
| SNP_P4_8885_28905952 | NC_021160.1    | Ca_kabuli_chr01 | 28905952                | CC                              | AA              | 1946733097               |
| SNP_P4_8886_28905958 | NC_021160.1    | Ca_kabuli_chr01 | 28905958                | AA                              | TT              | 1946733099               |
| SNP_P4_8887_28906046 | NC_021160.1    | Ca_kabuli_chr01 | 28906046                | TT                              | AA              | 1946733101               |
| SNP_P4_8888_28906083 | NC_021160.1    | Ca_kabuli_chr01 | 28906083                | TT                              | GG              | 1946733103               |
| SNP_P4_8889_28906209 | NC_021160.1    | Ca_kabuli_chr01 | 28906209                | TT                              | AA              | 1946733105               |
| SNP_P4_8890_28906216 | NC_021160.1    | Ca_kabuli_chr01 | 28906216                | GG                              | TT              | 1946733107               |
| SNP_P4_8891_28906260 | NC_021160.1    | Ca_kabuli_chr01 | 28906260                | AA                              | GG              | 1946733109               |
| SNP_P4_8892_28906588 | NC_021160.1    | Ca_kabuli_chr01 | 28906588                | AA                              | TT              | 1946733111               |
| SNP_P4_8893_28906605 | NC_021160.1    | Ca_kabuli_chr01 | 28906605                | AA                              | TT              | 1946733113               |
| SNP_P4_8894_28906642 | NC_021160.1    | Ca_kabuli_chr01 | 28906642                | AA                              | GG              | 1946733115               |
| SNP_P4_8896_28906731 | NC_021160.1    | Ca_kabuli_chr01 | 28906731                | AA                              | GG              | 1946733117               |
| SNP_P4_8897_28906864 | NC_021160.1    | Ca_kabuli_chr01 | 28906864                | TT                              | CC              | 1946733119               |
| SNP_P4_8898_28906869 | NC_021160.1    | Ca_kabuli_chr01 | 28906869                | AA                              | CC              | 1946733121               |
| SNP_P4_8899_28906886 | NC_021160.1    | Ca_kabuli_chr01 | 28906886                | CC                              | AA              | 1946733123               |
| SNP_P4_8900_28906892 | NC_021160.1    | Ca_kabuli_chr01 | 28906892                | CC                              | GG              | 1946733125               |
| SNP_P4_8901_28906919 | NC_021160.1    | Ca_kabuli_chr01 | 28906919                | AA                              | GG              | 1946733128               |
| SNP_P4_8902_28906929 | NC_021160.1    | Ca_kabuli_chr01 | 28906929                | GG                              | TT              | 1946733130               |
| SNP_P4_8903_28906961 | NC_021160.1    | Ca_kabuli_chr01 | 28906961                | AA                              | GG              | 1946733132               |
| SNP_P4_8904_28909932 | NC_021160.1    | Ca_kabuli_chr01 | 28909932                | AA                              | CC              | 1946733134               |
| SNP_P4_8905_28909941 | NC_021160.1    | Ca_kabuli_chr01 | 28909941                | CC                              | TT              | 1946733136               |
| SNP_P4_8906_28910026 | NC_021160.1    | Ca_kabuli_chr01 | 28910026                | CC                              | AA              | 1946733138               |
| SNP_P4_8907_28910152 | NC_021160.1    | Ca_kabuli_chr01 | 28910152                | GG                              | TT              | 1946733140               |
| SNP_P4_8908_28910235 | NC_021160.1    | Ca_kabuli_chr01 | 28910235                | GG                              | CC              | 1946733142               |
| SNP_P4_8909_28910243 | NC_021160.1    | Ca_kabuli_chr01 | 28910243                | CC                              | TT              | 1946733144               |
| SNP_P4_8911_28910355 | NC_021160.1    | Ca_kabuli_chr01 | 28910355                | CC                              | TT              | 1946733146               |
| SNP_P4_8914_28910512 | NC_021160.1    | Ca_kabuli_chr01 | 28910512                | TT                              | CC              | 1946733149               |
| SNP_P4_8915_28910677 | NC_021160.1    | Ca_kabuli_chr01 | 28910677                | AA                              | GG              | 1946733151               |
| SNP_P4_8916_28910998 | NC_021160.1    | Ca_kabuli_chr01 | 28910998                | AA                              | TT              | 1946733153               |
| SNP_P4_8917_28911004 | NC_021160.1    | Ca_kabuli_chr01 | 28911004                | TT                              | CC              | 1946733155               |
| SNP_P4_8918_28911062 | NC_021160.1    | Ca_kabuli_chr01 | 28911062                | CC                              | TT              | 1946733157               |
| SNP_P4_8919_28911072 | NC_021160.1    | Ca_kabuli_chr01 | 28911072                | AA                              | CC              | 1946733159               |
| SNP_P4_8920_28911098 | NC_021160.1    | Ca_kabuli_chr01 | 28911098                | GG                              | CC              | 1946733161               |
| SNP_P4_8921_28911365 | NC_021160.1    | Ca_kabuli_chr01 | 28911365                | AA                              | GG              | 1946733163               |
| SNP_P4_8922_28911438 | NC_021160.1    | Ca_kabuli_chr01 | 28911438                | CC                              | AA              | 1946733165               |
| SNP_P4_8923_28913149 | NC_021160.1    | Ca_kabuli_chr01 | 28913149                | CC                              | TT              | 1946733167               |
| SNP_P4_8924_28915328 | NC_021160.1    | Ca_kabuli_chr01 | 28915328                | TT                              | CC              | 1946733169               |

| SNPs IDs             | Chromosome IDs | Chromosomes     | Physical positions (bp) | CDC Frontier (Reference genome) | (ILWC46 & LPNB) | NCBI SNPdb Accession IDs |
|----------------------|----------------|-----------------|-------------------------|---------------------------------|-----------------|--------------------------|
| SNP_P4_8925_28915395 | NC_021160.1    | Ca_kabuli_chr01 | 28915395                | AA                              | GG              | 1946733171               |
| SNP_P4_8926_28915429 | NC_021160.1    | Ca_kabuli_chr01 | 28915429                | GG                              | AA              | 1946733174               |
| SNP_P4_8927_28915453 | NC_021160.1    | Ca_kabuli_chr01 | 28915453                | CC                              | TT              | 1946733176               |
| SNP_P4_8928_28915861 | NC_021160.1    | Ca_kabuli_chr01 | 28915861                | GG                              | TT              | 1946733178               |
| SNP_P4_8929_28915863 | NC_021160.1    | Ca_kabuli_chr01 | 28915863                | TT                              | GG              | 1946733180               |
| SNP_P4_8930_28915876 | NC_021160.1    | Ca_kabuli_chr01 | 28915876                | CC                              | TT              | 1946733182               |
| SNP_P4_8931_28916425 | NC_021160.1    | Ca_kabuli_chr01 | 28916425                | AA                              | CC              | 1946733184               |
| SNP_P4_8932_28916548 | NC_021160.1    | Ca_kabuli_chr01 | 28916548                | AA                              | CC              | 1946733186               |
| SNP_P4_8933_28916651 | NC_021160.1    | Ca_kabuli_chr01 | 28916651                | TT                              | CC              | 1946733188               |
| SNP_P4_8934_28916679 | NC_021160.1    | Ca_kabuli_chr01 | 28916679                | AA                              | CC              | 1946733190               |
| SNP_P4_8935_28916692 | NC_021160.1    | Ca_kabuli_chr01 | 28916692                | CC                              | TT              | 1946733192               |
| SNP_P4_8936_28916753 | NC_021160.1    | Ca_kabuli_chr01 | 28916753                | GG                              | AA              | 1946733194               |
| SNP_P4_8937_28916786 | NC_021160.1    | Ca_kabuli_chr01 | 28916786                | TT                              | CC              | 1946733196               |
| SNP_P4_8938_28916839 | NC_021160.1    | Ca_kabuli_chr01 | 28916839                | CC                              | GG              | 1946733198               |
| SNP_P4_8939_28916864 | NC_021160.1    | Ca_kabuli_chr01 | 28916864                | AA                              | CC              | 1946733200               |
| SNP_P4_8940_28917064 | NC_021160.1    | Ca_kabuli_chr01 | 28917064                | CC                              | TT              | 1946733202               |
| SNP_P4_8941_28917083 | NC_021160.1    | Ca_kabuli_chr01 | 28917083                | CC                              | AA              | 1946733204               |
| SNP_P4_8942_28917166 | NC_021160.1    | Ca_kabuli_chr01 | 28917166                | CC                              | GG              | 1946733206               |
| SNP_P4_8943_28917204 | NC_021160.1    | Ca_kabuli_chr01 | 28917204                | AA                              | CC              | 1946733208               |
| SNP_P4_8944_28917805 | NC_021160.1    | Ca_kabuli_chr01 | 28917805                | GG                              | TT              | 1946733210               |
| SNP_P4_8945_28927984 | NC_021160.1    | Ca_kabuli_chr01 | 28927984                | AA                              | TT              | 1946733212               |
| SNP_P4_8946_28928016 | NC_021160.1    | Ca_kabuli_chr01 | 28928016                | GG                              | AA              | 1946733214               |
| SNP_P4_8947_28928358 | NC_021160.1    | Ca_kabuli_chr01 | 28928358                | GG                              | AA              | 1946733216               |
| SNP_P4_8948_28929114 | NC_021160.1    | Ca_kabuli_chr01 | 28929114                | AA                              | TT              | 1946733218               |
| SNP_P4_8949_28929133 | NC_021160.1    | Ca_kabuli_chr01 | 28929133                | TT                              | CC              | 1946733220               |
| SNP_P4_8950_28929138 | NC_021160.1    | Ca_kabuli_chr01 | 28929138                | CC                              | TT              | 1946733222               |
| SNP_P4_8951_28929139 | NC_021160.1    | Ca_kabuli_chr01 | 28929139                | TT                              | CC              | 1946733224               |
| SNP_P4_8952_28929155 | NC_021160.1    | Ca_kabuli_chr01 | 28929155                | TT                              | CC              | 1946733226               |
| SNP_P4_8953_28929192 | NC_021160.1    | Ca_kabuli_chr01 | 28929192                | TT                              | AA              | 1946733228               |
| SNP_P4_8954_28929193 | NC_021160.1    | Ca_kabuli_chr01 | 28929193                | GG                              | TT              | 1946733230               |
| SNP_P4_8955_28929247 | NC_021160.1    | Ca_kabuli_chr01 | 28929247                | CC                              | TT              | 1946733232               |
| SNP_P4_8956_28929562 | NC_021160.1    | Ca_kabuli_chr01 | 28929562                | AA                              | CC              | 1946733234               |
| SNP_P4_8958_28929642 | NC_021160.1    | Ca_kabuli_chr01 | 28929642                | GG                              | AA              | 1946733236               |
| SNP_P4_8959_28929684 | NC_021160.1    | Ca_kabuli_chr01 | 28929684                | TT                              | AA              | 1946733238               |
| SNP_P4_8960_28929764 | NC_021160.1    | Ca_kabuli_chr01 | 28929764                | CC                              | TT              | 1946733240               |
| SNP_P4_8961_28929809 | NC_021160.1    | Ca_kabuli_chr01 | 28929809                | GG                              | AA              | 1946733242               |
| SNP_P4_8962_28929823 | NC_021160.1    | Ca_kabuli_chr01 | 28929823                | CC                              | GG              | 1946733244               |
| SNP_P4_8963_28929875 | NC_021160.1    | Ca_kabuli_chr01 | 28929875                | GG                              | AA              | 1946733246               |
| SNP_P4_8964_28929878 | NC_021160.1    | Ca_kabuli_chr01 | 28929878                | AA                              | GG              | 1946733248               |
| SNP_P4_8965_28929995 | NC_021160.1    | Ca_kabuli_chr01 | 28929995                | CC                              | TT              | 1946733250               |
| SNP_P4_8966_28930070 | NC_021160.1    | Ca_kabuli_chr01 | 28930070                | TT                              | AA              | 1946733252               |
| SNP_P4_8967_28930079 | NC_021160.1    | Ca_kabuli_chr01 | 28930079                | AA                              | GG              | 1946733254               |



| SNPs IDs             | Chromosome IDs | Chromosomes     | Physical positions (bp) | CDC Frontier (Reference genome) | (ILWC46 & LPNB) | NCBI SNPdb Accession IDs |
|----------------------|----------------|-----------------|-------------------------|---------------------------------|-----------------|--------------------------|
| SNP_P4_8968_28930093 | NC_021160.1    | Ca_kabuli_chr01 | 28930093                | AA                              | GG              | 1946733256               |
| SNP_P4_8969_28930140 | NC_021160.1    | Ca_kabuli_chr01 | 28930140                | AA                              | GG              | 1946733258               |
| SNP_P4_8970_28930167 | NC_021160.1    | Ca_kabuli_chr01 | 28930167                | GG                              | AA              | 1946733260               |
| SNP_P4_8971_28930225 | NC_021160.1    | Ca_kabuli_chr01 | 28930225                | GG                              | TT              | 1946733262               |
| SNP_P4_8972_28930252 | NC_021160.1    | Ca_kabuli_chr01 | 28930252                | AA                              | GG              | 1946733264               |
| SNP_P4_8973_28930310 | NC_021160.1    | Ca_kabuli_chr01 | 28930310                | CC                              | TT              | 1946733266               |
| SNP_P4_8974_28930318 | NC_021160.1    | Ca_kabuli_chr01 | 28930318                | CC                              | GG              | 1946733268               |
| SNP_P4_8976_28930718 | NC_021160.1    | Ca_kabuli_chr01 | 28930718                | GG                              | AA              | 1946733271               |
| SNP_P4_8978_28931164 | NC_021160.1    | Ca_kabuli_chr01 | 28931164                | TT                              | CC              | 1946733273               |
| SNP_P4_8980_28935849 | NC_021160.1    | Ca_kabuli_chr01 | 28935849                | AA                              | GG              | 1946733275               |
| SNP_P4_8981_28935858 | NC_021160.1    | Ca_kabuli_chr01 | 28935858                | AA                              | GG              | 1946733277               |
| SNP_P4_8982_28936044 | NC_021160.1    | Ca_kabuli_chr01 | 28936044                | CC                              | AA              | 1946733279               |
| SNP_P4_8983_28936045 | NC_021160.1    | Ca_kabuli_chr01 | 28936045                | AA                              | TT              | 1946733281               |
| SNP_P4_8984_28936061 | NC_021160.1    | Ca_kabuli_chr01 | 28936061                | CC                              | TT              | 1946733283               |
| SNP_P4_8985_28936166 | NC_021160.1    | Ca_kabuli_chr01 | 28936166                | AA                              | GG              | 1946733285               |
| SNP_P4_8986_28936174 | NC_021160.1    | Ca_kabuli_chr01 | 28936174                | AA                              | GG              | 1946733287               |
| SNP_P4_8987_28936588 | NC_021160.1    | Ca_kabuli_chr01 | 28936588                | GG                              | AA              | 1946733289               |
| SNP_P4_8988_28939299 | NC_021160.1    | Ca_kabuli_chr01 | 28939299                | CC                              | TT              | 1946733291               |
| SNP_P4_8989_28939389 | NC_021160.1    | Ca_kabuli_chr01 | 28939389                | TT                              | AA              | 1946733293               |
| SNP_P4_8991_28939505 | NC_021160.1    | Ca_kabuli_chr01 | 28939505                | GG                              | CC              | 1946733295               |
| SNP_P4_8992_28939530 | NC_021160.1    | Ca_kabuli_chr01 | 28939530                | CC                              | AA              | 1946733297               |
| SNP_P4_8993_28939628 | NC_021160.1    | Ca_kabuli_chr01 | 28939628                | GG                              | CC              | 1946733299               |
| SNP_P4_8994_28939679 | NC_021160.1    | Ca_kabuli_chr01 | 28939679                | AA                              | TT              | 1946733301               |
| SNP_P4_8995_28939701 | NC_021160.1    | Ca_kabuli_chr01 | 28939701                | TT                              | CC              | 1946733303               |
| SNP_P4_8996_28939756 | NC_021160.1    | Ca_kabuli_chr01 | 28939756                | AA                              | GG              | 1946733305               |
| SNP_P4_8997_28939777 | NC_021160.1    | Ca_kabuli_chr01 | 28939777                | CC                              | AA              | 1946733307               |
| SNP_P4_8998_28939860 | NC_021160.1    | Ca_kabuli_chr01 | 28939860                | AA                              | GG              | 1946733309               |
| SNP_P4_8999_28939866 | NC_021160.1    | Ca_kabuli_chr01 | 28939866                | CC                              | TT              | 1946733311               |
| SNP_P4_9000_28939983 | NC_021160.1    | Ca_kabuli_chr01 | 28939983                | AA                              | TT              | 1946733313               |
| SNP_P4_9001_28940012 | NC_021160.1    | Ca_kabuli_chr01 | 28940012                | AA                              | GG              | 1946733315               |
| SNP_P4_9002_28940049 | NC_021160.1    | Ca_kabuli_chr01 | 28940049                | TT                              | GG              | 1946733317               |
| SNP_P4_9003_28940078 | NC_021160.1    | Ca_kabuli_chr01 | 28940078                | GG                              | CC              | 1946733319               |
| SNP_P4_9004_28940085 | NC_021160.1    | Ca_kabuli_chr01 | 28940085                | TT                              | CC              | 1946733321               |
| SNP_P4_9005_28940357 | NC_021160.1    | Ca_kabuli_chr01 | 28940357                | GG                              | TT              | 1946733324               |
| SNP_P4_9006_28940402 | NC_021160.1    | Ca_kabuli_chr01 | 28940402                | AA                              | GG              | 1946733326               |
| SNP_P4_9007_28940480 | NC_021160.1    | Ca_kabuli_chr01 | 28940480                | TT                              | CC              | 1946733328               |
| SNP_P4_9008_28940760 | NC_021160.1    | Ca_kabuli_chr01 | 28940760                | AA                              | GG              | 1946733330               |
| SNP_P4_9009_28941278 | NC_021160.1    | Ca_kabuli_chr01 | 28941278                | TT                              | GG              | 1946733333               |
| SNP_P4_9010_28941379 | NC_021160.1    | Ca_kabuli_chr01 | 28941379                | CC                              | TT              | 1946733335               |
| SNP_P4_9011_28941429 | NC_021160.1    | Ca_kabuli_chr01 | 28941429                | GG                              | AA              | 1946733337               |
| SNP_P4_9012_28941466 | NC_021160.1    | Ca_kabuli_chr01 | 28941466                | CC                              | TT              | 1946733339               |
| SNP_P4_9014_28941659 | NC_021160.1    | Ca_kabuli_chr01 | 28941659                | CC                              | AA              | 1946733341               |

| SNPs IDs             | Chromosome IDs | Chromosomes     | Physical positions (bp) | CDC Frontier (Reference genome) | (ILWC46 & LPNB) | NCBI SNPdb Accession IDs |
|----------------------|----------------|-----------------|-------------------------|---------------------------------|-----------------|--------------------------|
| SNP_P4_9015_28941662 | NC_021160.1    | Ca_kabuli_chr01 | 28941662                | CC                              | TT              | 1946733343               |
| SNP_P4_9016_28941663 | NC_021160.1    | Ca_kabuli_chr01 | 28941663                | AA                              | GG              | 1946733345               |
| SNP_P4_9017_28941670 | NC_021160.1    | Ca_kabuli_chr01 | 28941670                | TT                              | AA              | 1946733347               |
| SNP_P4_9018_28941742 | NC_021160.1    | Ca_kabuli_chr01 | 28941742                | CC                              | AA              | 1946733349               |
| SNP_P4_9019_28941762 | NC_021160.1    | Ca_kabuli_chr01 | 28941762                | TT                              | CC              | 1946733351               |
| SNP_P4_9021_28942004 | NC_021160.1    | Ca_kabuli_chr01 | 28942004                | GG                              | AA              | 1946733353               |
| SNP_P4_9022_28942045 | NC_021160.1    | Ca_kabuli_chr01 | 28942045                | GG                              | TT              | 1946733355               |
| SNP_P4_9023_28942180 | NC_021160.1    | Ca_kabuli_chr01 | 28942180                | AA                              | CC              | 1946733357               |
| SNP_P4_9024_28942266 | NC_021160.1    | Ca_kabuli_chr01 | 28942266                | AA                              | GG              | 1946733359               |
| SNP_P4_9025_28943316 | NC_021160.1    | Ca_kabuli_chr01 | 28943316                | AA                              | TT              | 1946733361               |
| SNP_P4_9026_28943412 | NC_021160.1    | Ca_kabuli_chr01 | 28943412                | GG                              | AA              | 1946733363               |
| SNP_P4_9027_28943538 | NC_021160.1    | Ca_kabuli_chr01 | 28943538                | AA                              | GG              | 1946733365               |
| SNP_P4_9029_28943569 | NC_021160.1    | Ca_kabuli_chr01 | 28943569                | TT                              | CC              | 1946733367               |
| SNP_P4_9030_28943671 | NC_021160.1    | Ca_kabuli_chr01 | 28943671                | CC                              | AA              | 1946733369               |
| SNP_P4_9031_28943779 | NC_021160.1    | Ca_kabuli_chr01 | 28943779                | AA                              | GG              | 1946733371               |
| SNP_P4_9032_28943893 | NC_021160.1    | Ca_kabuli_chr01 | 28943893                | CC                              | TT              | 1946733373               |
| SNP_P4_9033_28943947 | NC_021160.1    | Ca_kabuli_chr01 | 28943947                | AA                              | TT              | 1946733374               |
| SNP_P4_9034_28944007 | NC_021160.1    | Ca_kabuli_chr01 | 28944007                | GG                              | AA              | 1946733376               |
| SNP_P4_9036_28944080 | NC_021160.1    | Ca_kabuli_chr01 | 28944080                | GG                              | TT              | 1946733378               |
| SNP_P4_9037_28944126 | NC_021160.1    | Ca_kabuli_chr01 | 28944126                | AA                              | TT              | 1946733380               |
| SNP_P4_9038_28944156 | NC_021160.1    | Ca_kabuli_chr01 | 28944156                | GG                              | AA              | 1946733382               |
| SNP_P4_9039_28944300 | NC_021160.1    | Ca_kabuli_chr01 | 28944300                | TT                              | CC              | 1946733384               |
| SNP_P4_9040_28944329 | NC_021160.1    | Ca_kabuli_chr01 | 28944329                | GG                              | TT              | 1946733386               |
| SNP_P4_9042_28944579 | NC_021160.1    | Ca_kabuli_chr01 | 28944579                | AA                              | GG              | 1946733388               |
| SNP_P4_9043_28944631 | NC_021160.1    | Ca_kabuli_chr01 | 28944631                | CC                              | TT              | 1946733390               |
| SNP_P4_9044_28944672 | NC_021160.1    | Ca_kabuli_chr01 | 28944672                | GG                              | TT              | 1946733392               |
| SNP_P4_9045_28944675 | NC_021160.1    | Ca_kabuli_chr01 | 28944675                | AA                              | GG              | 1946733394               |
| SNP_P4_9046_28944714 | NC_021160.1    | Ca_kabuli_chr01 | 28944714                | GG                              | TT              | 1946733396               |
| SNP_P4_9048_29029030 | NC_021160.1    | Ca_kabuli_chr01 | 29029030                | AA                              | TT              | 1946733398               |
| SNP_P4_9049_29029054 | NC_021160.1    | Ca_kabuli_chr01 | 29029054                | TT                              | CC              | 1946733400               |
| SNP_P4_9050_29029074 | NC_021160.1    | Ca_kabuli_chr01 | 29029074                | CC                              | TT              | 1946733402               |
| SNP_P4_9051_29029393 | NC_021160.1    | Ca_kabuli_chr01 | 29029393                | TT                              | CC              | 1946733404               |
| SNP_P4_9052_29050625 | NC_021160.1    | Ca_kabuli_chr01 | 29050625                | CC                              | AA              | 1946733406               |
| SNP_P4_9053_29050631 | NC_021160.1    | Ca_kabuli_chr01 | 29050631                | TT                              | CC              | 1946733408               |
| SNP_P4_9054_29071928 | NC_021160.1    | Ca_kabuli_chr01 | 29071928                | TT                              | AA              | 1946733410               |
| SNP_P4_9055_29072510 | NC_021160.1    | Ca_kabuli_chr01 | 29072510                | AA                              | GG              | 1946733412               |
| SNP_P4_9056_29102540 | NC_021160.1    | Ca_kabuli_chr01 | 29102540                | AA                              | GG              | 1946733414               |
| SNP_P4_9057_29106568 | NC_021160.1    | Ca_kabuli_chr01 | 29106568                | GG                              | AA              | 1946733416               |
| SNP_P4_9058_29106572 | NC_021160.1    | Ca_kabuli_chr01 | 29106572                | TT                              | GG              | 1946733418               |
| SNP_P4_9060_29134368 | NC_021160.1    | Ca_kabuli_chr01 | 29134368                | CC                              | TT              | 1946733420               |
| SNP_P4_9061_29140467 | NC_021160.1    | Ca_kabuli_chr01 | 29140467                | TT                              | AA              | 1946733422               |
| SNP_P4_9062_29144384 | NC_021160.1    | Ca_kabuli_chr01 | 29144384                | GG                              | AA              | 1946733424               |

| SNPs IDs             | Chromosome IDs | Chromosomes     | Physical positions (bp) | CDC Frontier (Reference genome) | (ILWC46 & LPNB) | NCBI SNPdb Accession IDs |
|----------------------|----------------|-----------------|-------------------------|---------------------------------|-----------------|--------------------------|
| SNP_P4_9063_29156201 | NC_021160.1    | Ca_kabuli_chr01 | 29156201                | AA                              | TT              | 1946733426               |
| SNP_P4_9064_29157356 | NC_021160.1    | Ca_kabuli_chr01 | 29157356                | GG                              | TT              | 1946733428               |
| SNP_P4_9066_29163335 | NC_021160.1    | Ca_kabuli_chr01 | 29163335                | CC                              | TT              | 1946733430               |
| SNP_P4_9067_29163338 | NC_021160.1    | Ca_kabuli_chr01 | 29163338                | GG                              | AA              | 1946733432               |
| SNP_P4_9068_29163398 | NC_021160.1    | Ca_kabuli_chr01 | 29163398                | CC                              | TT              | 1946733434               |
| SNP_P4_9069_29163405 | NC_021160.1    | Ca_kabuli_chr01 | 29163405                | GG                              | CC              | 1946733436               |
| SNP_P4_9070_29163423 | NC_021160.1    | Ca_kabuli_chr01 | 29163423                | TT                              | GG              | 1946733437               |
| SNP_P4_9071_29176738 | NC_021160.1    | Ca_kabuli_chr01 | 29176738                | GG                              | TT              | 1946733439               |
| SNP_P4_9072_29176779 | NC_021160.1    | Ca_kabuli_chr01 | 29176779                | GG                              | AA              | 1946733441               |
| SNP_P4_9073_29176852 | NC_021160.1    | Ca_kabuli_chr01 | 29176852                | AA                              | GG              | 1946733442               |
| SNP_P4_9074_29176954 | NC_021160.1    | Ca_kabuli_chr01 | 29176954                | CC                              | AA              | 1946733443               |
| SNP_P4_9075_29176986 | NC_021160.1    | Ca_kabuli_chr01 | 29176986                | AA                              | GG              | 1946733444               |
| SNP_P4_9076_29176998 | NC_021160.1    | Ca_kabuli_chr01 | 29176998                | AA                              | TT              | 1946733446               |
| SNP_P4_9077_29177012 | NC_021160.1    | Ca_kabuli_chr01 | 29177012                | TT                              | GG              | 1946733448               |
| SNP_P4_9078_29246112 | NC_021160.1    | Ca_kabuli_chr01 | 29246112                | TT                              | AA              | 1946733450               |
| SNP_P4_9079_29260677 | NC_021160.1    | Ca_kabuli_chr01 | 29260677                | TT                              | AA              | 1946733451               |
| SNP_P4_9080_29274953 | NC_021160.1    | Ca_kabuli_chr01 | 29274953                | AA                              | TT              | 1946733453               |
| SNP_P4_9081_29283593 | NC_021160.1    | Ca_kabuli_chr01 | 29283593                | CC                              | GG              | 1946733455               |
| SNP_P4_9082_29283594 | NC_021160.1    | Ca_kabuli_chr01 | 29283594                | TT                              | AA              | 1946733457               |
| SNP_P4_9083_29300133 | NC_021160.1    | Ca_kabuli_chr01 | 29300133                | TT                              | AA              | 1946733459               |
| SNP_P4_9084_29303968 | NC_021160.1    | Ca_kabuli_chr01 | 29303968                | AA                              | GG              | 1946733461               |
| SNP_P4_9085_29306191 | NC_021160.1    | Ca_kabuli_chr01 | 29306191                | CC                              | GG              | 1946733463               |
| SNP_P4_9086_29319915 | NC_021160.1    | Ca_kabuli_chr01 | 29319915                | AA                              | GG              | 1946733465               |
| SNP_P4_9087_29335822 | NC_021160.1    | Ca_kabuli_chr01 | 29335822                | GG                              | CC              | 1946733467               |
| SNP_P4_9089_29343994 | NC_021160.1    | Ca_kabuli_chr01 | 29343994                | GG                              | AA              | 1946733469               |
| SNP_P4_9090_29346822 | NC_021160.1    | Ca_kabuli_chr01 | 29346822                | TT                              | CC              | 1946733471               |
| SNP_P4_9091_29346840 | NC_021160.1    | Ca_kabuli_chr01 | 29346840                | GG                              | AA              | 1946733473               |
| SNP_P4_9092_29353346 | NC_021160.1    | Ca_kabuli_chr01 | 29353346                | AA                              | GG              | 1946733475               |
| SNP_P4_9093_29353595 | NC_021160.1    | Ca_kabuli_chr01 | 29353595                | AA                              | GG              | 1946733477               |
| SNP_P4_9094_29360043 | NC_021160.1    | Ca_kabuli_chr01 | 29360043                | TT                              | CC              | 1946733479               |
| SNP_P4_9095_29361559 | NC_021160.1    | Ca_kabuli_chr01 | 29361559                | TT                              | GG              | 1946733481               |
| SNP_P4_9096_29383593 | NC_021160.1    | Ca_kabuli_chr01 | 29383593                | CC                              | TT              | 1946733483               |
| SNP_P4_9097_29386772 | NC_021160.1    | Ca_kabuli_chr01 | 29386772                | TT                              | AA              | 1946733485               |
| SNP_P4_9098_29386800 | NC_021160.1    | Ca_kabuli_chr01 | 29386800                | AA                              | GG              | 1946733487               |
| SNP_P4_9099_29386833 | NC_021160.1    | Ca_kabuli_chr01 | 29386833                | TT                              | AA              | 1946733489               |
| SNP_P4_9101_29392857 | NC_021160.1    | Ca_kabuli_chr01 | 29392857                | TT                              | GG              | 1946733491               |
| SNP_P4_9103_29415729 | NC_021160.1    | Ca_kabuli_chr01 | 29415729                | CC                              | TT              | 1946733493               |
| SNP_P4_9104_29419736 | NC_021160.1    | Ca_kabuli_chr01 | 29419736                | GG                              | TT              | 1946733495               |
| SNP_P4_9105_29420304 | NC_021160.1    | Ca_kabuli_chr01 | 29420304                | GG                              | AA              | 1946733497               |
| SNP_P4_9106_29422282 | NC_021160.1    | Ca_kabuli_chr01 | 29422282                | AA                              | GG              | 1946733499               |
| SNP_P4_9107_29422531 | NC_021160.1    | Ca_kabuli_chr01 | 29422531                | AA                              | GG              | 1946733501               |
| SNP_P4_9108_29422565 | NC_021160.1    | Ca_kabuli_chr01 | 29422565                | GG                              | TT              | 1946733503               |

| SNPs IDs             | Chromosome IDs | Chromosomes     | Physical positions (bp) | CDC Frontier (Reference genome) | (ILWC46 & LPNB) | NCBI SNPdb Accession IDs |
|----------------------|----------------|-----------------|-------------------------|---------------------------------|-----------------|--------------------------|
| SNP_P4_9110_29422611 | NC_021160.1    | Ca_kabuli_chr01 | 29422611                | TT                              | CC              | 1946733505               |
| SNP_P4_9111_29422614 | NC_021160.1    | Ca_kabuli_chr01 | 29422614                | GG                              | AA              | 1946733507               |
| SNP_P4_9112_29455028 | NC_021160.1    | Ca_kabuli_chr01 | 29455028                | GG                              | TT              | 1946733509               |
| SNP_P4_9113_29455281 | NC_021160.1    | Ca_kabuli_chr01 | 29455281                | TT                              | CC              | 1946733511               |
| SNP_P4_9114_29455349 | NC_021160.1    | Ca_kabuli_chr01 | 29455349                | AA                              | GG              | 1946733513               |
| SNP_P4_9115_29471880 | NC_021160.1    | Ca_kabuli_chr01 | 29471880                | CC                              | TT              | 1946733515               |
| SNP_P4_9116_29483963 | NC_021160.1    | Ca_kabuli_chr01 | 29483963                | AA                              | CC              | 1946733517               |
| SNP_P4_9117_29505805 | NC_021160.1    | Ca_kabuli_chr01 | 29505805                | TT                              | AA              | 1946733520               |
| SNP_P4_9118_29505832 | NC_021160.1    | Ca_kabuli_chr01 | 29505832                | CC                              | TT              | 1946733522               |
| SNP_P4_9119_29505833 | NC_021160.1    | Ca_kabuli_chr01 | 29505833                | AA                              | GG              | 1946733524               |
| SNP_P4_9120_29505861 | NC_021160.1    | Ca_kabuli_chr01 | 29505861                | GG                              | AA              | 1946733527               |
| SNP_P4_9121_29505895 | NC_021160.1    | Ca_kabuli_chr01 | 29505895                | CC                              | AA              | 1946733529               |
| SNP_P4_9122_29505896 | NC_021160.1    | Ca_kabuli_chr01 | 29505896                | TT                              | CC              | 1946733530               |
| SNP_P4_9124_29515535 | NC_021160.1    | Ca_kabuli_chr01 | 29515535                | AA                              | GG              | 1946733532               |
| SNP_P4_9126_29524402 | NC_021160.1    | Ca_kabuli_chr01 | 29524402                | AA                              | GG              | 1946733534               |
| SNP_P4_9127_29525008 | NC_021160.1    | Ca_kabuli_chr01 | 29525008                | CC                              | TT              | 1946733536               |
| SNP_P4_9128_29525017 | NC_021160.1    | Ca_kabuli_chr01 | 29525017                | CC                              | TT              | 1946733538               |
| SNP_P4_9129_29525026 | NC_021160.1    | Ca_kabuli_chr01 | 29525026                | CC                              | TT              | 1946733540               |
| SNP_P4_9130_29526338 | NC_021160.1    | Ca_kabuli_chr01 | 29526338                | AA                              | TT              | 1946733542               |
| SNP_P4_9131_29526966 | NC_021160.1    | Ca_kabuli_chr01 | 29526966                | TT                              | CC              | 1946733544               |
| SNP_P4_9132_29538894 | NC_021160.1    | Ca_kabuli_chr01 | 29538894                | TT                              | CC              | 1946733546               |
| SNP_P4_9133_29538987 | NC_021160.1    | Ca_kabuli_chr01 | 29538987                | AA                              | GG              | 1946733548               |
| SNP_P4_9134_29539009 | NC_021160.1    | Ca_kabuli_chr01 | 29539009                | AA                              | GG              | 1946733550               |
| SNP_P4_9135_29539159 | NC_021160.1    | Ca_kabuli_chr01 | 29539159                | GG                              | AA              | 1946733552               |
| SNP_P4_9136_29540142 | NC_021160.1    | Ca_kabuli_chr01 | 29540142                | AA                              | GG              | 1946733554               |
| SNP_P4_9137_29544971 | NC_021160.1    | Ca_kabuli_chr01 | 29544971                | AA                              | GG              | 1946733556               |
| SNP_P4_9138_29572102 | NC_021160.1    | Ca_kabuli_chr01 | 29572102                | TT                              | GG              | 1946733558               |
| SNP_P4_9139_29572184 | NC_021160.1    | Ca_kabuli_chr01 | 29572184                | GG                              | AA              | 1946733559               |
| SNP_P4_9140_29572206 | NC_021160.1    | Ca_kabuli_chr01 | 29572206                | AA                              | GG              | 1946733561               |
| SNP_P4_9141_29572241 | NC_021160.1    | Ca_kabuli_chr01 | 29572241                | TT                              | CC              | 1946733563               |
| SNP_P4_9142_29572249 | NC_021160.1    | Ca_kabuli_chr01 | 29572249                | AA                              | GG              | 1946733565               |
| SNP_P4_9143_29572270 | NC_021160.1    | Ca_kabuli_chr01 | 29572270                | CC                              | TT              | 1946733567               |
| SNP_P4_9144_29572311 | NC_021160.1    | Ca_kabuli_chr01 | 29572311                | TT                              | CC              | 1946733569               |
| SNP_P4_9145_29572442 | NC_021160.1    | Ca_kabuli_chr01 | 29572442                | GG                              | AA              | 1946733571               |
| SNP_P4_9146_29572572 | NC_021160.1    | Ca_kabuli_chr01 | 29572572                | AA                              | GG              | 1946733573               |
| SNP_P4_9147_29572579 | NC_021160.1    | Ca_kabuli_chr01 | 29572579                | TT                              | CC              | 1946733575               |
| SNP_P4_9148_29572609 | NC_021160.1    | Ca_kabuli_chr01 | 29572609                | GG                              | AA              | 1946733577               |
| SNP_P4_9149_29572760 | NC_021160.1    | Ca_kabuli_chr01 | 29572760                | CC                              | TT              | 1946733579               |
| SNP_P4_9150_29576180 | NC_021160.1    | Ca_kabuli_chr01 | 29576180                | TT                              | CC              | 1946733581               |
| SNP_P4_9151_29579998 | NC_021160.1    | Ca_kabuli_chr01 | 29579998                | CC                              | TT              | 1946733583               |
| SNP_P4_9152_29582811 | NC_021160.1    | Ca_kabuli_chr01 | 29582811                | GG                              | CC              | 1946733585               |
| SNP_P4_9154_29587691 | NC_021160.1    | Ca_kabuli_chr01 | 29587691                | TT                              | CC              | 1946733587               |

| SNPs IDs             | Chromosome IDs | Chromosomes     | Physical positions (bp) | CDC Frontier (Reference genome) | (ILWC46 & LPNB) | NCBI SNPdb Accession IDs |
|----------------------|----------------|-----------------|-------------------------|---------------------------------|-----------------|--------------------------|
| SNP_P4_9155_29587701 | NC_021160.1    | Ca_kabuli_chr01 | 29587701                | AA                              | TT              | 1946733589               |
| SNP_P4_9156_29589521 | NC_021160.1    | Ca_kabuli_chr01 | 29589521                | AA                              | CC              | 1946733591               |
| SNP_P4_9157_29589535 | NC_021160.1    | Ca_kabuli_chr01 | 29589535                | AA                              | GG              | 1946733593               |
| SNP_P4_9158_29604771 | NC_021160.1    | Ca_kabuli_chr01 | 29604771                | CC                              | GG              | 1946733595               |
| SNP_P4_9159_29608860 | NC_021160.1    | Ca_kabuli_chr01 | 29608860                | TT                              | CC              | 1946733597               |
| SNP_P4_9160_29619593 | NC_021160.1    | Ca_kabuli_chr01 | 29619593                | CC                              | AA              | 1946733599               |
| SNP_P4_9161_29619830 | NC_021160.1    | Ca_kabuli_chr01 | 29619830                | AA                              | CC              | 1946733601               |
| SNP_P4_9162_29620230 | NC_021160.1    | Ca_kabuli_chr01 | 29620230                | GG                              | TT              | 1946733603               |
| SNP_P4_9163_29632665 | NC_021160.1    | Ca_kabuli_chr01 | 29632665                | TT                              | GG              | 1946733605               |
| SNP_P4_9164_29635296 | NC_021160.1    | Ca_kabuli_chr01 | 29635296                | TT                              | CC              | 1946733607               |
| SNP_P4_9165_29636688 | NC_021160.1    | Ca_kabuli_chr01 | 29636688                | GG                              | CC              | 1946733609               |
| SNP_P4_9167_29636959 | NC_021160.1    | Ca_kabuli_chr01 | 29636959                | AA                              | GG              | 1946733611               |
| SNP_P4_9169_29637110 | NC_021160.1    | Ca_kabuli_chr01 | 29637110                | CC                              | TT              | 1946733613               |
| SNP_P4_9170_29637157 | NC_021160.1    | Ca_kabuli_chr01 | 29637157                | AA                              | GG              | 1946733615               |
| SNP_P4_9171_29637342 | NC_021160.1    | Ca_kabuli_chr01 | 29637342                | AA                              | GG              | 1946733617               |
| SNP_P4_9172_29643475 | NC_021160.1    | Ca_kabuli_chr01 | 29643475                | TT                              | CC              | 1946733619               |
| SNP_P4_9173_29643488 | NC_021160.1    | Ca_kabuli_chr01 | 29643488                | TT                              | CC              | 1946733621               |
| SNP_P4_9174_29644159 | NC_021160.1    | Ca_kabuli_chr01 | 29644159                | GG                              | CC              | 1946733623               |
| SNP_P4_9175_29649728 | NC_021160.1    | Ca_kabuli_chr01 | 29649728                | AA                              | GG              | 1946733625               |
| SNP_P4_9176_29649730 | NC_021160.1    | Ca_kabuli_chr01 | 29649730                | CC                              | TT              | 1946733627               |
| SNP_P4_9177_29650149 | NC_021160.1    | Ca_kabuli_chr01 | 29650149                | AA                              | TT              | 1946733629               |
| SNP_P4_9179_29651022 | NC_021160.1    | Ca_kabuli_chr01 | 29651022                | CC                              | TT              | 1946733631               |
| SNP_P4_9180_29651843 | NC_021160.1    | Ca_kabuli_chr01 | 29651843                | TT                              | CC              | 1946733633               |
| SNP_P4_9181_29662577 | NC_021160.1    | Ca_kabuli_chr01 | 29662577                | AA                              | GG              | 1946733636               |
| SNP_P4_9183_29667539 | NC_021160.1    | Ca_kabuli_chr01 | 29667539                | CC                              | TT              | 1946733638               |
| SNP_P4_9184_29681676 | NC_021160.1    | Ca_kabuli_chr01 | 29681676                | AA                              | GG              | 1946733640               |
| SNP_P4_9185_29681704 | NC_021160.1    | Ca_kabuli_chr01 | 29681704                | TT                              | CC              | 1946733642               |
| SNP_P4_9186_29681746 | NC_021160.1    | Ca_kabuli_chr01 | 29681746                | GG                              | TT              | 1946733644               |
| SNP_P4_9187_29681757 | NC_021160.1    | Ca_kabuli_chr01 | 29681757                | TT                              | AA              | 1946733646               |
| SNP_P4_9188_29681764 | NC_021160.1    | Ca_kabuli_chr01 | 29681764                | CC                              | TT              | 1946733648               |
| SNP_P4_9189_29708430 | NC_021160.1    | Ca_kabuli_chr01 | 29708430                | GG                              | AA              | 1946733650               |
| SNP_P4_9190_29708494 | NC_021160.1    | Ca_kabuli_chr01 | 29708494                | CC                              | TT              | 1946733652               |
| SNP_P4_9191_29708521 | NC_021160.1    | Ca_kabuli_chr01 | 29708521                | GG                              | AA              | 1946733654               |
| SNP_P4_9192_29709089 | NC_021160.1    | Ca_kabuli_chr01 | 29709089                | TT                              | GG              | 1946733656               |
| SNP_P4_9193_29709116 | NC_021160.1    | Ca_kabuli_chr01 | 29709116                | TT                              | CC              | 1946733658               |
| SNP_P4_9194_29709146 | NC_021160.1    | Ca_kabuli_chr01 | 29709146                | TT                              | CC              | 1946733660               |
| SNP_P4_9196_29738800 | NC_021160.1    | Ca_kabuli_chr01 | 29738800                | TT                              | CC              | 1946733662               |
| SNP_P4_9197_29738832 | NC_021160.1    | Ca_kabuli_chr01 | 29738832                | AA                              | GG              | 1946733664               |
| SNP_P4_9198_29748203 | NC_021160.1    | Ca_kabuli_chr01 | 29748203                | TT                              | AA              | 1946733666               |
| SNP_P4_9199_29748251 | NC_021160.1    | Ca_kabuli_chr01 | 29748251                | TT                              | GG              | 1946733668               |
| SNP_P4_9200_29749936 | NC_021160.1    | Ca_kabuli_chr01 | 29749936                | CC                              | GG              | 1946733670               |
| SNP_P4_9201_29764271 | NC_021160.1    | Ca_kabuli_chr01 | 29764271                | AA                              | GG              | 1946733672               |

| SNPs IDs             | Chromosome IDs | Chromosomes     | Physical positions (bp) | CDC Frontier (Reference genome) | (ILWC46 & LPNB) | NCBI SNPdb Accession IDs |
|----------------------|----------------|-----------------|-------------------------|---------------------------------|-----------------|--------------------------|
| SNP_P4_9202_29764273 | NC_021160.1    | Ca_kabuli_chr01 | 29764273                | AA                              | GG              | 1946733674               |
| SNP_P4_9203_29764296 | NC_021160.1    | Ca_kabuli_chr01 | 29764296                | TT                              | CC              | 1946733676               |
| SNP_P4_9204_29764326 | NC_021160.1    | Ca_kabuli_chr01 | 29764326                | CC                              | TT              | 1946733678               |
| SNP_P4_9205_29766312 | NC_021160.1    | Ca_kabuli_chr01 | 29766312                | AA                              | GG              | 1946733680               |
| SNP_P4_9206_29766390 | NC_021160.1    | Ca_kabuli_chr01 | 29766390                | TT                              | CC              | 1946733682               |
| SNP_P4_9207_29770183 | NC_021160.1    | Ca_kabuli_chr01 | 29770183                | TT                              | AA              | 1946733684               |
| SNP_P4_9208_29770196 | NC_021160.1    | Ca_kabuli_chr01 | 29770196                | TT                              | AA              | 1946733686               |
| SNP_P4_9209_29781621 | NC_021160.1    | Ca_kabuli_chr01 | 29781621                | GG                              | AA              | 1946733688               |
| SNP_P4_9210_29781675 | NC_021160.1    | Ca_kabuli_chr01 | 29781675                | AA                              | GG              | 1946733690               |
| SNP_P4_9211_29781690 | NC_021160.1    | Ca_kabuli_chr01 | 29781690                | AA                              | GG              | 1946733692               |
| SNP_P4_9212_29781733 | NC_021160.1    | Ca_kabuli_chr01 | 29781733                | GG                              | AA              | 1946733695               |
| SNP_P4_9213_29781738 | NC_021160.1    | Ca_kabuli_chr01 | 29781738                | AA                              | CC              | 1946733698               |
| SNP_P4_9214_29781963 | NC_021160.1    | Ca_kabuli_chr01 | 29781963                | AA                              | CC              | 1946733701               |
| SNP_P4_9215_29781970 | NC_021160.1    | Ca_kabuli_chr01 | 29781970                | TT                              | CC              | 1946733704               |
| SNP_P4_9216_29782086 | NC_021160.1    | Ca_kabuli_chr01 | 29782086                | AA                              | TT              | 1946733706               |
| SNP_P4_9218_29791606 | NC_021160.1    | Ca_kabuli_chr01 | 29791606                | TT                              | AA              | 1946733708               |
| SNP_P4_9219_29792284 | NC_021160.1    | Ca_kabuli_chr01 | 29792284                | GG                              | AA              | 1946733710               |
| SNP_P4_9220_29792661 | NC_021160.1    | Ca_kabuli_chr01 | 29792661                | AA                              | CC              | 1946733712               |
| SNP_P4_9221_29792675 | NC_021160.1    | Ca_kabuli_chr01 | 29792675                | TT                              | AA              | 1946733714               |
| SNP_P4_9222_29792683 | NC_021160.1    | Ca_kabuli_chr01 | 29792683                | CC                              | TT              | 1946733716               |
| SNP_P4_9223_29792686 | NC_021160.1    | Ca_kabuli_chr01 | 29792686                | GG                              | TT              | 1946733718               |
| SNP_P4_9224_29796606 | NC_021160.1    | Ca_kabuli_chr01 | 29796606                | CC                              | TT              | 1946733720               |
| SNP_P4_9227_29811780 | NC_021160.1    | Ca_kabuli_chr01 | 29811780                | TT                              | CC              | 1946733722               |
| SNP_P4_9228_29812872 | NC_021160.1    | Ca_kabuli_chr01 | 29812872                | TT                              | AA              | 1946733724               |
| SNP_P4_9229_29812873 | NC_021160.1    | Ca_kabuli_chr01 | 29812873                | TT                              | CC              | 1946733726               |
| SNP_P4_9230_29812877 | NC_021160.1    | Ca_kabuli_chr01 | 29812877                | AA                              | TT              | 1946733728               |
| SNP_P4_9231_29813954 | NC_021160.1    | Ca_kabuli_chr01 | 29813954                | CC                              | TT              | 1946733730               |
| SNP_P4_9233_29817224 | NC_021160.1    | Ca_kabuli_chr01 | 29817224                | AA                              | GG              | 1946733732               |
| SNP_P4_9234_29817250 | NC_021160.1    | Ca_kabuli_chr01 | 29817250                | CC                              | TT              | 1946733734               |
| SNP_P4_9235_29817437 | NC_021160.1    | Ca_kabuli_chr01 | 29817437                | CC                              | AA              | 1946733736               |
| SNP_P4_9236_29817449 | NC_021160.1    | Ca_kabuli_chr01 | 29817449                | GG                              | AA              | 1946733738               |
| SNP_P4_9237_29817460 | NC_021160.1    | Ca_kabuli_chr01 | 29817460                | AA                              | GG              | 1946733740               |
| SNP_P4_9238_29817514 | NC_021160.1    | Ca_kabuli_chr01 | 29817514                | CC                              | AA              | 1946733741               |
| SNP_P4_9239_29817516 | NC_021160.1    | Ca_kabuli_chr01 | 29817516                | TT                              | CC              | 1946733743               |
| SNP_P4_9240_29817658 | NC_021160.1    | Ca_kabuli_chr01 | 29817658                | CC                              | TT              | 1946733745               |
| SNP_P4_9241_29817901 | NC_021160.1    | Ca_kabuli_chr01 | 29817901                | TT                              | CC              | 1946733747               |
| SNP_P4_9242_29817948 | NC_021160.1    | Ca_kabuli_chr01 | 29817948                | GG                              | AA              | 1946733749               |
| SNP_P4_9243_29817982 | NC_021160.1    | Ca_kabuli_chr01 | 29817982                | CC                              | TT              | 1946733751               |
| SNP_P4_9244_29818025 | NC_021160.1    | Ca_kabuli_chr01 | 29818025                | TT                              | CC              | 1946733753               |
| SNP_P4_9245_29818196 | NC_021160.1    | Ca_kabuli_chr01 | 29818196                | CC                              | AA              | 1946733755               |
| SNP_P4_9246_29818233 | NC_021160.1    | Ca_kabuli_chr01 | 29818233                | AA                              | GG              | 1946733757               |
| SNP_P4_9247_29818311 | NC_021160.1    | Ca_kabuli_chr01 | 29818311                | TT                              | CC              | 1946733759               |

| SNPs IDs             | Chromosome IDs | Chromosomes     | Physical positions (bp) | CDC Frontier (Reference genome) | (ILWC46 & LPNB) | NCBI SNPdb Accession IDs |
|----------------------|----------------|-----------------|-------------------------|---------------------------------|-----------------|--------------------------|
| SNP_P4_9248_29818367 | NC_021160.1    | Ca_kabuli_chr01 | 29818367                | AA                              | GG              | 1946733761               |
| SNP_P4_9249_29818390 | NC_021160.1    | Ca_kabuli_chr01 | 29818390                | AA                              | GG              | 1946733763               |
| SNP_P4_9250_29818474 | NC_021160.1    | Ca_kabuli_chr01 | 29818474                | AA                              | GG              | 1946733765               |
| SNP_P4_9251_29818597 | NC_021160.1    | Ca_kabuli_chr01 | 29818597                | TT                              | CC              | 1946733767               |
| SNP_P4_9252_29818601 | NC_021160.1    | Ca_kabuli_chr01 | 29818601                | AA                              | GG              | 1946733769               |
| SNP_P4_9253_29818605 | NC_021160.1    | Ca_kabuli_chr01 | 29818605                | AA                              | CC              | 1946733771               |
| SNP_P4_9254_29818615 | NC_021160.1    | Ca_kabuli_chr01 | 29818615                | TT                              | CC              | 1946733773               |
| SNP_P4_9255_29818667 | NC_021160.1    | Ca_kabuli_chr01 | 29818667                | GG                              | AA              | 1946733775               |
| SNP_P4_9257_29821444 | NC_021160.1    | Ca_kabuli_chr01 | 29821444                | CC                              | TT              | 1946733777               |
| SNP_P4_9258_29821458 | NC_021160.1    | Ca_kabuli_chr01 | 29821458                | TT                              | CC              | 1946733779               |
| SNP_P4_9259_29823411 | NC_021160.1    | Ca_kabuli_chr01 | 29823411                | GG                              | AA              | 1946733781               |
| SNP_P4_9260_29823495 | NC_021160.1    | Ca_kabuli_chr01 | 29823495                | AA                              | TT              | 1946733783               |
| SNP_P4_9261_29823496 | NC_021160.1    | Ca_kabuli_chr01 | 29823496                | TT                              | CC              | 1946733785               |
| SNP_P4_9262_29823570 | NC_021160.1    | Ca_kabuli_chr01 | 29823570                | CC                              | TT              | 1946733787               |
| SNP_P4_9263_29823595 | NC_021160.1    | Ca_kabuli_chr01 | 29823595                | CC                              | TT              | 1946733789               |
| SNP_P4_9264_29823812 | NC_021160.1    | Ca_kabuli_chr01 | 29823812                | CC                              | AA              | 1946733791               |
| SNP_P4_9265_29824286 | NC_021160.1    | Ca_kabuli_chr01 | 29824286                | CC                              | TT              | 1946733793               |
| SNP_P4_9266_29824320 | NC_021160.1    | Ca_kabuli_chr01 | 29824320                | TT                              | AA              | 1946733795               |
| SNP_P4_9267_29824668 | NC_021160.1    | Ca_kabuli_chr01 | 29824668                | TT                              | CC              | 1946733797               |
| SNP_P4_9268_29824738 | NC_021160.1    | Ca_kabuli_chr01 | 29824738                | GG                              | AA              | 1946733799               |
| SNP_P4_9269_29824753 | NC_021160.1    | Ca_kabuli_chr01 | 29824753                | AA                              | TT              | 1946733801               |
| SNP_P4_9270_29824798 | NC_021160.1    | Ca_kabuli_chr01 | 29824798                | CC                              | TT              | 1946733803               |
| SNP_P4_9271_29824840 | NC_021160.1    | Ca_kabuli_chr01 | 29824840                | TT                              | CC              | 1946733805               |
| SNP_P4_9272_29824861 | NC_021160.1    | Ca_kabuli_chr01 | 29824861                | GG                              | TT              | 1946733807               |
| SNP_P4_9273_29824933 | NC_021160.1    | Ca_kabuli_chr01 | 29824933                | GG                              | AA              | 1946733809               |
| SNP_P4_9274_29824987 | NC_021160.1    | Ca_kabuli_chr01 | 29824987                | GG                              | AA              | 1946733811               |
| SNP_P4_9275_29825002 | NC_021160.1    | Ca_kabuli_chr01 | 29825002                | CC                              | TT              | 1946733813               |
| SNP_P4_9276_29825092 | NC_021160.1    | Ca_kabuli_chr01 | 29825092                | GG                              | AA              | 1946733815               |
| SNP_P4_9277_29825125 | NC_021160.1    | Ca_kabuli_chr01 | 29825125                | GG                              | AA              | 1946733817               |
| SNP_P4_9278_29825128 | NC_021160.1    | Ca_kabuli_chr01 | 29825128                | TT                              | GG              | 1946733819               |
| SNP_P4_9280_29825588 | NC_021160.1    | Ca_kabuli_chr01 | 29825588                | AA                              | TT              | 1946733821               |
| SNP_P4_9282_29830003 | NC_021160.1    | Ca_kabuli_chr01 | 29830003                | CC                              | AA              | 1946733823               |
| SNP_P4_9283_29830227 | NC_021160.1    | Ca_kabuli_chr01 | 29830227                | TT                              | GG              | 1946733825               |
| SNP_P4_9284_29830271 | NC_021160.1    | Ca_kabuli_chr01 | 29830271                | TT                              | AA              | 1946733827               |
| SNP_P4_9285_29830272 | NC_021160.1    | Ca_kabuli_chr01 | 29830272                | TT                              | CC              | 1946733829               |
| SNP_P4_9286_29841456 | NC_021160.1    | Ca_kabuli_chr01 | 29841456                | TT                              | CC              | 1946733831               |
| SNP_P4_9287_29841835 | NC_021160.1    | Ca_kabuli_chr01 | 29841835                | CC                              | TT              | 1946733833               |
| SNP_P4_9288_29841895 | NC_021160.1    | Ca_kabuli_chr01 | 29841895                | AA                              | GG              | 1946733834               |
| SNP_P4_9289_29841949 | NC_021160.1    | Ca_kabuli_chr01 | 29841949                | CC                              | AA              | 1946733836               |
| SNP_P4_9290_29842165 | NC_021160.1    | Ca_kabuli_chr01 | 29842165                | TT                              | CC              | 1946733838               |
| SNP_P4_9291_29842268 | NC_021160.1    | Ca_kabuli_chr01 | 29842268                | AA                              | GG              | 1946733840               |
| SNP_P4_9292_29842342 | NC_021160.1    | Ca_kabuli_chr01 | 29842342                | TT                              | AA              | 1946733842               |

| SNPs IDs             | Chromosome IDs | Chromosomes     | Physical positions (bp) | CDC Frontier (Reference genome) | (ILWC46 & LPNB) | NCBI SNPdb Accession IDs |
|----------------------|----------------|-----------------|-------------------------|---------------------------------|-----------------|--------------------------|
| SNP_P4_9293_29842387 | NC_021160.1    | Ca_kabuli_chr01 | 29842387                | GG                              | AA              | 1946733844               |
| SNP_P4_9294_29842394 | NC_021160.1    | Ca_kabuli_chr01 | 29842394                | AA                              | GG              | 1946733846               |
| SNP_P4_9295_29842411 | NC_021160.1    | Ca_kabuli_chr01 | 29842411                | TT                              | GG              | 1946733848               |
| SNP_P4_9297_29842636 | NC_021160.1    | Ca_kabuli_chr01 | 29842636                | TT                              | CC              | 1946733850               |
| SNP_P4_9298_29842637 | NC_021160.1    | Ca_kabuli_chr01 | 29842637                | TT                              | CC              | 1946733852               |
| SNP_P4_9299_29842658 | NC_021160.1    | Ca_kabuli_chr01 | 29842658                | TT                              | AA              | 1946733854               |
| SNP_P4_9300_29842683 | NC_021160.1    | Ca_kabuli_chr01 | 29842683                | AA                              | CC              | 1946733856               |
| SNP_P4_9301_29842732 | NC_021160.1    | Ca_kabuli_chr01 | 29842732                | TT                              | CC              | 1946733858               |
| SNP_P4_9302_29842772 | NC_021160.1    | Ca_kabuli_chr01 | 29842772                | AA                              | GG              | 1946733860               |
| SNP_P4_9303_29843169 | NC_021160.1    | Ca_kabuli_chr01 | 29843169                | CC                              | TT              | 1946733862               |
| SNP_P4_9304_29843494 | NC_021160.1    | Ca_kabuli_chr01 | 29843494                | CC                              | AA              | 1946733864               |
| SNP_P4_9305_29843549 | NC_021160.1    | Ca_kabuli_chr01 | 29843549                | CC                              | TT              | 1946733866               |
| SNP_P4_9306_29843748 | NC_021160.1    | Ca_kabuli_chr01 | 29843748                | AA                              | TT              | 1946733867               |
| SNP_P4_9308_29843889 | NC_021160.1    | Ca_kabuli_chr01 | 29843889                | TT                              | CC              | 1946733869               |
| SNP_P4_9309_29844046 | NC_021160.1    | Ca_kabuli_chr01 | 29844046                | AA                              | GG              | 1946733871               |
| SNP_P4_9311_29844512 | NC_021160.1    | Ca_kabuli_chr01 | 29844512                | TT                              | GG              | 1946733873               |
| SNP_P4_9312_29844537 | NC_021160.1    | Ca_kabuli_chr01 | 29844537                | GG                              | CC              | 1946733875               |
| SNP_P4_9313_29845069 | NC_021160.1    | Ca_kabuli_chr01 | 29845069                | TT                              | GG              | 1946733877               |
| SNP_P4_9314_29845249 | NC_021160.1    | Ca_kabuli_chr01 | 29845249                | AA                              | TT              | 1946733879               |
| SNP_P4_9315_29845517 | NC_021160.1    | Ca_kabuli_chr01 | 29845517                | TT                              | AA              | 1946733881               |
| SNP_P4_9316_29845533 | NC_021160.1    | Ca_kabuli_chr01 | 29845533                | TT                              | CC              | 1946733883               |
| SNP_P4_9317_29845806 | NC_021160.1    | Ca_kabuli_chr01 | 29845806                | AA                              | CC              | 1946733885               |
| SNP_P4_9318_29845918 | NC_021160.1    | Ca_kabuli_chr01 | 29845918                | TT                              | CC              | 1946733887               |
| SNP_P4_9319_29845923 | NC_021160.1    | Ca_kabuli_chr01 | 29845923                | AA                              | TT              | 1946733889               |
| SNP_P4_9320_29846237 | NC_021160.1    | Ca_kabuli_chr01 | 29846237                | TT                              | CC              | 1946733891               |
| SNP_P4_9321_29846270 | NC_021160.1    | Ca_kabuli_chr01 | 29846270                | GG                              | AA              | 1946733894               |
| SNP_P4_9322_29846295 | NC_021160.1    | Ca_kabuli_chr01 | 29846295                | TT                              | CC              | 1946733896               |
| SNP_P4_9323_29846392 | NC_021160.1    | Ca_kabuli_chr01 | 29846392                | TT                              | GG              | 1946733898               |
| SNP_P4_9324_29846428 | NC_021160.1    | Ca_kabuli_chr01 | 29846428                | CC                              | AA              | 1946733900               |
| SNP_P4_9325_29846434 | NC_021160.1    | Ca_kabuli_chr01 | 29846434                | TT                              | GG              | 1946733902               |
| SNP_P4_9326_29846491 | NC_021160.1    | Ca_kabuli_chr01 | 29846491                | GG                              | TT              | 1946733904               |
| SNP_P4_9328_29846574 | NC_021160.1    | Ca_kabuli_chr01 | 29846574                | TT                              | AA              | 1946733906               |
| SNP_P4_9330_29847045 | NC_021160.1    | Ca_kabuli_chr01 | 29847045                | AA                              | TT              | 1946733908               |
| SNP_P4_9331_29847336 | NC_021160.1    | Ca_kabuli_chr01 | 29847336                | AA                              | GG              | 1946733910               |
| SNP_P4_9332_29847457 | NC_021160.1    | Ca_kabuli_chr01 | 29847457                | CC                              | AA              | 1946733912               |
| SNP_P4_9333_29847500 | NC_021160.1    | Ca_kabuli_chr01 | 29847500                | TT                              | CC              | 1946733914               |
| SNP_P4_9334_29847534 | NC_021160.1    | Ca_kabuli_chr01 | 29847534                | CC                              | TT              | 1946733916               |
| SNP_P4_9335_29847570 | NC_021160.1    | Ca_kabuli_chr01 | 29847570                | TT                              | CC              | 1946733918               |
| SNP_P4_9336_29847608 | NC_021160.1    | Ca_kabuli_chr01 | 29847608                | GG                              | AA              | 1946733920               |
| SNP_P4_9337_29847701 | NC_021160.1    | Ca_kabuli_chr01 | 29847701                | GG                              | AA              | 1946733922               |
| SNP_P4_9338_29847781 | NC_021160.1    | Ca_kabuli_chr01 | 29847781                | CC                              | GG              | 1946733924               |
| SNP_P4_9339_29847861 | NC_021160.1    | Ca_kabuli_chr01 | 29847861                | TT                              | CC              | 1946733926               |



| SNPs IDs             | Chromosome IDs | Chromosomes     | Physical positions (bp) | CDC Frontier (Reference genome) | (ILWC46 & LPNB) | NCBI SNPdb Accession IDs |
|----------------------|----------------|-----------------|-------------------------|---------------------------------|-----------------|--------------------------|
| SNP_P4_9340_29847918 | NC_021160.1    | Ca_kabuli_chr01 | 29847918                | GG                              | TT              | 1946733928               |
| SNP_P4_9343_29848169 | NC_021160.1    | Ca_kabuli_chr01 | 29848169                | CC                              | TT              | 1946733930               |
| SNP_P4_9344_29848317 | NC_021160.1    | Ca_kabuli_chr01 | 29848317                | AA                              | TT              | 1946733932               |
| SNP_P4_9345_29848320 | NC_021160.1    | Ca_kabuli_chr01 | 29848320                | TT                              | CC              | 1946733934               |
| SNP_P4_9346_29848428 | NC_021160.1    | Ca_kabuli_chr01 | 29848428                | CC                              | AA              | 1946733936               |
| SNP_P4_9347_29848466 | NC_021160.1    | Ca_kabuli_chr01 | 29848466                | GG                              | AA              | 1946733938               |
| SNP_P4_9348_29848512 | NC_021160.1    | Ca_kabuli_chr01 | 29848512                | GG                              | TT              | 1946733940               |
| SNP_P4_9349_29848826 | NC_021160.1    | Ca_kabuli_chr01 | 29848826                | TT                              | CC              | 1946733942               |
| SNP_P4_9350_29848856 | NC_021160.1    | Ca_kabuli_chr01 | 29848856                | GG                              | AA              | 1946733944               |
| SNP_P4_9351_29848868 | NC_021160.1    | Ca_kabuli_chr01 | 29848868                | GG                              | AA              | 1946733946               |
| SNP_P4_9352_29848871 | NC_021160.1    | Ca_kabuli_chr01 | 29848871                | GG                              | AA              | 1946733948               |
| SNP_P4_9353_29848880 | NC_021160.1    | Ca_kabuli_chr01 | 29848880                | GG                              | AA              | 1946733949               |
| SNP_P4_9354_29849049 | NC_021160.1    | Ca_kabuli_chr01 | 29849049                | GG                              | AA              | 1946733951               |
| SNP_P4_9355_29849050 | NC_021160.1    | Ca_kabuli_chr01 | 29849050                | CC                              | GG              | 1946733953               |
| SNP_P4_9356_29849052 | NC_021160.1    | Ca_kabuli_chr01 | 29849052                | AA                              | GG              | 1946733955               |
| SNP_P4_9357_29849056 | NC_021160.1    | Ca_kabuli_chr01 | 29849056                | GG                              | AA              | 1946733957               |
| SNP_P4_9358_29849068 | NC_021160.1    | Ca_kabuli_chr01 | 29849068                | AA                              | GG              | 1946733959               |
| SNP_P4_9359_29849081 | NC_021160.1    | Ca_kabuli_chr01 | 29849081                | AA                              | TT              | 1946733961               |
| SNP_P4_9360_29849121 | NC_021160.1    | Ca_kabuli_chr01 | 29849121                | TT                              | CC              | 1946733964               |
| SNP_P4_9361_29849234 | NC_021160.1    | Ca_kabuli_chr01 | 29849234                | GG                              | AA              | 1946733966               |
| SNP_P4_9362_29849255 | NC_021160.1    | Ca_kabuli_chr01 | 29849255                | GG                              | AA              | 1946733968               |
| SNP_P4_9363_29849257 | NC_021160.1    | Ca_kabuli_chr01 | 29849257                | GG                              | CC              | 1946733970               |
| SNP_P4_9364_29849267 | NC_021160.1    | Ca_kabuli_chr01 | 29849267                | AA                              | GG              | 1946733972               |
| SNP_P4_9365_29849268 | NC_021160.1    | Ca_kabuli_chr01 | 29849268                | CC                              | GG              | 1946733974               |
| SNP_P4_9366_29849272 | NC_021160.1    | Ca_kabuli_chr01 | 29849272                | CC                              | AA              | 1946733976               |
| SNP_P4_9367_29849342 | NC_021160.1    | Ca_kabuli_chr01 | 29849342                | CC                              | TT              | 1946733978               |
| SNP_P4_9368_29849362 | NC_021160.1    | Ca_kabuli_chr01 | 29849362                | CC                              | TT              | 1946733981               |
| SNP_P4_9369_29849441 | NC_021160.1    | Ca_kabuli_chr01 | 29849441                | CC                              | AA              | 1946733983               |
| SNP_P4_9370_29849553 | NC_021160.1    | Ca_kabuli_chr01 | 29849553                | GG                              | AA              | 1946733985               |
| SNP_P4_9371_29849617 | NC_021160.1    | Ca_kabuli_chr01 | 29849617                | AA                              | GG              | 1946733987               |
| SNP_P4_9372_29849659 | NC_021160.1    | Ca_kabuli_chr01 | 29849659                | GG                              | AA              | 1946733989               |
| SNP_P4_9373_29850545 | NC_021160.1    | Ca_kabuli_chr01 | 29850545                | GG                              | AA              | 1946733991               |
| SNP_P4_9374_29850842 | NC_021160.1    | Ca_kabuli_chr01 | 29850842                | AA                              | GG              | 1946733993               |
| SNP_P4_9375_29852030 | NC_021160.1    | Ca_kabuli_chr01 | 29852030                | TT                              | CC              | 1946733996               |
| SNP_P4_9376_29852202 | NC_021160.1    | Ca_kabuli_chr01 | 29852202                | CC                              | TT              | 1946733998               |
| SNP_P4_9377_29852204 | NC_021160.1    | Ca_kabuli_chr01 | 29852204                | TT                              | AA              | 1946734000               |
| SNP_P4_9378_29852212 | NC_021160.1    | Ca_kabuli_chr01 | 29852212                | AA                              | TT              | 1946734002               |
| SNP_P4_9379_29852340 | NC_021160.1    | Ca_kabuli_chr01 | 29852340                | TT                              | CC              | 1946734004               |
| SNP_P4_9380_29852469 | NC_021160.1    | Ca_kabuli_chr01 | 29852469                | TT                              | GG              | 1946734006               |
| SNP_P4_9381_29852480 | NC_021160.1    | Ca_kabuli_chr01 | 29852480                | AA                              | GG              | 1946734009               |
| SNP_P4_9382_29852482 | NC_021160.1    | Ca_kabuli_chr01 | 29852482                | AA                              | TT              | 1946734011               |
| SNP_P4_9383_29852517 | NC_021160.1    | Ca_kabuli_chr01 | 29852517                | TT                              | CC              | 1946734013               |

| SNPs IDs             | Chromosome IDs | Chromosomes     | Physical positions (bp) | CDC Frontier (Reference genome) | (ILWC46 & LPNB) | NCBI SNPdb Accession IDs |
|----------------------|----------------|-----------------|-------------------------|---------------------------------|-----------------|--------------------------|
| SNP_P4_9384_29852946 | NC_021160.1    | Ca_kabuli_chr01 | 29852946                | AA                              | CC              | 1946734015               |
| SNP_P4_9385_29852947 | NC_021160.1    | Ca_kabuli_chr01 | 29852947                | TT                              | AA              | 1946734017               |
| SNP_P4_9386_29853003 | NC_021160.1    | Ca_kabuli_chr01 | 29853003                | TT                              | AA              | 1946734019               |
| SNP_P4_9388_29853554 | NC_021160.1    | Ca_kabuli_chr01 | 29853554                | AA                              | CC              | 1946734021               |
| SNP_P4_9390_29853836 | NC_021160.1    | Ca_kabuli_chr01 | 29853836                | CC                              | AA              | 1946734023               |
| SNP_P4_9391_29853930 | NC_021160.1    | Ca_kabuli_chr01 | 29853930                | AA                              | CC              | 1946734025               |
| SNP_P4_9392_29854080 | NC_021160.1    | Ca_kabuli_chr01 | 29854080                | CC                              | AA              | 1946734027               |
| SNP_P4_9393_29854109 | NC_021160.1    | Ca_kabuli_chr01 | 29854109                | AA                              | GG              | 1946734029               |
| SNP_P4_9394_29854145 | NC_021160.1    | Ca_kabuli_chr01 | 29854145                | CC                              | AA              | 1946734031               |
| SNP_P4_9395_29854146 | NC_021160.1    | Ca_kabuli_chr01 | 29854146                | AA                              | CC              | 1946734033               |
| SNP_P4_9396_29854356 | NC_021160.1    | Ca_kabuli_chr01 | 29854356                | GG                              | AA              | 1946734035               |
| SNP_P4_9397_29854408 | NC_021160.1    | Ca_kabuli_chr01 | 29854408                | TT                              | AA              | 1946734037               |
| SNP_P4_9398_29854484 | NC_021160.1    | Ca_kabuli_chr01 | 29854484                | TT                              | AA              | 1946734039               |
| SNP_P4_9399_29854489 | NC_021160.1    | Ca_kabuli_chr01 | 29854489                | AA                              | GG              | 1946734041               |
| SNP_P4_9400_29854493 | NC_021160.1    | Ca_kabuli_chr01 | 29854493                | AA                              | GG              | 1946734043               |
| SNP_P4_9401_29854515 | NC_021160.1    | Ca_kabuli_chr01 | 29854515                | CC                              | TT              | 1946734045               |
| SNP_P4_9402_29854518 | NC_021160.1    | Ca_kabuli_chr01 | 29854518                | AA                              | TT              | 1946734047               |
| SNP_P4_9403_29854835 | NC_021160.1    | Ca_kabuli_chr01 | 29854835                | GG                              | TT              | 1946734049               |
| SNP_P4_9404_29854972 | NC_021160.1    | Ca_kabuli_chr01 | 29854972                | AA                              | CC              | 1946734051               |
| SNP_P4_9405_29854973 | NC_021160.1    | Ca_kabuli_chr01 | 29854973                | TT                              | AA              | 1946734053               |
| SNP_P4_9406_29855106 | NC_021160.1    | Ca_kabuli_chr01 | 29855106                | CC                              | GG              | 1946734055               |
| SNP_P4_9407_29855124 | NC_021160.1    | Ca_kabuli_chr01 | 29855124                | TT                              | CC              | 1946734057               |
| SNP_P4_9408_29855139 | NC_021160.1    | Ca_kabuli_chr01 | 29855139                | CC                              | TT              | 1946734059               |
| SNP_P4_9409_29855200 | NC_021160.1    | Ca_kabuli_chr01 | 29855200                | TT                              | GG              | 1946734061               |
| SNP_P4_9410_29855353 | NC_021160.1    | Ca_kabuli_chr01 | 29855353                | TT                              | CC              | 1946734063               |
| SNP_P4_9411_29855477 | NC_021160.1    | Ca_kabuli_chr01 | 29855477                | CC                              | TT              | 1946734065               |
| SNP_P4_9412_29855594 | NC_021160.1    | Ca_kabuli_chr01 | 29855594                | AA                              | GG              | 1946734067               |
| SNP_P4_9413_29855951 | NC_021160.1    | Ca_kabuli_chr01 | 29855951                | GG                              | CC              | 1946734069               |
| SNP_P4_9414_29856030 | NC_021160.1    | Ca_kabuli_chr01 | 29856030                | CC                              | TT              | 1946734070               |
| SNP_P4_9415_29856064 | NC_021160.1    | Ca_kabuli_chr01 | 29856064                | TT                              | GG              | 1946734072               |
| SNP_P4_9416_29856202 | NC_021160.1    | Ca_kabuli_chr01 | 29856202                | CC                              | GG              | 1946734074               |
| SNP_P4_9417_29856247 | NC_021160.1    | Ca_kabuli_chr01 | 29856247                | CC                              | TT              | 1946734076               |
| SNP_P4_9418_29856319 | NC_021160.1    | Ca_kabuli_chr01 | 29856319                | TT                              | GG              | 1946734078               |
| SNP_P4_9419_29856405 | NC_021160.1    | Ca_kabuli_chr01 | 29856405                | GG                              | AA              | 1946734080               |
| SNP_P4_9420_29856439 | NC_021160.1    | Ca_kabuli_chr01 | 29856439                | GG                              | AA              | 1946734082               |
| SNP_P4_9422_29856845 | NC_021160.1    | Ca_kabuli_chr01 | 29856845                | AA                              | TT              | 1946734084               |
| SNP_P4_9423_29856986 | NC_021160.1    | Ca_kabuli_chr01 | 29856986                | TT                              | CC              | 1946734086               |
| SNP_P4_9424_29857084 | NC_021160.1    | Ca_kabuli_chr01 | 29857084                | AA                              | TT              | 1946734088               |
| SNP_P4_9425_29857164 | NC_021160.1    | Ca_kabuli_chr01 | 29857164                | TT                              | GG              | 1946734090               |
| SNP_P4_9426_29857237 | NC_021160.1    | Ca_kabuli_chr01 | 29857237                | CC                              | TT              | 1946734092               |
| SNP_P4_9427_29861761 | NC_021160.1    | Ca_kabuli_chr01 | 29861761                | TT                              | CC              | 1946734094               |
| SNP_P4_9428_29861763 | NC_021160.1    | Ca_kabuli_chr01 | 29861763                | AA                              | CC              | 1946734096               |

| SNPs IDs             | Chromosome IDs | Chromosomes     | Physical positions (bp) | CDC Frontier (Reference genome) | (ILWC46 & LPNB) | NCBI SNPdb Accession IDs |
|----------------------|----------------|-----------------|-------------------------|---------------------------------|-----------------|--------------------------|
| SNP_P4_9429_29861854 | NC_021160.1    | Ca_kabuli_chr01 | 29861854                | CC                              | AA              | 1946734098               |
| SNP_P4_9430_29862290 | NC_021160.1    | Ca_kabuli_chr01 | 29862290                | AA                              | GG              | 1946734100               |
| SNP_P4_9431_29863093 | NC_021160.1    | Ca_kabuli_chr01 | 29863093                | AA                              | GG              | 1946734102               |
| SNP_P4_9433_29882289 | NC_021160.1    | Ca_kabuli_chr01 | 29882289                | GG                              | TT              | 1946734105               |
| SNP_P4_9434_29882688 | NC_021160.1    | Ca_kabuli_chr01 | 29882688                | TT                              | CC              | 1946734107               |
| SNP_P4_9435_29882706 | NC_021160.1    | Ca_kabuli_chr01 | 29882706                | TT                              | CC              | 1946734109               |
| SNP_P4_9436_29889320 | NC_021160.1    | Ca_kabuli_chr01 | 29889320                | AA                              | GG              | 1946734111               |
| SNP_P4_9437_29889347 | NC_021160.1    | Ca_kabuli_chr01 | 29889347                | CC                              | TT              | 1946734113               |
| SNP_P4_9438_29932054 | NC_021160.1    | Ca_kabuli_chr01 | 29932054                | TT                              | CC              | 1946734115               |
| SNP_P4_9439_29932794 | NC_021160.1    | Ca_kabuli_chr01 | 29932794                | CC                              | TT              | 1946734117               |
| SNP_P4_9440_29932832 | NC_021160.1    | Ca_kabuli_chr01 | 29932832                | GG                              | TT              | 1946734119               |
| SNP_P4_9441_29935930 | NC_021160.1    | Ca_kabuli_chr01 | 29935930                | GG                              | AA              | 1946734121               |
| SNP_P4_9442_29936738 | NC_021160.1    | Ca_kabuli_chr01 | 29936738                | TT                              | CC              | 1946734123               |
| SNP_P4_9443_29936749 | NC_021160.1    | Ca_kabuli_chr01 | 29936749                | TT                              | CC              | 1946734125               |
| SNP_P4_9444_29940268 | NC_021160.1    | Ca_kabuli_chr01 | 29940268                | TT                              | CC              | 1946734127               |
| SNP_P4_9445_29946324 | NC_021160.1    | Ca_kabuli_chr01 | 29946324                | TT                              | AA              | 1946734129               |
| SNP_P4_9446_29975442 | NC_021160.1    | Ca_kabuli_chr01 | 29975442                | GG                              | AA              | 1946734131               |
| SNP_P4_9447_29976976 | NC_021160.1    | Ca_kabuli_chr01 | 29976976                | TT                              | GG              | 1946734133               |
| SNP_P4_9448_29977417 | NC_021160.1    | Ca_kabuli_chr01 | 29977417                | AA                              | TT              | 1946734135               |
| SNP_P4_9449_29977418 | NC_021160.1    | Ca_kabuli_chr01 | 29977418                | TT                              | GG              | 1946734137               |
| SNP_P4_9450_29980455 | NC_021160.1    | Ca_kabuli_chr01 | 29980455                | AA                              | CC              | 1946734139               |
| SNP_P4_9451_29980732 | NC_021160.1    | Ca_kabuli_chr01 | 29980732                | GG                              | AA              | 1946734141               |
| SNP_P4_9452_29980806 | NC_021160.1    | Ca_kabuli_chr01 | 29980806                | TT                              | AA              | 1946734143               |
| SNP_P4_9453_29980983 | NC_021160.1    | Ca_kabuli_chr01 | 29980983                | CC                              | TT              | 1946734145               |
| SNP_P4_9454_29980993 | NC_021160.1    | Ca_kabuli_chr01 | 29980993                | AA                              | GG              | 1946734147               |
| SNP_P4_9455_29980996 | NC_021160.1    | Ca_kabuli_chr01 | 29980996                | TT                              | AA              | 1946734149               |
| SNP_P4_9456_29980998 | NC_021160.1    | Ca_kabuli_chr01 | 29980998                | TT                              | AA              | 1946734151               |
| SNP_P4_9457_29981001 | NC_021160.1    | Ca_kabuli_chr01 | 29981001                | CC                              | TT              | 1946734153               |
| SNP_P4_9458_29984997 | NC_021160.1    | Ca_kabuli_chr01 | 29984997                | CC                              | TT              | 1946734155               |
| SNP_P4_9459_29994039 | NC_021160.1    | Ca_kabuli_chr01 | 29994039                | AA                              | GG              | 1946734157               |
| SNP_P4_9460_29994040 | NC_021160.1    | Ca_kabuli_chr01 | 29994040                | GG                              | TT              | 1946734159               |
| SNP_P4_9461_29994082 | NC_021160.1    | Ca_kabuli_chr01 | 29994082                | AA                              | GG              | 1946734161               |
| SNP_P4_9462_29994364 | NC_021160.1    | Ca_kabuli_chr01 | 29994364                | AA                              | GG              | 1946734162               |
| SNP_P4_9463_29994369 | NC_021160.1    | Ca_kabuli_chr01 | 29994369                | AA                              | GG              | 1946734164               |
| SNP_P4_9465_29997145 | NC_021160.1    | Ca_kabuli_chr01 | 29997145                | TT                              | GG              | 1946734166               |
| SNP_P4_9466_29998078 | NC_021160.1    | Ca_kabuli_chr01 | 29998078                | CC                              | TT              | 1946734168               |
| SNP_P4_9467_29998081 | NC_021160.1    | Ca_kabuli_chr01 | 29998081                | AA                              | GG              | 1946734170               |
| SNP_P4_9468_29998111 | NC_021160.1    | Ca_kabuli_chr01 | 29998111                | TT                              | CC              | 1946734172               |
| SNP_P4_9469_29998315 | NC_021160.1    | Ca_kabuli_chr01 | 29998315                | AA                              | TT              | 1946734174               |
| SNP_P4_9470_30007768 | NC_021160.1    | Ca_kabuli_chr01 | 30007768                | GG                              | TT              | 1946734176               |
| SNP_P4_9471_30007976 | NC_021160.1    | Ca_kabuli_chr01 | 30007976                | CC                              | TT              | 1946734178               |
| SNP_P4_9472_30008062 | NC_021160.1    | Ca_kabuli_chr01 | 30008062                | TT                              | GG              | 1946734180               |

| SNPs IDs             | Chromosome IDs | Chromosomes     | Physical positions (bp) | CDC Frontier (Reference genome) | (ILWC46 & LPNB) | NCBI SNPdb Accession IDs |
|----------------------|----------------|-----------------|-------------------------|---------------------------------|-----------------|--------------------------|
| SNP_P4_9473_30020337 | NC_021160.1    | Ca_kabuli_chr01 | 30020337                | GG                              | TT              | 1946734182               |
| SNP_P4_9474_30035074 | NC_021160.1    | Ca_kabuli_chr01 | 30035074                | TT                              | AA              | 1946734184               |
| SNP_P4_9475_30036196 | NC_021160.1    | Ca_kabuli_chr01 | 30036196                | AA                              | GG              | 1946734186               |
| SNP_P4_9476_30037878 | NC_021160.1    | Ca_kabuli_chr01 | 30037878                | CC                              | AA              | 1946734188               |
| SNP_P4_9477_30037932 | NC_021160.1    | Ca_kabuli_chr01 | 30037932                | AA                              | CC              | 1946734190               |
| SNP_P4_9478_30037947 | NC_021160.1    | Ca_kabuli_chr01 | 30037947                | CC                              | TT              | 1946734192               |
| SNP_P4_9479_30038030 | NC_021160.1    | Ca_kabuli_chr01 | 30038030                | AA                              | GG              | 1946734195               |
| SNP_P4_9480_30038227 | NC_021160.1    | Ca_kabuli_chr01 | 30038227                | AA                              | GG              | 1946734197               |
| SNP_P4_9481_30038463 | NC_021160.1    | Ca_kabuli_chr01 | 30038463                | TT                              | CC              | 1946734200               |
| SNP_P4_9482_30038464 | NC_021160.1    | Ca_kabuli_chr01 | 30038464                | AA                              | CC              | 1946734202               |
| SNP_P4_9483_30038499 | NC_021160.1    | Ca_kabuli_chr01 | 30038499                | AA                              | TT              | 1946734205               |
| SNP_P4_9484_30038540 | NC_021160.1    | Ca_kabuli_chr01 | 30038540                | AA                              | GG              | 1946734208               |
| SNP_P4_9485_30044869 | NC_021160.1    | Ca_kabuli_chr01 | 30044869                | AA                              | GG              | 1946734210               |
| SNP_P4_9486_30044870 | NC_021160.1    | Ca_kabuli_chr01 | 30044870                | AA                              | GG              | 1946734212               |
| SNP_P4_9487_30048193 | NC_021160.1    | Ca_kabuli_chr01 | 30048193                | AA                              | GG              | 1946734214               |
| SNP_P4_9488_30049986 | NC_021160.1    | Ca_kabuli_chr01 | 30049986                | TT                              | AA              | 1946734216               |
| SNP_P4_9489_30051399 | NC_021160.1    | Ca_kabuli_chr01 | 30051399                | AA                              | TT              | 1946734218               |
| SNP_P4_9490_30059882 | NC_021160.1    | Ca_kabuli_chr01 | 30059882                | CC                              | TT              | 1946734220               |
| SNP_P4_9491_30061016 | NC_021160.1    | Ca_kabuli_chr01 | 30061016                | GG                              | AA              | 1946734222               |
| SNP_P4_9492_30083519 | NC_021160.1    | Ca_kabuli_chr01 | 30083519                | CC                              | AA              | 1946734224               |
| SNP_P4_9493_30091502 | NC_021160.1    | Ca_kabuli_chr01 | 30091502                | CC                              | GG              | 1946734226               |
| SNP_P4_9494_30092767 | NC_021160.1    | Ca_kabuli_chr01 | 30092767                | TT                              | CC              | 1946734228               |
| SNP_P4_9495_30100716 | NC_021160.1    | Ca_kabuli_chr01 | 30100716                | CC                              | TT              | 1946734230               |
| SNP_P4_9496_30100982 | NC_021160.1    | Ca_kabuli_chr01 | 30100982                | GG                              | AA              | 1946734232               |
| SNP_P4_9497_30106294 | NC_021160.1    | Ca_kabuli_chr01 | 30106294                | CC                              | AA              | 1946734233               |
| SNP_P4_9498_30109105 | NC_021160.1    | Ca_kabuli_chr01 | 30109105                | GG                              | TT              | 1946734234               |
| SNP_P4_9499_30111296 | NC_021160.1    | Ca_kabuli_chr01 | 30111296                | GG                              | AA              | 1946734235               |
| SNP_P4_9500_30111304 | NC_021160.1    | Ca_kabuli_chr01 | 30111304                | AA                              | CC              | 1946734236               |
| SNP_P4_9501_30111306 | NC_021160.1    | Ca_kabuli_chr01 | 30111306                | TT                              | GG              | 1946734237               |
| SNP_P4_9502_30111332 | NC_021160.1    | Ca_kabuli_chr01 | 30111332                | TT                              | CC              | 1946734238               |
| SNP_P4_9503_30111341 | NC_021160.1    | Ca_kabuli_chr01 | 30111341                | AA                              | GG              | 1946734239               |
| SNP_P4_9504_30111344 | NC_021160.1    | Ca_kabuli_chr01 | 30111344                | CC                              | TT              | 1946734240               |
| SNP_P4_9505_30111359 | NC_021160.1    | Ca_kabuli_chr01 | 30111359                | TT                              | GG              | 1946734242               |
| SNP_P4_9507_30111416 | NC_021160.1    | Ca_kabuli_chr01 | 30111416                | TT                              | CC              | 1946734244               |
| SNP_P4_9508_30111434 | NC_021160.1    | Ca_kabuli_chr01 | 30111434                | AA                              | GG              | 1946734247               |
| SNP_P4_9509_30111437 | NC_021160.1    | Ca_kabuli_chr01 | 30111437                | AA                              | GG              | 1946734249               |
| SNP_P4_9510_30111806 | NC_021160.1    | Ca_kabuli_chr01 | 30111806                | TT                              | AA              | 1946734251               |
| SNP_P4_9511_30117305 | NC_021160.1    | Ca_kabuli_chr01 | 30117305                | GG                              | TT              | 1946734253               |
| SNP_P4_9512_30117309 | NC_021160.1    | Ca_kabuli_chr01 | 30117309                | AA                              | GG              | 1946734255               |
| SNP_P4_9514_30117613 | NC_021160.1    | Ca_kabuli_chr01 | 30117613                | AA                              | GG              | 1946734257               |
| SNP_P4_9515_30117656 | NC_021160.1    | Ca_kabuli_chr01 | 30117656                | CC                              | TT              | 1946734259               |
| SNP_P4_9516_30117842 | NC_021160.1    | Ca_kabuli_chr01 | 30117842                | AA                              | TT              | 1946734261               |

| SNPs IDs             | Chromosome IDs | Chromosomes     | Physical positions (bp) | CDC Frontier (Reference genome) | (ILWC46 & LPNB) | NCBI SNPdb Accession IDs |
|----------------------|----------------|-----------------|-------------------------|---------------------------------|-----------------|--------------------------|
| SNP_P4_9518_30127241 | NC_021160.1    | Ca_kabuli_chr01 | 30127241                | AA                              | GG              | 1946734263               |
| SNP_P4_9519_30129826 | NC_021160.1    | Ca_kabuli_chr01 | 30129826                | TT                              | CC              | 1946734265               |
| SNP_P4_9520_30133778 | NC_021160.1    | Ca_kabuli_chr01 | 30133778                | TT                              | AA              | 1946734267               |
| SNP_P4_9521_30134586 | NC_021160.1    | Ca_kabuli_chr01 | 30134586                | TT                              | CC              | 1946734269               |
| SNP_P4_9522_30135836 | NC_021160.1    | Ca_kabuli_chr01 | 30135836                | TT                              | CC              | 1946734271               |
| SNP_P4_9523_30140424 | NC_021160.1    | Ca_kabuli_chr01 | 30140424                | TT                              | GG              | 1946734273               |
| SNP_P4_9524_30144193 | NC_021160.1    | Ca_kabuli_chr01 | 30144193                | CC                              | TT              | 1946734275               |
| SNP_P4_9525_30144482 | NC_021160.1    | Ca_kabuli_chr01 | 30144482                | TT                              | CC              | 1946734277               |
| SNP_P4_9526_30146667 | NC_021160.1    | Ca_kabuli_chr01 | 30146667                | GG                              | CC              | 1946734278               |
| SNP_P4_9527_30146807 | NC_021160.1    | Ca_kabuli_chr01 | 30146807                | AA                              | TT              | 1946734280               |
| SNP_P4_9529_30156813 | NC_021160.1    | Ca_kabuli_chr01 | 30156813                | AA                              | TT              | 1946734282               |
| SNP_P4_9530_30156814 | NC_021160.1    | Ca_kabuli_chr01 | 30156814                | AA                              | TT              | 1946734284               |
| SNP_P4_9531_30165203 | NC_021160.1    | Ca_kabuli_chr01 | 30165203                | AA                              | TT              | 1946734286               |
| SNP_P4_9532_30165206 | NC_021160.1    | Ca_kabuli_chr01 | 30165206                | AA                              | GG              | 1946734288               |
| SNP_P4_9533_30166013 | NC_021160.1    | Ca_kabuli_chr01 | 30166013                | CC                              | TT              | 1946734289               |
| SNP_P4_9534_30181603 | NC_021160.1    | Ca_kabuli_chr01 | 30181603                | GG                              | AA              | 1946734291               |
| SNP_P4_9535_30182906 | NC_021160.1    | Ca_kabuli_chr01 | 30182906                | GG                              | CC              | 1946734293               |
| SNP_P4_9536_30183436 | NC_021160.1    | Ca_kabuli_chr01 | 30183436                | AA                              | CC              | 1946734295               |
| SNP_P4_9537_30194282 | NC_021160.1    | Ca_kabuli_chr01 | 30194282                | GG                              | TT              | 1946734297               |
| SNP_P4_9538_30194296 | NC_021160.1    | Ca_kabuli_chr01 | 30194296                | AA                              | GG              | 1946734299               |
| SNP_P4_9540_30196447 | NC_021160.1    | Ca_kabuli_chr01 | 30196447                | CC                              | GG              | 1946734301               |
| SNP_P4_9541_30196455 | NC_021160.1    | Ca_kabuli_chr01 | 30196455                | GG                              | AA              | 1946734303               |
| SNP_P4_9542_30196462 | NC_021160.1    | Ca_kabuli_chr01 | 30196462                | GG                              | AA              | 1946734305               |
| SNP_P4_9543_30196760 | NC_021160.1    | Ca_kabuli_chr01 | 30196760                | GG                              | AA              | 1946734307               |
| SNP_P4_9544_30196805 | NC_021160.1    | Ca_kabuli_chr01 | 30196805                | GG                              | AA              | 1946734309               |
| SNP_P4_9545_30205439 | NC_021160.1    | Ca_kabuli_chr01 | 30205439                | GG                              | AA              | 1946734311               |
| SNP_P4_9548_30219772 | NC_021160.1    | Ca_kabuli_chr01 | 30219772                | CC                              | AA              | 1946734313               |
| SNP_P4_9549_30219780 | NC_021160.1    | Ca_kabuli_chr01 | 30219780                | GG                              | TT              | 1946734315               |
| SNP_P4_9550_30236405 | NC_021160.1    | Ca_kabuli_chr01 | 30236405                | AA                              | CC              | 1946734317               |
| SNP_P4_9551_30238670 | NC_021160.1    | Ca_kabuli_chr01 | 30238670                | GG                              | AA              | 1946734319               |
| SNP_P4_9552_30243171 | NC_021160.1    | Ca_kabuli_chr01 | 30243171                | AA                              | CC              | 1946734321               |
| SNP_P4_9554_30243639 | NC_021160.1    | Ca_kabuli_chr01 | 30243639                | AA                              | TT              | 1946734323               |
| SNP_P4_9555_30244348 | NC_021160.1    | Ca_kabuli_chr01 | 30244348                | TT                              | CC              | 1946734325               |
| SNP_P4_9556_30244925 | NC_021160.1    | Ca_kabuli_chr01 | 30244925                | CC                              | TT              | 1946734327               |
| SNP_P4_9557_30249903 | NC_021160.1    | Ca_kabuli_chr01 | 30249903                | GG                              | AA              | 1946734329               |
| SNP_P4_9558_30250041 | NC_021160.1    | Ca_kabuli_chr01 | 30250041                | CC                              | GG              | 1946734331               |
| SNP_P4_9559_30250072 | NC_021160.1    | Ca_kabuli_chr01 | 30250072                | AA                              | CC              | 1946734333               |
| SNP_P4_9560_30255590 | NC_021160.1    | Ca_kabuli_chr01 | 30255590                | AA                              | CC              | 1946734335               |
| SNP_P4_9561_30255705 | NC_021160.1    | Ca_kabuli_chr01 | 30255705                | GG                              | TT              | 1946734337               |
| SNP_P4_9562_30262840 | NC_021160.1    | Ca_kabuli_chr01 | 30262840                | GG                              | TT              | 1946734339               |
| SNP_P4_9563_30262875 | NC_021160.1    | Ca_kabuli_chr01 | 30262875                | AA                              | GG              | 1946734341               |
| SNP_P4_9564_30263146 | NC_021160.1    | Ca_kabuli_chr01 | 30263146                | GG                              | TT              | 1946734343               |

| SNPs IDs             | Chromosome IDs | Chromosomes     | Physical positions (bp) | CDC Frontier (Reference genome) | (ILWC46 & LPNB) | NCBI SNPdb Accession IDs |
|----------------------|----------------|-----------------|-------------------------|---------------------------------|-----------------|--------------------------|
| SNP_P4_9565_30263147 | NC_021160.1    | Ca_kabuli_chr01 | 30263147                | CC                              | TT              | 1946734345               |
| SNP_P4_9566_30263203 | NC_021160.1    | Ca_kabuli_chr01 | 30263203                | AA                              | TT              | 1946734346               |
| SNP_P4_9567_30263221 | NC_021160.1    | Ca_kabuli_chr01 | 30263221                | GG                              | AA              | 1946734348               |
| SNP_P4_9568_30263227 | NC_021160.1    | Ca_kabuli_chr01 | 30263227                | GG                              | TT              | 1946734350               |
| SNP_P4_9569_30263240 | NC_021160.1    | Ca_kabuli_chr01 | 30263240                | CC                              | TT              | 1946734352               |
| SNP_P4_9570_30263244 | NC_021160.1    | Ca_kabuli_chr01 | 30263244                | TT                              | CC              | 1946734354               |
| SNP_P4_9571_30263245 | NC_021160.1    | Ca_kabuli_chr01 | 30263245                | AA                              | CC              | 1946734356               |
| SNP_P4_9572_30263255 | NC_021160.1    | Ca_kabuli_chr01 | 30263255                | TT                              | CC              | 1946734358               |
| SNP_P4_9573_30263274 | NC_021160.1    | Ca_kabuli_chr01 | 30263274                | AA                              | CC              | 1946734360               |
| SNP_P4_9574_30264021 | NC_021160.1    | Ca_kabuli_chr01 | 30264021                | GG                              | AA              | 1946734362               |
| SNP_P4_9575_30264023 | NC_021160.1    | Ca_kabuli_chr01 | 30264023                | CC                              | AA              | 1946734364               |
| SNP_P4_9576_30264473 | NC_021160.1    | Ca_kabuli_chr01 | 30264473                | TT                              | AA              | 1946734366               |
| SNP_P4_9577_30264672 | NC_021160.1    | Ca_kabuli_chr01 | 30264672                | AA                              | TT              | 1946734368               |
| SNP_P4_9578_30277390 | NC_021160.1    | Ca_kabuli_chr01 | 30277390                | AA                              | CC              | 1946734370               |
| SNP_P4_9579_30280031 | NC_021160.1    | Ca_kabuli_chr01 | 30280031                | CC                              | TT              | 1946734372               |
| SNP_P4_9580_30280260 | NC_021160.1    | Ca_kabuli_chr01 | 30280260                | CC                              | TT              | 1946734374               |
| SNP_P4_9581_30280504 | NC_021160.1    | Ca_kabuli_chr01 | 30280504                | GG                              | AA              | 1946734376               |
| SNP_P4_9582_30284934 | NC_021160.1    | Ca_kabuli_chr01 | 30284934                | AA                              | TT              | 1946734379               |
| SNP_P4_9583_30285871 | NC_021160.1    | Ca_kabuli_chr01 | 30285871                | GG                              | AA              | 1946734381               |
| SNP_P4_9585_30292036 | NC_021160.1    | Ca_kabuli_chr01 | 30292036                | AA                              | TT              | 1946734383               |
| SNP_P4_9586_30292041 | NC_021160.1    | Ca_kabuli_chr01 | 30292041                | TT                              | CC              | 1946734385               |
| SNP_P4_9587_30292045 | NC_021160.1    | Ca_kabuli_chr01 | 30292045                | TT                              | CC              | 1946734387               |
| SNP_P4_9588_30295024 | NC_021160.1    | Ca_kabuli_chr01 | 30295024                | TT                              | AA              | 1946734389               |
| SNP_P4_9589_30333912 | NC_021160.1    | Ca_kabuli_chr01 | 30333912                | GG                              | AA              | 1946734391               |
| SNP_P4_9590_30334738 | NC_021160.1    | Ca_kabuli_chr01 | 30334738                | CC                              | TT              | 1946734393               |
| SNP_P4_9593_30418458 | NC_021160.1    | Ca_kabuli_chr01 | 30418458                | AA                              | GG              | 1946734395               |
| SNP_P4_9594_30423668 | NC_021160.1    | Ca_kabuli_chr01 | 30423668                | AA                              | GG              | 1946734397               |
| SNP_P4_9595_30424150 | NC_021160.1    | Ca_kabuli_chr01 | 30424150                | TT                              | CC              | 1946734399               |
| SNP_P4_9596_30424211 | NC_021160.1    | Ca_kabuli_chr01 | 30424211                | GG                              | AA              | 1946734401               |
| SNP_P4_9597_30424222 | NC_021160.1    | Ca_kabuli_chr01 | 30424222                | GG                              | AA              | 1946734403               |
| SNP_P4_9598_30429541 | NC_021160.1    | Ca_kabuli_chr01 | 30429541                | TT                              | CC              | 1946734405               |
| SNP_P4_9599_30429549 | NC_021160.1    | Ca_kabuli_chr01 | 30429549                | AA                              | TT              | 1946734407               |
| SNP_P4_9600_30432262 | NC_021160.1    | Ca_kabuli_chr01 | 30432262                | TT                              | AA              | 1946734409               |
| SNP_P4_9601_30450546 | NC_021160.1    | Ca_kabuli_chr01 | 30450546                | AA                              | CC              | 1946734411               |
| SNP_P4_9602_30450547 | NC_021160.1    | Ca_kabuli_chr01 | 30450547                | CC                              | AA              | 1946734413               |
| SNP_P4_9604_30452726 | NC_021160.1    | Ca_kabuli_chr01 | 30452726                | GG                              | AA              | 1946734415               |
| SNP_P4_9605_30452790 | NC_021160.1    | Ca_kabuli_chr01 | 30452790                | CC                              | TT              | 1946734417               |
| SNP_P4_9606_30452809 | NC_021160.1    | Ca_kabuli_chr01 | 30452809                | AA                              | GG              | 1946734419               |
| SNP_P4_9608_30460795 | NC_021160.1    | Ca_kabuli_chr01 | 30460795                | AA                              | GG              | 1946734421               |
| SNP_P4_9609_30460857 | NC_021160.1    | Ca_kabuli_chr01 | 30460857                | TT                              | CC              | 1946734423               |
| SNP_P4_9610_30460879 | NC_021160.1    | Ca_kabuli_chr01 | 30460879                | TT                              | CC              | 1946734425               |
| SNP_P4_9611_30460891 | NC_021160.1    | Ca_kabuli_chr01 | 30460891                | GG                              | TT              | 1946734427               |

| SNPs IDs             | Chromosome IDs | Chromosomes     | Physical positions (bp) | CDC Frontier (Reference genome) | (ILWC46 & LPNB) | NCBI SNPdb Accession IDs |
|----------------------|----------------|-----------------|-------------------------|---------------------------------|-----------------|--------------------------|
| SNP_P4_9612_30460892 | NC_021160.1    | Ca_kabuli_chr01 | 30460892                | TT                              | CC              | 1946734428               |
| SNP_P4_9613_30460933 | NC_021160.1    | Ca_kabuli_chr01 | 30460933                | TT                              | CC              | 1946734430               |
| SNP_P4_9614_30460953 | NC_021160.1    | Ca_kabuli_chr01 | 30460953                | AA                              | GG              | 1946734432               |
| SNP_P4_9615_30461178 | NC_021160.1    | Ca_kabuli_chr01 | 30461178                | GG                              | AA              | 1946734434               |
| SNP_P4_9616_30461207 | NC_021160.1    | Ca_kabuli_chr01 | 30461207                | TT                              | CC              | 1946734436               |
| SNP_P4_9617_30461279 | NC_021160.1    | Ca_kabuli_chr01 | 30461279                | GG                              | AA              | 1946734438               |
| SNP_P4_9618_30461292 | NC_021160.1    | Ca_kabuli_chr01 | 30461292                | AA                              | TT              | 1946734440               |
| SNP_P4_9619_30461297 | NC_021160.1    | Ca_kabuli_chr01 | 30461297                | GG                              | AA              | 1946734442               |
| SNP_P4_9620_30461336 | NC_021160.1    | Ca_kabuli_chr01 | 30461336                | CC                              | TT              | 1946734444               |
| SNP_P4_9621_30461380 | NC_021160.1    | Ca_kabuli_chr01 | 30461380                | AA                              | GG              | 1946734446               |
| SNP_P4_9623_30475446 | NC_021160.1    | Ca_kabuli_chr01 | 30475446                | AA                              | GG              | 1946734448               |
| SNP_P4_9624_30475485 | NC_021160.1    | Ca_kabuli_chr01 | 30475485                | AA                              | GG              | 1946734450               |
| SNP_P4_9625_30475502 | NC_021160.1    | Ca_kabuli_chr01 | 30475502                | CC                              | TT              | 1946734452               |
| SNP_P4_9627_30475581 | NC_021160.1    | Ca_kabuli_chr01 | 30475581                | TT                              | AA              | 1946734454               |
| SNP_P4_9628_30488960 | NC_021160.1    | Ca_kabuli_chr01 | 30488960                | GG                              | AA              | 1946734456               |
| SNP_P4_9629_30508804 | NC_021160.1    | Ca_kabuli_chr01 | 30508804                | AA                              | TT              | 1946734458               |
| SNP_P4_9630_30508821 | NC_021160.1    | Ca_kabuli_chr01 | 30508821                | AA                              | TT              | 1946734460               |
| SNP_P4_9631_30509164 | NC_021160.1    | Ca_kabuli_chr01 | 30509164                | AA                              | CC              | 1946734462               |
| SNP_P4_9632_30532267 | NC_021160.1    | Ca_kabuli_chr01 | 30532267                | AA                              | GG              | 1946734464               |
| SNP_P4_9633_30532902 | NC_021160.1    | Ca_kabuli_chr01 | 30532902                | TT                              | GG              | 1946734466               |
| SNP_P4_9634_30535216 | NC_021160.1    | Ca_kabuli_chr01 | 30535216                | CC                              | TT              | 1946734468               |
| SNP_P4_9635_30582631 | NC_021160.1    | Ca_kabuli_chr01 | 30582631                | TT                              | GG              | 1946734470               |
| SNP_P4_9636_30583309 | NC_021160.1    | Ca_kabuli_chr01 | 30583309                | CC                              | TT              | 1946734472               |
| SNP_P4_9637_30603992 | NC_021160.1    | Ca_kabuli_chr01 | 30603992                | AA                              | TT              | 1946734474               |
| SNP_P4_9638_30621386 | NC_021160.1    | Ca_kabuli_chr01 | 30621386                | TT                              | GG              | 1946734476               |
| SNP_P4_9639_30624943 | NC_021160.1    | Ca_kabuli_chr01 | 30624943                | GG                              | AA              | 1946734478               |
| SNP_P4_9641_30646785 | NC_021160.1    | Ca_kabuli_chr01 | 30646785                | CC                              | AA              | 1946734480               |
| SNP_P4_9642_30658402 | NC_021160.1    | Ca_kabuli_chr01 | 30658402                | TT                              | GG              | 1946734482               |
| SNP_P4_9644_30690964 | NC_021160.1    | Ca_kabuli_chr01 | 30690964                | TT                              | GG              | 1946734484               |
| SNP_P4_9645_30697948 | NC_021160.1    | Ca_kabuli_chr01 | 30697948                | AA                              | GG              | 1946734486               |
| SNP_P4_9646_30697968 | NC_021160.1    | Ca_kabuli_chr01 | 30697968                | CC                              | TT              | 1946734488               |
| SNP_P4_9647_30725547 | NC_021160.1    | Ca_kabuli_chr01 | 30725547                | TT                              | GG              | 1946734490               |
| SNP_P4_9648_30738240 | NC_021160.1    | Ca_kabuli_chr01 | 30738240                | AA                              | GG              | 1946734492               |
| SNP_P4_9649_30738244 | NC_021160.1    | Ca_kabuli_chr01 | 30738244                | AA                              | TT              | 1946734494               |
| SNP_P4_9650_30738524 | NC_021160.1    | Ca_kabuli_chr01 | 30738524                | CC                              | AA              | 1946734496               |
| SNP_P4_9651_30740232 | NC_021160.1    | Ca_kabuli_chr01 | 30740232                | GG                              | TT              | 1946734498               |
| SNP_P4_9652_30740325 | NC_021160.1    | Ca_kabuli_chr01 | 30740325                | CC                              | AA              | 1946734500               |
| SNP_P4_9653_30740326 | NC_021160.1    | Ca_kabuli_chr01 | 30740326                | GG                              | CC              | 1946734502               |
| SNP_P4_9654_30740444 | NC_021160.1    | Ca_kabuli_chr01 | 30740444                | TT                              | CC              | 1946734504               |
| SNP_P4_9655_30740502 | NC_021160.1    | Ca_kabuli_chr01 | 30740502                | AA                              | TT              | 1946734506               |
| SNP_P4_9656_30740835 | NC_021160.1    | Ca_kabuli_chr01 | 30740835                | GG                              | TT              | 1946734508               |
| SNP_P4_9657_30740872 | NC_021160.1    | Ca_kabuli_chr01 | 30740872                | CC                              | TT              | 1946734510               |

| SNPs IDs             | Chromosome IDs | Chromosomes     | Physical positions (bp) | CDC Frontier (Reference genome) | (ILWC46 & LPNB) | NCBI SNPdb Accession IDs |
|----------------------|----------------|-----------------|-------------------------|---------------------------------|-----------------|--------------------------|
| SNP_P4_9658_30741262 | NC_021160.1    | Ca_kabuli_chr01 | 30741262                | AA                              | GG              | 1946734512               |
| SNP_P4_9659_30745317 | NC_021160.1    | Ca_kabuli_chr01 | 30745317                | TT                              | CC              | 1946734514               |
| SNP_P4_9660_30745342 | NC_021160.1    | Ca_kabuli_chr01 | 30745342                | GG                              | AA              | 1946734516               |
| SNP_P4_9661_30745398 | NC_021160.1    | Ca_kabuli_chr01 | 30745398                | TT                              | CC              | 1946734518               |
| SNP_P4_9662_30745473 | NC_021160.1    | Ca_kabuli_chr01 | 30745473                | GG                              | CC              | 1946734520               |
| SNP_P4_9664_30745684 | NC_021160.1    | Ca_kabuli_chr01 | 30745684                | TT                              | GG              | 1946734522               |
| SNP_P4_9666_30756175 | NC_021160.1    | Ca_kabuli_chr01 | 30756175                | TT                              | CC              | 1946734524               |
| SNP_P4_9667_30756178 | NC_021160.1    | Ca_kabuli_chr01 | 30756178                | GG                              | TT              | 1946734526               |
| SNP_P4_9668_30762238 | NC_021160.1    | Ca_kabuli_chr01 | 30762238                | CC                              | TT              | 1946734528               |
| SNP_P4_9669_30762300 | NC_021160.1    | Ca_kabuli_chr01 | 30762300                | TT                              | AA              | 1946734530               |
| SNP_P4_9670_30762305 | NC_021160.1    | Ca_kabuli_chr01 | 30762305                | TT                              | AA              | 1946734532               |
| SNP_P4_9671_30762315 | NC_021160.1    | Ca_kabuli_chr01 | 30762315                | GG                              | AA              | 1946734534               |
| SNP_P4_9672_30762343 | NC_021160.1    | Ca_kabuli_chr01 | 30762343                | TT                              | CC              | 1946734535               |
| SNP_P4_9673_30762370 | NC_021160.1    | Ca_kabuli_chr01 | 30762370                | CC                              | TT              | 1946734537               |
| SNP_P4_9674_30762386 | NC_021160.1    | Ca_kabuli_chr01 | 30762386                | GG                              | AA              | 1946734539               |
| SNP_P4_9675_30762418 | NC_021160.1    | Ca_kabuli_chr01 | 30762418                | AA                              | GG              | 1946734541               |
| SNP_P4_9676_30762570 | NC_021160.1    | Ca_kabuli_chr01 | 30762570                | TT                              | CC              | 1946734543               |
| SNP_P4_9677_30762645 | NC_021160.1    | Ca_kabuli_chr01 | 30762645                | TT                              | GG              | 1946734545               |
| SNP_P4_9678_30762652 | NC_021160.1    | Ca_kabuli_chr01 | 30762652                | AA                              | GG              | 1946734547               |
| SNP_P4_9679_30762653 | NC_021160.1    | Ca_kabuli_chr01 | 30762653                | TT                              | CC              | 1946734549               |
| SNP_P4_9680_30762737 | NC_021160.1    | Ca_kabuli_chr01 | 30762737                | AA                              | GG              | 1946734551               |
| SNP_P4_9681_30762750 | NC_021160.1    | Ca_kabuli_chr01 | 30762750                | GG                              | TT              | 1946734553               |
| SNP_P4_9682_30762761 | NC_021160.1    | Ca_kabuli_chr01 | 30762761                | GG                              | TT              | 1946734555               |
| SNP_P4_9683_30762791 | NC_021160.1    | Ca_kabuli_chr01 | 30762791                | CC                              | AA              | 1946734557               |
| SNP_P4_9684_30765017 | NC_021160.1    | Ca_kabuli_chr01 | 30765017                | GG                              | CC              | 1946734559               |
| SNP_P4_9685_30765039 | NC_021160.1    | Ca_kabuli_chr01 | 30765039                | CC                              | TT              | 1946734561               |
| SNP_P4_9686_30765829 | NC_021160.1    | Ca_kabuli_chr01 | 30765829                | CC                              | GG              | 1946734563               |
| SNP_P4_9687_30766108 | NC_021160.1    | Ca_kabuli_chr01 | 30766108                | AA                              | CC              | 1946734565               |
| SNP_P4_9688_30766734 | NC_021160.1    | Ca_kabuli_chr01 | 30766734                | CC                              | TT              | 1946734567               |
| SNP_P4_9689_30767740 | NC_021160.1    | Ca_kabuli_chr01 | 30767740                | CC                              | TT              | 1946734569               |
| SNP_P4_9690_30767754 | NC_021160.1    | Ca_kabuli_chr01 | 30767754                | AA                              | TT              | 1946734571               |
| SNP_P4_9691_30767813 | NC_021160.1    | Ca_kabuli_chr01 | 30767813                | CC                              | TT              | 1946734573               |
| SNP_P4_9693_30769354 | NC_021160.1    | Ca_kabuli_chr01 | 30769354                | TT                              | CC              | 1946734575               |
| SNP_P4_9694_30769844 | NC_021160.1    | Ca_kabuli_chr01 | 30769844                | GG                              | AA              | 1946734577               |
| SNP_P4_9696_30769981 | NC_021160.1    | Ca_kabuli_chr01 | 30769981                | AA                              | TT              | 1946734579               |
| SNP_P4_9697_30770017 | NC_021160.1    | Ca_kabuli_chr01 | 30770017                | TT                              | AA              | 1946734581               |
| SNP_P4_9698_30770137 | NC_021160.1    | Ca_kabuli_chr01 | 30770137                | CC                              | TT              | 1946734583               |
| SNP_P4_9700_30770392 | NC_021160.1    | Ca_kabuli_chr01 | 30770392                | GG                              | AA              | 1946734585               |
| SNP_P4_9701_30770958 | NC_021160.1    | Ca_kabuli_chr01 | 30770958                | CC                              | GG              | 1946734587               |
| SNP_P4_9702_30771037 | NC_021160.1    | Ca_kabuli_chr01 | 30771037                | GG                              | TT              | 1946734589               |
| SNP_P4_9703_30771411 | NC_021160.1    | Ca_kabuli_chr01 | 30771411                | GG                              | AA              | 1946734591               |
| SNP_P4_9704_30786187 | NC_021160.1    | Ca_kabuli_chr01 | 30786187                | TT                              | GG              | 1946734593               |



| SNPs IDs             | Chromosome IDs | Chromosomes     | Physical positions (bp) | CDC Frontier (Reference genome) | (ILWC46 & LPNB) | NCBI SNPdb Accession IDs |
|----------------------|----------------|-----------------|-------------------------|---------------------------------|-----------------|--------------------------|
| SNP_P4_9705_30786197 | NC_021160.1    | Ca_kabuli_chr01 | 30786197                | GG                              | AA              | 1946734595               |
| SNP_P4_9706_30786220 | NC_021160.1    | Ca_kabuli_chr01 | 30786220                | AA                              | GG              | 1946734597               |
| SNP_P4_9707_30787378 | NC_021160.1    | Ca_kabuli_chr01 | 30787378                | AA                              | GG              | 1946734599               |
| SNP_P4_9708_30788870 | NC_021160.1    | Ca_kabuli_chr01 | 30788870                | AA                              | TT              | 1946734601               |
| SNP_P4_9710_30789736 | NC_021160.1    | Ca_kabuli_chr01 | 30789736                | GG                              | AA              | 1946734603               |
| SNP_P4_9712_30793321 | NC_021160.1    | Ca_kabuli_chr01 | 30793321                | AA                              | CC              | 1946734604               |
| SNP_P4_9713_30797797 | NC_021160.1    | Ca_kabuli_chr01 | 30797797                | TT                              | CC              | 1946734606               |
| SNP_P4_9714_30803194 | NC_021160.1    | Ca_kabuli_chr01 | 30803194                | TT                              | GG              | 1946734608               |
| SNP_P4_9715_30803690 | NC_021160.1    | Ca_kabuli_chr01 | 30803690                | TT                              | CC              | 1946734610               |
| SNP_P4_9716_30804101 | NC_021160.1    | Ca_kabuli_chr01 | 30804101                | CC                              | TT              | 1946734612               |
| SNP_P4_9717_30804680 | NC_021160.1    | Ca_kabuli_chr01 | 30804680                | CC                              | AA              | 1946734614               |
| SNP_P4_9718_30807355 | NC_021160.1    | Ca_kabuli_chr01 | 30807355                | CC                              | AA              | 1946734616               |
| SNP_P4_9720_30808058 | NC_021160.1    | Ca_kabuli_chr01 | 30808058                | AA                              | CC              | 1946734618               |
| SNP_P4_9721_30808062 | NC_021160.1    | Ca_kabuli_chr01 | 30808062                | AA                              | TT              | 1946734620               |
| SNP_P4_9722_30820541 | NC_021160.1    | Ca_kabuli_chr01 | 30820541                | TT                              | CC              | 1946734622               |
| SNP_P4_9723_30821740 | NC_021160.1    | Ca_kabuli_chr01 | 30821740                | CC                              | TT              | 1946734624               |
| SNP_P4_9724_30823413 | NC_021160.1    | Ca_kabuli_chr01 | 30823413                | AA                              | GG              | 1946734626               |
| SNP_P4_9725_30823490 | NC_021160.1    | Ca_kabuli_chr01 | 30823490                | GG                              | AA              | 1946734628               |
| SNP_P4_9726_30823653 | NC_021160.1    | Ca_kabuli_chr01 | 30823653                | GG                              | AA              | 1946734630               |
| SNP_P4_9727_30824547 | NC_021160.1    | Ca_kabuli_chr01 | 30824547                | CC                              | GG              | 1946734632               |
| SNP_P4_9728_30827678 | NC_021160.1    | Ca_kabuli_chr01 | 30827678                | GG                              | AA              | 1946734634               |
| SNP_P4_9729_30828226 | NC_021160.1    | Ca_kabuli_chr01 | 30828226                | GG                              | TT              | 1946734635               |
| SNP_P4_9730_30828880 | NC_021160.1    | Ca_kabuli_chr01 | 30828880                | TT                              | CC              | 1946734637               |
| SNP_P4_9731_30830953 | NC_021160.1    | Ca_kabuli_chr01 | 30830953                | AA                              | GG              | 1946734639               |
| SNP_P4_9732_30831400 | NC_021160.1    | Ca_kabuli_chr01 | 30831400                | TT                              | CC              | 1946734641               |
| SNP_P4_9733_30832417 | NC_021160.1    | Ca_kabuli_chr01 | 30832417                | CC                              | AA              | 1946734643               |
| SNP_P4_9734_30832451 | NC_021160.1    | Ca_kabuli_chr01 | 30832451                | AA                              | GG              | 1946734645               |
| SNP_P4_9735_30835562 | NC_021160.1    | Ca_kabuli_chr01 | 30835562                | TT                              | CC              | 1946734647               |
| SNP_P4_9736_30843818 | NC_021160.1    | Ca_kabuli_chr01 | 30843818                | GG                              | TT              | 1946734649               |
| SNP_P4_9738_30844305 | NC_021160.1    | Ca_kabuli_chr01 | 30844305                | AA                              | TT              | 1946734651               |
| SNP_P4_9739_30847395 | NC_021160.1    | Ca_kabuli_chr01 | 30847395                | GG                              | AA              | 1946734653               |
| SNP_P4_9740_30848936 | NC_021160.1    | Ca_kabuli_chr01 | 30848936                | TT                              | AA              | 1946734655               |
| SNP_P4_9741_30851335 | NC_021160.1    | Ca_kabuli_chr01 | 30851335                | TT                              | AA              | 1946734657               |
| SNP_P4_9743_30854129 | NC_021160.1    | Ca_kabuli_chr01 | 30854129                | TT                              | AA              | 1946734659               |
| SNP_P4_9744_30854548 | NC_021160.1    | Ca_kabuli_chr01 | 30854548                | GG                              | CC              | 1946734661               |
| SNP_P4_9745_30863196 | NC_021160.1    | Ca_kabuli_chr01 | 30863196                | TT                              | GG              | 1946734663               |
| SNP_P4_9746_30863253 | NC_021160.1    | Ca_kabuli_chr01 | 30863253                | AA                              | GG              | 1946734665               |
| SNP_P4_9747_30864973 | NC_021160.1    | Ca_kabuli_chr01 | 30864973                | GG                              | AA              | 1946734667               |
| SNP_P4_9748_30870154 | NC_021160.1    | Ca_kabuli_chr01 | 30870154                | AA                              | GG              | 1946734669               |
| SNP_P4_9749_30876773 | NC_021160.1    | Ca_kabuli_chr01 | 30876773                | AA                              | TT              | 1946734671               |
| SNP_P4_9750_30887888 | NC_021160.1    | Ca_kabuli_chr01 | 30887888                | CC                              | TT              | 1946734673               |
| SNP_P4_9751_30887904 | NC_021160.1    | Ca_kabuli_chr01 | 30887904                | AA                              | GG              | 1946734675               |

| SNPs IDs             | Chromosome IDs | Chromosomes     | Physical positions (bp) | CDC Frontier (Reference genome) | (ILWC46 & LPNB) | NCBI SNPdb Accession IDs |
|----------------------|----------------|-----------------|-------------------------|---------------------------------|-----------------|--------------------------|
| SNP_P4_9752_30887907 | NC_021160.1    | Ca_kabuli_chr01 | 30887907                | GG                              | TT              | 1946734677               |
| SNP_P4_9753_30888977 | NC_021160.1    | Ca_kabuli_chr01 | 30888977                | AA                              | TT              | 1946734678               |
| SNP_P4_9754_30889096 | NC_021160.1    | Ca_kabuli_chr01 | 30889096                | GG                              | CC              | 1946734680               |
| SNP_P4_9755_30889303 | NC_021160.1    | Ca_kabuli_chr01 | 30889303                | AA                              | GG              | 1946734682               |
| SNP_P4_9756_30889310 | NC_021160.1    | Ca_kabuli_chr01 | 30889310                | AA                              | GG              | 1946734684               |
| SNP_P4_9757_30889327 | NC_021160.1    | Ca_kabuli_chr01 | 30889327                | TT                              | CC              | 1946734686               |
| SNP_P4_9758_30889349 | NC_021160.1    | Ca_kabuli_chr01 | 30889349                | AA                              | GG              | 1946734688               |
| SNP_P4_9759_30889430 | NC_021160.1    | Ca_kabuli_chr01 | 30889430                | AA                              | CC              | 1946734690               |
| SNP_P4_9760_30889460 | NC_021160.1    | Ca_kabuli_chr01 | 30889460                | CC                              | AA              | 1946734692               |
| SNP_P4_9761_30889823 | NC_021160.1    | Ca_kabuli_chr01 | 30889823                | CC                              | TT              | 1946734694               |
| SNP_P4_9762_30889869 | NC_021160.1    | Ca_kabuli_chr01 | 30889869                | GG                              | AA              | 1946734695               |
| SNP_P4_9763_30890234 | NC_021160.1    | Ca_kabuli_chr01 | 30890234                | AA                              | CC              | 1946734697               |
| SNP_P4_9764_30890247 | NC_021160.1    | Ca_kabuli_chr01 | 30890247                | AA                              | GG              | 1946734699               |
| SNP_P4_9765_30896436 | NC_021160.1    | Ca_kabuli_chr01 | 30896436                | GG                              | AA              | 1946734701               |
| SNP_P4_9766_30908344 | NC_021160.1    | Ca_kabuli_chr01 | 30908344                | AA                              | GG              | 1946734703               |
| SNP_P4_9767_30914207 | NC_021160.1    | Ca_kabuli_chr01 | 30914207                | TT                              | CC              | 1946734705               |
| SNP_P4_9768_30923952 | NC_021160.1    | Ca_kabuli_chr01 | 30923952                | TT                              | CC              | 1946734707               |
| SNP_P4_9769_30926430 | NC_021160.1    | Ca_kabuli_chr01 | 30926430                | CC                              | TT              | 1946734709               |
| SNP_P4_9770_30926882 | NC_021160.1    | Ca_kabuli_chr01 | 30926882                | CC                              | GG              | 1946734711               |
| SNP_P4_9771_30929726 | NC_021160.1    | Ca_kabuli_chr01 | 30929726                | AA                              | CC              | 1946734713               |
| SNP_P4_9772_30930835 | NC_021160.1    | Ca_kabuli_chr01 | 30930835                | GG                              | AA              | 1946734715               |
| SNP_P4_9773_30933826 | NC_021160.1    | Ca_kabuli_chr01 | 30933826                | TT                              | AA              | 1946734717               |
| SNP_P4_9774_30934308 | NC_021160.1    | Ca_kabuli_chr01 | 30934308                | AA                              | GG              | 1946734719               |
| SNP_P4_9775_30934372 | NC_021160.1    | Ca_kabuli_chr01 | 30934372                | GG                              | TT              | 1946734721               |
| SNP_P4_9776_30934390 | NC_021160.1    | Ca_kabuli_chr01 | 30934390                | AA                              | GG              | 1946734723               |
| SNP_P4_9777_30934419 | NC_021160.1    | Ca_kabuli_chr01 | 30934419                | AA                              | GG              | 1946734725               |
| SNP_P4_9778_30934440 | NC_021160.1    | Ca_kabuli_chr01 | 30934440                | AA                              | CC              | 1946734727               |
| SNP_P4_9779_30934451 | NC_021160.1    | Ca_kabuli_chr01 | 30934451                | AA                              | GG              | 1946734729               |
| SNP_P4_9780_30934459 | NC_021160.1    | Ca_kabuli_chr01 | 30934459                | CC                              | TT              | 1946734731               |
| SNP_P4_9781_30934491 | NC_021160.1    | Ca_kabuli_chr01 | 30934491                | GG                              | TT              | 1946734733               |
| SNP_P4_9782_30934537 | NC_021160.1    | Ca_kabuli_chr01 | 30934537                | CC                              | TT              | 1946734735               |
| SNP_P4_9783_30938086 | NC_021160.1    | Ca_kabuli_chr01 | 30938086                | AA                              | CC              | 1946734737               |
| SNP_P4_9784_30938094 | NC_021160.1    | Ca_kabuli_chr01 | 30938094                | TT                              | CC              | 1946734739               |
| SNP_P4_9785_30938106 | NC_021160.1    | Ca_kabuli_chr01 | 30938106                | TT                              | CC              | 1946734741               |
| SNP_P4_9786_30938125 | NC_021160.1    | Ca_kabuli_chr01 | 30938125                | GG                              | TT              | 1946734743               |
| SNP_P4_9787_30938197 | NC_021160.1    | Ca_kabuli_chr01 | 30938197                | AA                              | GG              | 1946734745               |
| SNP_P4_9788_30938199 | NC_021160.1    | Ca_kabuli_chr01 | 30938199                | TT                              | CC              | 1946734746               |
| SNP_P4_9789_30938210 | NC_021160.1    | Ca_kabuli_chr01 | 30938210                | TT                              | CC              | 1946734748               |
| SNP_P4_9790_30938407 | NC_021160.1    | Ca_kabuli_chr01 | 30938407                | GG                              | CC              | 1946734751               |
| SNP_P4_9791_30938426 | NC_021160.1    | Ca_kabuli_chr01 | 30938426                | AA                              | TT              | 1946734753               |
| SNP_P4_9792_30938452 | NC_021160.1    | Ca_kabuli_chr01 | 30938452                | GG                              | AA              | 1946734755               |
| SNP_P4_9793_30938529 | NC_021160.1    | Ca_kabuli_chr01 | 30938529                | GG                              | AA              | 1946734757               |

| SNPs IDs             | Chromosome IDs | Chromosomes     | Physical positions (bp) | CDC Frontier (Reference genome) | (ILWC46 & LPNB) | NCBI SNPdb Accession IDs |
|----------------------|----------------|-----------------|-------------------------|---------------------------------|-----------------|--------------------------|
| SNP_P4_9794_30938583 | NC_021160.1    | Ca_kabuli_chr01 | 30938583                | TT                              | AA              | 1946734759               |
| SNP_P4_9796_30939509 | NC_021160.1    | Ca_kabuli_chr01 | 30939509                | TT                              | GG              | 1946734761               |
| SNP_P4_9797_30942347 | NC_021160.1    | Ca_kabuli_chr01 | 30942347                | AA                              | GG              | 1946734763               |
| SNP_P4_9798_30944237 | NC_021160.1    | Ca_kabuli_chr01 | 30944237                | AA                              | CC              | 1946734765               |
| SNP_P4_9799_30945737 | NC_021160.1    | Ca_kabuli_chr01 | 30945737                | AA                              | GG              | 1946734767               |
| SNP_P4_9800_30950036 | NC_021160.1    | Ca_kabuli_chr01 | 30950036                | CC                              | TT              | 1946734769               |
| SNP_P4_9801_30956312 | NC_021160.1    | Ca_kabuli_chr01 | 30956312                | CC                              | TT              | 1946734771               |
| SNP_P4_9802_30956335 | NC_021160.1    | Ca_kabuli_chr01 | 30956335                | GG                              | TT              | 1946734773               |
| SNP_P4_9803_30956466 | NC_021160.1    | Ca_kabuli_chr01 | 30956466                | AA                              | CC              | 1946734775               |
| SNP_P4_9804_30956643 | NC_021160.1    | Ca_kabuli_chr01 | 30956643                | TT                              | CC              | 1946734777               |
| SNP_P4_9805_30956840 | NC_021160.1    | Ca_kabuli_chr01 | 30956840                | AA                              | GG              | 1946734779               |
| SNP_P4_9806_30958852 | NC_021160.1    | Ca_kabuli_chr01 | 30958852                | GG                              | AA              | 1946734781               |
| SNP_P4_9807_30960535 | NC_021160.1    | Ca_kabuli_chr01 | 30960535                | AA                              | CC              | 1946734783               |
| SNP_P4_9808_30963312 | NC_021160.1    | Ca_kabuli_chr01 | 30963312                | TT                              | GG              | 1946734785               |
| SNP_P4_9809_30963314 | NC_021160.1    | Ca_kabuli_chr01 | 30963314                | GG                              | TT              | 1946734787               |
| SNP_P4_9810_30966911 | NC_021160.1    | Ca_kabuli_chr01 | 30966911                | GG                              | TT              | 1946734789               |
| SNP_P4_9811_30968577 | NC_021160.1    | Ca_kabuli_chr01 | 30968577                | AA                              | GG              | 1946734791               |
| SNP_P4_9812_30969311 | NC_021160.1    | Ca_kabuli_chr01 | 30969311                | CC                              | TT              | 1946734792               |
| SNP_P4_9813_30969324 | NC_021160.1    | Ca_kabuli_chr01 | 30969324                | TT                              | GG              | 1946734794               |
| SNP_P4_9815_30969954 | NC_021160.1    | Ca_kabuli_chr01 | 30969954                | AA                              | GG              | 1946734796               |
| SNP_P4_9816_30969961 | NC_021160.1    | Ca_kabuli_chr01 | 30969961                | GG                              | AA              | 1946734798               |
| SNP_P4_9817_30969966 | NC_021160.1    | Ca_kabuli_chr01 | 30969966                | GG                              | TT              | 1946734800               |
| SNP_P4_9818_30970205 | NC_021160.1    | Ca_kabuli_chr01 | 30970205                | AA                              | GG              | 1946734802               |
| SNP_P4_9819_30970277 | NC_021160.1    | Ca_kabuli_chr01 | 30970277                | AA                              | GG              | 1946734804               |
| SNP_P4_9820_30985187 | NC_021160.1    | Ca_kabuli_chr01 | 30985187                | AA                              | GG              | 1946734806               |
| SNP_P4_9821_30986982 | NC_021160.1    | Ca_kabuli_chr01 | 30986982                | TT                              | AA              | 1946734808               |
| SNP_P4_9822_30987798 | NC_021160.1    | Ca_kabuli_chr01 | 30987798                | CC                              | TT              | 1946734810               |
| SNP_P4_9823_30989437 | NC_021160.1    | Ca_kabuli_chr01 | 30989437                | TT                              | CC              | 1946734812               |
| SNP_P4_9824_30990845 | NC_021160.1    | Ca_kabuli_chr01 | 30990845                | GG                              | TT              | 1946734814               |
| SNP_P4_9827_31003497 | NC_021160.1    | Ca_kabuli_chr01 | 31003497                | TT                              | CC              | 1946734816               |
| SNP_P4_9830_31013722 | NC_021160.1    | Ca_kabuli_chr01 | 31013722                | AA                              | GG              | 1946734818               |
| SNP_P4_9831_31013818 | NC_021160.1    | Ca_kabuli_chr01 | 31013818                | AA                              | GG              | 1946734820               |
| SNP_P4_9833_31015934 | NC_021160.1    | Ca_kabuli_chr01 | 31015934                | AA                              | TT              | 1946734822               |
| SNP_P4_9834_31017850 | NC_021160.1    | Ca_kabuli_chr01 | 31017850                | CC                              | TT              | 1946734824               |
| SNP_P4_9835_31017944 | NC_021160.1    | Ca_kabuli_chr01 | 31017944                | CC                              | AA              | 1946734826               |
| SNP_P4_9836_31019739 | NC_021160.1    | Ca_kabuli_chr01 | 31019739                | AA                              | GG              | 1946734828               |
| SNP_P4_9837_31022049 | NC_021160.1    | Ca_kabuli_chr01 | 31022049                | GG                              | AA              | 1946734830               |
| SNP_P4_9838_31022078 | NC_021160.1    | Ca_kabuli_chr01 | 31022078                | TT                              | CC              | 1946734831               |
| SNP_P4_9839_31022085 | NC_021160.1    | Ca_kabuli_chr01 | 31022085                | AA                              | GG              | 1946734833               |
| SNP_P4_9840_31022122 | NC_021160.1    | Ca_kabuli_chr01 | 31022122                | TT                              | CC              | 1946734835               |
| SNP_P4_9841_31022203 | NC_021160.1    | Ca_kabuli_chr01 | 31022203                | AA                              | GG              | 1946734837               |
| SNP_P4_9842_31022235 | NC_021160.1    | Ca_kabuli_chr01 | 31022235                | TT                              | CC              | 1946734839               |

| SNPs IDs             | Chromosome IDs | Chromosomes     | Physical positions (bp) | CDC Frontier (Reference genome) | (ILWC46 & LPNB) | NCBI SNPdb Accession IDs |
|----------------------|----------------|-----------------|-------------------------|---------------------------------|-----------------|--------------------------|
| SNP_P4_9843_31022238 | NC_021160.1    | Ca_kabuli_chr01 | 31022238                | AA                              | GG              | 1946734841               |
| SNP_P4_9844_31022254 | NC_021160.1    | Ca_kabuli_chr01 | 31022254                | CC                              | TT              | 1946734843               |
| SNP_P4_9845_31022266 | NC_021160.1    | Ca_kabuli_chr01 | 31022266                | AA                              | GG              | 1946734845               |
| SNP_P4_9846_31022299 | NC_021160.1    | Ca_kabuli_chr01 | 31022299                | TT                              | AA              | 1946734847               |
| SNP_P4_9847_31022314 | NC_021160.1    | Ca_kabuli_chr01 | 31022314                | AA                              | CC              | 1946734849               |
| SNP_P4_9850_31029297 | NC_021160.1    | Ca_kabuli_chr01 | 31029297                | CC                              | TT              | 1946734851               |
| SNP_P4_9851_31044719 | NC_021160.1    | Ca_kabuli_chr01 | 31044719                | AA                              | GG              | 1946734853               |
| SNP_P4_9852_31045045 | NC_021160.1    | Ca_kabuli_chr01 | 31045045                | GG                              | AA              | 1946734855               |
| SNP_P4_9853_31050832 | NC_021160.1    | Ca_kabuli_chr01 | 31050832                | CC                              | AA              | 1946734857               |
| SNP_P4_9854_31050853 | NC_021160.1    | Ca_kabuli_chr01 | 31050853                | CC                              | TT              | 1946734859               |
| SNP_P4_9855_31050900 | NC_021160.1    | Ca_kabuli_chr01 | 31050900                | TT                              | CC              | 1946734861               |
| SNP_P4_9856_31050961 | NC_021160.1    | Ca_kabuli_chr01 | 31050961                | GG                              | AA              | 1946734863               |
| SNP_P4_9857_31051182 | NC_021160.1    | Ca_kabuli_chr01 | 31051182                | TT                              | CC              | 1946734865               |
| SNP_P4_9858_31051309 | NC_021160.1    | Ca_kabuli_chr01 | 31051309                | CC                              | TT              | 1946734867               |
| SNP_P4_9859_31051369 | NC_021160.1    | Ca_kabuli_chr01 | 31051369                | TT                              | CC              | 1946734869               |
| SNP_P4_9860_31056655 | NC_021160.1    | Ca_kabuli_chr01 | 31056655                | GG                              | AA              | 1946734871               |
| SNP_P4_9861_31057076 | NC_021160.1    | Ca_kabuli_chr01 | 31057076                | GG                              | AA              | 1946734873               |
| SNP_P4_9862_31058412 | NC_021160.1    | Ca_kabuli_chr01 | 31058412                | TT                              | GG              | 1946734875               |
| SNP_P4_9863_31058583 | NC_021160.1    | Ca_kabuli_chr01 | 31058583                | TT                              | CC              | 1946734877               |
| SNP_P4_9864_31068363 | NC_021160.1    | Ca_kabuli_chr01 | 31068363                | TT                              | CC              | 1946734879               |
| SNP_P4_9866_31072851 | NC_021160.1    | Ca_kabuli_chr01 | 31072851                | TT                              | CC              | 1946734881               |
| SNP_P4_9868_31073882 | NC_021160.1    | Ca_kabuli_chr01 | 31073882                | GG                              | CC              | 1946734883               |
| SNP_P4_9869_31074298 | NC_021160.1    | Ca_kabuli_chr01 | 31074298                | GG                              | AA              | 1946734885               |
| SNP_P4_9873_31094416 | NC_021160.1    | Ca_kabuli_chr01 | 31094416                | CC                              | TT              | 1946734886               |
| SNP_P4_9874_31094633 | NC_021160.1    | Ca_kabuli_chr01 | 31094633                | GG                              | AA              | 1946734888               |
| SNP_P4_9876_31104528 | NC_021160.1    | Ca_kabuli_chr01 | 31104528                | GG                              | TT              | 1946734890               |
| SNP_P4_9877_31114783 | NC_021160.1    | Ca_kabuli_chr01 | 31114783                | GG                              | AA              | 1946734892               |
| SNP_P4_9878_31115636 | NC_021160.1    | Ca_kabuli_chr01 | 31115636                | GG                              | CC              | 1946734894               |
| SNP_P4_9879_31117681 | NC_021160.1    | Ca_kabuli_chr01 | 31117681                | GG                              | CC              | 1946734896               |
| SNP_P4_9881_31118513 | NC_021160.1    | Ca_kabuli_chr01 | 31118513                | AA                              | GG              | 1946734898               |
| SNP_P4_9882_31118852 | NC_021160.1    | Ca_kabuli_chr01 | 31118852                | GG                              | AA              | 1946734900               |
| SNP_P4_9883_31120236 | NC_021160.1    | Ca_kabuli_chr01 | 31120236                | CC                              | GG              | 1946734902               |
| SNP_P4_9884_31130065 | NC_021160.1    | Ca_kabuli_chr01 | 31130065                | CC                              | TT              | 1946734904               |
| SNP_P4_9885_31130292 | NC_021160.1    | Ca_kabuli_chr01 | 31130292                | GG                              | TT              | 1946734906               |
| SNP_P4_9886_31130837 | NC_021160.1    | Ca_kabuli_chr01 | 31130837                | AA                              | GG              | 1946734908               |
| SNP_P4_9887_31130852 | NC_021160.1    | Ca_kabuli_chr01 | 31130852                | GG                              | AA              | 1946734910               |
| SNP_P4_9888_31134660 | NC_021160.1    | Ca_kabuli_chr01 | 31134660                | AA                              | GG              | 1946734912               |
| SNP_P4_9889_31135669 | NC_021160.1    | Ca_kabuli_chr01 | 31135669                | CC                              | GG              | 1946734914               |
| SNP_P4_9890_31136427 | NC_021160.1    | Ca_kabuli_chr01 | 31136427                | TT                              | CC              | 1946734916               |
| SNP_P4_9891_31141044 | NC_021160.1    | Ca_kabuli_chr01 | 31141044                | GG                              | TT              | 1946734917               |
| SNP_P4_9893_31142461 | NC_021160.1    | Ca_kabuli_chr01 | 31142461                | GG                              | CC              | 1946734919               |
| SNP_P4_9894_31142819 | NC_021160.1    | Ca_kabuli_chr01 | 31142819                | AA                              | TT              | 1946734921               |

| SNPs IDs             | Chromosome IDs | Chromosomes     | Physical positions (bp) | CDC Frontier (Reference genome) | (ILWC46 & LPNB) | NCBI SNPdb Accession IDs |
|----------------------|----------------|-----------------|-------------------------|---------------------------------|-----------------|--------------------------|
| SNP_P4_9895_31150262 | NC_021160.1    | Ca_kabuli_chr01 | 31150262                | TT                              | CC              | 1946734923               |
| SNP_P4_9897_31162909 | NC_021160.1    | Ca_kabuli_chr01 | 31162909                | AA                              | TT              | 1946734925               |
| SNP_P4_9898_31162917 | NC_021160.1    | Ca_kabuli_chr01 | 31162917                | AA                              | CC              | 1946734927               |
| SNP_P4_9899_31162948 | NC_021160.1    | Ca_kabuli_chr01 | 31162948                | GG                              | AA              | 1946734929               |
| SNP_P4_9900_31162952 | NC_021160.1    | Ca_kabuli_chr01 | 31162952                | CC                              | GG              | 1946734931               |
| SNP_P4_9902_31163570 | NC_021160.1    | Ca_kabuli_chr01 | 31163570                | TT                              | CC              | 1946734933               |
| SNP_P4_9903_31168300 | NC_021160.1    | Ca_kabuli_chr01 | 31168300                | CC                              | GG              | 1946734935               |
| SNP_P4_9904_31169360 | NC_021160.1    | Ca_kabuli_chr01 | 31169360                | AA                              | CC              | 1946734937               |
| SNP_P4_9905_31174374 | NC_021160.1    | Ca_kabuli_chr01 | 31174374                | AA                              | GG              | 1946734939               |
| SNP_P4_9906_31175605 | NC_021160.1    | Ca_kabuli_chr01 | 31175605                | GG                              | AA              | 1946734941               |
| SNP_P4_9907_31182489 | NC_021160.1    | Ca_kabuli_chr01 | 31182489                | GG                              | AA              | 1946734943               |
| SNP_P4_9908_31184175 | NC_021160.1    | Ca_kabuli_chr01 | 31184175                | CC                              | AA              | 1946734945               |
| SNP_P4_9909_31185873 | NC_021160.1    | Ca_kabuli_chr01 | 31185873                | GG                              | AA              | 1946734947               |
| SNP_P4_9910_31187772 | NC_021160.1    | Ca_kabuli_chr01 | 31187772                | AA                              | TT              | 1946734948               |
| SNP_P4_9911_31187881 | NC_021160.1    | Ca_kabuli_chr01 | 31187881                | AA                              | GG              | 1946734950               |
| SNP_P4_9912_31187920 | NC_021160.1    | Ca_kabuli_chr01 | 31187920                | AA                              | CC              | 1946734952               |
| SNP_P4_9913_31187922 | NC_021160.1    | Ca_kabuli_chr01 | 31187922                | CC                              | TT              | 1946734954               |
| SNP_P4_9914_31187927 | NC_021160.1    | Ca_kabuli_chr01 | 31187927                | TT                              | CC              | 1946734956               |
| SNP_P4_9915_31187966 | NC_021160.1    | Ca_kabuli_chr01 | 31187966                | CC                              | AA              | 1946734958               |
| SNP_P4_9916_31188005 | NC_021160.1    | Ca_kabuli_chr01 | 31188005                | AA                              | CC              | 1946734960               |
| SNP_P4_9917_31188019 | NC_021160.1    | Ca_kabuli_chr01 | 31188019                | GG                              | AA              | 1946734962               |
| SNP_P4_9918_31193203 | NC_021160.1    | Ca_kabuli_chr01 | 31193203                | GG                              | AA              | 1946734965               |
| SNP_P4_9919_31195065 | NC_021160.1    | Ca_kabuli_chr01 | 31195065                | AA                              | TT              | 1946734967               |
| SNP_P4_9920_31201504 | NC_021160.1    | Ca_kabuli_chr01 | 31201504                | GG                              | TT              | 1946734969               |
| SNP_P4_9921_31201538 | NC_021160.1    | Ca_kabuli_chr01 | 31201538                | TT                              | CC              | 1946734971               |
| SNP_P4_9922_31201559 | NC_021160.1    | Ca_kabuli_chr01 | 31201559                | AA                              | GG              | 1946734973               |
| SNP_P4_9923_31204087 | NC_021160.1    | Ca_kabuli_chr01 | 31204087                | AA                              | CC              | 1946734975               |
| SNP_P4_9924_31205310 | NC_021160.1    | Ca_kabuli_chr01 | 31205310                | GG                              | AA              | 1946734977               |
| SNP_P4_9925_31207366 | NC_021160.1    | Ca_kabuli_chr01 | 31207366                | TT                              | GG              | 1946734979               |
| SNP_P4_9926_31211547 | NC_021160.1    | Ca_kabuli_chr01 | 31211547                | AA                              | GG              | 1946734981               |
| SNP_P4_9927_31211580 | NC_021160.1    | Ca_kabuli_chr01 | 31211580                | CC                              | TT              | 1946734983               |
| SNP_P4_9929_31217186 | NC_021160.1    | Ca_kabuli_chr01 | 31217186                | AA                              | TT              | 1946734985               |
| SNP_P4_9930_31217269 | NC_021160.1    | Ca_kabuli_chr01 | 31217269                | AA                              | TT              | 1946734987               |
| SNP_P4_9931_31218110 | NC_021160.1    | Ca_kabuli_chr01 | 31218110                | AA                              | GG              | 1946734989               |
| SNP_P4_9932_31218387 | NC_021160.1    | Ca_kabuli_chr01 | 31218387                | TT                              | AA              | 1946734992               |
| SNP_P4_9933_31218396 | NC_021160.1    | Ca_kabuli_chr01 | 31218396                | GG                              | TT              | 1946734994               |
| SNP_P4_9934_31218464 | NC_021160.1    | Ca_kabuli_chr01 | 31218464                | CC                              | AA              | 1946734996               |
| SNP_P4_9935_31218547 | NC_021160.1    | Ca_kabuli_chr01 | 31218547                | GG                              | AA              | 1946734998               |
| SNP_P4_9936_31218601 | NC_021160.1    | Ca_kabuli_chr01 | 31218601                | CC                              | GG              | 1946735000               |
| SNP_P4_9937_31218768 | NC_021160.1    | Ca_kabuli_chr01 | 31218768                | GG                              | TT              | 1946735002               |
| SNP_P4_9938_31218863 | NC_021160.1    | Ca_kabuli_chr01 | 31218863                | CC                              | TT              | 1946735004               |
| SNP_P4_9939_31224986 | NC_021160.1    | Ca_kabuli_chr01 | 31224986                | GG                              | TT              | 1946735006               |

| SNPs IDs             | Chromosome IDs | Chromosomes     | Physical positions (bp) | CDC Frontier (Reference genome) | (ILWC46 & LPNB) | NCBI SNPdb Accession IDs |
|----------------------|----------------|-----------------|-------------------------|---------------------------------|-----------------|--------------------------|
| SNP_P4_9940_31226702 | NC_021160.1    | Ca_kabuli_chr01 | 31226702                | TT                              | CC              | 1946735008               |
| SNP_P4_9941_31248294 | NC_021160.1    | Ca_kabuli_chr01 | 31248294                | AA                              | CC              | 1946735010               |
| SNP_P4_9942_31249652 | NC_021160.1    | Ca_kabuli_chr01 | 31249652                | AA                              | GG              | 1946735012               |
| SNP_P4_9943_31250001 | NC_021160.1    | Ca_kabuli_chr01 | 31250001                | AA                              | GG              | 1946735014               |
| SNP_P4_9944_31251206 | NC_021160.1    | Ca_kabuli_chr01 | 31251206                | AA                              | CC              | 1946735016               |
| SNP_P4_9945_31251680 | NC_021160.1    | Ca_kabuli_chr01 | 31251680                | CC                              | TT              | 1946735019               |
| SNP_P4_9946_31252970 | NC_021160.1    | Ca_kabuli_chr01 | 31252970                | TT                              | CC              | 1946735021               |
| SNP_P4_9947_31254799 | NC_021160.1    | Ca_kabuli_chr01 | 31254799                | GG                              | AA              | 1946735023               |
| SNP_P4_9948_31259301 | NC_021160.1    | Ca_kabuli_chr01 | 31259301                | TT                              | CC              | 1946735025               |
| SNP_P4_9949_31266080 | NC_021160.1    | Ca_kabuli_chr01 | 31266080                | GG                              | AA              | 1946735027               |
| SNP_P4_9950_31267116 | NC_021160.1    | Ca_kabuli_chr01 | 31267116                | GG                              | CC              | 1946735029               |
| SNP_P4_9951_31279625 | NC_021160.1    | Ca_kabuli_chr01 | 31279625                | AA                              | CC              | 1946735030               |
| SNP_P4_9952_31280875 | NC_021160.1    | Ca_kabuli_chr01 | 31280875                | AA                              | GG              | 1946735032               |
| SNP_P4_9953_31280968 | NC_021160.1    | Ca_kabuli_chr01 | 31280968                | TT                              | CC              | 1946735034               |
| SNP_P4_9954_31281017 | NC_021160.1    | Ca_kabuli_chr01 | 31281017                | TT                              | AA              | 1946735036               |
| SNP_P4_9955_31281127 | NC_021160.1    | Ca_kabuli_chr01 | 31281127                | AA                              | GG              | 1946735038               |
| SNP_P4_9956_31282959 | NC_021160.1    | Ca_kabuli_chr01 | 31282959                | GG                              | AA              | 1946735040               |
| SNP_P4_9957_31286201 | NC_021160.1    | Ca_kabuli_chr01 | 31286201                | AA                              | GG              | 1946735042               |
| SNP_P4_9958_31286271 | NC_021160.1    | Ca_kabuli_chr01 | 31286271                | GG                              | TT              | 1946735044               |
| SNP_P4_9959_31286272 | NC_021160.1    | Ca_kabuli_chr01 | 31286272                | AA                              | GG              | 1946735046               |
| SNP_P4_9960_31286373 | NC_021160.1    | Ca_kabuli_chr01 | 31286373                | AA                              | GG              | 1946735048               |
| SNP_P4_9961_31290772 | NC_021160.1    | Ca_kabuli_chr01 | 31290772                | CC                              | TT              | 1946735050               |
| SNP_P4_9962_31291155 | NC_021160.1    | Ca_kabuli_chr01 | 31291155                | TT                              | GG              | 1946735052               |
| SNP_P4_9963_31306084 | NC_021160.1    | Ca_kabuli_chr01 | 31306084                | AA                              | TT              | 1946735054               |
| SNP_P4_9964_31307322 | NC_021160.1    | Ca_kabuli_chr01 | 31307322                | GG                              | AA              | 1946735056               |
| SNP_P4_9965_31307879 | NC_021160.1    | Ca_kabuli_chr01 | 31307879                | AA                              | GG              | 1946735059               |
| SNP_P4_9966_31309226 | NC_021160.1    | Ca_kabuli_chr01 | 31309226                | CC                              | GG              | 1946735061               |
| SNP_P4_9967_31309917 | NC_021160.1    | Ca_kabuli_chr01 | 31309917                | GG                              | AA              | 1946735063               |
| SNP_P4_9968_31310022 | NC_021160.1    | Ca_kabuli_chr01 | 31310022                | AA                              | GG              | 1946735065               |
| SNP_P4_9969_31310323 | NC_021160.1    | Ca_kabuli_chr01 | 31310323                | TT                              | GG              | 1946735067               |
| SNP_P4_9970_31310338 | NC_021160.1    | Ca_kabuli_chr01 | 31310338                | GG                              | AA              | 1946735069               |
| SNP_P4_9971_31310412 | NC_021160.1    | Ca_kabuli_chr01 | 31310412                | CC                              | TT              | 1946735071               |
| SNP_P4_9972_31320091 | NC_021160.1    | Ca_kabuli_chr01 | 31320091                | CC                              | TT              | 1946735073               |
| SNP_P4_9974_31326793 | NC_021160.1    | Ca_kabuli_chr01 | 31326793                | AA                              | GG              | 1946735076               |
| SNP_P4_9975_31330460 | NC_021160.1    | Ca_kabuli_chr01 | 31330460                | CC                              | TT              | 1946735078               |
| SNP_P4_9976_31336060 | NC_021160.1    | Ca_kabuli_chr01 | 31336060                | TT                              | CC              | 1946735080               |
| SNP_P4_9977_31336621 | NC_021160.1    | Ca_kabuli_chr01 | 31336621                | AA                              | GG              | 1946735082               |
| SNP_P4_9978_31342145 | NC_021160.1    | Ca_kabuli_chr01 | 31342145                | TT                              | AA              | 1946735084               |
| SNP_P4_9979_31344668 | NC_021160.1    | Ca_kabuli_chr01 | 31344668                | CC                              | TT              | 1946735086               |
| SNP_P4_9980_31344984 | NC_021160.1    | Ca_kabuli_chr01 | 31344984                | GG                              | TT              | 1946735088               |
| SNP_P4_9981_31347210 | NC_021160.1    | Ca_kabuli_chr01 | 31347210                | GG                              | AA              | 1946735090               |
| SNP_P4_9982_31368799 | NC_021160.1    | Ca_kabuli_chr01 | 31368799                | TT                              | CC              | 1946735092               |

| SNPs IDs              | Chromosome IDs | Chromosomes     | Physical positions (bp) | CDC Frontier (Reference genome) | (ILWC46 & LPNB) | NCBI SNPdb Accession IDs |
|-----------------------|----------------|-----------------|-------------------------|---------------------------------|-----------------|--------------------------|
| SNP_P4_9984_31378909  | NC_021160.1    | Ca_kabuli_chr01 | 31378909                | TT                              | AA              | 1946735094               |
| SNP_P4_9985_31379215  | NC_021160.1    | Ca_kabuli_chr01 | 31379215                | AA                              | GG              | 1946735096               |
| SNP_P4_9986_31381894  | NC_021160.1    | Ca_kabuli_chr01 | 31381894                | GG                              | AA              | 1946735098               |
| SNP_P4_9988_31386987  | NC_021160.1    | Ca_kabuli_chr01 | 31386987                | TT                              | GG              | 1946735100               |
| SNP_P4_9990_31406841  | NC_021160.1    | Ca_kabuli_chr01 | 31406841                | CC                              | AA              | 1946735102               |
| SNP_P4_9991_31410801  | NC_021160.1    | Ca_kabuli_chr01 | 31410801                | CC                              | TT              | 1946735104               |
| SNP_P4_9992_31421611  | NC_021160.1    | Ca_kabuli_chr01 | 31421611                | TT                              | AA              | 1946735107               |
| SNP_P4_9993_31421612  | NC_021160.1    | Ca_kabuli_chr01 | 31421612                | TT                              | CC              | 1946735109               |
| SNP_P4_9994_31422436  | NC_021160.1    | Ca_kabuli_chr01 | 31422436                | AA                              | TT              | 1946735111               |
| SNP_P4_9995_31422579  | NC_021160.1    | Ca_kabuli_chr01 | 31422579                | GG                              | AA              | 1946735112               |
| SNP_P4_9997_31422987  | NC_021160.1    | Ca_kabuli_chr01 | 31422987                | AA                              | GG              | 1946735114               |
| SNP_P4_9998_31422991  | NC_021160.1    | Ca_kabuli_chr01 | 31422991                | TT                              | GG              | 1946735116               |
| SNP_P4_9999_31431951  | NC_021160.1    | Ca_kabuli_chr01 | 31431951                | TT                              | CC              | 1946735118               |
| SNP_P4_10000_31432738 | NC_021160.1    | Ca_kabuli_chr01 | 31432738                | AA                              | GG              | 1946735120               |
| SNP_P4_10001_31434139 | NC_021160.1    | Ca_kabuli_chr01 | 31434139                | CC                              | TT              | 1946735122               |
| SNP_P4_10002_31436431 | NC_021160.1    | Ca_kabuli_chr01 | 31436431                | GG                              | CC              | 1946735124               |
| SNP_P4_10003_31437430 | NC_021160.1    | Ca_kabuli_chr01 | 31437430                | AA                              | GG              | 1946735126               |
| SNP_P4_10004_31441045 | NC_021160.1    | Ca_kabuli_chr01 | 31441045                | AA                              | GG              | 1946735128               |
| SNP_P4_10005_31443604 | NC_021160.1    | Ca_kabuli_chr01 | 31443604                | AA                              | GG              | 1946735130               |
| SNP_P4_10006_31443672 | NC_021160.1    | Ca_kabuli_chr01 | 31443672                | AA                              | CC              | 1946735132               |
| SNP_P4_10007_31450553 | NC_021160.1    | Ca_kabuli_chr01 | 31450553                | TT                              | AA              | 1946735134               |
| SNP_P4_10009_31455089 | NC_021160.1    | Ca_kabuli_chr01 | 31455089                | GG                              | AA              | 1946735136               |
| SNP_P4_10010_31455543 | NC_021160.1    | Ca_kabuli_chr01 | 31455543                | GG                              | AA              | 1946735138               |
| SNP_P4_10011_31456183 | NC_021160.1    | Ca_kabuli_chr01 | 31456183                | TT                              | GG              | 1946735140               |
| SNP_P4_10013_31466789 | NC_021160.1    | Ca_kabuli_chr01 | 31466789                | TT                              | CC              | 1946735142               |
| SNP_P4_10014_31477590 | NC_021160.1    | Ca_kabuli_chr01 | 31477590                | AA                              | TT              | 1946735144               |
| SNP_P4_10017_31482201 | NC_021160.1    | Ca_kabuli_chr01 | 31482201                | TT                              | CC              | 1946735146               |
| SNP_P4_10018_31482268 | NC_021160.1    | Ca_kabuli_chr01 | 31482268                | GG                              | AA              | 1946735148               |
| SNP_P4_10019_31487909 | NC_021160.1    | Ca_kabuli_chr01 | 31487909                | AA                              | GG              | 1946735149               |
| SNP_P4_10020_31490456 | NC_021160.1    | Ca_kabuli_chr01 | 31490456                | AA                              | GG              | 1946735151               |
| SNP_P4_10021_31491125 | NC_021160.1    | Ca_kabuli_chr01 | 31491125                | AA                              | GG              | 1946735153               |
| SNP_P4_10022_31491537 | NC_021160.1    | Ca_kabuli_chr01 | 31491537                | AA                              | GG              | 1946735155               |
| SNP_P4_10023_31492632 | NC_021160.1    | Ca_kabuli_chr01 | 31492632                | AA                              | GG              | 1946735157               |
| SNP_P4_10024_31493683 | NC_021160.1    | Ca_kabuli_chr01 | 31493683                | TT                              | CC              | 1946735159               |
| SNP_P4_10025_31494120 | NC_021160.1    | Ca_kabuli_chr01 | 31494120                | AA                              | CC              | 1946735161               |
| SNP_P4_10026_31497880 | NC_021160.1    | Ca_kabuli_chr01 | 31497880                | AA                              | GG              | 1946735163               |
| SNP_P4_10027_31498392 | NC_021160.1    | Ca_kabuli_chr01 | 31498392                | GG                              | AA              | 1946735165               |
| SNP_P4_10030_31499014 | NC_021160.1    | Ca_kabuli_chr01 | 31499014                | AA                              | GG              | 1946735167               |
| SNP_P4_10032_31508049 | NC_021160.1    | Ca_kabuli_chr01 | 31508049                | GG                              | AA              | 1946735169               |
| SNP_P4_10033_31510938 | NC_021160.1    | Ca_kabuli_chr01 | 31510938                | TT                              | AA              | 1946735171               |
| SNP_P4_10034_31512866 | NC_021160.1    | Ca_kabuli_chr01 | 31512866                | AA                              | GG              | 1946735173               |
| SNP_P4_10035_31513288 | NC_021160.1    | Ca_kabuli_chr01 | 31513288                | AA                              | CC              | 1946735175               |

| SNPs IDs              | Chromosome IDs | Chromosomes     | Physical positions (bp) | CDC Frontier (Reference genome) | (ILWC46 & LPNB) | NCBI SNPdb Accession IDs |
|-----------------------|----------------|-----------------|-------------------------|---------------------------------|-----------------|--------------------------|
| SNP_P4_10036_31515602 | NC_021160.1    | Ca_kabuli_chr01 | 31515602                | AA                              | GG              | 1946735177               |
| SNP_P4_10037_31515932 | NC_021160.1    | Ca_kabuli_chr01 | 31515932                | CC                              | TT              | 1946735179               |
| SNP_P4_10038_31515984 | NC_021160.1    | Ca_kabuli_chr01 | 31515984                | TT                              | GG              | 1946735180               |
| SNP_P4_10039_31516205 | NC_021160.1    | Ca_kabuli_chr01 | 31516205                | CC                              | TT              | 1946735182               |
| SNP_P4_10040_31522742 | NC_021160.1    | Ca_kabuli_chr01 | 31522742                | TT                              | CC              | 1946735184               |
| SNP_P4_10041_31533668 | NC_021160.1    | Ca_kabuli_chr01 | 31533668                | CC                              | TT              | 1946735186               |
| SNP_P4_10042_31541578 | NC_021160.1    | Ca_kabuli_chr01 | 31541578                | AA                              | TT              | 1946735188               |
| SNP_P4_10043_31544294 | NC_021160.1    | Ca_kabuli_chr01 | 31544294                | GG                              | TT              | 1946735190               |
| SNP_P4_10044_31550922 | NC_021160.1    | Ca_kabuli_chr01 | 31550922                | GG                              | AA              | 1946735192               |
| SNP_P4_10045_31556820 | NC_021160.1    | Ca_kabuli_chr01 | 31556820                | GG                              | AA              | 1946735194               |
| SNP_P4_10046_31580172 | NC_021160.1    | Ca_kabuli_chr01 | 31580172                | GG                              | AA              | 1946735196               |
| SNP_P4_10047_31581439 | NC_021160.1    | Ca_kabuli_chr01 | 31581439                | TT                              | GG              | 1946735198               |
| SNP_P4_10048_31581442 | NC_021160.1    | Ca_kabuli_chr01 | 31581442                | TT                              | AA              | 1946735200               |
| SNP_P4_10049_31584574 | NC_021160.1    | Ca_kabuli_chr01 | 31584574                | GG                              | AA              | 1946735202               |
| SNP_P4_10050_31584640 | NC_021160.1    | Ca_kabuli_chr01 | 31584640                | CC                              | AA              | 1946735204               |
| SNP_P4_10051_31585017 | NC_021160.1    | Ca_kabuli_chr01 | 31585017                | CC                              | TT              | 1946735206               |
| SNP_P4_10052_31585144 | NC_021160.1    | Ca_kabuli_chr01 | 31585144                | CC                              | TT              | 1946735208               |
| SNP_P4_10053_31585800 | NC_021160.1    | Ca_kabuli_chr01 | 31585800                | AA                              | GG              | 1946735210               |
| SNP_P4_10054_31587118 | NC_021160.1    | Ca_kabuli_chr01 | 31587118                | AA                              | GG              | 1946735212               |
| SNP_P4_10056_31590609 | NC_021160.1    | Ca_kabuli_chr01 | 31590609                | CC                              | AA              | 1946735214               |
| SNP_P4_10057_31592077 | NC_021160.1    | Ca_kabuli_chr01 | 31592077                | GG                              | CC              | 1946735216               |
| SNP_P4_10060_31592328 | NC_021160.1    | Ca_kabuli_chr01 | 31592328                | AA                              | GG              | 1946735218               |
| SNP_P4_10062_31592502 | NC_021160.1    | Ca_kabuli_chr01 | 31592502                | AA                              | CC              | 1946735220               |
| SNP_P4_10063_31592541 | NC_021160.1    | Ca_kabuli_chr01 | 31592541                | GG                              | AA              | 1946735222               |
| SNP_P4_10064_31592742 | NC_021160.1    | Ca_kabuli_chr01 | 31592742                | AA                              | TT              | 1946735224               |
| SNP_P4_10065_31592835 | NC_021160.1    | Ca_kabuli_chr01 | 31592835                | GG                              | AA              | 1946735226               |
| SNP_P4_10066_31592889 | NC_021160.1    | Ca_kabuli_chr01 | 31592889                | GG                              | AA              | 1946735228               |
| SNP_P4_10068_31599512 | NC_021160.1    | Ca_kabuli_chr01 | 31599512                | TT                              | CC              | 1946735230               |
| SNP_P4_10069_31599546 | NC_021160.1    | Ca_kabuli_chr01 | 31599546                | TT                              | GG              | 1946735232               |
| SNP_P4_10070_31599560 | NC_021160.1    | Ca_kabuli_chr01 | 31599560                | TT                              | CC              | 1946735235               |
| SNP_P4_10071_31599582 | NC_021160.1    | Ca_kabuli_chr01 | 31599582                | TT                              | AA              | 1946735237               |
| SNP_P4_10072_31599585 | NC_021160.1    | Ca_kabuli_chr01 | 31599585                | GG                              | AA              | 1946735239               |
| SNP_P4_10073_31599612 | NC_021160.1    | Ca_kabuli_chr01 | 31599612                | TT                              | GG              | 1946735241               |
| SNP_P4_10074_31599797 | NC_021160.1    | Ca_kabuli_chr01 | 31599797                | TT                              | CC              | 1946735243               |
| SNP_P4_10075_31599834 | NC_021160.1    | Ca_kabuli_chr01 | 31599834                | CC                              | GG              | 1946735245               |
| SNP_P4_10076_31599841 | NC_021160.1    | Ca_kabuli_chr01 | 31599841                | CC                              | TT              | 1946735247               |
| SNP_P4_10077_31599967 | NC_021160.1    | Ca_kabuli_chr01 | 31599967                | CC                              | AA              | 1946735249               |
| SNP_P4_10078_31599972 | NC_021160.1    | Ca_kabuli_chr01 | 31599972                | AA                              | CC              | 1946735251               |
| SNP_P4_10079_31600333 | NC_021160.1    | Ca_kabuli_chr01 | 31600333                | TT                              | CC              | 1946735253               |
| SNP_P4_10080_31600501 | NC_021160.1    | Ca_kabuli_chr01 | 31600501                | GG                              | AA              | 1946735255               |
| SNP_P4_10081_31600535 | NC_021160.1    | Ca_kabuli_chr01 | 31600535                | GG                              | TT              | 1946735257               |
| SNP_P4_10082_31600637 | NC_021160.1    | Ca_kabuli_chr01 | 31600637                | TT                              | AA              | 1946735259               |



| SNPs IDs              | Chromosome IDs | Chromosomes     | Physical positions (bp) | CDC Frontier (Reference genome) | (ILWC46 & LPNB) | NCBI SNPdb Accession IDs |
|-----------------------|----------------|-----------------|-------------------------|---------------------------------|-----------------|--------------------------|
| SNP_P4_10083_31600704 | NC_021160.1    | Ca_kabuli_chr01 | 31600704                | CC                              | TT              | 1946735261               |
| SNP_P4_10085_31601426 | NC_021160.1    | Ca_kabuli_chr01 | 31601426                | GG                              | AA              | 1946735263               |
| SNP_P4_10087_31605271 | NC_021160.1    | Ca_kabuli_chr01 | 31605271                | TT                              | GG              | 1946735265               |
| SNP_P4_10088_31615700 | NC_021160.1    | Ca_kabuli_chr01 | 31615700                | TT                              | CC              | 1946735267               |
| SNP_P4_10089_31627019 | NC_021160.1    | Ca_kabuli_chr01 | 31627019                | AA                              | CC              | 1946735269               |
| SNP_P4_10090_31627028 | NC_021160.1    | Ca_kabuli_chr01 | 31627028                | AA                              | GG              | 1946735271               |
| SNP_P4_10091_31627067 | NC_021160.1    | Ca_kabuli_chr01 | 31627067                | GG                              | CC              | 1946735273               |
| SNP_P4_10092_31627102 | NC_021160.1    | Ca_kabuli_chr01 | 31627102                | CC                              | TT              | 1946735275               |
| SNP_P4_10094_31627410 | NC_021160.1    | Ca_kabuli_chr01 | 31627410                | GG                              | AA              | 1946735277               |
| SNP_P4_10095_31627469 | NC_021160.1    | Ca_kabuli_chr01 | 31627469                | GG                              | AA              | 1946735279               |
| SNP_P4_10096_31627507 | NC_021160.1    | Ca_kabuli_chr01 | 31627507                | CC                              | TT              | 1946735281               |
| SNP_P4_10097_31627508 | NC_021160.1    | Ca_kabuli_chr01 | 31627508                | CC                              | TT              | 1946735283               |
| SNP_P4_10098_31627512 | NC_021160.1    | Ca_kabuli_chr01 | 31627512                | AA                              | GG              | 1946735285               |
| SNP_P4_10099_31627522 | NC_021160.1    | Ca_kabuli_chr01 | 31627522                | TT                              | GG              | 1946735287               |
| SNP_P4_10100_31627536 | NC_021160.1    | Ca_kabuli_chr01 | 31627536                | CC                              | TT              | 1946735289               |
| SNP_P4_10101_31627537 | NC_021160.1    | Ca_kabuli_chr01 | 31627537                | AA                              | GG              | 1946735291               |
| SNP_P4_10102_31627547 | NC_021160.1    | Ca_kabuli_chr01 | 31627547                | GG                              | TT              | 1946735293               |
| SNP_P4_10103_31627563 | NC_021160.1    | Ca_kabuli_chr01 | 31627563                | CC                              | AA              | 1946735296               |
| SNP_P4_10104_31627605 | NC_021160.1    | Ca_kabuli_chr01 | 31627605                | GG                              | TT              | 1946735298               |
| SNP_P4_10105_31627680 | NC_021160.1    | Ca_kabuli_chr01 | 31627680                | CC                              | AA              | 1946735300               |
| SNP_P4_10106_31627681 | NC_021160.1    | Ca_kabuli_chr01 | 31627681                | AA                              | CC              | 1946735302               |
| SNP_P4_10107_31627689 | NC_021160.1    | Ca_kabuli_chr01 | 31627689                | AA                              | GG              | 1946735304               |
| SNP_P4_10108_31627733 | NC_021160.1    | Ca_kabuli_chr01 | 31627733                | TT                              | CC              | 1946735306               |
| SNP_P4_10109_31627736 | NC_021160.1    | Ca_kabuli_chr01 | 31627736                | CC                              | TT              | 1946735308               |
| SNP_P4_10110_31627791 | NC_021160.1    | Ca_kabuli_chr01 | 31627791                | AA                              | TT              | 1946735310               |
| SNP_P4_10111_31627793 | NC_021160.1    | Ca_kabuli_chr01 | 31627793                | AA                              | CC              | 1946735312               |
| SNP_P4_10112_31631924 | NC_021160.1    | Ca_kabuli_chr01 | 31631924                | TT                              | CC              | 1946735314               |
| SNP_P4_10113_31632335 | NC_021160.1    | Ca_kabuli_chr01 | 31632335                | AA                              | GG              | 1946735315               |
| SNP_P4_10114_31633201 | NC_021160.1    | Ca_kabuli_chr01 | 31633201                | AA                              | GG              | 1946735316               |
| SNP_P4_10115_31637839 | NC_021160.1    | Ca_kabuli_chr01 | 31637839                | GG                              | AA              | 1946735317               |
| SNP_P4_10116_31637874 | NC_021160.1    | Ca_kabuli_chr01 | 31637874                | TT                              | AA              | 1946735318               |
| SNP_P4_10117_31640049 | NC_021160.1    | Ca_kabuli_chr01 | 31640049                | AA                              | CC              | 1946735320               |
| SNP_P4_10118_31641836 | NC_021160.1    | Ca_kabuli_chr01 | 31641836                | CC                              | AA              | 1946735322               |
| SNP_P4_10119_31641875 | NC_021160.1    | Ca_kabuli_chr01 | 31641875                | AA                              | TT              | 1946735324               |
| SNP_P4_10121_31646004 | NC_021160.1    | Ca_kabuli_chr01 | 31646004                | GG                              | CC              | 1946735326               |
| SNP_P4_10122_31647719 | NC_021160.1    | Ca_kabuli_chr01 | 31647719                | TT                              | CC              | 1946735328               |
| SNP_P4_10123_31649310 | NC_021160.1    | Ca_kabuli_chr01 | 31649310                | TT                              | CC              | 1946735330               |
| SNP_P4_10124_31653437 | NC_021160.1    | Ca_kabuli_chr01 | 31653437                | GG                              | AA              | 1946735332               |
| SNP_P4_10125_31654725 | NC_021160.1    | Ca_kabuli_chr01 | 31654725                | GG                              | CC              | 1946735334               |
| SNP_P4_10126_31661628 | NC_021160.1    | Ca_kabuli_chr01 | 31661628                | AA                              | GG              | 1946735336               |
| SNP_P4_10127_31661757 | NC_021160.1    | Ca_kabuli_chr01 | 31661757                | TT                              | AA              | 1946735338               |
| SNP_P4_10128_31661834 | NC_021160.1    | Ca_kabuli_chr01 | 31661834                | CC                              | GG              | 1946735340               |

| SNPs IDs              | Chromosome IDs | Chromosomes     | Physical positions (bp) | CDC Frontier (Reference genome) | (ILWC46 & LPNB) | NCBI SNPdb Accession IDs |
|-----------------------|----------------|-----------------|-------------------------|---------------------------------|-----------------|--------------------------|
| SNP_P4_10129_31663035 | NC_021160.1    | Ca_kabuli_chr01 | 31663035                | TT                              | CC              | 1946735342               |
| SNP_P4_10130_31664135 | NC_021160.1    | Ca_kabuli_chr01 | 31664135                | CC                              | TT              | 1946735344               |
| SNP_P4_10131_31667915 | NC_021160.1    | Ca_kabuli_chr01 | 31667915                | TT                              | AA              | 1946735346               |
| SNP_P4_10133_31669519 | NC_021160.1    | Ca_kabuli_chr01 | 31669519                | GG                              | AA              | 1946735348               |
| SNP_P4_10134_31694511 | NC_021160.1    | Ca_kabuli_chr01 | 31694511                | GG                              | CC              | 1946735350               |
| SNP_P4_10135_31710522 | NC_021160.1    | Ca_kabuli_chr01 | 31710522                | GG                              | AA              | 1946735352               |
| SNP_P4_10136_31710532 | NC_021160.1    | Ca_kabuli_chr01 | 31710532                | GG                              | TT              | 1946735354               |
| SNP_P4_10137_31710552 | NC_021160.1    | Ca_kabuli_chr01 | 31710552                | GG                              | TT              | 1946735356               |
| SNP_P4_10138_31716139 | NC_021160.1    | Ca_kabuli_chr01 | 31716139                | TT                              | CC              | 1946735358               |
| SNP_P4_10139_31716183 | NC_021160.1    | Ca_kabuli_chr01 | 31716183                | TT                              | AA              | 1946735360               |
| SNP_P4_10141_31716482 | NC_021160.1    | Ca_kabuli_chr01 | 31716482                | AA                              | GG              | 1946735362               |
| SNP_P4_10142_31716618 | NC_021160.1    | Ca_kabuli_chr01 | 31716618                | CC                              | GG              | 1946735364               |
| SNP_P4_10143_31721915 | NC_021160.1    | Ca_kabuli_chr01 | 31721915                | AA                              | GG              | 1946735366               |
| SNP_P4_10144_31726028 | NC_021160.1    | Ca_kabuli_chr01 | 31726028                | AA                              | GG              | 1946735368               |
| SNP_P4_10145_31726050 | NC_021160.1    | Ca_kabuli_chr01 | 31726050                | TT                              | CC              | 1946735370               |
| SNP_P4_10146_31726067 | NC_021160.1    | Ca_kabuli_chr01 | 31726067                | CC                              | AA              | 1946735372               |
| SNP_P4_10147_31726091 | NC_021160.1    | Ca_kabuli_chr01 | 31726091                | CC                              | TT              | 1946735374               |
| SNP_P4_10148_31726096 | NC_021160.1    | Ca_kabuli_chr01 | 31726096                | AA                              | CC              | 1946735376               |
| SNP_P4_10149_31726142 | NC_021160.1    | Ca_kabuli_chr01 | 31726142                | TT                              | GG              | 1946735378               |
| SNP_P4_10150_31726241 | NC_021160.1    | Ca_kabuli_chr01 | 31726241                | GG                              | AA              | 1946735380               |
| SNP_P4_10151_31726250 | NC_021160.1    | Ca_kabuli_chr01 | 31726250                | AA                              | CC              | 1946735382               |
| SNP_P4_10152_31726262 | NC_021160.1    | Ca_kabuli_chr01 | 31726262                | GG                              | AA              | 1946735384               |
| SNP_P4_10153_31726265 | NC_021160.1    | Ca_kabuli_chr01 | 31726265                | TT                              | CC              | 1946735386               |
| SNP_P4_10154_31726273 | NC_021160.1    | Ca_kabuli_chr01 | 31726273                | TT                              | GG              | 1946735388               |
| SNP_P4_10155_31753794 | NC_021160.1    | Ca_kabuli_chr01 | 31753794                | AA                              | GG              | 1946735390               |
| SNP_P4_10156_31754023 | NC_021160.1    | Ca_kabuli_chr01 | 31754023                | CC                              | AA              | 1946735392               |
| SNP_P4_10157_31754025 | NC_021160.1    | Ca_kabuli_chr01 | 31754025                | TT                              | AA              | 1946735394               |
| SNP_P4_10158_31754038 | NC_021160.1    | Ca_kabuli_chr01 | 31754038                | TT                              | CC              | 1946735396               |
| SNP_P4_10159_31762705 | NC_021160.1    | Ca_kabuli_chr01 | 31762705                | TT                              | CC              | 1946735398               |
| SNP_P4_10160_31768136 | NC_021160.1    | Ca_kabuli_chr01 | 31768136                | AA                              | GG              | 1946735400               |
| SNP_P4_10161_31768181 | NC_021160.1    | Ca_kabuli_chr01 | 31768181                | CC                              | AA              | 1946735402               |
| SNP_P4_10162_31768186 | NC_021160.1    | Ca_kabuli_chr01 | 31768186                | CC                              | TT              | 1946735404               |
| SNP_P4_10163_31768458 | NC_021160.1    | Ca_kabuli_chr01 | 31768458                | GG                              | AA              | 1946735406               |
| SNP_P4_10165_31773381 | NC_021160.1    | Ca_kabuli_chr01 | 31773381                | CC                              | TT              | 1946735408               |
| SNP_P4_10166_31778803 | NC_021160.1    | Ca_kabuli_chr01 | 31778803                | AA                              | TT              | 1946735410               |
| SNP_P4_10167_31778898 | NC_021160.1    | Ca_kabuli_chr01 | 31778898                | CC                              | GG              | 1946735413               |
| SNP_P4_10168_31778976 | NC_021160.1    | Ca_kabuli_chr01 | 31778976                | AA                              | GG              | 1946735415               |
| SNP_P4_10169_31778982 | NC_021160.1    | Ca_kabuli_chr01 | 31778982                | CC                              | TT              | 1946735417               |
| SNP_P4_10170_31779039 | NC_021160.1    | Ca_kabuli_chr01 | 31779039                | TT                              | CC              | 1946735419               |
| SNP_P4_10171_31779046 | NC_021160.1    | Ca_kabuli_chr01 | 31779046                | TT                              | CC              | 1946735421               |
| SNP_P4_10172_31779048 | NC_021160.1    | Ca_kabuli_chr01 | 31779048                | AA                              | GG              | 1946735423               |
| SNP_P4_10173_31779054 | NC_021160.1    | Ca_kabuli_chr01 | 31779054                | GG                              | AA              | 1946735425               |

| SNPs IDs              | Chromosome IDs | Chromosomes     | Physical positions (bp) | CDC Frontier (Reference genome) | (ILWC46 & LPNB) | NCBI SNPdb Accession IDs |
|-----------------------|----------------|-----------------|-------------------------|---------------------------------|-----------------|--------------------------|
| SNP_P4_10174_31779306 | NC_021160.1    | Ca_kabuli_chr01 | 31779306                | GG                              | TT              | 1946735427               |
| SNP_P4_10175_31779376 | NC_021160.1    | Ca_kabuli_chr01 | 31779376                | AA                              | GG              | 1946735429               |
| SNP_P4_10176_31779547 | NC_021160.1    | Ca_kabuli_chr01 | 31779547                | TT                              | GG              | 1946735431               |
| SNP_P4_10177_31779587 | NC_021160.1    | Ca_kabuli_chr01 | 31779587                | CC                              | TT              | 1946735433               |
| SNP_P4_10178_31779601 | NC_021160.1    | Ca_kabuli_chr01 | 31779601                | TT                              | CC              | 1946735435               |
| SNP_P4_10179_31779617 | NC_021160.1    | Ca_kabuli_chr01 | 31779617                | AA                              | CC              | 1946735437               |
| SNP_P4_10180_31779693 | NC_021160.1    | Ca_kabuli_chr01 | 31779693                | TT                              | AA              | 1946735439               |
| SNP_P4_10181_31779720 | NC_021160.1    | Ca_kabuli_chr01 | 31779720                | TT                              | AA              | 1946735441               |
| SNP_P4_10182_31779764 | NC_021160.1    | Ca_kabuli_chr01 | 31779764                | AA                              | TT              | 1946735443               |
| SNP_P4_10183_31779946 | NC_021160.1    | Ca_kabuli_chr01 | 31779946                | TT                              | CC              | 1946735444               |
| SNP_P4_10184_31780000 | NC_021160.1    | Ca_kabuli_chr01 | 31780000                | TT                              | GG              | 1946735446               |
| SNP_P4_10185_31780013 | NC_021160.1    | Ca_kabuli_chr01 | 31780013                | GG                              | TT              | 1946735448               |
| SNP_P4_10186_31780017 | NC_021160.1    | Ca_kabuli_chr01 | 31780017                | AA                              | TT              | 1946735450               |
| SNP_P4_10187_31780018 | NC_021160.1    | Ca_kabuli_chr01 | 31780018                | AA                              | GG              | 1946735452               |
| SNP_P4_10188_31783330 | NC_021160.1    | Ca_kabuli_chr01 | 31783330                | TT                              | CC              | 1946735454               |
| SNP_P4_10189_31783355 | NC_021160.1    | Ca_kabuli_chr01 | 31783355                | AA                              | GG              | 1946735456               |
| SNP_P4_10190_31783381 | NC_021160.1    | Ca_kabuli_chr01 | 31783381                | TT                              | CC              | 1946735458               |
| SNP_P4_10192_31783604 | NC_021160.1    | Ca_kabuli_chr01 | 31783604                | GG                              | AA              | 1946735460               |
| SNP_P4_10193_31783648 | NC_021160.1    | Ca_kabuli_chr01 | 31783648                | CC                              | GG              | 1946735462               |
| SNP_P4_10194_31783653 | NC_021160.1    | Ca_kabuli_chr01 | 31783653                | CC                              | TT              | 1946735464               |
| SNP_P4_10195_31783700 | NC_021160.1    | Ca_kabuli_chr01 | 31783700                | GG                              | AA              | 1946735466               |
| SNP_P4_10196_31783800 | NC_021160.1    | Ca_kabuli_chr01 | 31783800                | AA                              | TT              | 1946735468               |
| SNP_P4_10198_31783867 | NC_021160.1    | Ca_kabuli_chr01 | 31783867                | GG                              | TT              | 1946735470               |
| SNP_P4_10199_31783910 | NC_021160.1    | Ca_kabuli_chr01 | 31783910                | GG                              | AA              | 1946735472               |
| SNP_P4_10200_31784053 | NC_021160.1    | Ca_kabuli_chr01 | 31784053                | TT                              | AA              | 1946735474               |
| SNP_P4_10201_31784055 | NC_021160.1    | Ca_kabuli_chr01 | 31784055                | TT                              | AA              | 1946735476               |
| SNP_P4_10202_31784148 | NC_021160.1    | Ca_kabuli_chr01 | 31784148                | AA                              | CC              | 1946735478               |
| SNP_P4_10203_31784244 | NC_021160.1    | Ca_kabuli_chr01 | 31784244                | GG                              | AA              | 1946735479               |
| SNP_P4_10204_31784388 | NC_021160.1    | Ca_kabuli_chr01 | 31784388                | TT                              | CC              | 1946735480               |
| SNP_P4_10205_31784411 | NC_021160.1    | Ca_kabuli_chr01 | 31784411                | GG                              | AA              | 1946735481               |
| SNP_P4_10206_31784609 | NC_021160.1    | Ca_kabuli_chr01 | 31784609                | CC                              | TT              | 1946735482               |
| SNP_P4_10207_31784665 | NC_021160.1    | Ca_kabuli_chr01 | 31784665                | GG                              | AA              | 1946735483               |
| SNP_P4_10208_31784685 | NC_021160.1    | Ca_kabuli_chr01 | 31784685                | GG                              | AA              | 1946735485               |
| SNP_P4_10209_31784718 | NC_021160.1    | Ca_kabuli_chr01 | 31784718                | CC                              | GG              | 1946735487               |
| SNP_P4_10210_31784851 | NC_021160.1    | Ca_kabuli_chr01 | 31784851                | TT                              | CC              | 1946735489               |
| SNP_P4_10211_31785061 | NC_021160.1    | Ca_kabuli_chr01 | 31785061                | AA                              | GG              | 1946735491               |
| SNP_P4_10212_31785115 | NC_021160.1    | Ca_kabuli_chr01 | 31785115                | AA                              | TT              | 1946735493               |
| SNP_P4_10213_31785154 | NC_021160.1    | Ca_kabuli_chr01 | 31785154                | AA                              | TT              | 1946735495               |
| SNP_P4_10214_31785186 | NC_021160.1    | Ca_kabuli_chr01 | 31785186                | CC                              | GG              | 1946735497               |
| SNP_P4_10215_31785187 | NC_021160.1    | Ca_kabuli_chr01 | 31785187                | CC                              | TT              | 1946735499               |
| SNP_P4_10216_31785298 | NC_021160.1    | Ca_kabuli_chr01 | 31785298                | TT                              | GG              | 1946735501               |
| SNP_P4_10217_31785322 | NC_021160.1    | Ca_kabuli_chr01 | 31785322                | CC                              | TT              | 1946735503               |

| SNPs IDs              | Chromosome IDs | Chromosomes     | Physical positions (bp) | CDC Frontier (Reference genome) | (ILWC46 & LPNB) | NCBI SNPdb Accession IDs |
|-----------------------|----------------|-----------------|-------------------------|---------------------------------|-----------------|--------------------------|
| SNP_P4_10218_31785336 | NC_021160.1    | Ca_kabuli_chr01 | 31785336                | GG                              | AA              | 1946735505               |
| SNP_P4_10219_31785396 | NC_021160.1    | Ca_kabuli_chr01 | 31785396                | AA                              | TT              | 1946735507               |
| SNP_P4_10220_31785448 | NC_021160.1    | Ca_kabuli_chr01 | 31785448                | TT                              | GG              | 1946735509               |
| SNP_P4_10221_31785449 | NC_021160.1    | Ca_kabuli_chr01 | 31785449                | AA                              | TT              | 1946735511               |
| SNP_P4_10222_31785496 | NC_021160.1    | Ca_kabuli_chr01 | 31785496                | CC                              | TT              | 1946735513               |
| SNP_P4_10223_31785537 | NC_021160.1    | Ca_kabuli_chr01 | 31785537                | GG                              | AA              | 1946735515               |
| SNP_P4_10224_31785582 | NC_021160.1    | Ca_kabuli_chr01 | 31785582                | TT                              | CC              | 1946735517               |
| SNP_P4_10225_31785585 | NC_021160.1    | Ca_kabuli_chr01 | 31785585                | GG                              | CC              | 1946735519               |
| SNP_P4_10226_31785628 | NC_021160.1    | Ca_kabuli_chr01 | 31785628                | CC                              | AA              | 1946735520               |
| SNP_P4_10227_31785648 | NC_021160.1    | Ca_kabuli_chr01 | 31785648                | TT                              | GG              | 1946735522               |
| SNP_P4_10228_31785664 | NC_021160.1    | Ca_kabuli_chr01 | 31785664                | AA                              | CC              | 1946735524               |
| SNP_P4_10229_31785704 | NC_021160.1    | Ca_kabuli_chr01 | 31785704                | GG                              | AA              | 1946735526               |
| SNP_P4_10230_31785864 | NC_021160.1    | Ca_kabuli_chr01 | 31785864                | AA                              | CC              | 1946735528               |
| SNP_P4_10231_31785905 | NC_021160.1    | Ca_kabuli_chr01 | 31785905                | CC                              | TT              | 1946735530               |
| SNP_P4_10232_31786032 | NC_021160.1    | Ca_kabuli_chr01 | 31786032                | GG                              | CC              | 1946735532               |
| SNP_P4_10233_31786048 | NC_021160.1    | Ca_kabuli_chr01 | 31786048                | AA                              | CC              | 1946735534               |
| SNP_P4_10234_31786108 | NC_021160.1    | Ca_kabuli_chr01 | 31786108                | AA                              | CC              | 1946735536               |
| SNP_P4_10235_31786136 | NC_021160.1    | Ca_kabuli_chr01 | 31786136                | TT                              | CC              | 1946735538               |
| SNP_P4_10236_31786181 | NC_021160.1    | Ca_kabuli_chr01 | 31786181                | AA                              | TT              | 1946735540               |
| SNP_P4_10237_31786269 | NC_021160.1    | Ca_kabuli_chr01 | 31786269                | AA                              | TT              | 1946735542               |
| SNP_P4_10238_31786303 | NC_021160.1    | Ca_kabuli_chr01 | 31786303                | TT                              | AA              | 1946735544               |
| SNP_P4_10239_31786347 | NC_021160.1    | Ca_kabuli_chr01 | 31786347                | AA                              | GG              | 1946735546               |
| SNP_P4_10240_31786402 | NC_021160.1    | Ca_kabuli_chr01 | 31786402                | CC                              | AA              | 1946735548               |
| SNP_P4_10241_31786406 | NC_021160.1    | Ca_kabuli_chr01 | 31786406                | AA                              | TT              | 1946735550               |
| SNP_P4_10242_31786475 | NC_021160.1    | Ca_kabuli_chr01 | 31786475                | TT                              | CC              | 1946735551               |
| SNP_P4_10243_31786479 | NC_021160.1    | Ca_kabuli_chr01 | 31786479                | AA                              | TT              | 1946735553               |
| SNP_P4_10244_31786709 | NC_021160.1    | Ca_kabuli_chr01 | 31786709                | TT                              | AA              | 1946735555               |
| SNP_P4_10245_31786725 | NC_021160.1    | Ca_kabuli_chr01 | 31786725                | AA                              | GG              | 1946735557               |
| SNP_P4_10246_31788735 | NC_021160.1    | Ca_kabuli_chr01 | 31788735                | AA                              | GG              | 1946735559               |
| SNP_P4_10247_31794450 | NC_021160.1    | Ca_kabuli_chr01 | 31794450                | GG                              | TT              | 1946735561               |
| SNP_P4_10248_31795537 | NC_021160.1    | Ca_kabuli_chr01 | 31795537                | AA                              | CC              | 1946735563               |
| SNP_P4_10249_31795559 | NC_021160.1    | Ca_kabuli_chr01 | 31795559                | GG                              | TT              | 1946735565               |
| SNP_P4_10250_31795631 | NC_021160.1    | Ca_kabuli_chr01 | 31795631                | TT                              | GG              | 1946735567               |
| SNP_P4_10251_31795655 | NC_021160.1    | Ca_kabuli_chr01 | 31795655                | TT                              | AA              | 1946735569               |
| SNP_P4_10252_31795660 | NC_021160.1    | Ca_kabuli_chr01 | 31795660                | AA                              | TT              | 1946735571               |
| SNP_P4_10253_31795682 | NC_021160.1    | Ca_kabuli_chr01 | 31795682                | CC                              | TT              | 1946735573               |
| SNP_P4_10254_31795690 | NC_021160.1    | Ca_kabuli_chr01 | 31795690                | GG                              | AA              | 1946735575               |
| SNP_P4_10255_31795695 | NC_021160.1    | Ca_kabuli_chr01 | 31795695                | GG                              | AA              | 1946735577               |
| SNP_P4_10256_31795739 | NC_021160.1    | Ca_kabuli_chr01 | 31795739                | CC                              | AA              | 1946735579               |
| SNP_P4_10257_31795940 | NC_021160.1    | Ca_kabuli_chr01 | 31795940                | GG                              | TT              | 1946735581               |
| SNP_P4_10258_31805824 | NC_021160.1    | Ca_kabuli_chr01 | 31805824                | TT                              | CC              | 1946735583               |
| SNP_P4_10259_31806090 | NC_021160.1    | Ca_kabuli_chr01 | 31806090                | AA                              | GG              | 1946735585               |

| SNPs IDs              | Chromosome IDs | Chromosomes     | Physical positions (bp) | CDC Frontier (Reference genome) | (ILWC46 & LPNB) | NCBI SNPdb Accession IDs |
|-----------------------|----------------|-----------------|-------------------------|---------------------------------|-----------------|--------------------------|
| SNP_P4_10260_31806460 | NC_021160.1    | Ca_kabuli_chr01 | 31806460                | GG                              | TT              | 1946735587               |
| SNP_P4_10262_31830170 | NC_021160.1    | Ca_kabuli_chr01 | 31830170                | CC                              | AA              | 1946735589               |
| SNP_P4_10263_31833536 | NC_021160.1    | Ca_kabuli_chr01 | 31833536                | AA                              | GG              | 1946735591               |
| SNP_P4_10264_31833562 | NC_021160.1    | Ca_kabuli_chr01 | 31833562                | TT                              | GG              | 1946735593               |
| SNP_P4_10265_31833779 | NC_021160.1    | Ca_kabuli_chr01 | 31833779                | TT                              | CC              | 1946735595               |
| SNP_P4_10266_31833781 | NC_021160.1    | Ca_kabuli_chr01 | 31833781                | CC                              | TT              | 1946735597               |
| SNP_P4_10267_31833807 | NC_021160.1    | Ca_kabuli_chr01 | 31833807                | GG                              | CC              | 1946735599               |
| SNP_P4_10268_31833811 | NC_021160.1    | Ca_kabuli_chr01 | 31833811                | GG                              | AA              | 1946735601               |
| SNP_P4_10269_31833818 | NC_021160.1    | Ca_kabuli_chr01 | 31833818                | TT                              | AA              | 1946735603               |
| SNP_P4_10270_31836126 | NC_021160.1    | Ca_kabuli_chr01 | 31836126                | AA                              | TT              | 1946735605               |
| SNP_P4_10271_31868616 | NC_021160.1    | Ca_kabuli_chr01 | 31868616                | TT                              | GG              | 1946735607               |
| SNP_P4_10272_31868664 | NC_021160.1    | Ca_kabuli_chr01 | 31868664                | CC                              | GG              | 1946735609               |
| SNP_P4_10273_31870564 | NC_021160.1    | Ca_kabuli_chr01 | 31870564                | GG                              | TT              | 1946735611               |
| SNP_P4_10274_31894983 | NC_021160.1    | Ca_kabuli_chr01 | 31894983                | TT                              | CC              | 1946735613               |
| SNP_P4_10275_31905810 | NC_021160.1    | Ca_kabuli_chr01 | 31905810                | CC                              | GG              | 1946735615               |
| SNP_P4_10276_31913498 | NC_021160.1    | Ca_kabuli_chr01 | 31913498                | AA                              | TT              | 1946735617               |
| SNP_P4_10277_31918007 | NC_021160.1    | Ca_kabuli_chr01 | 31918007                | GG                              | AA              | 1946735619               |
| SNP_P4_10278_31926842 | NC_021160.1    | Ca_kabuli_chr01 | 31926842                | AA                              | GG              | 1946735621               |
| SNP_P4_10279_31944796 | NC_021160.1    | Ca_kabuli_chr01 | 31944796                | CC                              | TT              | 1946735623               |
| SNP_P4_10280_31945247 | NC_021160.1    | Ca_kabuli_chr01 | 31945247                | TT                              | CC              | 1946735625               |
| SNP_P4_10281_31946706 | NC_021160.1    | Ca_kabuli_chr01 | 31946706                | AA                              | GG              | 1946735627               |
| SNP_P4_10282_31946717 | NC_021160.1    | Ca_kabuli_chr01 | 31946717                | AA                              | GG              | 1946735629               |
| SNP_P4_10283_31946725 | NC_021160.1    | Ca_kabuli_chr01 | 31946725                | AA                              | TT              | 1946735631               |
| SNP_P4_10284_31946746 | NC_021160.1    | Ca_kabuli_chr01 | 31946746                | TT                              | GG              | 1946735633               |
| SNP_P4_10285_31946750 | NC_021160.1    | Ca_kabuli_chr01 | 31946750                | AA                              | GG              | 1946735635               |
| SNP_P4_10286_31952883 | NC_021160.1    | Ca_kabuli_chr01 | 31952883                | CC                              | TT              | 1946735636               |
| SNP_P4_10287_31964964 | NC_021160.1    | Ca_kabuli_chr01 | 31964964                | AA                              | GG              | 1946735638               |
| SNP_P4_10288_31969412 | NC_021160.1    | Ca_kabuli_chr01 | 31969412                | TT                              | CC              | 1946735640               |
| SNP_P4_10289_31976322 | NC_021160.1    | Ca_kabuli_chr01 | 31976322                | AA                              | GG              | 1946735642               |
| SNP_P4_10290_31979217 | NC_021160.1    | Ca_kabuli_chr01 | 31979217                | CC                              | TT              | 1946735644               |
| SNP_P4_10291_31994739 | NC_021160.1    | Ca_kabuli_chr01 | 31994739                | CC                              | TT              | 1946735646               |
| SNP_P4_10292_31995158 | NC_021160.1    | Ca_kabuli_chr01 | 31995158                | GG                              | AA              | 1946735648               |
| SNP_P4_10293_31995168 | NC_021160.1    | Ca_kabuli_chr01 | 31995168                | AA                              | TT              | 1946735650               |
| SNP_P4_10294_31995290 | NC_021160.1    | Ca_kabuli_chr01 | 31995290                | TT                              | CC              | 1946735652               |
| SNP_P4_10295_31995301 | NC_021160.1    | Ca_kabuli_chr01 | 31995301                | GG                              | AA              | 1946735654               |
| SNP_P4_10296_31995364 | NC_021160.1    | Ca_kabuli_chr01 | 31995364                | TT                              | GG              | 1946735656               |
| SNP_P4_10297_31995371 | NC_021160.1    | Ca_kabuli_chr01 | 31995371                | TT                              | GG              | 1946735658               |
| SNP_P4_10298_31995426 | NC_021160.1    | Ca_kabuli_chr01 | 31995426                | TT                              | CC              | 1946735660               |
| SNP_P4_10301_31995540 | NC_021160.1    | Ca_kabuli_chr01 | 31995540                | AA                              | TT              | 1946735662               |
| SNP_P4_10302_31995565 | NC_021160.1    | Ca_kabuli_chr01 | 31995565                | AA                              | GG              | 1946735664               |
| SNP_P4_10303_31995597 | NC_021160.1    | Ca_kabuli_chr01 | 31995597                | CC                              | TT              | 1946735666               |
| SNP_P4_10304_31995700 | NC_021160.1    | Ca_kabuli_chr01 | 31995700                | GG                              | AA              | 1946735668               |

| SNPs IDs              | Chromosome IDs | Chromosomes     | Physical positions (bp) | CDC Frontier (Reference genome) | (ILWC46 & LPNB) | NCBI SNPdb Accession IDs |
|-----------------------|----------------|-----------------|-------------------------|---------------------------------|-----------------|--------------------------|
| SNP_P4_10305_31995757 | NC_021160.1    | Ca_kabuli_chr01 | 31995757                | CC                              | TT              | 1946735670               |
| SNP_P4_10306_32003325 | NC_021160.1    | Ca_kabuli_chr01 | 32003325                | GG                              | TT              | 1946735672               |
| SNP_P4_10307_32003698 | NC_021160.1    | Ca_kabuli_chr01 | 32003698                | TT                              | AA              | 1946735674               |
| SNP_P4_10308_32003713 | NC_021160.1    | Ca_kabuli_chr01 | 32003713                | CC                              | AA              | 1946735676               |
| SNP_P4_10309_32006061 | NC_021160.1    | Ca_kabuli_chr01 | 32006061                | TT                              | CC              | 1946735678               |
| SNP_P4_10310_32006983 | NC_021160.1    | Ca_kabuli_chr01 | 32006983                | TT                              | AA              | 1946735680               |
| SNP_P4_10311_32031054 | NC_021160.1    | Ca_kabuli_chr01 | 32031054                | AA                              | CC              | 1946735682               |
| SNP_P4_10312_32033776 | NC_021160.1    | Ca_kabuli_chr01 | 32033776                | TT                              | AA              | 1946735684               |
| SNP_P4_10313_32033780 | NC_021160.1    | Ca_kabuli_chr01 | 32033780                | TT                              | AA              | 1946735686               |
| SNP_P4_10314_32033826 | NC_021160.1    | Ca_kabuli_chr01 | 32033826                | AA                              | GG              | 1946735688               |
| SNP_P4_10315_32037059 | NC_021160.1    | Ca_kabuli_chr01 | 32037059                | AA                              | GG              | 1946735690               |
| SNP_P4_10316_32037065 | NC_021160.1    | Ca_kabuli_chr01 | 32037065                | CC                              | TT              | 1946735693               |
| SNP_P4_10317_32037081 | NC_021160.1    | Ca_kabuli_chr01 | 32037081                | AA                              | TT              | 1946735695               |
| SNP_P4_10318_32037112 | NC_021160.1    | Ca_kabuli_chr01 | 32037112                | TT                              | CC              | 1946735697               |
| SNP_P4_10319_32037275 | NC_021160.1    | Ca_kabuli_chr01 | 32037275                | CC                              | TT              | 1946735699               |
| SNP_P4_10322_32037412 | NC_021160.1    | Ca_kabuli_chr01 | 32037412                | GG                              | AA              | 1946735700               |
| SNP_P4_10323_32038775 | NC_021160.1    | Ca_kabuli_chr01 | 32038775                | TT                              | CC              | 1946735702               |
| SNP_P4_10324_32038848 | NC_021160.1    | Ca_kabuli_chr01 | 32038848                | TT                              | CC              | 1946735704               |
| SNP_P4_10325_32038856 | NC_021160.1    | Ca_kabuli_chr01 | 32038856                | GG                              | TT              | 1946735706               |
| SNP_P4_10326_32038889 | NC_021160.1    | Ca_kabuli_chr01 | 32038889                | TT                              | GG              | 1946735708               |
| SNP_P4_10327_32038946 | NC_021160.1    | Ca_kabuli_chr01 | 32038946                | CC                              | GG              | 1946735710               |
| SNP_P4_10328_32039088 | NC_021160.1    | Ca_kabuli_chr01 | 32039088                | TT                              | CC              | 1946735712               |
| SNP_P4_10329_32043856 | NC_021160.1    | Ca_kabuli_chr01 | 32043856                | CC                              | AA              | 1946735714               |
| SNP_P4_10330_32047361 | NC_021160.1    | Ca_kabuli_chr01 | 32047361                | CC                              | TT              | 1946735716               |
| SNP_P4_10331_32047452 | NC_021160.1    | Ca_kabuli_chr01 | 32047452                | TT                              | AA              | 1946735718               |
| SNP_P4_10333_32079242 | NC_021160.1    | Ca_kabuli_chr01 | 32079242                | AA                              | TT              | 1946735720               |
| SNP_P4_10334_32079596 | NC_021160.1    | Ca_kabuli_chr01 | 32079596                | TT                              | AA              | 1946735722               |
| SNP_P4_10335_32079599 | NC_021160.1    | Ca_kabuli_chr01 | 32079599                | TT                              | CC              | 1946735724               |
| SNP_P4_10336_32079617 | NC_021160.1    | Ca_kabuli_chr01 | 32079617                | TT                              | AA              | 1946735726               |
| SNP_P4_10337_32079661 | NC_021160.1    | Ca_kabuli_chr01 | 32079661                | AA                              | GG              | 1946735728               |
| SNP_P4_10338_32079675 | NC_021160.1    | Ca_kabuli_chr01 | 32079675                | AA                              | CC              | 1946735730               |
| SNP_P4_10339_32079717 | NC_021160.1    | Ca_kabuli_chr01 | 32079717                | TT                              | CC              | 1946735733               |
| SNP_P4_10340_32079786 | NC_021160.1    | Ca_kabuli_chr01 | 32079786                | TT                              | CC              | 1946735735               |
| SNP_P4_10341_32079800 | NC_021160.1    | Ca_kabuli_chr01 | 32079800                | AA                              | GG              | 1946735737               |
| SNP_P4_10342_32079816 | NC_021160.1    | Ca_kabuli_chr01 | 32079816                | AA                              | GG              | 1946735738               |
| SNP_P4_10343_32079823 | NC_021160.1    | Ca_kabuli_chr01 | 32079823                | TT                              | CC              | 1946735740               |
| SNP_P4_10344_32079914 | NC_021160.1    | Ca_kabuli_chr01 | 32079914                | TT                              | GG              | 1946735742               |
| SNP_P4_10345_32079954 | NC_021160.1    | Ca_kabuli_chr01 | 32079954                | TT                              | CC              | 1946735744               |
| SNP_P4_10346_32079987 | NC_021160.1    | Ca_kabuli_chr01 | 32079987                | TT                              | CC              | 1946735746               |
| SNP_P4_10347_32080004 | NC_021160.1    | Ca_kabuli_chr01 | 32080004                | AA                              | GG              | 1946735748               |
| SNP_P4_10348_32080019 | NC_021160.1    | Ca_kabuli_chr01 | 32080019                | TT                              | CC              | 1946735750               |
| SNP_P4_10349_32080028 | NC_021160.1    | Ca_kabuli_chr01 | 32080028                | TT                              | CC              | 1946735752               |

| SNPs IDs              | Chromosome IDs | Chromosomes     | Physical positions (bp) | CDC Frontier (Reference genome) | (ILWC46 & LPNB) | NCBI SNPdb Accession IDs |
|-----------------------|----------------|-----------------|-------------------------|---------------------------------|-----------------|--------------------------|
| SNP_P4_10350_32080067 | NC_021160.1    | Ca_kabuli_chr01 | 32080067                | AA                              | GG              | 1946735754               |
| SNP_P4_10352_32080139 | NC_021160.1    | Ca_kabuli_chr01 | 32080139                | AA                              | GG              | 1946735756               |
| SNP_P4_10353_32080153 | NC_021160.1    | Ca_kabuli_chr01 | 32080153                | TT                              | CC              | 1946735758               |
| SNP_P4_10354_32080263 | NC_021160.1    | Ca_kabuli_chr01 | 32080263                | TT                              | CC              | 1946735760               |
| SNP_P4_10355_32080264 | NC_021160.1    | Ca_kabuli_chr01 | 32080264                | AA                              | GG              | 1946735762               |
| SNP_P4_10356_32080282 | NC_021160.1    | Ca_kabuli_chr01 | 32080282                | AA                              | CC              | 1946735764               |
| SNP_P4_10357_32080283 | NC_021160.1    | Ca_kabuli_chr01 | 32080283                | TT                              | CC              | 1946735766               |
| SNP_P4_10358_32080285 | NC_021160.1    | Ca_kabuli_chr01 | 32080285                | TT                              | GG              | 1946735768               |
| SNP_P4_10359_32080315 | NC_021160.1    | Ca_kabuli_chr01 | 32080315                | GG                              | AA              | 1946735770               |
| SNP_P4_10360_32080352 | NC_021160.1    | Ca_kabuli_chr01 | 32080352                | TT                              | CC              | 1946735772               |
| SNP_P4_10361_32080356 | NC_021160.1    | Ca_kabuli_chr01 | 32080356                | AA                              | GG              | 1946735774               |
| SNP_P4_10362_32080368 | NC_021160.1    | Ca_kabuli_chr01 | 32080368                | AA                              | GG              | 1946735776               |
| SNP_P4_10363_32080371 | NC_021160.1    | Ca_kabuli_chr01 | 32080371                | AA                              | GG              | 1946735778               |
| SNP_P4_10364_32080412 | NC_021160.1    | Ca_kabuli_chr01 | 32080412                | AA                              | GG              | 1946735780               |
| SNP_P4_10365_32080430 | NC_021160.1    | Ca_kabuli_chr01 | 32080430                | AA                              | GG              | 1946735782               |
| SNP_P4_10366_32080439 | NC_021160.1    | Ca_kabuli_chr01 | 32080439                | TT                              | CC              | 1946735784               |
| SNP_P4_10367_32080453 | NC_021160.1    | Ca_kabuli_chr01 | 32080453                | TT                              | GG              | 1946735786               |
| SNP_P4_10368_32080456 | NC_021160.1    | Ca_kabuli_chr01 | 32080456                | GG                              | CC              | 1946735788               |
| SNP_P4_10369_32080459 | NC_021160.1    | Ca_kabuli_chr01 | 32080459                | GG                              | AA              | 1946735790               |
| SNP_P4_10370_32080462 | NC_021160.1    | Ca_kabuli_chr01 | 32080462                | AA                              | GG              | 1946735792               |
| SNP_P4_10371_32080500 | NC_021160.1    | Ca_kabuli_chr01 | 32080500                | AA                              | GG              | 1946735794               |
| SNP_P4_10372_32080501 | NC_021160.1    | Ca_kabuli_chr01 | 32080501                | AA                              | GG              | 1946735796               |
| SNP_P4_10373_32080665 | NC_021160.1    | Ca_kabuli_chr01 | 32080665                | TT                              | AA              | 1946735798               |
| SNP_P4_10374_32080696 | NC_021160.1    | Ca_kabuli_chr01 | 32080696                | AA                              | GG              | 1946735800               |
| SNP_P4_10375_32080739 | NC_021160.1    | Ca_kabuli_chr01 | 32080739                | AA                              | CC              | 1946735802               |
| SNP_P4_10376_32081565 | NC_021160.1    | Ca_kabuli_chr01 | 32081565                | GG                              | AA              | 1946735804               |
| SNP_P4_10377_32082346 | NC_021160.1    | Ca_kabuli_chr01 | 32082346                | CC                              | AA              | 1946735806               |
| SNP_P4_10378_32083459 | NC_021160.1    | Ca_kabuli_chr01 | 32083459                | CC                              | TT              | 1946735808               |
| SNP_P4_10379_32087525 | NC_021160.1    | Ca_kabuli_chr01 | 32087525                | TT                              | AA              | 1946735810               |
| SNP_P4_10380_32124147 | NC_021160.1    | Ca_kabuli_chr01 | 32124147                | GG                              | AA              | 1946735812               |
| SNP_P4_10381_32124624 | NC_021160.1    | Ca_kabuli_chr01 | 32124624                | CC                              | TT              | 1946735814               |
| SNP_P4_10382_32124810 | NC_021160.1    | Ca_kabuli_chr01 | 32124810                | TT                              | GG              | 1946735816               |
| SNP_P4_10383_32125358 | NC_021160.1    | Ca_kabuli_chr01 | 32125358                | GG                              | AA              | 1946735818               |
| SNP_P4_10384_32126767 | NC_021160.1    | Ca_kabuli_chr01 | 32126767                | CC                              | AA              | 1946735820               |
| SNP_P4_10385_32126860 | NC_021160.1    | Ca_kabuli_chr01 | 32126860                | TT                              | GG              | 1946735822               |
| SNP_P4_10386_32126900 | NC_021160.1    | Ca_kabuli_chr01 | 32126900                | CC                              | TT              | 1946735824               |
| SNP_P4_10387_32128231 | NC_021160.1    | Ca_kabuli_chr01 | 32128231                | GG                              | AA              | 1946735826               |
| SNP_P4_10388_32133130 | NC_021160.1    | Ca_kabuli_chr01 | 32133130                | AA                              | GG              | 1946735828               |
| SNP_P4_10389_32133322 | NC_021160.1    | Ca_kabuli_chr01 | 32133322                | CC                              | TT              | 1946735830               |
| SNP_P4_10390_32139298 | NC_021160.1    | Ca_kabuli_chr01 | 32139298                | AA                              | TT              | 1946735832               |
| SNP_P4_10391_32139790 | NC_021160.1    | Ca_kabuli_chr01 | 32139790                | GG                              | AA              | 1946735834               |
| SNP_P4_10392_32139997 | NC_021160.1    | Ca_kabuli_chr01 | 32139997                | AA                              | GG              | 1946735836               |

| SNPs IDs              | Chromosome IDs | Chromosomes     | Physical positions (bp) | CDC Frontier (Reference genome) | (ILWC46 & LPNB) | NCBI SNPdb Accession IDs |
|-----------------------|----------------|-----------------|-------------------------|---------------------------------|-----------------|--------------------------|
| SNP_P4_10394_32141246 | NC_021160.1    | Ca_kabuli_chr01 | 32141246                | TT                              | CC              | 1946735838               |
| SNP_P4_10395_32141321 | NC_021160.1    | Ca_kabuli_chr01 | 32141321                | GG                              | AA              | 1946735840               |
| SNP_P4_10396_32141349 | NC_021160.1    | Ca_kabuli_chr01 | 32141349                | CC                              | TT              | 1946735842               |
| SNP_P4_10397_32141350 | NC_021160.1    | Ca_kabuli_chr01 | 32141350                | TT                              | CC              | 1946735844               |
| SNP_P4_10398_32141356 | NC_021160.1    | Ca_kabuli_chr01 | 32141356                | TT                              | GG              | 1946735846               |
| SNP_P4_10399_32141365 | NC_021160.1    | Ca_kabuli_chr01 | 32141365                | TT                              | CC              | 1946735848               |
| SNP_P4_10400_32145583 | NC_021160.1    | Ca_kabuli_chr01 | 32145583                | CC                              | TT              | 1946735850               |
| SNP_P4_10401_32145938 | NC_021160.1    | Ca_kabuli_chr01 | 32145938                | GG                              | AA              | 1946735852               |
| SNP_P4_10402_32146643 | NC_021160.1    | Ca_kabuli_chr01 | 32146643                | CC                              | AA              | 1946735854               |
| SNP_P4_10404_32147267 | NC_021160.1    | Ca_kabuli_chr01 | 32147267                | TT                              | CC              | 1946735856               |
| SNP_P4_10405_32150287 | NC_021160.1    | Ca_kabuli_chr01 | 32150287                | AA                              | TT              | 1946735858               |
| SNP_P4_10406_32150288 | NC_021160.1    | Ca_kabuli_chr01 | 32150288                | TT                              | GG              | 1946735860               |
| SNP_P4_10407_32150303 | NC_021160.1    | Ca_kabuli_chr01 | 32150303                | GG                              | TT              | 1946735862               |
| SNP_P4_10408_32150312 | NC_021160.1    | Ca_kabuli_chr01 | 32150312                | AA                              | GG              | 1946735864               |
| SNP_P4_10409_32150313 | NC_021160.1    | Ca_kabuli_chr01 | 32150313                | GG                              | AA              | 1946735866               |
| SNP_P4_10410_32150346 | NC_021160.1    | Ca_kabuli_chr01 | 32150346                | TT                              | AA              | 1946735868               |
| SNP_P4_10411_32150355 | NC_021160.1    | Ca_kabuli_chr01 | 32150355                | GG                              | AA              | 1946735870               |
| SNP_P4_10412_32150510 | NC_021160.1    | Ca_kabuli_chr01 | 32150510                | AA                              | GG              | 1946735872               |
| SNP_P4_10413_32150603 | NC_021160.1    | Ca_kabuli_chr01 | 32150603                | TT                              | CC              | 1946735874               |
| SNP_P4_10414_32150639 | NC_021160.1    | Ca_kabuli_chr01 | 32150639                | CC                              | AA              | 1946735876               |
| SNP_P4_10415_32150819 | NC_021160.1    | Ca_kabuli_chr01 | 32150819                | GG                              | AA              | 1946735878               |
| SNP_P4_10417_32151737 | NC_021160.1    | Ca_kabuli_chr01 | 32151737                | TT                              | GG              | 1946735880               |
| SNP_P4_10418_32152033 | NC_021160.1    | Ca_kabuli_chr01 | 32152033                | GG                              | AA              | 1946735883               |
| SNP_P4_10419_32152241 | NC_021160.1    | Ca_kabuli_chr01 | 32152241                | CC                              | TT              | 1946735885               |
| SNP_P4_10420_32152688 | NC_021160.1    | Ca_kabuli_chr01 | 32152688                | TT                              | CC              | 1946735887               |
| SNP_P4_10421_32152723 | NC_021160.1    | Ca_kabuli_chr01 | 32152723                | AA                              | CC              | 1946735889               |
| SNP_P4_10423_32154669 | NC_021160.1    | Ca_kabuli_chr01 | 32154669                | CC                              | TT              | 1946735891               |
| SNP_P4_10424_32154834 | NC_021160.1    | Ca_kabuli_chr01 | 32154834                | AA                              | CC              | 1946735893               |
| SNP_P4_10425_32154876 | NC_021160.1    | Ca_kabuli_chr01 | 32154876                | AA                              | CC              | 1946735895               |
| SNP_P4_10426_32155025 | NC_021160.1    | Ca_kabuli_chr01 | 32155025                | CC                              | TT              | 1946735897               |
| SNP_P4_10427_32155031 | NC_021160.1    | Ca_kabuli_chr01 | 32155031                | TT                              | CC              | 1946735899               |
| SNP_P4_10428_32155622 | NC_021160.1    | Ca_kabuli_chr01 | 32155622                | AA                              | TT              | 1946735901               |
| SNP_P4_10430_32156547 | NC_021160.1    | Ca_kabuli_chr01 | 32156547                | CC                              | TT              | 1946735903               |
| SNP_P4_10431_32157308 | NC_021160.1    | Ca_kabuli_chr01 | 32157308                | CC                              | TT              | 1946735905               |
| SNP_P4_10432_32158328 | NC_021160.1    | Ca_kabuli_chr01 | 32158328                | AA                              | GG              | 1946735907               |
| SNP_P4_10433_32159110 | NC_021160.1    | Ca_kabuli_chr01 | 32159110                | GG                              | AA              | 1946735909               |
| SNP_P4_10434_32159539 | NC_021160.1    | Ca_kabuli_chr01 | 32159539                | TT                              | CC              | 1946735911               |
| SNP_P4_10435_32160754 | NC_021160.1    | Ca_kabuli_chr01 | 32160754                | TT                              | CC              | 1946735913               |
| SNP_P4_10436_32160999 | NC_021160.1    | Ca_kabuli_chr01 | 32160999                | TT                              | AA              | 1946735915               |
| SNP_P4_10437_32170180 | NC_021160.1    | Ca_kabuli_chr01 | 32170180                | TT                              | CC              | 1946735917               |
| SNP_P4_10438_32172827 | NC_021160.1    | Ca_kabuli_chr01 | 32172827                | GG                              | AA              | 1946735919               |
| SNP_P4_10439_32174446 | NC_021160.1    | Ca_kabuli_chr01 | 32174446                | AA                              | GG              | 1946735921               |



| SNPs IDs              | Chromosome IDs | Chromosomes     | Physical positions (bp) | CDC Frontier (Reference genome) | (ILWC46 & LPNB) | NCBI SNPdb Accession IDs |
|-----------------------|----------------|-----------------|-------------------------|---------------------------------|-----------------|--------------------------|
| SNP_P4_10440_32174469 | NC_021160.1    | Ca_kabuli_chr01 | 32174469                | GG                              | AA              | 1946735923               |
| SNP_P4_10441_32175687 | NC_021160.1    | Ca_kabuli_chr01 | 32175687                | AA                              | TT              | 1946735925               |
| SNP_P4_10442_32175885 | NC_021160.1    | Ca_kabuli_chr01 | 32175885                | GG                              | AA              | 1946735927               |
| SNP_P4_10443_32175945 | NC_021160.1    | Ca_kabuli_chr01 | 32175945                | AA                              | CC              | 1946735929               |
| SNP_P4_10445_32176223 | NC_021160.1    | Ca_kabuli_chr01 | 32176223                | GG                              | AA              | 1946735931               |
| SNP_P4_10446_32177117 | NC_021160.1    | Ca_kabuli_chr01 | 32177117                | TT                              | CC              | 1946735933               |
| SNP_P4_10447_32177237 | NC_021160.1    | Ca_kabuli_chr01 | 32177237                | TT                              | CC              | 1946735935               |
| SNP_P4_10448_32177250 | NC_021160.1    | Ca_kabuli_chr01 | 32177250                | TT                              | CC              | 1946735937               |
| SNP_P4_10449_32177339 | NC_021160.1    | Ca_kabuli_chr01 | 32177339                | GG                              | AA              | 1946735939               |
| SNP_P4_10450_32177347 | NC_021160.1    | Ca_kabuli_chr01 | 32177347                | TT                              | GG              | 1946735941               |
| SNP_P4_10451_32177468 | NC_021160.1    | Ca_kabuli_chr01 | 32177468                | TT                              | CC              | 1946735943               |
| SNP_P4_10452_32177799 | NC_021160.1    | Ca_kabuli_chr01 | 32177799                | CC                              | TT              | 1946735945               |
| SNP_P4_10453_32179927 | NC_021160.1    | Ca_kabuli_chr01 | 32179927                | CC                              | TT              | 1946735947               |
| SNP_P4_10454_32179929 | NC_021160.1    | Ca_kabuli_chr01 | 32179929                | AA                              | GG              | 1946735949               |
| SNP_P4_10455_32179933 | NC_021160.1    | Ca_kabuli_chr01 | 32179933                | AA                              | CC              | 1946735951               |
| SNP_P4_10456_32179935 | NC_021160.1    | Ca_kabuli_chr01 | 32179935                | TT                              | GG              | 1946735953               |
| SNP_P4_10458_32180045 | NC_021160.1    | Ca_kabuli_chr01 | 32180045                | AA                              | TT              | 1946735955               |
| SNP_P4_10459_32180064 | NC_021160.1    | Ca_kabuli_chr01 | 32180064                | AA                              | GG              | 1946735957               |
| SNP_P4_10460_32183847 | NC_021160.1    | Ca_kabuli_chr01 | 32183847                | TT                              | AA              | 1946735959               |
| SNP_P4_10461_32183849 | NC_021160.1    | Ca_kabuli_chr01 | 32183849                | TT                              | CC              | 1946735961               |
| SNP_P4_10462_32183878 | NC_021160.1    | Ca_kabuli_chr01 | 32183878                | GG                              | AA              | 1946735963               |
| SNP_P4_10463_32186801 | NC_021160.1    | Ca_kabuli_chr01 | 32186801                | AA                              | TT              | 1946735965               |
| SNP_P4_10464_32186837 | NC_021160.1    | Ca_kabuli_chr01 | 32186837                | TT                              | CC              | 1946735967               |
| SNP_P4_10465_32186918 | NC_021160.1    | Ca_kabuli_chr01 | 32186918                | GG                              | CC              | 1946735969               |
| SNP_P4_10466_32187205 | NC_021160.1    | Ca_kabuli_chr01 | 32187205                | GG                              | TT              | 1946735971               |
| SNP_P4_10467_32187271 | NC_021160.1    | Ca_kabuli_chr01 | 32187271                | AA                              | GG              | 1946735973               |
| SNP_P4_10468_32187573 | NC_021160.1    | Ca_kabuli_chr01 | 32187573                | AA                              | TT              | 1946735975               |
| SNP_P4_10469_32187574 | NC_021160.1    | Ca_kabuli_chr01 | 32187574                | TT                              | GG              | 1946735977               |
| SNP_P4_10470_32190396 | NC_021160.1    | Ca_kabuli_chr01 | 32190396                | AA                              | CC              | 1946735979               |
| SNP_P4_10471_32191722 | NC_021160.1    | Ca_kabuli_chr01 | 32191722                | AA                              | TT              | 1946735981               |
| SNP_P4_10472_32191775 | NC_021160.1    | Ca_kabuli_chr01 | 32191775                | AA                              | TT              | 1946735983               |
| SNP_P4_10473_32192525 | NC_021160.1    | Ca_kabuli_chr01 | 32192525                | GG                              | TT              | 1946735985               |
| SNP_P4_10474_32193373 | NC_021160.1    | Ca_kabuli_chr01 | 32193373                | CC                              | GG              | 1946735987               |
| SNP_P4_10475_32193378 | NC_021160.1    | Ca_kabuli_chr01 | 32193378                | CC                              | AA              | 1946735989               |
| SNP_P4_10476_32193652 | NC_021160.1    | Ca_kabuli_chr01 | 32193652                | TT                              | GG              | 1946735991               |
| SNP_P4_10477_32194799 | NC_021160.1    | Ca_kabuli_chr01 | 32194799                | TT                              | CC              | 1946735993               |
| SNP_P4_10478_32194804 | NC_021160.1    | Ca_kabuli_chr01 | 32194804                | TT                              | CC              | 1946735995               |
| SNP_P4_10479_32195026 | NC_021160.1    | Ca_kabuli_chr01 | 32195026                | TT                              | GG              | 1946735997               |
| SNP_P4_10480_32195129 | NC_021160.1    | Ca_kabuli_chr01 | 32195129                | AA                              | TT              | 1946735999               |
| SNP_P4_10481_32195230 | NC_021160.1    | Ca_kabuli_chr01 | 32195230                | CC                              | TT              | 1946736001               |
| SNP_P4_10482_32195233 | NC_021160.1    | Ca_kabuli_chr01 | 32195233                | GG                              | CC              | 1946736003               |
| SNP_P4_10483_32195318 | NC_021160.1    | Ca_kabuli_chr01 | 32195318                | CC                              | GG              | 1946736005               |

| SNPs IDs              | Chromosome IDs | Chromosomes     | Physical positions (bp) | CDC Frontier (Reference genome) | (ILWC46 & LPNB) | NCBI SNPdb Accession IDs |
|-----------------------|----------------|-----------------|-------------------------|---------------------------------|-----------------|--------------------------|
| SNP_P4_10484_32196223 | NC_021160.1    | Ca_kabuli_chr01 | 32196223                | GG                              | TT              | 1946736007               |
| SNP_P4_10485_32196258 | NC_021160.1    | Ca_kabuli_chr01 | 32196258                | TT                              | CC              | 1946736009               |
| SNP_P4_10486_32196365 | NC_021160.1    | Ca_kabuli_chr01 | 32196365                | TT                              | CC              | 1946736011               |
| SNP_P4_10487_32196585 | NC_021160.1    | Ca_kabuli_chr01 | 32196585                | TT                              | CC              | 1946736013               |
| SNP_P4_10488_32200753 | NC_021160.1    | Ca_kabuli_chr01 | 32200753                | CC                              | TT              | 1946736015               |
| SNP_P4_10489_32203090 | NC_021160.1    | Ca_kabuli_chr01 | 32203090                | CC                              | AA              | 1946736017               |
| SNP_P4_10490_32203095 | NC_021160.1    | Ca_kabuli_chr01 | 32203095                | TT                              | CC              | 1946736019               |
| SNP_P4_10493_32204161 | NC_021160.1    | Ca_kabuli_chr01 | 32204161                | AA                              | TT              | 1946736021               |
| SNP_P4_10494_32221523 | NC_021160.1    | Ca_kabuli_chr01 | 32221523                | CC                              | AA              | 1946736023               |
| SNP_P4_10495_32222246 | NC_021160.1    | Ca_kabuli_chr01 | 32222246                | AA                              | GG              | 1946736025               |
| SNP_P4_10497_32238504 | NC_021160.1    | Ca_kabuli_chr01 | 32238504                | GG                              | TT              | 1946736027               |
| SNP_P4_10498_32239081 | NC_021160.1    | Ca_kabuli_chr01 | 32239081                | TT                              | GG              | 1946736029               |
| SNP_P4_10499_32244072 | NC_021160.1    | Ca_kabuli_chr01 | 32244072                | AA                              | TT              | 1946736031               |
| SNP_P4_10500_32244132 | NC_021160.1    | Ca_kabuli_chr01 | 32244132                | TT                              | CC              | 1946736033               |
| SNP_P4_10501_32244133 | NC_021160.1    | Ca_kabuli_chr01 | 32244133                | CC                              | TT              | 1946736035               |
| SNP_P4_10502_32244175 | NC_021160.1    | Ca_kabuli_chr01 | 32244175                | CC                              | TT              | 1946736037               |
| SNP_P4_10504_32244212 | NC_021160.1    | Ca_kabuli_chr01 | 32244212                | CC                              | TT              | 1946736039               |
| SNP_P4_10505_32244389 | NC_021160.1    | Ca_kabuli_chr01 | 32244389                | CC                              | TT              | 1946736041               |
| SNP_P4_10507_32244764 | NC_021160.1    | Ca_kabuli_chr01 | 32244764                | GG                              | TT              | 1946736043               |
| SNP_P4_10508_32245635 | NC_021160.1    | Ca_kabuli_chr01 | 32245635                | GG                              | CC              | 1946736045               |
| SNP_P4_10509_32246795 | NC_021160.1    | Ca_kabuli_chr01 | 32246795                | AA                              | GG              | 1946736048               |
| SNP_P4_10510_32246840 | NC_021160.1    | Ca_kabuli_chr01 | 32246840                | TT                              | AA              | 1946736050               |
| SNP_P4_10513_32255257 | NC_021160.1    | Ca_kabuli_chr01 | 32255257                | AA                              | CC              | 1946736052               |
| SNP_P4_10514_32257168 | NC_021160.1    | Ca_kabuli_chr01 | 32257168                | CC                              | TT              | 1946736053               |
| SNP_P4_10515_32257869 | NC_021160.1    | Ca_kabuli_chr01 | 32257869                | GG                              | TT              | 1946736055               |
| SNP_P4_10516_32259157 | NC_021160.1    | Ca_kabuli_chr01 | 32259157                | TT                              | GG              | 1946736057               |
| SNP_P4_10517_32261029 | NC_021160.1    | Ca_kabuli_chr01 | 32261029                | TT                              | GG              | 1946736059               |
| SNP_P4_10518_32261420 | NC_021160.1    | Ca_kabuli_chr01 | 32261420                | TT                              | CC              | 1946736061               |
| SNP_P4_10519_32261812 | NC_021160.1    | Ca_kabuli_chr01 | 32261812                | GG                              | AA              | 1946736063               |
| SNP_P4_10521_32266393 | NC_021160.1    | Ca_kabuli_chr01 | 32266393                | GG                              | AA              | 1946736065               |
| SNP_P4_10523_32266571 | NC_021160.1    | Ca_kabuli_chr01 | 32266571                | AA                              | TT              | 1946736067               |
| SNP_P4_10524_32266599 | NC_021160.1    | Ca_kabuli_chr01 | 32266599                | CC                              | TT              | 1946736069               |
| SNP_P4_10525_32266613 | NC_021160.1    | Ca_kabuli_chr01 | 32266613                | CC                              | AA              | 1946736071               |
| SNP_P4_10526_32266870 | NC_021160.1    | Ca_kabuli_chr01 | 32266870                | GG                              | CC              | 1946736073               |
| SNP_P4_10528_32267760 | NC_021160.1    | Ca_kabuli_chr01 | 32267760                | GG                              | AA              | 1946736075               |
| SNP_P4_10529_32268085 | NC_021160.1    | Ca_kabuli_chr01 | 32268085                | AA                              | GG              | 1946736077               |
| SNP_P4_10530_32268092 | NC_021160.1    | Ca_kabuli_chr01 | 32268092                | GG                              | CC              | 1946736079               |
| SNP_P4_10531_32268645 | NC_021160.1    | Ca_kabuli_chr01 | 32268645                | AA                              | TT              | 1946736081               |
| SNP_P4_10532_32268969 | NC_021160.1    | Ca_kabuli_chr01 | 32268969                | AA                              | TT              | 1946736083               |
| SNP_P4_10533_32273878 | NC_021160.1    | Ca_kabuli_chr01 | 32273878                | AA                              | TT              | 1946736085               |
| SNP_P4_10534_32273982 | NC_021160.1    | Ca_kabuli_chr01 | 32273982                | AA                              | CC              | 1946736087               |
| SNP_P4_10535_32274032 | NC_021160.1    | Ca_kabuli_chr01 | 32274032                | CC                              | TT              | 1946736089               |

| SNPs IDs              | Chromosome IDs | Chromosomes     | Physical positions (bp) | CDC Frontier (Reference genome) | (ILWC46 & LPNB) | NCBI SNPdb Accession IDs |
|-----------------------|----------------|-----------------|-------------------------|---------------------------------|-----------------|--------------------------|
| SNP_P4_10536_32280443 | NC_021160.1    | Ca_kabuli_chr01 | 32280443                | AA                              | GG              | 1946736091               |
| SNP_P4_10537_32281380 | NC_021160.1    | Ca_kabuli_chr01 | 32281380                | AA                              | TT              | 1946736094               |
| SNP_P4_10538_32281567 | NC_021160.1    | Ca_kabuli_chr01 | 32281567                | AA                              | GG              | 1946736096               |
| SNP_P4_10539_32281602 | NC_021160.1    | Ca_kabuli_chr01 | 32281602                | GG                              | AA              | 1946736098               |
| SNP_P4_10541_32281683 | NC_021160.1    | Ca_kabuli_chr01 | 32281683                | CC                              | TT              | 1946736100               |
| SNP_P4_10542_32281797 | NC_021160.1    | Ca_kabuli_chr01 | 32281797                | GG                              | AA              | 1946736101               |
| SNP_P4_10543_32281800 | NC_021160.1    | Ca_kabuli_chr01 | 32281800                | TT                              | AA              | 1946736103               |
| SNP_P4_10544_32282005 | NC_021160.1    | Ca_kabuli_chr01 | 32282005                | TT                              | GG              | 1946736105               |
| SNP_P4_10545_32282059 | NC_021160.1    | Ca_kabuli_chr01 | 32282059                | GG                              | AA              | 1946736107               |
| SNP_P4_10546_32282063 | NC_021160.1    | Ca_kabuli_chr01 | 32282063                | AA                              | CC              | 1946736109               |
| SNP_P4_10547_32282861 | NC_021160.1    | Ca_kabuli_chr01 | 32282861                | CC                              | TT              | 1946736111               |
| SNP_P4_10548_32282880 | NC_021160.1    | Ca_kabuli_chr01 | 32282880                | TT                              | GG              | 1946736113               |
| SNP_P4_10549_32283198 | NC_021160.1    | Ca_kabuli_chr01 | 32283198                | CC                              | GG              | 1946736115               |
| SNP_P4_10550_32283629 | NC_021160.1    | Ca_kabuli_chr01 | 32283629                | AA                              | TT              | 1946736117               |
| SNP_P4_10551_32283939 | NC_021160.1    | Ca_kabuli_chr01 | 32283939                | CC                              | GG              | 1946736119               |
| SNP_P4_10552_32286534 | NC_021160.1    | Ca_kabuli_chr01 | 32286534                | GG                              | CC              | 1946736121               |
| SNP_P4_10553_32286535 | NC_021160.1    | Ca_kabuli_chr01 | 32286535                | GG                              | AA              | 1946736123               |
| SNP_P4_10554_32286544 | NC_021160.1    | Ca_kabuli_chr01 | 32286544                | GG                              | AA              | 1946736125               |
| SNP_P4_10555_32286545 | NC_021160.1    | Ca_kabuli_chr01 | 32286545                | AA                              | GG              | 1946736127               |
| SNP_P4_10556_32286555 | NC_021160.1    | Ca_kabuli_chr01 | 32286555                | TT                              | CC              | 1946736129               |
| SNP_P4_10557_32286718 | NC_021160.1    | Ca_kabuli_chr01 | 32286718                | AA                              | GG              | 1946736131               |
| SNP_P4_10558_32287003 | NC_021160.1    | Ca_kabuli_chr01 | 32287003                | AA                              | GG              | 1946736133               |
| SNP_P4_10559_32287044 | NC_021160.1    | Ca_kabuli_chr01 | 32287044                | TT                              | GG              | 1946736135               |
| SNP_P4_10560_32300220 | NC_021160.1    | Ca_kabuli_chr01 | 32300220                | GG                              | AA              | 1946736136               |
| SNP_P4_10561_32300319 | NC_021160.1    | Ca_kabuli_chr01 | 32300319                | CC                              | TT              | 1946736138               |
| SNP_P4_10562_32300771 | NC_021160.1    | Ca_kabuli_chr01 | 32300771                | GG                              | AA              | 1946736140               |
| SNP_P4_10563_32301100 | NC_021160.1    | Ca_kabuli_chr01 | 32301100                | TT                              | CC              | 1946736142               |
| SNP_P4_10564_32301103 | NC_021160.1    | Ca_kabuli_chr01 | 32301103                | AA                              | CC              | 1946736144               |
| SNP_P4_10565_32301267 | NC_021160.1    | Ca_kabuli_chr01 | 32301267                | TT                              | CC              | 1946736146               |
| SNP_P4_10566_32301601 | NC_021160.1    | Ca_kabuli_chr01 | 32301601                | TT                              | CC              | 1946736148               |
| SNP_P4_10567_32312218 | NC_021160.1    | Ca_kabuli_chr01 | 32312218                | GG                              | AA              | 1946736150               |
| SNP_P4_10568_32312540 | NC_021160.1    | Ca_kabuli_chr01 | 32312540                | AA                              | CC              | 1946736152               |
| SNP_P4_10569_32312590 | NC_021160.1    | Ca_kabuli_chr01 | 32312590                | GG                              | AA              | 1946736154               |
| SNP_P4_10570_32312657 | NC_021160.1    | Ca_kabuli_chr01 | 32312657                | TT                              | CC              | 1946736156               |
| SNP_P4_10571_32312839 | NC_021160.1    | Ca_kabuli_chr01 | 32312839                | AA                              | TT              | 1946736158               |
| SNP_P4_10572_32387477 | NC_021160.1    | Ca_kabuli_chr01 | 32387477                | TT                              | CC              | 1946736160               |
| SNP_P4_10574_32413628 | NC_021160.1    | Ca_kabuli_chr01 | 32413628                | GG                              | AA              | 1946736161               |
| SNP_P4_10575_32424628 | NC_021160.1    | Ca_kabuli_chr01 | 32424628                | GG                              | AA              | 1946736163               |
| SNP_P4_10576_32428589 | NC_021160.1    | Ca_kabuli_chr01 | 32428589                | TT                              | CC              | 1946736165               |
| SNP_P4_10579_32453880 | NC_021160.1    | Ca_kabuli_chr01 | 32453880                | CC                              | AA              | 1946736167               |
| SNP_P4_10580_32454109 | NC_021160.1    | Ca_kabuli_chr01 | 32454109                | TT                              | CC              | 1946736169               |
| SNP_P4_10582_32454431 | NC_021160.1    | Ca_kabuli_chr01 | 32454431                | AA                              | TT              | 1946736171               |

| SNPs IDs              | Chromosome IDs | Chromosomes     | Physical positions (bp) | CDC Frontier (Reference genome) | (ILWC46 & LPNB) | NCBI SNPdb Accession IDs |
|-----------------------|----------------|-----------------|-------------------------|---------------------------------|-----------------|--------------------------|
| SNP_P4_10583_32454432 | NC_021160.1    | Ca_kabuli_chr01 | 32454432                | AA                              | TT              | 1946736173               |
| SNP_P4_10584_32454434 | NC_021160.1    | Ca_kabuli_chr01 | 32454434                | TT                              | CC              | 1946736175               |
| SNP_P4_10585_32454438 | NC_021160.1    | Ca_kabuli_chr01 | 32454438                | GG                              | AA              | 1946736177               |
| SNP_P4_10586_32454477 | NC_021160.1    | Ca_kabuli_chr01 | 32454477                | CC                              | AA              | 1946736179               |
| SNP_P4_10587_32475181 | NC_021160.1    | Ca_kabuli_chr01 | 32475181                | GG                              | TT              | 1946736181               |
| SNP_P4_10588_32477614 | NC_021160.1    | Ca_kabuli_chr01 | 32477614                | AA                              | GG              | 1946736183               |
| SNP_P4_10589_32505782 | NC_021160.1    | Ca_kabuli_chr01 | 32505782                | GG                              | CC              | 1946736185               |
| SNP_P4_10591_32573050 | NC_021160.1    | Ca_kabuli_chr01 | 32573050                | CC                              | TT              | 1946736187               |
| SNP_P4_10592_32606595 | NC_021160.1    | Ca_kabuli_chr01 | 32606595                | CC                              | TT              | 1946736189               |
| SNP_P4_10593_32606608 | NC_021160.1    | Ca_kabuli_chr01 | 32606608                | TT                              | CC              | 1946736191               |
| SNP_P4_10594_32606612 | NC_021160.1    | Ca_kabuli_chr01 | 32606612                | GG                              | AA              | 1946736193               |
| SNP_P4_10595_32606704 | NC_021160.1    | Ca_kabuli_chr01 | 32606704                | AA                              | CC              | 1946736195               |
| SNP_P4_10596_32750625 | NC_021160.1    | Ca_kabuli_chr01 | 32750625                | TT                              | CC              | 1946736197               |
| SNP_P4_10597_32751825 | NC_021160.1    | Ca_kabuli_chr01 | 32751825                | GG                              | TT              | 1946736199               |
| SNP_P4_10598_32758368 | NC_021160.1    | Ca_kabuli_chr01 | 32758368                | CC                              | TT              | 1946736201               |
| SNP_P4_10599_32758587 | NC_021160.1    | Ca_kabuli_chr01 | 32758587                | AA                              | TT              | 1946736203               |
| SNP_P4_10601_32758640 | NC_021160.1    | Ca_kabuli_chr01 | 32758640                | CC                              | TT              | 1946736205               |
| SNP_P4_10602_32758642 | NC_021160.1    | Ca_kabuli_chr01 | 32758642                | AA                              | TT              | 1946736207               |
| SNP_P4_10603_32758692 | NC_021160.1    | Ca_kabuli_chr01 | 32758692                | GG                              | AA              | 1946736209               |
| SNP_P4_10604_32758715 | NC_021160.1    | Ca_kabuli_chr01 | 32758715                | GG                              | CC              | 1946736211               |
| SNP_P4_10605_32758718 | NC_021160.1    | Ca_kabuli_chr01 | 32758718                | AA                              | GG              | 1946736213               |
| SNP_P4_10606_32758734 | NC_021160.1    | Ca_kabuli_chr01 | 32758734                | TT                              | AA              | 1946736215               |
| SNP_P4_10607_32758770 | NC_021160.1    | Ca_kabuli_chr01 | 32758770                | GG                              | AA              | 1946736217               |
| SNP_P4_10608_32758773 | NC_021160.1    | Ca_kabuli_chr01 | 32758773                | AA                              | GG              | 1946736219               |
| SNP_P4_10609_32758781 | NC_021160.1    | Ca_kabuli_chr01 | 32758781                | CC                              | TT              | 1946736221               |
| SNP_P4_10610_32758861 | NC_021160.1    | Ca_kabuli_chr01 | 32758861                | TT                              | AA              | 1946736223               |
| SNP_P4_10611_32765117 | NC_021160.1    | Ca_kabuli_chr01 | 32765117                | AA                              | GG              | 1946736225               |
| SNP_P4_10612_32765169 | NC_021160.1    | Ca_kabuli_chr01 | 32765169                | CC                              | TT              | 1946736227               |
| SNP_P4_10613_32765170 | NC_021160.1    | Ca_kabuli_chr01 | 32765170                | CC                              | AA              | 1946736229               |
| SNP_P4_10614_32777777 | NC_021160.1    | Ca_kabuli_chr01 | 32777777                | TT                              | CC              | 1946736231               |
| SNP_P4_10615_32788466 | NC_021160.1    | Ca_kabuli_chr01 | 32788466                | TT                              | AA              | 1946736233               |
| SNP_P4_10616_32788553 | NC_021160.1    | Ca_kabuli_chr01 | 32788553                | AA                              | TT              | 1946736235               |
| SNP_P4_10617_32796080 | NC_021160.1    | Ca_kabuli_chr01 | 32796080                | TT                              | GG              | 1946736237               |
| SNP_P4_10618_32796086 | NC_021160.1    | Ca_kabuli_chr01 | 32796086                | TT                              | CC              | 1946736239               |
| SNP_P4_10619_32798758 | NC_021160.1    | Ca_kabuli_chr01 | 32798758                | CC                              | TT              | 1946736241               |
| SNP_P4_10620_32798760 | NC_021160.1    | Ca_kabuli_chr01 | 32798760                | AA                              | CC              | 1946736243               |
| SNP_P4_10621_32798821 | NC_021160.1    | Ca_kabuli_chr01 | 32798821                | TT                              | GG              | 1946736245               |
| SNP_P4_10623_32807873 | NC_021160.1    | Ca_kabuli_chr01 | 32807873                | AA                              | GG              | 1946736247               |
| SNP_P4_10624_32808897 | NC_021160.1    | Ca_kabuli_chr01 | 32808897                | GG                              | TT              | 1946736249               |
| SNP_P4_10625_32810187 | NC_021160.1    | Ca_kabuli_chr01 | 32810187                | CC                              | GG              | 1946736250               |
| SNP_P4_10626_32813860 | NC_021160.1    | Ca_kabuli_chr01 | 32813860                | CC                              | TT              | 1946736253               |
| SNP_P4_10627_32814184 | NC_021160.1    | Ca_kabuli_chr01 | 32814184                | GG                              | AA              | 1946736255               |

| SNPs IDs              | Chromosome IDs | Chromosomes     | Physical positions (bp) | CDC Frontier (Reference genome) | (ILWC46 & LPNB) | NCBI SNPdb Accession IDs |
|-----------------------|----------------|-----------------|-------------------------|---------------------------------|-----------------|--------------------------|
| SNP_P4_10629_32823465 | NC_021160.1    | Ca_kabuli_chr01 | 32823465                | AA                              | TT              | 1946736257               |
| SNP_P4_10630_32834033 | NC_021160.1    | Ca_kabuli_chr01 | 32834033                | TT                              | CC              | 1946736258               |
| SNP_P4_10631_32834099 | NC_021160.1    | Ca_kabuli_chr01 | 32834099                | AA                              | GG              | 1946736260               |
| SNP_P4_10632_32835976 | NC_021160.1    | Ca_kabuli_chr01 | 32835976                | GG                              | AA              | 1946736262               |
| SNP_P4_10633_32835981 | NC_021160.1    | Ca_kabuli_chr01 | 32835981                | CC                              | GG              | 1946736264               |
| SNP_P4_10634_32836015 | NC_021160.1    | Ca_kabuli_chr01 | 32836015                | GG                              | TT              | 1946736266               |
| SNP_P4_10635_32836022 | NC_021160.1    | Ca_kabuli_chr01 | 32836022                | CC                              | TT              | 1946736268               |
| SNP_P4_10636_32836024 | NC_021160.1    | Ca_kabuli_chr01 | 32836024                | AA                              | TT              | 1946736270               |
| SNP_P4_10637_32847827 | NC_021160.1    | Ca_kabuli_chr01 | 32847827                | TT                              | AA              | 1946736272               |
| SNP_P4_10638_32847829 | NC_021160.1    | Ca_kabuli_chr01 | 32847829                | CC                              | TT              | 1946736274               |
| SNP_P4_10639_32849558 | NC_021160.1    | Ca_kabuli_chr01 | 32849558                | TT                              | CC              | 1946736276               |
| SNP_P4_10640_32856815 | NC_021160.1    | Ca_kabuli_chr01 | 32856815                | GG                              | CC              | 1946736278               |
| SNP_P4_10641_32856826 | NC_021160.1    | Ca_kabuli_chr01 | 32856826                | TT                              | CC              | 1946736280               |
| SNP_P4_10643_32863974 | NC_021160.1    | Ca_kabuli_chr01 | 32863974                | GG                              | AA              | 1946736282               |
| SNP_P4_10644_32864304 | NC_021160.1    | Ca_kabuli_chr01 | 32864304                | AA                              | GG              | 1946736284               |
| SNP_P4_10645_32867502 | NC_021160.1    | Ca_kabuli_chr01 | 32867502                | TT                              | CC              | 1946736286               |
| SNP_P4_10646_32867652 | NC_021160.1    | Ca_kabuli_chr01 | 32867652                | CC                              | GG              | 1946736288               |
| SNP_P4_10647_32867676 | NC_021160.1    | Ca_kabuli_chr01 | 32867676                | AA                              | GG              | 1946736290               |
| SNP_P4_10648_32867899 | NC_021160.1    | Ca_kabuli_chr01 | 32867899                | AA                              | CC              | 1946736292               |
| SNP_P4_10649_32868368 | NC_021160.1    | Ca_kabuli_chr01 | 32868368                | GG                              | AA              | 1946736294               |
| SNP_P4_10650_32868392 | NC_021160.1    | Ca_kabuli_chr01 | 32868392                | TT                              | CC              | 1946736296               |
| SNP_P4_10651_32868520 | NC_021160.1    | Ca_kabuli_chr01 | 32868520                | AA                              | TT              | 1946736298               |
| SNP_P4_10652_32868553 | NC_021160.1    | Ca_kabuli_chr01 | 32868553                | CC                              | GG              | 1946736300               |
| SNP_P4_10653_32868656 | NC_021160.1    | Ca_kabuli_chr01 | 32868656                | TT                              | GG              | 1946736301               |
| SNP_P4_10654_32868694 | NC_021160.1    | Ca_kabuli_chr01 | 32868694                | TT                              | CC              | 1946736303               |
| SNP_P4_10655_32885517 | NC_021160.1    | Ca_kabuli_chr01 | 32885517                | AA                              | GG              | 1946736305               |
| SNP_P4_10656_32888052 | NC_021160.1    | Ca_kabuli_chr01 | 32888052                | AA                              | TT              | 1946736307               |
| SNP_P4_10657_32905658 | NC_021160.1    | Ca_kabuli_chr01 | 32905658                | CC                              | TT              | 1946736309               |
| SNP_P4_10658_32905659 | NC_021160.1    | Ca_kabuli_chr01 | 32905659                | AA                              | TT              | 1946736311               |
| SNP_P4_10659_32905662 | NC_021160.1    | Ca_kabuli_chr01 | 32905662                | TT                              | AA              | 1946736313               |
| SNP_P4_10660_32905710 | NC_021160.1    | Ca_kabuli_chr01 | 32905710                | GG                              | CC              | 1946736315               |
| SNP_P4_10663_32910119 | NC_021160.1    | Ca_kabuli_chr01 | 32910119                | TT                              | CC              | 1946736317               |
| SNP_P4_10665_32913801 | NC_021160.1    | Ca_kabuli_chr01 | 32913801                | GG                              | TT              | 1946736319               |
| SNP_P4_10666_32914427 | NC_021160.1    | Ca_kabuli_chr01 | 32914427                | TT                              | CC              | 1946736321               |
| SNP_P4_10667_32914665 | NC_021160.1    | Ca_kabuli_chr01 | 32914665                | CC                              | TT              | 1946736323               |
| SNP_P4_10669_32917943 | NC_021160.1    | Ca_kabuli_chr01 | 32917943                | TT                              | CC              | 1946736325               |
| SNP_P4_10670_32918070 | NC_021160.1    | Ca_kabuli_chr01 | 32918070                | AA                              | GG              | 1946736326               |
| SNP_P4_10671_32918785 | NC_021160.1    | Ca_kabuli_chr01 | 32918785                | AA                              | TT              | 1946736328               |
| SNP_P4_10673_32921979 | NC_021160.1    | Ca_kabuli_chr01 | 32921979                | GG                              | CC              | 1946736330               |
| SNP_P4_10674_32922922 | NC_021160.1    | Ca_kabuli_chr01 | 32922922                | CC                              | TT              | 1946736332               |
| SNP_P4_10675_32922935 | NC_021160.1    | Ca_kabuli_chr01 | 32922935                | AA                              | GG              | 1946736334               |
| SNP_P4_10676_32931287 | NC_021160.1    | Ca_kabuli_chr01 | 32931287                | CC                              | GG              | 1946736336               |

| SNPs IDs              | Chromosome IDs | Chromosomes     | Physical positions (bp) | CDC Frontier (Reference genome) | (ILWC46 & LPNB) | NCBI SNPdb Accession IDs |
|-----------------------|----------------|-----------------|-------------------------|---------------------------------|-----------------|--------------------------|
| SNP_P4_10677_32931377 | NC_021160.1    | Ca_kabuli_chr01 | 32931377                | GG                              | AA              | 1946736338               |
| SNP_P4_10678_32936047 | NC_021160.1    | Ca_kabuli_chr01 | 32936047                | CC                              | TT              | 1946736340               |
| SNP_P4_10679_32936346 | NC_021160.1    | Ca_kabuli_chr01 | 32936346                | TT                              | AA              | 1946736342               |
| SNP_P4_10680_32937352 | NC_021160.1    | Ca_kabuli_chr01 | 32937352                | AA                              | GG              | 1946736344               |
| SNP_P4_10681_32937571 | NC_021160.1    | Ca_kabuli_chr01 | 32937571                | CC                              | GG              | 1946736346               |
| SNP_P4_10683_32939834 | NC_021160.1    | Ca_kabuli_chr01 | 32939834                | GG                              | TT              | 1946736348               |
| SNP_P4_10684_32941061 | NC_021160.1    | Ca_kabuli_chr01 | 32941061                | AA                              | GG              | 1946736349               |
| SNP_P4_10685_32941095 | NC_021160.1    | Ca_kabuli_chr01 | 32941095                | AA                              | GG              | 1946736351               |
| SNP_P4_10686_32941412 | NC_021160.1    | Ca_kabuli_chr01 | 32941412                | GG                              | CC              | 1946736353               |
| SNP_P4_10687_32941521 | NC_021160.1    | Ca_kabuli_chr01 | 32941521                | TT                              | CC              | 1946736355               |
| SNP_P4_10688_32942078 | NC_021160.1    | Ca_kabuli_chr01 | 32942078                | TT                              | CC              | 1946736357               |
| SNP_P4_10689_32942418 | NC_021160.1    | Ca_kabuli_chr01 | 32942418                | TT                              | CC              | 1946736359               |
| SNP_P4_10690_32949227 | NC_021160.1    | Ca_kabuli_chr01 | 32949227                | AA                              | CC              | 1946736361               |
| SNP_P4_10691_32949853 | NC_021160.1    | Ca_kabuli_chr01 | 32949853                | CC                              | TT              | 1946736363               |
| SNP_P4_10692_32950484 | NC_021160.1    | Ca_kabuli_chr01 | 32950484                | GG                              | AA              | 1946736365               |
| SNP_P4_10693_32950588 | NC_021160.1    | Ca_kabuli_chr01 | 32950588                | AA                              | GG              | 1946736367               |
| SNP_P4_10694_32950848 | NC_021160.1    | Ca_kabuli_chr01 | 32950848                | AA                              | GG              | 1946736369               |
| SNP_P4_10695_32950891 | NC_021160.1    | Ca_kabuli_chr01 | 32950891                | AA                              | GG              | 1946736371               |
| SNP_P4_10696_32951347 | NC_021160.1    | Ca_kabuli_chr01 | 32951347                | CC                              | GG              | 1946736373               |
| SNP_P4_10697_32957360 | NC_021160.1    | Ca_kabuli_chr01 | 32957360                | CC                              | GG              | 1946736375               |
| SNP_P4_10698_32957577 | NC_021160.1    | Ca_kabuli_chr01 | 32957577                | TT                              | AA              | 1946736377               |
| SNP_P4_10699_32957590 | NC_021160.1    | Ca_kabuli_chr01 | 32957590                | GG                              | CC              | 1946736379               |
| SNP_P4_10700_32957603 | NC_021160.1    | Ca_kabuli_chr01 | 32957603                | GG                              | AA              | 1946736381               |
| SNP_P4_10701_32957652 | NC_021160.1    | Ca_kabuli_chr01 | 32957652                | TT                              | CC              | 1946736383               |
| SNP_P4_10702_32957728 | NC_021160.1    | Ca_kabuli_chr01 | 32957728                | AA                              | GG              | 1946736385               |
| SNP_P4_10703_32957757 | NC_021160.1    | Ca_kabuli_chr01 | 32957757                | TT                              | GG              | 1946736387               |
| SNP_P4_10704_32958431 | NC_021160.1    | Ca_kabuli_chr01 | 32958431                | GG                              | AA              | 1946736389               |
| SNP_P4_10705_32964652 | NC_021160.1    | Ca_kabuli_chr01 | 32964652                | CC                              | TT              | 1946736391               |
| SNP_P4_10706_32964809 | NC_021160.1    | Ca_kabuli_chr01 | 32964809                | TT                              | CC              | 1946736393               |
| SNP_P4_10708_32973886 | NC_021160.1    | Ca_kabuli_chr01 | 32973886                | GG                              | CC              | 1946736395               |
| SNP_P4_10709_32974240 | NC_021160.1    | Ca_kabuli_chr01 | 32974240                | CC                              | TT              | 1946736396               |
| SNP_P4_10710_32976018 | NC_021160.1    | Ca_kabuli_chr01 | 32976018                | AA                              | GG              | 1946736398               |
| SNP_P4_10711_32977228 | NC_021160.1    | Ca_kabuli_chr01 | 32977228                | GG                              | TT              | 1946736400               |
| SNP_P4_10712_32981246 | NC_021160.1    | Ca_kabuli_chr01 | 32981246                | GG                              | TT              | 1946736402               |
| SNP_P4_10713_32981309 | NC_021160.1    | Ca_kabuli_chr01 | 32981309                | TT                              | AA              | 1946736404               |
| SNP_P4_10714_32981502 | NC_021160.1    | Ca_kabuli_chr01 | 32981502                | TT                              | CC              | 1946736406               |
| SNP_P4_10715_32981721 | NC_021160.1    | Ca_kabuli_chr01 | 32981721                | TT                              | AA              | 1946736408               |
| SNP_P4_10716_32981791 | NC_021160.1    | Ca_kabuli_chr01 | 32981791                | AA                              | CC              | 1946736410               |
| SNP_P4_10717_32981823 | NC_021160.1    | Ca_kabuli_chr01 | 32981823                | TT                              | CC              | 1946736412               |
| SNP_P4_10718_32982243 | NC_021160.1    | Ca_kabuli_chr01 | 32982243                | AA                              | CC              | 1946736414               |
| SNP_P4_10719_32983455 | NC_021160.1    | Ca_kabuli_chr01 | 32983455                | GG                              | AA              | 1946736416               |
| SNP_P4_10720_32984083 | NC_021160.1    | Ca_kabuli_chr01 | 32984083                | GG                              | TT              | 1946736417               |

| SNPs IDs              | Chromosome IDs | Chromosomes     | Physical positions (bp) | CDC Frontier (Reference genome) | (ILWC46 & LPNB) | NCBI SNPdb Accession IDs |
|-----------------------|----------------|-----------------|-------------------------|---------------------------------|-----------------|--------------------------|
| SNP_P4_10721_32984121 | NC_021160.1    | Ca_kabuli_chr01 | 32984121                | AA                              | GG              | 1946736419               |
| SNP_P4_10722_32987561 | NC_021160.1    | Ca_kabuli_chr01 | 32987561                | CC                              | GG              | 1946736421               |
| SNP_P4_10723_32998380 | NC_021160.1    | Ca_kabuli_chr01 | 32998380                | CC                              | AA              | 1946736423               |
| SNP_P4_10724_32998589 | NC_021160.1    | Ca_kabuli_chr01 | 32998589                | CC                              | TT              | 1946736425               |
| SNP_P4_10725_32998736 | NC_021160.1    | Ca_kabuli_chr01 | 32998736                | TT                              | GG              | 1946736427               |
| SNP_P4_10726_32998815 | NC_021160.1    | Ca_kabuli_chr01 | 32998815                | AA                              | GG              | 1946736429               |
| SNP_P4_10727_33001296 | NC_021160.1    | Ca_kabuli_chr01 | 33001296                | AA                              | GG              | 1946736431               |
| SNP_P4_10728_33004285 | NC_021160.1    | Ca_kabuli_chr01 | 33004285                | CC                              | TT              | 1946736433               |
| SNP_P4_10729_33006065 | NC_021160.1    | Ca_kabuli_chr01 | 33006065                | CC                              | TT              | 1946736434               |
| SNP_P4_10730_33008263 | NC_021160.1    | Ca_kabuli_chr01 | 33008263                | CC                              | TT              | 1946736436               |
| SNP_P4_10731_33008475 | NC_021160.1    | Ca_kabuli_chr01 | 33008475                | AA                              | GG              | 1946736438               |
| SNP_P4_10732_33008987 | NC_021160.1    | Ca_kabuli_chr01 | 33008987                | TT                              | CC              | 1946736440               |
| SNP_P4_10734_33019147 | NC_021160.1    | Ca_kabuli_chr01 | 33019147                | AA                              | CC              | 1946736442               |
| SNP_P4_10735_33019157 | NC_021160.1    | Ca_kabuli_chr01 | 33019157                | AA                              | GG              | 1946736444               |
| SNP_P4_10736_33019614 | NC_021160.1    | Ca_kabuli_chr01 | 33019614                | CC                              | TT              | 1946736446               |
| SNP_P4_10737_33019665 | NC_021160.1    | Ca_kabuli_chr01 | 33019665                | AA                              | GG              | 1946736448               |
| SNP_P4_10738_33020078 | NC_021160.1    | Ca_kabuli_chr01 | 33020078                | TT                              | CC              | 1946736450               |
| SNP_P4_10739_33033860 | NC_021160.1    | Ca_kabuli_chr01 | 33033860                | GG                              | AA              | 1946736452               |
| SNP_P4_10741_33034907 | NC_021160.1    | Ca_kabuli_chr01 | 33034907                | AA                              | GG              | 1946736454               |
| SNP_P4_10742_33035110 | NC_021160.1    | Ca_kabuli_chr01 | 33035110                | GG                              | AA              | 1946736456               |
| SNP_P4_10743_33041047 | NC_021160.1    | Ca_kabuli_chr01 | 33041047                | AA                              | GG              | 1946736458               |
| SNP_P4_10744_33041714 | NC_021160.1    | Ca_kabuli_chr01 | 33041714                | TT                              | CC              | 1946736460               |
| SNP_P4_10745_33050180 | NC_021160.1    | Ca_kabuli_chr01 | 33050180                | TT                              | CC              | 1946736462               |
| SNP_P4_10746_33054193 | NC_021160.1    | Ca_kabuli_chr01 | 33054193                | AA                              | TT              | 1946736464               |
| SNP_P4_10749_33063507 | NC_021160.1    | Ca_kabuli_chr01 | 33063507                | TT                              | CC              | 1946736466               |
| SNP_P4_10750_33075675 | NC_021160.1    | Ca_kabuli_chr01 | 33075675                | GG                              | AA              | 1946736468               |
| SNP_P4_10751_33080367 | NC_021160.1    | Ca_kabuli_chr01 | 33080367                | GG                              | AA              | 1946736470               |
| SNP_P4_10752_33082442 | NC_021160.1    | Ca_kabuli_chr01 | 33082442                | TT                              | CC              | 1946736472               |
| SNP_P4_10753_33082803 | NC_021160.1    | Ca_kabuli_chr01 | 33082803                | TT                              | CC              | 1946736474               |
| SNP_P4_10754_33082968 | NC_021160.1    | Ca_kabuli_chr01 | 33082968                | GG                              | AA              | 1946736476               |
| SNP_P4_10755_33083290 | NC_021160.1    | Ca_kabuli_chr01 | 33083290                | GG                              | AA              | 1946736478               |
| SNP_P4_10756_33088946 | NC_021160.1    | Ca_kabuli_chr01 | 33088946                | CC                              | TT              | 1946736480               |
| SNP_P4_10757_33090206 | NC_021160.1    | Ca_kabuli_chr01 | 33090206                | CC                              | TT              | 1946736482               |
| SNP_P4_10758_33092829 | NC_021160.1    | Ca_kabuli_chr01 | 33092829                | TT                              | CC              | 1946736484               |
| SNP_P4_10759_33093760 | NC_021160.1    | Ca_kabuli_chr01 | 33093760                | AA                              | GG              | 1946736486               |
| SNP_P4_10760_33094008 | NC_021160.1    | Ca_kabuli_chr01 | 33094008                | CC                              | TT              | 1946736488               |
| SNP_P4_10761_33094894 | NC_021160.1    | Ca_kabuli_chr01 | 33094894                | GG                              | TT              | 1946736489               |
| SNP_P4_10762_33095066 | NC_021160.1    | Ca_kabuli_chr01 | 33095066                | GG                              | AA              | 1946736492               |
| SNP_P4_10763_33095303 | NC_021160.1    | Ca_kabuli_chr01 | 33095303                | AA                              | CC              | 1946736494               |
| SNP_P4_10764_33097467 | NC_021160.1    | Ca_kabuli_chr01 | 33097467                | AA                              | GG              | 1946736497               |
| SNP_P4_10765_33100456 | NC_021160.1    | Ca_kabuli_chr01 | 33100456                | CC                              | TT              | 1946736499               |
| SNP_P4_10767_33102597 | NC_021160.1    | Ca_kabuli_chr01 | 33102597                | GG                              | TT              | 1946736501               |

| SNPs IDs              | Chromosome IDs | Chromosomes     | Physical positions (bp) | CDC Frontier (Reference genome) | (ILWC46 & LPNB) | NCBI SNPdb Accession IDs |
|-----------------------|----------------|-----------------|-------------------------|---------------------------------|-----------------|--------------------------|
| SNP_P4_10768_33102894 | NC_021160.1    | Ca_kabuli_chr01 | 33102894                | AA                              | CC              | 1946736503               |
| SNP_P4_10770_33105702 | NC_021160.1    | Ca_kabuli_chr01 | 33105702                | CC                              | TT              | 1946736505               |
| SNP_P4_10771_33106265 | NC_021160.1    | Ca_kabuli_chr01 | 33106265                | GG                              | AA              | 1946736507               |
| SNP_P4_10772_33116036 | NC_021160.1    | Ca_kabuli_chr01 | 33116036                | GG                              | AA              | 1946736509               |
| SNP_P4_10773_33116134 | NC_021160.1    | Ca_kabuli_chr01 | 33116134                | CC                              | AA              | 1946736511               |
| SNP_P4_10775_33119286 | NC_021160.1    | Ca_kabuli_chr01 | 33119286                | GG                              | CC              | 1946736513               |
| SNP_P4_10776_33119641 | NC_021160.1    | Ca_kabuli_chr01 | 33119641                | AA                              | CC              | 1946736515               |
| SNP_P4_10777_33120146 | NC_021160.1    | Ca_kabuli_chr01 | 33120146                | GG                              | AA              | 1946736517               |
| SNP_P4_10778_33120242 | NC_021160.1    | Ca_kabuli_chr01 | 33120242                | CC                              | TT              | 1946736519               |
| SNP_P4_10779_33125110 | NC_021160.1    | Ca_kabuli_chr01 | 33125110                | TT                              | AA              | 1946736521               |
| SNP_P4_10780_33126219 | NC_021160.1    | Ca_kabuli_chr01 | 33126219                | GG                              | AA              | 1946736523               |
| SNP_P4_10781_33126752 | NC_021160.1    | Ca_kabuli_chr01 | 33126752                | CC                              | TT              | 1946736525               |
| SNP_P4_10782_33127392 | NC_021160.1    | Ca_kabuli_chr01 | 33127392                | AA                              | GG              | 1946736527               |
| SNP_P4_10783_33127949 | NC_021160.1    | Ca_kabuli_chr01 | 33127949                | TT                              | CC              | 1946736529               |
| SNP_P4_10784_33129493 | NC_021160.1    | Ca_kabuli_chr01 | 33129493                | GG                              | TT              | 1946736531               |
| SNP_P4_10785_33129615 | NC_021160.1    | Ca_kabuli_chr01 | 33129615                | CC                              | TT              | 1946736533               |
| SNP_P4_10786_33129622 | NC_021160.1    | Ca_kabuli_chr01 | 33129622                | CC                              | TT              | 1946736535               |
| SNP_P4_10787_33129967 | NC_021160.1    | Ca_kabuli_chr01 | 33129967                | CC                              | AA              | 1946736537               |
| SNP_P4_10788_33129995 | NC_021160.1    | Ca_kabuli_chr01 | 33129995                | GG                              | AA              | 1946736539               |
| SNP_P4_10790_33134673 | NC_021160.1    | Ca_kabuli_chr01 | 33134673                | AA                              | GG              | 1946736541               |
| SNP_P4_10791_33134763 | NC_021160.1    | Ca_kabuli_chr01 | 33134763                | AA                              | TT              | 1946736543               |
| SNP_P4_10792_33134774 | NC_021160.1    | Ca_kabuli_chr01 | 33134774                | AA                              | TT              | 1946736545               |
| SNP_P4_10793_33140287 | NC_021160.1    | Ca_kabuli_chr01 | 33140287                | AA                              | GG              | 1946736547               |
| SNP_P4_10794_33140317 | NC_021160.1    | Ca_kabuli_chr01 | 33140317                | GG                              | AA              | 1946736549               |
| SNP_P4_10795_33140561 | NC_021160.1    | Ca_kabuli_chr01 | 33140561                | AA                              | GG              | 1946736551               |
| SNP_P4_10796_33142191 | NC_021160.1    | Ca_kabuli_chr01 | 33142191                | TT                              | CC              | 1946736553               |
| SNP_P4_10798_33146608 | NC_021160.1    | Ca_kabuli_chr01 | 33146608                | TT                              | AA              | 1946736555               |
| SNP_P4_10799_33146615 | NC_021160.1    | Ca_kabuli_chr01 | 33146615                | AA                              | TT              | 1946736557               |
| SNP_P4_10800_33148023 | NC_021160.1    | Ca_kabuli_chr01 | 33148023                | GG                              | CC              | 1946736559               |
| SNP_P4_10801_33154299 | NC_021160.1    | Ca_kabuli_chr01 | 33154299                | GG                              | AA              | 1946736561               |
| SNP_P4_10802_33159046 | NC_021160.1    | Ca_kabuli_chr01 | 33159046                | AA                              | GG              | 1946736563               |
| SNP_P4_10803_33159070 | NC_021160.1    | Ca_kabuli_chr01 | 33159070                | AA                              | GG              | 1946736565               |
| SNP_P4_10804_33159446 | NC_021160.1    | Ca_kabuli_chr01 | 33159446                | CC                              | TT              | 1946736567               |
| SNP_P4_10805_33159709 | NC_021160.1    | Ca_kabuli_chr01 | 33159709                | CC                              | TT              | 1946736569               |
| SNP_P4_10806_33159757 | NC_021160.1    | Ca_kabuli_chr01 | 33159757                | GG                              | TT              | 1946736571               |
| SNP_P4_10807_33160509 | NC_021160.1    | Ca_kabuli_chr01 | 33160509                | CC                              | AA              | 1946736573               |
| SNP_P4_10808_33162405 | NC_021160.1    | Ca_kabuli_chr01 | 33162405                | TT                              | CC              | 1946736575               |
| SNP_P4_10809_33162980 | NC_021160.1    | Ca_kabuli_chr01 | 33162980                | GG                              | TT              | 1946736577               |
| SNP_P4_10810_33163106 | NC_021160.1    | Ca_kabuli_chr01 | 33163106                | TT                              | CC              | 1946736579               |
| SNP_P4_10811_33164765 | NC_021160.1    | Ca_kabuli_chr01 | 33164765                | GG                              | AA              | 1946736581               |
| SNP_P4_10812_33167637 | NC_021160.1    | Ca_kabuli_chr01 | 33167637                | TT                              | CC              | 1946736583               |
| SNP_P4_10813_33167731 | NC_021160.1    | Ca_kabuli_chr01 | 33167731                | AA                              | TT              | 1946736585               |



| SNPs IDs              | Chromosome IDs | Chromosomes     | Physical positions (bp) | CDC Frontier (Reference genome) | (ILWC46 & LPNB) | NCBI SNPdb Accession IDs |
|-----------------------|----------------|-----------------|-------------------------|---------------------------------|-----------------|--------------------------|
| SNP_P4_10814_33169919 | NC_021160.1    | Ca_kabuli_chr01 | 33169919                | TT                              | AA              | 1946736587               |
| SNP_P4_10815_33172369 | NC_021160.1    | Ca_kabuli_chr01 | 33172369                | AA                              | TT              | 1946736589               |
| SNP_P4_10816_33180710 | NC_021160.1    | Ca_kabuli_chr01 | 33180710                | GG                              | AA              | 1946736592               |
| SNP_P4_10817_33182912 | NC_021160.1    | Ca_kabuli_chr01 | 33182912                | TT                              | CC              | 1946736594               |
| SNP_P4_10818_33183717 | NC_021160.1    | Ca_kabuli_chr01 | 33183717                | TT                              | CC              | 1946736596               |
| SNP_P4_10819_33183742 | NC_021160.1    | Ca_kabuli_chr01 | 33183742                | AA                              | TT              | 1946736598               |
| SNP_P4_10820_33184163 | NC_021160.1    | Ca_kabuli_chr01 | 33184163                | AA                              | GG              | 1946736600               |
| SNP_P4_10821_33185625 | NC_021160.1    | Ca_kabuli_chr01 | 33185625                | AA                              | GG              | 1946736602               |
| SNP_P4_10822_33186713 | NC_021160.1    | Ca_kabuli_chr01 | 33186713                | TT                              | GG              | 1946736604               |
| SNP_P4_10823_33186843 | NC_021160.1    | Ca_kabuli_chr01 | 33186843                | TT                              | GG              | 1946736606               |
| SNP_P4_10825_33195926 | NC_021160.1    | Ca_kabuli_chr01 | 33195926                | CC                              | TT              | 1946736608               |
| SNP_P4_10826_33197142 | NC_021160.1    | Ca_kabuli_chr01 | 33197142                | TT                              | CC              | 1946736610               |
| SNP_P4_10827_33199943 | NC_021160.1    | Ca_kabuli_chr01 | 33199943                | TT                              | CC              | 1946736612               |
| SNP_P4_10828_33203865 | NC_021160.1    | Ca_kabuli_chr01 | 33203865                | TT                              | GG              | 1946736614               |
| SNP_P4_10829_33207715 | NC_021160.1    | Ca_kabuli_chr01 | 33207715                | CC                              | TT              | 1946736616               |
| SNP_P4_10830_33207749 | NC_021160.1    | Ca_kabuli_chr01 | 33207749                | TT                              | GG              | 1946736618               |
| SNP_P4_10831_33207771 | NC_021160.1    | Ca_kabuli_chr01 | 33207771                | GG                              | AA              | 1946736620               |
| SNP_P4_10832_33226876 | NC_021160.1    | Ca_kabuli_chr01 | 33226876                | AA                              | GG              | 1946736622               |
| SNP_P4_10833_33228145 | NC_021160.1    | Ca_kabuli_chr01 | 33228145                | TT                              | GG              | 1946736624               |
| SNP_P4_10834_33231150 | NC_021160.1    | Ca_kabuli_chr01 | 33231150                | GG                              | AA              | 1946736626               |
| SNP_P4_10835_33237205 | NC_021160.1    | Ca_kabuli_chr01 | 33237205                | CC                              | AA              | 1946736628               |
| SNP_P4_10838_33241421 | NC_021160.1    | Ca_kabuli_chr01 | 33241421                | CC                              | TT              | 1946736630               |
| SNP_P4_10839_33241489 | NC_021160.1    | Ca_kabuli_chr01 | 33241489                | TT                              | GG              | 1946736632               |
| SNP_P4_10841_33245109 | NC_021160.1    | Ca_kabuli_chr01 | 33245109                | AA                              | GG              | 1946736634               |
| SNP_P4_10844_33247694 | NC_021160.1    | Ca_kabuli_chr01 | 33247694                | GG                              | AA              | 1946736636               |
| SNP_P4_10845_33251259 | NC_021160.1    | Ca_kabuli_chr01 | 33251259                | AA                              | TT              | 1946736638               |
| SNP_P4_10846_33253147 | NC_021160.1    | Ca_kabuli_chr01 | 33253147                | TT                              | AA              | 1946736640               |
| SNP_P4_10847_33253349 | NC_021160.1    | Ca_kabuli_chr01 | 33253349                | TT                              | GG              | 1946736642               |
| SNP_P4_10848_33253354 | NC_021160.1    | Ca_kabuli_chr01 | 33253354                | AA                              | GG              | 1946736644               |
| SNP_P4_10849_33255188 | NC_021160.1    | Ca_kabuli_chr01 | 33255188                | AA                              | TT              | 1946736646               |
| SNP_P4_10850_33255240 | NC_021160.1    | Ca_kabuli_chr01 | 33255240                | CC                              | TT              | 1946736648               |
| SNP_P4_10851_33257645 | NC_021160.1    | Ca_kabuli_chr01 | 33257645                | CC                              | AA              | 1946736650               |
| SNP_P4_10852_33258501 | NC_021160.1    | Ca_kabuli_chr01 | 33258501                | TT                              | AA              | 1946736652               |
| SNP_P4_10853_33258619 | NC_021160.1    | Ca_kabuli_chr01 | 33258619                | AA                              | GG              | 1946736655               |
| SNP_P4_10854_33258718 | NC_021160.1    | Ca_kabuli_chr01 | 33258718                | TT                              | CC              | 1946736657               |
| SNP_P4_10855_33258801 | NC_021160.1    | Ca_kabuli_chr01 | 33258801                | AA                              | GG              | 1946736659               |
| SNP_P4_10856_33258905 | NC_021160.1    | Ca_kabuli_chr01 | 33258905                | TT                              | CC              | 1946736661               |
| SNP_P4_10858_33261846 | NC_021160.1    | Ca_kabuli_chr01 | 33261846                | AA                              | GG              | 1946736663               |
| SNP_P4_10859_33261870 | NC_021160.1    | Ca_kabuli_chr01 | 33261870                | GG                              | AA              | 1946736665               |
| SNP_P4_10860_33261966 | NC_021160.1    | Ca_kabuli_chr01 | 33261966                | AA                              | GG              | 1946736667               |
| SNP_P4_10861_33268482 | NC_021160.1    | Ca_kabuli_chr01 | 33268482                | AA                              | GG              | 1946736669               |
| SNP_P4_10862_33268582 | NC_021160.1    | Ca_kabuli_chr01 | 33268582                | TT                              | CC              | 1946736671               |

| SNPs IDs              | Chromosome IDs | Chromosomes     | Physical positions (bp) | CDC Frontier (Reference genome) | (ILWC46 & LPNB) | NCBI SNPdb Accession IDs |
|-----------------------|----------------|-----------------|-------------------------|---------------------------------|-----------------|--------------------------|
| SNP_P4_10863_33269323 | NC_021160.1    | Ca_kabuli_chr01 | 33269323                | GG                              | AA              | 1946736673               |
| SNP_P4_10865_33269574 | NC_021160.1    | Ca_kabuli_chr01 | 33269574                | AA                              | TT              | 1946736675               |
| SNP_P4_10866_33269607 | NC_021160.1    | Ca_kabuli_chr01 | 33269607                | GG                              | TT              | 1946736677               |
| SNP_P4_10867_33269818 | NC_021160.1    | Ca_kabuli_chr01 | 33269818                | AA                              | GG              | 1946736679               |
| SNP_P4_10868_33271892 | NC_021160.1    | Ca_kabuli_chr01 | 33271892                | AA                              | GG              | 1946736681               |
| SNP_P4_10869_33277140 | NC_021160.1    | Ca_kabuli_chr01 | 33277140                | AA                              | GG              | 1946736683               |
| SNP_P4_10870_33277726 | NC_021160.1    | Ca_kabuli_chr01 | 33277726                | GG                              | AA              | 1946736685               |
| SNP_P4_10871_33278944 | NC_021160.1    | Ca_kabuli_chr01 | 33278944                | CC                              | TT              | 1946736687               |
| SNP_P4_10872_33283315 | NC_021160.1    | Ca_kabuli_chr01 | 33283315                | TT                              | CC              | 1946736689               |
| SNP_P4_10873_33283333 | NC_021160.1    | Ca_kabuli_chr01 | 33283333                | GG                              | TT              | 1946736691               |
| SNP_P4_10874_33283376 | NC_021160.1    | Ca_kabuli_chr01 | 33283376                | AA                              | GG              | 1946736693               |
| SNP_P4_10875_33283398 | NC_021160.1    | Ca_kabuli_chr01 | 33283398                | CC                              | TT              | 1946736695               |
| SNP_P4_10876_33283740 | NC_021160.1    | Ca_kabuli_chr01 | 33283740                | AA                              | GG              | 1946736697               |
| SNP_P4_10877_33285598 | NC_021160.1    | Ca_kabuli_chr01 | 33285598                | CC                              | AA              | 1946736699               |
| SNP_P4_10879_33286492 | NC_021160.1    | Ca_kabuli_chr01 | 33286492                | GG                              | AA              | 1946736701               |
| SNP_P4_10880_33288039 | NC_021160.1    | Ca_kabuli_chr01 | 33288039                | TT                              | CC              | 1946736703               |
| SNP_P4_10881_33288105 | NC_021160.1    | Ca_kabuli_chr01 | 33288105                | AA                              | CC              | 1946736705               |
| SNP_P4_10882_33288111 | NC_021160.1    | Ca_kabuli_chr01 | 33288111                | TT                              | CC              | 1946736707               |
| SNP_P4_10883_33288159 | NC_021160.1    | Ca_kabuli_chr01 | 33288159                | TT                              | GG              | 1946736709               |
| SNP_P4_10884_33288297 | NC_021160.1    | Ca_kabuli_chr01 | 33288297                | CC                              | AA              | 1946736711               |
| SNP_P4_10885_33289312 | NC_021160.1    | Ca_kabuli_chr01 | 33289312                | GG                              | AA              | 1946736713               |
| SNP_P4_10886_33290592 | NC_021160.1    | Ca_kabuli_chr01 | 33290592                | AA                              | GG              | 1946736715               |
| SNP_P4_10887_33291191 | NC_021160.1    | Ca_kabuli_chr01 | 33291191                | TT                              | GG              | 1946736717               |
| SNP_P4_10888_33291530 | NC_021160.1    | Ca_kabuli_chr01 | 33291530                | CC                              | TT              | 1946736719               |
| SNP_P4_10889_33296590 | NC_021160.1    | Ca_kabuli_chr01 | 33296590                | CC                              | TT              | 1946736721               |
| SNP_P4_10890_33297704 | NC_021160.1    | Ca_kabuli_chr01 | 33297704                | CC                              | AA              | 1946736723               |
| SNP_P4_10891_33297837 | NC_021160.1    | Ca_kabuli_chr01 | 33297837                | GG                              | AA              | 1946736725               |
| SNP_P4_10893_33303653 | NC_021160.1    | Ca_kabuli_chr01 | 33303653                | AA                              | GG              | 1946736726               |
| SNP_P4_10894_33303756 | NC_021160.1    | Ca_kabuli_chr01 | 33303756                | GG                              | AA              | 1946736727               |
| SNP_P4_10895_33303922 | NC_021160.1    | Ca_kabuli_chr01 | 33303922                | CC                              | TT              | 1946736728               |
| SNP_P4_10896_33304035 | NC_021160.1    | Ca_kabuli_chr01 | 33304035                | GG                              | CC              | 1946736729               |
| SNP_P4_10897_33306121 | NC_021160.1    | Ca_kabuli_chr01 | 33306121                | AA                              | TT              | 1946736730               |
| SNP_P4_10898_33306126 | NC_021160.1    | Ca_kabuli_chr01 | 33306126                | AA                              | GG              | 1946736731               |
| SNP_P4_10899_33307182 | NC_021160.1    | Ca_kabuli_chr01 | 33307182                | GG                              | AA              | 1946736732               |
| SNP_P4_10900_33307362 | NC_021160.1    | Ca_kabuli_chr01 | 33307362                | CC                              | TT              | 1946736733               |
| SNP_P4_10901_33307367 | NC_021160.1    | Ca_kabuli_chr01 | 33307367                | CC                              | TT              | 1946736734               |
| SNP_P4_10902_33307448 | NC_021160.1    | Ca_kabuli_chr01 | 33307448                | GG                              | AA              | 1946736735               |
| SNP_P4_10903_33307490 | NC_021160.1    | Ca_kabuli_chr01 | 33307490                | AA                              | TT              | 1946736736               |
| SNP_P4_10904_33307711 | NC_021160.1    | Ca_kabuli_chr01 | 33307711                | CC                              | TT              | 1946736737               |
| SNP_P4_10905_33307732 | NC_021160.1    | Ca_kabuli_chr01 | 33307732                | GG                              | TT              | 1946736738               |
| SNP_P4_10906_33307771 | NC_021160.1    | Ca_kabuli_chr01 | 33307771                | AA                              | CC              | 1946736739               |
| SNP_P4_10907_33307844 | NC_021160.1    | Ca_kabuli_chr01 | 33307844                | TT                              | CC              | 1946736740               |

| SNPs IDs              | Chromosome IDs | Chromosomes     | Physical positions (bp) | CDC Frontier (Reference genome) | (ILWC46 & LPNB) | NCBI SNPdb Accession IDs |
|-----------------------|----------------|-----------------|-------------------------|---------------------------------|-----------------|--------------------------|
| SNP_P4_10908_33307868 | NC_021160.1    | Ca_kabuli_chr01 | 33307868                | TT                              | CC              | 1946736741               |
| SNP_P4_10909_33307871 | NC_021160.1    | Ca_kabuli_chr01 | 33307871                | AA                              | GG              | 1946736742               |
| SNP_P4_10910_33307920 | NC_021160.1    | Ca_kabuli_chr01 | 33307920                | AA                              | GG              | 1946736743               |
| SNP_P4_10911_33307984 | NC_021160.1    | Ca_kabuli_chr01 | 33307984                | AA                              | GG              | 1946736744               |
| SNP_P4_10912_33308014 | NC_021160.1    | Ca_kabuli_chr01 | 33308014                | TT                              | CC              | 1946736745               |
| SNP_P4_10913_33315553 | NC_021160.1    | Ca_kabuli_chr01 | 33315553                | GG                              | TT              | 1946736746               |
| SNP_P4_10914_33320186 | NC_021160.1    | Ca_kabuli_chr01 | 33320186                | AA                              | GG              | 1946736747               |
| SNP_P4_10915_33320279 | NC_021160.1    | Ca_kabuli_chr01 | 33320279                | GG                              | AA              | 1946736748               |
| SNP_P4_10916_33320320 | NC_021160.1    | Ca_kabuli_chr01 | 33320320                | GG                              | TT              | 1946736749               |
| SNP_P4_10917_33321549 | NC_021160.1    | Ca_kabuli_chr01 | 33321549                | TT                              | GG              | 1946736750               |
| SNP_P4_10918_33329012 | NC_021160.1    | Ca_kabuli_chr01 | 33329012                | TT                              | AA              | 1946736751               |
| SNP_P4_10920_33331491 | NC_021160.1    | Ca_kabuli_chr01 | 33331491                | GG                              | AA              | 1946736752               |
| SNP_P4_10922_33333723 | NC_021160.1    | Ca_kabuli_chr01 | 33333723                | GG                              | AA              | 1946736753               |
| SNP_P4_10923_33333785 | NC_021160.1    | Ca_kabuli_chr01 | 33333785                | AA                              | GG              | 1946736754               |
| SNP_P4_10924_33333958 | NC_021160.1    | Ca_kabuli_chr01 | 33333958                | GG                              | AA              | 1946736755               |
| SNP_P4_10926_33339141 | NC_021160.1    | Ca_kabuli_chr01 | 33339141                | CC                              | TT              | 1946736756               |
| SNP_P4_10927_33339320 | NC_021160.1    | Ca_kabuli_chr01 | 33339320                | AA                              | CC              | 1946736757               |
| SNP_P4_10928_33340255 | NC_021160.1    | Ca_kabuli_chr01 | 33340255                | TT                              | CC              | 1946736758               |
| SNP_P4_10929_33340560 | NC_021160.1    | Ca_kabuli_chr01 | 33340560                | TT                              | CC              | 1946736759               |
| SNP_P4_10930_33341309 | NC_021160.1    | Ca_kabuli_chr01 | 33341309                | AA                              | GG              | 1946736760               |
| SNP_P4_10931_33346291 | NC_021160.1    | Ca_kabuli_chr01 | 33346291                | GG                              | AA              | 1946736761               |
| SNP_P4_10932_33346628 | NC_021160.1    | Ca_kabuli_chr01 | 33346628                | TT                              | CC              | 1946736762               |
| SNP_P4_10933_33350431 | NC_021160.1    | Ca_kabuli_chr01 | 33350431                | CC                              | TT              | 1946736763               |
| SNP_P4_10934_33350458 | NC_021160.1    | Ca_kabuli_chr01 | 33350458                | TT                              | CC              | 1946736764               |
| SNP_P4_10935_33350842 | NC_021160.1    | Ca_kabuli_chr01 | 33350842                | TT                              | CC              | 1946736765               |
| SNP_P4_10936_33351404 | NC_021160.1    | Ca_kabuli_chr01 | 33351404                | TT                              | CC              | 1946736766               |
| SNP_P4_10937_33351648 | NC_021160.1    | Ca_kabuli_chr01 | 33351648                | TT                              | GG              | 1946736767               |
| SNP_P4_10938_33351774 | NC_021160.1    | Ca_kabuli_chr01 | 33351774                | GG                              | CC              | 1946736768               |
| SNP_P4_10940_33354074 | NC_021160.1    | Ca_kabuli_chr01 | 33354074                | AA                              | TT              | 1946736769               |
| SNP_P4_10942_33357648 | NC_021160.1    | Ca_kabuli_chr01 | 33357648                | TT                              | GG              | 1946736770               |
| SNP_P4_10943_33357708 | NC_021160.1    | Ca_kabuli_chr01 | 33357708                | TT                              | GG              | 1946736771               |
| SNP_P4_10944_33360664 | NC_021160.1    | Ca_kabuli_chr01 | 33360664                | GG                              | AA              | 1946736772               |
| SNP_P4_10945_33365068 | NC_021160.1    | Ca_kabuli_chr01 | 33365068                | GG                              | CC              | 1946736773               |
| SNP_P4_10947_33371086 | NC_021160.1    | Ca_kabuli_chr01 | 33371086                | GG                              | AA              | 1946736774               |
| SNP_P4_10949_33379867 | NC_021160.1    | Ca_kabuli_chr01 | 33379867                | GG                              | TT              | 1946736775               |
| SNP_P4_10951_33380005 | NC_021160.1    | Ca_kabuli_chr01 | 33380005                | TT                              | AA              | 1946736776               |
| SNP_P4_10952_33385860 | NC_021160.1    | Ca_kabuli_chr01 | 33385860                | GG                              | AA              | 1946736777               |
| SNP_P4_10954_33389271 | NC_021160.1    | Ca_kabuli_chr01 | 33389271                | AA                              | GG              | 1946736778               |
| SNP_P4_10955_33389465 | NC_021160.1    | Ca_kabuli_chr01 | 33389465                | GG                              | AA              | 1946736779               |
| SNP_P4_10956_33394216 | NC_021160.1    | Ca_kabuli_chr01 | 33394216                | GG                              | TT              | 1946736780               |
| SNP_P4_10957_33398584 | NC_021160.1    | Ca_kabuli_chr01 | 33398584                | AA                              | GG              | 1946736781               |
| SNP_P4_10958_33400603 | NC_021160.1    | Ca_kabuli_chr01 | 33400603                | TT                              | CC              | 1946736782               |

| SNPs IDs              | Chromosome IDs | Chromosomes     | Physical positions (bp) | CDC Frontier (Reference genome) | (ILWC46 & LPNB) | NCBI SNPdb Accession IDs |
|-----------------------|----------------|-----------------|-------------------------|---------------------------------|-----------------|--------------------------|
| SNP_P4_10960_33401850 | NC_021160.1    | Ca_kabuli_chr01 | 33401850                | CC                              | TT              | 1946736783               |
| SNP_P4_10961_33402115 | NC_021160.1    | Ca_kabuli_chr01 | 33402115                | TT                              | CC              | 1946736784               |
| SNP_P4_10962_33402228 | NC_021160.1    | Ca_kabuli_chr01 | 33402228                | GG                              | AA              | 1946736785               |
| SNP_P4_10963_33402543 | NC_021160.1    | Ca_kabuli_chr01 | 33402543                | TT                              | GG              | 1946736786               |
| SNP_P4_10964_33407669 | NC_021160.1    | Ca_kabuli_chr01 | 33407669                | CC                              | AA              | 1946736787               |
| SNP_P4_10966_33407796 | NC_021160.1    | Ca_kabuli_chr01 | 33407796                | AA                              | GG              | 1946736788               |
| SNP_P4_10968_33419936 | NC_021160.1    | Ca_kabuli_chr01 | 33419936                | CC                              | TT              | 1946736789               |
| SNP_P4_10969_33421704 | NC_021160.1    | Ca_kabuli_chr01 | 33421704                | TT                              | AA              | 1946736790               |
| SNP_P4_10970_33424601 | NC_021160.1    | Ca_kabuli_chr01 | 33424601                | GG                              | AA              | 1946736791               |
| SNP_P4_10971_33426670 | NC_021160.1    | Ca_kabuli_chr01 | 33426670                | CC                              | AA              | 1946736792               |
| SNP_P4_10972_33442277 | NC_021160.1    | Ca_kabuli_chr01 | 33442277                | GG                              | TT              | 1946736793               |
| SNP_P4_10974_33443266 | NC_021160.1    | Ca_kabuli_chr01 | 33443266                | GG                              | CC              | 1946736794               |
| SNP_P4_10975_33446000 | NC_021160.1    | Ca_kabuli_chr01 | 33446000                | GG                              | AA              | 1946736795               |
| SNP_P4_10977_33452685 | NC_021160.1    | Ca_kabuli_chr01 | 33452685                | GG                              | TT              | 1946736797               |
| SNP_P4_10978_33457363 | NC_021160.1    | Ca_kabuli_chr01 | 33457363                | GG                              | AA              | 1946736799               |
| SNP_P4_10979_33457418 | NC_021160.1    | Ca_kabuli_chr01 | 33457418                | CC                              | TT              | 1946736801               |
| SNP_P4_10980_33457486 | NC_021160.1    | Ca_kabuli_chr01 | 33457486                | CC                              | TT              | 1946736803               |
| SNP_P4_10981_33457493 | NC_021160.1    | Ca_kabuli_chr01 | 33457493                | AA                              | GG              | 1946736805               |
| SNP_P4_10982_33457530 | NC_021160.1    | Ca_kabuli_chr01 | 33457530                | CC                              | AA              | 1946736806               |
| SNP_P4_10983_33458903 | NC_021160.1    | Ca_kabuli_chr01 | 33458903                | AA                              | TT              | 1946736808               |
| SNP_P4_10984_33459119 | NC_021160.1    | Ca_kabuli_chr01 | 33459119                | AA                              | GG              | 1946736810               |
| SNP_P4_10985_33459129 | NC_021160.1    | Ca_kabuli_chr01 | 33459129                | TT                              | CC              | 1946736812               |
| SNP_P4_10986_33459195 | NC_021160.1    | Ca_kabuli_chr01 | 33459195                | AA                              | GG              | 1946736814               |
| SNP_P4_10987_33459378 | NC_021160.1    | Ca_kabuli_chr01 | 33459378                | AA                              | GG              | 1946736816               |
| SNP_P4_10988_33462887 | NC_021160.1    | Ca_kabuli_chr01 | 33462887                | AA                              | GG              | 1946736817               |
| SNP_P4_10989_33462917 | NC_021160.1    | Ca_kabuli_chr01 | 33462917                | CC                              | TT              | 1946736819               |
| SNP_P4_10990_33462989 | NC_021160.1    | Ca_kabuli_chr01 | 33462989                | TT                              | GG              | 1946736821               |
| SNP_P4_10991_33465500 | NC_021160.1    | Ca_kabuli_chr01 | 33465500                | CC                              | TT              | 1946736823               |
| SNP_P4_10992_33488476 | NC_021160.1    | Ca_kabuli_chr01 | 33488476                | TT                              | CC              | 1946736825               |
| SNP_P4_10993_33488482 | NC_021160.1    | Ca_kabuli_chr01 | 33488482                | AA                              | GG              | 1946736827               |
| SNP_P4_10994_33488528 | NC_021160.1    | Ca_kabuli_chr01 | 33488528                | TT                              | AA              | 1946736829               |
| SNP_P4_10995_33488548 | NC_021160.1    | Ca_kabuli_chr01 | 33488548                | CC                              | AA              | 1946736831               |
| SNP_P4_10996_33488565 | NC_021160.1    | Ca_kabuli_chr01 | 33488565                | AA                              | GG              | 1946736832               |
| SNP_P4_10997_33488626 | NC_021160.1    | Ca_kabuli_chr01 | 33488626                | CC                              | AA              | 1946736834               |
| SNP_P4_10998_33488663 | NC_021160.1    | Ca_kabuli_chr01 | 33488663                | TT                              | CC              | 1946736836               |
| SNP_P4_10999_33488691 | NC_021160.1    | Ca_kabuli_chr01 | 33488691                | AA                              | CC              | 1946736838               |
| SNP_P4_11000_33488877 | NC_021160.1    | Ca_kabuli_chr01 | 33488877                | TT                              | CC              | 1946736840               |
| SNP_P4_11001_33489005 | NC_021160.1    | Ca_kabuli_chr01 | 33489005                | TT                              | GG              | 1946736842               |
| SNP_P4_11002_33489352 | NC_021160.1    | Ca_kabuli_chr01 | 33489352                | GG                              | CC              | 1946736844               |
| SNP_P4_11003_33493008 | NC_021160.1    | Ca_kabuli_chr01 | 33493008                | GG                              | TT              | 1946736846               |
| SNP_P4_11004_33493040 | NC_021160.1    | Ca_kabuli_chr01 | 33493040                | CC                              | TT              | 1946736848               |
| SNP_P4_11005_33493044 | NC_021160.1    | Ca_kabuli_chr01 | 33493044                | GG                              | TT              | 1946736850               |

| SNPs IDs              | Chromosome IDs | Chromosomes     | Physical positions (bp) | CDC Frontier (Reference genome) | (ILWC46 & LPNB) | NCBI SNPdb Accession IDs |
|-----------------------|----------------|-----------------|-------------------------|---------------------------------|-----------------|--------------------------|
| SNP_P4_11006_33493426 | NC_021160.1    | Ca_kabuli_chr01 | 33493426                | CC                              | TT              | 1946736851               |
| SNP_P4_11007_33493444 | NC_021160.1    | Ca_kabuli_chr01 | 33493444                | GG                              | CC              | 1946736853               |
| SNP_P4_11008_33493490 | NC_021160.1    | Ca_kabuli_chr01 | 33493490                | AA                              | GG              | 1946736855               |
| SNP_P4_11009_33502952 | NC_021160.1    | Ca_kabuli_chr01 | 33502952                | GG                              | AA              | 1946736857               |
| SNP_P4_11010_33505992 | NC_021160.1    | Ca_kabuli_chr01 | 33505992                | TT                              | CC              | 1946736859               |
| SNP_P4_11011_33506013 | NC_021160.1    | Ca_kabuli_chr01 | 33506013                | AA                              | GG              | 1946736861               |
| SNP_P4_11012_33506059 | NC_021160.1    | Ca_kabuli_chr01 | 33506059                | TT                              | GG              | 1946736863               |
| SNP_P4_11013_33506071 | NC_021160.1    | Ca_kabuli_chr01 | 33506071                | GG                              | TT              | 1946736865               |
| SNP_P4_11014_33506072 | NC_021160.1    | Ca_kabuli_chr01 | 33506072                | AA                              | CC              | 1946736866               |
| SNP_P4_11015_33506117 | NC_021160.1    | Ca_kabuli_chr01 | 33506117                | TT                              | CC              | 1946736868               |
| SNP_P4_11016_33506142 | NC_021160.1    | Ca_kabuli_chr01 | 33506142                | CC                              | TT              | 1946736870               |
| SNP_P4_11017_33506156 | NC_021160.1    | Ca_kabuli_chr01 | 33506156                | CC                              | AA              | 1946736872               |
| SNP_P4_11018_33506168 | NC_021160.1    | Ca_kabuli_chr01 | 33506168                | GG                              | AA              | 1946736874               |
| SNP_P4_11019_33506425 | NC_021160.1    | Ca_kabuli_chr01 | 33506425                | TT                              | CC              | 1946736876               |
| SNP_P4_11021_33506500 | NC_021160.1    | Ca_kabuli_chr01 | 33506500                | GG                              | AA              | 1946736878               |
| SNP_P4_11022_33506509 | NC_021160.1    | Ca_kabuli_chr01 | 33506509                | GG                              | AA              | 1946736880               |
| SNP_P4_11023_33524432 | NC_021160.1    | Ca_kabuli_chr01 | 33524432                | GG                              | CC              | 1946736882               |
| SNP_P4_11024_33526951 | NC_021160.1    | Ca_kabuli_chr01 | 33526951                | TT                              | CC              | 1946736883               |
| SNP_P4_11025_33529944 | NC_021160.1    | Ca_kabuli_chr01 | 33529944                | AA                              | GG              | 1946736885               |
| SNP_P4_11026_33531447 | NC_021160.1    | Ca_kabuli_chr01 | 33531447                | GG                              | AA              | 1946736887               |
| SNP_P4_11027_33544910 | NC_021160.1    | Ca_kabuli_chr01 | 33544910                | CC                              | TT              | 1946736889               |
| SNP_P4_11028_33544946 | NC_021160.1    | Ca_kabuli_chr01 | 33544946                | AA                              | CC              | 1946736891               |
| SNP_P4_11029_33551575 | NC_021160.1    | Ca_kabuli_chr01 | 33551575                | CC                              | TT              | 1946736893               |
| SNP_P4_11030_33555357 | NC_021160.1    | Ca_kabuli_chr01 | 33555357                | GG                              | TT              | 1946736895               |
| SNP_P4_11033_33563587 | NC_021160.1    | Ca_kabuli_chr01 | 33563587                | GG                              | AA              | 1946736897               |
| SNP_P4_11034_33563588 | NC_021160.1    | Ca_kabuli_chr01 | 33563588                | TT                              | GG              | 1946736898               |
| SNP_P4_11036_33564786 | NC_021160.1    | Ca_kabuli_chr01 | 33564786                | CC                              | TT              | 1946736900               |
| SNP_P4_11037_33564897 | NC_021160.1    | Ca_kabuli_chr01 | 33564897                | GG                              | TT              | 1946736902               |
| SNP_P4_11038_33565641 | NC_021160.1    | Ca_kabuli_chr01 | 33565641                | AA                              | GG              | 1946736904               |
| SNP_P4_11040_33573283 | NC_021160.1    | Ca_kabuli_chr01 | 33573283                | GG                              | AA              | 1946736906               |
| SNP_P4_11041_33573478 | NC_021160.1    | Ca_kabuli_chr01 | 33573478                | TT                              | AA              | 1946736908               |
| SNP_P4_11042_33580198 | NC_021160.1    | Ca_kabuli_chr01 | 33580198                | CC                              | TT              | 1946736910               |
| SNP_P4_11043_33589239 | NC_021160.1    | Ca_kabuli_chr01 | 33589239                | GG                              | AA              | 1946736912               |
| SNP_P4_11044_33589553 | NC_021160.1    | Ca_kabuli_chr01 | 33589553                | CC                              | GG              | 1946736914               |
| SNP_P4_11046_33597954 | NC_021160.1    | Ca_kabuli_chr01 | 33597954                | CC                              | TT              | 1946736916               |
| SNP_P4_11047_33599264 | NC_021160.1    | Ca_kabuli_chr01 | 33599264                | TT                              | CC              | 1946736918               |
| SNP_P4_11048_33600979 | NC_021160.1    | Ca_kabuli_chr01 | 33600979                | CC                              | TT              | 1946736919               |
| SNP_P4_11049_33619977 | NC_021160.1    | Ca_kabuli_chr01 | 33619977                | GG                              | AA              | 1946736921               |
| SNP_P4_11051_33623376 | NC_021160.1    | Ca_kabuli_chr01 | 33623376                | GG                              | CC              | 1946736923               |
| SNP_P4_11052_33625332 | NC_021160.1    | Ca_kabuli_chr01 | 33625332                | CC                              | TT              | 1946736925               |
| SNP_P4_11053_33630870 | NC_021160.1    | Ca_kabuli_chr01 | 33630870                | AA                              | GG              | 1946736927               |
| SNP_P4_11054_33630883 | NC_021160.1    | Ca_kabuli_chr01 | 33630883                | TT                              | CC              | 1946736929               |

| SNPs IDs              | Chromosome IDs | Chromosomes     | Physical positions (bp) | CDC Frontier (Reference genome) | (ILWC46 & LPNB) | NCBI SNPdb Accession IDs |
|-----------------------|----------------|-----------------|-------------------------|---------------------------------|-----------------|--------------------------|
| SNP_P4_11055_33630910 | NC_021160.1    | Ca_kabuli_chr01 | 33630910                | AA                              | GG              | 1946736931               |
| SNP_P4_11056_33635369 | NC_021160.1    | Ca_kabuli_chr01 | 33635369                | TT                              | AA              | 1946736933               |
| SNP_P4_11057_33637286 | NC_021160.1    | Ca_kabuli_chr01 | 33637286                | CC                              | TT              | 1946736935               |
| SNP_P4_11058_33639307 | NC_021160.1    | Ca_kabuli_chr01 | 33639307                | TT                              | CC              | 1946736937               |
| SNP_P4_11059_33639313 | NC_021160.1    | Ca_kabuli_chr01 | 33639313                | TT                              | CC              | 1946736939               |
| SNP_P4_11060_33639342 | NC_021160.1    | Ca_kabuli_chr01 | 33639342                | AA                              | CC              | 1946736940               |
| SNP_P4_11061_33639426 | NC_021160.1    | Ca_kabuli_chr01 | 33639426                | AA                              | GG              | 1946736942               |
| SNP_P4_11062_33639686 | NC_021160.1    | Ca_kabuli_chr01 | 33639686                | TT                              | AA              | 1946736944               |
| SNP_P4_11063_33639717 | NC_021160.1    | Ca_kabuli_chr01 | 33639717                | TT                              | CC              | 1946736946               |
| SNP_P4_11064_33639719 | NC_021160.1    | Ca_kabuli_chr01 | 33639719                | GG                              | AA              | 1946736948               |
| SNP_P4_11065_33639778 | NC_021160.1    | Ca_kabuli_chr01 | 33639778                | TT                              | CC              | 1946736950               |
| SNP_P4_11066_33640416 | NC_021160.1    | Ca_kabuli_chr01 | 33640416                | GG                              | AA              | 1946736952               |
| SNP_P4_11067_33640674 | NC_021160.1    | Ca_kabuli_chr01 | 33640674                | TT                              | AA              | 1946736954               |
| SNP_P4_11068_33648019 | NC_021160.1    | Ca_kabuli_chr01 | 33648019                | CC                              | GG              | 1946736956               |
| SNP_P4_11069_33652218 | NC_021160.1    | Ca_kabuli_chr01 | 33652218                | TT                              | CC              | 1946736958               |
| SNP_P4_11072_33656756 | NC_021160.1    | Ca_kabuli_chr01 | 33656756                | GG                              | AA              | 1946736960               |
| SNP_P4_11073_33657196 | NC_021160.1    | Ca_kabuli_chr01 | 33657196                | CC                              | TT              | 1946736961               |
| SNP_P4_11075_33659856 | NC_021160.1    | Ca_kabuli_chr01 | 33659856                | GG                              | AA              | 1946736963               |
| SNP_P4_11076_33660171 | NC_021160.1    | Ca_kabuli_chr01 | 33660171                | GG                              | AA              | 1946736965               |
| SNP_P4_11077_33661790 | NC_021160.1    | Ca_kabuli_chr01 | 33661790                | TT                              | CC              | 1946736967               |
| SNP_P4_11078_33663650 | NC_021160.1    | Ca_kabuli_chr01 | 33663650                | TT                              | CC              | 1946736969               |
| SNP_P4_11079_33667425 | NC_021160.1    | Ca_kabuli_chr01 | 33667425                | TT                              | AA              | 1946736971               |
| SNP_P4_11080_33668399 | NC_021160.1    | Ca_kabuli_chr01 | 33668399                | TT                              | CC              | 1946736973               |
| SNP_P4_11081_33668422 | NC_021160.1    | Ca_kabuli_chr01 | 33668422                | AA                              | TT              | 1946736974               |
| SNP_P4_11082_33668423 | NC_021160.1    | Ca_kabuli_chr01 | 33668423                | TT                              | AA              | 1946736976               |
| SNP_P4_11083_33668425 | NC_021160.1    | Ca_kabuli_chr01 | 33668425                | GG                              | AA              | 1946736978               |
| SNP_P4_11084_33673056 | NC_021160.1    | Ca_kabuli_chr01 | 33673056                | AA                              | GG              | 1946736980               |
| SNP_P4_11085_33681818 | NC_021160.1    | Ca_kabuli_chr01 | 33681818                | GG                              | AA              | 1946736982               |
| SNP_P4_11086_33682109 | NC_021160.1    | Ca_kabuli_chr01 | 33682109                | GG                              | AA              | 1946736984               |
| SNP_P4_11087_33688956 | NC_021160.1    | Ca_kabuli_chr01 | 33688956                | CC                              | AA              | 1946736986               |
| SNP_P4_11088_33688984 | NC_021160.1    | Ca_kabuli_chr01 | 33688984                | CC                              | TT              | 1946736988               |
| SNP_P4_11089_33689055 | NC_021160.1    | Ca_kabuli_chr01 | 33689055                | AA                              | GG              | 1946736990               |
| SNP_P4_11090_33689061 | NC_021160.1    | Ca_kabuli_chr01 | 33689061                | CC                              | AA              | 1946736992               |
| SNP_P4_11091_33689818 | NC_021160.1    | Ca_kabuli_chr01 | 33689818                | TT                              | GG              | 1946736994               |
| SNP_P4_11093_33698929 | NC_021160.1    | Ca_kabuli_chr01 | 33698929                | TT                              | GG              | 1946736996               |
| SNP_P4_11094_33699410 | NC_021160.1    | Ca_kabuli_chr01 | 33699410                | GG                              | AA              | 1946736998               |
| SNP_P4_11095_33699652 | NC_021160.1    | Ca_kabuli_chr01 | 33699652                | AA                              | TT              | 1946737000               |
| SNP_P4_11096_33700006 | NC_021160.1    | Ca_kabuli_chr01 | 33700006                | TT                              | AA              | 1946737002               |
| SNP_P4_11097_33700009 | NC_021160.1    | Ca_kabuli_chr01 | 33700009                | TT                              | AA              | 1946737004               |
| SNP_P4_11098_33700031 | NC_021160.1    | Ca_kabuli_chr01 | 33700031                | AA                              | TT              | 1946737006               |
| SNP_P4_11099_33700032 | NC_021160.1    | Ca_kabuli_chr01 | 33700032                | GG                              | AA              | 1946737008               |
| SNP_P4_11100_33700042 | NC_021160.1    | Ca_kabuli_chr01 | 33700042                | AA                              | CC              | 1946737010               |

| SNPs IDs              | Chromosome IDs | Chromosomes     | Physical positions (bp) | CDC Frontier (Reference genome) | (ILWC46 & LPNB) | NCBI SNPdb Accession IDs |
|-----------------------|----------------|-----------------|-------------------------|---------------------------------|-----------------|--------------------------|
| SNP_P4_11101_33700050 | NC_021160.1    | Ca_kabuli_chr01 | 33700050                | CC                              | AA              | 1946737012               |
| SNP_P4_11102_33700065 | NC_021160.1    | Ca_kabuli_chr01 | 33700065                | AA                              | CC              | 1946737014               |
| SNP_P4_11103_33700117 | NC_021160.1    | Ca_kabuli_chr01 | 33700117                | GG                              | AA              | 1946737016               |
| SNP_P4_11105_33727214 | NC_021160.1    | Ca_kabuli_chr01 | 33727214                | TT                              | AA              | 1946737018               |
| SNP_P4_11107_33736069 | NC_021160.1    | Ca_kabuli_chr01 | 33736069                | AA                              | GG              | 1946737020               |
| SNP_P4_11108_33746583 | NC_021160.1    | Ca_kabuli_chr01 | 33746583                | AA                              | GG              | 1946737022               |
| SNP_P4_11109_33749811 | NC_021160.1    | Ca_kabuli_chr01 | 33749811                | GG                              | AA              | 1946737024               |
| SNP_P4_11110_33751099 | NC_021160.1    | Ca_kabuli_chr01 | 33751099                | AA                              | GG              | 1946737026               |
| SNP_P4_11111_33754289 | NC_021160.1    | Ca_kabuli_chr01 | 33754289                | GG                              | AA              | 1946737028               |
| SNP_P4_11112_33757096 | NC_021160.1    | Ca_kabuli_chr01 | 33757096                | TT                              | CC              | 1946737030               |
| SNP_P4_11114_33760589 | NC_021160.1    | Ca_kabuli_chr01 | 33760589                | AA                              | CC              | 1946737032               |
| SNP_P4_11115_33764080 | NC_021160.1    | Ca_kabuli_chr01 | 33764080                | CC                              | TT              | 1946737034               |
| SNP_P4_11116_33770181 | NC_021160.1    | Ca_kabuli_chr01 | 33770181                | GG                              | AA              | 1946737036               |
| SNP_P4_11117_33770565 | NC_021160.1    | Ca_kabuli_chr01 | 33770565                | AA                              | CC              | 1946737038               |
| SNP_P4_11118_33771842 | NC_021160.1    | Ca_kabuli_chr01 | 33771842                | GG                              | AA              | 1946737040               |
| SNP_P4_11119_33776961 | NC_021160.1    | Ca_kabuli_chr01 | 33776961                | TT                              | GG              | 1946737043               |
| SNP_P4_11121_33780296 | NC_021160.1    | Ca_kabuli_chr01 | 33780296                | TT                              | CC              | 1946737045               |
| SNP_P4_11122_33780357 | NC_021160.1    | Ca_kabuli_chr01 | 33780357                | TT                              | AA              | 1946737047               |
| SNP_P4_11124_33782222 | NC_021160.1    | Ca_kabuli_chr01 | 33782222                | CC                              | TT              | 1946737049               |
| SNP_P4_11125_33782230 | NC_021160.1    | Ca_kabuli_chr01 | 33782230                | GG                              | AA              | 1946737051               |
| SNP_P4_11126_33782240 | NC_021160.1    | Ca_kabuli_chr01 | 33782240                | AA                              | GG              | 1946737053               |
| SNP_P4_11127_33782247 | NC_021160.1    | Ca_kabuli_chr01 | 33782247                | GG                              | CC              | 1946737055               |
| SNP_P4_11128_33792104 | NC_021160.1    | Ca_kabuli_chr01 | 33792104                | AA                              | GG              | 1946737057               |
| SNP_P4_11129_33799460 | NC_021160.1    | Ca_kabuli_chr01 | 33799460                | AA                              | GG              | 1946737059               |
| SNP_P4_11130_33802890 | NC_021160.1    | Ca_kabuli_chr01 | 33802890                | GG                              | CC              | 1946737060               |
| SNP_P4_11131_33803223 | NC_021160.1    | Ca_kabuli_chr01 | 33803223                | GG                              | CC              | 1946737062               |
| SNP_P4_11132_33803252 | NC_021160.1    | Ca_kabuli_chr01 | 33803252                | TT                              | CC              | 1946737064               |
| SNP_P4_11133_33803294 | NC_021160.1    | Ca_kabuli_chr01 | 33803294                | GG                              | AA              | 1946737066               |
| SNP_P4_11134_33803416 | NC_021160.1    | Ca_kabuli_chr01 | 33803416                | CC                              | TT              | 1946737068               |
| SNP_P4_11135_33803679 | NC_021160.1    | Ca_kabuli_chr01 | 33803679                | TT                              | CC              | 1946737070               |
| SNP_P4_11136_33813932 | NC_021160.1    | Ca_kabuli_chr01 | 33813932                | TT                              | GG              | 1946737072               |
| SNP_P4_11137_33813933 | NC_021160.1    | Ca_kabuli_chr01 | 33813933                | TT                              | CC              | 1946737074               |
| SNP_P4_11138_33823458 | NC_021160.1    | Ca_kabuli_chr01 | 33823458                | GG                              | AA              | 1946737076               |
| SNP_P4_11139_33826248 | NC_021160.1    | Ca_kabuli_chr01 | 33826248                | TT                              | CC              | 1946737078               |
| SNP_P4_11140_33826683 | NC_021160.1    | Ca_kabuli_chr01 | 33826683                | TT                              | CC              | 1946737080               |
| SNP_P4_11141_33826773 | NC_021160.1    | Ca_kabuli_chr01 | 33826773                | TT                              | AA              | 1946737082               |
| SNP_P4_11142_33827633 | NC_021160.1    | Ca_kabuli_chr01 | 33827633                | TT                              | GG              | 1946737084               |
| SNP_P4_11143_33831845 | NC_021160.1    | Ca_kabuli_chr01 | 33831845                | TT                              | CC              | 1946737086               |
| SNP_P4_11144_33831855 | NC_021160.1    | Ca_kabuli_chr01 | 33831855                | AA                              | CC              | 1946737088               |
| SNP_P4_11146_33836161 | NC_021160.1    | Ca_kabuli_chr01 | 33836161                | GG                              | AA              | 1946737090               |
| SNP_P4_11147_33844768 | NC_021160.1    | Ca_kabuli_chr01 | 33844768                | AA                              | GG              | 1946737092               |
| SNP_P4_11148_33844808 | NC_021160.1    | Ca_kabuli_chr01 | 33844808                | AA                              | CC              | 1946737094               |

| SNPs IDs              | Chromosome IDs | Chromosomes     | Physical positions (bp) | CDC Frontier (Reference genome) | (ILWC46 & LPNB) | NCBI SNPdb Accession IDs |
|-----------------------|----------------|-----------------|-------------------------|---------------------------------|-----------------|--------------------------|
| SNP_P4_11149_33844839 | NC_021160.1    | Ca_kabuli_chr01 | 33844839                | TT                              | CC              | 1946737096               |
| SNP_P4_11150_33844879 | NC_021160.1    | Ca_kabuli_chr01 | 33844879                | AA                              | GG              | 1946737098               |
| SNP_P4_11151_33844940 | NC_021160.1    | Ca_kabuli_chr01 | 33844940                | AA                              | CC              | 1946737100               |
| SNP_P4_11152_33845092 | NC_021160.1    | Ca_kabuli_chr01 | 33845092                | TT                              | AA              | 1946737102               |
| SNP_P4_11153_33848304 | NC_021160.1    | Ca_kabuli_chr01 | 33848304                | GG                              | AA              | 1946737104               |
| SNP_P4_11154_33849007 | NC_021160.1    | Ca_kabuli_chr01 | 33849007                | AA                              | GG              | 1946737106               |
| SNP_P4_11155_33852245 | NC_021160.1    | Ca_kabuli_chr01 | 33852245                | GG                              | AA              | 1946737108               |
| SNP_P4_11156_33854342 | NC_021160.1    | Ca_kabuli_chr01 | 33854342                | GG                              | AA              | 1946737110               |
| SNP_P4_11157_33854791 | NC_021160.1    | Ca_kabuli_chr01 | 33854791                | GG                              | AA              | 1946737112               |
| SNP_P4_11158_33857243 | NC_021160.1    | Ca_kabuli_chr01 | 33857243                | GG                              | AA              | 1946737114               |
| SNP_P4_11159_33863185 | NC_021160.1    | Ca_kabuli_chr01 | 33863185                | TT                              | GG              | 1946737116               |
| SNP_P4_11160_33863747 | NC_021160.1    | Ca_kabuli_chr01 | 33863747                | TT                              | CC              | 1946737118               |
| SNP_P4_11161_33882954 | NC_021160.1    | Ca_kabuli_chr01 | 33882954                | GG                              | TT              | 1946737120               |
| SNP_P4_11162_33897612 | NC_021160.1    | Ca_kabuli_chr01 | 33897612                | TT                              | AA              | 1946737122               |
| SNP_P4_11163_33915807 | NC_021160.1    | Ca_kabuli_chr01 | 33915807                | AA                              | GG              | 1946737124               |
| SNP_P4_11164_33915951 | NC_021160.1    | Ca_kabuli_chr01 | 33915951                | TT                              | CC              | 1946737126               |
| SNP_P4_11165_33915985 | NC_021160.1    | Ca_kabuli_chr01 | 33915985                | AA                              | GG              | 1946737128               |
| SNP_P4_11166_33916181 | NC_021160.1    | Ca_kabuli_chr01 | 33916181                | AA                              | GG              | 1946737130               |
| SNP_P4_11168_33916761 | NC_021160.1    | Ca_kabuli_chr01 | 33916761                | GG                              | CC              | 1946737132               |
| SNP_P4_11169_33916794 | NC_021160.1    | Ca_kabuli_chr01 | 33916794                | GG                              | AA              | 1946737134               |
| SNP_P4_11170_33916926 | NC_021160.1    | Ca_kabuli_chr01 | 33916926                | GG                              | AA              | 1946737136               |
| SNP_P4_11171_33923270 | NC_021160.1    | Ca_kabuli_chr01 | 33923270                | TT                              | CC              | 1946737138               |
| SNP_P4_11172_33930865 | NC_021160.1    | Ca_kabuli_chr01 | 33930865                | TT                              | GG              | 1946737140               |
| SNP_P4_11173_33930867 | NC_021160.1    | Ca_kabuli_chr01 | 33930867                | AA                              | GG              | 1946737142               |
| SNP_P4_11174_33931445 | NC_021160.1    | Ca_kabuli_chr01 | 33931445                | CC                              | TT              | 1946737144               |
| SNP_P4_11175_33934312 | NC_021160.1    | Ca_kabuli_chr01 | 33934312                | CC                              | TT              | 1946737146               |
| SNP_P4_11176_33934363 | NC_021160.1    | Ca_kabuli_chr01 | 33934363                | TT                              | GG              | 1946737148               |
| SNP_P4_11177_33934369 | NC_021160.1    | Ca_kabuli_chr01 | 33934369                | TT                              | CC              | 1946737150               |
| SNP_P4_11178_33938002 | NC_021160.1    | Ca_kabuli_chr01 | 33938002                | TT                              | CC              | 1946737152               |
| SNP_P4_11179_33943791 | NC_021160.1    | Ca_kabuli_chr01 | 33943791                | AA                              | GG              | 1946737154               |
| SNP_P4_11180_33971240 | NC_021160.1    | Ca_kabuli_chr01 | 33971240                | AA                              | GG              | 1946737156               |
| SNP_P4_11182_34001031 | NC_021160.1    | Ca_kabuli_chr01 | 34001031                | AA                              | CC              | 1946737158               |
| SNP_P4_11185_34037406 | NC_021160.1    | Ca_kabuli_chr01 | 34037406                | AA                              | GG              | 1946737160               |
| SNP_P4_11186_34039141 | NC_021160.1    | Ca_kabuli_chr01 | 34039141                | GG                              | AA              | 1946737162               |
| SNP_P4_11187_34042922 | NC_021160.1    | Ca_kabuli_chr01 | 34042922                | AA                              | GG              | 1946737164               |
| SNP_P4_11188_34043332 | NC_021160.1    | Ca_kabuli_chr01 | 34043332                | GG                              | AA              | 1946737166               |
| SNP_P4_11189_34043402 | NC_021160.1    | Ca_kabuli_chr01 | 34043402                | CC                              | TT              | 1946737168               |
| SNP_P4_11190_34043514 | NC_021160.1    | Ca_kabuli_chr01 | 34043514                | CC                              | AA              | 1946737171               |
| SNP_P4_11191_34043521 | NC_021160.1    | Ca_kabuli_chr01 | 34043521                | TT                              | CC              | 1946737173               |
| SNP_P4_11192_34043522 | NC_021160.1    | Ca_kabuli_chr01 | 34043522                | CC                              | TT              | 1946737175               |
| SNP_P4_11193_34043531 | NC_021160.1    | Ca_kabuli_chr01 | 34043531                | TT                              | CC              | 1946737177               |
| SNP_P4_11194_34043549 | NC_021160.1    | Ca_kabuli_chr01 | 34043549                | CC                              | TT              | 1946737179               |



| SNPs IDs              | Chromosome IDs | Chromosomes     | Physical positions (bp) | CDC Frontier (Reference genome) | (ILWC46 & LPNB) | NCBI SNPdb Accession IDs |
|-----------------------|----------------|-----------------|-------------------------|---------------------------------|-----------------|--------------------------|
| SNP_P4_11195_34043565 | NC_021160.1    | Ca_kabuli_chr01 | 34043565                | CC                              | TT              | 1946737181               |
| SNP_P4_11197_34072534 | NC_021160.1    | Ca_kabuli_chr01 | 34072534                | AA                              | TT              | 1946737183               |
| SNP_P4_11198_34127881 | NC_021160.1    | Ca_kabuli_chr01 | 34127881                | CC                              | GG              | 1946737185               |
| SNP_P4_11199_34127924 | NC_021160.1    | Ca_kabuli_chr01 | 34127924                | TT                              | AA              | 1946737187               |
| SNP_P4_11200_34127925 | NC_021160.1    | Ca_kabuli_chr01 | 34127925                | AA                              | TT              | 1946737189               |
| SNP_P4_11201_34128012 | NC_021160.1    | Ca_kabuli_chr01 | 34128012                | TT                              | CC              | 1946737191               |
| SNP_P4_11202_34128014 | NC_021160.1    | Ca_kabuli_chr01 | 34128014                | TT                              | AA              | 1946737193               |
| SNP_P4_11203_34128086 | NC_021160.1    | Ca_kabuli_chr01 | 34128086                | AA                              | GG              | 1946737195               |
| SNP_P4_11204_34128121 | NC_021160.1    | Ca_kabuli_chr01 | 34128121                | CC                              | TT              | 1946737197               |
| SNP_P4_11205_34128146 | NC_021160.1    | Ca_kabuli_chr01 | 34128146                | TT                              | AA              | 1946737199               |
| SNP_P4_11206_34128161 | NC_021160.1    | Ca_kabuli_chr01 | 34128161                | TT                              | AA              | 1946737201               |
| SNP_P4_11207_34128194 | NC_021160.1    | Ca_kabuli_chr01 | 34128194                | TT                              | AA              | 1946737203               |
| SNP_P4_11208_34128201 | NC_021160.1    | Ca_kabuli_chr01 | 34128201                | TT                              | CC              | 1946737205               |
| SNP_P4_11209_34128206 | NC_021160.1    | Ca_kabuli_chr01 | 34128206                | AA                              | GG              | 1946737207               |
| SNP_P4_11210_34128295 | NC_021160.1    | Ca_kabuli_chr01 | 34128295                | CC                              | TT              | 1946737209               |
| SNP_P4_11211_34128390 | NC_021160.1    | Ca_kabuli_chr01 | 34128390                | TT                              | CC              | 1946737211               |
| SNP_P4_11212_34128417 | NC_021160.1    | Ca_kabuli_chr01 | 34128417                | AA                              | CC              | 1946737213               |
| SNP_P4_11213_34128748 | NC_021160.1    | Ca_kabuli_chr01 | 34128748                | TT                              | AA              | 1946737215               |
| SNP_P4_11214_34128905 | NC_021160.1    | Ca_kabuli_chr01 | 34128905                | CC                              | AA              | 1946737217               |
| SNP_P4_11216_34129173 | NC_021160.1    | Ca_kabuli_chr01 | 34129173                | AA                              | GG              | 1946737219               |
| SNP_P4_11217_34129352 | NC_021160.1    | Ca_kabuli_chr01 | 34129352                | GG                              | TT              | 1946737221               |
| SNP_P4_11218_34129354 | NC_021160.1    | Ca_kabuli_chr01 | 34129354                | GG                              | CC              | 1946737223               |
| SNP_P4_11219_34129408 | NC_021160.1    | Ca_kabuli_chr01 | 34129408                | TT                              | AA              | 1946737225               |
| SNP_P4_11220_34129410 | NC_021160.1    | Ca_kabuli_chr01 | 34129410                | GG                              | TT              | 1946737227               |
| SNP_P4_11221_34129497 | NC_021160.1    | Ca_kabuli_chr01 | 34129497                | TT                              | GG              | 1946737229               |
| SNP_P4_11222_34129502 | NC_021160.1    | Ca_kabuli_chr01 | 34129502                | AA                              | CC              | 1946737231               |
| SNP_P4_11223_34129531 | NC_021160.1    | Ca_kabuli_chr01 | 34129531                | GG                              | AA              | 1946737233               |
| SNP_P4_11224_34129606 | NC_021160.1    | Ca_kabuli_chr01 | 34129606                | TT                              | AA              | 1946737235               |
| SNP_P4_11225_34129873 | NC_021160.1    | Ca_kabuli_chr01 | 34129873                | CC                              | AA              | 1946737237               |
| SNP_P4_11226_34130196 | NC_021160.1    | Ca_kabuli_chr01 | 34130196                | TT                              | CC              | 1946737239               |
| SNP_P4_11228_34132106 | NC_021160.1    | Ca_kabuli_chr01 | 34132106                | AA                              | GG              | 1946737241               |
| SNP_P4_11229_34132294 | NC_021160.1    | Ca_kabuli_chr01 | 34132294                | TT                              | CC              | 1946737243               |
| SNP_P4_11230_34132302 | NC_021160.1    | Ca_kabuli_chr01 | 34132302                | AA                              | GG              | 1946737245               |
| SNP_P4_11231_34132896 | NC_021160.1    | Ca_kabuli_chr01 | 34132896                | GG                              | AA              | 1946737247               |
| SNP_P4_11233_34133274 | NC_021160.1    | Ca_kabuli_chr01 | 34133274                | TT                              | CC              | 1946737249               |
| SNP_P4_11234_34134129 | NC_021160.1    | Ca_kabuli_chr01 | 34134129                | GG                              | TT              | 1946737251               |
| SNP_P4_11235_34134174 | NC_021160.1    | Ca_kabuli_chr01 | 34134174                | GG                              | TT              | 1946737253               |
| SNP_P4_11236_34134192 | NC_021160.1    | Ca_kabuli_chr01 | 34134192                | AA                              | GG              | 1946737255               |
| SNP_P4_11237_34134528 | NC_021160.1    | Ca_kabuli_chr01 | 34134528                | TT                              | CC              | 1946737257               |
| SNP_P4_11238_34136017 | NC_021160.1    | Ca_kabuli_chr01 | 34136017                | TT                              | CC              | 1946737259               |
| SNP_P4_11239_34136073 | NC_021160.1    | Ca_kabuli_chr01 | 34136073                | AA                              | GG              | 1946737261               |
| SNP_P4_11240_34136074 | NC_021160.1    | Ca_kabuli_chr01 | 34136074                | TT                              | CC              | 1946737263               |

| SNPs IDs              | Chromosome IDs | Chromosomes     | Physical positions (bp) | CDC Frontier (Reference genome) | (ILWC46 & LPNB) | NCBI SNPdb Accession IDs |
|-----------------------|----------------|-----------------|-------------------------|---------------------------------|-----------------|--------------------------|
| SNP_P4_11241_34136294 | NC_021160.1    | Ca_kabuli_chr01 | 34136294                | GG                              | CC              | 1946737265               |
| SNP_P4_11242_34136299 | NC_021160.1    | Ca_kabuli_chr01 | 34136299                | GG                              | AA              | 1946737267               |
| SNP_P4_11243_34136370 | NC_021160.1    | Ca_kabuli_chr01 | 34136370                | CC                              | TT              | 1946737269               |
| SNP_P4_11245_34136713 | NC_021160.1    | Ca_kabuli_chr01 | 34136713                | GG                              | AA              | 1946737271               |
| SNP_P4_11246_34136774 | NC_021160.1    | Ca_kabuli_chr01 | 34136774                | CC                              | TT              | 1946737273               |
| SNP_P4_11247_34136789 | NC_021160.1    | Ca_kabuli_chr01 | 34136789                | TT                              | CC              | 1946737275               |
| SNP_P4_11248_34136809 | NC_021160.1    | Ca_kabuli_chr01 | 34136809                | TT                              | GG              | 1946737277               |
| SNP_P4_11250_34137601 | NC_021160.1    | Ca_kabuli_chr01 | 34137601                | AA                              | GG              | 1946737279               |
| SNP_P4_11251_34137637 | NC_021160.1    | Ca_kabuli_chr01 | 34137637                | TT                              | AA              | 1946737281               |
| SNP_P4_11252_34139893 | NC_021160.1    | Ca_kabuli_chr01 | 34139893                | CC                              | AA              | 1946737283               |
| SNP_P4_11253_34141519 | NC_021160.1    | Ca_kabuli_chr01 | 34141519                | GG                              | AA              | 1946737285               |
| SNP_P4_11254_34141728 | NC_021160.1    | Ca_kabuli_chr01 | 34141728                | TT                              | CC              | 1946737287               |
| SNP_P4_11255_34141782 | NC_021160.1    | Ca_kabuli_chr01 | 34141782                | CC                              | TT              | 1946737289               |
| SNP_P4_11256_34141817 | NC_021160.1    | Ca_kabuli_chr01 | 34141817                | CC                              | GG              | 1946737291               |
| SNP_P4_11257_34141823 | NC_021160.1    | Ca_kabuli_chr01 | 34141823                | CC                              | TT              | 1946737293               |
| SNP_P4_11258_34141845 | NC_021160.1    | Ca_kabuli_chr01 | 34141845                | CC                              | AA              | 1946737295               |
| SNP_P4_11260_34143259 | NC_021160.1    | Ca_kabuli_chr01 | 34143259                | CC                              | TT              | 1946737297               |
| SNP_P4_11261_34143303 | NC_021160.1    | Ca_kabuli_chr01 | 34143303                | AA                              | TT              | 1946737299               |
| SNP_P4_11262_34143304 | NC_021160.1    | Ca_kabuli_chr01 | 34143304                | TT                              | GG              | 1946737301               |
| SNP_P4_11263_34143341 | NC_021160.1    | Ca_kabuli_chr01 | 34143341                | CC                              | TT              | 1946737303               |
| SNP_P4_11264_34143345 | NC_021160.1    | Ca_kabuli_chr01 | 34143345                | TT                              | CC              | 1946737305               |
| SNP_P4_11266_34143799 | NC_021160.1    | Ca_kabuli_chr01 | 34143799                | GG                              | TT              | 1946737307               |
| SNP_P4_11267_34145416 | NC_021160.1    | Ca_kabuli_chr01 | 34145416                | AA                              | GG              | 1946737309               |
| SNP_P4_11268_34145480 | NC_021160.1    | Ca_kabuli_chr01 | 34145480                | CC                              | TT              | 1946737311               |
| SNP_P4_11269_34145482 | NC_021160.1    | Ca_kabuli_chr01 | 34145482                | AA                              | GG              | 1946737313               |
| SNP_P4_11270_34145760 | NC_021160.1    | Ca_kabuli_chr01 | 34145760                | GG                              | AA              | 1946737315               |
| SNP_P4_11271_34145786 | NC_021160.1    | Ca_kabuli_chr01 | 34145786                | CC                              | GG              | 1946737317               |
| SNP_P4_11272_34146624 | NC_021160.1    | Ca_kabuli_chr01 | 34146624                | AA                              | TT              | 1946737320               |
| SNP_P4_11273_34146674 | NC_021160.1    | Ca_kabuli_chr01 | 34146674                | CC                              | TT              | 1946737322               |
| SNP_P4_11274_34146682 | NC_021160.1    | Ca_kabuli_chr01 | 34146682                | AA                              | GG              | 1946737324               |
| SNP_P4_11275_34146892 | NC_021160.1    | Ca_kabuli_chr01 | 34146892                | AA                              | CC              | 1946737326               |
| SNP_P4_11276_34154573 | NC_021160.1    | Ca_kabuli_chr01 | 34154573                | AA                              | GG              | 1946737328               |
| SNP_P4_11277_34157886 | NC_021160.1    | Ca_kabuli_chr01 | 34157886                | TT                              | CC              | 1946737330               |
| SNP_P4_11278_34157905 | NC_021160.1    | Ca_kabuli_chr01 | 34157905                | TT                              | CC              | 1946737332               |
| SNP_P4_11279_34158702 | NC_021160.1    | Ca_kabuli_chr01 | 34158702                | TT                              | CC              | 1946737334               |
| SNP_P4_11280_34158707 | NC_021160.1    | Ca_kabuli_chr01 | 34158707                | GG                              | AA              | 1946737336               |
| SNP_P4_11281_34159991 | NC_021160.1    | Ca_kabuli_chr01 | 34159991                | CC                              | TT              | 1946737338               |
| SNP_P4_11284_34161285 | NC_021160.1    | Ca_kabuli_chr01 | 34161285                | GG                              | AA              | 1946737340               |
| SNP_P4_11285_34163574 | NC_021160.1    | Ca_kabuli_chr01 | 34163574                | CC                              | TT              | 1946737342               |
| SNP_P4_11286_34163588 | NC_021160.1    | Ca_kabuli_chr01 | 34163588                | CC                              | TT              | 1946737344               |
| SNP_P4_11287_34164154 | NC_021160.1    | Ca_kabuli_chr01 | 34164154                | AA                              | CC              | 1946737346               |
| SNP_P4_11289_34164592 | NC_021160.1    | Ca_kabuli_chr01 | 34164592                | CC                              | TT              | 1946737348               |

| SNPs IDs              | Chromosome IDs | Chromosomes     | Physical positions (bp) | CDC Frontier (Reference genome) | (ILWC46 & LPNB) | NCBI SNPdb Accession IDs |
|-----------------------|----------------|-----------------|-------------------------|---------------------------------|-----------------|--------------------------|
| SNP_P4_11290_34164856 | NC_021160.1    | Ca_kabuli_chr01 | 34164856                | AA                              | TT              | 1946737350               |
| SNP_P4_11291_34165009 | NC_021160.1    | Ca_kabuli_chr01 | 34165009                | GG                              | AA              | 1946737352               |
| SNP_P4_11292_34165057 | NC_021160.1    | Ca_kabuli_chr01 | 34165057                | GG                              | AA              | 1946737354               |
| SNP_P4_11293_34166410 | NC_021160.1    | Ca_kabuli_chr01 | 34166410                | GG                              | AA              | 1946737356               |
| SNP_P4_11294_34169906 | NC_021160.1    | Ca_kabuli_chr01 | 34169906                | AA                              | GG              | 1946737358               |
| SNP_P4_11296_34170222 | NC_021160.1    | Ca_kabuli_chr01 | 34170222                | CC                              | TT              | 1946737360               |
| SNP_P4_11297_34176841 | NC_021160.1    | Ca_kabuli_chr01 | 34176841                | CC                              | TT              | 1946737362               |
| SNP_P4_11298_34176862 | NC_021160.1    | Ca_kabuli_chr01 | 34176862                | AA                              | GG              | 1946737364               |
| SNP_P4_11299_34177161 | NC_021160.1    | Ca_kabuli_chr01 | 34177161                | GG                              | AA              | 1946737366               |
| SNP_P4_11300_34177338 | NC_021160.1    | Ca_kabuli_chr01 | 34177338                | GG                              | TT              | 1946737368               |
| SNP_P4_11301_34177355 | NC_021160.1    | Ca_kabuli_chr01 | 34177355                | CC                              | AA              | 1946737370               |
| SNP_P4_11302_34177559 | NC_021160.1    | Ca_kabuli_chr01 | 34177559                | TT                              | AA              | 1946737372               |
| SNP_P4_11303_34177939 | NC_021160.1    | Ca_kabuli_chr01 | 34177939                | CC                              | AA              | 1946737374               |
| SNP_P4_11304_34177942 | NC_021160.1    | Ca_kabuli_chr01 | 34177942                | TT                              | CC              | 1946737376               |
| SNP_P4_11305_34179287 | NC_021160.1    | Ca_kabuli_chr01 | 34179287                | GG                              | AA              | 1946737378               |
| SNP_P4_11306_34179577 | NC_021160.1    | Ca_kabuli_chr01 | 34179577                | AA                              | GG              | 1946737380               |
| SNP_P4_11307_34183262 | NC_021160.1    | Ca_kabuli_chr01 | 34183262                | CC                              | TT              | 1946737382               |
| SNP_P4_11308_34183278 | NC_021160.1    | Ca_kabuli_chr01 | 34183278                | CC                              | AA              | 1946737384               |
| SNP_P4_11309_34183297 | NC_021160.1    | Ca_kabuli_chr01 | 34183297                | TT                              | CC              | 1946737386               |
| SNP_P4_11310_34183335 | NC_021160.1    | Ca_kabuli_chr01 | 34183335                | GG                              | TT              | 1946737388               |
| SNP_P4_11311_34183343 | NC_021160.1    | Ca_kabuli_chr01 | 34183343                | TT                              | CC              | 1946737390               |
| SNP_P4_11312_34183348 | NC_021160.1    | Ca_kabuli_chr01 | 34183348                | CC                              | TT              | 1946737392               |
| SNP_P4_11313_34183355 | NC_021160.1    | Ca_kabuli_chr01 | 34183355                | TT                              | AA              | 1946737394               |
| SNP_P4_11314_34183358 | NC_021160.1    | Ca_kabuli_chr01 | 34183358                | TT                              | AA              | 1946737396               |
| SNP_P4_11315_34183365 | NC_021160.1    | Ca_kabuli_chr01 | 34183365                | CC                              | TT              | 1946737398               |
| SNP_P4_11316_34183635 | NC_021160.1    | Ca_kabuli_chr01 | 34183635                | GG                              | TT              | 1946737400               |
| SNP_P4_11317_34183955 | NC_021160.1    | Ca_kabuli_chr01 | 34183955                | TT                              | CC              | 1946737402               |
| SNP_P4_11318_34184328 | NC_021160.1    | Ca_kabuli_chr01 | 34184328                | CC                              | TT              | 1946737404               |
| SNP_P4_11319_34184588 | NC_021160.1    | Ca_kabuli_chr01 | 34184588                | CC                              | TT              | 1946737406               |
| SNP_P4_11320_34185591 | NC_021160.1    | Ca_kabuli_chr01 | 34185591                | AA                              | GG              | 1946737408               |
| SNP_P4_11321_34192131 | NC_021160.1    | Ca_kabuli_chr01 | 34192131                | GG                              | AA              | 1946737410               |
| SNP_P4_11322_34193230 | NC_021160.1    | Ca_kabuli_chr01 | 34193230                | TT                              | AA              | 1946737412               |
| SNP_P4_11324_34193558 | NC_021160.1    | Ca_kabuli_chr01 | 34193558                | TT                              | AA              | 1946737414               |
| SNP_P4_11325_34194569 | NC_021160.1    | Ca_kabuli_chr01 | 34194569                | GG                              | TT              | 1946737416               |
| SNP_P4_11326_34194573 | NC_021160.1    | Ca_kabuli_chr01 | 34194573                | TT                              | CC              | 1946737418               |
| SNP_P4_11327_34194598 | NC_021160.1    | Ca_kabuli_chr01 | 34194598                | AA                              | TT              | 1946737420               |
| SNP_P4_11328_34194608 | NC_021160.1    | Ca_kabuli_chr01 | 34194608                | GG                              | AA              | 1946737422               |
| SNP_P4_11329_34195627 | NC_021160.1    | Ca_kabuli_chr01 | 34195627                | GG                              | AA              | 1946737424               |
| SNP_P4_11330_34195950 | NC_021160.1    | Ca_kabuli_chr01 | 34195950                | CC                              | TT              | 1946737427               |
| SNP_P4_11331_34196632 | NC_021160.1    | Ca_kabuli_chr01 | 34196632                | TT                              | CC              | 1946737429               |
| SNP_P4_11332_34197368 | NC_021160.1    | Ca_kabuli_chr01 | 34197368                | CC                              | AA              | 1946737431               |
| SNP_P4_11334_34199636 | NC_021160.1    | Ca_kabuli_chr01 | 34199636                | CC                              | TT              | 1946737433               |

| SNPs IDs              | Chromosome IDs | Chromosomes     | Physical positions (bp) | CDC Frontier (Reference genome) | (ILWC46 & LPNB) | NCBI SNPdb Accession IDs |
|-----------------------|----------------|-----------------|-------------------------|---------------------------------|-----------------|--------------------------|
| SNP_P4_11335_34200292 | NC_021160.1    | Ca_kabuli_chr01 | 34200292                | CC                              | AA              | 1946737435               |
| SNP_P4_11336_34200577 | NC_021160.1    | Ca_kabuli_chr01 | 34200577                | AA                              | TT              | 1946737437               |
| SNP_P4_11338_34202829 | NC_021160.1    | Ca_kabuli_chr01 | 34202829                | AA                              | GG              | 1946737439               |
| SNP_P4_11340_34217319 | NC_021160.1    | Ca_kabuli_chr01 | 34217319                | AA                              | GG              | 1946737441               |
| SNP_P4_11341_34221304 | NC_021160.1    | Ca_kabuli_chr01 | 34221304                | GG                              | AA              | 1946737443               |
| SNP_P4_11342_34226978 | NC_021160.1    | Ca_kabuli_chr01 | 34226978                | GG                              | AA              | 1946737445               |
| SNP_P4_11343_34227187 | NC_021160.1    | Ca_kabuli_chr01 | 34227187                | CC                              | AA              | 1946737447               |
| SNP_P4_11345_34228469 | NC_021160.1    | Ca_kabuli_chr01 | 34228469                | CC                              | TT              | 1946737449               |
| SNP_P4_11346_34228567 | NC_021160.1    | Ca_kabuli_chr01 | 34228567                | CC                              | TT              | 1946737451               |
| SNP_P4_11347_34228641 | NC_021160.1    | Ca_kabuli_chr01 | 34228641                | CC                              | TT              | 1946737453               |
| SNP_P4_11348_34231838 | NC_021160.1    | Ca_kabuli_chr01 | 34231838                | TT                              | GG              | 1946737455               |
| SNP_P4_11349_34231921 | NC_021160.1    | Ca_kabuli_chr01 | 34231921                | AA                              | TT              | 1946737457               |
| SNP_P4_11350_34231951 | NC_021160.1    | Ca_kabuli_chr01 | 34231951                | AA                              | GG              | 1946737459               |
| SNP_P4_11351_34236790 | NC_021160.1    | Ca_kabuli_chr01 | 34236790                | CC                              | TT              | 1946737460               |
| SNP_P4_11352_34237366 | NC_021160.1    | Ca_kabuli_chr01 | 34237366                | AA                              | GG              | 1946737462               |
| SNP_P4_11353_34243012 | NC_021160.1    | Ca_kabuli_chr01 | 34243012                | CC                              | TT              | 1946737464               |
| SNP_P4_11354_34243758 | NC_021160.1    | Ca_kabuli_chr01 | 34243758                | AA                              | CC              | 1946737466               |
| SNP_P4_11355_34244223 | NC_021160.1    | Ca_kabuli_chr01 | 34244223                | GG                              | TT              | 1946737468               |
| SNP_P4_11356_34244599 | NC_021160.1    | Ca_kabuli_chr01 | 34244599                | AA                              | GG              | 1946737470               |
| SNP_P4_11357_34245977 | NC_021160.1    | Ca_kabuli_chr01 | 34245977                | AA                              | GG              | 1946737472               |
| SNP_P4_11358_34246158 | NC_021160.1    | Ca_kabuli_chr01 | 34246158                | TT                              | CC              | 1946737474               |
| SNP_P4_11359_34249672 | NC_021160.1    | Ca_kabuli_chr01 | 34249672                | CC                              | TT              | 1946737476               |
| SNP_P4_11360_34250403 | NC_021160.1    | Ca_kabuli_chr01 | 34250403                | GG                              | AA              | 1946737478               |
| SNP_P4_11361_34250459 | NC_021160.1    | Ca_kabuli_chr01 | 34250459                | AA                              | CC              | 1946737480               |
| SNP_P4_11363_34251838 | NC_021160.1    | Ca_kabuli_chr01 | 34251838                | GG                              | TT              | 1946737482               |
| SNP_P4_11364_34255530 | NC_021160.1    | Ca_kabuli_chr01 | 34255530                | GG                              | AA              | 1946737484               |
| SNP_P4_11365_34262027 | NC_021160.1    | Ca_kabuli_chr01 | 34262027                | TT                              | CC              | 1946737486               |
| SNP_P4_11367_34278088 | NC_021160.1    | Ca_kabuli_chr01 | 34278088                | CC                              | AA              | 1946737488               |
| SNP_P4_11368_34279486 | NC_021160.1    | Ca_kabuli_chr01 | 34279486                | TT                              | CC              | 1946737490               |
| SNP_P4_11369_34280154 | NC_021160.1    | Ca_kabuli_chr01 | 34280154                | GG                              | TT              | 1946737492               |
| SNP_P4_11370_34280172 | NC_021160.1    | Ca_kabuli_chr01 | 34280172                | AA                              | TT              | 1946737494               |
| SNP_P4_11371_34280437 | NC_021160.1    | Ca_kabuli_chr01 | 34280437                | GG                              | TT              | 1946737496               |
| SNP_P4_11372_34283791 | NC_021160.1    | Ca_kabuli_chr01 | 34283791                | GG                              | AA              | 1946737498               |
| SNP_P4_11374_34288555 | NC_021160.1    | Ca_kabuli_chr01 | 34288555                | TT                              | CC              | 1946737500               |
| SNP_P4_11375_34288785 | NC_021160.1    | Ca_kabuli_chr01 | 34288785                | AA                              | GG              | 1946737503               |
| SNP_P4_11376_34294878 | NC_021160.1    | Ca_kabuli_chr01 | 34294878                | AA                              | TT              | 1946737505               |
| SNP_P4_11377_34298385 | NC_021160.1    | Ca_kabuli_chr01 | 34298385                | AA                              | GG              | 1946737507               |
| SNP_P4_11378_34302392 | NC_021160.1    | Ca_kabuli_chr01 | 34302392                | AA                              | GG              | 1946737508               |
| SNP_P4_11379_34302483 | NC_021160.1    | Ca_kabuli_chr01 | 34302483                | GG                              | AA              | 1946737510               |
| SNP_P4_11381_34316940 | NC_021160.1    | Ca_kabuli_chr01 | 34316940                | GG                              | AA              | 1946737512               |
| SNP_P4_11382_34323127 | NC_021160.1    | Ca_kabuli_chr01 | 34323127                | AA                              | TT              | 1946737514               |
| SNP_P4_11383_34328740 | NC_021160.1    | Ca_kabuli_chr01 | 34328740                | AA                              | TT              | 1946737516               |

| SNPs IDs              | Chromosome IDs | Chromosomes     | Physical positions (bp) | CDC Frontier (Reference genome) | (ILWC46 & LPNB) | NCBI SNPdb Accession IDs |
|-----------------------|----------------|-----------------|-------------------------|---------------------------------|-----------------|--------------------------|
| SNP_P4_11384_34329031 | NC_021160.1    | Ca_kabuli_chr01 | 34329031                | AA                              | GG              | 1946737518               |
| SNP_P4_11385_34330714 | NC_021160.1    | Ca_kabuli_chr01 | 34330714                | TT                              | AA              | 1946737520               |
| SNP_P4_11386_34331702 | NC_021160.1    | Ca_kabuli_chr01 | 34331702                | TT                              | GG              | 1946737522               |
| SNP_P4_11387_34331716 | NC_021160.1    | Ca_kabuli_chr01 | 34331716                | GG                              | TT              | 1946737524               |
| SNP_P4_11389_34335663 | NC_021160.1    | Ca_kabuli_chr01 | 34335663                | GG                              | AA              | 1946737527               |
| SNP_P4_11390_34336941 | NC_021160.1    | Ca_kabuli_chr01 | 34336941                | GG                              | AA              | 1946737529               |
| SNP_P4_11391_34339435 | NC_021160.1    | Ca_kabuli_chr01 | 34339435                | TT                              | CC              | 1946737531               |
| SNP_P4_11392_34340279 | NC_021160.1    | Ca_kabuli_chr01 | 34340279                | TT                              | GG              | 1946737533               |
| SNP_P4_11393_34342945 | NC_021160.1    | Ca_kabuli_chr01 | 34342945                | TT                              | CC              | 1946737535               |
| SNP_P4_11394_34342987 | NC_021160.1    | Ca_kabuli_chr01 | 34342987                | CC                              | AA              | 1946737537               |
| SNP_P4_11396_34346070 | NC_021160.1    | Ca_kabuli_chr01 | 34346070                | CC                              | TT              | 1946737539               |
| SNP_P4_11397_34346496 | NC_021160.1    | Ca_kabuli_chr01 | 34346496                | TT                              | GG              | 1946737541               |
| SNP_P4_11398_34347248 | NC_021160.1    | Ca_kabuli_chr01 | 34347248                | AA                              | GG              | 1946737543               |
| SNP_P4_11399_34354481 | NC_021160.1    | Ca_kabuli_chr01 | 34354481                | AA                              | GG              | 1946737545               |
| SNP_P4_11400_34355074 | NC_021160.1    | Ca_kabuli_chr01 | 34355074                | CC                              | TT              | 1946737547               |
| SNP_P4_11401_34355357 | NC_021160.1    | Ca_kabuli_chr01 | 34355357                | TT                              | GG              | 1946737549               |
| SNP_P4_11402_34355680 | NC_021160.1    | Ca_kabuli_chr01 | 34355680                | CC                              | AA              | 1946737551               |
| SNP_P4_11403_34356291 | NC_021160.1    | Ca_kabuli_chr01 | 34356291                | AA                              | GG              | 1946737553               |
| SNP_P4_11404_34356610 | NC_021160.1    | Ca_kabuli_chr01 | 34356610                | AA                              | GG              | 1946737555               |
| SNP_P4_11405_34360282 | NC_021160.1    | Ca_kabuli_chr01 | 34360282                | CC                              | TT              | 1946737557               |
| SNP_P4_11406_34360611 | NC_021160.1    | Ca_kabuli_chr01 | 34360611                | GG                              | AA              | 1946737559               |
| SNP_P4_11407_34361069 | NC_021160.1    | Ca_kabuli_chr01 | 34361069                | TT                              | AA              | 1946737561               |
| SNP_P4_11408_34361092 | NC_021160.1    | Ca_kabuli_chr01 | 34361092                | TT                              | AA              | 1946737563               |
| SNP_P4_11409_34361108 | NC_021160.1    | Ca_kabuli_chr01 | 34361108                | AA                              | GG              | 1946737565               |
| SNP_P4_11410_34362237 | NC_021160.1    | Ca_kabuli_chr01 | 34362237                | GG                              | AA              | 1946737567               |
| SNP_P4_11412_34362956 | NC_021160.1    | Ca_kabuli_chr01 | 34362956                | CC                              | TT              | 1946737569               |
| SNP_P4_11413_34362957 | NC_021160.1    | Ca_kabuli_chr01 | 34362957                | CC                              | AA              | 1946737571               |
| SNP_P4_11415_34363701 | NC_021160.1    | Ca_kabuli_chr01 | 34363701                | GG                              | AA              | 1946737573               |
| SNP_P4_11416_34363823 | NC_021160.1    | Ca_kabuli_chr01 | 34363823                | TT                              | AA              | 1946737575               |
| SNP_P4_11417_34363930 | NC_021160.1    | Ca_kabuli_chr01 | 34363930                | CC                              | TT              | 1946737577               |
| SNP_P4_11418_34364415 | NC_021160.1    | Ca_kabuli_chr01 | 34364415                | CC                              | TT              | 1946737579               |
| SNP_P4_11419_34366468 | NC_021160.1    | Ca_kabuli_chr01 | 34366468                | AA                              | GG              | 1946737581               |
| SNP_P4_11420_34367488 | NC_021160.1    | Ca_kabuli_chr01 | 34367488                | CC                              | TT              | 1946737583               |
| SNP_P4_11421_34367738 | NC_021160.1    | Ca_kabuli_chr01 | 34367738                | TT                              | CC              | 1946737585               |
| SNP_P4_11422_34367742 | NC_021160.1    | Ca_kabuli_chr01 | 34367742                | TT                              | GG              | 1946737587               |
| SNP_P4_11423_34370008 | NC_021160.1    | Ca_kabuli_chr01 | 34370008                | CC                              | AA              | 1946737589               |
| SNP_P4_11424_34372909 | NC_021160.1    | Ca_kabuli_chr01 | 34372909                | TT                              | AA              | 1946737591               |
| SNP_P4_11425_34377574 | NC_021160.1    | Ca_kabuli_chr01 | 34377574                | CC                              | TT              | 1946737592               |
| SNP_P4_11426_34378789 | NC_021160.1    | Ca_kabuli_chr01 | 34378789                | GG                              | AA              | 1946737594               |
| SNP_P4_11427_34378964 | NC_021160.1    | Ca_kabuli_chr01 | 34378964                | GG                              | AA              | 1946737596               |
| SNP_P4_11428_34380698 | NC_021160.1    | Ca_kabuli_chr01 | 34380698                | GG                              | CC              | 1946737598               |
| SNP_P4_11429_34384196 | NC_021160.1    | Ca_kabuli_chr01 | 34384196                | AA                              | GG              | 1946737600               |

| SNPs IDs              | Chromosome IDs | Chromosomes     | Physical positions (bp) | CDC Frontier (Reference genome) | (ILWC46 & LPNB) | NCBI SNPdb Accession IDs |
|-----------------------|----------------|-----------------|-------------------------|---------------------------------|-----------------|--------------------------|
| SNP_P4_11430_34384211 | NC_021160.1    | Ca_kabuli_chr01 | 34384211                | GG                              | AA              | 1946737602               |
| SNP_P4_11431_34384213 | NC_021160.1    | Ca_kabuli_chr01 | 34384213                | CC                              | TT              | 1946737604               |
| SNP_P4_11432_34384300 | NC_021160.1    | Ca_kabuli_chr01 | 34384300                | CC                              | TT              | 1946737606               |
| SNP_P4_11434_34386957 | NC_021160.1    | Ca_kabuli_chr01 | 34386957                | GG                              | TT              | 1946737608               |
| SNP_P4_11435_34386969 | NC_021160.1    | Ca_kabuli_chr01 | 34386969                | GG                              | AA              | 1946737610               |
| SNP_P4_11436_34387470 | NC_021160.1    | Ca_kabuli_chr01 | 34387470                | TT                              | CC              | 1946737612               |
| SNP_P4_11437_34387489 | NC_021160.1    | Ca_kabuli_chr01 | 34387489                | AA                              | GG              | 1946737614               |
| SNP_P4_11438_34387499 | NC_021160.1    | Ca_kabuli_chr01 | 34387499                | GG                              | AA              | 1946737616               |
| SNP_P4_11439_34387744 | NC_021160.1    | Ca_kabuli_chr01 | 34387744                | TT                              | GG              | 1946737618               |
| SNP_P4_11440_34395008 | NC_021160.1    | Ca_kabuli_chr01 | 34395008                | TT                              | CC              | 1946737619               |
| SNP_P4_11441_34395064 | NC_021160.1    | Ca_kabuli_chr01 | 34395064                | AA                              | GG              | 1946737621               |
| SNP_P4_11442_34396455 | NC_021160.1    | Ca_kabuli_chr01 | 34396455                | AA                              | TT              | 1946737623               |
| SNP_P4_11444_34397785 | NC_021160.1    | Ca_kabuli_chr01 | 34397785                | TT                              | AA              | 1946737625               |
| SNP_P4_11445_34403422 | NC_021160.1    | Ca_kabuli_chr01 | 34403422                | AA                              | GG              | 1946737627               |
| SNP_P4_11446_34404462 | NC_021160.1    | Ca_kabuli_chr01 | 34404462                | AA                              | CC              | 1946737629               |
| SNP_P4_11447_34404463 | NC_021160.1    | Ca_kabuli_chr01 | 34404463                | TT                              | AA              | 1946737631               |
| SNP_P4_11448_34404464 | NC_021160.1    | Ca_kabuli_chr01 | 34404464                | GG                              | TT              | 1946737633               |
| SNP_P4_11449_34405622 | NC_021160.1    | Ca_kabuli_chr01 | 34405622                | AA                              | GG              | 1946737635               |
| SNP_P4_11450_34405750 | NC_021160.1    | Ca_kabuli_chr01 | 34405750                | TT                              | GG              | 1946737637               |
| SNP_P4_11451_34405903 | NC_021160.1    | Ca_kabuli_chr01 | 34405903                | AA                              | CC              | 1946737639               |
| SNP_P4_11452_34408257 | NC_021160.1    | Ca_kabuli_chr01 | 34408257                | GG                              | AA              | 1946737641               |
| SNP_P4_11453_34408274 | NC_021160.1    | Ca_kabuli_chr01 | 34408274                | GG                              | TT              | 1946737643               |
| SNP_P4_11454_34408537 | NC_021160.1    | Ca_kabuli_chr01 | 34408537                | AA                              | GG              | 1946737645               |
| SNP_P4_11456_34414884 | NC_021160.1    | Ca_kabuli_chr01 | 34414884                | CC                              | TT              | 1946737647               |
| SNP_P4_11457_34415174 | NC_021160.1    | Ca_kabuli_chr01 | 34415174                | TT                              | CC              | 1946737649               |
| SNP_P4_11458_34415446 | NC_021160.1    | Ca_kabuli_chr01 | 34415446                | CC                              | TT              | 1946737651               |
| SNP_P4_11459_34419120 | NC_021160.1    | Ca_kabuli_chr01 | 34419120                | AA                              | TT              | 1946737653               |
| SNP_P4_11460_34426973 | NC_021160.1    | Ca_kabuli_chr01 | 34426973                | GG                              | AA              | 1946737655               |
| SNP_P4_11461_34432247 | NC_021160.1    | Ca_kabuli_chr01 | 34432247                | AA                              | GG              | 1946737657               |
| SNP_P4_11462_34433640 | NC_021160.1    | Ca_kabuli_chr01 | 34433640                | AA                              | GG              | 1946737659               |
| SNP_P4_11463_34433706 | NC_021160.1    | Ca_kabuli_chr01 | 34433706                | CC                              | AA              | 1946737661               |
| SNP_P4_11464_34459889 | NC_021160.1    | Ca_kabuli_chr01 | 34459889                | TT                              | GG              | 1946737663               |
| SNP_P4_11466_34479170 | NC_021160.1    | Ca_kabuli_chr01 | 34479170                | CC                              | AA              | 1946737665               |
| SNP_P4_11468_34537653 | NC_021160.1    | Ca_kabuli_chr01 | 34537653                | AA                              | GG              | 1946737667               |
| SNP_P4_11469_34537674 | NC_021160.1    | Ca_kabuli_chr01 | 34537674                | AA                              | GG              | 1946737669               |
| SNP_P4_11471_34567021 | NC_021160.1    | Ca_kabuli_chr01 | 34567021                | CC                              | TT              | 1946737671               |
| SNP_P4_11472_34567350 | NC_021160.1    | Ca_kabuli_chr01 | 34567350                | CC                              | TT              | 1946737672               |
| SNP_P4_11473_34576577 | NC_021160.1    | Ca_kabuli_chr01 | 34576577                | GG                              | AA              | 1946737674               |
| SNP_P4_11474_34580207 | NC_021160.1    | Ca_kabuli_chr01 | 34580207                | CC                              | TT              | 1946737676               |
| SNP_P4_11475_34584992 | NC_021160.1    | Ca_kabuli_chr01 | 34584992                | TT                              | CC              | 1946737678               |
| SNP_P4_11476_34585691 | NC_021160.1    | Ca_kabuli_chr01 | 34585691                | AA                              | GG              | 1946737680               |
| SNP_P4_11477_34586913 | NC_021160.1    | Ca_kabuli_chr01 | 34586913                | AA                              | GG              | 1946737682               |

| SNPs IDs              | Chromosome IDs | Chromosomes     | Physical positions (bp) | CDC Frontier (Reference genome) | (ILWC46 & LPNB) | NCBI SNPdb Accession IDs |
|-----------------------|----------------|-----------------|-------------------------|---------------------------------|-----------------|--------------------------|
| SNP_P4_11478_34587294 | NC_021160.1    | Ca_kabuli_chr01 | 34587294                | TT                              | AA              | 1946737684               |
| SNP_P4_11480_34596657 | NC_021160.1    | Ca_kabuli_chr01 | 34596657                | TT                              | AA              | 1946737686               |
| SNP_P4_11481_34599657 | NC_021160.1    | Ca_kabuli_chr01 | 34599657                | GG                              | AA              | 1946737688               |
| SNP_P4_11482_34600561 | NC_021160.1    | Ca_kabuli_chr01 | 34600561                | TT                              | GG              | 1946737690               |
| SNP_P4_11483_34602979 | NC_021160.1    | Ca_kabuli_chr01 | 34602979                | CC                              | TT              | 1946737692               |
| SNP_P4_11484_34602992 | NC_021160.1    | Ca_kabuli_chr01 | 34602992                | GG                              | AA              | 1946737693               |
| SNP_P4_11485_34603513 | NC_021160.1    | Ca_kabuli_chr01 | 34603513                | CC                              | GG              | 1946737696               |
| SNP_P4_11486_34614489 | NC_021160.1    | Ca_kabuli_chr01 | 34614489                | TT                              | CC              | 1946737698               |
| SNP_P4_11487_34624062 | NC_021160.1    | Ca_kabuli_chr01 | 34624062                | AA                              | GG              | 1946737700               |
| SNP_P4_11488_34624912 | NC_021160.1    | Ca_kabuli_chr01 | 34624912                | AA                              | GG              | 1946737702               |
| SNP_P4_11489_34625389 | NC_021160.1    | Ca_kabuli_chr01 | 34625389                | AA                              | GG              | 1946737703               |
| SNP_P4_11490_34625562 | NC_021160.1    | Ca_kabuli_chr01 | 34625562                | GG                              | CC              | 1946737705               |
| SNP_P4_11491_34625778 | NC_021160.1    | Ca_kabuli_chr01 | 34625778                | TT                              | GG              | 1946737707               |
| SNP_P4_11493_34634658 | NC_021160.1    | Ca_kabuli_chr01 | 34634658                | GG                              | AA              | 1946737709               |
| SNP_P4_11494_34644553 | NC_021160.1    | Ca_kabuli_chr01 | 34644553                | TT                              | GG              | 1946737711               |
| SNP_P4_11495_34646077 | NC_021160.1    | Ca_kabuli_chr01 | 34646077                | TT                              | AA              | 1946737713               |
| SNP_P4_11496_34646152 | NC_021160.1    | Ca_kabuli_chr01 | 34646152                | TT                              | GG              | 1946737715               |
| SNP_P4_11497_34653542 | NC_021160.1    | Ca_kabuli_chr01 | 34653542                | TT                              | CC              | 1946737717               |
| SNP_P4_11498_34658854 | NC_021160.1    | Ca_kabuli_chr01 | 34658854                | TT                              | AA              | 1946737719               |
| SNP_P4_11499_34659988 | NC_021160.1    | Ca_kabuli_chr01 | 34659988                | TT                              | CC              | 1946737721               |
| SNP_P4_11500_34662793 | NC_021160.1    | Ca_kabuli_chr01 | 34662793                | AA                              | GG              | 1946737723               |
| SNP_P4_11501_34664729 | NC_021160.1    | Ca_kabuli_chr01 | 34664729                | TT                              | CC              | 1946737724               |
| SNP_P4_11502_34665198 | NC_021160.1    | Ca_kabuli_chr01 | 34665198                | TT                              | GG              | 1946737726               |
| SNP_P4_11504_34672464 | NC_021160.1    | Ca_kabuli_chr01 | 34672464                | AA                              | GG              | 1946737728               |
| SNP_P4_11505_34675273 | NC_021160.1    | Ca_kabuli_chr01 | 34675273                | GG                              | AA              | 1946737730               |
| SNP_P4_11506_34675703 | NC_021160.1    | Ca_kabuli_chr01 | 34675703                | TT                              | CC              | 1946737732               |
| SNP_P4_11507_34682778 | NC_021160.1    | Ca_kabuli_chr01 | 34682778                | CC                              | GG              | 1946737734               |
| SNP_P4_11508_34685106 | NC_021160.1    | Ca_kabuli_chr01 | 34685106                | GG                              | AA              | 1946737736               |
| SNP_P4_11509_34687730 | NC_021160.1    | Ca_kabuli_chr01 | 34687730                | TT                              | CC              | 1946737738               |
| SNP_P4_11510_34691077 | NC_021160.1    | Ca_kabuli_chr01 | 34691077                | AA                              | CC              | 1946737740               |
| SNP_P4_11511_34691091 | NC_021160.1    | Ca_kabuli_chr01 | 34691091                | AA                              | GG              | 1946737742               |
| SNP_P4_11512_34691216 | NC_021160.1    | Ca_kabuli_chr01 | 34691216                | AA                              | GG              | 1946737744               |
| SNP_P4_11513_34691592 | NC_021160.1    | Ca_kabuli_chr01 | 34691592                | TT                              | GG              | 1946737746               |
| SNP_P4_11514_34691598 | NC_021160.1    | Ca_kabuli_chr01 | 34691598                | TT                              | CC              | 1946737748               |
| SNP_P4_11515_34692213 | NC_021160.1    | Ca_kabuli_chr01 | 34692213                | AA                              | GG              | 1946737750               |
| SNP_P4_11518_34694836 | NC_021160.1    | Ca_kabuli_chr01 | 34694836                | TT                              | AA              | 1946737753               |
| SNP_P4_11520_34704265 | NC_021160.1    | Ca_kabuli_chr01 | 34704265                | CC                              | TT              | 1946737755               |
| SNP_P4_11521_34704990 | NC_021160.1    | Ca_kabuli_chr01 | 34704990                | TT                              | AA              | 1946737757               |
| SNP_P4_11522_34704999 | NC_021160.1    | Ca_kabuli_chr01 | 34704999                | CC                              | TT              | 1946737759               |
| SNP_P4_11523_34707455 | NC_021160.1    | Ca_kabuli_chr01 | 34707455                | GG                              | CC              | 1946737761               |
| SNP_P4_11524_34710100 | NC_021160.1    | Ca_kabuli_chr01 | 34710100                | CC                              | TT              | 1946737763               |
| SNP_P4_11525_34714575 | NC_021160.1    | Ca_kabuli_chr01 | 34714575                | CC                              | TT              | 1946737764               |

| SNPs IDs              | Chromosome IDs | Chromosomes     | Physical positions (bp) | CDC Frontier (Reference genome) | (ILWC46 & LPNB) | NCBI SNPdb Accession IDs |
|-----------------------|----------------|-----------------|-------------------------|---------------------------------|-----------------|--------------------------|
| SNP_P4_11526_34714595 | NC_021160.1    | Ca_kabuli_chr01 | 34714595                | TT                              | CC              | 1946737766               |
| SNP_P4_11527_34714608 | NC_021160.1    | Ca_kabuli_chr01 | 34714608                | AA                              | GG              | 1946737768               |
| SNP_P4_11528_34714610 | NC_021160.1    | Ca_kabuli_chr01 | 34714610                | GG                              | CC              | 1946737770               |
| SNP_P4_11529_34714635 | NC_021160.1    | Ca_kabuli_chr01 | 34714635                | CC                              | TT              | 1946737772               |
| SNP_P4_11530_34723309 | NC_021160.1    | Ca_kabuli_chr01 | 34723309                | AA                              | GG              | 1946737774               |
| SNP_P4_11532_34730498 | NC_021160.1    | Ca_kabuli_chr01 | 34730498                | CC                              | AA              | 1946737776               |
| SNP_P4_11533_34731177 | NC_021160.1    | Ca_kabuli_chr01 | 34731177                | AA                              | GG              | 1946737778               |
| SNP_P4_11534_34736605 | NC_021160.1    | Ca_kabuli_chr01 | 34736605                | TT                              | CC              | 1946737780               |
| SNP_P4_11535_34739096 | NC_021160.1    | Ca_kabuli_chr01 | 34739096                | CC                              | AA              | 1946737782               |
| SNP_P4_11536_34739556 | NC_021160.1    | Ca_kabuli_chr01 | 34739556                | TT                              | AA              | 1946737783               |
| SNP_P4_11537_34744668 | NC_021160.1    | Ca_kabuli_chr01 | 34744668                | CC                              | TT              | 1946737785               |
| SNP_P4_11538_34745137 | NC_021160.1    | Ca_kabuli_chr01 | 34745137                | AA                              | GG              | 1946737787               |
| SNP_P4_11539_34747286 | NC_021160.1    | Ca_kabuli_chr01 | 34747286                | TT                              | CC              | 1946737789               |
| SNP_P4_11540_34757430 | NC_021160.1    | Ca_kabuli_chr01 | 34757430                | AA                              | GG              | 1946737791               |
| SNP_P4_11541_34757966 | NC_021160.1    | Ca_kabuli_chr01 | 34757966                | CC                              | AA              | 1946737793               |
| SNP_P4_11543_34768514 | NC_021160.1    | Ca_kabuli_chr01 | 34768514                | AA                              | CC              | 1946737795               |
| SNP_P4_11544_34786482 | NC_021160.1    | Ca_kabuli_chr01 | 34786482                | TT                              | CC              | 1946737797               |
| SNP_P4_11545_34786576 | NC_021160.1    | Ca_kabuli_chr01 | 34786576                | CC                              | AA              | 1946737799               |
| SNP_P4_11546_34806044 | NC_021160.1    | Ca_kabuli_chr01 | 34806044                | AA                              | TT              | 1946737800               |
| SNP_P4_11547_34806045 | NC_021160.1    | Ca_kabuli_chr01 | 34806045                | AA                              | CC              | 1946737802               |
| SNP_P4_11548_34806603 | NC_021160.1    | Ca_kabuli_chr01 | 34806603                | TT                              | GG              | 1946737804               |
| SNP_P4_11549_34808029 | NC_021160.1    | Ca_kabuli_chr01 | 34808029                | CC                              | TT              | 1946737806               |
| SNP_P4_11550_34809201 | NC_021160.1    | Ca_kabuli_chr01 | 34809201                | TT                              | GG              | 1946737808               |
| SNP_P4_11551_34809952 | NC_021160.1    | Ca_kabuli_chr01 | 34809952                | TT                              | CC              | 1946737810               |
| SNP_P4_11554_34818440 | NC_021160.1    | Ca_kabuli_chr01 | 34818440                | AA                              | GG              | 1946737812               |
| SNP_P4_11555_34818459 | NC_021160.1    | Ca_kabuli_chr01 | 34818459                | TT                              | CC              | 1946737814               |
| SNP_P4_11557_34828533 | NC_021160.1    | Ca_kabuli_chr01 | 34828533                | GG                              | AA              | 1946737816               |
| SNP_P4_11558_34835382 | NC_021160.1    | Ca_kabuli_chr01 | 34835382                | TT                              | CC              | 1946737818               |
| SNP_P4_11559_34842189 | NC_021160.1    | Ca_kabuli_chr01 | 34842189                | CC                              | TT              | 1946737819               |
| SNP_P4_11560_34844886 | NC_021160.1    | Ca_kabuli_chr01 | 34844886                | TT                              | CC              | 1946737821               |
| SNP_P4_11562_34848500 | NC_021160.1    | Ca_kabuli_chr01 | 34848500                | GG                              | TT              | 1946737823               |
| SNP_P4_11563_34848904 | NC_021160.1    | Ca_kabuli_chr01 | 34848904                | AA                              | GG              | 1946737825               |
| SNP_P4_11565_34854169 | NC_021160.1    | Ca_kabuli_chr01 | 34854169                | TT                              | CC              | 1946737827               |
| SNP_P4_11566_34854736 | NC_021160.1    | Ca_kabuli_chr01 | 34854736                | GG                              | AA              | 1946737829               |
| SNP_P4_11567_34858489 | NC_021160.1    | Ca_kabuli_chr01 | 34858489                | CC                              | GG              | 1946737831               |
| SNP_P4_11568_34865496 | NC_021160.1    | Ca_kabuli_chr01 | 34865496                | AA                              | GG              | 1946737833               |
| SNP_P4_11569_34865515 | NC_021160.1    | Ca_kabuli_chr01 | 34865515                | AA                              | GG              | 1946737835               |
| SNP_P4_11570_34865652 | NC_021160.1    | Ca_kabuli_chr01 | 34865652                | AA                              | GG              | 1946737837               |
| SNP_P4_11571_34865756 | NC_021160.1    | Ca_kabuli_chr01 | 34865756                | GG                              | AA              | 1946737839               |
| SNP_P4_11573_34868996 | NC_021160.1    | Ca_kabuli_chr01 | 34868996                | AA                              | TT              | 1946737841               |
| SNP_P4_11574_34877401 | NC_021160.1    | Ca_kabuli_chr01 | 34877401                | CC                              | TT              | 1946737843               |
| SNP_P4_11575_34877426 | NC_021160.1    | Ca_kabuli_chr01 | 34877426                | CC                              | AA              | 1946737845               |



| SNPs IDs              | Chromosome IDs | Chromosomes     | Physical positions (bp) | CDC Frontier (Reference genome) | (ILWC46 & LPNB) | NCBI SNPdb Accession IDs |
|-----------------------|----------------|-----------------|-------------------------|---------------------------------|-----------------|--------------------------|
| SNP_P4_11576_34879215 | NC_021160.1    | Ca_kabuli_chr01 | 34879215                | AA                              | CC              | 1946737847               |
| SNP_P4_11577_34883347 | NC_021160.1    | Ca_kabuli_chr01 | 34883347                | TT                              | AA              | 1946737849               |
| SNP_P4_11578_34883383 | NC_021160.1    | Ca_kabuli_chr01 | 34883383                | GG                              | AA              | 1946737851               |
| SNP_P4_11580_34895751 | NC_021160.1    | Ca_kabuli_chr01 | 34895751                | GG                              | CC              | 1946737853               |
| SNP_P4_11581_34895908 | NC_021160.1    | Ca_kabuli_chr01 | 34895908                | GG                              | AA              | 1946737855               |
| SNP_P4_11582_34902946 | NC_021160.1    | Ca_kabuli_chr01 | 34902946                | AA                              | CC              | 1946737857               |
| SNP_P4_11583_34905211 | NC_021160.1    | Ca_kabuli_chr01 | 34905211                | GG                              | CC              | 1946737859               |
| SNP_P4_11585_34908640 | NC_021160.1    | Ca_kabuli_chr01 | 34908640                | AA                              | TT              | 1946737861               |
| SNP_P4_11587_34914603 | NC_021160.1    | Ca_kabuli_chr01 | 34914603                | CC                              | TT              | 1946737863               |
| SNP_P4_11588_34914870 | NC_021160.1    | Ca_kabuli_chr01 | 34914870                | CC                              | TT              | 1946737865               |
| SNP_P4_11589_34916210 | NC_021160.1    | Ca_kabuli_chr01 | 34916210                | TT                              | AA              | 1946737867               |
| SNP_P4_11591_34921142 | NC_021160.1    | Ca_kabuli_chr01 | 34921142                | AA                              | CC              | 1946737869               |
| SNP_P4_11592_34922802 | NC_021160.1    | Ca_kabuli_chr01 | 34922802                | CC                              | TT              | 1946737871               |
| SNP_P4_11593_34933764 | NC_021160.1    | Ca_kabuli_chr01 | 34933764                | GG                              | TT              | 1946737873               |
| SNP_P4_11594_34933765 | NC_021160.1    | Ca_kabuli_chr01 | 34933765                | GG                              | CC              | 1946737875               |
| SNP_P4_11595_34933766 | NC_021160.1    | Ca_kabuli_chr01 | 34933766                | AA                              | CC              | 1946737877               |
| SNP_P4_11597_34942418 | NC_021160.1    | Ca_kabuli_chr01 | 34942418                | GG                              | AA              | 1946737879               |
| SNP_P4_11598_34951368 | NC_021160.1    | Ca_kabuli_chr01 | 34951368                | CC                              | TT              | 1946737881               |
| SNP_P4_11599_34954467 | NC_021160.1    | Ca_kabuli_chr01 | 34954467                | CC                              | GG              | 1946737883               |
| SNP_P4_11600_34955301 | NC_021160.1    | Ca_kabuli_chr01 | 34955301                | GG                              | AA              | 1946737885               |
| SNP_P4_11601_34957116 | NC_021160.1    | Ca_kabuli_chr01 | 34957116                | CC                              | TT              | 1946737887               |
| SNP_P4_11602_34962316 | NC_021160.1    | Ca_kabuli_chr01 | 34962316                | CC                              | TT              | 1946737889               |
| SNP_P4_11603_34970986 | NC_021160.1    | Ca_kabuli_chr01 | 34970986                | GG                              | AA              | 1946737891               |
| SNP_P4_11605_34971072 | NC_021160.1    | Ca_kabuli_chr01 | 34971072                | AA                              | CC              | 1946737893               |
| SNP_P4_11606_34971315 | NC_021160.1    | Ca_kabuli_chr01 | 34971315                | CC                              | TT              | 1946737895               |
| SNP_P4_11607_34971332 | NC_021160.1    | Ca_kabuli_chr01 | 34971332                | GG                              | AA              | 1946737897               |
| SNP_P4_11608_34971337 | NC_021160.1    | Ca_kabuli_chr01 | 34971337                | AA                              | GG              | 1946737899               |
| SNP_P4_11609_34971488 | NC_021160.1    | Ca_kabuli_chr01 | 34971488                | GG                              | AA              | 1946737901               |
| SNP_P4_11610_34971522 | NC_021160.1    | Ca_kabuli_chr01 | 34971522                | AA                              | GG              | 1946737903               |
| SNP_P4_11611_34972422 | NC_021160.1    | Ca_kabuli_chr01 | 34972422                | TT                              | CC              | 1946737905               |
| SNP_P4_11613_34987093 | NC_021160.1    | Ca_kabuli_chr01 | 34987093                | CC                              | TT              | 1946737907               |
| SNP_P4_11614_34988990 | NC_021160.1    | Ca_kabuli_chr01 | 34988990                | TT                              | CC              | 1946737909               |
| SNP_P4_11615_34989029 | NC_021160.1    | Ca_kabuli_chr01 | 34989029                | GG                              | AA              | 1946737911               |
| SNP_P4_11616_34989034 | NC_021160.1    | Ca_kabuli_chr01 | 34989034                | CC                              | TT              | 1946737913               |
| SNP_P4_11617_34989057 | NC_021160.1    | Ca_kabuli_chr01 | 34989057                | TT                              | CC              | 1946737915               |
| SNP_P4_11618_34989064 | NC_021160.1    | Ca_kabuli_chr01 | 34989064                | AA                              | GG              | 1946737917               |
| SNP_P4_11619_34989079 | NC_021160.1    | Ca_kabuli_chr01 | 34989079                | AA                              | CC              | 1946737919               |
| SNP_P4_11620_34989095 | NC_021160.1    | Ca_kabuli_chr01 | 34989095                | TT                              | CC              | 1946737921               |
| SNP_P4_11621_34989128 | NC_021160.1    | Ca_kabuli_chr01 | 34989128                | GG                              | AA              | 1946737923               |
| SNP_P4_11622_34989206 | NC_021160.1    | Ca_kabuli_chr01 | 34989206                | GG                              | AA              | 1946737925               |
| SNP_P4_11623_34991825 | NC_021160.1    | Ca_kabuli_chr01 | 34991825                | CC                              | TT              | 1946737927               |
| SNP_P4_11624_34992229 | NC_021160.1    | Ca_kabuli_chr01 | 34992229                | TT                              | CC              | 1946737929               |

| SNPs IDs              | Chromosome IDs | Chromosomes     | Physical positions (bp) | CDC Frontier (Reference genome) | (ILWC46 & LPNB) | NCBI SNPdb Accession IDs |
|-----------------------|----------------|-----------------|-------------------------|---------------------------------|-----------------|--------------------------|
| SNP_P4_11625_34993097 | NC_021160.1    | Ca_kabuli_chr01 | 34993097                | AA                              | CC              | 1946737931               |
| SNP_P4_11626_34993765 | NC_021160.1    | Ca_kabuli_chr01 | 34993765                | GG                              | AA              | 1946737933               |
| SNP_P4_11627_34995024 | NC_021160.1    | Ca_kabuli_chr01 | 34995024                | GG                              | AA              | 1946737935               |
| SNP_P4_11628_34996650 | NC_021160.1    | Ca_kabuli_chr01 | 34996650                | AA                              | GG              | 1946737937               |
| SNP_P4_11629_34996667 | NC_021160.1    | Ca_kabuli_chr01 | 34996667                | AA                              | GG              | 1946737939               |
| SNP_P4_11630_34996679 | NC_021160.1    | Ca_kabuli_chr01 | 34996679                | CC                              | AA              | 1946737941               |
| SNP_P4_11631_34996970 | NC_021160.1    | Ca_kabuli_chr01 | 34996970                | GG                              | TT              | 1946737943               |
| SNP_P4_11632_34997012 | NC_021160.1    | Ca_kabuli_chr01 | 34997012                | CC                              | TT              | 1946737945               |
| SNP_P4_11633_34997060 | NC_021160.1    | Ca_kabuli_chr01 | 34997060                | GG                              | AA              | 1946737947               |
| SNP_P4_11634_34997070 | NC_021160.1    | Ca_kabuli_chr01 | 34997070                | GG                              | AA              | 1946737949               |
| SNP_P4_11635_34998131 | NC_021160.1    | Ca_kabuli_chr01 | 34998131                | GG                              | AA              | 1946737951               |
| SNP_P4_11636_35000035 | NC_021160.1    | Ca_kabuli_chr01 | 35000035                | GG                              | AA              | 1946737953               |
| SNP_P4_11637_35003812 | NC_021160.1    | Ca_kabuli_chr01 | 35003812                | CC                              | TT              | 1946737955               |
| SNP_P4_11638_35007373 | NC_021160.1    | Ca_kabuli_chr01 | 35007373                | TT                              | AA              | 1946737957               |
| SNP_P4_11639_35007713 | NC_021160.1    | Ca_kabuli_chr01 | 35007713                | GG                              | TT              | 1946737959               |
| SNP_P4_11640_35011571 | NC_021160.1    | Ca_kabuli_chr01 | 35011571                | TT                              | AA              | 1946737961               |
| SNP_P4_11641_35024063 | NC_021160.1    | Ca_kabuli_chr01 | 35024063                | TT                              | CC              | 1946737963               |
| SNP_P4_11642_35024070 | NC_021160.1    | Ca_kabuli_chr01 | 35024070                | CC                              | TT              | 1946737965               |
| SNP_P4_11643_35029619 | NC_021160.1    | Ca_kabuli_chr01 | 35029619                | AA                              | TT              | 1946737967               |
| SNP_P4_11644_35036940 | NC_021160.1    | Ca_kabuli_chr01 | 35036940                | TT                              | CC              | 1946737969               |
| SNP_P4_11645_35038844 | NC_021160.1    | Ca_kabuli_chr01 | 35038844                | TT                              | AA              | 1946737971               |
| SNP_P4_11647_35046092 | NC_021160.1    | Ca_kabuli_chr01 | 35046092                | GG                              | TT              | 1946737973               |
| SNP_P4_11648_35049158 | NC_021160.1    | Ca_kabuli_chr01 | 35049158                | TT                              | AA              | 1946737975               |
| SNP_P4_11649_35049193 | NC_021160.1    | Ca_kabuli_chr01 | 35049193                | GG                              | AA              | 1946737977               |
| SNP_P4_11650_35055037 | NC_021160.1    | Ca_kabuli_chr01 | 35055037                | CC                              | AA              | 1946737979               |
| SNP_P4_11651_35057514 | NC_021160.1    | Ca_kabuli_chr01 | 35057514                | CC                              | TT              | 1946737981               |
| SNP_P4_11652_35057889 | NC_021160.1    | Ca_kabuli_chr01 | 35057889                | CC                              | TT              | 1946737983               |
| SNP_P4_11654_35059876 | NC_021160.1    | Ca_kabuli_chr01 | 35059876                | TT                              | AA              | 1946737985               |
| SNP_P4_11656_35060021 | NC_021160.1    | Ca_kabuli_chr01 | 35060021                | AA                              | TT              | 1946737987               |
| SNP_P4_11659_35062255 | NC_021160.1    | Ca_kabuli_chr01 | 35062255                | TT                              | AA              | 1946737989               |
| SNP_P4_11660_35063857 | NC_021160.1    | Ca_kabuli_chr01 | 35063857                | TT                              | CC              | 1946737991               |
| SNP_P4_11661_35063903 | NC_021160.1    | Ca_kabuli_chr01 | 35063903                | AA                              | GG              | 1946737993               |
| SNP_P4_11662_35063929 | NC_021160.1    | Ca_kabuli_chr01 | 35063929                | AA                              | GG              | 1946737995               |
| SNP_P4_11663_35064694 | NC_021160.1    | Ca_kabuli_chr01 | 35064694                | TT                              | CC              | 1946737997               |
| SNP_P4_11664_35068581 | NC_021160.1    | Ca_kabuli_chr01 | 35068581                | TT                              | CC              | 1946737999               |
| SNP_P4_11665_35070458 | NC_021160.1    | Ca_kabuli_chr01 | 35070458                | CC                              | AA              | 1946738001               |
| SNP_P4_11666_35071987 | NC_021160.1    | Ca_kabuli_chr01 | 35071987                | CC                              | TT              | 1946738003               |
| SNP_P4_11667_35072158 | NC_021160.1    | Ca_kabuli_chr01 | 35072158                | CC                              | TT              | 1946738005               |
| SNP_P4_11669_35074570 | NC_021160.1    | Ca_kabuli_chr01 | 35074570                | GG                              | TT              | 1946738007               |
| SNP_P4_11670_35075531 | NC_021160.1    | Ca_kabuli_chr01 | 35075531                | AA                              | TT              | 1946738009               |
| SNP_P4_11671_35077260 | NC_021160.1    | Ca_kabuli_chr01 | 35077260                | AA                              | GG              | 1946738011               |
| SNP_P4_11672_35077554 | NC_021160.1    | Ca_kabuli_chr01 | 35077554                | CC                              | TT              | 1946738013               |

| SNPs IDs              | Chromosome IDs | Chromosomes     | Physical positions (bp) | CDC Frontier (Reference genome) | (ILWC46 & LPNB) | NCBI SNPdb Accession IDs |
|-----------------------|----------------|-----------------|-------------------------|---------------------------------|-----------------|--------------------------|
| SNP_P4_11673_35078453 | NC_021160.1    | Ca_kabuli_chr01 | 35078453                | TT                              | CC              | 1946738015               |
| SNP_P4_11674_35078734 | NC_021160.1    | Ca_kabuli_chr01 | 35078734                | AA                              | CC              | 1946738017               |
| SNP_P4_11675_35078768 | NC_021160.1    | Ca_kabuli_chr01 | 35078768                | CC                              | AA              | 1946738019               |
| SNP_P4_11676_35078873 | NC_021160.1    | Ca_kabuli_chr01 | 35078873                | AA                              | TT              | 1946738021               |
| SNP_P4_11677_35084600 | NC_021160.1    | Ca_kabuli_chr01 | 35084600                | GG                              | AA              | 1946738023               |
| SNP_P4_11678_35087422 | NC_021160.1    | Ca_kabuli_chr01 | 35087422                | AA                              | CC              | 1946738025               |
| SNP_P4_11679_35091343 | NC_021160.1    | Ca_kabuli_chr01 | 35091343                | AA                              | GG              | 1946738027               |
| SNP_P4_11681_35092481 | NC_021160.1    | Ca_kabuli_chr01 | 35092481                | AA                              | GG              | 1946738029               |
| SNP_P4_11683_35096750 | NC_021160.1    | Ca_kabuli_chr01 | 35096750                | AA                              | GG              | 1946738031               |
| SNP_P4_11684_35097234 | NC_021160.1    | Ca_kabuli_chr01 | 35097234                | AA                              | GG              | 1946738033               |
| SNP_P4_11685_35100894 | NC_021160.1    | Ca_kabuli_chr01 | 35100894                | GG                              | AA              | 1946738034               |
| SNP_P4_11686_35100895 | NC_021160.1    | Ca_kabuli_chr01 | 35100895                | AA                              | TT              | 1946738035               |
| SNP_P4_11687_35102932 | NC_021160.1    | Ca_kabuli_chr01 | 35102932                | AA                              | GG              | 1946738036               |
| SNP_P4_11688_35105456 | NC_021160.1    | Ca_kabuli_chr01 | 35105456                | AA                              | GG              | 1946738037               |
| SNP_P4_11689_35105815 | NC_021160.1    | Ca_kabuli_chr01 | 35105815                | TT                              | CC              | 1946738039               |
| SNP_P4_11690_35108351 | NC_021160.1    | Ca_kabuli_chr01 | 35108351                | GG                              | CC              | 1946738041               |
| SNP_P4_11691_35108359 | NC_021160.1    | Ca_kabuli_chr01 | 35108359                | TT                              | AA              | 1946738043               |
| SNP_P4_11692_35109140 | NC_021160.1    | Ca_kabuli_chr01 | 35109140                | AA                              | TT              | 1946738045               |
| SNP_P4_11693_35109558 | NC_021160.1    | Ca_kabuli_chr01 | 35109558                | AA                              | TT              | 1946738047               |
| SNP_P4_11694_35109795 | NC_021160.1    | Ca_kabuli_chr01 | 35109795                | CC                              | AA              | 1946738049               |
| SNP_P4_11695_35111608 | NC_021160.1    | Ca_kabuli_chr01 | 35111608                | TT                              | AA              | 1946738051               |
| SNP_P4_11696_35111629 | NC_021160.1    | Ca_kabuli_chr01 | 35111629                | CC                              | TT              | 1946738053               |
| SNP_P4_11697_35111644 | NC_021160.1    | Ca_kabuli_chr01 | 35111644                | AA                              | GG              | 1946738056               |
| SNP_P4_11699_35125701 | NC_021160.1    | Ca_kabuli_chr01 | 35125701                | GG                              | TT              | 1946738058               |
| SNP_P4_11700_35125855 | NC_021160.1    | Ca_kabuli_chr01 | 35125855                | AA                              | GG              | 1946738060               |
| SNP_P4_11701_35133315 | NC_021160.1    | Ca_kabuli_chr01 | 35133315                | GG                              | AA              | 1946738062               |
| SNP_P4_11702_35135772 | NC_021160.1    | Ca_kabuli_chr01 | 35135772                | CC                              | TT              | 1946738064               |
| SNP_P4_11703_35137423 | NC_021160.1    | Ca_kabuli_chr01 | 35137423                | TT                              | AA              | 1946738066               |
| SNP_P4_11704_35139998 | NC_021160.1    | Ca_kabuli_chr01 | 35139998                | AA                              | TT              | 1946738068               |
| SNP_P4_11705_35141049 | NC_021160.1    | Ca_kabuli_chr01 | 35141049                | GG                              | CC              | 1946738070               |
| SNP_P4_11707_35141989 | NC_021160.1    | Ca_kabuli_chr01 | 35141989                | TT                              | GG              | 1946738072               |
| SNP_P4_11708_35141994 | NC_021160.1    | Ca_kabuli_chr01 | 35141994                | AA                              | CC              | 1946738074               |
| SNP_P4_11709_35142562 | NC_021160.1    | Ca_kabuli_chr01 | 35142562                | TT                              | CC              | 1946738076               |
| SNP_P4_11710_35142569 | NC_021160.1    | Ca_kabuli_chr01 | 35142569                | TT                              | AA              | 1946738078               |
| SNP_P4_11711_35142581 | NC_021160.1    | Ca_kabuli_chr01 | 35142581                | AA                              | CC              | 1946738080               |
| SNP_P4_11712_35142587 | NC_021160.1    | Ca_kabuli_chr01 | 35142587                | CC                              | TT              | 1946738082               |
| SNP_P4_11713_35142642 | NC_021160.1    | Ca_kabuli_chr01 | 35142642                | AA                              | CC              | 1946738084               |
| SNP_P4_11714_35145642 | NC_021160.1    | Ca_kabuli_chr01 | 35145642                | AA                              | TT              | 1946738086               |
| SNP_P4_11715_35145963 | NC_021160.1    | Ca_kabuli_chr01 | 35145963                | TT                              | CC              | 1946738088               |
| SNP_P4_11716_35146244 | NC_021160.1    | Ca_kabuli_chr01 | 35146244                | TT                              | CC              | 1946738090               |
| SNP_P4_11717_35146431 | NC_021160.1    | Ca_kabuli_chr01 | 35146431                | CC                              | AA              | 1946738092               |
| SNP_P4_11718_35146433 | NC_021160.1    | Ca_kabuli_chr01 | 35146433                | AA                              | GG              | 1946738094               |

| SNPs IDs              | Chromosome IDs | Chromosomes     | Physical positions (bp) | CDC Frontier (Reference genome) | (ILWC46 & LPNB) | NCBI SNPdb Accession IDs |
|-----------------------|----------------|-----------------|-------------------------|---------------------------------|-----------------|--------------------------|
| SNP_P4_11719_35146447 | NC_021160.1    | Ca_kabuli_chr01 | 35146447                | AA                              | GG              | 1946738096               |
| SNP_P4_11720_35146488 | NC_021160.1    | Ca_kabuli_chr01 | 35146488                | GG                              | AA              | 1946738098               |
| SNP_P4_11721_35149339 | NC_021160.1    | Ca_kabuli_chr01 | 35149339                | TT                              | AA              | 1946738099               |
| SNP_P4_11722_35149367 | NC_021160.1    | Ca_kabuli_chr01 | 35149367                | AA                              | GG              | 1946738101               |
| SNP_P4_11723_35149368 | NC_021160.1    | Ca_kabuli_chr01 | 35149368                | CC                              | TT              | 1946738103               |
| SNP_P4_11724_35149370 | NC_021160.1    | Ca_kabuli_chr01 | 35149370                | TT                              | AA              | 1946738105               |
| SNP_P4_11725_35150005 | NC_021160.1    | Ca_kabuli_chr01 | 35150005                | AA                              | GG              | 1946738107               |
| SNP_P4_11726_35150033 | NC_021160.1    | Ca_kabuli_chr01 | 35150033                | GG                              | AA              | 1946738109               |
| SNP_P4_11727_35150344 | NC_021160.1    | Ca_kabuli_chr01 | 35150344                | AA                              | GG              | 1946738111               |
| SNP_P4_11728_35151295 | NC_021160.1    | Ca_kabuli_chr01 | 35151295                | CC                              | GG              | 1946738113               |
| SNP_P4_11729_35151303 | NC_021160.1    | Ca_kabuli_chr01 | 35151303                | CC                              | TT              | 1946738115               |
| SNP_P4_11730_35151339 | NC_021160.1    | Ca_kabuli_chr01 | 35151339                | TT                              | AA              | 1946738117               |
| SNP_P4_11731_35151485 | NC_021160.1    | Ca_kabuli_chr01 | 35151485                | TT                              | CC              | 1946738119               |
| SNP_P4_11732_35151499 | NC_021160.1    | Ca_kabuli_chr01 | 35151499                | CC                              | TT              | 1946738121               |
| SNP_P4_11733_35154541 | NC_021160.1    | Ca_kabuli_chr01 | 35154541                | AA                              | GG              | 1946738124               |
| SNP_P4_11734_35155665 | NC_021160.1    | Ca_kabuli_chr01 | 35155665                | TT                              | AA              | 1946738126               |
| SNP_P4_11736_35156020 | NC_021160.1    | Ca_kabuli_chr01 | 35156020                | AA                              | GG              | 1946738128               |
| SNP_P4_11738_35156092 | NC_021160.1    | Ca_kabuli_chr01 | 35156092                | GG                              | AA              | 1946738130               |
| SNP_P4_11739_35157098 | NC_021160.1    | Ca_kabuli_chr01 | 35157098                | GG                              | AA              | 1946738132               |
| SNP_P4_11740_35157525 | NC_021160.1    | Ca_kabuli_chr01 | 35157525                | GG                              | TT              | 1946738134               |
| SNP_P4_11741_35157864 | NC_021160.1    | Ca_kabuli_chr01 | 35157864                | GG                              | AA              | 1946738136               |
| SNP_P4_11742_35157887 | NC_021160.1    | Ca_kabuli_chr01 | 35157887                | AA                              | GG              | 1946738138               |
| SNP_P4_11743_35158393 | NC_021160.1    | Ca_kabuli_chr01 | 35158393                | AA                              | GG              | 1946738140               |
| SNP_P4_11744_35158409 | NC_021160.1    | Ca_kabuli_chr01 | 35158409                | CC                              | TT              | 1946738142               |
| SNP_P4_11745_35158413 | NC_021160.1    | Ca_kabuli_chr01 | 35158413                | TT                              | CC              | 1946738145               |
| SNP_P4_11746_35158449 | NC_021160.1    | Ca_kabuli_chr01 | 35158449                | GG                              | AA              | 1946738146               |
| SNP_P4_11747_35158720 | NC_021160.1    | Ca_kabuli_chr01 | 35158720                | AA                              | TT              | 1946738147               |
| SNP_P4_11748_35158769 | NC_021160.1    | Ca_kabuli_chr01 | 35158769                | AA                              | GG              | 1946738148               |
| SNP_P4_11749_35159965 | NC_021160.1    | Ca_kabuli_chr01 | 35159965                | CC                              | TT              | 1946738149               |
| SNP_P4_11750_35167354 | NC_021160.1    | Ca_kabuli_chr01 | 35167354                | GG                              | CC              | 1946738150               |
| SNP_P4_11751_35167624 | NC_021160.1    | Ca_kabuli_chr01 | 35167624                | CC                              | TT              | 1946738152               |
| SNP_P4_11753_35167939 | NC_021160.1    | Ca_kabuli_chr01 | 35167939                | CC                              | AA              | 1946738154               |
| SNP_P4_11754_35168165 | NC_021160.1    | Ca_kabuli_chr01 | 35168165                | AA                              | CC              | 1946738156               |
| SNP_P4_11755_35168194 | NC_021160.1    | Ca_kabuli_chr01 | 35168194                | AA                              | CC              | 1946738158               |
| SNP_P4_11756_35168265 | NC_021160.1    | Ca_kabuli_chr01 | 35168265                | CC                              | TT              | 1946738160               |
| SNP_P4_11757_35169626 | NC_021160.1    | Ca_kabuli_chr01 | 35169626                | TT                              | CC              | 1946738162               |
| SNP_P4_11758_35169639 | NC_021160.1    | Ca_kabuli_chr01 | 35169639                | TT                              | AA              | 1946738164               |
| SNP_P4_11759_35171137 | NC_021160.1    | Ca_kabuli_chr01 | 35171137                | GG                              | AA              | 1946738166               |
| SNP_P4_11760_35171451 | NC_021160.1    | Ca_kabuli_chr01 | 35171451                | CC                              | TT              | 1946738168               |
| SNP_P4_11761_35176475 | NC_021160.1    | Ca_kabuli_chr01 | 35176475                | TT                              | CC              | 1946738170               |
| SNP_P4_11762_35176513 | NC_021160.1    | Ca_kabuli_chr01 | 35176513                | AA                              | GG              | 1946738172               |
| SNP_P4_11763_35176523 | NC_021160.1    | Ca_kabuli_chr01 | 35176523                | CC                              | TT              | 1946738174               |

| SNPs IDs              | Chromosome IDs | Chromosomes     | Physical positions (bp) | CDC Frontier (Reference genome) | (ILWC46 & LPNB) | NCBI SNPdb Accession IDs |
|-----------------------|----------------|-----------------|-------------------------|---------------------------------|-----------------|--------------------------|
| SNP_P4_11764_35176859 | NC_021160.1    | Ca_kabuli_chr01 | 35176859                | AA                              | GG              | 1946738176               |
| SNP_P4_11765_35176881 | NC_021160.1    | Ca_kabuli_chr01 | 35176881                | CC                              | GG              | 1946738178               |
| SNP_P4_11766_35177934 | NC_021160.1    | Ca_kabuli_chr01 | 35177934                | GG                              | CC              | 1946738180               |
| SNP_P4_11767_35177939 | NC_021160.1    | Ca_kabuli_chr01 | 35177939                | CC                              | TT              | 1946738181               |
| SNP_P4_11768_35178343 | NC_021160.1    | Ca_kabuli_chr01 | 35178343                | AA                              | GG              | 1946738183               |
| SNP_P4_11769_35179419 | NC_021160.1    | Ca_kabuli_chr01 | 35179419                | AA                              | GG              | 1946738185               |
| SNP_P4_11770_35179448 | NC_021160.1    | Ca_kabuli_chr01 | 35179448                | GG                              | AA              | 1946738187               |
| SNP_P4_11772_35181119 | NC_021160.1    | Ca_kabuli_chr01 | 35181119                | AA                              | GG              | 1946738189               |
| SNP_P4_11773_35181293 | NC_021160.1    | Ca_kabuli_chr01 | 35181293                | TT                              | AA              | 1946738191               |
| SNP_P4_11774_35182687 | NC_021160.1    | Ca_kabuli_chr01 | 35182687                | GG                              | AA              | 1946738193               |
| SNP_P4_11775_35182831 | NC_021160.1    | Ca_kabuli_chr01 | 35182831                | TT                              | CC              | 1946738195               |
| SNP_P4_11776_35182846 | NC_021160.1    | Ca_kabuli_chr01 | 35182846                | GG                              | AA              | 1946738197               |
| SNP_P4_11777_35182917 | NC_021160.1    | Ca_kabuli_chr01 | 35182917                | CC                              | TT              | 1946738199               |
| SNP_P4_11778_35182918 | NC_021160.1    | Ca_kabuli_chr01 | 35182918                | TT                              | CC              | 1946738201               |
| SNP_P4_11779_35182925 | NC_021160.1    | Ca_kabuli_chr01 | 35182925                | GG                              | AA              | 1946738203               |
| SNP_P4_11780_35183921 | NC_021160.1    | Ca_kabuli_chr01 | 35183921                | TT                              | CC              | 1946738205               |
| SNP_P4_11781_35183973 | NC_021160.1    | Ca_kabuli_chr01 | 35183973                | CC                              | TT              | 1946738207               |
| SNP_P4_11782_35184197 | NC_021160.1    | Ca_kabuli_chr01 | 35184197                | GG                              | TT              | 1946738209               |
| SNP_P4_11783_35184200 | NC_021160.1    | Ca_kabuli_chr01 | 35184200                | AA                              | GG              | 1946738211               |
| SNP_P4_11784_35184223 | NC_021160.1    | Ca_kabuli_chr01 | 35184223                | AA                              | GG              | 1946738213               |
| SNP_P4_11785_35184256 | NC_021160.1    | Ca_kabuli_chr01 | 35184256                | TT                              | CC              | 1946738214               |
| SNP_P4_11786_35184258 | NC_021160.1    | Ca_kabuli_chr01 | 35184258                | GG                              | TT              | 1946738216               |
| SNP_P4_11787_35184493 | NC_021160.1    | Ca_kabuli_chr01 | 35184493                | GG                              | TT              | 1946738218               |
| SNP_P4_11788_35184514 | NC_021160.1    | Ca_kabuli_chr01 | 35184514                | CC                              | TT              | 1946738220               |
| SNP_P4_11789_35184558 | NC_021160.1    | Ca_kabuli_chr01 | 35184558                | TT                              | CC              | 1946738222               |
| SNP_P4_11790_35184723 | NC_021160.1    | Ca_kabuli_chr01 | 35184723                | GG                              | AA              | 1946738224               |
| SNP_P4_11791_35184758 | NC_021160.1    | Ca_kabuli_chr01 | 35184758                | AA                              | GG              | 1946738226               |
| SNP_P4_11792_35185571 | NC_021160.1    | Ca_kabuli_chr01 | 35185571                | GG                              | TT              | 1946738228               |
| SNP_P4_11793_35185844 | NC_021160.1    | Ca_kabuli_chr01 | 35185844                | AA                              | GG              | 1946738230               |
| SNP_P4_11795_35186228 | NC_021160.1    | Ca_kabuli_chr01 | 35186228                | TT                              | GG              | 1946738232               |
| SNP_P4_11797_35187592 | NC_021160.1    | Ca_kabuli_chr01 | 35187592                | GG                              | AA              | 1946738234               |
| SNP_P4_11798_35206108 | NC_021160.1    | Ca_kabuli_chr01 | 35206108                | TT                              | GG              | 1946738236               |
| SNP_P4_11799_35206137 | NC_021160.1    | Ca_kabuli_chr01 | 35206137                | CC                              | TT              | 1946738238               |
| SNP_P4_11800_35213939 | NC_021160.1    | Ca_kabuli_chr01 | 35213939                | GG                              | AA              | 1946738240               |
| SNP_P4_11801_35215595 | NC_021160.1    | Ca_kabuli_chr01 | 35215595                | AA                              | GG              | 1946738242               |
| SNP_P4_11802_35215596 | NC_021160.1    | Ca_kabuli_chr01 | 35215596                | GG                              | TT              | 1946738244               |
| SNP_P4_11803_35216106 | NC_021160.1    | Ca_kabuli_chr01 | 35216106                | GG                              | AA              | 1946738246               |
| SNP_P4_11804_35217768 | NC_021160.1    | Ca_kabuli_chr01 | 35217768                | AA                              | CC              | 1946738248               |
| SNP_P4_11805_35218140 | NC_021160.1    | Ca_kabuli_chr01 | 35218140                | TT                              | CC              | 1946738250               |
| SNP_P4_11806_35221939 | NC_021160.1    | Ca_kabuli_chr01 | 35221939                | TT                              | CC              | 1946738252               |
| SNP_P4_11807_35221964 | NC_021160.1    | Ca_kabuli_chr01 | 35221964                | GG                              | AA              | 1946738254               |
| SNP_P4_11809_35222246 | NC_021160.1    | Ca_kabuli_chr01 | 35222246                | TT                              | CC              | 1946738256               |

| SNPs IDs              | Chromosome IDs | Chromosomes     | Physical positions (bp) | CDC Frontier (Reference genome) | (ILWC46 & LPNB) | NCBI SNPdb Accession IDs |
|-----------------------|----------------|-----------------|-------------------------|---------------------------------|-----------------|--------------------------|
| SNP_P4_11810_35222796 | NC_021160.1    | Ca_kabuli_chr01 | 35222796                | TT                              | CC              | 1946738258               |
| SNP_P4_11811_35223251 | NC_021160.1    | Ca_kabuli_chr01 | 35223251                | GG                              | AA              | 1946738260               |
| SNP_P4_11812_35223304 | NC_021160.1    | Ca_kabuli_chr01 | 35223304                | CC                              | GG              | 1946738262               |
| SNP_P4_11813_35223322 | NC_021160.1    | Ca_kabuli_chr01 | 35223322                | TT                              | CC              | 1946738263               |
| SNP_P4_11814_35223571 | NC_021160.1    | Ca_kabuli_chr01 | 35223571                | TT                              | AA              | 1946738265               |
| SNP_P4_11815_35224667 | NC_021160.1    | Ca_kabuli_chr01 | 35224667                | CC                              | TT              | 1946738267               |
| SNP_P4_11816_35224711 | NC_021160.1    | Ca_kabuli_chr01 | 35224711                | CC                              | TT              | 1946738269               |
| SNP_P4_11817_35225005 | NC_021160.1    | Ca_kabuli_chr01 | 35225005                | GG                              | AA              | 1946738271               |
| SNP_P4_11818_35225018 | NC_021160.1    | Ca_kabuli_chr01 | 35225018                | CC                              | GG              | 1946738273               |
| SNP_P4_11819_35225055 | NC_021160.1    | Ca_kabuli_chr01 | 35225055                | TT                              | CC              | 1946738275               |
| SNP_P4_11820_35225122 | NC_021160.1    | Ca_kabuli_chr01 | 35225122                | CC                              | GG              | 1946738277               |
| SNP_P4_11821_35225438 | NC_021160.1    | Ca_kabuli_chr01 | 35225438                | CC                              | TT              | 1946738279               |
| SNP_P4_11822_35225647 | NC_021160.1    | Ca_kabuli_chr01 | 35225647                | GG                              | TT              | 1946738281               |
| SNP_P4_11823_35225827 | NC_021160.1    | Ca_kabuli_chr01 | 35225827                | TT                              | GG              | 1946738283               |
| SNP_P4_11824_35226335 | NC_021160.1    | Ca_kabuli_chr01 | 35226335                | GG                              | TT              | 1946738285               |
| SNP_P4_11825_35226496 | NC_021160.1    | Ca_kabuli_chr01 | 35226496                | TT                              | CC              | 1946738287               |
| SNP_P4_11826_35226553 | NC_021160.1    | Ca_kabuli_chr01 | 35226553                | AA                              | CC              | 1946738289               |
| SNP_P4_11827_35226560 | NC_021160.1    | Ca_kabuli_chr01 | 35226560                | GG                              | CC              | 1946738291               |
| SNP_P4_11828_35226793 | NC_021160.1    | Ca_kabuli_chr01 | 35226793                | AA                              | CC              | 1946738293               |
| SNP_P4_11830_35227345 | NC_021160.1    | Ca_kabuli_chr01 | 35227345                | AA                              | TT              | 1946738295               |
| SNP_P4_11831_35227375 | NC_021160.1    | Ca_kabuli_chr01 | 35227375                | GG                              | AA              | 1946738296               |
| SNP_P4_11832_35227532 | NC_021160.1    | Ca_kabuli_chr01 | 35227532                | GG                              | AA              | 1946738298               |
| SNP_P4_11833_35227567 | NC_021160.1    | Ca_kabuli_chr01 | 35227567                | AA                              | GG              | 1946738300               |
| SNP_P4_11834_35227569 | NC_021160.1    | Ca_kabuli_chr01 | 35227569                | TT                              | CC              | 1946738302               |
| SNP_P4_11835_35227573 | NC_021160.1    | Ca_kabuli_chr01 | 35227573                | TT                              | CC              | 1946738304               |
| SNP_P4_11836_35227577 | NC_021160.1    | Ca_kabuli_chr01 | 35227577                | AA                              | GG              | 1946738306               |
| SNP_P4_11837_35227727 | NC_021160.1    | Ca_kabuli_chr01 | 35227727                | AA                              | CC              | 1946738308               |
| SNP_P4_11838_35227734 | NC_021160.1    | Ca_kabuli_chr01 | 35227734                | TT                              | GG              | 1946738310               |
| SNP_P4_11839_35227773 | NC_021160.1    | Ca_kabuli_chr01 | 35227773                | TT                              | CC              | 1946738312               |
| SNP_P4_11841_35227815 | NC_021160.1    | Ca_kabuli_chr01 | 35227815                | TT                              | CC              | 1946738314               |
| SNP_P4_11842_35227915 | NC_021160.1    | Ca_kabuli_chr01 | 35227915                | CC                              | AA              | 1946738316               |
| SNP_P4_11843_35229234 | NC_021160.1    | Ca_kabuli_chr01 | 35229234                | GG                              | AA              | 1946738318               |
| SNP_P4_11844_35229596 | NC_021160.1    | Ca_kabuli_chr01 | 35229596                | AA                              | CC              | 1946738320               |
| SNP_P4_11845_35230196 | NC_021160.1    | Ca_kabuli_chr01 | 35230196                | CC                              | AA              | 1946738322               |
| SNP_P4_11846_35230644 | NC_021160.1    | Ca_kabuli_chr01 | 35230644                | CC                              | AA              | 1946738324               |
| SNP_P4_11847_35230967 | NC_021160.1    | Ca_kabuli_chr01 | 35230967                | AA                              | GG              | 1946738326               |
| SNP_P4_11848_35230974 | NC_021160.1    | Ca_kabuli_chr01 | 35230974                | TT                              | CC              | 1946738328               |
| SNP_P4_11849_35231389 | NC_021160.1    | Ca_kabuli_chr01 | 35231389                | TT                              | CC              | 1946738330               |
| SNP_P4_11850_35231399 | NC_021160.1    | Ca_kabuli_chr01 | 35231399                | TT                              | GG              | 1946738332               |
| SNP_P4_11851_35232182 | NC_021160.1    | Ca_kabuli_chr01 | 35232182                | CC                              | TT              | 1946738334               |
| SNP_P4_11852_35232895 | NC_021160.1    | Ca_kabuli_chr01 | 35232895                | AA                              | TT              | 1946738336               |
| SNP_P4_11853_35232933 | NC_021160.1    | Ca_kabuli_chr01 | 35232933                | CC                              | GG              | 1946738338               |

| SNPs IDs              | Chromosome IDs | Chromosomes     | Physical positions (bp) | CDC Frontier (Reference genome) | (ILWC46 & LPNB) | NCBI SNPdb Accession IDs |
|-----------------------|----------------|-----------------|-------------------------|---------------------------------|-----------------|--------------------------|
| SNP_P4_11854_35233067 | NC_021160.1    | Ca_kabuli_chr01 | 35233067                | AA                              | GG              | 1946738340               |
| SNP_P4_11856_35233115 | NC_021160.1    | Ca_kabuli_chr01 | 35233115                | TT                              | AA              | 1946738342               |
| SNP_P4_11857_35233600 | NC_021160.1    | Ca_kabuli_chr01 | 35233600                | GG                              | AA              | 1946738344               |
| SNP_P4_11858_35233942 | NC_021160.1    | Ca_kabuli_chr01 | 35233942                | TT                              | GG              | 1946738346               |
| SNP_P4_11859_35235822 | NC_021160.1    | Ca_kabuli_chr01 | 35235822                | GG                              | TT              | 1946738348               |
| SNP_P4_11860_35235849 | NC_021160.1    | Ca_kabuli_chr01 | 35235849                | TT                              | AA              | 1946738350               |
| SNP_P4_11862_35236169 | NC_021160.1    | Ca_kabuli_chr01 | 35236169                | GG                              | AA              | 1946738352               |
| SNP_P4_11864_35236194 | NC_021160.1    | Ca_kabuli_chr01 | 35236194                | AA                              | GG              | 1946738354               |
| SNP_P4_11866_35238890 | NC_021160.1    | Ca_kabuli_chr01 | 35238890                | GG                              | TT              | 1946738356               |
| SNP_P4_11867_35239062 | NC_021160.1    | Ca_kabuli_chr01 | 35239062                | AA                              | GG              | 1946738359               |
| SNP_P4_11868_35239117 | NC_021160.1    | Ca_kabuli_chr01 | 35239117                | AA                              | CC              | 1946738361               |
| SNP_P4_11869_35239303 | NC_021160.1    | Ca_kabuli_chr01 | 35239303                | TT                              | CC              | 1946738363               |
| SNP_P4_11870_35239360 | NC_021160.1    | Ca_kabuli_chr01 | 35239360                | GG                              | CC              | 1946738365               |
| SNP_P4_11871_35240077 | NC_021160.1    | Ca_kabuli_chr01 | 35240077                | GG                              | AA              | 1946738367               |
| SNP_P4_11872_35240104 | NC_021160.1    | Ca_kabuli_chr01 | 35240104                | CC                              | AA              | 1946738369               |
| SNP_P4_11873_35240142 | NC_021160.1    | Ca_kabuli_chr01 | 35240142                | GG                              | AA              | 1946738372               |
| SNP_P4_11874_35240162 | NC_021160.1    | Ca_kabuli_chr01 | 35240162                | AA                              | GG              | 1946738374               |
| SNP_P4_11875_35240163 | NC_021160.1    | Ca_kabuli_chr01 | 35240163                | TT                              | CC              | 1946738376               |
| SNP_P4_11877_35240315 | NC_021160.1    | Ca_kabuli_chr01 | 35240315                | GG                              | AA              | 1946738378               |
| SNP_P4_11878_35240330 | NC_021160.1    | Ca_kabuli_chr01 | 35240330                | TT                              | GG              | 1946738380               |
| SNP_P4_11879_35240383 | NC_021160.1    | Ca_kabuli_chr01 | 35240383                | AA                              | GG              | 1946738382               |
| SNP_P4_11880_35240424 | NC_021160.1    | Ca_kabuli_chr01 | 35240424                | AA                              | TT              | 1946738385               |
| SNP_P4_11881_35240455 | NC_021160.1    | Ca_kabuli_chr01 | 35240455                | GG                              | TT              | 1946738387               |
| SNP_P4_11882_35240470 | NC_021160.1    | Ca_kabuli_chr01 | 35240470                | GG                              | AA              | 1946738389               |
| SNP_P4_11883_35240543 | NC_021160.1    | Ca_kabuli_chr01 | 35240543                | CC                              | TT              | 1946738391               |
| SNP_P4_11884_35240562 | NC_021160.1    | Ca_kabuli_chr01 | 35240562                | AA                              | CC              | 1946738393               |
| SNP_P4_11885_35240603 | NC_021160.1    | Ca_kabuli_chr01 | 35240603                | AA                              | CC              | 1946738395               |
| SNP_P4_11886_35240618 | NC_021160.1    | Ca_kabuli_chr01 | 35240618                | TT                              | CC              | 1946738397               |
| SNP_P4_11887_35240622 | NC_021160.1    | Ca_kabuli_chr01 | 35240622                | AA                              | GG              | 1946738399               |
| SNP_P4_11888_35240656 | NC_021160.1    | Ca_kabuli_chr01 | 35240656                | AA                              | CC              | 1946738402               |
| SNP_P4_11889_35240667 | NC_021160.1    | Ca_kabuli_chr01 | 35240667                | CC                              | TT              | 1946738404               |
| SNP_P4_11891_35241191 | NC_021160.1    | Ca_kabuli_chr01 | 35241191                | TT                              | AA              | 1946738406               |
| SNP_P4_11892_35242978 | NC_021160.1    | Ca_kabuli_chr01 | 35242978                | AA                              | CC              | 1946738408               |
| SNP_P4_11893_35243540 | NC_021160.1    | Ca_kabuli_chr01 | 35243540                | AA                              | GG              | 1946738410               |
| SNP_P4_11894_35243678 | NC_021160.1    | Ca_kabuli_chr01 | 35243678                | AA                              | TT              | 1946738412               |
| SNP_P4_11895_35243703 | NC_021160.1    | Ca_kabuli_chr01 | 35243703                | TT                              | CC              | 1946738414               |
| SNP_P4_11896_35243736 | NC_021160.1    | Ca_kabuli_chr01 | 35243736                | TT                              | AA              | 1946738416               |
| SNP_P4_11897_35243773 | NC_021160.1    | Ca_kabuli_chr01 | 35243773                | GG                              | TT              | 1946738418               |
| SNP_P4_11898_35243804 | NC_021160.1    | Ca_kabuli_chr01 | 35243804                | CC                              | AA              | 1946738420               |
| SNP_P4_11899_35244240 | NC_021160.1    | Ca_kabuli_chr01 | 35244240                | AA                              | TT              | 1946738422               |
| SNP_P4_11900_35244514 | NC_021160.1    | Ca_kabuli_chr01 | 35244514                | GG                              | TT              | 1946738424               |
| SNP_P4_11901_35244603 | NC_021160.1    | Ca_kabuli_chr01 | 35244603                | CC                              | AA              | 1946738426               |

| SNPs IDs              | Chromosome IDs | Chromosomes     | Physical positions (bp) | CDC Frontier (Reference genome) | (ILWC46 & LPNB) | NCBI SNPdb Accession IDs |
|-----------------------|----------------|-----------------|-------------------------|---------------------------------|-----------------|--------------------------|
| SNP_P4_11902_35244805 | NC_021160.1    | Ca_kabuli_chr01 | 35244805                | CC                              | AA              | 1946738428               |
| SNP_P4_11904_35246516 | NC_021160.1    | Ca_kabuli_chr01 | 35246516                | GG                              | TT              | 1946738430               |
| SNP_P4_11905_35246846 | NC_021160.1    | Ca_kabuli_chr01 | 35246846                | TT                              | CC              | 1946738433               |
| SNP_P4_11906_35248827 | NC_021160.1    | Ca_kabuli_chr01 | 35248827                | AA                              | TT              | 1946738435               |
| SNP_P4_11907_35249192 | NC_021160.1    | Ca_kabuli_chr01 | 35249192                | GG                              | CC              | 1946738437               |
| SNP_P4_11908_35249211 | NC_021160.1    | Ca_kabuli_chr01 | 35249211                | GG                              | AA              | 1946738439               |
| SNP_P4_11910_35252038 | NC_021160.1    | Ca_kabuli_chr01 | 35252038                | TT                              | GG              | 1946738441               |
| SNP_P4_11911_35252073 | NC_021160.1    | Ca_kabuli_chr01 | 35252073                | TT                              | GG              | 1946738443               |
| SNP_P4_11912_35252264 | NC_021160.1    | Ca_kabuli_chr01 | 35252264                | CC                              | AA              | 1946738445               |
| SNP_P4_11913_35252272 | NC_021160.1    | Ca_kabuli_chr01 | 35252272                | TT                              | GG              | 1946738447               |
| SNP_P4_11914_35252552 | NC_021160.1    | Ca_kabuli_chr01 | 35252552                | GG                              | AA              | 1946738449               |
| SNP_P4_11915_35252594 | NC_021160.1    | Ca_kabuli_chr01 | 35252594                | CC                              | TT              | 1946738451               |
| SNP_P4_11916_35254793 | NC_021160.1    | Ca_kabuli_chr01 | 35254793                | GG                              | TT              | 1946738453               |
| SNP_P4_11917_35255376 | NC_021160.1    | Ca_kabuli_chr01 | 35255376                | TT                              | AA              | 1946738455               |
| SNP_P4_11918_35256217 | NC_021160.1    | Ca_kabuli_chr01 | 35256217                | CC                              | AA              | 1946738458               |
| SNP_P4_11919_35256507 | NC_021160.1    | Ca_kabuli_chr01 | 35256507                | CC                              | AA              | 1946738460               |
| SNP_P4_11920_35256530 | NC_021160.1    | Ca_kabuli_chr01 | 35256530                | GG                              | AA              | 1946738462               |
| SNP_P4_11921_35257471 | NC_021160.1    | Ca_kabuli_chr01 | 35257471                | AA                              | GG              | 1946738464               |
| SNP_P4_11922_35257492 | NC_021160.1    | Ca_kabuli_chr01 | 35257492                | TT                              | GG              | 1946738466               |
| SNP_P4_11923_35257827 | NC_021160.1    | Ca_kabuli_chr01 | 35257827                | GG                              | AA              | 1946738468               |
| SNP_P4_11924_35259167 | NC_021160.1    | Ca_kabuli_chr01 | 35259167                | AA                              | CC              | 1946738470               |
| SNP_P4_11925_35259754 | NC_021160.1    | Ca_kabuli_chr01 | 35259754                | AA                              | GG              | 1946738472               |
| SNP_P4_11926_35259781 | NC_021160.1    | Ca_kabuli_chr01 | 35259781                | AA                              | GG              | 1946738474               |
| SNP_P4_11927_35259868 | NC_021160.1    | Ca_kabuli_chr01 | 35259868                | GG                              | AA              | 1946738476               |
| SNP_P4_11928_35260430 | NC_021160.1    | Ca_kabuli_chr01 | 35260430                | CC                              | AA              | 1946738478               |
| SNP_P4_11930_35260510 | NC_021160.1    | Ca_kabuli_chr01 | 35260510                | AA                              | CC              | 1946738481               |
| SNP_P4_11931_35260627 | NC_021160.1    | Ca_kabuli_chr01 | 35260627                | TT                              | CC              | 1946738483               |
| SNP_P4_11932_35260785 | NC_021160.1    | Ca_kabuli_chr01 | 35260785                | CC                              | TT              | 1946738485               |
| SNP_P4_11933_35260808 | NC_021160.1    | Ca_kabuli_chr01 | 35260808                | GG                              | AA              | 1946738487               |
| SNP_P4_11934_35260848 | NC_021160.1    | Ca_kabuli_chr01 | 35260848                | AA                              | GG              | 1946738489               |
| SNP_P4_11935_35260922 | NC_021160.1    | Ca_kabuli_chr01 | 35260922                | TT                              | CC              | 1946738491               |
| SNP_P4_11936_35261030 | NC_021160.1    | Ca_kabuli_chr01 | 35261030                | TT                              | GG              | 1946738493               |
| SNP_P4_11937_35261045 | NC_021160.1    | Ca_kabuli_chr01 | 35261045                | GG                              | TT              | 1946738495               |
| SNP_P4_11938_35261112 | NC_021160.1    | Ca_kabuli_chr01 | 35261112                | GG                              | AA              | 1946738497               |
| SNP_P4_11939_35261240 | NC_021160.1    | Ca_kabuli_chr01 | 35261240                | CC                              | TT              | 1946738499               |
| SNP_P4_11940_35261245 | NC_021160.1    | Ca_kabuli_chr01 | 35261245                | AA                              | GG              | 1946738501               |
| SNP_P4_11941_35261272 | NC_021160.1    | Ca_kabuli_chr01 | 35261272                | GG                              | AA              | 1946738503               |
| SNP_P4_11942_35261312 | NC_021160.1    | Ca_kabuli_chr01 | 35261312                | CC                              | AA              | 1946738505               |
| SNP_P4_11943_35261327 | NC_021160.1    | Ca_kabuli_chr01 | 35261327                | AA                              | GG              | 1946738507               |
| SNP_P4_11944_35261349 | NC_021160.1    | Ca_kabuli_chr01 | 35261349                | AA                              | TT              | 1946738510               |
| SNP_P4_11945_35261403 | NC_021160.1    | Ca_kabuli_chr01 | 35261403                | TT                              | AA              | 1946738512               |
| SNP_P4_11946_35261404 | NC_021160.1    | Ca_kabuli_chr01 | 35261404                | TT                              | AA              | 1946738514               |



| SNPs IDs              | Chromosome IDs | Chromosomes     | Physical positions (bp) | CDC Frontier (Reference genome) | (ILWC46 & LPNB) | NCBI SNPdb Accession IDs |
|-----------------------|----------------|-----------------|-------------------------|---------------------------------|-----------------|--------------------------|
| SNP_P4_11947_35261406 | NC_021160.1    | Ca_kabuli_chr01 | 35261406                | TT                              | AA              | 1946738516               |
| SNP_P4_11948_35261407 | NC_021160.1    | Ca_kabuli_chr01 | 35261407                | CC                              | TT              | 1946738518               |
| SNP_P4_11949_35261432 | NC_021160.1    | Ca_kabuli_chr01 | 35261432                | CC                              | AA              | 1946738520               |
| SNP_P4_11950_35261484 | NC_021160.1    | Ca_kabuli_chr01 | 35261484                | AA                              | TT              | 1946738522               |
| SNP_P4_11951_35261509 | NC_021160.1    | Ca_kabuli_chr01 | 35261509                | TT                              | AA              | 1946738524               |
| SNP_P4_11952_35261560 | NC_021160.1    | Ca_kabuli_chr01 | 35261560                | TT                              | CC              | 1946738527               |
| SNP_P4_11953_35261582 | NC_021160.1    | Ca_kabuli_chr01 | 35261582                | CC                              | TT              | 1946738529               |
| SNP_P4_11954_35261686 | NC_021160.1    | Ca_kabuli_chr01 | 35261686                | GG                              | AA              | 1946738531               |
| SNP_P4_11956_35261858 | NC_021160.1    | Ca_kabuli_chr01 | 35261858                | AA                              | CC              | 1946738533               |
| SNP_P4_11957_35261886 | NC_021160.1    | Ca_kabuli_chr01 | 35261886                | AA                              | CC              | 1946738535               |
| SNP_P4_11958_35261890 | NC_021160.1    | Ca_kabuli_chr01 | 35261890                | CC                              | GG              | 1946738537               |
| SNP_P4_11959_35261893 | NC_021160.1    | Ca_kabuli_chr01 | 35261893                | CC                              | TT              | 1946738539               |
| SNP_P4_11960_35261906 | NC_021160.1    | Ca_kabuli_chr01 | 35261906                | CC                              | TT              | 1946738541               |
| SNP_P4_11961_35261965 | NC_021160.1    | Ca_kabuli_chr01 | 35261965                | TT                              | GG              | 1946738543               |
| SNP_P4_11962_35261968 | NC_021160.1    | Ca_kabuli_chr01 | 35261968                | AA                              | CC              | 1946738545               |
| SNP_P4_11963_35261997 | NC_021160.1    | Ca_kabuli_chr01 | 35261997                | TT                              | CC              | 1946738547               |
| SNP_P4_11964_35262001 | NC_021160.1    | Ca_kabuli_chr01 | 35262001                | TT                              | CC              | 1946738549               |
| SNP_P4_11965_35262006 | NC_021160.1    | Ca_kabuli_chr01 | 35262006                | TT                              | AA              | 1946738551               |
| SNP_P4_11966_35262020 | NC_021160.1    | Ca_kabuli_chr01 | 35262020                | TT                              | CC              | 1946738553               |
| SNP_P4_11967_35262029 | NC_021160.1    | Ca_kabuli_chr01 | 35262029                | CC                              | AA              | 1946738555               |
| SNP_P4_11968_35262069 | NC_021160.1    | Ca_kabuli_chr01 | 35262069                | AA                              | GG              | 1946738557               |
| SNP_P4_11969_35262071 | NC_021160.1    | Ca_kabuli_chr01 | 35262071                | GG                              | AA              | 1946738559               |
| SNP_P4_11970_35262110 | NC_021160.1    | Ca_kabuli_chr01 | 35262110                | TT                              | CC              | 1946738561               |
| SNP_P4_11971_35264078 | NC_021160.1    | Ca_kabuli_chr01 | 35264078                | CC                              | TT              | 1946738563               |
| SNP_P4_11972_35264268 | NC_021160.1    | Ca_kabuli_chr01 | 35264268                | AA                              | TT              | 1946738565               |
| SNP_P4_11973_35264271 | NC_021160.1    | Ca_kabuli_chr01 | 35264271                | TT                              | CC              | 1946738567               |
| SNP_P4_11974_35264282 | NC_021160.1    | Ca_kabuli_chr01 | 35264282                | CC                              | TT              | 1946738569               |
| SNP_P4_11975_35264496 | NC_021160.1    | Ca_kabuli_chr01 | 35264496                | GG                              | TT              | 1946738571               |
| SNP_P4_11976_35264546 | NC_021160.1    | Ca_kabuli_chr01 | 35264546                | GG                              | AA              | 1946738573               |
| SNP_P4_11978_35264656 | NC_021160.1    | Ca_kabuli_chr01 | 35264656                | AA                              | GG              | 1946738575               |
| SNP_P4_11979_35264660 | NC_021160.1    | Ca_kabuli_chr01 | 35264660                | CC                              | AA              | 1946738577               |
| SNP_P4_11981_35264803 | NC_021160.1    | Ca_kabuli_chr01 | 35264803                | TT                              | CC              | 1946738579               |
| SNP_P4_11982_35264806 | NC_021160.1    | Ca_kabuli_chr01 | 35264806                | TT                              | AA              | 1946738582               |
| SNP_P4_11983_35264807 | NC_021160.1    | Ca_kabuli_chr01 | 35264807                | AA                              | TT              | 1946738584               |
| SNP_P4_11984_35264810 | NC_021160.1    | Ca_kabuli_chr01 | 35264810                | GG                              | AA              | 1946738586               |
| SNP_P4_11985_35264824 | NC_021160.1    | Ca_kabuli_chr01 | 35264824                | CC                              | GG              | 1946738588               |
| SNP_P4_11986_35264877 | NC_021160.1    | Ca_kabuli_chr01 | 35264877                | AA                              | CC              | 1946738590               |
| SNP_P4_11987_35264922 | NC_021160.1    | Ca_kabuli_chr01 | 35264922                | AA                              | GG              | 1946738592               |
| SNP_P4_11988_35264924 | NC_021160.1    | Ca_kabuli_chr01 | 35264924                | TT                              | CC              | 1946738594               |
| SNP_P4_11989_35264925 | NC_021160.1    | Ca_kabuli_chr01 | 35264925                | CC                              | TT              | 1946738595               |
| SNP_P4_11990_35264960 | NC_021160.1    | Ca_kabuli_chr01 | 35264960                | CC                              | TT              | 1946738597               |
| SNP_P4_11991_35264961 | NC_021160.1    | Ca_kabuli_chr01 | 35264961                | CC                              | TT              | 1946738599               |

| SNPs IDs              | Chromosome IDs | Chromosomes     | Physical positions (bp) | CDC Frontier (Reference genome) | (ILWC46 & LPNB) | NCBI SNPdb Accession IDs |
|-----------------------|----------------|-----------------|-------------------------|---------------------------------|-----------------|--------------------------|
| SNP_P4_11992_35264981 | NC_021160.1    | Ca_kabuli_chr01 | 35264981                | GG                              | CC              | 1946738601               |
| SNP_P4_11993_35264982 | NC_021160.1    | Ca_kabuli_chr01 | 35264982                | GG                              | AA              | 1946738603               |
| SNP_P4_11994_35265004 | NC_021160.1    | Ca_kabuli_chr01 | 35265004                | GG                              | TT              | 1946738605               |
| SNP_P4_11995_35265008 | NC_021160.1    | Ca_kabuli_chr01 | 35265008                | CC                              | AA              | 1946738607               |
| SNP_P4_11996_35265016 | NC_021160.1    | Ca_kabuli_chr01 | 35265016                | AA                              | TT              | 1946738609               |
| SNP_P4_11997_35265046 | NC_021160.1    | Ca_kabuli_chr01 | 35265046                | TT                              | CC              | 1946738611               |
| SNP_P4_11998_35265059 | NC_021160.1    | Ca_kabuli_chr01 | 35265059                | GG                              | AA              | 1946738613               |
| SNP_P4_11999_35265150 | NC_021160.1    | Ca_kabuli_chr01 | 35265150                | CC                              | TT              | 1946738615               |
| SNP_P4_12000_35265229 | NC_021160.1    | Ca_kabuli_chr01 | 35265229                | CC                              | AA              | 1946738617               |
| SNP_P4_12001_35265231 | NC_021160.1    | Ca_kabuli_chr01 | 35265231                | CC                              | TT              | 1946738619               |
| SNP_P4_12002_35265274 | NC_021160.1    | Ca_kabuli_chr01 | 35265274                | CC                              | TT              | 1946738621               |
| SNP_P4_12003_35265303 | NC_021160.1    | Ca_kabuli_chr01 | 35265303                | CC                              | GG              | 1946738623               |
| SNP_P4_12004_35265304 | NC_021160.1    | Ca_kabuli_chr01 | 35265304                | GG                              | AA              | 1946738625               |
| SNP_P4_12005_35265374 | NC_021160.1    | Ca_kabuli_chr01 | 35265374                | GG                              | AA              | 1946738627               |
| SNP_P4_12006_35265433 | NC_021160.1    | Ca_kabuli_chr01 | 35265433                | CC                              | TT              | 1946738629               |
| SNP_P4_12007_35265449 | NC_021160.1    | Ca_kabuli_chr01 | 35265449                | CC                              | GG              | 1946738631               |
| SNP_P4_12008_35265456 | NC_021160.1    | Ca_kabuli_chr01 | 35265456                | GG                              | AA              | 1946738633               |
| SNP_P4_12009_35265467 | NC_021160.1    | Ca_kabuli_chr01 | 35265467                | CC                              | TT              | 1946738635               |
| SNP_P4_12011_35265540 | NC_021160.1    | Ca_kabuli_chr01 | 35265540                | AA                              | CC              | 1946738637               |
| SNP_P4_12012_35265545 | NC_021160.1    | Ca_kabuli_chr01 | 35265545                | CC                              | TT              | 1946738639               |
| SNP_P4_12013_35265724 | NC_021160.1    | Ca_kabuli_chr01 | 35265724                | GG                              | AA              | 1946738641               |
| SNP_P4_12014_35265760 | NC_021160.1    | Ca_kabuli_chr01 | 35265760                | AA                              | TT              | 1946738643               |
| SNP_P4_12015_35265780 | NC_021160.1    | Ca_kabuli_chr01 | 35265780                | AA                              | GG              | 1946738646               |
| SNP_P4_12016_35265809 | NC_021160.1    | Ca_kabuli_chr01 | 35265809                | AA                              | GG              | 1946738648               |
| SNP_P4_12017_35265815 | NC_021160.1    | Ca_kabuli_chr01 | 35265815                | TT                              | CC              | 1946738651               |
| SNP_P4_12018_35265852 | NC_021160.1    | Ca_kabuli_chr01 | 35265852                | TT                              | GG              | 1946738653               |
| SNP_P4_12019_35265887 | NC_021160.1    | Ca_kabuli_chr01 | 35265887                | AA                              | TT              | 1946738655               |
| SNP_P4_12020_35265916 | NC_021160.1    | Ca_kabuli_chr01 | 35265916                | TT                              | CC              | 1946738657               |
| SNP_P4_12021_35265965 | NC_021160.1    | Ca_kabuli_chr01 | 35265965                | AA                              | TT              | 1946738659               |
| SNP_P4_12022_35266005 | NC_021160.1    | Ca_kabuli_chr01 | 35266005                | CC                              | GG              | 1946738661               |
| SNP_P4_12023_35266006 | NC_021160.1    | Ca_kabuli_chr01 | 35266006                | AA                              | GG              | 1946738663               |
| SNP_P4_12024_35266060 | NC_021160.1    | Ca_kabuli_chr01 | 35266060                | AA                              | TT              | 1946738665               |
| SNP_P4_12025_35266088 | NC_021160.1    | Ca_kabuli_chr01 | 35266088                | CC                              | TT              | 1946738667               |
| SNP_P4_12026_35266213 | NC_021160.1    | Ca_kabuli_chr01 | 35266213                | GG                              | CC              | 1946738669               |
| SNP_P4_12028_35266253 | NC_021160.1    | Ca_kabuli_chr01 | 35266253                | AA                              | GG              | 1946738671               |
| SNP_P4_12029_35266267 | NC_021160.1    | Ca_kabuli_chr01 | 35266267                | CC                              | AA              | 1946738673               |
| SNP_P4_12030_35266330 | NC_021160.1    | Ca_kabuli_chr01 | 35266330                | GG                              | AA              | 1946738675               |
| SNP_P4_12031_35266345 | NC_021160.1    | Ca_kabuli_chr01 | 35266345                | TT                              | GG              | 1946738677               |
| SNP_P4_12032_35267390 | NC_021160.1    | Ca_kabuli_chr01 | 35267390                | TT                              | AA              | 1946738679               |
| SNP_P4_12033_35267425 | NC_021160.1    | Ca_kabuli_chr01 | 35267425                | AA                              | GG              | 1946738681               |
| SNP_P4_12034_35272700 | NC_021160.1    | Ca_kabuli_chr01 | 35272700                | AA                              | GG              | 1946738683               |
| SNP_P4_12035_35275695 | NC_021160.1    | Ca_kabuli_chr01 | 35275695                | AA                              | GG              | 1946738685               |

| SNPs IDs              | Chromosome IDs | Chromosomes     | Physical positions (bp) | CDC Frontier (Reference genome) | (ILWC46 & LPNB) | NCBI SNPdb Accession IDs |
|-----------------------|----------------|-----------------|-------------------------|---------------------------------|-----------------|--------------------------|
| SNP_P4_12036_35275703 | NC_021160.1    | Ca_kabuli_chr01 | 35275703                | CC                              | TT              | 1946738687               |
| SNP_P4_12037_35275721 | NC_021160.1    | Ca_kabuli_chr01 | 35275721                | TT                              | CC              | 1946738689               |
| SNP_P4_12038_35281147 | NC_021160.1    | Ca_kabuli_chr01 | 35281147                | GG                              | CC              | 1946738690               |
| SNP_P4_12039_35281262 | NC_021160.1    | Ca_kabuli_chr01 | 35281262                | CC                              | TT              | 1946738692               |
| SNP_P4_12040_35281288 | NC_021160.1    | Ca_kabuli_chr01 | 35281288                | CC                              | TT              | 1946738694               |
| SNP_P4_12041_35281315 | NC_021160.1    | Ca_kabuli_chr01 | 35281315                | GG                              | AA              | 1946738696               |
| SNP_P4_12042_35281322 | NC_021160.1    | Ca_kabuli_chr01 | 35281322                | CC                              | GG              | 1946738698               |
| SNP_P4_12043_35281425 | NC_021160.1    | Ca_kabuli_chr01 | 35281425                | AA                              | TT              | 1946738700               |
| SNP_P4_12044_35281431 | NC_021160.1    | Ca_kabuli_chr01 | 35281431                | TT                              | AA              | 1946738702               |
| SNP_P4_12046_35281461 | NC_021160.1    | Ca_kabuli_chr01 | 35281461                | AA                              | GG              | 1946738704               |
| SNP_P4_12048_35281532 | NC_021160.1    | Ca_kabuli_chr01 | 35281532                | AA                              | CC              | 1946738706               |
| SNP_P4_12050_35281605 | NC_021160.1    | Ca_kabuli_chr01 | 35281605                | AA                              | GG              | 1946738708               |
| SNP_P4_12051_35281766 | NC_021160.1    | Ca_kabuli_chr01 | 35281766                | GG                              | AA              | 1946738709               |
| SNP_P4_12052_35281770 | NC_021160.1    | Ca_kabuli_chr01 | 35281770                | CC                              | TT              | 1946738711               |
| SNP_P4_12053_35281863 | NC_021160.1    | Ca_kabuli_chr01 | 35281863                | CC                              | AA              | 1946738713               |
| SNP_P4_12054_35281869 | NC_021160.1    | Ca_kabuli_chr01 | 35281869                | AA                              | GG              | 1946738715               |
| SNP_P4_12055_35281873 | NC_021160.1    | Ca_kabuli_chr01 | 35281873                | AA                              | TT              | 1946738717               |
| SNP_P4_12056_35281879 | NC_021160.1    | Ca_kabuli_chr01 | 35281879                | AA                              | TT              | 1946738719               |
| SNP_P4_12058_35281954 | NC_021160.1    | Ca_kabuli_chr01 | 35281954                | TT                              | AA              | 1946738721               |
| SNP_P4_12059_35281965 | NC_021160.1    | Ca_kabuli_chr01 | 35281965                | AA                              | CC              | 1946738723               |
| SNP_P4_12060_35282203 | NC_021160.1    | Ca_kabuli_chr01 | 35282203                | GG                              | AA              | 1946738725               |
| SNP_P4_12061_35282302 | NC_021160.1    | Ca_kabuli_chr01 | 35282302                | TT                              | CC              | 1946738727               |
| SNP_P4_12062_35282339 | NC_021160.1    | Ca_kabuli_chr01 | 35282339                | TT                              | CC              | 1946738729               |
| SNP_P4_12063_35282348 | NC_021160.1    | Ca_kabuli_chr01 | 35282348                | CC                              | TT              | 1946738730               |
| SNP_P4_12064_35282360 | NC_021160.1    | Ca_kabuli_chr01 | 35282360                | AA                              | TT              | 1946738732               |
| SNP_P4_12065_35282481 | NC_021160.1    | Ca_kabuli_chr01 | 35282481                | TT                              | CC              | 1946738735               |
| SNP_P4_12066_35282657 | NC_021160.1    | Ca_kabuli_chr01 | 35282657                | GG                              | CC              | 1946738736               |
| SNP_P4_12067_35282714 | NC_021160.1    | Ca_kabuli_chr01 | 35282714                | CC                              | TT              | 1946738738               |
| SNP_P4_12068_35282732 | NC_021160.1    | Ca_kabuli_chr01 | 35282732                | GG                              | AA              | 1946738740               |
| SNP_P4_12069_35282750 | NC_021160.1    | Ca_kabuli_chr01 | 35282750                | TT                              | CC              | 1946738742               |
| SNP_P4_12070_35282770 | NC_021160.1    | Ca_kabuli_chr01 | 35282770                | CC                              | TT              | 1946738744               |
| SNP_P4_12072_35282825 | NC_021160.1    | Ca_kabuli_chr01 | 35282825                | TT                              | CC              | 1946738746               |
| SNP_P4_12073_35282961 | NC_021160.1    | Ca_kabuli_chr01 | 35282961                | AA                              | GG              | 1946738748               |
| SNP_P4_12074_35282980 | NC_021160.1    | Ca_kabuli_chr01 | 35282980                | TT                              | AA              | 1946738750               |
| SNP_P4_12075_35282987 | NC_021160.1    | Ca_kabuli_chr01 | 35282987                | TT                              | CC              | 1946738752               |
| SNP_P4_12076_35283011 | NC_021160.1    | Ca_kabuli_chr01 | 35283011                | TT                              | CC              | 1946738754               |
| SNP_P4_12077_35283017 | NC_021160.1    | Ca_kabuli_chr01 | 35283017                | AA                              | TT              | 1946738756               |
| SNP_P4_12078_35283061 | NC_021160.1    | Ca_kabuli_chr01 | 35283061                | AA                              | TT              | 1946738758               |
| SNP_P4_12079_35283079 | NC_021160.1    | Ca_kabuli_chr01 | 35283079                | TT                              | GG              | 1946738760               |
| SNP_P4_12080_35283259 | NC_021160.1    | Ca_kabuli_chr01 | 35283259                | AA                              | GG              | 1946738762               |
| SNP_P4_12081_35283309 | NC_021160.1    | Ca_kabuli_chr01 | 35283309                | AA                              | GG              | 1946738764               |
| SNP_P4_12082_35283338 | NC_021160.1    | Ca_kabuli_chr01 | 35283338                | GG                              | TT              | 1946738766               |

| SNPs IDs              | Chromosome IDs | Chromosomes     | Physical positions (bp) | CDC Frontier (Reference genome) | (ILWC46 & LPNB) | NCBI SNPdb Accession IDs |
|-----------------------|----------------|-----------------|-------------------------|---------------------------------|-----------------|--------------------------|
| SNP_P4_12083_35283409 | NC_021160.1    | Ca_kabuli_chr01 | 35283409                | AA                              | GG              | 1946738768               |
| SNP_P4_12084_35283430 | NC_021160.1    | Ca_kabuli_chr01 | 35283430                | CC                              | GG              | 1946738770               |
| SNP_P4_12085_35283521 | NC_021160.1    | Ca_kabuli_chr01 | 35283521                | GG                              | TT              | 1946738772               |
| SNP_P4_12086_35283676 | NC_021160.1    | Ca_kabuli_chr01 | 35283676                | AA                              | TT              | 1946738774               |
| SNP_P4_12087_35283677 | NC_021160.1    | Ca_kabuli_chr01 | 35283677                | AA                              | CC              | 1946738776               |
| SNP_P4_12088_35283706 | NC_021160.1    | Ca_kabuli_chr01 | 35283706                | TT                              | AA              | 1946738778               |
| SNP_P4_12089_35283729 | NC_021160.1    | Ca_kabuli_chr01 | 35283729                | AA                              | CC              | 1946738780               |
| SNP_P4_12091_35283879 | NC_021160.1    | Ca_kabuli_chr01 | 35283879                | TT                              | GG              | 1946738782               |
| SNP_P4_12093_35284024 | NC_021160.1    | Ca_kabuli_chr01 | 35284024                | CC                              | TT              | 1946738784               |
| SNP_P4_12094_35284065 | NC_021160.1    | Ca_kabuli_chr01 | 35284065                | CC                              | TT              | 1946738786               |
| SNP_P4_12095_35284069 | NC_021160.1    | Ca_kabuli_chr01 | 35284069                | TT                              | CC              | 1946738788               |
| SNP_P4_12096_35284182 | NC_021160.1    | Ca_kabuli_chr01 | 35284182                | TT                              | AA              | 1946738790               |
| SNP_P4_12097_35284200 | NC_021160.1    | Ca_kabuli_chr01 | 35284200                | AA                              | CC              | 1946738792               |
| SNP_P4_12099_35284347 | NC_021160.1    | Ca_kabuli_chr01 | 35284347                | AA                              | TT              | 1946738794               |
| SNP_P4_12100_35284364 | NC_021160.1    | Ca_kabuli_chr01 | 35284364                | TT                              | AA              | 1946738796               |
| SNP_P4_12101_35284377 | NC_021160.1    | Ca_kabuli_chr01 | 35284377                | TT                              | AA              | 1946738798               |
| SNP_P4_12102_35284393 | NC_021160.1    | Ca_kabuli_chr01 | 35284393                | GG                              | TT              | 1946738800               |
| SNP_P4_12103_35284469 | NC_021160.1    | Ca_kabuli_chr01 | 35284469                | GG                              | TT              | 1946738802               |
| SNP_P4_12104_35284485 | NC_021160.1    | Ca_kabuli_chr01 | 35284485                | GG                              | AA              | 1946738804               |
| SNP_P4_12105_35284553 | NC_021160.1    | Ca_kabuli_chr01 | 35284553                | GG                              | AA              | 1946738806               |
| SNP_P4_12106_35284628 | NC_021160.1    | Ca_kabuli_chr01 | 35284628                | AA                              | CC              | 1946738808               |
| SNP_P4_12107_35284680 | NC_021160.1    | Ca_kabuli_chr01 | 35284680                | AA                              | GG              | 1946738810               |
| SNP_P4_12109_35284918 | NC_021160.1    | Ca_kabuli_chr01 | 35284918                | GG                              | TT              | 1946738812               |
| SNP_P4_12110_35284959 | NC_021160.1    | Ca_kabuli_chr01 | 35284959                | CC                              | TT              | 1946738814               |
| SNP_P4_12111_35284987 | NC_021160.1    | Ca_kabuli_chr01 | 35284987                | TT                              | GG              | 1946738816               |
| SNP_P4_12112_35285040 | NC_021160.1    | Ca_kabuli_chr01 | 35285040                | AA                              | CC              | 1946738818               |
| SNP_P4_12114_35285155 | NC_021160.1    | Ca_kabuli_chr01 | 35285155                | AA                              | CC              | 1946738820               |
| SNP_P4_12115_35285217 | NC_021160.1    | Ca_kabuli_chr01 | 35285217                | TT                              | CC              | 1946738822               |
| SNP_P4_12116_35285331 | NC_021160.1    | Ca_kabuli_chr01 | 35285331                | TT                              | AA              | 1946738824               |
| SNP_P4_12117_35285491 | NC_021160.1    | Ca_kabuli_chr01 | 35285491                | TT                              | CC              | 1946738826               |
| SNP_P4_12118_35285510 | NC_021160.1    | Ca_kabuli_chr01 | 35285510                | AA                              | GG              | 1946738829               |
| SNP_P4_12120_35285538 | NC_021160.1    | Ca_kabuli_chr01 | 35285538                | AA                              | TT              | 1946738831               |
| SNP_P4_12122_35285596 | NC_021160.1    | Ca_kabuli_chr01 | 35285596                | CC                              | TT              | 1946738833               |
| SNP_P4_12123_35285615 | NC_021160.1    | Ca_kabuli_chr01 | 35285615                | TT                              | CC              | 1946738835               |
| SNP_P4_12125_35285680 | NC_021160.1    | Ca_kabuli_chr01 | 35285680                | TT                              | CC              | 1946738837               |
| SNP_P4_12126_35285793 | NC_021160.1    | Ca_kabuli_chr01 | 35285793                | TT                              | CC              | 1946738839               |
| SNP_P4_12127_35285807 | NC_021160.1    | Ca_kabuli_chr01 | 35285807                | GG                              | AA              | 1946738841               |
| SNP_P4_12128_35285842 | NC_021160.1    | Ca_kabuli_chr01 | 35285842                | CC                              | TT              | 1946738843               |
| SNP_P4_12129_35285855 | NC_021160.1    | Ca_kabuli_chr01 | 35285855                | TT                              | CC              | 1946738845               |
| SNP_P4_12130_35286031 | NC_021160.1    | Ca_kabuli_chr01 | 35286031                | AA                              | GG              | 1946738847               |
| SNP_P4_12131_35286035 | NC_021160.1    | Ca_kabuli_chr01 | 35286035                | AA                              | GG              | 1946738849               |
| SNP_P4_12132_35286044 | NC_021160.1    | Ca_kabuli_chr01 | 35286044                | GG                              | AA              | 1946738851               |

| SNPs IDs              | Chromosome IDs | Chromosomes     | Physical positions (bp) | CDC Frontier (Reference genome) | (ILWC46 & LPNB) | NCBI SNPdb Accession IDs |
|-----------------------|----------------|-----------------|-------------------------|---------------------------------|-----------------|--------------------------|
| SNP_P4_12133_35287728 | NC_021160.1    | Ca_kabuli_chr01 | 35287728                | AA                              | CC              | 1946738853               |
| SNP_P4_12134_35287764 | NC_021160.1    | Ca_kabuli_chr01 | 35287764                | CC                              | AA              | 1946738855               |
| SNP_P4_12135_35287805 | NC_021160.1    | Ca_kabuli_chr01 | 35287805                | GG                              | AA              | 1946738857               |
| SNP_P4_12136_35287835 | NC_021160.1    | Ca_kabuli_chr01 | 35287835                | GG                              | AA              | 1946738859               |
| SNP_P4_12137_35287872 | NC_021160.1    | Ca_kabuli_chr01 | 35287872                | CC                              | TT              | 1946738861               |
| SNP_P4_12138_35287890 | NC_021160.1    | Ca_kabuli_chr01 | 35287890                | GG                              | TT              | 1946738863               |
| SNP_P4_12139_35287894 | NC_021160.1    | Ca_kabuli_chr01 | 35287894                | CC                              | TT              | 1946738865               |
| SNP_P4_12140_35287948 | NC_021160.1    | Ca_kabuli_chr01 | 35287948                | TT                              | AA              | 1946738867               |
| SNP_P4_12141_35287985 | NC_021160.1    | Ca_kabuli_chr01 | 35287985                | TT                              | GG              | 1946738869               |
| SNP_P4_12142_35288000 | NC_021160.1    | Ca_kabuli_chr01 | 35288000                | CC                              | TT              | 1946738871               |
| SNP_P4_12143_35288018 | NC_021160.1    | Ca_kabuli_chr01 | 35288018                | GG                              | AA              | 1946738872               |
| SNP_P4_12144_35288090 | NC_021160.1    | Ca_kabuli_chr01 | 35288090                | TT                              | GG              | 1946738874               |
| SNP_P4_12145_35288314 | NC_021160.1    | Ca_kabuli_chr01 | 35288314                | AA                              | TT              | 1946738876               |
| SNP_P4_12147_35288438 | NC_021160.1    | Ca_kabuli_chr01 | 35288438                | AA                              | GG              | 1946738878               |
| SNP_P4_12148_35288926 | NC_021160.1    | Ca_kabuli_chr01 | 35288926                | TT                              | AA              | 1946738880               |
| SNP_P4_12149_35288932 | NC_021160.1    | Ca_kabuli_chr01 | 35288932                | TT                              | CC              | 1946738882               |
| SNP_P4_12150_35288944 | NC_021160.1    | Ca_kabuli_chr01 | 35288944                | GG                              | AA              | 1946738884               |
| SNP_P4_12151_35288987 | NC_021160.1    | Ca_kabuli_chr01 | 35288987                | GG                              | TT              | 1946738886               |
| SNP_P4_12152_35289014 | NC_021160.1    | Ca_kabuli_chr01 | 35289014                | CC                              | TT              | 1946738888               |
| SNP_P4_12153_35289106 | NC_021160.1    | Ca_kabuli_chr01 | 35289106                | GG                              | AA              | 1946738890               |
| SNP_P4_12154_35289148 | NC_021160.1    | Ca_kabuli_chr01 | 35289148                | TT                              | CC              | 1946738892               |
| SNP_P4_12155_35289156 | NC_021160.1    | Ca_kabuli_chr01 | 35289156                | CC                              | TT              | 1946738894               |
| SNP_P4_12156_35289295 | NC_021160.1    | Ca_kabuli_chr01 | 35289295                | TT                              | CC              | 1946738896               |
| SNP_P4_12157_35289371 | NC_021160.1    | Ca_kabuli_chr01 | 35289371                | GG                              | AA              | 1946738898               |
| SNP_P4_12158_35290342 | NC_021160.1    | Ca_kabuli_chr01 | 35290342                | AA                              | GG              | 1946738900               |
| SNP_P4_12159_35290632 | NC_021160.1    | Ca_kabuli_chr01 | 35290632                | AA                              | GG              | 1946738902               |
| SNP_P4_12160_35290673 | NC_021160.1    | Ca_kabuli_chr01 | 35290673                | AA                              | TT              | 1946738904               |
| SNP_P4_12161_35290874 | NC_021160.1    | Ca_kabuli_chr01 | 35290874                | TT                              | CC              | 1946738906               |
| SNP_P4_12163_35290944 | NC_021160.1    | Ca_kabuli_chr01 | 35290944                | TT                              | CC              | 1946738908               |
| SNP_P4_12164_35290953 | NC_021160.1    | Ca_kabuli_chr01 | 35290953                | TT                              | CC              | 1946738910               |
| SNP_P4_12165_35291529 | NC_021160.1    | Ca_kabuli_chr01 | 35291529                | CC                              | TT              | 1946738912               |
| SNP_P4_12166_35291830 | NC_021160.1    | Ca_kabuli_chr01 | 35291830                | AA                              | TT              | 1946738914               |
| SNP_P4_12167_35291870 | NC_021160.1    | Ca_kabuli_chr01 | 35291870                | CC                              | TT              | 1946738916               |
| SNP_P4_12168_35291909 | NC_021160.1    | Ca_kabuli_chr01 | 35291909                | AA                              | TT              | 1946738918               |
| SNP_P4_12169_35292034 | NC_021160.1    | Ca_kabuli_chr01 | 35292034                | GG                              | AA              | 1946738920               |
| SNP_P4_12170_35292188 | NC_021160.1    | Ca_kabuli_chr01 | 35292188                | GG                              | CC              | 1946738922               |
| SNP_P4_12171_35292640 | NC_021160.1    | Ca_kabuli_chr01 | 35292640                | AA                              | GG              | 1946738924               |
| SNP_P4_12172_35292647 | NC_021160.1    | Ca_kabuli_chr01 | 35292647                | CC                              | AA              | 1946738926               |
| SNP_P4_12173_35292652 | NC_021160.1    | Ca_kabuli_chr01 | 35292652                | TT                              | GG              | 1946738928               |
| SNP_P4_12174_35292667 | NC_021160.1    | Ca_kabuli_chr01 | 35292667                | CC                              | TT              | 1946738930               |
| SNP_P4_12175_35292700 | NC_021160.1    | Ca_kabuli_chr01 | 35292700                | AA                              | GG              | 1946738932               |
| SNP_P4_12176_35292880 | NC_021160.1    | Ca_kabuli_chr01 | 35292880                | AA                              | TT              | 1946738934               |

| SNPs IDs              | Chromosome IDs | Chromosomes     | Physical positions (bp) | CDC Frontier (Reference genome) | (ILWC46 & LPNB) | NCBI SNPdb Accession IDs |
|-----------------------|----------------|-----------------|-------------------------|---------------------------------|-----------------|--------------------------|
| SNP_P4_12177_35293027 | NC_021160.1    | Ca_kabuli_chr01 | 35293027                | AA                              | GG              | 1946738936               |
| SNP_P4_12178_35293034 | NC_021160.1    | Ca_kabuli_chr01 | 35293034                | GG                              | CC              | 1946738938               |
| SNP_P4_12179_35293041 | NC_021160.1    | Ca_kabuli_chr01 | 35293041                | AA                              | CC              | 1946738940               |
| SNP_P4_12180_35293072 | NC_021160.1    | Ca_kabuli_chr01 | 35293072                | GG                              | TT              | 1946738941               |
| SNP_P4_12181_35293161 | NC_021160.1    | Ca_kabuli_chr01 | 35293161                | AA                              | TT              | 1946738943               |
| SNP_P4_12182_35293162 | NC_021160.1    | Ca_kabuli_chr01 | 35293162                | TT                              | GG              | 1946738945               |
| SNP_P4_12183_35293181 | NC_021160.1    | Ca_kabuli_chr01 | 35293181                | GG                              | AA              | 1946738947               |
| SNP_P4_12184_35293182 | NC_021160.1    | Ca_kabuli_chr01 | 35293182                | TT                              | CC              | 1946738949               |
| SNP_P4_12185_35293336 | NC_021160.1    | Ca_kabuli_chr01 | 35293336                | TT                              | CC              | 1946738951               |
| SNP_P4_12186_35293497 | NC_021160.1    | Ca_kabuli_chr01 | 35293497                | GG                              | AA              | 1946738952               |
| SNP_P4_12187_35293499 | NC_021160.1    | Ca_kabuli_chr01 | 35293499                | AA                              | GG              | 1946738953               |
| SNP_P4_12188_35293516 | NC_021160.1    | Ca_kabuli_chr01 | 35293516                | TT                              | CC              | 1946738954               |
| SNP_P4_12189_35294243 | NC_021160.1    | Ca_kabuli_chr01 | 35294243                | AA                              | GG              | 1946738955               |
| SNP_P4_12190_35294275 | NC_021160.1    | Ca_kabuli_chr01 | 35294275                | CC                              | TT              | 1946738956               |
| SNP_P4_12191_35295662 | NC_021160.1    | Ca_kabuli_chr01 | 35295662                | CC                              | GG              | 1946738957               |
| SNP_P4_12192_35295954 | NC_021160.1    | Ca_kabuli_chr01 | 35295954                | CC                              | AA              | 1946738959               |
| SNP_P4_12193_35295958 | NC_021160.1    | Ca_kabuli_chr01 | 35295958                | AA                              | GG              | 1946738961               |
| SNP_P4_12194_35296241 | NC_021160.1    | Ca_kabuli_chr01 | 35296241                | CC                              | TT              | 1946738963               |
| SNP_P4_12195_35296358 | NC_021160.1    | Ca_kabuli_chr01 | 35296358                | CC                              | TT              | 1946738965               |
| SNP_P4_12196_35296365 | NC_021160.1    | Ca_kabuli_chr01 | 35296365                | GG                              | CC              | 1946738967               |
| SNP_P4_12197_35296415 | NC_021160.1    | Ca_kabuli_chr01 | 35296415                | TT                              | CC              | 1946738969               |
| SNP_P4_12198_35296683 | NC_021160.1    | Ca_kabuli_chr01 | 35296683                | TT                              | CC              | 1946738971               |
| SNP_P4_12199_35296871 | NC_021160.1    | Ca_kabuli_chr01 | 35296871                | AA                              | TT              | 1946738974               |
| SNP_P4_12201_35300714 | NC_021160.1    | Ca_kabuli_chr01 | 35300714                | CC                              | TT              | 1946738976               |
| SNP_P4_12202_35300746 | NC_021160.1    | Ca_kabuli_chr01 | 35300746                | GG                              | TT              | 1946738978               |
| SNP_P4_12203_35300771 | NC_021160.1    | Ca_kabuli_chr01 | 35300771                | AA                              | GG              | 1946738980               |
| SNP_P4_12204_35300793 | NC_021160.1    | Ca_kabuli_chr01 | 35300793                | TT                              | CC              | 1946738982               |
| SNP_P4_12205_35300819 | NC_021160.1    | Ca_kabuli_chr01 | 35300819                | AA                              | CC              | 1946738984               |
| SNP_P4_12206_35304272 | NC_021160.1    | Ca_kabuli_chr01 | 35304272                | GG                              | AA              | 1946738986               |
| SNP_P4_12207_35304273 | NC_021160.1    | Ca_kabuli_chr01 | 35304273                | TT                              | CC              | 1946738988               |
| SNP_P4_12208_35304879 | NC_021160.1    | Ca_kabuli_chr01 | 35304879                | GG                              | TT              | 1946738990               |
| SNP_P4_12209_35304880 | NC_021160.1    | Ca_kabuli_chr01 | 35304880                | AA                              | CC              | 1946738992               |
| SNP_P4_12210_35305259 | NC_021160.1    | Ca_kabuli_chr01 | 35305259                | CC                              | TT              | 1946738994               |
| SNP_P4_12211_35308370 | NC_021160.1    | Ca_kabuli_chr01 | 35308370                | TT                              | CC              | 1946738996               |
| SNP_P4_12212_35309738 | NC_021160.1    | Ca_kabuli_chr01 | 35309738                | CC                              | TT              | 1946738998               |
| SNP_P4_12213_35310103 | NC_021160.1    | Ca_kabuli_chr01 | 35310103                | CC                              | TT              | 1946739000               |
| SNP_P4_12214_35310329 | NC_021160.1    | Ca_kabuli_chr01 | 35310329                | TT                              | GG              | 1946739002               |
| SNP_P4_12215_35310332 | NC_021160.1    | Ca_kabuli_chr01 | 35310332                | TT                              | AA              | 1946739004               |
| SNP_P4_12216_35310340 | NC_021160.1    | Ca_kabuli_chr01 | 35310340                | TT                              | CC              | 1946739006               |
| SNP_P4_12217_35310344 | NC_021160.1    | Ca_kabuli_chr01 | 35310344                | GG                              | AA              | 1946739008               |
| SNP_P4_12218_35310363 | NC_021160.1    | Ca_kabuli_chr01 | 35310363                | AA                              | TT              | 1946739010               |
| SNP_P4_12219_35310388 | NC_021160.1    | Ca_kabuli_chr01 | 35310388                | AA                              | TT              | 1946739012               |

| SNPs IDs              | Chromosome IDs | Chromosomes     | Physical positions (bp) | CDC Frontier (Reference genome) | (ILWC46 & LPNB) | NCBI SNPdb Accession IDs |
|-----------------------|----------------|-----------------|-------------------------|---------------------------------|-----------------|--------------------------|
| SNP_P4_12220_35310549 | NC_021160.1    | Ca_kabuli_chr01 | 35310549                | CC                              | GG              | 1946739013               |
| SNP_P4_12221_35310561 | NC_021160.1    | Ca_kabuli_chr01 | 35310561                | CC                              | TT              | 1946739015               |
| SNP_P4_12222_35310583 | NC_021160.1    | Ca_kabuli_chr01 | 35310583                | TT                              | GG              | 1946739017               |
| SNP_P4_12223_35310603 | NC_021160.1    | Ca_kabuli_chr01 | 35310603                | AA                              | GG              | 1946739019               |
| SNP_P4_12224_35310607 | NC_021160.1    | Ca_kabuli_chr01 | 35310607                | TT                              | CC              | 1946739021               |
| SNP_P4_12225_35310692 | NC_021160.1    | Ca_kabuli_chr01 | 35310692                | TT                              | AA              | 1946739023               |
| SNP_P4_12226_35310726 | NC_021160.1    | Ca_kabuli_chr01 | 35310726                | GG                              | AA              | 1946739025               |
| SNP_P4_12228_35310767 | NC_021160.1    | Ca_kabuli_chr01 | 35310767                | AA                              | TT              | 1946739027               |
| SNP_P4_12229_35310793 | NC_021160.1    | Ca_kabuli_chr01 | 35310793                | TT                              | AA              | 1946739029               |
| SNP_P4_12230_35310825 | NC_021160.1    | Ca_kabuli_chr01 | 35310825                | GG                              | AA              | 1946739031               |
| SNP_P4_12232_35310865 | NC_021160.1    | Ca_kabuli_chr01 | 35310865                | AA                              | TT              | 1946739033               |
| SNP_P4_12233_35310887 | NC_021160.1    | Ca_kabuli_chr01 | 35310887                | AA                              | GG              | 1946739035               |
| SNP_P4_12234_35310944 | NC_021160.1    | Ca_kabuli_chr01 | 35310944                | TT                              | GG              | 1946739037               |
| SNP_P4_12235_35310948 | NC_021160.1    | Ca_kabuli_chr01 | 35310948                | AA                              | GG              | 1946739039               |
| SNP_P4_12236_35310991 | NC_021160.1    | Ca_kabuli_chr01 | 35310991                | AA                              | GG              | 1946739041               |
| SNP_P4_12237_35311016 | NC_021160.1    | Ca_kabuli_chr01 | 35311016                | CC                              | GG              | 1946739043               |
| SNP_P4_12238_35311017 | NC_021160.1    | Ca_kabuli_chr01 | 35311017                | TT                              | CC              | 1946739045               |
| SNP_P4_12239_35311039 | NC_021160.1    | Ca_kabuli_chr01 | 35311039                | CC                              | TT              | 1946739047               |
| SNP_P4_12240_35311057 | NC_021160.1    | Ca_kabuli_chr01 | 35311057                | CC                              | GG              | 1946739050               |
| SNP_P4_12241_35311058 | NC_021160.1    | Ca_kabuli_chr01 | 35311058                | CC                              | GG              | 1946739052               |
| SNP_P4_12242_35311085 | NC_021160.1    | Ca_kabuli_chr01 | 35311085                | TT                              | CC              | 1946739054               |
| SNP_P4_12243_35311099 | NC_021160.1    | Ca_kabuli_chr01 | 35311099                | AA                              | TT              | 1946739056               |
| SNP_P4_12244_35311114 | NC_021160.1    | Ca_kabuli_chr01 | 35311114                | AA                              | CC              | 1946739058               |
| SNP_P4_12245_35311127 | NC_021160.1    | Ca_kabuli_chr01 | 35311127                | CC                              | TT              | 1946739060               |
| SNP_P4_12246_35311134 | NC_021160.1    | Ca_kabuli_chr01 | 35311134                | GG                              | AA              | 1946739062               |
| SNP_P4_12247_35311154 | NC_021160.1    | Ca_kabuli_chr01 | 35311154                | GG                              | AA              | 1946739064               |
| SNP_P4_12248_35311195 | NC_021160.1    | Ca_kabuli_chr01 | 35311195                | GG                              | AA              | 1946739066               |
| SNP_P4_12249_35311265 | NC_021160.1    | Ca_kabuli_chr01 | 35311265                | CC                              | AA              | 1946739068               |
| SNP_P4_12250_35311271 | NC_021160.1    | Ca_kabuli_chr01 | 35311271                | CC                              | TT              | 1946739070               |
| SNP_P4_12251_35311277 | NC_021160.1    | Ca_kabuli_chr01 | 35311277                | CC                              | TT              | 1946739072               |
| SNP_P4_12252_35311307 | NC_021160.1    | Ca_kabuli_chr01 | 35311307                | GG                              | AA              | 1946739074               |
| SNP_P4_12253_35311621 | NC_021160.1    | Ca_kabuli_chr01 | 35311621                | AA                              | GG              | 1946739076               |
| SNP_P4_12254_35311644 | NC_021160.1    | Ca_kabuli_chr01 | 35311644                | TT                              | GG              | 1946739078               |
| SNP_P4_12255_35311672 | NC_021160.1    | Ca_kabuli_chr01 | 35311672                | GG                              | TT              | 1946739080               |
| SNP_P4_12256_35311681 | NC_021160.1    | Ca_kabuli_chr01 | 35311681                | GG                              | AA              | 1946739082               |
| SNP_P4_12257_35311711 | NC_021160.1    | Ca_kabuli_chr01 | 35311711                | TT                              | GG              | 1946739084               |
| SNP_P4_12258_35311712 | NC_021160.1    | Ca_kabuli_chr01 | 35311712                | GG                              | AA              | 1946739086               |
| SNP_P4_12259_35311715 | NC_021160.1    | Ca_kabuli_chr01 | 35311715                | CC                              | TT              | 1946739088               |
| SNP_P4_12260_35311758 | NC_021160.1    | Ca_kabuli_chr01 | 35311758                | TT                              | CC              | 1946739090               |
| SNP_P4_12261_35311798 | NC_021160.1    | Ca_kabuli_chr01 | 35311798                | AA                              | TT              | 1946739091               |
| SNP_P4_12262_35311833 | NC_021160.1    | Ca_kabuli_chr01 | 35311833                | CC                              | TT              | 1946739093               |
| SNP_P4_12263_35311848 | NC_021160.1    | Ca_kabuli_chr01 | 35311848                | CC                              | GG              | 1946739095               |

| SNPs IDs              | Chromosome IDs | Chromosomes     | Physical positions (bp) | CDC Frontier (Reference genome) | (ILWC46 & LPNB) | NCBI SNPdb Accession IDs |
|-----------------------|----------------|-----------------|-------------------------|---------------------------------|-----------------|--------------------------|
| SNP_P4_12264_35311882 | NC_021160.1    | Ca_kabuli_chr01 | 35311882                | GG                              | AA              | 1946739097               |
| SNP_P4_12265_35311898 | NC_021160.1    | Ca_kabuli_chr01 | 35311898                | GG                              | AA              | 1946739099               |
| SNP_P4_12266_35311985 | NC_021160.1    | Ca_kabuli_chr01 | 35311985                | GG                              | AA              | 1946739101               |
| SNP_P4_12267_35312012 | NC_021160.1    | Ca_kabuli_chr01 | 35312012                | TT                              | CC              | 1946739103               |
| SNP_P4_12268_35312070 | NC_021160.1    | Ca_kabuli_chr01 | 35312070                | CC                              | TT              | 1946739105               |
| SNP_P4_12269_35312120 | NC_021160.1    | Ca_kabuli_chr01 | 35312120                | TT                              | GG              | 1946739107               |
| SNP_P4_12270_35312121 | NC_021160.1    | Ca_kabuli_chr01 | 35312121                | AA                              | GG              | 1946739109               |
| SNP_P4_12271_35312148 | NC_021160.1    | Ca_kabuli_chr01 | 35312148                | GG                              | TT              | 1946739111               |
| SNP_P4_12272_35312154 | NC_021160.1    | Ca_kabuli_chr01 | 35312154                | CC                              | AA              | 1946739113               |
| SNP_P4_12273_35312309 | NC_021160.1    | Ca_kabuli_chr01 | 35312309                | CC                              | AA              | 1946739115               |
| SNP_P4_12274_35312451 | NC_021160.1    | Ca_kabuli_chr01 | 35312451                | TT                              | GG              | 1946739117               |
| SNP_P4_12275_35316773 | NC_021160.1    | Ca_kabuli_chr01 | 35316773                | AA                              | GG              | 1946739119               |
| SNP_P4_12276_35316802 | NC_021160.1    | Ca_kabuli_chr01 | 35316802                | GG                              | AA              | 1946739121               |
| SNP_P4_12277_35316851 | NC_021160.1    | Ca_kabuli_chr01 | 35316851                | GG                              | AA              | 1946739123               |
| SNP_P4_12278_35316894 | NC_021160.1    | Ca_kabuli_chr01 | 35316894                | GG                              | CC              | 1946739125               |
| SNP_P4_12279_35316899 | NC_021160.1    | Ca_kabuli_chr01 | 35316899                | TT                              | CC              | 1946739127               |
| SNP_P4_12280_35316903 | NC_021160.1    | Ca_kabuli_chr01 | 35316903                | TT                              | CC              | 1946739130               |
| SNP_P4_12281_35316904 | NC_021160.1    | Ca_kabuli_chr01 | 35316904                | TT                              | GG              | 1946739132               |
| SNP_P4_12282_35316905 | NC_021160.1    | Ca_kabuli_chr01 | 35316905                | GG                              | CC              | 1946739134               |
| SNP_P4_12283_35316931 | NC_021160.1    | Ca_kabuli_chr01 | 35316931                | AA                              | CC              | 1946739136               |
| SNP_P4_12284_35316941 | NC_021160.1    | Ca_kabuli_chr01 | 35316941                | TT                              | CC              | 1946739138               |
| SNP_P4_12285_35316969 | NC_021160.1    | Ca_kabuli_chr01 | 35316969                | TT                              | GG              | 1946739140               |
| SNP_P4_12286_35317003 | NC_021160.1    | Ca_kabuli_chr01 | 35317003                | AA                              | GG              | 1946739142               |
| SNP_P4_12287_35317034 | NC_021160.1    | Ca_kabuli_chr01 | 35317034                | CC                              | TT              | 1946739144               |
| SNP_P4_12288_35317036 | NC_021160.1    | Ca_kabuli_chr01 | 35317036                | AA                              | GG              | 1946739146               |
| SNP_P4_12289_35317039 | NC_021160.1    | Ca_kabuli_chr01 | 35317039                | CC                              | TT              | 1946739148               |
| SNP_P4_12290_35317049 | NC_021160.1    | Ca_kabuli_chr01 | 35317049                | GG                              | AA              | 1946739150               |
| SNP_P4_12291_35317066 | NC_021160.1    | Ca_kabuli_chr01 | 35317066                | TT                              | CC              | 1946739152               |
| SNP_P4_12292_35317067 | NC_021160.1    | Ca_kabuli_chr01 | 35317067                | AA                              | TT              | 1946739154               |
| SNP_P4_12293_35317097 | NC_021160.1    | Ca_kabuli_chr01 | 35317097                | TT                              | CC              | 1946739156               |
| SNP_P4_12294_35317134 | NC_021160.1    | Ca_kabuli_chr01 | 35317134                | TT                              | CC              | 1946739158               |
| SNP_P4_12295_35317277 | NC_021160.1    | Ca_kabuli_chr01 | 35317277                | GG                              | AA              | 1946739160               |
| SNP_P4_12297_35317420 | NC_021160.1    | Ca_kabuli_chr01 | 35317420                | GG                              | AA              | 1946739162               |
| SNP_P4_12298_35317424 | NC_021160.1    | Ca_kabuli_chr01 | 35317424                | TT                              | CC              | 1946739164               |
| SNP_P4_12299_35320528 | NC_021160.1    | Ca_kabuli_chr01 | 35320528                | GG                              | AA              | 1946739166               |
| SNP_P4_12300_35320681 | NC_021160.1    | Ca_kabuli_chr01 | 35320681                | AA                              | CC              | 1946739168               |
| SNP_P4_12301_35320695 | NC_021160.1    | Ca_kabuli_chr01 | 35320695                | AA                              | GG              | 1946739170               |
| SNP_P4_12302_35323988 | NC_021160.1    | Ca_kabuli_chr01 | 35323988                | GG                              | CC              | 1946739172               |
| SNP_P4_12303_35326215 | NC_021160.1    | Ca_kabuli_chr01 | 35326215                | AA                              | TT              | 1946739174               |
| SNP_P4_12304_35328036 | NC_021160.1    | Ca_kabuli_chr01 | 35328036                | GG                              | TT              | 1946739176               |
| SNP_P4_12305_35328040 | NC_021160.1    | Ca_kabuli_chr01 | 35328040                | CC                              | TT              | 1946739178               |
| SNP_P4_12306_35329883 | NC_021160.1    | Ca_kabuli_chr01 | 35329883                | AA                              | CC              | 1946739180               |



| SNPs IDs              | Chromosome IDs | Chromosomes     | Physical positions (bp) | CDC Frontier (Reference genome) | (ILWC46 & LPNB) | NCBI SNPdb Accession IDs |
|-----------------------|----------------|-----------------|-------------------------|---------------------------------|-----------------|--------------------------|
| SNP_P4_12307_35330449 | NC_021160.1    | Ca_kabuli_chr01 | 35330449                | TT                              | CC              | 1946739182               |
| SNP_P4_12308_35332905 | NC_021160.1    | Ca_kabuli_chr01 | 35332905                | CC                              | GG              | 1946739184               |
| SNP_P4_12309_35332928 | NC_021160.1    | Ca_kabuli_chr01 | 35332928                | CC                              | TT              | 1946739186               |
| SNP_P4_12310_35333614 | NC_021160.1    | Ca_kabuli_chr01 | 35333614                | CC                              | AA              | 1946739188               |
| SNP_P4_12311_35333718 | NC_021160.1    | Ca_kabuli_chr01 | 35333718                | TT                              | AA              | 1946739190               |
| SNP_P4_12312_35333986 | NC_021160.1    | Ca_kabuli_chr01 | 35333986                | TT                              | CC              | 1946739192               |
| SNP_P4_12314_35336149 | NC_021160.1    | Ca_kabuli_chr01 | 35336149                | GG                              | AA              | 1946739194               |
| SNP_P4_12315_35336470 | NC_021160.1    | Ca_kabuli_chr01 | 35336470                | CC                              | TT              | 1946739197               |
| SNP_P4_12316_35336546 | NC_021160.1    | Ca_kabuli_chr01 | 35336546                | TT                              | CC              | 1946739199               |
| SNP_P4_12317_35337032 | NC_021160.1    | Ca_kabuli_chr01 | 35337032                | GG                              | TT              | 1946739201               |
| SNP_P4_12318_35337042 | NC_021160.1    | Ca_kabuli_chr01 | 35337042                | AA                              | GG              | 1946739203               |
| SNP_P4_12320_35337297 | NC_021160.1    | Ca_kabuli_chr01 | 35337297                | TT                              | GG              | 1946739205               |
| SNP_P4_12321_35341492 | NC_021160.1    | Ca_kabuli_chr01 | 35341492                | AA                              | TT              | 1946739207               |
| SNP_P4_12322_35342976 | NC_021160.1    | Ca_kabuli_chr01 | 35342976                | GG                              | AA              | 1946739209               |
| SNP_P4_12323_35346207 | NC_021160.1    | Ca_kabuli_chr01 | 35346207                | GG                              | AA              | 1946739211               |
| SNP_P4_12324_35346285 | NC_021160.1    | Ca_kabuli_chr01 | 35346285                | TT                              | AA              | 1946739213               |
| SNP_P4_12325_35347464 | NC_021160.1    | Ca_kabuli_chr01 | 35347464                | TT                              | GG              | 1946739215               |
| SNP_P4_12326_35348396 | NC_021160.1    | Ca_kabuli_chr01 | 35348396                | CC                              | TT              | 1946739217               |
| SNP_P4_12327_35348594 | NC_021160.1    | Ca_kabuli_chr01 | 35348594                | GG                              | AA              | 1946739219               |
| SNP_P4_12328_35348674 | NC_021160.1    | Ca_kabuli_chr01 | 35348674                | CC                              | GG              | 1946739221               |
| SNP_P4_12330_35349389 | NC_021160.1    | Ca_kabuli_chr01 | 35349389                | TT                              | AA              | 1946739223               |
| SNP_P4_12331_35349792 | NC_021160.1    | Ca_kabuli_chr01 | 35349792                | CC                              | TT              | 1946739225               |
| SNP_P4_12334_35354678 | NC_021160.1    | Ca_kabuli_chr01 | 35354678                | TT                              | GG              | 1946739227               |
| SNP_P4_12335_35355040 | NC_021160.1    | Ca_kabuli_chr01 | 35355040                | TT                              | CC              | 1946739229               |
| SNP_P4_12336_35355282 | NC_021160.1    | Ca_kabuli_chr01 | 35355282                | CC                              | AA              | 1946739231               |
| SNP_P4_12337_35355287 | NC_021160.1    | Ca_kabuli_chr01 | 35355287                | GG                              | TT              | 1946739233               |
| SNP_P4_12338_35355657 | NC_021160.1    | Ca_kabuli_chr01 | 35355657                | TT                              | GG              | 1946739235               |
| SNP_P4_12339_35356038 | NC_021160.1    | Ca_kabuli_chr01 | 35356038                | TT                              | CC              | 1946739237               |
| SNP_P4_12340_35357692 | NC_021160.1    | Ca_kabuli_chr01 | 35357692                | AA                              | GG              | 1946739239               |
| SNP_P4_12341_35358643 | NC_021160.1    | Ca_kabuli_chr01 | 35358643                | AA                              | GG              | 1946739241               |
| SNP_P4_12342_35358668 | NC_021160.1    | Ca_kabuli_chr01 | 35358668                | AA                              | GG              | 1946739243               |
| SNP_P4_12343_35358913 | NC_021160.1    | Ca_kabuli_chr01 | 35358913                | GG                              | AA              | 1946739245               |
| SNP_P4_12344_35359195 | NC_021160.1    | Ca_kabuli_chr01 | 35359195                | AA                              | GG              | 1946739247               |
| SNP_P4_12345_35359301 | NC_021160.1    | Ca_kabuli_chr01 | 35359301                | TT                              | CC              | 1946739249               |
| SNP_P4_12346_35359340 | NC_021160.1    | Ca_kabuli_chr01 | 35359340                | GG                              | AA              | 1946739251               |
| SNP_P4_12347_35359535 | NC_021160.1    | Ca_kabuli_chr01 | 35359535                | CC                              | TT              | 1946739253               |
| SNP_P4_12348_35359571 | NC_021160.1    | Ca_kabuli_chr01 | 35359571                | CC                              | AA              | 1946739255               |
| SNP_P4_12349_35359691 | NC_021160.1    | Ca_kabuli_chr01 | 35359691                | GG                              | TT              | 1946739257               |
| SNP_P4_12350_35359848 | NC_021160.1    | Ca_kabuli_chr01 | 35359848                | TT                              | CC              | 1946739259               |
| SNP_P4_12351_35359878 | NC_021160.1    | Ca_kabuli_chr01 | 35359878                | TT                              | GG              | 1946739261               |
| SNP_P4_12352_35360256 | NC_021160.1    | Ca_kabuli_chr01 | 35360256                | GG                              | AA              | 1946739263               |
| SNP_P4_12353_35360660 | NC_021160.1    | Ca_kabuli_chr01 | 35360660                | TT                              | CC              | 1946739265               |

| SNPs IDs              | Chromosome IDs | Chromosomes     | Physical positions (bp) | CDC Frontier (Reference genome) | (ILWC46 & LPNB) | NCBI SNPdb Accession IDs |
|-----------------------|----------------|-----------------|-------------------------|---------------------------------|-----------------|--------------------------|
| SNP_P4_12354_35360818 | NC_021160.1    | Ca_kabuli_chr01 | 35360818                | AA                              | GG              | 1946739267               |
| SNP_P4_12355_35361569 | NC_021160.1    | Ca_kabuli_chr01 | 35361569                | GG                              | AA              | 1946739269               |
| SNP_P4_12356_35361596 | NC_021160.1    | Ca_kabuli_chr01 | 35361596                | GG                              | AA              | 1946739271               |
| SNP_P4_12358_35363091 | NC_021160.1    | Ca_kabuli_chr01 | 35363091                | CC                              | TT              | 1946739273               |
| SNP_P4_12359_35363301 | NC_021160.1    | Ca_kabuli_chr01 | 35363301                | TT                              | CC              | 1946739275               |
| SNP_P4_12360_35363341 | NC_021160.1    | Ca_kabuli_chr01 | 35363341                | CC                              | GG              | 1946739277               |
| SNP_P4_12361_35363405 | NC_021160.1    | Ca_kabuli_chr01 | 35363405                | CC                              | TT              | 1946739279               |
| SNP_P4_12362_35367747 | NC_021160.1    | Ca_kabuli_chr01 | 35367747                | GG                              | AA              | 1946739281               |
| SNP_P4_12363_35371929 | NC_021160.1    | Ca_kabuli_chr01 | 35371929                | GG                              | AA              | 1946739283               |
| SNP_P4_12364_35372327 | NC_021160.1    | Ca_kabuli_chr01 | 35372327                | AA                              | GG              | 1946739285               |
| SNP_P4_12365_35374603 | NC_021160.1    | Ca_kabuli_chr01 | 35374603                | GG                              | TT              | 1946739287               |
| SNP_P4_12366_35374627 | NC_021160.1    | Ca_kabuli_chr01 | 35374627                | TT                              | CC              | 1946739289               |
| SNP_P4_12367_35375737 | NC_021160.1    | Ca_kabuli_chr01 | 35375737                | GG                              | AA              | 1946739291               |
| SNP_P4_12368_35376711 | NC_021160.1    | Ca_kabuli_chr01 | 35376711                | GG                              | AA              | 1946739293               |
| SNP_P4_12369_35376921 | NC_021160.1    | Ca_kabuli_chr01 | 35376921                | CC                              | TT              | 1946739295               |
| SNP_P4_12370_35376923 | NC_021160.1    | Ca_kabuli_chr01 | 35376923                | CC                              | GG              | 1946739297               |
| SNP_P4_12371_35376933 | NC_021160.1    | Ca_kabuli_chr01 | 35376933                | TT                              | CC              | 1946739299               |
| SNP_P4_12373_35378294 | NC_021160.1    | Ca_kabuli_chr01 | 35378294                | AA                              | CC              | 1946739301               |
| SNP_P4_12374_35378697 | NC_021160.1    | Ca_kabuli_chr01 | 35378697                | TT                              | AA              | 1946739303               |
| SNP_P4_12375_35378839 | NC_021160.1    | Ca_kabuli_chr01 | 35378839                | AA                              | TT              | 1946739305               |
| SNP_P4_12376_35380120 | NC_021160.1    | Ca_kabuli_chr01 | 35380120                | AA                              | CC              | 1946739307               |
| SNP_P4_12377_35381761 | NC_021160.1    | Ca_kabuli_chr01 | 35381761                | AA                              | GG              | 1946739309               |
| SNP_P4_12378_35381812 | NC_021160.1    | Ca_kabuli_chr01 | 35381812                | GG                              | AA              | 1946739310               |
| SNP_P4_12379_35382451 | NC_021160.1    | Ca_kabuli_chr01 | 35382451                | CC                              | AA              | 1946739312               |
| SNP_P4_12380_35383202 | NC_021160.1    | Ca_kabuli_chr01 | 35383202                | CC                              | AA              | 1946739314               |
| SNP_P4_12381_35384258 | NC_021160.1    | Ca_kabuli_chr01 | 35384258                | TT                              | GG              | 1946739316               |
| SNP_P4_12382_35398435 | NC_021160.1    | Ca_kabuli_chr01 | 35398435                | GG                              | AA              | 1946739318               |
| SNP_P4_12383_35398500 | NC_021160.1    | Ca_kabuli_chr01 | 35398500                | CC                              | TT              | 1946739320               |
| SNP_P4_12384_35398501 | NC_021160.1    | Ca_kabuli_chr01 | 35398501                | AA                              | GG              | 1946739322               |
| SNP_P4_12385_35398662 | NC_021160.1    | Ca_kabuli_chr01 | 35398662                | AA                              | GG              | 1946739324               |
| SNP_P4_12386_35398748 | NC_021160.1    | Ca_kabuli_chr01 | 35398748                | AA                              | GG              | 1946739326               |
| SNP_P4_12387_35398752 | NC_021160.1    | Ca_kabuli_chr01 | 35398752                | TT                              | CC              | 1946739328               |
| SNP_P4_12388_35403540 | NC_021160.1    | Ca_kabuli_chr01 | 35403540                | TT                              | CC              | 1946739330               |
| SNP_P4_12389_35403933 | NC_021160.1    | Ca_kabuli_chr01 | 35403933                | GG                              | AA              | 1946739332               |
| SNP_P4_12390_35404320 | NC_021160.1    | Ca_kabuli_chr01 | 35404320                | AA                              | GG              | 1946739334               |
| SNP_P4_12391_35404812 | NC_021160.1    | Ca_kabuli_chr01 | 35404812                | AA                              | TT              | 1946739336               |
| SNP_P4_12392_35404862 | NC_021160.1    | Ca_kabuli_chr01 | 35404862                | GG                              | AA              | 1946739338               |
| SNP_P4_12393_35404984 | NC_021160.1    | Ca_kabuli_chr01 | 35404984                | AA                              | CC              | 1946739339               |
| SNP_P4_12394_35404985 | NC_021160.1    | Ca_kabuli_chr01 | 35404985                | AA                              | GG              | 1946739341               |
| SNP_P4_12395_35405143 | NC_021160.1    | Ca_kabuli_chr01 | 35405143                | AA                              | CC              | 1946739343               |
| SNP_P4_12396_35405225 | NC_021160.1    | Ca_kabuli_chr01 | 35405225                | TT                              | CC              | 1946739345               |
| SNP_P4_12397_35405226 | NC_021160.1    | Ca_kabuli_chr01 | 35405226                | AA                              | TT              | 1946739348               |

| SNPs IDs              | Chromosome IDs | Chromosomes     | Physical positions (bp) | CDC Frontier (Reference genome) | (ILWC46 & LPNB) | NCBI SNPdb Accession IDs |
|-----------------------|----------------|-----------------|-------------------------|---------------------------------|-----------------|--------------------------|
| SNP_P4_12398_35405269 | NC_021160.1    | Ca_kabuli_chr01 | 35405269                | CC                              | AA              | 1946739350               |
| SNP_P4_12399_35405273 | NC_021160.1    | Ca_kabuli_chr01 | 35405273                | AA                              | GG              | 1946739352               |
| SNP_P4_12400_35405288 | NC_021160.1    | Ca_kabuli_chr01 | 35405288                | TT                              | AA              | 1946739354               |
| SNP_P4_12401_35405290 | NC_021160.1    | Ca_kabuli_chr01 | 35405290                | TT                              | CC              | 1946739356               |
| SNP_P4_12402_35405291 | NC_021160.1    | Ca_kabuli_chr01 | 35405291                | TT                              | CC              | 1946739358               |
| SNP_P4_12403_35405320 | NC_021160.1    | Ca_kabuli_chr01 | 35405320                | GG                              | AA              | 1946739360               |
| SNP_P4_12404_35405422 | NC_021160.1    | Ca_kabuli_chr01 | 35405422                | AA                              | GG              | 1946739362               |
| SNP_P4_12405_35405446 | NC_021160.1    | Ca_kabuli_chr01 | 35405446                | AA                              | TT              | 1946739364               |
| SNP_P4_12406_35405583 | NC_021160.1    | Ca_kabuli_chr01 | 35405583                | CC                              | TT              | 1946739366               |
| SNP_P4_12407_35422001 | NC_021160.1    | Ca_kabuli_chr01 | 35422001                | AA                              | GG              | 1946739368               |
| SNP_P4_12409_35425642 | NC_021160.1    | Ca_kabuli_chr01 | 35425642                | CC                              | GG              | 1946739370               |
| SNP_P4_12410_35428952 | NC_021160.1    | Ca_kabuli_chr01 | 35428952                | TT                              | CC              | 1946739372               |
| SNP_P4_12411_35429085 | NC_021160.1    | Ca_kabuli_chr01 | 35429085                | GG                              | AA              | 1946739374               |
| SNP_P4_12413_35432936 | NC_021160.1    | Ca_kabuli_chr01 | 35432936                | CC                              | TT              | 1946739376               |
| SNP_P4_12414_35432965 | NC_021160.1    | Ca_kabuli_chr01 | 35432965                | GG                              | AA              | 1946739378               |
| SNP_P4_12415_35432996 | NC_021160.1    | Ca_kabuli_chr01 | 35432996                | TT                              | CC              | 1946739380               |
| SNP_P4_12416_35433001 | NC_021160.1    | Ca_kabuli_chr01 | 35433001                | TT                              | CC              | 1946739382               |
| SNP_P4_12417_35433014 | NC_021160.1    | Ca_kabuli_chr01 | 35433014                | CC                              | TT              | 1946739384               |
| SNP_P4_12418_35433015 | NC_021160.1    | Ca_kabuli_chr01 | 35433015                | AA                              | GG              | 1946739386               |
| SNP_P4_12419_35433189 | NC_021160.1    | Ca_kabuli_chr01 | 35433189                | TT                              | CC              | 1946739388               |
| SNP_P4_12420_35433374 | NC_021160.1    | Ca_kabuli_chr01 | 35433374                | GG                              | AA              | 1946739390               |
| SNP_P4_12421_35435453 | NC_021160.1    | Ca_kabuli_chr01 | 35435453                | CC                              | TT              | 1946739392               |
| SNP_P4_12422_35436542 | NC_021160.1    | Ca_kabuli_chr01 | 35436542                | AA                              | GG              | 1946739394               |
| SNP_P4_12423_35436897 | NC_021160.1    | Ca_kabuli_chr01 | 35436897                | AA                              | CC              | 1946739396               |
| SNP_P4_12425_35449566 | NC_021160.1    | Ca_kabuli_chr01 | 35449566                | AA                              | GG              | 1946739398               |
| SNP_P4_12426_35450226 | NC_021160.1    | Ca_kabuli_chr01 | 35450226                | TT                              | CC              | 1946739400               |
| SNP_P4_12427_35450290 | NC_021160.1    | Ca_kabuli_chr01 | 35450290                | TT                              | CC              | 1946739402               |
| SNP_P4_12428_35454396 | NC_021160.1    | Ca_kabuli_chr01 | 35454396                | TT                              | CC              | 1946739404               |
| SNP_P4_12429_35454397 | NC_021160.1    | Ca_kabuli_chr01 | 35454397                | TT                              | AA              | 1946739406               |
| SNP_P4_12430_35471837 | NC_021160.1    | Ca_kabuli_chr01 | 35471837                | CC                              | TT              | 1946739408               |
| SNP_P4_12431_35475880 | NC_021160.1    | Ca_kabuli_chr01 | 35475880                | TT                              | AA              | 1946739410               |
| SNP_P4_12432_35479916 | NC_021160.1    | Ca_kabuli_chr01 | 35479916                | CC                              | TT              | 1946739412               |
| SNP_P4_12433_35480090 | NC_021160.1    | Ca_kabuli_chr01 | 35480090                | AA                              | GG              | 1946739414               |
| SNP_P4_12434_35480145 | NC_021160.1    | Ca_kabuli_chr01 | 35480145                | CC                              | TT              | 1946739416               |
| SNP_P4_12435_35480410 | NC_021160.1    | Ca_kabuli_chr01 | 35480410                | TT                              | GG              | 1946739418               |
| SNP_P4_12436_35480649 | NC_021160.1    | Ca_kabuli_chr01 | 35480649                | CC                              | AA              | 1946739420               |
| SNP_P4_12437_35480737 | NC_021160.1    | Ca_kabuli_chr01 | 35480737                | TT                              | CC              | 1946739422               |
| SNP_P4_12438_35481898 | NC_021160.1    | Ca_kabuli_chr01 | 35481898                | CC                              | TT              | 1946739424               |
| SNP_P4_12439_35482240 | NC_021160.1    | Ca_kabuli_chr01 | 35482240                | CC                              | TT              | 1946739426               |
| SNP_P4_12440_35482465 | NC_021160.1    | Ca_kabuli_chr01 | 35482465                | AA                              | TT              | 1946739427               |
| SNP_P4_12441_35489034 | NC_021160.1    | Ca_kabuli_chr01 | 35489034                | AA                              | CC              | 1946739429               |
| SNP_P4_12442_35489041 | NC_021160.1    | Ca_kabuli_chr01 | 35489041                | AA                              | CC              | 1946739431               |

| SNPs IDs              | Chromosome IDs | Chromosomes     | Physical positions (bp) | CDC Frontier (Reference genome) | (ILWC46 & LPNB) | NCBI SNPdb Accession IDs |
|-----------------------|----------------|-----------------|-------------------------|---------------------------------|-----------------|--------------------------|
| SNP_P4_12443_35489049 | NC_021160.1    | Ca_kabuli_chr01 | 35489049                | AA                              | GG              | 1946739433               |
| SNP_P4_12444_35489060 | NC_021160.1    | Ca_kabuli_chr01 | 35489060                | TT                              | AA              | 1946739435               |
| SNP_P4_12445_35492932 | NC_021160.1    | Ca_kabuli_chr01 | 35492932                | GG                              | AA              | 1946739437               |
| SNP_P4_12446_35496086 | NC_021160.1    | Ca_kabuli_chr01 | 35496086                | AA                              | GG              | 1946739439               |
| SNP_P4_12448_35496869 | NC_021160.1    | Ca_kabuli_chr01 | 35496869                | TT                              | CC              | 1946739441               |
| SNP_P4_12450_35502214 | NC_021160.1    | Ca_kabuli_chr01 | 35502214                | GG                              | AA              | 1946739443               |
| SNP_P4_12451_35502868 | NC_021160.1    | Ca_kabuli_chr01 | 35502868                | GG                              | AA              | 1946739445               |
| SNP_P4_12453_35508325 | NC_021160.1    | Ca_kabuli_chr01 | 35508325                | AA                              | GG              | 1946739447               |
| SNP_P4_12454_35508716 | NC_021160.1    | Ca_kabuli_chr01 | 35508716                | AA                              | GG              | 1946739449               |
| SNP_P4_12455_35537224 | NC_021160.1    | Ca_kabuli_chr01 | 35537224                | AA                              | CC              | 1946739450               |
| SNP_P4_12456_35537225 | NC_021160.1    | Ca_kabuli_chr01 | 35537225                | CC                              | TT              | 1946739452               |
| SNP_P4_12457_35537226 | NC_021160.1    | Ca_kabuli_chr01 | 35537226                | TT                              | AA              | 1946739454               |
| SNP_P4_12458_35537239 | NC_021160.1    | Ca_kabuli_chr01 | 35537239                | CC                              | TT              | 1946739456               |
| SNP_P4_12459_35537254 | NC_021160.1    | Ca_kabuli_chr01 | 35537254                | CC                              | AA              | 1946739458               |
| SNP_P4_12461_35537359 | NC_021160.1    | Ca_kabuli_chr01 | 35537359                | AA                              | CC              | 1946739460               |
| SNP_P4_12462_35537386 | NC_021160.1    | Ca_kabuli_chr01 | 35537386                | GG                              | AA              | 1946739462               |
| SNP_P4_12463_35537601 | NC_021160.1    | Ca_kabuli_chr01 | 35537601                | GG                              | AA              | 1946739464               |
| SNP_P4_12464_35538197 | NC_021160.1    | Ca_kabuli_chr01 | 35538197                | CC                              | TT              | 1946739466               |
| SNP_P4_12466_35540742 | NC_021160.1    | Ca_kabuli_chr01 | 35540742                | TT                              | GG              | 1946739468               |
| SNP_P4_12467_35546005 | NC_021160.1    | Ca_kabuli_chr01 | 35546005                | TT                              | GG              | 1946739470               |
| SNP_P4_12471_35560843 | NC_021160.1    | Ca_kabuli_chr01 | 35560843                | TT                              | AA              | 1946739472               |
| SNP_P4_12472_35560887 | NC_021160.1    | Ca_kabuli_chr01 | 35560887                | AA                              | GG              | 1946739474               |
| SNP_P4_12473_35560889 | NC_021160.1    | Ca_kabuli_chr01 | 35560889                | AA                              | GG              | 1946739476               |
| SNP_P4_12475_35564642 | NC_021160.1    | Ca_kabuli_chr01 | 35564642                | TT                              | GG              | 1946739478               |
| SNP_P4_12476_35564663 | NC_021160.1    | Ca_kabuli_chr01 | 35564663                | AA                              | TT              | 1946739480               |
| SNP_P4_12477_35564782 | NC_021160.1    | Ca_kabuli_chr01 | 35564782                | TT                              | GG              | 1946739482               |
| SNP_P4_12478_35564963 | NC_021160.1    | Ca_kabuli_chr01 | 35564963                | AA                              | GG              | 1946739484               |
| SNP_P4_12480_35565066 | NC_021160.1    | Ca_kabuli_chr01 | 35565066                | GG                              | AA              | 1946739486               |
| SNP_P4_12481_35565117 | NC_021160.1    | Ca_kabuli_chr01 | 35565117                | AA                              | TT              | 1946739488               |
| SNP_P4_12482_35565481 | NC_021160.1    | Ca_kabuli_chr01 | 35565481                | AA                              | CC              | 1946739490               |
| SNP_P4_12483_35569088 | NC_021160.1    | Ca_kabuli_chr01 | 35569088                | AA                              | GG              | 1946739492               |
| SNP_P4_12485_35574174 | NC_021160.1    | Ca_kabuli_chr01 | 35574174                | GG                              | AA              | 1946739494               |
| SNP_P4_12486_35574598 | NC_021160.1    | Ca_kabuli_chr01 | 35574598                | GG                              | AA              | 1946739496               |
| SNP_P4_12487_35574787 | NC_021160.1    | Ca_kabuli_chr01 | 35574787                | TT                              | AA              | 1946739498               |
| SNP_P4_12488_35576651 | NC_021160.1    | Ca_kabuli_chr01 | 35576651                | TT                              | AA              | 1946739500               |
| SNP_P4_12489_35578238 | NC_021160.1    | Ca_kabuli_chr01 | 35578238                | TT                              | AA              | 1946739502               |
| SNP_P4_12490_35579494 | NC_021160.1    | Ca_kabuli_chr01 | 35579494                | CC                              | AA              | 1946739504               |
| SNP_P4_12491_35580402 | NC_021160.1    | Ca_kabuli_chr01 | 35580402                | AA                              | TT              | 1946739506               |
| SNP_P4_12492_35580614 | NC_021160.1    | Ca_kabuli_chr01 | 35580614                | AA                              | CC              | 1946739508               |
| SNP_P4_12493_35582221 | NC_021160.1    | Ca_kabuli_chr01 | 35582221                | GG                              | AA              | 1946739510               |
| SNP_P4_12494_35585951 | NC_021160.1    | Ca_kabuli_chr01 | 35585951                | AA                              | GG              | 1946739512               |
| SNP_P4_12495_35598938 | NC_021160.1    | Ca_kabuli_chr01 | 35598938                | AA                              | TT              | 1946739514               |

| SNPs IDs              | Chromosome IDs | Chromosomes     | Physical positions (bp) | CDC Frontier (Reference genome) | (ILWC46 & LPNB) | NCBI SNPdb Accession IDs |
|-----------------------|----------------|-----------------|-------------------------|---------------------------------|-----------------|--------------------------|
| SNP_P4_12496_35599089 | NC_021160.1    | Ca_kabuli_chr01 | 35599089                | TT                              | AA              | 1946739516               |
| SNP_P4_12497_35599301 | NC_021160.1    | Ca_kabuli_chr01 | 35599301                | GG                              | AA              | 1946739518               |
| SNP_P4_12498_35599365 | NC_021160.1    | Ca_kabuli_chr01 | 35599365                | TT                              | AA              | 1946739520               |
| SNP_P4_12499_35599440 | NC_021160.1    | Ca_kabuli_chr01 | 35599440                | GG                              | AA              | 1946739522               |
| SNP_P4_12500_35599723 | NC_021160.1    | Ca_kabuli_chr01 | 35599723                | AA                              | CC              | 1946739524               |
| SNP_P4_12501_35600276 | NC_021160.1    | Ca_kabuli_chr01 | 35600276                | TT                              | CC              | 1946739526               |
| SNP_P4_12502_35603548 | NC_021160.1    | Ca_kabuli_chr01 | 35603548                | TT                              | AA              | 1946739528               |
| SNP_P4_12503_35603597 | NC_021160.1    | Ca_kabuli_chr01 | 35603597                | AA                              | GG              | 1946739530               |
| SNP_P4_12504_35604086 | NC_021160.1    | Ca_kabuli_chr01 | 35604086                | AA                              | CC              | 1946739532               |
| SNP_P4_12505_35605598 | NC_021160.1    | Ca_kabuli_chr01 | 35605598                | CC                              | TT              | 1946739534               |
| SNP_P4_12506_35605838 | NC_021160.1    | Ca_kabuli_chr01 | 35605838                | TT                              | CC              | 1946739536               |
| SNP_P4_12507_35605840 | NC_021160.1    | Ca_kabuli_chr01 | 35605840                | GG                              | AA              | 1946739538               |
| SNP_P4_12508_35606185 | NC_021160.1    | Ca_kabuli_chr01 | 35606185                | CC                              | AA              | 1946739540               |
| SNP_P4_12510_35613739 | NC_021160.1    | Ca_kabuli_chr01 | 35613739                | CC                              | TT              | 1946739541               |
| SNP_P4_12511_35613740 | NC_021160.1    | Ca_kabuli_chr01 | 35613740                | TT                              | GG              | 1946739543               |
| SNP_P4_12512_35613888 | NC_021160.1    | Ca_kabuli_chr01 | 35613888                | CC                              | TT              | 1946739545               |
| SNP_P4_12513_35613978 | NC_021160.1    | Ca_kabuli_chr01 | 35613978                | GG                              | AA              | 1946739547               |
| SNP_P4_12514_35614055 | NC_021160.1    | Ca_kabuli_chr01 | 35614055                | GG                              | AA              | 1946739549               |
| SNP_P4_12515_35614124 | NC_021160.1    | Ca_kabuli_chr01 | 35614124                | TT                              | AA              | 1946739551               |
| SNP_P4_12516_35614152 | NC_021160.1    | Ca_kabuli_chr01 | 35614152                | TT                              | CC              | 1946739553               |
| SNP_P4_12517_35614164 | NC_021160.1    | Ca_kabuli_chr01 | 35614164                | AA                              | GG              | 1946739555               |
| SNP_P4_12518_35614173 | NC_021160.1    | Ca_kabuli_chr01 | 35614173                | CC                              | TT              | 1946739557               |
| SNP_P4_12519_35614187 | NC_021160.1    | Ca_kabuli_chr01 | 35614187                | CC                              | TT              | 1946739559               |
| SNP_P4_12520_35621987 | NC_021160.1    | Ca_kabuli_chr01 | 35621987                | CC                              | AA              | 1946739561               |
| SNP_P4_12521_35622006 | NC_021160.1    | Ca_kabuli_chr01 | 35622006                | GG                              | AA              | 1946739563               |
| SNP_P4_12523_35624413 | NC_021160.1    | Ca_kabuli_chr01 | 35624413                | AA                              | GG              | 1946739565               |
| SNP_P4_12524_35635848 | NC_021160.1    | Ca_kabuli_chr01 | 35635848                | GG                              | AA              | 1946739567               |
| SNP_P4_12525_35637131 | NC_021160.1    | Ca_kabuli_chr01 | 35637131                | TT                              | GG              | 1946739569               |
| SNP_P4_12526_35637212 | NC_021160.1    | Ca_kabuli_chr01 | 35637212                | GG                              | AA              | 1946739571               |
| SNP_P4_12527_35637222 | NC_021160.1    | Ca_kabuli_chr01 | 35637222                | AA                              | CC              | 1946739573               |
| SNP_P4_12528_35637224 | NC_021160.1    | Ca_kabuli_chr01 | 35637224                | AA                              | GG              | 1946739575               |
| SNP_P4_12529_35642285 | NC_021160.1    | Ca_kabuli_chr01 | 35642285                | GG                              | AA              | 1946739577               |
| SNP_P4_12530_35648554 | NC_021160.1    | Ca_kabuli_chr01 | 35648554                | TT                              | CC              | 1946739579               |
| SNP_P4_12531_35649975 | NC_021160.1    | Ca_kabuli_chr01 | 35649975                | GG                              | AA              | 1946739581               |
| SNP_P4_12532_35656443 | NC_021160.1    | Ca_kabuli_chr01 | 35656443                | GG                              | AA              | 1946739583               |
| SNP_P4_12533_35659037 | NC_021160.1    | Ca_kabuli_chr01 | 35659037                | TT                              | AA              | 1946739585               |
| SNP_P4_12534_35659434 | NC_021160.1    | Ca_kabuli_chr01 | 35659434                | TT                              | CC              | 1946739587               |
| SNP_P4_12535_35660402 | NC_021160.1    | Ca_kabuli_chr01 | 35660402                | GG                              | AA              | 1946739589               |
| SNP_P4_12536_35660451 | NC_021160.1    | Ca_kabuli_chr01 | 35660451                | GG                              | TT              | 1946739591               |
| SNP_P4_12537_35663117 | NC_021160.1    | Ca_kabuli_chr01 | 35663117                | GG                              | CC              | 1946739593               |
| SNP_P4_12539_35681586 | NC_021160.1    | Ca_kabuli_chr01 | 35681586                | GG                              | CC              | 1946739595               |
| SNP_P4_12540_35687072 | NC_021160.1    | Ca_kabuli_chr01 | 35687072                | AA                              | CC              | 1946739597               |

| SNPs IDs              | Chromosome IDs | Chromosomes     | Physical positions (bp) | CDC Frontier (Reference genome) | (ILWC46 & LPNB) | NCBI SNPdb Accession IDs |
|-----------------------|----------------|-----------------|-------------------------|---------------------------------|-----------------|--------------------------|
| SNP_P4_12541_35687825 | NC_021160.1    | Ca_kabuli_chr01 | 35687825                | CC                              | TT              | 1946739599               |
| SNP_P4_12542_35689276 | NC_021160.1    | Ca_kabuli_chr01 | 35689276                | AA                              | CC              | 1946739601               |
| SNP_P4_12543_35689730 | NC_021160.1    | Ca_kabuli_chr01 | 35689730                | TT                              | CC              | 1946739603               |
| SNP_P4_12544_35690094 | NC_021160.1    | Ca_kabuli_chr01 | 35690094                | TT                              | CC              | 1946739605               |
| SNP_P4_12545_35690095 | NC_021160.1    | Ca_kabuli_chr01 | 35690095                | GG                              | AA              | 1946739607               |
| SNP_P4_12546_35692924 | NC_021160.1    | Ca_kabuli_chr01 | 35692924                | GG                              | AA              | 1946739609               |
| SNP_P4_12547_35711878 | NC_021160.1    | Ca_kabuli_chr01 | 35711878                | TT                              | GG              | 1946739611               |
| SNP_P4_12548_35713952 | NC_021160.1    | Ca_kabuli_chr01 | 35713952                | TT                              | CC              | 1946739613               |
| SNP_P4_12549_35714038 | NC_021160.1    | Ca_kabuli_chr01 | 35714038                | TT                              | CC              | 1946739615               |
| SNP_P4_12550_35714180 | NC_021160.1    | Ca_kabuli_chr01 | 35714180                | TT                              | CC              | 1946739617               |
| SNP_P4_12551_35714673 | NC_021160.1    | Ca_kabuli_chr01 | 35714673                | AA                              | GG              | 1946739620               |
| SNP_P4_12552_35715118 | NC_021160.1    | Ca_kabuli_chr01 | 35715118                | TT                              | CC              | 1946739622               |
| SNP_P4_12553_35715120 | NC_021160.1    | Ca_kabuli_chr01 | 35715120                | AA                              | GG              | 1946739624               |
| SNP_P4_12554_35717750 | NC_021160.1    | Ca_kabuli_chr01 | 35717750                | TT                              | GG              | 1946739626               |
| SNP_P4_12555_35724749 | NC_021160.1    | Ca_kabuli_chr01 | 35724749                | CC                              | TT              | 1946739628               |
| SNP_P4_12556_35724974 | NC_021160.1    | Ca_kabuli_chr01 | 35724974                | AA                              | GG              | 1946739630               |
| SNP_P4_12557_35724986 | NC_021160.1    | Ca_kabuli_chr01 | 35724986                | TT                              | CC              | 1946739632               |
| SNP_P4_12558_35724988 | NC_021160.1    | Ca_kabuli_chr01 | 35724988                | TT                              | CC              | 1946739634               |
| SNP_P4_12559_35725037 | NC_021160.1    | Ca_kabuli_chr01 | 35725037                | GG                              | AA              | 1946739636               |
| SNP_P4_12560_35725378 | NC_021160.1    | Ca_kabuli_chr01 | 35725378                | TT                              | CC              | 1946739638               |
| SNP_P4_12561_35727503 | NC_021160.1    | Ca_kabuli_chr01 | 35727503                | TT                              | GG              | 1946739640               |
| SNP_P4_12562_35737705 | NC_021160.1    | Ca_kabuli_chr01 | 35737705                | TT                              | CC              | 1946739641               |
| SNP_P4_12563_35741771 | NC_021160.1    | Ca_kabuli_chr01 | 35741771                | TT                              | CC              | 1946739644               |
| SNP_P4_12564_35744228 | NC_021160.1    | Ca_kabuli_chr01 | 35744228                | TT                              | GG              | 1946739646               |
| SNP_P4_12565_35747792 | NC_021160.1    | Ca_kabuli_chr01 | 35747792                | GG                              | AA              | 1946739648               |
| SNP_P4_12566_35749137 | NC_021160.1    | Ca_kabuli_chr01 | 35749137                | GG                              | AA              | 1946739649               |
| SNP_P4_12567_35759020 | NC_021160.1    | Ca_kabuli_chr01 | 35759020                | AA                              | TT              | 1946739651               |
| SNP_P4_12569_35771836 | NC_021160.1    | Ca_kabuli_chr01 | 35771836                | TT                              | GG              | 1946739653               |
| SNP_P4_12570_35775735 | NC_021160.1    | Ca_kabuli_chr01 | 35775735                | TT                              | AA              | 1946739655               |
| SNP_P4_12571_35784356 | NC_021160.1    | Ca_kabuli_chr01 | 35784356                | TT                              | CC              | 1946739657               |
| SNP_P4_12572_35784526 | NC_021160.1    | Ca_kabuli_chr01 | 35784526                | CC                              | AA              | 1946739659               |
| SNP_P4_12573_35784559 | NC_021160.1    | Ca_kabuli_chr01 | 35784559                | AA                              | GG              | 1946739661               |
| SNP_P4_12574_35784710 | NC_021160.1    | Ca_kabuli_chr01 | 35784710                | GG                              | TT              | 1946739663               |
| SNP_P4_12575_35787027 | NC_021160.1    | Ca_kabuli_chr01 | 35787027                | CC                              | AA              | 1946739665               |
| SNP_P4_12576_35788029 | NC_021160.1    | Ca_kabuli_chr01 | 35788029                | TT                              | GG              | 1946739667               |
| SNP_P4_12577_35788472 | NC_021160.1    | Ca_kabuli_chr01 | 35788472                | TT                              | GG              | 1946739669               |
| SNP_P4_12578_35788485 | NC_021160.1    | Ca_kabuli_chr01 | 35788485                | CC                              | TT              | 1946739671               |
| SNP_P4_12579_35788565 | NC_021160.1    | Ca_kabuli_chr01 | 35788565                | AA                              | GG              | 1946739673               |
| SNP_P4_12580_35791669 | NC_021160.1    | Ca_kabuli_chr01 | 35791669                | CC                              | TT              | 1946739675               |
| SNP_P4_12581_35791695 | NC_021160.1    | Ca_kabuli_chr01 | 35791695                | GG                              | AA              | 1946739677               |
| SNP_P4_12582_35791928 | NC_021160.1    | Ca_kabuli_chr01 | 35791928                | CC                              | AA              | 1946739679               |
| SNP_P4_12583_35796599 | NC_021160.1    | Ca_kabuli_chr01 | 35796599                | GG                              | CC              | 1946739681               |

| SNPs IDs              | Chromosome IDs | Chromosomes     | Physical positions (bp) | CDC Frontier (Reference genome) | (ILWC46 & LPNB) | NCBI SNPdb Accession IDs |
|-----------------------|----------------|-----------------|-------------------------|---------------------------------|-----------------|--------------------------|
| SNP_P4_12585_35799997 | NC_021160.1    | Ca_kabuli_chr01 | 35799997                | AA                              | GG              | 1946739683               |
| SNP_P4_12586_35801514 | NC_021160.1    | Ca_kabuli_chr01 | 35801514                | TT                              | CC              | 1946739685               |
| SNP_P4_12587_35801567 | NC_021160.1    | Ca_kabuli_chr01 | 35801567                | GG                              | AA              | 1946739687               |
| SNP_P4_12588_35817112 | NC_021160.1    | Ca_kabuli_chr01 | 35817112                | AA                              | TT              | 1946739689               |
| SNP_P4_12589_35817497 | NC_021160.1    | Ca_kabuli_chr01 | 35817497                | AA                              | GG              | 1946739691               |
| SNP_P4_12590_35818198 | NC_021160.1    | Ca_kabuli_chr01 | 35818198                | TT                              | GG              | 1946739693               |
| SNP_P4_12591_35818212 | NC_021160.1    | Ca_kabuli_chr01 | 35818212                | TT                              | GG              | 1946739695               |
| SNP_P4_12592_35818426 | NC_021160.1    | Ca_kabuli_chr01 | 35818426                | CC                              | TT              | 1946739697               |
| SNP_P4_12593_35822668 | NC_021160.1    | Ca_kabuli_chr01 | 35822668                | AA                              | GG              | 1946739699               |
| SNP_P4_12594_35822673 | NC_021160.1    | Ca_kabuli_chr01 | 35822673                | TT                              | CC              | 1946739701               |
| SNP_P4_12595_35827511 | NC_021160.1    | Ca_kabuli_chr01 | 35827511                | CC                              | TT              | 1946739703               |
| SNP_P4_12596_35829164 | NC_021160.1    | Ca_kabuli_chr01 | 35829164                | AA                              | GG              | 1946739705               |
| SNP_P4_12597_35829227 | NC_021160.1    | Ca_kabuli_chr01 | 35829227                | CC                              | TT              | 1946739707               |
| SNP_P4_12598_35829509 | NC_021160.1    | Ca_kabuli_chr01 | 35829509                | CC                              | TT              | 1946739708               |
| SNP_P4_12600_35842140 | NC_021160.1    | Ca_kabuli_chr01 | 35842140                | AA                              | TT              | 1946739710               |
| SNP_P4_12602_35842541 | NC_021160.1    | Ca_kabuli_chr01 | 35842541                | GG                              | CC              | 1946739712               |
| SNP_P4_12603_35844276 | NC_021160.1    | Ca_kabuli_chr01 | 35844276                | CC                              | TT              | 1946739714               |
| SNP_P4_12604_35846900 | NC_021160.1    | Ca_kabuli_chr01 | 35846900                | CC                              | TT              | 1946739716               |
| SNP_P4_12605_35856225 | NC_021160.1    | Ca_kabuli_chr01 | 35856225                | CC                              | AA              | 1946739718               |
| SNP_P4_12606_35856231 | NC_021160.1    | Ca_kabuli_chr01 | 35856231                | GG                              | AA              | 1946739720               |
| SNP_P4_12607_35856259 | NC_021160.1    | Ca_kabuli_chr01 | 35856259                | GG                              | AA              | 1946739722               |
| SNP_P4_12608_35856328 | NC_021160.1    | Ca_kabuli_chr01 | 35856328                | TT                              | CC              | 1946739724               |
| SNP_P4_12609_35856355 | NC_021160.1    | Ca_kabuli_chr01 | 35856355                | GG                              | AA              | 1946739726               |
| SNP_P4_12610_35856373 | NC_021160.1    | Ca_kabuli_chr01 | 35856373                | TT                              | AA              | 1946739728               |
| SNP_P4_12611_35856424 | NC_021160.1    | Ca_kabuli_chr01 | 35856424                | GG                              | CC              | 1946739730               |
| SNP_P4_12612_35856427 | NC_021160.1    | Ca_kabuli_chr01 | 35856427                | GG                              | AA              | 1946739732               |
| SNP_P4_12613_35856439 | NC_021160.1    | Ca_kabuli_chr01 | 35856439                | GG                              | AA              | 1946739734               |
| SNP_P4_12614_35856635 | NC_021160.1    | Ca_kabuli_chr01 | 35856635                | GG                              | CC              | 1946739736               |
| SNP_P4_12615_35856774 | NC_021160.1    | Ca_kabuli_chr01 | 35856774                | GG                              | AA              | 1946739738               |
| SNP_P4_12616_35856779 | NC_021160.1    | Ca_kabuli_chr01 | 35856779                | CC                              | TT              | 1946739740               |
| SNP_P4_12617_35856830 | NC_021160.1    | Ca_kabuli_chr01 | 35856830                | GG                              | AA              | 1946739742               |
| SNP_P4_12618_35856837 | NC_021160.1    | Ca_kabuli_chr01 | 35856837                | GG                              | AA              | 1946739744               |
| SNP_P4_12619_35857696 | NC_021160.1    | Ca_kabuli_chr01 | 35857696                | TT                              | CC              | 1946739746               |
| SNP_P4_12620_35857954 | NC_021160.1    | Ca_kabuli_chr01 | 35857954                | AA                              | TT              | 1946739749               |
| SNP_P4_12621_35859349 | NC_021160.1    | Ca_kabuli_chr01 | 35859349                | AA                              | TT              | 1946739751               |
| SNP_P4_12622_35862577 | NC_021160.1    | Ca_kabuli_chr01 | 35862577                | GG                              | CC              | 1946739753               |
| SNP_P4_12623_35862692 | NC_021160.1    | Ca_kabuli_chr01 | 35862692                | CC                              | TT              | 1946739755               |
| SNP_P4_12624_35865513 | NC_021160.1    | Ca_kabuli_chr01 | 35865513                | AA                              | TT              | 1946739757               |
| SNP_P4_12625_35865653 | NC_021160.1    | Ca_kabuli_chr01 | 35865653                | AA                              | TT              | 1946739759               |
| SNP_P4_12626_35865792 | NC_021160.1    | Ca_kabuli_chr01 | 35865792                | AA                              | CC              | 1946739761               |
| SNP_P4_12627_35865865 | NC_021160.1    | Ca_kabuli_chr01 | 35865865                | TT                              | AA              | 1946739763               |
| SNP_P4_12628_35865971 | NC_021160.1    | Ca_kabuli_chr01 | 35865971                | TT                              | CC              | 1946739765               |

| SNPs IDs              | Chromosome IDs | Chromosomes     | Physical positions (bp) | CDC Frontier (Reference genome) | (ILWC46 & LPNB) | NCBI SNPdb Accession IDs |
|-----------------------|----------------|-----------------|-------------------------|---------------------------------|-----------------|--------------------------|
| SNP_P4_12629_35867374 | NC_021160.1    | Ca_kabuli_chr01 | 35867374                | AA                              | GG              | 1946739768               |
| SNP_P4_12630_35867831 | NC_021160.1    | Ca_kabuli_chr01 | 35867831                | CC                              | AA              | 1946739770               |
| SNP_P4_12631_35870367 | NC_021160.1    | Ca_kabuli_chr01 | 35870367                | CC                              | TT              | 1946739771               |
| SNP_P4_12632_35876071 | NC_021160.1    | Ca_kabuli_chr01 | 35876071                | GG                              | CC              | 1946739773               |
| SNP_P4_12633_35884133 | NC_021160.1    | Ca_kabuli_chr01 | 35884133                | AA                              | GG              | 1946739775               |
| SNP_P4_12634_35889331 | NC_021160.1    | Ca_kabuli_chr01 | 35889331                | TT                              | AA              | 1946739777               |
| SNP_P4_12636_35901384 | NC_021160.1    | Ca_kabuli_chr01 | 35901384                | GG                              | AA              | 1946739780               |
| SNP_P4_12637_35904622 | NC_021160.1    | Ca_kabuli_chr01 | 35904622                | TT                              | CC              | 1946739782               |
| SNP_P4_12638_35907431 | NC_021160.1    | Ca_kabuli_chr01 | 35907431                | AA                              | GG              | 1946739784               |
| SNP_P4_12639_35907669 | NC_021160.1    | Ca_kabuli_chr01 | 35907669                | CC                              | TT              | 1946739786               |
| SNP_P4_12640_35908939 | NC_021160.1    | Ca_kabuli_chr01 | 35908939                | TT                              | CC              | 1946739788               |
| SNP_P4_12641_35912060 | NC_021160.1    | Ca_kabuli_chr01 | 35912060                | AA                              | GG              | 1946739790               |
| SNP_P4_12642_35922534 | NC_021160.1    | Ca_kabuli_chr01 | 35922534                | TT                              | CC              | 1946739792               |
| SNP_P4_12643_35923274 | NC_021160.1    | Ca_kabuli_chr01 | 35923274                | TT                              | CC              | 1946739794               |
| SNP_P4_12644_35924480 | NC_021160.1    | Ca_kabuli_chr01 | 35924480                | CC                              | TT              | 1946739796               |
| SNP_P4_12645_35925758 | NC_021160.1    | Ca_kabuli_chr01 | 35925758                | TT                              | CC              | 1946739798               |
| SNP_P4_12646_35930031 | NC_021160.1    | Ca_kabuli_chr01 | 35930031                | CC                              | TT              | 1946739800               |
| SNP_P4_12647_35930314 | NC_021160.1    | Ca_kabuli_chr01 | 35930314                | GG                              | CC              | 1946739802               |
| SNP_P4_12648_35946059 | NC_021160.1    | Ca_kabuli_chr01 | 35946059                | AA                              | GG              | 1946739804               |
| SNP_P4_12649_35946076 | NC_021160.1    | Ca_kabuli_chr01 | 35946076                | AA                              | TT              | 1946739806               |
| SNP_P4_12650_35946082 | NC_021160.1    | Ca_kabuli_chr01 | 35946082                | CC                              | GG              | 1946739808               |
| SNP_P4_12652_35946836 | NC_021160.1    | Ca_kabuli_chr01 | 35946836                | TT                              | CC              | 1946739810               |
| SNP_P4_12653_35946837 | NC_021160.1    | Ca_kabuli_chr01 | 35946837                | GG                              | AA              | 1946739812               |
| SNP_P4_12655_35946876 | NC_021160.1    | Ca_kabuli_chr01 | 35946876                | CC                              | GG              | 1946739814               |
| SNP_P4_12656_35946918 | NC_021160.1    | Ca_kabuli_chr01 | 35946918                | TT                              | CC              | 1946739816               |
| SNP_P4_12657_35946951 | NC_021160.1    | Ca_kabuli_chr01 | 35946951                | AA                              | GG              | 1946739818               |
| SNP_P4_12658_35946984 | NC_021160.1    | Ca_kabuli_chr01 | 35946984                | AA                              | GG              | 1946739820               |
| SNP_P4_12659_35947016 | NC_021160.1    | Ca_kabuli_chr01 | 35947016                | AA                              | GG              | 1946739822               |
| SNP_P4_12661_35947059 | NC_021160.1    | Ca_kabuli_chr01 | 35947059                | TT                              | GG              | 1946739824               |
| SNP_P4_12662_35947087 | NC_021160.1    | Ca_kabuli_chr01 | 35947087                | AA                              | GG              | 1946739826               |
| SNP_P4_12663_35947252 | NC_021160.1    | Ca_kabuli_chr01 | 35947252                | GG                              | AA              | 1946739827               |
| SNP_P4_12664_35947330 | NC_021160.1    | Ca_kabuli_chr01 | 35947330                | GG                              | AA              | 1946739829               |
| SNP_P4_12665_35947341 | NC_021160.1    | Ca_kabuli_chr01 | 35947341                | AA                              | TT              | 1946739831               |
| SNP_P4_12666_35948367 | NC_021160.1    | Ca_kabuli_chr01 | 35948367                | TT                              | CC              | 1946739833               |
| SNP_P4_12667_35959170 | NC_021160.1    | Ca_kabuli_chr01 | 35959170                | AA                              | CC              | 1946739835               |
| SNP_P4_12668_35959172 | NC_021160.1    | Ca_kabuli_chr01 | 35959172                | CC                              | AA              | 1946739837               |
| SNP_P4_12669_35959215 | NC_021160.1    | Ca_kabuli_chr01 | 35959215                | TT                              | CC              | 1946739839               |
| SNP_P4_12670_35973159 | NC_021160.1    | Ca_kabuli_chr01 | 35973159                | AA                              | CC              | 1946739841               |
| SNP_P4_12673_35977337 | NC_021160.1    | Ca_kabuli_chr01 | 35977337                | AA                              | GG              | 1946739843               |
| SNP_P4_12674_35977371 | NC_021160.1    | Ca_kabuli_chr01 | 35977371                | CC                              | TT              | 1946739845               |
| SNP_P4_12675_35977378 | NC_021160.1    | Ca_kabuli_chr01 | 35977378                | TT                              | GG              | 1946739847               |
| SNP_P4_12676_35977408 | NC_021160.1    | Ca_kabuli_chr01 | 35977408                | AA                              | GG              | 1946739849               |



| SNPs IDs              | Chromosome IDs | Chromosomes     | Physical positions (bp) | CDC Frontier (Reference genome) | (ILWC46 & LPNB) | NCBI SNPdb Accession IDs |
|-----------------------|----------------|-----------------|-------------------------|---------------------------------|-----------------|--------------------------|
| SNP_P4_12677_35977601 | NC_021160.1    | Ca_kabuli_chr01 | 35977601                | GG                              | CC              | 1946739851               |
| SNP_P4_12678_35977728 | NC_021160.1    | Ca_kabuli_chr01 | 35977728                | TT                              | CC              | 1946739853               |
| SNP_P4_12679_35978236 | NC_021160.1    | Ca_kabuli_chr01 | 35978236                | GG                              | TT              | 1946739855               |
| SNP_P4_12680_35994148 | NC_021160.1    | Ca_kabuli_chr01 | 35994148                | AA                              | GG              | 1946739857               |
| SNP_P4_12681_36005477 | NC_021160.1    | Ca_kabuli_chr01 | 36005477                | TT                              | CC              | 1946739859               |
| SNP_P4_12682_36010330 | NC_021160.1    | Ca_kabuli_chr01 | 36010330                | CC                              | TT              | 1946739861               |
| SNP_P4_12683_36012893 | NC_021160.1    | Ca_kabuli_chr01 | 36012893                | GG                              | AA              | 1946739863               |
| SNP_P4_12684_36012896 | NC_021160.1    | Ca_kabuli_chr01 | 36012896                | TT                              | AA              | 1946739865               |
| SNP_P4_12685_36012931 | NC_021160.1    | Ca_kabuli_chr01 | 36012931                | AA                              | GG              | 1946739869               |
| SNP_P4_12686_36012953 | NC_021160.1    | Ca_kabuli_chr01 | 36012953                | AA                              | CC              | 1946739871               |
| SNP_P4_12687_36012956 | NC_021160.1    | Ca_kabuli_chr01 | 36012956                | TT                              | AA              | 1946739873               |
| SNP_P4_12688_36012968 | NC_021160.1    | Ca_kabuli_chr01 | 36012968                | TT                              | CC              | 1946739875               |
| SNP_P4_12689_36012971 | NC_021160.1    | Ca_kabuli_chr01 | 36012971                | GG                              | AA              | 1946739877               |
| SNP_P4_12690_36012983 | NC_021160.1    | Ca_kabuli_chr01 | 36012983                | TT                              | CC              | 1946739879               |
| SNP_P4_12691_36012985 | NC_021160.1    | Ca_kabuli_chr01 | 36012985                | AA                              | GG              | 1946739881               |
| SNP_P4_12692_36012995 | NC_021160.1    | Ca_kabuli_chr01 | 36012995                | AA                              | GG              | 1946739883               |
| SNP_P4_12693_36012998 | NC_021160.1    | Ca_kabuli_chr01 | 36012998                | CC                              | TT              | 1946739885               |
| SNP_P4_12694_36013001 | NC_021160.1    | Ca_kabuli_chr01 | 36013001                | AA                              | CC              | 1946739887               |
| SNP_P4_12695_36013071 | NC_021160.1    | Ca_kabuli_chr01 | 36013071                | GG                              | TT              | 1946739889               |
| SNP_P4_12696_36013119 | NC_021160.1    | Ca_kabuli_chr01 | 36013119                | TT                              | CC              | 1946739891               |
| SNP_P4_12697_36013254 | NC_021160.1    | Ca_kabuli_chr01 | 36013254                | GG                              | AA              | 1946739893               |
| SNP_P4_12698_36013263 | NC_021160.1    | Ca_kabuli_chr01 | 36013263                | TT                              | CC              | 1946739895               |
| SNP_P4_12699_36013344 | NC_021160.1    | Ca_kabuli_chr01 | 36013344                | CC                              | TT              | 1946739897               |
| SNP_P4_12700_36013359 | NC_021160.1    | Ca_kabuli_chr01 | 36013359                | TT                              | AA              | 1946739899               |
| SNP_P4_12701_36013365 | NC_021160.1    | Ca_kabuli_chr01 | 36013365                | AA                              | CC              | 1946739901               |
| SNP_P4_12702_36013368 | NC_021160.1    | Ca_kabuli_chr01 | 36013368                | TT                              | CC              | 1946739903               |
| SNP_P4_12705_36059786 | NC_021160.1    | Ca_kabuli_chr01 | 36059786                | AA                              | TT              | 1946739905               |
| SNP_P4_12707_36063221 | NC_021160.1    | Ca_kabuli_chr01 | 36063221                | CC                              | AA              | 1946739907               |
| SNP_P4_12708_36081439 | NC_021160.1    | Ca_kabuli_chr01 | 36081439                | CC                              | TT              | 1946739909               |
| SNP_P4_12709_36081441 | NC_021160.1    | Ca_kabuli_chr01 | 36081441                | AA                              | GG              | 1946739911               |
| SNP_P4_12710_36081454 | NC_021160.1    | Ca_kabuli_chr01 | 36081454                | CC                              | TT              | 1946739913               |
| SNP_P4_12711_36081457 | NC_021160.1    | Ca_kabuli_chr01 | 36081457                | AA                              | GG              | 1946739914               |
| SNP_P4_12712_36081496 | NC_021160.1    | Ca_kabuli_chr01 | 36081496                | AA                              | GG              | 1946739916               |
| SNP_P4_12713_36081559 | NC_021160.1    | Ca_kabuli_chr01 | 36081559                | AA                              | TT              | 1946739918               |
| SNP_P4_12714_36081590 | NC_021160.1    | Ca_kabuli_chr01 | 36081590                | CC                              | TT              | 1946739920               |
| SNP_P4_12715_36081821 | NC_021160.1    | Ca_kabuli_chr01 | 36081821                | TT                              | CC              | 1946739922               |
| SNP_P4_12716_36081835 | NC_021160.1    | Ca_kabuli_chr01 | 36081835                | AA                              | TT              | 1946739924               |
| SNP_P4_12717_36081839 | NC_021160.1    | Ca_kabuli_chr01 | 36081839                | TT                              | CC              | 1946739926               |
| SNP_P4_12718_36081840 | NC_021160.1    | Ca_kabuli_chr01 | 36081840                | CC                              | AA              | 1946739928               |
| SNP_P4_12719_36081851 | NC_021160.1    | Ca_kabuli_chr01 | 36081851                | TT                              | CC              | 1946739930               |
| SNP_P4_12720_36081953 | NC_021160.1    | Ca_kabuli_chr01 | 36081953                | AA                              | GG              | 1946739932               |
| SNP_P4_12721_36081979 | NC_021160.1    | Ca_kabuli_chr01 | 36081979                | CC                              | TT              | 1946739934               |

| SNPs IDs              | Chromosome IDs | Chromosomes     | Physical positions (bp) | CDC Frontier (Reference genome) | (ILWC46 & LPNB) | NCBI SNPdb Accession IDs |
|-----------------------|----------------|-----------------|-------------------------|---------------------------------|-----------------|--------------------------|
| SNP_P4_12722_36081988 | NC_021160.1    | Ca_kabuli_chr01 | 36081988                | AA                              | CC              | 1946739936               |
| SNP_P4_12723_36082048 | NC_021160.1    | Ca_kabuli_chr01 | 36082048                | TT                              | GG              | 1946739938               |
| SNP_P4_12724_36087678 | NC_021160.1    | Ca_kabuli_chr01 | 36087678                | GG                              | AA              | 1946739940               |
| SNP_P4_12725_36087867 | NC_021160.1    | Ca_kabuli_chr01 | 36087867                | CC                              | TT              | 1946739942               |
| SNP_P4_12728_36154194 | NC_021160.1    | Ca_kabuli_chr01 | 36154194                | TT                              | CC              | 1946739944               |
| SNP_P4_12729_36154197 | NC_021160.1    | Ca_kabuli_chr01 | 36154197                | CC                              | TT              | 1946739946               |
| SNP_P4_12730_36154208 | NC_021160.1    | Ca_kabuli_chr01 | 36154208                | TT                              | AA              | 1946739948               |
| SNP_P4_12732_36172019 | NC_021160.1    | Ca_kabuli_chr01 | 36172019                | GG                              | TT              | 1946739950               |
| SNP_P4_12733_36203941 | NC_021160.1    | Ca_kabuli_chr01 | 36203941                | GG                              | AA              | 1946739952               |
| SNP_P4_12734_36243614 | NC_021160.1    | Ca_kabuli_chr01 | 36243614                | TT                              | CC              | 1946739954               |
| SNP_P4_12735_36243615 | NC_021160.1    | Ca_kabuli_chr01 | 36243615                | CC                              | TT              | 1946739956               |
| SNP_P4_12736_36243846 | NC_021160.1    | Ca_kabuli_chr01 | 36243846                | CC                              | GG              | 1946739958               |
| SNP_P4_12737_36249351 | NC_021160.1    | Ca_kabuli_chr01 | 36249351                | AA                              | CC              | 1946739959               |
| SNP_P4_12738_36249358 | NC_021160.1    | Ca_kabuli_chr01 | 36249358                | CC                              | AA              | 1946739961               |
| SNP_P4_12740_36268874 | NC_021160.1    | Ca_kabuli_chr01 | 36268874                | TT                              | CC              | 1946739963               |
| SNP_P4_12741_36269003 | NC_021160.1    | Ca_kabuli_chr01 | 36269003                | CC                              | AA              | 1946739965               |
| SNP_P4_12742_36269220 | NC_021160.1    | Ca_kabuli_chr01 | 36269220                | GG                              | AA              | 1946739967               |
| SNP_P4_12743_36269288 | NC_021160.1    | Ca_kabuli_chr01 | 36269288                | AA                              | GG              | 1946739969               |
| SNP_P4_12744_36271768 | NC_021160.1    | Ca_kabuli_chr01 | 36271768                | CC                              | TT              | 1946739971               |
| SNP_P4_12745_36282959 | NC_021160.1    | Ca_kabuli_chr01 | 36282959                | GG                              | AA              | 1946739973               |
| SNP_P4_12746_36282974 | NC_021160.1    | Ca_kabuli_chr01 | 36282974                | AA                              | GG              | 1946739975               |
| SNP_P4_12747_36283052 | NC_021160.1    | Ca_kabuli_chr01 | 36283052                | CC                              | GG              | 1946739977               |
| SNP_P4_12748_36283284 | NC_021160.1    | Ca_kabuli_chr01 | 36283284                | AA                              | GG              | 1946739979               |
| SNP_P4_12749_36283292 | NC_021160.1    | Ca_kabuli_chr01 | 36283292                | CC                              | TT              | 1946739981               |
| SNP_P4_12750_36283366 | NC_021160.1    | Ca_kabuli_chr01 | 36283366                | TT                              | GG              | 1946739983               |
| SNP_P4_12751_36283457 | NC_021160.1    | Ca_kabuli_chr01 | 36283457                | CC                              | TT              | 1946739985               |
| SNP_P4_12752_36283525 | NC_021160.1    | Ca_kabuli_chr01 | 36283525                | AA                              | TT              | 1946739987               |
| SNP_P4_12753_36283648 | NC_021160.1    | Ca_kabuli_chr01 | 36283648                | AA                              | GG              | 1946739989               |
| SNP_P4_12754_36296809 | NC_021160.1    | Ca_kabuli_chr01 | 36296809                | CC                              | TT              | 1946739991               |
| SNP_P4_12755_36297212 | NC_021160.1    | Ca_kabuli_chr01 | 36297212                | CC                              | TT              | 1946739993               |
| SNP_P4_12756_36297248 | NC_021160.1    | Ca_kabuli_chr01 | 36297248                | GG                              | AA              | 1946739995               |
| SNP_P4_12757_36297251 | NC_021160.1    | Ca_kabuli_chr01 | 36297251                | AA                              | TT              | 1946739996               |
| SNP_P4_12758_36297274 | NC_021160.1    | Ca_kabuli_chr01 | 36297274                | TT                              | GG              | 1946739998               |
| SNP_P4_12759_36300739 | NC_021160.1    | Ca_kabuli_chr01 | 36300739                | CC                              | GG              | 1946740000               |
| SNP_P4_12761_36342208 | NC_021160.1    | Ca_kabuli_chr01 | 36342208                | GG                              | TT              | 1946740002               |
| SNP_P4_12762_36345364 | NC_021160.1    | Ca_kabuli_chr01 | 36345364                | CC                              | TT              | 1946740004               |
| SNP_P4_12763_36346299 | NC_021160.1    | Ca_kabuli_chr01 | 36346299                | GG                              | AA              | 1946740006               |
| SNP_P4_12764_36349920 | NC_021160.1    | Ca_kabuli_chr01 | 36349920                | AA                              | GG              | 1946740008               |
| SNP_P4_12765_36356669 | NC_021160.1    | Ca_kabuli_chr01 | 36356669                | CC                              | TT              | 1946740010               |
| SNP_P4_12767_36471039 | NC_021160.1    | Ca_kabuli_chr01 | 36471039                | AA                              | TT              | 1946740013               |
| SNP_P4_12768_36474301 | NC_021160.1    | Ca_kabuli_chr01 | 36474301                | CC                              | AA              | 1946740015               |
| SNP_P4_12769_36513913 | NC_021160.1    | Ca_kabuli_chr01 | 36513913                | CC                              | TT              | 1946740016               |

| SNPs IDs              | Chromosome IDs | Chromosomes     | Physical positions (bp) | CDC Frontier (Reference genome) | (ILWC46 & LPNB) | NCBI SNPdb Accession IDs |
|-----------------------|----------------|-----------------|-------------------------|---------------------------------|-----------------|--------------------------|
| SNP_P4_12770_36531829 | NC_021160.1    | Ca_kabuli_chr01 | 36531829                | CC                              | TT              | 1946740018               |
| SNP_P4_12771_36532215 | NC_021160.1    | Ca_kabuli_chr01 | 36532215                | AA                              | GG              | 1946740020               |
| SNP_P4_12772_36538673 | NC_021160.1    | Ca_kabuli_chr01 | 36538673                | GG                              | AA              | 1946740022               |
| SNP_P4_12773_36572256 | NC_021160.1    | Ca_kabuli_chr01 | 36572256                | TT                              | CC              | 1946740024               |
| SNP_P4_12774_36572403 | NC_021160.1    | Ca_kabuli_chr01 | 36572403                | CC                              | TT              | 1946740026               |
| SNP_P4_12775_36594233 | NC_021160.1    | Ca_kabuli_chr01 | 36594233                | AA                              | GG              | 1946740028               |
| SNP_P4_12776_36594295 | NC_021160.1    | Ca_kabuli_chr01 | 36594295                | AA                              | GG              | 1946740030               |
| SNP_P4_12779_36642427 | NC_021160.1    | Ca_kabuli_chr01 | 36642427                | GG                              | TT              | 1946740032               |
| SNP_P4_12780_36661470 | NC_021160.1    | Ca_kabuli_chr01 | 36661470                | GG                              | AA              | 1946740034               |
| SNP_P4_12781_36661471 | NC_021160.1    | Ca_kabuli_chr01 | 36661471                | GG                              | AA              | 1946740036               |
| SNP_P4_12782_36661673 | NC_021160.1    | Ca_kabuli_chr01 | 36661673                | TT                              | AA              | 1946740038               |
| SNP_P4_12783_36711602 | NC_021160.1    | Ca_kabuli_chr01 | 36711602                | CC                              | TT              | 1946740040               |
| SNP_P4_12784_36716787 | NC_021160.1    | Ca_kabuli_chr01 | 36716787                | GG                              | AA              | 1946740042               |
| SNP_P4_12785_36717288 | NC_021160.1    | Ca_kabuli_chr01 | 36717288                | TT                              | CC              | 1946740044               |
| SNP_P4_12786_36717359 | NC_021160.1    | Ca_kabuli_chr01 | 36717359                | GG                              | AA              | 1946740046               |
| SNP_P4_12787_36717373 | NC_021160.1    | Ca_kabuli_chr01 | 36717373                | CC                              | TT              | 1946740048               |
| SNP_P4_12788_36719702 | NC_021160.1    | Ca_kabuli_chr01 | 36719702                | AA                              | GG              | 1946740050               |
| SNP_P4_12789_36719818 | NC_021160.1    | Ca_kabuli_chr01 | 36719818                | GG                              | CC              | 1946740052               |
| SNP_P4_12790_36720183 | NC_021160.1    | Ca_kabuli_chr01 | 36720183                | GG                              | AA              | 1946740054               |
| SNP_P4_12791_36720238 | NC_021160.1    | Ca_kabuli_chr01 | 36720238                | TT                              | GG              | 1946740056               |
| SNP_P4_12792_36720512 | NC_021160.1    | Ca_kabuli_chr01 | 36720512                | AA                              | CC              | 1946740058               |
| SNP_P4_12793_36720676 | NC_021160.1    | Ca_kabuli_chr01 | 36720676                | CC                              | TT              | 1946740060               |
| SNP_P4_12794_36720726 | NC_021160.1    | Ca_kabuli_chr01 | 36720726                | AA                              | TT              | 1946740063               |
| SNP_P4_12795_36720753 | NC_021160.1    | Ca_kabuli_chr01 | 36720753                | AA                              | GG              | 1946740065               |
| SNP_P4_12796_36720797 | NC_021160.1    | Ca_kabuli_chr01 | 36720797                | TT                              | CC              | 1946740067               |
| SNP_P4_12797_36721516 | NC_021160.1    | Ca_kabuli_chr01 | 36721516                | AA                              | GG              | 1946740069               |
| SNP_P4_12798_36721673 | NC_021160.1    | Ca_kabuli_chr01 | 36721673                | CC                              | TT              | 1946740071               |
| SNP_P4_12799_36721753 | NC_021160.1    | Ca_kabuli_chr01 | 36721753                | CC                              | TT              | 1946740073               |
| SNP_P4_12800_36724371 | NC_021160.1    | Ca_kabuli_chr01 | 36724371                | CC                              | GG              | 1946740075               |
| SNP_P4_12801_36724411 | NC_021160.1    | Ca_kabuli_chr01 | 36724411                | TT                              | GG              | 1946740077               |
| SNP_P4_12802_36724418 | NC_021160.1    | Ca_kabuli_chr01 | 36724418                | GG                              | TT              | 1946740078               |
| SNP_P4_12803_36724484 | NC_021160.1    | Ca_kabuli_chr01 | 36724484                | CC                              | AA              | 1946740080               |
| SNP_P4_12804_36724490 | NC_021160.1    | Ca_kabuli_chr01 | 36724490                | TT                              | AA              | 1946740082               |
| SNP_P4_12805_36724530 | NC_021160.1    | Ca_kabuli_chr01 | 36724530                | CC                              | TT              | 1946740084               |
| SNP_P4_12806_36724531 | NC_021160.1    | Ca_kabuli_chr01 | 36724531                | CC                              | AA              | 1946740086               |
| SNP_P4_12807_36724560 | NC_021160.1    | Ca_kabuli_chr01 | 36724560                | GG                              | AA              | 1946740089               |
| SNP_P4_12808_36724578 | NC_021160.1    | Ca_kabuli_chr01 | 36724578                | CC                              | TT              | 1946740091               |
| SNP_P4_12809_36724627 | NC_021160.1    | Ca_kabuli_chr01 | 36724627                | AA                              | GG              | 1946740093               |
| SNP_P4_12810_36724684 | NC_021160.1    | Ca_kabuli_chr01 | 36724684                | TT                              | AA              | 1946740095               |
| SNP_P4_12811_36724691 | NC_021160.1    | Ca_kabuli_chr01 | 36724691                | GG                              | TT              | 1946740097               |
| SNP_P4_12812_36724698 | NC_021160.1    | Ca_kabuli_chr01 | 36724698                | TT                              | CC              | 1946740099               |
| SNP_P4_12813_36724701 | NC_021160.1    | Ca_kabuli_chr01 | 36724701                | CC                              | TT              | 1946740101               |

| SNPs IDs              | Chromosome IDs | Chromosomes     | Physical positions (bp) | CDC Frontier (Reference genome) | (ILWC46 & LPNB) | NCBI SNPdb Accession IDs |
|-----------------------|----------------|-----------------|-------------------------|---------------------------------|-----------------|--------------------------|
| SNP_P4_12815_36724815 | NC_021160.1    | Ca_kabuli_chr01 | 36724815                | GG                              | AA              | 1946740103               |
| SNP_P4_12816_36724821 | NC_021160.1    | Ca_kabuli_chr01 | 36724821                | GG                              | TT              | 1946740105               |
| SNP_P4_12817_36724860 | NC_021160.1    | Ca_kabuli_chr01 | 36724860                | GG                              | TT              | 1946740107               |
| SNP_P4_12818_36724861 | NC_021160.1    | Ca_kabuli_chr01 | 36724861                | AA                              | TT              | 1946740110               |
| SNP_P4_12819_36725129 | NC_021160.1    | Ca_kabuli_chr01 | 36725129                | TT                              | CC              | 1946740112               |
| SNP_P4_12820_36725172 | NC_021160.1    | Ca_kabuli_chr01 | 36725172                | TT                              | CC              | 1946740114               |
| SNP_P4_12821_36725211 | NC_021160.1    | Ca_kabuli_chr01 | 36725211                | TT                              | CC              | 1946740115               |
| SNP_P4_12822_36725374 | NC_021160.1    | Ca_kabuli_chr01 | 36725374                | TT                              | GG              | 1946740117               |
| SNP_P4_12823_36725414 | NC_021160.1    | Ca_kabuli_chr01 | 36725414                | TT                              | CC              | 1946740119               |
| SNP_P4_12824_36725466 | NC_021160.1    | Ca_kabuli_chr01 | 36725466                | AA                              | GG              | 1946740121               |
| SNP_P4_12825_36725496 | NC_021160.1    | Ca_kabuli_chr01 | 36725496                | TT                              | AA              | 1946740123               |
| SNP_P4_12826_36725513 | NC_021160.1    | Ca_kabuli_chr01 | 36725513                | CC                              | TT              | 1946740125               |
| SNP_P4_12827_36725570 | NC_021160.1    | Ca_kabuli_chr01 | 36725570                | CC                              | TT              | 1946740127               |
| SNP_P4_12828_36725581 | NC_021160.1    | Ca_kabuli_chr01 | 36725581                | GG                              | AA              | 1946740129               |
| SNP_P4_12829_36725615 | NC_021160.1    | Ca_kabuli_chr01 | 36725615                | CC                              | GG              | 1946740131               |
| SNP_P4_12830_36725665 | NC_021160.1    | Ca_kabuli_chr01 | 36725665                | TT                              | AA              | 1946740133               |
| SNP_P4_12831_36725674 | NC_021160.1    | Ca_kabuli_chr01 | 36725674                | TT                              | CC              | 1946740135               |
| SNP_P4_12832_36725740 | NC_021160.1    | Ca_kabuli_chr01 | 36725740                | GG                              | TT              | 1946740137               |
| SNP_P4_12833_36725888 | NC_021160.1    | Ca_kabuli_chr01 | 36725888                | CC                              | TT              | 1946740139               |
| SNP_P4_12834_36725954 | NC_021160.1    | Ca_kabuli_chr01 | 36725954                | GG                              | TT              | 1946740141               |
| SNP_P4_12835_36725986 | NC_021160.1    | Ca_kabuli_chr01 | 36725986                | AA                              | GG              | 1946740143               |
| SNP_P4_12836_36726144 | NC_021160.1    | Ca_kabuli_chr01 | 36726144                | CC                              | TT              | 1946740145               |
| SNP_P4_12837_36726147 | NC_021160.1    | Ca_kabuli_chr01 | 36726147                | TT                              | CC              | 1946740147               |
| SNP_P4_12838_36726188 | NC_021160.1    | Ca_kabuli_chr01 | 36726188                | AA                              | CC              | 1946740149               |
| SNP_P4_12839_36726213 | NC_021160.1    | Ca_kabuli_chr01 | 36726213                | CC                              | TT              | 1946740151               |
| SNP_P4_12840_36726216 | NC_021160.1    | Ca_kabuli_chr01 | 36726216                | CC                              | AA              | 1946740153               |
| SNP_P4_12841_36726228 | NC_021160.1    | Ca_kabuli_chr01 | 36726228                | AA                              | GG              | 1946740155               |
| SNP_P4_12842_36726281 | NC_021160.1    | Ca_kabuli_chr01 | 36726281                | AA                              | GG              | 1946740157               |
| SNP_P4_12843_36726312 | NC_021160.1    | Ca_kabuli_chr01 | 36726312                | AA                              | CC              | 1946740159               |
| SNP_P4_12844_36726426 | NC_021160.1    | Ca_kabuli_chr01 | 36726426                | CC                              | AA              | 1946740161               |
| SNP_P4_12845_36726451 | NC_021160.1    | Ca_kabuli_chr01 | 36726451                | TT                              | CC              | 1946740163               |
| SNP_P4_12846_36726454 | NC_021160.1    | Ca_kabuli_chr01 | 36726454                | AA                              | CC              | 1946740165               |
| SNP_P4_12848_36726535 | NC_021160.1    | Ca_kabuli_chr01 | 36726535                | CC                              | TT              | 1946740167               |
| SNP_P4_12849_36726641 | NC_021160.1    | Ca_kabuli_chr01 | 36726641                | GG                              | AA              | 1946740169               |
| SNP_P4_12850_36726647 | NC_021160.1    | Ca_kabuli_chr01 | 36726647                | TT                              | CC              | 1946740171               |
| SNP_P4_12851_36726669 | NC_021160.1    | Ca_kabuli_chr01 | 36726669                | AA                              | TT              | 1946740173               |
| SNP_P4_12852_36726731 | NC_021160.1    | Ca_kabuli_chr01 | 36726731                | TT                              | CC              | 1946740175               |
| SNP_P4_12853_36727688 | NC_021160.1    | Ca_kabuli_chr01 | 36727688                | AA                              | GG              | 1946740177               |
| SNP_P4_12854_36727911 | NC_021160.1    | Ca_kabuli_chr01 | 36727911                | TT                              | CC              | 1946740179               |
| SNP_P4_12855_36727949 | NC_021160.1    | Ca_kabuli_chr01 | 36727949                | CC                              | GG              | 1946740181               |
| SNP_P4_12856_36728056 | NC_021160.1    | Ca_kabuli_chr01 | 36728056                | AA                              | CC              | 1946740182               |
| SNP_P4_12857_36728086 | NC_021160.1    | Ca_kabuli_chr01 | 36728086                | GG                              | TT              | 1946740183               |

| SNPs IDs              | Chromosome IDs | Chromosomes     | Physical positions (bp) | CDC Frontier (Reference genome) | (ILWC46 & LPNB) | NCBI SNPdb Accession IDs |
|-----------------------|----------------|-----------------|-------------------------|---------------------------------|-----------------|--------------------------|
| SNP_P4_12858_36728207 | NC_021160.1    | Ca_kabuli_chr01 | 36728207                | GG                              | AA              | 1946740184               |
| SNP_P4_12859_36728235 | NC_021160.1    | Ca_kabuli_chr01 | 36728235                | AA                              | TT              | 1946740185               |
| SNP_P4_12860_36728412 | NC_021160.1    | Ca_kabuli_chr01 | 36728412                | CC                              | TT              | 1946740186               |
| SNP_P4_12861_36737904 | NC_021160.1    | Ca_kabuli_chr01 | 36737904                | AA                              | GG              | 1946740187               |
| SNP_P4_12862_36737930 | NC_021160.1    | Ca_kabuli_chr01 | 36737930                | AA                              | GG              | 1946740189               |
| SNP_P4_12863_36738279 | NC_021160.1    | Ca_kabuli_chr01 | 36738279                | CC                              | AA              | 1946740191               |
| SNP_P4_12864_36746132 | NC_021160.1    | Ca_kabuli_chr01 | 36746132                | GG                              | AA              | 1946740193               |
| SNP_P4_12866_36750034 | NC_021160.1    | Ca_kabuli_chr01 | 36750034                | GG                              | TT              | 1946740195               |
| SNP_P4_12867_36752304 | NC_021160.1    | Ca_kabuli_chr01 | 36752304                | GG                              | AA              | 1946740197               |
| SNP_P4_12868_36752315 | NC_021160.1    | Ca_kabuli_chr01 | 36752315                | AA                              | GG              | 1946740199               |
| SNP_P4_12869_36785235 | NC_021160.1    | Ca_kabuli_chr01 | 36785235                | CC                              | TT              | 1946740201               |
| SNP_P4_12870_36793619 | NC_021160.1    | Ca_kabuli_chr01 | 36793619                | GG                              | AA              | 1946740203               |
| SNP_P4_12871_36795031 | NC_021160.1    | Ca_kabuli_chr01 | 36795031                | CC                              | TT              | 1946740205               |
| SNP_P4_12872_36810281 | NC_021160.1    | Ca_kabuli_chr01 | 36810281                | AA                              | TT              | 1946740207               |
| SNP_P4_12873_36832941 | NC_021160.1    | Ca_kabuli_chr01 | 36832941                | AA                              | CC              | 1946740209               |
| SNP_P4_12875_36869134 | NC_021160.1    | Ca_kabuli_chr01 | 36869134                | GG                              | TT              | 1946740211               |
| SNP_P4_12876_36869160 | NC_021160.1    | Ca_kabuli_chr01 | 36869160                | AA                              | TT              | 1946740213               |
| SNP_P4_12877_36869170 | NC_021160.1    | Ca_kabuli_chr01 | 36869170                | TT                              | GG              | 1946740215               |
| SNP_P4_12878_36869173 | NC_021160.1    | Ca_kabuli_chr01 | 36869173                | AA                              | GG              | 1946740217               |
| SNP_P4_12879_36869204 | NC_021160.1    | Ca_kabuli_chr01 | 36869204                | TT                              | AA              | 1946740219               |
| SNP_P4_12880_36869208 | NC_021160.1    | Ca_kabuli_chr01 | 36869208                | TT                              | CC              | 1946740221               |
| SNP_P4_12881_36869213 | NC_021160.1    | Ca_kabuli_chr01 | 36869213                | GG                              | AA              | 1946740223               |
| SNP_P4_12882_36869214 | NC_021160.1    | Ca_kabuli_chr01 | 36869214                | TT                              | GG              | 1946740225               |
| SNP_P4_12883_36869217 | NC_021160.1    | Ca_kabuli_chr01 | 36869217                | AA                              | GG              | 1946740227               |
| SNP_P4_12884_36869233 | NC_021160.1    | Ca_kabuli_chr01 | 36869233                | CC                              | AA              | 1946740229               |
| SNP_P4_12886_36876807 | NC_021160.1    | Ca_kabuli_chr01 | 36876807                | TT                              | CC              | 1946740231               |
| SNP_P4_12887_36885282 | NC_021160.1    | Ca_kabuli_chr01 | 36885282                | TT                              | CC              | 1946740233               |
| SNP_P4_12888_36896268 | NC_021160.1    | Ca_kabuli_chr01 | 36896268                | AA                              | GG              | 1946740235               |
| SNP_P4_12889_36896280 | NC_021160.1    | Ca_kabuli_chr01 | 36896280                | GG                              | CC              | 1946740237               |
| SNP_P4_12890_36896563 | NC_021160.1    | Ca_kabuli_chr01 | 36896563                | AA                              | TT              | 1946740239               |
| SNP_P4_12891_36898180 | NC_021160.1    | Ca_kabuli_chr01 | 36898180                | AA                              | GG              | 1946740241               |
| SNP_P4_12892_36916737 | NC_021160.1    | Ca_kabuli_chr01 | 36916737                | CC                              | TT              | 1946740243               |
| SNP_P4_12893_36923226 | NC_021160.1    | Ca_kabuli_chr01 | 36923226                | GG                              | AA              | 1946740244               |
| SNP_P4_12894_36950089 | NC_021160.1    | Ca_kabuli_chr01 | 36950089                | AA                              | CC              | 1946740246               |
| SNP_P4_12895_36950113 | NC_021160.1    | Ca_kabuli_chr01 | 36950113                | GG                              | TT              | 1946740248               |
| SNP_P4_12896_36950177 | NC_021160.1    | Ca_kabuli_chr01 | 36950177                | TT                              | AA              | 1946740250               |
| SNP_P4_12897_36950222 | NC_021160.1    | Ca_kabuli_chr01 | 36950222                | CC                              | TT              | 1946740252               |
| SNP_P4_12898_36950225 | NC_021160.1    | Ca_kabuli_chr01 | 36950225                | TT                              | GG              | 1946740254               |
| SNP_P4_12899_36950227 | NC_021160.1    | Ca_kabuli_chr01 | 36950227                | CC                              | TT              | 1946740256               |
| SNP_P4_12900_36950239 | NC_021160.1    | Ca_kabuli_chr01 | 36950239                | AA                              | GG              | 1946740258               |
| SNP_P4_12901_36950240 | NC_021160.1    | Ca_kabuli_chr01 | 36950240                | CC                              | AA              | 1946740260               |
| SNP_P4_12902_36950242 | NC_021160.1    | Ca_kabuli_chr01 | 36950242                | CC                              | AA              | 1946740262               |

| SNPs IDs              | Chromosome IDs | Chromosomes     | Physical positions (bp) | CDC Frontier (Reference genome) | (ILWC46 & LPNB) | NCBI SNPdb Accession IDs |
|-----------------------|----------------|-----------------|-------------------------|---------------------------------|-----------------|--------------------------|
| SNP_P4_12903_36950252 | NC_021160.1    | Ca_kabuli_chr01 | 36950252                | GG                              | AA              | 1946740264               |
| SNP_P4_12904_36950627 | NC_021160.1    | Ca_kabuli_chr01 | 36950627                | AA                              | GG              | 1946740266               |
| SNP_P4_12905_36956307 | NC_021160.1    | Ca_kabuli_chr01 | 36956307                | AA                              | TT              | 1946740268               |
| SNP_P4_12907_37032238 | NC_021160.1    | Ca_kabuli_chr01 | 37032238                | CC                              | TT              | 1946740270               |
| SNP_P4_12908_37033190 | NC_021160.1    | Ca_kabuli_chr01 | 37033190                | AA                              | TT              | 1946740272               |
| SNP_P4_12909_37034600 | NC_021160.1    | Ca_kabuli_chr01 | 37034600                | GG                              | AA              | 1946740274               |
| SNP_P4_12910_37037004 | NC_021160.1    | Ca_kabuli_chr01 | 37037004                | AA                              | GG              | 1946740276               |
| SNP_P4_12911_37037162 | NC_021160.1    | Ca_kabuli_chr01 | 37037162                | AA                              | GG              | 1946740278               |
| SNP_P4_12912_37037459 | NC_021160.1    | Ca_kabuli_chr01 | 37037459                | TT                              | CC              | 1946740280               |
| SNP_P4_12913_37037574 | NC_021160.1    | Ca_kabuli_chr01 | 37037574                | TT                              | CC              | 1946740282               |
| SNP_P4_12914_37037862 | NC_021160.1    | Ca_kabuli_chr01 | 37037862                | TT                              | CC              | 1946740284               |
| SNP_P4_12915_37038123 | NC_021160.1    | Ca_kabuli_chr01 | 37038123                | GG                              | TT              | 1946740286               |
| SNP_P4_12916_37038141 | NC_021160.1    | Ca_kabuli_chr01 | 37038141                | CC                              | GG              | 1946740288               |
| SNP_P4_12917_37038182 | NC_021160.1    | Ca_kabuli_chr01 | 37038182                | CC                              | GG              | 1946740290               |
| SNP_P4_12918_37038185 | NC_021160.1    | Ca_kabuli_chr01 | 37038185                | TT                              | CC              | 1946740292               |
| SNP_P4_12919_37042490 | NC_021160.1    | Ca_kabuli_chr01 | 37042490                | AA                              | GG              | 1946740294               |
| SNP_P4_12920_37042806 | NC_021160.1    | Ca_kabuli_chr01 | 37042806                | CC                              | TT              | 1946740296               |
| SNP_P4_12921_37043198 | NC_021160.1    | Ca_kabuli_chr01 | 37043198                | CC                              | TT              | 1946740298               |
| SNP_P4_12922_37054244 | NC_021160.1    | Ca_kabuli_chr01 | 37054244                | GG                              | AA              | 1946740300               |
| SNP_P4_12923_37054604 | NC_021160.1    | Ca_kabuli_chr01 | 37054604                | GG                              | AA              | 1946740302               |
| SNP_P4_12924_37054623 | NC_021160.1    | Ca_kabuli_chr01 | 37054623                | CC                              | AA              | 1946740304               |
| SNP_P4_12925_37054693 | NC_021160.1    | Ca_kabuli_chr01 | 37054693                | TT                              | CC              | 1946740306               |
| SNP_P4_12926_37054956 | NC_021160.1    | Ca_kabuli_chr01 | 37054956                | CC                              | TT              | 1946740309               |
| SNP_P4_12927_37055062 | NC_021160.1    | Ca_kabuli_chr01 | 37055062                | CC                              | TT              | 1946740311               |
| SNP_P4_12928_37075057 | NC_021160.1    | Ca_kabuli_chr01 | 37075057                | AA                              | TT              | 1946740313               |
| SNP_P4_12929_37078251 | NC_021160.1    | Ca_kabuli_chr01 | 37078251                | GG                              | AA              | 1946740315               |
| SNP_P4_12930_37078260 | NC_021160.1    | Ca_kabuli_chr01 | 37078260                | CC                              | AA              | 1946740317               |
| SNP_P4_12931_37078520 | NC_021160.1    | Ca_kabuli_chr01 | 37078520                | CC                              | TT              | 1946740319               |
| SNP_P4_12932_37078526 | NC_021160.1    | Ca_kabuli_chr01 | 37078526                | GG                              | AA              | 1946740321               |
| SNP_P4_12933_37078539 | NC_021160.1    | Ca_kabuli_chr01 | 37078539                | TT                              | CC              | 1946740323               |
| SNP_P4_12934_37078592 | NC_021160.1    | Ca_kabuli_chr01 | 37078592                | TT                              | GG              | 1946740325               |
| SNP_P4_12935_37078596 | NC_021160.1    | Ca_kabuli_chr01 | 37078596                | GG                              | AA              | 1946740327               |
| SNP_P4_12936_37078606 | NC_021160.1    | Ca_kabuli_chr01 | 37078606                | TT                              | GG              | 1946740329               |
| SNP_P4_12937_37078640 | NC_021160.1    | Ca_kabuli_chr01 | 37078640                | CC                              | TT              | 1946740330               |
| SNP_P4_12938_37078663 | NC_021160.1    | Ca_kabuli_chr01 | 37078663                | AA                              | TT              | 1946740332               |
| SNP_P4_12939_37078668 | NC_021160.1    | Ca_kabuli_chr01 | 37078668                | AA                              | GG              | 1946740334               |
| SNP_P4_12940_37078718 | NC_021160.1    | Ca_kabuli_chr01 | 37078718                | CC                              | AA              | 1946740336               |
| SNP_P4_12941_37078743 | NC_021160.1    | Ca_kabuli_chr01 | 37078743                | AA                              | GG              | 1946740338               |
| SNP_P4_12942_37078784 | NC_021160.1    | Ca_kabuli_chr01 | 37078784                | AA                              | TT              | 1946740340               |
| SNP_P4_12943_37078790 | NC_021160.1    | Ca_kabuli_chr01 | 37078790                | AA                              | GG              | 1946740342               |
| SNP_P4_12944_37078850 | NC_021160.1    | Ca_kabuli_chr01 | 37078850                | CC                              | GG              | 1946740344               |
| SNP_P4_12945_37078851 | NC_021160.1    | Ca_kabuli_chr01 | 37078851                | TT                              | CC              | 1946740346               |

| SNPs IDs              | Chromosome IDs | Chromosomes     | Physical positions (bp) | CDC Frontier (Reference genome) | (ILWC46 & LPNB) | NCBI SNPdb Accession IDs |
|-----------------------|----------------|-----------------|-------------------------|---------------------------------|-----------------|--------------------------|
| SNP_P4_12946_37078862 | NC_021160.1    | Ca_kabuli_chr01 | 37078862                | AA                              | TT              | 1946740348               |
| SNP_P4_12948_37078986 | NC_021160.1    | Ca_kabuli_chr01 | 37078986                | CC                              | AA              | 1946740350               |
| SNP_P4_12949_37079000 | NC_021160.1    | Ca_kabuli_chr01 | 37079000                | TT                              | GG              | 1946740352               |
| SNP_P4_12950_37079031 | NC_021160.1    | Ca_kabuli_chr01 | 37079031                | AA                              | CC              | 1946740354               |
| SNP_P4_12951_37079038 | NC_021160.1    | Ca_kabuli_chr01 | 37079038                | CC                              | GG              | 1946740356               |
| SNP_P4_12952_37079093 | NC_021160.1    | Ca_kabuli_chr01 | 37079093                | CC                              | TT              | 1946740358               |
| SNP_P4_12953_37079208 | NC_021160.1    | Ca_kabuli_chr01 | 37079208                | AA                              | TT              | 1946740360               |
| SNP_P4_12955_37079424 | NC_021160.1    | Ca_kabuli_chr01 | 37079424                | AA                              | GG              | 1946740362               |
| SNP_P4_12956_37081498 | NC_021160.1    | Ca_kabuli_chr01 | 37081498                | CC                              | TT              | 1946740364               |
| SNP_P4_12957_37081504 | NC_021160.1    | Ca_kabuli_chr01 | 37081504                | CC                              | TT              | 1946740366               |
| SNP_P4_12958_37081578 | NC_021160.1    | Ca_kabuli_chr01 | 37081578                | GG                              | CC              | 1946740368               |
| SNP_P4_12959_37081631 | NC_021160.1    | Ca_kabuli_chr01 | 37081631                | CC                              | TT              | 1946740370               |
| SNP_P4_12960_37081722 | NC_021160.1    | Ca_kabuli_chr01 | 37081722                | CC                              | TT              | 1946740372               |
| SNP_P4_12961_37081772 | NC_021160.1    | Ca_kabuli_chr01 | 37081772                | GG                              | TT              | 1946740374               |
| SNP_P4_12962_37082115 | NC_021160.1    | Ca_kabuli_chr01 | 37082115                | TT                              | CC              | 1946740376               |
| SNP_P4_12964_37105971 | NC_021160.1    | Ca_kabuli_chr01 | 37105971                | CC                              | TT              | 1946740377               |
| SNP_P4_12965_37105977 | NC_021160.1    | Ca_kabuli_chr01 | 37105977                | AA                              | CC              | 1946740379               |
| SNP_P4_12966_37113270 | NC_021160.1    | Ca_kabuli_chr01 | 37113270                | TT                              | CC              | 1946740381               |
| SNP_P4_12967_37120760 | NC_021160.1    | Ca_kabuli_chr01 | 37120760                | TT                              | AA              | 1946740383               |
| SNP_P4_12968_37120818 | NC_021160.1    | Ca_kabuli_chr01 | 37120818                | AA                              | GG              | 1946740385               |
| SNP_P4_12969_37120833 | NC_021160.1    | Ca_kabuli_chr01 | 37120833                | AA                              | CC              | 1946740387               |
| SNP_P4_12970_37120867 | NC_021160.1    | Ca_kabuli_chr01 | 37120867                | TT                              | AA              | 1946740389               |
| SNP_P4_12971_37120925 | NC_021160.1    | Ca_kabuli_chr01 | 37120925                | AA                              | GG              | 1946740392               |
| SNP_P4_12972_37120966 | NC_021160.1    | Ca_kabuli_chr01 | 37120966                | AA                              | GG              | 1946740394               |
| SNP_P4_12973_37120967 | NC_021160.1    | Ca_kabuli_chr01 | 37120967                | TT                              | GG              | 1946740396               |
| SNP_P4_12974_37121059 | NC_021160.1    | Ca_kabuli_chr01 | 37121059                | AA                              | GG              | 1946740398               |
| SNP_P4_12975_37121094 | NC_021160.1    | Ca_kabuli_chr01 | 37121094                | TT                              | CC              | 1946740400               |
| SNP_P4_12976_37121100 | NC_021160.1    | Ca_kabuli_chr01 | 37121100                | GG                              | AA              | 1946740402               |
| SNP_P4_12977_37121121 | NC_021160.1    | Ca_kabuli_chr01 | 37121121                | TT                              | CC              | 1946740404               |
| SNP_P4_12978_37121152 | NC_021160.1    | Ca_kabuli_chr01 | 37121152                | GG                              | AA              | 1946740406               |
| SNP_P4_12979_37121197 | NC_021160.1    | Ca_kabuli_chr01 | 37121197                | GG                              | AA              | 1946740408               |
| SNP_P4_12980_37121213 | NC_021160.1    | Ca_kabuli_chr01 | 37121213                | TT                              | AA              | 1946740410               |
| SNP_P4_12981_37121360 | NC_021160.1    | Ca_kabuli_chr01 | 37121360                | AA                              | GG              | 1946740412               |
| SNP_P4_12982_37121638 | NC_021160.1    | Ca_kabuli_chr01 | 37121638                | TT                              | AA              | 1946740414               |
| SNP_P4_12983_37121663 | NC_021160.1    | Ca_kabuli_chr01 | 37121663                | GG                              | AA              | 1946740416               |
| SNP_P4_12984_37121682 | NC_021160.1    | Ca_kabuli_chr01 | 37121682                | TT                              | CC              | 1946740418               |
| SNP_P4_12985_37121704 | NC_021160.1    | Ca_kabuli_chr01 | 37121704                | AA                              | TT              | 1946740420               |
| SNP_P4_12986_37121762 | NC_021160.1    | Ca_kabuli_chr01 | 37121762                | TT                              | CC              | 1946740422               |
| SNP_P4_12987_37121830 | NC_021160.1    | Ca_kabuli_chr01 | 37121830                | CC                              | TT              | 1946740424               |
| SNP_P4_12988_37121835 | NC_021160.1    | Ca_kabuli_chr01 | 37121835                | CC                              | AA              | 1946740426               |
| SNP_P4_12989_37121858 | NC_021160.1    | Ca_kabuli_chr01 | 37121858                | TT                              | CC              | 1946740428               |
| SNP_P4_12990_37121872 | NC_021160.1    | Ca_kabuli_chr01 | 37121872                | GG                              | AA              | 1946740430               |

| SNPs IDs              | Chromosome IDs | Chromosomes     | Physical positions (bp) | CDC Frontier (Reference genome) | (ILWC46 & LPNB) | NCBI SNPdb Accession IDs |
|-----------------------|----------------|-----------------|-------------------------|---------------------------------|-----------------|--------------------------|
| SNP_P4_12991_37121893 | NC_021160.1    | Ca_kabuli_chr01 | 37121893                | GG                              | AA              | 1946740432               |
| SNP_P4_12992_37121901 | NC_021160.1    | Ca_kabuli_chr01 | 37121901                | AA                              | GG              | 1946740434               |
| SNP_P4_12993_37121996 | NC_021160.1    | Ca_kabuli_chr01 | 37121996                | TT                              | CC              | 1946740436               |
| SNP_P4_12995_37122241 | NC_021160.1    | Ca_kabuli_chr01 | 37122241                | CC                              | TT              | 1946740438               |
| SNP_P4_12996_37122245 | NC_021160.1    | Ca_kabuli_chr01 | 37122245                | AA                              | CC              | 1946740440               |
| SNP_P4_12997_37122252 | NC_021160.1    | Ca_kabuli_chr01 | 37122252                | CC                              | TT              | 1946740442               |
| SNP_P4_12998_37122254 | NC_021160.1    | Ca_kabuli_chr01 | 37122254                | AA                              | TT              | 1946740444               |
| SNP_P4_12999_37122278 | NC_021160.1    | Ca_kabuli_chr01 | 37122278                | AA                              | CC              | 1946740446               |
| SNP_P4_13000_37122355 | NC_021160.1    | Ca_kabuli_chr01 | 37122355                | GG                              | AA              | 1946740448               |
| SNP_P4_13001_37122372 | NC_021160.1    | Ca_kabuli_chr01 | 37122372                | CC                              | TT              | 1946740450               |
| SNP_P4_13002_37122468 | NC_021160.1    | Ca_kabuli_chr01 | 37122468                | GG                              | CC              | 1946740452               |
| SNP_P4_13003_37122479 | NC_021160.1    | Ca_kabuli_chr01 | 37122479                | TT                              | AA              | 1946740454               |
| SNP_P4_13005_37122545 | NC_021160.1    | Ca_kabuli_chr01 | 37122545                | GG                              | AA              | 1946740456               |
| SNP_P4_13006_37122670 | NC_021160.1    | Ca_kabuli_chr01 | 37122670                | AA                              | TT              | 1946740458               |
| SNP_P4_13008_37122755 | NC_021160.1    | Ca_kabuli_chr01 | 37122755                | TT                              | GG              | 1946740460               |
| SNP_P4_13009_37122764 | NC_021160.1    | Ca_kabuli_chr01 | 37122764                | TT                              | CC              | 1946740461               |
| SNP_P4_13010_37122782 | NC_021160.1    | Ca_kabuli_chr01 | 37122782                | CC                              | TT              | 1946740462               |
| SNP_P4_13011_37122783 | NC_021160.1    | Ca_kabuli_chr01 | 37122783                | GG                              | AA              | 1946740464               |
| SNP_P4_13012_37122797 | NC_021160.1    | Ca_kabuli_chr01 | 37122797                | CC                              | TT              | 1946740466               |
| SNP_P4_13014_37122886 | NC_021160.1    | Ca_kabuli_chr01 | 37122886                | GG                              | AA              | 1946740468               |
| SNP_P4_13015_37122903 | NC_021160.1    | Ca_kabuli_chr01 | 37122903                | TT                              | CC              | 1946740470               |
| SNP_P4_13016_37122921 | NC_021160.1    | Ca_kabuli_chr01 | 37122921                | AA                              | GG              | 1946740472               |
| SNP_P4_13017_37122932 | NC_021160.1    | Ca_kabuli_chr01 | 37122932                | AA                              | GG              | 1946740474               |
| SNP_P4_13018_37122983 | NC_021160.1    | Ca_kabuli_chr01 | 37122983                | TT                              | CC              | 1946740476               |
| SNP_P4_13019_37122986 | NC_021160.1    | Ca_kabuli_chr01 | 37122986                | GG                              | TT              | 1946740478               |
| SNP_P4_13020_37122993 | NC_021160.1    | Ca_kabuli_chr01 | 37122993                | GG                              | AA              | 1946740480               |
| SNP_P4_13021_37122999 | NC_021160.1    | Ca_kabuli_chr01 | 37122999                | AA                              | TT              | 1946740482               |
| SNP_P4_13022_37123014 | NC_021160.1    | Ca_kabuli_chr01 | 37123014                | TT                              | CC              | 1946740484               |
| SNP_P4_13023_37123212 | NC_021160.1    | Ca_kabuli_chr01 | 37123212                | CC                              | TT              | 1946740486               |
| SNP_P4_13024_37125131 | NC_021160.1    | Ca_kabuli_chr01 | 37125131                | CC                              | TT              | 1946740488               |
| SNP_P4_13026_37128293 | NC_021160.1    | Ca_kabuli_chr01 | 37128293                | CC                              | TT              | 1946740490               |
| SNP_P4_13027_37128375 | NC_021160.1    | Ca_kabuli_chr01 | 37128375                | CC                              | TT              | 1946740492               |
| SNP_P4_13029_37128656 | NC_021160.1    | Ca_kabuli_chr01 | 37128656                | TT                              | AA              | 1946740494               |
| SNP_P4_13030_37128912 | NC_021160.1    | Ca_kabuli_chr01 | 37128912                | AA                              | TT              | 1946740495               |
| SNP_P4_13031_37128921 | NC_021160.1    | Ca_kabuli_chr01 | 37128921                | AA                              | CC              | 1946740496               |
| SNP_P4_13032_37128931 | NC_021160.1    | Ca_kabuli_chr01 | 37128931                | TT                              | CC              | 1946740497               |
| SNP_P4_13033_37128964 | NC_021160.1    | Ca_kabuli_chr01 | 37128964                | TT                              | CC              | 1946740499               |
| SNP_P4_13034_37129025 | NC_021160.1    | Ca_kabuli_chr01 | 37129025                | TT                              | CC              | 1946740501               |
| SNP_P4_13035_37129151 | NC_021160.1    | Ca_kabuli_chr01 | 37129151                | GG                              | AA              | 1946740503               |
| SNP_P4_13036_37129485 | NC_021160.1    | Ca_kabuli_chr01 | 37129485                | CC                              | TT              | 1946740505               |
| SNP_P4_13037_37129499 | NC_021160.1    | Ca_kabuli_chr01 | 37129499                | TT                              | AA              | 1946740507               |
| SNP_P4_13038_37130856 | NC_021160.1    | Ca_kabuli_chr01 | 37130856                | TT                              | AA              | 1946740509               |



| SNPs IDs              | Chromosome IDs | Chromosomes     | Physical positions (bp) | CDC Frontier (Reference genome) | (ILWC46 & LPNB) | NCBI SNPdb Accession IDs |
|-----------------------|----------------|-----------------|-------------------------|---------------------------------|-----------------|--------------------------|
| SNP_P4_13039_37138288 | NC_021160.1    | Ca_kabuli_chr01 | 37138288                | AA                              | GG              | 1946740511               |
| SNP_P4_13040_37157298 | NC_021160.1    | Ca_kabuli_chr01 | 37157298                | TT                              | CC              | 1946740513               |
| SNP_P4_13041_37157582 | NC_021160.1    | Ca_kabuli_chr01 | 37157582                | CC                              | TT              | 1946740515               |
| SNP_P4_13042_37176011 | NC_021160.1    | Ca_kabuli_chr01 | 37176011                | AA                              | GG              | 1946740517               |
| SNP_P4_13044_37176435 | NC_021160.1    | Ca_kabuli_chr01 | 37176435                | GG                              | AA              | 1946740519               |
| SNP_P4_13045_37190446 | NC_021160.1    | Ca_kabuli_chr01 | 37190446                | TT                              | CC              | 1946740520               |
| SNP_P4_13047_37206621 | NC_021160.1    | Ca_kabuli_chr01 | 37206621                | CC                              | TT              | 1946740522               |
| SNP_P4_13050_37243095 | NC_021160.1    | Ca_kabuli_chr01 | 37243095                | AA                              | GG              | 1946740524               |
| SNP_P4_13051_37243424 | NC_021160.1    | Ca_kabuli_chr01 | 37243424                | GG                              | AA              | 1946740526               |
| SNP_P4_13052_37245423 | NC_021160.1    | Ca_kabuli_chr01 | 37245423                | CC                              | TT              | 1946740529               |
| SNP_P4_13053_37245650 | NC_021160.1    | Ca_kabuli_chr01 | 37245650                | TT                              | CC              | 1946740531               |
| SNP_P4_13054_37245777 | NC_021160.1    | Ca_kabuli_chr01 | 37245777                | TT                              | CC              | 1946740533               |
| SNP_P4_13055_37246009 | NC_021160.1    | Ca_kabuli_chr01 | 37246009                | CC                              | AA              | 1946740535               |
| SNP_P4_13056_37249695 | NC_021160.1    | Ca_kabuli_chr01 | 37249695                | AA                              | GG              | 1946740536               |
| SNP_P4_13057_37258246 | NC_021160.1    | Ca_kabuli_chr01 | 37258246                | CC                              | TT              | 1946740538               |
| SNP_P4_13058_37260211 | NC_021160.1    | Ca_kabuli_chr01 | 37260211                | AA                              | CC              | 1946740540               |
| SNP_P4_13059_37260369 | NC_021160.1    | Ca_kabuli_chr01 | 37260369                | AA                              | TT              | 1946740543               |
| SNP_P4_13060_37279850 | NC_021160.1    | Ca_kabuli_chr01 | 37279850                | TT                              | AA              | 1946740545               |
| SNP_P4_13061_37279854 | NC_021160.1    | Ca_kabuli_chr01 | 37279854                | CC                              | TT              | 1946740547               |
| SNP_P4_13062_37281025 | NC_021160.1    | Ca_kabuli_chr01 | 37281025                | TT                              | CC              | 1946740549               |
| SNP_P4_13063_37283081 | NC_021160.1    | Ca_kabuli_chr01 | 37283081                | TT                              | CC              | 1946740551               |
| SNP_P4_13064_37291412 | NC_021160.1    | Ca_kabuli_chr01 | 37291412                | GG                              | AA              | 1946740553               |
| SNP_P4_13065_37302949 | NC_021160.1    | Ca_kabuli_chr01 | 37302949                | AA                              | TT              | 1946740556               |
| SNP_P4_13066_37336938 | NC_021160.1    | Ca_kabuli_chr01 | 37336938                | CC                              | TT              | 1946740558               |
| SNP_P4_13067_37350597 | NC_021160.1    | Ca_kabuli_chr01 | 37350597                | CC                              | TT              | 1946740560               |
| SNP_P4_13068_37351390 | NC_021160.1    | Ca_kabuli_chr01 | 37351390                | AA                              | CC              | 1946740562               |
| SNP_P4_13069_37353379 | NC_021160.1    | Ca_kabuli_chr01 | 37353379                | CC                              | TT              | 1946740564               |
| SNP_P4_13070_37362774 | NC_021160.1    | Ca_kabuli_chr01 | 37362774                | TT                              | CC              | 1946740566               |
| SNP_P4_13071_37391919 | NC_021160.1    | Ca_kabuli_chr01 | 37391919                | TT                              | CC              | 1946740568               |
| SNP_P4_13072_37392862 | NC_021160.1    | Ca_kabuli_chr01 | 37392862                | AA                              | TT              | 1946740569               |
| SNP_P4_13073_37406056 | NC_021160.1    | Ca_kabuli_chr01 | 37406056                | TT                              | CC              | 1946740571               |
| SNP_P4_13074_37406232 | NC_021160.1    | Ca_kabuli_chr01 | 37406232                | AA                              | CC              | 1946740573               |
| SNP_P4_13075_37406260 | NC_021160.1    | Ca_kabuli_chr01 | 37406260                | CC                              | AA              | 1946740575               |
| SNP_P4_13076_37406323 | NC_021160.1    | Ca_kabuli_chr01 | 37406323                | TT                              | CC              | 1946740577               |
| SNP_P4_13077_37406352 | NC_021160.1    | Ca_kabuli_chr01 | 37406352                | TT                              | CC              | 1946740579               |
| SNP_P4_13078_37406459 | NC_021160.1    | Ca_kabuli_chr01 | 37406459                | AA                              | CC              | 1946740581               |
| SNP_P4_13079_37406566 | NC_021160.1    | Ca_kabuli_chr01 | 37406566                | CC                              | TT              | 1946740583               |
| SNP_P4_13080_37406586 | NC_021160.1    | Ca_kabuli_chr01 | 37406586                | TT                              | CC              | 1946740585               |
| SNP_P4_13081_37409796 | NC_021160.1    | Ca_kabuli_chr01 | 37409796                | GG                              | AA              | 1946740587               |
| SNP_P4_13082_37409823 | NC_021160.1    | Ca_kabuli_chr01 | 37409823                | GG                              | AA              | 1946740589               |
| SNP_P4_13083_37409842 | NC_021160.1    | Ca_kabuli_chr01 | 37409842                | GG                              | AA              | 1946740591               |
| SNP_P4_13084_37409886 | NC_021160.1    | Ca_kabuli_chr01 | 37409886                | GG                              | AA              | 1946740593               |

| SNPs IDs              | Chromosome IDs | Chromosomes     | Physical positions (bp) | CDC Frontier (Reference genome) | (ILWC46 & LPNB) | NCBI SNPdb Accession IDs |
|-----------------------|----------------|-----------------|-------------------------|---------------------------------|-----------------|--------------------------|
| SNP_P4_13085_37409918 | NC_021160.1    | Ca_kabuli_chr01 | 37409918                | TT                              | CC              | 1946740595               |
| SNP_P4_13086_37409960 | NC_021160.1    | Ca_kabuli_chr01 | 37409960                | TT                              | CC              | 1946740597               |
| SNP_P4_13087_37409983 | NC_021160.1    | Ca_kabuli_chr01 | 37409983                | AA                              | GG              | 1946740599               |
| SNP_P4_13088_37410020 | NC_021160.1    | Ca_kabuli_chr01 | 37410020                | TT                              | CC              | 1946740601               |
| SNP_P4_13089_37410040 | NC_021160.1    | Ca_kabuli_chr01 | 37410040                | TT                              | CC              | 1946740603               |
| SNP_P4_13090_37410061 | NC_021160.1    | Ca_kabuli_chr01 | 37410061                | GG                              | AA              | 1946740605               |
| SNP_P4_13091_37410106 | NC_021160.1    | Ca_kabuli_chr01 | 37410106                | AA                              | GG              | 1946740606               |
| SNP_P4_13092_37410115 | NC_021160.1    | Ca_kabuli_chr01 | 37410115                | TT                              | CC              | 1946740609               |
| SNP_P4_13093_37410117 | NC_021160.1    | Ca_kabuli_chr01 | 37410117                | AA                              | GG              | 1946740611               |
| SNP_P4_13094_37410118 | NC_021160.1    | Ca_kabuli_chr01 | 37410118                | TT                              | AA              | 1946740613               |
| SNP_P4_13095_37410140 | NC_021160.1    | Ca_kabuli_chr01 | 37410140                | GG                              | AA              | 1946740615               |
| SNP_P4_13096_37410145 | NC_021160.1    | Ca_kabuli_chr01 | 37410145                | GG                              | TT              | 1946740617               |
| SNP_P4_13097_37410194 | NC_021160.1    | Ca_kabuli_chr01 | 37410194                | AA                              | GG              | 1946740619               |
| SNP_P4_13098_37410203 | NC_021160.1    | Ca_kabuli_chr01 | 37410203                | GG                              | AA              | 1946740621               |
| SNP_P4_13099_37410247 | NC_021160.1    | Ca_kabuli_chr01 | 37410247                | TT                              | GG              | 1946740623               |
| SNP_P4_13100_37410269 | NC_021160.1    | Ca_kabuli_chr01 | 37410269                | TT                              | CC              | 1946740624               |
| SNP_P4_13101_37410277 | NC_021160.1    | Ca_kabuli_chr01 | 37410277                | GG                              | CC              | 1946740626               |
| SNP_P4_13102_37410353 | NC_021160.1    | Ca_kabuli_chr01 | 37410353                | CC                              | GG              | 1946740628               |
| SNP_P4_13103_37410355 | NC_021160.1    | Ca_kabuli_chr01 | 37410355                | AA                              | GG              | 1946740630               |
| SNP_P4_13105_37410514 | NC_021160.1    | Ca_kabuli_chr01 | 37410514                | GG                              | TT              | 1946740632               |
| SNP_P4_13106_37410571 | NC_021160.1    | Ca_kabuli_chr01 | 37410571                | GG                              | AA              | 1946740634               |
| SNP_P4_13107_37410575 | NC_021160.1    | Ca_kabuli_chr01 | 37410575                | CC                              | AA              | 1946740636               |
| SNP_P4_13108_37410576 | NC_021160.1    | Ca_kabuli_chr01 | 37410576                | TT                              | AA              | 1946740638               |
| SNP_P4_13109_37410578 | NC_021160.1    | Ca_kabuli_chr01 | 37410578                | TT                              | AA              | 1946740640               |
| SNP_P4_13110_37410601 | NC_021160.1    | Ca_kabuli_chr01 | 37410601                | TT                              | AA              | 1946740642               |
| SNP_P4_13111_37410641 | NC_021160.1    | Ca_kabuli_chr01 | 37410641                | AA                              | TT              | 1946740644               |
| SNP_P4_13112_37410655 | NC_021160.1    | Ca_kabuli_chr01 | 37410655                | CC                              | AA              | 1946740646               |
| SNP_P4_13113_37410665 | NC_021160.1    | Ca_kabuli_chr01 | 37410665                | CC                              | TT              | 1946740648               |
| SNP_P4_13114_37411891 | NC_021160.1    | Ca_kabuli_chr01 | 37411891                | TT                              | CC              | 1946740650               |
| SNP_P4_13115_37411921 | NC_021160.1    | Ca_kabuli_chr01 | 37411921                | AA                              | CC              | 1946740652               |
| SNP_P4_13116_37412205 | NC_021160.1    | Ca_kabuli_chr01 | 37412205                | CC                              | AA              | 1946740654               |
| SNP_P4_13118_37419467 | NC_021160.1    | Ca_kabuli_chr01 | 37419467                | AA                              | GG              | 1946740656               |
| SNP_P4_13119_37419739 | NC_021160.1    | Ca_kabuli_chr01 | 37419739                | AA                              | GG              | 1946740658               |
| SNP_P4_13120_37420091 | NC_021160.1    | Ca_kabuli_chr01 | 37420091                | GG                              | AA              | 1946740659               |
| SNP_P4_13121_37420129 | NC_021160.1    | Ca_kabuli_chr01 | 37420129                | TT                              | CC              | 1946740661               |
| SNP_P4_13122_37420247 | NC_021160.1    | Ca_kabuli_chr01 | 37420247                | GG                              | TT              | 1946740663               |
| SNP_P4_13123_37420266 | NC_021160.1    | Ca_kabuli_chr01 | 37420266                | AA                              | CC              | 1946740665               |
| SNP_P4_13125_37420521 | NC_021160.1    | Ca_kabuli_chr01 | 37420521                | CC                              | AA              | 1946740667               |
| SNP_P4_13126_37420570 | NC_021160.1    | Ca_kabuli_chr01 | 37420570                | TT                              | GG              | 1946740669               |
| SNP_P4_13128_37420606 | NC_021160.1    | Ca_kabuli_chr01 | 37420606                | GG                              | AA              | 1946740671               |
| SNP_P4_13129_37420745 | NC_021160.1    | Ca_kabuli_chr01 | 37420745                | GG                              | TT              | 1946740673               |
| SNP_P4_13130_37420755 | NC_021160.1    | Ca_kabuli_chr01 | 37420755                | GG                              | CC              | 1946740675               |

| SNPs IDs              | Chromosome IDs | Chromosomes     | Physical positions (bp) | CDC Frontier (Reference genome) | (ILWC46 & LPNB) | NCBI SNPdb Accession IDs |
|-----------------------|----------------|-----------------|-------------------------|---------------------------------|-----------------|--------------------------|
| SNP_P4_13131_37420757 | NC_021160.1    | Ca_kabuli_chr01 | 37420757                | CC                              | TT              | 1946740677               |
| SNP_P4_13133_37421134 | NC_021160.1    | Ca_kabuli_chr01 | 37421134                | GG                              | AA              | 1946740679               |
| SNP_P4_13134_37421536 | NC_021160.1    | Ca_kabuli_chr01 | 37421536                | AA                              | TT              | 1946740680               |
| SNP_P4_13135_37421603 | NC_021160.1    | Ca_kabuli_chr01 | 37421603                | TT                              | AA              | 1946740682               |
| SNP_P4_13136_37422161 | NC_021160.1    | Ca_kabuli_chr01 | 37422161                | GG                              | AA              | 1946740684               |
| SNP_P4_13137_37422166 | NC_021160.1    | Ca_kabuli_chr01 | 37422166                | TT                              | CC              | 1946740686               |
| SNP_P4_13138_37422188 | NC_021160.1    | Ca_kabuli_chr01 | 37422188                | TT                              | AA              | 1946740688               |
| SNP_P4_13139_37422380 | NC_021160.1    | Ca_kabuli_chr01 | 37422380                | TT                              | AA              | 1946740690               |
| SNP_P4_13140_37422419 | NC_021160.1    | Ca_kabuli_chr01 | 37422419                | TT                              | AA              | 1946740692               |
| SNP_P4_13142_37422569 | NC_021160.1    | Ca_kabuli_chr01 | 37422569                | AA                              | TT              | 1946740694               |
| SNP_P4_13143_37422583 | NC_021160.1    | Ca_kabuli_chr01 | 37422583                | TT                              | AA              | 1946740696               |
| SNP_P4_13144_37422692 | NC_021160.1    | Ca_kabuli_chr01 | 37422692                | CC                              | TT              | 1946740698               |
| SNP_P4_13145_37422853 | NC_021160.1    | Ca_kabuli_chr01 | 37422853                | AA                              | TT              | 1946740700               |
| SNP_P4_13146_37422872 | NC_021160.1    | Ca_kabuli_chr01 | 37422872                | AA                              | GG              | 1946740702               |
| SNP_P4_13147_37422996 | NC_021160.1    | Ca_kabuli_chr01 | 37422996                | CC                              | GG              | 1946740703               |
| SNP_P4_13148_37423041 | NC_021160.1    | Ca_kabuli_chr01 | 37423041                | TT                              | CC              | 1946740705               |
| SNP_P4_13149_37423112 | NC_021160.1    | Ca_kabuli_chr01 | 37423112                | CC                              | AA              | 1946740707               |
| SNP_P4_13150_37423210 | NC_021160.1    | Ca_kabuli_chr01 | 37423210                | TT                              | CC              | 1946740709               |
| SNP_P4_13151_37423969 | NC_021160.1    | Ca_kabuli_chr01 | 37423969                | GG                              | AA              | 1946740711               |
| SNP_P4_13152_37424235 | NC_021160.1    | Ca_kabuli_chr01 | 37424235                | TT                              | GG              | 1946740713               |
| SNP_P4_13153_37424240 | NC_021160.1    | Ca_kabuli_chr01 | 37424240                | CC                              | TT              | 1946740715               |
| SNP_P4_13154_37424244 | NC_021160.1    | Ca_kabuli_chr01 | 37424244                | TT                              | AA              | 1946740717               |
| SNP_P4_13156_37424379 | NC_021160.1    | Ca_kabuli_chr01 | 37424379                | TT                              | CC              | 1946740719               |
| SNP_P4_13157_37424411 | NC_021160.1    | Ca_kabuli_chr01 | 37424411                | GG                              | TT              | 1946740721               |
| SNP_P4_13158_37424486 | NC_021160.1    | Ca_kabuli_chr01 | 37424486                | CC                              | GG              | 1946740723               |
| SNP_P4_13159_37424513 | NC_021160.1    | Ca_kabuli_chr01 | 37424513                | TT                              | GG              | 1946740725               |
| SNP_P4_13160_37424550 | NC_021160.1    | Ca_kabuli_chr01 | 37424550                | CC                              | TT              | 1946740728               |
| SNP_P4_13161_37424582 | NC_021160.1    | Ca_kabuli_chr01 | 37424582                | GG                              | TT              | 1946740730               |
| SNP_P4_13162_37424599 | NC_021160.1    | Ca_kabuli_chr01 | 37424599                | TT                              | GG              | 1946740734               |
| SNP_P4_13164_37424797 | NC_021160.1    | Ca_kabuli_chr01 | 37424797                | TT                              | GG              | 1946740736               |
| SNP_P4_13165_37424857 | NC_021160.1    | Ca_kabuli_chr01 | 37424857                | CC                              | TT              | 1946740738               |
| SNP_P4_13166_37424873 | NC_021160.1    | Ca_kabuli_chr01 | 37424873                | GG                              | TT              | 1946740740               |
| SNP_P4_13167_37424903 | NC_021160.1    | Ca_kabuli_chr01 | 37424903                | GG                              | AA              | 1946740742               |
| SNP_P4_13168_37424945 | NC_021160.1    | Ca_kabuli_chr01 | 37424945                | GG                              | TT              | 1946740744               |
| SNP_P4_13170_37424995 | NC_021160.1    | Ca_kabuli_chr01 | 37424995                | AA                              | GG              | 1946740746               |
| SNP_P4_13171_37425011 | NC_021160.1    | Ca_kabuli_chr01 | 37425011                | AA                              | GG              | 1946740747               |
| SNP_P4_13172_37425061 | NC_021160.1    | Ca_kabuli_chr01 | 37425061                | TT                              | GG              | 1946740749               |
| SNP_P4_13174_37425092 | NC_021160.1    | Ca_kabuli_chr01 | 37425092                | CC                              | TT              | 1946740751               |
| SNP_P4_13176_37425240 | NC_021160.1    | Ca_kabuli_chr01 | 37425240                | TT                              | GG              | 1946740753               |
| SNP_P4_13178_37425536 | NC_021160.1    | Ca_kabuli_chr01 | 37425536                | CC                              | AA              | 1946740755               |
| SNP_P4_13179_37425559 | NC_021160.1    | Ca_kabuli_chr01 | 37425559                | TT                              | GG              | 1946740757               |
| SNP_P4_13180_37425577 | NC_021160.1    | Ca_kabuli_chr01 | 37425577                | AA                              | GG              | 1946740759               |

| SNPs IDs              | Chromosome IDs | Chromosomes     | Physical positions (bp) | CDC Frontier (Reference genome) | (ILWC46 & LPNB) | NCBI SNPdb Accession IDs |
|-----------------------|----------------|-----------------|-------------------------|---------------------------------|-----------------|--------------------------|
| SNP_P4_13182_37425690 | NC_021160.1    | Ca_kabuli_chr01 | 37425690                | TT                              | CC              | 1946740761               |
| SNP_P4_13183_37425710 | NC_021160.1    | Ca_kabuli_chr01 | 37425710                | TT                              | AA              | 1946740763               |
| SNP_P4_13184_37425727 | NC_021160.1    | Ca_kabuli_chr01 | 37425727                | TT                              | GG              | 1946740765               |
| SNP_P4_13185_37426467 | NC_021160.1    | Ca_kabuli_chr01 | 37426467                | TT                              | CC              | 1946740767               |
| SNP_P4_13186_37426517 | NC_021160.1    | Ca_kabuli_chr01 | 37426517                | AA                              | CC              | 1946740769               |
| SNP_P4_13187_37432623 | NC_021160.1    | Ca_kabuli_chr01 | 37432623                | TT                              | AA              | 1946740771               |
| SNP_P4_13188_37433074 | NC_021160.1    | Ca_kabuli_chr01 | 37433074                | TT                              | CC              | 1946740773               |
| SNP_P4_13189_37433112 | NC_021160.1    | Ca_kabuli_chr01 | 37433112                | TT                              | AA              | 1946740775               |
| SNP_P4_13190_37433319 | NC_021160.1    | Ca_kabuli_chr01 | 37433319                | CC                              | AA              | 1946740777               |
| SNP_P4_13191_37433340 | NC_021160.1    | Ca_kabuli_chr01 | 37433340                | TT                              | AA              | 1946740779               |
| SNP_P4_13193_37433394 | NC_021160.1    | Ca_kabuli_chr01 | 37433394                | CC                              | AA              | 1946740781               |
| SNP_P4_13195_37433622 | NC_021160.1    | Ca_kabuli_chr01 | 37433622                | CC                              | TT              | 1946740783               |
| SNP_P4_13196_37433639 | NC_021160.1    | Ca_kabuli_chr01 | 37433639                | AA                              | GG              | 1946740785               |
| SNP_P4_13197_37433751 | NC_021160.1    | Ca_kabuli_chr01 | 37433751                | GG                              | TT              | 1946740786               |
| SNP_P4_13198_37450043 | NC_021160.1    | Ca_kabuli_chr01 | 37450043                | AA                              | GG              | 1946740788               |
| SNP_P4_13199_37450145 | NC_021160.1    | Ca_kabuli_chr01 | 37450145                | AA                              | TT              | 1946740790               |
| SNP_P4_13200_37450161 | NC_021160.1    | Ca_kabuli_chr01 | 37450161                | CC                              | GG              | 1946740792               |
| SNP_P4_13201_37450211 | NC_021160.1    | Ca_kabuli_chr01 | 37450211                | CC                              | TT              | 1946740794               |
| SNP_P4_13202_37450284 | NC_021160.1    | Ca_kabuli_chr01 | 37450284                | GG                              | CC              | 1946740796               |
| SNP_P4_13203_37450387 | NC_021160.1    | Ca_kabuli_chr01 | 37450387                | AA                              | GG              | 1946740798               |
| SNP_P4_13204_37450558 | NC_021160.1    | Ca_kabuli_chr01 | 37450558                | AA                              | CC              | 1946740800               |
| SNP_P4_13205_37450596 | NC_021160.1    | Ca_kabuli_chr01 | 37450596                | CC                              | TT              | 1946740802               |
| SNP_P4_13206_37450636 | NC_021160.1    | Ca_kabuli_chr01 | 37450636                | GG                              | CC              | 1946740804               |
| SNP_P4_13207_37450660 | NC_021160.1    | Ca_kabuli_chr01 | 37450660                | GG                              | TT              | 1946740806               |
| SNP_P4_13208_37450706 | NC_021160.1    | Ca_kabuli_chr01 | 37450706                | CC                              | TT              | 1946740808               |
| SNP_P4_13209_37450734 | NC_021160.1    | Ca_kabuli_chr01 | 37450734                | TT                              | AA              | 1946740810               |
| SNP_P4_13210_37450833 | NC_021160.1    | Ca_kabuli_chr01 | 37450833                | AA                              | TT              | 1946740812               |
| SNP_P4_13211_37452707 | NC_021160.1    | Ca_kabuli_chr01 | 37452707                | GG                              | CC              | 1946740814               |
| SNP_P4_13212_37452708 | NC_021160.1    | Ca_kabuli_chr01 | 37452708                | AA                              | TT              | 1946740816               |
| SNP_P4_13213_37453008 | NC_021160.1    | Ca_kabuli_chr01 | 37453008                | AA                              | TT              | 1946740818               |
| SNP_P4_13214_37457132 | NC_021160.1    | Ca_kabuli_chr01 | 37457132                | GG                              | AA              | 1946740820               |
| SNP_P4_13215_37465413 | NC_021160.1    | Ca_kabuli_chr01 | 37465413                | CC                              | AA              | 1946740822               |
| SNP_P4_13216_37466440 | NC_021160.1    | Ca_kabuli_chr01 | 37466440                | TT                              | GG              | 1946740824               |
| SNP_P4_13217_37466599 | NC_021160.1    | Ca_kabuli_chr01 | 37466599                | GG                              | AA              | 1946740825               |
| SNP_P4_13218_37466735 | NC_021160.1    | Ca_kabuli_chr01 | 37466735                | TT                              | AA              | 1946740827               |
| SNP_P4_13219_37466787 | NC_021160.1    | Ca_kabuli_chr01 | 37466787                | CC                              | GG              | 1946740830               |
| SNP_P4_13220_37466792 | NC_021160.1    | Ca_kabuli_chr01 | 37466792                | AA                              | GG              | 1946740832               |
| SNP_P4_13221_37468422 | NC_021160.1    | Ca_kabuli_chr01 | 37468422                | CC                              | AA              | 1946740834               |
| SNP_P4_13222_37468423 | NC_021160.1    | Ca_kabuli_chr01 | 37468423                | AA                              | TT              | 1946740836               |
| SNP_P4_13223_37468434 | NC_021160.1    | Ca_kabuli_chr01 | 37468434                | CC                              | TT              | 1946740838               |
| SNP_P4_13224_37468439 | NC_021160.1    | Ca_kabuli_chr01 | 37468439                | TT                              | GG              | 1946740840               |
| SNP_P4_13225_37468753 | NC_021160.1    | Ca_kabuli_chr01 | 37468753                | TT                              | AA              | 1946740842               |

| SNPs IDs              | Chromosome IDs | Chromosomes     | Physical positions (bp) | CDC Frontier (Reference genome) | (ILWC46 & LPNB) | NCBI SNPdb Accession IDs |
|-----------------------|----------------|-----------------|-------------------------|---------------------------------|-----------------|--------------------------|
| SNP_P4_13226_37468852 | NC_021160.1    | Ca_kabuli_chr01 | 37468852                | AA                              | TT              | 1946740844               |
| SNP_P4_13227_37468916 | NC_021160.1    | Ca_kabuli_chr01 | 37468916                | CC                              | AA              | 1946740846               |
| SNP_P4_13228_37468930 | NC_021160.1    | Ca_kabuli_chr01 | 37468930                | AA                              | GG              | 1946740848               |
| SNP_P4_13229_37469069 | NC_021160.1    | Ca_kabuli_chr01 | 37469069                | AA                              | GG              | 1946740850               |
| SNP_P4_13230_37469081 | NC_021160.1    | Ca_kabuli_chr01 | 37469081                | TT                              | CC              | 1946740851               |
| SNP_P4_13231_37469094 | NC_021160.1    | Ca_kabuli_chr01 | 37469094                | TT                              | AA              | 1946740853               |
| SNP_P4_13232_37469135 | NC_021160.1    | Ca_kabuli_chr01 | 37469135                | AA                              | TT              | 1946740855               |
| SNP_P4_13233_37469153 | NC_021160.1    | Ca_kabuli_chr01 | 37469153                | TT                              | AA              | 1946740857               |
| SNP_P4_13234_37469168 | NC_021160.1    | Ca_kabuli_chr01 | 37469168                | AA                              | GG              | 1946740859               |
| SNP_P4_13235_37469189 | NC_021160.1    | Ca_kabuli_chr01 | 37469189                | CC                              | AA              | 1946740861               |
| SNP_P4_13236_37469274 | NC_021160.1    | Ca_kabuli_chr01 | 37469274                | CC                              | GG              | 1946740863               |
| SNP_P4_13237_37487948 | NC_021160.1    | Ca_kabuli_chr01 | 37487948                | AA                              | GG              | 1946740865               |
| SNP_P4_13238_37489456 | NC_021160.1    | Ca_kabuli_chr01 | 37489456                | GG                              | AA              | 1946740867               |
| SNP_P4_13239_37489703 | NC_021160.1    | Ca_kabuli_chr01 | 37489703                | CC                              | AA              | 1946740869               |
| SNP_P4_13240_37489740 | NC_021160.1    | Ca_kabuli_chr01 | 37489740                | AA                              | CC              | 1946740871               |
| SNP_P4_13241_37489857 | NC_021160.1    | Ca_kabuli_chr01 | 37489857                | TT                              | CC              | 1946740873               |
| SNP_P4_13242_37489902 | NC_021160.1    | Ca_kabuli_chr01 | 37489902                | AA                              | GG              | 1946740875               |
| SNP_P4_13243_37489914 | NC_021160.1    | Ca_kabuli_chr01 | 37489914                | GG                              | AA              | 1946740877               |
| SNP_P4_13246_37490042 | NC_021160.1    | Ca_kabuli_chr01 | 37490042                | AA                              | TT              | 1946740879               |
| SNP_P4_13247_37490043 | NC_021160.1    | Ca_kabuli_chr01 | 37490043                | AA                              | CC              | 1946740881               |
| SNP_P4_13249_37498745 | NC_021160.1    | Ca_kabuli_chr01 | 37498745                | CC                              | TT              | 1946740883               |
| SNP_P4_13250_37500950 | NC_021160.1    | Ca_kabuli_chr01 | 37500950                | TT                              | AA              | 1946740885               |
| SNP_P4_13251_37500992 | NC_021160.1    | Ca_kabuli_chr01 | 37500992                | TT                              | AA              | 1946740887               |
| SNP_P4_13252_37501821 | NC_021160.1    | Ca_kabuli_chr01 | 37501821                | TT                              | AA              | 1946740889               |
| SNP_P4_13253_37501826 | NC_021160.1    | Ca_kabuli_chr01 | 37501826                | GG                              | AA              | 1946740891               |
| SNP_P4_13254_37505783 | NC_021160.1    | Ca_kabuli_chr01 | 37505783                | TT                              | AA              | 1946740893               |
| SNP_P4_13255_37505824 | NC_021160.1    | Ca_kabuli_chr01 | 37505824                | TT                              | CC              | 1946740895               |
| SNP_P4_13256_37506284 | NC_021160.1    | Ca_kabuli_chr01 | 37506284                | AA                              | CC              | 1946740897               |
| SNP_P4_13257_37538587 | NC_021160.1    | Ca_kabuli_chr01 | 37538587                | AA                              | GG              | 1946740899               |
| SNP_P4_13258_37552685 | NC_021160.1    | Ca_kabuli_chr01 | 37552685                | GG                              | AA              | 1946740901               |
| SNP_P4_13259_37556281 | NC_021160.1    | Ca_kabuli_chr01 | 37556281                | GG                              | AA              | 1946740903               |
| SNP_P4_13261_37583920 | NC_021160.1    | Ca_kabuli_chr01 | 37583920                | AA                              | GG              | 1946740905               |
| SNP_P4_13262_37584720 | NC_021160.1    | Ca_kabuli_chr01 | 37584720                | AA                              | TT              | 1946740907               |
| SNP_P4_13263_37601906 | NC_021160.1    | Ca_kabuli_chr01 | 37601906                | CC                              | TT              | 1946740909               |
| SNP_P4_13264_37629295 | NC_021160.1    | Ca_kabuli_chr01 | 37629295                | AA                              | CC              | 1946740911               |
| SNP_P4_13265_37632791 | NC_021160.1    | Ca_kabuli_chr01 | 37632791                | TT                              | CC              | 1946740913               |
| SNP_P4_13266_37634076 | NC_021160.1    | Ca_kabuli_chr01 | 37634076                | AA                              | GG              | 1946740915               |
| SNP_P4_13267_37634077 | NC_021160.1    | Ca_kabuli_chr01 | 37634077                | AA                              | CC              | 1946740917               |
| SNP_P4_13268_37646989 | NC_021160.1    | Ca_kabuli_chr01 | 37646989                | CC                              | GG              | 1946740919               |
| SNP_P4_13270_37690987 | NC_021160.1    | Ca_kabuli_chr01 | 37690987                | CC                              | GG              | 1946740921               |
| SNP_P4_13271_37691006 | NC_021160.1    | Ca_kabuli_chr01 | 37691006                | CC                              | TT              | 1946740923               |
| SNP_P4_13272_37691024 | NC_021160.1    | Ca_kabuli_chr01 | 37691024                | GG                              | AA              | 1946740925               |

| SNPs IDs              | Chromosome IDs | Chromosomes     | Physical positions (bp) | CDC Frontier (Reference genome) | (ILWC46 & LPNB) | NCBI SNPdb Accession IDs |
|-----------------------|----------------|-----------------|-------------------------|---------------------------------|-----------------|--------------------------|
| SNP_P4_13273_37691089 | NC_021160.1    | Ca_kabuli_chr01 | 37691089                | GG                              | TT              | 1946740927               |
| SNP_P4_13274_37691522 | NC_021160.1    | Ca_kabuli_chr01 | 37691522                | TT                              | AA              | 1946740929               |
| SNP_P4_13275_37691523 | NC_021160.1    | Ca_kabuli_chr01 | 37691523                | TT                              | AA              | 1946740932               |
| SNP_P4_13276_37691537 | NC_021160.1    | Ca_kabuli_chr01 | 37691537                | TT                              | AA              | 1946740934               |
| SNP_P4_13277_37691542 | NC_021160.1    | Ca_kabuli_chr01 | 37691542                | AA                              | GG              | 1946740937               |
| SNP_P4_13278_37693132 | NC_021160.1    | Ca_kabuli_chr01 | 37693132                | TT                              | AA              | 1946740939               |
| SNP_P4_13281_37694016 | NC_021160.1    | Ca_kabuli_chr01 | 37694016                | CC                              | TT              | 1946740941               |
| SNP_P4_13282_37694227 | NC_021160.1    | Ca_kabuli_chr01 | 37694227                | AA                              | GG              | 1946740944               |
| SNP_P4_13284_37697574 | NC_021160.1    | Ca_kabuli_chr01 | 37697574                | CC                              | TT              | 1946740946               |
| SNP_P4_13285_37697581 | NC_021160.1    | Ca_kabuli_chr01 | 37697581                | TT                              | CC              | 1946740948               |
| SNP_P4_13286_37697883 | NC_021160.1    | Ca_kabuli_chr01 | 37697883                | AA                              | CC              | 1946740950               |
| SNP_P4_13287_37698025 | NC_021160.1    | Ca_kabuli_chr01 | 37698025                | GG                              | AA              | 1946740952               |
| SNP_P4_13288_37698029 | NC_021160.1    | Ca_kabuli_chr01 | 37698029                | CC                              | TT              | 1946740954               |
| SNP_P4_13289_37698045 | NC_021160.1    | Ca_kabuli_chr01 | 37698045                | AA                              | GG              | 1946740956               |
| SNP_P4_13290_37698053 | NC_021160.1    | Ca_kabuli_chr01 | 37698053                | TT                              | AA              | 1946740958               |
| SNP_P4_13291_37701266 | NC_021160.1    | Ca_kabuli_chr01 | 37701266                | CC                              | AA              | 1946740960               |
| SNP_P4_13292_37701282 | NC_021160.1    | Ca_kabuli_chr01 | 37701282                | AA                              | TT              | 1946740962               |
| SNP_P4_13293_37701285 | NC_021160.1    | Ca_kabuli_chr01 | 37701285                | CC                              | GG              | 1946740963               |
| SNP_P4_13294_37701832 | NC_021160.1    | Ca_kabuli_chr01 | 37701832                | CC                              | AA              | 1946740965               |
| SNP_P4_13296_37703030 | NC_021160.1    | Ca_kabuli_chr01 | 37703030                | CC                              | TT              | 1946740967               |
| SNP_P4_13297_37704903 | NC_021160.1    | Ca_kabuli_chr01 | 37704903                | GG                              | AA              | 1946740969               |
| SNP_P4_13298_37704945 | NC_021160.1    | Ca_kabuli_chr01 | 37704945                | TT                              | CC              | 1946740971               |
| SNP_P4_13299_37704970 | NC_021160.1    | Ca_kabuli_chr01 | 37704970                | AA                              | GG              | 1946740973               |
| SNP_P4_13300_37708755 | NC_021160.1    | Ca_kabuli_chr01 | 37708755                | GG                              | TT              | 1946740975               |
| SNP_P4_13301_37709948 | NC_021160.1    | Ca_kabuli_chr01 | 37709948                | AA                              | CC              | 1946740977               |
| SNP_P4_13302_37710172 | NC_021160.1    | Ca_kabuli_chr01 | 37710172                | CC                              | GG              | 1946740979               |
| SNP_P4_13303_37710190 | NC_021160.1    | Ca_kabuli_chr01 | 37710190                | TT                              | CC              | 1946740981               |
| SNP_P4_13304_37710476 | NC_021160.1    | Ca_kabuli_chr01 | 37710476                | CC                              | AA              | 1946740983               |
| SNP_P4_13306_37710540 | NC_021160.1    | Ca_kabuli_chr01 | 37710540                | GG                              | AA              | 1946740985               |
| SNP_P4_13307_37710602 | NC_021160.1    | Ca_kabuli_chr01 | 37710602                | GG                              | AA              | 1946740987               |
| SNP_P4_13308_37710622 | NC_021160.1    | Ca_kabuli_chr01 | 37710622                | CC                              | GG              | 1946740989               |
| SNP_P4_13309_37710623 | NC_021160.1    | Ca_kabuli_chr01 | 37710623                | TT                              | AA              | 1946740991               |
| SNP_P4_13311_37714049 | NC_021160.1    | Ca_kabuli_chr01 | 37714049                | TT                              | CC              | 1946740993               |
| SNP_P4_13312_37714050 | NC_021160.1    | Ca_kabuli_chr01 | 37714050                | TT                              | CC              | 1946740995               |
| SNP_P4_13314_37714795 | NC_021160.1    | Ca_kabuli_chr01 | 37714795                | CC                              | TT              | 1946740997               |
| SNP_P4_13315_37714955 | NC_021160.1    | Ca_kabuli_chr01 | 37714955                | CC                              | TT              | 1946740999               |
| SNP_P4_13316_37714964 | NC_021160.1    | Ca_kabuli_chr01 | 37714964                | GG                              | AA              | 1946741001               |
| SNP_P4_13317_37714975 | NC_021160.1    | Ca_kabuli_chr01 | 37714975                | GG                              | AA              | 1946741002               |
| SNP_P4_13318_37714994 | NC_021160.1    | Ca_kabuli_chr01 | 37714994                | TT                              | CC              | 1946741004               |
| SNP_P4_13319_37714998 | NC_021160.1    | Ca_kabuli_chr01 | 37714998                | GG                              | AA              | 1946741006               |
| SNP_P4_13320_37715027 | NC_021160.1    | Ca_kabuli_chr01 | 37715027                | CC                              | TT              | 1946741008               |
| SNP_P4_13321_37715085 | NC_021160.1    | Ca_kabuli_chr01 | 37715085                | CC                              | TT              | 1946741010               |

| SNPs IDs              | Chromosome IDs | Chromosomes     | Physical positions (bp) | CDC Frontier (Reference genome) | (ILWC46 & LPNB) | NCBI SNPdb Accession IDs |
|-----------------------|----------------|-----------------|-------------------------|---------------------------------|-----------------|--------------------------|
| SNP_P4_13322_37715130 | NC_021160.1    | Ca_kabuli_chr01 | 37715130                | TT                              | GG              | 1946741012               |
| SNP_P4_13323_37715131 | NC_021160.1    | Ca_kabuli_chr01 | 37715131                | GG                              | AA              | 1946741014               |
| SNP_P4_13324_37715309 | NC_021160.1    | Ca_kabuli_chr01 | 37715309                | AA                              | CC              | 1946741016               |
| SNP_P4_13325_37715317 | NC_021160.1    | Ca_kabuli_chr01 | 37715317                | CC                              | TT              | 1946741018               |
| SNP_P4_13327_37716232 | NC_021160.1    | Ca_kabuli_chr01 | 37716232                | AA                              | CC              | 1946741020               |
| SNP_P4_13328_37716356 | NC_021160.1    | Ca_kabuli_chr01 | 37716356                | CC                              | AA              | 1946741022               |
| SNP_P4_13329_37716357 | NC_021160.1    | Ca_kabuli_chr01 | 37716357                | GG                              | CC              | 1946741024               |
| SNP_P4_13330_37716462 | NC_021160.1    | Ca_kabuli_chr01 | 37716462                | CC                              | TT              | 1946741026               |
| SNP_P4_13331_37716659 | NC_021160.1    | Ca_kabuli_chr01 | 37716659                | AA                              | GG              | 1946741028               |
| SNP_P4_13332_37716731 | NC_021160.1    | Ca_kabuli_chr01 | 37716731                | CC                              | TT              | 1946741030               |
| SNP_P4_13333_37716757 | NC_021160.1    | Ca_kabuli_chr01 | 37716757                | AA                              | GG              | 1946741032               |
| SNP_P4_13334_37716759 | NC_021160.1    | Ca_kabuli_chr01 | 37716759                | TT                              | CC              | 1946741034               |
| SNP_P4_13335_37716766 | NC_021160.1    | Ca_kabuli_chr01 | 37716766                | GG                              | TT              | 1946741036               |
| SNP_P4_13336_37716926 | NC_021160.1    | Ca_kabuli_chr01 | 37716926                | TT                              | CC              | 1946741038               |
| SNP_P4_13337_37716964 | NC_021160.1    | Ca_kabuli_chr01 | 37716964                | TT                              | CC              | 1946741040               |
| SNP_P4_13338_37716972 | NC_021160.1    | Ca_kabuli_chr01 | 37716972                | TT                              | CC              | 1946741042               |
| SNP_P4_13340_37717230 | NC_021160.1    | Ca_kabuli_chr01 | 37717230                | GG                              | CC              | 1946741044               |
| SNP_P4_13341_37717256 | NC_021160.1    | Ca_kabuli_chr01 | 37717256                | CC                              | TT              | 1946741046               |
| SNP_P4_13342_37717866 | NC_021160.1    | Ca_kabuli_chr01 | 37717866                | TT                              | CC              | 1946741047               |
| SNP_P4_13343_37717893 | NC_021160.1    | Ca_kabuli_chr01 | 37717893                | AA                              | CC              | 1946741049               |
| SNP_P4_13344_37717897 | NC_021160.1    | Ca_kabuli_chr01 | 37717897                | TT                              | CC              | 1946741051               |
| SNP_P4_13345_37717920 | NC_021160.1    | Ca_kabuli_chr01 | 37717920                | TT                              | AA              | 1946741053               |
| SNP_P4_13346_37717924 | NC_021160.1    | Ca_kabuli_chr01 | 37717924                | AA                              | GG              | 1946741055               |
| SNP_P4_13347_37717971 | NC_021160.1    | Ca_kabuli_chr01 | 37717971                | CC                              | TT              | 1946741057               |
| SNP_P4_13348_37717986 | NC_021160.1    | Ca_kabuli_chr01 | 37717986                | CC                              | TT              | 1946741059               |
| SNP_P4_13349_37718328 | NC_021160.1    | Ca_kabuli_chr01 | 37718328                | TT                              | AA              | 1946741061               |
| SNP_P4_13350_37718329 | NC_021160.1    | Ca_kabuli_chr01 | 37718329                | GG                              | AA              | 1946741063               |
| SNP_P4_13351_37719361 | NC_021160.1    | Ca_kabuli_chr01 | 37719361                | GG                              | AA              | 1946741065               |
| SNP_P4_13352_37719402 | NC_021160.1    | Ca_kabuli_chr01 | 37719402                | GG                              | AA              | 1946741067               |
| SNP_P4_13353_37719421 | NC_021160.1    | Ca_kabuli_chr01 | 37719421                | GG                              | AA              | 1946741068               |
| SNP_P4_13354_37719598 | NC_021160.1    | Ca_kabuli_chr01 | 37719598                | CC                              | TT              | 1946741070               |
| SNP_P4_13355_37719630 | NC_021160.1    | Ca_kabuli_chr01 | 37719630                | GG                              | AA              | 1946741072               |
| SNP_P4_13356_37719657 | NC_021160.1    | Ca_kabuli_chr01 | 37719657                | GG                              | AA              | 1946741074               |
| SNP_P4_13357_37719881 | NC_021160.1    | Ca_kabuli_chr01 | 37719881                | TT                              | CC              | 1946741076               |
| SNP_P4_13358_37720277 | NC_021160.1    | Ca_kabuli_chr01 | 37720277                | AA                              | GG              | 1946741078               |
| SNP_P4_13359_37720309 | NC_021160.1    | Ca_kabuli_chr01 | 37720309                | AA                              | CC              | 1946741080               |
| SNP_P4_13360_37720323 | NC_021160.1    | Ca_kabuli_chr01 | 37720323                | AA                              | GG              | 1946741082               |
| SNP_P4_13361_37720622 | NC_021160.1    | Ca_kabuli_chr01 | 37720622                | GG                              | AA              | 1946741084               |
| SNP_P4_13362_37720717 | NC_021160.1    | Ca_kabuli_chr01 | 37720717                | GG                              | AA              | 1946741086               |
| SNP_P4_13363_37720826 | NC_021160.1    | Ca_kabuli_chr01 | 37720826                | CC                              | TT              | 1946741088               |
| SNP_P4_13364_37720859 | NC_021160.1    | Ca_kabuli_chr01 | 37720859                | AA                              | GG              | 1946741090               |
| SNP_P4_13366_37721021 | NC_021160.1    | Ca_kabuli_chr01 | 37721021                | AA                              | TT              | 1946741092               |

| SNPs IDs              | Chromosome IDs | Chromosomes     | Physical positions (bp) | CDC Frontier (Reference genome) | (ILWC46 & LPNB) | NCBI SNPdb Accession IDs |
|-----------------------|----------------|-----------------|-------------------------|---------------------------------|-----------------|--------------------------|
| SNP_P4_13368_37721142 | NC_021160.1    | Ca_kabuli_chr01 | 37721142                | GG                              | CC              | 1946741094               |
| SNP_P4_13369_37721164 | NC_021160.1    | Ca_kabuli_chr01 | 37721164                | GG                              | CC              | 1946741096               |
| SNP_P4_13370_37721250 | NC_021160.1    | Ca_kabuli_chr01 | 37721250                | GG                              | AA              | 1946741098               |
| SNP_P4_13371_37721288 | NC_021160.1    | Ca_kabuli_chr01 | 37721288                | TT                              | CC              | 1946741100               |
| SNP_P4_13372_37721336 | NC_021160.1    | Ca_kabuli_chr01 | 37721336                | CC                              | TT              | 1946741102               |
| SNP_P4_13373_37721352 | NC_021160.1    | Ca_kabuli_chr01 | 37721352                | CC                              | TT              | 1946741104               |
| SNP_P4_13374_37721369 | NC_021160.1    | Ca_kabuli_chr01 | 37721369                | TT                              | AA              | 1946741106               |
| SNP_P4_13376_37721407 | NC_021160.1    | Ca_kabuli_chr01 | 37721407                | TT                              | AA              | 1946741108               |
| SNP_P4_13378_37722236 | NC_021160.1    | Ca_kabuli_chr01 | 37722236                | CC                              | TT              | 1946741110               |
| SNP_P4_13379_37724690 | NC_021160.1    | Ca_kabuli_chr01 | 37724690                | CC                              | AA              | 1946741112               |
| SNP_P4_13381_37725467 | NC_021160.1    | Ca_kabuli_chr01 | 37725467                | GG                              | AA              | 1946741114               |
| SNP_P4_13382_37725540 | NC_021160.1    | Ca_kabuli_chr01 | 37725540                | AA                              | TT              | 1946741116               |
| SNP_P4_13384_37728793 | NC_021160.1    | Ca_kabuli_chr01 | 37728793                | TT                              | CC              | 1946741118               |
| SNP_P4_13385_37728818 | NC_021160.1    | Ca_kabuli_chr01 | 37728818                | AA                              | CC              | 1946741120               |
| SNP_P4_13386_37732998 | NC_021160.1    | Ca_kabuli_chr01 | 37732998                | TT                              | AA              | 1946741122               |
| SNP_P4_13387_37736546 | NC_021160.1    | Ca_kabuli_chr01 | 37736546                | TT                              | CC              | 1946741124               |
| SNP_P4_13388_37736786 | NC_021160.1    | Ca_kabuli_chr01 | 37736786                | TT                              | CC              | 1946741126               |
| SNP_P4_13389_37738367 | NC_021160.1    | Ca_kabuli_chr01 | 37738367                | GG                              | AA              | 1946741128               |
| SNP_P4_13390_37738627 | NC_021160.1    | Ca_kabuli_chr01 | 37738627                | AA                              | GG              | 1946741130               |
| SNP_P4_13391_37741074 | NC_021160.1    | Ca_kabuli_chr01 | 37741074                | GG                              | AA              | 1946741132               |
| SNP_P4_13392_37741118 | NC_021160.1    | Ca_kabuli_chr01 | 37741118                | AA                              | GG              | 1946741134               |
| SNP_P4_13393_37742866 | NC_021160.1    | Ca_kabuli_chr01 | 37742866                | AA                              | TT              | 1946741136               |
| SNP_P4_13394_37744066 | NC_021160.1    | Ca_kabuli_chr01 | 37744066                | TT                              | CC              | 1946741138               |
| SNP_P4_13395_37744104 | NC_021160.1    | Ca_kabuli_chr01 | 37744104                | TT                              | AA              | 1946741140               |
| SNP_P4_13396_37744162 | NC_021160.1    | Ca_kabuli_chr01 | 37744162                | TT                              | CC              | 1946741142               |
| SNP_P4_13397_37744443 | NC_021160.1    | Ca_kabuli_chr01 | 37744443                | GG                              | AA              | 1946741144               |
| SNP_P4_13398_37744445 | NC_021160.1    | Ca_kabuli_chr01 | 37744445                | TT                              | GG              | 1946741146               |
| SNP_P4_13399_37744740 | NC_021160.1    | Ca_kabuli_chr01 | 37744740                | GG                              | AA              | 1946741148               |
| SNP_P4_13400_37745828 | NC_021160.1    | Ca_kabuli_chr01 | 37745828                | TT                              | CC              | 1946741150               |
| SNP_P4_13401_37745848 | NC_021160.1    | Ca_kabuli_chr01 | 37745848                | CC                              | AA              | 1946741152               |
| SNP_P4_13402_37745874 | NC_021160.1    | Ca_kabuli_chr01 | 37745874                | AA                              | GG              | 1946741154               |
| SNP_P4_13403_37747134 | NC_021160.1    | Ca_kabuli_chr01 | 37747134                | AA                              | GG              | 1946741156               |
| SNP_P4_13405_37747328 | NC_021160.1    | Ca_kabuli_chr01 | 37747328                | TT                              | CC              | 1946741158               |
| SNP_P4_13408_37747458 | NC_021160.1    | Ca_kabuli_chr01 | 37747458                | AA                              | GG              | 1946741159               |
| SNP_P4_13409_37747618 | NC_021160.1    | Ca_kabuli_chr01 | 37747618                | GG                              | AA              | 1946741161               |
| SNP_P4_13410_37747628 | NC_021160.1    | Ca_kabuli_chr01 | 37747628                | AA                              | GG              | 1946741163               |
| SNP_P4_13411_37747823 | NC_021160.1    | Ca_kabuli_chr01 | 37747823                | AA                              | TT              | 1946741165               |
| SNP_P4_13412_37750716 | NC_021160.1    | Ca_kabuli_chr01 | 37750716                | CC                              | TT              | 1946741167               |
| SNP_P4_13413_37750740 | NC_021160.1    | Ca_kabuli_chr01 | 37750740                | AA                              | GG              | 1946741169               |
| SNP_P4_13414_37751960 | NC_021160.1    | Ca_kabuli_chr01 | 37751960                | TT                              | CC              | 1946741171               |
| SNP_P4_13415_37751990 | NC_021160.1    | Ca_kabuli_chr01 | 37751990                | AA                              | GG              | 1946741172               |
| SNP_P4_13417_37758136 | NC_021160.1    | Ca_kabuli_chr01 | 37758136                | GG                              | AA              | 1946741174               |



| SNPs IDs              | Chromosome IDs | Chromosomes     | Physical positions (bp) | CDC Frontier (Reference genome) | (ILWC46 & LPNB) | NCBI SNPdb Accession IDs |
|-----------------------|----------------|-----------------|-------------------------|---------------------------------|-----------------|--------------------------|
| SNP_P4_13418_37758276 | NC_021160.1    | Ca_kabuli_chr01 | 37758276                | CC                              | TT              | 1946741176               |
| SNP_P4_13419_37758328 | NC_021160.1    | Ca_kabuli_chr01 | 37758328                | AA                              | GG              | 1946741178               |
| SNP_P4_13420_37759117 | NC_021160.1    | Ca_kabuli_chr01 | 37759117                | TT                              | GG              | 1946741180               |
| SNP_P4_13421_37759119 | NC_021160.1    | Ca_kabuli_chr01 | 37759119                | AA                              | GG              | 1946741182               |
| SNP_P4_13422_37759148 | NC_021160.1    | Ca_kabuli_chr01 | 37759148                | TT                              | GG              | 1946741184               |
| SNP_P4_13424_37759629 | NC_021160.1    | Ca_kabuli_chr01 | 37759629                | GG                              | AA              | 1946741186               |
| SNP_P4_13425_37759641 | NC_021160.1    | Ca_kabuli_chr01 | 37759641                | AA                              | GG              | 1946741188               |
| SNP_P4_13426_37761293 | NC_021160.1    | Ca_kabuli_chr01 | 37761293                | GG                              | AA              | 1946741190               |
| SNP_P4_13427_37761534 | NC_021160.1    | Ca_kabuli_chr01 | 37761534                | GG                              | AA              | 1946741192               |
| SNP_P4_13428_37761541 | NC_021160.1    | Ca_kabuli_chr01 | 37761541                | GG                              | CC              | 1946741194               |
| SNP_P4_13430_37761716 | NC_021160.1    | Ca_kabuli_chr01 | 37761716                | AA                              | GG              | 1946741196               |
| SNP_P4_13431_37761728 | NC_021160.1    | Ca_kabuli_chr01 | 37761728                | CC                              | TT              | 1946741198               |
| SNP_P4_13432_37761767 | NC_021160.1    | Ca_kabuli_chr01 | 37761767                | TT                              | CC              | 1946741199               |
| SNP_P4_13433_37761830 | NC_021160.1    | Ca_kabuli_chr01 | 37761830                | TT                              | AA              | 1946741201               |
| SNP_P4_13434_37761947 | NC_021160.1    | Ca_kabuli_chr01 | 37761947                | CC                              | TT              | 1946741203               |
| SNP_P4_13435_37762451 | NC_021160.1    | Ca_kabuli_chr01 | 37762451                | CC                              | TT              | 1946741205               |
| SNP_P4_13436_37762462 | NC_021160.1    | Ca_kabuli_chr01 | 37762462                | GG                              | AA              | 1946741207               |
| SNP_P4_13437_37762700 | NC_021160.1    | Ca_kabuli_chr01 | 37762700                | GG                              | TT              | 1946741209               |
| SNP_P4_13438_37762703 | NC_021160.1    | Ca_kabuli_chr01 | 37762703                | CC                              | AA              | 1946741211               |
| SNP_P4_13439_37762747 | NC_021160.1    | Ca_kabuli_chr01 | 37762747                | GG                              | CC              | 1946741213               |
| SNP_P4_13440_37762756 | NC_021160.1    | Ca_kabuli_chr01 | 37762756                | GG                              | TT              | 1946741215               |
| SNP_P4_13441_37762761 | NC_021160.1    | Ca_kabuli_chr01 | 37762761                | AA                              | GG              | 1946741217               |
| SNP_P4_13442_37763072 | NC_021160.1    | Ca_kabuli_chr01 | 37763072                | GG                              | CC              | 1946741219               |
| SNP_P4_13443_37767716 | NC_021160.1    | Ca_kabuli_chr01 | 37767716                | GG                              | AA              | 1946741221               |
| SNP_P4_13444_37768015 | NC_021160.1    | Ca_kabuli_chr01 | 37768015                | AA                              | CC              | 1946741223               |
| SNP_P4_13445_37769324 | NC_021160.1    | Ca_kabuli_chr01 | 37769324                | GG                              | TT              | 1946741225               |
| SNP_P4_13446_37769617 | NC_021160.1    | Ca_kabuli_chr01 | 37769617                | AA                              | GG              | 1946741227               |
| SNP_P4_13447_37769618 | NC_021160.1    | Ca_kabuli_chr01 | 37769618                | GG                              | AA              | 1946741229               |
| SNP_P4_13448_37769795 | NC_021160.1    | Ca_kabuli_chr01 | 37769795                | GG                              | TT              | 1946741231               |
| SNP_P4_13449_37770174 | NC_021160.1    | Ca_kabuli_chr01 | 37770174                | GG                              | AA              | 1946741233               |
| SNP_P4_13450_37770179 | NC_021160.1    | Ca_kabuli_chr01 | 37770179                | GG                              | AA              | 1946741235               |
| SNP_P4_13451_37770193 | NC_021160.1    | Ca_kabuli_chr01 | 37770193                | TT                              | GG              | 1946741237               |
| SNP_P4_13452_37771266 | NC_021160.1    | Ca_kabuli_chr01 | 37771266                | AA                              | GG              | 1946741239               |
| SNP_P4_13453_37772690 | NC_021160.1    | Ca_kabuli_chr01 | 37772690                | CC                              | TT              | 1946741241               |
| SNP_P4_13454_37772728 | NC_021160.1    | Ca_kabuli_chr01 | 37772728                | TT                              | AA              | 1946741244               |
| SNP_P4_13455_37772732 | NC_021160.1    | Ca_kabuli_chr01 | 37772732                | CC                              | AA              | 1946741246               |
| SNP_P4_13456_37772736 | NC_021160.1    | Ca_kabuli_chr01 | 37772736                | CC                              | AA              | 1946741248               |
| SNP_P4_13457_37772739 | NC_021160.1    | Ca_kabuli_chr01 | 37772739                | TT                              | CC              | 1946741250               |
| SNP_P4_13458_37772754 | NC_021160.1    | Ca_kabuli_chr01 | 37772754                | AA                              | CC              | 1946741252               |
| SNP_P4_13459_37772919 | NC_021160.1    | Ca_kabuli_chr01 | 37772919                | CC                              | TT              | 1946741254               |
| SNP_P4_13460_37773115 | NC_021160.1    | Ca_kabuli_chr01 | 37773115                | TT                              | CC              | 1946741256               |
| SNP_P4_13463_37776114 | NC_021160.1    | Ca_kabuli_chr01 | 37776114                | TT                              | AA              | 1946741258               |

| SNPs IDs              | Chromosome IDs | Chromosomes     | Physical positions (bp) | CDC Frontier (Reference genome) | (ILWC46 & LPNB) | NCBI SNPdb Accession IDs |
|-----------------------|----------------|-----------------|-------------------------|---------------------------------|-----------------|--------------------------|
| SNP_P4_13464_37776291 | NC_021160.1    | Ca_kabuli_chr01 | 37776291                | TT                              | CC              | 1946741260               |
| SNP_P4_13465_37776303 | NC_021160.1    | Ca_kabuli_chr01 | 37776303                | GG                              | AA              | 1946741262               |
| SNP_P4_13466_37776324 | NC_021160.1    | Ca_kabuli_chr01 | 37776324                | AA                              | TT              | 1946741264               |
| SNP_P4_13467_37776588 | NC_021160.1    | Ca_kabuli_chr01 | 37776588                | CC                              | TT              | 1946741266               |
| SNP_P4_13468_37776591 | NC_021160.1    | Ca_kabuli_chr01 | 37776591                | CC                              | TT              | 1946741268               |
| SNP_P4_13469_37776647 | NC_021160.1    | Ca_kabuli_chr01 | 37776647                | GG                              | AA              | 1946741270               |
| SNP_P4_13470_37776653 | NC_021160.1    | Ca_kabuli_chr01 | 37776653                | TT                              | GG              | 1946741272               |
| SNP_P4_13471_37776726 | NC_021160.1    | Ca_kabuli_chr01 | 37776726                | GG                              | AA              | 1946741274               |
| SNP_P4_13473_37777350 | NC_021160.1    | Ca_kabuli_chr01 | 37777350                | TT                              | GG              | 1946741276               |
| SNP_P4_13474_37777384 | NC_021160.1    | Ca_kabuli_chr01 | 37777384                | CC                              | TT              | 1946741278               |
| SNP_P4_13475_37777595 | NC_021160.1    | Ca_kabuli_chr01 | 37777595                | GG                              | AA              | 1946741280               |
| SNP_P4_13476_37777642 | NC_021160.1    | Ca_kabuli_chr01 | 37777642                | TT                              | CC              | 1946741282               |
| SNP_P4_13477_37777661 | NC_021160.1    | Ca_kabuli_chr01 | 37777661                | GG                              | AA              | 1946741284               |
| SNP_P4_13478_37780451 | NC_021160.1    | Ca_kabuli_chr01 | 37780451                | CC                              | GG              | 1946741286               |
| SNP_P4_13479_37780764 | NC_021160.1    | Ca_kabuli_chr01 | 37780764                | TT                              | AA              | 1946741288               |
| SNP_P4_13480_37780766 | NC_021160.1    | Ca_kabuli_chr01 | 37780766                | TT                              | AA              | 1946741290               |
| SNP_P4_13481_37780779 | NC_021160.1    | Ca_kabuli_chr01 | 37780779                | TT                              | AA              | 1946741292               |
| SNP_P4_13482_37780926 | NC_021160.1    | Ca_kabuli_chr01 | 37780926                | GG                              | TT              | 1946741294               |
| SNP_P4_13483_37780945 | NC_021160.1    | Ca_kabuli_chr01 | 37780945                | AA                              | CC              | 1946741296               |
| SNP_P4_13486_37783134 | NC_021160.1    | Ca_kabuli_chr01 | 37783134                | CC                              | TT              | 1946741298               |
| SNP_P4_13487_37783161 | NC_021160.1    | Ca_kabuli_chr01 | 37783161                | AA                              | GG              | 1946741300               |
| SNP_P4_13488_37783194 | NC_021160.1    | Ca_kabuli_chr01 | 37783194                | CC                              | TT              | 1946741302               |
| SNP_P4_13489_37783220 | NC_021160.1    | Ca_kabuli_chr01 | 37783220                | AA                              | GG              | 1946741304               |
| SNP_P4_13491_37783489 | NC_021160.1    | Ca_kabuli_chr01 | 37783489                | GG                              | AA              | 1946741306               |
| SNP_P4_13492_37783938 | NC_021160.1    | Ca_kabuli_chr01 | 37783938                | CC                              | TT              | 1946741308               |
| SNP_P4_13493_37783960 | NC_021160.1    | Ca_kabuli_chr01 | 37783960                | CC                              | AA              | 1946741310               |
| SNP_P4_13494_37784283 | NC_021160.1    | Ca_kabuli_chr01 | 37784283                | TT                              | GG              | 1946741312               |
| SNP_P4_13495_37786146 | NC_021160.1    | Ca_kabuli_chr01 | 37786146                | TT                              | AA              | 1946741314               |
| SNP_P4_13496_37796034 | NC_021160.1    | Ca_kabuli_chr01 | 37796034                | GG                              | TT              | 1946741316               |
| SNP_P4_13497_37796090 | NC_021160.1    | Ca_kabuli_chr01 | 37796090                | TT                              | GG              | 1946741318               |
| SNP_P4_13498_37797164 | NC_021160.1    | Ca_kabuli_chr01 | 37797164                | AA                              | GG              | 1946741320               |
| SNP_P4_13502_37798545 | NC_021160.1    | Ca_kabuli_chr01 | 37798545                | CC                              | TT              | 1946741322               |
| SNP_P4_13503_37798548 | NC_021160.1    | Ca_kabuli_chr01 | 37798548                | AA                              | GG              | 1946741324               |
| SNP_P4_13506_37799221 | NC_021160.1    | Ca_kabuli_chr01 | 37799221                | GG                              | AA              | 1946741326               |
| SNP_P4_13508_37799273 | NC_021160.1    | Ca_kabuli_chr01 | 37799273                | GG                              | TT              | 1946741328               |
| SNP_P4_13509_37799683 | NC_021160.1    | Ca_kabuli_chr01 | 37799683                | AA                              | GG              | 1946741330               |
| SNP_P4_13511_37800611 | NC_021160.1    | Ca_kabuli_chr01 | 37800611                | GG                              | AA              | 1946741332               |
| SNP_P4_13512_37800652 | NC_021160.1    | Ca_kabuli_chr01 | 37800652                | GG                              | AA              | 1946741334               |
| SNP_P4_13513_37800672 | NC_021160.1    | Ca_kabuli_chr01 | 37800672                | TT                              | CC              | 1946741336               |
| SNP_P4_13516_37803231 | NC_021160.1    | Ca_kabuli_chr01 | 37803231                | AA                              | GG              | 1946741338               |
| SNP_P4_13517_37803236 | NC_021160.1    | Ca_kabuli_chr01 | 37803236                | AA                              | GG              | 1946741340               |
| SNP_P4_13518_37803791 | NC_021160.1    | Ca_kabuli_chr01 | 37803791                | CC                              | TT              | 1946741342               |

| SNPs IDs              | Chromosome IDs | Chromosomes     | Physical positions (bp) | CDC Frontier (Reference genome) | (ILWC46 & LPNB) | NCBI SNPdb Accession IDs |
|-----------------------|----------------|-----------------|-------------------------|---------------------------------|-----------------|--------------------------|
| SNP_P4_13519_37804157 | NC_021160.1    | Ca_kabuli_chr01 | 37804157                | TT                              | GG              | 1946741344               |
| SNP_P4_13520_37804160 | NC_021160.1    | Ca_kabuli_chr01 | 37804160                | CC                              | TT              | 1946741346               |
| SNP_P4_13521_37804197 | NC_021160.1    | Ca_kabuli_chr01 | 37804197                | TT                              | AA              | 1946741348               |
| SNP_P4_13522_37804335 | NC_021160.1    | Ca_kabuli_chr01 | 37804335                | AA                              | GG              | 1946741350               |
| SNP_P4_13523_37806053 | NC_021160.1    | Ca_kabuli_chr01 | 37806053                | CC                              | TT              | 1946741352               |
| SNP_P4_13524_37806382 | NC_021160.1    | Ca_kabuli_chr01 | 37806382                | AA                              | GG              | 1946741354               |
| SNP_P4_13525_37806569 | NC_021160.1    | Ca_kabuli_chr01 | 37806569                | CC                              | TT              | 1946741356               |
| SNP_P4_13526_37806723 | NC_021160.1    | Ca_kabuli_chr01 | 37806723                | TT                              | CC              | 1946741358               |
| SNP_P4_13527_37806734 | NC_021160.1    | Ca_kabuli_chr01 | 37806734                | GG                              | AA              | 1946741360               |
| SNP_P4_13528_37806940 | NC_021160.1    | Ca_kabuli_chr01 | 37806940                | TT                              | GG              | 1946741362               |
| SNP_P4_13529_37807508 | NC_021160.1    | Ca_kabuli_chr01 | 37807508                | AA                              | GG              | 1946741364               |
| SNP_P4_13530_37807530 | NC_021160.1    | Ca_kabuli_chr01 | 37807530                | AA                              | TT              | 1946741366               |
| SNP_P4_13531_37808497 | NC_021160.1    | Ca_kabuli_chr01 | 37808497                | AA                              | CC              | 1946741368               |
| SNP_P4_13532_37809597 | NC_021160.1    | Ca_kabuli_chr01 | 37809597                | GG                              | AA              | 1946741370               |
| SNP_P4_13536_37811935 | NC_021160.1    | Ca_kabuli_chr01 | 37811935                | AA                              | TT              | 1946741372               |
| SNP_P4_13538_37813045 | NC_021160.1    | Ca_kabuli_chr01 | 37813045                | CC                              | TT              | 1946741374               |
| SNP_P4_13539_37825975 | NC_021160.1    | Ca_kabuli_chr01 | 37825975                | TT                              | AA              | 1946741376               |
| SNP_P4_13540_37826884 | NC_021160.1    | Ca_kabuli_chr01 | 37826884                | TT                              | CC              | 1946741378               |
| SNP_P4_13541_37828082 | NC_021160.1    | Ca_kabuli_chr01 | 37828082                | TT                              | CC              | 1946741380               |
| SNP_P4_13542_37833058 | NC_021160.1    | Ca_kabuli_chr01 | 37833058                | TT                              | CC              | 1946741382               |
| SNP_P4_13544_37838211 | NC_021160.1    | Ca_kabuli_chr01 | 37838211                | AA                              | GG              | 1946741384               |
| SNP_P4_13545_37838518 | NC_021160.1    | Ca_kabuli_chr01 | 37838518                | TT                              | AA              | 1946741386               |
| SNP_P4_13546_37838783 | NC_021160.1    | Ca_kabuli_chr01 | 37838783                | TT                              | CC              | 1946741388               |
| SNP_P4_13547_37844672 | NC_021160.1    | Ca_kabuli_chr01 | 37844672                | AA                              | TT              | 1946741390               |
| SNP_P4_13548_37845614 | NC_021160.1    | Ca_kabuli_chr01 | 37845614                | GG                              | TT              | 1946741392               |
| SNP_P4_13549_37846460 | NC_021160.1    | Ca_kabuli_chr01 | 37846460                | CC                              | TT              | 1946741394               |
| SNP_P4_13550_37847049 | NC_021160.1    | Ca_kabuli_chr01 | 37847049                | GG                              | AA              | 1946741396               |
| SNP_P4_13551_37849089 | NC_021160.1    | Ca_kabuli_chr01 | 37849089                | CC                              | AA              | 1946741398               |
| SNP_P4_13552_37850302 | NC_021160.1    | Ca_kabuli_chr01 | 37850302                | CC                              | TT              | 1946741400               |
| SNP_P4_13553_37850466 | NC_021160.1    | Ca_kabuli_chr01 | 37850466                | TT                              | CC              | 1946741402               |
| SNP_P4_13554_37850528 | NC_021160.1    | Ca_kabuli_chr01 | 37850528                | TT                              | CC              | 1946741404               |
| SNP_P4_13555_37850958 | NC_021160.1    | Ca_kabuli_chr01 | 37850958                | GG                              | AA              | 1946741406               |
| SNP_P4_13558_37851759 | NC_021160.1    | Ca_kabuli_chr01 | 37851759                | TT                              | GG              | 1946741407               |
| SNP_P4_13560_37854594 | NC_021160.1    | Ca_kabuli_chr01 | 37854594                | AA                              | TT              | 1946741409               |
| SNP_P4_13561_37855517 | NC_021160.1    | Ca_kabuli_chr01 | 37855517                | GG                              | AA              | 1946741411               |
| SNP_P4_13562_37863723 | NC_021160.1    | Ca_kabuli_chr01 | 37863723                | GG                              | AA              | 1946741413               |
| SNP_P4_13563_37866635 | NC_021160.1    | Ca_kabuli_chr01 | 37866635                | TT                              | CC              | 1946741415               |
| SNP_P4_13564_37866751 | NC_021160.1    | Ca_kabuli_chr01 | 37866751                | AA                              | GG              | 1946741417               |
| SNP_P4_13565_37867529 | NC_021160.1    | Ca_kabuli_chr01 | 37867529                | TT                              | CC              | 1946741419               |
| SNP_P4_13566_37867755 | NC_021160.1    | Ca_kabuli_chr01 | 37867755                | AA                              | GG              | 1946741422               |
| SNP_P4_13567_37868922 | NC_021160.1    | Ca_kabuli_chr01 | 37868922                | TT                              | GG              | 1946741424               |
| SNP_P4_13568_37869964 | NC_021160.1    | Ca_kabuli_chr01 | 37869964                | GG                              | TT              | 1946741426               |

| SNPs IDs              | Chromosome IDs | Chromosomes     | Physical positions (bp) | CDC Frontier (Reference genome) | (ILWC46 & LPNB) | NCBI SNPdb Accession IDs |
|-----------------------|----------------|-----------------|-------------------------|---------------------------------|-----------------|--------------------------|
| SNP_P4_13569_37871414 | NC_021160.1    | Ca_kabuli_chr01 | 37871414                | CC                              | AA              | 1946741428               |
| SNP_P4_13570_37871773 | NC_021160.1    | Ca_kabuli_chr01 | 37871773                | TT                              | CC              | 1946741430               |
| SNP_P4_13572_37872279 | NC_021160.1    | Ca_kabuli_chr01 | 37872279                | GG                              | AA              | 1946741432               |
| SNP_P4_13573_37873345 | NC_021160.1    | Ca_kabuli_chr01 | 37873345                | GG                              | AA              | 1946741434               |
| SNP_P4_13574_37873471 | NC_021160.1    | Ca_kabuli_chr01 | 37873471                | AA                              | TT              | 1946741436               |
| SNP_P4_13575_37873484 | NC_021160.1    | Ca_kabuli_chr01 | 37873484                | GG                              | TT              | 1946741438               |
| SNP_P4_13576_37874700 | NC_021160.1    | Ca_kabuli_chr01 | 37874700                | GG                              | CC              | 1946741440               |
| SNP_P4_13577_37875267 | NC_021160.1    | Ca_kabuli_chr01 | 37875267                | CC                              | TT              | 1946741442               |
| SNP_P4_13580_37876208 | NC_021160.1    | Ca_kabuli_chr01 | 37876208                | AA                              | GG              | 1946741444               |
| SNP_P4_13581_37883999 | NC_021160.1    | Ca_kabuli_chr01 | 37883999                | TT                              | CC              | 1946741446               |
| SNP_P4_13582_37886951 | NC_021160.1    | Ca_kabuli_chr01 | 37886951                | AA                              | TT              | 1946741448               |
| SNP_P4_13584_37887825 | NC_021160.1    | Ca_kabuli_chr01 | 37887825                | CC                              | GG              | 1946741450               |
| SNP_P4_13585_37887840 | NC_021160.1    | Ca_kabuli_chr01 | 37887840                | CC                              | TT              | 1946741452               |
| SNP_P4_13586_37887846 | NC_021160.1    | Ca_kabuli_chr01 | 37887846                | TT                              | CC              | 1946741454               |
| SNP_P4_13587_37887878 | NC_021160.1    | Ca_kabuli_chr01 | 37887878                | GG                              | AA              | 1946741456               |
| SNP_P4_13588_37889429 | NC_021160.1    | Ca_kabuli_chr01 | 37889429                | GG                              | AA              | 1946741458               |
| SNP_P4_13589_37890344 | NC_021160.1    | Ca_kabuli_chr01 | 37890344                | GG                              | TT              | 1946741460               |
| SNP_P4_13590_37896780 | NC_021160.1    | Ca_kabuli_chr01 | 37896780                | TT                              | CC              | 1946741462               |
| SNP_P4_13591_37897238 | NC_021160.1    | Ca_kabuli_chr01 | 37897238                | TT                              | CC              | 1946741464               |
| SNP_P4_13592_37898836 | NC_021160.1    | Ca_kabuli_chr01 | 37898836                | CC                              | TT              | 1946741466               |
| SNP_P4_13593_37899075 | NC_021160.1    | Ca_kabuli_chr01 | 37899075                | TT                              | CC              | 1946741468               |
| SNP_P4_13594_37901776 | NC_021160.1    | Ca_kabuli_chr01 | 37901776                | GG                              | AA              | 1946741470               |
| SNP_P4_13595_37901829 | NC_021160.1    | Ca_kabuli_chr01 | 37901829                | GG                              | AA              | 1946741472               |
| SNP_P4_13596_37901893 | NC_021160.1    | Ca_kabuli_chr01 | 37901893                | AA                              | TT              | 1946741474               |
| SNP_P4_13597_37901897 | NC_021160.1    | Ca_kabuli_chr01 | 37901897                | TT                              | GG              | 1946741476               |
| SNP_P4_13598_37903293 | NC_021160.1    | Ca_kabuli_chr01 | 37903293                | TT                              | CC              | 1946741478               |
| SNP_P4_13599_37903462 | NC_021160.1    | Ca_kabuli_chr01 | 37903462                | AA                              | GG              | 1946741480               |
| SNP_P4_13600_37905397 | NC_021160.1    | Ca_kabuli_chr01 | 37905397                | TT                              | CC              | 1946741482               |
| SNP_P4_13601_37906467 | NC_021160.1    | Ca_kabuli_chr01 | 37906467                | TT                              | AA              | 1946741484               |
| SNP_P4_13602_37906643 | NC_021160.1    | Ca_kabuli_chr01 | 37906643                | AA                              | TT              | 1946741486               |
| SNP_P4_13603_37906763 | NC_021160.1    | Ca_kabuli_chr01 | 37906763                | AA                              | CC              | 1946741488               |
| SNP_P4_13604_37906800 | NC_021160.1    | Ca_kabuli_chr01 | 37906800                | AA                              | GG              | 1946741490               |
| SNP_P4_13605_37907062 | NC_021160.1    | Ca_kabuli_chr01 | 37907062                | CC                              | TT              | 1946741492               |
| SNP_P4_13606_37907415 | NC_021160.1    | Ca_kabuli_chr01 | 37907415                | GG                              | TT              | 1946741494               |
| SNP_P4_13607_37909716 | NC_021160.1    | Ca_kabuli_chr01 | 37909716                | CC                              | AA              | 1946741496               |
| SNP_P4_13608_37913504 | NC_021160.1    | Ca_kabuli_chr01 | 37913504                | GG                              | AA              | 1946741498               |
| SNP_P4_13609_37913600 | NC_021160.1    | Ca_kabuli_chr01 | 37913600                | TT                              | AA              | 1946741500               |
| SNP_P4_13611_37913690 | NC_021160.1    | Ca_kabuli_chr01 | 37913690                | AA                              | CC              | 1946741502               |
| SNP_P4_13612_37917528 | NC_021160.1    | Ca_kabuli_chr01 | 37917528                | GG                              | CC              | 1946741504               |
| SNP_P4_13613_37917563 | NC_021160.1    | Ca_kabuli_chr01 | 37917563                | AA                              | TT              | 1946741506               |
| SNP_P4_13614_37917571 | NC_021160.1    | Ca_kabuli_chr01 | 37917571                | GG                              | AA              | 1946741508               |
| SNP_P4_13615_37917700 | NC_021160.1    | Ca_kabuli_chr01 | 37917700                | TT                              | AA              | 1946741510               |

| SNPs IDs              | Chromosome IDs | Chromosomes     | Physical positions (bp) | CDC Frontier (Reference genome) | (ILWC46 & LPNB) | NCBI SNPdb Accession IDs |
|-----------------------|----------------|-----------------|-------------------------|---------------------------------|-----------------|--------------------------|
| SNP_P4_13616_37917731 | NC_021160.1    | Ca_kabuli_chr01 | 37917731                | TT                              | AA              | 1946741512               |
| SNP_P4_13617_37917741 | NC_021160.1    | Ca_kabuli_chr01 | 37917741                | TT                              | CC              | 1946741514               |
| SNP_P4_13618_37917767 | NC_021160.1    | Ca_kabuli_chr01 | 37917767                | AA                              | TT              | 1946741516               |
| SNP_P4_13619_37917770 | NC_021160.1    | Ca_kabuli_chr01 | 37917770                | AA                              | GG              | 1946741518               |
| SNP_P4_13620_37917827 | NC_021160.1    | Ca_kabuli_chr01 | 37917827                | GG                              | TT              | 1946741520               |
| SNP_P4_13621_37917838 | NC_021160.1    | Ca_kabuli_chr01 | 37917838                | CC                              | AA              | 1946741522               |
| SNP_P4_13622_37917839 | NC_021160.1    | Ca_kabuli_chr01 | 37917839                | TT                              | AA              | 1946741524               |
| SNP_P4_13623_37917886 | NC_021160.1    | Ca_kabuli_chr01 | 37917886                | AA                              | TT              | 1946741526               |
| SNP_P4_13624_37917962 | NC_021160.1    | Ca_kabuli_chr01 | 37917962                | GG                              | CC              | 1946741528               |
| SNP_P4_13626_37918059 | NC_021160.1    | Ca_kabuli_chr01 | 37918059                | TT                              | GG              | 1946741530               |
| SNP_P4_13627_37918086 | NC_021160.1    | Ca_kabuli_chr01 | 37918086                | TT                              | CC              | 1946741532               |
| SNP_P4_13628_37918089 | NC_021160.1    | Ca_kabuli_chr01 | 37918089                | TT                              | AA              | 1946741534               |
| SNP_P4_13629_37918173 | NC_021160.1    | Ca_kabuli_chr01 | 37918173                | AA                              | CC              | 1946741536               |
| SNP_P4_13630_37918211 | NC_021160.1    | Ca_kabuli_chr01 | 37918211                | TT                              | CC              | 1946741538               |
| SNP_P4_13631_37918242 | NC_021160.1    | Ca_kabuli_chr01 | 37918242                | TT                              | CC              | 1946741540               |
| SNP_P4_13632_37918296 | NC_021160.1    | Ca_kabuli_chr01 | 37918296                | CC                              | TT              | 1946741542               |
| SNP_P4_13633_37925844 | NC_021160.1    | Ca_kabuli_chr01 | 37925844                | AA                              | GG              | 1946741544               |
| SNP_P4_13634_37925894 | NC_021160.1    | Ca_kabuli_chr01 | 37925894                | TT                              | CC              | 1946741546               |
| SNP_P4_13635_37925953 | NC_021160.1    | Ca_kabuli_chr01 | 37925953                | AA                              | GG              | 1946741548               |
| SNP_P4_13636_37925970 | NC_021160.1    | Ca_kabuli_chr01 | 37925970                | GG                              | TT              | 1946741550               |
| SNP_P4_13637_37925988 | NC_021160.1    | Ca_kabuli_chr01 | 37925988                | TT                              | CC              | 1946741552               |
| SNP_P4_13638_37926211 | NC_021160.1    | Ca_kabuli_chr01 | 37926211                | AA                              | CC              | 1946741554               |
| SNP_P4_13639_37927055 | NC_021160.1    | Ca_kabuli_chr01 | 37927055                | GG                              | AA              | 1946741556               |
| SNP_P4_13640_37927070 | NC_021160.1    | Ca_kabuli_chr01 | 37927070                | GG                              | TT              | 1946741558               |
| SNP_P4_13641_37927110 | NC_021160.1    | Ca_kabuli_chr01 | 37927110                | CC                              | TT              | 1946741560               |
| SNP_P4_13642_37927127 | NC_021160.1    | Ca_kabuli_chr01 | 37927127                | TT                              | CC              | 1946741562               |
| SNP_P4_13643_37927130 | NC_021160.1    | Ca_kabuli_chr01 | 37927130                | TT                              | GG              | 1946741564               |
| SNP_P4_13644_37927207 | NC_021160.1    | Ca_kabuli_chr01 | 37927207                | GG                              | AA              | 1946741566               |
| SNP_P4_13645_37927227 | NC_021160.1    | Ca_kabuli_chr01 | 37927227                | GG                              | AA              | 1946741568               |
| SNP_P4_13646_37927230 | NC_021160.1    | Ca_kabuli_chr01 | 37927230                | AA                              | GG              | 1946741570               |
| SNP_P4_13647_37927234 | NC_021160.1    | Ca_kabuli_chr01 | 37927234                | AA                              | GG              | 1946741572               |
| SNP_P4_13648_37927235 | NC_021160.1    | Ca_kabuli_chr01 | 37927235                | AA                              | GG              | 1946741574               |
| SNP_P4_13649_37927252 | NC_021160.1    | Ca_kabuli_chr01 | 37927252                | TT                              | CC              | 1946741576               |
| SNP_P4_13650_37927306 | NC_021160.1    | Ca_kabuli_chr01 | 37927306                | CC                              | GG              | 1946741578               |
| SNP_P4_13652_37927384 | NC_021160.1    | Ca_kabuli_chr01 | 37927384                | GG                              | CC              | 1946741580               |
| SNP_P4_13653_37927393 | NC_021160.1    | Ca_kabuli_chr01 | 37927393                | TT                              | AA              | 1946741582               |
| SNP_P4_13654_37927577 | NC_021160.1    | Ca_kabuli_chr01 | 37927577                | CC                              | GG              | 1946741584               |
| SNP_P4_13655_37927609 | NC_021160.1    | Ca_kabuli_chr01 | 37927609                | CC                              | GG              | 1946741586               |
| SNP_P4_13656_37927658 | NC_021160.1    | Ca_kabuli_chr01 | 37927658                | TT                              | AA              | 1946741588               |
| SNP_P4_13657_37927679 | NC_021160.1    | Ca_kabuli_chr01 | 37927679                | TT                              | CC              | 1946741590               |
| SNP_P4_13658_37927711 | NC_021160.1    | Ca_kabuli_chr01 | 37927711                | TT                              | AA              | 1946741592               |
| SNP_P4_13659_37927731 | NC_021160.1    | Ca_kabuli_chr01 | 37927731                | AA                              | CC              | 1946741594               |

| SNPs IDs              | Chromosome IDs | Chromosomes     | Physical positions (bp) | CDC Frontier (Reference genome) | (ILWC46 & LPNB) | NCBI SNPdb Accession IDs |
|-----------------------|----------------|-----------------|-------------------------|---------------------------------|-----------------|--------------------------|
| SNP_P4_13660_37927772 | NC_021160.1    | Ca_kabuli_chr01 | 37927772                | AA                              | GG              | 1946741596               |
| SNP_P4_13661_37927801 | NC_021160.1    | Ca_kabuli_chr01 | 37927801                | AA                              | GG              | 1946741598               |
| SNP_P4_13662_37927829 | NC_021160.1    | Ca_kabuli_chr01 | 37927829                | AA                              | TT              | 1946741600               |
| SNP_P4_13664_37927978 | NC_021160.1    | Ca_kabuli_chr01 | 37927978                | GG                              | AA              | 1946741602               |
| SNP_P4_13665_37928063 | NC_021160.1    | Ca_kabuli_chr01 | 37928063                | TT                              | GG              | 1946741604               |
| SNP_P4_13666_37928138 | NC_021160.1    | Ca_kabuli_chr01 | 37928138                | CC                              | TT              | 1946741606               |
| SNP_P4_13667_37928144 | NC_021160.1    | Ca_kabuli_chr01 | 37928144                | CC                              | TT              | 1946741609               |
| SNP_P4_13668_37928164 | NC_021160.1    | Ca_kabuli_chr01 | 37928164                | AA                              | TT              | 1946741611               |
| SNP_P4_13669_37928335 | NC_021160.1    | Ca_kabuli_chr01 | 37928335                | CC                              | TT              | 1946741613               |
| SNP_P4_13670_37928383 | NC_021160.1    | Ca_kabuli_chr01 | 37928383                | CC                              | TT              | 1946741615               |
| SNP_P4_13671_37928384 | NC_021160.1    | Ca_kabuli_chr01 | 37928384                | GG                              | AA              | 1946741617               |
| SNP_P4_13672_37928398 | NC_021160.1    | Ca_kabuli_chr01 | 37928398                | AA                              | GG              | 1946741619               |
| SNP_P4_13673_37928617 | NC_021160.1    | Ca_kabuli_chr01 | 37928617                | CC                              | AA              | 1946741621               |
| SNP_P4_13674_37928649 | NC_021160.1    | Ca_kabuli_chr01 | 37928649                | CC                              | TT              | 1946741622               |
| SNP_P4_13675_37928712 | NC_021160.1    | Ca_kabuli_chr01 | 37928712                | AA                              | GG              | 1946741624               |
| SNP_P4_13676_37928849 | NC_021160.1    | Ca_kabuli_chr01 | 37928849                | TT                              | CC              | 1946741626               |
| SNP_P4_13678_37928887 | NC_021160.1    | Ca_kabuli_chr01 | 37928887                | CC                              | TT              | 1946741628               |
| SNP_P4_13679_37928919 | NC_021160.1    | Ca_kabuli_chr01 | 37928919                | AA                              | CC              | 1946741630               |
| SNP_P4_13680_37929028 | NC_021160.1    | Ca_kabuli_chr01 | 37929028                | GG                              | TT              | 1946741632               |
| SNP_P4_13681_37929079 | NC_021160.1    | Ca_kabuli_chr01 | 37929079                | CC                              | AA              | 1946741634               |
| SNP_P4_13682_37929215 | NC_021160.1    | Ca_kabuli_chr01 | 37929215                | CC                              | TT              | 1946741636               |
| SNP_P4_13683_37929221 | NC_021160.1    | Ca_kabuli_chr01 | 37929221                | CC                              | GG              | 1946741638               |
| SNP_P4_13684_37929247 | NC_021160.1    | Ca_kabuli_chr01 | 37929247                | GG                              | TT              | 1946741640               |
| SNP_P4_13685_37929322 | NC_021160.1    | Ca_kabuli_chr01 | 37929322                | GG                              | TT              | 1946741642               |
| SNP_P4_13686_37929608 | NC_021160.1    | Ca_kabuli_chr01 | 37929608                | AA                              | GG              | 1946741644               |
| SNP_P4_13687_37929621 | NC_021160.1    | Ca_kabuli_chr01 | 37929621                | CC                              | AA              | 1946741646               |
| SNP_P4_13688_37929639 | NC_021160.1    | Ca_kabuli_chr01 | 37929639                | CC                              | GG              | 1946741648               |
| SNP_P4_13689_37929641 | NC_021160.1    | Ca_kabuli_chr01 | 37929641                | AA                              | GG              | 1946741650               |
| SNP_P4_13691_37929689 | NC_021160.1    | Ca_kabuli_chr01 | 37929689                | CC                              | TT              | 1946741652               |
| SNP_P4_13693_37929749 | NC_021160.1    | Ca_kabuli_chr01 | 37929749                | TT                              | GG              | 1946741654               |
| SNP_P4_13695_37929847 | NC_021160.1    | Ca_kabuli_chr01 | 37929847                | AA                              | TT              | 1946741656               |
| SNP_P4_13696_37929865 | NC_021160.1    | Ca_kabuli_chr01 | 37929865                | TT                              | CC              | 1946741658               |
| SNP_P4_13697_37929913 | NC_021160.1    | Ca_kabuli_chr01 | 37929913                | AA                              | TT              | 1946741660               |
| SNP_P4_13698_37930022 | NC_021160.1    | Ca_kabuli_chr01 | 37930022                | TT                              | AA              | 1946741662               |
| SNP_P4_13699_37930023 | NC_021160.1    | Ca_kabuli_chr01 | 37930023                | CC                              | AA              | 1946741664               |
| SNP_P4_13700_37930051 | NC_021160.1    | Ca_kabuli_chr01 | 37930051                | AA                              | TT              | 1946741666               |
| SNP_P4_13701_37930064 | NC_021160.1    | Ca_kabuli_chr01 | 37930064                | CC                              | AA              | 1946741668               |
| SNP_P4_13702_37930199 | NC_021160.1    | Ca_kabuli_chr01 | 37930199                | AA                              | TT              | 1946741670               |
| SNP_P4_13703_37930205 | NC_021160.1    | Ca_kabuli_chr01 | 37930205                | CC                              | TT              | 1946741672               |
| SNP_P4_13704_37930255 | NC_021160.1    | Ca_kabuli_chr01 | 37930255                | AA                              | GG              | 1946741674               |
| SNP_P4_13705_37930303 | NC_021160.1    | Ca_kabuli_chr01 | 37930303                | AA                              | GG              | 1946741676               |
| SNP_P4_13706_37933132 | NC_021160.1    | Ca_kabuli_chr01 | 37933132                | GG                              | AA              | 1946741678               |

| SNPs IDs              | Chromosome IDs | Chromosomes     | Physical positions (bp) | CDC Frontier (Reference genome) | (ILWC46 & LPNB) | NCBI SNPdb Accession IDs |
|-----------------------|----------------|-----------------|-------------------------|---------------------------------|-----------------|--------------------------|
| SNP_P4_13708_37935887 | NC_021160.1    | Ca_kabuli_chr01 | 37935887                | AA                              | GG              | 1946741680               |
| SNP_P4_13709_37936129 | NC_021160.1    | Ca_kabuli_chr01 | 37936129                | GG                              | TT              | 1946741681               |
| SNP_P4_13710_37948041 | NC_021160.1    | Ca_kabuli_chr01 | 37948041                | CC                              | AA              | 1946741683               |
| SNP_P4_13711_37948105 | NC_021160.1    | Ca_kabuli_chr01 | 37948105                | CC                              | GG              | 1946741685               |
| SNP_P4_13712_37948651 | NC_021160.1    | Ca_kabuli_chr01 | 37948651                | AA                              | TT              | 1946741687               |
| SNP_P4_13713_37948683 | NC_021160.1    | Ca_kabuli_chr01 | 37948683                | CC                              | AA              | 1946741689               |
| SNP_P4_13715_37954400 | NC_021160.1    | Ca_kabuli_chr01 | 37954400                | CC                              | TT              | 1946741691               |
| SNP_P4_13716_37954519 | NC_021160.1    | Ca_kabuli_chr01 | 37954519                | TT                              | AA              | 1946741693               |
| SNP_P4_13717_37954566 | NC_021160.1    | Ca_kabuli_chr01 | 37954566                | CC                              | TT              | 1946741695               |
| SNP_P4_13718_37954586 | NC_021160.1    | Ca_kabuli_chr01 | 37954586                | AA                              | GG              | 1946741697               |
| SNP_P4_13719_37954768 | NC_021160.1    | Ca_kabuli_chr01 | 37954768                | TT                              | CC              | 1946741699               |
| SNP_P4_13720_37954785 | NC_021160.1    | Ca_kabuli_chr01 | 37954785                | TT                              | AA              | 1946741701               |
| SNP_P4_13721_37954817 | NC_021160.1    | Ca_kabuli_chr01 | 37954817                | AA                              | CC              | 1946741703               |
| SNP_P4_13722_37954824 | NC_021160.1    | Ca_kabuli_chr01 | 37954824                | TT                              | AA              | 1946741705               |
| SNP_P4_13723_37959963 | NC_021160.1    | Ca_kabuli_chr01 | 37959963                | AA                              | TT              | 1946741707               |
| SNP_P4_13724_37966820 | NC_021160.1    | Ca_kabuli_chr01 | 37966820                | TT                              | CC              | 1946741709               |
| SNP_P4_13725_37966824 | NC_021160.1    | Ca_kabuli_chr01 | 37966824                | TT                              | CC              | 1946741711               |
| SNP_P4_13726_37966837 | NC_021160.1    | Ca_kabuli_chr01 | 37966837                | CC                              | TT              | 1946741713               |
| SNP_P4_13728_37993040 | NC_021160.1    | Ca_kabuli_chr01 | 37993040                | TT                              | CC              | 1946741715               |
| SNP_P4_13729_37993289 | NC_021160.1    | Ca_kabuli_chr01 | 37993289                | TT                              | CC              | 1946741717               |
| SNP_P4_13730_37993340 | NC_021160.1    | Ca_kabuli_chr01 | 37993340                | GG                              | AA              | 1946741719               |
| SNP_P4_13731_37993382 | NC_021160.1    | Ca_kabuli_chr01 | 37993382                | CC                              | TT              | 1946741721               |
| SNP_P4_13732_37993407 | NC_021160.1    | Ca_kabuli_chr01 | 37993407                | AA                              | GG              | 1946741723               |
| SNP_P4_13733_37993447 | NC_021160.1    | Ca_kabuli_chr01 | 37993447                | CC                              | TT              | 1946741725               |
| SNP_P4_13734_37993539 | NC_021160.1    | Ca_kabuli_chr01 | 37993539                | AA                              | GG              | 1946741727               |
| SNP_P4_13735_37993614 | NC_021160.1    | Ca_kabuli_chr01 | 37993614                | CC                              | TT              | 1946741729               |
| SNP_P4_13736_37993653 | NC_021160.1    | Ca_kabuli_chr01 | 37993653                | GG                              | AA              | 1946741731               |
| SNP_P4_13737_37993658 | NC_021160.1    | Ca_kabuli_chr01 | 37993658                | CC                              | TT              | 1946741733               |
| SNP_P4_13740_37993864 | NC_021160.1    | Ca_kabuli_chr01 | 37993864                | AA                              | CC              | 1946741734               |
| SNP_P4_13741_38022056 | NC_021160.1    | Ca_kabuli_chr01 | 38022056                | TT                              | CC              | 1946741736               |
| SNP_P4_13742_38022106 | NC_021160.1    | Ca_kabuli_chr01 | 38022106                | AA                              | GG              | 1946741738               |
| SNP_P4_13743_38022128 | NC_021160.1    | Ca_kabuli_chr01 | 38022128                | AA                              | GG              | 1946741740               |
| SNP_P4_13744_38022160 | NC_021160.1    | Ca_kabuli_chr01 | 38022160                | GG                              | AA              | 1946741742               |
| SNP_P4_13745_38022212 | NC_021160.1    | Ca_kabuli_chr01 | 38022212                | GG                              | AA              | 1946741744               |
| SNP_P4_13746_38022517 | NC_021160.1    | Ca_kabuli_chr01 | 38022517                | CC                              | TT              | 1946741746               |
| SNP_P4_13747_38022519 | NC_021160.1    | Ca_kabuli_chr01 | 38022519                | GG                              | AA              | 1946741748               |
| SNP_P4_13748_38022535 | NC_021160.1    | Ca_kabuli_chr01 | 38022535                | GG                              | TT              | 1946741750               |
| SNP_P4_13749_38022536 | NC_021160.1    | Ca_kabuli_chr01 | 38022536                | CC                              | GG              | 1946741752               |
| SNP_P4_13750_38022542 | NC_021160.1    | Ca_kabuli_chr01 | 38022542                | CC                              | AA              | 1946741753               |
| SNP_P4_13751_38022554 | NC_021160.1    | Ca_kabuli_chr01 | 38022554                | CC                              | TT              | 1946741755               |
| SNP_P4_13752_38024662 | NC_021160.1    | Ca_kabuli_chr01 | 38024662                | GG                              | CC              | 1946741757               |
| SNP_P4_13753_38024725 | NC_021160.1    | Ca_kabuli_chr01 | 38024725                | AA                              | CC              | 1946741759               |

| SNPs IDs              | Chromosome IDs | Chromosomes     | Physical positions (bp) | CDC Frontier (Reference genome) | (ILWC46 & LPNB) | NCBI SNPdb Accession IDs |
|-----------------------|----------------|-----------------|-------------------------|---------------------------------|-----------------|--------------------------|
| SNP_P4_13754_38025039 | NC_021160.1    | Ca_kabuli_chr01 | 38025039                | GG                              | TT              | 1946741761               |
| SNP_P4_13755_38043025 | NC_021160.1    | Ca_kabuli_chr01 | 38043025                | TT                              | GG              | 1946741763               |
| SNP_P4_13756_38043029 | NC_021160.1    | Ca_kabuli_chr01 | 38043029                | TT                              | GG              | 1946741765               |
| SNP_P4_13758_38060296 | NC_021160.1    | Ca_kabuli_chr01 | 38060296                | CC                              | TT              | 1946741767               |
| SNP_P4_13759_38060299 | NC_021160.1    | Ca_kabuli_chr01 | 38060299                | CC                              | TT              | 1946741769               |
| SNP_P4_13760_38060323 | NC_021160.1    | Ca_kabuli_chr01 | 38060323                | AA                              | GG              | 1946741770               |
| SNP_P4_13761_38063111 | NC_021160.1    | Ca_kabuli_chr01 | 38063111                | GG                              | CC              | 1946741772               |
| SNP_P4_13762_38063113 | NC_021160.1    | Ca_kabuli_chr01 | 38063113                | AA                              | GG              | 1946741774               |
| SNP_P4_13763_38063138 | NC_021160.1    | Ca_kabuli_chr01 | 38063138                | CC                              | AA              | 1946741776               |
| SNP_P4_13764_38063189 | NC_021160.1    | Ca_kabuli_chr01 | 38063189                | CC                              | TT              | 1946741778               |
| SNP_P4_13765_38063361 | NC_021160.1    | Ca_kabuli_chr01 | 38063361                | AA                              | GG              | 1946741780               |
| SNP_P4_13767_38065005 | NC_021160.1    | Ca_kabuli_chr01 | 38065005                | GG                              | AA              | 1946741782               |
| SNP_P4_13768_38065060 | NC_021160.1    | Ca_kabuli_chr01 | 38065060                | GG                              | AA              | 1946741784               |
| SNP_P4_13769_38065284 | NC_021160.1    | Ca_kabuli_chr01 | 38065284                | TT                              | CC              | 1946741786               |
| SNP_P4_13770_38065291 | NC_021160.1    | Ca_kabuli_chr01 | 38065291                | GG                              | TT              | 1946741788               |
| SNP_P4_13771_38065884 | NC_021160.1    | Ca_kabuli_chr01 | 38065884                | AA                              | GG              | 1946741789               |
| SNP_P4_13772_38066127 | NC_021160.1    | Ca_kabuli_chr01 | 38066127                | CC                              | GG              | 1946741792               |
| SNP_P4_13773_38066224 | NC_021160.1    | Ca_kabuli_chr01 | 38066224                | GG                              | AA              | 1946741794               |
| SNP_P4_13774_38066236 | NC_021160.1    | Ca_kabuli_chr01 | 38066236                | CC                              | GG              | 1946741796               |
| SNP_P4_13775_38066629 | NC_021160.1    | Ca_kabuli_chr01 | 38066629                | TT                              | GG              | 1946741798               |
| SNP_P4_13776_38066745 | NC_021160.1    | Ca_kabuli_chr01 | 38066745                | TT                              | CC              | 1946741800               |
| SNP_P4_13778_38067177 | NC_021160.1    | Ca_kabuli_chr01 | 38067177                | AA                              | TT              | 1946741801               |
| SNP_P4_13779_38067288 | NC_021160.1    | Ca_kabuli_chr01 | 38067288                | AA                              | CC              | 1946741803               |
| SNP_P4_13780_38067743 | NC_021160.1    | Ca_kabuli_chr01 | 38067743                | GG                              | AA              | 1946741805               |
| SNP_P4_13781_38069516 | NC_021160.1    | Ca_kabuli_chr01 | 38069516                | GG                              | AA              | 1946741807               |
| SNP_P4_13782_38069719 | NC_021160.1    | Ca_kabuli_chr01 | 38069719                | GG                              | TT              | 1946741809               |
| SNP_P4_13783_38069896 | NC_021160.1    | Ca_kabuli_chr01 | 38069896                | CC                              | TT              | 1946741811               |
| SNP_P4_13784_38069917 | NC_021160.1    | Ca_kabuli_chr01 | 38069917                | AA                              | GG              | 1946741813               |
| SNP_P4_13785_38070062 | NC_021160.1    | Ca_kabuli_chr01 | 38070062                | AA                              | TT              | 1946741815               |
| SNP_P4_13786_38070572 | NC_021160.1    | Ca_kabuli_chr01 | 38070572                | CC                              | GG              | 1946741816               |
| SNP_P4_13787_38070584 | NC_021160.1    | Ca_kabuli_chr01 | 38070584                | TT                              | GG              | 1946741818               |
| SNP_P4_13789_38070843 | NC_021160.1    | Ca_kabuli_chr01 | 38070843                | TT                              | CC              | 1946741820               |
| SNP_P4_13792_38071652 | NC_021160.1    | Ca_kabuli_chr01 | 38071652                | TT                              | CC              | 1946741822               |
| SNP_P4_13793_38071897 | NC_021160.1    | Ca_kabuli_chr01 | 38071897                | GG                              | AA              | 1946741824               |
| SNP_P4_13794_38089084 | NC_021160.1    | Ca_kabuli_chr01 | 38089084                | AA                              | GG              | 1946741826               |
| SNP_P4_13795_38090291 | NC_021160.1    | Ca_kabuli_chr01 | 38090291                | AA                              | CC              | 1946741828               |
| SNP_P4_13796_38090340 | NC_021160.1    | Ca_kabuli_chr01 | 38090340                | TT                              | CC              | 1946741830               |
| SNP_P4_13797_38090589 | NC_021160.1    | Ca_kabuli_chr01 | 38090589                | TT                              | CC              | 1946741832               |
| SNP_P4_13800_38104534 | NC_021160.1    | Ca_kabuli_chr01 | 38104534                | TT                              | AA              | 1946741834               |
| SNP_P4_13801_38104951 | NC_021160.1    | Ca_kabuli_chr01 | 38104951                | CC                              | GG              | 1946741836               |
| SNP_P4_13802_38105170 | NC_021160.1    | Ca_kabuli_chr01 | 38105170                | GG                              | AA              | 1946741838               |
| SNP_P4_13803_38105220 | NC_021160.1    | Ca_kabuli_chr01 | 38105220                | TT                              | CC              | 1946741840               |



| SNPs IDs              | Chromosome IDs | Chromosomes     | Physical positions (bp) | CDC Frontier (Reference genome) | (ILWC46 & LPNB) | NCBI SNPdb Accession IDs |
|-----------------------|----------------|-----------------|-------------------------|---------------------------------|-----------------|--------------------------|
| SNP_P4_13804_38105369 | NC_021160.1    | Ca_kabuli_chr01 | 38105369                | AA                              | GG              | 1946741842               |
| SNP_P4_13805_38105410 | NC_021160.1    | Ca_kabuli_chr01 | 38105410                | AA                              | GG              | 1946741843               |
| SNP_P4_13806_38105429 | NC_021160.1    | Ca_kabuli_chr01 | 38105429                | CC                              | TT              | 1946741845               |
| SNP_P4_13807_38105493 | NC_021160.1    | Ca_kabuli_chr01 | 38105493                | CC                              | GG              | 1946741847               |
| SNP_P4_13808_38105718 | NC_021160.1    | Ca_kabuli_chr01 | 38105718                | CC                              | GG              | 1946741849               |
| SNP_P4_13809_38105901 | NC_021160.1    | Ca_kabuli_chr01 | 38105901                | TT                              | GG              | 1946741851               |
| SNP_P4_13810_38105937 | NC_021160.1    | Ca_kabuli_chr01 | 38105937                | TT                              | GG              | 1946741853               |
| SNP_P4_13811_38105996 | NC_021160.1    | Ca_kabuli_chr01 | 38105996                | GG                              | AA              | 1946741855               |
| SNP_P4_13813_38106104 | NC_021160.1    | Ca_kabuli_chr01 | 38106104                | CC                              | AA              | 1946741857               |
| SNP_P4_13814_38106513 | NC_021160.1    | Ca_kabuli_chr01 | 38106513                | TT                              | CC              | 1946741859               |
| SNP_P4_13815_38107249 | NC_021160.1    | Ca_kabuli_chr01 | 38107249                | GG                              | AA              | 1946741861               |
| SNP_P4_13816_38107320 | NC_021160.1    | Ca_kabuli_chr01 | 38107320                | AA                              | GG              | 1946741863               |
| SNP_P4_13817_38107588 | NC_021160.1    | Ca_kabuli_chr01 | 38107588                | GG                              | AA              | 1946741865               |
| SNP_P4_13818_38107594 | NC_021160.1    | Ca_kabuli_chr01 | 38107594                | TT                              | AA              | 1946741867               |
| SNP_P4_13820_38108641 | NC_021160.1    | Ca_kabuli_chr01 | 38108641                | AA                              | GG              | 1946741869               |
| SNP_P4_13821_38108651 | NC_021160.1    | Ca_kabuli_chr01 | 38108651                | AA                              | CC              | 1946741871               |
| SNP_P4_13822_38108662 | NC_021160.1    | Ca_kabuli_chr01 | 38108662                | GG                              | TT              | 1946741873               |
| SNP_P4_13823_38108672 | NC_021160.1    | Ca_kabuli_chr01 | 38108672                | GG                              | TT              | 1946741875               |
| SNP_P4_13824_38108908 | NC_021160.1    | Ca_kabuli_chr01 | 38108908                | AA                              | GG              | 1946741877               |
| SNP_P4_13825_38109129 | NC_021160.1    | Ca_kabuli_chr01 | 38109129                | GG                              | CC              | 1946741878               |
| SNP_P4_13826_38111194 | NC_021160.1    | Ca_kabuli_chr01 | 38111194                | GG                              | TT              | 1946741880               |
| SNP_P4_13827_38112722 | NC_021160.1    | Ca_kabuli_chr01 | 38112722                | AA                              | GG              | 1946741882               |
| SNP_P4_13828_38113610 | NC_021160.1    | Ca_kabuli_chr01 | 38113610                | CC                              | GG              | 1946741884               |
| SNP_P4_13829_38113681 | NC_021160.1    | Ca_kabuli_chr01 | 38113681                | AA                              | GG              | 1946741886               |
| SNP_P4_13830_38114909 | NC_021160.1    | Ca_kabuli_chr01 | 38114909                | TT                              | GG              | 1946741888               |
| SNP_P4_13831_38115526 | NC_021160.1    | Ca_kabuli_chr01 | 38115526                | AA                              | GG              | 1946741890               |
| SNP_P4_13832_38115553 | NC_021160.1    | Ca_kabuli_chr01 | 38115553                | TT                              | GG              | 1946741892               |
| SNP_P4_13833_38115780 | NC_021160.1    | Ca_kabuli_chr01 | 38115780                | CC                              | TT              | 1946741894               |
| SNP_P4_13834_38115814 | NC_021160.1    | Ca_kabuli_chr01 | 38115814                | GG                              | AA              | 1946741896               |
| SNP_P4_13835_38115816 | NC_021160.1    | Ca_kabuli_chr01 | 38115816                | CC                              | GG              | 1946741898               |
| SNP_P4_13836_38115864 | NC_021160.1    | Ca_kabuli_chr01 | 38115864                | CC                              | TT              | 1946741900               |
| SNP_P4_13837_38116430 | NC_021160.1    | Ca_kabuli_chr01 | 38116430                | CC                              | TT              | 1946741901               |
| SNP_P4_13838_38116437 | NC_021160.1    | Ca_kabuli_chr01 | 38116437                | GG                              | AA              | 1946741903               |
| SNP_P4_13839_38116457 | NC_021160.1    | Ca_kabuli_chr01 | 38116457                | TT                              | GG              | 1946741905               |
| SNP_P4_13840_38116458 | NC_021160.1    | Ca_kabuli_chr01 | 38116458                | CC                              | TT              | 1946741907               |
| SNP_P4_13841_38116465 | NC_021160.1    | Ca_kabuli_chr01 | 38116465                | TT                              | GG              | 1946741909               |
| SNP_P4_13842_38116646 | NC_021160.1    | Ca_kabuli_chr01 | 38116646                | CC                              | AA              | 1946741911               |
| SNP_P4_13843_38116751 | NC_021160.1    | Ca_kabuli_chr01 | 38116751                | GG                              | AA              | 1946741913               |
| SNP_P4_13844_38116753 | NC_021160.1    | Ca_kabuli_chr01 | 38116753                | TT                              | CC              | 1946741915               |
| SNP_P4_13845_38116757 | NC_021160.1    | Ca_kabuli_chr01 | 38116757                | AA                              | GG              | 1946741917               |
| SNP_P4_13846_38116789 | NC_021160.1    | Ca_kabuli_chr01 | 38116789                | GG                              | TT              | 1946741919               |
| SNP_P4_13847_38123325 | NC_021160.1    | Ca_kabuli_chr01 | 38123325                | CC                              | TT              | 1946741920               |

| SNPs IDs              | Chromosome IDs | Chromosomes     | Physical positions (bp) | CDC Frontier (Reference genome) | (ILWC46 & LPNB) | NCBI SNPdb Accession IDs |
|-----------------------|----------------|-----------------|-------------------------|---------------------------------|-----------------|--------------------------|
| SNP_P4_13848_38124543 | NC_021160.1    | Ca_kabuli_chr01 | 38124543                | GG                              | AA              | 1946741922               |
| SNP_P4_13849_38124547 | NC_021160.1    | Ca_kabuli_chr01 | 38124547                | TT                              | GG              | 1946741924               |
| SNP_P4_13850_38125169 | NC_021160.1    | Ca_kabuli_chr01 | 38125169                | GG                              | CC              | 1946741926               |
| SNP_P4_13851_38125229 | NC_021160.1    | Ca_kabuli_chr01 | 38125229                | CC                              | GG              | 1946741928               |
| SNP_P4_13852_38125655 | NC_021160.1    | Ca_kabuli_chr01 | 38125655                | TT                              | CC              | 1946741930               |
| SNP_P4_13853_38125700 | NC_021160.1    | Ca_kabuli_chr01 | 38125700                | AA                              | GG              | 1946741932               |
| SNP_P4_13854_38125855 | NC_021160.1    | Ca_kabuli_chr01 | 38125855                | AA                              | GG              | 1946741934               |
| SNP_P4_13855_38125868 | NC_021160.1    | Ca_kabuli_chr01 | 38125868                | TT                              | CC              | 1946741936               |
| SNP_P4_13856_38126174 | NC_021160.1    | Ca_kabuli_chr01 | 38126174                | CC                              | GG              | 1946741938               |
| SNP_P4_13857_38126183 | NC_021160.1    | Ca_kabuli_chr01 | 38126183                | CC                              | TT              | 1946741940               |
| SNP_P4_13858_38126506 | NC_021160.1    | Ca_kabuli_chr01 | 38126506                | GG                              | AA              | 1946741942               |
| SNP_P4_13859_38126753 | NC_021160.1    | Ca_kabuli_chr01 | 38126753                | AA                              | GG              | 1946741944               |
| SNP_P4_13860_38127001 | NC_021160.1    | Ca_kabuli_chr01 | 38127001                | TT                              | CC              | 1946741946               |
| SNP_P4_13861_38127026 | NC_021160.1    | Ca_kabuli_chr01 | 38127026                | CC                              | TT              | 1946741948               |
| SNP_P4_13862_38127199 | NC_021160.1    | Ca_kabuli_chr01 | 38127199                | CC                              | AA              | 1946741950               |
| SNP_P4_13863_38127229 | NC_021160.1    | Ca_kabuli_chr01 | 38127229                | GG                              | AA              | 1946741952               |
| SNP_P4_13864_38127278 | NC_021160.1    | Ca_kabuli_chr01 | 38127278                | GG                              | AA              | 1946741954               |
| SNP_P4_13865_38127831 | NC_021160.1    | Ca_kabuli_chr01 | 38127831                | GG                              | CC              | 1946741956               |
| SNP_P4_13866_38127832 | NC_021160.1    | Ca_kabuli_chr01 | 38127832                | AA                              | CC              | 1946741958               |
| SNP_P4_13867_38128184 | NC_021160.1    | Ca_kabuli_chr01 | 38128184                | TT                              | GG              | 1946741960               |
| SNP_P4_13868_38130221 | NC_021160.1    | Ca_kabuli_chr01 | 38130221                | GG                              | AA              | 1946741962               |
| SNP_P4_13870_38130568 | NC_021160.1    | Ca_kabuli_chr01 | 38130568                | GG                              | TT              | 1946741964               |
| SNP_P4_13871_38130573 | NC_021160.1    | Ca_kabuli_chr01 | 38130573                | TT                              | CC              | 1946741966               |
| SNP_P4_13872_38130613 | NC_021160.1    | Ca_kabuli_chr01 | 38130613                | AA                              | CC              | 1946741968               |
| SNP_P4_13873_38131393 | NC_021160.1    | Ca_kabuli_chr01 | 38131393                | TT                              | CC              | 1946741970               |
| SNP_P4_13874_38131484 | NC_021160.1    | Ca_kabuli_chr01 | 38131484                | AA                              | GG              | 1946741972               |
| SNP_P4_13875_38131511 | NC_021160.1    | Ca_kabuli_chr01 | 38131511                | CC                              | TT              | 1946741974               |
| SNP_P4_13876_38131535 | NC_021160.1    | Ca_kabuli_chr01 | 38131535                | GG                              | AA              | 1946741976               |
| SNP_P4_13878_38131615 | NC_021160.1    | Ca_kabuli_chr01 | 38131615                | TT                              | AA              | 1946741978               |
| SNP_P4_13879_38131670 | NC_021160.1    | Ca_kabuli_chr01 | 38131670                | GG                              | CC              | 1946741980               |
| SNP_P4_13880_38131844 | NC_021160.1    | Ca_kabuli_chr01 | 38131844                | CC                              | GG              | 1946741982               |
| SNP_P4_13881_38131845 | NC_021160.1    | Ca_kabuli_chr01 | 38131845                | TT                              | AA              | 1946741984               |
| SNP_P4_13882_38132652 | NC_021160.1    | Ca_kabuli_chr01 | 38132652                | TT                              | CC              | 1946741986               |
| SNP_P4_13883_38132765 | NC_021160.1    | Ca_kabuli_chr01 | 38132765                | GG                              | AA              | 1946741988               |
| SNP_P4_13884_38133153 | NC_021160.1    | Ca_kabuli_chr01 | 38133153                | AA                              | CC              | 1946741990               |
| SNP_P4_13885_38133192 | NC_021160.1    | Ca_kabuli_chr01 | 38133192                | AA                              | GG              | 1946741992               |
| SNP_P4_13886_38133237 | NC_021160.1    | Ca_kabuli_chr01 | 38133237                | TT                              | CC              | 1946741994               |
| SNP_P4_13887_38133551 | NC_021160.1    | Ca_kabuli_chr01 | 38133551                | AA                              | CC              | 1946741996               |
| SNP_P4_13888_38133763 | NC_021160.1    | Ca_kabuli_chr01 | 38133763                | TT                              | CC              | 1946741998               |
| SNP_P4_13889_38134091 | NC_021160.1    | Ca_kabuli_chr01 | 38134091                | GG                              | TT              | 1946742000               |
| SNP_P4_13890_38134339 | NC_021160.1    | Ca_kabuli_chr01 | 38134339                | AA                              | GG              | 1946742002               |
| SNP_P4_13891_38135937 | NC_021160.1    | Ca_kabuli_chr01 | 38135937                | GG                              | TT              | 1946742004               |

| SNPs IDs              | Chromosome IDs | Chromosomes     | Physical positions (bp) | CDC Frontier (Reference genome) | (ILWC46 & LPNB) | NCBI SNPdb Accession IDs |
|-----------------------|----------------|-----------------|-------------------------|---------------------------------|-----------------|--------------------------|
| SNP_P4_13892_38139536 | NC_021160.1    | Ca_kabuli_chr01 | 38139536                | AA                              | GG              | 1946742006               |
| SNP_P4_13893_38139564 | NC_021160.1    | Ca_kabuli_chr01 | 38139564                | GG                              | AA              | 1946742008               |
| SNP_P4_13894_38141431 | NC_021160.1    | Ca_kabuli_chr01 | 38141431                | GG                              | AA              | 1946742010               |
| SNP_P4_13896_38141856 | NC_021160.1    | Ca_kabuli_chr01 | 38141856                | TT                              | AA              | 1946742012               |
| SNP_P4_13897_38142477 | NC_021160.1    | Ca_kabuli_chr01 | 38142477                | CC                              | AA              | 1946742014               |
| SNP_P4_13898_38142479 | NC_021160.1    | Ca_kabuli_chr01 | 38142479                | AA                              | GG              | 1946742016               |
| SNP_P4_13899_38142564 | NC_021160.1    | Ca_kabuli_chr01 | 38142564                | CC                              | AA              | 1946742018               |
| SNP_P4_13900_38142567 | NC_021160.1    | Ca_kabuli_chr01 | 38142567                | AA                              | TT              | 1946742020               |
| SNP_P4_13901_38142751 | NC_021160.1    | Ca_kabuli_chr01 | 38142751                | GG                              | AA              | 1946742022               |
| SNP_P4_13902_38143397 | NC_021160.1    | Ca_kabuli_chr01 | 38143397                | GG                              | AA              | 1946742024               |
| SNP_P4_13903_38143625 | NC_021160.1    | Ca_kabuli_chr01 | 38143625                | TT                              | CC              | 1946742026               |
| SNP_P4_13904_38143745 | NC_021160.1    | Ca_kabuli_chr01 | 38143745                | AA                              | GG              | 1946742028               |
| SNP_P4_13906_38143897 | NC_021160.1    | Ca_kabuli_chr01 | 38143897                | TT                              | CC              | 1946742030               |
| SNP_P4_13907_38143938 | NC_021160.1    | Ca_kabuli_chr01 | 38143938                | AA                              | GG              | 1946742032               |
| SNP_P4_13909_38147925 | NC_021160.1    | Ca_kabuli_chr01 | 38147925                | GG                              | AA              | 1946742034               |
| SNP_P4_13910_38148057 | NC_021160.1    | Ca_kabuli_chr01 | 38148057                | AA                              | TT              | 1946742036               |
| SNP_P4_13912_38148248 | NC_021160.1    | Ca_kabuli_chr01 | 38148248                | TT                              | CC              | 1946742038               |
| SNP_P4_13913_38148287 | NC_021160.1    | Ca_kabuli_chr01 | 38148287                | TT                              | GG              | 1946742040               |
| SNP_P4_13914_38148421 | NC_021160.1    | Ca_kabuli_chr01 | 38148421                | CC                              | TT              | 1946742042               |
| SNP_P4_13915_38148541 | NC_021160.1    | Ca_kabuli_chr01 | 38148541                | AA                              | TT              | 1946742044               |
| SNP_P4_13917_38150454 | NC_021160.1    | Ca_kabuli_chr01 | 38150454                | GG                              | AA              | 1946742046               |
| SNP_P4_13918_38150719 | NC_021160.1    | Ca_kabuli_chr01 | 38150719                | TT                              | CC              | 1946742048               |
| SNP_P4_13919_38150943 | NC_021160.1    | Ca_kabuli_chr01 | 38150943                | AA                              | CC              | 1946742050               |
| SNP_P4_13920_38161637 | NC_021160.1    | Ca_kabuli_chr01 | 38161637                | CC                              | TT              | 1946742052               |
| SNP_P4_13921_38169314 | NC_021160.1    | Ca_kabuli_chr01 | 38169314                | GG                              | AA              | 1946742054               |
| SNP_P4_13923_38177665 | NC_021160.1    | Ca_kabuli_chr01 | 38177665                | CC                              | TT              | 1946742056               |
| SNP_P4_13924_38177701 | NC_021160.1    | Ca_kabuli_chr01 | 38177701                | AA                              | CC              | 1946742058               |
| SNP_P4_13925_38177771 | NC_021160.1    | Ca_kabuli_chr01 | 38177771                | TT                              | AA              | 1946742060               |
| SNP_P4_13926_38177793 | NC_021160.1    | Ca_kabuli_chr01 | 38177793                | GG                              | AA              | 1946742062               |
| SNP_P4_13927_38177851 | NC_021160.1    | Ca_kabuli_chr01 | 38177851                | CC                              | TT              | 1946742064               |
| SNP_P4_13928_38177859 | NC_021160.1    | Ca_kabuli_chr01 | 38177859                | AA                              | GG              | 1946742066               |
| SNP_P4_13929_38178374 | NC_021160.1    | Ca_kabuli_chr01 | 38178374                | TT                              | AA              | 1946742068               |
| SNP_P4_13930_38179741 | NC_021160.1    | Ca_kabuli_chr01 | 38179741                | TT                              | CC              | 1946742070               |
| SNP_P4_13931_38179770 | NC_021160.1    | Ca_kabuli_chr01 | 38179770                | AA                              | GG              | 1946742072               |
| SNP_P4_13932_38179886 | NC_021160.1    | Ca_kabuli_chr01 | 38179886                | TT                              | CC              | 1946742074               |
| SNP_P4_13933_38179898 | NC_021160.1    | Ca_kabuli_chr01 | 38179898                | GG                              | AA              | 1946742076               |
| SNP_P4_13934_38180132 | NC_021160.1    | Ca_kabuli_chr01 | 38180132                | TT                              | CC              | 1946742078               |
| SNP_P4_13935_38180189 | NC_021160.1    | Ca_kabuli_chr01 | 38180189                | CC                              | TT              | 1946742080               |
| SNP_P4_13936_38180877 | NC_021160.1    | Ca_kabuli_chr01 | 38180877                | TT                              | CC              | 1946742082               |
| SNP_P4_13937_38182506 | NC_021160.1    | Ca_kabuli_chr01 | 38182506                | TT                              | AA              | 1946742084               |
| SNP_P4_13938_38182743 | NC_021160.1    | Ca_kabuli_chr01 | 38182743                | GG                              | AA              | 1946742086               |
| SNP_P4_13939_38182752 | NC_021160.1    | Ca_kabuli_chr01 | 38182752                | GG                              | AA              | 1946742088               |

| SNPs IDs              | Chromosome IDs | Chromosomes     | Physical positions (bp) | CDC Frontier (Reference genome) | (ILWC46 & LPNB) | NCBI SNPdb Accession IDs |
|-----------------------|----------------|-----------------|-------------------------|---------------------------------|-----------------|--------------------------|
| SNP_P4_13940_38184203 | NC_021160.1    | Ca_kabuli_chr01 | 38184203                | TT                              | GG              | 1946742090               |
| SNP_P4_13941_38184232 | NC_021160.1    | Ca_kabuli_chr01 | 38184232                | AA                              | GG              | 1946742092               |
| SNP_P4_13942_38184254 | NC_021160.1    | Ca_kabuli_chr01 | 38184254                | TT                              | CC              | 1946742094               |
| SNP_P4_13944_38184336 | NC_021160.1    | Ca_kabuli_chr01 | 38184336                | TT                              | AA              | 1946742096               |
| SNP_P4_13945_38184730 | NC_021160.1    | Ca_kabuli_chr01 | 38184730                | CC                              | TT              | 1946742098               |
| SNP_P4_13947_38184791 | NC_021160.1    | Ca_kabuli_chr01 | 38184791                | GG                              | AA              | 1946742100               |
| SNP_P4_13948_38184987 | NC_021160.1    | Ca_kabuli_chr01 | 38184987                | AA                              | TT              | 1946742102               |
| SNP_P4_13950_38186180 | NC_021160.1    | Ca_kabuli_chr01 | 38186180                | TT                              | CC              | 1946742104               |
| SNP_P4_13951_38186183 | NC_021160.1    | Ca_kabuli_chr01 | 38186183                | TT                              | AA              | 1946742106               |
| SNP_P4_13952_38186569 | NC_021160.1    | Ca_kabuli_chr01 | 38186569                | CC                              | TT              | 1946742108               |
| SNP_P4_13953_38186771 | NC_021160.1    | Ca_kabuli_chr01 | 38186771                | AA                              | GG              | 1946742110               |
| SNP_P4_13954_38188804 | NC_021160.1    | Ca_kabuli_chr01 | 38188804                | TT                              | CC              | 1946742112               |
| SNP_P4_13955_38189263 | NC_021160.1    | Ca_kabuli_chr01 | 38189263                | TT                              | CC              | 1946742114               |
| SNP_P4_13956_38189317 | NC_021160.1    | Ca_kabuli_chr01 | 38189317                | GG                              | TT              | 1946742116               |
| SNP_P4_13957_38190699 | NC_021160.1    | Ca_kabuli_chr01 | 38190699                | AA                              | GG              | 1946742118               |
| SNP_P4_13958_38191098 | NC_021160.1    | Ca_kabuli_chr01 | 38191098                | GG                              | TT              | 1946742120               |
| SNP_P4_13959_38191138 | NC_021160.1    | Ca_kabuli_chr01 | 38191138                | GG                              | CC              | 1946742122               |
| SNP_P4_13960_38191354 | NC_021160.1    | Ca_kabuli_chr01 | 38191354                | TT                              | CC              | 1946742123               |
| SNP_P4_13961_38192524 | NC_021160.1    | Ca_kabuli_chr01 | 38192524                | AA                              | GG              | 1946742125               |
| SNP_P4_13962_38192562 | NC_021160.1    | Ca_kabuli_chr01 | 38192562                | CC                              | TT              | 1946742127               |
| SNP_P4_13963_38192702 | NC_021160.1    | Ca_kabuli_chr01 | 38192702                | AA                              | GG              | 1946742129               |
| SNP_P4_13965_38194133 | NC_021160.1    | Ca_kabuli_chr01 | 38194133                | GG                              | AA              | 1946742131               |
| SNP_P4_13966_38194323 | NC_021160.1    | Ca_kabuli_chr01 | 38194323                | AA                              | TT              | 1946742133               |
| SNP_P4_13967_38195508 | NC_021160.1    | Ca_kabuli_chr01 | 38195508                | CC                              | AA              | 1946742135               |
| SNP_P4_13969_38196249 | NC_021160.1    | Ca_kabuli_chr01 | 38196249                | GG                              | AA              | 1946742138               |
| SNP_P4_13971_38196298 | NC_021160.1    | Ca_kabuli_chr01 | 38196298                | CC                              | AA              | 1946742140               |
| SNP_P4_13972_38201503 | NC_021160.1    | Ca_kabuli_chr01 | 38201503                | TT                              | CC              | 1946742142               |
| SNP_P4_13973_38201635 | NC_021160.1    | Ca_kabuli_chr01 | 38201635                | TT                              | CC              | 1946742144               |
| SNP_P4_13974_38201951 | NC_021160.1    | Ca_kabuli_chr01 | 38201951                | AA                              | GG              | 1946742146               |
| SNP_P4_13975_38201970 | NC_021160.1    | Ca_kabuli_chr01 | 38201970                | TT                              | AA              | 1946742148               |
| SNP_P4_13976_38201975 | NC_021160.1    | Ca_kabuli_chr01 | 38201975                | GG                              | AA              | 1946742150               |
| SNP_P4_13977_38201988 | NC_021160.1    | Ca_kabuli_chr01 | 38201988                | TT                              | CC              | 1946742152               |
| SNP_P4_13978_38202077 | NC_021160.1    | Ca_kabuli_chr01 | 38202077                | TT                              | CC              | 1946742154               |
| SNP_P4_13979_38203110 | NC_021160.1    | Ca_kabuli_chr01 | 38203110                | AA                              | GG              | 1946742156               |
| SNP_P4_13980_38203391 | NC_021160.1    | Ca_kabuli_chr01 | 38203391                | CC                              | GG              | 1946742158               |
| SNP_P4_13981_38203449 | NC_021160.1    | Ca_kabuli_chr01 | 38203449                | CC                              | AA              | 1946742160               |
| SNP_P4_13982_38214881 | NC_021160.1    | Ca_kabuli_chr01 | 38214881                | CC                              | GG              | 1946742162               |
| SNP_P4_13983_38214884 | NC_021160.1    | Ca_kabuli_chr01 | 38214884                | AA                              | TT              | 1946742164               |
| SNP_P4_13984_38214944 | NC_021160.1    | Ca_kabuli_chr01 | 38214944                | GG                              | AA              | 1946742166               |
| SNP_P4_13985_38215903 | NC_021160.1    | Ca_kabuli_chr01 | 38215903                | TT                              | CC              | 1946742168               |
| SNP_P4_13986_38215928 | NC_021160.1    | Ca_kabuli_chr01 | 38215928                | TT                              | CC              | 1946742170               |
| SNP_P4_13987_38217481 | NC_021160.1    | Ca_kabuli_chr01 | 38217481                | AA                              | TT              | 1946742172               |

| SNPs IDs              | Chromosome IDs | Chromosomes     | Physical positions (bp) | CDC Frontier (Reference genome) | (ILWC46 & LPNB) | NCBI SNPdb Accession IDs |
|-----------------------|----------------|-----------------|-------------------------|---------------------------------|-----------------|--------------------------|
| SNP_P4_13989_38226172 | NC_021160.1    | Ca_kabuli_chr01 | 38226172                | TT                              | CC              | 1946742174               |
| SNP_P4_13990_38226178 | NC_021160.1    | Ca_kabuli_chr01 | 38226178                | TT                              | AA              | 1946742176               |
| SNP_P4_13991_38226400 | NC_021160.1    | Ca_kabuli_chr01 | 38226400                | CC                              | GG              | 1946742178               |
| SNP_P4_13992_38226440 | NC_021160.1    | Ca_kabuli_chr01 | 38226440                | AA                              | GG              | 1946742180               |
| SNP_P4_13993_38227095 | NC_021160.1    | Ca_kabuli_chr01 | 38227095                | GG                              | AA              | 1946742182               |
| SNP_P4_13995_38227463 | NC_021160.1    | Ca_kabuli_chr01 | 38227463                | CC                              | GG              | 1946742184               |
| SNP_P4_13996_38228160 | NC_021160.1    | Ca_kabuli_chr01 | 38228160                | TT                              | CC              | 1946742186               |
| SNP_P4_13997_38228452 | NC_021160.1    | Ca_kabuli_chr01 | 38228452                | TT                              | CC              | 1946742188               |
| SNP_P4_13998_38228604 | NC_021160.1    | Ca_kabuli_chr01 | 38228604                | GG                              | CC              | 1946742190               |
| SNP_P4_13999_38228612 | NC_021160.1    | Ca_kabuli_chr01 | 38228612                | GG                              | TT              | 1946742193               |
| SNP_P4_14000_38228784 | NC_021160.1    | Ca_kabuli_chr01 | 38228784                | CC                              | TT              | 1946742195               |
| SNP_P4_14001_38229144 | NC_021160.1    | Ca_kabuli_chr01 | 38229144                | CC                              | AA              | 1946742197               |
| SNP_P4_14002_38230861 | NC_021160.1    | Ca_kabuli_chr01 | 38230861                | AA                              | GG              | 1946742199               |
| SNP_P4_14003_38231189 | NC_021160.1    | Ca_kabuli_chr01 | 38231189                | CC                              | TT              | 1946742201               |
| SNP_P4_14004_38231263 | NC_021160.1    | Ca_kabuli_chr01 | 38231263                | AA                              | CC              | 1946742203               |
| SNP_P4_14005_38231478 | NC_021160.1    | Ca_kabuli_chr01 | 38231478                | AA                              | CC              | 1946742205               |
| SNP_P4_14006_38236290 | NC_021160.1    | Ca_kabuli_chr01 | 38236290                | TT                              | AA              | 1946742207               |
| SNP_P4_14007_38236292 | NC_021160.1    | Ca_kabuli_chr01 | 38236292                | GG                              | TT              | 1946742209               |
| SNP_P4_14008_38236315 | NC_021160.1    | Ca_kabuli_chr01 | 38236315                | CC                              | TT              | 1946742211               |
| SNP_P4_14010_38236560 | NC_021160.1    | Ca_kabuli_chr01 | 38236560                | TT                              | AA              | 1946742213               |
| SNP_P4_14011_38236572 | NC_021160.1    | Ca_kabuli_chr01 | 38236572                | TT                              | GG              | 1946742215               |
| SNP_P4_14012_38236639 | NC_021160.1    | Ca_kabuli_chr01 | 38236639                | TT                              | CC              | 1946742217               |
| SNP_P4_14013_38236654 | NC_021160.1    | Ca_kabuli_chr01 | 38236654                | TT                              | GG              | 1946742219               |
| SNP_P4_14014_38236675 | NC_021160.1    | Ca_kabuli_chr01 | 38236675                | AA                              | CC              | 1946742221               |
| SNP_P4_14015_38236681 | NC_021160.1    | Ca_kabuli_chr01 | 38236681                | GG                              | AA              | 1946742223               |
| SNP_P4_14016_38236853 | NC_021160.1    | Ca_kabuli_chr01 | 38236853                | CC                              | AA              | 1946742225               |
| SNP_P4_14017_38236863 | NC_021160.1    | Ca_kabuli_chr01 | 38236863                | GG                              | TT              | 1946742227               |
| SNP_P4_14018_38237001 | NC_021160.1    | Ca_kabuli_chr01 | 38237001                | GG                              | CC              | 1946742229               |
| SNP_P4_14019_38239825 | NC_021160.1    | Ca_kabuli_chr01 | 38239825                | CC                              | TT              | 1946742231               |
| SNP_P4_14020_38240107 | NC_021160.1    | Ca_kabuli_chr01 | 38240107                | TT                              | AA              | 1946742233               |
| SNP_P4_14021_38240194 | NC_021160.1    | Ca_kabuli_chr01 | 38240194                | TT                              | CC              | 1946742235               |
| SNP_P4_14022_38240826 | NC_021160.1    | Ca_kabuli_chr01 | 38240826                | AA                              | GG              | 1946742237               |
| SNP_P4_14023_38240853 | NC_021160.1    | Ca_kabuli_chr01 | 38240853                | AA                              | CC              | 1946742239               |
| SNP_P4_14024_38242060 | NC_021160.1    | Ca_kabuli_chr01 | 38242060                | TT                              | GG              | 1946742241               |
| SNP_P4_14025_38242066 | NC_021160.1    | Ca_kabuli_chr01 | 38242066                | TT                              | CC              | 1946742243               |
| SNP_P4_14026_38242118 | NC_021160.1    | Ca_kabuli_chr01 | 38242118                | TT                              | GG              | 1946742245               |
| SNP_P4_14027_38242133 | NC_021160.1    | Ca_kabuli_chr01 | 38242133                | CC                              | TT              | 1946742248               |
| SNP_P4_14029_38242205 | NC_021160.1    | Ca_kabuli_chr01 | 38242205                | CC                              | TT              | 1946742250               |
| SNP_P4_14030_38242415 | NC_021160.1    | Ca_kabuli_chr01 | 38242415                | AA                              | GG              | 1946742252               |
| SNP_P4_14031_38242479 | NC_021160.1    | Ca_kabuli_chr01 | 38242479                | AA                              | GG              | 1946742254               |
| SNP_P4_14032_38242497 | NC_021160.1    | Ca_kabuli_chr01 | 38242497                | TT                              | CC              | 1946742256               |
| SNP_P4_14033_38243647 | NC_021160.1    | Ca_kabuli_chr01 | 38243647                | GG                              | TT              | 1946742258               |

| SNPs IDs              | Chromosome IDs | Chromosomes     | Physical positions (bp) | CDC Frontier (Reference genome) | (ILWC46 & LPNB) | NCBI SNPdb Accession IDs |
|-----------------------|----------------|-----------------|-------------------------|---------------------------------|-----------------|--------------------------|
| SNP_P4_14035_38244385 | NC_021160.1    | Ca_kabuli_chr01 | 38244385                | GG                              | AA              | 1946742260               |
| SNP_P4_14036_38246933 | NC_021160.1    | Ca_kabuli_chr01 | 38246933                | AA                              | GG              | 1946742262               |
| SNP_P4_14037_38247143 | NC_021160.1    | Ca_kabuli_chr01 | 38247143                | AA                              | CC              | 1946742264               |
| SNP_P4_14038_38247170 | NC_021160.1    | Ca_kabuli_chr01 | 38247170                | CC                              | TT              | 1946742266               |
| SNP_P4_14039_38248668 | NC_021160.1    | Ca_kabuli_chr01 | 38248668                | GG                              | CC              | 1946742268               |
| SNP_P4_14040_38249074 | NC_021160.1    | Ca_kabuli_chr01 | 38249074                | GG                              | AA              | 1946742270               |
| SNP_P4_14041_38249320 | NC_021160.1    | Ca_kabuli_chr01 | 38249320                | CC                              | TT              | 1946742272               |
| SNP_P4_14042_38249451 | NC_021160.1    | Ca_kabuli_chr01 | 38249451                | TT                              | CC              | 1946742275               |
| SNP_P4_14043_38249742 | NC_021160.1    | Ca_kabuli_chr01 | 38249742                | AA                              | TT              | 1946742277               |
| SNP_P4_14044_38250403 | NC_021160.1    | Ca_kabuli_chr01 | 38250403                | AA                              | GG              | 1946742279               |
| SNP_P4_14045_38250749 | NC_021160.1    | Ca_kabuli_chr01 | 38250749                | CC                              | AA              | 1946742281               |
| SNP_P4_14046_38251281 | NC_021160.1    | Ca_kabuli_chr01 | 38251281                | AA                              | CC              | 1946742283               |
| SNP_P4_14047_38253030 | NC_021160.1    | Ca_kabuli_chr01 | 38253030                | CC                              | TT              | 1946742285               |
| SNP_P4_14048_38261827 | NC_021160.1    | Ca_kabuli_chr01 | 38261827                | CC                              | TT              | 1946742287               |
| SNP_P4_14049_38261860 | NC_021160.1    | Ca_kabuli_chr01 | 38261860                | CC                              | TT              | 1946742289               |
| SNP_P4_14050_38261923 | NC_021160.1    | Ca_kabuli_chr01 | 38261923                | AA                              | GG              | 1946742291               |
| SNP_P4_14051_38262374 | NC_021160.1    | Ca_kabuli_chr01 | 38262374                | AA                              | GG              | 1946742293               |
| SNP_P4_14052_38262655 | NC_021160.1    | Ca_kabuli_chr01 | 38262655                | AA                              | GG              | 1946742295               |
| SNP_P4_14053_38263038 | NC_021160.1    | Ca_kabuli_chr01 | 38263038                | GG                              | AA              | 1946742297               |
| SNP_P4_14054_38263073 | NC_021160.1    | Ca_kabuli_chr01 | 38263073                | TT                              | CC              | 1946742299               |
| SNP_P4_14055_38263308 | NC_021160.1    | Ca_kabuli_chr01 | 38263308                | GG                              | AA              | 1946742301               |
| SNP_P4_14056_38263331 | NC_021160.1    | Ca_kabuli_chr01 | 38263331                | TT                              | AA              | 1946742303               |
| SNP_P4_14057_38263381 | NC_021160.1    | Ca_kabuli_chr01 | 38263381                | CC                              | TT              | 1946742305               |
| SNP_P4_14058_38265128 | NC_021160.1    | Ca_kabuli_chr01 | 38265128                | AA                              | TT              | 1946742307               |
| SNP_P4_14060_38265468 | NC_021160.1    | Ca_kabuli_chr01 | 38265468                | TT                              | CC              | 1946742309               |
| SNP_P4_14061_38266136 | NC_021160.1    | Ca_kabuli_chr01 | 38266136                | TT                              | CC              | 1946742311               |
| SNP_P4_14062_38267226 | NC_021160.1    | Ca_kabuli_chr01 | 38267226                | CC                              | TT              | 1946742313               |
| SNP_P4_14063_38267328 | NC_021160.1    | Ca_kabuli_chr01 | 38267328                | AA                              | GG              | 1946742315               |
| SNP_P4_14064_38267394 | NC_021160.1    | Ca_kabuli_chr01 | 38267394                | TT                              | AA              | 1946742317               |
| SNP_P4_14065_38271443 | NC_021160.1    | Ca_kabuli_chr01 | 38271443                | GG                              | AA              | 1946742319               |
| SNP_P4_14066_38272523 | NC_021160.1    | Ca_kabuli_chr01 | 38272523                | GG                              | AA              | 1946742321               |
| SNP_P4_14067_38273910 | NC_021160.1    | Ca_kabuli_chr01 | 38273910                | TT                              | AA              | 1946742323               |
| SNP_P4_14068_38273911 | NC_021160.1    | Ca_kabuli_chr01 | 38273911                | TT                              | AA              | 1946742325               |
| SNP_P4_14069_38274100 | NC_021160.1    | Ca_kabuli_chr01 | 38274100                | TT                              | AA              | 1946742327               |
| SNP_P4_14070_38274224 | NC_021160.1    | Ca_kabuli_chr01 | 38274224                | TT                              | AA              | 1946742329               |
| SNP_P4_14071_38274278 | NC_021160.1    | Ca_kabuli_chr01 | 38274278                | AA                              | TT              | 1946742331               |
| SNP_P4_14072_38274292 | NC_021160.1    | Ca_kabuli_chr01 | 38274292                | TT                              | GG              | 1946742333               |
| SNP_P4_14073_38277219 | NC_021160.1    | Ca_kabuli_chr01 | 38277219                | TT                              | CC              | 1946742335               |
| SNP_P4_14074_38277890 | NC_021160.1    | Ca_kabuli_chr01 | 38277890                | TT                              | GG              | 1946742337               |
| SNP_P4_14075_38278488 | NC_021160.1    | Ca_kabuli_chr01 | 38278488                | TT                              | AA              | 1946742339               |
| SNP_P4_14077_38281887 | NC_021160.1    | Ca_kabuli_chr01 | 38281887                | GG                              | AA              | 1946742341               |
| SNP_P4_14079_38282841 | NC_021160.1    | Ca_kabuli_chr01 | 38282841                | CC                              | AA              | 1946742343               |

| SNPs IDs              | Chromosome IDs | Chromosomes     | Physical positions (bp) | CDC Frontier (Reference genome) | (ILWC46 & LPNB) | NCBI SNPdb Accession IDs |
|-----------------------|----------------|-----------------|-------------------------|---------------------------------|-----------------|--------------------------|
| SNP_P4_14080_38282843 | NC_021160.1    | Ca_kabuli_chr01 | 38282843                | TT                              | CC              | 1946742345               |
| SNP_P4_14081_38282865 | NC_021160.1    | Ca_kabuli_chr01 | 38282865                | CC                              | TT              | 1946742347               |
| SNP_P4_14082_38282886 | NC_021160.1    | Ca_kabuli_chr01 | 38282886                | CC                              | TT              | 1946742349               |
| SNP_P4_14084_38284286 | NC_021160.1    | Ca_kabuli_chr01 | 38284286                | TT                              | CC              | 1946742351               |
| SNP_P4_14085_38284482 | NC_021160.1    | Ca_kabuli_chr01 | 38284482                | TT                              | CC              | 1946742353               |
| SNP_P4_14086_38284506 | NC_021160.1    | Ca_kabuli_chr01 | 38284506                | AA                              | TT              | 1946742355               |
| SNP_P4_14087_38284548 | NC_021160.1    | Ca_kabuli_chr01 | 38284548                | TT                              | CC              | 1946742357               |
| SNP_P4_14088_38284784 | NC_021160.1    | Ca_kabuli_chr01 | 38284784                | GG                              | TT              | 1946742359               |
| SNP_P4_14089_38285963 | NC_021160.1    | Ca_kabuli_chr01 | 38285963                | TT                              | CC              | 1946742361               |
| SNP_P4_14090_38285999 | NC_021160.1    | Ca_kabuli_chr01 | 38285999                | AA                              | TT              | 1946742363               |
| SNP_P4_14091_38286008 | NC_021160.1    | Ca_kabuli_chr01 | 38286008                | CC                              | GG              | 1946742365               |
| SNP_P4_14092_38286322 | NC_021160.1    | Ca_kabuli_chr01 | 38286322                | GG                              | AA              | 1946742367               |
| SNP_P4_14093_38286401 | NC_021160.1    | Ca_kabuli_chr01 | 38286401                | CC                              | TT              | 1946742369               |
| SNP_P4_14094_38287168 | NC_021160.1    | Ca_kabuli_chr01 | 38287168                | CC                              | TT              | 1946742371               |
| SNP_P4_14095_38287173 | NC_021160.1    | Ca_kabuli_chr01 | 38287173                | AA                              | GG              | 1946742373               |
| SNP_P4_14096_38288447 | NC_021160.1    | Ca_kabuli_chr01 | 38288447                | GG                              | AA              | 1946742376               |
| SNP_P4_14099_38295956 | NC_021160.1    | Ca_kabuli_chr01 | 38295956                | AA                              | GG              | 1946742378               |
| SNP_P4_14100_38295957 | NC_021160.1    | Ca_kabuli_chr01 | 38295957                | GG                              | AA              | 1946742380               |
| SNP_P4_14101_38295961 | NC_021160.1    | Ca_kabuli_chr01 | 38295961                | CC                              | AA              | 1946742382               |
| SNP_P4_14102_38295966 | NC_021160.1    | Ca_kabuli_chr01 | 38295966                | GG                              | TT              | 1946742384               |
| SNP_P4_14103_38296202 | NC_021160.1    | Ca_kabuli_chr01 | 38296202                | CC                              | TT              | 1946742386               |
| SNP_P4_14104_38296204 | NC_021160.1    | Ca_kabuli_chr01 | 38296204                | AA                              | TT              | 1946742388               |
| SNP_P4_14106_38303928 | NC_021160.1    | Ca_kabuli_chr01 | 38303928                | TT                              | CC              | 1946742390               |
| SNP_P4_14107_38303951 | NC_021160.1    | Ca_kabuli_chr01 | 38303951                | GG                              | AA              | 1946742392               |
| SNP_P4_14108_38315928 | NC_021160.1    | Ca_kabuli_chr01 | 38315928                | CC                              | TT              | 1946742394               |
| SNP_P4_14109_38315956 | NC_021160.1    | Ca_kabuli_chr01 | 38315956                | TT                              | CC              | 1946742396               |
| SNP_P4_14110_38316013 | NC_021160.1    | Ca_kabuli_chr01 | 38316013                | GG                              | TT              | 1946742398               |
| SNP_P4_14111_38316235 | NC_021160.1    | Ca_kabuli_chr01 | 38316235                | CC                              | TT              | 1946742400               |
| SNP_P4_14112_38316240 | NC_021160.1    | Ca_kabuli_chr01 | 38316240                | CC                              | TT              | 1946742402               |
| SNP_P4_14113_38316255 | NC_021160.1    | Ca_kabuli_chr01 | 38316255                | CC                              | TT              | 1946742404               |
| SNP_P4_14114_38316320 | NC_021160.1    | Ca_kabuli_chr01 | 38316320                | TT                              | CC              | 1946742406               |
| SNP_P4_14115_38316505 | NC_021160.1    | Ca_kabuli_chr01 | 38316505                | AA                              | CC              | 1946742408               |
| SNP_P4_14116_38316506 | NC_021160.1    | Ca_kabuli_chr01 | 38316506                | GG                              | TT              | 1946742410               |
| SNP_P4_14117_38316806 | NC_021160.1    | Ca_kabuli_chr01 | 38316806                | CC                              | TT              | 1946742412               |
| SNP_P4_14118_38316808 | NC_021160.1    | Ca_kabuli_chr01 | 38316808                | TT                              | GG              | 1946742414               |
| SNP_P4_14119_38316876 | NC_021160.1    | Ca_kabuli_chr01 | 38316876                | GG                              | AA              | 1946742416               |
| SNP_P4_14120_38316878 | NC_021160.1    | Ca_kabuli_chr01 | 38316878                | TT                              | CC              | 1946742418               |
| SNP_P4_14121_38316905 | NC_021160.1    | Ca_kabuli_chr01 | 38316905                | AA                              | GG              | 1946742420               |
| SNP_P4_14122_38317186 | NC_021160.1    | Ca_kabuli_chr01 | 38317186                | AA                              | GG              | 1946742422               |
| SNP_P4_14123_38317218 | NC_021160.1    | Ca_kabuli_chr01 | 38317218                | AA                              | TT              | 1946742424               |
| SNP_P4_14124_38317234 | NC_021160.1    | Ca_kabuli_chr01 | 38317234                | AA                              | GG              | 1946742426               |
| SNP_P4_14125_38317537 | NC_021160.1    | Ca_kabuli_chr01 | 38317537                | CC                              | TT              | 1946742428               |

| SNPs IDs              | Chromosome IDs | Chromosomes     | Physical positions (bp) | CDC Frontier (Reference genome) | (ILWC46 & LPNB) | NCBI SNPdb Accession IDs |
|-----------------------|----------------|-----------------|-------------------------|---------------------------------|-----------------|--------------------------|
| SNP_P4_14126_38317938 | NC_021160.1    | Ca_kabuli_chr01 | 38317938                | TT                              | CC              | 1946742430               |
| SNP_P4_14127_38317941 | NC_021160.1    | Ca_kabuli_chr01 | 38317941                | AA                              | GG              | 1946742432               |
| SNP_P4_14128_38317958 | NC_021160.1    | Ca_kabuli_chr01 | 38317958                | CC                              | TT              | 1946742434               |
| SNP_P4_14129_38320240 | NC_021160.1    | Ca_kabuli_chr01 | 38320240                | TT                              | AA              | 1946742436               |
| SNP_P4_14130_38320242 | NC_021160.1    | Ca_kabuli_chr01 | 38320242                | GG                              | CC              | 1946742438               |
| SNP_P4_14131_38320248 | NC_021160.1    | Ca_kabuli_chr01 | 38320248                | TT                              | CC              | 1946742440               |
| SNP_P4_14132_38320367 | NC_021160.1    | Ca_kabuli_chr01 | 38320367                | AA                              | GG              | 1946742442               |
| SNP_P4_14133_38320373 | NC_021160.1    | Ca_kabuli_chr01 | 38320373                | TT                              | CC              | 1946742444               |
| SNP_P4_14134_38320432 | NC_021160.1    | Ca_kabuli_chr01 | 38320432                | AA                              | GG              | 1946742446               |
| SNP_P4_14135_38320437 | NC_021160.1    | Ca_kabuli_chr01 | 38320437                | TT                              | CC              | 1946742448               |
| SNP_P4_14136_38321913 | NC_021160.1    | Ca_kabuli_chr01 | 38321913                | AA                              | GG              | 1946742450               |
| SNP_P4_14137_38321942 | NC_021160.1    | Ca_kabuli_chr01 | 38321942                | AA                              | GG              | 1946742452               |
| SNP_P4_14138_38321960 | NC_021160.1    | Ca_kabuli_chr01 | 38321960                | TT                              | CC              | 1946742454               |
| SNP_P4_14139_38321962 | NC_021160.1    | Ca_kabuli_chr01 | 38321962                | TT                              | GG              | 1946742455               |
| SNP_P4_14140_38322014 | NC_021160.1    | Ca_kabuli_chr01 | 38322014                | TT                              | CC              | 1946742457               |
| SNP_P4_14141_38322044 | NC_021160.1    | Ca_kabuli_chr01 | 38322044                | CC                              | TT              | 1946742459               |
| SNP_P4_14142_38322050 | NC_021160.1    | Ca_kabuli_chr01 | 38322050                | CC                              | AA              | 1946742461               |
| SNP_P4_14143_38322052 | NC_021160.1    | Ca_kabuli_chr01 | 38322052                | AA                              | GG              | 1946742463               |
| SNP_P4_14144_38322058 | NC_021160.1    | Ca_kabuli_chr01 | 38322058                | TT                              | GG              | 1946742465               |
| SNP_P4_14145_38322068 | NC_021160.1    | Ca_kabuli_chr01 | 38322068                | CC                              | AA              | 1946742467               |
| SNP_P4_14146_38322101 | NC_021160.1    | Ca_kabuli_chr01 | 38322101                | TT                              | CC              | 1946742469               |
| SNP_P4_14147_38322107 | NC_021160.1    | Ca_kabuli_chr01 | 38322107                | TT                              | CC              | 1946742471               |
| SNP_P4_14148_38322288 | NC_021160.1    | Ca_kabuli_chr01 | 38322288                | AA                              | TT              | 1946742473               |
| SNP_P4_14149_38323972 | NC_021160.1    | Ca_kabuli_chr01 | 38323972                | TT                              | CC              | 1946742475               |
| SNP_P4_14150_38323979 | NC_021160.1    | Ca_kabuli_chr01 | 38323979                | CC                              | TT              | 1946742477               |
| SNP_P4_14151_38324612 | NC_021160.1    | Ca_kabuli_chr01 | 38324612                | CC                              | TT              | 1946742479               |
| SNP_P4_14152_38326113 | NC_021160.1    | Ca_kabuli_chr01 | 38326113                | TT                              | CC              | 1946742481               |
| SNP_P4_14153_38326117 | NC_021160.1    | Ca_kabuli_chr01 | 38326117                | CC                              | TT              | 1946742483               |
| SNP_P4_14154_38326239 | NC_021160.1    | Ca_kabuli_chr01 | 38326239                | GG                              | AA              | 1946742485               |
| SNP_P4_14155_38326282 | NC_021160.1    | Ca_kabuli_chr01 | 38326282                | TT                              | AA              | 1946742487               |
| SNP_P4_14156_38328267 | NC_021160.1    | Ca_kabuli_chr01 | 38328267                | CC                              | TT              | 1946742489               |
| SNP_P4_14157_38328283 | NC_021160.1    | Ca_kabuli_chr01 | 38328283                | CC                              | TT              | 1946742491               |
| SNP_P4_14158_38328618 | NC_021160.1    | Ca_kabuli_chr01 | 38328618                | TT                              | CC              | 1946742493               |
| SNP_P4_14159_38329522 | NC_021160.1    | Ca_kabuli_chr01 | 38329522                | GG                              | AA              | 1946742495               |
| SNP_P4_14160_38329529 | NC_021160.1    | Ca_kabuli_chr01 | 38329529                | GG                              | AA              | 1946742498               |
| SNP_P4_14161_38329558 | NC_021160.1    | Ca_kabuli_chr01 | 38329558                | GG                              | AA              | 1946742501               |
| SNP_P4_14162_38329836 | NC_021160.1    | Ca_kabuli_chr01 | 38329836                | AA                              | GG              | 1946742504               |
| SNP_P4_14163_38331343 | NC_021160.1    | Ca_kabuli_chr01 | 38331343                | AA                              | TT              | 1946742506               |
| SNP_P4_14164_38332188 | NC_021160.1    | Ca_kabuli_chr01 | 38332188                | TT                              | CC              | 1946742508               |
| SNP_P4_14165_38334939 | NC_021160.1    | Ca_kabuli_chr01 | 38334939                | CC                              | TT              | 1946742511               |
| SNP_P4_14166_38334942 | NC_021160.1    | Ca_kabuli_chr01 | 38334942                | AA                              | GG              | 1946742514               |
| SNP_P4_14167_38335494 | NC_021160.1    | Ca_kabuli_chr01 | 38335494                | GG                              | CC              | 1946742516               |



| SNPs IDs              | Chromosome IDs | Chromosomes     | Physical positions (bp) | CDC Frontier (Reference genome) | (ILWC46 & LPNB) | NCBI SNPdb Accession IDs |
|-----------------------|----------------|-----------------|-------------------------|---------------------------------|-----------------|--------------------------|
| SNP_P4_14168_38336531 | NC_021160.1    | Ca_kabuli_chr01 | 38336531                | AA                              | GG              | 1946742518               |
| SNP_P4_14170_38338703 | NC_021160.1    | Ca_kabuli_chr01 | 38338703                | AA                              | GG              | 1946742519               |
| SNP_P4_14171_38338843 | NC_021160.1    | Ca_kabuli_chr01 | 38338843                | AA                              | GG              | 1946742521               |
| SNP_P4_14172_38338878 | NC_021160.1    | Ca_kabuli_chr01 | 38338878                | GG                              | AA              | 1946742523               |
| SNP_P4_14173_38338921 | NC_021160.1    | Ca_kabuli_chr01 | 38338921                | AA                              | GG              | 1946742525               |
| SNP_P4_14174_38338954 | NC_021160.1    | Ca_kabuli_chr01 | 38338954                | AA                              | TT              | 1946742527               |
| SNP_P4_14175_38341071 | NC_021160.1    | Ca_kabuli_chr01 | 38341071                | GG                              | AA              | 1946742529               |
| SNP_P4_14176_38341094 | NC_021160.1    | Ca_kabuli_chr01 | 38341094                | AA                              | GG              | 1946742531               |
| SNP_P4_14177_38341829 | NC_021160.1    | Ca_kabuli_chr01 | 38341829                | TT                              | GG              | 1946742533               |
| SNP_P4_14178_38341853 | NC_021160.1    | Ca_kabuli_chr01 | 38341853                | TT                              | AA              | 1946742535               |
| SNP_P4_14179_38342113 | NC_021160.1    | Ca_kabuli_chr01 | 38342113                | AA                              | GG              | 1946742537               |
| SNP_P4_14180_38342474 | NC_021160.1    | Ca_kabuli_chr01 | 38342474                | TT                              | GG              | 1946742539               |
| SNP_P4_14181_38342494 | NC_021160.1    | Ca_kabuli_chr01 | 38342494                | TT                              | CC              | 1946742541               |
| SNP_P4_14182_38342585 | NC_021160.1    | Ca_kabuli_chr01 | 38342585                | GG                              | TT              | 1946742543               |
| SNP_P4_14183_38342643 | NC_021160.1    | Ca_kabuli_chr01 | 38342643                | CC                              | TT              | 1946742545               |
| SNP_P4_14184_38342691 | NC_021160.1    | Ca_kabuli_chr01 | 38342691                | CC                              | TT              | 1946742547               |
| SNP_P4_14185_38342699 | NC_021160.1    | Ca_kabuli_chr01 | 38342699                | CC                              | TT              | 1946742549               |
| SNP_P4_14186_38342719 | NC_021160.1    | Ca_kabuli_chr01 | 38342719                | CC                              | AA              | 1946742551               |
| SNP_P4_14187_38342725 | NC_021160.1    | Ca_kabuli_chr01 | 38342725                | CC                              | TT              | 1946742553               |
| SNP_P4_14188_38342845 | NC_021160.1    | Ca_kabuli_chr01 | 38342845                | AA                              | GG              | 1946742555               |
| SNP_P4_14189_38342925 | NC_021160.1    | Ca_kabuli_chr01 | 38342925                | CC                              | GG              | 1946742557               |
| SNP_P4_14190_38342992 | NC_021160.1    | Ca_kabuli_chr01 | 38342992                | GG                              | AA              | 1946742559               |
| SNP_P4_14191_38343048 | NC_021160.1    | Ca_kabuli_chr01 | 38343048                | CC                              | TT              | 1946742561               |
| SNP_P4_14192_38343123 | NC_021160.1    | Ca_kabuli_chr01 | 38343123                | AA                              | GG              | 1946742564               |
| SNP_P4_14193_38343164 | NC_021160.1    | Ca_kabuli_chr01 | 38343164                | GG                              | TT              | 1946742566               |
| SNP_P4_14194_38343167 | NC_021160.1    | Ca_kabuli_chr01 | 38343167                | AA                              | CC              | 1946742568               |
| SNP_P4_14195_38344165 | NC_021160.1    | Ca_kabuli_chr01 | 38344165                | CC                              | TT              | 1946742570               |
| SNP_P4_14196_38344335 | NC_021160.1    | Ca_kabuli_chr01 | 38344335                | TT                              | CC              | 1946742572               |
| SNP_P4_14197_38344336 | NC_021160.1    | Ca_kabuli_chr01 | 38344336                | CC                              | TT              | 1946742574               |
| SNP_P4_14198_38344346 | NC_021160.1    | Ca_kabuli_chr01 | 38344346                | TT                              | GG              | 1946742576               |
| SNP_P4_14199_38345181 | NC_021160.1    | Ca_kabuli_chr01 | 38345181                | GG                              | AA              | 1946742578               |
| SNP_P4_14201_38346054 | NC_021160.1    | Ca_kabuli_chr01 | 38346054                | TT                              | GG              | 1946742580               |
| SNP_P4_14202_38346059 | NC_021160.1    | Ca_kabuli_chr01 | 38346059                | TT                              | GG              | 1946742583               |
| SNP_P4_14203_38346178 | NC_021160.1    | Ca_kabuli_chr01 | 38346178                | TT                              | CC              | 1946742585               |
| SNP_P4_14204_38346500 | NC_021160.1    | Ca_kabuli_chr01 | 38346500                | CC                              | TT              | 1946742587               |
| SNP_P4_14205_38346547 | NC_021160.1    | Ca_kabuli_chr01 | 38346547                | TT                              | CC              | 1946742589               |
| SNP_P4_14206_38346550 | NC_021160.1    | Ca_kabuli_chr01 | 38346550                | CC                              | TT              | 1946742591               |
| SNP_P4_14207_38346974 | NC_021160.1    | Ca_kabuli_chr01 | 38346974                | TT                              | CC              | 1946742593               |
| SNP_P4_14208_38347327 | NC_021160.1    | Ca_kabuli_chr01 | 38347327                | GG                              | CC              | 1946742595               |
| SNP_P4_14209_38347387 | NC_021160.1    | Ca_kabuli_chr01 | 38347387                | TT                              | AA              | 1946742597               |
| SNP_P4_14210_38347717 | NC_021160.1    | Ca_kabuli_chr01 | 38347717                | AA                              | GG              | 1946742599               |
| SNP_P4_14211_38347718 | NC_021160.1    | Ca_kabuli_chr01 | 38347718                | CC                              | TT              | 1946742601               |

| SNPs IDs              | Chromosome IDs | Chromosomes     | Physical positions (bp) | CDC Frontier (Reference genome) | (ILWC46 & LPNB) | NCBI SNPdb Accession IDs |
|-----------------------|----------------|-----------------|-------------------------|---------------------------------|-----------------|--------------------------|
| SNP_P4_14212_38347805 | NC_021160.1    | Ca_kabuli_chr01 | 38347805                | TT                              | GG              | 1946742603               |
| SNP_P4_14213_38348024 | NC_021160.1    | Ca_kabuli_chr01 | 38348024                | AA                              | GG              | 1946742605               |
| SNP_P4_14214_38348301 | NC_021160.1    | Ca_kabuli_chr01 | 38348301                | AA                              | GG              | 1946742607               |
| SNP_P4_14215_38349217 | NC_021160.1    | Ca_kabuli_chr01 | 38349217                | CC                              | TT              | 1946742609               |
| SNP_P4_14216_38349655 | NC_021160.1    | Ca_kabuli_chr01 | 38349655                | AA                              | CC              | 1946742611               |
| SNP_P4_14217_38350967 | NC_021160.1    | Ca_kabuli_chr01 | 38350967                | TT                              | AA              | 1946742613               |
| SNP_P4_14218_38351076 | NC_021160.1    | Ca_kabuli_chr01 | 38351076                | GG                              | AA              | 1946742615               |
| SNP_P4_14219_38351224 | NC_021160.1    | Ca_kabuli_chr01 | 38351224                | TT                              | CC              | 1946742617               |
| SNP_P4_14220_38351296 | NC_021160.1    | Ca_kabuli_chr01 | 38351296                | TT                              | CC              | 1946742619               |
| SNP_P4_14221_38351512 | NC_021160.1    | Ca_kabuli_chr01 | 38351512                | AA                              | TT              | 1946742621               |
| SNP_P4_14222_38351744 | NC_021160.1    | Ca_kabuli_chr01 | 38351744                | GG                              | TT              | 1946742623               |
| SNP_P4_14223_38352442 | NC_021160.1    | Ca_kabuli_chr01 | 38352442                | AA                              | TT              | 1946742625               |
| SNP_P4_14224_38352483 | NC_021160.1    | Ca_kabuli_chr01 | 38352483                | TT                              | CC              | 1946742627               |
| SNP_P4_14225_38352641 | NC_021160.1    | Ca_kabuli_chr01 | 38352641                | GG                              | AA              | 1946742629               |
| SNP_P4_14226_38356092 | NC_021160.1    | Ca_kabuli_chr01 | 38356092                | TT                              | CC              | 1946742631               |
| SNP_P4_14227_38358467 | NC_021160.1    | Ca_kabuli_chr01 | 38358467                | CC                              | TT              | 1946742633               |
| SNP_P4_14228_38359541 | NC_021160.1    | Ca_kabuli_chr01 | 38359541                | AA                              | GG              | 1946742635               |
| SNP_P4_14229_38359573 | NC_021160.1    | Ca_kabuli_chr01 | 38359573                | TT                              | CC              | 1946742637               |
| SNP_P4_14230_38360335 | NC_021160.1    | Ca_kabuli_chr01 | 38360335                | CC                              | AA              | 1946742639               |
| SNP_P4_14232_38360381 | NC_021160.1    | Ca_kabuli_chr01 | 38360381                | CC                              | AA              | 1946742641               |
| SNP_P4_14233_38360410 | NC_021160.1    | Ca_kabuli_chr01 | 38360410                | CC                              | GG              | 1946742643               |
| SNP_P4_14234_38365496 | NC_021160.1    | Ca_kabuli_chr01 | 38365496                | TT                              | CC              | 1946742645               |
| SNP_P4_14235_38365665 | NC_021160.1    | Ca_kabuli_chr01 | 38365665                | TT                              | CC              | 1946742647               |
| SNP_P4_14236_38366104 | NC_021160.1    | Ca_kabuli_chr01 | 38366104                | TT                              | CC              | 1946742649               |
| SNP_P4_14237_38367035 | NC_021160.1    | Ca_kabuli_chr01 | 38367035                | TT                              | CC              | 1946742651               |
| SNP_P4_14238_38373436 | NC_021160.1    | Ca_kabuli_chr01 | 38373436                | TT                              | CC              | 1946742653               |
| SNP_P4_14239_38380309 | NC_021160.1    | Ca_kabuli_chr01 | 38380309                | CC                              | AA              | 1946742655               |
| SNP_P4_14240_38386448 | NC_021160.1    | Ca_kabuli_chr01 | 38386448                | GG                              | AA              | 1946742657               |
| SNP_P4_14241_38389337 | NC_021160.1    | Ca_kabuli_chr01 | 38389337                | CC                              | TT              | 1946742659               |
| SNP_P4_14242_38391572 | NC_021160.1    | Ca_kabuli_chr01 | 38391572                | AA                              | GG              | 1946742661               |
| SNP_P4_14243_38393063 | NC_021160.1    | Ca_kabuli_chr01 | 38393063                | TT                              | CC              | 1946742663               |
| SNP_P4_14245_38395237 | NC_021160.1    | Ca_kabuli_chr01 | 38395237                | TT                              | AA              | 1946742665               |
| SNP_P4_14246_38420937 | NC_021160.1    | Ca_kabuli_chr01 | 38420937                | GG                              | AA              | 1946742667               |
| SNP_P4_14247_38421070 | NC_021160.1    | Ca_kabuli_chr01 | 38421070                | CC                              | AA              | 1946742669               |
| SNP_P4_14248_38421461 | NC_021160.1    | Ca_kabuli_chr01 | 38421461                | AA                              | TT              | 1946742671               |
| SNP_P4_14249_38422841 | NC_021160.1    | Ca_kabuli_chr01 | 38422841                | GG                              | AA              | 1946742673               |
| SNP_P4_14250_38424856 | NC_021160.1    | Ca_kabuli_chr01 | 38424856                | TT                              | CC              | 1946742675               |
| SNP_P4_14251_38426687 | NC_021160.1    | Ca_kabuli_chr01 | 38426687                | AA                              | GG              | 1946742677               |
| SNP_P4_14252_38442796 | NC_021160.1    | Ca_kabuli_chr01 | 38442796                | CC                              | TT              | 1946742679               |
| SNP_P4_14253_38444349 | NC_021160.1    | Ca_kabuli_chr01 | 38444349                | GG                              | TT              | 1946742681               |
| SNP_P4_14254_38448745 | NC_021160.1    | Ca_kabuli_chr01 | 38448745                | GG                              | AA              | 1946742683               |
| SNP_P4_14255_38449215 | NC_021160.1    | Ca_kabuli_chr01 | 38449215                | GG                              | AA              | 1946742685               |

| SNPs IDs              | Chromosome IDs | Chromosomes     | Physical positions (bp) | CDC Frontier (Reference genome) | (ILWC46 & LPNB) | NCBI SNPdb Accession IDs |
|-----------------------|----------------|-----------------|-------------------------|---------------------------------|-----------------|--------------------------|
| SNP_P4_14256_38449894 | NC_021160.1    | Ca_kabuli_chr01 | 38449894                | AA                              | GG              | 1946742688               |
| SNP_P4_14258_38463331 | NC_021160.1    | Ca_kabuli_chr01 | 38463331                | AA                              | GG              | 1946742690               |
| SNP_P4_14259_38466106 | NC_021160.1    | Ca_kabuli_chr01 | 38466106                | AA                              | TT              | 1946742692               |
| SNP_P4_14260_38466331 | NC_021160.1    | Ca_kabuli_chr01 | 38466331                | AA                              | TT              | 1946742694               |
| SNP_P4_14261_38466352 | NC_021160.1    | Ca_kabuli_chr01 | 38466352                | AA                              | GG              | 1946742696               |
| SNP_P4_14262_38466484 | NC_021160.1    | Ca_kabuli_chr01 | 38466484                | TT                              | CC              | 1946742698               |
| SNP_P4_14263_38479384 | NC_021160.1    | Ca_kabuli_chr01 | 38479384                | TT                              | AA              | 1946742700               |
| SNP_P4_14264_38480798 | NC_021160.1    | Ca_kabuli_chr01 | 38480798                | GG                              | AA              | 1946742701               |
| SNP_P4_14266_38484573 | NC_021160.1    | Ca_kabuli_chr01 | 38484573                | TT                              | CC              | 1946742703               |
| SNP_P4_14268_38488979 | NC_021160.1    | Ca_kabuli_chr01 | 38488979                | CC                              | GG              | 1946742705               |
| SNP_P4_14269_38491253 | NC_021160.1    | Ca_kabuli_chr01 | 38491253                | AA                              | CC              | 1946742707               |
| SNP_P4_14272_38496989 | NC_021160.1    | Ca_kabuli_chr01 | 38496989                | GG                              | AA              | 1946742709               |
| SNP_P4_14273_38498376 | NC_021160.1    | Ca_kabuli_chr01 | 38498376                | AA                              | GG              | 1946742711               |
| SNP_P4_14274_38499098 | NC_021160.1    | Ca_kabuli_chr01 | 38499098                | CC                              | TT              | 1946742713               |
| SNP_P4_14275_38499099 | NC_021160.1    | Ca_kabuli_chr01 | 38499099                | GG                              | AA              | 1946742715               |
| SNP_P4_14276_38499129 | NC_021160.1    | Ca_kabuli_chr01 | 38499129                | GG                              | AA              | 1946742717               |
| SNP_P4_14277_38499133 | NC_021160.1    | Ca_kabuli_chr01 | 38499133                | TT                              | AA              | 1946742719               |
| SNP_P4_14278_38499164 | NC_021160.1    | Ca_kabuli_chr01 | 38499164                | GG                              | TT              | 1946742721               |
| SNP_P4_14279_38514033 | NC_021160.1    | Ca_kabuli_chr01 | 38514033                | TT                              | CC              | 1946742723               |
| SNP_P4_14281_38520698 | NC_021160.1    | Ca_kabuli_chr01 | 38520698                | AA                              | GG              | 1946742725               |
| SNP_P4_14282_38522139 | NC_021160.1    | Ca_kabuli_chr01 | 38522139                | CC                              | TT              | 1946742727               |
| SNP_P4_14283_38523238 | NC_021160.1    | Ca_kabuli_chr01 | 38523238                | TT                              | CC              | 1946742729               |
| SNP_P4_14284_38524375 | NC_021160.1    | Ca_kabuli_chr01 | 38524375                | CC                              | TT              | 1946742731               |
| SNP_P4_14285_38529230 | NC_021160.1    | Ca_kabuli_chr01 | 38529230                | TT                              | AA              | 1946742733               |
| SNP_P4_14286_38529243 | NC_021160.1    | Ca_kabuli_chr01 | 38529243                | GG                              | TT              | 1946742735               |
| SNP_P4_14287_38531220 | NC_021160.1    | Ca_kabuli_chr01 | 38531220                | CC                              | TT              | 1946742737               |
| SNP_P4_14288_38535000 | NC_021160.1    | Ca_kabuli_chr01 | 38535000                | TT                              | CC              | 1946742739               |
| SNP_P4_14290_38535455 | NC_021160.1    | Ca_kabuli_chr01 | 38535455                | GG                              | AA              | 1946742741               |
| SNP_P4_14291_38535579 | NC_021160.1    | Ca_kabuli_chr01 | 38535579                | TT                              | CC              | 1946742743               |
| SNP_P4_14292_38537518 | NC_021160.1    | Ca_kabuli_chr01 | 38537518                | GG                              | AA              | 1946742745               |
| SNP_P4_14293_38539139 | NC_021160.1    | Ca_kabuli_chr01 | 38539139                | AA                              | GG              | 1946742747               |
| SNP_P4_14294_38539389 | NC_021160.1    | Ca_kabuli_chr01 | 38539389                | GG                              | CC              | 1946742749               |
| SNP_P4_14295_38547481 | NC_021160.1    | Ca_kabuli_chr01 | 38547481                | TT                              | GG              | 1946742750               |
| SNP_P4_14296_38547819 | NC_021160.1    | Ca_kabuli_chr01 | 38547819                | AA                              | GG              | 1946742752               |
| SNP_P4_14297_38548932 | NC_021160.1    | Ca_kabuli_chr01 | 38548932                | AA                              | GG              | 1946742754               |
| SNP_P4_14298_38551059 | NC_021160.1    | Ca_kabuli_chr01 | 38551059                | GG                              | AA              | 1946742756               |
| SNP_P4_14299_38553210 | NC_021160.1    | Ca_kabuli_chr01 | 38553210                | CC                              | TT              | 1946742758               |
| SNP_P4_14300_38553211 | NC_021160.1    | Ca_kabuli_chr01 | 38553211                | AA                              | CC              | 1946742760               |
| SNP_P4_14301_38553314 | NC_021160.1    | Ca_kabuli_chr01 | 38553314                | CC                              | TT              | 1946742762               |
| SNP_P4_14302_38553476 | NC_021160.1    | Ca_kabuli_chr01 | 38553476                | CC                              | TT              | 1946742764               |
| SNP_P4_14303_38553511 | NC_021160.1    | Ca_kabuli_chr01 | 38553511                | TT                              | AA              | 1946742766               |
| SNP_P4_14304_38553512 | NC_021160.1    | Ca_kabuli_chr01 | 38553512                | TT                              | AA              | 1946742768               |

| SNPs IDs              | Chromosome IDs | Chromosomes     | Physical positions (bp) | CDC Frontier (Reference genome) | (ILWC46 & LPNB) | NCBI SNPdb Accession IDs |
|-----------------------|----------------|-----------------|-------------------------|---------------------------------|-----------------|--------------------------|
| SNP_P4_14305_38554461 | NC_021160.1    | Ca_kabuli_chr01 | 38554461                | AA                              | GG              | 1946742770               |
| SNP_P4_14306_38554480 | NC_021160.1    | Ca_kabuli_chr01 | 38554480                | CC                              | TT              | 1946742772               |
| SNP_P4_14308_38562454 | NC_021160.1    | Ca_kabuli_chr01 | 38562454                | CC                              | TT              | 1946742774               |
| SNP_P4_14309_38562456 | NC_021160.1    | Ca_kabuli_chr01 | 38562456                | CC                              | TT              | 1946742776               |
| SNP_P4_14310_38562460 | NC_021160.1    | Ca_kabuli_chr01 | 38562460                | TT                              | CC              | 1946742778               |
| SNP_P4_14311_38562471 | NC_021160.1    | Ca_kabuli_chr01 | 38562471                | CC                              | TT              | 1946742780               |
| SNP_P4_14312_38562478 | NC_021160.1    | Ca_kabuli_chr01 | 38562478                | CC                              | TT              | 1946742782               |
| SNP_P4_14313_38562486 | NC_021160.1    | Ca_kabuli_chr01 | 38562486                | CC                              | TT              | 1946742784               |
| SNP_P4_14314_38562487 | NC_021160.1    | Ca_kabuli_chr01 | 38562487                | AA                              | TT              | 1946742786               |
| SNP_P4_14315_38562495 | NC_021160.1    | Ca_kabuli_chr01 | 38562495                | TT                              | CC              | 1946742788               |
| SNP_P4_14316_38563155 | NC_021160.1    | Ca_kabuli_chr01 | 38563155                | GG                              | CC              | 1946742790               |
| SNP_P4_14317_38563345 | NC_021160.1    | Ca_kabuli_chr01 | 38563345                | CC                              | TT              | 1946742792               |
| SNP_P4_14318_38563361 | NC_021160.1    | Ca_kabuli_chr01 | 38563361                | CC                              | TT              | 1946742794               |
| SNP_P4_14319_38563376 | NC_021160.1    | Ca_kabuli_chr01 | 38563376                | CC                              | TT              | 1946742796               |
| SNP_P4_14320_38563877 | NC_021160.1    | Ca_kabuli_chr01 | 38563877                | TT                              | CC              | 1946742798               |
| SNP_P4_14321_38563891 | NC_021160.1    | Ca_kabuli_chr01 | 38563891                | AA                              | CC              | 1946742800               |
| SNP_P4_14322_38564026 | NC_021160.1    | Ca_kabuli_chr01 | 38564026                | TT                              | CC              | 1946742802               |
| SNP_P4_14323_38564060 | NC_021160.1    | Ca_kabuli_chr01 | 38564060                | TT                              | GG              | 1946742804               |
| SNP_P4_14324_38564439 | NC_021160.1    | Ca_kabuli_chr01 | 38564439                | CC                              | TT              | 1946742806               |
| SNP_P4_14325_38564480 | NC_021160.1    | Ca_kabuli_chr01 | 38564480                | GG                              | AA              | 1946742808               |
| SNP_P4_14326_38564704 | NC_021160.1    | Ca_kabuli_chr01 | 38564704                | CC                              | TT              | 1946742810               |
| SNP_P4_14327_38564933 | NC_021160.1    | Ca_kabuli_chr01 | 38564933                | TT                              | CC              | 1946742812               |
| SNP_P4_14328_38565508 | NC_021160.1    | Ca_kabuli_chr01 | 38565508                | TT                              | AA              | 1946742814               |
| SNP_P4_14329_38566789 | NC_021160.1    | Ca_kabuli_chr01 | 38566789                | TT                              | AA              | 1946742816               |
| SNP_P4_14330_38566903 | NC_021160.1    | Ca_kabuli_chr01 | 38566903                | GG                              | AA              | 1946742818               |
| SNP_P4_14331_38567396 | NC_021160.1    | Ca_kabuli_chr01 | 38567396                | CC                              | TT              | 1946742820               |
| SNP_P4_14332_38567636 | NC_021160.1    | Ca_kabuli_chr01 | 38567636                | GG                              | TT              | 1946742822               |
| SNP_P4_14333_38567647 | NC_021160.1    | Ca_kabuli_chr01 | 38567647                | CC                              | TT              | 1946742824               |
| SNP_P4_14334_38568116 | NC_021160.1    | Ca_kabuli_chr01 | 38568116                | AA                              | GG              | 1946742826               |
| SNP_P4_14335_38568142 | NC_021160.1    | Ca_kabuli_chr01 | 38568142                | GG                              | AA              | 1946742828               |
| SNP_P4_14337_38568542 | NC_021160.1    | Ca_kabuli_chr01 | 38568542                | CC                              | GG              | 1946742830               |
| SNP_P4_14338_38568569 | NC_021160.1    | Ca_kabuli_chr01 | 38568569                | AA                              | GG              | 1946742832               |
| SNP_P4_14339_38568570 | NC_021160.1    | Ca_kabuli_chr01 | 38568570                | CC                              | GG              | 1946742833               |
| SNP_P4_14340_38568846 | NC_021160.1    | Ca_kabuli_chr01 | 38568846                | AA                              | GG              | 1946742835               |
| SNP_P4_14341_38569113 | NC_021160.1    | Ca_kabuli_chr01 | 38569113                | TT                              | AA              | 1946742837               |
| SNP_P4_14344_38571122 | NC_021160.1    | Ca_kabuli_chr01 | 38571122                | AA                              | GG              | 1946742839               |
| SNP_P4_14345_38571639 | NC_021160.1    | Ca_kabuli_chr01 | 38571639                | CC                              | AA              | 1946742841               |
| SNP_P4_14346_38571828 | NC_021160.1    | Ca_kabuli_chr01 | 38571828                | CC                              | TT              | 1946742844               |
| SNP_P4_14347_38572142 | NC_021160.1    | Ca_kabuli_chr01 | 38572142                | CC                              | TT              | 1946742846               |
| SNP_P4_14348_38572162 | NC_021160.1    | Ca_kabuli_chr01 | 38572162                | GG                              | TT              | 1946742848               |
| SNP_P4_14349_38573010 | NC_021160.1    | Ca_kabuli_chr01 | 38573010                | GG                              | AA              | 1946742850               |
| SNP_P4_14350_38573728 | NC_021160.1    | Ca_kabuli_chr01 | 38573728                | CC                              | TT              | 1946742852               |

| SNPs IDs              | Chromosome IDs | Chromosomes     | Physical positions (bp) | CDC Frontier (Reference genome) | (ILWC46 & LPNB) | NCBI SNPdb Accession IDs |
|-----------------------|----------------|-----------------|-------------------------|---------------------------------|-----------------|--------------------------|
| SNP_P4_14351_38573944 | NC_021160.1    | Ca_kabuli_chr01 | 38573944                | TT                              | AA              | 1946742854               |
| SNP_P4_14352_38574110 | NC_021160.1    | Ca_kabuli_chr01 | 38574110                | GG                              | CC              | 1946742855               |
| SNP_P4_14353_38574144 | NC_021160.1    | Ca_kabuli_chr01 | 38574144                | TT                              | GG              | 1946742857               |
| SNP_P4_14354_38574147 | NC_021160.1    | Ca_kabuli_chr01 | 38574147                | CC                              | TT              | 1946742859               |
| SNP_P4_14355_38574286 | NC_021160.1    | Ca_kabuli_chr01 | 38574286                | TT                              | CC              | 1946742861               |
| SNP_P4_14356_38574295 | NC_021160.1    | Ca_kabuli_chr01 | 38574295                | TT                              | CC              | 1946742863               |
| SNP_P4_14357_38574325 | NC_021160.1    | Ca_kabuli_chr01 | 38574325                | TT                              | CC              | 1946742865               |
| SNP_P4_14358_38574621 | NC_021160.1    | Ca_kabuli_chr01 | 38574621                | GG                              | CC              | 1946742867               |
| SNP_P4_14359_38574633 | NC_021160.1    | Ca_kabuli_chr01 | 38574633                | TT                              | CC              | 1946742869               |
| SNP_P4_14360_38574942 | NC_021160.1    | Ca_kabuli_chr01 | 38574942                | AA                              | GG              | 1946742871               |
| SNP_P4_14361_38575431 | NC_021160.1    | Ca_kabuli_chr01 | 38575431                | GG                              | AA              | 1946742873               |
| SNP_P4_14362_38575433 | NC_021160.1    | Ca_kabuli_chr01 | 38575433                | CC                              | AA              | 1946742875               |
| SNP_P4_14363_38576552 | NC_021160.1    | Ca_kabuli_chr01 | 38576552                | AA                              | GG              | 1946742877               |
| SNP_P4_14364_38577019 | NC_021160.1    | Ca_kabuli_chr01 | 38577019                | CC                              | AA              | 1946742879               |
| SNP_P4_14365_38577086 | NC_021160.1    | Ca_kabuli_chr01 | 38577086                | CC                              | TT              | 1946742881               |
| SNP_P4_14367_38577250 | NC_021160.1    | Ca_kabuli_chr01 | 38577250                | AA                              | TT              | 1946742883               |
| SNP_P4_14368_38578387 | NC_021160.1    | Ca_kabuli_chr01 | 38578387                | CC                              | TT              | 1946742885               |
| SNP_P4_14369_38585591 | NC_021160.1    | Ca_kabuli_chr01 | 38585591                | CC                              | TT              | 1946742887               |
| SNP_P4_14370_38585625 | NC_021160.1    | Ca_kabuli_chr01 | 38585625                | TT                              | CC              | 1946742889               |
| SNP_P4_14371_38586069 | NC_021160.1    | Ca_kabuli_chr01 | 38586069                | AA                              | TT              | 1946742890               |
| SNP_P4_14372_38592153 | NC_021160.1    | Ca_kabuli_chr01 | 38592153                | GG                              | AA              | 1946742892               |
| SNP_P4_14373_38592156 | NC_021160.1    | Ca_kabuli_chr01 | 38592156                | CC                              | TT              | 1946742894               |
| SNP_P4_14374_38592211 | NC_021160.1    | Ca_kabuli_chr01 | 38592211                | AA                              | TT              | 1946742896               |
| SNP_P4_14375_38592251 | NC_021160.1    | Ca_kabuli_chr01 | 38592251                | AA                              | GG              | 1946742898               |
| SNP_P4_14376_38592280 | NC_021160.1    | Ca_kabuli_chr01 | 38592280                | AA                              | TT              | 1946742900               |
| SNP_P4_14377_38594246 | NC_021160.1    | Ca_kabuli_chr01 | 38594246                | CC                              | GG              | 1946742902               |
| SNP_P4_14378_38594293 | NC_021160.1    | Ca_kabuli_chr01 | 38594293                | TT                              | GG              | 1946742904               |
| SNP_P4_14379_38594305 | NC_021160.1    | Ca_kabuli_chr01 | 38594305                | AA                              | CC              | 1946742906               |
| SNP_P4_14380_38594562 | NC_021160.1    | Ca_kabuli_chr01 | 38594562                | CC                              | AA              | 1946742908               |
| SNP_P4_14381_38594587 | NC_021160.1    | Ca_kabuli_chr01 | 38594587                | GG                              | AA              | 1946742910               |
| SNP_P4_14382_38594600 | NC_021160.1    | Ca_kabuli_chr01 | 38594600                | GG                              | AA              | 1946742912               |
| SNP_P4_14383_38595189 | NC_021160.1    | Ca_kabuli_chr01 | 38595189                | GG                              | TT              | 1946742914               |
| SNP_P4_14384_38596970 | NC_021160.1    | Ca_kabuli_chr01 | 38596970                | GG                              | AA              | 1946742917               |
| SNP_P4_14385_38596994 | NC_021160.1    | Ca_kabuli_chr01 | 38596994                | CC                              | TT              | 1946742919               |
| SNP_P4_14386_38597349 | NC_021160.1    | Ca_kabuli_chr01 | 38597349                | TT                              | CC              | 1946742921               |
| SNP_P4_14387_38597401 | NC_021160.1    | Ca_kabuli_chr01 | 38597401                | AA                              | GG              | 1946742923               |
| SNP_P4_14388_38597406 | NC_021160.1    | Ca_kabuli_chr01 | 38597406                | GG                              | AA              | 1946742925               |
| SNP_P4_14390_38597989 | NC_021160.1    | Ca_kabuli_chr01 | 38597989                | TT                              | AA              | 1946742927               |
| SNP_P4_14391_38598732 | NC_021160.1    | Ca_kabuli_chr01 | 38598732                | GG                              | AA              | 1946742929               |
| SNP_P4_14392_38598745 | NC_021160.1    | Ca_kabuli_chr01 | 38598745                | GG                              | CC              | 1946742931               |
| SNP_P4_14393_38598750 | NC_021160.1    | Ca_kabuli_chr01 | 38598750                | AA                              | GG              | 1946742933               |
| SNP_P4_14394_38601650 | NC_021160.1    | Ca_kabuli_chr01 | 38601650                | CC                              | TT              | 1946742935               |

| SNPs IDs              | Chromosome IDs | Chromosomes     | Physical positions (bp) | CDC Frontier (Reference genome) | (ILWC46 & LPNB) | NCBI SNPdb Accession IDs |
|-----------------------|----------------|-----------------|-------------------------|---------------------------------|-----------------|--------------------------|
| SNP_P4_14395_38601710 | NC_021160.1    | Ca_kabuli_chr01 | 38601710                | AA                              | GG              | 1946742937               |
| SNP_P4_14396_38603587 | NC_021160.1    | Ca_kabuli_chr01 | 38603587                | TT                              | CC              | 1946742939               |
| SNP_P4_14397_38605815 | NC_021160.1    | Ca_kabuli_chr01 | 38605815                | GG                              | AA              | 1946742941               |
| SNP_P4_14398_38607729 | NC_021160.1    | Ca_kabuli_chr01 | 38607729                | CC                              | TT              | 1946742943               |
| SNP_P4_14400_38615333 | NC_021160.1    | Ca_kabuli_chr01 | 38615333                | AA                              | TT              | 1946742945               |
| SNP_P4_14401_38615547 | NC_021160.1    | Ca_kabuli_chr01 | 38615547                | AA                              | GG              | 1946742947               |
| SNP_P4_14402_38615781 | NC_021160.1    | Ca_kabuli_chr01 | 38615781                | TT                              | GG              | 1946742949               |
| SNP_P4_14403_38616945 | NC_021160.1    | Ca_kabuli_chr01 | 38616945                | AA                              | GG              | 1946742951               |
| SNP_P4_14404_38617038 | NC_021160.1    | Ca_kabuli_chr01 | 38617038                | GG                              | CC              | 1946742953               |
| SNP_P4_14405_38617174 | NC_021160.1    | Ca_kabuli_chr01 | 38617174                | TT                              | GG              | 1946742955               |
| SNP_P4_14406_38619014 | NC_021160.1    | Ca_kabuli_chr01 | 38619014                | TT                              | AA              | 1946742957               |
| SNP_P4_14407_38619019 | NC_021160.1    | Ca_kabuli_chr01 | 38619019                | TT                              | CC              | 1946742959               |
| SNP_P4_14408_38619896 | NC_021160.1    | Ca_kabuli_chr01 | 38619896                | GG                              | AA              | 1946742961               |
| SNP_P4_14409_38621212 | NC_021160.1    | Ca_kabuli_chr01 | 38621212                | AA                              | CC              | 1946742963               |
| SNP_P4_14410_38621527 | NC_021160.1    | Ca_kabuli_chr01 | 38621527                | AA                              | GG              | 1946742965               |
| SNP_P4_14411_38621826 | NC_021160.1    | Ca_kabuli_chr01 | 38621826                | AA                              | TT              | 1946742967               |
| SNP_P4_14412_38621827 | NC_021160.1    | Ca_kabuli_chr01 | 38621827                | AA                              | GG              | 1946742969               |
| SNP_P4_14413_38623214 | NC_021160.1    | Ca_kabuli_chr01 | 38623214                | GG                              | AA              | 1946742971               |
| SNP_P4_14415_38623780 | NC_021160.1    | Ca_kabuli_chr01 | 38623780                | GG                              | AA              | 1946742973               |
| SNP_P4_14416_38626538 | NC_021160.1    | Ca_kabuli_chr01 | 38626538                | AA                              | GG              | 1946742975               |
| SNP_P4_14417_38631476 | NC_021160.1    | Ca_kabuli_chr01 | 38631476                | AA                              | CC              | 1946742977               |
| SNP_P4_14418_38633847 | NC_021160.1    | Ca_kabuli_chr01 | 38633847                | GG                              | AA              | 1946742979               |
| SNP_P4_14419_38635897 | NC_021160.1    | Ca_kabuli_chr01 | 38635897                | CC                              | TT              | 1946742981               |
| SNP_P4_14421_38638532 | NC_021160.1    | Ca_kabuli_chr01 | 38638532                | GG                              | AA              | 1946742983               |
| SNP_P4_14422_38638864 | NC_021160.1    | Ca_kabuli_chr01 | 38638864                | AA                              | GG              | 1946742985               |
| SNP_P4_14424_38643548 | NC_021160.1    | Ca_kabuli_chr01 | 38643548                | CC                              | AA              | 1946742987               |
| SNP_P4_14425_38644012 | NC_021160.1    | Ca_kabuli_chr01 | 38644012                | AA                              | TT              | 1946742989               |
| SNP_P4_14426_38644434 | NC_021160.1    | Ca_kabuli_chr01 | 38644434                | AA                              | GG              | 1946742991               |
| SNP_P4_14427_38644478 | NC_021160.1    | Ca_kabuli_chr01 | 38644478                | AA                              | TT              | 1946742993               |
| SNP_P4_14428_38650667 | NC_021160.1    | Ca_kabuli_chr01 | 38650667                | TT                              | CC              | 1946742995               |
| SNP_P4_14429_38650966 | NC_021160.1    | Ca_kabuli_chr01 | 38650966                | TT                              | CC              | 1946742997               |
| SNP_P4_14430_38651048 | NC_021160.1    | Ca_kabuli_chr01 | 38651048                | TT                              | CC              | 1946742999               |
| SNP_P4_14431_38651082 | NC_021160.1    | Ca_kabuli_chr01 | 38651082                | CC                              | TT              | 1946743001               |
| SNP_P4_14432_38651092 | NC_021160.1    | Ca_kabuli_chr01 | 38651092                | AA                              | GG              | 1946743003               |
| SNP_P4_14433_38651098 | NC_021160.1    | Ca_kabuli_chr01 | 38651098                | AA                              | CC              | 1946743005               |
| SNP_P4_14434_38651137 | NC_021160.1    | Ca_kabuli_chr01 | 38651137                | GG                              | TT              | 1946743007               |
| SNP_P4_14435_38651237 | NC_021160.1    | Ca_kabuli_chr01 | 38651237                | TT                              | CC              | 1946743009               |
| SNP_P4_14436_38651832 | NC_021160.1    | Ca_kabuli_chr01 | 38651832                | TT                              | CC              | 1946743011               |
| SNP_P4_14437_38651833 | NC_021160.1    | Ca_kabuli_chr01 | 38651833                | CC                              | TT              | 1946743013               |
| SNP_P4_14438_38651968 | NC_021160.1    | Ca_kabuli_chr01 | 38651968                | GG                              | AA              | 1946743015               |
| SNP_P4_14439_38652079 | NC_021160.1    | Ca_kabuli_chr01 | 38652079                | AA                              | GG              | 1946743017               |
| SNP_P4_14440_38652203 | NC_021160.1    | Ca_kabuli_chr01 | 38652203                | GG                              | AA              | 1946743018               |

| SNPs IDs              | Chromosome IDs | Chromosomes     | Physical positions (bp) | CDC Frontier (Reference genome) | (ILWC46 & LPNB) | NCBI SNPdb Accession IDs |
|-----------------------|----------------|-----------------|-------------------------|---------------------------------|-----------------|--------------------------|
| SNP_P4_14442_38656335 | NC_021160.1    | Ca_kabuli_chr01 | 38656335                | CC                              | AA              | 1946743020               |
| SNP_P4_14444_38659057 | NC_021160.1    | Ca_kabuli_chr01 | 38659057                | CC                              | GG              | 1946743022               |
| SNP_P4_14445_38659267 | NC_021160.1    | Ca_kabuli_chr01 | 38659267                | CC                              | TT              | 1946743024               |
| SNP_P4_14446_38660681 | NC_021160.1    | Ca_kabuli_chr01 | 38660681                | TT                              | AA              | 1946743026               |
| SNP_P4_14447_38661342 | NC_021160.1    | Ca_kabuli_chr01 | 38661342                | TT                              | AA              | 1946743028               |
| SNP_P4_14448_38662432 | NC_021160.1    | Ca_kabuli_chr01 | 38662432                | GG                              | TT              | 1946743030               |
| SNP_P4_14449_38662555 | NC_021160.1    | Ca_kabuli_chr01 | 38662555                | GG                              | AA              | 1946743032               |
| SNP_P4_14450_38662563 | NC_021160.1    | Ca_kabuli_chr01 | 38662563                | GG                              | TT              | 1946743034               |
| SNP_P4_14451_38662764 | NC_021160.1    | Ca_kabuli_chr01 | 38662764                | TT                              | CC              | 1946743036               |
| SNP_P4_14452_38662899 | NC_021160.1    | Ca_kabuli_chr01 | 38662899                | GG                              | AA              | 1946743038               |
| SNP_P4_14453_38664474 | NC_021160.1    | Ca_kabuli_chr01 | 38664474                | TT                              | AA              | 1946743040               |
| SNP_P4_14454_38664904 | NC_021160.1    | Ca_kabuli_chr01 | 38664904                | GG                              | TT              | 1946743042               |
| SNP_P4_14455_38667406 | NC_021160.1    | Ca_kabuli_chr01 | 38667406                | CC                              | TT              | 1946743044               |
| SNP_P4_14457_38671155 | NC_021160.1    | Ca_kabuli_chr01 | 38671155                | AA                              | GG              | 1946743045               |
| SNP_P4_14458_38671372 | NC_021160.1    | Ca_kabuli_chr01 | 38671372                | GG                              | TT              | 1946743047               |
| SNP_P4_14459_38677066 | NC_021160.1    | Ca_kabuli_chr01 | 38677066                | GG                              | AA              | 1946743049               |
| SNP_P4_14460_38677173 | NC_021160.1    | Ca_kabuli_chr01 | 38677173                | GG                              | TT              | 1946743051               |
| SNP_P4_14461_38677343 | NC_021160.1    | Ca_kabuli_chr01 | 38677343                | AA                              | CC              | 1946743053               |
| SNP_P4_14463_38677402 | NC_021160.1    | Ca_kabuli_chr01 | 38677402                | AA                              | CC              | 1946743055               |
| SNP_P4_14464_38677414 | NC_021160.1    | Ca_kabuli_chr01 | 38677414                | CC                              | TT              | 1946743057               |
| SNP_P4_14465_38677420 | NC_021160.1    | Ca_kabuli_chr01 | 38677420                | GG                              | AA              | 1946743059               |
| SNP_P4_14466_38677449 | NC_021160.1    | Ca_kabuli_chr01 | 38677449                | AA                              | GG              | 1946743061               |
| SNP_P4_14467_38677476 | NC_021160.1    | Ca_kabuli_chr01 | 38677476                | AA                              | GG              | 1946743063               |
| SNP_P4_14468_38677496 | NC_021160.1    | Ca_kabuli_chr01 | 38677496                | AA                              | CC              | 1946743065               |
| SNP_P4_14469_38677514 | NC_021160.1    | Ca_kabuli_chr01 | 38677514                | AA                              | GG              | 1946743067               |
| SNP_P4_14470_38677534 | NC_021160.1    | Ca_kabuli_chr01 | 38677534                | GG                              | AA              | 1946743069               |
| SNP_P4_14471_38677577 | NC_021160.1    | Ca_kabuli_chr01 | 38677577                | AA                              | GG              | 1946743071               |
| SNP_P4_14472_38677591 | NC_021160.1    | Ca_kabuli_chr01 | 38677591                | AA                              | GG              | 1946743073               |
| SNP_P4_14473_38677622 | NC_021160.1    | Ca_kabuli_chr01 | 38677622                | AA                              | CC              | 1946743075               |
| SNP_P4_14474_38677646 | NC_021160.1    | Ca_kabuli_chr01 | 38677646                | TT                              | CC              | 1946743077               |
| SNP_P4_14475_38681993 | NC_021160.1    | Ca_kabuli_chr01 | 38681993                | TT                              | AA              | 1946743079               |
| SNP_P4_14476_38682331 | NC_021160.1    | Ca_kabuli_chr01 | 38682331                | TT                              | CC              | 1946743081               |
| SNP_P4_14477_38682907 | NC_021160.1    | Ca_kabuli_chr01 | 38682907                | GG                              | AA              | 1946743083               |
| SNP_P4_14478_38699830 | NC_021160.1    | Ca_kabuli_chr01 | 38699830                | CC                              | TT              | 1946743085               |
| SNP_P4_14479_38703276 | NC_021160.1    | Ca_kabuli_chr01 | 38703276                | AA                              | GG              | 1946743087               |
| SNP_P4_14480_38703328 | NC_021160.1    | Ca_kabuli_chr01 | 38703328                | GG                              | AA              | 1946743089               |
| SNP_P4_14483_38715112 | NC_021160.1    | Ca_kabuli_chr01 | 38715112                | AA                              | TT              | 1946743091               |
| SNP_P4_14484_38717103 | NC_021160.1    | Ca_kabuli_chr01 | 38717103                | CC                              | AA              | 1946743093               |
| SNP_P4_14485_38718253 | NC_021160.1    | Ca_kabuli_chr01 | 38718253                | AA                              | CC              | 1946743095               |
| SNP_P4_14486_38721766 | NC_021160.1    | Ca_kabuli_chr01 | 38721766                | AA                              | GG              | 1946743097               |
| SNP_P4_14487_38721958 | NC_021160.1    | Ca_kabuli_chr01 | 38721958                | GG                              | AA              | 1946743099               |
| SNP_P4_14488_38723597 | NC_021160.1    | Ca_kabuli_chr01 | 38723597                | AA                              | GG              | 1946743101               |

| SNPs IDs              | Chromosome IDs | Chromosomes     | Physical positions (bp) | CDC Frontier (Reference genome) | (ILWC46 & LPNB) | NCBI SNPdb Accession IDs |
|-----------------------|----------------|-----------------|-------------------------|---------------------------------|-----------------|--------------------------|
| SNP_P4_14489_38723632 | NC_021160.1    | Ca_kabuli_chr01 | 38723632                | CC                              | TT              | 1946743103               |
| SNP_P4_14490_38727456 | NC_021160.1    | Ca_kabuli_chr01 | 38727456                | AA                              | CC              | 1946743105               |
| SNP_P4_14491_38731323 | NC_021160.1    | Ca_kabuli_chr01 | 38731323                | GG                              | TT              | 1946743107               |
| SNP_P4_14492_38731565 | NC_021160.1    | Ca_kabuli_chr01 | 38731565                | CC                              | TT              | 1946743109               |
| SNP_P4_14493_38732438 | NC_021160.1    | Ca_kabuli_chr01 | 38732438                | TT                              | AA              | 1946743111               |
| SNP_P4_14494_38733196 | NC_021160.1    | Ca_kabuli_chr01 | 38733196                | GG                              | TT              | 1946743113               |
| SNP_P4_14495_38734123 | NC_021160.1    | Ca_kabuli_chr01 | 38734123                | TT                              | CC              | 1946743115               |
| SNP_P4_14496_38735477 | NC_021160.1    | Ca_kabuli_chr01 | 38735477                | CC                              | TT              | 1946743117               |
| SNP_P4_14497_38736394 | NC_021160.1    | Ca_kabuli_chr01 | 38736394                | GG                              | CC              | 1946743119               |
| SNP_P4_14498_38736414 | NC_021160.1    | Ca_kabuli_chr01 | 38736414                | CC                              | TT              | 1946743121               |
| SNP_P4_14499_38736426 | NC_021160.1    | Ca_kabuli_chr01 | 38736426                | AA                              | GG              | 1946743123               |
| SNP_P4_14500_38736435 | NC_021160.1    | Ca_kabuli_chr01 | 38736435                | CC                              | AA              | 1946743125               |
| SNP_P4_14501_38737062 | NC_021160.1    | Ca_kabuli_chr01 | 38737062                | AA                              | TT              | 1946743127               |
| SNP_P4_14502_38737767 | NC_021160.1    | Ca_kabuli_chr01 | 38737767                | AA                              | TT              | 1946743129               |
| SNP_P4_14503_38737796 | NC_021160.1    | Ca_kabuli_chr01 | 38737796                | AA                              | CC              | 1946743131               |
| SNP_P4_14505_38740718 | NC_021160.1    | Ca_kabuli_chr01 | 38740718                | CC                              | GG              | 1946743133               |
| SNP_P4_14506_38743947 | NC_021160.1    | Ca_kabuli_chr01 | 38743947                | GG                              | AA              | 1946743134               |
| SNP_P4_14507_38744096 | NC_021160.1    | Ca_kabuli_chr01 | 38744096                | AA                              | CC              | 1946743135               |
| SNP_P4_14509_38744306 | NC_021160.1    | Ca_kabuli_chr01 | 38744306                | GG                              | AA              | 1946743136               |
| SNP_P4_14510_38744327 | NC_021160.1    | Ca_kabuli_chr01 | 38744327                | CC                              | TT              | 1946743137               |
| SNP_P4_14511_38744332 | NC_021160.1    | Ca_kabuli_chr01 | 38744332                | TT                              | CC              | 1946743138               |
| SNP_P4_14512_38745573 | NC_021160.1    | Ca_kabuli_chr01 | 38745573                | CC                              | TT              | 1946743140               |
| SNP_P4_14513_38745864 | NC_021160.1    | Ca_kabuli_chr01 | 38745864                | AA                              | GG              | 1946743142               |
| SNP_P4_14514_38745866 | NC_021160.1    | Ca_kabuli_chr01 | 38745866                | AA                              | TT              | 1946743145               |
| SNP_P4_14515_38746068 | NC_021160.1    | Ca_kabuli_chr01 | 38746068                | TT                              | AA              | 1946743147               |
| SNP_P4_14516_38746069 | NC_021160.1    | Ca_kabuli_chr01 | 38746069                | AA                              | TT              | 1946743149               |
| SNP_P4_14517_38746251 | NC_021160.1    | Ca_kabuli_chr01 | 38746251                | CC                              | TT              | 1946743151               |
| SNP_P4_14518_38746463 | NC_021160.1    | Ca_kabuli_chr01 | 38746463                | AA                              | CC              | 1946743152               |
| SNP_P4_14520_38748385 | NC_021160.1    | Ca_kabuli_chr01 | 38748385                | CC                              | TT              | 1946743154               |
| SNP_P4_14521_38749563 | NC_021160.1    | Ca_kabuli_chr01 | 38749563                | TT                              | CC              | 1946743156               |
| SNP_P4_14522_38750293 | NC_021160.1    | Ca_kabuli_chr01 | 38750293                | AA                              | GG              | 1946743158               |
| SNP_P4_14523_38750528 | NC_021160.1    | Ca_kabuli_chr01 | 38750528                | TT                              | CC              | 1946743160               |
| SNP_P4_14524_38750733 | NC_021160.1    | Ca_kabuli_chr01 | 38750733                | GG                              | AA              | 1946743162               |
| SNP_P4_14525_38751165 | NC_021160.1    | Ca_kabuli_chr01 | 38751165                | GG                              | AA              | 1946743164               |
| SNP_P4_14526_38751199 | NC_021160.1    | Ca_kabuli_chr01 | 38751199                | AA                              | TT              | 1946743166               |
| SNP_P4_14527_38751651 | NC_021160.1    | Ca_kabuli_chr01 | 38751651                | TT                              | AA              | 1946743168               |
| SNP_P4_14529_38752375 | NC_021160.1    | Ca_kabuli_chr01 | 38752375                | CC                              | TT              | 1946743170               |
| SNP_P4_14530_38752688 | NC_021160.1    | Ca_kabuli_chr01 | 38752688                | CC                              | TT              | 1946743172               |
| SNP_P4_14531_38752717 | NC_021160.1    | Ca_kabuli_chr01 | 38752717                | GG                              | AA              | 1946743174               |
| SNP_P4_14532_38754306 | NC_021160.1    | Ca_kabuli_chr01 | 38754306                | GG                              | TT              | 1946743176               |
| SNP_P4_14533_38754322 | NC_021160.1    | Ca_kabuli_chr01 | 38754322                | GG                              | CC              | 1946743178               |
| SNP_P4_14534_38754840 | NC_021160.1    | Ca_kabuli_chr01 | 38754840                | TT                              | GG              | 1946743180               |



| SNPs IDs              | Chromosome IDs | Chromosomes     | Physical positions (bp) | CDC Frontier (Reference genome) | (ILWC46 & LPNB) | NCBI SNPdb Accession IDs |
|-----------------------|----------------|-----------------|-------------------------|---------------------------------|-----------------|--------------------------|
| SNP_P4_14535_38754853 | NC_021160.1    | Ca_kabuli_chr01 | 38754853                | TT                              | AA              | 1946743182               |
| SNP_P4_14536_38755016 | NC_021160.1    | Ca_kabuli_chr01 | 38755016                | TT                              | CC              | 1946743184               |
| SNP_P4_14537_38755104 | NC_021160.1    | Ca_kabuli_chr01 | 38755104                | CC                              | TT              | 1946743186               |
| SNP_P4_14538_38755257 | NC_021160.1    | Ca_kabuli_chr01 | 38755257                | GG                              | TT              | 1946743188               |
| SNP_P4_14539_38755789 | NC_021160.1    | Ca_kabuli_chr01 | 38755789                | AA                              | TT              | 1946743190               |
| SNP_P4_14540_38756119 | NC_021160.1    | Ca_kabuli_chr01 | 38756119                | TT                              | CC              | 1946743192               |
| SNP_P4_14541_38756178 | NC_021160.1    | Ca_kabuli_chr01 | 38756178                | TT                              | GG              | 1946743194               |
| SNP_P4_14542_38756837 | NC_021160.1    | Ca_kabuli_chr01 | 38756837                | GG                              | TT              | 1946743196               |
| SNP_P4_14543_38757024 | NC_021160.1    | Ca_kabuli_chr01 | 38757024                | GG                              | AA              | 1946743198               |
| SNP_P4_14544_38757025 | NC_021160.1    | Ca_kabuli_chr01 | 38757025                | CC                              | TT              | 1946743200               |
| SNP_P4_14545_38757031 | NC_021160.1    | Ca_kabuli_chr01 | 38757031                | GG                              | AA              | 1946743202               |
| SNP_P4_14546_38757049 | NC_021160.1    | Ca_kabuli_chr01 | 38757049                | TT                              | CC              | 1946743204               |
| SNP_P4_14548_38757183 | NC_021160.1    | Ca_kabuli_chr01 | 38757183                | AA                              | GG              | 1946743206               |
| SNP_P4_14549_38758880 | NC_021160.1    | Ca_kabuli_chr01 | 38758880                | TT                              | GG              | 1946743208               |
| SNP_P4_14550_38759290 | NC_021160.1    | Ca_kabuli_chr01 | 38759290                | CC                              | TT              | 1946743210               |
| SNP_P4_14551_38759550 | NC_021160.1    | Ca_kabuli_chr01 | 38759550                | CC                              | TT              | 1946743212               |
| SNP_P4_14553_38760892 | NC_021160.1    | Ca_kabuli_chr01 | 38760892                | TT                              | CC              | 1946743214               |
| SNP_P4_14554_38761051 | NC_021160.1    | Ca_kabuli_chr01 | 38761051                | GG                              | AA              | 1946743216               |
| SNP_P4_14555_38761057 | NC_021160.1    | Ca_kabuli_chr01 | 38761057                | AA                              | CC              | 1946743218               |
| SNP_P4_14556_38761205 | NC_021160.1    | Ca_kabuli_chr01 | 38761205                | GG                              | AA              | 1946743220               |
| SNP_P4_14557_38761414 | NC_021160.1    | Ca_kabuli_chr01 | 38761414                | CC                              | AA              | 1946743222               |
| SNP_P4_14558_38761428 | NC_021160.1    | Ca_kabuli_chr01 | 38761428                | AA                              | GG              | 1946743224               |
| SNP_P4_14559_38762539 | NC_021160.1    | Ca_kabuli_chr01 | 38762539                | GG                              | TT              | 1946743226               |
| SNP_P4_14560_38762833 | NC_021160.1    | Ca_kabuli_chr01 | 38762833                | GG                              | AA              | 1946743228               |
| SNP_P4_14561_38763083 | NC_021160.1    | Ca_kabuli_chr01 | 38763083                | TT                              | AA              | 1946743230               |
| SNP_P4_14562_38763092 | NC_021160.1    | Ca_kabuli_chr01 | 38763092                | GG                              | AA              | 1946743232               |
| SNP_P4_14563_38763098 | NC_021160.1    | Ca_kabuli_chr01 | 38763098                | AA                              | GG              | 1946743234               |
| SNP_P4_14564_38763109 | NC_021160.1    | Ca_kabuli_chr01 | 38763109                | CC                              | GG              | 1946743236               |
| SNP_P4_14565_38763123 | NC_021160.1    | Ca_kabuli_chr01 | 38763123                | AA                              | TT              | 1946743238               |
| SNP_P4_14566_38765016 | NC_021160.1    | Ca_kabuli_chr01 | 38765016                | GG                              | AA              | 1946743241               |
| SNP_P4_14567_38765056 | NC_021160.1    | Ca_kabuli_chr01 | 38765056                | AA                              | TT              | 1946743243               |
| SNP_P4_14568_38766323 | NC_021160.1    | Ca_kabuli_chr01 | 38766323                | TT                              | GG              | 1946743245               |
| SNP_P4_14570_38769731 | NC_021160.1    | Ca_kabuli_chr01 | 38769731                | GG                              | AA              | 1946743247               |
| SNP_P4_14571_38769752 | NC_021160.1    | Ca_kabuli_chr01 | 38769752                | AA                              | GG              | 1946743249               |
| SNP_P4_14572_38769959 | NC_021160.1    | Ca_kabuli_chr01 | 38769959                | CC                              | TT              | 1946743251               |
| SNP_P4_14573_38769962 | NC_021160.1    | Ca_kabuli_chr01 | 38769962                | GG                              | TT              | 1946743252               |
| SNP_P4_14574_38770243 | NC_021160.1    | Ca_kabuli_chr01 | 38770243                | CC                              | AA              | 1946743255               |
| SNP_P4_14575_38770244 | NC_021160.1    | Ca_kabuli_chr01 | 38770244                | AA                              | TT              | 1946743257               |
| SNP_P4_14576_38770288 | NC_021160.1    | Ca_kabuli_chr01 | 38770288                | TT                              | CC              | 1946743258               |
| SNP_P4_14577_38770740 | NC_021160.1    | Ca_kabuli_chr01 | 38770740                | CC                              | AA              | 1946743260               |
| SNP_P4_14578_38770743 | NC_021160.1    | Ca_kabuli_chr01 | 38770743                | AA                              | GG              | 1946743262               |
| SNP_P4_14579_38770997 | NC_021160.1    | Ca_kabuli_chr01 | 38770997                | CC                              | TT              | 1946743264               |

| SNPs IDs              | Chromosome IDs | Chromosomes     | Physical positions (bp) | CDC Frontier (Reference genome) | (ILWC46 & LPNB) | NCBI SNPdb Accession IDs |
|-----------------------|----------------|-----------------|-------------------------|---------------------------------|-----------------|--------------------------|
| SNP_P4_14580_38770998 | NC_021160.1    | Ca_kabuli_chr01 | 38770998                | AA                              | GG              | 1946743266               |
| SNP_P4_14582_38771656 | NC_021160.1    | Ca_kabuli_chr01 | 38771656                | GG                              | TT              | 1946743268               |
| SNP_P4_14584_38773884 | NC_021160.1    | Ca_kabuli_chr01 | 38773884                | TT                              | CC              | 1946743271               |
| SNP_P4_14585_38774012 | NC_021160.1    | Ca_kabuli_chr01 | 38774012                | GG                              | AA              | 1946743273               |
| SNP_P4_14586_38774194 | NC_021160.1    | Ca_kabuli_chr01 | 38774194                | TT                              | AA              | 1946743275               |
| SNP_P4_14587_38774262 | NC_021160.1    | Ca_kabuli_chr01 | 38774262                | CC                              | TT              | 1946743277               |
| SNP_P4_14588_38774274 | NC_021160.1    | Ca_kabuli_chr01 | 38774274                | TT                              | CC              | 1946743279               |
| SNP_P4_14589_38774304 | NC_021160.1    | Ca_kabuli_chr01 | 38774304                | AA                              | CC              | 1946743281               |
| SNP_P4_14590_38775140 | NC_021160.1    | Ca_kabuli_chr01 | 38775140                | CC                              | TT              | 1946743283               |
| SNP_P4_14591_38775174 | NC_021160.1    | Ca_kabuli_chr01 | 38775174                | GG                              | AA              | 1946743285               |
| SNP_P4_14592_38775192 | NC_021160.1    | Ca_kabuli_chr01 | 38775192                | GG                              | AA              | 1946743287               |
| SNP_P4_14593_38775211 | NC_021160.1    | Ca_kabuli_chr01 | 38775211                | GG                              | CC              | 1946743289               |
| SNP_P4_14594_38775744 | NC_021160.1    | Ca_kabuli_chr01 | 38775744                | GG                              | AA              | 1946743291               |
| SNP_P4_14595_38775752 | NC_021160.1    | Ca_kabuli_chr01 | 38775752                | AA                              | GG              | 1946743293               |
| SNP_P4_14596_38775936 | NC_021160.1    | Ca_kabuli_chr01 | 38775936                | TT                              | CC              | 1946743295               |
| SNP_P4_14597_38775938 | NC_021160.1    | Ca_kabuli_chr01 | 38775938                | GG                              | TT              | 1946743297               |
| SNP_P4_14598_38775976 | NC_021160.1    | Ca_kabuli_chr01 | 38775976                | AA                              | GG              | 1946743299               |
| SNP_P4_14599_38776199 | NC_021160.1    | Ca_kabuli_chr01 | 38776199                | TT                              | AA              | 1946743301               |
| SNP_P4_14600_38776209 | NC_021160.1    | Ca_kabuli_chr01 | 38776209                | TT                              | CC              | 1946743303               |
| SNP_P4_14601_38776230 | NC_021160.1    | Ca_kabuli_chr01 | 38776230                | TT                              | GG              | 1946743305               |
| SNP_P4_14602_38777406 | NC_021160.1    | Ca_kabuli_chr01 | 38777406                | CC                              | TT              | 1946743307               |
| SNP_P4_14603_38777588 | NC_021160.1    | Ca_kabuli_chr01 | 38777588                | TT                              | CC              | 1946743309               |
| SNP_P4_14604_38778996 | NC_021160.1    | Ca_kabuli_chr01 | 38778996                | CC                              | TT              | 1946743311               |
| SNP_P4_14605_38779398 | NC_021160.1    | Ca_kabuli_chr01 | 38779398                | AA                              | CC              | 1946743313               |
| SNP_P4_14606_38779408 | NC_021160.1    | Ca_kabuli_chr01 | 38779408                | AA                              | GG              | 1946743315               |
| SNP_P4_14607_38780937 | NC_021160.1    | Ca_kabuli_chr01 | 38780937                | TT                              | AA              | 1946743317               |
| SNP_P4_14608_38781211 | NC_021160.1    | Ca_kabuli_chr01 | 38781211                | AA                              | GG              | 1946743319               |
| SNP_P4_14609_38781220 | NC_021160.1    | Ca_kabuli_chr01 | 38781220                | TT                              | AA              | 1946743321               |
| SNP_P4_14610_38781232 | NC_021160.1    | Ca_kabuli_chr01 | 38781232                | CC                              | AA              | 1946743323               |
| SNP_P4_14611_38781250 | NC_021160.1    | Ca_kabuli_chr01 | 38781250                | CC                              | TT              | 1946743325               |
| SNP_P4_14612_38781586 | NC_021160.1    | Ca_kabuli_chr01 | 38781586                | GG                              | AA              | 1946743327               |
| SNP_P4_14613_38781608 | NC_021160.1    | Ca_kabuli_chr01 | 38781608                | AA                              | GG              | 1946743329               |
| SNP_P4_14614_38781610 | NC_021160.1    | Ca_kabuli_chr01 | 38781610                | CC                              | TT              | 1946743331               |
| SNP_P4_14615_38781616 | NC_021160.1    | Ca_kabuli_chr01 | 38781616                | AA                              | GG              | 1946743333               |
| SNP_P4_14616_38781625 | NC_021160.1    | Ca_kabuli_chr01 | 38781625                | CC                              | TT              | 1946743335               |
| SNP_P4_14617_38781958 | NC_021160.1    | Ca_kabuli_chr01 | 38781958                | GG                              | TT              | 1946743337               |
| SNP_P4_14618_38781959 | NC_021160.1    | Ca_kabuli_chr01 | 38781959                | TT                              | AA              | 1946743339               |
| SNP_P4_14619_38787208 | NC_021160.1    | Ca_kabuli_chr01 | 38787208                | CC                              | TT              | 1946743341               |
| SNP_P4_14621_38792344 | NC_021160.1    | Ca_kabuli_chr01 | 38792344                | AA                              | GG              | 1946743343               |
| SNP_P4_14622_38792642 | NC_021160.1    | Ca_kabuli_chr01 | 38792642                | CC                              | TT              | 1946743345               |
| SNP_P4_14623_38792697 | NC_021160.1    | Ca_kabuli_chr01 | 38792697                | TT                              | GG              | 1946743347               |
| SNP_P4_14624_38793223 | NC_021160.1    | Ca_kabuli_chr01 | 38793223                | TT                              | CC              | 1946743349               |

| SNPs IDs              | Chromosome IDs | Chromosomes     | Physical positions (bp) | CDC Frontier (Reference genome) | (ILWC46 & LPNB) | NCBI SNPdb Accession IDs |
|-----------------------|----------------|-----------------|-------------------------|---------------------------------|-----------------|--------------------------|
| SNP_P4_14625_38796800 | NC_021160.1    | Ca_kabuli_chr01 | 38796800                | AA                              | CC              | 1946743351               |
| SNP_P4_14626_38799144 | NC_021160.1    | Ca_kabuli_chr01 | 38799144                | CC                              | TT              | 1946743353               |
| SNP_P4_14627_38800044 | NC_021160.1    | Ca_kabuli_chr01 | 38800044                | TT                              | GG              | 1946743355               |
| SNP_P4_14628_38800045 | NC_021160.1    | Ca_kabuli_chr01 | 38800045                | GG                              | AA              | 1946743357               |
| SNP_P4_14629_38800052 | NC_021160.1    | Ca_kabuli_chr01 | 38800052                | GG                              | AA              | 1946743359               |
| SNP_P4_14630_38800053 | NC_021160.1    | Ca_kabuli_chr01 | 38800053                | AA                              | GG              | 1946743361               |
| SNP_P4_14631_38800233 | NC_021160.1    | Ca_kabuli_chr01 | 38800233                | GG                              | CC              | 1946743363               |
| SNP_P4_14632_38800282 | NC_021160.1    | Ca_kabuli_chr01 | 38800282                | GG                              | AA              | 1946743365               |
| SNP_P4_14634_38800633 | NC_021160.1    | Ca_kabuli_chr01 | 38800633                | TT                              | AA              | 1946743367               |
| SNP_P4_14635_38801616 | NC_021160.1    | Ca_kabuli_chr01 | 38801616                | CC                              | TT              | 1946743369               |
| SNP_P4_14636_38801643 | NC_021160.1    | Ca_kabuli_chr01 | 38801643                | CC                              | AA              | 1946743372               |
| SNP_P4_14637_38801842 | NC_021160.1    | Ca_kabuli_chr01 | 38801842                | GG                              | TT              | 1946743374               |
| SNP_P4_14638_38801876 | NC_021160.1    | Ca_kabuli_chr01 | 38801876                | TT                              | AA              | 1946743375               |
| SNP_P4_14639_38801967 | NC_021160.1    | Ca_kabuli_chr01 | 38801967                | GG                              | TT              | 1946743377               |
| SNP_P4_14640_38802030 | NC_021160.1    | Ca_kabuli_chr01 | 38802030                | TT                              | CC              | 1946743380               |
| SNP_P4_14641_38802103 | NC_021160.1    | Ca_kabuli_chr01 | 38802103                | TT                              | CC              | 1946743382               |
| SNP_P4_14642_38802124 | NC_021160.1    | Ca_kabuli_chr01 | 38802124                | TT                              | CC              | 1946743384               |
| SNP_P4_14643_38811946 | NC_021160.1    | Ca_kabuli_chr01 | 38811946                | CC                              | AA              | 1946743386               |
| SNP_P4_14644_38811964 | NC_021160.1    | Ca_kabuli_chr01 | 38811964                | CC                              | TT              | 1946743388               |
| SNP_P4_14645_38811965 | NC_021160.1    | Ca_kabuli_chr01 | 38811965                | AA                              | GG              | 1946743389               |
| SNP_P4_14646_38811985 | NC_021160.1    | Ca_kabuli_chr01 | 38811985                | CC                              | TT              | 1946743392               |
| SNP_P4_14647_38812780 | NC_021160.1    | Ca_kabuli_chr01 | 38812780                | AA                              | CC              | 1946743394               |
| SNP_P4_14648_38813346 | NC_021160.1    | Ca_kabuli_chr01 | 38813346                | AA                              | GG              | 1946743396               |
| SNP_P4_14649_38814430 | NC_021160.1    | Ca_kabuli_chr01 | 38814430                | AA                              | GG              | 1946743398               |
| SNP_P4_14650_38814438 | NC_021160.1    | Ca_kabuli_chr01 | 38814438                | GG                              | CC              | 1946743400               |
| SNP_P4_14651_38814836 | NC_021160.1    | Ca_kabuli_chr01 | 38814836                | TT                              | CC              | 1946743402               |
| SNP_P4_14652_38815124 | NC_021160.1    | Ca_kabuli_chr01 | 38815124                | GG                              | AA              | 1946743404               |
| SNP_P4_14653_38815529 | NC_021160.1    | Ca_kabuli_chr01 | 38815529                | TT                              | CC              | 1946743406               |
| SNP_P4_14654_38815602 | NC_021160.1    | Ca_kabuli_chr01 | 38815602                | CC                              | TT              | 1946743407               |
| SNP_P4_14655_38815604 | NC_021160.1    | Ca_kabuli_chr01 | 38815604                | TT                              | AA              | 1946743409               |
| SNP_P4_14656_38816860 | NC_021160.1    | Ca_kabuli_chr01 | 38816860                | GG                              | CC              | 1946743411               |
| SNP_P4_14657_38816892 | NC_021160.1    | Ca_kabuli_chr01 | 38816892                | CC                              | AA              | 1946743413               |
| SNP_P4_14658_38841192 | NC_021160.1    | Ca_kabuli_chr01 | 38841192                | AA                              | GG              | 1946743415               |
| SNP_P4_14659_38841443 | NC_021160.1    | Ca_kabuli_chr01 | 38841443                | TT                              | GG              | 1946743417               |
| SNP_P4_14660_38841482 | NC_021160.1    | Ca_kabuli_chr01 | 38841482                | TT                              | CC              | 1946743419               |
| SNP_P4_14661_38841491 | NC_021160.1    | Ca_kabuli_chr01 | 38841491                | AA                              | GG              | 1946743421               |
| SNP_P4_14662_38843533 | NC_021160.1    | Ca_kabuli_chr01 | 38843533                | GG                              | AA              | 1946743423               |
| SNP_P4_14663_38844819 | NC_021160.1    | Ca_kabuli_chr01 | 38844819                | CC                              | AA              | 1946743425               |
| SNP_P4_14664_38845725 | NC_021160.1    | Ca_kabuli_chr01 | 38845725                | TT                              | CC              | 1946743427               |
| SNP_P4_14665_38846982 | NC_021160.1    | Ca_kabuli_chr01 | 38846982                | TT                              | CC              | 1946743429               |
| SNP_P4_14666_38847139 | NC_021160.1    | Ca_kabuli_chr01 | 38847139                | GG                              | AA              | 1946743431               |
| SNP_P4_14667_38847274 | NC_021160.1    | Ca_kabuli_chr01 | 38847274                | CC                              | TT              | 1946743433               |

| SNPs IDs              | Chromosome IDs | Chromosomes     | Physical positions (bp) | CDC Frontier (Reference genome) | (ILWC46 & LPNB) | NCBI SNPdb Accession IDs |
|-----------------------|----------------|-----------------|-------------------------|---------------------------------|-----------------|--------------------------|
| SNP_P4_14668_38852398 | NC_021160.1    | Ca_kabuli_chr01 | 38852398                | AA                              | GG              | 1946743435               |
| SNP_P4_14669_38852596 | NC_021160.1    | Ca_kabuli_chr01 | 38852596                | AA                              | GG              | 1946743437               |
| SNP_P4_14670_38852836 | NC_021160.1    | Ca_kabuli_chr01 | 38852836                | GG                              | AA              | 1946743439               |
| SNP_P4_14671_38852855 | NC_021160.1    | Ca_kabuli_chr01 | 38852855                | TT                              | CC              | 1946743441               |
| SNP_P4_14673_38852966 | NC_021160.1    | Ca_kabuli_chr01 | 38852966                | TT                              | CC              | 1946743443               |
| SNP_P4_14675_38853256 | NC_021160.1    | Ca_kabuli_chr01 | 38853256                | CC                              | TT              | 1946743445               |
| SNP_P4_14676_38853394 | NC_021160.1    | Ca_kabuli_chr01 | 38853394                | GG                              | TT              | 1946743447               |
| SNP_P4_14677_38853570 | NC_021160.1    | Ca_kabuli_chr01 | 38853570                | TT                              | CC              | 1946743449               |
| SNP_P4_14678_38853635 | NC_021160.1    | Ca_kabuli_chr01 | 38853635                | AA                              | GG              | 1946743451               |
| SNP_P4_14680_38872279 | NC_021160.1    | Ca_kabuli_chr01 | 38872279                | TT                              | AA              | 1946743453               |
| SNP_P4_14681_38872280 | NC_021160.1    | Ca_kabuli_chr01 | 38872280                | CC                              | TT              | 1946743455               |
| SNP_P4_14683_38873004 | NC_021160.1    | Ca_kabuli_chr01 | 38873004                | GG                              | AA              | 1946743457               |
| SNP_P4_14684_38873390 | NC_021160.1    | Ca_kabuli_chr01 | 38873390                | GG                              | TT              | 1946743459               |
| SNP_P4_14685_38873860 | NC_021160.1    | Ca_kabuli_chr01 | 38873860                | TT                              | CC              | 1946743461               |
| SNP_P4_14686_38873947 | NC_021160.1    | Ca_kabuli_chr01 | 38873947                | AA                              | GG              | 1946743463               |
| SNP_P4_14687_38874064 | NC_021160.1    | Ca_kabuli_chr01 | 38874064                | AA                              | GG              | 1946743465               |
| SNP_P4_14690_38875631 | NC_021160.1    | Ca_kabuli_chr01 | 38875631                | GG                              | AA              | 1946743467               |
| SNP_P4_14692_38878819 | NC_021160.1    | Ca_kabuli_chr01 | 38878819                | CC                              | TT              | 1946743469               |
| SNP_P4_14694_38885519 | NC_021160.1    | Ca_kabuli_chr01 | 38885519                | CC                              | TT              | 1946743471               |
| SNP_P4_14695_38885724 | NC_021160.1    | Ca_kabuli_chr01 | 38885724                | AA                              | GG              | 1946743473               |
| SNP_P4_14696_38886299 | NC_021160.1    | Ca_kabuli_chr01 | 38886299                | TT                              | GG              | 1946743475               |
| SNP_P4_14698_38886603 | NC_021160.1    | Ca_kabuli_chr01 | 38886603                | CC                              | TT              | 1946743477               |
| SNP_P4_14699_38886632 | NC_021160.1    | Ca_kabuli_chr01 | 38886632                | AA                              | GG              | 1946743479               |
| SNP_P4_14700_38886848 | NC_021160.1    | Ca_kabuli_chr01 | 38886848                | GG                              | AA              | 1946743481               |
| SNP_P4_14701_38887090 | NC_021160.1    | Ca_kabuli_chr01 | 38887090                | AA                              | TT              | 1946743483               |
| SNP_P4_14702_38887120 | NC_021160.1    | Ca_kabuli_chr01 | 38887120                | AA                              | GG              | 1946743485               |
| SNP_P4_14703_38887143 | NC_021160.1    | Ca_kabuli_chr01 | 38887143                | TT                              | CC              | 1946743487               |
| SNP_P4_14705_38887211 | NC_021160.1    | Ca_kabuli_chr01 | 38887211                | TT                              | CC              | 1946743489               |
| SNP_P4_14706_38889343 | NC_021160.1    | Ca_kabuli_chr01 | 38889343                | GG                              | AA              | 1946743491               |
| SNP_P4_14708_38891053 | NC_021160.1    | Ca_kabuli_chr01 | 38891053                | GG                              | AA              | 1946743493               |
| SNP_P4_14709_38893079 | NC_021160.1    | Ca_kabuli_chr01 | 38893079                | CC                              | TT              | 1946743495               |
| SNP_P4_14710_38894879 | NC_021160.1    | Ca_kabuli_chr01 | 38894879                | TT                              | AA              | 1946743497               |
| SNP_P4_14712_38895350 | NC_021160.1    | Ca_kabuli_chr01 | 38895350                | GG                              | TT              | 1946743499               |
| SNP_P4_14714_38897231 | NC_021160.1    | Ca_kabuli_chr01 | 38897231                | TT                              | AA              | 1946743501               |
| SNP_P4_14715_38897240 | NC_021160.1    | Ca_kabuli_chr01 | 38897240                | TT                              | CC              | 1946743503               |
| SNP_P4_14716_38897241 | NC_021160.1    | Ca_kabuli_chr01 | 38897241                | GG                              | AA              | 1946743505               |
| SNP_P4_14717_38897499 | NC_021160.1    | Ca_kabuli_chr01 | 38897499                | AA                              | GG              | 1946743507               |
| SNP_P4_14719_38914834 | NC_021160.1    | Ca_kabuli_chr01 | 38914834                | GG                              | TT              | 1946743509               |
| SNP_P4_14720_38914841 | NC_021160.1    | Ca_kabuli_chr01 | 38914841                | TT                              | AA              | 1946743511               |
| SNP_P4_14721_38914851 | NC_021160.1    | Ca_kabuli_chr01 | 38914851                | TT                              | CC              | 1946743513               |
| SNP_P4_14722_38915404 | NC_021160.1    | Ca_kabuli_chr01 | 38915404                | TT                              | GG              | 1946743515               |
| SNP_P4_14723_38915410 | NC_021160.1    | Ca_kabuli_chr01 | 38915410                | AA                              | CC              | 1946743517               |

| SNPs IDs              | Chromosome IDs | Chromosomes     | Physical positions (bp) | CDC Frontier (Reference genome) | (ILWC46 & LPNB) | NCBI SNPdb Accession IDs |
|-----------------------|----------------|-----------------|-------------------------|---------------------------------|-----------------|--------------------------|
| SNP_P4_14725_38915599 | NC_021160.1    | Ca_kabuli_chr01 | 38915599                | TT                              | GG              | 1946743519               |
| SNP_P4_14726_38917237 | NC_021160.1    | Ca_kabuli_chr01 | 38917237                | TT                              | AA              | 1946743520               |
| SNP_P4_14727_38917288 | NC_021160.1    | Ca_kabuli_chr01 | 38917288                | AA                              | GG              | 1946743522               |
| SNP_P4_14728_38919267 | NC_021160.1    | Ca_kabuli_chr01 | 38919267                | TT                              | CC              | 1946743524               |
| SNP_P4_14729_38921725 | NC_021160.1    | Ca_kabuli_chr01 | 38921725                | GG                              | TT              | 1946743526               |
| SNP_P4_14731_38923028 | NC_021160.1    | Ca_kabuli_chr01 | 38923028                | TT                              | CC              | 1946743528               |
| SNP_P4_14732_38923199 | NC_021160.1    | Ca_kabuli_chr01 | 38923199                | CC                              | AA              | 1946743530               |
| SNP_P4_14733_38923552 | NC_021160.1    | Ca_kabuli_chr01 | 38923552                | AA                              | GG              | 1946743532               |
| SNP_P4_14734_38932536 | NC_021160.1    | Ca_kabuli_chr01 | 38932536                | TT                              | AA              | 1946743534               |
| SNP_P4_14735_38932596 | NC_021160.1    | Ca_kabuli_chr01 | 38932596                | GG                              | TT              | 1946743536               |
| SNP_P4_14737_38942525 | NC_021160.1    | Ca_kabuli_chr01 | 38942525                | CC                              | TT              | 1946743538               |
| SNP_P4_14738_38942638 | NC_021160.1    | Ca_kabuli_chr01 | 38942638                | CC                              | AA              | 1946743540               |
| SNP_P4_14739_38943000 | NC_021160.1    | Ca_kabuli_chr01 | 38943000                | GG                              | TT              | 1946743542               |
| SNP_P4_14742_38944694 | NC_021160.1    | Ca_kabuli_chr01 | 38944694                | CC                              | GG              | 1946743544               |
| SNP_P4_14743_38944708 | NC_021160.1    | Ca_kabuli_chr01 | 38944708                | CC                              | TT              | 1946743546               |
| SNP_P4_14744_38944752 | NC_021160.1    | Ca_kabuli_chr01 | 38944752                | AA                              | CC              | 1946743548               |
| SNP_P4_14746_38945339 | NC_021160.1    | Ca_kabuli_chr01 | 38945339                | TT                              | GG              | 1946743550               |
| SNP_P4_14747_38947466 | NC_021160.1    | Ca_kabuli_chr01 | 38947466                | GG                              | AA              | 1946743552               |
| SNP_P4_14748_38947651 | NC_021160.1    | Ca_kabuli_chr01 | 38947651                | AA                              | CC              | 1946743554               |
| SNP_P4_14749_38947694 | NC_021160.1    | Ca_kabuli_chr01 | 38947694                | AA                              | CC              | 1946743556               |
| SNP_P4_14750_38948311 | NC_021160.1    | Ca_kabuli_chr01 | 38948311                | AA                              | GG              | 1946743558               |
| SNP_P4_14751_38948374 | NC_021160.1    | Ca_kabuli_chr01 | 38948374                | AA                              | GG              | 1946743560               |
| SNP_P4_14752_38948381 | NC_021160.1    | Ca_kabuli_chr01 | 38948381                | CC                              | TT              | 1946743562               |
| SNP_P4_14753_38948627 | NC_021160.1    | Ca_kabuli_chr01 | 38948627                | TT                              | AA              | 1946743564               |
| SNP_P4_14754_38948675 | NC_021160.1    | Ca_kabuli_chr01 | 38948675                | GG                              | AA              | 1946743566               |
| SNP_P4_14755_38949556 | NC_021160.1    | Ca_kabuli_chr01 | 38949556                | TT                              | CC              | 1946743568               |
| SNP_P4_14756_38949715 | NC_021160.1    | Ca_kabuli_chr01 | 38949715                | GG                              | AA              | 1946743570               |
| SNP_P4_14757_38949750 | NC_021160.1    | Ca_kabuli_chr01 | 38949750                | CC                              | GG              | 1946743572               |
| SNP_P4_14758_38949751 | NC_021160.1    | Ca_kabuli_chr01 | 38949751                | CC                              | AA              | 1946743574               |
| SNP_P4_14759_38949754 | NC_021160.1    | Ca_kabuli_chr01 | 38949754                | AA                              | GG              | 1946743576               |
| SNP_P4_14760_38950103 | NC_021160.1    | Ca_kabuli_chr01 | 38950103                | TT                              | CC              | 1946743578               |
| SNP_P4_14761_38951492 | NC_021160.1    | Ca_kabuli_chr01 | 38951492                | TT                              | CC              | 1946743580               |
| SNP_P4_14762_38951750 | NC_021160.1    | Ca_kabuli_chr01 | 38951750                | AA                              | CC              | 1946743582               |
| SNP_P4_14763_38953636 | NC_021160.1    | Ca_kabuli_chr01 | 38953636                | TT                              | AA              | 1946743584               |
| SNP_P4_14764_38958221 | NC_021160.1    | Ca_kabuli_chr01 | 38958221                | CC                              | TT              | 1946743586               |
| SNP_P4_14765_38958559 | NC_021160.1    | Ca_kabuli_chr01 | 38958559                | GG                              | AA              | 1946743588               |
| SNP_P4_14766_38960770 | NC_021160.1    | Ca_kabuli_chr01 | 38960770                | CC                              | TT              | 1946743591               |
| SNP_P4_14767_38971253 | NC_021160.1    | Ca_kabuli_chr01 | 38971253                | GG                              | CC              | 1946743593               |
| SNP_P4_14768_39002482 | NC_021160.1    | Ca_kabuli_chr01 | 39002482                | CC                              | TT              | 1946743595               |
| SNP_P4_14769_39002532 | NC_021160.1    | Ca_kabuli_chr01 | 39002532                | GG                              | CC              | 1946743597               |
| SNP_P4_14770_39003776 | NC_021160.1    | Ca_kabuli_chr01 | 39003776                | TT                              | CC              | 1946743599               |
| SNP_P4_14771_39005071 | NC_021160.1    | Ca_kabuli_chr01 | 39005071                | CC                              | AA              | 1946743601               |

| SNPs IDs              | Chromosome IDs | Chromosomes     | Physical positions (bp) | CDC Frontier (Reference genome) | (ILWC46 & LPNB) | NCBI SNPdb Accession IDs |
|-----------------------|----------------|-----------------|-------------------------|---------------------------------|-----------------|--------------------------|
| SNP_P4_14772_39007091 | NC_021160.1    | Ca_kabuli_chr01 | 39007091                | GG                              | TT              | 1946743603               |
| SNP_P4_14773_39007275 | NC_021160.1    | Ca_kabuli_chr01 | 39007275                | AA                              | GG              | 1946743605               |
| SNP_P4_14774_39010422 | NC_021160.1    | Ca_kabuli_chr01 | 39010422                | GG                              | TT              | 1946743607               |
| SNP_P4_14775_39010799 | NC_021160.1    | Ca_kabuli_chr01 | 39010799                | AA                              | GG              | 1946743609               |
| SNP_P4_14776_39012684 | NC_021160.1    | Ca_kabuli_chr01 | 39012684                | CC                              | AA              | 1946743611               |
| SNP_P4_14777_39013536 | NC_021160.1    | Ca_kabuli_chr01 | 39013536                | TT                              | GG              | 1946743613               |
| SNP_P4_14778_39013779 | NC_021160.1    | Ca_kabuli_chr01 | 39013779                | TT                              | CC              | 1946743615               |
| SNP_P4_14779_39013819 | NC_021160.1    | Ca_kabuli_chr01 | 39013819                | TT                              | GG              | 1946743617               |
| SNP_P4_14780_39013972 | NC_021160.1    | Ca_kabuli_chr01 | 39013972                | GG                              | AA              | 1946743619               |
| SNP_P4_14781_39014737 | NC_021160.1    | Ca_kabuli_chr01 | 39014737                | TT                              | CC              | 1946743621               |
| SNP_P4_14782_39015376 | NC_021160.1    | Ca_kabuli_chr01 | 39015376                | CC                              | TT              | 1946743623               |
| SNP_P4_14783_39015756 | NC_021160.1    | Ca_kabuli_chr01 | 39015756                | TT                              | AA              | 1946743625               |
| SNP_P4_14784_39015942 | NC_021160.1    | Ca_kabuli_chr01 | 39015942                | TT                              | GG              | 1946743627               |
| SNP_P4_14785_39016755 | NC_021160.1    | Ca_kabuli_chr01 | 39016755                | AA                              | GG              | 1946743629               |
| SNP_P4_14786_39016757 | NC_021160.1    | Ca_kabuli_chr01 | 39016757                | GG                              | AA              | 1946743631               |
| SNP_P4_14787_39016819 | NC_021160.1    | Ca_kabuli_chr01 | 39016819                | TT                              | GG              | 1946743633               |
| SNP_P4_14788_39018745 | NC_021160.1    | Ca_kabuli_chr01 | 39018745                | AA                              | GG              | 1946743635               |
| SNP_P4_14789_39020771 | NC_021160.1    | Ca_kabuli_chr01 | 39020771                | GG                              | AA              | 1946743637               |
| SNP_P4_14790_39022087 | NC_021160.1    | Ca_kabuli_chr01 | 39022087                | TT                              | CC              | 1946743639               |
| SNP_P4_14791_39022227 | NC_021160.1    | Ca_kabuli_chr01 | 39022227                | CC                              | TT              | 1946743641               |
| SNP_P4_14792_39022364 | NC_021160.1    | Ca_kabuli_chr01 | 39022364                | TT                              | GG              | 1946743643               |
| SNP_P4_14793_39025304 | NC_021160.1    | Ca_kabuli_chr01 | 39025304                | CC                              | TT              | 1946743645               |
| SNP_P4_14794_39025307 | NC_021160.1    | Ca_kabuli_chr01 | 39025307                | CC                              | TT              | 1946743647               |
| SNP_P4_14795_39025838 | NC_021160.1    | Ca_kabuli_chr01 | 39025838                | TT                              | GG              | 1946743649               |
| SNP_P4_14796_39026102 | NC_021160.1    | Ca_kabuli_chr01 | 39026102                | CC                              | GG              | 1946743651               |
| SNP_P4_14797_39026474 | NC_021160.1    | Ca_kabuli_chr01 | 39026474                | AA                              | GG              | 1946743653               |
| SNP_P4_14798_39026974 | NC_021160.1    | Ca_kabuli_chr01 | 39026974                | TT                              | GG              | 1946743655               |
| SNP_P4_14799_39026994 | NC_021160.1    | Ca_kabuli_chr01 | 39026994                | GG                              | TT              | 1946743657               |
| SNP_P4_14800_39027557 | NC_021160.1    | Ca_kabuli_chr01 | 39027557                | GG                              | AA              | 1946743659               |
| SNP_P4_14801_39027585 | NC_021160.1    | Ca_kabuli_chr01 | 39027585                | TT                              | AA              | 1946743661               |
| SNP_P4_14802_39027598 | NC_021160.1    | Ca_kabuli_chr01 | 39027598                | AA                              | CC              | 1946743663               |
| SNP_P4_14804_39027909 | NC_021160.1    | Ca_kabuli_chr01 | 39027909                | AA                              | TT              | 1946743665               |
| SNP_P4_14806_39030901 | NC_021160.1    | Ca_kabuli_chr01 | 39030901                | GG                              | AA              | 1946743667               |
| SNP_P4_14807_39037726 | NC_021160.1    | Ca_kabuli_chr01 | 39037726                | GG                              | AA              | 1946743669               |
| SNP_P4_14808_39039865 | NC_021160.1    | Ca_kabuli_chr01 | 39039865                | AA                              | TT              | 1946743671               |
| SNP_P4_14809_39040109 | NC_021160.1    | Ca_kabuli_chr01 | 39040109                | AA                              | CC              | 1946743673               |
| SNP_P4_14810_39040390 | NC_021160.1    | Ca_kabuli_chr01 | 39040390                | AA                              | CC              | 1946743675               |
| SNP_P4_14812_39041665 | NC_021160.1    | Ca_kabuli_chr01 | 39041665                | TT                              | AA              | 1946743677               |
| SNP_P4_14813_39041681 | NC_021160.1    | Ca_kabuli_chr01 | 39041681                | AA                              | TT              | 1946743679               |
| SNP_P4_14814_39041697 | NC_021160.1    | Ca_kabuli_chr01 | 39041697                | TT                              | GG              | 1946743681               |
| SNP_P4_14815_39041707 | NC_021160.1    | Ca_kabuli_chr01 | 39041707                | CC                              | TT              | 1946743683               |
| SNP_P4_14816_39042562 | NC_021160.1    | Ca_kabuli_chr01 | 39042562                | GG                              | AA              | 1946743684               |

| SNPs IDs              | Chromosome IDs | Chromosomes     | Physical positions (bp) | CDC Frontier (Reference genome) | (ILWC46 & LPNB) | NCBI SNPdb Accession IDs |
|-----------------------|----------------|-----------------|-------------------------|---------------------------------|-----------------|--------------------------|
| SNP_P4_14817_39051000 | NC_021160.1    | Ca_kabuli_chr01 | 39051000                | AA                              | GG              | 1946743686               |
| SNP_P4_14818_39051179 | NC_021160.1    | Ca_kabuli_chr01 | 39051179                | TT                              | CC              | 1946743688               |
| SNP_P4_14819_39051202 | NC_021160.1    | Ca_kabuli_chr01 | 39051202                | TT                              | CC              | 1946743690               |
| SNP_P4_14820_39051214 | NC_021160.1    | Ca_kabuli_chr01 | 39051214                | AA                              | CC              | 1946743692               |
| SNP_P4_14821_39051233 | NC_021160.1    | Ca_kabuli_chr01 | 39051233                | TT                              | CC              | 1946743694               |
| SNP_P4_14822_39051236 | NC_021160.1    | Ca_kabuli_chr01 | 39051236                | AA                              | GG              | 1946743696               |
| SNP_P4_14823_39051244 | NC_021160.1    | Ca_kabuli_chr01 | 39051244                | AA                              | CC              | 1946743698               |
| SNP_P4_14824_39051247 | NC_021160.1    | Ca_kabuli_chr01 | 39051247                | AA                              | CC              | 1946743700               |
| SNP_P4_14825_39051277 | NC_021160.1    | Ca_kabuli_chr01 | 39051277                | AA                              | GG              | 1946743702               |
| SNP_P4_14826_39051316 | NC_021160.1    | Ca_kabuli_chr01 | 39051316                | TT                              | CC              | 1946743704               |
| SNP_P4_14827_39051318 | NC_021160.1    | Ca_kabuli_chr01 | 39051318                | TT                              | GG              | 1946743706               |
| SNP_P4_14828_39051336 | NC_021160.1    | Ca_kabuli_chr01 | 39051336                | GG                              | TT              | 1946743708               |
| SNP_P4_14829_39051420 | NC_021160.1    | Ca_kabuli_chr01 | 39051420                | TT                              | AA              | 1946743710               |
| SNP_P4_14830_39051434 | NC_021160.1    | Ca_kabuli_chr01 | 39051434                | AA                              | CC              | 1946743712               |
| SNP_P4_14831_39051438 | NC_021160.1    | Ca_kabuli_chr01 | 39051438                | GG                              | AA              | 1946743714               |
| SNP_P4_14832_39051454 | NC_021160.1    | Ca_kabuli_chr01 | 39051454                | GG                              | AA              | 1946743716               |
| SNP_P4_14833_39051466 | NC_021160.1    | Ca_kabuli_chr01 | 39051466                | CC                              | AA              | 1946743718               |
| SNP_P4_14834_39051468 | NC_021160.1    | Ca_kabuli_chr01 | 39051468                | GG                              | TT              | 1946743720               |
| SNP_P4_14835_39052940 | NC_021160.1    | Ca_kabuli_chr01 | 39052940                | TT                              | CC              | 1946743722               |
| SNP_P4_14836_39053181 | NC_021160.1    | Ca_kabuli_chr01 | 39053181                | TT                              | GG              | 1946743724               |
| SNP_P4_14837_39054011 | NC_021160.1    | Ca_kabuli_chr01 | 39054011                | CC                              | TT              | 1946743726               |
| SNP_P4_14838_39055596 | NC_021160.1    | Ca_kabuli_chr01 | 39055596                | GG                              | AA              | 1946743728               |
| SNP_P4_14839_39055646 | NC_021160.1    | Ca_kabuli_chr01 | 39055646                | TT                              | CC              | 1946743730               |
| SNP_P4_14840_39055716 | NC_021160.1    | Ca_kabuli_chr01 | 39055716                | TT                              | GG              | 1946743732               |
| SNP_P4_14842_39056224 | NC_021160.1    | Ca_kabuli_chr01 | 39056224                | TT                              | CC              | 1946743734               |
| SNP_P4_14844_39060096 | NC_021160.1    | Ca_kabuli_chr01 | 39060096                | AA                              | GG              | 1946743736               |
| SNP_P4_14845_39061505 | NC_021160.1    | Ca_kabuli_chr01 | 39061505                | GG                              | AA              | 1946743738               |
| SNP_P4_14846_39061840 | NC_021160.1    | Ca_kabuli_chr01 | 39061840                | CC                              | TT              | 1946743740               |
| SNP_P4_14848_39065011 | NC_021160.1    | Ca_kabuli_chr01 | 39065011                | TT                              | CC              | 1946743742               |
| SNP_P4_14849_39065015 | NC_021160.1    | Ca_kabuli_chr01 | 39065015                | CC                              | TT              | 1946743744               |
| SNP_P4_14850_39065754 | NC_021160.1    | Ca_kabuli_chr01 | 39065754                | CC                              | TT              | 1946743746               |
| SNP_P4_14851_39065966 | NC_021160.1    | Ca_kabuli_chr01 | 39065966                | AA                              | CC              | 1946743748               |
| SNP_P4_14852_39066054 | NC_021160.1    | Ca_kabuli_chr01 | 39066054                | TT                              | CC              | 1946743750               |
| SNP_P4_14853_39066501 | NC_021160.1    | Ca_kabuli_chr01 | 39066501                | AA                              | GG              | 1946743752               |
| SNP_P4_14854_39066503 | NC_021160.1    | Ca_kabuli_chr01 | 39066503                | TT                              | GG              | 1946743754               |
| SNP_P4_14855_39066949 | NC_021160.1    | Ca_kabuli_chr01 | 39066949                | GG                              | TT              | 1946743756               |
| SNP_P4_14856_39067137 | NC_021160.1    | Ca_kabuli_chr01 | 39067137                | GG                              | AA              | 1946743758               |
| SNP_P4_14857_39067140 | NC_021160.1    | Ca_kabuli_chr01 | 39067140                | AA                              | TT              | 1946743760               |
| SNP_P4_14858_39068082 | NC_021160.1    | Ca_kabuli_chr01 | 39068082                | CC                              | AA              | 1946743762               |
| SNP_P4_14860_39071055 | NC_021160.1    | Ca_kabuli_chr01 | 39071055                | TT                              | CC              | 1946743764               |
| SNP_P4_14861_39071184 | NC_021160.1    | Ca_kabuli_chr01 | 39071184                | TT                              | CC              | 1946743766               |
| SNP_P4_14862_39071941 | NC_021160.1    | Ca_kabuli_chr01 | 39071941                | GG                              | AA              | 1946743768               |

| SNPs IDs              | Chromosome IDs | Chromosomes     | Physical positions (bp) | CDC Frontier (Reference genome) | (ILWC46 & LPNB) | NCBI SNPdb Accession IDs |
|-----------------------|----------------|-----------------|-------------------------|---------------------------------|-----------------|--------------------------|
| SNP_P4_14863_39072875 | NC_021160.1    | Ca_kabuli_chr01 | 39072875                | AA                              | TT              | 1946743770               |
| SNP_P4_14864_39073309 | NC_021160.1    | Ca_kabuli_chr01 | 39073309                | GG                              | CC              | 1946743772               |
| SNP_P4_14865_39073417 | NC_021160.1    | Ca_kabuli_chr01 | 39073417                | TT                              | AA              | 1946743774               |
| SNP_P4_14867_39073474 | NC_021160.1    | Ca_kabuli_chr01 | 39073474                | AA                              | TT              | 1946743776               |
| SNP_P4_14868_39073632 | NC_021160.1    | Ca_kabuli_chr01 | 39073632                | GG                              | AA              | 1946743778               |
| SNP_P4_14869_39073734 | NC_021160.1    | Ca_kabuli_chr01 | 39073734                | TT                              | AA              | 1946743780               |
| SNP_P4_14870_39073793 | NC_021160.1    | Ca_kabuli_chr01 | 39073793                | TT                              | CC              | 1946743782               |
| SNP_P4_14872_39073891 | NC_021160.1    | Ca_kabuli_chr01 | 39073891                | CC                              | TT              | 1946743784               |
| SNP_P4_14873_39073936 | NC_021160.1    | Ca_kabuli_chr01 | 39073936                | CC                              | AA              | 1946743786               |
| SNP_P4_14874_39073938 | NC_021160.1    | Ca_kabuli_chr01 | 39073938                | TT                              | CC              | 1946743788               |
| SNP_P4_14875_39074000 | NC_021160.1    | Ca_kabuli_chr01 | 39074000                | TT                              | AA              | 1946743790               |
| SNP_P4_14876_39074019 | NC_021160.1    | Ca_kabuli_chr01 | 39074019                | TT                              | AA              | 1946743792               |
| SNP_P4_14877_39074058 | NC_021160.1    | Ca_kabuli_chr01 | 39074058                | GG                              | AA              | 1946743794               |
| SNP_P4_14878_39074435 | NC_021160.1    | Ca_kabuli_chr01 | 39074435                | TT                              | GG              | 1946743796               |
| SNP_P4_14879_39074798 | NC_021160.1    | Ca_kabuli_chr01 | 39074798                | AA                              | CC              | 1946743798               |
| SNP_P4_14880_39074856 | NC_021160.1    | Ca_kabuli_chr01 | 39074856                | CC                              | TT              | 1946743800               |
| SNP_P4_14881_39074878 | NC_021160.1    | Ca_kabuli_chr01 | 39074878                | AA                              | TT              | 1946743802               |
| SNP_P4_14882_39074881 | NC_021160.1    | Ca_kabuli_chr01 | 39074881                | AA                              | TT              | 1946743804               |
| SNP_P4_14883_39074897 | NC_021160.1    | Ca_kabuli_chr01 | 39074897                | GG                              | TT              | 1946743806               |
| SNP_P4_14884_39074908 | NC_021160.1    | Ca_kabuli_chr01 | 39074908                | TT                              | CC              | 1946743808               |
| SNP_P4_14885_39074919 | NC_021160.1    | Ca_kabuli_chr01 | 39074919                | GG                              | TT              | 1946743810               |
| SNP_P4_14886_39074930 | NC_021160.1    | Ca_kabuli_chr01 | 39074930                | CC                              | TT              | 1946743812               |
| SNP_P4_14887_39074945 | NC_021160.1    | Ca_kabuli_chr01 | 39074945                | TT                              | GG              | 1946743814               |
| SNP_P4_14888_39074950 | NC_021160.1    | Ca_kabuli_chr01 | 39074950                | AA                              | GG              | 1946743816               |
| SNP_P4_14889_39074951 | NC_021160.1    | Ca_kabuli_chr01 | 39074951                | CC                              | GG              | 1946743818               |
| SNP_P4_14890_39075192 | NC_021160.1    | Ca_kabuli_chr01 | 39075192                | CC                              | TT              | 1946743820               |
| SNP_P4_14891_39077054 | NC_021160.1    | Ca_kabuli_chr01 | 39077054                | AA                              | GG              | 1946743822               |
| SNP_P4_14892_39077987 | NC_021160.1    | Ca_kabuli_chr01 | 39077987                | CC                              | TT              | 1946743824               |
| SNP_P4_14893_39078015 | NC_021160.1    | Ca_kabuli_chr01 | 39078015                | TT                              | CC              | 1946743826               |
| SNP_P4_14894_39079716 | NC_021160.1    | Ca_kabuli_chr01 | 39079716                | AA                              | GG              | 1946743828               |
| SNP_P4_14895_39080023 | NC_021160.1    | Ca_kabuli_chr01 | 39080023                | CC                              | GG              | 1946743830               |
| SNP_P4_14896_39081578 | NC_021160.1    | Ca_kabuli_chr01 | 39081578                | CC                              | GG              | 1946743832               |
| SNP_P4_14897_39081859 | NC_021160.1    | Ca_kabuli_chr01 | 39081859                | TT                              | GG              | 1946743834               |
| SNP_P4_14898_39081872 | NC_021160.1    | Ca_kabuli_chr01 | 39081872                | CC                              | AA              | 1946743836               |
| SNP_P4_14899_39081903 | NC_021160.1    | Ca_kabuli_chr01 | 39081903                | TT                              | CC              | 1946743838               |
| SNP_P4_14900_39083207 | NC_021160.1    | Ca_kabuli_chr01 | 39083207                | GG                              | TT              | 1946743840               |
| SNP_P4_14901_39083490 | NC_021160.1    | Ca_kabuli_chr01 | 39083490                | GG                              | TT              | 1946743842               |
| SNP_P4_14902_39094453 | NC_021160.1    | Ca_kabuli_chr01 | 39094453                | GG                              | AA              | 1946743844               |
| SNP_P4_14903_39094457 | NC_021160.1    | Ca_kabuli_chr01 | 39094457                | TT                              | CC              | 1946743846               |
| SNP_P4_14904_39096213 | NC_021160.1    | Ca_kabuli_chr01 | 39096213                | CC                              | TT              | 1946743848               |
| SNP_P4_14905_39096222 | NC_021160.1    | Ca_kabuli_chr01 | 39096222                | CC                              | AA              | 1946743850               |
| SNP_P4_14906_39096231 | NC_021160.1    | Ca_kabuli_chr01 | 39096231                | AA                              | GG              | 1946743852               |



| SNPs IDs              | Chromosome IDs | Chromosomes     | Physical positions (bp) | CDC Frontier (Reference genome) | (ILWC46 & LPNB) | NCBI SNPdb Accession IDs |
|-----------------------|----------------|-----------------|-------------------------|---------------------------------|-----------------|--------------------------|
| SNP_P4_14907_39096235 | NC_021160.1    | Ca_kabuli_chr01 | 39096235                | AA                              | GG              | 1946743854               |
| SNP_P4_14908_39098487 | NC_021160.1    | Ca_kabuli_chr01 | 39098487                | GG                              | AA              | 1946743856               |
| SNP_P4_14909_39099018 | NC_021160.1    | Ca_kabuli_chr01 | 39099018                | TT                              | CC              | 1946743858               |
| SNP_P4_14910_39099102 | NC_021160.1    | Ca_kabuli_chr01 | 39099102                | AA                              | GG              | 1946743860               |
| SNP_P4_14911_39099779 | NC_021160.1    | Ca_kabuli_chr01 | 39099779                | AA                              | TT              | 1946743862               |
| SNP_P4_14912_39100067 | NC_021160.1    | Ca_kabuli_chr01 | 39100067                | AA                              | CC              | 1946743864               |
| SNP_P4_14913_39100380 | NC_021160.1    | Ca_kabuli_chr01 | 39100380                | AA                              | GG              | 1946743866               |
| SNP_P4_14914_39100390 | NC_021160.1    | Ca_kabuli_chr01 | 39100390                | AA                              | GG              | 1946743868               |
| SNP_P4_14915_39100580 | NC_021160.1    | Ca_kabuli_chr01 | 39100580                | CC                              | AA              | 1946743869               |
| SNP_P4_14916_39100583 | NC_021160.1    | Ca_kabuli_chr01 | 39100583                | AA                              | TT              | 1946743871               |
| SNP_P4_14917_39100613 | NC_021160.1    | Ca_kabuli_chr01 | 39100613                | TT                              | AA              | 1946743873               |
| SNP_P4_14918_39100628 | NC_021160.1    | Ca_kabuli_chr01 | 39100628                | TT                              | CC              | 1946743875               |
| SNP_P4_14919_39100867 | NC_021160.1    | Ca_kabuli_chr01 | 39100867                | CC                              | AA              | 1946743877               |
| SNP_P4_14920_39101107 | NC_021160.1    | Ca_kabuli_chr01 | 39101107                | TT                              | CC              | 1946743879               |
| SNP_P4_14921_39101139 | NC_021160.1    | Ca_kabuli_chr01 | 39101139                | TT                              | CC              | 1946743881               |
| SNP_P4_14922_39101157 | NC_021160.1    | Ca_kabuli_chr01 | 39101157                | TT                              | CC              | 1946743883               |
| SNP_P4_14924_39105157 | NC_021160.1    | Ca_kabuli_chr01 | 39105157                | AA                              | CC              | 1946743885               |
| SNP_P4_14925_39105183 | NC_021160.1    | Ca_kabuli_chr01 | 39105183                | GG                              | CC              | 1946743887               |
| SNP_P4_14926_39105210 | NC_021160.1    | Ca_kabuli_chr01 | 39105210                | AA                              | GG              | 1946743889               |
| SNP_P4_14927_39105217 | NC_021160.1    | Ca_kabuli_chr01 | 39105217                | TT                              | CC              | 1946743891               |
| SNP_P4_14928_39105246 | NC_021160.1    | Ca_kabuli_chr01 | 39105246                | AA                              | GG              | 1946743892               |
| SNP_P4_14929_39105251 | NC_021160.1    | Ca_kabuli_chr01 | 39105251                | TT                              | CC              | 1946743894               |
| SNP_P4_14931_39115839 | NC_021160.1    | Ca_kabuli_chr01 | 39115839                | CC                              | TT              | 1946743896               |
| SNP_P4_14932_39115907 | NC_021160.1    | Ca_kabuli_chr01 | 39115907                | CC                              | TT              | 1946743898               |
| SNP_P4_14933_39118819 | NC_021160.1    | Ca_kabuli_chr01 | 39118819                | TT                              | GG              | 1946743900               |
| SNP_P4_14934_39118834 | NC_021160.1    | Ca_kabuli_chr01 | 39118834                | TT                              | CC              | 1946743902               |
| SNP_P4_14935_39119058 | NC_021160.1    | Ca_kabuli_chr01 | 39119058                | AA                              | CC              | 1946743904               |
| SNP_P4_14936_39126083 | NC_021160.1    | Ca_kabuli_chr01 | 39126083                | TT                              | AA              | 1946743906               |
| SNP_P4_14937_39126093 | NC_021160.1    | Ca_kabuli_chr01 | 39126093                | GG                              | TT              | 1946743908               |
| SNP_P4_14938_39126103 | NC_021160.1    | Ca_kabuli_chr01 | 39126103                | GG                              | AA              | 1946743910               |
| SNP_P4_14939_39126139 | NC_021160.1    | Ca_kabuli_chr01 | 39126139                | TT                              | GG              | 1946743912               |
| SNP_P4_14940_39138384 | NC_021160.1    | Ca_kabuli_chr01 | 39138384                | GG                              | AA              | 1946743914               |
| SNP_P4_14941_39138392 | NC_021160.1    | Ca_kabuli_chr01 | 39138392                | GG                              | AA              | 1946743916               |
| SNP_P4_14942_39138457 | NC_021160.1    | Ca_kabuli_chr01 | 39138457                | AA                              | GG              | 1946743918               |
| SNP_P4_14943_39138465 | NC_021160.1    | Ca_kabuli_chr01 | 39138465                | AA                              | CC              | 1946743920               |
| SNP_P4_14944_39138466 | NC_021160.1    | Ca_kabuli_chr01 | 39138466                | CC                              | TT              | 1946743922               |
| SNP_P4_14945_39138557 | NC_021160.1    | Ca_kabuli_chr01 | 39138557                | GG                              | AA              | 1946743924               |
| SNP_P4_14946_39138623 | NC_021160.1    | Ca_kabuli_chr01 | 39138623                | AA                              | GG              | 1946743927               |
| SNP_P4_14947_39138649 | NC_021160.1    | Ca_kabuli_chr01 | 39138649                | CC                              | TT              | 1946743929               |
| SNP_P4_14948_39138650 | NC_021160.1    | Ca_kabuli_chr01 | 39138650                | AA                              | CC              | 1946743930               |
| SNP_P4_14949_39138698 | NC_021160.1    | Ca_kabuli_chr01 | 39138698                | CC                              | TT              | 1946743932               |
| SNP_P4_14950_39138715 | NC_021160.1    | Ca_kabuli_chr01 | 39138715                | GG                              | AA              | 1946743934               |

| SNPs IDs              | Chromosome IDs | Chromosomes     | Physical positions (bp) | CDC Frontier (Reference genome) | (ILWC46 & LPNB) | NCBI SNPdb Accession IDs |
|-----------------------|----------------|-----------------|-------------------------|---------------------------------|-----------------|--------------------------|
| SNP_P4_14951_39138728 | NC_021160.1    | Ca_kabuli_chr01 | 39138728                | TT                              | CC              | 1946743936               |
| SNP_P4_14952_39138747 | NC_021160.1    | Ca_kabuli_chr01 | 39138747                | AA                              | TT              | 1946743938               |
| SNP_P4_14953_39138755 | NC_021160.1    | Ca_kabuli_chr01 | 39138755                | TT                              | CC              | 1946743940               |
| SNP_P4_14954_39138759 | NC_021160.1    | Ca_kabuli_chr01 | 39138759                | AA                              | CC              | 1946743942               |
| SNP_P4_14955_39138787 | NC_021160.1    | Ca_kabuli_chr01 | 39138787                | CC                              | TT              | 1946743944               |
| SNP_P4_14956_39138863 | NC_021160.1    | Ca_kabuli_chr01 | 39138863                | TT                              | CC              | 1946743946               |
| SNP_P4_14957_39139025 | NC_021160.1    | Ca_kabuli_chr01 | 39139025                | GG                              | AA              | 1946743948               |
| SNP_P4_14958_39139032 | NC_021160.1    | Ca_kabuli_chr01 | 39139032                | CC                              | TT              | 1946743950               |
| SNP_P4_14959_39139080 | NC_021160.1    | Ca_kabuli_chr01 | 39139080                | AA                              | TT              | 1946743952               |
| SNP_P4_14960_39139087 | NC_021160.1    | Ca_kabuli_chr01 | 39139087                | GG                              | CC              | 1946743954               |
| SNP_P4_14961_39139097 | NC_021160.1    | Ca_kabuli_chr01 | 39139097                | TT                              | CC              | 1946743956               |
| SNP_P4_14962_39139110 | NC_021160.1    | Ca_kabuli_chr01 | 39139110                | AA                              | TT              | 1946743958               |
| SNP_P4_14963_39139146 | NC_021160.1    | Ca_kabuli_chr01 | 39139146                | AA                              | TT              | 1946743960               |
| SNP_P4_14964_39139159 | NC_021160.1    | Ca_kabuli_chr01 | 39139159                | AA                              | CC              | 1946743962               |
| SNP_P4_14965_39139230 | NC_021160.1    | Ca_kabuli_chr01 | 39139230                | GG                              | TT              | 1946743964               |
| SNP_P4_14966_39139275 | NC_021160.1    | Ca_kabuli_chr01 | 39139275                | GG                              | AA              | 1946743966               |
| SNP_P4_14967_39139346 | NC_021160.1    | Ca_kabuli_chr01 | 39139346                | GG                              | AA              | 1946743968               |
| SNP_P4_14968_39139376 | NC_021160.1    | Ca_kabuli_chr01 | 39139376                | CC                              | TT              | 1946743970               |
| SNP_P4_14969_39139437 | NC_021160.1    | Ca_kabuli_chr01 | 39139437                | CC                              | TT              | 1946743972               |
| SNP_P4_14970_39139490 | NC_021160.1    | Ca_kabuli_chr01 | 39139490                | CC                              | TT              | 1946743974               |
| SNP_P4_14971_39140263 | NC_021160.1    | Ca_kabuli_chr01 | 39140263                | CC                              | TT              | 1946743975               |
| SNP_P4_14972_39140309 | NC_021160.1    | Ca_kabuli_chr01 | 39140309                | AA                              | CC              | 1946743977               |
| SNP_P4_14973_39140389 | NC_021160.1    | Ca_kabuli_chr01 | 39140389                | AA                              | CC              | 1946743979               |
| SNP_P4_14974_39140455 | NC_021160.1    | Ca_kabuli_chr01 | 39140455                | CC                              | GG              | 1946743980               |
| SNP_P4_14975_39140473 | NC_021160.1    | Ca_kabuli_chr01 | 39140473                | CC                              | AA              | 1946743981               |
| SNP_P4_14976_39140520 | NC_021160.1    | Ca_kabuli_chr01 | 39140520                | TT                              | CC              | 1946743983               |
| SNP_P4_14977_39140654 | NC_021160.1    | Ca_kabuli_chr01 | 39140654                | CC                              | TT              | 1946743985               |
| SNP_P4_14978_39140797 | NC_021160.1    | Ca_kabuli_chr01 | 39140797                | TT                              | AA              | 1946743987               |
| SNP_P4_14979_39140802 | NC_021160.1    | Ca_kabuli_chr01 | 39140802                | CC                              | AA              | 1946743988               |
| SNP_P4_14980_39140866 | NC_021160.1    | Ca_kabuli_chr01 | 39140866                | CC                              | TT              | 1946743990               |
| SNP_P4_14981_39140868 | NC_021160.1    | Ca_kabuli_chr01 | 39140868                | CC                              | TT              | 1946743992               |
| SNP_P4_14982_39140881 | NC_021160.1    | Ca_kabuli_chr01 | 39140881                | CC                              | AA              | 1946743994               |
| SNP_P4_14983_39141081 | NC_021160.1    | Ca_kabuli_chr01 | 39141081                | TT                              | CC              | 1946743996               |
| SNP_P4_14984_39141092 | NC_021160.1    | Ca_kabuli_chr01 | 39141092                | CC                              | TT              | 1946743998               |
| SNP_P4_14987_39144305 | NC_021160.1    | Ca_kabuli_chr01 | 39144305                | CC                              | GG              | 1946744001               |
| SNP_P4_14988_39144441 | NC_021160.1    | Ca_kabuli_chr01 | 39144441                | TT                              | CC              | 1946744003               |
| SNP_P4_14989_39144540 | NC_021160.1    | Ca_kabuli_chr01 | 39144540                | TT                              | GG              | 1946744005               |
| SNP_P4_14991_39145186 | NC_021160.1    | Ca_kabuli_chr01 | 39145186                | AA                              | TT              | 1946744007               |
| SNP_P4_14992_39145285 | NC_021160.1    | Ca_kabuli_chr01 | 39145285                | AA                              | TT              | 1946744009               |
| SNP_P4_14993_39146189 | NC_021160.1    | Ca_kabuli_chr01 | 39146189                | AA                              | GG              | 1946744011               |
| SNP_P4_14994_39147532 | NC_021160.1    | Ca_kabuli_chr01 | 39147532                | TT                              | CC              | 1946744013               |
| SNP_P4_14995_39149669 | NC_021160.1    | Ca_kabuli_chr01 | 39149669                | AA                              | GG              | 1946744014               |

| SNPs IDs              | Chromosome IDs | Chromosomes     | Physical positions (bp) | CDC Frontier (Reference genome) | (ILWC46 & LPNB) | NCBI SNPdb Accession IDs |
|-----------------------|----------------|-----------------|-------------------------|---------------------------------|-----------------|--------------------------|
| SNP_P4_14996_39149702 | NC_021160.1    | Ca_kabuli_chr01 | 39149702                | AA                              | GG              | 1946744016               |
| SNP_P4_14997_39149980 | NC_021160.1    | Ca_kabuli_chr01 | 39149980                | TT                              | CC              | 1946744018               |
| SNP_P4_14998_39149999 | NC_021160.1    | Ca_kabuli_chr01 | 39149999                | AA                              | CC              | 1946744020               |
| SNP_P4_15000_39150039 | NC_021160.1    | Ca_kabuli_chr01 | 39150039                | TT                              | CC              | 1946744022               |
| SNP_P4_15001_39159969 | NC_021160.1    | Ca_kabuli_chr01 | 39159969                | AA                              | GG              | 1946744024               |
| SNP_P4_15002_39161233 | NC_021160.1    | Ca_kabuli_chr01 | 39161233                | GG                              | TT              | 1946744026               |
| SNP_P4_15003_39161539 | NC_021160.1    | Ca_kabuli_chr01 | 39161539                | CC                              | TT              | 1946744028               |
| SNP_P4_15004_39162077 | NC_021160.1    | Ca_kabuli_chr01 | 39162077                | CC                              | TT              | 1946744029               |
| SNP_P4_15005_39162091 | NC_021160.1    | Ca_kabuli_chr01 | 39162091                | CC                              | TT              | 1946744031               |
| SNP_P4_15006_39165176 | NC_021160.1    | Ca_kabuli_chr01 | 39165176                | GG                              | AA              | 1946744033               |
| SNP_P4_15007_39166535 | NC_021160.1    | Ca_kabuli_chr01 | 39166535                | GG                              | AA              | 1946744035               |
| SNP_P4_15008_39166570 | NC_021160.1    | Ca_kabuli_chr01 | 39166570                | AA                              | TT              | 1946744037               |
| SNP_P4_15009_39166600 | NC_021160.1    | Ca_kabuli_chr01 | 39166600                | CC                              | AA              | 1946744039               |
| SNP_P4_15010_39166634 | NC_021160.1    | Ca_kabuli_chr01 | 39166634                | CC                              | GG              | 1946744041               |
| SNP_P4_15011_39166660 | NC_021160.1    | Ca_kabuli_chr01 | 39166660                | CC                              | TT              | 1946744043               |
| SNP_P4_15012_39166704 | NC_021160.1    | Ca_kabuli_chr01 | 39166704                | GG                              | CC              | 1946744045               |
| SNP_P4_15013_39166929 | NC_021160.1    | Ca_kabuli_chr01 | 39166929                | CC                              | TT              | 1946744047               |
| SNP_P4_15014_39166940 | NC_021160.1    | Ca_kabuli_chr01 | 39166940                | TT                              | CC              | 1946744049               |
| SNP_P4_15015_39166942 | NC_021160.1    | Ca_kabuli_chr01 | 39166942                | CC                              | TT              | 1946744050               |
| SNP_P4_15016_39166980 | NC_021160.1    | Ca_kabuli_chr01 | 39166980                | AA                              | GG              | 1946744053               |
| SNP_P4_15017_39196391 | NC_021160.1    | Ca_kabuli_chr01 | 39196391                | TT                              | AA              | 1946744055               |
| SNP_P4_15018_39196618 | NC_021160.1    | Ca_kabuli_chr01 | 39196618                | CC                              | TT              | 1946744056               |
| SNP_P4_15019_39227909 | NC_021160.1    | Ca_kabuli_chr01 | 39227909                | TT                              | AA              | 1946744058               |
| SNP_P4_15020_39228102 | NC_021160.1    | Ca_kabuli_chr01 | 39228102                | CC                              | GG              | 1946744060               |
| SNP_P4_15021_39228106 | NC_021160.1    | Ca_kabuli_chr01 | 39228106                | TT                              | AA              | 1946744062               |
| SNP_P4_15022_39231443 | NC_021160.1    | Ca_kabuli_chr01 | 39231443                | TT                              | GG              | 1946744064               |
| SNP_P4_15023_39240124 | NC_021160.1    | Ca_kabuli_chr01 | 39240124                | GG                              | AA              | 1946744067               |
| SNP_P4_15024_39240369 | NC_021160.1    | Ca_kabuli_chr01 | 39240369                | CC                              | TT              | 1946744069               |
| SNP_P4_15025_39250779 | NC_021160.1    | Ca_kabuli_chr01 | 39250779                | CC                              | AA              | 1946744071               |
| SNP_P4_15026_39250791 | NC_021160.1    | Ca_kabuli_chr01 | 39250791                | AA                              | CC              | 1946744073               |
| SNP_P4_15027_39253456 | NC_021160.1    | Ca_kabuli_chr01 | 39253456                | GG                              | CC              | 1946744075               |
| SNP_P4_15029_39261348 | NC_021160.1    | Ca_kabuli_chr01 | 39261348                | AA                              | GG              | 1946744077               |
| SNP_P4_15030_39261356 | NC_021160.1    | Ca_kabuli_chr01 | 39261356                | GG                              | AA              | 1946744079               |
| SNP_P4_15031_39261411 | NC_021160.1    | Ca_kabuli_chr01 | 39261411                | TT                              | CC              | 1946744081               |
| SNP_P4_15032_39261423 | NC_021160.1    | Ca_kabuli_chr01 | 39261423                | TT                              | AA              | 1946744083               |
| SNP_P4_15033_39261477 | NC_021160.1    | Ca_kabuli_chr01 | 39261477                | GG                              | TT              | 1946744086               |
| SNP_P4_15034_39261622 | NC_021160.1    | Ca_kabuli_chr01 | 39261622                | GG                              | AA              | 1946744088               |
| SNP_P4_15035_39261781 | NC_021160.1    | Ca_kabuli_chr01 | 39261781                | GG                              | AA              | 1946744090               |
| SNP_P4_15036_39261967 | NC_021160.1    | Ca_kabuli_chr01 | 39261967                | GG                              | AA              | 1946744092               |
| SNP_P4_15038_39262032 | NC_021160.1    | Ca_kabuli_chr01 | 39262032                | AA                              | GG              | 1946744094               |
| SNP_P4_15039_39262095 | NC_021160.1    | Ca_kabuli_chr01 | 39262095                | CC                              | GG              | 1946744096               |
| SNP_P4_15040_39262114 | NC_021160.1    | Ca_kabuli_chr01 | 39262114                | AA                              | TT              | 1946744098               |

| SNPs IDs              | Chromosome IDs | Chromosomes     | Physical positions (bp) | CDC Frontier (Reference genome) | (ILWC46 & LPNB) | NCBI SNPdb Accession IDs |
|-----------------------|----------------|-----------------|-------------------------|---------------------------------|-----------------|--------------------------|
| SNP_P4_15041_39262138 | NC_021160.1    | Ca_kabuli_chr01 | 39262138                | AA                              | TT              | 1946744100               |
| SNP_P4_15042_39262440 | NC_021160.1    | Ca_kabuli_chr01 | 39262440                | GG                              | AA              | 1946744102               |
| SNP_P4_15043_39262576 | NC_021160.1    | Ca_kabuli_chr01 | 39262576                | GG                              | AA              | 1946744104               |
| SNP_P4_15044_39262591 | NC_021160.1    | Ca_kabuli_chr01 | 39262591                | TT                              | GG              | 1946744106               |
| SNP_P4_15045_39262616 | NC_021160.1    | Ca_kabuli_chr01 | 39262616                | AA                              | TT              | 1946744108               |
| SNP_P4_15046_39264343 | NC_021160.1    | Ca_kabuli_chr01 | 39264343                | CC                              | AA              | 1946744110               |
| SNP_P4_15047_39264355 | NC_021160.1    | Ca_kabuli_chr01 | 39264355                | GG                              | CC              | 1946744112               |
| SNP_P4_15048_39264591 | NC_021160.1    | Ca_kabuli_chr01 | 39264591                | GG                              | AA              | 1946744114               |
| SNP_P4_15049_39264647 | NC_021160.1    | Ca_kabuli_chr01 | 39264647                | GG                              | AA              | 1946744116               |
| SNP_P4_15050_39264651 | NC_021160.1    | Ca_kabuli_chr01 | 39264651                | CC                              | GG              | 1946744118               |
| SNP_P4_15051_39264673 | NC_021160.1    | Ca_kabuli_chr01 | 39264673                | GG                              | AA              | 1946744120               |
| SNP_P4_15052_39264722 | NC_021160.1    | Ca_kabuli_chr01 | 39264722                | AA                              | CC              | 1946744122               |
| SNP_P4_15053_39264744 | NC_021160.1    | Ca_kabuli_chr01 | 39264744                | GG                              | CC              | 1946744124               |
| SNP_P4_15054_39264780 | NC_021160.1    | Ca_kabuli_chr01 | 39264780                | CC                              | GG              | 1946744126               |
| SNP_P4_15055_39264950 | NC_021160.1    | Ca_kabuli_chr01 | 39264950                | TT                              | CC              | 1946744128               |
| SNP_P4_15056_39265052 | NC_021160.1    | Ca_kabuli_chr01 | 39265052                | GG                              | AA              | 1946744130               |
| SNP_P4_15057_39265056 | NC_021160.1    | Ca_kabuli_chr01 | 39265056                | CC                              | TT              | 1946744131               |
| SNP_P4_15059_39265224 | NC_021160.1    | Ca_kabuli_chr01 | 39265224                | CC                              | GG              | 1946744133               |
| SNP_P4_15060_39265303 | NC_021160.1    | Ca_kabuli_chr01 | 39265303                | CC                              | TT              | 1946744135               |
| SNP_P4_15061_39265360 | NC_021160.1    | Ca_kabuli_chr01 | 39265360                | AA                              | GG              | 1946744137               |
| SNP_P4_15062_39268793 | NC_021160.1    | Ca_kabuli_chr01 | 39268793                | GG                              | AA              | 1946744139               |
| SNP_P4_15063_39271813 | NC_021160.1    | Ca_kabuli_chr01 | 39271813                | GG                              | TT              | 1946744141               |
| SNP_P4_15064_39274552 | NC_021160.1    | Ca_kabuli_chr01 | 39274552                | CC                              | TT              | 1946744143               |
| SNP_P4_15065_39275470 | NC_021160.1    | Ca_kabuli_chr01 | 39275470                | GG                              | AA              | 1946744145               |
| SNP_P4_15066_39281418 | NC_021160.1    | Ca_kabuli_chr01 | 39281418                | CC                              | TT              | 1946744147               |
| SNP_P4_15067_39285070 | NC_021160.1    | Ca_kabuli_chr01 | 39285070                | AA                              | GG              | 1946744149               |
| SNP_P4_15068_39286484 | NC_021160.1    | Ca_kabuli_chr01 | 39286484                | TT                              | CC              | 1946744152               |
| SNP_P4_15069_39292479 | NC_021160.1    | Ca_kabuli_chr01 | 39292479                | TT                              | AA              | 1946744154               |
| SNP_P4_15071_39294461 | NC_021160.1    | Ca_kabuli_chr01 | 39294461                | CC                              | TT              | 1946744156               |
| SNP_P4_15072_39294508 | NC_021160.1    | Ca_kabuli_chr01 | 39294508                | GG                              | AA              | 1946744158               |
| SNP_P4_15073_39294655 | NC_021160.1    | Ca_kabuli_chr01 | 39294655                | TT                              | CC              | 1946744160               |
| SNP_P4_15074_39294685 | NC_021160.1    | Ca_kabuli_chr01 | 39294685                | AA                              | GG              | 1946744162               |
| SNP_P4_15075_39299760 | NC_021160.1    | Ca_kabuli_chr01 | 39299760                | CC                              | TT              | 1946744163               |
| SNP_P4_15077_39308963 | NC_021160.1    | Ca_kabuli_chr01 | 39308963                | GG                              | AA              | 1946744165               |
| SNP_P4_15078_39309617 | NC_021160.1    | Ca_kabuli_chr01 | 39309617                | AA                              | GG              | 1946744167               |
| SNP_P4_15079_39311243 | NC_021160.1    | Ca_kabuli_chr01 | 39311243                | CC                              | TT              | 1946744169               |
| SNP_P4_15080_39313376 | NC_021160.1    | Ca_kabuli_chr01 | 39313376                | CC                              | GG              | 1946744170               |
| SNP_P4_15081_39317717 | NC_021160.1    | Ca_kabuli_chr01 | 39317717                | TT                              | GG              | 1946744171               |
| SNP_P4_15082_39318092 | NC_021160.1    | Ca_kabuli_chr01 | 39318092                | TT                              | GG              | 1946744172               |
| SNP_P4_15083_39318569 | NC_021160.1    | Ca_kabuli_chr01 | 39318569                | TT                              | CC              | 1946744173               |
| SNP_P4_15084_39318934 | NC_021160.1    | Ca_kabuli_chr01 | 39318934                | CC                              | TT              | 1946744174               |
| SNP_P4_15085_39318936 | NC_021160.1    | Ca_kabuli_chr01 | 39318936                | AA                              | TT              | 1946744175               |

| SNPs IDs              | Chromosome IDs | Chromosomes     | Physical positions (bp) | CDC Frontier (Reference genome) | (ILWC46 & LPNB) | NCBI SNPdb Accession IDs |
|-----------------------|----------------|-----------------|-------------------------|---------------------------------|-----------------|--------------------------|
| SNP_P4_15087_39320879 | NC_021160.1    | Ca_kabuli_chr01 | 39320879                | CC                              | GG              | 1946744176               |
| SNP_P4_15088_39320903 | NC_021160.1    | Ca_kabuli_chr01 | 39320903                | GG                              | AA              | 1946744177               |
| SNP_P4_15089_39321277 | NC_021160.1    | Ca_kabuli_chr01 | 39321277                | AA                              | TT              | 1946744178               |
| SNP_P4_15090_39332457 | NC_021160.1    | Ca_kabuli_chr01 | 39332457                | TT                              | CC              | 1946744179               |
| SNP_P4_15091_39334436 | NC_021160.1    | Ca_kabuli_chr01 | 39334436                | GG                              | TT              | 1946744180               |
| SNP_P4_15092_39334541 | NC_021160.1    | Ca_kabuli_chr01 | 39334541                | CC                              | TT              | 1946744181               |
| SNP_P4_15093_39334557 | NC_021160.1    | Ca_kabuli_chr01 | 39334557                | GG                              | CC              | 1946744182               |
| SNP_P4_15094_39334574 | NC_021160.1    | Ca_kabuli_chr01 | 39334574                | CC                              | TT              | 1946744183               |
| SNP_P4_15095_39334576 | NC_021160.1    | Ca_kabuli_chr01 | 39334576                | TT                              | CC              | 1946744184               |
| SNP_P4_15096_39334579 | NC_021160.1    | Ca_kabuli_chr01 | 39334579                | TT                              | CC              | 1946744185               |
| SNP_P4_15097_39334585 | NC_021160.1    | Ca_kabuli_chr01 | 39334585                | TT                              | AA              | 1946744186               |
| SNP_P4_15098_39334770 | NC_021160.1    | Ca_kabuli_chr01 | 39334770                | GG                              | AA              | 1946744187               |
| SNP_P4_15099_39334793 | NC_021160.1    | Ca_kabuli_chr01 | 39334793                | AA                              | TT              | 1946744188               |
| SNP_P4_15100_39334809 | NC_021160.1    | Ca_kabuli_chr01 | 39334809                | TT                              | CC              | 1946744189               |
| SNP_P4_15101_39334810 | NC_021160.1    | Ca_kabuli_chr01 | 39334810                | AA                              | GG              | 1946744190               |
| SNP_P4_15102_39334812 | NC_021160.1    | Ca_kabuli_chr01 | 39334812                | GG                              | AA              | 1946744191               |
| SNP_P4_15103_39334823 | NC_021160.1    | Ca_kabuli_chr01 | 39334823                | AA                              | CC              | 1946744192               |
| SNP_P4_15105_39334835 | NC_021160.1    | Ca_kabuli_chr01 | 39334835                | AA                              | TT              | 1946744193               |
| SNP_P4_15106_39334869 | NC_021160.1    | Ca_kabuli_chr01 | 39334869                | CC                              | TT              | 1946744194               |
| SNP_P4_15107_39335016 | NC_021160.1    | Ca_kabuli_chr01 | 39335016                | GG                              | AA              | 1946744195               |
| SNP_P4_15108_39366268 | NC_021160.1    | Ca_kabuli_chr01 | 39366268                | CC                              | GG              | 1946744196               |
| SNP_P4_15109_39366286 | NC_021160.1    | Ca_kabuli_chr01 | 39366286                | GG                              | AA              | 1946744197               |
| SNP_P4_15110_39366515 | NC_021160.1    | Ca_kabuli_chr01 | 39366515                | GG                              | AA              | 1946744198               |
| SNP_P4_15111_39377364 | NC_021160.1    | Ca_kabuli_chr01 | 39377364                | AA                              | CC              | 1946744199               |
| SNP_P4_15113_39384626 | NC_021160.1    | Ca_kabuli_chr01 | 39384626                | AA                              | GG              | 1946744200               |
| SNP_P4_15114_39385748 | NC_021160.1    | Ca_kabuli_chr01 | 39385748                | CC                              | TT              | 1946744201               |
| SNP_P4_15115_39386887 | NC_021160.1    | Ca_kabuli_chr01 | 39386887                | AA                              | TT              | 1946744202               |
| SNP_P4_15116_39386888 | NC_021160.1    | Ca_kabuli_chr01 | 39386888                | AA                              | TT              | 1946744203               |
| SNP_P4_15117_39386977 | NC_021160.1    | Ca_kabuli_chr01 | 39386977                | TT                              | CC              | 1946744204               |
| SNP_P4_15118_39387026 | NC_021160.1    | Ca_kabuli_chr01 | 39387026                | TT                              | GG              | 1946744205               |
| SNP_P4_15119_39387042 | NC_021160.1    | Ca_kabuli_chr01 | 39387042                | TT                              | CC              | 1946744206               |
| SNP_P4_15120_39387071 | NC_021160.1    | Ca_kabuli_chr01 | 39387071                | CC                              | TT              | 1946744207               |
| SNP_P4_15122_39387794 | NC_021160.1    | Ca_kabuli_chr01 | 39387794                | CC                              | TT              | 1946744208               |
| SNP_P4_15123_39387805 | NC_021160.1    | Ca_kabuli_chr01 | 39387805                | GG                              | AA              | 1946744209               |
| SNP_P4_15124_39387808 | NC_021160.1    | Ca_kabuli_chr01 | 39387808                | TT                              | CC              | 1946744210               |
| SNP_P4_15125_39388285 | NC_021160.1    | Ca_kabuli_chr01 | 39388285                | AA                              | GG              | 1946744211               |
| SNP_P4_15126_39388540 | NC_021160.1    | Ca_kabuli_chr01 | 39388540                | GG                              | AA              | 1946744212               |
| SNP_P4_15127_39388568 | NC_021160.1    | Ca_kabuli_chr01 | 39388568                | AA                              | GG              | 1946744213               |
| SNP_P4_15128_39388810 | NC_021160.1    | Ca_kabuli_chr01 | 39388810                | GG                              | AA              | 1946744214               |
| SNP_P4_15129_39388994 | NC_021160.1    | Ca_kabuli_chr01 | 39388994                | AA                              | GG              | 1946744215               |
| SNP_P4_15130_39389172 | NC_021160.1    | Ca_kabuli_chr01 | 39389172                | AA                              | GG              | 1946744216               |
| SNP_P4_15131_39389173 | NC_021160.1    | Ca_kabuli_chr01 | 39389173                | GG                              | AA              | 1946744217               |

| SNPs IDs              | Chromosome IDs | Chromosomes     | Physical positions (bp) | CDC Frontier (Reference genome) | (ILWC46 & LPNB) | NCBI SNPdb Accession IDs |
|-----------------------|----------------|-----------------|-------------------------|---------------------------------|-----------------|--------------------------|
| SNP_P4_15132_39389755 | NC_021160.1    | Ca_kabuli_chr01 | 39389755                | TT                              | GG              | 1946744218               |
| SNP_P4_15133_39389885 | NC_021160.1    | Ca_kabuli_chr01 | 39389885                | AA                              | TT              | 1946744219               |
| SNP_P4_15134_39389896 | NC_021160.1    | Ca_kabuli_chr01 | 39389896                | TT                              | CC              | 1946744220               |
| SNP_P4_15135_39389924 | NC_021160.1    | Ca_kabuli_chr01 | 39389924                | TT                              | CC              | 1946744221               |
| SNP_P4_15136_39389940 | NC_021160.1    | Ca_kabuli_chr01 | 39389940                | GG                              | AA              | 1946744222               |
| SNP_P4_15137_39390693 | NC_021160.1    | Ca_kabuli_chr01 | 39390693                | GG                              | AA              | 1946744223               |
| SNP_P4_15138_39390705 | NC_021160.1    | Ca_kabuli_chr01 | 39390705                | CC                              | TT              | 1946744224               |
| SNP_P4_15139_39390740 | NC_021160.1    | Ca_kabuli_chr01 | 39390740                | AA                              | TT              | 1946744225               |
| SNP_P4_15140_39390793 | NC_021160.1    | Ca_kabuli_chr01 | 39390793                | AA                              | GG              | 1946744226               |
| SNP_P4_15141_39390920 | NC_021160.1    | Ca_kabuli_chr01 | 39390920                | AA                              | TT              | 1946744227               |
| SNP_P4_15143_39391007 | NC_021160.1    | Ca_kabuli_chr01 | 39391007                | AA                              | CC              | 1946744228               |
| SNP_P4_15144_39391019 | NC_021160.1    | Ca_kabuli_chr01 | 39391019                | CC                              | AA              | 1946744229               |
| SNP_P4_15145_39391082 | NC_021160.1    | Ca_kabuli_chr01 | 39391082                | CC                              | TT              | 1946744230               |
| SNP_P4_15146_39391083 | NC_021160.1    | Ca_kabuli_chr01 | 39391083                | GG                              | TT              | 1946744231               |
| SNP_P4_15147_39391199 | NC_021160.1    | Ca_kabuli_chr01 | 39391199                | TT                              | CC              | 1946744232               |
| SNP_P4_15148_39391237 | NC_021160.1    | Ca_kabuli_chr01 | 39391237                | GG                              | CC              | 1946744233               |
| SNP_P4_15150_39393114 | NC_021160.1    | Ca_kabuli_chr01 | 39393114                | AA                              | GG              | 1946744234               |
| SNP_P4_15151_39393123 | NC_021160.1    | Ca_kabuli_chr01 | 39393123                | CC                              | TT              | 1946744235               |
| SNP_P4_15152_39393306 | NC_021160.1    | Ca_kabuli_chr01 | 39393306                | TT                              | GG              | 1946744236               |
| SNP_P4_15153_39393612 | NC_021160.1    | Ca_kabuli_chr01 | 39393612                | GG                              | AA              | 1946744237               |
| SNP_P4_15154_39396974 | NC_021160.1    | Ca_kabuli_chr01 | 39396974                | TT                              | GG              | 1946744238               |
| SNP_P4_15155_39399054 | NC_021160.1    | Ca_kabuli_chr01 | 39399054                | AA                              | CC              | 1946744239               |
| SNP_P4_15158_39400839 | NC_021160.1    | Ca_kabuli_chr01 | 39400839                | CC                              | AA              | 1946744240               |
| SNP_P4_15160_39401147 | NC_021160.1    | Ca_kabuli_chr01 | 39401147                | TT                              | GG              | 1946744241               |
| SNP_P4_15161_39402387 | NC_021160.1    | Ca_kabuli_chr01 | 39402387                | GG                              | AA              | 1946744242               |
| SNP_P4_15164_39406682 | NC_021160.1    | Ca_kabuli_chr01 | 39406682                | CC                              | TT              | 1946744243               |
| SNP_P4_15165_39407258 | NC_021160.1    | Ca_kabuli_chr01 | 39407258                | AA                              | GG              | 1946744244               |
| SNP_P4_15166_39409179 | NC_021160.1    | Ca_kabuli_chr01 | 39409179                | GG                              | TT              | 1946744245               |
| SNP_P4_15167_39409656 | NC_021160.1    | Ca_kabuli_chr01 | 39409656                | GG                              | AA              | 1946744246               |
| SNP_P4_15168_39409844 | NC_021160.1    | Ca_kabuli_chr01 | 39409844                | GG                              | AA              | 1946744247               |
| SNP_P4_15169_39411610 | NC_021160.1    | Ca_kabuli_chr01 | 39411610                | TT                              | CC              | 1946744249               |
| SNP_P4_15170_39411629 | NC_021160.1    | Ca_kabuli_chr01 | 39411629                | GG                              | AA              | 1946744251               |
| SNP_P4_15171_39411659 | NC_021160.1    | Ca_kabuli_chr01 | 39411659                | TT                              | CC              | 1946744253               |
| SNP_P4_15172_39415361 | NC_021160.1    | Ca_kabuli_chr01 | 39415361                | CC                              | TT              | 1946744254               |
| SNP_P4_15173_39416388 | NC_021160.1    | Ca_kabuli_chr01 | 39416388                | GG                              | AA              | 1946744256               |
| SNP_P4_15174_39418743 | NC_021160.1    | Ca_kabuli_chr01 | 39418743                | CC                              | TT              | 1946744258               |
| SNP_P4_15175_39420491 | NC_021160.1    | Ca_kabuli_chr01 | 39420491                | GG                              | CC              | 1946744260               |
| SNP_P4_15176_39420678 | NC_021160.1    | Ca_kabuli_chr01 | 39420678                | GG                              | AA              | 1946744262               |
| SNP_P4_15177_39424344 | NC_021160.1    | Ca_kabuli_chr01 | 39424344                | TT                              | CC              | 1946744264               |
| SNP_P4_15178_39424356 | NC_021160.1    | Ca_kabuli_chr01 | 39424356                | GG                              | AA              | 1946744266               |
| SNP_P4_15179_39424383 | NC_021160.1    | Ca_kabuli_chr01 | 39424383                | TT                              | CC              | 1946744268               |
| SNP_P4_15180_39424444 | NC_021160.1    | Ca_kabuli_chr01 | 39424444                | GG                              | AA              | 1946744270               |

| SNPs IDs              | Chromosome IDs | Chromosomes     | Physical positions (bp) | CDC Frontier (Reference genome) | (ILWC46 & LPNB) | NCBI SNPdb Accession IDs |
|-----------------------|----------------|-----------------|-------------------------|---------------------------------|-----------------|--------------------------|
| SNP_P4_15181_39424470 | NC_021160.1    | Ca_kabuli_chr01 | 39424470                | CC                              | TT              | 1946744272               |
| SNP_P4_15182_39424628 | NC_021160.1    | Ca_kabuli_chr01 | 39424628                | GG                              | AA              | 1946744273               |
| SNP_P4_15183_39425345 | NC_021160.1    | Ca_kabuli_chr01 | 39425345                | TT                              | CC              | 1946744275               |
| SNP_P4_15184_39428080 | NC_021160.1    | Ca_kabuli_chr01 | 39428080                | CC                              | GG              | 1946744277               |
| SNP_P4_15185_39428095 | NC_021160.1    | Ca_kabuli_chr01 | 39428095                | CC                              | TT              | 1946744279               |
| SNP_P4_15188_39428521 | NC_021160.1    | Ca_kabuli_chr01 | 39428521                | AA                              | CC              | 1946744281               |
| SNP_P4_15190_39430519 | NC_021160.1    | Ca_kabuli_chr01 | 39430519                | TT                              | CC              | 1946744283               |
| SNP_P4_15191_39430874 | NC_021160.1    | Ca_kabuli_chr01 | 39430874                | TT                              | CC              | 1946744285               |
| SNP_P4_15192_39430878 | NC_021160.1    | Ca_kabuli_chr01 | 39430878                | TT                              | CC              | 1946744287               |
| SNP_P4_15194_39431147 | NC_021160.1    | Ca_kabuli_chr01 | 39431147                | AA                              | TT              | 1946744289               |
| SNP_P4_15195_39431622 | NC_021160.1    | Ca_kabuli_chr01 | 39431622                | CC                              | GG              | 1946744291               |
| SNP_P4_15196_39431662 | NC_021160.1    | Ca_kabuli_chr01 | 39431662                | TT                              | GG              | 1946744293               |
| SNP_P4_15197_39431722 | NC_021160.1    | Ca_kabuli_chr01 | 39431722                | GG                              | AA              | 1946744295               |
| SNP_P4_15198_39431723 | NC_021160.1    | Ca_kabuli_chr01 | 39431723                | AA                              | GG              | 1946744297               |
| SNP_P4_15199_39431852 | NC_021160.1    | Ca_kabuli_chr01 | 39431852                | AA                              | GG              | 1946744299               |
| SNP_P4_15200_39431932 | NC_021160.1    | Ca_kabuli_chr01 | 39431932                | TT                              | GG              | 1946744301               |
| SNP_P4_15203_39433329 | NC_021160.1    | Ca_kabuli_chr01 | 39433329                | GG                              | AA              | 1946744302               |
| SNP_P4_15205_39433812 | NC_021160.1    | Ca_kabuli_chr01 | 39433812                | TT                              | CC              | 1946744304               |
| SNP_P4_15206_39433864 | NC_021160.1    | Ca_kabuli_chr01 | 39433864                | CC                              | TT              | 1946744306               |
| SNP_P4_15207_39434124 | NC_021160.1    | Ca_kabuli_chr01 | 39434124                | CC                              | TT              | 1946744308               |
| SNP_P4_15208_39434262 | NC_021160.1    | Ca_kabuli_chr01 | 39434262                | AA                              | GG              | 1946744310               |
| SNP_P4_15209_39434268 | NC_021160.1    | Ca_kabuli_chr01 | 39434268                | AA                              | GG              | 1946744312               |
| SNP_P4_15210_39434519 | NC_021160.1    | Ca_kabuli_chr01 | 39434519                | TT                              | AA              | 1946744314               |
| SNP_P4_15211_39435696 | NC_021160.1    | Ca_kabuli_chr01 | 39435696                | CC                              | GG              | 1946744317               |
| SNP_P4_15212_39435744 | NC_021160.1    | Ca_kabuli_chr01 | 39435744                | GG                              | TT              | 1946744319               |
| SNP_P4_15213_39437288 | NC_021160.1    | Ca_kabuli_chr01 | 39437288                | TT                              | AA              | 1946744321               |
| SNP_P4_15214_39437296 | NC_021160.1    | Ca_kabuli_chr01 | 39437296                | TT                              | CC              | 1946744323               |
| SNP_P4_15215_39437590 | NC_021160.1    | Ca_kabuli_chr01 | 39437590                | GG                              | AA              | 1946744325               |
| SNP_P4_15216_39437655 | NC_021160.1    | Ca_kabuli_chr01 | 39437655                | CC                              | GG              | 1946744327               |
| SNP_P4_15217_39438268 | NC_021160.1    | Ca_kabuli_chr01 | 39438268                | GG                              | AA              | 1946744329               |
| SNP_P4_15218_39439352 | NC_021160.1    | Ca_kabuli_chr01 | 39439352                | AA                              | TT              | 1946744331               |
| SNP_P4_15220_39440429 | NC_021160.1    | Ca_kabuli_chr01 | 39440429                | TT                              | GG              | 1946744333               |
| SNP_P4_15222_39441005 | NC_021160.1    | Ca_kabuli_chr01 | 39441005                | CC                              | AA              | 1946744334               |
| SNP_P4_15223_39441007 | NC_021160.1    | Ca_kabuli_chr01 | 39441007                | TT                              | AA              | 1946744336               |
| SNP_P4_15224_39441051 | NC_021160.1    | Ca_kabuli_chr01 | 39441051                | TT                              | AA              | 1946744338               |
| SNP_P4_15225_39441083 | NC_021160.1    | Ca_kabuli_chr01 | 39441083                | AA                              | TT              | 1946744340               |
| SNP_P4_15227_39441360 | NC_021160.1    | Ca_kabuli_chr01 | 39441360                | TT                              | CC              | 1946744342               |
| SNP_P4_15228_39441639 | NC_021160.1    | Ca_kabuli_chr01 | 39441639                | AA                              | GG              | 1946744344               |
| SNP_P4_15229_39441669 | NC_021160.1    | Ca_kabuli_chr01 | 39441669                | AA                              | CC              | 1946744347               |
| SNP_P4_15230_39442276 | NC_021160.1    | Ca_kabuli_chr01 | 39442276                | CC                              | GG              | 1946744349               |
| SNP_P4_15231_39442299 | NC_021160.1    | Ca_kabuli_chr01 | 39442299                | CC                              | AA              | 1946744351               |
| SNP_P4_15233_39442555 | NC_021160.1    | Ca_kabuli_chr01 | 39442555                | AA                              | CC              | 1946744353               |

| SNPs IDs              | Chromosome IDs | Chromosomes     | Physical positions (bp) | CDC Frontier (Reference genome) | (ILWC46 & LPNB) | NCBI SNPdb Accession IDs |
|-----------------------|----------------|-----------------|-------------------------|---------------------------------|-----------------|--------------------------|
| SNP_P4_15235_39442615 | NC_021160.1    | Ca_kabuli_chr01 | 39442615                | CC                              | GG              | 1946744355               |
| SNP_P4_15236_39442633 | NC_021160.1    | Ca_kabuli_chr01 | 39442633                | CC                              | TT              | 1946744357               |
| SNP_P4_15237_39442784 | NC_021160.1    | Ca_kabuli_chr01 | 39442784                | TT                              | CC              | 1946744359               |
| SNP_P4_15239_39444582 | NC_021160.1    | Ca_kabuli_chr01 | 39444582                | TT                              | AA              | 1946744361               |
| SNP_P4_15241_39445828 | NC_021160.1    | Ca_kabuli_chr01 | 39445828                | GG                              | CC              | 1946744363               |
| SNP_P4_15242_39445839 | NC_021160.1    | Ca_kabuli_chr01 | 39445839                | TT                              | GG              | 1946744365               |
| SNP_P4_15243_39446556 | NC_021160.1    | Ca_kabuli_chr01 | 39446556                | GG                              | AA              | 1946744367               |
| SNP_P4_15244_39446560 | NC_021160.1    | Ca_kabuli_chr01 | 39446560                | TT                              | CC              | 1946744369               |
| SNP_P4_15245_39446564 | NC_021160.1    | Ca_kabuli_chr01 | 39446564                | TT                              | GG              | 1946744371               |
| SNP_P4_15246_39446583 | NC_021160.1    | Ca_kabuli_chr01 | 39446583                | TT                              | CC              | 1946744374               |
| SNP_P4_15247_39446592 | NC_021160.1    | Ca_kabuli_chr01 | 39446592                | AA                              | CC              | 1946744376               |
| SNP_P4_15248_39446594 | NC_021160.1    | Ca_kabuli_chr01 | 39446594                | GG                              | CC              | 1946744378               |
| SNP_P4_15249_39446756 | NC_021160.1    | Ca_kabuli_chr01 | 39446756                | CC                              | TT              | 1946744380               |
| SNP_P4_15251_39446884 | NC_021160.1    | Ca_kabuli_chr01 | 39446884                | CC                              | TT              | 1946744382               |
| SNP_P4_15253_39447142 | NC_021160.1    | Ca_kabuli_chr01 | 39447142                | AA                              | GG              | 1946744384               |
| SNP_P4_15254_39447584 | NC_021160.1    | Ca_kabuli_chr01 | 39447584                | TT                              | AA              | 1946744386               |
| SNP_P4_15255_39447613 | NC_021160.1    | Ca_kabuli_chr01 | 39447613                | GG                              | AA              | 1946744388               |
| SNP_P4_15256_39447619 | NC_021160.1    | Ca_kabuli_chr01 | 39447619                | GG                              | AA              | 1946744390               |
| SNP_P4_15257_39448570 | NC_021160.1    | Ca_kabuli_chr01 | 39448570                | AA                              | GG              | 1946744392               |
| SNP_P4_15258_39448592 | NC_021160.1    | Ca_kabuli_chr01 | 39448592                | GG                              | AA              | 1946744394               |
| SNP_P4_15259_39450508 | NC_021160.1    | Ca_kabuli_chr01 | 39450508                | GG                              | AA              | 1946744396               |
| SNP_P4_15261_39451966 | NC_021160.1    | Ca_kabuli_chr01 | 39451966                | GG                              | AA              | 1946744399               |
| SNP_P4_15262_39452376 | NC_021160.1    | Ca_kabuli_chr01 | 39452376                | TT                              | CC              | 1946744401               |
| SNP_P4_15263_39454691 | NC_021160.1    | Ca_kabuli_chr01 | 39454691                | CC                              | TT              | 1946744403               |
| SNP_P4_15264_39455748 | NC_021160.1    | Ca_kabuli_chr01 | 39455748                | TT                              | CC              | 1946744405               |
| SNP_P4_15265_39455756 | NC_021160.1    | Ca_kabuli_chr01 | 39455756                | TT                              | CC              | 1946744407               |
| SNP_P4_15266_39455800 | NC_021160.1    | Ca_kabuli_chr01 | 39455800                | TT                              | CC              | 1946744409               |
| SNP_P4_15267_39456535 | NC_021160.1    | Ca_kabuli_chr01 | 39456535                | TT                              | GG              | 1946744411               |
| SNP_P4_15268_39456537 | NC_021160.1    | Ca_kabuli_chr01 | 39456537                | TT                              | GG              | 1946744413               |
| SNP_P4_15269_39456572 | NC_021160.1    | Ca_kabuli_chr01 | 39456572                | GG                              | AA              | 1946744415               |
| SNP_P4_15270_39456789 | NC_021160.1    | Ca_kabuli_chr01 | 39456789                | TT                              | CC              | 1946744417               |
| SNP_P4_15271_39456811 | NC_021160.1    | Ca_kabuli_chr01 | 39456811                | GG                              | AA              | 1946744419               |
| SNP_P4_15272_39456813 | NC_021160.1    | Ca_kabuli_chr01 | 39456813                | GG                              | TT              | 1946744421               |
| SNP_P4_15273_39456876 | NC_021160.1    | Ca_kabuli_chr01 | 39456876                | GG                              | CC              | 1946744423               |
| SNP_P4_15274_39456888 | NC_021160.1    | Ca_kabuli_chr01 | 39456888                | TT                              | CC              | 1946744425               |
| SNP_P4_15275_39457663 | NC_021160.1    | Ca_kabuli_chr01 | 39457663                | AA                              | GG              | 1946744427               |
| SNP_P4_15276_39457695 | NC_021160.1    | Ca_kabuli_chr01 | 39457695                | GG                              | CC              | 1946744429               |
| SNP_P4_15277_39457753 | NC_021160.1    | Ca_kabuli_chr01 | 39457753                | CC                              | TT              | 1946744431               |
| SNP_P4_15278_39458028 | NC_021160.1    | Ca_kabuli_chr01 | 39458028                | AA                              | CC              | 1946744433               |
| SNP_P4_15279_39458065 | NC_021160.1    | Ca_kabuli_chr01 | 39458065                | TT                              | CC              | 1946744435               |
| SNP_P4_15280_39458077 | NC_021160.1    | Ca_kabuli_chr01 | 39458077                | TT                              | CC              | 1946744437               |
| SNP_P4_15281_39458081 | NC_021160.1    | Ca_kabuli_chr01 | 39458081                | GG                              | AA              | 1946744440               |



| SNPs IDs              | Chromosome IDs | Chromosomes     | Physical positions (bp) | CDC Frontier (Reference genome) | (ILWC46 & LPNB) | NCBI SNPdb Accession IDs |
|-----------------------|----------------|-----------------|-------------------------|---------------------------------|-----------------|--------------------------|
| SNP_P4_15282_39458123 | NC_021160.1    | Ca_kabuli_chr01 | 39458123                | TT                              | CC              | 1946744442               |
| SNP_P4_15283_39458183 | NC_021160.1    | Ca_kabuli_chr01 | 39458183                | TT                              | GG              | 1946744444               |
| SNP_P4_15284_39458187 | NC_021160.1    | Ca_kabuli_chr01 | 39458187                | GG                              | TT              | 1946744446               |
| SNP_P4_15285_39459073 | NC_021160.1    | Ca_kabuli_chr01 | 39459073                | CC                              | AA              | 1946744448               |
| SNP_P4_15287_39460864 | NC_021160.1    | Ca_kabuli_chr01 | 39460864                | AA                              | GG              | 1946744450               |
| SNP_P4_15288_39460986 | NC_021160.1    | Ca_kabuli_chr01 | 39460986                | GG                              | AA              | 1946744452               |
| SNP_P4_15289_39460993 | NC_021160.1    | Ca_kabuli_chr01 | 39460993                | GG                              | AA              | 1946744454               |
| SNP_P4_15290_39461020 | NC_021160.1    | Ca_kabuli_chr01 | 39461020                | TT                              | CC              | 1946744456               |
| SNP_P4_15291_39461072 | NC_021160.1    | Ca_kabuli_chr01 | 39461072                | GG                              | CC              | 1946744458               |
| SNP_P4_15292_39461886 | NC_021160.1    | Ca_kabuli_chr01 | 39461886                | AA                              | GG              | 1946744460               |
| SNP_P4_15295_39464040 | NC_021160.1    | Ca_kabuli_chr01 | 39464040                | GG                              | AA              | 1946744462               |
| SNP_P4_15296_39464048 | NC_021160.1    | Ca_kabuli_chr01 | 39464048                | AA                              | CC              | 1946744464               |
| SNP_P4_15297_39464073 | NC_021160.1    | Ca_kabuli_chr01 | 39464073                | TT                              | GG              | 1946744466               |
| SNP_P4_15298_39464846 | NC_021160.1    | Ca_kabuli_chr01 | 39464846                | TT                              | AA              | 1946744468               |
| SNP_P4_15299_39465834 | NC_021160.1    | Ca_kabuli_chr01 | 39465834                | AA                              | CC              | 1946744470               |
| SNP_P4_15300_39469361 | NC_021160.1    | Ca_kabuli_chr01 | 39469361                | GG                              | AA              | 1946744472               |
| SNP_P4_15301_39469507 | NC_021160.1    | Ca_kabuli_chr01 | 39469507                | AA                              | CC              | 1946744474               |
| SNP_P4_15302_39469671 | NC_021160.1    | Ca_kabuli_chr01 | 39469671                | GG                              | AA              | 1946744476               |
| SNP_P4_15303_39469701 | NC_021160.1    | Ca_kabuli_chr01 | 39469701                | CC                              | TT              | 1946744478               |
| SNP_P4_15304_39469809 | NC_021160.1    | Ca_kabuli_chr01 | 39469809                | CC                              | GG              | 1946744480               |
| SNP_P4_15305_39470285 | NC_021160.1    | Ca_kabuli_chr01 | 39470285                | TT                              | CC              | 1946744482               |
| SNP_P4_15306_39470945 | NC_021160.1    | Ca_kabuli_chr01 | 39470945                | TT                              | CC              | 1946744484               |
| SNP_P4_15307_39470987 | NC_021160.1    | Ca_kabuli_chr01 | 39470987                | AA                              | TT              | 1946744486               |
| SNP_P4_15308_39471545 | NC_021160.1    | Ca_kabuli_chr01 | 39471545                | GG                              | AA              | 1946744488               |
| SNP_P4_15309_39471747 | NC_021160.1    | Ca_kabuli_chr01 | 39471747                | GG                              | CC              | 1946744490               |
| SNP_P4_15310_39471769 | NC_021160.1    | Ca_kabuli_chr01 | 39471769                | CC                              | TT              | 1946744492               |
| SNP_P4_15311_39472634 | NC_021160.1    | Ca_kabuli_chr01 | 39472634                | GG                              | AA              | 1946744494               |
| SNP_P4_15313_39480725 | NC_021160.1    | Ca_kabuli_chr01 | 39480725                | GG                              | AA              | 1946744496               |
| SNP_P4_15314_39480869 | NC_021160.1    | Ca_kabuli_chr01 | 39480869                | AA                              | GG              | 1946744498               |
| SNP_P4_15315_39482660 | NC_021160.1    | Ca_kabuli_chr01 | 39482660                | AA                              | TT              | 1946744500               |
| SNP_P4_15316_39483768 | NC_021160.1    | Ca_kabuli_chr01 | 39483768                | GG                              | TT              | 1946744502               |
| SNP_P4_15317_39484612 | NC_021160.1    | Ca_kabuli_chr01 | 39484612                | CC                              | AA              | 1946744504               |
| SNP_P4_15318_39484821 | NC_021160.1    | Ca_kabuli_chr01 | 39484821                | TT                              | GG              | 1946744506               |
| SNP_P4_15319_39486148 | NC_021160.1    | Ca_kabuli_chr01 | 39486148                | TT                              | AA              | 1946744508               |
| SNP_P4_15320_39487871 | NC_021160.1    | Ca_kabuli_chr01 | 39487871                | GG                              | AA              | 1946744510               |
| SNP_P4_15321_39488085 | NC_021160.1    | Ca_kabuli_chr01 | 39488085                | AA                              | GG              | 1946744513               |
| SNP_P4_15322_39488140 | NC_021160.1    | Ca_kabuli_chr01 | 39488140                | TT                              | GG              | 1946744515               |
| SNP_P4_15323_39488339 | NC_021160.1    | Ca_kabuli_chr01 | 39488339                | CC                              | TT              | 1946744517               |
| SNP_P4_15324_39489281 | NC_021160.1    | Ca_kabuli_chr01 | 39489281                | TT                              | AA              | 1946744519               |
| SNP_P4_15325_39490381 | NC_021160.1    | Ca_kabuli_chr01 | 39490381                | GG                              | TT              | 1946744521               |
| SNP_P4_15326_39494124 | NC_021160.1    | Ca_kabuli_chr01 | 39494124                | AA                              | GG              | 1946744523               |
| SNP_P4_15327_39494949 | NC_021160.1    | Ca_kabuli_chr01 | 39494949                | AA                              | GG              | 1946744525               |

| SNPs IDs              | Chromosome IDs | Chromosomes     | Physical positions (bp) | CDC Frontier (Reference genome) | (ILWC46 & LPNB) | NCBI SNPdb Accession IDs |
|-----------------------|----------------|-----------------|-------------------------|---------------------------------|-----------------|--------------------------|
| SNP_P4_15328_39496618 | NC_021160.1    | Ca_kabuli_chr01 | 39496618                | CC                              | TT              | 1946744527               |
| SNP_P4_15329_39497032 | NC_021160.1    | Ca_kabuli_chr01 | 39497032                | TT                              | GG              | 1946744529               |
| SNP_P4_15330_39497089 | NC_021160.1    | Ca_kabuli_chr01 | 39497089                | GG                              | AA              | 1946744532               |
| SNP_P4_15331_39498634 | NC_021160.1    | Ca_kabuli_chr01 | 39498634                | GG                              | AA              | 1946744534               |
| SNP_P4_15332_39501226 | NC_021160.1    | Ca_kabuli_chr01 | 39501226                | CC                              | TT              | 1946744536               |
| SNP_P4_15333_39501526 | NC_021160.1    | Ca_kabuli_chr01 | 39501526                | AA                              | CC              | 1946744538               |
| SNP_P4_15334_39501693 | NC_021160.1    | Ca_kabuli_chr01 | 39501693                | CC                              | TT              | 1946744540               |
| SNP_P4_15335_39501770 | NC_021160.1    | Ca_kabuli_chr01 | 39501770                | AA                              | GG              | 1946744542               |
| SNP_P4_15336_39504478 | NC_021160.1    | Ca_kabuli_chr01 | 39504478                | AA                              | GG              | 1946744544               |
| SNP_P4_15338_39504564 | NC_021160.1    | Ca_kabuli_chr01 | 39504564                | TT                              | AA              | 1946744546               |
| SNP_P4_15339_39507403 | NC_021160.1    | Ca_kabuli_chr01 | 39507403                | AA                              | TT              | 1946744548               |
| SNP_P4_15341_39509762 | NC_021160.1    | Ca_kabuli_chr01 | 39509762                | CC                              | TT              | 1946744550               |
| SNP_P4_15343_39511608 | NC_021160.1    | Ca_kabuli_chr01 | 39511608                | TT                              | AA              | 1946744552               |
| SNP_P4_15344_39511613 | NC_021160.1    | Ca_kabuli_chr01 | 39511613                | TT                              | AA              | 1946744554               |
| SNP_P4_15345_39511619 | NC_021160.1    | Ca_kabuli_chr01 | 39511619                | CC                              | TT              | 1946744556               |
| SNP_P4_15346_39511643 | NC_021160.1    | Ca_kabuli_chr01 | 39511643                | GG                              | AA              | 1946744558               |
| SNP_P4_15347_39511703 | NC_021160.1    | Ca_kabuli_chr01 | 39511703                | TT                              | CC              | 1946744560               |
| SNP_P4_15348_39516171 | NC_021160.1    | Ca_kabuli_chr01 | 39516171                | TT                              | CC              | 1946744562               |
| SNP_P4_15349_39517991 | NC_021160.1    | Ca_kabuli_chr01 | 39517991                | TT                              | GG              | 1946744564               |
| SNP_P4_15350_39518284 | NC_021160.1    | Ca_kabuli_chr01 | 39518284                | AA                              | GG              | 1946744566               |
| SNP_P4_15351_39520299 | NC_021160.1    | Ca_kabuli_chr01 | 39520299                | CC                              | TT              | 1946744568               |
| SNP_P4_15352_39521721 | NC_021160.1    | Ca_kabuli_chr01 | 39521721                | GG                              | AA              | 1946744570               |
| SNP_P4_15353_39523339 | NC_021160.1    | Ca_kabuli_chr01 | 39523339                | TT                              | CC              | 1946744572               |
| SNP_P4_15354_39523569 | NC_021160.1    | Ca_kabuli_chr01 | 39523569                | CC                              | TT              | 1946744574               |
| SNP_P4_15355_39524091 | NC_021160.1    | Ca_kabuli_chr01 | 39524091                | CC                              | AA              | 1946744576               |
| SNP_P4_15356_39524259 | NC_021160.1    | Ca_kabuli_chr01 | 39524259                | AA                              | GG              | 1946744578               |
| SNP_P4_15357_39524296 | NC_021160.1    | Ca_kabuli_chr01 | 39524296                | TT                              | CC              | 1946744580               |
| SNP_P4_15358_39524407 | NC_021160.1    | Ca_kabuli_chr01 | 39524407                | CC                              | TT              | 1946744582               |
| SNP_P4_15359_39525619 | NC_021160.1    | Ca_kabuli_chr01 | 39525619                | CC                              | TT              | 1946744584               |
| SNP_P4_15360_39526427 | NC_021160.1    | Ca_kabuli_chr01 | 39526427                | GG                              | AA              | 1946744586               |
| SNP_P4_15361_39526835 | NC_021160.1    | Ca_kabuli_chr01 | 39526835                | GG                              | AA              | 1946744588               |
| SNP_P4_15362_39527093 | NC_021160.1    | Ca_kabuli_chr01 | 39527093                | GG                              | AA              | 1946744590               |
| SNP_P4_15363_39528861 | NC_021160.1    | Ca_kabuli_chr01 | 39528861                | TT                              | CC              | 1946744592               |
| SNP_P4_15364_39528889 | NC_021160.1    | Ca_kabuli_chr01 | 39528889                | AA                              | TT              | 1946744594               |
| SNP_P4_15365_39529164 | NC_021160.1    | Ca_kabuli_chr01 | 39529164                | CC                              | GG              | 1946744596               |
| SNP_P4_15366_39540943 | NC_021160.1    | Ca_kabuli_chr01 | 39540943                | TT                              | CC              | 1946744598               |
| SNP_P4_15367_39540969 | NC_021160.1    | Ca_kabuli_chr01 | 39540969                | TT                              | CC              | 1946744600               |
| SNP_P4_15368_39541554 | NC_021160.1    | Ca_kabuli_chr01 | 39541554                | AA                              | GG              | 1946744602               |
| SNP_P4_15369_39545421 | NC_021160.1    | Ca_kabuli_chr01 | 39545421                | AA                              | TT              | 1946744604               |
| SNP_P4_15370_39547376 | NC_021160.1    | Ca_kabuli_chr01 | 39547376                | CC                              | TT              | 1946744606               |
| SNP_P4_15371_39548050 | NC_021160.1    | Ca_kabuli_chr01 | 39548050                | GG                              | AA              | 1946744608               |
| SNP_P4_15372_39548370 | NC_021160.1    | Ca_kabuli_chr01 | 39548370                | GG                              | AA              | 1946744610               |

| SNPs IDs              | Chromosome IDs | Chromosomes     | Physical positions (bp) | CDC Frontier (Reference genome) | (ILWC46 & LPNB) | NCBI SNPdb Accession IDs |
|-----------------------|----------------|-----------------|-------------------------|---------------------------------|-----------------|--------------------------|
| SNP_P4_15373_39550681 | NC_021160.1    | Ca_kabuli_chr01 | 39550681                | CC                              | TT              | 1946744612               |
| SNP_P4_15374_39552218 | NC_021160.1    | Ca_kabuli_chr01 | 39552218                | GG                              | AA              | 1946744614               |
| SNP_P4_15375_39552305 | NC_021160.1    | Ca_kabuli_chr01 | 39552305                | AA                              | CC              | 1946744616               |
| SNP_P4_15376_39552336 | NC_021160.1    | Ca_kabuli_chr01 | 39552336                | TT                              | CC              | 1946744618               |
| SNP_P4_15377_39552408 | NC_021160.1    | Ca_kabuli_chr01 | 39552408                | TT                              | CC              | 1946744620               |
| SNP_P4_15378_39552452 | NC_021160.1    | Ca_kabuli_chr01 | 39552452                | AA                              | GG              | 1946744622               |
| SNP_P4_15379_39552482 | NC_021160.1    | Ca_kabuli_chr01 | 39552482                | TT                              | CC              | 1946744624               |
| SNP_P4_15380_39552526 | NC_021160.1    | Ca_kabuli_chr01 | 39552526                | AA                              | GG              | 1946744626               |
| SNP_P4_15381_39552557 | NC_021160.1    | Ca_kabuli_chr01 | 39552557                | CC                              | AA              | 1946744628               |
| SNP_P4_15382_39552748 | NC_021160.1    | Ca_kabuli_chr01 | 39552748                | TT                              | CC              | 1946744629               |
| SNP_P4_15383_39552759 | NC_021160.1    | Ca_kabuli_chr01 | 39552759                | TT                              | CC              | 1946744631               |
| SNP_P4_15384_39552950 | NC_021160.1    | Ca_kabuli_chr01 | 39552950                | TT                              | CC              | 1946744633               |
| SNP_P4_15385_39552989 | NC_021160.1    | Ca_kabuli_chr01 | 39552989                | CC                              | GG              | 1946744635               |
| SNP_P4_15386_39553566 | NC_021160.1    | Ca_kabuli_chr01 | 39553566                | GG                              | TT              | 1946744637               |
| SNP_P4_15387_39554304 | NC_021160.1    | Ca_kabuli_chr01 | 39554304                | GG                              | AA              | 1946744639               |
| SNP_P4_15388_39556922 | NC_021160.1    | Ca_kabuli_chr01 | 39556922                | AA                              | GG              | 1946744641               |
| SNP_P4_15389_39557201 | NC_021160.1    | Ca_kabuli_chr01 | 39557201                | CC                              | TT              | 1946744643               |
| SNP_P4_15390_39557347 | NC_021160.1    | Ca_kabuli_chr01 | 39557347                | TT                              | CC              | 1946744645               |
| SNP_P4_15391_39558203 | NC_021160.1    | Ca_kabuli_chr01 | 39558203                | CC                              | TT              | 1946744647               |
| SNP_P4_15392_39560970 | NC_021160.1    | Ca_kabuli_chr01 | 39560970                | CC                              | TT              | 1946744649               |
| SNP_P4_15393_39561927 | NC_021160.1    | Ca_kabuli_chr01 | 39561927                | CC                              | TT              | 1946744651               |
| SNP_P4_15394_39562023 | NC_021160.1    | Ca_kabuli_chr01 | 39562023                | GG                              | AA              | 1946744653               |
| SNP_P4_15395_39562839 | NC_021160.1    | Ca_kabuli_chr01 | 39562839                | TT                              | CC              | 1946744655               |
| SNP_P4_15396_39565139 | NC_021160.1    | Ca_kabuli_chr01 | 39565139                | GG                              | CC              | 1946744657               |
| SNP_P4_15397_39566639 | NC_021160.1    | Ca_kabuli_chr01 | 39566639                | TT                              | CC              | 1946744659               |
| SNP_P4_15398_39566657 | NC_021160.1    | Ca_kabuli_chr01 | 39566657                | CC                              | TT              | 1946744661               |
| SNP_P4_15399_39567244 | NC_021160.1    | Ca_kabuli_chr01 | 39567244                | GG                              | TT              | 1946744663               |
| SNP_P4_15400_39567506 | NC_021160.1    | Ca_kabuli_chr01 | 39567506                | TT                              | GG              | 1946744665               |
| SNP_P4_15401_39569455 | NC_021160.1    | Ca_kabuli_chr01 | 39569455                | AA                              | GG              | 1946744667               |
| SNP_P4_15402_39569808 | NC_021160.1    | Ca_kabuli_chr01 | 39569808                | TT                              | CC              | 1946744669               |
| SNP_P4_15403_39570675 | NC_021160.1    | Ca_kabuli_chr01 | 39570675                | GG                              | AA              | 1946744671               |
| SNP_P4_15404_39570842 | NC_021160.1    | Ca_kabuli_chr01 | 39570842                | CC                              | TT              | 1946744673               |
| SNP_P4_15405_39571934 | NC_021160.1    | Ca_kabuli_chr01 | 39571934                | GG                              | AA              | 1946744675               |
| SNP_P4_15406_39571993 | NC_021160.1    | Ca_kabuli_chr01 | 39571993                | TT                              | GG              | 1946744677               |
| SNP_P4_15407_39571995 | NC_021160.1    | Ca_kabuli_chr01 | 39571995                | TT                              | CC              | 1946744679               |
| SNP_P4_15408_39573170 | NC_021160.1    | Ca_kabuli_chr01 | 39573170                | AA                              | GG              | 1946744681               |
| SNP_P4_15409_39573504 | NC_021160.1    | Ca_kabuli_chr01 | 39573504                | AA                              | GG              | 1946744683               |
| SNP_P4_15410_39573658 | NC_021160.1    | Ca_kabuli_chr01 | 39573658                | AA                              | GG              | 1946744685               |
| SNP_P4_15411_39573671 | NC_021160.1    | Ca_kabuli_chr01 | 39573671                | AA                              | GG              | 1946744687               |
| SNP_P4_15412_39574095 | NC_021160.1    | Ca_kabuli_chr01 | 39574095                | AA                              | GG              | 1946744689               |
| SNP_P4_15414_39574474 | NC_021160.1    | Ca_kabuli_chr01 | 39574474                | CC                              | GG              | 1946744691               |
| SNP_P4_15415_39575413 | NC_021160.1    | Ca_kabuli_chr01 | 39575413                | GG                              | AA              | 1946744693               |

| SNPs IDs              | Chromosome IDs | Chromosomes     | Physical positions (bp) | CDC Frontier (Reference genome) | (ILWC46 & LPNB) | NCBI SNPdb Accession IDs |
|-----------------------|----------------|-----------------|-------------------------|---------------------------------|-----------------|--------------------------|
| SNP_P4_15416_39575435 | NC_021160.1    | Ca_kabuli_chr01 | 39575435                | TT                              | CC              | 1946744695               |
| SNP_P4_15417_39575673 | NC_021160.1    | Ca_kabuli_chr01 | 39575673                | AA                              | GG              | 1946744697               |
| SNP_P4_15418_39578141 | NC_021160.1    | Ca_kabuli_chr01 | 39578141                | TT                              | GG              | 1946744699               |
| SNP_P4_15419_39578206 | NC_021160.1    | Ca_kabuli_chr01 | 39578206                | GG                              | TT              | 1946744701               |
| SNP_P4_15420_39579237 | NC_021160.1    | Ca_kabuli_chr01 | 39579237                | AA                              | TT              | 1946744703               |
| SNP_P4_15421_39579954 | NC_021160.1    | Ca_kabuli_chr01 | 39579954                | AA                              | GG              | 1946744705               |
| SNP_P4_15422_39580914 | NC_021160.1    | Ca_kabuli_chr01 | 39580914                | TT                              | CC              | 1946744707               |
| SNP_P4_15423_39581091 | NC_021160.1    | Ca_kabuli_chr01 | 39581091                | GG                              | AA              | 1946744709               |
| SNP_P4_15424_39581450 | NC_021160.1    | Ca_kabuli_chr01 | 39581450                | CC                              | GG              | 1946744711               |
| SNP_P4_15425_39581578 | NC_021160.1    | Ca_kabuli_chr01 | 39581578                | GG                              | TT              | 1946744713               |
| SNP_P4_15426_39582084 | NC_021160.1    | Ca_kabuli_chr01 | 39582084                | GG                              | AA              | 1946744715               |
| SNP_P4_15427_39583083 | NC_021160.1    | Ca_kabuli_chr01 | 39583083                | CC                              | AA              | 1946744717               |
| SNP_P4_15428_39583472 | NC_021160.1    | Ca_kabuli_chr01 | 39583472                | GG                              | TT              | 1946744719               |
| SNP_P4_15429_39583590 | NC_021160.1    | Ca_kabuli_chr01 | 39583590                | GG                              | AA              | 1946744721               |
| SNP_P4_15430_39583826 | NC_021160.1    | Ca_kabuli_chr01 | 39583826                | AA                              | GG              | 1946744723               |
| SNP_P4_15432_39585420 | NC_021160.1    | Ca_kabuli_chr01 | 39585420                | CC                              | GG              | 1946744725               |
| SNP_P4_15433_39585841 | NC_021160.1    | Ca_kabuli_chr01 | 39585841                | TT                              | CC              | 1946744727               |
| SNP_P4_15434_39586124 | NC_021160.1    | Ca_kabuli_chr01 | 39586124                | GG                              | AA              | 1946744729               |
| SNP_P4_15435_39586603 | NC_021160.1    | Ca_kabuli_chr01 | 39586603                | GG                              | CC              | 1946744731               |
| SNP_P4_15436_39586604 | NC_021160.1    | Ca_kabuli_chr01 | 39586604                | AA                              | GG              | 1946744733               |
| SNP_P4_15437_39586615 | NC_021160.1    | Ca_kabuli_chr01 | 39586615                | AA                              | TT              | 1946744735               |
| SNP_P4_15438_39586633 | NC_021160.1    | Ca_kabuli_chr01 | 39586633                | AA                              | TT              | 1946744737               |
| SNP_P4_15439_39586789 | NC_021160.1    | Ca_kabuli_chr01 | 39586789                | TT                              | CC              | 1946744739               |
| SNP_P4_15440_39589712 | NC_021160.1    | Ca_kabuli_chr01 | 39589712                | TT                              | CC              | 1946744741               |
| SNP_P4_15441_39590100 | NC_021160.1    | Ca_kabuli_chr01 | 39590100                | TT                              | CC              | 1946744742               |
| SNP_P4_15442_39590412 | NC_021160.1    | Ca_kabuli_chr01 | 39590412                | TT                              | CC              | 1946744744               |
| SNP_P4_15443_39591557 | NC_021160.1    | Ca_kabuli_chr01 | 39591557                | AA                              | GG              | 1946744746               |
| SNP_P4_15444_39591722 | NC_021160.1    | Ca_kabuli_chr01 | 39591722                | TT                              | CC              | 1946744748               |
| SNP_P4_15445_39591804 | NC_021160.1    | Ca_kabuli_chr01 | 39591804                | GG                              | AA              | 1946744750               |
| SNP_P4_15446_39591828 | NC_021160.1    | Ca_kabuli_chr01 | 39591828                | CC                              | AA              | 1946744752               |
| SNP_P4_15447_39593553 | NC_021160.1    | Ca_kabuli_chr01 | 39593553                | GG                              | AA              | 1946744754               |
| SNP_P4_15448_39594073 | NC_021160.1    | Ca_kabuli_chr01 | 39594073                | GG                              | AA              | 1946744756               |
| SNP_P4_15449_39594153 | NC_021160.1    | Ca_kabuli_chr01 | 39594153                | AA                              | GG              | 1946744758               |
| SNP_P4_15450_39594445 | NC_021160.1    | Ca_kabuli_chr01 | 39594445                | GG                              | AA              | 1946744760               |
| SNP_P4_15452_39595606 | NC_021160.1    | Ca_kabuli_chr01 | 39595606                | TT                              | AA              | 1946744762               |
| SNP_P4_15453_39596314 | NC_021160.1    | Ca_kabuli_chr01 | 39596314                | TT                              | CC              | 1946744764               |
| SNP_P4_15454_39598406 | NC_021160.1    | Ca_kabuli_chr01 | 39598406                | TT                              | CC              | 1946744766               |
| SNP_P4_15455_39598437 | NC_021160.1    | Ca_kabuli_chr01 | 39598437                | AA                              | TT              | 1946744768               |
| SNP_P4_15456_39598482 | NC_021160.1    | Ca_kabuli_chr01 | 39598482                | AA                              | GG              | 1946744770               |
| SNP_P4_15457_39598664 | NC_021160.1    | Ca_kabuli_chr01 | 39598664                | CC                              | TT              | 1946744772               |
| SNP_P4_15458_39598888 | NC_021160.1    | Ca_kabuli_chr01 | 39598888                | AA                              | TT              | 1946744774               |
| SNP_P4_15459_39598892 | NC_021160.1    | Ca_kabuli_chr01 | 39598892                | TT                              | CC              | 1946744776               |

| SNPs IDs              | Chromosome IDs | Chromosomes     | Physical positions (bp) | CDC Frontier (Reference genome) | (ILWC46 & LPNB) | NCBI SNPdb Accession IDs |
|-----------------------|----------------|-----------------|-------------------------|---------------------------------|-----------------|--------------------------|
| SNP_P4_15460_39601051 | NC_021160.1    | Ca_kabuli_chr01 | 39601051                | GG                              | CC              | 1946744778               |
| SNP_P4_15461_39601079 | NC_021160.1    | Ca_kabuli_chr01 | 39601079                | TT                              | CC              | 1946744780               |
| SNP_P4_15462_39601179 | NC_021160.1    | Ca_kabuli_chr01 | 39601179                | GG                              | AA              | 1946744782               |
| SNP_P4_15463_39605174 | NC_021160.1    | Ca_kabuli_chr01 | 39605174                | TT                              | CC              | 1946744784               |
| SNP_P4_15464_39605180 | NC_021160.1    | Ca_kabuli_chr01 | 39605180                | TT                              | CC              | 1946744786               |
| SNP_P4_15465_39605967 | NC_021160.1    | Ca_kabuli_chr01 | 39605967                | CC                              | TT              | 1946744788               |
| SNP_P4_15466_39605970 | NC_021160.1    | Ca_kabuli_chr01 | 39605970                | AA                              | CC              | 1946744790               |
| SNP_P4_15469_39606044 | NC_021160.1    | Ca_kabuli_chr01 | 39606044                | CC                              | AA              | 1946744792               |
| SNP_P4_15471_39608534 | NC_021160.1    | Ca_kabuli_chr01 | 39608534                | TT                              | AA              | 1946744794               |
| SNP_P4_15472_39609095 | NC_021160.1    | Ca_kabuli_chr01 | 39609095                | GG                              | TT              | 1946744796               |
| SNP_P4_15474_39609698 | NC_021160.1    | Ca_kabuli_chr01 | 39609698                | TT                              | CC              | 1946744798               |
| SNP_P4_15475_39612938 | NC_021160.1    | Ca_kabuli_chr01 | 39612938                | GG                              | TT              | 1946744800               |
| SNP_P4_15476_39613149 | NC_021160.1    | Ca_kabuli_chr01 | 39613149                | TT                              | CC              | 1946744803               |
| SNP_P4_15479_39614453 | NC_021160.1    | Ca_kabuli_chr01 | 39614453                | CC                              | TT              | 1946744805               |
| SNP_P4_15480_39615085 | NC_021160.1    | Ca_kabuli_chr01 | 39615085                | TT                              | AA              | 1946744807               |
| SNP_P4_15482_39617656 | NC_021160.1    | Ca_kabuli_chr01 | 39617656                | CC                              | TT              | 1946744809               |
| SNP_P4_15484_39621406 | NC_021160.1    | Ca_kabuli_chr01 | 39621406                | TT                              | AA              | 1946744811               |
| SNP_P4_15485_39621685 | NC_021160.1    | Ca_kabuli_chr01 | 39621685                | TT                              | GG              | 1946744813               |
| SNP_P4_15486_39621729 | NC_021160.1    | Ca_kabuli_chr01 | 39621729                | AA                              | TT              | 1946744815               |
| SNP_P4_15487_39622714 | NC_021160.1    | Ca_kabuli_chr01 | 39622714                | GG                              | AA              | 1946744816               |
| SNP_P4_15488_39623198 | NC_021160.1    | Ca_kabuli_chr01 | 39623198                | CC                              | TT              | 1946744818               |
| SNP_P4_15489_39623485 | NC_021160.1    | Ca_kabuli_chr01 | 39623485                | CC                              | AA              | 1946744820               |
| SNP_P4_15490_39636066 | NC_021160.1    | Ca_kabuli_chr01 | 39636066                | GG                              | AA              | 1946744822               |
| SNP_P4_15491_39636328 | NC_021160.1    | Ca_kabuli_chr01 | 39636328                | CC                              | TT              | 1946744824               |
| SNP_P4_15492_39638688 | NC_021160.1    | Ca_kabuli_chr01 | 39638688                | AA                              | TT              | 1946744826               |
| SNP_P4_15493_39639027 | NC_021160.1    | Ca_kabuli_chr01 | 39639027                | CC                              | AA              | 1946744828               |
| SNP_P4_15494_39642576 | NC_021160.1    | Ca_kabuli_chr01 | 39642576                | AA                              | GG              | 1946744830               |
| SNP_P4_15495_39647245 | NC_021160.1    | Ca_kabuli_chr01 | 39647245                | AA                              | GG              | 1946744832               |
| SNP_P4_15496_39650111 | NC_021160.1    | Ca_kabuli_chr01 | 39650111                | CC                              | TT              | 1946744834               |
| SNP_P4_15497_39650251 | NC_021160.1    | Ca_kabuli_chr01 | 39650251                | GG                              | AA              | 1946744836               |
| SNP_P4_15498_39650316 | NC_021160.1    | Ca_kabuli_chr01 | 39650316                | AA                              | GG              | 1946744838               |
| SNP_P4_15500_39652475 | NC_021160.1    | Ca_kabuli_chr01 | 39652475                | AA                              | GG              | 1946744840               |
| SNP_P4_15501_39652481 | NC_021160.1    | Ca_kabuli_chr01 | 39652481                | AA                              | GG              | 1946744842               |
| SNP_P4_15502_39652788 | NC_021160.1    | Ca_kabuli_chr01 | 39652788                | AA                              | TT              | 1946744844               |
| SNP_P4_15503_39653057 | NC_021160.1    | Ca_kabuli_chr01 | 39653057                | AA                              | GG              | 1946744846               |
| SNP_P4_15504_39654271 | NC_021160.1    | Ca_kabuli_chr01 | 39654271                | GG                              | TT              | 1946744848               |
| SNP_P4_15505_39654352 | NC_021160.1    | Ca_kabuli_chr01 | 39654352                | TT                              | CC              | 1946744850               |
| SNP_P4_15507_39657407 | NC_021160.1    | Ca_kabuli_chr01 | 39657407                | CC                              | TT              | 1946744852               |
| SNP_P4_15508_39657837 | NC_021160.1    | Ca_kabuli_chr01 | 39657837                | CC                              | TT              | 1946744854               |
| SNP_P4_15509_39659626 | NC_021160.1    | Ca_kabuli_chr01 | 39659626                | AA                              | GG              | 1946744856               |
| SNP_P4_15510_39663824 | NC_021160.1    | Ca_kabuli_chr01 | 39663824                | GG                              | CC              | 1946744858               |
| SNP_P4_15511_39664201 | NC_021160.1    | Ca_kabuli_chr01 | 39664201                | GG                              | AA              | 1946744860               |

| SNPs IDs              | Chromosome IDs | Chromosomes     | Physical positions (bp) | CDC Frontier (Reference genome) | (ILWC46 & LPNB) | NCBI SNPdb Accession IDs |
|-----------------------|----------------|-----------------|-------------------------|---------------------------------|-----------------|--------------------------|
| SNP_P4_15512_39668097 | NC_021160.1    | Ca_kabuli_chr01 | 39668097                | TT                              | GG              | 1946744862               |
| SNP_P4_15513_39669745 | NC_021160.1    | Ca_kabuli_chr01 | 39669745                | TT                              | CC              | 1946744864               |
| SNP_P4_15514_39670391 | NC_021160.1    | Ca_kabuli_chr01 | 39670391                | AA                              | GG              | 1946744866               |
| SNP_P4_15515_39671669 | NC_021160.1    | Ca_kabuli_chr01 | 39671669                | TT                              | CC              | 1946744868               |
| SNP_P4_15516_39671860 | NC_021160.1    | Ca_kabuli_chr01 | 39671860                | AA                              | GG              | 1946744870               |
| SNP_P4_15517_39672603 | NC_021160.1    | Ca_kabuli_chr01 | 39672603                | TT                              | CC              | 1946744872               |
| SNP_P4_15518_39672923 | NC_021160.1    | Ca_kabuli_chr01 | 39672923                | AA                              | GG              | 1946744874               |
| SNP_P4_15519_39673379 | NC_021160.1    | Ca_kabuli_chr01 | 39673379                | AA                              | GG              | 1946744876               |
| SNP_P4_15521_39674376 | NC_021160.1    | Ca_kabuli_chr01 | 39674376                | TT                              | CC              | 1946744878               |
| SNP_P4_15522_39679288 | NC_021160.1    | Ca_kabuli_chr01 | 39679288                | TT                              | CC              | 1946744880               |
| SNP_P4_15523_39681229 | NC_021160.1    | Ca_kabuli_chr01 | 39681229                | TT                              | CC              | 1946744882               |
| SNP_P4_15524_39681770 | NC_021160.1    | Ca_kabuli_chr01 | 39681770                | GG                              | AA              | 1946744884               |
| SNP_P4_15526_39682983 | NC_021160.1    | Ca_kabuli_chr01 | 39682983                | TT                              | AA              | 1946744885               |
| SNP_P4_15527_39683907 | NC_021160.1    | Ca_kabuli_chr01 | 39683907                | TT                              | GG              | 1946744887               |
| SNP_P4_15528_39684029 | NC_021160.1    | Ca_kabuli_chr01 | 39684029                | CC                              | AA              | 1946744889               |
| SNP_P4_15529_39684342 | NC_021160.1    | Ca_kabuli_chr01 | 39684342                | TT                              | CC              | 1946744891               |
| SNP_P4_15530_39685887 | NC_021160.1    | Ca_kabuli_chr01 | 39685887                | AA                              | GG              | 1946744893               |
| SNP_P4_15531_39686205 | NC_021160.1    | Ca_kabuli_chr01 | 39686205                | GG                              | TT              | 1946744895               |
| SNP_P4_15532_39687596 | NC_021160.1    | Ca_kabuli_chr01 | 39687596                | AA                              | CC              | 1946744897               |
| SNP_P4_15533_39687600 | NC_021160.1    | Ca_kabuli_chr01 | 39687600                | TT                              | GG              | 1946744899               |
| SNP_P4_15534_39688296 | NC_021160.1    | Ca_kabuli_chr01 | 39688296                | AA                              | GG              | 1946744901               |
| SNP_P4_15535_39688852 | NC_021160.1    | Ca_kabuli_chr01 | 39688852                | TT                              | CC              | 1946744903               |
| SNP_P4_15536_39689058 | NC_021160.1    | Ca_kabuli_chr01 | 39689058                | AA                              | GG              | 1946744905               |
| SNP_P4_15537_39691515 | NC_021160.1    | Ca_kabuli_chr01 | 39691515                | CC                              | AA              | 1946744907               |
| SNP_P4_15538_39693784 | NC_021160.1    | Ca_kabuli_chr01 | 39693784                | GG                              | TT              | 1946744909               |
| SNP_P4_15539_39694573 | NC_021160.1    | Ca_kabuli_chr01 | 39694573                | TT                              | CC              | 1946744911               |
| SNP_P4_15540_39694836 | NC_021160.1    | Ca_kabuli_chr01 | 39694836                | GG                              | TT              | 1946744913               |
| SNP_P4_15541_39695776 | NC_021160.1    | Ca_kabuli_chr01 | 39695776                | TT                              | CC              | 1946744915               |
| SNP_P4_15542_39696354 | NC_021160.1    | Ca_kabuli_chr01 | 39696354                | TT                              | CC              | 1946744917               |
| SNP_P4_15543_39696647 | NC_021160.1    | Ca_kabuli_chr01 | 39696647                | CC                              | AA              | 1946744919               |
| SNP_P4_15544_39697496 | NC_021160.1    | Ca_kabuli_chr01 | 39697496                | TT                              | CC              | 1946744921               |
| SNP_P4_15545_39697742 | NC_021160.1    | Ca_kabuli_chr01 | 39697742                | CC                              | TT              | 1946744923               |
| SNP_P4_15546_39700012 | NC_021160.1    | Ca_kabuli_chr01 | 39700012                | AA                              | TT              | 1946744925               |
| SNP_P4_15547_39700450 | NC_021160.1    | Ca_kabuli_chr01 | 39700450                | AA                              | GG              | 1946744927               |
| SNP_P4_15548_39700596 | NC_021160.1    | Ca_kabuli_chr01 | 39700596                | AA                              | GG              | 1946744929               |
| SNP_P4_15549_39700676 | NC_021160.1    | Ca_kabuli_chr01 | 39700676                | CC                              | TT              | 1946744931               |
| SNP_P4_15550_39704434 | NC_021160.1    | Ca_kabuli_chr01 | 39704434                | AA                              | CC              | 1946744933               |
| SNP_P4_15551_39704467 | NC_021160.1    | Ca_kabuli_chr01 | 39704467                | TT                              | AA              | 1946744935               |
| SNP_P4_15552_39704478 | NC_021160.1    | Ca_kabuli_chr01 | 39704478                | GG                              | AA              | 1946744937               |
| SNP_P4_15553_39716639 | NC_021160.1    | Ca_kabuli_chr01 | 39716639                | GG                              | AA              | 1946744939               |
| SNP_P4_15554_39717223 | NC_021160.1    | Ca_kabuli_chr01 | 39717223                | TT                              | AA              | 1946744941               |
| SNP_P4_15556_39720857 | NC_021160.1    | Ca_kabuli_chr01 | 39720857                | AA                              | GG              | 1946744943               |

| SNPs IDs              | Chromosome IDs | Chromosomes     | Physical positions (bp) | CDC Frontier (Reference genome) | (ILWC46 & LPNB) | NCBI SNPdb Accession IDs |
|-----------------------|----------------|-----------------|-------------------------|---------------------------------|-----------------|--------------------------|
| SNP_P4_15557_39725044 | NC_021160.1    | Ca_kabuli_chr01 | 39725044                | TT                              | CC              | 1946744945               |
| SNP_P4_15558_39725479 | NC_021160.1    | Ca_kabuli_chr01 | 39725479                | AA                              | GG              | 1946744947               |
| SNP_P4_15560_39726368 | NC_021160.1    | Ca_kabuli_chr01 | 39726368                | AA                              | CC              | 1946744948               |
| SNP_P4_15561_39726369 | NC_021160.1    | Ca_kabuli_chr01 | 39726369                | GG                              | CC              | 1946744950               |
| SNP_P4_15562_39731001 | NC_021160.1    | Ca_kabuli_chr01 | 39731001                | AA                              | TT              | 1946744952               |
| SNP_P4_15563_39731847 | NC_021160.1    | Ca_kabuli_chr01 | 39731847                | AA                              | GG              | 1946744954               |
| SNP_P4_15564_39731848 | NC_021160.1    | Ca_kabuli_chr01 | 39731848                | AA                              | TT              | 1946744956               |
| SNP_P4_15565_39731855 | NC_021160.1    | Ca_kabuli_chr01 | 39731855                | GG                              | AA              | 1946744958               |
| SNP_P4_15566_39732978 | NC_021160.1    | Ca_kabuli_chr01 | 39732978                | GG                              | CC              | 1946744960               |
| SNP_P4_15568_39737803 | NC_021160.1    | Ca_kabuli_chr01 | 39737803                | TT                              | CC              | 1946744962               |
| SNP_P4_15569_39738430 | NC_021160.1    | Ca_kabuli_chr01 | 39738430                | GG                              | CC              | 1946744964               |
| SNP_P4_15570_39741364 | NC_021160.1    | Ca_kabuli_chr01 | 39741364                | TT                              | CC              | 1946744966               |
| SNP_P4_15571_39741367 | NC_021160.1    | Ca_kabuli_chr01 | 39741367                | CC                              | AA              | 1946744968               |
| SNP_P4_15572_39741621 | NC_021160.1    | Ca_kabuli_chr01 | 39741621                | TT                              | AA              | 1946744970               |
| SNP_P4_15573_39743533 | NC_021160.1    | Ca_kabuli_chr01 | 39743533                | CC                              | TT              | 1946744972               |
| SNP_P4_15574_39743544 | NC_021160.1    | Ca_kabuli_chr01 | 39743544                | GG                              | AA              | 1946744974               |
| SNP_P4_15575_39743554 | NC_021160.1    | Ca_kabuli_chr01 | 39743554                | CC                              | GG              | 1946744976               |
| SNP_P4_15577_39744688 | NC_021160.1    | Ca_kabuli_chr01 | 39744688                | TT                              | CC              | 1946744978               |
| SNP_P4_15578_39744752 | NC_021160.1    | Ca_kabuli_chr01 | 39744752                | CC                              | TT              | 1946744980               |
| SNP_P4_15579_39746772 | NC_021160.1    | Ca_kabuli_chr01 | 39746772                | GG                              | TT              | 1946744982               |
| SNP_P4_15580_39748537 | NC_021160.1    | Ca_kabuli_chr01 | 39748537                | GG                              | AA              | 1946744984               |
| SNP_P4_15581_39748799 | NC_021160.1    | Ca_kabuli_chr01 | 39748799                | GG                              | AA              | 1946744986               |
| SNP_P4_15582_39752772 | NC_021160.1    | Ca_kabuli_chr01 | 39752772                | GG                              | AA              | 1946744988               |
| SNP_P4_15583_39754398 | NC_021160.1    | Ca_kabuli_chr01 | 39754398                | AA                              | CC              | 1946744990               |
| SNP_P4_15584_39759622 | NC_021160.1    | Ca_kabuli_chr01 | 39759622                | TT                              | AA              | 1946744992               |
| SNP_P4_15585_39763613 | NC_021160.1    | Ca_kabuli_chr01 | 39763613                | TT                              | GG              | 1946744994               |
| SNP_P4_15586_39766759 | NC_021160.1    | Ca_kabuli_chr01 | 39766759                | GG                              | AA              | 1946744996               |
| SNP_P4_15587_39767769 | NC_021160.1    | Ca_kabuli_chr01 | 39767769                | GG                              | AA              | 1946744998               |
| SNP_P4_15588_39768633 | NC_021160.1    | Ca_kabuli_chr01 | 39768633                | CC                              | TT              | 1946745000               |
| SNP_P4_15589_39768706 | NC_021160.1    | Ca_kabuli_chr01 | 39768706                | AA                              | TT              | 1946745002               |
| SNP_P4_15590_39769682 | NC_021160.1    | Ca_kabuli_chr01 | 39769682                | TT                              | AA              | 1946745004               |
| SNP_P4_15591_39769852 | NC_021160.1    | Ca_kabuli_chr01 | 39769852                | CC                              | TT              | 1946745006               |
| SNP_P4_15592_39770498 | NC_021160.1    | Ca_kabuli_chr01 | 39770498                | TT                              | GG              | 1946745008               |
| SNP_P4_15593_39771108 | NC_021160.1    | Ca_kabuli_chr01 | 39771108                | GG                              | AA              | 1946745010               |
| SNP_P4_15595_39776202 | NC_021160.1    | Ca_kabuli_chr01 | 39776202                | AA                              | GG              | 1946745012               |
| SNP_P4_15596_39776247 | NC_021160.1    | Ca_kabuli_chr01 | 39776247                | GG                              | AA              | 1946745014               |
| SNP_P4_15597_39779559 | NC_021160.1    | Ca_kabuli_chr01 | 39779559                | TT                              | GG              | 1946745016               |
| SNP_P4_15598_39780343 | NC_021160.1    | Ca_kabuli_chr01 | 39780343                | TT                              | CC              | 1946745018               |
| SNP_P4_15599_39780429 | NC_021160.1    | Ca_kabuli_chr01 | 39780429                | TT                              | AA              | 1946745020               |
| SNP_P4_15600_39780604 | NC_021160.1    | Ca_kabuli_chr01 | 39780604                | TT                              | CC              | 1946745022               |
| SNP_P4_15601_39781714 | NC_021160.1    | Ca_kabuli_chr01 | 39781714                | TT                              | CC              | 1946745025               |
| SNP_P4_15603_39782840 | NC_021160.1    | Ca_kabuli_chr01 | 39782840                | GG                              | TT              | 1946745027               |

| SNPs IDs              | Chromosome IDs | Chromosomes     | Physical positions (bp) | CDC Frontier (Reference genome) | (ILWC46 & LPNB) | NCBI SNPdb Accession IDs |
|-----------------------|----------------|-----------------|-------------------------|---------------------------------|-----------------|--------------------------|
| SNP_P4_15605_39786096 | NC_021160.1    | Ca_kabuli_chr01 | 39786096                | CC                              | TT              | 1946745029               |
| SNP_P4_15606_39790635 | NC_021160.1    | Ca_kabuli_chr01 | 39790635                | TT                              | AA              | 1946745031               |
| SNP_P4_15607_39792440 | NC_021160.1    | Ca_kabuli_chr01 | 39792440                | CC                              | GG              | 1946745033               |
| SNP_P4_15609_39797948 | NC_021160.1    | Ca_kabuli_chr01 | 39797948                | AA                              | TT              | 1946745035               |
| SNP_P4_15610_39798709 | NC_021160.1    | Ca_kabuli_chr01 | 39798709                | CC                              | TT              | 1946745037               |
| SNP_P4_15611_39801812 | NC_021160.1    | Ca_kabuli_chr01 | 39801812                | AA                              | GG              | 1946745039               |
| SNP_P4_15612_39801893 | NC_021160.1    | Ca_kabuli_chr01 | 39801893                | AA                              | GG              | 1946745041               |
| SNP_P4_15613_39801896 | NC_021160.1    | Ca_kabuli_chr01 | 39801896                | AA                              | CC              | 1946745043               |
| SNP_P4_15614_39802069 | NC_021160.1    | Ca_kabuli_chr01 | 39802069                | CC                              | TT              | 1946745045               |
| SNP_P4_15615_39802075 | NC_021160.1    | Ca_kabuli_chr01 | 39802075                | TT                              | CC              | 1946745047               |
| SNP_P4_15616_39803544 | NC_021160.1    | Ca_kabuli_chr01 | 39803544                | TT                              | AA              | 1946745049               |
| SNP_P4_15617_39805292 | NC_021160.1    | Ca_kabuli_chr01 | 39805292                | AA                              | GG              | 1946745051               |
| SNP_P4_15618_39807079 | NC_021160.1    | Ca_kabuli_chr01 | 39807079                | AA                              | CC              | 1946745053               |
| SNP_P4_15619_39809194 | NC_021160.1    | Ca_kabuli_chr01 | 39809194                | GG                              | AA              | 1946745055               |
| SNP_P4_15620_39811025 | NC_021160.1    | Ca_kabuli_chr01 | 39811025                | AA                              | TT              | 1946745057               |
| SNP_P4_15621_39811373 | NC_021160.1    | Ca_kabuli_chr01 | 39811373                | GG                              | AA              | 1946745059               |
| SNP_P4_15622_39820535 | NC_021160.1    | Ca_kabuli_chr01 | 39820535                | GG                              | AA              | 1946745061               |
| SNP_P4_15623_39821229 | NC_021160.1    | Ca_kabuli_chr01 | 39821229                | CC                              | AA              | 1946745063               |
| SNP_P4_15624_39831593 | NC_021160.1    | Ca_kabuli_chr01 | 39831593                | GG                              | AA              | 1946745065               |
| SNP_P4_15625_39833898 | NC_021160.1    | Ca_kabuli_chr01 | 39833898                | GG                              | AA              | 1946745067               |
| SNP_P4_15626_39834045 | NC_021160.1    | Ca_kabuli_chr01 | 39834045                | AA                              | GG              | 1946745069               |
| SNP_P4_15627_39836764 | NC_021160.1    | Ca_kabuli_chr01 | 39836764                | TT                              | CC              | 1946745071               |
| SNP_P4_15628_39836793 | NC_021160.1    | Ca_kabuli_chr01 | 39836793                | CC                              | TT              | 1946745073               |
| SNP_P4_15630_39837538 | NC_021160.1    | Ca_kabuli_chr01 | 39837538                | CC                              | TT              | 1946745075               |
| SNP_P4_15631_39837554 | NC_021160.1    | Ca_kabuli_chr01 | 39837554                | GG                              | TT              | 1946745078               |
| SNP_P4_15632_39837555 | NC_021160.1    | Ca_kabuli_chr01 | 39837555                | CC                              | TT              | 1946745080               |
| SNP_P4_15633_39837556 | NC_021160.1    | Ca_kabuli_chr01 | 39837556                | TT                              | CC              | 1946745082               |
| SNP_P4_15634_39837561 | NC_021160.1    | Ca_kabuli_chr01 | 39837561                | AA                              | CC              | 1946745084               |
| SNP_P4_15635_39837858 | NC_021160.1    | Ca_kabuli_chr01 | 39837858                | GG                              | AA              | 1946745086               |
| SNP_P4_15636_39839271 | NC_021160.1    | Ca_kabuli_chr01 | 39839271                | TT                              | CC              | 1946745088               |
| SNP_P4_15637_39839461 | NC_021160.1    | Ca_kabuli_chr01 | 39839461                | TT                              | GG              | 1946745090               |
| SNP_P4_15638_39839467 | NC_021160.1    | Ca_kabuli_chr01 | 39839467                | TT                              | GG              | 1946745092               |
| SNP_P4_15639_39842449 | NC_021160.1    | Ca_kabuli_chr01 | 39842449                | TT                              | CC              | 1946745094               |
| SNP_P4_15640_39842458 | NC_021160.1    | Ca_kabuli_chr01 | 39842458                | GG                              | AA              | 1946745096               |
| SNP_P4_15641_39842618 | NC_021160.1    | Ca_kabuli_chr01 | 39842618                | TT                              | CC              | 1946745098               |
| SNP_P4_15642_39843039 | NC_021160.1    | Ca_kabuli_chr01 | 39843039                | CC                              | AA              | 1946745100               |
| SNP_P4_15643_39843040 | NC_021160.1    | Ca_kabuli_chr01 | 39843040                | CC                              | TT              | 1946745102               |
| SNP_P4_15644_39843444 | NC_021160.1    | Ca_kabuli_chr01 | 39843444                | GG                              | AA              | 1946745104               |
| SNP_P4_15645_39843646 | NC_021160.1    | Ca_kabuli_chr01 | 39843646                | CC                              | TT              | 1946745106               |
| SNP_P4_15646_39844030 | NC_021160.1    | Ca_kabuli_chr01 | 39844030                | CC                              | TT              | 1946745108               |
| SNP_P4_15647_39844082 | NC_021160.1    | Ca_kabuli_chr01 | 39844082                | TT                              | CC              | 1946745110               |
| SNP_P4_15649_39844409 | NC_021160.1    | Ca_kabuli_chr01 | 39844409                | TT                              | CC              | 1946745111               |



| SNPs IDs              | Chromosome IDs | Chromosomes     | Physical positions (bp) | CDC Frontier (Reference genome) | (ILWC46 & LPNB) | NCBI SNPdb Accession IDs |
|-----------------------|----------------|-----------------|-------------------------|---------------------------------|-----------------|--------------------------|
| SNP_P4_15650_39847188 | NC_021160.1    | Ca_kabuli_chr01 | 39847188                | TT                              | CC              | 1946745113               |
| SNP_P4_15651_39847413 | NC_021160.1    | Ca_kabuli_chr01 | 39847413                | AA                              | CC              | 1946745115               |
| SNP_P4_15653_39849479 | NC_021160.1    | Ca_kabuli_chr01 | 39849479                | CC                              | TT              | 1946745117               |
| SNP_P4_15654_39851055 | NC_021160.1    | Ca_kabuli_chr01 | 39851055                | TT                              | AA              | 1946745119               |
| SNP_P4_15655_39851139 | NC_021160.1    | Ca_kabuli_chr01 | 39851139                | GG                              | TT              | 1946745121               |
| SNP_P4_15656_39851238 | NC_021160.1    | Ca_kabuli_chr01 | 39851238                | AA                              | GG              | 1946745123               |
| SNP_P4_15658_39854857 | NC_021160.1    | Ca_kabuli_chr01 | 39854857                | AA                              | GG              | 1946745125               |
| SNP_P4_15659_39857823 | NC_021160.1    | Ca_kabuli_chr01 | 39857823                | AA                              | GG              | 1946745127               |
| SNP_P4_15660_39857824 | NC_021160.1    | Ca_kabuli_chr01 | 39857824                | TT                              | CC              | 1946745129               |
| SNP_P4_15661_39857899 | NC_021160.1    | Ca_kabuli_chr01 | 39857899                | CC                              | TT              | 1946745131               |
| SNP_P4_15662_39858233 | NC_021160.1    | Ca_kabuli_chr01 | 39858233                | TT                              | CC              | 1946745133               |
| SNP_P4_15663_39858984 | NC_021160.1    | Ca_kabuli_chr01 | 39858984                | GG                              | AA              | 1946745135               |
| SNP_P4_15664_39859044 | NC_021160.1    | Ca_kabuli_chr01 | 39859044                | CC                              | AA              | 1946745138               |
| SNP_P4_15665_39859205 | NC_021160.1    | Ca_kabuli_chr01 | 39859205                | GG                              | CC              | 1946745140               |
| SNP_P4_15666_39859406 | NC_021160.1    | Ca_kabuli_chr01 | 39859406                | AA                              | CC              | 1946745142               |
| SNP_P4_15667_39859494 | NC_021160.1    | Ca_kabuli_chr01 | 39859494                | GG                              | AA              | 1946745144               |
| SNP_P4_15668_39859536 | NC_021160.1    | Ca_kabuli_chr01 | 39859536                | AA                              | GG              | 1946745146               |
| SNP_P4_15669_39859862 | NC_021160.1    | Ca_kabuli_chr01 | 39859862                | AA                              | TT              | 1946745148               |
| SNP_P4_15670_39860429 | NC_021160.1    | Ca_kabuli_chr01 | 39860429                | TT                              | CC              | 1946745150               |
| SNP_P4_15671_39861528 | NC_021160.1    | Ca_kabuli_chr01 | 39861528                | TT                              | GG              | 1946745152               |
| SNP_P4_15672_39863042 | NC_021160.1    | Ca_kabuli_chr01 | 39863042                | AA                              | GG              | 1946745154               |
| SNP_P4_15673_39868270 | NC_021160.1    | Ca_kabuli_chr01 | 39868270                | TT                              | CC              | 1946745155               |
| SNP_P4_15674_39868277 | NC_021160.1    | Ca_kabuli_chr01 | 39868277                | CC                              | TT              | 1946745157               |
| SNP_P4_15675_39870352 | NC_021160.1    | Ca_kabuli_chr01 | 39870352                | TT                              | AA              | 1946745159               |
| SNP_P4_15676_39870353 | NC_021160.1    | Ca_kabuli_chr01 | 39870353                | AA                              | TT              | 1946745161               |
| SNP_P4_15678_39871819 | NC_021160.1    | Ca_kabuli_chr01 | 39871819                | AA                              | TT              | 1946745163               |
| SNP_P4_15679_39874921 | NC_021160.1    | Ca_kabuli_chr01 | 39874921                | GG                              | AA              | 1946745165               |
| SNP_P4_15680_39875461 | NC_021160.1    | Ca_kabuli_chr01 | 39875461                | GG                              | AA              | 1946745167               |
| SNP_P4_15681_39883660 | NC_021160.1    | Ca_kabuli_chr01 | 39883660                | GG                              | AA              | 1946745169               |
| SNP_P4_15682_39891044 | NC_021160.1    | Ca_kabuli_chr01 | 39891044                | TT                              | CC              | 1946745171               |
| SNP_P4_15683_39898958 | NC_021160.1    | Ca_kabuli_chr01 | 39898958                | AA                              | CC              | 1946745173               |
| SNP_P4_15685_39913649 | NC_021160.1    | Ca_kabuli_chr01 | 39913649                | TT                              | AA              | 1946745175               |
| SNP_P4_15686_39914923 | NC_021160.1    | Ca_kabuli_chr01 | 39914923                | GG                              | TT              | 1946745177               |
| SNP_P4_15687_39914994 | NC_021160.1    | Ca_kabuli_chr01 | 39914994                | CC                              | TT              | 1946745179               |
| SNP_P4_15688_39915153 | NC_021160.1    | Ca_kabuli_chr01 | 39915153                | TT                              | CC              | 1946745181               |
| SNP_P4_15689_39924069 | NC_021160.1    | Ca_kabuli_chr01 | 39924069                | AA                              | GG              | 1946745183               |
| SNP_P4_15690_39924349 | NC_021160.1    | Ca_kabuli_chr01 | 39924349                | TT                              | GG              | 1946745185               |
| SNP_P4_15691_39927162 | NC_021160.1    | Ca_kabuli_chr01 | 39927162                | GG                              | TT              | 1946745187               |
| SNP_P4_15692_39930666 | NC_021160.1    | Ca_kabuli_chr01 | 39930666                | TT                              | GG              | 1946745189               |
| SNP_P4_15693_39930758 | NC_021160.1    | Ca_kabuli_chr01 | 39930758                | GG                              | AA              | 1946745191               |
| SNP_P4_15694_39930953 | NC_021160.1    | Ca_kabuli_chr01 | 39930953                | TT                              | AA              | 1946745193               |
| SNP_P4_15695_39931327 | NC_021160.1    | Ca_kabuli_chr01 | 39931327                | TT                              | GG              | 1946745195               |

| SNPs IDs              | Chromosome IDs | Chromosomes     | Physical positions (bp) | CDC Frontier (Reference genome) | (ILWC46 & LPNB) | NCBI SNPdb Accession IDs |
|-----------------------|----------------|-----------------|-------------------------|---------------------------------|-----------------|--------------------------|
| SNP_P4_15696_39931688 | NC_021160.1    | Ca_kabuli_chr01 | 39931688                | TT                              | CC              | 1946745197               |
| SNP_P4_15697_39937373 | NC_021160.1    | Ca_kabuli_chr01 | 39937373                | AA                              | GG              | 1946745199               |
| SNP_P4_15698_39937377 | NC_021160.1    | Ca_kabuli_chr01 | 39937377                | AA                              | GG              | 1946745201               |
| SNP_P4_15699_39937437 | NC_021160.1    | Ca_kabuli_chr01 | 39937437                | TT                              | GG              | 1946745203               |
| SNP_P4_15700_39937459 | NC_021160.1    | Ca_kabuli_chr01 | 39937459                | TT                              | CC              | 1946745205               |
| SNP_P4_15701_39937518 | NC_021160.1    | Ca_kabuli_chr01 | 39937518                | CC                              | GG              | 1946745207               |
| SNP_P4_15702_39937609 | NC_021160.1    | Ca_kabuli_chr01 | 39937609                | GG                              | AA              | 1946745209               |
| SNP_P4_15703_39937632 | NC_021160.1    | Ca_kabuli_chr01 | 39937632                | AA                              | GG              | 1946745211               |
| SNP_P4_15704_39937990 | NC_021160.1    | Ca_kabuli_chr01 | 39937990                | GG                              | TT              | 1946745213               |
| SNP_P4_15705_39937995 | NC_021160.1    | Ca_kabuli_chr01 | 39937995                | TT                              | CC              | 1946745215               |
| SNP_P4_15706_39938023 | NC_021160.1    | Ca_kabuli_chr01 | 39938023                | TT                              | GG              | 1946745217               |
| SNP_P4_15707_39944752 | NC_021160.1    | Ca_kabuli_chr01 | 39944752                | TT                              | AA              | 1946745219               |
| SNP_P4_15708_39947184 | NC_021160.1    | Ca_kabuli_chr01 | 39947184                | TT                              | CC              | 1946745221               |
| SNP_P4_15709_39948574 | NC_021160.1    | Ca_kabuli_chr01 | 39948574                | AA                              | TT              | 1946745223               |
| SNP_P4_15711_39949268 | NC_021160.1    | Ca_kabuli_chr01 | 39949268                | GG                              | AA              | 1946745225               |
| SNP_P4_15712_39951129 | NC_021160.1    | Ca_kabuli_chr01 | 39951129                | GG                              | CC              | 1946745227               |
| SNP_P4_15713_39951782 | NC_021160.1    | Ca_kabuli_chr01 | 39951782                | GG                              | AA              | 1946745229               |
| SNP_P4_15714_39954480 | NC_021160.1    | Ca_kabuli_chr01 | 39954480                | CC                              | AA              | 1946745231               |
| SNP_P4_15715_39955181 | NC_021160.1    | Ca_kabuli_chr01 | 39955181                | AA                              | CC              | 1946745233               |
| SNP_P4_15717_39955262 | NC_021160.1    | Ca_kabuli_chr01 | 39955262                | CC                              | TT              | 1946745235               |
| SNP_P4_15718_39957172 | NC_021160.1    | Ca_kabuli_chr01 | 39957172                | TT                              | CC              | 1946745238               |
| SNP_P4_15719_39957185 | NC_021160.1    | Ca_kabuli_chr01 | 39957185                | GG                              | AA              | 1946745240               |
| SNP_P4_15720_39967329 | NC_021160.1    | Ca_kabuli_chr01 | 39967329                | AA                              | TT              | 1946745242               |
| SNP_P4_15721_39968226 | NC_021160.1    | Ca_kabuli_chr01 | 39968226                | GG                              | TT              | 1946745244               |
| SNP_P4_15722_39968554 | NC_021160.1    | Ca_kabuli_chr01 | 39968554                | AA                              | GG              | 1946745246               |
| SNP_P4_15723_39968638 | NC_021160.1    | Ca_kabuli_chr01 | 39968638                | TT                              | CC              | 1946745248               |
| SNP_P4_15724_39968746 | NC_021160.1    | Ca_kabuli_chr01 | 39968746                | TT                              | AA              | 1946745250               |
| SNP_P4_15725_39968756 | NC_021160.1    | Ca_kabuli_chr01 | 39968756                | GG                              | AA              | 1946745252               |
| SNP_P4_15726_39970311 | NC_021160.1    | Ca_kabuli_chr01 | 39970311                | GG                              | AA              | 1946745254               |
| SNP_P4_15727_39971087 | NC_021160.1    | Ca_kabuli_chr01 | 39971087                | GG                              | AA              | 1946745256               |
| SNP_P4_15728_39973177 | NC_021160.1    | Ca_kabuli_chr01 | 39973177                | CC                              | TT              | 1946745258               |
| SNP_P4_15729_39974468 | NC_021160.1    | Ca_kabuli_chr01 | 39974468                | GG                              | AA              | 1946745260               |
| SNP_P4_15730_39978656 | NC_021160.1    | Ca_kabuli_chr01 | 39978656                | CC                              | TT              | 1946745262               |
| SNP_P4_15731_39978828 | NC_021160.1    | Ca_kabuli_chr01 | 39978828                | GG                              | AA              | 1946745264               |
| SNP_P4_15732_39981337 | NC_021160.1    | Ca_kabuli_chr01 | 39981337                | CC                              | GG              | 1946745266               |
| SNP_P4_15733_39982455 | NC_021160.1    | Ca_kabuli_chr01 | 39982455                | AA                              | GG              | 1946745268               |
| SNP_P4_15734_39984259 | NC_021160.1    | Ca_kabuli_chr01 | 39984259                | GG                              | TT              | 1946745269               |
| SNP_P4_15735_39984621 | NC_021160.1    | Ca_kabuli_chr01 | 39984621                | AA                              | CC              | 1946745271               |
| SNP_P4_15736_39984622 | NC_021160.1    | Ca_kabuli_chr01 | 39984622                | CC                              | AA              | 1946745273               |
| SNP_P4_15737_39985830 | NC_021160.1    | Ca_kabuli_chr01 | 39985830                | TT                              | CC              | 1946745275               |
| SNP_P4_15738_39986062 | NC_021160.1    | Ca_kabuli_chr01 | 39986062                | AA                              | TT              | 1946745277               |
| SNP_P4_15739_39992728 | NC_021160.1    | Ca_kabuli_chr01 | 39992728                | CC                              | TT              | 1946745279               |

| SNPs IDs              | Chromosome IDs | Chromosomes     | Physical positions (bp) | CDC Frontier (Reference genome) | (ILWC46 & LPNB) | NCBI SNPdb Accession IDs |
|-----------------------|----------------|-----------------|-------------------------|---------------------------------|-----------------|--------------------------|
| SNP_P4_15740_39992837 | NC_021160.1    | Ca_kabuli_chr01 | 39992837                | CC                              | TT              | 1946745281               |
| SNP_P4_15741_39993822 | NC_021160.1    | Ca_kabuli_chr01 | 39993822                | CC                              | GG              | 1946745283               |
| SNP_P4_15742_39994434 | NC_021160.1    | Ca_kabuli_chr01 | 39994434                | GG                              | AA              | 1946745285               |
| SNP_P4_15743_39994667 | NC_021160.1    | Ca_kabuli_chr01 | 39994667                | AA                              | GG              | 1946745287               |
| SNP_P4_15744_39994734 | NC_021160.1    | Ca_kabuli_chr01 | 39994734                | TT                              | GG              | 1946745289               |
| SNP_P4_15745_39996690 | NC_021160.1    | Ca_kabuli_chr01 | 39996690                | TT                              | AA              | 1946745291               |
| SNP_P4_15746_39996727 | NC_021160.1    | Ca_kabuli_chr01 | 39996727                | AA                              | CC              | 1946745293               |
| SNP_P4_15747_39999130 | NC_021160.1    | Ca_kabuli_chr01 | 39999130                | AA                              | GG              | 1946745295               |
| SNP_P4_15748_40008188 | NC_021160.1    | Ca_kabuli_chr01 | 40008188                | AA                              | GG              | 1946745297               |
| SNP_P4_15749_40008199 | NC_021160.1    | Ca_kabuli_chr01 | 40008199                | CC                              | TT              | 1946745299               |
| SNP_P4_15750_40008851 | NC_021160.1    | Ca_kabuli_chr01 | 40008851                | CC                              | AA              | 1946745301               |
| SNP_P4_15751_40010027 | NC_021160.1    | Ca_kabuli_chr01 | 40010027                | AA                              | GG              | 1946745303               |
| SNP_P4_15752_40010497 | NC_021160.1    | Ca_kabuli_chr01 | 40010497                | TT                              | AA              | 1946745305               |
| SNP_P4_15753_40010719 | NC_021160.1    | Ca_kabuli_chr01 | 40010719                | TT                              | AA              | 1946745307               |
| SNP_P4_15755_40012232 | NC_021160.1    | Ca_kabuli_chr01 | 40012232                | CC                              | TT              | 1946745309               |
| SNP_P4_15756_40012766 | NC_021160.1    | Ca_kabuli_chr01 | 40012766                | TT                              | GG              | 1946745311               |
| SNP_P4_15757_40013406 | NC_021160.1    | Ca_kabuli_chr01 | 40013406                | CC                              | AA              | 1946745313               |
| SNP_P4_15758_40013440 | NC_021160.1    | Ca_kabuli_chr01 | 40013440                | GG                              | AA              | 1946745315               |
| SNP_P4_15759_40015048 | NC_021160.1    | Ca_kabuli_chr01 | 40015048                | GG                              | AA              | 1946745317               |
| SNP_P4_15760_40017121 | NC_021160.1    | Ca_kabuli_chr01 | 40017121                | CC                              | TT              | 1946745319               |
| SNP_P4_15761_40020252 | NC_021160.1    | Ca_kabuli_chr01 | 40020252                | TT                              | CC              | 1946745321               |
| SNP_P4_15762_40020787 | NC_021160.1    | Ca_kabuli_chr01 | 40020787                | GG                              | TT              | 1946745323               |
| SNP_P4_15763_40020794 | NC_021160.1    | Ca_kabuli_chr01 | 40020794                | TT                              | AA              | 1946745325               |
| SNP_P4_15764_40020880 | NC_021160.1    | Ca_kabuli_chr01 | 40020880                | CC                              | TT              | 1946745327               |
| SNP_P4_15766_40021905 | NC_021160.1    | Ca_kabuli_chr01 | 40021905                | AA                              | CC              | 1946745329               |
| SNP_P4_15767_40022071 | NC_021160.1    | Ca_kabuli_chr01 | 40022071                | AA                              | GG              | 1946745331               |
| SNP_P4_15768_40023432 | NC_021160.1    | Ca_kabuli_chr01 | 40023432                | TT                              | AA              | 1946745333               |
| SNP_P4_15769_40028376 | NC_021160.1    | Ca_kabuli_chr01 | 40028376                | GG                              | AA              | 1946745335               |
| SNP_P4_15771_40035916 | NC_021160.1    | Ca_kabuli_chr01 | 40035916                | AA                              | GG              | 1946745337               |
| SNP_P4_15772_40036860 | NC_021160.1    | Ca_kabuli_chr01 | 40036860                | AA                              | TT              | 1946745339               |
| SNP_P4_15773_40037486 | NC_021160.1    | Ca_kabuli_chr01 | 40037486                | GG                              | CC              | 1946745341               |
| SNP_P4_15774_40052456 | NC_021160.1    | Ca_kabuli_chr01 | 40052456                | TT                              | GG              | 1946745343               |
| SNP_P4_15775_40052846 | NC_021160.1    | Ca_kabuli_chr01 | 40052846                | GG                              | AA              | 1946745345               |
| SNP_P4_15776_40055735 | NC_021160.1    | Ca_kabuli_chr01 | 40055735                | GG                              | AA              | 1946745347               |
| SNP_P4_15777_40056643 | NC_021160.1    | Ca_kabuli_chr01 | 40056643                | AA                              | CC              | 1946745349               |
| SNP_P4_15779_40059054 | NC_021160.1    | Ca_kabuli_chr01 | 40059054                | TT                              | CC              | 1946745351               |
| SNP_P4_15780_40060493 | NC_021160.1    | Ca_kabuli_chr01 | 40060493                | AA                              | GG              | 1946745353               |
| SNP_P4_15781_40061096 | NC_021160.1    | Ca_kabuli_chr01 | 40061096                | CC                              | GG              | 1946745355               |
| SNP_P4_15782_40062120 | NC_021160.1    | Ca_kabuli_chr01 | 40062120                | TT                              | CC              | 1946745357               |
| SNP_P4_15783_40063944 | NC_021160.1    | Ca_kabuli_chr01 | 40063944                | AA                              | GG              | 1946745359               |
| SNP_P4_15784_40068296 | NC_021160.1    | Ca_kabuli_chr01 | 40068296                | GG                              | AA              | 1946745361               |
| SNP_P4_15785_40068317 | NC_021160.1    | Ca_kabuli_chr01 | 40068317                | GG                              | AA              | 1946745363               |

| SNPs IDs              | Chromosome IDs | Chromosomes     | Physical positions (bp) | CDC Frontier (Reference genome) | (ILWC46 & LPNB) | NCBI SNPdb Accession IDs |
|-----------------------|----------------|-----------------|-------------------------|---------------------------------|-----------------|--------------------------|
| SNP_P4_15786_40068371 | NC_021160.1    | Ca_kabuli_chr01 | 40068371                | GG                              | TT              | 1946745365               |
| SNP_P4_15787_40068408 | NC_021160.1    | Ca_kabuli_chr01 | 40068408                | TT                              | GG              | 1946745367               |
| SNP_P4_15788_40068498 | NC_021160.1    | Ca_kabuli_chr01 | 40068498                | CC                              | TT              | 1946745369               |
| SNP_P4_15789_40068784 | NC_021160.1    | Ca_kabuli_chr01 | 40068784                | AA                              | GG              | 1946745371               |
| SNP_P4_15790_40068817 | NC_021160.1    | Ca_kabuli_chr01 | 40068817                | CC                              | AA              | 1946745373               |
| SNP_P4_15791_40072847 | NC_021160.1    | Ca_kabuli_chr01 | 40072847                | AA                              | GG              | 1946745375               |
| SNP_P4_15792_40074573 | NC_021160.1    | Ca_kabuli_chr01 | 40074573                | AA                              | GG              | 1946745377               |
| SNP_P4_15793_40074784 | NC_021160.1    | Ca_kabuli_chr01 | 40074784                | TT                              | CC              | 1946745379               |
| SNP_P4_15794_40075044 | NC_021160.1    | Ca_kabuli_chr01 | 40075044                | AA                              | TT              | 1946745381               |
| SNP_P4_15795_40078476 | NC_021160.1    | Ca_kabuli_chr01 | 40078476                | AA                              | TT              | 1946745383               |
| SNP_P4_15796_40080435 | NC_021160.1    | Ca_kabuli_chr01 | 40080435                | AA                              | CC              | 1946745385               |
| SNP_P4_15798_40083386 | NC_021160.1    | Ca_kabuli_chr01 | 40083386                | CC                              | AA              | 1946745387               |
| SNP_P4_15799_40083757 | NC_021160.1    | Ca_kabuli_chr01 | 40083757                | GG                              | AA              | 1946745389               |
| SNP_P4_15802_40092703 | NC_021160.1    | Ca_kabuli_chr01 | 40092703                | CC                              | TT              | 1946745391               |
| SNP_P4_15803_40092772 | NC_021160.1    | Ca_kabuli_chr01 | 40092772                | TT                              | CC              | 1946745393               |
| SNP_P4_15804_40092856 | NC_021160.1    | Ca_kabuli_chr01 | 40092856                | TT                              | GG              | 1946745395               |
| SNP_P4_15805_40093427 | NC_021160.1    | Ca_kabuli_chr01 | 40093427                | CC                              | TT              | 1946745397               |
| SNP_P4_15806_40096107 | NC_021160.1    | Ca_kabuli_chr01 | 40096107                | AA                              | TT              | 1946745399               |
| SNP_P4_15807_40098526 | NC_021160.1    | Ca_kabuli_chr01 | 40098526                | TT                              | AA              | 1946745401               |
| SNP_P4_15808_40101282 | NC_021160.1    | Ca_kabuli_chr01 | 40101282                | CC                              | TT              | 1946745403               |
| SNP_P4_15809_40101838 | NC_021160.1    | Ca_kabuli_chr01 | 40101838                | AA                              | TT              | 1946745405               |
| SNP_P4_15810_40101842 | NC_021160.1    | Ca_kabuli_chr01 | 40101842                | CC                              | TT              | 1946745407               |
| SNP_P4_15811_40102552 | NC_021160.1    | Ca_kabuli_chr01 | 40102552                | GG                              | AA              | 1946745409               |
| SNP_P4_15812_40103672 | NC_021160.1    | Ca_kabuli_chr01 | 40103672                | TT                              | CC              | 1946745411               |
| SNP_P4_15813_40108768 | NC_021160.1    | Ca_kabuli_chr01 | 40108768                | AA                              | CC              | 1946745413               |
| SNP_P4_15814_40110276 | NC_021160.1    | Ca_kabuli_chr01 | 40110276                | TT                              | CC              | 1946745415               |
| SNP_P4_15815_40114453 | NC_021160.1    | Ca_kabuli_chr01 | 40114453                | TT                              | AA              | 1946745417               |
| SNP_P4_15816_40119297 | NC_021160.1    | Ca_kabuli_chr01 | 40119297                | GG                              | AA              | 1946745419               |
| SNP_P4_15817_40119677 | NC_021160.1    | Ca_kabuli_chr01 | 40119677                | AA                              | GG              | 1946745421               |
| SNP_P4_15818_40120469 | NC_021160.1    | Ca_kabuli_chr01 | 40120469                | TT                              | AA              | 1946745423               |
| SNP_P4_15819_40120490 | NC_021160.1    | Ca_kabuli_chr01 | 40120490                | AA                              | TT              | 1946745424               |
| SNP_P4_15821_40125171 | NC_021160.1    | Ca_kabuli_chr01 | 40125171                | CC                              | TT              | 1946745426               |
| SNP_P4_15822_40125403 | NC_021160.1    | Ca_kabuli_chr01 | 40125403                | TT                              | CC              | 1946745428               |
| SNP_P4_15823_40126400 | NC_021160.1    | Ca_kabuli_chr01 | 40126400                | GG                              | AA              | 1946745430               |
| SNP_P4_15825_40129065 | NC_021160.1    | Ca_kabuli_chr01 | 40129065                | AA                              | TT              | 1946745432               |
| SNP_P4_15826_40131979 | NC_021160.1    | Ca_kabuli_chr01 | 40131979                | CC                              | TT              | 1946745434               |
| SNP_P4_15827_40134782 | NC_021160.1    | Ca_kabuli_chr01 | 40134782                | GG                              | AA              | 1946745436               |
| SNP_P4_15828_40138771 | NC_021160.1    | Ca_kabuli_chr01 | 40138771                | TT                              | CC              | 1946745438               |
| SNP_P4_15829_40141831 | NC_021160.1    | Ca_kabuli_chr01 | 40141831                | AA                              | GG              | 1946745440               |
| SNP_P4_15830_40141832 | NC_021160.1    | Ca_kabuli_chr01 | 40141832                | GG                              | AA              | 1946745442               |
| SNP_P4_15831_40141836 | NC_021160.1    | Ca_kabuli_chr01 | 40141836                | CC                              | GG              | 1946745444               |
| SNP_P4_15832_40141854 | NC_021160.1    | Ca_kabuli_chr01 | 40141854                | AA                              | TT              | 1946745446               |

| SNPs IDs              | Chromosome IDs | Chromosomes     | Physical positions (bp) | CDC Frontier (Reference genome) | (ILWC46 & LPNB) | NCBI SNPdb Accession IDs |
|-----------------------|----------------|-----------------|-------------------------|---------------------------------|-----------------|--------------------------|
| SNP_P4_15833_40141855 | NC_021160.1    | Ca_kabuli_chr01 | 40141855                | TT                              | AA              | 1946745448               |
| SNP_P4_15834_40141862 | NC_021160.1    | Ca_kabuli_chr01 | 40141862                | CC                              | TT              | 1946745449               |
| SNP_P4_15835_40142017 | NC_021160.1    | Ca_kabuli_chr01 | 40142017                | CC                              | GG              | 1946745451               |
| SNP_P4_15836_40142140 | NC_021160.1    | Ca_kabuli_chr01 | 40142140                | TT                              | GG              | 1946745453               |
| SNP_P4_15837_40142148 | NC_021160.1    | Ca_kabuli_chr01 | 40142148                | AA                              | GG              | 1946745455               |
| SNP_P4_15838_40142184 | NC_021160.1    | Ca_kabuli_chr01 | 40142184                | TT                              | CC              | 1946745457               |
| SNP_P4_15839_40142188 | NC_021160.1    | Ca_kabuli_chr01 | 40142188                | AA                              | GG              | 1946745459               |
| SNP_P4_15840_40142220 | NC_021160.1    | Ca_kabuli_chr01 | 40142220                | GG                              | AA              | 1946745461               |
| SNP_P4_15841_40142251 | NC_021160.1    | Ca_kabuli_chr01 | 40142251                | TT                              | CC              | 1946745463               |
| SNP_P4_15842_40142259 | NC_021160.1    | Ca_kabuli_chr01 | 40142259                | TT                              | CC              | 1946745465               |
| SNP_P4_15843_40142680 | NC_021160.1    | Ca_kabuli_chr01 | 40142680                | CC                              | TT              | 1946745467               |
| SNP_P4_15844_40142688 | NC_021160.1    | Ca_kabuli_chr01 | 40142688                | AA                              | CC              | 1946745469               |
| SNP_P4_15845_40144566 | NC_021160.1    | Ca_kabuli_chr01 | 40144566                | GG                              | AA              | 1946745471               |
| SNP_P4_15846_40145847 | NC_021160.1    | Ca_kabuli_chr01 | 40145847                | TT                              | AA              | 1946745473               |
| SNP_P4_15847_40145898 | NC_021160.1    | Ca_kabuli_chr01 | 40145898                | AA                              | GG              | 1946745475               |
| SNP_P4_15849_40148602 | NC_021160.1    | Ca_kabuli_chr01 | 40148602                | TT                              | CC              | 1946745476               |
| SNP_P4_15851_40150883 | NC_021160.1    | Ca_kabuli_chr01 | 40150883                | AA                              | GG              | 1946745478               |
| SNP_P4_15852_40155764 | NC_021160.1    | Ca_kabuli_chr01 | 40155764                | AA                              | GG              | 1946745480               |
| SNP_P4_15853_40158294 | NC_021160.1    | Ca_kabuli_chr01 | 40158294                | TT                              | GG              | 1946745482               |
| SNP_P4_15854_40160252 | NC_021160.1    | Ca_kabuli_chr01 | 40160252                | AA                              | GG              | 1946745484               |
| SNP_P4_15855_40160261 | NC_021160.1    | Ca_kabuli_chr01 | 40160261                | GG                              | AA              | 1946745486               |
| SNP_P4_15856_40161285 | NC_021160.1    | Ca_kabuli_chr01 | 40161285                | TT                              | AA              | 1946745488               |
| SNP_P4_15857_40163198 | NC_021160.1    | Ca_kabuli_chr01 | 40163198                | GG                              | AA              | 1946745490               |
| SNP_P4_15858_40164241 | NC_021160.1    | Ca_kabuli_chr01 | 40164241                | GG                              | AA              | 1946745492               |
| SNP_P4_15859_40164612 | NC_021160.1    | Ca_kabuli_chr01 | 40164612                | CC                              | GG              | 1946745494               |
| SNP_P4_15860_40164962 | NC_021160.1    | Ca_kabuli_chr01 | 40164962                | AA                              | GG              | 1946745496               |
| SNP_P4_15861_40170244 | NC_021160.1    | Ca_kabuli_chr01 | 40170244                | CC                              | TT              | 1946745498               |
| SNP_P4_15862_40175851 | NC_021160.1    | Ca_kabuli_chr01 | 40175851                | TT                              | CC              | 1946745500               |
| SNP_P4_15864_40177133 | NC_021160.1    | Ca_kabuli_chr01 | 40177133                | TT                              | AA              | 1946745502               |
| SNP_P4_15865_40177173 | NC_021160.1    | Ca_kabuli_chr01 | 40177173                | AA                              | TT              | 1946745504               |
| SNP_P4_15866_40177196 | NC_021160.1    | Ca_kabuli_chr01 | 40177196                | GG                              | TT              | 1946745506               |
| SNP_P4_15868_40177364 | NC_021160.1    | Ca_kabuli_chr01 | 40177364                | AA                              | TT              | 1946745508               |
| SNP_P4_15869_40177672 | NC_021160.1    | Ca_kabuli_chr01 | 40177672                | CC                              | TT              | 1946745510               |
| SNP_P4_15870_40177715 | NC_021160.1    | Ca_kabuli_chr01 | 40177715                | CC                              | AA              | 1946745512               |
| SNP_P4_15871_40177990 | NC_021160.1    | Ca_kabuli_chr01 | 40177990                | AA                              | GG              | 1946745514               |
| SNP_P4_15872_40178158 | NC_021160.1    | Ca_kabuli_chr01 | 40178158                | TT                              | CC              | 1946745516               |
| SNP_P4_15873_40178160 | NC_021160.1    | Ca_kabuli_chr01 | 40178160                | TT                              | AA              | 1946745518               |
| SNP_P4_15874_40178174 | NC_021160.1    | Ca_kabuli_chr01 | 40178174                | TT                              | CC              | 1946745520               |
| SNP_P4_15875_40178235 | NC_021160.1    | Ca_kabuli_chr01 | 40178235                | AA                              | CC              | 1946745522               |
| SNP_P4_15876_40178289 | NC_021160.1    | Ca_kabuli_chr01 | 40178289                | TT                              | AA              | 1946745524               |
| SNP_P4_15877_40178291 | NC_021160.1    | Ca_kabuli_chr01 | 40178291                | TT                              | AA              | 1946745526               |
| SNP_P4_15878_40178415 | NC_021160.1    | Ca_kabuli_chr01 | 40178415                | GG                              | AA              | 1946745528               |

| SNPs IDs              | Chromosome IDs | Chromosomes     | Physical positions (bp) | CDC Frontier (Reference genome) | (ILWC46 & LPNB) | NCBI SNPdb Accession IDs |
|-----------------------|----------------|-----------------|-------------------------|---------------------------------|-----------------|--------------------------|
| SNP_P4_15879_40178444 | NC_021160.1    | Ca_kabuli_chr01 | 40178444                | AA                              | TT              | 1946745530               |
| SNP_P4_15880_40178668 | NC_021160.1    | Ca_kabuli_chr01 | 40178668                | TT                              | AA              | 1946745532               |
| SNP_P4_15881_40179542 | NC_021160.1    | Ca_kabuli_chr01 | 40179542                | CC                              | TT              | 1946745534               |
| SNP_P4_15882_40180623 | NC_021160.1    | Ca_kabuli_chr01 | 40180623                | TT                              | CC              | 1946745536               |
| SNP_P4_15883_40180823 | NC_021160.1    | Ca_kabuli_chr01 | 40180823                | AA                              | GG              | 1946745538               |
| SNP_P4_15884_40180903 | NC_021160.1    | Ca_kabuli_chr01 | 40180903                | TT                              | CC              | 1946745540               |
| SNP_P4_15886_40181341 | NC_021160.1    | Ca_kabuli_chr01 | 40181341                | TT                              | CC              | 1946745542               |
| SNP_P4_15887_40181353 | NC_021160.1    | Ca_kabuli_chr01 | 40181353                | CC                              | GG              | 1946745544               |
| SNP_P4_15888_40182362 | NC_021160.1    | Ca_kabuli_chr01 | 40182362                | CC                              | TT              | 1946745546               |
| SNP_P4_15889_40182649 | NC_021160.1    | Ca_kabuli_chr01 | 40182649                | AA                              | GG              | 1946745548               |
| SNP_P4_15890_40182693 | NC_021160.1    | Ca_kabuli_chr01 | 40182693                | CC                              | TT              | 1946745550               |
| SNP_P4_15891_40182828 | NC_021160.1    | Ca_kabuli_chr01 | 40182828                | TT                              | CC              | 1946745552               |
| SNP_P4_15892_40182995 | NC_021160.1    | Ca_kabuli_chr01 | 40182995                | AA                              | GG              | 1946745553               |
| SNP_P4_15893_40183024 | NC_021160.1    | Ca_kabuli_chr01 | 40183024                | TT                              | CC              | 1946745555               |
| SNP_P4_15894_40183044 | NC_021160.1    | Ca_kabuli_chr01 | 40183044                | CC                              | GG              | 1946745557               |
| SNP_P4_15895_40183046 | NC_021160.1    | Ca_kabuli_chr01 | 40183046                | TT                              | CC              | 1946745559               |
| SNP_P4_15896_40183056 | NC_021160.1    | Ca_kabuli_chr01 | 40183056                | TT                              | CC              | 1946745561               |
| SNP_P4_15897_40184349 | NC_021160.1    | Ca_kabuli_chr01 | 40184349                | AA                              | GG              | 1946745563               |
| SNP_P4_15898_40187755 | NC_021160.1    | Ca_kabuli_chr01 | 40187755                | TT                              | CC              | 1946745565               |
| SNP_P4_15899_40187861 | NC_021160.1    | Ca_kabuli_chr01 | 40187861                | AA                              | GG              | 1946745567               |
| SNP_P4_15900_40188160 | NC_021160.1    | Ca_kabuli_chr01 | 40188160                | AA                              | CC              | 1946745569               |
| SNP_P4_15901_40188938 | NC_021160.1    | Ca_kabuli_chr01 | 40188938                | AA                              | CC              | 1946745571               |
| SNP_P4_15902_40190260 | NC_021160.1    | Ca_kabuli_chr01 | 40190260                | TT                              | GG              | 1946745573               |
| SNP_P4_15903_40190296 | NC_021160.1    | Ca_kabuli_chr01 | 40190296                | AA                              | GG              | 1946745575               |
| SNP_P4_15904_40193391 | NC_021160.1    | Ca_kabuli_chr01 | 40193391                | GG                              | CC              | 1946745577               |
| SNP_P4_15905_40193513 | NC_021160.1    | Ca_kabuli_chr01 | 40193513                | TT                              | CC              | 1946745579               |
| SNP_P4_15906_40196132 | NC_021160.1    | Ca_kabuli_chr01 | 40196132                | GG                              | CC              | 1946745581               |
| SNP_P4_15907_40196776 | NC_021160.1    | Ca_kabuli_chr01 | 40196776                | GG                              | AA              | 1946745583               |
| SNP_P4_15908_40199339 | NC_021160.1    | Ca_kabuli_chr01 | 40199339                | TT                              | CC              | 1946745585               |
| SNP_P4_15909_40199659 | NC_021160.1    | Ca_kabuli_chr01 | 40199659                | TT                              | CC              | 1946745587               |
| SNP_P4_15910_40206927 | NC_021160.1    | Ca_kabuli_chr01 | 40206927                | AA                              | GG              | 1946745589               |
| SNP_P4_15911_40209145 | NC_021160.1    | Ca_kabuli_chr01 | 40209145                | AA                              | GG              | 1946745591               |
| SNP_P4_15912_40209170 | NC_021160.1    | Ca_kabuli_chr01 | 40209170                | TT                              | GG              | 1946745593               |
| SNP_P4_15913_40209225 | NC_021160.1    | Ca_kabuli_chr01 | 40209225                | TT                              | CC              | 1946745595               |
| SNP_P4_15914_40209291 | NC_021160.1    | Ca_kabuli_chr01 | 40209291                | GG                              | AA              | 1946745597               |
| SNP_P4_15915_40209296 | NC_021160.1    | Ca_kabuli_chr01 | 40209296                | TT                              | CC              | 1946745599               |
| SNP_P4_15916_40209315 | NC_021160.1    | Ca_kabuli_chr01 | 40209315                | TT                              | CC              | 1946745601               |
| SNP_P4_15917_40209338 | NC_021160.1    | Ca_kabuli_chr01 | 40209338                | AA                              | GG              | 1946745603               |
| SNP_P4_15918_40209340 | NC_021160.1    | Ca_kabuli_chr01 | 40209340                | CC                              | AA              | 1946745605               |
| SNP_P4_15919_40209499 | NC_021160.1    | Ca_kabuli_chr01 | 40209499                | TT                              | CC              | 1946745607               |
| SNP_P4_15920_40209500 | NC_021160.1    | Ca_kabuli_chr01 | 40209500                | GG                              | CC              | 1946745609               |
| SNP_P4_15921_40209507 | NC_021160.1    | Ca_kabuli_chr01 | 40209507                | AA                              | CC              | 1946745611               |

| SNPs IDs              | Chromosome IDs | Chromosomes     | Physical positions (bp) | CDC Frontier (Reference genome) | (ILWC46 & LPNB) | NCBI SNPdb Accession IDs |
|-----------------------|----------------|-----------------|-------------------------|---------------------------------|-----------------|--------------------------|
| SNP_P4_15923_40214264 | NC_021160.1    | Ca_kabuli_chr01 | 40214264                | CC                              | AA              | 1946745613               |
| SNP_P4_15924_40214505 | NC_021160.1    | Ca_kabuli_chr01 | 40214505                | CC                              | TT              | 1946745615               |
| SNP_P4_15926_40216728 | NC_021160.1    | Ca_kabuli_chr01 | 40216728                | TT                              | GG              | 1946745617               |
| SNP_P4_15927_40216806 | NC_021160.1    | Ca_kabuli_chr01 | 40216806                | CC                              | TT              | 1946745619               |
| SNP_P4_15928_40216926 | NC_021160.1    | Ca_kabuli_chr01 | 40216926                | AA                              | GG              | 1946745621               |
| SNP_P4_15929_40217713 | NC_021160.1    | Ca_kabuli_chr01 | 40217713                | GG                              | AA              | 1946745623               |
| SNP_P4_15930_40217860 | NC_021160.1    | Ca_kabuli_chr01 | 40217860                | GG                              | AA              | 1946745625               |
| SNP_P4_15931_40219581 | NC_021160.1    | Ca_kabuli_chr01 | 40219581                | GG                              | AA              | 1946745627               |
| SNP_P4_15932_40219629 | NC_021160.1    | Ca_kabuli_chr01 | 40219629                | GG                              | AA              | 1946745628               |
| SNP_P4_15933_40219648 | NC_021160.1    | Ca_kabuli_chr01 | 40219648                | AA                              | GG              | 1946745629               |
| SNP_P4_15935_40219857 | NC_021160.1    | Ca_kabuli_chr01 | 40219857                | GG                              | AA              | 1946745630               |
| SNP_P4_15936_40220125 | NC_021160.1    | Ca_kabuli_chr01 | 40220125                | CC                              | AA              | 1946745631               |
| SNP_P4_15937_40222434 | NC_021160.1    | Ca_kabuli_chr01 | 40222434                | TT                              | GG              | 1946745633               |
| SNP_P4_15938_40223512 | NC_021160.1    | Ca_kabuli_chr01 | 40223512                | AA                              | GG              | 1946745635               |
| SNP_P4_15939_40223559 | NC_021160.1    | Ca_kabuli_chr01 | 40223559                | TT                              | AA              | 1946745637               |
| SNP_P4_15940_40224010 | NC_021160.1    | Ca_kabuli_chr01 | 40224010                | AA                              | TT              | 1946745639               |
| SNP_P4_15942_40226274 | NC_021160.1    | Ca_kabuli_chr01 | 40226274                | GG                              | TT              | 1946745641               |
| SNP_P4_15943_40226477 | NC_021160.1    | Ca_kabuli_chr01 | 40226477                | CC                              | AA              | 1946745643               |
| SNP_P4_15944_40226531 | NC_021160.1    | Ca_kabuli_chr01 | 40226531                | CC                              | AA              | 1946745645               |
| SNP_P4_15945_40228161 | NC_021160.1    | Ca_kabuli_chr01 | 40228161                | CC                              | TT              | 1946745647               |
| SNP_P4_15946_40229195 | NC_021160.1    | Ca_kabuli_chr01 | 40229195                | CC                              | TT              | 1946745649               |
| SNP_P4_15947_40230708 | NC_021160.1    | Ca_kabuli_chr01 | 40230708                | AA                              | GG              | 1946745651               |
| SNP_P4_15948_40230724 | NC_021160.1    | Ca_kabuli_chr01 | 40230724                | AA                              | GG              | 1946745653               |
| SNP_P4_15949_40230753 | NC_021160.1    | Ca_kabuli_chr01 | 40230753                | AA                              | GG              | 1946745655               |
| SNP_P4_15950_40230760 | NC_021160.1    | Ca_kabuli_chr01 | 40230760                | AA                              | GG              | 1946745657               |
| SNP_P4_15951_40231712 | NC_021160.1    | Ca_kabuli_chr01 | 40231712                | GG                              | AA              | 1946745658               |
| SNP_P4_15954_40232530 | NC_021160.1    | Ca_kabuli_chr01 | 40232530                | TT                              | CC              | 1946745660               |
| SNP_P4_15955_40232636 | NC_021160.1    | Ca_kabuli_chr01 | 40232636                | AA                              | CC              | 1946745662               |
| SNP_P4_15956_40233839 | NC_021160.1    | Ca_kabuli_chr01 | 40233839                | GG                              | AA              | 1946745664               |
| SNP_P4_15957_40233885 | NC_021160.1    | Ca_kabuli_chr01 | 40233885                | TT                              | CC              | 1946745666               |
| SNP_P4_15960_40235846 | NC_021160.1    | Ca_kabuli_chr01 | 40235846                | TT                              | CC              | 1946745668               |
| SNP_P4_15962_40248694 | NC_021160.1    | Ca_kabuli_chr01 | 40248694                | AA                              | GG              | 1946745670               |
| SNP_P4_15963_40251009 | NC_021160.1    | Ca_kabuli_chr01 | 40251009                | AA                              | CC              | 1946745672               |
| SNP_P4_15964_40251057 | NC_021160.1    | Ca_kabuli_chr01 | 40251057                | CC                              | AA              | 1946745674               |
| SNP_P4_15965_40257876 | NC_021160.1    | Ca_kabuli_chr01 | 40257876                | GG                              | AA              | 1946745676               |
| SNP_P4_15966_40258799 | NC_021160.1    | Ca_kabuli_chr01 | 40258799                | GG                              | AA              | 1946745678               |
| SNP_P4_15967_40258835 | NC_021160.1    | Ca_kabuli_chr01 | 40258835                | CC                              | AA              | 1946745680               |
| SNP_P4_15968_40259842 | NC_021160.1    | Ca_kabuli_chr01 | 40259842                | CC                              | TT              | 1946745682               |
| SNP_P4_15969_40260136 | NC_021160.1    | Ca_kabuli_chr01 | 40260136                | TT                              | AA              | 1946745684               |
| SNP_P4_15970_40260580 | NC_021160.1    | Ca_kabuli_chr01 | 40260580                | CC                              | TT              | 1946745686               |
| SNP_P4_15971_40260964 | NC_021160.1    | Ca_kabuli_chr01 | 40260964                | AA                              | CC              | 1946745688               |
| SNP_P4_15972_40261120 | NC_021160.1    | Ca_kabuli_chr01 | 40261120                | TT                              | CC              | 1946745690               |

| SNPs IDs              | Chromosome IDs | Chromosomes     | Physical positions (bp) | CDC Frontier (Reference genome) | (ILWC46 & LPNB) | NCBI SNPdb Accession IDs |
|-----------------------|----------------|-----------------|-------------------------|---------------------------------|-----------------|--------------------------|
| SNP_P4_15973_40261169 | NC_021160.1    | Ca_kabuli_chr01 | 40261169                | CC                              | AA              | 1946745692               |
| SNP_P4_15974_40261702 | NC_021160.1    | Ca_kabuli_chr01 | 40261702                | AA                              | GG              | 1946745694               |
| SNP_P4_15975_40261857 | NC_021160.1    | Ca_kabuli_chr01 | 40261857                | TT                              | GG              | 1946745696               |
| SNP_P4_15977_40266519 | NC_021160.1    | Ca_kabuli_chr01 | 40266519                | CC                              | TT              | 1946745698               |
| SNP_P4_15978_40266571 | NC_021160.1    | Ca_kabuli_chr01 | 40266571                | CC                              | TT              | 1946745700               |
| SNP_P4_15979_40266584 | NC_021160.1    | Ca_kabuli_chr01 | 40266584                | AA                              | GG              | 1946745702               |
| SNP_P4_15980_40266706 | NC_021160.1    | Ca_kabuli_chr01 | 40266706                | AA                              | TT              | 1946745704               |
| SNP_P4_15981_40266714 | NC_021160.1    | Ca_kabuli_chr01 | 40266714                | CC                              | AA              | 1946745706               |
| SNP_P4_15982_40266726 | NC_021160.1    | Ca_kabuli_chr01 | 40266726                | AA                              | GG              | 1946745708               |
| SNP_P4_15983_40266737 | NC_021160.1    | Ca_kabuli_chr01 | 40266737                | TT                              | CC              | 1946745710               |
| SNP_P4_15984_40266745 | NC_021160.1    | Ca_kabuli_chr01 | 40266745                | AA                              | GG              | 1946745712               |
| SNP_P4_15985_40266888 | NC_021160.1    | Ca_kabuli_chr01 | 40266888                | TT                              | CC              | 1946745714               |
| SNP_P4_15986_40266918 | NC_021160.1    | Ca_kabuli_chr01 | 40266918                | CC                              | GG              | 1946745716               |
| SNP_P4_15987_40267680 | NC_021160.1    | Ca_kabuli_chr01 | 40267680                | AA                              | GG              | 1946745718               |
| SNP_P4_15988_40268068 | NC_021160.1    | Ca_kabuli_chr01 | 40268068                | CC                              | TT              | 1946745720               |
| SNP_P4_15989_40268093 | NC_021160.1    | Ca_kabuli_chr01 | 40268093                | GG                              | TT              | 1946745722               |
| SNP_P4_15990_40268144 | NC_021160.1    | Ca_kabuli_chr01 | 40268144                | TT                              | GG              | 1946745724               |
| SNP_P4_15991_40270998 | NC_021160.1    | Ca_kabuli_chr01 | 40270998                | GG                              | AA              | 1946745726               |
| SNP_P4_15992_40272039 | NC_021160.1    | Ca_kabuli_chr01 | 40272039                | CC                              | GG              | 1946745728               |
| SNP_P4_15993_40272069 | NC_021160.1    | Ca_kabuli_chr01 | 40272069                | CC                              | TT              | 1946745729               |
| SNP_P4_15994_40273068 | NC_021160.1    | Ca_kabuli_chr01 | 40273068                | GG                              | CC              | 1946745731               |
| SNP_P4_15995_40273093 | NC_021160.1    | Ca_kabuli_chr01 | 40273093                | TT                              | AA              | 1946745733               |
| SNP_P4_15996_40273117 | NC_021160.1    | Ca_kabuli_chr01 | 40273117                | GG                              | AA              | 1946745735               |
| SNP_P4_15997_40273163 | NC_021160.1    | Ca_kabuli_chr01 | 40273163                | CC                              | TT              | 1946745737               |
| SNP_P4_15998_40273311 | NC_021160.1    | Ca_kabuli_chr01 | 40273311                | GG                              | TT              | 1946745739               |
| SNP_P4_15999_40274751 | NC_021160.1    | Ca_kabuli_chr01 | 40274751                | CC                              | TT              | 1946745741               |
| SNP_P4_16000_40275916 | NC_021160.1    | Ca_kabuli_chr01 | 40275916                | TT                              | CC              | 1946745743               |
| SNP_P4_16001_40277269 | NC_021160.1    | Ca_kabuli_chr01 | 40277269                | CC                              | TT              | 1946745745               |
| SNP_P4_16002_40277694 | NC_021160.1    | Ca_kabuli_chr01 | 40277694                | TT                              | GG              | 1946745747               |
| SNP_P4_16004_40281336 | NC_021160.1    | Ca_kabuli_chr01 | 40281336                | GG                              | AA              | 1946745749               |
| SNP_P4_16005_40281674 | NC_021160.1    | Ca_kabuli_chr01 | 40281674                | GG                              | CC              | 1946745751               |
| SNP_P4_16006_40295790 | NC_021160.1    | Ca_kabuli_chr01 | 40295790                | GG                              | AA              | 1946745753               |
| SNP_P4_16007_40295823 | NC_021160.1    | Ca_kabuli_chr01 | 40295823                | AA                              | CC              | 1946745755               |
| SNP_P4_16008_40295824 | NC_021160.1    | Ca_kabuli_chr01 | 40295824                | TT                              | CC              | 1946745757               |
| SNP_P4_16009_40295827 | NC_021160.1    | Ca_kabuli_chr01 | 40295827                | AA                              | GG              | 1946745759               |
| SNP_P4_16010_40296021 | NC_021160.1    | Ca_kabuli_chr01 | 40296021                | GG                              | TT              | 1946745761               |
| SNP_P4_16011_40296205 | NC_021160.1    | Ca_kabuli_chr01 | 40296205                | TT                              | CC              | 1946745763               |
| SNP_P4_16012_40296223 | NC_021160.1    | Ca_kabuli_chr01 | 40296223                | GG                              | AA              | 1946745765               |
| SNP_P4_16013_40297327 | NC_021160.1    | Ca_kabuli_chr01 | 40297327                | TT                              | CC              | 1946745766               |
| SNP_P4_16014_40297330 | NC_021160.1    | Ca_kabuli_chr01 | 40297330                | TT                              | CC              | 1946745768               |
| SNP_P4_16015_40297522 | NC_021160.1    | Ca_kabuli_chr01 | 40297522                | AA                              | GG              | 1946745770               |
| SNP_P4_16017_40298691 | NC_021160.1    | Ca_kabuli_chr01 | 40298691                | CC                              | GG              | 1946745772               |



| SNPs IDs              | Chromosome IDs | Chromosomes     | Physical positions (bp) | CDC Frontier (Reference genome) | (ILWC46 & LPNB) | NCBI SNPdb Accession IDs |
|-----------------------|----------------|-----------------|-------------------------|---------------------------------|-----------------|--------------------------|
| SNP_P4_16018_40299654 | NC_021160.1    | Ca_kabuli_chr01 | 40299654                | TT                              | CC              | 1946745774               |
| SNP_P4_16019_40299870 | NC_021160.1    | Ca_kabuli_chr01 | 40299870                | GG                              | CC              | 1946745776               |
| SNP_P4_16020_40299941 | NC_021160.1    | Ca_kabuli_chr01 | 40299941                | CC                              | TT              | 1946745778               |
| SNP_P4_16021_40299950 | NC_021160.1    | Ca_kabuli_chr01 | 40299950                | CC                              | TT              | 1946745780               |
| SNP_P4_16023_40301102 | NC_021160.1    | Ca_kabuli_chr01 | 40301102                | AA                              | GG              | 1946745782               |
| SNP_P4_16024_40301999 | NC_021160.1    | Ca_kabuli_chr01 | 40301999                | AA                              | GG              | 1946745784               |
| SNP_P4_16025_40302025 | NC_021160.1    | Ca_kabuli_chr01 | 40302025                | GG                              | AA              | 1946745786               |
| SNP_P4_16026_40302047 | NC_021160.1    | Ca_kabuli_chr01 | 40302047                | GG                              | TT              | 1946745788               |
| SNP_P4_16027_40302066 | NC_021160.1    | Ca_kabuli_chr01 | 40302066                | AA                              | GG              | 1946745790               |
| SNP_P4_16028_40302542 | NC_021160.1    | Ca_kabuli_chr01 | 40302542                | GG                              | CC              | 1946745792               |
| SNP_P4_16029_40302599 | NC_021160.1    | Ca_kabuli_chr01 | 40302599                | GG                              | TT              | 1946745794               |
| SNP_P4_16030_40302619 | NC_021160.1    | Ca_kabuli_chr01 | 40302619                | TT                              | CC              | 1946745796               |
| SNP_P4_16031_40303212 | NC_021160.1    | Ca_kabuli_chr01 | 40303212                | GG                              | AA              | 1946745798               |
| SNP_P4_16032_40303408 | NC_021160.1    | Ca_kabuli_chr01 | 40303408                | AA                              | CC              | 1946745799               |
| SNP_P4_16033_40311675 | NC_021160.1    | Ca_kabuli_chr01 | 40311675                | GG                              | AA              | 1946745801               |
| SNP_P4_16034_40312783 | NC_021160.1    | Ca_kabuli_chr01 | 40312783                | AA                              | TT              | 1946745803               |
| SNP_P4_16037_40314584 | NC_021160.1    | Ca_kabuli_chr01 | 40314584                | TT                              | AA              | 1946745805               |
| SNP_P4_16038_40315119 | NC_021160.1    | Ca_kabuli_chr01 | 40315119                | CC                              | TT              | 1946745807               |
| SNP_P4_16039_40316607 | NC_021160.1    | Ca_kabuli_chr01 | 40316607                | GG                              | TT              | 1946745809               |
| SNP_P4_16040_40319839 | NC_021160.1    | Ca_kabuli_chr01 | 40319839                | AA                              | GG              | 1946745811               |
| SNP_P4_16041_40319966 | NC_021160.1    | Ca_kabuli_chr01 | 40319966                | GG                              | AA              | 1946745813               |
| SNP_P4_16042_40320157 | NC_021160.1    | Ca_kabuli_chr01 | 40320157                | TT                              | AA              | 1946745815               |
| SNP_P4_16043_40320184 | NC_021160.1    | Ca_kabuli_chr01 | 40320184                | TT                              | CC              | 1946745817               |
| SNP_P4_16044_40322436 | NC_021160.1    | Ca_kabuli_chr01 | 40322436                | TT                              | AA              | 1946745819               |
| SNP_P4_16045_40325034 | NC_021160.1    | Ca_kabuli_chr01 | 40325034                | GG                              | AA              | 1946745821               |
| SNP_P4_16046_40325390 | NC_021160.1    | Ca_kabuli_chr01 | 40325390                | AA                              | TT              | 1946745823               |
| SNP_P4_16047_40325408 | NC_021160.1    | Ca_kabuli_chr01 | 40325408                | CC                              | GG              | 1946745825               |
| SNP_P4_16048_40325479 | NC_021160.1    | Ca_kabuli_chr01 | 40325479                | AA                              | GG              | 1946745827               |
| SNP_P4_16049_40325968 | NC_021160.1    | Ca_kabuli_chr01 | 40325968                | CC                              | AA              | 1946745829               |
| SNP_P4_16050_40325993 | NC_021160.1    | Ca_kabuli_chr01 | 40325993                | AA                              | GG              | 1946745831               |
| SNP_P4_16051_40326525 | NC_021160.1    | Ca_kabuli_chr01 | 40326525                | CC                              | GG              | 1946745833               |
| SNP_P4_16053_40330045 | NC_021160.1    | Ca_kabuli_chr01 | 40330045                | AA                              | GG              | 1946745835               |
| SNP_P4_16054_40330489 | NC_021160.1    | Ca_kabuli_chr01 | 40330489                | AA                              | GG              | 1946745838               |
| SNP_P4_16055_40330867 | NC_021160.1    | Ca_kabuli_chr01 | 40330867                | GG                              | AA              | 1946745840               |
| SNP_P4_16056_40331922 | NC_021160.1    | Ca_kabuli_chr01 | 40331922                | CC                              | AA              | 1946745842               |
| SNP_P4_16057_40332248 | NC_021160.1    | Ca_kabuli_chr01 | 40332248                | TT                              | GG              | 1946745844               |
| SNP_P4_16058_40332968 | NC_021160.1    | Ca_kabuli_chr01 | 40332968                | CC                              | TT              | 1946745846               |
| SNP_P4_16059_40334169 | NC_021160.1    | Ca_kabuli_chr01 | 40334169                | AA                              | GG              | 1946745848               |
| SNP_P4_16060_40335307 | NC_021160.1    | Ca_kabuli_chr01 | 40335307                | TT                              | CC              | 1946745850               |
| SNP_P4_16061_40336759 | NC_021160.1    | Ca_kabuli_chr01 | 40336759                | CC                              | TT              | 1946745852               |
| SNP_P4_16062_40337695 | NC_021160.1    | Ca_kabuli_chr01 | 40337695                | CC                              | AA              | 1946745854               |
| SNP_P4_16063_40339065 | NC_021160.1    | Ca_kabuli_chr01 | 40339065                | CC                              | TT              | 1946745856               |

| SNPs IDs              | Chromosome IDs | Chromosomes     | Physical positions (bp) | CDC Frontier (Reference genome) | (ILWC46 & LPNB) | NCBI SNPdb Accession IDs |
|-----------------------|----------------|-----------------|-------------------------|---------------------------------|-----------------|--------------------------|
| SNP_P4_16064_40339252 | NC_021160.1    | Ca_kabuli_chr01 | 40339252                | GG                              | CC              | 1946745858               |
| SNP_P4_16065_40339260 | NC_021160.1    | Ca_kabuli_chr01 | 40339260                | GG                              | AA              | 1946745860               |
| SNP_P4_16066_40339277 | NC_021160.1    | Ca_kabuli_chr01 | 40339277                | GG                              | AA              | 1946745862               |
| SNP_P4_16067_40339286 | NC_021160.1    | Ca_kabuli_chr01 | 40339286                | GG                              | AA              | 1946745864               |
| SNP_P4_16068_40339584 | NC_021160.1    | Ca_kabuli_chr01 | 40339584                | AA                              | GG              | 1946745866               |
| SNP_P4_16069_40339619 | NC_021160.1    | Ca_kabuli_chr01 | 40339619                | AA                              | GG              | 1946745868               |
| SNP_P4_16070_40340160 | NC_021160.1    | Ca_kabuli_chr01 | 40340160                | CC                              | AA              | 1946745870               |
| SNP_P4_16071_40340183 | NC_021160.1    | Ca_kabuli_chr01 | 40340183                | TT                              | CC              | 1946745872               |
| SNP_P4_16072_40340212 | NC_021160.1    | Ca_kabuli_chr01 | 40340212                | TT                              | CC              | 1946745874               |
| SNP_P4_16073_40340645 | NC_021160.1    | Ca_kabuli_chr01 | 40340645                | CC                              | TT              | 1946745876               |
| SNP_P4_16074_40340791 | NC_021160.1    | Ca_kabuli_chr01 | 40340791                | TT                              | CC              | 1946745878               |
| SNP_P4_16075_40341036 | NC_021160.1    | Ca_kabuli_chr01 | 40341036                | CC                              | TT              | 1946745880               |
| SNP_P4_16076_40343216 | NC_021160.1    | Ca_kabuli_chr01 | 40343216                | GG                              | TT              | 1946745882               |
| SNP_P4_16077_40343434 | NC_021160.1    | Ca_kabuli_chr01 | 40343434                | AA                              | TT              | 1946745884               |
| SNP_P4_16078_40343495 | NC_021160.1    | Ca_kabuli_chr01 | 40343495                | AA                              | GG              | 1946745886               |
| SNP_P4_16079_40345679 | NC_021160.1    | Ca_kabuli_chr01 | 40345679                | TT                              | CC              | 1946745888               |
| SNP_P4_16080_40345758 | NC_021160.1    | Ca_kabuli_chr01 | 40345758                | AA                              | GG              | 1946745890               |
| SNP_P4_16081_40350497 | NC_021160.1    | Ca_kabuli_chr01 | 40350497                | AA                              | TT              | 1946745892               |
| SNP_P4_16082_40350639 | NC_021160.1    | Ca_kabuli_chr01 | 40350639                | TT                              | AA              | 1946745894               |
| SNP_P4_16083_40351698 | NC_021160.1    | Ca_kabuli_chr01 | 40351698                | TT                              | CC              | 1946745896               |
| SNP_P4_16084_40355208 | NC_021160.1    | Ca_kabuli_chr01 | 40355208                | AA                              | TT              | 1946745898               |
| SNP_P4_16086_40355426 | NC_021160.1    | Ca_kabuli_chr01 | 40355426                | AA                              | TT              | 1946745900               |
| SNP_P4_16088_40357085 | NC_021160.1    | Ca_kabuli_chr01 | 40357085                | CC                              | TT              | 1946745901               |
| SNP_P4_16089_40357098 | NC_021160.1    | Ca_kabuli_chr01 | 40357098                | AA                              | GG              | 1946745903               |
| SNP_P4_16090_40357218 | NC_021160.1    | Ca_kabuli_chr01 | 40357218                | AA                              | TT              | 1946745905               |
| SNP_P4_16091_40358385 | NC_021160.1    | Ca_kabuli_chr01 | 40358385                | CC                              | TT              | 1946745907               |
| SNP_P4_16093_40358465 | NC_021160.1    | Ca_kabuli_chr01 | 40358465                | CC                              | TT              | 1946745909               |
| SNP_P4_16094_40358693 | NC_021160.1    | Ca_kabuli_chr01 | 40358693                | CC                              | TT              | 1946745911               |
| SNP_P4_16095_40359240 | NC_021160.1    | Ca_kabuli_chr01 | 40359240                | TT                              | AA              | 1946745913               |
| SNP_P4_16096_40359244 | NC_021160.1    | Ca_kabuli_chr01 | 40359244                | CC                              | TT              | 1946745915               |
| SNP_P4_16097_40359525 | NC_021160.1    | Ca_kabuli_chr01 | 40359525                | TT                              | AA              | 1946745917               |
| SNP_P4_16098_40359605 | NC_021160.1    | Ca_kabuli_chr01 | 40359605                | TT                              | CC              | 1946745919               |
| SNP_P4_16099_40363009 | NC_021160.1    | Ca_kabuli_chr01 | 40363009                | AA                              | GG              | 1946745921               |
| SNP_P4_16100_40363822 | NC_021160.1    | Ca_kabuli_chr01 | 40363822                | AA                              | CC              | 1946745923               |
| SNP_P4_16101_40364553 | NC_021160.1    | Ca_kabuli_chr01 | 40364553                | TT                              | GG              | 1946745924               |
| SNP_P4_16102_40367634 | NC_021160.1    | Ca_kabuli_chr01 | 40367634                | TT                              | CC              | 1946745926               |
| SNP_P4_16103_40368684 | NC_021160.1    | Ca_kabuli_chr01 | 40368684                | GG                              | AA              | 1946745929               |
| SNP_P4_16104_40370373 | NC_021160.1    | Ca_kabuli_chr01 | 40370373                | AA                              | GG              | 1946745931               |
| SNP_P4_16105_40370449 | NC_021160.1    | Ca_kabuli_chr01 | 40370449                | CC                              | TT              | 1946745932               |
| SNP_P4_16106_40373313 | NC_021160.1    | Ca_kabuli_chr01 | 40373313                | AA                              | TT              | 1946745934               |
| SNP_P4_16107_40373482 | NC_021160.1    | Ca_kabuli_chr01 | 40373482                | AA                              | TT              | 1946745936               |
| SNP_P4_16108_40373554 | NC_021160.1    | Ca_kabuli_chr01 | 40373554                | GG                              | AA              | 1946745938               |

| SNPs IDs              | Chromosome IDs | Chromosomes     | Physical positions (bp) | CDC Frontier (Reference genome) | (ILWC46 & LPNB) | NCBI SNPdb Accession IDs |
|-----------------------|----------------|-----------------|-------------------------|---------------------------------|-----------------|--------------------------|
| SNP_P4_16110_40373673 | NC_021160.1    | Ca_kabuli_chr01 | 40373673                | AA                              | GG              | 1946745940               |
| SNP_P4_16111_40373860 | NC_021160.1    | Ca_kabuli_chr01 | 40373860                | TT                              | AA              | 1946745942               |
| SNP_P4_16112_40374130 | NC_021160.1    | Ca_kabuli_chr01 | 40374130                | GG                              | TT              | 1946745944               |
| SNP_P4_16113_40391478 | NC_021160.1    | Ca_kabuli_chr01 | 40391478                | TT                              | CC              | 1946745946               |
| SNP_P4_16114_40391509 | NC_021160.1    | Ca_kabuli_chr01 | 40391509                | GG                              | AA              | 1946745948               |
| SNP_P4_16115_40391513 | NC_021160.1    | Ca_kabuli_chr01 | 40391513                | AA                              | GG              | 1946745950               |
| SNP_P4_16116_40392220 | NC_021160.1    | Ca_kabuli_chr01 | 40392220                | GG                              | TT              | 1946745952               |
| SNP_P4_16117_40392545 | NC_021160.1    | Ca_kabuli_chr01 | 40392545                | AA                              | TT              | 1946745954               |
| SNP_P4_16118_40393080 | NC_021160.1    | Ca_kabuli_chr01 | 40393080                | GG                              | TT              | 1946745956               |
| SNP_P4_16119_40393102 | NC_021160.1    | Ca_kabuli_chr01 | 40393102                | CC                              | GG              | 1946745958               |
| SNP_P4_16120_40393945 | NC_021160.1    | Ca_kabuli_chr01 | 40393945                | AA                              | GG              | 1946745960               |
| SNP_P4_16121_40394267 | NC_021160.1    | Ca_kabuli_chr01 | 40394267                | AA                              | GG              | 1946745961               |
| SNP_P4_16123_40396244 | NC_021160.1    | Ca_kabuli_chr01 | 40396244                | GG                              | AA              | 1946745963               |
| SNP_P4_16124_40396996 | NC_021160.1    | Ca_kabuli_chr01 | 40396996                | AA                              | GG              | 1946745965               |
| SNP_P4_16125_40396997 | NC_021160.1    | Ca_kabuli_chr01 | 40396997                | CC                              | TT              | 1946745967               |
| SNP_P4_16126_40397007 | NC_021160.1    | Ca_kabuli_chr01 | 40397007                | GG                              | TT              | 1946745969               |
| SNP_P4_16127_40397169 | NC_021160.1    | Ca_kabuli_chr01 | 40397169                | CC                              | TT              | 1946745971               |
| SNP_P4_16128_40397220 | NC_021160.1    | Ca_kabuli_chr01 | 40397220                | TT                              | CC              | 1946745973               |
| SNP_P4_16129_40397232 | NC_021160.1    | Ca_kabuli_chr01 | 40397232                | AA                              | GG              | 1946745975               |
| SNP_P4_16130_40397237 | NC_021160.1    | Ca_kabuli_chr01 | 40397237                | TT                              | CC              | 1946745977               |
| SNP_P4_16131_40397474 | NC_021160.1    | Ca_kabuli_chr01 | 40397474                | TT                              | GG              | 1946745979               |
| SNP_P4_16132_40397875 | NC_021160.1    | Ca_kabuli_chr01 | 40397875                | CC                              | AA              | 1946745981               |
| SNP_P4_16133_40398163 | NC_021160.1    | Ca_kabuli_chr01 | 40398163                | GG                              | TT              | 1946745983               |
| SNP_P4_16134_40398192 | NC_021160.1    | Ca_kabuli_chr01 | 40398192                | TT                              | CC              | 1946745985               |
| SNP_P4_16135_40398256 | NC_021160.1    | Ca_kabuli_chr01 | 40398256                | AA                              | TT              | 1946745987               |
| SNP_P4_16136_40398284 | NC_021160.1    | Ca_kabuli_chr01 | 40398284                | GG                              | TT              | 1946745989               |
| SNP_P4_16137_40398371 | NC_021160.1    | Ca_kabuli_chr01 | 40398371                | AA                              | CC              | 1946745991               |
| SNP_P4_16139_40398393 | NC_021160.1    | Ca_kabuli_chr01 | 40398393                | GG                              | AA              | 1946745993               |
| SNP_P4_16140_40398405 | NC_021160.1    | Ca_kabuli_chr01 | 40398405                | AA                              | CC              | 1946745995               |
| SNP_P4_16141_40398414 | NC_021160.1    | Ca_kabuli_chr01 | 40398414                | TT                              | AA              | 1946745997               |
| SNP_P4_16142_40398635 | NC_021160.1    | Ca_kabuli_chr01 | 40398635                | TT                              | CC              | 1946745999               |
| SNP_P4_16143_40398865 | NC_021160.1    | Ca_kabuli_chr01 | 40398865                | AA                              | GG              | 1946746001               |
| SNP_P4_16144_40398869 | NC_021160.1    | Ca_kabuli_chr01 | 40398869                | GG                              | TT              | 1946746003               |
| SNP_P4_16146_40400515 | NC_021160.1    | Ca_kabuli_chr01 | 40400515                | TT                              | CC              | 1946746005               |
| SNP_P4_16147_40400602 | NC_021160.1    | Ca_kabuli_chr01 | 40400602                | CC                              | TT              | 1946746007               |
| SNP_P4_16148_40401933 | NC_021160.1    | Ca_kabuli_chr01 | 40401933                | TT                              | CC              | 1946746009               |
| SNP_P4_16149_40402364 | NC_021160.1    | Ca_kabuli_chr01 | 40402364                | AA                              | GG              | 1946746011               |
| SNP_P4_16150_40402454 | NC_021160.1    | Ca_kabuli_chr01 | 40402454                | TT                              | CC              | 1946746013               |
| SNP_P4_16151_40403626 | NC_021160.1    | Ca_kabuli_chr01 | 40403626                | TT                              | GG              | 1946746015               |
| SNP_P4_16152_40404716 | NC_021160.1    | Ca_kabuli_chr01 | 40404716                | GG                              | TT              | 1946746017               |
| SNP_P4_16153_40405036 | NC_021160.1    | Ca_kabuli_chr01 | 40405036                | TT                              | CC              | 1946746019               |
| SNP_P4_16154_40405224 | NC_021160.1    | Ca_kabuli_chr01 | 40405224                | CC                              | TT              | 1946746021               |

| SNPs IDs              | Chromosome IDs | Chromosomes     | Physical positions (bp) | CDC Frontier (Reference genome) | (ILWC46 & LPNB) | NCBI SNPdb Accession IDs |
|-----------------------|----------------|-----------------|-------------------------|---------------------------------|-----------------|--------------------------|
| SNP_P4_16155_40406378 | NC_021160.1    | Ca_kabuli_chr01 | 40406378                | AA                              | GG              | 1946746022               |
| SNP_P4_16156_40407074 | NC_021160.1    | Ca_kabuli_chr01 | 40407074                | TT                              | AA              | 1946746023               |
| SNP_P4_16157_40407325 | NC_021160.1    | Ca_kabuli_chr01 | 40407325                | GG                              | AA              | 1946746024               |
| SNP_P4_16158_40407453 | NC_021160.1    | Ca_kabuli_chr01 | 40407453                | TT                              | CC              | 1946746025               |
| SNP_P4_16159_40407584 | NC_021160.1    | Ca_kabuli_chr01 | 40407584                | GG                              | AA              | 1946746027               |
| SNP_P4_16160_40407751 | NC_021160.1    | Ca_kabuli_chr01 | 40407751                | TT                              | CC              | 1946746029               |
| SNP_P4_16162_40408455 | NC_021160.1    | Ca_kabuli_chr01 | 40408455                | GG                              | TT              | 1946746031               |
| SNP_P4_16164_40408549 | NC_021160.1    | Ca_kabuli_chr01 | 40408549                | GG                              | AA              | 1946746033               |
| SNP_P4_16166_40408979 | NC_021160.1    | Ca_kabuli_chr01 | 40408979                | TT                              | GG              | 1946746035               |
| SNP_P4_16167_40411531 | NC_021160.1    | Ca_kabuli_chr01 | 40411531                | GG                              | CC              | 1946746037               |
| SNP_P4_16168_40411532 | NC_021160.1    | Ca_kabuli_chr01 | 40411532                | CC                              | TT              | 1946746039               |
| SNP_P4_16169_40412065 | NC_021160.1    | Ca_kabuli_chr01 | 40412065                | AA                              | GG              | 1946746041               |
| SNP_P4_16170_40412101 | NC_021160.1    | Ca_kabuli_chr01 | 40412101                | AA                              | GG              | 1946746043               |
| SNP_P4_16171_40412294 | NC_021160.1    | Ca_kabuli_chr01 | 40412294                | CC                              | TT              | 1946746045               |
| SNP_P4_16172_40412513 | NC_021160.1    | Ca_kabuli_chr01 | 40412513                | AA                              | TT              | 1946746047               |
| SNP_P4_16173_40412520 | NC_021160.1    | Ca_kabuli_chr01 | 40412520                | TT                              | AA              | 1946746049               |
| SNP_P4_16174_40413000 | NC_021160.1    | Ca_kabuli_chr01 | 40413000                | AA                              | GG              | 1946746051               |
| SNP_P4_16175_40413052 | NC_021160.1    | Ca_kabuli_chr01 | 40413052                | AA                              | GG              | 1946746052               |
| SNP_P4_16176_40413722 | NC_021160.1    | Ca_kabuli_chr01 | 40413722                | GG                              | AA              | 1946746054               |
| SNP_P4_16177_40414088 | NC_021160.1    | Ca_kabuli_chr01 | 40414088                | AA                              | TT              | 1946746056               |
| SNP_P4_16178_40415057 | NC_021160.1    | Ca_kabuli_chr01 | 40415057                | GG                              | AA              | 1946746058               |
| SNP_P4_16179_40415443 | NC_021160.1    | Ca_kabuli_chr01 | 40415443                | TT                              | CC              | 1946746060               |
| SNP_P4_16180_40417200 | NC_021160.1    | Ca_kabuli_chr01 | 40417200                | GG                              | AA              | 1946746062               |
| SNP_P4_16181_40417256 | NC_021160.1    | Ca_kabuli_chr01 | 40417256                | TT                              | CC              | 1946746064               |
| SNP_P4_16182_40419760 | NC_021160.1    | Ca_kabuli_chr01 | 40419760                | CC                              | TT              | 1946746066               |
| SNP_P4_16183_40421977 | NC_021160.1    | Ca_kabuli_chr01 | 40421977                | TT                              | GG              | 1946746068               |
| SNP_P4_16185_40422082 | NC_021160.1    | Ca_kabuli_chr01 | 40422082                | AA                              | GG              | 1946746070               |
| SNP_P4_16186_40422261 | NC_021160.1    | Ca_kabuli_chr01 | 40422261                | CC                              | TT              | 1946746072               |
| SNP_P4_16187_40422274 | NC_021160.1    | Ca_kabuli_chr01 | 40422274                | CC                              | TT              | 1946746073               |
| SNP_P4_16188_40422275 | NC_021160.1    | Ca_kabuli_chr01 | 40422275                | AA                              | GG              | 1946746075               |
| SNP_P4_16189_40422741 | NC_021160.1    | Ca_kabuli_chr01 | 40422741                | GG                              | AA              | 1946746077               |
| SNP_P4_16193_40425111 | NC_021160.1    | Ca_kabuli_chr01 | 40425111                | CC                              | TT              | 1946746079               |
| SNP_P4_16194_40425222 | NC_021160.1    | Ca_kabuli_chr01 | 40425222                | AA                              | CC              | 1946746081               |
| SNP_P4_16198_40425617 | NC_021160.1    | Ca_kabuli_chr01 | 40425617                | CC                              | TT              | 1946746083               |
| SNP_P4_16199_40425657 | NC_021160.1    | Ca_kabuli_chr01 | 40425657                | CC                              | AA              | 1946746085               |
| SNP_P4_16200_40425985 | NC_021160.1    | Ca_kabuli_chr01 | 40425985                | AA                              | GG              | 1946746087               |
| SNP_P4_16201_40426020 | NC_021160.1    | Ca_kabuli_chr01 | 40426020                | CC                              | TT              | 1946746089               |
| SNP_P4_16202_40427012 | NC_021160.1    | Ca_kabuli_chr01 | 40427012                | GG                              | AA              | 1946746091               |
| SNP_P4_16203_40427139 | NC_021160.1    | Ca_kabuli_chr01 | 40427139                | CC                              | TT              | 1946746093               |
| SNP_P4_16204_40427557 | NC_021160.1    | Ca_kabuli_chr01 | 40427557                | CC                              | TT              | 1946746094               |
| SNP_P4_16205_40427661 | NC_021160.1    | Ca_kabuli_chr01 | 40427661                | TT                              | CC              | 1946746096               |
| SNP_P4_16206_40428100 | NC_021160.1    | Ca_kabuli_chr01 | 40428100                | CC                              | GG              | 1946746098               |

| SNPs IDs              | Chromosome IDs | Chromosomes     | Physical positions (bp) | CDC Frontier (Reference genome) | (ILWC46 & LPNB) | NCBI SNPdb Accession IDs |
|-----------------------|----------------|-----------------|-------------------------|---------------------------------|-----------------|--------------------------|
| SNP_P4_16207_40428585 | NC_021160.1    | Ca_kabuli_chr01 | 40428585                | AA                              | GG              | 1946746100               |
| SNP_P4_16208_40430372 | NC_021160.1    | Ca_kabuli_chr01 | 40430372                | GG                              | AA              | 1946746102               |
| SNP_P4_16209_40430390 | NC_021160.1    | Ca_kabuli_chr01 | 40430390                | AA                              | GG              | 1946746104               |
| SNP_P4_16210_40430391 | NC_021160.1    | Ca_kabuli_chr01 | 40430391                | GG                              | AA              | 1946746106               |
| SNP_P4_16211_40444676 | NC_021160.1    | Ca_kabuli_chr01 | 40444676                | AA                              | GG              | 1946746108               |
| SNP_P4_16212_40444723 | NC_021160.1    | Ca_kabuli_chr01 | 40444723                | GG                              | AA              | 1946746110               |
| SNP_P4_16213_40445006 | NC_021160.1    | Ca_kabuli_chr01 | 40445006                | TT                              | CC              | 1946746112               |
| SNP_P4_16214_40445042 | NC_021160.1    | Ca_kabuli_chr01 | 40445042                | GG                              | AA              | 1946746114               |
| SNP_P4_16215_40445449 | NC_021160.1    | Ca_kabuli_chr01 | 40445449                | AA                              | GG              | 1946746116               |
| SNP_P4_16217_40483777 | NC_021160.1    | Ca_kabuli_chr01 | 40483777                | AA                              | GG              | 1946746118               |
| SNP_P4_16218_40508404 | NC_021160.1    | Ca_kabuli_chr01 | 40508404                | TT                              | GG              | 1946746120               |
| SNP_P4_16219_40511709 | NC_021160.1    | Ca_kabuli_chr01 | 40511709                | TT                              | GG              | 1946746122               |
| SNP_P4_16223_40538435 | NC_021160.1    | Ca_kabuli_chr01 | 40538435                | CC                              | AA              | 1946746124               |
| SNP_P4_16224_40538436 | NC_021160.1    | Ca_kabuli_chr01 | 40538436                | TT                              | CC              | 1946746126               |
| SNP_P4_16225_40538438 | NC_021160.1    | Ca_kabuli_chr01 | 40538438                | CC                              | GG              | 1946746128               |
| SNP_P4_16226_40538452 | NC_021160.1    | Ca_kabuli_chr01 | 40538452                | AA                              | GG              | 1946746130               |
| SNP_P4_16227_40543474 | NC_021160.1    | Ca_kabuli_chr01 | 40543474                | TT                              | AA              | 1946746132               |
| SNP_P4_16228_40543475 | NC_021160.1    | Ca_kabuli_chr01 | 40543475                | AA                              | TT              | 1946746134               |
| SNP_P4_16229_40543476 | NC_021160.1    | Ca_kabuli_chr01 | 40543476                | AA                              | TT              | 1946746136               |
| SNP_P4_16230_40543543 | NC_021160.1    | Ca_kabuli_chr01 | 40543543                | CC                              | TT              | 1946746138               |
| SNP_P4_16231_40543556 | NC_021160.1    | Ca_kabuli_chr01 | 40543556                | AA                              | CC              | 1946746140               |
| SNP_P4_16232_40587383 | NC_021160.1    | Ca_kabuli_chr01 | 40587383                | CC                              | TT              | 1946746142               |
| SNP_P4_16233_40595793 | NC_021160.1    | Ca_kabuli_chr01 | 40595793                | CC                              | TT              | 1946746144               |
| SNP_P4_16235_40627149 | NC_021160.1    | Ca_kabuli_chr01 | 40627149                | AA                              | TT              | 1946746146               |
| SNP_P4_16236_40628085 | NC_021160.1    | Ca_kabuli_chr01 | 40628085                | TT                              | AA              | 1946746148               |
| SNP_P4_16237_40650391 | NC_021160.1    | Ca_kabuli_chr01 | 40650391                | CC                              | GG              | 1946746150               |
| SNP_P4_16239_40674866 | NC_021160.1    | Ca_kabuli_chr01 | 40674866                | TT                              | AA              | 1946746152               |
| SNP_P4_16241_40743052 | NC_021160.1    | Ca_kabuli_chr01 | 40743052                | TT                              | CC              | 1946746154               |
| SNP_P4_16242_40747601 | NC_021160.1    | Ca_kabuli_chr01 | 40747601                | TT                              | AA              | 1946746156               |
| SNP_P4_16243_40747753 | NC_021160.1    | Ca_kabuli_chr01 | 40747753                | TT                              | AA              | 1946746158               |
| SNP_P4_16244_40747881 | NC_021160.1    | Ca_kabuli_chr01 | 40747881                | GG                              | CC              | 1946746160               |
| SNP_P4_16245_40766011 | NC_021160.1    | Ca_kabuli_chr01 | 40766011                | CC                              | GG              | 1946746162               |
| SNP_P4_16246_40766014 | NC_021160.1    | Ca_kabuli_chr01 | 40766014                | TT                              | CC              | 1946746164               |
| SNP_P4_16247_40766016 | NC_021160.1    | Ca_kabuli_chr01 | 40766016                | TT                              | GG              | 1946746166               |
| SNP_P4_16248_40766023 | NC_021160.1    | Ca_kabuli_chr01 | 40766023                | TT                              | CC              | 1946746168               |
| SNP_P4_16249_40766025 | NC_021160.1    | Ca_kabuli_chr01 | 40766025                | GG                              | AA              | 1946746170               |
| SNP_P4_16250_40785395 | NC_021160.1    | Ca_kabuli_chr01 | 40785395                | TT                              | CC              | 1946746172               |
| SNP_P4_16251_40791885 | NC_021160.1    | Ca_kabuli_chr01 | 40791885                | CC                              | TT              | 1946746173               |
| SNP_P4_16252_40801216 | NC_021160.1    | Ca_kabuli_chr01 | 40801216                | TT                              | AA              | 1946746175               |
| SNP_P4_16253_40801221 | NC_021160.1    | Ca_kabuli_chr01 | 40801221                | AA                              | GG              | 1946746177               |
| SNP_P4_16254_40801224 | NC_021160.1    | Ca_kabuli_chr01 | 40801224                | TT                              | CC              | 1946746179               |
| SNP_P4_16255_40803495 | NC_021160.1    | Ca_kabuli_chr01 | 40803495                | AA                              | TT              | 1946746181               |

| SNPs IDs              | Chromosome IDs | Chromosomes     | Physical positions (bp) | CDC Frontier (Reference genome) | (ILWC46 & LPNB) | NCBI SNPdb Accession IDs |
|-----------------------|----------------|-----------------|-------------------------|---------------------------------|-----------------|--------------------------|
| SNP_P4_16256_40810140 | NC_021160.1    | Ca_kabuli_chr01 | 40810140                | TT                              | GG              | 1946746183               |
| SNP_P4_16257_40810141 | NC_021160.1    | Ca_kabuli_chr01 | 40810141                | TT                              | CC              | 1946746185               |
| SNP_P4_16258_40810202 | NC_021160.1    | Ca_kabuli_chr01 | 40810202                | GG                              | AA              | 1946746187               |
| SNP_P4_16259_40814686 | NC_021160.1    | Ca_kabuli_chr01 | 40814686                | TT                              | CC              | 1946746189               |
| SNP_P4_16261_40814731 | NC_021160.1    | Ca_kabuli_chr01 | 40814731                | GG                              | AA              | 1946746191               |
| SNP_P4_16262_40814759 | NC_021160.1    | Ca_kabuli_chr01 | 40814759                | TT                              | CC              | 1946746193               |
| SNP_P4_16263_40814760 | NC_021160.1    | Ca_kabuli_chr01 | 40814760                | TT                              | CC              | 1946746195               |
| SNP_P4_16264_40814778 | NC_021160.1    | Ca_kabuli_chr01 | 40814778                | GG                              | TT              | 1946746197               |
| SNP_P4_16265_40814811 | NC_021160.1    | Ca_kabuli_chr01 | 40814811                | AA                              | GG              | 1946746199               |
| SNP_P4_16266_40814833 | NC_021160.1    | Ca_kabuli_chr01 | 40814833                | TT                              | CC              | 1946746201               |
| SNP_P4_16267_40814834 | NC_021160.1    | Ca_kabuli_chr01 | 40814834                | AA                              | GG              | 1946746203               |
| SNP_P4_16268_40814942 | NC_021160.1    | Ca_kabuli_chr01 | 40814942                | TT                              | GG              | 1946746205               |
| SNP_P4_16269_40814943 | NC_021160.1    | Ca_kabuli_chr01 | 40814943                | GG                              | TT              | 1946746207               |
| SNP_P4_16270_40816877 | NC_021160.1    | Ca_kabuli_chr01 | 40816877                | TT                              | CC              | 1946746209               |
| SNP_P4_16271_40827819 | NC_021160.1    | Ca_kabuli_chr01 | 40827819                | CC                              | TT              | 1946746211               |
| SNP_P4_16272_40827843 | NC_021160.1    | Ca_kabuli_chr01 | 40827843                | CC                              | GG              | 1946746213               |
| SNP_P4_16273_40838153 | NC_021160.1    | Ca_kabuli_chr01 | 40838153                | GG                              | AA              | 1946746215               |
| SNP_P4_16274_40838269 | NC_021160.1    | Ca_kabuli_chr01 | 40838269                | TT                              | AA              | 1946746217               |
| SNP_P4_16275_40838282 | NC_021160.1    | Ca_kabuli_chr01 | 40838282                | GG                              | TT              | 1946746218               |
| SNP_P4_16276_40838510 | NC_021160.1    | Ca_kabuli_chr01 | 40838510                | GG                              | AA              | 1946746220               |
| SNP_P4_16277_40838595 | NC_021160.1    | Ca_kabuli_chr01 | 40838595                | GG                              | TT              | 1946746222               |
| SNP_P4_16278_40838601 | NC_021160.1    | Ca_kabuli_chr01 | 40838601                | GG                              | AA              | 1946746224               |
| SNP_P4_16279_40838604 | NC_021160.1    | Ca_kabuli_chr01 | 40838604                | TT                              | CC              | 1946746226               |
| SNP_P4_16280_40859723 | NC_021160.1    | Ca_kabuli_chr01 | 40859723                | TT                              | AA              | 1946746228               |
| SNP_P4_16281_40859858 | NC_021160.1    | Ca_kabuli_chr01 | 40859858                | GG                              | AA              | 1946746230               |
| SNP_P4_16282_40860987 | NC_021160.1    | Ca_kabuli_chr01 | 40860987                | CC                              | TT              | 1946746232               |
| SNP_P4_16283_40861248 | NC_021160.1    | Ca_kabuli_chr01 | 40861248                | CC                              | TT              | 1946746234               |
| SNP_P4_16284_40861269 | NC_021160.1    | Ca_kabuli_chr01 | 40861269                | TT                              | GG              | 1946746236               |
| SNP_P4_16285_40862017 | NC_021160.1    | Ca_kabuli_chr01 | 40862017                | AA                              | GG              | 1946746237               |
| SNP_P4_16286_40862018 | NC_021160.1    | Ca_kabuli_chr01 | 40862018                | CC                              | TT              | 1946746239               |
| SNP_P4_16287_40870048 | NC_021160.1    | Ca_kabuli_chr01 | 40870048                | CC                              | TT              | 1946746241               |
| SNP_P4_16288_40871861 | NC_021160.1    | Ca_kabuli_chr01 | 40871861                | CC                              | TT              | 1946746243               |
| SNP_P4_16289_40871869 | NC_021160.1    | Ca_kabuli_chr01 | 40871869                | AA                              | CC              | 1946746245               |
| SNP_P4_16291_40872330 | NC_021160.1    | Ca_kabuli_chr01 | 40872330                | AA                              | GG              | 1946746247               |
| SNP_P4_16292_40872333 | NC_021160.1    | Ca_kabuli_chr01 | 40872333                | CC                              | TT              | 1946746249               |
| SNP_P4_16293_40872354 | NC_021160.1    | Ca_kabuli_chr01 | 40872354                | TT                              | GG              | 1946746251               |
| SNP_P4_16294_40872402 | NC_021160.1    | Ca_kabuli_chr01 | 40872402                | AA                              | GG              | 1946746253               |
| SNP_P4_16295_40872406 | NC_021160.1    | Ca_kabuli_chr01 | 40872406                | AA                              | GG              | 1946746255               |
| SNP_P4_16296_40872426 | NC_021160.1    | Ca_kabuli_chr01 | 40872426                | AA                              | GG              | 1946746257               |
| SNP_P4_16297_40872442 | NC_021160.1    | Ca_kabuli_chr01 | 40872442                | TT                              | CC              | 1946746259               |
| SNP_P4_16298_40872459 | NC_021160.1    | Ca_kabuli_chr01 | 40872459                | AA                              | CC              | 1946746261               |
| SNP_P4_16299_40883349 | NC_021160.1    | Ca_kabuli_chr01 | 40883349                | CC                              | TT              | 1946746263               |

| SNPs IDs              | Chromosome IDs | Chromosomes     | Physical positions (bp) | CDC Frontier (Reference genome) | (ILWC46 & LPNB) | NCBI SNPdb Accession IDs |
|-----------------------|----------------|-----------------|-------------------------|---------------------------------|-----------------|--------------------------|
| SNP_P4_16300_40886957 | NC_021160.1    | Ca_kabuli_chr01 | 40886957                | TT                              | GG              | 1946746265               |
| SNP_P4_16301_40887554 | NC_021160.1    | Ca_kabuli_chr01 | 40887554                | CC                              | TT              | 1946746267               |
| SNP_P4_16302_40887567 | NC_021160.1    | Ca_kabuli_chr01 | 40887567                | GG                              | AA              | 1946746269               |
| SNP_P4_16303_40887595 | NC_021160.1    | Ca_kabuli_chr01 | 40887595                | CC                              | TT              | 1946746271               |
| SNP_P4_16304_40887832 | NC_021160.1    | Ca_kabuli_chr01 | 40887832                | GG                              | AA              | 1946746273               |
| SNP_P4_16305_40887877 | NC_021160.1    | Ca_kabuli_chr01 | 40887877                | TT                              | CC              | 1946746275               |
| SNP_P4_16307_40887886 | NC_021160.1    | Ca_kabuli_chr01 | 40887886                | CC                              | AA              | 1946746277               |
| SNP_P4_16308_40887975 | NC_021160.1    | Ca_kabuli_chr01 | 40887975                | GG                              | AA              | 1946746279               |
| SNP_P4_16309_40888194 | NC_021160.1    | Ca_kabuli_chr01 | 40888194                | CC                              | TT              | 1946746281               |
| SNP_P4_16310_40889660 | NC_021160.1    | Ca_kabuli_chr01 | 40889660                | GG                              | TT              | 1946746282               |
| SNP_P4_16311_40889662 | NC_021160.1    | Ca_kabuli_chr01 | 40889662                | AA                              | TT              | 1946746284               |
| SNP_P4_16312_40889664 | NC_021160.1    | Ca_kabuli_chr01 | 40889664                | CC                              | TT              | 1946746286               |
| SNP_P4_16313_40889742 | NC_021160.1    | Ca_kabuli_chr01 | 40889742                | AA                              | GG              | 1946746288               |
| SNP_P4_16315_40889817 | NC_021160.1    | Ca_kabuli_chr01 | 40889817                | TT                              | AA              | 1946746290               |
| SNP_P4_16316_40890118 | NC_021160.1    | Ca_kabuli_chr01 | 40890118                | GG                              | CC              | 1946746292               |
| SNP_P4_16317_40890134 | NC_021160.1    | Ca_kabuli_chr01 | 40890134                | CC                              | AA              | 1946746294               |
| SNP_P4_16318_40890162 | NC_021160.1    | Ca_kabuli_chr01 | 40890162                | GG                              | TT              | 1946746299               |
| SNP_P4_16319_40890181 | NC_021160.1    | Ca_kabuli_chr01 | 40890181                | AA                              | TT              | 1946746301               |
| SNP_P4_16320_40890183 | NC_021160.1    | Ca_kabuli_chr01 | 40890183                | TT                              | CC              | 1946746303               |
| SNP_P4_16321_40890201 | NC_021160.1    | Ca_kabuli_chr01 | 40890201                | TT                              | CC              | 1946746305               |
| SNP_P4_16322_40890259 | NC_021160.1    | Ca_kabuli_chr01 | 40890259                | TT                              | AA              | 1946746307               |
| SNP_P4_16323_40890260 | NC_021160.1    | Ca_kabuli_chr01 | 40890260                | TT                              | AA              | 1946746309               |
| SNP_P4_16324_40890357 | NC_021160.1    | Ca_kabuli_chr01 | 40890357                | AA                              | GG              | 1946746311               |
| SNP_P4_16325_40890419 | NC_021160.1    | Ca_kabuli_chr01 | 40890419                | CC                              | TT              | 1946746313               |
| SNP_P4_16326_40890432 | NC_021160.1    | Ca_kabuli_chr01 | 40890432                | CC                              | TT              | 1946746316               |
| SNP_P4_16327_40890452 | NC_021160.1    | Ca_kabuli_chr01 | 40890452                | AA                              | GG              | 1946746318               |
| SNP_P4_16328_40890472 | NC_021160.1    | Ca_kabuli_chr01 | 40890472                | GG                              | AA              | 1946746320               |
| SNP_P4_16330_40890650 | NC_021160.1    | Ca_kabuli_chr01 | 40890650                | AA                              | TT              | 1946746322               |
| SNP_P4_16331_40890656 | NC_021160.1    | Ca_kabuli_chr01 | 40890656                | TT                              | CC              | 1946746324               |
| SNP_P4_16333_40890729 | NC_021160.1    | Ca_kabuli_chr01 | 40890729                | TT                              | GG              | 1946746326               |
| SNP_P4_16334_40890741 | NC_021160.1    | Ca_kabuli_chr01 | 40890741                | GG                              | CC              | 1946746328               |
| SNP_P4_16335_40890743 | NC_021160.1    | Ca_kabuli_chr01 | 40890743                | AA                              | CC              | 1946746330               |
| SNP_P4_16336_40896209 | NC_021160.1    | Ca_kabuli_chr01 | 40896209                | GG                              | AA              | 1946746332               |
| SNP_P4_16337_40896498 | NC_021160.1    | Ca_kabuli_chr01 | 40896498                | CC                              | TT              | 1946746334               |
| SNP_P4_16338_40896505 | NC_021160.1    | Ca_kabuli_chr01 | 40896505                | GG                              | AA              | 1946746337               |
| SNP_P4_16339_40896506 | NC_021160.1    | Ca_kabuli_chr01 | 40896506                | AA                              | CC              | 1946746339               |
| SNP_P4_16340_40896539 | NC_021160.1    | Ca_kabuli_chr01 | 40896539                | TT                              | CC              | 1946746341               |
| SNP_P4_16341_40897022 | NC_021160.1    | Ca_kabuli_chr01 | 40897022                | GG                              | AA              | 1946746343               |
| SNP_P4_16342_40897024 | NC_021160.1    | Ca_kabuli_chr01 | 40897024                | AA                              | CC              | 1946746345               |
| SNP_P4_16343_40897074 | NC_021160.1    | Ca_kabuli_chr01 | 40897074                | CC                              | GG              | 1946746347               |
| SNP_P4_16344_40897093 | NC_021160.1    | Ca_kabuli_chr01 | 40897093                | AA                              | GG              | 1946746349               |
| SNP_P4_16345_40897234 | NC_021160.1    | Ca_kabuli_chr01 | 40897234                | GG                              | AA              | 1946746351               |

| SNPs IDs              | Chromosome IDs | Chromosomes     | Physical positions (bp) | CDC Frontier (Reference genome) | (ILWC46 & LPNB) | NCBI SNPdb Accession IDs |
|-----------------------|----------------|-----------------|-------------------------|---------------------------------|-----------------|--------------------------|
| SNP_P4_16346_40897245 | NC_021160.1    | Ca_kabuli_chr01 | 40897245                | TT                              | AA              | 1946746353               |
| SNP_P4_16347_40898782 | NC_021160.1    | Ca_kabuli_chr01 | 40898782                | TT                              | CC              | 1946746355               |
| SNP_P4_16348_40898807 | NC_021160.1    | Ca_kabuli_chr01 | 40898807                | AA                              | GG              | 1946746357               |
| SNP_P4_16349_40898823 | NC_021160.1    | Ca_kabuli_chr01 | 40898823                | CC                              | TT              | 1946746359               |
| SNP_P4_16350_40899089 | NC_021160.1    | Ca_kabuli_chr01 | 40899089                | AA                              | TT              | 1946746361               |
| SNP_P4_16351_40899123 | NC_021160.1    | Ca_kabuli_chr01 | 40899123                | GG                              | TT              | 1946746363               |
| SNP_P4_16353_40899340 | NC_021160.1    | Ca_kabuli_chr01 | 40899340                | GG                              | AA              | 1946746365               |
| SNP_P4_16355_40931726 | NC_021160.1    | Ca_kabuli_chr01 | 40931726                | CC                              | TT              | 1946746367               |
| SNP_P4_16356_40934996 | NC_021160.1    | Ca_kabuli_chr01 | 40934996                | TT                              | GG              | 1946746369               |
| SNP_P4_16357_40934998 | NC_021160.1    | Ca_kabuli_chr01 | 40934998                | CC                              | GG              | 1946746371               |
| SNP_P4_16359_41033413 | NC_021160.1    | Ca_kabuli_chr01 | 41033413                | GG                              | AA              | 1946746373               |
| SNP_P4_16361_41103326 | NC_021160.1    | Ca_kabuli_chr01 | 41103326                | CC                              | TT              | 1946746375               |
| SNP_P4_16362_41103408 | NC_021160.1    | Ca_kabuli_chr01 | 41103408                | AA                              | GG              | 1946746377               |
| SNP_P4_16364_41103731 | NC_021160.1    | Ca_kabuli_chr01 | 41103731                | TT                              | CC              | 1946746380               |
| SNP_P4_16365_41103766 | NC_021160.1    | Ca_kabuli_chr01 | 41103766                | TT                              | CC              | 1946746381               |
| SNP_P4_16367_41187580 | NC_021160.1    | Ca_kabuli_chr01 | 41187580                | GG                              | AA              | 1946746383               |
| SNP_P4_16368_41226426 | NC_021160.1    | Ca_kabuli_chr01 | 41226426                | GG                              | AA              | 1946746386               |
| SNP_P4_16369_41234855 | NC_021160.1    | Ca_kabuli_chr01 | 41234855                | CC                              | GG              | 1946746388               |
| SNP_P4_16370_41234860 | NC_021160.1    | Ca_kabuli_chr01 | 41234860                | CC                              | TT              | 1946746389               |
| SNP_P4_16371_41234861 | NC_021160.1    | Ca_kabuli_chr01 | 41234861                | GG                              | AA              | 1946746391               |
| SNP_P4_16372_41234880 | NC_021160.1    | Ca_kabuli_chr01 | 41234880                | TT                              | CC              | 1946746393               |
| SNP_P4_16373_41237292 | NC_021160.1    | Ca_kabuli_chr01 | 41237292                | TT                              | CC              | 1946746395               |
| SNP_P4_16374_41237347 | NC_021160.1    | Ca_kabuli_chr01 | 41237347                | TT                              | AA              | 1946746397               |
| SNP_P4_16375_41238528 | NC_021160.1    | Ca_kabuli_chr01 | 41238528                | AA                              | GG              | 1946746399               |
| SNP_P4_16376_41238610 | NC_021160.1    | Ca_kabuli_chr01 | 41238610                | AA                              | CC              | 1946746401               |
| SNP_P4_16377_41238613 | NC_021160.1    | Ca_kabuli_chr01 | 41238613                | TT                              | CC              | 1946746403               |
| SNP_P4_16378_41238924 | NC_021160.1    | Ca_kabuli_chr01 | 41238924                | AA                              | CC              | 1946746405               |
| SNP_P4_16379_41238925 | NC_021160.1    | Ca_kabuli_chr01 | 41238925                | TT                              | AA              | 1946746407               |
| SNP_P4_16380_41247455 | NC_021160.1    | Ca_kabuli_chr01 | 41247455                | CC                              | TT              | 1946746409               |
| SNP_P4_16381_41247461 | NC_021160.1    | Ca_kabuli_chr01 | 41247461                | GG                              | AA              | 1946746411               |
| SNP_P4_16383_41248492 | NC_021160.1    | Ca_kabuli_chr01 | 41248492                | TT                              | CC              | 1946746413               |
| SNP_P4_16384_41248505 | NC_021160.1    | Ca_kabuli_chr01 | 41248505                | TT                              | GG              | 1946746415               |
| SNP_P4_16385_41248535 | NC_021160.1    | Ca_kabuli_chr01 | 41248535                | GG                              | TT              | 1946746417               |
| SNP_P4_16386_41248542 | NC_021160.1    | Ca_kabuli_chr01 | 41248542                | CC                              | AA              | 1946746419               |
| SNP_P4_16387_41248554 | NC_021160.1    | Ca_kabuli_chr01 | 41248554                | AA                              | TT              | 1946746421               |
| SNP_P4_16388_41248745 | NC_021160.1    | Ca_kabuli_chr01 | 41248745                | AA                              | GG              | 1946746423               |
| SNP_P4_16389_41248832 | NC_021160.1    | Ca_kabuli_chr01 | 41248832                | AA                              | TT              | 1946746425               |
| SNP_P4_16390_41256347 | NC_021160.1    | Ca_kabuli_chr01 | 41256347                | GG                              | AA              | 1946746427               |
| SNP_P4_16391_41261051 | NC_021160.1    | Ca_kabuli_chr01 | 41261051                | AA                              | TT              | 1946746429               |
| SNP_P4_16392_41265799 | NC_021160.1    | Ca_kabuli_chr01 | 41265799                | CC                              | TT              | 1946746431               |
| SNP_P4_16393_41265808 | NC_021160.1    | Ca_kabuli_chr01 | 41265808                | CC                              | TT              | 1946746433               |
| SNP_P4_16394_41265817 | NC_021160.1    | Ca_kabuli_chr01 | 41265817                | TT                              | GG              | 1946746435               |



| SNPs IDs              | Chromosome IDs | Chromosomes     | Physical positions (bp) | CDC Frontier (Reference genome) | (ILWC46 & LPNB) | NCBI SNPdb Accession IDs |
|-----------------------|----------------|-----------------|-------------------------|---------------------------------|-----------------|--------------------------|
| SNP_P4_16395_41265884 | NC_021160.1    | Ca_kabuli_chr01 | 41265884                | TT                              | AA              | 1946746437               |
| SNP_P4_16396_41265902 | NC_021160.1    | Ca_kabuli_chr01 | 41265902                | AA                              | CC              | 1946746439               |
| SNP_P4_16397_41266170 | NC_021160.1    | Ca_kabuli_chr01 | 41266170                | TT                              | CC              | 1946746441               |
| SNP_P4_16398_41266188 | NC_021160.1    | Ca_kabuli_chr01 | 41266188                | CC                              | TT              | 1946746443               |
| SNP_P4_16399_41266531 | NC_021160.1    | Ca_kabuli_chr01 | 41266531                | AA                              | CC              | 1946746445               |
| SNP_P4_16400_41266566 | NC_021160.1    | Ca_kabuli_chr01 | 41266566                | AA                              | GG              | 1946746447               |
| SNP_P4_16401_41266580 | NC_021160.1    | Ca_kabuli_chr01 | 41266580                | GG                              | AA              | 1946746449               |
| SNP_P4_16402_41266588 | NC_021160.1    | Ca_kabuli_chr01 | 41266588                | CC                              | TT              | 1946746451               |
| SNP_P4_16403_41267357 | NC_021160.1    | Ca_kabuli_chr01 | 41267357                | GG                              | AA              | 1946746453               |
| SNP_P4_16405_41277914 | NC_021160.1    | Ca_kabuli_chr01 | 41277914                | CC                              | TT              | 1946746455               |
| SNP_P4_16406_41277968 | NC_021160.1    | Ca_kabuli_chr01 | 41277968                | CC                              | TT              | 1946746457               |
| SNP_P4_16407_41320450 | NC_021160.1    | Ca_kabuli_chr01 | 41320450                | AA                              | GG              | 1946746459               |
| SNP_P4_16408_41320451 | NC_021160.1    | Ca_kabuli_chr01 | 41320451                | AA                              | GG              | 1946746461               |
| SNP_P4_16409_41320455 | NC_021160.1    | Ca_kabuli_chr01 | 41320455                | TT                              | CC              | 1946746463               |
| SNP_P4_16410_41320457 | NC_021160.1    | Ca_kabuli_chr01 | 41320457                | AA                              | GG              | 1946746465               |
| SNP_P4_16411_41320461 | NC_021160.1    | Ca_kabuli_chr01 | 41320461                | AA                              | GG              | 1946746467               |
| SNP_P4_16412_41320463 | NC_021160.1    | Ca_kabuli_chr01 | 41320463                | TT                              | GG              | 1946746469               |
| SNP_P4_16413_41320470 | NC_021160.1    | Ca_kabuli_chr01 | 41320470                | AA                              | GG              | 1946746471               |
| SNP_P4_16414_41320471 | NC_021160.1    | Ca_kabuli_chr01 | 41320471                | CC                              | TT              | 1946746473               |
| SNP_P4_16415_41329628 | NC_021160.1    | Ca_kabuli_chr01 | 41329628                | TT                              | AA              | 1946746475               |
| SNP_P4_16416_41329632 | NC_021160.1    | Ca_kabuli_chr01 | 41329632                | TT                              | CC              | 1946746477               |
| SNP_P4_16417_41348657 | NC_021160.1    | Ca_kabuli_chr01 | 41348657                | TT                              | GG              | 1946746479               |
| SNP_P4_16418_41362948 | NC_021160.1    | Ca_kabuli_chr01 | 41362948                | AA                              | GG              | 1946746481               |
| SNP_P4_16419_41363091 | NC_021160.1    | Ca_kabuli_chr01 | 41363091                | TT                              | GG              | 1946746483               |
| SNP_P4_16420_41378111 | NC_021160.1    | Ca_kabuli_chr01 | 41378111                | TT                              | GG              | 1946746485               |
| SNP_P4_16421_41378117 | NC_021160.1    | Ca_kabuli_chr01 | 41378117                | AA                              | GG              | 1946746487               |
| SNP_P4_16422_41380869 | NC_021160.1    | Ca_kabuli_chr01 | 41380869                | CC                              | GG              | 1946746489               |
| SNP_P4_16423_41406982 | NC_021160.1    | Ca_kabuli_chr01 | 41406982                | TT                              | AA              | 1946746491               |
| SNP_P4_16424_41412692 | NC_021160.1    | Ca_kabuli_chr01 | 41412692                | CC                              | TT              | 1946746493               |
| SNP_P4_16425_41416035 | NC_021160.1    | Ca_kabuli_chr01 | 41416035                | AA                              | CC              | 1946746495               |
| SNP_P4_16426_41416048 | NC_021160.1    | Ca_kabuli_chr01 | 41416048                | TT                              | GG              | 1946746497               |
| SNP_P4_16427_41416058 | NC_021160.1    | Ca_kabuli_chr01 | 41416058                | CC                              | TT              | 1946746499               |
| SNP_P4_16428_41416397 | NC_021160.1    | Ca_kabuli_chr01 | 41416397                | CC                              | AA              | 1946746502               |
| SNP_P4_16429_41416739 | NC_021160.1    | Ca_kabuli_chr01 | 41416739                | AA                              | CC              | 1946746504               |
| SNP_P4_16430_41422799 | NC_021160.1    | Ca_kabuli_chr01 | 41422799                | TT                              | AA              | 1946746506               |
| SNP_P4_16431_41429140 | NC_021160.1    | Ca_kabuli_chr01 | 41429140                | TT                              | CC              | 1946746508               |
| SNP_P4_16432_41450454 | NC_021160.1    | Ca_kabuli_chr01 | 41450454                | TT                              | CC              | 1946746510               |
| SNP_P4_16433_41450808 | NC_021160.1    | Ca_kabuli_chr01 | 41450808                | GG                              | AA              | 1946746512               |
| SNP_P4_16434_41450818 | NC_021160.1    | Ca_kabuli_chr01 | 41450818                | CC                              | TT              | 1946746514               |
| SNP_P4_16435_41450840 | NC_021160.1    | Ca_kabuli_chr01 | 41450840                | TT                              | GG              | 1946746516               |
| SNP_P4_16436_41451291 | NC_021160.1    | Ca_kabuli_chr01 | 41451291                | AA                              | TT              | 1946746518               |
| SNP_P4_16437_41451330 | NC_021160.1    | Ca_kabuli_chr01 | 41451330                | CC                              | GG              | 1946746520               |

| SNPs IDs              | Chromosome IDs | Chromosomes     | Physical positions (bp) | CDC Frontier (Reference genome) | (ILWC46 & LPNB) | NCBI SNPdb Accession IDs |
|-----------------------|----------------|-----------------|-------------------------|---------------------------------|-----------------|--------------------------|
| SNP_P4_16438_41451352 | NC_021160.1    | Ca_kabuli_chr01 | 41451352                | AA                              | GG              | 1946746522               |
| SNP_P4_16439_41452590 | NC_021160.1    | Ca_kabuli_chr01 | 41452590                | GG                              | TT              | 1946746524               |
| SNP_P4_16440_41452618 | NC_021160.1    | Ca_kabuli_chr01 | 41452618                | GG                              | AA              | 1946746526               |
| SNP_P4_16441_41452636 | NC_021160.1    | Ca_kabuli_chr01 | 41452636                | AA                              | GG              | 1946746528               |
| SNP_P4_16442_41452788 | NC_021160.1    | Ca_kabuli_chr01 | 41452788                | CC                              | AA              | 1946746530               |
| SNP_P4_16443_41471888 | NC_021160.1    | Ca_kabuli_chr01 | 41471888                | AA                              | TT              | 1946746532               |
| SNP_P4_16444_41472079 | NC_021160.1    | Ca_kabuli_chr01 | 41472079                | CC                              | GG              | 1946746534               |
| SNP_P4_16445_41472126 | NC_021160.1    | Ca_kabuli_chr01 | 41472126                | TT                              | CC              | 1946746536               |
| SNP_P4_16446_41482530 | NC_021160.1    | Ca_kabuli_chr01 | 41482530                | TT                              | CC              | 1946746538               |
| SNP_P4_16449_41501685 | NC_021160.1    | Ca_kabuli_chr01 | 41501685                | GG                              | AA              | 1946746540               |
| SNP_P4_16450_41504309 | NC_021160.1    | Ca_kabuli_chr01 | 41504309                | AA                              | TT              | 1946746543               |
| SNP_P4_16451_41504387 | NC_021160.1    | Ca_kabuli_chr01 | 41504387                | TT                              | CC              | 1946746545               |
| SNP_P4_16453_41504849 | NC_021160.1    | Ca_kabuli_chr01 | 41504849                | TT                              | CC              | 1946746547               |
| SNP_P4_16454_41504853 | NC_021160.1    | Ca_kabuli_chr01 | 41504853                | AA                              | TT              | 1946746549               |
| SNP_P4_16455_41536398 | NC_021160.1    | Ca_kabuli_chr01 | 41536398                | GG                              | AA              | 1946746551               |
| SNP_P4_16456_41556808 | NC_021160.1    | Ca_kabuli_chr01 | 41556808                | AA                              | TT              | 1946746553               |
| SNP_P4_16457_41597667 | NC_021160.1    | Ca_kabuli_chr01 | 41597667                | TT                              | CC              | 1946746555               |
| SNP_P4_16458_41617666 | NC_021160.1    | Ca_kabuli_chr01 | 41617666                | GG                              | TT              | 1946746557               |
| SNP_P4_16459_41631519 | NC_021160.1    | Ca_kabuli_chr01 | 41631519                | GG                              | TT              | 1946746559               |
| SNP_P4_16460_41643205 | NC_021160.1    | Ca_kabuli_chr01 | 41643205                | TT                              | AA              | 1946746561               |
| SNP_P4_16461_41648821 | NC_021160.1    | Ca_kabuli_chr01 | 41648821                | GG                              | AA              | 1946746563               |
| SNP_P4_16462_41657224 | NC_021160.1    | Ca_kabuli_chr01 | 41657224                | TT                              | CC              | 1946746565               |
| SNP_P4_16463_41661736 | NC_021160.1    | Ca_kabuli_chr01 | 41661736                | TT                              | CC              | 1946746567               |
| SNP_P4_16464_41694808 | NC_021160.1    | Ca_kabuli_chr01 | 41694808                | TT                              | CC              | 1946746569               |
| SNP_P4_16465_41694942 | NC_021160.1    | Ca_kabuli_chr01 | 41694942                | GG                              | TT              | 1946746571               |
| SNP_P4_16466_41694947 | NC_021160.1    | Ca_kabuli_chr01 | 41694947                | GG                              | AA              | 1946746573               |
| SNP_P4_16467_41694965 | NC_021160.1    | Ca_kabuli_chr01 | 41694965                | AA                              | GG              | 1946746575               |
| SNP_P4_16468_41694968 | NC_021160.1    | Ca_kabuli_chr01 | 41694968                | CC                              | GG              | 1946746577               |
| SNP_P4_16469_41694969 | NC_021160.1    | Ca_kabuli_chr01 | 41694969                | CC                              | TT              | 1946746579               |
| SNP_P4_16470_41694972 | NC_021160.1    | Ca_kabuli_chr01 | 41694972                | CC                              | TT              | 1946746581               |
| SNP_P4_16471_41694983 | NC_021160.1    | Ca_kabuli_chr01 | 41694983                | AA                              | CC              | 1946746583               |
| SNP_P4_16472_41694997 | NC_021160.1    | Ca_kabuli_chr01 | 41694997                | CC                              | TT              | 1946746585               |
| SNP_P4_16473_41695044 | NC_021160.1    | Ca_kabuli_chr01 | 41695044                | GG                              | AA              | 1946746587               |
| SNP_P4_16474_41695073 | NC_021160.1    | Ca_kabuli_chr01 | 41695073                | TT                              | CC              | 1946746589               |
| SNP_P4_16475_41695082 | NC_021160.1    | Ca_kabuli_chr01 | 41695082                | CC                              | AA              | 1946746591               |
| SNP_P4_16476_41695164 | NC_021160.1    | Ca_kabuli_chr01 | 41695164                | TT                              | CC              | 1946746593               |
| SNP_P4_16477_41695348 | NC_021160.1    | Ca_kabuli_chr01 | 41695348                | AA                              | GG              | 1946746595               |
| SNP_P4_16478_41695387 | NC_021160.1    | Ca_kabuli_chr01 | 41695387                | GG                              | AA              | 1946746597               |
| SNP_P4_16480_41695474 | NC_021160.1    | Ca_kabuli_chr01 | 41695474                | TT                              | GG              | 1946746599               |
| SNP_P4_16482_41695633 | NC_021160.1    | Ca_kabuli_chr01 | 41695633                | GG                              | AA              | 1946746601               |
| SNP_P4_16483_41695682 | NC_021160.1    | Ca_kabuli_chr01 | 41695682                | TT                              | AA              | 1946746603               |
| SNP_P4_16484_41695683 | NC_021160.1    | Ca_kabuli_chr01 | 41695683                | TT                              | AA              | 1946746605               |

| SNPs IDs              | Chromosome IDs | Chromosomes     | Physical positions (bp) | CDC Frontier (Reference genome) | (ILWC46 & LPNB) | NCBI SNPdb Accession IDs |
|-----------------------|----------------|-----------------|-------------------------|---------------------------------|-----------------|--------------------------|
| SNP_P4_16485_41696756 | NC_021160.1    | Ca_kabuli_chr01 | 41696756                | AA                              | GG              | 1946746606               |
| SNP_P4_16486_41696759 | NC_021160.1    | Ca_kabuli_chr01 | 41696759                | AA                              | CC              | 1946746608               |
| SNP_P4_16487_41696840 | NC_021160.1    | Ca_kabuli_chr01 | 41696840                | TT                              | CC              | 1946746610               |
| SNP_P4_16488_41697054 | NC_021160.1    | Ca_kabuli_chr01 | 41697054                | AA                              | CC              | 1946746612               |
| SNP_P4_16489_41704174 | NC_021160.1    | Ca_kabuli_chr01 | 41704174                | CC                              | AA              | 1946746614               |
| SNP_P4_16490_41704221 | NC_021160.1    | Ca_kabuli_chr01 | 41704221                | CC                              | TT              | 1946746617               |
| SNP_P4_16491_41704268 | NC_021160.1    | Ca_kabuli_chr01 | 41704268                | GG                              | AA              | 1946746619               |
| SNP_P4_16492_41704316 | NC_021160.1    | Ca_kabuli_chr01 | 41704316                | GG                              | AA              | 1946746621               |
| SNP_P4_16493_41704385 | NC_021160.1    | Ca_kabuli_chr01 | 41704385                | CC                              | AA              | 1946746623               |
| SNP_P4_16494_41704411 | NC_021160.1    | Ca_kabuli_chr01 | 41704411                | AA                              | GG              | 1946746625               |
| SNP_P4_16497_41704531 | NC_021160.1    | Ca_kabuli_chr01 | 41704531                | GG                              | AA              | 1946746627               |
| SNP_P4_16498_41704540 | NC_021160.1    | Ca_kabuli_chr01 | 41704540                | CC                              | TT              | 1946746629               |
| SNP_P4_16499_41704553 | NC_021160.1    | Ca_kabuli_chr01 | 41704553                | AA                              | TT              | 1946746631               |
| SNP_P4_16500_41704603 | NC_021160.1    | Ca_kabuli_chr01 | 41704603                | AA                              | TT              | 1946746633               |
| SNP_P4_16501_41704624 | NC_021160.1    | Ca_kabuli_chr01 | 41704624                | TT                              | AA              | 1946746635               |
| SNP_P4_16502_41704633 | NC_021160.1    | Ca_kabuli_chr01 | 41704633                | CC                              | TT              | 1946746637               |
| SNP_P4_16503_41705113 | NC_021160.1    | Ca_kabuli_chr01 | 41705113                | CC                              | TT              | 1946746639               |
| SNP_P4_16504_41705237 | NC_021160.1    | Ca_kabuli_chr01 | 41705237                | TT                              | GG              | 1946746641               |
| SNP_P4_16505_41705392 | NC_021160.1    | Ca_kabuli_chr01 | 41705392                | CC                              | TT              | 1946746643               |
| SNP_P4_16506_41705523 | NC_021160.1    | Ca_kabuli_chr01 | 41705523                | CC                              | GG              | 1946746645               |
| SNP_P4_16507_41705604 | NC_021160.1    | Ca_kabuli_chr01 | 41705604                | TT                              | AA              | 1946746647               |
| SNP_P4_16509_41708419 | NC_021160.1    | Ca_kabuli_chr01 | 41708419                | TT                              | GG              | 1946746649               |
| SNP_P4_16510_41708444 | NC_021160.1    | Ca_kabuli_chr01 | 41708444                | CC                              | AA              | 1946746651               |
| SNP_P4_16511_41708687 | NC_021160.1    | Ca_kabuli_chr01 | 41708687                | AA                              | CC              | 1946746653               |
| SNP_P4_16512_41708796 | NC_021160.1    | Ca_kabuli_chr01 | 41708796                | AA                              | GG              | 1946746655               |
| SNP_P4_16513_41708828 | NC_021160.1    | Ca_kabuli_chr01 | 41708828                | GG                              | AA              | 1946746657               |
| SNP_P4_16514_41709483 | NC_021160.1    | Ca_kabuli_chr01 | 41709483                | AA                              | TT              | 1946746659               |
| SNP_P4_16516_41709597 | NC_021160.1    | Ca_kabuli_chr01 | 41709597                | TT                              | CC              | 1946746661               |
| SNP_P4_16517_41709855 | NC_021160.1    | Ca_kabuli_chr01 | 41709855                | TT                              | GG              | 1946746662               |
| SNP_P4_16518_41711804 | NC_021160.1    | Ca_kabuli_chr01 | 41711804                | GG                              | AA              | 1946746663               |
| SNP_P4_16519_41712203 | NC_021160.1    | Ca_kabuli_chr01 | 41712203                | GG                              | AA              | 1946746664               |
| SNP_P4_16520_41712688 | NC_021160.1    | Ca_kabuli_chr01 | 41712688                | GG                              | AA              | 1946746666               |
| SNP_P4_16521_41712745 | NC_021160.1    | Ca_kabuli_chr01 | 41712745                | GG                              | TT              | 1946746668               |
| SNP_P4_16522_41713111 | NC_021160.1    | Ca_kabuli_chr01 | 41713111                | GG                              | TT              | 1946746670               |
| SNP_P4_16523_41715008 | NC_021160.1    | Ca_kabuli_chr01 | 41715008                | GG                              | TT              | 1946746671               |
| SNP_P4_16524_41718481 | NC_021160.1    | Ca_kabuli_chr01 | 41718481                | CC                              | TT              | 1946746673               |
| SNP_P4_16525_41718491 | NC_021160.1    | Ca_kabuli_chr01 | 41718491                | GG                              | AA              | 1946746675               |
| SNP_P4_16526_41718540 | NC_021160.1    | Ca_kabuli_chr01 | 41718540                | CC                              | TT              | 1946746677               |
| SNP_P4_16527_41718546 | NC_021160.1    | Ca_kabuli_chr01 | 41718546                | GG                              | AA              | 1946746679               |
| SNP_P4_16528_41718553 | NC_021160.1    | Ca_kabuli_chr01 | 41718553                | AA                              | GG              | 1946746681               |
| SNP_P4_16529_41718598 | NC_021160.1    | Ca_kabuli_chr01 | 41718598                | GG                              | AA              | 1946746683               |
| SNP_P4_16530_41718619 | NC_021160.1    | Ca_kabuli_chr01 | 41718619                | AA                              | TT              | 1946746685               |

| SNPs IDs              | Chromosome IDs | Chromosomes     | Physical positions (bp) | CDC Frontier (Reference genome) | (ILWC46 & LPNB) | NCBI SNPdb Accession IDs |
|-----------------------|----------------|-----------------|-------------------------|---------------------------------|-----------------|--------------------------|
| SNP_P4_16531_41718645 | NC_021160.1    | Ca_kabuli_chr01 | 41718645                | GG                              | AA              | 1946746686               |
| SNP_P4_16532_41718683 | NC_021160.1    | Ca_kabuli_chr01 | 41718683                | CC                              | GG              | 1946746687               |
| SNP_P4_16533_41718713 | NC_021160.1    | Ca_kabuli_chr01 | 41718713                | CC                              | TT              | 1946746688               |
| SNP_P4_16534_41718744 | NC_021160.1    | Ca_kabuli_chr01 | 41718744                | CC                              | AA              | 1946746689               |
| SNP_P4_16537_41721895 | NC_021160.1    | Ca_kabuli_chr01 | 41721895                | AA                              | GG              | 1946746690               |
| SNP_P4_16538_41721944 | NC_021160.1    | Ca_kabuli_chr01 | 41721944                | TT                              | GG              | 1946746692               |
| SNP_P4_16539_41721981 | NC_021160.1    | Ca_kabuli_chr01 | 41721981                | GG                              | AA              | 1946746694               |
| SNP_P4_16540_41722039 | NC_021160.1    | Ca_kabuli_chr01 | 41722039                | TT                              | AA              | 1946746696               |
| SNP_P4_16541_41722069 | NC_021160.1    | Ca_kabuli_chr01 | 41722069                | GG                              | AA              | 1946746698               |
| SNP_P4_16542_41722221 | NC_021160.1    | Ca_kabuli_chr01 | 41722221                | GG                              | AA              | 1946746700               |
| SNP_P4_16543_41722360 | NC_021160.1    | Ca_kabuli_chr01 | 41722360                | TT                              | AA              | 1946746702               |
| SNP_P4_16544_41722369 | NC_021160.1    | Ca_kabuli_chr01 | 41722369                | AA                              | TT              | 1946746704               |
| SNP_P4_16545_41722411 | NC_021160.1    | Ca_kabuli_chr01 | 41722411                | TT                              | AA              | 1946746705               |
| SNP_P4_16546_41723967 | NC_021160.1    | Ca_kabuli_chr01 | 41723967                | TT                              | AA              | 1946746707               |
| SNP_P4_16547_41724027 | NC_021160.1    | Ca_kabuli_chr01 | 41724027                | TT                              | CC              | 1946746709               |
| SNP_P4_16548_41727683 | NC_021160.1    | Ca_kabuli_chr01 | 41727683                | TT                              | CC              | 1946746711               |
| SNP_P4_16549_41727863 | NC_021160.1    | Ca_kabuli_chr01 | 41727863                | GG                              | TT              | 1946746713               |
| SNP_P4_16550_41727867 | NC_021160.1    | Ca_kabuli_chr01 | 41727867                | TT                              | CC              | 1946746715               |
| SNP_P4_16551_41730757 | NC_021160.1    | Ca_kabuli_chr01 | 41730757                | CC                              | TT              | 1946746717               |
| SNP_P4_16552_41732465 | NC_021160.1    | Ca_kabuli_chr01 | 41732465                | CC                              | TT              | 1946746719               |
| SNP_P4_16553_41743132 | NC_021160.1    | Ca_kabuli_chr01 | 41743132                | AA                              | GG              | 1946746721               |
| SNP_P4_16554_41746625 | NC_021160.1    | Ca_kabuli_chr01 | 41746625                | AA                              | TT              | 1946746723               |
| SNP_P4_16555_41746642 | NC_021160.1    | Ca_kabuli_chr01 | 41746642                | AA                              | GG              | 1946746725               |
| SNP_P4_16556_41746652 | NC_021160.1    | Ca_kabuli_chr01 | 41746652                | GG                              | AA              | 1946746727               |
| SNP_P4_16557_41746693 | NC_021160.1    | Ca_kabuli_chr01 | 41746693                | TT                              | GG              | 1946746729               |
| SNP_P4_16558_41746694 | NC_021160.1    | Ca_kabuli_chr01 | 41746694                | GG                              | AA              | 1946746731               |
| SNP_P4_16559_41747633 | NC_021160.1    | Ca_kabuli_chr01 | 41747633                | TT                              | CC              | 1946746733               |
| SNP_P4_16560_41748176 | NC_021160.1    | Ca_kabuli_chr01 | 41748176                | AA                              | GG              | 1946746735               |
| SNP_P4_16561_41748196 | NC_021160.1    | Ca_kabuli_chr01 | 41748196                | CC                              | TT              | 1946746737               |
| SNP_P4_16562_41773852 | NC_021160.1    | Ca_kabuli_chr01 | 41773852                | AA                              | TT              | 1946746738               |
| SNP_P4_16564_41777246 | NC_021160.1    | Ca_kabuli_chr01 | 41777246                | CC                              | TT              | 1946746740               |
| SNP_P4_16565_41801147 | NC_021160.1    | Ca_kabuli_chr01 | 41801147                | AA                              | TT              | 1946746742               |
| SNP_P4_16566_41801160 | NC_021160.1    | Ca_kabuli_chr01 | 41801160                | GG                              | AA              | 1946746744               |
| SNP_P4_16567_41801228 | NC_021160.1    | Ca_kabuli_chr01 | 41801228                | CC                              | TT              | 1946746746               |
| SNP_P4_16568_41801742 | NC_021160.1    | Ca_kabuli_chr01 | 41801742                | AA                              | CC              | 1946746748               |
| SNP_P4_16569_41807772 | NC_021160.1    | Ca_kabuli_chr01 | 41807772                | AA                              | CC              | 1946746750               |
| SNP_P4_16570_41808147 | NC_021160.1    | Ca_kabuli_chr01 | 41808147                | TT                              | CC              | 1946746752               |
| SNP_P4_16571_41812128 | NC_021160.1    | Ca_kabuli_chr01 | 41812128                | CC                              | GG              | 1946746754               |
| SNP_P4_16572_41839103 | NC_021160.1    | Ca_kabuli_chr01 | 41839103                | AA                              | GG              | 1946746756               |
| SNP_P4_16573_41841753 | NC_021160.1    | Ca_kabuli_chr01 | 41841753                | AA                              | GG              | 1946746758               |
| SNP_P4_16574_41846630 | NC_021160.1    | Ca_kabuli_chr01 | 41846630                | AA                              | GG              | 1946746760               |
| SNP_P4_16576_41886866 | NC_021160.1    | Ca_kabuli_chr01 | 41886866                | CC                              | TT              | 1946746762               |

| SNPs IDs              | Chromosome IDs | Chromosomes     | Physical positions (bp) | CDC Frontier (Reference genome) | (ILWC46 & LPNB) | NCBI SNPdb Accession IDs |
|-----------------------|----------------|-----------------|-------------------------|---------------------------------|-----------------|--------------------------|
| SNP_P4_16577_41908922 | NC_021160.1    | Ca_kabuli_chr01 | 41908922                | CC                              | TT              | 1946746764               |
| SNP_P4_16578_41911220 | NC_021160.1    | Ca_kabuli_chr01 | 41911220                | CC                              | AA              | 1946746766               |
| SNP_P4_16580_41948711 | NC_021160.1    | Ca_kabuli_chr01 | 41948711                | TT                              | CC              | 1946746768               |
| SNP_P4_16582_41966934 | NC_021160.1    | Ca_kabuli_chr01 | 41966934                | GG                              | TT              | 1946746770               |
| SNP_P4_16584_42000276 | NC_021160.1    | Ca_kabuli_chr01 | 42000276                | AA                              | GG              | 1946746772               |
| SNP_P4_16585_42020497 | NC_021160.1    | Ca_kabuli_chr01 | 42020497                | AA                              | GG              | 1946746774               |
| SNP_P4_16586_42021427 | NC_021160.1    | Ca_kabuli_chr01 | 42021427                | TT                              | AA              | 1946746776               |
| SNP_P4_16587_42021437 | NC_021160.1    | Ca_kabuli_chr01 | 42021437                | AA                              | TT              | 1946746778               |
| SNP_P4_16588_42021460 | NC_021160.1    | Ca_kabuli_chr01 | 42021460                | TT                              | CC              | 1946746780               |
| SNP_P4_16589_42021684 | NC_021160.1    | Ca_kabuli_chr01 | 42021684                | TT                              | AA              | 1946746782               |
| SNP_P4_16590_42021707 | NC_021160.1    | Ca_kabuli_chr01 | 42021707                | AA                              | TT              | 1946746784               |
| SNP_P4_16593_42070754 | NC_021160.1    | Ca_kabuli_chr01 | 42070754                | TT                              | AA              | 1946746786               |
| SNP_P4_16594_42070770 | NC_021160.1    | Ca_kabuli_chr01 | 42070770                | AA                              | GG              | 1946746788               |
| SNP_P4_16595_42070871 | NC_021160.1    | Ca_kabuli_chr01 | 42070871                | TT                              | CC              | 1946746790               |
| SNP_P4_16596_42086632 | NC_021160.1    | Ca_kabuli_chr01 | 42086632                | AA                              | TT              | 1946746792               |
| SNP_P4_16597_42088984 | NC_021160.1    | Ca_kabuli_chr01 | 42088984                | CC                              | AA              | 1946746794               |
| SNP_P4_16598_42098222 | NC_021160.1    | Ca_kabuli_chr01 | 42098222                | AA                              | TT              | 1946746796               |
| SNP_P4_16599_42098268 | NC_021160.1    | Ca_kabuli_chr01 | 42098268                | TT                              | GG              | 1946746798               |
| SNP_P4_16600_42106638 | NC_021160.1    | Ca_kabuli_chr01 | 42106638                | CC                              | TT              | 1946746800               |
| SNP_P4_16601_42128046 | NC_021160.1    | Ca_kabuli_chr01 | 42128046                | TT                              | CC              | 1946746801               |
| SNP_P4_16602_42131872 | NC_021160.1    | Ca_kabuli_chr01 | 42131872                | GG                              | AA              | 1946746803               |
| SNP_P4_16603_42143771 | NC_021160.1    | Ca_kabuli_chr01 | 42143771                | AA                              | TT              | 1946746805               |
| SNP_P4_16604_42143780 | NC_021160.1    | Ca_kabuli_chr01 | 42143780                | GG                              | AA              | 1946746807               |
| SNP_P4_16605_42167104 | NC_021160.1    | Ca_kabuli_chr01 | 42167104                | AA                              | GG              | 1946746809               |
| SNP_P4_16606_42167548 | NC_021160.1    | Ca_kabuli_chr01 | 42167548                | TT                              | CC              | 1946746812               |
| SNP_P4_16607_42168070 | NC_021160.1    | Ca_kabuli_chr01 | 42168070                | CC                              | AA              | 1946746814               |
| SNP_P4_16608_42168110 | NC_021160.1    | Ca_kabuli_chr01 | 42168110                | CC                              | TT              | 1946746816               |
| SNP_P4_16610_42172265 | NC_021160.1    | Ca_kabuli_chr01 | 42172265                | AA                              | GG              | 1946746819               |
| SNP_P4_16611_42172333 | NC_021160.1    | Ca_kabuli_chr01 | 42172333                | AA                              | GG              | 1946746821               |
| SNP_P4_16612_42172679 | NC_021160.1    | Ca_kabuli_chr01 | 42172679                | AA                              | CC              | 1946746823               |
| SNP_P4_16613_42179676 | NC_021160.1    | Ca_kabuli_chr01 | 42179676                | AA                              | CC              | 1946746825               |
| SNP_P4_16617_42209321 | NC_021160.1    | Ca_kabuli_chr01 | 42209321                | TT                              | AA              | 1946746827               |
| SNP_P4_16618_42230388 | NC_021160.1    | Ca_kabuli_chr01 | 42230388                | GG                              | AA              | 1946746829               |
| SNP_P4_16619_42238448 | NC_021160.1    | Ca_kabuli_chr01 | 42238448                | TT                              | CC              | 1946746831               |
| SNP_P4_16620_42239519 | NC_021160.1    | Ca_kabuli_chr01 | 42239519                | AA                              | GG              | 1946746833               |
| SNP_P4_16621_42243850 | NC_021160.1    | Ca_kabuli_chr01 | 42243850                | GG                              | AA              | 1946746835               |
| SNP_P4_16622_42243877 | NC_021160.1    | Ca_kabuli_chr01 | 42243877                | GG                              | TT              | 1946746837               |
| SNP_P4_16623_42244193 | NC_021160.1    | Ca_kabuli_chr01 | 42244193                | TT                              | CC              | 1946746839               |
| SNP_P4_16624_42244244 | NC_021160.1    | Ca_kabuli_chr01 | 42244244                | CC                              | TT              | 1946746841               |
| SNP_P4_16625_42244275 | NC_021160.1    | Ca_kabuli_chr01 | 42244275                | TT                              | GG              | 1946746843               |
| SNP_P4_16626_42244312 | NC_021160.1    | Ca_kabuli_chr01 | 42244312                | TT                              | AA              | 1946746845               |
| SNP_P4_16627_42244339 | NC_021160.1    | Ca_kabuli_chr01 | 42244339                | TT                              | CC              | 1946746847               |

| SNPs IDs              | Chromosome IDs | Chromosomes     | Physical positions (bp) | CDC Frontier (Reference genome) | (ILWC46 & LPNB) | NCBI SNPdb Accession IDs |
|-----------------------|----------------|-----------------|-------------------------|---------------------------------|-----------------|--------------------------|
| SNP_P4_16628_42244347 | NC_021160.1    | Ca_kabuli_chr01 | 42244347                | GG                              | TT              | 1946746849               |
| SNP_P4_16629_42244358 | NC_021160.1    | Ca_kabuli_chr01 | 42244358                | AA                              | TT              | 1946746850               |
| SNP_P4_16630_42261575 | NC_021160.1    | Ca_kabuli_chr01 | 42261575                | GG                              | AA              | 1946746852               |
| SNP_P4_16631_42266227 | NC_021160.1    | Ca_kabuli_chr01 | 42266227                | TT                              | AA              | 1946746854               |
| SNP_P4_16632_42266228 | NC_021160.1    | Ca_kabuli_chr01 | 42266228                | TT                              | AA              | 1946746856               |
| SNP_P4_16633_42267581 | NC_021160.1    | Ca_kabuli_chr01 | 42267581                | CC                              | TT              | 1946746858               |
| SNP_P4_16634_42275645 | NC_021160.1    | Ca_kabuli_chr01 | 42275645                | CC                              | AA              | 1946746860               |
| SNP_P4_16635_42287095 | NC_021160.1    | Ca_kabuli_chr01 | 42287095                | CC                              | TT              | 1946746862               |
| SNP_P4_16636_42312884 | NC_021160.1    | Ca_kabuli_chr01 | 42312884                | GG                              | AA              | 1946746864               |
| SNP_P4_16637_42329013 | NC_021160.1    | Ca_kabuli_chr01 | 42329013                | AA                              | GG              | 1946746866               |
| SNP_P4_16638_42329317 | NC_021160.1    | Ca_kabuli_chr01 | 42329317                | CC                              | TT              | 1946746868               |
| SNP_P4_16639_42329389 | NC_021160.1    | Ca_kabuli_chr01 | 42329389                | CC                              | TT              | 1946746870               |
| SNP_P4_16640_42332483 | NC_021160.1    | Ca_kabuli_chr01 | 42332483                | TT                              | AA              | 1946746872               |
| SNP_P4_16641_42338680 | NC_021160.1    | Ca_kabuli_chr01 | 42338680                | GG                              | AA              | 1946746874               |
| SNP_P4_16642_42350962 | NC_021160.1    | Ca_kabuli_chr01 | 42350962                | GG                              | TT              | 1946746876               |
| SNP_P4_16643_42379521 | NC_021160.1    | Ca_kabuli_chr01 | 42379521                | AA                              | CC              | 1946746878               |
| SNP_P4_16645_42392320 | NC_021160.1    | Ca_kabuli_chr01 | 42392320                | CC                              | TT              | 1946746880               |
| SNP_P4_16646_42405110 | NC_021160.1    | Ca_kabuli_chr01 | 42405110                | GG                              | AA              | 1946746882               |
| SNP_P4_16647_42405120 | NC_021160.1    | Ca_kabuli_chr01 | 42405120                | GG                              | AA              | 1946746884               |
| SNP_P4_16648_42405145 | NC_021160.1    | Ca_kabuli_chr01 | 42405145                | TT                              | AA              | 1946746886               |
| SNP_P4_16649_42405170 | NC_021160.1    | Ca_kabuli_chr01 | 42405170                | GG                              | CC              | 1946746888               |
| SNP_P4_16650_42405362 | NC_021160.1    | Ca_kabuli_chr01 | 42405362                | GG                              | AA              | 1946746890               |
| SNP_P4_16651_42405386 | NC_021160.1    | Ca_kabuli_chr01 | 42405386                | TT                              | CC              | 1946746892               |
| SNP_P4_16652_42410735 | NC_021160.1    | Ca_kabuli_chr01 | 42410735                | GG                              | AA              | 1946746894               |
| SNP_P4_16653_42410738 | NC_021160.1    | Ca_kabuli_chr01 | 42410738                | TT                              | CC              | 1946746896               |
| SNP_P4_16654_42410780 | NC_021160.1    | Ca_kabuli_chr01 | 42410780                | TT                              | CC              | 1946746898               |
| SNP_P4_16655_42411108 | NC_021160.1    | Ca_kabuli_chr01 | 42411108                | AA                              | CC              | 1946746900               |
| SNP_P4_16656_42411139 | NC_021160.1    | Ca_kabuli_chr01 | 42411139                | AA                              | GG              | 1946746902               |
| SNP_P4_16657_42411174 | NC_021160.1    | Ca_kabuli_chr01 | 42411174                | GG                              | AA              | 1946746904               |
| SNP_P4_16658_42411186 | NC_021160.1    | Ca_kabuli_chr01 | 42411186                | AA                              | CC              | 1946746906               |
| SNP_P4_16659_42411215 | NC_021160.1    | Ca_kabuli_chr01 | 42411215                | AA                              | CC              | 1946746908               |
| SNP_P4_16660_42411235 | NC_021160.1    | Ca_kabuli_chr01 | 42411235                | AA                              | CC              | 1946746910               |
| SNP_P4_16661_42416687 | NC_021160.1    | Ca_kabuli_chr01 | 42416687                | GG                              | AA              | 1946746912               |
| SNP_P4_16662_42416697 | NC_021160.1    | Ca_kabuli_chr01 | 42416697                | CC                              | AA              | 1946746914               |
| SNP_P4_16663_42416778 | NC_021160.1    | Ca_kabuli_chr01 | 42416778                | CC                              | TT              | 1946746916               |
| SNP_P4_16664_42476015 | NC_021160.1    | Ca_kabuli_chr01 | 42476015                | AA                              | GG              | 1946746918               |
| SNP_P4_16666_42499537 | NC_021160.1    | Ca_kabuli_chr01 | 42499537                | TT                              | CC              | 1946746920               |
| SNP_P4_16667_42530415 | NC_021160.1    | Ca_kabuli_chr01 | 42530415                | TT                              | CC              | 1946746922               |
| SNP_P4_16668_42538838 | NC_021160.1    | Ca_kabuli_chr01 | 42538838                | CC                              | TT              | 1946746924               |
| SNP_P4_16669_42538849 | NC_021160.1    | Ca_kabuli_chr01 | 42538849                | GG                              | TT              | 1946746926               |
| SNP_P4_16670_42538911 | NC_021160.1    | Ca_kabuli_chr01 | 42538911                | TT                              | AA              | 1946746928               |
| SNP_P4_16671_42538976 | NC_021160.1    | Ca_kabuli_chr01 | 42538976                | TT                              | AA              | 1946746930               |

| SNPs IDs              | Chromosome IDs | Chromosomes     | Physical positions (bp) | CDC Frontier (Reference genome) | (ILWC46 & LPNB) | NCBI SNPdb Accession IDs |
|-----------------------|----------------|-----------------|-------------------------|---------------------------------|-----------------|--------------------------|
| SNP_P4_16672_42539212 | NC_021160.1    | Ca_kabuli_chr01 | 42539212                | GG                              | TT              | 1946746932               |
| SNP_P4_16673_42539358 | NC_021160.1    | Ca_kabuli_chr01 | 42539358                | TT                              | CC              | 1946746934               |
| SNP_P4_16674_42540218 | NC_021160.1    | Ca_kabuli_chr01 | 42540218                | AA                              | GG              | 1946746936               |
| SNP_P4_16675_42540751 | NC_021160.1    | Ca_kabuli_chr01 | 42540751                | AA                              | TT              | 1946746937               |
| SNP_P4_16676_42540810 | NC_021160.1    | Ca_kabuli_chr01 | 42540810                | AA                              | TT              | 1946746939               |
| SNP_P4_16678_42550527 | NC_021160.1    | Ca_kabuli_chr01 | 42550527                | AA                              | GG              | 1946746941               |
| SNP_P4_16679_42550865 | NC_021160.1    | Ca_kabuli_chr01 | 42550865                | CC                              | TT              | 1946746943               |
| SNP_P4_16680_42550866 | NC_021160.1    | Ca_kabuli_chr01 | 42550866                | TT                              | CC              | 1946746945               |
| SNP_P4_16681_42550890 | NC_021160.1    | Ca_kabuli_chr01 | 42550890                | TT                              | CC              | 1946746947               |
| SNP_P4_16682_42556424 | NC_021160.1    | Ca_kabuli_chr01 | 42556424                | AA                              | GG              | 1946746949               |
| SNP_P4_16683_42556427 | NC_021160.1    | Ca_kabuli_chr01 | 42556427                | CC                              | TT              | 1946746951               |
| SNP_P4_16684_42556432 | NC_021160.1    | Ca_kabuli_chr01 | 42556432                | GG                              | AA              | 1946746953               |
| SNP_P4_16685_42635991 | NC_021160.1    | Ca_kabuli_chr01 | 42635991                | TT                              | CC              | 1946746955               |
| SNP_P4_16686_42636001 | NC_021160.1    | Ca_kabuli_chr01 | 42636001                | CC                              | AA              | 1946746957               |
| SNP_P4_16687_42636014 | NC_021160.1    | Ca_kabuli_chr01 | 42636014                | CC                              | TT              | 1946746959               |
| SNP_P4_16688_42636016 | NC_021160.1    | Ca_kabuli_chr01 | 42636016                | GG                              | CC              | 1946746961               |
| SNP_P4_16689_42636017 | NC_021160.1    | Ca_kabuli_chr01 | 42636017                | TT                              | AA              | 1946746963               |
| SNP_P4_16690_42636021 | NC_021160.1    | Ca_kabuli_chr01 | 42636021                | TT                              | AA              | 1946746965               |
| SNP_P4_16691_42636023 | NC_021160.1    | Ca_kabuli_chr01 | 42636023                | GG                              | AA              | 1946746967               |
| SNP_P4_16692_42641920 | NC_021160.1    | Ca_kabuli_chr01 | 42641920                | GG                              | AA              | 1946746969               |
| SNP_P4_16693_42641993 | NC_021160.1    | Ca_kabuli_chr01 | 42641993                | CC                              | TT              | 1946746971               |
| SNP_P4_16694_42642993 | NC_021160.1    | Ca_kabuli_chr01 | 42642993                | AA                              | CC              | 1946746973               |
| SNP_P4_16695_42643001 | NC_021160.1    | Ca_kabuli_chr01 | 42643001                | AA                              | TT              | 1946746975               |
| SNP_P4_16696_42643002 | NC_021160.1    | Ca_kabuli_chr01 | 42643002                | GG                              | TT              | 1946746977               |
| SNP_P4_16697_42643006 | NC_021160.1    | Ca_kabuli_chr01 | 42643006                | AA                              | TT              | 1946746979               |
| SNP_P4_16698_42643008 | NC_021160.1    | Ca_kabuli_chr01 | 42643008                | TT                              | CC              | 1946746981               |
| SNP_P4_16700_42692051 | NC_021160.1    | Ca_kabuli_chr01 | 42692051                | GG                              | AA              | 1946746983               |
| SNP_P4_16701_42721203 | NC_021160.1    | Ca_kabuli_chr01 | 42721203                | AA                              | GG              | 1946746984               |
| SNP_P4_16702_42740312 | NC_021160.1    | Ca_kabuli_chr01 | 42740312                | TT                              | CC              | 1946746986               |
| SNP_P4_16704_42749171 | NC_021160.1    | Ca_kabuli_chr01 | 42749171                | GG                              | AA              | 1946746988               |
| SNP_P4_16705_42762681 | NC_021160.1    | Ca_kabuli_chr01 | 42762681                | CC                              | GG              | 1946746990               |
| SNP_P4_16707_42791603 | NC_021160.1    | Ca_kabuli_chr01 | 42791603                | GG                              | AA              | 1946746992               |
| SNP_P4_16708_42793548 | NC_021160.1    | Ca_kabuli_chr01 | 42793548                | TT                              | CC              | 1946746994               |
| SNP_P4_16709_42793576 | NC_021160.1    | Ca_kabuli_chr01 | 42793576                | TT                              | CC              | 1946746997               |
| SNP_P4_16710_42793937 | NC_021160.1    | Ca_kabuli_chr01 | 42793937                | TT                              | CC              | 1946746999               |
| SNP_P4_16711_42800189 | NC_021160.1    | Ca_kabuli_chr01 | 42800189                | GG                              | AA              | 1946747001               |
| SNP_P4_16712_42813640 | NC_021160.1    | Ca_kabuli_chr01 | 42813640                | CC                              | GG              | 1946747004               |
| SNP_P4_16713_42820362 | NC_021160.1    | Ca_kabuli_chr01 | 42820362                | AA                              | GG              | 1946747006               |
| SNP_P4_16714_42820380 | NC_021160.1    | Ca_kabuli_chr01 | 42820380                | AA                              | GG              | 1946747008               |
| SNP_P4_16715_42820544 | NC_021160.1    | Ca_kabuli_chr01 | 42820544                | GG                              | AA              | 1946747010               |
| SNP_P4_16716_42820568 | NC_021160.1    | Ca_kabuli_chr01 | 42820568                | GG                              | AA              | 1946747012               |
| SNP_P4_16718_42862910 | NC_021160.1    | Ca_kabuli_chr01 | 42862910                | AA                              | GG              | 1946747014               |

| SNPs IDs              | Chromosome IDs | Chromosomes     | Physical positions (bp) | CDC Frontier (Reference genome) | (ILWC46 & LPNB) | NCBI SNPdb Accession IDs |
|-----------------------|----------------|-----------------|-------------------------|---------------------------------|-----------------|--------------------------|
| SNP_P4_16719_42880940 | NC_021160.1    | Ca_kabuli_chr01 | 42880940                | AA                              | GG              | 1946747016               |
| SNP_P4_16720_42890446 | NC_021160.1    | Ca_kabuli_chr01 | 42890446                | CC                              | TT              | 1946747018               |
| SNP_P4_16722_42902926 | NC_021160.1    | Ca_kabuli_chr01 | 42902926                | TT                              | CC              | 1946747020               |
| SNP_P4_16723_42903314 | NC_021160.1    | Ca_kabuli_chr01 | 42903314                | AA                              | GG              | 1946747022               |
| SNP_P4_16724_42928211 | NC_021160.1    | Ca_kabuli_chr01 | 42928211                | AA                              | TT              | 1946747024               |
| SNP_P4_16725_42970533 | NC_021160.1    | Ca_kabuli_chr01 | 42970533                | AA                              | GG              | 1946747025               |
| SNP_P4_16726_42972243 | NC_021160.1    | Ca_kabuli_chr01 | 42972243                | GG                              | AA              | 1946747027               |
| SNP_P4_16727_42980037 | NC_021160.1    | Ca_kabuli_chr01 | 42980037                | GG                              | CC              | 1946747029               |
| SNP_P4_16728_42980354 | NC_021160.1    | Ca_kabuli_chr01 | 42980354                | AA                              | GG              | 1946747031               |
| SNP_P4_16729_42980361 | NC_021160.1    | Ca_kabuli_chr01 | 42980361                | CC                              | TT              | 1946747033               |
| SNP_P4_16730_42980689 | NC_021160.1    | Ca_kabuli_chr01 | 42980689                | GG                              | AA              | 1946747035               |
| SNP_P4_16731_42980692 | NC_021160.1    | Ca_kabuli_chr01 | 42980692                | CC                              | GG              | 1946747037               |
| SNP_P4_16732_42980750 | NC_021160.1    | Ca_kabuli_chr01 | 42980750                | CC                              | TT              | 1946747039               |
| SNP_P4_16733_42991324 | NC_021160.1    | Ca_kabuli_chr01 | 42991324                | TT                              | CC              | 1946747041               |
| SNP_P4_16734_42991670 | NC_021160.1    | Ca_kabuli_chr01 | 42991670                | GG                              | AA              | 1946747043               |
| SNP_P4_16735_43000939 | NC_021160.1    | Ca_kabuli_chr01 | 43000939                | TT                              | AA              | 1946747044               |
| SNP_P4_16736_43001336 | NC_021160.1    | Ca_kabuli_chr01 | 43001336                | AA                              | GG              | 1946747046               |
| SNP_P4_16737_43001762 | NC_021160.1    | Ca_kabuli_chr01 | 43001762                | GG                              | AA              | 1946747048               |
| SNP_P4_16738_43001798 | NC_021160.1    | Ca_kabuli_chr01 | 43001798                | CC                              | GG              | 1946747050               |
| SNP_P4_16739_43039675 | NC_021160.1    | Ca_kabuli_chr01 | 43039675                | GG                              | AA              | 1946747053               |
| SNP_P4_16740_43061966 | NC_021160.1    | Ca_kabuli_chr01 | 43061966                | TT                              | GG              | 1946747055               |
| SNP_P4_16741_43062022 | NC_021160.1    | Ca_kabuli_chr01 | 43062022                | AA                              | GG              | 1946747057               |
| SNP_P4_16742_43062023 | NC_021160.1    | Ca_kabuli_chr01 | 43062023                | TT                              | CC              | 1946747060               |
| SNP_P4_16743_43062026 | NC_021160.1    | Ca_kabuli_chr01 | 43062026                | TT                              | CC              | 1946747062               |
| SNP_P4_16744_43064524 | NC_021160.1    | Ca_kabuli_chr01 | 43064524                | TT                              | CC              | 1946747064               |
| SNP_P4_16745_43065715 | NC_021160.1    | Ca_kabuli_chr01 | 43065715                | GG                              | AA              | 1946747066               |
| SNP_P4_16746_43065724 | NC_021160.1    | Ca_kabuli_chr01 | 43065724                | CC                              | GG              | 1946747068               |
| SNP_P4_16747_43065746 | NC_021160.1    | Ca_kabuli_chr01 | 43065746                | AA                              | GG              | 1946747070               |
| SNP_P4_16748_43065779 | NC_021160.1    | Ca_kabuli_chr01 | 43065779                | AA                              | GG              | 1946747072               |
| SNP_P4_16749_43065792 | NC_021160.1    | Ca_kabuli_chr01 | 43065792                | GG                              | CC              | 1946747074               |
| SNP_P4_16750_43065818 | NC_021160.1    | Ca_kabuli_chr01 | 43065818                | AA                              | TT              | 1946747076               |
| SNP_P4_16751_43066089 | NC_021160.1    | Ca_kabuli_chr01 | 43066089                | CC                              | TT              | 1946747078               |
| SNP_P4_16752_43066111 | NC_021160.1    | Ca_kabuli_chr01 | 43066111                | AA                              | GG              | 1946747080               |
| SNP_P4_16753_43066179 | NC_021160.1    | Ca_kabuli_chr01 | 43066179                | TT                              | GG              | 1946747082               |
| SNP_P4_16754_43066267 | NC_021160.1    | Ca_kabuli_chr01 | 43066267                | TT                              | CC              | 1946747084               |
| SNP_P4_16755_43066277 | NC_021160.1    | Ca_kabuli_chr01 | 43066277                | AA                              | CC              | 1946747086               |
| SNP_P4_16756_43066300 | NC_021160.1    | Ca_kabuli_chr01 | 43066300                | AA                              | GG              | 1946747088               |
| SNP_P4_16757_43067074 | NC_021160.1    | Ca_kabuli_chr01 | 43067074                | AA                              | GG              | 1946747089               |
| SNP_P4_16758_43067102 | NC_021160.1    | Ca_kabuli_chr01 | 43067102                | TT                              | CC              | 1946747092               |
| SNP_P4_16759_43090845 | NC_021160.1    | Ca_kabuli_chr01 | 43090845                | AA                              | GG              | 1946747094               |
| SNP_P4_16760_43118875 | NC_021160.1    | Ca_kabuli_chr01 | 43118875                | AA                              | TT              | 1946747096               |
| SNP_P4_16761_43119804 | NC_021160.1    | Ca_kabuli_chr01 | 43119804                | GG                              | AA              | 1946747097               |



| SNPs IDs              | Chromosome IDs | Chromosomes     | Physical positions (bp) | CDC Frontier (Reference genome) | (ILWC46 & LPNB) | NCBI SNPdb Accession IDs |
|-----------------------|----------------|-----------------|-------------------------|---------------------------------|-----------------|--------------------------|
| SNP_P4_16762_43123026 | NC_021160.1    | Ca_kabuli_chr01 | 43123026                | GG                              | AA              | 1946747099               |
| SNP_P4_16763_43177331 | NC_021160.1    | Ca_kabuli_chr01 | 43177331                | GG                              | AA              | 1946747101               |
| SNP_P4_16764_43225898 | NC_021160.1    | Ca_kabuli_chr01 | 43225898                | CC                              | TT              | 1946747103               |
| SNP_P4_16765_43235814 | NC_021160.1    | Ca_kabuli_chr01 | 43235814                | TT                              | CC              | 1946747105               |
| SNP_P4_16766_43254128 | NC_021160.1    | Ca_kabuli_chr01 | 43254128                | GG                              | TT              | 1946747107               |
| SNP_P4_16767_43262297 | NC_021160.1    | Ca_kabuli_chr01 | 43262297                | GG                              | AA              | 1946747109               |
| SNP_P4_16768_43262307 | NC_021160.1    | Ca_kabuli_chr01 | 43262307                | GG                              | AA              | 1946747111               |
| SNP_P4_16769_43262329 | NC_021160.1    | Ca_kabuli_chr01 | 43262329                | CC                              | TT              | 1946747113               |
| SNP_P4_16770_43262330 | NC_021160.1    | Ca_kabuli_chr01 | 43262330                | TT                              | CC              | 1946747115               |
| SNP_P4_16771_43300400 | NC_021160.1    | Ca_kabuli_chr01 | 43300400                | TT                              | GG              | 1946747116               |
| SNP_P4_16772_43313491 | NC_021160.1    | Ca_kabuli_chr01 | 43313491                | CC                              | TT              | 1946747118               |
| SNP_P4_16773_43330847 | NC_021160.1    | Ca_kabuli_chr01 | 43330847                | CC                              | TT              | 1946747120               |
| SNP_P4_16774_43336066 | NC_021160.1    | Ca_kabuli_chr01 | 43336066                | TT                              | CC              | 1946747122               |
| SNP_P4_16775_43363004 | NC_021160.1    | Ca_kabuli_chr01 | 43363004                | TT                              | GG              | 1946747124               |
| SNP_P4_16776_43363023 | NC_021160.1    | Ca_kabuli_chr01 | 43363023                | AA                              | GG              | 1946747126               |
| SNP_P4_16777_43363024 | NC_021160.1    | Ca_kabuli_chr01 | 43363024                | TT                              | GG              | 1946747128               |
| SNP_P4_16778_43363034 | NC_021160.1    | Ca_kabuli_chr01 | 43363034                | AA                              | GG              | 1946747130               |
| SNP_P4_16779_43363060 | NC_021160.1    | Ca_kabuli_chr01 | 43363060                | CC                              | GG              | 1946747132               |
| SNP_P4_16780_43363068 | NC_021160.1    | Ca_kabuli_chr01 | 43363068                | AA                              | GG              | 1946747133               |
| SNP_P4_16781_43363478 | NC_021160.1    | Ca_kabuli_chr01 | 43363478                | GG                              | AA              | 1946747135               |
| SNP_P4_16782_43393150 | NC_021160.1    | Ca_kabuli_chr01 | 43393150                | CC                              | AA              | 1946747137               |
| SNP_P4_16783_43406848 | NC_021160.1    | Ca_kabuli_chr01 | 43406848                | AA                              | TT              | 1946747139               |
| SNP_P4_16784_43411748 | NC_021160.1    | Ca_kabuli_chr01 | 43411748                | GG                              | AA              | 1946747141               |
| SNP_P4_16785_43411749 | NC_021160.1    | Ca_kabuli_chr01 | 43411749                | CC                              | TT              | 1946747143               |
| SNP_P4_16786_43411762 | NC_021160.1    | Ca_kabuli_chr01 | 43411762                | AA                              | GG              | 1946747145               |
| SNP_P4_16787_43412908 | NC_021160.1    | Ca_kabuli_chr01 | 43412908                | GG                              | AA              | 1946747147               |
| SNP_P4_16788_43420328 | NC_021160.1    | Ca_kabuli_chr01 | 43420328                | AA                              | GG              | 1946747150               |
| SNP_P4_16790_43438473 | NC_021160.1    | Ca_kabuli_chr01 | 43438473                | TT                              | AA              | 1946747152               |
| SNP_P4_16791_43438629 | NC_021160.1    | Ca_kabuli_chr01 | 43438629                | TT                              | CC              | 1946747154               |
| SNP_P4_16792_43438652 | NC_021160.1    | Ca_kabuli_chr01 | 43438652                | TT                              | CC              | 1946747156               |
| SNP_P4_16793_43439373 | NC_021160.1    | Ca_kabuli_chr01 | 43439373                | CC                              | GG              | 1946747158               |
| SNP_P4_16794_43439816 | NC_021160.1    | Ca_kabuli_chr01 | 43439816                | AA                              | GG              | 1946747160               |
| SNP_P4_16795_43440899 | NC_021160.1    | Ca_kabuli_chr01 | 43440899                | GG                              | AA              | 1946747162               |
| SNP_P4_16796_43441144 | NC_021160.1    | Ca_kabuli_chr01 | 43441144                | TT                              | CC              | 1946747164               |
| SNP_P4_16797_43441240 | NC_021160.1    | Ca_kabuli_chr01 | 43441240                | AA                              | GG              | 1946747166               |
| SNP_P4_16798_43441260 | NC_021160.1    | Ca_kabuli_chr01 | 43441260                | AA                              | GG              | 1946747168               |
| SNP_P4_16799_43441496 | NC_021160.1    | Ca_kabuli_chr01 | 43441496                | TT                              | CC              | 1946747170               |
| SNP_P4_16800_43441530 | NC_021160.1    | Ca_kabuli_chr01 | 43441530                | GG                              | AA              | 1946747172               |
| SNP_P4_16801_43441553 | NC_021160.1    | Ca_kabuli_chr01 | 43441553                | TT                              | GG              | 1946747174               |
| SNP_P4_16802_43451961 | NC_021160.1    | Ca_kabuli_chr01 | 43451961                | GG                              | AA              | 1946747176               |
| SNP_P4_16804_43467883 | NC_021160.1    | Ca_kabuli_chr01 | 43467883                | GG                              | AA              | 1946747178               |
| SNP_P4_16805_43467957 | NC_021160.1    | Ca_kabuli_chr01 | 43467957                | GG                              | AA              | 1946747180               |

| SNPs IDs              | Chromosome IDs | Chromosomes     | Physical positions (bp) | CDC Frontier (Reference genome) | (ILWC46 & LPNB) | NCBI SNPdb Accession IDs |
|-----------------------|----------------|-----------------|-------------------------|---------------------------------|-----------------|--------------------------|
| SNP_P4_16806_43476892 | NC_021160.1    | Ca_kabuli_chr01 | 43476892                | GG                              | AA              | 1946747182               |
| SNP_P4_16807_43476901 | NC_021160.1    | Ca_kabuli_chr01 | 43476901                | GG                              | CC              | 1946747184               |
| SNP_P4_16808_43476913 | NC_021160.1    | Ca_kabuli_chr01 | 43476913                | GG                              | AA              | 1946747186               |
| SNP_P4_16809_43493313 | NC_021160.1    | Ca_kabuli_chr01 | 43493313                | GG                              | TT              | 1946747188               |
| SNP_P4_16810_43517104 | NC_021160.1    | Ca_kabuli_chr01 | 43517104                | AA                              | CC              | 1946747190               |
| SNP_P4_16813_43567785 | NC_021160.1    | Ca_kabuli_chr01 | 43567785                | TT                              | GG              | 1946747192               |
| SNP_P4_16814_43569097 | NC_021160.1    | Ca_kabuli_chr01 | 43569097                | CC                              | AA              | 1946747194               |
| SNP_P4_16815_43577928 | NC_021160.1    | Ca_kabuli_chr01 | 43577928                | TT                              | GG              | 1946747196               |
| SNP_P4_16816_43578203 | NC_021160.1    | Ca_kabuli_chr01 | 43578203                | CC                              | TT              | 1946747198               |
| SNP_P4_16817_43581502 | NC_021160.1    | Ca_kabuli_chr01 | 43581502                | AA                              | GG              | 1946747200               |
| SNP_P4_16819_43612864 | NC_021160.1    | Ca_kabuli_chr01 | 43612864                | AA                              | GG              | 1946747202               |
| SNP_P4_16820_43618073 | NC_021160.1    | Ca_kabuli_chr01 | 43618073                | CC                              | GG              | 1946747204               |
| SNP_P4_16821_43622508 | NC_021160.1    | Ca_kabuli_chr01 | 43622508                | AA                              | GG              | 1946747206               |
| SNP_P4_16822_43635450 | NC_021160.1    | Ca_kabuli_chr01 | 43635450                | AA                              | CC              | 1946747208               |
| SNP_P4_16823_43640656 | NC_021160.1    | Ca_kabuli_chr01 | 43640656                | GG                              | AA              | 1946747210               |
| SNP_P4_16825_43665022 | NC_021160.1    | Ca_kabuli_chr01 | 43665022                | GG                              | TT              | 1946747212               |
| SNP_P4_16828_43688843 | NC_021160.1    | Ca_kabuli_chr01 | 43688843                | CC                              | TT              | 1946747214               |
| SNP_P4_16830_43690265 | NC_021160.1    | Ca_kabuli_chr01 | 43690265                | CC                              | TT              | 1946747216               |
| SNP_P4_16831_43690272 | NC_021160.1    | Ca_kabuli_chr01 | 43690272                | CC                              | TT              | 1946747218               |
| SNP_P4_16832_43690281 | NC_021160.1    | Ca_kabuli_chr01 | 43690281                | AA                              | TT              | 1946747220               |
| SNP_P4_16833_43690322 | NC_021160.1    | Ca_kabuli_chr01 | 43690322                | TT                              | CC              | 1946747222               |
| SNP_P4_16834_43690339 | NC_021160.1    | Ca_kabuli_chr01 | 43690339                | AA                              | TT              | 1946747224               |
| SNP_P4_16835_43691303 | NC_021160.1    | Ca_kabuli_chr01 | 43691303                | CC                              | GG              | 1946747226               |
| SNP_P4_16836_43715282 | NC_021160.1    | Ca_kabuli_chr01 | 43715282                | CC                              | TT              | 1946747228               |
| SNP_P4_16837_43722807 | NC_021160.1    | Ca_kabuli_chr01 | 43722807                | TT                              | GG              | 1946747230               |
| SNP_P4_16838_43727527 | NC_021160.1    | Ca_kabuli_chr01 | 43727527                | CC                              | TT              | 1946747232               |
| SNP_P4_16839_43792565 | NC_021160.1    | Ca_kabuli_chr01 | 43792565                | GG                              | AA              | 1946747234               |
| SNP_P4_16840_43816349 | NC_021160.1    | Ca_kabuli_chr01 | 43816349                | GG                              | AA              | 1946747236               |
| SNP_P4_16841_43830031 | NC_021160.1    | Ca_kabuli_chr01 | 43830031                | GG                              | AA              | 1946747237               |
| SNP_P4_16842_43896328 | NC_021160.1    | Ca_kabuli_chr01 | 43896328                | TT                              | CC              | 1946747239               |
| SNP_P4_16843_43896329 | NC_021160.1    | Ca_kabuli_chr01 | 43896329                | AA                              | GG              | 1946747241               |
| SNP_P4_16844_43899281 | NC_021160.1    | Ca_kabuli_chr01 | 43899281                | TT                              | CC              | 1946747243               |
| SNP_P4_16845_43903801 | NC_021160.1    | Ca_kabuli_chr01 | 43903801                | CC                              | TT              | 1946747245               |
| SNP_P4_16846_43903927 | NC_021160.1    | Ca_kabuli_chr01 | 43903927                | TT                              | CC              | 1946747247               |
| SNP_P4_16847_43904038 | NC_021160.1    | Ca_kabuli_chr01 | 43904038                | TT                              | CC              | 1946747249               |
| SNP_P4_16848_43904039 | NC_021160.1    | Ca_kabuli_chr01 | 43904039                | CC                              | TT              | 1946747251               |
| SNP_P4_16849_43904040 | NC_021160.1    | Ca_kabuli_chr01 | 43904040                | GG                              | AA              | 1946747253               |
| SNP_P4_16850_43904042 | NC_021160.1    | Ca_kabuli_chr01 | 43904042                | CC                              | TT              | 1946747255               |
| SNP_P4_16851_43904044 | NC_021160.1    | Ca_kabuli_chr01 | 43904044                | CC                              | TT              | 1946747257               |
| SNP_P4_16853_43932871 | NC_021160.1    | Ca_kabuli_chr01 | 43932871                | TT                              | CC              | 1946747258               |
| SNP_P4_16854_43942441 | NC_021160.1    | Ca_kabuli_chr01 | 43942441                | TT                              | GG              | 1946747260               |
| SNP_P4_16855_43946422 | NC_021160.1    | Ca_kabuli_chr01 | 43946422                | CC                              | TT              | 1946747262               |

| SNPs IDs              | Chromosome IDs | Chromosomes     | Physical positions (bp) | CDC Frontier (Reference genome) | (ILWC46 & LPNB) | NCBI SNPdb Accession IDs |
|-----------------------|----------------|-----------------|-------------------------|---------------------------------|-----------------|--------------------------|
| SNP_P4_16856_43970960 | NC_021160.1    | Ca_kabuli_chr01 | 43970960                | AA                              | TT              | 1946747264               |
| SNP_P4_16857_43980312 | NC_021160.1    | Ca_kabuli_chr01 | 43980312                | CC                              | TT              | 1946747266               |
| SNP_P4_16858_43980566 | NC_021160.1    | Ca_kabuli_chr01 | 43980566                | CC                              | TT              | 1946747268               |
| SNP_P4_16860_44022160 | NC_021160.1    | Ca_kabuli_chr01 | 44022160                | CC                              | TT              | 1946747270               |
| SNP_P4_16861_44051233 | NC_021160.1    | Ca_kabuli_chr01 | 44051233                | TT                              | GG              | 1946747272               |
| SNP_P4_16862_44051253 | NC_021160.1    | Ca_kabuli_chr01 | 44051253                | CC                              | TT              | 1946747274               |
| SNP_P4_16863_44051574 | NC_021160.1    | Ca_kabuli_chr01 | 44051574                | AA                              | GG              | 1946747276               |
| SNP_P4_16864_44079661 | NC_021160.1    | Ca_kabuli_chr01 | 44079661                | GG                              | TT              | 1946747278               |
| SNP_P4_16865_44104709 | NC_021160.1    | Ca_kabuli_chr01 | 44104709                | CC                              | AA              | 1946747280               |
| SNP_P4_16866_44126995 | NC_021160.1    | Ca_kabuli_chr01 | 44126995                | CC                              | GG              | 1946747282               |
| SNP_P4_16867_44129114 | NC_021160.1    | Ca_kabuli_chr01 | 44129114                | CC                              | TT              | 1946747284               |
| SNP_P4_16868_44129397 | NC_021160.1    | Ca_kabuli_chr01 | 44129397                | AA                              | GG              | 1946747286               |
| SNP_P4_16869_44144751 | NC_021160.1    | Ca_kabuli_chr01 | 44144751                | CC                              | TT              | 1946747288               |
| SNP_P4_16870_44146237 | NC_021160.1    | Ca_kabuli_chr01 | 44146237                | GG                              | TT              | 1946747290               |
| SNP_P4_16871_44150305 | NC_021160.1    | Ca_kabuli_chr01 | 44150305                | GG                              | AA              | 1946747292               |
| SNP_P4_16872_44153387 | NC_021160.1    | Ca_kabuli_chr01 | 44153387                | TT                              | GG              | 1946747294               |
| SNP_P4_16873_44155775 | NC_021160.1    | Ca_kabuli_chr01 | 44155775                | GG                              | AA              | 1946747296               |
| SNP_P4_16874_44162358 | NC_021160.1    | Ca_kabuli_chr01 | 44162358                | TT                              | CC              | 1946747298               |
| SNP_P4_16875_44175182 | NC_021160.1    | Ca_kabuli_chr01 | 44175182                | TT                              | AA              | 1946747300               |
| SNP_P4_16876_44175193 | NC_021160.1    | Ca_kabuli_chr01 | 44175193                | TT                              | CC              | 1946747302               |
| SNP_P4_16877_44175210 | NC_021160.1    | Ca_kabuli_chr01 | 44175210                | TT                              | CC              | 1946747304               |
| SNP_P4_16878_44175639 | NC_021160.1    | Ca_kabuli_chr01 | 44175639                | AA                              | CC              | 1946747306               |
| SNP_P4_16879_44186093 | NC_021160.1    | Ca_kabuli_chr01 | 44186093                | TT                              | AA              | 1946747308               |
| SNP_P4_16880_44186240 | NC_021160.1    | Ca_kabuli_chr01 | 44186240                | GG                              | AA              | 1946747310               |
| SNP_P4_16881_44186263 | NC_021160.1    | Ca_kabuli_chr01 | 44186263                | GG                              | AA              | 1946747312               |
| SNP_P4_16882_44187293 | NC_021160.1    | Ca_kabuli_chr01 | 44187293                | CC                              | AA              | 1946747314               |
| SNP_P4_16883_44187380 | NC_021160.1    | Ca_kabuli_chr01 | 44187380                | CC                              | TT              | 1946747316               |
| SNP_P4_16884_44187546 | NC_021160.1    | Ca_kabuli_chr01 | 44187546                | TT                              | CC              | 1946747318               |
| SNP_P4_16885_44187597 | NC_021160.1    | Ca_kabuli_chr01 | 44187597                | CC                              | AA              | 1946747320               |
| SNP_P4_16886_44187611 | NC_021160.1    | Ca_kabuli_chr01 | 44187611                | GG                              | TT              | 1946747322               |
| SNP_P4_16887_44194348 | NC_021160.1    | Ca_kabuli_chr01 | 44194348                | AA                              | GG              | 1946747324               |
| SNP_P4_16888_44204372 | NC_021160.1    | Ca_kabuli_chr01 | 44204372                | TT                              | CC              | 1946747326               |
| SNP_P4_16889_44205988 | NC_021160.1    | Ca_kabuli_chr01 | 44205988                | CC                              | TT              | 1946747329               |
| SNP_P4_16890_44206007 | NC_021160.1    | Ca_kabuli_chr01 | 44206007                | AA                              | TT              | 1946747331               |
| SNP_P4_16891_44206019 | NC_021160.1    | Ca_kabuli_chr01 | 44206019                | AA                              | TT              | 1946747333               |
| SNP_P4_16892_44206965 | NC_021160.1    | Ca_kabuli_chr01 | 44206965                | AA                              | GG              | 1946747335               |
| SNP_P4_16893_44207345 | NC_021160.1    | Ca_kabuli_chr01 | 44207345                | AA                              | TT              | 1946747337               |
| SNP_P4_16894_44207376 | NC_021160.1    | Ca_kabuli_chr01 | 44207376                | AA                              | GG              | 1946747339               |
| SNP_P4_16895_44207570 | NC_021160.1    | Ca_kabuli_chr01 | 44207570                | CC                              | TT              | 1946747341               |
| SNP_P4_16896_44209060 | NC_021160.1    | Ca_kabuli_chr01 | 44209060                | GG                              | TT              | 1946747343               |
| SNP_P4_16897_44209121 | NC_021160.1    | Ca_kabuli_chr01 | 44209121                | AA                              | GG              | 1946747345               |
| SNP_P4_16898_44209494 | NC_021160.1    | Ca_kabuli_chr01 | 44209494                | GG                              | CC              | 1946747347               |

| SNPs IDs              | Chromosome IDs | Chromosomes     | Physical positions (bp) | CDC Frontier (Reference genome) | (ILWC46 & LPNB) | NCBI SNPdb Accession IDs |
|-----------------------|----------------|-----------------|-------------------------|---------------------------------|-----------------|--------------------------|
| SNP_P4_16899_44219433 | NC_021160.1    | Ca_kabuli_chr01 | 44219433                | GG                              | AA              | 1946747349               |
| SNP_P4_16902_44295552 | NC_021160.1    | Ca_kabuli_chr01 | 44295552                | GG                              | CC              | 1946747351               |
| SNP_P4_16903_44299925 | NC_021160.1    | Ca_kabuli_chr01 | 44299925                | GG                              | CC              | 1946747353               |
| SNP_P4_16904_44300153 | NC_021160.1    | Ca_kabuli_chr01 | 44300153                | AA                              | CC              | 1946747355               |
| SNP_P4_16905_44300198 | NC_021160.1    | Ca_kabuli_chr01 | 44300198                | GG                              | CC              | 1946747357               |
| SNP_P4_16907_44369615 | NC_021160.1    | Ca_kabuli_chr01 | 44369615                | TT                              | CC              | 1946747359               |
| SNP_P4_16908_44374687 | NC_021160.1    | Ca_kabuli_chr01 | 44374687                | TT                              | CC              | 1946747361               |
| SNP_P4_16909_44374697 | NC_021160.1    | Ca_kabuli_chr01 | 44374697                | TT                              | AA              | 1946747363               |
| SNP_P4_16910_44376340 | NC_021160.1    | Ca_kabuli_chr01 | 44376340                | CC                              | GG              | 1946747365               |
| SNP_P4_16911_44376356 | NC_021160.1    | Ca_kabuli_chr01 | 44376356                | AA                              | GG              | 1946747367               |
| SNP_P4_16912_44376380 | NC_021160.1    | Ca_kabuli_chr01 | 44376380                | GG                              | AA              | 1946747369               |
| SNP_P4_16913_44376383 | NC_021160.1    | Ca_kabuli_chr01 | 44376383                | AA                              | GG              | 1946747371               |
| SNP_P4_16914_44376397 | NC_021160.1    | Ca_kabuli_chr01 | 44376397                | AA                              | TT              | 1946747373               |
| SNP_P4_16915_44376431 | NC_021160.1    | Ca_kabuli_chr01 | 44376431                | AA                              | CC              | 1946747375               |
| SNP_P4_16916_44376461 | NC_021160.1    | Ca_kabuli_chr01 | 44376461                | TT                              | CC              | 1946747377               |
| SNP_P4_16917_44376464 | NC_021160.1    | Ca_kabuli_chr01 | 44376464                | CC                              | AA              | 1946747379               |
| SNP_P4_16918_44376467 | NC_021160.1    | Ca_kabuli_chr01 | 44376467                | TT                              | CC              | 1946747381               |
| SNP_P4_16919_44376488 | NC_021160.1    | Ca_kabuli_chr01 | 44376488                | CC                              | TT              | 1946747383               |
| SNP_P4_16920_44376506 | NC_021160.1    | Ca_kabuli_chr01 | 44376506                | TT                              | CC              | 1946747385               |
| SNP_P4_16921_44376512 | NC_021160.1    | Ca_kabuli_chr01 | 44376512                | GG                              | AA              | 1946747387               |
| SNP_P4_16922_44376690 | NC_021160.1    | Ca_kabuli_chr01 | 44376690                | AA                              | GG              | 1946747389               |
| SNP_P4_16923_44384585 | NC_021160.1    | Ca_kabuli_chr01 | 44384585                | TT                              | AA              | 1946747391               |
| SNP_P4_16924_44384586 | NC_021160.1    | Ca_kabuli_chr01 | 44384586                | TT                              | AA              | 1946747393               |
| SNP_P4_16925_44384701 | NC_021160.1    | Ca_kabuli_chr01 | 44384701                | CC                              | TT              | 1946747395               |
| SNP_P4_16926_44384703 | NC_021160.1    | Ca_kabuli_chr01 | 44384703                | GG                              | AA              | 1946747397               |
| SNP_P4_16927_44384708 | NC_021160.1    | Ca_kabuli_chr01 | 44384708                | TT                              | AA              | 1946747399               |
| SNP_P4_16928_44385027 | NC_021160.1    | Ca_kabuli_chr01 | 44385027                | AA                              | TT              | 1946747401               |
| SNP_P4_16929_44389187 | NC_021160.1    | Ca_kabuli_chr01 | 44389187                | GG                              | AA              | 1946747403               |
| SNP_P4_16930_44402989 | NC_021160.1    | Ca_kabuli_chr01 | 44402989                | TT                              | CC              | 1946747405               |
| SNP_P4_16931_44402997 | NC_021160.1    | Ca_kabuli_chr01 | 44402997                | TT                              | CC              | 1946747406               |
| SNP_P4_16932_44403033 | NC_021160.1    | Ca_kabuli_chr01 | 44403033                | CC                              | TT              | 1946747408               |
| SNP_P4_16933_44403045 | NC_021160.1    | Ca_kabuli_chr01 | 44403045                | TT                              | CC              | 1946747410               |
| SNP_P4_16934_44404397 | NC_021160.1    | Ca_kabuli_chr01 | 44404397                | TT                              | CC              | 1946747412               |
| SNP_P4_16936_44427725 | NC_021160.1    | Ca_kabuli_chr01 | 44427725                | GG                              | AA              | 1946747414               |
| SNP_P4_16937_44428116 | NC_021160.1    | Ca_kabuli_chr01 | 44428116                | AA                              | TT              | 1946747416               |
| SNP_P4_16938_44428118 | NC_021160.1    | Ca_kabuli_chr01 | 44428118                | GG                              | AA              | 1946747418               |
| SNP_P4_16939_44428175 | NC_021160.1    | Ca_kabuli_chr01 | 44428175                | AA                              | CC              | 1946747420               |
| SNP_P4_16940_44428187 | NC_021160.1    | Ca_kabuli_chr01 | 44428187                | AA                              | GG              | 1946747422               |
| SNP_P4_16941_44428209 | NC_021160.1    | Ca_kabuli_chr01 | 44428209                | TT                              | CC              | 1946747424               |
| SNP_P4_16942_44428222 | NC_021160.1    | Ca_kabuli_chr01 | 44428222                | AA                              | GG              | 1946747426               |
| SNP_P4_16943_44428235 | NC_021160.1    | Ca_kabuli_chr01 | 44428235                | CC                              | TT              | 1946747428               |
| SNP_P4_16944_44428298 | NC_021160.1    | Ca_kabuli_chr01 | 44428298                | CC                              | TT              | 1946747430               |

| SNPs IDs              | Chromosome IDs | Chromosomes     | Physical positions (bp) | CDC Frontier (Reference genome) | (ILWC46 & LPNB) | NCBI SNPdb Accession IDs |
|-----------------------|----------------|-----------------|-------------------------|---------------------------------|-----------------|--------------------------|
| SNP_P4_16945_44428299 | NC_021160.1    | Ca_kabuli_chr01 | 44428299                | GG                              | TT              | 1946747432               |
| SNP_P4_16946_44428324 | NC_021160.1    | Ca_kabuli_chr01 | 44428324                | CC                              | TT              | 1946747434               |
| SNP_P4_16947_44428567 | NC_021160.1    | Ca_kabuli_chr01 | 44428567                | TT                              | GG              | 1946747436               |
| SNP_P4_16948_44467145 | NC_021160.1    | Ca_kabuli_chr01 | 44467145                | CC                              | TT              | 1946747437               |
| SNP_P4_16950_44467507 | NC_021160.1    | Ca_kabuli_chr01 | 44467507                | TT                              | CC              | 1946747439               |
| SNP_P4_16951_44467579 | NC_021160.1    | Ca_kabuli_chr01 | 44467579                | TT                              | CC              | 1946747441               |
| SNP_P4_16952_44467582 | NC_021160.1    | Ca_kabuli_chr01 | 44467582                | GG                              | AA              | 1946747443               |
| SNP_P4_16953_44487149 | NC_021160.1    | Ca_kabuli_chr01 | 44487149                | CC                              | TT              | 1946747445               |
| SNP_P4_16954_44502624 | NC_021160.1    | Ca_kabuli_chr01 | 44502624                | TT                              | CC              | 1946747447               |
| SNP_P4_16955_44503554 | NC_021160.1    | Ca_kabuli_chr01 | 44503554                | AA                              | TT              | 1946747449               |
| SNP_P4_16956_44519058 | NC_021160.1    | Ca_kabuli_chr01 | 44519058                | GG                              | AA              | 1946747451               |
| SNP_P4_16957_44537545 | NC_021160.1    | Ca_kabuli_chr01 | 44537545                | CC                              | TT              | 1946747453               |
| SNP_P4_16958_44537559 | NC_021160.1    | Ca_kabuli_chr01 | 44537559                | AA                              | GG              | 1946747455               |
| SNP_P4_16959_44537587 | NC_021160.1    | Ca_kabuli_chr01 | 44537587                | TT                              | AA              | 1946747456               |
| SNP_P4_16960_44537599 | NC_021160.1    | Ca_kabuli_chr01 | 44537599                | CC                              | GG              | 1946747458               |
| SNP_P4_16961_44537611 | NC_021160.1    | Ca_kabuli_chr01 | 44537611                | GG                              | AA              | 1946747460               |
| SNP_P4_16962_44537671 | NC_021160.1    | Ca_kabuli_chr01 | 44537671                | TT                              | CC              | 1946747462               |
| SNP_P4_16963_44537679 | NC_021160.1    | Ca_kabuli_chr01 | 44537679                | AA                              | GG              | 1946747464               |
| SNP_P4_16964_44537704 | NC_021160.1    | Ca_kabuli_chr01 | 44537704                | TT                              | CC              | 1946747466               |
| SNP_P4_16965_44537714 | NC_021160.1    | Ca_kabuli_chr01 | 44537714                | CC                              | AA              | 1946747468               |
| SNP_P4_16966_44537725 | NC_021160.1    | Ca_kabuli_chr01 | 44537725                | GG                              | AA              | 1946747470               |
| SNP_P4_16967_44543306 | NC_021160.1    | Ca_kabuli_chr01 | 44543306                | AA                              | CC              | 1946747471               |
| SNP_P4_16968_44583690 | NC_021160.1    | Ca_kabuli_chr01 | 44583690                | CC                              | TT              | 1946747473               |
| SNP_P4_16969_44588400 | NC_021160.1    | Ca_kabuli_chr01 | 44588400                | AA                              | GG              | 1946747475               |
| SNP_P4_16970_44588913 | NC_021160.1    | Ca_kabuli_chr01 | 44588913                | TT                              | GG              | 1946747477               |
| SNP_P4_16971_44588918 | NC_021160.1    | Ca_kabuli_chr01 | 44588918                | TT                              | CC              | 1946747479               |
| SNP_P4_16972_44588933 | NC_021160.1    | Ca_kabuli_chr01 | 44588933                | AA                              | GG              | 1946747481               |
| SNP_P4_16973_44588951 | NC_021160.1    | Ca_kabuli_chr01 | 44588951                | AA                              | CC              | 1946747483               |
| SNP_P4_16974_44588986 | NC_021160.1    | Ca_kabuli_chr01 | 44588986                | AA                              | GG              | 1946747485               |
| SNP_P4_16975_44588988 | NC_021160.1    | Ca_kabuli_chr01 | 44588988                | CC                              | TT              | 1946747487               |
| SNP_P4_16976_44589027 | NC_021160.1    | Ca_kabuli_chr01 | 44589027                | TT                              | GG              | 1946747488               |
| SNP_P4_16977_44589123 | NC_021160.1    | Ca_kabuli_chr01 | 44589123                | AA                              | CC              | 1946747490               |
| SNP_P4_16978_44589126 | NC_021160.1    | Ca_kabuli_chr01 | 44589126                | GG                              | TT              | 1946747492               |
| SNP_P4_16979_44592377 | NC_021160.1    | Ca_kabuli_chr01 | 44592377                | AA                              | GG              | 1946747494               |
| SNP_P4_16980_44592395 | NC_021160.1    | Ca_kabuli_chr01 | 44592395                | AA                              | CC              | 1946747496               |
| SNP_P4_16981_44592416 | NC_021160.1    | Ca_kabuli_chr01 | 44592416                | TT                              | GG              | 1946747498               |
| SNP_P4_16982_44592562 | NC_021160.1    | Ca_kabuli_chr01 | 44592562                | AA                              | GG              | 1946747500               |
| SNP_P4_16983_44592563 | NC_021160.1    | Ca_kabuli_chr01 | 44592563                | AA                              | GG              | 1946747502               |
| SNP_P4_16984_44592574 | NC_021160.1    | Ca_kabuli_chr01 | 44592574                | CC                              | AA              | 1946747504               |
| SNP_P4_16985_44592576 | NC_021160.1    | Ca_kabuli_chr01 | 44592576                | AA                              | TT              | 1946747506               |
| SNP_P4_16986_44592606 | NC_021160.1    | Ca_kabuli_chr01 | 44592606                | TT                              | CC              | 1946747508               |
| SNP_P4_16987_44592626 | NC_021160.1    | Ca_kabuli_chr01 | 44592626                | TT                              | CC              | 1946747510               |

| SNPs IDs              | Chromosome IDs | Chromosomes     | Physical positions (bp) | CDC Frontier (Reference genome) | (ILWC46 & LPNB) | NCBI SNPdb Accession IDs |
|-----------------------|----------------|-----------------|-------------------------|---------------------------------|-----------------|--------------------------|
| SNP_P4_16988_44592641 | NC_021160.1    | Ca_kabuli_chr01 | 44592641                | GG                              | AA              | 1946747512               |
| SNP_P4_16989_44592660 | NC_021160.1    | Ca_kabuli_chr01 | 44592660                | TT                              | CC              | 1946747513               |
| SNP_P4_16990_44592673 | NC_021160.1    | Ca_kabuli_chr01 | 44592673                | AA                              | GG              | 1946747515               |
| SNP_P4_16991_44592807 | NC_021160.1    | Ca_kabuli_chr01 | 44592807                | CC                              | TT              | 1946747517               |
| SNP_P4_16992_44603594 | NC_021160.1    | Ca_kabuli_chr01 | 44603594                | TT                              | CC              | 1946747519               |
| SNP_P4_16993_44610916 | NC_021160.1    | Ca_kabuli_chr01 | 44610916                | GG                              | TT              | 1946747521               |
| SNP_P4_16994_44611152 | NC_021160.1    | Ca_kabuli_chr01 | 44611152                | CC                              | GG              | 1946747523               |
| SNP_P4_16995_44611165 | NC_021160.1    | Ca_kabuli_chr01 | 44611165                | GG                              | AA              | 1946747525               |
| SNP_P4_16996_44618035 | NC_021160.1    | Ca_kabuli_chr01 | 44618035                | AA                              | GG              | 1946747527               |
| SNP_P4_16997_44618055 | NC_021160.1    | Ca_kabuli_chr01 | 44618055                | TT                              | CC              | 1946747529               |
| SNP_P4_16998_44618076 | NC_021160.1    | Ca_kabuli_chr01 | 44618076                | TT                              | GG              | 1946747531               |
| SNP_P4_16999_44618077 | NC_021160.1    | Ca_kabuli_chr01 | 44618077                | CC                              | TT              | 1946747533               |
| SNP_P4_17000_44618358 | NC_021160.1    | Ca_kabuli_chr01 | 44618358                | TT                              | CC              | 1946747535               |
| SNP_P4_17001_44631336 | NC_021160.1    | Ca_kabuli_chr01 | 44631336                | TT                              | CC              | 1946747537               |
| SNP_P4_17002_44650041 | NC_021160.1    | Ca_kabuli_chr01 | 44650041                | TT                              | GG              | 1946747539               |
| SNP_P4_17003_44650125 | NC_021160.1    | Ca_kabuli_chr01 | 44650125                | GG                              | TT              | 1946747541               |
| SNP_P4_17005_44650377 | NC_021160.1    | Ca_kabuli_chr01 | 44650377                | CC                              | TT              | 1946747543               |
| SNP_P4_17006_44650756 | NC_021160.1    | Ca_kabuli_chr01 | 44650756                | AA                              | CC              | 1946747545               |
| SNP_P4_17007_44650825 | NC_021160.1    | Ca_kabuli_chr01 | 44650825                | AA                              | GG              | 1946747547               |
| SNP_P4_17008_44651015 | NC_021160.1    | Ca_kabuli_chr01 | 44651015                | GG                              | TT              | 1946747549               |
| SNP_P4_17009_44651135 | NC_021160.1    | Ca_kabuli_chr01 | 44651135                | TT                              | AA              | 1946747551               |
| SNP_P4_17010_44731459 | NC_021160.1    | Ca_kabuli_chr01 | 44731459                | CC                              | AA              | 1946747553               |
| SNP_P4_17012_44752095 | NC_021160.1    | Ca_kabuli_chr01 | 44752095                | GG                              | AA              | 1946747555               |
| SNP_P4_17014_44778653 | NC_021160.1    | Ca_kabuli_chr01 | 44778653                | AA                              | CC              | 1946747557               |
| SNP_P4_17015_44786318 | NC_021160.1    | Ca_kabuli_chr01 | 44786318                | GG                              | TT              | 1946747559               |
| SNP_P4_17016_44787874 | NC_021160.1    | Ca_kabuli_chr01 | 44787874                | GG                              | TT              | 1946747561               |
| SNP_P4_17017_44799000 | NC_021160.1    | Ca_kabuli_chr01 | 44799000                | AA                              | GG              | 1946747563               |
| SNP_P4_17018_44799710 | NC_021160.1    | Ca_kabuli_chr01 | 44799710                | AA                              | CC              | 1946747565               |
| SNP_P4_17019_44799723 | NC_021160.1    | Ca_kabuli_chr01 | 44799723                | AA                              | GG              | 1946747567               |
| SNP_P4_17021_44822591 | NC_021160.1    | Ca_kabuli_chr01 | 44822591                | GG                              | CC              | 1946747569               |
| SNP_P4_17022_44824726 | NC_021160.1    | Ca_kabuli_chr01 | 44824726                | TT                              | AA              | 1946747571               |
| SNP_P4_17023_44847011 | NC_021160.1    | Ca_kabuli_chr01 | 44847011                | TT                              | CC              | 1946747573               |
| SNP_P4_17024_44847090 | NC_021160.1    | Ca_kabuli_chr01 | 44847090                | TT                              | GG              | 1946747575               |
| SNP_P4_17025_44847118 | NC_021160.1    | Ca_kabuli_chr01 | 44847118                | TT                              | AA              | 1946747577               |
| SNP_P4_17026_44847153 | NC_021160.1    | Ca_kabuli_chr01 | 44847153                | TT                              | AA              | 1946747579               |
| SNP_P4_17027_44847154 | NC_021160.1    | Ca_kabuli_chr01 | 44847154                | TT                              | AA              | 1946747581               |
| SNP_P4_17028_44847222 | NC_021160.1    | Ca_kabuli_chr01 | 44847222                | CC                              | AA              | 1946747583               |
| SNP_P4_17030_44847294 | NC_021160.1    | Ca_kabuli_chr01 | 44847294                | GG                              | AA              | 1946747585               |
| SNP_P4_17031_44847307 | NC_021160.1    | Ca_kabuli_chr01 | 44847307                | TT                              | CC              | 1946747587               |
| SNP_P4_17033_44847626 | NC_021160.1    | Ca_kabuli_chr01 | 44847626                | CC                              | GG              | 1946747589               |
| SNP_P4_17034_44848177 | NC_021160.1    | Ca_kabuli_chr01 | 44848177                | GG                              | TT              | 1946747591               |
| SNP_P4_17035_44848477 | NC_021160.1    | Ca_kabuli_chr01 | 44848477                | CC                              | TT              | 1946747593               |

| SNPs IDs              | Chromosome IDs | Chromosomes     | Physical positions (bp) | CDC Frontier (Reference genome) | (ILWC46 & LPNB) | NCBI SNPdb Accession IDs |
|-----------------------|----------------|-----------------|-------------------------|---------------------------------|-----------------|--------------------------|
| SNP_P4_17036_44848538 | NC_021160.1    | Ca_kabuli_chr01 | 44848538                | AA                              | GG              | 1946747595               |
| SNP_P4_17037_44848559 | NC_021160.1    | Ca_kabuli_chr01 | 44848559                | GG                              | AA              | 1946747597               |
| SNP_P4_17038_44852912 | NC_021160.1    | Ca_kabuli_chr01 | 44852912                | GG                              | AA              | 1946747599               |
| SNP_P4_17039_44906802 | NC_021160.1    | Ca_kabuli_chr01 | 44906802                | CC                              | TT              | 1946747601               |
| SNP_P4_17040_44921038 | NC_021160.1    | Ca_kabuli_chr01 | 44921038                | TT                              | AA              | 1946747603               |
| SNP_P4_17041_44921039 | NC_021160.1    | Ca_kabuli_chr01 | 44921039                | CC                              | TT              | 1946747605               |
| SNP_P4_17042_44921189 | NC_021160.1    | Ca_kabuli_chr01 | 44921189                | GG                              | AA              | 1946747606               |
| SNP_P4_17043_44921240 | NC_021160.1    | Ca_kabuli_chr01 | 44921240                | TT                              | CC              | 1946747609               |
| SNP_P4_17045_44921633 | NC_021160.1    | Ca_kabuli_chr01 | 44921633                | CC                              | TT              | 1946747611               |
| SNP_P4_17046_44921666 | NC_021160.1    | Ca_kabuli_chr01 | 44921666                | TT                              | CC              | 1946747613               |
| SNP_P4_17048_44952296 | NC_021160.1    | Ca_kabuli_chr01 | 44952296                | AA                              | GG              | 1946747615               |
| SNP_P4_17049_44952312 | NC_021160.1    | Ca_kabuli_chr01 | 44952312                | AA                              | GG              | 1946747617               |
| SNP_P4_17050_44971201 | NC_021160.1    | Ca_kabuli_chr01 | 44971201                | TT                              | CC              | 1946747619               |
| SNP_P4_17051_45002226 | NC_021160.1    | Ca_kabuli_chr01 | 45002226                | AA                              | GG              | 1946747621               |
| SNP_P4_17053_45029189 | NC_021160.1    | Ca_kabuli_chr01 | 45029189                | TT                              | GG              | 1946747623               |
| SNP_P4_17054_45046073 | NC_021160.1    | Ca_kabuli_chr01 | 45046073                | AA                              | TT              | 1946747625               |
| SNP_P4_17056_45057840 | NC_021160.1    | Ca_kabuli_chr01 | 45057840                | GG                              | AA              | 1946747627               |
| SNP_P4_17057_45057944 | NC_021160.1    | Ca_kabuli_chr01 | 45057944                | GG                              | TT              | 1946747629               |
| SNP_P4_17059_45058032 | NC_021160.1    | Ca_kabuli_chr01 | 45058032                | AA                              | GG              | 1946747631               |
| SNP_P4_17060_45058084 | NC_021160.1    | Ca_kabuli_chr01 | 45058084                | AA                              | GG              | 1946747633               |
| SNP_P4_17061_45058373 | NC_021160.1    | Ca_kabuli_chr01 | 45058373                | TT                              | CC              | 1946747635               |
| SNP_P4_17062_45058381 | NC_021160.1    | Ca_kabuli_chr01 | 45058381                | TT                              | GG              | 1946747637               |
| SNP_P4_17063_45058454 | NC_021160.1    | Ca_kabuli_chr01 | 45058454                | GG                              | AA              | 1946747639               |
| SNP_P4_17064_45058504 | NC_021160.1    | Ca_kabuli_chr01 | 45058504                | AA                              | CC              | 1946747641               |
| SNP_P4_17065_45096916 | NC_021160.1    | Ca_kabuli_chr01 | 45096916                | GG                              | AA              | 1946747643               |
| SNP_P4_17066_45096919 | NC_021160.1    | Ca_kabuli_chr01 | 45096919                | GG                              | AA              | 1946747645               |
| SNP_P4_17067_45096925 | NC_021160.1    | Ca_kabuli_chr01 | 45096925                | GG                              | AA              | 1946747647               |
| SNP_P4_17069_45105557 | NC_021160.1    | Ca_kabuli_chr01 | 45105557                | TT                              | CC              | 1946747649               |
| SNP_P4_17070_45112101 | NC_021160.1    | Ca_kabuli_chr01 | 45112101                | CC                              | TT              | 1946747651               |
| SNP_P4_17071_45112102 | NC_021160.1    | Ca_kabuli_chr01 | 45112102                | TT                              | AA              | 1946747653               |
| SNP_P4_17072_45112105 | NC_021160.1    | Ca_kabuli_chr01 | 45112105                | TT                              | AA              | 1946747655               |
| SNP_P4_17073_45112108 | NC_021160.1    | Ca_kabuli_chr01 | 45112108                | AA                              | CC              | 1946747657               |
| SNP_P4_17074_45112112 | NC_021160.1    | Ca_kabuli_chr01 | 45112112                | AA                              | TT              | 1946747659               |
| SNP_P4_17075_45112144 | NC_021160.1    | Ca_kabuli_chr01 | 45112144                | TT                              | CC              | 1946747661               |
| SNP_P4_17076_45115626 | NC_021160.1    | Ca_kabuli_chr01 | 45115626                | TT                              | CC              | 1946747663               |
| SNP_P4_17078_45176306 | NC_021160.1    | Ca_kabuli_chr01 | 45176306                | AA                              | CC              | 1946747665               |
| SNP_P4_17079_45230556 | NC_021160.1    | Ca_kabuli_chr01 | 45230556                | GG                              | AA              | 1946747667               |
| SNP_P4_17080_45231878 | NC_021160.1    | Ca_kabuli_chr01 | 45231878                | TT                              | GG              | 1946747669               |
| SNP_P4_17081_45232277 | NC_021160.1    | Ca_kabuli_chr01 | 45232277                | CC                              | GG              | 1946747671               |
| SNP_P4_17082_45232327 | NC_021160.1    | Ca_kabuli_chr01 | 45232327                | AA                              | GG              | 1946747673               |
| SNP_P4_17085_45241677 | NC_021160.1    | Ca_kabuli_chr01 | 45241677                | CC                              | GG              | 1946747675               |
| SNP_P4_17086_45241764 | NC_021160.1    | Ca_kabuli_chr01 | 45241764                | AA                              | GG              | 1946747677               |

| SNPs IDs              | Chromosome IDs | Chromosomes     | Physical positions (bp) | CDC Frontier (Reference genome) | (ILWC46 & LPNB) | NCBI SNPdb Accession IDs |
|-----------------------|----------------|-----------------|-------------------------|---------------------------------|-----------------|--------------------------|
| SNP_P4_17087_45241791 | NC_021160.1    | Ca_kabuli_chr01 | 45241791                | TT                              | CC              | 1946747679               |
| SNP_P4_17088_45241863 | NC_021160.1    | Ca_kabuli_chr01 | 45241863                | TT                              | CC              | 1946747681               |
| SNP_P4_17089_45241943 | NC_021160.1    | Ca_kabuli_chr01 | 45241943                | AA                              | TT              | 1946747683               |
| SNP_P4_17090_45241971 | NC_021160.1    | Ca_kabuli_chr01 | 45241971                | AA                              | GG              | 1946747684               |
| SNP_P4_17091_45241994 | NC_021160.1    | Ca_kabuli_chr01 | 45241994                | TT                              | CC              | 1946747686               |
| SNP_P4_17093_45242195 | NC_021160.1    | Ca_kabuli_chr01 | 45242195                | TT                              | CC              | 1946747688               |
| SNP_P4_17095_45243808 | NC_021160.1    | Ca_kabuli_chr01 | 45243808                | GG                              | CC              | 1946747690               |
| SNP_P4_17096_45243814 | NC_021160.1    | Ca_kabuli_chr01 | 45243814                | GG                              | CC              | 1946747692               |
| SNP_P4_17097_45243855 | NC_021160.1    | Ca_kabuli_chr01 | 45243855                | TT                              | CC              | 1946747694               |
| SNP_P4_17098_45244149 | NC_021160.1    | Ca_kabuli_chr01 | 45244149                | CC                              | TT              | 1946747696               |
| SNP_P4_17099_45244166 | NC_021160.1    | Ca_kabuli_chr01 | 45244166                | TT                              | CC              | 1946747697               |
| SNP_P4_17103_45263539 | NC_021160.1    | Ca_kabuli_chr01 | 45263539                | CC                              | TT              | 1946747699               |
| SNP_P4_17104_45265546 | NC_021160.1    | Ca_kabuli_chr01 | 45265546                | CC                              | TT              | 1946747701               |
| SNP_P4_17105_45265548 | NC_021160.1    | Ca_kabuli_chr01 | 45265548                | CC                              | TT              | 1946747703               |
| SNP_P4_17106_45267128 | NC_021160.1    | Ca_kabuli_chr01 | 45267128                | CC                              | TT              | 1946747705               |
| SNP_P4_17107_45267181 | NC_021160.1    | Ca_kabuli_chr01 | 45267181                | GG                              | AA              | 1946747707               |
| SNP_P4_17108_45267203 | NC_021160.1    | Ca_kabuli_chr01 | 45267203                | TT                              | CC              | 1946747709               |
| SNP_P4_17109_45272609 | NC_021160.1    | Ca_kabuli_chr01 | 45272609                | GG                              | TT              | 1946747711               |
| SNP_P4_17110_45275639 | NC_021160.1    | Ca_kabuli_chr01 | 45275639                | TT                              | CC              | 1946747713               |
| SNP_P4_17111_45305335 | NC_021160.1    | Ca_kabuli_chr01 | 45305335                | TT                              | GG              | 1946747715               |
| SNP_P4_17112_45308165 | NC_021160.1    | Ca_kabuli_chr01 | 45308165                | TT                              | AA              | 1946747717               |
| SNP_P4_17113_45332532 | NC_021160.1    | Ca_kabuli_chr01 | 45332532                | TT                              | GG              | 1946747718               |
| SNP_P4_17114_45332621 | NC_021160.1    | Ca_kabuli_chr01 | 45332621                | AA                              | CC              | 1946747720               |
| SNP_P4_17115_45332627 | NC_021160.1    | Ca_kabuli_chr01 | 45332627                | GG                              | TT              | 1946747722               |
| SNP_P4_17116_45332631 | NC_021160.1    | Ca_kabuli_chr01 | 45332631                | GG                              | TT              | 1946747724               |
| SNP_P4_17117_45332635 | NC_021160.1    | Ca_kabuli_chr01 | 45332635                | AA                              | CC              | 1946747726               |
| SNP_P4_17118_45332673 | NC_021160.1    | Ca_kabuli_chr01 | 45332673                | AA                              | GG              | 1946747728               |
| SNP_P4_17119_45332718 | NC_021160.1    | Ca_kabuli_chr01 | 45332718                | CC                              | TT              | 1946747730               |
| SNP_P4_17120_45332740 | NC_021160.1    | Ca_kabuli_chr01 | 45332740                | AA                              | GG              | 1946747732               |
| SNP_P4_17121_45332745 | NC_021160.1    | Ca_kabuli_chr01 | 45332745                | TT                              | CC              | 1946747734               |
| SNP_P4_17122_45332778 | NC_021160.1    | Ca_kabuli_chr01 | 45332778                | GG                              | AA              | 1946747736               |
| SNP_P4_17123_45332796 | NC_021160.1    | Ca_kabuli_chr01 | 45332796                | CC                              | TT              | 1946747737               |
| SNP_P4_17124_45332814 | NC_021160.1    | Ca_kabuli_chr01 | 45332814                | AA                              | TT              | 1946747739               |
| SNP_P4_17125_45333122 | NC_021160.1    | Ca_kabuli_chr01 | 45333122                | TT                              | CC              | 1946747741               |
| SNP_P4_17126_45337020 | NC_021160.1    | Ca_kabuli_chr01 | 45337020                | AA                              | GG              | 1946747743               |
| SNP_P4_17127_45337375 | NC_021160.1    | Ca_kabuli_chr01 | 45337375                | AA                              | CC              | 1946747745               |
| SNP_P4_17128_45352068 | NC_021160.1    | Ca_kabuli_chr01 | 45352068                | TT                              | CC              | 1946747747               |
| SNP_P4_17129_45364426 | NC_021160.1    | Ca_kabuli_chr01 | 45364426                | TT                              | AA              | 1946747749               |
| SNP_P4_17130_45372615 | NC_021160.1    | Ca_kabuli_chr01 | 45372615                | CC                              | TT              | 1946747751               |
| SNP_P4_17131_45372626 | NC_021160.1    | Ca_kabuli_chr01 | 45372626                | TT                              | CC              | 1946747753               |
| SNP_P4_17132_45372633 | NC_021160.1    | Ca_kabuli_chr01 | 45372633                | CC                              | AA              | 1946747755               |
| SNP_P4_17133_45377980 | NC_021160.1    | Ca_kabuli_chr01 | 45377980                | GG                              | CC              | 1946747757               |



| SNPs IDs              | Chromosome IDs | Chromosomes     | Physical positions (bp) | CDC Frontier (Reference genome) | (ILWC46 & LPNB) | NCBI SNPdb Accession IDs |
|-----------------------|----------------|-----------------|-------------------------|---------------------------------|-----------------|--------------------------|
| SNP_P4_17134_45378024 | NC_021160.1    | Ca_kabuli_chr01 | 45378024                | AA                              | GG              | 1946747759               |
| SNP_P4_17135_45378029 | NC_021160.1    | Ca_kabuli_chr01 | 45378029                | AA                              | GG              | 1946747761               |
| SNP_P4_17136_45378036 | NC_021160.1    | Ca_kabuli_chr01 | 45378036                | AA                              | GG              | 1946747763               |
| SNP_P4_17137_45378070 | NC_021160.1    | Ca_kabuli_chr01 | 45378070                | AA                              | GG              | 1946747765               |
| SNP_P4_17138_45378081 | NC_021160.1    | Ca_kabuli_chr01 | 45378081                | AA                              | TT              | 1946747766               |
| SNP_P4_17139_45392079 | NC_021160.1    | Ca_kabuli_chr01 | 45392079                | TT                              | CC              | 1946747768               |
| SNP_P4_17140_45392105 | NC_021160.1    | Ca_kabuli_chr01 | 45392105                | CC                              | AA              | 1946747770               |
| SNP_P4_17141_45392155 | NC_021160.1    | Ca_kabuli_chr01 | 45392155                | AA                              | GG              | 1946747772               |
| SNP_P4_17142_45392293 | NC_021160.1    | Ca_kabuli_chr01 | 45392293                | AA                              | CC              | 1946747774               |
| SNP_P4_17143_45392351 | NC_021160.1    | Ca_kabuli_chr01 | 45392351                | TT                              | AA              | 1946747776               |
| SNP_P4_17144_45392490 | NC_021160.1    | Ca_kabuli_chr01 | 45392490                | GG                              | CC              | 1946747778               |
| SNP_P4_17145_45392526 | NC_021160.1    | Ca_kabuli_chr01 | 45392526                | CC                              | TT              | 1946747780               |
| SNP_P4_17146_45392575 | NC_021160.1    | Ca_kabuli_chr01 | 45392575                | TT                              | AA              | 1946747782               |
| SNP_P4_17148_45392721 | NC_021160.1    | Ca_kabuli_chr01 | 45392721                | CC                              | TT              | 1946747784               |
| SNP_P4_17149_45392741 | NC_021160.1    | Ca_kabuli_chr01 | 45392741                | TT                              | CC              | 1946747786               |
| SNP_P4_17151_45438348 | NC_021160.1    | Ca_kabuli_chr01 | 45438348                | GG                              | AA              | 1946747788               |
| SNP_P4_17152_45438350 | NC_021160.1    | Ca_kabuli_chr01 | 45438350                | AA                              | GG              | 1946747790               |
| SNP_P4_17153_45438627 | NC_021160.1    | Ca_kabuli_chr01 | 45438627                | AA                              | GG              | 1946747792               |
| SNP_P4_17154_45438633 | NC_021160.1    | Ca_kabuli_chr01 | 45438633                | TT                              | GG              | 1946747794               |
| SNP_P4_17155_45439019 | NC_021160.1    | Ca_kabuli_chr01 | 45439019                | AA                              | CC              | 1946747796               |
| SNP_P4_17157_45449882 | NC_021160.1    | Ca_kabuli_chr01 | 45449882                | GG                              | TT              | 1946747798               |
| SNP_P4_17158_45469178 | NC_021160.1    | Ca_kabuli_chr01 | 45469178                | TT                              | GG              | 1946747800               |
| SNP_P4_17159_45496998 | NC_021160.1    | Ca_kabuli_chr01 | 45496998                | TT                              | GG              | 1946747802               |
| SNP_P4_17160_45497016 | NC_021160.1    | Ca_kabuli_chr01 | 45497016                | CC                              | TT              | 1946747804               |
| SNP_P4_17161_45497025 | NC_021160.1    | Ca_kabuli_chr01 | 45497025                | GG                              | AA              | 1946747806               |
| SNP_P4_17162_45497049 | NC_021160.1    | Ca_kabuli_chr01 | 45497049                | AA                              | GG              | 1946747808               |
| SNP_P4_17164_45497213 | NC_021160.1    | Ca_kabuli_chr01 | 45497213                | CC                              | AA              | 1946747810               |
| SNP_P4_17165_45497309 | NC_021160.1    | Ca_kabuli_chr01 | 45497309                | TT                              | CC              | 1946747812               |
| SNP_P4_17166_45497346 | NC_021160.1    | Ca_kabuli_chr01 | 45497346                | AA                              | CC              | 1946747814               |
| SNP_P4_17167_45497483 | NC_021160.1    | Ca_kabuli_chr01 | 45497483                | CC                              | GG              | 1946747816               |
| SNP_P4_17168_45497503 | NC_021160.1    | Ca_kabuli_chr01 | 45497503                | TT                              | AA              | 1946747818               |
| SNP_P4_17169_45497510 | NC_021160.1    | Ca_kabuli_chr01 | 45497510                | TT                              | CC              | 1946747820               |
| SNP_P4_17170_45499262 | NC_021160.1    | Ca_kabuli_chr01 | 45499262                | GG                              | TT              | 1946747822               |
| SNP_P4_17171_45499289 | NC_021160.1    | Ca_kabuli_chr01 | 45499289                | GG                              | AA              | 1946747824               |
| SNP_P4_17172_45499313 | NC_021160.1    | Ca_kabuli_chr01 | 45499313                | GG                              | AA              | 1946747826               |
| SNP_P4_17174_45553145 | NC_021160.1    | Ca_kabuli_chr01 | 45553145                | AA                              | GG              | 1946747828               |
| SNP_P4_17175_45553150 | NC_021160.1    | Ca_kabuli_chr01 | 45553150                | TT                              | CC              | 1946747830               |
| SNP_P4_17176_45553152 | NC_021160.1    | Ca_kabuli_chr01 | 45553152                | GG                              | AA              | 1946747832               |
| SNP_P4_17177_45553165 | NC_021160.1    | Ca_kabuli_chr01 | 45553165                | CC                              | TT              | 1946747834               |
| SNP_P4_17178_45553220 | NC_021160.1    | Ca_kabuli_chr01 | 45553220                | TT                              | CC              | 1946747836               |
| SNP_P4_17179_45553234 | NC_021160.1    | Ca_kabuli_chr01 | 45553234                | TT                              | CC              | 1946747838               |
| SNP_P4_17180_45553262 | NC_021160.1    | Ca_kabuli_chr01 | 45553262                | CC                              | TT              | 1946747840               |

| SNPs IDs              | Chromosome IDs | Chromosomes     | Physical positions (bp) | CDC Frontier (Reference genome) | (ILWC46 & LPNB) | NCBI SNPdb Accession IDs |
|-----------------------|----------------|-----------------|-------------------------|---------------------------------|-----------------|--------------------------|
| SNP_P4_17181_45553283 | NC_021160.1    | Ca_kabuli_chr01 | 45553283                | AA                              | GG              | 1946747842               |
| SNP_P4_17182_45553476 | NC_021160.1    | Ca_kabuli_chr01 | 45553476                | TT                              | CC              | 1946747844               |
| SNP_P4_17183_45553495 | NC_021160.1    | Ca_kabuli_chr01 | 45553495                | AA                              | TT              | 1946747846               |
| SNP_P4_17184_45553511 | NC_021160.1    | Ca_kabuli_chr01 | 45553511                | AA                              | TT              | 1946747848               |
| SNP_P4_17185_45553545 | NC_021160.1    | Ca_kabuli_chr01 | 45553545                | TT                              | CC              | 1946747850               |
| SNP_P4_17186_45567957 | NC_021160.1    | Ca_kabuli_chr01 | 45567957                | CC                              | AA              | 1946747852               |
| SNP_P4_17187_45568196 | NC_021160.1    | Ca_kabuli_chr01 | 45568196                | TT                              | CC              | 1946747854               |
| SNP_P4_17188_45592982 | NC_021160.1    | Ca_kabuli_chr01 | 45592982                | AA                              | GG              | 1946747856               |
| SNP_P4_17189_45593053 | NC_021160.1    | Ca_kabuli_chr01 | 45593053                | AA                              | GG              | 1946747858               |
| SNP_P4_17190_45593070 | NC_021160.1    | Ca_kabuli_chr01 | 45593070                | GG                              | TT              | 1946747860               |
| SNP_P4_17191_45593076 | NC_021160.1    | Ca_kabuli_chr01 | 45593076                | CC                              | GG              | 1946747862               |
| SNP_P4_17192_45593089 | NC_021160.1    | Ca_kabuli_chr01 | 45593089                | CC                              | TT              | 1946747864               |
| SNP_P4_17193_45593249 | NC_021160.1    | Ca_kabuli_chr01 | 45593249                | CC                              | AA              | 1946747866               |
| SNP_P4_17194_45605000 | NC_021160.1    | Ca_kabuli_chr01 | 45605000                | TT                              | GG              | 1946747868               |
| SNP_P4_17198_45611334 | NC_021160.1    | Ca_kabuli_chr01 | 45611334                | TT                              | CC              | 1946747870               |
| SNP_P4_17199_45613797 | NC_021160.1    | Ca_kabuli_chr01 | 45613797                | GG                              | AA              | 1946747872               |
| SNP_P4_17200_45617871 | NC_021160.1    | Ca_kabuli_chr01 | 45617871                | GG                              | AA              | 1946747874               |
| SNP_P4_17201_45645467 | NC_021160.1    | Ca_kabuli_chr01 | 45645467                | AA                              | CC              | 1946747876               |
| SNP_P4_17202_45647638 | NC_021160.1    | Ca_kabuli_chr01 | 45647638                | CC                              | TT              | 1946747878               |
| SNP_P4_17203_45662723 | NC_021160.1    | Ca_kabuli_chr01 | 45662723                | GG                              | AA              | 1946747880               |
| SNP_P4_17204_45663405 | NC_021160.1    | Ca_kabuli_chr01 | 45663405                | AA                              | GG              | 1946747882               |
| SNP_P4_17205_45663431 | NC_021160.1    | Ca_kabuli_chr01 | 45663431                | TT                              | GG              | 1946747884               |
| SNP_P4_17206_45733386 | NC_021160.1    | Ca_kabuli_chr01 | 45733386                | AA                              | GG              | 1946747886               |
| SNP_P4_17207_45753474 | NC_021160.1    | Ca_kabuli_chr01 | 45753474                | CC                              | TT              | 1946747888               |
| SNP_P4_17208_45754646 | NC_021160.1    | Ca_kabuli_chr01 | 45754646                | CC                              | TT              | 1946747890               |
| SNP_P4_17209_45768552 | NC_021160.1    | Ca_kabuli_chr01 | 45768552                | CC                              | TT              | 1946747892               |
| SNP_P4_17210_45768556 | NC_021160.1    | Ca_kabuli_chr01 | 45768556                | AA                              | GG              | 1946747894               |
| SNP_P4_17211_45788085 | NC_021160.1    | Ca_kabuli_chr01 | 45788085                | CC                              | TT              | 1946747896               |
| SNP_P4_17212_45788216 | NC_021160.1    | Ca_kabuli_chr01 | 45788216                | TT                              | AA              | 1946747898               |
| SNP_P4_17213_45788219 | NC_021160.1    | Ca_kabuli_chr01 | 45788219                | TT                              | GG              | 1946747900               |
| SNP_P4_17214_45788223 | NC_021160.1    | Ca_kabuli_chr01 | 45788223                | CC                              | TT              | 1946747902               |
| SNP_P4_17215_45788224 | NC_021160.1    | Ca_kabuli_chr01 | 45788224                | TT                              | GG              | 1946747904               |
| SNP_P4_17216_45788246 | NC_021160.1    | Ca_kabuli_chr01 | 45788246                | TT                              | CC              | 1946747906               |
| SNP_P4_17217_45788250 | NC_021160.1    | Ca_kabuli_chr01 | 45788250                | GG                              | TT              | 1946747908               |
| SNP_P4_17218_45797984 | NC_021160.1    | Ca_kabuli_chr01 | 45797984                | AA                              | GG              | 1946747910               |
| SNP_P4_17219_45798156 | NC_021160.1    | Ca_kabuli_chr01 | 45798156                | TT                              | AA              | 1946747912               |
| SNP_P4_17222_45884708 | NC_021160.1    | Ca_kabuli_chr01 | 45884708                | TT                              | CC              | 1946747914               |
| SNP_P4_17223_45913987 | NC_021160.1    | Ca_kabuli_chr01 | 45913987                | TT                              | AA              | 1946747916               |
| SNP_P4_17224_45913992 | NC_021160.1    | Ca_kabuli_chr01 | 45913992                | CC                              | TT              | 1946747918               |
| SNP_P4_17225_45913996 | NC_021160.1    | Ca_kabuli_chr01 | 45913996                | GG                              | AA              | 1946747920               |
| SNP_P4_17226_45914354 | NC_021160.1    | Ca_kabuli_chr01 | 45914354                | TT                              | CC              | 1946747922               |
| SNP_P4_17227_45914675 | NC_021160.1    | Ca_kabuli_chr01 | 45914675                | TT                              | AA              | 1946747924               |

| SNPs IDs              | Chromosome IDs | Chromosomes     | Physical positions (bp) | CDC Frontier (Reference genome) | (ILWC46 & LPNB) | NCBI SNPdb Accession IDs |
|-----------------------|----------------|-----------------|-------------------------|---------------------------------|-----------------|--------------------------|
| SNP_P4_17228_45915165 | NC_021160.1    | Ca_kabuli_chr01 | 45915165                | CC                              | TT              | 1946747926               |
| SNP_P4_17229_45915413 | NC_021160.1    | Ca_kabuli_chr01 | 45915413                | GG                              | CC              | 1946747928               |
| SNP_P4_17230_45915414 | NC_021160.1    | Ca_kabuli_chr01 | 45915414                | AA                              | CC              | 1946747930               |
| SNP_P4_17231_45915431 | NC_021160.1    | Ca_kabuli_chr01 | 45915431                | CC                              | TT              | 1946747932               |
| SNP_P4_17232_45958185 | NC_021160.1    | Ca_kabuli_chr01 | 45958185                | CC                              | TT              | 1946747934               |
| SNP_P4_17233_45958188 | NC_021160.1    | Ca_kabuli_chr01 | 45958188                | GG                              | AA              | 1946747936               |
| SNP_P4_17234_45958196 | NC_021160.1    | Ca_kabuli_chr01 | 45958196                | AA                              | TT              | 1946747938               |
| SNP_P4_17235_45958214 | NC_021160.1    | Ca_kabuli_chr01 | 45958214                | AA                              | TT              | 1946747940               |
| SNP_P4_17236_45992959 | NC_021160.1    | Ca_kabuli_chr01 | 45992959                | TT                              | CC              | 1946747942               |
| SNP_P4_17237_45993222 | NC_021160.1    | Ca_kabuli_chr01 | 45993222                | AA                              | CC              | 1946747944               |
| SNP_P4_17238_45993263 | NC_021160.1    | Ca_kabuli_chr01 | 45993263                | TT                              | CC              | 1946747946               |
| SNP_P4_17240_46065891 | NC_021160.1    | Ca_kabuli_chr01 | 46065891                | AA                              | GG              | 1946747948               |
| SNP_P4_17241_46066290 | NC_021160.1    | Ca_kabuli_chr01 | 46066290                | TT                              | AA              | 1946747950               |
| SNP_P4_17242_46066293 | NC_021160.1    | Ca_kabuli_chr01 | 46066293                | CC                              | TT              | 1946747952               |
| SNP_P4_17243_46066296 | NC_021160.1    | Ca_kabuli_chr01 | 46066296                | GG                              | AA              | 1946747954               |
| SNP_P4_17244_46066347 | NC_021160.1    | Ca_kabuli_chr01 | 46066347                | GG                              | TT              | 1946747956               |
| SNP_P4_17245_46066466 | NC_021160.1    | Ca_kabuli_chr01 | 46066466                | AA                              | GG              | 1946747958               |
| SNP_P4_17246_46071599 | NC_021160.1    | Ca_kabuli_chr01 | 46071599                | GG                              | AA              | 1946747960               |
| SNP_P4_17247_46083394 | NC_021160.1    | Ca_kabuli_chr01 | 46083394                | CC                              | TT              | 1946747962               |
| SNP_P4_17248_46083409 | NC_021160.1    | Ca_kabuli_chr01 | 46083409                | CC                              | AA              | 1946747964               |
| SNP_P4_17249_46086816 | NC_021160.1    | Ca_kabuli_chr01 | 46086816                | GG                              | TT              | 1946747966               |
| SNP_P4_17250_46087087 | NC_021160.1    | Ca_kabuli_chr01 | 46087087                | TT                              | AA              | 1946747968               |
| SNP_P4_17251_46088061 | NC_021160.1    | Ca_kabuli_chr01 | 46088061                | CC                              | TT              | 1946747970               |
| SNP_P4_17253_46092516 | NC_021160.1    | Ca_kabuli_chr01 | 46092516                | AA                              | CC              | 1946747972               |
| SNP_P4_17254_46104851 | NC_021160.1    | Ca_kabuli_chr01 | 46104851                | AA                              | TT              | 1946747974               |
| SNP_P4_17255_46116903 | NC_021160.1    | Ca_kabuli_chr01 | 46116903                | GG                              | AA              | 1946747976               |
| SNP_P4_17256_46155524 | NC_021160.1    | Ca_kabuli_chr01 | 46155524                | GG                              | TT              | 1946747978               |
| SNP_P4_17257_46166483 | NC_021160.1    | Ca_kabuli_chr01 | 46166483                | GG                              | AA              | 1946747980               |
| SNP_P4_17258_46169977 | NC_021160.1    | Ca_kabuli_chr01 | 46169977                | GG                              | TT              | 1946747982               |
| SNP_P4_17259_46171346 | NC_021160.1    | Ca_kabuli_chr01 | 46171346                | AA                              | GG              | 1946747984               |
| SNP_P4_17260_46171497 | NC_021160.1    | Ca_kabuli_chr01 | 46171497                | TT                              | AA              | 1946747986               |
| SNP_P4_17261_46171498 | NC_021160.1    | Ca_kabuli_chr01 | 46171498                | AA                              | GG              | 1946747988               |
| SNP_P4_17262_46171677 | NC_021160.1    | Ca_kabuli_chr01 | 46171677                | CC                              | TT              | 1946747990               |
| SNP_P4_17263_46171753 | NC_021160.1    | Ca_kabuli_chr01 | 46171753                | TT                              | CC              | 1946747992               |
| SNP_P4_17264_46171756 | NC_021160.1    | Ca_kabuli_chr01 | 46171756                | AA                              | TT              | 1946747994               |
| SNP_P4_17265_46171807 | NC_021160.1    | Ca_kabuli_chr01 | 46171807                | GG                              | AA              | 1946747996               |
| SNP_P4_17266_46171827 | NC_021160.1    | Ca_kabuli_chr01 | 46171827                | TT                              | GG              | 1946747998               |
| SNP_P4_17267_46171837 | NC_021160.1    | Ca_kabuli_chr01 | 46171837                | TT                              | CC              | 1946748000               |
| SNP_P4_17268_46174087 | NC_021160.1    | Ca_kabuli_chr01 | 46174087                | TT                              | CC              | 1946748002               |
| SNP_P4_17269_46174358 | NC_021160.1    | Ca_kabuli_chr01 | 46174358                | GG                              | TT              | 1946748004               |
| SNP_P4_17270_46174560 | NC_021160.1    | Ca_kabuli_chr01 | 46174560                | AA                              | TT              | 1946748006               |
| SNP_P4_17271_46174605 | NC_021160.1    | Ca_kabuli_chr01 | 46174605                | AA                              | GG              | 1946748008               |

| SNPs IDs              | Chromosome IDs | Chromosomes     | Physical positions (bp) | CDC Frontier (Reference genome) | (ILWC46 & LPNB) | NCBI SNPdb Accession IDs |
|-----------------------|----------------|-----------------|-------------------------|---------------------------------|-----------------|--------------------------|
| SNP_P4_17272_46174692 | NC_021160.1    | Ca_kabuli_chr01 | 46174692                | AA                              | GG              | 1946748010               |
| SNP_P4_17273_46177066 | NC_021160.1    | Ca_kabuli_chr01 | 46177066                | AA                              | GG              | 1946748012               |
| SNP_P4_17274_46178178 | NC_021160.1    | Ca_kabuli_chr01 | 46178178                | CC                              | TT              | 1946748014               |
| SNP_P4_17275_46178183 | NC_021160.1    | Ca_kabuli_chr01 | 46178183                | CC                              | AA              | 1946748016               |
| SNP_P4_17276_46178188 | NC_021160.1    | Ca_kabuli_chr01 | 46178188                | AA                              | CC              | 1946748018               |
| SNP_P4_17278_46178302 | NC_021160.1    | Ca_kabuli_chr01 | 46178302                | CC                              | TT              | 1946748020               |
| SNP_P4_17279_46179595 | NC_021160.1    | Ca_kabuli_chr01 | 46179595                | AA                              | GG              | 1946748022               |
| SNP_P4_17281_46192128 | NC_021160.1    | Ca_kabuli_chr01 | 46192128                | CC                              | TT              | 1946748024               |
| SNP_P4_17282_46192133 | NC_021160.1    | Ca_kabuli_chr01 | 46192133                | TT                              | CC              | 1946748026               |
| SNP_P4_17283_46192223 | NC_021160.1    | Ca_kabuli_chr01 | 46192223                | AA                              | TT              | 1946748028               |
| SNP_P4_17284_46192281 | NC_021160.1    | Ca_kabuli_chr01 | 46192281                | TT                              | CC              | 1946748030               |
| SNP_P4_17285_46205631 | NC_021160.1    | Ca_kabuli_chr01 | 46205631                | AA                              | CC              | 1946748032               |
| SNP_P4_17286_46240522 | NC_021160.1    | Ca_kabuli_chr01 | 46240522                | AA                              | GG              | 1946748034               |
| SNP_P4_17287_46242419 | NC_021160.1    | Ca_kabuli_chr01 | 46242419                | TT                              | CC              | 1946748037               |
| SNP_P4_17288_46259556 | NC_021160.1    | Ca_kabuli_chr01 | 46259556                | AA                              | TT              | 1946748039               |
| SNP_P4_17289_46262925 | NC_021160.1    | Ca_kabuli_chr01 | 46262925                | CC                              | TT              | 1946748041               |
| SNP_P4_17290_46263324 | NC_021160.1    | Ca_kabuli_chr01 | 46263324                | TT                              | AA              | 1946748043               |
| SNP_P4_17292_46277976 | NC_021160.1    | Ca_kabuli_chr01 | 46277976                | TT                              | AA              | 1946748045               |
| SNP_P4_17293_46278110 | NC_021160.1    | Ca_kabuli_chr01 | 46278110                | TT                              | GG              | 1946748046               |
| SNP_P4_17294_46278154 | NC_021160.1    | Ca_kabuli_chr01 | 46278154                | GG                              | TT              | 1946748047               |
| SNP_P4_17295_46278258 | NC_021160.1    | Ca_kabuli_chr01 | 46278258                | TT                              | CC              | 1946748048               |
| SNP_P4_17296_46278391 | NC_021160.1    | Ca_kabuli_chr01 | 46278391                | GG                              | AA              | 1946748049               |
| SNP_P4_17298_46278990 | NC_021160.1    | Ca_kabuli_chr01 | 46278990                | GG                              | TT              | 1946748050               |
| SNP_P4_17299_46279213 | NC_021160.1    | Ca_kabuli_chr01 | 46279213                | TT                              | AA              | 1946748052               |
| SNP_P4_17300_46279214 | NC_021160.1    | Ca_kabuli_chr01 | 46279214                | TT                              | AA              | 1946748054               |
| SNP_P4_17301_46279263 | NC_021160.1    | Ca_kabuli_chr01 | 46279263                | TT                              | CC              | 1946748056               |
| SNP_P4_17302_46279303 | NC_021160.1    | Ca_kabuli_chr01 | 46279303                | AA                              | CC              | 1946748058               |
| SNP_P4_17303_46279420 | NC_021160.1    | Ca_kabuli_chr01 | 46279420                | TT                              | CC              | 1946748060               |
| SNP_P4_17304_46279552 | NC_021160.1    | Ca_kabuli_chr01 | 46279552                | CC                              | TT              | 1946748062               |
| SNP_P4_17305_46279881 | NC_021160.1    | Ca_kabuli_chr01 | 46279881                | TT                              | CC              | 1946748064               |
| SNP_P4_17306_46279986 | NC_021160.1    | Ca_kabuli_chr01 | 46279986                | CC                              | TT              | 1946748066               |
| SNP_P4_17307_46280136 | NC_021160.1    | Ca_kabuli_chr01 | 46280136                | AA                              | CC              | 1946748068               |
| SNP_P4_17308_46280421 | NC_021160.1    | Ca_kabuli_chr01 | 46280421                | AA                              | GG              | 1946748070               |
| SNP_P4_17309_46280423 | NC_021160.1    | Ca_kabuli_chr01 | 46280423                | TT                              | CC              | 1946748072               |
| SNP_P4_17310_46280425 | NC_021160.1    | Ca_kabuli_chr01 | 46280425                | CC                              | TT              | 1946748074               |
| SNP_P4_17311_46280468 | NC_021160.1    | Ca_kabuli_chr01 | 46280468                | AA                              | CC              | 1946748076               |
| SNP_P4_17312_46280526 | NC_021160.1    | Ca_kabuli_chr01 | 46280526                | GG                              | AA              | 1946748077               |
| SNP_P4_17313_46280675 | NC_021160.1    | Ca_kabuli_chr01 | 46280675                | CC                              | TT              | 1946748079               |
| SNP_P4_17314_46280783 | NC_021160.1    | Ca_kabuli_chr01 | 46280783                | TT                              | GG              | 1946748081               |
| SNP_P4_17315_46281110 | NC_021160.1    | Ca_kabuli_chr01 | 46281110                | TT                              | CC              | 1946748083               |
| SNP_P4_17316_46282795 | NC_021160.1    | Ca_kabuli_chr01 | 46282795                | AA                              | TT              | 1946748085               |
| SNP_P4_17318_46283431 | NC_021160.1    | Ca_kabuli_chr01 | 46283431                | GG                              | AA              | 1946748087               |

| SNPs IDs              | Chromosome IDs | Chromosomes     | Physical positions (bp) | CDC Frontier (Reference genome) | (ILWC46 & LPNB) | NCBI SNPdb Accession IDs |
|-----------------------|----------------|-----------------|-------------------------|---------------------------------|-----------------|--------------------------|
| SNP_P4_17319_46283478 | NC_021160.1    | Ca_kabuli_chr01 | 46283478                | GG                              | TT              | 1946748089               |
| SNP_P4_17320_46283682 | NC_021160.1    | Ca_kabuli_chr01 | 46283682                | GG                              | AA              | 1946748091               |
| SNP_P4_17321_46283861 | NC_021160.1    | Ca_kabuli_chr01 | 46283861                | CC                              | AA              | 1946748093               |
| SNP_P4_17322_46284112 | NC_021160.1    | Ca_kabuli_chr01 | 46284112                | CC                              | TT              | 1946748095               |
| SNP_P4_17323_46284535 | NC_021160.1    | Ca_kabuli_chr01 | 46284535                | GG                              | AA              | 1946748097               |
| SNP_P4_17324_46284673 | NC_021160.1    | Ca_kabuli_chr01 | 46284673                | GG                              | AA              | 1946748099               |
| SNP_P4_17325_46284997 | NC_021160.1    | Ca_kabuli_chr01 | 46284997                | CC                              | TT              | 1946748101               |
| SNP_P4_17326_46285113 | NC_021160.1    | Ca_kabuli_chr01 | 46285113                | GG                              | AA              | 1946748103               |
| SNP_P4_17327_46285294 | NC_021160.1    | Ca_kabuli_chr01 | 46285294                | CC                              | TT              | 1946748105               |
| SNP_P4_17328_46285302 | NC_021160.1    | Ca_kabuli_chr01 | 46285302                | GG                              | AA              | 1946748107               |
| SNP_P4_17329_46285622 | NC_021160.1    | Ca_kabuli_chr01 | 46285622                | GG                              | TT              | 1946748109               |
| SNP_P4_17330_46285789 | NC_021160.1    | Ca_kabuli_chr01 | 46285789                | GG                              | CC              | 1946748111               |
| SNP_P4_17331_46285870 | NC_021160.1    | Ca_kabuli_chr01 | 46285870                | GG                              | CC              | 1946748113               |
| SNP_P4_17332_46286015 | NC_021160.1    | Ca_kabuli_chr01 | 46286015                | TT                              | GG              | 1946748114               |
| SNP_P4_17333_46286059 | NC_021160.1    | Ca_kabuli_chr01 | 46286059                | GG                              | TT              | 1946748116               |
| SNP_P4_17334_46286066 | NC_021160.1    | Ca_kabuli_chr01 | 46286066                | AA                              | GG              | 1946748118               |
| SNP_P4_17335_46286530 | NC_021160.1    | Ca_kabuli_chr01 | 46286530                | TT                              | GG              | 1946748120               |
| SNP_P4_17336_46286560 | NC_021160.1    | Ca_kabuli_chr01 | 46286560                | GG                              | CC              | 1946748122               |
| SNP_P4_17339_46302167 | NC_021160.1    | Ca_kabuli_chr01 | 46302167                | TT                              | CC              | 1946748124               |
| SNP_P4_17340_46325187 | NC_021160.1    | Ca_kabuli_chr01 | 46325187                | GG                              | AA              | 1946748126               |
| SNP_P4_17341_46335145 | NC_021160.1    | Ca_kabuli_chr01 | 46335145                | TT                              | AA              | 1946748128               |
| SNP_P4_17342_46342206 | NC_021160.1    | Ca_kabuli_chr01 | 46342206                | TT                              | CC              | 1946748130               |
| SNP_P4_17343_46351263 | NC_021160.1    | Ca_kabuli_chr01 | 46351263                | CC                              | TT              | 1946748132               |
| SNP_P4_17344_46351273 | NC_021160.1    | Ca_kabuli_chr01 | 46351273                | GG                              | AA              | 1946748134               |
| SNP_P4_17345_46351612 | NC_021160.1    | Ca_kabuli_chr01 | 46351612                | TT                              | GG              | 1946748136               |
| SNP_P4_17346_46351630 | NC_021160.1    | Ca_kabuli_chr01 | 46351630                | GG                              | AA              | 1946748138               |
| SNP_P4_17347_46351661 | NC_021160.1    | Ca_kabuli_chr01 | 46351661                | CC                              | TT              | 1946748140               |
| SNP_P4_17348_46351682 | NC_021160.1    | Ca_kabuli_chr01 | 46351682                | GG                              | AA              | 1946748141               |
| SNP_P4_17349_46351700 | NC_021160.1    | Ca_kabuli_chr01 | 46351700                | CC                              | AA              | 1946748143               |
| SNP_P4_17350_46351707 | NC_021160.1    | Ca_kabuli_chr01 | 46351707                | TT                              | AA              | 1946748145               |
| SNP_P4_17351_46351730 | NC_021160.1    | Ca_kabuli_chr01 | 46351730                | GG                              | AA              | 1946748147               |
| SNP_P4_17352_46351929 | NC_021160.1    | Ca_kabuli_chr01 | 46351929                | TT                              | CC              | 1946748149               |
| SNP_P4_17353_46352041 | NC_021160.1    | Ca_kabuli_chr01 | 46352041                | GG                              | TT              | 1946748151               |
| SNP_P4_17354_46352057 | NC_021160.1    | Ca_kabuli_chr01 | 46352057                | AA                              | CC              | 1946748153               |
| SNP_P4_17355_46352070 | NC_021160.1    | Ca_kabuli_chr01 | 46352070                | AA                              | GG              | 1946748155               |
| SNP_P4_17356_46352104 | NC_021160.1    | Ca_kabuli_chr01 | 46352104                | AA                              | GG              | 1946748157               |
| SNP_P4_17358_46352220 | NC_021160.1    | Ca_kabuli_chr01 | 46352220                | TT                              | GG              | 1946748159               |
| SNP_P4_17359_46352257 | NC_021160.1    | Ca_kabuli_chr01 | 46352257                | CC                              | GG              | 1946748161               |
| SNP_P4_17360_46352258 | NC_021160.1    | Ca_kabuli_chr01 | 46352258                | CC                              | TT              | 1946748163               |
| SNP_P4_17361_46352262 | NC_021160.1    | Ca_kabuli_chr01 | 46352262                | TT                              | CC              | 1946748165               |
| SNP_P4_17362_46352291 | NC_021160.1    | Ca_kabuli_chr01 | 46352291                | CC                              | TT              | 1946748167               |
| SNP_P4_17363_46367898 | NC_021160.1    | Ca_kabuli_chr01 | 46367898                | TT                              | AA              | 1946748169               |

| SNPs IDs              | Chromosome IDs | Chromosomes     | Physical positions (bp) | CDC Frontier (Reference genome) | (ILWC46 & LPNB) | NCBI SNPdb Accession IDs |
|-----------------------|----------------|-----------------|-------------------------|---------------------------------|-----------------|--------------------------|
| SNP_P4_17364_46368112 | NC_021160.1    | Ca_kabuli_chr01 | 46368112                | TT                              | CC              | 1946748170               |
| SNP_P4_17365_46368135 | NC_021160.1    | Ca_kabuli_chr01 | 46368135                | GG                              | AA              | 1946748171               |
| SNP_P4_17366_46392133 | NC_021160.1    | Ca_kabuli_chr01 | 46392133                | TT                              | GG              | 1946748172               |
| SNP_P4_17367_46392135 | NC_021160.1    | Ca_kabuli_chr01 | 46392135                | TT                              | CC              | 1946748173               |
| SNP_P4_17368_46393250 | NC_021160.1    | Ca_kabuli_chr01 | 46393250                | GG                              | AA              | 1946748174               |
| SNP_P4_17369_46393617 | NC_021160.1    | Ca_kabuli_chr01 | 46393617                | TT                              | CC              | 1946748175               |
| SNP_P4_17370_46395150 | NC_021160.1    | Ca_kabuli_chr01 | 46395150                | AA                              | GG              | 1946748176               |
| SNP_P4_17371_46450918 | NC_021160.1    | Ca_kabuli_chr01 | 46450918                | TT                              | CC              | 1946748178               |
| SNP_P4_17372_46452021 | NC_021160.1    | Ca_kabuli_chr01 | 46452021                | GG                              | AA              | 1946748180               |
| SNP_P4_17373_46454343 | NC_021160.1    | Ca_kabuli_chr01 | 46454343                | AA                              | GG              | 1946748182               |
| SNP_P4_17374_46491076 | NC_021160.1    | Ca_kabuli_chr01 | 46491076                | TT                              | AA              | 1946748184               |
| SNP_P4_17376_46499645 | NC_021160.1    | Ca_kabuli_chr01 | 46499645                | TT                              | GG              | 1946748186               |
| SNP_P4_17377_46499682 | NC_021160.1    | Ca_kabuli_chr01 | 46499682                | GG                              | AA              | 1946748188               |
| SNP_P4_17378_46499742 | NC_021160.1    | Ca_kabuli_chr01 | 46499742                | GG                              | TT              | 1946748190               |
| SNP_P4_17380_46500149 | NC_021160.1    | Ca_kabuli_chr01 | 46500149                | TT                              | AA              | 1946748192               |
| SNP_P4_17382_46507224 | NC_021160.1    | Ca_kabuli_chr01 | 46507224                | GG                              | AA              | 1946748193               |
| SNP_P4_17383_46516032 | NC_021160.1    | Ca_kabuli_chr01 | 46516032                | TT                              | AA              | 1946748195               |
| SNP_P4_17384_46519212 | NC_021160.1    | Ca_kabuli_chr01 | 46519212                | GG                              | AA              | 1946748197               |
| SNP_P4_17385_46519215 | NC_021160.1    | Ca_kabuli_chr01 | 46519215                | AA                              | GG              | 1946748199               |
| SNP_P4_17386_46522590 | NC_021160.1    | Ca_kabuli_chr01 | 46522590                | GG                              | AA              | 1946748201               |
| SNP_P4_17387_46523221 | NC_021160.1    | Ca_kabuli_chr01 | 46523221                | TT                              | CC              | 1946748203               |
| SNP_P4_17389_46523582 | NC_021160.1    | Ca_kabuli_chr01 | 46523582                | AA                              | CC              | 1946748205               |
| SNP_P4_17390_46524525 | NC_021160.1    | Ca_kabuli_chr01 | 46524525                | TT                              | GG              | 1946748207               |
| SNP_P4_17391_46524696 | NC_021160.1    | Ca_kabuli_chr01 | 46524696                | CC                              | GG              | 1946748209               |
| SNP_P4_17392_46524740 | NC_021160.1    | Ca_kabuli_chr01 | 46524740                | GG                              | TT              | 1946748210               |
| SNP_P4_17393_46525525 | NC_021160.1    | Ca_kabuli_chr01 | 46525525                | GG                              | AA              | 1946748212               |
| SNP_P4_17395_46526227 | NC_021160.1    | Ca_kabuli_chr01 | 46526227                | AA                              | GG              | 1946748214               |
| SNP_P4_17396_46526315 | NC_021160.1    | Ca_kabuli_chr01 | 46526315                | TT                              | CC              | 1946748216               |
| SNP_P4_17398_46527842 | NC_021160.1    | Ca_kabuli_chr01 | 46527842                | GG                              | TT              | 1946748218               |
| SNP_P4_17399_46528032 | NC_021160.1    | Ca_kabuli_chr01 | 46528032                | TT                              | CC              | 1946748220               |
| SNP_P4_17400_46528205 | NC_021160.1    | Ca_kabuli_chr01 | 46528205                | TT                              | CC              | 1946748222               |
| SNP_P4_17401_46528327 | NC_021160.1    | Ca_kabuli_chr01 | 46528327                | TT                              | AA              | 1946748224               |
| SNP_P4_17402_46528351 | NC_021160.1    | Ca_kabuli_chr01 | 46528351                | GG                              | AA              | 1946748226               |
| SNP_P4_17404_46528669 | NC_021160.1    | Ca_kabuli_chr01 | 46528669                | CC                              | TT              | 1946748228               |
| SNP_P4_17405_46528715 | NC_021160.1    | Ca_kabuli_chr01 | 46528715                | AA                              | GG              | 1946748230               |
| SNP_P4_17407_46528767 | NC_021160.1    | Ca_kabuli_chr01 | 46528767                | AA                              | GG              | 1946748232               |
| SNP_P4_17408_46529096 | NC_021160.1    | Ca_kabuli_chr01 | 46529096                | TT                              | CC              | 1946748234               |
| SNP_P4_17409_46529312 | NC_021160.1    | Ca_kabuli_chr01 | 46529312                | AA                              | GG              | 1946748236               |
| SNP_P4_17410_46529335 | NC_021160.1    | Ca_kabuli_chr01 | 46529335                | TT                              | CC              | 1946748238               |
| SNP_P4_17411_46529530 | NC_021160.1    | Ca_kabuli_chr01 | 46529530                | AA                              | GG              | 1946748239               |
| SNP_P4_17412_46529554 | NC_021160.1    | Ca_kabuli_chr01 | 46529554                | AA                              | GG              | 1946748241               |
| SNP_P4_17413_46529691 | NC_021160.1    | Ca_kabuli_chr01 | 46529691                | GG                              | AA              | 1946748243               |

| SNPs IDs              | Chromosome IDs | Chromosomes     | Physical positions (bp) | CDC Frontier (Reference genome) | (ILWC46 & LPNB) | NCBI SNPdb Accession IDs |
|-----------------------|----------------|-----------------|-------------------------|---------------------------------|-----------------|--------------------------|
| SNP_P4_17414_46529764 | NC_021160.1    | Ca_kabuli_chr01 | 46529764                | TT                              | GG              | 1946748245               |
| SNP_P4_17415_46529892 | NC_021160.1    | Ca_kabuli_chr01 | 46529892                | AA                              | CC              | 1946748247               |
| SNP_P4_17416_46529977 | NC_021160.1    | Ca_kabuli_chr01 | 46529977                | CC                              | TT              | 1946748249               |
| SNP_P4_17417_46530174 | NC_021160.1    | Ca_kabuli_chr01 | 46530174                | AA                              | GG              | 1946748251               |
| SNP_P4_17418_46530275 | NC_021160.1    | Ca_kabuli_chr01 | 46530275                | GG                              | AA              | 1946748253               |
| SNP_P4_17419_46530475 | NC_021160.1    | Ca_kabuli_chr01 | 46530475                | CC                              | GG              | 1946748255               |
| SNP_P4_17420_46530546 | NC_021160.1    | Ca_kabuli_chr01 | 46530546                | GG                              | AA              | 1946748257               |
| SNP_P4_17421_46530766 | NC_021160.1    | Ca_kabuli_chr01 | 46530766                | AA                              | GG              | 1946748259               |
| SNP_P4_17422_46530832 | NC_021160.1    | Ca_kabuli_chr01 | 46530832                | GG                              | AA              | 1946748261               |
| SNP_P4_17424_46531318 | NC_021160.1    | Ca_kabuli_chr01 | 46531318                | AA                              | GG              | 1946748262               |
| SNP_P4_17425_46534819 | NC_021160.1    | Ca_kabuli_chr01 | 46534819                | GG                              | AA              | 1946748264               |
| SNP_P4_17426_46534829 | NC_021160.1    | Ca_kabuli_chr01 | 46534829                | AA                              | TT              | 1946748266               |
| SNP_P4_17427_46538684 | NC_021160.1    | Ca_kabuli_chr01 | 46538684                | AA                              | TT              | 1946748268               |
| SNP_P4_17428_46538685 | NC_021160.1    | Ca_kabuli_chr01 | 46538685                | CC                              | GG              | 1946748270               |
| SNP_P4_17429_46538708 | NC_021160.1    | Ca_kabuli_chr01 | 46538708                | CC                              | GG              | 1946748272               |
| SNP_P4_17430_46538713 | NC_021160.1    | Ca_kabuli_chr01 | 46538713                | CC                              | TT              | 1946748274               |
| SNP_P4_17431_46538715 | NC_021160.1    | Ca_kabuli_chr01 | 46538715                | AA                              | GG              | 1946748276               |
| SNP_P4_17432_46538857 | NC_021160.1    | Ca_kabuli_chr01 | 46538857                | GG                              | TT              | 1946748278               |
| SNP_P4_17433_46538858 | NC_021160.1    | Ca_kabuli_chr01 | 46538858                | TT                              | CC              | 1946748280               |
| SNP_P4_17434_46539156 | NC_021160.1    | Ca_kabuli_chr01 | 46539156                | AA                              | GG              | 1946748281               |
| SNP_P4_17437_46539601 | NC_021160.1    | Ca_kabuli_chr01 | 46539601                | CC                              | TT              | 1946748283               |
| SNP_P4_17438_46540478 | NC_021160.1    | Ca_kabuli_chr01 | 46540478                | CC                              | AA              | 1946748285               |
| SNP_P4_17439_46565798 | NC_021160.1    | Ca_kabuli_chr01 | 46565798                | TT                              | CC              | 1946748287               |
| SNP_P4_17440_46566162 | NC_021160.1    | Ca_kabuli_chr01 | 46566162                | AA                              | TT              | 1946748289               |
| SNP_P4_17441_46568417 | NC_021160.1    | Ca_kabuli_chr01 | 46568417                | CC                              | TT              | 1946748291               |
| SNP_P4_17442_46568456 | NC_021160.1    | Ca_kabuli_chr01 | 46568456                | TT                              | CC              | 1946748293               |
| SNP_P4_17443_46568457 | NC_021160.1    | Ca_kabuli_chr01 | 46568457                | GG                              | AA              | 1946748295               |
| SNP_P4_17444_46568654 | NC_021160.1    | Ca_kabuli_chr01 | 46568654                | AA                              | TT              | 1946748297               |
| SNP_P4_17445_46568738 | NC_021160.1    | Ca_kabuli_chr01 | 46568738                | GG                              | AA              | 1946748299               |
| SNP_P4_17446_46568793 | NC_021160.1    | Ca_kabuli_chr01 | 46568793                | TT                              | CC              | 1946748301               |
| SNP_P4_17447_46619680 | NC_021160.1    | Ca_kabuli_chr01 | 46619680                | CC                              | TT              | 1946748303               |
| SNP_P4_17448_46630111 | NC_021160.1    | Ca_kabuli_chr01 | 46630111                | GG                              | AA              | 1946748305               |
| SNP_P4_17449_46630116 | NC_021160.1    | Ca_kabuli_chr01 | 46630116                | CC                              | TT              | 1946748307               |
| SNP_P4_17450_46630123 | NC_021160.1    | Ca_kabuli_chr01 | 46630123                | TT                              | CC              | 1946748309               |
| SNP_P4_17451_46632002 | NC_021160.1    | Ca_kabuli_chr01 | 46632002                | GG                              | AA              | 1946748310               |
| SNP_P4_17452_46632025 | NC_021160.1    | Ca_kabuli_chr01 | 46632025                | CC                              | TT              | 1946748312               |
| SNP_P4_17453_46632521 | NC_021160.1    | Ca_kabuli_chr01 | 46632521                | AA                              | GG              | 1946748314               |
| SNP_P4_17455_46640420 | NC_021160.1    | Ca_kabuli_chr01 | 46640420                | CC                              | TT              | 1946748316               |
| SNP_P4_17456_46658803 | NC_021160.1    | Ca_kabuli_chr01 | 46658803                | TT                              | GG              | 1946748318               |
| SNP_P4_17457_46660539 | NC_021160.1    | Ca_kabuli_chr01 | 46660539                | AA                              | CC              | 1946748320               |
| SNP_P4_17458_46661624 | NC_021160.1    | Ca_kabuli_chr01 | 46661624                | TT                              | AA              | 1946748322               |
| SNP_P4_17459_46661658 | NC_021160.1    | Ca_kabuli_chr01 | 46661658                | TT                              | CC              | 1946748324               |

| SNPs IDs              | Chromosome IDs | Chromosomes     | Physical positions (bp) | CDC Frontier (Reference genome) | (ILWC46 & LPNB) | NCBI SNPdb Accession IDs |
|-----------------------|----------------|-----------------|-------------------------|---------------------------------|-----------------|--------------------------|
| SNP_P4_17460_46661668 | NC_021160.1    | Ca_kabuli_chr01 | 46661668                | GG                              | AA              | 1946748326               |
| SNP_P4_17461_46661756 | NC_021160.1    | Ca_kabuli_chr01 | 46661756                | GG                              | CC              | 1946748328               |
| SNP_P4_17462_46661822 | NC_021160.1    | Ca_kabuli_chr01 | 46661822                | TT                              | GG              | 1946748330               |
| SNP_P4_17463_46661916 | NC_021160.1    | Ca_kabuli_chr01 | 46661916                | TT                              | CC              | 1946748332               |
| SNP_P4_17465_46662080 | NC_021160.1    | Ca_kabuli_chr01 | 46662080                | CC                              | TT              | 1946748334               |
| SNP_P4_17466_46664606 | NC_021160.1    | Ca_kabuli_chr01 | 46664606                | AA                              | GG              | 1946748336               |
| SNP_P4_17467_46667148 | NC_021160.1    | Ca_kabuli_chr01 | 46667148                | CC                              | TT              | 1946748338               |
| SNP_P4_17468_46698957 | NC_021160.1    | Ca_kabuli_chr01 | 46698957                | TT                              | CC              | 1946748340               |
| SNP_P4_17469_46699267 | NC_021160.1    | Ca_kabuli_chr01 | 46699267                | AA                              | TT              | 1946748342               |
| SNP_P4_17470_46699359 | NC_021160.1    | Ca_kabuli_chr01 | 46699359                | AA                              | TT              | 1946748344               |
| SNP_P4_17471_46699362 | NC_021160.1    | Ca_kabuli_chr01 | 46699362                | GG                              | AA              | 1946748346               |
| SNP_P4_17472_46699365 | NC_021160.1    | Ca_kabuli_chr01 | 46699365                | TT                              | AA              | 1946748348               |
| SNP_P4_17473_46699371 | NC_021160.1    | Ca_kabuli_chr01 | 46699371                | AA                              | GG              | 1946748350               |
| SNP_P4_17474_46699374 | NC_021160.1    | Ca_kabuli_chr01 | 46699374                | AA                              | TT              | 1946748352               |
| SNP_P4_17475_46699381 | NC_021160.1    | Ca_kabuli_chr01 | 46699381                | TT                              | CC              | 1946748354               |
| SNP_P4_17476_46699386 | NC_021160.1    | Ca_kabuli_chr01 | 46699386                | GG                              | AA              | 1946748356               |
| SNP_P4_17477_46699389 | NC_021160.1    | Ca_kabuli_chr01 | 46699389                | CC                              | AA              | 1946748358               |
| SNP_P4_17478_46699758 | NC_021160.1    | Ca_kabuli_chr01 | 46699758                | AA                              | GG              | 1946748360               |
| SNP_P4_17479_46701093 | NC_021160.1    | Ca_kabuli_chr01 | 46701093                | CC                              | TT              | 1946748362               |
| SNP_P4_17480_46701149 | NC_021160.1    | Ca_kabuli_chr01 | 46701149                | AA                              | TT              | 1946748364               |
| SNP_P4_17481_46701278 | NC_021160.1    | Ca_kabuli_chr01 | 46701278                | AA                              | GG              | 1946748366               |
| SNP_P4_17482_46701354 | NC_021160.1    | Ca_kabuli_chr01 | 46701354                | TT                              | GG              | 1946748368               |
| SNP_P4_17483_46701575 | NC_021160.1    | Ca_kabuli_chr01 | 46701575                | GG                              | AA              | 1946748370               |
| SNP_P4_17485_46797945 | NC_021160.1    | Ca_kabuli_chr01 | 46797945                | TT                              | AA              | 1946748372               |
| SNP_P4_17487_46801179 | NC_021160.1    | Ca_kabuli_chr01 | 46801179                | AA                              | GG              | 1946748374               |
| SNP_P4_17488_46801543 | NC_021160.1    | Ca_kabuli_chr01 | 46801543                | TT                              | AA              | 1946748376               |
| SNP_P4_17489_46801706 | NC_021160.1    | Ca_kabuli_chr01 | 46801706                | CC                              | AA              | 1946748378               |
| SNP_P4_17490_46811995 | NC_021160.1    | Ca_kabuli_chr01 | 46811995                | AA                              | TT              | 1946748380               |
| SNP_P4_17491_46812020 | NC_021160.1    | Ca_kabuli_chr01 | 46812020                | TT                              | CC              | 1946748382               |
| SNP_P4_17492_46814876 | NC_021160.1    | Ca_kabuli_chr01 | 46814876                | GG                              | TT              | 1946748384               |
| SNP_P4_17493_46819052 | NC_021160.1    | Ca_kabuli_chr01 | 46819052                | CC                              | TT              | 1946748386               |
| SNP_P4_17494_46819079 | NC_021160.1    | Ca_kabuli_chr01 | 46819079                | TT                              | AA              | 1946748388               |
| SNP_P4_17495_46819093 | NC_021160.1    | Ca_kabuli_chr01 | 46819093                | TT                              | CC              | 1946748390               |
| SNP_P4_17496_46819223 | NC_021160.1    | Ca_kabuli_chr01 | 46819223                | AA                              | GG              | 1946748392               |
| SNP_P4_17497_46819391 | NC_021160.1    | Ca_kabuli_chr01 | 46819391                | CC                              | TT              | 1946748394               |
| SNP_P4_17498_46819439 | NC_021160.1    | Ca_kabuli_chr01 | 46819439                | GG                              | AA              | 1946748396               |
| SNP_P4_17499_46819853 | NC_021160.1    | Ca_kabuli_chr01 | 46819853                | CC                              | TT              | 1946748398               |
| SNP_P4_17500_46819949 | NC_021160.1    | Ca_kabuli_chr01 | 46819949                | GG                              | AA              | 1946748400               |
| SNP_P4_17501_46820211 | NC_021160.1    | Ca_kabuli_chr01 | 46820211                | GG                              | AA              | 1946748402               |
| SNP_P4_17502_46820570 | NC_021160.1    | Ca_kabuli_chr01 | 46820570                | AA                              | CC              | 1946748404               |
| SNP_P4_17503_46822788 | NC_021160.1    | Ca_kabuli_chr01 | 46822788                | CC                              | TT              | 1946748406               |
| SNP_P4_17504_46826069 | NC_021160.1    | Ca_kabuli_chr01 | 46826069                | TT                              | CC              | 1946748408               |



| SNPs IDs              | Chromosome IDs | Chromosomes     | Physical positions (bp) | CDC Frontier (Reference genome) | (ILWC46 & LPNB) | NCBI SNPdb Accession IDs |
|-----------------------|----------------|-----------------|-------------------------|---------------------------------|-----------------|--------------------------|
| SNP_P4_17505_46831609 | NC_021160.1    | Ca_kabuli_chr01 | 46831609                | TT                              | GG              | 1946748410               |
| SNP_P4_17506_46831616 | NC_021160.1    | Ca_kabuli_chr01 | 46831616                | GG                              | CC              | 1946748412               |
| SNP_P4_17507_46831661 | NC_021160.1    | Ca_kabuli_chr01 | 46831661                | AA                              | TT              | 1946748414               |
| SNP_P4_17508_46831846 | NC_021160.1    | Ca_kabuli_chr01 | 46831846                | TT                              | AA              | 1946748416               |
| SNP_P4_17510_46831978 | NC_021160.1    | Ca_kabuli_chr01 | 46831978                | AA                              | GG              | 1946748418               |
| SNP_P4_17511_46831997 | NC_021160.1    | Ca_kabuli_chr01 | 46831997                | GG                              | AA              | 1946748420               |
| SNP_P4_17512_46832007 | NC_021160.1    | Ca_kabuli_chr01 | 46832007                | CC                              | AA              | 1946748422               |
| SNP_P4_17513_46832040 | NC_021160.1    | Ca_kabuli_chr01 | 46832040                | TT                              | GG              | 1946748424               |
| SNP_P4_17515_46836156 | NC_021160.1    | Ca_kabuli_chr01 | 46836156                | TT                              | CC              | 1946748426               |
| SNP_P4_17516_46836191 | NC_021160.1    | Ca_kabuli_chr01 | 46836191                | CC                              | TT              | 1946748428               |
| SNP_P4_17517_46836202 | NC_021160.1    | Ca_kabuli_chr01 | 46836202                | CC                              | AA              | 1946748430               |
| SNP_P4_17518_46836207 | NC_021160.1    | Ca_kabuli_chr01 | 46836207                | CC                              | TT              | 1946748432               |
| SNP_P4_17519_46848921 | NC_021160.1    | Ca_kabuli_chr01 | 46848921                | AA                              | GG              | 1946748434               |
| SNP_P4_17520_46848940 | NC_021160.1    | Ca_kabuli_chr01 | 46848940                | AA                              | GG              | 1946748436               |
| SNP_P4_17521_46848952 | NC_021160.1    | Ca_kabuli_chr01 | 46848952                | AA                              | CC              | 1946748438               |
| SNP_P4_17522_46849233 | NC_021160.1    | Ca_kabuli_chr01 | 46849233                | CC                              | TT              | 1946748440               |
| SNP_P4_17523_46849262 | NC_021160.1    | Ca_kabuli_chr01 | 46849262                | GG                              | AA              | 1946748442               |
| SNP_P4_17524_46849777 | NC_021160.1    | Ca_kabuli_chr01 | 46849777                | GG                              | AA              | 1946748444               |
| SNP_P4_17525_46851810 | NC_021160.1    | Ca_kabuli_chr01 | 46851810                | AA                              | GG              | 1946748446               |
| SNP_P4_17526_46855396 | NC_021160.1    | Ca_kabuli_chr01 | 46855396                | AA                              | GG              | 1946748448               |
| SNP_P4_17527_46856129 | NC_021160.1    | Ca_kabuli_chr01 | 46856129                | TT                              | CC              | 1946748450               |
| SNP_P4_17528_46856178 | NC_021160.1    | Ca_kabuli_chr01 | 46856178                | TT                              | CC              | 1946748452               |
| SNP_P4_17529_46856189 | NC_021160.1    | Ca_kabuli_chr01 | 46856189                | TT                              | CC              | 1946748454               |
| SNP_P4_17530_46856662 | NC_021160.1    | Ca_kabuli_chr01 | 46856662                | AA                              | GG              | 1946748456               |
| SNP_P4_17531_46863021 | NC_021160.1    | Ca_kabuli_chr01 | 46863021                | CC                              | TT              | 1946748458               |
| SNP_P4_17532_46864230 | NC_021160.1    | Ca_kabuli_chr01 | 46864230                | AA                              | TT              | 1946748460               |
| SNP_P4_17534_46867324 | NC_021160.1    | Ca_kabuli_chr01 | 46867324                | AA                              | CC              | 1946748462               |
| SNP_P4_17535_46867345 | NC_021160.1    | Ca_kabuli_chr01 | 46867345                | TT                              | CC              | 1946748464               |
| SNP_P4_17537_46869159 | NC_021160.1    | Ca_kabuli_chr01 | 46869159                | GG                              | AA              | 1946748466               |
| SNP_P4_17538_46884109 | NC_021160.1    | Ca_kabuli_chr01 | 46884109                | GG                              | AA              | 1946748468               |
| SNP_P4_17539_46892305 | NC_021160.1    | Ca_kabuli_chr01 | 46892305                | GG                              | AA              | 1946748470               |
| SNP_P4_17540_46894685 | NC_021160.1    | Ca_kabuli_chr01 | 46894685                | AA                              | GG              | 1946748472               |
| SNP_P4_17541_46894736 | NC_021160.1    | Ca_kabuli_chr01 | 46894736                | AA                              | CC              | 1946748474               |
| SNP_P4_17542_46894766 | NC_021160.1    | Ca_kabuli_chr01 | 46894766                | CC                              | TT              | 1946748476               |
| SNP_P4_17543_46894790 | NC_021160.1    | Ca_kabuli_chr01 | 46894790                | CC                              | TT              | 1946748478               |
| SNP_P4_17544_46894870 | NC_021160.1    | Ca_kabuli_chr01 | 46894870                | GG                              | AA              | 1946748480               |
| SNP_P4_17545_46894878 | NC_021160.1    | Ca_kabuli_chr01 | 46894878                | GG                              | TT              | 1946748482               |
| SNP_P4_17546_46895151 | NC_021160.1    | Ca_kabuli_chr01 | 46895151                | TT                              | GG              | 1946748484               |
| SNP_P4_17547_46895162 | NC_021160.1    | Ca_kabuli_chr01 | 46895162                | GG                              | AA              | 1946748486               |
| SNP_P4_17548_46895210 | NC_021160.1    | Ca_kabuli_chr01 | 46895210                | AA                              | GG              | 1946748488               |
| SNP_P4_17549_46895231 | NC_021160.1    | Ca_kabuli_chr01 | 46895231                | AA                              | GG              | 1946748490               |
| SNP_P4_17550_46895234 | NC_021160.1    | Ca_kabuli_chr01 | 46895234                | AA                              | GG              | 1946748492               |

| SNPs IDs              | Chromosome IDs | Chromosomes     | Physical positions (bp) | CDC Frontier (Reference genome) | (ILWC46 & LPNB) | NCBI SNPdb Accession IDs |
|-----------------------|----------------|-----------------|-------------------------|---------------------------------|-----------------|--------------------------|
| SNP_P4_17554_46938657 | NC_021160.1    | Ca_kabuli_chr01 | 46938657                | TT                              | CC              | 1946748494               |
| SNP_P4_17555_46978546 | NC_021160.1    | Ca_kabuli_chr01 | 46978546                | CC                              | AA              | 1946748497               |
| SNP_P4_17556_46978551 | NC_021160.1    | Ca_kabuli_chr01 | 46978551                | CC                              | TT              | 1946748499               |
| SNP_P4_17557_46978580 | NC_021160.1    | Ca_kabuli_chr01 | 46978580                | TT                              | CC              | 1946748501               |
| SNP_P4_17558_46981469 | NC_021160.1    | Ca_kabuli_chr01 | 46981469                | AA                              | GG              | 1946748503               |
| SNP_P4_17559_46981897 | NC_021160.1    | Ca_kabuli_chr01 | 46981897                | GG                              | AA              | 1946748505               |
| SNP_P4_17561_47023654 | NC_021160.1    | Ca_kabuli_chr01 | 47023654                | AA                              | GG              | 1946748507               |
| SNP_P4_17562_47023668 | NC_021160.1    | Ca_kabuli_chr01 | 47023668                | AA                              | TT              | 1946748509               |
| SNP_P4_17563_47023694 | NC_021160.1    | Ca_kabuli_chr01 | 47023694                | TT                              | AA              | 1946748511               |
| SNP_P4_17564_47026018 | NC_021160.1    | Ca_kabuli_chr01 | 47026018                | CC                              | TT              | 1946748513               |
| SNP_P4_17565_47026074 | NC_021160.1    | Ca_kabuli_chr01 | 47026074                | CC                              | TT              | 1946748515               |
| SNP_P4_17566_47037268 | NC_021160.1    | Ca_kabuli_chr01 | 47037268                | GG                              | AA              | 1946748517               |
| SNP_P4_17568_47058264 | NC_021160.1    | Ca_kabuli_chr01 | 47058264                | AA                              | TT              | 1946748519               |
| SNP_P4_17569_47058323 | NC_021160.1    | Ca_kabuli_chr01 | 47058323                | TT                              | AA              | 1946748521               |
| SNP_P4_17570_47058329 | NC_021160.1    | Ca_kabuli_chr01 | 47058329                | TT                              | GG              | 1946748523               |
| SNP_P4_17571_47058684 | NC_021160.1    | Ca_kabuli_chr01 | 47058684                | TT                              | GG              | 1946748525               |
| SNP_P4_17572_47058840 | NC_021160.1    | Ca_kabuli_chr01 | 47058840                | GG                              | CC              | 1946748527               |
| SNP_P4_17573_47059122 | NC_021160.1    | Ca_kabuli_chr01 | 47059122                | AA                              | GG              | 1946748528               |
| SNP_P4_17574_47059137 | NC_021160.1    | Ca_kabuli_chr01 | 47059137                | CC                              | GG              | 1946748530               |
| SNP_P4_17575_47059186 | NC_021160.1    | Ca_kabuli_chr01 | 47059186                | AA                              | CC              | 1946748532               |
| SNP_P4_17576_47059188 | NC_021160.1    | Ca_kabuli_chr01 | 47059188                | GG                              | AA              | 1946748534               |
| SNP_P4_17577_47059330 | NC_021160.1    | Ca_kabuli_chr01 | 47059330                | GG                              | TT              | 1946748536               |
| SNP_P4_17578_47069742 | NC_021160.1    | Ca_kabuli_chr01 | 47069742                | CC                              | GG              | 1946748538               |
| SNP_P4_17579_47069743 | NC_021160.1    | Ca_kabuli_chr01 | 47069743                | AA                              | TT              | 1946748540               |
| SNP_P4_17580_47104627 | NC_021160.1    | Ca_kabuli_chr01 | 47104627                | TT                              | CC              | 1946748542               |
| SNP_P4_17581_47148239 | NC_021160.1    | Ca_kabuli_chr01 | 47148239                | CC                              | TT              | 1946748544               |
| SNP_P4_17583_47186804 | NC_021160.1    | Ca_kabuli_chr01 | 47186804                | GG                              | TT              | 1946748546               |
| SNP_P4_17585_47190714 | NC_021160.1    | Ca_kabuli_chr01 | 47190714                | CC                              | GG              | 1946748548               |
| SNP_P4_17586_47195939 | NC_021160.1    | Ca_kabuli_chr01 | 47195939                | GG                              | AA              | 1946748550               |
| SNP_P4_17587_47197498 | NC_021160.1    | Ca_kabuli_chr01 | 47197498                | AA                              | GG              | 1946748552               |
| SNP_P4_17588_47209400 | NC_021160.1    | Ca_kabuli_chr01 | 47209400                | TT                              | GG              | 1946748554               |
| SNP_P4_17589_47239985 | NC_021160.1    | Ca_kabuli_chr01 | 47239985                | CC                              | AA              | 1946748556               |
| SNP_P4_17590_47257621 | NC_021160.1    | Ca_kabuli_chr01 | 47257621                | CC                              | TT              | 1946748558               |
| SNP_P4_17592_47277083 | NC_021160.1    | Ca_kabuli_chr01 | 47277083                | GG                              | TT              | 1946748560               |
| SNP_P4_17593_47292006 | NC_021160.1    | Ca_kabuli_chr01 | 47292006                | CC                              | AA              | 1946748562               |
| SNP_P4_17595_47292298 | NC_021160.1    | Ca_kabuli_chr01 | 47292298                | GG                              | AA              | 1946748564               |
| SNP_P4_17596_47292302 | NC_021160.1    | Ca_kabuli_chr01 | 47292302                | GG                              | CC              | 1946748566               |
| SNP_P4_17597_47292329 | NC_021160.1    | Ca_kabuli_chr01 | 47292329                | AA                              | GG              | 1946748567               |
| SNP_P4_17598_47292356 | NC_021160.1    | Ca_kabuli_chr01 | 47292356                | CC                              | GG              | 1946748569               |
| SNP_P4_17599_47292397 | NC_021160.1    | Ca_kabuli_chr01 | 47292397                | CC                              | TT              | 1946748571               |
| SNP_P4_17600_47296073 | NC_021160.1    | Ca_kabuli_chr01 | 47296073                | TT                              | AA              | 1946748573               |
| SNP_P4_17601_47303762 | NC_021160.1    | Ca_kabuli_chr01 | 47303762                | AA                              | TT              | 1946748575               |

| SNPs IDs              | Chromosome IDs | Chromosomes     | Physical positions (bp) | CDC Frontier (Reference genome) | (ILWC46 & LPNB) | NCBI SNPdb Accession IDs |
|-----------------------|----------------|-----------------|-------------------------|---------------------------------|-----------------|--------------------------|
| SNP_P4_17602_47327761 | NC_021160.1    | Ca_kabuli_chr01 | 47327761                | TT                              | CC              | 1946748577               |
| SNP_P4_17603_47328987 | NC_021160.1    | Ca_kabuli_chr01 | 47328987                | CC                              | GG              | 1946748579               |
| SNP_P4_17604_47329372 | NC_021160.1    | Ca_kabuli_chr01 | 47329372                | GG                              | AA              | 1946748581               |
| SNP_P4_17607_47346554 | NC_021160.1    | Ca_kabuli_chr01 | 47346554                | TT                              | CC              | 1946748583               |
| SNP_P4_17608_47370738 | NC_021160.1    | Ca_kabuli_chr01 | 47370738                | CC                              | TT              | 1946748585               |
| SNP_P4_17609_47370785 | NC_021160.1    | Ca_kabuli_chr01 | 47370785                | AA                              | CC              | 1946748587               |
| SNP_P4_17610_47373118 | NC_021160.1    | Ca_kabuli_chr01 | 47373118                | TT                              | CC              | 1946748589               |
| SNP_P4_17612_47375942 | NC_021160.1    | Ca_kabuli_chr01 | 47375942                | CC                              | AA              | 1946748591               |
| SNP_P4_17613_47375976 | NC_021160.1    | Ca_kabuli_chr01 | 47375976                | TT                              | CC              | 1946748592               |
| SNP_P4_17615_47391830 | NC_021160.1    | Ca_kabuli_chr01 | 47391830                | AA                              | TT              | 1946748594               |
| SNP_P4_17616_47396880 | NC_021160.1    | Ca_kabuli_chr01 | 47396880                | CC                              | TT              | 1946748596               |
| SNP_P4_17617_47404892 | NC_021160.1    | Ca_kabuli_chr01 | 47404892                | CC                              | TT              | 1946748598               |
| SNP_P4_17618_47416777 | NC_021160.1    | Ca_kabuli_chr01 | 47416777                | TT                              | CC              | 1946748600               |
| SNP_P4_17620_47459248 | NC_021160.1    | Ca_kabuli_chr01 | 47459248                | CC                              | TT              | 1946748602               |
| SNP_P4_17621_47459279 | NC_021160.1    | Ca_kabuli_chr01 | 47459279                | CC                              | TT              | 1946748604               |
| SNP_P4_17622_47507721 | NC_021160.1    | Ca_kabuli_chr01 | 47507721                | CC                              | AA              | 1946748606               |
| SNP_P4_17623_47507848 | NC_021160.1    | Ca_kabuli_chr01 | 47507848                | AA                              | GG              | 1946748608               |
| SNP_P4_17624_47510901 | NC_021160.1    | Ca_kabuli_chr01 | 47510901                | AA                              | GG              | 1946748610               |
| SNP_P4_17625_47517344 | NC_021160.1    | Ca_kabuli_chr01 | 47517344                | CC                              | AA              | 1946748612               |
| SNP_P4_17626_47519418 | NC_021160.1    | Ca_kabuli_chr01 | 47519418                | CC                              | AA              | 1946748614               |
| SNP_P4_17627_47523903 | NC_021160.1    | Ca_kabuli_chr01 | 47523903                | GG                              | CC              | 1946748616               |
| SNP_P4_17628_47529500 | NC_021160.1    | Ca_kabuli_chr01 | 47529500                | AA                              | TT              | 1946748618               |
| SNP_P4_17629_47538076 | NC_021160.1    | Ca_kabuli_chr01 | 47538076                | CC                              | TT              | 1946748620               |
| SNP_P4_17630_47549915 | NC_021160.1    | Ca_kabuli_chr01 | 47549915                | CC                              | AA              | 1946748622               |
| SNP_P4_17633_47585085 | NC_021160.1    | Ca_kabuli_chr01 | 47585085                | CC                              | TT              | 1946748624               |
| SNP_P4_17634_47605920 | NC_021160.1    | Ca_kabuli_chr01 | 47605920                | GG                              | TT              | 1946748626               |
| SNP_P4_17635_47608230 | NC_021160.1    | Ca_kabuli_chr01 | 47608230                | GG                              | AA              | 1946748628               |
| SNP_P4_17636_47625981 | NC_021160.1    | Ca_kabuli_chr01 | 47625981                | CC                              | TT              | 1946748630               |
| SNP_P4_17637_47626276 | NC_021160.1    | Ca_kabuli_chr01 | 47626276                | CC                              | AA              | 1946748632               |
| SNP_P4_17638_47626486 | NC_021160.1    | Ca_kabuli_chr01 | 47626486                | TT                              | AA              | 1946748634               |
| SNP_P4_17639_47626487 | NC_021160.1    | Ca_kabuli_chr01 | 47626487                | CC                              | AA              | 1946748636               |
| SNP_P4_17641_47626884 | NC_021160.1    | Ca_kabuli_chr01 | 47626884                | AA                              | TT              | 1946748638               |
| SNP_P4_17642_47626903 | NC_021160.1    | Ca_kabuli_chr01 | 47626903                | GG                              | TT              | 1946748640               |
| SNP_P4_17643_47626908 | NC_021160.1    | Ca_kabuli_chr01 | 47626908                | GG                              | CC              | 1946748642               |
| SNP_P4_17644_47626945 | NC_021160.1    | Ca_kabuli_chr01 | 47626945                | AA                              | GG              | 1946748644               |
| SNP_P4_17645_47626954 | NC_021160.1    | Ca_kabuli_chr01 | 47626954                | CC                              | TT              | 1946748647               |
| SNP_P4_17646_47630499 | NC_021160.1    | Ca_kabuli_chr01 | 47630499                | TT                              | CC              | 1946748649               |
| SNP_P4_17647_47630502 | NC_021160.1    | Ca_kabuli_chr01 | 47630502                | CC                              | AA              | 1946748651               |
| SNP_P4_17649_47630795 | NC_021160.1    | Ca_kabuli_chr01 | 47630795                | AA                              | GG              | 1946748653               |
| SNP_P4_17651_47631504 | NC_021160.1    | Ca_kabuli_chr01 | 47631504                | TT                              | AA              | 1946748655               |
| SNP_P4_17652_47633064 | NC_021160.1    | Ca_kabuli_chr01 | 47633064                | GG                              | AA              | 1946748657               |
| SNP_P4_17653_47633102 | NC_021160.1    | Ca_kabuli_chr01 | 47633102                | CC                              | TT              | 1946748659               |

| SNPs IDs              | Chromosome IDs | Chromosomes     | Physical positions (bp) | CDC Frontier (Reference genome) | (ILWC46 & LPNB) | NCBI SNPdb Accession IDs |
|-----------------------|----------------|-----------------|-------------------------|---------------------------------|-----------------|--------------------------|
| SNP_P4_17654_47633364 | NC_021160.1    | Ca_kabuli_chr01 | 47633364                | CC                              | TT              | 1946748661               |
| SNP_P4_17655_47680839 | NC_021160.1    | Ca_kabuli_chr01 | 47680839                | CC                              | TT              | 1946748663               |
| SNP_P4_17656_47729136 | NC_021160.1    | Ca_kabuli_chr01 | 47729136                | AA                              | GG              | 1946748665               |
| SNP_P4_17658_47730482 | NC_021160.1    | Ca_kabuli_chr01 | 47730482                | TT                              | CC              | 1946748667               |
| SNP_P4_17659_47743992 | NC_021160.1    | Ca_kabuli_chr01 | 47743992                | CC                              | AA              | 1946748669               |
| SNP_P4_17660_47771112 | NC_021160.1    | Ca_kabuli_chr01 | 47771112                | AA                              | GG              | 1946748671               |
| SNP_P4_17661_47771205 | NC_021160.1    | Ca_kabuli_chr01 | 47771205                | AA                              | GG              | 1946748673               |
| SNP_P4_17663_47771271 | NC_021160.1    | Ca_kabuli_chr01 | 47771271                | TT                              | GG              | 1946748675               |
| SNP_P4_17664_47771493 | NC_021160.1    | Ca_kabuli_chr01 | 47771493                | CC                              | TT              | 1946748677               |
| SNP_P4_17665_47814848 | NC_021160.1    | Ca_kabuli_chr01 | 47814848                | TT                              | CC              | 1946748679               |
| SNP_P4_17666_47823431 | NC_021160.1    | Ca_kabuli_chr01 | 47823431                | CC                              | TT              | 1946748681               |
| SNP_P4_17667_47838229 | NC_021160.1    | Ca_kabuli_chr01 | 47838229                | TT                              | CC              | 1946748683               |
| SNP_P4_17668_47838355 | NC_021160.1    | Ca_kabuli_chr01 | 47838355                | GG                              | AA              | 1946748685               |
| SNP_P4_17669_47838359 | NC_021160.1    | Ca_kabuli_chr01 | 47838359                | TT                              | CC              | 1946748687               |
| SNP_P4_17670_47838374 | NC_021160.1    | Ca_kabuli_chr01 | 47838374                | AA                              | GG              | 1946748689               |
| SNP_P4_17671_47838380 | NC_021160.1    | Ca_kabuli_chr01 | 47838380                | GG                              | AA              | 1946748691               |
| SNP_P4_17672_47838536 | NC_021160.1    | Ca_kabuli_chr01 | 47838536                | AA                              | GG              | 1946748693               |
| SNP_P4_17673_47839097 | NC_021160.1    | Ca_kabuli_chr01 | 47839097                | TT                              | CC              | 1946748695               |
| SNP_P4_17674_47839166 | NC_021160.1    | Ca_kabuli_chr01 | 47839166                | AA                              | GG              | 1946748697               |
| SNP_P4_17675_47839624 | NC_021160.1    | Ca_kabuli_chr01 | 47839624                | AA                              | GG              | 1946748700               |
| SNP_P4_17676_47839636 | NC_021160.1    | Ca_kabuli_chr01 | 47839636                | AA                              | GG              | 1946748702               |
| SNP_P4_17677_47839661 | NC_021160.1    | Ca_kabuli_chr01 | 47839661                | GG                              | TT              | 1946748705               |
| SNP_P4_17678_47839684 | NC_021160.1    | Ca_kabuli_chr01 | 47839684                | TT                              | CC              | 1946748707               |
| SNP_P4_17679_47847397 | NC_021160.1    | Ca_kabuli_chr01 | 47847397                | CC                              | TT              | 1946748709               |
| SNP_P4_17680_47859769 | NC_021160.1    | Ca_kabuli_chr01 | 47859769                | AA                              | GG              | 1946748711               |
| SNP_P4_17681_47859796 | NC_021160.1    | Ca_kabuli_chr01 | 47859796                | TT                              | GG              | 1946748713               |
| SNP_P4_17682_47874146 | NC_021160.1    | Ca_kabuli_chr01 | 47874146                | CC                              | AA              | 1946748715               |
| SNP_P4_17683_47874961 | NC_021160.1    | Ca_kabuli_chr01 | 47874961                | GG                              | AA              | 1946748717               |
| SNP_P4_17684_47874970 | NC_021160.1    | Ca_kabuli_chr01 | 47874970                | GG                              | AA              | 1946748719               |
| SNP_P4_17685_47875083 | NC_021160.1    | Ca_kabuli_chr01 | 47875083                | AA                              | TT              | 1946748721               |
| SNP_P4_17686_47875218 | NC_021160.1    | Ca_kabuli_chr01 | 47875218                | AA                              | TT              | 1946748723               |
| SNP_P4_17687_47875223 | NC_021160.1    | Ca_kabuli_chr01 | 47875223                | AA                              | GG              | 1946748725               |
| SNP_P4_17688_47875306 | NC_021160.1    | Ca_kabuli_chr01 | 47875306                | TT                              | GG              | 1946748727               |
| SNP_P4_17689_47875314 | NC_021160.1    | Ca_kabuli_chr01 | 47875314                | GG                              | TT              | 1946748729               |
| SNP_P4_17690_47875324 | NC_021160.1    | Ca_kabuli_chr01 | 47875324                | CC                              | AA              | 1946748731               |
| SNP_P4_17691_47875337 | NC_021160.1    | Ca_kabuli_chr01 | 47875337                | TT                              | AA              | 1946748733               |
| SNP_P4_17692_47875440 | NC_021160.1    | Ca_kabuli_chr01 | 47875440                | GG                              | AA              | 1946748735               |
| SNP_P4_17693_47875521 | NC_021160.1    | Ca_kabuli_chr01 | 47875521                | AA                              | GG              | 1946748738               |
| SNP_P4_17694_47877141 | NC_021160.1    | Ca_kabuli_chr01 | 47877141                | CC                              | TT              | 1946748740               |
| SNP_P4_17695_47892335 | NC_021160.1    | Ca_kabuli_chr01 | 47892335                | GG                              | CC              | 1946748742               |
| SNP_P4_17696_47892381 | NC_021160.1    | Ca_kabuli_chr01 | 47892381                | TT                              | GG              | 1946748744               |
| SNP_P4_17698_47913363 | NC_021160.1    | Ca_kabuli_chr01 | 47913363                | GG                              | AA              | 1946748746               |

| SNPs IDs              | Chromosome IDs | Chromosomes     | Physical positions (bp) | CDC Frontier (Reference genome) | (ILWC46 & LPNB) | NCBI SNPdb Accession IDs |
|-----------------------|----------------|-----------------|-------------------------|---------------------------------|-----------------|--------------------------|
| SNP_P4_17699_47951135 | NC_021160.1    | Ca_kabuli_chr01 | 47951135                | AA                              | TT              | 1946748748               |
| SNP_P4_17700_47951152 | NC_021160.1    | Ca_kabuli_chr01 | 47951152                | GG                              | TT              | 1946748750               |
| SNP_P4_17701_47955945 | NC_021160.1    | Ca_kabuli_chr01 | 47955945                | AA                              | TT              | 1946748752               |
| SNP_P4_17703_47960462 | NC_021160.1    | Ca_kabuli_chr01 | 47960462                | TT                              | AA              | 1946748754               |
| SNP_P4_17705_47990928 | NC_021160.1    | Ca_kabuli_chr01 | 47990928                | CC                              | TT              | 1946748756               |
| SNP_P4_17706_48044715 | NC_021160.1    | Ca_kabuli_chr01 | 48044715                | TT                              | CC              | 1946748758               |
| SNP_P4_17708_48069650 | NC_021160.1    | Ca_kabuli_chr01 | 48069650                | AA                              | CC              | 1946748760               |
| SNP_P4_17709_48069979 | NC_021160.1    | Ca_kabuli_chr01 | 48069979                | GG                              | AA              | 1946748762               |
| SNP_P4_17710_48071249 | NC_021160.1    | Ca_kabuli_chr01 | 48071249                | AA                              | GG              | 1946748764               |
| SNP_P4_17711_48071258 | NC_021160.1    | Ca_kabuli_chr01 | 48071258                | AA                              | CC              | 1946748766               |
| SNP_P4_17712_48071260 | NC_021160.1    | Ca_kabuli_chr01 | 48071260                | AA                              | GG              | 1946748769               |
| SNP_P4_17713_48071274 | NC_021160.1    | Ca_kabuli_chr01 | 48071274                | AA                              | GG              | 1946748771               |
| SNP_P4_17714_48071289 | NC_021160.1    | Ca_kabuli_chr01 | 48071289                | GG                              | AA              | 1946748773               |
| SNP_P4_17715_48071290 | NC_021160.1    | Ca_kabuli_chr01 | 48071290                | TT                              | GG              | 1946748775               |
| SNP_P4_17716_48071373 | NC_021160.1    | Ca_kabuli_chr01 | 48071373                | AA                              | GG              | 1946748777               |
| SNP_P4_17717_48071479 | NC_021160.1    | Ca_kabuli_chr01 | 48071479                | TT                              | CC              | 1946748779               |
| SNP_P4_17718_48071904 | NC_021160.1    | Ca_kabuli_chr01 | 48071904                | CC                              | GG              | 1946748781               |
| SNP_P4_17719_48072934 | NC_021160.1    | Ca_kabuli_chr01 | 48072934                | GG                              | AA              | 1946748784               |
| SNP_P4_17720_48087711 | NC_021160.1    | Ca_kabuli_chr01 | 48087711                | AA                              | TT              | 1946748786               |
| SNP_P4_17721_48091287 | NC_021160.1    | Ca_kabuli_chr01 | 48091287                | CC                              | TT              | 1946748788               |
| SNP_P4_17722_48091753 | NC_021160.1    | Ca_kabuli_chr01 | 48091753                | TT                              | CC              | 1946748790               |
| SNP_P4_17725_48126883 | NC_021160.1    | Ca_kabuli_chr01 | 48126883                | GG                              | AA              | 1946748792               |
| SNP_P4_17726_48138665 | NC_021160.1    | Ca_kabuli_chr01 | 48138665                | CC                              | TT              | 1946748794               |
| SNP_P4_17727_48155868 | NC_021160.1    | Ca_kabuli_chr01 | 48155868                | TT                              | GG              | 1946748796               |
| SNP_P4_17728_48155870 | NC_021160.1    | Ca_kabuli_chr01 | 48155870                | TT                              | GG              | 1946748798               |
| SNP_P4_17729_48155872 | NC_021160.1    | Ca_kabuli_chr01 | 48155872                | GG                              | TT              | 1946748800               |
| SNP_P4_17732_48209720 | NC_021160.1    | Ca_kabuli_chr01 | 48209720                | AA                              | GG              | 1946748802               |
| SNP_P4_17733_48213164 | NC_021160.1    | Ca_kabuli_chr01 | 48213164                | GG                              | AA              | 1946748804               |
| SNP_P4_17734_48215062 | NC_021160.1    | Ca_kabuli_chr01 | 48215062                | TT                              | AA              | 1946748806               |
| SNP_P4_17735_48223068 | NC_021160.1    | Ca_kabuli_chr01 | 48223068                | AA                              | CC              | 1946748808               |
| SNP_P4_17736_48223110 | NC_021160.1    | Ca_kabuli_chr01 | 48223110                | CC                              | TT              | 1946748810               |
| SNP_P4_17738_48240297 | NC_021160.1    | Ca_kabuli_chr01 | 48240297                | TT                              | AA              | 1946748812               |
| SNP_P4_17740_48246915 | NC_021160.1    | Ca_kabuli_chr01 | 48246915                | GG                              | AA              | 1946748814               |
| SNP_P4_17741_48252032 | NC_021160.1    | Ca_kabuli_chr01 | 48252032                | AA                              | GG              | 1946748816               |
| SNP_P4_17742_48286647 | NC_021160.1    | Ca_kabuli_chr01 | 48286647                | TT                              | CC              | 1946748818               |
| SNP_P4_17743_48296825 | NC_021160.1    | Ca_kabuli_chr01 | 48296825                | CC                              | TT              | 1946748820               |
| SNP_P4_17744_48303240 | NC_021160.1    | Ca_kabuli_chr01 | 48303240                | TT                              | CC              | 1946748822               |
| SNP_P4_17745_48350294 | NC_021160.1    | Ca_kabuli_chr01 | 48350294                | TT                              | CC              | 1946748824               |
| SNP_P4_17746_48350311 | NC_021160.1    | Ca_kabuli_chr01 | 48350311                | TT                              | CC              | 1946748826               |
| SNP_P4_17747_759      | NC_021161.1    | Ca_kabuli_chr02 | 759                     | AA                              | GG              | 1946748828               |
| SNP_P4_17748_808      | NC_021161.1    | Ca_kabuli_chr02 | 808                     | CC                              | GG              | 1946748831               |
| SNP_P4_17749_32821    | NC_021161.1    | Ca_kabuli_chr02 | 32821                   | CC                              | TT              | 1946748833               |

| SNPs IDs            | Chromosome IDs | Chromosomes     | Physical positions (bp) | CDC Frontier (Reference genome) | (ILWC46 & LPNB) | NCBI SNPdb Accession IDs |
|---------------------|----------------|-----------------|-------------------------|---------------------------------|-----------------|--------------------------|
| SNP_P4_17751_42006  | NC_021161.1    | Ca_kabuli_chr02 | 42006                   | AA                              | TT              | 1946748835               |
| SNP_P4_17752_42046  | NC_021161.1    | Ca_kabuli_chr02 | 42046                   | CC                              | TT              | 1946748837               |
| SNP_P4_17754_42249  | NC_021161.1    | Ca_kabuli_chr02 | 42249                   | AA                              | TT              | 1946748839               |
| SNP_P4_17755_42433  | NC_021161.1    | Ca_kabuli_chr02 | 42433                   | AA                              | GG              | 1946748841               |
| SNP_P4_17756_42678  | NC_021161.1    | Ca_kabuli_chr02 | 42678                   | AA                              | GG              | 1946748843               |
| SNP_P4_17757_42907  | NC_021161.1    | Ca_kabuli_chr02 | 42907                   | AA                              | CC              | 1946748845               |
| SNP_P4_17758_49284  | NC_021161.1    | Ca_kabuli_chr02 | 49284                   | CC                              | AA              | 1946748847               |
| SNP_P4_17759_61678  | NC_021161.1    | Ca_kabuli_chr02 | 61678                   | TT                              | CC              | 1946748849               |
| SNP_P4_17760_65696  | NC_021161.1    | Ca_kabuli_chr02 | 65696                   | AA                              | GG              | 1946748851               |
| SNP_P4_17762_70724  | NC_021161.1    | Ca_kabuli_chr02 | 70724                   | CC                              | TT              | 1946748853               |
| SNP_P4_17763_70737  | NC_021161.1    | Ca_kabuli_chr02 | 70737                   | TT                              | CC              | 1946748855               |
| SNP_P4_17764_88119  | NC_021161.1    | Ca_kabuli_chr02 | 88119                   | TT                              | CC              | 1946748857               |
| SNP_P4_17765_89822  | NC_021161.1    | Ca_kabuli_chr02 | 89822                   | CC                              | TT              | 1946748859               |
| SNP_P4_17766_93778  | NC_021161.1    | Ca_kabuli_chr02 | 93778                   | CC                              | TT              | 1946748861               |
| SNP_P4_17767_141818 | NC_021161.1    | Ca_kabuli_chr02 | 141818                  | GG                              | AA              | 1946748863               |
| SNP_P4_17768_159763 | NC_021161.1    | Ca_kabuli_chr02 | 159763                  | TT                              | AA              | 1946748865               |
| SNP_P4_17769_159766 | NC_021161.1    | Ca_kabuli_chr02 | 159766                  | TT                              | AA              | 1946748867               |
| SNP_P4_17770_165540 | NC_021161.1    | Ca_kabuli_chr02 | 165540                  | GG                              | AA              | 1946748869               |
| SNP_P4_17771_175927 | NC_021161.1    | Ca_kabuli_chr02 | 175927                  | AA                              | TT              | 1946748871               |
| SNP_P4_17772_196656 | NC_021161.1    | Ca_kabuli_chr02 | 196656                  | TT                              | CC              | 1946748873               |
| SNP_P4_17773_199338 | NC_021161.1    | Ca_kabuli_chr02 | 199338                  | TT                              | CC              | 1946748875               |
| SNP_P4_17774_201151 | NC_021161.1    | Ca_kabuli_chr02 | 201151                  | GG                              | AA              | 1946748877               |
| SNP_P4_17775_206646 | NC_021161.1    | Ca_kabuli_chr02 | 206646                  | GG                              | TT              | 1946748879               |
| SNP_P4_17777_213664 | NC_021161.1    | Ca_kabuli_chr02 | 213664                  | TT                              | GG              | 1946748881               |
| SNP_P4_17778_213668 | NC_021161.1    | Ca_kabuli_chr02 | 213668                  | AA                              | GG              | 1946748883               |
| SNP_P4_17779_213674 | NC_021161.1    | Ca_kabuli_chr02 | 213674                  | TT                              | GG              | 1946748885               |
| SNP_P4_17780_213709 | NC_021161.1    | Ca_kabuli_chr02 | 213709                  | CC                              | TT              | 1946748887               |
| SNP_P4_17781_214996 | NC_021161.1    | Ca_kabuli_chr02 | 214996                  | CC                              | GG              | 1946748889               |
| SNP_P4_17783_252483 | NC_021161.1    | Ca_kabuli_chr02 | 252483                  | CC                              | TT              | 1946748891               |
| SNP_P4_17786_298435 | NC_021161.1    | Ca_kabuli_chr02 | 298435                  | GG                              | TT              | 1946748893               |
| SNP_P4_17787_301598 | NC_021161.1    | Ca_kabuli_chr02 | 301598                  | CC                              | TT              | 1946748895               |
| SNP_P4_17788_310469 | NC_021161.1    | Ca_kabuli_chr02 | 310469                  | AA                              | GG              | 1946748897               |
| SNP_P4_17789_314961 | NC_021161.1    | Ca_kabuli_chr02 | 314961                  | CC                              | TT              | 1946748899               |
| SNP_P4_17790_323509 | NC_021161.1    | Ca_kabuli_chr02 | 323509                  | TT                              | CC              | 1946748901               |
| SNP_P4_17793_379377 | NC_021161.1    | Ca_kabuli_chr02 | 379377                  | CC                              | TT              | 1946748903               |
| SNP_P4_17794_390044 | NC_021161.1    | Ca_kabuli_chr02 | 390044                  | GG                              | AA              | 1946748905               |
| SNP_P4_17795_390075 | NC_021161.1    | Ca_kabuli_chr02 | 390075                  | GG                              | AA              | 1946748907               |
| SNP_P4_17797_421743 | NC_021161.1    | Ca_kabuli_chr02 | 421743                  | TT                              | AA              | 1946748909               |
| SNP_P4_17799_435691 | NC_021161.1    | Ca_kabuli_chr02 | 435691                  | TT                              | AA              | 1946748911               |
| SNP_P4_17801_454087 | NC_021161.1    | Ca_kabuli_chr02 | 454087                  | TT                              | CC              | 1946748913               |
| SNP_P4_17802_478241 | NC_021161.1    | Ca_kabuli_chr02 | 478241                  | TT                              | AA              | 1946748915               |
| SNP_P4_17803_479647 | NC_021161.1    | Ca_kabuli_chr02 | 479647                  | TT                              | CC              | 1946748917               |

| SNPs IDs            | Chromosome IDs | Chromosomes     | Physical positions (bp) | CDC Frontier (Reference genome) | (ILWC46 & LPNB) | NCBI SNPdb Accession IDs |
|---------------------|----------------|-----------------|-------------------------|---------------------------------|-----------------|--------------------------|
| SNP_P4_17805_488610 | NC_021161.1    | Ca_kabuli_chr02 | 488610                  | TT                              | CC              | 1946748919               |
| SNP_P4_17806_490272 | NC_021161.1    | Ca_kabuli_chr02 | 490272                  | TT                              | CC              | 1946748921               |
| SNP_P4_17807_490281 | NC_021161.1    | Ca_kabuli_chr02 | 490281                  | GG                              | AA              | 1946748923               |
| SNP_P4_17808_490292 | NC_021161.1    | Ca_kabuli_chr02 | 490292                  | AA                              | GG              | 1946748925               |
| SNP_P4_17809_491716 | NC_021161.1    | Ca_kabuli_chr02 | 491716                  | CC                              | TT              | 1946748927               |
| SNP_P4_17810_495575 | NC_021161.1    | Ca_kabuli_chr02 | 495575                  | TT                              | CC              | 1946748929               |
| SNP_P4_17811_496619 | NC_021161.1    | Ca_kabuli_chr02 | 496619                  | TT                              | CC              | 1946748931               |
| SNP_P4_17812_496790 | NC_021161.1    | Ca_kabuli_chr02 | 496790                  | CC                              | AA              | 1946748933               |
| SNP_P4_17813_496793 | NC_021161.1    | Ca_kabuli_chr02 | 496793                  | AA                              | GG              | 1946748935               |
| SNP_P4_17814_496811 | NC_021161.1    | Ca_kabuli_chr02 | 496811                  | TT                              | CC              | 1946748937               |
| SNP_P4_17815_500154 | NC_021161.1    | Ca_kabuli_chr02 | 500154                  | GG                              | TT              | 1946748939               |
| SNP_P4_17816_503369 | NC_021161.1    | Ca_kabuli_chr02 | 503369                  | CC                              | AA              | 1946748941               |
| SNP_P4_17817_503376 | NC_021161.1    | Ca_kabuli_chr02 | 503376                  | AA                              | TT              | 1946748943               |
| SNP_P4_17818_526059 | NC_021161.1    | Ca_kabuli_chr02 | 526059                  | CC                              | TT              | 1946748945               |
| SNP_P4_17819_577198 | NC_021161.1    | Ca_kabuli_chr02 | 577198                  | CC                              | TT              | 1946748946               |
| SNP_P4_17820_582218 | NC_021161.1    | Ca_kabuli_chr02 | 582218                  | CC                              | TT              | 1946748948               |
| SNP_P4_17821_600871 | NC_021161.1    | Ca_kabuli_chr02 | 600871                  | AA                              | TT              | 1946748950               |
| SNP_P4_17822_612729 | NC_021161.1    | Ca_kabuli_chr02 | 612729                  | TT                              | CC              | 1946748952               |
| SNP_P4_17823_621681 | NC_021161.1    | Ca_kabuli_chr02 | 621681                  | AA                              | GG              | 1946748954               |
| SNP_P4_17824_622070 | NC_021161.1    | Ca_kabuli_chr02 | 622070                  | AA                              | GG              | 1946748956               |
| SNP_P4_17825_622099 | NC_021161.1    | Ca_kabuli_chr02 | 622099                  | TT                              | CC              | 1946748958               |
| SNP_P4_17826_622226 | NC_021161.1    | Ca_kabuli_chr02 | 622226                  | AA                              | CC              | 1946748960               |
| SNP_P4_17827_622230 | NC_021161.1    | Ca_kabuli_chr02 | 622230                  | AA                              | GG              | 1946748962               |
| SNP_P4_17828_622233 | NC_021161.1    | Ca_kabuli_chr02 | 622233                  | GG                              | TT              | 1946748964               |
| SNP_P4_17829_622285 | NC_021161.1    | Ca_kabuli_chr02 | 622285                  | AA                              | GG              | 1946748966               |
| SNP_P4_17830_622304 | NC_021161.1    | Ca_kabuli_chr02 | 622304                  | AA                              | GG              | 1946748968               |
| SNP_P4_17831_622310 | NC_021161.1    | Ca_kabuli_chr02 | 622310                  | TT                              | CC              | 1946748970               |
| SNP_P4_17832_625396 | NC_021161.1    | Ca_kabuli_chr02 | 625396                  | TT                              | AA              | 1946748972               |
| SNP_P4_17833_636222 | NC_021161.1    | Ca_kabuli_chr02 | 636222                  | GG                              | TT              | 1946748974               |
| SNP_P4_17834_636227 | NC_021161.1    | Ca_kabuli_chr02 | 636227                  | GG                              | AA              | 1946748976               |
| SNP_P4_17835_636296 | NC_021161.1    | Ca_kabuli_chr02 | 636296                  | CC                              | TT              | 1946748978               |
| SNP_P4_17836_636312 | NC_021161.1    | Ca_kabuli_chr02 | 636312                  | AA                              | GG              | 1946748980               |
| SNP_P4_17837_636944 | NC_021161.1    | Ca_kabuli_chr02 | 636944                  | CC                              | TT              | 1946748982               |
| SNP_P4_17838_641631 | NC_021161.1    | Ca_kabuli_chr02 | 641631                  | CC                              | AA              | 1946748984               |
| SNP_P4_17839_642886 | NC_021161.1    | Ca_kabuli_chr02 | 642886                  | GG                              | TT              | 1946748986               |
| SNP_P4_17840_644036 | NC_021161.1    | Ca_kabuli_chr02 | 644036                  | TT                              | GG              | 1946748988               |
| SNP_P4_17841_644518 | NC_021161.1    | Ca_kabuli_chr02 | 644518                  | GG                              | AA              | 1946748990               |
| SNP_P4_17842_644547 | NC_021161.1    | Ca_kabuli_chr02 | 644547                  | GG                              | AA              | 1946748992               |
| SNP_P4_17843_644629 | NC_021161.1    | Ca_kabuli_chr02 | 644629                  | TT                              | AA              | 1946748994               |
| SNP_P4_17844_647343 | NC_021161.1    | Ca_kabuli_chr02 | 647343                  | GG                              | CC              | 1946748996               |
| SNP_P4_17845_652602 | NC_021161.1    | Ca_kabuli_chr02 | 652602                  | CC                              | TT              | 1946748998               |
| SNP_P4_17846_653018 | NC_021161.1    | Ca_kabuli_chr02 | 653018                  | AA                              | GG              | 1946749000               |

| SNPs IDs             | Chromosome IDs | Chromosomes     | Physical positions (bp) | CDC Frontier (Reference genome) | (ILWC46 & LPNB) | NCBI SNPdb Accession IDs |
|----------------------|----------------|-----------------|-------------------------|---------------------------------|-----------------|--------------------------|
| SNP_P4_17847_660546  | NC_021161.1    | Ca_kabuli_chr02 | 660546                  | CC                              | GG              | 1946749002               |
| SNP_P4_17848_661280  | NC_021161.1    | Ca_kabuli_chr02 | 661280                  | AA                              | CC              | 1946749004               |
| SNP_P4_17849_661282  | NC_021161.1    | Ca_kabuli_chr02 | 661282                  | TT                              | CC              | 1946749006               |
| SNP_P4_17850_661283  | NC_021161.1    | Ca_kabuli_chr02 | 661283                  | TT                              | AA              | 1946749008               |
| SNP_P4_17852_667402  | NC_021161.1    | Ca_kabuli_chr02 | 667402                  | TT                              | CC              | 1946749010               |
| SNP_P4_17853_691280  | NC_021161.1    | Ca_kabuli_chr02 | 691280                  | CC                              | TT              | 1946749012               |
| SNP_P4_17854_691281  | NC_021161.1    | Ca_kabuli_chr02 | 691281                  | TT                              | AA              | 1946749014               |
| SNP_P4_17856_713978  | NC_021161.1    | Ca_kabuli_chr02 | 713978                  | TT                              | AA              | 1946749015               |
| SNP_P4_17857_722961  | NC_021161.1    | Ca_kabuli_chr02 | 722961                  | CC                              | TT              | 1946749017               |
| SNP_P4_17858_745164  | NC_021161.1    | Ca_kabuli_chr02 | 745164                  | AA                              | GG              | 1946749019               |
| SNP_P4_17859_745897  | NC_021161.1    | Ca_kabuli_chr02 | 745897                  | AA                              | GG              | 1946749021               |
| SNP_P4_17863_857157  | NC_021161.1    | Ca_kabuli_chr02 | 857157                  | AA                              | GG              | 1946749023               |
| SNP_P4_17864_857169  | NC_021161.1    | Ca_kabuli_chr02 | 857169                  | TT                              | AA              | 1946749025               |
| SNP_P4_17865_859530  | NC_021161.1    | Ca_kabuli_chr02 | 859530                  | AA                              | GG              | 1946749027               |
| SNP_P4_17866_866639  | NC_021161.1    | Ca_kabuli_chr02 | 866639                  | CC                              | TT              | 1946749029               |
| SNP_P4_17867_892483  | NC_021161.1    | Ca_kabuli_chr02 | 892483                  | CC                              | TT              | 1946749031               |
| SNP_P4_17868_894931  | NC_021161.1    | Ca_kabuli_chr02 | 894931                  | GG                              | AA              | 1946749034               |
| SNP_P4_17869_894934  | NC_021161.1    | Ca_kabuli_chr02 | 894934                  | CC                              | TT              | 1946749036               |
| SNP_P4_17870_896294  | NC_021161.1    | Ca_kabuli_chr02 | 896294                  | GG                              | TT              | 1946749038               |
| SNP_P4_17871_898472  | NC_021161.1    | Ca_kabuli_chr02 | 898472                  | AA                              | CC              | 1946749040               |
| SNP_P4_17872_898539  | NC_021161.1    | Ca_kabuli_chr02 | 898539                  | GG                              | AA              | 1946749043               |
| SNP_P4_17873_931417  | NC_021161.1    | Ca_kabuli_chr02 | 931417                  | GG                              | AA              | 1946749045               |
| SNP_P4_17874_931426  | NC_021161.1    | Ca_kabuli_chr02 | 931426                  | AA                              | GG              | 1946749047               |
| SNP_P4_17875_937987  | NC_021161.1    | Ca_kabuli_chr02 | 937987                  | AA                              | GG              | 1946749049               |
| SNP_P4_17876_938056  | NC_021161.1    | Ca_kabuli_chr02 | 938056                  | TT                              | AA              | 1946749051               |
| SNP_P4_17877_938084  | NC_021161.1    | Ca_kabuli_chr02 | 938084                  | AA                              | CC              | 1946749053               |
| SNP_P4_17879_1008990 | NC_021161.1    | Ca_kabuli_chr02 | 1008990                 | GG                              | TT              | 1946749055               |
| SNP_P4_17880_1022363 | NC_021161.1    | Ca_kabuli_chr02 | 1022363                 | AA                              | TT              | 1946749057               |
| SNP_P4_17881_1022364 | NC_021161.1    | Ca_kabuli_chr02 | 1022364                 | AA                              | GG              | 1946749059               |
| SNP_P4_17885_1040084 | NC_021161.1    | Ca_kabuli_chr02 | 1040084                 | CC                              | TT              | 1946749061               |
| SNP_P4_17886_1040110 | NC_021161.1    | Ca_kabuli_chr02 | 1040110                 | GG                              | CC              | 1946749063               |
| SNP_P4_17887_1040111 | NC_021161.1    | Ca_kabuli_chr02 | 1040111                 | TT                              | AA              | 1946749064               |
| SNP_P4_17889_1040131 | NC_021161.1    | Ca_kabuli_chr02 | 1040131                 | TT                              | CC              | 1946749066               |
| SNP_P4_17890_1040167 | NC_021161.1    | Ca_kabuli_chr02 | 1040167                 | GG                              | AA              | 1946749068               |
| SNP_P4_17891_1040420 | NC_021161.1    | Ca_kabuli_chr02 | 1040420                 | GG                              | TT              | 1946749070               |
| SNP_P4_17892_1041112 | NC_021161.1    | Ca_kabuli_chr02 | 1041112                 | AA                              | GG              | 1946749072               |
| SNP_P4_17893_1041136 | NC_021161.1    | Ca_kabuli_chr02 | 1041136                 | TT                              | AA              | 1946749074               |
| SNP_P4_17894_1041205 | NC_021161.1    | Ca_kabuli_chr02 | 1041205                 | AA                              | GG              | 1946749077               |
| SNP_P4_17895_1041366 | NC_021161.1    | Ca_kabuli_chr02 | 1041366                 | GG                              | AA              | 1946749079               |
| SNP_P4_17896_1041434 | NC_021161.1    | Ca_kabuli_chr02 | 1041434                 | AA                              | GG              | 1946749081               |
| SNP_P4_17897_1041900 | NC_021161.1    | Ca_kabuli_chr02 | 1041900                 | AA                              | TT              | 1946749083               |
| SNP_P4_17898_1045974 | NC_021161.1    | Ca_kabuli_chr02 | 1045974                 | CC                              | TT              | 1946749085               |



| SNPs IDs             | Chromosome IDs | Chromosomes     | Physical positions (bp) | CDC Frontier (Reference genome) | (ILWC46 & LPNB) | NCBI SNPdb Accession IDs |
|----------------------|----------------|-----------------|-------------------------|---------------------------------|-----------------|--------------------------|
| SNP_P4_17899_1048553 | NC_021161.1    | Ca_kabuli_chr02 | 1048553                 | TT                              | AA              | 1946749087               |
| SNP_P4_17900_1048661 | NC_021161.1    | Ca_kabuli_chr02 | 1048661                 | CC                              | GG              | 1946749089               |
| SNP_P4_17901_1048681 | NC_021161.1    | Ca_kabuli_chr02 | 1048681                 | TT                              | AA              | 1946749091               |
| SNP_P4_17902_1048683 | NC_021161.1    | Ca_kabuli_chr02 | 1048683                 | TT                              | AA              | 1946749093               |
| SNP_P4_17903_1048684 | NC_021161.1    | Ca_kabuli_chr02 | 1048684                 | TT                              | AA              | 1946749094               |
| SNP_P4_17904_1048696 | NC_021161.1    | Ca_kabuli_chr02 | 1048696                 | TT                              | CC              | 1946749096               |
| SNP_P4_17905_1049048 | NC_021161.1    | Ca_kabuli_chr02 | 1049048                 | TT                              | AA              | 1946749098               |
| SNP_P4_17906_1049331 | NC_021161.1    | Ca_kabuli_chr02 | 1049331                 | TT                              | CC              | 1946749100               |
| SNP_P4_17907_1073752 | NC_021161.1    | Ca_kabuli_chr02 | 1073752                 | AA                              | CC              | 1946749102               |
| SNP_P4_17908_1073874 | NC_021161.1    | Ca_kabuli_chr02 | 1073874                 | TT                              | AA              | 1946749104               |
| SNP_P4_17909_1073892 | NC_021161.1    | Ca_kabuli_chr02 | 1073892                 | GG                              | AA              | 1946749106               |
| SNP_P4_17911_1074446 | NC_021161.1    | Ca_kabuli_chr02 | 1074446                 | TT                              | AA              | 1946749108               |
| SNP_P4_17913_1074897 | NC_021161.1    | Ca_kabuli_chr02 | 1074897                 | TT                              | CC              | 1946749110               |
| SNP_P4_17914_1075717 | NC_021161.1    | Ca_kabuli_chr02 | 1075717                 | GG                              | AA              | 1946749112               |
| SNP_P4_17916_1076971 | NC_021161.1    | Ca_kabuli_chr02 | 1076971                 | TT                              | CC              | 1946749114               |
| SNP_P4_17917_1098025 | NC_021161.1    | Ca_kabuli_chr02 | 1098025                 | AA                              | TT              | 1946749116               |
| SNP_P4_17918_1098029 | NC_021161.1    | Ca_kabuli_chr02 | 1098029                 | CC                              | GG              | 1946749118               |
| SNP_P4_17919_1105674 | NC_021161.1    | Ca_kabuli_chr02 | 1105674                 | TT                              | GG              | 1946749120               |
| SNP_P4_17921_1134133 | NC_021161.1    | Ca_kabuli_chr02 | 1134133                 | AA                              | TT              | 1946749122               |
| SNP_P4_17922_1148438 | NC_021161.1    | Ca_kabuli_chr02 | 1148438                 | GG                              | AA              | 1946749124               |
| SNP_P4_17923_1152782 | NC_021161.1    | Ca_kabuli_chr02 | 1152782                 | TT                              | AA              | 1946749126               |
| SNP_P4_17924_1177921 | NC_021161.1    | Ca_kabuli_chr02 | 1177921                 | CC                              | TT              | 1946749128               |
| SNP_P4_17925_1207910 | NC_021161.1    | Ca_kabuli_chr02 | 1207910                 | GG                              | AA              | 1946749129               |
| SNP_P4_17926_1209240 | NC_021161.1    | Ca_kabuli_chr02 | 1209240                 | CC                              | TT              | 1946749131               |
| SNP_P4_17927_1209442 | NC_021161.1    | Ca_kabuli_chr02 | 1209442                 | GG                              | AA              | 1946749133               |
| SNP_P4_17928_1209447 | NC_021161.1    | Ca_kabuli_chr02 | 1209447                 | AA                              | GG              | 1946749135               |
| SNP_P4_17929_1230714 | NC_021161.1    | Ca_kabuli_chr02 | 1230714                 | TT                              | CC              | 1946749137               |
| SNP_P4_17930_1230720 | NC_021161.1    | Ca_kabuli_chr02 | 1230720                 | TT                              | CC              | 1946749139               |
| SNP_P4_17931_1230723 | NC_021161.1    | Ca_kabuli_chr02 | 1230723                 | TT                              | CC              | 1946749141               |
| SNP_P4_17932_1230925 | NC_021161.1    | Ca_kabuli_chr02 | 1230925                 | TT                              | CC              | 1946749143               |
| SNP_P4_17933_1231618 | NC_021161.1    | Ca_kabuli_chr02 | 1231618                 | GG                              | AA              | 1946749145               |
| SNP_P4_17934_1240431 | NC_021161.1    | Ca_kabuli_chr02 | 1240431                 | CC                              | TT              | 1946749147               |
| SNP_P4_17935_1258289 | NC_021161.1    | Ca_kabuli_chr02 | 1258289                 | TT                              | CC              | 1946749149               |
| SNP_P4_17937_1292114 | NC_021161.1    | Ca_kabuli_chr02 | 1292114                 | TT                              | AA              | 1946749151               |
| SNP_P4_17938_1303139 | NC_021161.1    | Ca_kabuli_chr02 | 1303139                 | CC                              | TT              | 1946749153               |
| SNP_P4_17939_1303184 | NC_021161.1    | Ca_kabuli_chr02 | 1303184                 | GG                              | AA              | 1946749155               |
| SNP_P4_17940_1303231 | NC_021161.1    | Ca_kabuli_chr02 | 1303231                 | TT                              | GG              | 1946749157               |
| SNP_P4_17941_1303503 | NC_021161.1    | Ca_kabuli_chr02 | 1303503                 | AA                              | GG              | 1946749159               |
| SNP_P4_17942_1303510 | NC_021161.1    | Ca_kabuli_chr02 | 1303510                 | AA                              | GG              | 1946749160               |
| SNP_P4_17943_1303532 | NC_021161.1    | Ca_kabuli_chr02 | 1303532                 | GG                              | AA              | 1946749162               |
| SNP_P4_17944_1303601 | NC_021161.1    | Ca_kabuli_chr02 | 1303601                 | GG                              | AA              | 1946749164               |
| SNP_P4_17945_1325424 | NC_021161.1    | Ca_kabuli_chr02 | 1325424                 | GG                              | TT              | 1946749166               |

| SNPs IDs             | Chromosome IDs | Chromosomes     | Physical positions (bp) | CDC Frontier (Reference genome) | (ILWC46 & LPNB) | NCBI SNPdb Accession IDs |
|----------------------|----------------|-----------------|-------------------------|---------------------------------|-----------------|--------------------------|
| SNP_P4_17946_1372344 | NC_021161.1    | Ca_kabuli_chr02 | 1372344                 | AA                              | GG              | 1946749168               |
| SNP_P4_17947_1372345 | NC_021161.1    | Ca_kabuli_chr02 | 1372345                 | AA                              | TT              | 1946749170               |
| SNP_P4_17948_1394754 | NC_021161.1    | Ca_kabuli_chr02 | 1394754                 | AA                              | GG              | 1946749172               |
| SNP_P4_17950_1416439 | NC_021161.1    | Ca_kabuli_chr02 | 1416439                 | TT                              | AA              | 1946749174               |
| SNP_P4_17951_1423186 | NC_021161.1    | Ca_kabuli_chr02 | 1423186                 | CC                              | TT              | 1946749176               |
| SNP_P4_17952_1461064 | NC_021161.1    | Ca_kabuli_chr02 | 1461064                 | TT                              | AA              | 1946749178               |
| SNP_P4_17953_1461130 | NC_021161.1    | Ca_kabuli_chr02 | 1461130                 | GG                              | AA              | 1946749181               |
| SNP_P4_17954_1461166 | NC_021161.1    | Ca_kabuli_chr02 | 1461166                 | AA                              | TT              | 1946749183               |
| SNP_P4_17955_1461181 | NC_021161.1    | Ca_kabuli_chr02 | 1461181                 | TT                              | CC              | 1946749186               |
| SNP_P4_17956_1461186 | NC_021161.1    | Ca_kabuli_chr02 | 1461186                 | CC                              | TT              | 1946749188               |
| SNP_P4_17957_1461338 | NC_021161.1    | Ca_kabuli_chr02 | 1461338                 | CC                              | GG              | 1946749190               |
| SNP_P4_17958_1461340 | NC_021161.1    | Ca_kabuli_chr02 | 1461340                 | GG                              | AA              | 1946749193               |
| SNP_P4_17959_1461351 | NC_021161.1    | Ca_kabuli_chr02 | 1461351                 | AA                              | GG              | 1946749195               |
| SNP_P4_17960_1461498 | NC_021161.1    | Ca_kabuli_chr02 | 1461498                 | AA                              | GG              | 1946749197               |
| SNP_P4_17961_1461532 | NC_021161.1    | Ca_kabuli_chr02 | 1461532                 | CC                              | TT              | 1946749199               |
| SNP_P4_17962_1461620 | NC_021161.1    | Ca_kabuli_chr02 | 1461620                 | CC                              | TT              | 1946749201               |
| SNP_P4_17963_1461633 | NC_021161.1    | Ca_kabuli_chr02 | 1461633                 | AA                              | GG              | 1946749203               |
| SNP_P4_17964_1462422 | NC_021161.1    | Ca_kabuli_chr02 | 1462422                 | AA                              | GG              | 1946749205               |
| SNP_P4_17965_1462557 | NC_021161.1    | Ca_kabuli_chr02 | 1462557                 | GG                              | AA              | 1946749207               |
| SNP_P4_17966_1462573 | NC_021161.1    | Ca_kabuli_chr02 | 1462573                 | GG                              | AA              | 1946749209               |
| SNP_P4_17967_1468345 | NC_021161.1    | Ca_kabuli_chr02 | 1468345                 | CC                              | TT              | 1946749211               |
| SNP_P4_17968_1469712 | NC_021161.1    | Ca_kabuli_chr02 | 1469712                 | AA                              | GG              | 1946749213               |
| SNP_P4_17969_1469796 | NC_021161.1    | Ca_kabuli_chr02 | 1469796                 | TT                              | CC              | 1946749215               |
| SNP_P4_17970_1469812 | NC_021161.1    | Ca_kabuli_chr02 | 1469812                 | AA                              | CC              | 1946749217               |
| SNP_P4_17971_1470152 | NC_021161.1    | Ca_kabuli_chr02 | 1470152                 | TT                              | CC              | 1946749219               |
| SNP_P4_17972_1470193 | NC_021161.1    | Ca_kabuli_chr02 | 1470193                 | GG                              | TT              | 1946749221               |
| SNP_P4_17973_1486577 | NC_021161.1    | Ca_kabuli_chr02 | 1486577                 | TT                              | GG              | 1946749223               |
| SNP_P4_17974_1486592 | NC_021161.1    | Ca_kabuli_chr02 | 1486592                 | TT                              | GG              | 1946749225               |
| SNP_P4_17975_1486616 | NC_021161.1    | Ca_kabuli_chr02 | 1486616                 | GG                              | AA              | 1946749227               |
| SNP_P4_17976_1486669 | NC_021161.1    | Ca_kabuli_chr02 | 1486669                 | TT                              | AA              | 1946749229               |
| SNP_P4_17977_1486672 | NC_021161.1    | Ca_kabuli_chr02 | 1486672                 | AA                              | GG              | 1946749231               |
| SNP_P4_17978_1486994 | NC_021161.1    | Ca_kabuli_chr02 | 1486994                 | AA                              | GG              | 1946749233               |
| SNP_P4_17979_1487116 | NC_021161.1    | Ca_kabuli_chr02 | 1487116                 | CC                              | GG              | 1946749235               |
| SNP_P4_17980_1487149 | NC_021161.1    | Ca_kabuli_chr02 | 1487149                 | TT                              | GG              | 1946749237               |
| SNP_P4_17981_1487155 | NC_021161.1    | Ca_kabuli_chr02 | 1487155                 | AA                              | CC              | 1946749239               |
| SNP_P4_17982_1487207 | NC_021161.1    | Ca_kabuli_chr02 | 1487207                 | TT                              | AA              | 1946749241               |
| SNP_P4_17983_1487243 | NC_021161.1    | Ca_kabuli_chr02 | 1487243                 | AA                              | GG              | 1946749243               |
| SNP_P4_17984_1487606 | NC_021161.1    | Ca_kabuli_chr02 | 1487606                 | CC                              | TT              | 1946749245               |
| SNP_P4_17985_1503852 | NC_021161.1    | Ca_kabuli_chr02 | 1503852                 | GG                              | AA              | 1946749247               |
| SNP_P4_17986_1541723 | NC_021161.1    | Ca_kabuli_chr02 | 1541723                 | AA                              | GG              | 1946749249               |
| SNP_P4_17987_1541783 | NC_021161.1    | Ca_kabuli_chr02 | 1541783                 | CC                              | TT              | 1946749251               |
| SNP_P4_17988_1541801 | NC_021161.1    | Ca_kabuli_chr02 | 1541801                 | GG                              | AA              | 1946749253               |

| SNPs IDs             | Chromosome IDs | Chromosomes     | Physical positions (bp) | CDC Frontier (Reference genome) | (ILWC46 & LPNB) | NCBI SNPdb Accession IDs |
|----------------------|----------------|-----------------|-------------------------|---------------------------------|-----------------|--------------------------|
| SNP_P4_17989_1542770 | NC_021161.1    | Ca_kabuli_chr02 | 1542770                 | CC                              | TT              | 1946749255               |
| SNP_P4_17990_1544105 | NC_021161.1    | Ca_kabuli_chr02 | 1544105                 | AA                              | GG              | 1946749257               |
| SNP_P4_17991_1544769 | NC_021161.1    | Ca_kabuli_chr02 | 1544769                 | TT                              | CC              | 1946749259               |
| SNP_P4_17992_1544796 | NC_021161.1    | Ca_kabuli_chr02 | 1544796                 | AA                              | CC              | 1946749261               |
| SNP_P4_17993_1545989 | NC_021161.1    | Ca_kabuli_chr02 | 1545989                 | GG                              | AA              | 1946749263               |
| SNP_P4_17994_1568902 | NC_021161.1    | Ca_kabuli_chr02 | 1568902                 | GG                              | AA              | 1946749265               |
| SNP_P4_17995_1571720 | NC_021161.1    | Ca_kabuli_chr02 | 1571720                 | TT                              | GG              | 1946749267               |
| SNP_P4_17996_1602921 | NC_021161.1    | Ca_kabuli_chr02 | 1602921                 | GG                              | TT              | 1946749269               |
| SNP_P4_17997_1632155 | NC_021161.1    | Ca_kabuli_chr02 | 1632155                 | TT                              | CC              | 1946749271               |
| SNP_P4_17998_1639786 | NC_021161.1    | Ca_kabuli_chr02 | 1639786                 | AA                              | TT              | 1946749273               |
| SNP_P4_17999_1640042 | NC_021161.1    | Ca_kabuli_chr02 | 1640042                 | GG                              | TT              | 1946749275               |
| SNP_P4_18000_1640052 | NC_021161.1    | Ca_kabuli_chr02 | 1640052                 | GG                              | TT              | 1946749277               |
| SNP_P4_18002_1640275 | NC_021161.1    | Ca_kabuli_chr02 | 1640275                 | AA                              | GG              | 1946749279               |
| SNP_P4_18003_1640387 | NC_021161.1    | Ca_kabuli_chr02 | 1640387                 | GG                              | TT              | 1946749281               |
| SNP_P4_18004_1640440 | NC_021161.1    | Ca_kabuli_chr02 | 1640440                 | TT                              | AA              | 1946749283               |
| SNP_P4_18005_1640449 | NC_021161.1    | Ca_kabuli_chr02 | 1640449                 | CC                              | TT              | 1946749285               |
| SNP_P4_18006_1640511 | NC_021161.1    | Ca_kabuli_chr02 | 1640511                 | TT                              | AA              | 1946749288               |
| SNP_P4_18007_1640532 | NC_021161.1    | Ca_kabuli_chr02 | 1640532                 | AA                              | TT              | 1946749290               |
| SNP_P4_18008_1640552 | NC_021161.1    | Ca_kabuli_chr02 | 1640552                 | TT                              | CC              | 1946749292               |
| SNP_P4_18009_1640857 | NC_021161.1    | Ca_kabuli_chr02 | 1640857                 | TT                              | AA              | 1946749294               |
| SNP_P4_18011_1640937 | NC_021161.1    | Ca_kabuli_chr02 | 1640937                 | TT                              | AA              | 1946749296               |
| SNP_P4_18012_1640955 | NC_021161.1    | Ca_kabuli_chr02 | 1640955                 | TT                              | CC              | 1946749298               |
| SNP_P4_18013_1640961 | NC_021161.1    | Ca_kabuli_chr02 | 1640961                 | CC                              | TT              | 1946749300               |
| SNP_P4_18014_1640970 | NC_021161.1    | Ca_kabuli_chr02 | 1640970                 | CC                              | TT              | 1946749302               |
| SNP_P4_18015_1640985 | NC_021161.1    | Ca_kabuli_chr02 | 1640985                 | AA                              | GG              | 1946749304               |
| SNP_P4_18016_1641027 | NC_021161.1    | Ca_kabuli_chr02 | 1641027                 | TT                              | AA              | 1946749306               |
| SNP_P4_18017_1650078 | NC_021161.1    | Ca_kabuli_chr02 | 1650078                 | AA                              | GG              | 1946749308               |
| SNP_P4_18018_1650101 | NC_021161.1    | Ca_kabuli_chr02 | 1650101                 | AA                              | TT              | 1946749310               |
| SNP_P4_18019_1650670 | NC_021161.1    | Ca_kabuli_chr02 | 1650670                 | AA                              | TT              | 1946749312               |
| SNP_P4_18020_1653480 | NC_021161.1    | Ca_kabuli_chr02 | 1653480                 | CC                              | TT              | 1946749314               |
| SNP_P4_18021_1730275 | NC_021161.1    | Ca_kabuli_chr02 | 1730275                 | GG                              | TT              | 1946749316               |
| SNP_P4_18022_1735132 | NC_021161.1    | Ca_kabuli_chr02 | 1735132                 | CC                              | TT              | 1946749318               |
| SNP_P4_18023_1754562 | NC_021161.1    | Ca_kabuli_chr02 | 1754562                 | TT                              | GG              | 1946749321               |
| SNP_P4_18024_1767855 | NC_021161.1    | Ca_kabuli_chr02 | 1767855                 | TT                              | CC              | 1946749323               |
| SNP_P4_18025_1792551 | NC_021161.1    | Ca_kabuli_chr02 | 1792551                 | CC                              | TT              | 1946749325               |
| SNP_P4_18026_1809752 | NC_021161.1    | Ca_kabuli_chr02 | 1809752                 | TT                              | GG              | 1946749327               |
| SNP_P4_18033_1946863 | NC_021161.1    | Ca_kabuli_chr02 | 1946863                 | AA                              | CC              | 1946749329               |
| SNP_P4_18034_1983395 | NC_021161.1    | Ca_kabuli_chr02 | 1983395                 | CC                              | AA              | 1946749331               |
| SNP_P4_18035_1983421 | NC_021161.1    | Ca_kabuli_chr02 | 1983421                 | CC                              | TT              | 1946749333               |
| SNP_P4_18037_2029525 | NC_021161.1    | Ca_kabuli_chr02 | 2029525                 | GG                              | AA              | 1946749335               |
| SNP_P4_18038_2031558 | NC_021161.1    | Ca_kabuli_chr02 | 2031558                 | AA                              | TT              | 1946749337               |
| SNP_P4_18039_2036381 | NC_021161.1    | Ca_kabuli_chr02 | 2036381                 | AA                              | GG              | 1946749339               |

| SNPs IDs             | Chromosome IDs | Chromosomes     | Physical positions (bp) | CDC Frontier (Reference genome) | (ILWC46 & LPNB) | NCBI SNPdb Accession IDs |
|----------------------|----------------|-----------------|-------------------------|---------------------------------|-----------------|--------------------------|
| SNP_P4_18040_2045273 | NC_021161.1    | Ca_kabuli_chr02 | 2045273                 | CC                              | TT              | 1946749341               |
| SNP_P4_18041_2060943 | NC_021161.1    | Ca_kabuli_chr02 | 2060943                 | TT                              | AA              | 1946749343               |
| SNP_P4_18042_2072711 | NC_021161.1    | Ca_kabuli_chr02 | 2072711                 | TT                              | CC              | 1946749345               |
| SNP_P4_18043_2072716 | NC_021161.1    | Ca_kabuli_chr02 | 2072716                 | TT                              | AA              | 1946749347               |
| SNP_P4_18044_2073018 | NC_021161.1    | Ca_kabuli_chr02 | 2073018                 | AA                              | GG              | 1946749349               |
| SNP_P4_18045_2073034 | NC_021161.1    | Ca_kabuli_chr02 | 2073034                 | AA                              | GG              | 1946749351               |
| SNP_P4_18046_2073063 | NC_021161.1    | Ca_kabuli_chr02 | 2073063                 | GG                              | TT              | 1946749353               |
| SNP_P4_18047_2078425 | NC_021161.1    | Ca_kabuli_chr02 | 2078425                 | GG                              | CC              | 1946749355               |
| SNP_P4_18048_2078444 | NC_021161.1    | Ca_kabuli_chr02 | 2078444                 | AA                              | GG              | 1946749357               |
| SNP_P4_18049_2078445 | NC_021161.1    | Ca_kabuli_chr02 | 2078445                 | TT                              | AA              | 1946749359               |
| SNP_P4_18050_2078460 | NC_021161.1    | Ca_kabuli_chr02 | 2078460                 | TT                              | GG              | 1946749361               |
| SNP_P4_18051_2078467 | NC_021161.1    | Ca_kabuli_chr02 | 2078467                 | AA                              | GG              | 1946749363               |
| SNP_P4_18052_2078731 | NC_021161.1    | Ca_kabuli_chr02 | 2078731                 | CC                              | AA              | 1946749365               |
| SNP_P4_18053_2153981 | NC_021161.1    | Ca_kabuli_chr02 | 2153981                 | TT                              | AA              | 1946749367               |
| SNP_P4_18054_2155905 | NC_021161.1    | Ca_kabuli_chr02 | 2155905                 | AA                              | TT              | 1946749369               |
| SNP_P4_18055_2156477 | NC_021161.1    | Ca_kabuli_chr02 | 2156477                 | AA                              | CC              | 1946749371               |
| SNP_P4_18057_2169603 | NC_021161.1    | Ca_kabuli_chr02 | 2169603                 | GG                              | TT              | 1946749373               |
| SNP_P4_18058_2169623 | NC_021161.1    | Ca_kabuli_chr02 | 2169623                 | TT                              | CC              | 1946749375               |
| SNP_P4_18059_2169780 | NC_021161.1    | Ca_kabuli_chr02 | 2169780                 | TT                              | CC              | 1946749377               |
| SNP_P4_18062_2186819 | NC_021161.1    | Ca_kabuli_chr02 | 2186819                 | CC                              | TT              | 1946749379               |
| SNP_P4_18063_2225670 | NC_021161.1    | Ca_kabuli_chr02 | 2225670                 | TT                              | CC              | 1946749381               |
| SNP_P4_18064_2234792 | NC_021161.1    | Ca_kabuli_chr02 | 2234792                 | GG                              | AA              | 1946749383               |
| SNP_P4_18065_2241939 | NC_021161.1    | Ca_kabuli_chr02 | 2241939                 | CC                              | TT              | 1946749385               |
| SNP_P4_18067_2312104 | NC_021161.1    | Ca_kabuli_chr02 | 2312104                 | CC                              | TT              | 1946749387               |
| SNP_P4_18068_2320078 | NC_021161.1    | Ca_kabuli_chr02 | 2320078                 | AA                              | GG              | 1946749389               |
| SNP_P4_18069_2321109 | NC_021161.1    | Ca_kabuli_chr02 | 2321109                 | GG                              | AA              | 1946749391               |
| SNP_P4_18071_2326382 | NC_021161.1    | Ca_kabuli_chr02 | 2326382                 | TT                              | CC              | 1946749393               |
| SNP_P4_18072_2338678 | NC_021161.1    | Ca_kabuli_chr02 | 2338678                 | AA                              | CC              | 1946749395               |
| SNP_P4_18073_2339882 | NC_021161.1    | Ca_kabuli_chr02 | 2339882                 | TT                              | CC              | 1946749397               |
| SNP_P4_18075_2355185 | NC_021161.1    | Ca_kabuli_chr02 | 2355185                 | AA                              | GG              | 1946749399               |
| SNP_P4_18077_2369686 | NC_021161.1    | Ca_kabuli_chr02 | 2369686                 | TT                              | CC              | 1946749401               |
| SNP_P4_18079_2374795 | NC_021161.1    | Ca_kabuli_chr02 | 2374795                 | CC                              | TT              | 1946749403               |
| SNP_P4_18080_2377451 | NC_021161.1    | Ca_kabuli_chr02 | 2377451                 | CC                              | TT              | 1946749405               |
| SNP_P4_18084_2389874 | NC_021161.1    | Ca_kabuli_chr02 | 2389874                 | CC                              | TT              | 1946749407               |
| SNP_P4_18085_2394580 | NC_021161.1    | Ca_kabuli_chr02 | 2394580                 | TT                              | CC              | 1946749409               |
| SNP_P4_18086_2433020 | NC_021161.1    | Ca_kabuli_chr02 | 2433020                 | CC                              | GG              | 1946749411               |
| SNP_P4_18087_2433382 | NC_021161.1    | Ca_kabuli_chr02 | 2433382                 | GG                              | AA              | 1946749413               |
| SNP_P4_18088_2481720 | NC_021161.1    | Ca_kabuli_chr02 | 2481720                 | CC                              | GG              | 1946749415               |
| SNP_P4_18089_2481729 | NC_021161.1    | Ca_kabuli_chr02 | 2481729                 | CC                              | AA              | 1946749417               |
| SNP_P4_18090_2497844 | NC_021161.1    | Ca_kabuli_chr02 | 2497844                 | TT                              | AA              | 1946749419               |
| SNP_P4_18091_2497845 | NC_021161.1    | Ca_kabuli_chr02 | 2497845                 | AA                              | CC              | 1946749421               |
| SNP_P4_18092_2499631 | NC_021161.1    | Ca_kabuli_chr02 | 2499631                 | TT                              | AA              | 1946749423               |

| SNPs IDs             | Chromosome IDs | Chromosomes     | Physical positions (bp) | CDC Frontier (Reference genome) | (ILWC46 & LPNB) | NCBI SNPdb Accession IDs |
|----------------------|----------------|-----------------|-------------------------|---------------------------------|-----------------|--------------------------|
| SNP_P4_18093_2504134 | NC_021161.1    | Ca_kabuli_chr02 | 2504134                 | TT                              | CC              | 1946749425               |
| SNP_P4_18094_2568155 | NC_021161.1    | Ca_kabuli_chr02 | 2568155                 | AA                              | GG              | 1946749427               |
| SNP_P4_18095_2605300 | NC_021161.1    | Ca_kabuli_chr02 | 2605300                 | AA                              | GG              | 1946749429               |
| SNP_P4_18097_2628676 | NC_021161.1    | Ca_kabuli_chr02 | 2628676                 | GG                              | TT              | 1946749431               |
| SNP_P4_18099_2672825 | NC_021161.1    | Ca_kabuli_chr02 | 2672825                 | AA                              | GG              | 1946749433               |
| SNP_P4_18100_2673200 | NC_021161.1    | Ca_kabuli_chr02 | 2673200                 | CC                              | TT              | 1946749435               |
| SNP_P4_18101_2684278 | NC_021161.1    | Ca_kabuli_chr02 | 2684278                 | CC                              | TT              | 1946749437               |
| SNP_P4_18103_2700783 | NC_021161.1    | Ca_kabuli_chr02 | 2700783                 | GG                              | TT              | 1946749439               |
| SNP_P4_18104_2702342 | NC_021161.1    | Ca_kabuli_chr02 | 2702342                 | CC                              | TT              | 1946749441               |
| SNP_P4_18106_2710291 | NC_021161.1    | Ca_kabuli_chr02 | 2710291                 | CC                              | TT              | 1946749443               |
| SNP_P4_18108_2741360 | NC_021161.1    | Ca_kabuli_chr02 | 2741360                 | TT                              | AA              | 1946749445               |
| SNP_P4_18109_2741373 | NC_021161.1    | Ca_kabuli_chr02 | 2741373                 | AA                              | TT              | 1946749447               |
| SNP_P4_18110_2741375 | NC_021161.1    | Ca_kabuli_chr02 | 2741375                 | AA                              | TT              | 1946749449               |
| SNP_P4_18112_2746198 | NC_021161.1    | Ca_kabuli_chr02 | 2746198                 | CC                              | TT              | 1946749451               |
| SNP_P4_18113_2760922 | NC_021161.1    | Ca_kabuli_chr02 | 2760922                 | GG                              | AA              | 1946749453               |
| SNP_P4_18114_2785852 | NC_021161.1    | Ca_kabuli_chr02 | 2785852                 | GG                              | AA              | 1946749456               |
| SNP_P4_18115_2801785 | NC_021161.1    | Ca_kabuli_chr02 | 2801785                 | CC                              | TT              | 1946749458               |
| SNP_P4_18116_2835568 | NC_021161.1    | Ca_kabuli_chr02 | 2835568                 | GG                              | AA              | 1946749460               |
| SNP_P4_18117_2854535 | NC_021161.1    | Ca_kabuli_chr02 | 2854535                 | AA                              | GG              | 1946749462               |
| SNP_P4_18118_2857049 | NC_021161.1    | Ca_kabuli_chr02 | 2857049                 | AA                              | TT              | 1946749464               |
| SNP_P4_18119_2879541 | NC_021161.1    | Ca_kabuli_chr02 | 2879541                 | AA                              | GG              | 1946749466               |
| SNP_P4_18121_2886782 | NC_021161.1    | Ca_kabuli_chr02 | 2886782                 | AA                              | GG              | 1946749468               |
| SNP_P4_18122_2889270 | NC_021161.1    | Ca_kabuli_chr02 | 2889270                 | GG                              | AA              | 1946749470               |
| SNP_P4_18123_2919159 | NC_021161.1    | Ca_kabuli_chr02 | 2919159                 | TT                              | GG              | 1946749472               |
| SNP_P4_18124_2921467 | NC_021161.1    | Ca_kabuli_chr02 | 2921467                 | TT                              | CC              | 1946749474               |
| SNP_P4_18125_2934659 | NC_021161.1    | Ca_kabuli_chr02 | 2934659                 | AA                              | GG              | 1946749476               |
| SNP_P4_18126_2935058 | NC_021161.1    | Ca_kabuli_chr02 | 2935058                 | AA                              | TT              | 1946749478               |
| SNP_P4_18127_2935191 | NC_021161.1    | Ca_kabuli_chr02 | 2935191                 | AA                              | GG              | 1946749480               |
| SNP_P4_18128_2940776 | NC_021161.1    | Ca_kabuli_chr02 | 2940776                 | CC                              | TT              | 1946749482               |
| SNP_P4_18129_2940778 | NC_021161.1    | Ca_kabuli_chr02 | 2940778                 | GG                              | AA              | 1946749484               |
| SNP_P4_18130_2940896 | NC_021161.1    | Ca_kabuli_chr02 | 2940896                 | TT                              | CC              | 1946749486               |
| SNP_P4_18132_2941151 | NC_021161.1    | Ca_kabuli_chr02 | 2941151                 | CC                              | AA              | 1946749488               |
| SNP_P4_18133_2941304 | NC_021161.1    | Ca_kabuli_chr02 | 2941304                 | CC                              | AA              | 1946749489               |
| SNP_P4_18134_2941365 | NC_021161.1    | Ca_kabuli_chr02 | 2941365                 | CC                              | AA              | 1946749491               |
| SNP_P4_18135_2941557 | NC_021161.1    | Ca_kabuli_chr02 | 2941557                 | TT                              | CC              | 1946749493               |
| SNP_P4_18136_2941609 | NC_021161.1    | Ca_kabuli_chr02 | 2941609                 | CC                              | TT              | 1946749495               |
| SNP_P4_18137_2942928 | NC_021161.1    | Ca_kabuli_chr02 | 2942928                 | AA                              | GG              | 1946749497               |
| SNP_P4_18138_2943122 | NC_021161.1    | Ca_kabuli_chr02 | 2943122                 | AA                              | TT              | 1946749499               |
| SNP_P4_18139_2943420 | NC_021161.1    | Ca_kabuli_chr02 | 2943420                 | CC                              | TT              | 1946749501               |
| SNP_P4_18140_2943432 | NC_021161.1    | Ca_kabuli_chr02 | 2943432                 | AA                              | CC              | 1946749503               |
| SNP_P4_18141_2943463 | NC_021161.1    | Ca_kabuli_chr02 | 2943463                 | AA                              | CC              | 1946749505               |
| SNP_P4_18142_2950321 | NC_021161.1    | Ca_kabuli_chr02 | 2950321                 | AA                              | CC              | 1946749507               |

| SNPs IDs             | Chromosome IDs | Chromosomes     | Physical positions (bp) | CDC Frontier (Reference genome) | (ILWC46 & LPNB) | NCBI SNPdb Accession IDs |
|----------------------|----------------|-----------------|-------------------------|---------------------------------|-----------------|--------------------------|
| SNP_P4_18143_2950349 | NC_021161.1    | Ca_kabuli_chr02 | 2950349                 | AA                              | GG              | 1946749509               |
| SNP_P4_18144_2950863 | NC_021161.1    | Ca_kabuli_chr02 | 2950863                 | AA                              | GG              | 1946749511               |
| SNP_P4_18145_2950874 | NC_021161.1    | Ca_kabuli_chr02 | 2950874                 | AA                              | GG              | 1946749513               |
| SNP_P4_18146_2950896 | NC_021161.1    | Ca_kabuli_chr02 | 2950896                 | TT                              | CC              | 1946749515               |
| SNP_P4_18147_2950943 | NC_021161.1    | Ca_kabuli_chr02 | 2950943                 | TT                              | CC              | 1946749517               |
| SNP_P4_18148_2951049 | NC_021161.1    | Ca_kabuli_chr02 | 2951049                 | TT                              | CC              | 1946749519               |
| SNP_P4_18150_2960357 | NC_021161.1    | Ca_kabuli_chr02 | 2960357                 | GG                              | CC              | 1946749521               |
| SNP_P4_18151_2960483 | NC_021161.1    | Ca_kabuli_chr02 | 2960483                 | CC                              | TT              | 1946749523               |
| SNP_P4_18152_2964905 | NC_021161.1    | Ca_kabuli_chr02 | 2964905                 | CC                              | AA              | 1946749525               |
| SNP_P4_18153_2974843 | NC_021161.1    | Ca_kabuli_chr02 | 2974843                 | AA                              | GG              | 1946749527               |
| SNP_P4_18154_2975235 | NC_021161.1    | Ca_kabuli_chr02 | 2975235                 | GG                              | TT              | 1946749529               |
| SNP_P4_18155_2975236 | NC_021161.1    | Ca_kabuli_chr02 | 2975236                 | CC                              | AA              | 1946749531               |
| SNP_P4_18157_2975312 | NC_021161.1    | Ca_kabuli_chr02 | 2975312                 | AA                              | GG              | 1946749533               |
| SNP_P4_18158_2979814 | NC_021161.1    | Ca_kabuli_chr02 | 2979814                 | TT                              | CC              | 1946749535               |
| SNP_P4_18159_2979815 | NC_021161.1    | Ca_kabuli_chr02 | 2979815                 | CC                              | TT              | 1946749536               |
| SNP_P4_18160_2979845 | NC_021161.1    | Ca_kabuli_chr02 | 2979845                 | GG                              | CC              | 1946749538               |
| SNP_P4_18161_2980132 | NC_021161.1    | Ca_kabuli_chr02 | 2980132                 | CC                              | TT              | 1946749540               |
| SNP_P4_18162_2980144 | NC_021161.1    | Ca_kabuli_chr02 | 2980144                 | AA                              | GG              | 1946749542               |
| SNP_P4_18163_2980154 | NC_021161.1    | Ca_kabuli_chr02 | 2980154                 | GG                              | AA              | 1946749544               |
| SNP_P4_18164_2980219 | NC_021161.1    | Ca_kabuli_chr02 | 2980219                 | TT                              | AA              | 1946749546               |
| SNP_P4_18165_2980748 | NC_021161.1    | Ca_kabuli_chr02 | 2980748                 | AA                              | GG              | 1946749548               |
| SNP_P4_18166_2980753 | NC_021161.1    | Ca_kabuli_chr02 | 2980753                 | TT                              | CC              | 1946749550               |
| SNP_P4_18167_2980754 | NC_021161.1    | Ca_kabuli_chr02 | 2980754                 | AA                              | GG              | 1946749552               |
| SNP_P4_18168_2980822 | NC_021161.1    | Ca_kabuli_chr02 | 2980822                 | CC                              | TT              | 1946749553               |
| SNP_P4_18169_2980829 | NC_021161.1    | Ca_kabuli_chr02 | 2980829                 | TT                              | CC              | 1946749555               |
| SNP_P4_18170_2980832 | NC_021161.1    | Ca_kabuli_chr02 | 2980832                 | TT                              | CC              | 1946749557               |
| SNP_P4_18171_2980842 | NC_021161.1    | Ca_kabuli_chr02 | 2980842                 | TT                              | AA              | 1946749559               |
| SNP_P4_18172_2980882 | NC_021161.1    | Ca_kabuli_chr02 | 2980882                 | AA                              | GG              | 1946749561               |
| SNP_P4_18173_2981017 | NC_021161.1    | Ca_kabuli_chr02 | 2981017                 | TT                              | CC              | 1946749563               |
| SNP_P4_18174_2981031 | NC_021161.1    | Ca_kabuli_chr02 | 2981031                 | GG                              | TT              | 1946749565               |
| SNP_P4_18175_2981629 | NC_021161.1    | Ca_kabuli_chr02 | 2981629                 | TT                              | GG              | 1946749567               |
| SNP_P4_18176_2982582 | NC_021161.1    | Ca_kabuli_chr02 | 2982582                 | GG                              | AA              | 1946749569               |
| SNP_P4_18177_2982689 | NC_021161.1    | Ca_kabuli_chr02 | 2982689                 | AA                              | GG              | 1946749571               |
| SNP_P4_18178_2982726 | NC_021161.1    | Ca_kabuli_chr02 | 2982726                 | GG                              | CC              | 1946749573               |
| SNP_P4_18179_2982748 | NC_021161.1    | Ca_kabuli_chr02 | 2982748                 | GG                              | AA              | 1946749575               |
| SNP_P4_18181_2982863 | NC_021161.1    | Ca_kabuli_chr02 | 2982863                 | TT                              | CC              | 1946749577               |
| SNP_P4_18182_2983865 | NC_021161.1    | Ca_kabuli_chr02 | 2983865                 | AA                              | GG              | 1946749578               |
| SNP_P4_18183_2984188 | NC_021161.1    | Ca_kabuli_chr02 | 2984188                 | AA                              | TT              | 1946749580               |
| SNP_P4_18186_2985139 | NC_021161.1    | Ca_kabuli_chr02 | 2985139                 | CC                              | TT              | 1946749582               |
| SNP_P4_18187_2985179 | NC_021161.1    | Ca_kabuli_chr02 | 2985179                 | AA                              | TT              | 1946749584               |
| SNP_P4_18188_2985180 | NC_021161.1    | Ca_kabuli_chr02 | 2985180                 | AA                              | TT              | 1946749586               |
| SNP_P4_18189_2985499 | NC_021161.1    | Ca_kabuli_chr02 | 2985499                 | GG                              | AA              | 1946749588               |

| SNPs IDs             | Chromosome IDs | Chromosomes     | Physical positions (bp) | CDC Frontier (Reference genome) | (ILWC46 & LPNB) | NCBI SNPdb Accession IDs |
|----------------------|----------------|-----------------|-------------------------|---------------------------------|-----------------|--------------------------|
| SNP_P4_18190_2985893 | NC_021161.1    | Ca_kabuli_chr02 | 2985893                 | TT                              | AA              | 1946749590               |
| SNP_P4_18191_2985894 | NC_021161.1    | Ca_kabuli_chr02 | 2985894                 | TT                              | CC              | 1946749592               |
| SNP_P4_18192_2985919 | NC_021161.1    | Ca_kabuli_chr02 | 2985919                 | AA                              | CC              | 1946749594               |
| SNP_P4_18193_2985967 | NC_021161.1    | Ca_kabuli_chr02 | 2985967                 | CC                              | TT              | 1946749596               |
| SNP_P4_18194_2986021 | NC_021161.1    | Ca_kabuli_chr02 | 2986021                 | TT                              | CC              | 1946749598               |
| SNP_P4_18195_2986233 | NC_021161.1    | Ca_kabuli_chr02 | 2986233                 | AA                              | TT              | 1946749600               |
| SNP_P4_18196_2986244 | NC_021161.1    | Ca_kabuli_chr02 | 2986244                 | CC                              | TT              | 1946749601               |
| SNP_P4_18197_2986258 | NC_021161.1    | Ca_kabuli_chr02 | 2986258                 | GG                              | AA              | 1946749603               |
| SNP_P4_18198_2986389 | NC_021161.1    | Ca_kabuli_chr02 | 2986389                 | GG                              | AA              | 1946749605               |
| SNP_P4_18199_2986397 | NC_021161.1    | Ca_kabuli_chr02 | 2986397                 | GG                              | AA              | 1946749607               |
| SNP_P4_18200_2986416 | NC_021161.1    | Ca_kabuli_chr02 | 2986416                 | AA                              | GG              | 1946749609               |
| SNP_P4_18201_2986606 | NC_021161.1    | Ca_kabuli_chr02 | 2986606                 | AA                              | TT              | 1946749611               |
| SNP_P4_18202_2986645 | NC_021161.1    | Ca_kabuli_chr02 | 2986645                 | TT                              | AA              | 1946749613               |
| SNP_P4_18203_2987779 | NC_021161.1    | Ca_kabuli_chr02 | 2987779                 | AA                              | TT              | 1946749615               |
| SNP_P4_18204_2988410 | NC_021161.1    | Ca_kabuli_chr02 | 2988410                 | CC                              | TT              | 1946749617               |
| SNP_P4_18205_2988414 | NC_021161.1    | Ca_kabuli_chr02 | 2988414                 | TT                              | AA              | 1946749619               |
| SNP_P4_18206_2990096 | NC_021161.1    | Ca_kabuli_chr02 | 2990096                 | CC                              | TT              | 1946749621               |
| SNP_P4_18207_2990671 | NC_021161.1    | Ca_kabuli_chr02 | 2990671                 | TT                              | CC              | 1946749623               |
| SNP_P4_18208_2990773 | NC_021161.1    | Ca_kabuli_chr02 | 2990773                 | CC                              | TT              | 1946749625               |
| SNP_P4_18209_2990794 | NC_021161.1    | Ca_kabuli_chr02 | 2990794                 | TT                              | CC              | 1946749627               |
| SNP_P4_18210_2990811 | NC_021161.1    | Ca_kabuli_chr02 | 2990811                 | AA                              | TT              | 1946749629               |
| SNP_P4_18211_2990883 | NC_021161.1    | Ca_kabuli_chr02 | 2990883                 | TT                              | CC              | 1946749631               |
| SNP_P4_18212_2990923 | NC_021161.1    | Ca_kabuli_chr02 | 2990923                 | TT                              | CC              | 1946749633               |
| SNP_P4_18213_2990929 | NC_021161.1    | Ca_kabuli_chr02 | 2990929                 | GG                              | TT              | 1946749635               |
| SNP_P4_18214_2990935 | NC_021161.1    | Ca_kabuli_chr02 | 2990935                 | TT                              | CC              | 1946749637               |
| SNP_P4_18215_2990951 | NC_021161.1    | Ca_kabuli_chr02 | 2990951                 | CC                              | TT              | 1946749638               |
| SNP_P4_18216_2990989 | NC_021161.1    | Ca_kabuli_chr02 | 2990989                 | TT                              | AA              | 1946749640               |
| SNP_P4_18217_2990995 | NC_021161.1    | Ca_kabuli_chr02 | 2990995                 | AA                              | TT              | 1946749642               |
| SNP_P4_18218_2994000 | NC_021161.1    | Ca_kabuli_chr02 | 2994000                 | GG                              | AA              | 1946749644               |
| SNP_P4_18219_2994935 | NC_021161.1    | Ca_kabuli_chr02 | 2994935                 | CC                              | AA              | 1946749646               |
| SNP_P4_18220_2994969 | NC_021161.1    | Ca_kabuli_chr02 | 2994969                 | GG                              | AA              | 1946749648               |
| SNP_P4_18222_2995981 | NC_021161.1    | Ca_kabuli_chr02 | 2995981                 | AA                              | GG              | 1946749650               |
| SNP_P4_18223_2996031 | NC_021161.1    | Ca_kabuli_chr02 | 2996031                 | AA                              | GG              | 1946749652               |
| SNP_P4_18224_2996162 | NC_021161.1    | Ca_kabuli_chr02 | 2996162                 | TT                              | CC              | 1946749654               |
| SNP_P4_18226_2996194 | NC_021161.1    | Ca_kabuli_chr02 | 2996194                 | AA                              | TT              | 1946749656               |
| SNP_P4_18227_2996217 | NC_021161.1    | Ca_kabuli_chr02 | 2996217                 | TT                              | AA              | 1946749658               |
| SNP_P4_18229_2996606 | NC_021161.1    | Ca_kabuli_chr02 | 2996606                 | AA                              | CC              | 1946749660               |
| SNP_P4_18231_2997641 | NC_021161.1    | Ca_kabuli_chr02 | 2997641                 | AA                              | GG              | 1946749662               |
| SNP_P4_18232_2998285 | NC_021161.1    | Ca_kabuli_chr02 | 2998285                 | GG                              | AA              | 1946749664               |
| SNP_P4_18233_2998290 | NC_021161.1    | Ca_kabuli_chr02 | 2998290                 | AA                              | GG              | 1946749666               |
| SNP_P4_18234_2998291 | NC_021161.1    | Ca_kabuli_chr02 | 2998291                 | TT                              | AA              | 1946749668               |
| SNP_P4_18235_2998301 | NC_021161.1    | Ca_kabuli_chr02 | 2998301                 | GG                              | AA              | 1946749670               |

| SNPs IDs             | Chromosome IDs | Chromosomes     | Physical positions (bp) | CDC Frontier (Reference genome) | (ILWC46 & LPNB) | NCBI SNPdb Accession IDs |
|----------------------|----------------|-----------------|-------------------------|---------------------------------|-----------------|--------------------------|
| SNP_P4_18236_2998308 | NC_021161.1    | Ca_kabuli_chr02 | 2998308                 | TT                              | CC              | 1946749671               |
| SNP_P4_18237_3000398 | NC_021161.1    | Ca_kabuli_chr02 | 3000398                 | AA                              | CC              | 1946749673               |
| SNP_P4_18238_3000403 | NC_021161.1    | Ca_kabuli_chr02 | 3000403                 | CC                              | TT              | 1946749675               |
| SNP_P4_18241_3000657 | NC_021161.1    | Ca_kabuli_chr02 | 3000657                 | AA                              | GG              | 1946749677               |
| SNP_P4_18242_3000668 | NC_021161.1    | Ca_kabuli_chr02 | 3000668                 | CC                              | TT              | 1946749679               |
| SNP_P4_18243_3002477 | NC_021161.1    | Ca_kabuli_chr02 | 3002477                 | AA                              | TT              | 1946749681               |
| SNP_P4_18244_3002696 | NC_021161.1    | Ca_kabuli_chr02 | 3002696                 | AA                              | TT              | 1946749683               |
| SNP_P4_18246_3002952 | NC_021161.1    | Ca_kabuli_chr02 | 3002952                 | TT                              | CC              | 1946749685               |
| SNP_P4_18247_3003940 | NC_021161.1    | Ca_kabuli_chr02 | 3003940                 | CC                              | AA              | 1946749687               |
| SNP_P4_18248_3004700 | NC_021161.1    | Ca_kabuli_chr02 | 3004700                 | CC                              | TT              | 1946749689               |
| SNP_P4_18250_3005241 | NC_021161.1    | Ca_kabuli_chr02 | 3005241                 | GG                              | TT              | 1946749691               |
| SNP_P4_18251_3005251 | NC_021161.1    | Ca_kabuli_chr02 | 3005251                 | AA                              | GG              | 1946749693               |
| SNP_P4_18253_3005300 | NC_021161.1    | Ca_kabuli_chr02 | 3005300                 | GG                              | AA              | 1946749695               |
| SNP_P4_18255_3005531 | NC_021161.1    | Ca_kabuli_chr02 | 3005531                 | TT                              | AA              | 1946749697               |
| SNP_P4_18256_3005647 | NC_021161.1    | Ca_kabuli_chr02 | 3005647                 | CC                              | TT              | 1946749699               |
| SNP_P4_18257_3005668 | NC_021161.1    | Ca_kabuli_chr02 | 3005668                 | GG                              | AA              | 1946749701               |
| SNP_P4_18258_3005692 | NC_021161.1    | Ca_kabuli_chr02 | 3005692                 | CC                              | TT              | 1946749703               |
| SNP_P4_18260_3005843 | NC_021161.1    | Ca_kabuli_chr02 | 3005843                 | AA                              | GG              | 1946749705               |
| SNP_P4_18261_3006049 | NC_021161.1    | Ca_kabuli_chr02 | 3006049                 | CC                              | AA              | 1946749707               |
| SNP_P4_18262_3007327 | NC_021161.1    | Ca_kabuli_chr02 | 3007327                 | CC                              | TT              | 1946749709               |
| SNP_P4_18263_3007391 | NC_021161.1    | Ca_kabuli_chr02 | 3007391                 | GG                              | AA              | 1946749711               |
| SNP_P4_18264_3008853 | NC_021161.1    | Ca_kabuli_chr02 | 3008853                 | CC                              | TT              | 1946749713               |
| SNP_P4_18266_3009105 | NC_021161.1    | Ca_kabuli_chr02 | 3009105                 | AA                              | GG              | 1946749715               |
| SNP_P4_18267_3009107 | NC_021161.1    | Ca_kabuli_chr02 | 3009107                 | GG                              | TT              | 1946749717               |
| SNP_P4_18268_3013821 | NC_021161.1    | Ca_kabuli_chr02 | 3013821                 | CC                              | TT              | 1946749719               |
| SNP_P4_18269_3014154 | NC_021161.1    | Ca_kabuli_chr02 | 3014154                 | CC                              | TT              | 1946749721               |
| SNP_P4_18270_3014437 | NC_021161.1    | Ca_kabuli_chr02 | 3014437                 | AA                              | CC              | 1946749723               |
| SNP_P4_18271_3014489 | NC_021161.1    | Ca_kabuli_chr02 | 3014489                 | GG                              | TT              | 1946749725               |
| SNP_P4_18272_3014766 | NC_021161.1    | Ca_kabuli_chr02 | 3014766                 | AA                              | GG              | 1946749727               |
| SNP_P4_18273_3015948 | NC_021161.1    | Ca_kabuli_chr02 | 3015948                 | TT                              | GG              | 1946749729               |
| SNP_P4_18274_3016068 | NC_021161.1    | Ca_kabuli_chr02 | 3016068                 | TT                              | CC              | 1946749731               |
| SNP_P4_18275_3016069 | NC_021161.1    | Ca_kabuli_chr02 | 3016069                 | CC                              | AA              | 1946749733               |
| SNP_P4_18276_3016078 | NC_021161.1    | Ca_kabuli_chr02 | 3016078                 | TT                              | CC              | 1946749735               |
| SNP_P4_18279_3018719 | NC_021161.1    | Ca_kabuli_chr02 | 3018719                 | GG                              | AA              | 1946749737               |
| SNP_P4_18280_3018752 | NC_021161.1    | Ca_kabuli_chr02 | 3018752                 | AA                              | GG              | 1946749739               |
| SNP_P4_18282_3019601 | NC_021161.1    | Ca_kabuli_chr02 | 3019601                 | TT                              | AA              | 1946749741               |
| SNP_P4_18283_3019750 | NC_021161.1    | Ca_kabuli_chr02 | 3019750                 | GG                              | CC              | 1946749743               |
| SNP_P4_18284_3019810 | NC_021161.1    | Ca_kabuli_chr02 | 3019810                 | AA                              | GG              | 1946749745               |
| SNP_P4_18289_3022667 | NC_021161.1    | Ca_kabuli_chr02 | 3022667                 | TT                              | CC              | 1946749747               |
| SNP_P4_18290_3022697 | NC_021161.1    | Ca_kabuli_chr02 | 3022697                 | GG                              | AA              | 1946749749               |
| SNP_P4_18291_3023241 | NC_021161.1    | Ca_kabuli_chr02 | 3023241                 | GG                              | AA              | 1946749751               |
| SNP_P4_18292_3023243 | NC_021161.1    | Ca_kabuli_chr02 | 3023243                 | AA                              | GG              | 1946749753               |



| SNPs IDs             | Chromosome IDs | Chromosomes     | Physical positions (bp) | CDC Frontier (Reference genome) | (ILWC46 & LPNB) | NCBI SNPdb Accession IDs |
|----------------------|----------------|-----------------|-------------------------|---------------------------------|-----------------|--------------------------|
| SNP_P4_18293_3023320 | NC_021161.1    | Ca_kabuli_chr02 | 3023320                 | AA                              | CC              | 1946749755               |
| SNP_P4_18294_3024022 | NC_021161.1    | Ca_kabuli_chr02 | 3024022                 | AA                              | TT              | 1946749757               |
| SNP_P4_18295_3024395 | NC_021161.1    | Ca_kabuli_chr02 | 3024395                 | AA                              | GG              | 1946749759               |
| SNP_P4_18296_3024602 | NC_021161.1    | Ca_kabuli_chr02 | 3024602                 | AA                              | TT              | 1946749761               |
| SNP_P4_18297_3024615 | NC_021161.1    | Ca_kabuli_chr02 | 3024615                 | AA                              | GG              | 1946749763               |
| SNP_P4_18298_3025311 | NC_021161.1    | Ca_kabuli_chr02 | 3025311                 | TT                              | CC              | 1946749765               |
| SNP_P4_18299_3025427 | NC_021161.1    | Ca_kabuli_chr02 | 3025427                 | AA                              | GG              | 1946749767               |
| SNP_P4_18300_3025431 | NC_021161.1    | Ca_kabuli_chr02 | 3025431                 | GG                              | AA              | 1946749769               |
| SNP_P4_18301_3025438 | NC_021161.1    | Ca_kabuli_chr02 | 3025438                 | AA                              | GG              | 1946749771               |
| SNP_P4_18302_3025450 | NC_021161.1    | Ca_kabuli_chr02 | 3025450                 | TT                              | CC              | 1946749773               |
| SNP_P4_18303_3025502 | NC_021161.1    | Ca_kabuli_chr02 | 3025502                 | CC                              | TT              | 1946749775               |
| SNP_P4_18304_3025533 | NC_021161.1    | Ca_kabuli_chr02 | 3025533                 | AA                              | GG              | 1946749777               |
| SNP_P4_18306_3025626 | NC_021161.1    | Ca_kabuli_chr02 | 3025626                 | AA                              | TT              | 1946749779               |
| SNP_P4_18307_3025667 | NC_021161.1    | Ca_kabuli_chr02 | 3025667                 | TT                              | CC              | 1946749781               |
| SNP_P4_18308_3025801 | NC_021161.1    | Ca_kabuli_chr02 | 3025801                 | AA                              | GG              | 1946749783               |
| SNP_P4_18309_3025844 | NC_021161.1    | Ca_kabuli_chr02 | 3025844                 | TT                              | CC              | 1946749785               |
| SNP_P4_18310_3025867 | NC_021161.1    | Ca_kabuli_chr02 | 3025867                 | CC                              | TT              | 1946749787               |
| SNP_P4_18311_3025891 | NC_021161.1    | Ca_kabuli_chr02 | 3025891                 | CC                              | TT              | 1946749789               |
| SNP_P4_18312_3025905 | NC_021161.1    | Ca_kabuli_chr02 | 3025905                 | AA                              | GG              | 1946749791               |
| SNP_P4_18313_3026248 | NC_021161.1    | Ca_kabuli_chr02 | 3026248                 | AA                              | GG              | 1946749793               |
| SNP_P4_18314_3026315 | NC_021161.1    | Ca_kabuli_chr02 | 3026315                 | AA                              | CC              | 1946749795               |
| SNP_P4_18315_3026635 | NC_021161.1    | Ca_kabuli_chr02 | 3026635                 | TT                              | GG              | 1946749797               |
| SNP_P4_18316_3026636 | NC_021161.1    | Ca_kabuli_chr02 | 3026636                 | AA                              | GG              | 1946749799               |
| SNP_P4_18317_3026654 | NC_021161.1    | Ca_kabuli_chr02 | 3026654                 | TT                              | AA              | 1946749801               |
| SNP_P4_18318_3026656 | NC_021161.1    | Ca_kabuli_chr02 | 3026656                 | AA                              | TT              | 1946749803               |
| SNP_P4_18319_3026947 | NC_021161.1    | Ca_kabuli_chr02 | 3026947                 | GG                              | AA              | 1946749806               |
| SNP_P4_18320_3027062 | NC_021161.1    | Ca_kabuli_chr02 | 3027062                 | CC                              | TT              | 1946749808               |
| SNP_P4_18321_3027999 | NC_021161.1    | Ca_kabuli_chr02 | 3027999                 | AA                              | GG              | 1946749810               |
| SNP_P4_18322_3028055 | NC_021161.1    | Ca_kabuli_chr02 | 3028055                 | CC                              | TT              | 1946749812               |
| SNP_P4_18324_3028809 | NC_021161.1    | Ca_kabuli_chr02 | 3028809                 | TT                              | CC              | 1946749814               |
| SNP_P4_18325_3028810 | NC_021161.1    | Ca_kabuli_chr02 | 3028810                 | TT                              | CC              | 1946749816               |
| SNP_P4_18326_3029066 | NC_021161.1    | Ca_kabuli_chr02 | 3029066                 | CC                              | TT              | 1946749818               |
| SNP_P4_18327_3029068 | NC_021161.1    | Ca_kabuli_chr02 | 3029068                 | GG                              | CC              | 1946749820               |
| SNP_P4_18328_3029479 | NC_021161.1    | Ca_kabuli_chr02 | 3029479                 | AA                              | TT              | 1946749822               |
| SNP_P4_18331_3029612 | NC_021161.1    | Ca_kabuli_chr02 | 3029612                 | AA                              | GG              | 1946749824               |
| SNP_P4_18332_3029755 | NC_021161.1    | Ca_kabuli_chr02 | 3029755                 | GG                              | AA              | 1946749825               |
| SNP_P4_18333_3029781 | NC_021161.1    | Ca_kabuli_chr02 | 3029781                 | TT                              | CC              | 1946749827               |
| SNP_P4_18334_3029821 | NC_021161.1    | Ca_kabuli_chr02 | 3029821                 | AA                              | GG              | 1946749829               |
| SNP_P4_18335_3031031 | NC_021161.1    | Ca_kabuli_chr02 | 3031031                 | CC                              | TT              | 1946749831               |
| SNP_P4_18336_3031036 | NC_021161.1    | Ca_kabuli_chr02 | 3031036                 | AA                              | CC              | 1946749833               |
| SNP_P4_18337_3031049 | NC_021161.1    | Ca_kabuli_chr02 | 3031049                 | AA                              | GG              | 1946749835               |
| SNP_P4_18338_3031083 | NC_021161.1    | Ca_kabuli_chr02 | 3031083                 | GG                              | AA              | 1946749837               |

| SNPs IDs             | Chromosome IDs | Chromosomes     | Physical positions (bp) | CDC Frontier (Reference genome) | (ILWC46 & LPNB) | NCBI SNPdb Accession IDs |
|----------------------|----------------|-----------------|-------------------------|---------------------------------|-----------------|--------------------------|
| SNP_P4_18339_3031173 | NC_021161.1    | Ca_kabuli_chr02 | 3031173                 | GG                              | AA              | 1946749839               |
| SNP_P4_18340_3031197 | NC_021161.1    | Ca_kabuli_chr02 | 3031197                 | GG                              | CC              | 1946749841               |
| SNP_P4_18341_3031215 | NC_021161.1    | Ca_kabuli_chr02 | 3031215                 | CC                              | TT              | 1946749843               |
| SNP_P4_18343_3031550 | NC_021161.1    | Ca_kabuli_chr02 | 3031550                 | AA                              | TT              | 1946749845               |
| SNP_P4_18345_3031697 | NC_021161.1    | Ca_kabuli_chr02 | 3031697                 | AA                              | GG              | 1946749847               |
| SNP_P4_18346_3031726 | NC_021161.1    | Ca_kabuli_chr02 | 3031726                 | GG                              | AA              | 1946749849               |
| SNP_P4_18348_3031993 | NC_021161.1    | Ca_kabuli_chr02 | 3031993                 | TT                              | CC              | 1946749851               |
| SNP_P4_18350_3033169 | NC_021161.1    | Ca_kabuli_chr02 | 3033169                 | AA                              | TT              | 1946749853               |
| SNP_P4_18354_3033335 | NC_021161.1    | Ca_kabuli_chr02 | 3033335                 | AA                              | CC              | 1946749855               |
| SNP_P4_18356_3033762 | NC_021161.1    | Ca_kabuli_chr02 | 3033762                 | AA                              | GG              | 1946749857               |
| SNP_P4_18357_3034768 | NC_021161.1    | Ca_kabuli_chr02 | 3034768                 | GG                              | TT              | 1946749859               |
| SNP_P4_18358_3035090 | NC_021161.1    | Ca_kabuli_chr02 | 3035090                 | TT                              | CC              | 1946749861               |
| SNP_P4_18359_3037919 | NC_021161.1    | Ca_kabuli_chr02 | 3037919                 | AA                              | TT              | 1946749863               |
| SNP_P4_18360_3039334 | NC_021161.1    | Ca_kabuli_chr02 | 3039334                 | CC                              | TT              | 1946749865               |
| SNP_P4_18361_3041805 | NC_021161.1    | Ca_kabuli_chr02 | 3041805                 | AA                              | CC              | 1946749867               |
| SNP_P4_18362_3041858 | NC_021161.1    | Ca_kabuli_chr02 | 3041858                 | GG                              | TT              | 1946749869               |
| SNP_P4_18363_3041877 | NC_021161.1    | Ca_kabuli_chr02 | 3041877                 | TT                              | CC              | 1946749871               |
| SNP_P4_18364_3041980 | NC_021161.1    | Ca_kabuli_chr02 | 3041980                 | AA                              | GG              | 1946749873               |
| SNP_P4_18365_3042020 | NC_021161.1    | Ca_kabuli_chr02 | 3042020                 | CC                              | TT              | 1946749875               |
| SNP_P4_18367_3042190 | NC_021161.1    | Ca_kabuli_chr02 | 3042190                 | GG                              | AA              | 1946749877               |
| SNP_P4_18368_3044827 | NC_021161.1    | Ca_kabuli_chr02 | 3044827                 | AA                              | GG              | 1946749879               |
| SNP_P4_18369_3045020 | NC_021161.1    | Ca_kabuli_chr02 | 3045020                 | TT                              | AA              | 1946749881               |
| SNP_P4_18370_3045098 | NC_021161.1    | Ca_kabuli_chr02 | 3045098                 | AA                              | GG              | 1946749883               |
| SNP_P4_18372_3045486 | NC_021161.1    | Ca_kabuli_chr02 | 3045486                 | AA                              | GG              | 1946749885               |
| SNP_P4_18373_3046030 | NC_021161.1    | Ca_kabuli_chr02 | 3046030                 | AA                              | CC              | 1946749887               |
| SNP_P4_18375_3047371 | NC_021161.1    | Ca_kabuli_chr02 | 3047371                 | AA                              | TT              | 1946749889               |
| SNP_P4_18376_3047449 | NC_021161.1    | Ca_kabuli_chr02 | 3047449                 | AA                              | GG              | 1946749891               |
| SNP_P4_18377_3049334 | NC_021161.1    | Ca_kabuli_chr02 | 3049334                 | AA                              | GG              | 1946749893               |
| SNP_P4_18378_3049345 | NC_021161.1    | Ca_kabuli_chr02 | 3049345                 | CC                              | GG              | 1946749895               |
| SNP_P4_18380_3050194 | NC_021161.1    | Ca_kabuli_chr02 | 3050194                 | TT                              | CC              | 1946749897               |
| SNP_P4_18381_3050198 | NC_021161.1    | Ca_kabuli_chr02 | 3050198                 | AA                              | GG              | 1946749899               |
| SNP_P4_18382_3050202 | NC_021161.1    | Ca_kabuli_chr02 | 3050202                 | CC                              | TT              | 1946749901               |
| SNP_P4_18383_3050205 | NC_021161.1    | Ca_kabuli_chr02 | 3050205                 | CC                              | TT              | 1946749903               |
| SNP_P4_18384_3050210 | NC_021161.1    | Ca_kabuli_chr02 | 3050210                 | CC                              | TT              | 1946749905               |
| SNP_P4_18385_3050250 | NC_021161.1    | Ca_kabuli_chr02 | 3050250                 | AA                              | CC              | 1946749907               |
| SNP_P4_18386_3076812 | NC_021161.1    | Ca_kabuli_chr02 | 3076812                 | GG                              | CC              | 1946749909               |
| SNP_P4_18387_3076822 | NC_021161.1    | Ca_kabuli_chr02 | 3076822                 | CC                              | GG              | 1946749911               |
| SNP_P4_18389_3077346 | NC_021161.1    | Ca_kabuli_chr02 | 3077346                 | GG                              | AA              | 1946749913               |
| SNP_P4_18391_3078105 | NC_021161.1    | Ca_kabuli_chr02 | 3078105                 | CC                              | AA              | 1946749915               |
| SNP_P4_18395_3225852 | NC_021161.1    | Ca_kabuli_chr02 | 3225852                 | GG                              | AA              | 1946749917               |
| SNP_P4_18396_3230379 | NC_021161.1    | Ca_kabuli_chr02 | 3230379                 | TT                              | CC              | 1946749919               |
| SNP_P4_18398_3235524 | NC_021161.1    | Ca_kabuli_chr02 | 3235524                 | TT                              | CC              | 1946749921               |

| SNPs IDs             | Chromosome IDs | Chromosomes     | Physical positions (bp) | CDC Frontier (Reference genome) | (ILWC46 & LPNB) | NCBI SNPdb Accession IDs |
|----------------------|----------------|-----------------|-------------------------|---------------------------------|-----------------|--------------------------|
| SNP_P4_18399_3245016 | NC_021161.1    | Ca_kabuli_chr02 | 3245016                 | AA                              | GG              | 1946749923               |
| SNP_P4_18401_3251601 | NC_021161.1    | Ca_kabuli_chr02 | 3251601                 | GG                              | AA              | 1946749925               |
| SNP_P4_18402_3283404 | NC_021161.1    | Ca_kabuli_chr02 | 3283404                 | TT                              | AA              | 1946749927               |
| SNP_P4_18403_3283408 | NC_021161.1    | Ca_kabuli_chr02 | 3283408                 | TT                              | CC              | 1946749929               |
| SNP_P4_18404_3295581 | NC_021161.1    | Ca_kabuli_chr02 | 3295581                 | AA                              | GG              | 1946749931               |
| SNP_P4_18406_3312383 | NC_021161.1    | Ca_kabuli_chr02 | 3312383                 | AA                              | GG              | 1946749933               |
| SNP_P4_18407_3312485 | NC_021161.1    | Ca_kabuli_chr02 | 3312485                 | TT                              | CC              | 1946749935               |
| SNP_P4_18408_3312492 | NC_021161.1    | Ca_kabuli_chr02 | 3312492                 | GG                              | TT              | 1946749937               |
| SNP_P4_18409_3312504 | NC_021161.1    | Ca_kabuli_chr02 | 3312504                 | TT                              | AA              | 1946749939               |
| SNP_P4_18410_3362784 | NC_021161.1    | Ca_kabuli_chr02 | 3362784                 | GG                              | AA              | 1946749940               |
| SNP_P4_18411_3384438 | NC_021161.1    | Ca_kabuli_chr02 | 3384438                 | GG                              | TT              | 1946749942               |
| SNP_P4_18412_3387908 | NC_021161.1    | Ca_kabuli_chr02 | 3387908                 | GG                              | CC              | 1946749944               |
| SNP_P4_18414_3403994 | NC_021161.1    | Ca_kabuli_chr02 | 3403994                 | TT                              | CC              | 1946749946               |
| SNP_P4_18415_3411351 | NC_021161.1    | Ca_kabuli_chr02 | 3411351                 | TT                              | CC              | 1946749948               |
| SNP_P4_18416_3412976 | NC_021161.1    | Ca_kabuli_chr02 | 3412976                 | TT                              | CC              | 1946749950               |
| SNP_P4_18417_3424690 | NC_021161.1    | Ca_kabuli_chr02 | 3424690                 | TT                              | AA              | 1946749952               |
| SNP_P4_18418_3454239 | NC_021161.1    | Ca_kabuli_chr02 | 3454239                 | AA                              | TT              | 1946749954               |
| SNP_P4_18419_3454262 | NC_021161.1    | Ca_kabuli_chr02 | 3454262                 | TT                              | CC              | 1946749956               |
| SNP_P4_18420_3464758 | NC_021161.1    | Ca_kabuli_chr02 | 3464758                 | TT                              | CC              | 1946749958               |
| SNP_P4_18421_3464830 | NC_021161.1    | Ca_kabuli_chr02 | 3464830                 | GG                              | AA              | 1946749960               |
| SNP_P4_18422_3465184 | NC_021161.1    | Ca_kabuli_chr02 | 3465184                 | TT                              | CC              | 1946749962               |
| SNP_P4_18423_3465368 | NC_021161.1    | Ca_kabuli_chr02 | 3465368                 | TT                              | CC              | 1946749964               |
| SNP_P4_18424_3465370 | NC_021161.1    | Ca_kabuli_chr02 | 3465370                 | CC                              | TT              | 1946749966               |
| SNP_P4_18425_3465379 | NC_021161.1    | Ca_kabuli_chr02 | 3465379                 | GG                              | AA              | 1946749968               |
| SNP_P4_18426_3465395 | NC_021161.1    | Ca_kabuli_chr02 | 3465395                 | CC                              | AA              | 1946749970               |
| SNP_P4_18427_3465396 | NC_021161.1    | Ca_kabuli_chr02 | 3465396                 | GG                              | CC              | 1946749972               |
| SNP_P4_18428_3465547 | NC_021161.1    | Ca_kabuli_chr02 | 3465547                 | AA                              | CC              | 1946749974               |
| SNP_P4_18429_3501817 | NC_021161.1    | Ca_kabuli_chr02 | 3501817                 | AA                              | TT              | 1946749976               |
| SNP_P4_18430_3532699 | NC_021161.1    | Ca_kabuli_chr02 | 3532699                 | AA                              | GG              | 1946749978               |
| SNP_P4_18431_3577333 | NC_021161.1    | Ca_kabuli_chr02 | 3577333                 | TT                              | CC              | 1946749980               |
| SNP_P4_18432_3577335 | NC_021161.1    | Ca_kabuli_chr02 | 3577335                 | TT                              | GG              | 1946749981               |
| SNP_P4_18433_3591955 | NC_021161.1    | Ca_kabuli_chr02 | 3591955                 | CC                              | TT              | 1946749983               |
| SNP_P4_18434_3664001 | NC_021161.1    | Ca_kabuli_chr02 | 3664001                 | AA                              | GG              | 1946749985               |
| SNP_P4_18435_3667385 | NC_021161.1    | Ca_kabuli_chr02 | 3667385                 | AA                              | TT              | 1946749987               |
| SNP_P4_18436_3681624 | NC_021161.1    | Ca_kabuli_chr02 | 3681624                 | CC                              | GG              | 1946749990               |
| SNP_P4_18438_3723075 | NC_021161.1    | Ca_kabuli_chr02 | 3723075                 | CC                              | AA              | 1946749992               |
| SNP_P4_18439_3724991 | NC_021161.1    | Ca_kabuli_chr02 | 3724991                 | TT                              | CC              | 1946749994               |
| SNP_P4_18441_3728639 | NC_021161.1    | Ca_kabuli_chr02 | 3728639                 | TT                              | CC              | 1946749996               |
| SNP_P4_18443_3764992 | NC_021161.1    | Ca_kabuli_chr02 | 3764992                 | GG                              | TT              | 1946749998               |
| SNP_P4_18444_3787731 | NC_021161.1    | Ca_kabuli_chr02 | 3787731                 | GG                              | AA              | 1946750000               |
| SNP_P4_18445_3790258 | NC_021161.1    | Ca_kabuli_chr02 | 3790258                 | GG                              | AA              | 1946750002               |
| SNP_P4_18446_3790291 | NC_021161.1    | Ca_kabuli_chr02 | 3790291                 | TT                              | AA              | 1946750004               |

| SNPs IDs             | Chromosome IDs | Chromosomes     | Physical positions (bp) | CDC Frontier (Reference genome) | (ILWC46 & LPNB) | NCBI SNPdb Accession IDs |
|----------------------|----------------|-----------------|-------------------------|---------------------------------|-----------------|--------------------------|
| SNP_P4_18447_3790317 | NC_021161.1    | Ca_kabuli_chr02 | 3790317                 | AA                              | CC              | 1946750006               |
| SNP_P4_18450_3878673 | NC_021161.1    | Ca_kabuli_chr02 | 3878673                 | CC                              | TT              | 1946750008               |
| SNP_P4_18451_3882120 | NC_021161.1    | Ca_kabuli_chr02 | 3882120                 | CC                              | TT              | 1946750010               |
| SNP_P4_18453_3901632 | NC_021161.1    | Ca_kabuli_chr02 | 3901632                 | AA                              | GG              | 1946750011               |
| SNP_P4_18454_3901640 | NC_021161.1    | Ca_kabuli_chr02 | 3901640                 | TT                              | CC              | 1946750013               |
| SNP_P4_18455_3901712 | NC_021161.1    | Ca_kabuli_chr02 | 3901712                 | AA                              | CC              | 1946750015               |
| SNP_P4_18456_3901717 | NC_021161.1    | Ca_kabuli_chr02 | 3901717                 | TT                              | GG              | 1946750017               |
| SNP_P4_18457_3901729 | NC_021161.1    | Ca_kabuli_chr02 | 3901729                 | CC                              | AA              | 1946750019               |
| SNP_P4_18459_3901917 | NC_021161.1    | Ca_kabuli_chr02 | 3901917                 | GG                              | AA              | 1946750021               |
| SNP_P4_18460_3901918 | NC_021161.1    | Ca_kabuli_chr02 | 3901918                 | TT                              | GG              | 1946750023               |
| SNP_P4_18462_3941327 | NC_021161.1    | Ca_kabuli_chr02 | 3941327                 | CC                              | AA              | 1946750025               |
| SNP_P4_18463_3941333 | NC_021161.1    | Ca_kabuli_chr02 | 3941333                 | GG                              | CC              | 1946750027               |
| SNP_P4_18465_3950431 | NC_021161.1    | Ca_kabuli_chr02 | 3950431                 | CC                              | TT              | 1946750029               |
| SNP_P4_18467_3965082 | NC_021161.1    | Ca_kabuli_chr02 | 3965082                 | TT                              | CC              | 1946750030               |
| SNP_P4_18468_4012541 | NC_021161.1    | Ca_kabuli_chr02 | 4012541                 | GG                              | AA              | 1946750032               |
| SNP_P4_18469_4022300 | NC_021161.1    | Ca_kabuli_chr02 | 4022300                 | CC                              | TT              | 1946750034               |
| SNP_P4_18472_4069582 | NC_021161.1    | Ca_kabuli_chr02 | 4069582                 | AA                              | GG              | 1946750036               |
| SNP_P4_18473_4070901 | NC_021161.1    | Ca_kabuli_chr02 | 4070901                 | TT                              | CC              | 1946750038               |
| SNP_P4_18474_4130435 | NC_021161.1    | Ca_kabuli_chr02 | 4130435                 | CC                              | TT              | 1946750040               |
| SNP_P4_18475_4130561 | NC_021161.1    | Ca_kabuli_chr02 | 4130561                 | CC                              | TT              | 1946750042               |
| SNP_P4_18476_4156064 | NC_021161.1    | Ca_kabuli_chr02 | 4156064                 | AA                              | GG              | 1946750044               |
| SNP_P4_18477_4163297 | NC_021161.1    | Ca_kabuli_chr02 | 4163297                 | GG                              | AA              | 1946750046               |
| SNP_P4_18478_4171591 | NC_021161.1    | Ca_kabuli_chr02 | 4171591                 | GG                              | AA              | 1946750048               |
| SNP_P4_18479_4186706 | NC_021161.1    | Ca_kabuli_chr02 | 4186706                 | AA                              | GG              | 1946750049               |
| SNP_P4_18480_4192094 | NC_021161.1    | Ca_kabuli_chr02 | 4192094                 | AA                              | TT              | 1946750051               |
| SNP_P4_18481_4192331 | NC_021161.1    | Ca_kabuli_chr02 | 4192331                 | CC                              | TT              | 1946750053               |
| SNP_P4_18482_4192590 | NC_021161.1    | Ca_kabuli_chr02 | 4192590                 | GG                              | AA              | 1946750055               |
| SNP_P4_18483_4192625 | NC_021161.1    | Ca_kabuli_chr02 | 4192625                 | CC                              | AA              | 1946750057               |
| SNP_P4_18484_4192693 | NC_021161.1    | Ca_kabuli_chr02 | 4192693                 | AA                              | CC              | 1946750059               |
| SNP_P4_18485_4199515 | NC_021161.1    | Ca_kabuli_chr02 | 4199515                 | AA                              | GG              | 1946750061               |
| SNP_P4_18488_4239436 | NC_021161.1    | Ca_kabuli_chr02 | 4239436                 | GG                              | TT              | 1946750063               |
| SNP_P4_18489_4242997 | NC_021161.1    | Ca_kabuli_chr02 | 4242997                 | CC                              | TT              | 1946750065               |
| SNP_P4_18490_4243037 | NC_021161.1    | Ca_kabuli_chr02 | 4243037                 | GG                              | TT              | 1946750067               |
| SNP_P4_18491_4243057 | NC_021161.1    | Ca_kabuli_chr02 | 4243057                 | GG                              | TT              | 1946750069               |
| SNP_P4_18492_4253165 | NC_021161.1    | Ca_kabuli_chr02 | 4253165                 | GG                              | AA              | 1946750071               |
| SNP_P4_18493_4253175 | NC_021161.1    | Ca_kabuli_chr02 | 4253175                 | AA                              | GG              | 1946750073               |
| SNP_P4_18494_4253384 | NC_021161.1    | Ca_kabuli_chr02 | 4253384                 | TT                              | AA              | 1946750075               |
| SNP_P4_18496_4268161 | NC_021161.1    | Ca_kabuli_chr02 | 4268161                 | TT                              | CC              | 1946750077               |
| SNP_P4_18497_4268187 | NC_021161.1    | Ca_kabuli_chr02 | 4268187                 | CC                              | TT              | 1946750079               |
| SNP_P4_18498_4268225 | NC_021161.1    | Ca_kabuli_chr02 | 4268225                 | TT                              | CC              | 1946750081               |
| SNP_P4_18499_4268241 | NC_021161.1    | Ca_kabuli_chr02 | 4268241                 | GG                              | CC              | 1946750083               |
| SNP_P4_18500_4277749 | NC_021161.1    | Ca_kabuli_chr02 | 4277749                 | CC                              | TT              | 1946750085               |

| SNPs IDs             | Chromosome IDs | Chromosomes     | Physical positions (bp) | CDC Frontier (Reference genome) | (ILWC46 & LPNB) | NCBI SNPdb Accession IDs |
|----------------------|----------------|-----------------|-------------------------|---------------------------------|-----------------|--------------------------|
| SNP_P4_18501_4277752 | NC_021161.1    | Ca_kabuli_chr02 | 4277752                 | GG                              | AA              | 1946750087               |
| SNP_P4_18502_4277755 | NC_021161.1    | Ca_kabuli_chr02 | 4277755                 | GG                              | TT              | 1946750089               |
| SNP_P4_18503_4277776 | NC_021161.1    | Ca_kabuli_chr02 | 4277776                 | AA                              | GG              | 1946750091               |
| SNP_P4_18504_4277777 | NC_021161.1    | Ca_kabuli_chr02 | 4277777                 | TT                              | GG              | 1946750093               |
| SNP_P4_18505_4277908 | NC_021161.1    | Ca_kabuli_chr02 | 4277908                 | AA                              | CC              | 1946750095               |
| SNP_P4_18506_4277915 | NC_021161.1    | Ca_kabuli_chr02 | 4277915                 | GG                              | TT              | 1946750097               |
| SNP_P4_18507_4277948 | NC_021161.1    | Ca_kabuli_chr02 | 4277948                 | GG                              | AA              | 1946750099               |
| SNP_P4_18508_4278175 | NC_021161.1    | Ca_kabuli_chr02 | 4278175                 | TT                              | CC              | 1946750101               |
| SNP_P4_18509_4278192 | NC_021161.1    | Ca_kabuli_chr02 | 4278192                 | AA                              | GG              | 1946750103               |
| SNP_P4_18510_4278200 | NC_021161.1    | Ca_kabuli_chr02 | 4278200                 | AA                              | GG              | 1946750105               |
| SNP_P4_18511_4278253 | NC_021161.1    | Ca_kabuli_chr02 | 4278253                 | TT                              | CC              | 1946750107               |
| SNP_P4_18512_4278298 | NC_021161.1    | Ca_kabuli_chr02 | 4278298                 | AA                              | GG              | 1946750109               |
| SNP_P4_18513_4284997 | NC_021161.1    | Ca_kabuli_chr02 | 4284997                 | GG                              | AA              | 1946750111               |
| SNP_P4_18514_4285002 | NC_021161.1    | Ca_kabuli_chr02 | 4285002                 | AA                              | CC              | 1946750113               |
| SNP_P4_18515_4285004 | NC_021161.1    | Ca_kabuli_chr02 | 4285004                 | CC                              | AA              | 1946750115               |
| SNP_P4_18516_4285011 | NC_021161.1    | Ca_kabuli_chr02 | 4285011                 | AA                              | GG              | 1946750117               |
| SNP_P4_18518_4286414 | NC_021161.1    | Ca_kabuli_chr02 | 4286414                 | TT                              | CC              | 1946750119               |
| SNP_P4_18519_4315229 | NC_021161.1    | Ca_kabuli_chr02 | 4315229                 | AA                              | TT              | 1946750121               |
| SNP_P4_18520_4342004 | NC_021161.1    | Ca_kabuli_chr02 | 4342004                 | GG                              | TT              | 1946750123               |
| SNP_P4_18521_4342011 | NC_021161.1    | Ca_kabuli_chr02 | 4342011                 | AA                              | TT              | 1946750125               |
| SNP_P4_18522_4342027 | NC_021161.1    | Ca_kabuli_chr02 | 4342027                 | GG                              | CC              | 1946750127               |
| SNP_P4_18523_4342031 | NC_021161.1    | Ca_kabuli_chr02 | 4342031                 | CC                              | TT              | 1946750129               |
| SNP_P4_18524_4342037 | NC_021161.1    | Ca_kabuli_chr02 | 4342037                 | TT                              | CC              | 1946750131               |
| SNP_P4_18525_4342041 | NC_021161.1    | Ca_kabuli_chr02 | 4342041                 | CC                              | GG              | 1946750133               |
| SNP_P4_18526_4342043 | NC_021161.1    | Ca_kabuli_chr02 | 4342043                 | AA                              | GG              | 1946750135               |
| SNP_P4_18527_4342055 | NC_021161.1    | Ca_kabuli_chr02 | 4342055                 | CC                              | TT              | 1946750137               |
| SNP_P4_18528_4344672 | NC_021161.1    | Ca_kabuli_chr02 | 4344672                 | AA                              | TT              | 1946750139               |
| SNP_P4_18529_4344675 | NC_021161.1    | Ca_kabuli_chr02 | 4344675                 | AA                              | TT              | 1946750141               |
| SNP_P4_18530_4345068 | NC_021161.1    | Ca_kabuli_chr02 | 4345068                 | TT                              | CC              | 1946750143               |
| SNP_P4_18531_4358424 | NC_021161.1    | Ca_kabuli_chr02 | 4358424                 | CC                              | TT              | 1946750145               |
| SNP_P4_18533_4384469 | NC_021161.1    | Ca_kabuli_chr02 | 4384469                 | TT                              | GG              | 1946750147               |
| SNP_P4_18534_4410842 | NC_021161.1    | Ca_kabuli_chr02 | 4410842                 | TT                              | CC              | 1946750149               |
| SNP_P4_18535_4437009 | NC_021161.1    | Ca_kabuli_chr02 | 4437009                 | GG                              | TT              | 1946750151               |
| SNP_P4_18536_4449356 | NC_021161.1    | Ca_kabuli_chr02 | 4449356                 | GG                              | AA              | 1946750153               |
| SNP_P4_18537_4450985 | NC_021161.1    | Ca_kabuli_chr02 | 4450985                 | AA                              | GG              | 1946750155               |
| SNP_P4_18538_4460126 | NC_021161.1    | Ca_kabuli_chr02 | 4460126                 | TT                              | CC              | 1946750157               |
| SNP_P4_18539_4460524 | NC_021161.1    | Ca_kabuli_chr02 | 4460524                 | GG                              | AA              | 1946750159               |
| SNP_P4_18541_4502063 | NC_021161.1    | Ca_kabuli_chr02 | 4502063                 | TT                              | GG              | 1946750161               |
| SNP_P4_18542_4502067 | NC_021161.1    | Ca_kabuli_chr02 | 4502067                 | TT                              | GG              | 1946750163               |
| SNP_P4_18543_4517083 | NC_021161.1    | Ca_kabuli_chr02 | 4517083                 | AA                              | GG              | 1946750165               |
| SNP_P4_18545_4542625 | NC_021161.1    | Ca_kabuli_chr02 | 4542625                 | AA                              | GG              | 1946750167               |
| SNP_P4_18546_4549766 | NC_021161.1    | Ca_kabuli_chr02 | 4549766                 | AA                              | CC              | 1946750169               |

| SNPs IDs             | Chromosome IDs | Chromosomes     | Physical positions (bp) | CDC Frontier (Reference genome) | (ILWC46 & LPNB) | NCBI SNPdb Accession IDs |
|----------------------|----------------|-----------------|-------------------------|---------------------------------|-----------------|--------------------------|
| SNP_P4_18547_4549770 | NC_021161.1    | Ca_kabuli_chr02 | 4549770                 | GG                              | TT              | 1946750171               |
| SNP_P4_18548_4550633 | NC_021161.1    | Ca_kabuli_chr02 | 4550633                 | AA                              | GG              | 1946750173               |
| SNP_P4_18549_4551277 | NC_021161.1    | Ca_kabuli_chr02 | 4551277                 | TT                              | AA              | 1946750175               |
| SNP_P4_18550_4551279 | NC_021161.1    | Ca_kabuli_chr02 | 4551279                 | TT                              | GG              | 1946750177               |
| SNP_P4_18551_4556638 | NC_021161.1    | Ca_kabuli_chr02 | 4556638                 | TT                              | GG              | 1946750179               |
| SNP_P4_18553_4557347 | NC_021161.1    | Ca_kabuli_chr02 | 4557347                 | CC                              | TT              | 1946750181               |
| SNP_P4_18554_4557481 | NC_021161.1    | Ca_kabuli_chr02 | 4557481                 | TT                              | CC              | 1946750183               |
| SNP_P4_18555_4557484 | NC_021161.1    | Ca_kabuli_chr02 | 4557484                 | TT                              | GG              | 1946750185               |
| SNP_P4_18556_4569684 | NC_021161.1    | Ca_kabuli_chr02 | 4569684                 | AA                              | GG              | 1946750187               |
| SNP_P4_18557_4590204 | NC_021161.1    | Ca_kabuli_chr02 | 4590204                 | GG                              | AA              | 1946750189               |
| SNP_P4_18558_4594128 | NC_021161.1    | Ca_kabuli_chr02 | 4594128                 | CC                              | TT              | 1946750191               |
| SNP_P4_18559_4620728 | NC_021161.1    | Ca_kabuli_chr02 | 4620728                 | GG                              | AA              | 1946750193               |
| SNP_P4_18560_4620809 | NC_021161.1    | Ca_kabuli_chr02 | 4620809                 | AA                              | TT              | 1946750195               |
| SNP_P4_18561_4621090 | NC_021161.1    | Ca_kabuli_chr02 | 4621090                 | TT                              | CC              | 1946750197               |
| SNP_P4_18566_4671081 | NC_021161.1    | Ca_kabuli_chr02 | 4671081                 | GG                              | TT              | 1946750199               |
| SNP_P4_18567_4671103 | NC_021161.1    | Ca_kabuli_chr02 | 4671103                 | TT                              | GG              | 1946750201               |
| SNP_P4_18568_4671112 | NC_021161.1    | Ca_kabuli_chr02 | 4671112                 | GG                              | AA              | 1946750203               |
| SNP_P4_18569_4677963 | NC_021161.1    | Ca_kabuli_chr02 | 4677963                 | AA                              | GG              | 1946750205               |
| SNP_P4_18570_4677999 | NC_021161.1    | Ca_kabuli_chr02 | 4677999                 | CC                              | TT              | 1946750207               |
| SNP_P4_18571_4678270 | NC_021161.1    | Ca_kabuli_chr02 | 4678270                 | CC                              | TT              | 1946750209               |
| SNP_P4_18572_4678358 | NC_021161.1    | Ca_kabuli_chr02 | 4678358                 | CC                              | TT              | 1946750211               |
| SNP_P4_18573_4731884 | NC_021161.1    | Ca_kabuli_chr02 | 4731884                 | AA                              | CC              | 1946750213               |
| SNP_P4_18574_4732318 | NC_021161.1    | Ca_kabuli_chr02 | 4732318                 | TT                              | CC              | 1946750215               |
| SNP_P4_18575_4746281 | NC_021161.1    | Ca_kabuli_chr02 | 4746281                 | GG                              | AA              | 1946750217               |
| SNP_P4_18576_4747812 | NC_021161.1    | Ca_kabuli_chr02 | 4747812                 | AA                              | TT              | 1946750219               |
| SNP_P4_18577_4766082 | NC_021161.1    | Ca_kabuli_chr02 | 4766082                 | CC                              | TT              | 1946750221               |
| SNP_P4_18578_4766098 | NC_021161.1    | Ca_kabuli_chr02 | 4766098                 | AA                              | GG              | 1946750223               |
| SNP_P4_18579_4766239 | NC_021161.1    | Ca_kabuli_chr02 | 4766239                 | TT                              | CC              | 1946750225               |
| SNP_P4_18580_4766442 | NC_021161.1    | Ca_kabuli_chr02 | 4766442                 | CC                              | GG              | 1946750227               |
| SNP_P4_18581_4766466 | NC_021161.1    | Ca_kabuli_chr02 | 4766466                 | TT                              | CC              | 1946750228               |
| SNP_P4_18582_4766512 | NC_021161.1    | Ca_kabuli_chr02 | 4766512                 | CC                              | TT              | 1946750230               |
| SNP_P4_18583_4766516 | NC_021161.1    | Ca_kabuli_chr02 | 4766516                 | TT                              | CC              | 1946750232               |
| SNP_P4_18584_4766533 | NC_021161.1    | Ca_kabuli_chr02 | 4766533                 | GG                              | AA              | 1946750234               |
| SNP_P4_18585_4766566 | NC_021161.1    | Ca_kabuli_chr02 | 4766566                 | TT                              | AA              | 1946750236               |
| SNP_P4_18586_4767130 | NC_021161.1    | Ca_kabuli_chr02 | 4767130                 | CC                              | TT              | 1946750238               |
| SNP_P4_18587_4767165 | NC_021161.1    | Ca_kabuli_chr02 | 4767165                 | AA                              | CC              | 1946750240               |
| SNP_P4_18589_4805041 | NC_021161.1    | Ca_kabuli_chr02 | 4805041                 | CC                              | TT              | 1946750242               |
| SNP_P4_18590_4812595 | NC_021161.1    | Ca_kabuli_chr02 | 4812595                 | CC                              | TT              | 1946750244               |
| SNP_P4_18591_4812788 | NC_021161.1    | Ca_kabuli_chr02 | 4812788                 | AA                              | GG              | 1946750246               |
| SNP_P4_18592_4812851 | NC_021161.1    | Ca_kabuli_chr02 | 4812851                 | CC                              | TT              | 1946750248               |
| SNP_P4_18594_4812911 | NC_021161.1    | Ca_kabuli_chr02 | 4812911                 | TT                              | CC              | 1946750250               |
| SNP_P4_18595_4812950 | NC_021161.1    | Ca_kabuli_chr02 | 4812950                 | GG                              | TT              | 1946750252               |

| SNPs IDs             | Chromosome IDs | Chromosomes     | Physical positions (bp) | CDC Frontier (Reference genome) | (ILWC46 & LPNB) | NCBI SNPdb Accession IDs |
|----------------------|----------------|-----------------|-------------------------|---------------------------------|-----------------|--------------------------|
| SNP_P4_18596_4812959 | NC_021161.1    | Ca_kabuli_chr02 | 4812959                 | GG                              | TT              | 1946750254               |
| SNP_P4_18597_4812979 | NC_021161.1    | Ca_kabuli_chr02 | 4812979                 | GG                              | AA              | 1946750256               |
| SNP_P4_18598_4813128 | NC_021161.1    | Ca_kabuli_chr02 | 4813128                 | AA                              | GG              | 1946750257               |
| SNP_P4_18599_4813151 | NC_021161.1    | Ca_kabuli_chr02 | 4813151                 | AA                              | TT              | 1946750259               |
| SNP_P4_18600_4813161 | NC_021161.1    | Ca_kabuli_chr02 | 4813161                 | GG                              | AA              | 1946750261               |
| SNP_P4_18601_4813168 | NC_021161.1    | Ca_kabuli_chr02 | 4813168                 | CC                              | TT              | 1946750263               |
| SNP_P4_18602_4813172 | NC_021161.1    | Ca_kabuli_chr02 | 4813172                 | AA                              | GG              | 1946750265               |
| SNP_P4_18603_4813225 | NC_021161.1    | Ca_kabuli_chr02 | 4813225                 | GG                              | AA              | 1946750267               |
| SNP_P4_18604_4813273 | NC_021161.1    | Ca_kabuli_chr02 | 4813273                 | AA                              | GG              | 1946750269               |
| SNP_P4_18605_4819571 | NC_021161.1    | Ca_kabuli_chr02 | 4819571                 | CC                              | TT              | 1946750271               |
| SNP_P4_18606_4825637 | NC_021161.1    | Ca_kabuli_chr02 | 4825637                 | AA                              | GG              | 1946750273               |
| SNP_P4_18607_4829772 | NC_021161.1    | Ca_kabuli_chr02 | 4829772                 | TT                              | CC              | 1946750275               |
| SNP_P4_18608_4840871 | NC_021161.1    | Ca_kabuli_chr02 | 4840871                 | CC                              | TT              | 1946750277               |
| SNP_P4_18610_4873015 | NC_021161.1    | Ca_kabuli_chr02 | 4873015                 | GG                              | AA              | 1946750279               |
| SNP_P4_18611_4890866 | NC_021161.1    | Ca_kabuli_chr02 | 4890866                 | GG                              | TT              | 1946750281               |
| SNP_P4_18612_4890869 | NC_021161.1    | Ca_kabuli_chr02 | 4890869                 | TT                              | GG              | 1946750283               |
| SNP_P4_18613_4890929 | NC_021161.1    | Ca_kabuli_chr02 | 4890929                 | AA                              | CC              | 1946750285               |
| SNP_P4_18614_4890940 | NC_021161.1    | Ca_kabuli_chr02 | 4890940                 | AA                              | TT              | 1946750287               |
| SNP_P4_18615_4890996 | NC_021161.1    | Ca_kabuli_chr02 | 4890996                 | GG                              | AA              | 1946750289               |
| SNP_P4_18618_4891402 | NC_021161.1    | Ca_kabuli_chr02 | 4891402                 | GG                              | AA              | 1946750291               |
| SNP_P4_18619_4891487 | NC_021161.1    | Ca_kabuli_chr02 | 4891487                 | AA                              | GG              | 1946750293               |
| SNP_P4_18620_4892429 | NC_021161.1    | Ca_kabuli_chr02 | 4892429                 | CC                              | TT              | 1946750295               |
| SNP_P4_18621_4892489 | NC_021161.1    | Ca_kabuli_chr02 | 4892489                 | AA                              | CC              | 1946750297               |
| SNP_P4_18622_4892541 | NC_021161.1    | Ca_kabuli_chr02 | 4892541                 | TT                              | AA              | 1946750299               |
| SNP_P4_18623_4892639 | NC_021161.1    | Ca_kabuli_chr02 | 4892639                 | GG                              | AA              | 1946750301               |
| SNP_P4_18625_4892894 | NC_021161.1    | Ca_kabuli_chr02 | 4892894                 | AA                              | TT              | 1946750303               |
| SNP_P4_18626_4893002 | NC_021161.1    | Ca_kabuli_chr02 | 4893002                 | TT                              | GG              | 1946750304               |
| SNP_P4_18627_4893011 | NC_021161.1    | Ca_kabuli_chr02 | 4893011                 | CC                              | TT              | 1946750306               |
| SNP_P4_18628_4893117 | NC_021161.1    | Ca_kabuli_chr02 | 4893117                 | GG                              | AA              | 1946750308               |
| SNP_P4_18629_4893356 | NC_021161.1    | Ca_kabuli_chr02 | 4893356                 | AA                              | GG              | 1946750310               |
| SNP_P4_18630_4893411 | NC_021161.1    | Ca_kabuli_chr02 | 4893411                 | GG                              | CC              | 1946750312               |
| SNP_P4_18631_4893522 | NC_021161.1    | Ca_kabuli_chr02 | 4893522                 | CC                              | AA              | 1946750314               |
| SNP_P4_18632_4893601 | NC_021161.1    | Ca_kabuli_chr02 | 4893601                 | TT                              | CC              | 1946750316               |
| SNP_P4_18633_4893902 | NC_021161.1    | Ca_kabuli_chr02 | 4893902                 | CC                              | TT              | 1946750318               |
| SNP_P4_18634_4893941 | NC_021161.1    | Ca_kabuli_chr02 | 4893941                 | AA                              | GG              | 1946750320               |
| SNP_P4_18635_4894008 | NC_021161.1    | Ca_kabuli_chr02 | 4894008                 | AA                              | TT              | 1946750322               |
| SNP_P4_18636_4894056 | NC_021161.1    | Ca_kabuli_chr02 | 4894056                 | GG                              | AA              | 1946750324               |
| SNP_P4_18638_4894300 | NC_021161.1    | Ca_kabuli_chr02 | 4894300                 | TT                              | GG              | 1946750326               |
| SNP_P4_18639_4894415 | NC_021161.1    | Ca_kabuli_chr02 | 4894415                 | CC                              | AA              | 1946750328               |
| SNP_P4_18640_4894639 | NC_021161.1    | Ca_kabuli_chr02 | 4894639                 | GG                              | TT              | 1946750330               |
| SNP_P4_18641_4894701 | NC_021161.1    | Ca_kabuli_chr02 | 4894701                 | CC                              | AA              | 1946750332               |
| SNP_P4_18643_4895096 | NC_021161.1    | Ca_kabuli_chr02 | 4895096                 | TT                              | GG              | 1946750335               |

| SNPs IDs             | Chromosome IDs | Chromosomes     | Physical positions (bp) | CDC Frontier (Reference genome) | (ILWC46 & LPNB) | NCBI SNPdb Accession IDs |
|----------------------|----------------|-----------------|-------------------------|---------------------------------|-----------------|--------------------------|
| SNP_P4_18644_4895476 | NC_021161.1    | Ca_kabuli_chr02 | 4895476                 | CC                              | AA              | 1946750337               |
| SNP_P4_18645_4895477 | NC_021161.1    | Ca_kabuli_chr02 | 4895477                 | GG                              | AA              | 1946750339               |
| SNP_P4_18646_4895494 | NC_021161.1    | Ca_kabuli_chr02 | 4895494                 | AA                              | GG              | 1946750341               |
| SNP_P4_18647_4895497 | NC_021161.1    | Ca_kabuli_chr02 | 4895497                 | CC                              | TT              | 1946750343               |
| SNP_P4_18648_4895508 | NC_021161.1    | Ca_kabuli_chr02 | 4895508                 | GG                              | AA              | 1946750345               |
| SNP_P4_18649_4895575 | NC_021161.1    | Ca_kabuli_chr02 | 4895575                 | CC                              | TT              | 1946750347               |
| SNP_P4_18650_4895580 | NC_021161.1    | Ca_kabuli_chr02 | 4895580                 | GG                              | AA              | 1946750349               |
| SNP_P4_18651_4895614 | NC_021161.1    | Ca_kabuli_chr02 | 4895614                 | TT                              | CC              | 1946750351               |
| SNP_P4_18652_4895622 | NC_021161.1    | Ca_kabuli_chr02 | 4895622                 | TT                              | CC              | 1946750353               |
| SNP_P4_18653_4895627 | NC_021161.1    | Ca_kabuli_chr02 | 4895627                 | AA                              | GG              | 1946750355               |
| SNP_P4_18654_4895637 | NC_021161.1    | Ca_kabuli_chr02 | 4895637                 | TT                              | CC              | 1946750357               |
| SNP_P4_18655_4895642 | NC_021161.1    | Ca_kabuli_chr02 | 4895642                 | GG                              | AA              | 1946750359               |
| SNP_P4_18657_4895718 | NC_021161.1    | Ca_kabuli_chr02 | 4895718                 | GG                              | AA              | 1946750361               |
| SNP_P4_18658_4912766 | NC_021161.1    | Ca_kabuli_chr02 | 4912766                 | TT                              | AA              | 1946750363               |
| SNP_P4_18660_4916011 | NC_021161.1    | Ca_kabuli_chr02 | 4916011                 | AA                              | GG              | 1946750365               |
| SNP_P4_18661_4916248 | NC_021161.1    | Ca_kabuli_chr02 | 4916248                 | CC                              | GG              | 1946750367               |
| SNP_P4_18662_4916270 | NC_021161.1    | Ca_kabuli_chr02 | 4916270                 | TT                              | CC              | 1946750369               |
| SNP_P4_18664_4974322 | NC_021161.1    | Ca_kabuli_chr02 | 4974322                 | AA                              | GG              | 1946750371               |
| SNP_P4_18666_5003733 | NC_021161.1    | Ca_kabuli_chr02 | 5003733                 | AA                              | CC              | 1946750373               |
| SNP_P4_18667_5007247 | NC_021161.1    | Ca_kabuli_chr02 | 5007247                 | TT                              | AA              | 1946750375               |
| SNP_P4_18668_5008485 | NC_021161.1    | Ca_kabuli_chr02 | 5008485                 | AA                              | GG              | 1946750377               |
| SNP_P4_18670_5107850 | NC_021161.1    | Ca_kabuli_chr02 | 5107850                 | TT                              | CC              | 1946750379               |
| SNP_P4_18671_5108291 | NC_021161.1    | Ca_kabuli_chr02 | 5108291                 | AA                              | CC              | 1946750381               |
| SNP_P4_18672_5112362 | NC_021161.1    | Ca_kabuli_chr02 | 5112362                 | TT                              | CC              | 1946750383               |
| SNP_P4_18674_5112758 | NC_021161.1    | Ca_kabuli_chr02 | 5112758                 | AA                              | GG              | 1946750385               |
| SNP_P4_18675_5112827 | NC_021161.1    | Ca_kabuli_chr02 | 5112827                 | AA                              | GG              | 1946750387               |
| SNP_P4_18676_5135197 | NC_021161.1    | Ca_kabuli_chr02 | 5135197                 | AA                              | GG              | 1946750389               |
| SNP_P4_18677_5135328 | NC_021161.1    | Ca_kabuli_chr02 | 5135328                 | AA                              | CC              | 1946750391               |
| SNP_P4_18678_5135343 | NC_021161.1    | Ca_kabuli_chr02 | 5135343                 | AA                              | GG              | 1946750393               |
| SNP_P4_18679_5135366 | NC_021161.1    | Ca_kabuli_chr02 | 5135366                 | AA                              | CC              | 1946750395               |
| SNP_P4_18682_5155377 | NC_021161.1    | Ca_kabuli_chr02 | 5155377                 | TT                              | GG              | 1946750397               |
| SNP_P4_18683_5157587 | NC_021161.1    | Ca_kabuli_chr02 | 5157587                 | TT                              | CC              | 1946750399               |
| SNP_P4_18684_5157597 | NC_021161.1    | Ca_kabuli_chr02 | 5157597                 | AA                              | TT              | 1946750401               |
| SNP_P4_18685_5157609 | NC_021161.1    | Ca_kabuli_chr02 | 5157609                 | CC                              | TT              | 1946750402               |
| SNP_P4_18686_5157630 | NC_021161.1    | Ca_kabuli_chr02 | 5157630                 | AA                              | GG              | 1946750404               |
| SNP_P4_18687_5157657 | NC_021161.1    | Ca_kabuli_chr02 | 5157657                 | TT                              | CC              | 1946750406               |
| SNP_P4_18688_5157659 | NC_021161.1    | Ca_kabuli_chr02 | 5157659                 | TT                              | CC              | 1946750408               |
| SNP_P4_18689_5157667 | NC_021161.1    | Ca_kabuli_chr02 | 5157667                 | CC                              | TT              | 1946750410               |
| SNP_P4_18692_5238450 | NC_021161.1    | Ca_kabuli_chr02 | 5238450                 | AA                              | GG              | 1946750412               |
| SNP_P4_18694_5271218 | NC_021161.1    | Ca_kabuli_chr02 | 5271218                 | AA                              | TT              | 1946750414               |
| SNP_P4_18696_5290850 | NC_021161.1    | Ca_kabuli_chr02 | 5290850                 | AA                              | TT              | 1946750416               |
| SNP_P4_18697_5312249 | NC_021161.1    | Ca_kabuli_chr02 | 5312249                 | AA                              | CC              | 1946750418               |



| SNPs IDs             | Chromosome IDs | Chromosomes     | Physical positions (bp) | CDC Frontier (Reference genome) | (ILWC46 & LPNB) | NCBI SNPdb Accession IDs |
|----------------------|----------------|-----------------|-------------------------|---------------------------------|-----------------|--------------------------|
| SNP_P4_18699_5319564 | NC_021161.1    | Ca_kabuli_chr02 | 5319564                 | CC                              | TT              | 1946750420               |
| SNP_P4_18700_5339833 | NC_021161.1    | Ca_kabuli_chr02 | 5339833                 | GG                              | AA              | 1946750422               |
| SNP_P4_18701_5347609 | NC_021161.1    | Ca_kabuli_chr02 | 5347609                 | GG                              | AA              | 1946750424               |
| SNP_P4_18702_5347610 | NC_021161.1    | Ca_kabuli_chr02 | 5347610                 | TT                              | CC              | 1946750426               |
| SNP_P4_18703_5347642 | NC_021161.1    | Ca_kabuli_chr02 | 5347642                 | AA                              | GG              | 1946750428               |
| SNP_P4_18704_5347734 | NC_021161.1    | Ca_kabuli_chr02 | 5347734                 | CC                              | AA              | 1946750430               |
| SNP_P4_18705_5347931 | NC_021161.1    | Ca_kabuli_chr02 | 5347931                 | CC                              | TT              | 1946750432               |
| SNP_P4_18706_5347997 | NC_021161.1    | Ca_kabuli_chr02 | 5347997                 | TT                              | AA              | 1946750434               |
| SNP_P4_18707_5348020 | NC_021161.1    | Ca_kabuli_chr02 | 5348020                 | GG                              | AA              | 1946750436               |
| SNP_P4_18708_5355259 | NC_021161.1    | Ca_kabuli_chr02 | 5355259                 | CC                              | TT              | 1946750438               |
| SNP_P4_18709_5355281 | NC_021161.1    | Ca_kabuli_chr02 | 5355281                 | CC                              | TT              | 1946750440               |
| SNP_P4_18710_5357780 | NC_021161.1    | Ca_kabuli_chr02 | 5357780                 | TT                              | AA              | 1946750442               |
| SNP_P4_18711_5357782 | NC_021161.1    | Ca_kabuli_chr02 | 5357782                 | CC                              | AA              | 1946750444               |
| SNP_P4_18712_5373598 | NC_021161.1    | Ca_kabuli_chr02 | 5373598                 | TT                              | AA              | 1946750446               |
| SNP_P4_18713_5373612 | NC_021161.1    | Ca_kabuli_chr02 | 5373612                 | TT                              | AA              | 1946750448               |
| SNP_P4_18714_5373613 | NC_021161.1    | Ca_kabuli_chr02 | 5373613                 | TT                              | AA              | 1946750450               |
| SNP_P4_18716_5405348 | NC_021161.1    | Ca_kabuli_chr02 | 5405348                 | GG                              | AA              | 1946750452               |
| SNP_P4_18717_5407919 | NC_021161.1    | Ca_kabuli_chr02 | 5407919                 | CC                              | TT              | 1946750454               |
| SNP_P4_18718_5407927 | NC_021161.1    | Ca_kabuli_chr02 | 5407927                 | TT                              | AA              | 1946750456               |
| SNP_P4_18719_5407930 | NC_021161.1    | Ca_kabuli_chr02 | 5407930                 | TT                              | CC              | 1946750458               |
| SNP_P4_18720_5408023 | NC_021161.1    | Ca_kabuli_chr02 | 5408023                 | CC                              | TT              | 1946750460               |
| SNP_P4_18721_5408098 | NC_021161.1    | Ca_kabuli_chr02 | 5408098                 | CC                              | TT              | 1946750462               |
| SNP_P4_18724_5476879 | NC_021161.1    | Ca_kabuli_chr02 | 5476879                 | GG                              | AA              | 1946750464               |
| SNP_P4_18725_5482303 | NC_021161.1    | Ca_kabuli_chr02 | 5482303                 | AA                              | GG              | 1946750466               |
| SNP_P4_18726_5483872 | NC_021161.1    | Ca_kabuli_chr02 | 5483872                 | GG                              | AA              | 1946750468               |
| SNP_P4_18727_5484772 | NC_021161.1    | Ca_kabuli_chr02 | 5484772                 | GG                              | TT              | 1946750470               |
| SNP_P4_18729_5510140 | NC_021161.1    | Ca_kabuli_chr02 | 5510140                 | AA                              | CC              | 1946750472               |
| SNP_P4_18730_5522691 | NC_021161.1    | Ca_kabuli_chr02 | 5522691                 | AA                              | GG              | 1946750474               |
| SNP_P4_18731_5522713 | NC_021161.1    | Ca_kabuli_chr02 | 5522713                 | GG                              | AA              | 1946750476               |
| SNP_P4_18732_5522912 | NC_021161.1    | Ca_kabuli_chr02 | 5522912                 | AA                              | GG              | 1946750478               |
| SNP_P4_18733_5522930 | NC_021161.1    | Ca_kabuli_chr02 | 5522930                 | GG                              | TT              | 1946750480               |
| SNP_P4_18734_5522950 | NC_021161.1    | Ca_kabuli_chr02 | 5522950                 | AA                              | GG              | 1946750482               |
| SNP_P4_18735_5524155 | NC_021161.1    | Ca_kabuli_chr02 | 5524155                 | AA                              | CC              | 1946750484               |
| SNP_P4_18736_5524339 | NC_021161.1    | Ca_kabuli_chr02 | 5524339                 | TT                              | GG              | 1946750486               |
| SNP_P4_18737_5524431 | NC_021161.1    | Ca_kabuli_chr02 | 5524431                 | AA                              | GG              | 1946750488               |
| SNP_P4_18738_5524436 | NC_021161.1    | Ca_kabuli_chr02 | 5524436                 | GG                              | AA              | 1946750490               |
| SNP_P4_18739_5524451 | NC_021161.1    | Ca_kabuli_chr02 | 5524451                 | CC                              | TT              | 1946750492               |
| SNP_P4_18740_5524462 | NC_021161.1    | Ca_kabuli_chr02 | 5524462                 | AA                              | GG              | 1946750494               |
| SNP_P4_18741_5524465 | NC_021161.1    | Ca_kabuli_chr02 | 5524465                 | AA                              | TT              | 1946750495               |
| SNP_P4_18742_5524479 | NC_021161.1    | Ca_kabuli_chr02 | 5524479                 | AA                              | CC              | 1946750496               |
| SNP_P4_18743_5524663 | NC_021161.1    | Ca_kabuli_chr02 | 5524663                 | TT                              | CC              | 1946750497               |
| SNP_P4_18744_5524726 | NC_021161.1    | Ca_kabuli_chr02 | 5524726                 | TT                              | CC              | 1946750498               |

| SNPs IDs             | Chromosome IDs | Chromosomes     | Physical positions (bp) | CDC Frontier (Reference genome) | (ILWC46 & LPNB) | NCBI SNPdb Accession IDs |
|----------------------|----------------|-----------------|-------------------------|---------------------------------|-----------------|--------------------------|
| SNP_P4_18745_5524768 | NC_021161.1    | Ca_kabuli_chr02 | 5524768                 | CC                              | TT              | 1946750499               |
| SNP_P4_18746_5524783 | NC_021161.1    | Ca_kabuli_chr02 | 5524783                 | TT                              | AA              | 1946750500               |
| SNP_P4_18747_5526209 | NC_021161.1    | Ca_kabuli_chr02 | 5526209                 | CC                              | TT              | 1946750502               |
| SNP_P4_18748_5526532 | NC_021161.1    | Ca_kabuli_chr02 | 5526532                 | CC                              | GG              | 1946750504               |
| SNP_P4_18749_5531564 | NC_021161.1    | Ca_kabuli_chr02 | 5531564                 | GG                              | TT              | 1946750506               |
| SNP_P4_18750_5565922 | NC_021161.1    | Ca_kabuli_chr02 | 5565922                 | CC                              | TT              | 1946750508               |
| SNP_P4_18751_5565973 | NC_021161.1    | Ca_kabuli_chr02 | 5565973                 | AA                              | GG              | 1946750510               |
| SNP_P4_18752_5566058 | NC_021161.1    | Ca_kabuli_chr02 | 5566058                 | AA                              | TT              | 1946750512               |
| SNP_P4_18753_5566109 | NC_021161.1    | Ca_kabuli_chr02 | 5566109                 | GG                              | AA              | 1946750514               |
| SNP_P4_18754_5566157 | NC_021161.1    | Ca_kabuli_chr02 | 5566157                 | TT                              | CC              | 1946750516               |
| SNP_P4_18755_5566169 | NC_021161.1    | Ca_kabuli_chr02 | 5566169                 | GG                              | AA              | 1946750518               |
| SNP_P4_18756_5566171 | NC_021161.1    | Ca_kabuli_chr02 | 5566171                 | AA                              | GG              | 1946750520               |
| SNP_P4_18757_5566182 | NC_021161.1    | Ca_kabuli_chr02 | 5566182                 | TT                              | GG              | 1946750522               |
| SNP_P4_18758_5566217 | NC_021161.1    | Ca_kabuli_chr02 | 5566217                 | GG                              | AA              | 1946750524               |
| SNP_P4_18759_5566225 | NC_021161.1    | Ca_kabuli_chr02 | 5566225                 | AA                              | CC              | 1946750526               |
| SNP_P4_18760_5566317 | NC_021161.1    | Ca_kabuli_chr02 | 5566317                 | AA                              | GG              | 1946750528               |
| SNP_P4_18761_5566376 | NC_021161.1    | Ca_kabuli_chr02 | 5566376                 | GG                              | AA              | 1946750530               |
| SNP_P4_18762_5566391 | NC_021161.1    | Ca_kabuli_chr02 | 5566391                 | CC                              | TT              | 1946750532               |
| SNP_P4_18763_5579488 | NC_021161.1    | Ca_kabuli_chr02 | 5579488                 | TT                              | CC              | 1946750534               |
| SNP_P4_18764_5579489 | NC_021161.1    | Ca_kabuli_chr02 | 5579489                 | TT                              | GG              | 1946750536               |
| SNP_P4_18766_5640160 | NC_021161.1    | Ca_kabuli_chr02 | 5640160                 | AA                              | TT              | 1946750538               |
| SNP_P4_18767_5648204 | NC_021161.1    | Ca_kabuli_chr02 | 5648204                 | TT                              | CC              | 1946750540               |
| SNP_P4_18768_5655919 | NC_021161.1    | Ca_kabuli_chr02 | 5655919                 | AA                              | CC              | 1946750542               |
| SNP_P4_18769_5676434 | NC_021161.1    | Ca_kabuli_chr02 | 5676434                 | CC                              | TT              | 1946750544               |
| SNP_P4_18770_5701948 | NC_021161.1    | Ca_kabuli_chr02 | 5701948                 | TT                              | CC              | 1946750546               |
| SNP_P4_18771_5703431 | NC_021161.1    | Ca_kabuli_chr02 | 5703431                 | CC                              | TT              | 1946750548               |
| SNP_P4_18772_5703482 | NC_021161.1    | Ca_kabuli_chr02 | 5703482                 | TT                              | CC              | 1946750550               |
| SNP_P4_18773_5703508 | NC_021161.1    | Ca_kabuli_chr02 | 5703508                 | TT                              | CC              | 1946750552               |
| SNP_P4_18774_5703602 | NC_021161.1    | Ca_kabuli_chr02 | 5703602                 | GG                              | TT              | 1946750554               |
| SNP_P4_18775_5703606 | NC_021161.1    | Ca_kabuli_chr02 | 5703606                 | AA                              | GG              | 1946750556               |
| SNP_P4_18776_5703686 | NC_021161.1    | Ca_kabuli_chr02 | 5703686                 | TT                              | CC              | 1946750558               |
| SNP_P4_18777_5703730 | NC_021161.1    | Ca_kabuli_chr02 | 5703730                 | GG                              | AA              | 1946750560               |
| SNP_P4_18778_5703750 | NC_021161.1    | Ca_kabuli_chr02 | 5703750                 | GG                              | AA              | 1946750562               |
| SNP_P4_18779_5706190 | NC_021161.1    | Ca_kabuli_chr02 | 5706190                 | GG                              | AA              | 1946750564               |
| SNP_P4_18780_5706194 | NC_021161.1    | Ca_kabuli_chr02 | 5706194                 | CC                              | TT              | 1946750566               |
| SNP_P4_18781_5706196 | NC_021161.1    | Ca_kabuli_chr02 | 5706196                 | GG                              | TT              | 1946750568               |
| SNP_P4_18782_5706302 | NC_021161.1    | Ca_kabuli_chr02 | 5706302                 | AA                              | GG              | 1946750570               |
| SNP_P4_18783_5706327 | NC_021161.1    | Ca_kabuli_chr02 | 5706327                 | CC                              | AA              | 1946750572               |
| SNP_P4_18784_5706478 | NC_021161.1    | Ca_kabuli_chr02 | 5706478                 | GG                              | CC              | 1946750574               |
| SNP_P4_18785_5706482 | NC_021161.1    | Ca_kabuli_chr02 | 5706482                 | AA                              | CC              | 1946750576               |
| SNP_P4_18786_5706529 | NC_021161.1    | Ca_kabuli_chr02 | 5706529                 | GG                              | AA              | 1946750578               |
| SNP_P4_18787_5706552 | NC_021161.1    | Ca_kabuli_chr02 | 5706552                 | AA                              | GG              | 1946750580               |

| SNPs IDs             | Chromosome IDs | Chromosomes     | Physical positions (bp) | CDC Frontier (Reference genome) | (ILWC46 & LPNB) | NCBI SNPdb Accession IDs |
|----------------------|----------------|-----------------|-------------------------|---------------------------------|-----------------|--------------------------|
| SNP_P4_18788_5706583 | NC_021161.1    | Ca_kabuli_chr02 | 5706583                 | CC                              | TT              | 1946750582               |
| SNP_P4_18790_5710878 | NC_021161.1    | Ca_kabuli_chr02 | 5710878                 | TT                              | CC              | 1946750584               |
| SNP_P4_18791_5720055 | NC_021161.1    | Ca_kabuli_chr02 | 5720055                 | CC                              | TT              | 1946750585               |
| SNP_P4_18792_5720149 | NC_021161.1    | Ca_kabuli_chr02 | 5720149                 | GG                              | AA              | 1946750587               |
| SNP_P4_18793_5720340 | NC_021161.1    | Ca_kabuli_chr02 | 5720340                 | TT                              | CC              | 1946750589               |
| SNP_P4_18794_5720379 | NC_021161.1    | Ca_kabuli_chr02 | 5720379                 | TT                              | AA              | 1946750591               |
| SNP_P4_18795_5725057 | NC_021161.1    | Ca_kabuli_chr02 | 5725057                 | AA                              | GG              | 1946750593               |
| SNP_P4_18796_5725077 | NC_021161.1    | Ca_kabuli_chr02 | 5725077                 | GG                              | AA              | 1946750595               |
| SNP_P4_18797_5728899 | NC_021161.1    | Ca_kabuli_chr02 | 5728899                 | GG                              | CC              | 1946750597               |
| SNP_P4_18798_5734510 | NC_021161.1    | Ca_kabuli_chr02 | 5734510                 | TT                              | CC              | 1946750599               |
| SNP_P4_18799_5751341 | NC_021161.1    | Ca_kabuli_chr02 | 5751341                 | AA                              | GG              | 1946750601               |
| SNP_P4_18800_5751359 | NC_021161.1    | Ca_kabuli_chr02 | 5751359                 | CC                              | TT              | 1946750603               |
| SNP_P4_18801_5751386 | NC_021161.1    | Ca_kabuli_chr02 | 5751386                 | AA                              | GG              | 1946750605               |
| SNP_P4_18802_5751390 | NC_021161.1    | Ca_kabuli_chr02 | 5751390                 | CC                              | AA              | 1946750607               |
| SNP_P4_18803_5751600 | NC_021161.1    | Ca_kabuli_chr02 | 5751600                 | TT                              | AA              | 1946750609               |
| SNP_P4_18804_5751629 | NC_021161.1    | Ca_kabuli_chr02 | 5751629                 | TT                              | GG              | 1946750611               |
| SNP_P4_18805_5751653 | NC_021161.1    | Ca_kabuli_chr02 | 5751653                 | TT                              | CC              | 1946750613               |
| SNP_P4_18806_5752891 | NC_021161.1    | Ca_kabuli_chr02 | 5752891                 | CC                              | TT              | 1946750615               |
| SNP_P4_18807_5753041 | NC_021161.1    | Ca_kabuli_chr02 | 5753041                 | AA                              | TT              | 1946750617               |
| SNP_P4_18808_5753072 | NC_021161.1    | Ca_kabuli_chr02 | 5753072                 | AA                              | TT              | 1946750619               |
| SNP_P4_18809_5753212 | NC_021161.1    | Ca_kabuli_chr02 | 5753212                 | TT                              | CC              | 1946750621               |
| SNP_P4_18810_5753213 | NC_021161.1    | Ca_kabuli_chr02 | 5753213                 | AA                              | GG              | 1946750623               |
| SNP_P4_18811_5753292 | NC_021161.1    | Ca_kabuli_chr02 | 5753292                 | TT                              | GG              | 1946750625               |
| SNP_P4_18812_5753293 | NC_021161.1    | Ca_kabuli_chr02 | 5753293                 | CC                              | AA              | 1946750627               |
| SNP_P4_18813_5753309 | NC_021161.1    | Ca_kabuli_chr02 | 5753309                 | GG                              | CC              | 1946750629               |
| SNP_P4_18814_5762360 | NC_021161.1    | Ca_kabuli_chr02 | 5762360                 | TT                              | CC              | 1946750631               |
| SNP_P4_18815_5767688 | NC_021161.1    | Ca_kabuli_chr02 | 5767688                 | CC                              | TT              | 1946750633               |
| SNP_P4_18816_5767704 | NC_021161.1    | Ca_kabuli_chr02 | 5767704                 | CC                              | TT              | 1946750635               |
| SNP_P4_18817_5767711 | NC_021161.1    | Ca_kabuli_chr02 | 5767711                 | AA                              | TT              | 1946750637               |
| SNP_P4_18818_5768066 | NC_021161.1    | Ca_kabuli_chr02 | 5768066                 | TT                              | GG              | 1946750639               |
| SNP_P4_18819_5768761 | NC_021161.1    | Ca_kabuli_chr02 | 5768761                 | GG                              | AA              | 1946750641               |
| SNP_P4_18820_5768805 | NC_021161.1    | Ca_kabuli_chr02 | 5768805                 | TT                              | CC              | 1946750643               |
| SNP_P4_18821_5768826 | NC_021161.1    | Ca_kabuli_chr02 | 5768826                 | CC                              | AA              | 1946750645               |
| SNP_P4_18822_5768838 | NC_021161.1    | Ca_kabuli_chr02 | 5768838                 | GG                              | AA              | 1946750647               |
| SNP_P4_18823_5810819 | NC_021161.1    | Ca_kabuli_chr02 | 5810819                 | GG                              | AA              | 1946750649               |
| SNP_P4_18824_5812028 | NC_021161.1    | Ca_kabuli_chr02 | 5812028                 | TT                              | CC              | 1946750651               |
| SNP_P4_18825_5838625 | NC_021161.1    | Ca_kabuli_chr02 | 5838625                 | TT                              | CC              | 1946750653               |
| SNP_P4_18826_5843139 | NC_021161.1    | Ca_kabuli_chr02 | 5843139                 | AA                              | TT              | 1946750655               |
| SNP_P4_18827_5915256 | NC_021161.1    | Ca_kabuli_chr02 | 5915256                 | TT                              | GG              | 1946750657               |
| SNP_P4_18828_5928284 | NC_021161.1    | Ca_kabuli_chr02 | 5928284                 | CC                              | TT              | 1946750659               |
| SNP_P4_18829_5928286 | NC_021161.1    | Ca_kabuli_chr02 | 5928286                 | AA                              | GG              | 1946750661               |
| SNP_P4_18830_5928311 | NC_021161.1    | Ca_kabuli_chr02 | 5928311                 | CC                              | TT              | 1946750663               |

| SNPs IDs             | Chromosome IDs | Chromosomes     | Physical positions (bp) | CDC Frontier (Reference genome) | (ILWC46 & LPNB) | NCBI SNPdb Accession IDs |
|----------------------|----------------|-----------------|-------------------------|---------------------------------|-----------------|--------------------------|
| SNP_P4_18831_5928326 | NC_021161.1    | Ca_kabuli_chr02 | 5928326                 | TT                              | CC              | 1946750665               |
| SNP_P4_18832_5932808 | NC_021161.1    | Ca_kabuli_chr02 | 5932808                 | AA                              | CC              | 1946750667               |
| SNP_P4_18833_5964516 | NC_021161.1    | Ca_kabuli_chr02 | 5964516                 | TT                              | GG              | 1946750669               |
| SNP_P4_18834_5972576 | NC_021161.1    | Ca_kabuli_chr02 | 5972576                 | TT                              | GG              | 1946750671               |
| SNP_P4_18835_6017990 | NC_021161.1    | Ca_kabuli_chr02 | 6017990                 | AA                              | GG              | 1946750672               |
| SNP_P4_18836_6020369 | NC_021161.1    | Ca_kabuli_chr02 | 6020369                 | AA                              | GG              | 1946750674               |
| SNP_P4_18839_6065444 | NC_021161.1    | Ca_kabuli_chr02 | 6065444                 | AA                              | TT              | 1946750676               |
| SNP_P4_18840_6075388 | NC_021161.1    | Ca_kabuli_chr02 | 6075388                 | AA                              | GG              | 1946750678               |
| SNP_P4_18841_6075504 | NC_021161.1    | Ca_kabuli_chr02 | 6075504                 | TT                              | CC              | 1946750680               |
| SNP_P4_18842_6075580 | NC_021161.1    | Ca_kabuli_chr02 | 6075580                 | AA                              | GG              | 1946750682               |
| SNP_P4_18843_6075612 | NC_021161.1    | Ca_kabuli_chr02 | 6075612                 | AA                              | GG              | 1946750684               |
| SNP_P4_18844_6075849 | NC_021161.1    | Ca_kabuli_chr02 | 6075849                 | TT                              | CC              | 1946750686               |
| SNP_P4_18845_6075939 | NC_021161.1    | Ca_kabuli_chr02 | 6075939                 | CC                              | GG              | 1946750688               |
| SNP_P4_18846_6076284 | NC_021161.1    | Ca_kabuli_chr02 | 6076284                 | TT                              | CC              | 1946750690               |
| SNP_P4_18848_6154846 | NC_021161.1    | Ca_kabuli_chr02 | 6154846                 | CC                              | TT              | 1946750692               |
| SNP_P4_18849_6196498 | NC_021161.1    | Ca_kabuli_chr02 | 6196498                 | CC                              | AA              | 1946750694               |
| SNP_P4_18850_6213334 | NC_021161.1    | Ca_kabuli_chr02 | 6213334                 | TT                              | AA              | 1946750696               |
| SNP_P4_18851_6213362 | NC_021161.1    | Ca_kabuli_chr02 | 6213362                 | CC                              | AA              | 1946750698               |
| SNP_P4_18852_6262050 | NC_021161.1    | Ca_kabuli_chr02 | 6262050                 | AA                              | TT              | 1946750700               |
| SNP_P4_18853_6284611 | NC_021161.1    | Ca_kabuli_chr02 | 6284611                 | AA                              | CC              | 1946750702               |
| SNP_P4_18854_6284742 | NC_021161.1    | Ca_kabuli_chr02 | 6284742                 | TT                              | CC              | 1946750704               |
| SNP_P4_18855_6285360 | NC_021161.1    | Ca_kabuli_chr02 | 6285360                 | GG                              | AA              | 1946750706               |
| SNP_P4_18857_6314539 | NC_021161.1    | Ca_kabuli_chr02 | 6314539                 | AA                              | GG              | 1946750708               |
| SNP_P4_18858_6314579 | NC_021161.1    | Ca_kabuli_chr02 | 6314579                 | CC                              | TT              | 1946750710               |
| SNP_P4_18859_6314581 | NC_021161.1    | Ca_kabuli_chr02 | 6314581                 | AA                              | GG              | 1946750712               |
| SNP_P4_18860_6319382 | NC_021161.1    | Ca_kabuli_chr02 | 6319382                 | GG                              | AA              | 1946750714               |
| SNP_P4_18861_6329061 | NC_021161.1    | Ca_kabuli_chr02 | 6329061                 | GG                              | AA              | 1946750716               |
| SNP_P4_18862_6329077 | NC_021161.1    | Ca_kabuli_chr02 | 6329077                 | GG                              | AA              | 1946750718               |
| SNP_P4_18863_6329081 | NC_021161.1    | Ca_kabuli_chr02 | 6329081                 | TT                              | GG              | 1946750720               |
| SNP_P4_18864_6329145 | NC_021161.1    | Ca_kabuli_chr02 | 6329145                 | CC                              | GG              | 1946750722               |
| SNP_P4_18865_6329160 | NC_021161.1    | Ca_kabuli_chr02 | 6329160                 | CC                              | AA              | 1946750724               |
| SNP_P4_18866_6329161 | NC_021161.1    | Ca_kabuli_chr02 | 6329161                 | GG                              | AA              | 1946750726               |
| SNP_P4_18867_6334362 | NC_021161.1    | Ca_kabuli_chr02 | 6334362                 | CC                              | AA              | 1946750728               |
| SNP_P4_18868_6334365 | NC_021161.1    | Ca_kabuli_chr02 | 6334365                 | TT                              | CC              | 1946750730               |
| SNP_P4_18869_6334367 | NC_021161.1    | Ca_kabuli_chr02 | 6334367                 | GG                              | AA              | 1946750732               |
| SNP_P4_18870_6334408 | NC_021161.1    | Ca_kabuli_chr02 | 6334408                 | TT                              | GG              | 1946750734               |
| SNP_P4_18871_6334417 | NC_021161.1    | Ca_kabuli_chr02 | 6334417                 | GG                              | CC              | 1946750736               |
| SNP_P4_18872_6334429 | NC_021161.1    | Ca_kabuli_chr02 | 6334429                 | TT                              | CC              | 1946750738               |
| SNP_P4_18873_6334432 | NC_021161.1    | Ca_kabuli_chr02 | 6334432                 | GG                              | AA              | 1946750740               |
| SNP_P4_18874_6337319 | NC_021161.1    | Ca_kabuli_chr02 | 6337319                 | CC                              | AA              | 1946750742               |
| SNP_P4_18875_6380942 | NC_021161.1    | Ca_kabuli_chr02 | 6380942                 | AA                              | GG              | 1946750744               |
| SNP_P4_18876_6455880 | NC_021161.1    | Ca_kabuli_chr02 | 6455880                 | TT                              | AA              | 1946750746               |

| SNPs IDs             | Chromosome IDs | Chromosomes     | Physical positions (bp) | CDC Frontier (Reference genome) | (ILWC46 & LPNB) | NCBI SNPdb Accession IDs |
|----------------------|----------------|-----------------|-------------------------|---------------------------------|-----------------|--------------------------|
| SNP_P4_18877_6455882 | NC_021161.1    | Ca_kabuli_chr02 | 6455882                 | AA                              | CC              | 1946750748               |
| SNP_P4_18878_6505082 | NC_021161.1    | Ca_kabuli_chr02 | 6505082                 | AA                              | GG              | 1946750750               |
| SNP_P4_18879_6505170 | NC_021161.1    | Ca_kabuli_chr02 | 6505170                 | AA                              | TT              | 1946750752               |
| SNP_P4_18881_6505514 | NC_021161.1    | Ca_kabuli_chr02 | 6505514                 | GG                              | AA              | 1946750754               |
| SNP_P4_18882_6506952 | NC_021161.1    | Ca_kabuli_chr02 | 6506952                 | AA                              | CC              | 1946750757               |
| SNP_P4_18884_6538985 | NC_021161.1    | Ca_kabuli_chr02 | 6538985                 | CC                              | TT              | 1946750759               |
| SNP_P4_18885_6595913 | NC_021161.1    | Ca_kabuli_chr02 | 6595913                 | CC                              | TT              | 1946750761               |
| SNP_P4_18886_6617989 | NC_021161.1    | Ca_kabuli_chr02 | 6617989                 | GG                              | TT              | 1946750763               |
| SNP_P4_18887_6617994 | NC_021161.1    | Ca_kabuli_chr02 | 6617994                 | AA                              | TT              | 1946750765               |
| SNP_P4_18888_6618064 | NC_021161.1    | Ca_kabuli_chr02 | 6618064                 | TT                              | GG              | 1946750767               |
| SNP_P4_18889_6618359 | NC_021161.1    | Ca_kabuli_chr02 | 6618359                 | AA                              | GG              | 1946750769               |
| SNP_P4_18890_6618369 | NC_021161.1    | Ca_kabuli_chr02 | 6618369                 | AA                              | GG              | 1946750771               |
| SNP_P4_18891_6618376 | NC_021161.1    | Ca_kabuli_chr02 | 6618376                 | AA                              | CC              | 1946750773               |
| SNP_P4_18892_6618378 | NC_021161.1    | Ca_kabuli_chr02 | 6618378                 | TT                              | CC              | 1946750775               |
| SNP_P4_18893_6638603 | NC_021161.1    | Ca_kabuli_chr02 | 6638603                 | AA                              | GG              | 1946750777               |
| SNP_P4_18894_6639137 | NC_021161.1    | Ca_kabuli_chr02 | 6639137                 | GG                              | AA              | 1946750779               |
| SNP_P4_18895_6639244 | NC_021161.1    | Ca_kabuli_chr02 | 6639244                 | AA                              | CC              | 1946750781               |
| SNP_P4_18896_6639484 | NC_021161.1    | Ca_kabuli_chr02 | 6639484                 | AA                              | GG              | 1946750783               |
| SNP_P4_18897_6639593 | NC_021161.1    | Ca_kabuli_chr02 | 6639593                 | AA                              | TT              | 1946750785               |
| SNP_P4_18898_6639623 | NC_021161.1    | Ca_kabuli_chr02 | 6639623                 | CC                              | TT              | 1946750787               |
| SNP_P4_18899_6639692 | NC_021161.1    | Ca_kabuli_chr02 | 6639692                 | AA                              | GG              | 1946750789               |
| SNP_P4_18900_6640297 | NC_021161.1    | Ca_kabuli_chr02 | 6640297                 | GG                              | AA              | 1946750791               |
| SNP_P4_18902_6640408 | NC_021161.1    | Ca_kabuli_chr02 | 6640408                 | AA                              | CC              | 1946750793               |
| SNP_P4_18904_6640498 | NC_021161.1    | Ca_kabuli_chr02 | 6640498                 | AA                              | CC              | 1946750795               |
| SNP_P4_18905_6640533 | NC_021161.1    | Ca_kabuli_chr02 | 6640533                 | CC                              | TT              | 1946750797               |
| SNP_P4_18906_6640540 | NC_021161.1    | Ca_kabuli_chr02 | 6640540                 | CC                              | TT              | 1946750799               |
| SNP_P4_18907_6640571 | NC_021161.1    | Ca_kabuli_chr02 | 6640571                 | AA                              | GG              | 1946750801               |
| SNP_P4_18908_6640625 | NC_021161.1    | Ca_kabuli_chr02 | 6640625                 | CC                              | TT              | 1946750803               |
| SNP_P4_18909_6640702 | NC_021161.1    | Ca_kabuli_chr02 | 6640702                 | CC                              | TT              | 1946750805               |
| SNP_P4_18910_6640779 | NC_021161.1    | Ca_kabuli_chr02 | 6640779                 | CC                              | TT              | 1946750807               |
| SNP_P4_18911_6640852 | NC_021161.1    | Ca_kabuli_chr02 | 6640852                 | CC                              | TT              | 1946750809               |
| SNP_P4_18912_6640889 | NC_021161.1    | Ca_kabuli_chr02 | 6640889                 | AA                              | TT              | 1946750811               |
| SNP_P4_18913_6640951 | NC_021161.1    | Ca_kabuli_chr02 | 6640951                 | TT                              | CC              | 1946750813               |
| SNP_P4_18914_6641068 | NC_021161.1    | Ca_kabuli_chr02 | 6641068                 | AA                              | GG              | 1946750815               |
| SNP_P4_18915_6641252 | NC_021161.1    | Ca_kabuli_chr02 | 6641252                 | GG                              | AA              | 1946750817               |
| SNP_P4_18916_6641353 | NC_021161.1    | Ca_kabuli_chr02 | 6641353                 | TT                              | CC              | 1946750819               |
| SNP_P4_18917_6641462 | NC_021161.1    | Ca_kabuli_chr02 | 6641462                 | CC                              | AA              | 1946750821               |
| SNP_P4_18918_6641550 | NC_021161.1    | Ca_kabuli_chr02 | 6641550                 | AA                              | TT              | 1946750823               |
| SNP_P4_18920_6641754 | NC_021161.1    | Ca_kabuli_chr02 | 6641754                 | TT                              | CC              | 1946750825               |
| SNP_P4_18921_6641774 | NC_021161.1    | Ca_kabuli_chr02 | 6641774                 | GG                              | AA              | 1946750827               |
| SNP_P4_18922_6641798 | NC_021161.1    | Ca_kabuli_chr02 | 6641798                 | CC                              | TT              | 1946750829               |
| SNP_P4_18923_6641799 | NC_021161.1    | Ca_kabuli_chr02 | 6641799                 | GG                              | AA              | 1946750831               |

| SNPs IDs             | Chromosome IDs | Chromosomes     | Physical positions (bp) | CDC Frontier (Reference genome) | (ILWC46 & LPNB) | NCBI SNPdb Accession IDs |
|----------------------|----------------|-----------------|-------------------------|---------------------------------|-----------------|--------------------------|
| SNP_P4_18924_6641836 | NC_021161.1    | Ca_kabuli_chr02 | 6641836                 | CC                              | TT              | 1946750833               |
| SNP_P4_18926_6642168 | NC_021161.1    | Ca_kabuli_chr02 | 6642168                 | CC                              | AA              | 1946750835               |
| SNP_P4_18927_6642216 | NC_021161.1    | Ca_kabuli_chr02 | 6642216                 | AA                              | GG              | 1946750837               |
| SNP_P4_18928_6642298 | NC_021161.1    | Ca_kabuli_chr02 | 6642298                 | GG                              | TT              | 1946750839               |
| SNP_P4_18929_6642329 | NC_021161.1    | Ca_kabuli_chr02 | 6642329                 | TT                              | AA              | 1946750841               |
| SNP_P4_18930_6642359 | NC_021161.1    | Ca_kabuli_chr02 | 6642359                 | AA                              | CC              | 1946750843               |
| SNP_P4_18931_6642448 | NC_021161.1    | Ca_kabuli_chr02 | 6642448                 | GG                              | TT              | 1946750845               |
| SNP_P4_18932_6642481 | NC_021161.1    | Ca_kabuli_chr02 | 6642481                 | GG                              | AA              | 1946750847               |
| SNP_P4_18935_6642564 | NC_021161.1    | Ca_kabuli_chr02 | 6642564                 | CC                              | AA              | 1946750849               |
| SNP_P4_18936_6642720 | NC_021161.1    | Ca_kabuli_chr02 | 6642720                 | CC                              | TT              | 1946750851               |
| SNP_P4_18937_6642729 | NC_021161.1    | Ca_kabuli_chr02 | 6642729                 | TT                              | AA              | 1946750853               |
| SNP_P4_18938_6642762 | NC_021161.1    | Ca_kabuli_chr02 | 6642762                 | GG                              | TT              | 1946750855               |
| SNP_P4_18939_6642785 | NC_021161.1    | Ca_kabuli_chr02 | 6642785                 | AA                              | TT              | 1946750857               |
| SNP_P4_18940_6642921 | NC_021161.1    | Ca_kabuli_chr02 | 6642921                 | AA                              | GG              | 1946750859               |
| SNP_P4_18941_6642944 | NC_021161.1    | Ca_kabuli_chr02 | 6642944                 | AA                              | CC              | 1946750861               |
| SNP_P4_18942_6643061 | NC_021161.1    | Ca_kabuli_chr02 | 6643061                 | CC                              | GG              | 1946750863               |
| SNP_P4_18943_6643125 | NC_021161.1    | Ca_kabuli_chr02 | 6643125                 | CC                              | GG              | 1946750865               |
| SNP_P4_18944_6643264 | NC_021161.1    | Ca_kabuli_chr02 | 6643264                 | TT                              | AA              | 1946750867               |
| SNP_P4_18945_6643272 | NC_021161.1    | Ca_kabuli_chr02 | 6643272                 | AA                              | CC              | 1946750869               |
| SNP_P4_18946_6643331 | NC_021161.1    | Ca_kabuli_chr02 | 6643331                 | CC                              | AA              | 1946750871               |
| SNP_P4_18947_6643355 | NC_021161.1    | Ca_kabuli_chr02 | 6643355                 | AA                              | GG              | 1946750873               |
| SNP_P4_18948_6643418 | NC_021161.1    | Ca_kabuli_chr02 | 6643418                 | CC                              | TT              | 1946750875               |
| SNP_P4_18949_6643563 | NC_021161.1    | Ca_kabuli_chr02 | 6643563                 | AA                              | TT              | 1946750877               |
| SNP_P4_18950_6643589 | NC_021161.1    | Ca_kabuli_chr02 | 6643589                 | CC                              | TT              | 1946750879               |
| SNP_P4_18951_6643720 | NC_021161.1    | Ca_kabuli_chr02 | 6643720                 | GG                              | CC              | 1946750881               |
| SNP_P4_18953_6643784 | NC_021161.1    | Ca_kabuli_chr02 | 6643784                 | CC                              | TT              | 1946750883               |
| SNP_P4_18955_6644812 | NC_021161.1    | Ca_kabuli_chr02 | 6644812                 | CC                              | GG              | 1946750885               |
| SNP_P4_18956_6644903 | NC_021161.1    | Ca_kabuli_chr02 | 6644903                 | AA                              | CC              | 1946750887               |
| SNP_P4_18957_6644904 | NC_021161.1    | Ca_kabuli_chr02 | 6644904                 | CC                              | TT              | 1946750889               |
| SNP_P4_18958_6644964 | NC_021161.1    | Ca_kabuli_chr02 | 6644964                 | TT                              | CC              | 1946750891               |
| SNP_P4_18959_6645015 | NC_021161.1    | Ca_kabuli_chr02 | 6645015                 | TT                              | CC              | 1946750893               |
| SNP_P4_18960_6645017 | NC_021161.1    | Ca_kabuli_chr02 | 6645017                 | GG                              | AA              | 1946750895               |
| SNP_P4_18961_6645276 | NC_021161.1    | Ca_kabuli_chr02 | 6645276                 | AA                              | GG              | 1946750897               |
| SNP_P4_18962_6645291 | NC_021161.1    | Ca_kabuli_chr02 | 6645291                 | AA                              | GG              | 1946750899               |
| SNP_P4_18963_6645327 | NC_021161.1    | Ca_kabuli_chr02 | 6645327                 | CC                              | TT              | 1946750901               |
| SNP_P4_18964_6645440 | NC_021161.1    | Ca_kabuli_chr02 | 6645440                 | AA                              | GG              | 1946750903               |
| SNP_P4_18965_6645522 | NC_021161.1    | Ca_kabuli_chr02 | 6645522                 | TT                              | CC              | 1946750905               |
| SNP_P4_18966_6645608 | NC_021161.1    | Ca_kabuli_chr02 | 6645608                 | AA                              | GG              | 1946750907               |
| SNP_P4_18967_6645737 | NC_021161.1    | Ca_kabuli_chr02 | 6645737                 | CC                              | GG              | 1946750909               |
| SNP_P4_18968_6645747 | NC_021161.1    | Ca_kabuli_chr02 | 6645747                 | TT                              | AA              | 1946750911               |
| SNP_P4_18969_6645830 | NC_021161.1    | Ca_kabuli_chr02 | 6645830                 | CC                              | TT              | 1946750913               |
| SNP_P4_18970_6646210 | NC_021161.1    | Ca_kabuli_chr02 | 6646210                 | GG                              | AA              | 1946750915               |

| SNPs IDs             | Chromosome IDs | Chromosomes     | Physical positions (bp) | CDC Frontier (Reference genome) | (ILWC46 & LPNB) | NCBI SNPdb Accession IDs |
|----------------------|----------------|-----------------|-------------------------|---------------------------------|-----------------|--------------------------|
| SNP_P4_18971_6648216 | NC_021161.1    | Ca_kabuli_chr02 | 6648216                 | TT                              | CC              | 1946750917               |
| SNP_P4_18972_6648388 | NC_021161.1    | Ca_kabuli_chr02 | 6648388                 | AA                              | TT              | 1946750919               |
| SNP_P4_18974_6649839 | NC_021161.1    | Ca_kabuli_chr02 | 6649839                 | AA                              | TT              | 1946750921               |
| SNP_P4_18975_6650404 | NC_021161.1    | Ca_kabuli_chr02 | 6650404                 | GG                              | AA              | 1946750923               |
| SNP_P4_18976_6650405 | NC_021161.1    | Ca_kabuli_chr02 | 6650405                 | CC                              | TT              | 1946750925               |
| SNP_P4_18977_6650689 | NC_021161.1    | Ca_kabuli_chr02 | 6650689                 | TT                              | CC              | 1946750927               |
| SNP_P4_18978_6650695 | NC_021161.1    | Ca_kabuli_chr02 | 6650695                 | TT                              | CC              | 1946750929               |
| SNP_P4_18979_6656012 | NC_021161.1    | Ca_kabuli_chr02 | 6656012                 | AA                              | GG              | 1946750931               |
| SNP_P4_18980_6656227 | NC_021161.1    | Ca_kabuli_chr02 | 6656227                 | TT                              | GG              | 1946750933               |
| SNP_P4_18981_6656696 | NC_021161.1    | Ca_kabuli_chr02 | 6656696                 | AA                              | TT              | 1946750935               |
| SNP_P4_18982_6656699 | NC_021161.1    | Ca_kabuli_chr02 | 6656699                 | CC                              | TT              | 1946750937               |
| SNP_P4_18983_6657701 | NC_021161.1    | Ca_kabuli_chr02 | 6657701                 | CC                              | TT              | 1946750939               |
| SNP_P4_18985_6658111 | NC_021161.1    | Ca_kabuli_chr02 | 6658111                 | CC                              | GG              | 1946750941               |
| SNP_P4_18987_6659310 | NC_021161.1    | Ca_kabuli_chr02 | 6659310                 | GG                              | AA              | 1946750943               |
| SNP_P4_18988_6659340 | NC_021161.1    | Ca_kabuli_chr02 | 6659340                 | TT                              | AA              | 1946750945               |
| SNP_P4_18989_6659360 | NC_021161.1    | Ca_kabuli_chr02 | 6659360                 | AA                              | GG              | 1946750947               |
| SNP_P4_18990_6659541 | NC_021161.1    | Ca_kabuli_chr02 | 6659541                 | TT                              | GG              | 1946750949               |
| SNP_P4_18991_6668216 | NC_021161.1    | Ca_kabuli_chr02 | 6668216                 | TT                              | CC              | 1946750951               |
| SNP_P4_18992_6668360 | NC_021161.1    | Ca_kabuli_chr02 | 6668360                 | TT                              | CC              | 1946750953               |
| SNP_P4_18993_6670897 | NC_021161.1    | Ca_kabuli_chr02 | 6670897                 | TT                              | AA              | 1946750955               |
| SNP_P4_18994_6670932 | NC_021161.1    | Ca_kabuli_chr02 | 6670932                 | CC                              | TT              | 1946750957               |
| SNP_P4_18995_6671239 | NC_021161.1    | Ca_kabuli_chr02 | 6671239                 | AA                              | TT              | 1946750959               |
| SNP_P4_18996_6671242 | NC_021161.1    | Ca_kabuli_chr02 | 6671242                 | TT                              | GG              | 1946750961               |
| SNP_P4_18997_6671243 | NC_021161.1    | Ca_kabuli_chr02 | 6671243                 | AA                              | TT              | 1946750963               |
| SNP_P4_18998_6671258 | NC_021161.1    | Ca_kabuli_chr02 | 6671258                 | CC                              | TT              | 1946750965               |
| SNP_P4_18999_6671303 | NC_021161.1    | Ca_kabuli_chr02 | 6671303                 | TT                              | CC              | 1946750967               |
| SNP_P4_19000_6671320 | NC_021161.1    | Ca_kabuli_chr02 | 6671320                 | TT                              | AA              | 1946750969               |
| SNP_P4_19001_6674230 | NC_021161.1    | Ca_kabuli_chr02 | 6674230                 | TT                              | CC              | 1946750971               |
| SNP_P4_19002_6680731 | NC_021161.1    | Ca_kabuli_chr02 | 6680731                 | CC                              | TT              | 1946750973               |
| SNP_P4_19003_6680736 | NC_021161.1    | Ca_kabuli_chr02 | 6680736                 | TT                              | CC              | 1946750975               |
| SNP_P4_19004_6680767 | NC_021161.1    | Ca_kabuli_chr02 | 6680767                 | GG                              | AA              | 1946750977               |
| SNP_P4_19005_6680772 | NC_021161.1    | Ca_kabuli_chr02 | 6680772                 | TT                              | GG              | 1946750979               |
| SNP_P4_19006_6680991 | NC_021161.1    | Ca_kabuli_chr02 | 6680991                 | TT                              | AA              | 1946750981               |
| SNP_P4_19007_6680993 | NC_021161.1    | Ca_kabuli_chr02 | 6680993                 | CC                              | TT              | 1946750983               |
| SNP_P4_19008_6681008 | NC_021161.1    | Ca_kabuli_chr02 | 6681008                 | GG                              | TT              | 1946750985               |
| SNP_P4_19009_6681366 | NC_021161.1    | Ca_kabuli_chr02 | 6681366                 | GG                              | AA              | 1946750987               |
| SNP_P4_19010_6681371 | NC_021161.1    | Ca_kabuli_chr02 | 6681371                 | CC                              | TT              | 1946750989               |
| SNP_P4_19011_6687463 | NC_021161.1    | Ca_kabuli_chr02 | 6687463                 | CC                              | TT              | 1946750991               |
| SNP_P4_19012_6687475 | NC_021161.1    | Ca_kabuli_chr02 | 6687475                 | GG                              | AA              | 1946750992               |
| SNP_P4_19013_6687518 | NC_021161.1    | Ca_kabuli_chr02 | 6687518                 | AA                              | TT              | 1946750993               |
| SNP_P4_19014_6687519 | NC_021161.1    | Ca_kabuli_chr02 | 6687519                 | AA                              | TT              | 1946750994               |
| SNP_P4_19015_6687523 | NC_021161.1    | Ca_kabuli_chr02 | 6687523                 | CC                              | TT              | 1946750995               |

| SNPs IDs             | Chromosome IDs | Chromosomes     | Physical positions (bp) | CDC Frontier (Reference genome) | (ILWC46 & LPNB) | NCBI SNPdb Accession IDs |
|----------------------|----------------|-----------------|-------------------------|---------------------------------|-----------------|--------------------------|
| SNP_P4_19016_6687530 | NC_021161.1    | Ca_kabuli_chr02 | 6687530                 | TT                              | GG              | 1946750996               |
| SNP_P4_19017_6687604 | NC_021161.1    | Ca_kabuli_chr02 | 6687604                 | TT                              | GG              | 1946750997               |
| SNP_P4_19018_6687606 | NC_021161.1    | Ca_kabuli_chr02 | 6687606                 | CC                              | TT              | 1946750999               |
| SNP_P4_19019_6687609 | NC_021161.1    | Ca_kabuli_chr02 | 6687609                 | CC                              | TT              | 1946751001               |
| SNP_P4_19020_6687616 | NC_021161.1    | Ca_kabuli_chr02 | 6687616                 | AA                              | GG              | 1946751003               |
| SNP_P4_19021_6687638 | NC_021161.1    | Ca_kabuli_chr02 | 6687638                 | TT                              | GG              | 1946751005               |
| SNP_P4_19022_6687791 | NC_021161.1    | Ca_kabuli_chr02 | 6687791                 | AA                              | GG              | 1946751007               |
| SNP_P4_19023_6687908 | NC_021161.1    | Ca_kabuli_chr02 | 6687908                 | AA                              | GG              | 1946751009               |
| SNP_P4_19024_6687926 | NC_021161.1    | Ca_kabuli_chr02 | 6687926                 | TT                              | CC              | 1946751011               |
| SNP_P4_19025_6687975 | NC_021161.1    | Ca_kabuli_chr02 | 6687975                 | GG                              | AA              | 1946751013               |
| SNP_P4_19026_6689904 | NC_021161.1    | Ca_kabuli_chr02 | 6689904                 | TT                              | CC              | 1946751015               |
| SNP_P4_19027_6690146 | NC_021161.1    | Ca_kabuli_chr02 | 6690146                 | GG                              | AA              | 1946751017               |
| SNP_P4_19029_6692071 | NC_021161.1    | Ca_kabuli_chr02 | 6692071                 | AA                              | GG              | 1946751019               |
| SNP_P4_19030_6692084 | NC_021161.1    | Ca_kabuli_chr02 | 6692084                 | GG                              | CC              | 1946751021               |
| SNP_P4_19031_6692102 | NC_021161.1    | Ca_kabuli_chr02 | 6692102                 | GG                              | AA              | 1946751023               |
| SNP_P4_19032_6703400 | NC_021161.1    | Ca_kabuli_chr02 | 6703400                 | GG                              | AA              | 1946751025               |
| SNP_P4_19033_6745799 | NC_021161.1    | Ca_kabuli_chr02 | 6745799                 | TT                              | CC              | 1946751027               |
| SNP_P4_19035_6782056 | NC_021161.1    | Ca_kabuli_chr02 | 6782056                 | GG                              | AA              | 1946751029               |
| SNP_P4_19036_6782432 | NC_021161.1    | Ca_kabuli_chr02 | 6782432                 | CC                              | TT              | 1946751031               |
| SNP_P4_19037_6794405 | NC_021161.1    | Ca_kabuli_chr02 | 6794405                 | TT                              | CC              | 1946751033               |
| SNP_P4_19038_6811064 | NC_021161.1    | Ca_kabuli_chr02 | 6811064                 | TT                              | AA              | 1946751035               |
| SNP_P4_19039_6811065 | NC_021161.1    | Ca_kabuli_chr02 | 6811065                 | AA                              | TT              | 1946751037               |
| SNP_P4_19040_6811067 | NC_021161.1    | Ca_kabuli_chr02 | 6811067                 | AA                              | GG              | 1946751039               |
| SNP_P4_19041_6811084 | NC_021161.1    | Ca_kabuli_chr02 | 6811084                 | TT                              | CC              | 1946751041               |
| SNP_P4_19042_6811092 | NC_021161.1    | Ca_kabuli_chr02 | 6811092                 | CC                              | TT              | 1946751042               |
| SNP_P4_19044_6814176 | NC_021161.1    | Ca_kabuli_chr02 | 6814176                 | GG                              | AA              | 1946751044               |
| SNP_P4_19045_6814275 | NC_021161.1    | Ca_kabuli_chr02 | 6814275                 | TT                              | AA              | 1946751046               |
| SNP_P4_19047_6815074 | NC_021161.1    | Ca_kabuli_chr02 | 6815074                 | AA                              | GG              | 1946751048               |
| SNP_P4_19048_6815088 | NC_021161.1    | Ca_kabuli_chr02 | 6815088                 | AA                              | CC              | 1946751050               |
| SNP_P4_19049_6815091 | NC_021161.1    | Ca_kabuli_chr02 | 6815091                 | TT                              | CC              | 1946751052               |
| SNP_P4_19050_6815432 | NC_021161.1    | Ca_kabuli_chr02 | 6815432                 | AA                              | GG              | 1946751054               |
| SNP_P4_19051_6815464 | NC_021161.1    | Ca_kabuli_chr02 | 6815464                 | TT                              | CC              | 1946751056               |
| SNP_P4_19052_6815526 | NC_021161.1    | Ca_kabuli_chr02 | 6815526                 | GG                              | AA              | 1946751058               |
| SNP_P4_19053_6815556 | NC_021161.1    | Ca_kabuli_chr02 | 6815556                 | TT                              | CC              | 1946751060               |
| SNP_P4_19054_6815581 | NC_021161.1    | Ca_kabuli_chr02 | 6815581                 | TT                              | CC              | 1946751062               |
| SNP_P4_19055_6815582 | NC_021161.1    | Ca_kabuli_chr02 | 6815582                 | AA                              | GG              | 1946751064               |
| SNP_P4_19056_6815586 | NC_021161.1    | Ca_kabuli_chr02 | 6815586                 | GG                              | TT              | 1946751066               |
| SNP_P4_19057_6815597 | NC_021161.1    | Ca_kabuli_chr02 | 6815597                 | GG                              | TT              | 1946751068               |
| SNP_P4_19058_6828384 | NC_021161.1    | Ca_kabuli_chr02 | 6828384                 | CC                              | TT              | 1946751070               |
| SNP_P4_19059_6828416 | NC_021161.1    | Ca_kabuli_chr02 | 6828416                 | GG                              | AA              | 1946751072               |
| SNP_P4_19061_6940540 | NC_021161.1    | Ca_kabuli_chr02 | 6940540                 | AA                              | GG              | 1946751074               |
| SNP_P4_19062_7002435 | NC_021161.1    | Ca_kabuli_chr02 | 7002435                 | AA                              | GG              | 1946751076               |



| SNPs IDs             | Chromosome IDs | Chromosomes     | Physical positions (bp) | CDC Frontier (Reference genome) | (ILWC46 & LPNB) | NCBI SNPdb Accession IDs |
|----------------------|----------------|-----------------|-------------------------|---------------------------------|-----------------|--------------------------|
| SNP_P4_19063_7002751 | NC_021161.1    | Ca_kabuli_chr02 | 7002751                 | TT                              | CC              | 1946751078               |
| SNP_P4_19064_7002762 | NC_021161.1    | Ca_kabuli_chr02 | 7002762                 | AA                              | CC              | 1946751080               |
| SNP_P4_19066_7002777 | NC_021161.1    | Ca_kabuli_chr02 | 7002777                 | GG                              | TT              | 1946751082               |
| SNP_P4_19067_7002783 | NC_021161.1    | Ca_kabuli_chr02 | 7002783                 | TT                              | GG              | 1946751084               |
| SNP_P4_19068_7002840 | NC_021161.1    | Ca_kabuli_chr02 | 7002840                 | CC                              | TT              | 1946751086               |
| SNP_P4_19071_7054230 | NC_021161.1    | Ca_kabuli_chr02 | 7054230                 | TT                              | CC              | 1946751088               |
| SNP_P4_19072_7062808 | NC_021161.1    | Ca_kabuli_chr02 | 7062808                 | AA                              | GG              | 1946751090               |
| SNP_P4_19073_7075328 | NC_021161.1    | Ca_kabuli_chr02 | 7075328                 | TT                              | AA              | 1946751092               |
| SNP_P4_19074_7075393 | NC_021161.1    | Ca_kabuli_chr02 | 7075393                 | AA                              | GG              | 1946751094               |
| SNP_P4_19075_7075601 | NC_021161.1    | Ca_kabuli_chr02 | 7075601                 | AA                              | GG              | 1946751096               |
| SNP_P4_19076_7075735 | NC_021161.1    | Ca_kabuli_chr02 | 7075735                 | TT                              | CC              | 1946751098               |
| SNP_P4_19077_7076197 | NC_021161.1    | Ca_kabuli_chr02 | 7076197                 | TT                              | GG              | 1946751100               |
| SNP_P4_19078_7076985 | NC_021161.1    | Ca_kabuli_chr02 | 7076985                 | AA                              | CC              | 1946751102               |
| SNP_P4_19079_7090547 | NC_021161.1    | Ca_kabuli_chr02 | 7090547                 | CC                              | TT              | 1946751104               |
| SNP_P4_19080_7108139 | NC_021161.1    | Ca_kabuli_chr02 | 7108139                 | CC                              | TT              | 1946751106               |
| SNP_P4_19081_7151392 | NC_021161.1    | Ca_kabuli_chr02 | 7151392                 | GG                              | CC              | 1946751108               |
| SNP_P4_19082_7154425 | NC_021161.1    | Ca_kabuli_chr02 | 7154425                 | TT                              | AA              | 1946751110               |
| SNP_P4_19083_7171728 | NC_021161.1    | Ca_kabuli_chr02 | 7171728                 | AA                              | CC              | 1946751111               |
| SNP_P4_19086_7171984 | NC_021161.1    | Ca_kabuli_chr02 | 7171984                 | TT                              | CC              | 1946751113               |
| SNP_P4_19089_7172745 | NC_021161.1    | Ca_kabuli_chr02 | 7172745                 | CC                              | TT              | 1946751115               |
| SNP_P4_19090_7173097 | NC_021161.1    | Ca_kabuli_chr02 | 7173097                 | AA                              | TT              | 1946751117               |
| SNP_P4_19092_7177569 | NC_021161.1    | Ca_kabuli_chr02 | 7177569                 | GG                              | CC              | 1946751119               |
| SNP_P4_19094_7256769 | NC_021161.1    | Ca_kabuli_chr02 | 7256769                 | TT                              | CC              | 1946751121               |
| SNP_P4_19095_7261353 | NC_021161.1    | Ca_kabuli_chr02 | 7261353                 | GG                              | AA              | 1946751123               |
| SNP_P4_19096_7261687 | NC_021161.1    | Ca_kabuli_chr02 | 7261687                 | CC                              | AA              | 1946751126               |
| SNP_P4_19097_7262865 | NC_021161.1    | Ca_kabuli_chr02 | 7262865                 | CC                              | TT              | 1946751128               |
| SNP_P4_19098_7275018 | NC_021161.1    | Ca_kabuli_chr02 | 7275018                 | AA                              | TT              | 1946751130               |
| SNP_P4_19099_7275026 | NC_021161.1    | Ca_kabuli_chr02 | 7275026                 | AA                              | GG              | 1946751132               |
| SNP_P4_19100_7275744 | NC_021161.1    | Ca_kabuli_chr02 | 7275744                 | AA                              | GG              | 1946751134               |
| SNP_P4_19101_7275749 | NC_021161.1    | Ca_kabuli_chr02 | 7275749                 | CC                              | TT              | 1946751136               |
| SNP_P4_19103_7276388 | NC_021161.1    | Ca_kabuli_chr02 | 7276388                 | TT                              | CC              | 1946751138               |
| SNP_P4_19104_7278265 | NC_021161.1    | Ca_kabuli_chr02 | 7278265                 | GG                              | AA              | 1946751140               |
| SNP_P4_19105_7278355 | NC_021161.1    | Ca_kabuli_chr02 | 7278355                 | GG                              | TT              | 1946751142               |
| SNP_P4_19106_7279611 | NC_021161.1    | Ca_kabuli_chr02 | 7279611                 | TT                              | CC              | 1946751144               |
| SNP_P4_19107_7279969 | NC_021161.1    | Ca_kabuli_chr02 | 7279969                 | TT                              | AA              | 1946751146               |
| SNP_P4_19108_7280052 | NC_021161.1    | Ca_kabuli_chr02 | 7280052                 | GG                              | AA              | 1946751148               |
| SNP_P4_19109_7280130 | NC_021161.1    | Ca_kabuli_chr02 | 7280130                 | AA                              | GG              | 1946751150               |
| SNP_P4_19110_7280160 | NC_021161.1    | Ca_kabuli_chr02 | 7280160                 | AA                              | GG              | 1946751152               |
| SNP_P4_19111_7280227 | NC_021161.1    | Ca_kabuli_chr02 | 7280227                 | GG                              | AA              | 1946751154               |
| SNP_P4_19112_7280301 | NC_021161.1    | Ca_kabuli_chr02 | 7280301                 | GG                              | AA              | 1946751156               |
| SNP_P4_19114_7308149 | NC_021161.1    | Ca_kabuli_chr02 | 7308149                 | CC                              | AA              | 1946751158               |
| SNP_P4_19115_7308151 | NC_021161.1    | Ca_kabuli_chr02 | 7308151                 | TT                              | GG              | 1946751160               |

| SNPs IDs             | Chromosome IDs | Chromosomes     | Physical positions (bp) | CDC Frontier (Reference genome) | (ILWC46 & LPNB) | NCBI SNPdb Accession IDs |
|----------------------|----------------|-----------------|-------------------------|---------------------------------|-----------------|--------------------------|
| SNP_P4_19116_7308518 | NC_021161.1    | Ca_kabuli_chr02 | 7308518                 | AA                              | GG              | 1946751162               |
| SNP_P4_19117_7308534 | NC_021161.1    | Ca_kabuli_chr02 | 7308534                 | TT                              | CC              | 1946751164               |
| SNP_P4_19118_7340814 | NC_021161.1    | Ca_kabuli_chr02 | 7340814                 | TT                              | GG              | 1946751166               |
| SNP_P4_19119_7340822 | NC_021161.1    | Ca_kabuli_chr02 | 7340822                 | AA                              | GG              | 1946751168               |
| SNP_P4_19120_7340976 | NC_021161.1    | Ca_kabuli_chr02 | 7340976                 | GG                              | AA              | 1946751170               |
| SNP_P4_19121_7342830 | NC_021161.1    | Ca_kabuli_chr02 | 7342830                 | AA                              | GG              | 1946751172               |
| SNP_P4_19122_7349219 | NC_021161.1    | Ca_kabuli_chr02 | 7349219                 | GG                              | CC              | 1946751174               |
| SNP_P4_19123_7360008 | NC_021161.1    | Ca_kabuli_chr02 | 7360008                 | AA                              | CC              | 1946751176               |
| SNP_P4_19124_7360021 | NC_021161.1    | Ca_kabuli_chr02 | 7360021                 | CC                              | TT              | 1946751178               |
| SNP_P4_19125_7360022 | NC_021161.1    | Ca_kabuli_chr02 | 7360022                 | AA                              | GG              | 1946751180               |
| SNP_P4_19126_7378703 | NC_021161.1    | Ca_kabuli_chr02 | 7378703                 | CC                              | AA              | 1946751182               |
| SNP_P4_19128_7416441 | NC_021161.1    | Ca_kabuli_chr02 | 7416441                 | TT                              | AA              | 1946751184               |
| SNP_P4_19129_7417287 | NC_021161.1    | Ca_kabuli_chr02 | 7417287                 | CC                              | TT              | 1946751186               |
| SNP_P4_19130_7438016 | NC_021161.1    | Ca_kabuli_chr02 | 7438016                 | GG                              | AA              | 1946751188               |
| SNP_P4_19131_7445953 | NC_021161.1    | Ca_kabuli_chr02 | 7445953                 | GG                              | AA              | 1946751190               |
| SNP_P4_19132_7452022 | NC_021161.1    | Ca_kabuli_chr02 | 7452022                 | TT                              | CC              | 1946751192               |
| SNP_P4_19133_7455973 | NC_021161.1    | Ca_kabuli_chr02 | 7455973                 | GG                              | TT              | 1946751194               |
| SNP_P4_19134_7464850 | NC_021161.1    | Ca_kabuli_chr02 | 7464850                 | TT                              | GG              | 1946751196               |
| SNP_P4_19135_7464854 | NC_021161.1    | Ca_kabuli_chr02 | 7464854                 | AA                              | TT              | 1946751198               |
| SNP_P4_19136_7464855 | NC_021161.1    | Ca_kabuli_chr02 | 7464855                 | CC                              | AA              | 1946751200               |
| SNP_P4_19137_7464856 | NC_021161.1    | Ca_kabuli_chr02 | 7464856                 | TT                              | CC              | 1946751202               |
| SNP_P4_19138_7490457 | NC_021161.1    | Ca_kabuli_chr02 | 7490457                 | CC                              | TT              | 1946751204               |
| SNP_P4_19139_7494576 | NC_021161.1    | Ca_kabuli_chr02 | 7494576                 | TT                              | AA              | 1946751206               |
| SNP_P4_19140_7494982 | NC_021161.1    | Ca_kabuli_chr02 | 7494982                 | TT                              | CC              | 1946751208               |
| SNP_P4_19141_7496736 | NC_021161.1    | Ca_kabuli_chr02 | 7496736                 | AA                              | TT              | 1946751210               |
| SNP_P4_19142_7519670 | NC_021161.1    | Ca_kabuli_chr02 | 7519670                 | GG                              | TT              | 1946751212               |
| SNP_P4_19143_7519675 | NC_021161.1    | Ca_kabuli_chr02 | 7519675                 | AA                              | GG              | 1946751214               |
| SNP_P4_19144_7519698 | NC_021161.1    | Ca_kabuli_chr02 | 7519698                 | AA                              | GG              | 1946751216               |
| SNP_P4_19145_7519729 | NC_021161.1    | Ca_kabuli_chr02 | 7519729                 | TT                              | GG              | 1946751218               |
| SNP_P4_19146_7519739 | NC_021161.1    | Ca_kabuli_chr02 | 7519739                 | TT                              | GG              | 1946751220               |
| SNP_P4_19147_7519740 | NC_021161.1    | Ca_kabuli_chr02 | 7519740                 | AA                              | GG              | 1946751222               |
| SNP_P4_19148_7524633 | NC_021161.1    | Ca_kabuli_chr02 | 7524633                 | TT                              | CC              | 1946751224               |
| SNP_P4_19149_7524638 | NC_021161.1    | Ca_kabuli_chr02 | 7524638                 | TT                              | CC              | 1946751226               |
| SNP_P4_19150_7524642 | NC_021161.1    | Ca_kabuli_chr02 | 7524642                 | TT                              | CC              | 1946751228               |
| SNP_P4_19151_7524644 | NC_021161.1    | Ca_kabuli_chr02 | 7524644                 | TT                              | AA              | 1946751230               |
| SNP_P4_19152_7524675 | NC_021161.1    | Ca_kabuli_chr02 | 7524675                 | CC                              | TT              | 1946751232               |
| SNP_P4_19153_7524676 | NC_021161.1    | Ca_kabuli_chr02 | 7524676                 | AA                              | GG              | 1946751234               |
| SNP_P4_19154_7524717 | NC_021161.1    | Ca_kabuli_chr02 | 7524717                 | AA                              | GG              | 1946751236               |
| SNP_P4_19155_7524991 | NC_021161.1    | Ca_kabuli_chr02 | 7524991                 | TT                              | CC              | 1946751238               |
| SNP_P4_19156_7525000 | NC_021161.1    | Ca_kabuli_chr02 | 7525000                 | AA                              | TT              | 1946751240               |
| SNP_P4_19157_7525006 | NC_021161.1    | Ca_kabuli_chr02 | 7525006                 | CC                              | TT              | 1946751242               |
| SNP_P4_19158_7525096 | NC_021161.1    | Ca_kabuli_chr02 | 7525096                 | TT                              | CC              | 1946751244               |

| SNPs IDs             | Chromosome IDs | Chromosomes     | Physical positions (bp) | CDC Frontier (Reference genome) | (ILWC46 & LPNB) | NCBI SNPdb Accession IDs |
|----------------------|----------------|-----------------|-------------------------|---------------------------------|-----------------|--------------------------|
| SNP_P4_19159_7525134 | NC_021161.1    | Ca_kabuli_chr02 | 7525134                 | TT                              | CC              | 1946751246               |
| SNP_P4_19160_7525144 | NC_021161.1    | Ca_kabuli_chr02 | 7525144                 | CC                              | GG              | 1946751248               |
| SNP_P4_19161_7525247 | NC_021161.1    | Ca_kabuli_chr02 | 7525247                 | AA                              | GG              | 1946751250               |
| SNP_P4_19162_7525288 | NC_021161.1    | Ca_kabuli_chr02 | 7525288                 | TT                              | AA              | 1946751252               |
| SNP_P4_19163_7526868 | NC_021161.1    | Ca_kabuli_chr02 | 7526868                 | AA                              | GG              | 1946751254               |
| SNP_P4_19164_7526875 | NC_021161.1    | Ca_kabuli_chr02 | 7526875                 | GG                              | AA              | 1946751256               |
| SNP_P4_19166_7531487 | NC_021161.1    | Ca_kabuli_chr02 | 7531487                 | CC                              | TT              | 1946751258               |
| SNP_P4_19169_7566726 | NC_021161.1    | Ca_kabuli_chr02 | 7566726                 | TT                              | CC              | 1946751260               |
| SNP_P4_19170_7582474 | NC_021161.1    | Ca_kabuli_chr02 | 7582474                 | AA                              | GG              | 1946751262               |
| SNP_P4_19171_7582502 | NC_021161.1    | Ca_kabuli_chr02 | 7582502                 | AA                              | GG              | 1946751264               |
| SNP_P4_19175_7593520 | NC_021161.1    | Ca_kabuli_chr02 | 7593520                 | TT                              | GG              | 1946751266               |
| SNP_P4_19177_7614424 | NC_021161.1    | Ca_kabuli_chr02 | 7614424                 | AA                              | GG              | 1946751268               |
| SNP_P4_19178_7614545 | NC_021161.1    | Ca_kabuli_chr02 | 7614545                 | TT                              | CC              | 1946751270               |
| SNP_P4_19179_7614548 | NC_021161.1    | Ca_kabuli_chr02 | 7614548                 | CC                              | TT              | 1946751272               |
| SNP_P4_19180_7614741 | NC_021161.1    | Ca_kabuli_chr02 | 7614741                 | TT                              | CC              | 1946751274               |
| SNP_P4_19181_7614769 | NC_021161.1    | Ca_kabuli_chr02 | 7614769                 | TT                              | CC              | 1946751276               |
| SNP_P4_19185_7639252 | NC_021161.1    | Ca_kabuli_chr02 | 7639252                 | AA                              | TT              | 1946751278               |
| SNP_P4_19186_7645538 | NC_021161.1    | Ca_kabuli_chr02 | 7645538                 | TT                              | CC              | 1946751280               |
| SNP_P4_19187_7650952 | NC_021161.1    | Ca_kabuli_chr02 | 7650952                 | TT                              | GG              | 1946751282               |
| SNP_P4_19188_7651574 | NC_021161.1    | Ca_kabuli_chr02 | 7651574                 | AA                              | GG              | 1946751284               |
| SNP_P4_19189_7651635 | NC_021161.1    | Ca_kabuli_chr02 | 7651635                 | AA                              | GG              | 1946751286               |
| SNP_P4_19190_7654329 | NC_021161.1    | Ca_kabuli_chr02 | 7654329                 | TT                              | CC              | 1946751288               |
| SNP_P4_19191_7654382 | NC_021161.1    | Ca_kabuli_chr02 | 7654382                 | TT                              | AA              | 1946751290               |
| SNP_P4_19192_7654622 | NC_021161.1    | Ca_kabuli_chr02 | 7654622                 | TT                              | AA              | 1946751292               |
| SNP_P4_19193_7654623 | NC_021161.1    | Ca_kabuli_chr02 | 7654623                 | TT                              | AA              | 1946751294               |
| SNP_P4_19194_7655201 | NC_021161.1    | Ca_kabuli_chr02 | 7655201                 | TT                              | AA              | 1946751296               |
| SNP_P4_19195_7655202 | NC_021161.1    | Ca_kabuli_chr02 | 7655202                 | AA                              | TT              | 1946751298               |
| SNP_P4_19196_7655207 | NC_021161.1    | Ca_kabuli_chr02 | 7655207                 | GG                              | TT              | 1946751300               |
| SNP_P4_19198_7655592 | NC_021161.1    | Ca_kabuli_chr02 | 7655592                 | AA                              | GG              | 1946751302               |
| SNP_P4_19199_7655599 | NC_021161.1    | Ca_kabuli_chr02 | 7655599                 | CC                              | AA              | 1946751304               |
| SNP_P4_19200_7655686 | NC_021161.1    | Ca_kabuli_chr02 | 7655686                 | CC                              | TT              | 1946751306               |
| SNP_P4_19202_7657166 | NC_021161.1    | Ca_kabuli_chr02 | 7657166                 | TT                              | CC              | 1946751308               |
| SNP_P4_19203_7657183 | NC_021161.1    | Ca_kabuli_chr02 | 7657183                 | GG                              | AA              | 1946751310               |
| SNP_P4_19204_7657185 | NC_021161.1    | Ca_kabuli_chr02 | 7657185                 | GG                              | AA              | 1946751312               |
| SNP_P4_19205_7657220 | NC_021161.1    | Ca_kabuli_chr02 | 7657220                 | TT                              | CC              | 1946751314               |
| SNP_P4_19206_7657226 | NC_021161.1    | Ca_kabuli_chr02 | 7657226                 | GG                              | AA              | 1946751316               |
| SNP_P4_19207_7657264 | NC_021161.1    | Ca_kabuli_chr02 | 7657264                 | CC                              | TT              | 1946751318               |
| SNP_P4_19208_7657272 | NC_021161.1    | Ca_kabuli_chr02 | 7657272                 | AA                              | GG              | 1946751320               |
| SNP_P4_19209_7657338 | NC_021161.1    | Ca_kabuli_chr02 | 7657338                 | GG                              | AA              | 1946751322               |
| SNP_P4_19210_7657598 | NC_021161.1    | Ca_kabuli_chr02 | 7657598                 | TT                              | CC              | 1946751324               |
| SNP_P4_19211_7657664 | NC_021161.1    | Ca_kabuli_chr02 | 7657664                 | GG                              | AA              | 1946751327               |
| SNP_P4_19212_7657665 | NC_021161.1    | Ca_kabuli_chr02 | 7657665                 | GG                              | CC              | 1946751329               |

| SNPs IDs             | Chromosome IDs | Chromosomes     | Physical positions (bp) | CDC Frontier (Reference genome) | (ILWC46 & LPNB) | NCBI SNPdb Accession IDs |
|----------------------|----------------|-----------------|-------------------------|---------------------------------|-----------------|--------------------------|
| SNP_P4_19213_7665815 | NC_021161.1    | Ca_kabuli_chr02 | 7665815                 | TT                              | AA              | 1946751331               |
| SNP_P4_19214_7667819 | NC_021161.1    | Ca_kabuli_chr02 | 7667819                 | TT                              | CC              | 1946751333               |
| SNP_P4_19216_7669054 | NC_021161.1    | Ca_kabuli_chr02 | 7669054                 | CC                              | TT              | 1946751335               |
| SNP_P4_19217_7669067 | NC_021161.1    | Ca_kabuli_chr02 | 7669067                 | CC                              | TT              | 1946751337               |
| SNP_P4_19218_7669113 | NC_021161.1    | Ca_kabuli_chr02 | 7669113                 | GG                              | CC              | 1946751339               |
| SNP_P4_19219_7669161 | NC_021161.1    | Ca_kabuli_chr02 | 7669161                 | AA                              | GG              | 1946751341               |
| SNP_P4_19222_7669392 | NC_021161.1    | Ca_kabuli_chr02 | 7669392                 | TT                              | GG              | 1946751343               |
| SNP_P4_19223_7669404 | NC_021161.1    | Ca_kabuli_chr02 | 7669404                 | AA                              | GG              | 1946751345               |
| SNP_P4_19224_7669410 | NC_021161.1    | Ca_kabuli_chr02 | 7669410                 | TT                              | CC              | 1946751347               |
| SNP_P4_19225_7669508 | NC_021161.1    | Ca_kabuli_chr02 | 7669508                 | TT                              | CC              | 1946751349               |
| SNP_P4_19226_7669545 | NC_021161.1    | Ca_kabuli_chr02 | 7669545                 | CC                              | GG              | 1946751351               |
| SNP_P4_19227_7669556 | NC_021161.1    | Ca_kabuli_chr02 | 7669556                 | AA                              | TT              | 1946751353               |
| SNP_P4_19228_7669559 | NC_021161.1    | Ca_kabuli_chr02 | 7669559                 | GG                              | AA              | 1946751355               |
| SNP_P4_19230_7669973 | NC_021161.1    | Ca_kabuli_chr02 | 7669973                 | AA                              | TT              | 1946751357               |
| SNP_P4_19233_7673618 | NC_021161.1    | Ca_kabuli_chr02 | 7673618                 | TT                              | GG              | 1946751359               |
| SNP_P4_19234_7673643 | NC_021161.1    | Ca_kabuli_chr02 | 7673643                 | CC                              | TT              | 1946751361               |
| SNP_P4_19235_7673745 | NC_021161.1    | Ca_kabuli_chr02 | 7673745                 | AA                              | TT              | 1946751363               |
| SNP_P4_19236_7673908 | NC_021161.1    | Ca_kabuli_chr02 | 7673908                 | CC                              | TT              | 1946751365               |
| SNP_P4_19237_7674146 | NC_021161.1    | Ca_kabuli_chr02 | 7674146                 | AA                              | TT              | 1946751367               |
| SNP_P4_19238_7674182 | NC_021161.1    | Ca_kabuli_chr02 | 7674182                 | AA                              | GG              | 1946751369               |
| SNP_P4_19239_7674468 | NC_021161.1    | Ca_kabuli_chr02 | 7674468                 | TT                              | GG              | 1946751371               |
| SNP_P4_19240_7674753 | NC_021161.1    | Ca_kabuli_chr02 | 7674753                 | TT                              | GG              | 1946751373               |
| SNP_P4_19241_7674754 | NC_021161.1    | Ca_kabuli_chr02 | 7674754                 | GG                              | TT              | 1946751375               |
| SNP_P4_19242_7674760 | NC_021161.1    | Ca_kabuli_chr02 | 7674760                 | AA                              | GG              | 1946751377               |
| SNP_P4_19243_7674943 | NC_021161.1    | Ca_kabuli_chr02 | 7674943                 | TT                              | CC              | 1946751379               |
| SNP_P4_19244_7676461 | NC_021161.1    | Ca_kabuli_chr02 | 7676461                 | GG                              | CC              | 1946751381               |
| SNP_P4_19245_7677826 | NC_021161.1    | Ca_kabuli_chr02 | 7677826                 | GG                              | AA              | 1946751383               |
| SNP_P4_19246_7678243 | NC_021161.1    | Ca_kabuli_chr02 | 7678243                 | GG                              | TT              | 1946751385               |
| SNP_P4_19249_7679120 | NC_021161.1    | Ca_kabuli_chr02 | 7679120                 | AA                              | GG              | 1946751387               |
| SNP_P4_19250_7679317 | NC_021161.1    | Ca_kabuli_chr02 | 7679317                 | TT                              | CC              | 1946751389               |
| SNP_P4_19251_7680372 | NC_021161.1    | Ca_kabuli_chr02 | 7680372                 | AA                              | GG              | 1946751391               |
| SNP_P4_19252_7681172 | NC_021161.1    | Ca_kabuli_chr02 | 7681172                 | AA                              | GG              | 1946751393               |
| SNP_P4_19253_7681923 | NC_021161.1    | Ca_kabuli_chr02 | 7681923                 | AA                              | CC              | 1946751395               |
| SNP_P4_19254_7681937 | NC_021161.1    | Ca_kabuli_chr02 | 7681937                 | TT                              | AA              | 1946751397               |
| SNP_P4_19256_7684146 | NC_021161.1    | Ca_kabuli_chr02 | 7684146                 | GG                              | AA              | 1946751399               |
| SNP_P4_19257_7684391 | NC_021161.1    | Ca_kabuli_chr02 | 7684391                 | GG                              | AA              | 1946751401               |
| SNP_P4_19258_7684396 | NC_021161.1    | Ca_kabuli_chr02 | 7684396                 | GG                              | AA              | 1946751403               |
| SNP_P4_19261_7684791 | NC_021161.1    | Ca_kabuli_chr02 | 7684791                 | TT                              | AA              | 1946751405               |
| SNP_P4_19262_7684886 | NC_021161.1    | Ca_kabuli_chr02 | 7684886                 | GG                              | TT              | 1946751407               |
| SNP_P4_19263_7686619 | NC_021161.1    | Ca_kabuli_chr02 | 7686619                 | GG                              | AA              | 1946751409               |
| SNP_P4_19264_7689591 | NC_021161.1    | Ca_kabuli_chr02 | 7689591                 | TT                              | CC              | 1946751411               |
| SNP_P4_19265_7689939 | NC_021161.1    | Ca_kabuli_chr02 | 7689939                 | GG                              | AA              | 1946751413               |

| SNPs IDs             | Chromosome IDs | Chromosomes     | Physical positions (bp) | CDC Frontier (Reference genome) | (ILWC46 & LPNB) | NCBI SNPdb Accession IDs |
|----------------------|----------------|-----------------|-------------------------|---------------------------------|-----------------|--------------------------|
| SNP_P4_19266_7691410 | NC_021161.1    | Ca_kabuli_chr02 | 7691410                 | GG                              | TT              | 1946751415               |
| SNP_P4_19267_7691414 | NC_021161.1    | Ca_kabuli_chr02 | 7691414                 | CC                              | GG              | 1946751417               |
| SNP_P4_19268_7691415 | NC_021161.1    | Ca_kabuli_chr02 | 7691415                 | TT                              | CC              | 1946751419               |
| SNP_P4_19269_7691448 | NC_021161.1    | Ca_kabuli_chr02 | 7691448                 | TT                              | CC              | 1946751421               |
| SNP_P4_19270_7691458 | NC_021161.1    | Ca_kabuli_chr02 | 7691458                 | GG                              | AA              | 1946751423               |
| SNP_P4_19271_7691463 | NC_021161.1    | Ca_kabuli_chr02 | 7691463                 | TT                              | CC              | 1946751425               |
| SNP_P4_19273_7696998 | NC_021161.1    | Ca_kabuli_chr02 | 7696998                 | AA                              | GG              | 1946751427               |
| SNP_P4_19274_7697000 | NC_021161.1    | Ca_kabuli_chr02 | 7697000                 | AA                              | CC              | 1946751429               |
| SNP_P4_19275_7697041 | NC_021161.1    | Ca_kabuli_chr02 | 7697041                 | TT                              | GG              | 1946751431               |
| SNP_P4_19276_7698482 | NC_021161.1    | Ca_kabuli_chr02 | 7698482                 | CC                              | TT              | 1946751433               |
| SNP_P4_19277_7699441 | NC_021161.1    | Ca_kabuli_chr02 | 7699441                 | GG                              | AA              | 1946751435               |
| SNP_P4_19278_7699902 | NC_021161.1    | Ca_kabuli_chr02 | 7699902                 | AA                              | TT              | 1946751437               |
| SNP_P4_19279_7701095 | NC_021161.1    | Ca_kabuli_chr02 | 7701095                 | TT                              | GG              | 1946751439               |
| SNP_P4_19280_7701684 | NC_021161.1    | Ca_kabuli_chr02 | 7701684                 | TT                              | AA              | 1946751441               |
| SNP_P4_19281_7702328 | NC_021161.1    | Ca_kabuli_chr02 | 7702328                 | GG                              | CC              | 1946751443               |
| SNP_P4_19282_7702813 | NC_021161.1    | Ca_kabuli_chr02 | 7702813                 | AA                              | TT              | 1946751445               |
| SNP_P4_19283_7703082 | NC_021161.1    | Ca_kabuli_chr02 | 7703082                 | AA                              | GG              | 1946751447               |
| SNP_P4_19284_7704943 | NC_021161.1    | Ca_kabuli_chr02 | 7704943                 | TT                              | AA              | 1946751449               |
| SNP_P4_19285_7705014 | NC_021161.1    | Ca_kabuli_chr02 | 7705014                 | AA                              | GG              | 1946751451               |
| SNP_P4_19287_7705682 | NC_021161.1    | Ca_kabuli_chr02 | 7705682                 | GG                              | AA              | 1946751454               |
| SNP_P4_19288_7705683 | NC_021161.1    | Ca_kabuli_chr02 | 7705683                 | AA                              | GG              | 1946751456               |
| SNP_P4_19289_7705961 | NC_021161.1    | Ca_kabuli_chr02 | 7705961                 | AA                              | GG              | 1946751458               |
| SNP_P4_19290_7706029 | NC_021161.1    | Ca_kabuli_chr02 | 7706029                 | AA                              | GG              | 1946751460               |
| SNP_P4_19292_7706566 | NC_021161.1    | Ca_kabuli_chr02 | 7706566                 | GG                              | AA              | 1946751462               |
| SNP_P4_19293_7706583 | NC_021161.1    | Ca_kabuli_chr02 | 7706583                 | TT                              | GG              | 1946751464               |
| SNP_P4_19294_7706618 | NC_021161.1    | Ca_kabuli_chr02 | 7706618                 | AA                              | TT              | 1946751466               |
| SNP_P4_19295_7706636 | NC_021161.1    | Ca_kabuli_chr02 | 7706636                 | AA                              | GG              | 1946751468               |
| SNP_P4_19296_7707515 | NC_021161.1    | Ca_kabuli_chr02 | 7707515                 | AA                              | GG              | 1946751470               |
| SNP_P4_19297_7707524 | NC_021161.1    | Ca_kabuli_chr02 | 7707524                 | TT                              | CC              | 1946751472               |
| SNP_P4_19298_7707544 | NC_021161.1    | Ca_kabuli_chr02 | 7707544                 | AA                              | GG              | 1946751474               |
| SNP_P4_19299_7707551 | NC_021161.1    | Ca_kabuli_chr02 | 7707551                 | AA                              | TT              | 1946751476               |
| SNP_P4_19300_7707790 | NC_021161.1    | Ca_kabuli_chr02 | 7707790                 | GG                              | TT              | 1946751478               |
| SNP_P4_19301_7707814 | NC_021161.1    | Ca_kabuli_chr02 | 7707814                 | CC                              | AA              | 1946751480               |
| SNP_P4_19302_7708008 | NC_021161.1    | Ca_kabuli_chr02 | 7708008                 | AA                              | TT              | 1946751482               |
| SNP_P4_19304_7708079 | NC_021161.1    | Ca_kabuli_chr02 | 7708079                 | AA                              | GG              | 1946751484               |
| SNP_P4_19305_7709844 | NC_021161.1    | Ca_kabuli_chr02 | 7709844                 | TT                              | GG              | 1946751486               |
| SNP_P4_19306_7710488 | NC_021161.1    | Ca_kabuli_chr02 | 7710488                 | CC                              | TT              | 1946751488               |
| SNP_P4_19307_7710489 | NC_021161.1    | Ca_kabuli_chr02 | 7710489                 | AA                              | GG              | 1946751490               |
| SNP_P4_19308_7710610 | NC_021161.1    | Ca_kabuli_chr02 | 7710610                 | TT                              | CC              | 1946751492               |
| SNP_P4_19309_7710728 | NC_021161.1    | Ca_kabuli_chr02 | 7710728                 | CC                              | TT              | 1946751494               |
| SNP_P4_19310_7710766 | NC_021161.1    | Ca_kabuli_chr02 | 7710766                 | CC                              | TT              | 1946751496               |
| SNP_P4_19311_7710817 | NC_021161.1    | Ca_kabuli_chr02 | 7710817                 | AA                              | GG              | 1946751498               |

| SNPs IDs             | Chromosome IDs | Chromosomes     | Physical positions (bp) | CDC Frontier (Reference genome) | (ILWC46 & LPNB) | NCBI SNPdb Accession IDs |
|----------------------|----------------|-----------------|-------------------------|---------------------------------|-----------------|--------------------------|
| SNP_P4_19312_7710884 | NC_021161.1    | Ca_kabuli_chr02 | 7710884                 | GG                              | AA              | 1946751500               |
| SNP_P4_19313_7711949 | NC_021161.1    | Ca_kabuli_chr02 | 7711949                 | TT                              | GG              | 1946751502               |
| SNP_P4_19314_7712262 | NC_021161.1    | Ca_kabuli_chr02 | 7712262                 | AA                              | GG              | 1946751504               |
| SNP_P4_19315_7712313 | NC_021161.1    | Ca_kabuli_chr02 | 7712313                 | TT                              | CC              | 1946751506               |
| SNP_P4_19316_7713953 | NC_021161.1    | Ca_kabuli_chr02 | 7713953                 | GG                              | AA              | 1946751508               |
| SNP_P4_19317_7713962 | NC_021161.1    | Ca_kabuli_chr02 | 7713962                 | CC                              | GG              | 1946751510               |
| SNP_P4_19318_7714061 | NC_021161.1    | Ca_kabuli_chr02 | 7714061                 | TT                              | AA              | 1946751512               |
| SNP_P4_19320_7715429 | NC_021161.1    | Ca_kabuli_chr02 | 7715429                 | AA                              | GG              | 1946751514               |
| SNP_P4_19321_7715484 | NC_021161.1    | Ca_kabuli_chr02 | 7715484                 | GG                              | TT              | 1946751516               |
| SNP_P4_19322_7717532 | NC_021161.1    | Ca_kabuli_chr02 | 7717532                 | TT                              | CC              | 1946751518               |
| SNP_P4_19323_7717556 | NC_021161.1    | Ca_kabuli_chr02 | 7717556                 | GG                              | TT              | 1946751520               |
| SNP_P4_19324_7718584 | NC_021161.1    | Ca_kabuli_chr02 | 7718584                 | GG                              | TT              | 1946751523               |
| SNP_P4_19326_7718970 | NC_021161.1    | Ca_kabuli_chr02 | 7718970                 | CC                              | TT              | 1946751525               |
| SNP_P4_19327_7720720 | NC_021161.1    | Ca_kabuli_chr02 | 7720720                 | CC                              | AA              | 1946751527               |
| SNP_P4_19328_7720723 | NC_021161.1    | Ca_kabuli_chr02 | 7720723                 | CC                              | TT              | 1946751529               |
| SNP_P4_19329_7720979 | NC_021161.1    | Ca_kabuli_chr02 | 7720979                 | TT                              | AA              | 1946751531               |
| SNP_P4_19331_7723083 | NC_021161.1    | Ca_kabuli_chr02 | 7723083                 | CC                              | TT              | 1946751533               |
| SNP_P4_19332_7723102 | NC_021161.1    | Ca_kabuli_chr02 | 7723102                 | AA                              | TT              | 1946751535               |
| SNP_P4_19333_7723107 | NC_021161.1    | Ca_kabuli_chr02 | 7723107                 | TT                              | GG              | 1946751537               |
| SNP_P4_19334_7723160 | NC_021161.1    | Ca_kabuli_chr02 | 7723160                 | CC                              | TT              | 1946751539               |
| SNP_P4_19336_7723220 | NC_021161.1    | Ca_kabuli_chr02 | 7723220                 | AA                              | GG              | 1946751541               |
| SNP_P4_19337_7723234 | NC_021161.1    | Ca_kabuli_chr02 | 7723234                 | CC                              | TT              | 1946751543               |
| SNP_P4_19338_7723269 | NC_021161.1    | Ca_kabuli_chr02 | 7723269                 | GG                              | TT              | 1946751545               |
| SNP_P4_19340_7723620 | NC_021161.1    | Ca_kabuli_chr02 | 7723620                 | CC                              | TT              | 1946751547               |
| SNP_P4_19341_7723683 | NC_021161.1    | Ca_kabuli_chr02 | 7723683                 | TT                              | GG              | 1946751549               |
| SNP_P4_19342_7723918 | NC_021161.1    | Ca_kabuli_chr02 | 7723918                 | CC                              | TT              | 1946751551               |
| SNP_P4_19344_7726623 | NC_021161.1    | Ca_kabuli_chr02 | 7726623                 | CC                              | TT              | 1946751553               |
| SNP_P4_19345_7727804 | NC_021161.1    | Ca_kabuli_chr02 | 7727804                 | TT                              | CC              | 1946751555               |
| SNP_P4_19346_7727830 | NC_021161.1    | Ca_kabuli_chr02 | 7727830                 | GG                              | AA              | 1946751557               |
| SNP_P4_19347_7727837 | NC_021161.1    | Ca_kabuli_chr02 | 7727837                 | CC                              | TT              | 1946751560               |
| SNP_P4_19348_7727863 | NC_021161.1    | Ca_kabuli_chr02 | 7727863                 | TT                              | CC              | 1946751562               |
| SNP_P4_19349_7727864 | NC_021161.1    | Ca_kabuli_chr02 | 7727864                 | AA                              | GG              | 1946751564               |
| SNP_P4_19350_7727899 | NC_021161.1    | Ca_kabuli_chr02 | 7727899                 | AA                              | GG              | 1946751566               |
| SNP_P4_19351_7728067 | NC_021161.1    | Ca_kabuli_chr02 | 7728067                 | CC                              | GG              | 1946751568               |
| SNP_P4_19352_7728069 | NC_021161.1    | Ca_kabuli_chr02 | 7728069                 | GG                              | AA              | 1946751570               |
| SNP_P4_19353_7728073 | NC_021161.1    | Ca_kabuli_chr02 | 7728073                 | AA                              | GG              | 1946751572               |
| SNP_P4_19354_7728100 | NC_021161.1    | Ca_kabuli_chr02 | 7728100                 | CC                              | TT              | 1946751574               |
| SNP_P4_19355_7728112 | NC_021161.1    | Ca_kabuli_chr02 | 7728112                 | CC                              | TT              | 1946751576               |
| SNP_P4_19356_7728113 | NC_021161.1    | Ca_kabuli_chr02 | 7728113                 | CC                              | TT              | 1946751578               |
| SNP_P4_19357_7728124 | NC_021161.1    | Ca_kabuli_chr02 | 7728124                 | TT                              | CC              | 1946751580               |
| SNP_P4_19358_7728127 | NC_021161.1    | Ca_kabuli_chr02 | 7728127                 | AA                              | GG              | 1946751582               |
| SNP_P4_19359_7728136 | NC_021161.1    | Ca_kabuli_chr02 | 7728136                 | GG                              | AA              | 1946751584               |

| SNPs IDs             | Chromosome IDs | Chromosomes     | Physical positions (bp) | CDC Frontier (Reference genome) | (ILWC46 & LPNB) | NCBI SNPdb Accession IDs |
|----------------------|----------------|-----------------|-------------------------|---------------------------------|-----------------|--------------------------|
| SNP_P4_19360_7729195 | NC_021161.1    | Ca_kabuli_chr02 | 7729195                 | CC                              | TT              | 1946751586               |
| SNP_P4_19361_7729230 | NC_021161.1    | Ca_kabuli_chr02 | 7729230                 | CC                              | GG              | 1946751588               |
| SNP_P4_19362_7729236 | NC_021161.1    | Ca_kabuli_chr02 | 7729236                 | CC                              | TT              | 1946751590               |
| SNP_P4_19363_7729388 | NC_021161.1    | Ca_kabuli_chr02 | 7729388                 | TT                              | CC              | 1946751592               |
| SNP_P4_19364_7729399 | NC_021161.1    | Ca_kabuli_chr02 | 7729399                 | TT                              | GG              | 1946751594               |
| SNP_P4_19365_7729952 | NC_021161.1    | Ca_kabuli_chr02 | 7729952                 | AA                              | GG              | 1946751596               |
| SNP_P4_19366_7730133 | NC_021161.1    | Ca_kabuli_chr02 | 7730133                 | GG                              | AA              | 1946751598               |
| SNP_P4_19367_7730154 | NC_021161.1    | Ca_kabuli_chr02 | 7730154                 | TT                              | AA              | 1946751600               |
| SNP_P4_19368_7730262 | NC_021161.1    | Ca_kabuli_chr02 | 7730262                 | TT                              | CC              | 1946751602               |
| SNP_P4_19369_7730304 | NC_021161.1    | Ca_kabuli_chr02 | 7730304                 | TT                              | CC              | 1946751604               |
| SNP_P4_19370_7730554 | NC_021161.1    | Ca_kabuli_chr02 | 7730554                 | TT                              | AA              | 1946751606               |
| SNP_P4_19371_7730560 | NC_021161.1    | Ca_kabuli_chr02 | 7730560                 | AA                              | CC              | 1946751608               |
| SNP_P4_19372_7730852 | NC_021161.1    | Ca_kabuli_chr02 | 7730852                 | AA                              | GG              | 1946751610               |
| SNP_P4_19373_7730854 | NC_021161.1    | Ca_kabuli_chr02 | 7730854                 | TT                              | GG              | 1946751612               |
| SNP_P4_19374_7731026 | NC_021161.1    | Ca_kabuli_chr02 | 7731026                 | AA                              | CC              | 1946751614               |
| SNP_P4_19375_7731069 | NC_021161.1    | Ca_kabuli_chr02 | 7731069                 | TT                              | GG              | 1946751616               |
| SNP_P4_19376_7731086 | NC_021161.1    | Ca_kabuli_chr02 | 7731086                 | GG                              | AA              | 1946751618               |
| SNP_P4_19377_7731167 | NC_021161.1    | Ca_kabuli_chr02 | 7731167                 | CC                              | TT              | 1946751620               |
| SNP_P4_19378_7731246 | NC_021161.1    | Ca_kabuli_chr02 | 7731246                 | CC                              | TT              | 1946751622               |
| SNP_P4_19379_7731300 | NC_021161.1    | Ca_kabuli_chr02 | 7731300                 | TT                              | CC              | 1946751624               |
| SNP_P4_19380_7731361 | NC_021161.1    | Ca_kabuli_chr02 | 7731361                 | TT                              | CC              | 1946751626               |
| SNP_P4_19382_7731446 | NC_021161.1    | Ca_kabuli_chr02 | 7731446                 | AA                              | TT              | 1946751628               |
| SNP_P4_19383_7735220 | NC_021161.1    | Ca_kabuli_chr02 | 7735220                 | TT                              | CC              | 1946751630               |
| SNP_P4_19384_7735658 | NC_021161.1    | Ca_kabuli_chr02 | 7735658                 | TT                              | AA              | 1946751632               |
| SNP_P4_19385_7737063 | NC_021161.1    | Ca_kabuli_chr02 | 7737063                 | GG                              | AA              | 1946751634               |
| SNP_P4_19386_7737284 | NC_021161.1    | Ca_kabuli_chr02 | 7737284                 | TT                              | CC              | 1946751636               |
| SNP_P4_19387_7737289 | NC_021161.1    | Ca_kabuli_chr02 | 7737289                 | AA                              | GG              | 1946751638               |
| SNP_P4_19388_7737668 | NC_021161.1    | Ca_kabuli_chr02 | 7737668                 | TT                              | CC              | 1946751640               |
| SNP_P4_19389_7737968 | NC_021161.1    | Ca_kabuli_chr02 | 7737968                 | GG                              | AA              | 1946751642               |
| SNP_P4_19390_7738423 | NC_021161.1    | Ca_kabuli_chr02 | 7738423                 | CC                              | GG              | 1946751644               |
| SNP_P4_19391_7738756 | NC_021161.1    | Ca_kabuli_chr02 | 7738756                 | TT                              | GG              | 1946751646               |
| SNP_P4_19392_7738942 | NC_021161.1    | Ca_kabuli_chr02 | 7738942                 | GG                              | AA              | 1946751648               |
| SNP_P4_19393_7739006 | NC_021161.1    | Ca_kabuli_chr02 | 7739006                 | TT                              | CC              | 1946751650               |
| SNP_P4_19394_7739007 | NC_021161.1    | Ca_kabuli_chr02 | 7739007                 | AA                              | GG              | 1946751651               |
| SNP_P4_19395_7739027 | NC_021161.1    | Ca_kabuli_chr02 | 7739027                 | TT                              | GG              | 1946751653               |
| SNP_P4_19396_7739058 | NC_021161.1    | Ca_kabuli_chr02 | 7739058                 | AA                              | TT              | 1946751655               |
| SNP_P4_19397_7739068 | NC_021161.1    | Ca_kabuli_chr02 | 7739068                 | TT                              | CC              | 1946751657               |
| SNP_P4_19398_7739069 | NC_021161.1    | Ca_kabuli_chr02 | 7739069                 | AA                              | CC              | 1946751659               |
| SNP_P4_19400_7743389 | NC_021161.1    | Ca_kabuli_chr02 | 7743389                 | CC                              | AA              | 1946751661               |
| SNP_P4_19401_7743392 | NC_021161.1    | Ca_kabuli_chr02 | 7743392                 | TT                              | CC              | 1946751663               |
| SNP_P4_19403_7743424 | NC_021161.1    | Ca_kabuli_chr02 | 7743424                 | AA                              | GG              | 1946751665               |
| SNP_P4_19404_7743965 | NC_021161.1    | Ca_kabuli_chr02 | 7743965                 | AA                              | GG              | 1946751667               |

| SNPs IDs             | Chromosome IDs | Chromosomes     | Physical positions (bp) | CDC Frontier (Reference genome) | (ILWC46 & LPNB) | NCBI SNPdb Accession IDs |
|----------------------|----------------|-----------------|-------------------------|---------------------------------|-----------------|--------------------------|
| SNP_P4_19405_7744268 | NC_021161.1    | Ca_kabuli_chr02 | 7744268                 | AA                              | CC              | 1946751669               |
| SNP_P4_19406_7744271 | NC_021161.1    | Ca_kabuli_chr02 | 7744271                 | AA                              | GG              | 1946751671               |
| SNP_P4_19407_7744276 | NC_021161.1    | Ca_kabuli_chr02 | 7744276                 | GG                              | AA              | 1946751673               |
| SNP_P4_19408_7744296 | NC_021161.1    | Ca_kabuli_chr02 | 7744296                 | AA                              | GG              | 1946751675               |
| SNP_P4_19409_7744318 | NC_021161.1    | Ca_kabuli_chr02 | 7744318                 | AA                              | TT              | 1946751677               |
| SNP_P4_19410_7744369 | NC_021161.1    | Ca_kabuli_chr02 | 7744369                 | AA                              | TT              | 1946751679               |
| SNP_P4_19411_7744700 | NC_021161.1    | Ca_kabuli_chr02 | 7744700                 | AA                              | GG              | 1946751681               |
| SNP_P4_19412_7744701 | NC_021161.1    | Ca_kabuli_chr02 | 7744701                 | CC                              | TT              | 1946751683               |
| SNP_P4_19414_7744922 | NC_021161.1    | Ca_kabuli_chr02 | 7744922                 | GG                              | AA              | 1946751685               |
| SNP_P4_19415_7744969 | NC_021161.1    | Ca_kabuli_chr02 | 7744969                 | TT                              | GG              | 1946751687               |
| SNP_P4_19416_7744973 | NC_021161.1    | Ca_kabuli_chr02 | 7744973                 | GG                              | TT              | 1946751689               |
| SNP_P4_19417_7745163 | NC_021161.1    | Ca_kabuli_chr02 | 7745163                 | TT                              | CC              | 1946751691               |
| SNP_P4_19418_7745176 | NC_021161.1    | Ca_kabuli_chr02 | 7745176                 | TT                              | CC              | 1946751693               |
| SNP_P4_19420_7745268 | NC_021161.1    | Ca_kabuli_chr02 | 7745268                 | TT                              | AA              | 1946751695               |
| SNP_P4_19421_7746316 | NC_021161.1    | Ca_kabuli_chr02 | 7746316                 | AA                              | TT              | 1946751697               |
| SNP_P4_19422_7746725 | NC_021161.1    | Ca_kabuli_chr02 | 7746725                 | AA                              | GG              | 1946751699               |
| SNP_P4_19423_7747084 | NC_021161.1    | Ca_kabuli_chr02 | 7747084                 | CC                              | TT              | 1946751701               |
| SNP_P4_19424_7748490 | NC_021161.1    | Ca_kabuli_chr02 | 7748490                 | TT                              | CC              | 1946751703               |
| SNP_P4_19425_7748506 | NC_021161.1    | Ca_kabuli_chr02 | 7748506                 | TT                              | GG              | 1946751705               |
| SNP_P4_19426_7749450 | NC_021161.1    | Ca_kabuli_chr02 | 7749450                 | AA                              | GG              | 1946751707               |
| SNP_P4_19427_7749716 | NC_021161.1    | Ca_kabuli_chr02 | 7749716                 | GG                              | CC              | 1946751709               |
| SNP_P4_19428_7749886 | NC_021161.1    | Ca_kabuli_chr02 | 7749886                 | GG                              | CC              | 1946751711               |
| SNP_P4_19429_7749892 | NC_021161.1    | Ca_kabuli_chr02 | 7749892                 | AA                              | CC              | 1946751713               |
| SNP_P4_19430_7749930 | NC_021161.1    | Ca_kabuli_chr02 | 7749930                 | TT                              | CC              | 1946751715               |
| SNP_P4_19431_7749951 | NC_021161.1    | Ca_kabuli_chr02 | 7749951                 | CC                              | TT              | 1946751717               |
| SNP_P4_19432_7749954 | NC_021161.1    | Ca_kabuli_chr02 | 7749954                 | AA                              | GG              | 1946751719               |
| SNP_P4_19434_7750167 | NC_021161.1    | Ca_kabuli_chr02 | 7750167                 | AA                              | CC              | 1946751721               |
| SNP_P4_19436_7750346 | NC_021161.1    | Ca_kabuli_chr02 | 7750346                 | CC                              | TT              | 1946751723               |
| SNP_P4_19437_7752825 | NC_021161.1    | Ca_kabuli_chr02 | 7752825                 | AA                              | CC              | 1946751725               |
| SNP_P4_19438_7752840 | NC_021161.1    | Ca_kabuli_chr02 | 7752840                 | TT                              | GG              | 1946751727               |
| SNP_P4_19439_7752958 | NC_021161.1    | Ca_kabuli_chr02 | 7752958                 | CC                              | TT              | 1946751729               |
| SNP_P4_19441_7753419 | NC_021161.1    | Ca_kabuli_chr02 | 7753419                 | GG                              | CC              | 1946751730               |
| SNP_P4_19442_7753425 | NC_021161.1    | Ca_kabuli_chr02 | 7753425                 | TT                              | CC              | 1946751732               |
| SNP_P4_19443_7753440 | NC_021161.1    | Ca_kabuli_chr02 | 7753440                 | CC                              | TT              | 1946751734               |
| SNP_P4_19444_7755509 | NC_021161.1    | Ca_kabuli_chr02 | 7755509                 | CC                              | GG              | 1946751736               |
| SNP_P4_19446_7757253 | NC_021161.1    | Ca_kabuli_chr02 | 7757253                 | TT                              | AA              | 1946751738               |
| SNP_P4_19447_7757264 | NC_021161.1    | Ca_kabuli_chr02 | 7757264                 | AA                              | TT              | 1946751740               |
| SNP_P4_19448_7757285 | NC_021161.1    | Ca_kabuli_chr02 | 7757285                 | AA                              | GG              | 1946751742               |
| SNP_P4_19449_7757296 | NC_021161.1    | Ca_kabuli_chr02 | 7757296                 | AA                              | GG              | 1946751744               |
| SNP_P4_19450_7757494 | NC_021161.1    | Ca_kabuli_chr02 | 7757494                 | AA                              | GG              | 1946751746               |
| SNP_P4_19451_7757512 | NC_021161.1    | Ca_kabuli_chr02 | 7757512                 | GG                              | AA              | 1946751748               |
| SNP_P4_19452_7757632 | NC_021161.1    | Ca_kabuli_chr02 | 7757632                 | AA                              | GG              | 1946751750               |



| SNPs IDs             | Chromosome IDs | Chromosomes     | Physical positions (bp) | CDC Frontier (Reference genome) | (ILWC46 & LPNB) | NCBI SNPdb Accession IDs |
|----------------------|----------------|-----------------|-------------------------|---------------------------------|-----------------|--------------------------|
| SNP_P4_19454_7757662 | NC_021161.1    | Ca_kabuli_chr02 | 7757662                 | GG                              | CC              | 1946751752               |
| SNP_P4_19455_7757718 | NC_021161.1    | Ca_kabuli_chr02 | 7757718                 | CC                              | TT              | 1946751754               |
| SNP_P4_19456_7759184 | NC_021161.1    | Ca_kabuli_chr02 | 7759184                 | GG                              | AA              | 1946751756               |
| SNP_P4_19457_7759186 | NC_021161.1    | Ca_kabuli_chr02 | 7759186                 | GG                              | AA              | 1946751757               |
| SNP_P4_19458_7770792 | NC_021161.1    | Ca_kabuli_chr02 | 7770792                 | AA                              | GG              | 1946751759               |
| SNP_P4_19459_7770803 | NC_021161.1    | Ca_kabuli_chr02 | 7770803                 | GG                              | TT              | 1946751761               |
| SNP_P4_19460_7770833 | NC_021161.1    | Ca_kabuli_chr02 | 7770833                 | AA                              | GG              | 1946751763               |
| SNP_P4_19461_7771142 | NC_021161.1    | Ca_kabuli_chr02 | 7771142                 | CC                              | AA              | 1946751765               |
| SNP_P4_19462_7771145 | NC_021161.1    | Ca_kabuli_chr02 | 7771145                 | AA                              | TT              | 1946751767               |
| SNP_P4_19463_7771164 | NC_021161.1    | Ca_kabuli_chr02 | 7771164                 | TT                              | AA              | 1946751769               |
| SNP_P4_19464_7771292 | NC_021161.1    | Ca_kabuli_chr02 | 7771292                 | TT                              | GG              | 1946751771               |
| SNP_P4_19466_7771513 | NC_021161.1    | Ca_kabuli_chr02 | 7771513                 | GG                              | AA              | 1946751773               |
| SNP_P4_19467_7772243 | NC_021161.1    | Ca_kabuli_chr02 | 7772243                 | GG                              | AA              | 1946751775               |
| SNP_P4_19469_7772503 | NC_021161.1    | Ca_kabuli_chr02 | 7772503                 | TT                              | GG              | 1946751776               |
| SNP_P4_19470_7772542 | NC_021161.1    | Ca_kabuli_chr02 | 7772542                 | CC                              | AA              | 1946751778               |
| SNP_P4_19472_7772764 | NC_021161.1    | Ca_kabuli_chr02 | 7772764                 | AA                              | GG              | 1946751780               |
| SNP_P4_19473_7772765 | NC_021161.1    | Ca_kabuli_chr02 | 7772765                 | GG                              | AA              | 1946751782               |
| SNP_P4_19474_7772767 | NC_021161.1    | Ca_kabuli_chr02 | 7772767                 | TT                              | CC              | 1946751784               |
| SNP_P4_19475_7772793 | NC_021161.1    | Ca_kabuli_chr02 | 7772793                 | CC                              | GG              | 1946751786               |
| SNP_P4_19478_7773387 | NC_021161.1    | Ca_kabuli_chr02 | 7773387                 | CC                              | AA              | 1946751788               |
| SNP_P4_19480_7774267 | NC_021161.1    | Ca_kabuli_chr02 | 7774267                 | CC                              | TT              | 1946751790               |
| SNP_P4_19482_7774673 | NC_021161.1    | Ca_kabuli_chr02 | 7774673                 | GG                              | AA              | 1946751792               |
| SNP_P4_19483_7774689 | NC_021161.1    | Ca_kabuli_chr02 | 7774689                 | TT                              | CC              | 1946751793               |
| SNP_P4_19484_7774691 | NC_021161.1    | Ca_kabuli_chr02 | 7774691                 | TT                              | CC              | 1946751795               |
| SNP_P4_19487_7776422 | NC_021161.1    | Ca_kabuli_chr02 | 7776422                 | CC                              | TT              | 1946751797               |
| SNP_P4_19488_7776757 | NC_021161.1    | Ca_kabuli_chr02 | 7776757                 | CC                              | TT              | 1946751799               |
| SNP_P4_19489_7779390 | NC_021161.1    | Ca_kabuli_chr02 | 7779390                 | CC                              | TT              | 1946751801               |
| SNP_P4_19491_7782001 | NC_021161.1    | Ca_kabuli_chr02 | 7782001                 | CC                              | TT              | 1946751803               |
| SNP_P4_19492_7782477 | NC_021161.1    | Ca_kabuli_chr02 | 7782477                 | GG                              | AA              | 1946751805               |
| SNP_P4_19493_7783419 | NC_021161.1    | Ca_kabuli_chr02 | 7783419                 | AA                              | CC              | 1946751807               |
| SNP_P4_19494_7783581 | NC_021161.1    | Ca_kabuli_chr02 | 7783581                 | AA                              | GG              | 1946751809               |
| SNP_P4_19495_7783624 | NC_021161.1    | Ca_kabuli_chr02 | 7783624                 | TT                              | CC              | 1946751811               |
| SNP_P4_19496_7784015 | NC_021161.1    | Ca_kabuli_chr02 | 7784015                 | TT                              | CC              | 1946751813               |
| SNP_P4_19497_7784050 | NC_021161.1    | Ca_kabuli_chr02 | 7784050                 | CC                              | AA              | 1946751815               |
| SNP_P4_19498_7788526 | NC_021161.1    | Ca_kabuli_chr02 | 7788526                 | AA                              | GG              | 1946751817               |
| SNP_P4_19499_7789252 | NC_021161.1    | Ca_kabuli_chr02 | 7789252                 | GG                              | CC              | 1946751819               |
| SNP_P4_19500_7789262 | NC_021161.1    | Ca_kabuli_chr02 | 7789262                 | CC                              | TT              | 1946751821               |
| SNP_P4_19501_7789264 | NC_021161.1    | Ca_kabuli_chr02 | 7789264                 | GG                              | TT              | 1946751823               |
| SNP_P4_19502_7789288 | NC_021161.1    | Ca_kabuli_chr02 | 7789288                 | GG                              | TT              | 1946751825               |
| SNP_P4_19503_7789323 | NC_021161.1    | Ca_kabuli_chr02 | 7789323                 | AA                              | GG              | 1946751827               |
| SNP_P4_19504_7791655 | NC_021161.1    | Ca_kabuli_chr02 | 7791655                 | AA                              | TT              | 1946751829               |
| SNP_P4_19505_7791681 | NC_021161.1    | Ca_kabuli_chr02 | 7791681                 | AA                              | GG              | 1946751830               |

| SNPs IDs             | Chromosome IDs | Chromosomes     | Physical positions (bp) | CDC Frontier (Reference genome) | (ILWC46 & LPNB) | NCBI SNPdb Accession IDs |
|----------------------|----------------|-----------------|-------------------------|---------------------------------|-----------------|--------------------------|
| SNP_P4_19506_7791736 | NC_021161.1    | Ca_kabuli_chr02 | 7791736                 | TT                              | CC              | 1946751832               |
| SNP_P4_19507_7791808 | NC_021161.1    | Ca_kabuli_chr02 | 7791808                 | GG                              | AA              | 1946751835               |
| SNP_P4_19509_7792810 | NC_021161.1    | Ca_kabuli_chr02 | 7792810                 | CC                              | TT              | 1946751837               |
| SNP_P4_19510_7792815 | NC_021161.1    | Ca_kabuli_chr02 | 7792815                 | AA                              | GG              | 1946751839               |
| SNP_P4_19511_7792830 | NC_021161.1    | Ca_kabuli_chr02 | 7792830                 | AA                              | CC              | 1946751841               |
| SNP_P4_19513_7793059 | NC_021161.1    | Ca_kabuli_chr02 | 7793059                 | GG                              | AA              | 1946751843               |
| SNP_P4_19515_7793351 | NC_021161.1    | Ca_kabuli_chr02 | 7793351                 | TT                              | GG              | 1946751845               |
| SNP_P4_19516_7793558 | NC_021161.1    | Ca_kabuli_chr02 | 7793558                 | AA                              | GG              | 1946751847               |
| SNP_P4_19517_7795028 | NC_021161.1    | Ca_kabuli_chr02 | 7795028                 | AA                              | GG              | 1946751849               |
| SNP_P4_19518_7795077 | NC_021161.1    | Ca_kabuli_chr02 | 7795077                 | GG                              | AA              | 1946751851               |
| SNP_P4_19519_7795088 | NC_021161.1    | Ca_kabuli_chr02 | 7795088                 | AA                              | GG              | 1946751853               |
| SNP_P4_19521_7796738 | NC_021161.1    | Ca_kabuli_chr02 | 7796738                 | CC                              | TT              | 1946751855               |
| SNP_P4_19522_7796741 | NC_021161.1    | Ca_kabuli_chr02 | 7796741                 | AA                              | CC              | 1946751857               |
| SNP_P4_19523_7796756 | NC_021161.1    | Ca_kabuli_chr02 | 7796756                 | TT                              | AA              | 1946751859               |
| SNP_P4_19524_7800416 | NC_021161.1    | Ca_kabuli_chr02 | 7800416                 | GG                              | AA              | 1946751861               |
| SNP_P4_19525_7800640 | NC_021161.1    | Ca_kabuli_chr02 | 7800640                 | AA                              | CC              | 1946751864               |
| SNP_P4_19526_7801130 | NC_021161.1    | Ca_kabuli_chr02 | 7801130                 | AA                              | TT              | 1946751866               |
| SNP_P4_19528_7802130 | NC_021161.1    | Ca_kabuli_chr02 | 7802130                 | CC                              | TT              | 1946751868               |
| SNP_P4_19529_7803951 | NC_021161.1    | Ca_kabuli_chr02 | 7803951                 | TT                              | CC              | 1946751870               |
| SNP_P4_19530_7804995 | NC_021161.1    | Ca_kabuli_chr02 | 7804995                 | TT                              | AA              | 1946751872               |
| SNP_P4_19531_7805307 | NC_021161.1    | Ca_kabuli_chr02 | 7805307                 | AA                              | GG              | 1946751874               |
| SNP_P4_19532_7805326 | NC_021161.1    | Ca_kabuli_chr02 | 7805326                 | TT                              | CC              | 1946751876               |
| SNP_P4_19533_7805889 | NC_021161.1    | Ca_kabuli_chr02 | 7805889                 | GG                              | TT              | 1946751878               |
| SNP_P4_19534_7809134 | NC_021161.1    | Ca_kabuli_chr02 | 7809134                 | CC                              | TT              | 1946751880               |
| SNP_P4_19535_7810039 | NC_021161.1    | Ca_kabuli_chr02 | 7810039                 | AA                              | TT              | 1946751882               |
| SNP_P4_19536_7810042 | NC_021161.1    | Ca_kabuli_chr02 | 7810042                 | TT                              | GG              | 1946751884               |
| SNP_P4_19537_7810792 | NC_021161.1    | Ca_kabuli_chr02 | 7810792                 | TT                              | GG              | 1946751886               |
| SNP_P4_19540_7812144 | NC_021161.1    | Ca_kabuli_chr02 | 7812144                 | AA                              | GG              | 1946751888               |
| SNP_P4_19541_7812232 | NC_021161.1    | Ca_kabuli_chr02 | 7812232                 | CC                              | TT              | 1946751890               |
| SNP_P4_19542_7812237 | NC_021161.1    | Ca_kabuli_chr02 | 7812237                 | GG                              | AA              | 1946751892               |
| SNP_P4_19543_7812448 | NC_021161.1    | Ca_kabuli_chr02 | 7812448                 | TT                              | CC              | 1946751894               |
| SNP_P4_19544_7812781 | NC_021161.1    | Ca_kabuli_chr02 | 7812781                 | TT                              | GG              | 1946751896               |
| SNP_P4_19545_7813980 | NC_021161.1    | Ca_kabuli_chr02 | 7813980                 | CC                              | AA              | 1946751898               |
| SNP_P4_19546_7814197 | NC_021161.1    | Ca_kabuli_chr02 | 7814197                 | TT                              | GG              | 1946751900               |
| SNP_P4_19547_7814945 | NC_021161.1    | Ca_kabuli_chr02 | 7814945                 | TT                              | AA              | 1946751902               |
| SNP_P4_19550_7817026 | NC_021161.1    | Ca_kabuli_chr02 | 7817026                 | TT                              | AA              | 1946751904               |
| SNP_P4_19551_7817277 | NC_021161.1    | Ca_kabuli_chr02 | 7817277                 | TT                              | AA              | 1946751906               |
| SNP_P4_19552_7817305 | NC_021161.1    | Ca_kabuli_chr02 | 7817305                 | CC                              | TT              | 1946751908               |
| SNP_P4_19553_7817415 | NC_021161.1    | Ca_kabuli_chr02 | 7817415                 | CC                              | TT              | 1946751910               |
| SNP_P4_19554_7817427 | NC_021161.1    | Ca_kabuli_chr02 | 7817427                 | CC                              | TT              | 1946751912               |
| SNP_P4_19555_7817429 | NC_021161.1    | Ca_kabuli_chr02 | 7817429                 | CC                              | TT              | 1946751914               |
| SNP_P4_19556_7817602 | NC_021161.1    | Ca_kabuli_chr02 | 7817602                 | GG                              | AA              | 1946751916               |

| SNPs IDs             | Chromosome IDs | Chromosomes     | Physical positions (bp) | CDC Frontier (Reference genome) | (ILWC46 & LPNB) | NCBI SNPdb Accession IDs |
|----------------------|----------------|-----------------|-------------------------|---------------------------------|-----------------|--------------------------|
| SNP_P4_19558_7818720 | NC_021161.1    | Ca_kabuli_chr02 | 7818720                 | AA                              | GG              | 1946751918               |
| SNP_P4_19559_7818722 | NC_021161.1    | Ca_kabuli_chr02 | 7818722                 | GG                              | AA              | 1946751920               |
| SNP_P4_19560_7818836 | NC_021161.1    | Ca_kabuli_chr02 | 7818836                 | CC                              | TT              | 1946751922               |
| SNP_P4_19561_7818956 | NC_021161.1    | Ca_kabuli_chr02 | 7818956                 | GG                              | AA              | 1946751924               |
| SNP_P4_19563_7820993 | NC_021161.1    | Ca_kabuli_chr02 | 7820993                 | CC                              | TT              | 1946751927               |
| SNP_P4_19564_7821008 | NC_021161.1    | Ca_kabuli_chr02 | 7821008                 | AA                              | GG              | 1946751929               |
| SNP_P4_19565_7821054 | NC_021161.1    | Ca_kabuli_chr02 | 7821054                 | AA                              | CC              | 1946751931               |
| SNP_P4_19566_7821058 | NC_021161.1    | Ca_kabuli_chr02 | 7821058                 | AA                              | TT              | 1946751933               |
| SNP_P4_19568_7821502 | NC_021161.1    | Ca_kabuli_chr02 | 7821502                 | TT                              | GG              | 1946751935               |
| SNP_P4_19569_7821800 | NC_021161.1    | Ca_kabuli_chr02 | 7821800                 | TT                              | CC              | 1946751937               |
| SNP_P4_19570_7822613 | NC_021161.1    | Ca_kabuli_chr02 | 7822613                 | GG                              | AA              | 1946751939               |
| SNP_P4_19571_7822701 | NC_021161.1    | Ca_kabuli_chr02 | 7822701                 | CC                              | TT              | 1946751941               |
| SNP_P4_19572_7822717 | NC_021161.1    | Ca_kabuli_chr02 | 7822717                 | TT                              | CC              | 1946751943               |
| SNP_P4_19573_7822862 | NC_021161.1    | Ca_kabuli_chr02 | 7822862                 | CC                              | AA              | 1946751945               |
| SNP_P4_19574_7824174 | NC_021161.1    | Ca_kabuli_chr02 | 7824174                 | AA                              | GG              | 1946751947               |
| SNP_P4_19575_7824190 | NC_021161.1    | Ca_kabuli_chr02 | 7824190                 | AA                              | TT              | 1946751949               |
| SNP_P4_19576_7824197 | NC_021161.1    | Ca_kabuli_chr02 | 7824197                 | AA                              | TT              | 1946751951               |
| SNP_P4_19577_7827878 | NC_021161.1    | Ca_kabuli_chr02 | 7827878                 | AA                              | TT              | 1946751953               |
| SNP_P4_19578_7827928 | NC_021161.1    | Ca_kabuli_chr02 | 7827928                 | AA                              | GG              | 1946751955               |
| SNP_P4_19579_7844013 | NC_021161.1    | Ca_kabuli_chr02 | 7844013                 | CC                              | TT              | 1946751957               |
| SNP_P4_19580_7854220 | NC_021161.1    | Ca_kabuli_chr02 | 7854220                 | GG                              | AA              | 1946751959               |
| SNP_P4_19581_7863068 | NC_021161.1    | Ca_kabuli_chr02 | 7863068                 | AA                              | TT              | 1946751961               |
| SNP_P4_19582_7864532 | NC_021161.1    | Ca_kabuli_chr02 | 7864532                 | GG                              | AA              | 1946751963               |
| SNP_P4_19583_7864535 | NC_021161.1    | Ca_kabuli_chr02 | 7864535                 | AA                              | TT              | 1946751965               |
| SNP_P4_19584_7878175 | NC_021161.1    | Ca_kabuli_chr02 | 7878175                 | GG                              | TT              | 1946751967               |
| SNP_P4_19586_7882580 | NC_021161.1    | Ca_kabuli_chr02 | 7882580                 | GG                              | AA              | 1946751969               |
| SNP_P4_19587_7882590 | NC_021161.1    | Ca_kabuli_chr02 | 7882590                 | GG                              | CC              | 1946751971               |
| SNP_P4_19588_7883282 | NC_021161.1    | Ca_kabuli_chr02 | 7883282                 | GG                              | CC              | 1946751973               |
| SNP_P4_19589_7884437 | NC_021161.1    | Ca_kabuli_chr02 | 7884437                 | GG                              | AA              | 1946751975               |
| SNP_P4_19590_7886270 | NC_021161.1    | Ca_kabuli_chr02 | 7886270                 | AA                              | CC              | 1946751977               |
| SNP_P4_19593_7887481 | NC_021161.1    | Ca_kabuli_chr02 | 7887481                 | GG                              | AA              | 1946751979               |
| SNP_P4_19594_7887487 | NC_021161.1    | Ca_kabuli_chr02 | 7887487                 | TT                              | CC              | 1946751981               |
| SNP_P4_19596_7887555 | NC_021161.1    | Ca_kabuli_chr02 | 7887555                 | TT                              | CC              | 1946751983               |
| SNP_P4_19597_7889352 | NC_021161.1    | Ca_kabuli_chr02 | 7889352                 | TT                              | AA              | 1946751985               |
| SNP_P4_19598_7889368 | NC_021161.1    | Ca_kabuli_chr02 | 7889368                 | AA                              | GG              | 1946751987               |
| SNP_P4_19599_7890109 | NC_021161.1    | Ca_kabuli_chr02 | 7890109                 | TT                              | CC              | 1946751989               |
| SNP_P4_19600_7890140 | NC_021161.1    | Ca_kabuli_chr02 | 7890140                 | CC                              | AA              | 1946751991               |
| SNP_P4_19602_7893277 | NC_021161.1    | Ca_kabuli_chr02 | 7893277                 | AA                              | GG              | 1946751993               |
| SNP_P4_19603_7893294 | NC_021161.1    | Ca_kabuli_chr02 | 7893294                 | GG                              | CC              | 1946751995               |
| SNP_P4_19607_7894513 | NC_021161.1    | Ca_kabuli_chr02 | 7894513                 | AA                              | GG              | 1946751997               |
| SNP_P4_19608_7894533 | NC_021161.1    | Ca_kabuli_chr02 | 7894533                 | CC                              | GG              | 1946751999               |
| SNP_P4_19609_7894609 | NC_021161.1    | Ca_kabuli_chr02 | 7894609                 | CC                              | AA              | 1946752001               |

| SNPs IDs             | Chromosome IDs | Chromosomes     | Physical positions (bp) | CDC Frontier (Reference genome) | (ILWC46 & LPNB) | NCBI SNPdb Accession IDs |
|----------------------|----------------|-----------------|-------------------------|---------------------------------|-----------------|--------------------------|
| SNP_P4_19611_7894657 | NC_021161.1    | Ca_kabuli_chr02 | 7894657                 | TT                              | CC              | 1946752003               |
| SNP_P4_19612_7894701 | NC_021161.1    | Ca_kabuli_chr02 | 7894701                 | AA                              | TT              | 1946752005               |
| SNP_P4_19614_7894831 | NC_021161.1    | Ca_kabuli_chr02 | 7894831                 | TT                              | CC              | 1946752007               |
| SNP_P4_19615_7894872 | NC_021161.1    | Ca_kabuli_chr02 | 7894872                 | CC                              | GG              | 1946752009               |
| SNP_P4_19616_7895258 | NC_021161.1    | Ca_kabuli_chr02 | 7895258                 | AA                              | TT              | 1946752011               |
| SNP_P4_19617_7895260 | NC_021161.1    | Ca_kabuli_chr02 | 7895260                 | AA                              | TT              | 1946752013               |
| SNP_P4_19618_7895282 | NC_021161.1    | Ca_kabuli_chr02 | 7895282                 | AA                              | TT              | 1946752015               |
| SNP_P4_19619_7895292 | NC_021161.1    | Ca_kabuli_chr02 | 7895292                 | TT                              | CC              | 1946752017               |
| SNP_P4_19620_7896412 | NC_021161.1    | Ca_kabuli_chr02 | 7896412                 | AA                              | GG              | 1946752019               |
| SNP_P4_19621_7896439 | NC_021161.1    | Ca_kabuli_chr02 | 7896439                 | TT                              | CC              | 1946752021               |
| SNP_P4_19622_7896489 | NC_021161.1    | Ca_kabuli_chr02 | 7896489                 | AA                              | GG              | 1946752023               |
| SNP_P4_19623_7896550 | NC_021161.1    | Ca_kabuli_chr02 | 7896550                 | CC                              | TT              | 1946752025               |
| SNP_P4_19624_7896608 | NC_021161.1    | Ca_kabuli_chr02 | 7896608                 | TT                              | GG              | 1946752027               |
| SNP_P4_19625_7896612 | NC_021161.1    | Ca_kabuli_chr02 | 7896612                 | CC                              | TT              | 1946752029               |
| SNP_P4_19626_7896642 | NC_021161.1    | Ca_kabuli_chr02 | 7896642                 | GG                              | AA              | 1946752032               |
| SNP_P4_19627_7896646 | NC_021161.1    | Ca_kabuli_chr02 | 7896646                 | TT                              | CC              | 1946752034               |
| SNP_P4_19630_7898527 | NC_021161.1    | Ca_kabuli_chr02 | 7898527                 | TT                              | CC              | 1946752036               |
| SNP_P4_19631_7898551 | NC_021161.1    | Ca_kabuli_chr02 | 7898551                 | TT                              | GG              | 1946752038               |
| SNP_P4_19632_7898676 | NC_021161.1    | Ca_kabuli_chr02 | 7898676                 | GG                              | AA              | 1946752040               |
| SNP_P4_19634_7898709 | NC_021161.1    | Ca_kabuli_chr02 | 7898709                 | AA                              | GG              | 1946752042               |
| SNP_P4_19635_7898717 | NC_021161.1    | Ca_kabuli_chr02 | 7898717                 | GG                              | AA              | 1946752043               |
| SNP_P4_19636_7898735 | NC_021161.1    | Ca_kabuli_chr02 | 7898735                 | GG                              | TT              | 1946752045               |
| SNP_P4_19637_7898744 | NC_021161.1    | Ca_kabuli_chr02 | 7898744                 | AA                              | TT              | 1946752047               |
| SNP_P4_19638_7898757 | NC_021161.1    | Ca_kabuli_chr02 | 7898757                 | CC                              | AA              | 1946752049               |
| SNP_P4_19639_7898798 | NC_021161.1    | Ca_kabuli_chr02 | 7898798                 | GG                              | AA              | 1946752051               |
| SNP_P4_19640_7898805 | NC_021161.1    | Ca_kabuli_chr02 | 7898805                 | AA                              | GG              | 1946752053               |
| SNP_P4_19641_7898860 | NC_021161.1    | Ca_kabuli_chr02 | 7898860                 | AA                              | GG              | 1946752055               |
| SNP_P4_19642_7898861 | NC_021161.1    | Ca_kabuli_chr02 | 7898861                 | CC                              | TT              | 1946752057               |
| SNP_P4_19643_7898893 | NC_021161.1    | Ca_kabuli_chr02 | 7898893                 | CC                              | TT              | 1946752059               |
| SNP_P4_19644_7898915 | NC_021161.1    | Ca_kabuli_chr02 | 7898915                 | AA                              | CC              | 1946752061               |
| SNP_P4_19645_7898923 | NC_021161.1    | Ca_kabuli_chr02 | 7898923                 | TT                              | CC              | 1946752063               |
| SNP_P4_19646_7898939 | NC_021161.1    | Ca_kabuli_chr02 | 7898939                 | TT                              | CC              | 1946752065               |
| SNP_P4_19647_7898982 | NC_021161.1    | Ca_kabuli_chr02 | 7898982                 | TT                              | CC              | 1946752067               |
| SNP_P4_19648_7898999 | NC_021161.1    | Ca_kabuli_chr02 | 7898999                 | CC                              | TT              | 1946752069               |
| SNP_P4_19649_7899016 | NC_021161.1    | Ca_kabuli_chr02 | 7899016                 | TT                              | GG              | 1946752071               |
| SNP_P4_19650_7899038 | NC_021161.1    | Ca_kabuli_chr02 | 7899038                 | GG                              | AA              | 1946752073               |
| SNP_P4_19652_7899131 | NC_021161.1    | Ca_kabuli_chr02 | 7899131                 | AA                              | TT              | 1946752075               |
| SNP_P4_19653_7899136 | NC_021161.1    | Ca_kabuli_chr02 | 7899136                 | GG                              | AA              | 1946752077               |
| SNP_P4_19654_7899232 | NC_021161.1    | Ca_kabuli_chr02 | 7899232                 | CC                              | AA              | 1946752079               |
| SNP_P4_19655_7899283 | NC_021161.1    | Ca_kabuli_chr02 | 7899283                 | CC                              | TT              | 1946752081               |
| SNP_P4_19657_7909230 | NC_021161.1    | Ca_kabuli_chr02 | 7909230                 | GG                              | TT              | 1946752083               |
| SNP_P4_19658_7909455 | NC_021161.1    | Ca_kabuli_chr02 | 7909455                 | TT                              | CC              | 1946752085               |

| SNPs IDs             | Chromosome IDs | Chromosomes     | Physical positions (bp) | CDC Frontier (Reference genome) | (ILWC46 & LPNB) | NCBI SNPdb Accession IDs |
|----------------------|----------------|-----------------|-------------------------|---------------------------------|-----------------|--------------------------|
| SNP_P4_19659_7913331 | NC_021161.1    | Ca_kabuli_chr02 | 7913331                 | TT                              | GG              | 1946752087               |
| SNP_P4_19660_7913332 | NC_021161.1    | Ca_kabuli_chr02 | 7913332                 | AA                              | TT              | 1946752089               |
| SNP_P4_19662_7915513 | NC_021161.1    | Ca_kabuli_chr02 | 7915513                 | CC                              | TT              | 1946752091               |
| SNP_P4_19663_7915549 | NC_021161.1    | Ca_kabuli_chr02 | 7915549                 | GG                              | AA              | 1946752093               |
| SNP_P4_19664_7915771 | NC_021161.1    | Ca_kabuli_chr02 | 7915771                 | AA                              | GG              | 1946752095               |
| SNP_P4_19665_7915781 | NC_021161.1    | Ca_kabuli_chr02 | 7915781                 | CC                              | TT              | 1946752097               |
| SNP_P4_19666_7915813 | NC_021161.1    | Ca_kabuli_chr02 | 7915813                 | AA                              | CC              | 1946752099               |
| SNP_P4_19667_7915827 | NC_021161.1    | Ca_kabuli_chr02 | 7915827                 | GG                              | AA              | 1946752101               |
| SNP_P4_19668_7918106 | NC_021161.1    | Ca_kabuli_chr02 | 7918106                 | AA                              | CC              | 1946752103               |
| SNP_P4_19669_7919265 | NC_021161.1    | Ca_kabuli_chr02 | 7919265                 | GG                              | TT              | 1946752105               |
| SNP_P4_19670_7919515 | NC_021161.1    | Ca_kabuli_chr02 | 7919515                 | CC                              | TT              | 1946752107               |
| SNP_P4_19671_7919605 | NC_021161.1    | Ca_kabuli_chr02 | 7919605                 | AA                              | TT              | 1946752109               |
| SNP_P4_19672_7919628 | NC_021161.1    | Ca_kabuli_chr02 | 7919628                 | TT                              | GG              | 1946752111               |
| SNP_P4_19673_7919630 | NC_021161.1    | Ca_kabuli_chr02 | 7919630                 | GG                              | AA              | 1946752113               |
| SNP_P4_19674_7920385 | NC_021161.1    | Ca_kabuli_chr02 | 7920385                 | GG                              | AA              | 1946752115               |
| SNP_P4_19675_7920397 | NC_021161.1    | Ca_kabuli_chr02 | 7920397                 | GG                              | AA              | 1946752117               |
| SNP_P4_19676_7920403 | NC_021161.1    | Ca_kabuli_chr02 | 7920403                 | TT                              | CC              | 1946752120               |
| SNP_P4_19677_7920656 | NC_021161.1    | Ca_kabuli_chr02 | 7920656                 | GG                              | AA              | 1946752122               |
| SNP_P4_19678_7920673 | NC_021161.1    | Ca_kabuli_chr02 | 7920673                 | AA                              | TT              | 1946752124               |
| SNP_P4_19679_7921905 | NC_021161.1    | Ca_kabuli_chr02 | 7921905                 | AA                              | CC              | 1946752126               |
| SNP_P4_19680_7922888 | NC_021161.1    | Ca_kabuli_chr02 | 7922888                 | GG                              | CC              | 1946752128               |
| SNP_P4_19681_7922932 | NC_021161.1    | Ca_kabuli_chr02 | 7922932                 | TT                              | GG              | 1946752130               |
| SNP_P4_19682_7922940 | NC_021161.1    | Ca_kabuli_chr02 | 7922940                 | AA                              | GG              | 1946752132               |
| SNP_P4_19683_7923116 | NC_021161.1    | Ca_kabuli_chr02 | 7923116                 | CC                              | GG              | 1946752134               |
| SNP_P4_19684_7923118 | NC_021161.1    | Ca_kabuli_chr02 | 7923118                 | AA                              | GG              | 1946752136               |
| SNP_P4_19685_7923232 | NC_021161.1    | Ca_kabuli_chr02 | 7923232                 | CC                              | TT              | 1946752138               |
| SNP_P4_19686_7923280 | NC_021161.1    | Ca_kabuli_chr02 | 7923280                 | TT                              | CC              | 1946752140               |
| SNP_P4_19687_7923401 | NC_021161.1    | Ca_kabuli_chr02 | 7923401                 | GG                              | AA              | 1946752142               |
| SNP_P4_19688_7923414 | NC_021161.1    | Ca_kabuli_chr02 | 7923414                 | AA                              | CC              | 1946752144               |
| SNP_P4_19689_7923642 | NC_021161.1    | Ca_kabuli_chr02 | 7923642                 | AA                              | CC              | 1946752146               |
| SNP_P4_19690_7923654 | NC_021161.1    | Ca_kabuli_chr02 | 7923654                 | CC                              | TT              | 1946752148               |
| SNP_P4_19691_7923731 | NC_021161.1    | Ca_kabuli_chr02 | 7923731                 | TT                              | CC              | 1946752150               |
| SNP_P4_19692_7923742 | NC_021161.1    | Ca_kabuli_chr02 | 7923742                 | TT                              | CC              | 1946752152               |
| SNP_P4_19693_7924022 | NC_021161.1    | Ca_kabuli_chr02 | 7924022                 | TT                              | CC              | 1946752154               |
| SNP_P4_19694_7924051 | NC_021161.1    | Ca_kabuli_chr02 | 7924051                 | GG                              | TT              | 1946752156               |
| SNP_P4_19695_7924114 | NC_021161.1    | Ca_kabuli_chr02 | 7924114                 | GG                              | AA              | 1946752158               |
| SNP_P4_19697_7926018 | NC_021161.1    | Ca_kabuli_chr02 | 7926018                 | CC                              | TT              | 1946752160               |
| SNP_P4_19698_7926366 | NC_021161.1    | Ca_kabuli_chr02 | 7926366                 | GG                              | AA              | 1946752162               |
| SNP_P4_19699_7926412 | NC_021161.1    | Ca_kabuli_chr02 | 7926412                 | AA                              | GG              | 1946752164               |
| SNP_P4_19701_7928229 | NC_021161.1    | Ca_kabuli_chr02 | 7928229                 | GG                              | AA              | 1946752166               |
| SNP_P4_19702_7929005 | NC_021161.1    | Ca_kabuli_chr02 | 7929005                 | CC                              | TT              | 1946752168               |
| SNP_P4_19703_7929010 | NC_021161.1    | Ca_kabuli_chr02 | 7929010                 | TT                              | CC              | 1946752170               |

| SNPs IDs             | Chromosome IDs | Chromosomes     | Physical positions (bp) | CDC Frontier (Reference genome) | (ILWC46 & LPNB) | NCBI SNPdb Accession IDs |
|----------------------|----------------|-----------------|-------------------------|---------------------------------|-----------------|--------------------------|
| SNP_P4_19707_7933653 | NC_021161.1    | Ca_kabuli_chr02 | 7933653                 | GG                              | AA              | 1946752172               |
| SNP_P4_19708_7935407 | NC_021161.1    | Ca_kabuli_chr02 | 7935407                 | GG                              | AA              | 1946752174               |
| SNP_P4_19711_7935629 | NC_021161.1    | Ca_kabuli_chr02 | 7935629                 | AA                              | GG              | 1946752176               |
| SNP_P4_19712_7935690 | NC_021161.1    | Ca_kabuli_chr02 | 7935690                 | GG                              | AA              | 1946752178               |
| SNP_P4_19713_7935901 | NC_021161.1    | Ca_kabuli_chr02 | 7935901                 | TT                              | CC              | 1946752180               |
| SNP_P4_19714_7935906 | NC_021161.1    | Ca_kabuli_chr02 | 7935906                 | CC                              | TT              | 1946752182               |
| SNP_P4_19715_7935920 | NC_021161.1    | Ca_kabuli_chr02 | 7935920                 | TT                              | CC              | 1946752184               |
| SNP_P4_19716_7935924 | NC_021161.1    | Ca_kabuli_chr02 | 7935924                 | GG                              | AA              | 1946752186               |
| SNP_P4_19717_7935945 | NC_021161.1    | Ca_kabuli_chr02 | 7935945                 | AA                              | CC              | 1946752188               |
| SNP_P4_19718_7936050 | NC_021161.1    | Ca_kabuli_chr02 | 7936050                 | CC                              | TT              | 1946752190               |
| SNP_P4_19719_7936052 | NC_021161.1    | Ca_kabuli_chr02 | 7936052                 | TT                              | CC              | 1946752192               |
| SNP_P4_19720_7936071 | NC_021161.1    | Ca_kabuli_chr02 | 7936071                 | GG                              | AA              | 1946752194               |
| SNP_P4_19721_7936089 | NC_021161.1    | Ca_kabuli_chr02 | 7936089                 | GG                              | AA              | 1946752196               |
| SNP_P4_19723_7936256 | NC_021161.1    | Ca_kabuli_chr02 | 7936256                 | GG                              | AA              | 1946752198               |
| SNP_P4_19724_7936286 | NC_021161.1    | Ca_kabuli_chr02 | 7936286                 | CC                              | GG              | 1946752200               |
| SNP_P4_19725_7936358 | NC_021161.1    | Ca_kabuli_chr02 | 7936358                 | TT                              | CC              | 1946752202               |
| SNP_P4_19726_7936360 | NC_021161.1    | Ca_kabuli_chr02 | 7936360                 | CC                              | TT              | 1946752204               |
| SNP_P4_19727_7936399 | NC_021161.1    | Ca_kabuli_chr02 | 7936399                 | CC                              | AA              | 1946752206               |
| SNP_P4_19728_7936402 | NC_021161.1    | Ca_kabuli_chr02 | 7936402                 | AA                              | GG              | 1946752208               |
| SNP_P4_19729_7936619 | NC_021161.1    | Ca_kabuli_chr02 | 7936619                 | TT                              | CC              | 1946752211               |
| SNP_P4_19730_7938065 | NC_021161.1    | Ca_kabuli_chr02 | 7938065                 | GG                              | AA              | 1946752213               |
| SNP_P4_19731_7938466 | NC_021161.1    | Ca_kabuli_chr02 | 7938466                 | GG                              | CC              | 1946752215               |
| SNP_P4_19738_7940162 | NC_021161.1    | Ca_kabuli_chr02 | 7940162                 | AA                              | GG              | 1946752217               |
| SNP_P4_19740_7940413 | NC_021161.1    | Ca_kabuli_chr02 | 7940413                 | AA                              | TT              | 1946752219               |
| SNP_P4_19741_7940448 | NC_021161.1    | Ca_kabuli_chr02 | 7940448                 | CC                              | TT              | 1946752221               |
| SNP_P4_19742_7940550 | NC_021161.1    | Ca_kabuli_chr02 | 7940550                 | GG                              | AA              | 1946752223               |
| SNP_P4_19743_7940648 | NC_021161.1    | Ca_kabuli_chr02 | 7940648                 | AA                              | TT              | 1946752225               |
| SNP_P4_19744_7940713 | NC_021161.1    | Ca_kabuli_chr02 | 7940713                 | GG                              | AA              | 1946752227               |
| SNP_P4_19745_7940716 | NC_021161.1    | Ca_kabuli_chr02 | 7940716                 | AA                              | CC              | 1946752229               |
| SNP_P4_19746_7940727 | NC_021161.1    | Ca_kabuli_chr02 | 7940727                 | AA                              | CC              | 1946752231               |
| SNP_P4_19747_7940733 | NC_021161.1    | Ca_kabuli_chr02 | 7940733                 | AA                              | CC              | 1946752233               |
| SNP_P4_19748_7940762 | NC_021161.1    | Ca_kabuli_chr02 | 7940762                 | GG                              | CC              | 1946752235               |
| SNP_P4_19749_7940772 | NC_021161.1    | Ca_kabuli_chr02 | 7940772                 | CC                              | TT              | 1946752237               |
| SNP_P4_19751_7949324 | NC_021161.1    | Ca_kabuli_chr02 | 7949324                 | GG                              | AA              | 1946752239               |
| SNP_P4_19753_7949765 | NC_021161.1    | Ca_kabuli_chr02 | 7949765                 | AA                              | GG              | 1946752241               |
| SNP_P4_19754_7956305 | NC_021161.1    | Ca_kabuli_chr02 | 7956305                 | AA                              | CC              | 1946752243               |
| SNP_P4_19755_7965248 | NC_021161.1    | Ca_kabuli_chr02 | 7965248                 | TT                              | AA              | 1946752245               |
| SNP_P4_19756_7966499 | NC_021161.1    | Ca_kabuli_chr02 | 7966499                 | CC                              | TT              | 1946752247               |
| SNP_P4_19758_8001448 | NC_021161.1    | Ca_kabuli_chr02 | 8001448                 | GG                              | AA              | 1946752249               |
| SNP_P4_19759_8005080 | NC_021161.1    | Ca_kabuli_chr02 | 8005080                 | TT                              | CC              | 1946752251               |
| SNP_P4_19760_8005170 | NC_021161.1    | Ca_kabuli_chr02 | 8005170                 | AA                              | GG              | 1946752253               |
| SNP_P4_19761_8005318 | NC_021161.1    | Ca_kabuli_chr02 | 8005318                 | CC                              | TT              | 1946752255               |

| SNPs IDs             | Chromosome IDs | Chromosomes     | Physical positions (bp) | CDC Frontier (Reference genome) | (ILWC46 & LPNB) | NCBI SNPdb Accession IDs |
|----------------------|----------------|-----------------|-------------------------|---------------------------------|-----------------|--------------------------|
| SNP_P4_19762_8005421 | NC_021161.1    | Ca_kabuli_chr02 | 8005421                 | CC                              | GG              | 1946752257               |
| SNP_P4_19763_8005445 | NC_021161.1    | Ca_kabuli_chr02 | 8005445                 | AA                              | TT              | 1946752259               |
| SNP_P4_19764_8005487 | NC_021161.1    | Ca_kabuli_chr02 | 8005487                 | GG                              | AA              | 1946752261               |
| SNP_P4_19765_8005500 | NC_021161.1    | Ca_kabuli_chr02 | 8005500                 | AA                              | GG              | 1946752263               |
| SNP_P4_19766_8005534 | NC_021161.1    | Ca_kabuli_chr02 | 8005534                 | GG                              | AA              | 1946752265               |
| SNP_P4_19767_8005544 | NC_021161.1    | Ca_kabuli_chr02 | 8005544                 | AA                              | GG              | 1946752267               |
| SNP_P4_19768_8005546 | NC_021161.1    | Ca_kabuli_chr02 | 8005546                 | CC                              | TT              | 1946752269               |
| SNP_P4_19769_8005614 | NC_021161.1    | Ca_kabuli_chr02 | 8005614                 | TT                              | AA              | 1946752271               |
| SNP_P4_19770_8005624 | NC_021161.1    | Ca_kabuli_chr02 | 8005624                 | TT                              | CC              | 1946752273               |
| SNP_P4_19771_8005637 | NC_021161.1    | Ca_kabuli_chr02 | 8005637                 | AA                              | CC              | 1946752275               |
| SNP_P4_19772_8005661 | NC_021161.1    | Ca_kabuli_chr02 | 8005661                 | AA                              | GG              | 1946752277               |
| SNP_P4_19773_8005704 | NC_021161.1    | Ca_kabuli_chr02 | 8005704                 | AA                              | CC              | 1946752279               |
| SNP_P4_19774_8005747 | NC_021161.1    | Ca_kabuli_chr02 | 8005747                 | AA                              | GG              | 1946752282               |
| SNP_P4_19775_8006030 | NC_021161.1    | Ca_kabuli_chr02 | 8006030                 | TT                              | CC              | 1946752284               |
| SNP_P4_19776_8006201 | NC_021161.1    | Ca_kabuli_chr02 | 8006201                 | AA                              | GG              | 1946752286               |
| SNP_P4_19777_8010680 | NC_021161.1    | Ca_kabuli_chr02 | 8010680                 | TT                              | AA              | 1946752288               |
| SNP_P4_19778_8027384 | NC_021161.1    | Ca_kabuli_chr02 | 8027384                 | GG                              | CC              | 1946752290               |
| SNP_P4_19780_8035888 | NC_021161.1    | Ca_kabuli_chr02 | 8035888                 | GG                              | TT              | 1946752292               |
| SNP_P4_19782_8051185 | NC_021161.1    | Ca_kabuli_chr02 | 8051185                 | CC                              | TT              | 1946752294               |
| SNP_P4_19784_8094409 | NC_021161.1    | Ca_kabuli_chr02 | 8094409                 | AA                              | GG              | 1946752296               |
| SNP_P4_19785_8102882 | NC_021161.1    | Ca_kabuli_chr02 | 8102882                 | GG                              | TT              | 1946752298               |
| SNP_P4_19787_8140714 | NC_021161.1    | Ca_kabuli_chr02 | 8140714                 | AA                              | TT              | 1946752300               |
| SNP_P4_19788_8147405 | NC_021161.1    | Ca_kabuli_chr02 | 8147405                 | AA                              | CC              | 1946752302               |
| SNP_P4_19789_8163129 | NC_021161.1    | Ca_kabuli_chr02 | 8163129                 | CC                              | AA              | 1946752304               |
| SNP_P4_19790_8163164 | NC_021161.1    | Ca_kabuli_chr02 | 8163164                 | TT                              | AA              | 1946752306               |
| SNP_P4_19791_8163210 | NC_021161.1    | Ca_kabuli_chr02 | 8163210                 | GG                              | AA              | 1946752308               |
| SNP_P4_19792_8163246 | NC_021161.1    | Ca_kabuli_chr02 | 8163246                 | CC                              | TT              | 1946752310               |
| SNP_P4_19793_8163280 | NC_021161.1    | Ca_kabuli_chr02 | 8163280                 | GG                              | AA              | 1946752312               |
| SNP_P4_19795_8180408 | NC_021161.1    | Ca_kabuli_chr02 | 8180408                 | CC                              | TT              | 1946752314               |
| SNP_P4_19796_8228432 | NC_021161.1    | Ca_kabuli_chr02 | 8228432                 | CC                              | TT              | 1946752316               |
| SNP_P4_19797_8228471 | NC_021161.1    | Ca_kabuli_chr02 | 8228471                 | AA                              | GG              | 1946752318               |
| SNP_P4_19798_8228505 | NC_021161.1    | Ca_kabuli_chr02 | 8228505                 | CC                              | TT              | 1946752320               |
| SNP_P4_19799_8228506 | NC_021161.1    | Ca_kabuli_chr02 | 8228506                 | TT                              | GG              | 1946752322               |
| SNP_P4_19800_8269876 | NC_021161.1    | Ca_kabuli_chr02 | 8269876                 | TT                              | GG              | 1946752324               |
| SNP_P4_19801_8269877 | NC_021161.1    | Ca_kabuli_chr02 | 8269877                 | TT                              | GG              | 1946752326               |
| SNP_P4_19805_8365453 | NC_021161.1    | Ca_kabuli_chr02 | 8365453                 | AA                              | TT              | 1946752328               |
| SNP_P4_19806_8365454 | NC_021161.1    | Ca_kabuli_chr02 | 8365454                 | AA                              | TT              | 1946752330               |
| SNP_P4_19808_8419785 | NC_021161.1    | Ca_kabuli_chr02 | 8419785                 | TT                              | AA              | 1946752332               |
| SNP_P4_19810_8420178 | NC_021161.1    | Ca_kabuli_chr02 | 8420178                 | AA                              | CC              | 1946752334               |
| SNP_P4_19812_8420352 | NC_021161.1    | Ca_kabuli_chr02 | 8420352                 | CC                              | TT              | 1946752336               |
| SNP_P4_19813_8420560 | NC_021161.1    | Ca_kabuli_chr02 | 8420560                 | AA                              | CC              | 1946752338               |
| SNP_P4_19814_8420595 | NC_021161.1    | Ca_kabuli_chr02 | 8420595                 | CC                              | TT              | 1946752340               |

| SNPs IDs             | Chromosome IDs | Chromosomes     | Physical positions (bp) | CDC Frontier (Reference genome) | (ILWC46 & LPNB) | NCBI SNPdb Accession IDs |
|----------------------|----------------|-----------------|-------------------------|---------------------------------|-----------------|--------------------------|
| SNP_P4_19815_8420671 | NC_021161.1    | Ca_kabuli_chr02 | 8420671                 | TT                              | AA              | 1946752342               |
| SNP_P4_19816_8420678 | NC_021161.1    | Ca_kabuli_chr02 | 8420678                 | GG                              | AA              | 1946752344               |
| SNP_P4_19817_8423651 | NC_021161.1    | Ca_kabuli_chr02 | 8423651                 | AA                              | GG              | 1946752346               |
| SNP_P4_19818_8425858 | NC_021161.1    | Ca_kabuli_chr02 | 8425858                 | AA                              | TT              | 1946752348               |
| SNP_P4_19819_8425870 | NC_021161.1    | Ca_kabuli_chr02 | 8425870                 | TT                              | AA              | 1946752350               |
| SNP_P4_19820_8425871 | NC_021161.1    | Ca_kabuli_chr02 | 8425871                 | TT                              | CC              | 1946752351               |
| SNP_P4_19821_8428789 | NC_021161.1    | Ca_kabuli_chr02 | 8428789                 | AA                              | TT              | 1946752353               |
| SNP_P4_19822_8428868 | NC_021161.1    | Ca_kabuli_chr02 | 8428868                 | TT                              | CC              | 1946752355               |
| SNP_P4_19823_8429873 | NC_021161.1    | Ca_kabuli_chr02 | 8429873                 | TT                              | AA              | 1946752357               |
| SNP_P4_19824_8433706 | NC_021161.1    | Ca_kabuli_chr02 | 8433706                 | GG                              | CC              | 1946752359               |
| SNP_P4_19825_8434653 | NC_021161.1    | Ca_kabuli_chr02 | 8434653                 | AA                              | TT              | 1946752361               |
| SNP_P4_19826_8478740 | NC_021161.1    | Ca_kabuli_chr02 | 8478740                 | AA                              | CC              | 1946752363               |
| SNP_P4_19827_8478767 | NC_021161.1    | Ca_kabuli_chr02 | 8478767                 | GG                              | TT              | 1946752365               |
| SNP_P4_19829_8478860 | NC_021161.1    | Ca_kabuli_chr02 | 8478860                 | GG                              | CC              | 1946752367               |
| SNP_P4_19830_8478862 | NC_021161.1    | Ca_kabuli_chr02 | 8478862                 | GG                              | TT              | 1946752369               |
| SNP_P4_19832_8478939 | NC_021161.1    | Ca_kabuli_chr02 | 8478939                 | CC                              | AA              | 1946752371               |
| SNP_P4_19833_8479011 | NC_021161.1    | Ca_kabuli_chr02 | 8479011                 | GG                              | AA              | 1946752373               |
| SNP_P4_19834_8479012 | NC_021161.1    | Ca_kabuli_chr02 | 8479012                 | TT                              | AA              | 1946752375               |
| SNP_P4_19835_8479013 | NC_021161.1    | Ca_kabuli_chr02 | 8479013                 | GG                              | AA              | 1946752377               |
| SNP_P4_19836_8479119 | NC_021161.1    | Ca_kabuli_chr02 | 8479119                 | TT                              | AA              | 1946752379               |
| SNP_P4_19837_8479141 | NC_021161.1    | Ca_kabuli_chr02 | 8479141                 | TT                              | AA              | 1946752381               |
| SNP_P4_19838_8479455 | NC_021161.1    | Ca_kabuli_chr02 | 8479455                 | CC                              | TT              | 1946752383               |
| SNP_P4_19839_8479579 | NC_021161.1    | Ca_kabuli_chr02 | 8479579                 | CC                              | TT              | 1946752385               |
| SNP_P4_19840_8479616 | NC_021161.1    | Ca_kabuli_chr02 | 8479616                 | GG                              | AA              | 1946752387               |
| SNP_P4_19841_8479622 | NC_021161.1    | Ca_kabuli_chr02 | 8479622                 | GG                              | CC              | 1946752389               |
| SNP_P4_19842_8479643 | NC_021161.1    | Ca_kabuli_chr02 | 8479643                 | AA                              | GG              | 1946752391               |
| SNP_P4_19843_8479662 | NC_021161.1    | Ca_kabuli_chr02 | 8479662                 | GG                              | AA              | 1946752393               |
| SNP_P4_19844_8479675 | NC_021161.1    | Ca_kabuli_chr02 | 8479675                 | GG                              | AA              | 1946752394               |
| SNP_P4_19845_8479746 | NC_021161.1    | Ca_kabuli_chr02 | 8479746                 | AA                              | GG              | 1946752397               |
| SNP_P4_19846_8479768 | NC_021161.1    | Ca_kabuli_chr02 | 8479768                 | GG                              | AA              | 1946752399               |
| SNP_P4_19847_8479795 | NC_021161.1    | Ca_kabuli_chr02 | 8479795                 | AA                              | GG              | 1946752401               |
| SNP_P4_19848_8479829 | NC_021161.1    | Ca_kabuli_chr02 | 8479829                 | TT                              | CC              | 1946752403               |
| SNP_P4_19849_8479895 | NC_021161.1    | Ca_kabuli_chr02 | 8479895                 | AA                              | TT              | 1946752405               |
| SNP_P4_19850_8480020 | NC_021161.1    | Ca_kabuli_chr02 | 8480020                 | GG                              | CC              | 1946752407               |
| SNP_P4_19851_8510311 | NC_021161.1    | Ca_kabuli_chr02 | 8510311                 | AA                              | GG              | 1946752408               |
| SNP_P4_19852_8527240 | NC_021161.1    | Ca_kabuli_chr02 | 8527240                 | TT                              | CC              | 1946752410               |
| SNP_P4_19853_8527241 | NC_021161.1    | Ca_kabuli_chr02 | 8527241                 | TT                              | AA              | 1946752412               |
| SNP_P4_19855_8542285 | NC_021161.1    | Ca_kabuli_chr02 | 8542285                 | TT                              | CC              | 1946752414               |
| SNP_P4_19856_8586851 | NC_021161.1    | Ca_kabuli_chr02 | 8586851                 | AA                              | TT              | 1946752416               |
| SNP_P4_19857_8592951 | NC_021161.1    | Ca_kabuli_chr02 | 8592951                 | AA                              | TT              | 1946752418               |
| SNP_P4_19859_8597127 | NC_021161.1    | Ca_kabuli_chr02 | 8597127                 | AA                              | CC              | 1946752420               |
| SNP_P4_19860_8609851 | NC_021161.1    | Ca_kabuli_chr02 | 8609851                 | GG                              | AA              | 1946752422               |



| SNPs IDs             | Chromosome IDs | Chromosomes     | Physical positions (bp) | CDC Frontier (Reference genome) | (ILWC46 & LPNB) | NCBI SNPdb Accession IDs |
|----------------------|----------------|-----------------|-------------------------|---------------------------------|-----------------|--------------------------|
| SNP_P4_19861_8636138 | NC_021161.1    | Ca_kabuli_chr02 | 8636138                 | GG                              | AA              | 1946752424               |
| SNP_P4_19862_8647676 | NC_021161.1    | Ca_kabuli_chr02 | 8647676                 | AA                              | GG              | 1946752426               |
| SNP_P4_19863_8661863 | NC_021161.1    | Ca_kabuli_chr02 | 8661863                 | TT                              | GG              | 1946752428               |
| SNP_P4_19864_8664225 | NC_021161.1    | Ca_kabuli_chr02 | 8664225                 | TT                              | GG              | 1946752430               |
| SNP_P4_19865_8668130 | NC_021161.1    | Ca_kabuli_chr02 | 8668130                 | AA                              | CC              | 1946752432               |
| SNP_P4_19866_8668131 | NC_021161.1    | Ca_kabuli_chr02 | 8668131                 | AA                              | GG              | 1946752435               |
| SNP_P4_19869_8716399 | NC_021161.1    | Ca_kabuli_chr02 | 8716399                 | TT                              | CC              | 1946752437               |
| SNP_P4_19870_8724174 | NC_021161.1    | Ca_kabuli_chr02 | 8724174                 | AA                              | GG              | 1946752439               |
| SNP_P4_19871_8741174 | NC_021161.1    | Ca_kabuli_chr02 | 8741174                 | GG                              | AA              | 1946752441               |
| SNP_P4_19872_8751514 | NC_021161.1    | Ca_kabuli_chr02 | 8751514                 | GG                              | AA              | 1946752443               |
| SNP_P4_19873_8808469 | NC_021161.1    | Ca_kabuli_chr02 | 8808469                 | TT                              | AA              | 1946752445               |
| SNP_P4_19874_8814213 | NC_021161.1    | Ca_kabuli_chr02 | 8814213                 | GG                              | AA              | 1946752447               |
| SNP_P4_19876_8821600 | NC_021161.1    | Ca_kabuli_chr02 | 8821600                 | AA                              | CC              | 1946752449               |
| SNP_P4_19877_8821604 | NC_021161.1    | Ca_kabuli_chr02 | 8821604                 | TT                              | GG              | 1946752451               |
| SNP_P4_19878_8837235 | NC_021161.1    | Ca_kabuli_chr02 | 8837235                 | TT                              | AA              | 1946752453               |
| SNP_P4_19879_8837754 | NC_021161.1    | Ca_kabuli_chr02 | 8837754                 | TT                              | CC              | 1946752455               |
| SNP_P4_19880_8843031 | NC_021161.1    | Ca_kabuli_chr02 | 8843031                 | CC                              | GG              | 1946752457               |
| SNP_P4_19882_9256869 | NC_021161.1    | Ca_kabuli_chr02 | 9256869                 | CC                              | TT              | 1946752459               |
| SNP_P4_19883_9267740 | NC_021161.1    | Ca_kabuli_chr02 | 9267740                 | AA                              | CC              | 1946752461               |
| SNP_P4_19884_9271927 | NC_021161.1    | Ca_kabuli_chr02 | 9271927                 | GG                              | AA              | 1946752463               |
| SNP_P4_19885_9271992 | NC_021161.1    | Ca_kabuli_chr02 | 9271992                 | TT                              | CC              | 1946752465               |
| SNP_P4_19886_9272879 | NC_021161.1    | Ca_kabuli_chr02 | 9272879                 | CC                              | GG              | 1946752467               |
| SNP_P4_19888_9289991 | NC_021161.1    | Ca_kabuli_chr02 | 9289991                 | CC                              | GG              | 1946752470               |
| SNP_P4_19889_9300452 | NC_021161.1    | Ca_kabuli_chr02 | 9300452                 | CC                              | TT              | 1946752472               |
| SNP_P4_19890_9311830 | NC_021161.1    | Ca_kabuli_chr02 | 9311830                 | CC                              | TT              | 1946752474               |
| SNP_P4_19891_9311834 | NC_021161.1    | Ca_kabuli_chr02 | 9311834                 | AA                              | GG              | 1946752476               |
| SNP_P4_19892_9311854 | NC_021161.1    | Ca_kabuli_chr02 | 9311854                 | CC                              | GG              | 1946752478               |
| SNP_P4_19893_9360423 | NC_021161.1    | Ca_kabuli_chr02 | 9360423                 | TT                              | GG              | 1946752480               |
| SNP_P4_19894_9373902 | NC_021161.1    | Ca_kabuli_chr02 | 9373902                 | AA                              | TT              | 1946752482               |
| SNP_P4_19895_9378629 | NC_021161.1    | Ca_kabuli_chr02 | 9378629                 | AA                              | CC              | 1946752484               |
| SNP_P4_19896_9389837 | NC_021161.1    | Ca_kabuli_chr02 | 9389837                 | TT                              | AA              | 1946752485               |
| SNP_P4_19897_9408293 | NC_021161.1    | Ca_kabuli_chr02 | 9408293                 | TT                              | CC              | 1946752487               |
| SNP_P4_19898_9408295 | NC_021161.1    | Ca_kabuli_chr02 | 9408295                 | CC                              | AA              | 1946752489               |
| SNP_P4_19899_9408298 | NC_021161.1    | Ca_kabuli_chr02 | 9408298                 | TT                              | CC              | 1946752491               |
| SNP_P4_19902_9441999 | NC_021161.1    | Ca_kabuli_chr02 | 9441999                 | CC                              | TT              | 1946752493               |
| SNP_P4_19903_9468319 | NC_021161.1    | Ca_kabuli_chr02 | 9468319                 | AA                              | GG              | 1946752495               |
| SNP_P4_19904_9468628 | NC_021161.1    | Ca_kabuli_chr02 | 9468628                 | AA                              | GG              | 1946752497               |
| SNP_P4_19905_9468632 | NC_021161.1    | Ca_kabuli_chr02 | 9468632                 | CC                              | TT              | 1946752499               |
| SNP_P4_19906_9468652 | NC_021161.1    | Ca_kabuli_chr02 | 9468652                 | TT                              | GG              | 1946752501               |
| SNP_P4_19907_9468760 | NC_021161.1    | Ca_kabuli_chr02 | 9468760                 | TT                              | CC              | 1946752503               |
| SNP_P4_19909_9494001 | NC_021161.1    | Ca_kabuli_chr02 | 9494001                 | CC                              | TT              | 1946752505               |
| SNP_P4_19911_9494121 | NC_021161.1    | Ca_kabuli_chr02 | 9494121                 | AA                              | GG              | 1946752507               |

| SNPs IDs             | Chromosome IDs | Chromosomes     | Physical positions (bp) | CDC Frontier (Reference genome) | (ILWC46 & LPNB) | NCBI SNPdb Accession IDs |
|----------------------|----------------|-----------------|-------------------------|---------------------------------|-----------------|--------------------------|
| SNP_P4_19912_9494137 | NC_021161.1    | Ca_kabuli_chr02 | 9494137                 | TT                              | GG              | 1946752509               |
| SNP_P4_19914_9494315 | NC_021161.1    | Ca_kabuli_chr02 | 9494315                 | CC                              | GG              | 1946752511               |
| SNP_P4_19915_9494327 | NC_021161.1    | Ca_kabuli_chr02 | 9494327                 | CC                              | GG              | 1946752513               |
| SNP_P4_19916_9494348 | NC_021161.1    | Ca_kabuli_chr02 | 9494348                 | AA                              | CC              | 1946752515               |
| SNP_P4_19917_9494377 | NC_021161.1    | Ca_kabuli_chr02 | 9494377                 | TT                              | CC              | 1946752517               |
| SNP_P4_19918_9494394 | NC_021161.1    | Ca_kabuli_chr02 | 9494394                 | TT                              | AA              | 1946752519               |
| SNP_P4_19919_9494399 | NC_021161.1    | Ca_kabuli_chr02 | 9494399                 | CC                              | GG              | 1946752521               |
| SNP_P4_19920_9494402 | NC_021161.1    | Ca_kabuli_chr02 | 9494402                 | CC                              | AA              | 1946752523               |
| SNP_P4_19921_9494473 | NC_021161.1    | Ca_kabuli_chr02 | 9494473                 | CC                              | TT              | 1946752525               |
| SNP_P4_19922_9494484 | NC_021161.1    | Ca_kabuli_chr02 | 9494484                 | CC                              | GG              | 1946752527               |
| SNP_P4_19923_9498263 | NC_021161.1    | Ca_kabuli_chr02 | 9498263                 | AA                              | GG              | 1946752529               |
| SNP_P4_19924_9498604 | NC_021161.1    | Ca_kabuli_chr02 | 9498604                 | AA                              | GG              | 1946752531               |
| SNP_P4_19925_9498620 | NC_021161.1    | Ca_kabuli_chr02 | 9498620                 | TT                              | CC              | 1946752533               |
| SNP_P4_19926_9498863 | NC_021161.1    | Ca_kabuli_chr02 | 9498863                 | TT                              | AA              | 1946752535               |
| SNP_P4_19927_9498915 | NC_021161.1    | Ca_kabuli_chr02 | 9498915                 | TT                              | CC              | 1946752536               |
| SNP_P4_19928_9498966 | NC_021161.1    | Ca_kabuli_chr02 | 9498966                 | AA                              | GG              | 1946752538               |
| SNP_P4_19929_9499244 | NC_021161.1    | Ca_kabuli_chr02 | 9499244                 | AA                              | GG              | 1946752540               |
| SNP_P4_19930_9499509 | NC_021161.1    | Ca_kabuli_chr02 | 9499509                 | CC                              | TT              | 1946752542               |
| SNP_P4_19932_9500251 | NC_021161.1    | Ca_kabuli_chr02 | 9500251                 | TT                              | CC              | 1946752544               |
| SNP_P4_19934_9609320 | NC_021161.1    | Ca_kabuli_chr02 | 9609320                 | TT                              | CC              | 1946752546               |
| SNP_P4_19935_9612949 | NC_021161.1    | Ca_kabuli_chr02 | 9612949                 | GG                              | AA              | 1946752548               |
| SNP_P4_19936_9612958 | NC_021161.1    | Ca_kabuli_chr02 | 9612958                 | AA                              | CC              | 1946752550               |
| SNP_P4_19937_9612976 | NC_021161.1    | Ca_kabuli_chr02 | 9612976                 | TT                              | CC              | 1946752552               |
| SNP_P4_19938_9613181 | NC_021161.1    | Ca_kabuli_chr02 | 9613181                 | AA                              | GG              | 1946752553               |
| SNP_P4_19939_9613206 | NC_021161.1    | Ca_kabuli_chr02 | 9613206                 | AA                              | GG              | 1946752555               |
| SNP_P4_19940_9613228 | NC_021161.1    | Ca_kabuli_chr02 | 9613228                 | TT                              | CC              | 1946752557               |
| SNP_P4_19941_9613235 | NC_021161.1    | Ca_kabuli_chr02 | 9613235                 | AA                              | GG              | 1946752559               |
| SNP_P4_19942_9613259 | NC_021161.1    | Ca_kabuli_chr02 | 9613259                 | TT                              | CC              | 1946752561               |
| SNP_P4_19943_9613266 | NC_021161.1    | Ca_kabuli_chr02 | 9613266                 | CC                              | TT              | 1946752563               |
| SNP_P4_19944_9613343 | NC_021161.1    | Ca_kabuli_chr02 | 9613343                 | AA                              | GG              | 1946752565               |
| SNP_P4_19945_9613360 | NC_021161.1    | Ca_kabuli_chr02 | 9613360                 | TT                              | CC              | 1946752567               |
| SNP_P4_19946_9613366 | NC_021161.1    | Ca_kabuli_chr02 | 9613366                 | GG                              | AA              | 1946752569               |
| SNP_P4_19947_9613372 | NC_021161.1    | Ca_kabuli_chr02 | 9613372                 | AA                              | GG              | 1946752571               |
| SNP_P4_19948_9613375 | NC_021161.1    | Ca_kabuli_chr02 | 9613375                 | CC                              | TT              | 1946752573               |
| SNP_P4_19949_9613376 | NC_021161.1    | Ca_kabuli_chr02 | 9613376                 | TT                              | CC              | 1946752575               |
| SNP_P4_19950_9614571 | NC_021161.1    | Ca_kabuli_chr02 | 9614571                 | TT                              | CC              | 1946752577               |
| SNP_P4_19951_9647537 | NC_021161.1    | Ca_kabuli_chr02 | 9647537                 | TT                              | CC              | 1946752579               |
| SNP_P4_19952_9647553 | NC_021161.1    | Ca_kabuli_chr02 | 9647553                 | TT                              | AA              | 1946752581               |
| SNP_P4_19953_9647554 | NC_021161.1    | Ca_kabuli_chr02 | 9647554                 | CC                              | AA              | 1946752583               |
| SNP_P4_19954_9647556 | NC_021161.1    | Ca_kabuli_chr02 | 9647556                 | GG                              | AA              | 1946752585               |
| SNP_P4_19955_9647583 | NC_021161.1    | Ca_kabuli_chr02 | 9647583                 | AA                              | TT              | 1946752587               |
| SNP_P4_19956_9647585 | NC_021161.1    | Ca_kabuli_chr02 | 9647585                 | TT                              | AA              | 1946752589               |

| SNPs IDs             | Chromosome IDs | Chromosomes     | Physical positions (bp) | CDC Frontier (Reference genome) | (ILWC46 & LPNB) | NCBI SNPdb Accession IDs |
|----------------------|----------------|-----------------|-------------------------|---------------------------------|-----------------|--------------------------|
| SNP_P4_19957_9647944 | NC_021161.1    | Ca_kabuli_chr02 | 9647944                 | TT                              | GG              | 1946752591               |
| SNP_P4_19958_9647955 | NC_021161.1    | Ca_kabuli_chr02 | 9647955                 | GG                              | AA              | 1946752593               |
| SNP_P4_19959_9652756 | NC_021161.1    | Ca_kabuli_chr02 | 9652756                 | TT                              | AA              | 1946752595               |
| SNP_P4_19960_9661465 | NC_021161.1    | Ca_kabuli_chr02 | 9661465                 | CC                              | AA              | 1946752597               |
| SNP_P4_19961_9664171 | NC_021161.1    | Ca_kabuli_chr02 | 9664171                 | TT                              | CC              | 1946752599               |
| SNP_P4_19962_9689649 | NC_021161.1    | Ca_kabuli_chr02 | 9689649                 | TT                              | CC              | 1946752601               |
| SNP_P4_19964_9690579 | NC_021161.1    | Ca_kabuli_chr02 | 9690579                 | CC                              | TT              | 1946752603               |
| SNP_P4_19965_9693977 | NC_021161.1    | Ca_kabuli_chr02 | 9693977                 | GG                              | AA              | 1946752605               |
| SNP_P4_19966_9694205 | NC_021161.1    | Ca_kabuli_chr02 | 9694205                 | AA                              | GG              | 1946752607               |
| SNP_P4_19969_9722427 | NC_021161.1    | Ca_kabuli_chr02 | 9722427                 | CC                              | TT              | 1946752609               |
| SNP_P4_19970_9737338 | NC_021161.1    | Ca_kabuli_chr02 | 9737338                 | TT                              | CC              | 1946752611               |
| SNP_P4_19971_9737339 | NC_021161.1    | Ca_kabuli_chr02 | 9737339                 | GG                              | TT              | 1946752613               |
| SNP_P4_19972_9737397 | NC_021161.1    | Ca_kabuli_chr02 | 9737397                 | GG                              | TT              | 1946752615               |
| SNP_P4_19973_9776561 | NC_021161.1    | Ca_kabuli_chr02 | 9776561                 | GG                              | CC              | 1946752617               |
| SNP_P4_19974_9776583 | NC_021161.1    | Ca_kabuli_chr02 | 9776583                 | TT                              | CC              | 1946752619               |
| SNP_P4_19975_9776726 | NC_021161.1    | Ca_kabuli_chr02 | 9776726                 | GG                              | TT              | 1946752621               |
| SNP_P4_19976_9776782 | NC_021161.1    | Ca_kabuli_chr02 | 9776782                 | GG                              | AA              | 1946752623               |
| SNP_P4_19977_9776835 | NC_021161.1    | Ca_kabuli_chr02 | 9776835                 | CC                              | GG              | 1946752625               |
| SNP_P4_19978_9777094 | NC_021161.1    | Ca_kabuli_chr02 | 9777094                 | TT                              | CC              | 1946752627               |
| SNP_P4_19979_9779474 | NC_021161.1    | Ca_kabuli_chr02 | 9779474                 | TT                              | CC              | 1946752629               |
| SNP_P4_19980_9782075 | NC_021161.1    | Ca_kabuli_chr02 | 9782075                 | TT                              | GG              | 1946752631               |
| SNP_P4_19981_9782308 | NC_021161.1    | Ca_kabuli_chr02 | 9782308                 | CC                              | TT              | 1946752633               |
| SNP_P4_19982_9782636 | NC_021161.1    | Ca_kabuli_chr02 | 9782636                 | GG                              | TT              | 1946752635               |
| SNP_P4_19983_9782825 | NC_021161.1    | Ca_kabuli_chr02 | 9782825                 | AA                              | GG              | 1946752637               |
| SNP_P4_19984_9788292 | NC_021161.1    | Ca_kabuli_chr02 | 9788292                 | GG                              | TT              | 1946752639               |
| SNP_P4_19985_9788332 | NC_021161.1    | Ca_kabuli_chr02 | 9788332                 | CC                              | TT              | 1946752641               |
| SNP_P4_19986_9788638 | NC_021161.1    | Ca_kabuli_chr02 | 9788638                 | GG                              | AA              | 1946752643               |
| SNP_P4_19987_9788662 | NC_021161.1    | Ca_kabuli_chr02 | 9788662                 | TT                              | CC              | 1946752645               |
| SNP_P4_19988_9800497 | NC_021161.1    | Ca_kabuli_chr02 | 9800497                 | TT                              | AA              | 1946752647               |
| SNP_P4_19989_9803114 | NC_021161.1    | Ca_kabuli_chr02 | 9803114                 | GG                              | AA              | 1946752649               |
| SNP_P4_19990_9809099 | NC_021161.1    | Ca_kabuli_chr02 | 9809099                 | GG                              | CC              | 1946752651               |
| SNP_P4_19991_9843673 | NC_021161.1    | Ca_kabuli_chr02 | 9843673                 | AA                              | CC              | 1946752653               |
| SNP_P4_19992_9868203 | NC_021161.1    | Ca_kabuli_chr02 | 9868203                 | CC                              | TT              | 1946752655               |
| SNP_P4_19994_9881706 | NC_021161.1    | Ca_kabuli_chr02 | 9881706                 | TT                              | CC              | 1946752657               |
| SNP_P4_19995_9885533 | NC_021161.1    | Ca_kabuli_chr02 | 9885533                 | CC                              | TT              | 1946752659               |
| SNP_P4_19996_9885545 | NC_021161.1    | Ca_kabuli_chr02 | 9885545                 | AA                              | GG              | 1946752661               |
| SNP_P4_19997_9896610 | NC_021161.1    | Ca_kabuli_chr02 | 9896610                 | GG                              | TT              | 1946752663               |
| SNP_P4_19998_9898941 | NC_021161.1    | Ca_kabuli_chr02 | 9898941                 | TT                              | GG              | 1946752665               |
| SNP_P4_20001_9929836 | NC_021161.1    | Ca_kabuli_chr02 | 9929836                 | AA                              | CC              | 1946752667               |
| SNP_P4_20002_9929872 | NC_021161.1    | Ca_kabuli_chr02 | 9929872                 | TT                              | CC              | 1946752669               |
| SNP_P4_20003_9929873 | NC_021161.1    | Ca_kabuli_chr02 | 9929873                 | AA                              | GG              | 1946752671               |
| SNP_P4_20004_9929897 | NC_021161.1    | Ca_kabuli_chr02 | 9929897                 | TT                              | GG              | 1946752673               |

| SNPs IDs              | Chromosome IDs | Chromosomes     | Physical positions (bp) | CDC Frontier (Reference genome) | (ILWC46 & LPNB) | NCBI SNPdb Accession IDs |
|-----------------------|----------------|-----------------|-------------------------|---------------------------------|-----------------|--------------------------|
| SNP_P4_20005_9929920  | NC_021161.1    | Ca_kabuli_chr02 | 9929920                 | TT                              | CC              | 1946752675               |
| SNP_P4_20006_9935313  | NC_021161.1    | Ca_kabuli_chr02 | 9935313                 | AA                              | GG              | 1946752677               |
| SNP_P4_20007_9970182  | NC_021161.1    | Ca_kabuli_chr02 | 9970182                 | AA                              | TT              | 1946752679               |
| SNP_P4_20008_9974505  | NC_021161.1    | Ca_kabuli_chr02 | 9974505                 | GG                              | AA              | 1946752681               |
| SNP_P4_20009_9983656  | NC_021161.1    | Ca_kabuli_chr02 | 9983656                 | TT                              | CC              | 1946752683               |
| SNP_P4_20011_9997988  | NC_021161.1    | Ca_kabuli_chr02 | 9997988                 | AA                              | GG              | 1946752685               |
| SNP_P4_20012_9999943  | NC_021161.1    | Ca_kabuli_chr02 | 9999943                 | AA                              | GG              | 1946752687               |
| SNP_P4_20013_10011550 | NC_021161.1    | Ca_kabuli_chr02 | 10011550                | AA                              | GG              | 1946752689               |
| SNP_P4_20014_10013817 | NC_021161.1    | Ca_kabuli_chr02 | 10013817                | TT                              | CC              | 1946752691               |
| SNP_P4_20017_10082410 | NC_021161.1    | Ca_kabuli_chr02 | 10082410                | GG                              | TT              | 1946752693               |
| SNP_P4_20018_10083364 | NC_021161.1    | Ca_kabuli_chr02 | 10083364                | TT                              | AA              | 1946752695               |
| SNP_P4_20020_10104782 | NC_021161.1    | Ca_kabuli_chr02 | 10104782                | AA                              | GG              | 1946752697               |
| SNP_P4_20021_10105091 | NC_021161.1    | Ca_kabuli_chr02 | 10105091                | TT                              | AA              | 1946752699               |
| SNP_P4_20022_10105331 | NC_021161.1    | Ca_kabuli_chr02 | 10105331                | TT                              | AA              | 1946752701               |
| SNP_P4_20023_10112872 | NC_021161.1    | Ca_kabuli_chr02 | 10112872                | TT                              | CC              | 1946752703               |
| SNP_P4_20024_10113157 | NC_021161.1    | Ca_kabuli_chr02 | 10113157                | GG                              | AA              | 1946752705               |
| SNP_P4_20025_10113169 | NC_021161.1    | Ca_kabuli_chr02 | 10113169                | GG                              | AA              | 1946752707               |
| SNP_P4_20026_10116758 | NC_021161.1    | Ca_kabuli_chr02 | 10116758                | AA                              | TT              | 1946752709               |
| SNP_P4_20028_10121964 | NC_021161.1    | Ca_kabuli_chr02 | 10121964                | TT                              | AA              | 1946752711               |
| SNP_P4_20029_10126555 | NC_021161.1    | Ca_kabuli_chr02 | 10126555                | TT                              | AA              | 1946752713               |
| SNP_P4_20030_10134529 | NC_021161.1    | Ca_kabuli_chr02 | 10134529                | CC                              | TT              | 1946752715               |
| SNP_P4_20032_10161575 | NC_021161.1    | Ca_kabuli_chr02 | 10161575                | TT                              | GG              | 1946752717               |
| SNP_P4_20033_10168567 | NC_021161.1    | Ca_kabuli_chr02 | 10168567                | AA                              | GG              | 1946752719               |
| SNP_P4_20034_10168570 | NC_021161.1    | Ca_kabuli_chr02 | 10168570                | TT                              | AA              | 1946752721               |
| SNP_P4_20036_10175093 | NC_021161.1    | Ca_kabuli_chr02 | 10175093                | CC                              | TT              | 1946752723               |
| SNP_P4_20037_10186009 | NC_021161.1    | Ca_kabuli_chr02 | 10186009                | GG                              | AA              | 1946752725               |
| SNP_P4_20038_10202073 | NC_021161.1    | Ca_kabuli_chr02 | 10202073                | TT                              | AA              | 1946752727               |
| SNP_P4_20039_10208016 | NC_021161.1    | Ca_kabuli_chr02 | 10208016                | AA                              | GG              | 1946752729               |
| SNP_P4_20040_10208020 | NC_021161.1    | Ca_kabuli_chr02 | 10208020                | AA                              | TT              | 1946752731               |
| SNP_P4_20041_10254842 | NC_021161.1    | Ca_kabuli_chr02 | 10254842                | TT                              | CC              | 1946752733               |
| SNP_P4_20043_10321013 | NC_021161.1    | Ca_kabuli_chr02 | 10321013                | GG                              | TT              | 1946752735               |
| SNP_P4_20044_10322795 | NC_021161.1    | Ca_kabuli_chr02 | 10322795                | GG                              | AA              | 1946752737               |
| SNP_P4_20045_10326455 | NC_021161.1    | Ca_kabuli_chr02 | 10326455                | GG                              | TT              | 1946752739               |
| SNP_P4_20046_10328865 | NC_021161.1    | Ca_kabuli_chr02 | 10328865                | GG                              | TT              | 1946752741               |
| SNP_P4_20047_10361681 | NC_021161.1    | Ca_kabuli_chr02 | 10361681                | TT                              | GG              | 1946752743               |
| SNP_P4_20048_10362062 | NC_021161.1    | Ca_kabuli_chr02 | 10362062                | AA                              | GG              | 1946752745               |
| SNP_P4_20049_10362088 | NC_021161.1    | Ca_kabuli_chr02 | 10362088                | TT                              | CC              | 1946752747               |
| SNP_P4_20050_10362144 | NC_021161.1    | Ca_kabuli_chr02 | 10362144                | AA                              | GG              | 1946752749               |
| SNP_P4_20051_10362153 | NC_021161.1    | Ca_kabuli_chr02 | 10362153                | TT                              | CC              | 1946752751               |
| SNP_P4_20052_10362194 | NC_021161.1    | Ca_kabuli_chr02 | 10362194                | CC                              | GG              | 1946752753               |
| SNP_P4_20053_10362421 | NC_021161.1    | Ca_kabuli_chr02 | 10362421                | TT                              | CC              | 1946752755               |
| SNP_P4_20055_10362507 | NC_021161.1    | Ca_kabuli_chr02 | 10362507                | AA                              | TT              | 1946752757               |

| SNPs IDs              | Chromosome IDs | Chromosomes     | Physical positions (bp) | CDC Frontier (Reference genome) | (ILWC46 & LPNB) | NCBI SNPdb Accession IDs |
|-----------------------|----------------|-----------------|-------------------------|---------------------------------|-----------------|--------------------------|
| SNP_P4_20056_10367270 | NC_021161.1    | Ca_kabuli_chr02 | 10367270                | TT                              | CC              | 1946752759               |
| SNP_P4_20057_10367993 | NC_021161.1    | Ca_kabuli_chr02 | 10367993                | TT                              | CC              | 1946752761               |
| SNP_P4_20058_10380846 | NC_021161.1    | Ca_kabuli_chr02 | 10380846                | TT                              | CC              | 1946752763               |
| SNP_P4_20060_10395215 | NC_021161.1    | Ca_kabuli_chr02 | 10395215                | CC                              | AA              | 1946752765               |
| SNP_P4_20061_10395809 | NC_021161.1    | Ca_kabuli_chr02 | 10395809                | AA                              | TT              | 1946752767               |
| SNP_P4_20062_10395813 | NC_021161.1    | Ca_kabuli_chr02 | 10395813                | TT                              | AA              | 1946752769               |
| SNP_P4_20064_10473937 | NC_021161.1    | Ca_kabuli_chr02 | 10473937                | GG                              | TT              | 1946752771               |
| SNP_P4_20065_10500523 | NC_021161.1    | Ca_kabuli_chr02 | 10500523                | TT                              | CC              | 1946752773               |
| SNP_P4_20067_10540564 | NC_021161.1    | Ca_kabuli_chr02 | 10540564                | CC                              | AA              | 1946752775               |
| SNP_P4_20068_10540607 | NC_021161.1    | Ca_kabuli_chr02 | 10540607                | CC                              | GG              | 1946752777               |
| SNP_P4_20069_10540612 | NC_021161.1    | Ca_kabuli_chr02 | 10540612                | TT                              | CC              | 1946752779               |
| SNP_P4_20070_10540721 | NC_021161.1    | Ca_kabuli_chr02 | 10540721                | GG                              | AA              | 1946752781               |
| SNP_P4_20071_10541017 | NC_021161.1    | Ca_kabuli_chr02 | 10541017                | TT                              | GG              | 1946752783               |
| SNP_P4_20072_10541102 | NC_021161.1    | Ca_kabuli_chr02 | 10541102                | CC                              | TT              | 1946752785               |
| SNP_P4_20073_10541106 | NC_021161.1    | Ca_kabuli_chr02 | 10541106                | TT                              | GG              | 1946752787               |
| SNP_P4_20074_10541135 | NC_021161.1    | Ca_kabuli_chr02 | 10541135                | AA                              | TT              | 1946752789               |
| SNP_P4_20075_10541144 | NC_021161.1    | Ca_kabuli_chr02 | 10541144                | AA                              | GG              | 1946752792               |
| SNP_P4_20076_10541157 | NC_021161.1    | Ca_kabuli_chr02 | 10541157                | AA                              | GG              | 1946752794               |
| SNP_P4_20077_10541166 | NC_021161.1    | Ca_kabuli_chr02 | 10541166                | AA                              | CC              | 1946752796               |
| SNP_P4_20078_10541193 | NC_021161.1    | Ca_kabuli_chr02 | 10541193                | AA                              | GG              | 1946752798               |
| SNP_P4_20079_10541203 | NC_021161.1    | Ca_kabuli_chr02 | 10541203                | GG                              | AA              | 1946752800               |
| SNP_P4_20080_10541535 | NC_021161.1    | Ca_kabuli_chr02 | 10541535                | CC                              | GG              | 1946752802               |
| SNP_P4_20081_10544398 | NC_021161.1    | Ca_kabuli_chr02 | 10544398                | AA                              | TT              | 1946752804               |
| SNP_P4_20082_10544614 | NC_021161.1    | Ca_kabuli_chr02 | 10544614                | TT                              | CC              | 1946752806               |
| SNP_P4_20083_10544629 | NC_021161.1    | Ca_kabuli_chr02 | 10544629                | GG                              | AA              | 1946752807               |
| SNP_P4_20084_10544688 | NC_021161.1    | Ca_kabuli_chr02 | 10544688                | AA                              | CC              | 1946752809               |
| SNP_P4_20085_10554065 | NC_021161.1    | Ca_kabuli_chr02 | 10554065                | CC                              | TT              | 1946752811               |
| SNP_P4_20087_10599713 | NC_021161.1    | Ca_kabuli_chr02 | 10599713                | AA                              | CC              | 1946752813               |
| SNP_P4_20088_10599714 | NC_021161.1    | Ca_kabuli_chr02 | 10599714                | AA                              | TT              | 1946752815               |
| SNP_P4_20089_10600624 | NC_021161.1    | Ca_kabuli_chr02 | 10600624                | TT                              | AA              | 1946752817               |
| SNP_P4_20091_10628348 | NC_021161.1    | Ca_kabuli_chr02 | 10628348                | CC                              | TT              | 1946752819               |
| SNP_P4_20092_10664264 | NC_021161.1    | Ca_kabuli_chr02 | 10664264                | GG                              | CC              | 1946752821               |
| SNP_P4_20093_10664624 | NC_021161.1    | Ca_kabuli_chr02 | 10664624                | TT                              | AA              | 1946752823               |
| SNP_P4_20094_10664667 | NC_021161.1    | Ca_kabuli_chr02 | 10664667                | AA                              | GG              | 1946752825               |
| SNP_P4_20095_10664677 | NC_021161.1    | Ca_kabuli_chr02 | 10664677                | TT                              | GG              | 1946752827               |
| SNP_P4_20096_10664697 | NC_021161.1    | Ca_kabuli_chr02 | 10664697                | TT                              | CC              | 1946752829               |
| SNP_P4_20097_10664711 | NC_021161.1    | Ca_kabuli_chr02 | 10664711                | TT                              | CC              | 1946752831               |
| SNP_P4_20098_10664715 | NC_021161.1    | Ca_kabuli_chr02 | 10664715                | TT                              | GG              | 1946752833               |
| SNP_P4_20099_10664729 | NC_021161.1    | Ca_kabuli_chr02 | 10664729                | TT                              | CC              | 1946752835               |
| SNP_P4_20100_10664751 | NC_021161.1    | Ca_kabuli_chr02 | 10664751                | AA                              | GG              | 1946752837               |
| SNP_P4_20101_10664753 | NC_021161.1    | Ca_kabuli_chr02 | 10664753                | AA                              | CC              | 1946752839               |
| SNP_P4_20102_10682185 | NC_021161.1    | Ca_kabuli_chr02 | 10682185                | AA                              | CC              | 1946752841               |

| SNPs IDs              | Chromosome IDs | Chromosomes     | Physical positions (bp) | CDC Frontier (Reference genome) | (ILWC46 & LPNB) | NCBI SNPdb Accession IDs |
|-----------------------|----------------|-----------------|-------------------------|---------------------------------|-----------------|--------------------------|
| SNP_P4_20103_10696997 | NC_021161.1    | Ca_kabuli_chr02 | 10696997                | TT                              | CC              | 1946752844               |
| SNP_P4_20104_10719924 | NC_021161.1    | Ca_kabuli_chr02 | 10719924                | TT                              | CC              | 1946752846               |
| SNP_P4_20105_10722930 | NC_021161.1    | Ca_kabuli_chr02 | 10722930                | GG                              | AA              | 1946752848               |
| SNP_P4_20106_10727748 | NC_021161.1    | Ca_kabuli_chr02 | 10727748                | GG                              | AA              | 1946752850               |
| SNP_P4_20108_10766081 | NC_021161.1    | Ca_kabuli_chr02 | 10766081                | CC                              | TT              | 1946752852               |
| SNP_P4_20109_10766997 | NC_021161.1    | Ca_kabuli_chr02 | 10766997                | CC                              | AA              | 1946752854               |
| SNP_P4_20110_10767041 | NC_021161.1    | Ca_kabuli_chr02 | 10767041                | AA                              | CC              | 1946752856               |
| SNP_P4_20111_10767213 | NC_021161.1    | Ca_kabuli_chr02 | 10767213                | AA                              | GG              | 1946752858               |
| SNP_P4_20112_10767437 | NC_021161.1    | Ca_kabuli_chr02 | 10767437                | CC                              | TT              | 1946752860               |
| SNP_P4_20113_10767446 | NC_021161.1    | Ca_kabuli_chr02 | 10767446                | GG                              | AA              | 1946752862               |
| SNP_P4_20114_10767447 | NC_021161.1    | Ca_kabuli_chr02 | 10767447                | GG                              | AA              | 1946752864               |
| SNP_P4_20115_10767573 | NC_021161.1    | Ca_kabuli_chr02 | 10767573                | GG                              | AA              | 1946752866               |
| SNP_P4_20116_10767614 | NC_021161.1    | Ca_kabuli_chr02 | 10767614                | TT                              | CC              | 1946752868               |
| SNP_P4_20117_10767631 | NC_021161.1    | Ca_kabuli_chr02 | 10767631                | TT                              | AA              | 1946752869               |
| SNP_P4_20118_10767634 | NC_021161.1    | Ca_kabuli_chr02 | 10767634                | AA                              | TT              | 1946752870               |
| SNP_P4_20119_10777329 | NC_021161.1    | Ca_kabuli_chr02 | 10777329                | CC                              | GG              | 1946752871               |
| SNP_P4_20120_10777352 | NC_021161.1    | Ca_kabuli_chr02 | 10777352                | TT                              | CC              | 1946752872               |
| SNP_P4_20121_10777357 | NC_021161.1    | Ca_kabuli_chr02 | 10777357                | TT                              | CC              | 1946752873               |
| SNP_P4_20122_10777359 | NC_021161.1    | Ca_kabuli_chr02 | 10777359                | GG                              | AA              | 1946752874               |
| SNP_P4_20123_10777388 | NC_021161.1    | Ca_kabuli_chr02 | 10777388                | CC                              | AA              | 1946752875               |
| SNP_P4_20124_10777423 | NC_021161.1    | Ca_kabuli_chr02 | 10777423                | TT                              | GG              | 1946752876               |
| SNP_P4_20125_10777458 | NC_021161.1    | Ca_kabuli_chr02 | 10777458                | AA                              | GG              | 1946752877               |
| SNP_P4_20126_10777472 | NC_021161.1    | Ca_kabuli_chr02 | 10777472                | GG                              | TT              | 1946752878               |
| SNP_P4_20127_10777522 | NC_021161.1    | Ca_kabuli_chr02 | 10777522                | TT                              | CC              | 1946752879               |
| SNP_P4_20128_10777577 | NC_021161.1    | Ca_kabuli_chr02 | 10777577                | GG                              | AA              | 1946752880               |
| SNP_P4_20129_10777582 | NC_021161.1    | Ca_kabuli_chr02 | 10777582                | AA                              | GG              | 1946752881               |
| SNP_P4_20130_10777636 | NC_021161.1    | Ca_kabuli_chr02 | 10777636                | TT                              | CC              | 1946752882               |
| SNP_P4_20131_10777643 | NC_021161.1    | Ca_kabuli_chr02 | 10777643                | GG                              | TT              | 1946752883               |
| SNP_P4_20133_10778495 | NC_021161.1    | Ca_kabuli_chr02 | 10778495                | TT                              | CC              | 1946752884               |
| SNP_P4_20134_10778525 | NC_021161.1    | Ca_kabuli_chr02 | 10778525                | TT                              | CC              | 1946752885               |
| SNP_P4_20135_10778534 | NC_021161.1    | Ca_kabuli_chr02 | 10778534                | CC                              | AA              | 1946752886               |
| SNP_P4_20136_10778739 | NC_021161.1    | Ca_kabuli_chr02 | 10778739                | AA                              | TT              | 1946752887               |
| SNP_P4_20137_10778744 | NC_021161.1    | Ca_kabuli_chr02 | 10778744                | TT                              | CC              | 1946752888               |
| SNP_P4_20138_10778745 | NC_021161.1    | Ca_kabuli_chr02 | 10778745                | CC                              | TT              | 1946752889               |
| SNP_P4_20139_10778781 | NC_021161.1    | Ca_kabuli_chr02 | 10778781                | TT                              | CC              | 1946752890               |
| SNP_P4_20140_10778787 | NC_021161.1    | Ca_kabuli_chr02 | 10778787                | AA                              | CC              | 1946752891               |
| SNP_P4_20141_10778789 | NC_021161.1    | Ca_kabuli_chr02 | 10778789                | AA                              | GG              | 1946752892               |
| SNP_P4_20142_10779028 | NC_021161.1    | Ca_kabuli_chr02 | 10779028                | CC                              | TT              | 1946752893               |
| SNP_P4_20143_10779054 | NC_021161.1    | Ca_kabuli_chr02 | 10779054                | TT                              | CC              | 1946752894               |
| SNP_P4_20144_10779060 | NC_021161.1    | Ca_kabuli_chr02 | 10779060                | GG                              | AA              | 1946752895               |
| SNP_P4_20145_10779069 | NC_021161.1    | Ca_kabuli_chr02 | 10779069                | TT                              | CC              | 1946752896               |
| SNP_P4_20147_10779156 | NC_021161.1    | Ca_kabuli_chr02 | 10779156                | TT                              | CC              | 1946752897               |

| SNPs IDs              | Chromosome IDs | Chromosomes     | Physical positions (bp) | CDC Frontier (Reference genome) | (ILWC46 & LPNB) | NCBI SNPdb Accession IDs |
|-----------------------|----------------|-----------------|-------------------------|---------------------------------|-----------------|--------------------------|
| SNP_P4_20148_10779159 | NC_021161.1    | Ca_kabuli_chr02 | 10779159                | GG                              | AA              | 1946752898               |
| SNP_P4_20149_10779195 | NC_021161.1    | Ca_kabuli_chr02 | 10779195                | TT                              | CC              | 1946752899               |
| SNP_P4_20150_10779312 | NC_021161.1    | Ca_kabuli_chr02 | 10779312                | TT                              | CC              | 1946752900               |
| SNP_P4_20151_10779338 | NC_021161.1    | Ca_kabuli_chr02 | 10779338                | CC                              | TT              | 1946752901               |
| SNP_P4_20152_10779374 | NC_021161.1    | Ca_kabuli_chr02 | 10779374                | TT                              | CC              | 1946752902               |
| SNP_P4_20153_10779384 | NC_021161.1    | Ca_kabuli_chr02 | 10779384                | TT                              | CC              | 1946752903               |
| SNP_P4_20154_10779386 | NC_021161.1    | Ca_kabuli_chr02 | 10779386                | TT                              | AA              | 1946752904               |
| SNP_P4_20155_10779439 | NC_021161.1    | Ca_kabuli_chr02 | 10779439                | AA                              | GG              | 1946752905               |
| SNP_P4_20156_10779528 | NC_021161.1    | Ca_kabuli_chr02 | 10779528                | CC                              | TT              | 1946752906               |
| SNP_P4_20157_10789809 | NC_021161.1    | Ca_kabuli_chr02 | 10789809                | AA                              | GG              | 1946752907               |
| SNP_P4_20158_10789842 | NC_021161.1    | Ca_kabuli_chr02 | 10789842                | TT                              | CC              | 1946752908               |
| SNP_P4_20159_10789973 | NC_021161.1    | Ca_kabuli_chr02 | 10789973                | AA                              | GG              | 1946752909               |
| SNP_P4_20160_10790042 | NC_021161.1    | Ca_kabuli_chr02 | 10790042                | AA                              | GG              | 1946752910               |
| SNP_P4_20161_10790268 | NC_021161.1    | Ca_kabuli_chr02 | 10790268                | AA                              | GG              | 1946752911               |
| SNP_P4_20162_10794596 | NC_021161.1    | Ca_kabuli_chr02 | 10794596                | GG                              | AA              | 1946752912               |
| SNP_P4_20163_10796699 | NC_021161.1    | Ca_kabuli_chr02 | 10796699                | GG                              | AA              | 1946752913               |
| SNP_P4_20164_10796725 | NC_021161.1    | Ca_kabuli_chr02 | 10796725                | GG                              | AA              | 1946752914               |
| SNP_P4_20165_10796916 | NC_021161.1    | Ca_kabuli_chr02 | 10796916                | CC                              | TT              | 1946752915               |
| SNP_P4_20166_10801110 | NC_021161.1    | Ca_kabuli_chr02 | 10801110                | CC                              | GG              | 1946752916               |
| SNP_P4_20167_10833409 | NC_021161.1    | Ca_kabuli_chr02 | 10833409                | CC                              | TT              | 1946752917               |
| SNP_P4_20168_10833492 | NC_021161.1    | Ca_kabuli_chr02 | 10833492                | CC                              | AA              | 1946752918               |
| SNP_P4_20169_10833550 | NC_021161.1    | Ca_kabuli_chr02 | 10833550                | TT                              | CC              | 1946752919               |
| SNP_P4_20170_10834714 | NC_021161.1    | Ca_kabuli_chr02 | 10834714                | CC                              | TT              | 1946752920               |
| SNP_P4_20171_10834756 | NC_021161.1    | Ca_kabuli_chr02 | 10834756                | TT                              | CC              | 1946752921               |
| SNP_P4_20172_10834792 | NC_021161.1    | Ca_kabuli_chr02 | 10834792                | TT                              | CC              | 1946752922               |
| SNP_P4_20173_10834837 | NC_021161.1    | Ca_kabuli_chr02 | 10834837                | CC                              | TT              | 1946752923               |
| SNP_P4_20174_10834867 | NC_021161.1    | Ca_kabuli_chr02 | 10834867                | CC                              | TT              | 1946752924               |
| SNP_P4_20175_10834879 | NC_021161.1    | Ca_kabuli_chr02 | 10834879                | TT                              | CC              | 1946752925               |
| SNP_P4_20176_10834882 | NC_021161.1    | Ca_kabuli_chr02 | 10834882                | GG                              | AA              | 1946752926               |
| SNP_P4_20177_10834891 | NC_021161.1    | Ca_kabuli_chr02 | 10834891                | TT                              | CC              | 1946752927               |
| SNP_P4_20178_10834984 | NC_021161.1    | Ca_kabuli_chr02 | 10834984                | TT                              | CC              | 1946752928               |
| SNP_P4_20179_10835065 | NC_021161.1    | Ca_kabuli_chr02 | 10835065                | TT                              | CC              | 1946752929               |
| SNP_P4_20180_10835093 | NC_021161.1    | Ca_kabuli_chr02 | 10835093                | TT                              | CC              | 1946752930               |
| SNP_P4_20181_10835131 | NC_021161.1    | Ca_kabuli_chr02 | 10835131                | TT                              | CC              | 1946752931               |
| SNP_P4_20182_10835167 | NC_021161.1    | Ca_kabuli_chr02 | 10835167                | TT                              | CC              | 1946752932               |
| SNP_P4_20183_10835173 | NC_021161.1    | Ca_kabuli_chr02 | 10835173                | CC                              | TT              | 1946752933               |
| SNP_P4_20184_10835179 | NC_021161.1    | Ca_kabuli_chr02 | 10835179                | AA                              | GG              | 1946752934               |
| SNP_P4_20185_10835201 | NC_021161.1    | Ca_kabuli_chr02 | 10835201                | TT                              | CC              | 1946752935               |
| SNP_P4_20186_10840879 | NC_021161.1    | Ca_kabuli_chr02 | 10840879                | AA                              | GG              | 1946752936               |
| SNP_P4_20187_10840939 | NC_021161.1    | Ca_kabuli_chr02 | 10840939                | AA                              | GG              | 1946752937               |
| SNP_P4_20188_10840950 | NC_021161.1    | Ca_kabuli_chr02 | 10840950                | GG                              | AA              | 1946752938               |
| SNP_P4_20189_10841037 | NC_021161.1    | Ca_kabuli_chr02 | 10841037                | AA                              | TT              | 1946752939               |

| SNPs IDs              | Chromosome IDs | Chromosomes     | Physical positions (bp) | CDC Frontier (Reference genome) | (ILWC46 & LPNB) | NCBI SNPdb Accession IDs |
|-----------------------|----------------|-----------------|-------------------------|---------------------------------|-----------------|--------------------------|
| SNP_P4_20190_10850021 | NC_021161.1    | Ca_kabuli_chr02 | 10850021                | AA                              | CC              | 1946752940               |
| SNP_P4_20191_10851085 | NC_021161.1    | Ca_kabuli_chr02 | 10851085                | GG                              | AA              | 1946752941               |
| SNP_P4_20192_10851090 | NC_021161.1    | Ca_kabuli_chr02 | 10851090                | CC                              | TT              | 1946752942               |
| SNP_P4_20193_10851224 | NC_021161.1    | Ca_kabuli_chr02 | 10851224                | AA                              | GG              | 1946752943               |
| SNP_P4_20194_10851248 | NC_021161.1    | Ca_kabuli_chr02 | 10851248                | CC                              | TT              | 1946752944               |
| SNP_P4_20195_10878851 | NC_021161.1    | Ca_kabuli_chr02 | 10878851                | AA                              | GG              | 1946752945               |
| SNP_P4_20196_10878855 | NC_021161.1    | Ca_kabuli_chr02 | 10878855                | AA                              | GG              | 1946752946               |
| SNP_P4_20197_10878862 | NC_021161.1    | Ca_kabuli_chr02 | 10878862                | TT                              | CC              | 1946752947               |
| SNP_P4_20198_10878921 | NC_021161.1    | Ca_kabuli_chr02 | 10878921                | AA                              | GG              | 1946752948               |
| SNP_P4_20199_10881900 | NC_021161.1    | Ca_kabuli_chr02 | 10881900                | AA                              | GG              | 1946752949               |
| SNP_P4_20200_10888810 | NC_021161.1    | Ca_kabuli_chr02 | 10888810                | TT                              | CC              | 1946752950               |
| SNP_P4_20201_10888814 | NC_021161.1    | Ca_kabuli_chr02 | 10888814                | GG                              | AA              | 1946752951               |
| SNP_P4_20202_10888820 | NC_021161.1    | Ca_kabuli_chr02 | 10888820                | CC                              | GG              | 1946752952               |
| SNP_P4_20203_10890747 | NC_021161.1    | Ca_kabuli_chr02 | 10890747                | AA                              | CC              | 1946752953               |
| SNP_P4_20205_10890774 | NC_021161.1    | Ca_kabuli_chr02 | 10890774                | AA                              | TT              | 1946752954               |
| SNP_P4_20206_10893891 | NC_021161.1    | Ca_kabuli_chr02 | 10893891                | AA                              | GG              | 1946752955               |
| SNP_P4_20207_10893905 | NC_021161.1    | Ca_kabuli_chr02 | 10893905                | TT                              | CC              | 1946752956               |
| SNP_P4_20208_10894234 | NC_021161.1    | Ca_kabuli_chr02 | 10894234                | CC                              | TT              | 1946752957               |
| SNP_P4_20209_10894291 | NC_021161.1    | Ca_kabuli_chr02 | 10894291                | TT                              | CC              | 1946752958               |
| SNP_P4_20210_10894299 | NC_021161.1    | Ca_kabuli_chr02 | 10894299                | TT                              | CC              | 1946752959               |
| SNP_P4_20212_10924013 | NC_021161.1    | Ca_kabuli_chr02 | 10924013                | AA                              | GG              | 1946752961               |
| SNP_P4_20213_10926989 | NC_021161.1    | Ca_kabuli_chr02 | 10926989                | TT                              | CC              | 1946752963               |
| SNP_P4_20215_10947995 | NC_021161.1    | Ca_kabuli_chr02 | 10947995                | AA                              | GG              | 1946752965               |
| SNP_P4_20217_10956593 | NC_021161.1    | Ca_kabuli_chr02 | 10956593                | TT                              | CC              | 1946752967               |
| SNP_P4_20218_11010066 | NC_021161.1    | Ca_kabuli_chr02 | 11010066                | GG                              | AA              | 1946752969               |
| SNP_P4_20219_11010144 | NC_021161.1    | Ca_kabuli_chr02 | 11010144                | CC                              | AA              | 1946752971               |
| SNP_P4_20220_11010146 | NC_021161.1    | Ca_kabuli_chr02 | 11010146                | GG                              | AA              | 1946752973               |
| SNP_P4_20221_11010275 | NC_021161.1    | Ca_kabuli_chr02 | 11010275                | TT                              | AA              | 1946752974               |
| SNP_P4_20222_11031029 | NC_021161.1    | Ca_kabuli_chr02 | 11031029                | AA                              | TT              | 1946752976               |
| SNP_P4_20223_11031037 | NC_021161.1    | Ca_kabuli_chr02 | 11031037                | AA                              | GG              | 1946752978               |
| SNP_P4_20224_11031113 | NC_021161.1    | Ca_kabuli_chr02 | 11031113                | TT                              | CC              | 1946752980               |
| SNP_P4_20225_11031124 | NC_021161.1    | Ca_kabuli_chr02 | 11031124                | TT                              | AA              | 1946752982               |
| SNP_P4_20226_11031221 | NC_021161.1    | Ca_kabuli_chr02 | 11031221                | AA                              | CC              | 1946752984               |
| SNP_P4_20227_11055746 | NC_021161.1    | Ca_kabuli_chr02 | 11055746                | CC                              | TT              | 1946752986               |
| SNP_P4_20228_11055755 | NC_021161.1    | Ca_kabuli_chr02 | 11055755                | TT                              | CC              | 1946752988               |
| SNP_P4_20229_11055774 | NC_021161.1    | Ca_kabuli_chr02 | 11055774                | CC                              | TT              | 1946752990               |
| SNP_P4_20230_11055780 | NC_021161.1    | Ca_kabuli_chr02 | 11055780                | TT                              | CC              | 1946752992               |
| SNP_P4_20231_11055863 | NC_021161.1    | Ca_kabuli_chr02 | 11055863                | GG                              | AA              | 1946752994               |
| SNP_P4_20232_11055915 | NC_021161.1    | Ca_kabuli_chr02 | 11055915                | AA                              | GG              | 1946752996               |
| SNP_P4_20233_11056096 | NC_021161.1    | Ca_kabuli_chr02 | 11056096                | AA                              | TT              | 1946752998               |
| SNP_P4_20234_11056102 | NC_021161.1    | Ca_kabuli_chr02 | 11056102                | AA                              | GG              | 1946753000               |
| SNP_P4_20235_11056104 | NC_021161.1    | Ca_kabuli_chr02 | 11056104                | AA                              | GG              | 1946753002               |



| SNPs IDs              | Chromosome IDs | Chromosomes     | Physical positions (bp) | CDC Frontier (Reference genome) | (ILWC46 & LPNB) | NCBI SNPdb Accession IDs |
|-----------------------|----------------|-----------------|-------------------------|---------------------------------|-----------------|--------------------------|
| SNP_P4_20236_11056205 | NC_021161.1    | Ca_kabuli_chr02 | 11056205                | AA                              | GG              | 1946753004               |
| SNP_P4_20237_11056210 | NC_021161.1    | Ca_kabuli_chr02 | 11056210                | TT                              | AA              | 1946753006               |
| SNP_P4_20238_11056279 | NC_021161.1    | Ca_kabuli_chr02 | 11056279                | GG                              | TT              | 1946753008               |
| SNP_P4_20239_11056288 | NC_021161.1    | Ca_kabuli_chr02 | 11056288                | GG                              | AA              | 1946753010               |
| SNP_P4_20240_11056299 | NC_021161.1    | Ca_kabuli_chr02 | 11056299                | AA                              | GG              | 1946753012               |
| SNP_P4_20241_11056309 | NC_021161.1    | Ca_kabuli_chr02 | 11056309                | AA                              | GG              | 1946753014               |
| SNP_P4_20242_11056315 | NC_021161.1    | Ca_kabuli_chr02 | 11056315                | TT                              | CC              | 1946753016               |
| SNP_P4_20243_11056326 | NC_021161.1    | Ca_kabuli_chr02 | 11056326                | AA                              | GG              | 1946753018               |
| SNP_P4_20244_11056356 | NC_021161.1    | Ca_kabuli_chr02 | 11056356                | AA                              | TT              | 1946753020               |
| SNP_P4_20245_11056375 | NC_021161.1    | Ca_kabuli_chr02 | 11056375                | GG                              | AA              | 1946753022               |
| SNP_P4_20246_11063613 | NC_021161.1    | Ca_kabuli_chr02 | 11063613                | TT                              | CC              | 1946753024               |
| SNP_P4_20247_11063643 | NC_021161.1    | Ca_kabuli_chr02 | 11063643                | CC                              | AA              | 1946753026               |
| SNP_P4_20248_11063647 | NC_021161.1    | Ca_kabuli_chr02 | 11063647                | TT                              | AA              | 1946753029               |
| SNP_P4_20249_11063652 | NC_021161.1    | Ca_kabuli_chr02 | 11063652                | CC                              | GG              | 1946753031               |
| SNP_P4_20250_11063719 | NC_021161.1    | Ca_kabuli_chr02 | 11063719                | GG                              | TT              | 1946753033               |
| SNP_P4_20251_11063749 | NC_021161.1    | Ca_kabuli_chr02 | 11063749                | GG                              | TT              | 1946753035               |
| SNP_P4_20252_11063764 | NC_021161.1    | Ca_kabuli_chr02 | 11063764                | GG                              | AA              | 1946753037               |
| SNP_P4_20253_11063774 | NC_021161.1    | Ca_kabuli_chr02 | 11063774                | TT                              | CC              | 1946753039               |
| SNP_P4_20254_11063914 | NC_021161.1    | Ca_kabuli_chr02 | 11063914                | AA                              | GG              | 1946753041               |
| SNP_P4_20255_11083452 | NC_021161.1    | Ca_kabuli_chr02 | 11083452                | TT                              | CC              | 1946753043               |
| SNP_P4_20257_11102656 | NC_021161.1    | Ca_kabuli_chr02 | 11102656                | TT                              | CC              | 1946753045               |
| SNP_P4_20258_11142167 | NC_021161.1    | Ca_kabuli_chr02 | 11142167                | AA                              | GG              | 1946753047               |
| SNP_P4_20259_11142525 | NC_021161.1    | Ca_kabuli_chr02 | 11142525                | CC                              | TT              | 1946753049               |
| SNP_P4_20260_11144016 | NC_021161.1    | Ca_kabuli_chr02 | 11144016                | TT                              | CC              | 1946753051               |
| SNP_P4_20261_11144035 | NC_021161.1    | Ca_kabuli_chr02 | 11144035                | AA                              | GG              | 1946753053               |
| SNP_P4_20262_11144068 | NC_021161.1    | Ca_kabuli_chr02 | 11144068                | TT                              | CC              | 1946753055               |
| SNP_P4_20263_11144093 | NC_021161.1    | Ca_kabuli_chr02 | 11144093                | GG                              | AA              | 1946753057               |
| SNP_P4_20264_11144095 | NC_021161.1    | Ca_kabuli_chr02 | 11144095                | AA                              | GG              | 1946753059               |
| SNP_P4_20265_11144114 | NC_021161.1    | Ca_kabuli_chr02 | 11144114                | TT                              | CC              | 1946753061               |
| SNP_P4_20266_11144152 | NC_021161.1    | Ca_kabuli_chr02 | 11144152                | AA                              | GG              | 1946753066               |
| SNP_P4_20267_11144153 | NC_021161.1    | Ca_kabuli_chr02 | 11144153                | TT                              | CC              | 1946753068               |
| SNP_P4_20268_11144181 | NC_021161.1    | Ca_kabuli_chr02 | 11144181                | AA                              | GG              | 1946753070               |
| SNP_P4_20269_11144339 | NC_021161.1    | Ca_kabuli_chr02 | 11144339                | AA                              | GG              | 1946753072               |
| SNP_P4_20270_11144354 | NC_021161.1    | Ca_kabuli_chr02 | 11144354                | AA                              | GG              | 1946753074               |
| SNP_P4_20271_11144366 | NC_021161.1    | Ca_kabuli_chr02 | 11144366                | GG                              | TT              | 1946753076               |
| SNP_P4_20272_11144393 | NC_021161.1    | Ca_kabuli_chr02 | 11144393                | AA                              | CC              | 1946753078               |
| SNP_P4_20273_11144435 | NC_021161.1    | Ca_kabuli_chr02 | 11144435                | CC                              | TT              | 1946753080               |
| SNP_P4_20274_11144447 | NC_021161.1    | Ca_kabuli_chr02 | 11144447                | AA                              | GG              | 1946753082               |
| SNP_P4_20275_11157470 | NC_021161.1    | Ca_kabuli_chr02 | 11157470                | AA                              | CC              | 1946753084               |
| SNP_P4_20276_11214825 | NC_021161.1    | Ca_kabuli_chr02 | 11214825                | GG                              | AA              | 1946753086               |
| SNP_P4_20277_11219180 | NC_021161.1    | Ca_kabuli_chr02 | 11219180                | GG                              | TT              | 1946753088               |
| SNP_P4_20278_11223010 | NC_021161.1    | Ca_kabuli_chr02 | 11223010                | TT                              | AA              | 1946753090               |

| SNPs IDs              | Chromosome IDs | Chromosomes     | Physical positions (bp) | CDC Frontier (Reference genome) | (ILWC46 & LPNB) | NCBI SNPdb Accession IDs |
|-----------------------|----------------|-----------------|-------------------------|---------------------------------|-----------------|--------------------------|
| SNP_P4_20279_11240139 | NC_021161.1    | Ca_kabuli_chr02 | 11240139                | GG                              | TT              | 1946753092               |
| SNP_P4_20280_11240143 | NC_021161.1    | Ca_kabuli_chr02 | 11240143                | GG                              | AA              | 1946753094               |
| SNP_P4_20281_11248036 | NC_021161.1    | Ca_kabuli_chr02 | 11248036                | AA                              | GG              | 1946753096               |
| SNP_P4_20283_11297372 | NC_021161.1    | Ca_kabuli_chr02 | 11297372                | GG                              | AA              | 1946753098               |
| SNP_P4_20284_11312227 | NC_021161.1    | Ca_kabuli_chr02 | 11312227                | AA                              | CC              | 1946753100               |
| SNP_P4_20285_11312264 | NC_021161.1    | Ca_kabuli_chr02 | 11312264                | AA                              | CC              | 1946753102               |
| SNP_P4_20286_11312285 | NC_021161.1    | Ca_kabuli_chr02 | 11312285                | AA                              | CC              | 1946753104               |
| SNP_P4_20287_11312434 | NC_021161.1    | Ca_kabuli_chr02 | 11312434                | AA                              | TT              | 1946753106               |
| SNP_P4_20289_11327567 | NC_021161.1    | Ca_kabuli_chr02 | 11327567                | CC                              | AA              | 1946753108               |
| SNP_P4_20290_11329965 | NC_021161.1    | Ca_kabuli_chr02 | 11329965                | CC                              | AA              | 1946753111               |
| SNP_P4_20292_11359736 | NC_021161.1    | Ca_kabuli_chr02 | 11359736                | TT                              | AA              | 1946753113               |
| SNP_P4_20293_11482428 | NC_021161.1    | Ca_kabuli_chr02 | 11482428                | TT                              | CC              | 1946753115               |
| SNP_P4_20296_11506910 | NC_021161.1    | Ca_kabuli_chr02 | 11506910                | CC                              | AA              | 1946753117               |
| SNP_P4_20297_11507000 | NC_021161.1    | Ca_kabuli_chr02 | 11507000                | CC                              | TT              | 1946753119               |
| SNP_P4_20298_11507506 | NC_021161.1    | Ca_kabuli_chr02 | 11507506                | AA                              | GG              | 1946753121               |
| SNP_P4_20299_11507848 | NC_021161.1    | Ca_kabuli_chr02 | 11507848                | TT                              | CC              | 1946753123               |
| SNP_P4_20300_11507885 | NC_021161.1    | Ca_kabuli_chr02 | 11507885                | AA                              | GG              | 1946753125               |
| SNP_P4_20301_11507915 | NC_021161.1    | Ca_kabuli_chr02 | 11507915                | CC                              | TT              | 1946753127               |
| SNP_P4_20302_11535694 | NC_021161.1    | Ca_kabuli_chr02 | 11535694                | GG                              | TT              | 1946753129               |
| SNP_P4_20303_11536047 | NC_021161.1    | Ca_kabuli_chr02 | 11536047                | TT                              | CC              | 1946753131               |
| SNP_P4_20304_11537665 | NC_021161.1    | Ca_kabuli_chr02 | 11537665                | TT                              | GG              | 1946753133               |
| SNP_P4_20305_11537686 | NC_021161.1    | Ca_kabuli_chr02 | 11537686                | TT                              | CC              | 1946753135               |
| SNP_P4_20306_11538061 | NC_021161.1    | Ca_kabuli_chr02 | 11538061                | AA                              | GG              | 1946753137               |
| SNP_P4_20307_11538253 | NC_021161.1    | Ca_kabuli_chr02 | 11538253                | CC                              | TT              | 1946753139               |
| SNP_P4_20308_11538259 | NC_021161.1    | Ca_kabuli_chr02 | 11538259                | GG                              | TT              | 1946753141               |
| SNP_P4_20309_11552449 | NC_021161.1    | Ca_kabuli_chr02 | 11552449                | GG                              | AA              | 1946753144               |
| SNP_P4_20310_11570563 | NC_021161.1    | Ca_kabuli_chr02 | 11570563                | TT                              | GG              | 1946753146               |
| SNP_P4_20311_11626013 | NC_021161.1    | Ca_kabuli_chr02 | 11626013                | GG                              | CC              | 1946753148               |
| SNP_P4_20312_11648754 | NC_021161.1    | Ca_kabuli_chr02 | 11648754                | AA                              | GG              | 1946753150               |
| SNP_P4_20313_11653666 | NC_021161.1    | Ca_kabuli_chr02 | 11653666                | TT                              | AA              | 1946753152               |
| SNP_P4_20314_11670611 | NC_021161.1    | Ca_kabuli_chr02 | 11670611                | AA                              | CC              | 1946753154               |
| SNP_P4_20315_11670804 | NC_021161.1    | Ca_kabuli_chr02 | 11670804                | GG                              | AA              | 1946753156               |
| SNP_P4_20316_11670811 | NC_021161.1    | Ca_kabuli_chr02 | 11670811                | AA                              | TT              | 1946753158               |
| SNP_P4_20317_11670823 | NC_021161.1    | Ca_kabuli_chr02 | 11670823                | GG                              | AA              | 1946753160               |
| SNP_P4_20318_11671192 | NC_021161.1    | Ca_kabuli_chr02 | 11671192                | CC                              | TT              | 1946753162               |
| SNP_P4_20320_11671632 | NC_021161.1    | Ca_kabuli_chr02 | 11671632                | GG                              | AA              | 1946753164               |
| SNP_P4_20321_11671713 | NC_021161.1    | Ca_kabuli_chr02 | 11671713                | AA                              | TT              | 1946753166               |
| SNP_P4_20322_11674896 | NC_021161.1    | Ca_kabuli_chr02 | 11674896                | CC                              | TT              | 1946753168               |
| SNP_P4_20323_11680878 | NC_021161.1    | Ca_kabuli_chr02 | 11680878                | TT                              | AA              | 1946753170               |
| SNP_P4_20324_11686699 | NC_021161.1    | Ca_kabuli_chr02 | 11686699                | GG                              | AA              | 1946753172               |
| SNP_P4_20325_11690234 | NC_021161.1    | Ca_kabuli_chr02 | 11690234                | CC                              | GG              | 1946753174               |
| SNP_P4_20326_11697943 | NC_021161.1    | Ca_kabuli_chr02 | 11697943                | TT                              | AA              | 1946753176               |

| SNPs IDs              | Chromosome IDs | Chromosomes     | Physical positions (bp) | CDC Frontier (Reference genome) | (ILWC46 & LPNB) | NCBI SNPdb Accession IDs |
|-----------------------|----------------|-----------------|-------------------------|---------------------------------|-----------------|--------------------------|
| SNP_P4_20329_11726429 | NC_021161.1    | Ca_kabuli_chr02 | 11726429                | GG                              | AA              | 1946753178               |
| SNP_P4_20330_11726452 | NC_021161.1    | Ca_kabuli_chr02 | 11726452                | GG                              | CC              | 1946753179               |
| SNP_P4_20331_11726460 | NC_021161.1    | Ca_kabuli_chr02 | 11726460                | AA                              | TT              | 1946753180               |
| SNP_P4_20332_11728460 | NC_021161.1    | Ca_kabuli_chr02 | 11728460                | TT                              | GG              | 1946753181               |
| SNP_P4_20333_11751692 | NC_021161.1    | Ca_kabuli_chr02 | 11751692                | GG                              | AA              | 1946753182               |
| SNP_P4_20334_11786744 | NC_021161.1    | Ca_kabuli_chr02 | 11786744                | TT                              | AA              | 1946753183               |
| SNP_P4_20335_11822626 | NC_021161.1    | Ca_kabuli_chr02 | 11822626                | GG                              | TT              | 1946753184               |
| SNP_P4_20337_11850704 | NC_021161.1    | Ca_kabuli_chr02 | 11850704                | GG                              | AA              | 1946753185               |
| SNP_P4_20338_11878859 | NC_021161.1    | Ca_kabuli_chr02 | 11878859                | CC                              | GG              | 1946753186               |
| SNP_P4_20339_11878860 | NC_021161.1    | Ca_kabuli_chr02 | 11878860                | AA                              | GG              | 1946753187               |
| SNP_P4_20340_11912865 | NC_021161.1    | Ca_kabuli_chr02 | 11912865                | TT                              | CC              | 1946753188               |
| SNP_P4_20341_11934840 | NC_021161.1    | Ca_kabuli_chr02 | 11934840                | AA                              | GG              | 1946753189               |
| SNP_P4_20342_11950210 | NC_021161.1    | Ca_kabuli_chr02 | 11950210                | CC                              | TT              | 1946753190               |
| SNP_P4_20343_11950228 | NC_021161.1    | Ca_kabuli_chr02 | 11950228                | TT                              | GG              | 1946753191               |
| SNP_P4_20344_11950657 | NC_021161.1    | Ca_kabuli_chr02 | 11950657                | CC                              | AA              | 1946753192               |
| SNP_P4_20345_11954561 | NC_021161.1    | Ca_kabuli_chr02 | 11954561                | AA                              | GG              | 1946753194               |
| SNP_P4_20346_11985469 | NC_021161.1    | Ca_kabuli_chr02 | 11985469                | GG                              | CC              | 1946753196               |
| SNP_P4_20349_12019862 | NC_021161.1    | Ca_kabuli_chr02 | 12019862                | GG                              | AA              | 1946753197               |
| SNP_P4_20350_12030551 | NC_021161.1    | Ca_kabuli_chr02 | 12030551                | AA                              | GG              | 1946753199               |
| SNP_P4_20351_12035947 | NC_021161.1    | Ca_kabuli_chr02 | 12035947                | CC                              | TT              | 1946753201               |
| SNP_P4_20352_12040087 | NC_021161.1    | Ca_kabuli_chr02 | 12040087                | CC                              | AA              | 1946753203               |
| SNP_P4_20353_12040168 | NC_021161.1    | Ca_kabuli_chr02 | 12040168                | TT                              | AA              | 1946753205               |
| SNP_P4_20354_12040406 | NC_021161.1    | Ca_kabuli_chr02 | 12040406                | AA                              | TT              | 1946753206               |
| SNP_P4_20355_12040465 | NC_021161.1    | Ca_kabuli_chr02 | 12040465                | AA                              | TT              | 1946753208               |
| SNP_P4_20356_12040480 | NC_021161.1    | Ca_kabuli_chr02 | 12040480                | AA                              | TT              | 1946753210               |
| SNP_P4_20357_12040488 | NC_021161.1    | Ca_kabuli_chr02 | 12040488                | AA                              | TT              | 1946753212               |
| SNP_P4_20359_12040720 | NC_021161.1    | Ca_kabuli_chr02 | 12040720                | AA                              | GG              | 1946753214               |
| SNP_P4_20360_12040743 | NC_021161.1    | Ca_kabuli_chr02 | 12040743                | TT                              | AA              | 1946753216               |
| SNP_P4_20361_12041119 | NC_021161.1    | Ca_kabuli_chr02 | 12041119                | TT                              | CC              | 1946753218               |
| SNP_P4_20362_12041627 | NC_021161.1    | Ca_kabuli_chr02 | 12041627                | TT                              | CC              | 1946753220               |
| SNP_P4_20364_12041729 | NC_021161.1    | Ca_kabuli_chr02 | 12041729                | GG                              | AA              | 1946753222               |
| SNP_P4_20365_12041951 | NC_021161.1    | Ca_kabuli_chr02 | 12041951                | TT                              | CC              | 1946753224               |
| SNP_P4_20366_12041961 | NC_021161.1    | Ca_kabuli_chr02 | 12041961                | GG                              | AA              | 1946753226               |
| SNP_P4_20367_12041971 | NC_021161.1    | Ca_kabuli_chr02 | 12041971                | TT                              | AA              | 1946753228               |
| SNP_P4_20368_12042054 | NC_021161.1    | Ca_kabuli_chr02 | 12042054                | TT                              | AA              | 1946753230               |
| SNP_P4_20369_12042070 | NC_021161.1    | Ca_kabuli_chr02 | 12042070                | TT                              | CC              | 1946753232               |
| SNP_P4_20370_12042071 | NC_021161.1    | Ca_kabuli_chr02 | 12042071                | CC                              | AA              | 1946753234               |
| SNP_P4_20371_12042089 | NC_021161.1    | Ca_kabuli_chr02 | 12042089                | CC                              | TT              | 1946753236               |
| SNP_P4_20372_12042279 | NC_021161.1    | Ca_kabuli_chr02 | 12042279                | CC                              | TT              | 1946753238               |
| SNP_P4_20373_12042427 | NC_021161.1    | Ca_kabuli_chr02 | 12042427                | AA                              | CC              | 1946753240               |
| SNP_P4_20374_12048433 | NC_021161.1    | Ca_kabuli_chr02 | 12048433                | TT                              | CC              | 1946753244               |
| SNP_P4_20375_12048443 | NC_021161.1    | Ca_kabuli_chr02 | 12048443                | GG                              | AA              | 1946753246               |

| SNPs IDs              | Chromosome IDs | Chromosomes     | Physical positions (bp) | CDC Frontier (Reference genome) | (ILWC46 & LPNB) | NCBI SNPdb Accession IDs |
|-----------------------|----------------|-----------------|-------------------------|---------------------------------|-----------------|--------------------------|
| SNP_P4_20376_12048453 | NC_021161.1    | Ca_kabuli_chr02 | 12048453                | TT                              | AA              | 1946753248               |
| SNP_P4_20377_12048467 | NC_021161.1    | Ca_kabuli_chr02 | 12048467                | TT                              | CC              | 1946753250               |
| SNP_P4_20378_12048552 | NC_021161.1    | Ca_kabuli_chr02 | 12048552                | TT                              | CC              | 1946753252               |
| SNP_P4_20379_12048553 | NC_021161.1    | Ca_kabuli_chr02 | 12048553                | CC                              | AA              | 1946753254               |
| SNP_P4_20380_12048571 | NC_021161.1    | Ca_kabuli_chr02 | 12048571                | CC                              | TT              | 1946753256               |
| SNP_P4_20382_12048735 | NC_021161.1    | Ca_kabuli_chr02 | 12048735                | TT                              | AA              | 1946753258               |
| SNP_P4_20383_12048736 | NC_021161.1    | Ca_kabuli_chr02 | 12048736                | TT                              | AA              | 1946753259               |
| SNP_P4_20384_12048759 | NC_021161.1    | Ca_kabuli_chr02 | 12048759                | CC                              | TT              | 1946753262               |
| SNP_P4_20385_12048769 | NC_021161.1    | Ca_kabuli_chr02 | 12048769                | AA                              | TT              | 1946753264               |
| SNP_P4_20386_12074805 | NC_021161.1    | Ca_kabuli_chr02 | 12074805                | CC                              | GG              | 1946753265               |
| SNP_P4_20388_12082899 | NC_021161.1    | Ca_kabuli_chr02 | 12082899                | GG                              | CC              | 1946753267               |
| SNP_P4_20389_12098957 | NC_021161.1    | Ca_kabuli_chr02 | 12098957                | TT                              | CC              | 1946753268               |
| SNP_P4_20390_12098995 | NC_021161.1    | Ca_kabuli_chr02 | 12098995                | GG                              | AA              | 1946753269               |
| SNP_P4_20391_12099007 | NC_021161.1    | Ca_kabuli_chr02 | 12099007                | TT                              | CC              | 1946753271               |
| SNP_P4_20392_12114602 | NC_021161.1    | Ca_kabuli_chr02 | 12114602                | AA                              | GG              | 1946753273               |
| SNP_P4_20393_12128684 | NC_021161.1    | Ca_kabuli_chr02 | 12128684                | AA                              | TT              | 1946753275               |
| SNP_P4_20394_12146522 | NC_021161.1    | Ca_kabuli_chr02 | 12146522                | CC                              | AA              | 1946753277               |
| SNP_P4_20396_12191312 | NC_021161.1    | Ca_kabuli_chr02 | 12191312                | GG                              | AA              | 1946753278               |
| SNP_P4_20397_12210704 | NC_021161.1    | Ca_kabuli_chr02 | 12210704                | CC                              | TT              | 1946753280               |
| SNP_P4_20399_12220296 | NC_021161.1    | Ca_kabuli_chr02 | 12220296                | GG                              | AA              | 1946753282               |
| SNP_P4_20400_12220302 | NC_021161.1    | Ca_kabuli_chr02 | 12220302                | CC                              | TT              | 1946753284               |
| SNP_P4_20401_12220529 | NC_021161.1    | Ca_kabuli_chr02 | 12220529                | AA                              | GG              | 1946753286               |
| SNP_P4_20402_12220537 | NC_021161.1    | Ca_kabuli_chr02 | 12220537                | TT                              | GG              | 1946753288               |
| SNP_P4_20403_12220549 | NC_021161.1    | Ca_kabuli_chr02 | 12220549                | AA                              | GG              | 1946753289               |
| SNP_P4_20404_12221000 | NC_021161.1    | Ca_kabuli_chr02 | 12221000                | CC                              | TT              | 1946753291               |
| SNP_P4_20405_12221028 | NC_021161.1    | Ca_kabuli_chr02 | 12221028                | TT                              | CC              | 1946753292               |
| SNP_P4_20406_12221306 | NC_021161.1    | Ca_kabuli_chr02 | 12221306                | TT                              | CC              | 1946753293               |
| SNP_P4_20407_12221312 | NC_021161.1    | Ca_kabuli_chr02 | 12221312                | TT                              | CC              | 1946753295               |
| SNP_P4_20408_12261576 | NC_021161.1    | Ca_kabuli_chr02 | 12261576                | CC                              | TT              | 1946753297               |
| SNP_P4_20409_12283044 | NC_021161.1    | Ca_kabuli_chr02 | 12283044                | CC                              | AA              | 1946753299               |
| SNP_P4_20410_12283045 | NC_021161.1    | Ca_kabuli_chr02 | 12283045                | AA                              | TT              | 1946753300               |
| SNP_P4_20411_12303588 | NC_021161.1    | Ca_kabuli_chr02 | 12303588                | CC                              | TT              | 1946753303               |
| SNP_P4_20413_12307984 | NC_021161.1    | Ca_kabuli_chr02 | 12307984                | AA                              | TT              | 1946753305               |
| SNP_P4_20414_12321261 | NC_021161.1    | Ca_kabuli_chr02 | 12321261                | CC                              | TT              | 1946753307               |
| SNP_P4_20415_12321873 | NC_021161.1    | Ca_kabuli_chr02 | 12321873                | TT                              | CC              | 1946753309               |
| SNP_P4_20416_12324015 | NC_021161.1    | Ca_kabuli_chr02 | 12324015                | TT                              | CC              | 1946753311               |
| SNP_P4_20417_12326757 | NC_021161.1    | Ca_kabuli_chr02 | 12326757                | CC                              | TT              | 1946753313               |
| SNP_P4_20418_12326851 | NC_021161.1    | Ca_kabuli_chr02 | 12326851                | TT                              | CC              | 1946753314               |
| SNP_P4_20419_12326927 | NC_021161.1    | Ca_kabuli_chr02 | 12326927                | AA                              | GG              | 1946753316               |
| SNP_P4_20420_12333114 | NC_021161.1    | Ca_kabuli_chr02 | 12333114                | AA                              | GG              | 1946753318               |
| SNP_P4_20421_12333121 | NC_021161.1    | Ca_kabuli_chr02 | 12333121                | AA                              | GG              | 1946753320               |
| SNP_P4_20422_12333162 | NC_021161.1    | Ca_kabuli_chr02 | 12333162                | AA                              | TT              | 1946753322               |

| SNPs IDs              | Chromosome IDs | Chromosomes     | Physical positions (bp) | CDC Frontier (Reference genome) | (ILWC46 & LPNB) | NCBI SNPdb Accession IDs |
|-----------------------|----------------|-----------------|-------------------------|---------------------------------|-----------------|--------------------------|
| SNP_P4_20423_12333163 | NC_021161.1    | Ca_kabuli_chr02 | 12333163                | TT                              | CC              | 1946753329               |
| SNP_P4_20424_12333211 | NC_021161.1    | Ca_kabuli_chr02 | 12333211                | TT                              | CC              | 1946753331               |
| SNP_P4_20425_12333396 | NC_021161.1    | Ca_kabuli_chr02 | 12333396                | AA                              | TT              | 1946753333               |
| SNP_P4_20426_12333427 | NC_021161.1    | Ca_kabuli_chr02 | 12333427                | TT                              | AA              | 1946753335               |
| SNP_P4_20427_12344244 | NC_021161.1    | Ca_kabuli_chr02 | 12344244                | AA                              | GG              | 1946753337               |
| SNP_P4_20428_12345042 | NC_021161.1    | Ca_kabuli_chr02 | 12345042                | CC                              | AA              | 1946753339               |
| SNP_P4_20429_12345050 | NC_021161.1    | Ca_kabuli_chr02 | 12345050                | TT                              | GG              | 1946753341               |
| SNP_P4_20430_12345222 | NC_021161.1    | Ca_kabuli_chr02 | 12345222                | TT                              | CC              | 1946753343               |
| SNP_P4_20431_12345226 | NC_021161.1    | Ca_kabuli_chr02 | 12345226                | TT                              | CC              | 1946753345               |
| SNP_P4_20432_12367871 | NC_021161.1    | Ca_kabuli_chr02 | 12367871                | AA                              | TT              | 1946753347               |
| SNP_P4_20433_12380198 | NC_021161.1    | Ca_kabuli_chr02 | 12380198                | TT                              | CC              | 1946753349               |
| SNP_P4_20435_12380263 | NC_021161.1    | Ca_kabuli_chr02 | 12380263                | AA                              | GG              | 1946753351               |
| SNP_P4_20436_12380293 | NC_021161.1    | Ca_kabuli_chr02 | 12380293                | GG                              | AA              | 1946753355               |
| SNP_P4_20438_12380303 | NC_021161.1    | Ca_kabuli_chr02 | 12380303                | CC                              | TT              | 1946753357               |
| SNP_P4_20439_12380323 | NC_021161.1    | Ca_kabuli_chr02 | 12380323                | TT                              | CC              | 1946753359               |
| SNP_P4_20440_12380339 | NC_021161.1    | Ca_kabuli_chr02 | 12380339                | AA                              | GG              | 1946753361               |
| SNP_P4_20441_12380340 | NC_021161.1    | Ca_kabuli_chr02 | 12380340                | CC                              | TT              | 1946753363               |
| SNP_P4_20442_12380341 | NC_021161.1    | Ca_kabuli_chr02 | 12380341                | AA                              | CC              | 1946753365               |
| SNP_P4_20443_12384534 | NC_021161.1    | Ca_kabuli_chr02 | 12384534                | AA                              | TT              | 1946753367               |
| SNP_P4_20444_12384683 | NC_021161.1    | Ca_kabuli_chr02 | 12384683                | GG                              | AA              | 1946753368               |
| SNP_P4_20446_12399414 | NC_021161.1    | Ca_kabuli_chr02 | 12399414                | AA                              | GG              | 1946753370               |
| SNP_P4_20447_12431009 | NC_021161.1    | Ca_kabuli_chr02 | 12431009                | GG                              | AA              | 1946753372               |
| SNP_P4_20448_12435113 | NC_021161.1    | Ca_kabuli_chr02 | 12435113                | GG                              | TT              | 1946753374               |
| SNP_P4_20449_12435115 | NC_021161.1    | Ca_kabuli_chr02 | 12435115                | GG                              | AA              | 1946753375               |
| SNP_P4_20450_12435140 | NC_021161.1    | Ca_kabuli_chr02 | 12435140                | CC                              | AA              | 1946753377               |
| SNP_P4_20451_12435222 | NC_021161.1    | Ca_kabuli_chr02 | 12435222                | AA                              | CC              | 1946753379               |
| SNP_P4_20452_12435245 | NC_021161.1    | Ca_kabuli_chr02 | 12435245                | GG                              | AA              | 1946753381               |
| SNP_P4_20453_12435256 | NC_021161.1    | Ca_kabuli_chr02 | 12435256                | CC                              | TT              | 1946753383               |
| SNP_P4_20454_12435265 | NC_021161.1    | Ca_kabuli_chr02 | 12435265                | AA                              | GG              | 1946753385               |
| SNP_P4_20455_12435317 | NC_021161.1    | Ca_kabuli_chr02 | 12435317                | GG                              | AA              | 1946753387               |
| SNP_P4_20456_12469533 | NC_021161.1    | Ca_kabuli_chr02 | 12469533                | CC                              | GG              | 1946753389               |
| SNP_P4_20457_12472168 | NC_021161.1    | Ca_kabuli_chr02 | 12472168                | GG                              | TT              | 1946753391               |
| SNP_P4_20458_12472187 | NC_021161.1    | Ca_kabuli_chr02 | 12472187                | CC                              | GG              | 1946753393               |
| SNP_P4_20459_12475594 | NC_021161.1    | Ca_kabuli_chr02 | 12475594                | CC                              | TT              | 1946753395               |
| SNP_P4_20460_12475600 | NC_021161.1    | Ca_kabuli_chr02 | 12475600                | CC                              | TT              | 1946753397               |
| SNP_P4_20462_12475684 | NC_021161.1    | Ca_kabuli_chr02 | 12475684                | CC                              | TT              | 1946753399               |
| SNP_P4_20464_12493950 | NC_021161.1    | Ca_kabuli_chr02 | 12493950                | GG                              | AA              | 1946753400               |
| SNP_P4_20466_12496953 | NC_021161.1    | Ca_kabuli_chr02 | 12496953                | TT                              | CC              | 1946753402               |
| SNP_P4_20467_12526758 | NC_021161.1    | Ca_kabuli_chr02 | 12526758                | CC                              | TT              | 1946753404               |
| SNP_P4_20470_12581699 | NC_021161.1    | Ca_kabuli_chr02 | 12581699                | AA                              | GG              | 1946753406               |
| SNP_P4_20471_12581718 | NC_021161.1    | Ca_kabuli_chr02 | 12581718                | CC                              | AA              | 1946753408               |
| SNP_P4_20472_12581742 | NC_021161.1    | Ca_kabuli_chr02 | 12581742                | AA                              | GG              | 1946753409               |

| SNPs IDs              | Chromosome IDs | Chromosomes     | Physical positions (bp) | CDC Frontier (Reference genome) | (ILWC46 & LPNB) | NCBI SNPdb Accession IDs |
|-----------------------|----------------|-----------------|-------------------------|---------------------------------|-----------------|--------------------------|
| SNP_P4_20473_12583192 | NC_021161.1    | Ca_kabuli_chr02 | 12583192                | TT                              | GG              | 1946753411               |
| SNP_P4_20474_12584836 | NC_021161.1    | Ca_kabuli_chr02 | 12584836                | CC                              | TT              | 1946753414               |
| SNP_P4_20475_12585003 | NC_021161.1    | Ca_kabuli_chr02 | 12585003                | TT                              | AA              | 1946753416               |
| SNP_P4_20476_12585009 | NC_021161.1    | Ca_kabuli_chr02 | 12585009                | GG                              | AA              | 1946753419               |
| SNP_P4_20477_12585027 | NC_021161.1    | Ca_kabuli_chr02 | 12585027                | CC                              | TT              | 1946753421               |
| SNP_P4_20478_12585043 | NC_021161.1    | Ca_kabuli_chr02 | 12585043                | TT                              | CC              | 1946753423               |
| SNP_P4_20479_12588386 | NC_021161.1    | Ca_kabuli_chr02 | 12588386                | TT                              | AA              | 1946753425               |
| SNP_P4_20480_12602433 | NC_021161.1    | Ca_kabuli_chr02 | 12602433                | TT                              | CC              | 1946753427               |
| SNP_P4_20482_12639796 | NC_021161.1    | Ca_kabuli_chr02 | 12639796                | TT                              | CC              | 1946753429               |
| SNP_P4_20484_12676260 | NC_021161.1    | Ca_kabuli_chr02 | 12676260                | TT                              | CC              | 1946753430               |
| SNP_P4_20485_12676262 | NC_021161.1    | Ca_kabuli_chr02 | 12676262                | GG                              | CC              | 1946753432               |
| SNP_P4_20486_12676306 | NC_021161.1    | Ca_kabuli_chr02 | 12676306                | TT                              | CC              | 1946753434               |
| SNP_P4_20487_12680957 | NC_021161.1    | Ca_kabuli_chr02 | 12680957                | TT                              | GG              | 1946753436               |
| SNP_P4_20488_12684040 | NC_021161.1    | Ca_kabuli_chr02 | 12684040                | AA                              | GG              | 1946753438               |
| SNP_P4_20489_12684045 | NC_021161.1    | Ca_kabuli_chr02 | 12684045                | TT                              | CC              | 1946753440               |
| SNP_P4_20490_12689932 | NC_021161.1    | Ca_kabuli_chr02 | 12689932                | GG                              | AA              | 1946753442               |
| SNP_P4_20491_12690206 | NC_021161.1    | Ca_kabuli_chr02 | 12690206                | CC                              | TT              | 1946753444               |
| SNP_P4_20492_12690447 | NC_021161.1    | Ca_kabuli_chr02 | 12690447                | AA                              | TT              | 1946753446               |
| SNP_P4_20493_12772093 | NC_021161.1    | Ca_kabuli_chr02 | 12772093                | CC                              | TT              | 1946753448               |
| SNP_P4_20494_12785232 | NC_021161.1    | Ca_kabuli_chr02 | 12785232                | GG                              | AA              | 1946753450               |
| SNP_P4_20495_12785347 | NC_021161.1    | Ca_kabuli_chr02 | 12785347                | TT                              | CC              | 1946753452               |
| SNP_P4_20496_12785408 | NC_021161.1    | Ca_kabuli_chr02 | 12785408                | AA                              | TT              | 1946753454               |
| SNP_P4_20497_12785412 | NC_021161.1    | Ca_kabuli_chr02 | 12785412                | GG                              | AA              | 1946753456               |
| SNP_P4_20498_12837327 | NC_021161.1    | Ca_kabuli_chr02 | 12837327                | AA                              | GG              | 1946753458               |
| SNP_P4_20499_12837488 | NC_021161.1    | Ca_kabuli_chr02 | 12837488                | CC                              | TT              | 1946753460               |
| SNP_P4_20500_12843150 | NC_021161.1    | Ca_kabuli_chr02 | 12843150                | GG                              | AA              | 1946753462               |
| SNP_P4_20501_12843665 | NC_021161.1    | Ca_kabuli_chr02 | 12843665                | GG                              | AA              | 1946753464               |
| SNP_P4_20502_12855858 | NC_021161.1    | Ca_kabuli_chr02 | 12855858                | GG                              | AA              | 1946753466               |
| SNP_P4_20503_12931829 | NC_021161.1    | Ca_kabuli_chr02 | 12931829                | AA                              | CC              | 1946753468               |
| SNP_P4_20504_12931949 | NC_021161.1    | Ca_kabuli_chr02 | 12931949                | AA                              | TT              | 1946753470               |
| SNP_P4_20505_12932069 | NC_021161.1    | Ca_kabuli_chr02 | 12932069                | AA                              | GG              | 1946753472               |
| SNP_P4_20506_12932254 | NC_021161.1    | Ca_kabuli_chr02 | 12932254                | TT                              | AA              | 1946753474               |
| SNP_P4_20507_12932313 | NC_021161.1    | Ca_kabuli_chr02 | 12932313                | TT                              | CC              | 1946753476               |
| SNP_P4_20508_12932440 | NC_021161.1    | Ca_kabuli_chr02 | 12932440                | GG                              | TT              | 1946753478               |
| SNP_P4_20509_12932512 | NC_021161.1    | Ca_kabuli_chr02 | 12932512                | GG                              | AA              | 1946753480               |
| SNP_P4_20510_12932557 | NC_021161.1    | Ca_kabuli_chr02 | 12932557                | TT                              | AA              | 1946753482               |
| SNP_P4_20511_12932646 | NC_021161.1    | Ca_kabuli_chr02 | 12932646                | AA                              | CC              | 1946753484               |
| SNP_P4_20512_12932706 | NC_021161.1    | Ca_kabuli_chr02 | 12932706                | AA                              | GG              | 1946753486               |
| SNP_P4_20513_12932725 | NC_021161.1    | Ca_kabuli_chr02 | 12932725                | CC                              | TT              | 1946753487               |
| SNP_P4_20514_12932783 | NC_021161.1    | Ca_kabuli_chr02 | 12932783                | AA                              | GG              | 1946753489               |
| SNP_P4_20515_12932795 | NC_021161.1    | Ca_kabuli_chr02 | 12932795                | AA                              | GG              | 1946753491               |
| SNP_P4_20516_12932856 | NC_021161.1    | Ca_kabuli_chr02 | 12932856                | AA                              | GG              | 1946753493               |

| SNPs IDs              | Chromosome IDs | Chromosomes     | Physical positions (bp) | CDC Frontier (Reference genome) | (ILWC46 & LPNB) | NCBI SNPdb Accession IDs |
|-----------------------|----------------|-----------------|-------------------------|---------------------------------|-----------------|--------------------------|
| SNP_P4_20517_12932903 | NC_021161.1    | Ca_kabuli_chr02 | 12932903                | GG                              | CC              | 1946753495               |
| SNP_P4_20518_12933069 | NC_021161.1    | Ca_kabuli_chr02 | 12933069                | GG                              | AA              | 1946753497               |
| SNP_P4_20519_12933101 | NC_021161.1    | Ca_kabuli_chr02 | 12933101                | CC                              | TT              | 1946753499               |
| SNP_P4_20521_12933135 | NC_021161.1    | Ca_kabuli_chr02 | 12933135                | GG                              | AA              | 1946753501               |
| SNP_P4_20522_12933149 | NC_021161.1    | Ca_kabuli_chr02 | 12933149                | AA                              | GG              | 1946753503               |
| SNP_P4_20523_12933198 | NC_021161.1    | Ca_kabuli_chr02 | 12933198                | TT                              | CC              | 1946753504               |
| SNP_P4_20524_12933215 | NC_021161.1    | Ca_kabuli_chr02 | 12933215                | AA                              | TT              | 1946753506               |
| SNP_P4_20525_12933258 | NC_021161.1    | Ca_kabuli_chr02 | 12933258                | GG                              | CC              | 1946753508               |
| SNP_P4_20526_12933374 | NC_021161.1    | Ca_kabuli_chr02 | 12933374                | CC                              | GG              | 1946753510               |
| SNP_P4_20527_12933548 | NC_021161.1    | Ca_kabuli_chr02 | 12933548                | AA                              | CC              | 1946753512               |
| SNP_P4_20528_12933568 | NC_021161.1    | Ca_kabuli_chr02 | 12933568                | CC                              | TT              | 1946753514               |
| SNP_P4_20530_12933627 | NC_021161.1    | Ca_kabuli_chr02 | 12933627                | AA                              | GG              | 1946753516               |
| SNP_P4_20531_12933643 | NC_021161.1    | Ca_kabuli_chr02 | 12933643                | TT                              | CC              | 1946753518               |
| SNP_P4_20532_12933654 | NC_021161.1    | Ca_kabuli_chr02 | 12933654                | CC                              | TT              | 1946753521               |
| SNP_P4_20533_12933665 | NC_021161.1    | Ca_kabuli_chr02 | 12933665                | CC                              | TT              | 1946753523               |
| SNP_P4_20534_12933751 | NC_021161.1    | Ca_kabuli_chr02 | 12933751                | AA                              | TT              | 1946753525               |
| SNP_P4_20535_12933779 | NC_021161.1    | Ca_kabuli_chr02 | 12933779                | CC                              | TT              | 1946753527               |
| SNP_P4_20536_12933915 | NC_021161.1    | Ca_kabuli_chr02 | 12933915                | CC                              | GG              | 1946753529               |
| SNP_P4_20537_12934183 | NC_021161.1    | Ca_kabuli_chr02 | 12934183                | TT                              | AA              | 1946753531               |
| SNP_P4_20539_12934365 | NC_021161.1    | Ca_kabuli_chr02 | 12934365                | AA                              | GG              | 1946753533               |
| SNP_P4_20540_12934382 | NC_021161.1    | Ca_kabuli_chr02 | 12934382                | AA                              | CC              | 1946753535               |
| SNP_P4_20541_12934444 | NC_021161.1    | Ca_kabuli_chr02 | 12934444                | TT                              | CC              | 1946753537               |
| SNP_P4_20542_12934497 | NC_021161.1    | Ca_kabuli_chr02 | 12934497                | GG                              | AA              | 1946753539               |
| SNP_P4_20543_12934516 | NC_021161.1    | Ca_kabuli_chr02 | 12934516                | AA                              | TT              | 1946753541               |
| SNP_P4_20544_12934572 | NC_021161.1    | Ca_kabuli_chr02 | 12934572                | TT                              | GG              | 1946753543               |
| SNP_P4_20545_12934749 | NC_021161.1    | Ca_kabuli_chr02 | 12934749                | TT                              | AA              | 1946753545               |
| SNP_P4_20546_12934776 | NC_021161.1    | Ca_kabuli_chr02 | 12934776                | AA                              | CC              | 1946753547               |
| SNP_P4_20547_12934794 | NC_021161.1    | Ca_kabuli_chr02 | 12934794                | AA                              | GG              | 1946753549               |
| SNP_P4_20549_12935071 | NC_021161.1    | Ca_kabuli_chr02 | 12935071                | AA                              | TT              | 1946753551               |
| SNP_P4_20550_12935178 | NC_021161.1    | Ca_kabuli_chr02 | 12935178                | GG                              | AA              | 1946753553               |
| SNP_P4_20551_12935217 | NC_021161.1    | Ca_kabuli_chr02 | 12935217                | AA                              | GG              | 1946753555               |
| SNP_P4_20552_12935442 | NC_021161.1    | Ca_kabuli_chr02 | 12935442                | TT                              | GG              | 1946753557               |
| SNP_P4_20553_12935449 | NC_021161.1    | Ca_kabuli_chr02 | 12935449                | CC                              | TT              | 1946753559               |
| SNP_P4_20554_12935521 | NC_021161.1    | Ca_kabuli_chr02 | 12935521                | AA                              | GG              | 1946753563               |
| SNP_P4_20555_12935582 | NC_021161.1    | Ca_kabuli_chr02 | 12935582                | CC                              | TT              | 1946753564               |
| SNP_P4_20556_12935639 | NC_021161.1    | Ca_kabuli_chr02 | 12935639                | AA                              | GG              | 1946753566               |
| SNP_P4_20557_12935645 | NC_021161.1    | Ca_kabuli_chr02 | 12935645                | AA                              | GG              | 1946753568               |
| SNP_P4_20558_12935805 | NC_021161.1    | Ca_kabuli_chr02 | 12935805                | GG                              | AA              | 1946753570               |
| SNP_P4_20559_12935824 | NC_021161.1    | Ca_kabuli_chr02 | 12935824                | TT                              | CC              | 1946753572               |
| SNP_P4_20560_12935932 | NC_021161.1    | Ca_kabuli_chr02 | 12935932                | TT                              | GG              | 1946753574               |
| SNP_P4_20561_12935948 | NC_021161.1    | Ca_kabuli_chr02 | 12935948                | TT                              | CC              | 1946753576               |
| SNP_P4_20562_12936060 | NC_021161.1    | Ca_kabuli_chr02 | 12936060                | CC                              | TT              | 1946753578               |

| SNPs IDs              | Chromosome IDs | Chromosomes     | Physical positions (bp) | CDC Frontier (Reference genome) | (ILWC46 & LPNB) | NCBI SNPdb Accession IDs |
|-----------------------|----------------|-----------------|-------------------------|---------------------------------|-----------------|--------------------------|
| SNP_P4_20563_12936096 | NC_021161.1    | Ca_kabuli_chr02 | 12936096                | TT                              | AA              | 1946753581               |
| SNP_P4_20564_12936177 | NC_021161.1    | Ca_kabuli_chr02 | 12936177                | AA                              | GG              | 1946753583               |
| SNP_P4_20565_12936246 | NC_021161.1    | Ca_kabuli_chr02 | 12936246                | AA                              | GG              | 1946753585               |
| SNP_P4_20566_12936329 | NC_021161.1    | Ca_kabuli_chr02 | 12936329                | GG                              | TT              | 1946753587               |
| SNP_P4_20567_12936360 | NC_021161.1    | Ca_kabuli_chr02 | 12936360                | GG                              | CC              | 1946753589               |
| SNP_P4_20568_12936559 | NC_021161.1    | Ca_kabuli_chr02 | 12936559                | TT                              | AA              | 1946753590               |
| SNP_P4_20569_12936657 | NC_021161.1    | Ca_kabuli_chr02 | 12936657                | CC                              | TT              | 1946753592               |
| SNP_P4_20570_12936658 | NC_021161.1    | Ca_kabuli_chr02 | 12936658                | AA                              | GG              | 1946753594               |
| SNP_P4_20571_12936662 | NC_021161.1    | Ca_kabuli_chr02 | 12936662                | GG                              | AA              | 1946753596               |
| SNP_P4_20572_12936741 | NC_021161.1    | Ca_kabuli_chr02 | 12936741                | AA                              | GG              | 1946753598               |
| SNP_P4_20573_12937028 | NC_021161.1    | Ca_kabuli_chr02 | 12937028                | AA                              | GG              | 1946753600               |
| SNP_P4_20574_12937051 | NC_021161.1    | Ca_kabuli_chr02 | 12937051                | CC                              | TT              | 1946753602               |
| SNP_P4_20575_12937059 | NC_021161.1    | Ca_kabuli_chr02 | 12937059                | CC                              | AA              | 1946753605               |
| SNP_P4_20576_12937070 | NC_021161.1    | Ca_kabuli_chr02 | 12937070                | TT                              | AA              | 1946753607               |
| SNP_P4_20577_12937071 | NC_021161.1    | Ca_kabuli_chr02 | 12937071                | GG                              | AA              | 1946753609               |
| SNP_P4_20578_12937177 | NC_021161.1    | Ca_kabuli_chr02 | 12937177                | CC                              | TT              | 1946753611               |
| SNP_P4_20579_12937180 | NC_021161.1    | Ca_kabuli_chr02 | 12937180                | AA                              | TT              | 1946753613               |
| SNP_P4_20580_12937185 | NC_021161.1    | Ca_kabuli_chr02 | 12937185                | CC                              | TT              | 1946753615               |
| SNP_P4_20581_12937265 | NC_021161.1    | Ca_kabuli_chr02 | 12937265                | TT                              | AA              | 1946753617               |
| SNP_P4_20582_12937368 | NC_021161.1    | Ca_kabuli_chr02 | 12937368                | AA                              | GG              | 1946753619               |
| SNP_P4_20583_12937377 | NC_021161.1    | Ca_kabuli_chr02 | 12937377                | TT                              | CC              | 1946753621               |
| SNP_P4_20584_12937379 | NC_021161.1    | Ca_kabuli_chr02 | 12937379                | AA                              | TT              | 1946753623               |
| SNP_P4_20585_12937426 | NC_021161.1    | Ca_kabuli_chr02 | 12937426                | CC                              | AA              | 1946753625               |
| SNP_P4_20586_12937445 | NC_021161.1    | Ca_kabuli_chr02 | 12937445                | CC                              | AA              | 1946753627               |
| SNP_P4_20587_12937451 | NC_021161.1    | Ca_kabuli_chr02 | 12937451                | CC                              | AA              | 1946753629               |
| SNP_P4_20588_12937472 | NC_021161.1    | Ca_kabuli_chr02 | 12937472                | CC                              | TT              | 1946753631               |
| SNP_P4_20589_12937522 | NC_021161.1    | Ca_kabuli_chr02 | 12937522                | TT                              | AA              | 1946753633               |
| SNP_P4_20590_12937572 | NC_021161.1    | Ca_kabuli_chr02 | 12937572                | AA                              | CC              | 1946753635               |
| SNP_P4_20592_12937663 | NC_021161.1    | Ca_kabuli_chr02 | 12937663                | AA                              | CC              | 1946753637               |
| SNP_P4_20593_12937683 | NC_021161.1    | Ca_kabuli_chr02 | 12937683                | CC                              | TT              | 1946753639               |
| SNP_P4_20594_12937684 | NC_021161.1    | Ca_kabuli_chr02 | 12937684                | TT                              | CC              | 1946753641               |
| SNP_P4_20595_12937693 | NC_021161.1    | Ca_kabuli_chr02 | 12937693                | CC                              | TT              | 1946753643               |
| SNP_P4_20596_12937825 | NC_021161.1    | Ca_kabuli_chr02 | 12937825                | AA                              | TT              | 1946753644               |
| SNP_P4_20597_12937896 | NC_021161.1    | Ca_kabuli_chr02 | 12937896                | AA                              | GG              | 1946753646               |
| SNP_P4_20598_12937966 | NC_021161.1    | Ca_kabuli_chr02 | 12937966                | TT                              | AA              | 1946753648               |
| SNP_P4_20599_12939274 | NC_021161.1    | Ca_kabuli_chr02 | 12939274                | GG                              | CC              | 1946753650               |
| SNP_P4_20600_12939296 | NC_021161.1    | Ca_kabuli_chr02 | 12939296                | CC                              | GG              | 1946753652               |
| SNP_P4_20601_12939560 | NC_021161.1    | Ca_kabuli_chr02 | 12939560                | TT                              | CC              | 1946753654               |
| SNP_P4_20603_12939751 | NC_021161.1    | Ca_kabuli_chr02 | 12939751                | AA                              | TT              | 1946753656               |
| SNP_P4_20604_12940026 | NC_021161.1    | Ca_kabuli_chr02 | 12940026                | GG                              | AA              | 1946753658               |
| SNP_P4_20605_12940347 | NC_021161.1    | Ca_kabuli_chr02 | 12940347                | GG                              | TT              | 1946753660               |
| SNP_P4_20606_12940554 | NC_021161.1    | Ca_kabuli_chr02 | 12940554                | GG                              | CC              | 1946753662               |



| SNPs IDs              | Chromosome IDs | Chromosomes     | Physical positions (bp) | CDC Frontier (Reference genome) | (ILWC46 & LPNB) | NCBI SNPdb Accession IDs |
|-----------------------|----------------|-----------------|-------------------------|---------------------------------|-----------------|--------------------------|
| SNP_P4_20607_12940590 | NC_021161.1    | Ca_kabuli_chr02 | 12940590                | AA                              | GG              | 1946753664               |
| SNP_P4_20608_12940634 | NC_021161.1    | Ca_kabuli_chr02 | 12940634                | TT                              | AA              | 1946753666               |
| SNP_P4_20609_12940667 | NC_021161.1    | Ca_kabuli_chr02 | 12940667                | TT                              | CC              | 1946753668               |
| SNP_P4_20610_12940809 | NC_021161.1    | Ca_kabuli_chr02 | 12940809                | AA                              | GG              | 1946753670               |
| SNP_P4_20611_12940985 | NC_021161.1    | Ca_kabuli_chr02 | 12940985                | TT                              | CC              | 1946753673               |
| SNP_P4_20612_12941032 | NC_021161.1    | Ca_kabuli_chr02 | 12941032                | GG                              | AA              | 1946753675               |
| SNP_P4_20613_12941052 | NC_021161.1    | Ca_kabuli_chr02 | 12941052                | AA                              | GG              | 1946753677               |
| SNP_P4_20614_12941162 | NC_021161.1    | Ca_kabuli_chr02 | 12941162                | AA                              | GG              | 1946753679               |
| SNP_P4_20616_12941376 | NC_021161.1    | Ca_kabuli_chr02 | 12941376                | AA                              | CC              | 1946753681               |
| SNP_P4_20617_12941452 | NC_021161.1    | Ca_kabuli_chr02 | 12941452                | AA                              | TT              | 1946753683               |
| SNP_P4_20618_12941511 | NC_021161.1    | Ca_kabuli_chr02 | 12941511                | GG                              | AA              | 1946753685               |
| SNP_P4_20619_12941535 | NC_021161.1    | Ca_kabuli_chr02 | 12941535                | AA                              | GG              | 1946753687               |
| SNP_P4_20620_12941537 | NC_021161.1    | Ca_kabuli_chr02 | 12941537                | GG                              | CC              | 1946753689               |
| SNP_P4_20621_12941742 | NC_021161.1    | Ca_kabuli_chr02 | 12941742                | CC                              | AA              | 1946753691               |
| SNP_P4_20623_12941838 | NC_021161.1    | Ca_kabuli_chr02 | 12941838                | CC                              | TT              | 1946753693               |
| SNP_P4_20624_12941843 | NC_021161.1    | Ca_kabuli_chr02 | 12941843                | TT                              | CC              | 1946753696               |
| SNP_P4_20625_12941877 | NC_021161.1    | Ca_kabuli_chr02 | 12941877                | AA                              | CC              | 1946753698               |
| SNP_P4_20626_12941902 | NC_021161.1    | Ca_kabuli_chr02 | 12941902                | GG                              | AA              | 1946753700               |
| SNP_P4_20627_12942029 | NC_021161.1    | Ca_kabuli_chr02 | 12942029                | CC                              | TT              | 1946753702               |
| SNP_P4_20628_12942158 | NC_021161.1    | Ca_kabuli_chr02 | 12942158                | AA                              | GG              | 1946753704               |
| SNP_P4_20629_12942218 | NC_021161.1    | Ca_kabuli_chr02 | 12942218                | TT                              | GG              | 1946753706               |
| SNP_P4_20630_12942223 | NC_021161.1    | Ca_kabuli_chr02 | 12942223                | GG                              | AA              | 1946753708               |
| SNP_P4_20631_12942260 | NC_021161.1    | Ca_kabuli_chr02 | 12942260                | AA                              | CC              | 1946753710               |
| SNP_P4_20633_12946904 | NC_021161.1    | Ca_kabuli_chr02 | 12946904                | AA                              | TT              | 1946753712               |
| SNP_P4_20634_12947074 | NC_021161.1    | Ca_kabuli_chr02 | 12947074                | GG                              | TT              | 1946753713               |
| SNP_P4_20636_12948047 | NC_021161.1    | Ca_kabuli_chr02 | 12948047                | CC                              | TT              | 1946753715               |
| SNP_P4_20637_12948167 | NC_021161.1    | Ca_kabuli_chr02 | 12948167                | AA                              | GG              | 1946753717               |
| SNP_P4_20638_12948606 | NC_021161.1    | Ca_kabuli_chr02 | 12948606                | CC                              | TT              | 1946753719               |
| SNP_P4_20639_12948609 | NC_021161.1    | Ca_kabuli_chr02 | 12948609                | CC                              | TT              | 1946753721               |
| SNP_P4_20640_12949123 | NC_021161.1    | Ca_kabuli_chr02 | 12949123                | AA                              | TT              | 1946753722               |
| SNP_P4_20641_12949132 | NC_021161.1    | Ca_kabuli_chr02 | 12949132                | GG                              | AA              | 1946753723               |
| SNP_P4_20642_12949188 | NC_021161.1    | Ca_kabuli_chr02 | 12949188                | GG                              | AA              | 1946753725               |
| SNP_P4_20643_12949192 | NC_021161.1    | Ca_kabuli_chr02 | 12949192                | GG                              | TT              | 1946753727               |
| SNP_P4_20644_12949628 | NC_021161.1    | Ca_kabuli_chr02 | 12949628                | CC                              | TT              | 1946753729               |
| SNP_P4_20645_12949637 | NC_021161.1    | Ca_kabuli_chr02 | 12949637                | CC                              | TT              | 1946753731               |
| SNP_P4_20646_12949881 | NC_021161.1    | Ca_kabuli_chr02 | 12949881                | GG                              | AA              | 1946753733               |
| SNP_P4_20647_12950095 | NC_021161.1    | Ca_kabuli_chr02 | 12950095                | CC                              | TT              | 1946753735               |
| SNP_P4_20648_12950303 | NC_021161.1    | Ca_kabuli_chr02 | 12950303                | AA                              | CC              | 1946753737               |
| SNP_P4_20649_12950357 | NC_021161.1    | Ca_kabuli_chr02 | 12950357                | TT                              | AA              | 1946753739               |
| SNP_P4_20650_12950375 | NC_021161.1    | Ca_kabuli_chr02 | 12950375                | AA                              | CC              | 1946753741               |
| SNP_P4_20651_12951621 | NC_021161.1    | Ca_kabuli_chr02 | 12951621                | CC                              | AA              | 1946753743               |
| SNP_P4_20652_12951632 | NC_021161.1    | Ca_kabuli_chr02 | 12951632                | AA                              | GG              | 1946753745               |

| SNPs IDs              | Chromosome IDs | Chromosomes     | Physical positions (bp) | CDC Frontier (Reference genome) | (ILWC46 & LPNB) | NCBI SNPdb Accession IDs |
|-----------------------|----------------|-----------------|-------------------------|---------------------------------|-----------------|--------------------------|
| SNP_P4_20653_12951649 | NC_021161.1    | Ca_kabuli_chr02 | 12951649                | TT                              | CC              | 1946753747               |
| SNP_P4_20654_12951684 | NC_021161.1    | Ca_kabuli_chr02 | 12951684                | GG                              | AA              | 1946753749               |
| SNP_P4_20655_12951701 | NC_021161.1    | Ca_kabuli_chr02 | 12951701                | GG                              | AA              | 1946753751               |
| SNP_P4_20656_12951955 | NC_021161.1    | Ca_kabuli_chr02 | 12951955                | GG                              | AA              | 1946753753               |
| SNP_P4_20657_12952122 | NC_021161.1    | Ca_kabuli_chr02 | 12952122                | TT                              | AA              | 1946753755               |
| SNP_P4_20658_12952300 | NC_021161.1    | Ca_kabuli_chr02 | 12952300                | TT                              | GG              | 1946753757               |
| SNP_P4_20659_12952375 | NC_021161.1    | Ca_kabuli_chr02 | 12952375                | TT                              | CC              | 1946753759               |
| SNP_P4_20660_12952438 | NC_021161.1    | Ca_kabuli_chr02 | 12952438                | GG                              | AA              | 1946753761               |
| SNP_P4_20662_12952924 | NC_021161.1    | Ca_kabuli_chr02 | 12952924                | GG                              | AA              | 1946753763               |
| SNP_P4_20664_12953534 | NC_021161.1    | Ca_kabuli_chr02 | 12953534                | AA                              | GG              | 1946753765               |
| SNP_P4_20665_12953555 | NC_021161.1    | Ca_kabuli_chr02 | 12953555                | TT                              | CC              | 1946753767               |
| SNP_P4_20666_12953578 | NC_021161.1    | Ca_kabuli_chr02 | 12953578                | AA                              | GG              | 1946753769               |
| SNP_P4_20667_12954224 | NC_021161.1    | Ca_kabuli_chr02 | 12954224                | GG                              | AA              | 1946753771               |
| SNP_P4_20668_12959693 | NC_021161.1    | Ca_kabuli_chr02 | 12959693                | AA                              | GG              | 1946753773               |
| SNP_P4_20669_12959961 | NC_021161.1    | Ca_kabuli_chr02 | 12959961                | AA                              | GG              | 1946753775               |
| SNP_P4_20670_12959975 | NC_021161.1    | Ca_kabuli_chr02 | 12959975                | CC                              | AA              | 1946753777               |
| SNP_P4_20671_12960112 | NC_021161.1    | Ca_kabuli_chr02 | 12960112                | TT                              | GG              | 1946753779               |
| SNP_P4_20672_12960138 | NC_021161.1    | Ca_kabuli_chr02 | 12960138                | AA                              | GG              | 1946753781               |
| SNP_P4_20673_12960179 | NC_021161.1    | Ca_kabuli_chr02 | 12960179                | TT                              | AA              | 1946753783               |
| SNP_P4_20674_12960197 | NC_021161.1    | Ca_kabuli_chr02 | 12960197                | CC                              | TT              | 1946753785               |
| SNP_P4_20675_12960263 | NC_021161.1    | Ca_kabuli_chr02 | 12960263                | AA                              | CC              | 1946753787               |
| SNP_P4_20677_12960309 | NC_021161.1    | Ca_kabuli_chr02 | 12960309                | TT                              | AA              | 1946753789               |
| SNP_P4_20678_12960530 | NC_021161.1    | Ca_kabuli_chr02 | 12960530                | CC                              | GG              | 1946753791               |
| SNP_P4_20679_12960568 | NC_021161.1    | Ca_kabuli_chr02 | 12960568                | AA                              | GG              | 1946753793               |
| SNP_P4_20680_12960864 | NC_021161.1    | Ca_kabuli_chr02 | 12960864                | GG                              | AA              | 1946753794               |
| SNP_P4_20682_12987750 | NC_021161.1    | Ca_kabuli_chr02 | 12987750                | AA                              | GG              | 1946753796               |
| SNP_P4_20683_12994069 | NC_021161.1    | Ca_kabuli_chr02 | 12994069                | CC                              | AA              | 1946753798               |
| SNP_P4_20684_12994214 | NC_021161.1    | Ca_kabuli_chr02 | 12994214                | GG                              | AA              | 1946753800               |
| SNP_P4_20685_12994250 | NC_021161.1    | Ca_kabuli_chr02 | 12994250                | AA                              | TT              | 1946753802               |
| SNP_P4_20686_12994277 | NC_021161.1    | Ca_kabuli_chr02 | 12994277                | AA                              | GG              | 1946753804               |
| SNP_P4_20687_13009088 | NC_021161.1    | Ca_kabuli_chr02 | 13009088                | TT                              | AA              | 1946753806               |
| SNP_P4_20688_13020448 | NC_021161.1    | Ca_kabuli_chr02 | 13020448                | TT                              | CC              | 1946753808               |
| SNP_P4_20689_13020905 | NC_021161.1    | Ca_kabuli_chr02 | 13020905                | CC                              | TT              | 1946753810               |
| SNP_P4_20690_13021307 | NC_021161.1    | Ca_kabuli_chr02 | 13021307                | AA                              | GG              | 1946753812               |
| SNP_P4_20691_13026234 | NC_021161.1    | Ca_kabuli_chr02 | 13026234                | AA                              | CC              | 1946753814               |
| SNP_P4_20692_13026247 | NC_021161.1    | Ca_kabuli_chr02 | 13026247                | TT                              | AA              | 1946753816               |
| SNP_P4_20693_13026451 | NC_021161.1    | Ca_kabuli_chr02 | 13026451                | TT                              | CC              | 1946753817               |
| SNP_P4_20694_13026481 | NC_021161.1    | Ca_kabuli_chr02 | 13026481                | TT                              | AA              | 1946753819               |
| SNP_P4_20695_13026512 | NC_021161.1    | Ca_kabuli_chr02 | 13026512                | CC                              | TT              | 1946753821               |
| SNP_P4_20696_13026514 | NC_021161.1    | Ca_kabuli_chr02 | 13026514                | AA                              | GG              | 1946753823               |
| SNP_P4_20697_13026530 | NC_021161.1    | Ca_kabuli_chr02 | 13026530                | GG                              | AA              | 1946753824               |
| SNP_P4_20698_13026537 | NC_021161.1    | Ca_kabuli_chr02 | 13026537                | GG                              | AA              | 1946753826               |

| SNPs IDs              | Chromosome IDs | Chromosomes     | Physical positions (bp) | CDC Frontier (Reference genome) | (ILWC46 & LPNB) | NCBI SNPdb Accession IDs |
|-----------------------|----------------|-----------------|-------------------------|---------------------------------|-----------------|--------------------------|
| SNP_P4_20699_13026563 | NC_021161.1    | Ca_kabuli_chr02 | 13026563                | AA                              | TT              | 1946753828               |
| SNP_P4_20700_13026571 | NC_021161.1    | Ca_kabuli_chr02 | 13026571                | AA                              | GG              | 1946753830               |
| SNP_P4_20701_13026605 | NC_021161.1    | Ca_kabuli_chr02 | 13026605                | TT                              | AA              | 1946753832               |
| SNP_P4_20702_13027627 | NC_021161.1    | Ca_kabuli_chr02 | 13027627                | TT                              | AA              | 1946753834               |
| SNP_P4_20703_13027643 | NC_021161.1    | Ca_kabuli_chr02 | 13027643                | GG                              | AA              | 1946753836               |
| SNP_P4_20704_13028033 | NC_021161.1    | Ca_kabuli_chr02 | 13028033                | AA                              | GG              | 1946753838               |
| SNP_P4_20705_13120547 | NC_021161.1    | Ca_kabuli_chr02 | 13120547                | GG                              | CC              | 1946753840               |
| SNP_P4_20706_13142649 | NC_021161.1    | Ca_kabuli_chr02 | 13142649                | TT                              | CC              | 1946753842               |
| SNP_P4_20707_13142651 | NC_021161.1    | Ca_kabuli_chr02 | 13142651                | TT                              | CC              | 1946753843               |
| SNP_P4_20710_13234554 | NC_021161.1    | Ca_kabuli_chr02 | 13234554                | AA                              | GG              | 1946753845               |
| SNP_P4_20711_13234555 | NC_021161.1    | Ca_kabuli_chr02 | 13234555                | TT                              | GG              | 1946753847               |
| SNP_P4_20712_13268265 | NC_021161.1    | Ca_kabuli_chr02 | 13268265                | CC                              | TT              | 1946753849               |
| SNP_P4_20713_13270501 | NC_021161.1    | Ca_kabuli_chr02 | 13270501                | GG                              | AA              | 1946753851               |
| SNP_P4_20714_13270533 | NC_021161.1    | Ca_kabuli_chr02 | 13270533                | GG                              | CC              | 1946753853               |
| SNP_P4_20716_13297834 | NC_021161.1    | Ca_kabuli_chr02 | 13297834                | TT                              | CC              | 1946753855               |
| SNP_P4_20717_13298144 | NC_021161.1    | Ca_kabuli_chr02 | 13298144                | GG                              | AA              | 1946753857               |
| SNP_P4_20718_13319513 | NC_021161.1    | Ca_kabuli_chr02 | 13319513                | AA                              | GG              | 1946753858               |
| SNP_P4_20719_13338255 | NC_021161.1    | Ca_kabuli_chr02 | 13338255                | AA                              | GG              | 1946753860               |
| SNP_P4_20720_13347443 | NC_021161.1    | Ca_kabuli_chr02 | 13347443                | GG                              | AA              | 1946753862               |
| SNP_P4_20721_13359638 | NC_021161.1    | Ca_kabuli_chr02 | 13359638                | CC                              | GG              | 1946753864               |
| SNP_P4_20722_13365438 | NC_021161.1    | Ca_kabuli_chr02 | 13365438                | AA                              | GG              | 1946753865               |
| SNP_P4_20723_13365478 | NC_021161.1    | Ca_kabuli_chr02 | 13365478                | TT                              | CC              | 1946753867               |
| SNP_P4_20724_13365487 | NC_021161.1    | Ca_kabuli_chr02 | 13365487                | TT                              | GG              | 1946753869               |
| SNP_P4_20725_13365546 | NC_021161.1    | Ca_kabuli_chr02 | 13365546                | CC                              | TT              | 1946753873               |
| SNP_P4_20726_13365650 | NC_021161.1    | Ca_kabuli_chr02 | 13365650                | AA                              | TT              | 1946753875               |
| SNP_P4_20727_13365688 | NC_021161.1    | Ca_kabuli_chr02 | 13365688                | TT                              | AA              | 1946753877               |
| SNP_P4_20728_13365704 | NC_021161.1    | Ca_kabuli_chr02 | 13365704                | AA                              | CC              | 1946753879               |
| SNP_P4_20729_13365722 | NC_021161.1    | Ca_kabuli_chr02 | 13365722                | AA                              | CC              | 1946753881               |
| SNP_P4_20730_13365735 | NC_021161.1    | Ca_kabuli_chr02 | 13365735                | GG                              | AA              | 1946753883               |
| SNP_P4_20731_13365950 | NC_021161.1    | Ca_kabuli_chr02 | 13365950                | AA                              | GG              | 1946753885               |
| SNP_P4_20732_13368424 | NC_021161.1    | Ca_kabuli_chr02 | 13368424                | TT                              | CC              | 1946753887               |
| SNP_P4_20733_13368440 | NC_021161.1    | Ca_kabuli_chr02 | 13368440                | GG                              | AA              | 1946753889               |
| SNP_P4_20734_13369480 | NC_021161.1    | Ca_kabuli_chr02 | 13369480                | GG                              | AA              | 1946753890               |
| SNP_P4_20735_13373149 | NC_021161.1    | Ca_kabuli_chr02 | 13373149                | TT                              | CC              | 1946753892               |
| SNP_P4_20736_13400166 | NC_021161.1    | Ca_kabuli_chr02 | 13400166                | TT                              | CC              | 1946753894               |
| SNP_P4_20737_13400417 | NC_021161.1    | Ca_kabuli_chr02 | 13400417                | AA                              | GG              | 1946753896               |
| SNP_P4_20738_13400798 | NC_021161.1    | Ca_kabuli_chr02 | 13400798                | TT                              | GG              | 1946753898               |
| SNP_P4_20739_13444691 | NC_021161.1    | Ca_kabuli_chr02 | 13444691                | AA                              | TT              | 1946753900               |
| SNP_P4_20740_13444693 | NC_021161.1    | Ca_kabuli_chr02 | 13444693                | AA                              | TT              | 1946753901               |
| SNP_P4_20741_13519025 | NC_021161.1    | Ca_kabuli_chr02 | 13519025                | AA                              | GG              | 1946753903               |
| SNP_P4_20742_13584155 | NC_021161.1    | Ca_kabuli_chr02 | 13584155                | GG                              | AA              | 1946753905               |
| SNP_P4_20743_13584547 | NC_021161.1    | Ca_kabuli_chr02 | 13584547                | TT                              | AA              | 1946753906               |

| SNPs IDs              | Chromosome IDs | Chromosomes     | Physical positions (bp) | CDC Frontier (Reference genome) | (ILWC46 & LPNB) | NCBI SNPdb Accession IDs |
|-----------------------|----------------|-----------------|-------------------------|---------------------------------|-----------------|--------------------------|
| SNP_P4_20744_13639348 | NC_021161.1    | Ca_kabuli_chr02 | 13639348                | TT                              | CC              | 1946753908               |
| SNP_P4_20745_13639364 | NC_021161.1    | Ca_kabuli_chr02 | 13639364                | CC                              | AA              | 1946753910               |
| SNP_P4_20747_13639873 | NC_021161.1    | Ca_kabuli_chr02 | 13639873                | GG                              | AA              | 1946753912               |
| SNP_P4_20748_13694933 | NC_021161.1    | Ca_kabuli_chr02 | 13694933                | TT                              | GG              | 1946753914               |
| SNP_P4_20749_13695383 | NC_021161.1    | Ca_kabuli_chr02 | 13695383                | AA                              | GG              | 1946753916               |
| SNP_P4_20750_13695415 | NC_021161.1    | Ca_kabuli_chr02 | 13695415                | TT                              | GG              | 1946753918               |
| SNP_P4_20751_13695430 | NC_021161.1    | Ca_kabuli_chr02 | 13695430                | TT                              | GG              | 1946753920               |
| SNP_P4_20752_13707418 | NC_021161.1    | Ca_kabuli_chr02 | 13707418                | TT                              | CC              | 1946753922               |
| SNP_P4_20753_13728323 | NC_021161.1    | Ca_kabuli_chr02 | 13728323                | AA                              | TT              | 1946753924               |
| SNP_P4_20756_13785916 | NC_021161.1    | Ca_kabuli_chr02 | 13785916                | GG                              | AA              | 1946753926               |
| SNP_P4_20758_13796883 | NC_021161.1    | Ca_kabuli_chr02 | 13796883                | GG                              | TT              | 1946753928               |
| SNP_P4_20759_13807506 | NC_021161.1    | Ca_kabuli_chr02 | 13807506                | GG                              | TT              | 1946753930               |
| SNP_P4_20760_13807523 | NC_021161.1    | Ca_kabuli_chr02 | 13807523                | GG                              | AA              | 1946753932               |
| SNP_P4_20761_13807544 | NC_021161.1    | Ca_kabuli_chr02 | 13807544                | GG                              | AA              | 1946753934               |
| SNP_P4_20762_13807594 | NC_021161.1    | Ca_kabuli_chr02 | 13807594                | GG                              | AA              | 1946753936               |
| SNP_P4_20763_13807814 | NC_021161.1    | Ca_kabuli_chr02 | 13807814                | GG                              | TT              | 1946753937               |
| SNP_P4_20764_13808084 | NC_021161.1    | Ca_kabuli_chr02 | 13808084                | CC                              | TT              | 1946753939               |
| SNP_P4_20765_13808127 | NC_021161.1    | Ca_kabuli_chr02 | 13808127                | CC                              | AA              | 1946753941               |
| SNP_P4_20766_13808354 | NC_021161.1    | Ca_kabuli_chr02 | 13808354                | TT                              | AA              | 1946753943               |
| SNP_P4_20767_13840637 | NC_021161.1    | Ca_kabuli_chr02 | 13840637                | TT                              | CC              | 1946753945               |
| SNP_P4_20769_13879934 | NC_021161.1    | Ca_kabuli_chr02 | 13879934                | CC                              | GG              | 1946753947               |
| SNP_P4_20770_13879938 | NC_021161.1    | Ca_kabuli_chr02 | 13879938                | CC                              | TT              | 1946753949               |
| SNP_P4_20771_13880077 | NC_021161.1    | Ca_kabuli_chr02 | 13880077                | GG                              | TT              | 1946753951               |
| SNP_P4_20772_13880201 | NC_021161.1    | Ca_kabuli_chr02 | 13880201                | AA                              | TT              | 1946753952               |
| SNP_P4_20773_13880251 | NC_021161.1    | Ca_kabuli_chr02 | 13880251                | GG                              | TT              | 1946753954               |
| SNP_P4_20774_13909164 | NC_021161.1    | Ca_kabuli_chr02 | 13909164                | TT                              | CC              | 1946753956               |
| SNP_P4_20775_13909449 | NC_021161.1    | Ca_kabuli_chr02 | 13909449                | AA                              | TT              | 1946753958               |
| SNP_P4_20776_13909466 | NC_021161.1    | Ca_kabuli_chr02 | 13909466                | TT                              | CC              | 1946753960               |
| SNP_P4_20777_13909471 | NC_021161.1    | Ca_kabuli_chr02 | 13909471                | CC                              | GG              | 1946753962               |
| SNP_P4_20778_13909481 | NC_021161.1    | Ca_kabuli_chr02 | 13909481                | TT                              | AA              | 1946753963               |
| SNP_P4_20780_13922631 | NC_021161.1    | Ca_kabuli_chr02 | 13922631                | CC                              | AA              | 1946753964               |
| SNP_P4_20781_13923419 | NC_021161.1    | Ca_kabuli_chr02 | 13923419                | GG                              | CC              | 1946753966               |
| SNP_P4_20783_13923648 | NC_021161.1    | Ca_kabuli_chr02 | 13923648                | GG                              | CC              | 1946753967               |
| SNP_P4_20784_13923891 | NC_021161.1    | Ca_kabuli_chr02 | 13923891                | AA                              | CC              | 1946753969               |
| SNP_P4_20785_13925091 | NC_021161.1    | Ca_kabuli_chr02 | 13925091                | CC                              | GG              | 1946753971               |
| SNP_P4_20786_13955242 | NC_021161.1    | Ca_kabuli_chr02 | 13955242                | TT                              | AA              | 1946753973               |
| SNP_P4_20787_13956332 | NC_021161.1    | Ca_kabuli_chr02 | 13956332                | TT                              | CC              | 1946753975               |
| SNP_P4_20788_13956364 | NC_021161.1    | Ca_kabuli_chr02 | 13956364                | AA                              | CC              | 1946753977               |
| SNP_P4_20792_13957910 | NC_021161.1    | Ca_kabuli_chr02 | 13957910                | CC                              | AA              | 1946753979               |
| SNP_P4_20793_13957935 | NC_021161.1    | Ca_kabuli_chr02 | 13957935                | GG                              | TT              | 1946753981               |
| SNP_P4_20794_13957982 | NC_021161.1    | Ca_kabuli_chr02 | 13957982                | AA                              | CC              | 1946753983               |
| SNP_P4_20795_13958182 | NC_021161.1    | Ca_kabuli_chr02 | 13958182                | AA                              | TT              | 1946753985               |

| SNPs IDs              | Chromosome IDs | Chromosomes     | Physical positions (bp) | CDC Frontier (Reference genome) | (ILWC46 & LPNB) | NCBI SNPdb Accession IDs |
|-----------------------|----------------|-----------------|-------------------------|---------------------------------|-----------------|--------------------------|
| SNP_P4_20796_13989506 | NC_021161.1    | Ca_kabuli_chr02 | 13989506                | GG                              | AA              | 1946753987               |
| SNP_P4_20797_14025786 | NC_021161.1    | Ca_kabuli_chr02 | 14025786                | GG                              | AA              | 1946753989               |
| SNP_P4_20798_14025803 | NC_021161.1    | Ca_kabuli_chr02 | 14025803                | TT                              | AA              | 1946753991               |
| SNP_P4_20799_14025834 | NC_021161.1    | Ca_kabuli_chr02 | 14025834                | TT                              | AA              | 1946753992               |
| SNP_P4_20800_14025970 | NC_021161.1    | Ca_kabuli_chr02 | 14025970                | TT                              | CC              | 1946753994               |
| SNP_P4_20801_14028949 | NC_021161.1    | Ca_kabuli_chr02 | 14028949                | AA                              | GG              | 1946753996               |
| SNP_P4_20802_14028950 | NC_021161.1    | Ca_kabuli_chr02 | 14028950                | AA                              | TT              | 1946753998               |
| SNP_P4_20804_14041056 | NC_021161.1    | Ca_kabuli_chr02 | 14041056                | GG                              | CC              | 1946754000               |
| SNP_P4_20805_14041632 | NC_021161.1    | Ca_kabuli_chr02 | 14041632                | CC                              | TT              | 1946754002               |
| SNP_P4_20806_14044472 | NC_021161.1    | Ca_kabuli_chr02 | 14044472                | CC                              | TT              | 1946754004               |
| SNP_P4_20807_14044501 | NC_021161.1    | Ca_kabuli_chr02 | 14044501                | CC                              | AA              | 1946754006               |
| SNP_P4_20808_14044779 | NC_021161.1    | Ca_kabuli_chr02 | 14044779                | TT                              | CC              | 1946754008               |
| SNP_P4_20809_14044837 | NC_021161.1    | Ca_kabuli_chr02 | 14044837                | CC                              | TT              | 1946754010               |
| SNP_P4_20811_14070035 | NC_021161.1    | Ca_kabuli_chr02 | 14070035                | TT                              | CC              | 1946754011               |
| SNP_P4_20812_14070061 | NC_021161.1    | Ca_kabuli_chr02 | 14070061                | TT                              | GG              | 1946754013               |
| SNP_P4_20813_14085862 | NC_021161.1    | Ca_kabuli_chr02 | 14085862                | CC                              | TT              | 1946754014               |
| SNP_P4_20814_14086046 | NC_021161.1    | Ca_kabuli_chr02 | 14086046                | GG                              | AA              | 1946754016               |
| SNP_P4_20815_14086162 | NC_021161.1    | Ca_kabuli_chr02 | 14086162                | TT                              | CC              | 1946754017               |
| SNP_P4_20816_14086178 | NC_021161.1    | Ca_kabuli_chr02 | 14086178                | TT                              | CC              | 1946754018               |
| SNP_P4_20817_14086181 | NC_021161.1    | Ca_kabuli_chr02 | 14086181                | GG                              | AA              | 1946754019               |
| SNP_P4_20818_14086209 | NC_021161.1    | Ca_kabuli_chr02 | 14086209                | TT                              | CC              | 1946754021               |
| SNP_P4_20819_14086258 | NC_021161.1    | Ca_kabuli_chr02 | 14086258                | CC                              | TT              | 1946754023               |
| SNP_P4_20820_14086380 | NC_021161.1    | Ca_kabuli_chr02 | 14086380                | TT                              | CC              | 1946754025               |
| SNP_P4_20821_14086408 | NC_021161.1    | Ca_kabuli_chr02 | 14086408                | AA                              | GG              | 1946754027               |
| SNP_P4_20822_14087520 | NC_021161.1    | Ca_kabuli_chr02 | 14087520                | AA                              | GG              | 1946754029               |
| SNP_P4_20823_14114260 | NC_021161.1    | Ca_kabuli_chr02 | 14114260                | TT                              | AA              | 1946754031               |
| SNP_P4_20824_14114281 | NC_021161.1    | Ca_kabuli_chr02 | 14114281                | AA                              | TT              | 1946754033               |
| SNP_P4_20825_14118504 | NC_021161.1    | Ca_kabuli_chr02 | 14118504                | AA                              | CC              | 1946754034               |
| SNP_P4_20826_14150159 | NC_021161.1    | Ca_kabuli_chr02 | 14150159                | CC                              | TT              | 1946754036               |
| SNP_P4_20827_14150162 | NC_021161.1    | Ca_kabuli_chr02 | 14150162                | AA                              | TT              | 1946754038               |
| SNP_P4_20828_14190564 | NC_021161.1    | Ca_kabuli_chr02 | 14190564                | AA                              | GG              | 1946754040               |
| SNP_P4_20830_14195941 | NC_021161.1    | Ca_kabuli_chr02 | 14195941                | TT                              | CC              | 1946754042               |
| SNP_P4_20832_14195978 | NC_021161.1    | Ca_kabuli_chr02 | 14195978                | CC                              | TT              | 1946754044               |
| SNP_P4_20833_14196053 | NC_021161.1    | Ca_kabuli_chr02 | 14196053                | TT                              | GG              | 1946754046               |
| SNP_P4_20834_14196188 | NC_021161.1    | Ca_kabuli_chr02 | 14196188                | TT                              | AA              | 1946754048               |
| SNP_P4_20835_14208017 | NC_021161.1    | Ca_kabuli_chr02 | 14208017                | CC                              | TT              | 1946754050               |
| SNP_P4_20836_15092545 | NC_021161.1    | Ca_kabuli_chr02 | 15092545                | CC                              | TT              | 1946754051               |
| SNP_P4_20837_15111510 | NC_021161.1    | Ca_kabuli_chr02 | 15111510                | AA                              | GG              | 1946754053               |
| SNP_P4_20838_15127400 | NC_021161.1    | Ca_kabuli_chr02 | 15127400                | GG                              | AA              | 1946754055               |
| SNP_P4_20839_15154576 | NC_021161.1    | Ca_kabuli_chr02 | 15154576                | TT                              | GG              | 1946754057               |
| SNP_P4_20842_15168570 | NC_021161.1    | Ca_kabuli_chr02 | 15168570                | AA                              | CC              | 1946754059               |
| SNP_P4_20844_15168826 | NC_021161.1    | Ca_kabuli_chr02 | 15168826                | CC                              | TT              | 1946754060               |

| SNPs IDs              | Chromosome IDs | Chromosomes     | Physical positions (bp) | CDC Frontier (Reference genome) | (ILWC46 & LPNB) | NCBI SNPdb Accession IDs |
|-----------------------|----------------|-----------------|-------------------------|---------------------------------|-----------------|--------------------------|
| SNP_P4_20846_15190635 | NC_021161.1    | Ca_kabuli_chr02 | 15190635                | AA                              | GG              | 1946754062               |
| SNP_P4_20847_15190683 | NC_021161.1    | Ca_kabuli_chr02 | 15190683                | AA                              | CC              | 1946754064               |
| SNP_P4_20848_15197090 | NC_021161.1    | Ca_kabuli_chr02 | 15197090                | TT                              | CC              | 1946754066               |
| SNP_P4_20849_15200367 | NC_021161.1    | Ca_kabuli_chr02 | 15200367                | AA                              | CC              | 1946754068               |
| SNP_P4_20850_15252815 | NC_021161.1    | Ca_kabuli_chr02 | 15252815                | CC                              | AA              | 1946754070               |
| SNP_P4_20851_15282266 | NC_021161.1    | Ca_kabuli_chr02 | 15282266                | TT                              | CC              | 1946754071               |
| SNP_P4_20855_15345690 | NC_021161.1    | Ca_kabuli_chr02 | 15345690                | AA                              | TT              | 1946754073               |
| SNP_P4_20856_15363231 | NC_021161.1    | Ca_kabuli_chr02 | 15363231                | AA                              | GG              | 1946754074               |
| SNP_P4_20857_15363290 | NC_021161.1    | Ca_kabuli_chr02 | 15363290                | AA                              | CC              | 1946754076               |
| SNP_P4_20859_15363526 | NC_021161.1    | Ca_kabuli_chr02 | 15363526                | AA                              | GG              | 1946754077               |
| SNP_P4_20860_15367831 | NC_021161.1    | Ca_kabuli_chr02 | 15367831                | AA                              | GG              | 1946754079               |
| SNP_P4_20861_15401206 | NC_021161.1    | Ca_kabuli_chr02 | 15401206                | AA                              | CC              | 1946754080               |
| SNP_P4_20862_15406925 | NC_021161.1    | Ca_kabuli_chr02 | 15406925                | AA                              | GG              | 1946754082               |
| SNP_P4_20863_15439409 | NC_021161.1    | Ca_kabuli_chr02 | 15439409                | CC                              | AA              | 1946754083               |
| SNP_P4_20864_15439410 | NC_021161.1    | Ca_kabuli_chr02 | 15439410                | CC                              | TT              | 1946754085               |
| SNP_P4_20865_15439416 | NC_021161.1    | Ca_kabuli_chr02 | 15439416                | GG                              | TT              | 1946754087               |
| SNP_P4_20866_15453885 | NC_021161.1    | Ca_kabuli_chr02 | 15453885                | GG                              | TT              | 1946754089               |
| SNP_P4_20867_15454007 | NC_021161.1    | Ca_kabuli_chr02 | 15454007                | TT                              | CC              | 1946754091               |
| SNP_P4_20868_15454027 | NC_021161.1    | Ca_kabuli_chr02 | 15454027                | AA                              | GG              | 1946754093               |
| SNP_P4_20869_15454074 | NC_021161.1    | Ca_kabuli_chr02 | 15454074                | GG                              | CC              | 1946754095               |
| SNP_P4_20870_15454160 | NC_021161.1    | Ca_kabuli_chr02 | 15454160                | TT                              | GG              | 1946754096               |
| SNP_P4_20871_15454328 | NC_021161.1    | Ca_kabuli_chr02 | 15454328                | TT                              | AA              | 1946754098               |
| SNP_P4_20872_15454350 | NC_021161.1    | Ca_kabuli_chr02 | 15454350                | TT                              | CC              | 1946754100               |
| SNP_P4_20873_15456758 | NC_021161.1    | Ca_kabuli_chr02 | 15456758                | AA                              | CC              | 1946754102               |
| SNP_P4_20874_15521144 | NC_021161.1    | Ca_kabuli_chr02 | 15521144                | CC                              | AA              | 1946754104               |
| SNP_P4_20875_15521172 | NC_021161.1    | Ca_kabuli_chr02 | 15521172                | GG                              | AA              | 1946754106               |
| SNP_P4_20876_15521218 | NC_021161.1    | Ca_kabuli_chr02 | 15521218                | CC                              | AA              | 1946754108               |
| SNP_P4_20877_15535548 | NC_021161.1    | Ca_kabuli_chr02 | 15535548                | TT                              | AA              | 1946754110               |
| SNP_P4_20878_15535732 | NC_021161.1    | Ca_kabuli_chr02 | 15535732                | CC                              | AA              | 1946754111               |
| SNP_P4_20879_15550249 | NC_021161.1    | Ca_kabuli_chr02 | 15550249                | GG                              | AA              | 1946754113               |
| SNP_P4_20880_15569768 | NC_021161.1    | Ca_kabuli_chr02 | 15569768                | AA                              | CC              | 1946754115               |
| SNP_P4_20881_15583285 | NC_021161.1    | Ca_kabuli_chr02 | 15583285                | CC                              | TT              | 1946754116               |
| SNP_P4_20882_15588258 | NC_021161.1    | Ca_kabuli_chr02 | 15588258                | GG                              | AA              | 1946754118               |
| SNP_P4_20883_15588772 | NC_021161.1    | Ca_kabuli_chr02 | 15588772                | AA                              | GG              | 1946754119               |
| SNP_P4_20885_15589189 | NC_021161.1    | Ca_kabuli_chr02 | 15589189                | CC                              | TT              | 1946754121               |
| SNP_P4_20886_15589436 | NC_021161.1    | Ca_kabuli_chr02 | 15589436                | GG                              | CC              | 1946754122               |
| SNP_P4_20887_15595260 | NC_021161.1    | Ca_kabuli_chr02 | 15595260                | AA                              | GG              | 1946754124               |
| SNP_P4_20888_15596867 | NC_021161.1    | Ca_kabuli_chr02 | 15596867                | TT                              | CC              | 1946754125               |
| SNP_P4_20889_15597956 | NC_021161.1    | Ca_kabuli_chr02 | 15597956                | GG                              | AA              | 1946754126               |
| SNP_P4_20890_15598338 | NC_021161.1    | Ca_kabuli_chr02 | 15598338                | TT                              | CC              | 1946754127               |
| SNP_P4_20892_15598998 | NC_021161.1    | Ca_kabuli_chr02 | 15598998                | GG                              | TT              | 1946754128               |
| SNP_P4_20893_15615948 | NC_021161.1    | Ca_kabuli_chr02 | 15615948                | GG                              | AA              | 1946754129               |

| SNPs IDs              | Chromosome IDs | Chromosomes     | Physical positions (bp) | CDC Frontier (Reference genome) | (ILWC46 & LPNB) | NCBI SNPdb Accession IDs |
|-----------------------|----------------|-----------------|-------------------------|---------------------------------|-----------------|--------------------------|
| SNP_P4_20894_15623779 | NC_021161.1    | Ca_kabuli_chr02 | 15623779                | CC                              | TT              | 1946754131               |
| SNP_P4_20895_15624091 | NC_021161.1    | Ca_kabuli_chr02 | 15624091                | CC                              | TT              | 1946754133               |
| SNP_P4_20896_15624114 | NC_021161.1    | Ca_kabuli_chr02 | 15624114                | AA                              | CC              | 1946754134               |
| SNP_P4_20899_15719939 | NC_021161.1    | Ca_kabuli_chr02 | 15719939                | AA                              | GG              | 1946754136               |
| SNP_P4_20900_15735514 | NC_021161.1    | Ca_kabuli_chr02 | 15735514                | GG                              | AA              | 1946754137               |
| SNP_P4_20901_15735568 | NC_021161.1    | Ca_kabuli_chr02 | 15735568                | TT                              | CC              | 1946754139               |
| SNP_P4_20902_15737281 | NC_021161.1    | Ca_kabuli_chr02 | 15737281                | GG                              | AA              | 1946754141               |
| SNP_P4_20903_15737283 | NC_021161.1    | Ca_kabuli_chr02 | 15737283                | TT                              | CC              | 1946754143               |
| SNP_P4_20904_15737706 | NC_021161.1    | Ca_kabuli_chr02 | 15737706                | CC                              | TT              | 1946754144               |
| SNP_P4_20905_15737710 | NC_021161.1    | Ca_kabuli_chr02 | 15737710                | GG                              | AA              | 1946754147               |
| SNP_P4_20906_15737719 | NC_021161.1    | Ca_kabuli_chr02 | 15737719                | TT                              | CC              | 1946754149               |
| SNP_P4_20907_15737734 | NC_021161.1    | Ca_kabuli_chr02 | 15737734                | TT                              | CC              | 1946754151               |
| SNP_P4_20908_15737738 | NC_021161.1    | Ca_kabuli_chr02 | 15737738                | GG                              | CC              | 1946754153               |
| SNP_P4_20909_15737746 | NC_021161.1    | Ca_kabuli_chr02 | 15737746                | AA                              | TT              | 1946754155               |
| SNP_P4_20910_15737781 | NC_021161.1    | Ca_kabuli_chr02 | 15737781                | TT                              | CC              | 1946754156               |
| SNP_P4_20911_15737782 | NC_021161.1    | Ca_kabuli_chr02 | 15737782                | TT                              | CC              | 1946754158               |
| SNP_P4_20913_15784075 | NC_021161.1    | Ca_kabuli_chr02 | 15784075                | GG                              | AA              | 1946754160               |
| SNP_P4_20914_15796935 | NC_021161.1    | Ca_kabuli_chr02 | 15796935                | GG                              | CC              | 1946754162               |
| SNP_P4_20915_15797665 | NC_021161.1    | Ca_kabuli_chr02 | 15797665                | AA                              | TT              | 1946754164               |
| SNP_P4_20916_15797671 | NC_021161.1    | Ca_kabuli_chr02 | 15797671                | CC                              | TT              | 1946754166               |
| SNP_P4_20917_15804889 | NC_021161.1    | Ca_kabuli_chr02 | 15804889                | AA                              | GG              | 1946754168               |
| SNP_P4_20919_15813583 | NC_021161.1    | Ca_kabuli_chr02 | 15813583                | CC                              | TT              | 1946754170               |
| SNP_P4_20920_15842053 | NC_021161.1    | Ca_kabuli_chr02 | 15842053                | TT                              | GG              | 1946754172               |
| SNP_P4_20921_15889749 | NC_021161.1    | Ca_kabuli_chr02 | 15889749                | CC                              | GG              | 1946754174               |
| SNP_P4_20922_15902864 | NC_021161.1    | Ca_kabuli_chr02 | 15902864                | GG                              | CC              | 1946754176               |
| SNP_P4_20923_15903634 | NC_021161.1    | Ca_kabuli_chr02 | 15903634                | TT                              | CC              | 1946754178               |
| SNP_P4_20924_15917479 | NC_021161.1    | Ca_kabuli_chr02 | 15917479                | CC                              | AA              | 1946754179               |
| SNP_P4_20925_15917494 | NC_021161.1    | Ca_kabuli_chr02 | 15917494                | GG                              | TT              | 1946754182               |
| SNP_P4_20926_15917530 | NC_021161.1    | Ca_kabuli_chr02 | 15917530                | TT                              | GG              | 1946754184               |
| SNP_P4_20928_15934932 | NC_021161.1    | Ca_kabuli_chr02 | 15934932                | TT                              | CC              | 1946754186               |
| SNP_P4_20929_15937756 | NC_021161.1    | Ca_kabuli_chr02 | 15937756                | CC                              | TT              | 1946754188               |
| SNP_P4_20930_15937757 | NC_021161.1    | Ca_kabuli_chr02 | 15937757                | CC                              | AA              | 1946754190               |
| SNP_P4_20931_15937761 | NC_021161.1    | Ca_kabuli_chr02 | 15937761                | CC                              | TT              | 1946754192               |
| SNP_P4_20932_15941069 | NC_021161.1    | Ca_kabuli_chr02 | 15941069                | GG                              | AA              | 1946754193               |
| SNP_P4_20933_15941453 | NC_021161.1    | Ca_kabuli_chr02 | 15941453                | AA                              | GG              | 1946754195               |
| SNP_P4_20934_15941461 | NC_021161.1    | Ca_kabuli_chr02 | 15941461                | TT                              | CC              | 1946754197               |
| SNP_P4_20935_15941465 | NC_021161.1    | Ca_kabuli_chr02 | 15941465                | AA                              | CC              | 1946754199               |
| SNP_P4_20936_15941474 | NC_021161.1    | Ca_kabuli_chr02 | 15941474                | TT                              | CC              | 1946754201               |
| SNP_P4_20937_15941479 | NC_021161.1    | Ca_kabuli_chr02 | 15941479                | AA                              | TT              | 1946754203               |
| SNP_P4_20938_15941483 | NC_021161.1    | Ca_kabuli_chr02 | 15941483                | CC                              | TT              | 1946754205               |
| SNP_P4_20939_15941484 | NC_021161.1    | Ca_kabuli_chr02 | 15941484                | AA                              | GG              | 1946754207               |
| SNP_P4_20940_15947665 | NC_021161.1    | Ca_kabuli_chr02 | 15947665                | GG                              | TT              | 1946754209               |

| SNPs IDs              | Chromosome IDs | Chromosomes     | Physical positions (bp) | CDC Frontier (Reference genome) | (ILWC46 & LPNB) | NCBI SNPdb Accession IDs |
|-----------------------|----------------|-----------------|-------------------------|---------------------------------|-----------------|--------------------------|
| SNP_P4_20941_15965181 | NC_021161.1    | Ca_kabuli_chr02 | 15965181                | AA                              | GG              | 1946754211               |
| SNP_P4_20942_16003016 | NC_021161.1    | Ca_kabuli_chr02 | 16003016                | GG                              | TT              | 1946754213               |
| SNP_P4_20944_16062345 | NC_021161.1    | Ca_kabuli_chr02 | 16062345                | TT                              | CC              | 1946754215               |
| SNP_P4_20945_16080540 | NC_021161.1    | Ca_kabuli_chr02 | 16080540                | CC                              | TT              | 1946754217               |
| SNP_P4_20946_16082137 | NC_021161.1    | Ca_kabuli_chr02 | 16082137                | GG                              | CC              | 1946754219               |
| SNP_P4_20947_16097037 | NC_021161.1    | Ca_kabuli_chr02 | 16097037                | CC                              | TT              | 1946754221               |
| SNP_P4_20948_16155200 | NC_021161.1    | Ca_kabuli_chr02 | 16155200                | TT                              | CC              | 1946754223               |
| SNP_P4_20949_16155254 | NC_021161.1    | Ca_kabuli_chr02 | 16155254                | AA                              | GG              | 1946754224               |
| SNP_P4_20950_16171087 | NC_021161.1    | Ca_kabuli_chr02 | 16171087                | CC                              | TT              | 1946754226               |
| SNP_P4_20951_16171088 | NC_021161.1    | Ca_kabuli_chr02 | 16171088                | CC                              | GG              | 1946754228               |
| SNP_P4_20952_16171156 | NC_021161.1    | Ca_kabuli_chr02 | 16171156                | CC                              | TT              | 1946754230               |
| SNP_P4_20953_16171447 | NC_021161.1    | Ca_kabuli_chr02 | 16171447                | AA                              | GG              | 1946754232               |
| SNP_P4_20954_16171449 | NC_021161.1    | Ca_kabuli_chr02 | 16171449                | TT                              | AA              | 1946754234               |
| SNP_P4_20955_16171579 | NC_021161.1    | Ca_kabuli_chr02 | 16171579                | TT                              | CC              | 1946754236               |
| SNP_P4_20956_16171594 | NC_021161.1    | Ca_kabuli_chr02 | 16171594                | GG                              | AA              | 1946754238               |
| SNP_P4_20958_16220849 | NC_021161.1    | Ca_kabuli_chr02 | 16220849                | CC                              | TT              | 1946754240               |
| SNP_P4_20959_16246340 | NC_021161.1    | Ca_kabuli_chr02 | 16246340                | CC                              | AA              | 1946754242               |
| SNP_P4_20960_16252107 | NC_021161.1    | Ca_kabuli_chr02 | 16252107                | TT                              | AA              | 1946754244               |
| SNP_P4_20961_16252132 | NC_021161.1    | Ca_kabuli_chr02 | 16252132                | AA                              | GG              | 1946754246               |
| SNP_P4_20962_16252212 | NC_021161.1    | Ca_kabuli_chr02 | 16252212                | TT                              | CC              | 1946754248               |
| SNP_P4_20963_16252218 | NC_021161.1    | Ca_kabuli_chr02 | 16252218                | TT                              | CC              | 1946754250               |
| SNP_P4_20964_16252226 | NC_021161.1    | Ca_kabuli_chr02 | 16252226                | AA                              | GG              | 1946754252               |
| SNP_P4_20965_16252233 | NC_021161.1    | Ca_kabuli_chr02 | 16252233                | TT                              | AA              | 1946754254               |
| SNP_P4_20966_16252247 | NC_021161.1    | Ca_kabuli_chr02 | 16252247                | AA                              | GG              | 1946754256               |
| SNP_P4_20967_16252501 | NC_021161.1    | Ca_kabuli_chr02 | 16252501                | TT                              | CC              | 1946754258               |
| SNP_P4_20968_16252603 | NC_021161.1    | Ca_kabuli_chr02 | 16252603                | TT                              | CC              | 1946754260               |
| SNP_P4_20969_16275382 | NC_021161.1    | Ca_kabuli_chr02 | 16275382                | AA                              | TT              | 1946754262               |
| SNP_P4_20971_16330649 | NC_021161.1    | Ca_kabuli_chr02 | 16330649                | TT                              | CC              | 1946754264               |
| SNP_P4_20972_16335225 | NC_021161.1    | Ca_kabuli_chr02 | 16335225                | TT                              | GG              | 1946754266               |
| SNP_P4_20973_16340602 | NC_021161.1    | Ca_kabuli_chr02 | 16340602                | GG                              | AA              | 1946754268               |
| SNP_P4_20974_16341342 | NC_021161.1    | Ca_kabuli_chr02 | 16341342                | GG                              | CC              | 1946754270               |
| SNP_P4_20975_16341343 | NC_021161.1    | Ca_kabuli_chr02 | 16341343                | AA                              | CC              | 1946754272               |
| SNP_P4_20976_16341392 | NC_021161.1    | Ca_kabuli_chr02 | 16341392                | TT                              | GG              | 1946754275               |
| SNP_P4_20977_16341460 | NC_021161.1    | Ca_kabuli_chr02 | 16341460                | GG                              | AA              | 1946754277               |
| SNP_P4_20978_16351412 | NC_021161.1    | Ca_kabuli_chr02 | 16351412                | TT                              | CC              | 1946754279               |
| SNP_P4_20979_16365662 | NC_021161.1    | Ca_kabuli_chr02 | 16365662                | TT                              | CC              | 1946754282               |
| SNP_P4_20980_16368219 | NC_021161.1    | Ca_kabuli_chr02 | 16368219                | CC                              | AA              | 1946754284               |
| SNP_P4_20981_16416345 | NC_021161.1    | Ca_kabuli_chr02 | 16416345                | TT                              | CC              | 1946754286               |
| SNP_P4_20983_16433264 | NC_021161.1    | Ca_kabuli_chr02 | 16433264                | TT                              | CC              | 1946754288               |
| SNP_P4_20984_16436933 | NC_021161.1    | Ca_kabuli_chr02 | 16436933                | TT                              | CC              | 1946754290               |
| SNP_P4_20985_16456491 | NC_021161.1    | Ca_kabuli_chr02 | 16456491                | GG                              | AA              | 1946754292               |
| SNP_P4_20986_16456492 | NC_021161.1    | Ca_kabuli_chr02 | 16456492                | GG                              | AA              | 1946754294               |



| SNPs IDs              | Chromosome IDs | Chromosomes     | Physical positions (bp) | CDC Frontier (Reference genome) | (ILWC46 & LPNB) | NCBI SNPdb Accession IDs |
|-----------------------|----------------|-----------------|-------------------------|---------------------------------|-----------------|--------------------------|
| SNP_P4_20987_16456500 | NC_021161.1    | Ca_kabuli_chr02 | 16456500                | AA                              | GG              | 1946754296               |
| SNP_P4_20988_16456508 | NC_021161.1    | Ca_kabuli_chr02 | 16456508                | AA                              | CC              | 1946754298               |
| SNP_P4_20989_16456524 | NC_021161.1    | Ca_kabuli_chr02 | 16456524                | CC                              | AA              | 1946754300               |
| SNP_P4_20990_16456561 | NC_021161.1    | Ca_kabuli_chr02 | 16456561                | CC                              | TT              | 1946754302               |
| SNP_P4_20992_16456591 | NC_021161.1    | Ca_kabuli_chr02 | 16456591                | CC                              | TT              | 1946754304               |
| SNP_P4_20993_16456659 | NC_021161.1    | Ca_kabuli_chr02 | 16456659                | CC                              | TT              | 1946754306               |
| SNP_P4_20994_16456731 | NC_021161.1    | Ca_kabuli_chr02 | 16456731                | TT                              | CC              | 1946754307               |
| SNP_P4_20995_16458241 | NC_021161.1    | Ca_kabuli_chr02 | 16458241                | CC                              | TT              | 1946754309               |
| SNP_P4_20996_16465080 | NC_021161.1    | Ca_kabuli_chr02 | 16465080                | CC                              | AA              | 1946754311               |
| SNP_P4_20997_16465093 | NC_021161.1    | Ca_kabuli_chr02 | 16465093                | TT                              | CC              | 1946754313               |
| SNP_P4_20998_16465565 | NC_021161.1    | Ca_kabuli_chr02 | 16465565                | GG                              | TT              | 1946754315               |
| SNP_P4_20999_16489672 | NC_021161.1    | Ca_kabuli_chr02 | 16489672                | GG                              | AA              | 1946754317               |
| SNP_P4_21001_16507755 | NC_021161.1    | Ca_kabuli_chr02 | 16507755                | AA                              | TT              | 1946754319               |
| SNP_P4_21002_16508483 | NC_021161.1    | Ca_kabuli_chr02 | 16508483                | TT                              | CC              | 1946754321               |
| SNP_P4_21003_16508764 | NC_021161.1    | Ca_kabuli_chr02 | 16508764                | CC                              | TT              | 1946754323               |
| SNP_P4_21004_16509102 | NC_021161.1    | Ca_kabuli_chr02 | 16509102                | TT                              | CC              | 1946754325               |
| SNP_P4_21005_16509249 | NC_021161.1    | Ca_kabuli_chr02 | 16509249                | GG                              | AA              | 1946754327               |
| SNP_P4_21006_16509316 | NC_021161.1    | Ca_kabuli_chr02 | 16509316                | TT                              | CC              | 1946754329               |
| SNP_P4_21007_16509586 | NC_021161.1    | Ca_kabuli_chr02 | 16509586                | CC                              | TT              | 1946754331               |
| SNP_P4_21008_16510339 | NC_021161.1    | Ca_kabuli_chr02 | 16510339                | GG                              | AA              | 1946754333               |
| SNP_P4_21009_16510350 | NC_021161.1    | Ca_kabuli_chr02 | 16510350                | AA                              | GG              | 1946754335               |
| SNP_P4_21010_16511747 | NC_021161.1    | Ca_kabuli_chr02 | 16511747                | GG                              | AA              | 1946754337               |
| SNP_P4_21011_16513075 | NC_021161.1    | Ca_kabuli_chr02 | 16513075                | TT                              | GG              | 1946754339               |
| SNP_P4_21012_16514195 | NC_021161.1    | Ca_kabuli_chr02 | 16514195                | AA                              | GG              | 1946754341               |
| SNP_P4_21013_16514414 | NC_021161.1    | Ca_kabuli_chr02 | 16514414                | GG                              | AA              | 1946754343               |
| SNP_P4_21014_16514419 | NC_021161.1    | Ca_kabuli_chr02 | 16514419                | TT                              | AA              | 1946754345               |
| SNP_P4_21015_16514432 | NC_021161.1    | Ca_kabuli_chr02 | 16514432                | AA                              | GG              | 1946754347               |
| SNP_P4_21017_16537413 | NC_021161.1    | Ca_kabuli_chr02 | 16537413                | GG                              | TT              | 1946754348               |
| SNP_P4_21018_16537427 | NC_021161.1    | Ca_kabuli_chr02 | 16537427                | AA                              | CC              | 1946754351               |
| SNP_P4_21019_16537675 | NC_021161.1    | Ca_kabuli_chr02 | 16537675                | GG                              | AA              | 1946754352               |
| SNP_P4_21020_16565488 | NC_021161.1    | Ca_kabuli_chr02 | 16565488                | TT                              | CC              | 1946754354               |
| SNP_P4_21021_16603169 | NC_021161.1    | Ca_kabuli_chr02 | 16603169                | TT                              | CC              | 1946754356               |
| SNP_P4_21022_16604893 | NC_021161.1    | Ca_kabuli_chr02 | 16604893                | GG                              | AA              | 1946754358               |
| SNP_P4_21023_16648031 | NC_021161.1    | Ca_kabuli_chr02 | 16648031                | TT                              | CC              | 1946754360               |
| SNP_P4_21024_16650062 | NC_021161.1    | Ca_kabuli_chr02 | 16650062                | TT                              | CC              | 1946754362               |
| SNP_P4_21025_16650071 | NC_021161.1    | Ca_kabuli_chr02 | 16650071                | CC                              | TT              | 1946754364               |
| SNP_P4_21027_16650158 | NC_021161.1    | Ca_kabuli_chr02 | 16650158                | AA                              | GG              | 1946754366               |
| SNP_P4_21028_16665310 | NC_021161.1    | Ca_kabuli_chr02 | 16665310                | TT                              | AA              | 1946754368               |
| SNP_P4_21029_16697585 | NC_021161.1    | Ca_kabuli_chr02 | 16697585                | CC                              | TT              | 1946754370               |
| SNP_P4_21030_16713574 | NC_021161.1    | Ca_kabuli_chr02 | 16713574                | GG                              | TT              | 1946754372               |
| SNP_P4_21031_16788579 | NC_021161.1    | Ca_kabuli_chr02 | 16788579                | AA                              | TT              | 1946754374               |
| SNP_P4_21032_16823252 | NC_021161.1    | Ca_kabuli_chr02 | 16823252                | AA                              | GG              | 1946754376               |

| SNPs IDs              | Chromosome IDs | Chromosomes     | Physical positions (bp) | CDC Frontier (Reference genome) | (ILWC46 & LPNB) | NCBI SNPdb Accession IDs |
|-----------------------|----------------|-----------------|-------------------------|---------------------------------|-----------------|--------------------------|
| SNP_P4_21033_16864440 | NC_021161.1    | Ca_kabuli_chr02 | 16864440                | TT                              | AA              | 1946754378               |
| SNP_P4_21034_16864507 | NC_021161.1    | Ca_kabuli_chr02 | 16864507                | CC                              | AA              | 1946754380               |
| SNP_P4_21035_16864702 | NC_021161.1    | Ca_kabuli_chr02 | 16864702                | AA                              | GG              | 1946754382               |
| SNP_P4_21036_16864729 | NC_021161.1    | Ca_kabuli_chr02 | 16864729                | TT                              | CC              | 1946754383               |
| SNP_P4_21037_16864811 | NC_021161.1    | Ca_kabuli_chr02 | 16864811                | GG                              | AA              | 1946754385               |
| SNP_P4_21038_16905535 | NC_021161.1    | Ca_kabuli_chr02 | 16905535                | TT                              | GG              | 1946754387               |
| SNP_P4_21039_16905687 | NC_021161.1    | Ca_kabuli_chr02 | 16905687                | TT                              | CC              | 1946754389               |
| SNP_P4_21040_16905744 | NC_021161.1    | Ca_kabuli_chr02 | 16905744                | GG                              | AA              | 1946754391               |
| SNP_P4_21042_16954408 | NC_021161.1    | Ca_kabuli_chr02 | 16954408                | AA                              | GG              | 1946754393               |
| SNP_P4_21043_16984549 | NC_021161.1    | Ca_kabuli_chr02 | 16984549                | GG                              | AA              | 1946754395               |
| SNP_P4_21044_16985721 | NC_021161.1    | Ca_kabuli_chr02 | 16985721                | AA                              | TT              | 1946754397               |
| SNP_P4_21045_16990561 | NC_021161.1    | Ca_kabuli_chr02 | 16990561                | TT                              | CC              | 1946754399               |
| SNP_P4_21046_16990617 | NC_021161.1    | Ca_kabuli_chr02 | 16990617                | AA                              | TT              | 1946754401               |
| SNP_P4_21047_16990665 | NC_021161.1    | Ca_kabuli_chr02 | 16990665                | GG                              | AA              | 1946754403               |
| SNP_P4_21048_16990666 | NC_021161.1    | Ca_kabuli_chr02 | 16990666                | AA                              | GG              | 1946754405               |
| SNP_P4_21049_16990671 | NC_021161.1    | Ca_kabuli_chr02 | 16990671                | CC                              | TT              | 1946754407               |
| SNP_P4_21050_16991361 | NC_021161.1    | Ca_kabuli_chr02 | 16991361                | CC                              | AA              | 1946754409               |
| SNP_P4_21051_16991365 | NC_021161.1    | Ca_kabuli_chr02 | 16991365                | CC                              | TT              | 1946754411               |
| SNP_P4_21052_16991367 | NC_021161.1    | Ca_kabuli_chr02 | 16991367                | CC                              | GG              | 1946754413               |
| SNP_P4_21053_16991372 | NC_021161.1    | Ca_kabuli_chr02 | 16991372                | CC                              | TT              | 1946754415               |
| SNP_P4_21054_16991409 | NC_021161.1    | Ca_kabuli_chr02 | 16991409                | GG                              | AA              | 1946754417               |
| SNP_P4_21055_16996384 | NC_021161.1    | Ca_kabuli_chr02 | 16996384                | TT                              | AA              | 1946754419               |
| SNP_P4_21056_17030318 | NC_021161.1    | Ca_kabuli_chr02 | 17030318                | CC                              | AA              | 1946754421               |
| SNP_P4_21057_17030590 | NC_021161.1    | Ca_kabuli_chr02 | 17030590                | CC                              | AA              | 1946754423               |
| SNP_P4_21058_17030972 | NC_021161.1    | Ca_kabuli_chr02 | 17030972                | AA                              | TT              | 1946754425               |
| SNP_P4_21059_17031660 | NC_021161.1    | Ca_kabuli_chr02 | 17031660                | GG                              | AA              | 1946754427               |
| SNP_P4_21060_17039027 | NC_021161.1    | Ca_kabuli_chr02 | 17039027                | GG                              | TT              | 1946754429               |
| SNP_P4_21061_17039036 | NC_021161.1    | Ca_kabuli_chr02 | 17039036                | GG                              | AA              | 1946754431               |
| SNP_P4_21062_17046197 | NC_021161.1    | Ca_kabuli_chr02 | 17046197                | CC                              | AA              | 1946754433               |
| SNP_P4_21064_17050342 | NC_021161.1    | Ca_kabuli_chr02 | 17050342                | GG                              | AA              | 1946754435               |
| SNP_P4_21065_17050371 | NC_021161.1    | Ca_kabuli_chr02 | 17050371                | TT                              | GG              | 1946754437               |
| SNP_P4_21066_17051147 | NC_021161.1    | Ca_kabuli_chr02 | 17051147                | GG                              | AA              | 1946754439               |
| SNP_P4_21068_17061413 | NC_021161.1    | Ca_kabuli_chr02 | 17061413                | GG                              | AA              | 1946754441               |
| SNP_P4_21069_17062079 | NC_021161.1    | Ca_kabuli_chr02 | 17062079                | AA                              | GG              | 1946754443               |
| SNP_P4_21070_17106692 | NC_021161.1    | Ca_kabuli_chr02 | 17106692                | TT                              | GG              | 1946754445               |
| SNP_P4_21071_17158250 | NC_021161.1    | Ca_kabuli_chr02 | 17158250                | TT                              | CC              | 1946754447               |
| SNP_P4_21072_17161727 | NC_021161.1    | Ca_kabuli_chr02 | 17161727                | TT                              | CC              | 1946754449               |
| SNP_P4_21073_17161737 | NC_021161.1    | Ca_kabuli_chr02 | 17161737                | GG                              | AA              | 1946754451               |
| SNP_P4_21074_17161914 | NC_021161.1    | Ca_kabuli_chr02 | 17161914                | TT                              | AA              | 1946754453               |
| SNP_P4_21075_17161927 | NC_021161.1    | Ca_kabuli_chr02 | 17161927                | GG                              | AA              | 1946754454               |
| SNP_P4_21076_17203676 | NC_021161.1    | Ca_kabuli_chr02 | 17203676                | GG                              | TT              | 1946754456               |
| SNP_P4_21077_17203869 | NC_021161.1    | Ca_kabuli_chr02 | 17203869                | GG                              | AA              | 1946754458               |

| SNPs IDs              | Chromosome IDs | Chromosomes     | Physical positions (bp) | CDC Frontier (Reference genome) | (ILWC46 & LPNB) | NCBI SNPdb Accession IDs |
|-----------------------|----------------|-----------------|-------------------------|---------------------------------|-----------------|--------------------------|
| SNP_P4_21078_17204112 | NC_021161.1    | Ca_kabuli_chr02 | 17204112                | AA                              | GG              | 1946754460               |
| SNP_P4_21079_17204167 | NC_021161.1    | Ca_kabuli_chr02 | 17204167                | CC                              | AA              | 1946754462               |
| SNP_P4_21080_17204183 | NC_021161.1    | Ca_kabuli_chr02 | 17204183                | AA                              | GG              | 1946754464               |
| SNP_P4_21081_17208801 | NC_021161.1    | Ca_kabuli_chr02 | 17208801                | AA                              | GG              | 1946754466               |
| SNP_P4_21082_17208805 | NC_021161.1    | Ca_kabuli_chr02 | 17208805                | GG                              | AA              | 1946754468               |
| SNP_P4_21083_17208814 | NC_021161.1    | Ca_kabuli_chr02 | 17208814                | AA                              | CC              | 1946754470               |
| SNP_P4_21084_17208826 | NC_021161.1    | Ca_kabuli_chr02 | 17208826                | GG                              | AA              | 1946754472               |
| SNP_P4_21085_17208829 | NC_021161.1    | Ca_kabuli_chr02 | 17208829                | TT                              | CC              | 1946754474               |
| SNP_P4_21086_17208837 | NC_021161.1    | Ca_kabuli_chr02 | 17208837                | TT                              | GG              | 1946754476               |
| SNP_P4_21087_17208851 | NC_021161.1    | Ca_kabuli_chr02 | 17208851                | CC                              | TT              | 1946754478               |
| SNP_P4_21088_17208855 | NC_021161.1    | Ca_kabuli_chr02 | 17208855                | AA                              | GG              | 1946754480               |
| SNP_P4_21089_17208943 | NC_021161.1    | Ca_kabuli_chr02 | 17208943                | TT                              | CC              | 1946754482               |
| SNP_P4_21090_17209014 | NC_021161.1    | Ca_kabuli_chr02 | 17209014                | TT                              | CC              | 1946754484               |
| SNP_P4_21091_17209030 | NC_021161.1    | Ca_kabuli_chr02 | 17209030                | TT                              | CC              | 1946754486               |
| SNP_P4_21092_17209152 | NC_021161.1    | Ca_kabuli_chr02 | 17209152                | TT                              | CC              | 1946754488               |
| SNP_P4_21093_17209200 | NC_021161.1    | Ca_kabuli_chr02 | 17209200                | TT                              | CC              | 1946754490               |
| SNP_P4_21094_17209221 | NC_021161.1    | Ca_kabuli_chr02 | 17209221                | CC                              | TT              | 1946754492               |
| SNP_P4_21095_17209236 | NC_021161.1    | Ca_kabuli_chr02 | 17209236                | TT                              | CC              | 1946754494               |
| SNP_P4_21097_17209271 | NC_021161.1    | Ca_kabuli_chr02 | 17209271                | TT                              | AA              | 1946754495               |
| SNP_P4_21098_17209272 | NC_021161.1    | Ca_kabuli_chr02 | 17209272                | AA                              | CC              | 1946754497               |
| SNP_P4_21099_17209293 | NC_021161.1    | Ca_kabuli_chr02 | 17209293                | GG                              | AA              | 1946754499               |
| SNP_P4_21100_17209316 | NC_021161.1    | Ca_kabuli_chr02 | 17209316                | GG                              | AA              | 1946754501               |
| SNP_P4_21101_17209335 | NC_021161.1    | Ca_kabuli_chr02 | 17209335                | AA                              | TT              | 1946754503               |
| SNP_P4_21102_17209350 | NC_021161.1    | Ca_kabuli_chr02 | 17209350                | CC                              | TT              | 1946754505               |
| SNP_P4_21103_17238401 | NC_021161.1    | Ca_kabuli_chr02 | 17238401                | TT                              | AA              | 1946754507               |
| SNP_P4_21104_17243366 | NC_021161.1    | Ca_kabuli_chr02 | 17243366                | AA                              | GG              | 1946754509               |
| SNP_P4_21105_17257270 | NC_021161.1    | Ca_kabuli_chr02 | 17257270                | TT                              | GG              | 1946754511               |
| SNP_P4_21106_17257421 | NC_021161.1    | Ca_kabuli_chr02 | 17257421                | GG                              | AA              | 1946754513               |
| SNP_P4_21107_17257469 | NC_021161.1    | Ca_kabuli_chr02 | 17257469                | AA                              | GG              | 1946754515               |
| SNP_P4_21108_17257480 | NC_021161.1    | Ca_kabuli_chr02 | 17257480                | AA                              | GG              | 1946754517               |
| SNP_P4_21109_17257544 | NC_021161.1    | Ca_kabuli_chr02 | 17257544                | AA                              | GG              | 1946754519               |
| SNP_P4_21110_17262711 | NC_021161.1    | Ca_kabuli_chr02 | 17262711                | CC                              | TT              | 1946754521               |
| SNP_P4_21111_17301938 | NC_021161.1    | Ca_kabuli_chr02 | 17301938                | GG                              | AA              | 1946754523               |
| SNP_P4_21113_17387698 | NC_021161.1    | Ca_kabuli_chr02 | 17387698                | TT                              | AA              | 1946754525               |
| SNP_P4_21114_17387875 | NC_021161.1    | Ca_kabuli_chr02 | 17387875                | CC                              | TT              | 1946754527               |
| SNP_P4_21116_17394474 | NC_021161.1    | Ca_kabuli_chr02 | 17394474                | AA                              | GG              | 1946754529               |
| SNP_P4_21117_17395652 | NC_021161.1    | Ca_kabuli_chr02 | 17395652                | AA                              | GG              | 1946754531               |
| SNP_P4_21118_17399943 | NC_021161.1    | Ca_kabuli_chr02 | 17399943                | AA                              | GG              | 1946754533               |
| SNP_P4_21119_17402394 | NC_021161.1    | Ca_kabuli_chr02 | 17402394                | AA                              | GG              | 1946754535               |
| SNP_P4_21120_17406919 | NC_021161.1    | Ca_kabuli_chr02 | 17406919                | AA                              | GG              | 1946754537               |
| SNP_P4_21121_17407191 | NC_021161.1    | Ca_kabuli_chr02 | 17407191                | TT                              | CC              | 1946754539               |
| SNP_P4_21122_17407192 | NC_021161.1    | Ca_kabuli_chr02 | 17407192                | TT                              | AA              | 1946754541               |

| SNPs IDs              | Chromosome IDs | Chromosomes     | Physical positions (bp) | CDC Frontier (Reference genome) | (ILWC46 & LPNB) | NCBI SNPdb Accession IDs |
|-----------------------|----------------|-----------------|-------------------------|---------------------------------|-----------------|--------------------------|
| SNP_P4_21123_17407228 | NC_021161.1    | Ca_kabuli_chr02 | 17407228                | TT                              | CC              | 1946754543               |
| SNP_P4_21124_17407243 | NC_021161.1    | Ca_kabuli_chr02 | 17407243                | TT                              | CC              | 1946754545               |
| SNP_P4_21125_17407290 | NC_021161.1    | Ca_kabuli_chr02 | 17407290                | CC                              | TT              | 1946754547               |
| SNP_P4_21126_17407306 | NC_021161.1    | Ca_kabuli_chr02 | 17407306                | TT                              | CC              | 1946754549               |
| SNP_P4_21127_17412122 | NC_021161.1    | Ca_kabuli_chr02 | 17412122                | CC                              | TT              | 1946754551               |
| SNP_P4_21128_17435982 | NC_021161.1    | Ca_kabuli_chr02 | 17435982                | CC                              | TT              | 1946754553               |
| SNP_P4_21129_17487287 | NC_021161.1    | Ca_kabuli_chr02 | 17487287                | TT                              | CC              | 1946754555               |
| SNP_P4_21130_17487685 | NC_021161.1    | Ca_kabuli_chr02 | 17487685                | AA                              | GG              | 1946754557               |
| SNP_P4_21131_17490061 | NC_021161.1    | Ca_kabuli_chr02 | 17490061                | TT                              | GG              | 1946754559               |
| SNP_P4_21132_17490078 | NC_021161.1    | Ca_kabuli_chr02 | 17490078                | AA                              | GG              | 1946754561               |
| SNP_P4_21133_17490369 | NC_021161.1    | Ca_kabuli_chr02 | 17490369                | AA                              | GG              | 1946754563               |
| SNP_P4_21134_17490763 | NC_021161.1    | Ca_kabuli_chr02 | 17490763                | AA                              | TT              | 1946754565               |
| SNP_P4_21135_17491195 | NC_021161.1    | Ca_kabuli_chr02 | 17491195                | AA                              | CC              | 1946754567               |
| SNP_P4_21136_17491220 | NC_021161.1    | Ca_kabuli_chr02 | 17491220                | GG                              | AA              | 1946754569               |
| SNP_P4_21137_17491231 | NC_021161.1    | Ca_kabuli_chr02 | 17491231                | AA                              | GG              | 1946754571               |
| SNP_P4_21138_17491245 | NC_021161.1    | Ca_kabuli_chr02 | 17491245                | CC                              | TT              | 1946754573               |
| SNP_P4_21139_17491263 | NC_021161.1    | Ca_kabuli_chr02 | 17491263                | AA                              | GG              | 1946754575               |
| SNP_P4_21140_17491269 | NC_021161.1    | Ca_kabuli_chr02 | 17491269                | TT                              | AA              | 1946754577               |
| SNP_P4_21142_17540124 | NC_021161.1    | Ca_kabuli_chr02 | 17540124                | TT                              | CC              | 1946754579               |
| SNP_P4_21143_17540165 | NC_021161.1    | Ca_kabuli_chr02 | 17540165                | AA                              | TT              | 1946754581               |
| SNP_P4_21144_17551146 | NC_021161.1    | Ca_kabuli_chr02 | 17551146                | GG                              | AA              | 1946754583               |
| SNP_P4_21145_17551479 | NC_021161.1    | Ca_kabuli_chr02 | 17551479                | CC                              | TT              | 1946754585               |
| SNP_P4_21146_17551577 | NC_021161.1    | Ca_kabuli_chr02 | 17551577                | AA                              | CC              | 1946754586               |
| SNP_P4_21147_17551629 | NC_021161.1    | Ca_kabuli_chr02 | 17551629                | CC                              | AA              | 1946754588               |
| SNP_P4_21148_17551656 | NC_021161.1    | Ca_kabuli_chr02 | 17551656                | AA                              | GG              | 1946754591               |
| SNP_P4_21150_17551859 | NC_021161.1    | Ca_kabuli_chr02 | 17551859                | AA                              | CC              | 1946754593               |
| SNP_P4_21151_17551912 | NC_021161.1    | Ca_kabuli_chr02 | 17551912                | GG                              | AA              | 1946754595               |
| SNP_P4_21152_17562090 | NC_021161.1    | Ca_kabuli_chr02 | 17562090                | CC                              | GG              | 1946754597               |
| SNP_P4_21153_17562940 | NC_021161.1    | Ca_kabuli_chr02 | 17562940                | CC                              | TT              | 1946754599               |
| SNP_P4_21154_17563229 | NC_021161.1    | Ca_kabuli_chr02 | 17563229                | AA                              | TT              | 1946754601               |
| SNP_P4_21155_17563233 | NC_021161.1    | Ca_kabuli_chr02 | 17563233                | TT                              | CC              | 1946754602               |
| SNP_P4_21156_17565172 | NC_021161.1    | Ca_kabuli_chr02 | 17565172                | CC                              | AA              | 1946754604               |
| SNP_P4_21157_17578465 | NC_021161.1    | Ca_kabuli_chr02 | 17578465                | TT                              | CC              | 1946754606               |
| SNP_P4_21158_17587369 | NC_021161.1    | Ca_kabuli_chr02 | 17587369                | TT                              | CC              | 1946754608               |
| SNP_P4_21159_17587400 | NC_021161.1    | Ca_kabuli_chr02 | 17587400                | CC                              | AA              | 1946754610               |
| SNP_P4_21160_17587727 | NC_021161.1    | Ca_kabuli_chr02 | 17587727                | TT                              | CC              | 1946754612               |
| SNP_P4_21161_17588593 | NC_021161.1    | Ca_kabuli_chr02 | 17588593                | TT                              | AA              | 1946754614               |
| SNP_P4_21162_17588609 | NC_021161.1    | Ca_kabuli_chr02 | 17588609                | TT                              | CC              | 1946754616               |
| SNP_P4_21163_17588632 | NC_021161.1    | Ca_kabuli_chr02 | 17588632                | GG                              | TT              | 1946754618               |
| SNP_P4_21164_17588668 | NC_021161.1    | Ca_kabuli_chr02 | 17588668                | CC                              | TT              | 1946754620               |
| SNP_P4_21165_17595233 | NC_021161.1    | Ca_kabuli_chr02 | 17595233                | AA                              | GG              | 1946754622               |
| SNP_P4_21166_17725170 | NC_021161.1    | Ca_kabuli_chr02 | 17725170                | AA                              | GG              | 1946754624               |

| SNPs IDs              | Chromosome IDs | Chromosomes     | Physical positions (bp) | CDC Frontier (Reference genome) | (ILWC46 & LPNB) | NCBI SNPdb Accession IDs |
|-----------------------|----------------|-----------------|-------------------------|---------------------------------|-----------------|--------------------------|
| SNP_P4_21167_17765814 | NC_021161.1    | Ca_kabuli_chr02 | 17765814                | GG                              | TT              | 1946754626               |
| SNP_P4_21168_17883493 | NC_021161.1    | Ca_kabuli_chr02 | 17883493                | TT                              | AA              | 1946754628               |
| SNP_P4_21169_17892538 | NC_021161.1    | Ca_kabuli_chr02 | 17892538                | TT                              | CC              | 1946754630               |
| SNP_P4_21170_17892566 | NC_021161.1    | Ca_kabuli_chr02 | 17892566                | AA                              | GG              | 1946754632               |
| SNP_P4_21171_17892567 | NC_021161.1    | Ca_kabuli_chr02 | 17892567                | AA                              | GG              | 1946754634               |
| SNP_P4_21172_17892574 | NC_021161.1    | Ca_kabuli_chr02 | 17892574                | CC                              | TT              | 1946754636               |
| SNP_P4_21173_17892631 | NC_021161.1    | Ca_kabuli_chr02 | 17892631                | AA                              | GG              | 1946754638               |
| SNP_P4_21174_17892636 | NC_021161.1    | Ca_kabuli_chr02 | 17892636                | AA                              | GG              | 1946754640               |
| SNP_P4_21175_17892640 | NC_021161.1    | Ca_kabuli_chr02 | 17892640                | AA                              | GG              | 1946754642               |
| SNP_P4_21176_17892653 | NC_021161.1    | Ca_kabuli_chr02 | 17892653                | TT                              | GG              | 1946754644               |
| SNP_P4_21177_17892994 | NC_021161.1    | Ca_kabuli_chr02 | 17892994                | TT                              | CC              | 1946754646               |
| SNP_P4_21178_17904363 | NC_021161.1    | Ca_kabuli_chr02 | 17904363                | AA                              | GG              | 1946754648               |
| SNP_P4_21179_17904386 | NC_021161.1    | Ca_kabuli_chr02 | 17904386                | GG                              | AA              | 1946754650               |
| SNP_P4_21180_17915052 | NC_021161.1    | Ca_kabuli_chr02 | 17915052                | CC                              | TT              | 1946754652               |
| SNP_P4_21181_17915067 | NC_021161.1    | Ca_kabuli_chr02 | 17915067                | TT                              | GG              | 1946754654               |
| SNP_P4_21182_17915098 | NC_021161.1    | Ca_kabuli_chr02 | 17915098                | CC                              | GG              | 1946754656               |
| SNP_P4_21183_17915130 | NC_021161.1    | Ca_kabuli_chr02 | 17915130                | TT                              | CC              | 1946754658               |
| SNP_P4_21184_17915732 | NC_021161.1    | Ca_kabuli_chr02 | 17915732                | GG                              | TT              | 1946754660               |
| SNP_P4_21185_17916155 | NC_021161.1    | Ca_kabuli_chr02 | 17916155                | AA                              | CC              | 1946754662               |
| SNP_P4_21186_17918765 | NC_021161.1    | Ca_kabuli_chr02 | 17918765                | CC                              | TT              | 1946754664               |
| SNP_P4_21187_17924947 | NC_021161.1    | Ca_kabuli_chr02 | 17924947                | TT                              | CC              | 1946754666               |
| SNP_P4_21188_17971992 | NC_021161.1    | Ca_kabuli_chr02 | 17971992                | CC                              | TT              | 1946754668               |
| SNP_P4_21189_17971997 | NC_021161.1    | Ca_kabuli_chr02 | 17971997                | GG                              | CC              | 1946754670               |
| SNP_P4_21190_17981411 | NC_021161.1    | Ca_kabuli_chr02 | 17981411                | CC                              | GG              | 1946754673               |
| SNP_P4_21192_17995635 | NC_021161.1    | Ca_kabuli_chr02 | 17995635                | CC                              | TT              | 1946754675               |
| SNP_P4_21193_17995654 | NC_021161.1    | Ca_kabuli_chr02 | 17995654                | AA                              | GG              | 1946754677               |
| SNP_P4_21194_17996668 | NC_021161.1    | Ca_kabuli_chr02 | 17996668                | GG                              | AA              | 1946754679               |
| SNP_P4_21195_17996695 | NC_021161.1    | Ca_kabuli_chr02 | 17996695                | TT                              | GG              | 1946754681               |
| SNP_P4_21196_17996750 | NC_021161.1    | Ca_kabuli_chr02 | 17996750                | CC                              | GG              | 1946754683               |
| SNP_P4_21197_17997341 | NC_021161.1    | Ca_kabuli_chr02 | 17997341                | CC                              | TT              | 1946754685               |
| SNP_P4_21198_17997684 | NC_021161.1    | Ca_kabuli_chr02 | 17997684                | TT                              | CC              | 1946754687               |
| SNP_P4_21199_17997689 | NC_021161.1    | Ca_kabuli_chr02 | 17997689                | CC                              | TT              | 1946754689               |
| SNP_P4_21200_17997698 | NC_021161.1    | Ca_kabuli_chr02 | 17997698                | AA                              | GG              | 1946754691               |
| SNP_P4_21201_17997822 | NC_021161.1    | Ca_kabuli_chr02 | 17997822                | TT                              | CC              | 1946754693               |
| SNP_P4_21202_17997823 | NC_021161.1    | Ca_kabuli_chr02 | 17997823                | TT                              | CC              | 1946754695               |
| SNP_P4_21203_17997827 | NC_021161.1    | Ca_kabuli_chr02 | 17997827                | GG                              | AA              | 1946754697               |
| SNP_P4_21204_17997851 | NC_021161.1    | Ca_kabuli_chr02 | 17997851                | AA                              | GG              | 1946754699               |
| SNP_P4_21205_17997889 | NC_021161.1    | Ca_kabuli_chr02 | 17997889                | TT                              | GG              | 1946754701               |
| SNP_P4_21206_18024804 | NC_021161.1    | Ca_kabuli_chr02 | 18024804                | CC                              | GG              | 1946754703               |
| SNP_P4_21207_18083297 | NC_021161.1    | Ca_kabuli_chr02 | 18083297                | AA                              | CC              | 1946754705               |
| SNP_P4_21208_18101570 | NC_021161.1    | Ca_kabuli_chr02 | 18101570                | GG                              | AA              | 1946754707               |
| SNP_P4_21209_18101646 | NC_021161.1    | Ca_kabuli_chr02 | 18101646                | GG                              | AA              | 1946754709               |

| SNPs IDs              | Chromosome IDs | Chromosomes     | Physical positions (bp) | CDC Frontier (Reference genome) | (ILWC46 & LPNB) | NCBI SNPdb Accession IDs |
|-----------------------|----------------|-----------------|-------------------------|---------------------------------|-----------------|--------------------------|
| SNP_P4_21210_18101647 | NC_021161.1    | Ca_kabuli_chr02 | 18101647                | CC                              | TT              | 1946754711               |
| SNP_P4_21211_18111365 | NC_021161.1    | Ca_kabuli_chr02 | 18111365                | GG                              | TT              | 1946754713               |
| SNP_P4_21212_18111370 | NC_021161.1    | Ca_kabuli_chr02 | 18111370                | AA                              | TT              | 1946754715               |
| SNP_P4_21213_18125602 | NC_021161.1    | Ca_kabuli_chr02 | 18125602                | TT                              | CC              | 1946754717               |
| SNP_P4_21214_18169549 | NC_021161.1    | Ca_kabuli_chr02 | 18169549                | AA                              | CC              | 1946754719               |
| SNP_P4_21215_18169553 | NC_021161.1    | Ca_kabuli_chr02 | 18169553                | CC                              | GG              | 1946754721               |
| SNP_P4_21216_18169694 | NC_021161.1    | Ca_kabuli_chr02 | 18169694                | GG                              | AA              | 1946754723               |
| SNP_P4_21217_18169897 | NC_021161.1    | Ca_kabuli_chr02 | 18169897                | GG                              | AA              | 1946754725               |
| SNP_P4_21218_18170055 | NC_021161.1    | Ca_kabuli_chr02 | 18170055                | TT                              | AA              | 1946754727               |
| SNP_P4_21219_18170062 | NC_021161.1    | Ca_kabuli_chr02 | 18170062                | AA                              | CC              | 1946754729               |
| SNP_P4_21220_18170071 | NC_021161.1    | Ca_kabuli_chr02 | 18170071                | TT                              | AA              | 1946754731               |
| SNP_P4_21221_18213731 | NC_021161.1    | Ca_kabuli_chr02 | 18213731                | AA                              | GG              | 1946754733               |
| SNP_P4_21224_18299397 | NC_021161.1    | Ca_kabuli_chr02 | 18299397                | AA                              | GG              | 1946754735               |
| SNP_P4_21225_18326476 | NC_021161.1    | Ca_kabuli_chr02 | 18326476                | GG                              | CC              | 1946754737               |
| SNP_P4_21226_18326511 | NC_021161.1    | Ca_kabuli_chr02 | 18326511                | CC                              | TT              | 1946754739               |
| SNP_P4_21227_18326572 | NC_021161.1    | Ca_kabuli_chr02 | 18326572                | AA                              | GG              | 1946754741               |
| SNP_P4_21228_18333038 | NC_021161.1    | Ca_kabuli_chr02 | 18333038                | CC                              | TT              | 1946754743               |
| SNP_P4_21229_18333045 | NC_021161.1    | Ca_kabuli_chr02 | 18333045                | CC                              | TT              | 1946754745               |
| SNP_P4_21230_18333046 | NC_021161.1    | Ca_kabuli_chr02 | 18333046                | AA                              | TT              | 1946754747               |
| SNP_P4_21232_18344951 | NC_021161.1    | Ca_kabuli_chr02 | 18344951                | TT                              | CC              | 1946754749               |
| SNP_P4_21233_18344952 | NC_021161.1    | Ca_kabuli_chr02 | 18344952                | TT                              | CC              | 1946754751               |
| SNP_P4_21234_18345357 | NC_021161.1    | Ca_kabuli_chr02 | 18345357                | AA                              | GG              | 1946754753               |
| SNP_P4_21235_18345358 | NC_021161.1    | Ca_kabuli_chr02 | 18345358                | AA                              | CC              | 1946754755               |
| SNP_P4_21236_18381798 | NC_021161.1    | Ca_kabuli_chr02 | 18381798                | AA                              | GG              | 1946754757               |
| SNP_P4_21237_18408955 | NC_021161.1    | Ca_kabuli_chr02 | 18408955                | TT                              | CC              | 1946754759               |
| SNP_P4_21238_18408988 | NC_021161.1    | Ca_kabuli_chr02 | 18408988                | AA                              | GG              | 1946754760               |
| SNP_P4_21239_18409012 | NC_021161.1    | Ca_kabuli_chr02 | 18409012                | GG                              | CC              | 1946754762               |
| SNP_P4_21240_18409028 | NC_021161.1    | Ca_kabuli_chr02 | 18409028                | CC                              | TT              | 1946754764               |
| SNP_P4_21241_18409050 | NC_021161.1    | Ca_kabuli_chr02 | 18409050                | CC                              | TT              | 1946754766               |
| SNP_P4_21242_18409151 | NC_021161.1    | Ca_kabuli_chr02 | 18409151                | AA                              | TT              | 1946754768               |
| SNP_P4_21243_18409324 | NC_021161.1    | Ca_kabuli_chr02 | 18409324                | CC                              | AA              | 1946754771               |
| SNP_P4_21244_18409376 | NC_021161.1    | Ca_kabuli_chr02 | 18409376                | AA                              | GG              | 1946754773               |
| SNP_P4_21245_18409472 | NC_021161.1    | Ca_kabuli_chr02 | 18409472                | TT                              | CC              | 1946754775               |
| SNP_P4_21246_18410980 | NC_021161.1    | Ca_kabuli_chr02 | 18410980                | TT                              | CC              | 1946754777               |
| SNP_P4_21247_18438386 | NC_021161.1    | Ca_kabuli_chr02 | 18438386                | GG                              | AA              | 1946754779               |
| SNP_P4_21248_18456088 | NC_021161.1    | Ca_kabuli_chr02 | 18456088                | GG                              | AA              | 1946754781               |
| SNP_P4_21249_18462303 | NC_021161.1    | Ca_kabuli_chr02 | 18462303                | AA                              | TT              | 1946754783               |
| SNP_P4_21250_18480182 | NC_021161.1    | Ca_kabuli_chr02 | 18480182                | AA                              | CC              | 1946754785               |
| SNP_P4_21252_18516994 | NC_021161.1    | Ca_kabuli_chr02 | 18516994                | GG                              | AA              | 1946754787               |
| SNP_P4_21253_18563317 | NC_021161.1    | Ca_kabuli_chr02 | 18563317                | TT                              | CC              | 1946754789               |
| SNP_P4_21254_18563319 | NC_021161.1    | Ca_kabuli_chr02 | 18563319                | AA                              | GG              | 1946754791               |
| SNP_P4_21255_18565372 | NC_021161.1    | Ca_kabuli_chr02 | 18565372                | AA                              | CC              | 1946754793               |

| SNPs IDs              | Chromosome IDs | Chromosomes     | Physical positions (bp) | CDC Frontier (Reference genome) | (ILWC46 & LPNB) | NCBI SNPdb Accession IDs |
|-----------------------|----------------|-----------------|-------------------------|---------------------------------|-----------------|--------------------------|
| SNP_P4_21256_18565373 | NC_021161.1    | Ca_kabuli_chr02 | 18565373                | TT                              | CC              | 1946754795               |
| SNP_P4_21257_18574208 | NC_021161.1    | Ca_kabuli_chr02 | 18574208                | GG                              | AA              | 1946754797               |
| SNP_P4_21258_18587045 | NC_021161.1    | Ca_kabuli_chr02 | 18587045                | TT                              | CC              | 1946754799               |
| SNP_P4_21259_18587092 | NC_021161.1    | Ca_kabuli_chr02 | 18587092                | AA                              | TT              | 1946754801               |
| SNP_P4_21260_18587192 | NC_021161.1    | Ca_kabuli_chr02 | 18587192                | GG                              | AA              | 1946754803               |
| SNP_P4_21261_18595634 | NC_021161.1    | Ca_kabuli_chr02 | 18595634                | CC                              | TT              | 1946754805               |
| SNP_P4_21262_18610010 | NC_021161.1    | Ca_kabuli_chr02 | 18610010                | TT                              | CC              | 1946754807               |
| SNP_P4_21263_18660242 | NC_021161.1    | Ca_kabuli_chr02 | 18660242                | CC                              | AA              | 1946754809               |
| SNP_P4_21264_18660250 | NC_021161.1    | Ca_kabuli_chr02 | 18660250                | TT                              | CC              | 1946754811               |
| SNP_P4_21265_18660251 | NC_021161.1    | Ca_kabuli_chr02 | 18660251                | CC                              | AA              | 1946754813               |
| SNP_P4_21266_18663926 | NC_021161.1    | Ca_kabuli_chr02 | 18663926                | CC                              | TT              | 1946754815               |
| SNP_P4_21267_18699680 | NC_021161.1    | Ca_kabuli_chr02 | 18699680                | TT                              | CC              | 1946754817               |
| SNP_P4_21268_18699681 | NC_021161.1    | Ca_kabuli_chr02 | 18699681                | GG                              | AA              | 1946754819               |
| SNP_P4_21269_18700607 | NC_021161.1    | Ca_kabuli_chr02 | 18700607                | CC                              | AA              | 1946754821               |
| SNP_P4_21270_18703517 | NC_021161.1    | Ca_kabuli_chr02 | 18703517                | TT                              | AA              | 1946754823               |
| SNP_P4_21271_18707456 | NC_021161.1    | Ca_kabuli_chr02 | 18707456                | GG                              | AA              | 1946754825               |
| SNP_P4_21272_18707482 | NC_021161.1    | Ca_kabuli_chr02 | 18707482                | GG                              | TT              | 1946754827               |
| SNP_P4_21273_18711865 | NC_021161.1    | Ca_kabuli_chr02 | 18711865                | TT                              | GG              | 1946754829               |
| SNP_P4_21274_18714370 | NC_021161.1    | Ca_kabuli_chr02 | 18714370                | CC                              | TT              | 1946754832               |
| SNP_P4_21275_18724533 | NC_021161.1    | Ca_kabuli_chr02 | 18724533                | TT                              | CC              | 1946754834               |
| SNP_P4_21276_18755446 | NC_021161.1    | Ca_kabuli_chr02 | 18755446                | CC                              | GG              | 1946754836               |
| SNP_P4_21277_18758396 | NC_021161.1    | Ca_kabuli_chr02 | 18758396                | GG                              | AA              | 1946754838               |
| SNP_P4_21278_18758406 | NC_021161.1    | Ca_kabuli_chr02 | 18758406                | TT                              | CC              | 1946754840               |
| SNP_P4_21279_18758412 | NC_021161.1    | Ca_kabuli_chr02 | 18758412                | TT                              | CC              | 1946754842               |
| SNP_P4_21280_18758788 | NC_021161.1    | Ca_kabuli_chr02 | 18758788                | AA                              | GG              | 1946754843               |
| SNP_P4_21281_18776218 | NC_021161.1    | Ca_kabuli_chr02 | 18776218                | CC                              | TT              | 1946754845               |
| SNP_P4_21282_18776220 | NC_021161.1    | Ca_kabuli_chr02 | 18776220                | CC                              | TT              | 1946754847               |
| SNP_P4_21283_18776229 | NC_021161.1    | Ca_kabuli_chr02 | 18776229                | TT                              | CC              | 1946754849               |
| SNP_P4_21284_18776245 | NC_021161.1    | Ca_kabuli_chr02 | 18776245                | AA                              | CC              | 1946754851               |
| SNP_P4_21285_18776272 | NC_021161.1    | Ca_kabuli_chr02 | 18776272                | CC                              | TT              | 1946754853               |
| SNP_P4_21286_18776591 | NC_021161.1    | Ca_kabuli_chr02 | 18776591                | AA                              | TT              | 1946754855               |
| SNP_P4_21287_18776632 | NC_021161.1    | Ca_kabuli_chr02 | 18776632                | TT                              | GG              | 1946754857               |
| SNP_P4_21288_18776637 | NC_021161.1    | Ca_kabuli_chr02 | 18776637                | CC                              | TT              | 1946754859               |
| SNP_P4_21289_18776649 | NC_021161.1    | Ca_kabuli_chr02 | 18776649                | GG                              | AA              | 1946754861               |
| SNP_P4_21290_18776675 | NC_021161.1    | Ca_kabuli_chr02 | 18776675                | AA                              | TT              | 1946754863               |
| SNP_P4_21294_18896602 | NC_021161.1    | Ca_kabuli_chr02 | 18896602                | CC                              | AA              | 1946754865               |
| SNP_P4_21295_18901504 | NC_021161.1    | Ca_kabuli_chr02 | 18901504                | GG                              | AA              | 1946754867               |
| SNP_P4_21296_18915840 | NC_021161.1    | Ca_kabuli_chr02 | 18915840                | AA                              | GG              | 1946754869               |
| SNP_P4_21297_18936558 | NC_021161.1    | Ca_kabuli_chr02 | 18936558                | TT                              | GG              | 1946754871               |
| SNP_P4_21298_18944165 | NC_021161.1    | Ca_kabuli_chr02 | 18944165                | CC                              | AA              | 1946754873               |
| SNP_P4_21299_18944455 | NC_021161.1    | Ca_kabuli_chr02 | 18944455                | TT                              | CC              | 1946754874               |
| SNP_P4_21300_18944573 | NC_021161.1    | Ca_kabuli_chr02 | 18944573                | GG                              | AA              | 1946754876               |

| SNPs IDs              | Chromosome IDs | Chromosomes     | Physical positions (bp) | CDC Frontier (Reference genome) | (ILWC46 & LPNB) | NCBI SNPdb Accession IDs |
|-----------------------|----------------|-----------------|-------------------------|---------------------------------|-----------------|--------------------------|
| SNP_P4_21301_18944612 | NC_021161.1    | Ca_kabuli_chr02 | 18944612                | TT                              | CC              | 1946754878               |
| SNP_P4_21303_19000333 | NC_021161.1    | Ca_kabuli_chr02 | 19000333                | CC                              | TT              | 1946754880               |
| SNP_P4_21304_19001491 | NC_021161.1    | Ca_kabuli_chr02 | 19001491                | CC                              | TT              | 1946754882               |
| SNP_P4_21305_19004061 | NC_021161.1    | Ca_kabuli_chr02 | 19004061                | TT                              | CC              | 1946754884               |
| SNP_P4_21306_19008963 | NC_021161.1    | Ca_kabuli_chr02 | 19008963                | AA                              | GG              | 1946754886               |
| SNP_P4_21308_19008991 | NC_021161.1    | Ca_kabuli_chr02 | 19008991                | GG                              | TT              | 1946754888               |
| SNP_P4_21309_19009078 | NC_021161.1    | Ca_kabuli_chr02 | 19009078                | GG                              | AA              | 1946754890               |
| SNP_P4_21310_19009112 | NC_021161.1    | Ca_kabuli_chr02 | 19009112                | GG                              | CC              | 1946754892               |
| SNP_P4_21311_19009176 | NC_021161.1    | Ca_kabuli_chr02 | 19009176                | CC                              | AA              | 1946754894               |
| SNP_P4_21312_19009188 | NC_021161.1    | Ca_kabuli_chr02 | 19009188                | TT                              | CC              | 1946754896               |
| SNP_P4_21313_19009207 | NC_021161.1    | Ca_kabuli_chr02 | 19009207                | CC                              | TT              | 1946754898               |
| SNP_P4_21314_19009219 | NC_021161.1    | Ca_kabuli_chr02 | 19009219                | GG                              | AA              | 1946754900               |
| SNP_P4_21315_19009234 | NC_021161.1    | Ca_kabuli_chr02 | 19009234                | AA                              | CC              | 1946754902               |
| SNP_P4_21316_19009310 | NC_021161.1    | Ca_kabuli_chr02 | 19009310                | TT                              | GG              | 1946754904               |
| SNP_P4_21317_19009436 | NC_021161.1    | Ca_kabuli_chr02 | 19009436                | CC                              | TT              | 1946754906               |
| SNP_P4_21318_19009504 | NC_021161.1    | Ca_kabuli_chr02 | 19009504                | AA                              | TT              | 1946754908               |
| SNP_P4_21319_19009565 | NC_021161.1    | Ca_kabuli_chr02 | 19009565                | TT                              | GG              | 1946754910               |
| SNP_P4_21320_19015885 | NC_021161.1    | Ca_kabuli_chr02 | 19015885                | CC                              | TT              | 1946754912               |
| SNP_P4_21321_19015940 | NC_021161.1    | Ca_kabuli_chr02 | 19015940                | GG                              | TT              | 1946754914               |
| SNP_P4_21323_19016017 | NC_021161.1    | Ca_kabuli_chr02 | 19016017                | AA                              | GG              | 1946754916               |
| SNP_P4_21324_19016023 | NC_021161.1    | Ca_kabuli_chr02 | 19016023                | AA                              | GG              | 1946754918               |
| SNP_P4_21325_19016054 | NC_021161.1    | Ca_kabuli_chr02 | 19016054                | CC                              | GG              | 1946754920               |
| SNP_P4_21326_19016091 | NC_021161.1    | Ca_kabuli_chr02 | 19016091                | CC                              | AA              | 1946754922               |
| SNP_P4_21327_19016105 | NC_021161.1    | Ca_kabuli_chr02 | 19016105                | GG                              | CC              | 1946754924               |
| SNP_P4_21328_19016117 | NC_021161.1    | Ca_kabuli_chr02 | 19016117                | GG                              | AA              | 1946754926               |
| SNP_P4_21329_19016130 | NC_021161.1    | Ca_kabuli_chr02 | 19016130                | TT                              | CC              | 1946754928               |
| SNP_P4_21330_19016165 | NC_021161.1    | Ca_kabuli_chr02 | 19016165                | TT                              | CC              | 1946754930               |
| SNP_P4_21331_19016194 | NC_021161.1    | Ca_kabuli_chr02 | 19016194                | AA                              | GG              | 1946754932               |
| SNP_P4_21332_19016195 | NC_021161.1    | Ca_kabuli_chr02 | 19016195                | CC                              | TT              | 1946754934               |
| SNP_P4_21333_19016204 | NC_021161.1    | Ca_kabuli_chr02 | 19016204                | CC                              | GG              | 1946754936               |
| SNP_P4_21334_19016206 | NC_021161.1    | Ca_kabuli_chr02 | 19016206                | AA                              | GG              | 1946754938               |
| SNP_P4_21335_19016276 | NC_021161.1    | Ca_kabuli_chr02 | 19016276                | TT                              | GG              | 1946754940               |
| SNP_P4_21336_19016301 | NC_021161.1    | Ca_kabuli_chr02 | 19016301                | TT                              | CC              | 1946754942               |
| SNP_P4_21337_19016333 | NC_021161.1    | Ca_kabuli_chr02 | 19016333                | CC                              | AA              | 1946754944               |
| SNP_P4_21338_19016367 | NC_021161.1    | Ca_kabuli_chr02 | 19016367                | TT                              | AA              | 1946754946               |
| SNP_P4_21339_19016382 | NC_021161.1    | Ca_kabuli_chr02 | 19016382                | CC                              | TT              | 1946754948               |
| SNP_P4_21340_19016562 | NC_021161.1    | Ca_kabuli_chr02 | 19016562                | AA                              | CC              | 1946754950               |
| SNP_P4_21341_19016599 | NC_021161.1    | Ca_kabuli_chr02 | 19016599                | CC                              | AA              | 1946754952               |
| SNP_P4_21342_19021810 | NC_021161.1    | Ca_kabuli_chr02 | 19021810                | TT                              | CC              | 1946754954               |
| SNP_P4_21343_19022079 | NC_021161.1    | Ca_kabuli_chr02 | 19022079                | TT                              | CC              | 1946754956               |
| SNP_P4_21344_19022081 | NC_021161.1    | Ca_kabuli_chr02 | 19022081                | AA                              | GG              | 1946754958               |
| SNP_P4_21345_19022099 | NC_021161.1    | Ca_kabuli_chr02 | 19022099                | CC                              | TT              | 1946754960               |



| SNPs IDs              | Chromosome IDs | Chromosomes     | Physical positions (bp) | CDC Frontier (Reference genome) | (ILWC46 & LPNB) | NCBI SNPdb Accession IDs |
|-----------------------|----------------|-----------------|-------------------------|---------------------------------|-----------------|--------------------------|
| SNP_P4_21346_19022722 | NC_021161.1    | Ca_kabuli_chr02 | 19022722                | GG                              | AA              | 1946754962               |
| SNP_P4_21347_19022723 | NC_021161.1    | Ca_kabuli_chr02 | 19022723                | AA                              | TT              | 1946754964               |
| SNP_P4_21348_19025596 | NC_021161.1    | Ca_kabuli_chr02 | 19025596                | GG                              | TT              | 1946754966               |
| SNP_P4_21349_19026318 | NC_021161.1    | Ca_kabuli_chr02 | 19026318                | CC                              | TT              | 1946754968               |
| SNP_P4_21350_19026662 | NC_021161.1    | Ca_kabuli_chr02 | 19026662                | TT                              | CC              | 1946754970               |
| SNP_P4_21351_19026665 | NC_021161.1    | Ca_kabuli_chr02 | 19026665                | AA                              | TT              | 1946754972               |
| SNP_P4_21352_19026700 | NC_021161.1    | Ca_kabuli_chr02 | 19026700                | TT                              | CC              | 1946754974               |
| SNP_P4_21353_19053118 | NC_021161.1    | Ca_kabuli_chr02 | 19053118                | AA                              | GG              | 1946754976               |
| SNP_P4_21354_19081675 | NC_021161.1    | Ca_kabuli_chr02 | 19081675                | GG                              | AA              | 1946754978               |
| SNP_P4_21355_19081676 | NC_021161.1    | Ca_kabuli_chr02 | 19081676                | TT                              | CC              | 1946754980               |
| SNP_P4_21356_19081687 | NC_021161.1    | Ca_kabuli_chr02 | 19081687                | AA                              | GG              | 1946754982               |
| SNP_P4_21357_19081693 | NC_021161.1    | Ca_kabuli_chr02 | 19081693                | TT                              | CC              | 1946754984               |
| SNP_P4_21358_19097388 | NC_021161.1    | Ca_kabuli_chr02 | 19097388                | TT                              | GG              | 1946754986               |
| SNP_P4_21359_19101582 | NC_021161.1    | Ca_kabuli_chr02 | 19101582                | AA                              | CC              | 1946754988               |
| SNP_P4_21360_19101914 | NC_021161.1    | Ca_kabuli_chr02 | 19101914                | TT                              | GG              | 1946754990               |
| SNP_P4_21361_19102148 | NC_021161.1    | Ca_kabuli_chr02 | 19102148                | AA                              | TT              | 1946754991               |
| SNP_P4_21362_19102149 | NC_021161.1    | Ca_kabuli_chr02 | 19102149                | TT                              | AA              | 1946754993               |
| SNP_P4_21363_19102452 | NC_021161.1    | Ca_kabuli_chr02 | 19102452                | TT                              | GG              | 1946754995               |
| SNP_P4_21364_19130490 | NC_021161.1    | Ca_kabuli_chr02 | 19130490                | CC                              | TT              | 1946754997               |
| SNP_P4_21365_19131781 | NC_021161.1    | Ca_kabuli_chr02 | 19131781                | TT                              | GG              | 1946754999               |
| SNP_P4_21366_19131913 | NC_021161.1    | Ca_kabuli_chr02 | 19131913                | AA                              | CC              | 1946755001               |
| SNP_P4_21367_19131948 | NC_021161.1    | Ca_kabuli_chr02 | 19131948                | GG                              | CC              | 1946755003               |
| SNP_P4_21369_19134629 | NC_021161.1    | Ca_kabuli_chr02 | 19134629                | GG                              | AA              | 1946755005               |
| SNP_P4_21370_19134647 | NC_021161.1    | Ca_kabuli_chr02 | 19134647                | CC                              | GG              | 1946755007               |
| SNP_P4_21371_19134672 | NC_021161.1    | Ca_kabuli_chr02 | 19134672                | AA                              | GG              | 1946755009               |
| SNP_P4_21372_19134875 | NC_021161.1    | Ca_kabuli_chr02 | 19134875                | AA                              | CC              | 1946755011               |
| SNP_P4_21373_19136705 | NC_021161.1    | Ca_kabuli_chr02 | 19136705                | AA                              | TT              | 1946755013               |
| SNP_P4_21374_19136712 | NC_021161.1    | Ca_kabuli_chr02 | 19136712                | TT                              | CC              | 1946755015               |
| SNP_P4_21375_19139071 | NC_021161.1    | Ca_kabuli_chr02 | 19139071                | TT                              | CC              | 1946755017               |
| SNP_P4_21376_19139107 | NC_021161.1    | Ca_kabuli_chr02 | 19139107                | TT                              | CC              | 1946755019               |
| SNP_P4_21377_19139815 | NC_021161.1    | Ca_kabuli_chr02 | 19139815                | GG                              | AA              | 1946755021               |
| SNP_P4_21378_19164413 | NC_021161.1    | Ca_kabuli_chr02 | 19164413                | TT                              | AA              | 1946755022               |
| SNP_P4_21379_19164629 | NC_021161.1    | Ca_kabuli_chr02 | 19164629                | AA                              | GG              | 1946755025               |
| SNP_P4_21380_19180056 | NC_021161.1    | Ca_kabuli_chr02 | 19180056                | TT                              | GG              | 1946755027               |
| SNP_P4_21381_19180136 | NC_021161.1    | Ca_kabuli_chr02 | 19180136                | TT                              | AA              | 1946755029               |
| SNP_P4_21382_19187193 | NC_021161.1    | Ca_kabuli_chr02 | 19187193                | GG                              | AA              | 1946755031               |
| SNP_P4_21383_19192840 | NC_021161.1    | Ca_kabuli_chr02 | 19192840                | GG                              | AA              | 1946755032               |
| SNP_P4_21385_19194520 | NC_021161.1    | Ca_kabuli_chr02 | 19194520                | CC                              | TT              | 1946755034               |
| SNP_P4_21386_19198280 | NC_021161.1    | Ca_kabuli_chr02 | 19198280                | AA                              | GG              | 1946755036               |
| SNP_P4_21387_19216133 | NC_021161.1    | Ca_kabuli_chr02 | 19216133                | TT                              | AA              | 1946755038               |
| SNP_P4_21388_19216149 | NC_021161.1    | Ca_kabuli_chr02 | 19216149                | GG                              | AA              | 1946755040               |
| SNP_P4_21389_19218990 | NC_021161.1    | Ca_kabuli_chr02 | 19218990                | CC                              | AA              | 1946755042               |

| SNPs IDs              | Chromosome IDs | Chromosomes     | Physical positions (bp) | CDC Frontier (Reference genome) | (ILWC46 & LPNB) | NCBI SNPdb Accession IDs |
|-----------------------|----------------|-----------------|-------------------------|---------------------------------|-----------------|--------------------------|
| SNP_P4_21391_19219046 | NC_021161.1    | Ca_kabuli_chr02 | 19219046                | CC                              | AA              | 1946755044               |
| SNP_P4_21392_19219073 | NC_021161.1    | Ca_kabuli_chr02 | 19219073                | GG                              | AA              | 1946755046               |
| SNP_P4_21393_19219080 | NC_021161.1    | Ca_kabuli_chr02 | 19219080                | GG                              | TT              | 1946755048               |
| SNP_P4_21394_19219139 | NC_021161.1    | Ca_kabuli_chr02 | 19219139                | TT                              | CC              | 1946755051               |
| SNP_P4_21395_19236895 | NC_021161.1    | Ca_kabuli_chr02 | 19236895                | GG                              | CC              | 1946755053               |
| SNP_P4_21396_19250998 | NC_021161.1    | Ca_kabuli_chr02 | 19250998                | AA                              | GG              | 1946755055               |
| SNP_P4_21397_19251509 | NC_021161.1    | Ca_kabuli_chr02 | 19251509                | TT                              | AA              | 1946755057               |
| SNP_P4_21398_19251538 | NC_021161.1    | Ca_kabuli_chr02 | 19251538                | AA                              | GG              | 1946755059               |
| SNP_P4_21399_19251940 | NC_021161.1    | Ca_kabuli_chr02 | 19251940                | GG                              | AA              | 1946755061               |
| SNP_P4_21400_19261293 | NC_021161.1    | Ca_kabuli_chr02 | 19261293                | TT                              | AA              | 1946755063               |
| SNP_P4_21401_19281105 | NC_021161.1    | Ca_kabuli_chr02 | 19281105                | CC                              | AA              | 1946755065               |
| SNP_P4_21402_19281257 | NC_021161.1    | Ca_kabuli_chr02 | 19281257                | AA                              | CC              | 1946755067               |
| SNP_P4_21403_19283935 | NC_021161.1    | Ca_kabuli_chr02 | 19283935                | AA                              | TT              | 1946755070               |
| SNP_P4_21404_19283963 | NC_021161.1    | Ca_kabuli_chr02 | 19283963                | TT                              | CC              | 1946755072               |
| SNP_P4_21405_19307484 | NC_021161.1    | Ca_kabuli_chr02 | 19307484                | CC                              | TT              | 1946755074               |
| SNP_P4_21406_19312496 | NC_021161.1    | Ca_kabuli_chr02 | 19312496                | AA                              | TT              | 1946755076               |
| SNP_P4_21407_19314605 | NC_021161.1    | Ca_kabuli_chr02 | 19314605                | TT                              | AA              | 1946755078               |
| SNP_P4_21408_19314681 | NC_021161.1    | Ca_kabuli_chr02 | 19314681                | TT                              | GG              | 1946755080               |
| SNP_P4_21409_19326511 | NC_021161.1    | Ca_kabuli_chr02 | 19326511                | CC                              | TT              | 1946755082               |
| SNP_P4_21410_19326528 | NC_021161.1    | Ca_kabuli_chr02 | 19326528                | CC                              | AA              | 1946755084               |
| SNP_P4_21411_19326624 | NC_021161.1    | Ca_kabuli_chr02 | 19326624                | TT                              | CC              | 1946755086               |
| SNP_P4_21412_19327297 | NC_021161.1    | Ca_kabuli_chr02 | 19327297                | GG                              | AA              | 1946755088               |
| SNP_P4_21413_19328010 | NC_021161.1    | Ca_kabuli_chr02 | 19328010                | CC                              | TT              | 1946755090               |
| SNP_P4_21414_19363544 | NC_021161.1    | Ca_kabuli_chr02 | 19363544                | CC                              | TT              | 1946755092               |
| SNP_P4_21417_19395418 | NC_021161.1    | Ca_kabuli_chr02 | 19395418                | GG                              | AA              | 1946755094               |
| SNP_P4_21419_19447731 | NC_021161.1    | Ca_kabuli_chr02 | 19447731                | CC                              | AA              | 1946755096               |
| SNP_P4_21420_19461104 | NC_021161.1    | Ca_kabuli_chr02 | 19461104                | AA                              | TT              | 1946755098               |
| SNP_P4_21421_19461143 | NC_021161.1    | Ca_kabuli_chr02 | 19461143                | CC                              | TT              | 1946755100               |
| SNP_P4_21422_19461146 | NC_021161.1    | Ca_kabuli_chr02 | 19461146                | TT                              | GG              | 1946755102               |
| SNP_P4_21423_19461205 | NC_021161.1    | Ca_kabuli_chr02 | 19461205                | CC                              | TT              | 1946755104               |
| SNP_P4_21424_19461208 | NC_021161.1    | Ca_kabuli_chr02 | 19461208                | TT                              | GG              | 1946755105               |
| SNP_P4_21425_19477993 | NC_021161.1    | Ca_kabuli_chr02 | 19477993                | TT                              | AA              | 1946755108               |
| SNP_P4_21426_19483164 | NC_021161.1    | Ca_kabuli_chr02 | 19483164                | CC                              | GG              | 1946755110               |
| SNP_P4_21427_19500858 | NC_021161.1    | Ca_kabuli_chr02 | 19500858                | CC                              | GG              | 1946755112               |
| SNP_P4_21428_19501138 | NC_021161.1    | Ca_kabuli_chr02 | 19501138                | GG                              | AA              | 1946755114               |
| SNP_P4_21429_19501220 | NC_021161.1    | Ca_kabuli_chr02 | 19501220                | CC                              | TT              | 1946755116               |
| SNP_P4_21430_19501270 | NC_021161.1    | Ca_kabuli_chr02 | 19501270                | AA                              | CC              | 1946755118               |
| SNP_P4_21431_19501354 | NC_021161.1    | Ca_kabuli_chr02 | 19501354                | GG                              | AA              | 1946755120               |
| SNP_P4_21432_19501464 | NC_021161.1    | Ca_kabuli_chr02 | 19501464                | GG                              | TT              | 1946755122               |
| SNP_P4_21433_19501669 | NC_021161.1    | Ca_kabuli_chr02 | 19501669                | TT                              | AA              | 1946755124               |
| SNP_P4_21434_19501682 | NC_021161.1    | Ca_kabuli_chr02 | 19501682                | TT                              | AA              | 1946755126               |
| SNP_P4_21435_19513210 | NC_021161.1    | Ca_kabuli_chr02 | 19513210                | AA                              | GG              | 1946755127               |

| SNPs IDs              | Chromosome IDs | Chromosomes     | Physical positions (bp) | CDC Frontier (Reference genome) | (ILWC46 & LPNB) | NCBI SNPdb Accession IDs |
|-----------------------|----------------|-----------------|-------------------------|---------------------------------|-----------------|--------------------------|
| SNP_P4_21436_19514480 | NC_021161.1    | Ca_kabuli_chr02 | 19514480                | CC                              | TT              | 1946755129               |
| SNP_P4_21437_19514494 | NC_021161.1    | Ca_kabuli_chr02 | 19514494                | TT                              | AA              | 1946755131               |
| SNP_P4_21438_19514506 | NC_021161.1    | Ca_kabuli_chr02 | 19514506                | TT                              | CC              | 1946755133               |
| SNP_P4_21439_19516489 | NC_021161.1    | Ca_kabuli_chr02 | 19516489                | TT                              | AA              | 1946755135               |
| SNP_P4_21440_19516490 | NC_021161.1    | Ca_kabuli_chr02 | 19516490                | AA                              | TT              | 1946755137               |
| SNP_P4_21441_19516514 | NC_021161.1    | Ca_kabuli_chr02 | 19516514                | CC                              | TT              | 1946755139               |
| SNP_P4_21442_19516537 | NC_021161.1    | Ca_kabuli_chr02 | 19516537                | TT                              | CC              | 1946755141               |
| SNP_P4_21443_19516560 | NC_021161.1    | Ca_kabuli_chr02 | 19516560                | GG                              | AA              | 1946755143               |
| SNP_P4_21444_19516618 | NC_021161.1    | Ca_kabuli_chr02 | 19516618                | GG                              | AA              | 1946755145               |
| SNP_P4_21445_19516675 | NC_021161.1    | Ca_kabuli_chr02 | 19516675                | AA                              | TT              | 1946755147               |
| SNP_P4_21446_19516714 | NC_021161.1    | Ca_kabuli_chr02 | 19516714                | AA                              | GG              | 1946755149               |
| SNP_P4_21447_19516732 | NC_021161.1    | Ca_kabuli_chr02 | 19516732                | AA                              | TT              | 1946755151               |
| SNP_P4_21448_19516741 | NC_021161.1    | Ca_kabuli_chr02 | 19516741                | CC                              | AA              | 1946755153               |
| SNP_P4_21449_19516742 | NC_021161.1    | Ca_kabuli_chr02 | 19516742                | AA                              | TT              | 1946755155               |
| SNP_P4_21450_19516834 | NC_021161.1    | Ca_kabuli_chr02 | 19516834                | CC                              | TT              | 1946755157               |
| SNP_P4_21451_19517140 | NC_021161.1    | Ca_kabuli_chr02 | 19517140                | GG                              | AA              | 1946755159               |
| SNP_P4_21452_19517421 | NC_021161.1    | Ca_kabuli_chr02 | 19517421                | CC                              | AA              | 1946755161               |
| SNP_P4_21453_19517439 | NC_021161.1    | Ca_kabuli_chr02 | 19517439                | AA                              | TT              | 1946755163               |
| SNP_P4_21454_19518063 | NC_021161.1    | Ca_kabuli_chr02 | 19518063                | AA                              | GG              | 1946755165               |
| SNP_P4_21455_19518064 | NC_021161.1    | Ca_kabuli_chr02 | 19518064                | TT                              | AA              | 1946755166               |
| SNP_P4_21456_19528664 | NC_021161.1    | Ca_kabuli_chr02 | 19528664                | GG                              | AA              | 1946755169               |
| SNP_P4_21457_19563519 | NC_021161.1    | Ca_kabuli_chr02 | 19563519                | TT                              | GG              | 1946755170               |
| SNP_P4_21458_19570572 | NC_021161.1    | Ca_kabuli_chr02 | 19570572                | AA                              | CC              | 1946755172               |
| SNP_P4_21459_19571111 | NC_021161.1    | Ca_kabuli_chr02 | 19571111                | CC                              | TT              | 1946755174               |
| SNP_P4_21461_19590122 | NC_021161.1    | Ca_kabuli_chr02 | 19590122                | TT                              | GG              | 1946755176               |
| SNP_P4_21462_19590168 | NC_021161.1    | Ca_kabuli_chr02 | 19590168                | TT                              | CC              | 1946755178               |
| SNP_P4_21463_19590210 | NC_021161.1    | Ca_kabuli_chr02 | 19590210                | TT                              | CC              | 1946755180               |
| SNP_P4_21464_19590307 | NC_021161.1    | Ca_kabuli_chr02 | 19590307                | AA                              | GG              | 1946755182               |
| SNP_P4_21465_19590522 | NC_021161.1    | Ca_kabuli_chr02 | 19590522                | GG                              | CC              | 1946755184               |
| SNP_P4_21466_19590573 | NC_021161.1    | Ca_kabuli_chr02 | 19590573                | CC                              | TT              | 1946755186               |
| SNP_P4_21467_19590627 | NC_021161.1    | Ca_kabuli_chr02 | 19590627                | TT                              | GG              | 1946755188               |
| SNP_P4_21468_19590633 | NC_021161.1    | Ca_kabuli_chr02 | 19590633                | CC                              | TT              | 1946755191               |
| SNP_P4_21469_19602666 | NC_021161.1    | Ca_kabuli_chr02 | 19602666                | AA                              | GG              | 1946755193               |
| SNP_P4_21470_19602719 | NC_021161.1    | Ca_kabuli_chr02 | 19602719                | TT                              | CC              | 1946755195               |
| SNP_P4_21471_19602728 | NC_021161.1    | Ca_kabuli_chr02 | 19602728                | CC                              | GG              | 1946755197               |
| SNP_P4_21472_19602794 | NC_021161.1    | Ca_kabuli_chr02 | 19602794                | CC                              | TT              | 1946755198               |
| SNP_P4_21473_19602798 | NC_021161.1    | Ca_kabuli_chr02 | 19602798                | TT                              | GG              | 1946755200               |
| SNP_P4_21474_19602813 | NC_021161.1    | Ca_kabuli_chr02 | 19602813                | GG                              | TT              | 1946755202               |
| SNP_P4_21475_19603085 | NC_021161.1    | Ca_kabuli_chr02 | 19603085                | GG                              | AA              | 1946755204               |
| SNP_P4_21476_19603097 | NC_021161.1    | Ca_kabuli_chr02 | 19603097                | GG                              | AA              | 1946755206               |
| SNP_P4_21478_19603219 | NC_021161.1    | Ca_kabuli_chr02 | 19603219                | AA                              | GG              | 1946755208               |
| SNP_P4_21479_19603231 | NC_021161.1    | Ca_kabuli_chr02 | 19603231                | TT                              | CC              | 1946755210               |

| SNPs IDs              | Chromosome IDs | Chromosomes     | Physical positions (bp) | CDC Frontier (Reference genome) | (ILWC46 & LPNB) | NCBI SNPdb Accession IDs |
|-----------------------|----------------|-----------------|-------------------------|---------------------------------|-----------------|--------------------------|
| SNP_P4_21480_19615414 | NC_021161.1    | Ca_kabuli_chr02 | 19615414                | AA                              | TT              | 1946755212               |
| SNP_P4_21481_19615434 | NC_021161.1    | Ca_kabuli_chr02 | 19615434                | CC                              | AA              | 1946755213               |
| SNP_P4_21482_19616952 | NC_021161.1    | Ca_kabuli_chr02 | 19616952                | TT                              | CC              | 1946755215               |
| SNP_P4_21484_19617026 | NC_021161.1    | Ca_kabuli_chr02 | 19617026                | AA                              | GG              | 1946755217               |
| SNP_P4_21485_19617047 | NC_021161.1    | Ca_kabuli_chr02 | 19617047                | AA                              | GG              | 1946755219               |
| SNP_P4_21486_19617048 | NC_021161.1    | Ca_kabuli_chr02 | 19617048                | CC                              | TT              | 1946755221               |
| SNP_P4_21487_19617056 | NC_021161.1    | Ca_kabuli_chr02 | 19617056                | TT                              | AA              | 1946755223               |
| SNP_P4_21488_19617093 | NC_021161.1    | Ca_kabuli_chr02 | 19617093                | AA                              | GG              | 1946755225               |
| SNP_P4_21489_19617167 | NC_021161.1    | Ca_kabuli_chr02 | 19617167                | TT                              | CC              | 1946755227               |
| SNP_P4_21490_19617169 | NC_021161.1    | Ca_kabuli_chr02 | 19617169                | AA                              | GG              | 1946755229               |
| SNP_P4_21491_19617390 | NC_021161.1    | Ca_kabuli_chr02 | 19617390                | AA                              | GG              | 1946755231               |
| SNP_P4_21492_19617438 | NC_021161.1    | Ca_kabuli_chr02 | 19617438                | TT                              | AA              | 1946755233               |
| SNP_P4_21493_19620639 | NC_021161.1    | Ca_kabuli_chr02 | 19620639                | TT                              | GG              | 1946755235               |
| SNP_P4_21494_19620942 | NC_021161.1    | Ca_kabuli_chr02 | 19620942                | TT                              | GG              | 1946755237               |
| SNP_P4_21495_19642329 | NC_021161.1    | Ca_kabuli_chr02 | 19642329                | TT                              | CC              | 1946755239               |
| SNP_P4_21496_19646159 | NC_021161.1    | Ca_kabuli_chr02 | 19646159                | TT                              | AA              | 1946755241               |
| SNP_P4_21497_19649679 | NC_021161.1    | Ca_kabuli_chr02 | 19649679                | CC                              | AA              | 1946755243               |
| SNP_P4_21498_19649822 | NC_021161.1    | Ca_kabuli_chr02 | 19649822                | GG                              | AA              | 1946755245               |
| SNP_P4_21499_19650150 | NC_021161.1    | Ca_kabuli_chr02 | 19650150                | CC                              | TT              | 1946755247               |
| SNP_P4_21500_19650154 | NC_021161.1    | Ca_kabuli_chr02 | 19650154                | GG                              | AA              | 1946755249               |
| SNP_P4_21501_19650171 | NC_021161.1    | Ca_kabuli_chr02 | 19650171                | AA                              | TT              | 1946755251               |
| SNP_P4_21502_19650204 | NC_021161.1    | Ca_kabuli_chr02 | 19650204                | AA                              | GG              | 1946755253               |
| SNP_P4_21503_19650221 | NC_021161.1    | Ca_kabuli_chr02 | 19650221                | AA                              | GG              | 1946755255               |
| SNP_P4_21504_19650482 | NC_021161.1    | Ca_kabuli_chr02 | 19650482                | GG                              | TT              | 1946755257               |
| SNP_P4_21505_19650564 | NC_021161.1    | Ca_kabuli_chr02 | 19650564                | GG                              | AA              | 1946755259               |
| SNP_P4_21506_19652524 | NC_021161.1    | Ca_kabuli_chr02 | 19652524                | CC                              | TT              | 1946755261               |
| SNP_P4_21507_19652573 | NC_021161.1    | Ca_kabuli_chr02 | 19652573                | GG                              | AA              | 1946755263               |
| SNP_P4_21508_19652935 | NC_021161.1    | Ca_kabuli_chr02 | 19652935                | TT                              | CC              | 1946755265               |
| SNP_P4_21509_19652959 | NC_021161.1    | Ca_kabuli_chr02 | 19652959                | GG                              | AA              | 1946755266               |
| SNP_P4_21510_19653215 | NC_021161.1    | Ca_kabuli_chr02 | 19653215                | GG                              | AA              | 1946755268               |
| SNP_P4_21511_19668883 | NC_021161.1    | Ca_kabuli_chr02 | 19668883                | AA                              | GG              | 1946755270               |
| SNP_P4_21512_19668884 | NC_021161.1    | Ca_kabuli_chr02 | 19668884                | TT                              | CC              | 1946755272               |
| SNP_P4_21513_19668885 | NC_021161.1    | Ca_kabuli_chr02 | 19668885                | TT                              | GG              | 1946755274               |
| SNP_P4_21514_19668886 | NC_021161.1    | Ca_kabuli_chr02 | 19668886                | GG                              | AA              | 1946755276               |
| SNP_P4_21515_19668889 | NC_021161.1    | Ca_kabuli_chr02 | 19668889                | TT                              | CC              | 1946755278               |
| SNP_P4_21516_19705581 | NC_021161.1    | Ca_kabuli_chr02 | 19705581                | GG                              | AA              | 1946755280               |
| SNP_P4_21517_19705604 | NC_021161.1    | Ca_kabuli_chr02 | 19705604                | AA                              | TT              | 1946755282               |
| SNP_P4_21519_19705800 | NC_021161.1    | Ca_kabuli_chr02 | 19705800                | GG                              | AA              | 1946755284               |
| SNP_P4_21520_19706059 | NC_021161.1    | Ca_kabuli_chr02 | 19706059                | CC                              | TT              | 1946755286               |
| SNP_P4_21521_19706097 | NC_021161.1    | Ca_kabuli_chr02 | 19706097                | CC                              | TT              | 1946755288               |
| SNP_P4_21523_19728633 | NC_021161.1    | Ca_kabuli_chr02 | 19728633                | GG                              | AA              | 1946755290               |
| SNP_P4_21524_19728776 | NC_021161.1    | Ca_kabuli_chr02 | 19728776                | AA                              | GG              | 1946755292               |

| SNPs IDs              | Chromosome IDs | Chromosomes     | Physical positions (bp) | CDC Frontier (Reference genome) | (ILWC46 & LPNB) | NCBI SNPdb Accession IDs |
|-----------------------|----------------|-----------------|-------------------------|---------------------------------|-----------------|--------------------------|
| SNP_P4_21525_19761429 | NC_021161.1    | Ca_kabuli_chr02 | 19761429                | TT                              | CC              | 1946755294               |
| SNP_P4_21526_19767952 | NC_021161.1    | Ca_kabuli_chr02 | 19767952                | AA                              | GG              | 1946755296               |
| SNP_P4_21527_19767986 | NC_021161.1    | Ca_kabuli_chr02 | 19767986                | AA                              | GG              | 1946755298               |
| SNP_P4_21528_19768096 | NC_021161.1    | Ca_kabuli_chr02 | 19768096                | TT                              | AA              | 1946755300               |
| SNP_P4_21529_19768097 | NC_021161.1    | Ca_kabuli_chr02 | 19768097                | AA                              | GG              | 1946755302               |
| SNP_P4_21530_19768142 | NC_021161.1    | Ca_kabuli_chr02 | 19768142                | CC                              | TT              | 1946755304               |
| SNP_P4_21531_19768158 | NC_021161.1    | Ca_kabuli_chr02 | 19768158                | CC                              | TT              | 1946755306               |
| SNP_P4_21532_19768159 | NC_021161.1    | Ca_kabuli_chr02 | 19768159                | AA                              | GG              | 1946755308               |
| SNP_P4_21533_19768217 | NC_021161.1    | Ca_kabuli_chr02 | 19768217                | AA                              | GG              | 1946755310               |
| SNP_P4_21534_19768394 | NC_021161.1    | Ca_kabuli_chr02 | 19768394                | AA                              | GG              | 1946755312               |
| SNP_P4_21535_19769243 | NC_021161.1    | Ca_kabuli_chr02 | 19769243                | AA                              | GG              | 1946755314               |
| SNP_P4_21536_19769347 | NC_021161.1    | Ca_kabuli_chr02 | 19769347                | CC                              | TT              | 1946755316               |
| SNP_P4_21537_19769366 | NC_021161.1    | Ca_kabuli_chr02 | 19769366                | GG                              | TT              | 1946755318               |
| SNP_P4_21538_19769453 | NC_021161.1    | Ca_kabuli_chr02 | 19769453                | GG                              | AA              | 1946755320               |
| SNP_P4_21539_19769456 | NC_021161.1    | Ca_kabuli_chr02 | 19769456                | CC                              | TT              | 1946755322               |
| SNP_P4_21540_19769528 | NC_021161.1    | Ca_kabuli_chr02 | 19769528                | GG                              | AA              | 1946755324               |
| SNP_P4_21541_19769540 | NC_021161.1    | Ca_kabuli_chr02 | 19769540                | AA                              | CC              | 1946755325               |
| SNP_P4_21542_19769711 | NC_021161.1    | Ca_kabuli_chr02 | 19769711                | CC                              | TT              | 1946755327               |
| SNP_P4_21544_19769771 | NC_021161.1    | Ca_kabuli_chr02 | 19769771                | GG                              | AA              | 1946755329               |
| SNP_P4_21545_19769792 | NC_021161.1    | Ca_kabuli_chr02 | 19769792                | GG                              | AA              | 1946755331               |
| SNP_P4_21546_19770368 | NC_021161.1    | Ca_kabuli_chr02 | 19770368                | GG                              | CC              | 1946755333               |
| SNP_P4_21547_19770374 | NC_021161.1    | Ca_kabuli_chr02 | 19770374                | CC                              | TT              | 1946755335               |
| SNP_P4_21548_19772423 | NC_021161.1    | Ca_kabuli_chr02 | 19772423                | TT                              | CC              | 1946755337               |
| SNP_P4_21549_19772482 | NC_021161.1    | Ca_kabuli_chr02 | 19772482                | CC                              | TT              | 1946755339               |
| SNP_P4_21550_19772674 | NC_021161.1    | Ca_kabuli_chr02 | 19772674                | TT                              | GG              | 1946755341               |
| SNP_P4_21551_19772684 | NC_021161.1    | Ca_kabuli_chr02 | 19772684                | TT                              | CC              | 1946755343               |
| SNP_P4_21552_19772773 | NC_021161.1    | Ca_kabuli_chr02 | 19772773                | TT                              | GG              | 1946755345               |
| SNP_P4_21553_19772802 | NC_021161.1    | Ca_kabuli_chr02 | 19772802                | AA                              | GG              | 1946755346               |
| SNP_P4_21554_19772990 | NC_021161.1    | Ca_kabuli_chr02 | 19772990                | AA                              | GG              | 1946755348               |
| SNP_P4_21555_19773045 | NC_021161.1    | Ca_kabuli_chr02 | 19773045                | TT                              | AA              | 1946755350               |
| SNP_P4_21556_19773050 | NC_021161.1    | Ca_kabuli_chr02 | 19773050                | GG                              | AA              | 1946755352               |
| SNP_P4_21557_19777050 | NC_021161.1    | Ca_kabuli_chr02 | 19777050                | AA                              | TT              | 1946755354               |
| SNP_P4_21558_19777054 | NC_021161.1    | Ca_kabuli_chr02 | 19777054                | GG                              | AA              | 1946755356               |
| SNP_P4_21559_19777059 | NC_021161.1    | Ca_kabuli_chr02 | 19777059                | CC                              | AA              | 1946755358               |
| SNP_P4_21560_19779047 | NC_021161.1    | Ca_kabuli_chr02 | 19779047                | TT                              | AA              | 1946755360               |
| SNP_P4_21561_19786029 | NC_021161.1    | Ca_kabuli_chr02 | 19786029                | AA                              | CC              | 1946755363               |
| SNP_P4_21562_19786066 | NC_021161.1    | Ca_kabuli_chr02 | 19786066                | GG                              | AA              | 1946755365               |
| SNP_P4_21563_19786067 | NC_021161.1    | Ca_kabuli_chr02 | 19786067                | GG                              | AA              | 1946755366               |
| SNP_P4_21564_19786073 | NC_021161.1    | Ca_kabuli_chr02 | 19786073                | GG                              | AA              | 1946755369               |
| SNP_P4_21565_19791018 | NC_021161.1    | Ca_kabuli_chr02 | 19791018                | GG                              | AA              | 1946755371               |
| SNP_P4_21566_19791169 | NC_021161.1    | Ca_kabuli_chr02 | 19791169                | TT                              | CC              | 1946755373               |
| SNP_P4_21567_19791497 | NC_021161.1    | Ca_kabuli_chr02 | 19791497                | TT                              | GG              | 1946755375               |

| SNPs IDs              | Chromosome IDs | Chromosomes     | Physical positions (bp) | CDC Frontier (Reference genome) | (ILWC46 & LPNB) | NCBI SNPdb Accession IDs |
|-----------------------|----------------|-----------------|-------------------------|---------------------------------|-----------------|--------------------------|
| SNP_P4_21569_19791817 | NC_021161.1    | Ca_kabuli_chr02 | 19791817                | TT                              | GG              | 1946755377               |
| SNP_P4_21570_19800806 | NC_021161.1    | Ca_kabuli_chr02 | 19800806                | AA                              | GG              | 1946755379               |
| SNP_P4_21571_19808755 | NC_021161.1    | Ca_kabuli_chr02 | 19808755                | GG                              | AA              | 1946755381               |
| SNP_P4_21572_19808756 | NC_021161.1    | Ca_kabuli_chr02 | 19808756                | GG                              | AA              | 1946755383               |
| SNP_P4_21573_19811690 | NC_021161.1    | Ca_kabuli_chr02 | 19811690                | AA                              | TT              | 1946755385               |
| SNP_P4_21574_19824392 | NC_021161.1    | Ca_kabuli_chr02 | 19824392                | TT                              | AA              | 1946755387               |
| SNP_P4_21575_19824469 | NC_021161.1    | Ca_kabuli_chr02 | 19824469                | AA                              | TT              | 1946755389               |
| SNP_P4_21576_19824518 | NC_021161.1    | Ca_kabuli_chr02 | 19824518                | TT                              | GG              | 1946755392               |
| SNP_P4_21577_19825207 | NC_021161.1    | Ca_kabuli_chr02 | 19825207                | TT                              | GG              | 1946755394               |
| SNP_P4_21578_19881320 | NC_021161.1    | Ca_kabuli_chr02 | 19881320                | GG                              | AA              | 1946755396               |
| SNP_P4_21579_19881322 | NC_021161.1    | Ca_kabuli_chr02 | 19881322                | TT                              | AA              | 1946755397               |
| SNP_P4_21580_19881323 | NC_021161.1    | Ca_kabuli_chr02 | 19881323                | CC                              | AA              | 1946755399               |
| SNP_P4_21581_19881330 | NC_021161.1    | Ca_kabuli_chr02 | 19881330                | TT                              | GG              | 1946755401               |
| SNP_P4_21582_19894866 | NC_021161.1    | Ca_kabuli_chr02 | 19894866                | CC                              | TT              | 1946755403               |
| SNP_P4_21583_19901438 | NC_021161.1    | Ca_kabuli_chr02 | 19901438                | TT                              | CC              | 1946755405               |
| SNP_P4_21584_19904741 | NC_021161.1    | Ca_kabuli_chr02 | 19904741                | AA                              | GG              | 1946755407               |
| SNP_P4_21585_19904783 | NC_021161.1    | Ca_kabuli_chr02 | 19904783                | CC                              | TT              | 1946755409               |
| SNP_P4_21586_19904813 | NC_021161.1    | Ca_kabuli_chr02 | 19904813                | GG                              | AA              | 1946755410               |
| SNP_P4_21587_19915027 | NC_021161.1    | Ca_kabuli_chr02 | 19915027                | GG                              | AA              | 1946755411               |
| SNP_P4_21588_19927081 | NC_021161.1    | Ca_kabuli_chr02 | 19927081                | TT                              | CC              | 1946755412               |
| SNP_P4_21589_19927140 | NC_021161.1    | Ca_kabuli_chr02 | 19927140                | AA                              | GG              | 1946755413               |
| SNP_P4_21590_19927144 | NC_021161.1    | Ca_kabuli_chr02 | 19927144                | TT                              | AA              | 1946755414               |
| SNP_P4_21591_19927222 | NC_021161.1    | Ca_kabuli_chr02 | 19927222                | AA                              | CC              | 1946755416               |
| SNP_P4_21592_19927232 | NC_021161.1    | Ca_kabuli_chr02 | 19927232                | CC                              | TT              | 1946755418               |
| SNP_P4_21593_19927263 | NC_021161.1    | Ca_kabuli_chr02 | 19927263                | CC                              | TT              | 1946755420               |
| SNP_P4_21594_19927340 | NC_021161.1    | Ca_kabuli_chr02 | 19927340                | CC                              | GG              | 1946755422               |
| SNP_P4_21595_19927356 | NC_021161.1    | Ca_kabuli_chr02 | 19927356                | AA                              | GG              | 1946755423               |
| SNP_P4_21596_19927533 | NC_021161.1    | Ca_kabuli_chr02 | 19927533                | CC                              | TT              | 1946755425               |
| SNP_P4_21597_19927534 | NC_021161.1    | Ca_kabuli_chr02 | 19927534                | TT                              | CC              | 1946755427               |
| SNP_P4_21598_19927547 | NC_021161.1    | Ca_kabuli_chr02 | 19927547                | AA                              | CC              | 1946755429               |
| SNP_P4_21599_19927557 | NC_021161.1    | Ca_kabuli_chr02 | 19927557                | CC                              | TT              | 1946755431               |
| SNP_P4_21600_19931433 | NC_021161.1    | Ca_kabuli_chr02 | 19931433                | TT                              | AA              | 1946755433               |
| SNP_P4_21601_19931473 | NC_021161.1    | Ca_kabuli_chr02 | 19931473                | AA                              | GG              | 1946755435               |
| SNP_P4_21602_19931495 | NC_021161.1    | Ca_kabuli_chr02 | 19931495                | CC                              | TT              | 1946755437               |
| SNP_P4_21603_19931532 | NC_021161.1    | Ca_kabuli_chr02 | 19931532                | AA                              | GG              | 1946755439               |
| SNP_P4_21604_19931579 | NC_021161.1    | Ca_kabuli_chr02 | 19931579                | AA                              | GG              | 1946755441               |
| SNP_P4_21605_19931593 | NC_021161.1    | Ca_kabuli_chr02 | 19931593                | CC                              | TT              | 1946755443               |
| SNP_P4_21606_19931612 | NC_021161.1    | Ca_kabuli_chr02 | 19931612                | GG                              | AA              | 1946755445               |
| SNP_P4_21607_19966924 | NC_021161.1    | Ca_kabuli_chr02 | 19966924                | TT                              | CC              | 1946755447               |
| SNP_P4_21608_19966954 | NC_021161.1    | Ca_kabuli_chr02 | 19966954                | CC                              | TT              | 1946755449               |
| SNP_P4_21609_19966961 | NC_021161.1    | Ca_kabuli_chr02 | 19966961                | GG                              | TT              | 1946755451               |
| SNP_P4_21610_19971784 | NC_021161.1    | Ca_kabuli_chr02 | 19971784                | CC                              | TT              | 1946755453               |

| SNPs IDs              | Chromosome IDs | Chromosomes     | Physical positions (bp) | CDC Frontier (Reference genome) | (ILWC46 & LPNB) | NCBI SNPdb Accession IDs |
|-----------------------|----------------|-----------------|-------------------------|---------------------------------|-----------------|--------------------------|
| SNP_P4_21611_19986452 | NC_021161.1    | Ca_kabuli_chr02 | 19986452                | TT                              | CC              | 1946755455               |
| SNP_P4_21612_20069025 | NC_021161.1    | Ca_kabuli_chr02 | 20069025                | TT                              | AA              | 1946755457               |
| SNP_P4_21613_20069026 | NC_021161.1    | Ca_kabuli_chr02 | 20069026                | AA                              | GG              | 1946755460               |
| SNP_P4_21614_20069542 | NC_021161.1    | Ca_kabuli_chr02 | 20069542                | AA                              | CC              | 1946755462               |
| SNP_P4_21615_20069635 | NC_021161.1    | Ca_kabuli_chr02 | 20069635                | AA                              | GG              | 1946755464               |
| SNP_P4_21616_20069645 | NC_021161.1    | Ca_kabuli_chr02 | 20069645                | GG                              | AA              | 1946755466               |
| SNP_P4_21617_20074904 | NC_021161.1    | Ca_kabuli_chr02 | 20074904                | GG                              | AA              | 1946755469               |
| SNP_P4_21618_20074944 | NC_021161.1    | Ca_kabuli_chr02 | 20074944                | CC                              | TT              | 1946755472               |
| SNP_P4_21619_20075016 | NC_021161.1    | Ca_kabuli_chr02 | 20075016                | TT                              | CC              | 1946755474               |
| SNP_P4_21620_20077433 | NC_021161.1    | Ca_kabuli_chr02 | 20077433                | GG                              | AA              | 1946755476               |
| SNP_P4_21621_20077477 | NC_021161.1    | Ca_kabuli_chr02 | 20077477                | TT                              | CC              | 1946755478               |
| SNP_P4_21622_20077484 | NC_021161.1    | Ca_kabuli_chr02 | 20077484                | GG                              | TT              | 1946755480               |
| SNP_P4_21623_20077515 | NC_021161.1    | Ca_kabuli_chr02 | 20077515                | AA                              | GG              | 1946755482               |
| SNP_P4_21624_20077531 | NC_021161.1    | Ca_kabuli_chr02 | 20077531                | TT                              | CC              | 1946755484               |
| SNP_P4_21625_20078110 | NC_021161.1    | Ca_kabuli_chr02 | 20078110                | CC                              | AA              | 1946755486               |
| SNP_P4_21626_20078380 | NC_021161.1    | Ca_kabuli_chr02 | 20078380                | AA                              | GG              | 1946755488               |
| SNP_P4_21627_20078391 | NC_021161.1    | Ca_kabuli_chr02 | 20078391                | CC                              | AA              | 1946755490               |
| SNP_P4_21628_20078394 | NC_021161.1    | Ca_kabuli_chr02 | 20078394                | GG                              | AA              | 1946755492               |
| SNP_P4_21629_20078439 | NC_021161.1    | Ca_kabuli_chr02 | 20078439                | AA                              | TT              | 1946755494               |
| SNP_P4_21630_20084229 | NC_021161.1    | Ca_kabuli_chr02 | 20084229                | TT                              | AA              | 1946755496               |
| SNP_P4_21631_20085836 | NC_021161.1    | Ca_kabuli_chr02 | 20085836                | GG                              | AA              | 1946755498               |
| SNP_P4_21632_20085840 | NC_021161.1    | Ca_kabuli_chr02 | 20085840                | AA                              | GG              | 1946755500               |
| SNP_P4_21633_20087699 | NC_021161.1    | Ca_kabuli_chr02 | 20087699                | AA                              | GG              | 1946755502               |
| SNP_P4_21634_20087715 | NC_021161.1    | Ca_kabuli_chr02 | 20087715                | AA                              | GG              | 1946755504               |
| SNP_P4_21635_20087733 | NC_021161.1    | Ca_kabuli_chr02 | 20087733                | TT                              | CC              | 1946755506               |
| SNP_P4_21636_20088108 | NC_021161.1    | Ca_kabuli_chr02 | 20088108                | AA                              | GG              | 1946755508               |
| SNP_P4_21637_20088146 | NC_021161.1    | Ca_kabuli_chr02 | 20088146                | TT                              | CC              | 1946755510               |
| SNP_P4_21638_20088176 | NC_021161.1    | Ca_kabuli_chr02 | 20088176                | CC                              | AA              | 1946755512               |
| SNP_P4_21639_20088193 | NC_021161.1    | Ca_kabuli_chr02 | 20088193                | AA                              | GG              | 1946755514               |
| SNP_P4_21640_20088535 | NC_021161.1    | Ca_kabuli_chr02 | 20088535                | GG                              | AA              | 1946755516               |
| SNP_P4_21641_20090667 | NC_021161.1    | Ca_kabuli_chr02 | 20090667                | TT                              | CC              | 1946755518               |
| SNP_P4_21642_20105850 | NC_021161.1    | Ca_kabuli_chr02 | 20105850                | TT                              | CC              | 1946755520               |
| SNP_P4_21643_20144409 | NC_021161.1    | Ca_kabuli_chr02 | 20144409                | CC                              | GG              | 1946755522               |
| SNP_P4_21644_20150952 | NC_021161.1    | Ca_kabuli_chr02 | 20150952                | GG                              | AA              | 1946755524               |
| SNP_P4_21645_20151212 | NC_021161.1    | Ca_kabuli_chr02 | 20151212                | TT                              | AA              | 1946755526               |
| SNP_P4_21646_20151359 | NC_021161.1    | Ca_kabuli_chr02 | 20151359                | GG                              | AA              | 1946755527               |
| SNP_P4_21647_20151378 | NC_021161.1    | Ca_kabuli_chr02 | 20151378                | TT                              | CC              | 1946755529               |
| SNP_P4_21648_20151693 | NC_021161.1    | Ca_kabuli_chr02 | 20151693                | GG                              | CC              | 1946755531               |
| SNP_P4_21649_20151753 | NC_021161.1    | Ca_kabuli_chr02 | 20151753                | GG                              | AA              | 1946755533               |
| SNP_P4_21650_20151773 | NC_021161.1    | Ca_kabuli_chr02 | 20151773                | CC                              | TT              | 1946755535               |
| SNP_P4_21651_20151779 | NC_021161.1    | Ca_kabuli_chr02 | 20151779                | GG                              | AA              | 1946755537               |
| SNP_P4_21652_20151811 | NC_021161.1    | Ca_kabuli_chr02 | 20151811                | TT                              | AA              | 1946755539               |

| SNPs IDs              | Chromosome IDs | Chromosomes     | Physical positions (bp) | CDC Frontier (Reference genome) | (ILWC46 & LPNB) | NCBI SNPdb Accession IDs |
|-----------------------|----------------|-----------------|-------------------------|---------------------------------|-----------------|--------------------------|
| SNP_P4_21654_20151865 | NC_021161.1    | Ca_kabuli_chr02 | 20151865                | GG                              | AA              | 1946755541               |
| SNP_P4_21655_20151878 | NC_021161.1    | Ca_kabuli_chr02 | 20151878                | AA                              | TT              | 1946755543               |
| SNP_P4_21656_20151988 | NC_021161.1    | Ca_kabuli_chr02 | 20151988                | TT                              | CC              | 1946755545               |
| SNP_P4_21657_20152040 | NC_021161.1    | Ca_kabuli_chr02 | 20152040                | AA                              | CC              | 1946755547               |
| SNP_P4_21658_20152103 | NC_021161.1    | Ca_kabuli_chr02 | 20152103                | CC                              | GG              | 1946755549               |
| SNP_P4_21659_20152532 | NC_021161.1    | Ca_kabuli_chr02 | 20152532                | GG                              | TT              | 1946755551               |
| SNP_P4_21660_20153803 | NC_021161.1    | Ca_kabuli_chr02 | 20153803                | CC                              | TT              | 1946755553               |
| SNP_P4_21661_20155366 | NC_021161.1    | Ca_kabuli_chr02 | 20155366                | AA                              | TT              | 1946755555               |
| SNP_P4_21662_20169428 | NC_021161.1    | Ca_kabuli_chr02 | 20169428                | AA                              | TT              | 1946755557               |
| SNP_P4_21663_20171788 | NC_021161.1    | Ca_kabuli_chr02 | 20171788                | AA                              | TT              | 1946755559               |
| SNP_P4_21664_20171798 | NC_021161.1    | Ca_kabuli_chr02 | 20171798                | TT                              | AA              | 1946755564               |
| SNP_P4_21666_20171813 | NC_021161.1    | Ca_kabuli_chr02 | 20171813                | TT                              | AA              | 1946755570               |
| SNP_P4_21668_20176382 | NC_021161.1    | Ca_kabuli_chr02 | 20176382                | GG                              | AA              | 1946755576               |
| SNP_P4_21669_20177743 | NC_021161.1    | Ca_kabuli_chr02 | 20177743                | AA                              | GG              | 1946755582               |
| SNP_P4_21670_20177855 | NC_021161.1    | Ca_kabuli_chr02 | 20177855                | TT                              | GG              | 1946755589               |
| SNP_P4_21671_20177903 | NC_021161.1    | Ca_kabuli_chr02 | 20177903                | CC                              | TT              | 1946755593               |
| SNP_P4_21672_20178169 | NC_021161.1    | Ca_kabuli_chr02 | 20178169                | GG                              | CC              | 1946755596               |
| SNP_P4_21673_20191213 | NC_021161.1    | Ca_kabuli_chr02 | 20191213                | CC                              | TT              | 1946755600               |
| SNP_P4_21674_20191447 | NC_021161.1    | Ca_kabuli_chr02 | 20191447                | AA                              | TT              | 1946755602               |
| SNP_P4_21675_20191468 | NC_021161.1    | Ca_kabuli_chr02 | 20191468                | TT                              | CC              | 1946755611               |
| SNP_P4_21676_20191561 | NC_021161.1    | Ca_kabuli_chr02 | 20191561                | TT                              | CC              | 1946755613               |
| SNP_P4_21677_20191588 | NC_021161.1    | Ca_kabuli_chr02 | 20191588                | CC                              | TT              | 1946755615               |
| SNP_P4_21678_20191667 | NC_021161.1    | Ca_kabuli_chr02 | 20191667                | AA                              | CC              | 1946755623               |
| SNP_P4_21679_20191702 | NC_021161.1    | Ca_kabuli_chr02 | 20191702                | GG                              | TT              | 1946755625               |
| SNP_P4_21680_20191707 | NC_021161.1    | Ca_kabuli_chr02 | 20191707                | GG                              | CC              | 1946755627               |
| SNP_P4_21681_20191716 | NC_021161.1    | Ca_kabuli_chr02 | 20191716                | AA                              | GG              | 1946755635               |
| SNP_P4_21682_20191777 | NC_021161.1    | Ca_kabuli_chr02 | 20191777                | TT                              | AA              | 1946755637               |
| SNP_P4_21683_20191809 | NC_021161.1    | Ca_kabuli_chr02 | 20191809                | TT                              | CC              | 1946755645               |
| SNP_P4_21684_20191903 | NC_021161.1    | Ca_kabuli_chr02 | 20191903                | AA                              | TT              | 1946755648               |
| SNP_P4_21685_20191906 | NC_021161.1    | Ca_kabuli_chr02 | 20191906                | TT                              | CC              | 1946755655               |
| SNP_P4_21686_20191911 | NC_021161.1    | Ca_kabuli_chr02 | 20191911                | GG                              | AA              | 1946755658               |
| SNP_P4_21687_20192040 | NC_021161.1    | Ca_kabuli_chr02 | 20192040                | GG                              | AA              | 1946755660               |
| SNP_P4_21688_20192051 | NC_021161.1    | Ca_kabuli_chr02 | 20192051                | TT                              | GG              | 1946755667               |
| SNP_P4_21689_20192073 | NC_021161.1    | Ca_kabuli_chr02 | 20192073                | GG                              | AA              | 1946755670               |
| SNP_P4_21690_20192087 | NC_021161.1    | Ca_kabuli_chr02 | 20192087                | CC                              | TT              | 1946755679               |
| SNP_P4_21691_20192088 | NC_021161.1    | Ca_kabuli_chr02 | 20192088                | GG                              | TT              | 1946755681               |
| SNP_P4_21692_20192175 | NC_021161.1    | Ca_kabuli_chr02 | 20192175                | TT                              | CC              | 1946755688               |
| SNP_P4_21693_20192176 | NC_021161.1    | Ca_kabuli_chr02 | 20192176                | TT                              | CC              | 1946755691               |
| SNP_P4_21694_20192196 | NC_021161.1    | Ca_kabuli_chr02 | 20192196                | GG                              | TT              | 1946755698               |
| SNP_P4_21695_20192556 | NC_021161.1    | Ca_kabuli_chr02 | 20192556                | CC                              | TT              | 1946755701               |
| SNP_P4_21696_20197084 | NC_021161.1    | Ca_kabuli_chr02 | 20197084                | CC                              | AA              | 1946755704               |
| SNP_P4_21697_20210466 | NC_021161.1    | Ca_kabuli_chr02 | 20210466                | CC                              | TT              | 1946755706               |



| SNPs IDs              | Chromosome IDs | Chromosomes     | Physical positions (bp) | CDC Frontier (Reference genome) | (ILWC46 & LPNB) | NCBI SNPdb Accession IDs |
|-----------------------|----------------|-----------------|-------------------------|---------------------------------|-----------------|--------------------------|
| SNP_P4_21698_20235128 | NC_021161.1    | Ca_kabuli_chr02 | 20235128                | AA                              | TT              | 1946755708               |
| SNP_P4_21699_20235571 | NC_021161.1    | Ca_kabuli_chr02 | 20235571                | GG                              | AA              | 1946755710               |
| SNP_P4_21700_20235584 | NC_021161.1    | Ca_kabuli_chr02 | 20235584                | TT                              | CC              | 1946755712               |
| SNP_P4_21701_20249777 | NC_021161.1    | Ca_kabuli_chr02 | 20249777                | AA                              | GG              | 1946755714               |
| SNP_P4_21702_20307979 | NC_021161.1    | Ca_kabuli_chr02 | 20307979                | CC                              | TT              | 1946755716               |
| SNP_P4_21703_20310779 | NC_021161.1    | Ca_kabuli_chr02 | 20310779                | AA                              | TT              | 1946755718               |
| SNP_P4_21704_20313597 | NC_021161.1    | Ca_kabuli_chr02 | 20313597                | GG                              | CC              | 1946755721               |
| SNP_P4_21705_20321668 | NC_021161.1    | Ca_kabuli_chr02 | 20321668                | AA                              | TT              | 1946755723               |
| SNP_P4_21706_20321800 | NC_021161.1    | Ca_kabuli_chr02 | 20321800                | GG                              | AA              | 1946755725               |
| SNP_P4_21707_20346749 | NC_021161.1    | Ca_kabuli_chr02 | 20346749                | CC                              | TT              | 1946755735               |
| SNP_P4_21709_20353213 | NC_021161.1    | Ca_kabuli_chr02 | 20353213                | CC                              | TT              | 1946755737               |
| SNP_P4_21710_20353217 | NC_021161.1    | Ca_kabuli_chr02 | 20353217                | TT                              | AA              | 1946755739               |
| SNP_P4_21711_20353233 | NC_021161.1    | Ca_kabuli_chr02 | 20353233                | AA                              | GG              | 1946755741               |
| SNP_P4_21712_20353286 | NC_021161.1    | Ca_kabuli_chr02 | 20353286                | AA                              | GG              | 1946755743               |
| SNP_P4_21713_20353565 | NC_021161.1    | Ca_kabuli_chr02 | 20353565                | CC                              | GG              | 1946755745               |
| SNP_P4_21715_20353637 | NC_021161.1    | Ca_kabuli_chr02 | 20353637                | CC                              | TT              | 1946755747               |
| SNP_P4_21716_20353639 | NC_021161.1    | Ca_kabuli_chr02 | 20353639                | GG                              | TT              | 1946755749               |
| SNP_P4_21717_20355723 | NC_021161.1    | Ca_kabuli_chr02 | 20355723                | AA                              | GG              | 1946755751               |
| SNP_P4_21718_20357435 | NC_021161.1    | Ca_kabuli_chr02 | 20357435                | GG                              | TT              | 1946755753               |
| SNP_P4_21719_20417294 | NC_021161.1    | Ca_kabuli_chr02 | 20417294                | TT                              | AA              | 1946755755               |
| SNP_P4_21720_20420818 | NC_021161.1    | Ca_kabuli_chr02 | 20420818                | TT                              | CC              | 1946755757               |
| SNP_P4_21721_20424387 | NC_021161.1    | Ca_kabuli_chr02 | 20424387                | TT                              | AA              | 1946755759               |
| SNP_P4_21722_20424450 | NC_021161.1    | Ca_kabuli_chr02 | 20424450                | CC                              | TT              | 1946755761               |
| SNP_P4_21723_20424875 | NC_021161.1    | Ca_kabuli_chr02 | 20424875                | AA                              | GG              | 1946755763               |
| SNP_P4_21724_20427189 | NC_021161.1    | Ca_kabuli_chr02 | 20427189                | GG                              | TT              | 1946755765               |
| SNP_P4_21726_20448963 | NC_021161.1    | Ca_kabuli_chr02 | 20448963                | GG                              | TT              | 1946755767               |
| SNP_P4_21728_20474881 | NC_021161.1    | Ca_kabuli_chr02 | 20474881                | CC                              | GG              | 1946755769               |
| SNP_P4_21729_20474887 | NC_021161.1    | Ca_kabuli_chr02 | 20474887                | CC                              | GG              | 1946755780               |
| SNP_P4_21730_20475067 | NC_021161.1    | Ca_kabuli_chr02 | 20475067                | AA                              | GG              | 1946755789               |
| SNP_P4_21731_20475172 | NC_021161.1    | Ca_kabuli_chr02 | 20475172                | AA                              | CC              | 1946755795               |
| SNP_P4_21732_20475175 | NC_021161.1    | Ca_kabuli_chr02 | 20475175                | TT                              | CC              | 1946755805               |
| SNP_P4_21733_20475206 | NC_021161.1    | Ca_kabuli_chr02 | 20475206                | CC                              | TT              | 1946755813               |
| SNP_P4_21734_20477126 | NC_021161.1    | Ca_kabuli_chr02 | 20477126                | CC                              | TT              | 1946755818               |
| SNP_P4_21735_20478235 | NC_021161.1    | Ca_kabuli_chr02 | 20478235                | AA                              | GG              | 1946755827               |
| SNP_P4_21736_20479799 | NC_021161.1    | Ca_kabuli_chr02 | 20479799                | TT                              | CC              | 1946755832               |
| SNP_P4_21737_20490402 | NC_021161.1    | Ca_kabuli_chr02 | 20490402                | AA                              | GG              | 1946755839               |
| SNP_P4_21738_20490410 | NC_021161.1    | Ca_kabuli_chr02 | 20490410                | TT                              | CC              | 1946755843               |
| SNP_P4_21739_20490458 | NC_021161.1    | Ca_kabuli_chr02 | 20490458                | AA                              | GG              | 1946755846               |
| SNP_P4_21740_20490587 | NC_021161.1    | Ca_kabuli_chr02 | 20490587                | AA                              | GG              | 1946755848               |
| SNP_P4_21741_20490590 | NC_021161.1    | Ca_kabuli_chr02 | 20490590                | AA                              | GG              | 1946755856               |
| SNP_P4_21742_20490601 | NC_021161.1    | Ca_kabuli_chr02 | 20490601                | AA                              | GG              | 1946755858               |
| SNP_P4_21743_20490794 | NC_021161.1    | Ca_kabuli_chr02 | 20490794                | CC                              | TT              | 1946755867               |

| SNPs IDs              | Chromosome IDs | Chromosomes     | Physical positions (bp) | CDC Frontier (Reference genome) | (ILWC46 & LPNB) | NCBI SNPdb Accession IDs |
|-----------------------|----------------|-----------------|-------------------------|---------------------------------|-----------------|--------------------------|
| SNP_P4_21744_20490963 | NC_021161.1    | Ca_kabuli_chr02 | 20490963                | AA                              | TT              | 1946755869               |
| SNP_P4_21745_20493815 | NC_021161.1    | Ca_kabuli_chr02 | 20493815                | GG                              | AA              | 1946755876               |
| SNP_P4_21746_20518271 | NC_021161.1    | Ca_kabuli_chr02 | 20518271                | CC                              | TT              | 1946755879               |
| SNP_P4_21747_20544421 | NC_021161.1    | Ca_kabuli_chr02 | 20544421                | TT                              | AA              | 1946755887               |
| SNP_P4_21748_20544656 | NC_021161.1    | Ca_kabuli_chr02 | 20544656                | GG                              | AA              | 1946755890               |
| SNP_P4_21749_20563590 | NC_021161.1    | Ca_kabuli_chr02 | 20563590                | AA                              | GG              | 1946755892               |
| SNP_P4_21750_20568619 | NC_021161.1    | Ca_kabuli_chr02 | 20568619                | GG                              | TT              | 1946755901               |
| SNP_P4_21751_20579028 | NC_021161.1    | Ca_kabuli_chr02 | 20579028                | CC                              | TT              | 1946755902               |
| SNP_P4_21752_20579482 | NC_021161.1    | Ca_kabuli_chr02 | 20579482                | AA                              | TT              | 1946755904               |
| SNP_P4_21753_20579513 | NC_021161.1    | Ca_kabuli_chr02 | 20579513                | TT                              | GG              | 1946755909               |
| SNP_P4_21754_20579556 | NC_021161.1    | Ca_kabuli_chr02 | 20579556                | CC                              | AA              | 1946755911               |
| SNP_P4_21755_20579698 | NC_021161.1    | Ca_kabuli_chr02 | 20579698                | GG                              | AA              | 1946755913               |
| SNP_P4_21756_20587506 | NC_021161.1    | Ca_kabuli_chr02 | 20587506                | CC                              | TT              | 1946755915               |
| SNP_P4_21757_20587690 | NC_021161.1    | Ca_kabuli_chr02 | 20587690                | CC                              | TT              | 1946755917               |
| SNP_P4_21758_20587697 | NC_021161.1    | Ca_kabuli_chr02 | 20587697                | AA                              | GG              | 1946755919               |
| SNP_P4_21759_20587704 | NC_021161.1    | Ca_kabuli_chr02 | 20587704                | AA                              | CC              | 1946755921               |
| SNP_P4_21760_20587737 | NC_021161.1    | Ca_kabuli_chr02 | 20587737                | TT                              | AA              | 1946755923               |
| SNP_P4_21761_20587744 | NC_021161.1    | Ca_kabuli_chr02 | 20587744                | TT                              | CC              | 1946755925               |
| SNP_P4_21762_20587746 | NC_021161.1    | Ca_kabuli_chr02 | 20587746                | AA                              | TT              | 1946755927               |
| SNP_P4_21763_20596779 | NC_021161.1    | Ca_kabuli_chr02 | 20596779                | CC                              | TT              | 1946755929               |
| SNP_P4_21764_20596781 | NC_021161.1    | Ca_kabuli_chr02 | 20596781                | CC                              | AA              | 1946755931               |
| SNP_P4_21765_20620733 | NC_021161.1    | Ca_kabuli_chr02 | 20620733                | CC                              | GG              | 1946755933               |
| SNP_P4_21766_20620736 | NC_021161.1    | Ca_kabuli_chr02 | 20620736                | AA                              | TT              | 1946755935               |
| SNP_P4_21767_20620745 | NC_021161.1    | Ca_kabuli_chr02 | 20620745                | GG                              | CC              | 1946755937               |
| SNP_P4_21768_20620782 | NC_021161.1    | Ca_kabuli_chr02 | 20620782                | TT                              | GG              | 1946755939               |
| SNP_P4_21769_20620813 | NC_021161.1    | Ca_kabuli_chr02 | 20620813                | AA                              | CC              | 1946755941               |
| SNP_P4_21770_20621016 | NC_021161.1    | Ca_kabuli_chr02 | 20621016                | TT                              | CC              | 1946755943               |
| SNP_P4_21771_20621757 | NC_021161.1    | Ca_kabuli_chr02 | 20621757                | TT                              | GG              | 1946755945               |
| SNP_P4_21772_20621766 | NC_021161.1    | Ca_kabuli_chr02 | 20621766                | CC                              | TT              | 1946755947               |
| SNP_P4_21773_20621772 | NC_021161.1    | Ca_kabuli_chr02 | 20621772                | TT                              | CC              | 1946755949               |
| SNP_P4_21774_20621820 | NC_021161.1    | Ca_kabuli_chr02 | 20621820                | GG                              | AA              | 1946755951               |
| SNP_P4_21775_20622691 | NC_021161.1    | Ca_kabuli_chr02 | 20622691                | GG                              | AA              | 1946755953               |
| SNP_P4_21776_20622755 | NC_021161.1    | Ca_kabuli_chr02 | 20622755                | CC                              | TT              | 1946755955               |
| SNP_P4_21777_20622774 | NC_021161.1    | Ca_kabuli_chr02 | 20622774                | GG                              | TT              | 1946755957               |
| SNP_P4_21778_20622781 | NC_021161.1    | Ca_kabuli_chr02 | 20622781                | AA                              | CC              | 1946755959               |
| SNP_P4_21779_20622995 | NC_021161.1    | Ca_kabuli_chr02 | 20622995                | AA                              | GG              | 1946755961               |
| SNP_P4_21780_20623125 | NC_021161.1    | Ca_kabuli_chr02 | 20623125                | CC                              | TT              | 1946755963               |
| SNP_P4_21781_20623231 | NC_021161.1    | Ca_kabuli_chr02 | 20623231                | AA                              | CC              | 1946755965               |
| SNP_P4_21782_20623233 | NC_021161.1    | Ca_kabuli_chr02 | 20623233                | GG                              | AA              | 1946755967               |
| SNP_P4_21783_20625630 | NC_021161.1    | Ca_kabuli_chr02 | 20625630                | GG                              | AA              | 1946755969               |
| SNP_P4_21784_20648077 | NC_021161.1    | Ca_kabuli_chr02 | 20648077                | AA                              | GG              | 1946755971               |
| SNP_P4_21785_20649308 | NC_021161.1    | Ca_kabuli_chr02 | 20649308                | GG                              | AA              | 1946755973               |

| SNPs IDs              | Chromosome IDs | Chromosomes     | Physical positions (bp) | CDC Frontier (Reference genome) | (ILWC46 & LPNB) | NCBI SNPdb Accession IDs |
|-----------------------|----------------|-----------------|-------------------------|---------------------------------|-----------------|--------------------------|
| SNP_P4_21786_20649365 | NC_021161.1    | Ca_kabuli_chr02 | 20649365                | GG                              | TT              | 1946755975               |
| SNP_P4_21787_20649954 | NC_021161.1    | Ca_kabuli_chr02 | 20649954                | AA                              | GG              | 1946755977               |
| SNP_P4_21788_20650162 | NC_021161.1    | Ca_kabuli_chr02 | 20650162                | TT                              | GG              | 1946755979               |
| SNP_P4_21789_20650197 | NC_021161.1    | Ca_kabuli_chr02 | 20650197                | CC                              | TT              | 1946755981               |
| SNP_P4_21790_20651446 | NC_021161.1    | Ca_kabuli_chr02 | 20651446                | GG                              | CC              | 1946755983               |
| SNP_P4_21791_20657628 | NC_021161.1    | Ca_kabuli_chr02 | 20657628                | GG                              | AA              | 1946755985               |
| SNP_P4_21792_20657872 | NC_021161.1    | Ca_kabuli_chr02 | 20657872                | AA                              | TT              | 1946755987               |
| SNP_P4_21793_20658258 | NC_021161.1    | Ca_kabuli_chr02 | 20658258                | AA                              | CC              | 1946756000               |
| SNP_P4_21794_20658668 | NC_021161.1    | Ca_kabuli_chr02 | 20658668                | AA                              | GG              | 1946756007               |
| SNP_P4_21795_20664675 | NC_021161.1    | Ca_kabuli_chr02 | 20664675                | TT                              | AA              | 1946756013               |
| SNP_P4_21796_20664706 | NC_021161.1    | Ca_kabuli_chr02 | 20664706                | GG                              | CC              | 1946756021               |
| SNP_P4_21797_20669213 | NC_021161.1    | Ca_kabuli_chr02 | 20669213                | TT                              | AA              | 1946756026               |
| SNP_P4_21798_20669235 | NC_021161.1    | Ca_kabuli_chr02 | 20669235                | AA                              | CC              | 1946756028               |
| SNP_P4_21799_20669243 | NC_021161.1    | Ca_kabuli_chr02 | 20669243                | TT                              | AA              | 1946756031               |
| SNP_P4_21800_20684741 | NC_021161.1    | Ca_kabuli_chr02 | 20684741                | GG                              | AA              | 1946756034               |
| SNP_P4_21801_20686438 | NC_021161.1    | Ca_kabuli_chr02 | 20686438                | AA                              | GG              | 1946756042               |
| SNP_P4_21802_20687212 | NC_021161.1    | Ca_kabuli_chr02 | 20687212                | TT                              | AA              | 1946756047               |
| SNP_P4_21804_20689345 | NC_021161.1    | Ca_kabuli_chr02 | 20689345                | TT                              | AA              | 1946756049               |
| SNP_P4_21805_20715620 | NC_021161.1    | Ca_kabuli_chr02 | 20715620                | TT                              | CC              | 1946756058               |
| SNP_P4_21806_20715741 | NC_021161.1    | Ca_kabuli_chr02 | 20715741                | AA                              | CC              | 1946756066               |
| SNP_P4_21807_20715765 | NC_021161.1    | Ca_kabuli_chr02 | 20715765                | TT                              | CC              | 1946756069               |
| SNP_P4_21809_20716070 | NC_021161.1    | Ca_kabuli_chr02 | 20716070                | CC                              | AA              | 1946756071               |
| SNP_P4_21810_20716088 | NC_021161.1    | Ca_kabuli_chr02 | 20716088                | TT                              | GG              | 1946756084               |
| SNP_P4_21811_20716111 | NC_021161.1    | Ca_kabuli_chr02 | 20716111                | AA                              | CC              | 1946756090               |
| SNP_P4_21812_20716113 | NC_021161.1    | Ca_kabuli_chr02 | 20716113                | TT                              | AA              | 1946756099               |
| SNP_P4_21813_20716119 | NC_021161.1    | Ca_kabuli_chr02 | 20716119                | AA                              | GG              | 1946756101               |
| SNP_P4_21814_20731139 | NC_021161.1    | Ca_kabuli_chr02 | 20731139                | AA                              | GG              | 1946756109               |
| SNP_P4_21815_20757229 | NC_021161.1    | Ca_kabuli_chr02 | 20757229                | CC                              | TT              | 1946756111               |
| SNP_P4_21818_20798707 | NC_021161.1    | Ca_kabuli_chr02 | 20798707                | TT                              | CC              | 1946756113               |
| SNP_P4_21819_20816836 | NC_021161.1    | Ca_kabuli_chr02 | 20816836                | AA                              | CC              | 1946756120               |
| SNP_P4_21820_20864528 | NC_021161.1    | Ca_kabuli_chr02 | 20864528                | TT                              | AA              | 1946756122               |
| SNP_P4_21821_20864534 | NC_021161.1    | Ca_kabuli_chr02 | 20864534                | TT                              | AA              | 1946756125               |
| SNP_P4_21822_20869172 | NC_021161.1    | Ca_kabuli_chr02 | 20869172                | CC                              | TT              | 1946756127               |
| SNP_P4_21823_20876878 | NC_021161.1    | Ca_kabuli_chr02 | 20876878                | AA                              | CC              | 1946756129               |
| SNP_P4_21824_20930903 | NC_021161.1    | Ca_kabuli_chr02 | 20930903                | AA                              | GG              | 1946756131               |
| SNP_P4_21825_20933569 | NC_021161.1    | Ca_kabuli_chr02 | 20933569                | CC                              | TT              | 1946756133               |
| SNP_P4_21826_20937750 | NC_021161.1    | Ca_kabuli_chr02 | 20937750                | TT                              | GG              | 1946756135               |
| SNP_P4_21827_20937760 | NC_021161.1    | Ca_kabuli_chr02 | 20937760                | AA                              | GG              | 1946756137               |
| SNP_P4_21828_20937782 | NC_021161.1    | Ca_kabuli_chr02 | 20937782                | AA                              | GG              | 1946756140               |
| SNP_P4_21829_20937863 | NC_021161.1    | Ca_kabuli_chr02 | 20937863                | GG                              | AA              | 1946756142               |
| SNP_P4_21830_20937875 | NC_021161.1    | Ca_kabuli_chr02 | 20937875                | TT                              | GG              | 1946756144               |
| SNP_P4_21831_20970000 | NC_021161.1    | Ca_kabuli_chr02 | 20970000                | AA                              | GG              | 1946756146               |

| SNPs IDs              | Chromosome IDs | Chromosomes     | Physical positions (bp) | CDC Frontier (Reference genome) | (ILWC46 & LPNB) | NCBI SNPdb Accession IDs |
|-----------------------|----------------|-----------------|-------------------------|---------------------------------|-----------------|--------------------------|
| SNP_P4_21832_20970003 | NC_021161.1    | Ca_kabuli_chr02 | 20970003                | AA                              | CC              | 1946756148               |
| SNP_P4_21833_20970782 | NC_021161.1    | Ca_kabuli_chr02 | 20970782                | AA                              | CC              | 1946756150               |
| SNP_P4_21834_20970848 | NC_021161.1    | Ca_kabuli_chr02 | 20970848                | TT                              | AA              | 1946756152               |
| SNP_P4_21835_20971702 | NC_021161.1    | Ca_kabuli_chr02 | 20971702                | GG                              | AA              | 1946756154               |
| SNP_P4_21836_20971706 | NC_021161.1    | Ca_kabuli_chr02 | 20971706                | TT                              | CC              | 1946756156               |
| SNP_P4_21837_20998047 | NC_021161.1    | Ca_kabuli_chr02 | 20998047                | AA                              | TT              | 1946756158               |
| SNP_P4_21838_20998057 | NC_021161.1    | Ca_kabuli_chr02 | 20998057                | GG                              | TT              | 1946756160               |
| SNP_P4_21839_20998676 | NC_021161.1    | Ca_kabuli_chr02 | 20998676                | CC                              | AA              | 1946756162               |
| SNP_P4_21840_21000336 | NC_021161.1    | Ca_kabuli_chr02 | 21000336                | CC                              | TT              | 1946756164               |
| SNP_P4_21841_21000385 | NC_021161.1    | Ca_kabuli_chr02 | 21000385                | AA                              | GG              | 1946756166               |
| SNP_P4_21842_21000433 | NC_021161.1    | Ca_kabuli_chr02 | 21000433                | TT                              | CC              | 1946756168               |
| SNP_P4_21844_21038509 | NC_021161.1    | Ca_kabuli_chr02 | 21038509                | CC                              | GG              | 1946756170               |
| SNP_P4_21845_21038520 | NC_021161.1    | Ca_kabuli_chr02 | 21038520                | GG                              | TT              | 1946756172               |
| SNP_P4_21846_21038530 | NC_021161.1    | Ca_kabuli_chr02 | 21038530                | AA                              | GG              | 1946756174               |
| SNP_P4_21847_21038570 | NC_021161.1    | Ca_kabuli_chr02 | 21038570                | TT                              | CC              | 1946756176               |
| SNP_P4_21848_21040596 | NC_021161.1    | Ca_kabuli_chr02 | 21040596                | TT                              | CC              | 1946756178               |
| SNP_P4_21850_21044895 | NC_021161.1    | Ca_kabuli_chr02 | 21044895                | AA                              | TT              | 1946756180               |
| SNP_P4_21851_21085708 | NC_021161.1    | Ca_kabuli_chr02 | 21085708                | GG                              | TT              | 1946756182               |
| SNP_P4_21852_21140224 | NC_021161.1    | Ca_kabuli_chr02 | 21140224                | GG                              | AA              | 1946756184               |
| SNP_P4_21853_21140225 | NC_021161.1    | Ca_kabuli_chr02 | 21140225                | AA                              | GG              | 1946756186               |
| SNP_P4_21854_21140550 | NC_021161.1    | Ca_kabuli_chr02 | 21140550                | CC                              | TT              | 1946756188               |
| SNP_P4_21855_21140699 | NC_021161.1    | Ca_kabuli_chr02 | 21140699                | TT                              | AA              | 1946756190               |
| SNP_P4_21856_21140719 | NC_021161.1    | Ca_kabuli_chr02 | 21140719                | GG                              | TT              | 1946756192               |
| SNP_P4_21857_21140730 | NC_021161.1    | Ca_kabuli_chr02 | 21140730                | GG                              | AA              | 1946756206               |
| SNP_P4_21859_21161949 | NC_021161.1    | Ca_kabuli_chr02 | 21161949                | GG                              | AA              | 1946756212               |
| SNP_P4_21860_21161967 | NC_021161.1    | Ca_kabuli_chr02 | 21161967                | GG                              | TT              | 1946756219               |
| SNP_P4_21861_21176962 | NC_021161.1    | Ca_kabuli_chr02 | 21176962                | GG                              | AA              | 1946756228               |
| SNP_P4_21862_21176989 | NC_021161.1    | Ca_kabuli_chr02 | 21176989                | AA                              | CC              | 1946756232               |
| SNP_P4_21863_21204600 | NC_021161.1    | Ca_kabuli_chr02 | 21204600                | GG                              | AA              | 1946756238               |
| SNP_P4_21865_21204656 | NC_021161.1    | Ca_kabuli_chr02 | 21204656                | AA                              | CC              | 1946756246               |
| SNP_P4_21866_21204658 | NC_021161.1    | Ca_kabuli_chr02 | 21204658                | AA                              | CC              | 1946756256               |
| SNP_P4_21867_21204707 | NC_021161.1    | Ca_kabuli_chr02 | 21204707                | TT                              | CC              | 1946756264               |
| SNP_P4_21868_21204817 | NC_021161.1    | Ca_kabuli_chr02 | 21204817                | TT                              | CC              | 1946756269               |
| SNP_P4_21869_21205217 | NC_021161.1    | Ca_kabuli_chr02 | 21205217                | TT                              | CC              | 1946756272               |
| SNP_P4_21870_21205272 | NC_021161.1    | Ca_kabuli_chr02 | 21205272                | TT                              | GG              | 1946756280               |
| SNP_P4_21871_21205360 | NC_021161.1    | Ca_kabuli_chr02 | 21205360                | TT                              | CC              | 1946756282               |
| SNP_P4_21872_21208373 | NC_021161.1    | Ca_kabuli_chr02 | 21208373                | AA                              | GG              | 1946756285               |
| SNP_P4_21873_21208418 | NC_021161.1    | Ca_kabuli_chr02 | 21208418                | CC                              | TT              | 1946756293               |
| SNP_P4_21874_21208427 | NC_021161.1    | Ca_kabuli_chr02 | 21208427                | GG                              | AA              | 1946756295               |
| SNP_P4_21875_21208463 | NC_021161.1    | Ca_kabuli_chr02 | 21208463                | GG                              | AA              | 1946756297               |
| SNP_P4_21876_21208469 | NC_021161.1    | Ca_kabuli_chr02 | 21208469                | GG                              | AA              | 1946756299               |
| SNP_P4_21877_21208475 | NC_021161.1    | Ca_kabuli_chr02 | 21208475                | CC                              | TT              | 1946756308               |

| SNPs IDs              | Chromosome IDs | Chromosomes     | Physical positions (bp) | CDC Frontier (Reference genome) | (ILWC46 & LPNB) | NCBI SNPdb Accession IDs |
|-----------------------|----------------|-----------------|-------------------------|---------------------------------|-----------------|--------------------------|
| SNP_P4_21878_21208532 | NC_021161.1    | Ca_kabuli_chr02 | 21208532                | TT                              | CC              | 1946756310               |
| SNP_P4_21879_21208565 | NC_021161.1    | Ca_kabuli_chr02 | 21208565                | CC                              | TT              | 1946756313               |
| SNP_P4_21880_21208622 | NC_021161.1    | Ca_kabuli_chr02 | 21208622                | TT                              | AA              | 1946756322               |
| SNP_P4_21881_21208629 | NC_021161.1    | Ca_kabuli_chr02 | 21208629                | AA                              | GG              | 1946756324               |
| SNP_P4_21882_21208635 | NC_021161.1    | Ca_kabuli_chr02 | 21208635                | TT                              | CC              | 1946756332               |
| SNP_P4_21883_21208637 | NC_021161.1    | Ca_kabuli_chr02 | 21208637                | GG                              | TT              | 1946756334               |
| SNP_P4_21884_21208655 | NC_021161.1    | Ca_kabuli_chr02 | 21208655                | TT                              | CC              | 1946756336               |
| SNP_P4_21885_21208656 | NC_021161.1    | Ca_kabuli_chr02 | 21208656                | CC                              | TT              | 1946756338               |
| SNP_P4_21886_21208658 | NC_021161.1    | Ca_kabuli_chr02 | 21208658                | GG                              | AA              | 1946756340               |
| SNP_P4_21887_21208665 | NC_021161.1    | Ca_kabuli_chr02 | 21208665                | AA                              | GG              | 1946756342               |
| SNP_P4_21888_21208697 | NC_021161.1    | Ca_kabuli_chr02 | 21208697                | GG                              | AA              | 1946756344               |
| SNP_P4_21889_21208729 | NC_021161.1    | Ca_kabuli_chr02 | 21208729                | GG                              | CC              | 1946756346               |
| SNP_P4_21890_21208757 | NC_021161.1    | Ca_kabuli_chr02 | 21208757                | TT                              | CC              | 1946756349               |
| SNP_P4_21891_21208799 | NC_021161.1    | Ca_kabuli_chr02 | 21208799                | TT                              | GG              | 1946756351               |
| SNP_P4_21892_21208803 | NC_021161.1    | Ca_kabuli_chr02 | 21208803                | TT                              | AA              | 1946756353               |
| SNP_P4_21893_21208805 | NC_021161.1    | Ca_kabuli_chr02 | 21208805                | AA                              | GG              | 1946756355               |
| SNP_P4_21894_21208854 | NC_021161.1    | Ca_kabuli_chr02 | 21208854                | AA                              | TT              | 1946756357               |
| SNP_P4_21895_21208855 | NC_021161.1    | Ca_kabuli_chr02 | 21208855                | AA                              | TT              | 1946756359               |
| SNP_P4_21896_21208862 | NC_021161.1    | Ca_kabuli_chr02 | 21208862                | AA                              | GG              | 1946756361               |
| SNP_P4_21897_21208877 | NC_021161.1    | Ca_kabuli_chr02 | 21208877                | TT                              | CC              | 1946756363               |
| SNP_P4_21898_21209161 | NC_021161.1    | Ca_kabuli_chr02 | 21209161                | TT                              | CC              | 1946756365               |
| SNP_P4_21899_21231304 | NC_021161.1    | Ca_kabuli_chr02 | 21231304                | TT                              | AA              | 1946756367               |
| SNP_P4_21900_21231725 | NC_021161.1    | Ca_kabuli_chr02 | 21231725                | TT                              | AA              | 1946756369               |
| SNP_P4_21901_21272137 | NC_021161.1    | Ca_kabuli_chr02 | 21272137                | AA                              | TT              | 1946756371               |
| SNP_P4_21902_21272140 | NC_021161.1    | Ca_kabuli_chr02 | 21272140                | TT                              | AA              | 1946756373               |
| SNP_P4_21903_21272141 | NC_021161.1    | Ca_kabuli_chr02 | 21272141                | TT                              | GG              | 1946756375               |
| SNP_P4_21904_21272263 | NC_021161.1    | Ca_kabuli_chr02 | 21272263                | AA                              | GG              | 1946756378               |
| SNP_P4_21905_21272284 | NC_021161.1    | Ca_kabuli_chr02 | 21272284                | AA                              | GG              | 1946756380               |
| SNP_P4_21906_21272285 | NC_021161.1    | Ca_kabuli_chr02 | 21272285                | TT                              | CC              | 1946756382               |
| SNP_P4_21907_21274927 | NC_021161.1    | Ca_kabuli_chr02 | 21274927                | CC                              | GG              | 1946756384               |
| SNP_P4_21908_21283406 | NC_021161.1    | Ca_kabuli_chr02 | 21283406                | TT                              | AA              | 1946756386               |
| SNP_P4_21909_21303173 | NC_021161.1    | Ca_kabuli_chr02 | 21303173                | CC                              | TT              | 1946756388               |
| SNP_P4_21910_21303191 | NC_021161.1    | Ca_kabuli_chr02 | 21303191                | TT                              | AA              | 1946756390               |
| SNP_P4_21911_21303216 | NC_021161.1    | Ca_kabuli_chr02 | 21303216                | TT                              | AA              | 1946756392               |
| SNP_P4_21912_21303226 | NC_021161.1    | Ca_kabuli_chr02 | 21303226                | AA                              | GG              | 1946756394               |
| SNP_P4_21913_21303232 | NC_021161.1    | Ca_kabuli_chr02 | 21303232                | TT                              | CC              | 1946756396               |
| SNP_P4_21914_21303284 | NC_021161.1    | Ca_kabuli_chr02 | 21303284                | TT                              | CC              | 1946756398               |
| SNP_P4_21915_21303293 | NC_021161.1    | Ca_kabuli_chr02 | 21303293                | TT                              | CC              | 1946756400               |
| SNP_P4_21916_21303360 | NC_021161.1    | Ca_kabuli_chr02 | 21303360                | AA                              | GG              | 1946756402               |
| SNP_P4_21917_21303406 | NC_021161.1    | Ca_kabuli_chr02 | 21303406                | TT                              | CC              | 1946756404               |
| SNP_P4_21918_21303416 | NC_021161.1    | Ca_kabuli_chr02 | 21303416                | TT                              | GG              | 1946756406               |
| SNP_P4_21919_21303447 | NC_021161.1    | Ca_kabuli_chr02 | 21303447                | CC                              | TT              | 1946756408               |

| SNPs IDs              | Chromosome IDs | Chromosomes     | Physical positions (bp) | CDC Frontier (Reference genome) | (ILWC46 & LPNB) | NCBI SNPdb Accession IDs |
|-----------------------|----------------|-----------------|-------------------------|---------------------------------|-----------------|--------------------------|
| SNP_P4_21920_21303468 | NC_021161.1    | Ca_kabuli_chr02 | 21303468                | CC                              | TT              | 1946756419               |
| SNP_P4_21921_21303477 | NC_021161.1    | Ca_kabuli_chr02 | 21303477                | TT                              | CC              | 1946756426               |
| SNP_P4_21922_21303495 | NC_021161.1    | Ca_kabuli_chr02 | 21303495                | CC                              | TT              | 1946756433               |
| SNP_P4_21923_21303504 | NC_021161.1    | Ca_kabuli_chr02 | 21303504                | AA                              | GG              | 1946756438               |
| SNP_P4_21924_21303507 | NC_021161.1    | Ca_kabuli_chr02 | 21303507                | CC                              | TT              | 1946756447               |
| SNP_P4_21925_21303510 | NC_021161.1    | Ca_kabuli_chr02 | 21303510                | GG                              | AA              | 1946756454               |
| SNP_P4_21926_21303521 | NC_021161.1    | Ca_kabuli_chr02 | 21303521                | GG                              | AA              | 1946756463               |
| SNP_P4_21927_21303611 | NC_021161.1    | Ca_kabuli_chr02 | 21303611                | TT                              | CC              | 1946756470               |
| SNP_P4_21928_21303710 | NC_021161.1    | Ca_kabuli_chr02 | 21303710                | GG                              | AA              | 1946756474               |
| SNP_P4_21929_21303865 | NC_021161.1    | Ca_kabuli_chr02 | 21303865                | GG                              | AA              | 1946756482               |
| SNP_P4_21930_21305085 | NC_021161.1    | Ca_kabuli_chr02 | 21305085                | GG                              | AA              | 1946756486               |
| SNP_P4_21931_21305115 | NC_021161.1    | Ca_kabuli_chr02 | 21305115                | TT                              | AA              | 1946756488               |
| SNP_P4_21932_21305146 | NC_021161.1    | Ca_kabuli_chr02 | 21305146                | GG                              | AA              | 1946756496               |
| SNP_P4_21933_21305156 | NC_021161.1    | Ca_kabuli_chr02 | 21305156                | GG                              | AA              | 1946756498               |
| SNP_P4_21934_21305159 | NC_021161.1    | Ca_kabuli_chr02 | 21305159                | CC                              | TT              | 1946756500               |
| SNP_P4_21935_21305163 | NC_021161.1    | Ca_kabuli_chr02 | 21305163                | AA                              | GG              | 1946756508               |
| SNP_P4_21936_21305174 | NC_021161.1    | Ca_kabuli_chr02 | 21305174                | AA                              | GG              | 1946756510               |
| SNP_P4_21937_21305212 | NC_021161.1    | Ca_kabuli_chr02 | 21305212                | TT                              | AA              | 1946756518               |
| SNP_P4_21938_21305227 | NC_021161.1    | Ca_kabuli_chr02 | 21305227                | TT                              | GG              | 1946756520               |
| SNP_P4_21939_21305674 | NC_021161.1    | Ca_kabuli_chr02 | 21305674                | AA                              | CC              | 1946756522               |
| SNP_P4_21941_21308061 | NC_021161.1    | Ca_kabuli_chr02 | 21308061                | AA                              | TT              | 1946756531               |
| SNP_P4_21942_21308513 | NC_021161.1    | Ca_kabuli_chr02 | 21308513                | GG                              | AA              | 1946756533               |
| SNP_P4_21943_21308765 | NC_021161.1    | Ca_kabuli_chr02 | 21308765                | TT                              | GG              | 1946756541               |
| SNP_P4_21944_21308797 | NC_021161.1    | Ca_kabuli_chr02 | 21308797                | GG                              | AA              | 1946756543               |
| SNP_P4_21945_21308948 | NC_021161.1    | Ca_kabuli_chr02 | 21308948                | CC                              | TT              | 1946756545               |
| SNP_P4_21946_21309174 | NC_021161.1    | Ca_kabuli_chr02 | 21309174                | AA                              | TT              | 1946756547               |
| SNP_P4_21947_21309198 | NC_021161.1    | Ca_kabuli_chr02 | 21309198                | AA                              | CC              | 1946756549               |
| SNP_P4_21948_21309378 | NC_021161.1    | Ca_kabuli_chr02 | 21309378                | CC                              | AA              | 1946756551               |
| SNP_P4_21949_21309429 | NC_021161.1    | Ca_kabuli_chr02 | 21309429                | AA                              | TT              | 1946756553               |
| SNP_P4_21950_21309512 | NC_021161.1    | Ca_kabuli_chr02 | 21309512                | TT                              | CC              | 1946756555               |
| SNP_P4_21951_21309613 | NC_021161.1    | Ca_kabuli_chr02 | 21309613                | AA                              | GG              | 1946756557               |
| SNP_P4_21952_21309658 | NC_021161.1    | Ca_kabuli_chr02 | 21309658                | AA                              | GG              | 1946756559               |
| SNP_P4_21953_21309735 | NC_021161.1    | Ca_kabuli_chr02 | 21309735                | TT                              | CC              | 1946756561               |
| SNP_P4_21954_21310017 | NC_021161.1    | Ca_kabuli_chr02 | 21310017                | CC                              | TT              | 1946756564               |
| SNP_P4_21955_21310027 | NC_021161.1    | Ca_kabuli_chr02 | 21310027                | TT                              | CC              | 1946756566               |
| SNP_P4_21956_21310041 | NC_021161.1    | Ca_kabuli_chr02 | 21310041                | TT                              | CC              | 1946756568               |
| SNP_P4_21957_21310066 | NC_021161.1    | Ca_kabuli_chr02 | 21310066                | GG                              | AA              | 1946756570               |
| SNP_P4_21958_21310624 | NC_021161.1    | Ca_kabuli_chr02 | 21310624                | TT                              | AA              | 1946756572               |
| SNP_P4_21959_21310638 | NC_021161.1    | Ca_kabuli_chr02 | 21310638                | CC                              | TT              | 1946756574               |
| SNP_P4_21960_21312134 | NC_021161.1    | Ca_kabuli_chr02 | 21312134                | GG                              | AA              | 1946756576               |
| SNP_P4_21962_21313544 | NC_021161.1    | Ca_kabuli_chr02 | 21313544                | GG                              | AA              | 1946756578               |
| SNP_P4_21963_21313567 | NC_021161.1    | Ca_kabuli_chr02 | 21313567                | AA                              | CC              | 1946756580               |

| SNPs IDs              | Chromosome IDs | Chromosomes     | Physical positions (bp) | CDC Frontier (Reference genome) | (ILWC46 & LPNB) | NCBI SNPdb Accession IDs |
|-----------------------|----------------|-----------------|-------------------------|---------------------------------|-----------------|--------------------------|
| SNP_P4_21964_21313901 | NC_021161.1    | Ca_kabuli_chr02 | 21313901                | TT                              | CC              | 1946756582               |
| SNP_P4_21965_21314076 | NC_021161.1    | Ca_kabuli_chr02 | 21314076                | GG                              | CC              | 1946756584               |
| SNP_P4_21967_21314644 | NC_021161.1    | Ca_kabuli_chr02 | 21314644                | TT                              | GG              | 1946756586               |
| SNP_P4_21968_21314952 | NC_021161.1    | Ca_kabuli_chr02 | 21314952                | AA                              | TT              | 1946756588               |
| SNP_P4_21969_21314992 | NC_021161.1    | Ca_kabuli_chr02 | 21314992                | AA                              | TT              | 1946756590               |
| SNP_P4_21970_21315061 | NC_021161.1    | Ca_kabuli_chr02 | 21315061                | AA                              | TT              | 1946756592               |
| SNP_P4_21971_21315322 | NC_021161.1    | Ca_kabuli_chr02 | 21315322                | AA                              | GG              | 1946756594               |
| SNP_P4_21972_21315386 | NC_021161.1    | Ca_kabuli_chr02 | 21315386                | TT                              | AA              | 1946756596               |
| SNP_P4_21973_21315492 | NC_021161.1    | Ca_kabuli_chr02 | 21315492                | GG                              | TT              | 1946756598               |
| SNP_P4_21974_21315498 | NC_021161.1    | Ca_kabuli_chr02 | 21315498                | CC                              | AA              | 1946756600               |
| SNP_P4_21975_21315499 | NC_021161.1    | Ca_kabuli_chr02 | 21315499                | AA                              | TT              | 1946756602               |
| SNP_P4_21976_21315518 | NC_021161.1    | Ca_kabuli_chr02 | 21315518                | AA                              | CC              | 1946756604               |
| SNP_P4_21977_21315541 | NC_021161.1    | Ca_kabuli_chr02 | 21315541                | TT                              | GG              | 1946756606               |
| SNP_P4_21978_21315542 | NC_021161.1    | Ca_kabuli_chr02 | 21315542                | TT                              | AA              | 1946756608               |
| SNP_P4_21979_21315543 | NC_021161.1    | Ca_kabuli_chr02 | 21315543                | GG                              | AA              | 1946756610               |
| SNP_P4_21980_21315545 | NC_021161.1    | Ca_kabuli_chr02 | 21315545                | AA                              | GG              | 1946756619               |
| SNP_P4_21981_21317521 | NC_021161.1    | Ca_kabuli_chr02 | 21317521                | AA                              | GG              | 1946756630               |
| SNP_P4_21982_21318214 | NC_021161.1    | Ca_kabuli_chr02 | 21318214                | TT                              | CC              | 1946756637               |
| SNP_P4_21983_21318506 | NC_021161.1    | Ca_kabuli_chr02 | 21318506                | TT                              | GG              | 1946756645               |
| SNP_P4_21984_21318936 | NC_021161.1    | Ca_kabuli_chr02 | 21318936                | TT                              | AA              | 1946756650               |
| SNP_P4_21985_21319310 | NC_021161.1    | Ca_kabuli_chr02 | 21319310                | CC                              | AA              | 1946756658               |
| SNP_P4_21986_21321583 | NC_021161.1    | Ca_kabuli_chr02 | 21321583                | GG                              | AA              | 1946756665               |
| SNP_P4_21988_21404913 | NC_021161.1    | Ca_kabuli_chr02 | 21404913                | CC                              | GG              | 1946756672               |
| SNP_P4_21989_21405635 | NC_021161.1    | Ca_kabuli_chr02 | 21405635                | CC                              | TT              | 1946756680               |
| SNP_P4_21990_21413489 | NC_021161.1    | Ca_kabuli_chr02 | 21413489                | TT                              | AA              | 1946756685               |
| SNP_P4_21991_21413533 | NC_021161.1    | Ca_kabuli_chr02 | 21413533                | GG                              | AA              | 1946756689               |
| SNP_P4_21992_21442606 | NC_021161.1    | Ca_kabuli_chr02 | 21442606                | TT                              | AA              | 1946756696               |
| SNP_P4_21993_21511457 | NC_021161.1    | Ca_kabuli_chr02 | 21511457                | TT                              | CC              | 1946756702               |
| SNP_P4_21994_21524332 | NC_021161.1    | Ca_kabuli_chr02 | 21524332                | CC                              | GG              | 1946756706               |
| SNP_P4_21995_21524427 | NC_021161.1    | Ca_kabuli_chr02 | 21524427                | TT                              | GG              | 1946756708               |
| SNP_P4_21996_21524572 | NC_021161.1    | Ca_kabuli_chr02 | 21524572                | GG                              | AA              | 1946756717               |
| SNP_P4_21997_21524581 | NC_021161.1    | Ca_kabuli_chr02 | 21524581                | TT                              | GG              | 1946756719               |
| SNP_P4_21998_21536027 | NC_021161.1    | Ca_kabuli_chr02 | 21536027                | GG                              | AA              | 1946756721               |
| SNP_P4_21999_21536147 | NC_021161.1    | Ca_kabuli_chr02 | 21536147                | TT                              | CC              | 1946756729               |
| SNP_P4_22000_21536342 | NC_021161.1    | Ca_kabuli_chr02 | 21536342                | TT                              | CC              | 1946756734               |
| SNP_P4_22001_21536343 | NC_021161.1    | Ca_kabuli_chr02 | 21536343                | GG                              | AA              | 1946756742               |
| SNP_P4_22002_21536357 | NC_021161.1    | Ca_kabuli_chr02 | 21536357                | AA                              | TT              | 1946756744               |
| SNP_P4_22003_21536461 | NC_021161.1    | Ca_kabuli_chr02 | 21536461                | AA                              | GG              | 1946756746               |
| SNP_P4_22004_21536526 | NC_021161.1    | Ca_kabuli_chr02 | 21536526                | AA                              | GG              | 1946756750               |
| SNP_P4_22005_21537510 | NC_021161.1    | Ca_kabuli_chr02 | 21537510                | CC                              | TT              | 1946756752               |
| SNP_P4_22006_21537511 | NC_021161.1    | Ca_kabuli_chr02 | 21537511                | TT                              | CC              | 1946756754               |
| SNP_P4_22007_21537513 | NC_021161.1    | Ca_kabuli_chr02 | 21537513                | CC                              | TT              | 1946756756               |

| SNPs IDs              | Chromosome IDs | Chromosomes     | Physical positions (bp) | CDC Frontier (Reference genome) | (ILWC46 & LPNB) | NCBI SNPdb Accession IDs |
|-----------------------|----------------|-----------------|-------------------------|---------------------------------|-----------------|--------------------------|
| SNP_P4_22008_21537517 | NC_021161.1    | Ca_kabuli_chr02 | 21537517                | GG                              | AA              | 1946756758               |
| SNP_P4_22009_21537521 | NC_021161.1    | Ca_kabuli_chr02 | 21537521                | CC                              | TT              | 1946756760               |
| SNP_P4_22010_21537524 | NC_021161.1    | Ca_kabuli_chr02 | 21537524                | TT                              | GG              | 1946756762               |
| SNP_P4_22011_21537922 | NC_021161.1    | Ca_kabuli_chr02 | 21537922                | AA                              | TT              | 1946756764               |
| SNP_P4_22012_21537944 | NC_021161.1    | Ca_kabuli_chr02 | 21537944                | AA                              | GG              | 1946756766               |
| SNP_P4_22013_21538258 | NC_021161.1    | Ca_kabuli_chr02 | 21538258                | TT                              | CC              | 1946756768               |
| SNP_P4_22014_21538462 | NC_021161.1    | Ca_kabuli_chr02 | 21538462                | AA                              | GG              | 1946756770               |
| SNP_P4_22015_21538652 | NC_021161.1    | Ca_kabuli_chr02 | 21538652                | AA                              | GG              | 1946756772               |
| SNP_P4_22017_21582437 | NC_021161.1    | Ca_kabuli_chr02 | 21582437                | GG                              | AA              | 1946756774               |
| SNP_P4_22019_21652295 | NC_021161.1    | Ca_kabuli_chr02 | 21652295                | GG                              | TT              | 1946756776               |
| SNP_P4_22020_21652304 | NC_021161.1    | Ca_kabuli_chr02 | 21652304                | CC                              | TT              | 1946756778               |
| SNP_P4_22021_21652311 | NC_021161.1    | Ca_kabuli_chr02 | 21652311                | CC                              | TT              | 1946756780               |
| SNP_P4_22023_21666150 | NC_021161.1    | Ca_kabuli_chr02 | 21666150                | TT                              | GG              | 1946756782               |
| SNP_P4_22025_21673803 | NC_021161.1    | Ca_kabuli_chr02 | 21673803                | GG                              | AA              | 1946756784               |
| SNP_P4_22026_21675194 | NC_021161.1    | Ca_kabuli_chr02 | 21675194                | TT                              | AA              | 1946756786               |
| SNP_P4_22027_21675199 | NC_021161.1    | Ca_kabuli_chr02 | 21675199                | TT                              | CC              | 1946756788               |
| SNP_P4_22028_21675210 | NC_021161.1    | Ca_kabuli_chr02 | 21675210                | TT                              | CC              | 1946756790               |
| SNP_P4_22029_21675221 | NC_021161.1    | Ca_kabuli_chr02 | 21675221                | AA                              | TT              | 1946756792               |
| SNP_P4_22030_21684599 | NC_021161.1    | Ca_kabuli_chr02 | 21684599                | GG                              | AA              | 1946756794               |
| SNP_P4_22031_21690307 | NC_021161.1    | Ca_kabuli_chr02 | 21690307                | AA                              | GG              | 1946756797               |
| SNP_P4_22032_21690319 | NC_021161.1    | Ca_kabuli_chr02 | 21690319                | AA                              | GG              | 1946756799               |
| SNP_P4_22033_21690322 | NC_021161.1    | Ca_kabuli_chr02 | 21690322                | TT                              | CC              | 1946756801               |
| SNP_P4_22036_21711508 | NC_021161.1    | Ca_kabuli_chr02 | 21711508                | GG                              | CC              | 1946756803               |
| SNP_P4_22038_21753457 | NC_021161.1    | Ca_kabuli_chr02 | 21753457                | AA                              | TT              | 1946756805               |
| SNP_P4_22039_21767611 | NC_021161.1    | Ca_kabuli_chr02 | 21767611                | CC                              | TT              | 1946756807               |
| SNP_P4_22040_21767641 | NC_021161.1    | Ca_kabuli_chr02 | 21767641                | TT                              | AA              | 1946756809               |
| SNP_P4_22041_21774772 | NC_021161.1    | Ca_kabuli_chr02 | 21774772                | AA                              | GG              | 1946756811               |
| SNP_P4_22042_21774779 | NC_021161.1    | Ca_kabuli_chr02 | 21774779                | CC                              | TT              | 1946756813               |
| SNP_P4_22043_21777789 | NC_021161.1    | Ca_kabuli_chr02 | 21777789                | GG                              | AA              | 1946756815               |
| SNP_P4_22044_21777813 | NC_021161.1    | Ca_kabuli_chr02 | 21777813                | CC                              | TT              | 1946756816               |
| SNP_P4_22045_21777815 | NC_021161.1    | Ca_kabuli_chr02 | 21777815                | CC                              | TT              | 1946756817               |
| SNP_P4_22046_21777840 | NC_021161.1    | Ca_kabuli_chr02 | 21777840                | AA                              | GG              | 1946756818               |
| SNP_P4_22047_21778484 | NC_021161.1    | Ca_kabuli_chr02 | 21778484                | GG                              | AA              | 1946756819               |
| SNP_P4_22048_21778624 | NC_021161.1    | Ca_kabuli_chr02 | 21778624                | CC                              | TT              | 1946756820               |
| SNP_P4_22049_21778625 | NC_021161.1    | Ca_kabuli_chr02 | 21778625                | AA                              | GG              | 1946756821               |
| SNP_P4_22050_21778640 | NC_021161.1    | Ca_kabuli_chr02 | 21778640                | TT                              | CC              | 1946756822               |
| SNP_P4_22052_21784046 | NC_021161.1    | Ca_kabuli_chr02 | 21784046                | GG                              | AA              | 1946756835               |
| SNP_P4_22053_21784068 | NC_021161.1    | Ca_kabuli_chr02 | 21784068                | TT                              | CC              | 1946756842               |
| SNP_P4_22054_21784122 | NC_021161.1    | Ca_kabuli_chr02 | 21784122                | AA                              | GG              | 1946756851               |
| SNP_P4_22055_21784373 | NC_021161.1    | Ca_kabuli_chr02 | 21784373                | GG                              | AA              | 1946756856               |
| SNP_P4_22056_21790060 | NC_021161.1    | Ca_kabuli_chr02 | 21790060                | TT                              | AA              | 1946756861               |
| SNP_P4_22057_21790061 | NC_021161.1    | Ca_kabuli_chr02 | 21790061                | AA                              | TT              | 1946756869               |



| SNPs IDs              | Chromosome IDs | Chromosomes     | Physical positions (bp) | CDC Frontier (Reference genome) | (ILWC46 & LPNB) | NCBI SNPdb Accession IDs |
|-----------------------|----------------|-----------------|-------------------------|---------------------------------|-----------------|--------------------------|
| SNP_P4_22059_21856238 | NC_021161.1    | Ca_kabuli_chr02 | 21856238                | TT                              | AA              | 1946756874               |
| SNP_P4_22060_21892004 | NC_021161.1    | Ca_kabuli_chr02 | 21892004                | CC                              | TT              | 1946756879               |
| SNP_P4_22061_21892987 | NC_021161.1    | Ca_kabuli_chr02 | 21892987                | AA                              | GG              | 1946756885               |
| SNP_P4_22062_21902368 | NC_021161.1    | Ca_kabuli_chr02 | 21902368                | AA                              | GG              | 1946756889               |
| SNP_P4_22063_21902402 | NC_021161.1    | Ca_kabuli_chr02 | 21902402                | CC                              | AA              | 1946756896               |
| SNP_P4_22064_21902467 | NC_021161.1    | Ca_kabuli_chr02 | 21902467                | TT                              | AA              | 1946756900               |
| SNP_P4_22065_21902569 | NC_021161.1    | Ca_kabuli_chr02 | 21902569                | GG                              | AA              | 1946756902               |
| SNP_P4_22066_21902833 | NC_021161.1    | Ca_kabuli_chr02 | 21902833                | AA                              | GG              | 1946756910               |
| SNP_P4_22067_21902887 | NC_021161.1    | Ca_kabuli_chr02 | 21902887                | AA                              | GG              | 1946756912               |
| SNP_P4_22068_21902926 | NC_021161.1    | Ca_kabuli_chr02 | 21902926                | TT                              | CC              | 1946756919               |
| SNP_P4_22069_21902931 | NC_021161.1    | Ca_kabuli_chr02 | 21902931                | GG                              | AA              | 1946756923               |
| SNP_P4_22070_21928383 | NC_021161.1    | Ca_kabuli_chr02 | 21928383                | TT                              | CC              | 1946756925               |
| SNP_P4_22071_21928409 | NC_021161.1    | Ca_kabuli_chr02 | 21928409                | AA                              | CC              | 1946756934               |
| SNP_P4_22072_21928424 | NC_021161.1    | Ca_kabuli_chr02 | 21928424                | AA                              | CC              | 1946756936               |
| SNP_P4_22073_21930180 | NC_021161.1    | Ca_kabuli_chr02 | 21930180                | CC                              | TT              | 1946756938               |
| SNP_P4_22074_21930245 | NC_021161.1    | Ca_kabuli_chr02 | 21930245                | GG                              | TT              | 1946756946               |
| SNP_P4_22076_21943761 | NC_021161.1    | Ca_kabuli_chr02 | 21943761                | AA                              | GG              | 1946756948               |
| SNP_P4_22077_21943801 | NC_021161.1    | Ca_kabuli_chr02 | 21943801                | GG                              | AA              | 1946756953               |
| SNP_P4_22078_21943808 | NC_021161.1    | Ca_kabuli_chr02 | 21943808                | GG                              | AA              | 1946756955               |
| SNP_P4_22079_21943810 | NC_021161.1    | Ca_kabuli_chr02 | 21943810                | CC                              | TT              | 1946756957               |
| SNP_P4_22080_21943811 | NC_021161.1    | Ca_kabuli_chr02 | 21943811                | TT                              | CC              | 1946756959               |
| SNP_P4_22081_21956077 | NC_021161.1    | Ca_kabuli_chr02 | 21956077                | TT                              | CC              | 1946756961               |
| SNP_P4_22082_21956087 | NC_021161.1    | Ca_kabuli_chr02 | 21956087                | CC                              | AA              | 1946756963               |
| SNP_P4_22083_21956120 | NC_021161.1    | Ca_kabuli_chr02 | 21956120                | TT                              | CC              | 1946756965               |
| SNP_P4_22084_21956362 | NC_021161.1    | Ca_kabuli_chr02 | 21956362                | AA                              | GG              | 1946756967               |
| SNP_P4_22085_21956372 | NC_021161.1    | Ca_kabuli_chr02 | 21956372                | CC                              | AA              | 1946756970               |
| SNP_P4_22086_21956384 | NC_021161.1    | Ca_kabuli_chr02 | 21956384                | TT                              | AA              | 1946756972               |
| SNP_P4_22087_21956415 | NC_021161.1    | Ca_kabuli_chr02 | 21956415                | CC                              | AA              | 1946756974               |
| SNP_P4_22088_21956434 | NC_021161.1    | Ca_kabuli_chr02 | 21956434                | AA                              | GG              | 1946756976               |
| SNP_P4_22089_21956483 | NC_021161.1    | Ca_kabuli_chr02 | 21956483                | AA                              | TT              | 1946756978               |
| SNP_P4_22090_21960131 | NC_021161.1    | Ca_kabuli_chr02 | 21960131                | GG                              | AA              | 1946756980               |
| SNP_P4_22091_21997897 | NC_021161.1    | Ca_kabuli_chr02 | 21997897                | AA                              | GG              | 1946756982               |
| SNP_P4_22092_21998659 | NC_021161.1    | Ca_kabuli_chr02 | 21998659                | CC                              | TT              | 1946756984               |
| SNP_P4_22093_21998706 | NC_021161.1    | Ca_kabuli_chr02 | 21998706                | AA                              | GG              | 1946756986               |
| SNP_P4_22094_21998821 | NC_021161.1    | Ca_kabuli_chr02 | 21998821                | GG                              | AA              | 1946756988               |
| SNP_P4_22095_21998850 | NC_021161.1    | Ca_kabuli_chr02 | 21998850                | AA                              | TT              | 1946756990               |
| SNP_P4_22096_21998853 | NC_021161.1    | Ca_kabuli_chr02 | 21998853                | TT                              | CC              | 1946756992               |
| SNP_P4_22097_21998972 | NC_021161.1    | Ca_kabuli_chr02 | 21998972                | GG                              | AA              | 1946756994               |
| SNP_P4_22098_21999067 | NC_021161.1    | Ca_kabuli_chr02 | 21999067                | GG                              | AA              | 1946756996               |
| SNP_P4_22099_21999072 | NC_021161.1    | Ca_kabuli_chr02 | 21999072                | CC                              | TT              | 1946756998               |
| SNP_P4_22100_21999109 | NC_021161.1    | Ca_kabuli_chr02 | 21999109                | TT                              | AA              | 1946757000               |
| SNP_P4_22101_21999324 | NC_021161.1    | Ca_kabuli_chr02 | 21999324                | GG                              | AA              | 1946757002               |

| SNPs IDs              | Chromosome IDs | Chromosomes     | Physical positions (bp) | CDC Frontier (Reference genome) | (ILWC46 & LPNB) | NCBI SNPdb Accession IDs |
|-----------------------|----------------|-----------------|-------------------------|---------------------------------|-----------------|--------------------------|
| SNP_P4_22102_21999325 | NC_021161.1    | Ca_kabuli_chr02 | 21999325                | TT                              | CC              | 1946757004               |
| SNP_P4_22103_21999343 | NC_021161.1    | Ca_kabuli_chr02 | 21999343                | TT                              | AA              | 1946757006               |
| SNP_P4_22104_22045738 | NC_021161.1    | Ca_kabuli_chr02 | 22045738                | AA                              | CC              | 1946757008               |
| SNP_P4_22105_22045756 | NC_021161.1    | Ca_kabuli_chr02 | 22045756                | TT                              | GG              | 1946757010               |
| SNP_P4_22106_22065261 | NC_021161.1    | Ca_kabuli_chr02 | 22065261                | GG                              | AA              | 1946757012               |
| SNP_P4_22107_22065308 | NC_021161.1    | Ca_kabuli_chr02 | 22065308                | GG                              | CC              | 1946757014               |
| SNP_P4_22108_22065609 | NC_021161.1    | Ca_kabuli_chr02 | 22065609                | AA                              | TT              | 1946757016               |
| SNP_P4_22109_22065623 | NC_021161.1    | Ca_kabuli_chr02 | 22065623                | AA                              | GG              | 1946757018               |
| SNP_P4_22110_22065786 | NC_021161.1    | Ca_kabuli_chr02 | 22065786                | CC                              | GG              | 1946757020               |
| SNP_P4_22111_22068040 | NC_021161.1    | Ca_kabuli_chr02 | 22068040                | TT                              | CC              | 1946757022               |
| SNP_P4_22112_22068045 | NC_021161.1    | Ca_kabuli_chr02 | 22068045                | TT                              | CC              | 1946757024               |
| SNP_P4_22113_22068049 | NC_021161.1    | Ca_kabuli_chr02 | 22068049                | GG                              | AA              | 1946757025               |
| SNP_P4_22114_22068052 | NC_021161.1    | Ca_kabuli_chr02 | 22068052                | TT                              | GG              | 1946757026               |
| SNP_P4_22115_22068088 | NC_021161.1    | Ca_kabuli_chr02 | 22068088                | CC                              | TT              | 1946757027               |
| SNP_P4_22116_22068109 | NC_021161.1    | Ca_kabuli_chr02 | 22068109                | GG                              | AA              | 1946757028               |
| SNP_P4_22117_22069827 | NC_021161.1    | Ca_kabuli_chr02 | 22069827                | GG                              | AA              | 1946757029               |
| SNP_P4_22118_22111422 | NC_021161.1    | Ca_kabuli_chr02 | 22111422                | GG                              | TT              | 1946757031               |
| SNP_P4_22119_22154700 | NC_021161.1    | Ca_kabuli_chr02 | 22154700                | CC                              | AA              | 1946757036               |
| SNP_P4_22120_22179799 | NC_021161.1    | Ca_kabuli_chr02 | 22179799                | TT                              | CC              | 1946757044               |
| SNP_P4_22121_22194970 | NC_021161.1    | Ca_kabuli_chr02 | 22194970                | GG                              | TT              | 1946757051               |
| SNP_P4_22122_22195071 | NC_021161.1    | Ca_kabuli_chr02 | 22195071                | TT                              | GG              | 1946757061               |
| SNP_P4_22123_22195132 | NC_021161.1    | Ca_kabuli_chr02 | 22195132                | TT                              | CC              | 1946757069               |
| SNP_P4_22124_22195346 | NC_021161.1    | Ca_kabuli_chr02 | 22195346                | AA                              | GG              | 1946757074               |
| SNP_P4_22125_22195390 | NC_021161.1    | Ca_kabuli_chr02 | 22195390                | AA                              | CC              | 1946757082               |
| SNP_P4_22126_22195409 | NC_021161.1    | Ca_kabuli_chr02 | 22195409                | GG                              | AA              | 1946757085               |
| SNP_P4_22128_22196671 | NC_021161.1    | Ca_kabuli_chr02 | 22196671                | TT                              | AA              | 1946757087               |
| SNP_P4_22129_22202179 | NC_021161.1    | Ca_kabuli_chr02 | 22202179                | AA                              | GG              | 1946757095               |
| SNP_P4_22130_22202206 | NC_021161.1    | Ca_kabuli_chr02 | 22202206                | GG                              | AA              | 1946757097               |
| SNP_P4_22131_22202207 | NC_021161.1    | Ca_kabuli_chr02 | 22202207                | CC                              | AA              | 1946757099               |
| SNP_P4_22132_22202209 | NC_021161.1    | Ca_kabuli_chr02 | 22202209                | TT                              | GG              | 1946757106               |
| SNP_P4_22133_22202215 | NC_021161.1    | Ca_kabuli_chr02 | 22202215                | CC                              | GG              | 1946757109               |
| SNP_P4_22134_22202230 | NC_021161.1    | Ca_kabuli_chr02 | 22202230                | CC                              | TT              | 1946757111               |
| SNP_P4_22135_22202240 | NC_021161.1    | Ca_kabuli_chr02 | 22202240                | TT                              | GG              | 1946757119               |
| SNP_P4_22136_22202518 | NC_021161.1    | Ca_kabuli_chr02 | 22202518                | GG                              | TT              | 1946757122               |
| SNP_P4_22137_22202550 | NC_021161.1    | Ca_kabuli_chr02 | 22202550                | CC                              | TT              | 1946757124               |
| SNP_P4_22138_22202590 | NC_021161.1    | Ca_kabuli_chr02 | 22202590                | CC                              | AA              | 1946757133               |
| SNP_P4_22139_22202596 | NC_021161.1    | Ca_kabuli_chr02 | 22202596                | CC                              | TT              | 1946757135               |
| SNP_P4_22140_22203685 | NC_021161.1    | Ca_kabuli_chr02 | 22203685                | TT                              | GG              | 1946757142               |
| SNP_P4_22141_22203691 | NC_021161.1    | Ca_kabuli_chr02 | 22203691                | TT                              | CC              | 1946757144               |
| SNP_P4_22142_22203733 | NC_021161.1    | Ca_kabuli_chr02 | 22203733                | AA                              | TT              | 1946757146               |
| SNP_P4_22143_22204612 | NC_021161.1    | Ca_kabuli_chr02 | 22204612                | GG                              | AA              | 1946757148               |
| SNP_P4_22144_22284811 | NC_021161.1    | Ca_kabuli_chr02 | 22284811                | AA                              | GG              | 1946757150               |

| SNPs IDs              | Chromosome IDs | Chromosomes     | Physical positions (bp) | CDC Frontier (Reference genome) | (ILWC46 & LPNB) | NCBI SNPdb Accession IDs |
|-----------------------|----------------|-----------------|-------------------------|---------------------------------|-----------------|--------------------------|
| SNP_P4_22145_22284879 | NC_021161.1    | Ca_kabuli_chr02 | 22284879                | CC                              | TT              | 1946757152               |
| SNP_P4_22146_22284941 | NC_021161.1    | Ca_kabuli_chr02 | 22284941                | TT                              | CC              | 1946757154               |
| SNP_P4_22147_22285071 | NC_021161.1    | Ca_kabuli_chr02 | 22285071                | AA                              | GG              | 1946757156               |
| SNP_P4_22148_22285324 | NC_021161.1    | Ca_kabuli_chr02 | 22285324                | AA                              | CC              | 1946757158               |
| SNP_P4_22149_22285352 | NC_021161.1    | Ca_kabuli_chr02 | 22285352                | AA                              | GG              | 1946757160               |
| SNP_P4_22150_22301313 | NC_021161.1    | Ca_kabuli_chr02 | 22301313                | TT                              | AA              | 1946757162               |
| SNP_P4_22152_22310935 | NC_021161.1    | Ca_kabuli_chr02 | 22310935                | TT                              | AA              | 1946757164               |
| SNP_P4_22153_22331987 | NC_021161.1    | Ca_kabuli_chr02 | 22331987                | AA                              | GG              | 1946757166               |
| SNP_P4_22154_22334910 | NC_021161.1    | Ca_kabuli_chr02 | 22334910                | AA                              | GG              | 1946757168               |
| SNP_P4_22155_22359602 | NC_021161.1    | Ca_kabuli_chr02 | 22359602                | GG                              | CC              | 1946757170               |
| SNP_P4_22156_22360291 | NC_021161.1    | Ca_kabuli_chr02 | 22360291                | TT                              | GG              | 1946757172               |
| SNP_P4_22157_22442776 | NC_021161.1    | Ca_kabuli_chr02 | 22442776                | GG                              | TT              | 1946757174               |
| SNP_P4_22158_22451468 | NC_021161.1    | Ca_kabuli_chr02 | 22451468                | TT                              | AA              | 1946757176               |
| SNP_P4_22159_22451474 | NC_021161.1    | Ca_kabuli_chr02 | 22451474                | CC                              | TT              | 1946757178               |
| SNP_P4_22160_22455625 | NC_021161.1    | Ca_kabuli_chr02 | 22455625                | CC                              | TT              | 1946757180               |
| SNP_P4_22161_22455658 | NC_021161.1    | Ca_kabuli_chr02 | 22455658                | TT                              | CC              | 1946757182               |
| SNP_P4_22162_22456780 | NC_021161.1    | Ca_kabuli_chr02 | 22456780                | AA                              | GG              | 1946757184               |
| SNP_P4_22163_22456800 | NC_021161.1    | Ca_kabuli_chr02 | 22456800                | GG                              | CC              | 1946757186               |
| SNP_P4_22164_22456854 | NC_021161.1    | Ca_kabuli_chr02 | 22456854                | GG                              | TT              | 1946757188               |
| SNP_P4_22166_22480535 | NC_021161.1    | Ca_kabuli_chr02 | 22480535                | AA                              | TT              | 1946757190               |
| SNP_P4_22167_22482091 | NC_021161.1    | Ca_kabuli_chr02 | 22482091                | AA                              | GG              | 1946757193               |
| SNP_P4_22168_22482461 | NC_021161.1    | Ca_kabuli_chr02 | 22482461                | TT                              | GG              | 1946757195               |
| SNP_P4_22169_22482510 | NC_021161.1    | Ca_kabuli_chr02 | 22482510                | TT                              | CC              | 1946757197               |
| SNP_P4_22170_22482511 | NC_021161.1    | Ca_kabuli_chr02 | 22482511                | GG                              | AA              | 1946757199               |
| SNP_P4_22171_22482541 | NC_021161.1    | Ca_kabuli_chr02 | 22482541                | TT                              | GG              | 1946757201               |
| SNP_P4_22172_22482559 | NC_021161.1    | Ca_kabuli_chr02 | 22482559                | CC                              | AA              | 1946757203               |
| SNP_P4_22173_22482563 | NC_021161.1    | Ca_kabuli_chr02 | 22482563                | TT                              | AA              | 1946757205               |
| SNP_P4_22174_22482569 | NC_021161.1    | Ca_kabuli_chr02 | 22482569                | TT                              | CC              | 1946757207               |
| SNP_P4_22175_22482573 | NC_021161.1    | Ca_kabuli_chr02 | 22482573                | GG                              | AA              | 1946757209               |
| SNP_P4_22176_22482592 | NC_021161.1    | Ca_kabuli_chr02 | 22482592                | TT                              | GG              | 1946757211               |
| SNP_P4_22177_22482884 | NC_021161.1    | Ca_kabuli_chr02 | 22482884                | TT                              | GG              | 1946757213               |
| SNP_P4_22178_22482889 | NC_021161.1    | Ca_kabuli_chr02 | 22482889                | TT                              | CC              | 1946757215               |
| SNP_P4_22180_22489276 | NC_021161.1    | Ca_kabuli_chr02 | 22489276                | AA                              | TT              | 1946757218               |
| SNP_P4_22181_22489285 | NC_021161.1    | Ca_kabuli_chr02 | 22489285                | GG                              | AA              | 1946757232               |
| SNP_P4_22183_22505099 | NC_021161.1    | Ca_kabuli_chr02 | 22505099                | AA                              | GG              | 1946757241               |
| SNP_P4_22184_22505169 | NC_021161.1    | Ca_kabuli_chr02 | 22505169                | AA                              | TT              | 1946757251               |
| SNP_P4_22185_22505171 | NC_021161.1    | Ca_kabuli_chr02 | 22505171                | AA                              | TT              | 1946757258               |
| SNP_P4_22186_22505201 | NC_021161.1    | Ca_kabuli_chr02 | 22505201                | TT                              | CC              | 1946757263               |
| SNP_P4_22187_22506609 | NC_021161.1    | Ca_kabuli_chr02 | 22506609                | TT                              | CC              | 1946757270               |
| SNP_P4_22188_22506647 | NC_021161.1    | Ca_kabuli_chr02 | 22506647                | CC                              | TT              | 1946757275               |
| SNP_P4_22189_22507270 | NC_021161.1    | Ca_kabuli_chr02 | 22507270                | CC                              | TT              | 1946757283               |
| SNP_P4_22192_22565512 | NC_021161.1    | Ca_kabuli_chr02 | 22565512                | AA                              | TT              | 1946757286               |

| SNPs IDs              | Chromosome IDs | Chromosomes     | Physical positions (bp) | CDC Frontier (Reference genome) | (ILWC46 & LPNB) | NCBI SNPdb Accession IDs |
|-----------------------|----------------|-----------------|-------------------------|---------------------------------|-----------------|--------------------------|
| SNP_P4_22193_22579529 | NC_021161.1    | Ca_kabuli_chr02 | 22579529                | TT                              | AA              | 1946757288               |
| SNP_P4_22194_22584995 | NC_021161.1    | Ca_kabuli_chr02 | 22584995                | TT                              | CC              | 1946757291               |
| SNP_P4_22195_22585012 | NC_021161.1    | Ca_kabuli_chr02 | 22585012                | AA                              | GG              | 1946757299               |
| SNP_P4_22196_22585014 | NC_021161.1    | Ca_kabuli_chr02 | 22585014                | AA                              | GG              | 1946757301               |
| SNP_P4_22197_22585020 | NC_021161.1    | Ca_kabuli_chr02 | 22585020                | TT                              | AA              | 1946757303               |
| SNP_P4_22198_22585021 | NC_021161.1    | Ca_kabuli_chr02 | 22585021                | TT                              | AA              | 1946757311               |
| SNP_P4_22199_22585022 | NC_021161.1    | Ca_kabuli_chr02 | 22585022                | TT                              | AA              | 1946757314               |
| SNP_P4_22200_22585041 | NC_021161.1    | Ca_kabuli_chr02 | 22585041                | CC                              | AA              | 1946757321               |
| SNP_P4_22201_22585057 | NC_021161.1    | Ca_kabuli_chr02 | 22585057                | TT                              | CC              | 1946757324               |
| SNP_P4_22202_22585089 | NC_021161.1    | Ca_kabuli_chr02 | 22585089                | AA                              | GG              | 1946757326               |
| SNP_P4_22203_22585356 | NC_021161.1    | Ca_kabuli_chr02 | 22585356                | AA                              | GG              | 1946757335               |
| SNP_P4_22204_22585358 | NC_021161.1    | Ca_kabuli_chr02 | 22585358                | AA                              | GG              | 1946757337               |
| SNP_P4_22205_22585363 | NC_021161.1    | Ca_kabuli_chr02 | 22585363                | TT                              | CC              | 1946757346               |
| SNP_P4_22206_22585398 | NC_021161.1    | Ca_kabuli_chr02 | 22585398                | AA                              | GG              | 1946757354               |
| SNP_P4_22207_22590652 | NC_021161.1    | Ca_kabuli_chr02 | 22590652                | TT                              | CC              | 1946757357               |
| SNP_P4_22208_22594050 | NC_021161.1    | Ca_kabuli_chr02 | 22594050                | CC                              | TT              | 1946757359               |
| SNP_P4_22209_22594431 | NC_021161.1    | Ca_kabuli_chr02 | 22594431                | CC                              | TT              | 1946757361               |
| SNP_P4_22210_22594436 | NC_021161.1    | Ca_kabuli_chr02 | 22594436                | AA                              | GG              | 1946757363               |
| SNP_P4_22211_22594465 | NC_021161.1    | Ca_kabuli_chr02 | 22594465                | TT                              | CC              | 1946757365               |
| SNP_P4_22212_22599082 | NC_021161.1    | Ca_kabuli_chr02 | 22599082                | CC                              | TT              | 1946757367               |
| SNP_P4_22213_22602363 | NC_021161.1    | Ca_kabuli_chr02 | 22602363                | GG                              | AA              | 1946757369               |
| SNP_P4_22214_22608350 | NC_021161.1    | Ca_kabuli_chr02 | 22608350                | AA                              | GG              | 1946757371               |
| SNP_P4_22215_22608372 | NC_021161.1    | Ca_kabuli_chr02 | 22608372                | AA                              | GG              | 1946757373               |
| SNP_P4_22216_22608402 | NC_021161.1    | Ca_kabuli_chr02 | 22608402                | AA                              | GG              | 1946757375               |
| SNP_P4_22217_22608411 | NC_021161.1    | Ca_kabuli_chr02 | 22608411                | AA                              | GG              | 1946757377               |
| SNP_P4_22218_22608414 | NC_021161.1    | Ca_kabuli_chr02 | 22608414                | AA                              | GG              | 1946757379               |
| SNP_P4_22219_22608417 | NC_021161.1    | Ca_kabuli_chr02 | 22608417                | TT                              | CC              | 1946757381               |
| SNP_P4_22220_22608439 | NC_021161.1    | Ca_kabuli_chr02 | 22608439                | TT                              | CC              | 1946757383               |
| SNP_P4_22221_22643815 | NC_021161.1    | Ca_kabuli_chr02 | 22643815                | TT                              | AA              | 1946757385               |
| SNP_P4_22222_22643824 | NC_021161.1    | Ca_kabuli_chr02 | 22643824                | TT                              | AA              | 1946757387               |
| SNP_P4_22223_22643851 | NC_021161.1    | Ca_kabuli_chr02 | 22643851                | AA                              | GG              | 1946757389               |
| SNP_P4_22224_22643930 | NC_021161.1    | Ca_kabuli_chr02 | 22643930                | CC                              | TT              | 1946757391               |
| SNP_P4_22225_22643968 | NC_021161.1    | Ca_kabuli_chr02 | 22643968                | CC                              | TT              | 1946757394               |
| SNP_P4_22226_22643977 | NC_021161.1    | Ca_kabuli_chr02 | 22643977                | GG                              | TT              | 1946757396               |
| SNP_P4_22227_22643995 | NC_021161.1    | Ca_kabuli_chr02 | 22643995                | TT                              | CC              | 1946757398               |
| SNP_P4_22228_22643998 | NC_021161.1    | Ca_kabuli_chr02 | 22643998                | TT                              | CC              | 1946757400               |
| SNP_P4_22229_22644007 | NC_021161.1    | Ca_kabuli_chr02 | 22644007                | AA                              | TT              | 1946757402               |
| SNP_P4_22230_22644177 | NC_021161.1    | Ca_kabuli_chr02 | 22644177                | AA                              | GG              | 1946757404               |
| SNP_P4_22231_22644231 | NC_021161.1    | Ca_kabuli_chr02 | 22644231                | AA                              | GG              | 1946757406               |
| SNP_P4_22232_22644238 | NC_021161.1    | Ca_kabuli_chr02 | 22644238                | TT                              | GG              | 1946757408               |
| SNP_P4_22233_22644358 | NC_021161.1    | Ca_kabuli_chr02 | 22644358                | CC                              | TT              | 1946757410               |
| SNP_P4_22234_22644374 | NC_021161.1    | Ca_kabuli_chr02 | 22644374                | TT                              | CC              | 1946757412               |

| SNPs IDs              | Chromosome IDs | Chromosomes     | Physical positions (bp) | CDC Frontier (Reference genome) | (ILWC46 & LPNB) | NCBI SNPdb Accession IDs |
|-----------------------|----------------|-----------------|-------------------------|---------------------------------|-----------------|--------------------------|
| SNP_P4_22235_22644407 | NC_021161.1    | Ca_kabuli_chr02 | 22644407                | TT                              | AA              | 1946757414               |
| SNP_P4_22236_22644431 | NC_021161.1    | Ca_kabuli_chr02 | 22644431                | AA                              | GG              | 1946757416               |
| SNP_P4_22237_22650562 | NC_021161.1    | Ca_kabuli_chr02 | 22650562                | CC                              | TT              | 1946757418               |
| SNP_P4_22238_22650687 | NC_021161.1    | Ca_kabuli_chr02 | 22650687                | AA                              | GG              | 1946757420               |
| SNP_P4_22239_22650798 | NC_021161.1    | Ca_kabuli_chr02 | 22650798                | AA                              | GG              | 1946757422               |
| SNP_P4_22240_22650848 | NC_021161.1    | Ca_kabuli_chr02 | 22650848                | CC                              | TT              | 1946757424               |
| SNP_P4_22241_22651501 | NC_021161.1    | Ca_kabuli_chr02 | 22651501                | CC                              | AA              | 1946757426               |
| SNP_P4_22242_22651843 | NC_021161.1    | Ca_kabuli_chr02 | 22651843                | TT                              | CC              | 1946757428               |
| SNP_P4_22243_22651968 | NC_021161.1    | Ca_kabuli_chr02 | 22651968                | TT                              | GG              | 1946757430               |
| SNP_P4_22244_22651977 | NC_021161.1    | Ca_kabuli_chr02 | 22651977                | AA                              | CC              | 1946757443               |
| SNP_P4_22245_22652010 | NC_021161.1    | Ca_kabuli_chr02 | 22652010                | CC                              | TT              | 1946757454               |
| SNP_P4_22246_22652039 | NC_021161.1    | Ca_kabuli_chr02 | 22652039                | GG                              | TT              | 1946757461               |
| SNP_P4_22247_22665556 | NC_021161.1    | Ca_kabuli_chr02 | 22665556                | GG                              | AA              | 1946757467               |
| SNP_P4_22248_22667431 | NC_021161.1    | Ca_kabuli_chr02 | 22667431                | CC                              | TT              | 1946757471               |
| SNP_P4_22249_22667693 | NC_021161.1    | Ca_kabuli_chr02 | 22667693                | TT                              | AA              | 1946757479               |
| SNP_P4_22250_22667696 | NC_021161.1    | Ca_kabuli_chr02 | 22667696                | TT                              | CC              | 1946757486               |
| SNP_P4_22251_22667707 | NC_021161.1    | Ca_kabuli_chr02 | 22667707                | GG                              | TT              | 1946757492               |
| SNP_P4_22252_22667756 | NC_021161.1    | Ca_kabuli_chr02 | 22667756                | TT                              | CC              | 1946757501               |
| SNP_P4_22253_22667783 | NC_021161.1    | Ca_kabuli_chr02 | 22667783                | TT                              | CC              | 1946757506               |
| SNP_P4_22254_22668068 | NC_021161.1    | Ca_kabuli_chr02 | 22668068                | TT                              | CC              | 1946757508               |
| SNP_P4_22255_22676979 | NC_021161.1    | Ca_kabuli_chr02 | 22676979                | CC                              | TT              | 1946757514               |
| SNP_P4_22256_22681889 | NC_021161.1    | Ca_kabuli_chr02 | 22681889                | GG                              | TT              | 1946757520               |
| SNP_P4_22257_22681899 | NC_021161.1    | Ca_kabuli_chr02 | 22681899                | GG                              | AA              | 1946757523               |
| SNP_P4_22258_22748904 | NC_021161.1    | Ca_kabuli_chr02 | 22748904                | GG                              | TT              | 1946757525               |
| SNP_P4_22259_22749304 | NC_021161.1    | Ca_kabuli_chr02 | 22749304                | CC                              | TT              | 1946757530               |
| SNP_P4_22260_22749311 | NC_021161.1    | Ca_kabuli_chr02 | 22749311                | CC                              | AA              | 1946757532               |
| SNP_P4_22261_22749314 | NC_021161.1    | Ca_kabuli_chr02 | 22749314                | GG                              | AA              | 1946757540               |
| SNP_P4_22262_22749317 | NC_021161.1    | Ca_kabuli_chr02 | 22749317                | GG                              | AA              | 1946757543               |
| SNP_P4_22263_22749340 | NC_021161.1    | Ca_kabuli_chr02 | 22749340                | GG                              | AA              | 1946757545               |
| SNP_P4_22264_22749381 | NC_021161.1    | Ca_kabuli_chr02 | 22749381                | AA                              | GG              | 1946757554               |
| SNP_P4_22265_22749410 | NC_021161.1    | Ca_kabuli_chr02 | 22749410                | TT                              | CC              | 1946757556               |
| SNP_P4_22266_22749428 | NC_021161.1    | Ca_kabuli_chr02 | 22749428                | GG                              | AA              | 1946757560               |
| SNP_P4_22267_22749453 | NC_021161.1    | Ca_kabuli_chr02 | 22749453                | TT                              | GG              | 1946757562               |
| SNP_P4_22268_22749469 | NC_021161.1    | Ca_kabuli_chr02 | 22749469                | TT                              | GG              | 1946757564               |
| SNP_P4_22269_22749528 | NC_021161.1    | Ca_kabuli_chr02 | 22749528                | GG                              | AA              | 1946757566               |
| SNP_P4_22270_22749546 | NC_021161.1    | Ca_kabuli_chr02 | 22749546                | GG                              | AA              | 1946757568               |
| SNP_P4_22271_22749566 | NC_021161.1    | Ca_kabuli_chr02 | 22749566                | TT                              | AA              | 1946757570               |
| SNP_P4_22272_22749568 | NC_021161.1    | Ca_kabuli_chr02 | 22749568                | GG                              | AA              | 1946757572               |
| SNP_P4_22273_22749984 | NC_021161.1    | Ca_kabuli_chr02 | 22749984                | AA                              | GG              | 1946757574               |
| SNP_P4_22274_22750344 | NC_021161.1    | Ca_kabuli_chr02 | 22750344                | GG                              | AA              | 1946757576               |
| SNP_P4_22275_22750367 | NC_021161.1    | Ca_kabuli_chr02 | 22750367                | CC                              | TT              | 1946757579               |
| SNP_P4_22276_22750462 | NC_021161.1    | Ca_kabuli_chr02 | 22750462                | AA                              | GG              | 1946757581               |

| SNPs IDs              | Chromosome IDs | Chromosomes     | Physical positions (bp) | CDC Frontier (Reference genome) | (ILWC46 & LPNB) | NCBI SNPdb Accession IDs |
|-----------------------|----------------|-----------------|-------------------------|---------------------------------|-----------------|--------------------------|
| SNP_P4_22277_22750493 | NC_021161.1    | Ca_kabuli_chr02 | 22750493                | AA                              | GG              | 1946757583               |
| SNP_P4_22278_22755943 | NC_021161.1    | Ca_kabuli_chr02 | 22755943                | TT                              | AA              | 1946757585               |
| SNP_P4_22279_22778081 | NC_021161.1    | Ca_kabuli_chr02 | 22778081                | AA                              | GG              | 1946757587               |
| SNP_P4_22280_22778142 | NC_021161.1    | Ca_kabuli_chr02 | 22778142                | GG                              | TT              | 1946757589               |
| SNP_P4_22281_22778157 | NC_021161.1    | Ca_kabuli_chr02 | 22778157                | GG                              | TT              | 1946757591               |
| SNP_P4_22282_22778159 | NC_021161.1    | Ca_kabuli_chr02 | 22778159                | AA                              | GG              | 1946757594               |
| SNP_P4_22283_22778400 | NC_021161.1    | Ca_kabuli_chr02 | 22778400                | AA                              | GG              | 1946757596               |
| SNP_P4_22284_22778414 | NC_021161.1    | Ca_kabuli_chr02 | 22778414                | TT                              | CC              | 1946757598               |
| SNP_P4_22285_22778472 | NC_021161.1    | Ca_kabuli_chr02 | 22778472                | AA                              | GG              | 1946757600               |
| SNP_P4_22286_22779186 | NC_021161.1    | Ca_kabuli_chr02 | 22779186                | AA                              | GG              | 1946757602               |
| SNP_P4_22287_22779205 | NC_021161.1    | Ca_kabuli_chr02 | 22779205                | TT                              | CC              | 1946757604               |
| SNP_P4_22288_22779399 | NC_021161.1    | Ca_kabuli_chr02 | 22779399                | TT                              | CC              | 1946757606               |
| SNP_P4_22289_22779420 | NC_021161.1    | Ca_kabuli_chr02 | 22779420                | GG                              | AA              | 1946757608               |
| SNP_P4_22290_22779437 | NC_021161.1    | Ca_kabuli_chr02 | 22779437                | GG                              | AA              | 1946757610               |
| SNP_P4_22291_22779491 | NC_021161.1    | Ca_kabuli_chr02 | 22779491                | AA                              | CC              | 1946757612               |
| SNP_P4_22292_22779589 | NC_021161.1    | Ca_kabuli_chr02 | 22779589                | TT                              | CC              | 1946757614               |
| SNP_P4_22293_22779591 | NC_021161.1    | Ca_kabuli_chr02 | 22779591                | TT                              | AA              | 1946757617               |
| SNP_P4_22294_22779592 | NC_021161.1    | Ca_kabuli_chr02 | 22779592                | GG                              | AA              | 1946757619               |
| SNP_P4_22295_22779808 | NC_021161.1    | Ca_kabuli_chr02 | 22779808                | GG                              | TT              | 1946757622               |
| SNP_P4_22296_22779837 | NC_021161.1    | Ca_kabuli_chr02 | 22779837                | CC                              | AA              | 1946757624               |
| SNP_P4_22297_22779960 | NC_021161.1    | Ca_kabuli_chr02 | 22779960                | AA                              | TT              | 1946757626               |
| SNP_P4_22298_22780244 | NC_021161.1    | Ca_kabuli_chr02 | 22780244                | AA                              | GG              | 1946757628               |
| SNP_P4_22299_22782712 | NC_021161.1    | Ca_kabuli_chr02 | 22782712                | TT                              | AA              | 1946757630               |
| SNP_P4_22300_22788880 | NC_021161.1    | Ca_kabuli_chr02 | 22788880                | CC                              | TT              | 1946757632               |
| SNP_P4_22301_22793884 | NC_021161.1    | Ca_kabuli_chr02 | 22793884                | GG                              | AA              | 1946757636               |
| SNP_P4_22302_22805946 | NC_021161.1    | Ca_kabuli_chr02 | 22805946                | TT                              | AA              | 1946757639               |
| SNP_P4_22303_22805949 | NC_021161.1    | Ca_kabuli_chr02 | 22805949                | AA                              | GG              | 1946757642               |
| SNP_P4_22304_22812381 | NC_021161.1    | Ca_kabuli_chr02 | 22812381                | TT                              | CC              | 1946757645               |
| SNP_P4_22305_22812419 | NC_021161.1    | Ca_kabuli_chr02 | 22812419                | CC                              | TT              | 1946757648               |
| SNP_P4_22306_22812504 | NC_021161.1    | Ca_kabuli_chr02 | 22812504                | TT                              | CC              | 1946757650               |
| SNP_P4_22308_22812698 | NC_021161.1    | Ca_kabuli_chr02 | 22812698                | GG                              | AA              | 1946757653               |
| SNP_P4_22309_22812705 | NC_021161.1    | Ca_kabuli_chr02 | 22812705                | CC                              | AA              | 1946757657               |
| SNP_P4_22310_22827651 | NC_021161.1    | Ca_kabuli_chr02 | 22827651                | TT                              | CC              | 1946757659               |
| SNP_P4_22311_22828319 | NC_021161.1    | Ca_kabuli_chr02 | 22828319                | CC                              | TT              | 1946757662               |
| SNP_P4_22312_22864863 | NC_021161.1    | Ca_kabuli_chr02 | 22864863                | AA                              | GG              | 1946757665               |
| SNP_P4_22313_22897048 | NC_021161.1    | Ca_kabuli_chr02 | 22897048                | GG                              | AA              | 1946757668               |
| SNP_P4_22314_22897248 | NC_021161.1    | Ca_kabuli_chr02 | 22897248                | AA                              | GG              | 1946757672               |
| SNP_P4_22315_22911370 | NC_021161.1    | Ca_kabuli_chr02 | 22911370                | CC                              | TT              | 1946757675               |
| SNP_P4_22316_22915278 | NC_021161.1    | Ca_kabuli_chr02 | 22915278                | TT                              | CC              | 1946757677               |
| SNP_P4_22318_22952400 | NC_021161.1    | Ca_kabuli_chr02 | 22952400                | AA                              | GG              | 1946757680               |
| SNP_P4_22319_22959590 | NC_021161.1    | Ca_kabuli_chr02 | 22959590                | AA                              | GG              | 1946757683               |
| SNP_P4_22320_22959972 | NC_021161.1    | Ca_kabuli_chr02 | 22959972                | AA                              | GG              | 1946757688               |

| SNPs IDs              | Chromosome IDs | Chromosomes     | Physical positions (bp) | CDC Frontier (Reference genome) | (ILWC46 & LPNB) | NCBI SNPdb Accession IDs |
|-----------------------|----------------|-----------------|-------------------------|---------------------------------|-----------------|--------------------------|
| SNP_P4_22321_22959973 | NC_021161.1    | Ca_kabuli_chr02 | 22959973                | TT                              | AA              | 1946757690               |
| SNP_P4_22322_23017642 | NC_021161.1    | Ca_kabuli_chr02 | 23017642                | AA                              | GG              | 1946757693               |
| SNP_P4_22323_23017663 | NC_021161.1    | Ca_kabuli_chr02 | 23017663                | CC                              | GG              | 1946757697               |
| SNP_P4_22324_23023990 | NC_021161.1    | Ca_kabuli_chr02 | 23023990                | AA                              | CC              | 1946757699               |
| SNP_P4_22326_23041216 | NC_021161.1    | Ca_kabuli_chr02 | 23041216                | GG                              | AA              | 1946757703               |
| SNP_P4_22327_23041233 | NC_021161.1    | Ca_kabuli_chr02 | 23041233                | CC                              | AA              | 1946757705               |
| SNP_P4_22328_23041249 | NC_021161.1    | Ca_kabuli_chr02 | 23041249                | GG                              | AA              | 1946757709               |
| SNP_P4_22329_23041316 | NC_021161.1    | Ca_kabuli_chr02 | 23041316                | AA                              | TT              | 1946757712               |
| SNP_P4_22330_23041322 | NC_021161.1    | Ca_kabuli_chr02 | 23041322                | CC                              | TT              | 1946757714               |
| SNP_P4_22331_23041325 | NC_021161.1    | Ca_kabuli_chr02 | 23041325                | AA                              | GG              | 1946757717               |
| SNP_P4_22332_23041337 | NC_021161.1    | Ca_kabuli_chr02 | 23041337                | CC                              | TT              | 1946757721               |
| SNP_P4_22333_23041642 | NC_021161.1    | Ca_kabuli_chr02 | 23041642                | GG                              | TT              | 1946757723               |
| SNP_P4_22334_23041703 | NC_021161.1    | Ca_kabuli_chr02 | 23041703                | GG                              | AA              | 1946757725               |
| SNP_P4_22335_23044207 | NC_021161.1    | Ca_kabuli_chr02 | 23044207                | CC                              | TT              | 1946757727               |
| SNP_P4_22337_23066105 | NC_021161.1    | Ca_kabuli_chr02 | 23066105                | GG                              | AA              | 1946757729               |
| SNP_P4_22338_23067595 | NC_021161.1    | Ca_kabuli_chr02 | 23067595                | CC                              | TT              | 1946757731               |
| SNP_P4_22339_23067699 | NC_021161.1    | Ca_kabuli_chr02 | 23067699                | CC                              | TT              | 1946757733               |
| SNP_P4_22340_23067708 | NC_021161.1    | Ca_kabuli_chr02 | 23067708                | AA                              | TT              | 1946757735               |
| SNP_P4_22341_23068006 | NC_021161.1    | Ca_kabuli_chr02 | 23068006                | TT                              | CC              | 1946757737               |
| SNP_P4_22342_23146603 | NC_021161.1    | Ca_kabuli_chr02 | 23146603                | CC                              | TT              | 1946757739               |
| SNP_P4_22343_23154234 | NC_021161.1    | Ca_kabuli_chr02 | 23154234                | AA                              | TT              | 1946757741               |
| SNP_P4_22344_23155456 | NC_021161.1    | Ca_kabuli_chr02 | 23155456                | GG                              | AA              | 1946757743               |
| SNP_P4_22345_23155468 | NC_021161.1    | Ca_kabuli_chr02 | 23155468                | GG                              | AA              | 1946757745               |
| SNP_P4_22346_23155477 | NC_021161.1    | Ca_kabuli_chr02 | 23155477                | CC                              | TT              | 1946757746               |
| SNP_P4_22347_23155532 | NC_021161.1    | Ca_kabuli_chr02 | 23155532                | AA                              | GG              | 1946757748               |
| SNP_P4_22348_23155564 | NC_021161.1    | Ca_kabuli_chr02 | 23155564                | GG                              | TT              | 1946757750               |
| SNP_P4_22349_23155573 | NC_021161.1    | Ca_kabuli_chr02 | 23155573                | AA                              | TT              | 1946757752               |
| SNP_P4_22350_23155588 | NC_021161.1    | Ca_kabuli_chr02 | 23155588                | AA                              | TT              | 1946757754               |
| SNP_P4_22351_23155919 | NC_021161.1    | Ca_kabuli_chr02 | 23155919                | CC                              | TT              | 1946757757               |
| SNP_P4_22352_23192740 | NC_021161.1    | Ca_kabuli_chr02 | 23192740                | AA                              | CC              | 1946757771               |
| SNP_P4_22354_23192817 | NC_021161.1    | Ca_kabuli_chr02 | 23192817                | TT                              | CC              | 1946757779               |
| SNP_P4_22355_23192851 | NC_021161.1    | Ca_kabuli_chr02 | 23192851                | TT                              | CC              | 1946757785               |
| SNP_P4_22356_23192858 | NC_021161.1    | Ca_kabuli_chr02 | 23192858                | TT                              | CC              | 1946757791               |
| SNP_P4_22357_23192938 | NC_021161.1    | Ca_kabuli_chr02 | 23192938                | CC                              | TT              | 1946757798               |
| SNP_P4_22358_23192976 | NC_021161.1    | Ca_kabuli_chr02 | 23192976                | AA                              | GG              | 1946757804               |
| SNP_P4_22359_23193015 | NC_021161.1    | Ca_kabuli_chr02 | 23193015                | AA                              | GG              | 1946757806               |
| SNP_P4_22360_23193053 | NC_021161.1    | Ca_kabuli_chr02 | 23193053                | TT                              | AA              | 1946757808               |
| SNP_P4_22362_23199590 | NC_021161.1    | Ca_kabuli_chr02 | 23199590                | TT                              | AA              | 1946757818               |
| SNP_P4_22363_23199868 | NC_021161.1    | Ca_kabuli_chr02 | 23199868                | GG                              | CC              | 1946757825               |
| SNP_P4_22364_23213504 | NC_021161.1    | Ca_kabuli_chr02 | 23213504                | TT                              | CC              | 1946757830               |
| SNP_P4_22366_23251986 | NC_021161.1    | Ca_kabuli_chr02 | 23251986                | CC                              | TT              | 1946757838               |
| SNP_P4_22367_23251990 | NC_021161.1    | Ca_kabuli_chr02 | 23251990                | AA                              | CC              | 1946757843               |

| SNPs IDs              | Chromosome IDs | Chromosomes     | Physical positions (bp) | CDC Frontier (Reference genome) | (ILWC46 & LPNB) | NCBI SNPdb Accession IDs |
|-----------------------|----------------|-----------------|-------------------------|---------------------------------|-----------------|--------------------------|
| SNP_P4_22368_23253132 | NC_021161.1    | Ca_kabuli_chr02 | 23253132                | CC                              | GG              | 1946757852               |
| SNP_P4_22369_23253133 | NC_021161.1    | Ca_kabuli_chr02 | 23253133                | TT                              | CC              | 1946757854               |
| SNP_P4_22370_23253135 | NC_021161.1    | Ca_kabuli_chr02 | 23253135                | CC                              | TT              | 1946757856               |
| SNP_P4_22371_23253178 | NC_021161.1    | Ca_kabuli_chr02 | 23253178                | GG                              | TT              | 1946757864               |
| SNP_P4_22372_23256151 | NC_021161.1    | Ca_kabuli_chr02 | 23256151                | AA                              | GG              | 1946757867               |
| SNP_P4_22373_23260170 | NC_021161.1    | Ca_kabuli_chr02 | 23260170                | GG                              | TT              | 1946757875               |
| SNP_P4_22374_23356695 | NC_021161.1    | Ca_kabuli_chr02 | 23356695                | AA                              | GG              | 1946757877               |
| SNP_P4_22375_23356713 | NC_021161.1    | Ca_kabuli_chr02 | 23356713                | AA                              | GG              | 1946757884               |
| SNP_P4_22376_23356734 | NC_021161.1    | Ca_kabuli_chr02 | 23356734                | AA                              | CC              | 1946757888               |
| SNP_P4_22378_23361384 | NC_021161.1    | Ca_kabuli_chr02 | 23361384                | AA                              | GG              | 1946757892               |
| SNP_P4_22379_23362323 | NC_021161.1    | Ca_kabuli_chr02 | 23362323                | CC                              | TT              | 1946757894               |
| SNP_P4_22380_23362335 | NC_021161.1    | Ca_kabuli_chr02 | 23362335                | TT                              | CC              | 1946757896               |
| SNP_P4_22381_23362376 | NC_021161.1    | Ca_kabuli_chr02 | 23362376                | AA                              | GG              | 1946757898               |
| SNP_P4_22382_23362429 | NC_021161.1    | Ca_kabuli_chr02 | 23362429                | AA                              | GG              | 1946757900               |
| SNP_P4_22383_23362538 | NC_021161.1    | Ca_kabuli_chr02 | 23362538                | CC                              | GG              | 1946757902               |
| SNP_P4_22384_23362644 | NC_021161.1    | Ca_kabuli_chr02 | 23362644                | CC                              | GG              | 1946757904               |
| SNP_P4_22385_23362694 | NC_021161.1    | Ca_kabuli_chr02 | 23362694                | TT                              | CC              | 1946757906               |
| SNP_P4_22386_23362695 | NC_021161.1    | Ca_kabuli_chr02 | 23362695                | AA                              | CC              | 1946757908               |
| SNP_P4_22387_23371276 | NC_021161.1    | Ca_kabuli_chr02 | 23371276                | CC                              | TT              | 1946757910               |
| SNP_P4_22388_23371303 | NC_021161.1    | Ca_kabuli_chr02 | 23371303                | GG                              | CC              | 1946757912               |
| SNP_P4_22389_23371382 | NC_021161.1    | Ca_kabuli_chr02 | 23371382                | CC                              | TT              | 1946757914               |
| SNP_P4_22390_23371404 | NC_021161.1    | Ca_kabuli_chr02 | 23371404                | AA                              | GG              | 1946757916               |
| SNP_P4_22391_23371455 | NC_021161.1    | Ca_kabuli_chr02 | 23371455                | TT                              | CC              | 1946757918               |
| SNP_P4_22392_23371798 | NC_021161.1    | Ca_kabuli_chr02 | 23371798                | AA                              | GG              | 1946757920               |
| SNP_P4_22393_23371861 | NC_021161.1    | Ca_kabuli_chr02 | 23371861                | CC                              | TT              | 1946757922               |
| SNP_P4_22394_23400975 | NC_021161.1    | Ca_kabuli_chr02 | 23400975                | GG                              | AA              | 1946757924               |
| SNP_P4_22395_23400995 | NC_021161.1    | Ca_kabuli_chr02 | 23400995                | TT                              | AA              | 1946757926               |
| SNP_P4_22396_23401090 | NC_021161.1    | Ca_kabuli_chr02 | 23401090                | TT                              | GG              | 1946757928               |
| SNP_P4_22397_23447774 | NC_021161.1    | Ca_kabuli_chr02 | 23447774                | GG                              | CC              | 1946757930               |
| SNP_P4_22398_23447788 | NC_021161.1    | Ca_kabuli_chr02 | 23447788                | GG                              | AA              | 1946757932               |
| SNP_P4_22402_23513867 | NC_021161.1    | Ca_kabuli_chr02 | 23513867                | GG                              | AA              | 1946757934               |
| SNP_P4_22403_23514401 | NC_021161.1    | Ca_kabuli_chr02 | 23514401                | TT                              | AA              | 1946757936               |
| SNP_P4_22404_23544950 | NC_021161.1    | Ca_kabuli_chr02 | 23544950                | TT                              | CC              | 1946757938               |
| SNP_P4_22405_23545017 | NC_021161.1    | Ca_kabuli_chr02 | 23545017                | TT                              | CC              | 1946757940               |
| SNP_P4_22406_23545023 | NC_021161.1    | Ca_kabuli_chr02 | 23545023                | AA                              | GG              | 1946757942               |
| SNP_P4_22407_23545059 | NC_021161.1    | Ca_kabuli_chr02 | 23545059                | TT                              | AA              | 1946757944               |
| SNP_P4_22408_23545121 | NC_021161.1    | Ca_kabuli_chr02 | 23545121                | AA                              | CC              | 1946757946               |
| SNP_P4_22409_23545134 | NC_021161.1    | Ca_kabuli_chr02 | 23545134                | TT                              | CC              | 1946757948               |
| SNP_P4_22410_23545143 | NC_021161.1    | Ca_kabuli_chr02 | 23545143                | AA                              | CC              | 1946757950               |
| SNP_P4_22411_23545147 | NC_021161.1    | Ca_kabuli_chr02 | 23545147                | GG                              | AA              | 1946757952               |
| SNP_P4_22412_23545286 | NC_021161.1    | Ca_kabuli_chr02 | 23545286                | TT                              | AA              | 1946757954               |
| SNP_P4_22413_23547629 | NC_021161.1    | Ca_kabuli_chr02 | 23547629                | AA                              | TT              | 1946757957               |



| SNPs IDs              | Chromosome IDs | Chromosomes     | Physical positions (bp) | CDC Frontier (Reference genome) | (ILWC46 & LPNB) | NCBI SNPdb Accession IDs |
|-----------------------|----------------|-----------------|-------------------------|---------------------------------|-----------------|--------------------------|
| SNP_P4_22414_23572941 | NC_021161.1    | Ca_kabuli_chr02 | 23572941                | GG                              | AA              | 1946757959               |
| SNP_P4_22415_23572983 | NC_021161.1    | Ca_kabuli_chr02 | 23572983                | AA                              | GG              | 1946757961               |
| SNP_P4_22416_23573003 | NC_021161.1    | Ca_kabuli_chr02 | 23573003                | AA                              | GG              | 1946757975               |
| SNP_P4_22417_23579867 | NC_021161.1    | Ca_kabuli_chr02 | 23579867                | TT                              | GG              | 1946757981               |
| SNP_P4_22418_23615068 | NC_021161.1    | Ca_kabuli_chr02 | 23615068                | AA                              | GG              | 1946757990               |
| SNP_P4_22419_23624232 | NC_021161.1    | Ca_kabuli_chr02 | 23624232                | TT                              | CC              | 1946757995               |
| SNP_P4_22420_23624316 | NC_021161.1    | Ca_kabuli_chr02 | 23624316                | GG                              | AA              | 1946758003               |
| SNP_P4_22421_23624340 | NC_021161.1    | Ca_kabuli_chr02 | 23624340                | TT                              | AA              | 1946758009               |
| SNP_P4_22422_23624347 | NC_021161.1    | Ca_kabuli_chr02 | 23624347                | GG                              | TT              | 1946758011               |
| SNP_P4_22423_23624352 | NC_021161.1    | Ca_kabuli_chr02 | 23624352                | CC                              | TT              | 1946758014               |
| SNP_P4_22424_23624369 | NC_021161.1    | Ca_kabuli_chr02 | 23624369                | TT                              | AA              | 1946758022               |
| SNP_P4_22425_23624373 | NC_021161.1    | Ca_kabuli_chr02 | 23624373                | TT                              | GG              | 1946758031               |
| SNP_P4_22426_23624376 | NC_021161.1    | Ca_kabuli_chr02 | 23624376                | AA                              | GG              | 1946758035               |
| SNP_P4_22427_23624385 | NC_021161.1    | Ca_kabuli_chr02 | 23624385                | AA                              | GG              | 1946758044               |
| SNP_P4_22428_23624388 | NC_021161.1    | Ca_kabuli_chr02 | 23624388                | GG                              | CC              | 1946758049               |
| SNP_P4_22429_23624393 | NC_021161.1    | Ca_kabuli_chr02 | 23624393                | AA                              | GG              | 1946758051               |
| SNP_P4_22430_23624400 | NC_021161.1    | Ca_kabuli_chr02 | 23624400                | TT                              | CC              | 1946758053               |
| SNP_P4_22431_23624409 | NC_021161.1    | Ca_kabuli_chr02 | 23624409                | AA                              | GG              | 1946758055               |
| SNP_P4_22432_23624519 | NC_021161.1    | Ca_kabuli_chr02 | 23624519                | AA                              | TT              | 1946758057               |
| SNP_P4_22433_23624536 | NC_021161.1    | Ca_kabuli_chr02 | 23624536                | CC                              | TT              | 1946758065               |
| SNP_P4_22434_23624570 | NC_021161.1    | Ca_kabuli_chr02 | 23624570                | GG                              | AA              | 1946758068               |
| SNP_P4_22435_23626627 | NC_021161.1    | Ca_kabuli_chr02 | 23626627                | TT                              | AA              | 1946758070               |
| SNP_P4_22436_23627204 | NC_021161.1    | Ca_kabuli_chr02 | 23627204                | TT                              | CC              | 1946758072               |
| SNP_P4_22437_23627207 | NC_021161.1    | Ca_kabuli_chr02 | 23627207                | TT                              | CC              | 1946758074               |
| SNP_P4_22438_23627241 | NC_021161.1    | Ca_kabuli_chr02 | 23627241                | AA                              | CC              | 1946758076               |
| SNP_P4_22439_23627538 | NC_021161.1    | Ca_kabuli_chr02 | 23627538                | AA                              | GG              | 1946758079               |
| SNP_P4_22440_23627568 | NC_021161.1    | Ca_kabuli_chr02 | 23627568                | CC                              | TT              | 1946758081               |
| SNP_P4_22441_23627644 | NC_021161.1    | Ca_kabuli_chr02 | 23627644                | CC                              | TT              | 1946758083               |
| SNP_P4_22442_23627645 | NC_021161.1    | Ca_kabuli_chr02 | 23627645                | AA                              | GG              | 1946758085               |
| SNP_P4_22443_23628025 | NC_021161.1    | Ca_kabuli_chr02 | 23628025                | AA                              | TT              | 1946758087               |
| SNP_P4_22444_23695459 | NC_021161.1    | Ca_kabuli_chr02 | 23695459                | TT                              | CC              | 1946758089               |
| SNP_P4_22445_23695520 | NC_021161.1    | Ca_kabuli_chr02 | 23695520                | AA                              | CC              | 1946758091               |
| SNP_P4_22446_23695521 | NC_021161.1    | Ca_kabuli_chr02 | 23695521                | GG                              | AA              | 1946758093               |
| SNP_P4_22447_23695552 | NC_021161.1    | Ca_kabuli_chr02 | 23695552                | TT                              | CC              | 1946758096               |
| SNP_P4_22448_23695671 | NC_021161.1    | Ca_kabuli_chr02 | 23695671                | AA                              | CC              | 1946758098               |
| SNP_P4_22450_23753103 | NC_021161.1    | Ca_kabuli_chr02 | 23753103                | CC                              | TT              | 1946758100               |
| SNP_P4_22451_23760725 | NC_021161.1    | Ca_kabuli_chr02 | 23760725                | CC                              | TT              | 1946758102               |
| SNP_P4_22452_23760728 | NC_021161.1    | Ca_kabuli_chr02 | 23760728                | AA                              | TT              | 1946758104               |
| SNP_P4_22453_23760738 | NC_021161.1    | Ca_kabuli_chr02 | 23760738                | CC                              | TT              | 1946758106               |
| SNP_P4_22454_23760742 | NC_021161.1    | Ca_kabuli_chr02 | 23760742                | CC                              | TT              | 1946758109               |
| SNP_P4_22455_23761677 | NC_021161.1    | Ca_kabuli_chr02 | 23761677                | AA                              | GG              | 1946758111               |
| SNP_P4_22456_23765910 | NC_021161.1    | Ca_kabuli_chr02 | 23765910                | TT                              | AA              | 1946758113               |

| SNPs IDs              | Chromosome IDs | Chromosomes     | Physical positions (bp) | CDC Frontier (Reference genome) | (ILWC46 & LPNB) | NCBI SNPdb Accession IDs |
|-----------------------|----------------|-----------------|-------------------------|---------------------------------|-----------------|--------------------------|
| SNP_P4_22457_23766083 | NC_021161.1    | Ca_kabuli_chr02 | 23766083                | CC                              | TT              | 1946758115               |
| SNP_P4_22458_23766120 | NC_021161.1    | Ca_kabuli_chr02 | 23766120                | AA                              | TT              | 1946758117               |
| SNP_P4_22459_23766130 | NC_021161.1    | Ca_kabuli_chr02 | 23766130                | AA                              | CC              | 1946758119               |
| SNP_P4_22460_23766146 | NC_021161.1    | Ca_kabuli_chr02 | 23766146                | AA                              | TT              | 1946758121               |
| SNP_P4_22461_23766199 | NC_021161.1    | Ca_kabuli_chr02 | 23766199                | CC                              | AA              | 1946758123               |
| SNP_P4_22462_23776182 | NC_021161.1    | Ca_kabuli_chr02 | 23776182                | AA                              | TT              | 1946758125               |
| SNP_P4_22463_23785515 | NC_021161.1    | Ca_kabuli_chr02 | 23785515                | TT                              | CC              | 1946758127               |
| SNP_P4_22464_23785522 | NC_021161.1    | Ca_kabuli_chr02 | 23785522                | TT                              | CC              | 1946758129               |
| SNP_P4_22466_23794272 | NC_021161.1    | Ca_kabuli_chr02 | 23794272                | TT                              | CC              | 1946758131               |
| SNP_P4_22467_23845451 | NC_021161.1    | Ca_kabuli_chr02 | 23845451                | GG                              | TT              | 1946758133               |
| SNP_P4_22468_23886665 | NC_021161.1    | Ca_kabuli_chr02 | 23886665                | AA                              | GG              | 1946758135               |
| SNP_P4_22470_23895747 | NC_021161.1    | Ca_kabuli_chr02 | 23895747                | GG                              | AA              | 1946758137               |
| SNP_P4_22471_23897840 | NC_021161.1    | Ca_kabuli_chr02 | 23897840                | TT                              | GG              | 1946758139               |
| SNP_P4_22472_23906069 | NC_021161.1    | Ca_kabuli_chr02 | 23906069                | TT                              | AA              | 1946758141               |
| SNP_P4_22473_23910913 | NC_021161.1    | Ca_kabuli_chr02 | 23910913                | CC                              | AA              | 1946758143               |
| SNP_P4_22474_23911358 | NC_021161.1    | Ca_kabuli_chr02 | 23911358                | CC                              | TT              | 1946758145               |
| SNP_P4_22475_23912054 | NC_021161.1    | Ca_kabuli_chr02 | 23912054                | AA                              | CC              | 1946758147               |
| SNP_P4_22476_23912417 | NC_021161.1    | Ca_kabuli_chr02 | 23912417                | TT                              | CC              | 1946758149               |
| SNP_P4_22477_23912432 | NC_021161.1    | Ca_kabuli_chr02 | 23912432                | CC                              | TT              | 1946758151               |
| SNP_P4_22478_23912510 | NC_021161.1    | Ca_kabuli_chr02 | 23912510                | AA                              | GG              | 1946758153               |
| SNP_P4_22479_23913523 | NC_021161.1    | Ca_kabuli_chr02 | 23913523                | TT                              | CC              | 1946758155               |
| SNP_P4_22480_23913545 | NC_021161.1    | Ca_kabuli_chr02 | 23913545                | CC                              | TT              | 1946758157               |
| SNP_P4_22481_23913682 | NC_021161.1    | Ca_kabuli_chr02 | 23913682                | TT                              | CC              | 1946758159               |
| SNP_P4_22482_23925718 | NC_021161.1    | Ca_kabuli_chr02 | 23925718                | AA                              | CC              | 1946758161               |
| SNP_P4_22483_23925725 | NC_021161.1    | Ca_kabuli_chr02 | 23925725                | CC                              | TT              | 1946758163               |
| SNP_P4_22484_23925946 | NC_021161.1    | Ca_kabuli_chr02 | 23925946                | CC                              | TT              | 1946758164               |
| SNP_P4_22485_23926393 | NC_021161.1    | Ca_kabuli_chr02 | 23926393                | GG                              | AA              | 1946758166               |
| SNP_P4_22486_23926501 | NC_021161.1    | Ca_kabuli_chr02 | 23926501                | GG                              | CC              | 1946758168               |
| SNP_P4_22487_23926521 | NC_021161.1    | Ca_kabuli_chr02 | 23926521                | GG                              | AA              | 1946758170               |
| SNP_P4_22488_23926543 | NC_021161.1    | Ca_kabuli_chr02 | 23926543                | AA                              | TT              | 1946758172               |
| SNP_P4_22489_23926769 | NC_021161.1    | Ca_kabuli_chr02 | 23926769                | AA                              | GG              | 1946758174               |
| SNP_P4_22490_23926813 | NC_021161.1    | Ca_kabuli_chr02 | 23926813                | TT                              | GG              | 1946758176               |
| SNP_P4_22491_23926996 | NC_021161.1    | Ca_kabuli_chr02 | 23926996                | GG                              | CC              | 1946758178               |
| SNP_P4_22492_23927105 | NC_021161.1    | Ca_kabuli_chr02 | 23927105                | AA                              | GG              | 1946758180               |
| SNP_P4_22493_23927240 | NC_021161.1    | Ca_kabuli_chr02 | 23927240                | GG                              | AA              | 1946758182               |
| SNP_P4_22494_23931668 | NC_021161.1    | Ca_kabuli_chr02 | 23931668                | GG                              | AA              | 1946758184               |
| SNP_P4_22495_23932205 | NC_021161.1    | Ca_kabuli_chr02 | 23932205                | TT                              | GG              | 1946758186               |
| SNP_P4_22497_23933608 | NC_021161.1    | Ca_kabuli_chr02 | 23933608                | GG                              | CC              | 1946758188               |
| SNP_P4_22498_23934055 | NC_021161.1    | Ca_kabuli_chr02 | 23934055                | CC                              | GG              | 1946758190               |
| SNP_P4_22499_23934184 | NC_021161.1    | Ca_kabuli_chr02 | 23934184                | AA                              | GG              | 1946758193               |
| SNP_P4_22500_23934307 | NC_021161.1    | Ca_kabuli_chr02 | 23934307                | TT                              | CC              | 1946758196               |
| SNP_P4_22501_23973945 | NC_021161.1    | Ca_kabuli_chr02 | 23973945                | TT                              | AA              | 1946758198               |

| SNPs IDs              | Chromosome IDs | Chromosomes     | Physical positions (bp) | CDC Frontier (Reference genome) | (ILWC46 & LPNB) | NCBI SNPdb Accession IDs |
|-----------------------|----------------|-----------------|-------------------------|---------------------------------|-----------------|--------------------------|
| SNP_P4_22504_23990162 | NC_021161.1    | Ca_kabuli_chr02 | 23990162                | CC                              | AA              | 1946758201               |
| SNP_P4_22505_23990169 | NC_021161.1    | Ca_kabuli_chr02 | 23990169                | CC                              | TT              | 1946758203               |
| SNP_P4_22507_23991061 | NC_021161.1    | Ca_kabuli_chr02 | 23991061                | GG                              | AA              | 1946758206               |
| SNP_P4_22508_24023990 | NC_021161.1    | Ca_kabuli_chr02 | 24023990                | GG                              | AA              | 1946758209               |
| SNP_P4_22509_24047683 | NC_021161.1    | Ca_kabuli_chr02 | 24047683                | CC                              | AA              | 1946758211               |
| SNP_P4_22511_24080762 | NC_021161.1    | Ca_kabuli_chr02 | 24080762                | GG                              | AA              | 1946758214               |
| SNP_P4_22512_24104241 | NC_021161.1    | Ca_kabuli_chr02 | 24104241                | AA                              | GG              | 1946758216               |
| SNP_P4_22514_24140145 | NC_021161.1    | Ca_kabuli_chr02 | 24140145                | AA                              | TT              | 1946758219               |
| SNP_P4_22515_24150608 | NC_021161.1    | Ca_kabuli_chr02 | 24150608                | TT                              | CC              | 1946758221               |
| SNP_P4_22516_24150698 | NC_021161.1    | Ca_kabuli_chr02 | 24150698                | TT                              | CC              | 1946758223               |
| SNP_P4_22517_24151077 | NC_021161.1    | Ca_kabuli_chr02 | 24151077                | GG                              | TT              | 1946758226               |
| SNP_P4_22518_24151165 | NC_021161.1    | Ca_kabuli_chr02 | 24151165                | TT                              | CC              | 1946758228               |
| SNP_P4_22519_24151209 | NC_021161.1    | Ca_kabuli_chr02 | 24151209                | CC                              | TT              | 1946758230               |
| SNP_P4_22520_24151257 | NC_021161.1    | Ca_kabuli_chr02 | 24151257                | GG                              | AA              | 1946758232               |
| SNP_P4_22521_24151519 | NC_021161.1    | Ca_kabuli_chr02 | 24151519                | TT                              | CC              | 1946758234               |
| SNP_P4_22522_24151673 | NC_021161.1    | Ca_kabuli_chr02 | 24151673                | AA                              | GG              | 1946758237               |
| SNP_P4_22523_24151922 | NC_021161.1    | Ca_kabuli_chr02 | 24151922                | AA                              | GG              | 1946758239               |
| SNP_P4_22524_24151956 | NC_021161.1    | Ca_kabuli_chr02 | 24151956                | CC                              | TT              | 1946758241               |
| SNP_P4_22525_24171933 | NC_021161.1    | Ca_kabuli_chr02 | 24171933                | AA                              | GG              | 1946758243               |
| SNP_P4_22526_24227457 | NC_021161.1    | Ca_kabuli_chr02 | 24227457                | CC                              | TT              | 1946758245               |
| SNP_P4_22527_24238621 | NC_021161.1    | Ca_kabuli_chr02 | 24238621                | AA                              | TT              | 1946758247               |
| SNP_P4_22528_24241593 | NC_021161.1    | Ca_kabuli_chr02 | 24241593                | AA                              | TT              | 1946758250               |
| SNP_P4_22529_24243889 | NC_021161.1    | Ca_kabuli_chr02 | 24243889                | CC                              | TT              | 1946758252               |
| SNP_P4_22531_24251742 | NC_021161.1    | Ca_kabuli_chr02 | 24251742                | GG                              | CC              | 1946758255               |
| SNP_P4_22532_24251902 | NC_021161.1    | Ca_kabuli_chr02 | 24251902                | AA                              | GG              | 1946758257               |
| SNP_P4_22533_24251948 | NC_021161.1    | Ca_kabuli_chr02 | 24251948                | TT                              | CC              | 1946758259               |
| SNP_P4_22534_24252035 | NC_021161.1    | Ca_kabuli_chr02 | 24252035                | CC                              | TT              | 1946758261               |
| SNP_P4_22535_24252104 | NC_021161.1    | Ca_kabuli_chr02 | 24252104                | TT                              | CC              | 1946758263               |
| SNP_P4_22536_24252119 | NC_021161.1    | Ca_kabuli_chr02 | 24252119                | TT                              | CC              | 1946758265               |
| SNP_P4_22537_24252122 | NC_021161.1    | Ca_kabuli_chr02 | 24252122                | CC                              | TT              | 1946758267               |
| SNP_P4_22539_24252154 | NC_021161.1    | Ca_kabuli_chr02 | 24252154                | CC                              | TT              | 1946758269               |
| SNP_P4_22540_24252157 | NC_021161.1    | Ca_kabuli_chr02 | 24252157                | TT                              | CC              | 1946758272               |
| SNP_P4_22541_24252159 | NC_021161.1    | Ca_kabuli_chr02 | 24252159                | AA                              | CC              | 1946758274               |
| SNP_P4_22542_24252193 | NC_021161.1    | Ca_kabuli_chr02 | 24252193                | TT                              | CC              | 1946758277               |
| SNP_P4_22543_24252353 | NC_021161.1    | Ca_kabuli_chr02 | 24252353                | AA                              | GG              | 1946758279               |
| SNP_P4_22544_24256894 | NC_021161.1    | Ca_kabuli_chr02 | 24256894                | TT                              | CC              | 1946758282               |
| SNP_P4_22545_24257234 | NC_021161.1    | Ca_kabuli_chr02 | 24257234                | TT                              | CC              | 1946758284               |
| SNP_P4_22546_24257278 | NC_021161.1    | Ca_kabuli_chr02 | 24257278                | AA                              | GG              | 1946758286               |
| SNP_P4_22547_24257412 | NC_021161.1    | Ca_kabuli_chr02 | 24257412                | AA                              | TT              | 1946758288               |
| SNP_P4_22548_24259556 | NC_021161.1    | Ca_kabuli_chr02 | 24259556                | CC                              | TT              | 1946758290               |
| SNP_P4_22549_24259679 | NC_021161.1    | Ca_kabuli_chr02 | 24259679                | AA                              | CC              | 1946758292               |
| SNP_P4_22550_24259686 | NC_021161.1    | Ca_kabuli_chr02 | 24259686                | TT                              | AA              | 1946758294               |

| SNPs IDs              | Chromosome IDs | Chromosomes     | Physical positions (bp) | CDC Frontier (Reference genome) | (ILWC46 & LPNB) | NCBI SNPdb Accession IDs |
|-----------------------|----------------|-----------------|-------------------------|---------------------------------|-----------------|--------------------------|
| SNP_P4_22551_24259697 | NC_021161.1    | Ca_kabuli_chr02 | 24259697                | TT                              | GG              | 1946758297               |
| SNP_P4_22552_24259764 | NC_021161.1    | Ca_kabuli_chr02 | 24259764                | TT                              | CC              | 1946758299               |
| SNP_P4_22553_24259766 | NC_021161.1    | Ca_kabuli_chr02 | 24259766                | TT                              | CC              | 1946758302               |
| SNP_P4_22554_24259775 | NC_021161.1    | Ca_kabuli_chr02 | 24259775                | AA                              | TT              | 1946758304               |
| SNP_P4_22555_24259802 | NC_021161.1    | Ca_kabuli_chr02 | 24259802                | GG                              | TT              | 1946758307               |
| SNP_P4_22556_24260040 | NC_021161.1    | Ca_kabuli_chr02 | 24260040                | AA                              | GG              | 1946758309               |
| SNP_P4_22557_24260043 | NC_021161.1    | Ca_kabuli_chr02 | 24260043                | CC                              | TT              | 1946758312               |
| SNP_P4_22558_24309592 | NC_021161.1    | Ca_kabuli_chr02 | 24309592                | CC                              | TT              | 1946758314               |
| SNP_P4_22559_24309690 | NC_021161.1    | Ca_kabuli_chr02 | 24309690                | GG                              | TT              | 1946758316               |
| SNP_P4_22560_24309691 | NC_021161.1    | Ca_kabuli_chr02 | 24309691                | TT                              | CC              | 1946758318               |
| SNP_P4_22561_24309694 | NC_021161.1    | Ca_kabuli_chr02 | 24309694                | TT                              | CC              | 1946758320               |
| SNP_P4_22562_24309738 | NC_021161.1    | Ca_kabuli_chr02 | 24309738                | AA                              | GG              | 1946758323               |
| SNP_P4_22563_24309751 | NC_021161.1    | Ca_kabuli_chr02 | 24309751                | AA                              | CC              | 1946758325               |
| SNP_P4_22564_24309775 | NC_021161.1    | Ca_kabuli_chr02 | 24309775                | AA                              | CC              | 1946758328               |
| SNP_P4_22565_24309783 | NC_021161.1    | Ca_kabuli_chr02 | 24309783                | AA                              | TT              | 1946758331               |
| SNP_P4_22566_24309951 | NC_021161.1    | Ca_kabuli_chr02 | 24309951                | TT                              | CC              | 1946758333               |
| SNP_P4_22567_24310013 | NC_021161.1    | Ca_kabuli_chr02 | 24310013                | TT                              | CC              | 1946758335               |
| SNP_P4_22568_24310031 | NC_021161.1    | Ca_kabuli_chr02 | 24310031                | CC                              | AA              | 1946758337               |
| SNP_P4_22569_24310033 | NC_021161.1    | Ca_kabuli_chr02 | 24310033                | GG                              | CC              | 1946758339               |
| SNP_P4_22570_24310124 | NC_021161.1    | Ca_kabuli_chr02 | 24310124                | CC                              | AA              | 1946758342               |
| SNP_P4_22571_24310160 | NC_021161.1    | Ca_kabuli_chr02 | 24310160                | GG                              | AA              | 1946758344               |
| SNP_P4_22572_24310193 | NC_021161.1    | Ca_kabuli_chr02 | 24310193                | GG                              | AA              | 1946758347               |
| SNP_P4_22573_24310198 | NC_021161.1    | Ca_kabuli_chr02 | 24310198                | CC                              | TT              | 1946758349               |
| SNP_P4_22574_24310223 | NC_021161.1    | Ca_kabuli_chr02 | 24310223                | CC                              | TT              | 1946758351               |
| SNP_P4_22575_24310265 | NC_021161.1    | Ca_kabuli_chr02 | 24310265                | AA                              | CC              | 1946758353               |
| SNP_P4_22576_24310574 | NC_021161.1    | Ca_kabuli_chr02 | 24310574                | CC                              | TT              | 1946758355               |
| SNP_P4_22577_24310575 | NC_021161.1    | Ca_kabuli_chr02 | 24310575                | CC                              | TT              | 1946758357               |
| SNP_P4_22578_24310623 | NC_021161.1    | Ca_kabuli_chr02 | 24310623                | CC                              | TT              | 1946758360               |
| SNP_P4_22579_24317985 | NC_021161.1    | Ca_kabuli_chr02 | 24317985                | TT                              | CC              | 1946758363               |
| SNP_P4_22580_24318078 | NC_021161.1    | Ca_kabuli_chr02 | 24318078                | TT                              | AA              | 1946758365               |
| SNP_P4_22581_24318773 | NC_021161.1    | Ca_kabuli_chr02 | 24318773                | AA                              | GG              | 1946758367               |
| SNP_P4_22583_24391986 | NC_021161.1    | Ca_kabuli_chr02 | 24391986                | CC                              | TT              | 1946758370               |
| SNP_P4_22584_24392065 | NC_021161.1    | Ca_kabuli_chr02 | 24392065                | AA                              | GG              | 1946758372               |
| SNP_P4_22585_24392078 | NC_021161.1    | Ca_kabuli_chr02 | 24392078                | CC                              | TT              | 1946758374               |
| SNP_P4_22587_24393597 | NC_021161.1    | Ca_kabuli_chr02 | 24393597                | AA                              | GG              | 1946758376               |
| SNP_P4_22589_24426829 | NC_021161.1    | Ca_kabuli_chr02 | 24426829                | CC                              | TT              | 1946758378               |
| SNP_P4_22590_24426831 | NC_021161.1    | Ca_kabuli_chr02 | 24426831                | TT                              | AA              | 1946758381               |
| SNP_P4_22591_24426840 | NC_021161.1    | Ca_kabuli_chr02 | 24426840                | TT                              | CC              | 1946758383               |
| SNP_P4_22592_24426842 | NC_021161.1    | Ca_kabuli_chr02 | 24426842                | GG                              | AA              | 1946758386               |
| SNP_P4_22593_24433676 | NC_021161.1    | Ca_kabuli_chr02 | 24433676                | TT                              | AA              | 1946758388               |
| SNP_P4_22594_24433899 | NC_021161.1    | Ca_kabuli_chr02 | 24433899                | TT                              | AA              | 1946758390               |
| SNP_P4_22595_24433935 | NC_021161.1    | Ca_kabuli_chr02 | 24433935                | TT                              | CC              | 1946758392               |

| SNPs IDs              | Chromosome IDs | Chromosomes     | Physical positions (bp) | CDC Frontier (Reference genome) | (ILWC46 & LPNB) | NCBI SNPdb Accession IDs |
|-----------------------|----------------|-----------------|-------------------------|---------------------------------|-----------------|--------------------------|
| SNP_P4_22596_24433946 | NC_021161.1    | Ca_kabuli_chr02 | 24433946                | AA                              | GG              | 1946758394               |
| SNP_P4_22597_24442699 | NC_021161.1    | Ca_kabuli_chr02 | 24442699                | TT                              | AA              | 1946758396               |
| SNP_P4_22598_24442737 | NC_021161.1    | Ca_kabuli_chr02 | 24442737                | AA                              | GG              | 1946758399               |
| SNP_P4_22599_24442747 | NC_021161.1    | Ca_kabuli_chr02 | 24442747                | CC                              | AA              | 1946758402               |
| SNP_P4_22600_24444947 | NC_021161.1    | Ca_kabuli_chr02 | 24444947                | AA                              | GG              | 1946758404               |
| SNP_P4_22601_24447901 | NC_021161.1    | Ca_kabuli_chr02 | 24447901                | AA                              | GG              | 1946758406               |
| SNP_P4_22602_24454965 | NC_021161.1    | Ca_kabuli_chr02 | 24454965                | AA                              | GG              | 1946758408               |
| SNP_P4_22603_24454976 | NC_021161.1    | Ca_kabuli_chr02 | 24454976                | CC                              | AA              | 1946758410               |
| SNP_P4_22604_24454995 | NC_021161.1    | Ca_kabuli_chr02 | 24454995                | GG                              | CC              | 1946758412               |
| SNP_P4_22605_24454996 | NC_021161.1    | Ca_kabuli_chr02 | 24454996                | CC                              | TT              | 1946758414               |
| SNP_P4_22606_24455010 | NC_021161.1    | Ca_kabuli_chr02 | 24455010                | TT                              | CC              | 1946758417               |
| SNP_P4_22607_24455243 | NC_021161.1    | Ca_kabuli_chr02 | 24455243                | CC                              | TT              | 1946758419               |
| SNP_P4_22608_24455319 | NC_021161.1    | Ca_kabuli_chr02 | 24455319                | AA                              | GG              | 1946758422               |
| SNP_P4_22609_24476920 | NC_021161.1    | Ca_kabuli_chr02 | 24476920                | GG                              | AA              | 1946758424               |
| SNP_P4_22610_24489640 | NC_021161.1    | Ca_kabuli_chr02 | 24489640                | AA                              | GG              | 1946758426               |
| SNP_P4_22611_24489698 | NC_021161.1    | Ca_kabuli_chr02 | 24489698                | GG                              | AA              | 1946758428               |
| SNP_P4_22612_24494897 | NC_021161.1    | Ca_kabuli_chr02 | 24494897                | CC                              | TT              | 1946758430               |
| SNP_P4_22614_24498249 | NC_021161.1    | Ca_kabuli_chr02 | 24498249                | AA                              | GG              | 1946758432               |
| SNP_P4_22615_24513033 | NC_021161.1    | Ca_kabuli_chr02 | 24513033                | CC                              | AA              | 1946758434               |
| SNP_P4_22617_24554219 | NC_021161.1    | Ca_kabuli_chr02 | 24554219                | CC                              | TT              | 1946758436               |
| SNP_P4_22618_24554228 | NC_021161.1    | Ca_kabuli_chr02 | 24554228                | CC                              | TT              | 1946758438               |
| SNP_P4_22619_24557188 | NC_021161.1    | Ca_kabuli_chr02 | 24557188                | AA                              | CC              | 1946758440               |
| SNP_P4_22620_24557191 | NC_021161.1    | Ca_kabuli_chr02 | 24557191                | CC                              | TT              | 1946758442               |
| SNP_P4_22621_24557233 | NC_021161.1    | Ca_kabuli_chr02 | 24557233                | AA                              | GG              | 1946758443               |
| SNP_P4_22622_24557267 | NC_021161.1    | Ca_kabuli_chr02 | 24557267                | AA                              | GG              | 1946758445               |
| SNP_P4_22623_24557332 | NC_021161.1    | Ca_kabuli_chr02 | 24557332                | TT                              | CC              | 1946758447               |
| SNP_P4_22624_24557723 | NC_021161.1    | Ca_kabuli_chr02 | 24557723                | TT                              | CC              | 1946758449               |
| SNP_P4_22625_24570883 | NC_021161.1    | Ca_kabuli_chr02 | 24570883                | TT                              | CC              | 1946758451               |
| SNP_P4_22626_24570895 | NC_021161.1    | Ca_kabuli_chr02 | 24570895                | CC                              | TT              | 1946758453               |
| SNP_P4_22627_24574445 | NC_021161.1    | Ca_kabuli_chr02 | 24574445                | CC                              | GG              | 1946758455               |
| SNP_P4_22628_24574708 | NC_021161.1    | Ca_kabuli_chr02 | 24574708                | TT                              | AA              | 1946758457               |
| SNP_P4_22629_24575371 | NC_021161.1    | Ca_kabuli_chr02 | 24575371                | TT                              | GG              | 1946758459               |
| SNP_P4_22630_24575383 | NC_021161.1    | Ca_kabuli_chr02 | 24575383                | TT                              | CC              | 1946758461               |
| SNP_P4_22631_24575648 | NC_021161.1    | Ca_kabuli_chr02 | 24575648                | CC                              | TT              | 1946758463               |
| SNP_P4_22632_24575649 | NC_021161.1    | Ca_kabuli_chr02 | 24575649                | AA                              | GG              | 1946758465               |
| SNP_P4_22633_24575656 | NC_021161.1    | Ca_kabuli_chr02 | 24575656                | GG                              | AA              | 1946758467               |
| SNP_P4_22634_24575660 | NC_021161.1    | Ca_kabuli_chr02 | 24575660                | CC                              | TT              | 1946758470               |
| SNP_P4_22635_24575682 | NC_021161.1    | Ca_kabuli_chr02 | 24575682                | GG                              | TT              | 1946758472               |
| SNP_P4_22636_24575705 | NC_021161.1    | Ca_kabuli_chr02 | 24575705                | TT                              | CC              | 1946758474               |
| SNP_P4_22637_24577835 | NC_021161.1    | Ca_kabuli_chr02 | 24577835                | AA                              | TT              | 1946758477               |
| SNP_P4_22638_24577837 | NC_021161.1    | Ca_kabuli_chr02 | 24577837                | AA                              | TT              | 1946758479               |
| SNP_P4_22639_24597870 | NC_021161.1    | Ca_kabuli_chr02 | 24597870                | TT                              | CC              | 1946758480               |

| SNPs IDs              | Chromosome IDs | Chromosomes     | Physical positions (bp) | CDC Frontier (Reference genome) | (ILWC46 & LPNB) | NCBI SNPdb Accession IDs |
|-----------------------|----------------|-----------------|-------------------------|---------------------------------|-----------------|--------------------------|
| SNP_P4_22641_24597907 | NC_021161.1    | Ca_kabuli_chr02 | 24597907                | AA                              | GG              | 1946758481               |
| SNP_P4_22642_24597940 | NC_021161.1    | Ca_kabuli_chr02 | 24597940                | GG                              | AA              | 1946758482               |
| SNP_P4_22643_24597954 | NC_021161.1    | Ca_kabuli_chr02 | 24597954                | AA                              | GG              | 1946758483               |
| SNP_P4_22644_24598012 | NC_021161.1    | Ca_kabuli_chr02 | 24598012                | GG                              | AA              | 1946758484               |
| SNP_P4_22645_24600407 | NC_021161.1    | Ca_kabuli_chr02 | 24600407                | TT                              | CC              | 1946758485               |
| SNP_P4_22646_24600444 | NC_021161.1    | Ca_kabuli_chr02 | 24600444                | CC                              | AA              | 1946758486               |
| SNP_P4_22647_24600712 | NC_021161.1    | Ca_kabuli_chr02 | 24600712                | TT                              | CC              | 1946758487               |
| SNP_P4_22648_24601123 | NC_021161.1    | Ca_kabuli_chr02 | 24601123                | AA                              | GG              | 1946758488               |
| SNP_P4_22649_24611571 | NC_021161.1    | Ca_kabuli_chr02 | 24611571                | GG                              | AA              | 1946758489               |
| SNP_P4_22650_24625421 | NC_021161.1    | Ca_kabuli_chr02 | 24625421                | GG                              | AA              | 1946758490               |
| SNP_P4_22651_24634128 | NC_021161.1    | Ca_kabuli_chr02 | 24634128                | AA                              | GG              | 1946758491               |
| SNP_P4_22652_24709295 | NC_021161.1    | Ca_kabuli_chr02 | 24709295                | AA                              | GG              | 1946758492               |
| SNP_P4_22653_24753817 | NC_021161.1    | Ca_kabuli_chr02 | 24753817                | GG                              | AA              | 1946758493               |
| SNP_P4_22654_24818269 | NC_021161.1    | Ca_kabuli_chr02 | 24818269                | TT                              | CC              | 1946758494               |
| SNP_P4_22655_24818302 | NC_021161.1    | Ca_kabuli_chr02 | 24818302                | GG                              | CC              | 1946758495               |
| SNP_P4_22656_24818309 | NC_021161.1    | Ca_kabuli_chr02 | 24818309                | AA                              | GG              | 1946758497               |
| SNP_P4_22657_24818341 | NC_021161.1    | Ca_kabuli_chr02 | 24818341                | GG                              | AA              | 1946758499               |
| SNP_P4_22658_24818354 | NC_021161.1    | Ca_kabuli_chr02 | 24818354                | TT                              | GG              | 1946758501               |
| SNP_P4_22659_24821083 | NC_021161.1    | Ca_kabuli_chr02 | 24821083                | AA                              | TT              | 1946758503               |
| SNP_P4_22660_24821099 | NC_021161.1    | Ca_kabuli_chr02 | 24821099                | CC                              | AA              | 1946758505               |
| SNP_P4_22661_24892976 | NC_021161.1    | Ca_kabuli_chr02 | 24892976                | TT                              | GG              | 1946758507               |
| SNP_P4_22662_24893923 | NC_021161.1    | Ca_kabuli_chr02 | 24893923                | CC                              | AA              | 1946758509               |
| SNP_P4_22663_24894055 | NC_021161.1    | Ca_kabuli_chr02 | 24894055                | AA                              | GG              | 1946758512               |
| SNP_P4_22664_24894092 | NC_021161.1    | Ca_kabuli_chr02 | 24894092                | TT                              | AA              | 1946758514               |
| SNP_P4_22665_24894093 | NC_021161.1    | Ca_kabuli_chr02 | 24894093                | AA                              | GG              | 1946758516               |
| SNP_P4_22666_24894104 | NC_021161.1    | Ca_kabuli_chr02 | 24894104                | CC                              | GG              | 1946758518               |
| SNP_P4_22667_24894105 | NC_021161.1    | Ca_kabuli_chr02 | 24894105                | TT                              | AA              | 1946758520               |
| SNP_P4_22668_24894115 | NC_021161.1    | Ca_kabuli_chr02 | 24894115                | AA                              | GG              | 1946758522               |
| SNP_P4_22669_24894128 | NC_021161.1    | Ca_kabuli_chr02 | 24894128                | GG                              | AA              | 1946758525               |
| SNP_P4_22670_24894181 | NC_021161.1    | Ca_kabuli_chr02 | 24894181                | TT                              | CC              | 1946758527               |
| SNP_P4_22671_24940445 | NC_021161.1    | Ca_kabuli_chr02 | 24940445                | AA                              | TT              | 1946758529               |
| SNP_P4_22672_24940478 | NC_021161.1    | Ca_kabuli_chr02 | 24940478                | GG                              | TT              | 1946758531               |
| SNP_P4_22673_24940499 | NC_021161.1    | Ca_kabuli_chr02 | 24940499                | TT                              | GG              | 1946758533               |
| SNP_P4_22674_24940505 | NC_021161.1    | Ca_kabuli_chr02 | 24940505                | CC                              | TT              | 1946758535               |
| SNP_P4_22675_24940543 | NC_021161.1    | Ca_kabuli_chr02 | 24940543                | GG                              | AA              | 1946758537               |
| SNP_P4_22676_24940602 | NC_021161.1    | Ca_kabuli_chr02 | 24940602                | CC                              | TT              | 1946758539               |
| SNP_P4_22677_24940609 | NC_021161.1    | Ca_kabuli_chr02 | 24940609                | AA                              | GG              | 1946758541               |
| SNP_P4_22678_24940736 | NC_021161.1    | Ca_kabuli_chr02 | 24940736                | AA                              | GG              | 1946758543               |
| SNP_P4_22679_24941180 | NC_021161.1    | Ca_kabuli_chr02 | 24941180                | CC                              | TT              | 1946758545               |
| SNP_P4_22680_24941293 | NC_021161.1    | Ca_kabuli_chr02 | 24941293                | TT                              | AA              | 1946758547               |
| SNP_P4_22681_24942988 | NC_021161.1    | Ca_kabuli_chr02 | 24942988                | CC                              | TT              | 1946758549               |
| SNP_P4_22682_24943018 | NC_021161.1    | Ca_kabuli_chr02 | 24943018                | TT                              | GG              | 1946758551               |

| SNPs IDs              | Chromosome IDs | Chromosomes     | Physical positions (bp) | CDC Frontier (Reference genome) | (ILWC46 & LPNB) | NCBI SNPdb Accession IDs |
|-----------------------|----------------|-----------------|-------------------------|---------------------------------|-----------------|--------------------------|
| SNP_P4_22683_24943056 | NC_021161.1    | Ca_kabuli_chr02 | 24943056                | GG                              | TT              | 1946758553               |
| SNP_P4_22684_24943092 | NC_021161.1    | Ca_kabuli_chr02 | 24943092                | AA                              | GG              | 1946758555               |
| SNP_P4_22685_24943095 | NC_021161.1    | Ca_kabuli_chr02 | 24943095                | CC                              | TT              | 1946758557               |
| SNP_P4_22688_24943310 | NC_021161.1    | Ca_kabuli_chr02 | 24943310                | AA                              | GG              | 1946758559               |
| SNP_P4_22689_24943336 | NC_021161.1    | Ca_kabuli_chr02 | 24943336                | AA                              | GG              | 1946758561               |
| SNP_P4_22690_24943343 | NC_021161.1    | Ca_kabuli_chr02 | 24943343                | AA                              | GG              | 1946758563               |
| SNP_P4_22691_24943435 | NC_021161.1    | Ca_kabuli_chr02 | 24943435                | TT                              | CC              | 1946758565               |
| SNP_P4_22692_24943497 | NC_021161.1    | Ca_kabuli_chr02 | 24943497                | AA                              | GG              | 1946758567               |
| SNP_P4_22693_24947810 | NC_021161.1    | Ca_kabuli_chr02 | 24947810                | CC                              | TT              | 1946758568               |
| SNP_P4_22694_24947830 | NC_021161.1    | Ca_kabuli_chr02 | 24947830                | CC                              | TT              | 1946758570               |
| SNP_P4_22695_24947843 | NC_021161.1    | Ca_kabuli_chr02 | 24947843                | TT                              | AA              | 1946758572               |
| SNP_P4_22696_24947849 | NC_021161.1    | Ca_kabuli_chr02 | 24947849                | GG                              | AA              | 1946758574               |
| SNP_P4_22697_24947882 | NC_021161.1    | Ca_kabuli_chr02 | 24947882                | CC                              | TT              | 1946758576               |
| SNP_P4_22698_24947934 | NC_021161.1    | Ca_kabuli_chr02 | 24947934                | GG                              | AA              | 1946758578               |
| SNP_P4_22699_24948010 | NC_021161.1    | Ca_kabuli_chr02 | 24948010                | AA                              | GG              | 1946758580               |
| SNP_P4_22700_24948150 | NC_021161.1    | Ca_kabuli_chr02 | 24948150                | AA                              | GG              | 1946758582               |
| SNP_P4_22701_24948227 | NC_021161.1    | Ca_kabuli_chr02 | 24948227                | GG                              | AA              | 1946758584               |
| SNP_P4_22702_24948285 | NC_021161.1    | Ca_kabuli_chr02 | 24948285                | TT                              | CC              | 1946758586               |
| SNP_P4_22703_24948318 | NC_021161.1    | Ca_kabuli_chr02 | 24948318                | CC                              | TT              | 1946758588               |
| SNP_P4_22704_24948319 | NC_021161.1    | Ca_kabuli_chr02 | 24948319                | CC                              | AA              | 1946758590               |
| SNP_P4_22705_24948341 | NC_021161.1    | Ca_kabuli_chr02 | 24948341                | GG                              | AA              | 1946758592               |
| SNP_P4_22706_24968950 | NC_021161.1    | Ca_kabuli_chr02 | 24968950                | GG                              | CC              | 1946758594               |
| SNP_P4_22707_24968984 | NC_021161.1    | Ca_kabuli_chr02 | 24968984                | AA                              | GG              | 1946758596               |
| SNP_P4_22708_24969062 | NC_021161.1    | Ca_kabuli_chr02 | 24969062                | TT                              | CC              | 1946758598               |
| SNP_P4_22709_24969076 | NC_021161.1    | Ca_kabuli_chr02 | 24969076                | TT                              | AA              | 1946758600               |
| SNP_P4_22710_24969123 | NC_021161.1    | Ca_kabuli_chr02 | 24969123                | TT                              | CC              | 1946758602               |
| SNP_P4_22711_24969312 | NC_021161.1    | Ca_kabuli_chr02 | 24969312                | CC                              | GG              | 1946758604               |
| SNP_P4_22712_24969409 | NC_021161.1    | Ca_kabuli_chr02 | 24969409                | AA                              | GG              | 1946758606               |
| SNP_P4_22713_24969413 | NC_021161.1    | Ca_kabuli_chr02 | 24969413                | GG                              | CC              | 1946758608               |
| SNP_P4_22714_24983724 | NC_021161.1    | Ca_kabuli_chr02 | 24983724                | AA                              | GG              | 1946758610               |
| SNP_P4_22715_24984432 | NC_021161.1    | Ca_kabuli_chr02 | 24984432                | GG                              | AA              | 1946758612               |
| SNP_P4_22716_25025016 | NC_021161.1    | Ca_kabuli_chr02 | 25025016                | CC                              | TT              | 1946758614               |
| SNP_P4_22717_25025121 | NC_021161.1    | Ca_kabuli_chr02 | 25025121                | CC                              | TT              | 1946758616               |
| SNP_P4_22718_25025190 | NC_021161.1    | Ca_kabuli_chr02 | 25025190                | CC                              | TT              | 1946758618               |
| SNP_P4_22719_25025200 | NC_021161.1    | Ca_kabuli_chr02 | 25025200                | CC                              | TT              | 1946758620               |
| SNP_P4_22720_25025240 | NC_021161.1    | Ca_kabuli_chr02 | 25025240                | GG                              | AA              | 1946758622               |
| SNP_P4_22721_25025294 | NC_021161.1    | Ca_kabuli_chr02 | 25025294                | CC                              | TT              | 1946758624               |
| SNP_P4_22722_25025358 | NC_021161.1    | Ca_kabuli_chr02 | 25025358                | GG                              | AA              | 1946758626               |
| SNP_P4_22723_25032777 | NC_021161.1    | Ca_kabuli_chr02 | 25032777                | GG                              | AA              | 1946758628               |
| SNP_P4_22724_25074162 | NC_021161.1    | Ca_kabuli_chr02 | 25074162                | CC                              | TT              | 1946758630               |
| SNP_P4_22725_25090009 | NC_021161.1    | Ca_kabuli_chr02 | 25090009                | TT                              | CC              | 1946758632               |
| SNP_P4_22726_25135940 | NC_021161.1    | Ca_kabuli_chr02 | 25135940                | GG                              | AA              | 1946758634               |

| SNPs IDs              | Chromosome IDs | Chromosomes     | Physical positions (bp) | CDC Frontier (Reference genome) | (ILWC46 & LPNB) | NCBI SNPdb Accession IDs |
|-----------------------|----------------|-----------------|-------------------------|---------------------------------|-----------------|--------------------------|
| SNP_P4_22727_25157274 | NC_021161.1    | Ca_kabuli_chr02 | 25157274                | TT                              | CC              | 1946758636               |
| SNP_P4_22728_25157280 | NC_021161.1    | Ca_kabuli_chr02 | 25157280                | AA                              | GG              | 1946758638               |
| SNP_P4_22729_25157289 | NC_021161.1    | Ca_kabuli_chr02 | 25157289                | TT                              | CC              | 1946758640               |
| SNP_P4_22730_25157291 | NC_021161.1    | Ca_kabuli_chr02 | 25157291                | AA                              | CC              | 1946758642               |
| SNP_P4_22731_25157329 | NC_021161.1    | Ca_kabuli_chr02 | 25157329                | CC                              | TT              | 1946758644               |
| SNP_P4_22732_25157331 | NC_021161.1    | Ca_kabuli_chr02 | 25157331                | GG                              | AA              | 1946758646               |
| SNP_P4_22733_25157350 | NC_021161.1    | Ca_kabuli_chr02 | 25157350                | AA                              | GG              | 1946758648               |
| SNP_P4_22734_25169851 | NC_021161.1    | Ca_kabuli_chr02 | 25169851                | AA                              | TT              | 1946758650               |
| SNP_P4_22735_25172715 | NC_021161.1    | Ca_kabuli_chr02 | 25172715                | GG                              | TT              | 1946758652               |
| SNP_P4_22736_25188186 | NC_021161.1    | Ca_kabuli_chr02 | 25188186                | CC                              | TT              | 1946758654               |
| SNP_P4_22737_25193843 | NC_021161.1    | Ca_kabuli_chr02 | 25193843                | TT                              | AA              | 1946758656               |
| SNP_P4_22738_25193846 | NC_021161.1    | Ca_kabuli_chr02 | 25193846                | TT                              | AA              | 1946758658               |
| SNP_P4_22739_25224045 | NC_021161.1    | Ca_kabuli_chr02 | 25224045                | TT                              | CC              | 1946758660               |
| SNP_P4_22740_25224365 | NC_021161.1    | Ca_kabuli_chr02 | 25224365                | GG                              | AA              | 1946758663               |
| SNP_P4_22741_25224450 | NC_021161.1    | Ca_kabuli_chr02 | 25224450                | CC                              | TT              | 1946758665               |
| SNP_P4_22742_25224713 | NC_021161.1    | Ca_kabuli_chr02 | 25224713                | GG                              | AA              | 1946758667               |
| SNP_P4_22743_25224717 | NC_021161.1    | Ca_kabuli_chr02 | 25224717                | GG                              | AA              | 1946758669               |
| SNP_P4_22744_25224723 | NC_021161.1    | Ca_kabuli_chr02 | 25224723                | AA                              | GG              | 1946758675               |
| SNP_P4_22745_25224724 | NC_021161.1    | Ca_kabuli_chr02 | 25224724                | CC                              | TT              | 1946758678               |
| SNP_P4_22746_25224736 | NC_021161.1    | Ca_kabuli_chr02 | 25224736                | TT                              | CC              | 1946758680               |
| SNP_P4_22747_25225389 | NC_021161.1    | Ca_kabuli_chr02 | 25225389                | TT                              | CC              | 1946758682               |
| SNP_P4_22748_25227443 | NC_021161.1    | Ca_kabuli_chr02 | 25227443                | AA                              | TT              | 1946758684               |
| SNP_P4_22751_25303535 | NC_021161.1    | Ca_kabuli_chr02 | 25303535                | GG                              | AA              | 1946758686               |
| SNP_P4_22752_25342905 | NC_021161.1    | Ca_kabuli_chr02 | 25342905                | GG                              | AA              | 1946758688               |
| SNP_P4_22754_25401729 | NC_021161.1    | Ca_kabuli_chr02 | 25401729                | CC                              | TT              | 1946758690               |
| SNP_P4_22755_25411204 | NC_021161.1    | Ca_kabuli_chr02 | 25411204                | GG                              | AA              | 1946758692               |
| SNP_P4_22756_25422950 | NC_021161.1    | Ca_kabuli_chr02 | 25422950                | CC                              | TT              | 1946758694               |
| SNP_P4_22758_25445657 | NC_021161.1    | Ca_kabuli_chr02 | 25445657                | TT                              | CC              | 1946758696               |
| SNP_P4_22759_25449668 | NC_021161.1    | Ca_kabuli_chr02 | 25449668                | CC                              | TT              | 1946758698               |
| SNP_P4_22760_25449715 | NC_021161.1    | Ca_kabuli_chr02 | 25449715                | GG                              | AA              | 1946758700               |
| SNP_P4_22761_25449834 | NC_021161.1    | Ca_kabuli_chr02 | 25449834                | TT                              | CC              | 1946758702               |
| SNP_P4_22762_25451015 | NC_021161.1    | Ca_kabuli_chr02 | 25451015                | AA                              | GG              | 1946758704               |
| SNP_P4_22763_25451035 | NC_021161.1    | Ca_kabuli_chr02 | 25451035                | GG                              | AA              | 1946758706               |
| SNP_P4_22764_25451041 | NC_021161.1    | Ca_kabuli_chr02 | 25451041                | AA                              | GG              | 1946758708               |
| SNP_P4_22765_25451126 | NC_021161.1    | Ca_kabuli_chr02 | 25451126                | TT                              | CC              | 1946758710               |
| SNP_P4_22766_25453083 | NC_021161.1    | Ca_kabuli_chr02 | 25453083                | AA                              | TT              | 1946758712               |
| SNP_P4_22767_25458481 | NC_021161.1    | Ca_kabuli_chr02 | 25458481                | AA                              | GG              | 1946758714               |
| SNP_P4_22769_25510760 | NC_021161.1    | Ca_kabuli_chr02 | 25510760                | AA                              | GG              | 1946758716               |
| SNP_P4_22770_25510769 | NC_021161.1    | Ca_kabuli_chr02 | 25510769                | AA                              | GG              | 1946758718               |
| SNP_P4_22771_25512989 | NC_021161.1    | Ca_kabuli_chr02 | 25512989                | CC                              | TT              | 1946758720               |
| SNP_P4_22773_25528909 | NC_021161.1    | Ca_kabuli_chr02 | 25528909                | AA                              | GG              | 1946758722               |
| SNP_P4_22774_25528912 | NC_021161.1    | Ca_kabuli_chr02 | 25528912                | TT                              | GG              | 1946758724               |



| SNPs IDs              | Chromosome IDs | Chromosomes     | Physical positions (bp) | CDC Frontier (Reference genome) | (ILWC46 & LPNB) | NCBI SNPdb Accession IDs |
|-----------------------|----------------|-----------------|-------------------------|---------------------------------|-----------------|--------------------------|
| SNP_P4_22775_25528937 | NC_021161.1    | Ca_kabuli_chr02 | 25528937                | GG                              | CC              | 1946758726               |
| SNP_P4_22776_25528945 | NC_021161.1    | Ca_kabuli_chr02 | 25528945                | TT                              | GG              | 1946758728               |
| SNP_P4_22777_25528955 | NC_021161.1    | Ca_kabuli_chr02 | 25528955                | CC                              | AA              | 1946758730               |
| SNP_P4_22778_25528977 | NC_021161.1    | Ca_kabuli_chr02 | 25528977                | CC                              | TT              | 1946758732               |
| SNP_P4_22779_25529031 | NC_021161.1    | Ca_kabuli_chr02 | 25529031                | TT                              | AA              | 1946758734               |
| SNP_P4_22780_25529039 | NC_021161.1    | Ca_kabuli_chr02 | 25529039                | AA                              | GG              | 1946758736               |
| SNP_P4_22781_25529052 | NC_021161.1    | Ca_kabuli_chr02 | 25529052                | TT                              | CC              | 1946758738               |
| SNP_P4_22782_25529093 | NC_021161.1    | Ca_kabuli_chr02 | 25529093                | TT                              | GG              | 1946758740               |
| SNP_P4_22783_25529094 | NC_021161.1    | Ca_kabuli_chr02 | 25529094                | CC                              | AA              | 1946758742               |
| SNP_P4_22784_25529098 | NC_021161.1    | Ca_kabuli_chr02 | 25529098                | AA                              | CC              | 1946758744               |
| SNP_P4_22785_25529104 | NC_021161.1    | Ca_kabuli_chr02 | 25529104                | AA                              | CC              | 1946758746               |
| SNP_P4_22786_25529130 | NC_021161.1    | Ca_kabuli_chr02 | 25529130                | TT                              | CC              | 1946758748               |
| SNP_P4_22787_25529148 | NC_021161.1    | Ca_kabuli_chr02 | 25529148                | TT                              | CC              | 1946758750               |
| SNP_P4_22788_25529153 | NC_021161.1    | Ca_kabuli_chr02 | 25529153                | CC                              | AA              | 1946758753               |
| SNP_P4_22789_25529234 | NC_021161.1    | Ca_kabuli_chr02 | 25529234                | AA                              | GG              | 1946758755               |
| SNP_P4_22790_25529384 | NC_021161.1    | Ca_kabuli_chr02 | 25529384                | GG                              | AA              | 1946758757               |
| SNP_P4_22791_25529403 | NC_021161.1    | Ca_kabuli_chr02 | 25529403                | CC                              | AA              | 1946758759               |
| SNP_P4_22792_25529422 | NC_021161.1    | Ca_kabuli_chr02 | 25529422                | AA                              | GG              | 1946758761               |
| SNP_P4_22793_25529480 | NC_021161.1    | Ca_kabuli_chr02 | 25529480                | AA                              | GG              | 1946758763               |
| SNP_P4_22794_25529527 | NC_021161.1    | Ca_kabuli_chr02 | 25529527                | AA                              | CC              | 1946758765               |
| SNP_P4_22795_25529546 | NC_021161.1    | Ca_kabuli_chr02 | 25529546                | AA                              | TT              | 1946758767               |
| SNP_P4_22796_25529552 | NC_021161.1    | Ca_kabuli_chr02 | 25529552                | GG                              | AA              | 1946758769               |
| SNP_P4_22797_25529641 | NC_021161.1    | Ca_kabuli_chr02 | 25529641                | TT                              | GG              | 1946758771               |
| SNP_P4_22798_25529643 | NC_021161.1    | Ca_kabuli_chr02 | 25529643                | TT                              | CC              | 1946758773               |
| SNP_P4_22799_25529816 | NC_021161.1    | Ca_kabuli_chr02 | 25529816                | CC                              | TT              | 1946758775               |
| SNP_P4_22800_25529824 | NC_021161.1    | Ca_kabuli_chr02 | 25529824                | CC                              | TT              | 1946758777               |
| SNP_P4_22801_25529836 | NC_021161.1    | Ca_kabuli_chr02 | 25529836                | CC                              | TT              | 1946758779               |
| SNP_P4_22803_25529914 | NC_021161.1    | Ca_kabuli_chr02 | 25529914                | AA                              | GG              | 1946758781               |
| SNP_P4_22804_25529920 | NC_021161.1    | Ca_kabuli_chr02 | 25529920                | TT                              | GG              | 1946758783               |
| SNP_P4_22805_25529937 | NC_021161.1    | Ca_kabuli_chr02 | 25529937                | TT                              | CC              | 1946758785               |
| SNP_P4_22806_25529979 | NC_021161.1    | Ca_kabuli_chr02 | 25529979                | CC                              | TT              | 1946758787               |
| SNP_P4_22807_25534719 | NC_021161.1    | Ca_kabuli_chr02 | 25534719                | TT                              | GG              | 1946758789               |
| SNP_P4_22809_25535135 | NC_021161.1    | Ca_kabuli_chr02 | 25535135                | TT                              | CC              | 1946758791               |
| SNP_P4_22810_25535151 | NC_021161.1    | Ca_kabuli_chr02 | 25535151                | TT                              | CC              | 1946758793               |
| SNP_P4_22811_25535154 | NC_021161.1    | Ca_kabuli_chr02 | 25535154                | TT                              | GG              | 1946758795               |
| SNP_P4_22812_25535166 | NC_021161.1    | Ca_kabuli_chr02 | 25535166                | TT                              | CC              | 1946758797               |
| SNP_P4_22814_25592583 | NC_021161.1    | Ca_kabuli_chr02 | 25592583                | TT                              | CC              | 1946758799               |
| SNP_P4_22816_25594203 | NC_021161.1    | Ca_kabuli_chr02 | 25594203                | TT                              | AA              | 1946758801               |
| SNP_P4_22817_25594205 | NC_021161.1    | Ca_kabuli_chr02 | 25594205                | AA                              | GG              | 1946758803               |
| SNP_P4_22818_25603355 | NC_021161.1    | Ca_kabuli_chr02 | 25603355                | TT                              | CC              | 1946758805               |
| SNP_P4_22819_25603551 | NC_021161.1    | Ca_kabuli_chr02 | 25603551                | AA                              | GG              | 1946758807               |
| SNP_P4_22820_25603558 | NC_021161.1    | Ca_kabuli_chr02 | 25603558                | TT                              | CC              | 1946758809               |

| SNPs IDs              | Chromosome IDs | Chromosomes     | Physical positions (bp) | CDC Frontier (Reference genome) | (ILWC46 & LPNB) | NCBI SNPdb Accession IDs |
|-----------------------|----------------|-----------------|-------------------------|---------------------------------|-----------------|--------------------------|
| SNP_P4_22821_25603616 | NC_021161.1    | Ca_kabuli_chr02 | 25603616                | TT                              | GG              | 1946758811               |
| SNP_P4_22822_25604012 | NC_021161.1    | Ca_kabuli_chr02 | 25604012                | GG                              | AA              | 1946758813               |
| SNP_P4_22823_25609623 | NC_021161.1    | Ca_kabuli_chr02 | 25609623                | CC                              | AA              | 1946758815               |
| SNP_P4_22824_25609914 | NC_021161.1    | Ca_kabuli_chr02 | 25609914                | GG                              | AA              | 1946758817               |
| SNP_P4_22825_25609926 | NC_021161.1    | Ca_kabuli_chr02 | 25609926                | CC                              | AA              | 1946758819               |
| SNP_P4_22826_25610090 | NC_021161.1    | Ca_kabuli_chr02 | 25610090                | TT                              | CC              | 1946758821               |
| SNP_P4_22827_25613776 | NC_021161.1    | Ca_kabuli_chr02 | 25613776                | AA                              | TT              | 1946758823               |
| SNP_P4_22829_25673401 | NC_021161.1    | Ca_kabuli_chr02 | 25673401                | CC                              | TT              | 1946758825               |
| SNP_P4_22830_25680174 | NC_021161.1    | Ca_kabuli_chr02 | 25680174                | CC                              | TT              | 1946758827               |
| SNP_P4_22831_25680268 | NC_021161.1    | Ca_kabuli_chr02 | 25680268                | CC                              | GG              | 1946758829               |
| SNP_P4_22832_25680387 | NC_021161.1    | Ca_kabuli_chr02 | 25680387                | TT                              | GG              | 1946758832               |
| SNP_P4_22833_25680390 | NC_021161.1    | Ca_kabuli_chr02 | 25680390                | CC                              | TT              | 1946758834               |
| SNP_P4_22834_25680504 | NC_021161.1    | Ca_kabuli_chr02 | 25680504                | AA                              | TT              | 1946758836               |
| SNP_P4_22835_25680539 | NC_021161.1    | Ca_kabuli_chr02 | 25680539                | TT                              | CC              | 1946758838               |
| SNP_P4_22836_25680541 | NC_021161.1    | Ca_kabuli_chr02 | 25680541                | TT                              | CC              | 1946758840               |
| SNP_P4_22837_25680581 | NC_021161.1    | Ca_kabuli_chr02 | 25680581                | CC                              | TT              | 1946758842               |
| SNP_P4_22838_25680599 | NC_021161.1    | Ca_kabuli_chr02 | 25680599                | GG                              | TT              | 1946758844               |
| SNP_P4_22839_25680605 | NC_021161.1    | Ca_kabuli_chr02 | 25680605                | CC                              | TT              | 1946758846               |
| SNP_P4_22840_25680626 | NC_021161.1    | Ca_kabuli_chr02 | 25680626                | TT                              | CC              | 1946758848               |
| SNP_P4_22841_25680670 | NC_021161.1    | Ca_kabuli_chr02 | 25680670                | AA                              | GG              | 1946758850               |
| SNP_P4_22842_25680688 | NC_021161.1    | Ca_kabuli_chr02 | 25680688                | TT                              | CC              | 1946758852               |
| SNP_P4_22843_25683026 | NC_021161.1    | Ca_kabuli_chr02 | 25683026                | TT                              | CC              | 1946758854               |
| SNP_P4_22844_25683074 | NC_021161.1    | Ca_kabuli_chr02 | 25683074                | CC                              | TT              | 1946758856               |
| SNP_P4_22845_25683303 | NC_021161.1    | Ca_kabuli_chr02 | 25683303                | TT                              | CC              | 1946758858               |
| SNP_P4_22846_25683306 | NC_021161.1    | Ca_kabuli_chr02 | 25683306                | TT                              | CC              | 1946758860               |
| SNP_P4_22847_25683329 | NC_021161.1    | Ca_kabuli_chr02 | 25683329                | GG                              | CC              | 1946758862               |
| SNP_P4_22848_25687492 | NC_021161.1    | Ca_kabuli_chr02 | 25687492                | TT                              | AA              | 1946758864               |
| SNP_P4_22849_25708354 | NC_021161.1    | Ca_kabuli_chr02 | 25708354                | TT                              | CC              | 1946758866               |
| SNP_P4_22850_25712940 | NC_021161.1    | Ca_kabuli_chr02 | 25712940                | TT                              | CC              | 1946758868               |
| SNP_P4_22851_25712946 | NC_021161.1    | Ca_kabuli_chr02 | 25712946                | CC                              | AA              | 1946758871               |
| SNP_P4_22852_25712955 | NC_021161.1    | Ca_kabuli_chr02 | 25712955                | AA                              | CC              | 1946758873               |
| SNP_P4_22853_25713199 | NC_021161.1    | Ca_kabuli_chr02 | 25713199                | GG                              | TT              | 1946758875               |
| SNP_P4_22854_25713222 | NC_021161.1    | Ca_kabuli_chr02 | 25713222                | GG                              | AA              | 1946758877               |
| SNP_P4_22855_25713261 | NC_021161.1    | Ca_kabuli_chr02 | 25713261                | CC                              | GG              | 1946758879               |
| SNP_P4_22856_25713295 | NC_021161.1    | Ca_kabuli_chr02 | 25713295                | AA                              | TT              | 1946758881               |
| SNP_P4_22857_25713308 | NC_021161.1    | Ca_kabuli_chr02 | 25713308                | GG                              | AA              | 1946758883               |
| SNP_P4_22858_25713312 | NC_021161.1    | Ca_kabuli_chr02 | 25713312                | CC                              | TT              | 1946758885               |
| SNP_P4_22859_25725670 | NC_021161.1    | Ca_kabuli_chr02 | 25725670                | CC                              | AA              | 1946758887               |
| SNP_P4_22860_25731244 | NC_021161.1    | Ca_kabuli_chr02 | 25731244                | GG                              | CC              | 1946758889               |
| SNP_P4_22861_25732964 | NC_021161.1    | Ca_kabuli_chr02 | 25732964                | GG                              | TT              | 1946758891               |
| SNP_P4_22862_25732973 | NC_021161.1    | Ca_kabuli_chr02 | 25732973                | CC                              | TT              | 1946758893               |
| SNP_P4_22864_25747162 | NC_021161.1    | Ca_kabuli_chr02 | 25747162                | TT                              | AA              | 1946758895               |

| SNPs IDs              | Chromosome IDs | Chromosomes     | Physical positions (bp) | CDC Frontier (Reference genome) | (ILWC46 & LPNB) | NCBI SNPdb Accession IDs |
|-----------------------|----------------|-----------------|-------------------------|---------------------------------|-----------------|--------------------------|
| SNP_P4_22865_25747193 | NC_021161.1    | Ca_kabuli_chr02 | 25747193                | CC                              | TT              | 1946758897               |
| SNP_P4_22866_25747486 | NC_021161.1    | Ca_kabuli_chr02 | 25747486                | TT                              | CC              | 1946758899               |
| SNP_P4_22867_25767934 | NC_021161.1    | Ca_kabuli_chr02 | 25767934                | GG                              | AA              | 1946758901               |
| SNP_P4_22868_25768005 | NC_021161.1    | Ca_kabuli_chr02 | 25768005                | CC                              | GG              | 1946758903               |
| SNP_P4_22870_25788209 | NC_021161.1    | Ca_kabuli_chr02 | 25788209                | AA                              | GG              | 1946758905               |
| SNP_P4_22872_25795239 | NC_021161.1    | Ca_kabuli_chr02 | 25795239                | AA                              | TT              | 1946758908               |
| SNP_P4_22873_25795594 | NC_021161.1    | Ca_kabuli_chr02 | 25795594                | GG                              | AA              | 1946758911               |
| SNP_P4_22874_25809155 | NC_021161.1    | Ca_kabuli_chr02 | 25809155                | AA                              | GG              | 1946758913               |
| SNP_P4_22875_25845523 | NC_021161.1    | Ca_kabuli_chr02 | 25845523                | CC                              | TT              | 1946758915               |
| SNP_P4_22876_25901111 | NC_021161.1    | Ca_kabuli_chr02 | 25901111                | CC                              | GG              | 1946758917               |
| SNP_P4_22878_25914319 | NC_021161.1    | Ca_kabuli_chr02 | 25914319                | TT                              | AA              | 1946758919               |
| SNP_P4_22879_25914320 | NC_021161.1    | Ca_kabuli_chr02 | 25914320                | AA                              | GG              | 1946758921               |
| SNP_P4_22880_25921093 | NC_021161.1    | Ca_kabuli_chr02 | 25921093                | AA                              | CC              | 1946758923               |
| SNP_P4_22881_25921094 | NC_021161.1    | Ca_kabuli_chr02 | 25921094                | TT                              | CC              | 1946758925               |
| SNP_P4_22882_25941432 | NC_021161.1    | Ca_kabuli_chr02 | 25941432                | AA                              | GG              | 1946758927               |
| SNP_P4_22883_25962244 | NC_021161.1    | Ca_kabuli_chr02 | 25962244                | GG                              | TT              | 1946758929               |
| SNP_P4_22884_26053038 | NC_021161.1    | Ca_kabuli_chr02 | 26053038                | TT                              | AA              | 1946758931               |
| SNP_P4_22885_26057915 | NC_021161.1    | Ca_kabuli_chr02 | 26057915                | TT                              | CC              | 1946758933               |
| SNP_P4_22888_26115209 | NC_021161.1    | Ca_kabuli_chr02 | 26115209                | AA                              | TT              | 1946758935               |
| SNP_P4_22889_26408001 | NC_021161.1    | Ca_kabuli_chr02 | 26408001                | TT                              | AA              | 1946758937               |
| SNP_P4_22890_26429675 | NC_021161.1    | Ca_kabuli_chr02 | 26429675                | AA                              | CC              | 1946758939               |
| SNP_P4_22891_26429676 | NC_021161.1    | Ca_kabuli_chr02 | 26429676                | AA                              | TT              | 1946758941               |
| SNP_P4_22892_26438582 | NC_021161.1    | Ca_kabuli_chr02 | 26438582                | TT                              | GG              | 1946758943               |
| SNP_P4_22893_26438837 | NC_021161.1    | Ca_kabuli_chr02 | 26438837                | GG                              | AA              | 1946758945               |
| SNP_P4_22894_26438856 | NC_021161.1    | Ca_kabuli_chr02 | 26438856                | AA                              | GG              | 1946758947               |
| SNP_P4_22895_26446639 | NC_021161.1    | Ca_kabuli_chr02 | 26446639                | GG                              | AA              | 1946758949               |
| SNP_P4_22896_26448557 | NC_021161.1    | Ca_kabuli_chr02 | 26448557                | AA                              | GG              | 1946758951               |
| SNP_P4_22897_26448592 | NC_021161.1    | Ca_kabuli_chr02 | 26448592                | AA                              | GG              | 1946758953               |
| SNP_P4_22898_26448599 | NC_021161.1    | Ca_kabuli_chr02 | 26448599                | AA                              | GG              | 1946758955               |
| SNP_P4_22899_26448880 | NC_021161.1    | Ca_kabuli_chr02 | 26448880                | AA                              | GG              | 1946758957               |
| SNP_P4_22900_26448904 | NC_021161.1    | Ca_kabuli_chr02 | 26448904                | TT                              | CC              | 1946758959               |
| SNP_P4_22901_26471708 | NC_021161.1    | Ca_kabuli_chr02 | 26471708                | GG                              | AA              | 1946758961               |
| SNP_P4_22902_26488103 | NC_021161.1    | Ca_kabuli_chr02 | 26488103                | GG                              | AA              | 1946758963               |
| SNP_P4_22903_26488165 | NC_021161.1    | Ca_kabuli_chr02 | 26488165                | AA                              | TT              | 1946758965               |
| SNP_P4_22904_26488177 | NC_021161.1    | Ca_kabuli_chr02 | 26488177                | AA                              | GG              | 1946758967               |
| SNP_P4_22905_26488211 | NC_021161.1    | Ca_kabuli_chr02 | 26488211                | CC                              | TT              | 1946758968               |
| SNP_P4_22906_26488224 | NC_021161.1    | Ca_kabuli_chr02 | 26488224                | GG                              | TT              | 1946758970               |
| SNP_P4_22907_26488307 | NC_021161.1    | Ca_kabuli_chr02 | 26488307                | CC                              | TT              | 1946758972               |
| SNP_P4_22908_26488330 | NC_021161.1    | Ca_kabuli_chr02 | 26488330                | GG                              | AA              | 1946758974               |
| SNP_P4_22909_26488372 | NC_021161.1    | Ca_kabuli_chr02 | 26488372                | AA                              | GG              | 1946758976               |
| SNP_P4_22910_26488397 | NC_021161.1    | Ca_kabuli_chr02 | 26488397                | AA                              | CC              | 1946758978               |
| SNP_P4_22911_26488403 | NC_021161.1    | Ca_kabuli_chr02 | 26488403                | GG                              | AA              | 1946758980               |

| SNPs IDs              | Chromosome IDs | Chromosomes     | Physical positions (bp) | CDC Frontier (Reference genome) | (ILWC46 & LPNB) | NCBI SNPdb Accession IDs |
|-----------------------|----------------|-----------------|-------------------------|---------------------------------|-----------------|--------------------------|
| SNP_P4_22912_26488443 | NC_021161.1    | Ca_kabuli_chr02 | 26488443                | AA                              | TT              | 1946758982               |
| SNP_P4_22913_26488445 | NC_021161.1    | Ca_kabuli_chr02 | 26488445                | AA                              | TT              | 1946758984               |
| SNP_P4_22914_26488454 | NC_021161.1    | Ca_kabuli_chr02 | 26488454                | AA                              | GG              | 1946758986               |
| SNP_P4_22915_26488465 | NC_021161.1    | Ca_kabuli_chr02 | 26488465                | CC                              | TT              | 1946758988               |
| SNP_P4_22916_26488649 | NC_021161.1    | Ca_kabuli_chr02 | 26488649                | GG                              | AA              | 1946758990               |
| SNP_P4_22917_26504149 | NC_021161.1    | Ca_kabuli_chr02 | 26504149                | AA                              | GG              | 1946758992               |
| SNP_P4_22918_26504422 | NC_021161.1    | Ca_kabuli_chr02 | 26504422                | AA                              | GG              | 1946758994               |
| SNP_P4_22920_26504510 | NC_021161.1    | Ca_kabuli_chr02 | 26504510                | TT                              | CC              | 1946758996               |
| SNP_P4_22921_26504558 | NC_021161.1    | Ca_kabuli_chr02 | 26504558                | AA                              | GG              | 1946758998               |
| SNP_P4_22923_26556676 | NC_021161.1    | Ca_kabuli_chr02 | 26556676                | AA                              | GG              | 1946759000               |
| SNP_P4_22924_26567538 | NC_021161.1    | Ca_kabuli_chr02 | 26567538                | AA                              | GG              | 1946759002               |
| SNP_P4_22925_26589623 | NC_021161.1    | Ca_kabuli_chr02 | 26589623                | GG                              | AA              | 1946759004               |
| SNP_P4_22926_26618660 | NC_021161.1    | Ca_kabuli_chr02 | 26618660                | CC                              | TT              | 1946759006               |
| SNP_P4_22927_26633078 | NC_021161.1    | Ca_kabuli_chr02 | 26633078                | GG                              | AA              | 1946759008               |
| SNP_P4_22928_26675619 | NC_021161.1    | Ca_kabuli_chr02 | 26675619                | AA                              | TT              | 1946759010               |
| SNP_P4_22930_26716080 | NC_021161.1    | Ca_kabuli_chr02 | 26716080                | GG                              | AA              | 1946759012               |
| SNP_P4_22931_26736032 | NC_021161.1    | Ca_kabuli_chr02 | 26736032                | AA                              | GG              | 1946759014               |
| SNP_P4_22932_26736077 | NC_021161.1    | Ca_kabuli_chr02 | 26736077                | TT                              | CC              | 1946759016               |
| SNP_P4_22933_26751807 | NC_021161.1    | Ca_kabuli_chr02 | 26751807                | AA                              | CC              | 1946759018               |
| SNP_P4_22934_26777540 | NC_021161.1    | Ca_kabuli_chr02 | 26777540                | CC                              | TT              | 1946759020               |
| SNP_P4_22937_26842830 | NC_021161.1    | Ca_kabuli_chr02 | 26842830                | GG                              | TT              | 1946759021               |
| SNP_P4_22938_26856381 | NC_021161.1    | Ca_kabuli_chr02 | 26856381                | AA                              | TT              | 1946759023               |
| SNP_P4_22939_26893007 | NC_021161.1    | Ca_kabuli_chr02 | 26893007                | AA                              | GG              | 1946759025               |
| SNP_P4_22940_26901560 | NC_021161.1    | Ca_kabuli_chr02 | 26901560                | AA                              | TT              | 1946759027               |
| SNP_P4_22941_26909733 | NC_021161.1    | Ca_kabuli_chr02 | 26909733                | AA                              | GG              | 1946759029               |
| SNP_P4_22942_26909837 | NC_021161.1    | Ca_kabuli_chr02 | 26909837                | AA                              | GG              | 1946759031               |
| SNP_P4_22943_26910130 | NC_021161.1    | Ca_kabuli_chr02 | 26910130                | AA                              | GG              | 1946759033               |
| SNP_P4_22944_26910131 | NC_021161.1    | Ca_kabuli_chr02 | 26910131                | AA                              | TT              | 1946759035               |
| SNP_P4_22946_26922745 | NC_021161.1    | Ca_kabuli_chr02 | 26922745                | TT                              | AA              | 1946759037               |
| SNP_P4_22947_26925135 | NC_021161.1    | Ca_kabuli_chr02 | 26925135                | CC                              | TT              | 1946759039               |
| SNP_P4_22948_26925509 | NC_021161.1    | Ca_kabuli_chr02 | 26925509                | TT                              | CC              | 1946759041               |
| SNP_P4_22949_26925557 | NC_021161.1    | Ca_kabuli_chr02 | 26925557                | TT                              | CC              | 1946759043               |
| SNP_P4_22950_26925586 | NC_021161.1    | Ca_kabuli_chr02 | 26925586                | TT                              | CC              | 1946759045               |
| SNP_P4_22951_26925591 | NC_021161.1    | Ca_kabuli_chr02 | 26925591                | CC                              | TT              | 1946759047               |
| SNP_P4_22952_26925592 | NC_021161.1    | Ca_kabuli_chr02 | 26925592                | CC                              | TT              | 1946759049               |
| SNP_P4_22953_26937615 | NC_021161.1    | Ca_kabuli_chr02 | 26937615                | AA                              | CC              | 1946759051               |
| SNP_P4_22954_26997894 | NC_021161.1    | Ca_kabuli_chr02 | 26997894                | AA                              | GG              | 1946759053               |
| SNP_P4_22955_27114191 | NC_021161.1    | Ca_kabuli_chr02 | 27114191                | GG                              | AA              | 1946759055               |
| SNP_P4_22956_27133294 | NC_021161.1    | Ca_kabuli_chr02 | 27133294                | CC                              | TT              | 1946759057               |
| SNP_P4_22957_27133298 | NC_021161.1    | Ca_kabuli_chr02 | 27133298                | TT                              | CC              | 1946759059               |
| SNP_P4_22958_27135190 | NC_021161.1    | Ca_kabuli_chr02 | 27135190                | TT                              | CC              | 1946759061               |
| SNP_P4_22959_27135245 | NC_021161.1    | Ca_kabuli_chr02 | 27135245                | TT                              | CC              | 1946759063               |

| SNPs IDs              | Chromosome IDs | Chromosomes     | Physical positions (bp) | CDC Frontier (Reference genome) | (ILWC46 & LPNB) | NCBI SNPdb Accession IDs |
|-----------------------|----------------|-----------------|-------------------------|---------------------------------|-----------------|--------------------------|
| SNP_P4_22960_27137165 | NC_021161.1    | Ca_kabuli_chr02 | 27137165                | AA                              | GG              | 1946759065               |
| SNP_P4_22961_27137386 | NC_021161.1    | Ca_kabuli_chr02 | 27137386                | GG                              | AA              | 1946759067               |
| SNP_P4_22962_27137958 | NC_021161.1    | Ca_kabuli_chr02 | 27137958                | CC                              | TT              | 1946759069               |
| SNP_P4_22963_27137972 | NC_021161.1    | Ca_kabuli_chr02 | 27137972                | CC                              | TT              | 1946759071               |
| SNP_P4_22964_27137981 | NC_021161.1    | Ca_kabuli_chr02 | 27137981                | AA                              | TT              | 1946759073               |
| SNP_P4_22966_27152617 | NC_021161.1    | Ca_kabuli_chr02 | 27152617                | CC                              | TT              | 1946759075               |
| SNP_P4_22967_27156524 | NC_021161.1    | Ca_kabuli_chr02 | 27156524                | TT                              | CC              | 1946759077               |
| SNP_P4_22968_27188170 | NC_021161.1    | Ca_kabuli_chr02 | 27188170                | AA                              | TT              | 1946759079               |
| SNP_P4_22969_27190180 | NC_021161.1    | Ca_kabuli_chr02 | 27190180                | GG                              | TT              | 1946759081               |
| SNP_P4_22970_27190601 | NC_021161.1    | Ca_kabuli_chr02 | 27190601                | TT                              | CC              | 1946759083               |
| SNP_P4_22971_27192449 | NC_021161.1    | Ca_kabuli_chr02 | 27192449                | TT                              | AA              | 1946759085               |
| SNP_P4_22972_27192465 | NC_021161.1    | Ca_kabuli_chr02 | 27192465                | GG                              | AA              | 1946759087               |
| SNP_P4_22973_27192697 | NC_021161.1    | Ca_kabuli_chr02 | 27192697                | GG                              | AA              | 1946759089               |
| SNP_P4_22974_27192707 | NC_021161.1    | Ca_kabuli_chr02 | 27192707                | CC                              | TT              | 1946759091               |
| SNP_P4_22975_27192751 | NC_021161.1    | Ca_kabuli_chr02 | 27192751                | CC                              | TT              | 1946759093               |
| SNP_P4_22976_27192757 | NC_021161.1    | Ca_kabuli_chr02 | 27192757                | AA                              | GG              | 1946759095               |
| SNP_P4_22977_27192778 | NC_021161.1    | Ca_kabuli_chr02 | 27192778                | AA                              | TT              | 1946759097               |
| SNP_P4_22978_27192807 | NC_021161.1    | Ca_kabuli_chr02 | 27192807                | AA                              | CC              | 1946759099               |
| SNP_P4_22979_27192808 | NC_021161.1    | Ca_kabuli_chr02 | 27192808                | GG                              | AA              | 1946759101               |
| SNP_P4_22980_27192809 | NC_021161.1    | Ca_kabuli_chr02 | 27192809                | CC                              | TT              | 1946759103               |
| SNP_P4_22981_27192812 | NC_021161.1    | Ca_kabuli_chr02 | 27192812                | CC                              | TT              | 1946759105               |
| SNP_P4_22982_27192952 | NC_021161.1    | Ca_kabuli_chr02 | 27192952                | CC                              | GG              | 1946759107               |
| SNP_P4_22983_27194429 | NC_021161.1    | Ca_kabuli_chr02 | 27194429                | CC                              | TT              | 1946759109               |
| SNP_P4_22984_27194430 | NC_021161.1    | Ca_kabuli_chr02 | 27194430                | GG                              | AA              | 1946759111               |
| SNP_P4_22985_27194507 | NC_021161.1    | Ca_kabuli_chr02 | 27194507                | CC                              | TT              | 1946759113               |
| SNP_P4_22986_27194541 | NC_021161.1    | Ca_kabuli_chr02 | 27194541                | AA                              | GG              | 1946759115               |
| SNP_P4_22987_27197521 | NC_021161.1    | Ca_kabuli_chr02 | 27197521                | GG                              | AA              | 1946759117               |
| SNP_P4_22988_27251797 | NC_021161.1    | Ca_kabuli_chr02 | 27251797                | GG                              | AA              | 1946759119               |
| SNP_P4_22989_27251825 | NC_021161.1    | Ca_kabuli_chr02 | 27251825                | AA                              | GG              | 1946759121               |
| SNP_P4_22990_27254094 | NC_021161.1    | Ca_kabuli_chr02 | 27254094                | AA                              | TT              | 1946759123               |
| SNP_P4_22991_27254223 | NC_021161.1    | Ca_kabuli_chr02 | 27254223                | AA                              | GG              | 1946759125               |
| SNP_P4_22992_27254232 | NC_021161.1    | Ca_kabuli_chr02 | 27254232                | AA                              | GG              | 1946759128               |
| SNP_P4_22993_27254252 | NC_021161.1    | Ca_kabuli_chr02 | 27254252                | TT                              | CC              | 1946759130               |
| SNP_P4_22994_27254309 | NC_021161.1    | Ca_kabuli_chr02 | 27254309                | CC                              | TT              | 1946759132               |
| SNP_P4_22995_27254319 | NC_021161.1    | Ca_kabuli_chr02 | 27254319                | CC                              | TT              | 1946759134               |
| SNP_P4_22996_27254339 | NC_021161.1    | Ca_kabuli_chr02 | 27254339                | AA                              | GG              | 1946759136               |
| SNP_P4_22997_27254377 | NC_021161.1    | Ca_kabuli_chr02 | 27254377                | TT                              | CC              | 1946759138               |
| SNP_P4_22998_27254394 | NC_021161.1    | Ca_kabuli_chr02 | 27254394                | TT                              | AA              | 1946759139               |
| SNP_P4_22999_27261602 | NC_021161.1    | Ca_kabuli_chr02 | 27261602                | TT                              | AA              | 1946759140               |
| SNP_P4_23000_27261691 | NC_021161.1    | Ca_kabuli_chr02 | 27261691                | TT                              | GG              | 1946759141               |
| SNP_P4_23002_27262003 | NC_021161.1    | Ca_kabuli_chr02 | 27262003                | AA                              | GG              | 1946759142               |
| SNP_P4_23003_27296358 | NC_021161.1    | Ca_kabuli_chr02 | 27296358                | CC                              | TT              | 1946759143               |

| SNPs IDs              | Chromosome IDs | Chromosomes     | Physical positions (bp) | CDC Frontier (Reference genome) | (ILWC46 & LPNB) | NCBI SNPdb Accession IDs |
|-----------------------|----------------|-----------------|-------------------------|---------------------------------|-----------------|--------------------------|
| SNP_P4_23004_27323386 | NC_021161.1    | Ca_kabuli_chr02 | 27323386                | CC                              | TT              | 1946759144               |
| SNP_P4_23005_27325927 | NC_021161.1    | Ca_kabuli_chr02 | 27325927                | CC                              | TT              | 1946759145               |
| SNP_P4_23006_27325945 | NC_021161.1    | Ca_kabuli_chr02 | 27325945                | AA                              | GG              | 1946759146               |
| SNP_P4_23007_27325953 | NC_021161.1    | Ca_kabuli_chr02 | 27325953                | GG                              | CC              | 1946759147               |
| SNP_P4_23008_27325957 | NC_021161.1    | Ca_kabuli_chr02 | 27325957                | GG                              | AA              | 1946759148               |
| SNP_P4_23009_27325958 | NC_021161.1    | Ca_kabuli_chr02 | 27325958                | TT                              | CC              | 1946759149               |
| SNP_P4_23010_27325960 | NC_021161.1    | Ca_kabuli_chr02 | 27325960                | GG                              | TT              | 1946759150               |
| SNP_P4_23011_27325968 | NC_021161.1    | Ca_kabuli_chr02 | 27325968                | CC                              | AA              | 1946759151               |
| SNP_P4_23012_27389470 | NC_021161.1    | Ca_kabuli_chr02 | 27389470                | GG                              | AA              | 1946759152               |
| SNP_P4_23013_27389806 | NC_021161.1    | Ca_kabuli_chr02 | 27389806                | TT                              | GG              | 1946759153               |
| SNP_P4_23014_27418501 | NC_021161.1    | Ca_kabuli_chr02 | 27418501                | AA                              | GG              | 1946759154               |
| SNP_P4_23015_27418511 | NC_021161.1    | Ca_kabuli_chr02 | 27418511                | TT                              | CC              | 1946759155               |
| SNP_P4_23016_27418517 | NC_021161.1    | Ca_kabuli_chr02 | 27418517                | AA                              | GG              | 1946759156               |
| SNP_P4_23017_27418518 | NC_021161.1    | Ca_kabuli_chr02 | 27418518                | AA                              | CC              | 1946759157               |
| SNP_P4_23018_27418526 | NC_021161.1    | Ca_kabuli_chr02 | 27418526                | AA                              | CC              | 1946759158               |
| SNP_P4_23019_27418540 | NC_021161.1    | Ca_kabuli_chr02 | 27418540                | AA                              | GG              | 1946759159               |
| SNP_P4_23020_27418541 | NC_021161.1    | Ca_kabuli_chr02 | 27418541                | CC                              | AA              | 1946759160               |
| SNP_P4_23021_27419378 | NC_021161.1    | Ca_kabuli_chr02 | 27419378                | TT                              | CC              | 1946759161               |
| SNP_P4_23022_27432533 | NC_021161.1    | Ca_kabuli_chr02 | 27432533                | CC                              | TT              | 1946759162               |
| SNP_P4_23023_27432575 | NC_021161.1    | Ca_kabuli_chr02 | 27432575                | CC                              | AA              | 1946759164               |
| SNP_P4_23024_27475164 | NC_021161.1    | Ca_kabuli_chr02 | 27475164                | CC                              | AA              | 1946759166               |
| SNP_P4_23025_27475494 | NC_021161.1    | Ca_kabuli_chr02 | 27475494                | CC                              | TT              | 1946759168               |
| SNP_P4_23026_27491393 | NC_021161.1    | Ca_kabuli_chr02 | 27491393                | TT                              | CC              | 1946759170               |
| SNP_P4_23027_27491677 | NC_021161.1    | Ca_kabuli_chr02 | 27491677                | TT                              | CC              | 1946759172               |
| SNP_P4_23028_27491694 | NC_021161.1    | Ca_kabuli_chr02 | 27491694                | AA                              | GG              | 1946759174               |
| SNP_P4_23029_27491695 | NC_021161.1    | Ca_kabuli_chr02 | 27491695                | AA                              | GG              | 1946759176               |
| SNP_P4_23030_27491742 | NC_021161.1    | Ca_kabuli_chr02 | 27491742                | AA                              | TT              | 1946759177               |
| SNP_P4_23031_27491764 | NC_021161.1    | Ca_kabuli_chr02 | 27491764                | GG                              | AA              | 1946759179               |
| SNP_P4_23032_27491771 | NC_021161.1    | Ca_kabuli_chr02 | 27491771                | AA                              | TT              | 1946759181               |
| SNP_P4_23033_27491774 | NC_021161.1    | Ca_kabuli_chr02 | 27491774                | CC                              | TT              | 1946759183               |
| SNP_P4_23034_27491776 | NC_021161.1    | Ca_kabuli_chr02 | 27491776                | AA                              | CC              | 1946759185               |
| SNP_P4_23035_27504025 | NC_021161.1    | Ca_kabuli_chr02 | 27504025                | AA                              | TT              | 1946759187               |
| SNP_P4_23037_27525855 | NC_021161.1    | Ca_kabuli_chr02 | 27525855                | GG                              | AA              | 1946759189               |
| SNP_P4_23038_27528183 | NC_021161.1    | Ca_kabuli_chr02 | 27528183                | AA                              | GG              | 1946759191               |
| SNP_P4_23039_27528421 | NC_021161.1    | Ca_kabuli_chr02 | 27528421                | TT                              | AA              | 1946759193               |
| SNP_P4_23040_27528453 | NC_021161.1    | Ca_kabuli_chr02 | 27528453                | TT                              | AA              | 1946759195               |
| SNP_P4_23041_27528463 | NC_021161.1    | Ca_kabuli_chr02 | 27528463                | TT                              | CC              | 1946759196               |
| SNP_P4_23042_27528474 | NC_021161.1    | Ca_kabuli_chr02 | 27528474                | AA                              | GG              | 1946759198               |
| SNP_P4_23043_27528479 | NC_021161.1    | Ca_kabuli_chr02 | 27528479                | TT                              | CC              | 1946759200               |
| SNP_P4_23044_27528487 | NC_021161.1    | Ca_kabuli_chr02 | 27528487                | AA                              | TT              | 1946759202               |
| SNP_P4_23045_27528525 | NC_021161.1    | Ca_kabuli_chr02 | 27528525                | CC                              | AA              | 1946759204               |
| SNP_P4_23046_27532782 | NC_021161.1    | Ca_kabuli_chr02 | 27532782                | CC                              | TT              | 1946759206               |

| SNPs IDs              | Chromosome IDs | Chromosomes     | Physical positions (bp) | CDC Frontier (Reference genome) | (ILWC46 & LPNB) | NCBI SNPdb Accession IDs |
|-----------------------|----------------|-----------------|-------------------------|---------------------------------|-----------------|--------------------------|
| SNP_P4_23047_27539182 | NC_021161.1    | Ca_kabuli_chr02 | 27539182                | GG                              | AA              | 1946759208               |
| SNP_P4_23048_27539342 | NC_021161.1    | Ca_kabuli_chr02 | 27539342                | TT                              | AA              | 1946759210               |
| SNP_P4_23049_27539447 | NC_021161.1    | Ca_kabuli_chr02 | 27539447                | AA                              | TT              | 1946759212               |
| SNP_P4_23050_27539529 | NC_021161.1    | Ca_kabuli_chr02 | 27539529                | CC                              | GG              | 1946759214               |
| SNP_P4_23051_27539605 | NC_021161.1    | Ca_kabuli_chr02 | 27539605                | TT                              | CC              | 1946759216               |
| SNP_P4_23052_27539640 | NC_021161.1    | Ca_kabuli_chr02 | 27539640                | AA                              | GG              | 1946759218               |
| SNP_P4_23053_27539799 | NC_021161.1    | Ca_kabuli_chr02 | 27539799                | GG                              | AA              | 1946759220               |
| SNP_P4_23054_27539827 | NC_021161.1    | Ca_kabuli_chr02 | 27539827                | CC                              | AA              | 1946759222               |
| SNP_P4_23055_27540390 | NC_021161.1    | Ca_kabuli_chr02 | 27540390                | TT                              | AA              | 1946759224               |
| SNP_P4_23056_27540430 | NC_021161.1    | Ca_kabuli_chr02 | 27540430                | GG                              | TT              | 1946759226               |
| SNP_P4_23058_27544449 | NC_021161.1    | Ca_kabuli_chr02 | 27544449                | GG                              | AA              | 1946759228               |
| SNP_P4_23059_27545454 | NC_021161.1    | Ca_kabuli_chr02 | 27545454                | GG                              | AA              | 1946759230               |
| SNP_P4_23060_27581289 | NC_021161.1    | Ca_kabuli_chr02 | 27581289                | CC                              | TT              | 1946759232               |
| SNP_P4_23061_27609583 | NC_021161.1    | Ca_kabuli_chr02 | 27609583                | TT                              | CC              | 1946759234               |
| SNP_P4_23063_27612232 | NC_021161.1    | Ca_kabuli_chr02 | 27612232                | AA                              | TT              | 1946759236               |
| SNP_P4_23064_27630744 | NC_021161.1    | Ca_kabuli_chr02 | 27630744                | TT                              | CC              | 1946759238               |
| SNP_P4_23066_27647448 | NC_021161.1    | Ca_kabuli_chr02 | 27647448                | AA                              | GG              | 1946759240               |
| SNP_P4_23067_27647451 | NC_021161.1    | Ca_kabuli_chr02 | 27647451                | AA                              | GG              | 1946759242               |
| SNP_P4_23068_27647776 | NC_021161.1    | Ca_kabuli_chr02 | 27647776                | TT                              | CC              | 1946759244               |
| SNP_P4_23069_27647823 | NC_021161.1    | Ca_kabuli_chr02 | 27647823                | AA                              | GG              | 1946759246               |
| SNP_P4_23070_27647856 | NC_021161.1    | Ca_kabuli_chr02 | 27647856                | TT                              | CC              | 1946759248               |
| SNP_P4_23072_27730523 | NC_021161.1    | Ca_kabuli_chr02 | 27730523                | CC                              | TT              | 1946759250               |
| SNP_P4_23073_27742587 | NC_021161.1    | Ca_kabuli_chr02 | 27742587                | AA                              | GG              | 1946759252               |
| SNP_P4_23074_27742973 | NC_021161.1    | Ca_kabuli_chr02 | 27742973                | TT                              | GG              | 1946759254               |
| SNP_P4_23075_27758146 | NC_021161.1    | Ca_kabuli_chr02 | 27758146                | CC                              | GG              | 1946759256               |
| SNP_P4_23076_27758153 | NC_021161.1    | Ca_kabuli_chr02 | 27758153                | TT                              | CC              | 1946759258               |
| SNP_P4_23077_27758174 | NC_021161.1    | Ca_kabuli_chr02 | 27758174                | TT                              | CC              | 1946759260               |
| SNP_P4_23082_27807611 | NC_021161.1    | Ca_kabuli_chr02 | 27807611                | GG                              | AA              | 1946759262               |
| SNP_P4_23083_27808198 | NC_021161.1    | Ca_kabuli_chr02 | 27808198                | TT                              | AA              | 1946759268               |
| SNP_P4_23084_27808199 | NC_021161.1    | Ca_kabuli_chr02 | 27808199                | AA                              | CC              | 1946759270               |
| SNP_P4_23085_27813345 | NC_021161.1    | Ca_kabuli_chr02 | 27813345                | TT                              | CC              | 1946759272               |
| SNP_P4_23086_27887887 | NC_021161.1    | Ca_kabuli_chr02 | 27887887                | TT                              | CC              | 1946759274               |
| SNP_P4_23087_27888325 | NC_021161.1    | Ca_kabuli_chr02 | 27888325                | TT                              | CC              | 1946759276               |
| SNP_P4_23088_27888404 | NC_021161.1    | Ca_kabuli_chr02 | 27888404                | AA                              | CC              | 1946759278               |
| SNP_P4_23089_27888412 | NC_021161.1    | Ca_kabuli_chr02 | 27888412                | AA                              | CC              | 1946759280               |
| SNP_P4_23091_27930105 | NC_021161.1    | Ca_kabuli_chr02 | 27930105                | AA                              | GG              | 1946759282               |
| SNP_P4_23092_27965204 | NC_021161.1    | Ca_kabuli_chr02 | 27965204                | GG                              | AA              | 1946759284               |
| SNP_P4_23093_27965332 | NC_021161.1    | Ca_kabuli_chr02 | 27965332                | AA                              | CC              | 1946759286               |
| SNP_P4_23094_27965344 | NC_021161.1    | Ca_kabuli_chr02 | 27965344                | CC                              | TT              | 1946759288               |
| SNP_P4_23095_27965347 | NC_021161.1    | Ca_kabuli_chr02 | 27965347                | GG                              | AA              | 1946759290               |
| SNP_P4_23096_27965363 | NC_021161.1    | Ca_kabuli_chr02 | 27965363                | TT                              | CC              | 1946759292               |
| SNP_P4_23097_27973663 | NC_021161.1    | Ca_kabuli_chr02 | 27973663                | AA                              | TT              | 1946759294               |

| SNPs IDs              | Chromosome IDs | Chromosomes     | Physical positions (bp) | CDC Frontier (Reference genome) | (ILWC46 & LPNB) | NCBI SNPdb Accession IDs |
|-----------------------|----------------|-----------------|-------------------------|---------------------------------|-----------------|--------------------------|
| SNP_P4_23098_27982418 | NC_021161.1    | Ca_kabuli_chr02 | 27982418                | GG                              | AA              | 1946759296               |
| SNP_P4_23099_27995256 | NC_021161.1    | Ca_kabuli_chr02 | 27995256                | CC                              | TT              | 1946759298               |
| SNP_P4_23100_28009662 | NC_021161.1    | Ca_kabuli_chr02 | 28009662                | GG                              | TT              | 1946759300               |
| SNP_P4_23103_28038040 | NC_021161.1    | Ca_kabuli_chr02 | 28038040                | AA                              | TT              | 1946759302               |
| SNP_P4_23104_28039647 | NC_021161.1    | Ca_kabuli_chr02 | 28039647                | CC                              | TT              | 1946759304               |
| SNP_P4_23105_28108505 | NC_021161.1    | Ca_kabuli_chr02 | 28108505                | AA                              | GG              | 1946759306               |
| SNP_P4_23106_28112683 | NC_021161.1    | Ca_kabuli_chr02 | 28112683                | TT                              | CC              | 1946759308               |
| SNP_P4_23107_28143723 | NC_021161.1    | Ca_kabuli_chr02 | 28143723                | CC                              | TT              | 1946759310               |
| SNP_P4_23108_28143980 | NC_021161.1    | Ca_kabuli_chr02 | 28143980                | GG                              | AA              | 1946759312               |
| SNP_P4_23109_28143997 | NC_021161.1    | Ca_kabuli_chr02 | 28143997                | AA                              | GG              | 1946759314               |
| SNP_P4_23110_28144022 | NC_021161.1    | Ca_kabuli_chr02 | 28144022                | TT                              | CC              | 1946759316               |
| SNP_P4_23111_28144024 | NC_021161.1    | Ca_kabuli_chr02 | 28144024                | GG                              | AA              | 1946759318               |
| SNP_P4_23112_28148586 | NC_021161.1    | Ca_kabuli_chr02 | 28148586                | CC                              | TT              | 1946759320               |
| SNP_P4_23113_28162248 | NC_021161.1    | Ca_kabuli_chr02 | 28162248                | TT                              | CC              | 1946759322               |
| SNP_P4_23114_28167393 | NC_021161.1    | Ca_kabuli_chr02 | 28167393                | TT                              | AA              | 1946759324               |
| SNP_P4_23115_28222734 | NC_021161.1    | Ca_kabuli_chr02 | 28222734                | AA                              | GG              | 1946759326               |
| SNP_P4_23116_28233576 | NC_021161.1    | Ca_kabuli_chr02 | 28233576                | CC                              | TT              | 1946759328               |
| SNP_P4_23120_28240061 | NC_021161.1    | Ca_kabuli_chr02 | 28240061                | TT                              | GG              | 1946759330               |
| SNP_P4_23121_28240429 | NC_021161.1    | Ca_kabuli_chr02 | 28240429                | CC                              | AA              | 1946759332               |
| SNP_P4_23122_28252213 | NC_021161.1    | Ca_kabuli_chr02 | 28252213                | CC                              | GG              | 1946759334               |
| SNP_P4_23123_28252259 | NC_021161.1    | Ca_kabuli_chr02 | 28252259                | TT                              | AA              | 1946759336               |
| SNP_P4_23124_28252263 | NC_021161.1    | Ca_kabuli_chr02 | 28252263                | AA                              | GG              | 1946759338               |
| SNP_P4_23125_28252265 | NC_021161.1    | Ca_kabuli_chr02 | 28252265                | AA                              | TT              | 1946759340               |
| SNP_P4_23126_28252267 | NC_021161.1    | Ca_kabuli_chr02 | 28252267                | AA                              | TT              | 1946759342               |
| SNP_P4_23127_28252269 | NC_021161.1    | Ca_kabuli_chr02 | 28252269                | TT                              | CC              | 1946759344               |
| SNP_P4_23128_28252311 | NC_021161.1    | Ca_kabuli_chr02 | 28252311                | GG                              | TT              | 1946759346               |
| SNP_P4_23129_28252519 | NC_021161.1    | Ca_kabuli_chr02 | 28252519                | AA                              | GG              | 1946759348               |
| SNP_P4_23130_28252520 | NC_021161.1    | Ca_kabuli_chr02 | 28252520                | GG                              | AA              | 1946759350               |
| SNP_P4_23131_28252537 | NC_021161.1    | Ca_kabuli_chr02 | 28252537                | GG                              | AA              | 1946759352               |
| SNP_P4_23132_28252574 | NC_021161.1    | Ca_kabuli_chr02 | 28252574                | TT                              | GG              | 1946759354               |
| SNP_P4_23133_28252608 | NC_021161.1    | Ca_kabuli_chr02 | 28252608                | CC                              | TT              | 1946759357               |
| SNP_P4_23134_28252622 | NC_021161.1    | Ca_kabuli_chr02 | 28252622                | CC                              | TT              | 1946759359               |
| SNP_P4_23135_28252635 | NC_021161.1    | Ca_kabuli_chr02 | 28252635                | GG                              | AA              | 1946759361               |
| SNP_P4_23136_28252662 | NC_021161.1    | Ca_kabuli_chr02 | 28252662                | AA                              | TT              | 1946759363               |
| SNP_P4_23137_28252878 | NC_021161.1    | Ca_kabuli_chr02 | 28252878                | AA                              | CC              | 1946759365               |
| SNP_P4_23138_28252884 | NC_021161.1    | Ca_kabuli_chr02 | 28252884                | GG                              | TT              | 1946759367               |
| SNP_P4_23139_28252885 | NC_021161.1    | Ca_kabuli_chr02 | 28252885                | AA                              | GG              | 1946759369               |
| SNP_P4_23140_28252886 | NC_021161.1    | Ca_kabuli_chr02 | 28252886                | TT                              | AA              | 1946759371               |
| SNP_P4_23141_28253006 | NC_021161.1    | Ca_kabuli_chr02 | 28253006                | CC                              | TT              | 1946759373               |
| SNP_P4_23142_28253021 | NC_021161.1    | Ca_kabuli_chr02 | 28253021                | GG                              | TT              | 1946759376               |
| SNP_P4_23143_28253215 | NC_021161.1    | Ca_kabuli_chr02 | 28253215                | AA                              | CC              | 1946759378               |
| SNP_P4_23144_28253229 | NC_021161.1    | Ca_kabuli_chr02 | 28253229                | TT                              | GG              | 1946759380               |



| SNPs IDs              | Chromosome IDs | Chromosomes     | Physical positions (bp) | CDC Frontier (Reference genome) | (ILWC46 & LPNB) | NCBI SNPdb Accession IDs |
|-----------------------|----------------|-----------------|-------------------------|---------------------------------|-----------------|--------------------------|
| SNP_P4_23145_28253781 | NC_021161.1    | Ca_kabuli_chr02 | 28253781                | CC                              | TT              | 1946759382               |
| SNP_P4_23146_28259595 | NC_021161.1    | Ca_kabuli_chr02 | 28259595                | CC                              | TT              | 1946759384               |
| SNP_P4_23147_28259723 | NC_021161.1    | Ca_kabuli_chr02 | 28259723                | AA                              | TT              | 1946759386               |
| SNP_P4_23149_28262541 | NC_021161.1    | Ca_kabuli_chr02 | 28262541                | CC                              | TT              | 1946759388               |
| SNP_P4_23150_28262543 | NC_021161.1    | Ca_kabuli_chr02 | 28262543                | AA                              | CC              | 1946759390               |
| SNP_P4_23151_28262677 | NC_021161.1    | Ca_kabuli_chr02 | 28262677                | GG                              | TT              | 1946759392               |
| SNP_P4_23152_28262687 | NC_021161.1    | Ca_kabuli_chr02 | 28262687                | GG                              | TT              | 1946759394               |
| SNP_P4_23153_28262741 | NC_021161.1    | Ca_kabuli_chr02 | 28262741                | CC                              | AA              | 1946759396               |
| SNP_P4_23154_28262742 | NC_021161.1    | Ca_kabuli_chr02 | 28262742                | TT                              | CC              | 1946759398               |
| SNP_P4_23155_28262743 | NC_021161.1    | Ca_kabuli_chr02 | 28262743                | GG                              | AA              | 1946759400               |
| SNP_P4_23156_28262908 | NC_021161.1    | Ca_kabuli_chr02 | 28262908                | CC                              | AA              | 1946759402               |
| SNP_P4_23157_28262956 | NC_021161.1    | Ca_kabuli_chr02 | 28262956                | TT                              | GG              | 1946759404               |
| SNP_P4_23158_28262999 | NC_021161.1    | Ca_kabuli_chr02 | 28262999                | TT                              | GG              | 1946759406               |
| SNP_P4_23159_28263061 | NC_021161.1    | Ca_kabuli_chr02 | 28263061                | AA                              | GG              | 1946759408               |
| SNP_P4_23160_28263068 | NC_021161.1    | Ca_kabuli_chr02 | 28263068                | TT                              | GG              | 1946759410               |
| SNP_P4_23161_28263130 | NC_021161.1    | Ca_kabuli_chr02 | 28263130                | GG                              | AA              | 1946759412               |
| SNP_P4_23162_28263142 | NC_021161.1    | Ca_kabuli_chr02 | 28263142                | TT                              | CC              | 1946759414               |
| SNP_P4_23163_28263153 | NC_021161.1    | Ca_kabuli_chr02 | 28263153                | TT                              | CC              | 1946759416               |
| SNP_P4_23164_28270699 | NC_021161.1    | Ca_kabuli_chr02 | 28270699                | CC                              | TT              | 1946759418               |
| SNP_P4_23165_28282183 | NC_021161.1    | Ca_kabuli_chr02 | 28282183                | AA                              | GG              | 1946759420               |
| SNP_P4_23166_28284368 | NC_021161.1    | Ca_kabuli_chr02 | 28284368                | GG                              | AA              | 1946759423               |
| SNP_P4_23167_28284392 | NC_021161.1    | Ca_kabuli_chr02 | 28284392                | TT                              | AA              | 1946759425               |
| SNP_P4_23168_28284395 | NC_021161.1    | Ca_kabuli_chr02 | 28284395                | GG                              | TT              | 1946759427               |
| SNP_P4_23169_28284447 | NC_021161.1    | Ca_kabuli_chr02 | 28284447                | AA                              | GG              | 1946759429               |
| SNP_P4_23170_28304303 | NC_021161.1    | Ca_kabuli_chr02 | 28304303                | TT                              | CC              | 1946759431               |
| SNP_P4_23172_28374881 | NC_021161.1    | Ca_kabuli_chr02 | 28374881                | CC                              | TT              | 1946759433               |
| SNP_P4_23173_28388267 | NC_021161.1    | Ca_kabuli_chr02 | 28388267                | TT                              | CC              | 1946759435               |
| SNP_P4_23174_28388662 | NC_021161.1    | Ca_kabuli_chr02 | 28388662                | CC                              | TT              | 1946759437               |
| SNP_P4_23175_28392565 | NC_021161.1    | Ca_kabuli_chr02 | 28392565                | TT                              | GG              | 1946759439               |
| SNP_P4_23176_28395901 | NC_021161.1    | Ca_kabuli_chr02 | 28395901                | AA                              | TT              | 1946759441               |
| SNP_P4_23177_28395938 | NC_021161.1    | Ca_kabuli_chr02 | 28395938                | GG                              | AA              | 1946759443               |
| SNP_P4_23178_28396018 | NC_021161.1    | Ca_kabuli_chr02 | 28396018                | CC                              | GG              | 1946759445               |
| SNP_P4_23179_28396088 | NC_021161.1    | Ca_kabuli_chr02 | 28396088                | GG                              | AA              | 1946759447               |
| SNP_P4_23180_28396172 | NC_021161.1    | Ca_kabuli_chr02 | 28396172                | GG                              | AA              | 1946759449               |
| SNP_P4_23181_28396288 | NC_021161.1    | Ca_kabuli_chr02 | 28396288                | AA                              | TT              | 1946759451               |
| SNP_P4_23182_28396363 | NC_021161.1    | Ca_kabuli_chr02 | 28396363                | GG                              | TT              | 1946759453               |
| SNP_P4_23183_28396386 | NC_021161.1    | Ca_kabuli_chr02 | 28396386                | GG                              | CC              | 1946759455               |
| SNP_P4_23185_28414077 | NC_021161.1    | Ca_kabuli_chr02 | 28414077                | TT                              | GG              | 1946759457               |
| SNP_P4_23186_28425797 | NC_021161.1    | Ca_kabuli_chr02 | 28425797                | CC                              | TT              | 1946759459               |
| SNP_P4_23188_28465020 | NC_021161.1    | Ca_kabuli_chr02 | 28465020                | CC                              | AA              | 1946759461               |
| SNP_P4_23189_28465218 | NC_021161.1    | Ca_kabuli_chr02 | 28465218                | AA                              | GG              | 1946759463               |
| SNP_P4_23191_28465280 | NC_021161.1    | Ca_kabuli_chr02 | 28465280                | AA                              | CC              | 1946759465               |

| SNPs IDs              | Chromosome IDs | Chromosomes     | Physical positions (bp) | CDC Frontier (Reference genome) | (ILWC46 & LPNB) | NCBI SNPdb Accession IDs |
|-----------------------|----------------|-----------------|-------------------------|---------------------------------|-----------------|--------------------------|
| SNP_P4_23192_28465329 | NC_021161.1    | Ca_kabuli_chr02 | 28465329                | AA                              | TT              | 1946759467               |
| SNP_P4_23193_28465338 | NC_021161.1    | Ca_kabuli_chr02 | 28465338                | TT                              | AA              | 1946759469               |
| SNP_P4_23194_28465397 | NC_021161.1    | Ca_kabuli_chr02 | 28465397                | TT                              | CC              | 1946759471               |
| SNP_P4_23195_28465399 | NC_021161.1    | Ca_kabuli_chr02 | 28465399                | GG                              | AA              | 1946759473               |
| SNP_P4_23197_28465525 | NC_021161.1    | Ca_kabuli_chr02 | 28465525                | AA                              | GG              | 1946759475               |
| SNP_P4_23199_28465638 | NC_021161.1    | Ca_kabuli_chr02 | 28465638                | GG                              | AA              | 1946759477               |
| SNP_P4_23201_28483775 | NC_021161.1    | Ca_kabuli_chr02 | 28483775                | AA                              | GG              | 1946759479               |
| SNP_P4_23202_28498024 | NC_021161.1    | Ca_kabuli_chr02 | 28498024                | TT                              | CC              | 1946759481               |
| SNP_P4_23203_28498031 | NC_021161.1    | Ca_kabuli_chr02 | 28498031                | AA                              | CC              | 1946759483               |
| SNP_P4_23204_28498136 | NC_021161.1    | Ca_kabuli_chr02 | 28498136                | AA                              | GG              | 1946759485               |
| SNP_P4_23205_28498478 | NC_021161.1    | Ca_kabuli_chr02 | 28498478                | TT                              | CC              | 1946759487               |
| SNP_P4_23206_28501064 | NC_021161.1    | Ca_kabuli_chr02 | 28501064                | AA                              | CC              | 1946759489               |
| SNP_P4_23207_28501122 | NC_021161.1    | Ca_kabuli_chr02 | 28501122                | TT                              | CC              | 1946759491               |
| SNP_P4_23208_28501139 | NC_021161.1    | Ca_kabuli_chr02 | 28501139                | CC                              | TT              | 1946759493               |
| SNP_P4_23209_28501160 | NC_021161.1    | Ca_kabuli_chr02 | 28501160                | GG                              | CC              | 1946759496               |
| SNP_P4_23210_28501257 | NC_021161.1    | Ca_kabuli_chr02 | 28501257                | AA                              | GG              | 1946759498               |
| SNP_P4_23211_28513376 | NC_021161.1    | Ca_kabuli_chr02 | 28513376                | GG                              | TT              | 1946759500               |
| SNP_P4_23212_28513377 | NC_021161.1    | Ca_kabuli_chr02 | 28513377                | CC                              | AA              | 1946759502               |
| SNP_P4_23213_28519899 | NC_021161.1    | Ca_kabuli_chr02 | 28519899                | TT                              | GG              | 1946759504               |
| SNP_P4_23214_28519900 | NC_021161.1    | Ca_kabuli_chr02 | 28519900                | GG                              | AA              | 1946759506               |
| SNP_P4_23215_28525470 | NC_021161.1    | Ca_kabuli_chr02 | 28525470                | GG                              | AA              | 1946759508               |
| SNP_P4_23217_28567396 | NC_021161.1    | Ca_kabuli_chr02 | 28567396                | GG                              | AA              | 1946759510               |
| SNP_P4_23218_28567397 | NC_021161.1    | Ca_kabuli_chr02 | 28567397                | TT                              | CC              | 1946759512               |
| SNP_P4_23220_28583249 | NC_021161.1    | Ca_kabuli_chr02 | 28583249                | AA                              | GG              | 1946759515               |
| SNP_P4_23221_28583283 | NC_021161.1    | Ca_kabuli_chr02 | 28583283                | CC                              | TT              | 1946759517               |
| SNP_P4_23222_28583289 | NC_021161.1    | Ca_kabuli_chr02 | 28583289                | TT                              | GG              | 1946759519               |
| SNP_P4_23223_28583377 | NC_021161.1    | Ca_kabuli_chr02 | 28583377                | GG                              | AA              | 1946759521               |
| SNP_P4_23224_28583409 | NC_021161.1    | Ca_kabuli_chr02 | 28583409                | TT                              | CC              | 1946759523               |
| SNP_P4_23225_28583585 | NC_021161.1    | Ca_kabuli_chr02 | 28583585                | CC                              | TT              | 1946759525               |
| SNP_P4_23226_28604532 | NC_021161.1    | Ca_kabuli_chr02 | 28604532                | AA                              | GG              | 1946759527               |
| SNP_P4_23227_28604594 | NC_021161.1    | Ca_kabuli_chr02 | 28604594                | TT                              | CC              | 1946759529               |
| SNP_P4_23229_28618389 | NC_021161.1    | Ca_kabuli_chr02 | 28618389                | CC                              | TT              | 1946759531               |
| SNP_P4_23230_28625021 | NC_021161.1    | Ca_kabuli_chr02 | 28625021                | GG                              | AA              | 1946759533               |
| SNP_P4_23231_28631794 | NC_021161.1    | Ca_kabuli_chr02 | 28631794                | TT                              | AA              | 1946759535               |
| SNP_P4_23232_28632092 | NC_021161.1    | Ca_kabuli_chr02 | 28632092                | AA                              | TT              | 1946759537               |
| SNP_P4_23233_28632168 | NC_021161.1    | Ca_kabuli_chr02 | 28632168                | CC                              | GG              | 1946759538               |
| SNP_P4_23234_28632202 | NC_021161.1    | Ca_kabuli_chr02 | 28632202                | TT                              | CC              | 1946759539               |
| SNP_P4_23235_28632464 | NC_021161.1    | Ca_kabuli_chr02 | 28632464                | GG                              | AA              | 1946759540               |
| SNP_P4_23236_28664882 | NC_021161.1    | Ca_kabuli_chr02 | 28664882                | TT                              | CC              | 1946759541               |
| SNP_P4_23237_28668097 | NC_021161.1    | Ca_kabuli_chr02 | 28668097                | AA                              | GG              | 1946759542               |
| SNP_P4_23238_28669813 | NC_021161.1    | Ca_kabuli_chr02 | 28669813                | TT                              | AA              | 1946759544               |
| SNP_P4_23239_28676502 | NC_021161.1    | Ca_kabuli_chr02 | 28676502                | GG                              | TT              | 1946759546               |

| SNPs IDs              | Chromosome IDs | Chromosomes     | Physical positions (bp) | CDC Frontier (Reference genome) | (ILWC46 & LPNB) | NCBI SNPdb Accession IDs |
|-----------------------|----------------|-----------------|-------------------------|---------------------------------|-----------------|--------------------------|
| SNP_P4_23240_28687436 | NC_021161.1    | Ca_kabuli_chr02 | 28687436                | CC                              | TT              | 1946759548               |
| SNP_P4_23241_28708880 | NC_021161.1    | Ca_kabuli_chr02 | 28708880                | TT                              | CC              | 1946759550               |
| SNP_P4_23243_28723036 | NC_021161.1    | Ca_kabuli_chr02 | 28723036                | GG                              | CC              | 1946759552               |
| SNP_P4_23244_28723066 | NC_021161.1    | Ca_kabuli_chr02 | 28723066                | GG                              | CC              | 1946759554               |
| SNP_P4_23245_28723136 | NC_021161.1    | Ca_kabuli_chr02 | 28723136                | CC                              | AA              | 1946759556               |
| SNP_P4_23246_28723705 | NC_021161.1    | Ca_kabuli_chr02 | 28723705                | GG                              | TT              | 1946759558               |
| SNP_P4_23247_28751373 | NC_021161.1    | Ca_kabuli_chr02 | 28751373                | TT                              | CC              | 1946759560               |
| SNP_P4_23248_28765073 | NC_021161.1    | Ca_kabuli_chr02 | 28765073                | TT                              | CC              | 1946759562               |
| SNP_P4_23249_28768702 | NC_021161.1    | Ca_kabuli_chr02 | 28768702                | CC                              | TT              | 1946759564               |
| SNP_P4_23250_28794222 | NC_021161.1    | Ca_kabuli_chr02 | 28794222                | GG                              | AA              | 1946759566               |
| SNP_P4_23251_28794264 | NC_021161.1    | Ca_kabuli_chr02 | 28794264                | AA                              | GG              | 1946759568               |
| SNP_P4_23252_28802525 | NC_021161.1    | Ca_kabuli_chr02 | 28802525                | CC                              | TT              | 1946759570               |
| SNP_P4_23253_28811493 | NC_021161.1    | Ca_kabuli_chr02 | 28811493                | AA                              | TT              | 1946759572               |
| SNP_P4_23254_28817327 | NC_021161.1    | Ca_kabuli_chr02 | 28817327                | CC                              | GG              | 1946759574               |
| SNP_P4_23255_28817962 | NC_021161.1    | Ca_kabuli_chr02 | 28817962                | CC                              | TT              | 1946759576               |
| SNP_P4_23256_28818200 | NC_021161.1    | Ca_kabuli_chr02 | 28818200                | GG                              | CC              | 1946759578               |
| SNP_P4_23257_28828420 | NC_021161.1    | Ca_kabuli_chr02 | 28828420                | CC                              | AA              | 1946759580               |
| SNP_P4_23258_28828441 | NC_021161.1    | Ca_kabuli_chr02 | 28828441                | AA                              | GG              | 1946759582               |
| SNP_P4_23259_28828476 | NC_021161.1    | Ca_kabuli_chr02 | 28828476                | CC                              | TT              | 1946759584               |
| SNP_P4_23260_28833750 | NC_021161.1    | Ca_kabuli_chr02 | 28833750                | TT                              | CC              | 1946759586               |
| SNP_P4_23261_28834128 | NC_021161.1    | Ca_kabuli_chr02 | 28834128                | TT                              | CC              | 1946759588               |
| SNP_P4_23262_28834173 | NC_021161.1    | Ca_kabuli_chr02 | 28834173                | CC                              | TT              | 1946759590               |
| SNP_P4_23263_28842979 | NC_021161.1    | Ca_kabuli_chr02 | 28842979                | CC                              | TT              | 1946759592               |
| SNP_P4_23264_28856735 | NC_021161.1    | Ca_kabuli_chr02 | 28856735                | TT                              | AA              | 1946759594               |
| SNP_P4_23265_28861321 | NC_021161.1    | Ca_kabuli_chr02 | 28861321                | CC                              | AA              | 1946759596               |
| SNP_P4_23266_28863290 | NC_021161.1    | Ca_kabuli_chr02 | 28863290                | TT                              | CC              | 1946759598               |
| SNP_P4_23267_28873626 | NC_021161.1    | Ca_kabuli_chr02 | 28873626                | AA                              | TT              | 1946759600               |
| SNP_P4_23269_28873979 | NC_021161.1    | Ca_kabuli_chr02 | 28873979                | AA                              | GG              | 1946759602               |
| SNP_P4_23270_28889127 | NC_021161.1    | Ca_kabuli_chr02 | 28889127                | AA                              | CC              | 1946759604               |
| SNP_P4_23271_28889148 | NC_021161.1    | Ca_kabuli_chr02 | 28889148                | CC                              | GG              | 1946759606               |
| SNP_P4_23272_28889331 | NC_021161.1    | Ca_kabuli_chr02 | 28889331                | CC                              | TT              | 1946759608               |
| SNP_P4_23273_28889341 | NC_021161.1    | Ca_kabuli_chr02 | 28889341                | AA                              | GG              | 1946759610               |
| SNP_P4_23274_28889354 | NC_021161.1    | Ca_kabuli_chr02 | 28889354                | TT                              | CC              | 1946759612               |
| SNP_P4_23275_28889400 | NC_021161.1    | Ca_kabuli_chr02 | 28889400                | AA                              | GG              | 1946759614               |
| SNP_P4_23276_28889449 | NC_021161.1    | Ca_kabuli_chr02 | 28889449                | GG                              | AA              | 1946759616               |
| SNP_P4_23277_28889456 | NC_021161.1    | Ca_kabuli_chr02 | 28889456                | TT                              | CC              | 1946759618               |
| SNP_P4_23278_28889475 | NC_021161.1    | Ca_kabuli_chr02 | 28889475                | TT                              | CC              | 1946759620               |
| SNP_P4_23279_28889476 | NC_021161.1    | Ca_kabuli_chr02 | 28889476                | CC                              | TT              | 1946759622               |
| SNP_P4_23280_28889479 | NC_021161.1    | Ca_kabuli_chr02 | 28889479                | AA                              | GG              | 1946759624               |
| SNP_P4_23281_28889515 | NC_021161.1    | Ca_kabuli_chr02 | 28889515                | GG                              | TT              | 1946759626               |
| SNP_P4_23282_28889522 | NC_021161.1    | Ca_kabuli_chr02 | 28889522                | AA                              | GG              | 1946759628               |
| SNP_P4_23283_28889542 | NC_021161.1    | Ca_kabuli_chr02 | 28889542                | AA                              | GG              | 1946759630               |

| SNPs IDs              | Chromosome IDs | Chromosomes     | Physical positions (bp) | CDC Frontier (Reference genome) | (ILWC46 & LPNB) | NCBI SNPdb Accession IDs |
|-----------------------|----------------|-----------------|-------------------------|---------------------------------|-----------------|--------------------------|
| SNP_P4_23284_28889566 | NC_021161.1    | Ca_kabuli_chr02 | 28889566                | AA                              | GG              | 1946759632               |
| SNP_P4_23285_28889590 | NC_021161.1    | Ca_kabuli_chr02 | 28889590                | AA                              | GG              | 1946759634               |
| SNP_P4_23287_28892458 | NC_021161.1    | Ca_kabuli_chr02 | 28892458                | CC                              | TT              | 1946759636               |
| SNP_P4_23288_28898524 | NC_021161.1    | Ca_kabuli_chr02 | 28898524                | GG                              | CC              | 1946759638               |
| SNP_P4_23289_28898963 | NC_021161.1    | Ca_kabuli_chr02 | 28898963                | GG                              | CC              | 1946759640               |
| SNP_P4_23290_28899068 | NC_021161.1    | Ca_kabuli_chr02 | 28899068                | GG                              | AA              | 1946759642               |
| SNP_P4_23291_28901011 | NC_021161.1    | Ca_kabuli_chr02 | 28901011                | GG                              | AA              | 1946759644               |
| SNP_P4_23292_28915897 | NC_021161.1    | Ca_kabuli_chr02 | 28915897                | GG                              | AA              | 1946759646               |
| SNP_P4_23293_28939367 | NC_021161.1    | Ca_kabuli_chr02 | 28939367                | AA                              | GG              | 1946759648               |
| SNP_P4_23294_28979907 | NC_021161.1    | Ca_kabuli_chr02 | 28979907                | CC                              | AA              | 1946759650               |
| SNP_P4_23296_28996572 | NC_021161.1    | Ca_kabuli_chr02 | 28996572                | CC                              | TT              | 1946759652               |
| SNP_P4_23297_29046537 | NC_021161.1    | Ca_kabuli_chr02 | 29046537                | GG                              | AA              | 1946759654               |
| SNP_P4_23298_29053699 | NC_021161.1    | Ca_kabuli_chr02 | 29053699                | CC                              | TT              | 1946759656               |
| SNP_P4_23299_29059832 | NC_021161.1    | Ca_kabuli_chr02 | 29059832                | TT                              | CC              | 1946759659               |
| SNP_P4_23300_29059876 | NC_021161.1    | Ca_kabuli_chr02 | 29059876                | AA                              | TT              | 1946759661               |
| SNP_P4_23301_29060081 | NC_021161.1    | Ca_kabuli_chr02 | 29060081                | AA                              | TT              | 1946759663               |
| SNP_P4_23302_29060099 | NC_021161.1    | Ca_kabuli_chr02 | 29060099                | AA                              | TT              | 1946759665               |
| SNP_P4_23303_29060172 | NC_021161.1    | Ca_kabuli_chr02 | 29060172                | TT                              | GG              | 1946759667               |
| SNP_P4_23304_29060284 | NC_021161.1    | Ca_kabuli_chr02 | 29060284                | TT                              | GG              | 1946759669               |
| SNP_P4_23305_29060325 | NC_021161.1    | Ca_kabuli_chr02 | 29060325                | GG                              | TT              | 1946759671               |
| SNP_P4_23306_29060339 | NC_021161.1    | Ca_kabuli_chr02 | 29060339                | TT                              | AA              | 1946759673               |
| SNP_P4_23307_29060396 | NC_021161.1    | Ca_kabuli_chr02 | 29060396                | CC                              | TT              | 1946759675               |
| SNP_P4_23308_29060407 | NC_021161.1    | Ca_kabuli_chr02 | 29060407                | AA                              | TT              | 1946759677               |
| SNP_P4_23309_29060422 | NC_021161.1    | Ca_kabuli_chr02 | 29060422                | GG                              | TT              | 1946759679               |
| SNP_P4_23310_29071105 | NC_021161.1    | Ca_kabuli_chr02 | 29071105                | TT                              | CC              | 1946759681               |
| SNP_P4_23311_29071270 | NC_021161.1    | Ca_kabuli_chr02 | 29071270                | TT                              | CC              | 1946759683               |
| SNP_P4_23312_29071303 | NC_021161.1    | Ca_kabuli_chr02 | 29071303                | GG                              | CC              | 1946759685               |
| SNP_P4_23313_29071374 | NC_021161.1    | Ca_kabuli_chr02 | 29071374                | TT                              | GG              | 1946759687               |
| SNP_P4_23314_29071501 | NC_021161.1    | Ca_kabuli_chr02 | 29071501                | TT                              | GG              | 1946759689               |
| SNP_P4_23315_29071573 | NC_021161.1    | Ca_kabuli_chr02 | 29071573                | TT                              | CC              | 1946759691               |
| SNP_P4_23316_29071803 | NC_021161.1    | Ca_kabuli_chr02 | 29071803                | TT                              | CC              | 1946759693               |
| SNP_P4_23321_29129366 | NC_021161.1    | Ca_kabuli_chr02 | 29129366                | AA                              | GG              | 1946759695               |
| SNP_P4_23322_29129398 | NC_021161.1    | Ca_kabuli_chr02 | 29129398                | AA                              | TT              | 1946759697               |
| SNP_P4_23323_29129407 | NC_021161.1    | Ca_kabuli_chr02 | 29129407                | AA                              | GG              | 1946759699               |
| SNP_P4_23324_29129421 | NC_021161.1    | Ca_kabuli_chr02 | 29129421                | TT                              | AA              | 1946759701               |
| SNP_P4_23325_29129774 | NC_021161.1    | Ca_kabuli_chr02 | 29129774                | GG                              | CC              | 1946759703               |
| SNP_P4_23327_29142672 | NC_021161.1    | Ca_kabuli_chr02 | 29142672                | CC                              | TT              | 1946759705               |
| SNP_P4_23328_29142679 | NC_021161.1    | Ca_kabuli_chr02 | 29142679                | CC                              | GG              | 1946759707               |
| SNP_P4_23329_29142718 | NC_021161.1    | Ca_kabuli_chr02 | 29142718                | TT                              | GG              | 1946759709               |
| SNP_P4_23334_29215159 | NC_021161.1    | Ca_kabuli_chr02 | 29215159                | TT                              | CC              | 1946759711               |
| SNP_P4_23336_29215192 | NC_021161.1    | Ca_kabuli_chr02 | 29215192                | TT                              | CC              | 1946759713               |
| SNP_P4_23337_29215239 | NC_021161.1    | Ca_kabuli_chr02 | 29215239                | TT                              | CC              | 1946759715               |

| SNPs IDs              | Chromosome IDs | Chromosomes     | Physical positions (bp) | CDC Frontier (Reference genome) | (ILWC46 & LPNB) | NCBI SNPdb Accession IDs |
|-----------------------|----------------|-----------------|-------------------------|---------------------------------|-----------------|--------------------------|
| SNP_P4_23338_29215729 | NC_021161.1    | Ca_kabuli_chr02 | 29215729                | CC                              | TT              | 1946759717               |
| SNP_P4_23339_29215730 | NC_021161.1    | Ca_kabuli_chr02 | 29215730                | CC                              | TT              | 1946759719               |
| SNP_P4_23340_29215736 | NC_021161.1    | Ca_kabuli_chr02 | 29215736                | AA                              | GG              | 1946759721               |
| SNP_P4_23341_29215751 | NC_021161.1    | Ca_kabuli_chr02 | 29215751                | CC                              | GG              | 1946759723               |
| SNP_P4_23342_29220141 | NC_021161.1    | Ca_kabuli_chr02 | 29220141                | GG                              | AA              | 1946759725               |
| SNP_P4_23347_29238615 | NC_021161.1    | Ca_kabuli_chr02 | 29238615                | CC                              | TT              | 1946759727               |
| SNP_P4_23348_29238681 | NC_021161.1    | Ca_kabuli_chr02 | 29238681                | CC                              | TT              | 1946759729               |
| SNP_P4_23349_29238699 | NC_021161.1    | Ca_kabuli_chr02 | 29238699                | CC                              | GG              | 1946759731               |
| SNP_P4_23350_29238721 | NC_021161.1    | Ca_kabuli_chr02 | 29238721                | AA                              | TT              | 1946759733               |
| SNP_P4_23351_29238778 | NC_021161.1    | Ca_kabuli_chr02 | 29238778                | AA                              | GG              | 1946759735               |
| SNP_P4_23352_29239142 | NC_021161.1    | Ca_kabuli_chr02 | 29239142                | GG                              | TT              | 1946759737               |
| SNP_P4_23353_29239175 | NC_021161.1    | Ca_kabuli_chr02 | 29239175                | AA                              | GG              | 1946759739               |
| SNP_P4_23354_29239219 | NC_021161.1    | Ca_kabuli_chr02 | 29239219                | TT                              | CC              | 1946759741               |
| SNP_P4_23355_29239294 | NC_021161.1    | Ca_kabuli_chr02 | 29239294                | AA                              | CC              | 1946759743               |
| SNP_P4_23356_29239467 | NC_021161.1    | Ca_kabuli_chr02 | 29239467                | GG                              | AA              | 1946759745               |
| SNP_P4_23357_29239557 | NC_021161.1    | Ca_kabuli_chr02 | 29239557                | GG                              | AA              | 1946759747               |
| SNP_P4_23358_29239560 | NC_021161.1    | Ca_kabuli_chr02 | 29239560                | GG                              | AA              | 1946759749               |
| SNP_P4_23359_29239612 | NC_021161.1    | Ca_kabuli_chr02 | 29239612                | GG                              | AA              | 1946759751               |
| SNP_P4_23360_29239722 | NC_021161.1    | Ca_kabuli_chr02 | 29239722                | CC                              | TT              | 1946759753               |
| SNP_P4_23361_29239727 | NC_021161.1    | Ca_kabuli_chr02 | 29239727                | AA                              | GG              | 1946759755               |
| SNP_P4_23362_29239857 | NC_021161.1    | Ca_kabuli_chr02 | 29239857                | TT                              | CC              | 1946759757               |
| SNP_P4_23363_29239937 | NC_021161.1    | Ca_kabuli_chr02 | 29239937                | AA                              | GG              | 1946759759               |
| SNP_P4_23364_29239956 | NC_021161.1    | Ca_kabuli_chr02 | 29239956                | CC                              | TT              | 1946759761               |
| SNP_P4_23367_29240164 | NC_021161.1    | Ca_kabuli_chr02 | 29240164                | TT                              | CC              | 1946759763               |
| SNP_P4_23368_29240168 | NC_021161.1    | Ca_kabuli_chr02 | 29240168                | TT                              | GG              | 1946759765               |
| SNP_P4_23369_29240179 | NC_021161.1    | Ca_kabuli_chr02 | 29240179                | GG                              | AA              | 1946759767               |
| SNP_P4_23372_29240394 | NC_021161.1    | Ca_kabuli_chr02 | 29240394                | CC                              | TT              | 1946759769               |
| SNP_P4_23373_29240414 | NC_021161.1    | Ca_kabuli_chr02 | 29240414                | GG                              | AA              | 1946759771               |
| SNP_P4_23374_29240445 | NC_021161.1    | Ca_kabuli_chr02 | 29240445                | TT                              | CC              | 1946759773               |
| SNP_P4_23376_29240513 | NC_021161.1    | Ca_kabuli_chr02 | 29240513                | TT                              | CC              | 1946759775               |
| SNP_P4_23377_29240527 | NC_021161.1    | Ca_kabuli_chr02 | 29240527                | AA                              | GG              | 1946759777               |
| SNP_P4_23378_29240641 | NC_021161.1    | Ca_kabuli_chr02 | 29240641                | GG                              | TT              | 1946759779               |
| SNP_P4_23379_29240647 | NC_021161.1    | Ca_kabuli_chr02 | 29240647                | GG                              | AA              | 1946759781               |
| SNP_P4_23380_29240660 | NC_021161.1    | Ca_kabuli_chr02 | 29240660                | AA                              | GG              | 1946759783               |
| SNP_P4_23381_29240674 | NC_021161.1    | Ca_kabuli_chr02 | 29240674                | GG                              | AA              | 1946759785               |
| SNP_P4_23382_29240808 | NC_021161.1    | Ca_kabuli_chr02 | 29240808                | AA                              | TT              | 1946759787               |
| SNP_P4_23383_29241002 | NC_021161.1    | Ca_kabuli_chr02 | 29241002                | TT                              | AA              | 1946759789               |
| SNP_P4_23384_29241003 | NC_021161.1    | Ca_kabuli_chr02 | 29241003                | GG                              | TT              | 1946759791               |
| SNP_P4_23386_29253002 | NC_021161.1    | Ca_kabuli_chr02 | 29253002                | GG                              | AA              | 1946759793               |
| SNP_P4_23387_29253155 | NC_021161.1    | Ca_kabuli_chr02 | 29253155                | CC                              | TT              | 1946759795               |
| SNP_P4_23388_29253467 | NC_021161.1    | Ca_kabuli_chr02 | 29253467                | TT                              | CC              | 1946759797               |
| SNP_P4_23389_29253493 | NC_021161.1    | Ca_kabuli_chr02 | 29253493                | TT                              | CC              | 1946759799               |

| SNPs IDs              | Chromosome IDs | Chromosomes     | Physical positions (bp) | CDC Frontier (Reference genome) | (ILWC46 & LPNB) | NCBI SNPdb Accession IDs |
|-----------------------|----------------|-----------------|-------------------------|---------------------------------|-----------------|--------------------------|
| SNP_P4_23390_29253503 | NC_021161.1    | Ca_kabuli_chr02 | 29253503                | TT                              | CC              | 1946759801               |
| SNP_P4_23391_29278615 | NC_021161.1    | Ca_kabuli_chr02 | 29278615                | CC                              | AA              | 1946759803               |
| SNP_P4_23392_29278625 | NC_021161.1    | Ca_kabuli_chr02 | 29278625                | GG                              | AA              | 1946759805               |
| SNP_P4_23393_29278669 | NC_021161.1    | Ca_kabuli_chr02 | 29278669                | TT                              | CC              | 1946759807               |
| SNP_P4_23394_29278681 | NC_021161.1    | Ca_kabuli_chr02 | 29278681                | GG                              | AA              | 1946759809               |
| SNP_P4_23395_29278699 | NC_021161.1    | Ca_kabuli_chr02 | 29278699                | GG                              | AA              | 1946759811               |
| SNP_P4_23396_29278703 | NC_021161.1    | Ca_kabuli_chr02 | 29278703                | CC                              | TT              | 1946759813               |
| SNP_P4_23397_29278736 | NC_021161.1    | Ca_kabuli_chr02 | 29278736                | GG                              | AA              | 1946759815               |
| SNP_P4_23398_29278766 | NC_021161.1    | Ca_kabuli_chr02 | 29278766                | CC                              | AA              | 1946759817               |
| SNP_P4_23399_29278940 | NC_021161.1    | Ca_kabuli_chr02 | 29278940                | TT                              | AA              | 1946759819               |
| SNP_P4_23400_29279152 | NC_021161.1    | Ca_kabuli_chr02 | 29279152                | GG                              | AA              | 1946759821               |
| SNP_P4_23401_29279202 | NC_021161.1    | Ca_kabuli_chr02 | 29279202                | AA                              | GG              | 1946759823               |
| SNP_P4_23402_29279225 | NC_021161.1    | Ca_kabuli_chr02 | 29279225                | TT                              | AA              | 1946759825               |
| SNP_P4_23403_29279508 | NC_021161.1    | Ca_kabuli_chr02 | 29279508                | TT                              | CC              | 1946759827               |
| SNP_P4_23404_29289547 | NC_021161.1    | Ca_kabuli_chr02 | 29289547                | AA                              | GG              | 1946759829               |
| SNP_P4_23405_29289590 | NC_021161.1    | Ca_kabuli_chr02 | 29289590                | AA                              | GG              | 1946759831               |
| SNP_P4_23406_29314094 | NC_021161.1    | Ca_kabuli_chr02 | 29314094                | GG                              | AA              | 1946759833               |
| SNP_P4_23410_29369476 | NC_021161.1    | Ca_kabuli_chr02 | 29369476                | AA                              | GG              | 1946759836               |
| SNP_P4_23411_29409082 | NC_021161.1    | Ca_kabuli_chr02 | 29409082                | TT                              | GG              | 1946759838               |
| SNP_P4_23412_29411795 | NC_021161.1    | Ca_kabuli_chr02 | 29411795                | AA                              | TT              | 1946759840               |
| SNP_P4_23413_29412093 | NC_021161.1    | Ca_kabuli_chr02 | 29412093                | AA                              | GG              | 1946759842               |
| SNP_P4_23414_29412509 | NC_021161.1    | Ca_kabuli_chr02 | 29412509                | GG                              | AA              | 1946759844               |
| SNP_P4_23416_29412984 | NC_021161.1    | Ca_kabuli_chr02 | 29412984                | AA                              | GG              | 1946759846               |
| SNP_P4_23417_29416783 | NC_021161.1    | Ca_kabuli_chr02 | 29416783                | GG                              | TT              | 1946759848               |
| SNP_P4_23418_29416838 | NC_021161.1    | Ca_kabuli_chr02 | 29416838                | AA                              | GG              | 1946759850               |
| SNP_P4_23419_29416868 | NC_021161.1    | Ca_kabuli_chr02 | 29416868                | GG                              | AA              | 1946759852               |
| SNP_P4_23420_29417235 | NC_021161.1    | Ca_kabuli_chr02 | 29417235                | GG                              | TT              | 1946759854               |
| SNP_P4_23422_29418744 | NC_021161.1    | Ca_kabuli_chr02 | 29418744                | AA                              | TT              | 1946759856               |
| SNP_P4_23424_29444147 | NC_021161.1    | Ca_kabuli_chr02 | 29444147                | TT                              | AA              | 1946759858               |
| SNP_P4_23425_29444196 | NC_021161.1    | Ca_kabuli_chr02 | 29444196                | AA                              | GG              | 1946759860               |
| SNP_P4_23426_29444199 | NC_021161.1    | Ca_kabuli_chr02 | 29444199                | TT                              | CC              | 1946759862               |
| SNP_P4_23427_29444200 | NC_021161.1    | Ca_kabuli_chr02 | 29444200                | GG                              | TT              | 1946759865               |
| SNP_P4_23428_29444211 | NC_021161.1    | Ca_kabuli_chr02 | 29444211                | CC                              | AA              | 1946759867               |
| SNP_P4_23430_29444490 | NC_021161.1    | Ca_kabuli_chr02 | 29444490                | AA                              | GG              | 1946759869               |
| SNP_P4_23431_29444608 | NC_021161.1    | Ca_kabuli_chr02 | 29444608                | AA                              | CC              | 1946759871               |
| SNP_P4_23432_29445544 | NC_021161.1    | Ca_kabuli_chr02 | 29445544                | TT                              | CC              | 1946759873               |
| SNP_P4_23433_29445547 | NC_021161.1    | Ca_kabuli_chr02 | 29445547                | CC                              | AA              | 1946759875               |
| SNP_P4_23434_29445605 | NC_021161.1    | Ca_kabuli_chr02 | 29445605                | GG                              | CC              | 1946759877               |
| SNP_P4_23435_29445618 | NC_021161.1    | Ca_kabuli_chr02 | 29445618                | GG                              | CC              | 1946759879               |
| SNP_P4_23436_29445770 | NC_021161.1    | Ca_kabuli_chr02 | 29445770                | AA                              | GG              | 1946759881               |
| SNP_P4_23439_29446081 | NC_021161.1    | Ca_kabuli_chr02 | 29446081                | AA                              | GG              | 1946759883               |
| SNP_P4_23440_29446159 | NC_021161.1    | Ca_kabuli_chr02 | 29446159                | GG                              | TT              | 1946759885               |

| SNPs IDs              | Chromosome IDs | Chromosomes     | Physical positions (bp) | CDC Frontier (Reference genome) | (ILWC46 & LPNB) | NCBI SNPdb Accession IDs |
|-----------------------|----------------|-----------------|-------------------------|---------------------------------|-----------------|--------------------------|
| SNP_P4_23441_29446260 | NC_021161.1    | Ca_kabuli_chr02 | 29446260                | TT                              | CC              | 1946759887               |
| SNP_P4_23442_29446261 | NC_021161.1    | Ca_kabuli_chr02 | 29446261                | GG                              | TT              | 1946759889               |
| SNP_P4_23443_29446272 | NC_021161.1    | Ca_kabuli_chr02 | 29446272                | CC                              | AA              | 1946759891               |
| SNP_P4_23444_29455002 | NC_021161.1    | Ca_kabuli_chr02 | 29455002                | AA                              | TT              | 1946759893               |
| SNP_P4_23445_29455003 | NC_021161.1    | Ca_kabuli_chr02 | 29455003                | AA                              | GG              | 1946759895               |
| SNP_P4_23446_29457288 | NC_021161.1    | Ca_kabuli_chr02 | 29457288                | AA                              | GG              | 1946759897               |
| SNP_P4_23447_29457422 | NC_021161.1    | Ca_kabuli_chr02 | 29457422                | AA                              | GG              | 1946759899               |
| SNP_P4_23449_29476849 | NC_021161.1    | Ca_kabuli_chr02 | 29476849                | TT                              | AA              | 1946759901               |
| SNP_P4_23450_29504345 | NC_021161.1    | Ca_kabuli_chr02 | 29504345                | AA                              | GG              | 1946759903               |
| SNP_P4_23451_29504350 | NC_021161.1    | Ca_kabuli_chr02 | 29504350                | AA                              | CC              | 1946759905               |
| SNP_P4_23452_29509668 | NC_021161.1    | Ca_kabuli_chr02 | 29509668                | CC                              | TT              | 1946759907               |
| SNP_P4_23453_29540635 | NC_021161.1    | Ca_kabuli_chr02 | 29540635                | TT                              | AA              | 1946759909               |
| SNP_P4_23455_29572304 | NC_021161.1    | Ca_kabuli_chr02 | 29572304                | GG                              | AA              | 1946759911               |
| SNP_P4_23456_29609575 | NC_021161.1    | Ca_kabuli_chr02 | 29609575                | GG                              | CC              | 1946759913               |
| SNP_P4_23457_29618464 | NC_021161.1    | Ca_kabuli_chr02 | 29618464                | TT                              | GG              | 1946759915               |
| SNP_P4_23458_29644870 | NC_021161.1    | Ca_kabuli_chr02 | 29644870                | CC                              | AA              | 1946759917               |
| SNP_P4_23459_29644871 | NC_021161.1    | Ca_kabuli_chr02 | 29644871                | TT                              | CC              | 1946759919               |
| SNP_P4_23460_29644872 | NC_021161.1    | Ca_kabuli_chr02 | 29644872                | AA                              | TT              | 1946759921               |
| SNP_P4_23461_29644885 | NC_021161.1    | Ca_kabuli_chr02 | 29644885                | TT                              | AA              | 1946759923               |
| SNP_P4_23462_29644900 | NC_021161.1    | Ca_kabuli_chr02 | 29644900                | AA                              | CC              | 1946759925               |
| SNP_P4_23463_29647507 | NC_021161.1    | Ca_kabuli_chr02 | 29647507                | AA                              | CC              | 1946759927               |
| SNP_P4_23464_29653559 | NC_021161.1    | Ca_kabuli_chr02 | 29653559                | TT                              | CC              | 1946759929               |
| SNP_P4_23465_29653667 | NC_021161.1    | Ca_kabuli_chr02 | 29653667                | CC                              | TT              | 1946759931               |
| SNP_P4_23466_29653901 | NC_021161.1    | Ca_kabuli_chr02 | 29653901                | CC                              | AA              | 1946759933               |
| SNP_P4_23467_29653913 | NC_021161.1    | Ca_kabuli_chr02 | 29653913                | TT                              | CC              | 1946759935               |
| SNP_P4_23469_29715934 | NC_021161.1    | Ca_kabuli_chr02 | 29715934                | CC                              | TT              | 1946759937               |
| SNP_P4_23472_29724981 | NC_021161.1    | Ca_kabuli_chr02 | 29724981                | GG                              | AA              | 1946759939               |
| SNP_P4_23473_29724982 | NC_021161.1    | Ca_kabuli_chr02 | 29724982                | GG                              | AA              | 1946759941               |
| SNP_P4_23474_29728297 | NC_021161.1    | Ca_kabuli_chr02 | 29728297                | CC                              | AA              | 1946759943               |
| SNP_P4_23475_29737529 | NC_021161.1    | Ca_kabuli_chr02 | 29737529                | GG                              | AA              | 1946759945               |
| SNP_P4_23476_29737657 | NC_021161.1    | Ca_kabuli_chr02 | 29737657                | CC                              | TT              | 1946759947               |
| SNP_P4_23477_29737689 | NC_021161.1    | Ca_kabuli_chr02 | 29737689                | TT                              | CC              | 1946759949               |
| SNP_P4_23478_29737749 | NC_021161.1    | Ca_kabuli_chr02 | 29737749                | CC                              | TT              | 1946759951               |
| SNP_P4_23479_29737750 | NC_021161.1    | Ca_kabuli_chr02 | 29737750                | TT                              | CC              | 1946759953               |
| SNP_P4_23480_29737889 | NC_021161.1    | Ca_kabuli_chr02 | 29737889                | CC                              | TT              | 1946759955               |
| SNP_P4_23481_29738013 | NC_021161.1    | Ca_kabuli_chr02 | 29738013                | AA                              | CC              | 1946759957               |
| SNP_P4_23482_29738016 | NC_021161.1    | Ca_kabuli_chr02 | 29738016                | GG                              | AA              | 1946759959               |
| SNP_P4_23483_29738028 | NC_021161.1    | Ca_kabuli_chr02 | 29738028                | AA                              | GG              | 1946759961               |
| SNP_P4_23484_29738092 | NC_021161.1    | Ca_kabuli_chr02 | 29738092                | TT                              | CC              | 1946759963               |
| SNP_P4_23485_29738100 | NC_021161.1    | Ca_kabuli_chr02 | 29738100                | CC                              | TT              | 1946759966               |
| SNP_P4_23486_29738109 | NC_021161.1    | Ca_kabuli_chr02 | 29738109                | CC                              | AA              | 1946759968               |
| SNP_P4_23487_29738141 | NC_021161.1    | Ca_kabuli_chr02 | 29738141                | TT                              | CC              | 1946759970               |

| SNPs IDs              | Chromosome IDs | Chromosomes     | Physical positions (bp) | CDC Frontier (Reference genome) | (ILWC46 & LPNB) | NCBI SNPdb Accession IDs |
|-----------------------|----------------|-----------------|-------------------------|---------------------------------|-----------------|--------------------------|
| SNP_P4_23488_29738208 | NC_021161.1    | Ca_kabuli_chr02 | 29738208                | GG                              | TT              | 1946759972               |
| SNP_P4_23489_29738263 | NC_021161.1    | Ca_kabuli_chr02 | 29738263                | TT                              | CC              | 1946759974               |
| SNP_P4_23490_29739679 | NC_021161.1    | Ca_kabuli_chr02 | 29739679                | TT                              | CC              | 1946759976               |
| SNP_P4_23491_29742485 | NC_021161.1    | Ca_kabuli_chr02 | 29742485                | AA                              | CC              | 1946759978               |
| SNP_P4_23492_29757999 | NC_021161.1    | Ca_kabuli_chr02 | 29757999                | GG                              | AA              | 1946759980               |
| SNP_P4_23493_29775578 | NC_021161.1    | Ca_kabuli_chr02 | 29775578                | AA                              | GG              | 1946759981               |
| SNP_P4_23494_29775579 | NC_021161.1    | Ca_kabuli_chr02 | 29775579                | TT                              | AA              | 1946759983               |
| SNP_P4_23495_29779340 | NC_021161.1    | Ca_kabuli_chr02 | 29779340                | AA                              | TT              | 1946759985               |
| SNP_P4_23496_29783098 | NC_021161.1    | Ca_kabuli_chr02 | 29783098                | TT                              | CC              | 1946759987               |
| SNP_P4_23498_29799255 | NC_021161.1    | Ca_kabuli_chr02 | 29799255                | TT                              | CC              | 1946759989               |
| SNP_P4_23499_29828212 | NC_021161.1    | Ca_kabuli_chr02 | 29828212                | CC                              | AA              | 1946759991               |
| SNP_P4_23500_29829777 | NC_021161.1    | Ca_kabuli_chr02 | 29829777                | TT                              | CC              | 1946759993               |
| SNP_P4_23501_29829779 | NC_021161.1    | Ca_kabuli_chr02 | 29829779                | TT                              | CC              | 1946759995               |
| SNP_P4_23502_29829800 | NC_021161.1    | Ca_kabuli_chr02 | 29829800                | TT                              | AA              | 1946759997               |
| SNP_P4_23505_29834675 | NC_021161.1    | Ca_kabuli_chr02 | 29834675                | AA                              | GG              | 1946759999               |
| SNP_P4_23509_29856104 | NC_021161.1    | Ca_kabuli_chr02 | 29856104                | CC                              | TT              | 1946760001               |
| SNP_P4_23510_29868394 | NC_021161.1    | Ca_kabuli_chr02 | 29868394                | TT                              | AA              | 1946760003               |
| SNP_P4_23511_29868400 | NC_021161.1    | Ca_kabuli_chr02 | 29868400                | CC                              | GG              | 1946760005               |
| SNP_P4_23512_29872687 | NC_021161.1    | Ca_kabuli_chr02 | 29872687                | GG                              | TT              | 1946760007               |
| SNP_P4_23513_29872719 | NC_021161.1    | Ca_kabuli_chr02 | 29872719                | CC                              | TT              | 1946760009               |
| SNP_P4_23516_29912209 | NC_021161.1    | Ca_kabuli_chr02 | 29912209                | CC                              | GG              | 1946760011               |
| SNP_P4_23517_29942971 | NC_021161.1    | Ca_kabuli_chr02 | 29942971                | AA                              | CC              | 1946760013               |
| SNP_P4_23518_29961757 | NC_021161.1    | Ca_kabuli_chr02 | 29961757                | CC                              | TT              | 1946760015               |
| SNP_P4_23519_29962159 | NC_021161.1    | Ca_kabuli_chr02 | 29962159                | AA                              | GG              | 1946760017               |
| SNP_P4_23521_29962595 | NC_021161.1    | Ca_kabuli_chr02 | 29962595                | CC                              | TT              | 1946760019               |
| SNP_P4_23522_29962629 | NC_021161.1    | Ca_kabuli_chr02 | 29962629                | CC                              | TT              | 1946760021               |
| SNP_P4_23523_29962717 | NC_021161.1    | Ca_kabuli_chr02 | 29962717                | GG                              | AA              | 1946760023               |
| SNP_P4_23525_29962796 | NC_021161.1    | Ca_kabuli_chr02 | 29962796                | AA                              | GG              | 1946760025               |
| SNP_P4_23526_29962850 | NC_021161.1    | Ca_kabuli_chr02 | 29962850                | CC                              | TT              | 1946760027               |
| SNP_P4_23528_29963162 | NC_021161.1    | Ca_kabuli_chr02 | 29963162                | GG                              | AA              | 1946760029               |
| SNP_P4_23530_29964135 | NC_021161.1    | Ca_kabuli_chr02 | 29964135                | CC                              | AA              | 1946760031               |
| SNP_P4_23531_29964711 | NC_021161.1    | Ca_kabuli_chr02 | 29964711                | TT                              | AA              | 1946760033               |
| SNP_P4_23532_29967540 | NC_021161.1    | Ca_kabuli_chr02 | 29967540                | TT                              | AA              | 1946760035               |
| SNP_P4_23533_29993839 | NC_021161.1    | Ca_kabuli_chr02 | 29993839                | CC                              | TT              | 1946760037               |
| SNP_P4_23534_30040970 | NC_021161.1    | Ca_kabuli_chr02 | 30040970                | TT                              | GG              | 1946760039               |
| SNP_P4_23536_30054984 | NC_021161.1    | Ca_kabuli_chr02 | 30054984                | GG                              | AA              | 1946760041               |
| SNP_P4_23537_30054987 | NC_021161.1    | Ca_kabuli_chr02 | 30054987                | TT                              | AA              | 1946760043               |
| SNP_P4_23538_30057761 | NC_021161.1    | Ca_kabuli_chr02 | 30057761                | TT                              | CC              | 1946760046               |
| SNP_P4_23539_30058587 | NC_021161.1    | Ca_kabuli_chr02 | 30058587                | CC                              | TT              | 1946760048               |
| SNP_P4_23540_30058608 | NC_021161.1    | Ca_kabuli_chr02 | 30058608                | GG                              | CC              | 1946760050               |
| SNP_P4_23541_30058609 | NC_021161.1    | Ca_kabuli_chr02 | 30058609                | GG                              | AA              | 1946760052               |
| SNP_P4_23542_30058614 | NC_021161.1    | Ca_kabuli_chr02 | 30058614                | TT                              | AA              | 1946760054               |



| SNPs IDs              | Chromosome IDs | Chromosomes     | Physical positions (bp) | CDC Frontier (Reference genome) | (ILWC46 & LPNB) | NCBI SNPdb Accession IDs |
|-----------------------|----------------|-----------------|-------------------------|---------------------------------|-----------------|--------------------------|
| SNP_P4_23544_30075834 | NC_021161.1    | Ca_kabuli_chr02 | 30075834                | TT                              | CC              | 1946760056               |
| SNP_P4_23545_30075931 | NC_021161.1    | Ca_kabuli_chr02 | 30075931                | GG                              | AA              | 1946760058               |
| SNP_P4_23546_30092875 | NC_021161.1    | Ca_kabuli_chr02 | 30092875                | AA                              | CC              | 1946760060               |
| SNP_P4_23547_30093700 | NC_021161.1    | Ca_kabuli_chr02 | 30093700                | GG                              | AA              | 1946760062               |
| SNP_P4_23548_30094917 | NC_021161.1    | Ca_kabuli_chr02 | 30094917                | AA                              | TT              | 1946760064               |
| SNP_P4_23549_30095148 | NC_021161.1    | Ca_kabuli_chr02 | 30095148                | TT                              | AA              | 1946760066               |
| SNP_P4_23550_30095150 | NC_021161.1    | Ca_kabuli_chr02 | 30095150                | TT                              | CC              | 1946760068               |
| SNP_P4_23551_30095622 | NC_021161.1    | Ca_kabuli_chr02 | 30095622                | AA                              | GG              | 1946760070               |
| SNP_P4_23555_30097122 | NC_021161.1    | Ca_kabuli_chr02 | 30097122                | GG                              | AA              | 1946760072               |
| SNP_P4_23556_30112419 | NC_021161.1    | Ca_kabuli_chr02 | 30112419                | GG                              | AA              | 1946760074               |
| SNP_P4_23559_30112621 | NC_021161.1    | Ca_kabuli_chr02 | 30112621                | GG                              | AA              | 1946760076               |
| SNP_P4_23560_30112661 | NC_021161.1    | Ca_kabuli_chr02 | 30112661                | TT                              | GG              | 1946760078               |
| SNP_P4_23561_30119446 | NC_021161.1    | Ca_kabuli_chr02 | 30119446                | AA                              | GG              | 1946760080               |
| SNP_P4_23563_30126013 | NC_021161.1    | Ca_kabuli_chr02 | 30126013                | TT                              | AA              | 1946760082               |
| SNP_P4_23564_30127869 | NC_021161.1    | Ca_kabuli_chr02 | 30127869                | TT                              | AA              | 1946760084               |
| SNP_P4_23565_30144442 | NC_021161.1    | Ca_kabuli_chr02 | 30144442                | GG                              | AA              | 1946760086               |
| SNP_P4_23566_30144493 | NC_021161.1    | Ca_kabuli_chr02 | 30144493                | CC                              | AA              | 1946760088               |
| SNP_P4_23567_30145231 | NC_021161.1    | Ca_kabuli_chr02 | 30145231                | CC                              | GG              | 1946760090               |
| SNP_P4_23568_30145319 | NC_021161.1    | Ca_kabuli_chr02 | 30145319                | CC                              | TT              | 1946760092               |
| SNP_P4_23569_30145378 | NC_021161.1    | Ca_kabuli_chr02 | 30145378                | GG                              | AA              | 1946760094               |
| SNP_P4_23570_30145428 | NC_021161.1    | Ca_kabuli_chr02 | 30145428                | TT                              | CC              | 1946760096               |
| SNP_P4_23571_30145549 | NC_021161.1    | Ca_kabuli_chr02 | 30145549                | GG                              | CC              | 1946760098               |
| SNP_P4_23572_30146046 | NC_021161.1    | Ca_kabuli_chr02 | 30146046                | GG                              | AA              | 1946760100               |
| SNP_P4_23573_30146187 | NC_021161.1    | Ca_kabuli_chr02 | 30146187                | GG                              | AA              | 1946760102               |
| SNP_P4_23574_30146287 | NC_021161.1    | Ca_kabuli_chr02 | 30146287                | CC                              | TT              | 1946760104               |
| SNP_P4_23575_30146362 | NC_021161.1    | Ca_kabuli_chr02 | 30146362                | CC                              | AA              | 1946760106               |
| SNP_P4_23576_30146370 | NC_021161.1    | Ca_kabuli_chr02 | 30146370                | TT                              | CC              | 1946760108               |
| SNP_P4_23577_30146409 | NC_021161.1    | Ca_kabuli_chr02 | 30146409                | CC                              | TT              | 1946760110               |
| SNP_P4_23578_30146418 | NC_021161.1    | Ca_kabuli_chr02 | 30146418                | CC                              | TT              | 1946760112               |
| SNP_P4_23579_30146538 | NC_021161.1    | Ca_kabuli_chr02 | 30146538                | AA                              | TT              | 1946760114               |
| SNP_P4_23580_30147134 | NC_021161.1    | Ca_kabuli_chr02 | 30147134                | CC                              | TT              | 1946760116               |
| SNP_P4_23581_30147137 | NC_021161.1    | Ca_kabuli_chr02 | 30147137                | CC                              | TT              | 1946760118               |
| SNP_P4_23583_30147382 | NC_021161.1    | Ca_kabuli_chr02 | 30147382                | GG                              | AA              | 1946760120               |
| SNP_P4_23584_30147445 | NC_021161.1    | Ca_kabuli_chr02 | 30147445                | TT                              | CC              | 1946760122               |
| SNP_P4_23585_30164761 | NC_021161.1    | Ca_kabuli_chr02 | 30164761                | TT                              | CC              | 1946760124               |
| SNP_P4_23586_30164767 | NC_021161.1    | Ca_kabuli_chr02 | 30164767                | CC                              | TT              | 1946760126               |
| SNP_P4_23587_30164942 | NC_021161.1    | Ca_kabuli_chr02 | 30164942                | TT                              | AA              | 1946760128               |
| SNP_P4_23588_30164999 | NC_021161.1    | Ca_kabuli_chr02 | 30164999                | GG                              | TT              | 1946760130               |
| SNP_P4_23590_30165086 | NC_021161.1    | Ca_kabuli_chr02 | 30165086                | TT                              | AA              | 1946760132               |
| SNP_P4_23591_30165305 | NC_021161.1    | Ca_kabuli_chr02 | 30165305                | GG                              | TT              | 1946760134               |
| SNP_P4_23592_30165398 | NC_021161.1    | Ca_kabuli_chr02 | 30165398                | TT                              | CC              | 1946760136               |
| SNP_P4_23593_30165436 | NC_021161.1    | Ca_kabuli_chr02 | 30165436                | TT                              | CC              | 1946760138               |

| SNPs IDs              | Chromosome IDs | Chromosomes     | Physical positions (bp) | CDC Frontier (Reference genome) | (ILWC46 & LPNB) | NCBI SNPdb Accession IDs |
|-----------------------|----------------|-----------------|-------------------------|---------------------------------|-----------------|--------------------------|
| SNP_P4_23594_30166973 | NC_021161.1    | Ca_kabuli_chr02 | 30166973                | CC                              | TT              | 1946760140               |
| SNP_P4_23595_30172866 | NC_021161.1    | Ca_kabuli_chr02 | 30172866                | GG                              | CC              | 1946760142               |
| SNP_P4_23596_30172924 | NC_021161.1    | Ca_kabuli_chr02 | 30172924                | TT                              | CC              | 1946760144               |
| SNP_P4_23598_30173468 | NC_021161.1    | Ca_kabuli_chr02 | 30173468                | GG                              | AA              | 1946760146               |
| SNP_P4_23599_30173519 | NC_021161.1    | Ca_kabuli_chr02 | 30173519                | AA                              | TT              | 1946760148               |
| SNP_P4_23600_30173984 | NC_021161.1    | Ca_kabuli_chr02 | 30173984                | GG                              | AA              | 1946760151               |
| SNP_P4_23602_30215692 | NC_021161.1    | Ca_kabuli_chr02 | 30215692                | TT                              | CC              | 1946760153               |
| SNP_P4_23603_30221406 | NC_021161.1    | Ca_kabuli_chr02 | 30221406                | AA                              | GG              | 1946760155               |
| SNP_P4_23606_30289430 | NC_021161.1    | Ca_kabuli_chr02 | 30289430                | AA                              | GG              | 1946760157               |
| SNP_P4_23607_30308703 | NC_021161.1    | Ca_kabuli_chr02 | 30308703                | CC                              | TT              | 1946760159               |
| SNP_P4_23608_30314548 | NC_021161.1    | Ca_kabuli_chr02 | 30314548                | CC                              | TT              | 1946760161               |
| SNP_P4_23609_30314576 | NC_021161.1    | Ca_kabuli_chr02 | 30314576                | GG                              | AA              | 1946760163               |
| SNP_P4_23610_30314594 | NC_021161.1    | Ca_kabuli_chr02 | 30314594                | CC                              | TT              | 1946760165               |
| SNP_P4_23611_30325617 | NC_021161.1    | Ca_kabuli_chr02 | 30325617                | CC                              | TT              | 1946760167               |
| SNP_P4_23612_30337220 | NC_021161.1    | Ca_kabuli_chr02 | 30337220                | CC                              | TT              | 1946760169               |
| SNP_P4_23613_30337599 | NC_021161.1    | Ca_kabuli_chr02 | 30337599                | TT                              | GG              | 1946760171               |
| SNP_P4_23614_30339203 | NC_021161.1    | Ca_kabuli_chr02 | 30339203                | AA                              | GG              | 1946760173               |
| SNP_P4_23615_30339844 | NC_021161.1    | Ca_kabuli_chr02 | 30339844                | CC                              | AA              | 1946760175               |
| SNP_P4_23616_30340150 | NC_021161.1    | Ca_kabuli_chr02 | 30340150                | CC                              | TT              | 1946760178               |
| SNP_P4_23617_30340165 | NC_021161.1    | Ca_kabuli_chr02 | 30340165                | AA                              | TT              | 1946760180               |
| SNP_P4_23619_30340563 | NC_021161.1    | Ca_kabuli_chr02 | 30340563                | CC                              | TT              | 1946760182               |
| SNP_P4_23620_30340740 | NC_021161.1    | Ca_kabuli_chr02 | 30340740                | GG                              | AA              | 1946760184               |
| SNP_P4_23621_30340794 | NC_021161.1    | Ca_kabuli_chr02 | 30340794                | AA                              | TT              | 1946760186               |
| SNP_P4_23623_30340875 | NC_021161.1    | Ca_kabuli_chr02 | 30340875                | GG                              | CC              | 1946760188               |
| SNP_P4_23625_30341566 | NC_021161.1    | Ca_kabuli_chr02 | 30341566                | CC                              | TT              | 1946760190               |
| SNP_P4_23627_30343233 | NC_021161.1    | Ca_kabuli_chr02 | 30343233                | CC                              | TT              | 1946760192               |
| SNP_P4_23630_30345055 | NC_021161.1    | Ca_kabuli_chr02 | 30345055                | AA                              | GG              | 1946760194               |
| SNP_P4_23631_30346177 | NC_021161.1    | Ca_kabuli_chr02 | 30346177                | CC                              | TT              | 1946760196               |
| SNP_P4_23632_30346588 | NC_021161.1    | Ca_kabuli_chr02 | 30346588                | TT                              | GG              | 1946760198               |
| SNP_P4_23633_30346607 | NC_021161.1    | Ca_kabuli_chr02 | 30346607                | GG                              | AA              | 1946760200               |
| SNP_P4_23634_30347927 | NC_021161.1    | Ca_kabuli_chr02 | 30347927                | CC                              | TT              | 1946760202               |
| SNP_P4_23635_30347942 | NC_021161.1    | Ca_kabuli_chr02 | 30347942                | AA                              | GG              | 1946760204               |
| SNP_P4_23636_30348022 | NC_021161.1    | Ca_kabuli_chr02 | 30348022                | AA                              | GG              | 1946760206               |
| SNP_P4_23637_30348176 | NC_021161.1    | Ca_kabuli_chr02 | 30348176                | TT                              | CC              | 1946760208               |
| SNP_P4_23638_30348286 | NC_021161.1    | Ca_kabuli_chr02 | 30348286                | TT                              | CC              | 1946760210               |
| SNP_P4_23639_30348320 | NC_021161.1    | Ca_kabuli_chr02 | 30348320                | AA                              | TT              | 1946760212               |
| SNP_P4_23640_30348324 | NC_021161.1    | Ca_kabuli_chr02 | 30348324                | TT                              | AA              | 1946760214               |
| SNP_P4_23641_30348342 | NC_021161.1    | Ca_kabuli_chr02 | 30348342                | CC                              | TT              | 1946760216               |
| SNP_P4_23642_30348615 | NC_021161.1    | Ca_kabuli_chr02 | 30348615                | GG                              | AA              | 1946760218               |
| SNP_P4_23643_30348895 | NC_021161.1    | Ca_kabuli_chr02 | 30348895                | AA                              | CC              | 1946760220               |
| SNP_P4_23645_30351255 | NC_021161.1    | Ca_kabuli_chr02 | 30351255                | TT                              | AA              | 1946760222               |
| SNP_P4_23646_30351266 | NC_021161.1    | Ca_kabuli_chr02 | 30351266                | AA                              | GG              | 1946760224               |

| SNPs IDs              | Chromosome IDs | Chromosomes     | Physical positions (bp) | CDC Frontier (Reference genome) | (ILWC46 & LPNB) | NCBI SNPdb Accession IDs |
|-----------------------|----------------|-----------------|-------------------------|---------------------------------|-----------------|--------------------------|
| SNP_P4_23647_30352212 | NC_021161.1    | Ca_kabuli_chr02 | 30352212                | TT                              | AA              | 1946760226               |
| SNP_P4_23650_30355364 | NC_021161.1    | Ca_kabuli_chr02 | 30355364                | GG                              | AA              | 1946760228               |
| SNP_P4_23651_30355368 | NC_021161.1    | Ca_kabuli_chr02 | 30355368                | TT                              | AA              | 1946760230               |
| SNP_P4_23652_30355827 | NC_021161.1    | Ca_kabuli_chr02 | 30355827                | AA                              | TT              | 1946760232               |
| SNP_P4_23654_30358114 | NC_021161.1    | Ca_kabuli_chr02 | 30358114                | TT                              | AA              | 1946760235               |
| SNP_P4_23655_30358173 | NC_021161.1    | Ca_kabuli_chr02 | 30358173                | CC                              | AA              | 1946760237               |
| SNP_P4_23656_30358185 | NC_021161.1    | Ca_kabuli_chr02 | 30358185                | TT                              | GG              | 1946760239               |
| SNP_P4_23657_30358298 | NC_021161.1    | Ca_kabuli_chr02 | 30358298                | TT                              | CC              | 1946760241               |
| SNP_P4_23658_30358923 | NC_021161.1    | Ca_kabuli_chr02 | 30358923                | GG                              | CC              | 1946760243               |
| SNP_P4_23660_30360296 | NC_021161.1    | Ca_kabuli_chr02 | 30360296                | CC                              | TT              | 1946760245               |
| SNP_P4_23661_30360918 | NC_021161.1    | Ca_kabuli_chr02 | 30360918                | AA                              | GG              | 1946760247               |
| SNP_P4_23662_30360922 | NC_021161.1    | Ca_kabuli_chr02 | 30360922                | GG                              | CC              | 1946760249               |
| SNP_P4_23663_30361567 | NC_021161.1    | Ca_kabuli_chr02 | 30361567                | AA                              | TT              | 1946760251               |
| SNP_P4_23664_30361584 | NC_021161.1    | Ca_kabuli_chr02 | 30361584                | GG                              | AA              | 1946760253               |
| SNP_P4_23665_30361617 | NC_021161.1    | Ca_kabuli_chr02 | 30361617                | AA                              | GG              | 1946760255               |
| SNP_P4_23666_30363335 | NC_021161.1    | Ca_kabuli_chr02 | 30363335                | CC                              | TT              | 1946760257               |
| SNP_P4_23667_30364025 | NC_021161.1    | Ca_kabuli_chr02 | 30364025                | CC                              | TT              | 1946760259               |
| SNP_P4_23668_30364042 | NC_021161.1    | Ca_kabuli_chr02 | 30364042                | GG                              | AA              | 1946760261               |
| SNP_P4_23669_30364073 | NC_021161.1    | Ca_kabuli_chr02 | 30364073                | AA                              | TT              | 1946760263               |
| SNP_P4_23670_30364146 | NC_021161.1    | Ca_kabuli_chr02 | 30364146                | TT                              | AA              | 1946760265               |
| SNP_P4_23671_30364207 | NC_021161.1    | Ca_kabuli_chr02 | 30364207                | TT                              | GG              | 1946760267               |
| SNP_P4_23672_30364636 | NC_021161.1    | Ca_kabuli_chr02 | 30364636                | CC                              | AA              | 1946760269               |
| SNP_P4_23673_30364809 | NC_021161.1    | Ca_kabuli_chr02 | 30364809                | CC                              | GG              | 1946760271               |
| SNP_P4_23674_30364810 | NC_021161.1    | Ca_kabuli_chr02 | 30364810                | AA                              | GG              | 1946760272               |
| SNP_P4_23675_30364838 | NC_021161.1    | Ca_kabuli_chr02 | 30364838                | TT                              | CC              | 1946760273               |
| SNP_P4_23676_30364839 | NC_021161.1    | Ca_kabuli_chr02 | 30364839                | AA                              | GG              | 1946760274               |
| SNP_P4_23677_30364850 | NC_021161.1    | Ca_kabuli_chr02 | 30364850                | AA                              | GG              | 1946760275               |
| SNP_P4_23678_30364894 | NC_021161.1    | Ca_kabuli_chr02 | 30364894                | GG                              | TT              | 1946760276               |
| SNP_P4_23679_30364902 | NC_021161.1    | Ca_kabuli_chr02 | 30364902                | TT                              | AA              | 1946760277               |
| SNP_P4_23680_30365165 | NC_021161.1    | Ca_kabuli_chr02 | 30365165                | CC                              | TT              | 1946760278               |
| SNP_P4_23681_30365202 | NC_021161.1    | Ca_kabuli_chr02 | 30365202                | CC                              | GG              | 1946760279               |
| SNP_P4_23682_30365246 | NC_021161.1    | Ca_kabuli_chr02 | 30365246                | AA                              | TT              | 1946760280               |
| SNP_P4_23683_30365247 | NC_021161.1    | Ca_kabuli_chr02 | 30365247                | CC                              | AA              | 1946760281               |
| SNP_P4_23684_30365804 | NC_021161.1    | Ca_kabuli_chr02 | 30365804                | TT                              | GG              | 1946760282               |
| SNP_P4_23685_30367555 | NC_021161.1    | Ca_kabuli_chr02 | 30367555                | GG                              | CC              | 1946760283               |
| SNP_P4_23686_30367568 | NC_021161.1    | Ca_kabuli_chr02 | 30367568                | AA                              | TT              | 1946760284               |
| SNP_P4_23687_30367635 | NC_021161.1    | Ca_kabuli_chr02 | 30367635                | CC                              | GG              | 1946760285               |
| SNP_P4_23688_30369088 | NC_021161.1    | Ca_kabuli_chr02 | 30369088                | AA                              | GG              | 1946760286               |
| SNP_P4_23689_30369127 | NC_021161.1    | Ca_kabuli_chr02 | 30369127                | CC                              | TT              | 1946760287               |
| SNP_P4_23691_30369426 | NC_021161.1    | Ca_kabuli_chr02 | 30369426                | AA                              | TT              | 1946760288               |
| SNP_P4_23692_30369430 | NC_021161.1    | Ca_kabuli_chr02 | 30369430                | GG                              | AA              | 1946760289               |
| SNP_P4_23693_30370148 | NC_021161.1    | Ca_kabuli_chr02 | 30370148                | TT                              | GG              | 1946760290               |

| SNPs IDs              | Chromosome IDs | Chromosomes     | Physical positions (bp) | CDC Frontier (Reference genome) | (ILWC46 & LPNB) | NCBI SNPdb Accession IDs |
|-----------------------|----------------|-----------------|-------------------------|---------------------------------|-----------------|--------------------------|
| SNP_P4_23694_30370854 | NC_021161.1    | Ca_kabuli_chr02 | 30370854                | AA                              | CC              | 1946760291               |
| SNP_P4_23695_30370950 | NC_021161.1    | Ca_kabuli_chr02 | 30370950                | TT                              | AA              | 1946760292               |
| SNP_P4_23696_30371673 | NC_021161.1    | Ca_kabuli_chr02 | 30371673                | AA                              | GG              | 1946760293               |
| SNP_P4_23697_30371674 | NC_021161.1    | Ca_kabuli_chr02 | 30371674                | AA                              | GG              | 1946760294               |
| SNP_P4_23698_30373821 | NC_021161.1    | Ca_kabuli_chr02 | 30373821                | TT                              | GG              | 1946760295               |
| SNP_P4_23699_30373889 | NC_021161.1    | Ca_kabuli_chr02 | 30373889                | CC                              | TT              | 1946760296               |
| SNP_P4_23700_30374252 | NC_021161.1    | Ca_kabuli_chr02 | 30374252                | TT                              | CC              | 1946760297               |
| SNP_P4_23702_30375948 | NC_021161.1    | Ca_kabuli_chr02 | 30375948                | TT                              | CC              | 1946760298               |
| SNP_P4_23703_30376327 | NC_021161.1    | Ca_kabuli_chr02 | 30376327                | AA                              | TT              | 1946760299               |
| SNP_P4_23704_30377267 | NC_021161.1    | Ca_kabuli_chr02 | 30377267                | AA                              | CC              | 1946760300               |
| SNP_P4_23705_30377268 | NC_021161.1    | Ca_kabuli_chr02 | 30377268                | AA                              | CC              | 1946760301               |
| SNP_P4_23706_30377276 | NC_021161.1    | Ca_kabuli_chr02 | 30377276                | CC                              | GG              | 1946760302               |
| SNP_P4_23707_30377643 | NC_021161.1    | Ca_kabuli_chr02 | 30377643                | GG                              | TT              | 1946760303               |
| SNP_P4_23708_30378470 | NC_021161.1    | Ca_kabuli_chr02 | 30378470                | AA                              | GG              | 1946760304               |
| SNP_P4_23709_30379817 | NC_021161.1    | Ca_kabuli_chr02 | 30379817                | TT                              | GG              | 1946760305               |
| SNP_P4_23710_30380106 | NC_021161.1    | Ca_kabuli_chr02 | 30380106                | AA                              | TT              | 1946760306               |
| SNP_P4_23711_30383045 | NC_021161.1    | Ca_kabuli_chr02 | 30383045                | GG                              | AA              | 1946760308               |
| SNP_P4_23712_30383109 | NC_021161.1    | Ca_kabuli_chr02 | 30383109                | TT                              | CC              | 1946760310               |
| SNP_P4_23713_30383139 | NC_021161.1    | Ca_kabuli_chr02 | 30383139                | CC                              | AA              | 1946760312               |
| SNP_P4_23714_30383215 | NC_021161.1    | Ca_kabuli_chr02 | 30383215                | CC                              | GG              | 1946760314               |
| SNP_P4_23715_30383237 | NC_021161.1    | Ca_kabuli_chr02 | 30383237                | TT                              | AA              | 1946760316               |
| SNP_P4_23716_30383262 | NC_021161.1    | Ca_kabuli_chr02 | 30383262                | GG                              | AA              | 1946760318               |
| SNP_P4_23717_30383469 | NC_021161.1    | Ca_kabuli_chr02 | 30383469                | TT                              | CC              | 1946760320               |
| SNP_P4_23718_30383502 | NC_021161.1    | Ca_kabuli_chr02 | 30383502                | CC                              | TT              | 1946760322               |
| SNP_P4_23719_30383529 | NC_021161.1    | Ca_kabuli_chr02 | 30383529                | CC                              | TT              | 1946760324               |
| SNP_P4_23720_30383536 | NC_021161.1    | Ca_kabuli_chr02 | 30383536                | AA                              | GG              | 1946760326               |
| SNP_P4_23721_30384191 | NC_021161.1    | Ca_kabuli_chr02 | 30384191                | GG                              | AA              | 1946760328               |
| SNP_P4_23722_30384344 | NC_021161.1    | Ca_kabuli_chr02 | 30384344                | CC                              | TT              | 1946760330               |
| SNP_P4_23723_30384347 | NC_021161.1    | Ca_kabuli_chr02 | 30384347                | TT                              | CC              | 1946760332               |
| SNP_P4_23724_30384383 | NC_021161.1    | Ca_kabuli_chr02 | 30384383                | CC                              | TT              | 1946760334               |
| SNP_P4_23725_30384393 | NC_021161.1    | Ca_kabuli_chr02 | 30384393                | TT                              | CC              | 1946760336               |
| SNP_P4_23726_30384442 | NC_021161.1    | Ca_kabuli_chr02 | 30384442                | CC                              | GG              | 1946760338               |
| SNP_P4_23727_30384443 | NC_021161.1    | Ca_kabuli_chr02 | 30384443                | TT                              | CC              | 1946760340               |
| SNP_P4_23728_30384467 | NC_021161.1    | Ca_kabuli_chr02 | 30384467                | TT                              | GG              | 1946760342               |
| SNP_P4_23729_30384489 | NC_021161.1    | Ca_kabuli_chr02 | 30384489                | CC                              | TT              | 1946760345               |
| SNP_P4_23730_30384502 | NC_021161.1    | Ca_kabuli_chr02 | 30384502                | TT                              | GG              | 1946760347               |
| SNP_P4_23731_30384745 | NC_021161.1    | Ca_kabuli_chr02 | 30384745                | GG                              | TT              | 1946760349               |
| SNP_P4_23732_30384757 | NC_021161.1    | Ca_kabuli_chr02 | 30384757                | AA                              | GG              | 1946760351               |
| SNP_P4_23733_30384785 | NC_021161.1    | Ca_kabuli_chr02 | 30384785                | AA                              | GG              | 1946760353               |
| SNP_P4_23734_30384810 | NC_021161.1    | Ca_kabuli_chr02 | 30384810                | CC                              | TT              | 1946760355               |
| SNP_P4_23735_30384819 | NC_021161.1    | Ca_kabuli_chr02 | 30384819                | CC                              | TT              | 1946760357               |
| SNP_P4_23736_30384821 | NC_021161.1    | Ca_kabuli_chr02 | 30384821                | CC                              | GG              | 1946760359               |

| SNPs IDs              | Chromosome IDs | Chromosomes     | Physical positions (bp) | CDC Frontier (Reference genome) | (ILWC46 & LPNB) | NCBI SNPdb Accession IDs |
|-----------------------|----------------|-----------------|-------------------------|---------------------------------|-----------------|--------------------------|
| SNP_P4_23737_30384856 | NC_021161.1    | Ca_kabuli_chr02 | 30384856                | GG                              | AA              | 1946760361               |
| SNP_P4_23738_30384870 | NC_021161.1    | Ca_kabuli_chr02 | 30384870                | TT                              | AA              | 1946760363               |
| SNP_P4_23740_30385086 | NC_021161.1    | Ca_kabuli_chr02 | 30385086                | GG                              | TT              | 1946760365               |
| SNP_P4_23742_30385324 | NC_021161.1    | Ca_kabuli_chr02 | 30385324                | AA                              | GG              | 1946760367               |
| SNP_P4_23743_30385332 | NC_021161.1    | Ca_kabuli_chr02 | 30385332                | AA                              | GG              | 1946760369               |
| SNP_P4_23745_30385945 | NC_021161.1    | Ca_kabuli_chr02 | 30385945                | CC                              | TT              | 1946760371               |
| SNP_P4_23746_30385996 | NC_021161.1    | Ca_kabuli_chr02 | 30385996                | AA                              | GG              | 1946760373               |
| SNP_P4_23747_30386351 | NC_021161.1    | Ca_kabuli_chr02 | 30386351                | CC                              | AA              | 1946760375               |
| SNP_P4_23748_30386369 | NC_021161.1    | Ca_kabuli_chr02 | 30386369                | AA                              | GG              | 1946760377               |
| SNP_P4_23749_30386375 | NC_021161.1    | Ca_kabuli_chr02 | 30386375                | TT                              | CC              | 1946760379               |
| SNP_P4_23750_30386403 | NC_021161.1    | Ca_kabuli_chr02 | 30386403                | TT                              | CC              | 1946760381               |
| SNP_P4_23751_30386789 | NC_021161.1    | Ca_kabuli_chr02 | 30386789                | AA                              | GG              | 1946760383               |
| SNP_P4_23753_30389433 | NC_021161.1    | Ca_kabuli_chr02 | 30389433                | TT                              | CC              | 1946760385               |
| SNP_P4_23754_30389515 | NC_021161.1    | Ca_kabuli_chr02 | 30389515                | AA                              | TT              | 1946760387               |
| SNP_P4_23755_30389653 | NC_021161.1    | Ca_kabuli_chr02 | 30389653                | AA                              | TT              | 1946760389               |
| SNP_P4_23756_30389678 | NC_021161.1    | Ca_kabuli_chr02 | 30389678                | GG                              | AA              | 1946760391               |
| SNP_P4_23757_30389746 | NC_021161.1    | Ca_kabuli_chr02 | 30389746                | CC                              | GG              | 1946760393               |
| SNP_P4_23758_30389906 | NC_021161.1    | Ca_kabuli_chr02 | 30389906                | TT                              | AA              | 1946760395               |
| SNP_P4_23760_30390438 | NC_021161.1    | Ca_kabuli_chr02 | 30390438                | CC                              | AA              | 1946760397               |
| SNP_P4_23761_30393196 | NC_021161.1    | Ca_kabuli_chr02 | 30393196                | GG                              | AA              | 1946760399               |
| SNP_P4_23762_30393521 | NC_021161.1    | Ca_kabuli_chr02 | 30393521                | CC                              | AA              | 1946760401               |
| SNP_P4_23767_30394004 | NC_021161.1    | Ca_kabuli_chr02 | 30394004                | TT                              | GG              | 1946760403               |
| SNP_P4_23768_30394883 | NC_021161.1    | Ca_kabuli_chr02 | 30394883                | GG                              | AA              | 1946760405               |
| SNP_P4_23771_30395048 | NC_021161.1    | Ca_kabuli_chr02 | 30395048                | GG                              | TT              | 1946760407               |
| SNP_P4_23773_30397056 | NC_021161.1    | Ca_kabuli_chr02 | 30397056                | GG                              | AA              | 1946760409               |
| SNP_P4_23775_30398979 | NC_021161.1    | Ca_kabuli_chr02 | 30398979                | CC                              | TT              | 1946760411               |
| SNP_P4_23777_30400213 | NC_021161.1    | Ca_kabuli_chr02 | 30400213                | CC                              | TT              | 1946760413               |
| SNP_P4_23778_30400702 | NC_021161.1    | Ca_kabuli_chr02 | 30400702                | GG                              | AA              | 1946760415               |
| SNP_P4_23779_30400717 | NC_021161.1    | Ca_kabuli_chr02 | 30400717                | TT                              | CC              | 1946760417               |
| SNP_P4_23782_30401648 | NC_021161.1    | Ca_kabuli_chr02 | 30401648                | AA                              | GG              | 1946760420               |
| SNP_P4_23783_30401652 | NC_021161.1    | Ca_kabuli_chr02 | 30401652                | CC                              | TT              | 1946760422               |
| SNP_P4_23784_30401653 | NC_021161.1    | Ca_kabuli_chr02 | 30401653                | GG                              | AA              | 1946760424               |
| SNP_P4_23786_30401943 | NC_021161.1    | Ca_kabuli_chr02 | 30401943                | AA                              | TT              | 1946760426               |
| SNP_P4_23787_30402037 | NC_021161.1    | Ca_kabuli_chr02 | 30402037                | AA                              | TT              | 1946760428               |
| SNP_P4_23788_30402071 | NC_021161.1    | Ca_kabuli_chr02 | 30402071                | CC                              | TT              | 1946760430               |
| SNP_P4_23790_30402137 | NC_021161.1    | Ca_kabuli_chr02 | 30402137                | TT                              | CC              | 1946760432               |
| SNP_P4_23791_30402186 | NC_021161.1    | Ca_kabuli_chr02 | 30402186                | AA                              | TT              | 1946760434               |
| SNP_P4_23792_30402875 | NC_021161.1    | Ca_kabuli_chr02 | 30402875                | CC                              | TT              | 1946760436               |
| SNP_P4_23793_30402905 | NC_021161.1    | Ca_kabuli_chr02 | 30402905                | GG                              | TT              | 1946760438               |
| SNP_P4_23796_30403620 | NC_021161.1    | Ca_kabuli_chr02 | 30403620                | AA                              | TT              | 1946760440               |
| SNP_P4_23797_30403642 | NC_021161.1    | Ca_kabuli_chr02 | 30403642                | AA                              | TT              | 1946760442               |
| SNP_P4_23798_30406267 | NC_021161.1    | Ca_kabuli_chr02 | 30406267                | CC                              | TT              | 1946760444               |

| SNPs IDs              | Chromosome IDs | Chromosomes     | Physical positions (bp) | CDC Frontier (Reference genome) | (ILWC46 & LPNB) | NCBI SNPdb Accession IDs |
|-----------------------|----------------|-----------------|-------------------------|---------------------------------|-----------------|--------------------------|
| SNP_P4_23799_30406303 | NC_021161.1    | Ca_kabuli_chr02 | 30406303                | GG                              | TT              | 1946760446               |
| SNP_P4_23800_30407839 | NC_021161.1    | Ca_kabuli_chr02 | 30407839                | CC                              | TT              | 1946760448               |
| SNP_P4_23801_30407887 | NC_021161.1    | Ca_kabuli_chr02 | 30407887                | TT                              | CC              | 1946760450               |
| SNP_P4_23802_30407899 | NC_021161.1    | Ca_kabuli_chr02 | 30407899                | CC                              | TT              | 1946760452               |
| SNP_P4_23803_30410235 | NC_021161.1    | Ca_kabuli_chr02 | 30410235                | CC                              | TT              | 1946760454               |
| SNP_P4_23804_30410396 | NC_021161.1    | Ca_kabuli_chr02 | 30410396                | AA                              | GG              | 1946760456               |
| SNP_P4_23805_30410490 | NC_021161.1    | Ca_kabuli_chr02 | 30410490                | GG                              | CC              | 1946760458               |
| SNP_P4_23806_30410492 | NC_021161.1    | Ca_kabuli_chr02 | 30410492                | CC                              | TT              | 1946760460               |
| SNP_P4_23807_30410502 | NC_021161.1    | Ca_kabuli_chr02 | 30410502                | CC                              | AA              | 1946760462               |
| SNP_P4_23808_30410624 | NC_021161.1    | Ca_kabuli_chr02 | 30410624                | GG                              | CC              | 1946760464               |
| SNP_P4_23809_30410703 | NC_021161.1    | Ca_kabuli_chr02 | 30410703                | CC                              | TT              | 1946760466               |
| SNP_P4_23810_30410959 | NC_021161.1    | Ca_kabuli_chr02 | 30410959                | AA                              | GG              | 1946760469               |
| SNP_P4_23811_30410962 | NC_021161.1    | Ca_kabuli_chr02 | 30410962                | TT                              | CC              | 1946760471               |
| SNP_P4_23812_30411090 | NC_021161.1    | Ca_kabuli_chr02 | 30411090                | AA                              | GG              | 1946760473               |
| SNP_P4_23813_30411112 | NC_021161.1    | Ca_kabuli_chr02 | 30411112                | AA                              | GG              | 1946760475               |
| SNP_P4_23814_30411171 | NC_021161.1    | Ca_kabuli_chr02 | 30411171                | AA                              | GG              | 1946760477               |
| SNP_P4_23815_30411219 | NC_021161.1    | Ca_kabuli_chr02 | 30411219                | TT                              | CC              | 1946760479               |
| SNP_P4_23816_30411369 | NC_021161.1    | Ca_kabuli_chr02 | 30411369                | CC                              | TT              | 1946760481               |
| SNP_P4_23817_30411384 | NC_021161.1    | Ca_kabuli_chr02 | 30411384                | AA                              | TT              | 1946760483               |
| SNP_P4_23818_30411476 | NC_021161.1    | Ca_kabuli_chr02 | 30411476                | CC                              | TT              | 1946760485               |
| SNP_P4_23819_30411535 | NC_021161.1    | Ca_kabuli_chr02 | 30411535                | TT                              | CC              | 1946760487               |
| SNP_P4_23820_30411690 | NC_021161.1    | Ca_kabuli_chr02 | 30411690                | TT                              | AA              | 1946760489               |
| SNP_P4_23821_30412172 | NC_021161.1    | Ca_kabuli_chr02 | 30412172                | CC                              | TT              | 1946760491               |
| SNP_P4_23822_30412174 | NC_021161.1    | Ca_kabuli_chr02 | 30412174                | AA                              | TT              | 1946760493               |
| SNP_P4_23823_30412385 | NC_021161.1    | Ca_kabuli_chr02 | 30412385                | GG                              | AA              | 1946760495               |
| SNP_P4_23824_30412397 | NC_021161.1    | Ca_kabuli_chr02 | 30412397                | TT                              | CC              | 1946760497               |
| SNP_P4_23825_30414117 | NC_021161.1    | Ca_kabuli_chr02 | 30414117                | TT                              | AA              | 1946760499               |
| SNP_P4_23826_30414121 | NC_021161.1    | Ca_kabuli_chr02 | 30414121                | TT                              | GG              | 1946760501               |
| SNP_P4_23827_30415803 | NC_021161.1    | Ca_kabuli_chr02 | 30415803                | GG                              | AA              | 1946760503               |
| SNP_P4_23829_30416546 | NC_021161.1    | Ca_kabuli_chr02 | 30416546                | CC                              | GG              | 1946760505               |
| SNP_P4_23830_30416597 | NC_021161.1    | Ca_kabuli_chr02 | 30416597                | CC                              | AA              | 1946760507               |
| SNP_P4_23832_30418777 | NC_021161.1    | Ca_kabuli_chr02 | 30418777                | CC                              | TT              | 1946760509               |
| SNP_P4_23834_30421934 | NC_021161.1    | Ca_kabuli_chr02 | 30421934                | TT                              | AA              | 1946760511               |
| SNP_P4_23835_30423911 | NC_021161.1    | Ca_kabuli_chr02 | 30423911                | GG                              | AA              | 1946760513               |
| SNP_P4_23836_30429516 | NC_021161.1    | Ca_kabuli_chr02 | 30429516                | TT                              | AA              | 1946760515               |
| SNP_P4_23838_30432429 | NC_021161.1    | Ca_kabuli_chr02 | 30432429                | GG                              | AA              | 1946760517               |
| SNP_P4_23839_30432465 | NC_021161.1    | Ca_kabuli_chr02 | 30432465                | GG                              | AA              | 1946760519               |
| SNP_P4_23840_30433118 | NC_021161.1    | Ca_kabuli_chr02 | 30433118                | AA                              | GG              | 1946760521               |
| SNP_P4_23842_30433144 | NC_021161.1    | Ca_kabuli_chr02 | 30433144                | TT                              | AA              | 1946760523               |
| SNP_P4_23844_30433842 | NC_021161.1    | Ca_kabuli_chr02 | 30433842                | CC                              | AA              | 1946760526               |
| SNP_P4_23845_30434818 | NC_021161.1    | Ca_kabuli_chr02 | 30434818                | CC                              | AA              | 1946760528               |
| SNP_P4_23846_30434869 | NC_021161.1    | Ca_kabuli_chr02 | 30434869                | TT                              | AA              | 1946760530               |

| SNPs IDs              | Chromosome IDs | Chromosomes     | Physical positions (bp) | CDC Frontier (Reference genome) | (ILWC46 & LPNB) | NCBI SNPdb Accession IDs |
|-----------------------|----------------|-----------------|-------------------------|---------------------------------|-----------------|--------------------------|
| SNP_P4_23847_30435096 | NC_021161.1    | Ca_kabuli_chr02 | 30435096                | AA                              | CC              | 1946760531               |
| SNP_P4_23848_30435132 | NC_021161.1    | Ca_kabuli_chr02 | 30435132                | AA                              | CC              | 1946760532               |
| SNP_P4_23849_30435214 | NC_021161.1    | Ca_kabuli_chr02 | 30435214                | AA                              | CC              | 1946760534               |
| SNP_P4_23850_30435217 | NC_021161.1    | Ca_kabuli_chr02 | 30435217                | CC                              | TT              | 1946760536               |
| SNP_P4_23851_30435276 | NC_021161.1    | Ca_kabuli_chr02 | 30435276                | CC                              | GG              | 1946760538               |
| SNP_P4_23852_30435491 | NC_021161.1    | Ca_kabuli_chr02 | 30435491                | AA                              | TT              | 1946760540               |
| SNP_P4_23853_30435540 | NC_021161.1    | Ca_kabuli_chr02 | 30435540                | AA                              | TT              | 1946760542               |
| SNP_P4_23854_30435541 | NC_021161.1    | Ca_kabuli_chr02 | 30435541                | CC                              | TT              | 1946760545               |
| SNP_P4_23855_30435551 | NC_021161.1    | Ca_kabuli_chr02 | 30435551                | CC                              | TT              | 1946760547               |
| SNP_P4_23856_30438581 | NC_021161.1    | Ca_kabuli_chr02 | 30438581                | TT                              | GG              | 1946760549               |
| SNP_P4_23857_30438668 | NC_021161.1    | Ca_kabuli_chr02 | 30438668                | GG                              | TT              | 1946760551               |
| SNP_P4_23858_30438914 | NC_021161.1    | Ca_kabuli_chr02 | 30438914                | CC                              | TT              | 1946760553               |
| SNP_P4_23860_30439424 | NC_021161.1    | Ca_kabuli_chr02 | 30439424                | GG                              | AA              | 1946760555               |
| SNP_P4_23861_30439677 | NC_021161.1    | Ca_kabuli_chr02 | 30439677                | CC                              | TT              | 1946760557               |
| SNP_P4_23862_30439852 | NC_021161.1    | Ca_kabuli_chr02 | 30439852                | TT                              | AA              | 1946760559               |
| SNP_P4_23863_30442712 | NC_021161.1    | Ca_kabuli_chr02 | 30442712                | TT                              | GG              | 1946760561               |
| SNP_P4_23864_30442722 | NC_021161.1    | Ca_kabuli_chr02 | 30442722                | GG                              | CC              | 1946760563               |
| SNP_P4_23865_30444636 | NC_021161.1    | Ca_kabuli_chr02 | 30444636                | AA                              | GG              | 1946760565               |
| SNP_P4_23866_30444668 | NC_021161.1    | Ca_kabuli_chr02 | 30444668                | TT                              | AA              | 1946760567               |
| SNP_P4_23869_30445537 | NC_021161.1    | Ca_kabuli_chr02 | 30445537                | GG                              | AA              | 1946760569               |
| SNP_P4_23870_30445550 | NC_021161.1    | Ca_kabuli_chr02 | 30445550                | TT                              | CC              | 1946760571               |
| SNP_P4_23871_30445606 | NC_021161.1    | Ca_kabuli_chr02 | 30445606                | AA                              | CC              | 1946760573               |
| SNP_P4_23872_30445766 | NC_021161.1    | Ca_kabuli_chr02 | 30445766                | AA                              | CC              | 1946760575               |
| SNP_P4_23873_30445774 | NC_021161.1    | Ca_kabuli_chr02 | 30445774                | CC                              | TT              | 1946760577               |
| SNP_P4_23874_30445788 | NC_021161.1    | Ca_kabuli_chr02 | 30445788                | AA                              | GG              | 1946760579               |
| SNP_P4_23875_30445799 | NC_021161.1    | Ca_kabuli_chr02 | 30445799                | CC                              | TT              | 1946760581               |
| SNP_P4_23876_30445815 | NC_021161.1    | Ca_kabuli_chr02 | 30445815                | GG                              | AA              | 1946760583               |
| SNP_P4_23878_30445995 | NC_021161.1    | Ca_kabuli_chr02 | 30445995                | CC                              | TT              | 1946760585               |
| SNP_P4_23879_30446005 | NC_021161.1    | Ca_kabuli_chr02 | 30446005                | AA                              | GG              | 1946760587               |
| SNP_P4_23880_30446006 | NC_021161.1    | Ca_kabuli_chr02 | 30446006                | GG                              | AA              | 1946760589               |
| SNP_P4_23881_30446015 | NC_021161.1    | Ca_kabuli_chr02 | 30446015                | CC                              | TT              | 1946760591               |
| SNP_P4_23882_30446144 | NC_021161.1    | Ca_kabuli_chr02 | 30446144                | TT                              | AA              | 1946760593               |
| SNP_P4_23883_30446268 | NC_021161.1    | Ca_kabuli_chr02 | 30446268                | TT                              | AA              | 1946760595               |
| SNP_P4_23884_30446269 | NC_021161.1    | Ca_kabuli_chr02 | 30446269                | GG                              | AA              | 1946760597               |
| SNP_P4_23885_30446836 | NC_021161.1    | Ca_kabuli_chr02 | 30446836                | AA                              | GG              | 1946760599               |
| SNP_P4_23886_30446849 | NC_021161.1    | Ca_kabuli_chr02 | 30446849                | GG                              | AA              | 1946760601               |
| SNP_P4_23887_30446850 | NC_021161.1    | Ca_kabuli_chr02 | 30446850                | TT                              | CC              | 1946760603               |
| SNP_P4_23888_30446858 | NC_021161.1    | Ca_kabuli_chr02 | 30446858                | AA                              | GG              | 1946760605               |
| SNP_P4_23889_30446878 | NC_021161.1    | Ca_kabuli_chr02 | 30446878                | AA                              | GG              | 1946760607               |
| SNP_P4_23891_30447387 | NC_021161.1    | Ca_kabuli_chr02 | 30447387                | AA                              | CC              | 1946760609               |
| SNP_P4_23892_30447401 | NC_021161.1    | Ca_kabuli_chr02 | 30447401                | GG                              | TT              | 1946760611               |
| SNP_P4_23895_30448041 | NC_021161.1    | Ca_kabuli_chr02 | 30448041                | CC                              | AA              | 1946760613               |

| SNPs IDs              | Chromosome IDs | Chromosomes     | Physical positions (bp) | CDC Frontier (Reference genome) | (ILWC46 & LPNB) | NCBI SNPdb Accession IDs |
|-----------------------|----------------|-----------------|-------------------------|---------------------------------|-----------------|--------------------------|
| SNP_P4_23896_30448155 | NC_021161.1    | Ca_kabuli_chr02 | 30448155                | CC                              | GG              | 1946760615               |
| SNP_P4_23897_30448257 | NC_021161.1    | Ca_kabuli_chr02 | 30448257                | GG                              | AA              | 1946760617               |
| SNP_P4_23898_30448266 | NC_021161.1    | Ca_kabuli_chr02 | 30448266                | GG                              | TT              | 1946760619               |
| SNP_P4_23899_30448273 | NC_021161.1    | Ca_kabuli_chr02 | 30448273                | TT                              | AA              | 1946760621               |
| SNP_P4_23901_30448408 | NC_021161.1    | Ca_kabuli_chr02 | 30448408                | AA                              | TT              | 1946760623               |
| SNP_P4_23902_30448416 | NC_021161.1    | Ca_kabuli_chr02 | 30448416                | TT                              | CC              | 1946760625               |
| SNP_P4_23903_30448824 | NC_021161.1    | Ca_kabuli_chr02 | 30448824                | TT                              | GG              | 1946760627               |
| SNP_P4_23905_30449003 | NC_021161.1    | Ca_kabuli_chr02 | 30449003                | CC                              | TT              | 1946760629               |
| SNP_P4_23906_30449144 | NC_021161.1    | Ca_kabuli_chr02 | 30449144                | CC                              | TT              | 1946760631               |
| SNP_P4_23908_30449269 | NC_021161.1    | Ca_kabuli_chr02 | 30449269                | GG                              | AA              | 1946760633               |
| SNP_P4_23909_30449286 | NC_021161.1    | Ca_kabuli_chr02 | 30449286                | AA                              | TT              | 1946760635               |
| SNP_P4_23910_30449292 | NC_021161.1    | Ca_kabuli_chr02 | 30449292                | CC                              | TT              | 1946760637               |
| SNP_P4_23911_30449347 | NC_021161.1    | Ca_kabuli_chr02 | 30449347                | TT                              | AA              | 1946760639               |
| SNP_P4_23912_30449574 | NC_021161.1    | Ca_kabuli_chr02 | 30449574                | AA                              | TT              | 1946760641               |
| SNP_P4_23913_30449611 | NC_021161.1    | Ca_kabuli_chr02 | 30449611                | TT                              | CC              | 1946760643               |
| SNP_P4_23914_30449612 | NC_021161.1    | Ca_kabuli_chr02 | 30449612                | CC                              | TT              | 1946760645               |
| SNP_P4_23915_30449629 | NC_021161.1    | Ca_kabuli_chr02 | 30449629                | CC                              | TT              | 1946760647               |
| SNP_P4_23916_30449639 | NC_021161.1    | Ca_kabuli_chr02 | 30449639                | CC                              | TT              | 1946760649               |
| SNP_P4_23917_30449745 | NC_021161.1    | Ca_kabuli_chr02 | 30449745                | GG                              | AA              | 1946760651               |
| SNP_P4_23918_30449924 | NC_021161.1    | Ca_kabuli_chr02 | 30449924                | GG                              | AA              | 1946760653               |
| SNP_P4_23919_30449934 | NC_021161.1    | Ca_kabuli_chr02 | 30449934                | AA                              | TT              | 1946760655               |
| SNP_P4_23920_30450135 | NC_021161.1    | Ca_kabuli_chr02 | 30450135                | AA                              | GG              | 1946760657               |
| SNP_P4_23921_30450139 | NC_021161.1    | Ca_kabuli_chr02 | 30450139                | TT                              | CC              | 1946760659               |
| SNP_P4_23922_30450156 | NC_021161.1    | Ca_kabuli_chr02 | 30450156                | GG                              | CC              | 1946760661               |
| SNP_P4_23923_30450168 | NC_021161.1    | Ca_kabuli_chr02 | 30450168                | AA                              | GG              | 1946760663               |
| SNP_P4_23924_30450178 | NC_021161.1    | Ca_kabuli_chr02 | 30450178                | TT                              | AA              | 1946760665               |
| SNP_P4_23925_30450355 | NC_021161.1    | Ca_kabuli_chr02 | 30450355                | GG                              | AA              | 1946760667               |
| SNP_P4_23926_30450437 | NC_021161.1    | Ca_kabuli_chr02 | 30450437                | TT                              | AA              | 1946760669               |
| SNP_P4_23927_30450477 | NC_021161.1    | Ca_kabuli_chr02 | 30450477                | AA                              | GG              | 1946760671               |
| SNP_P4_23928_30450485 | NC_021161.1    | Ca_kabuli_chr02 | 30450485                | CC                              | GG              | 1946760673               |
| SNP_P4_23929_30450895 | NC_021161.1    | Ca_kabuli_chr02 | 30450895                | CC                              | TT              | 1946760676               |
| SNP_P4_23930_30457479 | NC_021161.1    | Ca_kabuli_chr02 | 30457479                | TT                              | CC              | 1946760678               |
| SNP_P4_23931_30457497 | NC_021161.1    | Ca_kabuli_chr02 | 30457497                | CC                              | TT              | 1946760680               |
| SNP_P4_23932_30457498 | NC_021161.1    | Ca_kabuli_chr02 | 30457498                | CC                              | GG              | 1946760682               |
| SNP_P4_23933_30457530 | NC_021161.1    | Ca_kabuli_chr02 | 30457530                | GG                              | AA              | 1946760684               |
| SNP_P4_23935_30459368 | NC_021161.1    | Ca_kabuli_chr02 | 30459368                | TT                              | CC              | 1946760686               |
| SNP_P4_23936_30459369 | NC_021161.1    | Ca_kabuli_chr02 | 30459369                | TT                              | CC              | 1946760688               |
| SNP_P4_23938_30460193 | NC_021161.1    | Ca_kabuli_chr02 | 30460193                | TT                              | GG              | 1946760690               |
| SNP_P4_23943_30462945 | NC_021161.1    | Ca_kabuli_chr02 | 30462945                | AA                              | GG              | 1946760692               |
| SNP_P4_23944_30462959 | NC_021161.1    | Ca_kabuli_chr02 | 30462959                | TT                              | AA              | 1946760694               |
| SNP_P4_23945_30462986 | NC_021161.1    | Ca_kabuli_chr02 | 30462986                | TT                              | CC              | 1946760696               |
| SNP_P4_23946_30462997 | NC_021161.1    | Ca_kabuli_chr02 | 30462997                | GG                              | TT              | 1946760698               |



| SNPs IDs              | Chromosome IDs | Chromosomes     | Physical positions (bp) | CDC Frontier (Reference genome) | (ILWC46 & LPNB) | NCBI SNPdb Accession IDs |
|-----------------------|----------------|-----------------|-------------------------|---------------------------------|-----------------|--------------------------|
| SNP_P4_23948_30464084 | NC_021161.1    | Ca_kabuli_chr02 | 30464084                | TT                              | CC              | 1946760700               |
| SNP_P4_23951_30464384 | NC_021161.1    | Ca_kabuli_chr02 | 30464384                | AA                              | GG              | 1946760702               |
| SNP_P4_23952_30464878 | NC_021161.1    | Ca_kabuli_chr02 | 30464878                | TT                              | CC              | 1946760704               |
| SNP_P4_23953_30465903 | NC_021161.1    | Ca_kabuli_chr02 | 30465903                | AA                              | TT              | 1946760706               |
| SNP_P4_23955_30466451 | NC_021161.1    | Ca_kabuli_chr02 | 30466451                | AA                              | CC              | 1946760708               |
| SNP_P4_23956_30468535 | NC_021161.1    | Ca_kabuli_chr02 | 30468535                | CC                              | TT              | 1946760710               |
| SNP_P4_23957_30475534 | NC_021161.1    | Ca_kabuli_chr02 | 30475534                | CC                              | AA              | 1946760713               |
| SNP_P4_23958_30475542 | NC_021161.1    | Ca_kabuli_chr02 | 30475542                | TT                              | GG              | 1946760715               |
| SNP_P4_23959_30476459 | NC_021161.1    | Ca_kabuli_chr02 | 30476459                | TT                              | CC              | 1946760717               |
| SNP_P4_23961_30476775 | NC_021161.1    | Ca_kabuli_chr02 | 30476775                | CC                              | TT              | 1946760719               |
| SNP_P4_23963_30478180 | NC_021161.1    | Ca_kabuli_chr02 | 30478180                | CC                              | GG              | 1946760721               |
| SNP_P4_23964_30478193 | NC_021161.1    | Ca_kabuli_chr02 | 30478193                | GG                              | AA              | 1946760723               |
| SNP_P4_23965_30478210 | NC_021161.1    | Ca_kabuli_chr02 | 30478210                | TT                              | CC              | 1946760725               |
| SNP_P4_23966_30478472 | NC_021161.1    | Ca_kabuli_chr02 | 30478472                | AA                              | GG              | 1946760727               |
| SNP_P4_23967_30478497 | NC_021161.1    | Ca_kabuli_chr02 | 30478497                | TT                              | CC              | 1946760729               |
| SNP_P4_23968_30478571 | NC_021161.1    | Ca_kabuli_chr02 | 30478571                | GG                              | AA              | 1946760731               |
| SNP_P4_23969_30478822 | NC_021161.1    | Ca_kabuli_chr02 | 30478822                | CC                              | GG              | 1946760733               |
| SNP_P4_23970_30478833 | NC_021161.1    | Ca_kabuli_chr02 | 30478833                | GG                              | AA              | 1946760735               |
| SNP_P4_23972_30479460 | NC_021161.1    | Ca_kabuli_chr02 | 30479460                | AA                              | GG              | 1946760737               |
| SNP_P4_23973_30480837 | NC_021161.1    | Ca_kabuli_chr02 | 30480837                | GG                              | CC              | 1946760739               |
| SNP_P4_23975_30481780 | NC_021161.1    | Ca_kabuli_chr02 | 30481780                | CC                              | GG              | 1946760741               |
| SNP_P4_23976_30481951 | NC_021161.1    | Ca_kabuli_chr02 | 30481951                | TT                              | CC              | 1946760743               |
| SNP_P4_23980_30484808 | NC_021161.1    | Ca_kabuli_chr02 | 30484808                | AA                              | CC              | 1946760745               |
| SNP_P4_23982_30485106 | NC_021161.1    | Ca_kabuli_chr02 | 30485106                | TT                              | CC              | 1946760747               |
| SNP_P4_23983_30485152 | NC_021161.1    | Ca_kabuli_chr02 | 30485152                | GG                              | TT              | 1946760749               |
| SNP_P4_23984_30485195 | NC_021161.1    | Ca_kabuli_chr02 | 30485195                | AA                              | GG              | 1946760751               |
| SNP_P4_23985_30485203 | NC_021161.1    | Ca_kabuli_chr02 | 30485203                | AA                              | GG              | 1946760754               |
| SNP_P4_23986_30487707 | NC_021161.1    | Ca_kabuli_chr02 | 30487707                | AA                              | GG              | 1946760756               |
| SNP_P4_23987_30487965 | NC_021161.1    | Ca_kabuli_chr02 | 30487965                | CC                              | TT              | 1946760758               |
| SNP_P4_23988_30487981 | NC_021161.1    | Ca_kabuli_chr02 | 30487981                | TT                              | CC              | 1946760760               |
| SNP_P4_23989_30488719 | NC_021161.1    | Ca_kabuli_chr02 | 30488719                | CC                              | AA              | 1946760762               |
| SNP_P4_23990_30488992 | NC_021161.1    | Ca_kabuli_chr02 | 30488992                | AA                              | GG              | 1946760764               |
| SNP_P4_23991_30489742 | NC_021161.1    | Ca_kabuli_chr02 | 30489742                | CC                              | TT              | 1946760766               |
| SNP_P4_23992_30489751 | NC_021161.1    | Ca_kabuli_chr02 | 30489751                | GG                              | AA              | 1946760768               |
| SNP_P4_23993_30489763 | NC_021161.1    | Ca_kabuli_chr02 | 30489763                | TT                              | CC              | 1946760770               |
| SNP_P4_23994_30489764 | NC_021161.1    | Ca_kabuli_chr02 | 30489764                | AA                              | TT              | 1946760772               |
| SNP_P4_23995_30490049 | NC_021161.1    | Ca_kabuli_chr02 | 30490049                | AA                              | GG              | 1946760774               |
| SNP_P4_23997_30490124 | NC_021161.1    | Ca_kabuli_chr02 | 30490124                | GG                              | AA              | 1946760776               |
| SNP_P4_23998_30490125 | NC_021161.1    | Ca_kabuli_chr02 | 30490125                | GG                              | AA              | 1946760778               |
| SNP_P4_23999_30490139 | NC_021161.1    | Ca_kabuli_chr02 | 30490139                | CC                              | TT              | 1946760780               |
| SNP_P4_24000_30490283 | NC_021161.1    | Ca_kabuli_chr02 | 30490283                | AA                              | TT              | 1946760782               |
| SNP_P4_24002_30490324 | NC_021161.1    | Ca_kabuli_chr02 | 30490324                | TT                              | AA              | 1946760784               |

| SNPs IDs              | Chromosome IDs | Chromosomes     | Physical positions (bp) | CDC Frontier (Reference genome) | (ILWC46 & LPNB) | NCBI SNPdb Accession IDs |
|-----------------------|----------------|-----------------|-------------------------|---------------------------------|-----------------|--------------------------|
| SNP_P4_24003_30490334 | NC_021161.1    | Ca_kabuli_chr02 | 30490334                | AA                              | GG              | 1946760786               |
| SNP_P4_24006_30490437 | NC_021161.1    | Ca_kabuli_chr02 | 30490437                | AA                              | GG              | 1946760788               |
| SNP_P4_24007_30490584 | NC_021161.1    | Ca_kabuli_chr02 | 30490584                | AA                              | TT              | 1946760790               |
| SNP_P4_24008_30490585 | NC_021161.1    | Ca_kabuli_chr02 | 30490585                | GG                              | AA              | 1946760792               |
| SNP_P4_24009_30490617 | NC_021161.1    | Ca_kabuli_chr02 | 30490617                | TT                              | CC              | 1946760794               |
| SNP_P4_24010_30490630 | NC_021161.1    | Ca_kabuli_chr02 | 30490630                | TT                              | GG              | 1946760796               |
| SNP_P4_24011_30490715 | NC_021161.1    | Ca_kabuli_chr02 | 30490715                | CC                              | GG              | 1946760798               |
| SNP_P4_24012_30490717 | NC_021161.1    | Ca_kabuli_chr02 | 30490717                | GG                              | CC              | 1946760800               |
| SNP_P4_24013_30490958 | NC_021161.1    | Ca_kabuli_chr02 | 30490958                | CC                              | GG              | 1946760803               |
| SNP_P4_24014_30490994 | NC_021161.1    | Ca_kabuli_chr02 | 30490994                | GG                              | CC              | 1946760805               |
| SNP_P4_24015_30491027 | NC_021161.1    | Ca_kabuli_chr02 | 30491027                | AA                              | CC              | 1946760807               |
| SNP_P4_24016_30491147 | NC_021161.1    | Ca_kabuli_chr02 | 30491147                | TT                              | CC              | 1946760809               |
| SNP_P4_24017_30491360 | NC_021161.1    | Ca_kabuli_chr02 | 30491360                | AA                              | GG              | 1946760811               |
| SNP_P4_24018_30491375 | NC_021161.1    | Ca_kabuli_chr02 | 30491375                | TT                              | CC              | 1946760813               |
| SNP_P4_24019_30491376 | NC_021161.1    | Ca_kabuli_chr02 | 30491376                | TT                              | CC              | 1946760815               |
| SNP_P4_24020_30493894 | NC_021161.1    | Ca_kabuli_chr02 | 30493894                | AA                              | CC              | 1946760817               |
| SNP_P4_24021_30493930 | NC_021161.1    | Ca_kabuli_chr02 | 30493930                | AA                              | CC              | 1946760819               |
| SNP_P4_24022_30494139 | NC_021161.1    | Ca_kabuli_chr02 | 30494139                | CC                              | TT              | 1946760821               |
| SNP_P4_24023_30494179 | NC_021161.1    | Ca_kabuli_chr02 | 30494179                | CC                              | TT              | 1946760823               |
| SNP_P4_24024_30494323 | NC_021161.1    | Ca_kabuli_chr02 | 30494323                | AA                              | GG              | 1946760825               |
| SNP_P4_24025_30494510 | NC_021161.1    | Ca_kabuli_chr02 | 30494510                | GG                              | AA              | 1946760827               |
| SNP_P4_24026_30494515 | NC_021161.1    | Ca_kabuli_chr02 | 30494515                | TT                              | CC              | 1946760829               |
| SNP_P4_24028_30494892 | NC_021161.1    | Ca_kabuli_chr02 | 30494892                | TT                              | CC              | 1946760832               |
| SNP_P4_24029_30494906 | NC_021161.1    | Ca_kabuli_chr02 | 30494906                | TT                              | CC              | 1946760834               |
| SNP_P4_24030_30500037 | NC_021161.1    | Ca_kabuli_chr02 | 30500037                | TT                              | CC              | 1946760836               |
| SNP_P4_24031_30500098 | NC_021161.1    | Ca_kabuli_chr02 | 30500098                | AA                              | GG              | 1946760838               |
| SNP_P4_24033_30500305 | NC_021161.1    | Ca_kabuli_chr02 | 30500305                | TT                              | AA              | 1946760840               |
| SNP_P4_24034_30500318 | NC_021161.1    | Ca_kabuli_chr02 | 30500318                | TT                              | AA              | 1946760842               |
| SNP_P4_24035_30500387 | NC_021161.1    | Ca_kabuli_chr02 | 30500387                | GG                              | AA              | 1946760844               |
| SNP_P4_24036_30500423 | NC_021161.1    | Ca_kabuli_chr02 | 30500423                | TT                              | CC              | 1946760846               |
| SNP_P4_24037_30500540 | NC_021161.1    | Ca_kabuli_chr02 | 30500540                | TT                              | CC              | 1946760848               |
| SNP_P4_24038_30500623 | NC_021161.1    | Ca_kabuli_chr02 | 30500623                | AA                              | GG              | 1946760850               |
| SNP_P4_24039_30500631 | NC_021161.1    | Ca_kabuli_chr02 | 30500631                | GG                              | AA              | 1946760852               |
| SNP_P4_24040_30504942 | NC_021161.1    | Ca_kabuli_chr02 | 30504942                | TT                              | GG              | 1946760854               |
| SNP_P4_24041_30506388 | NC_021161.1    | Ca_kabuli_chr02 | 30506388                | AA                              | TT              | 1946760856               |
| SNP_P4_24042_30507461 | NC_021161.1    | Ca_kabuli_chr02 | 30507461                | TT                              | CC              | 1946760858               |
| SNP_P4_24043_30508706 | NC_021161.1    | Ca_kabuli_chr02 | 30508706                | CC                              | TT              | 1946760860               |
| SNP_P4_24044_30508738 | NC_021161.1    | Ca_kabuli_chr02 | 30508738                | GG                              | CC              | 1946760862               |
| SNP_P4_24045_30509674 | NC_021161.1    | Ca_kabuli_chr02 | 30509674                | GG                              | TT              | 1946760864               |
| SNP_P4_24046_30509993 | NC_021161.1    | Ca_kabuli_chr02 | 30509993                | GG                              | AA              | 1946760866               |
| SNP_P4_24047_30510062 | NC_021161.1    | Ca_kabuli_chr02 | 30510062                | TT                              | AA              | 1946760868               |
| SNP_P4_24048_30510100 | NC_021161.1    | Ca_kabuli_chr02 | 30510100                | TT                              | CC              | 1946760870               |

| SNPs IDs              | Chromosome IDs | Chromosomes     | Physical positions (bp) | CDC Frontier (Reference genome) | (ILWC46 & LPNB) | NCBI SNPdb Accession IDs |
|-----------------------|----------------|-----------------|-------------------------|---------------------------------|-----------------|--------------------------|
| SNP_P4_24050_30510210 | NC_021161.1    | Ca_kabuli_chr02 | 30510210                | TT                              | CC              | 1946760872               |
| SNP_P4_24052_30511036 | NC_021161.1    | Ca_kabuli_chr02 | 30511036                | GG                              | AA              | 1946760874               |
| SNP_P4_24053_30512082 | NC_021161.1    | Ca_kabuli_chr02 | 30512082                | CC                              | TT              | 1946760876               |
| SNP_P4_24054_30512103 | NC_021161.1    | Ca_kabuli_chr02 | 30512103                | GG                              | TT              | 1946760878               |
| SNP_P4_24055_30512126 | NC_021161.1    | Ca_kabuli_chr02 | 30512126                | CC                              | TT              | 1946760880               |
| SNP_P4_24056_30513179 | NC_021161.1    | Ca_kabuli_chr02 | 30513179                | CC                              | AA              | 1946760882               |
| SNP_P4_24057_30513873 | NC_021161.1    | Ca_kabuli_chr02 | 30513873                | GG                              | TT              | 1946760884               |
| SNP_P4_24059_30514176 | NC_021161.1    | Ca_kabuli_chr02 | 30514176                | GG                              | AA              | 1946760886               |
| SNP_P4_24060_30514248 | NC_021161.1    | Ca_kabuli_chr02 | 30514248                | CC                              | AA              | 1946760888               |
| SNP_P4_24061_30516097 | NC_021161.1    | Ca_kabuli_chr02 | 30516097                | CC                              | TT              | 1946760890               |
| SNP_P4_24063_30516144 | NC_021161.1    | Ca_kabuli_chr02 | 30516144                | CC                              | TT              | 1946760892               |
| SNP_P4_24065_30517251 | NC_021161.1    | Ca_kabuli_chr02 | 30517251                | AA                              | GG              | 1946760894               |
| SNP_P4_24067_30521350 | NC_021161.1    | Ca_kabuli_chr02 | 30521350                | CC                              | TT              | 1946760896               |
| SNP_P4_24069_30521367 | NC_021161.1    | Ca_kabuli_chr02 | 30521367                | AA                              | TT              | 1946760898               |
| SNP_P4_24070_30521544 | NC_021161.1    | Ca_kabuli_chr02 | 30521544                | GG                              | AA              | 1946760900               |
| SNP_P4_24072_30522314 | NC_021161.1    | Ca_kabuli_chr02 | 30522314                | AA                              | GG              | 1946760902               |
| SNP_P4_24074_30522350 | NC_021161.1    | Ca_kabuli_chr02 | 30522350                | CC                              | AA              | 1946760904               |
| SNP_P4_24075_30523076 | NC_021161.1    | Ca_kabuli_chr02 | 30523076                | TT                              | CC              | 1946760906               |
| SNP_P4_24077_30523282 | NC_021161.1    | Ca_kabuli_chr02 | 30523282                | GG                              | AA              | 1946760908               |
| SNP_P4_24079_30526519 | NC_021161.1    | Ca_kabuli_chr02 | 30526519                | GG                              | AA              | 1946760910               |
| SNP_P4_24080_30526904 | NC_021161.1    | Ca_kabuli_chr02 | 30526904                | AA                              | CC              | 1946760912               |
| SNP_P4_24081_30526953 | NC_021161.1    | Ca_kabuli_chr02 | 30526953                | TT                              | GG              | 1946760914               |
| SNP_P4_24082_30526959 | NC_021161.1    | Ca_kabuli_chr02 | 30526959                | TT                              | GG              | 1946760916               |
| SNP_P4_24085_30527063 | NC_021161.1    | Ca_kabuli_chr02 | 30527063                | AA                              | TT              | 1946760918               |
| SNP_P4_24087_30527311 | NC_021161.1    | Ca_kabuli_chr02 | 30527311                | TT                              | CC              | 1946760920               |
| SNP_P4_24088_30527434 | NC_021161.1    | Ca_kabuli_chr02 | 30527434                | AA                              | GG              | 1946760922               |
| SNP_P4_24089_30527720 | NC_021161.1    | Ca_kabuli_chr02 | 30527720                | GG                              | TT              | 1946760924               |
| SNP_P4_24090_30537953 | NC_021161.1    | Ca_kabuli_chr02 | 30537953                | CC                              | TT              | 1946760926               |
| SNP_P4_24091_30538323 | NC_021161.1    | Ca_kabuli_chr02 | 30538323                | TT                              | CC              | 1946760928               |
| SNP_P4_24092_30538325 | NC_021161.1    | Ca_kabuli_chr02 | 30538325                | AA                              | CC              | 1946760930               |
| SNP_P4_24093_30538406 | NC_021161.1    | Ca_kabuli_chr02 | 30538406                | CC                              | AA              | 1946760932               |
| SNP_P4_24094_30538501 | NC_021161.1    | Ca_kabuli_chr02 | 30538501                | CC                              | AA              | 1946760934               |
| SNP_P4_24095_30538519 | NC_021161.1    | Ca_kabuli_chr02 | 30538519                | GG                              | TT              | 1946760936               |
| SNP_P4_24096_30546812 | NC_021161.1    | Ca_kabuli_chr02 | 30546812                | AA                              | GG              | 1946760938               |
| SNP_P4_24097_30546838 | NC_021161.1    | Ca_kabuli_chr02 | 30546838                | CC                              | TT              | 1946760940               |
| SNP_P4_24098_30547176 | NC_021161.1    | Ca_kabuli_chr02 | 30547176                | CC                              | TT              | 1946760942               |
| SNP_P4_24099_30547184 | NC_021161.1    | Ca_kabuli_chr02 | 30547184                | AA                              | GG              | 1946760944               |
| SNP_P4_24100_30547255 | NC_021161.1    | Ca_kabuli_chr02 | 30547255                | AA                              | GG              | 1946760946               |
| SNP_P4_24101_30548814 | NC_021161.1    | Ca_kabuli_chr02 | 30548814                | GG                              | CC              | 1946760948               |
| SNP_P4_24102_30549060 | NC_021161.1    | Ca_kabuli_chr02 | 30549060                | CC                              | TT              | 1946760950               |
| SNP_P4_24103_30549747 | NC_021161.1    | Ca_kabuli_chr02 | 30549747                | GG                              | AA              | 1946760952               |
| SNP_P4_24104_30549756 | NC_021161.1    | Ca_kabuli_chr02 | 30549756                | AA                              | CC              | 1946760954               |

| SNPs IDs              | Chromosome IDs | Chromosomes     | Physical positions (bp) | CDC Frontier (Reference genome) | (ILWC46 & LPNB) | NCBI SNPdb Accession IDs |
|-----------------------|----------------|-----------------|-------------------------|---------------------------------|-----------------|--------------------------|
| SNP_P4_24105_30549941 | NC_021161.1    | Ca_kabuli_chr02 | 30549941                | TT                              | AA              | 1946760957               |
| SNP_P4_24108_30550147 | NC_021161.1    | Ca_kabuli_chr02 | 30550147                | AA                              | GG              | 1946760959               |
| SNP_P4_24110_30550184 | NC_021161.1    | Ca_kabuli_chr02 | 30550184                | GG                              | TT              | 1946760961               |
| SNP_P4_24112_30550831 | NC_021161.1    | Ca_kabuli_chr02 | 30550831                | CC                              | TT              | 1946760963               |
| SNP_P4_24113_30552250 | NC_021161.1    | Ca_kabuli_chr02 | 30552250                | AA                              | GG              | 1946760965               |
| SNP_P4_24114_30552469 | NC_021161.1    | Ca_kabuli_chr02 | 30552469                | AA                              | GG              | 1946760967               |
| SNP_P4_24115_30552477 | NC_021161.1    | Ca_kabuli_chr02 | 30552477                | CC                              | TT              | 1946760969               |
| SNP_P4_24116_30552502 | NC_021161.1    | Ca_kabuli_chr02 | 30552502                | CC                              | AA              | 1946760971               |
| SNP_P4_24118_30553360 | NC_021161.1    | Ca_kabuli_chr02 | 30553360                | AA                              | GG              | 1946760973               |
| SNP_P4_24120_30553439 | NC_021161.1    | Ca_kabuli_chr02 | 30553439                | CC                              | AA              | 1946760975               |
| SNP_P4_24121_30553442 | NC_021161.1    | Ca_kabuli_chr02 | 30553442                | GG                              | CC              | 1946760977               |
| SNP_P4_24122_30553645 | NC_021161.1    | Ca_kabuli_chr02 | 30553645                | TT                              | CC              | 1946760979               |
| SNP_P4_24123_30553658 | NC_021161.1    | Ca_kabuli_chr02 | 30553658                | AA                              | GG              | 1946760981               |
| SNP_P4_24125_30553965 | NC_021161.1    | Ca_kabuli_chr02 | 30553965                | AA                              | GG              | 1946760983               |
| SNP_P4_24126_30554108 | NC_021161.1    | Ca_kabuli_chr02 | 30554108                | AA                              | TT              | 1946760985               |
| SNP_P4_24127_30554115 | NC_021161.1    | Ca_kabuli_chr02 | 30554115                | GG                              | AA              | 1946760987               |
| SNP_P4_24129_30554271 | NC_021161.1    | Ca_kabuli_chr02 | 30554271                | CC                              | TT              | 1946760989               |
| SNP_P4_24130_30554286 | NC_021161.1    | Ca_kabuli_chr02 | 30554286                | CC                              | TT              | 1946760991               |
| SNP_P4_24131_30556045 | NC_021161.1    | Ca_kabuli_chr02 | 30556045                | AA                              | CC              | 1946760993               |
| SNP_P4_24132_30556258 | NC_021161.1    | Ca_kabuli_chr02 | 30556258                | AA                              | GG              | 1946760995               |
| SNP_P4_24133_30556285 | NC_021161.1    | Ca_kabuli_chr02 | 30556285                | TT                              | CC              | 1946760997               |
| SNP_P4_24134_30556297 | NC_021161.1    | Ca_kabuli_chr02 | 30556297                | AA                              | GG              | 1946760999               |
| SNP_P4_24135_30556355 | NC_021161.1    | Ca_kabuli_chr02 | 30556355                | AA                              | GG              | 1946761001               |
| SNP_P4_24136_30556392 | NC_021161.1    | Ca_kabuli_chr02 | 30556392                | AA                              | GG              | 1946761003               |
| SNP_P4_24137_30556556 | NC_021161.1    | Ca_kabuli_chr02 | 30556556                | TT                              | CC              | 1946761005               |
| SNP_P4_24138_30556570 | NC_021161.1    | Ca_kabuli_chr02 | 30556570                | GG                              | AA              | 1946761007               |
| SNP_P4_24139_30556572 | NC_021161.1    | Ca_kabuli_chr02 | 30556572                | TT                              | GG              | 1946761009               |
| SNP_P4_24140_30556612 | NC_021161.1    | Ca_kabuli_chr02 | 30556612                | GG                              | AA              | 1946761011               |
| SNP_P4_24141_30556628 | NC_021161.1    | Ca_kabuli_chr02 | 30556628                | AA                              | GG              | 1946761013               |
| SNP_P4_24142_30556686 | NC_021161.1    | Ca_kabuli_chr02 | 30556686                | AA                              | GG              | 1946761015               |
| SNP_P4_24143_30558747 | NC_021161.1    | Ca_kabuli_chr02 | 30558747                | TT                              | AA              | 1946761017               |
| SNP_P4_24144_30558837 | NC_021161.1    | Ca_kabuli_chr02 | 30558837                | TT                              | CC              | 1946761019               |
| SNP_P4_24148_30559430 | NC_021161.1    | Ca_kabuli_chr02 | 30559430                | GG                              | TT              | 1946761021               |
| SNP_P4_24149_30559511 | NC_021161.1    | Ca_kabuli_chr02 | 30559511                | TT                              | AA              | 1946761023               |
| SNP_P4_24150_30559918 | NC_021161.1    | Ca_kabuli_chr02 | 30559918                | GG                              | AA              | 1946761025               |
| SNP_P4_24151_30559998 | NC_021161.1    | Ca_kabuli_chr02 | 30559998                | CC                              | TT              | 1946761027               |
| SNP_P4_24152_30560034 | NC_021161.1    | Ca_kabuli_chr02 | 30560034                | CC                              | TT              | 1946761029               |
| SNP_P4_24153_30560037 | NC_021161.1    | Ca_kabuli_chr02 | 30560037                | GG                              | AA              | 1946761031               |
| SNP_P4_24154_30560068 | NC_021161.1    | Ca_kabuli_chr02 | 30560068                | AA                              | GG              | 1946761033               |
| SNP_P4_24155_30560083 | NC_021161.1    | Ca_kabuli_chr02 | 30560083                | AA                              | GG              | 1946761035               |
| SNP_P4_24156_30563084 | NC_021161.1    | Ca_kabuli_chr02 | 30563084                | CC                              | TT              | 1946761037               |
| SNP_P4_24157_30563100 | NC_021161.1    | Ca_kabuli_chr02 | 30563100                | AA                              | CC              | 1946761039               |

| SNPs IDs              | Chromosome IDs | Chromosomes     | Physical positions (bp) | CDC Frontier (Reference genome) | (ILWC46 & LPNB) | NCBI SNPdb Accession IDs |
|-----------------------|----------------|-----------------|-------------------------|---------------------------------|-----------------|--------------------------|
| SNP_P4_24158_30563102 | NC_021161.1    | Ca_kabuli_chr02 | 30563102                | TT                              | CC              | 1946761041               |
| SNP_P4_24159_30563103 | NC_021161.1    | Ca_kabuli_chr02 | 30563103                | GG                              | AA              | 1946761043               |
| SNP_P4_24160_30563156 | NC_021161.1    | Ca_kabuli_chr02 | 30563156                | CC                              | TT              | 1946761045               |
| SNP_P4_24161_30563167 | NC_021161.1    | Ca_kabuli_chr02 | 30563167                | CC                              | TT              | 1946761047               |
| SNP_P4_24162_30563427 | NC_021161.1    | Ca_kabuli_chr02 | 30563427                | TT                              | CC              | 1946761049               |
| SNP_P4_24163_30563453 | NC_021161.1    | Ca_kabuli_chr02 | 30563453                | GG                              | AA              | 1946761051               |
| SNP_P4_24164_30563462 | NC_021161.1    | Ca_kabuli_chr02 | 30563462                | AA                              | GG              | 1946761053               |
| SNP_P4_24165_30563506 | NC_021161.1    | Ca_kabuli_chr02 | 30563506                | AA                              | GG              | 1946761055               |
| SNP_P4_24166_30563650 | NC_021161.1    | Ca_kabuli_chr02 | 30563650                | GG                              | TT              | 1946761057               |
| SNP_P4_24167_30564340 | NC_021161.1    | Ca_kabuli_chr02 | 30564340                | CC                              | TT              | 1946761059               |
| SNP_P4_24168_30564579 | NC_021161.1    | Ca_kabuli_chr02 | 30564579                | CC                              | TT              | 1946761061               |
| SNP_P4_24169_30564620 | NC_021161.1    | Ca_kabuli_chr02 | 30564620                | TT                              | CC              | 1946761063               |
| SNP_P4_24170_30564732 | NC_021161.1    | Ca_kabuli_chr02 | 30564732                | CC                              | AA              | 1946761065               |
| SNP_P4_24172_30566285 | NC_021161.1    | Ca_kabuli_chr02 | 30566285                | CC                              | AA              | 1946761067               |
| SNP_P4_24173_30566328 | NC_021161.1    | Ca_kabuli_chr02 | 30566328                | AA                              | TT              | 1946761069               |
| SNP_P4_24174_30566329 | NC_021161.1    | Ca_kabuli_chr02 | 30566329                | GG                              | AA              | 1946761071               |
| SNP_P4_24175_30566337 | NC_021161.1    | Ca_kabuli_chr02 | 30566337                | AA                              | TT              | 1946761073               |
| SNP_P4_24176_30566674 | NC_021161.1    | Ca_kabuli_chr02 | 30566674                | TT                              | AA              | 1946761075               |
| SNP_P4_24177_30566742 | NC_021161.1    | Ca_kabuli_chr02 | 30566742                | CC                              | TT              | 1946761077               |
| SNP_P4_24178_30566753 | NC_021161.1    | Ca_kabuli_chr02 | 30566753                | CC                              | AA              | 1946761079               |
| SNP_P4_24180_30568045 | NC_021161.1    | Ca_kabuli_chr02 | 30568045                | GG                              | TT              | 1946761081               |
| SNP_P4_24181_30568095 | NC_021161.1    | Ca_kabuli_chr02 | 30568095                | GG                              | AA              | 1946761083               |
| SNP_P4_24183_30569249 | NC_021161.1    | Ca_kabuli_chr02 | 30569249                | AA                              | CC              | 1946761085               |
| SNP_P4_24185_30569770 | NC_021161.1    | Ca_kabuli_chr02 | 30569770                | CC                              | TT              | 1946761087               |
| SNP_P4_24186_30569811 | NC_021161.1    | Ca_kabuli_chr02 | 30569811                | CC                              | GG              | 1946761089               |
| SNP_P4_24187_30569815 | NC_021161.1    | Ca_kabuli_chr02 | 30569815                | GG                              | AA              | 1946761091               |
| SNP_P4_24188_30570663 | NC_021161.1    | Ca_kabuli_chr02 | 30570663                | AA                              | GG              | 1946761093               |
| SNP_P4_24189_30572292 | NC_021161.1    | Ca_kabuli_chr02 | 30572292                | CC                              | TT              | 1946761095               |
| SNP_P4_24192_30573707 | NC_021161.1    | Ca_kabuli_chr02 | 30573707                | AA                              | CC              | 1946761097               |
| SNP_P4_24193_30573819 | NC_021161.1    | Ca_kabuli_chr02 | 30573819                | GG                              | AA              | 1946761099               |
| SNP_P4_24194_30573893 | NC_021161.1    | Ca_kabuli_chr02 | 30573893                | AA                              | TT              | 1946761101               |
| SNP_P4_24195_30574147 | NC_021161.1    | Ca_kabuli_chr02 | 30574147                | AA                              | GG              | 1946761103               |
| SNP_P4_24197_30574374 | NC_021161.1    | Ca_kabuli_chr02 | 30574374                | AA                              | CC              | 1946761105               |
| SNP_P4_24198_30574397 | NC_021161.1    | Ca_kabuli_chr02 | 30574397                | AA                              | GG              | 1946761107               |
| SNP_P4_24199_30574402 | NC_021161.1    | Ca_kabuli_chr02 | 30574402                | CC                              | AA              | 1946761109               |
| SNP_P4_24200_30574550 | NC_021161.1    | Ca_kabuli_chr02 | 30574550                | CC                              | AA              | 1946761112               |
| SNP_P4_24201_30574991 | NC_021161.1    | Ca_kabuli_chr02 | 30574991                | AA                              | GG              | 1946761114               |
| SNP_P4_24203_30575527 | NC_021161.1    | Ca_kabuli_chr02 | 30575527                | TT                              | CC              | 1946761116               |
| SNP_P4_24205_30575567 | NC_021161.1    | Ca_kabuli_chr02 | 30575567                | TT                              | CC              | 1946761118               |
| SNP_P4_24206_30575602 | NC_021161.1    | Ca_kabuli_chr02 | 30575602                | TT                              | GG              | 1946761120               |
| SNP_P4_24208_30577722 | NC_021161.1    | Ca_kabuli_chr02 | 30577722                | AA                              | TT              | 1946761122               |
| SNP_P4_24209_30577771 | NC_021161.1    | Ca_kabuli_chr02 | 30577771                | CC                              | GG              | 1946761124               |

| SNPs IDs              | Chromosome IDs | Chromosomes     | Physical positions (bp) | CDC Frontier (Reference genome) | (ILWC46 & LPNB) | NCBI SNPdb Accession IDs |
|-----------------------|----------------|-----------------|-------------------------|---------------------------------|-----------------|--------------------------|
| SNP_P4_24210_30578024 | NC_021161.1    | Ca_kabuli_chr02 | 30578024                | TT                              | AA              | 1946761126               |
| SNP_P4_24213_30580741 | NC_021161.1    | Ca_kabuli_chr02 | 30580741                | AA                              | GG              | 1946761128               |
| SNP_P4_24214_30581355 | NC_021161.1    | Ca_kabuli_chr02 | 30581355                | AA                              | CC              | 1946761130               |
| SNP_P4_24215_30581369 | NC_021161.1    | Ca_kabuli_chr02 | 30581369                | CC                              | TT              | 1946761132               |
| SNP_P4_24216_30581695 | NC_021161.1    | Ca_kabuli_chr02 | 30581695                | TT                              | GG              | 1946761134               |
| SNP_P4_24217_30581811 | NC_021161.1    | Ca_kabuli_chr02 | 30581811                | AA                              | GG              | 1946761136               |
| SNP_P4_24218_30582007 | NC_021161.1    | Ca_kabuli_chr02 | 30582007                | CC                              | TT              | 1946761138               |
| SNP_P4_24219_30582181 | NC_021161.1    | Ca_kabuli_chr02 | 30582181                | CC                              | AA              | 1946761140               |
| SNP_P4_24220_30582183 | NC_021161.1    | Ca_kabuli_chr02 | 30582183                | TT                              | CC              | 1946761142               |
| SNP_P4_24221_30582730 | NC_021161.1    | Ca_kabuli_chr02 | 30582730                | AA                              | GG              | 1946761144               |
| SNP_P4_24222_30583939 | NC_021161.1    | Ca_kabuli_chr02 | 30583939                | CC                              | TT              | 1946761146               |
| SNP_P4_24223_30584070 | NC_021161.1    | Ca_kabuli_chr02 | 30584070                | CC                              | TT              | 1946761148               |
| SNP_P4_24224_30584281 | NC_021161.1    | Ca_kabuli_chr02 | 30584281                | CC                              | GG              | 1946761150               |
| SNP_P4_24225_30584824 | NC_021161.1    | Ca_kabuli_chr02 | 30584824                | CC                              | TT              | 1946761152               |
| SNP_P4_24227_30585574 | NC_021161.1    | Ca_kabuli_chr02 | 30585574                | AA                              | GG              | 1946761154               |
| SNP_P4_24228_30586296 | NC_021161.1    | Ca_kabuli_chr02 | 30586296                | TT                              | AA              | 1946761156               |
| SNP_P4_24229_30586300 | NC_021161.1    | Ca_kabuli_chr02 | 30586300                | TT                              | AA              | 1946761159               |
| SNP_P4_24230_30586740 | NC_021161.1    | Ca_kabuli_chr02 | 30586740                | GG                              | TT              | 1946761161               |
| SNP_P4_24231_30587396 | NC_021161.1    | Ca_kabuli_chr02 | 30587396                | AA                              | GG              | 1946761163               |
| SNP_P4_24232_30589233 | NC_021161.1    | Ca_kabuli_chr02 | 30589233                | GG                              | CC              | 1946761165               |
| SNP_P4_24233_30589265 | NC_021161.1    | Ca_kabuli_chr02 | 30589265                | CC                              | TT              | 1946761167               |
| SNP_P4_24234_30589634 | NC_021161.1    | Ca_kabuli_chr02 | 30589634                | TT                              | AA              | 1946761169               |
| SNP_P4_24235_30593075 | NC_021161.1    | Ca_kabuli_chr02 | 30593075                | AA                              | TT              | 1946761171               |
| SNP_P4_24236_30593238 | NC_021161.1    | Ca_kabuli_chr02 | 30593238                | CC                              | GG              | 1946761173               |
| SNP_P4_24237_30593244 | NC_021161.1    | Ca_kabuli_chr02 | 30593244                | AA                              | TT              | 1946761175               |
| SNP_P4_24238_30612924 | NC_021161.1    | Ca_kabuli_chr02 | 30612924                | TT                              | CC              | 1946761177               |
| SNP_P4_24239_30613135 | NC_021161.1    | Ca_kabuli_chr02 | 30613135                | TT                              | CC              | 1946761179               |
| SNP_P4_24241_30616820 | NC_021161.1    | Ca_kabuli_chr02 | 30616820                | GG                              | AA              | 1946761181               |
| SNP_P4_24242_30616852 | NC_021161.1    | Ca_kabuli_chr02 | 30616852                | GG                              | AA              | 1946761183               |
| SNP_P4_24243_30617070 | NC_021161.1    | Ca_kabuli_chr02 | 30617070                | AA                              | GG              | 1946761185               |
| SNP_P4_24244_30617983 | NC_021161.1    | Ca_kabuli_chr02 | 30617983                | AA                              | GG              | 1946761188               |
| SNP_P4_24245_30618263 | NC_021161.1    | Ca_kabuli_chr02 | 30618263                | TT                              | CC              | 1946761190               |
| SNP_P4_24247_30618928 | NC_021161.1    | Ca_kabuli_chr02 | 30618928                | AA                              | CC              | 1946761192               |
| SNP_P4_24248_30619216 | NC_021161.1    | Ca_kabuli_chr02 | 30619216                | CC                              | TT              | 1946761194               |
| SNP_P4_24249_30620532 | NC_021161.1    | Ca_kabuli_chr02 | 30620532                | CC                              | TT              | 1946761196               |
| SNP_P4_24250_30620900 | NC_021161.1    | Ca_kabuli_chr02 | 30620900                | CC                              | AA              | 1946761198               |
| SNP_P4_24251_30620914 | NC_021161.1    | Ca_kabuli_chr02 | 30620914                | GG                              | AA              | 1946761200               |
| SNP_P4_24252_30620943 | NC_021161.1    | Ca_kabuli_chr02 | 30620943                | CC                              | TT              | 1946761202               |
| SNP_P4_24253_30620951 | NC_021161.1    | Ca_kabuli_chr02 | 30620951                | AA                              | GG              | 1946761204               |
| SNP_P4_24254_30621227 | NC_021161.1    | Ca_kabuli_chr02 | 30621227                | GG                              | TT              | 1946761206               |
| SNP_P4_24255_30621337 | NC_021161.1    | Ca_kabuli_chr02 | 30621337                | CC                              | TT              | 1946761208               |
| SNP_P4_24256_30621376 | NC_021161.1    | Ca_kabuli_chr02 | 30621376                | AA                              | GG              | 1946761210               |

| SNPs IDs              | Chromosome IDs | Chromosomes     | Physical positions (bp) | CDC Frontier (Reference genome) | (ILWC46 & LPNB) | NCBI SNPdb Accession IDs |
|-----------------------|----------------|-----------------|-------------------------|---------------------------------|-----------------|--------------------------|
| SNP_P4_24257_30621418 | NC_021161.1    | Ca_kabuli_chr02 | 30621418                | GG                              | AA              | 1946761212               |
| SNP_P4_24258_30621553 | NC_021161.1    | Ca_kabuli_chr02 | 30621553                | CC                              | TT              | 1946761214               |
| SNP_P4_24259_30621564 | NC_021161.1    | Ca_kabuli_chr02 | 30621564                | GG                              | CC              | 1946761216               |
| SNP_P4_24260_30621644 | NC_021161.1    | Ca_kabuli_chr02 | 30621644                | AA                              | TT              | 1946761218               |
| SNP_P4_24261_30621802 | NC_021161.1    | Ca_kabuli_chr02 | 30621802                | CC                              | TT              | 1946761220               |
| SNP_P4_24262_30621818 | NC_021161.1    | Ca_kabuli_chr02 | 30621818                | TT                              | CC              | 1946761222               |
| SNP_P4_24264_30622456 | NC_021161.1    | Ca_kabuli_chr02 | 30622456                | TT                              | CC              | 1946761224               |
| SNP_P4_24265_30622466 | NC_021161.1    | Ca_kabuli_chr02 | 30622466                | GG                              | AA              | 1946761227               |
| SNP_P4_24266_30622467 | NC_021161.1    | Ca_kabuli_chr02 | 30622467                | AA                              | GG              | 1946761229               |
| SNP_P4_24269_30624391 | NC_021161.1    | Ca_kabuli_chr02 | 30624391                | GG                              | CC              | 1946761231               |
| SNP_P4_24270_30624421 | NC_021161.1    | Ca_kabuli_chr02 | 30624421                | TT                              | GG              | 1946761233               |
| SNP_P4_24272_30624489 | NC_021161.1    | Ca_kabuli_chr02 | 30624489                | TT                              | CC              | 1946761235               |
| SNP_P4_24275_30626370 | NC_021161.1    | Ca_kabuli_chr02 | 30626370                | TT                              | CC              | 1946761237               |
| SNP_P4_24276_30630358 | NC_021161.1    | Ca_kabuli_chr02 | 30630358                | AA                              | GG              | 1946761239               |
| SNP_P4_24277_30631764 | NC_021161.1    | Ca_kabuli_chr02 | 30631764                | GG                              | CC              | 1946761241               |
| SNP_P4_24278_30632063 | NC_021161.1    | Ca_kabuli_chr02 | 30632063                | CC                              | TT              | 1946761243               |
| SNP_P4_24279_30632072 | NC_021161.1    | Ca_kabuli_chr02 | 30632072                | AA                              | CC              | 1946761245               |
| SNP_P4_24280_30632708 | NC_021161.1    | Ca_kabuli_chr02 | 30632708                | GG                              | CC              | 1946761247               |
| SNP_P4_24281_30632728 | NC_021161.1    | Ca_kabuli_chr02 | 30632728                | CC                              | TT              | 1946761249               |
| SNP_P4_24282_30632912 | NC_021161.1    | Ca_kabuli_chr02 | 30632912                | TT                              | CC              | 1946761251               |
| SNP_P4_24283_30632916 | NC_021161.1    | Ca_kabuli_chr02 | 30632916                | CC                              | TT              | 1946761253               |
| SNP_P4_24284_30632978 | NC_021161.1    | Ca_kabuli_chr02 | 30632978                | CC                              | AA              | 1946761255               |
| SNP_P4_24285_30632980 | NC_021161.1    | Ca_kabuli_chr02 | 30632980                | AA                              | CC              | 1946761257               |
| SNP_P4_24286_30633172 | NC_021161.1    | Ca_kabuli_chr02 | 30633172                | TT                              | AA              | 1946761259               |
| SNP_P4_24287_30633181 | NC_021161.1    | Ca_kabuli_chr02 | 30633181                | GG                              | AA              | 1946761261               |
| SNP_P4_24288_30633247 | NC_021161.1    | Ca_kabuli_chr02 | 30633247                | AA                              | CC              | 1946761263               |
| SNP_P4_24289_30633251 | NC_021161.1    | Ca_kabuli_chr02 | 30633251                | AA                              | GG              | 1946761265               |
| SNP_P4_24290_30633257 | NC_021161.1    | Ca_kabuli_chr02 | 30633257                | TT                              | GG              | 1946761267               |
| SNP_P4_24291_30633265 | NC_021161.1    | Ca_kabuli_chr02 | 30633265                | GG                              | TT              | 1946761269               |
| SNP_P4_24292_30633277 | NC_021161.1    | Ca_kabuli_chr02 | 30633277                | CC                              | TT              | 1946761271               |
| SNP_P4_24294_30639564 | NC_021161.1    | Ca_kabuli_chr02 | 30639564                | GG                              | AA              | 1946761273               |
| SNP_P4_24295_30640305 | NC_021161.1    | Ca_kabuli_chr02 | 30640305                | AA                              | TT              | 1946761275               |
| SNP_P4_24296_30640613 | NC_021161.1    | Ca_kabuli_chr02 | 30640613                | CC                              | TT              | 1946761277               |
| SNP_P4_24297_30640627 | NC_021161.1    | Ca_kabuli_chr02 | 30640627                | TT                              | AA              | 1946761279               |
| SNP_P4_24298_30640676 | NC_021161.1    | Ca_kabuli_chr02 | 30640676                | GG                              | AA              | 1946761281               |
| SNP_P4_24300_30643098 | NC_021161.1    | Ca_kabuli_chr02 | 30643098                | GG                              | CC              | 1946761283               |
| SNP_P4_24301_30643129 | NC_021161.1    | Ca_kabuli_chr02 | 30643129                | AA                              | GG              | 1946761285               |
| SNP_P4_24302_30643134 | NC_021161.1    | Ca_kabuli_chr02 | 30643134                | GG                              | AA              | 1946761287               |
| SNP_P4_24303_30643840 | NC_021161.1    | Ca_kabuli_chr02 | 30643840                | TT                              | CC              | 1946761289               |
| SNP_P4_24304_30643841 | NC_021161.1    | Ca_kabuli_chr02 | 30643841                | AA                              | CC              | 1946761291               |
| SNP_P4_24305_30645423 | NC_021161.1    | Ca_kabuli_chr02 | 30645423                | AA                              | TT              | 1946761293               |
| SNP_P4_24306_30645424 | NC_021161.1    | Ca_kabuli_chr02 | 30645424                | AA                              | CC              | 1946761295               |

| SNPs IDs              | Chromosome IDs | Chromosomes     | Physical positions (bp) | CDC Frontier (Reference genome) | (ILWC46 & LPNB) | NCBI SNPdb Accession IDs |
|-----------------------|----------------|-----------------|-------------------------|---------------------------------|-----------------|--------------------------|
| SNP_P4_24311_30647462 | NC_021161.1    | Ca_kabuli_chr02 | 30647462                | AA                              | GG              | 1946761297               |
| SNP_P4_24312_30647657 | NC_021161.1    | Ca_kabuli_chr02 | 30647657                | TT                              | CC              | 1946761299               |
| SNP_P4_24313_30648536 | NC_021161.1    | Ca_kabuli_chr02 | 30648536                | TT                              | CC              | 1946761301               |
| SNP_P4_24314_30648539 | NC_021161.1    | Ca_kabuli_chr02 | 30648539                | TT                              | GG              | 1946761303               |
| SNP_P4_24315_30648707 | NC_021161.1    | Ca_kabuli_chr02 | 30648707                | AA                              | GG              | 1946761305               |
| SNP_P4_24316_30649133 | NC_021161.1    | Ca_kabuli_chr02 | 30649133                | GG                              | TT              | 1946761307               |
| SNP_P4_24317_30649528 | NC_021161.1    | Ca_kabuli_chr02 | 30649528                | GG                              | AA              | 1946761309               |
| SNP_P4_24318_30649589 | NC_021161.1    | Ca_kabuli_chr02 | 30649589                | TT                              | CC              | 1946761311               |
| SNP_P4_24319_30653285 | NC_021161.1    | Ca_kabuli_chr02 | 30653285                | GG                              | TT              | 1946761313               |
| SNP_P4_24320_30657061 | NC_021161.1    | Ca_kabuli_chr02 | 30657061                | AA                              | GG              | 1946761315               |
| SNP_P4_24321_30657067 | NC_021161.1    | Ca_kabuli_chr02 | 30657067                | GG                              | TT              | 1946761317               |
| SNP_P4_24322_30657332 | NC_021161.1    | Ca_kabuli_chr02 | 30657332                | GG                              | AA              | 1946761319               |
| SNP_P4_24323_30657357 | NC_021161.1    | Ca_kabuli_chr02 | 30657357                | AA                              | GG              | 1946761321               |
| SNP_P4_24324_30658536 | NC_021161.1    | Ca_kabuli_chr02 | 30658536                | TT                              | CC              | 1946761323               |
| SNP_P4_24325_30658568 | NC_021161.1    | Ca_kabuli_chr02 | 30658568                | GG                              | AA              | 1946761325               |
| SNP_P4_24326_30658587 | NC_021161.1    | Ca_kabuli_chr02 | 30658587                | TT                              | CC              | 1946761327               |
| SNP_P4_24328_30662433 | NC_021161.1    | Ca_kabuli_chr02 | 30662433                | CC                              | TT              | 1946761330               |
| SNP_P4_24329_30664731 | NC_021161.1    | Ca_kabuli_chr02 | 30664731                | GG                              | TT              | 1946761332               |
| SNP_P4_24330_30664734 | NC_021161.1    | Ca_kabuli_chr02 | 30664734                | TT                              | CC              | 1946761334               |
| SNP_P4_24332_30665139 | NC_021161.1    | Ca_kabuli_chr02 | 30665139                | TT                              | GG              | 1946761336               |
| SNP_P4_24333_30665142 | NC_021161.1    | Ca_kabuli_chr02 | 30665142                | AA                              | GG              | 1946761338               |
| SNP_P4_24334_30665169 | NC_021161.1    | Ca_kabuli_chr02 | 30665169                | AA                              | TT              | 1946761340               |
| SNP_P4_24335_30665195 | NC_021161.1    | Ca_kabuli_chr02 | 30665195                | AA                              | GG              | 1946761342               |
| SNP_P4_24336_30665394 | NC_021161.1    | Ca_kabuli_chr02 | 30665394                | AA                              | GG              | 1946761344               |
| SNP_P4_24337_30665436 | NC_021161.1    | Ca_kabuli_chr02 | 30665436                | CC                              | GG              | 1946761346               |
| SNP_P4_24341_30666011 | NC_021161.1    | Ca_kabuli_chr02 | 30666011                | AA                              | GG              | 1946761348               |
| SNP_P4_24342_30666094 | NC_021161.1    | Ca_kabuli_chr02 | 30666094                | AA                              | TT              | 1946761350               |
| SNP_P4_24344_30667368 | NC_021161.1    | Ca_kabuli_chr02 | 30667368                | GG                              | AA              | 1946761352               |
| SNP_P4_24345_30668246 | NC_021161.1    | Ca_kabuli_chr02 | 30668246                | TT                              | CC              | 1946761354               |
| SNP_P4_24346_30668496 | NC_021161.1    | Ca_kabuli_chr02 | 30668496                | TT                              | CC              | 1946761356               |
| SNP_P4_24349_30668838 | NC_021161.1    | Ca_kabuli_chr02 | 30668838                | TT                              | CC              | 1946761358               |
| SNP_P4_24351_30670035 | NC_021161.1    | Ca_kabuli_chr02 | 30670035                | AA                              | TT              | 1946761360               |
| SNP_P4_24352_30670044 | NC_021161.1    | Ca_kabuli_chr02 | 30670044                | TT                              | CC              | 1946761362               |
| SNP_P4_24354_30670159 | NC_021161.1    | Ca_kabuli_chr02 | 30670159                | GG                              | CC              | 1946761364               |
| SNP_P4_24355_30671015 | NC_021161.1    | Ca_kabuli_chr02 | 30671015                | TT                              | GG              | 1946761366               |
| SNP_P4_24356_30671024 | NC_021161.1    | Ca_kabuli_chr02 | 30671024                | TT                              | CC              | 1946761368               |
| SNP_P4_24358_30671578 | NC_021161.1    | Ca_kabuli_chr02 | 30671578                | AA                              | GG              | 1946761370               |
| SNP_P4_24359_30671582 | NC_021161.1    | Ca_kabuli_chr02 | 30671582                | CC                              | TT              | 1946761372               |
| SNP_P4_24360_30671589 | NC_021161.1    | Ca_kabuli_chr02 | 30671589                | AA                              | GG              | 1946761374               |
| SNP_P4_24361_30672814 | NC_021161.1    | Ca_kabuli_chr02 | 30672814                | AA                              | GG              | 1946761376               |
| SNP_P4_24363_30672841 | NC_021161.1    | Ca_kabuli_chr02 | 30672841                | CC                              | GG              | 1946761378               |
| SNP_P4_24364_30674513 | NC_021161.1    | Ca_kabuli_chr02 | 30674513                | AA                              | CC              | 1946761380               |



| SNPs IDs              | Chromosome IDs | Chromosomes     | Physical positions (bp) | CDC Frontier (Reference genome) | (ILWC46 & LPNB) | NCBI SNPdb Accession IDs |
|-----------------------|----------------|-----------------|-------------------------|---------------------------------|-----------------|--------------------------|
| SNP_P4_24365_30676246 | NC_021161.1    | Ca_kabuli_chr02 | 30676246                | GG                              | AA              | 1946761382               |
| SNP_P4_24366_30676250 | NC_021161.1    | Ca_kabuli_chr02 | 30676250                | CC                              | TT              | 1946761384               |
| SNP_P4_24368_30676474 | NC_021161.1    | Ca_kabuli_chr02 | 30676474                | CC                              | AA              | 1946761386               |
| SNP_P4_24369_30676488 | NC_021161.1    | Ca_kabuli_chr02 | 30676488                | CC                              | TT              | 1946761388               |
| SNP_P4_24370_30676511 | NC_021161.1    | Ca_kabuli_chr02 | 30676511                | CC                              | TT              | 1946761390               |
| SNP_P4_24371_30676520 | NC_021161.1    | Ca_kabuli_chr02 | 30676520                | TT                              | CC              | 1946761392               |
| SNP_P4_24373_30676710 | NC_021161.1    | Ca_kabuli_chr02 | 30676710                | CC                              | TT              | 1946761394               |
| SNP_P4_24374_30676717 | NC_021161.1    | Ca_kabuli_chr02 | 30676717                | AA                              | GG              | 1946761396               |
| SNP_P4_24377_30677070 | NC_021161.1    | Ca_kabuli_chr02 | 30677070                | AA                              | GG              | 1946761398               |
| SNP_P4_24379_30677145 | NC_021161.1    | Ca_kabuli_chr02 | 30677145                | TT                              | CC              | 1946761400               |
| SNP_P4_24380_30677832 | NC_021161.1    | Ca_kabuli_chr02 | 30677832                | TT                              | CC              | 1946761402               |
| SNP_P4_24381_30678015 | NC_021161.1    | Ca_kabuli_chr02 | 30678015                | CC                              | TT              | 1946761404               |
| SNP_P4_24382_30678035 | NC_021161.1    | Ca_kabuli_chr02 | 30678035                | AA                              | GG              | 1946761406               |
| SNP_P4_24383_30678160 | NC_021161.1    | Ca_kabuli_chr02 | 30678160                | CC                              | TT              | 1946761408               |
| SNP_P4_24385_30679052 | NC_021161.1    | Ca_kabuli_chr02 | 30679052                | TT                              | AA              | 1946761410               |
| SNP_P4_24386_30679176 | NC_021161.1    | Ca_kabuli_chr02 | 30679176                | GG                              | AA              | 1946761412               |
| SNP_P4_24387_30679220 | NC_021161.1    | Ca_kabuli_chr02 | 30679220                | GG                              | TT              | 1946761414               |
| SNP_P4_24388_30679485 | NC_021161.1    | Ca_kabuli_chr02 | 30679485                | AA                              | GG              | 1946761416               |
| SNP_P4_24389_30679689 | NC_021161.1    | Ca_kabuli_chr02 | 30679689                | TT                              | CC              | 1946761418               |
| SNP_P4_24390_30679832 | NC_021161.1    | Ca_kabuli_chr02 | 30679832                | AA                              | CC              | 1946761420               |
| SNP_P4_24392_30679924 | NC_021161.1    | Ca_kabuli_chr02 | 30679924                | CC                              | AA              | 1946761422               |
| SNP_P4_24393_30680764 | NC_021161.1    | Ca_kabuli_chr02 | 30680764                | CC                              | TT              | 1946761424               |
| SNP_P4_24395_30680879 | NC_021161.1    | Ca_kabuli_chr02 | 30680879                | TT                              | AA              | 1946761426               |
| SNP_P4_24396_30680908 | NC_021161.1    | Ca_kabuli_chr02 | 30680908                | AA                              | GG              | 1946761428               |
| SNP_P4_24397_30680930 | NC_021161.1    | Ca_kabuli_chr02 | 30680930                | AA                              | CC              | 1946761430               |
| SNP_P4_24398_30680946 | NC_021161.1    | Ca_kabuli_chr02 | 30680946                | GG                              | AA              | 1946761432               |
| SNP_P4_24399_30681192 | NC_021161.1    | Ca_kabuli_chr02 | 30681192                | CC                              | TT              | 1946761434               |
| SNP_P4_24400_30681259 | NC_021161.1    | Ca_kabuli_chr02 | 30681259                | TT                              | CC              | 1946761436               |
| SNP_P4_24401_30681282 | NC_021161.1    | Ca_kabuli_chr02 | 30681282                | AA                              | GG              | 1946761438               |
| SNP_P4_24402_30681285 | NC_021161.1    | Ca_kabuli_chr02 | 30681285                | CC                              | TT              | 1946761440               |
| SNP_P4_24403_30681312 | NC_021161.1    | Ca_kabuli_chr02 | 30681312                | TT                              | CC              | 1946761442               |
| SNP_P4_24405_30683327 | NC_021161.1    | Ca_kabuli_chr02 | 30683327                | AA                              | CC              | 1946761444               |
| SNP_P4_24406_30684014 | NC_021161.1    | Ca_kabuli_chr02 | 30684014                | CC                              | TT              | 1946761446               |
| SNP_P4_24407_30684036 | NC_021161.1    | Ca_kabuli_chr02 | 30684036                | TT                              | CC              | 1946761448               |
| SNP_P4_24408_30684207 | NC_021161.1    | Ca_kabuli_chr02 | 30684207                | GG                              | CC              | 1946761450               |
| SNP_P4_24409_30685040 | NC_021161.1    | Ca_kabuli_chr02 | 30685040                | CC                              | TT              | 1946761452               |
| SNP_P4_24410_30686000 | NC_021161.1    | Ca_kabuli_chr02 | 30686000                | AA                              | GG              | 1946761454               |
| SNP_P4_24411_30687220 | NC_021161.1    | Ca_kabuli_chr02 | 30687220                | GG                              | AA              | 1946761456               |
| SNP_P4_24412_30687223 | NC_021161.1    | Ca_kabuli_chr02 | 30687223                | TT                              | CC              | 1946761458               |
| SNP_P4_24413_30687225 | NC_021161.1    | Ca_kabuli_chr02 | 30687225                | AA                              | GG              | 1946761460               |
| SNP_P4_24414_30687263 | NC_021161.1    | Ca_kabuli_chr02 | 30687263                | CC                              | TT              | 1946761462               |
| SNP_P4_24415_30687363 | NC_021161.1    | Ca_kabuli_chr02 | 30687363                | AA                              | TT              | 1946761464               |

| SNPs IDs              | Chromosome IDs | Chromosomes     | Physical positions (bp) | CDC Frontier (Reference genome) | (ILWC46 & LPNB) | NCBI SNPdb Accession IDs |
|-----------------------|----------------|-----------------|-------------------------|---------------------------------|-----------------|--------------------------|
| SNP_P4_24416_30689361 | NC_021161.1    | Ca_kabuli_chr02 | 30689361                | GG                              | TT              | 1946761466               |
| SNP_P4_24417_30689545 | NC_021161.1    | Ca_kabuli_chr02 | 30689545                | AA                              | TT              | 1946761468               |
| SNP_P4_24418_30689564 | NC_021161.1    | Ca_kabuli_chr02 | 30689564                | CC                              | TT              | 1946761470               |
| SNP_P4_24419_30689730 | NC_021161.1    | Ca_kabuli_chr02 | 30689730                | CC                              | TT              | 1946761472               |
| SNP_P4_24423_30690315 | NC_021161.1    | Ca_kabuli_chr02 | 30690315                | AA                              | TT              | 1946761474               |
| SNP_P4_24424_30690318 | NC_021161.1    | Ca_kabuli_chr02 | 30690318                | TT                              | CC              | 1946761476               |
| SNP_P4_24427_30690501 | NC_021161.1    | Ca_kabuli_chr02 | 30690501                | CC                              | AA              | 1946761478               |
| SNP_P4_24428_30690503 | NC_021161.1    | Ca_kabuli_chr02 | 30690503                | TT                              | CC              | 1946761480               |
| SNP_P4_24430_30690609 | NC_021161.1    | Ca_kabuli_chr02 | 30690609                | CC                              | AA              | 1946761482               |
| SNP_P4_24431_30690826 | NC_021161.1    | Ca_kabuli_chr02 | 30690826                | AA                              | TT              | 1946761484               |
| SNP_P4_24432_30690829 | NC_021161.1    | Ca_kabuli_chr02 | 30690829                | GG                              | TT              | 1946761486               |
| SNP_P4_24433_30690835 | NC_021161.1    | Ca_kabuli_chr02 | 30690835                | CC                              | AA              | 1946761488               |
| SNP_P4_24434_30690852 | NC_021161.1    | Ca_kabuli_chr02 | 30690852                | GG                              | TT              | 1946761490               |
| SNP_P4_24436_30696001 | NC_021161.1    | Ca_kabuli_chr02 | 30696001                | TT                              | CC              | 1946761492               |
| SNP_P4_24437_30696023 | NC_021161.1    | Ca_kabuli_chr02 | 30696023                | TT                              | CC              | 1946761494               |
| SNP_P4_24438_30696081 | NC_021161.1    | Ca_kabuli_chr02 | 30696081                | TT                              | CC              | 1946761496               |
| SNP_P4_24439_30696144 | NC_021161.1    | Ca_kabuli_chr02 | 30696144                | CC                              | TT              | 1946761498               |
| SNP_P4_24440_30697341 | NC_021161.1    | Ca_kabuli_chr02 | 30697341                | AA                              | CC              | 1946761500               |
| SNP_P4_24441_30697841 | NC_021161.1    | Ca_kabuli_chr02 | 30697841                | TT                              | GG              | 1946761502               |
| SNP_P4_24442_30698478 | NC_021161.1    | Ca_kabuli_chr02 | 30698478                | AA                              | GG              | 1946761504               |
| SNP_P4_24444_30701652 | NC_021161.1    | Ca_kabuli_chr02 | 30701652                | GG                              | AA              | 1946761506               |
| SNP_P4_24445_30701699 | NC_021161.1    | Ca_kabuli_chr02 | 30701699                | GG                              | AA              | 1946761508               |
| SNP_P4_24448_30703327 | NC_021161.1    | Ca_kabuli_chr02 | 30703327                | AA                              | GG              | 1946761510               |
| SNP_P4_24450_30704086 | NC_021161.1    | Ca_kabuli_chr02 | 30704086                | CC                              | AA              | 1946761512               |
| SNP_P4_24451_30704589 | NC_021161.1    | Ca_kabuli_chr02 | 30704589                | GG                              | AA              | 1946761514               |
| SNP_P4_24452_30704627 | NC_021161.1    | Ca_kabuli_chr02 | 30704627                | CC                              | TT              | 1946761517               |
| SNP_P4_24454_30704685 | NC_021161.1    | Ca_kabuli_chr02 | 30704685                | CC                              | GG              | 1946761519               |
| SNP_P4_24455_30705229 | NC_021161.1    | Ca_kabuli_chr02 | 30705229                | TT                              | CC              | 1946761521               |
| SNP_P4_24457_30705509 | NC_021161.1    | Ca_kabuli_chr02 | 30705509                | TT                              | AA              | 1946761523               |
| SNP_P4_24458_30705820 | NC_021161.1    | Ca_kabuli_chr02 | 30705820                | TT                              | AA              | 1946761525               |
| SNP_P4_24459_30707512 | NC_021161.1    | Ca_kabuli_chr02 | 30707512                | GG                              | AA              | 1946761527               |
| SNP_P4_24460_30707815 | NC_021161.1    | Ca_kabuli_chr02 | 30707815                | AA                              | GG              | 1946761529               |
| SNP_P4_24461_30709047 | NC_021161.1    | Ca_kabuli_chr02 | 30709047                | CC                              | TT              | 1946761531               |
| SNP_P4_24462_30710170 | NC_021161.1    | Ca_kabuli_chr02 | 30710170                | GG                              | AA              | 1946761533               |
| SNP_P4_24463_30711496 | NC_021161.1    | Ca_kabuli_chr02 | 30711496                | AA                              | CC              | 1946761535               |
| SNP_P4_24464_30712733 | NC_021161.1    | Ca_kabuli_chr02 | 30712733                | CC                              | GG              | 1946761537               |
| SNP_P4_24466_30714128 | NC_021161.1    | Ca_kabuli_chr02 | 30714128                | TT                              | AA              | 1946761539               |
| SNP_P4_24467_30716237 | NC_021161.1    | Ca_kabuli_chr02 | 30716237                | TT                              | CC              | 1946761541               |
| SNP_P4_24468_30716266 | NC_021161.1    | Ca_kabuli_chr02 | 30716266                | TT                              | CC              | 1946761543               |
| SNP_P4_24469_30716690 | NC_021161.1    | Ca_kabuli_chr02 | 30716690                | AA                              | GG              | 1946761545               |
| SNP_P4_24470_30718163 | NC_021161.1    | Ca_kabuli_chr02 | 30718163                | AA                              | GG              | 1946761547               |
| SNP_P4_24471_30718492 | NC_021161.1    | Ca_kabuli_chr02 | 30718492                | TT                              | CC              | 1946761549               |

| SNPs IDs              | Chromosome IDs | Chromosomes     | Physical positions (bp) | CDC Frontier (Reference genome) | (ILWC46 & LPNB) | NCBI SNPdb Accession IDs |
|-----------------------|----------------|-----------------|-------------------------|---------------------------------|-----------------|--------------------------|
| SNP_P4_24472_30718493 | NC_021161.1    | Ca_kabuli_chr02 | 30718493                | AA                              | GG              | 1946761551               |
| SNP_P4_24473_30718510 | NC_021161.1    | Ca_kabuli_chr02 | 30718510                | GG                              | TT              | 1946761553               |
| SNP_P4_24474_30718521 | NC_021161.1    | Ca_kabuli_chr02 | 30718521                | TT                              | AA              | 1946761555               |
| SNP_P4_24475_30718547 | NC_021161.1    | Ca_kabuli_chr02 | 30718547                | GG                              | AA              | 1946761557               |
| SNP_P4_24476_30718549 | NC_021161.1    | Ca_kabuli_chr02 | 30718549                | CC                              | TT              | 1946761559               |
| SNP_P4_24477_30718800 | NC_021161.1    | Ca_kabuli_chr02 | 30718800                | GG                              | AA              | 1946761561               |
| SNP_P4_24478_30718806 | NC_021161.1    | Ca_kabuli_chr02 | 30718806                | AA                              | GG              | 1946761563               |
| SNP_P4_24479_30719158 | NC_021161.1    | Ca_kabuli_chr02 | 30719158                | AA                              | GG              | 1946761565               |
| SNP_P4_24480_30719590 | NC_021161.1    | Ca_kabuli_chr02 | 30719590                | AA                              | GG              | 1946761567               |
| SNP_P4_24481_30719909 | NC_021161.1    | Ca_kabuli_chr02 | 30719909                | CC                              | TT              | 1946761569               |
| SNP_P4_24482_30720337 | NC_021161.1    | Ca_kabuli_chr02 | 30720337                | TT                              | AA              | 1946761571               |
| SNP_P4_24483_30720711 | NC_021161.1    | Ca_kabuli_chr02 | 30720711                | AA                              | GG              | 1946761573               |
| SNP_P4_24484_30730118 | NC_021161.1    | Ca_kabuli_chr02 | 30730118                | CC                              | TT              | 1946761575               |
| SNP_P4_24485_30730176 | NC_021161.1    | Ca_kabuli_chr02 | 30730176                | TT                              | CC              | 1946761577               |
| SNP_P4_24486_30730958 | NC_021161.1    | Ca_kabuli_chr02 | 30730958                | AA                              | GG              | 1946761580               |
| SNP_P4_24487_30731092 | NC_021161.1    | Ca_kabuli_chr02 | 30731092                | CC                              | TT              | 1946761582               |
| SNP_P4_24488_30731989 | NC_021161.1    | Ca_kabuli_chr02 | 30731989                | TT                              | AA              | 1946761584               |
| SNP_P4_24490_30732009 | NC_021161.1    | Ca_kabuli_chr02 | 30732009                | GG                              | TT              | 1946761586               |
| SNP_P4_24491_30732049 | NC_021161.1    | Ca_kabuli_chr02 | 30732049                | GG                              | AA              | 1946761588               |
| SNP_P4_24492_30732060 | NC_021161.1    | Ca_kabuli_chr02 | 30732060                | GG                              | AA              | 1946761590               |
| SNP_P4_24493_30732467 | NC_021161.1    | Ca_kabuli_chr02 | 30732467                | CC                              | AA              | 1946761592               |
| SNP_P4_24496_30732997 | NC_021161.1    | Ca_kabuli_chr02 | 30732997                | CC                              | TT              | 1946761594               |
| SNP_P4_24497_30733052 | NC_021161.1    | Ca_kabuli_chr02 | 30733052                | CC                              | TT              | 1946761596               |
| SNP_P4_24498_30733088 | NC_021161.1    | Ca_kabuli_chr02 | 30733088                | GG                              | TT              | 1946761598               |
| SNP_P4_24499_30733093 | NC_021161.1    | Ca_kabuli_chr02 | 30733093                | TT                              | CC              | 1946761600               |
| SNP_P4_24500_30733290 | NC_021161.1    | Ca_kabuli_chr02 | 30733290                | GG                              | CC              | 1946761602               |
| SNP_P4_24501_30733357 | NC_021161.1    | Ca_kabuli_chr02 | 30733357                | GG                              | AA              | 1946761604               |
| SNP_P4_24503_30736161 | NC_021161.1    | Ca_kabuli_chr02 | 30736161                | CC                              | TT              | 1946761606               |
| SNP_P4_24504_30736180 | NC_021161.1    | Ca_kabuli_chr02 | 30736180                | CC                              | AA              | 1946761608               |
| SNP_P4_24506_30738247 | NC_021161.1    | Ca_kabuli_chr02 | 30738247                | AA                              | GG              | 1946761610               |
| SNP_P4_24507_30738524 | NC_021161.1    | Ca_kabuli_chr02 | 30738524                | TT                              | AA              | 1946761612               |
| SNP_P4_24508_30738534 | NC_021161.1    | Ca_kabuli_chr02 | 30738534                | CC                              | TT              | 1946761614               |
| SNP_P4_24510_30739081 | NC_021161.1    | Ca_kabuli_chr02 | 30739081                | TT                              | CC              | 1946761616               |
| SNP_P4_24511_30739303 | NC_021161.1    | Ca_kabuli_chr02 | 30739303                | GG                              | AA              | 1946761618               |
| SNP_P4_24512_30739547 | NC_021161.1    | Ca_kabuli_chr02 | 30739547                | GG                              | AA              | 1946761620               |
| SNP_P4_24513_30740448 | NC_021161.1    | Ca_kabuli_chr02 | 30740448                | AA                              | GG              | 1946761622               |
| SNP_P4_24514_30740472 | NC_021161.1    | Ca_kabuli_chr02 | 30740472                | CC                              | TT              | 1946761624               |
| SNP_P4_24515_30742247 | NC_021161.1    | Ca_kabuli_chr02 | 30742247                | AA                              | GG              | 1946761627               |
| SNP_P4_24518_30742862 | NC_021161.1    | Ca_kabuli_chr02 | 30742862                | AA                              | GG              | 1946761629               |
| SNP_P4_24519_30743388 | NC_021161.1    | Ca_kabuli_chr02 | 30743388                | AA                              | GG              | 1946761631               |
| SNP_P4_24521_30746204 | NC_021161.1    | Ca_kabuli_chr02 | 30746204                | GG                              | AA              | 1946761633               |
| SNP_P4_24522_30756015 | NC_021161.1    | Ca_kabuli_chr02 | 30756015                | GG                              | TT              | 1946761635               |

| SNPs IDs              | Chromosome IDs | Chromosomes     | Physical positions (bp) | CDC Frontier (Reference genome) | (ILWC46 & LPNB) | NCBI SNPdb Accession IDs |
|-----------------------|----------------|-----------------|-------------------------|---------------------------------|-----------------|--------------------------|
| SNP_P4_24524_30766136 | NC_021161.1    | Ca_kabuli_chr02 | 30766136                | AA                              | CC              | 1946761637               |
| SNP_P4_24526_30768987 | NC_021161.1    | Ca_kabuli_chr02 | 30768987                | GG                              | CC              | 1946761639               |
| SNP_P4_24528_30769066 | NC_021161.1    | Ca_kabuli_chr02 | 30769066                | AA                              | GG              | 1946761641               |
| SNP_P4_24530_30772363 | NC_021161.1    | Ca_kabuli_chr02 | 30772363                | GG                              | TT              | 1946761643               |
| SNP_P4_24531_30772368 | NC_021161.1    | Ca_kabuli_chr02 | 30772368                | TT                              | AA              | 1946761645               |
| SNP_P4_24532_30772434 | NC_021161.1    | Ca_kabuli_chr02 | 30772434                | GG                              | AA              | 1946761647               |
| SNP_P4_24533_30772445 | NC_021161.1    | Ca_kabuli_chr02 | 30772445                | CC                              | TT              | 1946761649               |
| SNP_P4_24534_30775784 | NC_021161.1    | Ca_kabuli_chr02 | 30775784                | GG                              | TT              | 1946761651               |
| SNP_P4_24535_30775887 | NC_021161.1    | Ca_kabuli_chr02 | 30775887                | TT                              | GG              | 1946761653               |
| SNP_P4_24536_30776091 | NC_021161.1    | Ca_kabuli_chr02 | 30776091                | AA                              | GG              | 1946761655               |
| SNP_P4_24537_30776114 | NC_021161.1    | Ca_kabuli_chr02 | 30776114                | TT                              | AA              | 1946761657               |
| SNP_P4_24538_30776637 | NC_021161.1    | Ca_kabuli_chr02 | 30776637                | CC                              | GG              | 1946761659               |
| SNP_P4_24539_30777280 | NC_021161.1    | Ca_kabuli_chr02 | 30777280                | AA                              | TT              | 1946761661               |
| SNP_P4_24540_30778386 | NC_021161.1    | Ca_kabuli_chr02 | 30778386                | AA                              | GG              | 1946761663               |
| SNP_P4_24541_30778781 | NC_021161.1    | Ca_kabuli_chr02 | 30778781                | AA                              | TT              | 1946761665               |
| SNP_P4_24542_30778805 | NC_021161.1    | Ca_kabuli_chr02 | 30778805                | CC                              | TT              | 1946761667               |
| SNP_P4_24543_30778806 | NC_021161.1    | Ca_kabuli_chr02 | 30778806                | CC                              | TT              | 1946761669               |
| SNP_P4_24544_30778843 | NC_021161.1    | Ca_kabuli_chr02 | 30778843                | TT                              | AA              | 1946761671               |
| SNP_P4_24545_30783793 | NC_021161.1    | Ca_kabuli_chr02 | 30783793                | AA                              | TT              | 1946761673               |
| SNP_P4_24546_30783799 | NC_021161.1    | Ca_kabuli_chr02 | 30783799                | AA                              | TT              | 1946761675               |
| SNP_P4_24548_30785598 | NC_021161.1    | Ca_kabuli_chr02 | 30785598                | TT                              | AA              | 1946761677               |
| SNP_P4_24549_30785615 | NC_021161.1    | Ca_kabuli_chr02 | 30785615                | AA                              | GG              | 1946761679               |
| SNP_P4_24551_30785631 | NC_021161.1    | Ca_kabuli_chr02 | 30785631                | AA                              | GG              | 1946761681               |
| SNP_P4_24552_30785811 | NC_021161.1    | Ca_kabuli_chr02 | 30785811                | CC                              | TT              | 1946761683               |
| SNP_P4_24553_30788384 | NC_021161.1    | Ca_kabuli_chr02 | 30788384                | AA                              | GG              | 1946761685               |
| SNP_P4_24554_30788431 | NC_021161.1    | Ca_kabuli_chr02 | 30788431                | GG                              | AA              | 1946761687               |
| SNP_P4_24555_30788842 | NC_021161.1    | Ca_kabuli_chr02 | 30788842                | CC                              | AA              | 1946761689               |
| SNP_P4_24556_30789416 | NC_021161.1    | Ca_kabuli_chr02 | 30789416                | AA                              | GG              | 1946761691               |
| SNP_P4_24557_30789716 | NC_021161.1    | Ca_kabuli_chr02 | 30789716                | AA                              | GG              | 1946761693               |
| SNP_P4_24558_30789749 | NC_021161.1    | Ca_kabuli_chr02 | 30789749                | TT                              | AA              | 1946761695               |
| SNP_P4_24559_30790370 | NC_021161.1    | Ca_kabuli_chr02 | 30790370                | TT                              | CC              | 1946761697               |
| SNP_P4_24560_30791001 | NC_021161.1    | Ca_kabuli_chr02 | 30791001                | AA                              | GG              | 1946761699               |
| SNP_P4_24561_30791106 | NC_021161.1    | Ca_kabuli_chr02 | 30791106                | AA                              | CC              | 1946761701               |
| SNP_P4_24562_30791345 | NC_021161.1    | Ca_kabuli_chr02 | 30791345                | TT                              | CC              | 1946761703               |
| SNP_P4_24563_30791939 | NC_021161.1    | Ca_kabuli_chr02 | 30791939                | CC                              | AA              | 1946761705               |
| SNP_P4_24564_30793357 | NC_021161.1    | Ca_kabuli_chr02 | 30793357                | GG                              | AA              | 1946761707               |
| SNP_P4_24565_30793578 | NC_021161.1    | Ca_kabuli_chr02 | 30793578                | CC                              | AA              | 1946761709               |
| SNP_P4_24566_30793781 | NC_021161.1    | Ca_kabuli_chr02 | 30793781                | GG                              | TT              | 1946761711               |
| SNP_P4_24567_30793914 | NC_021161.1    | Ca_kabuli_chr02 | 30793914                | AA                              | CC              | 1946761713               |
| SNP_P4_24568_30793932 | NC_021161.1    | Ca_kabuli_chr02 | 30793932                | AA                              | GG              | 1946761715               |
| SNP_P4_24569_30793933 | NC_021161.1    | Ca_kabuli_chr02 | 30793933                | TT                              | CC              | 1946761717               |
| SNP_P4_24570_30793935 | NC_021161.1    | Ca_kabuli_chr02 | 30793935                | CC                              | AA              | 1946761719               |

| SNPs IDs              | Chromosome IDs | Chromosomes     | Physical positions (bp) | CDC Frontier (Reference genome) | (ILWC46 & LPNB) | NCBI SNPdb Accession IDs |
|-----------------------|----------------|-----------------|-------------------------|---------------------------------|-----------------|--------------------------|
| SNP_P4_24571_30793949 | NC_021161.1    | Ca_kabuli_chr02 | 30793949                | AA                              | TT              | 1946761721               |
| SNP_P4_24572_30793967 | NC_021161.1    | Ca_kabuli_chr02 | 30793967                | AA                              | GG              | 1946761723               |
| SNP_P4_24573_30793976 | NC_021161.1    | Ca_kabuli_chr02 | 30793976                | CC                              | GG              | 1946761725               |
| SNP_P4_24576_30794782 | NC_021161.1    | Ca_kabuli_chr02 | 30794782                | TT                              | CC              | 1946761727               |
| SNP_P4_24577_30794813 | NC_021161.1    | Ca_kabuli_chr02 | 30794813                | AA                              | TT              | 1946761729               |
| SNP_P4_24578_30794926 | NC_021161.1    | Ca_kabuli_chr02 | 30794926                | CC                              | TT              | 1946761731               |
| SNP_P4_24579_30794940 | NC_021161.1    | Ca_kabuli_chr02 | 30794940                | CC                              | GG              | 1946761733               |
| SNP_P4_24581_30795163 | NC_021161.1    | Ca_kabuli_chr02 | 30795163                | CC                              | TT              | 1946761735               |
| SNP_P4_24582_30795217 | NC_021161.1    | Ca_kabuli_chr02 | 30795217                | AA                              | GG              | 1946761737               |
| SNP_P4_24583_30795240 | NC_021161.1    | Ca_kabuli_chr02 | 30795240                | CC                              | TT              | 1946761739               |
| SNP_P4_24584_30795247 | NC_021161.1    | Ca_kabuli_chr02 | 30795247                | TT                              | CC              | 1946761741               |
| SNP_P4_24585_30795351 | NC_021161.1    | Ca_kabuli_chr02 | 30795351                | CC                              | GG              | 1946761743               |
| SNP_P4_24586_30795357 | NC_021161.1    | Ca_kabuli_chr02 | 30795357                | GG                              | CC              | 1946761745               |
| SNP_P4_24589_30795774 | NC_021161.1    | Ca_kabuli_chr02 | 30795774                | AA                              | TT              | 1946761747               |
| SNP_P4_24590_30795838 | NC_021161.1    | Ca_kabuli_chr02 | 30795838                | AA                              | GG              | 1946761749               |
| SNP_P4_24591_30795867 | NC_021161.1    | Ca_kabuli_chr02 | 30795867                | TT                              | CC              | 1946761751               |
| SNP_P4_24592_30798157 | NC_021161.1    | Ca_kabuli_chr02 | 30798157                | TT                              | AA              | 1946761753               |
| SNP_P4_24593_30798314 | NC_021161.1    | Ca_kabuli_chr02 | 30798314                | GG                              | TT              | 1946761755               |
| SNP_P4_24594_30798315 | NC_021161.1    | Ca_kabuli_chr02 | 30798315                | GG                              | AA              | 1946761757               |
| SNP_P4_24595_30798510 | NC_021161.1    | Ca_kabuli_chr02 | 30798510                | GG                              | CC              | 1946761760               |
| SNP_P4_24596_30798540 | NC_021161.1    | Ca_kabuli_chr02 | 30798540                | TT                              | CC              | 1946761762               |
| SNP_P4_24597_30798569 | NC_021161.1    | Ca_kabuli_chr02 | 30798569                | AA                              | TT              | 1946761764               |
| SNP_P4_24598_30798574 | NC_021161.1    | Ca_kabuli_chr02 | 30798574                | CC                              | TT              | 1946761770               |
| SNP_P4_24599_30798610 | NC_021161.1    | Ca_kabuli_chr02 | 30798610                | GG                              | AA              | 1946761771               |
| SNP_P4_24600_30798627 | NC_021161.1    | Ca_kabuli_chr02 | 30798627                | AA                              | GG              | 1946761772               |
| SNP_P4_24601_30798637 | NC_021161.1    | Ca_kabuli_chr02 | 30798637                | AA                              | TT              | 1946761773               |
| SNP_P4_24602_30798689 | NC_021161.1    | Ca_kabuli_chr02 | 30798689                | CC                              | TT              | 1946761774               |
| SNP_P4_24603_30798692 | NC_021161.1    | Ca_kabuli_chr02 | 30798692                | GG                              | AA              | 1946761775               |
| SNP_P4_24604_30798694 | NC_021161.1    | Ca_kabuli_chr02 | 30798694                | AA                              | GG              | 1946761776               |
| SNP_P4_24605_30798890 | NC_021161.1    | Ca_kabuli_chr02 | 30798890                | CC                              | TT              | 1946761777               |
| SNP_P4_24606_30799006 | NC_021161.1    | Ca_kabuli_chr02 | 30799006                | AA                              | GG              | 1946761778               |
| SNP_P4_24607_30799054 | NC_021161.1    | Ca_kabuli_chr02 | 30799054                | CC                              | TT              | 1946761779               |
| SNP_P4_24608_30799274 | NC_021161.1    | Ca_kabuli_chr02 | 30799274                | CC                              | GG              | 1946761780               |
| SNP_P4_24609_30799293 | NC_021161.1    | Ca_kabuli_chr02 | 30799293                | GG                              | TT              | 1946761781               |
| SNP_P4_24610_30804880 | NC_021161.1    | Ca_kabuli_chr02 | 30804880                | AA                              | CC              | 1946761782               |
| SNP_P4_24612_30805042 | NC_021161.1    | Ca_kabuli_chr02 | 30805042                | AA                              | TT              | 1946761783               |
| SNP_P4_24613_30805064 | NC_021161.1    | Ca_kabuli_chr02 | 30805064                | CC                              | TT              | 1946761785               |
| SNP_P4_24614_30805096 | NC_021161.1    | Ca_kabuli_chr02 | 30805096                | GG                              | AA              | 1946761787               |
| SNP_P4_24616_30805869 | NC_021161.1    | Ca_kabuli_chr02 | 30805869                | CC                              | TT              | 1946761789               |
| SNP_P4_24617_30805980 | NC_021161.1    | Ca_kabuli_chr02 | 30805980                | GG                              | TT              | 1946761791               |
| SNP_P4_24619_30806855 | NC_021161.1    | Ca_kabuli_chr02 | 30806855                | TT                              | AA              | 1946761793               |
| SNP_P4_24620_30807241 | NC_021161.1    | Ca_kabuli_chr02 | 30807241                | TT                              | AA              | 1946761795               |

| SNPs IDs              | Chromosome IDs | Chromosomes     | Physical positions (bp) | CDC Frontier (Reference genome) | (ILWC46 & LPNB) | NCBI SNPdb Accession IDs |
|-----------------------|----------------|-----------------|-------------------------|---------------------------------|-----------------|--------------------------|
| SNP_P4_24621_30809665 | NC_021161.1    | Ca_kabuli_chr02 | 30809665                | AA                              | GG              | 1946761797               |
| SNP_P4_24622_30818654 | NC_021161.1    | Ca_kabuli_chr02 | 30818654                | CC                              | GG              | 1946761799               |
| SNP_P4_24623_30818661 | NC_021161.1    | Ca_kabuli_chr02 | 30818661                | GG                              | CC              | 1946761801               |
| SNP_P4_24624_30819850 | NC_021161.1    | Ca_kabuli_chr02 | 30819850                | AA                              | GG              | 1946761803               |
| SNP_P4_24625_30819944 | NC_021161.1    | Ca_kabuli_chr02 | 30819944                | TT                              | CC              | 1946761805               |
| SNP_P4_24626_30819981 | NC_021161.1    | Ca_kabuli_chr02 | 30819981                | AA                              | GG              | 1946761807               |
| SNP_P4_24627_30819999 | NC_021161.1    | Ca_kabuli_chr02 | 30819999                | CC                              | TT              | 1946761809               |
| SNP_P4_24628_30820057 | NC_021161.1    | Ca_kabuli_chr02 | 30820057                | TT                              | GG              | 1946761811               |
| SNP_P4_24629_30820101 | NC_021161.1    | Ca_kabuli_chr02 | 30820101                | GG                              | AA              | 1946761813               |
| SNP_P4_24630_30820156 | NC_021161.1    | Ca_kabuli_chr02 | 30820156                | CC                              | TT              | 1946761815               |
| SNP_P4_24631_30820237 | NC_021161.1    | Ca_kabuli_chr02 | 30820237                | GG                              | TT              | 1946761817               |
| SNP_P4_24632_30820324 | NC_021161.1    | Ca_kabuli_chr02 | 30820324                | AA                              | GG              | 1946761819               |
| SNP_P4_24633_30820342 | NC_021161.1    | Ca_kabuli_chr02 | 30820342                | AA                              | TT              | 1946761821               |
| SNP_P4_24634_30820884 | NC_021161.1    | Ca_kabuli_chr02 | 30820884                | AA                              | GG              | 1946761823               |
| SNP_P4_24635_30820891 | NC_021161.1    | Ca_kabuli_chr02 | 30820891                | TT                              | CC              | 1946761825               |
| SNP_P4_24636_30820898 | NC_021161.1    | Ca_kabuli_chr02 | 30820898                | CC                              | TT              | 1946761827               |
| SNP_P4_24637_30822311 | NC_021161.1    | Ca_kabuli_chr02 | 30822311                | TT                              | AA              | 1946761829               |
| SNP_P4_24638_30822374 | NC_021161.1    | Ca_kabuli_chr02 | 30822374                | CC                              | TT              | 1946761831               |
| SNP_P4_24639_30822384 | NC_021161.1    | Ca_kabuli_chr02 | 30822384                | CC                              | GG              | 1946761833               |
| SNP_P4_24640_30822415 | NC_021161.1    | Ca_kabuli_chr02 | 30822415                | GG                              | AA              | 1946761835               |
| SNP_P4_24641_30822448 | NC_021161.1    | Ca_kabuli_chr02 | 30822448                | AA                              | GG              | 1946761837               |
| SNP_P4_24642_30822456 | NC_021161.1    | Ca_kabuli_chr02 | 30822456                | GG                              | AA              | 1946761839               |
| SNP_P4_24643_30822644 | NC_021161.1    | Ca_kabuli_chr02 | 30822644                | TT                              | CC              | 1946761841               |
| SNP_P4_24644_30822681 | NC_021161.1    | Ca_kabuli_chr02 | 30822681                | AA                              | TT              | 1946761843               |
| SNP_P4_24645_30822686 | NC_021161.1    | Ca_kabuli_chr02 | 30822686                | GG                              | AA              | 1946761845               |
| SNP_P4_24646_30822774 | NC_021161.1    | Ca_kabuli_chr02 | 30822774                | CC                              | AA              | 1946761846               |
| SNP_P4_24647_30831214 | NC_021161.1    | Ca_kabuli_chr02 | 30831214                | CC                              | TT              | 1946761848               |
| SNP_P4_24648_30831522 | NC_021161.1    | Ca_kabuli_chr02 | 30831522                | AA                              | GG              | 1946761850               |
| SNP_P4_24649_30831569 | NC_021161.1    | Ca_kabuli_chr02 | 30831569                | GG                              | AA              | 1946761852               |
| SNP_P4_24650_30831594 | NC_021161.1    | Ca_kabuli_chr02 | 30831594                | AA                              | CC              | 1946761854               |
| SNP_P4_24651_30831625 | NC_021161.1    | Ca_kabuli_chr02 | 30831625                | CC                              | AA              | 1946761856               |
| SNP_P4_24652_30831628 | NC_021161.1    | Ca_kabuli_chr02 | 30831628                | GG                              | AA              | 1946761858               |
| SNP_P4_24653_30831663 | NC_021161.1    | Ca_kabuli_chr02 | 30831663                | TT                              | CC              | 1946761860               |
| SNP_P4_24654_30831665 | NC_021161.1    | Ca_kabuli_chr02 | 30831665                | TT                              | GG              | 1946761862               |
| SNP_P4_24655_30831843 | NC_021161.1    | Ca_kabuli_chr02 | 30831843                | CC                              | TT              | 1946761864               |
| SNP_P4_24656_30834695 | NC_021161.1    | Ca_kabuli_chr02 | 30834695                | GG                              | AA              | 1946761866               |
| SNP_P4_24657_30834854 | NC_021161.1    | Ca_kabuli_chr02 | 30834854                | AA                              | GG              | 1946761868               |
| SNP_P4_24658_30834880 | NC_021161.1    | Ca_kabuli_chr02 | 30834880                | TT                              | CC              | 1946761870               |
| SNP_P4_24659_30834889 | NC_021161.1    | Ca_kabuli_chr02 | 30834889                | AA                              | TT              | 1946761872               |
| SNP_P4_24660_30834945 | NC_021161.1    | Ca_kabuli_chr02 | 30834945                | CC                              | TT              | 1946761874               |
| SNP_P4_24661_30834997 | NC_021161.1    | Ca_kabuli_chr02 | 30834997                | AA                              | GG              | 1946761876               |
| SNP_P4_24662_30836568 | NC_021161.1    | Ca_kabuli_chr02 | 30836568                | CC                              | AA              | 1946761878               |

| SNPs IDs              | Chromosome IDs | Chromosomes     | Physical positions (bp) | CDC Frontier (Reference genome) | (ILWC46 & LPNB) | NCBI SNPdb Accession IDs |
|-----------------------|----------------|-----------------|-------------------------|---------------------------------|-----------------|--------------------------|
| SNP_P4_24663_30836680 | NC_021161.1    | Ca_kabuli_chr02 | 30836680                | TT                              | CC              | 1946761880               |
| SNP_P4_24664_30836760 | NC_021161.1    | Ca_kabuli_chr02 | 30836760                | GG                              | AA              | 1946761882               |
| SNP_P4_24665_30836851 | NC_021161.1    | Ca_kabuli_chr02 | 30836851                | AA                              | GG              | 1946761884               |
| SNP_P4_24666_30836899 | NC_021161.1    | Ca_kabuli_chr02 | 30836899                | CC                              | TT              | 1946761886               |
| SNP_P4_24667_30836912 | NC_021161.1    | Ca_kabuli_chr02 | 30836912                | AA                              | GG              | 1946761888               |
| SNP_P4_24668_30836955 | NC_021161.1    | Ca_kabuli_chr02 | 30836955                | CC                              | TT              | 1946761890               |
| SNP_P4_24669_30837083 | NC_021161.1    | Ca_kabuli_chr02 | 30837083                | TT                              | AA              | 1946761892               |
| SNP_P4_24670_30837108 | NC_021161.1    | Ca_kabuli_chr02 | 30837108                | CC                              | TT              | 1946761894               |
| SNP_P4_24671_30837110 | NC_021161.1    | Ca_kabuli_chr02 | 30837110                | GG                              | AA              | 1946761897               |
| SNP_P4_24672_30839711 | NC_021161.1    | Ca_kabuli_chr02 | 30839711                | CC                              | TT              | 1946761899               |
| SNP_P4_24673_30839720 | NC_021161.1    | Ca_kabuli_chr02 | 30839720                | CC                              | GG              | 1946761901               |
| SNP_P4_24674_30839733 | NC_021161.1    | Ca_kabuli_chr02 | 30839733                | TT                              | CC              | 1946761903               |
| SNP_P4_24675_30839798 | NC_021161.1    | Ca_kabuli_chr02 | 30839798                | TT                              | CC              | 1946761905               |
| SNP_P4_24676_30840027 | NC_021161.1    | Ca_kabuli_chr02 | 30840027                | GG                              | AA              | 1946761907               |
| SNP_P4_24681_30843276 | NC_021161.1    | Ca_kabuli_chr02 | 30843276                | TT                              | GG              | 1946761909               |
| SNP_P4_24683_30843814 | NC_021161.1    | Ca_kabuli_chr02 | 30843814                | AA                              | CC              | 1946761911               |
| SNP_P4_24684_30843823 | NC_021161.1    | Ca_kabuli_chr02 | 30843823                | AA                              | CC              | 1946761913               |
| SNP_P4_24685_30844086 | NC_021161.1    | Ca_kabuli_chr02 | 30844086                | GG                              | AA              | 1946761915               |
| SNP_P4_24687_30844328 | NC_021161.1    | Ca_kabuli_chr02 | 30844328                | GG                              | TT              | 1946761917               |
| SNP_P4_24688_30844344 | NC_021161.1    | Ca_kabuli_chr02 | 30844344                | TT                              | CC              | 1946761919               |
| SNP_P4_24689_30844398 | NC_021161.1    | Ca_kabuli_chr02 | 30844398                | TT                              | AA              | 1946761921               |
| SNP_P4_24690_30844440 | NC_021161.1    | Ca_kabuli_chr02 | 30844440                | AA                              | TT              | 1946761923               |
| SNP_P4_24692_30844677 | NC_021161.1    | Ca_kabuli_chr02 | 30844677                | GG                              | CC              | 1946761925               |
| SNP_P4_24693_30844701 | NC_021161.1    | Ca_kabuli_chr02 | 30844701                | CC                              | TT              | 1946761927               |
| SNP_P4_24694_30844761 | NC_021161.1    | Ca_kabuli_chr02 | 30844761                | AA                              | TT              | 1946761929               |
| SNP_P4_24695_30844982 | NC_021161.1    | Ca_kabuli_chr02 | 30844982                | CC                              | GG              | 1946761931               |
| SNP_P4_24696_30844996 | NC_021161.1    | Ca_kabuli_chr02 | 30844996                | CC                              | TT              | 1946761933               |
| SNP_P4_24697_30845003 | NC_021161.1    | Ca_kabuli_chr02 | 30845003                | AA                              | GG              | 1946761935               |
| SNP_P4_24698_30846237 | NC_021161.1    | Ca_kabuli_chr02 | 30846237                | GG                              | AA              | 1946761937               |
| SNP_P4_24700_30846246 | NC_021161.1    | Ca_kabuli_chr02 | 30846246                | CC                              | TT              | 1946761939               |
| SNP_P4_24701_30846280 | NC_021161.1    | Ca_kabuli_chr02 | 30846280                | AA                              | GG              | 1946761941               |
| SNP_P4_24703_30846649 | NC_021161.1    | Ca_kabuli_chr02 | 30846649                | AA                              | CC              | 1946761943               |
| SNP_P4_24706_30848630 | NC_021161.1    | Ca_kabuli_chr02 | 30848630                | GG                              | AA              | 1946761945               |
| SNP_P4_24707_30848683 | NC_021161.1    | Ca_kabuli_chr02 | 30848683                | GG                              | AA              | 1946761947               |
| SNP_P4_24708_30849702 | NC_021161.1    | Ca_kabuli_chr02 | 30849702                | GG                              | AA              | 1946761949               |
| SNP_P4_24710_30859229 | NC_021161.1    | Ca_kabuli_chr02 | 30859229                | GG                              | CC              | 1946761951               |
| SNP_P4_24711_30859254 | NC_021161.1    | Ca_kabuli_chr02 | 30859254                | GG                              | AA              | 1946761953               |
| SNP_P4_24712_30859978 | NC_021161.1    | Ca_kabuli_chr02 | 30859978                | AA                              | GG              | 1946761955               |
| SNP_P4_24713_30859985 | NC_021161.1    | Ca_kabuli_chr02 | 30859985                | AA                              | TT              | 1946761957               |
| SNP_P4_24715_30860214 | NC_021161.1    | Ca_kabuli_chr02 | 30860214                | TT                              | CC              | 1946761959               |
| SNP_P4_24716_30860228 | NC_021161.1    | Ca_kabuli_chr02 | 30860228                | GG                              | AA              | 1946761961               |
| SNP_P4_24718_30860299 | NC_021161.1    | Ca_kabuli_chr02 | 30860299                | GG                              | AA              | 1946761963               |

| SNPs IDs              | Chromosome IDs | Chromosomes     | Physical positions (bp) | CDC Frontier (Reference genome) | (ILWC46 & LPNB) | NCBI SNPdb Accession IDs |
|-----------------------|----------------|-----------------|-------------------------|---------------------------------|-----------------|--------------------------|
| SNP_P4_24720_30860533 | NC_021161.1    | Ca_kabuli_chr02 | 30860533                | AA                              | GG              | 1946761965               |
| SNP_P4_24721_30860598 | NC_021161.1    | Ca_kabuli_chr02 | 30860598                | AA                              | TT              | 1946761967               |
| SNP_P4_24725_30860739 | NC_021161.1    | Ca_kabuli_chr02 | 30860739                | TT                              | GG              | 1946761969               |
| SNP_P4_24727_30860930 | NC_021161.1    | Ca_kabuli_chr02 | 30860930                | GG                              | CC              | 1946761971               |
| SNP_P4_24730_30861538 | NC_021161.1    | Ca_kabuli_chr02 | 30861538                | GG                              | TT              | 1946761973               |
| SNP_P4_24731_30864364 | NC_021161.1    | Ca_kabuli_chr02 | 30864364                | CC                              | TT              | 1946761974               |
| SNP_P4_24733_30865235 | NC_021161.1    | Ca_kabuli_chr02 | 30865235                | AA                              | GG              | 1946761976               |
| SNP_P4_24735_30868923 | NC_021161.1    | Ca_kabuli_chr02 | 30868923                | AA                              | TT              | 1946761978               |
| SNP_P4_24737_30869273 | NC_021161.1    | Ca_kabuli_chr02 | 30869273                | CC                              | TT              | 1946761980               |
| SNP_P4_24738_30869942 | NC_021161.1    | Ca_kabuli_chr02 | 30869942                | AA                              | GG              | 1946761982               |
| SNP_P4_24739_30870068 | NC_021161.1    | Ca_kabuli_chr02 | 30870068                | AA                              | CC              | 1946761984               |
| SNP_P4_24740_30870069 | NC_021161.1    | Ca_kabuli_chr02 | 30870069                | TT                              | CC              | 1946761986               |
| SNP_P4_24741_30870455 | NC_021161.1    | Ca_kabuli_chr02 | 30870455                | TT                              | GG              | 1946761988               |
| SNP_P4_24742_30870944 | NC_021161.1    | Ca_kabuli_chr02 | 30870944                | CC                              | TT              | 1946761990               |
| SNP_P4_24743_30870963 | NC_021161.1    | Ca_kabuli_chr02 | 30870963                | GG                              | AA              | 1946761992               |
| SNP_P4_24744_30871313 | NC_021161.1    | Ca_kabuli_chr02 | 30871313                | AA                              | CC              | 1946761994               |
| SNP_P4_24746_30872800 | NC_021161.1    | Ca_kabuli_chr02 | 30872800                | AA                              | GG              | 1946761996               |
| SNP_P4_24748_30873347 | NC_021161.1    | Ca_kabuli_chr02 | 30873347                | AA                              | TT              | 1946761998               |
| SNP_P4_24749_30873583 | NC_021161.1    | Ca_kabuli_chr02 | 30873583                | AA                              | GG              | 1946762000               |
| SNP_P4_24750_30874043 | NC_021161.1    | Ca_kabuli_chr02 | 30874043                | TT                              | AA              | 1946762002               |
| SNP_P4_24751_30874713 | NC_021161.1    | Ca_kabuli_chr02 | 30874713                | CC                              | TT              | 1946762004               |
| SNP_P4_24752_30875622 | NC_021161.1    | Ca_kabuli_chr02 | 30875622                | CC                              | TT              | 1946762006               |
| SNP_P4_24753_30875629 | NC_021161.1    | Ca_kabuli_chr02 | 30875629                | AA                              | CC              | 1946762008               |
| SNP_P4_24754_30875730 | NC_021161.1    | Ca_kabuli_chr02 | 30875730                | TT                              | CC              | 1946762010               |
| SNP_P4_24755_30875787 | NC_021161.1    | Ca_kabuli_chr02 | 30875787                | GG                              | AA              | 1946762011               |
| SNP_P4_24756_30876038 | NC_021161.1    | Ca_kabuli_chr02 | 30876038                | TT                              | CC              | 1946762013               |
| SNP_P4_24757_30876112 | NC_021161.1    | Ca_kabuli_chr02 | 30876112                | AA                              | GG              | 1946762015               |
| SNP_P4_24758_30877345 | NC_021161.1    | Ca_kabuli_chr02 | 30877345                | CC                              | TT              | 1946762017               |
| SNP_P4_24759_30877355 | NC_021161.1    | Ca_kabuli_chr02 | 30877355                | TT                              | AA              | 1946762018               |
| SNP_P4_24760_30877886 | NC_021161.1    | Ca_kabuli_chr02 | 30877886                | GG                              | AA              | 1946762019               |
| SNP_P4_24761_30878086 | NC_021161.1    | Ca_kabuli_chr02 | 30878086                | GG                              | AA              | 1946762020               |
| SNP_P4_24762_30878398 | NC_021161.1    | Ca_kabuli_chr02 | 30878398                | TT                              | CC              | 1946762021               |
| SNP_P4_24763_30878450 | NC_021161.1    | Ca_kabuli_chr02 | 30878450                | CC                              | AA              | 1946762022               |
| SNP_P4_24764_30878702 | NC_021161.1    | Ca_kabuli_chr02 | 30878702                | CC                              | TT              | 1946762024               |
| SNP_P4_24765_30878743 | NC_021161.1    | Ca_kabuli_chr02 | 30878743                | AA                              | CC              | 1946762026               |
| SNP_P4_24766_30879066 | NC_021161.1    | Ca_kabuli_chr02 | 30879066                | GG                              | AA              | 1946762028               |
| SNP_P4_24767_30879074 | NC_021161.1    | Ca_kabuli_chr02 | 30879074                | TT                              | CC              | 1946762030               |
| SNP_P4_24768_30879147 | NC_021161.1    | Ca_kabuli_chr02 | 30879147                | TT                              | CC              | 1946762032               |
| SNP_P4_24769_30879235 | NC_021161.1    | Ca_kabuli_chr02 | 30879235                | CC                              | TT              | 1946762034               |
| SNP_P4_24770_30879357 | NC_021161.1    | Ca_kabuli_chr02 | 30879357                | TT                              | CC              | 1946762036               |
| SNP_P4_24771_30879513 | NC_021161.1    | Ca_kabuli_chr02 | 30879513                | CC                              | TT              | 1946762038               |
| SNP_P4_24772_30880986 | NC_021161.1    | Ca_kabuli_chr02 | 30880986                | TT                              | CC              | 1946762040               |



| SNPs IDs              | Chromosome IDs | Chromosomes     | Physical positions (bp) | CDC Frontier (Reference genome) | (ILWC46 & LPNB) | NCBI SNPdb Accession IDs |
|-----------------------|----------------|-----------------|-------------------------|---------------------------------|-----------------|--------------------------|
| SNP_P4_24773_30882029 | NC_021161.1    | Ca_kabuli_chr02 | 30882029                | AA                              | GG              | 1946762042               |
| SNP_P4_24774_30882037 | NC_021161.1    | Ca_kabuli_chr02 | 30882037                | TT                              | GG              | 1946762044               |
| SNP_P4_24775_30882256 | NC_021161.1    | Ca_kabuli_chr02 | 30882256                | AA                              | GG              | 1946762046               |
| SNP_P4_24776_30882422 | NC_021161.1    | Ca_kabuli_chr02 | 30882422                | AA                              | GG              | 1946762048               |
| SNP_P4_24777_30882713 | NC_021161.1    | Ca_kabuli_chr02 | 30882713                | AA                              | GG              | 1946762050               |
| SNP_P4_24778_30883017 | NC_021161.1    | Ca_kabuli_chr02 | 30883017                | AA                              | GG              | 1946762051               |
| SNP_P4_24779_30883023 | NC_021161.1    | Ca_kabuli_chr02 | 30883023                | TT                              | GG              | 1946762053               |
| SNP_P4_24780_30883241 | NC_021161.1    | Ca_kabuli_chr02 | 30883241                | AA                              | GG              | 1946762055               |
| SNP_P4_24781_30887172 | NC_021161.1    | Ca_kabuli_chr02 | 30887172                | TT                              | CC              | 1946762057               |
| SNP_P4_24782_30887207 | NC_021161.1    | Ca_kabuli_chr02 | 30887207                | CC                              | AA              | 1946762059               |
| SNP_P4_24783_30887452 | NC_021161.1    | Ca_kabuli_chr02 | 30887452                | TT                              | CC              | 1946762061               |
| SNP_P4_24784_30887575 | NC_021161.1    | Ca_kabuli_chr02 | 30887575                | CC                              | TT              | 1946762063               |
| SNP_P4_24787_30887819 | NC_021161.1    | Ca_kabuli_chr02 | 30887819                | CC                              | GG              | 1946762065               |
| SNP_P4_24788_30887911 | NC_021161.1    | Ca_kabuli_chr02 | 30887911                | CC                              | TT              | 1946762067               |
| SNP_P4_24789_30887938 | NC_021161.1    | Ca_kabuli_chr02 | 30887938                | AA                              | TT              | 1946762069               |
| SNP_P4_24790_30887942 | NC_021161.1    | Ca_kabuli_chr02 | 30887942                | TT                              | AA              | 1946762071               |
| SNP_P4_24791_30887944 | NC_021161.1    | Ca_kabuli_chr02 | 30887944                | AA                              | CC              | 1946762073               |
| SNP_P4_24792_30889371 | NC_021161.1    | Ca_kabuli_chr02 | 30889371                | GG                              | AA              | 1946762075               |
| SNP_P4_24793_30889376 | NC_021161.1    | Ca_kabuli_chr02 | 30889376                | CC                              | TT              | 1946762077               |
| SNP_P4_24794_30889603 | NC_021161.1    | Ca_kabuli_chr02 | 30889603                | AA                              | GG              | 1946762079               |
| SNP_P4_24795_30889608 | NC_021161.1    | Ca_kabuli_chr02 | 30889608                | GG                              | AA              | 1946762081               |
| SNP_P4_24796_30889642 | NC_021161.1    | Ca_kabuli_chr02 | 30889642                | GG                              | AA              | 1946762083               |
| SNP_P4_24797_30890017 | NC_021161.1    | Ca_kabuli_chr02 | 30890017                | GG                              | CC              | 1946762085               |
| SNP_P4_24798_30890021 | NC_021161.1    | Ca_kabuli_chr02 | 30890021                | AA                              | TT              | 1946762087               |
| SNP_P4_24799_30890035 | NC_021161.1    | Ca_kabuli_chr02 | 30890035                | TT                              | CC              | 1946762089               |
| SNP_P4_24800_30890061 | NC_021161.1    | Ca_kabuli_chr02 | 30890061                | AA                              | CC              | 1946762091               |
| SNP_P4_24801_30890113 | NC_021161.1    | Ca_kabuli_chr02 | 30890113                | AA                              | TT              | 1946762093               |
| SNP_P4_24803_30890174 | NC_021161.1    | Ca_kabuli_chr02 | 30890174                | CC                              | TT              | 1946762095               |
| SNP_P4_24806_30890429 | NC_021161.1    | Ca_kabuli_chr02 | 30890429                | AA                              | CC              | 1946762097               |
| SNP_P4_24807_30890510 | NC_021161.1    | Ca_kabuli_chr02 | 30890510                | CC                              | AA              | 1946762099               |
| SNP_P4_24808_30890587 | NC_021161.1    | Ca_kabuli_chr02 | 30890587                | GG                              | AA              | 1946762101               |
| SNP_P4_24810_30892563 | NC_021161.1    | Ca_kabuli_chr02 | 30892563                | TT                              | AA              | 1946762103               |
| SNP_P4_24811_30892776 | NC_021161.1    | Ca_kabuli_chr02 | 30892776                | CC                              | TT              | 1946762105               |
| SNP_P4_24812_30892808 | NC_021161.1    | Ca_kabuli_chr02 | 30892808                | CC                              | TT              | 1946762107               |
| SNP_P4_24816_30894169 | NC_021161.1    | Ca_kabuli_chr02 | 30894169                | AA                              | GG              | 1946762109               |
| SNP_P4_24817_30894171 | NC_021161.1    | Ca_kabuli_chr02 | 30894171                | GG                              | CC              | 1946762111               |
| SNP_P4_24818_30894575 | NC_021161.1    | Ca_kabuli_chr02 | 30894575                | TT                              | CC              | 1946762113               |
| SNP_P4_24819_30894629 | NC_021161.1    | Ca_kabuli_chr02 | 30894629                | GG                              | TT              | 1946762115               |
| SNP_P4_24820_30895466 | NC_021161.1    | Ca_kabuli_chr02 | 30895466                | CC                              | TT              | 1946762117               |
| SNP_P4_24823_30897877 | NC_021161.1    | Ca_kabuli_chr02 | 30897877                | CC                              | TT              | 1946762119               |
| SNP_P4_24824_30897908 | NC_021161.1    | Ca_kabuli_chr02 | 30897908                | TT                              | AA              | 1946762121               |
| SNP_P4_24825_30898069 | NC_021161.1    | Ca_kabuli_chr02 | 30898069                | CC                              | TT              | 1946762122               |

| SNPs IDs              | Chromosome IDs | Chromosomes     | Physical positions (bp) | CDC Frontier (Reference genome) | (ILWC46 & LPNB) | NCBI SNPdb Accession IDs |
|-----------------------|----------------|-----------------|-------------------------|---------------------------------|-----------------|--------------------------|
| SNP_P4_24826_30898158 | NC_021161.1    | Ca_kabuli_chr02 | 30898158                | TT                              | AA              | 1946762125               |
| SNP_P4_24829_30899569 | NC_021161.1    | Ca_kabuli_chr02 | 30899569                | TT                              | GG              | 1946762127               |
| SNP_P4_24830_30899789 | NC_021161.1    | Ca_kabuli_chr02 | 30899789                | AA                              | GG              | 1946762129               |
| SNP_P4_24831_30900705 | NC_021161.1    | Ca_kabuli_chr02 | 30900705                | GG                              | AA              | 1946762131               |
| SNP_P4_24833_30902858 | NC_021161.1    | Ca_kabuli_chr02 | 30902858                | TT                              | CC              | 1946762133               |
| SNP_P4_24834_30904458 | NC_021161.1    | Ca_kabuli_chr02 | 30904458                | AA                              | GG              | 1946762135               |
| SNP_P4_24835_30904515 | NC_021161.1    | Ca_kabuli_chr02 | 30904515                | GG                              | AA              | 1946762137               |
| SNP_P4_24837_30905192 | NC_021161.1    | Ca_kabuli_chr02 | 30905192                | TT                              | AA              | 1946762139               |
| SNP_P4_24839_30905750 | NC_021161.1    | Ca_kabuli_chr02 | 30905750                | TT                              | CC              | 1946762141               |
| SNP_P4_24840_30905964 | NC_021161.1    | Ca_kabuli_chr02 | 30905964                | CC                              | TT              | 1946762143               |
| SNP_P4_24841_30906753 | NC_021161.1    | Ca_kabuli_chr02 | 30906753                | AA                              | TT              | 1946762145               |
| SNP_P4_24843_30907492 | NC_021161.1    | Ca_kabuli_chr02 | 30907492                | GG                              | AA              | 1946762147               |
| SNP_P4_24844_30907792 | NC_021161.1    | Ca_kabuli_chr02 | 30907792                | AA                              | GG              | 1946762149               |
| SNP_P4_24845_30910523 | NC_021161.1    | Ca_kabuli_chr02 | 30910523                | AA                              | GG              | 1946762151               |
| SNP_P4_24846_30910547 | NC_021161.1    | Ca_kabuli_chr02 | 30910547                | GG                              | AA              | 1946762153               |
| SNP_P4_24848_30912722 | NC_021161.1    | Ca_kabuli_chr02 | 30912722                | CC                              | AA              | 1946762155               |
| SNP_P4_24849_30914337 | NC_021161.1    | Ca_kabuli_chr02 | 30914337                | TT                              | AA              | 1946762157               |
| SNP_P4_24850_30915238 | NC_021161.1    | Ca_kabuli_chr02 | 30915238                | CC                              | TT              | 1946762159               |
| SNP_P4_24851_30915243 | NC_021161.1    | Ca_kabuli_chr02 | 30915243                | GG                              | AA              | 1946762161               |
| SNP_P4_24853_30915967 | NC_021161.1    | Ca_kabuli_chr02 | 30915967                | GG                              | CC              | 1946762163               |
| SNP_P4_24854_30916131 | NC_021161.1    | Ca_kabuli_chr02 | 30916131                | AA                              | GG              | 1946762165               |
| SNP_P4_24855_30916155 | NC_021161.1    | Ca_kabuli_chr02 | 30916155                | CC                              | TT              | 1946762167               |
| SNP_P4_24857_30916189 | NC_021161.1    | Ca_kabuli_chr02 | 30916189                | AA                              | GG              | 1946762169               |
| SNP_P4_24858_30916353 | NC_021161.1    | Ca_kabuli_chr02 | 30916353                | TT                              | AA              | 1946762171               |
| SNP_P4_24859_30919612 | NC_021161.1    | Ca_kabuli_chr02 | 30919612                | GG                              | TT              | 1946762172               |
| SNP_P4_24860_30919973 | NC_021161.1    | Ca_kabuli_chr02 | 30919973                | CC                              | TT              | 1946762174               |
| SNP_P4_24861_30920224 | NC_021161.1    | Ca_kabuli_chr02 | 30920224                | TT                              | AA              | 1946762176               |
| SNP_P4_24862_30920461 | NC_021161.1    | Ca_kabuli_chr02 | 30920461                | TT                              | CC              | 1946762178               |
| SNP_P4_24863_30922708 | NC_021161.1    | Ca_kabuli_chr02 | 30922708                | TT                              | CC              | 1946762180               |
| SNP_P4_24864_30923027 | NC_021161.1    | Ca_kabuli_chr02 | 30923027                | AA                              | CC              | 1946762182               |
| SNP_P4_24865_30923393 | NC_021161.1    | Ca_kabuli_chr02 | 30923393                | CC                              | TT              | 1946762184               |
| SNP_P4_24866_30923433 | NC_021161.1    | Ca_kabuli_chr02 | 30923433                | AA                              | GG              | 1946762186               |
| SNP_P4_24868_30929398 | NC_021161.1    | Ca_kabuli_chr02 | 30929398                | TT                              | AA              | 1946762188               |
| SNP_P4_24869_30929413 | NC_021161.1    | Ca_kabuli_chr02 | 30929413                | GG                              | AA              | 1946762190               |
| SNP_P4_24870_30929795 | NC_021161.1    | Ca_kabuli_chr02 | 30929795                | AA                              | GG              | 1946762192               |
| SNP_P4_24871_30930075 | NC_021161.1    | Ca_kabuli_chr02 | 30930075                | AA                              | GG              | 1946762194               |
| SNP_P4_24872_30930318 | NC_021161.1    | Ca_kabuli_chr02 | 30930318                | AA                              | GG              | 1946762196               |
| SNP_P4_24873_30931260 | NC_021161.1    | Ca_kabuli_chr02 | 30931260                | AA                              | GG              | 1946762198               |
| SNP_P4_24874_30931266 | NC_021161.1    | Ca_kabuli_chr02 | 30931266                | CC                              | TT              | 1946762200               |
| SNP_P4_24875_30931293 | NC_021161.1    | Ca_kabuli_chr02 | 30931293                | GG                              | AA              | 1946762202               |
| SNP_P4_24876_30933465 | NC_021161.1    | Ca_kabuli_chr02 | 30933465                | AA                              | CC              | 1946762204               |
| SNP_P4_24877_30933736 | NC_021161.1    | Ca_kabuli_chr02 | 30933736                | TT                              | CC              | 1946762206               |

| SNPs IDs              | Chromosome IDs | Chromosomes     | Physical positions (bp) | CDC Frontier (Reference genome) | (ILWC46 & LPNB) | NCBI SNPdb Accession IDs |
|-----------------------|----------------|-----------------|-------------------------|---------------------------------|-----------------|--------------------------|
| SNP_P4_24879_30933982 | NC_021161.1    | Ca_kabuli_chr02 | 30933982                | AA                              | GG              | 1946762207               |
| SNP_P4_24880_30935458 | NC_021161.1    | Ca_kabuli_chr02 | 30935458                | CC                              | TT              | 1946762209               |
| SNP_P4_24882_30936920 | NC_021161.1    | Ca_kabuli_chr02 | 30936920                | TT                              | CC              | 1946762211               |
| SNP_P4_24883_30936944 | NC_021161.1    | Ca_kabuli_chr02 | 30936944                | TT                              | GG              | 1946762213               |
| SNP_P4_24886_30937245 | NC_021161.1    | Ca_kabuli_chr02 | 30937245                | AA                              | TT              | 1946762215               |
| SNP_P4_24889_30939182 | NC_021161.1    | Ca_kabuli_chr02 | 30939182                | GG                              | AA              | 1946762217               |
| SNP_P4_24892_30941733 | NC_021161.1    | Ca_kabuli_chr02 | 30941733                | CC                              | TT              | 1946762219               |
| SNP_P4_24893_30941735 | NC_021161.1    | Ca_kabuli_chr02 | 30941735                | TT                              | AA              | 1946762221               |
| SNP_P4_24894_30941941 | NC_021161.1    | Ca_kabuli_chr02 | 30941941                | TT                              | GG              | 1946762223               |
| SNP_P4_24895_30942206 | NC_021161.1    | Ca_kabuli_chr02 | 30942206                | TT                              | GG              | 1946762225               |
| SNP_P4_24896_30942554 | NC_021161.1    | Ca_kabuli_chr02 | 30942554                | TT                              | GG              | 1946762227               |
| SNP_P4_24897_30942555 | NC_021161.1    | Ca_kabuli_chr02 | 30942555                | AA                              | GG              | 1946762229               |
| SNP_P4_24898_30942659 | NC_021161.1    | Ca_kabuli_chr02 | 30942659                | AA                              | GG              | 1946762231               |
| SNP_P4_24899_30942729 | NC_021161.1    | Ca_kabuli_chr02 | 30942729                | CC                              | AA              | 1946762233               |
| SNP_P4_24900_30943057 | NC_021161.1    | Ca_kabuli_chr02 | 30943057                | AA                              | TT              | 1946762235               |
| SNP_P4_24901_30943059 | NC_021161.1    | Ca_kabuli_chr02 | 30943059                | AA                              | CC              | 1946762237               |
| SNP_P4_24902_30943090 | NC_021161.1    | Ca_kabuli_chr02 | 30943090                | CC                              | AA              | 1946762239               |
| SNP_P4_24903_30943278 | NC_021161.1    | Ca_kabuli_chr02 | 30943278                | TT                              | CC              | 1946762241               |
| SNP_P4_24904_30943783 | NC_021161.1    | Ca_kabuli_chr02 | 30943783                | GG                              | AA              | 1946762243               |
| SNP_P4_24905_30944536 | NC_021161.1    | Ca_kabuli_chr02 | 30944536                | AA                              | TT              | 1946762245               |
| SNP_P4_24906_30944551 | NC_021161.1    | Ca_kabuli_chr02 | 30944551                | CC                              | TT              | 1946762247               |
| SNP_P4_24908_30947034 | NC_021161.1    | Ca_kabuli_chr02 | 30947034                | AA                              | GG              | 1946762249               |
| SNP_P4_24909_30947253 | NC_021161.1    | Ca_kabuli_chr02 | 30947253                | CC                              | TT              | 1946762251               |
| SNP_P4_24910_30947607 | NC_021161.1    | Ca_kabuli_chr02 | 30947607                | TT                              | CC              | 1946762253               |
| SNP_P4_24911_30949078 | NC_021161.1    | Ca_kabuli_chr02 | 30949078                | TT                              | CC              | 1946762255               |
| SNP_P4_24912_30949148 | NC_021161.1    | Ca_kabuli_chr02 | 30949148                | AA                              | GG              | 1946762257               |
| SNP_P4_24914_30950434 | NC_021161.1    | Ca_kabuli_chr02 | 30950434                | TT                              | AA              | 1946762259               |
| SNP_P4_24916_30951536 | NC_021161.1    | Ca_kabuli_chr02 | 30951536                | TT                              | CC              | 1946762261               |
| SNP_P4_24917_30951922 | NC_021161.1    | Ca_kabuli_chr02 | 30951922                | GG                              | CC              | 1946762263               |
| SNP_P4_24918_30954199 | NC_021161.1    | Ca_kabuli_chr02 | 30954199                | AA                              | GG              | 1946762265               |
| SNP_P4_24920_30956852 | NC_021161.1    | Ca_kabuli_chr02 | 30956852                | CC                              | AA              | 1946762267               |
| SNP_P4_24922_30957004 | NC_021161.1    | Ca_kabuli_chr02 | 30957004                | CC                              | TT              | 1946762269               |
| SNP_P4_24923_30957389 | NC_021161.1    | Ca_kabuli_chr02 | 30957389                | CC                              | TT              | 1946762271               |
| SNP_P4_24926_30958066 | NC_021161.1    | Ca_kabuli_chr02 | 30958066                | CC                              | AA              | 1946762273               |
| SNP_P4_24927_30958856 | NC_021161.1    | Ca_kabuli_chr02 | 30958856                | TT                              | GG              | 1946762275               |
| SNP_P4_24928_30958871 | NC_021161.1    | Ca_kabuli_chr02 | 30958871                | TT                              | CC              | 1946762277               |
| SNP_P4_24929_30959113 | NC_021161.1    | Ca_kabuli_chr02 | 30959113                | TT                              | AA              | 1946762279               |
| SNP_P4_24930_30962144 | NC_021161.1    | Ca_kabuli_chr02 | 30962144                | TT                              | AA              | 1946762281               |
| SNP_P4_24931_30962150 | NC_021161.1    | Ca_kabuli_chr02 | 30962150                | TT                              | CC              | 1946762283               |
| SNP_P4_24932_30962157 | NC_021161.1    | Ca_kabuli_chr02 | 30962157                | TT                              | CC              | 1946762285               |
| SNP_P4_24933_30962207 | NC_021161.1    | Ca_kabuli_chr02 | 30962207                | CC                              | TT              | 1946762287               |
| SNP_P4_24934_30962272 | NC_021161.1    | Ca_kabuli_chr02 | 30962272                | TT                              | CC              | 1946762289               |

| SNPs IDs              | Chromosome IDs | Chromosomes     | Physical positions (bp) | CDC Frontier (Reference genome) | (ILWC46 & LPNB) | NCBI SNPdb Accession IDs |
|-----------------------|----------------|-----------------|-------------------------|---------------------------------|-----------------|--------------------------|
| SNP_P4_24935_30962383 | NC_021161.1    | Ca_kabuli_chr02 | 30962383                | AA                              | CC              | 1946762291               |
| SNP_P4_24936_30962415 | NC_021161.1    | Ca_kabuli_chr02 | 30962415                | AA                              | GG              | 1946762293               |
| SNP_P4_24937_30962498 | NC_021161.1    | Ca_kabuli_chr02 | 30962498                | AA                              | GG              | 1946762295               |
| SNP_P4_24938_30962632 | NC_021161.1    | Ca_kabuli_chr02 | 30962632                | AA                              | GG              | 1946762297               |
| SNP_P4_24939_30962645 | NC_021161.1    | Ca_kabuli_chr02 | 30962645                | CC                              | AA              | 1946762299               |
| SNP_P4_24940_30963191 | NC_021161.1    | Ca_kabuli_chr02 | 30963191                | GG                              | TT              | 1946762301               |
| SNP_P4_24941_30963199 | NC_021161.1    | Ca_kabuli_chr02 | 30963199                | CC                              | TT              | 1946762303               |
| SNP_P4_24942_30963208 | NC_021161.1    | Ca_kabuli_chr02 | 30963208                | CC                              | TT              | 1946762305               |
| SNP_P4_24943_30963218 | NC_021161.1    | Ca_kabuli_chr02 | 30963218                | TT                              | GG              | 1946762307               |
| SNP_P4_24944_30963252 | NC_021161.1    | Ca_kabuli_chr02 | 30963252                | CC                              | GG              | 1946762309               |
| SNP_P4_24945_30963433 | NC_021161.1    | Ca_kabuli_chr02 | 30963433                | TT                              | CC              | 1946762311               |
| SNP_P4_24946_30963461 | NC_021161.1    | Ca_kabuli_chr02 | 30963461                | TT                              | CC              | 1946762313               |
| SNP_P4_24947_30963482 | NC_021161.1    | Ca_kabuli_chr02 | 30963482                | TT                              | CC              | 1946762315               |
| SNP_P4_24948_30963548 | NC_021161.1    | Ca_kabuli_chr02 | 30963548                | AA                              | TT              | 1946762317               |
| SNP_P4_24949_30963589 | NC_021161.1    | Ca_kabuli_chr02 | 30963589                | GG                              | AA              | 1946762319               |
| SNP_P4_24951_30963694 | NC_021161.1    | Ca_kabuli_chr02 | 30963694                | TT                              | AA              | 1946762321               |
| SNP_P4_24952_30963870 | NC_021161.1    | Ca_kabuli_chr02 | 30963870                | TT                              | AA              | 1946762323               |
| SNP_P4_24953_30963884 | NC_021161.1    | Ca_kabuli_chr02 | 30963884                | TT                              | CC              | 1946762325               |
| SNP_P4_24955_30964104 | NC_021161.1    | Ca_kabuli_chr02 | 30964104                | AA                              | CC              | 1946762327               |
| SNP_P4_24956_30964140 | NC_021161.1    | Ca_kabuli_chr02 | 30964140                | CC                              | AA              | 1946762329               |
| SNP_P4_24957_30964158 | NC_021161.1    | Ca_kabuli_chr02 | 30964158                | GG                              | TT              | 1946762331               |
| SNP_P4_24958_30966172 | NC_021161.1    | Ca_kabuli_chr02 | 30966172                | GG                              | AA              | 1946762333               |
| SNP_P4_24959_30966222 | NC_021161.1    | Ca_kabuli_chr02 | 30966222                | TT                              | GG              | 1946762335               |
| SNP_P4_24960_30966427 | NC_021161.1    | Ca_kabuli_chr02 | 30966427                | CC                              | TT              | 1946762337               |
| SNP_P4_24961_30966492 | NC_021161.1    | Ca_kabuli_chr02 | 30966492                | CC                              | TT              | 1946762339               |
| SNP_P4_24962_30967970 | NC_021161.1    | Ca_kabuli_chr02 | 30967970                | GG                              | AA              | 1946762341               |
| SNP_P4_24963_30967986 | NC_021161.1    | Ca_kabuli_chr02 | 30967986                | CC                              | GG              | 1946762344               |
| SNP_P4_24964_30968026 | NC_021161.1    | Ca_kabuli_chr02 | 30968026                | AA                              | GG              | 1946762346               |
| SNP_P4_24966_30968055 | NC_021161.1    | Ca_kabuli_chr02 | 30968055                | GG                              | AA              | 1946762348               |
| SNP_P4_24967_30968059 | NC_021161.1    | Ca_kabuli_chr02 | 30968059                | AA                              | CC              | 1946762351               |
| SNP_P4_24968_30968094 | NC_021161.1    | Ca_kabuli_chr02 | 30968094                | CC                              | TT              | 1946762353               |
| SNP_P4_24969_30968174 | NC_021161.1    | Ca_kabuli_chr02 | 30968174                | TT                              | GG              | 1946762355               |
| SNP_P4_24973_30968584 | NC_021161.1    | Ca_kabuli_chr02 | 30968584                | CC                              | AA              | 1946762357               |
| SNP_P4_24974_30968624 | NC_021161.1    | Ca_kabuli_chr02 | 30968624                | AA                              | CC              | 1946762360               |
| SNP_P4_24975_30969098 | NC_021161.1    | Ca_kabuli_chr02 | 30969098                | GG                              | TT              | 1946762362               |
| SNP_P4_24976_30969175 | NC_021161.1    | Ca_kabuli_chr02 | 30969175                | TT                              | AA              | 1946762364               |
| SNP_P4_24977_30978624 | NC_021161.1    | Ca_kabuli_chr02 | 30978624                | AA                              | GG              | 1946762366               |
| SNP_P4_24978_30978633 | NC_021161.1    | Ca_kabuli_chr02 | 30978633                | TT                              | CC              | 1946762368               |
| SNP_P4_24979_30978890 | NC_021161.1    | Ca_kabuli_chr02 | 30978890                | GG                              | CC              | 1946762370               |
| SNP_P4_24981_30979164 | NC_021161.1    | Ca_kabuli_chr02 | 30979164                | TT                              | AA              | 1946762372               |
| SNP_P4_24982_30979221 | NC_021161.1    | Ca_kabuli_chr02 | 30979221                | GG                              | TT              | 1946762374               |
| SNP_P4_24983_30979224 | NC_021161.1    | Ca_kabuli_chr02 | 30979224                | GG                              | AA              | 1946762376               |

| SNPs IDs              | Chromosome IDs | Chromosomes     | Physical positions (bp) | CDC Frontier (Reference genome) | (ILWC46 & LPNB) | NCBI SNPdb Accession IDs |
|-----------------------|----------------|-----------------|-------------------------|---------------------------------|-----------------|--------------------------|
| SNP_P4_24984_30979246 | NC_021161.1    | Ca_kabuli_chr02 | 30979246                | GG                              | AA              | 1946762378               |
| SNP_P4_24985_30979300 | NC_021161.1    | Ca_kabuli_chr02 | 30979300                | GG                              | AA              | 1946762380               |
| SNP_P4_24986_30980570 | NC_021161.1    | Ca_kabuli_chr02 | 30980570                | CC                              | AA              | 1946762382               |
| SNP_P4_24988_30983027 | NC_021161.1    | Ca_kabuli_chr02 | 30983027                | GG                              | AA              | 1946762384               |
| SNP_P4_24989_30983045 | NC_021161.1    | Ca_kabuli_chr02 | 30983045                | TT                              | CC              | 1946762386               |
| SNP_P4_24990_30983056 | NC_021161.1    | Ca_kabuli_chr02 | 30983056                | TT                              | CC              | 1946762388               |
| SNP_P4_24991_30983062 | NC_021161.1    | Ca_kabuli_chr02 | 30983062                | CC                              | TT              | 1946762390               |
| SNP_P4_24992_30983063 | NC_021161.1    | Ca_kabuli_chr02 | 30983063                | GG                              | TT              | 1946762392               |
| SNP_P4_24995_30983409 | NC_021161.1    | Ca_kabuli_chr02 | 30983409                | AA                              | GG              | 1946762394               |
| SNP_P4_24996_30983572 | NC_021161.1    | Ca_kabuli_chr02 | 30983572                | CC                              | TT              | 1946762396               |
| SNP_P4_24997_30983581 | NC_021161.1    | Ca_kabuli_chr02 | 30983581                | TT                              | GG              | 1946762398               |
| SNP_P4_24999_30983697 | NC_021161.1    | Ca_kabuli_chr02 | 30983697                | AA                              | GG              | 1946762400               |
| SNP_P4_25000_30983703 | NC_021161.1    | Ca_kabuli_chr02 | 30983703                | TT                              | AA              | 1946762402               |
| SNP_P4_25002_30988444 | NC_021161.1    | Ca_kabuli_chr02 | 30988444                | GG                              | AA              | 1946762404               |
| SNP_P4_25004_30997394 | NC_021161.1    | Ca_kabuli_chr02 | 30997394                | TT                              | AA              | 1946762406               |
| SNP_P4_25005_30999422 | NC_021161.1    | Ca_kabuli_chr02 | 30999422                | GG                              | AA              | 1946762408               |
| SNP_P4_25006_30999430 | NC_021161.1    | Ca_kabuli_chr02 | 30999430                | GG                              | AA              | 1946762410               |
| SNP_P4_25009_31000650 | NC_021161.1    | Ca_kabuli_chr02 | 31000650                | GG                              | AA              | 1946762412               |
| SNP_P4_25010_31000963 | NC_021161.1    | Ca_kabuli_chr02 | 31000963                | GG                              | AA              | 1946762414               |
| SNP_P4_25011_31000991 | NC_021161.1    | Ca_kabuli_chr02 | 31000991                | AA                              | GG              | 1946762416               |
| SNP_P4_25012_31002766 | NC_021161.1    | Ca_kabuli_chr02 | 31002766                | TT                              | GG              | 1946762418               |
| SNP_P4_25013_31002769 | NC_021161.1    | Ca_kabuli_chr02 | 31002769                | AA                              | GG              | 1946762420               |
| SNP_P4_25017_31005307 | NC_021161.1    | Ca_kabuli_chr02 | 31005307                | GG                              | TT              | 1946762422               |
| SNP_P4_25018_31005309 | NC_021161.1    | Ca_kabuli_chr02 | 31005309                | TT                              | CC              | 1946762424               |
| SNP_P4_25019_31005336 | NC_021161.1    | Ca_kabuli_chr02 | 31005336                | CC                              | GG              | 1946762426               |
| SNP_P4_25020_31007419 | NC_021161.1    | Ca_kabuli_chr02 | 31007419                | GG                              | TT              | 1946762428               |
| SNP_P4_25021_31007427 | NC_021161.1    | Ca_kabuli_chr02 | 31007427                | GG                              | AA              | 1946762430               |
| SNP_P4_25022_31007444 | NC_021161.1    | Ca_kabuli_chr02 | 31007444                | AA                              | TT              | 1946762432               |
| SNP_P4_25023_31008154 | NC_021161.1    | Ca_kabuli_chr02 | 31008154                | TT                              | AA              | 1946762434               |
| SNP_P4_25025_31013550 | NC_021161.1    | Ca_kabuli_chr02 | 31013550                | AA                              | CC              | 1946762436               |
| SNP_P4_25026_31030847 | NC_021161.1    | Ca_kabuli_chr02 | 31030847                | AA                              | CC              | 1946762438               |
| SNP_P4_25027_31080029 | NC_021161.1    | Ca_kabuli_chr02 | 31080029                | AA                              | GG              | 1946762440               |
| SNP_P4_25028_31109667 | NC_021161.1    | Ca_kabuli_chr02 | 31109667                | CC                              | TT              | 1946762442               |
| SNP_P4_25029_31120676 | NC_021161.1    | Ca_kabuli_chr02 | 31120676                | GG                              | TT              | 1946762444               |
| SNP_P4_25033_31153298 | NC_021161.1    | Ca_kabuli_chr02 | 31153298                | GG                              | CC              | 1946762446               |
| SNP_P4_25034_31218629 | NC_021161.1    | Ca_kabuli_chr02 | 31218629                | TT                              | CC              | 1946762448               |
| SNP_P4_25035_31220507 | NC_021161.1    | Ca_kabuli_chr02 | 31220507                | AA                              | GG              | 1946762450               |
| SNP_P4_25036_31225418 | NC_021161.1    | Ca_kabuli_chr02 | 31225418                | AA                              | GG              | 1946762452               |
| SNP_P4_25037_31225440 | NC_021161.1    | Ca_kabuli_chr02 | 31225440                | AA                              | CC              | 1946762454               |
| SNP_P4_25038_31225447 | NC_021161.1    | Ca_kabuli_chr02 | 31225447                | TT                              | CC              | 1946762456               |
| SNP_P4_25039_31225779 | NC_021161.1    | Ca_kabuli_chr02 | 31225779                | AA                              | GG              | 1946762458               |
| SNP_P4_25040_31225801 | NC_021161.1    | Ca_kabuli_chr02 | 31225801                | TT                              | GG              | 1946762460               |

| SNPs IDs              | Chromosome IDs | Chromosomes     | Physical positions (bp) | CDC Frontier (Reference genome) | (ILWC46 & LPNB) | NCBI SNPdb Accession IDs |
|-----------------------|----------------|-----------------|-------------------------|---------------------------------|-----------------|--------------------------|
| SNP_P4_25041_31226119 | NC_021161.1    | Ca_kabuli_chr02 | 31226119                | TT                              | CC              | 1946762462               |
| SNP_P4_25042_31226498 | NC_021161.1    | Ca_kabuli_chr02 | 31226498                | AA                              | TT              | 1946762464               |
| SNP_P4_25043_31237075 | NC_021161.1    | Ca_kabuli_chr02 | 31237075                | GG                              | TT              | 1946762466               |
| SNP_P4_25044_31237394 | NC_021161.1    | Ca_kabuli_chr02 | 31237394                | AA                              | TT              | 1946762468               |
| SNP_P4_25045_31238308 | NC_021161.1    | Ca_kabuli_chr02 | 31238308                | TT                              | CC              | 1946762470               |
| SNP_P4_25046_31238320 | NC_021161.1    | Ca_kabuli_chr02 | 31238320                | GG                              | TT              | 1946762472               |
| SNP_P4_25047_31238329 | NC_021161.1    | Ca_kabuli_chr02 | 31238329                | CC                              | AA              | 1946762474               |
| SNP_P4_25048_31238333 | NC_021161.1    | Ca_kabuli_chr02 | 31238333                | AA                              | CC              | 1946762476               |
| SNP_P4_25049_31238338 | NC_021161.1    | Ca_kabuli_chr02 | 31238338                | AA                              | GG              | 1946762478               |
| SNP_P4_25050_31238342 | NC_021161.1    | Ca_kabuli_chr02 | 31238342                | CC                              | TT              | 1946762480               |
| SNP_P4_25051_31238344 | NC_021161.1    | Ca_kabuli_chr02 | 31238344                | TT                              | CC              | 1946762482               |
| SNP_P4_25052_31238351 | NC_021161.1    | Ca_kabuli_chr02 | 31238351                | AA                              | TT              | 1946762484               |
| SNP_P4_25053_31238352 | NC_021161.1    | Ca_kabuli_chr02 | 31238352                | AA                              | GG              | 1946762486               |
| SNP_P4_25054_31238393 | NC_021161.1    | Ca_kabuli_chr02 | 31238393                | AA                              | GG              | 1946762488               |
| SNP_P4_25055_31238398 | NC_021161.1    | Ca_kabuli_chr02 | 31238398                | AA                              | GG              | 1946762490               |
| SNP_P4_25056_31238434 | NC_021161.1    | Ca_kabuli_chr02 | 31238434                | AA                              | TT              | 1946762492               |
| SNP_P4_25057_31238444 | NC_021161.1    | Ca_kabuli_chr02 | 31238444                | TT                              | CC              | 1946762494               |
| SNP_P4_25058_31238488 | NC_021161.1    | Ca_kabuli_chr02 | 31238488                | GG                              | AA              | 1946762496               |
| SNP_P4_25059_31238509 | NC_021161.1    | Ca_kabuli_chr02 | 31238509                | TT                              | CC              | 1946762498               |
| SNP_P4_25060_31238625 | NC_021161.1    | Ca_kabuli_chr02 | 31238625                | AA                              | GG              | 1946762500               |
| SNP_P4_25061_31238649 | NC_021161.1    | Ca_kabuli_chr02 | 31238649                | GG                              | AA              | 1946762502               |
| SNP_P4_25062_31238689 | NC_021161.1    | Ca_kabuli_chr02 | 31238689                | AA                              | GG              | 1946762504               |
| SNP_P4_25063_31238695 | NC_021161.1    | Ca_kabuli_chr02 | 31238695                | CC                              | AA              | 1946762506               |
| SNP_P4_25064_31238743 | NC_021161.1    | Ca_kabuli_chr02 | 31238743                | AA                              | GG              | 1946762508               |
| SNP_P4_25065_31239046 | NC_021161.1    | Ca_kabuli_chr02 | 31239046                | TT                              | CC              | 1946762510               |
| SNP_P4_25066_31239806 | NC_021161.1    | Ca_kabuli_chr02 | 31239806                | TT                              | CC              | 1946762512               |
| SNP_P4_25068_31240375 | NC_021161.1    | Ca_kabuli_chr02 | 31240375                | TT                              | CC              | 1946762514               |
| SNP_P4_25069_31261233 | NC_021161.1    | Ca_kabuli_chr02 | 31261233                | AA                              | GG              | 1946762516               |
| SNP_P4_25070_31261304 | NC_021161.1    | Ca_kabuli_chr02 | 31261304                | TT                              | CC              | 1946762518               |
| SNP_P4_25071_31261329 | NC_021161.1    | Ca_kabuli_chr02 | 31261329                | AA                              | GG              | 1946762520               |
| SNP_P4_25072_31263330 | NC_021161.1    | Ca_kabuli_chr02 | 31263330                | AA                              | GG              | 1946762522               |
| SNP_P4_25073_31270709 | NC_021161.1    | Ca_kabuli_chr02 | 31270709                | AA                              | GG              | 1946762524               |
| SNP_P4_25075_31270733 | NC_021161.1    | Ca_kabuli_chr02 | 31270733                | GG                              | AA              | 1946762525               |
| SNP_P4_25076_31270747 | NC_021161.1    | Ca_kabuli_chr02 | 31270747                | GG                              | AA              | 1946762527               |
| SNP_P4_25077_31271116 | NC_021161.1    | Ca_kabuli_chr02 | 31271116                | TT                              | AA              | 1946762529               |
| SNP_P4_25079_31285188 | NC_021161.1    | Ca_kabuli_chr02 | 31285188                | TT                              | GG              | 1946762531               |
| SNP_P4_25080_31288740 | NC_021161.1    | Ca_kabuli_chr02 | 31288740                | AA                              | CC              | 1946762533               |
| SNP_P4_25081_31289984 | NC_021161.1    | Ca_kabuli_chr02 | 31289984                | AA                              | CC              | 1946762535               |
| SNP_P4_25082_31290472 | NC_021161.1    | Ca_kabuli_chr02 | 31290472                | CC                              | AA              | 1946762537               |
| SNP_P4_25083_31290828 | NC_021161.1    | Ca_kabuli_chr02 | 31290828                | AA                              | TT              | 1946762539               |
| SNP_P4_25084_31293844 | NC_021161.1    | Ca_kabuli_chr02 | 31293844                | AA                              | TT              | 1946762541               |
| SNP_P4_25085_31295471 | NC_021161.1    | Ca_kabuli_chr02 | 31295471                | AA                              | TT              | 1946762543               |

| SNPs IDs              | Chromosome IDs | Chromosomes     | Physical positions (bp) | CDC Frontier (Reference genome) | (ILWC46 & LPNB) | NCBI SNPdb Accession IDs |
|-----------------------|----------------|-----------------|-------------------------|---------------------------------|-----------------|--------------------------|
| SNP_P4_25086_31297774 | NC_021161.1    | Ca_kabuli_chr02 | 31297774                | CC                              | GG              | 1946762545               |
| SNP_P4_25089_31337931 | NC_021161.1    | Ca_kabuli_chr02 | 31337931                | GG                              | AA              | 1946762547               |
| SNP_P4_25090_31365945 | NC_021161.1    | Ca_kabuli_chr02 | 31365945                | GG                              | TT              | 1946762549               |
| SNP_P4_25091_31383986 | NC_021161.1    | Ca_kabuli_chr02 | 31383986                | CC                              | TT              | 1946762551               |
| SNP_P4_25092_31386704 | NC_021161.1    | Ca_kabuli_chr02 | 31386704                | GG                              | AA              | 1946762553               |
| SNP_P4_25094_31450217 | NC_021161.1    | Ca_kabuli_chr02 | 31450217                | AA                              | TT              | 1946762555               |
| SNP_P4_25095_31450239 | NC_021161.1    | Ca_kabuli_chr02 | 31450239                | TT                              | CC              | 1946762557               |
| SNP_P4_25096_31450300 | NC_021161.1    | Ca_kabuli_chr02 | 31450300                | CC                              | AA              | 1946762559               |
| SNP_P4_25097_31450347 | NC_021161.1    | Ca_kabuli_chr02 | 31450347                | TT                              | CC              | 1946762561               |
| SNP_P4_25098_31450501 | NC_021161.1    | Ca_kabuli_chr02 | 31450501                | AA                              | GG              | 1946762563               |
| SNP_P4_25099_31450508 | NC_021161.1    | Ca_kabuli_chr02 | 31450508                | AA                              | GG              | 1946762565               |
| SNP_P4_25100_31450675 | NC_021161.1    | Ca_kabuli_chr02 | 31450675                | AA                              | GG              | 1946762567               |
| SNP_P4_25101_31450729 | NC_021161.1    | Ca_kabuli_chr02 | 31450729                | AA                              | GG              | 1946762569               |
| SNP_P4_25102_31451565 | NC_021161.1    | Ca_kabuli_chr02 | 31451565                | TT                              | GG              | 1946762571               |
| SNP_P4_25103_31451572 | NC_021161.1    | Ca_kabuli_chr02 | 31451572                | AA                              | GG              | 1946762573               |
| SNP_P4_25104_31451585 | NC_021161.1    | Ca_kabuli_chr02 | 31451585                | GG                              | AA              | 1946762575               |
| SNP_P4_25105_31451594 | NC_021161.1    | Ca_kabuli_chr02 | 31451594                | CC                              | TT              | 1946762577               |
| SNP_P4_25106_31451618 | NC_021161.1    | Ca_kabuli_chr02 | 31451618                | AA                              | TT              | 1946762579               |
| SNP_P4_25107_31451653 | NC_021161.1    | Ca_kabuli_chr02 | 31451653                | TT                              | CC              | 1946762581               |
| SNP_P4_25108_31451701 | NC_021161.1    | Ca_kabuli_chr02 | 31451701                | GG                              | AA              | 1946762583               |
| SNP_P4_25109_31451709 | NC_021161.1    | Ca_kabuli_chr02 | 31451709                | CC                              | AA              | 1946762585               |
| SNP_P4_25110_31451890 | NC_021161.1    | Ca_kabuli_chr02 | 31451890                | AA                              | GG              | 1946762587               |
| SNP_P4_25111_31451949 | NC_021161.1    | Ca_kabuli_chr02 | 31451949                | AA                              | CC              | 1946762589               |
| SNP_P4_25112_31451963 | NC_021161.1    | Ca_kabuli_chr02 | 31451963                | TT                              | CC              | 1946762591               |
| SNP_P4_25113_31453004 | NC_021161.1    | Ca_kabuli_chr02 | 31453004                | AA                              | GG              | 1946762593               |
| SNP_P4_25114_31453065 | NC_021161.1    | Ca_kabuli_chr02 | 31453065                | AA                              | GG              | 1946762595               |
| SNP_P4_25115_31482994 | NC_021161.1    | Ca_kabuli_chr02 | 31482994                | AA                              | GG              | 1946762597               |
| SNP_P4_25116_31483319 | NC_021161.1    | Ca_kabuli_chr02 | 31483319                | TT                              | AA              | 1946762599               |
| SNP_P4_25117_31483327 | NC_021161.1    | Ca_kabuli_chr02 | 31483327                | AA                              | GG              | 1946762601               |
| SNP_P4_25118_31491516 | NC_021161.1    | Ca_kabuli_chr02 | 31491516                | AA                              | TT              | 1946762603               |
| SNP_P4_25119_31498386 | NC_021161.1    | Ca_kabuli_chr02 | 31498386                | GG                              | TT              | 1946762605               |
| SNP_P4_25120_31499609 | NC_021161.1    | Ca_kabuli_chr02 | 31499609                | TT                              | AA              | 1946762607               |
| SNP_P4_25121_31516993 | NC_021161.1    | Ca_kabuli_chr02 | 31516993                | GG                              | AA              | 1946762609               |
| SNP_P4_25122_31517040 | NC_021161.1    | Ca_kabuli_chr02 | 31517040                | AA                              | GG              | 1946762611               |
| SNP_P4_25123_31534100 | NC_021161.1    | Ca_kabuli_chr02 | 31534100                | CC                              | TT              | 1946762613               |
| SNP_P4_25124_31534502 | NC_021161.1    | Ca_kabuli_chr02 | 31534502                | AA                              | TT              | 1946762615               |
| SNP_P4_25125_31534623 | NC_021161.1    | Ca_kabuli_chr02 | 31534623                | AA                              | TT              | 1946762617               |
| SNP_P4_25126_31534642 | NC_021161.1    | Ca_kabuli_chr02 | 31534642                | TT                              | AA              | 1946762620               |
| SNP_P4_25127_31534749 | NC_021161.1    | Ca_kabuli_chr02 | 31534749                | AA                              | TT              | 1946762622               |
| SNP_P4_25128_31534777 | NC_021161.1    | Ca_kabuli_chr02 | 31534777                | CC                              | TT              | 1946762624               |
| SNP_P4_25129_31534784 | NC_021161.1    | Ca_kabuli_chr02 | 31534784                | GG                              | TT              | 1946762626               |
| SNP_P4_25130_31534820 | NC_021161.1    | Ca_kabuli_chr02 | 31534820                | AA                              | CC              | 1946762628               |

| SNPs IDs              | Chromosome IDs | Chromosomes     | Physical positions (bp) | CDC Frontier (Reference genome) | (ILWC46 & LPNB) | NCBI SNPdb Accession IDs |
|-----------------------|----------------|-----------------|-------------------------|---------------------------------|-----------------|--------------------------|
| SNP_P4_25131_31535153 | NC_021161.1    | Ca_kabuli_chr02 | 31535153                | AA                              | GG              | 1946762630               |
| SNP_P4_25132_31544617 | NC_021161.1    | Ca_kabuli_chr02 | 31544617                | CC                              | TT              | 1946762632               |
| SNP_P4_25134_31551415 | NC_021161.1    | Ca_kabuli_chr02 | 31551415                | AA                              | GG              | 1946762634               |
| SNP_P4_25135_31551674 | NC_021161.1    | Ca_kabuli_chr02 | 31551674                | CC                              | TT              | 1946762636               |
| SNP_P4_25136_31551825 | NC_021161.1    | Ca_kabuli_chr02 | 31551825                | AA                              | GG              | 1946762638               |
| SNP_P4_25137_31551866 | NC_021161.1    | Ca_kabuli_chr02 | 31551866                | GG                              | AA              | 1946762640               |
| SNP_P4_25138_31552257 | NC_021161.1    | Ca_kabuli_chr02 | 31552257                | CC                              | TT              | 1946762642               |
| SNP_P4_25139_31559410 | NC_021161.1    | Ca_kabuli_chr02 | 31559410                | AA                              | CC              | 1946762644               |
| SNP_P4_25140_31595812 | NC_021161.1    | Ca_kabuli_chr02 | 31595812                | CC                              | GG              | 1946762646               |
| SNP_P4_25142_31605112 | NC_021161.1    | Ca_kabuli_chr02 | 31605112                | TT                              | CC              | 1946762648               |
| SNP_P4_25143_31605113 | NC_021161.1    | Ca_kabuli_chr02 | 31605113                | TT                              | AA              | 1946762650               |
| SNP_P4_25144_31605119 | NC_021161.1    | Ca_kabuli_chr02 | 31605119                | CC                              | TT              | 1946762652               |
| SNP_P4_25145_31605181 | NC_021161.1    | Ca_kabuli_chr02 | 31605181                | GG                              | AA              | 1946762654               |
| SNP_P4_25146_31605222 | NC_021161.1    | Ca_kabuli_chr02 | 31605222                | GG                              | TT              | 1946762656               |
| SNP_P4_25147_31605336 | NC_021161.1    | Ca_kabuli_chr02 | 31605336                | CC                              | AA              | 1946762658               |
| SNP_P4_25148_31605458 | NC_021161.1    | Ca_kabuli_chr02 | 31605458                | TT                              | CC              | 1946762660               |
| SNP_P4_25149_31605479 | NC_021161.1    | Ca_kabuli_chr02 | 31605479                | AA                              | GG              | 1946762662               |
| SNP_P4_25150_31605499 | NC_021161.1    | Ca_kabuli_chr02 | 31605499                | AA                              | CC              | 1946762664               |
| SNP_P4_25151_31605511 | NC_021161.1    | Ca_kabuli_chr02 | 31605511                | AA                              | GG              | 1946762666               |
| SNP_P4_25152_31605534 | NC_021161.1    | Ca_kabuli_chr02 | 31605534                | CC                              | GG              | 1946762668               |
| SNP_P4_25153_31605568 | NC_021161.1    | Ca_kabuli_chr02 | 31605568                | CC                              | AA              | 1946762670               |
| SNP_P4_25154_31605659 | NC_021161.1    | Ca_kabuli_chr02 | 31605659                | TT                              | CC              | 1946762672               |
| SNP_P4_25155_31612650 | NC_021161.1    | Ca_kabuli_chr02 | 31612650                | CC                              | AA              | 1946762674               |
| SNP_P4_25156_31631647 | NC_021161.1    | Ca_kabuli_chr02 | 31631647                | CC                              | TT              | 1946762676               |
| SNP_P4_25157_31631852 | NC_021161.1    | Ca_kabuli_chr02 | 31631852                | CC                              | TT              | 1946762678               |
| SNP_P4_25158_31647709 | NC_021161.1    | Ca_kabuli_chr02 | 31647709                | AA                              | TT              | 1946762680               |
| SNP_P4_25159_31648055 | NC_021161.1    | Ca_kabuli_chr02 | 31648055                | TT                              | GG              | 1946762682               |
| SNP_P4_25161_31700565 | NC_021161.1    | Ca_kabuli_chr02 | 31700565                | TT                              | GG              | 1946762684               |
| SNP_P4_25162_31700576 | NC_021161.1    | Ca_kabuli_chr02 | 31700576                | TT                              | AA              | 1946762686               |
| SNP_P4_25163_31700578 | NC_021161.1    | Ca_kabuli_chr02 | 31700578                | AA                              | TT              | 1946762688               |
| SNP_P4_25164_31703482 | NC_021161.1    | Ca_kabuli_chr02 | 31703482                | CC                              | TT              | 1946762690               |
| SNP_P4_25165_31716355 | NC_021161.1    | Ca_kabuli_chr02 | 31716355                | GG                              | CC              | 1946762692               |
| SNP_P4_25166_31720075 | NC_021161.1    | Ca_kabuli_chr02 | 31720075                | AA                              | GG              | 1946762694               |
| SNP_P4_25167_31720095 | NC_021161.1    | Ca_kabuli_chr02 | 31720095                | CC                              | TT              | 1946762696               |
| SNP_P4_25168_31720117 | NC_021161.1    | Ca_kabuli_chr02 | 31720117                | TT                              | GG              | 1946762698               |
| SNP_P4_25169_31720442 | NC_021161.1    | Ca_kabuli_chr02 | 31720442                | TT                              | CC              | 1946762700               |
| SNP_P4_25170_31734620 | NC_021161.1    | Ca_kabuli_chr02 | 31734620                | TT                              | CC              | 1946762702               |
| SNP_P4_25171_31736523 | NC_021161.1    | Ca_kabuli_chr02 | 31736523                | GG                              | AA              | 1946762704               |
| SNP_P4_25174_31779946 | NC_021161.1    | Ca_kabuli_chr02 | 31779946                | TT                              | AA              | 1946762706               |
| SNP_P4_25175_31810326 | NC_021161.1    | Ca_kabuli_chr02 | 31810326                | TT                              | CC              | 1946762708               |
| SNP_P4_25176_31812753 | NC_021161.1    | Ca_kabuli_chr02 | 31812753                | GG                              | AA              | 1946762710               |
| SNP_P4_25177_31839453 | NC_021161.1    | Ca_kabuli_chr02 | 31839453                | GG                              | AA              | 1946762712               |



| SNPs IDs              | Chromosome IDs | Chromosomes     | Physical positions (bp) | CDC Frontier (Reference genome) | (ILWC46 & LPNB) | NCBI SNPdb Accession IDs |
|-----------------------|----------------|-----------------|-------------------------|---------------------------------|-----------------|--------------------------|
| SNP_P4_25180_31853942 | NC_021161.1    | Ca_kabuli_chr02 | 31853942                | AA                              | TT              | 1946762714               |
| SNP_P4_25181_31853943 | NC_021161.1    | Ca_kabuli_chr02 | 31853943                | TT                              | AA              | 1946762716               |
| SNP_P4_25182_31853989 | NC_021161.1    | Ca_kabuli_chr02 | 31853989                | CC                              | TT              | 1946762718               |
| SNP_P4_25183_31854601 | NC_021161.1    | Ca_kabuli_chr02 | 31854601                | TT                              | AA              | 1946762720               |
| SNP_P4_25184_31854617 | NC_021161.1    | Ca_kabuli_chr02 | 31854617                | AA                              | CC              | 1946762722               |
| SNP_P4_25186_31854680 | NC_021161.1    | Ca_kabuli_chr02 | 31854680                | CC                              | TT              | 1946762724               |
| SNP_P4_25188_31856090 | NC_021161.1    | Ca_kabuli_chr02 | 31856090                | CC                              | TT              | 1946762726               |
| SNP_P4_25189_31857180 | NC_021161.1    | Ca_kabuli_chr02 | 31857180                | CC                              | TT              | 1946762728               |
| SNP_P4_25190_31857182 | NC_021161.1    | Ca_kabuli_chr02 | 31857182                | GG                              | AA              | 1946762730               |
| SNP_P4_25191_31857658 | NC_021161.1    | Ca_kabuli_chr02 | 31857658                | TT                              | AA              | 1946762732               |
| SNP_P4_25192_31858124 | NC_021161.1    | Ca_kabuli_chr02 | 31858124                | TT                              | CC              | 1946762734               |
| SNP_P4_25193_31858173 | NC_021161.1    | Ca_kabuli_chr02 | 31858173                | TT                              | AA              | 1946762736               |
| SNP_P4_25197_31859211 | NC_021161.1    | Ca_kabuli_chr02 | 31859211                | CC                              | GG              | 1946762738               |
| SNP_P4_25199_31861126 | NC_021161.1    | Ca_kabuli_chr02 | 31861126                | CC                              | TT              | 1946762740               |
| SNP_P4_25201_31864375 | NC_021161.1    | Ca_kabuli_chr02 | 31864375                | CC                              | TT              | 1946762742               |
| SNP_P4_25203_31864456 | NC_021161.1    | Ca_kabuli_chr02 | 31864456                | AA                              | GG              | 1946762744               |
| SNP_P4_25204_31864688 | NC_021161.1    | Ca_kabuli_chr02 | 31864688                | GG                              | AA              | 1946762746               |
| SNP_P4_25205_31864888 | NC_021161.1    | Ca_kabuli_chr02 | 31864888                | CC                              | TT              | 1946762748               |
| SNP_P4_25206_31866455 | NC_021161.1    | Ca_kabuli_chr02 | 31866455                | GG                              | TT              | 1946762750               |
| SNP_P4_25207_31866487 | NC_021161.1    | Ca_kabuli_chr02 | 31866487                | CC                              | TT              | 1946762752               |
| SNP_P4_25208_31868098 | NC_021161.1    | Ca_kabuli_chr02 | 31868098                | TT                              | CC              | 1946762754               |
| SNP_P4_25209_31868107 | NC_021161.1    | Ca_kabuli_chr02 | 31868107                | AA                              | CC              | 1946762756               |
| SNP_P4_25210_31868109 | NC_021161.1    | Ca_kabuli_chr02 | 31868109                | GG                              | AA              | 1946762758               |
| SNP_P4_25211_31868122 | NC_021161.1    | Ca_kabuli_chr02 | 31868122                | AA                              | TT              | 1946762760               |
| SNP_P4_25212_31868370 | NC_021161.1    | Ca_kabuli_chr02 | 31868370                | TT                              | CC              | 1946762762               |
| SNP_P4_25213_31868393 | NC_021161.1    | Ca_kabuli_chr02 | 31868393                | AA                              | GG              | 1946762764               |
| SNP_P4_25214_31868408 | NC_021161.1    | Ca_kabuli_chr02 | 31868408                | AA                              | GG              | 1946762766               |
| SNP_P4_25215_31869268 | NC_021161.1    | Ca_kabuli_chr02 | 31869268                | TT                              | AA              | 1946762768               |
| SNP_P4_25216_31869320 | NC_021161.1    | Ca_kabuli_chr02 | 31869320                | AA                              | TT              | 1946762770               |
| SNP_P4_25217_31870258 | NC_021161.1    | Ca_kabuli_chr02 | 31870258                | TT                              | CC              | 1946762772               |
| SNP_P4_25218_31870791 | NC_021161.1    | Ca_kabuli_chr02 | 31870791                | CC                              | GG              | 1946762774               |
| SNP_P4_25219_31871001 | NC_021161.1    | Ca_kabuli_chr02 | 31871001                | TT                              | CC              | 1946762776               |
| SNP_P4_25221_31876734 | NC_021161.1    | Ca_kabuli_chr02 | 31876734                | TT                              | GG              | 1946762778               |
| SNP_P4_25222_31876750 | NC_021161.1    | Ca_kabuli_chr02 | 31876750                | CC                              | TT              | 1946762780               |
| SNP_P4_25223_31876755 | NC_021161.1    | Ca_kabuli_chr02 | 31876755                | AA                              | GG              | 1946762782               |
| SNP_P4_25225_31881396 | NC_021161.1    | Ca_kabuli_chr02 | 31881396                | CC                              | TT              | 1946762784               |
| SNP_P4_25226_31882232 | NC_021161.1    | Ca_kabuli_chr02 | 31882232                | AA                              | TT              | 1946762786               |
| SNP_P4_25227_31882685 | NC_021161.1    | Ca_kabuli_chr02 | 31882685                | TT                              | CC              | 1946762788               |
| SNP_P4_25228_31882696 | NC_021161.1    | Ca_kabuli_chr02 | 31882696                | GG                              | AA              | 1946762790               |
| SNP_P4_25229_31882768 | NC_021161.1    | Ca_kabuli_chr02 | 31882768                | CC                              | GG              | 1946762792               |
| SNP_P4_25230_31882830 | NC_021161.1    | Ca_kabuli_chr02 | 31882830                | GG                              | AA              | 1946762794               |
| SNP_P4_25231_31882840 | NC_021161.1    | Ca_kabuli_chr02 | 31882840                | TT                              | CC              | 1946762796               |

| SNPs IDs              | Chromosome IDs | Chromosomes     | Physical positions (bp) | CDC Frontier (Reference genome) | (ILWC46 & LPNB) | NCBI SNPdb Accession IDs |
|-----------------------|----------------|-----------------|-------------------------|---------------------------------|-----------------|--------------------------|
| SNP_P4_25232_31882845 | NC_021161.1    | Ca_kabuli_chr02 | 31882845                | GG                              | AA              | 1946762798               |
| SNP_P4_25233_31882872 | NC_021161.1    | Ca_kabuli_chr02 | 31882872                | TT                              | CC              | 1946762800               |
| SNP_P4_25234_31882924 | NC_021161.1    | Ca_kabuli_chr02 | 31882924                | AA                              | CC              | 1946762802               |
| SNP_P4_25236_31882982 | NC_021161.1    | Ca_kabuli_chr02 | 31882982                | TT                              | CC              | 1946762804               |
| SNP_P4_25237_31882992 | NC_021161.1    | Ca_kabuli_chr02 | 31882992                | AA                              | CC              | 1946762806               |
| SNP_P4_25239_31883040 | NC_021161.1    | Ca_kabuli_chr02 | 31883040                | AA                              | CC              | 1946762808               |
| SNP_P4_25240_31883240 | NC_021161.1    | Ca_kabuli_chr02 | 31883240                | CC                              | GG              | 1946762811               |
| SNP_P4_25241_31883310 | NC_021161.1    | Ca_kabuli_chr02 | 31883310                | AA                              | GG              | 1946762813               |
| SNP_P4_25242_31883399 | NC_021161.1    | Ca_kabuli_chr02 | 31883399                | TT                              | CC              | 1946762815               |
| SNP_P4_25243_31883516 | NC_021161.1    | Ca_kabuli_chr02 | 31883516                | TT                              | CC              | 1946762817               |
| SNP_P4_25244_31883583 | NC_021161.1    | Ca_kabuli_chr02 | 31883583                | GG                              | TT              | 1946762819               |
| SNP_P4_25246_31883738 | NC_021161.1    | Ca_kabuli_chr02 | 31883738                | CC                              | TT              | 1946762821               |
| SNP_P4_25247_31883915 | NC_021161.1    | Ca_kabuli_chr02 | 31883915                | GG                              | AA              | 1946762823               |
| SNP_P4_25248_31884226 | NC_021161.1    | Ca_kabuli_chr02 | 31884226                | GG                              | AA              | 1946762825               |
| SNP_P4_25249_31884454 | NC_021161.1    | Ca_kabuli_chr02 | 31884454                | GG                              | AA              | 1946762827               |
| SNP_P4_25250_31884471 | NC_021161.1    | Ca_kabuli_chr02 | 31884471                | GG                              | AA              | 1946762829               |
| SNP_P4_25251_31884599 | NC_021161.1    | Ca_kabuli_chr02 | 31884599                | CC                              | TT              | 1946762831               |
| SNP_P4_25252_31885934 | NC_021161.1    | Ca_kabuli_chr02 | 31885934                | AA                              | GG              | 1946762833               |
| SNP_P4_25253_31891906 | NC_021161.1    | Ca_kabuli_chr02 | 31891906                | GG                              | AA              | 1946762835               |
| SNP_P4_25254_31892602 | NC_021161.1    | Ca_kabuli_chr02 | 31892602                | CC                              | GG              | 1946762837               |
| SNP_P4_25255_31892932 | NC_021161.1    | Ca_kabuli_chr02 | 31892932                | CC                              | AA              | 1946762839               |
| SNP_P4_25256_31893292 | NC_021161.1    | Ca_kabuli_chr02 | 31893292                | AA                              | TT              | 1946762841               |
| SNP_P4_25257_31895451 | NC_021161.1    | Ca_kabuli_chr02 | 31895451                | AA                              | GG              | 1946762843               |
| SNP_P4_25258_31896133 | NC_021161.1    | Ca_kabuli_chr02 | 31896133                | CC                              | AA              | 1946762845               |
| SNP_P4_25259_31896456 | NC_021161.1    | Ca_kabuli_chr02 | 31896456                | TT                              | AA              | 1946762847               |
| SNP_P4_25260_31896457 | NC_021161.1    | Ca_kabuli_chr02 | 31896457                | TT                              | AA              | 1946762849               |
| SNP_P4_25261_31896478 | NC_021161.1    | Ca_kabuli_chr02 | 31896478                | TT                              | AA              | 1946762851               |
| SNP_P4_25263_31896938 | NC_021161.1    | Ca_kabuli_chr02 | 31896938                | TT                              | AA              | 1946762853               |
| SNP_P4_25264_31897229 | NC_021161.1    | Ca_kabuli_chr02 | 31897229                | TT                              | CC              | 1946762855               |
| SNP_P4_25265_31897589 | NC_021161.1    | Ca_kabuli_chr02 | 31897589                | AA                              | CC              | 1946762857               |
| SNP_P4_25266_31898799 | NC_021161.1    | Ca_kabuli_chr02 | 31898799                | TT                              | CC              | 1946762859               |
| SNP_P4_25268_31899131 | NC_021161.1    | Ca_kabuli_chr02 | 31899131                | TT                              | CC              | 1946762861               |
| SNP_P4_25269_31899301 | NC_021161.1    | Ca_kabuli_chr02 | 31899301                | GG                              | TT              | 1946762863               |
| SNP_P4_25270_31899476 | NC_021161.1    | Ca_kabuli_chr02 | 31899476                | AA                              | TT              | 1946762865               |
| SNP_P4_25271_31899483 | NC_021161.1    | Ca_kabuli_chr02 | 31899483                | AA                              | GG              | 1946762867               |
| SNP_P4_25272_31902197 | NC_021161.1    | Ca_kabuli_chr02 | 31902197                | CC                              | GG              | 1946762869               |
| SNP_P4_25273_31903218 | NC_021161.1    | Ca_kabuli_chr02 | 31903218                | TT                              | CC              | 1946762871               |
| SNP_P4_25274_31905528 | NC_021161.1    | Ca_kabuli_chr02 | 31905528                | GG                              | AA              | 1946762873               |
| SNP_P4_25275_31906069 | NC_021161.1    | Ca_kabuli_chr02 | 31906069                | TT                              | GG              | 1946762876               |
| SNP_P4_25276_31906248 | NC_021161.1    | Ca_kabuli_chr02 | 31906248                | AA                              | TT              | 1946762878               |
| SNP_P4_25277_31906568 | NC_021161.1    | Ca_kabuli_chr02 | 31906568                | GG                              | AA              | 1946762879               |
| SNP_P4_25278_31906642 | NC_021161.1    | Ca_kabuli_chr02 | 31906642                | GG                              | AA              | 1946762881               |

| SNPs IDs              | Chromosome IDs | Chromosomes     | Physical positions (bp) | CDC Frontier (Reference genome) | (ILWC46 & LPNB) | NCBI SNPdb Accession IDs |
|-----------------------|----------------|-----------------|-------------------------|---------------------------------|-----------------|--------------------------|
| SNP_P4_25279_31907229 | NC_021161.1    | Ca_kabuli_chr02 | 31907229                | GG                              | AA              | 1946762883               |
| SNP_P4_25280_31907403 | NC_021161.1    | Ca_kabuli_chr02 | 31907403                | TT                              | CC              | 1946762885               |
| SNP_P4_25281_31907541 | NC_021161.1    | Ca_kabuli_chr02 | 31907541                | AA                              | TT              | 1946762887               |
| SNP_P4_25282_31907629 | NC_021161.1    | Ca_kabuli_chr02 | 31907629                | AA                              | GG              | 1946762889               |
| SNP_P4_25283_31908377 | NC_021161.1    | Ca_kabuli_chr02 | 31908377                | GG                              | AA              | 1946762891               |
| SNP_P4_25284_31910565 | NC_021161.1    | Ca_kabuli_chr02 | 31910565                | AA                              | GG              | 1946762893               |
| SNP_P4_25285_31911183 | NC_021161.1    | Ca_kabuli_chr02 | 31911183                | GG                              | AA              | 1946762895               |
| SNP_P4_25286_31911295 | NC_021161.1    | Ca_kabuli_chr02 | 31911295                | AA                              | GG              | 1946762897               |
| SNP_P4_25287_31911365 | NC_021161.1    | Ca_kabuli_chr02 | 31911365                | GG                              | AA              | 1946762899               |
| SNP_P4_25288_31911423 | NC_021161.1    | Ca_kabuli_chr02 | 31911423                | CC                              | TT              | 1946762901               |
| SNP_P4_25289_31911657 | NC_021161.1    | Ca_kabuli_chr02 | 31911657                | AA                              | TT              | 1946762903               |
| SNP_P4_25290_31914223 | NC_021161.1    | Ca_kabuli_chr02 | 31914223                | AA                              | GG              | 1946762905               |
| SNP_P4_25291_31914593 | NC_021161.1    | Ca_kabuli_chr02 | 31914593                | AA                              | CC              | 1946762907               |
| SNP_P4_25292_31914833 | NC_021161.1    | Ca_kabuli_chr02 | 31914833                | GG                              | AA              | 1946762909               |
| SNP_P4_25293_31914912 | NC_021161.1    | Ca_kabuli_chr02 | 31914912                | CC                              | TT              | 1946762911               |
| SNP_P4_25294_31914932 | NC_021161.1    | Ca_kabuli_chr02 | 31914932                | GG                              | CC              | 1946762913               |
| SNP_P4_25295_31915837 | NC_021161.1    | Ca_kabuli_chr02 | 31915837                | AA                              | CC              | 1946762915               |
| SNP_P4_25296_31916539 | NC_021161.1    | Ca_kabuli_chr02 | 31916539                | AA                              | GG              | 1946762917               |
| SNP_P4_25297_31916907 | NC_021161.1    | Ca_kabuli_chr02 | 31916907                | AA                              | GG              | 1946762919               |
| SNP_P4_25298_31916938 | NC_021161.1    | Ca_kabuli_chr02 | 31916938                | AA                              | TT              | 1946762921               |
| SNP_P4_25299_31917104 | NC_021161.1    | Ca_kabuli_chr02 | 31917104                | AA                              | GG              | 1946762923               |
| SNP_P4_25300_31917372 | NC_021161.1    | Ca_kabuli_chr02 | 31917372                | TT                              | CC              | 1946762925               |
| SNP_P4_25302_31918726 | NC_021161.1    | Ca_kabuli_chr02 | 31918726                | TT                              | CC              | 1946762927               |
| SNP_P4_25303_31918923 | NC_021161.1    | Ca_kabuli_chr02 | 31918923                | TT                              | CC              | 1946762929               |
| SNP_P4_25304_31918954 | NC_021161.1    | Ca_kabuli_chr02 | 31918954                | AA                              | GG              | 1946762931               |
| SNP_P4_25305_31919747 | NC_021161.1    | Ca_kabuli_chr02 | 31919747                | CC                              | TT              | 1946762933               |
| SNP_P4_25306_31920248 | NC_021161.1    | Ca_kabuli_chr02 | 31920248                | CC                              | AA              | 1946762935               |
| SNP_P4_25307_31921536 | NC_021161.1    | Ca_kabuli_chr02 | 31921536                | GG                              | AA              | 1946762937               |
| SNP_P4_25308_31921538 | NC_021161.1    | Ca_kabuli_chr02 | 31921538                | AA                              | GG              | 1946762939               |
| SNP_P4_25309_31922945 | NC_021161.1    | Ca_kabuli_chr02 | 31922945                | AA                              | TT              | 1946762941               |
| SNP_P4_25310_31922956 | NC_021161.1    | Ca_kabuli_chr02 | 31922956                | AA                              | GG              | 1946762943               |
| SNP_P4_25311_31922960 | NC_021161.1    | Ca_kabuli_chr02 | 31922960                | AA                              | GG              | 1946762945               |
| SNP_P4_25312_31922977 | NC_021161.1    | Ca_kabuli_chr02 | 31922977                | TT                              | GG              | 1946762947               |
| SNP_P4_25313_31923321 | NC_021161.1    | Ca_kabuli_chr02 | 31923321                | GG                              | AA              | 1946762949               |
| SNP_P4_25314_31923720 | NC_021161.1    | Ca_kabuli_chr02 | 31923720                | TT                              | CC              | 1946762951               |
| SNP_P4_25315_31923753 | NC_021161.1    | Ca_kabuli_chr02 | 31923753                | GG                              | AA              | 1946762953               |
| SNP_P4_25316_31923894 | NC_021161.1    | Ca_kabuli_chr02 | 31923894                | CC                              | TT              | 1946762955               |
| SNP_P4_25317_31923972 | NC_021161.1    | Ca_kabuli_chr02 | 31923972                | GG                              | AA              | 1946762957               |
| SNP_P4_25318_31923975 | NC_021161.1    | Ca_kabuli_chr02 | 31923975                | GG                              | AA              | 1946762959               |
| SNP_P4_25319_31926349 | NC_021161.1    | Ca_kabuli_chr02 | 31926349                | GG                              | AA              | 1946762961               |
| SNP_P4_25321_31927009 | NC_021161.1    | Ca_kabuli_chr02 | 31927009                | AA                              | GG              | 1946762963               |
| SNP_P4_25322_31927235 | NC_021161.1    | Ca_kabuli_chr02 | 31927235                | AA                              | CC              | 1946762965               |

| SNPs IDs              | Chromosome IDs | Chromosomes     | Physical positions (bp) | CDC Frontier (Reference genome) | (ILWC46 & LPNB) | NCBI SNPdb Accession IDs |
|-----------------------|----------------|-----------------|-------------------------|---------------------------------|-----------------|--------------------------|
| SNP_P4_25323_31927319 | NC_021161.1    | Ca_kabuli_chr02 | 31927319                | AA                              | CC              | 1946762967               |
| SNP_P4_25324_31927407 | NC_021161.1    | Ca_kabuli_chr02 | 31927407                | CC                              | TT              | 1946762969               |
| SNP_P4_25325_31927411 | NC_021161.1    | Ca_kabuli_chr02 | 31927411                | CC                              | AA              | 1946762971               |
| SNP_P4_25326_31929396 | NC_021161.1    | Ca_kabuli_chr02 | 31929396                | AA                              | TT              | 1946762973               |
| SNP_P4_25327_31929633 | NC_021161.1    | Ca_kabuli_chr02 | 31929633                | AA                              | TT              | 1946762975               |
| SNP_P4_25329_31929882 | NC_021161.1    | Ca_kabuli_chr02 | 31929882                | AA                              | GG              | 1946762977               |
| SNP_P4_25330_31929913 | NC_021161.1    | Ca_kabuli_chr02 | 31929913                | TT                              | CC              | 1946762979               |
| SNP_P4_25331_31930090 | NC_021161.1    | Ca_kabuli_chr02 | 31930090                | AA                              | TT              | 1946762981               |
| SNP_P4_25332_31930092 | NC_021161.1    | Ca_kabuli_chr02 | 31930092                | TT                              | CC              | 1946762983               |
| SNP_P4_25333_31930112 | NC_021161.1    | Ca_kabuli_chr02 | 31930112                | AA                              | GG              | 1946762985               |
| SNP_P4_25334_31930410 | NC_021161.1    | Ca_kabuli_chr02 | 31930410                | GG                              | AA              | 1946762987               |
| SNP_P4_25335_31930651 | NC_021161.1    | Ca_kabuli_chr02 | 31930651                | TT                              | CC              | 1946762989               |
| SNP_P4_25336_31930669 | NC_021161.1    | Ca_kabuli_chr02 | 31930669                | CC                              | AA              | 1946762991               |
| SNP_P4_25337_31930694 | NC_021161.1    | Ca_kabuli_chr02 | 31930694                | GG                              | AA              | 1946762993               |
| SNP_P4_25338_31930722 | NC_021161.1    | Ca_kabuli_chr02 | 31930722                | GG                              | TT              | 1946762995               |
| SNP_P4_25339_31930765 | NC_021161.1    | Ca_kabuli_chr02 | 31930765                | GG                              | AA              | 1946762997               |
| SNP_P4_25340_31930795 | NC_021161.1    | Ca_kabuli_chr02 | 31930795                | TT                              | CC              | 1946762999               |
| SNP_P4_25341_31931046 | NC_021161.1    | Ca_kabuli_chr02 | 31931046                | CC                              | AA              | 1946763001               |
| SNP_P4_25342_31931081 | NC_021161.1    | Ca_kabuli_chr02 | 31931081                | TT                              | AA              | 1946763003               |
| SNP_P4_25344_31931114 | NC_021161.1    | Ca_kabuli_chr02 | 31931114                | TT                              | AA              | 1946763005               |
| SNP_P4_25346_31931452 | NC_021161.1    | Ca_kabuli_chr02 | 31931452                | GG                              | AA              | 1946763007               |
| SNP_P4_25347_31931487 | NC_021161.1    | Ca_kabuli_chr02 | 31931487                | AA                              | TT              | 1946763009               |
| SNP_P4_25348_31931666 | NC_021161.1    | Ca_kabuli_chr02 | 31931666                | AA                              | GG              | 1946763011               |
| SNP_P4_25349_31931668 | NC_021161.1    | Ca_kabuli_chr02 | 31931668                | TT                              | CC              | 1946763013               |
| SNP_P4_25350_31931696 | NC_021161.1    | Ca_kabuli_chr02 | 31931696                | GG                              | AA              | 1946763015               |
| SNP_P4_25351_31931808 | NC_021161.1    | Ca_kabuli_chr02 | 31931808                | TT                              | AA              | 1946763017               |
| SNP_P4_25352_31931889 | NC_021161.1    | Ca_kabuli_chr02 | 31931889                | CC                              | TT              | 1946763019               |
| SNP_P4_25353_31933696 | NC_021161.1    | Ca_kabuli_chr02 | 31933696                | CC                              | TT              | 1946763021               |
| SNP_P4_25354_31933700 | NC_021161.1    | Ca_kabuli_chr02 | 31933700                | GG                              | AA              | 1946763023               |
| SNP_P4_25355_31933742 | NC_021161.1    | Ca_kabuli_chr02 | 31933742                | GG                              | AA              | 1946763025               |
| SNP_P4_25356_31933751 | NC_021161.1    | Ca_kabuli_chr02 | 31933751                | CC                              | TT              | 1946763027               |
| SNP_P4_25358_31933942 | NC_021161.1    | Ca_kabuli_chr02 | 31933942                | CC                              | AA              | 1946763029               |
| SNP_P4_25359_31935426 | NC_021161.1    | Ca_kabuli_chr02 | 31935426                | GG                              | TT              | 1946763031               |
| SNP_P4_25360_31935430 | NC_021161.1    | Ca_kabuli_chr02 | 31935430                | CC                              | TT              | 1946763033               |
| SNP_P4_25361_31935462 | NC_021161.1    | Ca_kabuli_chr02 | 31935462                | AA                              | GG              | 1946763035               |
| SNP_P4_25362_31935752 | NC_021161.1    | Ca_kabuli_chr02 | 31935752                | CC                              | TT              | 1946763037               |
| SNP_P4_25364_31936308 | NC_021161.1    | Ca_kabuli_chr02 | 31936308                | GG                              | AA              | 1946763039               |
| SNP_P4_25366_31937440 | NC_021161.1    | Ca_kabuli_chr02 | 31937440                | TT                              | AA              | 1946763041               |
| SNP_P4_25368_31937998 | NC_021161.1    | Ca_kabuli_chr02 | 31937998                | TT                              | AA              | 1946763043               |
| SNP_P4_25369_31938199 | NC_021161.1    | Ca_kabuli_chr02 | 31938199                | TT                              | AA              | 1946763045               |
| SNP_P4_25370_31938352 | NC_021161.1    | Ca_kabuli_chr02 | 31938352                | AA                              | TT              | 1946763047               |
| SNP_P4_25371_31938755 | NC_021161.1    | Ca_kabuli_chr02 | 31938755                | CC                              | TT              | 1946763049               |

| SNPs IDs              | Chromosome IDs | Chromosomes     | Physical positions (bp) | CDC Frontier (Reference genome) | (ILWC46 & LPNB) | NCBI SNPdb Accession IDs |
|-----------------------|----------------|-----------------|-------------------------|---------------------------------|-----------------|--------------------------|
| SNP_P4_25372_31938759 | NC_021161.1    | Ca_kabuli_chr02 | 31938759                | CC                              | TT              | 1946763051               |
| SNP_P4_25374_31939152 | NC_021161.1    | Ca_kabuli_chr02 | 31939152                | TT                              | CC              | 1946763053               |
| SNP_P4_25376_31943674 | NC_021161.1    | Ca_kabuli_chr02 | 31943674                | GG                              | AA              | 1946763055               |
| SNP_P4_25378_31945727 | NC_021161.1    | Ca_kabuli_chr02 | 31945727                | TT                              | GG              | 1946763057               |
| SNP_P4_25380_31945883 | NC_021161.1    | Ca_kabuli_chr02 | 31945883                | AA                              | GG              | 1946763059               |
| SNP_P4_25381_31946074 | NC_021161.1    | Ca_kabuli_chr02 | 31946074                | TT                              | GG              | 1946763061               |
| SNP_P4_25382_31946082 | NC_021161.1    | Ca_kabuli_chr02 | 31946082                | GG                              | AA              | 1946763063               |
| SNP_P4_25383_31946101 | NC_021161.1    | Ca_kabuli_chr02 | 31946101                | CC                              | AA              | 1946763065               |
| SNP_P4_25384_31946112 | NC_021161.1    | Ca_kabuli_chr02 | 31946112                | TT                              | CC              | 1946763067               |
| SNP_P4_25385_31946115 | NC_021161.1    | Ca_kabuli_chr02 | 31946115                | CC                              | AA              | 1946763069               |
| SNP_P4_25386_31947029 | NC_021161.1    | Ca_kabuli_chr02 | 31947029                | GG                              | AA              | 1946763071               |
| SNP_P4_25387_31947041 | NC_021161.1    | Ca_kabuli_chr02 | 31947041                | CC                              | TT              | 1946763073               |
| SNP_P4_25388_31947091 | NC_021161.1    | Ca_kabuli_chr02 | 31947091                | GG                              | AA              | 1946763075               |
| SNP_P4_25389_31947522 | NC_021161.1    | Ca_kabuli_chr02 | 31947522                | GG                              | TT              | 1946763077               |
| SNP_P4_25390_31947552 | NC_021161.1    | Ca_kabuli_chr02 | 31947552                | AA                              | GG              | 1946763079               |
| SNP_P4_25391_31947563 | NC_021161.1    | Ca_kabuli_chr02 | 31947563                | GG                              | AA              | 1946763081               |
| SNP_P4_25392_31947583 | NC_021161.1    | Ca_kabuli_chr02 | 31947583                | CC                              | TT              | 1946763083               |
| SNP_P4_25393_31947590 | NC_021161.1    | Ca_kabuli_chr02 | 31947590                | AA                              | CC              | 1946763085               |
| SNP_P4_25394_31947663 | NC_021161.1    | Ca_kabuli_chr02 | 31947663                | TT                              | CC              | 1946763087               |
| SNP_P4_25395_31947834 | NC_021161.1    | Ca_kabuli_chr02 | 31947834                | AA                              | GG              | 1946763089               |
| SNP_P4_25396_31948453 | NC_021161.1    | Ca_kabuli_chr02 | 31948453                | AA                              | GG              | 1946763091               |
| SNP_P4_25397_31949614 | NC_021161.1    | Ca_kabuli_chr02 | 31949614                | CC                              | GG              | 1946763093               |
| SNP_P4_25398_31949650 | NC_021161.1    | Ca_kabuli_chr02 | 31949650                | GG                              | AA              | 1946763095               |
| SNP_P4_25399_31949863 | NC_021161.1    | Ca_kabuli_chr02 | 31949863                | AA                              | GG              | 1946763097               |
| SNP_P4_25400_31949947 | NC_021161.1    | Ca_kabuli_chr02 | 31949947                | CC                              | TT              | 1946763099               |
| SNP_P4_25401_31950009 | NC_021161.1    | Ca_kabuli_chr02 | 31950009                | GG                              | CC              | 1946763101               |
| SNP_P4_25402_31950028 | NC_021161.1    | Ca_kabuli_chr02 | 31950028                | AA                              | TT              | 1946763103               |
| SNP_P4_25403_31950656 | NC_021161.1    | Ca_kabuli_chr02 | 31950656                | GG                              | AA              | 1946763105               |
| SNP_P4_25404_31950788 | NC_021161.1    | Ca_kabuli_chr02 | 31950788                | CC                              | TT              | 1946763107               |
| SNP_P4_25407_31950996 | NC_021161.1    | Ca_kabuli_chr02 | 31950996                | TT                              | GG              | 1946763109               |
| SNP_P4_25408_31951015 | NC_021161.1    | Ca_kabuli_chr02 | 31951015                | GG                              | AA              | 1946763111               |
| SNP_P4_25409_31951652 | NC_021161.1    | Ca_kabuli_chr02 | 31951652                | TT                              | CC              | 1946763113               |
| SNP_P4_25410_31952914 | NC_021161.1    | Ca_kabuli_chr02 | 31952914                | AA                              | TT              | 1946763115               |
| SNP_P4_25411_31952915 | NC_021161.1    | Ca_kabuli_chr02 | 31952915                | AA                              | TT              | 1946763117               |
| SNP_P4_25412_31952916 | NC_021161.1    | Ca_kabuli_chr02 | 31952916                | AA                              | TT              | 1946763119               |
| SNP_P4_25413_31952917 | NC_021161.1    | Ca_kabuli_chr02 | 31952917                | AA                              | TT              | 1946763121               |
| SNP_P4_25414_31953450 | NC_021161.1    | Ca_kabuli_chr02 | 31953450                | TT                              | GG              | 1946763123               |
| SNP_P4_25415_31953510 | NC_021161.1    | Ca_kabuli_chr02 | 31953510                | TT                              | CC              | 1946763125               |
| SNP_P4_25417_31953718 | NC_021161.1    | Ca_kabuli_chr02 | 31953718                | TT                              | AA              | 1946763127               |
| SNP_P4_25419_31955217 | NC_021161.1    | Ca_kabuli_chr02 | 31955217                | TT                              | AA              | 1946763129               |
| SNP_P4_25420_31955463 | NC_021161.1    | Ca_kabuli_chr02 | 31955463                | CC                              | TT              | 1946763131               |
| SNP_P4_25421_31955526 | NC_021161.1    | Ca_kabuli_chr02 | 31955526                | CC                              | AA              | 1946763133               |

| SNPs IDs              | Chromosome IDs | Chromosomes     | Physical positions (bp) | CDC Frontier (Reference genome) | (ILWC46 & LPNB) | NCBI SNPdb Accession IDs |
|-----------------------|----------------|-----------------|-------------------------|---------------------------------|-----------------|--------------------------|
| SNP_P4_25422_31955622 | NC_021161.1    | Ca_kabuli_chr02 | 31955622                | GG                              | AA              | 1946763135               |
| SNP_P4_25423_31955648 | NC_021161.1    | Ca_kabuli_chr02 | 31955648                | CC                              | TT              | 1946763137               |
| SNP_P4_25425_31955715 | NC_021161.1    | Ca_kabuli_chr02 | 31955715                | AA                              | GG              | 1946763139               |
| SNP_P4_25427_31955824 | NC_021161.1    | Ca_kabuli_chr02 | 31955824                | CC                              | GG              | 1946763141               |
| SNP_P4_25428_31955875 | NC_021161.1    | Ca_kabuli_chr02 | 31955875                | GG                              | TT              | 1946763143               |
| SNP_P4_25429_31956019 | NC_021161.1    | Ca_kabuli_chr02 | 31956019                | TT                              | CC              | 1946763145               |
| SNP_P4_25430_31958080 | NC_021161.1    | Ca_kabuli_chr02 | 31958080                | AA                              | GG              | 1946763147               |
| SNP_P4_25431_31958099 | NC_021161.1    | Ca_kabuli_chr02 | 31958099                | GG                              | AA              | 1946763149               |
| SNP_P4_25432_31958120 | NC_021161.1    | Ca_kabuli_chr02 | 31958120                | GG                              | AA              | 1946763151               |
| SNP_P4_25433_31958123 | NC_021161.1    | Ca_kabuli_chr02 | 31958123                | GG                              | AA              | 1946763153               |
| SNP_P4_25434_31958216 | NC_021161.1    | Ca_kabuli_chr02 | 31958216                | AA                              | GG              | 1946763155               |
| SNP_P4_25435_31958227 | NC_021161.1    | Ca_kabuli_chr02 | 31958227                | TT                              | CC              | 1946763157               |
| SNP_P4_25436_31958313 | NC_021161.1    | Ca_kabuli_chr02 | 31958313                | GG                              | AA              | 1946763159               |
| SNP_P4_25437_31958372 | NC_021161.1    | Ca_kabuli_chr02 | 31958372                | TT                              | CC              | 1946763161               |
| SNP_P4_25438_31958390 | NC_021161.1    | Ca_kabuli_chr02 | 31958390                | GG                              | AA              | 1946763163               |
| SNP_P4_25439_31958409 | NC_021161.1    | Ca_kabuli_chr02 | 31958409                | AA                              | GG              | 1946763165               |
| SNP_P4_25440_31958471 | NC_021161.1    | Ca_kabuli_chr02 | 31958471                | CC                              | TT              | 1946763167               |
| SNP_P4_25441_31958564 | NC_021161.1    | Ca_kabuli_chr02 | 31958564                | TT                              | AA              | 1946763169               |
| SNP_P4_25442_31960075 | NC_021161.1    | Ca_kabuli_chr02 | 31960075                | AA                              | GG              | 1946763171               |
| SNP_P4_25444_31961265 | NC_021161.1    | Ca_kabuli_chr02 | 31961265                | AA                              | GG              | 1946763173               |
| SNP_P4_25445_31962644 | NC_021161.1    | Ca_kabuli_chr02 | 31962644                | GG                              | AA              | 1946763175               |
| SNP_P4_25447_31963984 | NC_021161.1    | Ca_kabuli_chr02 | 31963984                | GG                              | AA              | 1946763177               |
| SNP_P4_25450_31967297 | NC_021161.1    | Ca_kabuli_chr02 | 31967297                | TT                              | CC              | 1946763180               |
| SNP_P4_25451_31971745 | NC_021161.1    | Ca_kabuli_chr02 | 31971745                | CC                              | AA              | 1946763182               |
| SNP_P4_25452_31978422 | NC_021161.1    | Ca_kabuli_chr02 | 31978422                | GG                              | AA              | 1946763184               |
| SNP_P4_25453_31980563 | NC_021161.1    | Ca_kabuli_chr02 | 31980563                | CC                              | GG              | 1946763186               |
| SNP_P4_25454_31980913 | NC_021161.1    | Ca_kabuli_chr02 | 31980913                | TT                              | CC              | 1946763188               |
| SNP_P4_25456_31983449 | NC_021161.1    | Ca_kabuli_chr02 | 31983449                | GG                              | TT              | 1946763190               |
| SNP_P4_25458_31985149 | NC_021161.1    | Ca_kabuli_chr02 | 31985149                | AA                              | GG              | 1946763192               |
| SNP_P4_25459_31985615 | NC_021161.1    | Ca_kabuli_chr02 | 31985615                | CC                              | TT              | 1946763194               |
| SNP_P4_25460_31988311 | NC_021161.1    | Ca_kabuli_chr02 | 31988311                | AA                              | GG              | 1946763196               |
| SNP_P4_25461_31988613 | NC_021161.1    | Ca_kabuli_chr02 | 31988613                | GG                              | AA              | 1946763198               |
| SNP_P4_25462_31988869 | NC_021161.1    | Ca_kabuli_chr02 | 31988869                | AA                              | TT              | 1946763200               |
| SNP_P4_25463_31989168 | NC_021161.1    | Ca_kabuli_chr02 | 31989168                | TT                              | AA              | 1946763202               |
| SNP_P4_25464_31991334 | NC_021161.1    | Ca_kabuli_chr02 | 31991334                | TT                              | CC              | 1946763204               |
| SNP_P4_25466_31991673 | NC_021161.1    | Ca_kabuli_chr02 | 31991673                | TT                              | CC              | 1946763206               |
| SNP_P4_25467_31992297 | NC_021161.1    | Ca_kabuli_chr02 | 31992297                | GG                              | TT              | 1946763208               |
| SNP_P4_25468_31992321 | NC_021161.1    | Ca_kabuli_chr02 | 31992321                | AA                              | GG              | 1946763210               |
| SNP_P4_25469_31992710 | NC_021161.1    | Ca_kabuli_chr02 | 31992710                | TT                              | CC              | 1946763212               |
| SNP_P4_25470_31992789 | NC_021161.1    | Ca_kabuli_chr02 | 31992789                | AA                              | GG              | 1946763214               |
| SNP_P4_25471_31995017 | NC_021161.1    | Ca_kabuli_chr02 | 31995017                | GG                              | AA              | 1946763216               |
| SNP_P4_25472_31995041 | NC_021161.1    | Ca_kabuli_chr02 | 31995041                | AA                              | GG              | 1946763218               |

| SNPs IDs              | Chromosome IDs | Chromosomes     | Physical positions (bp) | CDC Frontier (Reference genome) | (ILWC46 & LPNB) | NCBI SNPdb Accession IDs |
|-----------------------|----------------|-----------------|-------------------------|---------------------------------|-----------------|--------------------------|
| SNP_P4_25473_31997880 | NC_021161.1    | Ca_kabuli_chr02 | 31997880                | TT                              | CC              | 1946763220               |
| SNP_P4_25474_31997896 | NC_021161.1    | Ca_kabuli_chr02 | 31997896                | AA                              | TT              | 1946763222               |
| SNP_P4_25475_31997903 | NC_021161.1    | Ca_kabuli_chr02 | 31997903                | GG                              | AA              | 1946763225               |
| SNP_P4_25476_32001796 | NC_021161.1    | Ca_kabuli_chr02 | 32001796                | TT                              | CC              | 1946763227               |
| SNP_P4_25477_32001801 | NC_021161.1    | Ca_kabuli_chr02 | 32001801                | GG                              | TT              | 1946763229               |
| SNP_P4_25478_32001829 | NC_021161.1    | Ca_kabuli_chr02 | 32001829                | CC                              | TT              | 1946763231               |
| SNP_P4_25479_32002563 | NC_021161.1    | Ca_kabuli_chr02 | 32002563                | TT                              | CC              | 1946763233               |
| SNP_P4_25480_32002565 | NC_021161.1    | Ca_kabuli_chr02 | 32002565                | TT                              | CC              | 1946763235               |
| SNP_P4_25481_32002572 | NC_021161.1    | Ca_kabuli_chr02 | 32002572                | TT                              | CC              | 1946763237               |
| SNP_P4_25482_32002578 | NC_021161.1    | Ca_kabuli_chr02 | 32002578                | AA                              | GG              | 1946763239               |
| SNP_P4_25483_32002598 | NC_021161.1    | Ca_kabuli_chr02 | 32002598                | AA                              | GG              | 1946763241               |
| SNP_P4_25484_32002636 | NC_021161.1    | Ca_kabuli_chr02 | 32002636                | CC                              | TT              | 1946763243               |
| SNP_P4_25485_32002645 | NC_021161.1    | Ca_kabuli_chr02 | 32002645                | AA                              | GG              | 1946763245               |
| SNP_P4_25486_32003468 | NC_021161.1    | Ca_kabuli_chr02 | 32003468                | TT                              | CC              | 1946763247               |
| SNP_P4_25487_32003469 | NC_021161.1    | Ca_kabuli_chr02 | 32003469                | TT                              | CC              | 1946763249               |
| SNP_P4_25488_32003473 | NC_021161.1    | Ca_kabuli_chr02 | 32003473                | GG                              | AA              | 1946763252               |
| SNP_P4_25490_32004353 | NC_021161.1    | Ca_kabuli_chr02 | 32004353                | GG                              | TT              | 1946763254               |
| SNP_P4_25491_32006976 | NC_021161.1    | Ca_kabuli_chr02 | 32006976                | CC                              | TT              | 1946763256               |
| SNP_P4_25493_32007765 | NC_021161.1    | Ca_kabuli_chr02 | 32007765                | CC                              | TT              | 1946763258               |
| SNP_P4_25494_32007917 | NC_021161.1    | Ca_kabuli_chr02 | 32007917                | GG                              | AA              | 1946763260               |
| SNP_P4_25495_32007933 | NC_021161.1    | Ca_kabuli_chr02 | 32007933                | GG                              | AA              | 1946763262               |
| SNP_P4_25496_32007942 | NC_021161.1    | Ca_kabuli_chr02 | 32007942                | CC                              | AA              | 1946763264               |
| SNP_P4_25497_32008147 | NC_021161.1    | Ca_kabuli_chr02 | 32008147                | TT                              | AA              | 1946763266               |
| SNP_P4_25498_32008190 | NC_021161.1    | Ca_kabuli_chr02 | 32008190                | GG                              | CC              | 1946763268               |
| SNP_P4_25499_32008191 | NC_021161.1    | Ca_kabuli_chr02 | 32008191                | AA                              | TT              | 1946763270               |
| SNP_P4_25500_32008534 | NC_021161.1    | Ca_kabuli_chr02 | 32008534                | AA                              | TT              | 1946763272               |
| SNP_P4_25501_32008535 | NC_021161.1    | Ca_kabuli_chr02 | 32008535                | GG                              | TT              | 1946763274               |
| SNP_P4_25502_32008549 | NC_021161.1    | Ca_kabuli_chr02 | 32008549                | GG                              | AA              | 1946763276               |
| SNP_P4_25503_32008584 | NC_021161.1    | Ca_kabuli_chr02 | 32008584                | TT                              | CC              | 1946763278               |
| SNP_P4_25505_32010482 | NC_021161.1    | Ca_kabuli_chr02 | 32010482                | TT                              | CC              | 1946763281               |
| SNP_P4_25506_32010497 | NC_021161.1    | Ca_kabuli_chr02 | 32010497                | GG                              | AA              | 1946763283               |
| SNP_P4_25507_32012842 | NC_021161.1    | Ca_kabuli_chr02 | 32012842                | TT                              | AA              | 1946763285               |
| SNP_P4_25509_32012972 | NC_021161.1    | Ca_kabuli_chr02 | 32012972                | AA                              | GG              | 1946763287               |
| SNP_P4_25510_32012984 | NC_021161.1    | Ca_kabuli_chr02 | 32012984                | GG                              | AA              | 1946763289               |
| SNP_P4_25511_32013090 | NC_021161.1    | Ca_kabuli_chr02 | 32013090                | CC                              | AA              | 1946763291               |
| SNP_P4_25512_32013095 | NC_021161.1    | Ca_kabuli_chr02 | 32013095                | TT                              | CC              | 1946763293               |
| SNP_P4_25513_32013098 | NC_021161.1    | Ca_kabuli_chr02 | 32013098                | AA                              | TT              | 1946763295               |
| SNP_P4_25515_32016456 | NC_021161.1    | Ca_kabuli_chr02 | 32016456                | GG                              | AA              | 1946763297               |
| SNP_P4_25516_32016457 | NC_021161.1    | Ca_kabuli_chr02 | 32016457                | GG                              | TT              | 1946763299               |
| SNP_P4_25517_32016487 | NC_021161.1    | Ca_kabuli_chr02 | 32016487                | AA                              | GG              | 1946763301               |
| SNP_P4_25518_32017255 | NC_021161.1    | Ca_kabuli_chr02 | 32017255                | GG                              | AA              | 1946763303               |
| SNP_P4_25519_32017935 | NC_021161.1    | Ca_kabuli_chr02 | 32017935                | CC                              | TT              | 1946763305               |

| SNPs IDs              | Chromosome IDs | Chromosomes     | Physical positions (bp) | CDC Frontier (Reference genome) | (ILWC46 & LPNB) | NCBI SNPdb Accession IDs |
|-----------------------|----------------|-----------------|-------------------------|---------------------------------|-----------------|--------------------------|
| SNP_P4_25520_32018482 | NC_021161.1    | Ca_kabuli_chr02 | 32018482                | AA                              | GG              | 1946763307               |
| SNP_P4_25521_32018782 | NC_021161.1    | Ca_kabuli_chr02 | 32018782                | AA                              | CC              | 1946763309               |
| SNP_P4_25522_32019036 | NC_021161.1    | Ca_kabuli_chr02 | 32019036                | CC                              | AA              | 1946763311               |
| SNP_P4_25523_32019444 | NC_021161.1    | Ca_kabuli_chr02 | 32019444                | GG                              | TT              | 1946763313               |
| SNP_P4_25524_32022304 | NC_021161.1    | Ca_kabuli_chr02 | 32022304                | GG                              | AA              | 1946763315               |
| SNP_P4_25526_32022611 | NC_021161.1    | Ca_kabuli_chr02 | 32022611                | AA                              | GG              | 1946763317               |
| SNP_P4_25527_32022627 | NC_021161.1    | Ca_kabuli_chr02 | 32022627                | CC                              | TT              | 1946763319               |
| SNP_P4_25528_32022822 | NC_021161.1    | Ca_kabuli_chr02 | 32022822                | GG                              | CC              | 1946763321               |
| SNP_P4_25529_32023194 | NC_021161.1    | Ca_kabuli_chr02 | 32023194                | AA                              | TT              | 1946763323               |
| SNP_P4_25530_32023241 | NC_021161.1    | Ca_kabuli_chr02 | 32023241                | GG                              | AA              | 1946763325               |
| SNP_P4_25531_32023283 | NC_021161.1    | Ca_kabuli_chr02 | 32023283                | CC                              | GG              | 1946763327               |
| SNP_P4_25532_32025148 | NC_021161.1    | Ca_kabuli_chr02 | 32025148                | AA                              | GG              | 1946763329               |
| SNP_P4_25533_32025214 | NC_021161.1    | Ca_kabuli_chr02 | 32025214                | TT                              | CC              | 1946763331               |
| SNP_P4_25534_32025226 | NC_021161.1    | Ca_kabuli_chr02 | 32025226                | GG                              | TT              | 1946763333               |
| SNP_P4_25535_32025266 | NC_021161.1    | Ca_kabuli_chr02 | 32025266                | CC                              | TT              | 1946763335               |
| SNP_P4_25536_32025271 | NC_021161.1    | Ca_kabuli_chr02 | 32025271                | CC                              | TT              | 1946763337               |
| SNP_P4_25537_32030879 | NC_021161.1    | Ca_kabuli_chr02 | 32030879                | TT                              | CC              | 1946763339               |
| SNP_P4_25538_32030880 | NC_021161.1    | Ca_kabuli_chr02 | 32030880                | AA                              | TT              | 1946763341               |
| SNP_P4_25539_32030889 | NC_021161.1    | Ca_kabuli_chr02 | 32030889                | AA                              | GG              | 1946763343               |
| SNP_P4_25540_32030897 | NC_021161.1    | Ca_kabuli_chr02 | 32030897                | GG                              | AA              | 1946763346               |
| SNP_P4_25542_32032206 | NC_021161.1    | Ca_kabuli_chr02 | 32032206                | TT                              | GG              | 1946763348               |
| SNP_P4_25543_32033167 | NC_021161.1    | Ca_kabuli_chr02 | 32033167                | CC                              | AA              | 1946763350               |
| SNP_P4_25545_32038501 | NC_021161.1    | Ca_kabuli_chr02 | 32038501                | TT                              | CC              | 1946763352               |
| SNP_P4_25546_32039805 | NC_021161.1    | Ca_kabuli_chr02 | 32039805                | CC                              | AA              | 1946763354               |
| SNP_P4_25547_32040025 | NC_021161.1    | Ca_kabuli_chr02 | 32040025                | TT                              | CC              | 1946763356               |
| SNP_P4_25548_32040032 | NC_021161.1    | Ca_kabuli_chr02 | 32040032                | CC                              | TT              | 1946763358               |
| SNP_P4_25549_32040043 | NC_021161.1    | Ca_kabuli_chr02 | 32040043                | GG                              | AA              | 1946763360               |
| SNP_P4_25550_32040084 | NC_021161.1    | Ca_kabuli_chr02 | 32040084                | GG                              | AA              | 1946763362               |
| SNP_P4_25551_32040103 | NC_021161.1    | Ca_kabuli_chr02 | 32040103                | GG                              | AA              | 1946763364               |
| SNP_P4_25552_32046038 | NC_021161.1    | Ca_kabuli_chr02 | 32046038                | AA                              | CC              | 1946763366               |
| SNP_P4_25553_32048281 | NC_021161.1    | Ca_kabuli_chr02 | 32048281                | CC                              | TT              | 1946763368               |
| SNP_P4_25556_32048406 | NC_021161.1    | Ca_kabuli_chr02 | 32048406                | AA                              | TT              | 1946763370               |
| SNP_P4_25557_32054535 | NC_021161.1    | Ca_kabuli_chr02 | 32054535                | GG                              | AA              | 1946763372               |
| SNP_P4_25558_32056204 | NC_021161.1    | Ca_kabuli_chr02 | 32056204                | AA                              | GG              | 1946763374               |
| SNP_P4_25559_32056561 | NC_021161.1    | Ca_kabuli_chr02 | 32056561                | CC                              | TT              | 1946763376               |
| SNP_P4_25560_32056883 | NC_021161.1    | Ca_kabuli_chr02 | 32056883                | CC                              | AA              | 1946763378               |
| SNP_P4_25561_32060134 | NC_021161.1    | Ca_kabuli_chr02 | 32060134                | CC                              | TT              | 1946763380               |
| SNP_P4_25563_32060229 | NC_021161.1    | Ca_kabuli_chr02 | 32060229                | AA                              | GG              | 1946763382               |
| SNP_P4_25564_32060230 | NC_021161.1    | Ca_kabuli_chr02 | 32060230                | CC                              | TT              | 1946763384               |
| SNP_P4_25565_32060371 | NC_021161.1    | Ca_kabuli_chr02 | 32060371                | TT                              | AA              | 1946763386               |
| SNP_P4_25566_32060537 | NC_021161.1    | Ca_kabuli_chr02 | 32060537                | AA                              | GG              | 1946763388               |
| SNP_P4_25568_32062871 | NC_021161.1    | Ca_kabuli_chr02 | 32062871                | AA                              | TT              | 1946763390               |



| SNPs IDs              | Chromosome IDs | Chromosomes     | Physical positions (bp) | CDC Frontier (Reference genome) | (ILWC46 & LPNB) | NCBI SNPdb Accession IDs |
|-----------------------|----------------|-----------------|-------------------------|---------------------------------|-----------------|--------------------------|
| SNP_P4_25569_32062885 | NC_021161.1    | Ca_kabuli_chr02 | 32062885                | GG                              | TT              | 1946763392               |
| SNP_P4_25570_32062901 | NC_021161.1    | Ca_kabuli_chr02 | 32062901                | AA                              | GG              | 1946763394               |
| SNP_P4_25571_32064388 | NC_021161.1    | Ca_kabuli_chr02 | 32064388                | GG                              | CC              | 1946763396               |
| SNP_P4_25573_32070676 | NC_021161.1    | Ca_kabuli_chr02 | 32070676                | AA                              | GG              | 1946763398               |
| SNP_P4_25575_32074490 | NC_021161.1    | Ca_kabuli_chr02 | 32074490                | TT                              | CC              | 1946763401               |
| SNP_P4_25577_32074774 | NC_021161.1    | Ca_kabuli_chr02 | 32074774                | AA                              | GG              | 1946763403               |
| SNP_P4_25578_32076071 | NC_021161.1    | Ca_kabuli_chr02 | 32076071                | TT                              | AA              | 1946763405               |
| SNP_P4_25579_32076355 | NC_021161.1    | Ca_kabuli_chr02 | 32076355                | TT                              | CC              | 1946763407               |
| SNP_P4_25580_32076554 | NC_021161.1    | Ca_kabuli_chr02 | 32076554                | CC                              | AA              | 1946763409               |
| SNP_P4_25582_32080071 | NC_021161.1    | Ca_kabuli_chr02 | 32080071                | TT                              | CC              | 1946763411               |
| SNP_P4_25583_32080094 | NC_021161.1    | Ca_kabuli_chr02 | 32080094                | CC                              | GG              | 1946763413               |
| SNP_P4_25584_32080763 | NC_021161.1    | Ca_kabuli_chr02 | 32080763                | TT                              | CC              | 1946763415               |
| SNP_P4_25587_32085452 | NC_021161.1    | Ca_kabuli_chr02 | 32085452                | AA                              | TT              | 1946763417               |
| SNP_P4_25588_32087122 | NC_021161.1    | Ca_kabuli_chr02 | 32087122                | GG                              | CC              | 1946763419               |
| SNP_P4_25589_32088914 | NC_021161.1    | Ca_kabuli_chr02 | 32088914                | AA                              | CC              | 1946763421               |
| SNP_P4_25590_32088918 | NC_021161.1    | Ca_kabuli_chr02 | 32088918                | GG                              | TT              | 1946763423               |
| SNP_P4_25591_32088931 | NC_021161.1    | Ca_kabuli_chr02 | 32088931                | CC                              | GG              | 1946763425               |
| SNP_P4_25592_32089074 | NC_021161.1    | Ca_kabuli_chr02 | 32089074                | AA                              | GG              | 1946763427               |
| SNP_P4_25593_32089138 | NC_021161.1    | Ca_kabuli_chr02 | 32089138                | CC                              | TT              | 1946763429               |
| SNP_P4_25594_32089198 | NC_021161.1    | Ca_kabuli_chr02 | 32089198                | TT                              | GG              | 1946763431               |
| SNP_P4_25595_32089437 | NC_021161.1    | Ca_kabuli_chr02 | 32089437                | GG                              | AA              | 1946763433               |
| SNP_P4_25596_32089444 | NC_021161.1    | Ca_kabuli_chr02 | 32089444                | AA                              | CC              | 1946763435               |
| SNP_P4_25597_32089449 | NC_021161.1    | Ca_kabuli_chr02 | 32089449                | CC                              | TT              | 1946763437               |
| SNP_P4_25598_32089521 | NC_021161.1    | Ca_kabuli_chr02 | 32089521                | CC                              | TT              | 1946763439               |
| SNP_P4_25599_32089657 | NC_021161.1    | Ca_kabuli_chr02 | 32089657                | TT                              | CC              | 1946763442               |
| SNP_P4_25600_32096248 | NC_021161.1    | Ca_kabuli_chr02 | 32096248                | TT                              | AA              | 1946763444               |
| SNP_P4_25601_32096249 | NC_021161.1    | Ca_kabuli_chr02 | 32096249                | CC                              | GG              | 1946763446               |
| SNP_P4_25604_32098442 | NC_021161.1    | Ca_kabuli_chr02 | 32098442                | AA                              | TT              | 1946763448               |
| SNP_P4_25605_32098486 | NC_021161.1    | Ca_kabuli_chr02 | 32098486                | AA                              | CC              | 1946763450               |
| SNP_P4_25606_32098782 | NC_021161.1    | Ca_kabuli_chr02 | 32098782                | GG                              | TT              | 1946763452               |
| SNP_P4_25607_32098966 | NC_021161.1    | Ca_kabuli_chr02 | 32098966                | GG                              | AA              | 1946763454               |
| SNP_P4_25608_32098978 | NC_021161.1    | Ca_kabuli_chr02 | 32098978                | GG                              | TT              | 1946763456               |
| SNP_P4_25609_32098998 | NC_021161.1    | Ca_kabuli_chr02 | 32098998                | CC                              | TT              | 1946763458               |
| SNP_P4_25610_32099329 | NC_021161.1    | Ca_kabuli_chr02 | 32099329                | CC                              | TT              | 1946763460               |
| SNP_P4_25611_32099350 | NC_021161.1    | Ca_kabuli_chr02 | 32099350                | TT                              | GG              | 1946763462               |
| SNP_P4_25612_32099587 | NC_021161.1    | Ca_kabuli_chr02 | 32099587                | TT                              | CC              | 1946763464               |
| SNP_P4_25613_32099620 | NC_021161.1    | Ca_kabuli_chr02 | 32099620                | GG                              | AA              | 1946763466               |
| SNP_P4_25614_32100330 | NC_021161.1    | Ca_kabuli_chr02 | 32100330                | CC                              | TT              | 1946763468               |
| SNP_P4_25616_32103298 | NC_021161.1    | Ca_kabuli_chr02 | 32103298                | GG                              | TT              | 1946763470               |
| SNP_P4_25617_32104496 | NC_021161.1    | Ca_kabuli_chr02 | 32104496                | AA                              | GG              | 1946763472               |
| SNP_P4_25618_32104567 | NC_021161.1    | Ca_kabuli_chr02 | 32104567                | AA                              | TT              | 1946763474               |
| SNP_P4_25619_32104609 | NC_021161.1    | Ca_kabuli_chr02 | 32104609                | GG                              | TT              | 1946763476               |

| SNPs IDs              | Chromosome IDs | Chromosomes     | Physical positions (bp) | CDC Frontier (Reference genome) | (ILWC46 & LPNB) | NCBI SNPdb Accession IDs |
|-----------------------|----------------|-----------------|-------------------------|---------------------------------|-----------------|--------------------------|
| SNP_P4_25620_32109546 | NC_021161.1    | Ca_kabuli_chr02 | 32109546                | CC                              | GG              | 1946763478               |
| SNP_P4_25621_32109551 | NC_021161.1    | Ca_kabuli_chr02 | 32109551                | GG                              | TT              | 1946763480               |
| SNP_P4_25622_32109577 | NC_021161.1    | Ca_kabuli_chr02 | 32109577                | CC                              | TT              | 1946763482               |
| SNP_P4_25623_32109585 | NC_021161.1    | Ca_kabuli_chr02 | 32109585                | TT                              | CC              | 1946763484               |
| SNP_P4_25624_32109605 | NC_021161.1    | Ca_kabuli_chr02 | 32109605                | CC                              | TT              | 1946763486               |
| SNP_P4_25625_32109904 | NC_021161.1    | Ca_kabuli_chr02 | 32109904                | AA                              | TT              | 1946763488               |
| SNP_P4_25626_32109931 | NC_021161.1    | Ca_kabuli_chr02 | 32109931                | CC                              | TT              | 1946763490               |
| SNP_P4_25627_32109940 | NC_021161.1    | Ca_kabuli_chr02 | 32109940                | GG                              | AA              | 1946763492               |
| SNP_P4_25628_32109999 | NC_021161.1    | Ca_kabuli_chr02 | 32109999                | AA                              | GG              | 1946763494               |
| SNP_P4_25629_32110001 | NC_021161.1    | Ca_kabuli_chr02 | 32110001                | AA                              | TT              | 1946763496               |
| SNP_P4_25630_32110165 | NC_021161.1    | Ca_kabuli_chr02 | 32110165                | AA                              | GG              | 1946763498               |
| SNP_P4_25632_32110254 | NC_021161.1    | Ca_kabuli_chr02 | 32110254                | AA                              | GG              | 1946763500               |
| SNP_P4_25633_32110255 | NC_021161.1    | Ca_kabuli_chr02 | 32110255                | CC                              | TT              | 1946763502               |
| SNP_P4_25634_32110279 | NC_021161.1    | Ca_kabuli_chr02 | 32110279                | GG                              | AA              | 1946763504               |
| SNP_P4_25635_32110423 | NC_021161.1    | Ca_kabuli_chr02 | 32110423                | CC                              | TT              | 1946763506               |
| SNP_P4_25636_32110433 | NC_021161.1    | Ca_kabuli_chr02 | 32110433                | TT                              | AA              | 1946763508               |
| SNP_P4_25637_32110436 | NC_021161.1    | Ca_kabuli_chr02 | 32110436                | CC                              | AA              | 1946763510               |
| SNP_P4_25638_32110468 | NC_021161.1    | Ca_kabuli_chr02 | 32110468                | GG                              | AA              | 1946763512               |
| SNP_P4_25639_32111102 | NC_021161.1    | Ca_kabuli_chr02 | 32111102                | GG                              | AA              | 1946763514               |
| SNP_P4_25640_32111107 | NC_021161.1    | Ca_kabuli_chr02 | 32111107                | CC                              | AA              | 1946763516               |
| SNP_P4_25641_32111115 | NC_021161.1    | Ca_kabuli_chr02 | 32111115                | AA                              | GG              | 1946763518               |
| SNP_P4_25642_32111136 | NC_021161.1    | Ca_kabuli_chr02 | 32111136                | TT                              | CC              | 1946763520               |
| SNP_P4_25643_32112221 | NC_021161.1    | Ca_kabuli_chr02 | 32112221                | GG                              | AA              | 1946763522               |
| SNP_P4_25644_32112422 | NC_021161.1    | Ca_kabuli_chr02 | 32112422                | GG                              | AA              | 1946763524               |
| SNP_P4_25645_32112452 | NC_021161.1    | Ca_kabuli_chr02 | 32112452                | AA                              | GG              | 1946763526               |
| SNP_P4_25647_32112776 | NC_021161.1    | Ca_kabuli_chr02 | 32112776                | TT                              | CC              | 1946763528               |
| SNP_P4_25648_32112966 | NC_021161.1    | Ca_kabuli_chr02 | 32112966                | GG                              | TT              | 1946763530               |
| SNP_P4_25649_32112972 | NC_021161.1    | Ca_kabuli_chr02 | 32112972                | GG                              | AA              | 1946763532               |
| SNP_P4_25650_32112975 | NC_021161.1    | Ca_kabuli_chr02 | 32112975                | CC                              | TT              | 1946763534               |
| SNP_P4_25651_32113086 | NC_021161.1    | Ca_kabuli_chr02 | 32113086                | AA                              | CC              | 1946763536               |
| SNP_P4_25652_32113131 | NC_021161.1    | Ca_kabuli_chr02 | 32113131                | AA                              | GG              | 1946763538               |
| SNP_P4_25653_32113415 | NC_021161.1    | Ca_kabuli_chr02 | 32113415                | AA                              | TT              | 1946763540               |
| SNP_P4_25654_32113525 | NC_021161.1    | Ca_kabuli_chr02 | 32113525                | TT                              | GG              | 1946763543               |
| SNP_P4_25655_32113526 | NC_021161.1    | Ca_kabuli_chr02 | 32113526                | GG                              | AA              | 1946763545               |
| SNP_P4_25656_32114381 | NC_021161.1    | Ca_kabuli_chr02 | 32114381                | GG                              | AA              | 1946763547               |
| SNP_P4_25657_32115654 | NC_021161.1    | Ca_kabuli_chr02 | 32115654                | AA                              | GG              | 1946763549               |
| SNP_P4_25658_32115969 | NC_021161.1    | Ca_kabuli_chr02 | 32115969                | AA                              | TT              | 1946763551               |
| SNP_P4_25660_32116274 | NC_021161.1    | Ca_kabuli_chr02 | 32116274                | CC                              | AA              | 1946763553               |
| SNP_P4_25662_32116521 | NC_021161.1    | Ca_kabuli_chr02 | 32116521                | AA                              | CC              | 1946763555               |
| SNP_P4_25664_32117594 | NC_021161.1    | Ca_kabuli_chr02 | 32117594                | GG                              | AA              | 1946763557               |
| SNP_P4_25665_32118171 | NC_021161.1    | Ca_kabuli_chr02 | 32118171                | CC                              | TT              | 1946763559               |
| SNP_P4_25666_32118348 | NC_021161.1    | Ca_kabuli_chr02 | 32118348                | CC                              | TT              | 1946763561               |

| SNPs IDs              | Chromosome IDs | Chromosomes     | Physical positions (bp) | CDC Frontier (Reference genome) | (ILWC46 & LPNB) | NCBI SNPdb Accession IDs |
|-----------------------|----------------|-----------------|-------------------------|---------------------------------|-----------------|--------------------------|
| SNP_P4_25667_32118351 | NC_021161.1    | Ca_kabuli_chr02 | 32118351                | GG                              | AA              | 1946763563               |
| SNP_P4_25668_32118411 | NC_021161.1    | Ca_kabuli_chr02 | 32118411                | TT                              | AA              | 1946763565               |
| SNP_P4_25669_32118437 | NC_021161.1    | Ca_kabuli_chr02 | 32118437                | CC                              | TT              | 1946763567               |
| SNP_P4_25670_32118440 | NC_021161.1    | Ca_kabuli_chr02 | 32118440                | AA                              | GG              | 1946763569               |
| SNP_P4_25672_32118499 | NC_021161.1    | Ca_kabuli_chr02 | 32118499                | GG                              | CC              | 1946763571               |
| SNP_P4_25673_32118686 | NC_021161.1    | Ca_kabuli_chr02 | 32118686                | AA                              | TT              | 1946763573               |
| SNP_P4_25674_32118876 | NC_021161.1    | Ca_kabuli_chr02 | 32118876                | AA                              | CC              | 1946763575               |
| SNP_P4_25675_32118888 | NC_021161.1    | Ca_kabuli_chr02 | 32118888                | TT                              | GG              | 1946763577               |
| SNP_P4_25677_32118965 | NC_021161.1    | Ca_kabuli_chr02 | 32118965                | AA                              | TT              | 1946763579               |
| SNP_P4_25678_32119020 | NC_021161.1    | Ca_kabuli_chr02 | 32119020                | GG                              | AA              | 1946763581               |
| SNP_P4_25679_32119268 | NC_021161.1    | Ca_kabuli_chr02 | 32119268                | TT                              | AA              | 1946763583               |
| SNP_P4_25680_32119274 | NC_021161.1    | Ca_kabuli_chr02 | 32119274                | TT                              | CC              | 1946763585               |
| SNP_P4_25681_32122594 | NC_021161.1    | Ca_kabuli_chr02 | 32122594                | CC                              | TT              | 1946763587               |
| SNP_P4_25683_32122923 | NC_021161.1    | Ca_kabuli_chr02 | 32122923                | TT                              | CC              | 1946763589               |
| SNP_P4_25684_32122964 | NC_021161.1    | Ca_kabuli_chr02 | 32122964                | CC                              | GG              | 1946763591               |
| SNP_P4_25685_32122973 | NC_021161.1    | Ca_kabuli_chr02 | 32122973                | CC                              | TT              | 1946763593               |
| SNP_P4_25686_32122988 | NC_021161.1    | Ca_kabuli_chr02 | 32122988                | CC                              | TT              | 1946763595               |
| SNP_P4_25687_32125967 | NC_021161.1    | Ca_kabuli_chr02 | 32125967                | AA                              | TT              | 1946763597               |
| SNP_P4_25688_32125993 | NC_021161.1    | Ca_kabuli_chr02 | 32125993                | GG                              | CC              | 1946763599               |
| SNP_P4_25689_32126036 | NC_021161.1    | Ca_kabuli_chr02 | 32126036                | GG                              | TT              | 1946763602               |
| SNP_P4_25690_32126137 | NC_021161.1    | Ca_kabuli_chr02 | 32126137                | AA                              | GG              | 1946763604               |
| SNP_P4_25691_32126327 | NC_021161.1    | Ca_kabuli_chr02 | 32126327                | CC                              | TT              | 1946763606               |
| SNP_P4_25692_32126332 | NC_021161.1    | Ca_kabuli_chr02 | 32126332                | TT                              | GG              | 1946763608               |
| SNP_P4_25693_32126379 | NC_021161.1    | Ca_kabuli_chr02 | 32126379                | GG                              | AA              | 1946763610               |
| SNP_P4_25694_32126412 | NC_021161.1    | Ca_kabuli_chr02 | 32126412                | CC                              | TT              | 1946763612               |
| SNP_P4_25695_32126421 | NC_021161.1    | Ca_kabuli_chr02 | 32126421                | TT                              | CC              | 1946763614               |
| SNP_P4_25696_32126431 | NC_021161.1    | Ca_kabuli_chr02 | 32126431                | AA                              | GG              | 1946763616               |
| SNP_P4_25697_32126433 | NC_021161.1    | Ca_kabuli_chr02 | 32126433                | CC                              | TT              | 1946763618               |
| SNP_P4_25698_32126454 | NC_021161.1    | Ca_kabuli_chr02 | 32126454                | AA                              | GG              | 1946763620               |
| SNP_P4_25699_32126465 | NC_021161.1    | Ca_kabuli_chr02 | 32126465                | GG                              | AA              | 1946763622               |
| SNP_P4_25700_32126536 | NC_021161.1    | Ca_kabuli_chr02 | 32126536                | CC                              | AA              | 1946763624               |
| SNP_P4_25701_32126753 | NC_021161.1    | Ca_kabuli_chr02 | 32126753                | CC                              | AA              | 1946763626               |
| SNP_P4_25702_32126778 | NC_021161.1    | Ca_kabuli_chr02 | 32126778                | TT                              | AA              | 1946763628               |
| SNP_P4_25703_32126814 | NC_021161.1    | Ca_kabuli_chr02 | 32126814                | GG                              | TT              | 1946763630               |
| SNP_P4_25704_32126993 | NC_021161.1    | Ca_kabuli_chr02 | 32126993                | AA                              | TT              | 1946763632               |
| SNP_P4_25706_32127045 | NC_021161.1    | Ca_kabuli_chr02 | 32127045                | GG                              | TT              | 1946763634               |
| SNP_P4_25707_32127055 | NC_021161.1    | Ca_kabuli_chr02 | 32127055                | TT                              | AA              | 1946763636               |
| SNP_P4_25708_32127146 | NC_021161.1    | Ca_kabuli_chr02 | 32127146                | AA                              | GG              | 1946763639               |
| SNP_P4_25709_32127156 | NC_021161.1    | Ca_kabuli_chr02 | 32127156                | AA                              | GG              | 1946763641               |
| SNP_P4_25712_32130256 | NC_021161.1    | Ca_kabuli_chr02 | 32130256                | TT                              | CC              | 1946763643               |
| SNP_P4_25714_32130606 | NC_021161.1    | Ca_kabuli_chr02 | 32130606                | CC                              | TT              | 1946763645               |
| SNP_P4_25715_32131016 | NC_021161.1    | Ca_kabuli_chr02 | 32131016                | AA                              | TT              | 1946763647               |

| SNPs IDs              | Chromosome IDs | Chromosomes     | Physical positions (bp) | CDC Frontier (Reference genome) | (ILWC46 & LPNB) | NCBI SNPdb Accession IDs |
|-----------------------|----------------|-----------------|-------------------------|---------------------------------|-----------------|--------------------------|
| SNP_P4_25716_32134514 | NC_021161.1    | Ca_kabuli_chr02 | 32134514                | AA                              | GG              | 1946763649               |
| SNP_P4_25717_32134577 | NC_021161.1    | Ca_kabuli_chr02 | 32134577                | TT                              | CC              | 1946763651               |
| SNP_P4_25718_32134773 | NC_021161.1    | Ca_kabuli_chr02 | 32134773                | TT                              | CC              | 1946763653               |
| SNP_P4_25719_32134971 | NC_021161.1    | Ca_kabuli_chr02 | 32134971                | TT                              | GG              | 1946763655               |
| SNP_P4_25720_32136790 | NC_021161.1    | Ca_kabuli_chr02 | 32136790                | TT                              | CC              | 1946763657               |
| SNP_P4_25721_32136809 | NC_021161.1    | Ca_kabuli_chr02 | 32136809                | GG                              | AA              | 1946763659               |
| SNP_P4_25722_32138354 | NC_021161.1    | Ca_kabuli_chr02 | 32138354                | AA                              | GG              | 1946763661               |
| SNP_P4_25723_32138418 | NC_021161.1    | Ca_kabuli_chr02 | 32138418                | GG                              | AA              | 1946763663               |
| SNP_P4_25724_32138420 | NC_021161.1    | Ca_kabuli_chr02 | 32138420                | GG                              | AA              | 1946763665               |
| SNP_P4_25725_32138464 | NC_021161.1    | Ca_kabuli_chr02 | 32138464                | AA                              | GG              | 1946763667               |
| SNP_P4_25726_32138888 | NC_021161.1    | Ca_kabuli_chr02 | 32138888                | GG                              | CC              | 1946763669               |
| SNP_P4_25727_32144840 | NC_021161.1    | Ca_kabuli_chr02 | 32144840                | TT                              | AA              | 1946763671               |
| SNP_P4_25729_32145012 | NC_021161.1    | Ca_kabuli_chr02 | 32145012                | GG                              | AA              | 1946763673               |
| SNP_P4_25730_32145260 | NC_021161.1    | Ca_kabuli_chr02 | 32145260                | TT                              | CC              | 1946763675               |
| SNP_P4_25731_32145299 | NC_021161.1    | Ca_kabuli_chr02 | 32145299                | TT                              | AA              | 1946763677               |
| SNP_P4_25732_32145761 | NC_021161.1    | Ca_kabuli_chr02 | 32145761                | TT                              | CC              | 1946763679               |
| SNP_P4_25733_32146482 | NC_021161.1    | Ca_kabuli_chr02 | 32146482                | CC                              | TT              | 1946763681               |
| SNP_P4_25735_32146868 | NC_021161.1    | Ca_kabuli_chr02 | 32146868                | GG                              | AA              | 1946763683               |
| SNP_P4_25736_32147087 | NC_021161.1    | Ca_kabuli_chr02 | 32147087                | TT                              | AA              | 1946763685               |
| SNP_P4_25737_32147887 | NC_021161.1    | Ca_kabuli_chr02 | 32147887                | AA                              | GG              | 1946763687               |
| SNP_P4_25738_32150405 | NC_021161.1    | Ca_kabuli_chr02 | 32150405                | GG                              | TT              | 1946763689               |
| SNP_P4_25740_32152325 | NC_021161.1    | Ca_kabuli_chr02 | 32152325                | AA                              | CC              | 1946763691               |
| SNP_P4_25741_32152403 | NC_021161.1    | Ca_kabuli_chr02 | 32152403                | CC                              | TT              | 1946763693               |
| SNP_P4_25742_32152604 | NC_021161.1    | Ca_kabuli_chr02 | 32152604                | AA                              | GG              | 1946763695               |
| SNP_P4_25744_32153054 | NC_021161.1    | Ca_kabuli_chr02 | 32153054                | GG                              | AA              | 1946763697               |
| SNP_P4_25745_32153107 | NC_021161.1    | Ca_kabuli_chr02 | 32153107                | AA                              | CC              | 1946763699               |
| SNP_P4_25746_32155965 | NC_021161.1    | Ca_kabuli_chr02 | 32155965                | GG                              | AA              | 1946763701               |
| SNP_P4_25747_32156334 | NC_021161.1    | Ca_kabuli_chr02 | 32156334                | AA                              | CC              | 1946763703               |
| SNP_P4_25748_32156371 | NC_021161.1    | Ca_kabuli_chr02 | 32156371                | CC                              | TT              | 1946763705               |
| SNP_P4_25749_32157159 | NC_021161.1    | Ca_kabuli_chr02 | 32157159                | CC                              | GG              | 1946763706               |
| SNP_P4_25751_32158163 | NC_021161.1    | Ca_kabuli_chr02 | 32158163                | AA                              | GG              | 1946763707               |
| SNP_P4_25752_32158200 | NC_021161.1    | Ca_kabuli_chr02 | 32158200                | GG                              | TT              | 1946763708               |
| SNP_P4_25753_32158375 | NC_021161.1    | Ca_kabuli_chr02 | 32158375                | TT                              | CC              | 1946763709               |
| SNP_P4_25754_32158378 | NC_021161.1    | Ca_kabuli_chr02 | 32158378                | CC                              | AA              | 1946763711               |
| SNP_P4_25755_32158407 | NC_021161.1    | Ca_kabuli_chr02 | 32158407                | CC                              | TT              | 1946763713               |
| SNP_P4_25756_32158414 | NC_021161.1    | Ca_kabuli_chr02 | 32158414                | TT                              | AA              | 1946763715               |
| SNP_P4_25757_32158436 | NC_021161.1    | Ca_kabuli_chr02 | 32158436                | AA                              | TT              | 1946763717               |
| SNP_P4_25758_32158446 | NC_021161.1    | Ca_kabuli_chr02 | 32158446                | AA                              | GG              | 1946763719               |
| SNP_P4_25759_32158451 | NC_021161.1    | Ca_kabuli_chr02 | 32158451                | GG                              | AA              | 1946763721               |
| SNP_P4_25760_32158459 | NC_021161.1    | Ca_kabuli_chr02 | 32158459                | AA                              | TT              | 1946763723               |
| SNP_P4_25761_32158471 | NC_021161.1    | Ca_kabuli_chr02 | 32158471                | AA                              | TT              | 1946763725               |
| SNP_P4_25762_32158497 | NC_021161.1    | Ca_kabuli_chr02 | 32158497                | CC                              | TT              | 1946763727               |

| SNPs IDs              | Chromosome IDs | Chromosomes     | Physical positions (bp) | CDC Frontier (Reference genome) | (ILWC46 & LPNB) | NCBI SNPdb Accession IDs |
|-----------------------|----------------|-----------------|-------------------------|---------------------------------|-----------------|--------------------------|
| SNP_P4_25763_32158500 | NC_021161.1    | Ca_kabuli_chr02 | 32158500                | CC                              | TT              | 1946763729               |
| SNP_P4_25764_32158941 | NC_021161.1    | Ca_kabuli_chr02 | 32158941                | TT                              | CC              | 1946763731               |
| SNP_P4_25765_32159430 | NC_021161.1    | Ca_kabuli_chr02 | 32159430                | CC                              | TT              | 1946763733               |
| SNP_P4_25766_32159443 | NC_021161.1    | Ca_kabuli_chr02 | 32159443                | AA                              | GG              | 1946763735               |
| SNP_P4_25768_32160781 | NC_021161.1    | Ca_kabuli_chr02 | 32160781                | CC                              | AA              | 1946763737               |
| SNP_P4_25769_32161076 | NC_021161.1    | Ca_kabuli_chr02 | 32161076                | AA                              | CC              | 1946763739               |
| SNP_P4_25770_32161125 | NC_021161.1    | Ca_kabuli_chr02 | 32161125                | TT                              | GG              | 1946763741               |
| SNP_P4_25771_32163008 | NC_021161.1    | Ca_kabuli_chr02 | 32163008                | CC                              | TT              | 1946763743               |
| SNP_P4_25772_32163699 | NC_021161.1    | Ca_kabuli_chr02 | 32163699                | TT                              | CC              | 1946763745               |
| SNP_P4_25773_32164083 | NC_021161.1    | Ca_kabuli_chr02 | 32164083                | AA                              | TT              | 1946763747               |
| SNP_P4_25774_32164175 | NC_021161.1    | Ca_kabuli_chr02 | 32164175                | CC                              | TT              | 1946763749               |
| SNP_P4_25775_32166368 | NC_021161.1    | Ca_kabuli_chr02 | 32166368                | GG                              | AA              | 1946763751               |
| SNP_P4_25776_32166550 | NC_021161.1    | Ca_kabuli_chr02 | 32166550                | CC                              | TT              | 1946763753               |
| SNP_P4_25777_32166560 | NC_021161.1    | Ca_kabuli_chr02 | 32166560                | CC                              | AA              | 1946763755               |
| SNP_P4_25778_32166753 | NC_021161.1    | Ca_kabuli_chr02 | 32166753                | AA                              | CC              | 1946763757               |
| SNP_P4_25779_32166765 | NC_021161.1    | Ca_kabuli_chr02 | 32166765                | TT                              | AA              | 1946763759               |
| SNP_P4_25780_32166957 | NC_021161.1    | Ca_kabuli_chr02 | 32166957                | CC                              | TT              | 1946763761               |
| SNP_P4_25782_32168305 | NC_021161.1    | Ca_kabuli_chr02 | 32168305                | TT                              | AA              | 1946763763               |
| SNP_P4_25783_32168307 | NC_021161.1    | Ca_kabuli_chr02 | 32168307                | AA                              | TT              | 1946763765               |
| SNP_P4_25784_32168652 | NC_021161.1    | Ca_kabuli_chr02 | 32168652                | TT                              | CC              | 1946763767               |
| SNP_P4_25785_32168661 | NC_021161.1    | Ca_kabuli_chr02 | 32168661                | AA                              | TT              | 1946763769               |
| SNP_P4_25787_32168784 | NC_021161.1    | Ca_kabuli_chr02 | 32168784                | CC                              | TT              | 1946763771               |
| SNP_P4_25788_32168916 | NC_021161.1    | Ca_kabuli_chr02 | 32168916                | CC                              | GG              | 1946763773               |
| SNP_P4_25789_32169581 | NC_021161.1    | Ca_kabuli_chr02 | 32169581                | TT                              | AA              | 1946763775               |
| SNP_P4_25790_32172638 | NC_021161.1    | Ca_kabuli_chr02 | 32172638                | CC                              | TT              | 1946763777               |
| SNP_P4_25792_32175418 | NC_021161.1    | Ca_kabuli_chr02 | 32175418                | AA                              | TT              | 1946763779               |
| SNP_P4_25794_32178250 | NC_021161.1    | Ca_kabuli_chr02 | 32178250                | CC                              | TT              | 1946763781               |
| SNP_P4_25795_32178251 | NC_021161.1    | Ca_kabuli_chr02 | 32178251                | AA                              | CC              | 1946763783               |
| SNP_P4_25797_32178280 | NC_021161.1    | Ca_kabuli_chr02 | 32178280                | GG                              | AA              | 1946763785               |
| SNP_P4_25799_32179071 | NC_021161.1    | Ca_kabuli_chr02 | 32179071                | AA                              | TT              | 1946763787               |
| SNP_P4_25800_32179412 | NC_021161.1    | Ca_kabuli_chr02 | 32179412                | AA                              | GG              | 1946763789               |
| SNP_P4_25801_32182943 | NC_021161.1    | Ca_kabuli_chr02 | 32182943                | TT                              | AA              | 1946763791               |
| SNP_P4_25802_32182986 | NC_021161.1    | Ca_kabuli_chr02 | 32182986                | AA                              | TT              | 1946763793               |
| SNP_P4_25803_32182991 | NC_021161.1    | Ca_kabuli_chr02 | 32182991                | TT                              | AA              | 1946763795               |
| SNP_P4_25804_32183007 | NC_021161.1    | Ca_kabuli_chr02 | 32183007                | CC                              | TT              | 1946763797               |
| SNP_P4_25805_32183009 | NC_021161.1    | Ca_kabuli_chr02 | 32183009                | TT                              | CC              | 1946763799               |
| SNP_P4_25806_32183165 | NC_021161.1    | Ca_kabuli_chr02 | 32183165                | GG                              | AA              | 1946763801               |
| SNP_P4_25807_32183297 | NC_021161.1    | Ca_kabuli_chr02 | 32183297                | AA                              | TT              | 1946763803               |
| SNP_P4_25808_32183299 | NC_021161.1    | Ca_kabuli_chr02 | 32183299                | GG                              | AA              | 1946763805               |
| SNP_P4_25809_32183325 | NC_021161.1    | Ca_kabuli_chr02 | 32183325                | TT                              | AA              | 1946763808               |
| SNP_P4_25810_32183328 | NC_021161.1    | Ca_kabuli_chr02 | 32183328                | TT                              | CC              | 1946763810               |
| SNP_P4_25811_32183364 | NC_021161.1    | Ca_kabuli_chr02 | 32183364                | TT                              | CC              | 1946763812               |

| SNPs IDs              | Chromosome IDs | Chromosomes     | Physical positions (bp) | CDC Frontier (Reference genome) | (ILWC46 & LPNB) | NCBI SNPdb Accession IDs |
|-----------------------|----------------|-----------------|-------------------------|---------------------------------|-----------------|--------------------------|
| SNP_P4_25812_32198989 | NC_021161.1    | Ca_kabuli_chr02 | 32198989                | AA                              | GG              | 1946763814               |
| SNP_P4_25813_32199294 | NC_021161.1    | Ca_kabuli_chr02 | 32199294                | TT                              | AA              | 1946763816               |
| SNP_P4_25814_32199639 | NC_021161.1    | Ca_kabuli_chr02 | 32199639                | CC                              | TT              | 1946763818               |
| SNP_P4_25816_32203427 | NC_021161.1    | Ca_kabuli_chr02 | 32203427                | CC                              | GG              | 1946763820               |
| SNP_P4_25817_32203527 | NC_021161.1    | Ca_kabuli_chr02 | 32203527                | TT                              | CC              | 1946763822               |
| SNP_P4_25818_32203753 | NC_021161.1    | Ca_kabuli_chr02 | 32203753                | TT                              | AA              | 1946763825               |
| SNP_P4_25819_32203755 | NC_021161.1    | Ca_kabuli_chr02 | 32203755                | TT                              | AA              | 1946763827               |
| SNP_P4_25820_32203757 | NC_021161.1    | Ca_kabuli_chr02 | 32203757                | TT                              | AA              | 1946763829               |
| SNP_P4_25821_32203822 | NC_021161.1    | Ca_kabuli_chr02 | 32203822                | TT                              | GG              | 1946763832               |
| SNP_P4_25823_32203866 | NC_021161.1    | Ca_kabuli_chr02 | 32203866                | GG                              | CC              | 1946763834               |
| SNP_P4_25825_32208817 | NC_021161.1    | Ca_kabuli_chr02 | 32208817                | TT                              | CC              | 1946763836               |
| SNP_P4_25826_32208822 | NC_021161.1    | Ca_kabuli_chr02 | 32208822                | GG                              | AA              | 1946763838               |
| SNP_P4_25827_32208937 | NC_021161.1    | Ca_kabuli_chr02 | 32208937                | TT                              | CC              | 1946763840               |
| SNP_P4_25828_32208958 | NC_021161.1    | Ca_kabuli_chr02 | 32208958                | TT                              | AA              | 1946763842               |
| SNP_P4_25829_32208965 | NC_021161.1    | Ca_kabuli_chr02 | 32208965                | TT                              | CC              | 1946763844               |
| SNP_P4_25830_32209005 | NC_021161.1    | Ca_kabuli_chr02 | 32209005                | TT                              | AA              | 1946763846               |
| SNP_P4_25831_32209035 | NC_021161.1    | Ca_kabuli_chr02 | 32209035                | TT                              | AA              | 1946763848               |
| SNP_P4_25833_32209145 | NC_021161.1    | Ca_kabuli_chr02 | 32209145                | GG                              | TT              | 1946763850               |
| SNP_P4_25834_32209158 | NC_021161.1    | Ca_kabuli_chr02 | 32209158                | CC                              | TT              | 1946763852               |
| SNP_P4_25835_32209171 | NC_021161.1    | Ca_kabuli_chr02 | 32209171                | AA                              | CC              | 1946763854               |
| SNP_P4_25836_32209179 | NC_021161.1    | Ca_kabuli_chr02 | 32209179                | GG                              | AA              | 1946763856               |
| SNP_P4_25837_32209201 | NC_021161.1    | Ca_kabuli_chr02 | 32209201                | AA                              | CC              | 1946763858               |
| SNP_P4_25838_32209208 | NC_021161.1    | Ca_kabuli_chr02 | 32209208                | CC                              | TT              | 1946763860               |
| SNP_P4_25839_32209291 | NC_021161.1    | Ca_kabuli_chr02 | 32209291                | GG                              | CC              | 1946763862               |
| SNP_P4_25840_32209319 | NC_021161.1    | Ca_kabuli_chr02 | 32209319                | CC                              | AA              | 1946763864               |
| SNP_P4_25842_32209368 | NC_021161.1    | Ca_kabuli_chr02 | 32209368                | TT                              | CC              | 1946763866               |
| SNP_P4_25843_32209427 | NC_021161.1    | Ca_kabuli_chr02 | 32209427                | AA                              | CC              | 1946763868               |
| SNP_P4_25844_32209429 | NC_021161.1    | Ca_kabuli_chr02 | 32209429                | AA                              | TT              | 1946763870               |
| SNP_P4_25845_32209435 | NC_021161.1    | Ca_kabuli_chr02 | 32209435                | GG                              | AA              | 1946763872               |
| SNP_P4_25846_32209468 | NC_021161.1    | Ca_kabuli_chr02 | 32209468                | TT                              | AA              | 1946763874               |
| SNP_P4_25847_32209479 | NC_021161.1    | Ca_kabuli_chr02 | 32209479                | CC                              | TT              | 1946763876               |
| SNP_P4_25848_32209606 | NC_021161.1    | Ca_kabuli_chr02 | 32209606                | GG                              | AA              | 1946763878               |
| SNP_P4_25849_32209621 | NC_021161.1    | Ca_kabuli_chr02 | 32209621                | TT                              | CC              | 1946763880               |
| SNP_P4_25850_32209631 | NC_021161.1    | Ca_kabuli_chr02 | 32209631                | GG                              | TT              | 1946763882               |
| SNP_P4_25851_32209648 | NC_021161.1    | Ca_kabuli_chr02 | 32209648                | CC                              | GG              | 1946763885               |
| SNP_P4_25852_32209663 | NC_021161.1    | Ca_kabuli_chr02 | 32209663                | AA                              | CC              | 1946763887               |
| SNP_P4_25854_32209729 | NC_021161.1    | Ca_kabuli_chr02 | 32209729                | TT                              | AA              | 1946763889               |
| SNP_P4_25855_32209742 | NC_021161.1    | Ca_kabuli_chr02 | 32209742                | AA                              | CC              | 1946763891               |
| SNP_P4_25856_32209766 | NC_021161.1    | Ca_kabuli_chr02 | 32209766                | AA                              | GG              | 1946763893               |
| SNP_P4_25857_32209793 | NC_021161.1    | Ca_kabuli_chr02 | 32209793                | AA                              | CC              | 1946763895               |
| SNP_P4_25858_32209845 | NC_021161.1    | Ca_kabuli_chr02 | 32209845                | GG                              | AA              | 1946763897               |
| SNP_P4_25859_32209871 | NC_021161.1    | Ca_kabuli_chr02 | 32209871                | GG                              | CC              | 1946763899               |

| SNPs IDs              | Chromosome IDs | Chromosomes     | Physical positions (bp) | CDC Frontier (Reference genome) | (ILWC46 & LPNB) | NCBI SNPdb Accession IDs |
|-----------------------|----------------|-----------------|-------------------------|---------------------------------|-----------------|--------------------------|
| SNP_P4_25860_32209910 | NC_021161.1    | Ca_kabuli_chr02 | 32209910                | TT                              | GG              | 1946763901               |
| SNP_P4_25861_32209927 | NC_021161.1    | Ca_kabuli_chr02 | 32209927                | CC                              | GG              | 1946763904               |
| SNP_P4_25862_32209990 | NC_021161.1    | Ca_kabuli_chr02 | 32209990                | CC                              | TT              | 1946763906               |
| SNP_P4_25863_32210010 | NC_021161.1    | Ca_kabuli_chr02 | 32210010                | AA                              | CC              | 1946763908               |
| SNP_P4_25864_32210049 | NC_021161.1    | Ca_kabuli_chr02 | 32210049                | AA                              | GG              | 1946763910               |
| SNP_P4_25866_32210189 | NC_021161.1    | Ca_kabuli_chr02 | 32210189                | AA                              | TT              | 1946763912               |
| SNP_P4_25867_32210572 | NC_021161.1    | Ca_kabuli_chr02 | 32210572                | TT                              | CC              | 1946763914               |
| SNP_P4_25868_32210824 | NC_021161.1    | Ca_kabuli_chr02 | 32210824                | AA                              | TT              | 1946763916               |
| SNP_P4_25869_32211108 | NC_021161.1    | Ca_kabuli_chr02 | 32211108                | GG                              | AA              | 1946763918               |
| SNP_P4_25870_32211163 | NC_021161.1    | Ca_kabuli_chr02 | 32211163                | GG                              | AA              | 1946763920               |
| SNP_P4_25871_32211340 | NC_021161.1    | Ca_kabuli_chr02 | 32211340                | TT                              | CC              | 1946763922               |
| SNP_P4_25872_32211546 | NC_021161.1    | Ca_kabuli_chr02 | 32211546                | CC                              | AA              | 1946763924               |
| SNP_P4_25873_32211571 | NC_021161.1    | Ca_kabuli_chr02 | 32211571                | AA                              | TT              | 1946763926               |
| SNP_P4_25874_32211592 | NC_021161.1    | Ca_kabuli_chr02 | 32211592                | GG                              | TT              | 1946763928               |
| SNP_P4_25875_32211597 | NC_021161.1    | Ca_kabuli_chr02 | 32211597                | AA                              | TT              | 1946763930               |
| SNP_P4_25876_32211738 | NC_021161.1    | Ca_kabuli_chr02 | 32211738                | AA                              | GG              | 1946763932               |
| SNP_P4_25877_32211870 | NC_021161.1    | Ca_kabuli_chr02 | 32211870                | AA                              | TT              | 1946763934               |
| SNP_P4_25878_32211898 | NC_021161.1    | Ca_kabuli_chr02 | 32211898                | TT                              | GG              | 1946763936               |
| SNP_P4_25879_32212178 | NC_021161.1    | Ca_kabuli_chr02 | 32212178                | CC                              | AA              | 1946763938               |
| SNP_P4_25880_32212180 | NC_021161.1    | Ca_kabuli_chr02 | 32212180                | TT                              | CC              | 1946763940               |
| SNP_P4_25881_32212329 | NC_021161.1    | Ca_kabuli_chr02 | 32212329                | CC                              | GG              | 1946763942               |
| SNP_P4_25882_32212491 | NC_021161.1    | Ca_kabuli_chr02 | 32212491                | CC                              | TT              | 1946763944               |
| SNP_P4_25884_32213239 | NC_021161.1    | Ca_kabuli_chr02 | 32213239                | GG                              | CC              | 1946763946               |
| SNP_P4_25885_32213346 | NC_021161.1    | Ca_kabuli_chr02 | 32213346                | CC                              | TT              | 1946763948               |
| SNP_P4_25886_32213351 | NC_021161.1    | Ca_kabuli_chr02 | 32213351                | CC                              | TT              | 1946763950               |
| SNP_P4_25887_32213382 | NC_021161.1    | Ca_kabuli_chr02 | 32213382                | TT                              | AA              | 1946763952               |
| SNP_P4_25888_32213420 | NC_021161.1    | Ca_kabuli_chr02 | 32213420                | GG                              | AA              | 1946763954               |
| SNP_P4_25890_32213929 | NC_021161.1    | Ca_kabuli_chr02 | 32213929                | AA                              | CC              | 1946763956               |
| SNP_P4_25891_32213967 | NC_021161.1    | Ca_kabuli_chr02 | 32213967                | CC                              | TT              | 1946763958               |
| SNP_P4_25892_32214942 | NC_021161.1    | Ca_kabuli_chr02 | 32214942                | TT                              | CC              | 1946763960               |
| SNP_P4_25893_32214969 | NC_021161.1    | Ca_kabuli_chr02 | 32214969                | TT                              | GG              | 1946763962               |
| SNP_P4_25894_32215224 | NC_021161.1    | Ca_kabuli_chr02 | 32215224                | TT                              | CC              | 1946763964               |
| SNP_P4_25895_32216465 | NC_021161.1    | Ca_kabuli_chr02 | 32216465                | CC                              | TT              | 1946763966               |
| SNP_P4_25896_32216917 | NC_021161.1    | Ca_kabuli_chr02 | 32216917                | CC                              | GG              | 1946763968               |
| SNP_P4_25897_32216955 | NC_021161.1    | Ca_kabuli_chr02 | 32216955                | TT                              | GG              | 1946763970               |
| SNP_P4_25898_32218143 | NC_021161.1    | Ca_kabuli_chr02 | 32218143                | GG                              | AA              | 1946763972               |
| SNP_P4_25900_32219075 | NC_021161.1    | Ca_kabuli_chr02 | 32219075                | CC                              | TT              | 1946763974               |
| SNP_P4_25901_32219417 | NC_021161.1    | Ca_kabuli_chr02 | 32219417                | TT                              | CC              | 1946763976               |
| SNP_P4_25903_32222927 | NC_021161.1    | Ca_kabuli_chr02 | 32222927                | AA                              | GG              | 1946763978               |
| SNP_P4_25904_32222940 | NC_021161.1    | Ca_kabuli_chr02 | 32222940                | CC                              | GG              | 1946763980               |
| SNP_P4_25905_32222942 | NC_021161.1    | Ca_kabuli_chr02 | 32222942                | TT                              | CC              | 1946763982               |
| SNP_P4_25907_32223245 | NC_021161.1    | Ca_kabuli_chr02 | 32223245                | TT                              | CC              | 1946763984               |

| SNPs IDs              | Chromosome IDs | Chromosomes     | Physical positions (bp) | CDC Frontier (Reference genome) | (ILWC46 & LPNB) | NCBI SNPdb Accession IDs |
|-----------------------|----------------|-----------------|-------------------------|---------------------------------|-----------------|--------------------------|
| SNP_P4_25908_32233595 | NC_021161.1    | Ca_kabuli_chr02 | 32233595                | CC                              | AA              | 1946763986               |
| SNP_P4_25909_32233869 | NC_021161.1    | Ca_kabuli_chr02 | 32233869                | GG                              | AA              | 1946763988               |
| SNP_P4_25910_32233944 | NC_021161.1    | Ca_kabuli_chr02 | 32233944                | GG                              | TT              | 1946763990               |
| SNP_P4_25911_32234255 | NC_021161.1    | Ca_kabuli_chr02 | 32234255                | TT                              | CC              | 1946763992               |
| SNP_P4_25912_32234629 | NC_021161.1    | Ca_kabuli_chr02 | 32234629                | TT                              | CC              | 1946763994               |
| SNP_P4_25913_32235022 | NC_021161.1    | Ca_kabuli_chr02 | 32235022                | GG                              | AA              | 1946763996               |
| SNP_P4_25914_32235666 | NC_021161.1    | Ca_kabuli_chr02 | 32235666                | CC                              | TT              | 1946763998               |
| SNP_P4_25915_32235683 | NC_021161.1    | Ca_kabuli_chr02 | 32235683                | GG                              | TT              | 1946764000               |
| SNP_P4_25916_32235973 | NC_021161.1    | Ca_kabuli_chr02 | 32235973                | TT                              | CC              | 1946764002               |
| SNP_P4_25917_32235978 | NC_021161.1    | Ca_kabuli_chr02 | 32235978                | TT                              | AA              | 1946764004               |
| SNP_P4_25918_32235987 | NC_021161.1    | Ca_kabuli_chr02 | 32235987                | AA                              | CC              | 1946764006               |
| SNP_P4_25919_32236286 | NC_021161.1    | Ca_kabuli_chr02 | 32236286                | TT                              | GG              | 1946764008               |
| SNP_P4_25920_32236943 | NC_021161.1    | Ca_kabuli_chr02 | 32236943                | AA                              | TT              | 1946764010               |
| SNP_P4_25921_32236949 | NC_021161.1    | Ca_kabuli_chr02 | 32236949                | CC                              | TT              | 1946764012               |
| SNP_P4_25922_32237948 | NC_021161.1    | Ca_kabuli_chr02 | 32237948                | GG                              | AA              | 1946764014               |
| SNP_P4_25923_32240237 | NC_021161.1    | Ca_kabuli_chr02 | 32240237                | TT                              | AA              | 1946764016               |
| SNP_P4_25924_32240289 | NC_021161.1    | Ca_kabuli_chr02 | 32240289                | CC                              | TT              | 1946764018               |
| SNP_P4_25926_32241214 | NC_021161.1    | Ca_kabuli_chr02 | 32241214                | AA                              | TT              | 1946764020               |
| SNP_P4_25927_32241225 | NC_021161.1    | Ca_kabuli_chr02 | 32241225                | GG                              | AA              | 1946764022               |
| SNP_P4_25929_32241275 | NC_021161.1    | Ca_kabuli_chr02 | 32241275                | TT                              | AA              | 1946764024               |
| SNP_P4_25930_32241535 | NC_021161.1    | Ca_kabuli_chr02 | 32241535                | AA                              | TT              | 1946764027               |
| SNP_P4_25931_32242625 | NC_021161.1    | Ca_kabuli_chr02 | 32242625                | GG                              | CC              | 1946764029               |
| SNP_P4_25933_32243147 | NC_021161.1    | Ca_kabuli_chr02 | 32243147                | CC                              | TT              | 1946764031               |
| SNP_P4_25934_32243530 | NC_021161.1    | Ca_kabuli_chr02 | 32243530                | TT                              | AA              | 1946764033               |
| SNP_P4_25935_32245422 | NC_021161.1    | Ca_kabuli_chr02 | 32245422                | AA                              | GG              | 1946764034               |
| SNP_P4_25937_32245678 | NC_021161.1    | Ca_kabuli_chr02 | 32245678                | TT                              | CC              | 1946764036               |
| SNP_P4_25938_32245728 | NC_021161.1    | Ca_kabuli_chr02 | 32245728                | AA                              | TT              | 1946764038               |
| SNP_P4_25940_32245966 | NC_021161.1    | Ca_kabuli_chr02 | 32245966                | GG                              | AA              | 1946764041               |
| SNP_P4_25941_32245988 | NC_021161.1    | Ca_kabuli_chr02 | 32245988                | CC                              | TT              | 1946764043               |
| SNP_P4_25942_32246073 | NC_021161.1    | Ca_kabuli_chr02 | 32246073                | GG                              | AA              | 1946764045               |
| SNP_P4_25943_32246083 | NC_021161.1    | Ca_kabuli_chr02 | 32246083                | CC                              | TT              | 1946764047               |
| SNP_P4_25944_32246102 | NC_021161.1    | Ca_kabuli_chr02 | 32246102                | GG                              | TT              | 1946764049               |
| SNP_P4_25945_32246201 | NC_021161.1    | Ca_kabuli_chr02 | 32246201                | AA                              | GG              | 1946764051               |
| SNP_P4_25946_32246274 | NC_021161.1    | Ca_kabuli_chr02 | 32246274                | CC                              | TT              | 1946764052               |
| SNP_P4_25947_32246344 | NC_021161.1    | Ca_kabuli_chr02 | 32246344                | AA                              | GG              | 1946764054               |
| SNP_P4_25948_32246372 | NC_021161.1    | Ca_kabuli_chr02 | 32246372                | TT                              | CC              | 1946764056               |
| SNP_P4_25949_32246420 | NC_021161.1    | Ca_kabuli_chr02 | 32246420                | TT                              | GG              | 1946764058               |
| SNP_P4_25950_32246427 | NC_021161.1    | Ca_kabuli_chr02 | 32246427                | TT                              | CC              | 1946764060               |
| SNP_P4_25951_32246457 | NC_021161.1    | Ca_kabuli_chr02 | 32246457                | TT                              | GG              | 1946764062               |
| SNP_P4_25952_32246536 | NC_021161.1    | Ca_kabuli_chr02 | 32246536                | AA                              | TT              | 1946764064               |
| SNP_P4_25954_32247093 | NC_021161.1    | Ca_kabuli_chr02 | 32247093                | AA                              | GG              | 1946764066               |
| SNP_P4_25955_32247200 | NC_021161.1    | Ca_kabuli_chr02 | 32247200                | TT                              | CC              | 1946764068               |



| SNPs IDs              | Chromosome IDs | Chromosomes     | Physical positions (bp) | CDC Frontier (Reference genome) | (ILWC46 & LPNB) | NCBI SNPdb Accession IDs |
|-----------------------|----------------|-----------------|-------------------------|---------------------------------|-----------------|--------------------------|
| SNP_P4_25956_32247284 | NC_021161.1    | Ca_kabuli_chr02 | 32247284                | CC                              | AA              | 1946764070               |
| SNP_P4_25957_32248000 | NC_021161.1    | Ca_kabuli_chr02 | 32248000                | GG                              | AA              | 1946764072               |
| SNP_P4_25958_32248270 | NC_021161.1    | Ca_kabuli_chr02 | 32248270                | TT                              | AA              | 1946764074               |
| SNP_P4_25959_32248613 | NC_021161.1    | Ca_kabuli_chr02 | 32248613                | AA                              | CC              | 1946764076               |
| SNP_P4_25960_32248630 | NC_021161.1    | Ca_kabuli_chr02 | 32248630                | GG                              | AA              | 1946764078               |
| SNP_P4_25961_32248631 | NC_021161.1    | Ca_kabuli_chr02 | 32248631                | AA                              | CC              | 1946764080               |
| SNP_P4_25962_32248689 | NC_021161.1    | Ca_kabuli_chr02 | 32248689                | GG                              | AA              | 1946764082               |
| SNP_P4_25963_32248714 | NC_021161.1    | Ca_kabuli_chr02 | 32248714                | GG                              | AA              | 1946764084               |
| SNP_P4_25964_32249964 | NC_021161.1    | Ca_kabuli_chr02 | 32249964                | CC                              | TT              | 1946764086               |
| SNP_P4_25965_32250256 | NC_021161.1    | Ca_kabuli_chr02 | 32250256                | CC                              | TT              | 1946764088               |
| SNP_P4_25966_32250272 | NC_021161.1    | Ca_kabuli_chr02 | 32250272                | TT                              | GG              | 1946764090               |
| SNP_P4_25967_32250283 | NC_021161.1    | Ca_kabuli_chr02 | 32250283                | GG                              | CC              | 1946764092               |
| SNP_P4_25968_32252330 | NC_021161.1    | Ca_kabuli_chr02 | 32252330                | TT                              | GG              | 1946764094               |
| SNP_P4_25969_32252332 | NC_021161.1    | Ca_kabuli_chr02 | 32252332                | AA                              | GG              | 1946764096               |
| SNP_P4_25970_32252334 | NC_021161.1    | Ca_kabuli_chr02 | 32252334                | CC                              | AA              | 1946764098               |
| SNP_P4_25971_32252624 | NC_021161.1    | Ca_kabuli_chr02 | 32252624                | AA                              | TT              | 1946764100               |
| SNP_P4_25972_32252653 | NC_021161.1    | Ca_kabuli_chr02 | 32252653                | AA                              | GG              | 1946764102               |
| SNP_P4_25973_32253378 | NC_021161.1    | Ca_kabuli_chr02 | 32253378                | GG                              | AA              | 1946764104               |
| SNP_P4_25975_32253576 | NC_021161.1    | Ca_kabuli_chr02 | 32253576                | CC                              | AA              | 1946764106               |
| SNP_P4_25976_32253636 | NC_021161.1    | Ca_kabuli_chr02 | 32253636                | TT                              | GG              | 1946764108               |
| SNP_P4_25977_32253866 | NC_021161.1    | Ca_kabuli_chr02 | 32253866                | AA                              | TT              | 1946764110               |
| SNP_P4_25978_32253867 | NC_021161.1    | Ca_kabuli_chr02 | 32253867                | AA                              | GG              | 1946764112               |
| SNP_P4_25979_32257680 | NC_021161.1    | Ca_kabuli_chr02 | 32257680                | AA                              | GG              | 1946764114               |
| SNP_P4_25980_32257832 | NC_021161.1    | Ca_kabuli_chr02 | 32257832                | AA                              | TT              | 1946764116               |
| SNP_P4_25981_32258021 | NC_021161.1    | Ca_kabuli_chr02 | 32258021                | TT                              | GG              | 1946764118               |
| SNP_P4_25982_32258027 | NC_021161.1    | Ca_kabuli_chr02 | 32258027                | AA                              | GG              | 1946764120               |
| SNP_P4_25983_32259808 | NC_021161.1    | Ca_kabuli_chr02 | 32259808                | AA                              | CC              | 1946764122               |
| SNP_P4_25986_32261573 | NC_021161.1    | Ca_kabuli_chr02 | 32261573                | CC                              | TT              | 1946764124               |
| SNP_P4_25987_32262821 | NC_021161.1    | Ca_kabuli_chr02 | 32262821                | CC                              | GG              | 1946764126               |
| SNP_P4_25989_32263667 | NC_021161.1    | Ca_kabuli_chr02 | 32263667                | AA                              | TT              | 1946764128               |
| SNP_P4_25991_32264733 | NC_021161.1    | Ca_kabuli_chr02 | 32264733                | TT                              | GG              | 1946764130               |
| SNP_P4_25992_32264779 | NC_021161.1    | Ca_kabuli_chr02 | 32264779                | GG                              | AA              | 1946764132               |
| SNP_P4_25993_32264819 | NC_021161.1    | Ca_kabuli_chr02 | 32264819                | AA                              | GG              | 1946764134               |
| SNP_P4_25994_32266090 | NC_021161.1    | Ca_kabuli_chr02 | 32266090                | CC                              | TT              | 1946764136               |
| SNP_P4_25995_32266102 | NC_021161.1    | Ca_kabuli_chr02 | 32266102                | AA                              | GG              | 1946764137               |
| SNP_P4_25996_32266126 | NC_021161.1    | Ca_kabuli_chr02 | 32266126                | CC                              | AA              | 1946764139               |
| SNP_P4_25997_32266384 | NC_021161.1    | Ca_kabuli_chr02 | 32266384                | GG                              | AA              | 1946764141               |
| SNP_P4_25998_32266403 | NC_021161.1    | Ca_kabuli_chr02 | 32266403                | TT                              | CC              | 1946764143               |
| SNP_P4_25999_32266429 | NC_021161.1    | Ca_kabuli_chr02 | 32266429                | GG                              | AA              | 1946764145               |
| SNP_P4_26000_32268480 | NC_021161.1    | Ca_kabuli_chr02 | 32268480                | CC                              | AA              | 1946764147               |
| SNP_P4_26001_32269558 | NC_021161.1    | Ca_kabuli_chr02 | 32269558                | GG                              | TT              | 1946764149               |
| SNP_P4_26002_32269913 | NC_021161.1    | Ca_kabuli_chr02 | 32269913                | AA                              | GG              | 1946764151               |

| SNPs IDs              | Chromosome IDs | Chromosomes     | Physical positions (bp) | CDC Frontier (Reference genome) | (ILWC46 & LPNB) | NCBI SNPdb Accession IDs |
|-----------------------|----------------|-----------------|-------------------------|---------------------------------|-----------------|--------------------------|
| SNP_P4_26003_32269975 | NC_021161.1    | Ca_kabuli_chr02 | 32269975                | CC                              | TT              | 1946764153               |
| SNP_P4_26004_32269981 | NC_021161.1    | Ca_kabuli_chr02 | 32269981                | CC                              | GG              | 1946764155               |
| SNP_P4_26005_32270077 | NC_021161.1    | Ca_kabuli_chr02 | 32270077                | TT                              | CC              | 1946764157               |
| SNP_P4_26006_32270156 | NC_021161.1    | Ca_kabuli_chr02 | 32270156                | GG                              | TT              | 1946764159               |
| SNP_P4_26007_32270160 | NC_021161.1    | Ca_kabuli_chr02 | 32270160                | CC                              | AA              | 1946764161               |
| SNP_P4_26008_32271334 | NC_021161.1    | Ca_kabuli_chr02 | 32271334                | AA                              | TT              | 1946764163               |
| SNP_P4_26009_32271622 | NC_021161.1    | Ca_kabuli_chr02 | 32271622                | AA                              | TT              | 1946764165               |
| SNP_P4_26010_32271647 | NC_021161.1    | Ca_kabuli_chr02 | 32271647                | AA                              | CC              | 1946764167               |
| SNP_P4_26011_32272128 | NC_021161.1    | Ca_kabuli_chr02 | 32272128                | GG                              | AA              | 1946764169               |
| SNP_P4_26012_32272131 | NC_021161.1    | Ca_kabuli_chr02 | 32272131                | AA                              | TT              | 1946764171               |
| SNP_P4_26013_32272771 | NC_021161.1    | Ca_kabuli_chr02 | 32272771                | CC                              | AA              | 1946764173               |
| SNP_P4_26014_32272784 | NC_021161.1    | Ca_kabuli_chr02 | 32272784                | CC                              | AA              | 1946764175               |
| SNP_P4_26015_32274226 | NC_021161.1    | Ca_kabuli_chr02 | 32274226                | AA                              | TT              | 1946764177               |
| SNP_P4_26016_32276904 | NC_021161.1    | Ca_kabuli_chr02 | 32276904                | AA                              | GG              | 1946764179               |
| SNP_P4_26017_32277934 | NC_021161.1    | Ca_kabuli_chr02 | 32277934                | AA                              | TT              | 1946764181               |
| SNP_P4_26018_32277992 | NC_021161.1    | Ca_kabuli_chr02 | 32277992                | AA                              | TT              | 1946764183               |
| SNP_P4_26019_32278320 | NC_021161.1    | Ca_kabuli_chr02 | 32278320                | TT                              | GG              | 1946764185               |
| SNP_P4_26020_32279326 | NC_021161.1    | Ca_kabuli_chr02 | 32279326                | CC                              | TT              | 1946764187               |
| SNP_P4_26021_32288034 | NC_021161.1    | Ca_kabuli_chr02 | 32288034                | TT                              | CC              | 1946764189               |
| SNP_P4_26022_32289293 | NC_021161.1    | Ca_kabuli_chr02 | 32289293                | TT                              | AA              | 1946764191               |
| SNP_P4_26023_32289307 | NC_021161.1    | Ca_kabuli_chr02 | 32289307                | CC                              | AA              | 1946764193               |
| SNP_P4_26025_32289363 | NC_021161.1    | Ca_kabuli_chr02 | 32289363                | AA                              | GG              | 1946764195               |
| SNP_P4_26026_32289374 | NC_021161.1    | Ca_kabuli_chr02 | 32289374                | GG                              | AA              | 1946764197               |
| SNP_P4_26028_32290568 | NC_021161.1    | Ca_kabuli_chr02 | 32290568                | CC                              | TT              | 1946764198               |
| SNP_P4_26029_32290611 | NC_021161.1    | Ca_kabuli_chr02 | 32290611                | CC                              | TT              | 1946764200               |
| SNP_P4_26030_32290704 | NC_021161.1    | Ca_kabuli_chr02 | 32290704                | AA                              | GG              | 1946764202               |
| SNP_P4_26031_32290808 | NC_021161.1    | Ca_kabuli_chr02 | 32290808                | AA                              | TT              | 1946764204               |
| SNP_P4_26033_32292025 | NC_021161.1    | Ca_kabuli_chr02 | 32292025                | GG                              | TT              | 1946764206               |
| SNP_P4_26034_32292210 | NC_021161.1    | Ca_kabuli_chr02 | 32292210                | AA                              | GG              | 1946764208               |
| SNP_P4_26035_32292240 | NC_021161.1    | Ca_kabuli_chr02 | 32292240                | CC                              | TT              | 1946764210               |
| SNP_P4_26036_32292248 | NC_021161.1    | Ca_kabuli_chr02 | 32292248                | TT                              | GG              | 1946764212               |
| SNP_P4_26037_32292420 | NC_021161.1    | Ca_kabuli_chr02 | 32292420                | GG                              | AA              | 1946764214               |
| SNP_P4_26038_32292693 | NC_021161.1    | Ca_kabuli_chr02 | 32292693                | TT                              | CC              | 1946764216               |
| SNP_P4_26039_32293115 | NC_021161.1    | Ca_kabuli_chr02 | 32293115                | CC                              | AA              | 1946764218               |
| SNP_P4_26040_32293117 | NC_021161.1    | Ca_kabuli_chr02 | 32293117                | GG                              | AA              | 1946764220               |
| SNP_P4_26041_32293119 | NC_021161.1    | Ca_kabuli_chr02 | 32293119                | CC                              | TT              | 1946764222               |
| SNP_P4_26042_32293227 | NC_021161.1    | Ca_kabuli_chr02 | 32293227                | AA                              | TT              | 1946764223               |
| SNP_P4_26043_32293423 | NC_021161.1    | Ca_kabuli_chr02 | 32293423                | TT                              | CC              | 1946764225               |
| SNP_P4_26046_32293845 | NC_021161.1    | Ca_kabuli_chr02 | 32293845                | TT                              | AA              | 1946764227               |
| SNP_P4_26047_32294394 | NC_021161.1    | Ca_kabuli_chr02 | 32294394                | AA                              | GG              | 1946764229               |
| SNP_P4_26049_32295158 | NC_021161.1    | Ca_kabuli_chr02 | 32295158                | AA                              | TT              | 1946764231               |
| SNP_P4_26050_32295269 | NC_021161.1    | Ca_kabuli_chr02 | 32295269                | AA                              | GG              | 1946764233               |

| SNPs IDs              | Chromosome IDs | Chromosomes     | Physical positions (bp) | CDC Frontier (Reference genome) | (ILWC46 & LPNB) | NCBI SNPdb Accession IDs |
|-----------------------|----------------|-----------------|-------------------------|---------------------------------|-----------------|--------------------------|
| SNP_P4_26051_32295291 | NC_021161.1    | Ca_kabuli_chr02 | 32295291                | GG                              | AA              | 1946764235               |
| SNP_P4_26052_32295319 | NC_021161.1    | Ca_kabuli_chr02 | 32295319                | GG                              | CC              | 1946764237               |
| SNP_P4_26055_32327155 | NC_021161.1    | Ca_kabuli_chr02 | 32327155                | TT                              | CC              | 1946764239               |
| SNP_P4_26056_32327480 | NC_021161.1    | Ca_kabuli_chr02 | 32327480                | CC                              | TT              | 1946764241               |
| SNP_P4_26057_32327637 | NC_021161.1    | Ca_kabuli_chr02 | 32327637                | AA                              | CC              | 1946764243               |
| SNP_P4_26060_32328002 | NC_021161.1    | Ca_kabuli_chr02 | 32328002                | AA                              | GG              | 1946764245               |
| SNP_P4_26061_32328003 | NC_021161.1    | Ca_kabuli_chr02 | 32328003                | CC                              | TT              | 1946764247               |
| SNP_P4_26062_32328097 | NC_021161.1    | Ca_kabuli_chr02 | 32328097                | AA                              | GG              | 1946764249               |
| SNP_P4_26063_32328115 | NC_021161.1    | Ca_kabuli_chr02 | 32328115                | TT                              | CC              | 1946764251               |
| SNP_P4_26064_32328931 | NC_021161.1    | Ca_kabuli_chr02 | 32328931                | CC                              | AA              | 1946764253               |
| SNP_P4_26065_32328935 | NC_021161.1    | Ca_kabuli_chr02 | 32328935                | GG                              | AA              | 1946764255               |
| SNP_P4_26066_32328939 | NC_021161.1    | Ca_kabuli_chr02 | 32328939                | CC                              | TT              | 1946764257               |
| SNP_P4_26067_32332177 | NC_021161.1    | Ca_kabuli_chr02 | 32332177                | TT                              | AA              | 1946764259               |
| SNP_P4_26069_32339308 | NC_021161.1    | Ca_kabuli_chr02 | 32339308                | TT                              | GG              | 1946764261               |
| SNP_P4_26070_32339336 | NC_021161.1    | Ca_kabuli_chr02 | 32339336                | AA                              | GG              | 1946764263               |
| SNP_P4_26071_32339337 | NC_021161.1    | Ca_kabuli_chr02 | 32339337                | TT                              | CC              | 1946764265               |
| SNP_P4_26072_32339350 | NC_021161.1    | Ca_kabuli_chr02 | 32339350                | TT                              | CC              | 1946764267               |
| SNP_P4_26073_32339365 | NC_021161.1    | Ca_kabuli_chr02 | 32339365                | GG                              | TT              | 1946764269               |
| SNP_P4_26074_32339374 | NC_021161.1    | Ca_kabuli_chr02 | 32339374                | CC                              | TT              | 1946764271               |
| SNP_P4_26075_32339491 | NC_021161.1    | Ca_kabuli_chr02 | 32339491                | GG                              | AA              | 1946764273               |
| SNP_P4_26076_32339538 | NC_021161.1    | Ca_kabuli_chr02 | 32339538                | CC                              | TT              | 1946764275               |
| SNP_P4_26077_32339576 | NC_021161.1    | Ca_kabuli_chr02 | 32339576                | TT                              | CC              | 1946764277               |
| SNP_P4_26078_32340405 | NC_021161.1    | Ca_kabuli_chr02 | 32340405                | TT                              | CC              | 1946764278               |
| SNP_P4_26079_32340652 | NC_021161.1    | Ca_kabuli_chr02 | 32340652                | CC                              | TT              | 1946764280               |
| SNP_P4_26080_32340705 | NC_021161.1    | Ca_kabuli_chr02 | 32340705                | CC                              | TT              | 1946764282               |
| SNP_P4_26081_32341152 | NC_021161.1    | Ca_kabuli_chr02 | 32341152                | GG                              | AA              | 1946764284               |
| SNP_P4_26082_32341178 | NC_021161.1    | Ca_kabuli_chr02 | 32341178                | AA                              | GG              | 1946764287               |
| SNP_P4_26083_32341356 | NC_021161.1    | Ca_kabuli_chr02 | 32341356                | AA                              | TT              | 1946764289               |
| SNP_P4_26084_32342258 | NC_021161.1    | Ca_kabuli_chr02 | 32342258                | AA                              | TT              | 1946764291               |
| SNP_P4_26085_32343541 | NC_021161.1    | Ca_kabuli_chr02 | 32343541                | CC                              | TT              | 1946764293               |
| SNP_P4_26086_32344766 | NC_021161.1    | Ca_kabuli_chr02 | 32344766                | GG                              | AA              | 1946764295               |
| SNP_P4_26087_32346377 | NC_021161.1    | Ca_kabuli_chr02 | 32346377                | AA                              | TT              | 1946764297               |
| SNP_P4_26089_32347421 | NC_021161.1    | Ca_kabuli_chr02 | 32347421                | TT                              | CC              | 1946764299               |
| SNP_P4_26090_32347424 | NC_021161.1    | Ca_kabuli_chr02 | 32347424                | GG                              | AA              | 1946764301               |
| SNP_P4_26091_32347448 | NC_021161.1    | Ca_kabuli_chr02 | 32347448                | TT                              | GG              | 1946764303               |
| SNP_P4_26093_32347786 | NC_021161.1    | Ca_kabuli_chr02 | 32347786                | CC                              | GG              | 1946764305               |
| SNP_P4_26094_32348352 | NC_021161.1    | Ca_kabuli_chr02 | 32348352                | TT                              | AA              | 1946764307               |
| SNP_P4_26095_32348397 | NC_021161.1    | Ca_kabuli_chr02 | 32348397                | AA                              | CC              | 1946764309               |
| SNP_P4_26096_32348539 | NC_021161.1    | Ca_kabuli_chr02 | 32348539                | AA                              | GG              | 1946764311               |
| SNP_P4_26097_32348870 | NC_021161.1    | Ca_kabuli_chr02 | 32348870                | CC                              | TT              | 1946764313               |
| SNP_P4_26099_32348933 | NC_021161.1    | Ca_kabuli_chr02 | 32348933                | GG                              | AA              | 1946764315               |
| SNP_P4_26100_32350833 | NC_021161.1    | Ca_kabuli_chr02 | 32350833                | GG                              | AA              | 1946764317               |

| SNPs IDs              | Chromosome IDs | Chromosomes     | Physical positions (bp) | CDC Frontier (Reference genome) | (ILWC46 & LPNB) | NCBI SNPdb Accession IDs |
|-----------------------|----------------|-----------------|-------------------------|---------------------------------|-----------------|--------------------------|
| SNP_P4_26101_32351189 | NC_021161.1    | Ca_kabuli_chr02 | 32351189                | TT                              | AA              | 1946764319               |
| SNP_P4_26102_32351250 | NC_021161.1    | Ca_kabuli_chr02 | 32351250                | TT                              | CC              | 1946764321               |
| SNP_P4_26103_32351252 | NC_021161.1    | Ca_kabuli_chr02 | 32351252                | AA                              | TT              | 1946764323               |
| SNP_P4_26104_32351634 | NC_021161.1    | Ca_kabuli_chr02 | 32351634                | GG                              | AA              | 1946764325               |
| SNP_P4_26106_32353325 | NC_021161.1    | Ca_kabuli_chr02 | 32353325                | TT                              | CC              | 1946764327               |
| SNP_P4_26107_32353341 | NC_021161.1    | Ca_kabuli_chr02 | 32353341                | GG                              | TT              | 1946764329               |
| SNP_P4_26108_32353631 | NC_021161.1    | Ca_kabuli_chr02 | 32353631                | TT                              | GG              | 1946764331               |
| SNP_P4_26109_32353661 | NC_021161.1    | Ca_kabuli_chr02 | 32353661                | AA                              | CC              | 1946764333               |
| SNP_P4_26110_32353686 | NC_021161.1    | Ca_kabuli_chr02 | 32353686                | CC                              | TT              | 1946764335               |
| SNP_P4_26111_32353719 | NC_021161.1    | Ca_kabuli_chr02 | 32353719                | AA                              | GG              | 1946764337               |
| SNP_P4_26112_32353760 | NC_021161.1    | Ca_kabuli_chr02 | 32353760                | AA                              | TT              | 1946764339               |
| SNP_P4_26113_32353935 | NC_021161.1    | Ca_kabuli_chr02 | 32353935                | AA                              | GG              | 1946764341               |
| SNP_P4_26115_32355980 | NC_021161.1    | Ca_kabuli_chr02 | 32355980                | TT                              | GG              | 1946764343               |
| SNP_P4_26117_32356334 | NC_021161.1    | Ca_kabuli_chr02 | 32356334                | CC                              | TT              | 1946764345               |
| SNP_P4_26119_32356684 | NC_021161.1    | Ca_kabuli_chr02 | 32356684                | GG                              | CC              | 1946764347               |
| SNP_P4_26120_32356694 | NC_021161.1    | Ca_kabuli_chr02 | 32356694                | AA                              | GG              | 1946764349               |
| SNP_P4_26121_32356751 | NC_021161.1    | Ca_kabuli_chr02 | 32356751                | TT                              | CC              | 1946764351               |
| SNP_P4_26123_32356798 | NC_021161.1    | Ca_kabuli_chr02 | 32356798                | AA                              | GG              | 1946764353               |
| SNP_P4_26124_32356979 | NC_021161.1    | Ca_kabuli_chr02 | 32356979                | CC                              | TT              | 1946764355               |
| SNP_P4_26125_32357239 | NC_021161.1    | Ca_kabuli_chr02 | 32357239                | TT                              | CC              | 1946764357               |
| SNP_P4_26126_32357363 | NC_021161.1    | Ca_kabuli_chr02 | 32357363                | CC                              | TT              | 1946764359               |
| SNP_P4_26127_32357963 | NC_021161.1    | Ca_kabuli_chr02 | 32357963                | GG                              | CC              | 1946764361               |
| SNP_P4_26128_32357965 | NC_021161.1    | Ca_kabuli_chr02 | 32357965                | CC                              | TT              | 1946764363               |
| SNP_P4_26129_32358649 | NC_021161.1    | Ca_kabuli_chr02 | 32358649                | GG                              | AA              | 1946764365               |
| SNP_P4_26130_32358778 | NC_021161.1    | Ca_kabuli_chr02 | 32358778                | TT                              | CC              | 1946764367               |
| SNP_P4_26133_32360067 | NC_021161.1    | Ca_kabuli_chr02 | 32360067                | AA                              | CC              | 1946764369               |
| SNP_P4_26135_32361335 | NC_021161.1    | Ca_kabuli_chr02 | 32361335                | AA                              | GG              | 1946764371               |
| SNP_P4_26136_32361358 | NC_021161.1    | Ca_kabuli_chr02 | 32361358                | GG                              | AA              | 1946764373               |
| SNP_P4_26138_32361900 | NC_021161.1    | Ca_kabuli_chr02 | 32361900                | TT                              | CC              | 1946764375               |
| SNP_P4_26139_32361909 | NC_021161.1    | Ca_kabuli_chr02 | 32361909                | GG                              | AA              | 1946764377               |
| SNP_P4_26140_32361948 | NC_021161.1    | Ca_kabuli_chr02 | 32361948                | TT                              | AA              | 1946764379               |
| SNP_P4_26141_32363275 | NC_021161.1    | Ca_kabuli_chr02 | 32363275                | CC                              | AA              | 1946764381               |
| SNP_P4_26142_32363618 | NC_021161.1    | Ca_kabuli_chr02 | 32363618                | GG                              | AA              | 1946764383               |
| SNP_P4_26143_32363642 | NC_021161.1    | Ca_kabuli_chr02 | 32363642                | CC                              | TT              | 1946764385               |
| SNP_P4_26144_32363896 | NC_021161.1    | Ca_kabuli_chr02 | 32363896                | CC                              | TT              | 1946764387               |
| SNP_P4_26146_32364283 | NC_021161.1    | Ca_kabuli_chr02 | 32364283                | GG                              | TT              | 1946764389               |
| SNP_P4_26147_32365412 | NC_021161.1    | Ca_kabuli_chr02 | 32365412                | CC                              | TT              | 1946764391               |
| SNP_P4_26149_32365548 | NC_021161.1    | Ca_kabuli_chr02 | 32365548                | GG                              | AA              | 1946764394               |
| SNP_P4_26150_32365625 | NC_021161.1    | Ca_kabuli_chr02 | 32365625                | GG                              | AA              | 1946764396               |
| SNP_P4_26151_32365913 | NC_021161.1    | Ca_kabuli_chr02 | 32365913                | TT                              | AA              | 1946764398               |
| SNP_P4_26152_32365927 | NC_021161.1    | Ca_kabuli_chr02 | 32365927                | TT                              | AA              | 1946764400               |
| SNP_P4_26153_32365932 | NC_021161.1    | Ca_kabuli_chr02 | 32365932                | GG                              | AA              | 1946764402               |

| SNPs IDs              | Chromosome IDs | Chromosomes     | Physical positions (bp) | CDC Frontier (Reference genome) | (ILWC46 & LPNB) | NCBI SNPdb Accession IDs |
|-----------------------|----------------|-----------------|-------------------------|---------------------------------|-----------------|--------------------------|
| SNP_P4_26154_32365960 | NC_021161.1    | Ca_kabuli_chr02 | 32365960                | GG                              | CC              | 1946764404               |
| SNP_P4_26155_32366214 | NC_021161.1    | Ca_kabuli_chr02 | 32366214                | CC                              | TT              | 1946764406               |
| SNP_P4_26157_32366489 | NC_021161.1    | Ca_kabuli_chr02 | 32366489                | CC                              | TT              | 1946764408               |
| SNP_P4_26158_32366844 | NC_021161.1    | Ca_kabuli_chr02 | 32366844                | GG                              | TT              | 1946764409               |
| SNP_P4_26159_32367323 | NC_021161.1    | Ca_kabuli_chr02 | 32367323                | CC                              | AA              | 1946764410               |
| SNP_P4_26160_32367487 | NC_021161.1    | Ca_kabuli_chr02 | 32367487                | CC                              | AA              | 1946764411               |
| SNP_P4_26161_32367709 | NC_021161.1    | Ca_kabuli_chr02 | 32367709                | AA                              | GG              | 1946764412               |
| SNP_P4_26162_32368064 | NC_021161.1    | Ca_kabuli_chr02 | 32368064                | GG                              | AA              | 1946764414               |
| SNP_P4_26163_32368400 | NC_021161.1    | Ca_kabuli_chr02 | 32368400                | TT                              | CC              | 1946764416               |
| SNP_P4_26164_32368420 | NC_021161.1    | Ca_kabuli_chr02 | 32368420                | GG                              | TT              | 1946764418               |
| SNP_P4_26166_32369529 | NC_021161.1    | Ca_kabuli_chr02 | 32369529                | CC                              | TT              | 1946764420               |
| SNP_P4_26167_32369563 | NC_021161.1    | Ca_kabuli_chr02 | 32369563                | AA                              | GG              | 1946764422               |
| SNP_P4_26168_32369837 | NC_021161.1    | Ca_kabuli_chr02 | 32369837                | CC                              | TT              | 1946764424               |
| SNP_P4_26169_32369855 | NC_021161.1    | Ca_kabuli_chr02 | 32369855                | CC                              | TT              | 1946764426               |
| SNP_P4_26170_32370005 | NC_021161.1    | Ca_kabuli_chr02 | 32370005                | AA                              | TT              | 1946764428               |
| SNP_P4_26171_32370088 | NC_021161.1    | Ca_kabuli_chr02 | 32370088                | AA                              | CC              | 1946764430               |
| SNP_P4_26172_32370111 | NC_021161.1    | Ca_kabuli_chr02 | 32370111                | GG                              | AA              | 1946764432               |
| SNP_P4_26174_32370404 | NC_021161.1    | Ca_kabuli_chr02 | 32370404                | TT                              | AA              | 1946764434               |
| SNP_P4_26175_32370466 | NC_021161.1    | Ca_kabuli_chr02 | 32370466                | AA                              | GG              | 1946764436               |
| SNP_P4_26176_32371538 | NC_021161.1    | Ca_kabuli_chr02 | 32371538                | AA                              | TT              | 1946764438               |
| SNP_P4_26177_32371539 | NC_021161.1    | Ca_kabuli_chr02 | 32371539                | TT                              | CC              | 1946764439               |
| SNP_P4_26178_32371683 | NC_021161.1    | Ca_kabuli_chr02 | 32371683                | GG                              | AA              | 1946764441               |
| SNP_P4_26179_32371766 | NC_021161.1    | Ca_kabuli_chr02 | 32371766                | TT                              | CC              | 1946764443               |
| SNP_P4_26180_32372431 | NC_021161.1    | Ca_kabuli_chr02 | 32372431                | AA                              | GG              | 1946764445               |
| SNP_P4_26181_32373277 | NC_021161.1    | Ca_kabuli_chr02 | 32373277                | AA                              | CC              | 1946764447               |
| SNP_P4_26182_32375458 | NC_021161.1    | Ca_kabuli_chr02 | 32375458                | GG                              | AA              | 1946764449               |
| SNP_P4_26183_32378273 | NC_021161.1    | Ca_kabuli_chr02 | 32378273                | AA                              | GG              | 1946764451               |
| SNP_P4_26185_32378503 | NC_021161.1    | Ca_kabuli_chr02 | 32378503                | AA                              | GG              | 1946764453               |
| SNP_P4_26188_32379178 | NC_021161.1    | Ca_kabuli_chr02 | 32379178                | AA                              | TT              | 1946764455               |
| SNP_P4_26189_32379357 | NC_021161.1    | Ca_kabuli_chr02 | 32379357                | GG                              | TT              | 1946764457               |
| SNP_P4_26190_32379450 | NC_021161.1    | Ca_kabuli_chr02 | 32379450                | GG                              | AA              | 1946764459               |
| SNP_P4_26191_32379506 | NC_021161.1    | Ca_kabuli_chr02 | 32379506                | GG                              | TT              | 1946764461               |
| SNP_P4_26192_32379507 | NC_021161.1    | Ca_kabuli_chr02 | 32379507                | TT                              | GG              | 1946764463               |
| SNP_P4_26193_32379544 | NC_021161.1    | Ca_kabuli_chr02 | 32379544                | GG                              | AA              | 1946764465               |
| SNP_P4_26194_32379545 | NC_021161.1    | Ca_kabuli_chr02 | 32379545                | GG                              | AA              | 1946764468               |
| SNP_P4_26196_32379636 | NC_021161.1    | Ca_kabuli_chr02 | 32379636                | AA                              | GG              | 1946764470               |
| SNP_P4_26197_32379724 | NC_021161.1    | Ca_kabuli_chr02 | 32379724                | GG                              | AA              | 1946764472               |
| SNP_P4_26199_32379854 | NC_021161.1    | Ca_kabuli_chr02 | 32379854                | AA                              | GG              | 1946764474               |
| SNP_P4_26200_32380467 | NC_021161.1    | Ca_kabuli_chr02 | 32380467                | CC                              | TT              | 1946764476               |
| SNP_P4_26201_32390348 | NC_021161.1    | Ca_kabuli_chr02 | 32390348                | CC                              | TT              | 1946764478               |
| SNP_P4_26202_32390392 | NC_021161.1    | Ca_kabuli_chr02 | 32390392                | GG                              | AA              | 1946764480               |
| SNP_P4_26203_32390507 | NC_021161.1    | Ca_kabuli_chr02 | 32390507                | GG                              | TT              | 1946764482               |

| SNPs IDs              | Chromosome IDs | Chromosomes     | Physical positions (bp) | CDC Frontier (Reference genome) | (ILWC46 & LPNB) | NCBI SNPdb Accession IDs |
|-----------------------|----------------|-----------------|-------------------------|---------------------------------|-----------------|--------------------------|
| SNP_P4_26204_32392384 | NC_021161.1    | Ca_kabuli_chr02 | 32392384                | TT                              | AA              | 1946764484               |
| SNP_P4_26205_32392391 | NC_021161.1    | Ca_kabuli_chr02 | 32392391                | GG                              | AA              | 1946764486               |
| SNP_P4_26206_32392520 | NC_021161.1    | Ca_kabuli_chr02 | 32392520                | CC                              | AA              | 1946764488               |
| SNP_P4_26208_32392558 | NC_021161.1    | Ca_kabuli_chr02 | 32392558                | AA                              | TT              | 1946764490               |
| SNP_P4_26209_32392593 | NC_021161.1    | Ca_kabuli_chr02 | 32392593                | GG                              | CC              | 1946764492               |
| SNP_P4_26210_32392633 | NC_021161.1    | Ca_kabuli_chr02 | 32392633                | GG                              | CC              | 1946764494               |
| SNP_P4_26211_32392640 | NC_021161.1    | Ca_kabuli_chr02 | 32392640                | GG                              | CC              | 1946764496               |
| SNP_P4_26212_32392654 | NC_021161.1    | Ca_kabuli_chr02 | 32392654                | CC                              | TT              | 1946764498               |
| SNP_P4_26213_32392684 | NC_021161.1    | Ca_kabuli_chr02 | 32392684                | AA                              | TT              | 1946764500               |
| SNP_P4_26215_32392696 | NC_021161.1    | Ca_kabuli_chr02 | 32392696                | GG                              | CC              | 1946764502               |
| SNP_P4_26216_32392713 | NC_021161.1    | Ca_kabuli_chr02 | 32392713                | TT                              | AA              | 1946764504               |
| SNP_P4_26217_32392749 | NC_021161.1    | Ca_kabuli_chr02 | 32392749                | CC                              | TT              | 1946764506               |
| SNP_P4_26218_32392758 | NC_021161.1    | Ca_kabuli_chr02 | 32392758                | GG                              | AA              | 1946764508               |
| SNP_P4_26219_32392781 | NC_021161.1    | Ca_kabuli_chr02 | 32392781                | GG                              | AA              | 1946764510               |
| SNP_P4_26220_32392791 | NC_021161.1    | Ca_kabuli_chr02 | 32392791                | CC                              | TT              | 1946764512               |
| SNP_P4_26221_32392801 | NC_021161.1    | Ca_kabuli_chr02 | 32392801                | TT                              | CC              | 1946764514               |
| SNP_P4_26222_32392809 | NC_021161.1    | Ca_kabuli_chr02 | 32392809                | AA                              | TT              | 1946764516               |
| SNP_P4_26223_32392830 | NC_021161.1    | Ca_kabuli_chr02 | 32392830                | GG                              | AA              | 1946764518               |
| SNP_P4_26224_32392841 | NC_021161.1    | Ca_kabuli_chr02 | 32392841                | TT                              | CC              | 1946764520               |
| SNP_P4_26225_32392846 | NC_021161.1    | Ca_kabuli_chr02 | 32392846                | TT                              | CC              | 1946764522               |
| SNP_P4_26226_32392868 | NC_021161.1    | Ca_kabuli_chr02 | 32392868                | CC                              | TT              | 1946764524               |
| SNP_P4_26227_32392871 | NC_021161.1    | Ca_kabuli_chr02 | 32392871                | TT                              | GG              | 1946764526               |
| SNP_P4_26228_32392893 | NC_021161.1    | Ca_kabuli_chr02 | 32392893                | CC                              | AA              | 1946764528               |
| SNP_P4_26229_32392943 | NC_021161.1    | Ca_kabuli_chr02 | 32392943                | AA                              | GG              | 1946764530               |
| SNP_P4_26230_32392945 | NC_021161.1    | Ca_kabuli_chr02 | 32392945                | TT                              | CC              | 1946764532               |
| SNP_P4_26231_32392948 | NC_021161.1    | Ca_kabuli_chr02 | 32392948                | TT                              | GG              | 1946764534               |
| SNP_P4_26232_32392986 | NC_021161.1    | Ca_kabuli_chr02 | 32392986                | CC                              | TT              | 1946764536               |
| SNP_P4_26233_32393014 | NC_021161.1    | Ca_kabuli_chr02 | 32393014                | CC                              | TT              | 1946764538               |
| SNP_P4_26234_32393015 | NC_021161.1    | Ca_kabuli_chr02 | 32393015                | GG                              | TT              | 1946764540               |
| SNP_P4_26235_32393020 | NC_021161.1    | Ca_kabuli_chr02 | 32393020                | GG                              | AA              | 1946764541               |
| SNP_P4_26236_32393035 | NC_021161.1    | Ca_kabuli_chr02 | 32393035                | GG                              | AA              | 1946764543               |
| SNP_P4_26239_32393135 | NC_021161.1    | Ca_kabuli_chr02 | 32393135                | AA                              | CC              | 1946764545               |
| SNP_P4_26241_32393289 | NC_021161.1    | Ca_kabuli_chr02 | 32393289                | GG                              | AA              | 1946764547               |
| SNP_P4_26242_32393364 | NC_021161.1    | Ca_kabuli_chr02 | 32393364                | GG                              | TT              | 1946764549               |
| SNP_P4_26243_32393429 | NC_021161.1    | Ca_kabuli_chr02 | 32393429                | GG                              | AA              | 1946764551               |
| SNP_P4_26245_32393490 | NC_021161.1    | Ca_kabuli_chr02 | 32393490                | TT                              | CC              | 1946764553               |
| SNP_P4_26246_32393509 | NC_021161.1    | Ca_kabuli_chr02 | 32393509                | GG                              | AA              | 1946764555               |
| SNP_P4_26247_32393535 | NC_021161.1    | Ca_kabuli_chr02 | 32393535                | TT                              | AA              | 1946764557               |
| SNP_P4_26248_32393539 | NC_021161.1    | Ca_kabuli_chr02 | 32393539                | AA                              | GG              | 1946764559               |
| SNP_P4_26249_32393574 | NC_021161.1    | Ca_kabuli_chr02 | 32393574                | GG                              | TT              | 1946764561               |
| SNP_P4_26250_32393596 | NC_021161.1    | Ca_kabuli_chr02 | 32393596                | GG                              | AA              | 1946764563               |
| SNP_P4_26251_32393606 | NC_021161.1    | Ca_kabuli_chr02 | 32393606                | AA                              | GG              | 1946764565               |

| SNPs IDs              | Chromosome IDs | Chromosomes     | Physical positions (bp) | CDC Frontier (Reference genome) | (ILWC46 & LPNB) | NCBI SNPdb Accession IDs |
|-----------------------|----------------|-----------------|-------------------------|---------------------------------|-----------------|--------------------------|
| SNP_P4_26252_32393626 | NC_021161.1    | Ca_kabuli_chr02 | 32393626                | AA                              | GG              | 1946764566               |
| SNP_P4_26255_32393652 | NC_021161.1    | Ca_kabuli_chr02 | 32393652                | AA                              | TT              | 1946764568               |
| SNP_P4_26256_32394531 | NC_021161.1    | Ca_kabuli_chr02 | 32394531                | CC                              | TT              | 1946764570               |
| SNP_P4_26257_32394550 | NC_021161.1    | Ca_kabuli_chr02 | 32394550                | TT                              | CC              | 1946764572               |
| SNP_P4_26258_32394614 | NC_021161.1    | Ca_kabuli_chr02 | 32394614                | AA                              | GG              | 1946764574               |
| SNP_P4_26260_32395609 | NC_021161.1    | Ca_kabuli_chr02 | 32395609                | AA                              | TT              | 1946764576               |
| SNP_P4_26262_32398708 | NC_021161.1    | Ca_kabuli_chr02 | 32398708                | TT                              | AA              | 1946764578               |
| SNP_P4_26264_32399633 | NC_021161.1    | Ca_kabuli_chr02 | 32399633                | CC                              | TT              | 1946764580               |
| SNP_P4_26265_32399654 | NC_021161.1    | Ca_kabuli_chr02 | 32399654                | AA                              | GG              | 1946764582               |
| SNP_P4_26266_32399964 | NC_021161.1    | Ca_kabuli_chr02 | 32399964                | AA                              | TT              | 1946764584               |
| SNP_P4_26267_32399978 | NC_021161.1    | Ca_kabuli_chr02 | 32399978                | AA                              | TT              | 1946764586               |
| SNP_P4_26268_32401841 | NC_021161.1    | Ca_kabuli_chr02 | 32401841                | TT                              | CC              | 1946764588               |
| SNP_P4_26269_32401990 | NC_021161.1    | Ca_kabuli_chr02 | 32401990                | TT                              | GG              | 1946764590               |
| SNP_P4_26270_32402054 | NC_021161.1    | Ca_kabuli_chr02 | 32402054                | TT                              | GG              | 1946764591               |
| SNP_P4_26271_32405219 | NC_021161.1    | Ca_kabuli_chr02 | 32405219                | CC                              | TT              | 1946764593               |
| SNP_P4_26272_32405391 | NC_021161.1    | Ca_kabuli_chr02 | 32405391                | GG                              | AA              | 1946764595               |
| SNP_P4_26273_32405978 | NC_021161.1    | Ca_kabuli_chr02 | 32405978                | CC                              | TT              | 1946764597               |
| SNP_P4_26274_32406351 | NC_021161.1    | Ca_kabuli_chr02 | 32406351                | CC                              | TT              | 1946764599               |
| SNP_P4_26275_32406512 | NC_021161.1    | Ca_kabuli_chr02 | 32406512                | TT                              | CC              | 1946764601               |
| SNP_P4_26276_32406526 | NC_021161.1    | Ca_kabuli_chr02 | 32406526                | TT                              | GG              | 1946764603               |
| SNP_P4_26277_32406527 | NC_021161.1    | Ca_kabuli_chr02 | 32406527                | GG                              | AA              | 1946764605               |
| SNP_P4_26279_32408474 | NC_021161.1    | Ca_kabuli_chr02 | 32408474                | GG                              | AA              | 1946764607               |
| SNP_P4_26280_32409126 | NC_021161.1    | Ca_kabuli_chr02 | 32409126                | CC                              | TT              | 1946764609               |
| SNP_P4_26281_32409765 | NC_021161.1    | Ca_kabuli_chr02 | 32409765                | GG                              | CC              | 1946764611               |
| SNP_P4_26283_32409967 | NC_021161.1    | Ca_kabuli_chr02 | 32409967                | CC                              | AA              | 1946764613               |
| SNP_P4_26284_32410660 | NC_021161.1    | Ca_kabuli_chr02 | 32410660                | AA                              | GG              | 1946764615               |
| SNP_P4_26285_32410684 | NC_021161.1    | Ca_kabuli_chr02 | 32410684                | TT                              | CC              | 1946764616               |
| SNP_P4_26286_32410696 | NC_021161.1    | Ca_kabuli_chr02 | 32410696                | AA                              | GG              | 1946764618               |
| SNP_P4_26287_32410737 | NC_021161.1    | Ca_kabuli_chr02 | 32410737                | AA                              | GG              | 1946764620               |
| SNP_P4_26288_32412182 | NC_021161.1    | Ca_kabuli_chr02 | 32412182                | GG                              | AA              | 1946764622               |
| SNP_P4_26290_32412897 | NC_021161.1    | Ca_kabuli_chr02 | 32412897                | GG                              | AA              | 1946764624               |
| SNP_P4_26291_32413219 | NC_021161.1    | Ca_kabuli_chr02 | 32413219                | TT                              | AA              | 1946764626               |
| SNP_P4_26292_32413233 | NC_021161.1    | Ca_kabuli_chr02 | 32413233                | TT                              | GG              | 1946764628               |
| SNP_P4_26293_32413999 | NC_021161.1    | Ca_kabuli_chr02 | 32413999                | AA                              | CC              | 1946764630               |
| SNP_P4_26294_32415118 | NC_021161.1    | Ca_kabuli_chr02 | 32415118                | GG                              | AA              | 1946764632               |
| SNP_P4_26295_32415338 | NC_021161.1    | Ca_kabuli_chr02 | 32415338                | AA                              | TT              | 1946764634               |
| SNP_P4_26296_32416298 | NC_021161.1    | Ca_kabuli_chr02 | 32416298                | TT                              | CC              | 1946764636               |
| SNP_P4_26297_32417378 | NC_021161.1    | Ca_kabuli_chr02 | 32417378                | AA                              | GG              | 1946764638               |
| SNP_P4_26298_32417804 | NC_021161.1    | Ca_kabuli_chr02 | 32417804                | CC                              | AA              | 1946764640               |
| SNP_P4_26299_32417820 | NC_021161.1    | Ca_kabuli_chr02 | 32417820                | GG                              | AA              | 1946764642               |
| SNP_P4_26300_32417961 | NC_021161.1    | Ca_kabuli_chr02 | 32417961                | AA                              | GG              | 1946764644               |
| SNP_P4_26301_32418036 | NC_021161.1    | Ca_kabuli_chr02 | 32418036                | CC                              | TT              | 1946764646               |

| SNPs IDs              | Chromosome IDs | Chromosomes     | Physical positions (bp) | CDC Frontier (Reference genome) | (ILWC46 & LPNB) | NCBI SNPdb Accession IDs |
|-----------------------|----------------|-----------------|-------------------------|---------------------------------|-----------------|--------------------------|
| SNP_P4_26302_32419750 | NC_021161.1    | Ca_kabuli_chr02 | 32419750                | GG                              | AA              | 1946764648               |
| SNP_P4_26303_32420046 | NC_021161.1    | Ca_kabuli_chr02 | 32420046                | AA                              | GG              | 1946764650               |
| SNP_P4_26304_32420280 | NC_021161.1    | Ca_kabuli_chr02 | 32420280                | AA                              | GG              | 1946764652               |
| SNP_P4_26306_32420457 | NC_021161.1    | Ca_kabuli_chr02 | 32420457                | AA                              | TT              | 1946764654               |
| SNP_P4_26307_32422165 | NC_021161.1    | Ca_kabuli_chr02 | 32422165                | GG                              | TT              | 1946764656               |
| SNP_P4_26308_32422176 | NC_021161.1    | Ca_kabuli_chr02 | 32422176                | AA                              | GG              | 1946764658               |
| SNP_P4_26309_32422221 | NC_021161.1    | Ca_kabuli_chr02 | 32422221                | AA                              | TT              | 1946764660               |
| SNP_P4_26310_32422710 | NC_021161.1    | Ca_kabuli_chr02 | 32422710                | AA                              | TT              | 1946764662               |
| SNP_P4_26313_32427803 | NC_021161.1    | Ca_kabuli_chr02 | 32427803                | AA                              | GG              | 1946764664               |
| SNP_P4_26314_32428201 | NC_021161.1    | Ca_kabuli_chr02 | 32428201                | TT                              | AA              | 1946764666               |
| SNP_P4_26315_32430363 | NC_021161.1    | Ca_kabuli_chr02 | 32430363                | GG                              | TT              | 1946764668               |
| SNP_P4_26316_32430407 | NC_021161.1    | Ca_kabuli_chr02 | 32430407                | AA                              | CC              | 1946764670               |
| SNP_P4_26317_32430460 | NC_021161.1    | Ca_kabuli_chr02 | 32430460                | TT                              | GG              | 1946764671               |
| SNP_P4_26318_32434130 | NC_021161.1    | Ca_kabuli_chr02 | 32434130                | AA                              | CC              | 1946764673               |
| SNP_P4_26319_32434391 | NC_021161.1    | Ca_kabuli_chr02 | 32434391                | TT                              | CC              | 1946764675               |
| SNP_P4_26321_32436354 | NC_021161.1    | Ca_kabuli_chr02 | 32436354                | CC                              | AA              | 1946764677               |
| SNP_P4_26322_32436395 | NC_021161.1    | Ca_kabuli_chr02 | 32436395                | TT                              | CC              | 1946764679               |
| SNP_P4_26324_32436488 | NC_021161.1    | Ca_kabuli_chr02 | 32436488                | TT                              | GG              | 1946764681               |
| SNP_P4_26325_32436489 | NC_021161.1    | Ca_kabuli_chr02 | 32436489                | CC                              | TT              | 1946764683               |
| SNP_P4_26326_32436495 | NC_021161.1    | Ca_kabuli_chr02 | 32436495                | TT                              | AA              | 1946764685               |
| SNP_P4_26327_32436754 | NC_021161.1    | Ca_kabuli_chr02 | 32436754                | AA                              | GG              | 1946764687               |
| SNP_P4_26328_32437788 | NC_021161.1    | Ca_kabuli_chr02 | 32437788                | TT                              | AA              | 1946764689               |
| SNP_P4_26329_32437796 | NC_021161.1    | Ca_kabuli_chr02 | 32437796                | CC                              | TT              | 1946764691               |
| SNP_P4_26330_32437818 | NC_021161.1    | Ca_kabuli_chr02 | 32437818                | GG                              | TT              | 1946764693               |
| SNP_P4_26331_32437837 | NC_021161.1    | Ca_kabuli_chr02 | 32437837                | TT                              | AA              | 1946764695               |
| SNP_P4_26332_32437941 | NC_021161.1    | Ca_kabuli_chr02 | 32437941                | GG                              | AA              | 1946764697               |
| SNP_P4_26333_32437949 | NC_021161.1    | Ca_kabuli_chr02 | 32437949                | AA                              | GG              | 1946764699               |
| SNP_P4_26334_32437961 | NC_021161.1    | Ca_kabuli_chr02 | 32437961                | CC                              | GG              | 1946764701               |
| SNP_P4_26335_32437979 | NC_021161.1    | Ca_kabuli_chr02 | 32437979                | TT                              | CC              | 1946764703               |
| SNP_P4_26336_32438018 | NC_021161.1    | Ca_kabuli_chr02 | 32438018                | GG                              | AA              | 1946764705               |
| SNP_P4_26337_32438022 | NC_021161.1    | Ca_kabuli_chr02 | 32438022                | CC                              | TT              | 1946764707               |
| SNP_P4_26338_32438023 | NC_021161.1    | Ca_kabuli_chr02 | 32438023                | AA                              | CC              | 1946764709               |
| SNP_P4_26339_32438039 | NC_021161.1    | Ca_kabuli_chr02 | 32438039                | TT                              | CC              | 1946764711               |
| SNP_P4_26340_32438204 | NC_021161.1    | Ca_kabuli_chr02 | 32438204                | AA                              | GG              | 1946764712               |
| SNP_P4_26341_32438205 | NC_021161.1    | Ca_kabuli_chr02 | 32438205                | AA                              | GG              | 1946764714               |
| SNP_P4_26342_32438231 | NC_021161.1    | Ca_kabuli_chr02 | 32438231                | GG                              | AA              | 1946764716               |
| SNP_P4_26343_32438232 | NC_021161.1    | Ca_kabuli_chr02 | 32438232                | GG                              | AA              | 1946764718               |
| SNP_P4_26344_32438262 | NC_021161.1    | Ca_kabuli_chr02 | 32438262                | GG                              | AA              | 1946764720               |
| SNP_P4_26345_32438265 | NC_021161.1    | Ca_kabuli_chr02 | 32438265                | AA                              | GG              | 1946764722               |
| SNP_P4_26346_32438267 | NC_021161.1    | Ca_kabuli_chr02 | 32438267                | TT                              | CC              | 1946764724               |
| SNP_P4_26347_32439654 | NC_021161.1    | Ca_kabuli_chr02 | 32439654                | CC                              | GG              | 1946764726               |
| SNP_P4_26348_32452902 | NC_021161.1    | Ca_kabuli_chr02 | 32452902                | CC                              | TT              | 1946764727               |



| SNPs IDs              | Chromosome IDs | Chromosomes     | Physical positions (bp) | CDC Frontier (Reference genome) | (ILWC46 & LPNB) | NCBI SNPdb Accession IDs |
|-----------------------|----------------|-----------------|-------------------------|---------------------------------|-----------------|--------------------------|
| SNP_P4_26350_32453136 | NC_021161.1    | Ca_kabuli_chr02 | 32453136                | TT                              | GG              | 1946764728               |
| SNP_P4_26351_32453162 | NC_021161.1    | Ca_kabuli_chr02 | 32453162                | TT                              | GG              | 1946764729               |
| SNP_P4_26352_32453176 | NC_021161.1    | Ca_kabuli_chr02 | 32453176                | GG                              | TT              | 1946764730               |
| SNP_P4_26353_32455360 | NC_021161.1    | Ca_kabuli_chr02 | 32455360                | AA                              | CC              | 1946764731               |
| SNP_P4_26354_32474510 | NC_021161.1    | Ca_kabuli_chr02 | 32474510                | GG                              | TT              | 1946764733               |
| SNP_P4_26355_32474638 | NC_021161.1    | Ca_kabuli_chr02 | 32474638                | AA                              | CC              | 1946764735               |
| SNP_P4_26356_32474675 | NC_021161.1    | Ca_kabuli_chr02 | 32474675                | CC                              | AA              | 1946764737               |
| SNP_P4_26357_32474768 | NC_021161.1    | Ca_kabuli_chr02 | 32474768                | AA                              | CC              | 1946764739               |
| SNP_P4_26358_32474788 | NC_021161.1    | Ca_kabuli_chr02 | 32474788                | TT                              | AA              | 1946764741               |
| SNP_P4_26359_32474829 | NC_021161.1    | Ca_kabuli_chr02 | 32474829                | GG                              | AA              | 1946764743               |
| SNP_P4_26360_32474840 | NC_021161.1    | Ca_kabuli_chr02 | 32474840                | TT                              | GG              | 1946764745               |
| SNP_P4_26361_32475028 | NC_021161.1    | Ca_kabuli_chr02 | 32475028                | CC                              | GG              | 1946764747               |
| SNP_P4_26362_32475085 | NC_021161.1    | Ca_kabuli_chr02 | 32475085                | TT                              | CC              | 1946764749               |
| SNP_P4_26363_32475087 | NC_021161.1    | Ca_kabuli_chr02 | 32475087                | GG                              | AA              | 1946764751               |
| SNP_P4_26364_32475125 | NC_021161.1    | Ca_kabuli_chr02 | 32475125                | AA                              | GG              | 1946764753               |
| SNP_P4_26365_32475145 | NC_021161.1    | Ca_kabuli_chr02 | 32475145                | GG                              | AA              | 1946764755               |
| SNP_P4_26366_32475146 | NC_021161.1    | Ca_kabuli_chr02 | 32475146                | CC                              | AA              | 1946764757               |
| SNP_P4_26367_32475151 | NC_021161.1    | Ca_kabuli_chr02 | 32475151                | CC                              | AA              | 1946764758               |
| SNP_P4_26368_32475317 | NC_021161.1    | Ca_kabuli_chr02 | 32475317                | AA                              | GG              | 1946764760               |
| SNP_P4_26369_32475751 | NC_021161.1    | Ca_kabuli_chr02 | 32475751                | AA                              | CC              | 1946764762               |
| SNP_P4_26370_32476307 | NC_021161.1    | Ca_kabuli_chr02 | 32476307                | GG                              | TT              | 1946764764               |
| SNP_P4_26371_32476555 | NC_021161.1    | Ca_kabuli_chr02 | 32476555                | AA                              | TT              | 1946764766               |
| SNP_P4_26372_32476566 | NC_021161.1    | Ca_kabuli_chr02 | 32476566                | GG                              | CC              | 1946764768               |
| SNP_P4_26373_32476861 | NC_021161.1    | Ca_kabuli_chr02 | 32476861                | TT                              | CC              | 1946764770               |
| SNP_P4_26374_32477089 | NC_021161.1    | Ca_kabuli_chr02 | 32477089                | AA                              | TT              | 1946764772               |
| SNP_P4_26376_32477218 | NC_021161.1    | Ca_kabuli_chr02 | 32477218                | CC                              | TT              | 1946764774               |
| SNP_P4_26377_32477767 | NC_021161.1    | Ca_kabuli_chr02 | 32477767                | AA                              | TT              | 1946764776               |
| SNP_P4_26378_32477793 | NC_021161.1    | Ca_kabuli_chr02 | 32477793                | CC                              | TT              | 1946764778               |
| SNP_P4_26379_32478173 | NC_021161.1    | Ca_kabuli_chr02 | 32478173                | GG                              | CC              | 1946764780               |
| SNP_P4_26380_32478284 | NC_021161.1    | Ca_kabuli_chr02 | 32478284                | TT                              | AA              | 1946764782               |
| SNP_P4_26383_32479073 | NC_021161.1    | Ca_kabuli_chr02 | 32479073                | GG                              | AA              | 1946764784               |
| SNP_P4_26384_32479215 | NC_021161.1    | Ca_kabuli_chr02 | 32479215                | AA                              | GG              | 1946764786               |
| SNP_P4_26385_32479266 | NC_021161.1    | Ca_kabuli_chr02 | 32479266                | AA                              | GG              | 1946764788               |
| SNP_P4_26386_32479405 | NC_021161.1    | Ca_kabuli_chr02 | 32479405                | AA                              | GG              | 1946764790               |
| SNP_P4_26387_32479406 | NC_021161.1    | Ca_kabuli_chr02 | 32479406                | GG                              | TT              | 1946764792               |
| SNP_P4_26389_32479585 | NC_021161.1    | Ca_kabuli_chr02 | 32479585                | AA                              | GG              | 1946764794               |
| SNP_P4_26390_32479626 | NC_021161.1    | Ca_kabuli_chr02 | 32479626                | GG                              | CC              | 1946764796               |
| SNP_P4_26392_32485755 | NC_021161.1    | Ca_kabuli_chr02 | 32485755                | CC                              | GG              | 1946764798               |
| SNP_P4_26393_32487684 | NC_021161.1    | Ca_kabuli_chr02 | 32487684                | TT                              | GG              | 1946764800               |
| SNP_P4_26394_32488272 | NC_021161.1    | Ca_kabuli_chr02 | 32488272                | TT                              | CC              | 1946764802               |
| SNP_P4_26395_32493268 | NC_021161.1    | Ca_kabuli_chr02 | 32493268                | CC                              | TT              | 1946764804               |
| SNP_P4_26396_32506471 | NC_021161.1    | Ca_kabuli_chr02 | 32506471                | GG                              | AA              | 1946764805               |

| SNPs IDs              | Chromosome IDs | Chromosomes     | Physical positions (bp) | CDC Frontier (Reference genome) | (ILWC46 & LPNB) | NCBI SNPdb Accession IDs |
|-----------------------|----------------|-----------------|-------------------------|---------------------------------|-----------------|--------------------------|
| SNP_P4_26399_32543588 | NC_021161.1    | Ca_kabuli_chr02 | 32543588                | AA                              | TT              | 1946764807               |
| SNP_P4_26401_32644657 | NC_021161.1    | Ca_kabuli_chr02 | 32644657                | AA                              | GG              | 1946764809               |
| SNP_P4_26403_32679916 | NC_021161.1    | Ca_kabuli_chr02 | 32679916                | AA                              | GG              | 1946764811               |
| SNP_P4_26404_32713393 | NC_021161.1    | Ca_kabuli_chr02 | 32713393                | CC                              | AA              | 1946764813               |
| SNP_P4_26405_32713621 | NC_021161.1    | Ca_kabuli_chr02 | 32713621                | CC                              | TT              | 1946764815               |
| SNP_P4_26408_32773778 | NC_021161.1    | Ca_kabuli_chr02 | 32773778                | GG                              | AA              | 1946764817               |
| SNP_P4_26409_32781132 | NC_021161.1    | Ca_kabuli_chr02 | 32781132                | CC                              | AA              | 1946764819               |
| SNP_P4_26410_32819380 | NC_021161.1    | Ca_kabuli_chr02 | 32819380                | AA                              | CC              | 1946764821               |
| SNP_P4_26411_32876467 | NC_021161.1    | Ca_kabuli_chr02 | 32876467                | CC                              | TT              | 1946764823               |
| SNP_P4_26412_32914753 | NC_021161.1    | Ca_kabuli_chr02 | 32914753                | TT                              | CC              | 1946764825               |
| SNP_P4_26413_32914816 | NC_021161.1    | Ca_kabuli_chr02 | 32914816                | TT                              | CC              | 1946764827               |
| SNP_P4_26414_32914833 | NC_021161.1    | Ca_kabuli_chr02 | 32914833                | CC                              | TT              | 1946764829               |
| SNP_P4_26415_32915039 | NC_021161.1    | Ca_kabuli_chr02 | 32915039                | GG                              | AA              | 1946764831               |
| SNP_P4_26416_32915145 | NC_021161.1    | Ca_kabuli_chr02 | 32915145                | AA                              | TT              | 1946764833               |
| SNP_P4_26417_32924532 | NC_021161.1    | Ca_kabuli_chr02 | 32924532                | TT                              | GG              | 1946764835               |
| SNP_P4_26419_32935101 | NC_021161.1    | Ca_kabuli_chr02 | 32935101                | CC                              | TT              | 1946764836               |
| SNP_P4_26420_32955078 | NC_021161.1    | Ca_kabuli_chr02 | 32955078                | CC                              | GG              | 1946764837               |
| SNP_P4_26421_32968876 | NC_021161.1    | Ca_kabuli_chr02 | 32968876                | GG                              | AA              | 1946764838               |
| SNP_P4_26423_32998260 | NC_021161.1    | Ca_kabuli_chr02 | 32998260                | TT                              | AA              | 1946764840               |
| SNP_P4_26424_33020596 | NC_021161.1    | Ca_kabuli_chr02 | 33020596                | TT                              | CC              | 1946764842               |
| SNP_P4_26425_33020597 | NC_021161.1    | Ca_kabuli_chr02 | 33020597                | TT                              | CC              | 1946764844               |
| SNP_P4_26428_33063728 | NC_021161.1    | Ca_kabuli_chr02 | 33063728                | GG                              | AA              | 1946764846               |
| SNP_P4_26431_33151940 | NC_021161.1    | Ca_kabuli_chr02 | 33151940                | TT                              | GG              | 1946764848               |
| SNP_P4_26432_33151950 | NC_021161.1    | Ca_kabuli_chr02 | 33151950                | GG                              | TT              | 1946764850               |
| SNP_P4_26433_33152001 | NC_021161.1    | Ca_kabuli_chr02 | 33152001                | CC                              | AA              | 1946764852               |
| SNP_P4_26434_33152077 | NC_021161.1    | Ca_kabuli_chr02 | 33152077                | GG                              | TT              | 1946764854               |
| SNP_P4_26435_33152162 | NC_021161.1    | Ca_kabuli_chr02 | 33152162                | AA                              | GG              | 1946764856               |
| SNP_P4_26436_33152231 | NC_021161.1    | Ca_kabuli_chr02 | 33152231                | AA                              | TT              | 1946764858               |
| SNP_P4_26437_33166097 | NC_021161.1    | Ca_kabuli_chr02 | 33166097                | CC                              | TT              | 1946764860               |
| SNP_P4_26438_33166115 | NC_021161.1    | Ca_kabuli_chr02 | 33166115                | AA                              | GG              | 1946764862               |
| SNP_P4_26439_33166132 | NC_021161.1    | Ca_kabuli_chr02 | 33166132                | TT                              | CC              | 1946764864               |
| SNP_P4_26440_33166160 | NC_021161.1    | Ca_kabuli_chr02 | 33166160                | TT                              | CC              | 1946764866               |
| SNP_P4_26441_33166192 | NC_021161.1    | Ca_kabuli_chr02 | 33166192                | GG                              | AA              | 1946764868               |
| SNP_P4_26442_33166240 | NC_021161.1    | Ca_kabuli_chr02 | 33166240                | AA                              | GG              | 1946764870               |
| SNP_P4_26443_33166350 | NC_021161.1    | Ca_kabuli_chr02 | 33166350                | GG                              | AA              | 1946764872               |
| SNP_P4_26444_33166434 | NC_021161.1    | Ca_kabuli_chr02 | 33166434                | TT                              | CC              | 1946764874               |
| SNP_P4_26445_33166485 | NC_021161.1    | Ca_kabuli_chr02 | 33166485                | GG                              | TT              | 1946764876               |
| SNP_P4_26446_33166525 | NC_021161.1    | Ca_kabuli_chr02 | 33166525                | GG                              | AA              | 1946764878               |
| SNP_P4_26447_33166535 | NC_021161.1    | Ca_kabuli_chr02 | 33166535                | CC                              | GG              | 1946764880               |
| SNP_P4_26448_33166561 | NC_021161.1    | Ca_kabuli_chr02 | 33166561                | CC                              | TT              | 1946764882               |
| SNP_P4_26449_33166563 | NC_021161.1    | Ca_kabuli_chr02 | 33166563                | AA                              | CC              | 1946764884               |
| SNP_P4_26450_33166570 | NC_021161.1    | Ca_kabuli_chr02 | 33166570                | GG                              | AA              | 1946764886               |

| SNPs IDs              | Chromosome IDs | Chromosomes     | Physical positions (bp) | CDC Frontier (Reference genome) | (ILWC46 & LPNB) | NCBI SNPdb Accession IDs |
|-----------------------|----------------|-----------------|-------------------------|---------------------------------|-----------------|--------------------------|
| SNP_P4_26451_33166582 | NC_021161.1    | Ca_kabuli_chr02 | 33166582                | CC                              | AA              | 1946764888               |
| SNP_P4_26452_33166704 | NC_021161.1    | Ca_kabuli_chr02 | 33166704                | CC                              | TT              | 1946764890               |
| SNP_P4_26453_33167107 | NC_021161.1    | Ca_kabuli_chr02 | 33167107                | AA                              | CC              | 1946764892               |
| SNP_P4_26454_33167116 | NC_021161.1    | Ca_kabuli_chr02 | 33167116                | AA                              | GG              | 1946764894               |
| SNP_P4_26455_33171249 | NC_021161.1    | Ca_kabuli_chr02 | 33171249                | GG                              | AA              | 1946764896               |
| SNP_P4_26456_33218507 | NC_021161.1    | Ca_kabuli_chr02 | 33218507                | AA                              | GG              | 1946764898               |
| SNP_P4_26457_33240030 | NC_021161.1    | Ca_kabuli_chr02 | 33240030                | TT                              | CC              | 1946764900               |
| SNP_P4_26458_33240055 | NC_021161.1    | Ca_kabuli_chr02 | 33240055                | CC                              | TT              | 1946764902               |
| SNP_P4_26459_33243537 | NC_021161.1    | Ca_kabuli_chr02 | 33243537                | TT                              | CC              | 1946764904               |
| SNP_P4_26462_33258167 | NC_021161.1    | Ca_kabuli_chr02 | 33258167                | GG                              | AA              | 1946764906               |
| SNP_P4_26463_33258183 | NC_021161.1    | Ca_kabuli_chr02 | 33258183                | TT                              | CC              | 1946764908               |
| SNP_P4_26464_33258743 | NC_021161.1    | Ca_kabuli_chr02 | 33258743                | CC                              | TT              | 1946764910               |
| SNP_P4_26465_33269236 | NC_021161.1    | Ca_kabuli_chr02 | 33269236                | GG                              | AA              | 1946764912               |
| SNP_P4_26466_33269320 | NC_021161.1    | Ca_kabuli_chr02 | 33269320                | CC                              | TT              | 1946764914               |
| SNP_P4_26467_33269338 | NC_021161.1    | Ca_kabuli_chr02 | 33269338                | GG                              | TT              | 1946764916               |
| SNP_P4_26468_33269410 | NC_021161.1    | Ca_kabuli_chr02 | 33269410                | AA                              | GG              | 1946764918               |
| SNP_P4_26470_33283868 | NC_021161.1    | Ca_kabuli_chr02 | 33283868                | CC                              | TT              | 1946764920               |
| SNP_P4_26472_33296232 | NC_021161.1    | Ca_kabuli_chr02 | 33296232                | AA                              | TT              | 1946764922               |
| SNP_P4_26473_33345168 | NC_021161.1    | Ca_kabuli_chr02 | 33345168                | AA                              | CC              | 1946764924               |
| SNP_P4_26474_33345173 | NC_021161.1    | Ca_kabuli_chr02 | 33345173                | TT                              | GG              | 1946764926               |
| SNP_P4_26475_33345177 | NC_021161.1    | Ca_kabuli_chr02 | 33345177                | AA                              | TT              | 1946764928               |
| SNP_P4_26476_33345575 | NC_021161.1    | Ca_kabuli_chr02 | 33345575                | AA                              | GG              | 1946764930               |
| SNP_P4_26477_33345581 | NC_021161.1    | Ca_kabuli_chr02 | 33345581                | GG                              | AA              | 1946764932               |
| SNP_P4_26478_33345764 | NC_021161.1    | Ca_kabuli_chr02 | 33345764                | GG                              | AA              | 1946764934               |
| SNP_P4_26479_33345775 | NC_021161.1    | Ca_kabuli_chr02 | 33345775                | GG                              | TT              | 1946764936               |
| SNP_P4_26480_33346229 | NC_021161.1    | Ca_kabuli_chr02 | 33346229                | AA                              | GG              | 1946764938               |
| SNP_P4_26481_33346395 | NC_021161.1    | Ca_kabuli_chr02 | 33346395                | AA                              | TT              | 1946764940               |
| SNP_P4_26482_33346444 | NC_021161.1    | Ca_kabuli_chr02 | 33346444                | AA                              | GG              | 1946764942               |
| SNP_P4_26483_33346452 | NC_021161.1    | Ca_kabuli_chr02 | 33346452                | GG                              | AA              | 1946764944               |
| SNP_P4_26484_33346720 | NC_021161.1    | Ca_kabuli_chr02 | 33346720                | TT                              | CC              | 1946764946               |
| SNP_P4_26485_33346742 | NC_021161.1    | Ca_kabuli_chr02 | 33346742                | TT                              | CC              | 1946764948               |
| SNP_P4_26487_33346860 | NC_021161.1    | Ca_kabuli_chr02 | 33346860                | AA                              | CC              | 1946764950               |
| SNP_P4_26488_33346903 | NC_021161.1    | Ca_kabuli_chr02 | 33346903                | AA                              | GG              | 1946764952               |
| SNP_P4_26489_33346949 | NC_021161.1    | Ca_kabuli_chr02 | 33346949                | GG                              | AA              | 1946764954               |
| SNP_P4_26490_33347171 | NC_021161.1    | Ca_kabuli_chr02 | 33347171                | CC                              | TT              | 1946764956               |
| SNP_P4_26491_33347187 | NC_021161.1    | Ca_kabuli_chr02 | 33347187                | GG                              | AA              | 1946764958               |
| SNP_P4_26492_33347189 | NC_021161.1    | Ca_kabuli_chr02 | 33347189                | TT                              | CC              | 1946764960               |
| SNP_P4_26493_33347225 | NC_021161.1    | Ca_kabuli_chr02 | 33347225                | CC                              | TT              | 1946764962               |
| SNP_P4_26494_33353742 | NC_021161.1    | Ca_kabuli_chr02 | 33353742                | TT                              | GG              | 1946764964               |
| SNP_P4_26495_33353743 | NC_021161.1    | Ca_kabuli_chr02 | 33353743                | GG                              | AA              | 1946764966               |
| SNP_P4_26496_33363264 | NC_021161.1    | Ca_kabuli_chr02 | 33363264                | TT                              | CC              | 1946764968               |
| SNP_P4_26497_33365049 | NC_021161.1    | Ca_kabuli_chr02 | 33365049                | CC                              | TT              | 1946764970               |

| SNPs IDs              | Chromosome IDs | Chromosomes     | Physical positions (bp) | CDC Frontier (Reference genome) | (ILWC46 & LPNB) | NCBI SNPdb Accession IDs |
|-----------------------|----------------|-----------------|-------------------------|---------------------------------|-----------------|--------------------------|
| SNP_P4_26499_33381901 | NC_021161.1    | Ca_kabuli_chr02 | 33381901                | CC                              | AA              | 1946764972               |
| SNP_P4_26500_33381913 | NC_021161.1    | Ca_kabuli_chr02 | 33381913                | GG                              | TT              | 1946764974               |
| SNP_P4_26501_33381927 | NC_021161.1    | Ca_kabuli_chr02 | 33381927                | GG                              | CC              | 1946764976               |
| SNP_P4_26505_33398527 | NC_021161.1    | Ca_kabuli_chr02 | 33398527                | GG                              | TT              | 1946764978               |
| SNP_P4_26506_33398549 | NC_021161.1    | Ca_kabuli_chr02 | 33398549                | CC                              | TT              | 1946764980               |
| SNP_P4_26507_33398550 | NC_021161.1    | Ca_kabuli_chr02 | 33398550                | AA                              | GG              | 1946764982               |
| SNP_P4_26508_33398735 | NC_021161.1    | Ca_kabuli_chr02 | 33398735                | TT                              | AA              | 1946764984               |
| SNP_P4_26509_33400684 | NC_021161.1    | Ca_kabuli_chr02 | 33400684                | TT                              | CC              | 1946764986               |
| SNP_P4_26510_33400969 | NC_021161.1    | Ca_kabuli_chr02 | 33400969                | AA                              | TT              | 1946764988               |
| SNP_P4_26511_33404571 | NC_021161.1    | Ca_kabuli_chr02 | 33404571                | CC                              | TT              | 1946764990               |
| SNP_P4_26513_33405442 | NC_021161.1    | Ca_kabuli_chr02 | 33405442                | AA                              | GG              | 1946764992               |
| SNP_P4_26514_33405445 | NC_021161.1    | Ca_kabuli_chr02 | 33405445                | TT                              | AA              | 1946764994               |
| SNP_P4_26515_33405469 | NC_021161.1    | Ca_kabuli_chr02 | 33405469                | AA                              | GG              | 1946764996               |
| SNP_P4_26516_33450606 | NC_021161.1    | Ca_kabuli_chr02 | 33450606                | TT                              | CC              | 1946764998               |
| SNP_P4_26517_33454039 | NC_021161.1    | Ca_kabuli_chr02 | 33454039                | GG                              | CC              | 1946765000               |
| SNP_P4_26518_33462805 | NC_021161.1    | Ca_kabuli_chr02 | 33462805                | AA                              | GG              | 1946765002               |
| SNP_P4_26519_33462911 | NC_021161.1    | Ca_kabuli_chr02 | 33462911                | GG                              | TT              | 1946765004               |
| SNP_P4_26520_33462953 | NC_021161.1    | Ca_kabuli_chr02 | 33462953                | CC                              | AA              | 1946765006               |
| SNP_P4_26521_33463060 | NC_021161.1    | Ca_kabuli_chr02 | 33463060                | CC                              | GG              | 1946765008               |
| SNP_P4_26523_33465922 | NC_021161.1    | Ca_kabuli_chr02 | 33465922                | TT                              | GG              | 1946765010               |
| SNP_P4_26524_33468220 | NC_021161.1    | Ca_kabuli_chr02 | 33468220                | GG                              | AA              | 1946765012               |
| SNP_P4_26525_33469596 | NC_021161.1    | Ca_kabuli_chr02 | 33469596                | AA                              | GG              | 1946765014               |
| SNP_P4_26526_33506237 | NC_021161.1    | Ca_kabuli_chr02 | 33506237                | TT                              | GG              | 1946765016               |
| SNP_P4_26527_33506241 | NC_021161.1    | Ca_kabuli_chr02 | 33506241                | TT                              | AA              | 1946765018               |
| SNP_P4_26528_33509840 | NC_021161.1    | Ca_kabuli_chr02 | 33509840                | AA                              | GG              | 1946765020               |
| SNP_P4_26530_33570546 | NC_021161.1    | Ca_kabuli_chr02 | 33570546                | GG                              | AA              | 1946765022               |
| SNP_P4_26531_33580213 | NC_021161.1    | Ca_kabuli_chr02 | 33580213                | AA                              | GG              | 1946765024               |
| SNP_P4_26532_33581868 | NC_021161.1    | Ca_kabuli_chr02 | 33581868                | GG                              | TT              | 1946765026               |
| SNP_P4_26533_33582304 | NC_021161.1    | Ca_kabuli_chr02 | 33582304                | TT                              | GG              | 1946765028               |
| SNP_P4_26534_33582336 | NC_021161.1    | Ca_kabuli_chr02 | 33582336                | TT                              | CC              | 1946765030               |
| SNP_P4_26535_33582702 | NC_021161.1    | Ca_kabuli_chr02 | 33582702                | AA                              | GG              | 1946765032               |
| SNP_P4_26536_33585364 | NC_021161.1    | Ca_kabuli_chr02 | 33585364                | CC                              | AA              | 1946765034               |
| SNP_P4_26537_33609171 | NC_021161.1    | Ca_kabuli_chr02 | 33609171                | CC                              | TT              | 1946765036               |
| SNP_P4_26539_33625731 | NC_021161.1    | Ca_kabuli_chr02 | 33625731                | TT                              | CC              | 1946765038               |
| SNP_P4_26540_33642149 | NC_021161.1    | Ca_kabuli_chr02 | 33642149                | CC                              | TT              | 1946765040               |
| SNP_P4_26543_33684416 | NC_021161.1    | Ca_kabuli_chr02 | 33684416                | TT                              | CC              | 1946765042               |
| SNP_P4_26544_33695292 | NC_021161.1    | Ca_kabuli_chr02 | 33695292                | TT                              | AA              | 1946765044               |
| SNP_P4_26545_33751679 | NC_021161.1    | Ca_kabuli_chr02 | 33751679                | AA                              | TT              | 1946765046               |
| SNP_P4_26546_33760552 | NC_021161.1    | Ca_kabuli_chr02 | 33760552                | CC                              | TT              | 1946765048               |
| SNP_P4_26547_33761577 | NC_021161.1    | Ca_kabuli_chr02 | 33761577                | GG                              | AA              | 1946765050               |
| SNP_P4_26548_33794361 | NC_021161.1    | Ca_kabuli_chr02 | 33794361                | AA                              | GG              | 1946765051               |
| SNP_P4_26549_33854266 | NC_021161.1    | Ca_kabuli_chr02 | 33854266                | CC                              | TT              | 1946765054               |

| SNPs IDs              | Chromosome IDs | Chromosomes     | Physical positions (bp) | CDC Frontier (Reference genome) | (ILWC46 & LPNB) | NCBI SNPdb Accession IDs |
|-----------------------|----------------|-----------------|-------------------------|---------------------------------|-----------------|--------------------------|
| SNP_P4_26550_33860161 | NC_021161.1    | Ca_kabuli_chr02 | 33860161                | AA                              | GG              | 1946765056               |
| SNP_P4_26551_33860168 | NC_021161.1    | Ca_kabuli_chr02 | 33860168                | AA                              | CC              | 1946765058               |
| SNP_P4_26552_33860174 | NC_021161.1    | Ca_kabuli_chr02 | 33860174                | TT                              | AA              | 1946765060               |
| SNP_P4_26553_33882897 | NC_021161.1    | Ca_kabuli_chr02 | 33882897                | TT                              | GG              | 1946765062               |
| SNP_P4_26554_33944749 | NC_021161.1    | Ca_kabuli_chr02 | 33944749                | CC                              | AA              | 1946765064               |
| SNP_P4_26555_33955534 | NC_021161.1    | Ca_kabuli_chr02 | 33955534                | TT                              | CC              | 1946765066               |
| SNP_P4_26556_33955620 | NC_021161.1    | Ca_kabuli_chr02 | 33955620                | AA                              | GG              | 1946765068               |
| SNP_P4_26557_33959754 | NC_021161.1    | Ca_kabuli_chr02 | 33959754                | AA                              | GG              | 1946765070               |
| SNP_P4_26558_33959755 | NC_021161.1    | Ca_kabuli_chr02 | 33959755                | GG                              | TT              | 1946765072               |
| SNP_P4_26559_33959859 | NC_021161.1    | Ca_kabuli_chr02 | 33959859                | CC                              | TT              | 1946765074               |
| SNP_P4_26560_33959891 | NC_021161.1    | Ca_kabuli_chr02 | 33959891                | GG                              | AA              | 1946765076               |
| SNP_P4_26561_33984158 | NC_021161.1    | Ca_kabuli_chr02 | 33984158                | GG                              | TT              | 1946765078               |
| SNP_P4_26562_33984200 | NC_021161.1    | Ca_kabuli_chr02 | 33984200                | TT                              | AA              | 1946765080               |
| SNP_P4_26563_33984237 | NC_021161.1    | Ca_kabuli_chr02 | 33984237                | CC                              | TT              | 1946765082               |
| SNP_P4_26564_33984260 | NC_021161.1    | Ca_kabuli_chr02 | 33984260                | AA                              | GG              | 1946765084               |
| SNP_P4_26566_33984402 | NC_021161.1    | Ca_kabuli_chr02 | 33984402                | GG                              | AA              | 1946765086               |
| SNP_P4_26567_33984409 | NC_021161.1    | Ca_kabuli_chr02 | 33984409                | AA                              | TT              | 1946765088               |
| SNP_P4_26568_33984416 | NC_021161.1    | Ca_kabuli_chr02 | 33984416                | CC                              | TT              | 1946765090               |
| SNP_P4_26569_33984453 | NC_021161.1    | Ca_kabuli_chr02 | 33984453                | TT                              | CC              | 1946765092               |
| SNP_P4_26570_33984502 | NC_021161.1    | Ca_kabuli_chr02 | 33984502                | GG                              | AA              | 1946765094               |
| SNP_P4_26571_33984576 | NC_021161.1    | Ca_kabuli_chr02 | 33984576                | TT                              | GG              | 1946765095               |
| SNP_P4_26572_33984585 | NC_021161.1    | Ca_kabuli_chr02 | 33984585                | TT                              | GG              | 1946765097               |
| SNP_P4_26573_33984598 | NC_021161.1    | Ca_kabuli_chr02 | 33984598                | AA                              | CC              | 1946765099               |
| SNP_P4_26574_33984614 | NC_021161.1    | Ca_kabuli_chr02 | 33984614                | AA                              | TT              | 1946765101               |
| SNP_P4_26576_33984681 | NC_021161.1    | Ca_kabuli_chr02 | 33984681                | AA                              | TT              | 1946765103               |
| SNP_P4_26577_33985356 | NC_021161.1    | Ca_kabuli_chr02 | 33985356                | GG                              | AA              | 1946765105               |
| SNP_P4_26578_33985714 | NC_021161.1    | Ca_kabuli_chr02 | 33985714                | AA                              | CC              | 1946765107               |
| SNP_P4_26580_33986125 | NC_021161.1    | Ca_kabuli_chr02 | 33986125                | AA                              | CC              | 1946765109               |
| SNP_P4_26581_33986236 | NC_021161.1    | Ca_kabuli_chr02 | 33986236                | AA                              | CC              | 1946765111               |
| SNP_P4_26583_33986315 | NC_021161.1    | Ca_kabuli_chr02 | 33986315                | TT                              | GG              | 1946765113               |
| SNP_P4_26584_33986317 | NC_021161.1    | Ca_kabuli_chr02 | 33986317                | TT                              | CC              | 1946765115               |
| SNP_P4_26585_33986335 | NC_021161.1    | Ca_kabuli_chr02 | 33986335                | TT                              | CC              | 1946765117               |
| SNP_P4_26586_33986503 | NC_021161.1    | Ca_kabuli_chr02 | 33986503                | CC                              | AA              | 1946765119               |
| SNP_P4_26587_33986566 | NC_021161.1    | Ca_kabuli_chr02 | 33986566                | AA                              | GG              | 1946765121               |
| SNP_P4_26589_33986596 | NC_021161.1    | Ca_kabuli_chr02 | 33986596                | GG                              | TT              | 1946765123               |
| SNP_P4_26590_33986597 | NC_021161.1    | Ca_kabuli_chr02 | 33986597                | GG                              | TT              | 1946765125               |
| SNP_P4_26591_33986629 | NC_021161.1    | Ca_kabuli_chr02 | 33986629                | AA                              | TT              | 1946765127               |
| SNP_P4_26592_33986683 | NC_021161.1    | Ca_kabuli_chr02 | 33986683                | CC                              | TT              | 1946765129               |
| SNP_P4_26593_33986740 | NC_021161.1    | Ca_kabuli_chr02 | 33986740                | CC                              | TT              | 1946765131               |
| SNP_P4_26594_33986819 | NC_021161.1    | Ca_kabuli_chr02 | 33986819                | AA                              | TT              | 1946765133               |
| SNP_P4_26595_33986828 | NC_021161.1    | Ca_kabuli_chr02 | 33986828                | AA                              | GG              | 1946765135               |
| SNP_P4_26596_33986838 | NC_021161.1    | Ca_kabuli_chr02 | 33986838                | GG                              | AA              | 1946765137               |

| SNPs IDs              | Chromosome IDs | Chromosomes     | Physical positions (bp) | CDC Frontier (Reference genome) | (ILWC46 & LPNB) | NCBI SNPdb Accession IDs |
|-----------------------|----------------|-----------------|-------------------------|---------------------------------|-----------------|--------------------------|
| SNP_P4_26597_33986845 | NC_021161.1    | Ca_kabuli_chr02 | 33986845                | TT                              | GG              | 1946765139               |
| SNP_P4_26598_33986861 | NC_021161.1    | Ca_kabuli_chr02 | 33986861                | AA                              | TT              | 1946765141               |
| SNP_P4_26599_33986923 | NC_021161.1    | Ca_kabuli_chr02 | 33986923                | AA                              | TT              | 1946765142               |
| SNP_P4_26600_34021889 | NC_021161.1    | Ca_kabuli_chr02 | 34021889                | TT                              | AA              | 1946765144               |
| SNP_P4_26601_34021976 | NC_021161.1    | Ca_kabuli_chr02 | 34021976                | AA                              | CC              | 1946765146               |
| SNP_P4_26602_34022549 | NC_021161.1    | Ca_kabuli_chr02 | 34022549                | AA                              | CC              | 1946765148               |
| SNP_P4_26603_34022824 | NC_021161.1    | Ca_kabuli_chr02 | 34022824                | AA                              | GG              | 1946765150               |
| SNP_P4_26604_34022954 | NC_021161.1    | Ca_kabuli_chr02 | 34022954                | GG                              | AA              | 1946765152               |
| SNP_P4_26605_34024569 | NC_021161.1    | Ca_kabuli_chr02 | 34024569                | TT                              | GG              | 1946765154               |
| SNP_P4_26606_34024589 | NC_021161.1    | Ca_kabuli_chr02 | 34024589                | AA                              | TT              | 1946765156               |
| SNP_P4_26607_34024835 | NC_021161.1    | Ca_kabuli_chr02 | 34024835                | AA                              | CC              | 1946765158               |
| SNP_P4_26608_34025175 | NC_021161.1    | Ca_kabuli_chr02 | 34025175                | AA                              | TT              | 1946765160               |
| SNP_P4_26609_34025270 | NC_021161.1    | Ca_kabuli_chr02 | 34025270                | TT                              | CC              | 1946765162               |
| SNP_P4_26610_34025286 | NC_021161.1    | Ca_kabuli_chr02 | 34025286                | TT                              | CC              | 1946765164               |
| SNP_P4_26611_34025330 | NC_021161.1    | Ca_kabuli_chr02 | 34025330                | AA                              | TT              | 1946765166               |
| SNP_P4_26612_34025456 | NC_021161.1    | Ca_kabuli_chr02 | 34025456                | CC                              | TT              | 1946765168               |
| SNP_P4_26613_34025637 | NC_021161.1    | Ca_kabuli_chr02 | 34025637                | TT                              | CC              | 1946765170               |
| SNP_P4_26614_34025653 | NC_021161.1    | Ca_kabuli_chr02 | 34025653                | TT                              | GG              | 1946765172               |
| SNP_P4_26615_34028460 | NC_021161.1    | Ca_kabuli_chr02 | 34028460                | AA                              | CC              | 1946765174               |
| SNP_P4_26616_34028465 | NC_021161.1    | Ca_kabuli_chr02 | 34028465                | AA                              | TT              | 1946765176               |
| SNP_P4_26617_34028525 | NC_021161.1    | Ca_kabuli_chr02 | 34028525                | AA                              | TT              | 1946765178               |
| SNP_P4_26618_34028549 | NC_021161.1    | Ca_kabuli_chr02 | 34028549                | CC                              | AA              | 1946765180               |
| SNP_P4_26619_34028572 | NC_021161.1    | Ca_kabuli_chr02 | 34028572                | AA                              | TT              | 1946765182               |
| SNP_P4_26620_34028751 | NC_021161.1    | Ca_kabuli_chr02 | 34028751                | TT                              | CC              | 1946765184               |
| SNP_P4_26621_34028821 | NC_021161.1    | Ca_kabuli_chr02 | 34028821                | TT                              | CC              | 1946765186               |
| SNP_P4_26622_34028828 | NC_021161.1    | Ca_kabuli_chr02 | 34028828                | AA                              | GG              | 1946765188               |
| SNP_P4_26624_34028908 | NC_021161.1    | Ca_kabuli_chr02 | 34028908                | TT                              | CC              | 1946765190               |
| SNP_P4_26625_34037724 | NC_021161.1    | Ca_kabuli_chr02 | 34037724                | TT                              | GG              | 1946765192               |
| SNP_P4_26626_34037739 | NC_021161.1    | Ca_kabuli_chr02 | 34037739                | AA                              | TT              | 1946765194               |
| SNP_P4_26627_34038155 | NC_021161.1    | Ca_kabuli_chr02 | 34038155                | TT                              | CC              | 1946765196               |
| SNP_P4_26628_34038534 | NC_021161.1    | Ca_kabuli_chr02 | 34038534                | GG                              | AA              | 1946765198               |
| SNP_P4_26629_34041417 | NC_021161.1    | Ca_kabuli_chr02 | 34041417                | AA                              | GG              | 1946765200               |
| SNP_P4_26630_34041444 | NC_021161.1    | Ca_kabuli_chr02 | 34041444                | AA                              | GG              | 1946765202               |
| SNP_P4_26631_34054932 | NC_021161.1    | Ca_kabuli_chr02 | 34054932                | AA                              | TT              | 1946765204               |
| SNP_P4_26633_34061644 | NC_021161.1    | Ca_kabuli_chr02 | 34061644                | CC                              | TT              | 1946765206               |
| SNP_P4_26634_34062809 | NC_021161.1    | Ca_kabuli_chr02 | 34062809                | TT                              | AA              | 1946765208               |
| SNP_P4_26635_34063422 | NC_021161.1    | Ca_kabuli_chr02 | 34063422                | CC                              | TT              | 1946765210               |
| SNP_P4_26636_34063452 | NC_021161.1    | Ca_kabuli_chr02 | 34063452                | CC                              | TT              | 1946765212               |
| SNP_P4_26637_34063822 | NC_021161.1    | Ca_kabuli_chr02 | 34063822                | GG                              | AA              | 1946765214               |
| SNP_P4_26639_34076126 | NC_021161.1    | Ca_kabuli_chr02 | 34076126                | AA                              | CC              | 1946765217               |
| SNP_P4_26640_34076196 | NC_021161.1    | Ca_kabuli_chr02 | 34076196                | AA                              | GG              | 1946765219               |
| SNP_P4_26641_34076782 | NC_021161.1    | Ca_kabuli_chr02 | 34076782                | CC                              | AA              | 1946765221               |

| SNPs IDs              | Chromosome IDs | Chromosomes     | Physical positions (bp) | CDC Frontier (Reference genome) | (ILWC46 & LPNB) | NCBI SNPdb Accession IDs |
|-----------------------|----------------|-----------------|-------------------------|---------------------------------|-----------------|--------------------------|
| SNP_P4_26642_34085738 | NC_021161.1    | Ca_kabuli_chr02 | 34085738                | GG                              | AA              | 1946765223               |
| SNP_P4_26643_34086029 | NC_021161.1    | Ca_kabuli_chr02 | 34086029                | CC                              | TT              | 1946765225               |
| SNP_P4_26644_34086035 | NC_021161.1    | Ca_kabuli_chr02 | 34086035                | CC                              | GG              | 1946765227               |
| SNP_P4_26645_34086050 | NC_021161.1    | Ca_kabuli_chr02 | 34086050                | GG                              | AA              | 1946765229               |
| SNP_P4_26646_34086119 | NC_021161.1    | Ca_kabuli_chr02 | 34086119                | AA                              | GG              | 1946765231               |
| SNP_P4_26647_34086122 | NC_021161.1    | Ca_kabuli_chr02 | 34086122                | CC                              | TT              | 1946765233               |
| SNP_P4_26648_34086155 | NC_021161.1    | Ca_kabuli_chr02 | 34086155                | GG                              | AA              | 1946765235               |
| SNP_P4_26649_34086188 | NC_021161.1    | Ca_kabuli_chr02 | 34086188                | GG                              | AA              | 1946765237               |
| SNP_P4_26650_34086198 | NC_021161.1    | Ca_kabuli_chr02 | 34086198                | TT                              | CC              | 1946765239               |
| SNP_P4_26651_34086286 | NC_021161.1    | Ca_kabuli_chr02 | 34086286                | CC                              | TT              | 1946765241               |
| SNP_P4_26652_34086296 | NC_021161.1    | Ca_kabuli_chr02 | 34086296                | CC                              | TT              | 1946765243               |
| SNP_P4_26653_34086338 | NC_021161.1    | Ca_kabuli_chr02 | 34086338                | AA                              | GG              | 1946765245               |
| SNP_P4_26654_34086534 | NC_021161.1    | Ca_kabuli_chr02 | 34086534                | TT                              | CC              | 1946765247               |
| SNP_P4_26655_34087085 | NC_021161.1    | Ca_kabuli_chr02 | 34087085                | TT                              | CC              | 1946765249               |
| SNP_P4_26657_34119105 | NC_021161.1    | Ca_kabuli_chr02 | 34119105                | AA                              | GG              | 1946765251               |
| SNP_P4_26658_34140804 | NC_021161.1    | Ca_kabuli_chr02 | 34140804                | GG                              | TT              | 1946765253               |
| SNP_P4_26659_34143336 | NC_021161.1    | Ca_kabuli_chr02 | 34143336                | CC                              | TT              | 1946765256               |
| SNP_P4_26660_34143363 | NC_021161.1    | Ca_kabuli_chr02 | 34143363                | CC                              | TT              | 1946765258               |
| SNP_P4_26661_34173185 | NC_021161.1    | Ca_kabuli_chr02 | 34173185                | AA                              | GG              | 1946765260               |
| SNP_P4_26662_34184530 | NC_021161.1    | Ca_kabuli_chr02 | 34184530                | AA                              | TT              | 1946765262               |
| SNP_P4_26663_34188650 | NC_021161.1    | Ca_kabuli_chr02 | 34188650                | AA                              | GG              | 1946765264               |
| SNP_P4_26664_34195481 | NC_021161.1    | Ca_kabuli_chr02 | 34195481                | AA                              | TT              | 1946765266               |
| SNP_P4_26665_34201436 | NC_021161.1    | Ca_kabuli_chr02 | 34201436                | AA                              | CC              | 1946765268               |
| SNP_P4_26666_34205776 | NC_021161.1    | Ca_kabuli_chr02 | 34205776                | AA                              | GG              | 1946765270               |
| SNP_P4_26667_34232763 | NC_021161.1    | Ca_kabuli_chr02 | 34232763                | GG                              | AA              | 1946765272               |
| SNP_P4_26668_34254719 | NC_021161.1    | Ca_kabuli_chr02 | 34254719                | TT                              | CC              | 1946765274               |
| SNP_P4_26669_34262506 | NC_021161.1    | Ca_kabuli_chr02 | 34262506                | TT                              | GG              | 1946765276               |
| SNP_P4_26670_34264900 | NC_021161.1    | Ca_kabuli_chr02 | 34264900                | AA                              | CC              | 1946765278               |
| SNP_P4_26672_34272155 | NC_021161.1    | Ca_kabuli_chr02 | 34272155                | TT                              | GG              | 1946765280               |
| SNP_P4_26673_34272158 | NC_021161.1    | Ca_kabuli_chr02 | 34272158                | AA                              | GG              | 1946765282               |
| SNP_P4_26674_34278643 | NC_021161.1    | Ca_kabuli_chr02 | 34278643                | AA                              | CC              | 1946765284               |
| SNP_P4_26675_34290297 | NC_021161.1    | Ca_kabuli_chr02 | 34290297                | AA                              | GG              | 1946765286               |
| SNP_P4_26677_34327327 | NC_021161.1    | Ca_kabuli_chr02 | 34327327                | AA                              | GG              | 1946765288               |
| SNP_P4_26678_34330483 | NC_021161.1    | Ca_kabuli_chr02 | 34330483                | TT                              | AA              | 1946765290               |
| SNP_P4_26679_34330950 | NC_021161.1    | Ca_kabuli_chr02 | 34330950                | AA                              | GG              | 1946765292               |
| SNP_P4_26680_34330953 | NC_021161.1    | Ca_kabuli_chr02 | 34330953                | AA                              | GG              | 1946765294               |
| SNP_P4_26681_34333227 | NC_021161.1    | Ca_kabuli_chr02 | 34333227                | TT                              | CC              | 1946765296               |
| SNP_P4_26682_34333237 | NC_021161.1    | Ca_kabuli_chr02 | 34333237                | AA                              | GG              | 1946765298               |
| SNP_P4_26683_34333267 | NC_021161.1    | Ca_kabuli_chr02 | 34333267                | CC                              | TT              | 1946765301               |
| SNP_P4_26684_34334980 | NC_021161.1    | Ca_kabuli_chr02 | 34334980                | AA                              | CC              | 1946765303               |
| SNP_P4_26685_34336271 | NC_021161.1    | Ca_kabuli_chr02 | 34336271                | GG                              | AA              | 1946765305               |
| SNP_P4_26686_34336281 | NC_021161.1    | Ca_kabuli_chr02 | 34336281                | AA                              | TT              | 1946765307               |

| SNPs IDs              | Chromosome IDs | Chromosomes     | Physical positions (bp) | CDC Frontier (Reference genome) | (ILWC46 & LPNB) | NCBI SNPdb Accession IDs |
|-----------------------|----------------|-----------------|-------------------------|---------------------------------|-----------------|--------------------------|
| SNP_P4_26687_34336334 | NC_021161.1    | Ca_kabuli_chr02 | 34336334                | TT                              | GG              | 1946765309               |
| SNP_P4_26688_34340532 | NC_021161.1    | Ca_kabuli_chr02 | 34340532                | GG                              | AA              | 1946765311               |
| SNP_P4_26689_34340718 | NC_021161.1    | Ca_kabuli_chr02 | 34340718                | AA                              | GG              | 1946765313               |
| SNP_P4_26690_34340725 | NC_021161.1    | Ca_kabuli_chr02 | 34340725                | GG                              | AA              | 1946765315               |
| SNP_P4_26691_34341236 | NC_021161.1    | Ca_kabuli_chr02 | 34341236                | GG                              | AA              | 1946765317               |
| SNP_P4_26692_34341265 | NC_021161.1    | Ca_kabuli_chr02 | 34341265                | CC                              | TT              | 1946765319               |
| SNP_P4_26693_34341466 | NC_021161.1    | Ca_kabuli_chr02 | 34341466                | GG                              | AA              | 1946765321               |
| SNP_P4_26694_34341471 | NC_021161.1    | Ca_kabuli_chr02 | 34341471                | TT                              | AA              | 1946765323               |
| SNP_P4_26695_34341929 | NC_021161.1    | Ca_kabuli_chr02 | 34341929                | AA                              | GG              | 1946765325               |
| SNP_P4_26696_34341953 | NC_021161.1    | Ca_kabuli_chr02 | 34341953                | TT                              | CC              | 1946765327               |
| SNP_P4_26699_34353800 | NC_021161.1    | Ca_kabuli_chr02 | 34353800                | CC                              | TT              | 1946765329               |
| SNP_P4_26701_34354082 | NC_021161.1    | Ca_kabuli_chr02 | 34354082                | TT                              | CC              | 1946765331               |
| SNP_P4_26702_34354372 | NC_021161.1    | Ca_kabuli_chr02 | 34354372                | GG                              | TT              | 1946765333               |
| SNP_P4_26703_34354616 | NC_021161.1    | Ca_kabuli_chr02 | 34354616                | GG                              | AA              | 1946765335               |
| SNP_P4_26704_34354632 | NC_021161.1    | Ca_kabuli_chr02 | 34354632                | AA                              | TT              | 1946765337               |
| SNP_P4_26705_34355149 | NC_021161.1    | Ca_kabuli_chr02 | 34355149                | GG                              | CC              | 1946765339               |
| SNP_P4_26708_34355499 | NC_021161.1    | Ca_kabuli_chr02 | 34355499                | TT                              | AA              | 1946765341               |
| SNP_P4_26710_34355603 | NC_021161.1    | Ca_kabuli_chr02 | 34355603                | AA                              | GG              | 1946765343               |
| SNP_P4_26711_34355766 | NC_021161.1    | Ca_kabuli_chr02 | 34355766                | AA                              | GG              | 1946765345               |
| SNP_P4_26712_34355804 | NC_021161.1    | Ca_kabuli_chr02 | 34355804                | AA                              | GG              | 1946765347               |
| SNP_P4_26714_34358169 | NC_021161.1    | Ca_kabuli_chr02 | 34358169                | TT                              | CC              | 1946765349               |
| SNP_P4_26716_34432316 | NC_021161.1    | Ca_kabuli_chr02 | 34432316                | GG                              | AA              | 1946765351               |
| SNP_P4_26718_34497103 | NC_021161.1    | Ca_kabuli_chr02 | 34497103                | CC                              | TT              | 1946765353               |
| SNP_P4_26719_34499652 | NC_021161.1    | Ca_kabuli_chr02 | 34499652                | GG                              | TT              | 1946765355               |
| SNP_P4_26720_34508430 | NC_021161.1    | Ca_kabuli_chr02 | 34508430                | GG                              | AA              | 1946765357               |
| SNP_P4_26721_34530405 | NC_021161.1    | Ca_kabuli_chr02 | 34530405                | CC                              | TT              | 1946765359               |
| SNP_P4_26722_34542511 | NC_021161.1    | Ca_kabuli_chr02 | 34542511                | AA                              | GG              | 1946765361               |
| SNP_P4_26724_34566542 | NC_021161.1    | Ca_kabuli_chr02 | 34566542                | AA                              | CC              | 1946765363               |
| SNP_P4_26725_34566561 | NC_021161.1    | Ca_kabuli_chr02 | 34566561                | AA                              | TT              | 1946765365               |
| SNP_P4_26726_34566633 | NC_021161.1    | Ca_kabuli_chr02 | 34566633                | TT                              | CC              | 1946765367               |
| SNP_P4_26727_34566670 | NC_021161.1    | Ca_kabuli_chr02 | 34566670                | AA                              | GG              | 1946765369               |
| SNP_P4_26728_34566798 | NC_021161.1    | Ca_kabuli_chr02 | 34566798                | CC                              | GG              | 1946765371               |
| SNP_P4_26729_34566862 | NC_021161.1    | Ca_kabuli_chr02 | 34566862                | AA                              | CC              | 1946765373               |
| SNP_P4_26730_34566908 | NC_021161.1    | Ca_kabuli_chr02 | 34566908                | CC                              | TT              | 1946765376               |
| SNP_P4_26731_34566945 | NC_021161.1    | Ca_kabuli_chr02 | 34566945                | TT                              | CC              | 1946765378               |
| SNP_P4_26732_34567017 | NC_021161.1    | Ca_kabuli_chr02 | 34567017                | AA                              | GG              | 1946765380               |
| SNP_P4_26733_34567061 | NC_021161.1    | Ca_kabuli_chr02 | 34567061                | AA                              | TT              | 1946765382               |
| SNP_P4_26734_34567101 | NC_021161.1    | Ca_kabuli_chr02 | 34567101                | TT                              | GG              | 1946765384               |
| SNP_P4_26735_34567153 | NC_021161.1    | Ca_kabuli_chr02 | 34567153                | TT                              | GG              | 1946765386               |
| SNP_P4_26736_34567161 | NC_021161.1    | Ca_kabuli_chr02 | 34567161                | TT                              | CC              | 1946765388               |
| SNP_P4_26739_34588450 | NC_021161.1    | Ca_kabuli_chr02 | 34588450                | CC                              | TT              | 1946765390               |
| SNP_P4_26740_34648174 | NC_021161.1    | Ca_kabuli_chr02 | 34648174                | CC                              | TT              | 1946765392               |



| SNPs IDs              | Chromosome IDs | Chromosomes     | Physical positions (bp) | CDC Frontier (Reference genome) | (ILWC46 & LPNB) | NCBI SNPdb Accession IDs |
|-----------------------|----------------|-----------------|-------------------------|---------------------------------|-----------------|--------------------------|
| SNP_P4_26741_34658890 | NC_021161.1    | Ca_kabuli_chr02 | 34658890                | TT                              | AA              | 1946765394               |
| SNP_P4_26742_34672336 | NC_021161.1    | Ca_kabuli_chr02 | 34672336                | AA                              | GG              | 1946765396               |
| SNP_P4_26743_34683522 | NC_021161.1    | Ca_kabuli_chr02 | 34683522                | TT                              | AA              | 1946765398               |
| SNP_P4_26744_34683539 | NC_021161.1    | Ca_kabuli_chr02 | 34683539                | CC                              | TT              | 1946765400               |
| SNP_P4_26745_34683576 | NC_021161.1    | Ca_kabuli_chr02 | 34683576                | CC                              | TT              | 1946765402               |
| SNP_P4_26746_34683739 | NC_021161.1    | Ca_kabuli_chr02 | 34683739                | AA                              | CC              | 1946765404               |
| SNP_P4_26748_34683876 | NC_021161.1    | Ca_kabuli_chr02 | 34683876                | AA                              | GG              | 1946765406               |
| SNP_P4_26749_34683889 | NC_021161.1    | Ca_kabuli_chr02 | 34683889                | AA                              | TT              | 1946765408               |
| SNP_P4_26750_34683928 | NC_021161.1    | Ca_kabuli_chr02 | 34683928                | TT                              | AA              | 1946765410               |
| SNP_P4_26751_34683949 | NC_021161.1    | Ca_kabuli_chr02 | 34683949                | CC                              | AA              | 1946765412               |
| SNP_P4_26752_34684026 | NC_021161.1    | Ca_kabuli_chr02 | 34684026                | TT                              | CC              | 1946765414               |
| SNP_P4_26753_34684138 | NC_021161.1    | Ca_kabuli_chr02 | 34684138                | GG                              | AA              | 1946765416               |
| SNP_P4_26754_34684183 | NC_021161.1    | Ca_kabuli_chr02 | 34684183                | AA                              | GG              | 1946765418               |
| SNP_P4_26755_34684216 | NC_021161.1    | Ca_kabuli_chr02 | 34684216                | AA                              | GG              | 1946765420               |
| SNP_P4_26756_34684222 | NC_021161.1    | Ca_kabuli_chr02 | 34684222                | GG                              | AA              | 1946765422               |
| SNP_P4_26757_34684251 | NC_021161.1    | Ca_kabuli_chr02 | 34684251                | GG                              | TT              | 1946765424               |
| SNP_P4_26758_34684271 | NC_021161.1    | Ca_kabuli_chr02 | 34684271                | AA                              | TT              | 1946765426               |
| SNP_P4_26759_34684276 | NC_021161.1    | Ca_kabuli_chr02 | 34684276                | AA                              | GG              | 1946765428               |
| SNP_P4_26760_34684296 | NC_021161.1    | Ca_kabuli_chr02 | 34684296                | AA                              | GG              | 1946765430               |
| SNP_P4_26761_34684314 | NC_021161.1    | Ca_kabuli_chr02 | 34684314                | GG                              | CC              | 1946765432               |
| SNP_P4_26762_34684322 | NC_021161.1    | Ca_kabuli_chr02 | 34684322                | GG                              | CC              | 1946765435               |
| SNP_P4_26763_34684327 | NC_021161.1    | Ca_kabuli_chr02 | 34684327                | AA                              | GG              | 1946765437               |
| SNP_P4_26764_34684342 | NC_021161.1    | Ca_kabuli_chr02 | 34684342                | TT                              | GG              | 1946765439               |
| SNP_P4_26765_34684354 | NC_021161.1    | Ca_kabuli_chr02 | 34684354                | TT                              | CC              | 1946765441               |
| SNP_P4_26767_34684403 | NC_021161.1    | Ca_kabuli_chr02 | 34684403                | GG                              | AA              | 1946765443               |
| SNP_P4_26768_34684428 | NC_021161.1    | Ca_kabuli_chr02 | 34684428                | GG                              | CC              | 1946765445               |
| SNP_P4_26769_34684448 | NC_021161.1    | Ca_kabuli_chr02 | 34684448                | CC                              | TT              | 1946765447               |
| SNP_P4_26770_34684509 | NC_021161.1    | Ca_kabuli_chr02 | 34684509                | TT                              | GG              | 1946765449               |
| SNP_P4_26772_34684646 | NC_021161.1    | Ca_kabuli_chr02 | 34684646                | GG                              | AA              | 1946765451               |
| SNP_P4_26774_34684732 | NC_021161.1    | Ca_kabuli_chr02 | 34684732                | AA                              | GG              | 1946765454               |
| SNP_P4_26775_34684742 | NC_021161.1    | Ca_kabuli_chr02 | 34684742                | GG                              | AA              | 1946765456               |
| SNP_P4_26776_34684754 | NC_021161.1    | Ca_kabuli_chr02 | 34684754                | GG                              | TT              | 1946765458               |
| SNP_P4_26777_34684850 | NC_021161.1    | Ca_kabuli_chr02 | 34684850                | TT                              | CC              | 1946765460               |
| SNP_P4_26779_34685009 | NC_021161.1    | Ca_kabuli_chr02 | 34685009                | CC                              | AA              | 1946765462               |
| SNP_P4_26780_34685048 | NC_021161.1    | Ca_kabuli_chr02 | 34685048                | CC                              | TT              | 1946765463               |
| SNP_P4_26781_34685085 | NC_021161.1    | Ca_kabuli_chr02 | 34685085                | CC                              | TT              | 1946765466               |
| SNP_P4_26782_34685101 | NC_021161.1    | Ca_kabuli_chr02 | 34685101                | CC                              | TT              | 1946765468               |
| SNP_P4_26783_34685116 | NC_021161.1    | Ca_kabuli_chr02 | 34685116                | TT                              | GG              | 1946765470               |
| SNP_P4_26784_34685148 | NC_021161.1    | Ca_kabuli_chr02 | 34685148                | GG                              | TT              | 1946765472               |
| SNP_P4_26785_34685180 | NC_021161.1    | Ca_kabuli_chr02 | 34685180                | CC                              | TT              | 1946765474               |
| SNP_P4_26787_34685510 | NC_021161.1    | Ca_kabuli_chr02 | 34685510                | TT                              | CC              | 1946765476               |
| SNP_P4_26788_34685620 | NC_021161.1    | Ca_kabuli_chr02 | 34685620                | GG                              | TT              | 1946765478               |

| SNPs IDs              | Chromosome IDs | Chromosomes     | Physical positions (bp) | CDC Frontier (Reference genome) | (ILWC46 & LPNB) | NCBI SNPdb Accession IDs |
|-----------------------|----------------|-----------------|-------------------------|---------------------------------|-----------------|--------------------------|
| SNP_P4_26789_34685687 | NC_021161.1    | Ca_kabuli_chr02 | 34685687                | GG                              | AA              | 1946765480               |
| SNP_P4_26790_34685691 | NC_021161.1    | Ca_kabuli_chr02 | 34685691                | TT                              | AA              | 1946765482               |
| SNP_P4_26792_34685736 | NC_021161.1    | Ca_kabuli_chr02 | 34685736                | CC                              | TT              | 1946765484               |
| SNP_P4_26793_34685789 | NC_021161.1    | Ca_kabuli_chr02 | 34685789                | TT                              | GG              | 1946765486               |
| SNP_P4_26794_34685796 | NC_021161.1    | Ca_kabuli_chr02 | 34685796                | TT                              | AA              | 1946765488               |
| SNP_P4_26795_34719975 | NC_021161.1    | Ca_kabuli_chr02 | 34719975                | CC                              | AA              | 1946765490               |
| SNP_P4_26796_34726976 | NC_021161.1    | Ca_kabuli_chr02 | 34726976                | TT                              | CC              | 1946765492               |
| SNP_P4_26797_34726979 | NC_021161.1    | Ca_kabuli_chr02 | 34726979                | AA                              | GG              | 1946765494               |
| SNP_P4_26798_34739253 | NC_021161.1    | Ca_kabuli_chr02 | 34739253                | AA                              | GG              | 1946765497               |
| SNP_P4_26799_34768734 | NC_021161.1    | Ca_kabuli_chr02 | 34768734                | TT                              | GG              | 1946765499               |
| SNP_P4_26801_34785590 | NC_021161.1    | Ca_kabuli_chr02 | 34785590                | TT                              | GG              | 1946765501               |
| SNP_P4_26802_34803341 | NC_021161.1    | Ca_kabuli_chr02 | 34803341                | TT                              | CC              | 1946765503               |
| SNP_P4_26803_34807547 | NC_021161.1    | Ca_kabuli_chr02 | 34807547                | GG                              | AA              | 1946765505               |
| SNP_P4_26804_34809592 | NC_021161.1    | Ca_kabuli_chr02 | 34809592                | GG                              | AA              | 1946765507               |
| SNP_P4_26805_34810138 | NC_021161.1    | Ca_kabuli_chr02 | 34810138                | GG                              | AA              | 1946765509               |
| SNP_P4_26806_34824845 | NC_021161.1    | Ca_kabuli_chr02 | 34824845                | AA                              | GG              | 1946765511               |
| SNP_P4_26807_34830733 | NC_021161.1    | Ca_kabuli_chr02 | 34830733                | CC                              | GG              | 1946765513               |
| SNP_P4_26808_34830827 | NC_021161.1    | Ca_kabuli_chr02 | 34830827                | CC                              | TT              | 1946765515               |
| SNP_P4_26809_34830967 | NC_021161.1    | Ca_kabuli_chr02 | 34830967                | GG                              | AA              | 1946765517               |
| SNP_P4_26810_34831021 | NC_021161.1    | Ca_kabuli_chr02 | 34831021                | CC                              | TT              | 1946765519               |
| SNP_P4_26811_34831161 | NC_021161.1    | Ca_kabuli_chr02 | 34831161                | TT                              | CC              | 1946765521               |
| SNP_P4_26814_34905321 | NC_021161.1    | Ca_kabuli_chr02 | 34905321                | CC                              | TT              | 1946765523               |
| SNP_P4_26815_34924326 | NC_021161.1    | Ca_kabuli_chr02 | 34924326                | TT                              | GG              | 1946765526               |
| SNP_P4_26816_34943595 | NC_021161.1    | Ca_kabuli_chr02 | 34943595                | TT                              | CC              | 1946765528               |
| SNP_P4_26817_34943633 | NC_021161.1    | Ca_kabuli_chr02 | 34943633                | AA                              | CC              | 1946765530               |
| SNP_P4_26819_34983186 | NC_021161.1    | Ca_kabuli_chr02 | 34983186                | TT                              | CC              | 1946765532               |
| SNP_P4_26821_35073717 | NC_021161.1    | Ca_kabuli_chr02 | 35073717                | CC                              | TT              | 1946765534               |
| SNP_P4_26822_35074766 | NC_021161.1    | Ca_kabuli_chr02 | 35074766                | CC                              | TT              | 1946765536               |
| SNP_P4_26824_35125679 | NC_021161.1    | Ca_kabuli_chr02 | 35125679                | GG                              | AA              | 1946765538               |
| SNP_P4_26829_35246849 | NC_021161.1    | Ca_kabuli_chr02 | 35246849                | TT                              | CC              | 1946765540               |
| SNP_P4_26830_35246904 | NC_021161.1    | Ca_kabuli_chr02 | 35246904                | AA                              | CC              | 1946765542               |
| SNP_P4_26831_35258079 | NC_021161.1    | Ca_kabuli_chr02 | 35258079                | CC                              | TT              | 1946765544               |
| SNP_P4_26832_35258090 | NC_021161.1    | Ca_kabuli_chr02 | 35258090                | AA                              | GG              | 1946765546               |
| SNP_P4_26833_35258094 | NC_021161.1    | Ca_kabuli_chr02 | 35258094                | TT                              | CC              | 1946765548               |
| SNP_P4_26834_35258397 | NC_021161.1    | Ca_kabuli_chr02 | 35258397                | TT                              | CC              | 1946765550               |
| SNP_P4_26836_35258650 | NC_021161.1    | Ca_kabuli_chr02 | 35258650                | GG                              | AA              | 1946765552               |
| SNP_P4_26837_35258711 | NC_021161.1    | Ca_kabuli_chr02 | 35258711                | TT                              | CC              | 1946765554               |
| SNP_P4_26839_35258756 | NC_021161.1    | Ca_kabuli_chr02 | 35258756                | CC                              | TT              | 1946765556               |
| SNP_P4_26840_35258801 | NC_021161.1    | Ca_kabuli_chr02 | 35258801                | TT                              | CC              | 1946765558               |
| SNP_P4_26841_35258841 | NC_021161.1    | Ca_kabuli_chr02 | 35258841                | TT                              | CC              | 1946765560               |
| SNP_P4_26842_35258852 | NC_021161.1    | Ca_kabuli_chr02 | 35258852                | AA                              | GG              | 1946765562               |
| SNP_P4_26843_35258857 | NC_021161.1    | Ca_kabuli_chr02 | 35258857                | GG                              | AA              | 1946765564               |

| SNPs IDs              | Chromosome IDs | Chromosomes     | Physical positions (bp) | CDC Frontier (Reference genome) | (ILWC46 & LPNB) | NCBI SNPdb Accession IDs |
|-----------------------|----------------|-----------------|-------------------------|---------------------------------|-----------------|--------------------------|
| SNP_P4_26844_35258881 | NC_021161.1    | Ca_kabuli_chr02 | 35258881                | TT                              | CC              | 1946765566               |
| SNP_P4_26845_35259129 | NC_021161.1    | Ca_kabuli_chr02 | 35259129                | TT                              | AA              | 1946765568               |
| SNP_P4_26846_35259139 | NC_021161.1    | Ca_kabuli_chr02 | 35259139                | AA                              | TT              | 1946765570               |
| SNP_P4_26847_35259149 | NC_021161.1    | Ca_kabuli_chr02 | 35259149                | CC                              | TT              | 1946765572               |
| SNP_P4_26849_35260917 | NC_021161.1    | Ca_kabuli_chr02 | 35260917                | CC                              | TT              | 1946765574               |
| SNP_P4_26850_35273944 | NC_021161.1    | Ca_kabuli_chr02 | 35273944                | TT                              | AA              | 1946765576               |
| SNP_P4_26851_35287542 | NC_021161.1    | Ca_kabuli_chr02 | 35287542                | CC                              | TT              | 1946765578               |
| SNP_P4_26852_35287920 | NC_021161.1    | Ca_kabuli_chr02 | 35287920                | CC                              | TT              | 1946765580               |
| SNP_P4_26853_35287962 | NC_021161.1    | Ca_kabuli_chr02 | 35287962                | GG                              | CC              | 1946765582               |
| SNP_P4_26854_35288028 | NC_021161.1    | Ca_kabuli_chr02 | 35288028                | TT                              | AA              | 1946765584               |
| SNP_P4_26855_35288039 | NC_021161.1    | Ca_kabuli_chr02 | 35288039                | AA                              | GG              | 1946765586               |
| SNP_P4_26856_35288097 | NC_021161.1    | Ca_kabuli_chr02 | 35288097                | TT                              | CC              | 1946765588               |
| SNP_P4_26858_35288190 | NC_021161.1    | Ca_kabuli_chr02 | 35288190                | AA                              | GG              | 1946765590               |
| SNP_P4_26859_35288203 | NC_021161.1    | Ca_kabuli_chr02 | 35288203                | AA                              | GG              | 1946765592               |
| SNP_P4_26860_35288205 | NC_021161.1    | Ca_kabuli_chr02 | 35288205                | GG                              | TT              | 1946765595               |
| SNP_P4_26861_35288260 | NC_021161.1    | Ca_kabuli_chr02 | 35288260                | AA                              | GG              | 1946765597               |
| SNP_P4_26862_35288350 | NC_021161.1    | Ca_kabuli_chr02 | 35288350                | TT                              | CC              | 1946765599               |
| SNP_P4_26863_35288351 | NC_021161.1    | Ca_kabuli_chr02 | 35288351                | TT                              | CC              | 1946765601               |
| SNP_P4_26864_35288379 | NC_021161.1    | Ca_kabuli_chr02 | 35288379                | AA                              | CC              | 1946765603               |
| SNP_P4_26865_35288412 | NC_021161.1    | Ca_kabuli_chr02 | 35288412                | GG                              | TT              | 1946765605               |
| SNP_P4_26867_35288529 | NC_021161.1    | Ca_kabuli_chr02 | 35288529                | AA                              | TT              | 1946765607               |
| SNP_P4_26868_35288530 | NC_021161.1    | Ca_kabuli_chr02 | 35288530                | CC                              | TT              | 1946765609               |
| SNP_P4_26869_35288540 | NC_021161.1    | Ca_kabuli_chr02 | 35288540                | TT                              | AA              | 1946765611               |
| SNP_P4_26870_35288578 | NC_021161.1    | Ca_kabuli_chr02 | 35288578                | GG                              | TT              | 1946765613               |
| SNP_P4_26871_35288581 | NC_021161.1    | Ca_kabuli_chr02 | 35288581                | GG                              | AA              | 1946765615               |
| SNP_P4_26872_35288703 | NC_021161.1    | Ca_kabuli_chr02 | 35288703                | TT                              | CC              | 1946765617               |
| SNP_P4_26873_35288746 | NC_021161.1    | Ca_kabuli_chr02 | 35288746                | AA                              | TT              | 1946765619               |
| SNP_P4_26874_35288859 | NC_021161.1    | Ca_kabuli_chr02 | 35288859                | TT                              | GG              | 1946765621               |
| SNP_P4_26875_35288863 | NC_021161.1    | Ca_kabuli_chr02 | 35288863                | GG                              | TT              | 1946765623               |
| SNP_P4_26876_35288966 | NC_021161.1    | Ca_kabuli_chr02 | 35288966                | TT                              | CC              | 1946765625               |
| SNP_P4_26877_35288967 | NC_021161.1    | Ca_kabuli_chr02 | 35288967                | TT                              | AA              | 1946765627               |
| SNP_P4_26878_35289047 | NC_021161.1    | Ca_kabuli_chr02 | 35289047                | TT                              | CC              | 1946765629               |
| SNP_P4_26879_35289099 | NC_021161.1    | Ca_kabuli_chr02 | 35289099                | TT                              | GG              | 1946765631               |
| SNP_P4_26880_35289103 | NC_021161.1    | Ca_kabuli_chr02 | 35289103                | GG                              | CC              | 1946765633               |
| SNP_P4_26881_35289282 | NC_021161.1    | Ca_kabuli_chr02 | 35289282                | AA                              | CC              | 1946765635               |
| SNP_P4_26882_35289300 | NC_021161.1    | Ca_kabuli_chr02 | 35289300                | AA                              | CC              | 1946765637               |
| SNP_P4_26883_35289310 | NC_021161.1    | Ca_kabuli_chr02 | 35289310                | TT                              | AA              | 1946765639               |
| SNP_P4_26884_35289367 | NC_021161.1    | Ca_kabuli_chr02 | 35289367                | GG                              | TT              | 1946765641               |
| SNP_P4_26885_35289371 | NC_021161.1    | Ca_kabuli_chr02 | 35289371                | AA                              | TT              | 1946765643               |
| SNP_P4_26887_35291940 | NC_021161.1    | Ca_kabuli_chr02 | 35291940                | AA                              | GG              | 1946765645               |
| SNP_P4_26890_35297860 | NC_021161.1    | Ca_kabuli_chr02 | 35297860                | CC                              | AA              | 1946765647               |
| SNP_P4_26892_35298528 | NC_021161.1    | Ca_kabuli_chr02 | 35298528                | GG                              | AA              | 1946765649               |

| SNPs IDs              | Chromosome IDs | Chromosomes     | Physical positions (bp) | CDC Frontier (Reference genome) | (ILWC46 & LPNB) | NCBI SNPdb Accession IDs |
|-----------------------|----------------|-----------------|-------------------------|---------------------------------|-----------------|--------------------------|
| SNP_P4_26893_35298784 | NC_021161.1    | Ca_kabuli_chr02 | 35298784                | TT                              | AA              | 1946765651               |
| SNP_P4_26894_35298857 | NC_021161.1    | Ca_kabuli_chr02 | 35298857                | GG                              | AA              | 1946765653               |
| SNP_P4_26895_35299052 | NC_021161.1    | Ca_kabuli_chr02 | 35299052                | CC                              | TT              | 1946765655               |
| SNP_P4_26896_35299116 | NC_021161.1    | Ca_kabuli_chr02 | 35299116                | GG                              | AA              | 1946765657               |
| SNP_P4_26897_35299117 | NC_021161.1    | Ca_kabuli_chr02 | 35299117                | AA                              | CC              | 1946765659               |
| SNP_P4_26898_35299129 | NC_021161.1    | Ca_kabuli_chr02 | 35299129                | GG                              | AA              | 1946765662               |
| SNP_P4_26899_35299163 | NC_021161.1    | Ca_kabuli_chr02 | 35299163                | AA                              | GG              | 1946765664               |
| SNP_P4_26900_35299597 | NC_021161.1    | Ca_kabuli_chr02 | 35299597                | TT                              | CC              | 1946765666               |
| SNP_P4_26901_35299868 | NC_021161.1    | Ca_kabuli_chr02 | 35299868                | GG                              | TT              | 1946765668               |
| SNP_P4_26902_35300219 | NC_021161.1    | Ca_kabuli_chr02 | 35300219                | GG                              | AA              | 1946765670               |
| SNP_P4_26903_35300227 | NC_021161.1    | Ca_kabuli_chr02 | 35300227                | GG                              | TT              | 1946765672               |
| SNP_P4_26904_35300860 | NC_021161.1    | Ca_kabuli_chr02 | 35300860                | TT                              | CC              | 1946765674               |
| SNP_P4_26905_35302844 | NC_021161.1    | Ca_kabuli_chr02 | 35302844                | GG                              | AA              | 1946765676               |
| SNP_P4_26906_35302916 | NC_021161.1    | Ca_kabuli_chr02 | 35302916                | GG                              | AA              | 1946765678               |
| SNP_P4_26907_35302992 | NC_021161.1    | Ca_kabuli_chr02 | 35302992                | GG                              | AA              | 1946765680               |
| SNP_P4_26908_35303184 | NC_021161.1    | Ca_kabuli_chr02 | 35303184                | GG                              | AA              | 1946765682               |
| SNP_P4_26909_35303231 | NC_021161.1    | Ca_kabuli_chr02 | 35303231                | CC                              | TT              | 1946765684               |
| SNP_P4_26910_35303281 | NC_021161.1    | Ca_kabuli_chr02 | 35303281                | TT                              | AA              | 1946765686               |
| SNP_P4_26911_35303295 | NC_021161.1    | Ca_kabuli_chr02 | 35303295                | GG                              | AA              | 1946765688               |
| SNP_P4_26912_35303397 | NC_021161.1    | Ca_kabuli_chr02 | 35303397                | GG                              | AA              | 1946765690               |
| SNP_P4_26914_35303511 | NC_021161.1    | Ca_kabuli_chr02 | 35303511                | GG                              | AA              | 1946765692               |
| SNP_P4_26915_35303589 | NC_021161.1    | Ca_kabuli_chr02 | 35303589                | AA                              | GG              | 1946765694               |
| SNP_P4_26916_35303595 | NC_021161.1    | Ca_kabuli_chr02 | 35303595                | TT                              | GG              | 1946765696               |
| SNP_P4_26917_35303614 | NC_021161.1    | Ca_kabuli_chr02 | 35303614                | TT                              | CC              | 1946765698               |
| SNP_P4_26918_35303671 | NC_021161.1    | Ca_kabuli_chr02 | 35303671                | CC                              | AA              | 1946765700               |
| SNP_P4_26919_35303711 | NC_021161.1    | Ca_kabuli_chr02 | 35303711                | GG                              | AA              | 1946765702               |
| SNP_P4_26920_35303836 | NC_021161.1    | Ca_kabuli_chr02 | 35303836                | GG                              | AA              | 1946765704               |
| SNP_P4_26921_35303932 | NC_021161.1    | Ca_kabuli_chr02 | 35303932                | TT                              | CC              | 1946765706               |
| SNP_P4_26922_35303957 | NC_021161.1    | Ca_kabuli_chr02 | 35303957                | TT                              | CC              | 1946765708               |
| SNP_P4_26923_35303978 | NC_021161.1    | Ca_kabuli_chr02 | 35303978                | TT                              | GG              | 1946765710               |
| SNP_P4_26924_35304015 | NC_021161.1    | Ca_kabuli_chr02 | 35304015                | GG                              | CC              | 1946765712               |
| SNP_P4_26925_35304021 | NC_021161.1    | Ca_kabuli_chr02 | 35304021                | TT                              | CC              | 1946765714               |
| SNP_P4_26926_35304053 | NC_021161.1    | Ca_kabuli_chr02 | 35304053                | GG                              | TT              | 1946765716               |
| SNP_P4_26927_35304070 | NC_021161.1    | Ca_kabuli_chr02 | 35304070                | TT                              | CC              | 1946765718               |
| SNP_P4_26928_35304207 | NC_021161.1    | Ca_kabuli_chr02 | 35304207                | GG                              | AA              | 1946765720               |
| SNP_P4_26929_35304311 | NC_021161.1    | Ca_kabuli_chr02 | 35304311                | GG                              | AA              | 1946765722               |
| SNP_P4_26930_35304451 | NC_021161.1    | Ca_kabuli_chr02 | 35304451                | CC                              | TT              | 1946765724               |
| SNP_P4_26931_35304458 | NC_021161.1    | Ca_kabuli_chr02 | 35304458                | GG                              | AA              | 1946765726               |
| SNP_P4_26932_35304463 | NC_021161.1    | Ca_kabuli_chr02 | 35304463                | AA                              | CC              | 1946765728               |
| SNP_P4_26933_35304588 | NC_021161.1    | Ca_kabuli_chr02 | 35304588                | TT                              | CC              | 1946765730               |
| SNP_P4_26935_35304719 | NC_021161.1    | Ca_kabuli_chr02 | 35304719                | TT                              | CC              | 1946765732               |
| SNP_P4_26936_35304722 | NC_021161.1    | Ca_kabuli_chr02 | 35304722                | TT                              | CC              | 1946765734               |

| SNPs IDs              | Chromosome IDs | Chromosomes     | Physical positions (bp) | CDC Frontier (Reference genome) | (ILWC46 & LPNB) | NCBI SNPdb Accession IDs |
|-----------------------|----------------|-----------------|-------------------------|---------------------------------|-----------------|--------------------------|
| SNP_P4_26937_35304764 | NC_021161.1    | Ca_kabuli_chr02 | 35304764                | TT                              | CC              | 1946765736               |
| SNP_P4_26938_35304962 | NC_021161.1    | Ca_kabuli_chr02 | 35304962                | GG                              | TT              | 1946765738               |
| SNP_P4_26939_35305015 | NC_021161.1    | Ca_kabuli_chr02 | 35305015                | GG                              | AA              | 1946765740               |
| SNP_P4_26940_35305136 | NC_021161.1    | Ca_kabuli_chr02 | 35305136                | CC                              | TT              | 1946765742               |
| SNP_P4_26941_35305138 | NC_021161.1    | Ca_kabuli_chr02 | 35305138                | AA                              | GG              | 1946765744               |
| SNP_P4_26942_35305254 | NC_021161.1    | Ca_kabuli_chr02 | 35305254                | CC                              | AA              | 1946765746               |
| SNP_P4_26943_35305399 | NC_021161.1    | Ca_kabuli_chr02 | 35305399                | CC                              | TT              | 1946765748               |
| SNP_P4_26944_35305429 | NC_021161.1    | Ca_kabuli_chr02 | 35305429                | AA                              | GG              | 1946765750               |
| SNP_P4_26945_35305584 | NC_021161.1    | Ca_kabuli_chr02 | 35305584                | AA                              | GG              | 1946765752               |
| SNP_P4_26946_35305647 | NC_021161.1    | Ca_kabuli_chr02 | 35305647                | CC                              | TT              | 1946765754               |
| SNP_P4_26947_35306135 | NC_021161.1    | Ca_kabuli_chr02 | 35306135                | AA                              | GG              | 1946765756               |
| SNP_P4_26948_35306353 | NC_021161.1    | Ca_kabuli_chr02 | 35306353                | GG                              | AA              | 1946765759               |
| SNP_P4_26949_35306374 | NC_021161.1    | Ca_kabuli_chr02 | 35306374                | TT                              | CC              | 1946765761               |
| SNP_P4_26950_35313126 | NC_021161.1    | Ca_kabuli_chr02 | 35313126                | GG                              | TT              | 1946765763               |
| SNP_P4_26951_35313171 | NC_021161.1    | Ca_kabuli_chr02 | 35313171                | CC                              | TT              | 1946765765               |
| SNP_P4_26952_35313225 | NC_021161.1    | Ca_kabuli_chr02 | 35313225                | TT                              | GG              | 1946765767               |
| SNP_P4_26953_35313309 | NC_021161.1    | Ca_kabuli_chr02 | 35313309                | CC                              | TT              | 1946765769               |
| SNP_P4_26954_35313842 | NC_021161.1    | Ca_kabuli_chr02 | 35313842                | AA                              | GG              | 1946765771               |
| SNP_P4_26955_35314571 | NC_021161.1    | Ca_kabuli_chr02 | 35314571                | GG                              | TT              | 1946765773               |
| SNP_P4_26957_35353824 | NC_021161.1    | Ca_kabuli_chr02 | 35353824                | TT                              | AA              | 1946765775               |
| SNP_P4_26958_35353827 | NC_021161.1    | Ca_kabuli_chr02 | 35353827                | AA                              | CC              | 1946765777               |
| SNP_P4_26960_35406578 | NC_021161.1    | Ca_kabuli_chr02 | 35406578                | CC                              | TT              | 1946765779               |
| SNP_P4_26961_35410973 | NC_021161.1    | Ca_kabuli_chr02 | 35410973                | GG                              | CC              | 1946765781               |
| SNP_P4_26962_35413576 | NC_021161.1    | Ca_kabuli_chr02 | 35413576                | TT                              | CC              | 1946765783               |
| SNP_P4_26963_35417617 | NC_021161.1    | Ca_kabuli_chr02 | 35417617                | AA                              | GG              | 1946765785               |
| SNP_P4_26964_35423953 | NC_021161.1    | Ca_kabuli_chr02 | 35423953                | TT                              | GG              | 1946765787               |
| SNP_P4_26966_35461291 | NC_021161.1    | Ca_kabuli_chr02 | 35461291                | GG                              | AA              | 1946765789               |
| SNP_P4_26968_35553107 | NC_021161.1    | Ca_kabuli_chr02 | 35553107                | AA                              | GG              | 1946765791               |
| SNP_P4_26969_35556094 | NC_021161.1    | Ca_kabuli_chr02 | 35556094                | TT                              | CC              | 1946765793               |
| SNP_P4_26970_35556097 | NC_021161.1    | Ca_kabuli_chr02 | 35556097                | GG                              | CC              | 1946765795               |
| SNP_P4_26971_35559080 | NC_021161.1    | Ca_kabuli_chr02 | 35559080                | TT                              | CC              | 1946765798               |
| SNP_P4_26974_35578464 | NC_021161.1    | Ca_kabuli_chr02 | 35578464                | AA                              | TT              | 1946765800               |
| SNP_P4_26975_35580369 | NC_021161.1    | Ca_kabuli_chr02 | 35580369                | AA                              | GG              | 1946765802               |
| SNP_P4_26976_35580446 | NC_021161.1    | Ca_kabuli_chr02 | 35580446                | TT                              | CC              | 1946765804               |
| SNP_P4_26977_35580628 | NC_021161.1    | Ca_kabuli_chr02 | 35580628                | AA                              | TT              | 1946765806               |
| SNP_P4_26978_35580685 | NC_021161.1    | Ca_kabuli_chr02 | 35580685                | CC                              | GG              | 1946765808               |
| SNP_P4_26979_35580704 | NC_021161.1    | Ca_kabuli_chr02 | 35580704                | CC                              | AA              | 1946765810               |
| SNP_P4_26980_35580875 | NC_021161.1    | Ca_kabuli_chr02 | 35580875                | CC                              | TT              | 1946765813               |
| SNP_P4_26981_35581047 | NC_021161.1    | Ca_kabuli_chr02 | 35581047                | GG                              | AA              | 1946765819               |
| SNP_P4_26983_35582183 | NC_021161.1    | Ca_kabuli_chr02 | 35582183                | AA                              | TT              | 1946765824               |
| SNP_P4_26984_35582497 | NC_021161.1    | Ca_kabuli_chr02 | 35582497                | AA                              | CC              | 1946765828               |
| SNP_P4_26985_35624164 | NC_021161.1    | Ca_kabuli_chr02 | 35624164                | CC                              | TT              | 1946765830               |

| SNPs IDs              | Chromosome IDs | Chromosomes     | Physical positions (bp) | CDC Frontier (Reference genome) | (ILWC46 & LPNB) | NCBI SNPdb Accession IDs |
|-----------------------|----------------|-----------------|-------------------------|---------------------------------|-----------------|--------------------------|
| SNP_P4_26986_35626349 | NC_021161.1    | Ca_kabuli_chr02 | 35626349                | GG                              | AA              | 1946765833               |
| SNP_P4_26988_35651102 | NC_021161.1    | Ca_kabuli_chr02 | 35651102                | CC                              | TT              | 1946765835               |
| SNP_P4_26989_35655639 | NC_021161.1    | Ca_kabuli_chr02 | 35655639                | TT                              | CC              | 1946765838               |
| SNP_P4_26990_35655640 | NC_021161.1    | Ca_kabuli_chr02 | 35655640                | TT                              | CC              | 1946765840               |
| SNP_P4_26991_35655648 | NC_021161.1    | Ca_kabuli_chr02 | 35655648                | AA                              | CC              | 1946765842               |
| SNP_P4_26994_35696748 | NC_021161.1    | Ca_kabuli_chr02 | 35696748                | TT                              | GG              | 1946765844               |
| SNP_P4_26995_35696789 | NC_021161.1    | Ca_kabuli_chr02 | 35696789                | TT                              | CC              | 1946765846               |
| SNP_P4_26996_35697181 | NC_021161.1    | Ca_kabuli_chr02 | 35697181                | AA                              | GG              | 1946765849               |
| SNP_P4_26997_35711922 | NC_021161.1    | Ca_kabuli_chr02 | 35711922                | TT                              | CC              | 1946765851               |
| SNP_P4_26999_35722499 | NC_021161.1    | Ca_kabuli_chr02 | 35722499                | GG                              | TT              | 1946765854               |
| SNP_P4_27000_35734841 | NC_021161.1    | Ca_kabuli_chr02 | 35734841                | GG                              | AA              | 1946765856               |
| SNP_P4_27002_35746727 | NC_021161.1    | Ca_kabuli_chr02 | 35746727                | AA                              | CC              | 1946765858               |
| SNP_P4_27003_35746728 | NC_021161.1    | Ca_kabuli_chr02 | 35746728                | AA                              | TT              | 1946765860               |
| SNP_P4_27004_35761993 | NC_021161.1    | Ca_kabuli_chr02 | 35761993                | AA                              | GG              | 1946765862               |
| SNP_P4_27005_35775449 | NC_021161.1    | Ca_kabuli_chr02 | 35775449                | CC                              | TT              | 1946765865               |
| SNP_P4_27006_35788873 | NC_021161.1    | Ca_kabuli_chr02 | 35788873                | TT                              | CC              | 1946765867               |
| SNP_P4_27008_35805122 | NC_021161.1    | Ca_kabuli_chr02 | 35805122                | CC                              | TT              | 1946765869               |
| SNP_P4_27009_35807108 | NC_021161.1    | Ca_kabuli_chr02 | 35807108                | TT                              | GG              | 1946765872               |
| SNP_P4_27011_35815989 | NC_021161.1    | Ca_kabuli_chr02 | 35815989                | TT                              | AA              | 1946765874               |
| SNP_P4_27012_35815991 | NC_021161.1    | Ca_kabuli_chr02 | 35815991                | TT                              | AA              | 1946765876               |
| SNP_P4_27013_35818502 | NC_021161.1    | Ca_kabuli_chr02 | 35818502                | AA                              | CC              | 1946765878               |
| SNP_P4_27017_35843669 | NC_021161.1    | Ca_kabuli_chr02 | 35843669                | CC                              | TT              | 1946765880               |
| SNP_P4_27018_35843671 | NC_021161.1    | Ca_kabuli_chr02 | 35843671                | TT                              | CC              | 1946765882               |
| SNP_P4_27019_35843728 | NC_021161.1    | Ca_kabuli_chr02 | 35843728                | GG                              | TT              | 1946765884               |
| SNP_P4_27022_35845806 | NC_021161.1    | Ca_kabuli_chr02 | 35845806                | CC                              | TT              | 1946765886               |
| SNP_P4_27023_35846209 | NC_021161.1    | Ca_kabuli_chr02 | 35846209                | GG                              | AA              | 1946765888               |
| SNP_P4_27024_35846235 | NC_021161.1    | Ca_kabuli_chr02 | 35846235                | TT                              | AA              | 1946765890               |
| SNP_P4_27025_35846342 | NC_021161.1    | Ca_kabuli_chr02 | 35846342                | GG                              | AA              | 1946765892               |
| SNP_P4_27026_35846370 | NC_021161.1    | Ca_kabuli_chr02 | 35846370                | GG                              | AA              | 1946765894               |
| SNP_P4_27027_35846473 | NC_021161.1    | Ca_kabuli_chr02 | 35846473                | TT                              | CC              | 1946765896               |
| SNP_P4_27028_35846506 | NC_021161.1    | Ca_kabuli_chr02 | 35846506                | GG                              | AA              | 1946765898               |
| SNP_P4_27030_35846656 | NC_021161.1    | Ca_kabuli_chr02 | 35846656                | TT                              | CC              | 1946765900               |
| SNP_P4_27031_35847026 | NC_021161.1    | Ca_kabuli_chr02 | 35847026                | TT                              | CC              | 1946765902               |
| SNP_P4_27032_35847289 | NC_021161.1    | Ca_kabuli_chr02 | 35847289                | AA                              | GG              | 1946765904               |
| SNP_P4_27033_35848476 | NC_021161.1    | Ca_kabuli_chr02 | 35848476                | CC                              | AA              | 1946765906               |
| SNP_P4_27034_35848491 | NC_021161.1    | Ca_kabuli_chr02 | 35848491                | TT                              | CC              | 1946765908               |
| SNP_P4_27035_35849334 | NC_021161.1    | Ca_kabuli_chr02 | 35849334                | GG                              | TT              | 1946765910               |
| SNP_P4_27036_35850294 | NC_021161.1    | Ca_kabuli_chr02 | 35850294                | CC                              | TT              | 1946765912               |
| SNP_P4_27037_35852656 | NC_021161.1    | Ca_kabuli_chr02 | 35852656                | AA                              | GG              | 1946765914               |
| SNP_P4_27038_35852662 | NC_021161.1    | Ca_kabuli_chr02 | 35852662                | AA                              | GG              | 1946765916               |
| SNP_P4_27039_35852689 | NC_021161.1    | Ca_kabuli_chr02 | 35852689                | CC                              | AA              | 1946765918               |
| SNP_P4_27040_35853217 | NC_021161.1    | Ca_kabuli_chr02 | 35853217                | CC                              | TT              | 1946765920               |

| SNPs IDs              | Chromosome IDs | Chromosomes     | Physical positions (bp) | CDC Frontier (Reference genome) | (ILWC46 & LPNB) | NCBI SNPdb Accession IDs |
|-----------------------|----------------|-----------------|-------------------------|---------------------------------|-----------------|--------------------------|
| SNP_P4_27041_35853440 | NC_021161.1    | Ca_kabuli_chr02 | 35853440                | CC                              | TT              | 1946765922               |
| SNP_P4_27042_35853636 | NC_021161.1    | Ca_kabuli_chr02 | 35853636                | CC                              | TT              | 1946765925               |
| SNP_P4_27044_35853717 | NC_021161.1    | Ca_kabuli_chr02 | 35853717                | AA                              | GG              | 1946765927               |
| SNP_P4_27045_35853746 | NC_021161.1    | Ca_kabuli_chr02 | 35853746                | GG                              | AA              | 1946765929               |
| SNP_P4_27046_35854776 | NC_021161.1    | Ca_kabuli_chr02 | 35854776                | CC                              | TT              | 1946765931               |
| SNP_P4_27048_35855097 | NC_021161.1    | Ca_kabuli_chr02 | 35855097                | CC                              | TT              | 1946765933               |
| SNP_P4_27050_35855430 | NC_021161.1    | Ca_kabuli_chr02 | 35855430                | AA                              | GG              | 1946765935               |
| SNP_P4_27052_35855737 | NC_021161.1    | Ca_kabuli_chr02 | 35855737                | GG                              | AA              | 1946765937               |
| SNP_P4_27053_35855840 | NC_021161.1    | Ca_kabuli_chr02 | 35855840                | AA                              | GG              | 1946765939               |
| SNP_P4_27055_35856147 | NC_021161.1    | Ca_kabuli_chr02 | 35856147                | CC                              | TT              | 1946765941               |
| SNP_P4_27056_35856834 | NC_021161.1    | Ca_kabuli_chr02 | 35856834                | CC                              | TT              | 1946765943               |
| SNP_P4_27057_35856915 | NC_021161.1    | Ca_kabuli_chr02 | 35856915                | GG                              | TT              | 1946765945               |
| SNP_P4_27059_35858345 | NC_021161.1    | Ca_kabuli_chr02 | 35858345                | AA                              | GG              | 1946765947               |
| SNP_P4_27061_35858664 | NC_021161.1    | Ca_kabuli_chr02 | 35858664                | GG                              | AA              | 1946765949               |
| SNP_P4_27062_35858692 | NC_021161.1    | Ca_kabuli_chr02 | 35858692                | AA                              | GG              | 1946765951               |
| SNP_P4_27063_35861771 | NC_021161.1    | Ca_kabuli_chr02 | 35861771                | AA                              | GG              | 1946765953               |
| SNP_P4_27064_35862044 | NC_021161.1    | Ca_kabuli_chr02 | 35862044                | AA                              | GG              | 1946765955               |
| SNP_P4_27065_35862106 | NC_021161.1    | Ca_kabuli_chr02 | 35862106                | GG                              | CC              | 1946765957               |
| SNP_P4_27066_35862325 | NC_021161.1    | Ca_kabuli_chr02 | 35862325                | CC                              | TT              | 1946765959               |
| SNP_P4_27067_35863150 | NC_021161.1    | Ca_kabuli_chr02 | 35863150                | GG                              | AA              | 1946765962               |
| SNP_P4_27068_35863854 | NC_021161.1    | Ca_kabuli_chr02 | 35863854                | AA                              | GG              | 1946765964               |
| SNP_P4_27069_35863856 | NC_021161.1    | Ca_kabuli_chr02 | 35863856                | AA                              | TT              | 1946765966               |
| SNP_P4_27071_35865416 | NC_021161.1    | Ca_kabuli_chr02 | 35865416                | CC                              | TT              | 1946765968               |
| SNP_P4_27072_35866046 | NC_021161.1    | Ca_kabuli_chr02 | 35866046                | GG                              | AA              | 1946765970               |
| SNP_P4_27074_35867782 | NC_021161.1    | Ca_kabuli_chr02 | 35867782                | GG                              | CC              | 1946765972               |
| SNP_P4_27075_35869959 | NC_021161.1    | Ca_kabuli_chr02 | 35869959                | AA                              | TT              | 1946765974               |
| SNP_P4_27076_35870350 | NC_021161.1    | Ca_kabuli_chr02 | 35870350                | GG                              | AA              | 1946765976               |
| SNP_P4_27077_35870813 | NC_021161.1    | Ca_kabuli_chr02 | 35870813                | CC                              | TT              | 1946765978               |
| SNP_P4_27079_35872078 | NC_021161.1    | Ca_kabuli_chr02 | 35872078                | GG                              | CC              | 1946765980               |
| SNP_P4_27080_35872125 | NC_021161.1    | Ca_kabuli_chr02 | 35872125                | TT                              | CC              | 1946765983               |
| SNP_P4_27081_35872326 | NC_021161.1    | Ca_kabuli_chr02 | 35872326                | AA                              | GG              | 1946765984               |
| SNP_P4_27082_35872420 | NC_021161.1    | Ca_kabuli_chr02 | 35872420                | GG                              | AA              | 1946765986               |
| SNP_P4_27084_35877733 | NC_021161.1    | Ca_kabuli_chr02 | 35877733                | GG                              | AA              | 1946765988               |
| SNP_P4_27085_35878088 | NC_021161.1    | Ca_kabuli_chr02 | 35878088                | GG                              | AA              | 1946765990               |
| SNP_P4_27086_35878257 | NC_021161.1    | Ca_kabuli_chr02 | 35878257                | TT                              | CC              | 1946765992               |
| SNP_P4_27087_35878302 | NC_021161.1    | Ca_kabuli_chr02 | 35878302                | CC                              | TT              | 1946765994               |
| SNP_P4_27088_35878342 | NC_021161.1    | Ca_kabuli_chr02 | 35878342                | TT                              | GG              | 1946765997               |
| SNP_P4_27089_35878458 | NC_021161.1    | Ca_kabuli_chr02 | 35878458                | TT                              | AA              | 1946765999               |
| SNP_P4_27090_35878527 | NC_021161.1    | Ca_kabuli_chr02 | 35878527                | TT                              | AA              | 1946766001               |
| SNP_P4_27091_35878767 | NC_021161.1    | Ca_kabuli_chr02 | 35878767                | CC                              | GG              | 1946766003               |
| SNP_P4_27092_35878776 | NC_021161.1    | Ca_kabuli_chr02 | 35878776                | AA                              | TT              | 1946766005               |
| SNP_P4_27093_35879504 | NC_021161.1    | Ca_kabuli_chr02 | 35879504                | TT                              | CC              | 1946766007               |

| SNPs IDs              | Chromosome IDs | Chromosomes     | Physical positions (bp) | CDC Frontier (Reference genome) | (ILWC46 & LPNB) | NCBI SNPdb Accession IDs |
|-----------------------|----------------|-----------------|-------------------------|---------------------------------|-----------------|--------------------------|
| SNP_P4_27094_35882400 | NC_021161.1    | Ca_kabuli_chr02 | 35882400                | AA                              | GG              | 1946766009               |
| SNP_P4_27095_35882487 | NC_021161.1    | Ca_kabuli_chr02 | 35882487                | TT                              | GG              | 1946766011               |
| SNP_P4_27096_35883830 | NC_021161.1    | Ca_kabuli_chr02 | 35883830                | AA                              | GG              | 1946766013               |
| SNP_P4_27098_35885286 | NC_021161.1    | Ca_kabuli_chr02 | 35885286                | CC                              | GG              | 1946766015               |
| SNP_P4_27100_35885867 | NC_021161.1    | Ca_kabuli_chr02 | 35885867                | GG                              | AA              | 1946766017               |
| SNP_P4_27101_35886720 | NC_021161.1    | Ca_kabuli_chr02 | 35886720                | AA                              | GG              | 1946766019               |
| SNP_P4_27102_35888908 | NC_021161.1    | Ca_kabuli_chr02 | 35888908                | CC                              | TT              | 1946766021               |
| SNP_P4_27103_35890289 | NC_021161.1    | Ca_kabuli_chr02 | 35890289                | GG                              | TT              | 1946766023               |
| SNP_P4_27105_35892513 | NC_021161.1    | Ca_kabuli_chr02 | 35892513                | AA                              | CC              | 1946766025               |
| SNP_P4_27107_35893772 | NC_021161.1    | Ca_kabuli_chr02 | 35893772                | GG                              | AA              | 1946766027               |
| SNP_P4_27109_35893991 | NC_021161.1    | Ca_kabuli_chr02 | 35893991                | GG                              | TT              | 1946766029               |
| SNP_P4_27110_35894905 | NC_021161.1    | Ca_kabuli_chr02 | 35894905                | CC                              | TT              | 1946766031               |
| SNP_P4_27111_35895071 | NC_021161.1    | Ca_kabuli_chr02 | 35895071                | GG                              | TT              | 1946766033               |
| SNP_P4_27112_35895587 | NC_021161.1    | Ca_kabuli_chr02 | 35895587                | AA                              | CC              | 1946766035               |
| SNP_P4_27114_35895895 | NC_021161.1    | Ca_kabuli_chr02 | 35895895                | CC                              | TT              | 1946766037               |
| SNP_P4_27115_35897395 | NC_021161.1    | Ca_kabuli_chr02 | 35897395                | GG                              | CC              | 1946766039               |
| SNP_P4_27116_35898735 | NC_021161.1    | Ca_kabuli_chr02 | 35898735                | TT                              | CC              | 1946766041               |
| SNP_P4_27117_35898856 | NC_021161.1    | Ca_kabuli_chr02 | 35898856                | CC                              | AA              | 1946766043               |
| SNP_P4_27118_35898940 | NC_021161.1    | Ca_kabuli_chr02 | 35898940                | GG                              | TT              | 1946766045               |
| SNP_P4_27119_35901298 | NC_021161.1    | Ca_kabuli_chr02 | 35901298                | TT                              | AA              | 1946766047               |
| SNP_P4_27120_35901559 | NC_021161.1    | Ca_kabuli_chr02 | 35901559                | TT                              | CC              | 1946766049               |
| SNP_P4_27121_35903112 | NC_021161.1    | Ca_kabuli_chr02 | 35903112                | TT                              | CC              | 1946766051               |
| SNP_P4_27122_35906664 | NC_021161.1    | Ca_kabuli_chr02 | 35906664                | GG                              | AA              | 1946766053               |
| SNP_P4_27123_35908649 | NC_021161.1    | Ca_kabuli_chr02 | 35908649                | CC                              | TT              | 1946766055               |
| SNP_P4_27125_35910047 | NC_021161.1    | Ca_kabuli_chr02 | 35910047                | GG                              | AA              | 1946766057               |
| SNP_P4_27126_35910081 | NC_021161.1    | Ca_kabuli_chr02 | 35910081                | TT                              | AA              | 1946766059               |
| SNP_P4_27127_35910083 | NC_021161.1    | Ca_kabuli_chr02 | 35910083                | TT                              | CC              | 1946766061               |
| SNP_P4_27128_35911272 | NC_021161.1    | Ca_kabuli_chr02 | 35911272                | CC                              | TT              | 1946766063               |
| SNP_P4_27129_35911850 | NC_021161.1    | Ca_kabuli_chr02 | 35911850                | TT                              | GG              | 1946766065               |
| SNP_P4_27130_35912613 | NC_021161.1    | Ca_kabuli_chr02 | 35912613                | CC                              | TT              | 1946766067               |
| SNP_P4_27131_35912764 | NC_021161.1    | Ca_kabuli_chr02 | 35912764                | TT                              | CC              | 1946766069               |
| SNP_P4_27132_35912798 | NC_021161.1    | Ca_kabuli_chr02 | 35912798                | TT                              | CC              | 1946766071               |
| SNP_P4_27133_35912806 | NC_021161.1    | Ca_kabuli_chr02 | 35912806                | TT                              | CC              | 1946766073               |
| SNP_P4_27134_35912833 | NC_021161.1    | Ca_kabuli_chr02 | 35912833                | CC                              | TT              | 1946766075               |
| SNP_P4_27135_35912848 | NC_021161.1    | Ca_kabuli_chr02 | 35912848                | AA                              | GG              | 1946766077               |
| SNP_P4_27136_35912849 | NC_021161.1    | Ca_kabuli_chr02 | 35912849                | AA                              | TT              | 1946766079               |
| SNP_P4_27137_35912851 | NC_021161.1    | Ca_kabuli_chr02 | 35912851                | TT                              | CC              | 1946766081               |
| SNP_P4_27138_35912898 | NC_021161.1    | Ca_kabuli_chr02 | 35912898                | CC                              | TT              | 1946766083               |
| SNP_P4_27139_35912935 | NC_021161.1    | Ca_kabuli_chr02 | 35912935                | TT                              | CC              | 1946766085               |
| SNP_P4_27140_35913790 | NC_021161.1    | Ca_kabuli_chr02 | 35913790                | TT                              | CC              | 1946766087               |
| SNP_P4_27141_35913819 | NC_021161.1    | Ca_kabuli_chr02 | 35913819                | AA                              | GG              | 1946766089               |
| SNP_P4_27142_35913841 | NC_021161.1    | Ca_kabuli_chr02 | 35913841                | CC                              | AA              | 1946766091               |



| SNPs IDs              | Chromosome IDs | Chromosomes     | Physical positions (bp) | CDC Frontier (Reference genome) | (ILWC46 & LPNB) | NCBI SNPdb Accession IDs |
|-----------------------|----------------|-----------------|-------------------------|---------------------------------|-----------------|--------------------------|
| SNP_P4_27144_35915747 | NC_021161.1    | Ca_kabuli_chr02 | 35915747                | GG                              | AA              | 1946766093               |
| SNP_P4_27145_35918457 | NC_021161.1    | Ca_kabuli_chr02 | 35918457                | AA                              | CC              | 1946766095               |
| SNP_P4_27147_35918749 | NC_021161.1    | Ca_kabuli_chr02 | 35918749                | GG                              | AA              | 1946766097               |
| SNP_P4_27148_35918753 | NC_021161.1    | Ca_kabuli_chr02 | 35918753                | TT                              | CC              | 1946766099               |
| SNP_P4_27149_35918778 | NC_021161.1    | Ca_kabuli_chr02 | 35918778                | GG                              | AA              | 1946766102               |
| SNP_P4_27150_35919018 | NC_021161.1    | Ca_kabuli_chr02 | 35919018                | CC                              | AA              | 1946766104               |
| SNP_P4_27151_35919032 | NC_021161.1    | Ca_kabuli_chr02 | 35919032                | AA                              | GG              | 1946766106               |
| SNP_P4_27152_35919036 | NC_021161.1    | Ca_kabuli_chr02 | 35919036                | AA                              | TT              | 1946766108               |
| SNP_P4_27153_35921883 | NC_021161.1    | Ca_kabuli_chr02 | 35921883                | AA                              | GG              | 1946766110               |
| SNP_P4_27154_35921897 | NC_021161.1    | Ca_kabuli_chr02 | 35921897                | CC                              | TT              | 1946766112               |
| SNP_P4_27155_35922952 | NC_021161.1    | Ca_kabuli_chr02 | 35922952                | GG                              | AA              | 1946766114               |
| SNP_P4_27156_35922955 | NC_021161.1    | Ca_kabuli_chr02 | 35922955                | AA                              | GG              | 1946766116               |
| SNP_P4_27157_35922956 | NC_021161.1    | Ca_kabuli_chr02 | 35922956                | TT                              | CC              | 1946766118               |
| SNP_P4_27158_35923166 | NC_021161.1    | Ca_kabuli_chr02 | 35923166                | AA                              | TT              | 1946766120               |
| SNP_P4_27159_35924165 | NC_021161.1    | Ca_kabuli_chr02 | 35924165                | TT                              | CC              | 1946766122               |
| SNP_P4_27161_35924206 | NC_021161.1    | Ca_kabuli_chr02 | 35924206                | CC                              | TT              | 1946766124               |
| SNP_P4_27162_35924229 | NC_021161.1    | Ca_kabuli_chr02 | 35924229                | TT                              | CC              | 1946766126               |
| SNP_P4_27163_35924367 | NC_021161.1    | Ca_kabuli_chr02 | 35924367                | CC                              | TT              | 1946766128               |
| SNP_P4_27164_35924387 | NC_021161.1    | Ca_kabuli_chr02 | 35924387                | CC                              | TT              | 1946766130               |
| SNP_P4_27165_35924402 | NC_021161.1    | Ca_kabuli_chr02 | 35924402                | GG                              | AA              | 1946766133               |
| SNP_P4_27166_35924768 | NC_021161.1    | Ca_kabuli_chr02 | 35924768                | AA                              | TT              | 1946766135               |
| SNP_P4_27168_35925884 | NC_021161.1    | Ca_kabuli_chr02 | 35925884                | CC                              | TT              | 1946766137               |
| SNP_P4_27170_35926277 | NC_021161.1    | Ca_kabuli_chr02 | 35926277                | AA                              | TT              | 1946766139               |
| SNP_P4_27172_35931510 | NC_021161.1    | Ca_kabuli_chr02 | 35931510                | TT                              | AA              | 1946766141               |
| SNP_P4_27173_35931512 | NC_021161.1    | Ca_kabuli_chr02 | 35931512                | TT                              | CC              | 1946766143               |
| SNP_P4_27174_35931514 | NC_021161.1    | Ca_kabuli_chr02 | 35931514                | GG                              | CC              | 1946766145               |
| SNP_P4_27175_35931523 | NC_021161.1    | Ca_kabuli_chr02 | 35931523                | TT                              | AA              | 1946766147               |
| SNP_P4_27176_35934039 | NC_021161.1    | Ca_kabuli_chr02 | 35934039                | TT                              | GG              | 1946766149               |
| SNP_P4_27177_35934321 | NC_021161.1    | Ca_kabuli_chr02 | 35934321                | CC                              | AA              | 1946766151               |
| SNP_P4_27178_35934339 | NC_021161.1    | Ca_kabuli_chr02 | 35934339                | CC                              | TT              | 1946766153               |
| SNP_P4_27179_35934342 | NC_021161.1    | Ca_kabuli_chr02 | 35934342                | CC                              | TT              | 1946766155               |
| SNP_P4_27181_35937584 | NC_021161.1    | Ca_kabuli_chr02 | 35937584                | AA                              | CC              | 1946766156               |
| SNP_P4_27183_35939422 | NC_021161.1    | Ca_kabuli_chr02 | 35939422                | CC                              | GG              | 1946766158               |
| SNP_P4_27186_35940418 | NC_021161.1    | Ca_kabuli_chr02 | 35940418                | CC                              | TT              | 1946766160               |
| SNP_P4_27187_35940425 | NC_021161.1    | Ca_kabuli_chr02 | 35940425                | CC                              | TT              | 1946766162               |
| SNP_P4_27188_35941395 | NC_021161.1    | Ca_kabuli_chr02 | 35941395                | TT                              | GG              | 1946766164               |
| SNP_P4_27189_35941410 | NC_021161.1    | Ca_kabuli_chr02 | 35941410                | GG                              | AA              | 1946766166               |
| SNP_P4_27190_35941412 | NC_021161.1    | Ca_kabuli_chr02 | 35941412                | CC                              | AA              | 1946766168               |
| SNP_P4_27191_35941600 | NC_021161.1    | Ca_kabuli_chr02 | 35941600                | GG                              | AA              | 1946766170               |
| SNP_P4_27192_35941665 | NC_021161.1    | Ca_kabuli_chr02 | 35941665                | GG                              | AA              | 1946766172               |
| SNP_P4_27193_35941670 | NC_021161.1    | Ca_kabuli_chr02 | 35941670                | TT                              | CC              | 1946766174               |
| SNP_P4_27194_35941690 | NC_021161.1    | Ca_kabuli_chr02 | 35941690                | AA                              | GG              | 1946766176               |

| SNPs IDs              | Chromosome IDs | Chromosomes     | Physical positions (bp) | CDC Frontier (Reference genome) | (ILWC46 & LPNB) | NCBI SNPdb Accession IDs |
|-----------------------|----------------|-----------------|-------------------------|---------------------------------|-----------------|--------------------------|
| SNP_P4_27195_35941702 | NC_021161.1    | Ca_kabuli_chr02 | 35941702                | AA                              | GG              | 1946766178               |
| SNP_P4_27196_35941714 | NC_021161.1    | Ca_kabuli_chr02 | 35941714                | AA                              | GG              | 1946766180               |
| SNP_P4_27197_35941721 | NC_021161.1    | Ca_kabuli_chr02 | 35941721                | AA                              | GG              | 1946766182               |
| SNP_P4_27198_35942042 | NC_021161.1    | Ca_kabuli_chr02 | 35942042                | AA                              | GG              | 1946766184               |
| SNP_P4_27199_35942063 | NC_021161.1    | Ca_kabuli_chr02 | 35942063                | GG                              | AA              | 1946766186               |
| SNP_P4_27200_35942072 | NC_021161.1    | Ca_kabuli_chr02 | 35942072                | TT                              | CC              | 1946766188               |
| SNP_P4_27201_35942561 | NC_021161.1    | Ca_kabuli_chr02 | 35942561                | CC                              | TT              | 1946766190               |
| SNP_P4_27202_35942578 | NC_021161.1    | Ca_kabuli_chr02 | 35942578                | AA                              | GG              | 1946766192               |
| SNP_P4_27203_35944225 | NC_021161.1    | Ca_kabuli_chr02 | 35944225                | TT                              | AA              | 1946766194               |
| SNP_P4_27204_35944781 | NC_021161.1    | Ca_kabuli_chr02 | 35944781                | CC                              | TT              | 1946766196               |
| SNP_P4_27205_35944799 | NC_021161.1    | Ca_kabuli_chr02 | 35944799                | GG                              | AA              | 1946766198               |
| SNP_P4_27206_35944816 | NC_021161.1    | Ca_kabuli_chr02 | 35944816                | AA                              | CC              | 1946766200               |
| SNP_P4_27207_35944831 | NC_021161.1    | Ca_kabuli_chr02 | 35944831                | CC                              | TT              | 1946766202               |
| SNP_P4_27208_35944834 | NC_021161.1    | Ca_kabuli_chr02 | 35944834                | CC                              | TT              | 1946766204               |
| SNP_P4_27209_35944855 | NC_021161.1    | Ca_kabuli_chr02 | 35944855                | CC                              | TT              | 1946766206               |
| SNP_P4_27210_35944875 | NC_021161.1    | Ca_kabuli_chr02 | 35944875                | CC                              | GG              | 1946766208               |
| SNP_P4_27211_35944897 | NC_021161.1    | Ca_kabuli_chr02 | 35944897                | TT                              | AA              | 1946766210               |
| SNP_P4_27212_35944938 | NC_021161.1    | Ca_kabuli_chr02 | 35944938                | TT                              | AA              | 1946766212               |
| SNP_P4_27213_35944958 | NC_021161.1    | Ca_kabuli_chr02 | 35944958                | TT                              | CC              | 1946766214               |
| SNP_P4_27215_35945012 | NC_021161.1    | Ca_kabuli_chr02 | 35945012                | AA                              | GG              | 1946766216               |
| SNP_P4_27216_35945028 | NC_021161.1    | Ca_kabuli_chr02 | 35945028                | TT                              | AA              | 1946766218               |
| SNP_P4_27217_35945051 | NC_021161.1    | Ca_kabuli_chr02 | 35945051                | CC                              | AA              | 1946766220               |
| SNP_P4_27218_35945069 | NC_021161.1    | Ca_kabuli_chr02 | 35945069                | CC                              | TT              | 1946766222               |
| SNP_P4_27219_35945086 | NC_021161.1    | Ca_kabuli_chr02 | 35945086                | AA                              | TT              | 1946766224               |
| SNP_P4_27220_35945091 | NC_021161.1    | Ca_kabuli_chr02 | 35945091                | CC                              | AA              | 1946766226               |
| SNP_P4_27222_35945161 | NC_021161.1    | Ca_kabuli_chr02 | 35945161                | AA                              | TT              | 1946766228               |
| SNP_P4_27223_35945206 | NC_021161.1    | Ca_kabuli_chr02 | 35945206                | AA                              | TT              | 1946766230               |
| SNP_P4_27224_35945220 | NC_021161.1    | Ca_kabuli_chr02 | 35945220                | AA                              | CC              | 1946766232               |
| SNP_P4_27225_35945284 | NC_021161.1    | Ca_kabuli_chr02 | 35945284                | AA                              | GG              | 1946766234               |
| SNP_P4_27226_35945287 | NC_021161.1    | Ca_kabuli_chr02 | 35945287                | AA                              | GG              | 1946766236               |
| SNP_P4_27227_35945293 | NC_021161.1    | Ca_kabuli_chr02 | 35945293                | AA                              | GG              | 1946766238               |
| SNP_P4_27229_35953978 | NC_021161.1    | Ca_kabuli_chr02 | 35953978                | GG                              | AA              | 1946766240               |
| SNP_P4_27230_35956164 | NC_021161.1    | Ca_kabuli_chr02 | 35956164                | CC                              | TT              | 1946766242               |
| SNP_P4_27231_35956365 | NC_021161.1    | Ca_kabuli_chr02 | 35956365                | CC                              | AA              | 1946766244               |
| SNP_P4_27232_35956417 | NC_021161.1    | Ca_kabuli_chr02 | 35956417                | CC                              | TT              | 1946766246               |
| SNP_P4_27233_35956467 | NC_021161.1    | Ca_kabuli_chr02 | 35956467                | GG                              | AA              | 1946766248               |
| SNP_P4_27234_35956477 | NC_021161.1    | Ca_kabuli_chr02 | 35956477                | CC                              | TT              | 1946766250               |
| SNP_P4_27235_35956479 | NC_021161.1    | Ca_kabuli_chr02 | 35956479                | TT                              | CC              | 1946766252               |
| SNP_P4_27236_35956845 | NC_021161.1    | Ca_kabuli_chr02 | 35956845                | AA                              | CC              | 1946766254               |
| SNP_P4_27238_35957293 | NC_021161.1    | Ca_kabuli_chr02 | 35957293                | AA                              | TT              | 1946766257               |
| SNP_P4_27239_35957404 | NC_021161.1    | Ca_kabuli_chr02 | 35957404                | CC                              | TT              | 1946766259               |
| SNP_P4_27240_35957457 | NC_021161.1    | Ca_kabuli_chr02 | 35957457                | GG                              | TT              | 1946766261               |

| SNPs IDs              | Chromosome IDs | Chromosomes     | Physical positions (bp) | CDC Frontier (Reference genome) | (ILWC46 & LPNB) | NCBI SNPdb Accession IDs |
|-----------------------|----------------|-----------------|-------------------------|---------------------------------|-----------------|--------------------------|
| SNP_P4_27241_35960431 | NC_021161.1    | Ca_kabuli_chr02 | 35960431                | AA                              | CC              | 1946766263               |
| SNP_P4_27242_35960436 | NC_021161.1    | Ca_kabuli_chr02 | 35960436                | CC                              | AA              | 1946766265               |
| SNP_P4_27243_35960451 | NC_021161.1    | Ca_kabuli_chr02 | 35960451                | CC                              | TT              | 1946766267               |
| SNP_P4_27244_35960457 | NC_021161.1    | Ca_kabuli_chr02 | 35960457                | CC                              | TT              | 1946766269               |
| SNP_P4_27246_35961614 | NC_021161.1    | Ca_kabuli_chr02 | 35961614                | TT                              | CC              | 1946766271               |
| SNP_P4_27248_35961900 | NC_021161.1    | Ca_kabuli_chr02 | 35961900                | CC                              | TT              | 1946766273               |
| SNP_P4_27250_35962207 | NC_021161.1    | Ca_kabuli_chr02 | 35962207                | TT                              | CC              | 1946766275               |
| SNP_P4_27251_35962426 | NC_021161.1    | Ca_kabuli_chr02 | 35962426                | TT                              | CC              | 1946766277               |
| SNP_P4_27252_35962438 | NC_021161.1    | Ca_kabuli_chr02 | 35962438                | AA                              | GG              | 1946766279               |
| SNP_P4_27255_35962749 | NC_021161.1    | Ca_kabuli_chr02 | 35962749                | TT                              | AA              | 1946766281               |
| SNP_P4_27256_35962752 | NC_021161.1    | Ca_kabuli_chr02 | 35962752                | TT                              | AA              | 1946766284               |
| SNP_P4_27257_35962754 | NC_021161.1    | Ca_kabuli_chr02 | 35962754                | GG                              | TT              | 1946766286               |
| SNP_P4_27258_35962789 | NC_021161.1    | Ca_kabuli_chr02 | 35962789                | TT                              | AA              | 1946766288               |
| SNP_P4_27259_35963031 | NC_021161.1    | Ca_kabuli_chr02 | 35963031                | CC                              | GG              | 1946766290               |
| SNP_P4_27260_35963039 | NC_021161.1    | Ca_kabuli_chr02 | 35963039                | AA                              | GG              | 1946766292               |
| SNP_P4_27261_35963041 | NC_021161.1    | Ca_kabuli_chr02 | 35963041                | TT                              | CC              | 1946766294               |
| SNP_P4_27262_35963074 | NC_021161.1    | Ca_kabuli_chr02 | 35963074                | GG                              | CC              | 1946766296               |
| SNP_P4_27263_35963132 | NC_021161.1    | Ca_kabuli_chr02 | 35963132                | CC                              | TT              | 1946766298               |
| SNP_P4_27264_35963474 | NC_021161.1    | Ca_kabuli_chr02 | 35963474                | AA                              | GG              | 1946766300               |
| SNP_P4_27265_35963501 | NC_021161.1    | Ca_kabuli_chr02 | 35963501                | TT                              | CC              | 1946766302               |
| SNP_P4_27266_35963625 | NC_021161.1    | Ca_kabuli_chr02 | 35963625                | GG                              | AA              | 1946766304               |
| SNP_P4_27267_35963644 | NC_021161.1    | Ca_kabuli_chr02 | 35963644                | GG                              | AA              | 1946766306               |
| SNP_P4_27268_35963647 | NC_021161.1    | Ca_kabuli_chr02 | 35963647                | CC                              | GG              | 1946766308               |
| SNP_P4_27269_35963652 | NC_021161.1    | Ca_kabuli_chr02 | 35963652                | GG                              | AA              | 1946766310               |
| SNP_P4_27270_35963663 | NC_021161.1    | Ca_kabuli_chr02 | 35963663                | CC                              | TT              | 1946766312               |
| SNP_P4_27271_35963695 | NC_021161.1    | Ca_kabuli_chr02 | 35963695                | GG                              | AA              | 1946766314               |
| SNP_P4_27272_35963726 | NC_021161.1    | Ca_kabuli_chr02 | 35963726                | AA                              | CC              | 1946766316               |
| SNP_P4_27273_35963756 | NC_021161.1    | Ca_kabuli_chr02 | 35963756                | AA                              | TT              | 1946766318               |
| SNP_P4_27274_35964403 | NC_021161.1    | Ca_kabuli_chr02 | 35964403                | CC                              | TT              | 1946766320               |
| SNP_P4_27275_35964454 | NC_021161.1    | Ca_kabuli_chr02 | 35964454                | GG                              | AA              | 1946766322               |
| SNP_P4_27276_35964740 | NC_021161.1    | Ca_kabuli_chr02 | 35964740                | AA                              | TT              | 1946766324               |
| SNP_P4_27277_35965550 | NC_021161.1    | Ca_kabuli_chr02 | 35965550                | AA                              | TT              | 1946766326               |
| SNP_P4_27279_35965766 | NC_021161.1    | Ca_kabuli_chr02 | 35965766                | AA                              | TT              | 1946766328               |
| SNP_P4_27282_35966311 | NC_021161.1    | Ca_kabuli_chr02 | 35966311                | GG                              | AA              | 1946766330               |
| SNP_P4_27283_35966373 | NC_021161.1    | Ca_kabuli_chr02 | 35966373                | AA                              | GG              | 1946766332               |
| SNP_P4_27284_35966525 | NC_021161.1    | Ca_kabuli_chr02 | 35966525                | CC                              | AA              | 1946766334               |
| SNP_P4_27285_35967032 | NC_021161.1    | Ca_kabuli_chr02 | 35967032                | AA                              | TT              | 1946766336               |
| SNP_P4_27287_35967430 | NC_021161.1    | Ca_kabuli_chr02 | 35967430                | GG                              | AA              | 1946766338               |
| SNP_P4_27288_35967745 | NC_021161.1    | Ca_kabuli_chr02 | 35967745                | GG                              | AA              | 1946766340               |
| SNP_P4_27291_35969782 | NC_021161.1    | Ca_kabuli_chr02 | 35969782                | AA                              | TT              | 1946766342               |
| SNP_P4_27292_35970463 | NC_021161.1    | Ca_kabuli_chr02 | 35970463                | CC                              | TT              | 1946766344               |
| SNP_P4_27293_35971397 | NC_021161.1    | Ca_kabuli_chr02 | 35971397                | GG                              | CC              | 1946766346               |

| SNPs IDs              | Chromosome IDs | Chromosomes     | Physical positions (bp) | CDC Frontier (Reference genome) | (ILWC46 & LPNB) | NCBI SNPdb Accession IDs |
|-----------------------|----------------|-----------------|-------------------------|---------------------------------|-----------------|--------------------------|
| SNP_P4_27294_35971423 | NC_021161.1    | Ca_kabuli_chr02 | 35971423                | CC                              | GG              | 1946766348               |
| SNP_P4_27295_35971605 | NC_021161.1    | Ca_kabuli_chr02 | 35971605                | GG                              | AA              | 1946766350               |
| SNP_P4_27297_35971876 | NC_021161.1    | Ca_kabuli_chr02 | 35971876                | TT                              | CC              | 1946766352               |
| SNP_P4_27298_35971889 | NC_021161.1    | Ca_kabuli_chr02 | 35971889                | CC                              | TT              | 1946766354               |
| SNP_P4_27299_35972248 | NC_021161.1    | Ca_kabuli_chr02 | 35972248                | AA                              | TT              | 1946766356               |
| SNP_P4_27300_35972369 | NC_021161.1    | Ca_kabuli_chr02 | 35972369                | AA                              | CC              | 1946766358               |
| SNP_P4_27301_35972661 | NC_021161.1    | Ca_kabuli_chr02 | 35972661                | CC                              | GG              | 1946766360               |
| SNP_P4_27302_35972690 | NC_021161.1    | Ca_kabuli_chr02 | 35972690                | GG                              | AA              | 1946766362               |
| SNP_P4_27303_35972712 | NC_021161.1    | Ca_kabuli_chr02 | 35972712                | AA                              | GG              | 1946766364               |
| SNP_P4_27304_35972717 | NC_021161.1    | Ca_kabuli_chr02 | 35972717                | GG                              | CC              | 1946766366               |
| SNP_P4_27305_35973580 | NC_021161.1    | Ca_kabuli_chr02 | 35973580                | GG                              | AA              | 1946766368               |
| SNP_P4_27306_35973863 | NC_021161.1    | Ca_kabuli_chr02 | 35973863                | AA                              | GG              | 1946766370               |
| SNP_P4_27307_35974964 | NC_021161.1    | Ca_kabuli_chr02 | 35974964                | TT                              | CC              | 1946766372               |
| SNP_P4_27308_35976021 | NC_021161.1    | Ca_kabuli_chr02 | 35976021                | GG                              | AA              | 1946766374               |
| SNP_P4_27309_35982956 | NC_021161.1    | Ca_kabuli_chr02 | 35982956                | GG                              | AA              | 1946766376               |
| SNP_P4_27310_35983180 | NC_021161.1    | Ca_kabuli_chr02 | 35983180                | TT                              | GG              | 1946766378               |
| SNP_P4_27311_35983347 | NC_021161.1    | Ca_kabuli_chr02 | 35983347                | AA                              | GG              | 1946766380               |
| SNP_P4_27312_35983700 | NC_021161.1    | Ca_kabuli_chr02 | 35983700                | TT                              | AA              | 1946766382               |
| SNP_P4_27313_35983754 | NC_021161.1    | Ca_kabuli_chr02 | 35983754                | GG                              | AA              | 1946766384               |
| SNP_P4_27314_35983817 | NC_021161.1    | Ca_kabuli_chr02 | 35983817                | AA                              | GG              | 1946766386               |
| SNP_P4_27315_35983885 | NC_021161.1    | Ca_kabuli_chr02 | 35983885                | GG                              | AA              | 1946766388               |
| SNP_P4_27316_35983903 | NC_021161.1    | Ca_kabuli_chr02 | 35983903                | TT                              | CC              | 1946766390               |
| SNP_P4_27317_35983927 | NC_021161.1    | Ca_kabuli_chr02 | 35983927                | AA                              | CC              | 1946766392               |
| SNP_P4_27318_35984090 | NC_021161.1    | Ca_kabuli_chr02 | 35984090                | AA                              | CC              | 1946766394               |
| SNP_P4_27319_35986927 | NC_021161.1    | Ca_kabuli_chr02 | 35986927                | AA                              | TT              | 1946766396               |
| SNP_P4_27320_35986931 | NC_021161.1    | Ca_kabuli_chr02 | 35986931                | GG                              | TT              | 1946766398               |
| SNP_P4_27321_35987048 | NC_021161.1    | Ca_kabuli_chr02 | 35987048                | AA                              | GG              | 1946766400               |
| SNP_P4_27322_35987071 | NC_021161.1    | Ca_kabuli_chr02 | 35987071                | GG                              | AA              | 1946766402               |
| SNP_P4_27323_35987920 | NC_021161.1    | Ca_kabuli_chr02 | 35987920                | CC                              | AA              | 1946766404               |
| SNP_P4_27325_35988275 | NC_021161.1    | Ca_kabuli_chr02 | 35988275                | GG                              | CC              | 1946766406               |
| SNP_P4_27326_35988931 | NC_021161.1    | Ca_kabuli_chr02 | 35988931                | TT                              | CC              | 1946766408               |
| SNP_P4_27327_35991444 | NC_021161.1    | Ca_kabuli_chr02 | 35991444                | TT                              | GG              | 1946766410               |
| SNP_P4_27328_35992815 | NC_021161.1    | Ca_kabuli_chr02 | 35992815                | CC                              | GG              | 1946766412               |
| SNP_P4_27331_35995925 | NC_021161.1    | Ca_kabuli_chr02 | 35995925                | CC                              | AA              | 1946766414               |
| SNP_P4_27333_35996462 | NC_021161.1    | Ca_kabuli_chr02 | 35996462                | GG                              | AA              | 1946766416               |
| SNP_P4_27334_35996492 | NC_021161.1    | Ca_kabuli_chr02 | 35996492                | TT                              | CC              | 1946766418               |
| SNP_P4_27335_35996702 | NC_021161.1    | Ca_kabuli_chr02 | 35996702                | GG                              | TT              | 1946766420               |
| SNP_P4_27336_35996703 | NC_021161.1    | Ca_kabuli_chr02 | 35996703                | GG                              | AA              | 1946766422               |
| SNP_P4_27337_35996707 | NC_021161.1    | Ca_kabuli_chr02 | 35996707                | AA                              | GG              | 1946766424               |
| SNP_P4_27338_35996722 | NC_021161.1    | Ca_kabuli_chr02 | 35996722                | TT                              | CC              | 1946766426               |
| SNP_P4_27339_35996734 | NC_021161.1    | Ca_kabuli_chr02 | 35996734                | GG                              | AA              | 1946766428               |
| SNP_P4_27340_35996740 | NC_021161.1    | Ca_kabuli_chr02 | 35996740                | TT                              | CC              | 1946766430               |

| SNPs IDs              | Chromosome IDs | Chromosomes     | Physical positions (bp) | CDC Frontier (Reference genome) | (ILWC46 & LPNB) | NCBI SNPdb Accession IDs |
|-----------------------|----------------|-----------------|-------------------------|---------------------------------|-----------------|--------------------------|
| SNP_P4_27341_35996746 | NC_021161.1    | Ca_kabuli_chr02 | 35996746                | TT                              | CC              | 1946766432               |
| SNP_P4_27342_35997107 | NC_021161.1    | Ca_kabuli_chr02 | 35997107                | TT                              | GG              | 1946766434               |
| SNP_P4_27343_35997210 | NC_021161.1    | Ca_kabuli_chr02 | 35997210                | AA                              | CC              | 1946766436               |
| SNP_P4_27344_35997258 | NC_021161.1    | Ca_kabuli_chr02 | 35997258                | AA                              | GG              | 1946766438               |
| SNP_P4_27345_35997272 | NC_021161.1    | Ca_kabuli_chr02 | 35997272                | CC                              | TT              | 1946766440               |
| SNP_P4_27346_35997273 | NC_021161.1    | Ca_kabuli_chr02 | 35997273                | TT                              | CC              | 1946766442               |
| SNP_P4_27347_35997279 | NC_021161.1    | Ca_kabuli_chr02 | 35997279                | TT                              | CC              | 1946766444               |
| SNP_P4_27348_35997288 | NC_021161.1    | Ca_kabuli_chr02 | 35997288                | CC                              | TT              | 1946766446               |
| SNP_P4_27349_35997291 | NC_021161.1    | Ca_kabuli_chr02 | 35997291                | CC                              | TT              | 1946766448               |
| SNP_P4_27350_35997297 | NC_021161.1    | Ca_kabuli_chr02 | 35997297                | TT                              | CC              | 1946766450               |
| SNP_P4_27351_35997722 | NC_021161.1    | Ca_kabuli_chr02 | 35997722                | AA                              | GG              | 1946766452               |
| SNP_P4_27352_35999167 | NC_021161.1    | Ca_kabuli_chr02 | 35999167                | AA                              | TT              | 1946766454               |
| SNP_P4_27353_35999168 | NC_021161.1    | Ca_kabuli_chr02 | 35999168                | GG                              | TT              | 1946766456               |
| SNP_P4_27354_35999218 | NC_021161.1    | Ca_kabuli_chr02 | 35999218                | AA                              | GG              | 1946766458               |
| SNP_P4_27355_35999875 | NC_021161.1    | Ca_kabuli_chr02 | 35999875                | TT                              | AA              | 1946766460               |
| SNP_P4_27357_36000786 | NC_021161.1    | Ca_kabuli_chr02 | 36000786                | CC                              | TT              | 1946766462               |
| SNP_P4_27359_36001281 | NC_021161.1    | Ca_kabuli_chr02 | 36001281                | TT                              | CC              | 1946766464               |
| SNP_P4_27360_36001400 | NC_021161.1    | Ca_kabuli_chr02 | 36001400                | TT                              | GG              | 1946766466               |
| SNP_P4_27361_36001489 | NC_021161.1    | Ca_kabuli_chr02 | 36001489                | AA                              | GG              | 1946766468               |
| SNP_P4_27363_36001687 | NC_021161.1    | Ca_kabuli_chr02 | 36001687                | CC                              | GG              | 1946766470               |
| SNP_P4_27364_36001842 | NC_021161.1    | Ca_kabuli_chr02 | 36001842                | GG                              | TT              | 1946766472               |
| SNP_P4_27365_36001845 | NC_021161.1    | Ca_kabuli_chr02 | 36001845                | CC                              | TT              | 1946766475               |
| SNP_P4_27366_36004337 | NC_021161.1    | Ca_kabuli_chr02 | 36004337                | GG                              | AA              | 1946766477               |
| SNP_P4_27367_36004393 | NC_021161.1    | Ca_kabuli_chr02 | 36004393                | TT                              | CC              | 1946766479               |
| SNP_P4_27370_36004797 | NC_021161.1    | Ca_kabuli_chr02 | 36004797                | TT                              | CC              | 1946766481               |
| SNP_P4_27372_36007588 | NC_021161.1    | Ca_kabuli_chr02 | 36007588                | AA                              | CC              | 1946766483               |
| SNP_P4_27373_36012829 | NC_021161.1    | Ca_kabuli_chr02 | 36012829                | CC                              | AA              | 1946766485               |
| SNP_P4_27374_36013414 | NC_021161.1    | Ca_kabuli_chr02 | 36013414                | TT                              | GG              | 1946766487               |
| SNP_P4_27375_36013415 | NC_021161.1    | Ca_kabuli_chr02 | 36013415                | AA                              | CC              | 1946766489               |
| SNP_P4_27376_36015127 | NC_021161.1    | Ca_kabuli_chr02 | 36015127                | CC                              | TT              | 1946766491               |
| SNP_P4_27377_36016362 | NC_021161.1    | Ca_kabuli_chr02 | 36016362                | GG                              | AA              | 1946766493               |
| SNP_P4_27378_36017591 | NC_021161.1    | Ca_kabuli_chr02 | 36017591                | AA                              | CC              | 1946766495               |
| SNP_P4_27379_36020350 | NC_021161.1    | Ca_kabuli_chr02 | 36020350                | CC                              | GG              | 1946766497               |
| SNP_P4_27380_36020353 | NC_021161.1    | Ca_kabuli_chr02 | 36020353                | AA                              | TT              | 1946766499               |
| SNP_P4_27381_36020365 | NC_021161.1    | Ca_kabuli_chr02 | 36020365                | CC                              | GG              | 1946766501               |
| SNP_P4_27382_36025477 | NC_021161.1    | Ca_kabuli_chr02 | 36025477                | CC                              | TT              | 1946766503               |
| SNP_P4_27383_36025503 | NC_021161.1    | Ca_kabuli_chr02 | 36025503                | GG                              | CC              | 1946766506               |
| SNP_P4_27384_36026063 | NC_021161.1    | Ca_kabuli_chr02 | 36026063                | TT                              | GG              | 1946766508               |
| SNP_P4_27385_36028910 | NC_021161.1    | Ca_kabuli_chr02 | 36028910                | AA                              | GG              | 1946766510               |
| SNP_P4_27386_36028984 | NC_021161.1    | Ca_kabuli_chr02 | 36028984                | TT                              | CC              | 1946766512               |
| SNP_P4_27387_36029132 | NC_021161.1    | Ca_kabuli_chr02 | 36029132                | GG                              | AA              | 1946766514               |
| SNP_P4_27388_36032786 | NC_021161.1    | Ca_kabuli_chr02 | 36032786                | TT                              | GG              | 1946766516               |

| SNPs IDs              | Chromosome IDs | Chromosomes     | Physical positions (bp) | CDC Frontier (Reference genome) | (ILWC46 & LPNB) | NCBI SNPdb Accession IDs |
|-----------------------|----------------|-----------------|-------------------------|---------------------------------|-----------------|--------------------------|
| SNP_P4_27391_36039979 | NC_021161.1    | Ca_kabuli_chr02 | 36039979                | GG                              | CC              | 1946766518               |
| SNP_P4_27392_36040730 | NC_021161.1    | Ca_kabuli_chr02 | 36040730                | AA                              | GG              | 1946766520               |
| SNP_P4_27393_36040736 | NC_021161.1    | Ca_kabuli_chr02 | 36040736                | GG                              | AA              | 1946766522               |
| SNP_P4_27394_36040798 | NC_021161.1    | Ca_kabuli_chr02 | 36040798                | AA                              | GG              | 1946766524               |
| SNP_P4_27395_36040915 | NC_021161.1    | Ca_kabuli_chr02 | 36040915                | AA                              | GG              | 1946766526               |
| SNP_P4_27396_36040953 | NC_021161.1    | Ca_kabuli_chr02 | 36040953                | AA                              | GG              | 1946766528               |
| SNP_P4_27397_36040956 | NC_021161.1    | Ca_kabuli_chr02 | 36040956                | CC                              | TT              | 1946766530               |
| SNP_P4_27398_36041276 | NC_021161.1    | Ca_kabuli_chr02 | 36041276                | AA                              | CC              | 1946766532               |
| SNP_P4_27399_36041535 | NC_021161.1    | Ca_kabuli_chr02 | 36041535                | AA                              | GG              | 1946766534               |
| SNP_P4_27400_36041587 | NC_021161.1    | Ca_kabuli_chr02 | 36041587                | CC                              | TT              | 1946766536               |
| SNP_P4_27401_36041595 | NC_021161.1    | Ca_kabuli_chr02 | 36041595                | GG                              | AA              | 1946766539               |
| SNP_P4_27402_36046820 | NC_021161.1    | Ca_kabuli_chr02 | 36046820                | AA                              | TT              | 1946766541               |
| SNP_P4_27404_36048941 | NC_021161.1    | Ca_kabuli_chr02 | 36048941                | TT                              | AA              | 1946766543               |
| SNP_P4_27405_36049733 | NC_021161.1    | Ca_kabuli_chr02 | 36049733                | GG                              | TT              | 1946766545               |
| SNP_P4_27406_36052417 | NC_021161.1    | Ca_kabuli_chr02 | 36052417                | GG                              | AA              | 1946766547               |
| SNP_P4_27407_36052418 | NC_021161.1    | Ca_kabuli_chr02 | 36052418                | AA                              | TT              | 1946766549               |
| SNP_P4_27408_36058055 | NC_021161.1    | Ca_kabuli_chr02 | 36058055                | AA                              | CC              | 1946766551               |
| SNP_P4_27409_36059561 | NC_021161.1    | Ca_kabuli_chr02 | 36059561                | GG                              | AA              | 1946766553               |
| SNP_P4_27410_36060527 | NC_021161.1    | Ca_kabuli_chr02 | 36060527                | TT                              | AA              | 1946766555               |
| SNP_P4_27411_36064038 | NC_021161.1    | Ca_kabuli_chr02 | 36064038                | TT                              | CC              | 1946766557               |
| SNP_P4_27413_36065736 | NC_021161.1    | Ca_kabuli_chr02 | 36065736                | AA                              | TT              | 1946766559               |
| SNP_P4_27414_36066023 | NC_021161.1    | Ca_kabuli_chr02 | 36066023                | TT                              | GG              | 1946766561               |
| SNP_P4_27415_36068709 | NC_021161.1    | Ca_kabuli_chr02 | 36068709                | GG                              | AA              | 1946766563               |
| SNP_P4_27416_36069106 | NC_021161.1    | Ca_kabuli_chr02 | 36069106                | TT                              | CC              | 1946766565               |
| SNP_P4_27417_36069652 | NC_021161.1    | Ca_kabuli_chr02 | 36069652                | TT                              | CC              | 1946766567               |
| SNP_P4_27418_36072864 | NC_021161.1    | Ca_kabuli_chr02 | 36072864                | AA                              | GG              | 1946766569               |
| SNP_P4_27419_36072885 | NC_021161.1    | Ca_kabuli_chr02 | 36072885                | GG                              | CC              | 1946766571               |
| SNP_P4_27421_36078621 | NC_021161.1    | Ca_kabuli_chr02 | 36078621                | AA                              | GG              | 1946766573               |
| SNP_P4_27422_36080161 | NC_021161.1    | Ca_kabuli_chr02 | 36080161                | CC                              | GG              | 1946766575               |
| SNP_P4_27423_36080252 | NC_021161.1    | Ca_kabuli_chr02 | 36080252                | GG                              | AA              | 1946766577               |
| SNP_P4_27424_36080402 | NC_021161.1    | Ca_kabuli_chr02 | 36080402                | CC                              | TT              | 1946766579               |
| SNP_P4_27425_36081170 | NC_021161.1    | Ca_kabuli_chr02 | 36081170                | GG                              | AA              | 1946766581               |
| SNP_P4_27426_36081766 | NC_021161.1    | Ca_kabuli_chr02 | 36081766                | TT                              | AA              | 1946766583               |
| SNP_P4_27427_36081790 | NC_021161.1    | Ca_kabuli_chr02 | 36081790                | AA                              | GG              | 1946766585               |
| SNP_P4_27428_36081908 | NC_021161.1    | Ca_kabuli_chr02 | 36081908                | AA                              | GG              | 1946766587               |
| SNP_P4_27429_36083904 | NC_021161.1    | Ca_kabuli_chr02 | 36083904                | AA                              | TT              | 1946766589               |
| SNP_P4_27430_36084484 | NC_021161.1    | Ca_kabuli_chr02 | 36084484                | GG                              | TT              | 1946766591               |
| SNP_P4_27431_36093724 | NC_021161.1    | Ca_kabuli_chr02 | 36093724                | GG                              | AA              | 1946766593               |
| SNP_P4_27432_36093905 | NC_021161.1    | Ca_kabuli_chr02 | 36093905                | TT                              | CC              | 1946766595               |
| SNP_P4_27433_36093906 | NC_021161.1    | Ca_kabuli_chr02 | 36093906                | CC                              | TT              | 1946766597               |
| SNP_P4_27435_36094018 | NC_021161.1    | Ca_kabuli_chr02 | 36094018                | CC                              | TT              | 1946766599               |
| SNP_P4_27437_36108627 | NC_021161.1    | Ca_kabuli_chr02 | 36108627                | GG                              | AA              | 1946766601               |

| SNPs IDs              | Chromosome IDs | Chromosomes     | Physical positions (bp) | CDC Frontier (Reference genome) | (ILWC46 & LPNB) | NCBI SNPdb Accession IDs |
|-----------------------|----------------|-----------------|-------------------------|---------------------------------|-----------------|--------------------------|
| SNP_P4_27438_36108643 | NC_021161.1    | Ca_kabuli_chr02 | 36108643                | CC                              | TT              | 1946766603               |
| SNP_P4_27439_36110761 | NC_021161.1    | Ca_kabuli_chr02 | 36110761                | CC                              | TT              | 1946766606               |
| SNP_P4_27440_36112415 | NC_021161.1    | Ca_kabuli_chr02 | 36112415                | CC                              | TT              | 1946766608               |
| SNP_P4_27441_36112939 | NC_021161.1    | Ca_kabuli_chr02 | 36112939                | CC                              | TT              | 1946766610               |
| SNP_P4_27442_36120826 | NC_021161.1    | Ca_kabuli_chr02 | 36120826                | AA                              | TT              | 1946766612               |
| SNP_P4_27443_36122851 | NC_021161.1    | Ca_kabuli_chr02 | 36122851                | CC                              | TT              | 1946766614               |
| SNP_P4_27444_36122875 | NC_021161.1    | Ca_kabuli_chr02 | 36122875                | AA                              | TT              | 1946766616               |
| SNP_P4_27445_36123691 | NC_021161.1    | Ca_kabuli_chr02 | 36123691                | TT                              | CC              | 1946766618               |
| SNP_P4_27447_36146587 | NC_021161.1    | Ca_kabuli_chr02 | 36146587                | GG                              | AA              | 1946766620               |
| SNP_P4_27449_36146719 | NC_021161.1    | Ca_kabuli_chr02 | 36146719                | TT                              | CC              | 1946766622               |
| SNP_P4_27450_36146853 | NC_021161.1    | Ca_kabuli_chr02 | 36146853                | CC                              | TT              | 1946766624               |
| SNP_P4_27453_36149198 | NC_021161.1    | Ca_kabuli_chr02 | 36149198                | AA                              | TT              | 1946766626               |
| SNP_P4_27454_36150061 | NC_021161.1    | Ca_kabuli_chr02 | 36150061                | GG                              | AA              | 1946766628               |
| SNP_P4_27455_36151080 | NC_021161.1    | Ca_kabuli_chr02 | 36151080                | AA                              | GG              | 1946766630               |
| SNP_P4_27456_36162994 | NC_021161.1    | Ca_kabuli_chr02 | 36162994                | CC                              | TT              | 1946766632               |
| SNP_P4_27457_36162998 | NC_021161.1    | Ca_kabuli_chr02 | 36162998                | AA                              | CC              | 1946766634               |
| SNP_P4_27458_36163093 | NC_021161.1    | Ca_kabuli_chr02 | 36163093                | GG                              | AA              | 1946766636               |
| SNP_P4_27460_36164452 | NC_021161.1    | Ca_kabuli_chr02 | 36164452                | AA                              | GG              | 1946766638               |
| SNP_P4_27462_36220043 | NC_021161.1    | Ca_kabuli_chr02 | 36220043                | AA                              | GG              | 1946766640               |
| SNP_P4_27463_36244142 | NC_021161.1    | Ca_kabuli_chr02 | 36244142                | AA                              | GG              | 1946766642               |
| SNP_P4_27464_36280731 | NC_021161.1    | Ca_kabuli_chr02 | 36280731                | AA                              | GG              | 1946766644               |
| SNP_P4_27465_36285865 | NC_021161.1    | Ca_kabuli_chr02 | 36285865                | TT                              | CC              | 1946766646               |
| SNP_P4_27467_36321367 | NC_021161.1    | Ca_kabuli_chr02 | 36321367                | AA                              | CC              | 1946766648               |
| SNP_P4_27468_36321382 | NC_021161.1    | Ca_kabuli_chr02 | 36321382                | AA                              | TT              | 1946766650               |
| SNP_P4_27469_36333450 | NC_021161.1    | Ca_kabuli_chr02 | 36333450                | TT                              | AA              | 1946766652               |
| SNP_P4_27471_36381888 | NC_021161.1    | Ca_kabuli_chr02 | 36381888                | CC                              | TT              | 1946766654               |
| SNP_P4_27473_36413312 | NC_021161.1    | Ca_kabuli_chr02 | 36413312                | AA                              | TT              | 1946766656               |
| SNP_P4_27474_36421759 | NC_021161.1    | Ca_kabuli_chr02 | 36421759                | CC                              | TT              | 1946766659               |
| SNP_P4_27475_36451580 | NC_021161.1    | Ca_kabuli_chr02 | 36451580                | GG                              | TT              | 1946766661               |
| SNP_P4_27476_36463596 | NC_021161.1    | Ca_kabuli_chr02 | 36463596                | TT                              | AA              | 1946766663               |
| SNP_P4_27478_36464193 | NC_021161.1    | Ca_kabuli_chr02 | 36464193                | AA                              | GG              | 1946766665               |
| SNP_P4_27480_36489388 | NC_021161.1    | Ca_kabuli_chr02 | 36489388                | TT                              | CC              | 1946766667               |
| SNP_P4_27482_36503836 | NC_021161.1    | Ca_kabuli_chr02 | 36503836                | CC                              | AA              | 1946766669               |
| SNP_P4_27483_36513984 | NC_021161.1    | Ca_kabuli_chr02 | 36513984                | GG                              | AA              | 1946766671               |
| SNP_P4_27484_36521682 | NC_021161.1    | Ca_kabuli_chr02 | 36521682                | AA                              | GG              | 1946766673               |
| SNP_P4_27485_36530358 | NC_021161.1    | Ca_kabuli_chr02 | 36530358                | TT                              | CC              | 1946766675               |
| SNP_P4_27486_36580856 | NC_021161.1    | Ca_kabuli_chr02 | 36580856                | GG                              | TT              | 1946766677               |
| SNP_P4_27487_36589919 | NC_021161.1    | Ca_kabuli_chr02 | 36589919                | TT                              | CC              | 1946766679               |
| SNP_P4_27488_36595568 | NC_021161.1    | Ca_kabuli_chr02 | 36595568                | CC                              | AA              | 1946766682               |
| SNP_P4_27489_36596684 | NC_021161.1    | Ca_kabuli_chr02 | 36596684                | AA                              | TT              | 1946766684               |
| SNP_P4_27490_36597130 | NC_021161.1    | Ca_kabuli_chr02 | 36597130                | AA                              | GG              | 1946766686               |
| SNP_P4_27491_36597548 | NC_021161.1    | Ca_kabuli_chr02 | 36597548                | CC                              | TT              | 1946766688               |

| SNPs IDs              | Chromosome IDs | Chromosomes     | Physical positions (bp) | CDC Frontier (Reference genome) | (ILWC46 & LPNB) | NCBI SNPdb Accession IDs |
|-----------------------|----------------|-----------------|-------------------------|---------------------------------|-----------------|--------------------------|
| SNP_P4_27492_36597550 | NC_021161.1    | Ca_kabuli_chr02 | 36597550                | TT                              | CC              | 1946766690               |
| SNP_P4_27493_36597882 | NC_021161.1    | Ca_kabuli_chr02 | 36597882                | AA                              | GG              | 1946766692               |
| SNP_P4_27494_36607632 | NC_021161.1    | Ca_kabuli_chr02 | 36607632                | TT                              | CC              | 1946766694               |
| SNP_P4_27495_36616058 | NC_021161.1    | Ca_kabuli_chr02 | 36616058                | GG                              | AA              | 1946766696               |
| SNP_P4_27496_36620836 | NC_021161.1    | Ca_kabuli_chr02 | 36620836                | CC                              | TT              | 1946766698               |
| SNP_P4_27497_36621221 | NC_021161.1    | Ca_kabuli_chr02 | 36621221                | GG                              | AA              | 1946766700               |
| SNP_P4_27498_36624181 | NC_021161.1    | Ca_kabuli_chr02 | 36624181                | GG                              | TT              | 1946766702               |
| SNP_P4_27499_36624182 | NC_021161.1    | Ca_kabuli_chr02 | 36624182                | TT                              | AA              | 1946766704               |
| SNP_P4_27500_36624256 | NC_021161.1    | Ca_kabuli_chr02 | 36624256                | TT                              | CC              | 1946766706               |
| SNP_P4_27501_36624276 | NC_021161.1    | Ca_kabuli_chr02 | 36624276                | AA                              | GG              | 1946766708               |
| SNP_P4_27502_36624397 | NC_021161.1    | Ca_kabuli_chr02 | 36624397                | AA                              | GG              | 1946766710               |
| SNP_P4_27503_36624497 | NC_021161.1    | Ca_kabuli_chr02 | 36624497                | TT                              | CC              | 1946766712               |
| SNP_P4_27504_36624552 | NC_021161.1    | Ca_kabuli_chr02 | 36624552                | TT                              | CC              | 1946766714               |
| SNP_P4_27505_36626378 | NC_021161.1    | Ca_kabuli_chr02 | 36626378                | AA                              | GG              | 1946766716               |
| SNP_P4_27506_36627078 | NC_021161.1    | Ca_kabuli_chr02 | 36627078                | CC                              | TT              | 1946766718               |
| SNP_P4_27507_36627637 | NC_021161.1    | Ca_kabuli_chr02 | 36627637                | TT                              | CC              | 1946766720               |
| SNP_P4_27508_36628463 | NC_021161.1    | Ca_kabuli_chr02 | 36628463                | AA                              | CC              | 1946766722               |
| SNP_P4_27509_36633061 | NC_021161.1    | Ca_kabuli_chr02 | 36633061                | TT                              | CC              | 1946766725               |
| SNP_P4_27510_36633213 | NC_021161.1    | Ca_kabuli_chr02 | 36633213                | CC                              | AA              | 1946766727               |
| SNP_P4_27511_36634297 | NC_021161.1    | Ca_kabuli_chr02 | 36634297                | GG                              | CC              | 1946766729               |
| SNP_P4_27512_36634802 | NC_021161.1    | Ca_kabuli_chr02 | 36634802                | AA                              | GG              | 1946766731               |
| SNP_P4_27513_36634837 | NC_021161.1    | Ca_kabuli_chr02 | 36634837                | GG                              | AA              | 1946766733               |
| SNP_P4_27514_1082     | NC_021162.1    | Ca_kabuli_chr03 | 1082                    | TT                              | CC              | 1946766735               |
| SNP_P4_27515_4019     | NC_021162.1    | Ca_kabuli_chr03 | 4019                    | TT                              | CC              | 1946766737               |
| SNP_P4_27516_4020     | NC_021162.1    | Ca_kabuli_chr03 | 4020                    | CC                              | TT              | 1946766740               |
| SNP_P4_27517_5598     | NC_021162.1    | Ca_kabuli_chr03 | 5598                    | CC                              | TT              | 1946766742               |
| SNP_P4_27518_38197    | NC_021162.1    | Ca_kabuli_chr03 | 38197                   | GG                              | AA              | 1946766744               |
| SNP_P4_27520_65947    | NC_021162.1    | Ca_kabuli_chr03 | 65947                   | TT                              | GG              | 1946766746               |
| SNP_P4_27521_72355    | NC_021162.1    | Ca_kabuli_chr03 | 72355                   | CC                              | AA              | 1946766748               |
| SNP_P4_27522_72356    | NC_021162.1    | Ca_kabuli_chr03 | 72356                   | CC                              | AA              | 1946766750               |
| SNP_P4_27523_84169    | NC_021162.1    | Ca_kabuli_chr03 | 84169                   | AA                              | GG              | 1946766752               |
| SNP_P4_27524_86095    | NC_021162.1    | Ca_kabuli_chr03 | 86095                   | TT                              | CC              | 1946766754               |
| SNP_P4_27527_113550   | NC_021162.1    | Ca_kabuli_chr03 | 113550                  | TT                              | AA              | 1946766756               |
| SNP_P4_27528_122883   | NC_021162.1    | Ca_kabuli_chr03 | 122883                  | AA                              | TT              | 1946766758               |
| SNP_P4_27529_124514   | NC_021162.1    | Ca_kabuli_chr03 | 124514                  | GG                              | TT              | 1946766760               |
| SNP_P4_27530_130558   | NC_021162.1    | Ca_kabuli_chr03 | 130558                  | GG                              | AA              | 1946766762               |
| SNP_P4_27531_131903   | NC_021162.1    | Ca_kabuli_chr03 | 131903                  | GG                              | AA              | 1946766764               |
| SNP_P4_27532_133391   | NC_021162.1    | Ca_kabuli_chr03 | 133391                  | AA                              | GG              | 1946766766               |
| SNP_P4_27533_135373   | NC_021162.1    | Ca_kabuli_chr03 | 135373                  | AA                              | TT              | 1946766768               |
| SNP_P4_27534_150119   | NC_021162.1    | Ca_kabuli_chr03 | 150119                  | GG                              | CC              | 1946766770               |
| SNP_P4_27535_160494   | NC_021162.1    | Ca_kabuli_chr03 | 160494                  | TT                              | CC              | 1946766772               |
| SNP_P4_27536_160497   | NC_021162.1    | Ca_kabuli_chr03 | 160497                  | CC                              | AA              | 1946766775               |



| SNPs IDs            | Chromosome IDs | Chromosomes     | Physical positions (bp) | CDC Frontier (Reference genome) | (ILWC46 & LPNB) | NCBI SNPdb Accession IDs |
|---------------------|----------------|-----------------|-------------------------|---------------------------------|-----------------|--------------------------|
| SNP_P4_27537_160507 | NC_021162.1    | Ca_kabuli_chr03 | 160507                  | AA                              | TT              | 1946766777               |
| SNP_P4_27538_160510 | NC_021162.1    | Ca_kabuli_chr03 | 160510                  | GG                              | TT              | 1946766779               |
| SNP_P4_27539_160511 | NC_021162.1    | Ca_kabuli_chr03 | 160511                  | AA                              | GG              | 1946766781               |
| SNP_P4_27540_160520 | NC_021162.1    | Ca_kabuli_chr03 | 160520                  | AA                              | CC              | 1946766783               |
| SNP_P4_27541_160522 | NC_021162.1    | Ca_kabuli_chr03 | 160522                  | AA                              | TT              | 1946766785               |
| SNP_P4_27542_160523 | NC_021162.1    | Ca_kabuli_chr03 | 160523                  | GG                              | AA              | 1946766787               |
| SNP_P4_27544_178971 | NC_021162.1    | Ca_kabuli_chr03 | 178971                  | TT                              | GG              | 1946766789               |
| SNP_P4_27545_188299 | NC_021162.1    | Ca_kabuli_chr03 | 188299                  | CC                              | TT              | 1946766791               |
| SNP_P4_27546_188306 | NC_021162.1    | Ca_kabuli_chr03 | 188306                  | AA                              | TT              | 1946766793               |
| SNP_P4_27547_188311 | NC_021162.1    | Ca_kabuli_chr03 | 188311                  | AA                              | CC              | 1946766795               |
| SNP_P4_27548_189870 | NC_021162.1    | Ca_kabuli_chr03 | 189870                  | TT                              | CC              | 1946766797               |
| SNP_P4_27549_189902 | NC_021162.1    | Ca_kabuli_chr03 | 189902                  | CC                              | AA              | 1946766799               |
| SNP_P4_27550_189916 | NC_021162.1    | Ca_kabuli_chr03 | 189916                  | AA                              | GG              | 1946766801               |
| SNP_P4_27551_189928 | NC_021162.1    | Ca_kabuli_chr03 | 189928                  | AA                              | CC              | 1946766803               |
| SNP_P4_27552_189929 | NC_021162.1    | Ca_kabuli_chr03 | 189929                  | AA                              | TT              | 1946766805               |
| SNP_P4_27553_189932 | NC_021162.1    | Ca_kabuli_chr03 | 189932                  | GG                              | AA              | 1946766807               |
| SNP_P4_27554_189938 | NC_021162.1    | Ca_kabuli_chr03 | 189938                  | AA                              | GG              | 1946766809               |
| SNP_P4_27555_201052 | NC_021162.1    | Ca_kabuli_chr03 | 201052                  | AA                              | GG              | 1946766811               |
| SNP_P4_27556_214008 | NC_021162.1    | Ca_kabuli_chr03 | 214008                  | TT                              | CC              | 1946766813               |
| SNP_P4_27557_214009 | NC_021162.1    | Ca_kabuli_chr03 | 214009                  | AA                              | GG              | 1946766815               |
| SNP_P4_27559_247679 | NC_021162.1    | Ca_kabuli_chr03 | 247679                  | GG                              | AA              | 1946766817               |
| SNP_P4_27560_247703 | NC_021162.1    | Ca_kabuli_chr03 | 247703                  | AA                              | GG              | 1946766819               |
| SNP_P4_27561_251369 | NC_021162.1    | Ca_kabuli_chr03 | 251369                  | AA                              | GG              | 1946766821               |
| SNP_P4_27562_251785 | NC_021162.1    | Ca_kabuli_chr03 | 251785                  | GG                              | TT              | 1946766823               |
| SNP_P4_27563_277453 | NC_021162.1    | Ca_kabuli_chr03 | 277453                  | TT                              | GG              | 1946766825               |
| SNP_P4_27564_277610 | NC_021162.1    | Ca_kabuli_chr03 | 277610                  | TT                              | GG              | 1946766827               |
| SNP_P4_27565_277622 | NC_021162.1    | Ca_kabuli_chr03 | 277622                  | GG                              | AA              | 1946766829               |
| SNP_P4_27566_277627 | NC_021162.1    | Ca_kabuli_chr03 | 277627                  | AA                              | CC              | 1946766831               |
| SNP_P4_27567_277656 | NC_021162.1    | Ca_kabuli_chr03 | 277656                  | AA                              | GG              | 1946766833               |
| SNP_P4_27568_277670 | NC_021162.1    | Ca_kabuli_chr03 | 277670                  | CC                              | TT              | 1946766835               |
| SNP_P4_27569_301368 | NC_021162.1    | Ca_kabuli_chr03 | 301368                  | CC                              | TT              | 1946766837               |
| SNP_P4_27570_304445 | NC_021162.1    | Ca_kabuli_chr03 | 304445                  | TT                              | GG              | 1946766839               |
| SNP_P4_27571_304581 | NC_021162.1    | Ca_kabuli_chr03 | 304581                  | GG                              | CC              | 1946766840               |
| SNP_P4_27572_304595 | NC_021162.1    | Ca_kabuli_chr03 | 304595                  | GG                              | AA              | 1946766841               |
| SNP_P4_27573_335987 | NC_021162.1    | Ca_kabuli_chr03 | 335987                  | CC                              | TT              | 1946766842               |
| SNP_P4_27574_336071 | NC_021162.1    | Ca_kabuli_chr03 | 336071                  | GG                              | AA              | 1946766843               |
| SNP_P4_27575_337195 | NC_021162.1    | Ca_kabuli_chr03 | 337195                  | AA                              | GG              | 1946766844               |
| SNP_P4_27576_339110 | NC_021162.1    | Ca_kabuli_chr03 | 339110                  | TT                              | CC              | 1946766845               |
| SNP_P4_27577_339288 | NC_021162.1    | Ca_kabuli_chr03 | 339288                  | CC                              | TT              | 1946766846               |
| SNP_P4_27578_357490 | NC_021162.1    | Ca_kabuli_chr03 | 357490                  | CC                              | TT              | 1946766847               |
| SNP_P4_27579_358363 | NC_021162.1    | Ca_kabuli_chr03 | 358363                  | TT                              | CC              | 1946766848               |
| SNP_P4_27580_370630 | NC_021162.1    | Ca_kabuli_chr03 | 370630                  | GG                              | AA              | 1946766849               |

| SNPs IDs            | Chromosome IDs | Chromosomes     | Physical positions (bp) | CDC Frontier (Reference genome) | (ILWC46 & LPNB) | NCBI SNPdb Accession IDs |
|---------------------|----------------|-----------------|-------------------------|---------------------------------|-----------------|--------------------------|
| SNP_P4_27581_371708 | NC_021162.1    | Ca_kabuli_chr03 | 371708                  | AA                              | CC              | 1946766851               |
| SNP_P4_27582_376342 | NC_021162.1    | Ca_kabuli_chr03 | 376342                  | GG                              | TT              | 1946766853               |
| SNP_P4_27583_376712 | NC_021162.1    | Ca_kabuli_chr03 | 376712                  | TT                              | CC              | 1946766855               |
| SNP_P4_27584_380777 | NC_021162.1    | Ca_kabuli_chr03 | 380777                  | AA                              | GG              | 1946766857               |
| SNP_P4_27585_395811 | NC_021162.1    | Ca_kabuli_chr03 | 395811                  | AA                              | GG              | 1946766859               |
| SNP_P4_27586_395820 | NC_021162.1    | Ca_kabuli_chr03 | 395820                  | GG                              | AA              | 1946766861               |
| SNP_P4_27589_415305 | NC_021162.1    | Ca_kabuli_chr03 | 415305                  | GG                              | AA              | 1946766863               |
| SNP_P4_27590_415494 | NC_021162.1    | Ca_kabuli_chr03 | 415494                  | TT                              | GG              | 1946766866               |
| SNP_P4_27591_415694 | NC_021162.1    | Ca_kabuli_chr03 | 415694                  | CC                              | GG              | 1946766868               |
| SNP_P4_27592_415739 | NC_021162.1    | Ca_kabuli_chr03 | 415739                  | TT                              | CC              | 1946766870               |
| SNP_P4_27593_415743 | NC_021162.1    | Ca_kabuli_chr03 | 415743                  | CC                              | TT              | 1946766872               |
| SNP_P4_27594_426792 | NC_021162.1    | Ca_kabuli_chr03 | 426792                  | GG                              | AA              | 1946766874               |
| SNP_P4_27595_433140 | NC_021162.1    | Ca_kabuli_chr03 | 433140                  | AA                              | GG              | 1946766876               |
| SNP_P4_27596_433865 | NC_021162.1    | Ca_kabuli_chr03 | 433865                  | GG                              | AA              | 1946766878               |
| SNP_P4_27597_450062 | NC_021162.1    | Ca_kabuli_chr03 | 450062                  | GG                              | AA              | 1946766880               |
| SNP_P4_27599_451700 | NC_021162.1    | Ca_kabuli_chr03 | 451700                  | GG                              | AA              | 1946766882               |
| SNP_P4_27600_451809 | NC_021162.1    | Ca_kabuli_chr03 | 451809                  | AA                              | GG              | 1946766884               |
| SNP_P4_27601_451980 | NC_021162.1    | Ca_kabuli_chr03 | 451980                  | CC                              | AA              | 1946766886               |
| SNP_P4_27602_452090 | NC_021162.1    | Ca_kabuli_chr03 | 452090                  | TT                              | AA              | 1946766888               |
| SNP_P4_27603_454268 | NC_021162.1    | Ca_kabuli_chr03 | 454268                  | AA                              | GG              | 1946766890               |
| SNP_P4_27604_454271 | NC_021162.1    | Ca_kabuli_chr03 | 454271                  | GG                              | AA              | 1946766892               |
| SNP_P4_27607_454727 | NC_021162.1    | Ca_kabuli_chr03 | 454727                  | CC                              | TT              | 1946766894               |
| SNP_P4_27608_454738 | NC_021162.1    | Ca_kabuli_chr03 | 454738                  | TT                              | CC              | 1946766897               |
| SNP_P4_27609_454851 | NC_021162.1    | Ca_kabuli_chr03 | 454851                  | GG                              | AA              | 1946766899               |
| SNP_P4_27610_454862 | NC_021162.1    | Ca_kabuli_chr03 | 454862                  | AA                              | GG              | 1946766901               |
| SNP_P4_27611_457860 | NC_021162.1    | Ca_kabuli_chr03 | 457860                  | GG                              | TT              | 1946766903               |
| SNP_P4_27613_473881 | NC_021162.1    | Ca_kabuli_chr03 | 473881                  | GG                              | AA              | 1946766905               |
| SNP_P4_27615_527426 | NC_021162.1    | Ca_kabuli_chr03 | 527426                  | CC                              | TT              | 1946766907               |
| SNP_P4_27617_566314 | NC_021162.1    | Ca_kabuli_chr03 | 566314                  | AA                              | CC              | 1946766909               |
| SNP_P4_27618_567187 | NC_021162.1    | Ca_kabuli_chr03 | 567187                  | TT                              | CC              | 1946766911               |
| SNP_P4_27619_600861 | NC_021162.1    | Ca_kabuli_chr03 | 600861                  | GG                              | AA              | 1946766913               |
| SNP_P4_27620_635196 | NC_021162.1    | Ca_kabuli_chr03 | 635196                  | AA                              | GG              | 1946766915               |
| SNP_P4_27621_635197 | NC_021162.1    | Ca_kabuli_chr03 | 635197                  | AA                              | TT              | 1946766917               |
| SNP_P4_27622_643917 | NC_021162.1    | Ca_kabuli_chr03 | 643917                  | GG                              | AA              | 1946766919               |
| SNP_P4_27623_646509 | NC_021162.1    | Ca_kabuli_chr03 | 646509                  | GG                              | AA              | 1946766921               |
| SNP_P4_27624_646524 | NC_021162.1    | Ca_kabuli_chr03 | 646524                  | GG                              | AA              | 1946766923               |
| SNP_P4_27625_646525 | NC_021162.1    | Ca_kabuli_chr03 | 646525                  | TT                              | GG              | 1946766925               |
| SNP_P4_27626_646923 | NC_021162.1    | Ca_kabuli_chr03 | 646923                  | AA                              | GG              | 1946766927               |
| SNP_P4_27627_647432 | NC_021162.1    | Ca_kabuli_chr03 | 647432                  | CC                              | TT              | 1946766929               |
| SNP_P4_27628_647437 | NC_021162.1    | Ca_kabuli_chr03 | 647437                  | GG                              | AA              | 1946766931               |
| SNP_P4_27629_647492 | NC_021162.1    | Ca_kabuli_chr03 | 647492                  | CC                              | AA              | 1946766933               |
| SNP_P4_27630_671284 | NC_021162.1    | Ca_kabuli_chr03 | 671284                  | TT                              | CC              | 1946766935               |

| SNPs IDs            | Chromosome IDs | Chromosomes     | Physical positions (bp) | CDC Frontier (Reference genome) | (ILWC46 & LPNB) | NCBI SNPdb Accession IDs |
|---------------------|----------------|-----------------|-------------------------|---------------------------------|-----------------|--------------------------|
| SNP_P4_27631_671321 | NC_021162.1    | Ca_kabuli_chr03 | 671321                  | GG                              | AA              | 1946766938               |
| SNP_P4_27632_671376 | NC_021162.1    | Ca_kabuli_chr03 | 671376                  | TT                              | CC              | 1946766940               |
| SNP_P4_27633_671390 | NC_021162.1    | Ca_kabuli_chr03 | 671390                  | CC                              | TT              | 1946766942               |
| SNP_P4_27634_671392 | NC_021162.1    | Ca_kabuli_chr03 | 671392                  | TT                              | GG              | 1946766944               |
| SNP_P4_27635_671399 | NC_021162.1    | Ca_kabuli_chr03 | 671399                  | GG                              | CC              | 1946766946               |
| SNP_P4_27636_671412 | NC_021162.1    | Ca_kabuli_chr03 | 671412                  | TT                              | AA              | 1946766948               |
| SNP_P4_27637_671451 | NC_021162.1    | Ca_kabuli_chr03 | 671451                  | AA                              | GG              | 1946766950               |
| SNP_P4_27638_671549 | NC_021162.1    | Ca_kabuli_chr03 | 671549                  | TT                              | CC              | 1946766952               |
| SNP_P4_27639_671632 | NC_021162.1    | Ca_kabuli_chr03 | 671632                  | CC                              | TT              | 1946766954               |
| SNP_P4_27640_671633 | NC_021162.1    | Ca_kabuli_chr03 | 671633                  | TT                              | CC              | 1946766956               |
| SNP_P4_27641_683763 | NC_021162.1    | Ca_kabuli_chr03 | 683763                  | CC                              | TT              | 1946766958               |
| SNP_P4_27642_686721 | NC_021162.1    | Ca_kabuli_chr03 | 686721                  | CC                              | TT              | 1946766960               |
| SNP_P4_27643_715589 | NC_021162.1    | Ca_kabuli_chr03 | 715589                  | TT                              | AA              | 1946766962               |
| SNP_P4_27644_749257 | NC_021162.1    | Ca_kabuli_chr03 | 749257                  | CC                              | GG              | 1946766964               |
| SNP_P4_27646_801698 | NC_021162.1    | Ca_kabuli_chr03 | 801698                  | TT                              | GG              | 1946766966               |
| SNP_P4_27648_812382 | NC_021162.1    | Ca_kabuli_chr03 | 812382                  | AA                              | GG              | 1946766968               |
| SNP_P4_27649_812822 | NC_021162.1    | Ca_kabuli_chr03 | 812822                  | CC                              | TT              | 1946766970               |
| SNP_P4_27650_812831 | NC_021162.1    | Ca_kabuli_chr03 | 812831                  | CC                              | TT              | 1946766972               |
| SNP_P4_27651_825911 | NC_021162.1    | Ca_kabuli_chr03 | 825911                  | CC                              | TT              | 1946766974               |
| SNP_P4_27652_833850 | NC_021162.1    | Ca_kabuli_chr03 | 833850                  | AA                              | TT              | 1946766976               |
| SNP_P4_27654_854281 | NC_021162.1    | Ca_kabuli_chr03 | 854281                  | AA                              | GG              | 1946766979               |
| SNP_P4_27655_882721 | NC_021162.1    | Ca_kabuli_chr03 | 882721                  | GG                              | AA              | 1946766981               |
| SNP_P4_27656_888998 | NC_021162.1    | Ca_kabuli_chr03 | 888998                  | AA                              | TT              | 1946766983               |
| SNP_P4_27657_894281 | NC_021162.1    | Ca_kabuli_chr03 | 894281                  | AA                              | CC              | 1946766984               |
| SNP_P4_27658_898747 | NC_021162.1    | Ca_kabuli_chr03 | 898747                  | GG                              | CC              | 1946766986               |
| SNP_P4_27659_899597 | NC_021162.1    | Ca_kabuli_chr03 | 899597                  | CC                              | AA              | 1946766988               |
| SNP_P4_27660_901996 | NC_021162.1    | Ca_kabuli_chr03 | 901996                  | CC                              | TT              | 1946766990               |
| SNP_P4_27661_907493 | NC_021162.1    | Ca_kabuli_chr03 | 907493                  | CC                              | AA              | 1946766992               |
| SNP_P4_27662_922479 | NC_021162.1    | Ca_kabuli_chr03 | 922479                  | TT                              | CC              | 1946766994               |
| SNP_P4_27663_922516 | NC_021162.1    | Ca_kabuli_chr03 | 922516                  | TT                              | CC              | 1946766996               |
| SNP_P4_27664_922553 | NC_021162.1    | Ca_kabuli_chr03 | 922553                  | AA                              | GG              | 1946766998               |
| SNP_P4_27665_922557 | NC_021162.1    | Ca_kabuli_chr03 | 922557                  | AA                              | TT              | 1946767000               |
| SNP_P4_27666_922599 | NC_021162.1    | Ca_kabuli_chr03 | 922599                  | TT                              | CC              | 1946767002               |
| SNP_P4_27667_922645 | NC_021162.1    | Ca_kabuli_chr03 | 922645                  | TT                              | CC              | 1946767004               |
| SNP_P4_27668_922852 | NC_021162.1    | Ca_kabuli_chr03 | 922852                  | AA                              | GG              | 1946767006               |
| SNP_P4_27669_923493 | NC_021162.1    | Ca_kabuli_chr03 | 923493                  | GG                              | AA              | 1946767008               |
| SNP_P4_27670_924803 | NC_021162.1    | Ca_kabuli_chr03 | 924803                  | AA                              | GG              | 1946767010               |
| SNP_P4_27671_924839 | NC_021162.1    | Ca_kabuli_chr03 | 924839                  | AA                              | GG              | 1946767012               |
| SNP_P4_27672_925181 | NC_021162.1    | Ca_kabuli_chr03 | 925181                  | GG                              | TT              | 1946767014               |
| SNP_P4_27673_925217 | NC_021162.1    | Ca_kabuli_chr03 | 925217                  | AA                              | TT              | 1946767016               |
| SNP_P4_27674_925300 | NC_021162.1    | Ca_kabuli_chr03 | 925300                  | AA                              | CC              | 1946767018               |
| SNP_P4_27675_938744 | NC_021162.1    | Ca_kabuli_chr03 | 938744                  | CC                              | AA              | 1946767020               |

| SNPs IDs             | Chromosome IDs | Chromosomes     | Physical positions (bp) | CDC Frontier (Reference genome) | (ILWC46 & LPNB) | NCBI SNPdb Accession IDs |
|----------------------|----------------|-----------------|-------------------------|---------------------------------|-----------------|--------------------------|
| SNP_P4_27676_938903  | NC_021162.1    | Ca_kabuli_chr03 | 938903                  | TT                              | AA              | 1946767022               |
| SNP_P4_27678_939100  | NC_021162.1    | Ca_kabuli_chr03 | 939100                  | AA                              | GG              | 1946767024               |
| SNP_P4_27679_939166  | NC_021162.1    | Ca_kabuli_chr03 | 939166                  | GG                              | TT              | 1946767026               |
| SNP_P4_27680_939396  | NC_021162.1    | Ca_kabuli_chr03 | 939396                  | GG                              | AA              | 1946767028               |
| SNP_P4_27681_959118  | NC_021162.1    | Ca_kabuli_chr03 | 959118                  | TT                              | GG              | 1946767030               |
| SNP_P4_27682_959400  | NC_021162.1    | Ca_kabuli_chr03 | 959400                  | TT                              | CC              | 1946767032               |
| SNP_P4_27683_962309  | NC_021162.1    | Ca_kabuli_chr03 | 962309                  | TT                              | AA              | 1946767034               |
| SNP_P4_27684_962482  | NC_021162.1    | Ca_kabuli_chr03 | 962482                  | TT                              | CC              | 1946767036               |
| SNP_P4_27685_962517  | NC_021162.1    | Ca_kabuli_chr03 | 962517                  | GG                              | AA              | 1946767038               |
| SNP_P4_27686_964059  | NC_021162.1    | Ca_kabuli_chr03 | 964059                  | AA                              | CC              | 1946767040               |
| SNP_P4_27687_964568  | NC_021162.1    | Ca_kabuli_chr03 | 964568                  | CC                              | TT              | 1946767042               |
| SNP_P4_27688_964673  | NC_021162.1    | Ca_kabuli_chr03 | 964673                  | AA                              | GG              | 1946767044               |
| SNP_P4_27689_965988  | NC_021162.1    | Ca_kabuli_chr03 | 965988                  | TT                              | CC              | 1946767046               |
| SNP_P4_27690_966018  | NC_021162.1    | Ca_kabuli_chr03 | 966018                  | CC                              | TT              | 1946767048               |
| SNP_P4_27691_966054  | NC_021162.1    | Ca_kabuli_chr03 | 966054                  | AA                              | GG              | 1946767050               |
| SNP_P4_27692_968322  | NC_021162.1    | Ca_kabuli_chr03 | 968322                  | GG                              | TT              | 1946767052               |
| SNP_P4_27693_982552  | NC_021162.1    | Ca_kabuli_chr03 | 982552                  | CC                              | TT              | 1946767054               |
| SNP_P4_27694_993659  | NC_021162.1    | Ca_kabuli_chr03 | 993659                  | TT                              | CC              | 1946767056               |
| SNP_P4_27695_995997  | NC_021162.1    | Ca_kabuli_chr03 | 995997                  | GG                              | TT              | 1946767058               |
| SNP_P4_27696_996284  | NC_021162.1    | Ca_kabuli_chr03 | 996284                  | TT                              | CC              | 1946767061               |
| SNP_P4_27697_1005040 | NC_021162.1    | Ca_kabuli_chr03 | 1005040                 | CC                              | TT              | 1946767063               |
| SNP_P4_27698_1005340 | NC_021162.1    | Ca_kabuli_chr03 | 1005340                 | CC                              | AA              | 1946767065               |
| SNP_P4_27699_1005376 | NC_021162.1    | Ca_kabuli_chr03 | 1005376                 | AA                              | GG              | 1946767067               |
| SNP_P4_27700_1020369 | NC_021162.1    | Ca_kabuli_chr03 | 1020369                 | AA                              | GG              | 1946767069               |
| SNP_P4_27702_1038194 | NC_021162.1    | Ca_kabuli_chr03 | 1038194                 | AA                              | GG              | 1946767071               |
| SNP_P4_27703_1038213 | NC_021162.1    | Ca_kabuli_chr03 | 1038213                 | TT                              | CC              | 1946767073               |
| SNP_P4_27704_1054054 | NC_021162.1    | Ca_kabuli_chr03 | 1054054                 | CC                              | AA              | 1946767075               |
| SNP_P4_27705_1062910 | NC_021162.1    | Ca_kabuli_chr03 | 1062910                 | TT                              | CC              | 1946767077               |
| SNP_P4_27706_1062946 | NC_021162.1    | Ca_kabuli_chr03 | 1062946                 | CC                              | TT              | 1946767079               |
| SNP_P4_27707_1063002 | NC_021162.1    | Ca_kabuli_chr03 | 1063002                 | TT                              | CC              | 1946767081               |
| SNP_P4_27708_1063006 | NC_021162.1    | Ca_kabuli_chr03 | 1063006                 | CC                              | GG              | 1946767083               |
| SNP_P4_27709_1063032 | NC_021162.1    | Ca_kabuli_chr03 | 1063032                 | CC                              | TT              | 1946767085               |
| SNP_P4_27710_1063097 | NC_021162.1    | Ca_kabuli_chr03 | 1063097                 | CC                              | TT              | 1946767086               |
| SNP_P4_27711_1063112 | NC_021162.1    | Ca_kabuli_chr03 | 1063112                 | CC                              | TT              | 1946767087               |
| SNP_P4_27712_1063130 | NC_021162.1    | Ca_kabuli_chr03 | 1063130                 | AA                              | CC              | 1946767088               |
| SNP_P4_27713_1063148 | NC_021162.1    | Ca_kabuli_chr03 | 1063148                 | TT                              | CC              | 1946767089               |
| SNP_P4_27714_1063160 | NC_021162.1    | Ca_kabuli_chr03 | 1063160                 | CC                              | TT              | 1946767091               |
| SNP_P4_27715_1089581 | NC_021162.1    | Ca_kabuli_chr03 | 1089581                 | AA                              | GG              | 1946767093               |
| SNP_P4_27716_1090063 | NC_021162.1    | Ca_kabuli_chr03 | 1090063                 | AA                              | TT              | 1946767095               |
| SNP_P4_27717_1091019 | NC_021162.1    | Ca_kabuli_chr03 | 1091019                 | AA                              | GG              | 1946767097               |
| SNP_P4_27718_1091026 | NC_021162.1    | Ca_kabuli_chr03 | 1091026                 | CC                              | AA              | 1946767099               |
| SNP_P4_27719_1091037 | NC_021162.1    | Ca_kabuli_chr03 | 1091037                 | AA                              | TT              | 1946767101               |

| SNPs IDs             | Chromosome IDs | Chromosomes     | Physical positions (bp) | CDC Frontier (Reference genome) | (ILWC46 & LPNB) | NCBI SNPdb Accession IDs |
|----------------------|----------------|-----------------|-------------------------|---------------------------------|-----------------|--------------------------|
| SNP_P4_27720_1111448 | NC_021162.1    | Ca_kabuli_chr03 | 1111448                 | AA                              | GG              | 1946767103               |
| SNP_P4_27721_1117276 | NC_021162.1    | Ca_kabuli_chr03 | 1117276                 | CC                              | TT              | 1946767105               |
| SNP_P4_27722_1118999 | NC_021162.1    | Ca_kabuli_chr03 | 1118999                 | AA                              | TT              | 1946767107               |
| SNP_P4_27724_1159563 | NC_021162.1    | Ca_kabuli_chr03 | 1159563                 | CC                              | AA              | 1946767109               |
| SNP_P4_27725_1175163 | NC_021162.1    | Ca_kabuli_chr03 | 1175163                 | TT                              | AA              | 1946767111               |
| SNP_P4_27726_1175415 | NC_021162.1    | Ca_kabuli_chr03 | 1175415                 | TT                              | GG              | 1946767113               |
| SNP_P4_27727_1175443 | NC_021162.1    | Ca_kabuli_chr03 | 1175443                 | AA                              | CC              | 1946767115               |
| SNP_P4_27728_1175453 | NC_021162.1    | Ca_kabuli_chr03 | 1175453                 | TT                              | GG              | 1946767117               |
| SNP_P4_27729_1175485 | NC_021162.1    | Ca_kabuli_chr03 | 1175485                 | TT                              | CC              | 1946767120               |
| SNP_P4_27730_1175486 | NC_021162.1    | Ca_kabuli_chr03 | 1175486                 | AA                              | TT              | 1946767122               |
| SNP_P4_27731_1175538 | NC_021162.1    | Ca_kabuli_chr03 | 1175538                 | AA                              | CC              | 1946767124               |
| SNP_P4_27732_1175761 | NC_021162.1    | Ca_kabuli_chr03 | 1175761                 | AA                              | GG              | 1946767126               |
| SNP_P4_27733_1175791 | NC_021162.1    | Ca_kabuli_chr03 | 1175791                 | AA                              | TT              | 1946767128               |
| SNP_P4_27734_1175911 | NC_021162.1    | Ca_kabuli_chr03 | 1175911                 | AA                              | GG              | 1946767130               |
| SNP_P4_27735_1175945 | NC_021162.1    | Ca_kabuli_chr03 | 1175945                 | GG                              | AA              | 1946767132               |
| SNP_P4_27736_1185584 | NC_021162.1    | Ca_kabuli_chr03 | 1185584                 | TT                              | CC              | 1946767134               |
| SNP_P4_27737_1185717 | NC_021162.1    | Ca_kabuli_chr03 | 1185717                 | AA                              | GG              | 1946767136               |
| SNP_P4_27738_1185730 | NC_021162.1    | Ca_kabuli_chr03 | 1185730                 | GG                              | AA              | 1946767138               |
| SNP_P4_27739_1185894 | NC_021162.1    | Ca_kabuli_chr03 | 1185894                 | GG                              | AA              | 1946767140               |
| SNP_P4_27740_1185903 | NC_021162.1    | Ca_kabuli_chr03 | 1185903                 | GG                              | TT              | 1946767142               |
| SNP_P4_27741_1185904 | NC_021162.1    | Ca_kabuli_chr03 | 1185904                 | GG                              | AA              | 1946767144               |
| SNP_P4_27742_1185915 | NC_021162.1    | Ca_kabuli_chr03 | 1185915                 | AA                              | GG              | 1946767146               |
| SNP_P4_27743_1185933 | NC_021162.1    | Ca_kabuli_chr03 | 1185933                 | TT                              | CC              | 1946767148               |
| SNP_P4_27744_1188342 | NC_021162.1    | Ca_kabuli_chr03 | 1188342                 | CC                              | TT              | 1946767150               |
| SNP_P4_27745_1188396 | NC_021162.1    | Ca_kabuli_chr03 | 1188396                 | TT                              | CC              | 1946767152               |
| SNP_P4_27746_1188397 | NC_021162.1    | Ca_kabuli_chr03 | 1188397                 | GG                              | TT              | 1946767154               |
| SNP_P4_27747_1188676 | NC_021162.1    | Ca_kabuli_chr03 | 1188676                 | TT                              | AA              | 1946767156               |
| SNP_P4_27748_1188683 | NC_021162.1    | Ca_kabuli_chr03 | 1188683                 | CC                              | TT              | 1946767159               |
| SNP_P4_27749_1188728 | NC_021162.1    | Ca_kabuli_chr03 | 1188728                 | GG                              | AA              | 1946767161               |
| SNP_P4_27751_1208109 | NC_021162.1    | Ca_kabuli_chr03 | 1208109                 | AA                              | GG              | 1946767163               |
| SNP_P4_27752_1208149 | NC_021162.1    | Ca_kabuli_chr03 | 1208149                 | AA                              | CC              | 1946767165               |
| SNP_P4_27753_1245616 | NC_021162.1    | Ca_kabuli_chr03 | 1245616                 | AA                              | GG              | 1946767167               |
| SNP_P4_27754_1272094 | NC_021162.1    | Ca_kabuli_chr03 | 1272094                 | GG                              | TT              | 1946767169               |
| SNP_P4_27755_1273313 | NC_021162.1    | Ca_kabuli_chr03 | 1273313                 | AA                              | GG              | 1946767171               |
| SNP_P4_27756_1273367 | NC_021162.1    | Ca_kabuli_chr03 | 1273367                 | AA                              | GG              | 1946767173               |
| SNP_P4_27757_1273572 | NC_021162.1    | Ca_kabuli_chr03 | 1273572                 | AA                              | GG              | 1946767175               |
| SNP_P4_27758_1280568 | NC_021162.1    | Ca_kabuli_chr03 | 1280568                 | GG                              | AA              | 1946767177               |
| SNP_P4_27760_1332786 | NC_021162.1    | Ca_kabuli_chr03 | 1332786                 | CC                              | TT              | 1946767179               |
| SNP_P4_27762_1391626 | NC_021162.1    | Ca_kabuli_chr03 | 1391626                 | TT                              | CC              | 1946767181               |
| SNP_P4_27763_1395000 | NC_021162.1    | Ca_kabuli_chr03 | 1395000                 | GG                              | CC              | 1946767184               |
| SNP_P4_27764_1395094 | NC_021162.1    | Ca_kabuli_chr03 | 1395094                 | TT                              | AA              | 1946767186               |
| SNP_P4_27765_1395105 | NC_021162.1    | Ca_kabuli_chr03 | 1395105                 | TT                              | GG              | 1946767188               |

| SNPs IDs             | Chromosome IDs | Chromosomes     | Physical positions (bp) | CDC Frontier (Reference genome) | (ILWC46 & LPNB) | NCBI SNPdb Accession IDs |
|----------------------|----------------|-----------------|-------------------------|---------------------------------|-----------------|--------------------------|
| SNP_P4_27766_1395110 | NC_021162.1    | Ca_kabuli_chr03 | 1395110                 | TT                              | AA              | 1946767190               |
| SNP_P4_27767_1395121 | NC_021162.1    | Ca_kabuli_chr03 | 1395121                 | AA                              | GG              | 1946767192               |
| SNP_P4_27768_1395135 | NC_021162.1    | Ca_kabuli_chr03 | 1395135                 | CC                              | TT              | 1946767194               |
| SNP_P4_27769_1395218 | NC_021162.1    | Ca_kabuli_chr03 | 1395218                 | CC                              | TT              | 1946767196               |
| SNP_P4_27770_1395381 | NC_021162.1    | Ca_kabuli_chr03 | 1395381                 | CC                              | GG              | 1946767198               |
| SNP_P4_27771_1395392 | NC_021162.1    | Ca_kabuli_chr03 | 1395392                 | CC                              | AA              | 1946767200               |
| SNP_P4_27772_1395397 | NC_021162.1    | Ca_kabuli_chr03 | 1395397                 | TT                              | AA              | 1946767202               |
| SNP_P4_27773_1395398 | NC_021162.1    | Ca_kabuli_chr03 | 1395398                 | AA                              | CC              | 1946767204               |
| SNP_P4_27774_1395399 | NC_021162.1    | Ca_kabuli_chr03 | 1395399                 | TT                              | AA              | 1946767206               |
| SNP_P4_27775_1395400 | NC_021162.1    | Ca_kabuli_chr03 | 1395400                 | GG                              | TT              | 1946767208               |
| SNP_P4_27776_1395407 | NC_021162.1    | Ca_kabuli_chr03 | 1395407                 | GG                              | TT              | 1946767210               |
| SNP_P4_27777_1395482 | NC_021162.1    | Ca_kabuli_chr03 | 1395482                 | CC                              | TT              | 1946767212               |
| SNP_P4_27778_1395580 | NC_021162.1    | Ca_kabuli_chr03 | 1395580                 | GG                              | TT              | 1946767214               |
| SNP_P4_27779_1396142 | NC_021162.1    | Ca_kabuli_chr03 | 1396142                 | AA                              | GG              | 1946767216               |
| SNP_P4_27780_1396167 | NC_021162.1    | Ca_kabuli_chr03 | 1396167                 | TT                              | GG              | 1946767218               |
| SNP_P4_27781_1396177 | NC_021162.1    | Ca_kabuli_chr03 | 1396177                 | TT                              | GG              | 1946767220               |
| SNP_P4_27782_1396182 | NC_021162.1    | Ca_kabuli_chr03 | 1396182                 | AA                              | GG              | 1946767222               |
| SNP_P4_27783_1396482 | NC_021162.1    | Ca_kabuli_chr03 | 1396482                 | TT                              | CC              | 1946767224               |
| SNP_P4_27784_1396653 | NC_021162.1    | Ca_kabuli_chr03 | 1396653                 | GG                              | AA              | 1946767226               |
| SNP_P4_27785_1396966 | NC_021162.1    | Ca_kabuli_chr03 | 1396966                 | AA                              | TT              | 1946767228               |
| SNP_P4_27786_1397159 | NC_021162.1    | Ca_kabuli_chr03 | 1397159                 | AA                              | GG              | 1946767230               |
| SNP_P4_27787_1397182 | NC_021162.1    | Ca_kabuli_chr03 | 1397182                 | AA                              | TT              | 1946767232               |
| SNP_P4_27788_1397553 | NC_021162.1    | Ca_kabuli_chr03 | 1397553                 | TT                              | CC              | 1946767234               |
| SNP_P4_27789_1417735 | NC_021162.1    | Ca_kabuli_chr03 | 1417735                 | AA                              | GG              | 1946767236               |
| SNP_P4_27790_1418993 | NC_021162.1    | Ca_kabuli_chr03 | 1418993                 | TT                              | CC              | 1946767238               |
| SNP_P4_27791_1438776 | NC_021162.1    | Ca_kabuli_chr03 | 1438776                 | AA                              | GG              | 1946767241               |
| SNP_P4_27793_1450685 | NC_021162.1    | Ca_kabuli_chr03 | 1450685                 | GG                              | TT              | 1946767243               |
| SNP_P4_27794_1450898 | NC_021162.1    | Ca_kabuli_chr03 | 1450898                 | CC                              | TT              | 1946767245               |
| SNP_P4_27795_1450984 | NC_021162.1    | Ca_kabuli_chr03 | 1450984                 | AA                              | GG              | 1946767247               |
| SNP_P4_27796_1452268 | NC_021162.1    | Ca_kabuli_chr03 | 1452268                 | TT                              | AA              | 1946767249               |
| SNP_P4_27797_1452269 | NC_021162.1    | Ca_kabuli_chr03 | 1452269                 | CC                              | AA              | 1946767251               |
| SNP_P4_27798_1454878 | NC_021162.1    | Ca_kabuli_chr03 | 1454878                 | AA                              | GG              | 1946767253               |
| SNP_P4_27799_1458366 | NC_021162.1    | Ca_kabuli_chr03 | 1458366                 | GG                              | AA              | 1946767255               |
| SNP_P4_27800_1461935 | NC_021162.1    | Ca_kabuli_chr03 | 1461935                 | GG                              | AA              | 1946767257               |
| SNP_P4_27801_1464172 | NC_021162.1    | Ca_kabuli_chr03 | 1464172                 | AA                              | GG              | 1946767259               |
| SNP_P4_27802_1468205 | NC_021162.1    | Ca_kabuli_chr03 | 1468205                 | GG                              | CC              | 1946767261               |
| SNP_P4_27803_1476372 | NC_021162.1    | Ca_kabuli_chr03 | 1476372                 | AA                              | GG              | 1946767263               |
| SNP_P4_27804_1477916 | NC_021162.1    | Ca_kabuli_chr03 | 1477916                 | AA                              | TT              | 1946767265               |
| SNP_P4_27806_1489932 | NC_021162.1    | Ca_kabuli_chr03 | 1489932                 | AA                              | TT              | 1946767267               |
| SNP_P4_27807_1532706 | NC_021162.1    | Ca_kabuli_chr03 | 1532706                 | TT                              | CC              | 1946767269               |
| SNP_P4_27808_1532734 | NC_021162.1    | Ca_kabuli_chr03 | 1532734                 | TT                              | AA              | 1946767271               |
| SNP_P4_27809_1532808 | NC_021162.1    | Ca_kabuli_chr03 | 1532808                 | AA                              | CC              | 1946767273               |

| SNPs IDs             | Chromosome IDs | Chromosomes     | Physical positions (bp) | CDC Frontier (Reference genome) | (ILWC46 & LPNB) | NCBI SNPdb Accession IDs |
|----------------------|----------------|-----------------|-------------------------|---------------------------------|-----------------|--------------------------|
| SNP_P4_27810_1532809 | NC_021162.1    | Ca_kabuli_chr03 | 1532809                 | GG                              | AA              | 1946767275               |
| SNP_P4_27811_1532866 | NC_021162.1    | Ca_kabuli_chr03 | 1532866                 | AA                              | CC              | 1946767277               |
| SNP_P4_27812_1533039 | NC_021162.1    | Ca_kabuli_chr03 | 1533039                 | AA                              | GG              | 1946767279               |
| SNP_P4_27813_1533063 | NC_021162.1    | Ca_kabuli_chr03 | 1533063                 | TT                              | GG              | 1946767281               |
| SNP_P4_27814_1533090 | NC_021162.1    | Ca_kabuli_chr03 | 1533090                 | CC                              | TT              | 1946767283               |
| SNP_P4_27815_1533220 | NC_021162.1    | Ca_kabuli_chr03 | 1533220                 | CC                              | TT              | 1946767285               |
| SNP_P4_27816_1533228 | NC_021162.1    | Ca_kabuli_chr03 | 1533228                 | AA                              | CC              | 1946767287               |
| SNP_P4_27817_1533230 | NC_021162.1    | Ca_kabuli_chr03 | 1533230                 | TT                              | AA              | 1946767290               |
| SNP_P4_27818_1533266 | NC_021162.1    | Ca_kabuli_chr03 | 1533266                 | GG                              | CC              | 1946767292               |
| SNP_P4_27819_1533319 | NC_021162.1    | Ca_kabuli_chr03 | 1533319                 | AA                              | GG              | 1946767294               |
| SNP_P4_27820_1533341 | NC_021162.1    | Ca_kabuli_chr03 | 1533341                 | CC                              | TT              | 1946767296               |
| SNP_P4_27822_1533410 | NC_021162.1    | Ca_kabuli_chr03 | 1533410                 | GG                              | AA              | 1946767298               |
| SNP_P4_27823_1533560 | NC_021162.1    | Ca_kabuli_chr03 | 1533560                 | TT                              | CC              | 1946767300               |
| SNP_P4_27824_1533706 | NC_021162.1    | Ca_kabuli_chr03 | 1533706                 | CC                              | GG              | 1946767302               |
| SNP_P4_27825_1533711 | NC_021162.1    | Ca_kabuli_chr03 | 1533711                 | TT                              | CC              | 1946767304               |
| SNP_P4_27826_1533885 | NC_021162.1    | Ca_kabuli_chr03 | 1533885                 | TT                              | CC              | 1946767306               |
| SNP_P4_27828_1534242 | NC_021162.1    | Ca_kabuli_chr03 | 1534242                 | TT                              | CC              | 1946767308               |
| SNP_P4_27829_1534371 | NC_021162.1    | Ca_kabuli_chr03 | 1534371                 | TT                              | AA              | 1946767310               |
| SNP_P4_27830_1534419 | NC_021162.1    | Ca_kabuli_chr03 | 1534419                 | CC                              | TT              | 1946767312               |
| SNP_P4_27831_1534459 | NC_021162.1    | Ca_kabuli_chr03 | 1534459                 | TT                              | AA              | 1946767314               |
| SNP_P4_27832_1534509 | NC_021162.1    | Ca_kabuli_chr03 | 1534509                 | GG                              | AA              | 1946767316               |
| SNP_P4_27833_1534631 | NC_021162.1    | Ca_kabuli_chr03 | 1534631                 | AA                              | CC              | 1946767318               |
| SNP_P4_27834_1534651 | NC_021162.1    | Ca_kabuli_chr03 | 1534651                 | CC                              | TT              | 1946767320               |
| SNP_P4_27835_1534678 | NC_021162.1    | Ca_kabuli_chr03 | 1534678                 | AA                              | GG              | 1946767322               |
| SNP_P4_27836_1534763 | NC_021162.1    | Ca_kabuli_chr03 | 1534763                 | CC                              | TT              | 1946767324               |
| SNP_P4_27837_1534806 | NC_021162.1    | Ca_kabuli_chr03 | 1534806                 | GG                              | AA              | 1946767326               |
| SNP_P4_27838_1534811 | NC_021162.1    | Ca_kabuli_chr03 | 1534811                 | AA                              | GG              | 1946767328               |
| SNP_P4_27839_1546100 | NC_021162.1    | Ca_kabuli_chr03 | 1546100                 | TT                              | CC              | 1946767330               |
| SNP_P4_27840_1546150 | NC_021162.1    | Ca_kabuli_chr03 | 1546150                 | CC                              | GG              | 1946767332               |
| SNP_P4_27841_1577619 | NC_021162.1    | Ca_kabuli_chr03 | 1577619                 | TT                              | GG              | 1946767334               |
| SNP_P4_27842_1599075 | NC_021162.1    | Ca_kabuli_chr03 | 1599075                 | AA                              | TT              | 1946767336               |
| SNP_P4_27844_1642028 | NC_021162.1    | Ca_kabuli_chr03 | 1642028                 | GG                              | AA              | 1946767338               |
| SNP_P4_27845_1642588 | NC_021162.1    | Ca_kabuli_chr03 | 1642588                 | CC                              | TT              | 1946767340               |
| SNP_P4_27846_1650604 | NC_021162.1    | Ca_kabuli_chr03 | 1650604                 | AA                              | GG              | 1946767342               |
| SNP_P4_27847_1650689 | NC_021162.1    | Ca_kabuli_chr03 | 1650689                 | AA                              | GG              | 1946767344               |
| SNP_P4_27850_1708576 | NC_021162.1    | Ca_kabuli_chr03 | 1708576                 | AA                              | TT              | 1946767346               |
| SNP_P4_27851_1718188 | NC_021162.1    | Ca_kabuli_chr03 | 1718188                 | TT                              | CC              | 1946767348               |
| SNP_P4_27853_1749337 | NC_021162.1    | Ca_kabuli_chr03 | 1749337                 | TT                              | GG              | 1946767350               |
| SNP_P4_27854_1749340 | NC_021162.1    | Ca_kabuli_chr03 | 1749340                 | TT                              | GG              | 1946767352               |
| SNP_P4_27856_1796176 | NC_021162.1    | Ca_kabuli_chr03 | 1796176                 | GG                              | AA              | 1946767354               |
| SNP_P4_27857_1796185 | NC_021162.1    | Ca_kabuli_chr03 | 1796185                 | AA                              | TT              | 1946767356               |
| SNP_P4_27858_1796197 | NC_021162.1    | Ca_kabuli_chr03 | 1796197                 | TT                              | CC              | 1946767358               |

| SNPs IDs             | Chromosome IDs | Chromosomes     | Physical positions (bp) | CDC Frontier (Reference genome) | (ILWC46 & LPNB) | NCBI SNPdb Accession IDs |
|----------------------|----------------|-----------------|-------------------------|---------------------------------|-----------------|--------------------------|
| SNP_P4_27859_1796200 | NC_021162.1    | Ca_kabuli_chr03 | 1796200                 | GG                              | AA              | 1946767360               |
| SNP_P4_27860_1796233 | NC_021162.1    | Ca_kabuli_chr03 | 1796233                 | CC                              | TT              | 1946767362               |
| SNP_P4_27861_1796238 | NC_021162.1    | Ca_kabuli_chr03 | 1796238                 | TT                              | CC              | 1946767364               |
| SNP_P4_27862_1796242 | NC_021162.1    | Ca_kabuli_chr03 | 1796242                 | CC                              | TT              | 1946767366               |
| SNP_P4_27863_1796251 | NC_021162.1    | Ca_kabuli_chr03 | 1796251                 | AA                              | GG              | 1946767368               |
| SNP_P4_27864_1796272 | NC_021162.1    | Ca_kabuli_chr03 | 1796272                 | CC                              | TT              | 1946767370               |
| SNP_P4_27865_1796370 | NC_021162.1    | Ca_kabuli_chr03 | 1796370                 | AA                              | CC              | 1946767372               |
| SNP_P4_27866_1796373 | NC_021162.1    | Ca_kabuli_chr03 | 1796373                 | GG                              | AA              | 1946767374               |
| SNP_P4_27867_1796380 | NC_021162.1    | Ca_kabuli_chr03 | 1796380                 | CC                              | TT              | 1946767376               |
| SNP_P4_27868_1796425 | NC_021162.1    | Ca_kabuli_chr03 | 1796425                 | CC                              | TT              | 1946767378               |
| SNP_P4_27869_1796837 | NC_021162.1    | Ca_kabuli_chr03 | 1796837                 | CC                              | TT              | 1946767380               |
| SNP_P4_27870_1796867 | NC_021162.1    | Ca_kabuli_chr03 | 1796867                 | CC                              | TT              | 1946767382               |
| SNP_P4_27871_1813123 | NC_021162.1    | Ca_kabuli_chr03 | 1813123                 | CC                              | GG              | 1946767384               |
| SNP_P4_27872_1828968 | NC_021162.1    | Ca_kabuli_chr03 | 1828968                 | AA                              | GG              | 1946767386               |
| SNP_P4_27873_1904023 | NC_021162.1    | Ca_kabuli_chr03 | 1904023                 | AA                              | GG              | 1946767388               |
| SNP_P4_27874_1921411 | NC_021162.1    | Ca_kabuli_chr03 | 1921411                 | CC                              | AA              | 1946767390               |
| SNP_P4_27877_1991844 | NC_021162.1    | Ca_kabuli_chr03 | 1991844                 | TT                              | AA              | 1946767392               |
| SNP_P4_27878_1994208 | NC_021162.1    | Ca_kabuli_chr03 | 1994208                 | AA                              | GG              | 1946767394               |
| SNP_P4_27879_2023097 | NC_021162.1    | Ca_kabuli_chr03 | 2023097                 | CC                              | TT              | 1946767396               |
| SNP_P4_27880_2026751 | NC_021162.1    | Ca_kabuli_chr03 | 2026751                 | TT                              | CC              | 1946767397               |
| SNP_P4_27881_2035505 | NC_021162.1    | Ca_kabuli_chr03 | 2035505                 | GG                              | AA              | 1946767399               |
| SNP_P4_27882_2044277 | NC_021162.1    | Ca_kabuli_chr03 | 2044277                 | GG                              | AA              | 1946767401               |
| SNP_P4_27883_2066942 | NC_021162.1    | Ca_kabuli_chr03 | 2066942                 | CC                              | AA              | 1946767403               |
| SNP_P4_27884_2101631 | NC_021162.1    | Ca_kabuli_chr03 | 2101631                 | GG                              | CC              | 1946767405               |
| SNP_P4_27886_2123296 | NC_021162.1    | Ca_kabuli_chr03 | 2123296                 | AA                              | CC              | 1946767407               |
| SNP_P4_27887_2126611 | NC_021162.1    | Ca_kabuli_chr03 | 2126611                 | AA                              | GG              | 1946767409               |
| SNP_P4_27889_2185567 | NC_021162.1    | Ca_kabuli_chr03 | 2185567                 | GG                              | AA              | 1946767411               |
| SNP_P4_27890_2194670 | NC_021162.1    | Ca_kabuli_chr03 | 2194670                 | TT                              | CC              | 1946767413               |
| SNP_P4_27891_2194715 | NC_021162.1    | Ca_kabuli_chr03 | 2194715                 | TT                              | AA              | 1946767415               |
| SNP_P4_27892_2194716 | NC_021162.1    | Ca_kabuli_chr03 | 2194716                 | TT                              | GG              | 1946767417               |
| SNP_P4_27893_2194738 | NC_021162.1    | Ca_kabuli_chr03 | 2194738                 | TT                              | CC              | 1946767419               |
| SNP_P4_27894_2194962 | NC_021162.1    | Ca_kabuli_chr03 | 2194962                 | AA                              | CC              | 1946767421               |
| SNP_P4_27895_2206622 | NC_021162.1    | Ca_kabuli_chr03 | 2206622                 | GG                              | AA              | 1946767423               |
| SNP_P4_27896_2210514 | NC_021162.1    | Ca_kabuli_chr03 | 2210514                 | TT                              | GG              | 1946767425               |
| SNP_P4_27898_2233826 | NC_021162.1    | Ca_kabuli_chr03 | 2233826                 | AA                              | CC              | 1946767427               |
| SNP_P4_27899_2242248 | NC_021162.1    | Ca_kabuli_chr03 | 2242248                 | TT                              | CC              | 1946767429               |
| SNP_P4_27900_2260030 | NC_021162.1    | Ca_kabuli_chr03 | 2260030                 | AA                              | GG              | 1946767431               |
| SNP_P4_27902_2260239 | NC_021162.1    | Ca_kabuli_chr03 | 2260239                 | TT                              | CC              | 1946767433               |
| SNP_P4_27903_2260444 | NC_021162.1    | Ca_kabuli_chr03 | 2260444                 | GG                              | AA              | 1946767435               |
| SNP_P4_27904_2260605 | NC_021162.1    | Ca_kabuli_chr03 | 2260605                 | TT                              | AA              | 1946767437               |
| SNP_P4_27905_2272141 | NC_021162.1    | Ca_kabuli_chr03 | 2272141                 | CC                              | GG              | 1946767439               |
| SNP_P4_27906_2272143 | NC_021162.1    | Ca_kabuli_chr03 | 2272143                 | CC                              | GG              | 1946767441               |



| SNPs IDs             | Chromosome IDs | Chromosomes     | Physical positions (bp) | CDC Frontier (Reference genome) | (ILWC46 & LPNB) | NCBI SNPdb Accession IDs |
|----------------------|----------------|-----------------|-------------------------|---------------------------------|-----------------|--------------------------|
| SNP_P4_27907_2285921 | NC_021162.1    | Ca_kabuli_chr03 | 2285921                 | AA                              | GG              | 1946767443               |
| SNP_P4_27908_2286292 | NC_021162.1    | Ca_kabuli_chr03 | 2286292                 | AA                              | GG              | 1946767445               |
| SNP_P4_27909_2292147 | NC_021162.1    | Ca_kabuli_chr03 | 2292147                 | CC                              | TT              | 1946767447               |
| SNP_P4_27910_2331172 | NC_021162.1    | Ca_kabuli_chr03 | 2331172                 | TT                              | CC              | 1946767449               |
| SNP_P4_27911_2355510 | NC_021162.1    | Ca_kabuli_chr03 | 2355510                 | AA                              | GG              | 1946767451               |
| SNP_P4_27912_2382590 | NC_021162.1    | Ca_kabuli_chr03 | 2382590                 | AA                              | CC              | 1946767453               |
| SNP_P4_27913_2382636 | NC_021162.1    | Ca_kabuli_chr03 | 2382636                 | TT                              | AA              | 1946767455               |
| SNP_P4_27914_2382659 | NC_021162.1    | Ca_kabuli_chr03 | 2382659                 | TT                              | AA              | 1946767457               |
| SNP_P4_27915_2384797 | NC_021162.1    | Ca_kabuli_chr03 | 2384797                 | GG                              | AA              | 1946767459               |
| SNP_P4_27916_2441439 | NC_021162.1    | Ca_kabuli_chr03 | 2441439                 | TT                              | CC              | 1946767461               |
| SNP_P4_27917_2442094 | NC_021162.1    | Ca_kabuli_chr03 | 2442094                 | CC                              | AA              | 1946767463               |
| SNP_P4_27919_2496315 | NC_021162.1    | Ca_kabuli_chr03 | 2496315                 | TT                              | AA              | 1946767465               |
| SNP_P4_27920_2496354 | NC_021162.1    | Ca_kabuli_chr03 | 2496354                 | GG                              | AA              | 1946767467               |
| SNP_P4_27921_2496368 | NC_021162.1    | Ca_kabuli_chr03 | 2496368                 | TT                              | GG              | 1946767469               |
| SNP_P4_27922_2496458 | NC_021162.1    | Ca_kabuli_chr03 | 2496458                 | TT                              | CC              | 1946767471               |
| SNP_P4_27923_2496482 | NC_021162.1    | Ca_kabuli_chr03 | 2496482                 | AA                              | TT              | 1946767473               |
| SNP_P4_27924_2496505 | NC_021162.1    | Ca_kabuli_chr03 | 2496505                 | TT                              | AA              | 1946767475               |
| SNP_P4_27925_2496524 | NC_021162.1    | Ca_kabuli_chr03 | 2496524                 | CC                              | TT              | 1946767477               |
| SNP_P4_27926_2496563 | NC_021162.1    | Ca_kabuli_chr03 | 2496563                 | GG                              | CC              | 1946767479               |
| SNP_P4_27927_2496733 | NC_021162.1    | Ca_kabuli_chr03 | 2496733                 | GG                              | AA              | 1946767481               |
| SNP_P4_27929_2513919 | NC_021162.1    | Ca_kabuli_chr03 | 2513919                 | GG                              | AA              | 1946767483               |
| SNP_P4_27930_2522535 | NC_021162.1    | Ca_kabuli_chr03 | 2522535                 | CC                              | GG              | 1946767485               |
| SNP_P4_27931_2529197 | NC_021162.1    | Ca_kabuli_chr03 | 2529197                 | GG                              | CC              | 1946767487               |
| SNP_P4_27932_2571166 | NC_021162.1    | Ca_kabuli_chr03 | 2571166                 | AA                              | TT              | 1946767489               |
| SNP_P4_27933_2571335 | NC_021162.1    | Ca_kabuli_chr03 | 2571335                 | AA                              | GG              | 1946767491               |
| SNP_P4_27934_2571401 | NC_021162.1    | Ca_kabuli_chr03 | 2571401                 | AA                              | GG              | 1946767493               |
| SNP_P4_27935_2571517 | NC_021162.1    | Ca_kabuli_chr03 | 2571517                 | AA                              | CC              | 1946767495               |
| SNP_P4_27936_2571572 | NC_021162.1    | Ca_kabuli_chr03 | 2571572                 | CC                              | GG              | 1946767497               |
| SNP_P4_27937_2573682 | NC_021162.1    | Ca_kabuli_chr03 | 2573682                 | TT                              | AA              | 1946767499               |
| SNP_P4_27938_2573694 | NC_021162.1    | Ca_kabuli_chr03 | 2573694                 | AA                              | CC              | 1946767501               |
| SNP_P4_27939_2573707 | NC_021162.1    | Ca_kabuli_chr03 | 2573707                 | GG                              | AA              | 1946767503               |
| SNP_P4_27940_2573753 | NC_021162.1    | Ca_kabuli_chr03 | 2573753                 | CC                              | GG              | 1946767505               |
| SNP_P4_27941_2573763 | NC_021162.1    | Ca_kabuli_chr03 | 2573763                 | TT                              | GG              | 1946767507               |
| SNP_P4_27942_2573786 | NC_021162.1    | Ca_kabuli_chr03 | 2573786                 | TT                              | AA              | 1946767509               |
| SNP_P4_27943_2574084 | NC_021162.1    | Ca_kabuli_chr03 | 2574084                 | GG                              | AA              | 1946767511               |
| SNP_P4_27944_2579310 | NC_021162.1    | Ca_kabuli_chr03 | 2579310                 | AA                              | CC              | 1946767513               |
| SNP_P4_27945_2579318 | NC_021162.1    | Ca_kabuli_chr03 | 2579318                 | TT                              | CC              | 1946767515               |
| SNP_P4_27946_2621066 | NC_021162.1    | Ca_kabuli_chr03 | 2621066                 | CC                              | TT              | 1946767517               |
| SNP_P4_27947_2631149 | NC_021162.1    | Ca_kabuli_chr03 | 2631149                 | TT                              | CC              | 1946767519               |
| SNP_P4_27948_2631150 | NC_021162.1    | Ca_kabuli_chr03 | 2631150                 | AA                              | GG              | 1946767521               |
| SNP_P4_27949_2631164 | NC_021162.1    | Ca_kabuli_chr03 | 2631164                 | GG                              | AA              | 1946767523               |
| SNP_P4_27950_2631188 | NC_021162.1    | Ca_kabuli_chr03 | 2631188                 | GG                              | AA              | 1946767525               |

| SNPs IDs             | Chromosome IDs | Chromosomes     | Physical positions (bp) | CDC Frontier (Reference genome) | (ILWC46 & LPNB) | NCBI SNPdb Accession IDs |
|----------------------|----------------|-----------------|-------------------------|---------------------------------|-----------------|--------------------------|
| SNP_P4_27951_2631205 | NC_021162.1    | Ca_kabuli_chr03 | 2631205                 | AA                              | GG              | 1946767527               |
| SNP_P4_27952_2631222 | NC_021162.1    | Ca_kabuli_chr03 | 2631222                 | GG                              | AA              | 1946767529               |
| SNP_P4_27953_2631250 | NC_021162.1    | Ca_kabuli_chr03 | 2631250                 | CC                              | TT              | 1946767531               |
| SNP_P4_27954_2631325 | NC_021162.1    | Ca_kabuli_chr03 | 2631325                 | AA                              | GG              | 1946767533               |
| SNP_P4_27955_2631342 | NC_021162.1    | Ca_kabuli_chr03 | 2631342                 | CC                              | AA              | 1946767535               |
| SNP_P4_27956_2631466 | NC_021162.1    | Ca_kabuli_chr03 | 2631466                 | TT                              | CC              | 1946767537               |
| SNP_P4_27957_2631553 | NC_021162.1    | Ca_kabuli_chr03 | 2631553                 | GG                              | AA              | 1946767539               |
| SNP_P4_27958_2631569 | NC_021162.1    | Ca_kabuli_chr03 | 2631569                 | AA                              | GG              | 1946767541               |
| SNP_P4_27959_2631589 | NC_021162.1    | Ca_kabuli_chr03 | 2631589                 | GG                              | AA              | 1946767543               |
| SNP_P4_27960_2631593 | NC_021162.1    | Ca_kabuli_chr03 | 2631593                 | TT                              | CC              | 1946767545               |
| SNP_P4_27961_2631635 | NC_021162.1    | Ca_kabuli_chr03 | 2631635                 | AA                              | GG              | 1946767547               |
| SNP_P4_27962_2631666 | NC_021162.1    | Ca_kabuli_chr03 | 2631666                 | GG                              | AA              | 1946767549               |
| SNP_P4_27963_2631680 | NC_021162.1    | Ca_kabuli_chr03 | 2631680                 | TT                              | CC              | 1946767551               |
| SNP_P4_27964_2648298 | NC_021162.1    | Ca_kabuli_chr03 | 2648298                 | AA                              | GG              | 1946767553               |
| SNP_P4_27965_2652312 | NC_021162.1    | Ca_kabuli_chr03 | 2652312                 | GG                              | TT              | 1946767555               |
| SNP_P4_27967_2653903 | NC_021162.1    | Ca_kabuli_chr03 | 2653903                 | CC                              | TT              | 1946767557               |
| SNP_P4_27968_2685944 | NC_021162.1    | Ca_kabuli_chr03 | 2685944                 | AA                              | GG              | 1946767559               |
| SNP_P4_27969_2685961 | NC_021162.1    | Ca_kabuli_chr03 | 2685961                 | TT                              | GG              | 1946767561               |
| SNP_P4_27970_2686345 | NC_021162.1    | Ca_kabuli_chr03 | 2686345                 | GG                              | AA              | 1946767563               |
| SNP_P4_27971_2717615 | NC_021162.1    | Ca_kabuli_chr03 | 2717615                 | TT                              | CC              | 1946767565               |
| SNP_P4_27972_2717674 | NC_021162.1    | Ca_kabuli_chr03 | 2717674                 | GG                              | AA              | 1946767567               |
| SNP_P4_27973_2717687 | NC_021162.1    | Ca_kabuli_chr03 | 2717687                 | AA                              | GG              | 1946767569               |
| SNP_P4_27975_2736906 | NC_021162.1    | Ca_kabuli_chr03 | 2736906                 | CC                              | TT              | 1946767571               |
| SNP_P4_27976_2753957 | NC_021162.1    | Ca_kabuli_chr03 | 2753957                 | CC                              | AA              | 1946767573               |
| SNP_P4_27977_2762293 | NC_021162.1    | Ca_kabuli_chr03 | 2762293                 | TT                              | AA              | 1946767575               |
| SNP_P4_27979_2762578 | NC_021162.1    | Ca_kabuli_chr03 | 2762578                 | CC                              | AA              | 1946767577               |
| SNP_P4_27980_2764763 | NC_021162.1    | Ca_kabuli_chr03 | 2764763                 | CC                              | TT              | 1946767579               |
| SNP_P4_27981_2767612 | NC_021162.1    | Ca_kabuli_chr03 | 2767612                 | TT                              | CC              | 1946767581               |
| SNP_P4_27982_2777291 | NC_021162.1    | Ca_kabuli_chr03 | 2777291                 | TT                              | CC              | 1946767583               |
| SNP_P4_27983_2814666 | NC_021162.1    | Ca_kabuli_chr03 | 2814666                 | TT                              | GG              | 1946767585               |
| SNP_P4_27984_2820334 | NC_021162.1    | Ca_kabuli_chr03 | 2820334                 | AA                              | TT              | 1946767587               |
| SNP_P4_27985_2821622 | NC_021162.1    | Ca_kabuli_chr03 | 2821622                 | TT                              | AA              | 1946767589               |
| SNP_P4_27986_2843474 | NC_021162.1    | Ca_kabuli_chr03 | 2843474                 | TT                              | CC              | 1946767591               |
| SNP_P4_27987_2854997 | NC_021162.1    | Ca_kabuli_chr03 | 2854997                 | AA                              | GG              | 1946767593               |
| SNP_P4_27988_2855217 | NC_021162.1    | Ca_kabuli_chr03 | 2855217                 | GG                              | AA              | 1946767596               |
| SNP_P4_27989_2855225 | NC_021162.1    | Ca_kabuli_chr03 | 2855225                 | CC                              | TT              | 1946767598               |
| SNP_P4_27990_2855246 | NC_021162.1    | Ca_kabuli_chr03 | 2855246                 | GG                              | CC              | 1946767600               |
| SNP_P4_27991_2855268 | NC_021162.1    | Ca_kabuli_chr03 | 2855268                 | CC                              | TT              | 1946767602               |
| SNP_P4_27992_2855322 | NC_021162.1    | Ca_kabuli_chr03 | 2855322                 | TT                              | CC              | 1946767604               |
| SNP_P4_27993_2855344 | NC_021162.1    | Ca_kabuli_chr03 | 2855344                 | AA                              | GG              | 1946767606               |
| SNP_P4_27994_2855360 | NC_021162.1    | Ca_kabuli_chr03 | 2855360                 | CC                              | TT              | 1946767608               |
| SNP_P4_27995_2855379 | NC_021162.1    | Ca_kabuli_chr03 | 2855379                 | TT                              | GG              | 1946767610               |

| SNPs IDs             | Chromosome IDs | Chromosomes     | Physical positions (bp) | CDC Frontier (Reference genome) | (ILWC46 & LPNB) | NCBI SNPdb Accession IDs |
|----------------------|----------------|-----------------|-------------------------|---------------------------------|-----------------|--------------------------|
| SNP_P4_27996_2855383 | NC_021162.1    | Ca_kabuli_chr03 | 2855383                 | AA                              | TT              | 1946767612               |
| SNP_P4_27997_2855408 | NC_021162.1    | Ca_kabuli_chr03 | 2855408                 | AA                              | GG              | 1946767614               |
| SNP_P4_27998_2855431 | NC_021162.1    | Ca_kabuli_chr03 | 2855431                 | AA                              | GG              | 1946767616               |
| SNP_P4_27999_2855441 | NC_021162.1    | Ca_kabuli_chr03 | 2855441                 | AA                              | GG              | 1946767618               |
| SNP_P4_28000_2855486 | NC_021162.1    | Ca_kabuli_chr03 | 2855486                 | TT                              | GG              | 1946767620               |
| SNP_P4_28001_2855488 | NC_021162.1    | Ca_kabuli_chr03 | 2855488                 | AA                              | GG              | 1946767622               |
| SNP_P4_28002_2855512 | NC_021162.1    | Ca_kabuli_chr03 | 2855512                 | AA                              | TT              | 1946767624               |
| SNP_P4_28003_2855532 | NC_021162.1    | Ca_kabuli_chr03 | 2855532                 | AA                              | GG              | 1946767626               |
| SNP_P4_28004_2855540 | NC_021162.1    | Ca_kabuli_chr03 | 2855540                 | AA                              | TT              | 1946767628               |
| SNP_P4_28005_2855550 | NC_021162.1    | Ca_kabuli_chr03 | 2855550                 | TT                              | CC              | 1946767630               |
| SNP_P4_28006_2855608 | NC_021162.1    | Ca_kabuli_chr03 | 2855608                 | CC                              | TT              | 1946767632               |
| SNP_P4_28007_2855611 | NC_021162.1    | Ca_kabuli_chr03 | 2855611                 | CC                              | TT              | 1946767634               |
| SNP_P4_28008_2855612 | NC_021162.1    | Ca_kabuli_chr03 | 2855612                 | CC                              | AA              | 1946767636               |
| SNP_P4_28009_2855676 | NC_021162.1    | Ca_kabuli_chr03 | 2855676                 | GG                              | TT              | 1946767638               |
| SNP_P4_28010_2855741 | NC_021162.1    | Ca_kabuli_chr03 | 2855741                 | CC                              | GG              | 1946767640               |
| SNP_P4_28011_2855776 | NC_021162.1    | Ca_kabuli_chr03 | 2855776                 | AA                              | GG              | 1946767642               |
| SNP_P4_28013_2855803 | NC_021162.1    | Ca_kabuli_chr03 | 2855803                 | AA                              | CC              | 1946767644               |
| SNP_P4_28014_2855812 | NC_021162.1    | Ca_kabuli_chr03 | 2855812                 | TT                              | CC              | 1946767646               |
| SNP_P4_28015_2855848 | NC_021162.1    | Ca_kabuli_chr03 | 2855848                 | CC                              | AA              | 1946767648               |
| SNP_P4_28016_2855858 | NC_021162.1    | Ca_kabuli_chr03 | 2855858                 | GG                              | TT              | 1946767650               |
| SNP_P4_28017_2855949 | NC_021162.1    | Ca_kabuli_chr03 | 2855949                 | GG                              | AA              | 1946767652               |
| SNP_P4_28018_2855965 | NC_021162.1    | Ca_kabuli_chr03 | 2855965                 | CC                              | GG              | 1946767654               |
| SNP_P4_28020_2856020 | NC_021162.1    | Ca_kabuli_chr03 | 2856020                 | CC                              | GG              | 1946767656               |
| SNP_P4_28021_2856038 | NC_021162.1    | Ca_kabuli_chr03 | 2856038                 | TT                              | CC              | 1946767658               |
| SNP_P4_28022_2856050 | NC_021162.1    | Ca_kabuli_chr03 | 2856050                 | AA                              | GG              | 1946767660               |
| SNP_P4_28023_2856064 | NC_021162.1    | Ca_kabuli_chr03 | 2856064                 | GG                              | TT              | 1946767662               |
| SNP_P4_28024_2856181 | NC_021162.1    | Ca_kabuli_chr03 | 2856181                 | CC                              | TT              | 1946767665               |
| SNP_P4_28025_2856311 | NC_021162.1    | Ca_kabuli_chr03 | 2856311                 | CC                              | GG              | 1946767667               |
| SNP_P4_28026_2856321 | NC_021162.1    | Ca_kabuli_chr03 | 2856321                 | AA                              | CC              | 1946767669               |
| SNP_P4_28027_2856361 | NC_021162.1    | Ca_kabuli_chr03 | 2856361                 | CC                              | TT              | 1946767671               |
| SNP_P4_28028_2856380 | NC_021162.1    | Ca_kabuli_chr03 | 2856380                 | AA                              | GG              | 1946767673               |
| SNP_P4_28029_2856390 | NC_021162.1    | Ca_kabuli_chr03 | 2856390                 | TT                              | CC              | 1946767675               |
| SNP_P4_28030_2856406 | NC_021162.1    | Ca_kabuli_chr03 | 2856406                 | GG                              | AA              | 1946767677               |
| SNP_P4_28031_2856436 | NC_021162.1    | Ca_kabuli_chr03 | 2856436                 | AA                              | CC              | 1946767679               |
| SNP_P4_28032_2856468 | NC_021162.1    | Ca_kabuli_chr03 | 2856468                 | AA                              | GG              | 1946767681               |
| SNP_P4_28033_2856497 | NC_021162.1    | Ca_kabuli_chr03 | 2856497                 | GG                              | TT              | 1946767683               |
| SNP_P4_28034_2856521 | NC_021162.1    | Ca_kabuli_chr03 | 2856521                 | TT                              | AA              | 1946767685               |
| SNP_P4_28035_2856523 | NC_021162.1    | Ca_kabuli_chr03 | 2856523                 | CC                              | TT              | 1946767687               |
| SNP_P4_28036_2856540 | NC_021162.1    | Ca_kabuli_chr03 | 2856540                 | TT                              | CC              | 1946767689               |
| SNP_P4_28037_2856545 | NC_021162.1    | Ca_kabuli_chr03 | 2856545                 | GG                              | TT              | 1946767691               |
| SNP_P4_28038_2856551 | NC_021162.1    | Ca_kabuli_chr03 | 2856551                 | GG                              | AA              | 1946767693               |
| SNP_P4_28039_2856560 | NC_021162.1    | Ca_kabuli_chr03 | 2856560                 | TT                              | AA              | 1946767695               |

| SNPs IDs             | Chromosome IDs | Chromosomes     | Physical positions (bp) | CDC Frontier (Reference genome) | (ILWC46 & LPNB) | NCBI SNPdb Accession IDs |
|----------------------|----------------|-----------------|-------------------------|---------------------------------|-----------------|--------------------------|
| SNP_P4_28040_2856593 | NC_021162.1    | Ca_kabuli_chr03 | 2856593                 | CC                              | AA              | 1946767698               |
| SNP_P4_28041_2856696 | NC_021162.1    | Ca_kabuli_chr03 | 2856696                 | TT                              | GG              | 1946767700               |
| SNP_P4_28042_2858389 | NC_021162.1    | Ca_kabuli_chr03 | 2858389                 | GG                              | AA              | 1946767702               |
| SNP_P4_28043_2858426 | NC_021162.1    | Ca_kabuli_chr03 | 2858426                 | GG                              | AA              | 1946767704               |
| SNP_P4_28044_2858428 | NC_021162.1    | Ca_kabuli_chr03 | 2858428                 | AA                              | GG              | 1946767706               |
| SNP_P4_28045_2858551 | NC_021162.1    | Ca_kabuli_chr03 | 2858551                 | CC                              | TT              | 1946767708               |
| SNP_P4_28046_2858718 | NC_021162.1    | Ca_kabuli_chr03 | 2858718                 | GG                              | TT              | 1946767710               |
| SNP_P4_28047_2858726 | NC_021162.1    | Ca_kabuli_chr03 | 2858726                 | CC                              | TT              | 1946767712               |
| SNP_P4_28048_2860446 | NC_021162.1    | Ca_kabuli_chr03 | 2860446                 | AA                              | GG              | 1946767714               |
| SNP_P4_28050_2903010 | NC_021162.1    | Ca_kabuli_chr03 | 2903010                 | GG                              | AA              | 1946767716               |
| SNP_P4_28051_2954902 | NC_021162.1    | Ca_kabuli_chr03 | 2954902                 | TT                              | CC              | 1946767718               |
| SNP_P4_28052_2962126 | NC_021162.1    | Ca_kabuli_chr03 | 2962126                 | AA                              | GG              | 1946767721               |
| SNP_P4_28053_2962475 | NC_021162.1    | Ca_kabuli_chr03 | 2962475                 | GG                              | AA              | 1946767723               |
| SNP_P4_28055_3051260 | NC_021162.1    | Ca_kabuli_chr03 | 3051260                 | TT                              | AA              | 1946767725               |
| SNP_P4_28056_3063834 | NC_021162.1    | Ca_kabuli_chr03 | 3063834                 | TT                              | CC              | 1946767727               |
| SNP_P4_28057_3068401 | NC_021162.1    | Ca_kabuli_chr03 | 3068401                 | TT                              | GG              | 1946767729               |
| SNP_P4_28058_3071917 | NC_021162.1    | Ca_kabuli_chr03 | 3071917                 | GG                              | AA              | 1946767731               |
| SNP_P4_28060_3107860 | NC_021162.1    | Ca_kabuli_chr03 | 3107860                 | CC                              | TT              | 1946767733               |
| SNP_P4_28062_3120516 | NC_021162.1    | Ca_kabuli_chr03 | 3120516                 | TT                              | AA              | 1946767735               |
| SNP_P4_28063_3120524 | NC_021162.1    | Ca_kabuli_chr03 | 3120524                 | AA                              | GG              | 1946767737               |
| SNP_P4_28064_3120554 | NC_021162.1    | Ca_kabuli_chr03 | 3120554                 | CC                              | GG              | 1946767739               |
| SNP_P4_28065_3121606 | NC_021162.1    | Ca_kabuli_chr03 | 3121606                 | AA                              | GG              | 1946767741               |
| SNP_P4_28066_3121942 | NC_021162.1    | Ca_kabuli_chr03 | 3121942                 | CC                              | TT              | 1946767743               |
| SNP_P4_28067_3121973 | NC_021162.1    | Ca_kabuli_chr03 | 3121973                 | CC                              | AA              | 1946767746               |
| SNP_P4_28068_3121992 | NC_021162.1    | Ca_kabuli_chr03 | 3121992                 | AA                              | CC              | 1946767748               |
| SNP_P4_28069_3125300 | NC_021162.1    | Ca_kabuli_chr03 | 3125300                 | AA                              | GG              | 1946767750               |
| SNP_P4_28070_3125507 | NC_021162.1    | Ca_kabuli_chr03 | 3125507                 | TT                              | CC              | 1946767752               |
| SNP_P4_28071_3128005 | NC_021162.1    | Ca_kabuli_chr03 | 3128005                 | GG                              | CC              | 1946767754               |
| SNP_P4_28072_3128996 | NC_021162.1    | Ca_kabuli_chr03 | 3128996                 | AA                              | GG              | 1946767756               |
| SNP_P4_28073_3129016 | NC_021162.1    | Ca_kabuli_chr03 | 3129016                 | GG                              | AA              | 1946767758               |
| SNP_P4_28074_3129049 | NC_021162.1    | Ca_kabuli_chr03 | 3129049                 | TT                              | GG              | 1946767760               |
| SNP_P4_28075_3129520 | NC_021162.1    | Ca_kabuli_chr03 | 3129520                 | TT                              | CC              | 1946767763               |
| SNP_P4_28076_3129527 | NC_021162.1    | Ca_kabuli_chr03 | 3129527                 | CC                              | AA              | 1946767765               |
| SNP_P4_28077_3129547 | NC_021162.1    | Ca_kabuli_chr03 | 3129547                 | CC                              | TT              | 1946767767               |
| SNP_P4_28078_3134489 | NC_021162.1    | Ca_kabuli_chr03 | 3134489                 | CC                              | TT              | 1946767769               |
| SNP_P4_28079_3146708 | NC_021162.1    | Ca_kabuli_chr03 | 3146708                 | TT                              | CC              | 1946767771               |
| SNP_P4_28080_3148817 | NC_021162.1    | Ca_kabuli_chr03 | 3148817                 | GG                              | AA              | 1946767773               |
| SNP_P4_28081_3148846 | NC_021162.1    | Ca_kabuli_chr03 | 3148846                 | AA                              | TT              | 1946767775               |
| SNP_P4_28082_3149542 | NC_021162.1    | Ca_kabuli_chr03 | 3149542                 | GG                              | AA              | 1946767777               |
| SNP_P4_28083_3149765 | NC_021162.1    | Ca_kabuli_chr03 | 3149765                 | TT                              | CC              | 1946767779               |
| SNP_P4_28084_3150006 | NC_021162.1    | Ca_kabuli_chr03 | 3150006                 | TT                              | CC              | 1946767781               |
| SNP_P4_28085_3151408 | NC_021162.1    | Ca_kabuli_chr03 | 3151408                 | CC                              | TT              | 1946767783               |

| SNPs IDs             | Chromosome IDs | Chromosomes     | Physical positions (bp) | CDC Frontier (Reference genome) | (ILWC46 & LPNB) | NCBI SNPdb Accession IDs |
|----------------------|----------------|-----------------|-------------------------|---------------------------------|-----------------|--------------------------|
| SNP_P4_28086_3151424 | NC_021162.1    | Ca_kabuli_chr03 | 3151424                 | CC                              | TT              | 1946767785               |
| SNP_P4_28087_3162032 | NC_021162.1    | Ca_kabuli_chr03 | 3162032                 | GG                              | TT              | 1946767787               |
| SNP_P4_28088_3163571 | NC_021162.1    | Ca_kabuli_chr03 | 3163571                 | TT                              | GG              | 1946767789               |
| SNP_P4_28089_3170206 | NC_021162.1    | Ca_kabuli_chr03 | 3170206                 | AA                              | GG              | 1946767791               |
| SNP_P4_28090_3170208 | NC_021162.1    | Ca_kabuli_chr03 | 3170208                 | TT                              | CC              | 1946767793               |
| SNP_P4_28091_3170792 | NC_021162.1    | Ca_kabuli_chr03 | 3170792                 | AA                              | GG              | 1946767795               |
| SNP_P4_28092_3170936 | NC_021162.1    | Ca_kabuli_chr03 | 3170936                 | GG                              | AA              | 1946767797               |
| SNP_P4_28093_3182319 | NC_021162.1    | Ca_kabuli_chr03 | 3182319                 | TT                              | GG              | 1946767799               |
| SNP_P4_28094_3182517 | NC_021162.1    | Ca_kabuli_chr03 | 3182517                 | CC                              | TT              | 1946767801               |
| SNP_P4_28095_3183613 | NC_021162.1    | Ca_kabuli_chr03 | 3183613                 | GG                              | AA              | 1946767803               |
| SNP_P4_28096_3183771 | NC_021162.1    | Ca_kabuli_chr03 | 3183771                 | AA                              | CC              | 1946767805               |
| SNP_P4_28098_3185950 | NC_021162.1    | Ca_kabuli_chr03 | 3185950                 | GG                              | CC              | 1946767807               |
| SNP_P4_28099_3186199 | NC_021162.1    | Ca_kabuli_chr03 | 3186199                 | CC                              | TT              | 1946767809               |
| SNP_P4_28100_3234990 | NC_021162.1    | Ca_kabuli_chr03 | 3234990                 | TT                              | CC              | 1946767811               |
| SNP_P4_28101_3235086 | NC_021162.1    | Ca_kabuli_chr03 | 3235086                 | AA                              | CC              | 1946767814               |
| SNP_P4_28102_3235102 | NC_021162.1    | Ca_kabuli_chr03 | 3235102                 | CC                              | AA              | 1946767816               |
| SNP_P4_28103_3235163 | NC_021162.1    | Ca_kabuli_chr03 | 3235163                 | GG                              | CC              | 1946767818               |
| SNP_P4_28104_3235263 | NC_021162.1    | Ca_kabuli_chr03 | 3235263                 | CC                              | AA              | 1946767820               |
| SNP_P4_28106_3235371 | NC_021162.1    | Ca_kabuli_chr03 | 3235371                 | TT                              | CC              | 1946767822               |
| SNP_P4_28107_3235442 | NC_021162.1    | Ca_kabuli_chr03 | 3235442                 | AA                              | GG              | 1946767824               |
| SNP_P4_28109_3235487 | NC_021162.1    | Ca_kabuli_chr03 | 3235487                 | TT                              | GG              | 1946767826               |
| SNP_P4_28110_3235491 | NC_021162.1    | Ca_kabuli_chr03 | 3235491                 | CC                              | TT              | 1946767828               |
| SNP_P4_28111_3235536 | NC_021162.1    | Ca_kabuli_chr03 | 3235536                 | AA                              | GG              | 1946767830               |
| SNP_P4_28113_3235751 | NC_021162.1    | Ca_kabuli_chr03 | 3235751                 | TT                              | CC              | 1946767832               |
| SNP_P4_28114_3235789 | NC_021162.1    | Ca_kabuli_chr03 | 3235789                 | CC                              | AA              | 1946767834               |
| SNP_P4_28115_3235799 | NC_021162.1    | Ca_kabuli_chr03 | 3235799                 | CC                              | AA              | 1946767836               |
| SNP_P4_28116_3235814 | NC_021162.1    | Ca_kabuli_chr03 | 3235814                 | GG                              | CC              | 1946767838               |
| SNP_P4_28117_3235887 | NC_021162.1    | Ca_kabuli_chr03 | 3235887                 | GG                              | TT              | 1946767840               |
| SNP_P4_28118_3252066 | NC_021162.1    | Ca_kabuli_chr03 | 3252066                 | GG                              | TT              | 1946767842               |
| SNP_P4_28119_3267300 | NC_021162.1    | Ca_kabuli_chr03 | 3267300                 | TT                              | GG              | 1946767844               |
| SNP_P4_28120_3267322 | NC_021162.1    | Ca_kabuli_chr03 | 3267322                 | CC                              | TT              | 1946767846               |
| SNP_P4_28121_3267324 | NC_021162.1    | Ca_kabuli_chr03 | 3267324                 | CC                              | TT              | 1946767848               |
| SNP_P4_28122_3267337 | NC_021162.1    | Ca_kabuli_chr03 | 3267337                 | GG                              | AA              | 1946767851               |
| SNP_P4_28123_3289512 | NC_021162.1    | Ca_kabuli_chr03 | 3289512                 | AA                              | TT              | 1946767853               |
| SNP_P4_28124_3289590 | NC_021162.1    | Ca_kabuli_chr03 | 3289590                 | TT                              | GG              | 1946767855               |
| SNP_P4_28125_3289845 | NC_021162.1    | Ca_kabuli_chr03 | 3289845                 | GG                              | AA              | 1946767857               |
| SNP_P4_28126_3289860 | NC_021162.1    | Ca_kabuli_chr03 | 3289860                 | AA                              | GG              | 1946767860               |
| SNP_P4_28127_3289890 | NC_021162.1    | Ca_kabuli_chr03 | 3289890                 | TT                              | CC              | 1946767862               |
| SNP_P4_28128_3289913 | NC_021162.1    | Ca_kabuli_chr03 | 3289913                 | AA                              | TT              | 1946767864               |
| SNP_P4_28129_3289952 | NC_021162.1    | Ca_kabuli_chr03 | 3289952                 | TT                              | CC              | 1946767866               |
| SNP_P4_28130_3291424 | NC_021162.1    | Ca_kabuli_chr03 | 3291424                 | GG                              | AA              | 1946767868               |
| SNP_P4_28131_3291445 | NC_021162.1    | Ca_kabuli_chr03 | 3291445                 | GG                              | AA              | 1946767870               |

| SNPs IDs             | Chromosome IDs | Chromosomes     | Physical positions (bp) | CDC Frontier (Reference genome) | (ILWC46 & LPNB) | NCBI SNPdb Accession IDs |
|----------------------|----------------|-----------------|-------------------------|---------------------------------|-----------------|--------------------------|
| SNP_P4_28132_3291641 | NC_021162.1    | Ca_kabuli_chr03 | 3291641                 | AA                              | GG              | 1946767872               |
| SNP_P4_28133_3291656 | NC_021162.1    | Ca_kabuli_chr03 | 3291656                 | GG                              | TT              | 1946767874               |
| SNP_P4_28134_3291688 | NC_021162.1    | Ca_kabuli_chr03 | 3291688                 | GG                              | AA              | 1946767876               |
| SNP_P4_28135_3291697 | NC_021162.1    | Ca_kabuli_chr03 | 3291697                 | AA                              | GG              | 1946767878               |
| SNP_P4_28136_3291742 | NC_021162.1    | Ca_kabuli_chr03 | 3291742                 | GG                              | AA              | 1946767880               |
| SNP_P4_28137_3291746 | NC_021162.1    | Ca_kabuli_chr03 | 3291746                 | CC                              | TT              | 1946767883               |
| SNP_P4_28139_3291760 | NC_021162.1    | Ca_kabuli_chr03 | 3291760                 | TT                              | CC              | 1946767885               |
| SNP_P4_28140_3291907 | NC_021162.1    | Ca_kabuli_chr03 | 3291907                 | CC                              | AA              | 1946767887               |
| SNP_P4_28141_3291912 | NC_021162.1    | Ca_kabuli_chr03 | 3291912                 | GG                              | AA              | 1946767889               |
| SNP_P4_28142_3291932 | NC_021162.1    | Ca_kabuli_chr03 | 3291932                 | CC                              | TT              | 1946767891               |
| SNP_P4_28143_3292249 | NC_021162.1    | Ca_kabuli_chr03 | 3292249                 | GG                              | AA              | 1946767893               |
| SNP_P4_28144_3292264 | NC_021162.1    | Ca_kabuli_chr03 | 3292264                 | GG                              | AA              | 1946767896               |
| SNP_P4_28145_3292279 | NC_021162.1    | Ca_kabuli_chr03 | 3292279                 | TT                              | CC              | 1946767898               |
| SNP_P4_28146_3305977 | NC_021162.1    | Ca_kabuli_chr03 | 3305977                 | AA                              | GG              | 1946767900               |
| SNP_P4_28147_3306450 | NC_021162.1    | Ca_kabuli_chr03 | 3306450                 | AA                              | GG              | 1946767902               |
| SNP_P4_28148_3306454 | NC_021162.1    | Ca_kabuli_chr03 | 3306454                 | GG                              | TT              | 1946767904               |
| SNP_P4_28149_3306541 | NC_021162.1    | Ca_kabuli_chr03 | 3306541                 | TT                              | CC              | 1946767907               |
| SNP_P4_28150_3306567 | NC_021162.1    | Ca_kabuli_chr03 | 3306567                 | AA                              | GG              | 1946767909               |
| SNP_P4_28151_3306586 | NC_021162.1    | Ca_kabuli_chr03 | 3306586                 | TT                              | CC              | 1946767911               |
| SNP_P4_28152_3306929 | NC_021162.1    | Ca_kabuli_chr03 | 3306929                 | GG                              | AA              | 1946767913               |
| SNP_P4_28154_3330588 | NC_021162.1    | Ca_kabuli_chr03 | 3330588                 | AA                              | GG              | 1946767915               |
| SNP_P4_28155_3334665 | NC_021162.1    | Ca_kabuli_chr03 | 3334665                 | AA                              | GG              | 1946767917               |
| SNP_P4_28157_3339551 | NC_021162.1    | Ca_kabuli_chr03 | 3339551                 | GG                              | AA              | 1946767919               |
| SNP_P4_28159_3340463 | NC_021162.1    | Ca_kabuli_chr03 | 3340463                 | GG                              | TT              | 1946767921               |
| SNP_P4_28160_3341235 | NC_021162.1    | Ca_kabuli_chr03 | 3341235                 | TT                              | CC              | 1946767923               |
| SNP_P4_28161_3344161 | NC_021162.1    | Ca_kabuli_chr03 | 3344161                 | GG                              | AA              | 1946767925               |
| SNP_P4_28163_3372078 | NC_021162.1    | Ca_kabuli_chr03 | 3372078                 | AA                              | GG              | 1946767927               |
| SNP_P4_28164_3388500 | NC_021162.1    | Ca_kabuli_chr03 | 3388500                 | GG                              | AA              | 1946767929               |
| SNP_P4_28165_3392065 | NC_021162.1    | Ca_kabuli_chr03 | 3392065                 | AA                              | TT              | 1946767931               |
| SNP_P4_28167_3392493 | NC_021162.1    | Ca_kabuli_chr03 | 3392493                 | TT                              | GG              | 1946767933               |
| SNP_P4_28168_3392498 | NC_021162.1    | Ca_kabuli_chr03 | 3392498                 | TT                              | AA              | 1946767935               |
| SNP_P4_28170_3418278 | NC_021162.1    | Ca_kabuli_chr03 | 3418278                 | CC                              | TT              | 1946767937               |
| SNP_P4_28171_3433601 | NC_021162.1    | Ca_kabuli_chr03 | 3433601                 | CC                              | GG              | 1946767939               |
| SNP_P4_28172_3435889 | NC_021162.1    | Ca_kabuli_chr03 | 3435889                 | CC                              | GG              | 1946767941               |
| SNP_P4_28173_3439088 | NC_021162.1    | Ca_kabuli_chr03 | 3439088                 | CC                              | AA              | 1946767943               |
| SNP_P4_28174_3449815 | NC_021162.1    | Ca_kabuli_chr03 | 3449815                 | AA                              | TT              | 1946767945               |
| SNP_P4_28175_3478152 | NC_021162.1    | Ca_kabuli_chr03 | 3478152                 | GG                              | AA              | 1946767947               |
| SNP_P4_28176_3478215 | NC_021162.1    | Ca_kabuli_chr03 | 3478215                 | TT                              | GG              | 1946767949               |
| SNP_P4_28177_3478363 | NC_021162.1    | Ca_kabuli_chr03 | 3478363                 | AA                              | GG              | 1946767951               |
| SNP_P4_28178_3493567 | NC_021162.1    | Ca_kabuli_chr03 | 3493567                 | CC                              | TT              | 1946767953               |
| SNP_P4_28179_3497374 | NC_021162.1    | Ca_kabuli_chr03 | 3497374                 | TT                              | AA              | 1946767955               |
| SNP_P4_28180_3497385 | NC_021162.1    | Ca_kabuli_chr03 | 3497385                 | CC                              | TT              | 1946767957               |

| SNPs IDs             | Chromosome IDs | Chromosomes     | Physical positions (bp) | CDC Frontier (Reference genome) | (ILWC46 & LPNB) | NCBI SNPdb Accession IDs |
|----------------------|----------------|-----------------|-------------------------|---------------------------------|-----------------|--------------------------|
| SNP_P4_28181_3498053 | NC_021162.1    | Ca_kabuli_chr03 | 3498053                 | CC                              | GG              | 1946767959               |
| SNP_P4_28182_3503317 | NC_021162.1    | Ca_kabuli_chr03 | 3503317                 | GG                              | CC              | 1946767961               |
| SNP_P4_28183_3503322 | NC_021162.1    | Ca_kabuli_chr03 | 3503322                 | GG                              | AA              | 1946767963               |
| SNP_P4_28184_3503630 | NC_021162.1    | Ca_kabuli_chr03 | 3503630                 | TT                              | CC              | 1946767965               |
| SNP_P4_28185_3503812 | NC_021162.1    | Ca_kabuli_chr03 | 3503812                 | AA                              | TT              | 1946767967               |
| SNP_P4_28186_3504430 | NC_021162.1    | Ca_kabuli_chr03 | 3504430                 | GG                              | TT              | 1946767969               |
| SNP_P4_28187_3515905 | NC_021162.1    | Ca_kabuli_chr03 | 3515905                 | AA                              | CC              | 1946767971               |
| SNP_P4_28188_3517247 | NC_021162.1    | Ca_kabuli_chr03 | 3517247                 | AA                              | TT              | 1946767973               |
| SNP_P4_28189_3517248 | NC_021162.1    | Ca_kabuli_chr03 | 3517248                 | CC                              | TT              | 1946767975               |
| SNP_P4_28190_3517501 | NC_021162.1    | Ca_kabuli_chr03 | 3517501                 | GG                              | AA              | 1946767977               |
| SNP_P4_28191_3517564 | NC_021162.1    | Ca_kabuli_chr03 | 3517564                 | AA                              | TT              | 1946767979               |
| SNP_P4_28192_3517583 | NC_021162.1    | Ca_kabuli_chr03 | 3517583                 | CC                              | TT              | 1946767981               |
| SNP_P4_28193_3517871 | NC_021162.1    | Ca_kabuli_chr03 | 3517871                 | TT                              | GG              | 1946767983               |
| SNP_P4_28194_3517940 | NC_021162.1    | Ca_kabuli_chr03 | 3517940                 | GG                              | TT              | 1946767985               |
| SNP_P4_28195_3517966 | NC_021162.1    | Ca_kabuli_chr03 | 3517966                 | GG                              | TT              | 1946767987               |
| SNP_P4_28196_3519734 | NC_021162.1    | Ca_kabuli_chr03 | 3519734                 | AA                              | CC              | 1946767990               |
| SNP_P4_28197_3519742 | NC_021162.1    | Ca_kabuli_chr03 | 3519742                 | TT                              | GG              | 1946767992               |
| SNP_P4_28199_3531593 | NC_021162.1    | Ca_kabuli_chr03 | 3531593                 | CC                              | AA              | 1946767994               |
| SNP_P4_28200_3531756 | NC_021162.1    | Ca_kabuli_chr03 | 3531756                 | AA                              | TT              | 1946767996               |
| SNP_P4_28201_3531996 | NC_021162.1    | Ca_kabuli_chr03 | 3531996                 | AA                              | TT              | 1946767998               |
| SNP_P4_28202_3535079 | NC_021162.1    | Ca_kabuli_chr03 | 3535079                 | CC                              | TT              | 1946768000               |
| SNP_P4_28203_3535509 | NC_021162.1    | Ca_kabuli_chr03 | 3535509                 | GG                              | TT              | 1946768002               |
| SNP_P4_28204_3537147 | NC_021162.1    | Ca_kabuli_chr03 | 3537147                 | GG                              | CC              | 1946768004               |
| SNP_P4_28205_3537176 | NC_021162.1    | Ca_kabuli_chr03 | 3537176                 | AA                              | GG              | 1946768006               |
| SNP_P4_28206_3537311 | NC_021162.1    | Ca_kabuli_chr03 | 3537311                 | TT                              | CC              | 1946768008               |
| SNP_P4_28207_3537312 | NC_021162.1    | Ca_kabuli_chr03 | 3537312                 | CC                              | AA              | 1946768010               |
| SNP_P4_28208_3542315 | NC_021162.1    | Ca_kabuli_chr03 | 3542315                 | TT                              | GG              | 1946768012               |
| SNP_P4_28209_3547098 | NC_021162.1    | Ca_kabuli_chr03 | 3547098                 | TT                              | CC              | 1946768014               |
| SNP_P4_28210_3549849 | NC_021162.1    | Ca_kabuli_chr03 | 3549849                 | AA                              | GG              | 1946768016               |
| SNP_P4_28211_3559067 | NC_021162.1    | Ca_kabuli_chr03 | 3559067                 | CC                              | GG              | 1946768018               |
| SNP_P4_28212_3570363 | NC_021162.1    | Ca_kabuli_chr03 | 3570363                 | GG                              | CC              | 1946768020               |
| SNP_P4_28213_3571122 | NC_021162.1    | Ca_kabuli_chr03 | 3571122                 | CC                              | TT              | 1946768022               |
| SNP_P4_28214_3579643 | NC_021162.1    | Ca_kabuli_chr03 | 3579643                 | GG                              | AA              | 1946768024               |
| SNP_P4_28215_3580599 | NC_021162.1    | Ca_kabuli_chr03 | 3580599                 | GG                              | AA              | 1946768026               |
| SNP_P4_28216_3580684 | NC_021162.1    | Ca_kabuli_chr03 | 3580684                 | TT                              | CC              | 1946768028               |
| SNP_P4_28217_3587340 | NC_021162.1    | Ca_kabuli_chr03 | 3587340                 | CC                              | TT              | 1946768030               |
| SNP_P4_28218_3608245 | NC_021162.1    | Ca_kabuli_chr03 | 3608245                 | AA                              | TT              | 1946768032               |
| SNP_P4_28222_3640041 | NC_021162.1    | Ca_kabuli_chr03 | 3640041                 | AA                              | GG              | 1946768034               |
| SNP_P4_28223_3643471 | NC_021162.1    | Ca_kabuli_chr03 | 3643471                 | CC                              | TT              | 1946768036               |
| SNP_P4_28224_3646793 | NC_021162.1    | Ca_kabuli_chr03 | 3646793                 | AA                              | GG              | 1946768038               |
| SNP_P4_28225_3695727 | NC_021162.1    | Ca_kabuli_chr03 | 3695727                 | AA                              | CC              | 1946768040               |
| SNP_P4_28229_3725133 | NC_021162.1    | Ca_kabuli_chr03 | 3725133                 | GG                              | AA              | 1946768042               |

| SNPs IDs             | Chromosome IDs | Chromosomes     | Physical positions (bp) | CDC Frontier (Reference genome) | (ILWC46 & LPNB) | NCBI SNPdb Accession IDs |
|----------------------|----------------|-----------------|-------------------------|---------------------------------|-----------------|--------------------------|
| SNP_P4_28230_3725142 | NC_021162.1    | Ca_kabuli_chr03 | 3725142                 | GG                              | AA              | 1946768044               |
| SNP_P4_28231_3730911 | NC_021162.1    | Ca_kabuli_chr03 | 3730911                 | TT                              | AA              | 1946768046               |
| SNP_P4_28232_3730938 | NC_021162.1    | Ca_kabuli_chr03 | 3730938                 | AA                              | GG              | 1946768048               |
| SNP_P4_28233_3730953 | NC_021162.1    | Ca_kabuli_chr03 | 3730953                 | GG                              | AA              | 1946768050               |
| SNP_P4_28234_3730962 | NC_021162.1    | Ca_kabuli_chr03 | 3730962                 | TT                              | CC              | 1946768052               |
| SNP_P4_28235_3730987 | NC_021162.1    | Ca_kabuli_chr03 | 3730987                 | AA                              | GG              | 1946768054               |
| SNP_P4_28236_3731127 | NC_021162.1    | Ca_kabuli_chr03 | 3731127                 | AA                              | CC              | 1946768056               |
| SNP_P4_28237_3731382 | NC_021162.1    | Ca_kabuli_chr03 | 3731382                 | AA                              | GG              | 1946768058               |
| SNP_P4_28238_3731403 | NC_021162.1    | Ca_kabuli_chr03 | 3731403                 | GG                              | AA              | 1946768060               |
| SNP_P4_28239_3731404 | NC_021162.1    | Ca_kabuli_chr03 | 3731404                 | AA                              | CC              | 1946768062               |
| SNP_P4_28240_3731452 | NC_021162.1    | Ca_kabuli_chr03 | 3731452                 | AA                              | GG              | 1946768064               |
| SNP_P4_28241_3731466 | NC_021162.1    | Ca_kabuli_chr03 | 3731466                 | TT                              | AA              | 1946768066               |
| SNP_P4_28242_3731482 | NC_021162.1    | Ca_kabuli_chr03 | 3731482                 | CC                              | GG              | 1946768068               |
| SNP_P4_28243_3734857 | NC_021162.1    | Ca_kabuli_chr03 | 3734857                 | TT                              | CC              | 1946768070               |
| SNP_P4_28244_3734918 | NC_021162.1    | Ca_kabuli_chr03 | 3734918                 | TT                              | CC              | 1946768072               |
| SNP_P4_28245_3734973 | NC_021162.1    | Ca_kabuli_chr03 | 3734973                 | AA                              | CC              | 1946768074               |
| SNP_P4_28246_3735629 | NC_021162.1    | Ca_kabuli_chr03 | 3735629                 | CC                              | GG              | 1946768076               |
| SNP_P4_28247_3788990 | NC_021162.1    | Ca_kabuli_chr03 | 3788990                 | AA                              | TT              | 1946768078               |
| SNP_P4_28248_3788991 | NC_021162.1    | Ca_kabuli_chr03 | 3788991                 | GG                              | AA              | 1946768080               |
| SNP_P4_28249_3789150 | NC_021162.1    | Ca_kabuli_chr03 | 3789150                 | CC                              | TT              | 1946768082               |
| SNP_P4_28250_3789174 | NC_021162.1    | Ca_kabuli_chr03 | 3789174                 | TT                              | CC              | 1946768084               |
| SNP_P4_28251_3789202 | NC_021162.1    | Ca_kabuli_chr03 | 3789202                 | TT                              | CC              | 1946768086               |
| SNP_P4_28252_3789378 | NC_021162.1    | Ca_kabuli_chr03 | 3789378                 | AA                              | GG              | 1946768088               |
| SNP_P4_28253_3789385 | NC_021162.1    | Ca_kabuli_chr03 | 3789385                 | GG                              | AA              | 1946768090               |
| SNP_P4_28254_3804511 | NC_021162.1    | Ca_kabuli_chr03 | 3804511                 | CC                              | TT              | 1946768092               |
| SNP_P4_28255_3804516 | NC_021162.1    | Ca_kabuli_chr03 | 3804516                 | CC                              | TT              | 1946768094               |
| SNP_P4_28256_3804555 | NC_021162.1    | Ca_kabuli_chr03 | 3804555                 | AA                              | GG              | 1946768096               |
| SNP_P4_28257_3804622 | NC_021162.1    | Ca_kabuli_chr03 | 3804622                 | TT                              | GG              | 1946768098               |
| SNP_P4_28258_3804638 | NC_021162.1    | Ca_kabuli_chr03 | 3804638                 | CC                              | TT              | 1946768100               |
| SNP_P4_28259_3804657 | NC_021162.1    | Ca_kabuli_chr03 | 3804657                 | TT                              | GG              | 1946768102               |
| SNP_P4_28262_3818085 | NC_021162.1    | Ca_kabuli_chr03 | 3818085                 | AA                              | GG              | 1946768104               |
| SNP_P4_28263_3818120 | NC_021162.1    | Ca_kabuli_chr03 | 3818120                 | AA                              | GG              | 1946768106               |
| SNP_P4_28264_3818135 | NC_021162.1    | Ca_kabuli_chr03 | 3818135                 | CC                              | GG              | 1946768108               |
| SNP_P4_28265_3827997 | NC_021162.1    | Ca_kabuli_chr03 | 3827997                 | AA                              | GG              | 1946768110               |
| SNP_P4_28266_3836419 | NC_021162.1    | Ca_kabuli_chr03 | 3836419                 | AA                              | CC              | 1946768112               |
| SNP_P4_28267_3836998 | NC_021162.1    | Ca_kabuli_chr03 | 3836998                 | AA                              | GG              | 1946768114               |
| SNP_P4_28268_3841610 | NC_021162.1    | Ca_kabuli_chr03 | 3841610                 | CC                              | TT              | 1946768116               |
| SNP_P4_28269_3844053 | NC_021162.1    | Ca_kabuli_chr03 | 3844053                 | GG                              | AA              | 1946768118               |
| SNP_P4_28270_3844124 | NC_021162.1    | Ca_kabuli_chr03 | 3844124                 | GG                              | AA              | 1946768120               |
| SNP_P4_28271_3857043 | NC_021162.1    | Ca_kabuli_chr03 | 3857043                 | GG                              | CC              | 1946768122               |
| SNP_P4_28272_3866345 | NC_021162.1    | Ca_kabuli_chr03 | 3866345                 | CC                              | AA              | 1946768124               |
| SNP_P4_28273_3884249 | NC_021162.1    | Ca_kabuli_chr03 | 3884249                 | TT                              | GG              | 1946768126               |



| SNPs IDs             | Chromosome IDs | Chromosomes     | Physical positions (bp) | CDC Frontier (Reference genome) | (ILWC46 & LPNB) | NCBI SNPdb Accession IDs |
|----------------------|----------------|-----------------|-------------------------|---------------------------------|-----------------|--------------------------|
| SNP_P4_28275_3901883 | NC_021162.1    | Ca_kabuli_chr03 | 3901883                 | AA                              | GG              | 1946768128               |
| SNP_P4_28276_3902525 | NC_021162.1    | Ca_kabuli_chr03 | 3902525                 | AA                              | TT              | 1946768130               |
| SNP_P4_28277_3918315 | NC_021162.1    | Ca_kabuli_chr03 | 3918315                 | GG                              | CC              | 1946768132               |
| SNP_P4_28278_3924273 | NC_021162.1    | Ca_kabuli_chr03 | 3924273                 | GG                              | AA              | 1946768134               |
| SNP_P4_28279_3929638 | NC_021162.1    | Ca_kabuli_chr03 | 3929638                 | TT                              | CC              | 1946768136               |
| SNP_P4_28281_3962903 | NC_021162.1    | Ca_kabuli_chr03 | 3962903                 | TT                              | CC              | 1946768138               |
| SNP_P4_28282_3962965 | NC_021162.1    | Ca_kabuli_chr03 | 3962965                 | GG                              | AA              | 1946768140               |
| SNP_P4_28283_3963012 | NC_021162.1    | Ca_kabuli_chr03 | 3963012                 | TT                              | GG              | 1946768142               |
| SNP_P4_28284_3963025 | NC_021162.1    | Ca_kabuli_chr03 | 3963025                 | AA                              | TT              | 1946768144               |
| SNP_P4_28285_3963159 | NC_021162.1    | Ca_kabuli_chr03 | 3963159                 | TT                              | CC              | 1946768146               |
| SNP_P4_28286_3963178 | NC_021162.1    | Ca_kabuli_chr03 | 3963178                 | GG                              | AA              | 1946768148               |
| SNP_P4_28287_3963192 | NC_021162.1    | Ca_kabuli_chr03 | 3963192                 | CC                              | TT              | 1946768150               |
| SNP_P4_28288_3963202 | NC_021162.1    | Ca_kabuli_chr03 | 3963202                 | AA                              | GG              | 1946768152               |
| SNP_P4_28289_3963208 | NC_021162.1    | Ca_kabuli_chr03 | 3963208                 | AA                              | TT              | 1946768154               |
| SNP_P4_28290_3963213 | NC_021162.1    | Ca_kabuli_chr03 | 3963213                 | GG                              | AA              | 1946768156               |
| SNP_P4_28291_3963246 | NC_021162.1    | Ca_kabuli_chr03 | 3963246                 | CC                              | TT              | 1946768158               |
| SNP_P4_28293_3966350 | NC_021162.1    | Ca_kabuli_chr03 | 3966350                 | AA                              | TT              | 1946768160               |
| SNP_P4_28294_3966358 | NC_021162.1    | Ca_kabuli_chr03 | 3966358                 | AA                              | GG              | 1946768162               |
| SNP_P4_28295_3966374 | NC_021162.1    | Ca_kabuli_chr03 | 3966374                 | GG                              | AA              | 1946768164               |
| SNP_P4_28296_3974855 | NC_021162.1    | Ca_kabuli_chr03 | 3974855                 | GG                              | AA              | 1946768166               |
| SNP_P4_28297_3974935 | NC_021162.1    | Ca_kabuli_chr03 | 3974935                 | GG                              | CC              | 1946768168               |
| SNP_P4_28298_3974947 | NC_021162.1    | Ca_kabuli_chr03 | 3974947                 | AA                              | CC              | 1946768170               |
| SNP_P4_28299_3974949 | NC_021162.1    | Ca_kabuli_chr03 | 3974949                 | GG                              | AA              | 1946768172               |
| SNP_P4_28300_3976821 | NC_021162.1    | Ca_kabuli_chr03 | 3976821                 | AA                              | GG              | 1946768174               |
| SNP_P4_28301_3977983 | NC_021162.1    | Ca_kabuli_chr03 | 3977983                 | GG                              | AA              | 1946768176               |
| SNP_P4_28302_3977987 | NC_021162.1    | Ca_kabuli_chr03 | 3977987                 | AA                              | GG              | 1946768178               |
| SNP_P4_28303_3978022 | NC_021162.1    | Ca_kabuli_chr03 | 3978022                 | GG                              | TT              | 1946768180               |
| SNP_P4_28304_3981751 | NC_021162.1    | Ca_kabuli_chr03 | 3981751                 | CC                              | AA              | 1946768182               |
| SNP_P4_28305_3996746 | NC_021162.1    | Ca_kabuli_chr03 | 3996746                 | GG                              | AA              | 1946768184               |
| SNP_P4_28306_4006992 | NC_021162.1    | Ca_kabuli_chr03 | 4006992                 | TT                              | GG              | 1946768186               |
| SNP_P4_28307_4007005 | NC_021162.1    | Ca_kabuli_chr03 | 4007005                 | AA                              | GG              | 1946768188               |
| SNP_P4_28308_4007029 | NC_021162.1    | Ca_kabuli_chr03 | 4007029                 | GG                              | AA              | 1946768190               |
| SNP_P4_28309_4007371 | NC_021162.1    | Ca_kabuli_chr03 | 4007371                 | TT                              | GG              | 1946768192               |
| SNP_P4_28310_4007385 | NC_021162.1    | Ca_kabuli_chr03 | 4007385                 | AA                              | CC              | 1946768194               |
| SNP_P4_28311_4007402 | NC_021162.1    | Ca_kabuli_chr03 | 4007402                 | GG                              | AA              | 1946768196               |
| SNP_P4_28312_4007421 | NC_021162.1    | Ca_kabuli_chr03 | 4007421                 | AA                              | GG              | 1946768198               |
| SNP_P4_28313_4007426 | NC_021162.1    | Ca_kabuli_chr03 | 4007426                 | CC                              | TT              | 1946768200               |
| SNP_P4_28314_4007428 | NC_021162.1    | Ca_kabuli_chr03 | 4007428                 | AA                              | CC              | 1946768202               |
| SNP_P4_28315_4013536 | NC_021162.1    | Ca_kabuli_chr03 | 4013536                 | TT                              | CC              | 1946768204               |
| SNP_P4_28316_4017297 | NC_021162.1    | Ca_kabuli_chr03 | 4017297                 | TT                              | AA              | 1946768207               |
| SNP_P4_28317_4017551 | NC_021162.1    | Ca_kabuli_chr03 | 4017551                 | TT                              | AA              | 1946768209               |
| SNP_P4_28319_4017698 | NC_021162.1    | Ca_kabuli_chr03 | 4017698                 | TT                              | CC              | 1946768211               |

| SNPs IDs             | Chromosome IDs | Chromosomes     | Physical positions (bp) | CDC Frontier (Reference genome) | (ILWC46 & LPNB) | NCBI SNPdb Accession IDs |
|----------------------|----------------|-----------------|-------------------------|---------------------------------|-----------------|--------------------------|
| SNP_P4_28320_4017759 | NC_021162.1    | Ca_kabuli_chr03 | 4017759                 | TT                              | CC              | 1946768213               |
| SNP_P4_28321_4017827 | NC_021162.1    | Ca_kabuli_chr03 | 4017827                 | GG                              | AA              | 1946768215               |
| SNP_P4_28322_4027999 | NC_021162.1    | Ca_kabuli_chr03 | 4027999                 | TT                              | AA              | 1946768218               |
| SNP_P4_28323_4035553 | NC_021162.1    | Ca_kabuli_chr03 | 4035553                 | AA                              | GG              | 1946768220               |
| SNP_P4_28324_4035964 | NC_021162.1    | Ca_kabuli_chr03 | 4035964                 | AA                              | GG              | 1946768222               |
| SNP_P4_28325_4035966 | NC_021162.1    | Ca_kabuli_chr03 | 4035966                 | TT                              | GG              | 1946768224               |
| SNP_P4_28326_4036026 | NC_021162.1    | Ca_kabuli_chr03 | 4036026                 | AA                              | GG              | 1946768226               |
| SNP_P4_28327_4036038 | NC_021162.1    | Ca_kabuli_chr03 | 4036038                 | CC                              | AA              | 1946768228               |
| SNP_P4_28328_4036360 | NC_021162.1    | Ca_kabuli_chr03 | 4036360                 | GG                              | AA              | 1946768230               |
| SNP_P4_28329_4040223 | NC_021162.1    | Ca_kabuli_chr03 | 4040223                 | CC                              | TT              | 1946768233               |
| SNP_P4_28330_4041668 | NC_021162.1    | Ca_kabuli_chr03 | 4041668                 | AA                              | TT              | 1946768234               |
| SNP_P4_28331_4052120 | NC_021162.1    | Ca_kabuli_chr03 | 4052120                 | TT                              | GG              | 1946768235               |
| SNP_P4_28332_4052124 | NC_021162.1    | Ca_kabuli_chr03 | 4052124                 | CC                              | TT              | 1946768236               |
| SNP_P4_28333_4056452 | NC_021162.1    | Ca_kabuli_chr03 | 4056452                 | CC                              | AA              | 1946768237               |
| SNP_P4_28334_4056533 | NC_021162.1    | Ca_kabuli_chr03 | 4056533                 | AA                              | GG              | 1946768238               |
| SNP_P4_28335_4056660 | NC_021162.1    | Ca_kabuli_chr03 | 4056660                 | TT                              | CC              | 1946768239               |
| SNP_P4_28336_4073322 | NC_021162.1    | Ca_kabuli_chr03 | 4073322                 | TT                              | GG              | 1946768240               |
| SNP_P4_28337_4073324 | NC_021162.1    | Ca_kabuli_chr03 | 4073324                 | GG                              | AA              | 1946768241               |
| SNP_P4_28338_4073441 | NC_021162.1    | Ca_kabuli_chr03 | 4073441                 | TT                              | GG              | 1946768242               |
| SNP_P4_28340_4076448 | NC_021162.1    | Ca_kabuli_chr03 | 4076448                 | CC                              | TT              | 1946768244               |
| SNP_P4_28341_4076513 | NC_021162.1    | Ca_kabuli_chr03 | 4076513                 | TT                              | AA              | 1946768246               |
| SNP_P4_28342_4076534 | NC_021162.1    | Ca_kabuli_chr03 | 4076534                 | AA                              | TT              | 1946768248               |
| SNP_P4_28343_4076541 | NC_021162.1    | Ca_kabuli_chr03 | 4076541                 | AA                              | TT              | 1946768250               |
| SNP_P4_28345_4098871 | NC_021162.1    | Ca_kabuli_chr03 | 4098871                 | GG                              | TT              | 1946768252               |
| SNP_P4_28346_4098876 | NC_021162.1    | Ca_kabuli_chr03 | 4098876                 | GG                              | AA              | 1946768254               |
| SNP_P4_28347_4098906 | NC_021162.1    | Ca_kabuli_chr03 | 4098906                 | CC                              | AA              | 1946768256               |
| SNP_P4_28348_4098910 | NC_021162.1    | Ca_kabuli_chr03 | 4098910                 | TT                              | AA              | 1946768258               |
| SNP_P4_28349_4112515 | NC_021162.1    | Ca_kabuli_chr03 | 4112515                 | TT                              | CC              | 1946768260               |
| SNP_P4_28350_4112529 | NC_021162.1    | Ca_kabuli_chr03 | 4112529                 | AA                              | GG              | 1946768262               |
| SNP_P4_28351_4112590 | NC_021162.1    | Ca_kabuli_chr03 | 4112590                 | CC                              | TT              | 1946768264               |
| SNP_P4_28352_4112891 | NC_021162.1    | Ca_kabuli_chr03 | 4112891                 | AA                              | GG              | 1946768266               |
| SNP_P4_28353_4116914 | NC_021162.1    | Ca_kabuli_chr03 | 4116914                 | GG                              | TT              | 1946768268               |
| SNP_P4_28354_4117381 | NC_021162.1    | Ca_kabuli_chr03 | 4117381                 | AA                              | CC              | 1946768270               |
| SNP_P4_28355_4117418 | NC_021162.1    | Ca_kabuli_chr03 | 4117418                 | CC                              | TT              | 1946768272               |
| SNP_P4_28356_4119785 | NC_021162.1    | Ca_kabuli_chr03 | 4119785                 | GG                              | TT              | 1946768274               |
| SNP_P4_28361_4155186 | NC_021162.1    | Ca_kabuli_chr03 | 4155186                 | GG                              | CC              | 1946768276               |
| SNP_P4_28362_4157947 | NC_021162.1    | Ca_kabuli_chr03 | 4157947                 | AA                              | GG              | 1946768278               |
| SNP_P4_28363_4169292 | NC_021162.1    | Ca_kabuli_chr03 | 4169292                 | TT                              | AA              | 1946768280               |
| SNP_P4_28364_4169315 | NC_021162.1    | Ca_kabuli_chr03 | 4169315                 | AA                              | TT              | 1946768282               |
| SNP_P4_28365_4169398 | NC_021162.1    | Ca_kabuli_chr03 | 4169398                 | CC                              | TT              | 1946768284               |
| SNP_P4_28367_4189784 | NC_021162.1    | Ca_kabuli_chr03 | 4189784                 | AA                              | GG              | 1946768287               |
| SNP_P4_28368_4189805 | NC_021162.1    | Ca_kabuli_chr03 | 4189805                 | TT                              | GG              | 1946768289               |

| SNPs IDs             | Chromosome IDs | Chromosomes     | Physical positions (bp) | CDC Frontier (Reference genome) | (ILWC46 & LPNB) | NCBI SNPdb Accession IDs |
|----------------------|----------------|-----------------|-------------------------|---------------------------------|-----------------|--------------------------|
| SNP_P4_28370_4205369 | NC_021162.1    | Ca_kabuli_chr03 | 4205369                 | AA                              | TT              | 1946768291               |
| SNP_P4_28371_4212589 | NC_021162.1    | Ca_kabuli_chr03 | 4212589                 | TT                              | CC              | 1946768293               |
| SNP_P4_28372_4215918 | NC_021162.1    | Ca_kabuli_chr03 | 4215918                 | TT                              | AA              | 1946768295               |
| SNP_P4_28373_4231808 | NC_021162.1    | Ca_kabuli_chr03 | 4231808                 | AA                              | GG              | 1946768297               |
| SNP_P4_28374_4232128 | NC_021162.1    | Ca_kabuli_chr03 | 4232128                 | AA                              | TT              | 1946768299               |
| SNP_P4_28375_4232588 | NC_021162.1    | Ca_kabuli_chr03 | 4232588                 | GG                              | TT              | 1946768301               |
| SNP_P4_28376_4232899 | NC_021162.1    | Ca_kabuli_chr03 | 4232899                 | CC                              | GG              | 1946768303               |
| SNP_P4_28377_4264274 | NC_021162.1    | Ca_kabuli_chr03 | 4264274                 | AA                              | CC              | 1946768305               |
| SNP_P4_28378_4267750 | NC_021162.1    | Ca_kabuli_chr03 | 4267750                 | GG                              | AA              | 1946768307               |
| SNP_P4_28379_4267770 | NC_021162.1    | Ca_kabuli_chr03 | 4267770                 | TT                              | CC              | 1946768309               |
| SNP_P4_28380_4270915 | NC_021162.1    | Ca_kabuli_chr03 | 4270915                 | GG                              | AA              | 1946768311               |
| SNP_P4_28382_4294281 | NC_021162.1    | Ca_kabuli_chr03 | 4294281                 | GG                              | AA              | 1946768313               |
| SNP_P4_28383_4301279 | NC_021162.1    | Ca_kabuli_chr03 | 4301279                 | AA                              | GG              | 1946768316               |
| SNP_P4_28384_4307807 | NC_021162.1    | Ca_kabuli_chr03 | 4307807                 | CC                              | GG              | 1946768318               |
| SNP_P4_28385_4307844 | NC_021162.1    | Ca_kabuli_chr03 | 4307844                 | AA                              | GG              | 1946768320               |
| SNP_P4_28386_4307852 | NC_021162.1    | Ca_kabuli_chr03 | 4307852                 | AA                              | TT              | 1946768322               |
| SNP_P4_28387_4307880 | NC_021162.1    | Ca_kabuli_chr03 | 4307880                 | TT                              | AA              | 1946768324               |
| SNP_P4_28388_4308282 | NC_021162.1    | Ca_kabuli_chr03 | 4308282                 | CC                              | AA              | 1946768326               |
| SNP_P4_28389_4308298 | NC_021162.1    | Ca_kabuli_chr03 | 4308298                 | CC                              | TT              | 1946768328               |
| SNP_P4_28390_4316016 | NC_021162.1    | Ca_kabuli_chr03 | 4316016                 | GG                              | AA              | 1946768330               |
| SNP_P4_28392_4372559 | NC_021162.1    | Ca_kabuli_chr03 | 4372559                 | AA                              | GG              | 1946768332               |
| SNP_P4_28393_4374460 | NC_021162.1    | Ca_kabuli_chr03 | 4374460                 | TT                              | AA              | 1946768334               |
| SNP_P4_28394_4382864 | NC_021162.1    | Ca_kabuli_chr03 | 4382864                 | GG                              | AA              | 1946768336               |
| SNP_P4_28395_4385381 | NC_021162.1    | Ca_kabuli_chr03 | 4385381                 | CC                              | TT              | 1946768338               |
| SNP_P4_28396_4411141 | NC_021162.1    | Ca_kabuli_chr03 | 4411141                 | CC                              | TT              | 1946768340               |
| SNP_P4_28398_4517531 | NC_021162.1    | Ca_kabuli_chr03 | 4517531                 | CC                              | TT              | 1946768342               |
| SNP_P4_28399_4536644 | NC_021162.1    | Ca_kabuli_chr03 | 4536644                 | GG                              | TT              | 1946768344               |
| SNP_P4_28400_4536667 | NC_021162.1    | Ca_kabuli_chr03 | 4536667                 | CC                              | TT              | 1946768346               |
| SNP_P4_28401_4536671 | NC_021162.1    | Ca_kabuli_chr03 | 4536671                 | CC                              | TT              | 1946768348               |
| SNP_P4_28402_4541803 | NC_021162.1    | Ca_kabuli_chr03 | 4541803                 | CC                              | TT              | 1946768350               |
| SNP_P4_28403_4562892 | NC_021162.1    | Ca_kabuli_chr03 | 4562892                 | AA                              | GG              | 1946768352               |
| SNP_P4_28404_4611190 | NC_021162.1    | Ca_kabuli_chr03 | 4611190                 | TT                              | GG              | 1946768354               |
| SNP_P4_28405_4611264 | NC_021162.1    | Ca_kabuli_chr03 | 4611264                 | GG                              | AA              | 1946768357               |
| SNP_P4_28406_4611622 | NC_021162.1    | Ca_kabuli_chr03 | 4611622                 | AA                              | GG              | 1946768359               |
| SNP_P4_28407_4611682 | NC_021162.1    | Ca_kabuli_chr03 | 4611682                 | CC                              | TT              | 1946768361               |
| SNP_P4_28408_4611683 | NC_021162.1    | Ca_kabuli_chr03 | 4611683                 | GG                              | TT              | 1946768363               |
| SNP_P4_28409_4619343 | NC_021162.1    | Ca_kabuli_chr03 | 4619343                 | CC                              | TT              | 1946768365               |
| SNP_P4_28410_4619695 | NC_021162.1    | Ca_kabuli_chr03 | 4619695                 | TT                              | CC              | 1946768367               |
| SNP_P4_28411_4622794 | NC_021162.1    | Ca_kabuli_chr03 | 4622794                 | AA                              | TT              | 1946768369               |
| SNP_P4_28412_4623807 | NC_021162.1    | Ca_kabuli_chr03 | 4623807                 | TT                              | CC              | 1946768371               |
| SNP_P4_28414_4671246 | NC_021162.1    | Ca_kabuli_chr03 | 4671246                 | TT                              | CC              | 1946768373               |
| SNP_P4_28415_4688117 | NC_021162.1    | Ca_kabuli_chr03 | 4688117                 | GG                              | AA              | 1946768375               |

| SNPs IDs             | Chromosome IDs | Chromosomes     | Physical positions (bp) | CDC Frontier (Reference genome) | (ILWC46 & LPNB) | NCBI SNPdb Accession IDs |
|----------------------|----------------|-----------------|-------------------------|---------------------------------|-----------------|--------------------------|
| SNP_P4_28416_4688256 | NC_021162.1    | Ca_kabuli_chr03 | 4688256                 | CC                              | TT              | 1946768377               |
| SNP_P4_28418_4688258 | NC_021162.1    | Ca_kabuli_chr03 | 4688258                 | AA                              | GG              | 1946768379               |
| SNP_P4_28419_4688269 | NC_021162.1    | Ca_kabuli_chr03 | 4688269                 | CC                              | TT              | 1946768381               |
| SNP_P4_28420_4688327 | NC_021162.1    | Ca_kabuli_chr03 | 4688327                 | TT                              | GG              | 1946768383               |
| SNP_P4_28421_4688383 | NC_021162.1    | Ca_kabuli_chr03 | 4688383                 | TT                              | CC              | 1946768386               |
| SNP_P4_28422_4688500 | NC_021162.1    | Ca_kabuli_chr03 | 4688500                 | GG                              | AA              | 1946768388               |
| SNP_P4_28423_4688552 | NC_021162.1    | Ca_kabuli_chr03 | 4688552                 | CC                              | AA              | 1946768390               |
| SNP_P4_28424_4688556 | NC_021162.1    | Ca_kabuli_chr03 | 4688556                 | AA                              | GG              | 1946768392               |
| SNP_P4_28425_4688709 | NC_021162.1    | Ca_kabuli_chr03 | 4688709                 | GG                              | TT              | 1946768394               |
| SNP_P4_28426_4688770 | NC_021162.1    | Ca_kabuli_chr03 | 4688770                 | TT                              | AA              | 1946768396               |
| SNP_P4_28427_4688799 | NC_021162.1    | Ca_kabuli_chr03 | 4688799                 | AA                              | TT              | 1946768399               |
| SNP_P4_28428_4688867 | NC_021162.1    | Ca_kabuli_chr03 | 4688867                 | TT                              | AA              | 1946768401               |
| SNP_P4_28429_4688868 | NC_021162.1    | Ca_kabuli_chr03 | 4688868                 | TT                              | AA              | 1946768403               |
| SNP_P4_28430_4688885 | NC_021162.1    | Ca_kabuli_chr03 | 4688885                 | AA                              | GG              | 1946768405               |
| SNP_P4_28431_4688894 | NC_021162.1    | Ca_kabuli_chr03 | 4688894                 | CC                              | TT              | 1946768407               |
| SNP_P4_28432_4688901 | NC_021162.1    | Ca_kabuli_chr03 | 4688901                 | AA                              | CC              | 1946768409               |
| SNP_P4_28433_4688940 | NC_021162.1    | Ca_kabuli_chr03 | 4688940                 | GG                              | AA              | 1946768411               |
| SNP_P4_28434_4689021 | NC_021162.1    | Ca_kabuli_chr03 | 4689021                 | CC                              | TT              | 1946768413               |
| SNP_P4_28435_4689029 | NC_021162.1    | Ca_kabuli_chr03 | 4689029                 | GG                              | AA              | 1946768415               |
| SNP_P4_28436_4689053 | NC_021162.1    | Ca_kabuli_chr03 | 4689053                 | GG                              | CC              | 1946768417               |
| SNP_P4_28437_4689098 | NC_021162.1    | Ca_kabuli_chr03 | 4689098                 | GG                              | AA              | 1946768419               |
| SNP_P4_28439_4689205 | NC_021162.1    | Ca_kabuli_chr03 | 4689205                 | AA                              | TT              | 1946768421               |
| SNP_P4_28440_4689310 | NC_021162.1    | Ca_kabuli_chr03 | 4689310                 | TT                              | CC              | 1946768423               |
| SNP_P4_28441_4690885 | NC_021162.1    | Ca_kabuli_chr03 | 4690885                 | GG                              | CC              | 1946768425               |
| SNP_P4_28442_4690886 | NC_021162.1    | Ca_kabuli_chr03 | 4690886                 | AA                              | CC              | 1946768427               |
| SNP_P4_28443_4705074 | NC_021162.1    | Ca_kabuli_chr03 | 4705074                 | AA                              | TT              | 1946768429               |
| SNP_P4_28444_4720312 | NC_021162.1    | Ca_kabuli_chr03 | 4720312                 | GG                              | AA              | 1946768431               |
| SNP_P4_28445_4720317 | NC_021162.1    | Ca_kabuli_chr03 | 4720317                 | TT                              | GG              | 1946768433               |
| SNP_P4_28446_4720319 | NC_021162.1    | Ca_kabuli_chr03 | 4720319                 | AA                              | CC              | 1946768435               |
| SNP_P4_28447_4720392 | NC_021162.1    | Ca_kabuli_chr03 | 4720392                 | TT                              | CC              | 1946768437               |
| SNP_P4_28448_4720557 | NC_021162.1    | Ca_kabuli_chr03 | 4720557                 | CC                              | AA              | 1946768439               |
| SNP_P4_28449_4720572 | NC_021162.1    | Ca_kabuli_chr03 | 4720572                 | AA                              | GG              | 1946768441               |
| SNP_P4_28450_4721986 | NC_021162.1    | Ca_kabuli_chr03 | 4721986                 | GG                              | AA              | 1946768443               |
| SNP_P4_28451_4725321 | NC_021162.1    | Ca_kabuli_chr03 | 4725321                 | TT                              | CC              | 1946768445               |
| SNP_P4_28452_4735959 | NC_021162.1    | Ca_kabuli_chr03 | 4735959                 | GG                              | CC              | 1946768447               |
| SNP_P4_28453_4761112 | NC_021162.1    | Ca_kabuli_chr03 | 4761112                 | AA                              | GG              | 1946768449               |
| SNP_P4_28454_4783877 | NC_021162.1    | Ca_kabuli_chr03 | 4783877                 | CC                              | TT              | 1946768451               |
| SNP_P4_28455_4787227 | NC_021162.1    | Ca_kabuli_chr03 | 4787227                 | CC                              | TT              | 1946768453               |
| SNP_P4_28456_4787230 | NC_021162.1    | Ca_kabuli_chr03 | 4787230                 | AA                              | CC              | 1946768455               |
| SNP_P4_28457_4787283 | NC_021162.1    | Ca_kabuli_chr03 | 4787283                 | CC                              | TT              | 1946768457               |
| SNP_P4_28458_4845876 | NC_021162.1    | Ca_kabuli_chr03 | 4845876                 | GG                              | AA              | 1946768459               |
| SNP_P4_28459_4866726 | NC_021162.1    | Ca_kabuli_chr03 | 4866726                 | TT                              | CC              | 1946768461               |

| SNPs IDs             | Chromosome IDs | Chromosomes     | Physical positions (bp) | CDC Frontier (Reference genome) | (ILWC46 & LPNB) | NCBI SNPdb Accession IDs |
|----------------------|----------------|-----------------|-------------------------|---------------------------------|-----------------|--------------------------|
| SNP_P4_28460_4869700 | NC_021162.1    | Ca_kabuli_chr03 | 4869700                 | AA                              | GG              | 1946768463               |
| SNP_P4_28461_4894958 | NC_021162.1    | Ca_kabuli_chr03 | 4894958                 | AA                              | GG              | 1946768465               |
| SNP_P4_28462_4894992 | NC_021162.1    | Ca_kabuli_chr03 | 4894992                 | CC                              | TT              | 1946768467               |
| SNP_P4_28463_4894996 | NC_021162.1    | Ca_kabuli_chr03 | 4894996                 | TT                              | CC              | 1946768469               |
| SNP_P4_28464_4895009 | NC_021162.1    | Ca_kabuli_chr03 | 4895009                 | AA                              | GG              | 1946768471               |
| SNP_P4_28466_4945359 | NC_021162.1    | Ca_kabuli_chr03 | 4945359                 | CC                              | TT              | 1946768473               |
| SNP_P4_28467_4945391 | NC_021162.1    | Ca_kabuli_chr03 | 4945391                 | GG                              | CC              | 1946768475               |
| SNP_P4_28468_4946063 | NC_021162.1    | Ca_kabuli_chr03 | 4946063                 | AA                              | CC              | 1946768477               |
| SNP_P4_28469_4946277 | NC_021162.1    | Ca_kabuli_chr03 | 4946277                 | TT                              | CC              | 1946768479               |
| SNP_P4_28470_4952174 | NC_021162.1    | Ca_kabuli_chr03 | 4952174                 | AA                              | CC              | 1946768481               |
| SNP_P4_28471_4952236 | NC_021162.1    | Ca_kabuli_chr03 | 4952236                 | GG                              | AA              | 1946768483               |
| SNP_P4_28472_4954284 | NC_021162.1    | Ca_kabuli_chr03 | 4954284                 | CC                              | TT              | 1946768485               |
| SNP_P4_28473_4955387 | NC_021162.1    | Ca_kabuli_chr03 | 4955387                 | AA                              | GG              | 1946768487               |
| SNP_P4_28474_4955404 | NC_021162.1    | Ca_kabuli_chr03 | 4955404                 | CC                              | TT              | 1946768489               |
| SNP_P4_28475_4955520 | NC_021162.1    | Ca_kabuli_chr03 | 4955520                 | CC                              | TT              | 1946768491               |
| SNP_P4_28476_4955521 | NC_021162.1    | Ca_kabuli_chr03 | 4955521                 | GG                              | TT              | 1946768493               |
| SNP_P4_28477_4955564 | NC_021162.1    | Ca_kabuli_chr03 | 4955564                 | TT                              | CC              | 1946768495               |
| SNP_P4_28478_4955669 | NC_021162.1    | Ca_kabuli_chr03 | 4955669                 | CC                              | TT              | 1946768497               |
| SNP_P4_28479_4955684 | NC_021162.1    | Ca_kabuli_chr03 | 4955684                 | CC                              | TT              | 1946768499               |
| SNP_P4_28480_4962805 | NC_021162.1    | Ca_kabuli_chr03 | 4962805                 | CC                              | AA              | 1946768501               |
| SNP_P4_28481_4962907 | NC_021162.1    | Ca_kabuli_chr03 | 4962907                 | AA                              | TT              | 1946768503               |
| SNP_P4_28482_4962915 | NC_021162.1    | Ca_kabuli_chr03 | 4962915                 | TT                              | GG              | 1946768505               |
| SNP_P4_28483_4962971 | NC_021162.1    | Ca_kabuli_chr03 | 4962971                 | AA                              | GG              | 1946768507               |
| SNP_P4_28484_4962973 | NC_021162.1    | Ca_kabuli_chr03 | 4962973                 | AA                              | GG              | 1946768509               |
| SNP_P4_28485_4963182 | NC_021162.1    | Ca_kabuli_chr03 | 4963182                 | CC                              | TT              | 1946768510               |
| SNP_P4_28486_4963276 | NC_021162.1    | Ca_kabuli_chr03 | 4963276                 | TT                              | GG              | 1946768512               |
| SNP_P4_28487_4963309 | NC_021162.1    | Ca_kabuli_chr03 | 4963309                 | AA                              | CC              | 1946768515               |
| SNP_P4_28488_4964707 | NC_021162.1    | Ca_kabuli_chr03 | 4964707                 | TT                              | CC              | 1946768517               |
| SNP_P4_28489_4965187 | NC_021162.1    | Ca_kabuli_chr03 | 4965187                 | AA                              | CC              | 1946768519               |
| SNP_P4_28490_4965188 | NC_021162.1    | Ca_kabuli_chr03 | 4965188                 | CC                              | AA              | 1946768521               |
| SNP_P4_28491_4965307 | NC_021162.1    | Ca_kabuli_chr03 | 4965307                 | CC                              | TT              | 1946768523               |
| SNP_P4_28492_4965332 | NC_021162.1    | Ca_kabuli_chr03 | 4965332                 | TT                              | CC              | 1946768525               |
| SNP_P4_28493_4965422 | NC_021162.1    | Ca_kabuli_chr03 | 4965422                 | AA                              | TT              | 1946768527               |
| SNP_P4_28495_4965561 | NC_021162.1    | Ca_kabuli_chr03 | 4965561                 | AA                              | TT              | 1946768529               |
| SNP_P4_28497_4965643 | NC_021162.1    | Ca_kabuli_chr03 | 4965643                 | AA                              | TT              | 1946768531               |
| SNP_P4_28498_4965646 | NC_021162.1    | Ca_kabuli_chr03 | 4965646                 | AA                              | TT              | 1946768533               |
| SNP_P4_28499_4965648 | NC_021162.1    | Ca_kabuli_chr03 | 4965648                 | AA                              | CC              | 1946768535               |
| SNP_P4_28500_4965669 | NC_021162.1    | Ca_kabuli_chr03 | 4965669                 | AA                              | GG              | 1946768537               |
| SNP_P4_28501_4965678 | NC_021162.1    | Ca_kabuli_chr03 | 4965678                 | TT                              | AA              | 1946768539               |
| SNP_P4_28502_4965689 | NC_021162.1    | Ca_kabuli_chr03 | 4965689                 | TT                              | CC              | 1946768541               |
| SNP_P4_28503_4965721 | NC_021162.1    | Ca_kabuli_chr03 | 4965721                 | CC                              | TT              | 1946768543               |
| SNP_P4_28504_4965750 | NC_021162.1    | Ca_kabuli_chr03 | 4965750                 | AA                              | GG              | 1946768545               |

| SNPs IDs             | Chromosome IDs | Chromosomes     | Physical positions (bp) | CDC Frontier (Reference genome) | (ILWC46 & LPNB) | NCBI SNPdb Accession IDs |
|----------------------|----------------|-----------------|-------------------------|---------------------------------|-----------------|--------------------------|
| SNP_P4_28505_4965771 | NC_021162.1    | Ca_kabuli_chr03 | 4965771                 | CC                              | AA              | 1946768547               |
| SNP_P4_28506_4965813 | NC_021162.1    | Ca_kabuli_chr03 | 4965813                 | TT                              | AA              | 1946768549               |
| SNP_P4_28507_4965915 | NC_021162.1    | Ca_kabuli_chr03 | 4965915                 | CC                              | TT              | 1946768551               |
| SNP_P4_28508_4965982 | NC_021162.1    | Ca_kabuli_chr03 | 4965982                 | CC                              | TT              | 1946768553               |
| SNP_P4_28510_4966188 | NC_021162.1    | Ca_kabuli_chr03 | 4966188                 | CC                              | TT              | 1946768555               |
| SNP_P4_28511_4966201 | NC_021162.1    | Ca_kabuli_chr03 | 4966201                 | GG                              | AA              | 1946768557               |
| SNP_P4_28512_4966809 | NC_021162.1    | Ca_kabuli_chr03 | 4966809                 | AA                              | CC              | 1946768559               |
| SNP_P4_28513_4966928 | NC_021162.1    | Ca_kabuli_chr03 | 4966928                 | TT                              | CC              | 1946768561               |
| SNP_P4_28515_4975135 | NC_021162.1    | Ca_kabuli_chr03 | 4975135                 | CC                              | TT              | 1946768564               |
| SNP_P4_28517_4975260 | NC_021162.1    | Ca_kabuli_chr03 | 4975260                 | TT                              | CC              | 1946768566               |
| SNP_P4_28518_4975317 | NC_021162.1    | Ca_kabuli_chr03 | 4975317                 | TT                              | CC              | 1946768568               |
| SNP_P4_28519_4976978 | NC_021162.1    | Ca_kabuli_chr03 | 4976978                 | AA                              | GG              | 1946768570               |
| SNP_P4_28520_5045961 | NC_021162.1    | Ca_kabuli_chr03 | 5045961                 | CC                              | TT              | 1946768572               |
| SNP_P4_28521_5045962 | NC_021162.1    | Ca_kabuli_chr03 | 5045962                 | TT                              | GG              | 1946768574               |
| SNP_P4_28524_5095174 | NC_021162.1    | Ca_kabuli_chr03 | 5095174                 | GG                              | AA              | 1946768576               |
| SNP_P4_28525_5115910 | NC_021162.1    | Ca_kabuli_chr03 | 5115910                 | AA                              | GG              | 1946768578               |
| SNP_P4_28526_5115912 | NC_021162.1    | Ca_kabuli_chr03 | 5115912                 | AA                              | TT              | 1946768580               |
| SNP_P4_28527_5156348 | NC_021162.1    | Ca_kabuli_chr03 | 5156348                 | AA                              | GG              | 1946768582               |
| SNP_P4_28528_5165295 | NC_021162.1    | Ca_kabuli_chr03 | 5165295                 | TT                              | CC              | 1946768584               |
| SNP_P4_28529_5198660 | NC_021162.1    | Ca_kabuli_chr03 | 5198660                 | GG                              | AA              | 1946768586               |
| SNP_P4_28530_5220020 | NC_021162.1    | Ca_kabuli_chr03 | 5220020                 | GG                              | TT              | 1946768588               |
| SNP_P4_28531_5229745 | NC_021162.1    | Ca_kabuli_chr03 | 5229745                 | GG                              | AA              | 1946768590               |
| SNP_P4_28532_5265289 | NC_021162.1    | Ca_kabuli_chr03 | 5265289                 | CC                              | AA              | 1946768592               |
| SNP_P4_28533_5269898 | NC_021162.1    | Ca_kabuli_chr03 | 5269898                 | CC                              | AA              | 1946768594               |
| SNP_P4_28535_5269991 | NC_021162.1    | Ca_kabuli_chr03 | 5269991                 | AA                              | TT              | 1946768596               |
| SNP_P4_28536_5269993 | NC_021162.1    | Ca_kabuli_chr03 | 5269993                 | TT                              | AA              | 1946768598               |
| SNP_P4_28537_5270108 | NC_021162.1    | Ca_kabuli_chr03 | 5270108                 | AA                              | GG              | 1946768600               |
| SNP_P4_28539_5270131 | NC_021162.1    | Ca_kabuli_chr03 | 5270131                 | TT                              | CC              | 1946768602               |
| SNP_P4_28540_5270290 | NC_021162.1    | Ca_kabuli_chr03 | 5270290                 | AA                              | GG              | 1946768604               |
| SNP_P4_28541_5270298 | NC_021162.1    | Ca_kabuli_chr03 | 5270298                 | AA                              | TT              | 1946768606               |
| SNP_P4_28542_5270306 | NC_021162.1    | Ca_kabuli_chr03 | 5270306                 | AA                              | TT              | 1946768608               |
| SNP_P4_28543_5270398 | NC_021162.1    | Ca_kabuli_chr03 | 5270398                 | TT                              | AA              | 1946768610               |
| SNP_P4_28544_5270404 | NC_021162.1    | Ca_kabuli_chr03 | 5270404                 | CC                              | AA              | 1946768612               |
| SNP_P4_28545_5270405 | NC_021162.1    | Ca_kabuli_chr03 | 5270405                 | AA                              | TT              | 1946768614               |
| SNP_P4_28546_5270439 | NC_021162.1    | Ca_kabuli_chr03 | 5270439                 | CC                              | TT              | 1946768616               |
| SNP_P4_28548_5270648 | NC_021162.1    | Ca_kabuli_chr03 | 5270648                 | CC                              | GG              | 1946768619               |
| SNP_P4_28549_5270705 | NC_021162.1    | Ca_kabuli_chr03 | 5270705                 | TT                              | AA              | 1946768621               |
| SNP_P4_28550_5273919 | NC_021162.1    | Ca_kabuli_chr03 | 5273919                 | CC                              | TT              | 1946768623               |
| SNP_P4_28551_5274147 | NC_021162.1    | Ca_kabuli_chr03 | 5274147                 | TT                              | CC              | 1946768625               |
| SNP_P4_28552_5274156 | NC_021162.1    | Ca_kabuli_chr03 | 5274156                 | AA                              | GG              | 1946768627               |
| SNP_P4_28553_5274178 | NC_021162.1    | Ca_kabuli_chr03 | 5274178                 | TT                              | CC              | 1946768629               |
| SNP_P4_28554_5274192 | NC_021162.1    | Ca_kabuli_chr03 | 5274192                 | AA                              | GG              | 1946768631               |

| SNPs IDs             | Chromosome IDs | Chromosomes     | Physical positions (bp) | CDC Frontier (Reference genome) | (ILWC46 & LPNB) | NCBI SNPdb Accession IDs |
|----------------------|----------------|-----------------|-------------------------|---------------------------------|-----------------|--------------------------|
| SNP_P4_28555_5274198 | NC_021162.1    | Ca_kabuli_chr03 | 5274198                 | AA                              | GG              | 1946768633               |
| SNP_P4_28556_5274204 | NC_021162.1    | Ca_kabuli_chr03 | 5274204                 | TT                              | CC              | 1946768635               |
| SNP_P4_28557_5274210 | NC_021162.1    | Ca_kabuli_chr03 | 5274210                 | TT                              | AA              | 1946768637               |
| SNP_P4_28558_5274216 | NC_021162.1    | Ca_kabuli_chr03 | 5274216                 | AA                              | CC              | 1946768639               |
| SNP_P4_28559_5274225 | NC_021162.1    | Ca_kabuli_chr03 | 5274225                 | TT                              | CC              | 1946768641               |
| SNP_P4_28560_5274231 | NC_021162.1    | Ca_kabuli_chr03 | 5274231                 | TT                              | AA              | 1946768643               |
| SNP_P4_28561_5274249 | NC_021162.1    | Ca_kabuli_chr03 | 5274249                 | AA                              | GG              | 1946768645               |
| SNP_P4_28562_5274255 | NC_021162.1    | Ca_kabuli_chr03 | 5274255                 | CC                              | AA              | 1946768648               |
| SNP_P4_28563_5274261 | NC_021162.1    | Ca_kabuli_chr03 | 5274261                 | CC                              | TT              | 1946768650               |
| SNP_P4_28564_5274267 | NC_021162.1    | Ca_kabuli_chr03 | 5274267                 | TT                              | AA              | 1946768652               |
| SNP_P4_28566_5274291 | NC_021162.1    | Ca_kabuli_chr03 | 5274291                 | TT                              | GG              | 1946768654               |
| SNP_P4_28567_5274303 | NC_021162.1    | Ca_kabuli_chr03 | 5274303                 | TT                              | AA              | 1946768656               |
| SNP_P4_28568_5274318 | NC_021162.1    | Ca_kabuli_chr03 | 5274318                 | TT                              | AA              | 1946768658               |
| SNP_P4_28569_5274330 | NC_021162.1    | Ca_kabuli_chr03 | 5274330                 | TT                              | CC              | 1946768660               |
| SNP_P4_28570_5274342 | NC_021162.1    | Ca_kabuli_chr03 | 5274342                 | GG                              | AA              | 1946768662               |
| SNP_P4_28571_5274366 | NC_021162.1    | Ca_kabuli_chr03 | 5274366                 | AA                              | GG              | 1946768664               |
| SNP_P4_28572_5274396 | NC_021162.1    | Ca_kabuli_chr03 | 5274396                 | GG                              | AA              | 1946768666               |
| SNP_P4_28573_5274404 | NC_021162.1    | Ca_kabuli_chr03 | 5274404                 | AA                              | CC              | 1946768668               |
| SNP_P4_28575_5274423 | NC_021162.1    | Ca_kabuli_chr03 | 5274423                 | CC                              | TT              | 1946768670               |
| SNP_P4_28576_5274428 | NC_021162.1    | Ca_kabuli_chr03 | 5274428                 | TT                              | CC              | 1946768672               |
| SNP_P4_28577_5274429 | NC_021162.1    | Ca_kabuli_chr03 | 5274429                 | AA                              | TT              | 1946768674               |
| SNP_P4_28578_5274444 | NC_021162.1    | Ca_kabuli_chr03 | 5274444                 | CC                              | TT              | 1946768676               |
| SNP_P4_28579_5274450 | NC_021162.1    | Ca_kabuli_chr03 | 5274450                 | CC                              | AA              | 1946768678               |
| SNP_P4_28580_5274453 | NC_021162.1    | Ca_kabuli_chr03 | 5274453                 | TT                              | CC              | 1946768680               |
| SNP_P4_28581_5274456 | NC_021162.1    | Ca_kabuli_chr03 | 5274456                 | CC                              | TT              | 1946768683               |
| SNP_P4_28582_5276557 | NC_021162.1    | Ca_kabuli_chr03 | 5276557                 | GG                              | AA              | 1946768685               |
| SNP_P4_28583_5276573 | NC_021162.1    | Ca_kabuli_chr03 | 5276573                 | TT                              | AA              | 1946768687               |
| SNP_P4_28584_5276575 | NC_021162.1    | Ca_kabuli_chr03 | 5276575                 | GG                              | AA              | 1946768689               |
| SNP_P4_28585_5276581 | NC_021162.1    | Ca_kabuli_chr03 | 5276581                 | TT                              | CC              | 1946768691               |
| SNP_P4_28586_5276590 | NC_021162.1    | Ca_kabuli_chr03 | 5276590                 | TT                              | CC              | 1946768693               |
| SNP_P4_28587_5276611 | NC_021162.1    | Ca_kabuli_chr03 | 5276611                 | TT                              | AA              | 1946768695               |
| SNP_P4_28588_5276615 | NC_021162.1    | Ca_kabuli_chr03 | 5276615                 | TT                              | GG              | 1946768697               |
| SNP_P4_28589_5276621 | NC_021162.1    | Ca_kabuli_chr03 | 5276621                 | TT                              | CC              | 1946768699               |
| SNP_P4_28590_5276626 | NC_021162.1    | Ca_kabuli_chr03 | 5276626                 | AA                              | CC              | 1946768701               |
| SNP_P4_28591_5276632 | NC_021162.1    | Ca_kabuli_chr03 | 5276632                 | AA                              | TT              | 1946768703               |
| SNP_P4_28592_5276645 | NC_021162.1    | Ca_kabuli_chr03 | 5276645                 | AA                              | GG              | 1946768705               |
| SNP_P4_28593_5276647 | NC_021162.1    | Ca_kabuli_chr03 | 5276647                 | TT                              | CC              | 1946768707               |
| SNP_P4_28594_5276656 | NC_021162.1    | Ca_kabuli_chr03 | 5276656                 | CC                              | TT              | 1946768710               |
| SNP_P4_28595_5276665 | NC_021162.1    | Ca_kabuli_chr03 | 5276665                 | TT                              | GG              | 1946768712               |
| SNP_P4_28596_5276672 | NC_021162.1    | Ca_kabuli_chr03 | 5276672                 | TT                              | CC              | 1946768714               |
| SNP_P4_28597_5281687 | NC_021162.1    | Ca_kabuli_chr03 | 5281687                 | AA                              | TT              | 1946768716               |
| SNP_P4_28598_5281706 | NC_021162.1    | Ca_kabuli_chr03 | 5281706                 | TT                              | AA              | 1946768718               |

| SNPs IDs             | Chromosome IDs | Chromosomes     | Physical positions (bp) | CDC Frontier (Reference genome) | (ILWC46 & LPNB) | NCBI SNPdb Accession IDs |
|----------------------|----------------|-----------------|-------------------------|---------------------------------|-----------------|--------------------------|
| SNP_P4_28599_5282132 | NC_021162.1    | Ca_kabuli_chr03 | 5282132                 | GG                              | AA              | 1946768720               |
| SNP_P4_28600_5282265 | NC_021162.1    | Ca_kabuli_chr03 | 5282265                 | CC                              | TT              | 1946768722               |
| SNP_P4_28601_5282266 | NC_021162.1    | Ca_kabuli_chr03 | 5282266                 | GG                              | TT              | 1946768724               |
| SNP_P4_28602_5285617 | NC_021162.1    | Ca_kabuli_chr03 | 5285617                 | CC                              | TT              | 1946768726               |
| SNP_P4_28603_5285637 | NC_021162.1    | Ca_kabuli_chr03 | 5285637                 | GG                              | AA              | 1946768728               |
| SNP_P4_28604_5285640 | NC_021162.1    | Ca_kabuli_chr03 | 5285640                 | TT                              | CC              | 1946768730               |
| SNP_P4_28605_5285791 | NC_021162.1    | Ca_kabuli_chr03 | 5285791                 | TT                              | CC              | 1946768732               |
| SNP_P4_28606_5285793 | NC_021162.1    | Ca_kabuli_chr03 | 5285793                 | TT                              | CC              | 1946768734               |
| SNP_P4_28607_5285804 | NC_021162.1    | Ca_kabuli_chr03 | 5285804                 | GG                              | CC              | 1946768736               |
| SNP_P4_28608_5285820 | NC_021162.1    | Ca_kabuli_chr03 | 5285820                 | GG                              | CC              | 1946768739               |
| SNP_P4_28609_5285854 | NC_021162.1    | Ca_kabuli_chr03 | 5285854                 | AA                              | GG              | 1946768741               |
| SNP_P4_28610_5285873 | NC_021162.1    | Ca_kabuli_chr03 | 5285873                 | TT                              | AA              | 1946768743               |
| SNP_P4_28611_5286022 | NC_021162.1    | Ca_kabuli_chr03 | 5286022                 | TT                              | CC              | 1946768745               |
| SNP_P4_28612_5286026 | NC_021162.1    | Ca_kabuli_chr03 | 5286026                 | AA                              | GG              | 1946768747               |
| SNP_P4_28613_5286136 | NC_021162.1    | Ca_kabuli_chr03 | 5286136                 | AA                              | GG              | 1946768749               |
| SNP_P4_28616_5286363 | NC_021162.1    | Ca_kabuli_chr03 | 5286363                 | CC                              | TT              | 1946768751               |
| SNP_P4_28617_5286381 | NC_021162.1    | Ca_kabuli_chr03 | 5286381                 | TT                              | GG              | 1946768753               |
| SNP_P4_28618_5286414 | NC_021162.1    | Ca_kabuli_chr03 | 5286414                 | AA                              | TT              | 1946768755               |
| SNP_P4_28619_5286422 | NC_021162.1    | Ca_kabuli_chr03 | 5286422                 | TT                              | GG              | 1946768757               |
| SNP_P4_28620_5286434 | NC_021162.1    | Ca_kabuli_chr03 | 5286434                 | TT                              | CC              | 1946768759               |
| SNP_P4_28621_5286441 | NC_021162.1    | Ca_kabuli_chr03 | 5286441                 | TT                              | AA              | 1946768761               |
| SNP_P4_28622_5286450 | NC_021162.1    | Ca_kabuli_chr03 | 5286450                 | AA                              | TT              | 1946768763               |
| SNP_P4_28623_5287450 | NC_021162.1    | Ca_kabuli_chr03 | 5287450                 | CC                              | TT              | 1946768766               |
| SNP_P4_28624_5287688 | NC_021162.1    | Ca_kabuli_chr03 | 5287688                 | CC                              | TT              | 1946768768               |
| SNP_P4_28625_5287691 | NC_021162.1    | Ca_kabuli_chr03 | 5287691                 | AA                              | GG              | 1946768770               |
| SNP_P4_28626_5287699 | NC_021162.1    | Ca_kabuli_chr03 | 5287699                 | CC                              | TT              | 1946768772               |
| SNP_P4_28627_5287769 | NC_021162.1    | Ca_kabuli_chr03 | 5287769                 | AA                              | TT              | 1946768774               |
| SNP_P4_28630_5296576 | NC_021162.1    | Ca_kabuli_chr03 | 5296576                 | AA                              | GG              | 1946768776               |
| SNP_P4_28631_5296952 | NC_021162.1    | Ca_kabuli_chr03 | 5296952                 | CC                              | AA              | 1946768778               |
| SNP_P4_28632_5296960 | NC_021162.1    | Ca_kabuli_chr03 | 5296960                 | TT                              | CC              | 1946768780               |
| SNP_P4_28633_5297019 | NC_021162.1    | Ca_kabuli_chr03 | 5297019                 | GG                              | AA              | 1946768782               |
| SNP_P4_28634_5297050 | NC_021162.1    | Ca_kabuli_chr03 | 5297050                 | GG                              | AA              | 1946768784               |
| SNP_P4_28635_5338716 | NC_021162.1    | Ca_kabuli_chr03 | 5338716                 | GG                              | AA              | 1946768786               |
| SNP_P4_28636_5338717 | NC_021162.1    | Ca_kabuli_chr03 | 5338717                 | AA                              | GG              | 1946768788               |
| SNP_P4_28637_5338753 | NC_021162.1    | Ca_kabuli_chr03 | 5338753                 | GG                              | AA              | 1946768790               |
| SNP_P4_28638_5340163 | NC_021162.1    | Ca_kabuli_chr03 | 5340163                 | TT                              | CC              | 1946768793               |
| SNP_P4_28639_5340461 | NC_021162.1    | Ca_kabuli_chr03 | 5340461                 | AA                              | GG              | 1946768795               |
| SNP_P4_28640_5340504 | NC_021162.1    | Ca_kabuli_chr03 | 5340504                 | AA                              | GG              | 1946768797               |
| SNP_P4_28641_5340847 | NC_021162.1    | Ca_kabuli_chr03 | 5340847                 | TT                              | CC              | 1946768799               |
| SNP_P4_28642_5340876 | NC_021162.1    | Ca_kabuli_chr03 | 5340876                 | AA                              | GG              | 1946768801               |
| SNP_P4_28643_5340881 | NC_021162.1    | Ca_kabuli_chr03 | 5340881                 | TT                              | AA              | 1946768803               |
| SNP_P4_28644_5340893 | NC_021162.1    | Ca_kabuli_chr03 | 5340893                 | CC                              | TT              | 1946768805               |



| SNPs IDs             | Chromosome IDs | Chromosomes     | Physical positions (bp) | CDC Frontier (Reference genome) | (ILWC46 & LPNB) | NCBI SNPdb Accession IDs |
|----------------------|----------------|-----------------|-------------------------|---------------------------------|-----------------|--------------------------|
| SNP_P4_28645_5340922 | NC_021162.1    | Ca_kabuli_chr03 | 5340922                 | AA                              | GG              | 1946768807               |
| SNP_P4_28646_5340929 | NC_021162.1    | Ca_kabuli_chr03 | 5340929                 | TT                              | CC              | 1946768809               |
| SNP_P4_28647_5340951 | NC_021162.1    | Ca_kabuli_chr03 | 5340951                 | TT                              | GG              | 1946768811               |
| SNP_P4_28648_5340959 | NC_021162.1    | Ca_kabuli_chr03 | 5340959                 | TT                              | CC              | 1946768813               |
| SNP_P4_28649_5340965 | NC_021162.1    | Ca_kabuli_chr03 | 5340965                 | CC                              | TT              | 1946768815               |
| SNP_P4_28650_5340976 | NC_021162.1    | Ca_kabuli_chr03 | 5340976                 | AA                              | CC              | 1946768818               |
| SNP_P4_28651_5341001 | NC_021162.1    | Ca_kabuli_chr03 | 5341001                 | GG                              | AA              | 1946768820               |
| SNP_P4_28652_5344680 | NC_021162.1    | Ca_kabuli_chr03 | 5344680                 | GG                              | AA              | 1946768822               |
| SNP_P4_28656_5460078 | NC_021162.1    | Ca_kabuli_chr03 | 5460078                 | GG                              | AA              | 1946768824               |
| SNP_P4_28657_5490778 | NC_021162.1    | Ca_kabuli_chr03 | 5490778                 | TT                              | AA              | 1946768826               |
| SNP_P4_28658_5490866 | NC_021162.1    | Ca_kabuli_chr03 | 5490866                 | AA                              | CC              | 1946768828               |
| SNP_P4_28659_5490878 | NC_021162.1    | Ca_kabuli_chr03 | 5490878                 | TT                              | CC              | 1946768830               |
| SNP_P4_28660_5491189 | NC_021162.1    | Ca_kabuli_chr03 | 5491189                 | GG                              | AA              | 1946768832               |
| SNP_P4_28661_5492250 | NC_021162.1    | Ca_kabuli_chr03 | 5492250                 | AA                              | CC              | 1946768834               |
| SNP_P4_28662_5494543 | NC_021162.1    | Ca_kabuli_chr03 | 5494543                 | TT                              | GG              | 1946768836               |
| SNP_P4_28663_5494578 | NC_021162.1    | Ca_kabuli_chr03 | 5494578                 | AA                              | CC              | 1946768838               |
| SNP_P4_28664_5501930 | NC_021162.1    | Ca_kabuli_chr03 | 5501930                 | TT                              | GG              | 1946768840               |
| SNP_P4_28665_5501949 | NC_021162.1    | Ca_kabuli_chr03 | 5501949                 | GG                              | AA              | 1946768842               |
| SNP_P4_28666_5501951 | NC_021162.1    | Ca_kabuli_chr03 | 5501951                 | AA                              | TT              | 1946768844               |
| SNP_P4_28667_5501952 | NC_021162.1    | Ca_kabuli_chr03 | 5501952                 | GG                              | CC              | 1946768846               |
| SNP_P4_28668_5502027 | NC_021162.1    | Ca_kabuli_chr03 | 5502027                 | AA                              | CC              | 1946768848               |
| SNP_P4_28669_5502184 | NC_021162.1    | Ca_kabuli_chr03 | 5502184                 | GG                              | AA              | 1946768850               |
| SNP_P4_28671_5507649 | NC_021162.1    | Ca_kabuli_chr03 | 5507649                 | TT                              | AA              | 1946768852               |
| SNP_P4_28672_5507850 | NC_021162.1    | Ca_kabuli_chr03 | 5507850                 | AA                              | GG              | 1946768854               |
| SNP_P4_28673_5507946 | NC_021162.1    | Ca_kabuli_chr03 | 5507946                 | AA                              | CC              | 1946768856               |
| SNP_P4_28674_5508035 | NC_021162.1    | Ca_kabuli_chr03 | 5508035                 | GG                              | TT              | 1946768858               |
| SNP_P4_28675_5508816 | NC_021162.1    | Ca_kabuli_chr03 | 5508816                 | AA                              | GG              | 1946768860               |
| SNP_P4_28676_5508835 | NC_021162.1    | Ca_kabuli_chr03 | 5508835                 | AA                              | GG              | 1946768862               |
| SNP_P4_28677_5509233 | NC_021162.1    | Ca_kabuli_chr03 | 5509233                 | AA                              | CC              | 1946768864               |
| SNP_P4_28678_5510238 | NC_021162.1    | Ca_kabuli_chr03 | 5510238                 | TT                              | CC              | 1946768866               |
| SNP_P4_28679_5516392 | NC_021162.1    | Ca_kabuli_chr03 | 5516392                 | AA                              | GG              | 1946768868               |
| SNP_P4_28680_5516394 | NC_021162.1    | Ca_kabuli_chr03 | 5516394                 | CC                              | TT              | 1946768870               |
| SNP_P4_28681_5516397 | NC_021162.1    | Ca_kabuli_chr03 | 5516397                 | GG                              | CC              | 1946768872               |
| SNP_P4_28682_5516407 | NC_021162.1    | Ca_kabuli_chr03 | 5516407                 | CC                              | TT              | 1946768874               |
| SNP_P4_28683_5516408 | NC_021162.1    | Ca_kabuli_chr03 | 5516408                 | CC                              | TT              | 1946768876               |
| SNP_P4_28684_5516411 | NC_021162.1    | Ca_kabuli_chr03 | 5516411                 | CC                              | TT              | 1946768878               |
| SNP_P4_28685_5516422 | NC_021162.1    | Ca_kabuli_chr03 | 5516422                 | GG                              | AA              | 1946768880               |
| SNP_P4_28686_5516464 | NC_021162.1    | Ca_kabuli_chr03 | 5516464                 | GG                              | AA              | 1946768883               |
| SNP_P4_28687_5516739 | NC_021162.1    | Ca_kabuli_chr03 | 5516739                 | TT                              | CC              | 1946768885               |
| SNP_P4_28688_5516741 | NC_021162.1    | Ca_kabuli_chr03 | 5516741                 | TT                              | CC              | 1946768887               |
| SNP_P4_28689_5516785 | NC_021162.1    | Ca_kabuli_chr03 | 5516785                 | AA                              | GG              | 1946768889               |
| SNP_P4_28690_5516811 | NC_021162.1    | Ca_kabuli_chr03 | 5516811                 | GG                              | AA              | 1946768891               |

| SNPs IDs             | Chromosome IDs | Chromosomes     | Physical positions (bp) | CDC Frontier (Reference genome) | (ILWC46 & LPNB) | NCBI SNPdb Accession IDs |
|----------------------|----------------|-----------------|-------------------------|---------------------------------|-----------------|--------------------------|
| SNP_P4_28691_5520149 | NC_021162.1    | Ca_kabuli_chr03 | 5520149                 | GG                              | AA              | 1946768893               |
| SNP_P4_28694_5573571 | NC_021162.1    | Ca_kabuli_chr03 | 5573571                 | GG                              | AA              | 1946768895               |
| SNP_P4_28695_5574836 | NC_021162.1    | Ca_kabuli_chr03 | 5574836                 | GG                              | AA              | 1946768897               |
| SNP_P4_28696_5588724 | NC_021162.1    | Ca_kabuli_chr03 | 5588724                 | GG                              | TT              | 1946768899               |
| SNP_P4_28697_5588739 | NC_021162.1    | Ca_kabuli_chr03 | 5588739                 | TT                              | AA              | 1946768901               |
| SNP_P4_28698_5588765 | NC_021162.1    | Ca_kabuli_chr03 | 5588765                 | CC                              | TT              | 1946768903               |
| SNP_P4_28699_5588800 | NC_021162.1    | Ca_kabuli_chr03 | 5588800                 | CC                              | TT              | 1946768905               |
| SNP_P4_28700_5588878 | NC_021162.1    | Ca_kabuli_chr03 | 5588878                 | TT                              | CC              | 1946768907               |
| SNP_P4_28701_5588880 | NC_021162.1    | Ca_kabuli_chr03 | 5588880                 | GG                              | AA              | 1946768909               |
| SNP_P4_28702_5588889 | NC_021162.1    | Ca_kabuli_chr03 | 5588889                 | AA                              | CC              | 1946768911               |
| SNP_P4_28703_5588900 | NC_021162.1    | Ca_kabuli_chr03 | 5588900                 | GG                              | TT              | 1946768913               |
| SNP_P4_28704_5588902 | NC_021162.1    | Ca_kabuli_chr03 | 5588902                 | AA                              | GG              | 1946768915               |
| SNP_P4_28705_5588905 | NC_021162.1    | Ca_kabuli_chr03 | 5588905                 | AA                              | TT              | 1946768917               |
| SNP_P4_28706_5589736 | NC_021162.1    | Ca_kabuli_chr03 | 5589736                 | GG                              | AA              | 1946768919               |
| SNP_P4_28707_5633964 | NC_021162.1    | Ca_kabuli_chr03 | 5633964                 | AA                              | TT              | 1946768921               |
| SNP_P4_28708_5635740 | NC_021162.1    | Ca_kabuli_chr03 | 5635740                 | AA                              | GG              | 1946768923               |
| SNP_P4_28709_5637283 | NC_021162.1    | Ca_kabuli_chr03 | 5637283                 | CC                              | TT              | 1946768925               |
| SNP_P4_28710_5637634 | NC_021162.1    | Ca_kabuli_chr03 | 5637634                 | CC                              | GG              | 1946768927               |
| SNP_P4_28711_5637675 | NC_021162.1    | Ca_kabuli_chr03 | 5637675                 | AA                              | TT              | 1946768929               |
| SNP_P4_28712_5637745 | NC_021162.1    | Ca_kabuli_chr03 | 5637745                 | AA                              | GG              | 1946768932               |
| SNP_P4_28713_5637769 | NC_021162.1    | Ca_kabuli_chr03 | 5637769                 | CC                              | AA              | 1946768934               |
| SNP_P4_28715_5658749 | NC_021162.1    | Ca_kabuli_chr03 | 5658749                 | AA                              | CC              | 1946768936               |
| SNP_P4_28716_5658753 | NC_021162.1    | Ca_kabuli_chr03 | 5658753                 | AA                              | CC              | 1946768938               |
| SNP_P4_28717_5659612 | NC_021162.1    | Ca_kabuli_chr03 | 5659612                 | TT                              | CC              | 1946768940               |
| SNP_P4_28718_5667304 | NC_021162.1    | Ca_kabuli_chr03 | 5667304                 | CC                              | TT              | 1946768942               |
| SNP_P4_28719_5677780 | NC_021162.1    | Ca_kabuli_chr03 | 5677780                 | TT                              | CC              | 1946768944               |
| SNP_P4_28720_5678295 | NC_021162.1    | Ca_kabuli_chr03 | 5678295                 | AA                              | GG              | 1946768946               |
| SNP_P4_28721_5686083 | NC_021162.1    | Ca_kabuli_chr03 | 5686083                 | GG                              | TT              | 1946768948               |
| SNP_P4_28722_5687787 | NC_021162.1    | Ca_kabuli_chr03 | 5687787                 | GG                              | AA              | 1946768950               |
| SNP_P4_28724_5689050 | NC_021162.1    | Ca_kabuli_chr03 | 5689050                 | CC                              | TT              | 1946768952               |
| SNP_P4_28725_5689101 | NC_021162.1    | Ca_kabuli_chr03 | 5689101                 | TT                              | GG              | 1946768954               |
| SNP_P4_28728_5689357 | NC_021162.1    | Ca_kabuli_chr03 | 5689357                 | TT                              | CC              | 1946768956               |
| SNP_P4_28729_5689359 | NC_021162.1    | Ca_kabuli_chr03 | 5689359                 | AA                              | GG              | 1946768958               |
| SNP_P4_28730_5689376 | NC_021162.1    | Ca_kabuli_chr03 | 5689376                 | CC                              | AA              | 1946768960               |
| SNP_P4_28732_5692283 | NC_021162.1    | Ca_kabuli_chr03 | 5692283                 | GG                              | AA              | 1946768962               |
| SNP_P4_28735_5707794 | NC_021162.1    | Ca_kabuli_chr03 | 5707794                 | TT                              | CC              | 1946768964               |
| SNP_P4_28736_5716301 | NC_021162.1    | Ca_kabuli_chr03 | 5716301                 | GG                              | TT              | 1946768966               |
| SNP_P4_28737_5716306 | NC_021162.1    | Ca_kabuli_chr03 | 5716306                 | AA                              | TT              | 1946768969               |
| SNP_P4_28738_5716620 | NC_021162.1    | Ca_kabuli_chr03 | 5716620                 | AA                              | CC              | 1946768971               |
| SNP_P4_28739_5716746 | NC_021162.1    | Ca_kabuli_chr03 | 5716746                 | AA                              | TT              | 1946768973               |
| SNP_P4_28740_5717226 | NC_021162.1    | Ca_kabuli_chr03 | 5717226                 | GG                              | AA              | 1946768975               |
| SNP_P4_28741_5717996 | NC_021162.1    | Ca_kabuli_chr03 | 5717996                 | TT                              | AA              | 1946768977               |

| SNPs IDs             | Chromosome IDs | Chromosomes     | Physical positions (bp) | CDC Frontier (Reference genome) | (ILWC46 & LPNB) | NCBI SNPdb Accession IDs |
|----------------------|----------------|-----------------|-------------------------|---------------------------------|-----------------|--------------------------|
| SNP_P4_28742_5718300 | NC_021162.1    | Ca_kabuli_chr03 | 5718300                 | AA                              | CC              | 1946768979               |
| SNP_P4_28744_5730063 | NC_021162.1    | Ca_kabuli_chr03 | 5730063                 | CC                              | TT              | 1946768981               |
| SNP_P4_28745_5734196 | NC_021162.1    | Ca_kabuli_chr03 | 5734196                 | TT                              | CC              | 1946768983               |
| SNP_P4_28747_5769802 | NC_021162.1    | Ca_kabuli_chr03 | 5769802                 | GG                              | CC              | 1946768986               |
| SNP_P4_28748_5770654 | NC_021162.1    | Ca_kabuli_chr03 | 5770654                 | CC                              | TT              | 1946768988               |
| SNP_P4_28749_5771586 | NC_021162.1    | Ca_kabuli_chr03 | 5771586                 | CC                              | AA              | 1946768990               |
| SNP_P4_28750_5804851 | NC_021162.1    | Ca_kabuli_chr03 | 5804851                 | TT                              | CC              | 1946768992               |
| SNP_P4_28751_5804907 | NC_021162.1    | Ca_kabuli_chr03 | 5804907                 | TT                              | AA              | 1946768994               |
| SNP_P4_28752_5805133 | NC_021162.1    | Ca_kabuli_chr03 | 5805133                 | AA                              | TT              | 1946768996               |
| SNP_P4_28753_5805214 | NC_021162.1    | Ca_kabuli_chr03 | 5805214                 | CC                              | TT              | 1946768998               |
| SNP_P4_28756_5810403 | NC_021162.1    | Ca_kabuli_chr03 | 5810403                 | TT                              | CC              | 1946769000               |
| SNP_P4_28757_5837703 | NC_021162.1    | Ca_kabuli_chr03 | 5837703                 | GG                              | AA              | 1946769002               |
| SNP_P4_28758_5839015 | NC_021162.1    | Ca_kabuli_chr03 | 5839015                 | AA                              | GG              | 1946769004               |
| SNP_P4_28759_5839023 | NC_021162.1    | Ca_kabuli_chr03 | 5839023                 | CC                              | TT              | 1946769006               |
| SNP_P4_28760_5840722 | NC_021162.1    | Ca_kabuli_chr03 | 5840722                 | TT                              | CC              | 1946769008               |
| SNP_P4_28761_5840829 | NC_021162.1    | Ca_kabuli_chr03 | 5840829                 | AA                              | GG              | 1946769010               |
| SNP_P4_28762_5840841 | NC_021162.1    | Ca_kabuli_chr03 | 5840841                 | AA                              | GG              | 1946769012               |
| SNP_P4_28764_5840860 | NC_021162.1    | Ca_kabuli_chr03 | 5840860                 | AA                              | GG              | 1946769014               |
| SNP_P4_28765_5840888 | NC_021162.1    | Ca_kabuli_chr03 | 5840888                 | GG                              | TT              | 1946769016               |
| SNP_P4_28766_5840904 | NC_021162.1    | Ca_kabuli_chr03 | 5840904                 | CC                              | TT              | 1946769018               |
| SNP_P4_28767_5840927 | NC_021162.1    | Ca_kabuli_chr03 | 5840927                 | AA                              | GG              | 1946769021               |
| SNP_P4_28768_5841005 | NC_021162.1    | Ca_kabuli_chr03 | 5841005                 | AA                              | CC              | 1946769023               |
| SNP_P4_28769_5841413 | NC_021162.1    | Ca_kabuli_chr03 | 5841413                 | AA                              | GG              | 1946769025               |
| SNP_P4_28770_5879208 | NC_021162.1    | Ca_kabuli_chr03 | 5879208                 | CC                              | AA              | 1946769027               |
| SNP_P4_28771_5894021 | NC_021162.1    | Ca_kabuli_chr03 | 5894021                 | TT                              | AA              | 1946769029               |
| SNP_P4_28772_5894066 | NC_021162.1    | Ca_kabuli_chr03 | 5894066                 | CC                              | GG              | 1946769031               |
| SNP_P4_28773_5900893 | NC_021162.1    | Ca_kabuli_chr03 | 5900893                 | GG                              | AA              | 1946769033               |
| SNP_P4_28774_5900897 | NC_021162.1    | Ca_kabuli_chr03 | 5900897                 | CC                              | TT              | 1946769035               |
| SNP_P4_28775_5900902 | NC_021162.1    | Ca_kabuli_chr03 | 5900902                 | GG                              | AA              | 1946769037               |
| SNP_P4_28776_5907688 | NC_021162.1    | Ca_kabuli_chr03 | 5907688                 | GG                              | AA              | 1946769039               |
| SNP_P4_28777_5910255 | NC_021162.1    | Ca_kabuli_chr03 | 5910255                 | AA                              | GG              | 1946769041               |
| SNP_P4_28778_5916180 | NC_021162.1    | Ca_kabuli_chr03 | 5916180                 | AA                              | GG              | 1946769043               |
| SNP_P4_28779_5916185 | NC_021162.1    | Ca_kabuli_chr03 | 5916185                 | TT                              | CC              | 1946769046               |
| SNP_P4_28780_5916677 | NC_021162.1    | Ca_kabuli_chr03 | 5916677                 | GG                              | AA              | 1946769048               |
| SNP_P4_28782_5922057 | NC_021162.1    | Ca_kabuli_chr03 | 5922057                 | AA                              | TT              | 1946769050               |
| SNP_P4_28783_5922087 | NC_021162.1    | Ca_kabuli_chr03 | 5922087                 | CC                              | GG              | 1946769052               |
| SNP_P4_28784_5922096 | NC_021162.1    | Ca_kabuli_chr03 | 5922096                 | CC                              | TT              | 1946769054               |
| SNP_P4_28785_5922131 | NC_021162.1    | Ca_kabuli_chr03 | 5922131                 | TT                              | GG              | 1946769056               |
| SNP_P4_28786_5922174 | NC_021162.1    | Ca_kabuli_chr03 | 5922174                 | TT                              | AA              | 1946769058               |
| SNP_P4_28787_5922517 | NC_021162.1    | Ca_kabuli_chr03 | 5922517                 | AA                              | GG              | 1946769060               |
| SNP_P4_28788_5923068 | NC_021162.1    | Ca_kabuli_chr03 | 5923068                 | AA                              | GG              | 1946769063               |
| SNP_P4_28789_5934571 | NC_021162.1    | Ca_kabuli_chr03 | 5934571                 | CC                              | GG              | 1946769065               |

| SNPs IDs             | Chromosome IDs | Chromosomes     | Physical positions (bp) | CDC Frontier (Reference genome) | (ILWC46 & LPNB) | NCBI SNPdb Accession IDs |
|----------------------|----------------|-----------------|-------------------------|---------------------------------|-----------------|--------------------------|
| SNP_P4_28790_5934572 | NC_021162.1    | Ca_kabuli_chr03 | 5934572                 | AA                              | GG              | 1946769067               |
| SNP_P4_28791_5935323 | NC_021162.1    | Ca_kabuli_chr03 | 5935323                 | TT                              | GG              | 1946769069               |
| SNP_P4_28792_5936579 | NC_021162.1    | Ca_kabuli_chr03 | 5936579                 | CC                              | TT              | 1946769071               |
| SNP_P4_28793_5936608 | NC_021162.1    | Ca_kabuli_chr03 | 5936608                 | TT                              | AA              | 1946769073               |
| SNP_P4_28794_5936665 | NC_021162.1    | Ca_kabuli_chr03 | 5936665                 | CC                              | TT              | 1946769075               |
| SNP_P4_28795_5936666 | NC_021162.1    | Ca_kabuli_chr03 | 5936666                 | AA                              | GG              | 1946769077               |
| SNP_P4_28796_5936668 | NC_021162.1    | Ca_kabuli_chr03 | 5936668                 | GG                              | AA              | 1946769079               |
| SNP_P4_28797_5936735 | NC_021162.1    | Ca_kabuli_chr03 | 5936735                 | TT                              | GG              | 1946769081               |
| SNP_P4_28798_5943483 | NC_021162.1    | Ca_kabuli_chr03 | 5943483                 | TT                              | CC              | 1946769084               |
| SNP_P4_28799_5943814 | NC_021162.1    | Ca_kabuli_chr03 | 5943814                 | GG                              | CC              | 1946769086               |
| SNP_P4_28800_5945493 | NC_021162.1    | Ca_kabuli_chr03 | 5945493                 | CC                              | AA              | 1946769088               |
| SNP_P4_28801_5945500 | NC_021162.1    | Ca_kabuli_chr03 | 5945500                 | AA                              | TT              | 1946769090               |
| SNP_P4_28802_5945531 | NC_021162.1    | Ca_kabuli_chr03 | 5945531                 | CC                              | TT              | 1946769092               |
| SNP_P4_28803_5945766 | NC_021162.1    | Ca_kabuli_chr03 | 5945766                 | AA                              | TT              | 1946769094               |
| SNP_P4_28804_5945768 | NC_021162.1    | Ca_kabuli_chr03 | 5945768                 | AA                              | TT              | 1946769096               |
| SNP_P4_28805_5945791 | NC_021162.1    | Ca_kabuli_chr03 | 5945791                 | CC                              | GG              | 1946769098               |
| SNP_P4_28806_5945797 | NC_021162.1    | Ca_kabuli_chr03 | 5945797                 | AA                              | GG              | 1946769100               |
| SNP_P4_28807_5945800 | NC_021162.1    | Ca_kabuli_chr03 | 5945800                 | AA                              | CC              | 1946769102               |
| SNP_P4_28808_5950319 | NC_021162.1    | Ca_kabuli_chr03 | 5950319                 | AA                              | TT              | 1946769104               |
| SNP_P4_28809_5953417 | NC_021162.1    | Ca_kabuli_chr03 | 5953417                 | TT                              | CC              | 1946769107               |
| SNP_P4_28810_5953427 | NC_021162.1    | Ca_kabuli_chr03 | 5953427                 | TT                              | AA              | 1946769109               |
| SNP_P4_28811_5953440 | NC_021162.1    | Ca_kabuli_chr03 | 5953440                 | AA                              | GG              | 1946769111               |
| SNP_P4_28812_5953474 | NC_021162.1    | Ca_kabuli_chr03 | 5953474                 | CC                              | GG              | 1946769113               |
| SNP_P4_28813_5956550 | NC_021162.1    | Ca_kabuli_chr03 | 5956550                 | GG                              | AA              | 1946769115               |
| SNP_P4_28814_5956554 | NC_021162.1    | Ca_kabuli_chr03 | 5956554                 | GG                              | TT              | 1946769117               |
| SNP_P4_28815_5958643 | NC_021162.1    | Ca_kabuli_chr03 | 5958643                 | GG                              | TT              | 1946769119               |
| SNP_P4_28816_5967019 | NC_021162.1    | Ca_kabuli_chr03 | 5967019                 | GG                              | CC              | 1946769121               |
| SNP_P4_28817_5970699 | NC_021162.1    | Ca_kabuli_chr03 | 5970699                 | AA                              | TT              | 1946769123               |
| SNP_P4_28818_5975906 | NC_021162.1    | Ca_kabuli_chr03 | 5975906                 | GG                              | AA              | 1946769125               |
| SNP_P4_28820_5978448 | NC_021162.1    | Ca_kabuli_chr03 | 5978448                 | CC                              | AA              | 1946769128               |
| SNP_P4_28821_5983523 | NC_021162.1    | Ca_kabuli_chr03 | 5983523                 | GG                              | TT              | 1946769130               |
| SNP_P4_28822_5987748 | NC_021162.1    | Ca_kabuli_chr03 | 5987748                 | CC                              | AA              | 1946769132               |
| SNP_P4_28823_5987760 | NC_021162.1    | Ca_kabuli_chr03 | 5987760                 | CC                              | AA              | 1946769134               |
| SNP_P4_28824_5993548 | NC_021162.1    | Ca_kabuli_chr03 | 5993548                 | TT                              | CC              | 1946769136               |
| SNP_P4_28825_5994201 | NC_021162.1    | Ca_kabuli_chr03 | 5994201                 | GG                              | AA              | 1946769138               |
| SNP_P4_28826_5994202 | NC_021162.1    | Ca_kabuli_chr03 | 5994202                 | GG                              | CC              | 1946769140               |
| SNP_P4_28827_5994233 | NC_021162.1    | Ca_kabuli_chr03 | 5994233                 | AA                              | TT              | 1946769142               |
| SNP_P4_28828_5994269 | NC_021162.1    | Ca_kabuli_chr03 | 5994269                 | AA                              | CC              | 1946769144               |
| SNP_P4_28829_6004312 | NC_021162.1    | Ca_kabuli_chr03 | 6004312                 | AA                              | GG              | 1946769146               |
| SNP_P4_28830_6004797 | NC_021162.1    | Ca_kabuli_chr03 | 6004797                 | AA                              | GG              | 1946769148               |
| SNP_P4_28831_6021674 | NC_021162.1    | Ca_kabuli_chr03 | 6021674                 | CC                              | GG              | 1946769150               |
| SNP_P4_28832_6021698 | NC_021162.1    | Ca_kabuli_chr03 | 6021698                 | GG                              | CC              | 1946769152               |

| SNPs IDs             | Chromosome IDs | Chromosomes     | Physical positions (bp) | CDC Frontier (Reference genome) | (ILWC46 & LPNB) | NCBI SNPdb Accession IDs |
|----------------------|----------------|-----------------|-------------------------|---------------------------------|-----------------|--------------------------|
| SNP_P4_28833_6021701 | NC_021162.1    | Ca_kabuli_chr03 | 6021701                 | GG                              | AA              | 1946769154               |
| SNP_P4_28834_6030819 | NC_021162.1    | Ca_kabuli_chr03 | 6030819                 | AA                              | GG              | 1946769156               |
| SNP_P4_28835_6030821 | NC_021162.1    | Ca_kabuli_chr03 | 6030821                 | GG                              | TT              | 1946769158               |
| SNP_P4_28836_6030829 | NC_021162.1    | Ca_kabuli_chr03 | 6030829                 | TT                              | CC              | 1946769160               |
| SNP_P4_28837_6030871 | NC_021162.1    | Ca_kabuli_chr03 | 6030871                 | TT                              | GG              | 1946769163               |
| SNP_P4_28838_6031035 | NC_021162.1    | Ca_kabuli_chr03 | 6031035                 | GG                              | AA              | 1946769165               |
| SNP_P4_28839_6031082 | NC_021162.1    | Ca_kabuli_chr03 | 6031082                 | TT                              | CC              | 1946769167               |
| SNP_P4_28840_6031215 | NC_021162.1    | Ca_kabuli_chr03 | 6031215                 | TT                              | CC              | 1946769169               |
| SNP_P4_28841_6031225 | NC_021162.1    | Ca_kabuli_chr03 | 6031225                 | AA                              | CC              | 1946769171               |
| SNP_P4_28842_6031238 | NC_021162.1    | Ca_kabuli_chr03 | 6031238                 | GG                              | AA              | 1946769173               |
| SNP_P4_28843_6031307 | NC_021162.1    | Ca_kabuli_chr03 | 6031307                 | AA                              | TT              | 1946769175               |
| SNP_P4_28844_6031374 | NC_021162.1    | Ca_kabuli_chr03 | 6031374                 | GG                              | TT              | 1946769177               |
| SNP_P4_28845_6031433 | NC_021162.1    | Ca_kabuli_chr03 | 6031433                 | GG                              | AA              | 1946769179               |
| SNP_P4_28846_6031451 | NC_021162.1    | Ca_kabuli_chr03 | 6031451                 | TT                              | CC              | 1946769181               |
| SNP_P4_28847_6035912 | NC_021162.1    | Ca_kabuli_chr03 | 6035912                 | AA                              | CC              | 1946769183               |
| SNP_P4_28848_6037644 | NC_021162.1    | Ca_kabuli_chr03 | 6037644                 | TT                              | CC              | 1946769185               |
| SNP_P4_28849_6037762 | NC_021162.1    | Ca_kabuli_chr03 | 6037762                 | CC                              | TT              | 1946769187               |
| SNP_P4_28850_6037800 | NC_021162.1    | Ca_kabuli_chr03 | 6037800                 | CC                              | AA              | 1946769190               |
| SNP_P4_28852_6058807 | NC_021162.1    | Ca_kabuli_chr03 | 6058807                 | CC                              | TT              | 1946769192               |
| SNP_P4_28853_6058833 | NC_021162.1    | Ca_kabuli_chr03 | 6058833                 | TT                              | AA              | 1946769194               |
| SNP_P4_28854_6058841 | NC_021162.1    | Ca_kabuli_chr03 | 6058841                 | TT                              | GG              | 1946769196               |
| SNP_P4_28855_6095767 | NC_021162.1    | Ca_kabuli_chr03 | 6095767                 | GG                              | AA              | 1946769198               |
| SNP_P4_28856_6104494 | NC_021162.1    | Ca_kabuli_chr03 | 6104494                 | TT                              | GG              | 1946769200               |
| SNP_P4_28857_6104556 | NC_021162.1    | Ca_kabuli_chr03 | 6104556                 | CC                              | TT              | 1946769202               |
| SNP_P4_28858_6104594 | NC_021162.1    | Ca_kabuli_chr03 | 6104594                 | TT                              | GG              | 1946769204               |
| SNP_P4_28859_6117859 | NC_021162.1    | Ca_kabuli_chr03 | 6117859                 | CC                              | AA              | 1946769206               |
| SNP_P4_28860_6117868 | NC_021162.1    | Ca_kabuli_chr03 | 6117868                 | CC                              | GG              | 1946769208               |
| SNP_P4_28861_6157531 | NC_021162.1    | Ca_kabuli_chr03 | 6157531                 | CC                              | AA              | 1946769210               |
| SNP_P4_28862_6157898 | NC_021162.1    | Ca_kabuli_chr03 | 6157898                 | TT                              | CC              | 1946769212               |
| SNP_P4_28863_6159112 | NC_021162.1    | Ca_kabuli_chr03 | 6159112                 | AA                              | CC              | 1946769214               |
| SNP_P4_28864_6159237 | NC_021162.1    | Ca_kabuli_chr03 | 6159237                 | CC                              | TT              | 1946769216               |
| SNP_P4_28865_6174745 | NC_021162.1    | Ca_kabuli_chr03 | 6174745                 | AA                              | GG              | 1946769218               |
| SNP_P4_28866_6219007 | NC_021162.1    | Ca_kabuli_chr03 | 6219007                 | TT                              | AA              | 1946769221               |
| SNP_P4_28867_6219407 | NC_021162.1    | Ca_kabuli_chr03 | 6219407                 | GG                              | AA              | 1946769223               |
| SNP_P4_28868_6234452 | NC_021162.1    | Ca_kabuli_chr03 | 6234452                 | TT                              | CC              | 1946769225               |
| SNP_P4_28869_6234453 | NC_021162.1    | Ca_kabuli_chr03 | 6234453                 | TT                              | CC              | 1946769227               |
| SNP_P4_28870_6251687 | NC_021162.1    | Ca_kabuli_chr03 | 6251687                 | CC                              | TT              | 1946769229               |
| SNP_P4_28871_6259684 | NC_021162.1    | Ca_kabuli_chr03 | 6259684                 | GG                              | AA              | 1946769230               |
| SNP_P4_28872_6297142 | NC_021162.1    | Ca_kabuli_chr03 | 6297142                 | GG                              | AA              | 1946769231               |
| SNP_P4_28873_6297155 | NC_021162.1    | Ca_kabuli_chr03 | 6297155                 | CC                              | TT              | 1946769232               |
| SNP_P4_28874_6302492 | NC_021162.1    | Ca_kabuli_chr03 | 6302492                 | AA                              | CC              | 1946769233               |
| SNP_P4_28875_6302939 | NC_021162.1    | Ca_kabuli_chr03 | 6302939                 | CC                              | TT              | 1946769234               |

| SNPs IDs             | Chromosome IDs | Chromosomes     | Physical positions (bp) | CDC Frontier (Reference genome) | (ILWC46 & LPNB) | NCBI SNPdb Accession IDs |
|----------------------|----------------|-----------------|-------------------------|---------------------------------|-----------------|--------------------------|
| SNP_P4_28876_6306526 | NC_021162.1    | Ca_kabuli_chr03 | 6306526                 | AA                              | GG              | 1946769236               |
| SNP_P4_28877_6328620 | NC_021162.1    | Ca_kabuli_chr03 | 6328620                 | GG                              | TT              | 1946769238               |
| SNP_P4_28878_6328696 | NC_021162.1    | Ca_kabuli_chr03 | 6328696                 | CC                              | TT              | 1946769240               |
| SNP_P4_28879_6330756 | NC_021162.1    | Ca_kabuli_chr03 | 6330756                 | AA                              | GG              | 1946769242               |
| SNP_P4_28880_6330898 | NC_021162.1    | Ca_kabuli_chr03 | 6330898                 | AA                              | TT              | 1946769244               |
| SNP_P4_28881_6333149 | NC_021162.1    | Ca_kabuli_chr03 | 6333149                 | TT                              | GG              | 1946769246               |
| SNP_P4_28882_6333483 | NC_021162.1    | Ca_kabuli_chr03 | 6333483                 | CC                              | TT              | 1946769248               |
| SNP_P4_28883_6333723 | NC_021162.1    | Ca_kabuli_chr03 | 6333723                 | TT                              | GG              | 1946769250               |
| SNP_P4_28884_6333759 | NC_021162.1    | Ca_kabuli_chr03 | 6333759                 | AA                              | TT              | 1946769252               |
| SNP_P4_28885_6333827 | NC_021162.1    | Ca_kabuli_chr03 | 6333827                 | AA                              | GG              | 1946769254               |
| SNP_P4_28888_6353601 | NC_021162.1    | Ca_kabuli_chr03 | 6353601                 | AA                              | TT              | 1946769256               |
| SNP_P4_28889_6371941 | NC_021162.1    | Ca_kabuli_chr03 | 6371941                 | CC                              | TT              | 1946769259               |
| SNP_P4_28890_6371988 | NC_021162.1    | Ca_kabuli_chr03 | 6371988                 | GG                              | AA              | 1946769261               |
| SNP_P4_28891_6372002 | NC_021162.1    | Ca_kabuli_chr03 | 6372002                 | TT                              | AA              | 1946769263               |
| SNP_P4_28892_6372004 | NC_021162.1    | Ca_kabuli_chr03 | 6372004                 | AA                              | GG              | 1946769265               |
| SNP_P4_28893_6372173 | NC_021162.1    | Ca_kabuli_chr03 | 6372173                 | GG                              | AA              | 1946769267               |
| SNP_P4_28895_6372228 | NC_021162.1    | Ca_kabuli_chr03 | 6372228                 | AA                              | TT              | 1946769269               |
| SNP_P4_28896_6372262 | NC_021162.1    | Ca_kabuli_chr03 | 6372262                 | AA                              | CC              | 1946769271               |
| SNP_P4_28897_6372264 | NC_021162.1    | Ca_kabuli_chr03 | 6372264                 | AA                              | TT              | 1946769273               |
| SNP_P4_28900_6373630 | NC_021162.1    | Ca_kabuli_chr03 | 6373630                 | AA                              | GG              | 1946769275               |
| SNP_P4_28901_6386864 | NC_021162.1    | Ca_kabuli_chr03 | 6386864                 | TT                              | CC              | 1946769277               |
| SNP_P4_28902_6386877 | NC_021162.1    | Ca_kabuli_chr03 | 6386877                 | TT                              | GG              | 1946769280               |
| SNP_P4_28903_6386896 | NC_021162.1    | Ca_kabuli_chr03 | 6386896                 | CC                              | TT              | 1946769282               |
| SNP_P4_28905_6386943 | NC_021162.1    | Ca_kabuli_chr03 | 6386943                 | GG                              | AA              | 1946769284               |
| SNP_P4_28906_6397214 | NC_021162.1    | Ca_kabuli_chr03 | 6397214                 | GG                              | AA              | 1946769286               |
| SNP_P4_28908_6419399 | NC_021162.1    | Ca_kabuli_chr03 | 6419399                 | AA                              | GG              | 1946769288               |
| SNP_P4_28909_6430274 | NC_021162.1    | Ca_kabuli_chr03 | 6430274                 | CC                              | TT              | 1946769290               |
| SNP_P4_28910_6430284 | NC_021162.1    | Ca_kabuli_chr03 | 6430284                 | TT                              | CC              | 1946769292               |
| SNP_P4_28911_6430530 | NC_021162.1    | Ca_kabuli_chr03 | 6430530                 | TT                              | AA              | 1946769294               |
| SNP_P4_28912_6430603 | NC_021162.1    | Ca_kabuli_chr03 | 6430603                 | GG                              | AA              | 1946769296               |
| SNP_P4_28913_6430983 | NC_021162.1    | Ca_kabuli_chr03 | 6430983                 | AA                              | GG              | 1946769298               |
| SNP_P4_28914_6430987 | NC_021162.1    | Ca_kabuli_chr03 | 6430987                 | GG                              | CC              | 1946769300               |
| SNP_P4_28915_6431254 | NC_021162.1    | Ca_kabuli_chr03 | 6431254                 | AA                              | CC              | 1946769302               |
| SNP_P4_28916_6431274 | NC_021162.1    | Ca_kabuli_chr03 | 6431274                 | GG                              | AA              | 1946769304               |
| SNP_P4_28917_6431363 | NC_021162.1    | Ca_kabuli_chr03 | 6431363                 | AA                              | GG              | 1946769306               |
| SNP_P4_28919_6443022 | NC_021162.1    | Ca_kabuli_chr03 | 6443022                 | CC                              | GG              | 1946769308               |
| SNP_P4_28920_6445158 | NC_021162.1    | Ca_kabuli_chr03 | 6445158                 | AA                              | GG              | 1946769310               |
| SNP_P4_28921_6448669 | NC_021162.1    | Ca_kabuli_chr03 | 6448669                 | TT                              | CC              | 1946769312               |
| SNP_P4_28922_6448687 | NC_021162.1    | Ca_kabuli_chr03 | 6448687                 | TT                              | CC              | 1946769314               |
| SNP_P4_28924_6474373 | NC_021162.1    | Ca_kabuli_chr03 | 6474373                 | AA                              | TT              | 1946769316               |
| SNP_P4_28925_6474374 | NC_021162.1    | Ca_kabuli_chr03 | 6474374                 | AA                              | TT              | 1946769318               |
| SNP_P4_28926_6487656 | NC_021162.1    | Ca_kabuli_chr03 | 6487656                 | AA                              | GG              | 1946769320               |

| SNPs IDs             | Chromosome IDs | Chromosomes     | Physical positions (bp) | CDC Frontier (Reference genome) | (ILWC46 & LPNB) | NCBI SNPdb Accession IDs |
|----------------------|----------------|-----------------|-------------------------|---------------------------------|-----------------|--------------------------|
| SNP_P4_28927_6520284 | NC_021162.1    | Ca_kabuli_chr03 | 6520284                 | AA                              | GG              | 1946769322               |
| SNP_P4_28928_6520291 | NC_021162.1    | Ca_kabuli_chr03 | 6520291                 | CC                              | TT              | 1946769324               |
| SNP_P4_28929_6547970 | NC_021162.1    | Ca_kabuli_chr03 | 6547970                 | CC                              | AA              | 1946769326               |
| SNP_P4_28931_6569728 | NC_021162.1    | Ca_kabuli_chr03 | 6569728                 | CC                              | TT              | 1946769328               |
| SNP_P4_28932_6581942 | NC_021162.1    | Ca_kabuli_chr03 | 6581942                 | GG                              | AA              | 1946769330               |
| SNP_P4_28933_6582270 | NC_021162.1    | Ca_kabuli_chr03 | 6582270                 | TT                              | CC              | 1946769333               |
| SNP_P4_28934_6583701 | NC_021162.1    | Ca_kabuli_chr03 | 6583701                 | CC                              | GG              | 1946769335               |
| SNP_P4_28935_6587860 | NC_021162.1    | Ca_kabuli_chr03 | 6587860                 | AA                              | GG              | 1946769337               |
| SNP_P4_28936_6588348 | NC_021162.1    | Ca_kabuli_chr03 | 6588348                 | TT                              | AA              | 1946769339               |
| SNP_P4_28937_6588638 | NC_021162.1    | Ca_kabuli_chr03 | 6588638                 | CC                              | TT              | 1946769341               |
| SNP_P4_28938_6588778 | NC_021162.1    | Ca_kabuli_chr03 | 6588778                 | TT                              | GG              | 1946769343               |
| SNP_P4_28939_6588920 | NC_021162.1    | Ca_kabuli_chr03 | 6588920                 | GG                              | AA              | 1946769345               |
| SNP_P4_28940_6589283 | NC_021162.1    | Ca_kabuli_chr03 | 6589283                 | CC                              | AA              | 1946769347               |
| SNP_P4_28941_6589692 | NC_021162.1    | Ca_kabuli_chr03 | 6589692                 | TT                              | CC              | 1946769349               |
| SNP_P4_28942_6590380 | NC_021162.1    | Ca_kabuli_chr03 | 6590380                 | GG                              | AA              | 1946769351               |
| SNP_P4_28943_6590452 | NC_021162.1    | Ca_kabuli_chr03 | 6590452                 | CC                              | AA              | 1946769354               |
| SNP_P4_28944_6591729 | NC_021162.1    | Ca_kabuli_chr03 | 6591729                 | TT                              | GG              | 1946769356               |
| SNP_P4_28946_6599039 | NC_021162.1    | Ca_kabuli_chr03 | 6599039                 | TT                              | CC              | 1946769358               |
| SNP_P4_28947_6599058 | NC_021162.1    | Ca_kabuli_chr03 | 6599058                 | AA                              | CC              | 1946769360               |
| SNP_P4_28948_6599070 | NC_021162.1    | Ca_kabuli_chr03 | 6599070                 | TT                              | CC              | 1946769362               |
| SNP_P4_28949_6599081 | NC_021162.1    | Ca_kabuli_chr03 | 6599081                 | CC                              | TT              | 1946769364               |
| SNP_P4_28950_6599088 | NC_021162.1    | Ca_kabuli_chr03 | 6599088                 | GG                              | AA              | 1946769366               |
| SNP_P4_28951_6599095 | NC_021162.1    | Ca_kabuli_chr03 | 6599095                 | GG                              | CC              | 1946769368               |
| SNP_P4_28952_6599098 | NC_021162.1    | Ca_kabuli_chr03 | 6599098                 | TT                              | AA              | 1946769370               |
| SNP_P4_28953_6599124 | NC_021162.1    | Ca_kabuli_chr03 | 6599124                 | TT                              | AA              | 1946769372               |
| SNP_P4_28954_6599143 | NC_021162.1    | Ca_kabuli_chr03 | 6599143                 | TT                              | CC              | 1946769374               |
| SNP_P4_28955_6599149 | NC_021162.1    | Ca_kabuli_chr03 | 6599149                 | TT                              | CC              | 1946769376               |
| SNP_P4_28956_6599174 | NC_021162.1    | Ca_kabuli_chr03 | 6599174                 | AA                              | TT              | 1946769378               |
| SNP_P4_28957_6599175 | NC_021162.1    | Ca_kabuli_chr03 | 6599175                 | TT                              | AA              | 1946769380               |
| SNP_P4_28958_6599208 | NC_021162.1    | Ca_kabuli_chr03 | 6599208                 | AA                              | GG              | 1946769382               |
| SNP_P4_28959_6599217 | NC_021162.1    | Ca_kabuli_chr03 | 6599217                 | TT                              | AA              | 1946769384               |
| SNP_P4_28960_6599258 | NC_021162.1    | Ca_kabuli_chr03 | 6599258                 | CC                              | AA              | 1946769386               |
| SNP_P4_28961_6599310 | NC_021162.1    | Ca_kabuli_chr03 | 6599310                 | AA                              | GG              | 1946769388               |
| SNP_P4_28962_6599482 | NC_021162.1    | Ca_kabuli_chr03 | 6599482                 | GG                              | AA              | 1946769390               |
| SNP_P4_28963_6600839 | NC_021162.1    | Ca_kabuli_chr03 | 6600839                 | CC                              | AA              | 1946769392               |
| SNP_P4_28964_6601618 | NC_021162.1    | Ca_kabuli_chr03 | 6601618                 | CC                              | TT              | 1946769394               |
| SNP_P4_28965_6605135 | NC_021162.1    | Ca_kabuli_chr03 | 6605135                 | TT                              | CC              | 1946769396               |
| SNP_P4_28966_6606297 | NC_021162.1    | Ca_kabuli_chr03 | 6606297                 | GG                              | AA              | 1946769398               |
| SNP_P4_28967_6608449 | NC_021162.1    | Ca_kabuli_chr03 | 6608449                 | GG                              | TT              | 1946769400               |
| SNP_P4_28968_6608725 | NC_021162.1    | Ca_kabuli_chr03 | 6608725                 | TT                              | AA              | 1946769403               |
| SNP_P4_28969_6608740 | NC_021162.1    | Ca_kabuli_chr03 | 6608740                 | CC                              | TT              | 1946769405               |
| SNP_P4_28970_6608861 | NC_021162.1    | Ca_kabuli_chr03 | 6608861                 | TT                              | AA              | 1946769407               |

| SNPs IDs             | Chromosome IDs | Chromosomes     | Physical positions (bp) | CDC Frontier (Reference genome) | (ILWC46 & LPNB) | NCBI SNPdb Accession IDs |
|----------------------|----------------|-----------------|-------------------------|---------------------------------|-----------------|--------------------------|
| SNP_P4_28971_6609243 | NC_021162.1    | Ca_kabuli_chr03 | 6609243                 | GG                              | AA              | 1946769409               |
| SNP_P4_28972_6621993 | NC_021162.1    | Ca_kabuli_chr03 | 6621993                 | CC                              | TT              | 1946769411               |
| SNP_P4_28973_6646801 | NC_021162.1    | Ca_kabuli_chr03 | 6646801                 | TT                              | GG              | 1946769413               |
| SNP_P4_28974_6648599 | NC_021162.1    | Ca_kabuli_chr03 | 6648599                 | CC                              | TT              | 1946769415               |
| SNP_P4_28975_6649696 | NC_021162.1    | Ca_kabuli_chr03 | 6649696                 | GG                              | AA              | 1946769417               |
| SNP_P4_28978_6675431 | NC_021162.1    | Ca_kabuli_chr03 | 6675431                 | AA                              | GG              | 1946769419               |
| SNP_P4_28979_6675470 | NC_021162.1    | Ca_kabuli_chr03 | 6675470                 | GG                              | TT              | 1946769421               |
| SNP_P4_28980_6675544 | NC_021162.1    | Ca_kabuli_chr03 | 6675544                 | TT                              | CC              | 1946769423               |
| SNP_P4_28981_6675562 | NC_021162.1    | Ca_kabuli_chr03 | 6675562                 | AA                              | GG              | 1946769425               |
| SNP_P4_28982_6675633 | NC_021162.1    | Ca_kabuli_chr03 | 6675633                 | TT                              | GG              | 1946769427               |
| SNP_P4_28983_6683646 | NC_021162.1    | Ca_kabuli_chr03 | 6683646                 | AA                              | GG              | 1946769429               |
| SNP_P4_28984_6698037 | NC_021162.1    | Ca_kabuli_chr03 | 6698037                 | AA                              | GG              | 1946769431               |
| SNP_P4_28985_6699470 | NC_021162.1    | Ca_kabuli_chr03 | 6699470                 | TT                              | CC              | 1946769433               |
| SNP_P4_28986_6722037 | NC_021162.1    | Ca_kabuli_chr03 | 6722037                 | GG                              | AA              | 1946769435               |
| SNP_P4_28988_6724076 | NC_021162.1    | Ca_kabuli_chr03 | 6724076                 | AA                              | GG              | 1946769437               |
| SNP_P4_28989_6724288 | NC_021162.1    | Ca_kabuli_chr03 | 6724288                 | TT                              | CC              | 1946769439               |
| SNP_P4_28990_6728901 | NC_021162.1    | Ca_kabuli_chr03 | 6728901                 | AA                              | GG              | 1946769441               |
| SNP_P4_28992_6738522 | NC_021162.1    | Ca_kabuli_chr03 | 6738522                 | CC                              | TT              | 1946769443               |
| SNP_P4_28993_6739764 | NC_021162.1    | Ca_kabuli_chr03 | 6739764                 | GG                              | AA              | 1946769445               |
| SNP_P4_28994_6740127 | NC_021162.1    | Ca_kabuli_chr03 | 6740127                 | AA                              | GG              | 1946769447               |
| SNP_P4_28995_6740673 | NC_021162.1    | Ca_kabuli_chr03 | 6740673                 | CC                              | TT              | 1946769450               |
| SNP_P4_28996_6740895 | NC_021162.1    | Ca_kabuli_chr03 | 6740895                 | CC                              | TT              | 1946769452               |
| SNP_P4_28997_6740990 | NC_021162.1    | Ca_kabuli_chr03 | 6740990                 | TT                              | CC              | 1946769454               |
| SNP_P4_28998_6753802 | NC_021162.1    | Ca_kabuli_chr03 | 6753802                 | AA                              | GG              | 1946769457               |
| SNP_P4_28999_6753828 | NC_021162.1    | Ca_kabuli_chr03 | 6753828                 | TT                              | CC              | 1946769459               |
| SNP_P4_29000_6753838 | NC_021162.1    | Ca_kabuli_chr03 | 6753838                 | AA                              | GG              | 1946769461               |
| SNP_P4_29001_6757539 | NC_021162.1    | Ca_kabuli_chr03 | 6757539                 | AA                              | CC              | 1946769463               |
| SNP_P4_29002_6771187 | NC_021162.1    | Ca_kabuli_chr03 | 6771187                 | GG                              | AA              | 1946769465               |
| SNP_P4_29003_6772025 | NC_021162.1    | Ca_kabuli_chr03 | 6772025                 | TT                              | CC              | 1946769467               |
| SNP_P4_29004_6772524 | NC_021162.1    | Ca_kabuli_chr03 | 6772524                 | TT                              | CC              | 1946769469               |
| SNP_P4_29005_6772552 | NC_021162.1    | Ca_kabuli_chr03 | 6772552                 | CC                              | TT              | 1946769471               |
| SNP_P4_29006_6772738 | NC_021162.1    | Ca_kabuli_chr03 | 6772738                 | AA                              | GG              | 1946769473               |
| SNP_P4_29007_6772746 | NC_021162.1    | Ca_kabuli_chr03 | 6772746                 | AA                              | GG              | 1946769475               |
| SNP_P4_29009_6773044 | NC_021162.1    | Ca_kabuli_chr03 | 6773044                 | CC                              | AA              | 1946769477               |
| SNP_P4_29010_6773169 | NC_021162.1    | Ca_kabuli_chr03 | 6773169                 | GG                              | AA              | 1946769479               |
| SNP_P4_29011_6773171 | NC_021162.1    | Ca_kabuli_chr03 | 6773171                 | AA                              | GG              | 1946769481               |
| SNP_P4_29012_6773439 | NC_021162.1    | Ca_kabuli_chr03 | 6773439                 | TT                              | CC              | 1946769483               |
| SNP_P4_29013_6773443 | NC_021162.1    | Ca_kabuli_chr03 | 6773443                 | TT                              | CC              | 1946769485               |
| SNP_P4_29014_6773447 | NC_021162.1    | Ca_kabuli_chr03 | 6773447                 | GG                              | AA              | 1946769487               |
| SNP_P4_29015_6773481 | NC_021162.1    | Ca_kabuli_chr03 | 6773481                 | TT                              | CC              | 1946769489               |
| SNP_P4_29016_6774057 | NC_021162.1    | Ca_kabuli_chr03 | 6774057                 | CC                              | TT              | 1946769491               |
| SNP_P4_29018_6774146 | NC_021162.1    | Ca_kabuli_chr03 | 6774146                 | GG                              | AA              | 1946769494               |



| SNPs IDs             | Chromosome IDs | Chromosomes     | Physical positions (bp) | CDC Frontier (Reference genome) | (ILWC46 & LPNB) | NCBI SNPdb Accession IDs |
|----------------------|----------------|-----------------|-------------------------|---------------------------------|-----------------|--------------------------|
| SNP_P4_29019_6774235 | NC_021162.1    | Ca_kabuli_chr03 | 6774235                 | CC                              | AA              | 1946769496               |
| SNP_P4_29020_6774373 | NC_021162.1    | Ca_kabuli_chr03 | 6774373                 | TT                              | AA              | 1946769498               |
| SNP_P4_29021_6774379 | NC_021162.1    | Ca_kabuli_chr03 | 6774379                 | AA                              | GG              | 1946769500               |
| SNP_P4_29022_6774452 | NC_021162.1    | Ca_kabuli_chr03 | 6774452                 | TT                              | CC              | 1946769502               |
| SNP_P4_29023_6774461 | NC_021162.1    | Ca_kabuli_chr03 | 6774461                 | AA                              | GG              | 1946769504               |
| SNP_P4_29024_6777878 | NC_021162.1    | Ca_kabuli_chr03 | 6777878                 | CC                              | TT              | 1946769506               |
| SNP_P4_29025_6780284 | NC_021162.1    | Ca_kabuli_chr03 | 6780284                 | AA                              | GG              | 1946769508               |
| SNP_P4_29026_6780285 | NC_021162.1    | Ca_kabuli_chr03 | 6780285                 | GG                              | AA              | 1946769510               |
| SNP_P4_29027_6780322 | NC_021162.1    | Ca_kabuli_chr03 | 6780322                 | CC                              | TT              | 1946769512               |
| SNP_P4_29029_6780560 | NC_021162.1    | Ca_kabuli_chr03 | 6780560                 | GG                              | AA              | 1946769514               |
| SNP_P4_29030_6780651 | NC_021162.1    | Ca_kabuli_chr03 | 6780651                 | TT                              | AA              | 1946769516               |
| SNP_P4_29031_6780692 | NC_021162.1    | Ca_kabuli_chr03 | 6780692                 | TT                              | AA              | 1946769518               |
| SNP_P4_29032_6780894 | NC_021162.1    | Ca_kabuli_chr03 | 6780894                 | GG                              | AA              | 1946769520               |
| SNP_P4_29033_6781028 | NC_021162.1    | Ca_kabuli_chr03 | 6781028                 | CC                              | TT              | 1946769522               |
| SNP_P4_29034_6781062 | NC_021162.1    | Ca_kabuli_chr03 | 6781062                 | TT                              | GG              | 1946769524               |
| SNP_P4_29035_6781078 | NC_021162.1    | Ca_kabuli_chr03 | 6781078                 | CC                              | AA              | 1946769526               |
| SNP_P4_29036_6781193 | NC_021162.1    | Ca_kabuli_chr03 | 6781193                 | AA                              | CC              | 1946769528               |
| SNP_P4_29037_6781214 | NC_021162.1    | Ca_kabuli_chr03 | 6781214                 | AA                              | GG              | 1946769531               |
| SNP_P4_29038_6781245 | NC_021162.1    | Ca_kabuli_chr03 | 6781245                 | AA                              | CC              | 1946769533               |
| SNP_P4_29039_6781247 | NC_021162.1    | Ca_kabuli_chr03 | 6781247                 | GG                              | AA              | 1946769535               |
| SNP_P4_29040_6781311 | NC_021162.1    | Ca_kabuli_chr03 | 6781311                 | CC                              | TT              | 1946769537               |
| SNP_P4_29041_6790084 | NC_021162.1    | Ca_kabuli_chr03 | 6790084                 | GG                              | AA              | 1946769539               |
| SNP_P4_29042_6790188 | NC_021162.1    | Ca_kabuli_chr03 | 6790188                 | CC                              | TT              | 1946769541               |
| SNP_P4_29043_6790218 | NC_021162.1    | Ca_kabuli_chr03 | 6790218                 | TT                              | AA              | 1946769543               |
| SNP_P4_29044_6790293 | NC_021162.1    | Ca_kabuli_chr03 | 6790293                 | GG                              | AA              | 1946769545               |
| SNP_P4_29045_6790356 | NC_021162.1    | Ca_kabuli_chr03 | 6790356                 | CC                              | TT              | 1946769547               |
| SNP_P4_29046_6790446 | NC_021162.1    | Ca_kabuli_chr03 | 6790446                 | CC                              | TT              | 1946769550               |
| SNP_P4_29048_6813502 | NC_021162.1    | Ca_kabuli_chr03 | 6813502                 | TT                              | CC              | 1946769552               |
| SNP_P4_29050_6815969 | NC_021162.1    | Ca_kabuli_chr03 | 6815969                 | AA                              | GG              | 1946769554               |
| SNP_P4_29051_6818043 | NC_021162.1    | Ca_kabuli_chr03 | 6818043                 | CC                              | TT              | 1946769556               |
| SNP_P4_29052_6821764 | NC_021162.1    | Ca_kabuli_chr03 | 6821764                 | GG                              | CC              | 1946769558               |
| SNP_P4_29053_6821796 | NC_021162.1    | Ca_kabuli_chr03 | 6821796                 | CC                              | TT              | 1946769560               |
| SNP_P4_29055_6822080 | NC_021162.1    | Ca_kabuli_chr03 | 6822080                 | GG                              | AA              | 1946769562               |
| SNP_P4_29056_6822100 | NC_021162.1    | Ca_kabuli_chr03 | 6822100                 | GG                              | TT              | 1946769564               |
| SNP_P4_29057_6822158 | NC_021162.1    | Ca_kabuli_chr03 | 6822158                 | AA                              | GG              | 1946769566               |
| SNP_P4_29059_6823678 | NC_021162.1    | Ca_kabuli_chr03 | 6823678                 | CC                              | TT              | 1946769568               |
| SNP_P4_29060_6825995 | NC_021162.1    | Ca_kabuli_chr03 | 6825995                 | AA                              | CC              | 1946769570               |
| SNP_P4_29061_6826099 | NC_021162.1    | Ca_kabuli_chr03 | 6826099                 | TT                              | CC              | 1946769573               |
| SNP_P4_29062_6826292 | NC_021162.1    | Ca_kabuli_chr03 | 6826292                 | GG                              | AA              | 1946769575               |
| SNP_P4_29063_6826297 | NC_021162.1    | Ca_kabuli_chr03 | 6826297                 | TT                              | CC              | 1946769577               |
| SNP_P4_29065_6842435 | NC_021162.1    | Ca_kabuli_chr03 | 6842435                 | GG                              | AA              | 1946769579               |
| SNP_P4_29066_6859411 | NC_021162.1    | Ca_kabuli_chr03 | 6859411                 | GG                              | TT              | 1946769581               |

| SNPs IDs             | Chromosome IDs | Chromosomes     | Physical positions (bp) | CDC Frontier (Reference genome) | (ILWC46 & LPNB) | NCBI SNPdb Accession IDs |
|----------------------|----------------|-----------------|-------------------------|---------------------------------|-----------------|--------------------------|
| SNP_P4_29067_6859424 | NC_021162.1    | Ca_kabuli_chr03 | 6859424                 | CC                              | TT              | 1946769583               |
| SNP_P4_29068_6859432 | NC_021162.1    | Ca_kabuli_chr03 | 6859432                 | CC                              | AA              | 1946769585               |
| SNP_P4_29069_6859470 | NC_021162.1    | Ca_kabuli_chr03 | 6859470                 | CC                              | AA              | 1946769587               |
| SNP_P4_29070_6859498 | NC_021162.1    | Ca_kabuli_chr03 | 6859498                 | TT                              | CC              | 1946769589               |
| SNP_P4_29071_6859508 | NC_021162.1    | Ca_kabuli_chr03 | 6859508                 | CC                              | TT              | 1946769591               |
| SNP_P4_29072_6859561 | NC_021162.1    | Ca_kabuli_chr03 | 6859561                 | GG                              | AA              | 1946769593               |
| SNP_P4_29073_6859668 | NC_021162.1    | Ca_kabuli_chr03 | 6859668                 | GG                              | AA              | 1946769596               |
| SNP_P4_29074_6859762 | NC_021162.1    | Ca_kabuli_chr03 | 6859762                 | TT                              | CC              | 1946769598               |
| SNP_P4_29075_6859889 | NC_021162.1    | Ca_kabuli_chr03 | 6859889                 | GG                              | AA              | 1946769600               |
| SNP_P4_29076_6859890 | NC_021162.1    | Ca_kabuli_chr03 | 6859890                 | TT                              | CC              | 1946769602               |
| SNP_P4_29077_6867200 | NC_021162.1    | Ca_kabuli_chr03 | 6867200                 | GG                              | CC              | 1946769604               |
| SNP_P4_29078_6867251 | NC_021162.1    | Ca_kabuli_chr03 | 6867251                 | GG                              | AA              | 1946769606               |
| SNP_P4_29079_6867917 | NC_021162.1    | Ca_kabuli_chr03 | 6867917                 | TT                              | AA              | 1946769608               |
| SNP_P4_29080_6869120 | NC_021162.1    | Ca_kabuli_chr03 | 6869120                 | GG                              | AA              | 1946769610               |
| SNP_P4_29081_6869138 | NC_021162.1    | Ca_kabuli_chr03 | 6869138                 | CC                              | TT              | 1946769612               |
| SNP_P4_29082_6869150 | NC_021162.1    | Ca_kabuli_chr03 | 6869150                 | CC                              | TT              | 1946769615               |
| SNP_P4_29083_6869153 | NC_021162.1    | Ca_kabuli_chr03 | 6869153                 | GG                              | AA              | 1946769617               |
| SNP_P4_29084_6893302 | NC_021162.1    | Ca_kabuli_chr03 | 6893302                 | CC                              | TT              | 1946769619               |
| SNP_P4_29085_6893317 | NC_021162.1    | Ca_kabuli_chr03 | 6893317                 | TT                              | CC              | 1946769621               |
| SNP_P4_29086_6893330 | NC_021162.1    | Ca_kabuli_chr03 | 6893330                 | GG                              | AA              | 1946769623               |
| SNP_P4_29087_6893354 | NC_021162.1    | Ca_kabuli_chr03 | 6893354                 | TT                              | AA              | 1946769625               |
| SNP_P4_29088_6906187 | NC_021162.1    | Ca_kabuli_chr03 | 6906187                 | AA                              | GG              | 1946769627               |
| SNP_P4_29089_6906547 | NC_021162.1    | Ca_kabuli_chr03 | 6906547                 | TT                              | GG              | 1946769629               |
| SNP_P4_29090_6906571 | NC_021162.1    | Ca_kabuli_chr03 | 6906571                 | TT                              | CC              | 1946769631               |
| SNP_P4_29092_6921870 | NC_021162.1    | Ca_kabuli_chr03 | 6921870                 | TT                              | AA              | 1946769633               |
| SNP_P4_29094_6966638 | NC_021162.1    | Ca_kabuli_chr03 | 6966638                 | CC                              | TT              | 1946769636               |
| SNP_P4_29095_6984191 | NC_021162.1    | Ca_kabuli_chr03 | 6984191                 | CC                              | TT              | 1946769638               |
| SNP_P4_29096_6984207 | NC_021162.1    | Ca_kabuli_chr03 | 6984207                 | GG                              | TT              | 1946769640               |
| SNP_P4_29097_6997448 | NC_021162.1    | Ca_kabuli_chr03 | 6997448                 | GG                              | AA              | 1946769642               |
| SNP_P4_29098_6997465 | NC_021162.1    | Ca_kabuli_chr03 | 6997465                 | GG                              | AA              | 1946769644               |
| SNP_P4_29099_7037173 | NC_021162.1    | Ca_kabuli_chr03 | 7037173                 | CC                              | AA              | 1946769646               |
| SNP_P4_29100_7045344 | NC_021162.1    | Ca_kabuli_chr03 | 7045344                 | CC                              | TT              | 1946769648               |
| SNP_P4_29101_7049354 | NC_021162.1    | Ca_kabuli_chr03 | 7049354                 | TT                              | CC              | 1946769650               |
| SNP_P4_29102_7056308 | NC_021162.1    | Ca_kabuli_chr03 | 7056308                 | GG                              | AA              | 1946769652               |
| SNP_P4_29103_7065569 | NC_021162.1    | Ca_kabuli_chr03 | 7065569                 | AA                              | CC              | 1946769654               |
| SNP_P4_29104_7065580 | NC_021162.1    | Ca_kabuli_chr03 | 7065580                 | AA                              | GG              | 1946769656               |
| SNP_P4_29105_7065621 | NC_021162.1    | Ca_kabuli_chr03 | 7065621                 | TT                              | AA              | 1946769658               |
| SNP_P4_29106_7065625 | NC_021162.1    | Ca_kabuli_chr03 | 7065625                 | CC                              | TT              | 1946769660               |
| SNP_P4_29107_7065637 | NC_021162.1    | Ca_kabuli_chr03 | 7065637                 | GG                              | AA              | 1946769662               |
| SNP_P4_29108_7065728 | NC_021162.1    | Ca_kabuli_chr03 | 7065728                 | AA                              | CC              | 1946769664               |
| SNP_P4_29109_7107271 | NC_021162.1    | Ca_kabuli_chr03 | 7107271                 | TT                              | CC              | 1946769666               |
| SNP_P4_29111_7119623 | NC_021162.1    | Ca_kabuli_chr03 | 7119623                 | CC                              | TT              | 1946769668               |

| SNPs IDs             | Chromosome IDs | Chromosomes     | Physical positions (bp) | CDC Frontier (Reference genome) | (ILWC46 & LPNB) | NCBI SNPdb Accession IDs |
|----------------------|----------------|-----------------|-------------------------|---------------------------------|-----------------|--------------------------|
| SNP_P4_29112_7119654 | NC_021162.1    | Ca_kabuli_chr03 | 7119654                 | CC                              | AA              | 1946769670               |
| SNP_P4_29113_7120291 | NC_021162.1    | Ca_kabuli_chr03 | 7120291                 | TT                              | CC              | 1946769672               |
| SNP_P4_29114_7120370 | NC_021162.1    | Ca_kabuli_chr03 | 7120370                 | GG                              | AA              | 1946769675               |
| SNP_P4_29115_7120627 | NC_021162.1    | Ca_kabuli_chr03 | 7120627                 | AA                              | GG              | 1946769677               |
| SNP_P4_29116_7162939 | NC_021162.1    | Ca_kabuli_chr03 | 7162939                 | TT                              | GG              | 1946769679               |
| SNP_P4_29118_7247354 | NC_021162.1    | Ca_kabuli_chr03 | 7247354                 | CC                              | TT              | 1946769681               |
| SNP_P4_29119_7280034 | NC_021162.1    | Ca_kabuli_chr03 | 7280034                 | TT                              | CC              | 1946769683               |
| SNP_P4_29120_7284640 | NC_021162.1    | Ca_kabuli_chr03 | 7284640                 | CC                              | TT              | 1946769685               |
| SNP_P4_29123_7338389 | NC_021162.1    | Ca_kabuli_chr03 | 7338389                 | AA                              | CC              | 1946769687               |
| SNP_P4_29125_7340236 | NC_021162.1    | Ca_kabuli_chr03 | 7340236                 | AA                              | GG              | 1946769689               |
| SNP_P4_29126_7354022 | NC_021162.1    | Ca_kabuli_chr03 | 7354022                 | AA                              | GG              | 1946769691               |
| SNP_P4_29127_7368069 | NC_021162.1    | Ca_kabuli_chr03 | 7368069                 | GG                              | CC              | 1946769693               |
| SNP_P4_29128_7368089 | NC_021162.1    | Ca_kabuli_chr03 | 7368089                 | CC                              | TT              | 1946769695               |
| SNP_P4_29129_7373338 | NC_021162.1    | Ca_kabuli_chr03 | 7373338                 | GG                              | TT              | 1946769697               |
| SNP_P4_29131_7430628 | NC_021162.1    | Ca_kabuli_chr03 | 7430628                 | CC                              | AA              | 1946769699               |
| SNP_P4_29132_7441819 | NC_021162.1    | Ca_kabuli_chr03 | 7441819                 | GG                              | AA              | 1946769701               |
| SNP_P4_29134_7470707 | NC_021162.1    | Ca_kabuli_chr03 | 7470707                 | CC                              | GG              | 1946769703               |
| SNP_P4_29135_7480793 | NC_021162.1    | Ca_kabuli_chr03 | 7480793                 | AA                              | GG              | 1946769706               |
| SNP_P4_29136_7480796 | NC_021162.1    | Ca_kabuli_chr03 | 7480796                 | GG                              | AA              | 1946769708               |
| SNP_P4_29137_7480822 | NC_021162.1    | Ca_kabuli_chr03 | 7480822                 | GG                              | AA              | 1946769710               |
| SNP_P4_29138_7480838 | NC_021162.1    | Ca_kabuli_chr03 | 7480838                 | AA                              | GG              | 1946769712               |
| SNP_P4_29139_7480840 | NC_021162.1    | Ca_kabuli_chr03 | 7480840                 | AA                              | GG              | 1946769714               |
| SNP_P4_29140_7480846 | NC_021162.1    | Ca_kabuli_chr03 | 7480846                 | GG                              | AA              | 1946769716               |
| SNP_P4_29141_7480851 | NC_021162.1    | Ca_kabuli_chr03 | 7480851                 | AA                              | GG              | 1946769718               |
| SNP_P4_29142_7480858 | NC_021162.1    | Ca_kabuli_chr03 | 7480858                 | AA                              | TT              | 1946769721               |
| SNP_P4_29143_7480865 | NC_021162.1    | Ca_kabuli_chr03 | 7480865                 | GG                              | AA              | 1946769723               |
| SNP_P4_29144_7480879 | NC_021162.1    | Ca_kabuli_chr03 | 7480879                 | AA                              | GG              | 1946769725               |
| SNP_P4_29146_7496614 | NC_021162.1    | Ca_kabuli_chr03 | 7496614                 | GG                              | CC              | 1946769727               |
| SNP_P4_29147_7497642 | NC_021162.1    | Ca_kabuli_chr03 | 7497642                 | TT                              | CC              | 1946769729               |
| SNP_P4_29148_7544237 | NC_021162.1    | Ca_kabuli_chr03 | 7544237                 | GG                              | AA              | 1946769731               |
| SNP_P4_29149_7564345 | NC_021162.1    | Ca_kabuli_chr03 | 7564345                 | CC                              | TT              | 1946769733               |
| SNP_P4_29150_7570957 | NC_021162.1    | Ca_kabuli_chr03 | 7570957                 | TT                              | AA              | 1946769736               |
| SNP_P4_29151_7570958 | NC_021162.1    | Ca_kabuli_chr03 | 7570958                 | TT                              | GG              | 1946769738               |
| SNP_P4_29152_7596894 | NC_021162.1    | Ca_kabuli_chr03 | 7596894                 | GG                              | AA              | 1946769740               |
| SNP_P4_29153_7596938 | NC_021162.1    | Ca_kabuli_chr03 | 7596938                 | GG                              | AA              | 1946769742               |
| SNP_P4_29154_7597036 | NC_021162.1    | Ca_kabuli_chr03 | 7597036                 | TT                              | CC              | 1946769744               |
| SNP_P4_29155_7597065 | NC_021162.1    | Ca_kabuli_chr03 | 7597065                 | CC                              | GG              | 1946769746               |
| SNP_P4_29156_7597316 | NC_021162.1    | Ca_kabuli_chr03 | 7597316                 | CC                              | TT              | 1946769748               |
| SNP_P4_29157_7597432 | NC_021162.1    | Ca_kabuli_chr03 | 7597432                 | CC                              | TT              | 1946769750               |
| SNP_P4_29158_7597441 | NC_021162.1    | Ca_kabuli_chr03 | 7597441                 | GG                              | TT              | 1946769752               |
| SNP_P4_29160_7682043 | NC_021162.1    | Ca_kabuli_chr03 | 7682043                 | AA                              | GG              | 1946769755               |
| SNP_P4_29161_7682273 | NC_021162.1    | Ca_kabuli_chr03 | 7682273                 | GG                              | AA              | 1946769757               |

| SNPs IDs             | Chromosome IDs | Chromosomes     | Physical positions (bp) | CDC Frontier (Reference genome) | (ILWC46 & LPNB) | NCBI SNPdb Accession IDs |
|----------------------|----------------|-----------------|-------------------------|---------------------------------|-----------------|--------------------------|
| SNP_P4_29162_7682540 | NC_021162.1    | Ca_kabuli_chr03 | 7682540                 | TT                              | CC              | 1946769759               |
| SNP_P4_29163_7682542 | NC_021162.1    | Ca_kabuli_chr03 | 7682542                 | GG                              | AA              | 1946769761               |
| SNP_P4_29164_7682576 | NC_021162.1    | Ca_kabuli_chr03 | 7682576                 | CC                              | TT              | 1946769763               |
| SNP_P4_29165_7682577 | NC_021162.1    | Ca_kabuli_chr03 | 7682577                 | AA                              | GG              | 1946769765               |
| SNP_P4_29166_7686896 | NC_021162.1    | Ca_kabuli_chr03 | 7686896                 | CC                              | TT              | 1946769767               |
| SNP_P4_29167_7689393 | NC_021162.1    | Ca_kabuli_chr03 | 7689393                 | TT                              | GG              | 1946769769               |
| SNP_P4_29169_7754309 | NC_021162.1    | Ca_kabuli_chr03 | 7754309                 | AA                              | TT              | 1946769772               |
| SNP_P4_29171_7774804 | NC_021162.1    | Ca_kabuli_chr03 | 7774804                 | TT                              | CC              | 1946769774               |
| SNP_P4_29172_7782748 | NC_021162.1    | Ca_kabuli_chr03 | 7782748                 | CC                              | AA              | 1946769776               |
| SNP_P4_29173_7783536 | NC_021162.1    | Ca_kabuli_chr03 | 7783536                 | GG                              | AA              | 1946769778               |
| SNP_P4_29175_7792887 | NC_021162.1    | Ca_kabuli_chr03 | 7792887                 | AA                              | GG              | 1946769780               |
| SNP_P4_29176_7801457 | NC_021162.1    | Ca_kabuli_chr03 | 7801457                 | AA                              | GG              | 1946769782               |
| SNP_P4_29177_7801573 | NC_021162.1    | Ca_kabuli_chr03 | 7801573                 | AA                              | GG              | 1946769784               |
| SNP_P4_29178_7804266 | NC_021162.1    | Ca_kabuli_chr03 | 7804266                 | AA                              | GG              | 1946769786               |
| SNP_P4_29179_7804559 | NC_021162.1    | Ca_kabuli_chr03 | 7804559                 | TT                              | GG              | 1946769788               |
| SNP_P4_29180_7804607 | NC_021162.1    | Ca_kabuli_chr03 | 7804607                 | AA                              | GG              | 1946769790               |
| SNP_P4_29181_7804924 | NC_021162.1    | Ca_kabuli_chr03 | 7804924                 | TT                              | GG              | 1946769792               |
| SNP_P4_29182_7804934 | NC_021162.1    | Ca_kabuli_chr03 | 7804934                 | AA                              | GG              | 1946769794               |
| SNP_P4_29183_7830611 | NC_021162.1    | Ca_kabuli_chr03 | 7830611                 | CC                              | TT              | 1946769796               |
| SNP_P4_29184_7847374 | NC_021162.1    | Ca_kabuli_chr03 | 7847374                 | TT                              | CC              | 1946769798               |
| SNP_P4_29185_7847741 | NC_021162.1    | Ca_kabuli_chr03 | 7847741                 | TT                              | CC              | 1946769800               |
| SNP_P4_29186_7868320 | NC_021162.1    | Ca_kabuli_chr03 | 7868320                 | AA                              | GG              | 1946769802               |
| SNP_P4_29187_7868321 | NC_021162.1    | Ca_kabuli_chr03 | 7868321                 | AA                              | GG              | 1946769805               |
| SNP_P4_29188_7880202 | NC_021162.1    | Ca_kabuli_chr03 | 7880202                 | AA                              | GG              | 1946769807               |
| SNP_P4_29189_7884320 | NC_021162.1    | Ca_kabuli_chr03 | 7884320                 | AA                              | TT              | 1946769809               |
| SNP_P4_29190_7885434 | NC_021162.1    | Ca_kabuli_chr03 | 7885434                 | CC                              | TT              | 1946769811               |
| SNP_P4_29191_7886111 | NC_021162.1    | Ca_kabuli_chr03 | 7886111                 | CC                              | TT              | 1946769813               |
| SNP_P4_29192_7900347 | NC_021162.1    | Ca_kabuli_chr03 | 7900347                 | AA                              | GG              | 1946769815               |
| SNP_P4_29193_7915268 | NC_021162.1    | Ca_kabuli_chr03 | 7915268                 | GG                              | CC              | 1946769817               |
| SNP_P4_29194_7923059 | NC_021162.1    | Ca_kabuli_chr03 | 7923059                 | TT                              | CC              | 1946769820               |
| SNP_P4_29195_7924842 | NC_021162.1    | Ca_kabuli_chr03 | 7924842                 | GG                              | AA              | 1946769822               |
| SNP_P4_29196_7959265 | NC_021162.1    | Ca_kabuli_chr03 | 7959265                 | GG                              | TT              | 1946769824               |
| SNP_P4_29197_7959420 | NC_021162.1    | Ca_kabuli_chr03 | 7959420                 | AA                              | CC              | 1946769826               |
| SNP_P4_29198_7959450 | NC_021162.1    | Ca_kabuli_chr03 | 7959450                 | TT                              | CC              | 1946769828               |
| SNP_P4_29199_7959455 | NC_021162.1    | Ca_kabuli_chr03 | 7959455                 | CC                              | TT              | 1946769830               |
| SNP_P4_29200_7959594 | NC_021162.1    | Ca_kabuli_chr03 | 7959594                 | GG                              | AA              | 1946769832               |
| SNP_P4_29201_7959601 | NC_021162.1    | Ca_kabuli_chr03 | 7959601                 | AA                              | CC              | 1946769834               |
| SNP_P4_29202_7959718 | NC_021162.1    | Ca_kabuli_chr03 | 7959718                 | AA                              | TT              | 1946769836               |
| SNP_P4_29203_7959744 | NC_021162.1    | Ca_kabuli_chr03 | 7959744                 | AA                              | GG              | 1946769838               |
| SNP_P4_29205_7959882 | NC_021162.1    | Ca_kabuli_chr03 | 7959882                 | CC                              | TT              | 1946769840               |
| SNP_P4_29206_7959912 | NC_021162.1    | Ca_kabuli_chr03 | 7959912                 | CC                              | TT              | 1946769842               |
| SNP_P4_29207_7959918 | NC_021162.1    | Ca_kabuli_chr03 | 7959918                 | GG                              | AA              | 1946769844               |

| SNPs IDs             | Chromosome IDs | Chromosomes     | Physical positions (bp) | CDC Frontier (Reference genome) | (ILWC46 & LPNB) | NCBI SNPdb Accession IDs |
|----------------------|----------------|-----------------|-------------------------|---------------------------------|-----------------|--------------------------|
| SNP_P4_29208_7959948 | NC_021162.1    | Ca_kabuli_chr03 | 7959948                 | CC                              | TT              | 1946769846               |
| SNP_P4_29209_7963472 | NC_021162.1    | Ca_kabuli_chr03 | 7963472                 | AA                              | GG              | 1946769848               |
| SNP_P4_29210_7963516 | NC_021162.1    | Ca_kabuli_chr03 | 7963516                 | CC                              | TT              | 1946769850               |
| SNP_P4_29211_7963533 | NC_021162.1    | Ca_kabuli_chr03 | 7963533                 | AA                              | GG              | 1946769852               |
| SNP_P4_29212_7963568 | NC_021162.1    | Ca_kabuli_chr03 | 7963568                 | TT                              | CC              | 1946769854               |
| SNP_P4_29213_7963571 | NC_021162.1    | Ca_kabuli_chr03 | 7963571                 | TT                              | AA              | 1946769856               |
| SNP_P4_29214_7963783 | NC_021162.1    | Ca_kabuli_chr03 | 7963783                 | TT                              | CC              | 1946769858               |
| SNP_P4_29215_7972863 | NC_021162.1    | Ca_kabuli_chr03 | 7972863                 | CC                              | TT              | 1946769860               |
| SNP_P4_29216_7972876 | NC_021162.1    | Ca_kabuli_chr03 | 7972876                 | GG                              | AA              | 1946769862               |
| SNP_P4_29217_7979776 | NC_021162.1    | Ca_kabuli_chr03 | 7979776                 | CC                              | TT              | 1946769864               |
| SNP_P4_29218_7989380 | NC_021162.1    | Ca_kabuli_chr03 | 7989380                 | AA                              | TT              | 1946769866               |
| SNP_P4_29219_8026788 | NC_021162.1    | Ca_kabuli_chr03 | 8026788                 | TT                              | CC              | 1946769868               |
| SNP_P4_29220_8028585 | NC_021162.1    | Ca_kabuli_chr03 | 8028585                 | GG                              | AA              | 1946769870               |
| SNP_P4_29221_8029547 | NC_021162.1    | Ca_kabuli_chr03 | 8029547                 | CC                              | TT              | 1946769872               |
| SNP_P4_29222_8030009 | NC_021162.1    | Ca_kabuli_chr03 | 8030009                 | GG                              | AA              | 1946769875               |
| SNP_P4_29223_8058436 | NC_021162.1    | Ca_kabuli_chr03 | 8058436                 | AA                              | TT              | 1946769877               |
| SNP_P4_29225_8062018 | NC_021162.1    | Ca_kabuli_chr03 | 8062018                 | AA                              | GG              | 1946769879               |
| SNP_P4_29226_8062043 | NC_021162.1    | Ca_kabuli_chr03 | 8062043                 | TT                              | CC              | 1946769881               |
| SNP_P4_29227_8062078 | NC_021162.1    | Ca_kabuli_chr03 | 8062078                 | CC                              | TT              | 1946769884               |
| SNP_P4_29228_8062098 | NC_021162.1    | Ca_kabuli_chr03 | 8062098                 | TT                              | CC              | 1946769886               |
| SNP_P4_29229_8062113 | NC_021162.1    | Ca_kabuli_chr03 | 8062113                 | TT                              | CC              | 1946769888               |
| SNP_P4_29230_8062124 | NC_021162.1    | Ca_kabuli_chr03 | 8062124                 | AA                              | CC              | 1946769890               |
| SNP_P4_29231_8062127 | NC_021162.1    | Ca_kabuli_chr03 | 8062127                 | AA                              | CC              | 1946769892               |
| SNP_P4_29232_8062197 | NC_021162.1    | Ca_kabuli_chr03 | 8062197                 | AA                              | CC              | 1946769894               |
| SNP_P4_29233_8062216 | NC_021162.1    | Ca_kabuli_chr03 | 8062216                 | GG                              | TT              | 1946769896               |
| SNP_P4_29234_8062348 | NC_021162.1    | Ca_kabuli_chr03 | 8062348                 | GG                              | AA              | 1946769898               |
| SNP_P4_29235_8062386 | NC_021162.1    | Ca_kabuli_chr03 | 8062386                 | CC                              | TT              | 1946769900               |
| SNP_P4_29236_8062389 | NC_021162.1    | Ca_kabuli_chr03 | 8062389                 | CC                              | AA              | 1946769902               |
| SNP_P4_29237_8062451 | NC_021162.1    | Ca_kabuli_chr03 | 8062451                 | AA                              | CC              | 1946769904               |
| SNP_P4_29238_8062506 | NC_021162.1    | Ca_kabuli_chr03 | 8062506                 | AA                              | GG              | 1946769906               |
| SNP_P4_29239_8062510 | NC_021162.1    | Ca_kabuli_chr03 | 8062510                 | TT                              | CC              | 1946769908               |
| SNP_P4_29240_8064480 | NC_021162.1    | Ca_kabuli_chr03 | 8064480                 | AA                              | GG              | 1946769910               |
| SNP_P4_29241_8066919 | NC_021162.1    | Ca_kabuli_chr03 | 8066919                 | CC                              | AA              | 1946769912               |
| SNP_P4_29242_8066922 | NC_021162.1    | Ca_kabuli_chr03 | 8066922                 | GG                              | AA              | 1946769914               |
| SNP_P4_29244_8087910 | NC_021162.1    | Ca_kabuli_chr03 | 8087910                 | AA                              | CC              | 1946769916               |
| SNP_P4_29245_8088092 | NC_021162.1    | Ca_kabuli_chr03 | 8088092                 | AA                              | CC              | 1946769918               |
| SNP_P4_29246_8088131 | NC_021162.1    | Ca_kabuli_chr03 | 8088131                 | GG                              | CC              | 1946769920               |
| SNP_P4_29247_8088149 | NC_021162.1    | Ca_kabuli_chr03 | 8088149                 | CC                              | AA              | 1946769922               |
| SNP_P4_29248_8088257 | NC_021162.1    | Ca_kabuli_chr03 | 8088257                 | AA                              | CC              | 1946769924               |
| SNP_P4_29249_8088269 | NC_021162.1    | Ca_kabuli_chr03 | 8088269                 | TT                              | CC              | 1946769926               |
| SNP_P4_29251_8088319 | NC_021162.1    | Ca_kabuli_chr03 | 8088319                 | TT                              | CC              | 1946769928               |
| SNP_P4_29252_8088345 | NC_021162.1    | Ca_kabuli_chr03 | 8088345                 | GG                              | AA              | 1946769930               |

| SNPs IDs             | Chromosome IDs | Chromosomes     | Physical positions (bp) | CDC Frontier (Reference genome) | (ILWC46 & LPNB) | NCBI SNPdb Accession IDs |
|----------------------|----------------|-----------------|-------------------------|---------------------------------|-----------------|--------------------------|
| SNP_P4_29253_8088358 | NC_021162.1    | Ca_kabuli_chr03 | 8088358                 | TT                              | CC              | 1946769932               |
| SNP_P4_29254_8088387 | NC_021162.1    | Ca_kabuli_chr03 | 8088387                 | TT                              | CC              | 1946769934               |
| SNP_P4_29255_8088394 | NC_021162.1    | Ca_kabuli_chr03 | 8088394                 | TT                              | CC              | 1946769936               |
| SNP_P4_29256_8088419 | NC_021162.1    | Ca_kabuli_chr03 | 8088419                 | AA                              | CC              | 1946769938               |
| SNP_P4_29257_8088433 | NC_021162.1    | Ca_kabuli_chr03 | 8088433                 | CC                              | AA              | 1946769941               |
| SNP_P4_29258_8088434 | NC_021162.1    | Ca_kabuli_chr03 | 8088434                 | TT                              | GG              | 1946769943               |
| SNP_P4_29259_8088447 | NC_021162.1    | Ca_kabuli_chr03 | 8088447                 | GG                              | AA              | 1946769945               |
| SNP_P4_29260_8088452 | NC_021162.1    | Ca_kabuli_chr03 | 8088452                 | GG                              | AA              | 1946769947               |
| SNP_P4_29261_8088479 | NC_021162.1    | Ca_kabuli_chr03 | 8088479                 | AA                              | TT              | 1946769949               |
| SNP_P4_29262_8088480 | NC_021162.1    | Ca_kabuli_chr03 | 8088480                 | TT                              | CC              | 1946769951               |
| SNP_P4_29263_8088509 | NC_021162.1    | Ca_kabuli_chr03 | 8088509                 | GG                              | TT              | 1946769953               |
| SNP_P4_29264_8088534 | NC_021162.1    | Ca_kabuli_chr03 | 8088534                 | AA                              | CC              | 1946769955               |
| SNP_P4_29265_8088586 | NC_021162.1    | Ca_kabuli_chr03 | 8088586                 | TT                              | CC              | 1946769957               |
| SNP_P4_29266_8089354 | NC_021162.1    | Ca_kabuli_chr03 | 8089354                 | AA                              | GG              | 1946769959               |
| SNP_P4_29267_8101003 | NC_021162.1    | Ca_kabuli_chr03 | 8101003                 | CC                              | TT              | 1946769961               |
| SNP_P4_29268_8143558 | NC_021162.1    | Ca_kabuli_chr03 | 8143558                 | AA                              | TT              | 1946769963               |
| SNP_P4_29270_8157250 | NC_021162.1    | Ca_kabuli_chr03 | 8157250                 | CC                              | TT              | 1946769965               |
| SNP_P4_29271_8166222 | NC_021162.1    | Ca_kabuli_chr03 | 8166222                 | TT                              | AA              | 1946769967               |
| SNP_P4_29272_8190534 | NC_021162.1    | Ca_kabuli_chr03 | 8190534                 | GG                              | AA              | 1946769969               |
| SNP_P4_29273_8200581 | NC_021162.1    | Ca_kabuli_chr03 | 8200581                 | GG                              | TT              | 1946769971               |
| SNP_P4_29274_8212686 | NC_021162.1    | Ca_kabuli_chr03 | 8212686                 | AA                              | GG              | 1946769973               |
| SNP_P4_29275_8221970 | NC_021162.1    | Ca_kabuli_chr03 | 8221970                 | CC                              | AA              | 1946769975               |
| SNP_P4_29276_8221971 | NC_021162.1    | Ca_kabuli_chr03 | 8221971                 | AA                              | TT              | 1946769977               |
| SNP_P4_29277_8222541 | NC_021162.1    | Ca_kabuli_chr03 | 8222541                 | TT                              | GG              | 1946769979               |
| SNP_P4_29278_8226093 | NC_021162.1    | Ca_kabuli_chr03 | 8226093                 | AA                              | GG              | 1946769981               |
| SNP_P4_29279_8234498 | NC_021162.1    | Ca_kabuli_chr03 | 8234498                 | TT                              | AA              | 1946769983               |
| SNP_P4_29280_8234620 | NC_021162.1    | Ca_kabuli_chr03 | 8234620                 | AA                              | TT              | 1946769985               |
| SNP_P4_29281_8234984 | NC_021162.1    | Ca_kabuli_chr03 | 8234984                 | CC                              | TT              | 1946769987               |
| SNP_P4_29282_8240937 | NC_021162.1    | Ca_kabuli_chr03 | 8240937                 | CC                              | TT              | 1946769989               |
| SNP_P4_29283_8241073 | NC_021162.1    | Ca_kabuli_chr03 | 8241073                 | AA                              | GG              | 1946769991               |
| SNP_P4_29284_8241086 | NC_021162.1    | Ca_kabuli_chr03 | 8241086                 | CC                              | TT              | 1946769993               |
| SNP_P4_29285_8241160 | NC_021162.1    | Ca_kabuli_chr03 | 8241160                 | CC                              | TT              | 1946769995               |
| SNP_P4_29286_8241319 | NC_021162.1    | Ca_kabuli_chr03 | 8241319                 | GG                              | CC              | 1946769997               |
| SNP_P4_29287_8241839 | NC_021162.1    | Ca_kabuli_chr03 | 8241839                 | CC                              | TT              | 1946769999               |
| SNP_P4_29288_8241858 | NC_021162.1    | Ca_kabuli_chr03 | 8241858                 | TT                              | CC              | 1946770001               |
| SNP_P4_29289_8241880 | NC_021162.1    | Ca_kabuli_chr03 | 8241880                 | AA                              | GG              | 1946770003               |
| SNP_P4_29290_8241881 | NC_021162.1    | Ca_kabuli_chr03 | 8241881                 | TT                              | CC              | 1946770005               |
| SNP_P4_29292_8245635 | NC_021162.1    | Ca_kabuli_chr03 | 8245635                 | GG                              | AA              | 1946770007               |
| SNP_P4_29293_8245668 | NC_021162.1    | Ca_kabuli_chr03 | 8245668                 | AA                              | GG              | 1946770009               |
| SNP_P4_29294_8245671 | NC_021162.1    | Ca_kabuli_chr03 | 8245671                 | AA                              | CC              | 1946770012               |
| SNP_P4_29295_8245781 | NC_021162.1    | Ca_kabuli_chr03 | 8245781                 | AA                              | GG              | 1946770014               |
| SNP_P4_29296_8277187 | NC_021162.1    | Ca_kabuli_chr03 | 8277187                 | TT                              | CC              | 1946770016               |

| SNPs IDs             | Chromosome IDs | Chromosomes     | Physical positions (bp) | CDC Frontier (Reference genome) | (ILWC46 & LPNB) | NCBI SNPdb Accession IDs |
|----------------------|----------------|-----------------|-------------------------|---------------------------------|-----------------|--------------------------|
| SNP_P4_29297_8277188 | NC_021162.1    | Ca_kabuli_chr03 | 8277188                 | CC                              | TT              | 1946770018               |
| SNP_P4_29298_8277711 | NC_021162.1    | Ca_kabuli_chr03 | 8277711                 | CC                              | TT              | 1946770020               |
| SNP_P4_29299_8278178 | NC_021162.1    | Ca_kabuli_chr03 | 8278178                 | AA                              | TT              | 1946770022               |
| SNP_P4_29300_8282137 | NC_021162.1    | Ca_kabuli_chr03 | 8282137                 | CC                              | AA              | 1946770024               |
| SNP_P4_29301_8282897 | NC_021162.1    | Ca_kabuli_chr03 | 8282897                 | TT                              | CC              | 1946770026               |
| SNP_P4_29302_8282913 | NC_021162.1    | Ca_kabuli_chr03 | 8282913                 | GG                              | AA              | 1946770028               |
| SNP_P4_29303_8284470 | NC_021162.1    | Ca_kabuli_chr03 | 8284470                 | TT                              | CC              | 1946770030               |
| SNP_P4_29304_8302130 | NC_021162.1    | Ca_kabuli_chr03 | 8302130                 | TT                              | CC              | 1946770032               |
| SNP_P4_29305_8302236 | NC_021162.1    | Ca_kabuli_chr03 | 8302236                 | CC                              | TT              | 1946770034               |
| SNP_P4_29306_8302557 | NC_021162.1    | Ca_kabuli_chr03 | 8302557                 | AA                              | CC              | 1946770036               |
| SNP_P4_29307_8304776 | NC_021162.1    | Ca_kabuli_chr03 | 8304776                 | CC                              | AA              | 1946770038               |
| SNP_P4_29308_8304837 | NC_021162.1    | Ca_kabuli_chr03 | 8304837                 | TT                              | CC              | 1946770040               |
| SNP_P4_29309_8304850 | NC_021162.1    | Ca_kabuli_chr03 | 8304850                 | TT                              | CC              | 1946770042               |
| SNP_P4_29310_8304854 | NC_021162.1    | Ca_kabuli_chr03 | 8304854                 | AA                              | TT              | 1946770044               |
| SNP_P4_29311_8305712 | NC_021162.1    | Ca_kabuli_chr03 | 8305712                 | GG                              | AA              | 1946770046               |
| SNP_P4_29312_8306712 | NC_021162.1    | Ca_kabuli_chr03 | 8306712                 | AA                              | GG              | 1946770048               |
| SNP_P4_29313_8306740 | NC_021162.1    | Ca_kabuli_chr03 | 8306740                 | TT                              | CC              | 1946770051               |
| SNP_P4_29314_8306785 | NC_021162.1    | Ca_kabuli_chr03 | 8306785                 | GG                              | AA              | 1946770053               |
| SNP_P4_29315_8306821 | NC_021162.1    | Ca_kabuli_chr03 | 8306821                 | CC                              | TT              | 1946770055               |
| SNP_P4_29316_8306845 | NC_021162.1    | Ca_kabuli_chr03 | 8306845                 | AA                              | GG              | 1946770057               |
| SNP_P4_29317_8325463 | NC_021162.1    | Ca_kabuli_chr03 | 8325463                 | TT                              | CC              | 1946770059               |
| SNP_P4_29318_8325610 | NC_021162.1    | Ca_kabuli_chr03 | 8325610                 | TT                              | CC              | 1946770061               |
| SNP_P4_29319_8339317 | NC_021162.1    | Ca_kabuli_chr03 | 8339317                 | AA                              | GG              | 1946770063               |
| SNP_P4_29320_8339465 | NC_021162.1    | Ca_kabuli_chr03 | 8339465                 | AA                              | GG              | 1946770065               |
| SNP_P4_29321_8339473 | NC_021162.1    | Ca_kabuli_chr03 | 8339473                 | TT                              | CC              | 1946770067               |
| SNP_P4_29322_8339506 | NC_021162.1    | Ca_kabuli_chr03 | 8339506                 | AA                              | TT              | 1946770069               |
| SNP_P4_29323_8360453 | NC_021162.1    | Ca_kabuli_chr03 | 8360453                 | AA                              | GG              | 1946770071               |
| SNP_P4_29324_8360509 | NC_021162.1    | Ca_kabuli_chr03 | 8360509                 | GG                              | AA              | 1946770073               |
| SNP_P4_29325_8384120 | NC_021162.1    | Ca_kabuli_chr03 | 8384120                 | AA                              | TT              | 1946770075               |
| SNP_P4_29326_8386260 | NC_021162.1    | Ca_kabuli_chr03 | 8386260                 | AA                              | GG              | 1946770077               |
| SNP_P4_29327_8386266 | NC_021162.1    | Ca_kabuli_chr03 | 8386266                 | GG                              | AA              | 1946770079               |
| SNP_P4_29328_8392518 | NC_021162.1    | Ca_kabuli_chr03 | 8392518                 | AA                              | TT              | 1946770081               |
| SNP_P4_29329_8392554 | NC_021162.1    | Ca_kabuli_chr03 | 8392554                 | TT                              | CC              | 1946770083               |
| SNP_P4_29330_8392560 | NC_021162.1    | Ca_kabuli_chr03 | 8392560                 | CC                              | AA              | 1946770085               |
| SNP_P4_29331_8392587 | NC_021162.1    | Ca_kabuli_chr03 | 8392587                 | CC                              | TT              | 1946770087               |
| SNP_P4_29333_8394415 | NC_021162.1    | Ca_kabuli_chr03 | 8394415                 | TT                              | CC              | 1946770089               |
| SNP_P4_29334_8413070 | NC_021162.1    | Ca_kabuli_chr03 | 8413070                 | TT                              | CC              | 1946770092               |
| SNP_P4_29335_8413102 | NC_021162.1    | Ca_kabuli_chr03 | 8413102                 | AA                              | TT              | 1946770094               |
| SNP_P4_29336_8413489 | NC_021162.1    | Ca_kabuli_chr03 | 8413489                 | TT                              | AA              | 1946770096               |
| SNP_P4_29337_8431794 | NC_021162.1    | Ca_kabuli_chr03 | 8431794                 | CC                              | TT              | 1946770098               |
| SNP_P4_29338_8436767 | NC_021162.1    | Ca_kabuli_chr03 | 8436767                 | TT                              | CC              | 1946770100               |
| SNP_P4_29339_8437126 | NC_021162.1    | Ca_kabuli_chr03 | 8437126                 | TT                              | GG              | 1946770103               |

| SNPs IDs             | Chromosome IDs | Chromosomes     | Physical positions (bp) | CDC Frontier (Reference genome) | (ILWC46 & LPNB) | NCBI SNPdb Accession IDs |
|----------------------|----------------|-----------------|-------------------------|---------------------------------|-----------------|--------------------------|
| SNP_P4_29340_8450547 | NC_021162.1    | Ca_kabuli_chr03 | 8450547                 | CC                              | TT              | 1946770105               |
| SNP_P4_29341_8476023 | NC_021162.1    | Ca_kabuli_chr03 | 8476023                 | AA                              | CC              | 1946770107               |
| SNP_P4_29342_8476025 | NC_021162.1    | Ca_kabuli_chr03 | 8476025                 | AA                              | GG              | 1946770109               |
| SNP_P4_29343_8494536 | NC_021162.1    | Ca_kabuli_chr03 | 8494536                 | AA                              | TT              | 1946770111               |
| SNP_P4_29344_8500988 | NC_021162.1    | Ca_kabuli_chr03 | 8500988                 | AA                              | GG              | 1946770113               |
| SNP_P4_29345_8501119 | NC_021162.1    | Ca_kabuli_chr03 | 8501119                 | CC                              | GG              | 1946770115               |
| SNP_P4_29346_8501402 | NC_021162.1    | Ca_kabuli_chr03 | 8501402                 | TT                              | AA              | 1946770117               |
| SNP_P4_29347_8501416 | NC_021162.1    | Ca_kabuli_chr03 | 8501416                 | AA                              | CC              | 1946770119               |
| SNP_P4_29348_8501451 | NC_021162.1    | Ca_kabuli_chr03 | 8501451                 | AA                              | GG              | 1946770121               |
| SNP_P4_29349_8501456 | NC_021162.1    | Ca_kabuli_chr03 | 8501456                 | CC                              | TT              | 1946770123               |
| SNP_P4_29350_8501466 | NC_021162.1    | Ca_kabuli_chr03 | 8501466                 | AA                              | GG              | 1946770125               |
| SNP_P4_29351_8501515 | NC_021162.1    | Ca_kabuli_chr03 | 8501515                 | CC                              | GG              | 1946770127               |
| SNP_P4_29352_8501782 | NC_021162.1    | Ca_kabuli_chr03 | 8501782                 | GG                              | CC              | 1946770129               |
| SNP_P4_29353_8501829 | NC_021162.1    | Ca_kabuli_chr03 | 8501829                 | AA                              | GG              | 1946770131               |
| SNP_P4_29355_8527521 | NC_021162.1    | Ca_kabuli_chr03 | 8527521                 | GG                              | AA              | 1946770133               |
| SNP_P4_29356_8527527 | NC_021162.1    | Ca_kabuli_chr03 | 8527527                 | AA                              | GG              | 1946770135               |
| SNP_P4_29357_8527618 | NC_021162.1    | Ca_kabuli_chr03 | 8527618                 | GG                              | AA              | 1946770137               |
| SNP_P4_29358_8527761 | NC_021162.1    | Ca_kabuli_chr03 | 8527761                 | TT                              | CC              | 1946770140               |
| SNP_P4_29359_8534716 | NC_021162.1    | Ca_kabuli_chr03 | 8534716                 | GG                              | TT              | 1946770142               |
| SNP_P4_29360_8535045 | NC_021162.1    | Ca_kabuli_chr03 | 8535045                 | CC                              | TT              | 1946770144               |
| SNP_P4_29361_8535190 | NC_021162.1    | Ca_kabuli_chr03 | 8535190                 | AA                              | GG              | 1946770146               |
| SNP_P4_29362_8535241 | NC_021162.1    | Ca_kabuli_chr03 | 8535241                 | AA                              | CC              | 1946770148               |
| SNP_P4_29363_8535291 | NC_021162.1    | Ca_kabuli_chr03 | 8535291                 | TT                              | CC              | 1946770150               |
| SNP_P4_29364_8535364 | NC_021162.1    | Ca_kabuli_chr03 | 8535364                 | TT                              | CC              | 1946770152               |
| SNP_P4_29365_8535369 | NC_021162.1    | Ca_kabuli_chr03 | 8535369                 | TT                              | CC              | 1946770154               |
| SNP_P4_29366_8535487 | NC_021162.1    | Ca_kabuli_chr03 | 8535487                 | GG                              | TT              | 1946770156               |
| SNP_P4_29367_8535510 | NC_021162.1    | Ca_kabuli_chr03 | 8535510                 | GG                              | CC              | 1946770158               |
| SNP_P4_29368_8535749 | NC_021162.1    | Ca_kabuli_chr03 | 8535749                 | AA                              | CC              | 1946770160               |
| SNP_P4_29369_8535779 | NC_021162.1    | Ca_kabuli_chr03 | 8535779                 | CC                              | TT              | 1946770162               |
| SNP_P4_29370_8535920 | NC_021162.1    | Ca_kabuli_chr03 | 8535920                 | TT                              | CC              | 1946770164               |
| SNP_P4_29371_8535940 | NC_021162.1    | Ca_kabuli_chr03 | 8535940                 | AA                              | CC              | 1946770167               |
| SNP_P4_29372_8536213 | NC_021162.1    | Ca_kabuli_chr03 | 8536213                 | TT                              | CC              | 1946770169               |
| SNP_P4_29373_8536275 | NC_021162.1    | Ca_kabuli_chr03 | 8536275                 | CC                              | TT              | 1946770171               |
| SNP_P4_29374_8536568 | NC_021162.1    | Ca_kabuli_chr03 | 8536568                 | TT                              | CC              | 1946770173               |
| SNP_P4_29375_8539524 | NC_021162.1    | Ca_kabuli_chr03 | 8539524                 | CC                              | TT              | 1946770176               |
| SNP_P4_29377_8545888 | NC_021162.1    | Ca_kabuli_chr03 | 8545888                 | GG                              | AA              | 1946770178               |
| SNP_P4_29378_8545898 | NC_021162.1    | Ca_kabuli_chr03 | 8545898                 | TT                              | CC              | 1946770180               |
| SNP_P4_29379_8545906 | NC_021162.1    | Ca_kabuli_chr03 | 8545906                 | AA                              | TT              | 1946770182               |
| SNP_P4_29380_8550793 | NC_021162.1    | Ca_kabuli_chr03 | 8550793                 | GG                              | AA              | 1946770184               |
| SNP_P4_29382_8608311 | NC_021162.1    | Ca_kabuli_chr03 | 8608311                 | AA                              | GG              | 1946770186               |
| SNP_P4_29384_8622958 | NC_021162.1    | Ca_kabuli_chr03 | 8622958                 | AA                              | GG              | 1946770188               |
| SNP_P4_29385_8624718 | NC_021162.1    | Ca_kabuli_chr03 | 8624718                 | CC                              | TT              | 1946770190               |



| SNPs IDs             | Chromosome IDs | Chromosomes     | Physical positions (bp) | CDC Frontier (Reference genome) | (ILWC46 & LPNB) | NCBI SNPdb Accession IDs |
|----------------------|----------------|-----------------|-------------------------|---------------------------------|-----------------|--------------------------|
| SNP_P4_29386_8629657 | NC_021162.1    | Ca_kabuli_chr03 | 8629657                 | TT                              | CC              | 1946770192               |
| SNP_P4_29387_8630597 | NC_021162.1    | Ca_kabuli_chr03 | 8630597                 | GG                              | AA              | 1946770194               |
| SNP_P4_29388_8633044 | NC_021162.1    | Ca_kabuli_chr03 | 8633044                 | TT                              | CC              | 1946770196               |
| SNP_P4_29389_8633282 | NC_021162.1    | Ca_kabuli_chr03 | 8633282                 | GG                              | AA              | 1946770198               |
| SNP_P4_29390_8633312 | NC_021162.1    | Ca_kabuli_chr03 | 8633312                 | AA                              | GG              | 1946770200               |
| SNP_P4_29391_8633353 | NC_021162.1    | Ca_kabuli_chr03 | 8633353                 | CC                              | TT              | 1946770203               |
| SNP_P4_29392_8633367 | NC_021162.1    | Ca_kabuli_chr03 | 8633367                 | GG                              | AA              | 1946770205               |
| SNP_P4_29393_8633387 | NC_021162.1    | Ca_kabuli_chr03 | 8633387                 | AA                              | GG              | 1946770207               |
| SNP_P4_29394_8645825 | NC_021162.1    | Ca_kabuli_chr03 | 8645825                 | GG                              | AA              | 1946770209               |
| SNP_P4_29395_8647445 | NC_021162.1    | Ca_kabuli_chr03 | 8647445                 | CC                              | TT              | 1946770211               |
| SNP_P4_29396_8651674 | NC_021162.1    | Ca_kabuli_chr03 | 8651674                 | AA                              | GG              | 1946770213               |
| SNP_P4_29397_8651691 | NC_021162.1    | Ca_kabuli_chr03 | 8651691                 | TT                              | GG              | 1946770215               |
| SNP_P4_29398_8651707 | NC_021162.1    | Ca_kabuli_chr03 | 8651707                 | CC                              | TT              | 1946770217               |
| SNP_P4_29399_8651731 | NC_021162.1    | Ca_kabuli_chr03 | 8651731                 | TT                              | CC              | 1946770219               |
| SNP_P4_29400_8651767 | NC_021162.1    | Ca_kabuli_chr03 | 8651767                 | GG                              | AA              | 1946770221               |
| SNP_P4_29401_8651891 | NC_021162.1    | Ca_kabuli_chr03 | 8651891                 | GG                              | TT              | 1946770223               |
| SNP_P4_29402_8653335 | NC_021162.1    | Ca_kabuli_chr03 | 8653335                 | CC                              | TT              | 1946770225               |
| SNP_P4_29403_8653344 | NC_021162.1    | Ca_kabuli_chr03 | 8653344                 | GG                              | AA              | 1946770227               |
| SNP_P4_29404_8656688 | NC_021162.1    | Ca_kabuli_chr03 | 8656688                 | GG                              | TT              | 1946770229               |
| SNP_P4_29405_8656700 | NC_021162.1    | Ca_kabuli_chr03 | 8656700                 | TT                              | CC              | 1946770231               |
| SNP_P4_29406_8684165 | NC_021162.1    | Ca_kabuli_chr03 | 8684165                 | TT                              | CC              | 1946770233               |
| SNP_P4_29407_8718643 | NC_021162.1    | Ca_kabuli_chr03 | 8718643                 | GG                              | AA              | 1946770235               |
| SNP_P4_29408_8727540 | NC_021162.1    | Ca_kabuli_chr03 | 8727540                 | AA                              | GG              | 1946770237               |
| SNP_P4_29410_8737612 | NC_021162.1    | Ca_kabuli_chr03 | 8737612                 | AA                              | CC              | 1946770239               |
| SNP_P4_29411_8756665 | NC_021162.1    | Ca_kabuli_chr03 | 8756665                 | GG                              | AA              | 1946770241               |
| SNP_P4_29413_8778641 | NC_021162.1    | Ca_kabuli_chr03 | 8778641                 | GG                              | AA              | 1946770243               |
| SNP_P4_29414_8795909 | NC_021162.1    | Ca_kabuli_chr03 | 8795909                 | GG                              | AA              | 1946770245               |
| SNP_P4_29415_8800981 | NC_021162.1    | Ca_kabuli_chr03 | 8800981                 | GG                              | AA              | 1946770247               |
| SNP_P4_29416_8823707 | NC_021162.1    | Ca_kabuli_chr03 | 8823707                 | AA                              | CC              | 1946770249               |
| SNP_P4_29417_8836868 | NC_021162.1    | Ca_kabuli_chr03 | 8836868                 | TT                              | CC              | 1946770251               |
| SNP_P4_29418_8860849 | NC_021162.1    | Ca_kabuli_chr03 | 8860849                 | GG                              | AA              | 1946770253               |
| SNP_P4_29419_8861013 | NC_021162.1    | Ca_kabuli_chr03 | 8861013                 | CC                              | TT              | 1946770255               |
| SNP_P4_29421_8900268 | NC_021162.1    | Ca_kabuli_chr03 | 8900268                 | AA                              | GG              | 1946770257               |
| SNP_P4_29422_8915192 | NC_021162.1    | Ca_kabuli_chr03 | 8915192                 | TT                              | CC              | 1946770259               |
| SNP_P4_29423_8933619 | NC_021162.1    | Ca_kabuli_chr03 | 8933619                 | TT                              | CC              | 1946770261               |
| SNP_P4_29424_8933638 | NC_021162.1    | Ca_kabuli_chr03 | 8933638                 | GG                              | AA              | 1946770263               |
| SNP_P4_29425_8941478 | NC_021162.1    | Ca_kabuli_chr03 | 8941478                 | GG                              | AA              | 1946770265               |
| SNP_P4_29426_8941492 | NC_021162.1    | Ca_kabuli_chr03 | 8941492                 | TT                              | AA              | 1946770267               |
| SNP_P4_29427_8941493 | NC_021162.1    | Ca_kabuli_chr03 | 8941493                 | AA                              | TT              | 1946770269               |
| SNP_P4_29428_8941583 | NC_021162.1    | Ca_kabuli_chr03 | 8941583                 | CC                              | AA              | 1946770271               |
| SNP_P4_29429_8941619 | NC_021162.1    | Ca_kabuli_chr03 | 8941619                 | CC                              | GG              | 1946770273               |
| SNP_P4_29430_8941745 | NC_021162.1    | Ca_kabuli_chr03 | 8941745                 | CC                              | TT              | 1946770275               |

| SNPs IDs             | Chromosome IDs | Chromosomes     | Physical positions (bp) | CDC Frontier (Reference genome) | (ILWC46 & LPNB) | NCBI SNPdb Accession IDs |
|----------------------|----------------|-----------------|-------------------------|---------------------------------|-----------------|--------------------------|
| SNP_P4_29431_8941857 | NC_021162.1    | Ca_kabuli_chr03 | 8941857                 | AA                              | TT              | 1946770277               |
| SNP_P4_29432_8941858 | NC_021162.1    | Ca_kabuli_chr03 | 8941858                 | TT                              | AA              | 1946770280               |
| SNP_P4_29433_8941873 | NC_021162.1    | Ca_kabuli_chr03 | 8941873                 | AA                              | CC              | 1946770282               |
| SNP_P4_29434_8941919 | NC_021162.1    | Ca_kabuli_chr03 | 8941919                 | GG                              | CC              | 1946770284               |
| SNP_P4_29436_8942203 | NC_021162.1    | Ca_kabuli_chr03 | 8942203                 | CC                              | TT              | 1946770286               |
| SNP_P4_29437_8942204 | NC_021162.1    | Ca_kabuli_chr03 | 8942204                 | TT                              | CC              | 1946770288               |
| SNP_P4_29438_8947981 | NC_021162.1    | Ca_kabuli_chr03 | 8947981                 | GG                              | AA              | 1946770289               |
| SNP_P4_29439_8954423 | NC_021162.1    | Ca_kabuli_chr03 | 8954423                 | TT                              | CC              | 1946770290               |
| SNP_P4_29440_8955085 | NC_021162.1    | Ca_kabuli_chr03 | 8955085                 | GG                              | AA              | 1946770291               |
| SNP_P4_29441_8969182 | NC_021162.1    | Ca_kabuli_chr03 | 8969182                 | CC                              | TT              | 1946770292               |
| SNP_P4_29442_9041660 | NC_021162.1    | Ca_kabuli_chr03 | 9041660                 | TT                              | CC              | 1946770294               |
| SNP_P4_29443_9042199 | NC_021162.1    | Ca_kabuli_chr03 | 9042199                 | TT                              | AA              | 1946770296               |
| SNP_P4_29444_9060267 | NC_021162.1    | Ca_kabuli_chr03 | 9060267                 | GG                              | AA              | 1946770298               |
| SNP_P4_29445_9060398 | NC_021162.1    | Ca_kabuli_chr03 | 9060398                 | TT                              | CC              | 1946770301               |
| SNP_P4_29446_9060444 | NC_021162.1    | Ca_kabuli_chr03 | 9060444                 | TT                              | AA              | 1946770303               |
| SNP_P4_29447_9060445 | NC_021162.1    | Ca_kabuli_chr03 | 9060445                 | AA                              | GG              | 1946770305               |
| SNP_P4_29448_9060506 | NC_021162.1    | Ca_kabuli_chr03 | 9060506                 | AA                              | TT              | 1946770307               |
| SNP_P4_29449_9060542 | NC_021162.1    | Ca_kabuli_chr03 | 9060542                 | TT                              | CC              | 1946770309               |
| SNP_P4_29450_9060589 | NC_021162.1    | Ca_kabuli_chr03 | 9060589                 | TT                              | CC              | 1946770311               |
| SNP_P4_29451_9060654 | NC_021162.1    | Ca_kabuli_chr03 | 9060654                 | GG                              | AA              | 1946770313               |
| SNP_P4_29452_9060657 | NC_021162.1    | Ca_kabuli_chr03 | 9060657                 | GG                              | AA              | 1946770315               |
| SNP_P4_29453_9060688 | NC_021162.1    | Ca_kabuli_chr03 | 9060688                 | CC                              | TT              | 1946770317               |
| SNP_P4_29454_9060817 | NC_021162.1    | Ca_kabuli_chr03 | 9060817                 | GG                              | AA              | 1946770319               |
| SNP_P4_29455_9060829 | NC_021162.1    | Ca_kabuli_chr03 | 9060829                 | CC                              | TT              | 1946770321               |
| SNP_P4_29456_9060937 | NC_021162.1    | Ca_kabuli_chr03 | 9060937                 | GG                              | AA              | 1946770323               |
| SNP_P4_29457_9060965 | NC_021162.1    | Ca_kabuli_chr03 | 9060965                 | AA                              | TT              | 1946770325               |
| SNP_P4_29458_9061078 | NC_021162.1    | Ca_kabuli_chr03 | 9061078                 | AA                              | GG              | 1946770327               |
| SNP_P4_29459_9061105 | NC_021162.1    | Ca_kabuli_chr03 | 9061105                 | CC                              | TT              | 1946770330               |
| SNP_P4_29460_9061116 | NC_021162.1    | Ca_kabuli_chr03 | 9061116                 | GG                              | AA              | 1946770332               |
| SNP_P4_29461_9063882 | NC_021162.1    | Ca_kabuli_chr03 | 9063882                 | CC                              | TT              | 1946770334               |
| SNP_P4_29462_9063884 | NC_021162.1    | Ca_kabuli_chr03 | 9063884                 | AA                              | GG              | 1946770336               |
| SNP_P4_29463_9063902 | NC_021162.1    | Ca_kabuli_chr03 | 9063902                 | CC                              | TT              | 1946770338               |
| SNP_P4_29464_9063911 | NC_021162.1    | Ca_kabuli_chr03 | 9063911                 | GG                              | AA              | 1946770340               |
| SNP_P4_29465_9063914 | NC_021162.1    | Ca_kabuli_chr03 | 9063914                 | CC                              | TT              | 1946770342               |
| SNP_P4_29466_9063938 | NC_021162.1    | Ca_kabuli_chr03 | 9063938                 | AA                              | GG              | 1946770344               |
| SNP_P4_29467_9063941 | NC_021162.1    | Ca_kabuli_chr03 | 9063941                 | TT                              | GG              | 1946770346               |
| SNP_P4_29468_9063944 | NC_021162.1    | Ca_kabuli_chr03 | 9063944                 | AA                              | GG              | 1946770349               |
| SNP_P4_29470_9063965 | NC_021162.1    | Ca_kabuli_chr03 | 9063965                 | GG                              | AA              | 1946770351               |
| SNP_P4_29471_9063974 | NC_021162.1    | Ca_kabuli_chr03 | 9063974                 | AA                              | GG              | 1946770353               |
| SNP_P4_29472_9063977 | NC_021162.1    | Ca_kabuli_chr03 | 9063977                 | TT                              | CC              | 1946770355               |
| SNP_P4_29473_9063994 | NC_021162.1    | Ca_kabuli_chr03 | 9063994                 | GG                              | TT              | 1946770357               |
| SNP_P4_29474_9064024 | NC_021162.1    | Ca_kabuli_chr03 | 9064024                 | AA                              | GG              | 1946770359               |

| SNPs IDs             | Chromosome IDs | Chromosomes     | Physical positions (bp) | CDC Frontier (Reference genome) | (ILWC46 & LPNB) | NCBI SNPdb Accession IDs |
|----------------------|----------------|-----------------|-------------------------|---------------------------------|-----------------|--------------------------|
| SNP_P4_29475_9064026 | NC_021162.1    | Ca_kabuli_chr03 | 9064026                 | AA                              | GG              | 1946770361               |
| SNP_P4_29476_9064027 | NC_021162.1    | Ca_kabuli_chr03 | 9064027                 | TT                              | CC              | 1946770364               |
| SNP_P4_29477_9064103 | NC_021162.1    | Ca_kabuli_chr03 | 9064103                 | TT                              | CC              | 1946770366               |
| SNP_P4_29478_9064142 | NC_021162.1    | Ca_kabuli_chr03 | 9064142                 | AA                              | GG              | 1946770368               |
| SNP_P4_29479_9066977 | NC_021162.1    | Ca_kabuli_chr03 | 9066977                 | AA                              | GG              | 1946770370               |
| SNP_P4_29480_9067061 | NC_021162.1    | Ca_kabuli_chr03 | 9067061                 | CC                              | TT              | 1946770374               |
| SNP_P4_29481_9067330 | NC_021162.1    | Ca_kabuli_chr03 | 9067330                 | AA                              | GG              | 1946770376               |
| SNP_P4_29482_9067333 | NC_021162.1    | Ca_kabuli_chr03 | 9067333                 | GG                              | AA              | 1946770378               |
| SNP_P4_29483_9067342 | NC_021162.1    | Ca_kabuli_chr03 | 9067342                 | GG                              | CC              | 1946770380               |
| SNP_P4_29484_9067370 | NC_021162.1    | Ca_kabuli_chr03 | 9067370                 | CC                              | TT              | 1946770382               |
| SNP_P4_29485_9067373 | NC_021162.1    | Ca_kabuli_chr03 | 9067373                 | AA                              | GG              | 1946770385               |
| SNP_P4_29486_9067400 | NC_021162.1    | Ca_kabuli_chr03 | 9067400                 | AA                              | GG              | 1946770387               |
| SNP_P4_29487_9067425 | NC_021162.1    | Ca_kabuli_chr03 | 9067425                 | AA                              | GG              | 1946770389               |
| SNP_P4_29488_9067479 | NC_021162.1    | Ca_kabuli_chr03 | 9067479                 | GG                              | AA              | 1946770391               |
| SNP_P4_29490_9068528 | NC_021162.1    | Ca_kabuli_chr03 | 9068528                 | CC                              | TT              | 1946770393               |
| SNP_P4_29491_9144617 | NC_021162.1    | Ca_kabuli_chr03 | 9144617                 | AA                              | GG              | 1946770395               |
| SNP_P4_29492_9144640 | NC_021162.1    | Ca_kabuli_chr03 | 9144640                 | GG                              | CC              | 1946770397               |
| SNP_P4_29493_9144662 | NC_021162.1    | Ca_kabuli_chr03 | 9144662                 | TT                              | AA              | 1946770400               |
| SNP_P4_29494_9185409 | NC_021162.1    | Ca_kabuli_chr03 | 9185409                 | AA                              | GG              | 1946770402               |
| SNP_P4_29496_9193474 | NC_021162.1    | Ca_kabuli_chr03 | 9193474                 | AA                              | GG              | 1946770404               |
| SNP_P4_29497_9195641 | NC_021162.1    | Ca_kabuli_chr03 | 9195641                 | TT                              | GG              | 1946770407               |
| SNP_P4_29498_9196013 | NC_021162.1    | Ca_kabuli_chr03 | 9196013                 | AA                              | GG              | 1946770409               |
| SNP_P4_29500_9229271 | NC_021162.1    | Ca_kabuli_chr03 | 9229271                 | AA                              | CC              | 1946770411               |
| SNP_P4_29501_9229866 | NC_021162.1    | Ca_kabuli_chr03 | 9229866                 | TT                              | CC              | 1946770413               |
| SNP_P4_29502_9230532 | NC_021162.1    | Ca_kabuli_chr03 | 9230532                 | CC                              | TT              | 1946770415               |
| SNP_P4_29503_9236240 | NC_021162.1    | Ca_kabuli_chr03 | 9236240                 | GG                              | AA              | 1946770417               |
| SNP_P4_29505_9290195 | NC_021162.1    | Ca_kabuli_chr03 | 9290195                 | CC                              | TT              | 1946770419               |
| SNP_P4_29506_9305229 | NC_021162.1    | Ca_kabuli_chr03 | 9305229                 | TT                              | GG              | 1946770421               |
| SNP_P4_29507_9305235 | NC_021162.1    | Ca_kabuli_chr03 | 9305235                 | TT                              | CC              | 1946770423               |
| SNP_P4_29509_9374726 | NC_021162.1    | Ca_kabuli_chr03 | 9374726                 | TT                              | AA              | 1946770425               |
| SNP_P4_29510_9374730 | NC_021162.1    | Ca_kabuli_chr03 | 9374730                 | AA                              | TT              | 1946770428               |
| SNP_P4_29511_9374741 | NC_021162.1    | Ca_kabuli_chr03 | 9374741                 | TT                              | CC              | 1946770430               |
| SNP_P4_29512_9374977 | NC_021162.1    | Ca_kabuli_chr03 | 9374977                 | GG                              | TT              | 1946770432               |
| SNP_P4_29513_9399930 | NC_021162.1    | Ca_kabuli_chr03 | 9399930                 | TT                              | AA              | 1946770434               |
| SNP_P4_29514_9401904 | NC_021162.1    | Ca_kabuli_chr03 | 9401904                 | GG                              | AA              | 1946770436               |
| SNP_P4_29515_9404996 | NC_021162.1    | Ca_kabuli_chr03 | 9404996                 | CC                              | AA              | 1946770439               |
| SNP_P4_29516_9405463 | NC_021162.1    | Ca_kabuli_chr03 | 9405463                 | TT                              | AA              | 1946770441               |
| SNP_P4_29517_9408047 | NC_021162.1    | Ca_kabuli_chr03 | 9408047                 | GG                              | AA              | 1946770443               |
| SNP_P4_29518_9416331 | NC_021162.1    | Ca_kabuli_chr03 | 9416331                 | AA                              | GG              | 1946770445               |
| SNP_P4_29519_9416333 | NC_021162.1    | Ca_kabuli_chr03 | 9416333                 | TT                              | AA              | 1946770447               |
| SNP_P4_29521_9418089 | NC_021162.1    | Ca_kabuli_chr03 | 9418089                 | GG                              | AA              | 1946770449               |
| SNP_P4_29522_9418397 | NC_021162.1    | Ca_kabuli_chr03 | 9418397                 | AA                              | CC              | 1946770451               |

| SNPs IDs             | Chromosome IDs | Chromosomes     | Physical positions (bp) | CDC Frontier (Reference genome) | (ILWC46 & LPNB) | NCBI SNPdb Accession IDs |
|----------------------|----------------|-----------------|-------------------------|---------------------------------|-----------------|--------------------------|
| SNP_P4_29523_9418612 | NC_021162.1    | Ca_kabuli_chr03 | 9418612                 | GG                              | CC              | 1946770454               |
| SNP_P4_29524_9418622 | NC_021162.1    | Ca_kabuli_chr03 | 9418622                 | AA                              | GG              | 1946770456               |
| SNP_P4_29525_9418648 | NC_021162.1    | Ca_kabuli_chr03 | 9418648                 | CC                              | TT              | 1946770458               |
| SNP_P4_29526_9418682 | NC_021162.1    | Ca_kabuli_chr03 | 9418682                 | GG                              | AA              | 1946770460               |
| SNP_P4_29529_9429199 | NC_021162.1    | Ca_kabuli_chr03 | 9429199                 | CC                              | TT              | 1946770463               |
| SNP_P4_29530_9429239 | NC_021162.1    | Ca_kabuli_chr03 | 9429239                 | AA                              | CC              | 1946770465               |
| SNP_P4_29531_9429335 | NC_021162.1    | Ca_kabuli_chr03 | 9429335                 | GG                              | TT              | 1946770467               |
| SNP_P4_29532_9429588 | NC_021162.1    | Ca_kabuli_chr03 | 9429588                 | GG                              | TT              | 1946770470               |
| SNP_P4_29533_9429615 | NC_021162.1    | Ca_kabuli_chr03 | 9429615                 | AA                              | TT              | 1946770472               |
| SNP_P4_29534_9429651 | NC_021162.1    | Ca_kabuli_chr03 | 9429651                 | AA                              | GG              | 1946770475               |
| SNP_P4_29535_9429673 | NC_021162.1    | Ca_kabuli_chr03 | 9429673                 | AA                              | GG              | 1946770477               |
| SNP_P4_29536_9429684 | NC_021162.1    | Ca_kabuli_chr03 | 9429684                 | CC                              | TT              | 1946770479               |
| SNP_P4_29537_9429688 | NC_021162.1    | Ca_kabuli_chr03 | 9429688                 | TT                              | CC              | 1946770481               |
| SNP_P4_29538_9429751 | NC_021162.1    | Ca_kabuli_chr03 | 9429751                 | AA                              | GG              | 1946770483               |
| SNP_P4_29539_9429779 | NC_021162.1    | Ca_kabuli_chr03 | 9429779                 | TT                              | CC              | 1946770485               |
| SNP_P4_29540_9434455 | NC_021162.1    | Ca_kabuli_chr03 | 9434455                 | AA                              | GG              | 1946770488               |
| SNP_P4_29541_9453191 | NC_021162.1    | Ca_kabuli_chr03 | 9453191                 | AA                              | TT              | 1946770490               |
| SNP_P4_29542_9465401 | NC_021162.1    | Ca_kabuli_chr03 | 9465401                 | CC                              | TT              | 1946770492               |
| SNP_P4_29543_9487724 | NC_021162.1    | Ca_kabuli_chr03 | 9487724                 | AA                              | TT              | 1946770494               |
| SNP_P4_29544_9487767 | NC_021162.1    | Ca_kabuli_chr03 | 9487767                 | AA                              | TT              | 1946770496               |
| SNP_P4_29546_9501502 | NC_021162.1    | Ca_kabuli_chr03 | 9501502                 | AA                              | GG              | 1946770498               |
| SNP_P4_29547_9501682 | NC_021162.1    | Ca_kabuli_chr03 | 9501682                 | AA                              | CC              | 1946770500               |
| SNP_P4_29548_9501698 | NC_021162.1    | Ca_kabuli_chr03 | 9501698                 | AA                              | CC              | 1946770502               |
| SNP_P4_29549_9502041 | NC_021162.1    | Ca_kabuli_chr03 | 9502041                 | TT                              | CC              | 1946770503               |
| SNP_P4_29550_9512479 | NC_021162.1    | Ca_kabuli_chr03 | 9512479                 | AA                              | TT              | 1946770504               |
| SNP_P4_29551_9521441 | NC_021162.1    | Ca_kabuli_chr03 | 9521441                 | GG                              | AA              | 1946770506               |
| SNP_P4_29552_9539187 | NC_021162.1    | Ca_kabuli_chr03 | 9539187                 | TT                              | AA              | 1946770508               |
| SNP_P4_29553_9539198 | NC_021162.1    | Ca_kabuli_chr03 | 9539198                 | CC                              | TT              | 1946770511               |
| SNP_P4_29554_9539200 | NC_021162.1    | Ca_kabuli_chr03 | 9539200                 | TT                              | CC              | 1946770513               |
| SNP_P4_29555_9540674 | NC_021162.1    | Ca_kabuli_chr03 | 9540674                 | AA                              | TT              | 1946770515               |
| SNP_P4_29556_9562678 | NC_021162.1    | Ca_kabuli_chr03 | 9562678                 | GG                              | TT              | 1946770517               |
| SNP_P4_29557_9577875 | NC_021162.1    | Ca_kabuli_chr03 | 9577875                 | AA                              | GG              | 1946770519               |
| SNP_P4_29558_9577902 | NC_021162.1    | Ca_kabuli_chr03 | 9577902                 | CC                              | GG              | 1946770522               |
| SNP_P4_29560_9578032 | NC_021162.1    | Ca_kabuli_chr03 | 9578032                 | TT                              | CC              | 1946770524               |
| SNP_P4_29561_9578264 | NC_021162.1    | Ca_kabuli_chr03 | 9578264                 | TT                              | CC              | 1946770526               |
| SNP_P4_29562_9578341 | NC_021162.1    | Ca_kabuli_chr03 | 9578341                 | TT                              | GG              | 1946770528               |
| SNP_P4_29563_9578346 | NC_021162.1    | Ca_kabuli_chr03 | 9578346                 | TT                              | CC              | 1946770530               |
| SNP_P4_29564_9578388 | NC_021162.1    | Ca_kabuli_chr03 | 9578388                 | TT                              | GG              | 1946770532               |
| SNP_P4_29565_9578412 | NC_021162.1    | Ca_kabuli_chr03 | 9578412                 | TT                              | GG              | 1946770534               |
| SNP_P4_29566_9578688 | NC_021162.1    | Ca_kabuli_chr03 | 9578688                 | AA                              | GG              | 1946770537               |
| SNP_P4_29567_9578703 | NC_021162.1    | Ca_kabuli_chr03 | 9578703                 | GG                              | TT              | 1946770539               |
| SNP_P4_29568_9578841 | NC_021162.1    | Ca_kabuli_chr03 | 9578841                 | CC                              | TT              | 1946770541               |

| SNPs IDs             | Chromosome IDs | Chromosomes     | Physical positions (bp) | CDC Frontier (Reference genome) | (ILWC46 & LPNB) | NCBI SNPdb Accession IDs |
|----------------------|----------------|-----------------|-------------------------|---------------------------------|-----------------|--------------------------|
| SNP_P4_29569_9584371 | NC_021162.1    | Ca_kabuli_chr03 | 9584371                 | TT                              | GG              | 1946770543               |
| SNP_P4_29570_9584381 | NC_021162.1    | Ca_kabuli_chr03 | 9584381                 | CC                              | TT              | 1946770545               |
| SNP_P4_29571_9584383 | NC_021162.1    | Ca_kabuli_chr03 | 9584383                 | AA                              | GG              | 1946770547               |
| SNP_P4_29572_9584398 | NC_021162.1    | Ca_kabuli_chr03 | 9584398                 | CC                              | TT              | 1946770550               |
| SNP_P4_29573_9584412 | NC_021162.1    | Ca_kabuli_chr03 | 9584412                 | GG                              | AA              | 1946770552               |
| SNP_P4_29574_9584535 | NC_021162.1    | Ca_kabuli_chr03 | 9584535                 | CC                              | AA              | 1946770554               |
| SNP_P4_29575_9584554 | NC_021162.1    | Ca_kabuli_chr03 | 9584554                 | AA                              | TT              | 1946770556               |
| SNP_P4_29576_9584556 | NC_021162.1    | Ca_kabuli_chr03 | 9584556                 | TT                              | AA              | 1946770558               |
| SNP_P4_29577_9584557 | NC_021162.1    | Ca_kabuli_chr03 | 9584557                 | CC                              | AA              | 1946770560               |
| SNP_P4_29578_9584604 | NC_021162.1    | Ca_kabuli_chr03 | 9584604                 | CC                              | TT              | 1946770562               |
| SNP_P4_29579_9584611 | NC_021162.1    | Ca_kabuli_chr03 | 9584611                 | GG                              | AA              | 1946770564               |
| SNP_P4_29580_9584677 | NC_021162.1    | Ca_kabuli_chr03 | 9584677                 | AA                              | GG              | 1946770566               |
| SNP_P4_29581_9584678 | NC_021162.1    | Ca_kabuli_chr03 | 9584678                 | CC                              | AA              | 1946770568               |
| SNP_P4_29582_9596046 | NC_021162.1    | Ca_kabuli_chr03 | 9596046                 | AA                              | GG              | 1946770571               |
| SNP_P4_29583_9608117 | NC_021162.1    | Ca_kabuli_chr03 | 9608117                 | GG                              | AA              | 1946770573               |
| SNP_P4_29584_9608133 | NC_021162.1    | Ca_kabuli_chr03 | 9608133                 | CC                              | AA              | 1946770575               |
| SNP_P4_29585_9614012 | NC_021162.1    | Ca_kabuli_chr03 | 9614012                 | CC                              | TT              | 1946770577               |
| SNP_P4_29586_9615753 | NC_021162.1    | Ca_kabuli_chr03 | 9615753                 | AA                              | TT              | 1946770579               |
| SNP_P4_29587_9623375 | NC_021162.1    | Ca_kabuli_chr03 | 9623375                 | GG                              | AA              | 1946770581               |
| SNP_P4_29588_9623376 | NC_021162.1    | Ca_kabuli_chr03 | 9623376                 | AA                              | CC              | 1946770584               |
| SNP_P4_29589_9649822 | NC_021162.1    | Ca_kabuli_chr03 | 9649822                 | GG                              | TT              | 1946770586               |
| SNP_P4_29591_9649887 | NC_021162.1    | Ca_kabuli_chr03 | 9649887                 | GG                              | AA              | 1946770589               |
| SNP_P4_29592_9650548 | NC_021162.1    | Ca_kabuli_chr03 | 9650548                 | AA                              | TT              | 1946770591               |
| SNP_P4_29593_9650559 | NC_021162.1    | Ca_kabuli_chr03 | 9650559                 | GG                              | AA              | 1946770593               |
| SNP_P4_29594_9650583 | NC_021162.1    | Ca_kabuli_chr03 | 9650583                 | TT                              | CC              | 1946770595               |
| SNP_P4_29595_9650654 | NC_021162.1    | Ca_kabuli_chr03 | 9650654                 | CC                              | TT              | 1946770597               |
| SNP_P4_29596_9651069 | NC_021162.1    | Ca_kabuli_chr03 | 9651069                 | GG                              | AA              | 1946770599               |
| SNP_P4_29598_9709168 | NC_021162.1    | Ca_kabuli_chr03 | 9709168                 | TT                              | GG              | 1946770601               |
| SNP_P4_29599_9709194 | NC_021162.1    | Ca_kabuli_chr03 | 9709194                 | AA                              | TT              | 1946770603               |
| SNP_P4_29601_9754628 | NC_021162.1    | Ca_kabuli_chr03 | 9754628                 | GG                              | AA              | 1946770605               |
| SNP_P4_29602_9767065 | NC_021162.1    | Ca_kabuli_chr03 | 9767065                 | TT                              | AA              | 1946770608               |
| SNP_P4_29603_9780224 | NC_021162.1    | Ca_kabuli_chr03 | 9780224                 | CC                              | TT              | 1946770610               |
| SNP_P4_29604_9785165 | NC_021162.1    | Ca_kabuli_chr03 | 9785165                 | TT                              | CC              | 1946770612               |
| SNP_P4_29605_9785182 | NC_021162.1    | Ca_kabuli_chr03 | 9785182                 | AA                              | TT              | 1946770614               |
| SNP_P4_29606_9793340 | NC_021162.1    | Ca_kabuli_chr03 | 9793340                 | CC                              | AA              | 1946770616               |
| SNP_P4_29607_9825181 | NC_021162.1    | Ca_kabuli_chr03 | 9825181                 | GG                              | AA              | 1946770618               |
| SNP_P4_29610_9849186 | NC_021162.1    | Ca_kabuli_chr03 | 9849186                 | TT                              | AA              | 1946770620               |
| SNP_P4_29611_9894248 | NC_021162.1    | Ca_kabuli_chr03 | 9894248                 | GG                              | TT              | 1946770622               |
| SNP_P4_29612_9917714 | NC_021162.1    | Ca_kabuli_chr03 | 9917714                 | GG                              | TT              | 1946770624               |
| SNP_P4_29613_9922032 | NC_021162.1    | Ca_kabuli_chr03 | 9922032                 | AA                              | TT              | 1946770626               |
| SNP_P4_29614_9939266 | NC_021162.1    | Ca_kabuli_chr03 | 9939266                 | TT                              | CC              | 1946770628               |
| SNP_P4_29615_9940409 | NC_021162.1    | Ca_kabuli_chr03 | 9940409                 | TT                              | CC              | 1946770631               |

| SNPs IDs              | Chromosome IDs | Chromosomes     | Physical positions (bp) | CDC Frontier (Reference genome) | (ILWC46 & LPNB) | NCBI SNPdb Accession IDs |
|-----------------------|----------------|-----------------|-------------------------|---------------------------------|-----------------|--------------------------|
| SNP_P4_29617_9945699  | NC_021162.1    | Ca_kabuli_chr03 | 9945699                 | TT                              | CC              | 1946770633               |
| SNP_P4_29618_9946057  | NC_021162.1    | Ca_kabuli_chr03 | 9946057                 | TT                              | CC              | 1946770635               |
| SNP_P4_29619_9953150  | NC_021162.1    | Ca_kabuli_chr03 | 9953150                 | TT                              | CC              | 1946770637               |
| SNP_P4_29621_9966885  | NC_021162.1    | Ca_kabuli_chr03 | 9966885                 | AA                              | GG              | 1946770639               |
| SNP_P4_29622_9967426  | NC_021162.1    | Ca_kabuli_chr03 | 9967426                 | GG                              | TT              | 1946770641               |
| SNP_P4_29623_9967749  | NC_021162.1    | Ca_kabuli_chr03 | 9967749                 | TT                              | CC              | 1946770643               |
| SNP_P4_29624_9967750  | NC_021162.1    | Ca_kabuli_chr03 | 9967750                 | AA                              | TT              | 1946770645               |
| SNP_P4_29625_9968623  | NC_021162.1    | Ca_kabuli_chr03 | 9968623                 | GG                              | AA              | 1946770647               |
| SNP_P4_29626_9968730  | NC_021162.1    | Ca_kabuli_chr03 | 9968730                 | CC                              | GG              | 1946770649               |
| SNP_P4_29627_9988946  | NC_021162.1    | Ca_kabuli_chr03 | 9988946                 | TT                              | AA              | 1946770651               |
| SNP_P4_29628_9993801  | NC_021162.1    | Ca_kabuli_chr03 | 9993801                 | TT                              | CC              | 1946770653               |
| SNP_P4_29629_9994133  | NC_021162.1    | Ca_kabuli_chr03 | 9994133                 | GG                              | AA              | 1946770655               |
| SNP_P4_29630_9994159  | NC_021162.1    | Ca_kabuli_chr03 | 9994159                 | GG                              | AA              | 1946770657               |
| SNP_P4_29631_10005148 | NC_021162.1    | Ca_kabuli_chr03 | 10005148                | AA                              | CC              | 1946770659               |
| SNP_P4_29632_10005162 | NC_021162.1    | Ca_kabuli_chr03 | 10005162                | AA                              | CC              | 1946770661               |
| SNP_P4_29633_10009230 | NC_021162.1    | Ca_kabuli_chr03 | 10009230                | TT                              | GG              | 1946770664               |
| SNP_P4_29634_10009237 | NC_021162.1    | Ca_kabuli_chr03 | 10009237                | GG                              | AA              | 1946770666               |
| SNP_P4_29635_10013132 | NC_021162.1    | Ca_kabuli_chr03 | 10013132                | TT                              | GG              | 1946770668               |
| SNP_P4_29636_10014385 | NC_021162.1    | Ca_kabuli_chr03 | 10014385                | TT                              | CC              | 1946770670               |
| SNP_P4_29637_10014730 | NC_021162.1    | Ca_kabuli_chr03 | 10014730                | AA                              | GG              | 1946770672               |
| SNP_P4_29638_10026450 | NC_021162.1    | Ca_kabuli_chr03 | 10026450                | CC                              | AA              | 1946770674               |
| SNP_P4_29639_10026478 | NC_021162.1    | Ca_kabuli_chr03 | 10026478                | TT                              | GG              | 1946770676               |
| SNP_P4_29640_10026538 | NC_021162.1    | Ca_kabuli_chr03 | 10026538                | TT                              | AA              | 1946770678               |
| SNP_P4_29641_10026736 | NC_021162.1    | Ca_kabuli_chr03 | 10026736                | GG                              | AA              | 1946770680               |
| SNP_P4_29642_10079833 | NC_021162.1    | Ca_kabuli_chr03 | 10079833                | TT                              | CC              | 1946770682               |
| SNP_P4_29644_10094580 | NC_021162.1    | Ca_kabuli_chr03 | 10094580                | GG                              | TT              | 1946770684               |
| SNP_P4_29645_10094592 | NC_021162.1    | Ca_kabuli_chr03 | 10094592                | TT                              | CC              | 1946770686               |
| SNP_P4_29646_10094594 | NC_021162.1    | Ca_kabuli_chr03 | 10094594                | TT                              | GG              | 1946770688               |
| SNP_P4_29647_10094657 | NC_021162.1    | Ca_kabuli_chr03 | 10094657                | AA                              | GG              | 1946770690               |
| SNP_P4_29648_10095161 | NC_021162.1    | Ca_kabuli_chr03 | 10095161                | GG                              | TT              | 1946770693               |
| SNP_P4_29649_10110881 | NC_021162.1    | Ca_kabuli_chr03 | 10110881                | AA                              | TT              | 1946770695               |
| SNP_P4_29651_10147754 | NC_021162.1    | Ca_kabuli_chr03 | 10147754                | AA                              | TT              | 1946770697               |
| SNP_P4_29652_10150758 | NC_021162.1    | Ca_kabuli_chr03 | 10150758                | AA                              | GG              | 1946770699               |
| SNP_P4_29653_10159074 | NC_021162.1    | Ca_kabuli_chr03 | 10159074                | AA                              | GG              | 1946770701               |
| SNP_P4_29654_10159268 | NC_021162.1    | Ca_kabuli_chr03 | 10159268                | AA                              | GG              | 1946770703               |
| SNP_P4_29655_10159272 | NC_021162.1    | Ca_kabuli_chr03 | 10159272                | CC                              | TT              | 1946770706               |
| SNP_P4_29656_10159277 | NC_021162.1    | Ca_kabuli_chr03 | 10159277                | CC                              | TT              | 1946770708               |
| SNP_P4_29657_10159334 | NC_021162.1    | Ca_kabuli_chr03 | 10159334                | TT                              | CC              | 1946770710               |
| SNP_P4_29660_10159496 | NC_021162.1    | Ca_kabuli_chr03 | 10159496                | TT                              | CC              | 1946770712               |
| SNP_P4_29661_10159548 | NC_021162.1    | Ca_kabuli_chr03 | 10159548                | TT                              | CC              | 1946770714               |
| SNP_P4_29662_10159607 | NC_021162.1    | Ca_kabuli_chr03 | 10159607                | AA                              | GG              | 1946770716               |
| SNP_P4_29663_10159630 | NC_021162.1    | Ca_kabuli_chr03 | 10159630                | TT                              | CC              | 1946770718               |

| SNPs IDs              | Chromosome IDs | Chromosomes     | Physical positions (bp) | CDC Frontier (Reference genome) | (ILWC46 & LPNB) | NCBI SNPdb Accession IDs |
|-----------------------|----------------|-----------------|-------------------------|---------------------------------|-----------------|--------------------------|
| SNP_P4_29664_10159639 | NC_021162.1    | Ca_kabuli_chr03 | 10159639                | TT                              | CC              | 1946770720               |
| SNP_P4_29665_10159665 | NC_021162.1    | Ca_kabuli_chr03 | 10159665                | GG                              | AA              | 1946770722               |
| SNP_P4_29667_10159709 | NC_021162.1    | Ca_kabuli_chr03 | 10159709                | AA                              | CC              | 1946770724               |
| SNP_P4_29668_10159710 | NC_021162.1    | Ca_kabuli_chr03 | 10159710                | TT                              | CC              | 1946770726               |
| SNP_P4_29669_10159714 | NC_021162.1    | Ca_kabuli_chr03 | 10159714                | TT                              | CC              | 1946770728               |
| SNP_P4_29670_10159787 | NC_021162.1    | Ca_kabuli_chr03 | 10159787                | AA                              | CC              | 1946770730               |
| SNP_P4_29671_10159795 | NC_021162.1    | Ca_kabuli_chr03 | 10159795                | TT                              | GG              | 1946770733               |
| SNP_P4_29672_10159812 | NC_021162.1    | Ca_kabuli_chr03 | 10159812                | AA                              | GG              | 1946770735               |
| SNP_P4_29673_10159818 | NC_021162.1    | Ca_kabuli_chr03 | 10159818                | TT                              | CC              | 1946770737               |
| SNP_P4_29674_10159822 | NC_021162.1    | Ca_kabuli_chr03 | 10159822                | TT                              | CC              | 1946770739               |
| SNP_P4_29675_10169165 | NC_021162.1    | Ca_kabuli_chr03 | 10169165                | GG                              | AA              | 1946770741               |
| SNP_P4_29676_10169196 | NC_021162.1    | Ca_kabuli_chr03 | 10169196                | GG                              | AA              | 1946770743               |
| SNP_P4_29677_10169224 | NC_021162.1    | Ca_kabuli_chr03 | 10169224                | AA                              | GG              | 1946770745               |
| SNP_P4_29678_10169320 | NC_021162.1    | Ca_kabuli_chr03 | 10169320                | TT                              | CC              | 1946770747               |
| SNP_P4_29679_10169330 | NC_021162.1    | Ca_kabuli_chr03 | 10169330                | AA                              | GG              | 1946770749               |
| SNP_P4_29680_10169335 | NC_021162.1    | Ca_kabuli_chr03 | 10169335                | TT                              | CC              | 1946770751               |
| SNP_P4_29681_10169512 | NC_021162.1    | Ca_kabuli_chr03 | 10169512                | AA                              | GG              | 1946770753               |
| SNP_P4_29682_10169553 | NC_021162.1    | Ca_kabuli_chr03 | 10169553                | AA                              | CC              | 1946770755               |
| SNP_P4_29683_10169594 | NC_021162.1    | Ca_kabuli_chr03 | 10169594                | TT                              | CC              | 1946770757               |
| SNP_P4_29684_10169615 | NC_021162.1    | Ca_kabuli_chr03 | 10169615                | AA                              | GG              | 1946770759               |
| SNP_P4_29685_10169627 | NC_021162.1    | Ca_kabuli_chr03 | 10169627                | TT                              | CC              | 1946770761               |
| SNP_P4_29687_10169685 | NC_021162.1    | Ca_kabuli_chr03 | 10169685                | GG                              | CC              | 1946770763               |
| SNP_P4_29688_10180372 | NC_021162.1    | Ca_kabuli_chr03 | 10180372                | GG                              | TT              | 1946770765               |
| SNP_P4_29689_10183938 | NC_021162.1    | Ca_kabuli_chr03 | 10183938                | AA                              | GG              | 1946770767               |
| SNP_P4_29690_10184259 | NC_021162.1    | Ca_kabuli_chr03 | 10184259                | AA                              | GG              | 1946770769               |
| SNP_P4_29691_10184514 | NC_021162.1    | Ca_kabuli_chr03 | 10184514                | TT                              | CC              | 1946770771               |
| SNP_P4_29692_10184519 | NC_021162.1    | Ca_kabuli_chr03 | 10184519                | AA                              | TT              | 1946770773               |
| SNP_P4_29693_10184523 | NC_021162.1    | Ca_kabuli_chr03 | 10184523                | TT                              | CC              | 1946770775               |
| SNP_P4_29694_10184548 | NC_021162.1    | Ca_kabuli_chr03 | 10184548                | AA                              | CC              | 1946770777               |
| SNP_P4_29695_10184968 | NC_021162.1    | Ca_kabuli_chr03 | 10184968                | AA                              | GG              | 1946770779               |
| SNP_P4_29696_10186758 | NC_021162.1    | Ca_kabuli_chr03 | 10186758                | CC                              | TT              | 1946770781               |
| SNP_P4_29697_10188632 | NC_021162.1    | Ca_kabuli_chr03 | 10188632                | GG                              | CC              | 1946770783               |
| SNP_P4_29698_10188638 | NC_021162.1    | Ca_kabuli_chr03 | 10188638                | TT                              | AA              | 1946770785               |
| SNP_P4_29699_10188686 | NC_021162.1    | Ca_kabuli_chr03 | 10188686                | TT                              | GG              | 1946770787               |
| SNP_P4_29700_10188688 | NC_021162.1    | Ca_kabuli_chr03 | 10188688                | GG                              | TT              | 1946770790               |
| SNP_P4_29701_10188694 | NC_021162.1    | Ca_kabuli_chr03 | 10188694                | GG                              | TT              | 1946770792               |
| SNP_P4_29702_10188699 | NC_021162.1    | Ca_kabuli_chr03 | 10188699                | GG                              | CC              | 1946770794               |
| SNP_P4_29704_10197351 | NC_021162.1    | Ca_kabuli_chr03 | 10197351                | GG                              | AA              | 1946770796               |
| SNP_P4_29705_10211518 | NC_021162.1    | Ca_kabuli_chr03 | 10211518                | TT                              | CC              | 1946770798               |
| SNP_P4_29706_10226228 | NC_021162.1    | Ca_kabuli_chr03 | 10226228                | GG                              | CC              | 1946770800               |
| SNP_P4_29707_10254917 | NC_021162.1    | Ca_kabuli_chr03 | 10254917                | TT                              | CC              | 1946770802               |
| SNP_P4_29708_10255319 | NC_021162.1    | Ca_kabuli_chr03 | 10255319                | AA                              | GG              | 1946770805               |

| SNPs IDs              | Chromosome IDs | Chromosomes     | Physical positions (bp) | CDC Frontier (Reference genome) | (ILWC46 & LPNB) | NCBI SNPdb Accession IDs |
|-----------------------|----------------|-----------------|-------------------------|---------------------------------|-----------------|--------------------------|
| SNP_P4_29709_10255377 | NC_021162.1    | Ca_kabuli_chr03 | 10255377                | AA                              | GG              | 1946770807               |
| SNP_P4_29710_10255381 | NC_021162.1    | Ca_kabuli_chr03 | 10255381                | TT                              | CC              | 1946770809               |
| SNP_P4_29711_10255392 | NC_021162.1    | Ca_kabuli_chr03 | 10255392                | TT                              | CC              | 1946770811               |
| SNP_P4_29712_10255395 | NC_021162.1    | Ca_kabuli_chr03 | 10255395                | TT                              | CC              | 1946770813               |
| SNP_P4_29713_10255405 | NC_021162.1    | Ca_kabuli_chr03 | 10255405                | AA                              | GG              | 1946770815               |
| SNP_P4_29714_10265580 | NC_021162.1    | Ca_kabuli_chr03 | 10265580                | TT                              | CC              | 1946770817               |
| SNP_P4_29715_10265590 | NC_021162.1    | Ca_kabuli_chr03 | 10265590                | GG                              | AA              | 1946770819               |
| SNP_P4_29716_10342271 | NC_021162.1    | Ca_kabuli_chr03 | 10342271                | AA                              | GG              | 1946770822               |
| SNP_P4_29717_10342292 | NC_021162.1    | Ca_kabuli_chr03 | 10342292                | GG                              | AA              | 1946770824               |
| SNP_P4_29718_10342294 | NC_021162.1    | Ca_kabuli_chr03 | 10342294                | CC                              | TT              | 1946770826               |
| SNP_P4_29719_10342694 | NC_021162.1    | Ca_kabuli_chr03 | 10342694                | AA                              | CC              | 1946770828               |
| SNP_P4_29720_10342731 | NC_021162.1    | Ca_kabuli_chr03 | 10342731                | AA                              | GG              | 1946770830               |
| SNP_P4_29721_10350760 | NC_021162.1    | Ca_kabuli_chr03 | 10350760                | AA                              | GG              | 1946770832               |
| SNP_P4_29722_10389490 | NC_021162.1    | Ca_kabuli_chr03 | 10389490                | TT                              | GG              | 1946770834               |
| SNP_P4_29724_10404205 | NC_021162.1    | Ca_kabuli_chr03 | 10404205                | TT                              | CC              | 1946770836               |
| SNP_P4_29725_10404263 | NC_021162.1    | Ca_kabuli_chr03 | 10404263                | CC                              | TT              | 1946770838               |
| SNP_P4_29728_10498584 | NC_021162.1    | Ca_kabuli_chr03 | 10498584                | TT                              | AA              | 1946770840               |
| SNP_P4_29729_10498947 | NC_021162.1    | Ca_kabuli_chr03 | 10498947                | AA                              | CC              | 1946770842               |
| SNP_P4_29730_10505142 | NC_021162.1    | Ca_kabuli_chr03 | 10505142                | AA                              | CC              | 1946770844               |
| SNP_P4_29731_10505355 | NC_021162.1    | Ca_kabuli_chr03 | 10505355                | TT                              | CC              | 1946770846               |
| SNP_P4_29732_10505411 | NC_021162.1    | Ca_kabuli_chr03 | 10505411                | GG                              | TT              | 1946770849               |
| SNP_P4_29733_10514950 | NC_021162.1    | Ca_kabuli_chr03 | 10514950                | AA                              | CC              | 1946770851               |
| SNP_P4_29734_10514958 | NC_021162.1    | Ca_kabuli_chr03 | 10514958                | AA                              | CC              | 1946770853               |
| SNP_P4_29735_10540096 | NC_021162.1    | Ca_kabuli_chr03 | 10540096                | CC                              | GG              | 1946770855               |
| SNP_P4_29737_10594902 | NC_021162.1    | Ca_kabuli_chr03 | 10594902                | CC                              | TT              | 1946770857               |
| SNP_P4_29738_10594936 | NC_021162.1    | Ca_kabuli_chr03 | 10594936                | AA                              | CC              | 1946770860               |
| SNP_P4_29739_10594978 | NC_021162.1    | Ca_kabuli_chr03 | 10594978                | AA                              | CC              | 1946770862               |
| SNP_P4_29740_10595279 | NC_021162.1    | Ca_kabuli_chr03 | 10595279                | CC                              | TT              | 1946770864               |
| SNP_P4_29741_10608739 | NC_021162.1    | Ca_kabuli_chr03 | 10608739                | AA                              | GG              | 1946770866               |
| SNP_P4_29743_10663701 | NC_021162.1    | Ca_kabuli_chr03 | 10663701                | TT                              | AA              | 1946770868               |
| SNP_P4_29744_10670635 | NC_021162.1    | Ca_kabuli_chr03 | 10670635                | AA                              | GG              | 1946770871               |
| SNP_P4_29745_10670905 | NC_021162.1    | Ca_kabuli_chr03 | 10670905                | TT                              | CC              | 1946770873               |
| SNP_P4_29746_10674126 | NC_021162.1    | Ca_kabuli_chr03 | 10674126                | GG                              | AA              | 1946770875               |
| SNP_P4_29747_10678023 | NC_021162.1    | Ca_kabuli_chr03 | 10678023                | GG                              | AA              | 1946770877               |
| SNP_P4_29749_10849476 | NC_021162.1    | Ca_kabuli_chr03 | 10849476                | AA                              | GG              | 1946770879               |
| SNP_P4_29750_10849479 | NC_021162.1    | Ca_kabuli_chr03 | 10849479                | AA                              | CC              | 1946770881               |
| SNP_P4_29751_10851683 | NC_021162.1    | Ca_kabuli_chr03 | 10851683                | GG                              | AA              | 1946770883               |
| SNP_P4_29752_10851895 | NC_021162.1    | Ca_kabuli_chr03 | 10851895                | AA                              | GG              | 1946770885               |
| SNP_P4_29753_10851958 | NC_021162.1    | Ca_kabuli_chr03 | 10851958                | AA                              | GG              | 1946770887               |
| SNP_P4_29754_10851994 | NC_021162.1    | Ca_kabuli_chr03 | 10851994                | AA                              | GG              | 1946770889               |
| SNP_P4_29755_10852405 | NC_021162.1    | Ca_kabuli_chr03 | 10852405                | AA                              | TT              | 1946770891               |
| SNP_P4_29756_10852417 | NC_021162.1    | Ca_kabuli_chr03 | 10852417                | GG                              | TT              | 1946770893               |



| SNPs IDs              | Chromosome IDs | Chromosomes     | Physical positions (bp) | CDC Frontier (Reference genome) | (ILWC46 & LPNB) | NCBI SNPdb Accession IDs |
|-----------------------|----------------|-----------------|-------------------------|---------------------------------|-----------------|--------------------------|
| SNP_P4_29757_10852418 | NC_021162.1    | Ca_kabuli_chr03 | 10852418                | TT                              | CC              | 1946770895               |
| SNP_P4_29758_10852432 | NC_021162.1    | Ca_kabuli_chr03 | 10852432                | AA                              | GG              | 1946770897               |
| SNP_P4_29759_10852448 | NC_021162.1    | Ca_kabuli_chr03 | 10852448                | TT                              | GG              | 1946770899               |
| SNP_P4_29760_10856412 | NC_021162.1    | Ca_kabuli_chr03 | 10856412                | GG                              | AA              | 1946770901               |
| SNP_P4_29761_10858765 | NC_021162.1    | Ca_kabuli_chr03 | 10858765                | TT                              | GG              | 1946770903               |
| SNP_P4_29762_10858767 | NC_021162.1    | Ca_kabuli_chr03 | 10858767                | TT                              | AA              | 1946770905               |
| SNP_P4_29765_10920158 | NC_021162.1    | Ca_kabuli_chr03 | 10920158                | AA                              | GG              | 1946770907               |
| SNP_P4_29766_10921755 | NC_021162.1    | Ca_kabuli_chr03 | 10921755                | GG                              | AA              | 1946770909               |
| SNP_P4_29767_10922384 | NC_021162.1    | Ca_kabuli_chr03 | 10922384                | CC                              | TT              | 1946770911               |
| SNP_P4_29768_10922915 | NC_021162.1    | Ca_kabuli_chr03 | 10922915                | TT                              | GG              | 1946770914               |
| SNP_P4_29769_10923019 | NC_021162.1    | Ca_kabuli_chr03 | 10923019                | TT                              | AA              | 1946770916               |
| SNP_P4_29770_10923031 | NC_021162.1    | Ca_kabuli_chr03 | 10923031                | AA                              | GG              | 1946770918               |
| SNP_P4_29771_10923111 | NC_021162.1    | Ca_kabuli_chr03 | 10923111                | AA                              | GG              | 1946770920               |
| SNP_P4_29772_10923130 | NC_021162.1    | Ca_kabuli_chr03 | 10923130                | TT                              | AA              | 1946770922               |
| SNP_P4_29773_10923148 | NC_021162.1    | Ca_kabuli_chr03 | 10923148                | AA                              | GG              | 1946770924               |
| SNP_P4_29775_10923178 | NC_021162.1    | Ca_kabuli_chr03 | 10923178                | AA                              | GG              | 1946770926               |
| SNP_P4_29776_10923181 | NC_021162.1    | Ca_kabuli_chr03 | 10923181                | GG                              | AA              | 1946770928               |
| SNP_P4_29777_10923184 | NC_021162.1    | Ca_kabuli_chr03 | 10923184                | AA                              | GG              | 1946770930               |
| SNP_P4_29779_10923298 | NC_021162.1    | Ca_kabuli_chr03 | 10923298                | GG                              | AA              | 1946770932               |
| SNP_P4_29780_10923304 | NC_021162.1    | Ca_kabuli_chr03 | 10923304                | AA                              | GG              | 1946770934               |
| SNP_P4_29781_10923478 | NC_021162.1    | Ca_kabuli_chr03 | 10923478                | AA                              | GG              | 1946770936               |
| SNP_P4_29782_10924893 | NC_021162.1    | Ca_kabuli_chr03 | 10924893                | AA                              | GG              | 1946770938               |
| SNP_P4_29783_10951995 | NC_021162.1    | Ca_kabuli_chr03 | 10951995                | GG                              | AA              | 1946770940               |
| SNP_P4_29784_10954227 | NC_021162.1    | Ca_kabuli_chr03 | 10954227                | TT                              | CC              | 1946770942               |
| SNP_P4_29785_10954249 | NC_021162.1    | Ca_kabuli_chr03 | 10954249                | AA                              | TT              | 1946770944               |
| SNP_P4_29786_10954289 | NC_021162.1    | Ca_kabuli_chr03 | 10954289                | AA                              | GG              | 1946770947               |
| SNP_P4_29787_10954463 | NC_021162.1    | Ca_kabuli_chr03 | 10954463                | GG                              | TT              | 1946770949               |
| SNP_P4_29788_10954473 | NC_021162.1    | Ca_kabuli_chr03 | 10954473                | AA                              | GG              | 1946770951               |
| SNP_P4_29789_10954524 | NC_021162.1    | Ca_kabuli_chr03 | 10954524                | CC                              | TT              | 1946770953               |
| SNP_P4_29790_10954571 | NC_021162.1    | Ca_kabuli_chr03 | 10954571                | CC                              | TT              | 1946770955               |
| SNP_P4_29791_10965659 | NC_021162.1    | Ca_kabuli_chr03 | 10965659                | CC                              | TT              | 1946770957               |
| SNP_P4_29792_10965660 | NC_021162.1    | Ca_kabuli_chr03 | 10965660                | CC                              | TT              | 1946770959               |
| SNP_P4_29793_10965672 | NC_021162.1    | Ca_kabuli_chr03 | 10965672                | TT                              | CC              | 1946770961               |
| SNP_P4_29795_10993646 | NC_021162.1    | Ca_kabuli_chr03 | 10993646                | CC                              | TT              | 1946770963               |
| SNP_P4_29796_10995425 | NC_021162.1    | Ca_kabuli_chr03 | 10995425                | GG                              | AA              | 1946770966               |
| SNP_P4_29797_11013256 | NC_021162.1    | Ca_kabuli_chr03 | 11013256                | TT                              | CC              | 1946770968               |
| SNP_P4_29798_11040734 | NC_021162.1    | Ca_kabuli_chr03 | 11040734                | AA                              | GG              | 1946770970               |
| SNP_P4_29799_11041013 | NC_021162.1    | Ca_kabuli_chr03 | 11041013                | GG                              | AA              | 1946770972               |
| SNP_P4_29800_11041105 | NC_021162.1    | Ca_kabuli_chr03 | 11041105                | TT                              | AA              | 1946770974               |
| SNP_P4_29801_11041106 | NC_021162.1    | Ca_kabuli_chr03 | 11041106                | AA                              | TT              | 1946770976               |
| SNP_P4_29804_11052056 | NC_021162.1    | Ca_kabuli_chr03 | 11052056                | CC                              | GG              | 1946770979               |
| SNP_P4_29805_11057723 | NC_021162.1    | Ca_kabuli_chr03 | 11057723                | AA                              | TT              | 1946770981               |

| SNPs IDs              | Chromosome IDs | Chromosomes     | Physical positions (bp) | CDC Frontier (Reference genome) | (ILWC46 & LPNB) | NCBI SNPdb Accession IDs |
|-----------------------|----------------|-----------------|-------------------------|---------------------------------|-----------------|--------------------------|
| SNP_P4_29806_11080124 | NC_021162.1    | Ca_kabuli_chr03 | 11080124                | AA                              | CC              | 1946770983               |
| SNP_P4_29807_11087414 | NC_021162.1    | Ca_kabuli_chr03 | 11087414                | TT                              | GG              | 1946770985               |
| SNP_P4_29808_11087456 | NC_021162.1    | Ca_kabuli_chr03 | 11087456                | GG                              | AA              | 1946770987               |
| SNP_P4_29809_11087470 | NC_021162.1    | Ca_kabuli_chr03 | 11087470                | TT                              | CC              | 1946770989               |
| SNP_P4_29810_11098969 | NC_021162.1    | Ca_kabuli_chr03 | 11098969                | CC                              | TT              | 1946770991               |
| SNP_P4_29812_11130743 | NC_021162.1    | Ca_kabuli_chr03 | 11130743                | AA                              | TT              | 1946770993               |
| SNP_P4_29813_11142705 | NC_021162.1    | Ca_kabuli_chr03 | 11142705                | TT                              | AA              | 1946770996               |
| SNP_P4_29814_11142779 | NC_021162.1    | Ca_kabuli_chr03 | 11142779                | TT                              | GG              | 1946770998               |
| SNP_P4_29815_11142866 | NC_021162.1    | Ca_kabuli_chr03 | 11142866                | AA                              | CC              | 1946771000               |
| SNP_P4_29816_11142872 | NC_021162.1    | Ca_kabuli_chr03 | 11142872                | TT                              | CC              | 1946771002               |
| SNP_P4_29817_11142907 | NC_021162.1    | Ca_kabuli_chr03 | 11142907                | AA                              | CC              | 1946771004               |
| SNP_P4_29818_11142945 | NC_021162.1    | Ca_kabuli_chr03 | 11142945                | TT                              | CC              | 1946771007               |
| SNP_P4_29819_11146212 | NC_021162.1    | Ca_kabuli_chr03 | 11146212                | GG                              | CC              | 1946771009               |
| SNP_P4_29820_11146219 | NC_021162.1    | Ca_kabuli_chr03 | 11146219                | GG                              | AA              | 1946771011               |
| SNP_P4_29821_11146412 | NC_021162.1    | Ca_kabuli_chr03 | 11146412                | GG                              | TT              | 1946771013               |
| SNP_P4_29822_11146484 | NC_021162.1    | Ca_kabuli_chr03 | 11146484                | CC                              | GG              | 1946771015               |
| SNP_P4_29823_11146549 | NC_021162.1    | Ca_kabuli_chr03 | 11146549                | AA                              | GG              | 1946771017               |
| SNP_P4_29824_11146629 | NC_021162.1    | Ca_kabuli_chr03 | 11146629                | CC                              | TT              | 1946771019               |
| SNP_P4_29825_11146657 | NC_021162.1    | Ca_kabuli_chr03 | 11146657                | GG                              | TT              | 1946771021               |
| SNP_P4_29826_11147057 | NC_021162.1    | Ca_kabuli_chr03 | 11147057                | AA                              | CC              | 1946771024               |
| SNP_P4_29827_11147063 | NC_021162.1    | Ca_kabuli_chr03 | 11147063                | TT                              | GG              | 1946771026               |
| SNP_P4_29828_11208032 | NC_021162.1    | Ca_kabuli_chr03 | 11208032                | TT                              | CC              | 1946771028               |
| SNP_P4_29830_11231891 | NC_021162.1    | Ca_kabuli_chr03 | 11231891                | AA                              | GG              | 1946771030               |
| SNP_P4_29831_11231925 | NC_021162.1    | Ca_kabuli_chr03 | 11231925                | TT                              | CC              | 1946771032               |
| SNP_P4_29832_11246904 | NC_021162.1    | Ca_kabuli_chr03 | 11246904                | CC                              | TT              | 1946771034               |
| SNP_P4_29834_11247147 | NC_021162.1    | Ca_kabuli_chr03 | 11247147                | CC                              | TT              | 1946771036               |
| SNP_P4_29838_11250582 | NC_021162.1    | Ca_kabuli_chr03 | 11250582                | GG                              | AA              | 1946771038               |
| SNP_P4_29839_11262813 | NC_021162.1    | Ca_kabuli_chr03 | 11262813                | TT                              | GG              | 1946771040               |
| SNP_P4_29840_11262847 | NC_021162.1    | Ca_kabuli_chr03 | 11262847                | GG                              | AA              | 1946771042               |
| SNP_P4_29841_11262940 | NC_021162.1    | Ca_kabuli_chr03 | 11262940                | CC                              | TT              | 1946771045               |
| SNP_P4_29842_11263152 | NC_021162.1    | Ca_kabuli_chr03 | 11263152                | CC                              | TT              | 1946771047               |
| SNP_P4_29843_11280508 | NC_021162.1    | Ca_kabuli_chr03 | 11280508                | GG                              | TT              | 1946771049               |
| SNP_P4_29844_11282152 | NC_021162.1    | Ca_kabuli_chr03 | 11282152                | AA                              | GG              | 1946771051               |
| SNP_P4_29845_11282365 | NC_021162.1    | Ca_kabuli_chr03 | 11282365                | AA                              | GG              | 1946771053               |
| SNP_P4_29846_11282367 | NC_021162.1    | Ca_kabuli_chr03 | 11282367                | CC                              | TT              | 1946771055               |
| SNP_P4_29847_11282404 | NC_021162.1    | Ca_kabuli_chr03 | 11282404                | CC                              | TT              | 1946771057               |
| SNP_P4_29848_11282433 | NC_021162.1    | Ca_kabuli_chr03 | 11282433                | AA                              | GG              | 1946771059               |
| SNP_P4_29849_11282458 | NC_021162.1    | Ca_kabuli_chr03 | 11282458                | AA                              | GG              | 1946771061               |
| SNP_P4_29850_11286111 | NC_021162.1    | Ca_kabuli_chr03 | 11286111                | TT                              | AA              | 1946771064               |
| SNP_P4_29851_11286119 | NC_021162.1    | Ca_kabuli_chr03 | 11286119                | AA                              | GG              | 1946771066               |
| SNP_P4_29852_11286125 | NC_021162.1    | Ca_kabuli_chr03 | 11286125                | CC                              | TT              | 1946771068               |
| SNP_P4_29855_11322621 | NC_021162.1    | Ca_kabuli_chr03 | 11322621                | GG                              | AA              | 1946771070               |

| SNPs IDs              | Chromosome IDs | Chromosomes     | Physical positions (bp) | CDC Frontier (Reference genome) | (ILWC46 & LPNB) | NCBI SNPdb Accession IDs |
|-----------------------|----------------|-----------------|-------------------------|---------------------------------|-----------------|--------------------------|
| SNP_P4_29856_11326762 | NC_021162.1    | Ca_kabuli_chr03 | 11326762                | TT                              | CC              | 1946771073               |
| SNP_P4_29857_11326798 | NC_021162.1    | Ca_kabuli_chr03 | 11326798                | AA                              | GG              | 1946771075               |
| SNP_P4_29858_11329265 | NC_021162.1    | Ca_kabuli_chr03 | 11329265                | TT                              | GG              | 1946771077               |
| SNP_P4_29859_11354577 | NC_021162.1    | Ca_kabuli_chr03 | 11354577                | TT                              | GG              | 1946771079               |
| SNP_P4_29860_11354578 | NC_021162.1    | Ca_kabuli_chr03 | 11354578                | TT                              | AA              | 1946771081               |
| SNP_P4_29861_11388985 | NC_021162.1    | Ca_kabuli_chr03 | 11388985                | TT                              | CC              | 1946771083               |
| SNP_P4_29862_11402472 | NC_021162.1    | Ca_kabuli_chr03 | 11402472                | AA                              | GG              | 1946771086               |
| SNP_P4_29863_11404047 | NC_021162.1    | Ca_kabuli_chr03 | 11404047                | CC                              | AA              | 1946771088               |
| SNP_P4_29864_11457567 | NC_021162.1    | Ca_kabuli_chr03 | 11457567                | CC                              | TT              | 1946771090               |
| SNP_P4_29865_11457916 | NC_021162.1    | Ca_kabuli_chr03 | 11457916                | CC                              | TT              | 1946771092               |
| SNP_P4_29867_11464649 | NC_021162.1    | Ca_kabuli_chr03 | 11464649                | TT                              | CC              | 1946771094               |
| SNP_P4_29868_11465059 | NC_021162.1    | Ca_kabuli_chr03 | 11465059                | AA                              | GG              | 1946771096               |
| SNP_P4_29869_11465093 | NC_021162.1    | Ca_kabuli_chr03 | 11465093                | AA                              | TT              | 1946771098               |
| SNP_P4_29870_11495798 | NC_021162.1    | Ca_kabuli_chr03 | 11495798                | TT                              | AA              | 1946771101               |
| SNP_P4_29872_11497986 | NC_021162.1    | Ca_kabuli_chr03 | 11497986                | CC                              | TT              | 1946771103               |
| SNP_P4_29873_11498020 | NC_021162.1    | Ca_kabuli_chr03 | 11498020                | AA                              | TT              | 1946771106               |
| SNP_P4_29874_11498215 | NC_021162.1    | Ca_kabuli_chr03 | 11498215                | TT                              | GG              | 1946771109               |
| SNP_P4_29875_11498275 | NC_021162.1    | Ca_kabuli_chr03 | 11498275                | TT                              | CC              | 1946771111               |
| SNP_P4_29876_11498292 | NC_021162.1    | Ca_kabuli_chr03 | 11498292                | TT                              | CC              | 1946771113               |
| SNP_P4_29877_11498307 | NC_021162.1    | Ca_kabuli_chr03 | 11498307                | TT                              | CC              | 1946771116               |
| SNP_P4_29878_11498315 | NC_021162.1    | Ca_kabuli_chr03 | 11498315                | GG                              | AA              | 1946771118               |
| SNP_P4_29879_11498329 | NC_021162.1    | Ca_kabuli_chr03 | 11498329                | CC                              | TT              | 1946771120               |
| SNP_P4_29880_11498357 | NC_021162.1    | Ca_kabuli_chr03 | 11498357                | TT                              | CC              | 1946771122               |
| SNP_P4_29881_11501251 | NC_021162.1    | Ca_kabuli_chr03 | 11501251                | CC                              | TT              | 1946771125               |
| SNP_P4_29882_11501252 | NC_021162.1    | Ca_kabuli_chr03 | 11501252                | TT                              | CC              | 1946771127               |
| SNP_P4_29883_11519682 | NC_021162.1    | Ca_kabuli_chr03 | 11519682                | CC                              | TT              | 1946771129               |
| SNP_P4_29886_11521168 | NC_021162.1    | Ca_kabuli_chr03 | 11521168                | TT                              | CC              | 1946771131               |
| SNP_P4_29887_11527391 | NC_021162.1    | Ca_kabuli_chr03 | 11527391                | AA                              | GG              | 1946771133               |
| SNP_P4_29888_11527509 | NC_021162.1    | Ca_kabuli_chr03 | 11527509                | AA                              | TT              | 1946771135               |
| SNP_P4_29889_11527511 | NC_021162.1    | Ca_kabuli_chr03 | 11527511                | AA                              | GG              | 1946771138               |
| SNP_P4_29890_11527535 | NC_021162.1    | Ca_kabuli_chr03 | 11527535                | AA                              | GG              | 1946771140               |
| SNP_P4_29891_11527576 | NC_021162.1    | Ca_kabuli_chr03 | 11527576                | AA                              | GG              | 1946771142               |
| SNP_P4_29892_11527630 | NC_021162.1    | Ca_kabuli_chr03 | 11527630                | GG                              | AA              | 1946771144               |
| SNP_P4_29893_11527752 | NC_021162.1    | Ca_kabuli_chr03 | 11527752                | AA                              | CC              | 1946771146               |
| SNP_P4_29894_11527832 | NC_021162.1    | Ca_kabuli_chr03 | 11527832                | AA                              | GG              | 1946771149               |
| SNP_P4_29895_11527905 | NC_021162.1    | Ca_kabuli_chr03 | 11527905                | AA                              | GG              | 1946771151               |
| SNP_P4_29896_11527927 | NC_021162.1    | Ca_kabuli_chr03 | 11527927                | AA                              | GG              | 1946771153               |
| SNP_P4_29897_11528043 | NC_021162.1    | Ca_kabuli_chr03 | 11528043                | AA                              | GG              | 1946771155               |
| SNP_P4_29898_11528095 | NC_021162.1    | Ca_kabuli_chr03 | 11528095                | GG                              | AA              | 1946771157               |
| SNP_P4_29899_11536200 | NC_021162.1    | Ca_kabuli_chr03 | 11536200                | TT                              | CC              | 1946771158               |
| SNP_P4_29901_11570595 | NC_021162.1    | Ca_kabuli_chr03 | 11570595                | CC                              | AA              | 1946771159               |
| SNP_P4_29902_11571843 | NC_021162.1    | Ca_kabuli_chr03 | 11571843                | CC                              | TT              | 1946771160               |

| SNPs IDs              | Chromosome IDs | Chromosomes     | Physical positions (bp) | CDC Frontier (Reference genome) | (ILWC46 & LPNB) | NCBI SNPdb Accession IDs |
|-----------------------|----------------|-----------------|-------------------------|---------------------------------|-----------------|--------------------------|
| SNP_P4_29903_11575964 | NC_021162.1    | Ca_kabuli_chr03 | 11575964                | TT                              | CC              | 1946771161               |
| SNP_P4_29904_11586551 | NC_021162.1    | Ca_kabuli_chr03 | 11586551                | GG                              | AA              | 1946771162               |
| SNP_P4_29905_11586578 | NC_021162.1    | Ca_kabuli_chr03 | 11586578                | TT                              | CC              | 1946771163               |
| SNP_P4_29906_11586640 | NC_021162.1    | Ca_kabuli_chr03 | 11586640                | TT                              | AA              | 1946771164               |
| SNP_P4_29907_11586683 | NC_021162.1    | Ca_kabuli_chr03 | 11586683                | GG                              | AA              | 1946771165               |
| SNP_P4_29908_11587125 | NC_021162.1    | Ca_kabuli_chr03 | 11587125                | GG                              | TT              | 1946771166               |
| SNP_P4_29909_11589857 | NC_021162.1    | Ca_kabuli_chr03 | 11589857                | TT                              | GG              | 1946771167               |
| SNP_P4_29910_11590142 | NC_021162.1    | Ca_kabuli_chr03 | 11590142                | TT                              | GG              | 1946771169               |
| SNP_P4_29912_11608343 | NC_021162.1    | Ca_kabuli_chr03 | 11608343                | GG                              | CC              | 1946771172               |
| SNP_P4_29913_11608346 | NC_021162.1    | Ca_kabuli_chr03 | 11608346                | GG                              | AA              | 1946771174               |
| SNP_P4_29914_11608356 | NC_021162.1    | Ca_kabuli_chr03 | 11608356                | CC                              | TT              | 1946771176               |
| SNP_P4_29916_11631121 | NC_021162.1    | Ca_kabuli_chr03 | 11631121                | CC                              | TT              | 1946771178               |
| SNP_P4_29918_11714815 | NC_021162.1    | Ca_kabuli_chr03 | 11714815                | CC                              | TT              | 1946771180               |
| SNP_P4_29919_11735199 | NC_021162.1    | Ca_kabuli_chr03 | 11735199                | GG                              | AA              | 1946771182               |
| SNP_P4_29920_11765226 | NC_021162.1    | Ca_kabuli_chr03 | 11765226                | AA                              | TT              | 1946771184               |
| SNP_P4_29921_11773670 | NC_021162.1    | Ca_kabuli_chr03 | 11773670                | GG                              | AA              | 1946771187               |
| SNP_P4_29922_11774039 | NC_021162.1    | Ca_kabuli_chr03 | 11774039                | TT                              | CC              | 1946771189               |
| SNP_P4_29923_11774087 | NC_021162.1    | Ca_kabuli_chr03 | 11774087                | AA                              | TT              | 1946771191               |
| SNP_P4_29924_11774111 | NC_021162.1    | Ca_kabuli_chr03 | 11774111                | AA                              | TT              | 1946771193               |
| SNP_P4_29925_11774261 | NC_021162.1    | Ca_kabuli_chr03 | 11774261                | GG                              | AA              | 1946771195               |
| SNP_P4_29926_11774312 | NC_021162.1    | Ca_kabuli_chr03 | 11774312                | AA                              | GG              | 1946771197               |
| SNP_P4_29927_11774315 | NC_021162.1    | Ca_kabuli_chr03 | 11774315                | TT                              | CC              | 1946771199               |
| SNP_P4_29928_11790670 | NC_021162.1    | Ca_kabuli_chr03 | 11790670                | GG                              | AA              | 1946771201               |
| SNP_P4_29929_11806397 | NC_021162.1    | Ca_kabuli_chr03 | 11806397                | GG                              | AA              | 1946771203               |
| SNP_P4_29930_11830671 | NC_021162.1    | Ca_kabuli_chr03 | 11830671                | TT                              | AA              | 1946771205               |
| SNP_P4_29931_11830855 | NC_021162.1    | Ca_kabuli_chr03 | 11830855                | TT                              | CC              | 1946771208               |
| SNP_P4_29932_11830933 | NC_021162.1    | Ca_kabuli_chr03 | 11830933                | TT                              | AA              | 1946771210               |
| SNP_P4_29933_11831063 | NC_021162.1    | Ca_kabuli_chr03 | 11831063                | AA                              | GG              | 1946771212               |
| SNP_P4_29934_11859399 | NC_021162.1    | Ca_kabuli_chr03 | 11859399                | CC                              | AA              | 1946771214               |
| SNP_P4_29935_11875518 | NC_021162.1    | Ca_kabuli_chr03 | 11875518                | AA                              | GG              | 1946771216               |
| SNP_P4_29937_11888175 | NC_021162.1    | Ca_kabuli_chr03 | 11888175                | GG                              | CC              | 1946771218               |
| SNP_P4_29939_11907322 | NC_021162.1    | Ca_kabuli_chr03 | 11907322                | TT                              | CC              | 1946771220               |
| SNP_P4_29940_11917347 | NC_021162.1    | Ca_kabuli_chr03 | 11917347                | GG                              | TT              | 1946771222               |
| SNP_P4_29943_11930054 | NC_021162.1    | Ca_kabuli_chr03 | 11930054                | AA                              | TT              | 1946771225               |
| SNP_P4_29944_11949911 | NC_021162.1    | Ca_kabuli_chr03 | 11949911                | TT                              | AA              | 1946771227               |
| SNP_P4_29945_11950220 | NC_021162.1    | Ca_kabuli_chr03 | 11950220                | TT                              | CC              | 1946771229               |
| SNP_P4_29946_11950231 | NC_021162.1    | Ca_kabuli_chr03 | 11950231                | CC                              | AA              | 1946771231               |
| SNP_P4_29947_11950263 | NC_021162.1    | Ca_kabuli_chr03 | 11950263                | CC                              | TT              | 1946771233               |
| SNP_P4_29948_11950316 | NC_021162.1    | Ca_kabuli_chr03 | 11950316                | GG                              | AA              | 1946771235               |
| SNP_P4_29949_11950495 | NC_021162.1    | Ca_kabuli_chr03 | 11950495                | CC                              | TT              | 1946771238               |
| SNP_P4_29950_11950501 | NC_021162.1    | Ca_kabuli_chr03 | 11950501                | CC                              | GG              | 1946771239               |
| SNP_P4_29951_11957969 | NC_021162.1    | Ca_kabuli_chr03 | 11957969                | TT                              | CC              | 1946771242               |

| SNPs IDs              | Chromosome IDs | Chromosomes     | Physical positions (bp) | CDC Frontier (Reference genome) | (ILWC46 & LPNB) | NCBI SNPdb Accession IDs |
|-----------------------|----------------|-----------------|-------------------------|---------------------------------|-----------------|--------------------------|
| SNP_P4_29953_12000846 | NC_021162.1    | Ca_kabuli_chr03 | 12000846                | GG                              | AA              | 1946771244               |
| SNP_P4_29954_12002724 | NC_021162.1    | Ca_kabuli_chr03 | 12002724                | GG                              | AA              | 1946771246               |
| SNP_P4_29955_12008370 | NC_021162.1    | Ca_kabuli_chr03 | 12008370                | AA                              | GG              | 1946771248               |
| SNP_P4_29956_12027024 | NC_021162.1    | Ca_kabuli_chr03 | 12027024                | TT                              | GG              | 1946771250               |
| SNP_P4_29957_12032060 | NC_021162.1    | Ca_kabuli_chr03 | 12032060                | GG                              | AA              | 1946771252               |
| SNP_P4_29958_12032069 | NC_021162.1    | Ca_kabuli_chr03 | 12032069                | CC                              | AA              | 1946771255               |
| SNP_P4_29959_12032125 | NC_021162.1    | Ca_kabuli_chr03 | 12032125                | AA                              | TT              | 1946771257               |
| SNP_P4_29960_12034162 | NC_021162.1    | Ca_kabuli_chr03 | 12034162                | TT                              | CC              | 1946771259               |
| SNP_P4_29961_12037682 | NC_021162.1    | Ca_kabuli_chr03 | 12037682                | TT                              | CC              | 1946771262               |
| SNP_P4_29962_12048298 | NC_021162.1    | Ca_kabuli_chr03 | 12048298                | TT                              | CC              | 1946771264               |
| SNP_P4_29964_12074906 | NC_021162.1    | Ca_kabuli_chr03 | 12074906                | CC                              | TT              | 1946771266               |
| SNP_P4_29965_12080826 | NC_021162.1    | Ca_kabuli_chr03 | 12080826                | AA                              | CC              | 1946771268               |
| SNP_P4_29966_12081024 | NC_021162.1    | Ca_kabuli_chr03 | 12081024                | AA                              | GG              | 1946771271               |
| SNP_P4_29967_12081058 | NC_021162.1    | Ca_kabuli_chr03 | 12081058                | GG                              | CC              | 1946771273               |
| SNP_P4_29968_12081071 | NC_021162.1    | Ca_kabuli_chr03 | 12081071                | CC                              | AA              | 1946771275               |
| SNP_P4_29970_12106671 | NC_021162.1    | Ca_kabuli_chr03 | 12106671                | CC                              | AA              | 1946771277               |
| SNP_P4_29971_12106807 | NC_021162.1    | Ca_kabuli_chr03 | 12106807                | GG                              | AA              | 1946771280               |
| SNP_P4_29972_12111477 | NC_021162.1    | Ca_kabuli_chr03 | 12111477                | CC                              | TT              | 1946771282               |
| SNP_P4_29973_12111545 | NC_021162.1    | Ca_kabuli_chr03 | 12111545                | CC                              | TT              | 1946771284               |
| SNP_P4_29974_12111628 | NC_021162.1    | Ca_kabuli_chr03 | 12111628                | GG                              | AA              | 1946771286               |
| SNP_P4_29975_12111629 | NC_021162.1    | Ca_kabuli_chr03 | 12111629                | CC                              | TT              | 1946771288               |
| SNP_P4_29976_12111753 | NC_021162.1    | Ca_kabuli_chr03 | 12111753                | AA                              | TT              | 1946771292               |
| SNP_P4_29977_12111758 | NC_021162.1    | Ca_kabuli_chr03 | 12111758                | TT                              | AA              | 1946771294               |
| SNP_P4_29978_12111759 | NC_021162.1    | Ca_kabuli_chr03 | 12111759                | TT                              | CC              | 1946771297               |
| SNP_P4_29979_12111760 | NC_021162.1    | Ca_kabuli_chr03 | 12111760                | TT                              | AA              | 1946771299               |
| SNP_P4_29980_12111879 | NC_021162.1    | Ca_kabuli_chr03 | 12111879                | CC                              | TT              | 1946771301               |
| SNP_P4_29981_12115367 | NC_021162.1    | Ca_kabuli_chr03 | 12115367                | AA                              | GG              | 1946771303               |
| SNP_P4_29982_12115369 | NC_021162.1    | Ca_kabuli_chr03 | 12115369                | GG                              | TT              | 1946771305               |
| SNP_P4_29983_12127557 | NC_021162.1    | Ca_kabuli_chr03 | 12127557                | CC                              | TT              | 1946771307               |
| SNP_P4_29984_12131454 | NC_021162.1    | Ca_kabuli_chr03 | 12131454                | AA                              | GG              | 1946771310               |
| SNP_P4_29985_12151871 | NC_021162.1    | Ca_kabuli_chr03 | 12151871                | TT                              | CC              | 1946771312               |
| SNP_P4_29986_12163829 | NC_021162.1    | Ca_kabuli_chr03 | 12163829                | CC                              | AA              | 1946771314               |
| SNP_P4_29987_12164150 | NC_021162.1    | Ca_kabuli_chr03 | 12164150                | GG                              | AA              | 1946771316               |
| SNP_P4_29989_12197360 | NC_021162.1    | Ca_kabuli_chr03 | 12197360                | TT                              | AA              | 1946771318               |
| SNP_P4_29990_12206527 | NC_021162.1    | Ca_kabuli_chr03 | 12206527                | AA                              | CC              | 1946771320               |
| SNP_P4_29991_12208945 | NC_021162.1    | Ca_kabuli_chr03 | 12208945                | AA                              | GG              | 1946771322               |
| SNP_P4_29992_12239571 | NC_021162.1    | Ca_kabuli_chr03 | 12239571                | CC                              | AA              | 1946771324               |
| SNP_P4_29993_12250800 | NC_021162.1    | Ca_kabuli_chr03 | 12250800                | AA                              | GG              | 1946771327               |
| SNP_P4_29995_12286939 | NC_021162.1    | Ca_kabuli_chr03 | 12286939                | TT                              | GG              | 1946771329               |
| SNP_P4_29997_12293886 | NC_021162.1    | Ca_kabuli_chr03 | 12293886                | AA                              | TT              | 1946771331               |
| SNP_P4_29998_12345798 | NC_021162.1    | Ca_kabuli_chr03 | 12345798                | TT                              | AA              | 1946771334               |
| SNP_P4_29999_12345910 | NC_021162.1    | Ca_kabuli_chr03 | 12345910                | CC                              | AA              | 1946771337               |

| SNPs IDs              | Chromosome IDs | Chromosomes     | Physical positions (bp) | CDC Frontier (Reference genome) | (ILWC46 & LPNB) | NCBI SNPdb Accession IDs |
|-----------------------|----------------|-----------------|-------------------------|---------------------------------|-----------------|--------------------------|
| SNP_P4_30000_12345921 | NC_021162.1    | Ca_kabuli_chr03 | 12345921                | CC                              | AA              | 1946771339               |
| SNP_P4_30001_12345927 | NC_021162.1    | Ca_kabuli_chr03 | 12345927                | CC                              | TT              | 1946771341               |
| SNP_P4_30002_12345942 | NC_021162.1    | Ca_kabuli_chr03 | 12345942                | GG                              | AA              | 1946771343               |
| SNP_P4_30003_12346000 | NC_021162.1    | Ca_kabuli_chr03 | 12346000                | AA                              | GG              | 1946771345               |
| SNP_P4_30004_12346014 | NC_021162.1    | Ca_kabuli_chr03 | 12346014                | GG                              | AA              | 1946771347               |
| SNP_P4_30005_12348370 | NC_021162.1    | Ca_kabuli_chr03 | 12348370                | TT                              | AA              | 1946771349               |
| SNP_P4_30006_12348432 | NC_021162.1    | Ca_kabuli_chr03 | 12348432                | AA                              | TT              | 1946771352               |
| SNP_P4_30007_12373444 | NC_021162.1    | Ca_kabuli_chr03 | 12373444                | TT                              | GG              | 1946771354               |
| SNP_P4_30008_12387488 | NC_021162.1    | Ca_kabuli_chr03 | 12387488                | TT                              | CC              | 1946771356               |
| SNP_P4_30009_12387519 | NC_021162.1    | Ca_kabuli_chr03 | 12387519                | GG                              | AA              | 1946771358               |
| SNP_P4_30010_12387588 | NC_021162.1    | Ca_kabuli_chr03 | 12387588                | AA                              | GG              | 1946771360               |
| SNP_P4_30011_12387643 | NC_021162.1    | Ca_kabuli_chr03 | 12387643                | CC                              | TT              | 1946771362               |
| SNP_P4_30012_12387668 | NC_021162.1    | Ca_kabuli_chr03 | 12387668                | TT                              | CC              | 1946771364               |
| SNP_P4_30013_12387679 | NC_021162.1    | Ca_kabuli_chr03 | 12387679                | AA                              | GG              | 1946771366               |
| SNP_P4_30014_12387698 | NC_021162.1    | Ca_kabuli_chr03 | 12387698                | TT                              | CC              | 1946771369               |
| SNP_P4_30017_12423256 | NC_021162.1    | Ca_kabuli_chr03 | 12423256                | TT                              | CC              | 1946771371               |
| SNP_P4_30018_12423437 | NC_021162.1    | Ca_kabuli_chr03 | 12423437                | CC                              | GG              | 1946771373               |
| SNP_P4_30019_12423454 | NC_021162.1    | Ca_kabuli_chr03 | 12423454                | GG                              | TT              | 1946771375               |
| SNP_P4_30020_12423576 | NC_021162.1    | Ca_kabuli_chr03 | 12423576                | CC                              | TT              | 1946771377               |
| SNP_P4_30021_12426707 | NC_021162.1    | Ca_kabuli_chr03 | 12426707                | CC                              | GG              | 1946771380               |
| SNP_P4_30023_12429509 | NC_021162.1    | Ca_kabuli_chr03 | 12429509                | CC                              | TT              | 1946771382               |
| SNP_P4_30024_12432747 | NC_021162.1    | Ca_kabuli_chr03 | 12432747                | GG                              | AA              | 1946771384               |
| SNP_P4_30025_12438400 | NC_021162.1    | Ca_kabuli_chr03 | 12438400                | TT                              | CC              | 1946771386               |
| SNP_P4_30026_12451057 | NC_021162.1    | Ca_kabuli_chr03 | 12451057                | CC                              | TT              | 1946771388               |
| SNP_P4_30027_12488749 | NC_021162.1    | Ca_kabuli_chr03 | 12488749                | TT                              | GG              | 1946771390               |
| SNP_P4_30028_12493647 | NC_021162.1    | Ca_kabuli_chr03 | 12493647                | AA                              | GG              | 1946771392               |
| SNP_P4_30029_12518105 | NC_021162.1    | Ca_kabuli_chr03 | 12518105                | AA                              | GG              | 1946771394               |
| SNP_P4_30030_12518431 | NC_021162.1    | Ca_kabuli_chr03 | 12518431                | AA                              | GG              | 1946771396               |
| SNP_P4_30031_12518446 | NC_021162.1    | Ca_kabuli_chr03 | 12518446                | CC                              | AA              | 1946771398               |
| SNP_P4_30032_12549275 | NC_021162.1    | Ca_kabuli_chr03 | 12549275                | AA                              | GG              | 1946771400               |
| SNP_P4_30033_12549307 | NC_021162.1    | Ca_kabuli_chr03 | 12549307                | AA                              | CC              | 1946771402               |
| SNP_P4_30034_12549326 | NC_021162.1    | Ca_kabuli_chr03 | 12549326                | AA                              | GG              | 1946771405               |
| SNP_P4_30035_12549704 | NC_021162.1    | Ca_kabuli_chr03 | 12549704                | CC                              | GG              | 1946771407               |
| SNP_P4_30036_12549717 | NC_021162.1    | Ca_kabuli_chr03 | 12549717                | AA                              | GG              | 1946771409               |
| SNP_P4_30038_12558986 | NC_021162.1    | Ca_kabuli_chr03 | 12558986                | TT                              | CC              | 1946771411               |
| SNP_P4_30039_12560207 | NC_021162.1    | Ca_kabuli_chr03 | 12560207                | CC                              | TT              | 1946771413               |
| SNP_P4_30040_12566315 | NC_021162.1    | Ca_kabuli_chr03 | 12566315                | AA                              | GG              | 1946771415               |
| SNP_P4_30041_12566605 | NC_021162.1    | Ca_kabuli_chr03 | 12566605                | GG                              | AA              | 1946771417               |
| SNP_P4_30042_12566658 | NC_021162.1    | Ca_kabuli_chr03 | 12566658                | CC                              | GG              | 1946771419               |
| SNP_P4_30043_12566766 | NC_021162.1    | Ca_kabuli_chr03 | 12566766                | TT                              | GG              | 1946771421               |
| SNP_P4_30044_12573582 | NC_021162.1    | Ca_kabuli_chr03 | 12573582                | TT                              | CC              | 1946771423               |
| SNP_P4_30045_12581143 | NC_021162.1    | Ca_kabuli_chr03 | 12581143                | CC                              | TT              | 1946771426               |

| SNPs IDs              | Chromosome IDs | Chromosomes     | Physical positions (bp) | CDC Frontier (Reference genome) | (ILWC46 & LPNB) | NCBI SNPdb Accession IDs |
|-----------------------|----------------|-----------------|-------------------------|---------------------------------|-----------------|--------------------------|
| SNP_P4_30046_12581204 | NC_021162.1    | Ca_kabuli_chr03 | 12581204                | GG                              | TT              | 1946771428               |
| SNP_P4_30047_12581217 | NC_021162.1    | Ca_kabuli_chr03 | 12581217                | GG                              | AA              | 1946771430               |
| SNP_P4_30048_12581961 | NC_021162.1    | Ca_kabuli_chr03 | 12581961                | CC                              | TT              | 1946771432               |
| SNP_P4_30049_12582006 | NC_021162.1    | Ca_kabuli_chr03 | 12582006                | AA                              | TT              | 1946771434               |
| SNP_P4_30050_12587532 | NC_021162.1    | Ca_kabuli_chr03 | 12587532                | GG                              | AA              | 1946771436               |
| SNP_P4_30051_12603691 | NC_021162.1    | Ca_kabuli_chr03 | 12603691                | TT                              | GG              | 1946771438               |
| SNP_P4_30052_12618101 | NC_021162.1    | Ca_kabuli_chr03 | 12618101                | GG                              | AA              | 1946771440               |
| SNP_P4_30053_12622503 | NC_021162.1    | Ca_kabuli_chr03 | 12622503                | AA                              | GG              | 1946771442               |
| SNP_P4_30054_12650974 | NC_021162.1    | Ca_kabuli_chr03 | 12650974                | AA                              | TT              | 1946771444               |
| SNP_P4_30056_12660292 | NC_021162.1    | Ca_kabuli_chr03 | 12660292                | TT                              | AA              | 1946771446               |
| SNP_P4_30057_12660550 | NC_021162.1    | Ca_kabuli_chr03 | 12660550                | TT                              | CC              | 1946771448               |
| SNP_P4_30058_12671329 | NC_021162.1    | Ca_kabuli_chr03 | 12671329                | CC                              | TT              | 1946771450               |
| SNP_P4_30059_12676974 | NC_021162.1    | Ca_kabuli_chr03 | 12676974                | CC                              | TT              | 1946771453               |
| SNP_P4_30060_12683926 | NC_021162.1    | Ca_kabuli_chr03 | 12683926                | CC                              | TT              | 1946771455               |
| SNP_P4_30061_12683930 | NC_021162.1    | Ca_kabuli_chr03 | 12683930                | GG                              | AA              | 1946771457               |
| SNP_P4_30062_12699629 | NC_021162.1    | Ca_kabuli_chr03 | 12699629                | CC                              | TT              | 1946771459               |
| SNP_P4_30063_12699638 | NC_021162.1    | Ca_kabuli_chr03 | 12699638                | GG                              | AA              | 1946771461               |
| SNP_P4_30064_12699929 | NC_021162.1    | Ca_kabuli_chr03 | 12699929                | TT                              | CC              | 1946771463               |
| SNP_P4_30065_12702484 | NC_021162.1    | Ca_kabuli_chr03 | 12702484                | AA                              | CC              | 1946771465               |
| SNP_P4_30066_12702485 | NC_021162.1    | Ca_kabuli_chr03 | 12702485                | CC                              | TT              | 1946771467               |
| SNP_P4_30067_12714262 | NC_021162.1    | Ca_kabuli_chr03 | 12714262                | AA                              | CC              | 1946771469               |
| SNP_P4_30068_12714270 | NC_021162.1    | Ca_kabuli_chr03 | 12714270                | TT                              | CC              | 1946771471               |
| SNP_P4_30069_12714273 | NC_021162.1    | Ca_kabuli_chr03 | 12714273                | CC                              | TT              | 1946771474               |
| SNP_P4_30070_12714346 | NC_021162.1    | Ca_kabuli_chr03 | 12714346                | TT                              | GG              | 1946771476               |
| SNP_P4_30071_12714400 | NC_021162.1    | Ca_kabuli_chr03 | 12714400                | CC                              | AA              | 1946771478               |
| SNP_P4_30072_12714405 | NC_021162.1    | Ca_kabuli_chr03 | 12714405                | CC                              | TT              | 1946771480               |
| SNP_P4_30074_12723553 | NC_021162.1    | Ca_kabuli_chr03 | 12723553                | CC                              | TT              | 1946771482               |
| SNP_P4_30075_12739816 | NC_021162.1    | Ca_kabuli_chr03 | 12739816                | AA                              | GG              | 1946771484               |
| SNP_P4_30076_12739819 | NC_021162.1    | Ca_kabuli_chr03 | 12739819                | CC                              | TT              | 1946771486               |
| SNP_P4_30077_12739840 | NC_021162.1    | Ca_kabuli_chr03 | 12739840                | GG                              | AA              | 1946771488               |
| SNP_P4_30078_12739850 | NC_021162.1    | Ca_kabuli_chr03 | 12739850                | GG                              | CC              | 1946771491               |
| SNP_P4_30079_12739882 | NC_021162.1    | Ca_kabuli_chr03 | 12739882                | AA                              | GG              | 1946771493               |
| SNP_P4_30080_12740154 | NC_021162.1    | Ca_kabuli_chr03 | 12740154                | AA                              | GG              | 1946771495               |
| SNP_P4_30081_12740161 | NC_021162.1    | Ca_kabuli_chr03 | 12740161                | TT                              | CC              | 1946771497               |
| SNP_P4_30082_12747046 | NC_021162.1    | Ca_kabuli_chr03 | 12747046                | CC                              | TT              | 1946771499               |
| SNP_P4_30083_12808624 | NC_021162.1    | Ca_kabuli_chr03 | 12808624                | TT                              | AA              | 1946771501               |
| SNP_P4_30084_12808647 | NC_021162.1    | Ca_kabuli_chr03 | 12808647                | TT                              | GG              | 1946771503               |
| SNP_P4_30085_12808666 | NC_021162.1    | Ca_kabuli_chr03 | 12808666                | AA                              | GG              | 1946771505               |
| SNP_P4_30086_12808677 | NC_021162.1    | Ca_kabuli_chr03 | 12808677                | AA                              | GG              | 1946771507               |
| SNP_P4_30087_12808871 | NC_021162.1    | Ca_kabuli_chr03 | 12808871                | CC                              | AA              | 1946771509               |
| SNP_P4_30088_12808902 | NC_021162.1    | Ca_kabuli_chr03 | 12808902                | GG                              | AA              | 1946771511               |
| SNP_P4_30089_12808948 | NC_021162.1    | Ca_kabuli_chr03 | 12808948                | TT                              | GG              | 1946771513               |

| SNPs IDs              | Chromosome IDs | Chromosomes     | Physical positions (bp) | CDC Frontier (Reference genome) | (ILWC46 & LPNB) | NCBI SNPdb Accession IDs |
|-----------------------|----------------|-----------------|-------------------------|---------------------------------|-----------------|--------------------------|
| SNP_P4_30090_12808985 | NC_021162.1    | Ca_kabuli_chr03 | 12808985                | AA                              | GG              | 1946771515               |
| SNP_P4_30091_12814456 | NC_021162.1    | Ca_kabuli_chr03 | 12814456                | GG                              | AA              | 1946771517               |
| SNP_P4_30092_12819665 | NC_021162.1    | Ca_kabuli_chr03 | 12819665                | CC                              | GG              | 1946771520               |
| SNP_P4_30093_12823097 | NC_021162.1    | Ca_kabuli_chr03 | 12823097                | GG                              | AA              | 1946771522               |
| SNP_P4_30094_12823624 | NC_021162.1    | Ca_kabuli_chr03 | 12823624                | TT                              | CC              | 1946771524               |
| SNP_P4_30095_12823998 | NC_021162.1    | Ca_kabuli_chr03 | 12823998                | AA                              | GG              | 1946771526               |
| SNP_P4_30096_12827289 | NC_021162.1    | Ca_kabuli_chr03 | 12827289                | GG                              | AA              | 1946771528               |
| SNP_P4_30097_12839564 | NC_021162.1    | Ca_kabuli_chr03 | 12839564                | GG                              | AA              | 1946771530               |
| SNP_P4_30098_12863916 | NC_021162.1    | Ca_kabuli_chr03 | 12863916                | AA                              | GG              | 1946771532               |
| SNP_P4_30099_12911057 | NC_021162.1    | Ca_kabuli_chr03 | 12911057                | TT                              | AA              | 1946771534               |
| SNP_P4_30100_12911114 | NC_021162.1    | Ca_kabuli_chr03 | 12911114                | AA                              | GG              | 1946771537               |
| SNP_P4_30102_12915733 | NC_021162.1    | Ca_kabuli_chr03 | 12915733                | TT                              | GG              | 1946771539               |
| SNP_P4_30103_12922189 | NC_021162.1    | Ca_kabuli_chr03 | 12922189                | TT                              | CC              | 1946771541               |
| SNP_P4_30104_12922586 | NC_021162.1    | Ca_kabuli_chr03 | 12922586                | AA                              | TT              | 1946771543               |
| SNP_P4_30105_12922599 | NC_021162.1    | Ca_kabuli_chr03 | 12922599                | GG                              | CC              | 1946771545               |
| SNP_P4_30106_12922667 | NC_021162.1    | Ca_kabuli_chr03 | 12922667                | AA                              | CC              | 1946771547               |
| SNP_P4_30107_12969802 | NC_021162.1    | Ca_kabuli_chr03 | 12969802                | TT                              | AA              | 1946771549               |
| SNP_P4_30109_12993773 | NC_021162.1    | Ca_kabuli_chr03 | 12993773                | CC                              | TT              | 1946771551               |
| SNP_P4_30110_12993777 | NC_021162.1    | Ca_kabuli_chr03 | 12993777                | TT                              | CC              | 1946771553               |
| SNP_P4_30111_12993826 | NC_021162.1    | Ca_kabuli_chr03 | 12993826                | CC                              | TT              | 1946771555               |
| SNP_P4_30112_12993827 | NC_021162.1    | Ca_kabuli_chr03 | 12993827                | AA                              | GG              | 1946771557               |
| SNP_P4_30113_12993841 | NC_021162.1    | Ca_kabuli_chr03 | 12993841                | TT                              | GG              | 1946771560               |
| SNP_P4_30114_12993846 | NC_021162.1    | Ca_kabuli_chr03 | 12993846                | GG                              | AA              | 1946771562               |
| SNP_P4_30115_12993915 | NC_021162.1    | Ca_kabuli_chr03 | 12993915                | AA                              | GG              | 1946771564               |
| SNP_P4_30116_12994119 | NC_021162.1    | Ca_kabuli_chr03 | 12994119                | AA                              | GG              | 1946771566               |
| SNP_P4_30117_12994145 | NC_021162.1    | Ca_kabuli_chr03 | 12994145                | TT                              | CC              | 1946771568               |
| SNP_P4_30118_12994177 | NC_021162.1    | Ca_kabuli_chr03 | 12994177                | GG                              | TT              | 1946771570               |
| SNP_P4_30119_12994183 | NC_021162.1    | Ca_kabuli_chr03 | 12994183                | AA                              | CC              | 1946771572               |
| SNP_P4_30120_12994188 | NC_021162.1    | Ca_kabuli_chr03 | 12994188                | TT                              | CC              | 1946771573               |
| SNP_P4_30121_12994235 | NC_021162.1    | Ca_kabuli_chr03 | 12994235                | AA                              | GG              | 1946771574               |
| SNP_P4_30122_12994253 | NC_021162.1    | Ca_kabuli_chr03 | 12994253                | TT                              | CC              | 1946771575               |
| SNP_P4_30123_12994262 | NC_021162.1    | Ca_kabuli_chr03 | 12994262                | GG                              | AA              | 1946771576               |
| SNP_P4_30124_12994269 | NC_021162.1    | Ca_kabuli_chr03 | 12994269                | AA                              | CC              | 1946771578               |
| SNP_P4_30125_12994305 | NC_021162.1    | Ca_kabuli_chr03 | 12994305                | TT                              | CC              | 1946771580               |
| SNP_P4_30126_12994318 | NC_021162.1    | Ca_kabuli_chr03 | 12994318                | AA                              | GG              | 1946771582               |
| SNP_P4_30127_12994324 | NC_021162.1    | Ca_kabuli_chr03 | 12994324                | TT                              | GG              | 1946771584               |
| SNP_P4_30128_12994374 | NC_021162.1    | Ca_kabuli_chr03 | 12994374                | CC                              | TT              | 1946771586               |
| SNP_P4_30129_13006634 | NC_021162.1    | Ca_kabuli_chr03 | 13006634                | AA                              | GG              | 1946771588               |
| SNP_P4_30130_13021529 | NC_021162.1    | Ca_kabuli_chr03 | 13021529                | TT                              | GG              | 1946771590               |
| SNP_P4_30131_13024373 | NC_021162.1    | Ca_kabuli_chr03 | 13024373                | GG                              | AA              | 1946771592               |
| SNP_P4_30132_13024376 | NC_021162.1    | Ca_kabuli_chr03 | 13024376                | CC                              | TT              | 1946771594               |
| SNP_P4_30133_13024396 | NC_021162.1    | Ca_kabuli_chr03 | 13024396                | CC                              | TT              | 1946771596               |



| SNPs IDs              | Chromosome IDs | Chromosomes     | Physical positions (bp) | CDC Frontier (Reference genome) | (ILWC46 & LPNB) | NCBI SNPdb Accession IDs |
|-----------------------|----------------|-----------------|-------------------------|---------------------------------|-----------------|--------------------------|
| SNP_P4_30134_13024405 | NC_021162.1    | Ca_kabuli_chr03 | 13024405                | AA                              | TT              | 1946771598               |
| SNP_P4_30135_13024423 | NC_021162.1    | Ca_kabuli_chr03 | 13024423                | TT                              | GG              | 1946771600               |
| SNP_P4_30136_13024442 | NC_021162.1    | Ca_kabuli_chr03 | 13024442                | AA                              | TT              | 1946771601               |
| SNP_P4_30137_13034310 | NC_021162.1    | Ca_kabuli_chr03 | 13034310                | CC                              | TT              | 1946771602               |
| SNP_P4_30138_13036372 | NC_021162.1    | Ca_kabuli_chr03 | 13036372                | AA                              | CC              | 1946771603               |
| SNP_P4_30139_13036479 | NC_021162.1    | Ca_kabuli_chr03 | 13036479                | AA                              | GG              | 1946771604               |
| SNP_P4_30140_13036484 | NC_021162.1    | Ca_kabuli_chr03 | 13036484                | AA                              | GG              | 1946771605               |
| SNP_P4_30141_13038081 | NC_021162.1    | Ca_kabuli_chr03 | 13038081                | TT                              | CC              | 1946771606               |
| SNP_P4_30142_13038211 | NC_021162.1    | Ca_kabuli_chr03 | 13038211                | GG                              | TT              | 1946771608               |
| SNP_P4_30143_13040983 | NC_021162.1    | Ca_kabuli_chr03 | 13040983                | TT                              | CC              | 1946771610               |
| SNP_P4_30144_13041005 | NC_021162.1    | Ca_kabuli_chr03 | 13041005                | GG                              | AA              | 1946771612               |
| SNP_P4_30145_13041039 | NC_021162.1    | Ca_kabuli_chr03 | 13041039                | AA                              | GG              | 1946771614               |
| SNP_P4_30146_13041042 | NC_021162.1    | Ca_kabuli_chr03 | 13041042                | TT                              | CC              | 1946771616               |
| SNP_P4_30147_13041075 | NC_021162.1    | Ca_kabuli_chr03 | 13041075                | CC                              | AA              | 1946771618               |
| SNP_P4_30148_13041122 | NC_021162.1    | Ca_kabuli_chr03 | 13041122                | GG                              | AA              | 1946771620               |
| SNP_P4_30149_13041422 | NC_021162.1    | Ca_kabuli_chr03 | 13041422                | CC                              | TT              | 1946771622               |
| SNP_P4_30150_13041468 | NC_021162.1    | Ca_kabuli_chr03 | 13041468                | CC                              | TT              | 1946771625               |
| SNP_P4_30151_13041533 | NC_021162.1    | Ca_kabuli_chr03 | 13041533                | AA                              | GG              | 1946771627               |
| SNP_P4_30152_13041578 | NC_021162.1    | Ca_kabuli_chr03 | 13041578                | AA                              | GG              | 1946771629               |
| SNP_P4_30153_13041653 | NC_021162.1    | Ca_kabuli_chr03 | 13041653                | GG                              | TT              | 1946771631               |
| SNP_P4_30154_13041676 | NC_021162.1    | Ca_kabuli_chr03 | 13041676                | TT                              | CC              | 1946771633               |
| SNP_P4_30155_13041685 | NC_021162.1    | Ca_kabuli_chr03 | 13041685                | AA                              | CC              | 1946771635               |
| SNP_P4_30156_13042121 | NC_021162.1    | Ca_kabuli_chr03 | 13042121                | AA                              | TT              | 1946771637               |
| SNP_P4_30157_13042123 | NC_021162.1    | Ca_kabuli_chr03 | 13042123                | GG                              | AA              | 1946771639               |
| SNP_P4_30158_13047747 | NC_021162.1    | Ca_kabuli_chr03 | 13047747                | GG                              | AA              | 1946771641               |
| SNP_P4_30159_13047759 | NC_021162.1    | Ca_kabuli_chr03 | 13047759                | GG                              | TT              | 1946771643               |
| SNP_P4_30160_13050309 | NC_021162.1    | Ca_kabuli_chr03 | 13050309                | TT                              | AA              | 1946771645               |
| SNP_P4_30161_13064297 | NC_021162.1    | Ca_kabuli_chr03 | 13064297                | TT                              | AA              | 1946771647               |
| SNP_P4_30162_13068635 | NC_021162.1    | Ca_kabuli_chr03 | 13068635                | AA                              | GG              | 1946771650               |
| SNP_P4_30163_13070122 | NC_021162.1    | Ca_kabuli_chr03 | 13070122                | GG                              | TT              | 1946771652               |
| SNP_P4_30164_13094174 | NC_021162.1    | Ca_kabuli_chr03 | 13094174                | GG                              | AA              | 1946771654               |
| SNP_P4_30165_13096562 | NC_021162.1    | Ca_kabuli_chr03 | 13096562                | TT                              | CC              | 1946771656               |
| SNP_P4_30166_13096566 | NC_021162.1    | Ca_kabuli_chr03 | 13096566                | AA                              | CC              | 1946771658               |
| SNP_P4_30167_13096590 | NC_021162.1    | Ca_kabuli_chr03 | 13096590                | AA                              | CC              | 1946771660               |
| SNP_P4_30168_13096629 | NC_021162.1    | Ca_kabuli_chr03 | 13096629                | TT                              | GG              | 1946771662               |
| SNP_P4_30169_13096654 | NC_021162.1    | Ca_kabuli_chr03 | 13096654                | TT                              | CC              | 1946771664               |
| SNP_P4_30170_13096687 | NC_021162.1    | Ca_kabuli_chr03 | 13096687                | AA                              | GG              | 1946771666               |
| SNP_P4_30171_13096689 | NC_021162.1    | Ca_kabuli_chr03 | 13096689                | CC                              | TT              | 1946771668               |
| SNP_P4_30172_13096751 | NC_021162.1    | Ca_kabuli_chr03 | 13096751                | TT                              | AA              | 1946771670               |
| SNP_P4_30173_13096756 | NC_021162.1    | Ca_kabuli_chr03 | 13096756                | CC                              | AA              | 1946771672               |
| SNP_P4_30174_13096763 | NC_021162.1    | Ca_kabuli_chr03 | 13096763                | AA                              | CC              | 1946771674               |
| SNP_P4_30175_13096771 | NC_021162.1    | Ca_kabuli_chr03 | 13096771                | AA                              | GG              | 1946771676               |

| SNPs IDs              | Chromosome IDs | Chromosomes     | Physical positions (bp) | CDC Frontier (Reference genome) | (ILWC46 & LPNB) | NCBI SNPdb Accession IDs |
|-----------------------|----------------|-----------------|-------------------------|---------------------------------|-----------------|--------------------------|
| SNP_P4_30176_13096799 | NC_021162.1    | Ca_kabuli_chr03 | 13096799                | TT                              | GG              | 1946771679               |
| SNP_P4_30177_13096813 | NC_021162.1    | Ca_kabuli_chr03 | 13096813                | GG                              | AA              | 1946771681               |
| SNP_P4_30178_13096814 | NC_021162.1    | Ca_kabuli_chr03 | 13096814                | GG                              | TT              | 1946771684               |
| SNP_P4_30179_13096869 | NC_021162.1    | Ca_kabuli_chr03 | 13096869                | TT                              | CC              | 1946771686               |
| SNP_P4_30180_13096884 | NC_021162.1    | Ca_kabuli_chr03 | 13096884                | TT                              | CC              | 1946771689               |
| SNP_P4_30183_13097106 | NC_021162.1    | Ca_kabuli_chr03 | 13097106                | TT                              | CC              | 1946771692               |
| SNP_P4_30184_13097110 | NC_021162.1    | Ca_kabuli_chr03 | 13097110                | CC                              | TT              | 1946771694               |
| SNP_P4_30185_13097189 | NC_021162.1    | Ca_kabuli_chr03 | 13097189                | AA                              | GG              | 1946771696               |
| SNP_P4_30186_13104973 | NC_021162.1    | Ca_kabuli_chr03 | 13104973                | CC                              | TT              | 1946771698               |
| SNP_P4_30187_13104977 | NC_021162.1    | Ca_kabuli_chr03 | 13104977                | TT                              | CC              | 1946771700               |
| SNP_P4_30188_13107617 | NC_021162.1    | Ca_kabuli_chr03 | 13107617                | AA                              | GG              | 1946771702               |
| SNP_P4_30189_13129295 | NC_021162.1    | Ca_kabuli_chr03 | 13129295                | AA                              | TT              | 1946771704               |
| SNP_P4_30190_13135619 | NC_021162.1    | Ca_kabuli_chr03 | 13135619                | AA                              | CC              | 1946771706               |
| SNP_P4_30191_13135626 | NC_021162.1    | Ca_kabuli_chr03 | 13135626                | TT                              | AA              | 1946771708               |
| SNP_P4_30192_13146137 | NC_021162.1    | Ca_kabuli_chr03 | 13146137                | GG                              | CC              | 1946771710               |
| SNP_P4_30193_13146142 | NC_021162.1    | Ca_kabuli_chr03 | 13146142                | AA                              | GG              | 1946771712               |
| SNP_P4_30194_13151635 | NC_021162.1    | Ca_kabuli_chr03 | 13151635                | CC                              | TT              | 1946771714               |
| SNP_P4_30196_13172358 | NC_021162.1    | Ca_kabuli_chr03 | 13172358                | CC                              | GG              | 1946771716               |
| SNP_P4_30197_13172370 | NC_021162.1    | Ca_kabuli_chr03 | 13172370                | GG                              | CC              | 1946771718               |
| SNP_P4_30198_13180035 | NC_021162.1    | Ca_kabuli_chr03 | 13180035                | CC                              | TT              | 1946771720               |
| SNP_P4_30199_13180052 | NC_021162.1    | Ca_kabuli_chr03 | 13180052                | TT                              | CC              | 1946771723               |
| SNP_P4_30200_13184587 | NC_021162.1    | Ca_kabuli_chr03 | 13184587                | CC                              | AA              | 1946771725               |
| SNP_P4_30201_13185101 | NC_021162.1    | Ca_kabuli_chr03 | 13185101                | TT                              | CC              | 1946771727               |
| SNP_P4_30202_13185138 | NC_021162.1    | Ca_kabuli_chr03 | 13185138                | GG                              | TT              | 1946771729               |
| SNP_P4_30203_13185163 | NC_021162.1    | Ca_kabuli_chr03 | 13185163                | GG                              | CC              | 1946771731               |
| SNP_P4_30204_13185164 | NC_021162.1    | Ca_kabuli_chr03 | 13185164                | AA                              | CC              | 1946771733               |
| SNP_P4_30205_13185210 | NC_021162.1    | Ca_kabuli_chr03 | 13185210                | GG                              | AA              | 1946771735               |
| SNP_P4_30206_13185297 | NC_021162.1    | Ca_kabuli_chr03 | 13185297                | CC                              | AA              | 1946771737               |
| SNP_P4_30207_13185329 | NC_021162.1    | Ca_kabuli_chr03 | 13185329                | GG                              | AA              | 1946771739               |
| SNP_P4_30208_13185385 | NC_021162.1    | Ca_kabuli_chr03 | 13185385                | GG                              | TT              | 1946771741               |
| SNP_P4_30210_13185472 | NC_021162.1    | Ca_kabuli_chr03 | 13185472                | AA                              | CC              | 1946771744               |
| SNP_P4_30211_13185540 | NC_021162.1    | Ca_kabuli_chr03 | 13185540                | GG                              | TT              | 1946771746               |
| SNP_P4_30212_13185558 | NC_021162.1    | Ca_kabuli_chr03 | 13185558                | GG                              | CC              | 1946771748               |
| SNP_P4_30213_13185559 | NC_021162.1    | Ca_kabuli_chr03 | 13185559                | GG                              | AA              | 1946771750               |
| SNP_P4_30214_13185579 | NC_021162.1    | Ca_kabuli_chr03 | 13185579                | TT                              | CC              | 1946771752               |
| SNP_P4_30215_13185767 | NC_021162.1    | Ca_kabuli_chr03 | 13185767                | CC                              | GG              | 1946771754               |
| SNP_P4_30216_13201081 | NC_021162.1    | Ca_kabuli_chr03 | 13201081                | CC                              | TT              | 1946771756               |
| SNP_P4_30217_13201214 | NC_021162.1    | Ca_kabuli_chr03 | 13201214                | TT                              | CC              | 1946771758               |
| SNP_P4_30219_13237061 | NC_021162.1    | Ca_kabuli_chr03 | 13237061                | AA                              | GG              | 1946771760               |
| SNP_P4_30220_13237065 | NC_021162.1    | Ca_kabuli_chr03 | 13237065                | TT                              | GG              | 1946771762               |
| SNP_P4_30221_13238621 | NC_021162.1    | Ca_kabuli_chr03 | 13238621                | AA                              | CC              | 1946771764               |
| SNP_P4_30222_13244178 | NC_021162.1    | Ca_kabuli_chr03 | 13244178                | GG                              | AA              | 1946771766               |

| SNPs IDs              | Chromosome IDs | Chromosomes     | Physical positions (bp) | CDC Frontier (Reference genome) | (ILWC46 & LPNB) | NCBI SNPdb Accession IDs |
|-----------------------|----------------|-----------------|-------------------------|---------------------------------|-----------------|--------------------------|
| SNP_P4_30223_13261324 | NC_021162.1    | Ca_kabuli_chr03 | 13261324                | TT                              | CC              | 1946771769               |
| SNP_P4_30224_13263946 | NC_021162.1    | Ca_kabuli_chr03 | 13263946                | GG                              | TT              | 1946771771               |
| SNP_P4_30225_13264432 | NC_021162.1    | Ca_kabuli_chr03 | 13264432                | AA                              | TT              | 1946771773               |
| SNP_P4_30226_13285008 | NC_021162.1    | Ca_kabuli_chr03 | 13285008                | TT                              | GG              | 1946771775               |
| SNP_P4_30227_13285010 | NC_021162.1    | Ca_kabuli_chr03 | 13285010                | CC                              | GG              | 1946771777               |
| SNP_P4_30228_13285199 | NC_021162.1    | Ca_kabuli_chr03 | 13285199                | CC                              | TT              | 1946771779               |
| SNP_P4_30229_13285211 | NC_021162.1    | Ca_kabuli_chr03 | 13285211                | AA                              | GG              | 1946771781               |
| SNP_P4_30230_13291899 | NC_021162.1    | Ca_kabuli_chr03 | 13291899                | AA                              | GG              | 1946771783               |
| SNP_P4_30231_13291932 | NC_021162.1    | Ca_kabuli_chr03 | 13291932                | AA                              | GG              | 1946771785               |
| SNP_P4_30232_13317234 | NC_021162.1    | Ca_kabuli_chr03 | 13317234                | CC                              | TT              | 1946771788               |
| SNP_P4_30233_13335659 | NC_021162.1    | Ca_kabuli_chr03 | 13335659                | TT                              | GG              | 1946771790               |
| SNP_P4_30234_13335669 | NC_021162.1    | Ca_kabuli_chr03 | 13335669                | CC                              | TT              | 1946771792               |
| SNP_P4_30235_13335710 | NC_021162.1    | Ca_kabuli_chr03 | 13335710                | TT                              | CC              | 1946771794               |
| SNP_P4_30236_13335885 | NC_021162.1    | Ca_kabuli_chr03 | 13335885                | AA                              | GG              | 1946771796               |
| SNP_P4_30237_13335892 | NC_021162.1    | Ca_kabuli_chr03 | 13335892                | TT                              | CC              | 1946771798               |
| SNP_P4_30239_13363088 | NC_021162.1    | Ca_kabuli_chr03 | 13363088                | CC                              | TT              | 1946771800               |
| SNP_P4_30240_13363223 | NC_021162.1    | Ca_kabuli_chr03 | 13363223                | TT                              | CC              | 1946771802               |
| SNP_P4_30241_13363286 | NC_021162.1    | Ca_kabuli_chr03 | 13363286                | GG                              | AA              | 1946771804               |
| SNP_P4_30242_13363334 | NC_021162.1    | Ca_kabuli_chr03 | 13363334                | AA                              | GG              | 1946771806               |
| SNP_P4_30243_13363395 | NC_021162.1    | Ca_kabuli_chr03 | 13363395                | CC                              | AA              | 1946771808               |
| SNP_P4_30244_13363401 | NC_021162.1    | Ca_kabuli_chr03 | 13363401                | AA                              | GG              | 1946771810               |
| SNP_P4_30245_13364307 | NC_021162.1    | Ca_kabuli_chr03 | 13364307                | GG                              | AA              | 1946771812               |
| SNP_P4_30246_13364372 | NC_021162.1    | Ca_kabuli_chr03 | 13364372                | GG                              | AA              | 1946771815               |
| SNP_P4_30247_13364387 | NC_021162.1    | Ca_kabuli_chr03 | 13364387                | GG                              | AA              | 1946771817               |
| SNP_P4_30248_13364426 | NC_021162.1    | Ca_kabuli_chr03 | 13364426                | GG                              | AA              | 1946771819               |
| SNP_P4_30249_13364428 | NC_021162.1    | Ca_kabuli_chr03 | 13364428                | AA                              | GG              | 1946771821               |
| SNP_P4_30250_13364493 | NC_021162.1    | Ca_kabuli_chr03 | 13364493                | CC                              | TT              | 1946771823               |
| SNP_P4_30251_13364515 | NC_021162.1    | Ca_kabuli_chr03 | 13364515                | AA                              | CC              | 1946771825               |
| SNP_P4_30252_13364596 | NC_021162.1    | Ca_kabuli_chr03 | 13364596                | CC                              | AA              | 1946771827               |
| SNP_P4_30253_13364608 | NC_021162.1    | Ca_kabuli_chr03 | 13364608                | GG                              | AA              | 1946771829               |
| SNP_P4_30255_13412911 | NC_021162.1    | Ca_kabuli_chr03 | 13412911                | CC                              | AA              | 1946771831               |
| SNP_P4_30257_13417951 | NC_021162.1    | Ca_kabuli_chr03 | 13417951                | AA                              | CC              | 1946771833               |
| SNP_P4_30258_13450999 | NC_021162.1    | Ca_kabuli_chr03 | 13450999                | AA                              | CC              | 1946771835               |
| SNP_P4_30259_13451009 | NC_021162.1    | Ca_kabuli_chr03 | 13451009                | GG                              | TT              | 1946771837               |
| SNP_P4_30260_13451073 | NC_021162.1    | Ca_kabuli_chr03 | 13451073                | AA                              | TT              | 1946771839               |
| SNP_P4_30261_13451074 | NC_021162.1    | Ca_kabuli_chr03 | 13451074                | AA                              | CC              | 1946771841               |
| SNP_P4_30262_13451076 | NC_021162.1    | Ca_kabuli_chr03 | 13451076                | AA                              | GG              | 1946771843               |
| SNP_P4_30263_13451077 | NC_021162.1    | Ca_kabuli_chr03 | 13451077                | TT                              | CC              | 1946771845               |
| SNP_P4_30264_13451093 | NC_021162.1    | Ca_kabuli_chr03 | 13451093                | TT                              | CC              | 1946771847               |
| SNP_P4_30265_13451106 | NC_021162.1    | Ca_kabuli_chr03 | 13451106                | AA                              | TT              | 1946771849               |
| SNP_P4_30266_13465239 | NC_021162.1    | Ca_kabuli_chr03 | 13465239                | TT                              | CC              | 1946771852               |
| SNP_P4_30267_13465281 | NC_021162.1    | Ca_kabuli_chr03 | 13465281                | GG                              | TT              | 1946771854               |

| SNPs IDs              | Chromosome IDs | Chromosomes     | Physical positions (bp) | CDC Frontier (Reference genome) | (ILWC46 & LPNB) | NCBI SNPdb Accession IDs |
|-----------------------|----------------|-----------------|-------------------------|---------------------------------|-----------------|--------------------------|
| SNP_P4_30268_13466069 | NC_021162.1    | Ca_kabuli_chr03 | 13466069                | AA                              | GG              | 1946771856               |
| SNP_P4_30269_13467331 | NC_021162.1    | Ca_kabuli_chr03 | 13467331                | AA                              | GG              | 1946771858               |
| SNP_P4_30270_13480016 | NC_021162.1    | Ca_kabuli_chr03 | 13480016                | TT                              | CC              | 1946771860               |
| SNP_P4_30271_13487957 | NC_021162.1    | Ca_kabuli_chr03 | 13487957                | AA                              | GG              | 1946771862               |
| SNP_P4_30272_13488023 | NC_021162.1    | Ca_kabuli_chr03 | 13488023                | GG                              | AA              | 1946771864               |
| SNP_P4_30273_13488155 | NC_021162.1    | Ca_kabuli_chr03 | 13488155                | CC                              | TT              | 1946771866               |
| SNP_P4_30274_13488414 | NC_021162.1    | Ca_kabuli_chr03 | 13488414                | AA                              | GG              | 1946771868               |
| SNP_P4_30275_13488476 | NC_021162.1    | Ca_kabuli_chr03 | 13488476                | TT                              | CC              | 1946771870               |
| SNP_P4_30276_13488517 | NC_021162.1    | Ca_kabuli_chr03 | 13488517                | AA                              | TT              | 1946771872               |
| SNP_P4_30277_13488518 | NC_021162.1    | Ca_kabuli_chr03 | 13488518                | TT                              | AA              | 1946771874               |
| SNP_P4_30278_13488549 | NC_021162.1    | Ca_kabuli_chr03 | 13488549                | CC                              | TT              | 1946771876               |
| SNP_P4_30279_13520929 | NC_021162.1    | Ca_kabuli_chr03 | 13520929                | GG                              | AA              | 1946771878               |
| SNP_P4_30280_13521791 | NC_021162.1    | Ca_kabuli_chr03 | 13521791                | AA                              | TT              | 1946771881               |
| SNP_P4_30281_13521792 | NC_021162.1    | Ca_kabuli_chr03 | 13521792                | AA                              | TT              | 1946771883               |
| SNP_P4_30282_13552038 | NC_021162.1    | Ca_kabuli_chr03 | 13552038                | GG                              | AA              | 1946771885               |
| SNP_P4_30283_13556723 | NC_021162.1    | Ca_kabuli_chr03 | 13556723                | TT                              | AA              | 1946771887               |
| SNP_P4_30284_13596984 | NC_021162.1    | Ca_kabuli_chr03 | 13596984                | TT                              | AA              | 1946771889               |
| SNP_P4_30285_13597050 | NC_021162.1    | Ca_kabuli_chr03 | 13597050                | AA                              | GG              | 1946771891               |
| SNP_P4_30286_13612460 | NC_021162.1    | Ca_kabuli_chr03 | 13612460                | AA                              | GG              | 1946771893               |
| SNP_P4_30287_13612461 | NC_021162.1    | Ca_kabuli_chr03 | 13612461                | TT                              | GG              | 1946771895               |
| SNP_P4_30288_13642822 | NC_021162.1    | Ca_kabuli_chr03 | 13642822                | AA                              | GG              | 1946771898               |
| SNP_P4_30289_13645911 | NC_021162.1    | Ca_kabuli_chr03 | 13645911                | CC                              | TT              | 1946771900               |
| SNP_P4_30293_13733563 | NC_021162.1    | Ca_kabuli_chr03 | 13733563                | TT                              | CC              | 1946771902               |
| SNP_P4_30294_13752051 | NC_021162.1    | Ca_kabuli_chr03 | 13752051                | AA                              | CC              | 1946771904               |
| SNP_P4_30295_13787486 | NC_021162.1    | Ca_kabuli_chr03 | 13787486                | GG                              | AA              | 1946771906               |
| SNP_P4_30296_13788607 | NC_021162.1    | Ca_kabuli_chr03 | 13788607                | AA                              | GG              | 1946771908               |
| SNP_P4_30298_13829589 | NC_021162.1    | Ca_kabuli_chr03 | 13829589                | AA                              | TT              | 1946771910               |
| SNP_P4_30299_13840565 | NC_021162.1    | Ca_kabuli_chr03 | 13840565                | CC                              | AA              | 1946771912               |
| SNP_P4_30300_13840569 | NC_021162.1    | Ca_kabuli_chr03 | 13840569                | CC                              | TT              | 1946771914               |
| SNP_P4_30301_13844195 | NC_021162.1    | Ca_kabuli_chr03 | 13844195                | AA                              | GG              | 1946771916               |
| SNP_P4_30302_13861007 | NC_021162.1    | Ca_kabuli_chr03 | 13861007                | TT                              | CC              | 1946771918               |
| SNP_P4_30303_13864703 | NC_021162.1    | Ca_kabuli_chr03 | 13864703                | CC                              | TT              | 1946771920               |
| SNP_P4_30304_13868409 | NC_021162.1    | Ca_kabuli_chr03 | 13868409                | GG                              | AA              | 1946771923               |
| SNP_P4_30305_13868412 | NC_021162.1    | Ca_kabuli_chr03 | 13868412                | CC                              | TT              | 1946771925               |
| SNP_P4_30306_13868445 | NC_021162.1    | Ca_kabuli_chr03 | 13868445                | AA                              | GG              | 1946771927               |
| SNP_P4_30307_13868452 | NC_021162.1    | Ca_kabuli_chr03 | 13868452                | TT                              | CC              | 1946771929               |
| SNP_P4_30308_13868478 | NC_021162.1    | Ca_kabuli_chr03 | 13868478                | AA                              | GG              | 1946771931               |
| SNP_P4_30309_13868536 | NC_021162.1    | Ca_kabuli_chr03 | 13868536                | AA                              | GG              | 1946771933               |
| SNP_P4_30310_13868703 | NC_021162.1    | Ca_kabuli_chr03 | 13868703                | AA                              | CC              | 1946771935               |
| SNP_P4_30311_13868720 | NC_021162.1    | Ca_kabuli_chr03 | 13868720                | GG                              | AA              | 1946771937               |
| SNP_P4_30312_13868750 | NC_021162.1    | Ca_kabuli_chr03 | 13868750                | AA                              | GG              | 1946771939               |
| SNP_P4_30314_13868803 | NC_021162.1    | Ca_kabuli_chr03 | 13868803                | TT                              | GG              | 1946771941               |

| SNPs IDs              | Chromosome IDs | Chromosomes     | Physical positions (bp) | CDC Frontier (Reference genome) | (ILWC46 & LPNB) | NCBI SNPdb Accession IDs |
|-----------------------|----------------|-----------------|-------------------------|---------------------------------|-----------------|--------------------------|
| SNP_P4_30315_13868811 | NC_021162.1    | Ca_kabuli_chr03 | 13868811                | TT                              | CC              | 1946771944               |
| SNP_P4_30316_13868818 | NC_021162.1    | Ca_kabuli_chr03 | 13868818                | TT                              | GG              | 1946771946               |
| SNP_P4_30317_13868820 | NC_021162.1    | Ca_kabuli_chr03 | 13868820                | CC                              | TT              | 1946771948               |
| SNP_P4_30318_13868879 | NC_021162.1    | Ca_kabuli_chr03 | 13868879                | CC                              | TT              | 1946771950               |
| SNP_P4_30319_13868880 | NC_021162.1    | Ca_kabuli_chr03 | 13868880                | TT                              | CC              | 1946771952               |
| SNP_P4_30320_13868881 | NC_021162.1    | Ca_kabuli_chr03 | 13868881                | TT                              | GG              | 1946771954               |
| SNP_P4_30321_13868886 | NC_021162.1    | Ca_kabuli_chr03 | 13868886                | AA                              | GG              | 1946771956               |
| SNP_P4_30322_13868894 | NC_021162.1    | Ca_kabuli_chr03 | 13868894                | TT                              | CC              | 1946771958               |
| SNP_P4_30323_13868900 | NC_021162.1    | Ca_kabuli_chr03 | 13868900                | GG                              | TT              | 1946771960               |
| SNP_P4_30324_13878265 | NC_021162.1    | Ca_kabuli_chr03 | 13878265                | TT                              | CC              | 1946771962               |
| SNP_P4_30325_13878298 | NC_021162.1    | Ca_kabuli_chr03 | 13878298                | GG                              | TT              | 1946771965               |
| SNP_P4_30326_13886105 | NC_021162.1    | Ca_kabuli_chr03 | 13886105                | CC                              | TT              | 1946771967               |
| SNP_P4_30328_13917997 | NC_021162.1    | Ca_kabuli_chr03 | 13917997                | GG                              | TT              | 1946771969               |
| SNP_P4_30329_13934996 | NC_021162.1    | Ca_kabuli_chr03 | 13934996                | AA                              | GG              | 1946771971               |
| SNP_P4_30330_13935043 | NC_021162.1    | Ca_kabuli_chr03 | 13935043                | GG                              | TT              | 1946771973               |
| SNP_P4_30331_13935464 | NC_021162.1    | Ca_kabuli_chr03 | 13935464                | TT                              | CC              | 1946771975               |
| SNP_P4_30332_13935523 | NC_021162.1    | Ca_kabuli_chr03 | 13935523                | GG                              | TT              | 1946771977               |
| SNP_P4_30334_13935971 | NC_021162.1    | Ca_kabuli_chr03 | 13935971                | CC                              | AA              | 1946771979               |
| SNP_P4_30335_13935983 | NC_021162.1    | Ca_kabuli_chr03 | 13935983                | CC                              | TT              | 1946771982               |
| SNP_P4_30336_13948005 | NC_021162.1    | Ca_kabuli_chr03 | 13948005                | AA                              | GG              | 1946771984               |
| SNP_P4_30337_13955788 | NC_021162.1    | Ca_kabuli_chr03 | 13955788                | CC                              | TT              | 1946771986               |
| SNP_P4_30338_13955807 | NC_021162.1    | Ca_kabuli_chr03 | 13955807                | TT                              | CC              | 1946771988               |
| SNP_P4_30339_13956192 | NC_021162.1    | Ca_kabuli_chr03 | 13956192                | TT                              | AA              | 1946771990               |
| SNP_P4_30340_13960003 | NC_021162.1    | Ca_kabuli_chr03 | 13960003                | TT                              | GG              | 1946771992               |
| SNP_P4_30341_13992297 | NC_021162.1    | Ca_kabuli_chr03 | 13992297                | TT                              | CC              | 1946771995               |
| SNP_P4_30342_13993310 | NC_021162.1    | Ca_kabuli_chr03 | 13993310                | CC                              | AA              | 1946771997               |
| SNP_P4_30345_14018318 | NC_021162.1    | Ca_kabuli_chr03 | 14018318                | AA                              | GG              | 1946771999               |
| SNP_P4_30348_14102341 | NC_021162.1    | Ca_kabuli_chr03 | 14102341                | CC                              | AA              | 1946772001               |
| SNP_P4_30350_14142566 | NC_021162.1    | Ca_kabuli_chr03 | 14142566                | AA                              | CC              | 1946772003               |
| SNP_P4_30352_14227835 | NC_021162.1    | Ca_kabuli_chr03 | 14227835                | TT                              | CC              | 1946772005               |
| SNP_P4_30353_14227841 | NC_021162.1    | Ca_kabuli_chr03 | 14227841                | GG                              | AA              | 1946772007               |
| SNP_P4_30354_14227848 | NC_021162.1    | Ca_kabuli_chr03 | 14227848                | AA                              | GG              | 1946772009               |
| SNP_P4_30355_14227854 | NC_021162.1    | Ca_kabuli_chr03 | 14227854                | AA                              | CC              | 1946772012               |
| SNP_P4_30356_14227881 | NC_021162.1    | Ca_kabuli_chr03 | 14227881                | AA                              | GG              | 1946772014               |
| SNP_P4_30358_14242193 | NC_021162.1    | Ca_kabuli_chr03 | 14242193                | AA                              | TT              | 1946772016               |
| SNP_P4_30359_14242194 | NC_021162.1    | Ca_kabuli_chr03 | 14242194                | TT                              | CC              | 1946772018               |
| SNP_P4_30360_14242214 | NC_021162.1    | Ca_kabuli_chr03 | 14242214                | TT                              | GG              | 1946772020               |
| SNP_P4_30361_14242239 | NC_021162.1    | Ca_kabuli_chr03 | 14242239                | GG                              | TT              | 1946772022               |
| SNP_P4_30362_14243761 | NC_021162.1    | Ca_kabuli_chr03 | 14243761                | TT                              | CC              | 1946772024               |
| SNP_P4_30363_14243770 | NC_021162.1    | Ca_kabuli_chr03 | 14243770                | CC                              | TT              | 1946772026               |
| SNP_P4_30364_14243772 | NC_021162.1    | Ca_kabuli_chr03 | 14243772                | AA                              | GG              | 1946772028               |
| SNP_P4_30365_14245585 | NC_021162.1    | Ca_kabuli_chr03 | 14245585                | AA                              | GG              | 1946772030               |

| SNPs IDs              | Chromosome IDs | Chromosomes     | Physical positions (bp) | CDC Frontier (Reference genome) | (ILWC46 & LPNB) | NCBI SNPdb Accession IDs |
|-----------------------|----------------|-----------------|-------------------------|---------------------------------|-----------------|--------------------------|
| SNP_P4_30366_14245820 | NC_021162.1    | Ca_kabuli_chr03 | 14245820                | AA                              | GG              | 1946772032               |
| SNP_P4_30367_14246983 | NC_021162.1    | Ca_kabuli_chr03 | 14246983                | TT                              | GG              | 1946772034               |
| SNP_P4_30368_14247231 | NC_021162.1    | Ca_kabuli_chr03 | 14247231                | TT                              | CC              | 1946772036               |
| SNP_P4_30369_14247491 | NC_021162.1    | Ca_kabuli_chr03 | 14247491                | GG                              | AA              | 1946772038               |
| SNP_P4_30370_14247724 | NC_021162.1    | Ca_kabuli_chr03 | 14247724                | CC                              | TT              | 1946772040               |
| SNP_P4_30371_14247853 | NC_021162.1    | Ca_kabuli_chr03 | 14247853                | GG                              | AA              | 1946772042               |
| SNP_P4_30372_14247953 | NC_021162.1    | Ca_kabuli_chr03 | 14247953                | CC                              | TT              | 1946772045               |
| SNP_P4_30373_14248011 | NC_021162.1    | Ca_kabuli_chr03 | 14248011                | GG                              | TT              | 1946772047               |
| SNP_P4_30374_14248014 | NC_021162.1    | Ca_kabuli_chr03 | 14248014                | AA                              | CC              | 1946772049               |
| SNP_P4_30375_14248095 | NC_021162.1    | Ca_kabuli_chr03 | 14248095                | TT                              | GG              | 1946772051               |
| SNP_P4_30376_14248098 | NC_021162.1    | Ca_kabuli_chr03 | 14248098                | TT                              | AA              | 1946772053               |
| SNP_P4_30377_14248157 | NC_021162.1    | Ca_kabuli_chr03 | 14248157                | AA                              | GG              | 1946772055               |
| SNP_P4_30378_14248305 | NC_021162.1    | Ca_kabuli_chr03 | 14248305                | AA                              | GG              | 1946772057               |
| SNP_P4_30379_14248309 | NC_021162.1    | Ca_kabuli_chr03 | 14248309                | TT                              | CC              | 1946772059               |
| SNP_P4_30380_14248339 | NC_021162.1    | Ca_kabuli_chr03 | 14248339                | TT                              | CC              | 1946772061               |
| SNP_P4_30381_14248404 | NC_021162.1    | Ca_kabuli_chr03 | 14248404                | TT                              | AA              | 1946772063               |
| SNP_P4_30382_14248410 | NC_021162.1    | Ca_kabuli_chr03 | 14248410                | TT                              | CC              | 1946772065               |
| SNP_P4_30383_14248435 | NC_021162.1    | Ca_kabuli_chr03 | 14248435                | TT                              | AA              | 1946772067               |
| SNP_P4_30384_14248446 | NC_021162.1    | Ca_kabuli_chr03 | 14248446                | CC                              | AA              | 1946772069               |
| SNP_P4_30385_14248576 | NC_021162.1    | Ca_kabuli_chr03 | 14248576                | TT                              | CC              | 1946772071               |
| SNP_P4_30386_14248827 | NC_021162.1    | Ca_kabuli_chr03 | 14248827                | AA                              | GG              | 1946772073               |
| SNP_P4_30387_14248863 | NC_021162.1    | Ca_kabuli_chr03 | 14248863                | CC                              | TT              | 1946772075               |
| SNP_P4_30388_14248933 | NC_021162.1    | Ca_kabuli_chr03 | 14248933                | GG                              | AA              | 1946772077               |
| SNP_P4_30389_14249125 | NC_021162.1    | Ca_kabuli_chr03 | 14249125                | TT                              | CC              | 1946772079               |
| SNP_P4_30390_14249133 | NC_021162.1    | Ca_kabuli_chr03 | 14249133                | AA                              | GG              | 1946772081               |
| SNP_P4_30391_14249147 | NC_021162.1    | Ca_kabuli_chr03 | 14249147                | AA                              | GG              | 1946772083               |
| SNP_P4_30392_14249148 | NC_021162.1    | Ca_kabuli_chr03 | 14249148                | AA                              | TT              | 1946772086               |
| SNP_P4_30393_14249156 | NC_021162.1    | Ca_kabuli_chr03 | 14249156                | CC                              | TT              | 1946772088               |
| SNP_P4_30394_14249242 | NC_021162.1    | Ca_kabuli_chr03 | 14249242                | TT                              | AA              | 1946772090               |
| SNP_P4_30395_14249248 | NC_021162.1    | Ca_kabuli_chr03 | 14249248                | AA                              | GG              | 1946772092               |
| SNP_P4_30396_14249439 | NC_021162.1    | Ca_kabuli_chr03 | 14249439                | CC                              | TT              | 1946772094               |
| SNP_P4_30397_14249497 | NC_021162.1    | Ca_kabuli_chr03 | 14249497                | CC                              | TT              | 1946772096               |
| SNP_P4_30398_14249508 | NC_021162.1    | Ca_kabuli_chr03 | 14249508                | GG                              | CC              | 1946772098               |
| SNP_P4_30402_14448814 | NC_021162.1    | Ca_kabuli_chr03 | 14448814                | CC                              | TT              | 1946772100               |
| SNP_P4_30403_14453285 | NC_021162.1    | Ca_kabuli_chr03 | 14453285                | AA                              | GG              | 1946772102               |
| SNP_P4_30404_14473924 | NC_021162.1    | Ca_kabuli_chr03 | 14473924                | TT                              | CC              | 1946772105               |
| SNP_P4_30405_14488182 | NC_021162.1    | Ca_kabuli_chr03 | 14488182                | AA                              | CC              | 1946772107               |
| SNP_P4_30406_14488184 | NC_021162.1    | Ca_kabuli_chr03 | 14488184                | TT                              | CC              | 1946772109               |
| SNP_P4_30407_14488192 | NC_021162.1    | Ca_kabuli_chr03 | 14488192                | TT                              | CC              | 1946772111               |
| SNP_P4_30408_14495075 | NC_021162.1    | Ca_kabuli_chr03 | 14495075                | CC                              | TT              | 1946772113               |
| SNP_P4_30409_14495131 | NC_021162.1    | Ca_kabuli_chr03 | 14495131                | AA                              | GG              | 1946772115               |
| SNP_P4_30410_14495154 | NC_021162.1    | Ca_kabuli_chr03 | 14495154                | CC                              | TT              | 1946772118               |

| SNPs IDs              | Chromosome IDs | Chromosomes     | Physical positions (bp) | CDC Frontier (Reference genome) | (ILWC46 & LPNB) | NCBI SNPdb Accession IDs |
|-----------------------|----------------|-----------------|-------------------------|---------------------------------|-----------------|--------------------------|
| SNP_P4_30411_14495170 | NC_021162.1    | Ca_kabuli_chr03 | 14495170                | AA                              | CC              | 1946772120               |
| SNP_P4_30412_14495205 | NC_021162.1    | Ca_kabuli_chr03 | 14495205                | GG                              | AA              | 1946772122               |
| SNP_P4_30413_14495259 | NC_021162.1    | Ca_kabuli_chr03 | 14495259                | GG                              | CC              | 1946772124               |
| SNP_P4_30414_14495264 | NC_021162.1    | Ca_kabuli_chr03 | 14495264                | TT                              | CC              | 1946772127               |
| SNP_P4_30415_14495298 | NC_021162.1    | Ca_kabuli_chr03 | 14495298                | TT                              | CC              | 1946772129               |
| SNP_P4_30416_14495412 | NC_021162.1    | Ca_kabuli_chr03 | 14495412                | CC                              | AA              | 1946772131               |
| SNP_P4_30417_14495459 | NC_021162.1    | Ca_kabuli_chr03 | 14495459                | TT                              | CC              | 1946772133               |
| SNP_P4_30418_14495501 | NC_021162.1    | Ca_kabuli_chr03 | 14495501                | TT                              | CC              | 1946772135               |
| SNP_P4_30419_14495663 | NC_021162.1    | Ca_kabuli_chr03 | 14495663                | TT                              | CC              | 1946772138               |
| SNP_P4_30420_14495667 | NC_021162.1    | Ca_kabuli_chr03 | 14495667                | CC                              | GG              | 1946772140               |
| SNP_P4_30421_14506072 | NC_021162.1    | Ca_kabuli_chr03 | 14506072                | CC                              | TT              | 1946772142               |
| SNP_P4_30422_14524618 | NC_021162.1    | Ca_kabuli_chr03 | 14524618                | GG                              | CC              | 1946772144               |
| SNP_P4_30423_14540732 | NC_021162.1    | Ca_kabuli_chr03 | 14540732                | GG                              | AA              | 1946772146               |
| SNP_P4_30424_14543331 | NC_021162.1    | Ca_kabuli_chr03 | 14543331                | TT                              | CC              | 1946772148               |
| SNP_P4_30425_14543361 | NC_021162.1    | Ca_kabuli_chr03 | 14543361                | TT                              | CC              | 1946772150               |
| SNP_P4_30426_14543362 | NC_021162.1    | Ca_kabuli_chr03 | 14543362                | CC                              | TT              | 1946772153               |
| SNP_P4_30427_14543365 | NC_021162.1    | Ca_kabuli_chr03 | 14543365                | CC                              | GG              | 1946772155               |
| SNP_P4_30428_14543534 | NC_021162.1    | Ca_kabuli_chr03 | 14543534                | TT                              | CC              | 1946772157               |
| SNP_P4_30429_14554462 | NC_021162.1    | Ca_kabuli_chr03 | 14554462                | AA                              | GG              | 1946772159               |
| SNP_P4_30430_14556043 | NC_021162.1    | Ca_kabuli_chr03 | 14556043                | CC                              | TT              | 1946772161               |
| SNP_P4_30431_14556073 | NC_021162.1    | Ca_kabuli_chr03 | 14556073                | GG                              | AA              | 1946772163               |
| SNP_P4_30432_14556078 | NC_021162.1    | Ca_kabuli_chr03 | 14556078                | CC                              | TT              | 1946772165               |
| SNP_P4_30433_14556386 | NC_021162.1    | Ca_kabuli_chr03 | 14556386                | AA                              | GG              | 1946772168               |
| SNP_P4_30434_14556413 | NC_021162.1    | Ca_kabuli_chr03 | 14556413                | AA                              | GG              | 1946772170               |
| SNP_P4_30435_14556648 | NC_021162.1    | Ca_kabuli_chr03 | 14556648                | GG                              | TT              | 1946772172               |
| SNP_P4_30436_14573506 | NC_021162.1    | Ca_kabuli_chr03 | 14573506                | CC                              | TT              | 1946772174               |
| SNP_P4_30438_14575322 | NC_021162.1    | Ca_kabuli_chr03 | 14575322                | AA                              | GG              | 1946772176               |
| SNP_P4_30439_14575325 | NC_021162.1    | Ca_kabuli_chr03 | 14575325                | GG                              | AA              | 1946772178               |
| SNP_P4_30440_14575390 | NC_021162.1    | Ca_kabuli_chr03 | 14575390                | AA                              | GG              | 1946772180               |
| SNP_P4_30441_14591552 | NC_021162.1    | Ca_kabuli_chr03 | 14591552                | TT                              | CC              | 1946772182               |
| SNP_P4_30442_14602795 | NC_021162.1    | Ca_kabuli_chr03 | 14602795                | TT                              | GG              | 1946772184               |
| SNP_P4_30445_14653365 | NC_021162.1    | Ca_kabuli_chr03 | 14653365                | AA                              | GG              | 1946772186               |
| SNP_P4_30446_14653384 | NC_021162.1    | Ca_kabuli_chr03 | 14653384                | CC                              | GG              | 1946772189               |
| SNP_P4_30447_14679933 | NC_021162.1    | Ca_kabuli_chr03 | 14679933                | GG                              | TT              | 1946772191               |
| SNP_P4_30449_14687830 | NC_021162.1    | Ca_kabuli_chr03 | 14687830                | CC                              | AA              | 1946772193               |
| SNP_P4_30450_14696036 | NC_021162.1    | Ca_kabuli_chr03 | 14696036                | TT                              | CC              | 1946772195               |
| SNP_P4_30451_14696854 | NC_021162.1    | Ca_kabuli_chr03 | 14696854                | GG                              | AA              | 1946772197               |
| SNP_P4_30452_14696998 | NC_021162.1    | Ca_kabuli_chr03 | 14696998                | AA                              | GG              | 1946772199               |
| SNP_P4_30453_14699581 | NC_021162.1    | Ca_kabuli_chr03 | 14699581                | CC                              | AA              | 1946772201               |
| SNP_P4_30454_14699583 | NC_021162.1    | Ca_kabuli_chr03 | 14699583                | AA                              | GG              | 1946772203               |
| SNP_P4_30455_14699590 | NC_021162.1    | Ca_kabuli_chr03 | 14699590                | TT                              | CC              | 1946772205               |
| SNP_P4_30457_14703949 | NC_021162.1    | Ca_kabuli_chr03 | 14703949                | CC                              | AA              | 1946772207               |

| SNPs IDs              | Chromosome IDs | Chromosomes     | Physical positions (bp) | CDC Frontier (Reference genome) | (ILWC46 & LPNB) | NCBI SNPdb Accession IDs |
|-----------------------|----------------|-----------------|-------------------------|---------------------------------|-----------------|--------------------------|
| SNP_P4_30458_14704175 | NC_021162.1    | Ca_kabuli_chr03 | 14704175                | GG                              | CC              | 1946772209               |
| SNP_P4_30459_14706181 | NC_021162.1    | Ca_kabuli_chr03 | 14706181                | TT                              | AA              | 1946772211               |
| SNP_P4_30460_14706603 | NC_021162.1    | Ca_kabuli_chr03 | 14706603                | AA                              | CC              | 1946772213               |
| SNP_P4_30461_14711343 | NC_021162.1    | Ca_kabuli_chr03 | 14711343                | CC                              | AA              | 1946772215               |
| SNP_P4_30462_14751358 | NC_021162.1    | Ca_kabuli_chr03 | 14751358                | TT                              | CC              | 1946772217               |
| SNP_P4_30463_14751362 | NC_021162.1    | Ca_kabuli_chr03 | 14751362                | GG                              | TT              | 1946772219               |
| SNP_P4_30464_14770761 | NC_021162.1    | Ca_kabuli_chr03 | 14770761                | TT                              | CC              | 1946772221               |
| SNP_P4_30465_14780176 | NC_021162.1    | Ca_kabuli_chr03 | 14780176                | CC                              | TT              | 1946772223               |
| SNP_P4_30466_14780247 | NC_021162.1    | Ca_kabuli_chr03 | 14780247                | AA                              | GG              | 1946772226               |
| SNP_P4_30467_14780282 | NC_021162.1    | Ca_kabuli_chr03 | 14780282                | AA                              | GG              | 1946772228               |
| SNP_P4_30468_14790349 | NC_021162.1    | Ca_kabuli_chr03 | 14790349                | CC                              | AA              | 1946772230               |
| SNP_P4_30469_14797148 | NC_021162.1    | Ca_kabuli_chr03 | 14797148                | AA                              | GG              | 1946772232               |
| SNP_P4_30470_14801632 | NC_021162.1    | Ca_kabuli_chr03 | 14801632                | TT                              | CC              | 1946772234               |
| SNP_P4_30471_14805350 | NC_021162.1    | Ca_kabuli_chr03 | 14805350                | CC                              | TT              | 1946772236               |
| SNP_P4_30472_14808618 | NC_021162.1    | Ca_kabuli_chr03 | 14808618                | CC                              | TT              | 1946772238               |
| SNP_P4_30473_14810434 | NC_021162.1    | Ca_kabuli_chr03 | 14810434                | CC                              | TT              | 1946772240               |
| SNP_P4_30474_14811822 | NC_021162.1    | Ca_kabuli_chr03 | 14811822                | GG                              | AA              | 1946772242               |
| SNP_P4_30475_14814676 | NC_021162.1    | Ca_kabuli_chr03 | 14814676                | CC                              | TT              | 1946772244               |
| SNP_P4_30476_14815849 | NC_021162.1    | Ca_kabuli_chr03 | 14815849                | GG                              | TT              | 1946772246               |
| SNP_P4_30477_14815929 | NC_021162.1    | Ca_kabuli_chr03 | 14815929                | TT                              | CC              | 1946772248               |
| SNP_P4_30478_14815947 | NC_021162.1    | Ca_kabuli_chr03 | 14815947                | GG                              | AA              | 1946772250               |
| SNP_P4_30479_14816120 | NC_021162.1    | Ca_kabuli_chr03 | 14816120                | AA                              | TT              | 1946772253               |
| SNP_P4_30480_14816180 | NC_021162.1    | Ca_kabuli_chr03 | 14816180                | TT                              | CC              | 1946772255               |
| SNP_P4_30481_14816185 | NC_021162.1    | Ca_kabuli_chr03 | 14816185                | AA                              | GG              | 1946772257               |
| SNP_P4_30482_14816216 | NC_021162.1    | Ca_kabuli_chr03 | 14816216                | GG                              | AA              | 1946772259               |
| SNP_P4_30483_14835338 | NC_021162.1    | Ca_kabuli_chr03 | 14835338                | AA                              | CC              | 1946772261               |
| SNP_P4_30485_14843257 | NC_021162.1    | Ca_kabuli_chr03 | 14843257                | AA                              | GG              | 1946772263               |
| SNP_P4_30487_14845796 | NC_021162.1    | Ca_kabuli_chr03 | 14845796                | GG                              | AA              | 1946772265               |
| SNP_P4_30488_14848183 | NC_021162.1    | Ca_kabuli_chr03 | 14848183                | GG                              | AA              | 1946772267               |
| SNP_P4_30489_14848635 | NC_021162.1    | Ca_kabuli_chr03 | 14848635                | CC                              | TT              | 1946772269               |
| SNP_P4_30490_14848666 | NC_021162.1    | Ca_kabuli_chr03 | 14848666                | CC                              | GG              | 1946772271               |
| SNP_P4_30491_14848673 | NC_021162.1    | Ca_kabuli_chr03 | 14848673                | GG                              | TT              | 1946772273               |
| SNP_P4_30492_14848682 | NC_021162.1    | Ca_kabuli_chr03 | 14848682                | CC                              | GG              | 1946772276               |
| SNP_P4_30493_14854126 | NC_021162.1    | Ca_kabuli_chr03 | 14854126                | AA                              | GG              | 1946772278               |
| SNP_P4_30494_14854204 | NC_021162.1    | Ca_kabuli_chr03 | 14854204                | CC                              | GG              | 1946772280               |
| SNP_P4_30495_14858469 | NC_021162.1    | Ca_kabuli_chr03 | 14858469                | CC                              | TT              | 1946772282               |
| SNP_P4_30496_14858487 | NC_021162.1    | Ca_kabuli_chr03 | 14858487                | AA                              | TT              | 1946772284               |
| SNP_P4_30497_14858491 | NC_021162.1    | Ca_kabuli_chr03 | 14858491                | TT                              | GG              | 1946772286               |
| SNP_P4_30498_14858495 | NC_021162.1    | Ca_kabuli_chr03 | 14858495                | AA                              | GG              | 1946772288               |
| SNP_P4_30499_14858499 | NC_021162.1    | Ca_kabuli_chr03 | 14858499                | AA                              | GG              | 1946772290               |
| SNP_P4_30500_14858766 | NC_021162.1    | Ca_kabuli_chr03 | 14858766                | CC                              | AA              | 1946772292               |
| SNP_P4_30501_14859923 | NC_021162.1    | Ca_kabuli_chr03 | 14859923                | AA                              | GG              | 1946772294               |



| SNPs IDs              | Chromosome IDs | Chromosomes     | Physical positions (bp) | CDC Frontier (Reference genome) | (ILWC46 & LPNB) | NCBI SNPdb Accession IDs |
|-----------------------|----------------|-----------------|-------------------------|---------------------------------|-----------------|--------------------------|
| SNP_P4_30502_14859955 | NC_021162.1    | Ca_kabuli_chr03 | 14859955                | GG                              | AA              | 1946772297               |
| SNP_P4_30503_14860007 | NC_021162.1    | Ca_kabuli_chr03 | 14860007                | CC                              | TT              | 1946772299               |
| SNP_P4_30504_14860680 | NC_021162.1    | Ca_kabuli_chr03 | 14860680                | AA                              | GG              | 1946772301               |
| SNP_P4_30505_14860683 | NC_021162.1    | Ca_kabuli_chr03 | 14860683                | TT                              | CC              | 1946772303               |
| SNP_P4_30506_14860684 | NC_021162.1    | Ca_kabuli_chr03 | 14860684                | CC                              | AA              | 1946772305               |
| SNP_P4_30507_14860685 | NC_021162.1    | Ca_kabuli_chr03 | 14860685                | AA                              | TT              | 1946772307               |
| SNP_P4_30508_14864099 | NC_021162.1    | Ca_kabuli_chr03 | 14864099                | TT                              | GG              | 1946772310               |
| SNP_P4_30509_14867177 | NC_021162.1    | Ca_kabuli_chr03 | 14867177                | CC                              | GG              | 1946772312               |
| SNP_P4_30510_14867226 | NC_021162.1    | Ca_kabuli_chr03 | 14867226                | AA                              | CC              | 1946772314               |
| SNP_P4_30511_14867508 | NC_021162.1    | Ca_kabuli_chr03 | 14867508                | TT                              | GG              | 1946772316               |
| SNP_P4_30512_14867608 | NC_021162.1    | Ca_kabuli_chr03 | 14867608                | CC                              | GG              | 1946772318               |
| SNP_P4_30513_14867621 | NC_021162.1    | Ca_kabuli_chr03 | 14867621                | AA                              | GG              | 1946772321               |
| SNP_P4_30514_14867716 | NC_021162.1    | Ca_kabuli_chr03 | 14867716                | GG                              | AA              | 1946772323               |
| SNP_P4_30515_14867718 | NC_021162.1    | Ca_kabuli_chr03 | 14867718                | AA                              | GG              | 1946772325               |
| SNP_P4_30516_14867748 | NC_021162.1    | Ca_kabuli_chr03 | 14867748                | TT                              | GG              | 1946772327               |
| SNP_P4_30517_14867789 | NC_021162.1    | Ca_kabuli_chr03 | 14867789                | AA                              | GG              | 1946772329               |
| SNP_P4_30518_14868671 | NC_021162.1    | Ca_kabuli_chr03 | 14868671                | TT                              | CC              | 1946772331               |
| SNP_P4_30519_14868759 | NC_021162.1    | Ca_kabuli_chr03 | 14868759                | CC                              | TT              | 1946772333               |
| SNP_P4_30520_14868767 | NC_021162.1    | Ca_kabuli_chr03 | 14868767                | CC                              | AA              | 1946772335               |
| SNP_P4_30521_14868769 | NC_021162.1    | Ca_kabuli_chr03 | 14868769                | TT                              | GG              | 1946772337               |
| SNP_P4_30522_14868840 | NC_021162.1    | Ca_kabuli_chr03 | 14868840                | AA                              | GG              | 1946772339               |
| SNP_P4_30523_14868861 | NC_021162.1    | Ca_kabuli_chr03 | 14868861                | GG                              | TT              | 1946772341               |
| SNP_P4_30524_14868871 | NC_021162.1    | Ca_kabuli_chr03 | 14868871                | AA                              | GG              | 1946772343               |
| SNP_P4_30525_14868873 | NC_021162.1    | Ca_kabuli_chr03 | 14868873                | CC                              | TT              | 1946772345               |
| SNP_P4_30526_14868874 | NC_021162.1    | Ca_kabuli_chr03 | 14868874                | GG                              | CC              | 1946772347               |
| SNP_P4_30527_14868877 | NC_021162.1    | Ca_kabuli_chr03 | 14868877                | TT                              | CC              | 1946772349               |
| SNP_P4_30528_14868901 | NC_021162.1    | Ca_kabuli_chr03 | 14868901                | CC                              | AA              | 1946772351               |
| SNP_P4_30529_14868980 | NC_021162.1    | Ca_kabuli_chr03 | 14868980                | TT                              | CC              | 1946772353               |
| SNP_P4_30530_14869051 | NC_021162.1    | Ca_kabuli_chr03 | 14869051                | AA                              | TT              | 1946772355               |
| SNP_P4_30531_14869067 | NC_021162.1    | Ca_kabuli_chr03 | 14869067                | GG                              | AA              | 1946772357               |
| SNP_P4_30532_14869078 | NC_021162.1    | Ca_kabuli_chr03 | 14869078                | GG                              | AA              | 1946772359               |
| SNP_P4_30533_14872076 | NC_021162.1    | Ca_kabuli_chr03 | 14872076                | GG                              | AA              | 1946772361               |
| SNP_P4_30534_14872084 | NC_021162.1    | Ca_kabuli_chr03 | 14872084                | TT                              | AA              | 1946772363               |
| SNP_P4_30535_14872349 | NC_021162.1    | Ca_kabuli_chr03 | 14872349                | GG                              | CC              | 1946772365               |
| SNP_P4_30537_14878396 | NC_021162.1    | Ca_kabuli_chr03 | 14878396                | AA                              | TT              | 1946772367               |
| SNP_P4_30538_14878402 | NC_021162.1    | Ca_kabuli_chr03 | 14878402                | GG                              | AA              | 1946772369               |
| SNP_P4_30539_14878598 | NC_021162.1    | Ca_kabuli_chr03 | 14878598                | CC                              | TT              | 1946772371               |
| SNP_P4_30540_14878768 | NC_021162.1    | Ca_kabuli_chr03 | 14878768                | CC                              | TT              | 1946772373               |
| SNP_P4_30541_14878909 | NC_021162.1    | Ca_kabuli_chr03 | 14878909                | GG                              | TT              | 1946772375               |
| SNP_P4_30542_14879312 | NC_021162.1    | Ca_kabuli_chr03 | 14879312                | AA                              | TT              | 1946772377               |
| SNP_P4_30543_14879389 | NC_021162.1    | Ca_kabuli_chr03 | 14879389                | CC                              | AA              | 1946772379               |
| SNP_P4_30544_14879992 | NC_021162.1    | Ca_kabuli_chr03 | 14879992                | CC                              | TT              | 1946772381               |

| SNPs IDs              | Chromosome IDs | Chromosomes     | Physical positions (bp) | CDC Frontier (Reference genome) | (ILWC46 & LPNB) | NCBI SNPdb Accession IDs |
|-----------------------|----------------|-----------------|-------------------------|---------------------------------|-----------------|--------------------------|
| SNP_P4_30545_14879993 | NC_021162.1    | Ca_kabuli_chr03 | 14879993                | CC                              | AA              | 1946772383               |
| SNP_P4_30546_14880003 | NC_021162.1    | Ca_kabuli_chr03 | 14880003                | CC                              | TT              | 1946772385               |
| SNP_P4_30547_14880004 | NC_021162.1    | Ca_kabuli_chr03 | 14880004                | GG                              | AA              | 1946772387               |
| SNP_P4_30548_14880026 | NC_021162.1    | Ca_kabuli_chr03 | 14880026                | GG                              | AA              | 1946772389               |
| SNP_P4_30549_14880033 | NC_021162.1    | Ca_kabuli_chr03 | 14880033                | TT                              | GG              | 1946772391               |
| SNP_P4_30550_14880034 | NC_021162.1    | Ca_kabuli_chr03 | 14880034                | CC                              | AA              | 1946772393               |
| SNP_P4_30552_14880876 | NC_021162.1    | Ca_kabuli_chr03 | 14880876                | TT                              | GG              | 1946772395               |
| SNP_P4_30553_14880889 | NC_021162.1    | Ca_kabuli_chr03 | 14880889                | CC                              | GG              | 1946772397               |
| SNP_P4_30554_14880891 | NC_021162.1    | Ca_kabuli_chr03 | 14880891                | GG                              | AA              | 1946772399               |
| SNP_P4_30555_14880943 | NC_021162.1    | Ca_kabuli_chr03 | 14880943                | TT                              | CC              | 1946772401               |
| SNP_P4_30556_14880978 | NC_021162.1    | Ca_kabuli_chr03 | 14880978                | AA                              | GG              | 1946772403               |
| SNP_P4_30557_14881069 | NC_021162.1    | Ca_kabuli_chr03 | 14881069                | GG                              | AA              | 1946772405               |
| SNP_P4_30558_14881143 | NC_021162.1    | Ca_kabuli_chr03 | 14881143                | GG                              | AA              | 1946772407               |
| SNP_P4_30559_14881183 | NC_021162.1    | Ca_kabuli_chr03 | 14881183                | AA                              | TT              | 1946772409               |
| SNP_P4_30560_14881189 | NC_021162.1    | Ca_kabuli_chr03 | 14881189                | TT                              | CC              | 1946772411               |
| SNP_P4_30561_14881311 | NC_021162.1    | Ca_kabuli_chr03 | 14881311                | CC                              | TT              | 1946772413               |
| SNP_P4_30562_14881397 | NC_021162.1    | Ca_kabuli_chr03 | 14881397                | TT                              | GG              | 1946772415               |
| SNP_P4_30563_14889048 | NC_021162.1    | Ca_kabuli_chr03 | 14889048                | AA                              | TT              | 1946772417               |
| SNP_P4_30564_14889195 | NC_021162.1    | Ca_kabuli_chr03 | 14889195                | GG                              | CC              | 1946772419               |
| SNP_P4_30565_14889334 | NC_021162.1    | Ca_kabuli_chr03 | 14889334                | TT                              | CC              | 1946772421               |
| SNP_P4_30566_14889380 | NC_021162.1    | Ca_kabuli_chr03 | 14889380                | TT                              | GG              | 1946772423               |
| SNP_P4_30567_14889463 | NC_021162.1    | Ca_kabuli_chr03 | 14889463                | TT                              | AA              | 1946772425               |
| SNP_P4_30568_14889568 | NC_021162.1    | Ca_kabuli_chr03 | 14889568                | AA                              | TT              | 1946772427               |
| SNP_P4_30569_14889664 | NC_021162.1    | Ca_kabuli_chr03 | 14889664                | CC                              | TT              | 1946772429               |
| SNP_P4_30570_14889745 | NC_021162.1    | Ca_kabuli_chr03 | 14889745                | CC                              | TT              | 1946772431               |
| SNP_P4_30571_14889805 | NC_021162.1    | Ca_kabuli_chr03 | 14889805                | TT                              | CC              | 1946772433               |
| SNP_P4_30572_14889891 | NC_021162.1    | Ca_kabuli_chr03 | 14889891                | TT                              | AA              | 1946772435               |
| SNP_P4_30573_14890030 | NC_021162.1    | Ca_kabuli_chr03 | 14890030                | AA                              | GG              | 1946772437               |
| SNP_P4_30574_14890031 | NC_021162.1    | Ca_kabuli_chr03 | 14890031                | GG                              | TT              | 1946772439               |
| SNP_P4_30575_14890033 | NC_021162.1    | Ca_kabuli_chr03 | 14890033                | TT                              | GG              | 1946772441               |
| SNP_P4_30576_14890034 | NC_021162.1    | Ca_kabuli_chr03 | 14890034                | CC                              | TT              | 1946772443               |
| SNP_P4_30577_14890035 | NC_021162.1    | Ca_kabuli_chr03 | 14890035                | AA                              | GG              | 1946772445               |
| SNP_P4_30578_14890176 | NC_021162.1    | Ca_kabuli_chr03 | 14890176                | TT                              | CC              | 1946772447               |
| SNP_P4_30579_14890772 | NC_021162.1    | Ca_kabuli_chr03 | 14890772                | CC                              | TT              | 1946772449               |
| SNP_P4_30580_14890809 | NC_021162.1    | Ca_kabuli_chr03 | 14890809                | AA                              | GG              | 1946772451               |
| SNP_P4_30581_14890812 | NC_021162.1    | Ca_kabuli_chr03 | 14890812                | AA                              | CC              | 1946772453               |
| SNP_P4_30582_14890847 | NC_021162.1    | Ca_kabuli_chr03 | 14890847                | GG                              | AA              | 1946772455               |
| SNP_P4_30583_14890932 | NC_021162.1    | Ca_kabuli_chr03 | 14890932                | AA                              | GG              | 1946772457               |
| SNP_P4_30584_14890933 | NC_021162.1    | Ca_kabuli_chr03 | 14890933                | TT                              | CC              | 1946772459               |
| SNP_P4_30585_14891123 | NC_021162.1    | Ca_kabuli_chr03 | 14891123                | CC                              | GG              | 1946772461               |
| SNP_P4_30586_14891152 | NC_021162.1    | Ca_kabuli_chr03 | 14891152                | AA                              | GG              | 1946772463               |
| SNP_P4_30587_14891174 | NC_021162.1    | Ca_kabuli_chr03 | 14891174                | GG                              | CC              | 1946772465               |

| SNPs IDs              | Chromosome IDs | Chromosomes     | Physical positions (bp) | CDC Frontier (Reference genome) | (ILWC46 & LPNB) | NCBI SNPdb Accession IDs |
|-----------------------|----------------|-----------------|-------------------------|---------------------------------|-----------------|--------------------------|
| SNP_P4_30588_14891213 | NC_021162.1    | Ca_kabuli_chr03 | 14891213                | CC                              | AA              | 1946772466               |
| SNP_P4_30589_14892758 | NC_021162.1    | Ca_kabuli_chr03 | 14892758                | TT                              | CC              | 1946772468               |
| SNP_P4_30590_14892787 | NC_021162.1    | Ca_kabuli_chr03 | 14892787                | CC                              | AA              | 1946772470               |
| SNP_P4_30591_14892924 | NC_021162.1    | Ca_kabuli_chr03 | 14892924                | AA                              | GG              | 1946772472               |
| SNP_P4_30592_14892951 | NC_021162.1    | Ca_kabuli_chr03 | 14892951                | CC                              | TT              | 1946772475               |
| SNP_P4_30593_14893123 | NC_021162.1    | Ca_kabuli_chr03 | 14893123                | AA                              | TT              | 1946772477               |
| SNP_P4_30594_14893246 | NC_021162.1    | Ca_kabuli_chr03 | 14893246                | CC                              | TT              | 1946772479               |
| SNP_P4_30595_14893290 | NC_021162.1    | Ca_kabuli_chr03 | 14893290                | GG                              | CC              | 1946772481               |
| SNP_P4_30596_14893385 | NC_021162.1    | Ca_kabuli_chr03 | 14893385                | CC                              | AA              | 1946772483               |
| SNP_P4_30597_14893438 | NC_021162.1    | Ca_kabuli_chr03 | 14893438                | TT                              | CC              | 1946772485               |
| SNP_P4_30598_14893486 | NC_021162.1    | Ca_kabuli_chr03 | 14893486                | CC                              | GG              | 1946772487               |
| SNP_P4_30599_14893498 | NC_021162.1    | Ca_kabuli_chr03 | 14893498                | AA                              | TT              | 1946772489               |
| SNP_P4_30600_14893537 | NC_021162.1    | Ca_kabuli_chr03 | 14893537                | AA                              | CC              | 1946772491               |
| SNP_P4_30601_14893603 | NC_021162.1    | Ca_kabuli_chr03 | 14893603                | GG                              | TT              | 1946772493               |
| SNP_P4_30602_14893646 | NC_021162.1    | Ca_kabuli_chr03 | 14893646                | TT                              | CC              | 1946772495               |
| SNP_P4_30603_14893720 | NC_021162.1    | Ca_kabuli_chr03 | 14893720                | CC                              | TT              | 1946772497               |
| SNP_P4_30604_14895810 | NC_021162.1    | Ca_kabuli_chr03 | 14895810                | AA                              | TT              | 1946772499               |
| SNP_P4_30605_14900867 | NC_021162.1    | Ca_kabuli_chr03 | 14900867                | GG                              | AA              | 1946772502               |
| SNP_P4_30606_14900875 | NC_021162.1    | Ca_kabuli_chr03 | 14900875                | CC                              | TT              | 1946772504               |
| SNP_P4_30607_14900879 | NC_021162.1    | Ca_kabuli_chr03 | 14900879                | CC                              | AA              | 1946772506               |
| SNP_P4_30608_14900885 | NC_021162.1    | Ca_kabuli_chr03 | 14900885                | AA                              | TT              | 1946772508               |
| SNP_P4_30609_14900899 | NC_021162.1    | Ca_kabuli_chr03 | 14900899                | CC                              | TT              | 1946772510               |
| SNP_P4_30610_14900904 | NC_021162.1    | Ca_kabuli_chr03 | 14900904                | AA                              | TT              | 1946772512               |
| SNP_P4_30611_14900931 | NC_021162.1    | Ca_kabuli_chr03 | 14900931                | CC                              | GG              | 1946772514               |
| SNP_P4_30612_14900943 | NC_021162.1    | Ca_kabuli_chr03 | 14900943                | CC                              | TT              | 1946772516               |
| SNP_P4_30613_14901473 | NC_021162.1    | Ca_kabuli_chr03 | 14901473                | AA                              | TT              | 1946772518               |
| SNP_P4_30614_14902777 | NC_021162.1    | Ca_kabuli_chr03 | 14902777                | TT                              | CC              | 1946772520               |
| SNP_P4_30615_14902800 | NC_021162.1    | Ca_kabuli_chr03 | 14902800                | TT                              | GG              | 1946772522               |
| SNP_P4_30617_14904456 | NC_021162.1    | Ca_kabuli_chr03 | 14904456                | TT                              | CC              | 1946772525               |
| SNP_P4_30618_14905954 | NC_021162.1    | Ca_kabuli_chr03 | 14905954                | AA                              | TT              | 1946772527               |
| SNP_P4_30620_14908015 | NC_021162.1    | Ca_kabuli_chr03 | 14908015                | AA                              | TT              | 1946772530               |
| SNP_P4_30622_14919718 | NC_021162.1    | Ca_kabuli_chr03 | 14919718                | GG                              | AA              | 1946772532               |
| SNP_P4_30623_14935253 | NC_021162.1    | Ca_kabuli_chr03 | 14935253                | GG                              | TT              | 1946772534               |
| SNP_P4_30624_14935255 | NC_021162.1    | Ca_kabuli_chr03 | 14935255                | AA                              | GG              | 1946772536               |
| SNP_P4_30625_14936802 | NC_021162.1    | Ca_kabuli_chr03 | 14936802                | GG                              | TT              | 1946772538               |
| SNP_P4_30626_14944684 | NC_021162.1    | Ca_kabuli_chr03 | 14944684                | GG                              | TT              | 1946772540               |
| SNP_P4_30627_14947081 | NC_021162.1    | Ca_kabuli_chr03 | 14947081                | TT                              | GG              | 1946772542               |
| SNP_P4_30628_14952103 | NC_021162.1    | Ca_kabuli_chr03 | 14952103                | AA                              | GG              | 1946772544               |
| SNP_P4_30629_14952152 | NC_021162.1    | Ca_kabuli_chr03 | 14952152                | AA                              | GG              | 1946772546               |
| SNP_P4_30630_14952189 | NC_021162.1    | Ca_kabuli_chr03 | 14952189                | TT                              | GG              | 1946772548               |
| SNP_P4_30631_14952213 | NC_021162.1    | Ca_kabuli_chr03 | 14952213                | CC                              | GG              | 1946772550               |
| SNP_P4_30632_14952277 | NC_021162.1    | Ca_kabuli_chr03 | 14952277                | TT                              | CC              | 1946772552               |

| SNPs IDs              | Chromosome IDs | Chromosomes     | Physical positions (bp) | CDC Frontier (Reference genome) | (ILWC46 & LPNB) | NCBI SNPdb Accession IDs |
|-----------------------|----------------|-----------------|-------------------------|---------------------------------|-----------------|--------------------------|
| SNP_P4_30633_14952285 | NC_021162.1    | Ca_kabuli_chr03 | 14952285                | TT                              | GG              | 1946772554               |
| SNP_P4_30634_14952313 | NC_021162.1    | Ca_kabuli_chr03 | 14952313                | TT                              | GG              | 1946772556               |
| SNP_P4_30635_14953625 | NC_021162.1    | Ca_kabuli_chr03 | 14953625                | TT                              | CC              | 1946772558               |
| SNP_P4_30636_14953813 | NC_021162.1    | Ca_kabuli_chr03 | 14953813                | TT                              | AA              | 1946772560               |
| SNP_P4_30637_14953989 | NC_021162.1    | Ca_kabuli_chr03 | 14953989                | GG                              | AA              | 1946772562               |
| SNP_P4_30638_14963933 | NC_021162.1    | Ca_kabuli_chr03 | 14963933                | AA                              | GG              | 1946772564               |
| SNP_P4_30639_14972851 | NC_021162.1    | Ca_kabuli_chr03 | 14972851                | GG                              | CC              | 1946772566               |
| SNP_P4_30640_14972852 | NC_021162.1    | Ca_kabuli_chr03 | 14972852                | AA                              | GG              | 1946772568               |
| SNP_P4_30641_14972863 | NC_021162.1    | Ca_kabuli_chr03 | 14972863                | TT                              | CC              | 1946772570               |
| SNP_P4_30642_14972870 | NC_021162.1    | Ca_kabuli_chr03 | 14972870                | TT                              | CC              | 1946772572               |
| SNP_P4_30643_14987158 | NC_021162.1    | Ca_kabuli_chr03 | 14987158                | TT                              | AA              | 1946772574               |
| SNP_P4_30644_14987248 | NC_021162.1    | Ca_kabuli_chr03 | 14987248                | GG                              | AA              | 1946772577               |
| SNP_P4_30645_14987264 | NC_021162.1    | Ca_kabuli_chr03 | 14987264                | TT                              | CC              | 1946772579               |
| SNP_P4_30646_14987457 | NC_021162.1    | Ca_kabuli_chr03 | 14987457                | TT                              | GG              | 1946772581               |
| SNP_P4_30647_15013555 | NC_021162.1    | Ca_kabuli_chr03 | 15013555                | AA                              | GG              | 1946772583               |
| SNP_P4_30648_15013557 | NC_021162.1    | Ca_kabuli_chr03 | 15013557                | TT                              | CC              | 1946772585               |
| SNP_P4_30649_15032578 | NC_021162.1    | Ca_kabuli_chr03 | 15032578                | TT                              | GG              | 1946772587               |
| SNP_P4_30650_15033561 | NC_021162.1    | Ca_kabuli_chr03 | 15033561                | GG                              | TT              | 1946772589               |
| SNP_P4_30651_15033621 | NC_021162.1    | Ca_kabuli_chr03 | 15033621                | AA                              | TT              | 1946772591               |
| SNP_P4_30652_15033622 | NC_021162.1    | Ca_kabuli_chr03 | 15033622                | GG                              | TT              | 1946772593               |
| SNP_P4_30653_15034379 | NC_021162.1    | Ca_kabuli_chr03 | 15034379                | CC                              | TT              | 1946772595               |
| SNP_P4_30654_15034382 | NC_021162.1    | Ca_kabuli_chr03 | 15034382                | TT                              | CC              | 1946772597               |
| SNP_P4_30655_15038518 | NC_021162.1    | Ca_kabuli_chr03 | 15038518                | CC                              | TT              | 1946772599               |
| SNP_P4_30656_15038531 | NC_021162.1    | Ca_kabuli_chr03 | 15038531                | TT                              | CC              | 1946772601               |
| SNP_P4_30657_15038792 | NC_021162.1    | Ca_kabuli_chr03 | 15038792                | AA                              | CC              | 1946772603               |
| SNP_P4_30659_15038949 | NC_021162.1    | Ca_kabuli_chr03 | 15038949                | CC                              | TT              | 1946772605               |
| SNP_P4_30660_15038981 | NC_021162.1    | Ca_kabuli_chr03 | 15038981                | GG                              | AA              | 1946772607               |
| SNP_P4_30661_15038989 | NC_021162.1    | Ca_kabuli_chr03 | 15038989                | TT                              | CC              | 1946772609               |
| SNP_P4_30662_15039218 | NC_021162.1    | Ca_kabuli_chr03 | 15039218                | CC                              | AA              | 1946772611               |
| SNP_P4_30664_15039363 | NC_021162.1    | Ca_kabuli_chr03 | 15039363                | AA                              | TT              | 1946772613               |
| SNP_P4_30665_15042477 | NC_021162.1    | Ca_kabuli_chr03 | 15042477                | CC                              | TT              | 1946772615               |
| SNP_P4_30667_15047360 | NC_021162.1    | Ca_kabuli_chr03 | 15047360                | TT                              | CC              | 1946772617               |
| SNP_P4_30668_15047616 | NC_021162.1    | Ca_kabuli_chr03 | 15047616                | CC                              | TT              | 1946772619               |
| SNP_P4_30669_15047652 | NC_021162.1    | Ca_kabuli_chr03 | 15047652                | TT                              | CC              | 1946772621               |
| SNP_P4_30670_15047667 | NC_021162.1    | Ca_kabuli_chr03 | 15047667                | TT                              | GG              | 1946772623               |
| SNP_P4_30671_15047819 | NC_021162.1    | Ca_kabuli_chr03 | 15047819                | AA                              | GG              | 1946772625               |
| SNP_P4_30672_15049391 | NC_021162.1    | Ca_kabuli_chr03 | 15049391                | CC                              | GG              | 1946772627               |
| SNP_P4_30673_15052145 | NC_021162.1    | Ca_kabuli_chr03 | 15052145                | TT                              | AA              | 1946772629               |
| SNP_P4_30674_15052898 | NC_021162.1    | Ca_kabuli_chr03 | 15052898                | CC                              | GG              | 1946772631               |
| SNP_P4_30675_15053002 | NC_021162.1    | Ca_kabuli_chr03 | 15053002                | GG                              | AA              | 1946772633               |
| SNP_P4_30676_15053080 | NC_021162.1    | Ca_kabuli_chr03 | 15053080                | GG                              | AA              | 1946772635               |
| SNP_P4_30678_15072295 | NC_021162.1    | Ca_kabuli_chr03 | 15072295                | GG                              | AA              | 1946772637               |

| SNPs IDs              | Chromosome IDs | Chromosomes     | Physical positions (bp) | CDC Frontier (Reference genome) | (ILWC46 & LPNB) | NCBI SNPdb Accession IDs |
|-----------------------|----------------|-----------------|-------------------------|---------------------------------|-----------------|--------------------------|
| SNP_P4_30680_15072494 | NC_021162.1    | Ca_kabuli_chr03 | 15072494                | GG                              | TT              | 1946772640               |
| SNP_P4_30681_15072506 | NC_021162.1    | Ca_kabuli_chr03 | 15072506                | AA                              | CC              | 1946772642               |
| SNP_P4_30682_15072516 | NC_021162.1    | Ca_kabuli_chr03 | 15072516                | TT                              | CC              | 1946772644               |
| SNP_P4_30683_15072535 | NC_021162.1    | Ca_kabuli_chr03 | 15072535                | GG                              | CC              | 1946772646               |
| SNP_P4_30686_15124603 | NC_021162.1    | Ca_kabuli_chr03 | 15124603                | AA                              | GG              | 1946772648               |
| SNP_P4_30687_15124627 | NC_021162.1    | Ca_kabuli_chr03 | 15124627                | AA                              | GG              | 1946772650               |
| SNP_P4_30688_15125321 | NC_021162.1    | Ca_kabuli_chr03 | 15125321                | TT                              | AA              | 1946772652               |
| SNP_P4_30689_15145062 | NC_021162.1    | Ca_kabuli_chr03 | 15145062                | CC                              | AA              | 1946772654               |
| SNP_P4_30690_15158798 | NC_021162.1    | Ca_kabuli_chr03 | 15158798                | AA                              | CC              | 1946772656               |
| SNP_P4_30691_15173074 | NC_021162.1    | Ca_kabuli_chr03 | 15173074                | CC                              | GG              | 1946772658               |
| SNP_P4_30692_15173136 | NC_021162.1    | Ca_kabuli_chr03 | 15173136                | GG                              | CC              | 1946772661               |
| SNP_P4_30693_15212417 | NC_021162.1    | Ca_kabuli_chr03 | 15212417                | CC                              | AA              | 1946772663               |
| SNP_P4_30694_15212423 | NC_021162.1    | Ca_kabuli_chr03 | 15212423                | GG                              | AA              | 1946772665               |
| SNP_P4_30695_15212440 | NC_021162.1    | Ca_kabuli_chr03 | 15212440                | TT                              | CC              | 1946772667               |
| SNP_P4_30696_15212540 | NC_021162.1    | Ca_kabuli_chr03 | 15212540                | GG                              | AA              | 1946772669               |
| SNP_P4_30697_15216080 | NC_021162.1    | Ca_kabuli_chr03 | 15216080                | TT                              | CC              | 1946772671               |
| SNP_P4_30698_15231692 | NC_021162.1    | Ca_kabuli_chr03 | 15231692                | AA                              | GG              | 1946772673               |
| SNP_P4_30699_15231840 | NC_021162.1    | Ca_kabuli_chr03 | 15231840                | GG                              | AA              | 1946772675               |
| SNP_P4_30700_15231999 | NC_021162.1    | Ca_kabuli_chr03 | 15231999                | TT                              | CC              | 1946772677               |
| SNP_P4_30701_15232252 | NC_021162.1    | Ca_kabuli_chr03 | 15232252                | AA                              | GG              | 1946772680               |
| SNP_P4_30702_15239878 | NC_021162.1    | Ca_kabuli_chr03 | 15239878                | CC                              | TT              | 1946772682               |
| SNP_P4_30703_15266412 | NC_021162.1    | Ca_kabuli_chr03 | 15266412                | TT                              | AA              | 1946772684               |
| SNP_P4_30704_15271861 | NC_021162.1    | Ca_kabuli_chr03 | 15271861                | GG                              | AA              | 1946772686               |
| SNP_P4_30705_15272204 | NC_021162.1    | Ca_kabuli_chr03 | 15272204                | AA                              | GG              | 1946772688               |
| SNP_P4_30706_15282156 | NC_021162.1    | Ca_kabuli_chr03 | 15282156                | AA                              | GG              | 1946772691               |
| SNP_P4_30707_15297139 | NC_021162.1    | Ca_kabuli_chr03 | 15297139                | GG                              | AA              | 1946772693               |
| SNP_P4_30708_15299654 | NC_021162.1    | Ca_kabuli_chr03 | 15299654                | CC                              | AA              | 1946772695               |
| SNP_P4_30709_15301292 | NC_021162.1    | Ca_kabuli_chr03 | 15301292                | CC                              | TT              | 1946772697               |
| SNP_P4_30710_15305580 | NC_021162.1    | Ca_kabuli_chr03 | 15305580                | TT                              | GG              | 1946772699               |
| SNP_P4_30711_15308464 | NC_021162.1    | Ca_kabuli_chr03 | 15308464                | GG                              | AA              | 1946772701               |
| SNP_P4_30712_15309631 | NC_021162.1    | Ca_kabuli_chr03 | 15309631                | TT                              | CC              | 1946772703               |
| SNP_P4_30713_15309918 | NC_021162.1    | Ca_kabuli_chr03 | 15309918                | CC                              | TT              | 1946772705               |
| SNP_P4_30714_15309924 | NC_021162.1    | Ca_kabuli_chr03 | 15309924                | AA                              | TT              | 1946772707               |
| SNP_P4_30715_15309941 | NC_021162.1    | Ca_kabuli_chr03 | 15309941                | AA                              | GG              | 1946772709               |
| SNP_P4_30716_15314117 | NC_021162.1    | Ca_kabuli_chr03 | 15314117                | GG                              | AA              | 1946772711               |
| SNP_P4_30717_15314199 | NC_021162.1    | Ca_kabuli_chr03 | 15314199                | GG                              | AA              | 1946772714               |
| SNP_P4_30718_15314488 | NC_021162.1    | Ca_kabuli_chr03 | 15314488                | TT                              | CC              | 1946772716               |
| SNP_P4_30719_15324516 | NC_021162.1    | Ca_kabuli_chr03 | 15324516                | CC                              | GG              | 1946772718               |
| SNP_P4_30720_15331855 | NC_021162.1    | Ca_kabuli_chr03 | 15331855                | AA                              | GG              | 1946772720               |
| SNP_P4_30721_15332236 | NC_021162.1    | Ca_kabuli_chr03 | 15332236                | AA                              | CC              | 1946772722               |
| SNP_P4_30722_15338295 | NC_021162.1    | Ca_kabuli_chr03 | 15338295                | GG                              | CC              | 1946772724               |
| SNP_P4_30723_15338348 | NC_021162.1    | Ca_kabuli_chr03 | 15338348                | CC                              | AA              | 1946772726               |

| SNPs IDs              | Chromosome IDs | Chromosomes     | Physical positions (bp) | CDC Frontier (Reference genome) | (ILWC46 & LPNB) | NCBI SNPdb Accession IDs |
|-----------------------|----------------|-----------------|-------------------------|---------------------------------|-----------------|--------------------------|
| SNP_P4_30725_15387937 | NC_021162.1    | Ca_kabuli_chr03 | 15387937                | AA                              | GG              | 1946772728               |
| SNP_P4_30726_15388246 | NC_021162.1    | Ca_kabuli_chr03 | 15388246                | GG                              | AA              | 1946772730               |
| SNP_P4_30728_15396920 | NC_021162.1    | Ca_kabuli_chr03 | 15396920                | TT                              | CC              | 1946772733               |
| SNP_P4_30729_15422305 | NC_021162.1    | Ca_kabuli_chr03 | 15422305                | TT                              | GG              | 1946772735               |
| SNP_P4_30730_15468084 | NC_021162.1    | Ca_kabuli_chr03 | 15468084                | CC                              | AA              | 1946772737               |
| SNP_P4_30731_15485834 | NC_021162.1    | Ca_kabuli_chr03 | 15485834                | CC                              | GG              | 1946772739               |
| SNP_P4_30732_15547929 | NC_021162.1    | Ca_kabuli_chr03 | 15547929                | AA                              | TT              | 1946772741               |
| SNP_P4_30733_15583874 | NC_021162.1    | Ca_kabuli_chr03 | 15583874                | TT                              | CC              | 1946772743               |
| SNP_P4_30734_15583899 | NC_021162.1    | Ca_kabuli_chr03 | 15583899                | AA                              | CC              | 1946772746               |
| SNP_P4_30735_15584074 | NC_021162.1    | Ca_kabuli_chr03 | 15584074                | CC                              | GG              | 1946772748               |
| SNP_P4_30736_15584182 | NC_021162.1    | Ca_kabuli_chr03 | 15584182                | CC                              | AA              | 1946772750               |
| SNP_P4_30737_15588649 | NC_021162.1    | Ca_kabuli_chr03 | 15588649                | AA                              | GG              | 1946772752               |
| SNP_P4_30738_15588665 | NC_021162.1    | Ca_kabuli_chr03 | 15588665                | GG                              | AA              | 1946772754               |
| SNP_P4_30739_15588669 | NC_021162.1    | Ca_kabuli_chr03 | 15588669                | CC                              | TT              | 1946772756               |
| SNP_P4_30740_15588672 | NC_021162.1    | Ca_kabuli_chr03 | 15588672                | CC                              | TT              | 1946772759               |
| SNP_P4_30741_15588682 | NC_021162.1    | Ca_kabuli_chr03 | 15588682                | AA                              | GG              | 1946772761               |
| SNP_P4_30742_15588731 | NC_021162.1    | Ca_kabuli_chr03 | 15588731                | AA                              | GG              | 1946772763               |
| SNP_P4_30743_15588735 | NC_021162.1    | Ca_kabuli_chr03 | 15588735                | GG                              | AA              | 1946772765               |
| SNP_P4_30744_15588738 | NC_021162.1    | Ca_kabuli_chr03 | 15588738                | AA                              | CC              | 1946772767               |
| SNP_P4_30745_15588788 | NC_021162.1    | Ca_kabuli_chr03 | 15588788                | GG                              | TT              | 1946772769               |
| SNP_P4_30746_15588830 | NC_021162.1    | Ca_kabuli_chr03 | 15588830                | TT                              | CC              | 1946772771               |
| SNP_P4_30747_15588912 | NC_021162.1    | Ca_kabuli_chr03 | 15588912                | AA                              | CC              | 1946772773               |
| SNP_P4_30748_15611261 | NC_021162.1    | Ca_kabuli_chr03 | 15611261                | AA                              | GG              | 1946772775               |
| SNP_P4_30749_15620554 | NC_021162.1    | Ca_kabuli_chr03 | 15620554                | AA                              | GG              | 1946772777               |
| SNP_P4_30750_15620617 | NC_021162.1    | Ca_kabuli_chr03 | 15620617                | AA                              | GG              | 1946772779               |
| SNP_P4_30751_15620621 | NC_021162.1    | Ca_kabuli_chr03 | 15620621                | TT                              | AA              | 1946772781               |
| SNP_P4_30752_15620895 | NC_021162.1    | Ca_kabuli_chr03 | 15620895                | GG                              | AA              | 1946772784               |
| SNP_P4_30753_15649640 | NC_021162.1    | Ca_kabuli_chr03 | 15649640                | CC                              | TT              | 1946772786               |
| SNP_P4_30754_15652871 | NC_021162.1    | Ca_kabuli_chr03 | 15652871                | TT                              | CC              | 1946772788               |
| SNP_P4_30755_15653264 | NC_021162.1    | Ca_kabuli_chr03 | 15653264                | TT                              | GG              | 1946772790               |
| SNP_P4_30756_15657522 | NC_021162.1    | Ca_kabuli_chr03 | 15657522                | AA                              | GG              | 1946772792               |
| SNP_P4_30757_15657545 | NC_021162.1    | Ca_kabuli_chr03 | 15657545                | TT                              | CC              | 1946772794               |
| SNP_P4_30758_15657579 | NC_021162.1    | Ca_kabuli_chr03 | 15657579                | AA                              | CC              | 1946772796               |
| SNP_P4_30759_15657580 | NC_021162.1    | Ca_kabuli_chr03 | 15657580                | TT                              | CC              | 1946772799               |
| SNP_P4_30760_15657605 | NC_021162.1    | Ca_kabuli_chr03 | 15657605                | GG                              | CC              | 1946772801               |
| SNP_P4_30761_15657620 | NC_021162.1    | Ca_kabuli_chr03 | 15657620                | AA                              | GG              | 1946772803               |
| SNP_P4_30762_15657677 | NC_021162.1    | Ca_kabuli_chr03 | 15657677                | AA                              | GG              | 1946772805               |
| SNP_P4_30763_15657720 | NC_021162.1    | Ca_kabuli_chr03 | 15657720                | GG                              | AA              | 1946772807               |
| SNP_P4_30764_15657745 | NC_021162.1    | Ca_kabuli_chr03 | 15657745                | AA                              | GG              | 1946772809               |
| SNP_P4_30765_15657755 | NC_021162.1    | Ca_kabuli_chr03 | 15657755                | TT                              | CC              | 1946772811               |
| SNP_P4_30766_15657768 | NC_021162.1    | Ca_kabuli_chr03 | 15657768                | AA                              | GG              | 1946772813               |
| SNP_P4_30767_15657779 | NC_021162.1    | Ca_kabuli_chr03 | 15657779                | AA                              | GG              | 1946772815               |

| SNPs IDs              | Chromosome IDs | Chromosomes     | Physical positions (bp) | CDC Frontier (Reference genome) | (ILWC46 & LPNB) | NCBI SNPdb Accession IDs |
|-----------------------|----------------|-----------------|-------------------------|---------------------------------|-----------------|--------------------------|
| SNP_P4_30768_15657886 | NC_021162.1    | Ca_kabuli_chr03 | 15657886                | GG                              | AA              | 1946772817               |
| SNP_P4_30769_15657907 | NC_021162.1    | Ca_kabuli_chr03 | 15657907                | CC                              | GG              | 1946772819               |
| SNP_P4_30770_15657913 | NC_021162.1    | Ca_kabuli_chr03 | 15657913                | TT                              | CC              | 1946772821               |
| SNP_P4_30771_15657931 | NC_021162.1    | Ca_kabuli_chr03 | 15657931                | AA                              | GG              | 1946772823               |
| SNP_P4_30772_15657942 | NC_021162.1    | Ca_kabuli_chr03 | 15657942                | CC                              | TT              | 1946772825               |
| SNP_P4_30773_15657944 | NC_021162.1    | Ca_kabuli_chr03 | 15657944                | AA                              | CC              | 1946772827               |
| SNP_P4_30774_15657955 | NC_021162.1    | Ca_kabuli_chr03 | 15657955                | TT                              | CC              | 1946772829               |
| SNP_P4_30775_15657968 | NC_021162.1    | Ca_kabuli_chr03 | 15657968                | CC                              | AA              | 1946772831               |
| SNP_P4_30776_15657972 | NC_021162.1    | Ca_kabuli_chr03 | 15657972                | AA                              | CC              | 1946772833               |
| SNP_P4_30777_15657977 | NC_021162.1    | Ca_kabuli_chr03 | 15657977                | TT                              | CC              | 1946772835               |
| SNP_P4_30778_15658198 | NC_021162.1    | Ca_kabuli_chr03 | 15658198                | TT                              | GG              | 1946772837               |
| SNP_P4_30779_15658199 | NC_021162.1    | Ca_kabuli_chr03 | 15658199                | GG                              | AA              | 1946772839               |
| SNP_P4_30780_15658210 | NC_021162.1    | Ca_kabuli_chr03 | 15658210                | TT                              | CC              | 1946772841               |
| SNP_P4_30781_15658304 | NC_021162.1    | Ca_kabuli_chr03 | 15658304                | TT                              | CC              | 1946772843               |
| SNP_P4_30782_15658389 | NC_021162.1    | Ca_kabuli_chr03 | 15658389                | TT                              | CC              | 1946772846               |
| SNP_P4_30783_15658437 | NC_021162.1    | Ca_kabuli_chr03 | 15658437                | TT                              | AA              | 1946772848               |
| SNP_P4_30784_15658469 | NC_021162.1    | Ca_kabuli_chr03 | 15658469                | GG                              | AA              | 1946772850               |
| SNP_P4_30786_15658509 | NC_021162.1    | Ca_kabuli_chr03 | 15658509                | CC                              | GG              | 1946772852               |
| SNP_P4_30788_15658530 | NC_021162.1    | Ca_kabuli_chr03 | 15658530                | AA                              | CC              | 1946772854               |
| SNP_P4_30789_15658537 | NC_021162.1    | Ca_kabuli_chr03 | 15658537                | TT                              | CC              | 1946772856               |
| SNP_P4_30790_15658598 | NC_021162.1    | Ca_kabuli_chr03 | 15658598                | GG                              | TT              | 1946772858               |
| SNP_P4_30791_15658686 | NC_021162.1    | Ca_kabuli_chr03 | 15658686                | TT                              | GG              | 1946772860               |
| SNP_P4_30792_15658714 | NC_021162.1    | Ca_kabuli_chr03 | 15658714                | TT                              | GG              | 1946772862               |
| SNP_P4_30793_15658736 | NC_021162.1    | Ca_kabuli_chr03 | 15658736                | TT                              | CC              | 1946772865               |
| SNP_P4_30794_15658803 | NC_021162.1    | Ca_kabuli_chr03 | 15658803                | AA                              | CC              | 1946772867               |
| SNP_P4_30795_15658805 | NC_021162.1    | Ca_kabuli_chr03 | 15658805                | GG                              | CC              | 1946772869               |
| SNP_P4_30796_15658815 | NC_021162.1    | Ca_kabuli_chr03 | 15658815                | TT                              | CC              | 1946772871               |
| SNP_P4_30797_15658819 | NC_021162.1    | Ca_kabuli_chr03 | 15658819                | GG                              | AA              | 1946772873               |
| SNP_P4_30798_15658867 | NC_021162.1    | Ca_kabuli_chr03 | 15658867                | TT                              | CC              | 1946772875               |
| SNP_P4_30799_15658923 | NC_021162.1    | Ca_kabuli_chr03 | 15658923                | AA                              | GG              | 1946772877               |
| SNP_P4_30800_15658928 | NC_021162.1    | Ca_kabuli_chr03 | 15658928                | TT                              | CC              | 1946772879               |
| SNP_P4_30801_15658971 | NC_021162.1    | Ca_kabuli_chr03 | 15658971                | TT                              | CC              | 1946772881               |
| SNP_P4_30802_15658984 | NC_021162.1    | Ca_kabuli_chr03 | 15658984                | TT                              | CC              | 1946772883               |
| SNP_P4_30803_15659061 | NC_021162.1    | Ca_kabuli_chr03 | 15659061                | AA                              | CC              | 1946772885               |
| SNP_P4_30804_15659075 | NC_021162.1    | Ca_kabuli_chr03 | 15659075                | AA                              | CC              | 1946772887               |
| SNP_P4_30805_15659081 | NC_021162.1    | Ca_kabuli_chr03 | 15659081                | CC                              | TT              | 1946772890               |
| SNP_P4_30806_15659125 | NC_021162.1    | Ca_kabuli_chr03 | 15659125                | TT                              | CC              | 1946772892               |
| SNP_P4_30807_15659138 | NC_021162.1    | Ca_kabuli_chr03 | 15659138                | GG                              | TT              | 1946772894               |
| SNP_P4_30808_15659140 | NC_021162.1    | Ca_kabuli_chr03 | 15659140                | AA                              | GG              | 1946772896               |
| SNP_P4_30809_15659151 | NC_021162.1    | Ca_kabuli_chr03 | 15659151                | CC                              | AA              | 1946772898               |
| SNP_P4_30810_15659162 | NC_021162.1    | Ca_kabuli_chr03 | 15659162                | TT                              | CC              | 1946772900               |
| SNP_P4_30811_15659213 | NC_021162.1    | Ca_kabuli_chr03 | 15659213                | AA                              | CC              | 1946772903               |

| SNPs IDs              | Chromosome IDs | Chromosomes     | Physical positions (bp) | CDC Frontier (Reference genome) | (ILWC46 & LPNB) | NCBI SNPdb Accession IDs |
|-----------------------|----------------|-----------------|-------------------------|---------------------------------|-----------------|--------------------------|
| SNP_P4_30812_15659257 | NC_021162.1    | Ca_kabuli_chr03 | 15659257                | CC                              | TT              | 1946772905               |
| SNP_P4_30813_15659263 | NC_021162.1    | Ca_kabuli_chr03 | 15659263                | TT                              | CC              | 1946772907               |
| SNP_P4_30814_15659306 | NC_021162.1    | Ca_kabuli_chr03 | 15659306                | TT                              | GG              | 1946772909               |
| SNP_P4_30815_15659311 | NC_021162.1    | Ca_kabuli_chr03 | 15659311                | TT                              | CC              | 1946772911               |
| SNP_P4_30816_15659319 | NC_021162.1    | Ca_kabuli_chr03 | 15659319                | GG                              | TT              | 1946772913               |
| SNP_P4_30817_15659334 | NC_021162.1    | Ca_kabuli_chr03 | 15659334                | CC                              | AA              | 1946772915               |
| SNP_P4_30818_15659354 | NC_021162.1    | Ca_kabuli_chr03 | 15659354                | AA                              | GG              | 1946772917               |
| SNP_P4_30819_15659363 | NC_021162.1    | Ca_kabuli_chr03 | 15659363                | AA                              | CC              | 1946772920               |
| SNP_P4_30820_15659387 | NC_021162.1    | Ca_kabuli_chr03 | 15659387                | GG                              | AA              | 1946772922               |
| SNP_P4_30821_15659400 | NC_021162.1    | Ca_kabuli_chr03 | 15659400                | TT                              | CC              | 1946772924               |
| SNP_P4_30822_15659420 | NC_021162.1    | Ca_kabuli_chr03 | 15659420                | TT                              | CC              | 1946772926               |
| SNP_P4_30823_15659459 | NC_021162.1    | Ca_kabuli_chr03 | 15659459                | AA                              | TT              | 1946772928               |
| SNP_P4_30824_15659474 | NC_021162.1    | Ca_kabuli_chr03 | 15659474                | AA                              | GG              | 1946772930               |
| SNP_P4_30825_15659508 | NC_021162.1    | Ca_kabuli_chr03 | 15659508                | TT                              | AA              | 1946772932               |
| SNP_P4_30826_15659513 | NC_021162.1    | Ca_kabuli_chr03 | 15659513                | AA                              | GG              | 1946772934               |
| SNP_P4_30827_15659556 | NC_021162.1    | Ca_kabuli_chr03 | 15659556                | AA                              | CC              | 1946772936               |
| SNP_P4_30828_15659582 | NC_021162.1    | Ca_kabuli_chr03 | 15659582                | GG                              | TT              | 1946772938               |
| SNP_P4_30829_15659590 | NC_021162.1    | Ca_kabuli_chr03 | 15659590                | TT                              | AA              | 1946772940               |
| SNP_P4_30830_15659597 | NC_021162.1    | Ca_kabuli_chr03 | 15659597                | AA                              | TT              | 1946772942               |
| SNP_P4_30831_15659616 | NC_021162.1    | Ca_kabuli_chr03 | 15659616                | AA                              | CC              | 1946772944               |
| SNP_P4_30832_15659651 | NC_021162.1    | Ca_kabuli_chr03 | 15659651                | AA                              | GG              | 1946772946               |
| SNP_P4_30833_15659653 | NC_021162.1    | Ca_kabuli_chr03 | 15659653                | AA                              | GG              | 1946772948               |
| SNP_P4_30834_15659667 | NC_021162.1    | Ca_kabuli_chr03 | 15659667                | TT                              | CC              | 1946772950               |
| SNP_P4_30835_15659694 | NC_021162.1    | Ca_kabuli_chr03 | 15659694                | TT                              | CC              | 1946772952               |
| SNP_P4_30836_15659712 | NC_021162.1    | Ca_kabuli_chr03 | 15659712                | TT                              | CC              | 1946772954               |
| SNP_P4_30837_15659749 | NC_021162.1    | Ca_kabuli_chr03 | 15659749                | GG                              | CC              | 1946772956               |
| SNP_P4_30838_15659774 | NC_021162.1    | Ca_kabuli_chr03 | 15659774                | AA                              | CC              | 1946772959               |
| SNP_P4_30839_15659806 | NC_021162.1    | Ca_kabuli_chr03 | 15659806                | AA                              | GG              | 1946772961               |
| SNP_P4_30840_15659811 | NC_021162.1    | Ca_kabuli_chr03 | 15659811                | TT                              | CC              | 1946772963               |
| SNP_P4_30841_15659867 | NC_021162.1    | Ca_kabuli_chr03 | 15659867                | AA                              | GG              | 1946772965               |
| SNP_P4_30842_15659957 | NC_021162.1    | Ca_kabuli_chr03 | 15659957                | TT                              | CC              | 1946772967               |
| SNP_P4_30843_15659997 | NC_021162.1    | Ca_kabuli_chr03 | 15659997                | AA                              | GG              | 1946772969               |
| SNP_P4_30844_15660047 | NC_021162.1    | Ca_kabuli_chr03 | 15660047                | TT                              | CC              | 1946772971               |
| SNP_P4_30845_15660063 | NC_021162.1    | Ca_kabuli_chr03 | 15660063                | TT                              | CC              | 1946772973               |
| SNP_P4_30846_15660076 | NC_021162.1    | Ca_kabuli_chr03 | 15660076                | AA                              | GG              | 1946772975               |
| SNP_P4_30847_15660096 | NC_021162.1    | Ca_kabuli_chr03 | 15660096                | AA                              | GG              | 1946772977               |
| SNP_P4_30848_15660116 | NC_021162.1    | Ca_kabuli_chr03 | 15660116                | TT                              | CC              | 1946772979               |
| SNP_P4_30849_15660128 | NC_021162.1    | Ca_kabuli_chr03 | 15660128                | AA                              | GG              | 1946772981               |
| SNP_P4_30850_15660163 | NC_021162.1    | Ca_kabuli_chr03 | 15660163                | GG                              | AA              | 1946772983               |
| SNP_P4_30851_15660341 | NC_021162.1    | Ca_kabuli_chr03 | 15660341                | TT                              | CC              | 1946772985               |
| SNP_P4_30852_15660348 | NC_021162.1    | Ca_kabuli_chr03 | 15660348                | AA                              | GG              | 1946772987               |
| SNP_P4_30853_15660352 | NC_021162.1    | Ca_kabuli_chr03 | 15660352                | AA                              | GG              | 1946772989               |



| SNPs IDs              | Chromosome IDs | Chromosomes     | Physical positions (bp) | CDC Frontier (Reference genome) | (ILWC46 & LPNB) | NCBI SNPdb Accession IDs |
|-----------------------|----------------|-----------------|-------------------------|---------------------------------|-----------------|--------------------------|
| SNP_P4_30854_15660358 | NC_021162.1    | Ca_kabuli_chr03 | 15660358                | AA                              | GG              | 1946772991               |
| SNP_P4_30855_15660389 | NC_021162.1    | Ca_kabuli_chr03 | 15660389                | AA                              | CC              | 1946772994               |
| SNP_P4_30856_15660414 | NC_021162.1    | Ca_kabuli_chr03 | 15660414                | TT                              | CC              | 1946772996               |
| SNP_P4_30857_15660438 | NC_021162.1    | Ca_kabuli_chr03 | 15660438                | CC                              | GG              | 1946772998               |
| SNP_P4_30858_15660466 | NC_021162.1    | Ca_kabuli_chr03 | 15660466                | TT                              | CC              | 1946773000               |
| SNP_P4_30859_15660467 | NC_021162.1    | Ca_kabuli_chr03 | 15660467                | AA                              | GG              | 1946773002               |
| SNP_P4_30861_15660551 | NC_021162.1    | Ca_kabuli_chr03 | 15660551                | AA                              | GG              | 1946773004               |
| SNP_P4_30862_15660579 | NC_021162.1    | Ca_kabuli_chr03 | 15660579                | CC                              | TT              | 1946773006               |
| SNP_P4_30863_15660622 | NC_021162.1    | Ca_kabuli_chr03 | 15660622                | AA                              | CC              | 1946773008               |
| SNP_P4_30864_15660636 | NC_021162.1    | Ca_kabuli_chr03 | 15660636                | AA                              | GG              | 1946773010               |
| SNP_P4_30865_15660684 | NC_021162.1    | Ca_kabuli_chr03 | 15660684                | AA                              | GG              | 1946773012               |
| SNP_P4_30867_15689297 | NC_021162.1    | Ca_kabuli_chr03 | 15689297                | GG                              | AA              | 1946773014               |
| SNP_P4_30868_15690583 | NC_021162.1    | Ca_kabuli_chr03 | 15690583                | AA                              | GG              | 1946773016               |
| SNP_P4_30869_15732582 | NC_021162.1    | Ca_kabuli_chr03 | 15732582                | AA                              | GG              | 1946773018               |
| SNP_P4_30870_15752535 | NC_021162.1    | Ca_kabuli_chr03 | 15752535                | TT                              | CC              | 1946773020               |
| SNP_P4_30871_15806617 | NC_021162.1    | Ca_kabuli_chr03 | 15806617                | CC                              | GG              | 1946773022               |
| SNP_P4_30872_15810326 | NC_021162.1    | Ca_kabuli_chr03 | 15810326                | GG                              | AA              | 1946773024               |
| SNP_P4_30873_15810339 | NC_021162.1    | Ca_kabuli_chr03 | 15810339                | TT                              | AA              | 1946773026               |
| SNP_P4_30874_15810350 | NC_021162.1    | Ca_kabuli_chr03 | 15810350                | CC                              | AA              | 1946773028               |
| SNP_P4_30875_15831261 | NC_021162.1    | Ca_kabuli_chr03 | 15831261                | GG                              | AA              | 1946773030               |
| SNP_P4_30878_15870964 | NC_021162.1    | Ca_kabuli_chr03 | 15870964                | CC                              | AA              | 1946773033               |
| SNP_P4_30879_15876623 | NC_021162.1    | Ca_kabuli_chr03 | 15876623                | TT                              | GG              | 1946773035               |
| SNP_P4_30880_15884175 | NC_021162.1    | Ca_kabuli_chr03 | 15884175                | AA                              | CC              | 1946773037               |
| SNP_P4_30881_15888772 | NC_021162.1    | Ca_kabuli_chr03 | 15888772                | GG                              | AA              | 1946773039               |
| SNP_P4_30882_15911672 | NC_021162.1    | Ca_kabuli_chr03 | 15911672                | AA                              | GG              | 1946773041               |
| SNP_P4_30883_15913593 | NC_021162.1    | Ca_kabuli_chr03 | 15913593                | AA                              | GG              | 1946773043               |
| SNP_P4_30885_15956725 | NC_021162.1    | Ca_kabuli_chr03 | 15956725                | TT                              | GG              | 1946773046               |
| SNP_P4_30886_15967768 | NC_021162.1    | Ca_kabuli_chr03 | 15967768                | AA                              | GG              | 1946773048               |
| SNP_P4_30887_15978819 | NC_021162.1    | Ca_kabuli_chr03 | 15978819                | AA                              | GG              | 1946773050               |
| SNP_P4_30888_15986325 | NC_021162.1    | Ca_kabuli_chr03 | 15986325                | AA                              | CC              | 1946773052               |
| SNP_P4_30889_15988949 | NC_021162.1    | Ca_kabuli_chr03 | 15988949                | GG                              | AA              | 1946773054               |
| SNP_P4_30890_16046380 | NC_021162.1    | Ca_kabuli_chr03 | 16046380                | GG                              | AA              | 1946773057               |
| SNP_P4_30892_16078493 | NC_021162.1    | Ca_kabuli_chr03 | 16078493                | TT                              | GG              | 1946773059               |
| SNP_P4_30893_16094011 | NC_021162.1    | Ca_kabuli_chr03 | 16094011                | TT                              | CC              | 1946773061               |
| SNP_P4_30894_16094015 | NC_021162.1    | Ca_kabuli_chr03 | 16094015                | CC                              | TT              | 1946773063               |
| SNP_P4_30896_16106775 | NC_021162.1    | Ca_kabuli_chr03 | 16106775                | GG                              | TT              | 1946773065               |
| SNP_P4_30897_16106863 | NC_021162.1    | Ca_kabuli_chr03 | 16106863                | GG                              | CC              | 1946773067               |
| SNP_P4_30898_16106945 | NC_021162.1    | Ca_kabuli_chr03 | 16106945                | AA                              | GG              | 1946773069               |
| SNP_P4_30899_16106983 | NC_021162.1    | Ca_kabuli_chr03 | 16106983                | TT                              | CC              | 1946773071               |
| SNP_P4_30900_16107228 | NC_021162.1    | Ca_kabuli_chr03 | 16107228                | AA                              | GG              | 1946773073               |
| SNP_P4_30901_16107263 | NC_021162.1    | Ca_kabuli_chr03 | 16107263                | AA                              | GG              | 1946773075               |
| SNP_P4_30902_16107292 | NC_021162.1    | Ca_kabuli_chr03 | 16107292                | AA                              | GG              | 1946773077               |

| SNPs IDs              | Chromosome IDs | Chromosomes     | Physical positions (bp) | CDC Frontier (Reference genome) | (ILWC46 & LPNB) | NCBI SNPdb Accession IDs |
|-----------------------|----------------|-----------------|-------------------------|---------------------------------|-----------------|--------------------------|
| SNP_P4_30903_16107345 | NC_021162.1    | Ca_kabuli_chr03 | 16107345                | CC                              | TT              | 1946773079               |
| SNP_P4_30904_16107417 | NC_021162.1    | Ca_kabuli_chr03 | 16107417                | TT                              | CC              | 1946773081               |
| SNP_P4_30906_16115088 | NC_021162.1    | Ca_kabuli_chr03 | 16115088                | AA                              | GG              | 1946773084               |
| SNP_P4_30907_16115201 | NC_021162.1    | Ca_kabuli_chr03 | 16115201                | GG                              | AA              | 1946773086               |
| SNP_P4_30908_16115209 | NC_021162.1    | Ca_kabuli_chr03 | 16115209                | CC                              | AA              | 1946773088               |
| SNP_P4_30909_16116723 | NC_021162.1    | Ca_kabuli_chr03 | 16116723                | TT                              | AA              | 1946773090               |
| SNP_P4_30910_16117260 | NC_021162.1    | Ca_kabuli_chr03 | 16117260                | AA                              | GG              | 1946773092               |
| SNP_P4_30911_16117495 | NC_021162.1    | Ca_kabuli_chr03 | 16117495                | CC                              | GG              | 1946773094               |
| SNP_P4_30912_16117499 | NC_021162.1    | Ca_kabuli_chr03 | 16117499                | TT                              | CC              | 1946773096               |
| SNP_P4_30913_16117500 | NC_021162.1    | Ca_kabuli_chr03 | 16117500                | GG                              | AA              | 1946773098               |
| SNP_P4_30914_16117549 | NC_021162.1    | Ca_kabuli_chr03 | 16117549                | GG                              | AA              | 1946773100               |
| SNP_P4_30915_16117587 | NC_021162.1    | Ca_kabuli_chr03 | 16117587                | CC                              | AA              | 1946773102               |
| SNP_P4_30916_16117952 | NC_021162.1    | Ca_kabuli_chr03 | 16117952                | AA                              | TT              | 1946773104               |
| SNP_P4_30917_16117965 | NC_021162.1    | Ca_kabuli_chr03 | 16117965                | TT                              | CC              | 1946773107               |
| SNP_P4_30919_16133223 | NC_021162.1    | Ca_kabuli_chr03 | 16133223                | TT                              | CC              | 1946773109               |
| SNP_P4_30921_16133445 | NC_021162.1    | Ca_kabuli_chr03 | 16133445                | CC                              | GG              | 1946773111               |
| SNP_P4_30923_16133506 | NC_021162.1    | Ca_kabuli_chr03 | 16133506                | TT                              | AA              | 1946773113               |
| SNP_P4_30924_16133508 | NC_021162.1    | Ca_kabuli_chr03 | 16133508                | TT                              | AA              | 1946773115               |
| SNP_P4_30925_16133528 | NC_021162.1    | Ca_kabuli_chr03 | 16133528                | CC                              | TT              | 1946773117               |
| SNP_P4_30927_16141616 | NC_021162.1    | Ca_kabuli_chr03 | 16141616                | CC                              | TT              | 1946773119               |
| SNP_P4_30928_16155170 | NC_021162.1    | Ca_kabuli_chr03 | 16155170                | TT                              | AA              | 1946773121               |
| SNP_P4_30929_16160472 | NC_021162.1    | Ca_kabuli_chr03 | 16160472                | TT                              | CC              | 1946773123               |
| SNP_P4_30930_16160682 | NC_021162.1    | Ca_kabuli_chr03 | 16160682                | GG                              | AA              | 1946773125               |
| SNP_P4_30931_16160714 | NC_021162.1    | Ca_kabuli_chr03 | 16160714                | TT                              | CC              | 1946773127               |
| SNP_P4_30932_16160818 | NC_021162.1    | Ca_kabuli_chr03 | 16160818                | GG                              | AA              | 1946773129               |
| SNP_P4_30933_16160843 | NC_021162.1    | Ca_kabuli_chr03 | 16160843                | TT                              | AA              | 1946773131               |
| SNP_P4_30934_16160844 | NC_021162.1    | Ca_kabuli_chr03 | 16160844                | AA                              | TT              | 1946773133               |
| SNP_P4_30935_16160989 | NC_021162.1    | Ca_kabuli_chr03 | 16160989                | AA                              | GG              | 1946773135               |
| SNP_P4_30936_16161048 | NC_021162.1    | Ca_kabuli_chr03 | 16161048                | TT                              | GG              | 1946773138               |
| SNP_P4_30937_16164198 | NC_021162.1    | Ca_kabuli_chr03 | 16164198                | AA                              | GG              | 1946773140               |
| SNP_P4_30938_16164247 | NC_021162.1    | Ca_kabuli_chr03 | 16164247                | CC                              | TT              | 1946773142               |
| SNP_P4_30939_16164261 | NC_021162.1    | Ca_kabuli_chr03 | 16164261                | CC                              | AA              | 1946773144               |
| SNP_P4_30940_16164283 | NC_021162.1    | Ca_kabuli_chr03 | 16164283                | AA                              | GG              | 1946773146               |
| SNP_P4_30941_16164292 | NC_021162.1    | Ca_kabuli_chr03 | 16164292                | CC                              | GG              | 1946773149               |
| SNP_P4_30942_16164308 | NC_021162.1    | Ca_kabuli_chr03 | 16164308                | CC                              | TT              | 1946773151               |
| SNP_P4_30943_16164482 | NC_021162.1    | Ca_kabuli_chr03 | 16164482                | GG                              | CC              | 1946773153               |
| SNP_P4_30944_16164503 | NC_021162.1    | Ca_kabuli_chr03 | 16164503                | CC                              | TT              | 1946773155               |
| SNP_P4_30945_16164524 | NC_021162.1    | Ca_kabuli_chr03 | 16164524                | CC                              | GG              | 1946773157               |
| SNP_P4_30946_16164613 | NC_021162.1    | Ca_kabuli_chr03 | 16164613                | TT                              | AA              | 1946773159               |
| SNP_P4_30948_16166862 | NC_021162.1    | Ca_kabuli_chr03 | 16166862                | AA                              | TT              | 1946773162               |
| SNP_P4_30949_16166938 | NC_021162.1    | Ca_kabuli_chr03 | 16166938                | GG                              | AA              | 1946773164               |
| SNP_P4_30950_16166948 | NC_021162.1    | Ca_kabuli_chr03 | 16166948                | GG                              | AA              | 1946773166               |

| SNPs IDs              | Chromosome IDs | Chromosomes     | Physical positions (bp) | CDC Frontier (Reference genome) | (ILWC46 & LPNB) | NCBI SNPdb Accession IDs |
|-----------------------|----------------|-----------------|-------------------------|---------------------------------|-----------------|--------------------------|
| SNP_P4_30951_16167055 | NC_021162.1    | Ca_kabuli_chr03 | 16167055                | TT                              | CC              | 1946773169               |
| SNP_P4_30952_16167092 | NC_021162.1    | Ca_kabuli_chr03 | 16167092                | AA                              | GG              | 1946773171               |
| SNP_P4_30953_16167100 | NC_021162.1    | Ca_kabuli_chr03 | 16167100                | GG                              | TT              | 1946773173               |
| SNP_P4_30954_16167116 | NC_021162.1    | Ca_kabuli_chr03 | 16167116                | CC                              | TT              | 1946773175               |
| SNP_P4_30955_16167247 | NC_021162.1    | Ca_kabuli_chr03 | 16167247                | AA                              | GG              | 1946773177               |
| SNP_P4_30956_16167294 | NC_021162.1    | Ca_kabuli_chr03 | 16167294                | AA                              | CC              | 1946773179               |
| SNP_P4_30957_16168848 | NC_021162.1    | Ca_kabuli_chr03 | 16168848                | TT                              | CC              | 1946773181               |
| SNP_P4_30958_16168929 | NC_021162.1    | Ca_kabuli_chr03 | 16168929                | CC                              | GG              | 1946773184               |
| SNP_P4_30959_16168936 | NC_021162.1    | Ca_kabuli_chr03 | 16168936                | CC                              | TT              | 1946773186               |
| SNP_P4_30960_16168969 | NC_021162.1    | Ca_kabuli_chr03 | 16168969                | GG                              | AA              | 1946773188               |
| SNP_P4_30961_16168982 | NC_021162.1    | Ca_kabuli_chr03 | 16168982                | CC                              | TT              | 1946773190               |
| SNP_P4_30962_16169169 | NC_021162.1    | Ca_kabuli_chr03 | 16169169                | AA                              | GG              | 1946773192               |
| SNP_P4_30963_16169209 | NC_021162.1    | Ca_kabuli_chr03 | 16169209                | CC                              | TT              | 1946773195               |
| SNP_P4_30964_16169245 | NC_021162.1    | Ca_kabuli_chr03 | 16169245                | GG                              | AA              | 1946773197               |
| SNP_P4_30965_16170604 | NC_021162.1    | Ca_kabuli_chr03 | 16170604                | TT                              | CC              | 1946773199               |
| SNP_P4_30966_16170617 | NC_021162.1    | Ca_kabuli_chr03 | 16170617                | CC                              | AA              | 1946773201               |
| SNP_P4_30967_16170632 | NC_021162.1    | Ca_kabuli_chr03 | 16170632                | GG                              | TT              | 1946773203               |
| SNP_P4_30968_16170792 | NC_021162.1    | Ca_kabuli_chr03 | 16170792                | AA                              | GG              | 1946773205               |
| SNP_P4_30969_16170975 | NC_021162.1    | Ca_kabuli_chr03 | 16170975                | CC                              | TT              | 1946773208               |
| SNP_P4_30970_16170997 | NC_021162.1    | Ca_kabuli_chr03 | 16170997                | TT                              | CC              | 1946773210               |
| SNP_P4_30971_16170998 | NC_021162.1    | Ca_kabuli_chr03 | 16170998                | CC                              | AA              | 1946773212               |
| SNP_P4_30972_16171007 | NC_021162.1    | Ca_kabuli_chr03 | 16171007                | GG                              | AA              | 1946773214               |
| SNP_P4_30973_16171028 | NC_021162.1    | Ca_kabuli_chr03 | 16171028                | CC                              | TT              | 1946773216               |
| SNP_P4_30974_16171051 | NC_021162.1    | Ca_kabuli_chr03 | 16171051                | TT                              | CC              | 1946773218               |
| SNP_P4_30976_16171366 | NC_021162.1    | Ca_kabuli_chr03 | 16171366                | CC                              | TT              | 1946773221               |
| SNP_P4_30977_16171409 | NC_021162.1    | Ca_kabuli_chr03 | 16171409                | TT                              | GG              | 1946773223               |
| SNP_P4_30978_16171625 | NC_021162.1    | Ca_kabuli_chr03 | 16171625                | AA                              | TT              | 1946773225               |
| SNP_P4_30979_16181478 | NC_021162.1    | Ca_kabuli_chr03 | 16181478                | AA                              | TT              | 1946773227               |
| SNP_P4_30980_16181553 | NC_021162.1    | Ca_kabuli_chr03 | 16181553                | GG                              | TT              | 1946773229               |
| SNP_P4_30981_16181971 | NC_021162.1    | Ca_kabuli_chr03 | 16181971                | CC                              | TT              | 1946773232               |
| SNP_P4_30982_16182007 | NC_021162.1    | Ca_kabuli_chr03 | 16182007                | CC                              | TT              | 1946773234               |
| SNP_P4_30983_16182402 | NC_021162.1    | Ca_kabuli_chr03 | 16182402                | AA                              | CC              | 1946773236               |
| SNP_P4_30984_16182646 | NC_021162.1    | Ca_kabuli_chr03 | 16182646                | TT                              | CC              | 1946773238               |
| SNP_P4_30985_16182674 | NC_021162.1    | Ca_kabuli_chr03 | 16182674                | GG                              | AA              | 1946773240               |
| SNP_P4_30987_16182938 | NC_021162.1    | Ca_kabuli_chr03 | 16182938                | GG                              | AA              | 1946773242               |
| SNP_P4_30988_16183187 | NC_021162.1    | Ca_kabuli_chr03 | 16183187                | CC                              | TT              | 1946773244               |
| SNP_P4_30989_16183207 | NC_021162.1    | Ca_kabuli_chr03 | 16183207                | GG                              | AA              | 1946773247               |
| SNP_P4_30990_16183241 | NC_021162.1    | Ca_kabuli_chr03 | 16183241                | CC                              | GG              | 1946773249               |
| SNP_P4_30991_16183257 | NC_021162.1    | Ca_kabuli_chr03 | 16183257                | TT                              | CC              | 1946773251               |
| SNP_P4_30992_16190153 | NC_021162.1    | Ca_kabuli_chr03 | 16190153                | AA                              | GG              | 1946773253               |
| SNP_P4_30993_16190165 | NC_021162.1    | Ca_kabuli_chr03 | 16190165                | GG                              | AA              | 1946773256               |
| SNP_P4_30994_16190276 | NC_021162.1    | Ca_kabuli_chr03 | 16190276                | GG                              | TT              | 1946773258               |

| SNPs IDs              | Chromosome IDs | Chromosomes     | Physical positions (bp) | CDC Frontier (Reference genome) | (ILWC46 & LPNB) | NCBI SNPdb Accession IDs |
|-----------------------|----------------|-----------------|-------------------------|---------------------------------|-----------------|--------------------------|
| SNP_P4_30995_16190500 | NC_021162.1    | Ca_kabuli_chr03 | 16190500                | TT                              | CC              | 1946773260               |
| SNP_P4_30996_16190693 | NC_021162.1    | Ca_kabuli_chr03 | 16190693                | AA                              | GG              | 1946773262               |
| SNP_P4_30997_16190727 | NC_021162.1    | Ca_kabuli_chr03 | 16190727                | CC                              | TT              | 1946773265               |
| SNP_P4_30998_16190766 | NC_021162.1    | Ca_kabuli_chr03 | 16190766                | TT                              | AA              | 1946773267               |
| SNP_P4_31000_16190976 | NC_021162.1    | Ca_kabuli_chr03 | 16190976                | AA                              | GG              | 1946773269               |
| SNP_P4_31001_16195021 | NC_021162.1    | Ca_kabuli_chr03 | 16195021                | CC                              | TT              | 1946773271               |
| SNP_P4_31002_16195099 | NC_021162.1    | Ca_kabuli_chr03 | 16195099                | GG                              | AA              | 1946773274               |
| SNP_P4_31004_16195223 | NC_021162.1    | Ca_kabuli_chr03 | 16195223                | AA                              | GG              | 1946773276               |
| SNP_P4_31005_16195418 | NC_021162.1    | Ca_kabuli_chr03 | 16195418                | TT                              | CC              | 1946773278               |
| SNP_P4_31007_16195743 | NC_021162.1    | Ca_kabuli_chr03 | 16195743                | AA                              | GG              | 1946773280               |
| SNP_P4_31008_16195752 | NC_021162.1    | Ca_kabuli_chr03 | 16195752                | AA                              | TT              | 1946773282               |
| SNP_P4_31009_16195770 | NC_021162.1    | Ca_kabuli_chr03 | 16195770                | CC                              | TT              | 1946773284               |
| SNP_P4_31010_16195781 | NC_021162.1    | Ca_kabuli_chr03 | 16195781                | GG                              | CC              | 1946773286               |
| SNP_P4_31011_16195806 | NC_021162.1    | Ca_kabuli_chr03 | 16195806                | AA                              | TT              | 1946773288               |
| SNP_P4_31012_16195811 | NC_021162.1    | Ca_kabuli_chr03 | 16195811                | CC                              | AA              | 1946773290               |
| SNP_P4_31013_16195828 | NC_021162.1    | Ca_kabuli_chr03 | 16195828                | CC                              | GG              | 1946773292               |
| SNP_P4_31014_16195883 | NC_021162.1    | Ca_kabuli_chr03 | 16195883                | GG                              | AA              | 1946773294               |
| SNP_P4_31015_16195914 | NC_021162.1    | Ca_kabuli_chr03 | 16195914                | AA                              | GG              | 1946773296               |
| SNP_P4_31016_16195933 | NC_021162.1    | Ca_kabuli_chr03 | 16195933                | CC                              | GG              | 1946773298               |
| SNP_P4_31017_16196052 | NC_021162.1    | Ca_kabuli_chr03 | 16196052                | TT                              | CC              | 1946773300               |
| SNP_P4_31018_16196098 | NC_021162.1    | Ca_kabuli_chr03 | 16196098                | CC                              | TT              | 1946773302               |
| SNP_P4_31019_16196649 | NC_021162.1    | Ca_kabuli_chr03 | 16196649                | TT                              | AA              | 1946773304               |
| SNP_P4_31020_16196718 | NC_021162.1    | Ca_kabuli_chr03 | 16196718                | AA                              | TT              | 1946773306               |
| SNP_P4_31021_16196841 | NC_021162.1    | Ca_kabuli_chr03 | 16196841                | TT                              | AA              | 1946773308               |
| SNP_P4_31022_16196885 | NC_021162.1    | Ca_kabuli_chr03 | 16196885                | TT                              | AA              | 1946773310               |
| SNP_P4_31023_16197226 | NC_021162.1    | Ca_kabuli_chr03 | 16197226                | AA                              | CC              | 1946773312               |
| SNP_P4_31024_16197264 | NC_021162.1    | Ca_kabuli_chr03 | 16197264                | TT                              | GG              | 1946773314               |
| SNP_P4_31025_16197370 | NC_021162.1    | Ca_kabuli_chr03 | 16197370                | AA                              | GG              | 1946773316               |
| SNP_P4_31026_16197539 | NC_021162.1    | Ca_kabuli_chr03 | 16197539                | GG                              | TT              | 1946773318               |
| SNP_P4_31027_16197582 | NC_021162.1    | Ca_kabuli_chr03 | 16197582                | CC                              | AA              | 1946773320               |
| SNP_P4_31028_16197638 | NC_021162.1    | Ca_kabuli_chr03 | 16197638                | AA                              | GG              | 1946773322               |
| SNP_P4_31029_16197653 | NC_021162.1    | Ca_kabuli_chr03 | 16197653                | CC                              | TT              | 1946773325               |
| SNP_P4_31030_16197689 | NC_021162.1    | Ca_kabuli_chr03 | 16197689                | AA                              | GG              | 1946773327               |
| SNP_P4_31031_16197703 | NC_021162.1    | Ca_kabuli_chr03 | 16197703                | GG                              | AA              | 1946773329               |
| SNP_P4_31032_16197731 | NC_021162.1    | Ca_kabuli_chr03 | 16197731                | GG                              | AA              | 1946773331               |
| SNP_P4_31033_16197733 | NC_021162.1    | Ca_kabuli_chr03 | 16197733                | CC                              | TT              | 1946773333               |
| SNP_P4_31034_16197749 | NC_021162.1    | Ca_kabuli_chr03 | 16197749                | TT                              | CC              | 1946773335               |
| SNP_P4_31035_16197797 | NC_021162.1    | Ca_kabuli_chr03 | 16197797                | TT                              | AA              | 1946773337               |
| SNP_P4_31036_16197808 | NC_021162.1    | Ca_kabuli_chr03 | 16197808                | CC                              | TT              | 1946773339               |
| SNP_P4_31037_16211999 | NC_021162.1    | Ca_kabuli_chr03 | 16211999                | TT                              | AA              | 1946773341               |
| SNP_P4_31038_16212025 | NC_021162.1    | Ca_kabuli_chr03 | 16212025                | TT                              | AA              | 1946773343               |
| SNP_P4_31039_16212049 | NC_021162.1    | Ca_kabuli_chr03 | 16212049                | TT                              | CC              | 1946773345               |

| SNPs IDs              | Chromosome IDs | Chromosomes     | Physical positions (bp) | CDC Frontier (Reference genome) | (ILWC46 & LPNB) | NCBI SNPdb Accession IDs |
|-----------------------|----------------|-----------------|-------------------------|---------------------------------|-----------------|--------------------------|
| SNP_P4_31040_16212077 | NC_021162.1    | Ca_kabuli_chr03 | 16212077                | AA                              | GG              | 1946773347               |
| SNP_P4_31042_16212123 | NC_021162.1    | Ca_kabuli_chr03 | 16212123                | CC                              | AA              | 1946773349               |
| SNP_P4_31043_16212159 | NC_021162.1    | Ca_kabuli_chr03 | 16212159                | GG                              | AA              | 1946773351               |
| SNP_P4_31044_16212168 | NC_021162.1    | Ca_kabuli_chr03 | 16212168                | AA                              | GG              | 1946773353               |
| SNP_P4_31045_16212198 | NC_021162.1    | Ca_kabuli_chr03 | 16212198                | GG                              | TT              | 1946773355               |
| SNP_P4_31046_16212226 | NC_021162.1    | Ca_kabuli_chr03 | 16212226                | GG                              | AA              | 1946773357               |
| SNP_P4_31047_16212275 | NC_021162.1    | Ca_kabuli_chr03 | 16212275                | TT                              | CC              | 1946773359               |
| SNP_P4_31048_16212290 | NC_021162.1    | Ca_kabuli_chr03 | 16212290                | AA                              | TT              | 1946773361               |
| SNP_P4_31049_16212318 | NC_021162.1    | Ca_kabuli_chr03 | 16212318                | TT                              | AA              | 1946773363               |
| SNP_P4_31050_16212331 | NC_021162.1    | Ca_kabuli_chr03 | 16212331                | GG                              | TT              | 1946773365               |
| SNP_P4_31051_16212362 | NC_021162.1    | Ca_kabuli_chr03 | 16212362                | AA                              | GG              | 1946773367               |
| SNP_P4_31053_16212401 | NC_021162.1    | Ca_kabuli_chr03 | 16212401                | TT                              | CC              | 1946773369               |
| SNP_P4_31054_16212438 | NC_021162.1    | Ca_kabuli_chr03 | 16212438                | TT                              | CC              | 1946773371               |
| SNP_P4_31055_16212485 | NC_021162.1    | Ca_kabuli_chr03 | 16212485                | CC                              | GG              | 1946773373               |
| SNP_P4_31056_16212488 | NC_021162.1    | Ca_kabuli_chr03 | 16212488                | TT                              | CC              | 1946773375               |
| SNP_P4_31057_16236480 | NC_021162.1    | Ca_kabuli_chr03 | 16236480                | AA                              | GG              | 1946773378               |
| SNP_P4_31058_16237507 | NC_021162.1    | Ca_kabuli_chr03 | 16237507                | AA                              | GG              | 1946773380               |
| SNP_P4_31059_16237518 | NC_021162.1    | Ca_kabuli_chr03 | 16237518                | TT                              | AA              | 1946773382               |
| SNP_P4_31060_16237530 | NC_021162.1    | Ca_kabuli_chr03 | 16237530                | TT                              | CC              | 1946773384               |
| SNP_P4_31061_16239203 | NC_021162.1    | Ca_kabuli_chr03 | 16239203                | TT                              | GG              | 1946773386               |
| SNP_P4_31062_16244871 | NC_021162.1    | Ca_kabuli_chr03 | 16244871                | CC                              | TT              | 1946773388               |
| SNP_P4_31063_16245336 | NC_021162.1    | Ca_kabuli_chr03 | 16245336                | GG                              | CC              | 1946773390               |
| SNP_P4_31064_16245342 | NC_021162.1    | Ca_kabuli_chr03 | 16245342                | AA                              | GG              | 1946773392               |
| SNP_P4_31065_16249101 | NC_021162.1    | Ca_kabuli_chr03 | 16249101                | AA                              | TT              | 1946773394               |
| SNP_P4_31066_16249102 | NC_021162.1    | Ca_kabuli_chr03 | 16249102                | AA                              | TT              | 1946773396               |
| SNP_P4_31068_16253245 | NC_021162.1    | Ca_kabuli_chr03 | 16253245                | AA                              | GG              | 1946773398               |
| SNP_P4_31069_16253254 | NC_021162.1    | Ca_kabuli_chr03 | 16253254                | CC                              | TT              | 1946773400               |
| SNP_P4_31070_16260766 | NC_021162.1    | Ca_kabuli_chr03 | 16260766                | CC                              | TT              | 1946773402               |
| SNP_P4_31071_16260983 | NC_021162.1    | Ca_kabuli_chr03 | 16260983                | CC                              | TT              | 1946773405               |
| SNP_P4_31072_16264128 | NC_021162.1    | Ca_kabuli_chr03 | 16264128                | GG                              | CC              | 1946773407               |
| SNP_P4_31073_16279541 | NC_021162.1    | Ca_kabuli_chr03 | 16279541                | CC                              | TT              | 1946773409               |
| SNP_P4_31074_16283434 | NC_021162.1    | Ca_kabuli_chr03 | 16283434                | AA                              | GG              | 1946773411               |
| SNP_P4_31075_16283986 | NC_021162.1    | Ca_kabuli_chr03 | 16283986                | GG                              | AA              | 1946773413               |
| SNP_P4_31076_16331221 | NC_021162.1    | Ca_kabuli_chr03 | 16331221                | TT                              | CC              | 1946773415               |
| SNP_P4_31077_16331630 | NC_021162.1    | Ca_kabuli_chr03 | 16331630                | AA                              | CC              | 1946773417               |
| SNP_P4_31078_16331822 | NC_021162.1    | Ca_kabuli_chr03 | 16331822                | AA                              | CC              | 1946773420               |
| SNP_P4_31079_16346521 | NC_021162.1    | Ca_kabuli_chr03 | 16346521                | AA                              | TT              | 1946773422               |
| SNP_P4_31080_16347192 | NC_021162.1    | Ca_kabuli_chr03 | 16347192                | TT                              | CC              | 1946773424               |
| SNP_P4_31081_16357977 | NC_021162.1    | Ca_kabuli_chr03 | 16357977                | TT                              | CC              | 1946773426               |
| SNP_P4_31082_16373788 | NC_021162.1    | Ca_kabuli_chr03 | 16373788                | CC                              | AA              | 1946773428               |
| SNP_P4_31083_16378468 | NC_021162.1    | Ca_kabuli_chr03 | 16378468                | GG                              | CC              | 1946773430               |
| SNP_P4_31084_16378505 | NC_021162.1    | Ca_kabuli_chr03 | 16378505                | CC                              | TT              | 1946773432               |

| SNPs IDs              | Chromosome IDs | Chromosomes     | Physical positions (bp) | CDC Frontier (Reference genome) | (ILWC46 & LPNB) | NCBI SNPdb Accession IDs |
|-----------------------|----------------|-----------------|-------------------------|---------------------------------|-----------------|--------------------------|
| SNP_P4_31085_16391975 | NC_021162.1    | Ca_kabuli_chr03 | 16391975                | CC                              | TT              | 1946773434               |
| SNP_P4_31086_16413573 | NC_021162.1    | Ca_kabuli_chr03 | 16413573                | TT                              | CC              | 1946773436               |
| SNP_P4_31087_16413587 | NC_021162.1    | Ca_kabuli_chr03 | 16413587                | GG                              | AA              | 1946773438               |
| SNP_P4_31088_16413639 | NC_021162.1    | Ca_kabuli_chr03 | 16413639                | AA                              | GG              | 1946773440               |
| SNP_P4_31089_16413642 | NC_021162.1    | Ca_kabuli_chr03 | 16413642                | GG                              | AA              | 1946773442               |
| SNP_P4_31090_16413648 | NC_021162.1    | Ca_kabuli_chr03 | 16413648                | GG                              | AA              | 1946773444               |
| SNP_P4_31091_16413662 | NC_021162.1    | Ca_kabuli_chr03 | 16413662                | CC                              | TT              | 1946773446               |
| SNP_P4_31092_16413666 | NC_021162.1    | Ca_kabuli_chr03 | 16413666                | AA                              | GG              | 1946773448               |
| SNP_P4_31093_16413698 | NC_021162.1    | Ca_kabuli_chr03 | 16413698                | CC                              | AA              | 1946773450               |
| SNP_P4_31094_16413725 | NC_021162.1    | Ca_kabuli_chr03 | 16413725                | AA                              | GG              | 1946773452               |
| SNP_P4_31095_16413863 | NC_021162.1    | Ca_kabuli_chr03 | 16413863                | TT                              | CC              | 1946773454               |
| SNP_P4_31096_16413954 | NC_021162.1    | Ca_kabuli_chr03 | 16413954                | TT                              | CC              | 1946773456               |
| SNP_P4_31097_16414054 | NC_021162.1    | Ca_kabuli_chr03 | 16414054                | AA                              | CC              | 1946773458               |
| SNP_P4_31098_16414066 | NC_021162.1    | Ca_kabuli_chr03 | 16414066                | GG                              | AA              | 1946773460               |
| SNP_P4_31100_16441500 | NC_021162.1    | Ca_kabuli_chr03 | 16441500                | TT                              | CC              | 1946773463               |
| SNP_P4_31101_16441514 | NC_021162.1    | Ca_kabuli_chr03 | 16441514                | CC                              | AA              | 1946773465               |
| SNP_P4_31102_16441516 | NC_021162.1    | Ca_kabuli_chr03 | 16441516                | AA                              | TT              | 1946773467               |
| SNP_P4_31103_16441517 | NC_021162.1    | Ca_kabuli_chr03 | 16441517                | AA                              | GG              | 1946773468               |
| SNP_P4_31104_16441550 | NC_021162.1    | Ca_kabuli_chr03 | 16441550                | GG                              | AA              | 1946773469               |
| SNP_P4_31105_16441589 | NC_021162.1    | Ca_kabuli_chr03 | 16441589                | GG                              | CC              | 1946773470               |
| SNP_P4_31106_16441617 | NC_021162.1    | Ca_kabuli_chr03 | 16441617                | AA                              | GG              | 1946773471               |
| SNP_P4_31107_16441687 | NC_021162.1    | Ca_kabuli_chr03 | 16441687                | TT                              | GG              | 1946773472               |
| SNP_P4_31108_16447165 | NC_021162.1    | Ca_kabuli_chr03 | 16447165                | GG                              | CC              | 1946773473               |
| SNP_P4_31110_16470088 | NC_021162.1    | Ca_kabuli_chr03 | 16470088                | TT                              | CC              | 1946773474               |
| SNP_P4_31111_16471580 | NC_021162.1    | Ca_kabuli_chr03 | 16471580                | CC                              | TT              | 1946773475               |
| SNP_P4_31112_16471630 | NC_021162.1    | Ca_kabuli_chr03 | 16471630                | TT                              | GG              | 1946773476               |
| SNP_P4_31113_16471637 | NC_021162.1    | Ca_kabuli_chr03 | 16471637                | AA                              | TT              | 1946773477               |
| SNP_P4_31115_16471686 | NC_021162.1    | Ca_kabuli_chr03 | 16471686                | AA                              | GG              | 1946773479               |
| SNP_P4_31116_16471915 | NC_021162.1    | Ca_kabuli_chr03 | 16471915                | CC                              | AA              | 1946773481               |
| SNP_P4_31117_16471943 | NC_021162.1    | Ca_kabuli_chr03 | 16471943                | TT                              | GG              | 1946773483               |
| SNP_P4_31118_16472423 | NC_021162.1    | Ca_kabuli_chr03 | 16472423                | AA                              | GG              | 1946773485               |
| SNP_P4_31119_16472648 | NC_021162.1    | Ca_kabuli_chr03 | 16472648                | AA                              | CC              | 1946773487               |
| SNP_P4_31120_16473376 | NC_021162.1    | Ca_kabuli_chr03 | 16473376                | CC                              | TT              | 1946773489               |
| SNP_P4_31122_16489043 | NC_021162.1    | Ca_kabuli_chr03 | 16489043                | GG                              | AA              | 1946773491               |
| SNP_P4_31123_16504050 | NC_021162.1    | Ca_kabuli_chr03 | 16504050                | CC                              | TT              | 1946773493               |
| SNP_P4_31124_16504182 | NC_021162.1    | Ca_kabuli_chr03 | 16504182                | TT                              | CC              | 1946773495               |
| SNP_P4_31125_16504960 | NC_021162.1    | Ca_kabuli_chr03 | 16504960                | TT                              | AA              | 1946773498               |
| SNP_P4_31126_16509420 | NC_021162.1    | Ca_kabuli_chr03 | 16509420                | TT                              | GG              | 1946773500               |
| SNP_P4_31129_16556014 | NC_021162.1    | Ca_kabuli_chr03 | 16556014                | GG                              | AA              | 1946773502               |
| SNP_P4_31130_16556043 | NC_021162.1    | Ca_kabuli_chr03 | 16556043                | CC                              | TT              | 1946773504               |
| SNP_P4_31131_16633818 | NC_021162.1    | Ca_kabuli_chr03 | 16633818                | TT                              | CC              | 1946773506               |
| SNP_P4_31132_16662023 | NC_021162.1    | Ca_kabuli_chr03 | 16662023                | TT                              | AA              | 1946773508               |

| SNPs IDs              | Chromosome IDs | Chromosomes     | Physical positions (bp) | CDC Frontier (Reference genome) | (ILWC46 & LPNB) | NCBI SNPdb Accession IDs |
|-----------------------|----------------|-----------------|-------------------------|---------------------------------|-----------------|--------------------------|
| SNP_P4_31133_16673999 | NC_021162.1    | Ca_kabuli_chr03 | 16673999                | TT                              | AA              | 1946773510               |
| SNP_P4_31134_16674033 | NC_021162.1    | Ca_kabuli_chr03 | 16674033                | TT                              | GG              | 1946773512               |
| SNP_P4_31136_16679136 | NC_021162.1    | Ca_kabuli_chr03 | 16679136                | GG                              | AA              | 1946773514               |
| SNP_P4_31137_16724334 | NC_021162.1    | Ca_kabuli_chr03 | 16724334                | GG                              | AA              | 1946773517               |
| SNP_P4_31139_16747373 | NC_021162.1    | Ca_kabuli_chr03 | 16747373                | AA                              | GG              | 1946773519               |
| SNP_P4_31140_16747391 | NC_021162.1    | Ca_kabuli_chr03 | 16747391                | TT                              | CC              | 1946773521               |
| SNP_P4_31141_16747396 | NC_021162.1    | Ca_kabuli_chr03 | 16747396                | TT                              | CC              | 1946773523               |
| SNP_P4_31142_16772686 | NC_021162.1    | Ca_kabuli_chr03 | 16772686                | CC                              | TT              | 1946773525               |
| SNP_P4_31143_16780245 | NC_021162.1    | Ca_kabuli_chr03 | 16780245                | GG                              | AA              | 1946773527               |
| SNP_P4_31144_16784985 | NC_021162.1    | Ca_kabuli_chr03 | 16784985                | CC                              | AA              | 1946773529               |
| SNP_P4_31146_16820942 | NC_021162.1    | Ca_kabuli_chr03 | 16820942                | TT                              | CC              | 1946773531               |
| SNP_P4_31147_16879470 | NC_021162.1    | Ca_kabuli_chr03 | 16879470                | GG                              | AA              | 1946773533               |
| SNP_P4_31148_16879721 | NC_021162.1    | Ca_kabuli_chr03 | 16879721                | GG                              | AA              | 1946773535               |
| SNP_P4_31150_16879972 | NC_021162.1    | Ca_kabuli_chr03 | 16879972                | CC                              | TT              | 1946773537               |
| SNP_P4_31151_16887095 | NC_021162.1    | Ca_kabuli_chr03 | 16887095                | TT                              | CC              | 1946773539               |
| SNP_P4_31152_16894800 | NC_021162.1    | Ca_kabuli_chr03 | 16894800                | TT                              | GG              | 1946773541               |
| SNP_P4_31153_16903557 | NC_021162.1    | Ca_kabuli_chr03 | 16903557                | AA                              | GG              | 1946773543               |
| SNP_P4_31154_16911409 | NC_021162.1    | Ca_kabuli_chr03 | 16911409                | AA                              | GG              | 1946773546               |
| SNP_P4_31155_16932254 | NC_021162.1    | Ca_kabuli_chr03 | 16932254                | TT                              | AA              | 1946773548               |
| SNP_P4_31156_16974268 | NC_021162.1    | Ca_kabuli_chr03 | 16974268                | GG                              | CC              | 1946773550               |
| SNP_P4_31157_16975249 | NC_021162.1    | Ca_kabuli_chr03 | 16975249                | TT                              | CC              | 1946773552               |
| SNP_P4_31158_16976026 | NC_021162.1    | Ca_kabuli_chr03 | 16976026                | GG                              | AA              | 1946773554               |
| SNP_P4_31159_17030909 | NC_021162.1    | Ca_kabuli_chr03 | 17030909                | AA                              | TT              | 1946773556               |
| SNP_P4_31160_17030915 | NC_021162.1    | Ca_kabuli_chr03 | 17030915                | TT                              | AA              | 1946773558               |
| SNP_P4_31161_17031033 | NC_021162.1    | Ca_kabuli_chr03 | 17031033                | CC                              | TT              | 1946773560               |
| SNP_P4_31162_17031342 | NC_021162.1    | Ca_kabuli_chr03 | 17031342                | AA                              | GG              | 1946773562               |
| SNP_P4_31163_17031413 | NC_021162.1    | Ca_kabuli_chr03 | 17031413                | TT                              | GG              | 1946773564               |
| SNP_P4_31164_17031515 | NC_021162.1    | Ca_kabuli_chr03 | 17031515                | AA                              | TT              | 1946773566               |
| SNP_P4_31165_17031539 | NC_021162.1    | Ca_kabuli_chr03 | 17031539                | TT                              | GG              | 1946773568               |
| SNP_P4_31166_17031886 | NC_021162.1    | Ca_kabuli_chr03 | 17031886                | AA                              | CC              | 1946773570               |
| SNP_P4_31167_17032467 | NC_021162.1    | Ca_kabuli_chr03 | 17032467                | CC                              | GG              | 1946773572               |
| SNP_P4_31169_17034444 | NC_021162.1    | Ca_kabuli_chr03 | 17034444                | TT                              | GG              | 1946773575               |
| SNP_P4_31170_17034515 | NC_021162.1    | Ca_kabuli_chr03 | 17034515                | AA                              | GG              | 1946773577               |
| SNP_P4_31171_17035050 | NC_021162.1    | Ca_kabuli_chr03 | 17035050                | AA                              | GG              | 1946773579               |
| SNP_P4_31172_17035357 | NC_021162.1    | Ca_kabuli_chr03 | 17035357                | TT                              | GG              | 1946773581               |
| SNP_P4_31173_17035389 | NC_021162.1    | Ca_kabuli_chr03 | 17035389                | GG                              | TT              | 1946773583               |
| SNP_P4_31174_17039093 | NC_021162.1    | Ca_kabuli_chr03 | 17039093                | AA                              | GG              | 1946773585               |
| SNP_P4_31175_17039154 | NC_021162.1    | Ca_kabuli_chr03 | 17039154                | TT                              | AA              | 1946773587               |
| SNP_P4_31176_17039230 | NC_021162.1    | Ca_kabuli_chr03 | 17039230                | TT                              | CC              | 1946773589               |
| SNP_P4_31178_17039333 | NC_021162.1    | Ca_kabuli_chr03 | 17039333                | AA                              | GG              | 1946773591               |
| SNP_P4_31179_17039363 | NC_021162.1    | Ca_kabuli_chr03 | 17039363                | AA                              | CC              | 1946773593               |
| SNP_P4_31180_17039364 | NC_021162.1    | Ca_kabuli_chr03 | 17039364                | CC                              | TT              | 1946773595               |

| SNPs IDs              | Chromosome IDs | Chromosomes     | Physical positions (bp) | CDC Frontier (Reference genome) | (ILWC46 & LPNB) | NCBI SNPdb Accession IDs |
|-----------------------|----------------|-----------------|-------------------------|---------------------------------|-----------------|--------------------------|
| SNP_P4_31181_17039388 | NC_021162.1    | Ca_kabuli_chr03 | 17039388                | TT                              | CC              | 1946773597               |
| SNP_P4_31183_17128186 | NC_021162.1    | Ca_kabuli_chr03 | 17128186                | GG                              | AA              | 1946773600               |
| SNP_P4_31185_17138004 | NC_021162.1    | Ca_kabuli_chr03 | 17138004                | TT                              | GG              | 1946773602               |
| SNP_P4_31186_17138043 | NC_021162.1    | Ca_kabuli_chr03 | 17138043                | AA                              | GG              | 1946773604               |
| SNP_P4_31187_17138055 | NC_021162.1    | Ca_kabuli_chr03 | 17138055                | CC                              | TT              | 1946773606               |
| SNP_P4_31188_17138080 | NC_021162.1    | Ca_kabuli_chr03 | 17138080                | AA                              | CC              | 1946773608               |
| SNP_P4_31189_17138148 | NC_021162.1    | Ca_kabuli_chr03 | 17138148                | GG                              | AA              | 1946773610               |
| SNP_P4_31190_17138417 | NC_021162.1    | Ca_kabuli_chr03 | 17138417                | AA                              | CC              | 1946773612               |
| SNP_P4_31191_17138428 | NC_021162.1    | Ca_kabuli_chr03 | 17138428                | TT                              | CC              | 1946773614               |
| SNP_P4_31192_17138524 | NC_021162.1    | Ca_kabuli_chr03 | 17138524                | CC                              | GG              | 1946773617               |
| SNP_P4_31193_17138553 | NC_021162.1    | Ca_kabuli_chr03 | 17138553                | CC                              | TT              | 1946773619               |
| SNP_P4_31194_17138595 | NC_021162.1    | Ca_kabuli_chr03 | 17138595                | TT                              | CC              | 1946773621               |
| SNP_P4_31195_17167267 | NC_021162.1    | Ca_kabuli_chr03 | 17167267                | AA                              | GG              | 1946773623               |
| SNP_P4_31196_17167309 | NC_021162.1    | Ca_kabuli_chr03 | 17167309                | GG                              | TT              | 1946773625               |
| SNP_P4_31197_17167321 | NC_021162.1    | Ca_kabuli_chr03 | 17167321                | GG                              | AA              | 1946773627               |
| SNP_P4_31198_17167645 | NC_021162.1    | Ca_kabuli_chr03 | 17167645                | TT                              | CC              | 1946773629               |
| SNP_P4_31199_17167687 | NC_021162.1    | Ca_kabuli_chr03 | 17167687                | AA                              | CC              | 1946773631               |
| SNP_P4_31200_17169444 | NC_021162.1    | Ca_kabuli_chr03 | 17169444                | AA                              | GG              | 1946773633               |
| SNP_P4_31202_17187821 | NC_021162.1    | Ca_kabuli_chr03 | 17187821                | CC                              | GG              | 1946773634               |
| SNP_P4_31203_17187826 | NC_021162.1    | Ca_kabuli_chr03 | 17187826                | GG                              | AA              | 1946773635               |
| SNP_P4_31204_17202587 | NC_021162.1    | Ca_kabuli_chr03 | 17202587                | GG                              | AA              | 1946773636               |
| SNP_P4_31206_17217934 | NC_021162.1    | Ca_kabuli_chr03 | 17217934                | AA                              | TT              | 1946773638               |
| SNP_P4_31207_17217978 | NC_021162.1    | Ca_kabuli_chr03 | 17217978                | AA                              | GG              | 1946773640               |
| SNP_P4_31208_17219949 | NC_021162.1    | Ca_kabuli_chr03 | 17219949                | CC                              | TT              | 1946773642               |
| SNP_P4_31209_17221730 | NC_021162.1    | Ca_kabuli_chr03 | 17221730                | AA                              | TT              | 1946773644               |
| SNP_P4_31210_17221731 | NC_021162.1    | Ca_kabuli_chr03 | 17221731                | AA                              | CC              | 1946773646               |
| SNP_P4_31211_17222126 | NC_021162.1    | Ca_kabuli_chr03 | 17222126                | TT                              | AA              | 1946773649               |
| SNP_P4_31212_17222424 | NC_021162.1    | Ca_kabuli_chr03 | 17222424                | TT                              | AA              | 1946773651               |
| SNP_P4_31213_17223743 | NC_021162.1    | Ca_kabuli_chr03 | 17223743                | CC                              | TT              | 1946773653               |
| SNP_P4_31214_17225519 | NC_021162.1    | Ca_kabuli_chr03 | 17225519                | GG                              | TT              | 1946773655               |
| SNP_P4_31215_17277490 | NC_021162.1    | Ca_kabuli_chr03 | 17277490                | CC                              | GG              | 1946773657               |
| SNP_P4_31216_17277491 | NC_021162.1    | Ca_kabuli_chr03 | 17277491                | AA                              | TT              | 1946773659               |
| SNP_P4_31218_17325491 | NC_021162.1    | Ca_kabuli_chr03 | 17325491                | TT                              | CC              | 1946773661               |
| SNP_P4_31219_17327006 | NC_021162.1    | Ca_kabuli_chr03 | 17327006                | TT                              | AA              | 1946773663               |
| SNP_P4_31220_17353994 | NC_021162.1    | Ca_kabuli_chr03 | 17353994                | TT                              | AA              | 1946773665               |
| SNP_P4_31221_17354023 | NC_021162.1    | Ca_kabuli_chr03 | 17354023                | TT                              | GG              | 1946773667               |
| SNP_P4_31222_17375341 | NC_021162.1    | Ca_kabuli_chr03 | 17375341                | CC                              | AA              | 1946773669               |
| SNP_P4_31224_17420634 | NC_021162.1    | Ca_kabuli_chr03 | 17420634                | AA                              | GG              | 1946773671               |
| SNP_P4_31225_17436864 | NC_021162.1    | Ca_kabuli_chr03 | 17436864                | CC                              | TT              | 1946773673               |
| SNP_P4_31226_17440744 | NC_021162.1    | Ca_kabuli_chr03 | 17440744                | GG                              | AA              | 1946773675               |
| SNP_P4_31227_17440892 | NC_021162.1    | Ca_kabuli_chr03 | 17440892                | AA                              | TT              | 1946773677               |
| SNP_P4_31229_17486300 | NC_021162.1    | Ca_kabuli_chr03 | 17486300                | TT                              | AA              | 1946773679               |



| SNPs IDs              | Chromosome IDs | Chromosomes     | Physical positions (bp) | CDC Frontier (Reference genome) | (ILWC46 & LPNB) | NCBI SNPdb Accession IDs |
|-----------------------|----------------|-----------------|-------------------------|---------------------------------|-----------------|--------------------------|
| SNP_P4_31230_17486420 | NC_021162.1    | Ca_kabuli_chr03 | 17486420                | TT                              | CC              | 1946773681               |
| SNP_P4_31231_17491556 | NC_021162.1    | Ca_kabuli_chr03 | 17491556                | GG                              | AA              | 1946773683               |
| SNP_P4_31233_17491908 | NC_021162.1    | Ca_kabuli_chr03 | 17491908                | AA                              | GG              | 1946773685               |
| SNP_P4_31234_17491909 | NC_021162.1    | Ca_kabuli_chr03 | 17491909                | AA                              | TT              | 1946773687               |
| SNP_P4_31235_17491910 | NC_021162.1    | Ca_kabuli_chr03 | 17491910                | AA                              | TT              | 1946773689               |
| SNP_P4_31236_17491911 | NC_021162.1    | Ca_kabuli_chr03 | 17491911                | AA                              | TT              | 1946773691               |
| SNP_P4_31237_17491912 | NC_021162.1    | Ca_kabuli_chr03 | 17491912                | AA                              | TT              | 1946773693               |
| SNP_P4_31238_17491928 | NC_021162.1    | Ca_kabuli_chr03 | 17491928                | AA                              | GG              | 1946773695               |
| SNP_P4_31239_17492106 | NC_021162.1    | Ca_kabuli_chr03 | 17492106                | TT                              | CC              | 1946773697               |
| SNP_P4_31240_17492210 | NC_021162.1    | Ca_kabuli_chr03 | 17492210                | TT                              | AA              | 1946773699               |
| SNP_P4_31241_17492211 | NC_021162.1    | Ca_kabuli_chr03 | 17492211                | CC                              | TT              | 1946773701               |
| SNP_P4_31242_17492411 | NC_021162.1    | Ca_kabuli_chr03 | 17492411                | GG                              | AA              | 1946773703               |
| SNP_P4_31243_17498882 | NC_021162.1    | Ca_kabuli_chr03 | 17498882                | AA                              | CC              | 1946773705               |
| SNP_P4_31244_17498966 | NC_021162.1    | Ca_kabuli_chr03 | 17498966                | CC                              | TT              | 1946773707               |
| SNP_P4_31245_17498989 | NC_021162.1    | Ca_kabuli_chr03 | 17498989                | CC                              | TT              | 1946773709               |
| SNP_P4_31246_17499157 | NC_021162.1    | Ca_kabuli_chr03 | 17499157                | TT                              | GG              | 1946773711               |
| SNP_P4_31247_17499178 | NC_021162.1    | Ca_kabuli_chr03 | 17499178                | AA                              | TT              | 1946773713               |
| SNP_P4_31248_17499390 | NC_021162.1    | Ca_kabuli_chr03 | 17499390                | CC                              | TT              | 1946773715               |
| SNP_P4_31249_17505588 | NC_021162.1    | Ca_kabuli_chr03 | 17505588                | GG                              | AA              | 1946773717               |
| SNP_P4_31250_17505637 | NC_021162.1    | Ca_kabuli_chr03 | 17505637                | TT                              | CC              | 1946773719               |
| SNP_P4_31251_17505640 | NC_021162.1    | Ca_kabuli_chr03 | 17505640                | CC                              | AA              | 1946773722               |
| SNP_P4_31252_17505648 | NC_021162.1    | Ca_kabuli_chr03 | 17505648                | GG                              | CC              | 1946773724               |
| SNP_P4_31253_17505684 | NC_021162.1    | Ca_kabuli_chr03 | 17505684                | GG                              | AA              | 1946773726               |
| SNP_P4_31254_17505685 | NC_021162.1    | Ca_kabuli_chr03 | 17505685                | GG                              | TT              | 1946773728               |
| SNP_P4_31255_17505719 | NC_021162.1    | Ca_kabuli_chr03 | 17505719                | CC                              | AA              | 1946773730               |
| SNP_P4_31256_17505743 | NC_021162.1    | Ca_kabuli_chr03 | 17505743                | CC                              | TT              | 1946773732               |
| SNP_P4_31257_17505786 | NC_021162.1    | Ca_kabuli_chr03 | 17505786                | TT                              | AA              | 1946773734               |
| SNP_P4_31258_17505978 | NC_021162.1    | Ca_kabuli_chr03 | 17505978                | AA                              | GG              | 1946773736               |
| SNP_P4_31259_17506037 | NC_021162.1    | Ca_kabuli_chr03 | 17506037                | CC                              | TT              | 1946773738               |
| SNP_P4_31260_17506070 | NC_021162.1    | Ca_kabuli_chr03 | 17506070                | CC                              | AA              | 1946773740               |
| SNP_P4_31261_17506140 | NC_021162.1    | Ca_kabuli_chr03 | 17506140                | TT                              | CC              | 1946773742               |
| SNP_P4_31262_17506405 | NC_021162.1    | Ca_kabuli_chr03 | 17506405                | AA                              | CC              | 1946773744               |
| SNP_P4_31263_17506610 | NC_021162.1    | Ca_kabuli_chr03 | 17506610                | AA                              | GG              | 1946773746               |
| SNP_P4_31264_17506775 | NC_021162.1    | Ca_kabuli_chr03 | 17506775                | CC                              | AA              | 1946773748               |
| SNP_P4_31265_17506908 | NC_021162.1    | Ca_kabuli_chr03 | 17506908                | TT                              | CC              | 1946773750               |
| SNP_P4_31266_17506937 | NC_021162.1    | Ca_kabuli_chr03 | 17506937                | CC                              | TT              | 1946773753               |
| SNP_P4_31267_17507151 | NC_021162.1    | Ca_kabuli_chr03 | 17507151                | GG                              | AA              | 1946773755               |
| SNP_P4_31268_17507260 | NC_021162.1    | Ca_kabuli_chr03 | 17507260                | CC                              | TT              | 1946773757               |
| SNP_P4_31270_17508151 | NC_021162.1    | Ca_kabuli_chr03 | 17508151                | CC                              | GG              | 1946773759               |
| SNP_P4_31271_17508815 | NC_021162.1    | Ca_kabuli_chr03 | 17508815                | CC                              | TT              | 1946773761               |
| SNP_P4_31272_17509509 | NC_021162.1    | Ca_kabuli_chr03 | 17509509                | CC                              | AA              | 1946773763               |
| SNP_P4_31273_17513411 | NC_021162.1    | Ca_kabuli_chr03 | 17513411                | AA                              | TT              | 1946773765               |

| SNPs IDs              | Chromosome IDs | Chromosomes     | Physical positions (bp) | CDC Frontier (Reference genome) | (ILWC46 & LPNB) | NCBI SNPdb Accession IDs |
|-----------------------|----------------|-----------------|-------------------------|---------------------------------|-----------------|--------------------------|
| SNP_P4_31274_17517938 | NC_021162.1    | Ca_kabuli_chr03 | 17517938                | CC                              | TT              | 1946773767               |
| SNP_P4_31275_17571290 | NC_021162.1    | Ca_kabuli_chr03 | 17571290                | AA                              | CC              | 1946773769               |
| SNP_P4_31276_17571291 | NC_021162.1    | Ca_kabuli_chr03 | 17571291                | AA                              | CC              | 1946773771               |
| SNP_P4_31277_17580028 | NC_021162.1    | Ca_kabuli_chr03 | 17580028                | GG                              | AA              | 1946773773               |
| SNP_P4_31278_17580757 | NC_021162.1    | Ca_kabuli_chr03 | 17580757                | GG                              | AA              | 1946773775               |
| SNP_P4_31279_17601003 | NC_021162.1    | Ca_kabuli_chr03 | 17601003                | GG                              | TT              | 1946773777               |
| SNP_P4_31280_17601044 | NC_021162.1    | Ca_kabuli_chr03 | 17601044                | TT                              | CC              | 1946773779               |
| SNP_P4_31281_17601110 | NC_021162.1    | Ca_kabuli_chr03 | 17601110                | TT                              | CC              | 1946773781               |
| SNP_P4_31282_17601112 | NC_021162.1    | Ca_kabuli_chr03 | 17601112                | TT                              | CC              | 1946773783               |
| SNP_P4_31283_17601180 | NC_021162.1    | Ca_kabuli_chr03 | 17601180                | AA                              | GG              | 1946773785               |
| SNP_P4_31284_17601225 | NC_021162.1    | Ca_kabuli_chr03 | 17601225                | GG                              | AA              | 1946773787               |
| SNP_P4_31285_17601352 | NC_021162.1    | Ca_kabuli_chr03 | 17601352                | GG                              | AA              | 1946773789               |
| SNP_P4_31286_17601370 | NC_021162.1    | Ca_kabuli_chr03 | 17601370                | TT                              | CC              | 1946773792               |
| SNP_P4_31287_17601444 | NC_021162.1    | Ca_kabuli_chr03 | 17601444                | AA                              | GG              | 1946773794               |
| SNP_P4_31288_17659102 | NC_021162.1    | Ca_kabuli_chr03 | 17659102                | GG                              | TT              | 1946773796               |
| SNP_P4_31289_17678808 | NC_021162.1    | Ca_kabuli_chr03 | 17678808                | AA                              | CC              | 1946773798               |
| SNP_P4_31290_17679172 | NC_021162.1    | Ca_kabuli_chr03 | 17679172                | AA                              | GG              | 1946773800               |
| SNP_P4_31291_17679205 | NC_021162.1    | Ca_kabuli_chr03 | 17679205                | TT                              | GG              | 1946773802               |
| SNP_P4_31292_17679228 | NC_021162.1    | Ca_kabuli_chr03 | 17679228                | AA                              | GG              | 1946773804               |
| SNP_P4_31293_17681521 | NC_021162.1    | Ca_kabuli_chr03 | 17681521                | GG                              | TT              | 1946773806               |
| SNP_P4_31294_17681533 | NC_021162.1    | Ca_kabuli_chr03 | 17681533                | CC                              | GG              | 1946773808               |
| SNP_P4_31295_17681560 | NC_021162.1    | Ca_kabuli_chr03 | 17681560                | TT                              | AA              | 1946773810               |
| SNP_P4_31296_17683944 | NC_021162.1    | Ca_kabuli_chr03 | 17683944                | GG                              | TT              | 1946773812               |
| SNP_P4_31299_17714663 | NC_021162.1    | Ca_kabuli_chr03 | 17714663                | AA                              | CC              | 1946773814               |
| SNP_P4_31300_17714667 | NC_021162.1    | Ca_kabuli_chr03 | 17714667                | TT                              | GG              | 1946773816               |
| SNP_P4_31302_17752859 | NC_021162.1    | Ca_kabuli_chr03 | 17752859                | AA                              | GG              | 1946773819               |
| SNP_P4_31303_17752865 | NC_021162.1    | Ca_kabuli_chr03 | 17752865                | AA                              | CC              | 1946773821               |
| SNP_P4_31304_17756027 | NC_021162.1    | Ca_kabuli_chr03 | 17756027                | TT                              | CC              | 1946773823               |
| SNP_P4_31305_17756132 | NC_021162.1    | Ca_kabuli_chr03 | 17756132                | GG                              | AA              | 1946773825               |
| SNP_P4_31306_17756149 | NC_021162.1    | Ca_kabuli_chr03 | 17756149                | GG                              | AA              | 1946773827               |
| SNP_P4_31307_17756166 | NC_021162.1    | Ca_kabuli_chr03 | 17756166                | AA                              | GG              | 1946773829               |
| SNP_P4_31308_17756182 | NC_021162.1    | Ca_kabuli_chr03 | 17756182                | AA                              | TT              | 1946773831               |
| SNP_P4_31309_17756186 | NC_021162.1    | Ca_kabuli_chr03 | 17756186                | TT                              | CC              | 1946773833               |
| SNP_P4_31310_17756200 | NC_021162.1    | Ca_kabuli_chr03 | 17756200                | CC                              | TT              | 1946773835               |
| SNP_P4_31311_17756242 | NC_021162.1    | Ca_kabuli_chr03 | 17756242                | TT                              | CC              | 1946773838               |
| SNP_P4_31312_17756254 | NC_021162.1    | Ca_kabuli_chr03 | 17756254                | CC                              | TT              | 1946773840               |
| SNP_P4_31313_17756258 | NC_021162.1    | Ca_kabuli_chr03 | 17756258                | AA                              | GG              | 1946773842               |
| SNP_P4_31314_17756262 | NC_021162.1    | Ca_kabuli_chr03 | 17756262                | CC                              | TT              | 1946773844               |
| SNP_P4_31315_17756292 | NC_021162.1    | Ca_kabuli_chr03 | 17756292                | TT                              | CC              | 1946773846               |
| SNP_P4_31316_17756301 | NC_021162.1    | Ca_kabuli_chr03 | 17756301                | TT                              | CC              | 1946773848               |
| SNP_P4_31317_17756312 | NC_021162.1    | Ca_kabuli_chr03 | 17756312                | CC                              | TT              | 1946773850               |
| SNP_P4_31318_17756346 | NC_021162.1    | Ca_kabuli_chr03 | 17756346                | CC                              | TT              | 1946773852               |

| SNPs IDs              | Chromosome IDs | Chromosomes     | Physical positions (bp) | CDC Frontier (Reference genome) | (ILWC46 & LPNB) | NCBI SNPdb Accession IDs |
|-----------------------|----------------|-----------------|-------------------------|---------------------------------|-----------------|--------------------------|
| SNP_P4_31319_17756423 | NC_021162.1    | Ca_kabuli_chr03 | 17756423                | CC                              | TT              | 1946773855               |
| SNP_P4_31320_17756440 | NC_021162.1    | Ca_kabuli_chr03 | 17756440                | AA                              | GG              | 1946773857               |
| SNP_P4_31321_17756470 | NC_021162.1    | Ca_kabuli_chr03 | 17756470                | CC                              | TT              | 1946773859               |
| SNP_P4_31322_17756522 | NC_021162.1    | Ca_kabuli_chr03 | 17756522                | GG                              | TT              | 1946773861               |
| SNP_P4_31323_17756574 | NC_021162.1    | Ca_kabuli_chr03 | 17756574                | AA                              | GG              | 1946773863               |
| SNP_P4_31324_17756717 | NC_021162.1    | Ca_kabuli_chr03 | 17756717                | TT                              | CC              | 1946773866               |
| SNP_P4_31325_17757593 | NC_021162.1    | Ca_kabuli_chr03 | 17757593                | GG                              | AA              | 1946773868               |
| SNP_P4_31326_17759424 | NC_021162.1    | Ca_kabuli_chr03 | 17759424                | GG                              | AA              | 1946773870               |
| SNP_P4_31327_17761126 | NC_021162.1    | Ca_kabuli_chr03 | 17761126                | AA                              | TT              | 1946773872               |
| SNP_P4_31329_17798535 | NC_021162.1    | Ca_kabuli_chr03 | 17798535                | TT                              | AA              | 1946773874               |
| SNP_P4_31330_17805415 | NC_021162.1    | Ca_kabuli_chr03 | 17805415                | AA                              | GG              | 1946773877               |
| SNP_P4_31331_17805470 | NC_021162.1    | Ca_kabuli_chr03 | 17805470                | GG                              | AA              | 1946773879               |
| SNP_P4_31333_17849241 | NC_021162.1    | Ca_kabuli_chr03 | 17849241                | GG                              | AA              | 1946773881               |
| SNP_P4_31334_17849246 | NC_021162.1    | Ca_kabuli_chr03 | 17849246                | CC                              | GG              | 1946773883               |
| SNP_P4_31335_17849289 | NC_021162.1    | Ca_kabuli_chr03 | 17849289                | AA                              | TT              | 1946773885               |
| SNP_P4_31336_17874816 | NC_021162.1    | Ca_kabuli_chr03 | 17874816                | GG                              | TT              | 1946773887               |
| SNP_P4_31337_17874825 | NC_021162.1    | Ca_kabuli_chr03 | 17874825                | CC                              | AA              | 1946773890               |
| SNP_P4_31338_17874895 | NC_021162.1    | Ca_kabuli_chr03 | 17874895                | TT                              | CC              | 1946773892               |
| SNP_P4_31339_17941532 | NC_021162.1    | Ca_kabuli_chr03 | 17941532                | AA                              | GG              | 1946773894               |
| SNP_P4_31340_17941602 | NC_021162.1    | Ca_kabuli_chr03 | 17941602                | CC                              | TT              | 1946773896               |
| SNP_P4_31341_17941729 | NC_021162.1    | Ca_kabuli_chr03 | 17941729                | TT                              | CC              | 1946773898               |
| SNP_P4_31342_17942935 | NC_021162.1    | Ca_kabuli_chr03 | 17942935                | TT                              | CC              | 1946773900               |
| SNP_P4_31344_18009605 | NC_021162.1    | Ca_kabuli_chr03 | 18009605                | TT                              | CC              | 1946773902               |
| SNP_P4_31345_18016148 | NC_021162.1    | Ca_kabuli_chr03 | 18016148                | TT                              | AA              | 1946773905               |
| SNP_P4_31346_18016149 | NC_021162.1    | Ca_kabuli_chr03 | 18016149                | CC                              | AA              | 1946773907               |
| SNP_P4_31347_18016657 | NC_021162.1    | Ca_kabuli_chr03 | 18016657                | AA                              | TT              | 1946773909               |
| SNP_P4_31348_18018979 | NC_021162.1    | Ca_kabuli_chr03 | 18018979                | CC                              | TT              | 1946773911               |
| SNP_P4_31349_18018988 | NC_021162.1    | Ca_kabuli_chr03 | 18018988                | GG                              | AA              | 1946773912               |
| SNP_P4_31350_18019089 | NC_021162.1    | Ca_kabuli_chr03 | 18019089                | AA                              | CC              | 1946773913               |
| SNP_P4_31351_18019101 | NC_021162.1    | Ca_kabuli_chr03 | 18019101                | AA                              | GG              | 1946773914               |
| SNP_P4_31352_18019102 | NC_021162.1    | Ca_kabuli_chr03 | 18019102                | TT                              | CC              | 1946773915               |
| SNP_P4_31353_18020762 | NC_021162.1    | Ca_kabuli_chr03 | 18020762                | AA                              | GG              | 1946773916               |
| SNP_P4_31354_18028326 | NC_021162.1    | Ca_kabuli_chr03 | 18028326                | TT                              | CC              | 1946773918               |
| SNP_P4_31355_18048501 | NC_021162.1    | Ca_kabuli_chr03 | 18048501                | AA                              | TT              | 1946773921               |
| SNP_P4_31356_18062393 | NC_021162.1    | Ca_kabuli_chr03 | 18062393                | GG                              | AA              | 1946773923               |
| SNP_P4_31357_18062402 | NC_021162.1    | Ca_kabuli_chr03 | 18062402                | GG                              | CC              | 1946773925               |
| SNP_P4_31358_18071959 | NC_021162.1    | Ca_kabuli_chr03 | 18071959                | GG                              | TT              | 1946773927               |
| SNP_P4_31359_18088384 | NC_021162.1    | Ca_kabuli_chr03 | 18088384                | GG                              | CC              | 1946773929               |
| SNP_P4_31361_18093668 | NC_021162.1    | Ca_kabuli_chr03 | 18093668                | CC                              | TT              | 1946773931               |
| SNP_P4_31362_18094185 | NC_021162.1    | Ca_kabuli_chr03 | 18094185                | TT                              | GG              | 1946773934               |
| SNP_P4_31363_18094246 | NC_021162.1    | Ca_kabuli_chr03 | 18094246                | CC                              | AA              | 1946773936               |
| SNP_P4_31364_18094538 | NC_021162.1    | Ca_kabuli_chr03 | 18094538                | TT                              | CC              | 1946773939               |

| SNPs IDs              | Chromosome IDs | Chromosomes     | Physical positions (bp) | CDC Frontier (Reference genome) | (ILWC46 & LPNB) | NCBI SNPdb Accession IDs |
|-----------------------|----------------|-----------------|-------------------------|---------------------------------|-----------------|--------------------------|
| SNP_P4_31365_18094570 | NC_021162.1    | Ca_kabuli_chr03 | 18094570                | CC                              | GG              | 1946773941               |
| SNP_P4_31367_18125278 | NC_021162.1    | Ca_kabuli_chr03 | 18125278                | GG                              | AA              | 1946773943               |
| SNP_P4_31368_18128918 | NC_021162.1    | Ca_kabuli_chr03 | 18128918                | AA                              | GG              | 1946773945               |
| SNP_P4_31369_18129265 | NC_021162.1    | Ca_kabuli_chr03 | 18129265                | TT                              | AA              | 1946773947               |
| SNP_P4_31370_18133205 | NC_021162.1    | Ca_kabuli_chr03 | 18133205                | GG                              | AA              | 1946773949               |
| SNP_P4_31371_18133220 | NC_021162.1    | Ca_kabuli_chr03 | 18133220                | GG                              | AA              | 1946773952               |
| SNP_P4_31372_18133243 | NC_021162.1    | Ca_kabuli_chr03 | 18133243                | GG                              | AA              | 1946773954               |
| SNP_P4_31373_18133287 | NC_021162.1    | Ca_kabuli_chr03 | 18133287                | GG                              | AA              | 1946773956               |
| SNP_P4_31374_18145571 | NC_021162.1    | Ca_kabuli_chr03 | 18145571                | TT                              | CC              | 1946773958               |
| SNP_P4_31375_18150506 | NC_021162.1    | Ca_kabuli_chr03 | 18150506                | AA                              | CC              | 1946773960               |
| SNP_P4_31376_18170547 | NC_021162.1    | Ca_kabuli_chr03 | 18170547                | AA                              | GG              | 1946773962               |
| SNP_P4_31377_18170562 | NC_021162.1    | Ca_kabuli_chr03 | 18170562                | TT                              | CC              | 1946773965               |
| SNP_P4_31378_18170749 | NC_021162.1    | Ca_kabuli_chr03 | 18170749                | GG                              | CC              | 1946773967               |
| SNP_P4_31379_18170780 | NC_021162.1    | Ca_kabuli_chr03 | 18170780                | AA                              | GG              | 1946773969               |
| SNP_P4_31380_18173334 | NC_021162.1    | Ca_kabuli_chr03 | 18173334                | TT                              | CC              | 1946773971               |
| SNP_P4_31381_18173347 | NC_021162.1    | Ca_kabuli_chr03 | 18173347                | AA                              | GG              | 1946773973               |
| SNP_P4_31382_18173353 | NC_021162.1    | Ca_kabuli_chr03 | 18173353                | TT                              | CC              | 1946773975               |
| SNP_P4_31383_18173365 | NC_021162.1    | Ca_kabuli_chr03 | 18173365                | AA                              | GG              | 1946773978               |
| SNP_P4_31384_18173571 | NC_021162.1    | Ca_kabuli_chr03 | 18173571                | AA                              | CC              | 1946773980               |
| SNP_P4_31385_18173640 | NC_021162.1    | Ca_kabuli_chr03 | 18173640                | TT                              | CC              | 1946773982               |
| SNP_P4_31386_18173701 | NC_021162.1    | Ca_kabuli_chr03 | 18173701                | CC                              | TT              | 1946773984               |
| SNP_P4_31387_18174239 | NC_021162.1    | Ca_kabuli_chr03 | 18174239                | TT                              | CC              | 1946773986               |
| SNP_P4_31388_18178781 | NC_021162.1    | Ca_kabuli_chr03 | 18178781                | TT                              | CC              | 1946773988               |
| SNP_P4_31389_18178797 | NC_021162.1    | Ca_kabuli_chr03 | 18178797                | GG                              | AA              | 1946773990               |
| SNP_P4_31390_18178799 | NC_021162.1    | Ca_kabuli_chr03 | 18178799                | TT                              | CC              | 1946773992               |
| SNP_P4_31391_18178879 | NC_021162.1    | Ca_kabuli_chr03 | 18178879                | AA                              | CC              | 1946773994               |
| SNP_P4_31392_18179109 | NC_021162.1    | Ca_kabuli_chr03 | 18179109                | AA                              | GG              | 1946773996               |
| SNP_P4_31393_18179312 | NC_021162.1    | Ca_kabuli_chr03 | 18179312                | CC                              | AA              | 1946773998               |
| SNP_P4_31394_18189811 | NC_021162.1    | Ca_kabuli_chr03 | 18189811                | GG                              | AA              | 1946774001               |
| SNP_P4_31395_18190083 | NC_021162.1    | Ca_kabuli_chr03 | 18190083                | TT                              | CC              | 1946774003               |
| SNP_P4_31396_18190090 | NC_021162.1    | Ca_kabuli_chr03 | 18190090                | TT                              | AA              | 1946774005               |
| SNP_P4_31397_18190097 | NC_021162.1    | Ca_kabuli_chr03 | 18190097                | CC                              | TT              | 1946774007               |
| SNP_P4_31398_18190147 | NC_021162.1    | Ca_kabuli_chr03 | 18190147                | CC                              | TT              | 1946774009               |
| SNP_P4_31399_18190169 | NC_021162.1    | Ca_kabuli_chr03 | 18190169                | TT                              | CC              | 1946774011               |
| SNP_P4_31400_18190286 | NC_021162.1    | Ca_kabuli_chr03 | 18190286                | GG                              | AA              | 1946774013               |
| SNP_P4_31401_18190333 | NC_021162.1    | Ca_kabuli_chr03 | 18190333                | TT                              | GG              | 1946774015               |
| SNP_P4_31402_18190367 | NC_021162.1    | Ca_kabuli_chr03 | 18190367                | AA                              | GG              | 1946774017               |
| SNP_P4_31403_18190399 | NC_021162.1    | Ca_kabuli_chr03 | 18190399                | GG                              | AA              | 1946774019               |
| SNP_P4_31404_18190624 | NC_021162.1    | Ca_kabuli_chr03 | 18190624                | TT                              | AA              | 1946774021               |
| SNP_P4_31405_18190635 | NC_021162.1    | Ca_kabuli_chr03 | 18190635                | AA                              | CC              | 1946774024               |
| SNP_P4_31406_18190981 | NC_021162.1    | Ca_kabuli_chr03 | 18190981                | TT                              | GG              | 1946774026               |
| SNP_P4_31407_18191035 | NC_021162.1    | Ca_kabuli_chr03 | 18191035                | AA                              | GG              | 1946774028               |

| SNPs IDs              | Chromosome IDs | Chromosomes     | Physical positions (bp) | CDC Frontier (Reference genome) | (ILWC46 & LPNB) | NCBI SNPdb Accession IDs |
|-----------------------|----------------|-----------------|-------------------------|---------------------------------|-----------------|--------------------------|
| SNP_P4_31408_18191058 | NC_021162.1    | Ca_kabuli_chr03 | 18191058                | AA                              | GG              | 1946774030               |
| SNP_P4_31409_18191090 | NC_021162.1    | Ca_kabuli_chr03 | 18191090                | AA                              | TT              | 1946774032               |
| SNP_P4_31410_18191095 | NC_021162.1    | Ca_kabuli_chr03 | 18191095                | TT                              | AA              | 1946774034               |
| SNP_P4_31411_18191101 | NC_021162.1    | Ca_kabuli_chr03 | 18191101                | CC                              | TT              | 1946774036               |
| SNP_P4_31412_18191128 | NC_021162.1    | Ca_kabuli_chr03 | 18191128                | CC                              | TT              | 1946774038               |
| SNP_P4_31413_18191136 | NC_021162.1    | Ca_kabuli_chr03 | 18191136                | CC                              | TT              | 1946774040               |
| SNP_P4_31414_18191433 | NC_021162.1    | Ca_kabuli_chr03 | 18191433                | AA                              | GG              | 1946774043               |
| SNP_P4_31415_18191528 | NC_021162.1    | Ca_kabuli_chr03 | 18191528                | TT                              | CC              | 1946774045               |
| SNP_P4_31416_18191540 | NC_021162.1    | Ca_kabuli_chr03 | 18191540                | GG                              | TT              | 1946774047               |
| SNP_P4_31417_18192399 | NC_021162.1    | Ca_kabuli_chr03 | 18192399                | TT                              | GG              | 1946774049               |
| SNP_P4_31418_18196771 | NC_021162.1    | Ca_kabuli_chr03 | 18196771                | TT                              | GG              | 1946774051               |
| SNP_P4_31419_18197007 | NC_021162.1    | Ca_kabuli_chr03 | 18197007                | AA                              | GG              | 1946774053               |
| SNP_P4_31420_18197026 | NC_021162.1    | Ca_kabuli_chr03 | 18197026                | CC                              | TT              | 1946774055               |
| SNP_P4_31421_18197111 | NC_021162.1    | Ca_kabuli_chr03 | 18197111                | CC                              | TT              | 1946774057               |
| SNP_P4_31422_18197121 | NC_021162.1    | Ca_kabuli_chr03 | 18197121                | TT                              | CC              | 1946774059               |
| SNP_P4_31423_18241499 | NC_021162.1    | Ca_kabuli_chr03 | 18241499                | TT                              | CC              | 1946774061               |
| SNP_P4_31424_18249302 | NC_021162.1    | Ca_kabuli_chr03 | 18249302                | CC                              | TT              | 1946774063               |
| SNP_P4_31426_18253227 | NC_021162.1    | Ca_kabuli_chr03 | 18253227                | AA                              | GG              | 1946774065               |
| SNP_P4_31427_18253280 | NC_021162.1    | Ca_kabuli_chr03 | 18253280                | CC                              | TT              | 1946774067               |
| SNP_P4_31428_18253490 | NC_021162.1    | Ca_kabuli_chr03 | 18253490                | GG                              | AA              | 1946774070               |
| SNP_P4_31430_18272689 | NC_021162.1    | Ca_kabuli_chr03 | 18272689                | AA                              | CC              | 1946774072               |
| SNP_P4_31431_18272752 | NC_021162.1    | Ca_kabuli_chr03 | 18272752                | CC                              | TT              | 1946774074               |
| SNP_P4_31432_18272767 | NC_021162.1    | Ca_kabuli_chr03 | 18272767                | TT                              | CC              | 1946774076               |
| SNP_P4_31433_18274773 | NC_021162.1    | Ca_kabuli_chr03 | 18274773                | TT                              | GG              | 1946774078               |
| SNP_P4_31434_18295154 | NC_021162.1    | Ca_kabuli_chr03 | 18295154                | TT                              | AA              | 1946774080               |
| SNP_P4_31435_18303044 | NC_021162.1    | Ca_kabuli_chr03 | 18303044                | TT                              | CC              | 1946774082               |
| SNP_P4_31436_18303447 | NC_021162.1    | Ca_kabuli_chr03 | 18303447                | TT                              | CC              | 1946774084               |
| SNP_P4_31437_18341768 | NC_021162.1    | Ca_kabuli_chr03 | 18341768                | TT                              | CC              | 1946774086               |
| SNP_P4_31439_18348316 | NC_021162.1    | Ca_kabuli_chr03 | 18348316                | CC                              | TT              | 1946774088               |
| SNP_P4_31440_18359624 | NC_021162.1    | Ca_kabuli_chr03 | 18359624                | CC                              | AA              | 1946774090               |
| SNP_P4_31442_18362087 | NC_021162.1    | Ca_kabuli_chr03 | 18362087                | AA                              | TT              | 1946774093               |
| SNP_P4_31443_18370435 | NC_021162.1    | Ca_kabuli_chr03 | 18370435                | TT                              | CC              | 1946774095               |
| SNP_P4_31444_18380484 | NC_021162.1    | Ca_kabuli_chr03 | 18380484                | AA                              | GG              | 1946774097               |
| SNP_P4_31445_18380486 | NC_021162.1    | Ca_kabuli_chr03 | 18380486                | AA                              | GG              | 1946774099               |
| SNP_P4_31446_18434851 | NC_021162.1    | Ca_kabuli_chr03 | 18434851                | AA                              | GG              | 1946774101               |
| SNP_P4_31447_18435140 | NC_021162.1    | Ca_kabuli_chr03 | 18435140                | AA                              | GG              | 1946774103               |
| SNP_P4_31448_18435159 | NC_021162.1    | Ca_kabuli_chr03 | 18435159                | GG                              | AA              | 1946774105               |
| SNP_P4_31449_18435196 | NC_021162.1    | Ca_kabuli_chr03 | 18435196                | TT                              | GG              | 1946774107               |
| SNP_P4_31450_18435210 | NC_021162.1    | Ca_kabuli_chr03 | 18435210                | TT                              | CC              | 1946774109               |
| SNP_P4_31451_18435216 | NC_021162.1    | Ca_kabuli_chr03 | 18435216                | CC                              | TT              | 1946774112               |
| SNP_P4_31452_18435952 | NC_021162.1    | Ca_kabuli_chr03 | 18435952                | AA                              | GG              | 1946774114               |
| SNP_P4_31453_18440194 | NC_021162.1    | Ca_kabuli_chr03 | 18440194                | GG                              | CC              | 1946774116               |

| SNPs IDs              | Chromosome IDs | Chromosomes     | Physical positions (bp) | CDC Frontier (Reference genome) | (ILWC46 & LPNB) | NCBI SNPdb Accession IDs |
|-----------------------|----------------|-----------------|-------------------------|---------------------------------|-----------------|--------------------------|
| SNP_P4_31454_18491181 | NC_021162.1    | Ca_kabuli_chr03 | 18491181                | TT                              | GG              | 1946774118               |
| SNP_P4_31455_18523139 | NC_021162.1    | Ca_kabuli_chr03 | 18523139                | CC                              | AA              | 1946774120               |
| SNP_P4_31457_18553968 | NC_021162.1    | Ca_kabuli_chr03 | 18553968                | AA                              | CC              | 1946774122               |
| SNP_P4_31458_18566027 | NC_021162.1    | Ca_kabuli_chr03 | 18566027                | GG                              | TT              | 1946774124               |
| SNP_P4_31459_18574549 | NC_021162.1    | Ca_kabuli_chr03 | 18574549                | GG                              | AA              | 1946774126               |
| SNP_P4_31460_18606513 | NC_021162.1    | Ca_kabuli_chr03 | 18606513                | AA                              | GG              | 1946774128               |
| SNP_P4_31461_18610486 | NC_021162.1    | Ca_kabuli_chr03 | 18610486                | CC                              | AA              | 1946774131               |
| SNP_P4_31464_18670501 | NC_021162.1    | Ca_kabuli_chr03 | 18670501                | CC                              | TT              | 1946774133               |
| SNP_P4_31465_18670519 | NC_021162.1    | Ca_kabuli_chr03 | 18670519                | TT                              | GG              | 1946774135               |
| SNP_P4_31466_18670826 | NC_021162.1    | Ca_kabuli_chr03 | 18670826                | CC                              | TT              | 1946774137               |
| SNP_P4_31467_18674438 | NC_021162.1    | Ca_kabuli_chr03 | 18674438                | GG                              | AA              | 1946774139               |
| SNP_P4_31468_18713532 | NC_021162.1    | Ca_kabuli_chr03 | 18713532                | AA                              | TT              | 1946774141               |
| SNP_P4_31469_18713546 | NC_021162.1    | Ca_kabuli_chr03 | 18713546                | TT                              | GG              | 1946774143               |
| SNP_P4_31470_18713753 | NC_021162.1    | Ca_kabuli_chr03 | 18713753                | AA                              | GG              | 1946774145               |
| SNP_P4_31471_18746155 | NC_021162.1    | Ca_kabuli_chr03 | 18746155                | GG                              | AA              | 1946774147               |
| SNP_P4_31472_18746196 | NC_021162.1    | Ca_kabuli_chr03 | 18746196                | CC                              | TT              | 1946774149               |
| SNP_P4_31473_18755322 | NC_021162.1    | Ca_kabuli_chr03 | 18755322                | AA                              | TT              | 1946774151               |
| SNP_P4_31474_18755323 | NC_021162.1    | Ca_kabuli_chr03 | 18755323                | TT                              | GG              | 1946774153               |
| SNP_P4_31475_18755337 | NC_021162.1    | Ca_kabuli_chr03 | 18755337                | TT                              | CC              | 1946774155               |
| SNP_P4_31476_18794225 | NC_021162.1    | Ca_kabuli_chr03 | 18794225                | GG                              | CC              | 1946774157               |
| SNP_P4_31477_18798934 | NC_021162.1    | Ca_kabuli_chr03 | 18798934                | CC                              | TT              | 1946774159               |
| SNP_P4_31478_18799413 | NC_021162.1    | Ca_kabuli_chr03 | 18799413                | GG                              | AA              | 1946774161               |
| SNP_P4_31479_18852234 | NC_021162.1    | Ca_kabuli_chr03 | 18852234                | AA                              | CC              | 1946774163               |
| SNP_P4_31480_18862509 | NC_021162.1    | Ca_kabuli_chr03 | 18862509                | TT                              | CC              | 1946774165               |
| SNP_P4_31481_18863957 | NC_021162.1    | Ca_kabuli_chr03 | 18863957                | TT                              | GG              | 1946774167               |
| SNP_P4_31482_18864050 | NC_021162.1    | Ca_kabuli_chr03 | 18864050                | TT                              | AA              | 1946774169               |
| SNP_P4_31483_18864515 | NC_021162.1    | Ca_kabuli_chr03 | 18864515                | AA                              | CC              | 1946774172               |
| SNP_P4_31484_18866421 | NC_021162.1    | Ca_kabuli_chr03 | 18866421                | AA                              | CC              | 1946774174               |
| SNP_P4_31485_18915019 | NC_021162.1    | Ca_kabuli_chr03 | 18915019                | CC                              | TT              | 1946774176               |
| SNP_P4_31486_18920173 | NC_021162.1    | Ca_kabuli_chr03 | 18920173                | CC                              | GG              | 1946774178               |
| SNP_P4_31487_18942695 | NC_021162.1    | Ca_kabuli_chr03 | 18942695                | AA                              | GG              | 1946774180               |
| SNP_P4_31488_18943101 | NC_021162.1    | Ca_kabuli_chr03 | 18943101                | TT                              | CC              | 1946774182               |
| SNP_P4_31489_18943103 | NC_021162.1    | Ca_kabuli_chr03 | 18943103                | GG                              | TT              | 1946774185               |
| SNP_P4_31491_18943247 | NC_021162.1    | Ca_kabuli_chr03 | 18943247                | AA                              | TT              | 1946774187               |
| SNP_P4_31492_18972596 | NC_021162.1    | Ca_kabuli_chr03 | 18972596                | AA                              | GG              | 1946774189               |
| SNP_P4_31493_18972619 | NC_021162.1    | Ca_kabuli_chr03 | 18972619                | CC                              | TT              | 1946774191               |
| SNP_P4_31494_18972664 | NC_021162.1    | Ca_kabuli_chr03 | 18972664                | TT                              | CC              | 1946774193               |
| SNP_P4_31495_18993015 | NC_021162.1    | Ca_kabuli_chr03 | 18993015                | AA                              | GG              | 1946774195               |
| SNP_P4_31496_18993035 | NC_021162.1    | Ca_kabuli_chr03 | 18993035                | TT                              | GG              | 1946774197               |
| SNP_P4_31497_19007108 | NC_021162.1    | Ca_kabuli_chr03 | 19007108                | TT                              | GG              | 1946774199               |
| SNP_P4_31498_19007189 | NC_021162.1    | Ca_kabuli_chr03 | 19007189                | AA                              | CC              | 1946774201               |
| SNP_P4_31499_19007191 | NC_021162.1    | Ca_kabuli_chr03 | 19007191                | TT                              | CC              | 1946774203               |

| SNPs IDs              | Chromosome IDs | Chromosomes     | Physical positions (bp) | CDC Frontier (Reference genome) | (ILWC46 & LPNB) | NCBI SNPdb Accession IDs |
|-----------------------|----------------|-----------------|-------------------------|---------------------------------|-----------------|--------------------------|
| SNP_P4_31500_19007221 | NC_021162.1    | Ca_kabuli_chr03 | 19007221                | AA                              | TT              | 1946774205               |
| SNP_P4_31501_19007538 | NC_021162.1    | Ca_kabuli_chr03 | 19007538                | AA                              | GG              | 1946774207               |
| SNP_P4_31502_19010213 | NC_021162.1    | Ca_kabuli_chr03 | 19010213                | TT                              | AA              | 1946774209               |
| SNP_P4_31504_19016197 | NC_021162.1    | Ca_kabuli_chr03 | 19016197                | AA                              | TT              | 1946774211               |
| SNP_P4_31505_19016198 | NC_021162.1    | Ca_kabuli_chr03 | 19016198                | AA                              | CC              | 1946774213               |
| SNP_P4_31506_19030645 | NC_021162.1    | Ca_kabuli_chr03 | 19030645                | CC                              | TT              | 1946774215               |
| SNP_P4_31509_19063185 | NC_021162.1    | Ca_kabuli_chr03 | 19063185                | CC                              | TT              | 1946774217               |
| SNP_P4_31510_19063194 | NC_021162.1    | Ca_kabuli_chr03 | 19063194                | CC                              | TT              | 1946774219               |
| SNP_P4_31511_19063585 | NC_021162.1    | Ca_kabuli_chr03 | 19063585                | TT                              | CC              | 1946774221               |
| SNP_P4_31512_19075715 | NC_021162.1    | Ca_kabuli_chr03 | 19075715                | CC                              | TT              | 1946774223               |
| SNP_P4_31513_19087053 | NC_021162.1    | Ca_kabuli_chr03 | 19087053                | CC                              | AA              | 1946774225               |
| SNP_P4_31514_19087069 | NC_021162.1    | Ca_kabuli_chr03 | 19087069                | TT                              | CC              | 1946774227               |
| SNP_P4_31515_19089012 | NC_021162.1    | Ca_kabuli_chr03 | 19089012                | CC                              | AA              | 1946774229               |
| SNP_P4_31517_19089346 | NC_021162.1    | Ca_kabuli_chr03 | 19089346                | TT                              | CC              | 1946774231               |
| SNP_P4_31518_19089417 | NC_021162.1    | Ca_kabuli_chr03 | 19089417                | TT                              | CC              | 1946774234               |
| SNP_P4_31519_19089456 | NC_021162.1    | Ca_kabuli_chr03 | 19089456                | TT                              | GG              | 1946774236               |
| SNP_P4_31520_19089483 | NC_021162.1    | Ca_kabuli_chr03 | 19089483                | AA                              | GG              | 1946774238               |
| SNP_P4_31521_19089496 | NC_021162.1    | Ca_kabuli_chr03 | 19089496                | TT                              | CC              | 1946774240               |
| SNP_P4_31522_19089515 | NC_021162.1    | Ca_kabuli_chr03 | 19089515                | GG                              | AA              | 1946774242               |
| SNP_P4_31526_19148024 | NC_021162.1    | Ca_kabuli_chr03 | 19148024                | AA                              | TT              | 1946774244               |
| SNP_P4_31527_19148778 | NC_021162.1    | Ca_kabuli_chr03 | 19148778                | GG                              | AA              | 1946774246               |
| SNP_P4_31528_19164903 | NC_021162.1    | Ca_kabuli_chr03 | 19164903                | AA                              | GG              | 1946774248               |
| SNP_P4_31529_19196345 | NC_021162.1    | Ca_kabuli_chr03 | 19196345                | CC                              | TT              | 1946774251               |
| SNP_P4_31530_19196406 | NC_021162.1    | Ca_kabuli_chr03 | 19196406                | CC                              | TT              | 1946774253               |
| SNP_P4_31531_19196511 | NC_021162.1    | Ca_kabuli_chr03 | 19196511                | AA                              | TT              | 1946774255               |
| SNP_P4_31532_19196834 | NC_021162.1    | Ca_kabuli_chr03 | 19196834                | AA                              | CC              | 1946774257               |
| SNP_P4_31533_19196883 | NC_021162.1    | Ca_kabuli_chr03 | 19196883                | TT                              | CC              | 1946774259               |
| SNP_P4_31534_19198551 | NC_021162.1    | Ca_kabuli_chr03 | 19198551                | GG                              | AA              | 1946774261               |
| SNP_P4_31535_19198639 | NC_021162.1    | Ca_kabuli_chr03 | 19198639                | TT                              | GG              | 1946774263               |
| SNP_P4_31536_19198654 | NC_021162.1    | Ca_kabuli_chr03 | 19198654                | TT                              | CC              | 1946774265               |
| SNP_P4_31538_19198771 | NC_021162.1    | Ca_kabuli_chr03 | 19198771                | TT                              | CC              | 1946774267               |
| SNP_P4_31539_19198864 | NC_021162.1    | Ca_kabuli_chr03 | 19198864                | TT                              | CC              | 1946774269               |
| SNP_P4_31540_19198896 | NC_021162.1    | Ca_kabuli_chr03 | 19198896                | TT                              | CC              | 1946774271               |
| SNP_P4_31541_19198953 | NC_021162.1    | Ca_kabuli_chr03 | 19198953                | TT                              | CC              | 1946774273               |
| SNP_P4_31542_19198990 | NC_021162.1    | Ca_kabuli_chr03 | 19198990                | TT                              | GG              | 1946774275               |
| SNP_P4_31543_19199019 | NC_021162.1    | Ca_kabuli_chr03 | 19199019                | AA                              | CC              | 1946774277               |
| SNP_P4_31544_19199038 | NC_021162.1    | Ca_kabuli_chr03 | 19199038                | TT                              | CC              | 1946774279               |
| SNP_P4_31545_19230357 | NC_021162.1    | Ca_kabuli_chr03 | 19230357                | AA                              | GG              | 1946774281               |
| SNP_P4_31546_19230665 | NC_021162.1    | Ca_kabuli_chr03 | 19230665                | CC                              | TT              | 1946774283               |
| SNP_P4_31550_19347444 | NC_021162.1    | Ca_kabuli_chr03 | 19347444                | CC                              | TT              | 1946774286               |
| SNP_P4_31551_19357223 | NC_021162.1    | Ca_kabuli_chr03 | 19357223                | CC                              | GG              | 1946774288               |
| SNP_P4_31552_19357318 | NC_021162.1    | Ca_kabuli_chr03 | 19357318                | AA                              | GG              | 1946774290               |

| SNPs IDs              | Chromosome IDs | Chromosomes     | Physical positions (bp) | CDC Frontier (Reference genome) | (ILWC46 & LPNB) | NCBI SNPdb Accession IDs |
|-----------------------|----------------|-----------------|-------------------------|---------------------------------|-----------------|--------------------------|
| SNP_P4_31553_19357461 | NC_021162.1    | Ca_kabuli_chr03 | 19357461                | AA                              | CC              | 1946774292               |
| SNP_P4_31554_19357487 | NC_021162.1    | Ca_kabuli_chr03 | 19357487                | CC                              | AA              | 1946774294               |
| SNP_P4_31555_19357545 | NC_021162.1    | Ca_kabuli_chr03 | 19357545                | AA                              | TT              | 1946774296               |
| SNP_P4_31556_19357549 | NC_021162.1    | Ca_kabuli_chr03 | 19357549                | TT                              | CC              | 1946774298               |
| SNP_P4_31557_19357721 | NC_021162.1    | Ca_kabuli_chr03 | 19357721                | CC                              | AA              | 1946774300               |
| SNP_P4_31558_19357783 | NC_021162.1    | Ca_kabuli_chr03 | 19357783                | TT                              | AA              | 1946774302               |
| SNP_P4_31559_19357788 | NC_021162.1    | Ca_kabuli_chr03 | 19357788                | CC                              | TT              | 1946774304               |
| SNP_P4_31560_19357930 | NC_021162.1    | Ca_kabuli_chr03 | 19357930                | CC                              | TT              | 1946774306               |
| SNP_P4_31561_19357972 | NC_021162.1    | Ca_kabuli_chr03 | 19357972                | TT                              | CC              | 1946774309               |
| SNP_P4_31562_19358021 | NC_021162.1    | Ca_kabuli_chr03 | 19358021                | CC                              | TT              | 1946774311               |
| SNP_P4_31563_19358108 | NC_021162.1    | Ca_kabuli_chr03 | 19358108                | AA                              | GG              | 1946774313               |
| SNP_P4_31564_19358186 | NC_021162.1    | Ca_kabuli_chr03 | 19358186                | AA                              | GG              | 1946774315               |
| SNP_P4_31565_19358343 | NC_021162.1    | Ca_kabuli_chr03 | 19358343                | CC                              | TT              | 1946774317               |
| SNP_P4_31566_19358347 | NC_021162.1    | Ca_kabuli_chr03 | 19358347                | TT                              | CC              | 1946774319               |
| SNP_P4_31567_19358380 | NC_021162.1    | Ca_kabuli_chr03 | 19358380                | CC                              | AA              | 1946774321               |
| SNP_P4_31568_19358410 | NC_021162.1    | Ca_kabuli_chr03 | 19358410                | GG                              | CC              | 1946774324               |
| SNP_P4_31569_19358422 | NC_021162.1    | Ca_kabuli_chr03 | 19358422                | AA                              | CC              | 1946774326               |
| SNP_P4_31570_19358678 | NC_021162.1    | Ca_kabuli_chr03 | 19358678                | GG                              | AA              | 1946774328               |
| SNP_P4_31571_19358710 | NC_021162.1    | Ca_kabuli_chr03 | 19358710                | CC                              | TT              | 1946774330               |
| SNP_P4_31572_19358718 | NC_021162.1    | Ca_kabuli_chr03 | 19358718                | GG                              | AA              | 1946774332               |
| SNP_P4_31573_19358734 | NC_021162.1    | Ca_kabuli_chr03 | 19358734                | CC                              | TT              | 1946774335               |
| SNP_P4_31574_19358834 | NC_021162.1    | Ca_kabuli_chr03 | 19358834                | CC                              | AA              | 1946774337               |
| SNP_P4_31575_19358877 | NC_021162.1    | Ca_kabuli_chr03 | 19358877                | CC                              | GG              | 1946774339               |
| SNP_P4_31576_19358880 | NC_021162.1    | Ca_kabuli_chr03 | 19358880                | TT                              | CC              | 1946774341               |
| SNP_P4_31577_19358954 | NC_021162.1    | Ca_kabuli_chr03 | 19358954                | AA                              | TT              | 1946774343               |
| SNP_P4_31578_19358967 | NC_021162.1    | Ca_kabuli_chr03 | 19358967                | GG                              | AA              | 1946774345               |
| SNP_P4_31579_19358993 | NC_021162.1    | Ca_kabuli_chr03 | 19358993                | AA                              | GG              | 1946774347               |
| SNP_P4_31581_19359053 | NC_021162.1    | Ca_kabuli_chr03 | 19359053                | GG                              | AA              | 1946774349               |
| SNP_P4_31582_19359111 | NC_021162.1    | Ca_kabuli_chr03 | 19359111                | CC                              | TT              | 1946774351               |
| SNP_P4_31583_19359147 | NC_021162.1    | Ca_kabuli_chr03 | 19359147                | GG                              | CC              | 1946774353               |
| SNP_P4_31584_19359151 | NC_021162.1    | Ca_kabuli_chr03 | 19359151                | GG                              | CC              | 1946774356               |
| SNP_P4_31585_19359153 | NC_021162.1    | Ca_kabuli_chr03 | 19359153                | GG                              | TT              | 1946774358               |
| SNP_P4_31586_19359188 | NC_021162.1    | Ca_kabuli_chr03 | 19359188                | CC                              | TT              | 1946774360               |
| SNP_P4_31587_19359189 | NC_021162.1    | Ca_kabuli_chr03 | 19359189                | TT                              | GG              | 1946774362               |
| SNP_P4_31588_19359254 | NC_021162.1    | Ca_kabuli_chr03 | 19359254                | AA                              | GG              | 1946774364               |
| SNP_P4_31589_19359309 | NC_021162.1    | Ca_kabuli_chr03 | 19359309                | AA                              | TT              | 1946774366               |
| SNP_P4_31590_19359310 | NC_021162.1    | Ca_kabuli_chr03 | 19359310                | GG                              | CC              | 1946774368               |
| SNP_P4_31592_19359455 | NC_021162.1    | Ca_kabuli_chr03 | 19359455                | AA                              | TT              | 1946774371               |
| SNP_P4_31593_19359494 | NC_021162.1    | Ca_kabuli_chr03 | 19359494                | CC                              | TT              | 1946774373               |
| SNP_P4_31594_19359510 | NC_021162.1    | Ca_kabuli_chr03 | 19359510                | AA                              | GG              | 1946774375               |
| SNP_P4_31595_19359522 | NC_021162.1    | Ca_kabuli_chr03 | 19359522                | CC                              | TT              | 1946774377               |
| SNP_P4_31596_19359528 | NC_021162.1    | Ca_kabuli_chr03 | 19359528                | TT                              | CC              | 1946774379               |



| SNPs IDs              | Chromosome IDs | Chromosomes     | Physical positions (bp) | CDC Frontier (Reference genome) | (ILWC46 & LPNB) | NCBI SNPdb Accession IDs |
|-----------------------|----------------|-----------------|-------------------------|---------------------------------|-----------------|--------------------------|
| SNP_P4_31597_19359544 | NC_021162.1    | Ca_kabuli_chr03 | 19359544                | TT                              | CC              | 1946774381               |
| SNP_P4_31598_19359557 | NC_021162.1    | Ca_kabuli_chr03 | 19359557                | CC                              | TT              | 1946774383               |
| SNP_P4_31599_19359562 | NC_021162.1    | Ca_kabuli_chr03 | 19359562                | TT                              | CC              | 1946774385               |
| SNP_P4_31600_19359576 | NC_021162.1    | Ca_kabuli_chr03 | 19359576                | TT                              | GG              | 1946774387               |
| SNP_P4_31601_19359580 | NC_021162.1    | Ca_kabuli_chr03 | 19359580                | CC                              | TT              | 1946774389               |
| SNP_P4_31602_19359641 | NC_021162.1    | Ca_kabuli_chr03 | 19359641                | GG                              | AA              | 1946774391               |
| SNP_P4_31603_19359749 | NC_021162.1    | Ca_kabuli_chr03 | 19359749                | TT                              | CC              | 1946774393               |
| SNP_P4_31604_19359834 | NC_021162.1    | Ca_kabuli_chr03 | 19359834                | TT                              | GG              | 1946774395               |
| SNP_P4_31605_19359992 | NC_021162.1    | Ca_kabuli_chr03 | 19359992                | CC                              | TT              | 1946774397               |
| SNP_P4_31606_19360046 | NC_021162.1    | Ca_kabuli_chr03 | 19360046                | AA                              | GG              | 1946774399               |
| SNP_P4_31607_19360051 | NC_021162.1    | Ca_kabuli_chr03 | 19360051                | TT                              | CC              | 1946774402               |
| SNP_P4_31608_19360078 | NC_021162.1    | Ca_kabuli_chr03 | 19360078                | AA                              | GG              | 1946774404               |
| SNP_P4_31609_19360198 | NC_021162.1    | Ca_kabuli_chr03 | 19360198                | AA                              | CC              | 1946774406               |
| SNP_P4_31610_19360261 | NC_021162.1    | Ca_kabuli_chr03 | 19360261                | AA                              | CC              | 1946774408               |
| SNP_P4_31611_19360331 | NC_021162.1    | Ca_kabuli_chr03 | 19360331                | GG                              | AA              | 1946774410               |
| SNP_P4_31612_19360370 | NC_021162.1    | Ca_kabuli_chr03 | 19360370                | GG                              | AA              | 1946774412               |
| SNP_P4_31613_19360674 | NC_021162.1    | Ca_kabuli_chr03 | 19360674                | AA                              | GG              | 1946774414               |
| SNP_P4_31614_19360680 | NC_021162.1    | Ca_kabuli_chr03 | 19360680                | CC                              | GG              | 1946774416               |
| SNP_P4_31615_19360710 | NC_021162.1    | Ca_kabuli_chr03 | 19360710                | GG                              | AA              | 1946774418               |
| SNP_P4_31616_19361040 | NC_021162.1    | Ca_kabuli_chr03 | 19361040                | GG                              | TT              | 1946774420               |
| SNP_P4_31617_19361075 | NC_021162.1    | Ca_kabuli_chr03 | 19361075                | AA                              | GG              | 1946774422               |
| SNP_P4_31618_19361143 | NC_021162.1    | Ca_kabuli_chr03 | 19361143                | CC                              | TT              | 1946774424               |
| SNP_P4_31619_19361153 | NC_021162.1    | Ca_kabuli_chr03 | 19361153                | TT                              | AA              | 1946774426               |
| SNP_P4_31620_19361274 | NC_021162.1    | Ca_kabuli_chr03 | 19361274                | CC                              | TT              | 1946774428               |
| SNP_P4_31621_19361361 | NC_021162.1    | Ca_kabuli_chr03 | 19361361                | GG                              | AA              | 1946774430               |
| SNP_P4_31622_19361640 | NC_021162.1    | Ca_kabuli_chr03 | 19361640                | AA                              | GG              | 1946774432               |
| SNP_P4_31623_19361653 | NC_021162.1    | Ca_kabuli_chr03 | 19361653                | AA                              | GG              | 1946774434               |
| SNP_P4_31624_19361968 | NC_021162.1    | Ca_kabuli_chr03 | 19361968                | TT                              | AA              | 1946774436               |
| SNP_P4_31625_19362033 | NC_021162.1    | Ca_kabuli_chr03 | 19362033                | TT                              | AA              | 1946774438               |
| SNP_P4_31626_19362034 | NC_021162.1    | Ca_kabuli_chr03 | 19362034                | GG                              | AA              | 1946774441               |
| SNP_P4_31627_19362035 | NC_021162.1    | Ca_kabuli_chr03 | 19362035                | CC                              | AA              | 1946774443               |
| SNP_P4_31628_19362043 | NC_021162.1    | Ca_kabuli_chr03 | 19362043                | AA                              | TT              | 1946774445               |
| SNP_P4_31629_19362069 | NC_021162.1    | Ca_kabuli_chr03 | 19362069                | TT                              | CC              | 1946774447               |
| SNP_P4_31630_19362113 | NC_021162.1    | Ca_kabuli_chr03 | 19362113                | CC                              | TT              | 1946774449               |
| SNP_P4_31632_19366628 | NC_021162.1    | Ca_kabuli_chr03 | 19366628                | TT                              | CC              | 1946774451               |
| SNP_P4_31634_19367244 | NC_021162.1    | Ca_kabuli_chr03 | 19367244                | CC                              | TT              | 1946774453               |
| SNP_P4_31635_19367265 | NC_021162.1    | Ca_kabuli_chr03 | 19367265                | GG                              | AA              | 1946774455               |
| SNP_P4_31636_19367432 | NC_021162.1    | Ca_kabuli_chr03 | 19367432                | GG                              | AA              | 1946774457               |
| SNP_P4_31637_19367540 | NC_021162.1    | Ca_kabuli_chr03 | 19367540                | AA                              | TT              | 1946774459               |
| SNP_P4_31638_19367596 | NC_021162.1    | Ca_kabuli_chr03 | 19367596                | AA                              | TT              | 1946774461               |
| SNP_P4_31639_19367688 | NC_021162.1    | Ca_kabuli_chr03 | 19367688                | AA                              | TT              | 1946774463               |
| SNP_P4_31640_19367756 | NC_021162.1    | Ca_kabuli_chr03 | 19367756                | TT                              | CC              | 1946774465               |

| SNPs IDs              | Chromosome IDs | Chromosomes     | Physical positions (bp) | CDC Frontier (Reference genome) | (ILWC46 & LPNB) | NCBI SNPdb Accession IDs |
|-----------------------|----------------|-----------------|-------------------------|---------------------------------|-----------------|--------------------------|
| SNP_P4_31641_19367815 | NC_021162.1    | Ca_kabuli_chr03 | 19367815                | CC                              | AA              | 1946774468               |
| SNP_P4_31642_19367904 | NC_021162.1    | Ca_kabuli_chr03 | 19367904                | CC                              | AA              | 1946774470               |
| SNP_P4_31643_19367941 | NC_021162.1    | Ca_kabuli_chr03 | 19367941                | CC                              | TT              | 1946774472               |
| SNP_P4_31644_19368421 | NC_021162.1    | Ca_kabuli_chr03 | 19368421                | AA                              | GG              | 1946774474               |
| SNP_P4_31645_19368460 | NC_021162.1    | Ca_kabuli_chr03 | 19368460                | CC                              | AA              | 1946774476               |
| SNP_P4_31646_19368514 | NC_021162.1    | Ca_kabuli_chr03 | 19368514                | AA                              | TT              | 1946774478               |
| SNP_P4_31648_19368598 | NC_021162.1    | Ca_kabuli_chr03 | 19368598                | AA                              | GG              | 1946774480               |
| SNP_P4_31649_19368724 | NC_021162.1    | Ca_kabuli_chr03 | 19368724                | AA                              | GG              | 1946774482               |
| SNP_P4_31650_19368881 | NC_021162.1    | Ca_kabuli_chr03 | 19368881                | TT                              | AA              | 1946774484               |
| SNP_P4_31651_19369150 | NC_021162.1    | Ca_kabuli_chr03 | 19369150                | TT                              | GG              | 1946774486               |
| SNP_P4_31652_19369196 | NC_021162.1    | Ca_kabuli_chr03 | 19369196                | GG                              | AA              | 1946774488               |
| SNP_P4_31653_19369312 | NC_021162.1    | Ca_kabuli_chr03 | 19369312                | AA                              | TT              | 1946774490               |
| SNP_P4_31654_19369494 | NC_021162.1    | Ca_kabuli_chr03 | 19369494                | TT                              | CC              | 1946774492               |
| SNP_P4_31656_19369587 | NC_021162.1    | Ca_kabuli_chr03 | 19369587                | CC                              | TT              | 1946774495               |
| SNP_P4_31657_19369590 | NC_021162.1    | Ca_kabuli_chr03 | 19369590                | AA                              | CC              | 1946774497               |
| SNP_P4_31658_19369627 | NC_021162.1    | Ca_kabuli_chr03 | 19369627                | AA                              | GG              | 1946774499               |
| SNP_P4_31659_19370429 | NC_021162.1    | Ca_kabuli_chr03 | 19370429                | AA                              | CC              | 1946774501               |
| SNP_P4_31660_19370503 | NC_021162.1    | Ca_kabuli_chr03 | 19370503                | TT                              | AA              | 1946774503               |
| SNP_P4_31661_19370827 | NC_021162.1    | Ca_kabuli_chr03 | 19370827                | GG                              | AA              | 1946774505               |
| SNP_P4_31662_19370857 | NC_021162.1    | Ca_kabuli_chr03 | 19370857                | GG                              | TT              | 1946774507               |
| SNP_P4_31663_19372688 | NC_021162.1    | Ca_kabuli_chr03 | 19372688                | TT                              | CC              | 1946774509               |
| SNP_P4_31664_19372850 | NC_021162.1    | Ca_kabuli_chr03 | 19372850                | GG                              | AA              | 1946774511               |
| SNP_P4_31665_19372913 | NC_021162.1    | Ca_kabuli_chr03 | 19372913                | GG                              | AA              | 1946774513               |
| SNP_P4_31666_19373146 | NC_021162.1    | Ca_kabuli_chr03 | 19373146                | TT                              | CC              | 1946774515               |
| SNP_P4_31667_19373237 | NC_021162.1    | Ca_kabuli_chr03 | 19373237                | AA                              | TT              | 1946774517               |
| SNP_P4_31668_19373371 | NC_021162.1    | Ca_kabuli_chr03 | 19373371                | TT                              | AA              | 1946774519               |
| SNP_P4_31669_19373419 | NC_021162.1    | Ca_kabuli_chr03 | 19373419                | TT                              | CC              | 1946774521               |
| SNP_P4_31670_19373527 | NC_021162.1    | Ca_kabuli_chr03 | 19373527                | AA                              | TT              | 1946774523               |
| SNP_P4_31671_19373558 | NC_021162.1    | Ca_kabuli_chr03 | 19373558                | GG                              | AA              | 1946774525               |
| SNP_P4_31672_19373579 | NC_021162.1    | Ca_kabuli_chr03 | 19373579                | CC                              | TT              | 1946774527               |
| SNP_P4_31673_19373625 | NC_021162.1    | Ca_kabuli_chr03 | 19373625                | CC                              | AA              | 1946774529               |
| SNP_P4_31674_19373629 | NC_021162.1    | Ca_kabuli_chr03 | 19373629                | TT                              | CC              | 1946774531               |
| SNP_P4_31676_19373968 | NC_021162.1    | Ca_kabuli_chr03 | 19373968                | AA                              | GG              | 1946774534               |
| SNP_P4_31677_19374000 | NC_021162.1    | Ca_kabuli_chr03 | 19374000                | AA                              | TT              | 1946774536               |
| SNP_P4_31678_19374012 | NC_021162.1    | Ca_kabuli_chr03 | 19374012                | TT                              | CC              | 1946774538               |
| SNP_P4_31679_19374013 | NC_021162.1    | Ca_kabuli_chr03 | 19374013                | TT                              | CC              | 1946774540               |
| SNP_P4_31680_19374024 | NC_021162.1    | Ca_kabuli_chr03 | 19374024                | GG                              | TT              | 1946774542               |
| SNP_P4_31681_19374038 | NC_021162.1    | Ca_kabuli_chr03 | 19374038                | AA                              | CC              | 1946774544               |
| SNP_P4_31682_19374046 | NC_021162.1    | Ca_kabuli_chr03 | 19374046                | AA                              | TT              | 1946774546               |
| SNP_P4_31683_19374051 | NC_021162.1    | Ca_kabuli_chr03 | 19374051                | CC                              | TT              | 1946774548               |
| SNP_P4_31684_19374102 | NC_021162.1    | Ca_kabuli_chr03 | 19374102                | TT                              | AA              | 1946774550               |
| SNP_P4_31685_19374150 | NC_021162.1    | Ca_kabuli_chr03 | 19374150                | TT                              | CC              | 1946774552               |

| SNPs IDs              | Chromosome IDs | Chromosomes     | Physical positions (bp) | CDC Frontier (Reference genome) | (ILWC46 & LPNB) | NCBI SNPdb Accession IDs |
|-----------------------|----------------|-----------------|-------------------------|---------------------------------|-----------------|--------------------------|
| SNP_P4_31686_19374352 | NC_021162.1    | Ca_kabuli_chr03 | 19374352                | GG                              | TT              | 1946774554               |
| SNP_P4_31687_19374538 | NC_021162.1    | Ca_kabuli_chr03 | 19374538                | CC                              | AA              | 1946774556               |
| SNP_P4_31688_19374606 | NC_021162.1    | Ca_kabuli_chr03 | 19374606                | CC                              | TT              | 1946774558               |
| SNP_P4_31689_19374611 | NC_021162.1    | Ca_kabuli_chr03 | 19374611                | TT                              | GG              | 1946774560               |
| SNP_P4_31690_19374638 | NC_021162.1    | Ca_kabuli_chr03 | 19374638                | TT                              | GG              | 1946774562               |
| SNP_P4_31691_19374732 | NC_021162.1    | Ca_kabuli_chr03 | 19374732                | CC                              | GG              | 1946774565               |
| SNP_P4_31692_19375012 | NC_021162.1    | Ca_kabuli_chr03 | 19375012                | TT                              | AA              | 1946774567               |
| SNP_P4_31693_19375020 | NC_021162.1    | Ca_kabuli_chr03 | 19375020                | AA                              | GG              | 1946774568               |
| SNP_P4_31694_19375031 | NC_021162.1    | Ca_kabuli_chr03 | 19375031                | AA                              | GG              | 1946774570               |
| SNP_P4_31697_19375138 | NC_021162.1    | Ca_kabuli_chr03 | 19375138                | GG                              | AA              | 1946774572               |
| SNP_P4_31698_19375145 | NC_021162.1    | Ca_kabuli_chr03 | 19375145                | AA                              | GG              | 1946774574               |
| SNP_P4_31699_19375191 | NC_021162.1    | Ca_kabuli_chr03 | 19375191                | AA                              | CC              | 1946774576               |
| SNP_P4_31700_19375219 | NC_021162.1    | Ca_kabuli_chr03 | 19375219                | TT                              | AA              | 1946774578               |
| SNP_P4_31701_19375236 | NC_021162.1    | Ca_kabuli_chr03 | 19375236                | GG                              | AA              | 1946774580               |
| SNP_P4_31702_19375292 | NC_021162.1    | Ca_kabuli_chr03 | 19375292                | CC                              | TT              | 1946774582               |
| SNP_P4_31703_19375438 | NC_021162.1    | Ca_kabuli_chr03 | 19375438                | TT                              | GG              | 1946774584               |
| SNP_P4_31704_19375495 | NC_021162.1    | Ca_kabuli_chr03 | 19375495                | TT                              | CC              | 1946774586               |
| SNP_P4_31705_19375505 | NC_021162.1    | Ca_kabuli_chr03 | 19375505                | TT                              | GG              | 1946774588               |
| SNP_P4_31706_19375539 | NC_021162.1    | Ca_kabuli_chr03 | 19375539                | AA                              | GG              | 1946774591               |
| SNP_P4_31708_19376104 | NC_021162.1    | Ca_kabuli_chr03 | 19376104                | CC                              | AA              | 1946774593               |
| SNP_P4_31709_19376166 | NC_021162.1    | Ca_kabuli_chr03 | 19376166                | TT                              | GG              | 1946774595               |
| SNP_P4_31710_19376201 | NC_021162.1    | Ca_kabuli_chr03 | 19376201                | CC                              | TT              | 1946774597               |
| SNP_P4_31711_19376255 | NC_021162.1    | Ca_kabuli_chr03 | 19376255                | CC                              | TT              | 1946774599               |
| SNP_P4_31712_19376296 | NC_021162.1    | Ca_kabuli_chr03 | 19376296                | GG                              | AA              | 1946774601               |
| SNP_P4_31713_19376356 | NC_021162.1    | Ca_kabuli_chr03 | 19376356                | CC                              | TT              | 1946774603               |
| SNP_P4_31714_19376443 | NC_021162.1    | Ca_kabuli_chr03 | 19376443                | GG                              | TT              | 1946774605               |
| SNP_P4_31715_19376495 | NC_021162.1    | Ca_kabuli_chr03 | 19376495                | TT                              | CC              | 1946774607               |
| SNP_P4_31716_19376528 | NC_021162.1    | Ca_kabuli_chr03 | 19376528                | TT                              | CC              | 1946774609               |
| SNP_P4_31717_19376562 | NC_021162.1    | Ca_kabuli_chr03 | 19376562                | AA                              | GG              | 1946774611               |
| SNP_P4_31718_19376579 | NC_021162.1    | Ca_kabuli_chr03 | 19376579                | AA                              | GG              | 1946774614               |
| SNP_P4_31719_19376603 | NC_021162.1    | Ca_kabuli_chr03 | 19376603                | TT                              | AA              | 1946774616               |
| SNP_P4_31720_19376820 | NC_021162.1    | Ca_kabuli_chr03 | 19376820                | CC                              | TT              | 1946774618               |
| SNP_P4_31721_19376838 | NC_021162.1    | Ca_kabuli_chr03 | 19376838                | GG                              | AA              | 1946774620               |
| SNP_P4_31722_19377071 | NC_021162.1    | Ca_kabuli_chr03 | 19377071                | GG                              | CC              | 1946774622               |
| SNP_P4_31723_19377393 | NC_021162.1    | Ca_kabuli_chr03 | 19377393                | TT                              | CC              | 1946774624               |
| SNP_P4_31724_19377400 | NC_021162.1    | Ca_kabuli_chr03 | 19377400                | TT                              | CC              | 1946774627               |
| SNP_P4_31725_19377743 | NC_021162.1    | Ca_kabuli_chr03 | 19377743                | AA                              | GG              | 1946774629               |
| SNP_P4_31726_19380118 | NC_021162.1    | Ca_kabuli_chr03 | 19380118                | GG                              | CC              | 1946774631               |
| SNP_P4_31728_19380292 | NC_021162.1    | Ca_kabuli_chr03 | 19380292                | CC                              | TT              | 1946774633               |
| SNP_P4_31729_19380371 | NC_021162.1    | Ca_kabuli_chr03 | 19380371                | CC                              | TT              | 1946774635               |
| SNP_P4_31730_19380434 | NC_021162.1    | Ca_kabuli_chr03 | 19380434                | TT                              | GG              | 1946774637               |
| SNP_P4_31731_19380490 | NC_021162.1    | Ca_kabuli_chr03 | 19380490                | GG                              | AA              | 1946774639               |

| SNPs IDs              | Chromosome IDs | Chromosomes     | Physical positions (bp) | CDC Frontier (Reference genome) | (ILWC46 & LPNB) | NCBI SNPdb Accession IDs |
|-----------------------|----------------|-----------------|-------------------------|---------------------------------|-----------------|--------------------------|
| SNP_P4_31732_19380582 | NC_021162.1    | Ca_kabuli_chr03 | 19380582                | TT                              | CC              | 1946774641               |
| SNP_P4_31733_19380625 | NC_021162.1    | Ca_kabuli_chr03 | 19380625                | GG                              | AA              | 1946774643               |
| SNP_P4_31734_19380659 | NC_021162.1    | Ca_kabuli_chr03 | 19380659                | TT                              | CC              | 1946774645               |
| SNP_P4_31735_19380721 | NC_021162.1    | Ca_kabuli_chr03 | 19380721                | TT                              | CC              | 1946774647               |
| SNP_P4_31736_19380769 | NC_021162.1    | Ca_kabuli_chr03 | 19380769                | TT                              | CC              | 1946774649               |
| SNP_P4_31737_19380799 | NC_021162.1    | Ca_kabuli_chr03 | 19380799                | TT                              | CC              | 1946774651               |
| SNP_P4_31738_19380962 | NC_021162.1    | Ca_kabuli_chr03 | 19380962                | GG                              | TT              | 1946774653               |
| SNP_P4_31739_19380966 | NC_021162.1    | Ca_kabuli_chr03 | 19380966                | TT                              | CC              | 1946774656               |
| SNP_P4_31740_19381019 | NC_021162.1    | Ca_kabuli_chr03 | 19381019                | GG                              | AA              | 1946774658               |
| SNP_P4_31741_19381034 | NC_021162.1    | Ca_kabuli_chr03 | 19381034                | TT                              | AA              | 1946774660               |
| SNP_P4_31742_19381107 | NC_021162.1    | Ca_kabuli_chr03 | 19381107                | GG                              | AA              | 1946774662               |
| SNP_P4_31743_19381306 | NC_021162.1    | Ca_kabuli_chr03 | 19381306                | CC                              | TT              | 1946774664               |
| SNP_P4_31744_19381356 | NC_021162.1    | Ca_kabuli_chr03 | 19381356                | AA                              | GG              | 1946774666               |
| SNP_P4_31745_19381365 | NC_021162.1    | Ca_kabuli_chr03 | 19381365                | TT                              | CC              | 1946774669               |
| SNP_P4_31746_19381428 | NC_021162.1    | Ca_kabuli_chr03 | 19381428                | CC                              | TT              | 1946774671               |
| SNP_P4_31747_19381453 | NC_021162.1    | Ca_kabuli_chr03 | 19381453                | TT                              | GG              | 1946774674               |
| SNP_P4_31749_19381656 | NC_021162.1    | Ca_kabuli_chr03 | 19381656                | AA                              | GG              | 1946774676               |
| SNP_P4_31750_19381713 | NC_021162.1    | Ca_kabuli_chr03 | 19381713                | AA                              | GG              | 1946774678               |
| SNP_P4_31751_19381719 | NC_021162.1    | Ca_kabuli_chr03 | 19381719                | TT                              | GG              | 1946774680               |
| SNP_P4_31752_19381727 | NC_021162.1    | Ca_kabuli_chr03 | 19381727                | AA                              | GG              | 1946774682               |
| SNP_P4_31753_19381787 | NC_021162.1    | Ca_kabuli_chr03 | 19381787                | GG                              | AA              | 1946774684               |
| SNP_P4_31754_19381804 | NC_021162.1    | Ca_kabuli_chr03 | 19381804                | TT                              | CC              | 1946774686               |
| SNP_P4_31755_19381839 | NC_021162.1    | Ca_kabuli_chr03 | 19381839                | CC                              | AA              | 1946774688               |
| SNP_P4_31756_19381894 | NC_021162.1    | Ca_kabuli_chr03 | 19381894                | AA                              | CC              | 1946774691               |
| SNP_P4_31757_19381919 | NC_021162.1    | Ca_kabuli_chr03 | 19381919                | CC                              | TT              | 1946774693               |
| SNP_P4_31758_19382076 | NC_021162.1    | Ca_kabuli_chr03 | 19382076                | TT                              | CC              | 1946774695               |
| SNP_P4_31759_19382126 | NC_021162.1    | Ca_kabuli_chr03 | 19382126                | GG                              | CC              | 1946774697               |
| SNP_P4_31760_19382140 | NC_021162.1    | Ca_kabuli_chr03 | 19382140                | GG                              | AA              | 1946774699               |
| SNP_P4_31761_19382193 | NC_021162.1    | Ca_kabuli_chr03 | 19382193                | TT                              | CC              | 1946774701               |
| SNP_P4_31762_19382254 | NC_021162.1    | Ca_kabuli_chr03 | 19382254                | GG                              | AA              | 1946774703               |
| SNP_P4_31763_19382269 | NC_021162.1    | Ca_kabuli_chr03 | 19382269                | GG                              | AA              | 1946774705               |
| SNP_P4_31764_19382324 | NC_021162.1    | Ca_kabuli_chr03 | 19382324                | GG                              | AA              | 1946774708               |
| SNP_P4_31765_19382328 | NC_021162.1    | Ca_kabuli_chr03 | 19382328                | AA                              | GG              | 1946774710               |
| SNP_P4_31766_19382329 | NC_021162.1    | Ca_kabuli_chr03 | 19382329                | CC                              | TT              | 1946774712               |
| SNP_P4_31767_19382500 | NC_021162.1    | Ca_kabuli_chr03 | 19382500                | TT                              | GG              | 1946774714               |
| SNP_P4_31769_19383542 | NC_021162.1    | Ca_kabuli_chr03 | 19383542                | AA                              | GG              | 1946774716               |
| SNP_P4_31770_19383555 | NC_021162.1    | Ca_kabuli_chr03 | 19383555                | CC                              | TT              | 1946774718               |
| SNP_P4_31771_19383672 | NC_021162.1    | Ca_kabuli_chr03 | 19383672                | TT                              | CC              | 1946774720               |
| SNP_P4_31772_19383687 | NC_021162.1    | Ca_kabuli_chr03 | 19383687                | TT                              | CC              | 1946774722               |
| SNP_P4_31773_19383698 | NC_021162.1    | Ca_kabuli_chr03 | 19383698                | AA                              | CC              | 1946774724               |
| SNP_P4_31774_19383714 | NC_021162.1    | Ca_kabuli_chr03 | 19383714                | GG                              | AA              | 1946774726               |
| SNP_P4_31775_19383772 | NC_021162.1    | Ca_kabuli_chr03 | 19383772                | CC                              | TT              | 1946774728               |

| SNPs IDs              | Chromosome IDs | Chromosomes     | Physical positions (bp) | CDC Frontier (Reference genome) | (ILWC46 & LPNB) | NCBI SNPdb Accession IDs |
|-----------------------|----------------|-----------------|-------------------------|---------------------------------|-----------------|--------------------------|
| SNP_P4_31777_19384022 | NC_021162.1    | Ca_kabuli_chr03 | 19384022                | GG                              | AA              | 1946774730               |
| SNP_P4_31778_19384055 | NC_021162.1    | Ca_kabuli_chr03 | 19384055                | AA                              | GG              | 1946774732               |
| SNP_P4_31779_19384089 | NC_021162.1    | Ca_kabuli_chr03 | 19384089                | AA                              | GG              | 1946774734               |
| SNP_P4_31780_19384093 | NC_021162.1    | Ca_kabuli_chr03 | 19384093                | CC                              | TT              | 1946774735               |
| SNP_P4_31781_19384108 | NC_021162.1    | Ca_kabuli_chr03 | 19384108                | AA                              | CC              | 1946774737               |
| SNP_P4_31782_19384125 | NC_021162.1    | Ca_kabuli_chr03 | 19384125                | GG                              | AA              | 1946774739               |
| SNP_P4_31783_19384126 | NC_021162.1    | Ca_kabuli_chr03 | 19384126                | GG                              | AA              | 1946774741               |
| SNP_P4_31784_19385025 | NC_021162.1    | Ca_kabuli_chr03 | 19385025                | GG                              | AA              | 1946774743               |
| SNP_P4_31785_19385079 | NC_021162.1    | Ca_kabuli_chr03 | 19385079                | AA                              | GG              | 1946774745               |
| SNP_P4_31786_19385144 | NC_021162.1    | Ca_kabuli_chr03 | 19385144                | CC                              | AA              | 1946774747               |
| SNP_P4_31787_19385147 | NC_021162.1    | Ca_kabuli_chr03 | 19385147                | CC                              | TT              | 1946774749               |
| SNP_P4_31788_19385179 | NC_021162.1    | Ca_kabuli_chr03 | 19385179                | AA                              | GG              | 1946774751               |
| SNP_P4_31789_19385271 | NC_021162.1    | Ca_kabuli_chr03 | 19385271                | TT                              | CC              | 1946774753               |
| SNP_P4_31790_19385318 | NC_021162.1    | Ca_kabuli_chr03 | 19385318                | AA                              | GG              | 1946774755               |
| SNP_P4_31791_19385371 | NC_021162.1    | Ca_kabuli_chr03 | 19385371                | GG                              | AA              | 1946774757               |
| SNP_P4_31792_19385519 | NC_021162.1    | Ca_kabuli_chr03 | 19385519                | TT                              | CC              | 1946774759               |
| SNP_P4_31793_19385526 | NC_021162.1    | Ca_kabuli_chr03 | 19385526                | CC                              | TT              | 1946774761               |
| SNP_P4_31794_19385570 | NC_021162.1    | Ca_kabuli_chr03 | 19385570                | AA                              | TT              | 1946774764               |
| SNP_P4_31795_19385609 | NC_021162.1    | Ca_kabuli_chr03 | 19385609                | TT                              | CC              | 1946774766               |
| SNP_P4_31796_19385618 | NC_021162.1    | Ca_kabuli_chr03 | 19385618                | TT                              | AA              | 1946774768               |
| SNP_P4_31797_19385645 | NC_021162.1    | Ca_kabuli_chr03 | 19385645                | AA                              | GG              | 1946774770               |
| SNP_P4_31798_19385650 | NC_021162.1    | Ca_kabuli_chr03 | 19385650                | AA                              | GG              | 1946774772               |
| SNP_P4_31799_19385655 | NC_021162.1    | Ca_kabuli_chr03 | 19385655                | CC                              | TT              | 1946774774               |
| SNP_P4_31800_19385753 | NC_021162.1    | Ca_kabuli_chr03 | 19385753                | TT                              | CC              | 1946774776               |
| SNP_P4_31801_19385808 | NC_021162.1    | Ca_kabuli_chr03 | 19385808                | GG                              | CC              | 1946774778               |
| SNP_P4_31802_19385918 | NC_021162.1    | Ca_kabuli_chr03 | 19385918                | CC                              | TT              | 1946774780               |
| SNP_P4_31803_19385972 | NC_021162.1    | Ca_kabuli_chr03 | 19385972                | GG                              | AA              | 1946774782               |
| SNP_P4_31804_19385976 | NC_021162.1    | Ca_kabuli_chr03 | 19385976                | GG                              | AA              | 1946774784               |
| SNP_P4_31805_19385982 | NC_021162.1    | Ca_kabuli_chr03 | 19385982                | AA                              | GG              | 1946774786               |
| SNP_P4_31806_19386037 | NC_021162.1    | Ca_kabuli_chr03 | 19386037                | AA                              | GG              | 1946774789               |
| SNP_P4_31807_19386044 | NC_021162.1    | Ca_kabuli_chr03 | 19386044                | TT                              | CC              | 1946774791               |
| SNP_P4_31808_19386061 | NC_021162.1    | Ca_kabuli_chr03 | 19386061                | AA                              | GG              | 1946774794               |
| SNP_P4_31809_19386096 | NC_021162.1    | Ca_kabuli_chr03 | 19386096                | GG                              | AA              | 1946774796               |
| SNP_P4_31810_19386105 | NC_021162.1    | Ca_kabuli_chr03 | 19386105                | GG                              | CC              | 1946774798               |
| SNP_P4_31811_19386142 | NC_021162.1    | Ca_kabuli_chr03 | 19386142                | AA                              | GG              | 1946774800               |
| SNP_P4_31812_19386821 | NC_021162.1    | Ca_kabuli_chr03 | 19386821                | TT                              | GG              | 1946774802               |
| SNP_P4_31813_19386833 | NC_021162.1    | Ca_kabuli_chr03 | 19386833                | CC                              | GG              | 1946774804               |
| SNP_P4_31814_19386847 | NC_021162.1    | Ca_kabuli_chr03 | 19386847                | AA                              | GG              | 1946774806               |
| SNP_P4_31815_19386858 | NC_021162.1    | Ca_kabuli_chr03 | 19386858                | TT                              | CC              | 1946774808               |
| SNP_P4_31816_19387022 | NC_021162.1    | Ca_kabuli_chr03 | 19387022                | AA                              | GG              | 1946774810               |
| SNP_P4_31817_19387026 | NC_021162.1    | Ca_kabuli_chr03 | 19387026                | TT                              | AA              | 1946774812               |
| SNP_P4_31818_19389532 | NC_021162.1    | Ca_kabuli_chr03 | 19389532                | TT                              | CC              | 1946774814               |

| SNPs IDs              | Chromosome IDs | Chromosomes     | Physical positions (bp) | CDC Frontier (Reference genome) | (ILWC46 & LPNB) | NCBI SNPdb Accession IDs |
|-----------------------|----------------|-----------------|-------------------------|---------------------------------|-----------------|--------------------------|
| SNP_P4_31819_19389563 | NC_021162.1    | Ca_kabuli_chr03 | 19389563                | GG                              | AA              | 1946774817               |
| SNP_P4_31820_19389602 | NC_021162.1    | Ca_kabuli_chr03 | 19389602                | TT                              | CC              | 1946774819               |
| SNP_P4_31821_19389607 | NC_021162.1    | Ca_kabuli_chr03 | 19389607                | CC                              | AA              | 1946774821               |
| SNP_P4_31822_19389632 | NC_021162.1    | Ca_kabuli_chr03 | 19389632                | TT                              | CC              | 1946774823               |
| SNP_P4_31823_19391542 | NC_021162.1    | Ca_kabuli_chr03 | 19391542                | GG                              | AA              | 1946774825               |
| SNP_P4_31824_19402891 | NC_021162.1    | Ca_kabuli_chr03 | 19402891                | AA                              | TT              | 1946774827               |
| SNP_P4_31825_19402911 | NC_021162.1    | Ca_kabuli_chr03 | 19402911                | GG                              | TT              | 1946774829               |
| SNP_P4_31826_19402926 | NC_021162.1    | Ca_kabuli_chr03 | 19402926                | TT                              | CC              | 1946774831               |
| SNP_P4_31827_19402946 | NC_021162.1    | Ca_kabuli_chr03 | 19402946                | AA                              | CC              | 1946774833               |
| SNP_P4_31828_19402952 | NC_021162.1    | Ca_kabuli_chr03 | 19402952                | TT                              | CC              | 1946774835               |
| SNP_P4_31829_19402975 | NC_021162.1    | Ca_kabuli_chr03 | 19402975                | AA                              | GG              | 1946774837               |
| SNP_P4_31830_19402981 | NC_021162.1    | Ca_kabuli_chr03 | 19402981                | AA                              | GG              | 1946774839               |
| SNP_P4_31832_19452875 | NC_021162.1    | Ca_kabuli_chr03 | 19452875                | TT                              | CC              | 1946774841               |
| SNP_P4_31833_19452892 | NC_021162.1    | Ca_kabuli_chr03 | 19452892                | TT                              | CC              | 1946774843               |
| SNP_P4_31834_19452910 | NC_021162.1    | Ca_kabuli_chr03 | 19452910                | CC                              | AA              | 1946774846               |
| SNP_P4_31835_19452913 | NC_021162.1    | Ca_kabuli_chr03 | 19452913                | GG                              | TT              | 1946774848               |
| SNP_P4_31836_19452934 | NC_021162.1    | Ca_kabuli_chr03 | 19452934                | CC                              | GG              | 1946774850               |
| SNP_P4_31837_19454089 | NC_021162.1    | Ca_kabuli_chr03 | 19454089                | TT                              | CC              | 1946774852               |
| SNP_P4_31838_19481413 | NC_021162.1    | Ca_kabuli_chr03 | 19481413                | TT                              | GG              | 1946774854               |
| SNP_P4_31839_19486013 | NC_021162.1    | Ca_kabuli_chr03 | 19486013                | AA                              | TT              | 1946774856               |
| SNP_P4_31840_19486014 | NC_021162.1    | Ca_kabuli_chr03 | 19486014                | AA                              | GG              | 1946774858               |
| SNP_P4_31841_19492691 | NC_021162.1    | Ca_kabuli_chr03 | 19492691                | TT                              | AA              | 1946774860               |
| SNP_P4_31842_19492692 | NC_021162.1    | Ca_kabuli_chr03 | 19492692                | TT                              | AA              | 1946774863               |
| SNP_P4_31843_19494405 | NC_021162.1    | Ca_kabuli_chr03 | 19494405                | AA                              | CC              | 1946774865               |
| SNP_P4_31845_19513549 | NC_021162.1    | Ca_kabuli_chr03 | 19513549                | CC                              | TT              | 1946774867               |
| SNP_P4_31846_19530074 | NC_021162.1    | Ca_kabuli_chr03 | 19530074                | AA                              | GG              | 1946774869               |
| SNP_P4_31847_19533100 | NC_021162.1    | Ca_kabuli_chr03 | 19533100                | GG                              | AA              | 1946774871               |
| SNP_P4_31848_19555475 | NC_021162.1    | Ca_kabuli_chr03 | 19555475                | CC                              | TT              | 1946774873               |
| SNP_P4_31849_19555520 | NC_021162.1    | Ca_kabuli_chr03 | 19555520                | TT                              | CC              | 1946774875               |
| SNP_P4_31850_19556609 | NC_021162.1    | Ca_kabuli_chr03 | 19556609                | GG                              | AA              | 1946774877               |
| SNP_P4_31851_19556633 | NC_021162.1    | Ca_kabuli_chr03 | 19556633                | GG                              | AA              | 1946774879               |
| SNP_P4_31852_19556657 | NC_021162.1    | Ca_kabuli_chr03 | 19556657                | AA                              | GG              | 1946774881               |
| SNP_P4_31853_19557085 | NC_021162.1    | Ca_kabuli_chr03 | 19557085                | AA                              | GG              | 1946774883               |
| SNP_P4_31854_19557087 | NC_021162.1    | Ca_kabuli_chr03 | 19557087                | CC                              | TT              | 1946774885               |
| SNP_P4_31856_19559898 | NC_021162.1    | Ca_kabuli_chr03 | 19559898                | CC                              | AA              | 1946774887               |
| SNP_P4_31858_19566215 | NC_021162.1    | Ca_kabuli_chr03 | 19566215                | TT                              | CC              | 1946774889               |
| SNP_P4_31860_19634128 | NC_021162.1    | Ca_kabuli_chr03 | 19634128                | AA                              | TT              | 1946774891               |
| SNP_P4_31861_19634288 | NC_021162.1    | Ca_kabuli_chr03 | 19634288                | TT                              | CC              | 1946774893               |
| SNP_P4_31862_19634322 | NC_021162.1    | Ca_kabuli_chr03 | 19634322                | AA                              | GG              | 1946774895               |
| SNP_P4_31863_19634370 | NC_021162.1    | Ca_kabuli_chr03 | 19634370                | CC                              | TT              | 1946774897               |
| SNP_P4_31864_19635993 | NC_021162.1    | Ca_kabuli_chr03 | 19635993                | GG                              | AA              | 1946774899               |
| SNP_P4_31865_19636415 | NC_021162.1    | Ca_kabuli_chr03 | 19636415                | AA                              | GG              | 1946774901               |

| SNPs IDs              | Chromosome IDs | Chromosomes     | Physical positions (bp) | CDC Frontier (Reference genome) | (ILWC46 & LPNB) | NCBI SNPdb Accession IDs |
|-----------------------|----------------|-----------------|-------------------------|---------------------------------|-----------------|--------------------------|
| SNP_P4_31866_19636503 | NC_021162.1    | Ca_kabuli_chr03 | 19636503                | CC                              | GG              | 1946774903               |
| SNP_P4_31867_19637115 | NC_021162.1    | Ca_kabuli_chr03 | 19637115                | GG                              | TT              | 1946774905               |
| SNP_P4_31868_19639561 | NC_021162.1    | Ca_kabuli_chr03 | 19639561                | TT                              | CC              | 1946774907               |
| SNP_P4_31869_19639939 | NC_021162.1    | Ca_kabuli_chr03 | 19639939                | GG                              | AA              | 1946774909               |
| SNP_P4_31870_19639973 | NC_021162.1    | Ca_kabuli_chr03 | 19639973                | TT                              | AA              | 1946774911               |
| SNP_P4_31871_19639989 | NC_021162.1    | Ca_kabuli_chr03 | 19639989                | TT                              | GG              | 1946774913               |
| SNP_P4_31872_19639992 | NC_021162.1    | Ca_kabuli_chr03 | 19639992                | AA                              | TT              | 1946774915               |
| SNP_P4_31873_19640018 | NC_021162.1    | Ca_kabuli_chr03 | 19640018                | GG                              | CC              | 1946774917               |
| SNP_P4_31874_19654702 | NC_021162.1    | Ca_kabuli_chr03 | 19654702                | GG                              | AA              | 1946774919               |
| SNP_P4_31876_19682962 | NC_021162.1    | Ca_kabuli_chr03 | 19682962                | CC                              | AA              | 1946774921               |
| SNP_P4_31877_19682985 | NC_021162.1    | Ca_kabuli_chr03 | 19682985                | GG                              | TT              | 1946774923               |
| SNP_P4_31878_19684026 | NC_021162.1    | Ca_kabuli_chr03 | 19684026                | CC                              | TT              | 1946774925               |
| SNP_P4_31879_19686998 | NC_021162.1    | Ca_kabuli_chr03 | 19686998                | CC                              | AA              | 1946774927               |
| SNP_P4_31880_19687054 | NC_021162.1    | Ca_kabuli_chr03 | 19687054                | CC                              | AA              | 1946774929               |
| SNP_P4_31881_19687100 | NC_021162.1    | Ca_kabuli_chr03 | 19687100                | TT                              | CC              | 1946774932               |
| SNP_P4_31882_19688164 | NC_021162.1    | Ca_kabuli_chr03 | 19688164                | AA                              | TT              | 1946774934               |
| SNP_P4_31883_19688166 | NC_021162.1    | Ca_kabuli_chr03 | 19688166                | GG                              | AA              | 1946774936               |
| SNP_P4_31884_19688198 | NC_021162.1    | Ca_kabuli_chr03 | 19688198                | GG                              | CC              | 1946774938               |
| SNP_P4_31885_19688207 | NC_021162.1    | Ca_kabuli_chr03 | 19688207                | TT                              | CC              | 1946774940               |
| SNP_P4_31886_19688210 | NC_021162.1    | Ca_kabuli_chr03 | 19688210                | AA                              | TT              | 1946774942               |
| SNP_P4_31887_19688212 | NC_021162.1    | Ca_kabuli_chr03 | 19688212                | GG                              | TT              | 1946774944               |
| SNP_P4_31888_19688226 | NC_021162.1    | Ca_kabuli_chr03 | 19688226                | AA                              | CC              | 1946774947               |
| SNP_P4_31889_19688481 | NC_021162.1    | Ca_kabuli_chr03 | 19688481                | TT                              | CC              | 1946774949               |
| SNP_P4_31890_19688485 | NC_021162.1    | Ca_kabuli_chr03 | 19688485                | TT                              | CC              | 1946774951               |
| SNP_P4_31891_19688486 | NC_021162.1    | Ca_kabuli_chr03 | 19688486                | AA                              | GG              | 1946774953               |
| SNP_P4_31892_19688719 | NC_021162.1    | Ca_kabuli_chr03 | 19688719                | GG                              | AA              | 1946774955               |
| SNP_P4_31893_19688748 | NC_021162.1    | Ca_kabuli_chr03 | 19688748                | GG                              | AA              | 1946774957               |
| SNP_P4_31894_19702398 | NC_021162.1    | Ca_kabuli_chr03 | 19702398                | AA                              | TT              | 1946774959               |
| SNP_P4_31895_19702417 | NC_021162.1    | Ca_kabuli_chr03 | 19702417                | GG                              | TT              | 1946774962               |
| SNP_P4_31896_19705274 | NC_021162.1    | Ca_kabuli_chr03 | 19705274                | CC                              | TT              | 1946774964               |
| SNP_P4_31897_19731521 | NC_021162.1    | Ca_kabuli_chr03 | 19731521                | TT                              | GG              | 1946774966               |
| SNP_P4_31898_19735115 | NC_021162.1    | Ca_kabuli_chr03 | 19735115                | CC                              | AA              | 1946774968               |
| SNP_P4_31899_19740917 | NC_021162.1    | Ca_kabuli_chr03 | 19740917                | CC                              | AA              | 1946774970               |
| SNP_P4_31900_19742599 | NC_021162.1    | Ca_kabuli_chr03 | 19742599                | TT                              | AA              | 1946774972               |
| SNP_P4_31901_19742668 | NC_021162.1    | Ca_kabuli_chr03 | 19742668                | GG                              | CC              | 1946774975               |
| SNP_P4_31902_19769522 | NC_021162.1    | Ca_kabuli_chr03 | 19769522                | TT                              | CC              | 1946774977               |
| SNP_P4_31903_19769742 | NC_021162.1    | Ca_kabuli_chr03 | 19769742                | CC                              | AA              | 1946774979               |
| SNP_P4_31904_19771899 | NC_021162.1    | Ca_kabuli_chr03 | 19771899                | TT                              | CC              | 1946774981               |
| SNP_P4_31906_19810809 | NC_021162.1    | Ca_kabuli_chr03 | 19810809                | CC                              | TT              | 1946774983               |
| SNP_P4_31907_19815790 | NC_021162.1    | Ca_kabuli_chr03 | 19815790                | AA                              | TT              | 1946774985               |
| SNP_P4_31908_19832600 | NC_021162.1    | Ca_kabuli_chr03 | 19832600                | CC                              | TT              | 1946774987               |
| SNP_P4_31909_19835739 | NC_021162.1    | Ca_kabuli_chr03 | 19835739                | CC                              | GG              | 1946774990               |

| SNPs IDs              | Chromosome IDs | Chromosomes     | Physical positions (bp) | CDC Frontier (Reference genome) | (ILWC46 & LPNB) | NCBI SNPdb Accession IDs |
|-----------------------|----------------|-----------------|-------------------------|---------------------------------|-----------------|--------------------------|
| SNP_P4_31910_19897385 | NC_021162.1    | Ca_kabuli_chr03 | 19897385                | AA                              | GG              | 1946774992               |
| SNP_P4_31911_19897679 | NC_021162.1    | Ca_kabuli_chr03 | 19897679                | AA                              | CC              | 1946774994               |
| SNP_P4_31912_19901997 | NC_021162.1    | Ca_kabuli_chr03 | 19901997                | AA                              | GG              | 1946774996               |
| SNP_P4_31913_19916976 | NC_021162.1    | Ca_kabuli_chr03 | 19916976                | AA                              | TT              | 1946774998               |
| SNP_P4_31914_19929792 | NC_021162.1    | Ca_kabuli_chr03 | 19929792                | TT                              | CC              | 1946775000               |
| SNP_P4_31915_19960101 | NC_021162.1    | Ca_kabuli_chr03 | 19960101                | AA                              | GG              | 1946775002               |
| SNP_P4_31916_19960175 | NC_021162.1    | Ca_kabuli_chr03 | 19960175                | GG                              | AA              | 1946775004               |
| SNP_P4_31918_19961010 | NC_021162.1    | Ca_kabuli_chr03 | 19961010                | CC                              | TT              | 1946775006               |
| SNP_P4_31919_19961016 | NC_021162.1    | Ca_kabuli_chr03 | 19961016                | AA                              | CC              | 1946775008               |
| SNP_P4_31920_19964171 | NC_021162.1    | Ca_kabuli_chr03 | 19964171                | GG                              | TT              | 1946775010               |
| SNP_P4_31921_19965047 | NC_021162.1    | Ca_kabuli_chr03 | 19965047                | CC                              | TT              | 1946775012               |
| SNP_P4_31922_19965098 | NC_021162.1    | Ca_kabuli_chr03 | 19965098                | CC                              | TT              | 1946775014               |
| SNP_P4_31923_19965123 | NC_021162.1    | Ca_kabuli_chr03 | 19965123                | AA                              | GG              | 1946775016               |
| SNP_P4_31924_19965148 | NC_021162.1    | Ca_kabuli_chr03 | 19965148                | CC                              | AA              | 1946775018               |
| SNP_P4_31925_19965308 | NC_021162.1    | Ca_kabuli_chr03 | 19965308                | GG                              | CC              | 1946775020               |
| SNP_P4_31926_19965313 | NC_021162.1    | Ca_kabuli_chr03 | 19965313                | GG                              | AA              | 1946775023               |
| SNP_P4_31927_19965323 | NC_021162.1    | Ca_kabuli_chr03 | 19965323                | GG                              | AA              | 1946775025               |
| SNP_P4_31928_19965325 | NC_021162.1    | Ca_kabuli_chr03 | 19965325                | GG                              | AA              | 1946775027               |
| SNP_P4_31929_19965339 | NC_021162.1    | Ca_kabuli_chr03 | 19965339                | GG                              | TT              | 1946775029               |
| SNP_P4_31930_19965349 | NC_021162.1    | Ca_kabuli_chr03 | 19965349                | TT                              | CC              | 1946775031               |
| SNP_P4_31932_19965407 | NC_021162.1    | Ca_kabuli_chr03 | 19965407                | AA                              | CC              | 1946775033               |
| SNP_P4_31933_19967565 | NC_021162.1    | Ca_kabuli_chr03 | 19967565                | AA                              | GG              | 1946775035               |
| SNP_P4_31934_19967624 | NC_021162.1    | Ca_kabuli_chr03 | 19967624                | CC                              | TT              | 1946775037               |
| SNP_P4_31935_19967630 | NC_021162.1    | Ca_kabuli_chr03 | 19967630                | AA                              | CC              | 1946775039               |
| SNP_P4_31936_19967771 | NC_021162.1    | Ca_kabuli_chr03 | 19967771                | TT                              | CC              | 1946775041               |
| SNP_P4_31937_19967773 | NC_021162.1    | Ca_kabuli_chr03 | 19967773                | AA                              | GG              | 1946775043               |
| SNP_P4_31938_19967843 | NC_021162.1    | Ca_kabuli_chr03 | 19967843                | TT                              | CC              | 1946775045               |
| SNP_P4_31939_19967963 | NC_021162.1    | Ca_kabuli_chr03 | 19967963                | TT                              | CC              | 1946775047               |
| SNP_P4_31940_19968053 | NC_021162.1    | Ca_kabuli_chr03 | 19968053                | AA                              | TT              | 1946775049               |
| SNP_P4_31941_19968170 | NC_021162.1    | Ca_kabuli_chr03 | 19968170                | CC                              | TT              | 1946775051               |
| SNP_P4_31942_19968197 | NC_021162.1    | Ca_kabuli_chr03 | 19968197                | AA                              | GG              | 1946775053               |
| SNP_P4_31943_19969699 | NC_021162.1    | Ca_kabuli_chr03 | 19969699                | CC                              | TT              | 1946775055               |
| SNP_P4_31944_19993982 | NC_021162.1    | Ca_kabuli_chr03 | 19993982                | AA                              | GG              | 1946775057               |
| SNP_P4_31945_19994000 | NC_021162.1    | Ca_kabuli_chr03 | 19994000                | AA                              | TT              | 1946775059               |
| SNP_P4_31946_19994048 | NC_021162.1    | Ca_kabuli_chr03 | 19994048                | GG                              | CC              | 1946775061               |
| SNP_P4_31947_19994126 | NC_021162.1    | Ca_kabuli_chr03 | 19994126                | AA                              | GG              | 1946775064               |
| SNP_P4_31948_19994146 | NC_021162.1    | Ca_kabuli_chr03 | 19994146                | AA                              | GG              | 1946775066               |
| SNP_P4_31949_19994168 | NC_021162.1    | Ca_kabuli_chr03 | 19994168                | CC                              | AA              | 1946775068               |
| SNP_P4_31950_19994170 | NC_021162.1    | Ca_kabuli_chr03 | 19994170                | AA                              | GG              | 1946775070               |
| SNP_P4_31951_19994297 | NC_021162.1    | Ca_kabuli_chr03 | 19994297                | CC                              | TT              | 1946775072               |
| SNP_P4_31952_19994301 | NC_021162.1    | Ca_kabuli_chr03 | 19994301                | CC                              | TT              | 1946775074               |
| SNP_P4_31953_19994352 | NC_021162.1    | Ca_kabuli_chr03 | 19994352                | AA                              | GG              | 1946775076               |



| SNPs IDs              | Chromosome IDs | Chromosomes     | Physical positions (bp) | CDC Frontier (Reference genome) | (ILWC46 & LPNB) | NCBI SNPdb Accession IDs |
|-----------------------|----------------|-----------------|-------------------------|---------------------------------|-----------------|--------------------------|
| SNP_P4_31954_19997872 | NC_021162.1    | Ca_kabuli_chr03 | 19997872                | GG                              | AA              | 1946775078               |
| SNP_P4_31956_20011615 | NC_021162.1    | Ca_kabuli_chr03 | 20011615                | GG                              | AA              | 1946775080               |
| SNP_P4_31957_20011718 | NC_021162.1    | Ca_kabuli_chr03 | 20011718                | GG                              | AA              | 1946775083               |
| SNP_P4_31958_20011742 | NC_021162.1    | Ca_kabuli_chr03 | 20011742                | CC                              | TT              | 1946775085               |
| SNP_P4_31959_20011905 | NC_021162.1    | Ca_kabuli_chr03 | 20011905                | GG                              | CC              | 1946775087               |
| SNP_P4_31960_20011933 | NC_021162.1    | Ca_kabuli_chr03 | 20011933                | CC                              | TT              | 1946775089               |
| SNP_P4_31961_20012040 | NC_021162.1    | Ca_kabuli_chr03 | 20012040                | CC                              | TT              | 1946775091               |
| SNP_P4_31962_20012067 | NC_021162.1    | Ca_kabuli_chr03 | 20012067                | CC                              | TT              | 1946775094               |
| SNP_P4_31963_20012109 | NC_021162.1    | Ca_kabuli_chr03 | 20012109                | GG                              | AA              | 1946775096               |
| SNP_P4_31964_20012171 | NC_021162.1    | Ca_kabuli_chr03 | 20012171                | GG                              | AA              | 1946775098               |
| SNP_P4_31965_20012191 | NC_021162.1    | Ca_kabuli_chr03 | 20012191                | TT                              | CC              | 1946775100               |
| SNP_P4_31966_20012193 | NC_021162.1    | Ca_kabuli_chr03 | 20012193                | GG                              | AA              | 1946775102               |
| SNP_P4_31967_20012233 | NC_021162.1    | Ca_kabuli_chr03 | 20012233                | GG                              | AA              | 1946775104               |
| SNP_P4_31968_20012263 | NC_021162.1    | Ca_kabuli_chr03 | 20012263                | CC                              | TT              | 1946775107               |
| SNP_P4_31971_20075277 | NC_021162.1    | Ca_kabuli_chr03 | 20075277                | AA                              | GG              | 1946775109               |
| SNP_P4_31972_20113524 | NC_021162.1    | Ca_kabuli_chr03 | 20113524                | TT                              | CC              | 1946775112               |
| SNP_P4_31973_20113668 | NC_021162.1    | Ca_kabuli_chr03 | 20113668                | GG                              | AA              | 1946775114               |
| SNP_P4_31974_20113672 | NC_021162.1    | Ca_kabuli_chr03 | 20113672                | GG                              | TT              | 1946775116               |
| SNP_P4_31975_20120884 | NC_021162.1    | Ca_kabuli_chr03 | 20120884                | AA                              | TT              | 1946775118               |
| SNP_P4_31976_20122707 | NC_021162.1    | Ca_kabuli_chr03 | 20122707                | TT                              | CC              | 1946775120               |
| SNP_P4_31978_20162167 | NC_021162.1    | Ca_kabuli_chr03 | 20162167                | TT                              | AA              | 1946775122               |
| SNP_P4_31979_20206624 | NC_021162.1    | Ca_kabuli_chr03 | 20206624                | GG                              | AA              | 1946775124               |
| SNP_P4_31980_20222130 | NC_021162.1    | Ca_kabuli_chr03 | 20222130                | GG                              | TT              | 1946775127               |
| SNP_P4_31981_20222547 | NC_021162.1    | Ca_kabuli_chr03 | 20222547                | AA                              | GG              | 1946775129               |
| SNP_P4_31982_20223735 | NC_021162.1    | Ca_kabuli_chr03 | 20223735                | AA                              | GG              | 1946775131               |
| SNP_P4_31983_20232380 | NC_021162.1    | Ca_kabuli_chr03 | 20232380                | TT                              | AA              | 1946775133               |
| SNP_P4_31984_20233059 | NC_021162.1    | Ca_kabuli_chr03 | 20233059                | GG                              | TT              | 1946775136               |
| SNP_P4_31985_20256109 | NC_021162.1    | Ca_kabuli_chr03 | 20256109                | AA                              | CC              | 1946775138               |
| SNP_P4_31986_20256153 | NC_021162.1    | Ca_kabuli_chr03 | 20256153                | CC                              | TT              | 1946775140               |
| SNP_P4_31987_20258270 | NC_021162.1    | Ca_kabuli_chr03 | 20258270                | TT                              | CC              | 1946775142               |
| SNP_P4_31988_20258298 | NC_021162.1    | Ca_kabuli_chr03 | 20258298                | CC                              | TT              | 1946775144               |
| SNP_P4_31989_20258317 | NC_021162.1    | Ca_kabuli_chr03 | 20258317                | AA                              | GG              | 1946775147               |
| SNP_P4_31990_20258357 | NC_021162.1    | Ca_kabuli_chr03 | 20258357                | TT                              | CC              | 1946775149               |
| SNP_P4_31991_20258551 | NC_021162.1    | Ca_kabuli_chr03 | 20258551                | TT                              | GG              | 1946775151               |
| SNP_P4_31992_20258573 | NC_021162.1    | Ca_kabuli_chr03 | 20258573                | AA                              | CC              | 1946775153               |
| SNP_P4_31993_20273974 | NC_021162.1    | Ca_kabuli_chr03 | 20273974                | CC                              | TT              | 1946775155               |
| SNP_P4_31994_20280249 | NC_021162.1    | Ca_kabuli_chr03 | 20280249                | TT                              | AA              | 1946775157               |
| SNP_P4_31996_20319266 | NC_021162.1    | Ca_kabuli_chr03 | 20319266                | AA                              | TT              | 1946775159               |
| SNP_P4_31997_20323846 | NC_021162.1    | Ca_kabuli_chr03 | 20323846                | GG                              | AA              | 1946775161               |
| SNP_P4_31998_20323960 | NC_021162.1    | Ca_kabuli_chr03 | 20323960                | TT                              | AA              | 1946775163               |
| SNP_P4_31999_20324152 | NC_021162.1    | Ca_kabuli_chr03 | 20324152                | CC                              | AA              | 1946775165               |
| SNP_P4_32000_20324219 | NC_021162.1    | Ca_kabuli_chr03 | 20324219                | AA                              | CC              | 1946775167               |

| SNPs IDs              | Chromosome IDs | Chromosomes     | Physical positions (bp) | CDC Frontier (Reference genome) | (ILWC46 & LPNB) | NCBI SNPdb Accession IDs |
|-----------------------|----------------|-----------------|-------------------------|---------------------------------|-----------------|--------------------------|
| SNP_P4_32001_20324276 | NC_021162.1    | Ca_kabuli_chr03 | 20324276                | AA                              | CC              | 1946775169               |
| SNP_P4_32002_20335840 | NC_021162.1    | Ca_kabuli_chr03 | 20335840                | TT                              | GG              | 1946775171               |
| SNP_P4_32003_20337413 | NC_021162.1    | Ca_kabuli_chr03 | 20337413                | CC                              | TT              | 1946775174               |
| SNP_P4_32004_20337417 | NC_021162.1    | Ca_kabuli_chr03 | 20337417                | CC                              | AA              | 1946775176               |
| SNP_P4_32005_20337555 | NC_021162.1    | Ca_kabuli_chr03 | 20337555                | TT                              | AA              | 1946775178               |
| SNP_P4_32006_20337567 | NC_021162.1    | Ca_kabuli_chr03 | 20337567                | CC                              | TT              | 1946775180               |
| SNP_P4_32007_20337573 | NC_021162.1    | Ca_kabuli_chr03 | 20337573                | GG                              | AA              | 1946775182               |
| SNP_P4_32008_20337582 | NC_021162.1    | Ca_kabuli_chr03 | 20337582                | CC                              | TT              | 1946775184               |
| SNP_P4_32009_20337587 | NC_021162.1    | Ca_kabuli_chr03 | 20337587                | AA                              | GG              | 1946775186               |
| SNP_P4_32011_20339579 | NC_021162.1    | Ca_kabuli_chr03 | 20339579                | AA                              | TT              | 1946775189               |
| SNP_P4_32012_20339580 | NC_021162.1    | Ca_kabuli_chr03 | 20339580                | TT                              | AA              | 1946775191               |
| SNP_P4_32013_20340142 | NC_021162.1    | Ca_kabuli_chr03 | 20340142                | CC                              | TT              | 1946775193               |
| SNP_P4_32015_20377955 | NC_021162.1    | Ca_kabuli_chr03 | 20377955                | CC                              | GG              | 1946775196               |
| SNP_P4_32016_20378319 | NC_021162.1    | Ca_kabuli_chr03 | 20378319                | CC                              | TT              | 1946775198               |
| SNP_P4_32017_20378340 | NC_021162.1    | Ca_kabuli_chr03 | 20378340                | GG                              | AA              | 1946775200               |
| SNP_P4_32020_20391551 | NC_021162.1    | Ca_kabuli_chr03 | 20391551                | TT                              | CC              | 1946775202               |
| SNP_P4_32021_20398302 | NC_021162.1    | Ca_kabuli_chr03 | 20398302                | CC                              | TT              | 1946775204               |
| SNP_P4_32023_20424957 | NC_021162.1    | Ca_kabuli_chr03 | 20424957                | GG                              | AA              | 1946775206               |
| SNP_P4_32024_20436728 | NC_021162.1    | Ca_kabuli_chr03 | 20436728                | TT                              | CC              | 1946775208               |
| SNP_P4_32025_20436737 | NC_021162.1    | Ca_kabuli_chr03 | 20436737                | CC                              | TT              | 1946775210               |
| SNP_P4_32026_20438634 | NC_021162.1    | Ca_kabuli_chr03 | 20438634                | TT                              | CC              | 1946775212               |
| SNP_P4_32027_20438777 | NC_021162.1    | Ca_kabuli_chr03 | 20438777                | TT                              | CC              | 1946775214               |
| SNP_P4_32028_20438787 | NC_021162.1    | Ca_kabuli_chr03 | 20438787                | AA                              | CC              | 1946775216               |
| SNP_P4_32029_20439004 | NC_021162.1    | Ca_kabuli_chr03 | 20439004                | GG                              | TT              | 1946775218               |
| SNP_P4_32030_20439013 | NC_021162.1    | Ca_kabuli_chr03 | 20439013                | AA                              | TT              | 1946775221               |
| SNP_P4_32031_20446911 | NC_021162.1    | Ca_kabuli_chr03 | 20446911                | GG                              | AA              | 1946775223               |
| SNP_P4_32032_20468329 | NC_021162.1    | Ca_kabuli_chr03 | 20468329                | AA                              | CC              | 1946775224               |
| SNP_P4_32033_20468330 | NC_021162.1    | Ca_kabuli_chr03 | 20468330                | AA                              | TT              | 1946775226               |
| SNP_P4_32034_20484349 | NC_021162.1    | Ca_kabuli_chr03 | 20484349                | TT                              | CC              | 1946775229               |
| SNP_P4_32035_20484465 | NC_021162.1    | Ca_kabuli_chr03 | 20484465                | GG                              | CC              | 1946775231               |
| SNP_P4_32036_20488175 | NC_021162.1    | Ca_kabuli_chr03 | 20488175                | AA                              | GG              | 1946775233               |
| SNP_P4_32037_20511878 | NC_021162.1    | Ca_kabuli_chr03 | 20511878                | GG                              | AA              | 1946775235               |
| SNP_P4_32038_20513655 | NC_021162.1    | Ca_kabuli_chr03 | 20513655                | TT                              | CC              | 1946775237               |
| SNP_P4_32039_20518831 | NC_021162.1    | Ca_kabuli_chr03 | 20518831                | CC                              | TT              | 1946775239               |
| SNP_P4_32040_20518833 | NC_021162.1    | Ca_kabuli_chr03 | 20518833                | TT                              | AA              | 1946775242               |
| SNP_P4_32041_20521486 | NC_021162.1    | Ca_kabuli_chr03 | 20521486                | GG                              | AA              | 1946775244               |
| SNP_P4_32042_20526423 | NC_021162.1    | Ca_kabuli_chr03 | 20526423                | TT                              | AA              | 1946775246               |
| SNP_P4_32043_20526424 | NC_021162.1    | Ca_kabuli_chr03 | 20526424                | TT                              | AA              | 1946775249               |
| SNP_P4_32044_20541854 | NC_021162.1    | Ca_kabuli_chr03 | 20541854                | TT                              | AA              | 1946775251               |
| SNP_P4_32045_20542185 | NC_021162.1    | Ca_kabuli_chr03 | 20542185                | TT                              | GG              | 1946775253               |
| SNP_P4_32046_20569079 | NC_021162.1    | Ca_kabuli_chr03 | 20569079                | CC                              | AA              | 1946775255               |
| SNP_P4_32047_20576599 | NC_021162.1    | Ca_kabuli_chr03 | 20576599                | TT                              | CC              | 1946775257               |

| SNPs IDs              | Chromosome IDs | Chromosomes     | Physical positions (bp) | CDC Frontier (Reference genome) | (ILWC46 & LPNB) | NCBI SNPdb Accession IDs |
|-----------------------|----------------|-----------------|-------------------------|---------------------------------|-----------------|--------------------------|
| SNP_P4_32048_20579224 | NC_021162.1    | Ca_kabuli_chr03 | 20579224                | GG                              | TT              | 1946775259               |
| SNP_P4_32049_20579233 | NC_021162.1    | Ca_kabuli_chr03 | 20579233                | GG                              | AA              | 1946775261               |
| SNP_P4_32050_20583223 | NC_021162.1    | Ca_kabuli_chr03 | 20583223                | CC                              | TT              | 1946775264               |
| SNP_P4_32051_20616410 | NC_021162.1    | Ca_kabuli_chr03 | 20616410                | CC                              | TT              | 1946775266               |
| SNP_P4_32052_20620903 | NC_021162.1    | Ca_kabuli_chr03 | 20620903                | GG                              | AA              | 1946775268               |
| SNP_P4_32053_20621232 | NC_021162.1    | Ca_kabuli_chr03 | 20621232                | TT                              | AA              | 1946775270               |
| SNP_P4_32054_20621269 | NC_021162.1    | Ca_kabuli_chr03 | 20621269                | GG                              | CC              | 1946775272               |
| SNP_P4_32055_20641624 | NC_021162.1    | Ca_kabuli_chr03 | 20641624                | GG                              | AA              | 1946775274               |
| SNP_P4_32056_20649654 | NC_021162.1    | Ca_kabuli_chr03 | 20649654                | TT                              | AA              | 1946775276               |
| SNP_P4_32057_20665149 | NC_021162.1    | Ca_kabuli_chr03 | 20665149                | AA                              | GG              | 1946775278               |
| SNP_P4_32058_20696874 | NC_021162.1    | Ca_kabuli_chr03 | 20696874                | GG                              | AA              | 1946775280               |
| SNP_P4_32059_20696890 | NC_021162.1    | Ca_kabuli_chr03 | 20696890                | CC                              | TT              | 1946775283               |
| SNP_P4_32060_20698888 | NC_021162.1    | Ca_kabuli_chr03 | 20698888                | AA                              | TT              | 1946775285               |
| SNP_P4_32061_20698903 | NC_021162.1    | Ca_kabuli_chr03 | 20698903                | GG                              | AA              | 1946775287               |
| SNP_P4_32062_20698911 | NC_021162.1    | Ca_kabuli_chr03 | 20698911                | AA                              | GG              | 1946775291               |
| SNP_P4_32063_20699584 | NC_021162.1    | Ca_kabuli_chr03 | 20699584                | GG                              | AA              | 1946775293               |
| SNP_P4_32064_20703473 | NC_021162.1    | Ca_kabuli_chr03 | 20703473                | CC                              | AA              | 1946775295               |
| SNP_P4_32066_20720940 | NC_021162.1    | Ca_kabuli_chr03 | 20720940                | AA                              | GG              | 1946775297               |
| SNP_P4_32067_20724295 | NC_021162.1    | Ca_kabuli_chr03 | 20724295                | CC                              | TT              | 1946775299               |
| SNP_P4_32068_20724310 | NC_021162.1    | Ca_kabuli_chr03 | 20724310                | TT                              | CC              | 1946775301               |
| SNP_P4_32069_20728620 | NC_021162.1    | Ca_kabuli_chr03 | 20728620                | AA                              | GG              | 1946775303               |
| SNP_P4_32070_20728629 | NC_021162.1    | Ca_kabuli_chr03 | 20728629                | GG                              | AA              | 1946775305               |
| SNP_P4_32071_20728764 | NC_021162.1    | Ca_kabuli_chr03 | 20728764                | CC                              | AA              | 1946775307               |
| SNP_P4_32072_20729129 | NC_021162.1    | Ca_kabuli_chr03 | 20729129                | GG                              | CC              | 1946775309               |
| SNP_P4_32073_20729164 | NC_021162.1    | Ca_kabuli_chr03 | 20729164                | AA                              | GG              | 1946775311               |
| SNP_P4_32074_20729213 | NC_021162.1    | Ca_kabuli_chr03 | 20729213                | AA                              | TT              | 1946775313               |
| SNP_P4_32075_20730674 | NC_021162.1    | Ca_kabuli_chr03 | 20730674                | AA                              | CC              | 1946775315               |
| SNP_P4_32076_20730679 | NC_021162.1    | Ca_kabuli_chr03 | 20730679                | GG                              | AA              | 1946775317               |
| SNP_P4_32077_20730721 | NC_021162.1    | Ca_kabuli_chr03 | 20730721                | GG                              | TT              | 1946775319               |
| SNP_P4_32078_20730724 | NC_021162.1    | Ca_kabuli_chr03 | 20730724                | TT                              | GG              | 1946775321               |
| SNP_P4_32079_20730734 | NC_021162.1    | Ca_kabuli_chr03 | 20730734                | CC                              | TT              | 1946775324               |
| SNP_P4_32080_20731027 | NC_021162.1    | Ca_kabuli_chr03 | 20731027                | CC                              | TT              | 1946775326               |
| SNP_P4_32081_20731074 | NC_021162.1    | Ca_kabuli_chr03 | 20731074                | AA                              | GG              | 1946775328               |
| SNP_P4_32082_20738578 | NC_021162.1    | Ca_kabuli_chr03 | 20738578                | TT                              | CC              | 1946775330               |
| SNP_P4_32083_20738789 | NC_021162.1    | Ca_kabuli_chr03 | 20738789                | CC                              | TT              | 1946775332               |
| SNP_P4_32084_20738820 | NC_021162.1    | Ca_kabuli_chr03 | 20738820                | CC                              | TT              | 1946775335               |
| SNP_P4_32085_20739053 | NC_021162.1    | Ca_kabuli_chr03 | 20739053                | GG                              | TT              | 1946775337               |
| SNP_P4_32086_20739423 | NC_021162.1    | Ca_kabuli_chr03 | 20739423                | CC                              | TT              | 1946775339               |
| SNP_P4_32087_20744087 | NC_021162.1    | Ca_kabuli_chr03 | 20744087                | CC                              | TT              | 1946775341               |
| SNP_P4_32088_20744226 | NC_021162.1    | Ca_kabuli_chr03 | 20744226                | AA                              | GG              | 1946775343               |
| SNP_P4_32089_20744412 | NC_021162.1    | Ca_kabuli_chr03 | 20744412                | AA                              | TT              | 1946775345               |
| SNP_P4_32090_20744414 | NC_021162.1    | Ca_kabuli_chr03 | 20744414                | TT                              | CC              | 1946775347               |

| SNPs IDs              | Chromosome IDs | Chromosomes     | Physical positions (bp) | CDC Frontier (Reference genome) | (ILWC46 & LPNB) | NCBI SNPdb Accession IDs |
|-----------------------|----------------|-----------------|-------------------------|---------------------------------|-----------------|--------------------------|
| SNP_P4_32091_20744423 | NC_021162.1    | Ca_kabuli_chr03 | 20744423                | AA                              | GG              | 1946775349               |
| SNP_P4_32092_20744425 | NC_021162.1    | Ca_kabuli_chr03 | 20744425                | TT                              | CC              | 1946775352               |
| SNP_P4_32093_20744433 | NC_021162.1    | Ca_kabuli_chr03 | 20744433                | AA                              | GG              | 1946775354               |
| SNP_P4_32094_20744474 | NC_021162.1    | Ca_kabuli_chr03 | 20744474                | TT                              | GG              | 1946775356               |
| SNP_P4_32095_20744515 | NC_021162.1    | Ca_kabuli_chr03 | 20744515                | AA                              | TT              | 1946775358               |
| SNP_P4_32096_20744525 | NC_021162.1    | Ca_kabuli_chr03 | 20744525                | GG                              | AA              | 1946775360               |
| SNP_P4_32097_20744550 | NC_021162.1    | Ca_kabuli_chr03 | 20744550                | GG                              | CC              | 1946775362               |
| SNP_P4_32098_20746110 | NC_021162.1    | Ca_kabuli_chr03 | 20746110                | TT                              | AA              | 1946775364               |
| SNP_P4_32099_20751055 | NC_021162.1    | Ca_kabuli_chr03 | 20751055                | AA                              | TT              | 1946775366               |
| SNP_P4_32100_20793067 | NC_021162.1    | Ca_kabuli_chr03 | 20793067                | GG                              | AA              | 1946775369               |
| SNP_P4_32101_20800018 | NC_021162.1    | Ca_kabuli_chr03 | 20800018                | GG                              | AA              | 1946775371               |
| SNP_P4_32102_20847880 | NC_021162.1    | Ca_kabuli_chr03 | 20847880                | TT                              | GG              | 1946775373               |
| SNP_P4_32103_20848781 | NC_021162.1    | Ca_kabuli_chr03 | 20848781                | GG                              | TT              | 1946775375               |
| SNP_P4_32104_20860226 | NC_021162.1    | Ca_kabuli_chr03 | 20860226                | CC                              | TT              | 1946775377               |
| SNP_P4_32105_20894408 | NC_021162.1    | Ca_kabuli_chr03 | 20894408                | CC                              | TT              | 1946775379               |
| SNP_P4_32106_20896548 | NC_021162.1    | Ca_kabuli_chr03 | 20896548                | AA                              | CC              | 1946775381               |
| SNP_P4_32107_20896563 | NC_021162.1    | Ca_kabuli_chr03 | 20896563                | AA                              | GG              | 1946775383               |
| SNP_P4_32108_20896581 | NC_021162.1    | Ca_kabuli_chr03 | 20896581                | GG                              | AA              | 1946775385               |
| SNP_P4_32109_20896610 | NC_021162.1    | Ca_kabuli_chr03 | 20896610                | TT                              | AA              | 1946775387               |
| SNP_P4_32110_20902283 | NC_021162.1    | Ca_kabuli_chr03 | 20902283                | TT                              | CC              | 1946775389               |
| SNP_P4_32111_20913600 | NC_021162.1    | Ca_kabuli_chr03 | 20913600                | CC                              | TT              | 1946775391               |
| SNP_P4_32112_20913615 | NC_021162.1    | Ca_kabuli_chr03 | 20913615                | CC                              | TT              | 1946775393               |
| SNP_P4_32113_20914028 | NC_021162.1    | Ca_kabuli_chr03 | 20914028                | AA                              | GG              | 1946775395               |
| SNP_P4_32114_20928256 | NC_021162.1    | Ca_kabuli_chr03 | 20928256                | CC                              | TT              | 1946775397               |
| SNP_P4_32115_20933563 | NC_021162.1    | Ca_kabuli_chr03 | 20933563                | AA                              | GG              | 1946775399               |
| SNP_P4_32116_20933572 | NC_021162.1    | Ca_kabuli_chr03 | 20933572                | CC                              | GG              | 1946775401               |
| SNP_P4_32117_20933613 | NC_021162.1    | Ca_kabuli_chr03 | 20933613                | TT                              | CC              | 1946775403               |
| SNP_P4_32118_20933618 | NC_021162.1    | Ca_kabuli_chr03 | 20933618                | TT                              | AA              | 1946775405               |
| SNP_P4_32119_20940587 | NC_021162.1    | Ca_kabuli_chr03 | 20940587                | CC                              | TT              | 1946775408               |
| SNP_P4_32120_20940618 | NC_021162.1    | Ca_kabuli_chr03 | 20940618                | CC                              | GG              | 1946775410               |
| SNP_P4_32122_20944439 | NC_021162.1    | Ca_kabuli_chr03 | 20944439                | GG                              | AA              | 1946775412               |
| SNP_P4_32123_20944443 | NC_021162.1    | Ca_kabuli_chr03 | 20944443                | TT                              | GG              | 1946775414               |
| SNP_P4_32124_20947300 | NC_021162.1    | Ca_kabuli_chr03 | 20947300                | AA                              | GG              | 1946775416               |
| SNP_P4_32125_20947327 | NC_021162.1    | Ca_kabuli_chr03 | 20947327                | AA                              | TT              | 1946775418               |
| SNP_P4_32126_20951796 | NC_021162.1    | Ca_kabuli_chr03 | 20951796                | AA                              | TT              | 1946775421               |
| SNP_P4_32127_20991955 | NC_021162.1    | Ca_kabuli_chr03 | 20991955                | TT                              | CC              | 1946775423               |
| SNP_P4_32129_20997416 | NC_021162.1    | Ca_kabuli_chr03 | 20997416                | AA                              | GG              | 1946775425               |
| SNP_P4_32131_21048925 | NC_021162.1    | Ca_kabuli_chr03 | 21048925                | TT                              | GG              | 1946775427               |
| SNP_P4_32132_21049601 | NC_021162.1    | Ca_kabuli_chr03 | 21049601                | CC                              | TT              | 1946775429               |
| SNP_P4_32133_21060357 | NC_021162.1    | Ca_kabuli_chr03 | 21060357                | AA                              | CC              | 1946775431               |
| SNP_P4_32134_21060358 | NC_021162.1    | Ca_kabuli_chr03 | 21060358                | CC                              | AA              | 1946775433               |
| SNP_P4_32135_21063203 | NC_021162.1    | Ca_kabuli_chr03 | 21063203                | CC                              | TT              | 1946775435               |

| SNPs IDs              | Chromosome IDs | Chromosomes     | Physical positions (bp) | CDC Frontier (Reference genome) | (ILWC46 & LPNB) | NCBI SNPdb Accession IDs |
|-----------------------|----------------|-----------------|-------------------------|---------------------------------|-----------------|--------------------------|
| SNP_P4_32136_21066549 | NC_021162.1    | Ca_kabuli_chr03 | 21066549                | CC                              | AA              | 1946775437               |
| SNP_P4_32137_21066574 | NC_021162.1    | Ca_kabuli_chr03 | 21066574                | AA                              | CC              | 1946775439               |
| SNP_P4_32138_21066575 | NC_021162.1    | Ca_kabuli_chr03 | 21066575                | TT                              | CC              | 1946775441               |
| SNP_P4_32139_21067143 | NC_021162.1    | Ca_kabuli_chr03 | 21067143                | CC                              | TT              | 1946775443               |
| SNP_P4_32140_21069111 | NC_021162.1    | Ca_kabuli_chr03 | 21069111                | CC                              | AA              | 1946775445               |
| SNP_P4_32141_21069148 | NC_021162.1    | Ca_kabuli_chr03 | 21069148                | CC                              | TT              | 1946775447               |
| SNP_P4_32142_21071853 | NC_021162.1    | Ca_kabuli_chr03 | 21071853                | GG                              | TT              | 1946775450               |
| SNP_P4_32143_21086854 | NC_021162.1    | Ca_kabuli_chr03 | 21086854                | TT                              | CC              | 1946775452               |
| SNP_P4_32144_21086860 | NC_021162.1    | Ca_kabuli_chr03 | 21086860                | TT                              | CC              | 1946775454               |
| SNP_P4_32145_21087095 | NC_021162.1    | Ca_kabuli_chr03 | 21087095                | AA                              | GG              | 1946775456               |
| SNP_P4_32148_21093947 | NC_021162.1    | Ca_kabuli_chr03 | 21093947                | GG                              | TT              | 1946775458               |
| SNP_P4_32149_21094760 | NC_021162.1    | Ca_kabuli_chr03 | 21094760                | AA                              | TT              | 1946775460               |
| SNP_P4_32151_21111636 | NC_021162.1    | Ca_kabuli_chr03 | 21111636                | CC                              | TT              | 1946775462               |
| SNP_P4_32153_21146308 | NC_021162.1    | Ca_kabuli_chr03 | 21146308                | AA                              | CC              | 1946775464               |
| SNP_P4_32154_21154678 | NC_021162.1    | Ca_kabuli_chr03 | 21154678                | AA                              | TT              | 1946775466               |
| SNP_P4_32155_21157098 | NC_021162.1    | Ca_kabuli_chr03 | 21157098                | CC                              | AA              | 1946775468               |
| SNP_P4_32156_21169549 | NC_021162.1    | Ca_kabuli_chr03 | 21169549                | AA                              | CC              | 1946775470               |
| SNP_P4_32157_21186528 | NC_021162.1    | Ca_kabuli_chr03 | 21186528                | CC                              | TT              | 1946775472               |
| SNP_P4_32158_21186542 | NC_021162.1    | Ca_kabuli_chr03 | 21186542                | CC                              | AA              | 1946775475               |
| SNP_P4_32159_21186782 | NC_021162.1    | Ca_kabuli_chr03 | 21186782                | TT                              | GG              | 1946775477               |
| SNP_P4_32160_21186796 | NC_021162.1    | Ca_kabuli_chr03 | 21186796                | GG                              | AA              | 1946775479               |
| SNP_P4_32161_21186822 | NC_021162.1    | Ca_kabuli_chr03 | 21186822                | TT                              | AA              | 1946775481               |
| SNP_P4_32162_21186823 | NC_021162.1    | Ca_kabuli_chr03 | 21186823                | TT                              | CC              | 1946775483               |
| SNP_P4_32164_21194057 | NC_021162.1    | Ca_kabuli_chr03 | 21194057                | AA                              | GG              | 1946775485               |
| SNP_P4_32166_21298942 | NC_021162.1    | Ca_kabuli_chr03 | 21298942                | CC                              | AA              | 1946775487               |
| SNP_P4_32167_21298961 | NC_021162.1    | Ca_kabuli_chr03 | 21298961                | CC                              | TT              | 1946775490               |
| SNP_P4_32169_21321455 | NC_021162.1    | Ca_kabuli_chr03 | 21321455                | TT                              | CC              | 1946775492               |
| SNP_P4_32170_21321491 | NC_021162.1    | Ca_kabuli_chr03 | 21321491                | AA                              | GG              | 1946775494               |
| SNP_P4_32171_21321534 | NC_021162.1    | Ca_kabuli_chr03 | 21321534                | AA                              | GG              | 1946775496               |
| SNP_P4_32172_21321712 | NC_021162.1    | Ca_kabuli_chr03 | 21321712                | CC                              | TT              | 1946775498               |
| SNP_P4_32173_21322272 | NC_021162.1    | Ca_kabuli_chr03 | 21322272                | GG                              | AA              | 1946775500               |
| SNP_P4_32174_21323594 | NC_021162.1    | Ca_kabuli_chr03 | 21323594                | AA                              | GG              | 1946775502               |
| SNP_P4_32175_21331362 | NC_021162.1    | Ca_kabuli_chr03 | 21331362                | CC                              | TT              | 1946775504               |
| SNP_P4_32176_21331365 | NC_021162.1    | Ca_kabuli_chr03 | 21331365                | TT                              | CC              | 1946775506               |
| SNP_P4_32177_21331803 | NC_021162.1    | Ca_kabuli_chr03 | 21331803                | AA                              | GG              | 1946775508               |
| SNP_P4_32178_21356990 | NC_021162.1    | Ca_kabuli_chr03 | 21356990                | GG                              | TT              | 1946775510               |
| SNP_P4_32179_21357464 | NC_021162.1    | Ca_kabuli_chr03 | 21357464                | TT                              | CC              | 1946775512               |
| SNP_P4_32180_21357474 | NC_021162.1    | Ca_kabuli_chr03 | 21357474                | AA                              | TT              | 1946775515               |
| SNP_P4_32181_21357492 | NC_021162.1    | Ca_kabuli_chr03 | 21357492                | TT                              | CC              | 1946775517               |
| SNP_P4_32182_21357528 | NC_021162.1    | Ca_kabuli_chr03 | 21357528                | AA                              | GG              | 1946775519               |
| SNP_P4_32184_21418395 | NC_021162.1    | Ca_kabuli_chr03 | 21418395                | GG                              | AA              | 1946775521               |
| SNP_P4_32185_21419252 | NC_021162.1    | Ca_kabuli_chr03 | 21419252                | AA                              | GG              | 1946775524               |

| SNPs IDs              | Chromosome IDs | Chromosomes     | Physical positions (bp) | CDC Frontier (Reference genome) | (ILWC46 & LPNB) | NCBI SNPdb Accession IDs |
|-----------------------|----------------|-----------------|-------------------------|---------------------------------|-----------------|--------------------------|
| SNP_P4_32186_21422167 | NC_021162.1    | Ca_kabuli_chr03 | 21422167                | TT                              | GG              | 1946775526               |
| SNP_P4_32187_21422190 | NC_021162.1    | Ca_kabuli_chr03 | 21422190                | TT                              | CC              | 1946775528               |
| SNP_P4_32188_21426672 | NC_021162.1    | Ca_kabuli_chr03 | 21426672                | AA                              | CC              | 1946775530               |
| SNP_P4_32189_21430425 | NC_021162.1    | Ca_kabuli_chr03 | 21430425                | GG                              | CC              | 1946775532               |
| SNP_P4_32191_21481051 | NC_021162.1    | Ca_kabuli_chr03 | 21481051                | AA                              | TT              | 1946775534               |
| SNP_P4_32194_21489653 | NC_021162.1    | Ca_kabuli_chr03 | 21489653                | TT                              | CC              | 1946775536               |
| SNP_P4_32195_21489964 | NC_021162.1    | Ca_kabuli_chr03 | 21489964                | CC                              | TT              | 1946775538               |
| SNP_P4_32196_21517571 | NC_021162.1    | Ca_kabuli_chr03 | 21517571                | CC                              | AA              | 1946775540               |
| SNP_P4_32197_21529582 | NC_021162.1    | Ca_kabuli_chr03 | 21529582                | CC                              | TT              | 1946775543               |
| SNP_P4_32198_21554343 | NC_021162.1    | Ca_kabuli_chr03 | 21554343                | AA                              | GG              | 1946775545               |
| SNP_P4_32199_21583417 | NC_021162.1    | Ca_kabuli_chr03 | 21583417                | CC                              | AA              | 1946775547               |
| SNP_P4_32200_21583495 | NC_021162.1    | Ca_kabuli_chr03 | 21583495                | CC                              | TT              | 1946775550               |
| SNP_P4_32201_21583604 | NC_021162.1    | Ca_kabuli_chr03 | 21583604                | AA                              | TT              | 1946775552               |
| SNP_P4_32202_21583609 | NC_021162.1    | Ca_kabuli_chr03 | 21583609                | TT                              | AA              | 1946775554               |
| SNP_P4_32203_21583610 | NC_021162.1    | Ca_kabuli_chr03 | 21583610                | GG                              | AA              | 1946775556               |
| SNP_P4_32204_21583629 | NC_021162.1    | Ca_kabuli_chr03 | 21583629                | AA                              | TT              | 1946775558               |
| SNP_P4_32205_21583925 | NC_021162.1    | Ca_kabuli_chr03 | 21583925                | TT                              | CC              | 1946775560               |
| SNP_P4_32206_21583945 | NC_021162.1    | Ca_kabuli_chr03 | 21583945                | CC                              | TT              | 1946775563               |
| SNP_P4_32207_21617178 | NC_021162.1    | Ca_kabuli_chr03 | 21617178                | AA                              | GG              | 1946775566               |
| SNP_P4_32208_21635312 | NC_021162.1    | Ca_kabuli_chr03 | 21635312                | AA                              | TT              | 1946775569               |
| SNP_P4_32209_21635387 | NC_021162.1    | Ca_kabuli_chr03 | 21635387                | CC                              | AA              | 1946775572               |
| SNP_P4_32210_21635388 | NC_021162.1    | Ca_kabuli_chr03 | 21635388                | AA                              | TT              | 1946775574               |
| SNP_P4_32211_21635390 | NC_021162.1    | Ca_kabuli_chr03 | 21635390                | AA                              | GG              | 1946775576               |
| SNP_P4_32212_21635417 | NC_021162.1    | Ca_kabuli_chr03 | 21635417                | GG                              | TT              | 1946775578               |
| SNP_P4_32213_21635466 | NC_021162.1    | Ca_kabuli_chr03 | 21635466                | AA                              | GG              | 1946775580               |
| SNP_P4_32215_21635661 | NC_021162.1    | Ca_kabuli_chr03 | 21635661                | GG                              | TT              | 1946775582               |
| SNP_P4_32216_21635673 | NC_021162.1    | Ca_kabuli_chr03 | 21635673                | AA                              | TT              | 1946775584               |
| SNP_P4_32217_21635675 | NC_021162.1    | Ca_kabuli_chr03 | 21635675                | GG                              | AA              | 1946775586               |
| SNP_P4_32218_21635688 | NC_021162.1    | Ca_kabuli_chr03 | 21635688                | AA                              | GG              | 1946775588               |
| SNP_P4_32219_21635744 | NC_021162.1    | Ca_kabuli_chr03 | 21635744                | TT                              | AA              | 1946775590               |
| SNP_P4_32220_21635766 | NC_021162.1    | Ca_kabuli_chr03 | 21635766                | TT                              | CC              | 1946775592               |
| SNP_P4_32221_21635852 | NC_021162.1    | Ca_kabuli_chr03 | 21635852                | GG                              | TT              | 1946775594               |
| SNP_P4_32222_21635859 | NC_021162.1    | Ca_kabuli_chr03 | 21635859                | GG                              | TT              | 1946775596               |
| SNP_P4_32223_21635875 | NC_021162.1    | Ca_kabuli_chr03 | 21635875                | GG                              | AA              | 1946775598               |
| SNP_P4_32225_21636945 | NC_021162.1    | Ca_kabuli_chr03 | 21636945                | CC                              | TT              | 1946775600               |
| SNP_P4_32226_21674619 | NC_021162.1    | Ca_kabuli_chr03 | 21674619                | GG                              | AA              | 1946775602               |
| SNP_P4_32228_21715410 | NC_021162.1    | Ca_kabuli_chr03 | 21715410                | CC                              | GG              | 1946775604               |
| SNP_P4_32229_21722597 | NC_021162.1    | Ca_kabuli_chr03 | 21722597                | AA                              | GG              | 1946775606               |
| SNP_P4_32230_21741769 | NC_021162.1    | Ca_kabuli_chr03 | 21741769                | TT                              | CC              | 1946775608               |
| SNP_P4_32231_21816688 | NC_021162.1    | Ca_kabuli_chr03 | 21816688                | CC                              | TT              | 1946775611               |
| SNP_P4_32232_21818936 | NC_021162.1    | Ca_kabuli_chr03 | 21818936                | CC                              | TT              | 1946775613               |
| SNP_P4_32233_21870718 | NC_021162.1    | Ca_kabuli_chr03 | 21870718                | AA                              | CC              | 1946775615               |

| SNPs IDs              | Chromosome IDs | Chromosomes     | Physical positions (bp) | CDC Frontier (Reference genome) | (ILWC46 & LPNB) | NCBI SNPdb Accession IDs |
|-----------------------|----------------|-----------------|-------------------------|---------------------------------|-----------------|--------------------------|
| SNP_P4_32235_21874649 | NC_021162.1    | Ca_kabuli_chr03 | 21874649                | CC                              | TT              | 1946775617               |
| SNP_P4_32236_21877591 | NC_021162.1    | Ca_kabuli_chr03 | 21877591                | CC                              | TT              | 1946775619               |
| SNP_P4_32237_21880415 | NC_021162.1    | Ca_kabuli_chr03 | 21880415                | TT                              | AA              | 1946775621               |
| SNP_P4_32238_21881092 | NC_021162.1    | Ca_kabuli_chr03 | 21881092                | GG                              | AA              | 1946775623               |
| SNP_P4_32239_21881295 | NC_021162.1    | Ca_kabuli_chr03 | 21881295                | AA                              | GG              | 1946775625               |
| SNP_P4_32240_21881414 | NC_021162.1    | Ca_kabuli_chr03 | 21881414                | AA                              | GG              | 1946775627               |
| SNP_P4_32241_21882109 | NC_021162.1    | Ca_kabuli_chr03 | 21882109                | GG                              | CC              | 1946775629               |
| SNP_P4_32242_21883789 | NC_021162.1    | Ca_kabuli_chr03 | 21883789                | GG                              | AA              | 1946775631               |
| SNP_P4_32243_21885730 | NC_021162.1    | Ca_kabuli_chr03 | 21885730                | GG                              | AA              | 1946775633               |
| SNP_P4_32244_21885772 | NC_021162.1    | Ca_kabuli_chr03 | 21885772                | AA                              | CC              | 1946775635               |
| SNP_P4_32245_21885775 | NC_021162.1    | Ca_kabuli_chr03 | 21885775                | AA                              | GG              | 1946775637               |
| SNP_P4_32246_21886198 | NC_021162.1    | Ca_kabuli_chr03 | 21886198                | GG                              | AA              | 1946775639               |
| SNP_P4_32247_21886602 | NC_021162.1    | Ca_kabuli_chr03 | 21886602                | AA                              | GG              | 1946775642               |
| SNP_P4_32248_21887525 | NC_021162.1    | Ca_kabuli_chr03 | 21887525                | TT                              | GG              | 1946775644               |
| SNP_P4_32249_21887705 | NC_021162.1    | Ca_kabuli_chr03 | 21887705                | GG                              | AA              | 1946775646               |
| SNP_P4_32250_21890831 | NC_021162.1    | Ca_kabuli_chr03 | 21890831                | TT                              | CC              | 1946775648               |
| SNP_P4_32251_21891241 | NC_021162.1    | Ca_kabuli_chr03 | 21891241                | TT                              | GG              | 1946775650               |
| SNP_P4_32252_21891664 | NC_021162.1    | Ca_kabuli_chr03 | 21891664                | TT                              | CC              | 1946775652               |
| SNP_P4_32253_21891697 | NC_021162.1    | Ca_kabuli_chr03 | 21891697                | AA                              | CC              | 1946775654               |
| SNP_P4_32254_21891708 | NC_021162.1    | Ca_kabuli_chr03 | 21891708                | CC                              | TT              | 1946775656               |
| SNP_P4_32255_21891716 | NC_021162.1    | Ca_kabuli_chr03 | 21891716                | AA                              | GG              | 1946775658               |
| SNP_P4_32256_21891764 | NC_021162.1    | Ca_kabuli_chr03 | 21891764                | GG                              | AA              | 1946775660               |
| SNP_P4_32257_21891798 | NC_021162.1    | Ca_kabuli_chr03 | 21891798                | GG                              | TT              | 1946775663               |
| SNP_P4_32258_21892123 | NC_021162.1    | Ca_kabuli_chr03 | 21892123                | AA                              | TT              | 1946775665               |
| SNP_P4_32259_21892130 | NC_021162.1    | Ca_kabuli_chr03 | 21892130                | TT                              | CC              | 1946775667               |
| SNP_P4_32260_21892171 | NC_021162.1    | Ca_kabuli_chr03 | 21892171                | CC                              | TT              | 1946775669               |
| SNP_P4_32262_21893100 | NC_021162.1    | Ca_kabuli_chr03 | 21893100                | GG                              | TT              | 1946775671               |
| SNP_P4_32263_21895702 | NC_021162.1    | Ca_kabuli_chr03 | 21895702                | CC                              | TT              | 1946775673               |
| SNP_P4_32264_21895883 | NC_021162.1    | Ca_kabuli_chr03 | 21895883                | AA                              | TT              | 1946775676               |
| SNP_P4_32266_21898771 | NC_021162.1    | Ca_kabuli_chr03 | 21898771                | AA                              | CC              | 1946775678               |
| SNP_P4_32268_21900017 | NC_021162.1    | Ca_kabuli_chr03 | 21900017                | CC                              | AA              | 1946775680               |
| SNP_P4_32269_21904319 | NC_021162.1    | Ca_kabuli_chr03 | 21904319                | AA                              | GG              | 1946775682               |
| SNP_P4_32270_21904374 | NC_021162.1    | Ca_kabuli_chr03 | 21904374                | AA                              | CC              | 1946775684               |
| SNP_P4_32271_21922688 | NC_021162.1    | Ca_kabuli_chr03 | 21922688                | TT                              | CC              | 1946775686               |
| SNP_P4_32272_21938152 | NC_021162.1    | Ca_kabuli_chr03 | 21938152                | GG                              | AA              | 1946775688               |
| SNP_P4_32273_21945773 | NC_021162.1    | Ca_kabuli_chr03 | 21945773                | AA                              | TT              | 1946775691               |
| SNP_P4_32274_21945774 | NC_021162.1    | Ca_kabuli_chr03 | 21945774                | TT                              | AA              | 1946775693               |
| SNP_P4_32275_21945790 | NC_021162.1    | Ca_kabuli_chr03 | 21945790                | TT                              | CC              | 1946775695               |
| SNP_P4_32276_21955911 | NC_021162.1    | Ca_kabuli_chr03 | 21955911                | AA                              | TT              | 1946775697               |
| SNP_P4_32277_21969565 | NC_021162.1    | Ca_kabuli_chr03 | 21969565                | AA                              | GG              | 1946775699               |
| SNP_P4_32279_21994535 | NC_021162.1    | Ca_kabuli_chr03 | 21994535                | GG                              | AA              | 1946775701               |
| SNP_P4_32280_22010623 | NC_021162.1    | Ca_kabuli_chr03 | 22010623                | GG                              | AA              | 1946775703               |

| SNPs IDs              | Chromosome IDs | Chromosomes     | Physical positions (bp) | CDC Frontier (Reference genome) | (ILWC46 & LPNB) | NCBI SNPdb Accession IDs |
|-----------------------|----------------|-----------------|-------------------------|---------------------------------|-----------------|--------------------------|
| SNP_P4_32281_22010912 | NC_021162.1    | Ca_kabuli_chr03 | 22010912                | GG                              | AA              | 1946775705               |
| SNP_P4_32282_22029335 | NC_021162.1    | Ca_kabuli_chr03 | 22029335                | GG                              | AA              | 1946775707               |
| SNP_P4_32283_22048546 | NC_021162.1    | Ca_kabuli_chr03 | 22048546                | GG                              | AA              | 1946775709               |
| SNP_P4_32284_22071037 | NC_021162.1    | Ca_kabuli_chr03 | 22071037                | GG                              | AA              | 1946775711               |
| SNP_P4_32287_22101038 | NC_021162.1    | Ca_kabuli_chr03 | 22101038                | TT                              | GG              | 1946775713               |
| SNP_P4_32289_22125361 | NC_021162.1    | Ca_kabuli_chr03 | 22125361                | TT                              | CC              | 1946775715               |
| SNP_P4_32290_22125375 | NC_021162.1    | Ca_kabuli_chr03 | 22125375                | AA                              | TT              | 1946775717               |
| SNP_P4_32291_22130178 | NC_021162.1    | Ca_kabuli_chr03 | 22130178                | AA                              | GG              | 1946775720               |
| SNP_P4_32292_22130250 | NC_021162.1    | Ca_kabuli_chr03 | 22130250                | AA                              | GG              | 1946775723               |
| SNP_P4_32293_22130312 | NC_021162.1    | Ca_kabuli_chr03 | 22130312                | CC                              | TT              | 1946775726               |
| SNP_P4_32294_22130333 | NC_021162.1    | Ca_kabuli_chr03 | 22130333                | AA                              | GG              | 1946775728               |
| SNP_P4_32295_22130334 | NC_021162.1    | Ca_kabuli_chr03 | 22130334                | AA                              | GG              | 1946775730               |
| SNP_P4_32296_22130343 | NC_021162.1    | Ca_kabuli_chr03 | 22130343                | GG                              | TT              | 1946775732               |
| SNP_P4_32297_22130356 | NC_021162.1    | Ca_kabuli_chr03 | 22130356                | AA                              | TT              | 1946775734               |
| SNP_P4_32298_22130466 | NC_021162.1    | Ca_kabuli_chr03 | 22130466                | GG                              | AA              | 1946775736               |
| SNP_P4_32299_22130661 | NC_021162.1    | Ca_kabuli_chr03 | 22130661                | GG                              | AA              | 1946775738               |
| SNP_P4_32300_22130682 | NC_021162.1    | Ca_kabuli_chr03 | 22130682                | CC                              | AA              | 1946775740               |
| SNP_P4_32301_22130697 | NC_021162.1    | Ca_kabuli_chr03 | 22130697                | AA                              | GG              | 1946775743               |
| SNP_P4_32302_22130712 | NC_021162.1    | Ca_kabuli_chr03 | 22130712                | AA                              | GG              | 1946775745               |
| SNP_P4_32303_22130751 | NC_021162.1    | Ca_kabuli_chr03 | 22130751                | AA                              | GG              | 1946775747               |
| SNP_P4_32305_22143613 | NC_021162.1    | Ca_kabuli_chr03 | 22143613                | CC                              | TT              | 1946775749               |
| SNP_P4_32306_22145693 | NC_021162.1    | Ca_kabuli_chr03 | 22145693                | GG                              | CC              | 1946775752               |
| SNP_P4_32307_22159469 | NC_021162.1    | Ca_kabuli_chr03 | 22159469                | CC                              | GG              | 1946775754               |
| SNP_P4_32309_22163457 | NC_021162.1    | Ca_kabuli_chr03 | 22163457                | AA                              | GG              | 1946775756               |
| SNP_P4_32311_22214663 | NC_021162.1    | Ca_kabuli_chr03 | 22214663                | CC                              | GG              | 1946775758               |
| SNP_P4_32312_22216617 | NC_021162.1    | Ca_kabuli_chr03 | 22216617                | CC                              | TT              | 1946775760               |
| SNP_P4_32313_22247704 | NC_021162.1    | Ca_kabuli_chr03 | 22247704                | TT                              | AA              | 1946775762               |
| SNP_P4_32314_22293593 | NC_021162.1    | Ca_kabuli_chr03 | 22293593                | CC                              | AA              | 1946775764               |
| SNP_P4_32315_22336945 | NC_021162.1    | Ca_kabuli_chr03 | 22336945                | AA                              | GG              | 1946775767               |
| SNP_P4_32316_22343847 | NC_021162.1    | Ca_kabuli_chr03 | 22343847                | AA                              | CC              | 1946775769               |
| SNP_P4_32320_22413535 | NC_021162.1    | Ca_kabuli_chr03 | 22413535                | AA                              | GG              | 1946775772               |
| SNP_P4_32321_22420648 | NC_021162.1    | Ca_kabuli_chr03 | 22420648                | AA                              | GG              | 1946775774               |
| SNP_P4_32323_22425492 | NC_021162.1    | Ca_kabuli_chr03 | 22425492                | TT                              | CC              | 1946775776               |
| SNP_P4_32324_22425495 | NC_021162.1    | Ca_kabuli_chr03 | 22425495                | AA                              | GG              | 1946775778               |
| SNP_P4_32325_22425948 | NC_021162.1    | Ca_kabuli_chr03 | 22425948                | CC                              | TT              | 1946775780               |
| SNP_P4_32326_22430988 | NC_021162.1    | Ca_kabuli_chr03 | 22430988                | CC                              | TT              | 1946775782               |
| SNP_P4_32328_22438946 | NC_021162.1    | Ca_kabuli_chr03 | 22438946                | TT                              | AA              | 1946775784               |
| SNP_P4_32329_22439155 | NC_021162.1    | Ca_kabuli_chr03 | 22439155                | GG                              | AA              | 1946775786               |
| SNP_P4_32330_22440116 | NC_021162.1    | Ca_kabuli_chr03 | 22440116                | AA                              | TT              | 1946775789               |
| SNP_P4_32331_22440566 | NC_021162.1    | Ca_kabuli_chr03 | 22440566                | AA                              | GG              | 1946775791               |
| SNP_P4_32332_22460133 | NC_021162.1    | Ca_kabuli_chr03 | 22460133                | CC                              | TT              | 1946775793               |
| SNP_P4_32334_22482848 | NC_021162.1    | Ca_kabuli_chr03 | 22482848                | GG                              | AA              | 1946775795               |



| SNPs IDs              | Chromosome IDs | Chromosomes     | Physical positions (bp) | CDC Frontier (Reference genome) | (ILWC46 & LPNB) | NCBI SNPdb Accession IDs |
|-----------------------|----------------|-----------------|-------------------------|---------------------------------|-----------------|--------------------------|
| SNP_P4_32335_22482870 | NC_021162.1    | Ca_kabuli_chr03 | 22482870                | TT                              | CC              | 1946775797               |
| SNP_P4_32336_22483116 | NC_021162.1    | Ca_kabuli_chr03 | 22483116                | TT                              | GG              | 1946775799               |
| SNP_P4_32337_22483384 | NC_021162.1    | Ca_kabuli_chr03 | 22483384                | AA                              | TT              | 1946775801               |
| SNP_P4_32338_22485106 | NC_021162.1    | Ca_kabuli_chr03 | 22485106                | CC                              | AA              | 1946775804               |
| SNP_P4_32340_22490195 | NC_021162.1    | Ca_kabuli_chr03 | 22490195                | AA                              | CC              | 1946775806               |
| SNP_P4_32341_22507196 | NC_021162.1    | Ca_kabuli_chr03 | 22507196                | CC                              | GG              | 1946775808               |
| SNP_P4_32342_22516668 | NC_021162.1    | Ca_kabuli_chr03 | 22516668                | CC                              | TT              | 1946775810               |
| SNP_P4_32343_22522936 | NC_021162.1    | Ca_kabuli_chr03 | 22522936                | CC                              | TT              | 1946775812               |
| SNP_P4_32344_22524452 | NC_021162.1    | Ca_kabuli_chr03 | 22524452                | TT                              | AA              | 1946775814               |
| SNP_P4_32346_22535574 | NC_021162.1    | Ca_kabuli_chr03 | 22535574                | AA                              | GG              | 1946775816               |
| SNP_P4_32347_22538214 | NC_021162.1    | Ca_kabuli_chr03 | 22538214                | GG                              | AA              | 1946775818               |
| SNP_P4_32348_22546856 | NC_021162.1    | Ca_kabuli_chr03 | 22546856                | CC                              | TT              | 1946775820               |
| SNP_P4_32350_22569112 | NC_021162.1    | Ca_kabuli_chr03 | 22569112                | TT                              | GG              | 1946775822               |
| SNP_P4_32351_22587053 | NC_021162.1    | Ca_kabuli_chr03 | 22587053                | AA                              | TT              | 1946775825               |
| SNP_P4_32352_22592899 | NC_021162.1    | Ca_kabuli_chr03 | 22592899                | AA                              | GG              | 1946775827               |
| SNP_P4_32353_22599637 | NC_021162.1    | Ca_kabuli_chr03 | 22599637                | GG                              | AA              | 1946775829               |
| SNP_P4_32354_22615343 | NC_021162.1    | Ca_kabuli_chr03 | 22615343                | TT                              | CC              | 1946775831               |
| SNP_P4_32355_22620559 | NC_021162.1    | Ca_kabuli_chr03 | 22620559                | AA                              | GG              | 1946775834               |
| SNP_P4_32356_22620610 | NC_021162.1    | Ca_kabuli_chr03 | 22620610                | GG                              | AA              | 1946775836               |
| SNP_P4_32357_22628121 | NC_021162.1    | Ca_kabuli_chr03 | 22628121                | AA                              | TT              | 1946775838               |
| SNP_P4_32358_22643994 | NC_021162.1    | Ca_kabuli_chr03 | 22643994                | TT                              | CC              | 1946775840               |
| SNP_P4_32359_22644373 | NC_021162.1    | Ca_kabuli_chr03 | 22644373                | AA                              | GG              | 1946775842               |
| SNP_P4_32360_22679724 | NC_021162.1    | Ca_kabuli_chr03 | 22679724                | TT                              | AA              | 1946775844               |
| SNP_P4_32361_22700046 | NC_021162.1    | Ca_kabuli_chr03 | 22700046                | CC                              | TT              | 1946775846               |
| SNP_P4_32362_22732591 | NC_021162.1    | Ca_kabuli_chr03 | 22732591                | CC                              | TT              | 1946775848               |
| SNP_P4_32363_22742971 | NC_021162.1    | Ca_kabuli_chr03 | 22742971                | GG                              | AA              | 1946775850               |
| SNP_P4_32364_22743150 | NC_021162.1    | Ca_kabuli_chr03 | 22743150                | GG                              | AA              | 1946775853               |
| SNP_P4_32365_22757960 | NC_021162.1    | Ca_kabuli_chr03 | 22757960                | TT                              | CC              | 1946775855               |
| SNP_P4_32366_22762369 | NC_021162.1    | Ca_kabuli_chr03 | 22762369                | CC                              | TT              | 1946775857               |
| SNP_P4_32368_22836776 | NC_021162.1    | Ca_kabuli_chr03 | 22836776                | AA                              | TT              | 1946775859               |
| SNP_P4_32369_22836777 | NC_021162.1    | Ca_kabuli_chr03 | 22836777                | TT                              | AA              | 1946775861               |
| SNP_P4_32370_22838597 | NC_021162.1    | Ca_kabuli_chr03 | 22838597                | TT                              | CC              | 1946775863               |
| SNP_P4_32371_22850671 | NC_021162.1    | Ca_kabuli_chr03 | 22850671                | AA                              | TT              | 1946775865               |
| SNP_P4_32372_22875989 | NC_021162.1    | Ca_kabuli_chr03 | 22875989                | TT                              | CC              | 1946775867               |
| SNP_P4_32373_22907306 | NC_021162.1    | Ca_kabuli_chr03 | 22907306                | GG                              | AA              | 1946775869               |
| SNP_P4_32375_22935147 | NC_021162.1    | Ca_kabuli_chr03 | 22935147                | TT                              | GG              | 1946775871               |
| SNP_P4_32376_22935154 | NC_021162.1    | Ca_kabuli_chr03 | 22935154                | GG                              | AA              | 1946775873               |
| SNP_P4_32377_22948635 | NC_021162.1    | Ca_kabuli_chr03 | 22948635                | AA                              | GG              | 1946775876               |
| SNP_P4_32378_22949984 | NC_021162.1    | Ca_kabuli_chr03 | 22949984                | GG                              | AA              | 1946775878               |
| SNP_P4_32379_22957653 | NC_021162.1    | Ca_kabuli_chr03 | 22957653                | AA                              | GG              | 1946775880               |
| SNP_P4_32380_22964420 | NC_021162.1    | Ca_kabuli_chr03 | 22964420                | AA                              | TT              | 1946775882               |
| SNP_P4_32381_22978506 | NC_021162.1    | Ca_kabuli_chr03 | 22978506                | TT                              | CC              | 1946775884               |

| SNPs IDs              | Chromosome IDs | Chromosomes     | Physical positions (bp) | CDC Frontier (Reference genome) | (ILWC46 & LPNB) | NCBI SNPdb Accession IDs |
|-----------------------|----------------|-----------------|-------------------------|---------------------------------|-----------------|--------------------------|
| SNP_P4_32382_22999646 | NC_021162.1    | Ca_kabuli_chr03 | 22999646                | TT                              | AA              | 1946775886               |
| SNP_P4_32383_23001861 | NC_021162.1    | Ca_kabuli_chr03 | 23001861                | TT                              | GG              | 1946775888               |
| SNP_P4_32384_23002053 | NC_021162.1    | Ca_kabuli_chr03 | 23002053                | CC                              | TT              | 1946775890               |
| SNP_P4_32385_23012928 | NC_021162.1    | Ca_kabuli_chr03 | 23012928                | TT                              | GG              | 1946775892               |
| SNP_P4_32386_23013246 | NC_021162.1    | Ca_kabuli_chr03 | 23013246                | AA                              | TT              | 1946775895               |
| SNP_P4_32387_23013920 | NC_021162.1    | Ca_kabuli_chr03 | 23013920                | GG                              | AA              | 1946775897               |
| SNP_P4_32389_23014136 | NC_021162.1    | Ca_kabuli_chr03 | 23014136                | GG                              | TT              | 1946775899               |
| SNP_P4_32390_23014149 | NC_021162.1    | Ca_kabuli_chr03 | 23014149                | TT                              | GG              | 1946775902               |
| SNP_P4_32391_23014151 | NC_021162.1    | Ca_kabuli_chr03 | 23014151                | TT                              | CC              | 1946775905               |
| SNP_P4_32392_23014152 | NC_021162.1    | Ca_kabuli_chr03 | 23014152                | GG                              | AA              | 1946775907               |
| SNP_P4_32393_23014178 | NC_021162.1    | Ca_kabuli_chr03 | 23014178                | TT                              | AA              | 1946775909               |
| SNP_P4_32394_23014183 | NC_021162.1    | Ca_kabuli_chr03 | 23014183                | GG                              | CC              | 1946775911               |
| SNP_P4_32395_23014194 | NC_021162.1    | Ca_kabuli_chr03 | 23014194                | GG                              | AA              | 1946775913               |
| SNP_P4_32396_23015562 | NC_021162.1    | Ca_kabuli_chr03 | 23015562                | CC                              | AA              | 1946775915               |
| SNP_P4_32398_23016959 | NC_021162.1    | Ca_kabuli_chr03 | 23016959                | CC                              | TT              | 1946775917               |
| SNP_P4_32399_23018703 | NC_021162.1    | Ca_kabuli_chr03 | 23018703                | CC                              | AA              | 1946775919               |
| SNP_P4_32400_23019096 | NC_021162.1    | Ca_kabuli_chr03 | 23019096                | CC                              | TT              | 1946775921               |
| SNP_P4_32401_23019162 | NC_021162.1    | Ca_kabuli_chr03 | 23019162                | AA                              | TT              | 1946775923               |
| SNP_P4_32402_23019184 | NC_021162.1    | Ca_kabuli_chr03 | 23019184                | GG                              | AA              | 1946775925               |
| SNP_P4_32403_23044941 | NC_021162.1    | Ca_kabuli_chr03 | 23044941                | TT                              | GG              | 1946775927               |
| SNP_P4_32404_23044983 | NC_021162.1    | Ca_kabuli_chr03 | 23044983                | GG                              | AA              | 1946775929               |
| SNP_P4_32405_23045312 | NC_021162.1    | Ca_kabuli_chr03 | 23045312                | CC                              | TT              | 1946775931               |
| SNP_P4_32407_23114608 | NC_021162.1    | Ca_kabuli_chr03 | 23114608                | GG                              | AA              | 1946775933               |
| SNP_P4_32408_23129377 | NC_021162.1    | Ca_kabuli_chr03 | 23129377                | AA                              | GG              | 1946775936               |
| SNP_P4_32409_23130460 | NC_021162.1    | Ca_kabuli_chr03 | 23130460                | AA                              | GG              | 1946775938               |
| SNP_P4_32410_23132107 | NC_021162.1    | Ca_kabuli_chr03 | 23132107                | GG                              | AA              | 1946775940               |
| SNP_P4_32411_23132531 | NC_021162.1    | Ca_kabuli_chr03 | 23132531                | AA                              | GG              | 1946775942               |
| SNP_P4_32412_23135272 | NC_021162.1    | Ca_kabuli_chr03 | 23135272                | TT                              | AA              | 1946775944               |
| SNP_P4_32413_23135559 | NC_021162.1    | Ca_kabuli_chr03 | 23135559                | TT                              | GG              | 1946775947               |
| SNP_P4_32416_23186784 | NC_021162.1    | Ca_kabuli_chr03 | 23186784                | CC                              | AA              | 1946775949               |
| SNP_P4_32419_23261243 | NC_021162.1    | Ca_kabuli_chr03 | 23261243                | CC                              | AA              | 1946775951               |
| SNP_P4_32421_23297021 | NC_021162.1    | Ca_kabuli_chr03 | 23297021                | GG                              | AA              | 1946775953               |
| SNP_P4_32422_23297272 | NC_021162.1    | Ca_kabuli_chr03 | 23297272                | AA                              | GG              | 1946775956               |
| SNP_P4_32423_23305981 | NC_021162.1    | Ca_kabuli_chr03 | 23305981                | GG                              | TT              | 1946775958               |
| SNP_P4_32424_23318510 | NC_021162.1    | Ca_kabuli_chr03 | 23318510                | AA                              | TT              | 1946775961               |
| SNP_P4_32425_23329914 | NC_021162.1    | Ca_kabuli_chr03 | 23329914                | GG                              | AA              | 1946775963               |
| SNP_P4_32427_23372846 | NC_021162.1    | Ca_kabuli_chr03 | 23372846                | CC                              | TT              | 1946775966               |
| SNP_P4_32428_23388388 | NC_021162.1    | Ca_kabuli_chr03 | 23388388                | AA                              | TT              | 1946775968               |
| SNP_P4_32429_23424106 | NC_021162.1    | Ca_kabuli_chr03 | 23424106                | GG                              | AA              | 1946775970               |
| SNP_P4_32430_23424149 | NC_021162.1    | Ca_kabuli_chr03 | 23424149                | TT                              | CC              | 1946775972               |
| SNP_P4_32431_23424409 | NC_021162.1    | Ca_kabuli_chr03 | 23424409                | TT                              | GG              | 1946775974               |
| SNP_P4_32432_23432755 | NC_021162.1    | Ca_kabuli_chr03 | 23432755                | TT                              | CC              | 1946775976               |

| SNPs IDs              | Chromosome IDs | Chromosomes     | Physical positions (bp) | CDC Frontier (Reference genome) | (ILWC46 & LPNB) | NCBI SNPdb Accession IDs |
|-----------------------|----------------|-----------------|-------------------------|---------------------------------|-----------------|--------------------------|
| SNP_P4_32433_23432930 | NC_021162.1    | Ca_kabuli_chr03 | 23432930                | AA                              | GG              | 1946775978               |
| SNP_P4_32434_23446725 | NC_021162.1    | Ca_kabuli_chr03 | 23446725                | AA                              | GG              | 1946775981               |
| SNP_P4_32436_23464351 | NC_021162.1    | Ca_kabuli_chr03 | 23464351                | CC                              | TT              | 1946775982               |
| SNP_P4_32437_23484219 | NC_021162.1    | Ca_kabuli_chr03 | 23484219                | CC                              | TT              | 1946775984               |
| SNP_P4_32438_23496729 | NC_021162.1    | Ca_kabuli_chr03 | 23496729                | TT                              | CC              | 1946775986               |
| SNP_P4_32439_23496865 | NC_021162.1    | Ca_kabuli_chr03 | 23496865                | GG                              | AA              | 1946775988               |
| SNP_P4_32442_23539981 | NC_021162.1    | Ca_kabuli_chr03 | 23539981                | TT                              | CC              | 1946775990               |
| SNP_P4_32443_23541882 | NC_021162.1    | Ca_kabuli_chr03 | 23541882                | TT                              | GG              | 1946775993               |
| SNP_P4_32444_23544784 | NC_021162.1    | Ca_kabuli_chr03 | 23544784                | GG                              | TT              | 1946775995               |
| SNP_P4_32445_23544785 | NC_021162.1    | Ca_kabuli_chr03 | 23544785                | TT                              | AA              | 1946775998               |
| SNP_P4_32446_23547289 | NC_021162.1    | Ca_kabuli_chr03 | 23547289                | GG                              | AA              | 1946776000               |
| SNP_P4_32448_23550769 | NC_021162.1    | Ca_kabuli_chr03 | 23550769                | GG                              | CC              | 1946776002               |
| SNP_P4_32449_23563189 | NC_021162.1    | Ca_kabuli_chr03 | 23563189                | AA                              | GG              | 1946776004               |
| SNP_P4_32450_23606300 | NC_021162.1    | Ca_kabuli_chr03 | 23606300                | AA                              | GG              | 1946776006               |
| SNP_P4_32451_23606335 | NC_021162.1    | Ca_kabuli_chr03 | 23606335                | TT                              | CC              | 1946776008               |
| SNP_P4_32452_23606339 | NC_021162.1    | Ca_kabuli_chr03 | 23606339                | TT                              | GG              | 1946776010               |
| SNP_P4_32454_23616218 | NC_021162.1    | Ca_kabuli_chr03 | 23616218                | TT                              | AA              | 1946776012               |
| SNP_P4_32455_23652896 | NC_021162.1    | Ca_kabuli_chr03 | 23652896                | GG                              | AA              | 1946776015               |
| SNP_P4_32457_23654371 | NC_021162.1    | Ca_kabuli_chr03 | 23654371                | AA                              | GG              | 1946776017               |
| SNP_P4_32458_23657840 | NC_021162.1    | Ca_kabuli_chr03 | 23657840                | CC                              | TT              | 1946776019               |
| SNP_P4_32459_23666287 | NC_021162.1    | Ca_kabuli_chr03 | 23666287                | GG                              | AA              | 1946776021               |
| SNP_P4_32460_23682072 | NC_021162.1    | Ca_kabuli_chr03 | 23682072                | CC                              | TT              | 1946776023               |
| SNP_P4_32461_23686357 | NC_021162.1    | Ca_kabuli_chr03 | 23686357                | AA                              | GG              | 1946776025               |
| SNP_P4_32462_23690166 | NC_021162.1    | Ca_kabuli_chr03 | 23690166                | GG                              | AA              | 1946776027               |
| SNP_P4_32463_23703274 | NC_021162.1    | Ca_kabuli_chr03 | 23703274                | AA                              | GG              | 1946776029               |
| SNP_P4_32464_23711816 | NC_021162.1    | Ca_kabuli_chr03 | 23711816                | TT                              | CC              | 1946776031               |
| SNP_P4_32465_23724278 | NC_021162.1    | Ca_kabuli_chr03 | 23724278                | CC                              | TT              | 1946776035               |
| SNP_P4_32466_23734823 | NC_021162.1    | Ca_kabuli_chr03 | 23734823                | GG                              | AA              | 1946776037               |
| SNP_P4_32467_23736501 | NC_021162.1    | Ca_kabuli_chr03 | 23736501                | CC                              | AA              | 1946776039               |
| SNP_P4_32468_23736748 | NC_021162.1    | Ca_kabuli_chr03 | 23736748                | CC                              | AA              | 1946776041               |
| SNP_P4_32469_23737974 | NC_021162.1    | Ca_kabuli_chr03 | 23737974                | CC                              | TT              | 1946776043               |
| SNP_P4_32470_23738006 | NC_021162.1    | Ca_kabuli_chr03 | 23738006                | GG                              | AA              | 1946776045               |
| SNP_P4_32471_23738807 | NC_021162.1    | Ca_kabuli_chr03 | 23738807                | CC                              | TT              | 1946776047               |
| SNP_P4_32472_23738808 | NC_021162.1    | Ca_kabuli_chr03 | 23738808                | AA                              | TT              | 1946776049               |
| SNP_P4_32473_23760956 | NC_021162.1    | Ca_kabuli_chr03 | 23760956                | GG                              | AA              | 1946776051               |
| SNP_P4_32474_23761089 | NC_021162.1    | Ca_kabuli_chr03 | 23761089                | AA                              | GG              | 1946776053               |
| SNP_P4_32475_23761136 | NC_021162.1    | Ca_kabuli_chr03 | 23761136                | TT                              | GG              | 1946776055               |
| SNP_P4_32476_23761575 | NC_021162.1    | Ca_kabuli_chr03 | 23761575                | TT                              | CC              | 1946776057               |
| SNP_P4_32477_23761585 | NC_021162.1    | Ca_kabuli_chr03 | 23761585                | AA                              | CC              | 1946776059               |
| SNP_P4_32478_23794010 | NC_021162.1    | Ca_kabuli_chr03 | 23794010                | GG                              | AA              | 1946776061               |
| SNP_P4_32479_23795665 | NC_021162.1    | Ca_kabuli_chr03 | 23795665                | AA                              | CC              | 1946776063               |
| SNP_P4_32480_23795667 | NC_021162.1    | Ca_kabuli_chr03 | 23795667                | CC                              | TT              | 1946776065               |

| SNPs IDs              | Chromosome IDs | Chromosomes     | Physical positions (bp) | CDC Frontier (Reference genome) | (ILWC46 & LPNB) | NCBI SNPdb Accession IDs |
|-----------------------|----------------|-----------------|-------------------------|---------------------------------|-----------------|--------------------------|
| SNP_P4_32481_23795690 | NC_021162.1    | Ca_kabuli_chr03 | 23795690                | AA                              | TT              | 1946776067               |
| SNP_P4_32482_23795693 | NC_021162.1    | Ca_kabuli_chr03 | 23795693                | GG                              | AA              | 1946776069               |
| SNP_P4_32483_23795694 | NC_021162.1    | Ca_kabuli_chr03 | 23795694                | GG                              | AA              | 1946776071               |
| SNP_P4_32484_23795702 | NC_021162.1    | Ca_kabuli_chr03 | 23795702                | AA                              | GG              | 1946776073               |
| SNP_P4_32485_23805262 | NC_021162.1    | Ca_kabuli_chr03 | 23805262                | CC                              | TT              | 1946776076               |
| SNP_P4_32487_23839485 | NC_021162.1    | Ca_kabuli_chr03 | 23839485                | TT                              | GG              | 1946776078               |
| SNP_P4_32488_23841428 | NC_021162.1    | Ca_kabuli_chr03 | 23841428                | TT                              | CC              | 1946776080               |
| SNP_P4_32489_23854353 | NC_021162.1    | Ca_kabuli_chr03 | 23854353                | AA                              | TT              | 1946776082               |
| SNP_P4_32490_23854742 | NC_021162.1    | Ca_kabuli_chr03 | 23854742                | GG                              | TT              | 1946776084               |
| SNP_P4_32491_23857333 | NC_021162.1    | Ca_kabuli_chr03 | 23857333                | GG                              | TT              | 1946776086               |
| SNP_P4_32492_23858191 | NC_021162.1    | Ca_kabuli_chr03 | 23858191                | TT                              | CC              | 1946776088               |
| SNP_P4_32493_23863491 | NC_021162.1    | Ca_kabuli_chr03 | 23863491                | TT                              | GG              | 1946776090               |
| SNP_P4_32494_23863816 | NC_021162.1    | Ca_kabuli_chr03 | 23863816                | CC                              | AA              | 1946776093               |
| SNP_P4_32497_23885674 | NC_021162.1    | Ca_kabuli_chr03 | 23885674                | CC                              | TT              | 1946776095               |
| SNP_P4_32498_23887445 | NC_021162.1    | Ca_kabuli_chr03 | 23887445                | AA                              | CC              | 1946776097               |
| SNP_P4_32500_23912427 | NC_021162.1    | Ca_kabuli_chr03 | 23912427                | AA                              | GG              | 1946776099               |
| SNP_P4_32501_23945749 | NC_021162.1    | Ca_kabuli_chr03 | 23945749                | AA                              | GG              | 1946776101               |
| SNP_P4_32502_23945795 | NC_021162.1    | Ca_kabuli_chr03 | 23945795                | TT                              | AA              | 1946776103               |
| SNP_P4_32503_23945807 | NC_021162.1    | Ca_kabuli_chr03 | 23945807                | TT                              | AA              | 1946776105               |
| SNP_P4_32504_23945816 | NC_021162.1    | Ca_kabuli_chr03 | 23945816                | GG                              | AA              | 1946776108               |
| SNP_P4_32505_23945828 | NC_021162.1    | Ca_kabuli_chr03 | 23945828                | AA                              | CC              | 1946776110               |
| SNP_P4_32506_23945832 | NC_021162.1    | Ca_kabuli_chr03 | 23945832                | CC                              | TT              | 1946776112               |
| SNP_P4_32507_23945836 | NC_021162.1    | Ca_kabuli_chr03 | 23945836                | GG                              | TT              | 1946776114               |
| SNP_P4_32508_23945874 | NC_021162.1    | Ca_kabuli_chr03 | 23945874                | CC                              | TT              | 1946776116               |
| SNP_P4_32509_23945919 | NC_021162.1    | Ca_kabuli_chr03 | 23945919                | TT                              | GG              | 1946776118               |
| SNP_P4_32510_23945931 | NC_021162.1    | Ca_kabuli_chr03 | 23945931                | AA                              | GG              | 1946776120               |
| SNP_P4_32511_23945963 | NC_021162.1    | Ca_kabuli_chr03 | 23945963                | AA                              | GG              | 1946776122               |
| SNP_P4_32512_23946006 | NC_021162.1    | Ca_kabuli_chr03 | 23946006                | AA                              | GG              | 1946776124               |
| SNP_P4_32513_23946018 | NC_021162.1    | Ca_kabuli_chr03 | 23946018                | GG                              | AA              | 1946776126               |
| SNP_P4_32514_23946041 | NC_021162.1    | Ca_kabuli_chr03 | 23946041                | TT                              | AA              | 1946776127               |
| SNP_P4_32515_23946157 | NC_021162.1    | Ca_kabuli_chr03 | 23946157                | TT                              | GG              | 1946776128               |
| SNP_P4_32516_23946300 | NC_021162.1    | Ca_kabuli_chr03 | 23946300                | TT                              | CC              | 1946776129               |
| SNP_P4_32517_23946301 | NC_021162.1    | Ca_kabuli_chr03 | 23946301                | TT                              | CC              | 1946776130               |
| SNP_P4_32518_23946309 | NC_021162.1    | Ca_kabuli_chr03 | 23946309                | TT                              | GG              | 1946776131               |
| SNP_P4_32519_23946317 | NC_021162.1    | Ca_kabuli_chr03 | 23946317                | GG                              | AA              | 1946776132               |
| SNP_P4_32520_23946416 | NC_021162.1    | Ca_kabuli_chr03 | 23946416                | TT                              | CC              | 1946776133               |
| SNP_P4_32521_23946486 | NC_021162.1    | Ca_kabuli_chr03 | 23946486                | CC                              | TT              | 1946776134               |
| SNP_P4_32522_23948711 | NC_021162.1    | Ca_kabuli_chr03 | 23948711                | AA                              | CC              | 1946776135               |
| SNP_P4_32523_23948970 | NC_021162.1    | Ca_kabuli_chr03 | 23948970                | AA                              | CC              | 1946776136               |
| SNP_P4_32524_23948977 | NC_021162.1    | Ca_kabuli_chr03 | 23948977                | TT                              | GG              | 1946776139               |
| SNP_P4_32525_23949003 | NC_021162.1    | Ca_kabuli_chr03 | 23949003                | TT                              | CC              | 1946776141               |
| SNP_P4_32526_23949010 | NC_021162.1    | Ca_kabuli_chr03 | 23949010                | GG                              | AA              | 1946776143               |

| SNPs IDs              | Chromosome IDs | Chromosomes     | Physical positions (bp) | CDC Frontier (Reference genome) | (ILWC46 & LPNB) | NCBI SNPdb Accession IDs |
|-----------------------|----------------|-----------------|-------------------------|---------------------------------|-----------------|--------------------------|
| SNP_P4_32527_23949012 | NC_021162.1    | Ca_kabuli_chr03 | 23949012                | TT                              | CC              | 1946776145               |
| SNP_P4_32528_23949055 | NC_021162.1    | Ca_kabuli_chr03 | 23949055                | TT                              | CC              | 1946776147               |
| SNP_P4_32529_23949058 | NC_021162.1    | Ca_kabuli_chr03 | 23949058                | TT                              | GG              | 1946776149               |
| SNP_P4_32530_23949059 | NC_021162.1    | Ca_kabuli_chr03 | 23949059                | TT                              | CC              | 1946776151               |
| SNP_P4_32531_23949080 | NC_021162.1    | Ca_kabuli_chr03 | 23949080                | AA                              | GG              | 1946776153               |
| SNP_P4_32532_23949316 | NC_021162.1    | Ca_kabuli_chr03 | 23949316                | TT                              | AA              | 1946776156               |
| SNP_P4_32533_23949364 | NC_021162.1    | Ca_kabuli_chr03 | 23949364                | AA                              | GG              | 1946776158               |
| SNP_P4_32534_23949501 | NC_021162.1    | Ca_kabuli_chr03 | 23949501                | TT                              | CC              | 1946776160               |
| SNP_P4_32535_23949503 | NC_021162.1    | Ca_kabuli_chr03 | 23949503                | TT                              | CC              | 1946776162               |
| SNP_P4_32536_23949510 | NC_021162.1    | Ca_kabuli_chr03 | 23949510                | TT                              | CC              | 1946776164               |
| SNP_P4_32537_23949517 | NC_021162.1    | Ca_kabuli_chr03 | 23949517                | GG                              | AA              | 1946776166               |
| SNP_P4_32538_23949813 | NC_021162.1    | Ca_kabuli_chr03 | 23949813                | CC                              | TT              | 1946776168               |
| SNP_P4_32539_23965230 | NC_021162.1    | Ca_kabuli_chr03 | 23965230                | AA                              | GG              | 1946776171               |
| SNP_P4_32540_23965441 | NC_021162.1    | Ca_kabuli_chr03 | 23965441                | TT                              | AA              | 1946776174               |
| SNP_P4_32541_23992612 | NC_021162.1    | Ca_kabuli_chr03 | 23992612                | AA                              | GG              | 1946776176               |
| SNP_P4_32544_24010837 | NC_021162.1    | Ca_kabuli_chr03 | 24010837                | TT                              | AA              | 1946776178               |
| SNP_P4_32545_24018767 | NC_021162.1    | Ca_kabuli_chr03 | 24018767                | GG                              | TT              | 1946776180               |
| SNP_P4_32546_24032461 | NC_021162.1    | Ca_kabuli_chr03 | 24032461                | CC                              | TT              | 1946776182               |
| SNP_P4_32548_24057480 | NC_021162.1    | Ca_kabuli_chr03 | 24057480                | TT                              | GG              | 1946776184               |
| SNP_P4_32549_24071433 | NC_021162.1    | Ca_kabuli_chr03 | 24071433                | CC                              | AA              | 1946776186               |
| SNP_P4_32550_24082411 | NC_021162.1    | Ca_kabuli_chr03 | 24082411                | TT                              | CC              | 1946776189               |
| SNP_P4_32551_24109797 | NC_021162.1    | Ca_kabuli_chr03 | 24109797                | AA                              | CC              | 1946776191               |
| SNP_P4_32552_24112327 | NC_021162.1    | Ca_kabuli_chr03 | 24112327                | CC                              | TT              | 1946776193               |
| SNP_P4_32553_24112679 | NC_021162.1    | Ca_kabuli_chr03 | 24112679                | TT                              | CC              | 1946776195               |
| SNP_P4_32554_24112686 | NC_021162.1    | Ca_kabuli_chr03 | 24112686                | TT                              | AA              | 1946776197               |
| SNP_P4_32555_24130368 | NC_021162.1    | Ca_kabuli_chr03 | 24130368                | CC                              | TT              | 1946776199               |
| SNP_P4_32556_24135454 | NC_021162.1    | Ca_kabuli_chr03 | 24135454                | AA                              | CC              | 1946776201               |
| SNP_P4_32557_24151582 | NC_021162.1    | Ca_kabuli_chr03 | 24151582                | GG                              | AA              | 1946776203               |
| SNP_P4_32558_24152983 | NC_021162.1    | Ca_kabuli_chr03 | 24152983                | AA                              | TT              | 1946776206               |
| SNP_P4_32559_24156800 | NC_021162.1    | Ca_kabuli_chr03 | 24156800                | AA                              | TT              | 1946776208               |
| SNP_P4_32561_24168024 | NC_021162.1    | Ca_kabuli_chr03 | 24168024                | GG                              | TT              | 1946776210               |
| SNP_P4_32563_24174639 | NC_021162.1    | Ca_kabuli_chr03 | 24174639                | TT                              | GG              | 1946776212               |
| SNP_P4_32564_24174651 | NC_021162.1    | Ca_kabuli_chr03 | 24174651                | AA                              | GG              | 1946776214               |
| SNP_P4_32565_24174652 | NC_021162.1    | Ca_kabuli_chr03 | 24174652                | TT                              | CC              | 1946776216               |
| SNP_P4_32566_24175087 | NC_021162.1    | Ca_kabuli_chr03 | 24175087                | AA                              | TT              | 1946776218               |
| SNP_P4_32567_24175258 | NC_021162.1    | Ca_kabuli_chr03 | 24175258                | TT                              | CC              | 1946776220               |
| SNP_P4_32568_24175270 | NC_021162.1    | Ca_kabuli_chr03 | 24175270                | CC                              | TT              | 1946776222               |
| SNP_P4_32569_24175288 | NC_021162.1    | Ca_kabuli_chr03 | 24175288                | GG                              | AA              | 1946776225               |
| SNP_P4_32570_24177255 | NC_021162.1    | Ca_kabuli_chr03 | 24177255                | CC                              | TT              | 1946776228               |
| SNP_P4_32571_24177338 | NC_021162.1    | Ca_kabuli_chr03 | 24177338                | AA                              | CC              | 1946776230               |
| SNP_P4_32572_24177380 | NC_021162.1    | Ca_kabuli_chr03 | 24177380                | GG                              | TT              | 1946776232               |
| SNP_P4_32573_24177428 | NC_021162.1    | Ca_kabuli_chr03 | 24177428                | GG                              | AA              | 1946776234               |

| SNPs IDs              | Chromosome IDs | Chromosomes     | Physical positions (bp) | CDC Frontier (Reference genome) | (ILWC46 & LPNB) | NCBI SNPdb Accession IDs |
|-----------------------|----------------|-----------------|-------------------------|---------------------------------|-----------------|--------------------------|
| SNP_P4_32574_24177505 | NC_021162.1    | Ca_kabuli_chr03 | 24177505                | TT                              | GG              | 1946776236               |
| SNP_P4_32575_24177730 | NC_021162.1    | Ca_kabuli_chr03 | 24177730                | TT                              | CC              | 1946776238               |
| SNP_P4_32576_24187072 | NC_021162.1    | Ca_kabuli_chr03 | 24187072                | AA                              | GG              | 1946776240               |
| SNP_P4_32577_24187382 | NC_021162.1    | Ca_kabuli_chr03 | 24187382                | GG                              | AA              | 1946776242               |
| SNP_P4_32578_24187403 | NC_021162.1    | Ca_kabuli_chr03 | 24187403                | TT                              | AA              | 1946776244               |
| SNP_P4_32579_24187421 | NC_021162.1    | Ca_kabuli_chr03 | 24187421                | GG                              | AA              | 1946776246               |
| SNP_P4_32580_24187437 | NC_021162.1    | Ca_kabuli_chr03 | 24187437                | TT                              | CC              | 1946776248               |
| SNP_P4_32581_24187451 | NC_021162.1    | Ca_kabuli_chr03 | 24187451                | AA                              | TT              | 1946776251               |
| SNP_P4_32582_24187452 | NC_021162.1    | Ca_kabuli_chr03 | 24187452                | AA                              | GG              | 1946776253               |
| SNP_P4_32583_24187453 | NC_021162.1    | Ca_kabuli_chr03 | 24187453                | AA                              | TT              | 1946776255               |
| SNP_P4_32584_24187457 | NC_021162.1    | Ca_kabuli_chr03 | 24187457                | CC                              | AA              | 1946776257               |
| SNP_P4_32585_24187505 | NC_021162.1    | Ca_kabuli_chr03 | 24187505                | TT                              | AA              | 1946776259               |
| SNP_P4_32586_24187508 | NC_021162.1    | Ca_kabuli_chr03 | 24187508                | CC                              | AA              | 1946776261               |
| SNP_P4_32587_24187519 | NC_021162.1    | Ca_kabuli_chr03 | 24187519                | GG                              | AA              | 1946776263               |
| SNP_P4_32588_24187520 | NC_021162.1    | Ca_kabuli_chr03 | 24187520                | AA                              | GG              | 1946776266               |
| SNP_P4_32589_24187535 | NC_021162.1    | Ca_kabuli_chr03 | 24187535                | GG                              | AA              | 1946776268               |
| SNP_P4_32590_24187540 | NC_021162.1    | Ca_kabuli_chr03 | 24187540                | TT                              | CC              | 1946776270               |
| SNP_P4_32591_24187558 | NC_021162.1    | Ca_kabuli_chr03 | 24187558                | AA                              | CC              | 1946776273               |
| SNP_P4_32592_24187568 | NC_021162.1    | Ca_kabuli_chr03 | 24187568                | GG                              | AA              | 1946776275               |
| SNP_P4_32593_24187571 | NC_021162.1    | Ca_kabuli_chr03 | 24187571                | GG                              | TT              | 1946776277               |
| SNP_P4_32594_24187577 | NC_021162.1    | Ca_kabuli_chr03 | 24187577                | TT                              | AA              | 1946776279               |
| SNP_P4_32595_24187592 | NC_021162.1    | Ca_kabuli_chr03 | 24187592                | AA                              | GG              | 1946776281               |
| SNP_P4_32596_24187595 | NC_021162.1    | Ca_kabuli_chr03 | 24187595                | AA                              | GG              | 1946776283               |
| SNP_P4_32597_24187687 | NC_021162.1    | Ca_kabuli_chr03 | 24187687                | CC                              | AA              | 1946776285               |
| SNP_P4_32599_24187734 | NC_021162.1    | Ca_kabuli_chr03 | 24187734                | TT                              | AA              | 1946776287               |
| SNP_P4_32600_24187746 | NC_021162.1    | Ca_kabuli_chr03 | 24187746                | AA                              | CC              | 1946776289               |
| SNP_P4_32601_24187774 | NC_021162.1    | Ca_kabuli_chr03 | 24187774                | AA                              | TT              | 1946776291               |
| SNP_P4_32602_24187819 | NC_021162.1    | Ca_kabuli_chr03 | 24187819                | TT                              | GG              | 1946776294               |
| SNP_P4_32603_24187821 | NC_021162.1    | Ca_kabuli_chr03 | 24187821                | GG                              | AA              | 1946776296               |
| SNP_P4_32604_24187823 | NC_021162.1    | Ca_kabuli_chr03 | 24187823                | AA                              | GG              | 1946776298               |
| SNP_P4_32605_24187850 | NC_021162.1    | Ca_kabuli_chr03 | 24187850                | AA                              | GG              | 1946776300               |
| SNP_P4_32606_24187853 | NC_021162.1    | Ca_kabuli_chr03 | 24187853                | CC                              | TT              | 1946776303               |
| SNP_P4_32607_24187863 | NC_021162.1    | Ca_kabuli_chr03 | 24187863                | CC                              | TT              | 1946776305               |
| SNP_P4_32608_24187914 | NC_021162.1    | Ca_kabuli_chr03 | 24187914                | AA                              | TT              | 1946776307               |
| SNP_P4_32609_24187915 | NC_021162.1    | Ca_kabuli_chr03 | 24187915                | AA                              | CC              | 1946776309               |
| SNP_P4_32610_24187955 | NC_021162.1    | Ca_kabuli_chr03 | 24187955                | TT                              | CC              | 1946776311               |
| SNP_P4_32611_24187970 | NC_021162.1    | Ca_kabuli_chr03 | 24187970                | AA                              | GG              | 1946776313               |
| SNP_P4_32612_24187995 | NC_021162.1    | Ca_kabuli_chr03 | 24187995                | GG                              | AA              | 1946776315               |
| SNP_P4_32613_24188025 | NC_021162.1    | Ca_kabuli_chr03 | 24188025                | CC                              | TT              | 1946776317               |
| SNP_P4_32614_24188913 | NC_021162.1    | Ca_kabuli_chr03 | 24188913                | CC                              | TT              | 1946776320               |
| SNP_P4_32615_24188972 | NC_021162.1    | Ca_kabuli_chr03 | 24188972                | AA                              | GG              | 1946776322               |
| SNP_P4_32616_24190229 | NC_021162.1    | Ca_kabuli_chr03 | 24190229                | AA                              | GG              | 1946776324               |

| SNPs IDs              | Chromosome IDs | Chromosomes     | Physical positions (bp) | CDC Frontier (Reference genome) | (ILWC46 & LPNB) | NCBI SNPdb Accession IDs |
|-----------------------|----------------|-----------------|-------------------------|---------------------------------|-----------------|--------------------------|
| SNP_P4_32617_24194574 | NC_021162.1    | Ca_kabuli_chr03 | 24194574                | TT                              | CC              | 1946776326               |
| SNP_P4_32618_24199579 | NC_021162.1    | Ca_kabuli_chr03 | 24199579                | GG                              | AA              | 1946776328               |
| SNP_P4_32620_24233126 | NC_021162.1    | Ca_kabuli_chr03 | 24233126                | CC                              | TT              | 1946776330               |
| SNP_P4_32621_24240398 | NC_021162.1    | Ca_kabuli_chr03 | 24240398                | AA                              | GG              | 1946776332               |
| SNP_P4_32622_24243810 | NC_021162.1    | Ca_kabuli_chr03 | 24243810                | TT                              | GG              | 1946776334               |
| SNP_P4_32623_24270461 | NC_021162.1    | Ca_kabuli_chr03 | 24270461                | TT                              | AA              | 1946776336               |
| SNP_P4_32624_24270467 | NC_021162.1    | Ca_kabuli_chr03 | 24270467                | GG                              | TT              | 1946776338               |
| SNP_P4_32625_24270612 | NC_021162.1    | Ca_kabuli_chr03 | 24270612                | CC                              | TT              | 1946776340               |
| SNP_P4_32626_24272821 | NC_021162.1    | Ca_kabuli_chr03 | 24272821                | GG                              | TT              | 1946776342               |
| SNP_P4_32627_24272955 | NC_021162.1    | Ca_kabuli_chr03 | 24272955                | CC                              | AA              | 1946776344               |
| SNP_P4_32629_24272991 | NC_021162.1    | Ca_kabuli_chr03 | 24272991                | AA                              | CC              | 1946776346               |
| SNP_P4_32630_24273004 | NC_021162.1    | Ca_kabuli_chr03 | 24273004                | TT                              | CC              | 1946776348               |
| SNP_P4_32631_24292671 | NC_021162.1    | Ca_kabuli_chr03 | 24292671                | GG                              | AA              | 1946776350               |
| SNP_P4_32632_24295655 | NC_021162.1    | Ca_kabuli_chr03 | 24295655                | AA                              | GG              | 1946776352               |
| SNP_P4_32633_24304844 | NC_021162.1    | Ca_kabuli_chr03 | 24304844                | AA                              | GG              | 1946776354               |
| SNP_P4_32635_24320298 | NC_021162.1    | Ca_kabuli_chr03 | 24320298                | GG                              | AA              | 1946776356               |
| SNP_P4_32636_24342775 | NC_021162.1    | Ca_kabuli_chr03 | 24342775                | TT                              | AA              | 1946776358               |
| SNP_P4_32637_24342777 | NC_021162.1    | Ca_kabuli_chr03 | 24342777                | TT                              | GG              | 1946776361               |
| SNP_P4_32639_24440781 | NC_021162.1    | Ca_kabuli_chr03 | 24440781                | GG                              | CC              | 1946776364               |
| SNP_P4_32641_24454564 | NC_021162.1    | Ca_kabuli_chr03 | 24454564                | CC                              | TT              | 1946776367               |
| SNP_P4_32642_24504163 | NC_021162.1    | Ca_kabuli_chr03 | 24504163                | GG                              | CC              | 1946776369               |
| SNP_P4_32643_24509844 | NC_021162.1    | Ca_kabuli_chr03 | 24509844                | TT                              | GG              | 1946776372               |
| SNP_P4_32644_24509845 | NC_021162.1    | Ca_kabuli_chr03 | 24509845                | TT                              | GG              | 1946776374               |
| SNP_P4_32645_24512151 | NC_021162.1    | Ca_kabuli_chr03 | 24512151                | AA                              | GG              | 1946776376               |
| SNP_P4_32646_24513745 | NC_021162.1    | Ca_kabuli_chr03 | 24513745                | AA                              | CC              | 1946776379               |
| SNP_P4_32647_24513754 | NC_021162.1    | Ca_kabuli_chr03 | 24513754                | CC                              | TT              | 1946776381               |
| SNP_P4_32648_24521396 | NC_021162.1    | Ca_kabuli_chr03 | 24521396                | CC                              | TT              | 1946776383               |
| SNP_P4_32651_24559528 | NC_021162.1    | Ca_kabuli_chr03 | 24559528                | AA                              | GG              | 1946776386               |
| SNP_P4_32652_24561743 | NC_021162.1    | Ca_kabuli_chr03 | 24561743                | AA                              | TT              | 1946776388               |
| SNP_P4_32654_24592813 | NC_021162.1    | Ca_kabuli_chr03 | 24592813                | AA                              | GG              | 1946776390               |
| SNP_P4_32655_24610184 | NC_021162.1    | Ca_kabuli_chr03 | 24610184                | AA                              | TT              | 1946776393               |
| SNP_P4_32656_24613182 | NC_021162.1    | Ca_kabuli_chr03 | 24613182                | AA                              | GG              | 1946776395               |
| SNP_P4_32657_24613524 | NC_021162.1    | Ca_kabuli_chr03 | 24613524                | TT                              | CC              | 1946776398               |
| SNP_P4_32658_24618136 | NC_021162.1    | Ca_kabuli_chr03 | 24618136                | AA                              | CC              | 1946776400               |
| SNP_P4_32659_24649250 | NC_021162.1    | Ca_kabuli_chr03 | 24649250                | GG                              | TT              | 1946776403               |
| SNP_P4_32660_24649252 | NC_021162.1    | Ca_kabuli_chr03 | 24649252                | TT                              | CC              | 1946776405               |
| SNP_P4_32661_24649653 | NC_021162.1    | Ca_kabuli_chr03 | 24649653                | GG                              | AA              | 1946776407               |
| SNP_P4_32662_24650344 | NC_021162.1    | Ca_kabuli_chr03 | 24650344                | TT                              | CC              | 1946776409               |
| SNP_P4_32663_24660952 | NC_021162.1    | Ca_kabuli_chr03 | 24660952                | CC                              | TT              | 1946776412               |
| SNP_P4_32664_24664582 | NC_021162.1    | Ca_kabuli_chr03 | 24664582                | TT                              | GG              | 1946776414               |
| SNP_P4_32665_24679218 | NC_021162.1    | Ca_kabuli_chr03 | 24679218                | CC                              | TT              | 1946776416               |
| SNP_P4_32667_24689042 | NC_021162.1    | Ca_kabuli_chr03 | 24689042                | GG                              | AA              | 1946776418               |

| SNPs IDs              | Chromosome IDs | Chromosomes     | Physical positions (bp) | CDC Frontier (Reference genome) | (ILWC46 & LPNB) | NCBI SNPdb Accession IDs |
|-----------------------|----------------|-----------------|-------------------------|---------------------------------|-----------------|--------------------------|
| SNP_P4_32668_24695420 | NC_021162.1    | Ca_kabuli_chr03 | 24695420                | GG                              | CC              | 1946776420               |
| SNP_P4_32669_24699964 | NC_021162.1    | Ca_kabuli_chr03 | 24699964                | TT                              | CC              | 1946776422               |
| SNP_P4_32670_24703638 | NC_021162.1    | Ca_kabuli_chr03 | 24703638                | CC                              | TT              | 1946776425               |
| SNP_P4_32671_24703675 | NC_021162.1    | Ca_kabuli_chr03 | 24703675                | TT                              | CC              | 1946776427               |
| SNP_P4_32673_24737073 | NC_021162.1    | Ca_kabuli_chr03 | 24737073                | TT                              | CC              | 1946776429               |
| SNP_P4_32674_24737146 | NC_021162.1    | Ca_kabuli_chr03 | 24737146                | CC                              | TT              | 1946776431               |
| SNP_P4_32675_24790087 | NC_021162.1    | Ca_kabuli_chr03 | 24790087                | TT                              | CC              | 1946776433               |
| SNP_P4_32676_24790092 | NC_021162.1    | Ca_kabuli_chr03 | 24790092                | CC                              | TT              | 1946776437               |
| SNP_P4_32678_24791035 | NC_021162.1    | Ca_kabuli_chr03 | 24791035                | GG                              | CC              | 1946776439               |
| SNP_P4_32680_24795684 | NC_021162.1    | Ca_kabuli_chr03 | 24795684                | GG                              | AA              | 1946776441               |
| SNP_P4_32681_24795685 | NC_021162.1    | Ca_kabuli_chr03 | 24795685                | GG                              | AA              | 1946776443               |
| SNP_P4_32682_24795704 | NC_021162.1    | Ca_kabuli_chr03 | 24795704                | GG                              | TT              | 1946776445               |
| SNP_P4_32683_24796017 | NC_021162.1    | Ca_kabuli_chr03 | 24796017                | CC                              | TT              | 1946776447               |
| SNP_P4_32684_24796317 | NC_021162.1    | Ca_kabuli_chr03 | 24796317                | AA                              | GG              | 1946776449               |
| SNP_P4_32685_24796328 | NC_021162.1    | Ca_kabuli_chr03 | 24796328                | AA                              | TT              | 1946776452               |
| SNP_P4_32686_24796347 | NC_021162.1    | Ca_kabuli_chr03 | 24796347                | AA                              | CC              | 1946776454               |
| SNP_P4_32687_24796349 | NC_021162.1    | Ca_kabuli_chr03 | 24796349                | TT                              | CC              | 1946776456               |
| SNP_P4_32688_24796400 | NC_021162.1    | Ca_kabuli_chr03 | 24796400                | TT                              | CC              | 1946776458               |
| SNP_P4_32689_24796488 | NC_021162.1    | Ca_kabuli_chr03 | 24796488                | CC                              | AA              | 1946776460               |
| SNP_P4_32690_24796528 | NC_021162.1    | Ca_kabuli_chr03 | 24796528                | CC                              | TT              | 1946776462               |
| SNP_P4_32691_24796535 | NC_021162.1    | Ca_kabuli_chr03 | 24796535                | AA                              | TT              | 1946776464               |
| SNP_P4_32692_24796575 | NC_021162.1    | Ca_kabuli_chr03 | 24796575                | CC                              | TT              | 1946776466               |
| SNP_P4_32693_24796582 | NC_021162.1    | Ca_kabuli_chr03 | 24796582                | CC                              | AA              | 1946776468               |
| SNP_P4_32694_24796615 | NC_021162.1    | Ca_kabuli_chr03 | 24796615                | AA                              | CC              | 1946776470               |
| SNP_P4_32695_24796655 | NC_021162.1    | Ca_kabuli_chr03 | 24796655                | CC                              | AA              | 1946776472               |
| SNP_P4_32696_24796712 | NC_021162.1    | Ca_kabuli_chr03 | 24796712                | AA                              | TT              | 1946776474               |
| SNP_P4_32697_24796715 | NC_021162.1    | Ca_kabuli_chr03 | 24796715                | CC                              | TT              | 1946776476               |
| SNP_P4_32698_24796756 | NC_021162.1    | Ca_kabuli_chr03 | 24796756                | AA                              | GG              | 1946776478               |
| SNP_P4_32699_24796783 | NC_021162.1    | Ca_kabuli_chr03 | 24796783                | TT                              | AA              | 1946776480               |
| SNP_P4_32700_24796836 | NC_021162.1    | Ca_kabuli_chr03 | 24796836                | CC                              | AA              | 1946776482               |
| SNP_P4_32702_24805939 | NC_021162.1    | Ca_kabuli_chr03 | 24805939                | GG                              | AA              | 1946776484               |
| SNP_P4_32703_24808435 | NC_021162.1    | Ca_kabuli_chr03 | 24808435                | CC                              | TT              | 1946776486               |
| SNP_P4_32705_24832314 | NC_021162.1    | Ca_kabuli_chr03 | 24832314                | TT                              | GG              | 1946776488               |
| SNP_P4_32706_24836070 | NC_021162.1    | Ca_kabuli_chr03 | 24836070                | GG                              | CC              | 1946776490               |
| SNP_P4_32707_24840514 | NC_021162.1    | Ca_kabuli_chr03 | 24840514                | TT                              | GG              | 1946776492               |
| SNP_P4_32708_24849712 | NC_021162.1    | Ca_kabuli_chr03 | 24849712                | GG                              | AA              | 1946776494               |
| SNP_P4_32710_24866232 | NC_021162.1    | Ca_kabuli_chr03 | 24866232                | CC                              | TT              | 1946776496               |
| SNP_P4_32711_24873288 | NC_021162.1    | Ca_kabuli_chr03 | 24873288                | TT                              | CC              | 1946776498               |
| SNP_P4_32712_24877509 | NC_021162.1    | Ca_kabuli_chr03 | 24877509                | AA                              | CC              | 1946776500               |
| SNP_P4_32713_24877513 | NC_021162.1    | Ca_kabuli_chr03 | 24877513                | AA                              | CC              | 1946776502               |
| SNP_P4_32715_24908625 | NC_021162.1    | Ca_kabuli_chr03 | 24908625                | CC                              | TT              | 1946776504               |
| SNP_P4_32716_24909971 | NC_021162.1    | Ca_kabuli_chr03 | 24909971                | AA                              | GG              | 1946776506               |



| SNPs IDs              | Chromosome IDs | Chromosomes     | Physical positions (bp) | CDC Frontier (Reference genome) | (ILWC46 & LPNB) | NCBI SNPdb Accession IDs |
|-----------------------|----------------|-----------------|-------------------------|---------------------------------|-----------------|--------------------------|
| SNP_P4_32718_24940937 | NC_021162.1    | Ca_kabuli_chr03 | 24940937                | CC                              | TT              | 1946776508               |
| SNP_P4_32719_24941338 | NC_021162.1    | Ca_kabuli_chr03 | 24941338                | AA                              | GG              | 1946776510               |
| SNP_P4_32723_25040615 | NC_021162.1    | Ca_kabuli_chr03 | 25040615                | AA                              | GG              | 1946776512               |
| SNP_P4_32724_25040663 | NC_021162.1    | Ca_kabuli_chr03 | 25040663                | GG                              | AA              | 1946776514               |
| SNP_P4_32725_25040673 | NC_021162.1    | Ca_kabuli_chr03 | 25040673                | GG                              | TT              | 1946776516               |
| SNP_P4_32726_25040718 | NC_021162.1    | Ca_kabuli_chr03 | 25040718                | TT                              | CC              | 1946776519               |
| SNP_P4_32727_25040730 | NC_021162.1    | Ca_kabuli_chr03 | 25040730                | AA                              | GG              | 1946776521               |
| SNP_P4_32728_25040745 | NC_021162.1    | Ca_kabuli_chr03 | 25040745                | AA                              | GG              | 1946776523               |
| SNP_P4_32729_25040798 | NC_021162.1    | Ca_kabuli_chr03 | 25040798                | AA                              | GG              | 1946776525               |
| SNP_P4_32730_25040800 | NC_021162.1    | Ca_kabuli_chr03 | 25040800                | AA                              | GG              | 1946776527               |
| SNP_P4_32731_25040827 | NC_021162.1    | Ca_kabuli_chr03 | 25040827                | AA                              | GG              | 1946776529               |
| SNP_P4_32732_25040835 | NC_021162.1    | Ca_kabuli_chr03 | 25040835                | AA                              | TT              | 1946776531               |
| SNP_P4_32733_25040838 | NC_021162.1    | Ca_kabuli_chr03 | 25040838                | TT                              | CC              | 1946776533               |
| SNP_P4_32734_25040844 | NC_021162.1    | Ca_kabuli_chr03 | 25040844                | TT                              | CC              | 1946776536               |
| SNP_P4_32735_25048039 | NC_021162.1    | Ca_kabuli_chr03 | 25048039                | AA                              | CC              | 1946776538               |
| SNP_P4_32736_25057350 | NC_021162.1    | Ca_kabuli_chr03 | 25057350                | AA                              | CC              | 1946776540               |
| SNP_P4_32737_25092680 | NC_021162.1    | Ca_kabuli_chr03 | 25092680                | CC                              | AA              | 1946776542               |
| SNP_P4_32738_25114594 | NC_021162.1    | Ca_kabuli_chr03 | 25114594                | AA                              | GG              | 1946776544               |
| SNP_P4_32739_25124236 | NC_021162.1    | Ca_kabuli_chr03 | 25124236                | CC                              | TT              | 1946776545               |
| SNP_P4_32740_25152469 | NC_021162.1    | Ca_kabuli_chr03 | 25152469                | TT                              | CC              | 1946776547               |
| SNP_P4_32741_25154718 | NC_021162.1    | Ca_kabuli_chr03 | 25154718                | GG                              | TT              | 1946776549               |
| SNP_P4_32742_25155539 | NC_021162.1    | Ca_kabuli_chr03 | 25155539                | AA                              | GG              | 1946776551               |
| SNP_P4_32743_25155625 | NC_021162.1    | Ca_kabuli_chr03 | 25155625                | AA                              | GG              | 1946776553               |
| SNP_P4_32746_25215763 | NC_021162.1    | Ca_kabuli_chr03 | 25215763                | GG                              | AA              | 1946776555               |
| SNP_P4_32748_25247470 | NC_021162.1    | Ca_kabuli_chr03 | 25247470                | CC                              | TT              | 1946776557               |
| SNP_P4_32749_25247530 | NC_021162.1    | Ca_kabuli_chr03 | 25247530                | AA                              | CC              | 1946776559               |
| SNP_P4_32750_25247533 | NC_021162.1    | Ca_kabuli_chr03 | 25247533                | AA                              | TT              | 1946776561               |
| SNP_P4_32751_25264699 | NC_021162.1    | Ca_kabuli_chr03 | 25264699                | TT                              | AA              | 1946776563               |
| SNP_P4_32752_25264702 | NC_021162.1    | Ca_kabuli_chr03 | 25264702                | TT                              | CC              | 1946776565               |
| SNP_P4_32753_25271621 | NC_021162.1    | Ca_kabuli_chr03 | 25271621                | AA                              | GG              | 1946776568               |
| SNP_P4_32754_25289371 | NC_021162.1    | Ca_kabuli_chr03 | 25289371                | CC                              | TT              | 1946776569               |
| SNP_P4_32756_25332021 | NC_021162.1    | Ca_kabuli_chr03 | 25332021                | AA                              | GG              | 1946776571               |
| SNP_P4_32757_25335934 | NC_021162.1    | Ca_kabuli_chr03 | 25335934                | TT                              | CC              | 1946776573               |
| SNP_P4_32758_25354805 | NC_021162.1    | Ca_kabuli_chr03 | 25354805                | CC                              | GG              | 1946776575               |
| SNP_P4_32759_25372830 | NC_021162.1    | Ca_kabuli_chr03 | 25372830                | AA                              | CC              | 1946776577               |
| SNP_P4_32761_25441627 | NC_021162.1    | Ca_kabuli_chr03 | 25441627                | GG                              | AA              | 1946776580               |
| SNP_P4_32762_25490685 | NC_021162.1    | Ca_kabuli_chr03 | 25490685                | TT                              | GG              | 1946776582               |
| SNP_P4_32763_25490686 | NC_021162.1    | Ca_kabuli_chr03 | 25490686                | TT                              | AA              | 1946776584               |
| SNP_P4_32765_25548964 | NC_021162.1    | Ca_kabuli_chr03 | 25548964                | TT                              | GG              | 1946776586               |
| SNP_P4_32766_25582287 | NC_021162.1    | Ca_kabuli_chr03 | 25582287                | CC                              | TT              | 1946776588               |
| SNP_P4_32768_25593117 | NC_021162.1    | Ca_kabuli_chr03 | 25593117                | TT                              | CC              | 1946776590               |
| SNP_P4_32769_25625867 | NC_021162.1    | Ca_kabuli_chr03 | 25625867                | AA                              | GG              | 1946776593               |

| SNPs IDs              | Chromosome IDs | Chromosomes     | Physical positions (bp) | CDC Frontier (Reference genome) | (ILWC46 & LPNB) | NCBI SNPdb Accession IDs |
|-----------------------|----------------|-----------------|-------------------------|---------------------------------|-----------------|--------------------------|
| SNP_P4_32770_25625873 | NC_021162.1    | Ca_kabuli_chr03 | 25625873                | AA                              | GG              | 1946776595               |
| SNP_P4_32771_25625899 | NC_021162.1    | Ca_kabuli_chr03 | 25625899                | GG                              | AA              | 1946776597               |
| SNP_P4_32772_25625908 | NC_021162.1    | Ca_kabuli_chr03 | 25625908                | GG                              | AA              | 1946776599               |
| SNP_P4_32773_25632732 | NC_021162.1    | Ca_kabuli_chr03 | 25632732                | AA                              | TT              | 1946776601               |
| SNP_P4_32774_25663749 | NC_021162.1    | Ca_kabuli_chr03 | 25663749                | GG                              | AA              | 1946776603               |
| SNP_P4_32776_25720624 | NC_021162.1    | Ca_kabuli_chr03 | 25720624                | TT                              | GG              | 1946776605               |
| SNP_P4_32777_25736997 | NC_021162.1    | Ca_kabuli_chr03 | 25736997                | CC                              | TT              | 1946776607               |
| SNP_P4_32778_25764420 | NC_021162.1    | Ca_kabuli_chr03 | 25764420                | TT                              | GG              | 1946776609               |
| SNP_P4_32780_25800717 | NC_021162.1    | Ca_kabuli_chr03 | 25800717                | AA                              | CC              | 1946776610               |
| SNP_P4_32781_25810900 | NC_021162.1    | Ca_kabuli_chr03 | 25810900                | CC                              | TT              | 1946776612               |
| SNP_P4_32782_25811242 | NC_021162.1    | Ca_kabuli_chr03 | 25811242                | TT                              | GG              | 1946776614               |
| SNP_P4_32783_25811254 | NC_021162.1    | Ca_kabuli_chr03 | 25811254                | CC                              | TT              | 1946776615               |
| SNP_P4_32784_25811325 | NC_021162.1    | Ca_kabuli_chr03 | 25811325                | AA                              | TT              | 1946776616               |
| SNP_P4_32785_25827814 | NC_021162.1    | Ca_kabuli_chr03 | 25827814                | TT                              | CC              | 1946776617               |
| SNP_P4_32786_25827863 | NC_021162.1    | Ca_kabuli_chr03 | 25827863                | GG                              | TT              | 1946776619               |
| SNP_P4_32787_25867782 | NC_021162.1    | Ca_kabuli_chr03 | 25867782                | TT                              | AA              | 1946776621               |
| SNP_P4_32788_25872828 | NC_021162.1    | Ca_kabuli_chr03 | 25872828                | AA                              | GG              | 1946776623               |
| SNP_P4_32789_25872829 | NC_021162.1    | Ca_kabuli_chr03 | 25872829                | GG                              | AA              | 1946776625               |
| SNP_P4_32791_25872988 | NC_021162.1    | Ca_kabuli_chr03 | 25872988                | GG                              | AA              | 1946776627               |
| SNP_P4_32792_25885767 | NC_021162.1    | Ca_kabuli_chr03 | 25885767                | TT                              | CC              | 1946776629               |
| SNP_P4_32793_25885789 | NC_021162.1    | Ca_kabuli_chr03 | 25885789                | TT                              | CC              | 1946776631               |
| SNP_P4_32794_25885798 | NC_021162.1    | Ca_kabuli_chr03 | 25885798                | AA                              | GG              | 1946776633               |
| SNP_P4_32795_25886077 | NC_021162.1    | Ca_kabuli_chr03 | 25886077                | AA                              | TT              | 1946776635               |
| SNP_P4_32796_25886087 | NC_021162.1    | Ca_kabuli_chr03 | 25886087                | TT                              | AA              | 1946776638               |
| SNP_P4_32797_25886088 | NC_021162.1    | Ca_kabuli_chr03 | 25886088                | AA                              | TT              | 1946776640               |
| SNP_P4_32798_25886132 | NC_021162.1    | Ca_kabuli_chr03 | 25886132                | CC                              | TT              | 1946776642               |
| SNP_P4_32799_25886289 | NC_021162.1    | Ca_kabuli_chr03 | 25886289                | AA                              | CC              | 1946776644               |
| SNP_P4_32800_25886296 | NC_021162.1    | Ca_kabuli_chr03 | 25886296                | CC                              | TT              | 1946776646               |
| SNP_P4_32801_25886431 | NC_021162.1    | Ca_kabuli_chr03 | 25886431                | GG                              | AA              | 1946776648               |
| SNP_P4_32802_25886606 | NC_021162.1    | Ca_kabuli_chr03 | 25886606                | TT                              | GG              | 1946776650               |
| SNP_P4_32803_25886784 | NC_021162.1    | Ca_kabuli_chr03 | 25886784                | CC                              | GG              | 1946776653               |
| SNP_P4_32805_25888108 | NC_021162.1    | Ca_kabuli_chr03 | 25888108                | CC                              | GG              | 1946776655               |
| SNP_P4_32806_25888172 | NC_021162.1    | Ca_kabuli_chr03 | 25888172                | TT                              | AA              | 1946776657               |
| SNP_P4_32807_25888215 | NC_021162.1    | Ca_kabuli_chr03 | 25888215                | CC                              | TT              | 1946776659               |
| SNP_P4_32808_25888226 | NC_021162.1    | Ca_kabuli_chr03 | 25888226                | TT                              | CC              | 1946776661               |
| SNP_P4_32809_25888289 | NC_021162.1    | Ca_kabuli_chr03 | 25888289                | TT                              | AA              | 1946776664               |
| SNP_P4_32810_25888497 | NC_021162.1    | Ca_kabuli_chr03 | 25888497                | GG                              | AA              | 1946776666               |
| SNP_P4_32811_25888499 | NC_021162.1    | Ca_kabuli_chr03 | 25888499                | AA                              | CC              | 1946776668               |
| SNP_P4_32812_25888504 | NC_021162.1    | Ca_kabuli_chr03 | 25888504                | AA                              | GG              | 1946776670               |
| SNP_P4_32813_25888512 | NC_021162.1    | Ca_kabuli_chr03 | 25888512                | TT                              | CC              | 1946776673               |
| SNP_P4_32814_25888516 | NC_021162.1    | Ca_kabuli_chr03 | 25888516                | GG                              | TT              | 1946776675               |
| SNP_P4_32815_25888573 | NC_021162.1    | Ca_kabuli_chr03 | 25888573                | AA                              | GG              | 1946776677               |

| SNPs IDs              | Chromosome IDs | Chromosomes     | Physical positions (bp) | CDC Frontier (Reference genome) | (ILWC46 & LPNB) | NCBI SNPdb Accession IDs |
|-----------------------|----------------|-----------------|-------------------------|---------------------------------|-----------------|--------------------------|
| SNP_P4_32816_25888585 | NC_021162.1    | Ca_kabuli_chr03 | 25888585                | AA                              | GG              | 1946776679               |
| SNP_P4_32817_25888659 | NC_021162.1    | Ca_kabuli_chr03 | 25888659                | TT                              | AA              | 1946776681               |
| SNP_P4_32818_25888665 | NC_021162.1    | Ca_kabuli_chr03 | 25888665                | AA                              | TT              | 1946776683               |
| SNP_P4_32819_25888698 | NC_021162.1    | Ca_kabuli_chr03 | 25888698                | AA                              | TT              | 1946776685               |
| SNP_P4_32820_25888753 | NC_021162.1    | Ca_kabuli_chr03 | 25888753                | TT                              | GG              | 1946776687               |
| SNP_P4_32822_25888961 | NC_021162.1    | Ca_kabuli_chr03 | 25888961                | TT                              | CC              | 1946776689               |
| SNP_P4_32823_25888970 | NC_021162.1    | Ca_kabuli_chr03 | 25888970                | AA                              | TT              | 1946776692               |
| SNP_P4_32824_25888971 | NC_021162.1    | Ca_kabuli_chr03 | 25888971                | CC                              | AA              | 1946776694               |
| SNP_P4_32825_25888986 | NC_021162.1    | Ca_kabuli_chr03 | 25888986                | GG                              | AA              | 1946776696               |
| SNP_P4_32826_25889053 | NC_021162.1    | Ca_kabuli_chr03 | 25889053                | TT                              | CC              | 1946776698               |
| SNP_P4_32827_25889085 | NC_021162.1    | Ca_kabuli_chr03 | 25889085                | AA                              | GG              | 1946776700               |
| SNP_P4_32829_25889157 | NC_021162.1    | Ca_kabuli_chr03 | 25889157                | CC                              | TT              | 1946776702               |
| SNP_P4_32830_25889158 | NC_021162.1    | Ca_kabuli_chr03 | 25889158                | AA                              | TT              | 1946776704               |
| SNP_P4_32831_25889383 | NC_021162.1    | Ca_kabuli_chr03 | 25889383                | TT                              | CC              | 1946776706               |
| SNP_P4_32832_25889389 | NC_021162.1    | Ca_kabuli_chr03 | 25889389                | CC                              | TT              | 1946776709               |
| SNP_P4_32833_25889398 | NC_021162.1    | Ca_kabuli_chr03 | 25889398                | AA                              | TT              | 1946776711               |
| SNP_P4_32834_25889405 | NC_021162.1    | Ca_kabuli_chr03 | 25889405                | CC                              | AA              | 1946776713               |
| SNP_P4_32835_25889416 | NC_021162.1    | Ca_kabuli_chr03 | 25889416                | TT                              | GG              | 1946776715               |
| SNP_P4_32836_25889604 | NC_021162.1    | Ca_kabuli_chr03 | 25889604                | AA                              | TT              | 1946776717               |
| SNP_P4_32837_25889605 | NC_021162.1    | Ca_kabuli_chr03 | 25889605                | TT                              | AA              | 1946776719               |
| SNP_P4_32839_25889650 | NC_021162.1    | Ca_kabuli_chr03 | 25889650                | GG                              | AA              | 1946776721               |
| SNP_P4_32840_25889680 | NC_021162.1    | Ca_kabuli_chr03 | 25889680                | AA                              | CC              | 1946776723               |
| SNP_P4_32842_25890434 | NC_021162.1    | Ca_kabuli_chr03 | 25890434                | TT                              | AA              | 1946776726               |
| SNP_P4_32843_25890469 | NC_021162.1    | Ca_kabuli_chr03 | 25890469                | AA                              | CC              | 1946776728               |
| SNP_P4_32844_25890789 | NC_021162.1    | Ca_kabuli_chr03 | 25890789                | AA                              | TT              | 1946776730               |
| SNP_P4_32845_25891463 | NC_021162.1    | Ca_kabuli_chr03 | 25891463                | AA                              | CC              | 1946776732               |
| SNP_P4_32846_25891464 | NC_021162.1    | Ca_kabuli_chr03 | 25891464                | TT                              | GG              | 1946776734               |
| SNP_P4_32847_25891471 | NC_021162.1    | Ca_kabuli_chr03 | 25891471                | TT                              | AA              | 1946776736               |
| SNP_P4_32848_25891916 | NC_021162.1    | Ca_kabuli_chr03 | 25891916                | GG                              | AA              | 1946776738               |
| SNP_P4_32849_25892027 | NC_021162.1    | Ca_kabuli_chr03 | 25892027                | TT                              | CC              | 1946776740               |
| SNP_P4_32850_25905935 | NC_021162.1    | Ca_kabuli_chr03 | 25905935                | AA                              | CC              | 1946776742               |
| SNP_P4_32851_25905936 | NC_021162.1    | Ca_kabuli_chr03 | 25905936                | AA                              | GG              | 1946776745               |
| SNP_P4_32853_25908993 | NC_021162.1    | Ca_kabuli_chr03 | 25908993                | GG                              | AA              | 1946776747               |
| SNP_P4_32855_25946409 | NC_021162.1    | Ca_kabuli_chr03 | 25946409                | GG                              | TT              | 1946776749               |
| SNP_P4_32856_25948982 | NC_021162.1    | Ca_kabuli_chr03 | 25948982                | GG                              | AA              | 1946776751               |
| SNP_P4_32858_25966751 | NC_021162.1    | Ca_kabuli_chr03 | 25966751                | AA                              | TT              | 1946776753               |
| SNP_P4_32859_25966757 | NC_021162.1    | Ca_kabuli_chr03 | 25966757                | GG                              | TT              | 1946776755               |
| SNP_P4_32860_25971833 | NC_021162.1    | Ca_kabuli_chr03 | 25971833                | AA                              | GG              | 1946776757               |
| SNP_P4_32861_25971852 | NC_021162.1    | Ca_kabuli_chr03 | 25971852                | TT                              | CC              | 1946776759               |
| SNP_P4_32862_25971861 | NC_021162.1    | Ca_kabuli_chr03 | 25971861                | AA                              | GG              | 1946776761               |
| SNP_P4_32863_25971878 | NC_021162.1    | Ca_kabuli_chr03 | 25971878                | TT                              | AA              | 1946776764               |
| SNP_P4_32864_25971933 | NC_021162.1    | Ca_kabuli_chr03 | 25971933                | AA                              | CC              | 1946776766               |

| SNPs IDs              | Chromosome IDs | Chromosomes     | Physical positions (bp) | CDC Frontier (Reference genome) | (ILWC46 & LPNB) | NCBI SNPdb Accession IDs |
|-----------------------|----------------|-----------------|-------------------------|---------------------------------|-----------------|--------------------------|
| SNP_P4_32865_25972042 | NC_021162.1    | Ca_kabuli_chr03 | 25972042                | TT                              | CC              | 1946776768               |
| SNP_P4_32866_25972161 | NC_021162.1    | Ca_kabuli_chr03 | 25972161                | AA                              | GG              | 1946776770               |
| SNP_P4_32867_25972178 | NC_021162.1    | Ca_kabuli_chr03 | 25972178                | AA                              | GG              | 1946776772               |
| SNP_P4_32868_25972211 | NC_021162.1    | Ca_kabuli_chr03 | 25972211                | TT                              | CC              | 1946776775               |
| SNP_P4_32869_25972233 | NC_021162.1    | Ca_kabuli_chr03 | 25972233                | AA                              | CC              | 1946776777               |
| SNP_P4_32870_25972250 | NC_021162.1    | Ca_kabuli_chr03 | 25972250                | TT                              | GG              | 1946776779               |
| SNP_P4_32871_25972368 | NC_021162.1    | Ca_kabuli_chr03 | 25972368                | AA                              | GG              | 1946776781               |
| SNP_P4_32872_25972426 | NC_021162.1    | Ca_kabuli_chr03 | 25972426                | AA                              | GG              | 1946776783               |
| SNP_P4_32873_25972441 | NC_021162.1    | Ca_kabuli_chr03 | 25972441                | AA                              | GG              | 1946776786               |
| SNP_P4_32874_25972442 | NC_021162.1    | Ca_kabuli_chr03 | 25972442                | TT                              | GG              | 1946776788               |
| SNP_P4_32875_25972449 | NC_021162.1    | Ca_kabuli_chr03 | 25972449                | TT                              | CC              | 1946776790               |
| SNP_P4_32876_26014078 | NC_021162.1    | Ca_kabuli_chr03 | 26014078                | AA                              | GG              | 1946776792               |
| SNP_P4_32877_26014324 | NC_021162.1    | Ca_kabuli_chr03 | 26014324                | AA                              | TT              | 1946776794               |
| SNP_P4_32878_26014355 | NC_021162.1    | Ca_kabuli_chr03 | 26014355                | GG                              | AA              | 1946776796               |
| SNP_P4_32879_26018180 | NC_021162.1    | Ca_kabuli_chr03 | 26018180                | TT                              | CC              | 1946776799               |
| SNP_P4_32881_26037029 | NC_021162.1    | Ca_kabuli_chr03 | 26037029                | AA                              | TT              | 1946776801               |
| SNP_P4_32882_26037030 | NC_021162.1    | Ca_kabuli_chr03 | 26037030                | AA                              | GG              | 1946776803               |
| SNP_P4_32883_26042309 | NC_021162.1    | Ca_kabuli_chr03 | 26042309                | CC                              | TT              | 1946776805               |
| SNP_P4_32884_26042318 | NC_021162.1    | Ca_kabuli_chr03 | 26042318                | TT                              | CC              | 1946776807               |
| SNP_P4_32885_26042359 | NC_021162.1    | Ca_kabuli_chr03 | 26042359                | TT                              | AA              | 1946776809               |
| SNP_P4_32886_26042366 | NC_021162.1    | Ca_kabuli_chr03 | 26042366                | TT                              | CC              | 1946776811               |
| SNP_P4_32887_26042436 | NC_021162.1    | Ca_kabuli_chr03 | 26042436                | CC                              | AA              | 1946776813               |
| SNP_P4_32888_26042447 | NC_021162.1    | Ca_kabuli_chr03 | 26042447                | TT                              | AA              | 1946776815               |
| SNP_P4_32889_26042477 | NC_021162.1    | Ca_kabuli_chr03 | 26042477                | TT                              | CC              | 1946776817               |
| SNP_P4_32890_26042480 | NC_021162.1    | Ca_kabuli_chr03 | 26042480                | CC                              | TT              | 1946776819               |
| SNP_P4_32891_26042549 | NC_021162.1    | Ca_kabuli_chr03 | 26042549                | AA                              | CC              | 1946776821               |
| SNP_P4_32892_26043767 | NC_021162.1    | Ca_kabuli_chr03 | 26043767                | TT                              | CC              | 1946776823               |
| SNP_P4_32893_26043779 | NC_021162.1    | Ca_kabuli_chr03 | 26043779                | AA                              | GG              | 1946776825               |
| SNP_P4_32894_26070622 | NC_021162.1    | Ca_kabuli_chr03 | 26070622                | TT                              | GG              | 1946776828               |
| SNP_P4_32895_26070813 | NC_021162.1    | Ca_kabuli_chr03 | 26070813                | AA                              | TT              | 1946776830               |
| SNP_P4_32896_26071489 | NC_021162.1    | Ca_kabuli_chr03 | 26071489                | CC                              | GG              | 1946776832               |
| SNP_P4_32897_26071524 | NC_021162.1    | Ca_kabuli_chr03 | 26071524                | GG                              | CC              | 1946776834               |
| SNP_P4_32898_26071763 | NC_021162.1    | Ca_kabuli_chr03 | 26071763                | GG                              | CC              | 1946776837               |
| SNP_P4_32899_26071805 | NC_021162.1    | Ca_kabuli_chr03 | 26071805                | GG                              | AA              | 1946776839               |
| SNP_P4_32901_26071929 | NC_021162.1    | Ca_kabuli_chr03 | 26071929                | AA                              | CC              | 1946776841               |
| SNP_P4_32902_26071936 | NC_021162.1    | Ca_kabuli_chr03 | 26071936                | GG                              | AA              | 1946776843               |
| SNP_P4_32903_26071972 | NC_021162.1    | Ca_kabuli_chr03 | 26071972                | TT                              | GG              | 1946776845               |
| SNP_P4_32904_26074399 | NC_021162.1    | Ca_kabuli_chr03 | 26074399                | AA                              | TT              | 1946776847               |
| SNP_P4_32905_26074424 | NC_021162.1    | Ca_kabuli_chr03 | 26074424                | CC                              | TT              | 1946776849               |
| SNP_P4_32907_26074539 | NC_021162.1    | Ca_kabuli_chr03 | 26074539                | AA                              | GG              | 1946776851               |
| SNP_P4_32908_26074543 | NC_021162.1    | Ca_kabuli_chr03 | 26074543                | TT                              | CC              | 1946776853               |
| SNP_P4_32909_26074610 | NC_021162.1    | Ca_kabuli_chr03 | 26074610                | AA                              | TT              | 1946776855               |

| SNPs IDs              | Chromosome IDs | Chromosomes     | Physical positions (bp) | CDC Frontier (Reference genome) | (ILWC46 & LPNB) | NCBI SNPdb Accession IDs |
|-----------------------|----------------|-----------------|-------------------------|---------------------------------|-----------------|--------------------------|
| SNP_P4_32910_26074614 | NC_021162.1    | Ca_kabuli_chr03 | 26074614                | TT                              | GG              | 1946776857               |
| SNP_P4_32912_26101073 | NC_021162.1    | Ca_kabuli_chr03 | 26101073                | TT                              | CC              | 1946776859               |
| SNP_P4_32913_26101092 | NC_021162.1    | Ca_kabuli_chr03 | 26101092                | CC                              | TT              | 1946776861               |
| SNP_P4_32914_26101098 | NC_021162.1    | Ca_kabuli_chr03 | 26101098                | AA                              | TT              | 1946776863               |
| SNP_P4_32915_26101105 | NC_021162.1    | Ca_kabuli_chr03 | 26101105                | AA                              | GG              | 1946776865               |
| SNP_P4_32916_26101111 | NC_021162.1    | Ca_kabuli_chr03 | 26101111                | AA                              | CC              | 1946776867               |
| SNP_P4_32917_26101366 | NC_021162.1    | Ca_kabuli_chr03 | 26101366                | GG                              | CC              | 1946776869               |
| SNP_P4_32918_26101750 | NC_021162.1    | Ca_kabuli_chr03 | 26101750                | AA                              | TT              | 1946776871               |
| SNP_P4_32919_26102048 | NC_021162.1    | Ca_kabuli_chr03 | 26102048                | CC                              | TT              | 1946776873               |
| SNP_P4_32920_26102900 | NC_021162.1    | Ca_kabuli_chr03 | 26102900                | GG                              | AA              | 1946776875               |
| SNP_P4_32922_26103611 | NC_021162.1    | Ca_kabuli_chr03 | 26103611                | GG                              | TT              | 1946776878               |
| SNP_P4_32923_26103641 | NC_021162.1    | Ca_kabuli_chr03 | 26103641                | GG                              | AA              | 1946776880               |
| SNP_P4_32924_26103672 | NC_021162.1    | Ca_kabuli_chr03 | 26103672                | TT                              | CC              | 1946776882               |
| SNP_P4_32926_26114539 | NC_021162.1    | Ca_kabuli_chr03 | 26114539                | CC                              | GG              | 1946776884               |
| SNP_P4_32927_26114858 | NC_021162.1    | Ca_kabuli_chr03 | 26114858                | CC                              | TT              | 1946776886               |
| SNP_P4_32929_26114967 | NC_021162.1    | Ca_kabuli_chr03 | 26114967                | CC                              | TT              | 1946776888               |
| SNP_P4_32930_26114972 | NC_021162.1    | Ca_kabuli_chr03 | 26114972                | AA                              | TT              | 1946776890               |
| SNP_P4_32932_26115036 | NC_021162.1    | Ca_kabuli_chr03 | 26115036                | AA                              | GG              | 1946776892               |
| SNP_P4_32933_26115051 | NC_021162.1    | Ca_kabuli_chr03 | 26115051                | GG                              | CC              | 1946776894               |
| SNP_P4_32934_26115162 | NC_021162.1    | Ca_kabuli_chr03 | 26115162                | AA                              | TT              | 1946776896               |
| SNP_P4_32935_26115199 | NC_021162.1    | Ca_kabuli_chr03 | 26115199                | TT                              | AA              | 1946776898               |
| SNP_P4_32936_26115202 | NC_021162.1    | Ca_kabuli_chr03 | 26115202                | CC                              | GG              | 1946776900               |
| SNP_P4_32937_26115226 | NC_021162.1    | Ca_kabuli_chr03 | 26115226                | AA                              | TT              | 1946776902               |
| SNP_P4_32938_26115322 | NC_021162.1    | Ca_kabuli_chr03 | 26115322                | TT                              | AA              | 1946776904               |
| SNP_P4_32939_26115384 | NC_021162.1    | Ca_kabuli_chr03 | 26115384                | AA                              | TT              | 1946776906               |
| SNP_P4_32940_26115435 | NC_021162.1    | Ca_kabuli_chr03 | 26115435                | TT                              | GG              | 1946776908               |
| SNP_P4_32941_26115543 | NC_021162.1    | Ca_kabuli_chr03 | 26115543                | GG                              | AA              | 1946776910               |
| SNP_P4_32942_26115748 | NC_021162.1    | Ca_kabuli_chr03 | 26115748                | AA                              | TT              | 1946776912               |
| SNP_P4_32943_26115961 | NC_021162.1    | Ca_kabuli_chr03 | 26115961                | AA                              | GG              | 1946776914               |
| SNP_P4_32944_26116007 | NC_021162.1    | Ca_kabuli_chr03 | 26116007                | TT                              | GG              | 1946776916               |
| SNP_P4_32945_26116011 | NC_021162.1    | Ca_kabuli_chr03 | 26116011                | TT                              | CC              | 1946776918               |
| SNP_P4_32946_26117807 | NC_021162.1    | Ca_kabuli_chr03 | 26117807                | TT                              | AA              | 1946776920               |
| SNP_P4_32948_26174976 | NC_021162.1    | Ca_kabuli_chr03 | 26174976                | TT                              | CC              | 1946776922               |
| SNP_P4_32949_26177435 | NC_021162.1    | Ca_kabuli_chr03 | 26177435                | CC                              | TT              | 1946776924               |
| SNP_P4_32950_26179921 | NC_021162.1    | Ca_kabuli_chr03 | 26179921                | TT                              | AA              | 1946776926               |
| SNP_P4_32952_26250231 | NC_021162.1    | Ca_kabuli_chr03 | 26250231                | GG                              | TT              | 1946776928               |
| SNP_P4_32953_26266788 | NC_021162.1    | Ca_kabuli_chr03 | 26266788                | AA                              | TT              | 1946776930               |
| SNP_P4_32954_26351770 | NC_021162.1    | Ca_kabuli_chr03 | 26351770                | AA                              | GG              | 1946776932               |
| SNP_P4_32955_26379025 | NC_021162.1    | Ca_kabuli_chr03 | 26379025                | TT                              | GG              | 1946776934               |
| SNP_P4_32956_26396126 | NC_021162.1    | Ca_kabuli_chr03 | 26396126                | TT                              | GG              | 1946776936               |
| SNP_P4_32957_26396130 | NC_021162.1    | Ca_kabuli_chr03 | 26396130                | TT                              | CC              | 1946776938               |
| SNP_P4_32958_26411747 | NC_021162.1    | Ca_kabuli_chr03 | 26411747                | TT                              | CC              | 1946776940               |

| SNPs IDs              | Chromosome IDs | Chromosomes     | Physical positions (bp) | CDC Frontier (Reference genome) | (ILWC46 & LPNB) | NCBI SNPdb Accession IDs |
|-----------------------|----------------|-----------------|-------------------------|---------------------------------|-----------------|--------------------------|
| SNP_P4_32960_26411988 | NC_021162.1    | Ca_kabuli_chr03 | 26411988                | CC                              | TT              | 1946776942               |
| SNP_P4_32961_26412178 | NC_021162.1    | Ca_kabuli_chr03 | 26412178                | TT                              | GG              | 1946776944               |
| SNP_P4_32962_26412251 | NC_021162.1    | Ca_kabuli_chr03 | 26412251                | GG                              | CC              | 1946776946               |
| SNP_P4_32963_26433193 | NC_021162.1    | Ca_kabuli_chr03 | 26433193                | GG                              | TT              | 1946776948               |
| SNP_P4_32965_26443313 | NC_021162.1    | Ca_kabuli_chr03 | 26443313                | TT                              | GG              | 1946776950               |
| SNP_P4_32966_26443356 | NC_021162.1    | Ca_kabuli_chr03 | 26443356                | GG                              | AA              | 1946776952               |
| SNP_P4_32967_26478729 | NC_021162.1    | Ca_kabuli_chr03 | 26478729                | GG                              | TT              | 1946776954               |
| SNP_P4_32968_26484163 | NC_021162.1    | Ca_kabuli_chr03 | 26484163                | TT                              | CC              | 1946776956               |
| SNP_P4_32969_26484213 | NC_021162.1    | Ca_kabuli_chr03 | 26484213                | AA                              | GG              | 1946776958               |
| SNP_P4_32970_26495314 | NC_021162.1    | Ca_kabuli_chr03 | 26495314                | AA                              | GG              | 1946776960               |
| SNP_P4_32971_26495353 | NC_021162.1    | Ca_kabuli_chr03 | 26495353                | TT                              | CC              | 1946776962               |
| SNP_P4_32972_26495361 | NC_021162.1    | Ca_kabuli_chr03 | 26495361                | TT                              | CC              | 1946776964               |
| SNP_P4_32973_26495556 | NC_021162.1    | Ca_kabuli_chr03 | 26495556                | GG                              | AA              | 1946776966               |
| SNP_P4_32974_26495558 | NC_021162.1    | Ca_kabuli_chr03 | 26495558                | GG                              | AA              | 1946776968               |
| SNP_P4_32975_26495591 | NC_021162.1    | Ca_kabuli_chr03 | 26495591                | AA                              | GG              | 1946776970               |
| SNP_P4_32976_26495621 | NC_021162.1    | Ca_kabuli_chr03 | 26495621                | GG                              | AA              | 1946776972               |
| SNP_P4_32977_26495666 | NC_021162.1    | Ca_kabuli_chr03 | 26495666                | CC                              | TT              | 1946776974               |
| SNP_P4_32978_26495683 | NC_021162.1    | Ca_kabuli_chr03 | 26495683                | TT                              | CC              | 1946776976               |
| SNP_P4_32979_26495685 | NC_021162.1    | Ca_kabuli_chr03 | 26495685                | TT                              | CC              | 1946776978               |
| SNP_P4_32980_26495689 | NC_021162.1    | Ca_kabuli_chr03 | 26495689                | AA                              | TT              | 1946776980               |
| SNP_P4_32981_26495714 | NC_021162.1    | Ca_kabuli_chr03 | 26495714                | TT                              | AA              | 1946776982               |
| SNP_P4_32982_26495766 | NC_021162.1    | Ca_kabuli_chr03 | 26495766                | AA                              | TT              | 1946776984               |
| SNP_P4_32983_26495956 | NC_021162.1    | Ca_kabuli_chr03 | 26495956                | CC                              | TT              | 1946776986               |
| SNP_P4_32984_26496003 | NC_021162.1    | Ca_kabuli_chr03 | 26496003                | AA                              | CC              | 1946776989               |
| SNP_P4_32985_26496120 | NC_021162.1    | Ca_kabuli_chr03 | 26496120                | TT                              | AA              | 1946776991               |
| SNP_P4_32986_26496123 | NC_021162.1    | Ca_kabuli_chr03 | 26496123                | GG                              | AA              | 1946776993               |
| SNP_P4_32987_26496149 | NC_021162.1    | Ca_kabuli_chr03 | 26496149                | AA                              | GG              | 1946776995               |
| SNP_P4_32988_26496154 | NC_021162.1    | Ca_kabuli_chr03 | 26496154                | AA                              | GG              | 1946776997               |
| SNP_P4_32989_26585415 | NC_021162.1    | Ca_kabuli_chr03 | 26585415                | AA                              | CC              | 1946776999               |
| SNP_P4_32990_26648608 | NC_021162.1    | Ca_kabuli_chr03 | 26648608                | GG                              | AA              | 1946777001               |
| SNP_P4_32991_26686647 | NC_021162.1    | Ca_kabuli_chr03 | 26686647                | TT                              | GG              | 1946777003               |
| SNP_P4_32992_26686950 | NC_021162.1    | Ca_kabuli_chr03 | 26686950                | CC                              | TT              | 1946777005               |
| SNP_P4_32994_26707690 | NC_021162.1    | Ca_kabuli_chr03 | 26707690                | TT                              | CC              | 1946777007               |
| SNP_P4_32995_26707753 | NC_021162.1    | Ca_kabuli_chr03 | 26707753                | CC                              | GG              | 1946777009               |
| SNP_P4_32996_26708079 | NC_021162.1    | Ca_kabuli_chr03 | 26708079                | TT                              | GG              | 1946777011               |
| SNP_P4_32997_26708087 | NC_021162.1    | Ca_kabuli_chr03 | 26708087                | CC                              | AA              | 1946777013               |
| SNP_P4_32999_26777114 | NC_021162.1    | Ca_kabuli_chr03 | 26777114                | GG                              | CC              | 1946777015               |
| SNP_P4_33000_26777125 | NC_021162.1    | Ca_kabuli_chr03 | 26777125                | AA                              | GG              | 1946777017               |
| SNP_P4_33002_26785180 | NC_021162.1    | Ca_kabuli_chr03 | 26785180                | AA                              | CC              | 1946777019               |
| SNP_P4_33003_26803025 | NC_021162.1    | Ca_kabuli_chr03 | 26803025                | CC                              | TT              | 1946777021               |
| SNP_P4_33005_26838231 | NC_021162.1    | Ca_kabuli_chr03 | 26838231                | GG                              | AA              | 1946777023               |
| SNP_P4_33006_26857997 | NC_021162.1    | Ca_kabuli_chr03 | 26857997                | CC                              | TT              | 1946777025               |

| SNPs IDs              | Chromosome IDs | Chromosomes     | Physical positions (bp) | CDC Frontier (Reference genome) | (ILWC46 & LPNB) | NCBI SNPdb Accession IDs |
|-----------------------|----------------|-----------------|-------------------------|---------------------------------|-----------------|--------------------------|
| SNP_P4_33008_26875885 | NC_021162.1    | Ca_kabuli_chr03 | 26875885                | CC                              | GG              | 1946777028               |
| SNP_P4_33009_26897312 | NC_021162.1    | Ca_kabuli_chr03 | 26897312                | CC                              | TT              | 1946777031               |
| SNP_P4_33010_27051571 | NC_021162.1    | Ca_kabuli_chr03 | 27051571                | CC                              | TT              | 1946777033               |
| SNP_P4_33011_27073468 | NC_021162.1    | Ca_kabuli_chr03 | 27073468                | AA                              | GG              | 1946777035               |
| SNP_P4_33013_27073507 | NC_021162.1    | Ca_kabuli_chr03 | 27073507                | TT                              | AA              | 1946777037               |
| SNP_P4_33014_27073585 | NC_021162.1    | Ca_kabuli_chr03 | 27073585                | GG                              | TT              | 1946777039               |
| SNP_P4_33015_27073619 | NC_021162.1    | Ca_kabuli_chr03 | 27073619                | TT                              | GG              | 1946777042               |
| SNP_P4_33016_27073658 | NC_021162.1    | Ca_kabuli_chr03 | 27073658                | TT                              | AA              | 1946777044               |
| SNP_P4_33017_27073779 | NC_021162.1    | Ca_kabuli_chr03 | 27073779                | TT                              | CC              | 1946777046               |
| SNP_P4_33018_27073847 | NC_021162.1    | Ca_kabuli_chr03 | 27073847                | AA                              | GG              | 1946777048               |
| SNP_P4_33019_27073861 | NC_021162.1    | Ca_kabuli_chr03 | 27073861                | CC                              | TT              | 1946777051               |
| SNP_P4_33020_27075484 | NC_021162.1    | Ca_kabuli_chr03 | 27075484                | GG                              | CC              | 1946777053               |
| SNP_P4_33021_27075560 | NC_021162.1    | Ca_kabuli_chr03 | 27075560                | TT                              | CC              | 1946777055               |
| SNP_P4_33022_27077744 | NC_021162.1    | Ca_kabuli_chr03 | 27077744                | AA                              | TT              | 1946777057               |
| SNP_P4_33023_27080519 | NC_021162.1    | Ca_kabuli_chr03 | 27080519                | AA                              | GG              | 1946777059               |
| SNP_P4_33024_27148327 | NC_021162.1    | Ca_kabuli_chr03 | 27148327                | TT                              | CC              | 1946777061               |
| SNP_P4_33025_27148892 | NC_021162.1    | Ca_kabuli_chr03 | 27148892                | TT                              | AA              | 1946777063               |
| SNP_P4_33028_27221910 | NC_021162.1    | Ca_kabuli_chr03 | 27221910                | AA                              | TT              | 1946777065               |
| SNP_P4_33029_27233597 | NC_021162.1    | Ca_kabuli_chr03 | 27233597                | GG                              | AA              | 1946777067               |
| SNP_P4_33030_27238032 | NC_021162.1    | Ca_kabuli_chr03 | 27238032                | TT                              | GG              | 1946777069               |
| SNP_P4_33031_27238879 | NC_021162.1    | Ca_kabuli_chr03 | 27238879                | AA                              | GG              | 1946777071               |
| SNP_P4_33032_27240617 | NC_021162.1    | Ca_kabuli_chr03 | 27240617                | TT                              | CC              | 1946777073               |
| SNP_P4_33033_27240695 | NC_021162.1    | Ca_kabuli_chr03 | 27240695                | GG                              | AA              | 1946777075               |
| SNP_P4_33034_27240708 | NC_021162.1    | Ca_kabuli_chr03 | 27240708                | TT                              | CC              | 1946777077               |
| SNP_P4_33035_27240762 | NC_021162.1    | Ca_kabuli_chr03 | 27240762                | CC                              | GG              | 1946777080               |
| SNP_P4_33036_27240763 | NC_021162.1    | Ca_kabuli_chr03 | 27240763                | AA                              | CC              | 1946777082               |
| SNP_P4_33037_27242649 | NC_021162.1    | Ca_kabuli_chr03 | 27242649                | CC                              | GG              | 1946777084               |
| SNP_P4_33038_27242652 | NC_021162.1    | Ca_kabuli_chr03 | 27242652                | CC                              | TT              | 1946777086               |
| SNP_P4_33039_27242692 | NC_021162.1    | Ca_kabuli_chr03 | 27242692                | CC                              | AA              | 1946777088               |
| SNP_P4_33040_27242716 | NC_021162.1    | Ca_kabuli_chr03 | 27242716                | TT                              | CC              | 1946777090               |
| SNP_P4_33041_27244911 | NC_021162.1    | Ca_kabuli_chr03 | 27244911                | GG                              | CC              | 1946777092               |
| SNP_P4_33042_27245484 | NC_021162.1    | Ca_kabuli_chr03 | 27245484                | GG                              | AA              | 1946777094               |
| SNP_P4_33043_27252086 | NC_021162.1    | Ca_kabuli_chr03 | 27252086                | AA                              | TT              | 1946777096               |
| SNP_P4_33044_27252091 | NC_021162.1    | Ca_kabuli_chr03 | 27252091                | GG                              | CC              | 1946777099               |
| SNP_P4_33045_27252093 | NC_021162.1    | Ca_kabuli_chr03 | 27252093                | GG                              | AA              | 1946777101               |
| SNP_P4_33046_27252135 | NC_021162.1    | Ca_kabuli_chr03 | 27252135                | TT                              | CC              | 1946777103               |
| SNP_P4_33047_27261443 | NC_021162.1    | Ca_kabuli_chr03 | 27261443                | GG                              | CC              | 1946777105               |
| SNP_P4_33049_27282055 | NC_021162.1    | Ca_kabuli_chr03 | 27282055                | AA                              | TT              | 1946777107               |
| SNP_P4_33050_27282766 | NC_021162.1    | Ca_kabuli_chr03 | 27282766                | GG                              | AA              | 1946777109               |
| SNP_P4_33051_27285780 | NC_021162.1    | Ca_kabuli_chr03 | 27285780                | AA                              | CC              | 1946777111               |
| SNP_P4_33052_27291454 | NC_021162.1    | Ca_kabuli_chr03 | 27291454                | GG                              | AA              | 1946777113               |
| SNP_P4_33053_27306870 | NC_021162.1    | Ca_kabuli_chr03 | 27306870                | AA                              | GG              | 1946777115               |

| SNPs IDs              | Chromosome IDs | Chromosomes     | Physical positions (bp) | CDC Frontier (Reference genome) | (ILWC46 & LPNB) | NCBI SNPdb Accession IDs |
|-----------------------|----------------|-----------------|-------------------------|---------------------------------|-----------------|--------------------------|
| SNP_P4_33054_27310665 | NC_021162.1    | Ca_kabuli_chr03 | 27310665                | GG                              | TT              | 1946777117               |
| SNP_P4_33055_27340082 | NC_021162.1    | Ca_kabuli_chr03 | 27340082                | GG                              | AA              | 1946777120               |
| SNP_P4_33056_27345010 | NC_021162.1    | Ca_kabuli_chr03 | 27345010                | TT                              | CC              | 1946777122               |
| SNP_P4_33057_27345014 | NC_021162.1    | Ca_kabuli_chr03 | 27345014                | AA                              | CC              | 1946777124               |
| SNP_P4_33058_27357691 | NC_021162.1    | Ca_kabuli_chr03 | 27357691                | GG                              | AA              | 1946777126               |
| SNP_P4_33059_27362680 | NC_021162.1    | Ca_kabuli_chr03 | 27362680                | TT                              | CC              | 1946777128               |
| SNP_P4_33060_27365797 | NC_021162.1    | Ca_kabuli_chr03 | 27365797                | GG                              | AA              | 1946777130               |
| SNP_P4_33062_27379106 | NC_021162.1    | Ca_kabuli_chr03 | 27379106                | CC                              | GG              | 1946777132               |
| SNP_P4_33063_27379107 | NC_021162.1    | Ca_kabuli_chr03 | 27379107                | AA                              | TT              | 1946777135               |
| SNP_P4_33064_27379149 | NC_021162.1    | Ca_kabuli_chr03 | 27379149                | TT                              | AA              | 1946777137               |
| SNP_P4_33065_27381302 | NC_021162.1    | Ca_kabuli_chr03 | 27381302                | GG                              | CC              | 1946777139               |
| SNP_P4_33066_27414330 | NC_021162.1    | Ca_kabuli_chr03 | 27414330                | CC                              | TT              | 1946777141               |
| SNP_P4_33067_27430856 | NC_021162.1    | Ca_kabuli_chr03 | 27430856                | AA                              | GG              | 1946777143               |
| SNP_P4_33068_27433940 | NC_021162.1    | Ca_kabuli_chr03 | 27433940                | CC                              | TT              | 1946777145               |
| SNP_P4_33069_27496103 | NC_021162.1    | Ca_kabuli_chr03 | 27496103                | AA                              | TT              | 1946777147               |
| SNP_P4_33071_27559317 | NC_021162.1    | Ca_kabuli_chr03 | 27559317                | TT                              | AA              | 1946777149               |
| SNP_P4_33074_27582313 | NC_021162.1    | Ca_kabuli_chr03 | 27582313                | AA                              | TT              | 1946777151               |
| SNP_P4_33075_27582610 | NC_021162.1    | Ca_kabuli_chr03 | 27582610                | CC                              | GG              | 1946777154               |
| SNP_P4_33076_27582645 | NC_021162.1    | Ca_kabuli_chr03 | 27582645                | TT                              | CC              | 1946777156               |
| SNP_P4_33077_27582657 | NC_021162.1    | Ca_kabuli_chr03 | 27582657                | AA                              | TT              | 1946777158               |
| SNP_P4_33078_27582658 | NC_021162.1    | Ca_kabuli_chr03 | 27582658                | AA                              | CC              | 1946777160               |
| SNP_P4_33079_27582664 | NC_021162.1    | Ca_kabuli_chr03 | 27582664                | CC                              | TT              | 1946777162               |
| SNP_P4_33081_27617967 | NC_021162.1    | Ca_kabuli_chr03 | 27617967                | AA                              | GG              | 1946777164               |
| SNP_P4_33082_27629059 | NC_021162.1    | Ca_kabuli_chr03 | 27629059                | CC                              | TT              | 1946777166               |
| SNP_P4_33083_27648605 | NC_021162.1    | Ca_kabuli_chr03 | 27648605                | TT                              | CC              | 1946777169               |
| SNP_P4_33084_27648608 | NC_021162.1    | Ca_kabuli_chr03 | 27648608                | AA                              | CC              | 1946777171               |
| SNP_P4_33085_27668130 | NC_021162.1    | Ca_kabuli_chr03 | 27668130                | TT                              | CC              | 1946777173               |
| SNP_P4_33086_27679549 | NC_021162.1    | Ca_kabuli_chr03 | 27679549                | TT                              | GG              | 1946777175               |
| SNP_P4_33087_27679551 | NC_021162.1    | Ca_kabuli_chr03 | 27679551                | TT                              | GG              | 1946777178               |
| SNP_P4_33088_27690842 | NC_021162.1    | Ca_kabuli_chr03 | 27690842                | TT                              | CC              | 1946777180               |
| SNP_P4_33089_27695675 | NC_021162.1    | Ca_kabuli_chr03 | 27695675                | GG                              | AA              | 1946777182               |
| SNP_P4_33090_27701339 | NC_021162.1    | Ca_kabuli_chr03 | 27701339                | TT                              | CC              | 1946777185               |
| SNP_P4_33091_27726061 | NC_021162.1    | Ca_kabuli_chr03 | 27726061                | TT                              | CC              | 1946777187               |
| SNP_P4_33092_27731814 | NC_021162.1    | Ca_kabuli_chr03 | 27731814                | CC                              | TT              | 1946777189               |
| SNP_P4_33093_27736128 | NC_021162.1    | Ca_kabuli_chr03 | 27736128                | TT                              | AA              | 1946777191               |
| SNP_P4_33095_27794304 | NC_021162.1    | Ca_kabuli_chr03 | 27794304                | AA                              | TT              | 1946777193               |
| SNP_P4_33096_27794465 | NC_021162.1    | Ca_kabuli_chr03 | 27794465                | GG                              | AA              | 1946777195               |
| SNP_P4_33097_27828706 | NC_021162.1    | Ca_kabuli_chr03 | 27828706                | CC                              | TT              | 1946777197               |
| SNP_P4_33098_27836542 | NC_021162.1    | Ca_kabuli_chr03 | 27836542                | AA                              | GG              | 1946777200               |
| SNP_P4_33099_27840598 | NC_021162.1    | Ca_kabuli_chr03 | 27840598                | CC                              | TT              | 1946777202               |
| SNP_P4_33101_27846763 | NC_021162.1    | Ca_kabuli_chr03 | 27846763                | TT                              | CC              | 1946777204               |
| SNP_P4_33102_27849884 | NC_021162.1    | Ca_kabuli_chr03 | 27849884                | TT                              | AA              | 1946777206               |



| SNPs IDs              | Chromosome IDs | Chromosomes     | Physical positions (bp) | CDC Frontier (Reference genome) | (ILWC46 & LPNB) | NCBI SNPdb Accession IDs |
|-----------------------|----------------|-----------------|-------------------------|---------------------------------|-----------------|--------------------------|
| SNP_P4_33103_27853044 | NC_021162.1    | Ca_kabuli_chr03 | 27853044                | AA                              | TT              | 1946777208               |
| SNP_P4_33104_27853050 | NC_021162.1    | Ca_kabuli_chr03 | 27853050                | AA                              | TT              | 1946777210               |
| SNP_P4_33105_27853054 | NC_021162.1    | Ca_kabuli_chr03 | 27853054                | GG                              | AA              | 1946777212               |
| SNP_P4_33106_27853598 | NC_021162.1    | Ca_kabuli_chr03 | 27853598                | CC                              | AA              | 1946777214               |
| SNP_P4_33108_27853957 | NC_021162.1    | Ca_kabuli_chr03 | 27853957                | CC                              | TT              | 1946777217               |
| SNP_P4_33109_27853970 | NC_021162.1    | Ca_kabuli_chr03 | 27853970                | AA                              | TT              | 1946777219               |
| SNP_P4_33110_27854097 | NC_021162.1    | Ca_kabuli_chr03 | 27854097                | GG                              | AA              | 1946777221               |
| SNP_P4_33112_27854215 | NC_021162.1    | Ca_kabuli_chr03 | 27854215                | GG                              | AA              | 1946777223               |
| SNP_P4_33113_27854224 | NC_021162.1    | Ca_kabuli_chr03 | 27854224                | GG                              | AA              | 1946777225               |
| SNP_P4_33114_27854256 | NC_021162.1    | Ca_kabuli_chr03 | 27854256                | AA                              | GG              | 1946777227               |
| SNP_P4_33115_27854270 | NC_021162.1    | Ca_kabuli_chr03 | 27854270                | AA                              | GG              | 1946777229               |
| SNP_P4_33116_27854283 | NC_021162.1    | Ca_kabuli_chr03 | 27854283                | CC                              | TT              | 1946777232               |
| SNP_P4_33117_27854306 | NC_021162.1    | Ca_kabuli_chr03 | 27854306                | GG                              | AA              | 1946777234               |
| SNP_P4_33118_27854352 | NC_021162.1    | Ca_kabuli_chr03 | 27854352                | TT                              | CC              | 1946777236               |
| SNP_P4_33119_27854355 | NC_021162.1    | Ca_kabuli_chr03 | 27854355                | GG                              | AA              | 1946777238               |
| SNP_P4_33120_27854427 | NC_021162.1    | Ca_kabuli_chr03 | 27854427                | TT                              | AA              | 1946777240               |
| SNP_P4_33121_27854555 | NC_021162.1    | Ca_kabuli_chr03 | 27854555                | GG                              | AA              | 1946777242               |
| SNP_P4_33122_27854694 | NC_021162.1    | Ca_kabuli_chr03 | 27854694                | AA                              | GG              | 1946777244               |
| SNP_P4_33123_27854695 | NC_021162.1    | Ca_kabuli_chr03 | 27854695                | AA                              | GG              | 1946777246               |
| SNP_P4_33124_27854731 | NC_021162.1    | Ca_kabuli_chr03 | 27854731                | AA                              | GG              | 1946777249               |
| SNP_P4_33125_27854735 | NC_021162.1    | Ca_kabuli_chr03 | 27854735                | AA                              | GG              | 1946777251               |
| SNP_P4_33126_27854744 | NC_021162.1    | Ca_kabuli_chr03 | 27854744                | GG                              | TT              | 1946777253               |
| SNP_P4_33128_27854816 | NC_021162.1    | Ca_kabuli_chr03 | 27854816                | GG                              | TT              | 1946777255               |
| SNP_P4_33130_27855139 | NC_021162.1    | Ca_kabuli_chr03 | 27855139                | AA                              | CC              | 1946777257               |
| SNP_P4_33131_27855273 | NC_021162.1    | Ca_kabuli_chr03 | 27855273                | GG                              | CC              | 1946777259               |
| SNP_P4_33133_27861236 | NC_021162.1    | Ca_kabuli_chr03 | 27861236                | AA                              | GG              | 1946777261               |
| SNP_P4_33134_27866897 | NC_021162.1    | Ca_kabuli_chr03 | 27866897                | AA                              | CC              | 1946777263               |
| SNP_P4_33135_27866904 | NC_021162.1    | Ca_kabuli_chr03 | 27866904                | TT                              | CC              | 1946777265               |
| SNP_P4_33136_27866950 | NC_021162.1    | Ca_kabuli_chr03 | 27866950                | AA                              | GG              | 1946777268               |
| SNP_P4_33139_27867143 | NC_021162.1    | Ca_kabuli_chr03 | 27867143                | GG                              | TT              | 1946777270               |
| SNP_P4_33140_27867177 | NC_021162.1    | Ca_kabuli_chr03 | 27867177                | AA                              | TT              | 1946777272               |
| SNP_P4_33141_27867189 | NC_021162.1    | Ca_kabuli_chr03 | 27867189                | GG                              | AA              | 1946777274               |
| SNP_P4_33142_27867193 | NC_021162.1    | Ca_kabuli_chr03 | 27867193                | AA                              | TT              | 1946777276               |
| SNP_P4_33143_27869764 | NC_021162.1    | Ca_kabuli_chr03 | 27869764                | TT                              | AA              | 1946777278               |
| SNP_P4_33144_27869836 | NC_021162.1    | Ca_kabuli_chr03 | 27869836                | TT                              | GG              | 1946777281               |
| SNP_P4_33145_27869912 | NC_021162.1    | Ca_kabuli_chr03 | 27869912                | GG                              | AA              | 1946777283               |
| SNP_P4_33146_27870079 | NC_021162.1    | Ca_kabuli_chr03 | 27870079                | TT                              | CC              | 1946777285               |
| SNP_P4_33147_27870132 | NC_021162.1    | Ca_kabuli_chr03 | 27870132                | TT                              | CC              | 1946777288               |
| SNP_P4_33148_27882614 | NC_021162.1    | Ca_kabuli_chr03 | 27882614                | TT                              | GG              | 1946777290               |
| SNP_P4_33149_27882615 | NC_021162.1    | Ca_kabuli_chr03 | 27882615                | AA                              | TT              | 1946777292               |
| SNP_P4_33151_27887405 | NC_021162.1    | Ca_kabuli_chr03 | 27887405                | CC                              | TT              | 1946777294               |
| SNP_P4_33152_27905163 | NC_021162.1    | Ca_kabuli_chr03 | 27905163                | AA                              | TT              | 1946777296               |

| SNPs IDs              | Chromosome IDs | Chromosomes     | Physical positions (bp) | CDC Frontier (Reference genome) | (ILWC46 & LPNB) | NCBI SNPdb Accession IDs |
|-----------------------|----------------|-----------------|-------------------------|---------------------------------|-----------------|--------------------------|
| SNP_P4_33153_27919487 | NC_021162.1    | Ca_kabuli_chr03 | 27919487                | AA                              | TT              | 1946777298               |
| SNP_P4_33154_27939626 | NC_021162.1    | Ca_kabuli_chr03 | 27939626                | GG                              | CC              | 1946777300               |
| SNP_P4_33155_27970929 | NC_021162.1    | Ca_kabuli_chr03 | 27970929                | CC                              | GG              | 1946777302               |
| SNP_P4_33156_27976616 | NC_021162.1    | Ca_kabuli_chr03 | 27976616                | GG                              | AA              | 1946777304               |
| SNP_P4_33157_27994465 | NC_021162.1    | Ca_kabuli_chr03 | 27994465                | AA                              | CC              | 1946777306               |
| SNP_P4_33158_28014298 | NC_021162.1    | Ca_kabuli_chr03 | 28014298                | TT                              | AA              | 1946777308               |
| SNP_P4_33159_28026724 | NC_021162.1    | Ca_kabuli_chr03 | 28026724                | TT                              | CC              | 1946777310               |
| SNP_P4_33160_28026728 | NC_021162.1    | Ca_kabuli_chr03 | 28026728                | AA                              | CC              | 1946777313               |
| SNP_P4_33161_28037729 | NC_021162.1    | Ca_kabuli_chr03 | 28037729                | GG                              | CC              | 1946777315               |
| SNP_P4_33162_28052656 | NC_021162.1    | Ca_kabuli_chr03 | 28052656                | GG                              | AA              | 1946777317               |
| SNP_P4_33163_28052822 | NC_021162.1    | Ca_kabuli_chr03 | 28052822                | CC                              | GG              | 1946777319               |
| SNP_P4_33164_28074907 | NC_021162.1    | Ca_kabuli_chr03 | 28074907                | TT                              | AA              | 1946777321               |
| SNP_P4_33165_28075103 | NC_021162.1    | Ca_kabuli_chr03 | 28075103                | CC                              | TT              | 1946777323               |
| SNP_P4_33166_28104222 | NC_021162.1    | Ca_kabuli_chr03 | 28104222                | GG                              | TT              | 1946777325               |
| SNP_P4_33167_28109606 | NC_021162.1    | Ca_kabuli_chr03 | 28109606                | TT                              | CC              | 1946777328               |
| SNP_P4_33168_28109758 | NC_021162.1    | Ca_kabuli_chr03 | 28109758                | AA                              | GG              | 1946777330               |
| SNP_P4_33170_28167126 | NC_021162.1    | Ca_kabuli_chr03 | 28167126                | AA                              | CC              | 1946777332               |
| SNP_P4_33171_28167576 | NC_021162.1    | Ca_kabuli_chr03 | 28167576                | GG                              | AA              | 1946777334               |
| SNP_P4_33172_28173191 | NC_021162.1    | Ca_kabuli_chr03 | 28173191                | TT                              | CC              | 1946777336               |
| SNP_P4_33173_28173192 | NC_021162.1    | Ca_kabuli_chr03 | 28173192                | AA                              | CC              | 1946777338               |
| SNP_P4_33174_28179523 | NC_021162.1    | Ca_kabuli_chr03 | 28179523                | GG                              | AA              | 1946777340               |
| SNP_P4_33175_28182697 | NC_021162.1    | Ca_kabuli_chr03 | 28182697                | TT                              | CC              | 1946777342               |
| SNP_P4_33176_28184182 | NC_021162.1    | Ca_kabuli_chr03 | 28184182                | AA                              | CC              | 1946777344               |
| SNP_P4_33177_28188148 | NC_021162.1    | Ca_kabuli_chr03 | 28188148                | CC                              | AA              | 1946777348               |
| SNP_P4_33178_28188262 | NC_021162.1    | Ca_kabuli_chr03 | 28188262                | CC                              | TT              | 1946777350               |
| SNP_P4_33180_28188337 | NC_021162.1    | Ca_kabuli_chr03 | 28188337                | GG                              | TT              | 1946777352               |
| SNP_P4_33181_28188406 | NC_021162.1    | Ca_kabuli_chr03 | 28188406                | AA                              | TT              | 1946777354               |
| SNP_P4_33182_28188412 | NC_021162.1    | Ca_kabuli_chr03 | 28188412                | GG                              | AA              | 1946777356               |
| SNP_P4_33184_28188447 | NC_021162.1    | Ca_kabuli_chr03 | 28188447                | TT                              | AA              | 1946777359               |
| SNP_P4_33185_28188761 | NC_021162.1    | Ca_kabuli_chr03 | 28188761                | TT                              | AA              | 1946777362               |
| SNP_P4_33186_28188762 | NC_021162.1    | Ca_kabuli_chr03 | 28188762                | AA                              | CC              | 1946777364               |
| SNP_P4_33187_28192938 | NC_021162.1    | Ca_kabuli_chr03 | 28192938                | TT                              | CC              | 1946777366               |
| SNP_P4_33188_28192940 | NC_021162.1    | Ca_kabuli_chr03 | 28192940                | GG                              | AA              | 1946777369               |
| SNP_P4_33189_28193234 | NC_021162.1    | Ca_kabuli_chr03 | 28193234                | GG                              | AA              | 1946777371               |
| SNP_P4_33190_28193238 | NC_021162.1    | Ca_kabuli_chr03 | 28193238                | GG                              | AA              | 1946777373               |
| SNP_P4_33191_28193301 | NC_021162.1    | Ca_kabuli_chr03 | 28193301                | CC                              | TT              | 1946777375               |
| SNP_P4_33193_28196304 | NC_021162.1    | Ca_kabuli_chr03 | 28196304                | GG                              | CC              | 1946777377               |
| SNP_P4_33194_28196360 | NC_021162.1    | Ca_kabuli_chr03 | 28196360                | GG                              | AA              | 1946777379               |
| SNP_P4_33195_28196367 | NC_021162.1    | Ca_kabuli_chr03 | 28196367                | TT                              | CC              | 1946777381               |
| SNP_P4_33196_28196370 | NC_021162.1    | Ca_kabuli_chr03 | 28196370                | AA                              | GG              | 1946777383               |
| SNP_P4_33197_28198303 | NC_021162.1    | Ca_kabuli_chr03 | 28198303                | TT                              | AA              | 1946777385               |
| SNP_P4_33198_28198304 | NC_021162.1    | Ca_kabuli_chr03 | 28198304                | CC                              | AA              | 1946777387               |

| SNPs IDs              | Chromosome IDs | Chromosomes     | Physical positions (bp) | CDC Frontier (Reference genome) | (ILWC46 & LPNB) | NCBI SNPdb Accession IDs |
|-----------------------|----------------|-----------------|-------------------------|---------------------------------|-----------------|--------------------------|
| SNP_P4_33199_28198336 | NC_021162.1    | Ca_kabuli_chr03 | 28198336                | TT                              | CC              | 1946777389               |
| SNP_P4_33200_28198384 | NC_021162.1    | Ca_kabuli_chr03 | 28198384                | CC                              | TT              | 1946777391               |
| SNP_P4_33201_28203824 | NC_021162.1    | Ca_kabuli_chr03 | 28203824                | AA                              | GG              | 1946777393               |
| SNP_P4_33202_28203837 | NC_021162.1    | Ca_kabuli_chr03 | 28203837                | GG                              | CC              | 1946777395               |
| SNP_P4_33203_28203842 | NC_021162.1    | Ca_kabuli_chr03 | 28203842                | AA                              | GG              | 1946777397               |
| SNP_P4_33204_28262373 | NC_021162.1    | Ca_kabuli_chr03 | 28262373                | TT                              | GG              | 1946777399               |
| SNP_P4_33207_28274804 | NC_021162.1    | Ca_kabuli_chr03 | 28274804                | AA                              | GG              | 1946777401               |
| SNP_P4_33211_28316420 | NC_021162.1    | Ca_kabuli_chr03 | 28316420                | TT                              | CC              | 1946777403               |
| SNP_P4_33214_28335635 | NC_021162.1    | Ca_kabuli_chr03 | 28335635                | AA                              | GG              | 1946777405               |
| SNP_P4_33215_28354917 | NC_021162.1    | Ca_kabuli_chr03 | 28354917                | GG                              | AA              | 1946777407               |
| SNP_P4_33216_28358002 | NC_021162.1    | Ca_kabuli_chr03 | 28358002                | TT                              | AA              | 1946777410               |
| SNP_P4_33217_28362634 | NC_021162.1    | Ca_kabuli_chr03 | 28362634                | TT                              | CC              | 1946777412               |
| SNP_P4_33219_28407763 | NC_021162.1    | Ca_kabuli_chr03 | 28407763                | CC                              | TT              | 1946777414               |
| SNP_P4_33220_28407798 | NC_021162.1    | Ca_kabuli_chr03 | 28407798                | TT                              | CC              | 1946777416               |
| SNP_P4_33221_28407926 | NC_021162.1    | Ca_kabuli_chr03 | 28407926                | TT                              | AA              | 1946777418               |
| SNP_P4_33223_28428317 | NC_021162.1    | Ca_kabuli_chr03 | 28428317                | GG                              | AA              | 1946777421               |
| SNP_P4_33224_28514728 | NC_021162.1    | Ca_kabuli_chr03 | 28514728                | AA                              | CC              | 1946777423               |
| SNP_P4_33225_28514733 | NC_021162.1    | Ca_kabuli_chr03 | 28514733                | GG                              | AA              | 1946777425               |
| SNP_P4_33226_28514734 | NC_021162.1    | Ca_kabuli_chr03 | 28514734                | AA                              | CC              | 1946777427               |
| SNP_P4_33227_28533333 | NC_021162.1    | Ca_kabuli_chr03 | 28533333                | AA                              | CC              | 1946777430               |
| SNP_P4_33229_28535614 | NC_021162.1    | Ca_kabuli_chr03 | 28535614                | AA                              | TT              | 1946777432               |
| SNP_P4_33230_28537904 | NC_021162.1    | Ca_kabuli_chr03 | 28537904                | TT                              | CC              | 1946777435               |
| SNP_P4_33231_28537908 | NC_021162.1    | Ca_kabuli_chr03 | 28537908                | TT                              | CC              | 1946777437               |
| SNP_P4_33232_28558968 | NC_021162.1    | Ca_kabuli_chr03 | 28558968                | CC                              | TT              | 1946777439               |
| SNP_P4_33233_28589084 | NC_021162.1    | Ca_kabuli_chr03 | 28589084                | AA                              | GG              | 1946777441               |
| SNP_P4_33234_28619328 | NC_021162.1    | Ca_kabuli_chr03 | 28619328                | GG                              | AA              | 1946777443               |
| SNP_P4_33235_28619329 | NC_021162.1    | Ca_kabuli_chr03 | 28619329                | AA                              | GG              | 1946777445               |
| SNP_P4_33236_28624450 | NC_021162.1    | Ca_kabuli_chr03 | 28624450                | TT                              | AA              | 1946777447               |
| SNP_P4_33238_28672643 | NC_021162.1    | Ca_kabuli_chr03 | 28672643                | TT                              | CC              | 1946777450               |
| SNP_P4_33239_28702017 | NC_021162.1    | Ca_kabuli_chr03 | 28702017                | AA                              | CC              | 1946777452               |
| SNP_P4_33240_28702038 | NC_021162.1    | Ca_kabuli_chr03 | 28702038                | AA                              | CC              | 1946777454               |
| SNP_P4_33241_28759552 | NC_021162.1    | Ca_kabuli_chr03 | 28759552                | CC                              | TT              | 1946777456               |
| SNP_P4_33242_28778849 | NC_021162.1    | Ca_kabuli_chr03 | 28778849                | GG                              | TT              | 1946777458               |
| SNP_P4_33243_28780163 | NC_021162.1    | Ca_kabuli_chr03 | 28780163                | AA                              | GG              | 1946777460               |
| SNP_P4_33244_28783106 | NC_021162.1    | Ca_kabuli_chr03 | 28783106                | CC                              | TT              | 1946777463               |
| SNP_P4_33247_28797235 | NC_021162.1    | Ca_kabuli_chr03 | 28797235                | GG                              | TT              | 1946777465               |
| SNP_P4_33249_28797835 | NC_021162.1    | Ca_kabuli_chr03 | 28797835                | GG                              | CC              | 1946777467               |
| SNP_P4_33250_28798991 | NC_021162.1    | Ca_kabuli_chr03 | 28798991                | AA                              | TT              | 1946777469               |
| SNP_P4_33251_28799300 | NC_021162.1    | Ca_kabuli_chr03 | 28799300                | GG                              | AA              | 1946777471               |
| SNP_P4_33252_28799332 | NC_021162.1    | Ca_kabuli_chr03 | 28799332                | AA                              | TT              | 1946777473               |
| SNP_P4_33253_28799366 | NC_021162.1    | Ca_kabuli_chr03 | 28799366                | CC                              | TT              | 1946777475               |
| SNP_P4_33254_28799374 | NC_021162.1    | Ca_kabuli_chr03 | 28799374                | TT                              | AA              | 1946777477               |

| SNPs IDs              | Chromosome IDs | Chromosomes     | Physical positions (bp) | CDC Frontier (Reference genome) | (ILWC46 & LPNB) | NCBI SNPdb Accession IDs |
|-----------------------|----------------|-----------------|-------------------------|---------------------------------|-----------------|--------------------------|
| SNP_P4_33255_28799381 | NC_021162.1    | Ca_kabuli_chr03 | 28799381                | TT                              | AA              | 1946777479               |
| SNP_P4_33257_28799600 | NC_021162.1    | Ca_kabuli_chr03 | 28799600                | GG                              | AA              | 1946777481               |
| SNP_P4_33258_28799751 | NC_021162.1    | Ca_kabuli_chr03 | 28799751                | CC                              | TT              | 1946777484               |
| SNP_P4_33259_28799779 | NC_021162.1    | Ca_kabuli_chr03 | 28799779                | TT                              | CC              | 1946777486               |
| SNP_P4_33260_28799803 | NC_021162.1    | Ca_kabuli_chr03 | 28799803                | CC                              | AA              | 1946777488               |
| SNP_P4_33261_28799805 | NC_021162.1    | Ca_kabuli_chr03 | 28799805                | GG                              | TT              | 1946777490               |
| SNP_P4_33262_28800183 | NC_021162.1    | Ca_kabuli_chr03 | 28800183                | GG                              | AA              | 1946777492               |
| SNP_P4_33263_28820967 | NC_021162.1    | Ca_kabuli_chr03 | 28820967                | AA                              | GG              | 1946777494               |
| SNP_P4_33265_28839094 | NC_021162.1    | Ca_kabuli_chr03 | 28839094                | CC                              | GG              | 1946777496               |
| SNP_P4_33266_28839676 | NC_021162.1    | Ca_kabuli_chr03 | 28839676                | TT                              | CC              | 1946777498               |
| SNP_P4_33267_28842216 | NC_021162.1    | Ca_kabuli_chr03 | 28842216                | GG                              | TT              | 1946777500               |
| SNP_P4_33268_28844373 | NC_021162.1    | Ca_kabuli_chr03 | 28844373                | TT                              | CC              | 1946777502               |
| SNP_P4_33269_28889456 | NC_021162.1    | Ca_kabuli_chr03 | 28889456                | TT                              | AA              | 1946777504               |
| SNP_P4_33270_28902233 | NC_021162.1    | Ca_kabuli_chr03 | 28902233                | AA                              | TT              | 1946777507               |
| SNP_P4_33271_28918929 | NC_021162.1    | Ca_kabuli_chr03 | 28918929                | AA                              | CC              | 1946777509               |
| SNP_P4_33272_28922573 | NC_021162.1    | Ca_kabuli_chr03 | 28922573                | GG                              | AA              | 1946777511               |
| SNP_P4_33273_28923981 | NC_021162.1    | Ca_kabuli_chr03 | 28923981                | AA                              | CC              | 1946777513               |
| SNP_P4_33274_28924217 | NC_021162.1    | Ca_kabuli_chr03 | 28924217                | AA                              | GG              | 1946777516               |
| SNP_P4_33275_28984577 | NC_021162.1    | Ca_kabuli_chr03 | 28984577                | TT                              | CC              | 1946777518               |
| SNP_P4_33276_28984910 | NC_021162.1    | Ca_kabuli_chr03 | 28984910                | CC                              | TT              | 1946777522               |
| SNP_P4_33277_28994626 | NC_021162.1    | Ca_kabuli_chr03 | 28994626                | TT                              | CC              | 1946777524               |
| SNP_P4_33278_28994737 | NC_021162.1    | Ca_kabuli_chr03 | 28994737                | CC                              | AA              | 1946777526               |
| SNP_P4_33279_28994904 | NC_021162.1    | Ca_kabuli_chr03 | 28994904                | TT                              | GG              | 1946777528               |
| SNP_P4_33280_28994916 | NC_021162.1    | Ca_kabuli_chr03 | 28994916                | AA                              | GG              | 1946777530               |
| SNP_P4_33281_28994917 | NC_021162.1    | Ca_kabuli_chr03 | 28994917                | TT                              | CC              | 1946777533               |
| SNP_P4_33283_28995047 | NC_021162.1    | Ca_kabuli_chr03 | 28995047                | CC                              | TT              | 1946777535               |
| SNP_P4_33284_28995098 | NC_021162.1    | Ca_kabuli_chr03 | 28995098                | AA                              | GG              | 1946777537               |
| SNP_P4_33285_28995112 | NC_021162.1    | Ca_kabuli_chr03 | 28995112                | CC                              | AA              | 1946777539               |
| SNP_P4_33287_28995158 | NC_021162.1    | Ca_kabuli_chr03 | 28995158                | TT                              | CC              | 1946777541               |
| SNP_P4_33288_28995293 | NC_021162.1    | Ca_kabuli_chr03 | 28995293                | GG                              | CC              | 1946777543               |
| SNP_P4_33289_28995379 | NC_021162.1    | Ca_kabuli_chr03 | 28995379                | AA                              | GG              | 1946777545               |
| SNP_P4_33290_28995407 | NC_021162.1    | Ca_kabuli_chr03 | 28995407                | AA                              | GG              | 1946777547               |
| SNP_P4_33291_28995492 | NC_021162.1    | Ca_kabuli_chr03 | 28995492                | AA                              | GG              | 1946777550               |
| SNP_P4_33292_28996573 | NC_021162.1    | Ca_kabuli_chr03 | 28996573                | TT                              | CC              | 1946777552               |
| SNP_P4_33293_28996584 | NC_021162.1    | Ca_kabuli_chr03 | 28996584                | CC                              | TT              | 1946777554               |
| SNP_P4_33294_28996585 | NC_021162.1    | Ca_kabuli_chr03 | 28996585                | AA                              | GG              | 1946777556               |
| SNP_P4_33295_28996587 | NC_021162.1    | Ca_kabuli_chr03 | 28996587                | TT                              | AA              | 1946777558               |
| SNP_P4_33296_28996595 | NC_021162.1    | Ca_kabuli_chr03 | 28996595                | TT                              | GG              | 1946777560               |
| SNP_P4_33297_28996624 | NC_021162.1    | Ca_kabuli_chr03 | 28996624                | GG                              | TT              | 1946777562               |
| SNP_P4_33299_28996928 | NC_021162.1    | Ca_kabuli_chr03 | 28996928                | AA                              | GG              | 1946777564               |
| SNP_P4_33300_28996931 | NC_021162.1    | Ca_kabuli_chr03 | 28996931                | AA                              | GG              | 1946777566               |
| SNP_P4_33301_28996935 | NC_021162.1    | Ca_kabuli_chr03 | 28996935                | AA                              | GG              | 1946777568               |

| SNPs IDs              | Chromosome IDs | Chromosomes     | Physical positions (bp) | CDC Frontier (Reference genome) | (ILWC46 & LPNB) | NCBI SNPdb Accession IDs |
|-----------------------|----------------|-----------------|-------------------------|---------------------------------|-----------------|--------------------------|
| SNP_P4_33302_28996971 | NC_021162.1    | Ca_kabuli_chr03 | 28996971                | TT                              | AA              | 1946777570               |
| SNP_P4_33303_28996977 | NC_021162.1    | Ca_kabuli_chr03 | 28996977                | TT                              | CC              | 1946777573               |
| SNP_P4_33304_28997022 | NC_021162.1    | Ca_kabuli_chr03 | 28997022                | CC                              | TT              | 1946777575               |
| SNP_P4_33305_28997027 | NC_021162.1    | Ca_kabuli_chr03 | 28997027                | AA                              | CC              | 1946777577               |
| SNP_P4_33306_28997337 | NC_021162.1    | Ca_kabuli_chr03 | 28997337                | CC                              | TT              | 1946777579               |
| SNP_P4_33307_28997338 | NC_021162.1    | Ca_kabuli_chr03 | 28997338                | AA                              | GG              | 1946777581               |
| SNP_P4_33308_28997389 | NC_021162.1    | Ca_kabuli_chr03 | 28997389                | AA                              | CC              | 1946777583               |
| SNP_P4_33309_28997427 | NC_021162.1    | Ca_kabuli_chr03 | 28997427                | CC                              | TT              | 1946777585               |
| SNP_P4_33310_28999521 | NC_021162.1    | Ca_kabuli_chr03 | 28999521                | CC                              | TT              | 1946777587               |
| SNP_P4_33311_28999544 | NC_021162.1    | Ca_kabuli_chr03 | 28999544                | TT                              | AA              | 1946777590               |
| SNP_P4_33312_28999585 | NC_021162.1    | Ca_kabuli_chr03 | 28999585                | GG                              | AA              | 1946777592               |
| SNP_P4_33313_28999587 | NC_021162.1    | Ca_kabuli_chr03 | 28999587                | CC                              | GG              | 1946777594               |
| SNP_P4_33314_28999620 | NC_021162.1    | Ca_kabuli_chr03 | 28999620                | AA                              | GG              | 1946777596               |
| SNP_P4_33316_28999770 | NC_021162.1    | Ca_kabuli_chr03 | 28999770                | AA                              | GG              | 1946777598               |
| SNP_P4_33317_28999780 | NC_021162.1    | Ca_kabuli_chr03 | 28999780                | AA                              | CC              | 1946777600               |
| SNP_P4_33318_28999785 | NC_021162.1    | Ca_kabuli_chr03 | 28999785                | CC                              | GG              | 1946777602               |
| SNP_P4_33319_28999798 | NC_021162.1    | Ca_kabuli_chr03 | 28999798                | CC                              | TT              | 1946777604               |
| SNP_P4_33320_28999814 | NC_021162.1    | Ca_kabuli_chr03 | 28999814                | AA                              | TT              | 1946777606               |
| SNP_P4_33321_28999841 | NC_021162.1    | Ca_kabuli_chr03 | 28999841                | AA                              | GG              | 1946777608               |
| SNP_P4_33322_28999900 | NC_021162.1    | Ca_kabuli_chr03 | 28999900                | CC                              | TT              | 1946777610               |
| SNP_P4_33323_28999916 | NC_021162.1    | Ca_kabuli_chr03 | 28999916                | TT                              | AA              | 1946777612               |
| SNP_P4_33324_28999921 | NC_021162.1    | Ca_kabuli_chr03 | 28999921                | AA                              | TT              | 1946777614               |
| SNP_P4_33325_29000035 | NC_021162.1    | Ca_kabuli_chr03 | 29000035                | TT                              | GG              | 1946777616               |
| SNP_P4_33326_29000040 | NC_021162.1    | Ca_kabuli_chr03 | 29000040                | CC                              | GG              | 1946777619               |
| SNP_P4_33328_29000093 | NC_021162.1    | Ca_kabuli_chr03 | 29000093                | AA                              | GG              | 1946777621               |
| SNP_P4_33329_29000161 | NC_021162.1    | Ca_kabuli_chr03 | 29000161                | TT                              | GG              | 1946777623               |
| SNP_P4_33330_29000220 | NC_021162.1    | Ca_kabuli_chr03 | 29000220                | GG                              | AA              | 1946777625               |
| SNP_P4_33331_29000223 | NC_021162.1    | Ca_kabuli_chr03 | 29000223                | GG                              | AA              | 1946777627               |
| SNP_P4_33332_29000240 | NC_021162.1    | Ca_kabuli_chr03 | 29000240                | GG                              | AA              | 1946777629               |
| SNP_P4_33333_29000268 | NC_021162.1    | Ca_kabuli_chr03 | 29000268                | GG                              | AA              | 1946777631               |
| SNP_P4_33334_29000594 | NC_021162.1    | Ca_kabuli_chr03 | 29000594                | CC                              | GG              | 1946777634               |
| SNP_P4_33335_29000627 | NC_021162.1    | Ca_kabuli_chr03 | 29000627                | GG                              | CC              | 1946777636               |
| SNP_P4_33336_29000667 | NC_021162.1    | Ca_kabuli_chr03 | 29000667                | CC                              | AA              | 1946777638               |
| SNP_P4_33337_29000745 | NC_021162.1    | Ca_kabuli_chr03 | 29000745                | GG                              | AA              | 1946777640               |
| SNP_P4_33338_29000758 | NC_021162.1    | Ca_kabuli_chr03 | 29000758                | GG                              | TT              | 1946777642               |
| SNP_P4_33339_29000770 | NC_021162.1    | Ca_kabuli_chr03 | 29000770                | AA                              | GG              | 1946777645               |
| SNP_P4_33340_29000810 | NC_021162.1    | Ca_kabuli_chr03 | 29000810                | CC                              | TT              | 1946777647               |
| SNP_P4_33342_29000965 | NC_021162.1    | Ca_kabuli_chr03 | 29000965                | GG                              | TT              | 1946777649               |
| SNP_P4_33343_29000970 | NC_021162.1    | Ca_kabuli_chr03 | 29000970                | AA                              | TT              | 1946777651               |
| SNP_P4_33344_29000975 | NC_021162.1    | Ca_kabuli_chr03 | 29000975                | AA                              | CC              | 1946777653               |
| SNP_P4_33345_29000981 | NC_021162.1    | Ca_kabuli_chr03 | 29000981                | CC                              | TT              | 1946777655               |
| SNP_P4_33346_29001038 | NC_021162.1    | Ca_kabuli_chr03 | 29001038                | TT                              | CC              | 1946777657               |

| SNPs IDs              | Chromosome IDs | Chromosomes     | Physical positions (bp) | CDC Frontier (Reference genome) | (ILWC46 & LPNB) | NCBI SNPdb Accession IDs |
|-----------------------|----------------|-----------------|-------------------------|---------------------------------|-----------------|--------------------------|
| SNP_P4_33347_29001043 | NC_021162.1    | Ca_kabuli_chr03 | 29001043                | AA                              | GG              | 1946777660               |
| SNP_P4_33348_29001068 | NC_021162.1    | Ca_kabuli_chr03 | 29001068                | GG                              | AA              | 1946777662               |
| SNP_P4_33349_29001074 | NC_021162.1    | Ca_kabuli_chr03 | 29001074                | TT                              | CC              | 1946777664               |
| SNP_P4_33350_29001178 | NC_021162.1    | Ca_kabuli_chr03 | 29001178                | CC                              | TT              | 1946777666               |
| SNP_P4_33351_29001180 | NC_021162.1    | Ca_kabuli_chr03 | 29001180                | GG                              | AA              | 1946777669               |
| SNP_P4_33352_29001210 | NC_021162.1    | Ca_kabuli_chr03 | 29001210                | CC                              | AA              | 1946777671               |
| SNP_P4_33353_29002780 | NC_021162.1    | Ca_kabuli_chr03 | 29002780                | TT                              | AA              | 1946777673               |
| SNP_P4_33354_29002795 | NC_021162.1    | Ca_kabuli_chr03 | 29002795                | TT                              | AA              | 1946777675               |
| SNP_P4_33356_29006787 | NC_021162.1    | Ca_kabuli_chr03 | 29006787                | CC                              | TT              | 1946777677               |
| SNP_P4_33357_29007134 | NC_021162.1    | Ca_kabuli_chr03 | 29007134                | CC                              | TT              | 1946777679               |
| SNP_P4_33358_29007146 | NC_021162.1    | Ca_kabuli_chr03 | 29007146                | TT                              | CC              | 1946777681               |
| SNP_P4_33359_29012256 | NC_021162.1    | Ca_kabuli_chr03 | 29012256                | TT                              | CC              | 1946777683               |
| SNP_P4_33360_29012271 | NC_021162.1    | Ca_kabuli_chr03 | 29012271                | TT                              | CC              | 1946777685               |
| SNP_P4_33361_29012275 | NC_021162.1    | Ca_kabuli_chr03 | 29012275                | AA                              | GG              | 1946777687               |
| SNP_P4_33364_29048822 | NC_021162.1    | Ca_kabuli_chr03 | 29048822                | AA                              | CC              | 1946777689               |
| SNP_P4_33365_29048824 | NC_021162.1    | Ca_kabuli_chr03 | 29048824                | AA                              | CC              | 1946777692               |
| SNP_P4_33367_29073856 | NC_021162.1    | Ca_kabuli_chr03 | 29073856                | AA                              | CC              | 1946777694               |
| SNP_P4_33370_29089880 | NC_021162.1    | Ca_kabuli_chr03 | 29089880                | CC                              | AA              | 1946777696               |
| SNP_P4_33373_29091826 | NC_021162.1    | Ca_kabuli_chr03 | 29091826                | GG                              | AA              | 1946777698               |
| SNP_P4_33374_29127758 | NC_021162.1    | Ca_kabuli_chr03 | 29127758                | GG                              | AA              | 1946777700               |
| SNP_P4_33375_29132058 | NC_021162.1    | Ca_kabuli_chr03 | 29132058                | TT                              | CC              | 1946777702               |
| SNP_P4_33376_29161048 | NC_021162.1    | Ca_kabuli_chr03 | 29161048                | TT                              | AA              | 1946777705               |
| SNP_P4_33377_29161985 | NC_021162.1    | Ca_kabuli_chr03 | 29161985                | AA                              | TT              | 1946777707               |
| SNP_P4_33378_29174538 | NC_021162.1    | Ca_kabuli_chr03 | 29174538                | TT                              | AA              | 1946777709               |
| SNP_P4_33380_29213380 | NC_021162.1    | Ca_kabuli_chr03 | 29213380                | AA                              | GG              | 1946777711               |
| SNP_P4_33381_29214525 | NC_021162.1    | Ca_kabuli_chr03 | 29214525                | CC                              | TT              | 1946777714               |
| SNP_P4_33382_29221154 | NC_021162.1    | Ca_kabuli_chr03 | 29221154                | AA                              | GG              | 1946777716               |
| SNP_P4_33384_29244144 | NC_021162.1    | Ca_kabuli_chr03 | 29244144                | GG                              | AA              | 1946777718               |
| SNP_P4_33385_29244389 | NC_021162.1    | Ca_kabuli_chr03 | 29244389                | AA                              | CC              | 1946777720               |
| SNP_P4_33386_29244746 | NC_021162.1    | Ca_kabuli_chr03 | 29244746                | AA                              | TT              | 1946777722               |
| SNP_P4_33387_29246875 | NC_021162.1    | Ca_kabuli_chr03 | 29246875                | CC                              | TT              | 1946777724               |
| SNP_P4_33388_29246883 | NC_021162.1    | Ca_kabuli_chr03 | 29246883                | GG                              | CC              | 1946777726               |
| SNP_P4_33389_29248366 | NC_021162.1    | Ca_kabuli_chr03 | 29248366                | TT                              | CC              | 1946777728               |
| SNP_P4_33390_29249434 | NC_021162.1    | Ca_kabuli_chr03 | 29249434                | CC                              | TT              | 1946777730               |
| SNP_P4_33391_29249462 | NC_021162.1    | Ca_kabuli_chr03 | 29249462                | TT                              | GG              | 1946777732               |
| SNP_P4_33392_29249503 | NC_021162.1    | Ca_kabuli_chr03 | 29249503                | AA                              | GG              | 1946777734               |
| SNP_P4_33393_29249508 | NC_021162.1    | Ca_kabuli_chr03 | 29249508                | TT                              | GG              | 1946777736               |
| SNP_P4_33395_29249535 | NC_021162.1    | Ca_kabuli_chr03 | 29249535                | GG                              | AA              | 1946777738               |
| SNP_P4_33396_29249553 | NC_021162.1    | Ca_kabuli_chr03 | 29249553                | AA                              | GG              | 1946777741               |
| SNP_P4_33397_29249614 | NC_021162.1    | Ca_kabuli_chr03 | 29249614                | AA                              | GG              | 1946777743               |
| SNP_P4_33398_29249681 | NC_021162.1    | Ca_kabuli_chr03 | 29249681                | AA                              | CC              | 1946777745               |
| SNP_P4_33399_29249942 | NC_021162.1    | Ca_kabuli_chr03 | 29249942                | TT                              | CC              | 1946777747               |

| SNPs IDs              | Chromosome IDs | Chromosomes     | Physical positions (bp) | CDC Frontier (Reference genome) | (ILWC46 & LPNB) | NCBI SNPdb Accession IDs |
|-----------------------|----------------|-----------------|-------------------------|---------------------------------|-----------------|--------------------------|
| SNP_P4_33400_29249965 | NC_021162.1    | Ca_kabuli_chr03 | 29249965                | AA                              | GG              | 1946777749               |
| SNP_P4_33401_29250029 | NC_021162.1    | Ca_kabuli_chr03 | 29250029                | GG                              | AA              | 1946777751               |
| SNP_P4_33402_29250060 | NC_021162.1    | Ca_kabuli_chr03 | 29250060                | GG                              | AA              | 1946777753               |
| SNP_P4_33403_29251608 | NC_021162.1    | Ca_kabuli_chr03 | 29251608                | CC                              | TT              | 1946777755               |
| SNP_P4_33404_29251637 | NC_021162.1    | Ca_kabuli_chr03 | 29251637                | CC                              | AA              | 1946777757               |
| SNP_P4_33405_29251702 | NC_021162.1    | Ca_kabuli_chr03 | 29251702                | GG                              | TT              | 1946777759               |
| SNP_P4_33408_29318929 | NC_021162.1    | Ca_kabuli_chr03 | 29318929                | GG                              | AA              | 1946777761               |
| SNP_P4_33409_29322235 | NC_021162.1    | Ca_kabuli_chr03 | 29322235                | CC                              | AA              | 1946777764               |
| SNP_P4_33411_29341052 | NC_021162.1    | Ca_kabuli_chr03 | 29341052                | CC                              | TT              | 1946777766               |
| SNP_P4_33412_29345228 | NC_021162.1    | Ca_kabuli_chr03 | 29345228                | AA                              | CC              | 1946777767               |
| SNP_P4_33414_29370421 | NC_021162.1    | Ca_kabuli_chr03 | 29370421                | CC                              | TT              | 1946777768               |
| SNP_P4_33415_29407813 | NC_021162.1    | Ca_kabuli_chr03 | 29407813                | CC                              | TT              | 1946777770               |
| SNP_P4_33417_29495200 | NC_021162.1    | Ca_kabuli_chr03 | 29495200                | CC                              | GG              | 1946777772               |
| SNP_P4_33418_29506963 | NC_021162.1    | Ca_kabuli_chr03 | 29506963                | TT                              | GG              | 1946777774               |
| SNP_P4_33421_29535227 | NC_021162.1    | Ca_kabuli_chr03 | 29535227                | GG                              | AA              | 1946777776               |
| SNP_P4_33422_29540939 | NC_021162.1    | Ca_kabuli_chr03 | 29540939                | TT                              | CC              | 1946777778               |
| SNP_P4_33423_29541829 | NC_021162.1    | Ca_kabuli_chr03 | 29541829                | TT                              | CC              | 1946777780               |
| SNP_P4_33424_29551519 | NC_021162.1    | Ca_kabuli_chr03 | 29551519                | TT                              | CC              | 1946777782               |
| SNP_P4_33426_29553660 | NC_021162.1    | Ca_kabuli_chr03 | 29553660                | AA                              | TT              | 1946777784               |
| SNP_P4_33427_29553761 | NC_021162.1    | Ca_kabuli_chr03 | 29553761                | TT                              | GG              | 1946777786               |
| SNP_P4_33428_29553762 | NC_021162.1    | Ca_kabuli_chr03 | 29553762                | GG                              | AA              | 1946777788               |
| SNP_P4_33430_29560743 | NC_021162.1    | Ca_kabuli_chr03 | 29560743                | AA                              | GG              | 1946777790               |
| SNP_P4_33431_29560745 | NC_021162.1    | Ca_kabuli_chr03 | 29560745                | AA                              | CC              | 1946777793               |
| SNP_P4_33432_29564352 | NC_021162.1    | Ca_kabuli_chr03 | 29564352                | GG                              | AA              | 1946777795               |
| SNP_P4_33433_29570466 | NC_021162.1    | Ca_kabuli_chr03 | 29570466                | AA                              | GG              | 1946777797               |
| SNP_P4_33434_29587174 | NC_021162.1    | Ca_kabuli_chr03 | 29587174                | CC                              | TT              | 1946777799               |
| SNP_P4_33435_29613054 | NC_021162.1    | Ca_kabuli_chr03 | 29613054                | TT                              | GG              | 1946777801               |
| SNP_P4_33436_29613057 | NC_021162.1    | Ca_kabuli_chr03 | 29613057                | TT                              | CC              | 1946777803               |
| SNP_P4_33438_29654077 | NC_021162.1    | Ca_kabuli_chr03 | 29654077                | TT                              | AA              | 1946777805               |
| SNP_P4_33439_29687755 | NC_021162.1    | Ca_kabuli_chr03 | 29687755                | GG                              | TT              | 1946777808               |
| SNP_P4_33440_29691890 | NC_021162.1    | Ca_kabuli_chr03 | 29691890                | TT                              | AA              | 1946777810               |
| SNP_P4_33441_29717197 | NC_021162.1    | Ca_kabuli_chr03 | 29717197                | TT                              | CC              | 1946777812               |
| SNP_P4_33442_29718103 | NC_021162.1    | Ca_kabuli_chr03 | 29718103                | CC                              | TT              | 1946777814               |
| SNP_P4_33443_29735720 | NC_021162.1    | Ca_kabuli_chr03 | 29735720                | GG                              | TT              | 1946777816               |
| SNP_P4_33444_29742799 | NC_021162.1    | Ca_kabuli_chr03 | 29742799                | TT                              | AA              | 1946777818               |
| SNP_P4_33445_29762301 | NC_021162.1    | Ca_kabuli_chr03 | 29762301                | TT                              | CC              | 1946777820               |
| SNP_P4_33446_29762305 | NC_021162.1    | Ca_kabuli_chr03 | 29762305                | TT                              | GG              | 1946777822               |
| SNP_P4_33448_29826318 | NC_021162.1    | Ca_kabuli_chr03 | 29826318                | CC                              | TT              | 1946777824               |
| SNP_P4_33450_29831091 | NC_021162.1    | Ca_kabuli_chr03 | 29831091                | GG                              | AA              | 1946777827               |
| SNP_P4_33453_29858723 | NC_021162.1    | Ca_kabuli_chr03 | 29858723                | AA                              | TT              | 1946777829               |
| SNP_P4_33455_29867328 | NC_021162.1    | Ca_kabuli_chr03 | 29867328                | GG                              | TT              | 1946777831               |
| SNP_P4_33456_29872908 | NC_021162.1    | Ca_kabuli_chr03 | 29872908                | AA                              | CC              | 1946777833               |

| SNPs IDs              | Chromosome IDs | Chromosomes     | Physical positions (bp) | CDC Frontier (Reference genome) | (ILWC46 & LPNB) | NCBI SNPdb Accession IDs |
|-----------------------|----------------|-----------------|-------------------------|---------------------------------|-----------------|--------------------------|
| SNP_P4_33458_29926926 | NC_021162.1    | Ca_kabuli_chr03 | 29926926                | CC                              | TT              | 1946777836               |
| SNP_P4_33459_29934810 | NC_021162.1    | Ca_kabuli_chr03 | 29934810                | AA                              | GG              | 1946777838               |
| SNP_P4_33460_29937161 | NC_021162.1    | Ca_kabuli_chr03 | 29937161                | AA                              | GG              | 1946777840               |
| SNP_P4_33461_29946381 | NC_021162.1    | Ca_kabuli_chr03 | 29946381                | CC                              | TT              | 1946777842               |
| SNP_P4_33463_29950693 | NC_021162.1    | Ca_kabuli_chr03 | 29950693                | CC                              | TT              | 1946777844               |
| SNP_P4_33464_29967289 | NC_021162.1    | Ca_kabuli_chr03 | 29967289                | TT                              | GG              | 1946777846               |
| SNP_P4_33465_29980359 | NC_021162.1    | Ca_kabuli_chr03 | 29980359                | CC                              | AA              | 1946777848               |
| SNP_P4_33466_29980727 | NC_021162.1    | Ca_kabuli_chr03 | 29980727                | TT                              | AA              | 1946777850               |
| SNP_P4_33467_29993001 | NC_021162.1    | Ca_kabuli_chr03 | 29993001                | TT                              | CC              | 1946777852               |
| SNP_P4_33468_29994022 | NC_021162.1    | Ca_kabuli_chr03 | 29994022                | AA                              | TT              | 1946777853               |
| SNP_P4_33470_30029610 | NC_021162.1    | Ca_kabuli_chr03 | 30029610                | AA                              | CC              | 1946777855               |
| SNP_P4_33471_30033954 | NC_021162.1    | Ca_kabuli_chr03 | 30033954                | CC                              | AA              | 1946777857               |
| SNP_P4_33472_30046024 | NC_021162.1    | Ca_kabuli_chr03 | 30046024                | GG                              | CC              | 1946777859               |
| SNP_P4_33475_30069641 | NC_021162.1    | Ca_kabuli_chr03 | 30069641                | CC                              | TT              | 1946777861               |
| SNP_P4_33476_30072323 | NC_021162.1    | Ca_kabuli_chr03 | 30072323                | TT                              | GG              | 1946777863               |
| SNP_P4_33477_30072324 | NC_021162.1    | Ca_kabuli_chr03 | 30072324                | TT                              | CC              | 1946777866               |
| SNP_P4_33478_30072669 | NC_021162.1    | Ca_kabuli_chr03 | 30072669                | AA                              | GG              | 1946777868               |
| SNP_P4_33480_30085370 | NC_021162.1    | Ca_kabuli_chr03 | 30085370                | GG                              | AA              | 1946777870               |
| SNP_P4_33481_30098175 | NC_021162.1    | Ca_kabuli_chr03 | 30098175                | CC                              | TT              | 1946777872               |
| SNP_P4_33482_30103611 | NC_021162.1    | Ca_kabuli_chr03 | 30103611                | AA                              | GG              | 1946777874               |
| SNP_P4_33483_30103626 | NC_021162.1    | Ca_kabuli_chr03 | 30103626                | GG                              | AA              | 1946777876               |
| SNP_P4_33484_30103638 | NC_021162.1    | Ca_kabuli_chr03 | 30103638                | TT                              | CC              | 1946777878               |
| SNP_P4_33485_30103651 | NC_021162.1    | Ca_kabuli_chr03 | 30103651                | TT                              | GG              | 1946777880               |
| SNP_P4_33486_30109775 | NC_021162.1    | Ca_kabuli_chr03 | 30109775                | CC                              | AA              | 1946777882               |
| SNP_P4_33488_30134414 | NC_021162.1    | Ca_kabuli_chr03 | 30134414                | TT                              | CC              | 1946777884               |
| SNP_P4_33489_30136201 | NC_021162.1    | Ca_kabuli_chr03 | 30136201                | AA                              | GG              | 1946777886               |
| SNP_P4_33490_30154852 | NC_021162.1    | Ca_kabuli_chr03 | 30154852                | CC                              | TT              | 1946777888               |
| SNP_P4_33491_30180279 | NC_021162.1    | Ca_kabuli_chr03 | 30180279                | AA                              | CC              | 1946777890               |
| SNP_P4_33492_30220664 | NC_021162.1    | Ca_kabuli_chr03 | 30220664                | GG                              | CC              | 1946777892               |
| SNP_P4_33493_30226451 | NC_021162.1    | Ca_kabuli_chr03 | 30226451                | TT                              | CC              | 1946777894               |
| SNP_P4_33494_30244945 | NC_021162.1    | Ca_kabuli_chr03 | 30244945                | AA                              | GG              | 1946777896               |
| SNP_P4_33495_30252353 | NC_021162.1    | Ca_kabuli_chr03 | 30252353                | AA                              | GG              | 1946777898               |
| SNP_P4_33496_30252374 | NC_021162.1    | Ca_kabuli_chr03 | 30252374                | AA                              | GG              | 1946777900               |
| SNP_P4_33497_30252751 | NC_021162.1    | Ca_kabuli_chr03 | 30252751                | TT                              | AA              | 1946777902               |
| SNP_P4_33498_30260469 | NC_021162.1    | Ca_kabuli_chr03 | 30260469                | CC                              | TT              | 1946777905               |
| SNP_P4_33499_30262038 | NC_021162.1    | Ca_kabuli_chr03 | 30262038                | CC                              | TT              | 1946777907               |
| SNP_P4_33500_30277302 | NC_021162.1    | Ca_kabuli_chr03 | 30277302                | TT                              | AA              | 1946777909               |
| SNP_P4_33501_30283142 | NC_021162.1    | Ca_kabuli_chr03 | 30283142                | TT                              | GG              | 1946777911               |
| SNP_P4_33502_30283147 | NC_021162.1    | Ca_kabuli_chr03 | 30283147                | TT                              | AA              | 1946777913               |
| SNP_P4_33503_30283148 | NC_021162.1    | Ca_kabuli_chr03 | 30283148                | TT                              | GG              | 1946777915               |
| SNP_P4_33504_30283156 | NC_021162.1    | Ca_kabuli_chr03 | 30283156                | TT                              | AA              | 1946777917               |
| SNP_P4_33505_30283888 | NC_021162.1    | Ca_kabuli_chr03 | 30283888                | TT                              | CC              | 1946777919               |



| SNPs IDs              | Chromosome IDs | Chromosomes     | Physical positions (bp) | CDC Frontier (Reference genome) | (ILWC46 & LPNB) | NCBI SNPdb Accession IDs |
|-----------------------|----------------|-----------------|-------------------------|---------------------------------|-----------------|--------------------------|
| SNP_P4_33506_30285884 | NC_021162.1    | Ca_kabuli_chr03 | 30285884                | AA                              | GG              | 1946777921               |
| SNP_P4_33507_30288195 | NC_021162.1    | Ca_kabuli_chr03 | 30288195                | TT                              | CC              | 1946777923               |
| SNP_P4_33509_30291933 | NC_021162.1    | Ca_kabuli_chr03 | 30291933                | AA                              | TT              | 1946777925               |
| SNP_P4_33510_30293456 | NC_021162.1    | Ca_kabuli_chr03 | 30293456                | GG                              | TT              | 1946777929               |
| SNP_P4_33511_30293591 | NC_021162.1    | Ca_kabuli_chr03 | 30293591                | CC                              | TT              | 1946777931               |
| SNP_P4_33513_30347518 | NC_021162.1    | Ca_kabuli_chr03 | 30347518                | CC                              | TT              | 1946777933               |
| SNP_P4_33514_30381451 | NC_021162.1    | Ca_kabuli_chr03 | 30381451                | TT                              | AA              | 1946777936               |
| SNP_P4_33515_30393306 | NC_021162.1    | Ca_kabuli_chr03 | 30393306                | GG                              | AA              | 1946777938               |
| SNP_P4_33516_30399794 | NC_021162.1    | Ca_kabuli_chr03 | 30399794                | AA                              | GG              | 1946777940               |
| SNP_P4_33517_30412995 | NC_021162.1    | Ca_kabuli_chr03 | 30412995                | GG                              | AA              | 1946777942               |
| SNP_P4_33518_30420634 | NC_021162.1    | Ca_kabuli_chr03 | 30420634                | AA                              | GG              | 1946777945               |
| SNP_P4_33520_30438938 | NC_021162.1    | Ca_kabuli_chr03 | 30438938                | TT                              | AA              | 1946777947               |
| SNP_P4_33521_30461610 | NC_021162.1    | Ca_kabuli_chr03 | 30461610                | GG                              | AA              | 1946777949               |
| SNP_P4_33522_30479227 | NC_021162.1    | Ca_kabuli_chr03 | 30479227                | GG                              | AA              | 1946777951               |
| SNP_P4_33523_30488085 | NC_021162.1    | Ca_kabuli_chr03 | 30488085                | TT                              | AA              | 1946777953               |
| SNP_P4_33524_30491216 | NC_021162.1    | Ca_kabuli_chr03 | 30491216                | TT                              | GG              | 1946777955               |
| SNP_P4_33525_30491396 | NC_021162.1    | Ca_kabuli_chr03 | 30491396                | GG                              | AA              | 1946777958               |
| SNP_P4_33526_30495532 | NC_021162.1    | Ca_kabuli_chr03 | 30495532                | AA                              | TT              | 1946777960               |
| SNP_P4_33527_30497743 | NC_021162.1    | Ca_kabuli_chr03 | 30497743                | AA                              | GG              | 1946777962               |
| SNP_P4_33528_30497746 | NC_021162.1    | Ca_kabuli_chr03 | 30497746                | AA                              | TT              | 1946777964               |
| SNP_P4_33529_30510899 | NC_021162.1    | Ca_kabuli_chr03 | 30510899                | AA                              | TT              | 1946777966               |
| SNP_P4_33530_30515799 | NC_021162.1    | Ca_kabuli_chr03 | 30515799                | CC                              | TT              | 1946777968               |
| SNP_P4_33531_30530937 | NC_021162.1    | Ca_kabuli_chr03 | 30530937                | GG                              | TT              | 1946777970               |
| SNP_P4_33532_30530962 | NC_021162.1    | Ca_kabuli_chr03 | 30530962                | GG                              | AA              | 1946777973               |
| SNP_P4_33533_30531328 | NC_021162.1    | Ca_kabuli_chr03 | 30531328                | CC                              | GG              | 1946777975               |
| SNP_P4_33534_30555163 | NC_021162.1    | Ca_kabuli_chr03 | 30555163                | TT                              | AA              | 1946777978               |
| SNP_P4_33535_30559326 | NC_021162.1    | Ca_kabuli_chr03 | 30559326                | TT                              | GG              | 1946777980               |
| SNP_P4_33536_30559332 | NC_021162.1    | Ca_kabuli_chr03 | 30559332                | CC                              | GG              | 1946777982               |
| SNP_P4_33539_30566770 | NC_021162.1    | Ca_kabuli_chr03 | 30566770                | TT                              | CC              | 1946777984               |
| SNP_P4_33540_30566986 | NC_021162.1    | Ca_kabuli_chr03 | 30566986                | AA                              | CC              | 1946777986               |
| SNP_P4_33541_30567622 | NC_021162.1    | Ca_kabuli_chr03 | 30567622                | CC                              | GG              | 1946777988               |
| SNP_P4_33542_30573976 | NC_021162.1    | Ca_kabuli_chr03 | 30573976                | AA                              | GG              | 1946777990               |
| SNP_P4_33543_30582485 | NC_021162.1    | Ca_kabuli_chr03 | 30582485                | AA                              | CC              | 1946777992               |
| SNP_P4_33544_30582488 | NC_021162.1    | Ca_kabuli_chr03 | 30582488                | TT                              | AA              | 1946777994               |
| SNP_P4_33545_30582493 | NC_021162.1    | Ca_kabuli_chr03 | 30582493                | GG                              | AA              | 1946777997               |
| SNP_P4_33546_30584947 | NC_021162.1    | Ca_kabuli_chr03 | 30584947                | TT                              | CC              | 1946777999               |
| SNP_P4_33547_30602133 | NC_021162.1    | Ca_kabuli_chr03 | 30602133                | TT                              | GG              | 1946778001               |
| SNP_P4_33548_30602207 | NC_021162.1    | Ca_kabuli_chr03 | 30602207                | AA                              | TT              | 1946778003               |
| SNP_P4_33549_30602216 | NC_021162.1    | Ca_kabuli_chr03 | 30602216                | GG                              | AA              | 1946778005               |
| SNP_P4_33550_30602272 | NC_021162.1    | Ca_kabuli_chr03 | 30602272                | GG                              | TT              | 1946778007               |
| SNP_P4_33551_30602304 | NC_021162.1    | Ca_kabuli_chr03 | 30602304                | TT                              | AA              | 1946778009               |
| SNP_P4_33553_30602366 | NC_021162.1    | Ca_kabuli_chr03 | 30602366                | AA                              | GG              | 1946778011               |

| SNPs IDs              | Chromosome IDs | Chromosomes     | Physical positions (bp) | CDC Frontier (Reference genome) | (ILWC46 & LPNB) | NCBI SNPdb Accession IDs |
|-----------------------|----------------|-----------------|-------------------------|---------------------------------|-----------------|--------------------------|
| SNP_P4_33554_30607460 | NC_021162.1    | Ca_kabuli_chr03 | 30607460                | AA                              | CC              | 1946778014               |
| SNP_P4_33555_30609231 | NC_021162.1    | Ca_kabuli_chr03 | 30609231                | CC                              | TT              | 1946778016               |
| SNP_P4_33556_30616581 | NC_021162.1    | Ca_kabuli_chr03 | 30616581                | TT                              | CC              | 1946778018               |
| SNP_P4_33557_30626462 | NC_021162.1    | Ca_kabuli_chr03 | 30626462                | TT                              | CC              | 1946778020               |
| SNP_P4_33558_30630165 | NC_021162.1    | Ca_kabuli_chr03 | 30630165                | TT                              | GG              | 1946778022               |
| SNP_P4_33559_30637349 | NC_021162.1    | Ca_kabuli_chr03 | 30637349                | AA                              | GG              | 1946778024               |
| SNP_P4_33560_30646505 | NC_021162.1    | Ca_kabuli_chr03 | 30646505                | GG                              | AA              | 1946778026               |
| SNP_P4_33562_30697303 | NC_021162.1    | Ca_kabuli_chr03 | 30697303                | AA                              | GG              | 1946778028               |
| SNP_P4_33563_30703408 | NC_021162.1    | Ca_kabuli_chr03 | 30703408                | CC                              | TT              | 1946778030               |
| SNP_P4_33565_30733177 | NC_021162.1    | Ca_kabuli_chr03 | 30733177                | AA                              | GG              | 1946778032               |
| SNP_P4_33566_30758138 | NC_021162.1    | Ca_kabuli_chr03 | 30758138                | CC                              | TT              | 1946778035               |
| SNP_P4_33569_30779182 | NC_021162.1    | Ca_kabuli_chr03 | 30779182                | TT                              | CC              | 1946778037               |
| SNP_P4_33572_30815376 | NC_021162.1    | Ca_kabuli_chr03 | 30815376                | GG                              | AA              | 1946778039               |
| SNP_P4_33573_30820175 | NC_021162.1    | Ca_kabuli_chr03 | 30820175                | TT                              | GG              | 1946778041               |
| SNP_P4_33574_30820176 | NC_021162.1    | Ca_kabuli_chr03 | 30820176                | TT                              | CC              | 1946778043               |
| SNP_P4_33575_30820186 | NC_021162.1    | Ca_kabuli_chr03 | 30820186                | GG                              | AA              | 1946778045               |
| SNP_P4_33576_30820208 | NC_021162.1    | Ca_kabuli_chr03 | 30820208                | AA                              | GG              | 1946778047               |
| SNP_P4_33578_30846355 | NC_021162.1    | Ca_kabuli_chr03 | 30846355                | CC                              | AA              | 1946778050               |
| SNP_P4_33579_30846404 | NC_021162.1    | Ca_kabuli_chr03 | 30846404                | AA                              | GG              | 1946778052               |
| SNP_P4_33580_30846471 | NC_021162.1    | Ca_kabuli_chr03 | 30846471                | TT                              | AA              | 1946778054               |
| SNP_P4_33581_30846658 | NC_021162.1    | Ca_kabuli_chr03 | 30846658                | CC                              | TT              | 1946778056               |
| SNP_P4_33582_30846708 | NC_021162.1    | Ca_kabuli_chr03 | 30846708                | CC                              | TT              | 1946778058               |
| SNP_P4_33583_30846773 | NC_021162.1    | Ca_kabuli_chr03 | 30846773                | AA                              | GG              | 1946778060               |
| SNP_P4_33584_30846791 | NC_021162.1    | Ca_kabuli_chr03 | 30846791                | TT                              | CC              | 1946778063               |
| SNP_P4_33585_30846803 | NC_021162.1    | Ca_kabuli_chr03 | 30846803                | AA                              | GG              | 1946778065               |
| SNP_P4_33586_30846854 | NC_021162.1    | Ca_kabuli_chr03 | 30846854                | AA                              | GG              | 1946778067               |
| SNP_P4_33587_30860805 | NC_021162.1    | Ca_kabuli_chr03 | 30860805                | TT                              | CC              | 1946778069               |
| SNP_P4_33588_30872345 | NC_021162.1    | Ca_kabuli_chr03 | 30872345                | AA                              | TT              | 1946778071               |
| SNP_P4_33589_30872441 | NC_021162.1    | Ca_kabuli_chr03 | 30872441                | TT                              | AA              | 1946778073               |
| SNP_P4_33592_30895072 | NC_021162.1    | Ca_kabuli_chr03 | 30895072                | CC                              | TT              | 1946778075               |
| SNP_P4_33593_30898282 | NC_021162.1    | Ca_kabuli_chr03 | 30898282                | GG                              | AA              | 1946778078               |
| SNP_P4_33595_30904753 | NC_021162.1    | Ca_kabuli_chr03 | 30904753                | TT                              | CC              | 1946778080               |
| SNP_P4_33596_30911006 | NC_021162.1    | Ca_kabuli_chr03 | 30911006                | AA                              | GG              | 1946778082               |
| SNP_P4_33597_30914138 | NC_021162.1    | Ca_kabuli_chr03 | 30914138                | CC                              | AA              | 1946778084               |
| SNP_P4_33598_30914139 | NC_021162.1    | Ca_kabuli_chr03 | 30914139                | CC                              | AA              | 1946778088               |
| SNP_P4_33600_30930645 | NC_021162.1    | Ca_kabuli_chr03 | 30930645                | TT                              | CC              | 1946778090               |
| SNP_P4_33601_30930912 | NC_021162.1    | Ca_kabuli_chr03 | 30930912                | GG                              | AA              | 1946778092               |
| SNP_P4_33604_30941677 | NC_021162.1    | Ca_kabuli_chr03 | 30941677                | GG                              | AA              | 1946778095               |
| SNP_P4_33605_30941679 | NC_021162.1    | Ca_kabuli_chr03 | 30941679                | AA                              | CC              | 1946778097               |
| SNP_P4_33607_30953574 | NC_021162.1    | Ca_kabuli_chr03 | 30953574                | TT                              | GG              | 1946778099               |
| SNP_P4_33608_31001745 | NC_021162.1    | Ca_kabuli_chr03 | 31001745                | CC                              | TT              | 1946778101               |
| SNP_P4_33609_31008715 | NC_021162.1    | Ca_kabuli_chr03 | 31008715                | TT                              | AA              | 1946778103               |

| SNPs IDs              | Chromosome IDs | Chromosomes     | Physical positions (bp) | CDC Frontier (Reference genome) | (ILWC46 & LPNB) | NCBI SNPdb Accession IDs |
|-----------------------|----------------|-----------------|-------------------------|---------------------------------|-----------------|--------------------------|
| SNP_P4_33610_31024307 | NC_021162.1    | Ca_kabuli_chr03 | 31024307                | TT                              | AA              | 1946778105               |
| SNP_P4_33611_31025237 | NC_021162.1    | Ca_kabuli_chr03 | 31025237                | TT                              | AA              | 1946778108               |
| SNP_P4_33612_31025240 | NC_021162.1    | Ca_kabuli_chr03 | 31025240                | TT                              | CC              | 1946778111               |
| SNP_P4_33614_31027358 | NC_021162.1    | Ca_kabuli_chr03 | 31027358                | AA                              | CC              | 1946778114               |
| SNP_P4_33615_31029006 | NC_021162.1    | Ca_kabuli_chr03 | 31029006                | AA                              | TT              | 1946778116               |
| SNP_P4_33617_31067424 | NC_021162.1    | Ca_kabuli_chr03 | 31067424                | GG                              | AA              | 1946778119               |
| SNP_P4_33620_31165509 | NC_021162.1    | Ca_kabuli_chr03 | 31165509                | TT                              | AA              | 1946778121               |
| SNP_P4_33622_31199054 | NC_021162.1    | Ca_kabuli_chr03 | 31199054                | TT                              | CC              | 1946778123               |
| SNP_P4_33625_31214385 | NC_021162.1    | Ca_kabuli_chr03 | 31214385                | GG                              | AA              | 1946778125               |
| SNP_P4_33626_31232521 | NC_021162.1    | Ca_kabuli_chr03 | 31232521                | GG                              | AA              | 1946778128               |
| SNP_P4_33627_31249948 | NC_021162.1    | Ca_kabuli_chr03 | 31249948                | CC                              | AA              | 1946778130               |
| SNP_P4_33629_31253697 | NC_021162.1    | Ca_kabuli_chr03 | 31253697                | CC                              | TT              | 1946778132               |
| SNP_P4_33630_31255493 | NC_021162.1    | Ca_kabuli_chr03 | 31255493                | GG                              | TT              | 1946778134               |
| SNP_P4_33631_31263216 | NC_021162.1    | Ca_kabuli_chr03 | 31263216                | AA                              | GG              | 1946778136               |
| SNP_P4_33633_31263534 | NC_021162.1    | Ca_kabuli_chr03 | 31263534                | TT                              | CC              | 1946778139               |
| SNP_P4_33634_31263892 | NC_021162.1    | Ca_kabuli_chr03 | 31263892                | GG                              | AA              | 1946778141               |
| SNP_P4_33636_31264365 | NC_021162.1    | Ca_kabuli_chr03 | 31264365                | TT                              | CC              | 1946778143               |
| SNP_P4_33637_31264695 | NC_021162.1    | Ca_kabuli_chr03 | 31264695                | AA                              | TT              | 1946778145               |
| SNP_P4_33638_31264735 | NC_021162.1    | Ca_kabuli_chr03 | 31264735                | GG                              | AA              | 1946778147               |
| SNP_P4_33639_31264918 | NC_021162.1    | Ca_kabuli_chr03 | 31264918                | AA                              | GG              | 1946778149               |
| SNP_P4_33640_31265162 | NC_021162.1    | Ca_kabuli_chr03 | 31265162                | AA                              | CC              | 1946778151               |
| SNP_P4_33641_31265678 | NC_021162.1    | Ca_kabuli_chr03 | 31265678                | AA                              | GG              | 1946778154               |
| SNP_P4_33642_31265693 | NC_021162.1    | Ca_kabuli_chr03 | 31265693                | AA                              | GG              | 1946778156               |
| SNP_P4_33643_31265700 | NC_021162.1    | Ca_kabuli_chr03 | 31265700                | AA                              | GG              | 1946778158               |
| SNP_P4_33644_31265716 | NC_021162.1    | Ca_kabuli_chr03 | 31265716                | CC                              | AA              | 1946778160               |
| SNP_P4_33645_31265741 | NC_021162.1    | Ca_kabuli_chr03 | 31265741                | GG                              | AA              | 1946778162               |
| SNP_P4_33646_31265757 | NC_021162.1    | Ca_kabuli_chr03 | 31265757                | CC                              | TT              | 1946778164               |
| SNP_P4_33647_31265786 | NC_021162.1    | Ca_kabuli_chr03 | 31265786                | GG                              | AA              | 1946778167               |
| SNP_P4_33648_31265789 | NC_021162.1    | Ca_kabuli_chr03 | 31265789                | AA                              | GG              | 1946778169               |
| SNP_P4_33650_31266959 | NC_021162.1    | Ca_kabuli_chr03 | 31266959                | CC                              | AA              | 1946778172               |
| SNP_P4_33651_31266963 | NC_021162.1    | Ca_kabuli_chr03 | 31266963                | AA                              | GG              | 1946778174               |
| SNP_P4_33652_31267137 | NC_021162.1    | Ca_kabuli_chr03 | 31267137                | AA                              | GG              | 1946778176               |
| SNP_P4_33653_31267241 | NC_021162.1    | Ca_kabuli_chr03 | 31267241                | GG                              | AA              | 1946778178               |
| SNP_P4_33654_31267251 | NC_021162.1    | Ca_kabuli_chr03 | 31267251                | TT                              | AA              | 1946778180               |
| SNP_P4_33655_31267257 | NC_021162.1    | Ca_kabuli_chr03 | 31267257                | TT                              | CC              | 1946778182               |
| SNP_P4_33656_31267348 | NC_021162.1    | Ca_kabuli_chr03 | 31267348                | TT                              | AA              | 1946778184               |
| SNP_P4_33657_31267361 | NC_021162.1    | Ca_kabuli_chr03 | 31267361                | AA                              | GG              | 1946778186               |
| SNP_P4_33658_31267477 | NC_021162.1    | Ca_kabuli_chr03 | 31267477                | GG                              | AA              | 1946778188               |
| SNP_P4_33659_31267675 | NC_021162.1    | Ca_kabuli_chr03 | 31267675                | AA                              | GG              | 1946778190               |
| SNP_P4_33660_31269034 | NC_021162.1    | Ca_kabuli_chr03 | 31269034                | CC                              | AA              | 1946778192               |
| SNP_P4_33661_31269640 | NC_021162.1    | Ca_kabuli_chr03 | 31269640                | TT                              | GG              | 1946778195               |
| SNP_P4_33662_31269867 | NC_021162.1    | Ca_kabuli_chr03 | 31269867                | CC                              | AA              | 1946778197               |

| SNPs IDs              | Chromosome IDs | Chromosomes     | Physical positions (bp) | CDC Frontier (Reference genome) | (ILWC46 & LPNB) | NCBI SNPdb Accession IDs |
|-----------------------|----------------|-----------------|-------------------------|---------------------------------|-----------------|--------------------------|
| SNP_P4_33663_31269885 | NC_021162.1    | Ca_kabuli_chr03 | 31269885                | CC                              | TT              | 1946778199               |
| SNP_P4_33664_31270189 | NC_021162.1    | Ca_kabuli_chr03 | 31270189                | TT                              | CC              | 1946778201               |
| SNP_P4_33665_31270653 | NC_021162.1    | Ca_kabuli_chr03 | 31270653                | GG                              | TT              | 1946778203               |
| SNP_P4_33666_31270688 | NC_021162.1    | Ca_kabuli_chr03 | 31270688                | AA                              | GG              | 1946778205               |
| SNP_P4_33667_31270804 | NC_021162.1    | Ca_kabuli_chr03 | 31270804                | AA                              | GG              | 1946778208               |
| SNP_P4_33668_31271211 | NC_021162.1    | Ca_kabuli_chr03 | 31271211                | TT                              | AA              | 1946778212               |
| SNP_P4_33669_31272160 | NC_021162.1    | Ca_kabuli_chr03 | 31272160                | CC                              | TT              | 1946778214               |
| SNP_P4_33670_31272161 | NC_021162.1    | Ca_kabuli_chr03 | 31272161                | AA                              | GG              | 1946778216               |
| SNP_P4_33671_31272591 | NC_021162.1    | Ca_kabuli_chr03 | 31272591                | GG                              | AA              | 1946778218               |
| SNP_P4_33672_31272631 | NC_021162.1    | Ca_kabuli_chr03 | 31272631                | TT                              | CC              | 1946778221               |
| SNP_P4_33673_31273214 | NC_021162.1    | Ca_kabuli_chr03 | 31273214                | AA                              | TT              | 1946778223               |
| SNP_P4_33674_31273681 | NC_021162.1    | Ca_kabuli_chr03 | 31273681                | TT                              | CC              | 1946778226               |
| SNP_P4_33675_31273697 | NC_021162.1    | Ca_kabuli_chr03 | 31273697                | GG                              | AA              | 1946778228               |
| SNP_P4_33676_31273729 | NC_021162.1    | Ca_kabuli_chr03 | 31273729                | GG                              | CC              | 1946778230               |
| SNP_P4_33677_31273827 | NC_021162.1    | Ca_kabuli_chr03 | 31273827                | CC                              | TT              | 1946778232               |
| SNP_P4_33678_31273947 | NC_021162.1    | Ca_kabuli_chr03 | 31273947                | TT                              | CC              | 1946778234               |
| SNP_P4_33679_31274153 | NC_021162.1    | Ca_kabuli_chr03 | 31274153                | TT                              | AA              | 1946778236               |
| SNP_P4_33680_31274179 | NC_021162.1    | Ca_kabuli_chr03 | 31274179                | CC                              | TT              | 1946778238               |
| SNP_P4_33681_31274188 | NC_021162.1    | Ca_kabuli_chr03 | 31274188                | TT                              | GG              | 1946778241               |
| SNP_P4_33682_31280326 | NC_021162.1    | Ca_kabuli_chr03 | 31280326                | AA                              | GG              | 1946778243               |
| SNP_P4_33684_31280649 | NC_021162.1    | Ca_kabuli_chr03 | 31280649                | CC                              | TT              | 1946778246               |
| SNP_P4_33685_31280834 | NC_021162.1    | Ca_kabuli_chr03 | 31280834                | TT                              | AA              | 1946778248               |
| SNP_P4_33686_31282372 | NC_021162.1    | Ca_kabuli_chr03 | 31282372                | GG                              | TT              | 1946778250               |
| SNP_P4_33687_31282389 | NC_021162.1    | Ca_kabuli_chr03 | 31282389                | CC                              | TT              | 1946778252               |
| SNP_P4_33688_31283794 | NC_021162.1    | Ca_kabuli_chr03 | 31283794                | AA                              | GG              | 1946778255               |
| SNP_P4_33689_31283899 | NC_021162.1    | Ca_kabuli_chr03 | 31283899                | TT                              | GG              | 1946778257               |
| SNP_P4_33690_31284694 | NC_021162.1    | Ca_kabuli_chr03 | 31284694                | TT                              | CC              | 1946778259               |
| SNP_P4_33691_31285114 | NC_021162.1    | Ca_kabuli_chr03 | 31285114                | TT                              | CC              | 1946778263               |
| SNP_P4_33692_31286175 | NC_021162.1    | Ca_kabuli_chr03 | 31286175                | AA                              | TT              | 1946778265               |
| SNP_P4_33693_31286462 | NC_021162.1    | Ca_kabuli_chr03 | 31286462                | GG                              | TT              | 1946778267               |
| SNP_P4_33694_31286979 | NC_021162.1    | Ca_kabuli_chr03 | 31286979                | AA                              | GG              | 1946778269               |
| SNP_P4_33695_31287043 | NC_021162.1    | Ca_kabuli_chr03 | 31287043                | GG                              | AA              | 1946778271               |
| SNP_P4_33696_31287257 | NC_021162.1    | Ca_kabuli_chr03 | 31287257                | TT                              | CC              | 1946778273               |
| SNP_P4_33697_31289218 | NC_021162.1    | Ca_kabuli_chr03 | 31289218                | CC                              | GG              | 1946778275               |
| SNP_P4_33698_31289700 | NC_021162.1    | Ca_kabuli_chr03 | 31289700                | TT                              | AA              | 1946778278               |
| SNP_P4_33699_31289701 | NC_021162.1    | Ca_kabuli_chr03 | 31289701                | CC                              | AA              | 1946778281               |
| SNP_P4_33700_31289786 | NC_021162.1    | Ca_kabuli_chr03 | 31289786                | AA                              | CC              | 1946778283               |
| SNP_P4_33701_31289809 | NC_021162.1    | Ca_kabuli_chr03 | 31289809                | CC                              | TT              | 1946778285               |
| SNP_P4_33702_31290054 | NC_021162.1    | Ca_kabuli_chr03 | 31290054                | GG                              | AA              | 1946778287               |
| SNP_P4_33703_31290289 | NC_021162.1    | Ca_kabuli_chr03 | 31290289                | CC                              | TT              | 1946778290               |
| SNP_P4_33705_31290422 | NC_021162.1    | Ca_kabuli_chr03 | 31290422                | CC                              | TT              | 1946778292               |
| SNP_P4_33707_31291245 | NC_021162.1    | Ca_kabuli_chr03 | 31291245                | AA                              | GG              | 1946778294               |

| SNPs IDs              | Chromosome IDs | Chromosomes     | Physical positions (bp) | CDC Frontier (Reference genome) | (ILWC46 & LPNB) | NCBI SNPdb Accession IDs |
|-----------------------|----------------|-----------------|-------------------------|---------------------------------|-----------------|--------------------------|
| SNP_P4_33708_31291520 | NC_021162.1    | Ca_kabuli_chr03 | 31291520                | TT                              | CC              | 1946778296               |
| SNP_P4_33710_31291883 | NC_021162.1    | Ca_kabuli_chr03 | 31291883                | AA                              | GG              | 1946778298               |
| SNP_P4_33711_31291923 | NC_021162.1    | Ca_kabuli_chr03 | 31291923                | TT                              | GG              | 1946778301               |
| SNP_P4_33712_31292114 | NC_021162.1    | Ca_kabuli_chr03 | 31292114                | TT                              | AA              | 1946778303               |
| SNP_P4_33713_31292203 | NC_021162.1    | Ca_kabuli_chr03 | 31292203                | AA                              | GG              | 1946778305               |
| SNP_P4_33714_31292417 | NC_021162.1    | Ca_kabuli_chr03 | 31292417                | TT                              | CC              | 1946778307               |
| SNP_P4_33715_31292445 | NC_021162.1    | Ca_kabuli_chr03 | 31292445                | AA                              | GG              | 1946778309               |
| SNP_P4_33717_31292549 | NC_021162.1    | Ca_kabuli_chr03 | 31292549                | AA                              | GG              | 1946778311               |
| SNP_P4_33718_31292811 | NC_021162.1    | Ca_kabuli_chr03 | 31292811                | GG                              | TT              | 1946778313               |
| SNP_P4_33719_31292819 | NC_021162.1    | Ca_kabuli_chr03 | 31292819                | CC                              | TT              | 1946778316               |
| SNP_P4_33720_31292953 | NC_021162.1    | Ca_kabuli_chr03 | 31292953                | GG                              | AA              | 1946778318               |
| SNP_P4_33721_31292966 | NC_021162.1    | Ca_kabuli_chr03 | 31292966                | TT                              | GG              | 1946778320               |
| SNP_P4_33722_31293230 | NC_021162.1    | Ca_kabuli_chr03 | 31293230                | CC                              | TT              | 1946778322               |
| SNP_P4_33723_31293245 | NC_021162.1    | Ca_kabuli_chr03 | 31293245                | CC                              | TT              | 1946778324               |
| SNP_P4_33724_31293257 | NC_021162.1    | Ca_kabuli_chr03 | 31293257                | CC                              | TT              | 1946778326               |
| SNP_P4_33725_31293260 | NC_021162.1    | Ca_kabuli_chr03 | 31293260                | AA                              | GG              | 1946778328               |
| SNP_P4_33726_31293439 | NC_021162.1    | Ca_kabuli_chr03 | 31293439                | TT                              | GG              | 1946778332               |
| SNP_P4_33727_31293451 | NC_021162.1    | Ca_kabuli_chr03 | 31293451                | GG                              | TT              | 1946778334               |
| SNP_P4_33729_31293463 | NC_021162.1    | Ca_kabuli_chr03 | 31293463                | AA                              | GG              | 1946778336               |
| SNP_P4_33731_31293587 | NC_021162.1    | Ca_kabuli_chr03 | 31293587                | CC                              | TT              | 1946778338               |
| SNP_P4_33733_31294253 | NC_021162.1    | Ca_kabuli_chr03 | 31294253                | GG                              | TT              | 1946778340               |
| SNP_P4_33734_31294278 | NC_021162.1    | Ca_kabuli_chr03 | 31294278                | TT                              | CC              | 1946778342               |
| SNP_P4_33735_31294283 | NC_021162.1    | Ca_kabuli_chr03 | 31294283                | AA                              | GG              | 1946778344               |
| SNP_P4_33736_31294456 | NC_021162.1    | Ca_kabuli_chr03 | 31294456                | GG                              | AA              | 1946778346               |
| SNP_P4_33738_31294721 | NC_021162.1    | Ca_kabuli_chr03 | 31294721                | GG                              | AA              | 1946778348               |
| SNP_P4_33739_31294749 | NC_021162.1    | Ca_kabuli_chr03 | 31294749                | GG                              | TT              | 1946778350               |
| SNP_P4_33740_31294832 | NC_021162.1    | Ca_kabuli_chr03 | 31294832                | AA                              | CC              | 1946778352               |
| SNP_P4_33741_31294928 | NC_021162.1    | Ca_kabuli_chr03 | 31294928                | TT                              | CC              | 1946778355               |
| SNP_P4_33742_31294932 | NC_021162.1    | Ca_kabuli_chr03 | 31294932                | AA                              | TT              | 1946778357               |
| SNP_P4_33743_31294938 | NC_021162.1    | Ca_kabuli_chr03 | 31294938                | CC                              | TT              | 1946778359               |
| SNP_P4_33744_31294950 | NC_021162.1    | Ca_kabuli_chr03 | 31294950                | TT                              | CC              | 1946778361               |
| SNP_P4_33745_31295977 | NC_021162.1    | Ca_kabuli_chr03 | 31295977                | TT                              | AA              | 1946778363               |
| SNP_P4_33746_31296051 | NC_021162.1    | Ca_kabuli_chr03 | 31296051                | CC                              | TT              | 1946778365               |
| SNP_P4_33747_31296076 | NC_021162.1    | Ca_kabuli_chr03 | 31296076                | TT                              | GG              | 1946778367               |
| SNP_P4_33748_31296272 | NC_021162.1    | Ca_kabuli_chr03 | 31296272                | AA                              | GG              | 1946778369               |
| SNP_P4_33749_31296426 | NC_021162.1    | Ca_kabuli_chr03 | 31296426                | TT                              | CC              | 1946778372               |
| SNP_P4_33750_31296677 | NC_021162.1    | Ca_kabuli_chr03 | 31296677                | AA                              | GG              | 1946778374               |
| SNP_P4_33751_31296746 | NC_021162.1    | Ca_kabuli_chr03 | 31296746                | TT                              | CC              | 1946778376               |
| SNP_P4_33752_31296779 | NC_021162.1    | Ca_kabuli_chr03 | 31296779                | TT                              | CC              | 1946778378               |
| SNP_P4_33753_31296948 | NC_021162.1    | Ca_kabuli_chr03 | 31296948                | GG                              | CC              | 1946778380               |
| SNP_P4_33754_31296954 | NC_021162.1    | Ca_kabuli_chr03 | 31296954                | GG                              | AA              | 1946778382               |
| SNP_P4_33755_31296983 | NC_021162.1    | Ca_kabuli_chr03 | 31296983                | GG                              | AA              | 1946778384               |

| SNPs IDs              | Chromosome IDs | Chromosomes     | Physical positions (bp) | CDC Frontier (Reference genome) | (ILWC46 & LPNB) | NCBI SNPdb Accession IDs |
|-----------------------|----------------|-----------------|-------------------------|---------------------------------|-----------------|--------------------------|
| SNP_P4_33756_31297508 | NC_021162.1    | Ca_kabuli_chr03 | 31297508                | AA                              | CC              | 1946778386               |
| SNP_P4_33757_31297631 | NC_021162.1    | Ca_kabuli_chr03 | 31297631                | GG                              | AA              | 1946778389               |
| SNP_P4_33758_31297636 | NC_021162.1    | Ca_kabuli_chr03 | 31297636                | CC                              | GG              | 1946778391               |
| SNP_P4_33760_31298335 | NC_021162.1    | Ca_kabuli_chr03 | 31298335                | CC                              | TT              | 1946778393               |
| SNP_P4_33761_31298521 | NC_021162.1    | Ca_kabuli_chr03 | 31298521                | TT                              | CC              | 1946778395               |
| SNP_P4_33762_31299284 | NC_021162.1    | Ca_kabuli_chr03 | 31299284                | CC                              | AA              | 1946778398               |
| SNP_P4_33763_31299285 | NC_021162.1    | Ca_kabuli_chr03 | 31299285                | CC                              | GG              | 1946778400               |
| SNP_P4_33764_31299995 | NC_021162.1    | Ca_kabuli_chr03 | 31299995                | AA                              | GG              | 1946778402               |
| SNP_P4_33765_31300022 | NC_021162.1    | Ca_kabuli_chr03 | 31300022                | TT                              | GG              | 1946778403               |
| SNP_P4_33766_31300027 | NC_021162.1    | Ca_kabuli_chr03 | 31300027                | CC                              | TT              | 1946778406               |
| SNP_P4_33767_31302329 | NC_021162.1    | Ca_kabuli_chr03 | 31302329                | TT                              | AA              | 1946778408               |
| SNP_P4_33768_31302625 | NC_021162.1    | Ca_kabuli_chr03 | 31302625                | CC                              | TT              | 1946778410               |
| SNP_P4_33769_31302712 | NC_021162.1    | Ca_kabuli_chr03 | 31302712                | CC                              | TT              | 1946778412               |
| SNP_P4_33770_31303607 | NC_021162.1    | Ca_kabuli_chr03 | 31303607                | AA                              | CC              | 1946778414               |
| SNP_P4_33771_31303618 | NC_021162.1    | Ca_kabuli_chr03 | 31303618                | TT                              | CC              | 1946778416               |
| SNP_P4_33773_31306317 | NC_021162.1    | Ca_kabuli_chr03 | 31306317                | AA                              | TT              | 1946778418               |
| SNP_P4_33774_31306860 | NC_021162.1    | Ca_kabuli_chr03 | 31306860                | GG                              | TT              | 1946778420               |
| SNP_P4_33775_31306865 | NC_021162.1    | Ca_kabuli_chr03 | 31306865                | CC                              | GG              | 1946778422               |
| SNP_P4_33776_31306923 | NC_021162.1    | Ca_kabuli_chr03 | 31306923                | TT                              | AA              | 1946778424               |
| SNP_P4_33777_31306951 | NC_021162.1    | Ca_kabuli_chr03 | 31306951                | AA                              | CC              | 1946778427               |
| SNP_P4_33778_31307381 | NC_021162.1    | Ca_kabuli_chr03 | 31307381                | AA                              | TT              | 1946778429               |
| SNP_P4_33779_31310453 | NC_021162.1    | Ca_kabuli_chr03 | 31310453                | CC                              | AA              | 1946778431               |
| SNP_P4_33780_31310504 | NC_021162.1    | Ca_kabuli_chr03 | 31310504                | CC                              | TT              | 1946778434               |
| SNP_P4_33781_31313906 | NC_021162.1    | Ca_kabuli_chr03 | 31313906                | TT                              | CC              | 1946778437               |
| SNP_P4_33782_31313914 | NC_021162.1    | Ca_kabuli_chr03 | 31313914                | TT                              | CC              | 1946778439               |
| SNP_P4_33783_31315015 | NC_021162.1    | Ca_kabuli_chr03 | 31315015                | GG                              | TT              | 1946778441               |
| SNP_P4_33784_31315087 | NC_021162.1    | Ca_kabuli_chr03 | 31315087                | TT                              | AA              | 1946778445               |
| SNP_P4_33785_31315297 | NC_021162.1    | Ca_kabuli_chr03 | 31315297                | CC                              | GG              | 1946778447               |
| SNP_P4_33786_31315313 | NC_021162.1    | Ca_kabuli_chr03 | 31315313                | CC                              | TT              | 1946778449               |
| SNP_P4_33787_31320605 | NC_021162.1    | Ca_kabuli_chr03 | 31320605                | TT                              | CC              | 1946778451               |
| SNP_P4_33788_31320639 | NC_021162.1    | Ca_kabuli_chr03 | 31320639                | GG                              | TT              | 1946778453               |
| SNP_P4_33789_31321077 | NC_021162.1    | Ca_kabuli_chr03 | 31321077                | TT                              | GG              | 1946778455               |
| SNP_P4_33790_31321540 | NC_021162.1    | Ca_kabuli_chr03 | 31321540                | AA                              | GG              | 1946778457               |
| SNP_P4_33791_31321877 | NC_021162.1    | Ca_kabuli_chr03 | 31321877                | GG                              | AA              | 1946778459               |
| SNP_P4_33793_31322858 | NC_021162.1    | Ca_kabuli_chr03 | 31322858                | CC                              | TT              | 1946778461               |
| SNP_P4_33794_31322900 | NC_021162.1    | Ca_kabuli_chr03 | 31322900                | AA                              | TT              | 1946778463               |
| SNP_P4_33795_31322921 | NC_021162.1    | Ca_kabuli_chr03 | 31322921                | CC                              | TT              | 1946778466               |
| SNP_P4_33796_31322962 | NC_021162.1    | Ca_kabuli_chr03 | 31322962                | AA                              | TT              | 1946778468               |
| SNP_P4_33797_31322967 | NC_021162.1    | Ca_kabuli_chr03 | 31322967                | CC                              | TT              | 1946778470               |
| SNP_P4_33800_31323305 | NC_021162.1    | Ca_kabuli_chr03 | 31323305                | TT                              | AA              | 1946778472               |
| SNP_P4_33801_31323310 | NC_021162.1    | Ca_kabuli_chr03 | 31323310                | GG                              | CC              | 1946778474               |
| SNP_P4_33802_31323364 | NC_021162.1    | Ca_kabuli_chr03 | 31323364                | AA                              | GG              | 1946778477               |

| SNPs IDs              | Chromosome IDs | Chromosomes     | Physical positions (bp) | CDC Frontier (Reference genome) | (ILWC46 & LPNB) | NCBI SNPdb Accession IDs |
|-----------------------|----------------|-----------------|-------------------------|---------------------------------|-----------------|--------------------------|
| SNP_P4_33803_31323398 | NC_021162.1    | Ca_kabuli_chr03 | 31323398                | GG                              | AA              | 1946778479               |
| SNP_P4_33804_31323446 | NC_021162.1    | Ca_kabuli_chr03 | 31323446                | TT                              | AA              | 1946778481               |
| SNP_P4_33805_31323608 | NC_021162.1    | Ca_kabuli_chr03 | 31323608                | TT                              | CC              | 1946778483               |
| SNP_P4_33806_31323685 | NC_021162.1    | Ca_kabuli_chr03 | 31323685                | TT                              | AA              | 1946778485               |
| SNP_P4_33810_31327588 | NC_021162.1    | Ca_kabuli_chr03 | 31327588                | AA                              | GG              | 1946778487               |
| SNP_P4_33811_31328393 | NC_021162.1    | Ca_kabuli_chr03 | 31328393                | GG                              | AA              | 1946778489               |
| SNP_P4_33812_31328805 | NC_021162.1    | Ca_kabuli_chr03 | 31328805                | GG                              | AA              | 1946778491               |
| SNP_P4_33813_31330293 | NC_021162.1    | Ca_kabuli_chr03 | 31330293                | TT                              | CC              | 1946778493               |
| SNP_P4_33814_31330308 | NC_021162.1    | Ca_kabuli_chr03 | 31330308                | CC                              | TT              | 1946778495               |
| SNP_P4_33815_31330311 | NC_021162.1    | Ca_kabuli_chr03 | 31330311                | AA                              | CC              | 1946778497               |
| SNP_P4_33816_31330913 | NC_021162.1    | Ca_kabuli_chr03 | 31330913                | TT                              | GG              | 1946778499               |
| SNP_P4_33817_31330953 | NC_021162.1    | Ca_kabuli_chr03 | 31330953                | AA                              | TT              | 1946778501               |
| SNP_P4_33818_31331318 | NC_021162.1    | Ca_kabuli_chr03 | 31331318                | TT                              | AA              | 1946778503               |
| SNP_P4_33819_31333461 | NC_021162.1    | Ca_kabuli_chr03 | 31333461                | CC                              | TT              | 1946778505               |
| SNP_P4_33820_31333735 | NC_021162.1    | Ca_kabuli_chr03 | 31333735                | GG                              | TT              | 1946778507               |
| SNP_P4_33821_31333747 | NC_021162.1    | Ca_kabuli_chr03 | 31333747                | GG                              | AA              | 1946778511               |
| SNP_P4_33822_31333780 | NC_021162.1    | Ca_kabuli_chr03 | 31333780                | GG                              | AA              | 1946778513               |
| SNP_P4_33823_31334180 | NC_021162.1    | Ca_kabuli_chr03 | 31334180                | AA                              | GG              | 1946778515               |
| SNP_P4_33824_31335345 | NC_021162.1    | Ca_kabuli_chr03 | 31335345                | CC                              | AA              | 1946778517               |
| SNP_P4_33825_31335417 | NC_021162.1    | Ca_kabuli_chr03 | 31335417                | GG                              | AA              | 1946778519               |
| SNP_P4_33826_31336040 | NC_021162.1    | Ca_kabuli_chr03 | 31336040                | CC                              | TT              | 1946778521               |
| SNP_P4_33827_31336115 | NC_021162.1    | Ca_kabuli_chr03 | 31336115                | TT                              | AA              | 1946778523               |
| SNP_P4_33829_31336940 | NC_021162.1    | Ca_kabuli_chr03 | 31336940                | AA                              | TT              | 1946778525               |
| SNP_P4_33830_31336986 | NC_021162.1    | Ca_kabuli_chr03 | 31336986                | CC                              | AA              | 1946778527               |
| SNP_P4_33831_31337633 | NC_021162.1    | Ca_kabuli_chr03 | 31337633                | GG                              | CC              | 1946778529               |
| SNP_P4_33832_31337681 | NC_021162.1    | Ca_kabuli_chr03 | 31337681                | AA                              | GG              | 1946778531               |
| SNP_P4_33833_31337952 | NC_021162.1    | Ca_kabuli_chr03 | 31337952                | AA                              | GG              | 1946778533               |
| SNP_P4_33835_31338641 | NC_021162.1    | Ca_kabuli_chr03 | 31338641                | CC                              | TT              | 1946778535               |
| SNP_P4_33836_31338780 | NC_021162.1    | Ca_kabuli_chr03 | 31338780                | CC                              | GG              | 1946778537               |
| SNP_P4_33837_31339155 | NC_021162.1    | Ca_kabuli_chr03 | 31339155                | AA                              | GG              | 1946778539               |
| SNP_P4_33839_31339276 | NC_021162.1    | Ca_kabuli_chr03 | 31339276                | TT                              | CC              | 1946778541               |
| SNP_P4_33840_31339375 | NC_021162.1    | Ca_kabuli_chr03 | 31339375                | AA                              | TT              | 1946778543               |
| SNP_P4_33841_31339388 | NC_021162.1    | Ca_kabuli_chr03 | 31339388                | TT                              | GG              | 1946778545               |
| SNP_P4_33842_31339569 | NC_021162.1    | Ca_kabuli_chr03 | 31339569                | CC                              | TT              | 1946778547               |
| SNP_P4_33843_31339616 | NC_021162.1    | Ca_kabuli_chr03 | 31339616                | CC                              | TT              | 1946778549               |
| SNP_P4_33844_31339644 | NC_021162.1    | Ca_kabuli_chr03 | 31339644                | AA                              | TT              | 1946778551               |
| SNP_P4_33846_31339698 | NC_021162.1    | Ca_kabuli_chr03 | 31339698                | GG                              | AA              | 1946778553               |
| SNP_P4_33847_31339739 | NC_021162.1    | Ca_kabuli_chr03 | 31339739                | AA                              | TT              | 1946778555               |
| SNP_P4_33848_31339777 | NC_021162.1    | Ca_kabuli_chr03 | 31339777                | AA                              | GG              | 1946778557               |
| SNP_P4_33849_31339788 | NC_021162.1    | Ca_kabuli_chr03 | 31339788                | GG                              | TT              | 1946778559               |
| SNP_P4_33850_31339821 | NC_021162.1    | Ca_kabuli_chr03 | 31339821                | CC                              | AA              | 1946778562               |
| SNP_P4_33851_31339824 | NC_021162.1    | Ca_kabuli_chr03 | 31339824                | AA                              | GG              | 1946778564               |

| SNPs IDs              | Chromosome IDs | Chromosomes     | Physical positions (bp) | CDC Frontier (Reference genome) | (ILWC46 & LPNB) | NCBI SNPdb Accession IDs |
|-----------------------|----------------|-----------------|-------------------------|---------------------------------|-----------------|--------------------------|
| SNP_P4_33852_31339975 | NC_021162.1    | Ca_kabuli_chr03 | 31339975                | GG                              | TT              | 1946778566               |
| SNP_P4_33854_31343546 | NC_021162.1    | Ca_kabuli_chr03 | 31343546                | TT                              | CC              | 1946778568               |
| SNP_P4_33855_31343571 | NC_021162.1    | Ca_kabuli_chr03 | 31343571                | TT                              | CC              | 1946778570               |
| SNP_P4_33856_31343824 | NC_021162.1    | Ca_kabuli_chr03 | 31343824                | TT                              | CC              | 1946778572               |
| SNP_P4_33857_31344013 | NC_021162.1    | Ca_kabuli_chr03 | 31344013                | TT                              | CC              | 1946778574               |
| SNP_P4_33859_31344624 | NC_021162.1    | Ca_kabuli_chr03 | 31344624                | CC                              | TT              | 1946778577               |
| SNP_P4_33860_31344961 | NC_021162.1    | Ca_kabuli_chr03 | 31344961                | GG                              | TT              | 1946778579               |
| SNP_P4_33862_31345588 | NC_021162.1    | Ca_kabuli_chr03 | 31345588                | GG                              | TT              | 1946778581               |
| SNP_P4_33863_31346106 | NC_021162.1    | Ca_kabuli_chr03 | 31346106                | CC                              | TT              | 1946778583               |
| SNP_P4_33864_31347200 | NC_021162.1    | Ca_kabuli_chr03 | 31347200                | TT                              | GG              | 1946778585               |
| SNP_P4_33865_31347748 | NC_021162.1    | Ca_kabuli_chr03 | 31347748                | AA                              | GG              | 1946778587               |
| SNP_P4_33866_31347752 | NC_021162.1    | Ca_kabuli_chr03 | 31347752                | GG                              | CC              | 1946778589               |
| SNP_P4_33867_31347759 | NC_021162.1    | Ca_kabuli_chr03 | 31347759                | AA                              | CC              | 1946778592               |
| SNP_P4_33868_31347946 | NC_021162.1    | Ca_kabuli_chr03 | 31347946                | AA                              | GG              | 1946778594               |
| SNP_P4_33869_31347960 | NC_021162.1    | Ca_kabuli_chr03 | 31347960                | TT                              | AA              | 1946778596               |
| SNP_P4_33870_31347964 | NC_021162.1    | Ca_kabuli_chr03 | 31347964                | TT                              | AA              | 1946778598               |
| SNP_P4_33871_31347965 | NC_021162.1    | Ca_kabuli_chr03 | 31347965                | TT                              | CC              | 1946778600               |
| SNP_P4_33873_31348150 | NC_021162.1    | Ca_kabuli_chr03 | 31348150                | TT                              | AA              | 1946778602               |
| SNP_P4_33874_31348304 | NC_021162.1    | Ca_kabuli_chr03 | 31348304                | GG                              | TT              | 1946778604               |
| SNP_P4_33875_31348426 | NC_021162.1    | Ca_kabuli_chr03 | 31348426                | TT                              | CC              | 1946778606               |
| SNP_P4_33876_31348439 | NC_021162.1    | Ca_kabuli_chr03 | 31348439                | CC                              | TT              | 1946778608               |
| SNP_P4_33877_31348442 | NC_021162.1    | Ca_kabuli_chr03 | 31348442                | CC                              | AA              | 1946778611               |
| SNP_P4_33878_31348546 | NC_021162.1    | Ca_kabuli_chr03 | 31348546                | AA                              | GG              | 1946778613               |
| SNP_P4_33879_31348561 | NC_021162.1    | Ca_kabuli_chr03 | 31348561                | AA                              | CC              | 1946778615               |
| SNP_P4_33880_31348574 | NC_021162.1    | Ca_kabuli_chr03 | 31348574                | GG                              | AA              | 1946778617               |
| SNP_P4_33881_31348595 | NC_021162.1    | Ca_kabuli_chr03 | 31348595                | AA                              | CC              | 1946778619               |
| SNP_P4_33882_31348817 | NC_021162.1    | Ca_kabuli_chr03 | 31348817                | AA                              | CC              | 1946778621               |
| SNP_P4_33883_31348829 | NC_021162.1    | Ca_kabuli_chr03 | 31348829                | TT                              | CC              | 1946778623               |
| SNP_P4_33884_31350194 | NC_021162.1    | Ca_kabuli_chr03 | 31350194                | GG                              | AA              | 1946778625               |
| SNP_P4_33885_31350635 | NC_021162.1    | Ca_kabuli_chr03 | 31350635                | CC                              | TT              | 1946778627               |
| SNP_P4_33887_31351481 | NC_021162.1    | Ca_kabuli_chr03 | 31351481                | AA                              | GG              | 1946778629               |
| SNP_P4_33888_31351501 | NC_021162.1    | Ca_kabuli_chr03 | 31351501                | TT                              | CC              | 1946778631               |
| SNP_P4_33889_31352927 | NC_021162.1    | Ca_kabuli_chr03 | 31352927                | GG                              | TT              | 1946778634               |
| SNP_P4_33890_31353425 | NC_021162.1    | Ca_kabuli_chr03 | 31353425                | AA                              | TT              | 1946778636               |
| SNP_P4_33891_31353463 | NC_021162.1    | Ca_kabuli_chr03 | 31353463                | AA                              | GG              | 1946778638               |
| SNP_P4_33892_31354627 | NC_021162.1    | Ca_kabuli_chr03 | 31354627                | GG                              | CC              | 1946778640               |
| SNP_P4_33893_31355246 | NC_021162.1    | Ca_kabuli_chr03 | 31355246                | CC                              | TT              | 1946778642               |
| SNP_P4_33894_31356233 | NC_021162.1    | Ca_kabuli_chr03 | 31356233                | AA                              | GG              | 1946778644               |
| SNP_P4_33895_31356423 | NC_021162.1    | Ca_kabuli_chr03 | 31356423                | TT                              | GG              | 1946778646               |
| SNP_P4_33897_31357212 | NC_021162.1    | Ca_kabuli_chr03 | 31357212                | GG                              | AA              | 1946778648               |
| SNP_P4_33898_31359013 | NC_021162.1    | Ca_kabuli_chr03 | 31359013                | CC                              | TT              | 1946778650               |
| SNP_P4_33899_31359077 | NC_021162.1    | Ca_kabuli_chr03 | 31359077                | AA                              | CC              | 1946778652               |



| SNPs IDs              | Chromosome IDs | Chromosomes     | Physical positions (bp) | CDC Frontier (Reference genome) | (ILWC46 & LPNB) | NCBI SNPdb Accession IDs |
|-----------------------|----------------|-----------------|-------------------------|---------------------------------|-----------------|--------------------------|
| SNP_P4_33900_31359081 | NC_021162.1    | Ca_kabuli_chr03 | 31359081                | TT                              | CC              | 1946778655               |
| SNP_P4_33901_31359087 | NC_021162.1    | Ca_kabuli_chr03 | 31359087                | GG                              | AA              | 1946778657               |
| SNP_P4_33902_31359315 | NC_021162.1    | Ca_kabuli_chr03 | 31359315                | GG                              | AA              | 1946778659               |
| SNP_P4_33905_31366700 | NC_021162.1    | Ca_kabuli_chr03 | 31366700                | AA                              | GG              | 1946778661               |
| SNP_P4_33906_31366896 | NC_021162.1    | Ca_kabuli_chr03 | 31366896                | CC                              | TT              | 1946778663               |
| SNP_P4_33907_31366985 | NC_021162.1    | Ca_kabuli_chr03 | 31366985                | CC                              | AA              | 1946778665               |
| SNP_P4_33908_31367026 | NC_021162.1    | Ca_kabuli_chr03 | 31367026                | TT                              | CC              | 1946778667               |
| SNP_P4_33909_31367108 | NC_021162.1    | Ca_kabuli_chr03 | 31367108                | TT                              | GG              | 1946778669               |
| SNP_P4_33910_31367676 | NC_021162.1    | Ca_kabuli_chr03 | 31367676                | TT                              | GG              | 1946778671               |
| SNP_P4_33911_31367678 | NC_021162.1    | Ca_kabuli_chr03 | 31367678                | AA                              | TT              | 1946778673               |
| SNP_P4_33913_31368814 | NC_021162.1    | Ca_kabuli_chr03 | 31368814                | CC                              | TT              | 1946778675               |
| SNP_P4_33914_31370795 | NC_021162.1    | Ca_kabuli_chr03 | 31370795                | GG                              | AA              | 1946778677               |
| SNP_P4_33915_31371009 | NC_021162.1    | Ca_kabuli_chr03 | 31371009                | CC                              | TT              | 1946778679               |
| SNP_P4_33916_31371021 | NC_021162.1    | Ca_kabuli_chr03 | 31371021                | CC                              | TT              | 1946778681               |
| SNP_P4_33917_31371051 | NC_021162.1    | Ca_kabuli_chr03 | 31371051                | AA                              | CC              | 1946778683               |
| SNP_P4_33918_31371067 | NC_021162.1    | Ca_kabuli_chr03 | 31371067                | TT                              | GG              | 1946778685               |
| SNP_P4_33919_31371244 | NC_021162.1    | Ca_kabuli_chr03 | 31371244                | AA                              | GG              | 1946778687               |
| SNP_P4_33920_31371288 | NC_021162.1    | Ca_kabuli_chr03 | 31371288                | TT                              | AA              | 1946778689               |
| SNP_P4_33921_31371541 | NC_021162.1    | Ca_kabuli_chr03 | 31371541                | CC                              | TT              | 1946778691               |
| SNP_P4_33922_31371558 | NC_021162.1    | Ca_kabuli_chr03 | 31371558                | TT                              | CC              | 1946778693               |
| SNP_P4_33923_31372670 | NC_021162.1    | Ca_kabuli_chr03 | 31372670                | TT                              | CC              | 1946778695               |
| SNP_P4_33924_31373939 | NC_021162.1    | Ca_kabuli_chr03 | 31373939                | AA                              | TT              | 1946778697               |
| SNP_P4_33925_31374279 | NC_021162.1    | Ca_kabuli_chr03 | 31374279                | CC                              | GG              | 1946778699               |
| SNP_P4_33926_31374607 | NC_021162.1    | Ca_kabuli_chr03 | 31374607                | GG                              | AA              | 1946778701               |
| SNP_P4_33927_31375813 | NC_021162.1    | Ca_kabuli_chr03 | 31375813                | AA                              | TT              | 1946778704               |
| SNP_P4_33929_31377101 | NC_021162.1    | Ca_kabuli_chr03 | 31377101                | AA                              | CC              | 1946778706               |
| SNP_P4_33930_31377193 | NC_021162.1    | Ca_kabuli_chr03 | 31377193                | AA                              | CC              | 1946778709               |
| SNP_P4_33931_31377194 | NC_021162.1    | Ca_kabuli_chr03 | 31377194                | GG                              | AA              | 1946778711               |
| SNP_P4_33932_31377321 | NC_021162.1    | Ca_kabuli_chr03 | 31377321                | AA                              | GG              | 1946778713               |
| SNP_P4_33933_31378716 | NC_021162.1    | Ca_kabuli_chr03 | 31378716                | AA                              | TT              | 1946778715               |
| SNP_P4_33934_31379793 | NC_021162.1    | Ca_kabuli_chr03 | 31379793                | CC                              | AA              | 1946778717               |
| SNP_P4_33935_31379795 | NC_021162.1    | Ca_kabuli_chr03 | 31379795                | TT                              | CC              | 1946778719               |
| SNP_P4_33936_31380171 | NC_021162.1    | Ca_kabuli_chr03 | 31380171                | TT                              | CC              | 1946778721               |
| SNP_P4_33937_31381767 | NC_021162.1    | Ca_kabuli_chr03 | 31381767                | TT                              | CC              | 1946778723               |
| SNP_P4_33938_31381787 | NC_021162.1    | Ca_kabuli_chr03 | 31381787                | AA                              | GG              | 1946778725               |
| SNP_P4_33939_31381806 | NC_021162.1    | Ca_kabuli_chr03 | 31381806                | AA                              | CC              | 1946778727               |
| SNP_P4_33940_31381820 | NC_021162.1    | Ca_kabuli_chr03 | 31381820                | TT                              | CC              | 1946778729               |
| SNP_P4_33941_31382642 | NC_021162.1    | Ca_kabuli_chr03 | 31382642                | GG                              | CC              | 1946778731               |
| SNP_P4_33942_31383699 | NC_021162.1    | Ca_kabuli_chr03 | 31383699                | GG                              | CC              | 1946778733               |
| SNP_P4_33943_31383769 | NC_021162.1    | Ca_kabuli_chr03 | 31383769                | GG                              | CC              | 1946778735               |
| SNP_P4_33944_31384688 | NC_021162.1    | Ca_kabuli_chr03 | 31384688                | CC                              | TT              | 1946778737               |
| SNP_P4_33945_31384989 | NC_021162.1    | Ca_kabuli_chr03 | 31384989                | TT                              | CC              | 1946778739               |

| SNPs IDs              | Chromosome IDs | Chromosomes     | Physical positions (bp) | CDC Frontier (Reference genome) | (ILWC46 & LPNB) | NCBI SNPdb Accession IDs |
|-----------------------|----------------|-----------------|-------------------------|---------------------------------|-----------------|--------------------------|
| SNP_P4_33946_31385165 | NC_021162.1    | Ca_kabuli_chr03 | 31385165                | GG                              | AA              | 1946778742               |
| SNP_P4_33947_31385188 | NC_021162.1    | Ca_kabuli_chr03 | 31385188                | CC                              | TT              | 1946778744               |
| SNP_P4_33948_31385235 | NC_021162.1    | Ca_kabuli_chr03 | 31385235                | AA                              | GG              | 1946778746               |
| SNP_P4_33949_31388885 | NC_021162.1    | Ca_kabuli_chr03 | 31388885                | TT                              | AA              | 1946778748               |
| SNP_P4_33951_31391834 | NC_021162.1    | Ca_kabuli_chr03 | 31391834                | GG                              | AA              | 1946778750               |
| SNP_P4_33952_31392024 | NC_021162.1    | Ca_kabuli_chr03 | 31392024                | CC                              | TT              | 1946778752               |
| SNP_P4_33953_31392049 | NC_021162.1    | Ca_kabuli_chr03 | 31392049                | AA                              | GG              | 1946778755               |
| SNP_P4_33954_31392150 | NC_021162.1    | Ca_kabuli_chr03 | 31392150                | GG                              | AA              | 1946778757               |
| SNP_P4_33955_31392164 | NC_021162.1    | Ca_kabuli_chr03 | 31392164                | AA                              | GG              | 1946778759               |
| SNP_P4_33956_31392166 | NC_021162.1    | Ca_kabuli_chr03 | 31392166                | AA                              | GG              | 1946778761               |
| SNP_P4_33957_31392182 | NC_021162.1    | Ca_kabuli_chr03 | 31392182                | CC                              | TT              | 1946778763               |
| SNP_P4_33958_31392186 | NC_021162.1    | Ca_kabuli_chr03 | 31392186                | AA                              | GG              | 1946778765               |
| SNP_P4_33960_31392225 | NC_021162.1    | Ca_kabuli_chr03 | 31392225                | GG                              | AA              | 1946778767               |
| SNP_P4_33961_31392374 | NC_021162.1    | Ca_kabuli_chr03 | 31392374                | AA                              | TT              | 1946778769               |
| SNP_P4_33962_31392462 | NC_021162.1    | Ca_kabuli_chr03 | 31392462                | GG                              | AA              | 1946778771               |
| SNP_P4_33963_31392473 | NC_021162.1    | Ca_kabuli_chr03 | 31392473                | AA                              | GG              | 1946778773               |
| SNP_P4_33965_31393160 | NC_021162.1    | Ca_kabuli_chr03 | 31393160                | CC                              | TT              | 1946778775               |
| SNP_P4_33966_31393913 | NC_021162.1    | Ca_kabuli_chr03 | 31393913                | TT                              | GG              | 1946778777               |
| SNP_P4_33967_31393950 | NC_021162.1    | Ca_kabuli_chr03 | 31393950                | CC                              | GG              | 1946778779               |
| SNP_P4_33968_31393959 | NC_021162.1    | Ca_kabuli_chr03 | 31393959                | CC                              | TT              | 1946778781               |
| SNP_P4_33969_31394165 | NC_021162.1    | Ca_kabuli_chr03 | 31394165                | AA                              | CC              | 1946778783               |
| SNP_P4_33970_31394175 | NC_021162.1    | Ca_kabuli_chr03 | 31394175                | GG                              | TT              | 1946778786               |
| SNP_P4_33971_31394201 | NC_021162.1    | Ca_kabuli_chr03 | 31394201                | CC                              | TT              | 1946778788               |
| SNP_P4_33972_31394210 | NC_021162.1    | Ca_kabuli_chr03 | 31394210                | TT                              | AA              | 1946778790               |
| SNP_P4_33973_31394568 | NC_021162.1    | Ca_kabuli_chr03 | 31394568                | AA                              | GG              | 1946778792               |
| SNP_P4_33974_31394580 | NC_021162.1    | Ca_kabuli_chr03 | 31394580                | GG                              | AA              | 1946778794               |
| SNP_P4_33975_31395344 | NC_021162.1    | Ca_kabuli_chr03 | 31395344                | TT                              | GG              | 1946778796               |
| SNP_P4_33976_31395817 | NC_021162.1    | Ca_kabuli_chr03 | 31395817                | GG                              | TT              | 1946778798               |
| SNP_P4_33977_31396174 | NC_021162.1    | Ca_kabuli_chr03 | 31396174                | CC                              | TT              | 1946778800               |
| SNP_P4_33978_31396560 | NC_021162.1    | Ca_kabuli_chr03 | 31396560                | TT                              | CC              | 1946778802               |
| SNP_P4_33979_31396604 | NC_021162.1    | Ca_kabuli_chr03 | 31396604                | CC                              | TT              | 1946778804               |
| SNP_P4_33980_31396715 | NC_021162.1    | Ca_kabuli_chr03 | 31396715                | TT                              | GG              | 1946778806               |
| SNP_P4_33981_31396724 | NC_021162.1    | Ca_kabuli_chr03 | 31396724                | GG                              | AA              | 1946778809               |
| SNP_P4_33982_31396729 | NC_021162.1    | Ca_kabuli_chr03 | 31396729                | GG                              | TT              | 1946778811               |
| SNP_P4_33983_31396744 | NC_021162.1    | Ca_kabuli_chr03 | 31396744                | CC                              | GG              | 1946778813               |
| SNP_P4_33984_31399520 | NC_021162.1    | Ca_kabuli_chr03 | 31399520                | AA                              | TT              | 1946778815               |
| SNP_P4_33985_31399710 | NC_021162.1    | Ca_kabuli_chr03 | 31399710                | CC                              | AA              | 1946778817               |
| SNP_P4_33988_31406964 | NC_021162.1    | Ca_kabuli_chr03 | 31406964                | CC                              | GG              | 1946778819               |
| SNP_P4_33989_31411180 | NC_021162.1    | Ca_kabuli_chr03 | 31411180                | TT                              | CC              | 1946778821               |
| SNP_P4_33990_31411220 | NC_021162.1    | Ca_kabuli_chr03 | 31411220                | GG                              | AA              | 1946778824               |
| SNP_P4_33991_31411283 | NC_021162.1    | Ca_kabuli_chr03 | 31411283                | GG                              | AA              | 1946778826               |
| SNP_P4_33992_31411435 | NC_021162.1    | Ca_kabuli_chr03 | 31411435                | CC                              | AA              | 1946778828               |

| SNPs IDs              | Chromosome IDs | Chromosomes     | Physical positions (bp) | CDC Frontier (Reference genome) | (ILWC46 & LPNB) | NCBI SNPdb Accession IDs |
|-----------------------|----------------|-----------------|-------------------------|---------------------------------|-----------------|--------------------------|
| SNP_P4_33993_31411530 | NC_021162.1    | Ca_kabuli_chr03 | 31411530                | CC                              | TT              | 1946778830               |
| SNP_P4_33994_31411534 | NC_021162.1    | Ca_kabuli_chr03 | 31411534                | AA                              | TT              | 1946778832               |
| SNP_P4_33995_31411638 | NC_021162.1    | Ca_kabuli_chr03 | 31411638                | AA                              | CC              | 1946778834               |
| SNP_P4_33996_31411720 | NC_021162.1    | Ca_kabuli_chr03 | 31411720                | AA                              | GG              | 1946778836               |
| SNP_P4_33997_31412062 | NC_021162.1    | Ca_kabuli_chr03 | 31412062                | AA                              | CC              | 1946778838               |
| SNP_P4_33999_31413589 | NC_021162.1    | Ca_kabuli_chr03 | 31413589                | GG                              | TT              | 1946778840               |
| SNP_P4_34000_31414536 | NC_021162.1    | Ca_kabuli_chr03 | 31414536                | TT                              | AA              | 1946778842               |
| SNP_P4_34002_31415969 | NC_021162.1    | Ca_kabuli_chr03 | 31415969                | AA                              | GG              | 1946778844               |
| SNP_P4_34003_31416058 | NC_021162.1    | Ca_kabuli_chr03 | 31416058                | GG                              | AA              | 1946778846               |
| SNP_P4_34004_31416395 | NC_021162.1    | Ca_kabuli_chr03 | 31416395                | CC                              | TT              | 1946778848               |
| SNP_P4_34005_31416636 | NC_021162.1    | Ca_kabuli_chr03 | 31416636                | GG                              | AA              | 1946778851               |
| SNP_P4_34006_31416642 | NC_021162.1    | Ca_kabuli_chr03 | 31416642                | CC                              | TT              | 1946778853               |
| SNP_P4_34007_31416849 | NC_021162.1    | Ca_kabuli_chr03 | 31416849                | CC                              | AA              | 1946778855               |
| SNP_P4_34008_31417460 | NC_021162.1    | Ca_kabuli_chr03 | 31417460                | CC                              | AA              | 1946778857               |
| SNP_P4_34009_31418534 | NC_021162.1    | Ca_kabuli_chr03 | 31418534                | TT                              | AA              | 1946778859               |
| SNP_P4_34010_31419359 | NC_021162.1    | Ca_kabuli_chr03 | 31419359                | TT                              | AA              | 1946778861               |
| SNP_P4_34011_31419698 | NC_021162.1    | Ca_kabuli_chr03 | 31419698                | TT                              | CC              | 1946778863               |
| SNP_P4_34012_31421645 | NC_021162.1    | Ca_kabuli_chr03 | 31421645                | GG                              | TT              | 1946778865               |
| SNP_P4_34013_31425154 | NC_021162.1    | Ca_kabuli_chr03 | 31425154                | CC                              | GG              | 1946778867               |
| SNP_P4_34014_31425383 | NC_021162.1    | Ca_kabuli_chr03 | 31425383                | AA                              | GG              | 1946778869               |
| SNP_P4_34015_31426867 | NC_021162.1    | Ca_kabuli_chr03 | 31426867                | AA                              | GG              | 1946778871               |
| SNP_P4_34016_31431413 | NC_021162.1    | Ca_kabuli_chr03 | 31431413                | CC                              | GG              | 1946778873               |
| SNP_P4_34017_31439756 | NC_021162.1    | Ca_kabuli_chr03 | 31439756                | AA                              | CC              | 1946778875               |
| SNP_P4_34018_31441489 | NC_021162.1    | Ca_kabuli_chr03 | 31441489                | GG                              | AA              | 1946778877               |
| SNP_P4_34019_31441631 | NC_021162.1    | Ca_kabuli_chr03 | 31441631                | GG                              | AA              | 1946778879               |
| SNP_P4_34020_31441889 | NC_021162.1    | Ca_kabuli_chr03 | 31441889                | AA                              | CC              | 1946778880               |
| SNP_P4_34021_31441919 | NC_021162.1    | Ca_kabuli_chr03 | 31441919                | AA                              | TT              | 1946778883               |
| SNP_P4_34022_31441921 | NC_021162.1    | Ca_kabuli_chr03 | 31441921                | CC                              | GG              | 1946778885               |
| SNP_P4_34023_31442402 | NC_021162.1    | Ca_kabuli_chr03 | 31442402                | AA                              | GG              | 1946778887               |
| SNP_P4_34024_31443631 | NC_021162.1    | Ca_kabuli_chr03 | 31443631                | CC                              | TT              | 1946778890               |
| SNP_P4_34025_31443877 | NC_021162.1    | Ca_kabuli_chr03 | 31443877                | CC                              | TT              | 1946778892               |
| SNP_P4_34026_31445311 | NC_021162.1    | Ca_kabuli_chr03 | 31445311                | GG                              | AA              | 1946778895               |
| SNP_P4_34027_31445338 | NC_021162.1    | Ca_kabuli_chr03 | 31445338                | AA                              | GG              | 1946778897               |
| SNP_P4_34028_31446054 | NC_021162.1    | Ca_kabuli_chr03 | 31446054                | TT                              | CC              | 1946778899               |
| SNP_P4_34029_31446182 | NC_021162.1    | Ca_kabuli_chr03 | 31446182                | CC                              | TT              | 1946778901               |
| SNP_P4_34030_31447151 | NC_021162.1    | Ca_kabuli_chr03 | 31447151                | GG                              | AA              | 1946778903               |
| SNP_P4_34031_31447973 | NC_021162.1    | Ca_kabuli_chr03 | 31447973                | TT                              | CC              | 1946778905               |
| SNP_P4_34032_31447975 | NC_021162.1    | Ca_kabuli_chr03 | 31447975                | GG                              | AA              | 1946778908               |
| SNP_P4_34033_31448012 | NC_021162.1    | Ca_kabuli_chr03 | 31448012                | TT                              | CC              | 1946778910               |
| SNP_P4_34034_31448032 | NC_021162.1    | Ca_kabuli_chr03 | 31448032                | TT                              | CC              | 1946778912               |
| SNP_P4_34036_31448402 | NC_021162.1    | Ca_kabuli_chr03 | 31448402                | AA                              | CC              | 1946778914               |
| SNP_P4_34037_31448670 | NC_021162.1    | Ca_kabuli_chr03 | 31448670                | TT                              | CC              | 1946778916               |

| SNPs IDs              | Chromosome IDs | Chromosomes     | Physical positions (bp) | CDC Frontier (Reference genome) | (ILWC46 & LPNB) | NCBI SNPdb Accession IDs |
|-----------------------|----------------|-----------------|-------------------------|---------------------------------|-----------------|--------------------------|
| SNP_P4_34039_31449345 | NC_021162.1    | Ca_kabuli_chr03 | 31449345                | GG                              | TT              | 1946778918               |
| SNP_P4_34040_31449352 | NC_021162.1    | Ca_kabuli_chr03 | 31449352                | TT                              | CC              | 1946778920               |
| SNP_P4_34041_31449377 | NC_021162.1    | Ca_kabuli_chr03 | 31449377                | AA                              | GG              | 1946778922               |
| SNP_P4_34042_31450187 | NC_021162.1    | Ca_kabuli_chr03 | 31450187                | AA                              | CC              | 1946778924               |
| SNP_P4_34043_31450250 | NC_021162.1    | Ca_kabuli_chr03 | 31450250                | TT                              | CC              | 1946778925               |
| SNP_P4_34044_31452000 | NC_021162.1    | Ca_kabuli_chr03 | 31452000                | AA                              | CC              | 1946778927               |
| SNP_P4_34045_31452772 | NC_021162.1    | Ca_kabuli_chr03 | 31452772                | GG                              | AA              | 1946778929               |
| SNP_P4_34046_31452781 | NC_021162.1    | Ca_kabuli_chr03 | 31452781                | CC                              | TT              | 1946778931               |
| SNP_P4_34047_31452966 | NC_021162.1    | Ca_kabuli_chr03 | 31452966                | AA                              | GG              | 1946778933               |
| SNP_P4_34048_31453024 | NC_021162.1    | Ca_kabuli_chr03 | 31453024                | CC                              | AA              | 1946778935               |
| SNP_P4_34049_31454191 | NC_021162.1    | Ca_kabuli_chr03 | 31454191                | CC                              | TT              | 1946778937               |
| SNP_P4_34050_31454283 | NC_021162.1    | Ca_kabuli_chr03 | 31454283                | AA                              | GG              | 1946778939               |
| SNP_P4_34051_31455281 | NC_021162.1    | Ca_kabuli_chr03 | 31455281                | GG                              | AA              | 1946778941               |
| SNP_P4_34052_31455806 | NC_021162.1    | Ca_kabuli_chr03 | 31455806                | AA                              | CC              | 1946778943               |
| SNP_P4_34053_31459384 | NC_021162.1    | Ca_kabuli_chr03 | 31459384                | GG                              | AA              | 1946778945               |
| SNP_P4_34054_31459478 | NC_021162.1    | Ca_kabuli_chr03 | 31459478                | TT                              | CC              | 1946778947               |
| SNP_P4_34055_31459598 | NC_021162.1    | Ca_kabuli_chr03 | 31459598                | AA                              | GG              | 1946778949               |
| SNP_P4_34056_31459648 | NC_021162.1    | Ca_kabuli_chr03 | 31459648                | AA                              | GG              | 1946778951               |
| SNP_P4_34057_31459772 | NC_021162.1    | Ca_kabuli_chr03 | 31459772                | AA                              | TT              | 1946778952               |
| SNP_P4_34058_31459777 | NC_021162.1    | Ca_kabuli_chr03 | 31459777                | CC                              | TT              | 1946778953               |
| SNP_P4_34059_31459801 | NC_021162.1    | Ca_kabuli_chr03 | 31459801                | GG                              | AA              | 1946778954               |
| SNP_P4_34060_31459884 | NC_021162.1    | Ca_kabuli_chr03 | 31459884                | TT                              | CC              | 1946778955               |
| SNP_P4_34061_31459902 | NC_021162.1    | Ca_kabuli_chr03 | 31459902                | AA                              | GG              | 1946778956               |
| SNP_P4_34062_31459907 | NC_021162.1    | Ca_kabuli_chr03 | 31459907                | TT                              | CC              | 1946778958               |
| SNP_P4_34063_31460173 | NC_021162.1    | Ca_kabuli_chr03 | 31460173                | AA                              | CC              | 1946778960               |
| SNP_P4_34064_31461015 | NC_021162.1    | Ca_kabuli_chr03 | 31461015                | AA                              | GG              | 1946778962               |
| SNP_P4_34065_31462816 | NC_021162.1    | Ca_kabuli_chr03 | 31462816                | GG                              | CC              | 1946778964               |
| SNP_P4_34066_31462860 | NC_021162.1    | Ca_kabuli_chr03 | 31462860                | GG                              | TT              | 1946778966               |
| SNP_P4_34067_31463199 | NC_021162.1    | Ca_kabuli_chr03 | 31463199                | CC                              | TT              | 1946778968               |
| SNP_P4_34068_31463200 | NC_021162.1    | Ca_kabuli_chr03 | 31463200                | AA                              | GG              | 1946778970               |
| SNP_P4_34069_31463446 | NC_021162.1    | Ca_kabuli_chr03 | 31463446                | GG                              | AA              | 1946778972               |
| SNP_P4_34070_31463771 | NC_021162.1    | Ca_kabuli_chr03 | 31463771                | TT                              | CC              | 1946778974               |
| SNP_P4_34071_31463779 | NC_021162.1    | Ca_kabuli_chr03 | 31463779                | TT                              | AA              | 1946778976               |
| SNP_P4_34072_31465056 | NC_021162.1    | Ca_kabuli_chr03 | 31465056                | AA                              | GG              | 1946778978               |
| SNP_P4_34073_31465472 | NC_021162.1    | Ca_kabuli_chr03 | 31465472                | GG                              | AA              | 1946778980               |
| SNP_P4_34074_31465485 | NC_021162.1    | Ca_kabuli_chr03 | 31465485                | GG                              | AA              | 1946778982               |
| SNP_P4_34075_31466068 | NC_021162.1    | Ca_kabuli_chr03 | 31466068                | CC                              | TT              | 1946778984               |
| SNP_P4_34077_31469762 | NC_021162.1    | Ca_kabuli_chr03 | 31469762                | GG                              | AA              | 1946778986               |
| SNP_P4_34078_31470068 | NC_021162.1    | Ca_kabuli_chr03 | 31470068                | GG                              | AA              | 1946778989               |
| SNP_P4_34079_31470147 | NC_021162.1    | Ca_kabuli_chr03 | 31470147                | TT                              | GG              | 1946778991               |
| SNP_P4_34080_31470148 | NC_021162.1    | Ca_kabuli_chr03 | 31470148                | AA                              | GG              | 1946778993               |
| SNP_P4_34081_31475149 | NC_021162.1    | Ca_kabuli_chr03 | 31475149                | AA                              | GG              | 1946778996               |

| SNPs IDs              | Chromosome IDs | Chromosomes     | Physical positions (bp) | CDC Frontier (Reference genome) | (ILWC46 & LPNB) | NCBI SNPdb Accession IDs |
|-----------------------|----------------|-----------------|-------------------------|---------------------------------|-----------------|--------------------------|
| SNP_P4_34083_31475401 | NC_021162.1    | Ca_kabuli_chr03 | 31475401                | CC                              | TT              | 1946778998               |
| SNP_P4_34084_31475402 | NC_021162.1    | Ca_kabuli_chr03 | 31475402                | GG                              | CC              | 1946779000               |
| SNP_P4_34085_31475459 | NC_021162.1    | Ca_kabuli_chr03 | 31475459                | AA                              | GG              | 1946779002               |
| SNP_P4_34086_31475495 | NC_021162.1    | Ca_kabuli_chr03 | 31475495                | GG                              | AA              | 1946779004               |
| SNP_P4_34087_31475500 | NC_021162.1    | Ca_kabuli_chr03 | 31475500                | GG                              | TT              | 1946779006               |
| SNP_P4_34088_31475507 | NC_021162.1    | Ca_kabuli_chr03 | 31475507                | GG                              | AA              | 1946779008               |
| SNP_P4_34089_31475828 | NC_021162.1    | Ca_kabuli_chr03 | 31475828                | CC                              | AA              | 1946779010               |
| SNP_P4_34091_31476624 | NC_021162.1    | Ca_kabuli_chr03 | 31476624                | GG                              | TT              | 1946779013               |
| SNP_P4_34093_31477950 | NC_021162.1    | Ca_kabuli_chr03 | 31477950                | GG                              | TT              | 1946779015               |
| SNP_P4_34094_31477959 | NC_021162.1    | Ca_kabuli_chr03 | 31477959                | CC                              | TT              | 1946779017               |
| SNP_P4_34095_31477984 | NC_021162.1    | Ca_kabuli_chr03 | 31477984                | TT                              | CC              | 1946779019               |
| SNP_P4_34096_31478242 | NC_021162.1    | Ca_kabuli_chr03 | 31478242                | TT                              | GG              | 1946779022               |
| SNP_P4_34097_31478243 | NC_021162.1    | Ca_kabuli_chr03 | 31478243                | AA                              | GG              | 1946779024               |
| SNP_P4_34098_31478592 | NC_021162.1    | Ca_kabuli_chr03 | 31478592                | TT                              | AA              | 1946779027               |
| SNP_P4_34099_31479392 | NC_021162.1    | Ca_kabuli_chr03 | 31479392                | CC                              | TT              | 1946779029               |
| SNP_P4_34100_31480677 | NC_021162.1    | Ca_kabuli_chr03 | 31480677                | TT                              | GG              | 1946779031               |
| SNP_P4_34101_31480682 | NC_021162.1    | Ca_kabuli_chr03 | 31480682                | CC                              | GG              | 1946779033               |
| SNP_P4_34102_31480737 | NC_021162.1    | Ca_kabuli_chr03 | 31480737                | GG                              | AA              | 1946779036               |
| SNP_P4_34103_31481095 | NC_021162.1    | Ca_kabuli_chr03 | 31481095                | TT                              | CC              | 1946779038               |
| SNP_P4_34104_31481132 | NC_021162.1    | Ca_kabuli_chr03 | 31481132                | AA                              | CC              | 1946779041               |
| SNP_P4_34105_31481162 | NC_021162.1    | Ca_kabuli_chr03 | 31481162                | GG                              | TT              | 1946779043               |
| SNP_P4_34106_31481163 | NC_021162.1    | Ca_kabuli_chr03 | 31481163                | TT                              | AA              | 1946779045               |
| SNP_P4_34107_31482122 | NC_021162.1    | Ca_kabuli_chr03 | 31482122                | AA                              | TT              | 1946779047               |
| SNP_P4_34109_31483367 | NC_021162.1    | Ca_kabuli_chr03 | 31483367                | TT                              | CC              | 1946779049               |
| SNP_P4_34110_31483601 | NC_021162.1    | Ca_kabuli_chr03 | 31483601                | TT                              | CC              | 1946779051               |
| SNP_P4_34111_31485878 | NC_021162.1    | Ca_kabuli_chr03 | 31485878                | TT                              | GG              | 1946779053               |
| SNP_P4_34112_31486324 | NC_021162.1    | Ca_kabuli_chr03 | 31486324                | GG                              | AA              | 1946779056               |
| SNP_P4_34113_31487210 | NC_021162.1    | Ca_kabuli_chr03 | 31487210                | TT                              | CC              | 1946779059               |
| SNP_P4_34114_31487486 | NC_021162.1    | Ca_kabuli_chr03 | 31487486                | GG                              | TT              | 1946779061               |
| SNP_P4_34117_31491212 | NC_021162.1    | Ca_kabuli_chr03 | 31491212                | AA                              | GG              | 1946779063               |
| SNP_P4_34118_31491462 | NC_021162.1    | Ca_kabuli_chr03 | 31491462                | TT                              | AA              | 1946779065               |
| SNP_P4_34119_31491570 | NC_021162.1    | Ca_kabuli_chr03 | 31491570                | CC                              | TT              | 1946779067               |
| SNP_P4_34120_31492127 | NC_021162.1    | Ca_kabuli_chr03 | 31492127                | CC                              | TT              | 1946779069               |
| SNP_P4_34121_31493515 | NC_021162.1    | Ca_kabuli_chr03 | 31493515                | GG                              | CC              | 1946779071               |
| SNP_P4_34122_31493633 | NC_021162.1    | Ca_kabuli_chr03 | 31493633                | TT                              | CC              | 1946779074               |
| SNP_P4_34123_31493823 | NC_021162.1    | Ca_kabuli_chr03 | 31493823                | AA                              | GG              | 1946779076               |
| SNP_P4_34124_31493869 | NC_021162.1    | Ca_kabuli_chr03 | 31493869                | GG                              | AA              | 1946779078               |
| SNP_P4_34125_31493965 | NC_021162.1    | Ca_kabuli_chr03 | 31493965                | AA                              | GG              | 1946779080               |
| SNP_P4_34126_31494014 | NC_021162.1    | Ca_kabuli_chr03 | 31494014                | CC                              | AA              | 1946779082               |
| SNP_P4_34127_31494106 | NC_021162.1    | Ca_kabuli_chr03 | 31494106                | CC                              | TT              | 1946779084               |
| SNP_P4_34128_31494112 | NC_021162.1    | Ca_kabuli_chr03 | 31494112                | CC                              | TT              | 1946779086               |
| SNP_P4_34130_31494202 | NC_021162.1    | Ca_kabuli_chr03 | 31494202                | GG                              | AA              | 1946779088               |

| SNPs IDs              | Chromosome IDs | Chromosomes     | Physical positions (bp) | CDC Frontier (Reference genome) | (ILWC46 & LPNB) | NCBI SNPdb Accession IDs |
|-----------------------|----------------|-----------------|-------------------------|---------------------------------|-----------------|--------------------------|
| SNP_P4_34131_31494339 | NC_021162.1    | Ca_kabuli_chr03 | 31494339                | GG                              | CC              | 1946779092               |
| SNP_P4_34132_31494802 | NC_021162.1    | Ca_kabuli_chr03 | 31494802                | AA                              | GG              | 1946779094               |
| SNP_P4_34133_31495281 | NC_021162.1    | Ca_kabuli_chr03 | 31495281                | TT                              | GG              | 1946779096               |
| SNP_P4_34134_31495288 | NC_021162.1    | Ca_kabuli_chr03 | 31495288                | TT                              | GG              | 1946779098               |
| SNP_P4_34135_31496335 | NC_021162.1    | Ca_kabuli_chr03 | 31496335                | TT                              | GG              | 1946779100               |
| SNP_P4_34136_31496704 | NC_021162.1    | Ca_kabuli_chr03 | 31496704                | CC                              | TT              | 1946779102               |
| SNP_P4_34137_31497254 | NC_021162.1    | Ca_kabuli_chr03 | 31497254                | TT                              | CC              | 1946779104               |
| SNP_P4_34138_31498284 | NC_021162.1    | Ca_kabuli_chr03 | 31498284                | GG                              | AA              | 1946779107               |
| SNP_P4_34140_31498734 | NC_021162.1    | Ca_kabuli_chr03 | 31498734                | TT                              | AA              | 1946779110               |
| SNP_P4_34141_31499046 | NC_021162.1    | Ca_kabuli_chr03 | 31499046                | CC                              | TT              | 1946779112               |
| SNP_P4_34142_31499207 | NC_021162.1    | Ca_kabuli_chr03 | 31499207                | AA                              | GG              | 1946779114               |
| SNP_P4_34143_31499210 | NC_021162.1    | Ca_kabuli_chr03 | 31499210                | CC                              | AA              | 1946779116               |
| SNP_P4_34144_31499238 | NC_021162.1    | Ca_kabuli_chr03 | 31499238                | GG                              | AA              | 1946779118               |
| SNP_P4_34146_31499550 | NC_021162.1    | Ca_kabuli_chr03 | 31499550                | CC                              | TT              | 1946779120               |
| SNP_P4_34147_31499630 | NC_021162.1    | Ca_kabuli_chr03 | 31499630                | AA                              | CC              | 1946779123               |
| SNP_P4_34148_31499771 | NC_021162.1    | Ca_kabuli_chr03 | 31499771                | AA                              | CC              | 1946779125               |
| SNP_P4_34149_31499798 | NC_021162.1    | Ca_kabuli_chr03 | 31499798                | GG                              | TT              | 1946779128               |
| SNP_P4_34151_31501239 | NC_021162.1    | Ca_kabuli_chr03 | 31501239                | GG                              | TT              | 1946779130               |
| SNP_P4_34152_31503002 | NC_021162.1    | Ca_kabuli_chr03 | 31503002                | TT                              | CC              | 1946779132               |
| SNP_P4_34153_31505018 | NC_021162.1    | Ca_kabuli_chr03 | 31505018                | TT                              | CC              | 1946779134               |
| SNP_P4_34154_31505537 | NC_021162.1    | Ca_kabuli_chr03 | 31505537                | GG                              | AA              | 1946779136               |
| SNP_P4_34155_31506040 | NC_021162.1    | Ca_kabuli_chr03 | 31506040                | CC                              | TT              | 1946779138               |
| SNP_P4_34156_31509007 | NC_021162.1    | Ca_kabuli_chr03 | 31509007                | CC                              | AA              | 1946779140               |
| SNP_P4_34157_31509516 | NC_021162.1    | Ca_kabuli_chr03 | 31509516                | AA                              | CC              | 1946779142               |
| SNP_P4_34158_31510115 | NC_021162.1    | Ca_kabuli_chr03 | 31510115                | AA                              | CC              | 1946779144               |
| SNP_P4_34159_31512000 | NC_021162.1    | Ca_kabuli_chr03 | 31512000                | CC                              | AA              | 1946779147               |
| SNP_P4_34160_31512018 | NC_021162.1    | Ca_kabuli_chr03 | 31512018                | CC                              | TT              | 1946779149               |
| SNP_P4_34161_31512034 | NC_021162.1    | Ca_kabuli_chr03 | 31512034                | GG                              | CC              | 1946779151               |
| SNP_P4_34162_31512242 | NC_021162.1    | Ca_kabuli_chr03 | 31512242                | TT                              | GG              | 1946779153               |
| SNP_P4_34163_31514670 | NC_021162.1    | Ca_kabuli_chr03 | 31514670                | TT                              | CC              | 1946779155               |
| SNP_P4_34164_31514673 | NC_021162.1    | Ca_kabuli_chr03 | 31514673                | GG                              | CC              | 1946779158               |
| SNP_P4_34165_31514720 | NC_021162.1    | Ca_kabuli_chr03 | 31514720                | CC                              | GG              | 1946779160               |
| SNP_P4_34166_31515805 | NC_021162.1    | Ca_kabuli_chr03 | 31515805                | CC                              | TT              | 1946779163               |
| SNP_P4_34167_31516766 | NC_021162.1    | Ca_kabuli_chr03 | 31516766                | TT                              | CC              | 1946779165               |
| SNP_P4_34168_31517136 | NC_021162.1    | Ca_kabuli_chr03 | 31517136                | GG                              | AA              | 1946779167               |
| SNP_P4_34169_31517201 | NC_021162.1    | Ca_kabuli_chr03 | 31517201                | AA                              | GG              | 1946779169               |
| SNP_P4_34170_31517596 | NC_021162.1    | Ca_kabuli_chr03 | 31517596                | CC                              | TT              | 1946779171               |
| SNP_P4_34171_31518763 | NC_021162.1    | Ca_kabuli_chr03 | 31518763                | CC                              | TT              | 1946779173               |
| SNP_P4_34172_31518764 | NC_021162.1    | Ca_kabuli_chr03 | 31518764                | GG                              | AA              | 1946779176               |
| SNP_P4_34173_31518879 | NC_021162.1    | Ca_kabuli_chr03 | 31518879                | AA                              | GG              | 1946779178               |
| SNP_P4_34174_31518884 | NC_021162.1    | Ca_kabuli_chr03 | 31518884                | TT                              | GG              | 1946779180               |
| SNP_P4_34176_31519542 | NC_021162.1    | Ca_kabuli_chr03 | 31519542                | AA                              | TT              | 1946779182               |

| SNPs IDs              | Chromosome IDs | Chromosomes     | Physical positions (bp) | CDC Frontier (Reference genome) | (ILWC46 & LPNB) | NCBI SNPdb Accession IDs |
|-----------------------|----------------|-----------------|-------------------------|---------------------------------|-----------------|--------------------------|
| SNP_P4_34177_31519595 | NC_021162.1    | Ca_kabuli_chr03 | 31519595                | AA                              | CC              | 1946779184               |
| SNP_P4_34178_31519682 | NC_021162.1    | Ca_kabuli_chr03 | 31519682                | TT                              | CC              | 1946779186               |
| SNP_P4_34179_31519758 | NC_021162.1    | Ca_kabuli_chr03 | 31519758                | TT                              | CC              | 1946779189               |
| SNP_P4_34180_31519880 | NC_021162.1    | Ca_kabuli_chr03 | 31519880                | CC                              | TT              | 1946779191               |
| SNP_P4_34181_31520119 | NC_021162.1    | Ca_kabuli_chr03 | 31520119                | CC                              | TT              | 1946779193               |
| SNP_P4_34182_31520190 | NC_021162.1    | Ca_kabuli_chr03 | 31520190                | TT                              | CC              | 1946779195               |
| SNP_P4_34183_31520198 | NC_021162.1    | Ca_kabuli_chr03 | 31520198                | GG                              | AA              | 1946779198               |
| SNP_P4_34184_31520967 | NC_021162.1    | Ca_kabuli_chr03 | 31520967                | AA                              | GG              | 1946779200               |
| SNP_P4_34185_31527604 | NC_021162.1    | Ca_kabuli_chr03 | 31527604                | TT                              | AA              | 1946779202               |
| SNP_P4_34186_31527751 | NC_021162.1    | Ca_kabuli_chr03 | 31527751                | AA                              | GG              | 1946779204               |
| SNP_P4_34187_31527846 | NC_021162.1    | Ca_kabuli_chr03 | 31527846                | AA                              | GG              | 1946779207               |
| SNP_P4_34188_31528309 | NC_021162.1    | Ca_kabuli_chr03 | 31528309                | GG                              | CC              | 1946779209               |
| SNP_P4_34189_31530709 | NC_021162.1    | Ca_kabuli_chr03 | 31530709                | GG                              | AA              | 1946779211               |
| SNP_P4_34190_31530724 | NC_021162.1    | Ca_kabuli_chr03 | 31530724                | CC                              | AA              | 1946779214               |
| SNP_P4_34192_31530926 | NC_021162.1    | Ca_kabuli_chr03 | 31530926                | AA                              | GG              | 1946779216               |
| SNP_P4_34193_31532802 | NC_021162.1    | Ca_kabuli_chr03 | 31532802                | TT                              | GG              | 1946779219               |
| SNP_P4_34194_31533128 | NC_021162.1    | Ca_kabuli_chr03 | 31533128                | CC                              | TT              | 1946779221               |
| SNP_P4_34195_31533141 | NC_021162.1    | Ca_kabuli_chr03 | 31533141                | AA                              | GG              | 1946779223               |
| SNP_P4_34196_31533161 | NC_021162.1    | Ca_kabuli_chr03 | 31533161                | AA                              | GG              | 1946779226               |
| SNP_P4_34197_31533291 | NC_021162.1    | Ca_kabuli_chr03 | 31533291                | CC                              | TT              | 1946779228               |
| SNP_P4_34198_31535551 | NC_021162.1    | Ca_kabuli_chr03 | 31535551                | GG                              | TT              | 1946779230               |
| SNP_P4_34200_31535592 | NC_021162.1    | Ca_kabuli_chr03 | 31535592                | TT                              | AA              | 1946779233               |
| SNP_P4_34201_31536241 | NC_021162.1    | Ca_kabuli_chr03 | 31536241                | AA                              | TT              | 1946779235               |
| SNP_P4_34202_31536743 | NC_021162.1    | Ca_kabuli_chr03 | 31536743                | GG                              | CC              | 1946779237               |
| SNP_P4_34203_31536749 | NC_021162.1    | Ca_kabuli_chr03 | 31536749                | TT                              | CC              | 1946779239               |
| SNP_P4_34204_31538421 | NC_021162.1    | Ca_kabuli_chr03 | 31538421                | TT                              | AA              | 1946779241               |
| SNP_P4_34205_31538422 | NC_021162.1    | Ca_kabuli_chr03 | 31538422                | TT                              | CC              | 1946779244               |
| SNP_P4_34207_31538607 | NC_021162.1    | Ca_kabuli_chr03 | 31538607                | GG                              | AA              | 1946779247               |
| SNP_P4_34208_31539836 | NC_021162.1    | Ca_kabuli_chr03 | 31539836                | TT                              | AA              | 1946779249               |
| SNP_P4_34209_31542798 | NC_021162.1    | Ca_kabuli_chr03 | 31542798                | CC                              | AA              | 1946779251               |
| SNP_P4_34210_31543787 | NC_021162.1    | Ca_kabuli_chr03 | 31543787                | CC                              | TT              | 1946779253               |
| SNP_P4_34211_31544114 | NC_021162.1    | Ca_kabuli_chr03 | 31544114                | TT                              | CC              | 1946779256               |
| SNP_P4_34212_31544206 | NC_021162.1    | Ca_kabuli_chr03 | 31544206                | AA                              | CC              | 1946779258               |
| SNP_P4_34213_31544279 | NC_021162.1    | Ca_kabuli_chr03 | 31544279                | AA                              | GG              | 1946779260               |
| SNP_P4_34214_31560572 | NC_021162.1    | Ca_kabuli_chr03 | 31560572                | GG                              | AA              | 1946779262               |
| SNP_P4_34215_31560698 | NC_021162.1    | Ca_kabuli_chr03 | 31560698                | TT                              | CC              | 1946779264               |
| SNP_P4_34216_31560700 | NC_021162.1    | Ca_kabuli_chr03 | 31560700                | TT                              | AA              | 1946779267               |
| SNP_P4_34217_31560701 | NC_021162.1    | Ca_kabuli_chr03 | 31560701                | TT                              | CC              | 1946779269               |
| SNP_P4_34219_31560710 | NC_021162.1    | Ca_kabuli_chr03 | 31560710                | AA                              | GG              | 1946779271               |
| SNP_P4_34220_31563214 | NC_021162.1    | Ca_kabuli_chr03 | 31563214                | GG                              | AA              | 1946779274               |
| SNP_P4_34221_31563553 | NC_021162.1    | Ca_kabuli_chr03 | 31563553                | GG                              | AA              | 1946779276               |
| SNP_P4_34222_31563575 | NC_021162.1    | Ca_kabuli_chr03 | 31563575                | GG                              | AA              | 1946779279               |

| SNPs IDs              | Chromosome IDs | Chromosomes     | Physical positions (bp) | CDC Frontier (Reference genome) | (ILWC46 & LPNB) | NCBI SNPdb Accession IDs |
|-----------------------|----------------|-----------------|-------------------------|---------------------------------|-----------------|--------------------------|
| SNP_P4_34223_31563576 | NC_021162.1    | Ca_kabuli_chr03 | 31563576                | GG                              | AA              | 1946779281               |
| SNP_P4_34224_31563584 | NC_021162.1    | Ca_kabuli_chr03 | 31563584                | TT                              | CC              | 1946779283               |
| SNP_P4_34225_31565398 | NC_021162.1    | Ca_kabuli_chr03 | 31565398                | TT                              | GG              | 1946779286               |
| SNP_P4_34226_31565399 | NC_021162.1    | Ca_kabuli_chr03 | 31565399                | GG                              | AA              | 1946779288               |
| SNP_P4_34227_31565657 | NC_021162.1    | Ca_kabuli_chr03 | 31565657                | CC                              | TT              | 1946779290               |
| SNP_P4_34228_31565674 | NC_021162.1    | Ca_kabuli_chr03 | 31565674                | GG                              | CC              | 1946779292               |
| SNP_P4_34229_31565676 | NC_021162.1    | Ca_kabuli_chr03 | 31565676                | AA                              | GG              | 1946779295               |
| SNP_P4_34230_31566048 | NC_021162.1    | Ca_kabuli_chr03 | 31566048                | TT                              | AA              | 1946779297               |
| SNP_P4_34231_31566248 | NC_021162.1    | Ca_kabuli_chr03 | 31566248                | GG                              | AA              | 1946779299               |
| SNP_P4_34232_31566251 | NC_021162.1    | Ca_kabuli_chr03 | 31566251                | GG                              | AA              | 1946779302               |
| SNP_P4_34233_31566857 | NC_021162.1    | Ca_kabuli_chr03 | 31566857                | CC                              | TT              | 1946779304               |
| SNP_P4_34234_31567457 | NC_021162.1    | Ca_kabuli_chr03 | 31567457                | CC                              | AA              | 1946779306               |
| SNP_P4_34235_31569075 | NC_021162.1    | Ca_kabuli_chr03 | 31569075                | GG                              | AA              | 1946779308               |
| SNP_P4_34236_31569454 | NC_021162.1    | Ca_kabuli_chr03 | 31569454                | CC                              | TT              | 1946779310               |
| SNP_P4_34237_31571091 | NC_021162.1    | Ca_kabuli_chr03 | 31571091                | GG                              | AA              | 1946779312               |
| SNP_P4_34238_31572256 | NC_021162.1    | Ca_kabuli_chr03 | 31572256                | AA                              | GG              | 1946779314               |
| SNP_P4_34239_31572651 | NC_021162.1    | Ca_kabuli_chr03 | 31572651                | GG                              | AA              | 1946779316               |
| SNP_P4_34240_31572751 | NC_021162.1    | Ca_kabuli_chr03 | 31572751                | CC                              | AA              | 1946779318               |
| SNP_P4_34241_31574271 | NC_021162.1    | Ca_kabuli_chr03 | 31574271                | GG                              | AA              | 1946779321               |
| SNP_P4_34242_31574612 | NC_021162.1    | Ca_kabuli_chr03 | 31574612                | AA                              | GG              | 1946779323               |
| SNP_P4_34243_31574644 | NC_021162.1    | Ca_kabuli_chr03 | 31574644                | CC                              | TT              | 1946779325               |
| SNP_P4_34244_31574658 | NC_021162.1    | Ca_kabuli_chr03 | 31574658                | AA                              | TT              | 1946779327               |
| SNP_P4_34245_31574811 | NC_021162.1    | Ca_kabuli_chr03 | 31574811                | AA                              | TT              | 1946779329               |
| SNP_P4_34246_31575128 | NC_021162.1    | Ca_kabuli_chr03 | 31575128                | CC                              | AA              | 1946779331               |
| SNP_P4_34247_31575221 | NC_021162.1    | Ca_kabuli_chr03 | 31575221                | TT                              | CC              | 1946779333               |
| SNP_P4_34248_31575682 | NC_021162.1    | Ca_kabuli_chr03 | 31575682                | AA                              | GG              | 1946779336               |
| SNP_P4_34249_31577975 | NC_021162.1    | Ca_kabuli_chr03 | 31577975                | GG                              | AA              | 1946779338               |
| SNP_P4_34250_31577984 | NC_021162.1    | Ca_kabuli_chr03 | 31577984                | TT                              | GG              | 1946779340               |
| SNP_P4_34251_31578008 | NC_021162.1    | Ca_kabuli_chr03 | 31578008                | GG                              | AA              | 1946779342               |
| SNP_P4_34252_31578139 | NC_021162.1    | Ca_kabuli_chr03 | 31578139                | CC                              | TT              | 1946779345               |
| SNP_P4_34253_31578205 | NC_021162.1    | Ca_kabuli_chr03 | 31578205                | GG                              | AA              | 1946779347               |
| SNP_P4_34254_31578217 | NC_021162.1    | Ca_kabuli_chr03 | 31578217                | AA                              | CC              | 1946779350               |
| SNP_P4_34256_31578677 | NC_021162.1    | Ca_kabuli_chr03 | 31578677                | CC                              | AA              | 1946779352               |
| SNP_P4_34257_31578689 | NC_021162.1    | Ca_kabuli_chr03 | 31578689                | AA                              | CC              | 1946779354               |
| SNP_P4_34258_31582210 | NC_021162.1    | Ca_kabuli_chr03 | 31582210                | AA                              | GG              | 1946779357               |
| SNP_P4_34259_31583819 | NC_021162.1    | Ca_kabuli_chr03 | 31583819                | TT                              | CC              | 1946779359               |
| SNP_P4_34260_31584193 | NC_021162.1    | Ca_kabuli_chr03 | 31584193                | GG                              | AA              | 1946779361               |
| SNP_P4_34261_31585382 | NC_021162.1    | Ca_kabuli_chr03 | 31585382                | TT                              | GG              | 1946779364               |
| SNP_P4_34262_31585384 | NC_021162.1    | Ca_kabuli_chr03 | 31585384                | CC                              | TT              | 1946779366               |
| SNP_P4_34263_31585493 | NC_021162.1    | Ca_kabuli_chr03 | 31585493                | GG                              | AA              | 1946779368               |
| SNP_P4_34264_31585502 | NC_021162.1    | Ca_kabuli_chr03 | 31585502                | GG                              | CC              | 1946779370               |
| SNP_P4_34265_31585516 | NC_021162.1    | Ca_kabuli_chr03 | 31585516                | TT                              | CC              | 1946779374               |



| SNPs IDs              | Chromosome IDs | Chromosomes     | Physical positions (bp) | CDC Frontier (Reference genome) | (ILWC46 & LPNB) | NCBI SNPdb Accession IDs |
|-----------------------|----------------|-----------------|-------------------------|---------------------------------|-----------------|--------------------------|
| SNP_P4_34266_31585635 | NC_021162.1    | Ca_kabuli_chr03 | 31585635                | CC                              | TT              | 1946779376               |
| SNP_P4_34267_31585904 | NC_021162.1    | Ca_kabuli_chr03 | 31585904                | AA                              | GG              | 1946779379               |
| SNP_P4_34268_31585907 | NC_021162.1    | Ca_kabuli_chr03 | 31585907                | TT                              | CC              | 1946779381               |
| SNP_P4_34269_31585925 | NC_021162.1    | Ca_kabuli_chr03 | 31585925                | CC                              | TT              | 1946779383               |
| SNP_P4_34270_31585926 | NC_021162.1    | Ca_kabuli_chr03 | 31585926                | AA                              | TT              | 1946779385               |
| SNP_P4_34271_31585948 | NC_021162.1    | Ca_kabuli_chr03 | 31585948                | AA                              | GG              | 1946779387               |
| SNP_P4_34272_31585951 | NC_021162.1    | Ca_kabuli_chr03 | 31585951                | CC                              | GG              | 1946779389               |
| SNP_P4_34273_31587490 | NC_021162.1    | Ca_kabuli_chr03 | 31587490                | GG                              | CC              | 1946779393               |
| SNP_P4_34274_31587826 | NC_021162.1    | Ca_kabuli_chr03 | 31587826                | CC                              | GG              | 1946779395               |
| SNP_P4_34277_31589465 | NC_021162.1    | Ca_kabuli_chr03 | 31589465                | AA                              | CC              | 1946779397               |
| SNP_P4_34278_31589643 | NC_021162.1    | Ca_kabuli_chr03 | 31589643                | AA                              | GG              | 1946779399               |
| SNP_P4_34279_31590720 | NC_021162.1    | Ca_kabuli_chr03 | 31590720                | TT                              | CC              | 1946779401               |
| SNP_P4_34280_31591369 | NC_021162.1    | Ca_kabuli_chr03 | 31591369                | CC                              | GG              | 1946779403               |
| SNP_P4_34281_31591931 | NC_021162.1    | Ca_kabuli_chr03 | 31591931                | AA                              | GG              | 1946779405               |
| SNP_P4_34282_31592318 | NC_021162.1    | Ca_kabuli_chr03 | 31592318                | GG                              | TT              | 1946779407               |
| SNP_P4_34283_31592502 | NC_021162.1    | Ca_kabuli_chr03 | 31592502                | GG                              | TT              | 1946779409               |
| SNP_P4_34284_31592530 | NC_021162.1    | Ca_kabuli_chr03 | 31592530                | TT                              | GG              | 1946779411               |
| SNP_P4_34285_31592544 | NC_021162.1    | Ca_kabuli_chr03 | 31592544                | TT                              | CC              | 1946779413               |
| SNP_P4_34286_31592612 | NC_021162.1    | Ca_kabuli_chr03 | 31592612                | GG                              | AA              | 1946779415               |
| SNP_P4_34287_31592839 | NC_021162.1    | Ca_kabuli_chr03 | 31592839                | TT                              | AA              | 1946779418               |
| SNP_P4_34288_31592910 | NC_021162.1    | Ca_kabuli_chr03 | 31592910                | CC                              | AA              | 1946779420               |
| SNP_P4_34289_31593229 | NC_021162.1    | Ca_kabuli_chr03 | 31593229                | TT                              | AA              | 1946779422               |
| SNP_P4_34290_31593602 | NC_021162.1    | Ca_kabuli_chr03 | 31593602                | TT                              | CC              | 1946779424               |
| SNP_P4_34291_31594902 | NC_021162.1    | Ca_kabuli_chr03 | 31594902                | CC                              | TT              | 1946779426               |
| SNP_P4_34292_31594921 | NC_021162.1    | Ca_kabuli_chr03 | 31594921                | AA                              | TT              | 1946779428               |
| SNP_P4_34293_31594994 | NC_021162.1    | Ca_kabuli_chr03 | 31594994                | AA                              | GG              | 1946779430               |
| SNP_P4_34294_31595104 | NC_021162.1    | Ca_kabuli_chr03 | 31595104                | AA                              | GG              | 1946779432               |
| SNP_P4_34295_31595117 | NC_021162.1    | Ca_kabuli_chr03 | 31595117                | CC                              | TT              | 1946779434               |
| SNP_P4_34296_31595157 | NC_021162.1    | Ca_kabuli_chr03 | 31595157                | AA                              | GG              | 1946779436               |
| SNP_P4_34297_31595288 | NC_021162.1    | Ca_kabuli_chr03 | 31595288                | GG                              | AA              | 1946779438               |
| SNP_P4_34298_31601950 | NC_021162.1    | Ca_kabuli_chr03 | 31601950                | TT                              | AA              | 1946779441               |
| SNP_P4_34299_31601958 | NC_021162.1    | Ca_kabuli_chr03 | 31601958                | TT                              | GG              | 1946779443               |
| SNP_P4_34300_31602012 | NC_021162.1    | Ca_kabuli_chr03 | 31602012                | GG                              | TT              | 1946779446               |
| SNP_P4_34301_31602031 | NC_021162.1    | Ca_kabuli_chr03 | 31602031                | AA                              | TT              | 1946779448               |
| SNP_P4_34302_31602036 | NC_021162.1    | Ca_kabuli_chr03 | 31602036                | AA                              | GG              | 1946779450               |
| SNP_P4_34303_31602167 | NC_021162.1    | Ca_kabuli_chr03 | 31602167                | CC                              | TT              | 1946779452               |
| SNP_P4_34304_31602194 | NC_021162.1    | Ca_kabuli_chr03 | 31602194                | TT                              | CC              | 1946779454               |
| SNP_P4_34305_31602229 | NC_021162.1    | Ca_kabuli_chr03 | 31602229                | AA                              | GG              | 1946779456               |
| SNP_P4_34306_31602668 | NC_021162.1    | Ca_kabuli_chr03 | 31602668                | CC                              | TT              | 1946779458               |
| SNP_P4_34307_31602819 | NC_021162.1    | Ca_kabuli_chr03 | 31602819                | GG                              | AA              | 1946779460               |
| SNP_P4_34308_31602827 | NC_021162.1    | Ca_kabuli_chr03 | 31602827                | CC                              | TT              | 1946779462               |
| SNP_P4_34309_31603099 | NC_021162.1    | Ca_kabuli_chr03 | 31603099                | GG                              | AA              | 1946779464               |

| SNPs IDs              | Chromosome IDs | Chromosomes     | Physical positions (bp) | CDC Frontier (Reference genome) | (ILWC46 & LPNB) | NCBI SNPdb Accession IDs |
|-----------------------|----------------|-----------------|-------------------------|---------------------------------|-----------------|--------------------------|
| SNP_P4_34310_31604270 | NC_021162.1    | Ca_kabuli_chr03 | 31604270                | GG                              | AA              | 1946779466               |
| SNP_P4_34311_31604297 | NC_021162.1    | Ca_kabuli_chr03 | 31604297                | GG                              | AA              | 1946779468               |
| SNP_P4_34313_31604416 | NC_021162.1    | Ca_kabuli_chr03 | 31604416                | CC                              | TT              | 1946779470               |
| SNP_P4_34314_31604424 | NC_021162.1    | Ca_kabuli_chr03 | 31604424                | TT                              | AA              | 1946779473               |
| SNP_P4_34315_31604750 | NC_021162.1    | Ca_kabuli_chr03 | 31604750                | TT                              | CC              | 1946779475               |
| SNP_P4_34316_31605724 | NC_021162.1    | Ca_kabuli_chr03 | 31605724                | AA                              | GG              | 1946779477               |
| SNP_P4_34317_31607988 | NC_021162.1    | Ca_kabuli_chr03 | 31607988                | TT                              | CC              | 1946779479               |
| SNP_P4_34318_31607994 | NC_021162.1    | Ca_kabuli_chr03 | 31607994                | GG                              | CC              | 1946779481               |
| SNP_P4_34319_31607995 | NC_021162.1    | Ca_kabuli_chr03 | 31607995                | GG                              | TT              | 1946779483               |
| SNP_P4_34320_31608240 | NC_021162.1    | Ca_kabuli_chr03 | 31608240                | TT                              | AA              | 1946779485               |
| SNP_P4_34321_31608641 | NC_021162.1    | Ca_kabuli_chr03 | 31608641                | GG                              | CC              | 1946779487               |
| SNP_P4_34322_31608649 | NC_021162.1    | Ca_kabuli_chr03 | 31608649                | CC                              | TT              | 1946779489               |
| SNP_P4_34323_31608655 | NC_021162.1    | Ca_kabuli_chr03 | 31608655                | GG                              | AA              | 1946779491               |
| SNP_P4_34325_31610812 | NC_021162.1    | Ca_kabuli_chr03 | 31610812                | CC                              | TT              | 1946779493               |
| SNP_P4_34326_31612505 | NC_021162.1    | Ca_kabuli_chr03 | 31612505                | AA                              | GG              | 1946779495               |
| SNP_P4_34327_31612519 | NC_021162.1    | Ca_kabuli_chr03 | 31612519                | TT                              | CC              | 1946779497               |
| SNP_P4_34328_31612532 | NC_021162.1    | Ca_kabuli_chr03 | 31612532                | AA                              | CC              | 1946779500               |
| SNP_P4_34329_31612850 | NC_021162.1    | Ca_kabuli_chr03 | 31612850                | GG                              | TT              | 1946779502               |
| SNP_P4_34330_31612866 | NC_021162.1    | Ca_kabuli_chr03 | 31612866                | AA                              | CC              | 1946779504               |
| SNP_P4_34331_31612875 | NC_021162.1    | Ca_kabuli_chr03 | 31612875                | AA                              | TT              | 1946779506               |
| SNP_P4_34332_31613424 | NC_021162.1    | Ca_kabuli_chr03 | 31613424                | CC                              | GG              | 1946779508               |
| SNP_P4_34333_31613431 | NC_021162.1    | Ca_kabuli_chr03 | 31613431                | AA                              | GG              | 1946779510               |
| SNP_P4_34334_31616058 | NC_021162.1    | Ca_kabuli_chr03 | 31616058                | AA                              | GG              | 1946779512               |
| SNP_P4_34335_31616077 | NC_021162.1    | Ca_kabuli_chr03 | 31616077                | GG                              | AA              | 1946779514               |
| SNP_P4_34336_31616121 | NC_021162.1    | Ca_kabuli_chr03 | 31616121                | AA                              | GG              | 1946779516               |
| SNP_P4_34337_31616467 | NC_021162.1    | Ca_kabuli_chr03 | 31616467                | GG                              | AA              | 1946779519               |
| SNP_P4_34338_31618311 | NC_021162.1    | Ca_kabuli_chr03 | 31618311                | GG                              | TT              | 1946779521               |
| SNP_P4_34339_31618407 | NC_021162.1    | Ca_kabuli_chr03 | 31618407                | AA                              | CC              | 1946779523               |
| SNP_P4_34340_31618568 | NC_021162.1    | Ca_kabuli_chr03 | 31618568                | CC                              | GG              | 1946779525               |
| SNP_P4_34341_31618829 | NC_021162.1    | Ca_kabuli_chr03 | 31618829                | TT                              | CC              | 1946779527               |
| SNP_P4_34342_31618868 | NC_021162.1    | Ca_kabuli_chr03 | 31618868                | TT                              | AA              | 1946779529               |
| SNP_P4_34343_31618910 | NC_021162.1    | Ca_kabuli_chr03 | 31618910                | GG                              | AA              | 1946779531               |
| SNP_P4_34344_31619569 | NC_021162.1    | Ca_kabuli_chr03 | 31619569                | GG                              | TT              | 1946779533               |
| SNP_P4_34345_31619783 | NC_021162.1    | Ca_kabuli_chr03 | 31619783                | GG                              | TT              | 1946779536               |
| SNP_P4_34346_31623810 | NC_021162.1    | Ca_kabuli_chr03 | 31623810                | AA                              | GG              | 1946779538               |
| SNP_P4_34347_31624028 | NC_021162.1    | Ca_kabuli_chr03 | 31624028                | TT                              | GG              | 1946779540               |
| SNP_P4_34348_31624032 | NC_021162.1    | Ca_kabuli_chr03 | 31624032                | GG                              | AA              | 1946779542               |
| SNP_P4_34349_31624049 | NC_021162.1    | Ca_kabuli_chr03 | 31624049                | GG                              | CC              | 1946779544               |
| SNP_P4_34350_31624134 | NC_021162.1    | Ca_kabuli_chr03 | 31624134                | TT                              | GG              | 1946779546               |
| SNP_P4_34351_31624482 | NC_021162.1    | Ca_kabuli_chr03 | 31624482                | GG                              | AA              | 1946779549               |
| SNP_P4_34352_31624536 | NC_021162.1    | Ca_kabuli_chr03 | 31624536                | TT                              | AA              | 1946779551               |
| SNP_P4_34355_31625914 | NC_021162.1    | Ca_kabuli_chr03 | 31625914                | GG                              | AA              | 1946779553               |

| SNPs IDs              | Chromosome IDs | Chromosomes     | Physical positions (bp) | CDC Frontier (Reference genome) | (ILWC46 & LPNB) | NCBI SNPdb Accession IDs |
|-----------------------|----------------|-----------------|-------------------------|---------------------------------|-----------------|--------------------------|
| SNP_P4_34356_31627413 | NC_021162.1    | Ca_kabuli_chr03 | 31627413                | AA                              | GG              | 1946779555               |
| SNP_P4_34357_31627871 | NC_021162.1    | Ca_kabuli_chr03 | 31627871                | TT                              | CC              | 1946779557               |
| SNP_P4_34358_31630195 | NC_021162.1    | Ca_kabuli_chr03 | 31630195                | TT                              | CC              | 1946779560               |
| SNP_P4_34359_31630384 | NC_021162.1    | Ca_kabuli_chr03 | 31630384                | GG                              | TT              | 1946779562               |
| SNP_P4_34362_31632006 | NC_021162.1    | Ca_kabuli_chr03 | 31632006                | GG                              | AA              | 1946779564               |
| SNP_P4_34363_31632307 | NC_021162.1    | Ca_kabuli_chr03 | 31632307                | AA                              | GG              | 1946779566               |
| SNP_P4_34364_31632308 | NC_021162.1    | Ca_kabuli_chr03 | 31632308                | AA                              | GG              | 1946779568               |
| SNP_P4_34365_31632310 | NC_021162.1    | Ca_kabuli_chr03 | 31632310                | GG                              | TT              | 1946779571               |
| SNP_P4_34366_31632311 | NC_021162.1    | Ca_kabuli_chr03 | 31632311                | TT                              | AA              | 1946779573               |
| SNP_P4_34367_31632313 | NC_021162.1    | Ca_kabuli_chr03 | 31632313                | AA                              | TT              | 1946779575               |
| SNP_P4_34371_31633542 | NC_021162.1    | Ca_kabuli_chr03 | 31633542                | CC                              | GG              | 1946779577               |
| SNP_P4_34372_31633615 | NC_021162.1    | Ca_kabuli_chr03 | 31633615                | GG                              | AA              | 1946779579               |
| SNP_P4_34373_31634511 | NC_021162.1    | Ca_kabuli_chr03 | 31634511                | TT                              | AA              | 1946779581               |
| SNP_P4_34374_31634761 | NC_021162.1    | Ca_kabuli_chr03 | 31634761                | TT                              | CC              | 1946779583               |
| SNP_P4_34375_31634818 | NC_021162.1    | Ca_kabuli_chr03 | 31634818                | TT                              | CC              | 1946779585               |
| SNP_P4_34376_31635557 | NC_021162.1    | Ca_kabuli_chr03 | 31635557                | CC                              | TT              | 1946779587               |
| SNP_P4_34377_31635564 | NC_021162.1    | Ca_kabuli_chr03 | 31635564                | AA                              | CC              | 1946779590               |
| SNP_P4_34379_31636087 | NC_021162.1    | Ca_kabuli_chr03 | 31636087                | AA                              | GG              | 1946779592               |
| SNP_P4_34380_31636301 | NC_021162.1    | Ca_kabuli_chr03 | 31636301                | AA                              | GG              | 1946779594               |
| SNP_P4_34381_31636529 | NC_021162.1    | Ca_kabuli_chr03 | 31636529                | CC                              | TT              | 1946779596               |
| SNP_P4_34382_31636768 | NC_021162.1    | Ca_kabuli_chr03 | 31636768                | AA                              | GG              | 1946779598               |
| SNP_P4_34383_31636913 | NC_021162.1    | Ca_kabuli_chr03 | 31636913                | CC                              | TT              | 1946779602               |
| SNP_P4_34385_31637172 | NC_021162.1    | Ca_kabuli_chr03 | 31637172                | CC                              | TT              | 1946779604               |
| SNP_P4_34386_31638069 | NC_021162.1    | Ca_kabuli_chr03 | 31638069                | TT                              | AA              | 1946779606               |
| SNP_P4_34387_31641927 | NC_021162.1    | Ca_kabuli_chr03 | 31641927                | GG                              | TT              | 1946779608               |
| SNP_P4_34388_31646112 | NC_021162.1    | Ca_kabuli_chr03 | 31646112                | CC                              | TT              | 1946779610               |
| SNP_P4_34389_31646439 | NC_021162.1    | Ca_kabuli_chr03 | 31646439                | GG                              | AA              | 1946779612               |
| SNP_P4_34390_31646454 | NC_021162.1    | Ca_kabuli_chr03 | 31646454                | AA                              | GG              | 1946779614               |
| SNP_P4_34391_31656226 | NC_021162.1    | Ca_kabuli_chr03 | 31656226                | CC                              | TT              | 1946779617               |
| SNP_P4_34393_31671478 | NC_021162.1    | Ca_kabuli_chr03 | 31671478                | TT                              | CC              | 1946779619               |
| SNP_P4_34395_31675039 | NC_021162.1    | Ca_kabuli_chr03 | 31675039                | GG                              | AA              | 1946779621               |
| SNP_P4_34396_31681004 | NC_021162.1    | Ca_kabuli_chr03 | 31681004                | GG                              | CC              | 1946779623               |
| SNP_P4_34397_31681372 | NC_021162.1    | Ca_kabuli_chr03 | 31681372                | TT                              | AA              | 1946779625               |
| SNP_P4_34398_31693784 | NC_021162.1    | Ca_kabuli_chr03 | 31693784                | GG                              | AA              | 1946779627               |
| SNP_P4_34399_31693949 | NC_021162.1    | Ca_kabuli_chr03 | 31693949                | TT                              | AA              | 1946779630               |
| SNP_P4_34400_31700183 | NC_021162.1    | Ca_kabuli_chr03 | 31700183                | AA                              | TT              | 1946779632               |
| SNP_P4_34401_31739495 | NC_021162.1    | Ca_kabuli_chr03 | 31739495                | CC                              | TT              | 1946779634               |
| SNP_P4_34402_31775113 | NC_021162.1    | Ca_kabuli_chr03 | 31775113                | TT                              | GG              | 1946779636               |
| SNP_P4_34404_31800872 | NC_021162.1    | Ca_kabuli_chr03 | 31800872                | CC                              | TT              | 1946779638               |
| SNP_P4_34405_31811588 | NC_021162.1    | Ca_kabuli_chr03 | 31811588                | AA                              | CC              | 1946779640               |
| SNP_P4_34407_31902349 | NC_021162.1    | Ca_kabuli_chr03 | 31902349                | AA                              | GG              | 1946779643               |
| SNP_P4_34408_31906484 | NC_021162.1    | Ca_kabuli_chr03 | 31906484                | TT                              | AA              | 1946779645               |

| SNPs IDs              | Chromosome IDs | Chromosomes     | Physical positions (bp) | CDC Frontier (Reference genome) | (ILWC46 & LPNB) | NCBI SNPdb Accession IDs |
|-----------------------|----------------|-----------------|-------------------------|---------------------------------|-----------------|--------------------------|
| SNP_P4_34410_31919762 | NC_021162.1    | Ca_kabuli_chr03 | 31919762                | TT                              | AA              | 1946779647               |
| SNP_P4_34411_31939782 | NC_021162.1    | Ca_kabuli_chr03 | 31939782                | AA                              | CC              | 1946779649               |
| SNP_P4_34412_31939825 | NC_021162.1    | Ca_kabuli_chr03 | 31939825                | AA                              | TT              | 1946779651               |
| SNP_P4_34414_31940126 | NC_021162.1    | Ca_kabuli_chr03 | 31940126                | TT                              | GG              | 1946779653               |
| SNP_P4_34415_31940187 | NC_021162.1    | Ca_kabuli_chr03 | 31940187                | CC                              | TT              | 1946779655               |
| SNP_P4_34416_31940378 | NC_021162.1    | Ca_kabuli_chr03 | 31940378                | CC                              | TT              | 1946779657               |
| SNP_P4_34417_31940438 | NC_021162.1    | Ca_kabuli_chr03 | 31940438                | CC                              | GG              | 1946779659               |
| SNP_P4_34418_31940484 | NC_021162.1    | Ca_kabuli_chr03 | 31940484                | GG                              | CC              | 1946779662               |
| SNP_P4_34419_31940682 | NC_021162.1    | Ca_kabuli_chr03 | 31940682                | GG                              | AA              | 1946779664               |
| SNP_P4_34420_31940714 | NC_021162.1    | Ca_kabuli_chr03 | 31940714                | AA                              | GG              | 1946779666               |
| SNP_P4_34421_31940744 | NC_021162.1    | Ca_kabuli_chr03 | 31940744                | TT                              | CC              | 1946779668               |
| SNP_P4_34422_31940766 | NC_021162.1    | Ca_kabuli_chr03 | 31940766                | CC                              | TT              | 1946779670               |
| SNP_P4_34423_31942794 | NC_021162.1    | Ca_kabuli_chr03 | 31942794                | CC                              | TT              | 1946779672               |
| SNP_P4_34425_32334831 | NC_021162.1    | Ca_kabuli_chr03 | 32334831                | AA                              | GG              | 1946779675               |
| SNP_P4_34426_32334844 | NC_021162.1    | Ca_kabuli_chr03 | 32334844                | TT                              | GG              | 1946779677               |
| SNP_P4_34427_32334858 | NC_021162.1    | Ca_kabuli_chr03 | 32334858                | CC                              | TT              | 1946779679               |
| SNP_P4_34428_32334899 | NC_021162.1    | Ca_kabuli_chr03 | 32334899                | TT                              | CC              | 1946779681               |
| SNP_P4_34429_32334940 | NC_021162.1    | Ca_kabuli_chr03 | 32334940                | AA                              | CC              | 1946779683               |
| SNP_P4_34430_32334949 | NC_021162.1    | Ca_kabuli_chr03 | 32334949                | TT                              | CC              | 1946779685               |
| SNP_P4_34431_32334985 | NC_021162.1    | Ca_kabuli_chr03 | 32334985                | TT                              | GG              | 1946779687               |
| SNP_P4_34432_32335906 | NC_021162.1    | Ca_kabuli_chr03 | 32335906                | CC                              | TT              | 1946779690               |
| SNP_P4_34433_32347697 | NC_021162.1    | Ca_kabuli_chr03 | 32347697                | GG                              | AA              | 1946779692               |
| SNP_P4_34434_32360456 | NC_021162.1    | Ca_kabuli_chr03 | 32360456                | TT                              | CC              | 1946779694               |
| SNP_P4_34435_32373434 | NC_021162.1    | Ca_kabuli_chr03 | 32373434                | AA                              | CC              | 1946779696               |
| SNP_P4_34436_32376298 | NC_021162.1    | Ca_kabuli_chr03 | 32376298                | AA                              | CC              | 1946779698               |
| SNP_P4_34437_32376954 | NC_021162.1    | Ca_kabuli_chr03 | 32376954                | CC                              | TT              | 1946779700               |
| SNP_P4_34438_32378896 | NC_021162.1    | Ca_kabuli_chr03 | 32378896                | TT                              | GG              | 1946779702               |
| SNP_P4_34439_32378897 | NC_021162.1    | Ca_kabuli_chr03 | 32378897                | GG                              | AA              | 1946779705               |
| SNP_P4_34442_32414372 | NC_021162.1    | Ca_kabuli_chr03 | 32414372                | TT                              | CC              | 1946779707               |
| SNP_P4_34443_32414401 | NC_021162.1    | Ca_kabuli_chr03 | 32414401                | TT                              | CC              | 1946779709               |
| SNP_P4_34444_32414411 | NC_021162.1    | Ca_kabuli_chr03 | 32414411                | CC                              | TT              | 1946779711               |
| SNP_P4_34445_32414493 | NC_021162.1    | Ca_kabuli_chr03 | 32414493                | AA                              | GG              | 1946779713               |
| SNP_P4_34446_32414497 | NC_021162.1    | Ca_kabuli_chr03 | 32414497                | TT                              | GG              | 1946779715               |
| SNP_P4_34447_32414554 | NC_021162.1    | Ca_kabuli_chr03 | 32414554                | AA                              | CC              | 1946779718               |
| SNP_P4_34448_32414613 | NC_021162.1    | Ca_kabuli_chr03 | 32414613                | AA                              | GG              | 1946779720               |
| SNP_P4_34449_32414834 | NC_021162.1    | Ca_kabuli_chr03 | 32414834                | TT                              | CC              | 1946779722               |
| SNP_P4_34450_32417324 | NC_021162.1    | Ca_kabuli_chr03 | 32417324                | CC                              | TT              | 1946779724               |
| SNP_P4_34451_32418659 | NC_021162.1    | Ca_kabuli_chr03 | 32418659                | CC                              | TT              | 1946779726               |
| SNP_P4_34452_32431046 | NC_021162.1    | Ca_kabuli_chr03 | 32431046                | CC                              | AA              | 1946779728               |
| SNP_P4_34453_32431050 | NC_021162.1    | Ca_kabuli_chr03 | 32431050                | CC                              | AA              | 1946779730               |
| SNP_P4_34454_32431052 | NC_021162.1    | Ca_kabuli_chr03 | 32431052                | GG                              | AA              | 1946779732               |
| SNP_P4_34455_32431054 | NC_021162.1    | Ca_kabuli_chr03 | 32431054                | AA                              | TT              | 1946779734               |

| SNPs IDs              | Chromosome IDs | Chromosomes     | Physical positions (bp) | CDC Frontier (Reference genome) | (ILWC46 & LPNB) | NCBI SNPdb Accession IDs |
|-----------------------|----------------|-----------------|-------------------------|---------------------------------|-----------------|--------------------------|
| SNP_P4_34456_32451219 | NC_021162.1    | Ca_kabuli_chr03 | 32451219                | GG                              | AA              | 1946779736               |
| SNP_P4_34457_32453086 | NC_021162.1    | Ca_kabuli_chr03 | 32453086                | AA                              | TT              | 1946779738               |
| SNP_P4_34458_32457393 | NC_021162.1    | Ca_kabuli_chr03 | 32457393                | TT                              | CC              | 1946779740               |
| SNP_P4_34459_32457406 | NC_021162.1    | Ca_kabuli_chr03 | 32457406                | AA                              | GG              | 1946779743               |
| SNP_P4_34460_32457426 | NC_021162.1    | Ca_kabuli_chr03 | 32457426                | CC                              | TT              | 1946779745               |
| SNP_P4_34461_32457516 | NC_021162.1    | Ca_kabuli_chr03 | 32457516                | TT                              | AA              | 1946779747               |
| SNP_P4_34462_32457747 | NC_021162.1    | Ca_kabuli_chr03 | 32457747                | GG                              | AA              | 1946779749               |
| SNP_P4_34463_32457924 | NC_021162.1    | Ca_kabuli_chr03 | 32457924                | CC                              | AA              | 1946779751               |
| SNP_P4_34464_32458016 | NC_021162.1    | Ca_kabuli_chr03 | 32458016                | CC                              | AA              | 1946779753               |
| SNP_P4_34465_32458192 | NC_021162.1    | Ca_kabuli_chr03 | 32458192                | CC                              | AA              | 1946779755               |
| SNP_P4_34466_32458230 | NC_021162.1    | Ca_kabuli_chr03 | 32458230                | CC                              | TT              | 1946779757               |
| SNP_P4_34467_32458251 | NC_021162.1    | Ca_kabuli_chr03 | 32458251                | TT                              | AA              | 1946779760               |
| SNP_P4_34469_32478465 | NC_021162.1    | Ca_kabuli_chr03 | 32478465                | AA                              | CC              | 1946779762               |
| SNP_P4_34470_32481809 | NC_021162.1    | Ca_kabuli_chr03 | 32481809                | GG                              | AA              | 1946779764               |
| SNP_P4_34471_32482929 | NC_021162.1    | Ca_kabuli_chr03 | 32482929                | TT                              | CC              | 1946779766               |
| SNP_P4_34472_32485805 | NC_021162.1    | Ca_kabuli_chr03 | 32485805                | TT                              | CC              | 1946779768               |
| SNP_P4_34474_32488762 | NC_021162.1    | Ca_kabuli_chr03 | 32488762                | TT                              | AA              | 1946779770               |
| SNP_P4_34476_32515605 | NC_021162.1    | Ca_kabuli_chr03 | 32515605                | GG                              | AA              | 1946779773               |
| SNP_P4_34477_32535281 | NC_021162.1    | Ca_kabuli_chr03 | 32535281                | GG                              | AA              | 1946779775               |
| SNP_P4_34479_32541648 | NC_021162.1    | Ca_kabuli_chr03 | 32541648                | CC                              | TT              | 1946779777               |
| SNP_P4_34480_32545149 | NC_021162.1    | Ca_kabuli_chr03 | 32545149                | AA                              | TT              | 1946779779               |
| SNP_P4_34481_32550294 | NC_021162.1    | Ca_kabuli_chr03 | 32550294                | AA                              | GG              | 1946779781               |
| SNP_P4_34485_32581927 | NC_021162.1    | Ca_kabuli_chr03 | 32581927                | TT                              | CC              | 1946779783               |
| SNP_P4_34486_32582045 | NC_021162.1    | Ca_kabuli_chr03 | 32582045                | CC                              | AA              | 1946779785               |
| SNP_P4_34487_32582211 | NC_021162.1    | Ca_kabuli_chr03 | 32582211                | AA                              | GG              | 1946779787               |
| SNP_P4_34488_32582290 | NC_021162.1    | Ca_kabuli_chr03 | 32582290                | AA                              | TT              | 1946779789               |
| SNP_P4_34489_32582291 | NC_021162.1    | Ca_kabuli_chr03 | 32582291                | TT                              | GG              | 1946779792               |
| SNP_P4_34491_32589596 | NC_021162.1    | Ca_kabuli_chr03 | 32589596                | AA                              | GG              | 1946779794               |
| SNP_P4_34492_32589963 | NC_021162.1    | Ca_kabuli_chr03 | 32589963                | CC                              | TT              | 1946779796               |
| SNP_P4_34493_32590021 | NC_021162.1    | Ca_kabuli_chr03 | 32590021                | TT                              | CC              | 1946779798               |
| SNP_P4_34495_32597780 | NC_021162.1    | Ca_kabuli_chr03 | 32597780                | AA                              | GG              | 1946779800               |
| SNP_P4_34496_32615823 | NC_021162.1    | Ca_kabuli_chr03 | 32615823                | CC                              | TT              | 1946779802               |
| SNP_P4_34498_32625227 | NC_021162.1    | Ca_kabuli_chr03 | 32625227                | AA                              | TT              | 1946779805               |
| SNP_P4_34501_32679335 | NC_021162.1    | Ca_kabuli_chr03 | 32679335                | TT                              | AA              | 1946779807               |
| SNP_P4_34504_32700646 | NC_021162.1    | Ca_kabuli_chr03 | 32700646                | GG                              | AA              | 1946779809               |
| SNP_P4_34505_32702386 | NC_021162.1    | Ca_kabuli_chr03 | 32702386                | CC                              | TT              | 1946779811               |
| SNP_P4_34506_32740057 | NC_021162.1    | Ca_kabuli_chr03 | 32740057                | TT                              | GG              | 1946779814               |
| SNP_P4_34507_32752139 | NC_021162.1    | Ca_kabuli_chr03 | 32752139                | CC                              | TT              | 1946779816               |
| SNP_P4_34508_32752140 | NC_021162.1    | Ca_kabuli_chr03 | 32752140                | GG                              | TT              | 1946779819               |
| SNP_P4_34509_32752143 | NC_021162.1    | Ca_kabuli_chr03 | 32752143                | CC                              | TT              | 1946779822               |
| SNP_P4_34510_32752150 | NC_021162.1    | Ca_kabuli_chr03 | 32752150                | GG                              | AA              | 1946779824               |
| SNP_P4_34511_32752331 | NC_021162.1    | Ca_kabuli_chr03 | 32752331                | CC                              | AA              | 1946779827               |

| SNPs IDs              | Chromosome IDs | Chromosomes     | Physical positions (bp) | CDC Frontier (Reference genome) | (ILWC46 & LPNB) | NCBI SNPdb Accession IDs |
|-----------------------|----------------|-----------------|-------------------------|---------------------------------|-----------------|--------------------------|
| SNP_P4_34512_32752332 | NC_021162.1    | Ca_kabuli_chr03 | 32752332                | AA                              | GG              | 1946779830               |
| SNP_P4_34513_32752334 | NC_021162.1    | Ca_kabuli_chr03 | 32752334                | AA                              | TT              | 1946779832               |
| SNP_P4_34514_32752338 | NC_021162.1    | Ca_kabuli_chr03 | 32752338                | AA                              | GG              | 1946779834               |
| SNP_P4_34515_32770538 | NC_021162.1    | Ca_kabuli_chr03 | 32770538                | GG                              | AA              | 1946779836               |
| SNP_P4_34516_32781308 | NC_021162.1    | Ca_kabuli_chr03 | 32781308                | AA                              | CC              | 1946779838               |
| SNP_P4_34518_32822380 | NC_021162.1    | Ca_kabuli_chr03 | 32822380                | CC                              | GG              | 1946779840               |
| SNP_P4_34519_32824050 | NC_021162.1    | Ca_kabuli_chr03 | 32824050                | CC                              | TT              | 1946779843               |
| SNP_P4_34520_32829883 | NC_021162.1    | Ca_kabuli_chr03 | 32829883                | AA                              | TT              | 1946779846               |
| SNP_P4_34521_32832264 | NC_021162.1    | Ca_kabuli_chr03 | 32832264                | GG                              | AA              | 1946779848               |
| SNP_P4_34523_32840886 | NC_021162.1    | Ca_kabuli_chr03 | 32840886                | AA                              | TT              | 1946779850               |
| SNP_P4_34524_32849933 | NC_021162.1    | Ca_kabuli_chr03 | 32849933                | TT                              | CC              | 1946779852               |
| SNP_P4_34525_32851370 | NC_021162.1    | Ca_kabuli_chr03 | 32851370                | TT                              | GG              | 1946779854               |
| SNP_P4_34527_32858188 | NC_021162.1    | Ca_kabuli_chr03 | 32858188                | TT                              | CC              | 1946779857               |
| SNP_P4_34529_32876787 | NC_021162.1    | Ca_kabuli_chr03 | 32876787                | AA                              | TT              | 1946779859               |
| SNP_P4_34530_32881921 | NC_021162.1    | Ca_kabuli_chr03 | 32881921                | GG                              | AA              | 1946779861               |
| SNP_P4_34532_32925333 | NC_021162.1    | Ca_kabuli_chr03 | 32925333                | AA                              | CC              | 1946779863               |
| SNP_P4_34533_32925335 | NC_021162.1    | Ca_kabuli_chr03 | 32925335                | AA                              | TT              | 1946779866               |
| SNP_P4_34534_32925347 | NC_021162.1    | Ca_kabuli_chr03 | 32925347                | AA                              | GG              | 1946779868               |
| SNP_P4_34535_32963186 | NC_021162.1    | Ca_kabuli_chr03 | 32963186                | GG                              | TT              | 1946779870               |
| SNP_P4_34536_32965908 | NC_021162.1    | Ca_kabuli_chr03 | 32965908                | CC                              | TT              | 1946779872               |
| SNP_P4_34537_32982680 | NC_021162.1    | Ca_kabuli_chr03 | 32982680                | CC                              | TT              | 1946779874               |
| SNP_P4_34538_32992671 | NC_021162.1    | Ca_kabuli_chr03 | 32992671                | GG                              | CC              | 1946779876               |
| SNP_P4_34540_33026491 | NC_021162.1    | Ca_kabuli_chr03 | 33026491                | CC                              | TT              | 1946779878               |
| SNP_P4_34541_33029224 | NC_021162.1    | Ca_kabuli_chr03 | 33029224                | TT                              | AA              | 1946779881               |
| SNP_P4_34542_33029225 | NC_021162.1    | Ca_kabuli_chr03 | 33029225                | TT                              | AA              | 1946779883               |
| SNP_P4_34543_33030488 | NC_021162.1    | Ca_kabuli_chr03 | 33030488                | GG                              | TT              | 1946779885               |
| SNP_P4_34544_33035860 | NC_021162.1    | Ca_kabuli_chr03 | 33035860                | GG                              | AA              | 1946779887               |
| SNP_P4_34545_33035861 | NC_021162.1    | Ca_kabuli_chr03 | 33035861                | AA                              | TT              | 1946779889               |
| SNP_P4_34548_33084828 | NC_021162.1    | Ca_kabuli_chr03 | 33084828                | GG                              | TT              | 1946779891               |
| SNP_P4_34549_33097262 | NC_021162.1    | Ca_kabuli_chr03 | 33097262                | AA                              | GG              | 1946779893               |
| SNP_P4_34550_33099629 | NC_021162.1    | Ca_kabuli_chr03 | 33099629                | TT                              | CC              | 1946779896               |
| SNP_P4_34551_33099632 | NC_021162.1    | Ca_kabuli_chr03 | 33099632                | TT                              | GG              | 1946779898               |
| SNP_P4_34553_33107892 | NC_021162.1    | Ca_kabuli_chr03 | 33107892                | AA                              | GG              | 1946779900               |
| SNP_P4_34554_33121835 | NC_021162.1    | Ca_kabuli_chr03 | 33121835                | TT                              | GG              | 1946779902               |
| SNP_P4_34555_33122650 | NC_021162.1    | Ca_kabuli_chr03 | 33122650                | AA                              | GG              | 1946779904               |
| SNP_P4_34556_33130968 | NC_021162.1    | Ca_kabuli_chr03 | 33130968                | TT                              | CC              | 1946779906               |
| SNP_P4_34557_33131102 | NC_021162.1    | Ca_kabuli_chr03 | 33131102                | GG                              | AA              | 1946779908               |
| SNP_P4_34558_33145201 | NC_021162.1    | Ca_kabuli_chr03 | 33145201                | TT                              | AA              | 1946779910               |
| SNP_P4_34559_33145381 | NC_021162.1    | Ca_kabuli_chr03 | 33145381                | AA                              | GG              | 1946779912               |
| SNP_P4_34560_33145384 | NC_021162.1    | Ca_kabuli_chr03 | 33145384                | AA                              | GG              | 1946779915               |
| SNP_P4_34561_33153840 | NC_021162.1    | Ca_kabuli_chr03 | 33153840                | GG                              | AA              | 1946779917               |
| SNP_P4_34562_33162890 | NC_021162.1    | Ca_kabuli_chr03 | 33162890                | AA                              | GG              | 1946779919               |

| SNPs IDs              | Chromosome IDs | Chromosomes     | Physical positions (bp) | CDC Frontier (Reference genome) | (ILWC46 & LPNB) | NCBI SNPdb Accession IDs |
|-----------------------|----------------|-----------------|-------------------------|---------------------------------|-----------------|--------------------------|
| SNP_P4_34563_33170917 | NC_021162.1    | Ca_kabuli_chr03 | 33170917                | TT                              | CC              | 1946779921               |
| SNP_P4_34564_33178143 | NC_021162.1    | Ca_kabuli_chr03 | 33178143                | CC                              | AA              | 1946779923               |
| SNP_P4_34565_33181094 | NC_021162.1    | Ca_kabuli_chr03 | 33181094                | CC                              | TT              | 1946779925               |
| SNP_P4_34566_33190221 | NC_021162.1    | Ca_kabuli_chr03 | 33190221                | AA                              | TT              | 1946779927               |
| SNP_P4_34568_33192900 | NC_021162.1    | Ca_kabuli_chr03 | 33192900                | GG                              | AA              | 1946779929               |
| SNP_P4_34570_33228442 | NC_021162.1    | Ca_kabuli_chr03 | 33228442                | GG                              | AA              | 1946779932               |
| SNP_P4_34572_33279010 | NC_021162.1    | Ca_kabuli_chr03 | 33279010                | AA                              | TT              | 1946779934               |
| SNP_P4_34573_33279310 | NC_021162.1    | Ca_kabuli_chr03 | 33279310                | CC                              | GG              | 1946779936               |
| SNP_P4_34574_33279311 | NC_021162.1    | Ca_kabuli_chr03 | 33279311                | TT                              | GG              | 1946779938               |
| SNP_P4_34575_33279331 | NC_021162.1    | Ca_kabuli_chr03 | 33279331                | GG                              | AA              | 1946779941               |
| SNP_P4_34576_33290623 | NC_021162.1    | Ca_kabuli_chr03 | 33290623                | CC                              | AA              | 1946779943               |
| SNP_P4_34577_33290922 | NC_021162.1    | Ca_kabuli_chr03 | 33290922                | CC                              | TT              | 1946779945               |
| SNP_P4_34578_33323445 | NC_021162.1    | Ca_kabuli_chr03 | 33323445                | CC                              | GG              | 1946779947               |
| SNP_P4_34579_33333343 | NC_021162.1    | Ca_kabuli_chr03 | 33333343                | AA                              | CC              | 1946779949               |
| SNP_P4_34580_33345611 | NC_021162.1    | Ca_kabuli_chr03 | 33345611                | AA                              | CC              | 1946779951               |
| SNP_P4_34581_33393591 | NC_021162.1    | Ca_kabuli_chr03 | 33393591                | TT                              | CC              | 1946779953               |
| SNP_P4_34582_33417231 | NC_021162.1    | Ca_kabuli_chr03 | 33417231                | AA                              | TT              | 1946779955               |
| SNP_P4_34584_33435834 | NC_021162.1    | Ca_kabuli_chr03 | 33435834                | TT                              | CC              | 1946779957               |
| SNP_P4_34585_33447035 | NC_021162.1    | Ca_kabuli_chr03 | 33447035                | GG                              | AA              | 1946779960               |
| SNP_P4_34586_33456123 | NC_021162.1    | Ca_kabuli_chr03 | 33456123                | CC                              | TT              | 1946779962               |
| SNP_P4_34587_33460398 | NC_021162.1    | Ca_kabuli_chr03 | 33460398                | TT                              | CC              | 1946779964               |
| SNP_P4_34588_33460436 | NC_021162.1    | Ca_kabuli_chr03 | 33460436                | GG                              | AA              | 1946779966               |
| SNP_P4_34589_33460540 | NC_021162.1    | Ca_kabuli_chr03 | 33460540                | GG                              | AA              | 1946779969               |
| SNP_P4_34590_33460559 | NC_021162.1    | Ca_kabuli_chr03 | 33460559                | AA                              | CC              | 1946779971               |
| SNP_P4_34591_33460594 | NC_021162.1    | Ca_kabuli_chr03 | 33460594                | AA                              | CC              | 1946779974               |
| SNP_P4_34592_33460646 | NC_021162.1    | Ca_kabuli_chr03 | 33460646                | TT                              | GG              | 1946779976               |
| SNP_P4_34593_33460710 | NC_021162.1    | Ca_kabuli_chr03 | 33460710                | TT                              | GG              | 1946779978               |
| SNP_P4_34594_33466687 | NC_021162.1    | Ca_kabuli_chr03 | 33466687                | CC                              | AA              | 1946779980               |
| SNP_P4_34595_33468780 | NC_021162.1    | Ca_kabuli_chr03 | 33468780                | CC                              | TT              | 1946779982               |
| SNP_P4_34596_33480780 | NC_021162.1    | Ca_kabuli_chr03 | 33480780                | TT                              | AA              | 1946779984               |
| SNP_P4_34598_33540265 | NC_021162.1    | Ca_kabuli_chr03 | 33540265                | AA                              | GG              | 1946779986               |
| SNP_P4_34599_33540276 | NC_021162.1    | Ca_kabuli_chr03 | 33540276                | AA                              | GG              | 1946779988               |
| SNP_P4_34601_33561571 | NC_021162.1    | Ca_kabuli_chr03 | 33561571                | CC                              | TT              | 1946779990               |
| SNP_P4_34603_33579127 | NC_021162.1    | Ca_kabuli_chr03 | 33579127                | TT                              | GG              | 1946779992               |
| SNP_P4_34605_33587349 | NC_021162.1    | Ca_kabuli_chr03 | 33587349                | CC                              | TT              | 1946779994               |
| SNP_P4_34607_33609722 | NC_021162.1    | Ca_kabuli_chr03 | 33609722                | AA                              | CC              | 1946779997               |
| SNP_P4_34608_33609740 | NC_021162.1    | Ca_kabuli_chr03 | 33609740                | AA                              | CC              | 1946780000               |
| SNP_P4_34609_33609751 | NC_021162.1    | Ca_kabuli_chr03 | 33609751                | TT                              | AA              | 1946780002               |
| SNP_P4_34610_33618955 | NC_021162.1    | Ca_kabuli_chr03 | 33618955                | CC                              | TT              | 1946780004               |
| SNP_P4_34611_33626018 | NC_021162.1    | Ca_kabuli_chr03 | 33626018                | TT                              | AA              | 1946780006               |
| SNP_P4_34612_33629825 | NC_021162.1    | Ca_kabuli_chr03 | 33629825                | GG                              | TT              | 1946780008               |
| SNP_P4_34613_33629844 | NC_021162.1    | Ca_kabuli_chr03 | 33629844                | TT                              | CC              | 1946780010               |

| SNPs IDs              | Chromosome IDs | Chromosomes     | Physical positions (bp) | CDC Frontier (Reference genome) | (ILWC46 & LPNB) | NCBI SNPdb Accession IDs |
|-----------------------|----------------|-----------------|-------------------------|---------------------------------|-----------------|--------------------------|
| SNP_P4_34614_33629856 | NC_021162.1    | Ca_kabuli_chr03 | 33629856                | CC                              | TT              | 1946780012               |
| SNP_P4_34615_33630022 | NC_021162.1    | Ca_kabuli_chr03 | 33630022                | GG                              | AA              | 1946780014               |
| SNP_P4_34616_33630398 | NC_021162.1    | Ca_kabuli_chr03 | 33630398                | AA                              | GG              | 1946780017               |
| SNP_P4_34617_33645952 | NC_021162.1    | Ca_kabuli_chr03 | 33645952                | AA                              | TT              | 1946780019               |
| SNP_P4_34618_33662368 | NC_021162.1    | Ca_kabuli_chr03 | 33662368                | CC                              | TT              | 1946780021               |
| SNP_P4_34619_33682817 | NC_021162.1    | Ca_kabuli_chr03 | 33682817                | AA                              | GG              | 1946780023               |
| SNP_P4_34620_33683491 | NC_021162.1    | Ca_kabuli_chr03 | 33683491                | AA                              | CC              | 1946780025               |
| SNP_P4_34621_33684086 | NC_021162.1    | Ca_kabuli_chr03 | 33684086                | AA                              | GG              | 1946780027               |
| SNP_P4_34622_33693196 | NC_021162.1    | Ca_kabuli_chr03 | 33693196                | TT                              | GG              | 1946780029               |
| SNP_P4_34625_33706514 | NC_021162.1    | Ca_kabuli_chr03 | 33706514                | AA                              | CC              | 1946780031               |
| SNP_P4_34626_33715215 | NC_021162.1    | Ca_kabuli_chr03 | 33715215                | GG                              | TT              | 1946780033               |
| SNP_P4_34627_33719345 | NC_021162.1    | Ca_kabuli_chr03 | 33719345                | CC                              | GG              | 1946780036               |
| SNP_P4_34628_33720681 | NC_021162.1    | Ca_kabuli_chr03 | 33720681                | AA                              | GG              | 1946780038               |
| SNP_P4_34630_33755048 | NC_021162.1    | Ca_kabuli_chr03 | 33755048                | AA                              | GG              | 1946780040               |
| SNP_P4_34631_33762182 | NC_021162.1    | Ca_kabuli_chr03 | 33762182                | GG                              | AA              | 1946780042               |
| SNP_P4_34632_33762538 | NC_021162.1    | Ca_kabuli_chr03 | 33762538                | TT                              | CC              | 1946780044               |
| SNP_P4_34633_33765733 | NC_021162.1    | Ca_kabuli_chr03 | 33765733                | TT                              | AA              | 1946780046               |
| SNP_P4_34634_33766554 | NC_021162.1    | Ca_kabuli_chr03 | 33766554                | AA                              | GG              | 1946780047               |
| SNP_P4_34635_33774925 | NC_021162.1    | Ca_kabuli_chr03 | 33774925                | AA                              | GG              | 1946780049               |
| SNP_P4_34636_33778522 | NC_021162.1    | Ca_kabuli_chr03 | 33778522                | GG                              | AA              | 1946780051               |
| SNP_P4_34637_33779104 | NC_021162.1    | Ca_kabuli_chr03 | 33779104                | TT                              | AA              | 1946780054               |
| SNP_P4_34638_33789971 | NC_021162.1    | Ca_kabuli_chr03 | 33789971                | AA                              | GG              | 1946780056               |
| SNP_P4_34639_33791063 | NC_021162.1    | Ca_kabuli_chr03 | 33791063                | TT                              | AA              | 1946780059               |
| SNP_P4_34640_33792119 | NC_021162.1    | Ca_kabuli_chr03 | 33792119                | TT                              | AA              | 1946780061               |
| SNP_P4_34641_33792129 | NC_021162.1    | Ca_kabuli_chr03 | 33792129                | AA                              | CC              | 1946780063               |
| SNP_P4_34642_33792176 | NC_021162.1    | Ca_kabuli_chr03 | 33792176                | AA                              | GG              | 1946780064               |
| SNP_P4_34643_33792181 | NC_021162.1    | Ca_kabuli_chr03 | 33792181                | GG                              | TT              | 1946780065               |
| SNP_P4_34644_33794702 | NC_021162.1    | Ca_kabuli_chr03 | 33794702                | AA                              | GG              | 1946780066               |
| SNP_P4_34645_33794836 | NC_021162.1    | Ca_kabuli_chr03 | 33794836                | AA                              | CC              | 1946780067               |
| SNP_P4_34646_33794898 | NC_021162.1    | Ca_kabuli_chr03 | 33794898                | AA                              | CC              | 1946780069               |
| SNP_P4_34647_33794901 | NC_021162.1    | Ca_kabuli_chr03 | 33794901                | TT                              | CC              | 1946780071               |
| SNP_P4_34648_33795129 | NC_021162.1    | Ca_kabuli_chr03 | 33795129                | AA                              | CC              | 1946780074               |
| SNP_P4_34649_33795248 | NC_021162.1    | Ca_kabuli_chr03 | 33795248                | AA                              | GG              | 1946780076               |
| SNP_P4_34650_33795329 | NC_021162.1    | Ca_kabuli_chr03 | 33795329                | TT                              | CC              | 1946780078               |
| SNP_P4_34651_33809951 | NC_021162.1    | Ca_kabuli_chr03 | 33809951                | GG                              | AA              | 1946780080               |
| SNP_P4_34652_33813187 | NC_021162.1    | Ca_kabuli_chr03 | 33813187                | CC                              | TT              | 1946780082               |
| SNP_P4_34653_33813206 | NC_021162.1    | Ca_kabuli_chr03 | 33813206                | AA                              | GG              | 1946780084               |
| SNP_P4_34654_33813237 | NC_021162.1    | Ca_kabuli_chr03 | 33813237                | AA                              | GG              | 1946780086               |
| SNP_P4_34655_33813335 | NC_021162.1    | Ca_kabuli_chr03 | 33813335                | AA                              | GG              | 1946780088               |
| SNP_P4_34656_33813368 | NC_021162.1    | Ca_kabuli_chr03 | 33813368                | GG                              | CC              | 1946780090               |
| SNP_P4_34657_33813386 | NC_021162.1    | Ca_kabuli_chr03 | 33813386                | AA                              | CC              | 1946780092               |
| SNP_P4_34658_33820543 | NC_021162.1    | Ca_kabuli_chr03 | 33820543                | GG                              | AA              | 1946780095               |



| SNPs IDs              | Chromosome IDs | Chromosomes     | Physical positions (bp) | CDC Frontier (Reference genome) | (ILWC46 & LPNB) | NCBI SNPdb Accession IDs |
|-----------------------|----------------|-----------------|-------------------------|---------------------------------|-----------------|--------------------------|
| SNP_P4_34659_33826199 | NC_021162.1    | Ca_kabuli_chr03 | 33826199                | TT                              | CC              | 1946780097               |
| SNP_P4_34661_33827836 | NC_021162.1    | Ca_kabuli_chr03 | 33827836                | CC                              | TT              | 1946780099               |
| SNP_P4_34662_33827947 | NC_021162.1    | Ca_kabuli_chr03 | 33827947                | AA                              | CC              | 1946780101               |
| SNP_P4_34664_33848360 | NC_021162.1    | Ca_kabuli_chr03 | 33848360                | GG                              | AA              | 1946780103               |
| SNP_P4_34666_33883300 | NC_021162.1    | Ca_kabuli_chr03 | 33883300                | TT                              | CC              | 1946780105               |
| SNP_P4_34668_33890041 | NC_021162.1    | Ca_kabuli_chr03 | 33890041                | AA                              | GG              | 1946780107               |
| SNP_P4_34669_33900777 | NC_021162.1    | Ca_kabuli_chr03 | 33900777                | CC                              | TT              | 1946780109               |
| SNP_P4_34670_33900795 | NC_021162.1    | Ca_kabuli_chr03 | 33900795                | GG                              | AA              | 1946780111               |
| SNP_P4_34671_33911029 | NC_021162.1    | Ca_kabuli_chr03 | 33911029                | GG                              | AA              | 1946780113               |
| SNP_P4_34672_33914071 | NC_021162.1    | Ca_kabuli_chr03 | 33914071                | TT                              | GG              | 1946780115               |
| SNP_P4_34673_33932384 | NC_021162.1    | Ca_kabuli_chr03 | 33932384                | CC                              | TT              | 1946780118               |
| SNP_P4_34674_33933209 | NC_021162.1    | Ca_kabuli_chr03 | 33933209                | AA                              | GG              | 1946780120               |
| SNP_P4_34675_33933231 | NC_021162.1    | Ca_kabuli_chr03 | 33933231                | GG                              | AA              | 1946780122               |
| SNP_P4_34676_33952342 | NC_021162.1    | Ca_kabuli_chr03 | 33952342                | AA                              | GG              | 1946780124               |
| SNP_P4_34679_33955439 | NC_021162.1    | Ca_kabuli_chr03 | 33955439                | TT                              | CC              | 1946780126               |
| SNP_P4_34680_33970281 | NC_021162.1    | Ca_kabuli_chr03 | 33970281                | AA                              | CC              | 1946780128               |
| SNP_P4_34682_34012235 | NC_021162.1    | Ca_kabuli_chr03 | 34012235                | TT                              | AA              | 1946780130               |
| SNP_P4_34683_34032814 | NC_021162.1    | Ca_kabuli_chr03 | 34032814                | CC                              | TT              | 1946780132               |
| SNP_P4_34685_34032907 | NC_021162.1    | Ca_kabuli_chr03 | 34032907                | GG                              | TT              | 1946780134               |
| SNP_P4_34686_34032942 | NC_021162.1    | Ca_kabuli_chr03 | 34032942                | GG                              | CC              | 1946780137               |
| SNP_P4_34688_34065648 | NC_021162.1    | Ca_kabuli_chr03 | 34065648                | CC                              | TT              | 1946780139               |
| SNP_P4_34689_34065668 | NC_021162.1    | Ca_kabuli_chr03 | 34065668                | AA                              | GG              | 1946780141               |
| SNP_P4_34690_34065679 | NC_021162.1    | Ca_kabuli_chr03 | 34065679                | AA                              | GG              | 1946780143               |
| SNP_P4_34691_34065690 | NC_021162.1    | Ca_kabuli_chr03 | 34065690                | TT                              | AA              | 1946780145               |
| SNP_P4_34692_34065712 | NC_021162.1    | Ca_kabuli_chr03 | 34065712                | TT                              | CC              | 1946780147               |
| SNP_P4_34693_34065861 | NC_021162.1    | Ca_kabuli_chr03 | 34065861                | TT                              | AA              | 1946780149               |
| SNP_P4_34694_34065891 | NC_021162.1    | Ca_kabuli_chr03 | 34065891                | TT                              | GG              | 1946780152               |
| SNP_P4_34695_34068909 | NC_021162.1    | Ca_kabuli_chr03 | 34068909                | TT                              | CC              | 1946780154               |
| SNP_P4_34696_34068930 | NC_021162.1    | Ca_kabuli_chr03 | 34068930                | TT                              | CC              | 1946780156               |
| SNP_P4_34697_34068953 | NC_021162.1    | Ca_kabuli_chr03 | 34068953                | CC                              | AA              | 1946780158               |
| SNP_P4_34698_34089123 | NC_021162.1    | Ca_kabuli_chr03 | 34089123                | GG                              | AA              | 1946780160               |
| SNP_P4_34699_34109568 | NC_021162.1    | Ca_kabuli_chr03 | 34109568                | CC                              | AA              | 1946780162               |
| SNP_P4_34700_34109570 | NC_021162.1    | Ca_kabuli_chr03 | 34109570                | TT                              | AA              | 1946780164               |
| SNP_P4_34701_34115264 | NC_021162.1    | Ca_kabuli_chr03 | 34115264                | CC                              | TT              | 1946780166               |
| SNP_P4_34703_34130784 | NC_021162.1    | Ca_kabuli_chr03 | 34130784                | TT                              | AA              | 1946780168               |
| SNP_P4_34704_34131847 | NC_021162.1    | Ca_kabuli_chr03 | 34131847                | AA                              | GG              | 1946780170               |
| SNP_P4_34705_34139699 | NC_021162.1    | Ca_kabuli_chr03 | 34139699                | AA                              | CC              | 1946780172               |
| SNP_P4_34706_34139713 | NC_021162.1    | Ca_kabuli_chr03 | 34139713                | TT                              | CC              | 1946780174               |
| SNP_P4_34707_34142796 | NC_021162.1    | Ca_kabuli_chr03 | 34142796                | CC                              | TT              | 1946780177               |
| SNP_P4_34708_34142981 | NC_021162.1    | Ca_kabuli_chr03 | 34142981                | TT                              | CC              | 1946780179               |
| SNP_P4_34709_34143022 | NC_021162.1    | Ca_kabuli_chr03 | 34143022                | AA                              | TT              | 1946780181               |
| SNP_P4_34710_34147207 | NC_021162.1    | Ca_kabuli_chr03 | 34147207                | TT                              | GG              | 1946780183               |

| SNPs IDs              | Chromosome IDs | Chromosomes     | Physical positions (bp) | CDC Frontier (Reference genome) | (ILWC46 & LPNB) | NCBI SNPdb Accession IDs |
|-----------------------|----------------|-----------------|-------------------------|---------------------------------|-----------------|--------------------------|
| SNP_P4_34711_34161234 | NC_021162.1    | Ca_kabuli_chr03 | 34161234                | CC                              | TT              | 1946780185               |
| SNP_P4_34712_34165840 | NC_021162.1    | Ca_kabuli_chr03 | 34165840                | AA                              | CC              | 1946780187               |
| SNP_P4_34713_34169411 | NC_021162.1    | Ca_kabuli_chr03 | 34169411                | GG                              | AA              | 1946780189               |
| SNP_P4_34714_34169430 | NC_021162.1    | Ca_kabuli_chr03 | 34169430                | AA                              | GG              | 1946780191               |
| SNP_P4_34715_34169871 | NC_021162.1    | Ca_kabuli_chr03 | 34169871                | GG                              | AA              | 1946780193               |
| SNP_P4_34716_34169895 | NC_021162.1    | Ca_kabuli_chr03 | 34169895                | AA                              | GG              | 1946780195               |
| SNP_P4_34717_34169956 | NC_021162.1    | Ca_kabuli_chr03 | 34169956                | TT                              | CC              | 1946780197               |
| SNP_P4_34718_34170253 | NC_021162.1    | Ca_kabuli_chr03 | 34170253                | GG                              | AA              | 1946780199               |
| SNP_P4_34719_34170254 | NC_021162.1    | Ca_kabuli_chr03 | 34170254                | GG                              | CC              | 1946780202               |
| SNP_P4_34720_34189501 | NC_021162.1    | Ca_kabuli_chr03 | 34189501                | AA                              | CC              | 1946780204               |
| SNP_P4_34724_34222000 | NC_021162.1    | Ca_kabuli_chr03 | 34222000                | GG                              | AA              | 1946780206               |
| SNP_P4_34725_34225550 | NC_021162.1    | Ca_kabuli_chr03 | 34225550                | AA                              | GG              | 1946780208               |
| SNP_P4_34726_34227429 | NC_021162.1    | Ca_kabuli_chr03 | 34227429                | CC                              | AA              | 1946780210               |
| SNP_P4_34729_34284596 | NC_021162.1    | Ca_kabuli_chr03 | 34284596                | GG                              | CC              | 1946780212               |
| SNP_P4_34730_34292181 | NC_021162.1    | Ca_kabuli_chr03 | 34292181                | AA                              | GG              | 1946780214               |
| SNP_P4_34731_34292279 | NC_021162.1    | Ca_kabuli_chr03 | 34292279                | AA                              | GG              | 1946780216               |
| SNP_P4_34732_34298750 | NC_021162.1    | Ca_kabuli_chr03 | 34298750                | AA                              | TT              | 1946780218               |
| SNP_P4_34733_34304115 | NC_021162.1    | Ca_kabuli_chr03 | 34304115                | AA                              | GG              | 1946780220               |
| SNP_P4_34735_34340892 | NC_021162.1    | Ca_kabuli_chr03 | 34340892                | AA                              | CC              | 1946780222               |
| SNP_P4_34736_34352662 | NC_021162.1    | Ca_kabuli_chr03 | 34352662                | CC                              | GG              | 1946780224               |
| SNP_P4_34737_34361314 | NC_021162.1    | Ca_kabuli_chr03 | 34361314                | GG                              | AA              | 1946780226               |
| SNP_P4_34738_34364957 | NC_021162.1    | Ca_kabuli_chr03 | 34364957                | AA                              | CC              | 1946780228               |
| SNP_P4_34739_34367367 | NC_021162.1    | Ca_kabuli_chr03 | 34367367                | AA                              | TT              | 1946780230               |
| SNP_P4_34742_34456717 | NC_021162.1    | Ca_kabuli_chr03 | 34456717                | TT                              | CC              | 1946780232               |
| SNP_P4_34743_34460085 | NC_021162.1    | Ca_kabuli_chr03 | 34460085                | AA                              | TT              | 1946780234               |
| SNP_P4_34745_34490538 | NC_021162.1    | Ca_kabuli_chr03 | 34490538                | CC                              | TT              | 1946780236               |
| SNP_P4_34746_34492227 | NC_021162.1    | Ca_kabuli_chr03 | 34492227                | GG                              | CC              | 1946780238               |
| SNP_P4_34747_34538841 | NC_021162.1    | Ca_kabuli_chr03 | 34538841                | TT                              | AA              | 1946780240               |
| SNP_P4_34748_34538864 | NC_021162.1    | Ca_kabuli_chr03 | 34538864                | CC                              | TT              | 1946780242               |
| SNP_P4_34749_34538865 | NC_021162.1    | Ca_kabuli_chr03 | 34538865                | AA                              | CC              | 1946780244               |
| SNP_P4_34750_34538891 | NC_021162.1    | Ca_kabuli_chr03 | 34538891                | CC                              | TT              | 1946780246               |
| SNP_P4_34751_34538914 | NC_021162.1    | Ca_kabuli_chr03 | 34538914                | GG                              | TT              | 1946780248               |
| SNP_P4_34752_34538918 | NC_021162.1    | Ca_kabuli_chr03 | 34538918                | CC                              | TT              | 1946780250               |
| SNP_P4_34753_34540293 | NC_021162.1    | Ca_kabuli_chr03 | 34540293                | TT                              | CC              | 1946780252               |
| SNP_P4_34754_34540471 | NC_021162.1    | Ca_kabuli_chr03 | 34540471                | AA                              | CC              | 1946780254               |
| SNP_P4_34755_34540475 | NC_021162.1    | Ca_kabuli_chr03 | 34540475                | GG                              | AA              | 1946780257               |
| SNP_P4_34756_34578005 | NC_021162.1    | Ca_kabuli_chr03 | 34578005                | CC                              | TT              | 1946780259               |
| SNP_P4_34758_34601360 | NC_021162.1    | Ca_kabuli_chr03 | 34601360                | AA                              | CC              | 1946780261               |
| SNP_P4_34759_34601388 | NC_021162.1    | Ca_kabuli_chr03 | 34601388                | GG                              | CC              | 1946780263               |
| SNP_P4_34760_34601468 | NC_021162.1    | Ca_kabuli_chr03 | 34601468                | AA                              | TT              | 1946780265               |
| SNP_P4_34761_34601492 | NC_021162.1    | Ca_kabuli_chr03 | 34601492                | TT                              | CC              | 1946780267               |
| SNP_P4_34762_34601507 | NC_021162.1    | Ca_kabuli_chr03 | 34601507                | CC                              | AA              | 1946780269               |

| SNPs IDs              | Chromosome IDs | Chromosomes     | Physical positions (bp) | CDC Frontier (Reference genome) | (ILWC46 & LPNB) | NCBI SNPdb Accession IDs |
|-----------------------|----------------|-----------------|-------------------------|---------------------------------|-----------------|--------------------------|
| SNP_P4_34763_34601599 | NC_021162.1    | Ca_kabuli_chr03 | 34601599                | GG                              | AA              | 1946780271               |
| SNP_P4_34764_34601661 | NC_021162.1    | Ca_kabuli_chr03 | 34601661                | CC                              | AA              | 1946780273               |
| SNP_P4_34765_34601714 | NC_021162.1    | Ca_kabuli_chr03 | 34601714                | AA                              | TT              | 1946780275               |
| SNP_P4_34766_34601733 | NC_021162.1    | Ca_kabuli_chr03 | 34601733                | AA                              | GG              | 1946780278               |
| SNP_P4_34767_34688040 | NC_021162.1    | Ca_kabuli_chr03 | 34688040                | AA                              | CC              | 1946780280               |
| SNP_P4_34768_34712695 | NC_021162.1    | Ca_kabuli_chr03 | 34712695                | TT                              | CC              | 1946780283               |
| SNP_P4_34769_34725914 | NC_021162.1    | Ca_kabuli_chr03 | 34725914                | TT                              | CC              | 1946780286               |
| SNP_P4_34770_34745453 | NC_021162.1    | Ca_kabuli_chr03 | 34745453                | AA                              | GG              | 1946780288               |
| SNP_P4_34771_34748303 | NC_021162.1    | Ca_kabuli_chr03 | 34748303                | AA                              | TT              | 1946780290               |
| SNP_P4_34772_34788220 | NC_021162.1    | Ca_kabuli_chr03 | 34788220                | GG                              | TT              | 1946780292               |
| SNP_P4_34774_34820079 | NC_021162.1    | Ca_kabuli_chr03 | 34820079                | TT                              | AA              | 1946780294               |
| SNP_P4_34776_34827852 | NC_021162.1    | Ca_kabuli_chr03 | 34827852                | CC                              | TT              | 1946780296               |
| SNP_P4_34778_34881778 | NC_021162.1    | Ca_kabuli_chr03 | 34881778                | TT                              | CC              | 1946780299               |
| SNP_P4_34779_34895710 | NC_021162.1    | Ca_kabuli_chr03 | 34895710                | AA                              | GG              | 1946780301               |
| SNP_P4_34780_34901407 | NC_021162.1    | Ca_kabuli_chr03 | 34901407                | CC                              | TT              | 1946780303               |
| SNP_P4_34782_35004001 | NC_021162.1    | Ca_kabuli_chr03 | 35004001                | CC                              | GG              | 1946780305               |
| SNP_P4_34784_35009318 | NC_021162.1    | Ca_kabuli_chr03 | 35009318                | CC                              | AA              | 1946780307               |
| SNP_P4_34785_35009326 | NC_021162.1    | Ca_kabuli_chr03 | 35009326                | TT                              | CC              | 1946780309               |
| SNP_P4_34786_35009340 | NC_021162.1    | Ca_kabuli_chr03 | 35009340                | TT                              | CC              | 1946780311               |
| SNP_P4_34789_35063117 | NC_021162.1    | Ca_kabuli_chr03 | 35063117                | TT                              | CC              | 1946780313               |
| SNP_P4_34790_35065122 | NC_021162.1    | Ca_kabuli_chr03 | 35065122                | TT                              | CC              | 1946780315               |
| SNP_P4_34791_35075804 | NC_021162.1    | Ca_kabuli_chr03 | 35075804                | TT                              | CC              | 1946780316               |
| SNP_P4_34793_35128615 | NC_021162.1    | Ca_kabuli_chr03 | 35128615                | TT                              | CC              | 1946780317               |
| SNP_P4_34794_35153792 | NC_021162.1    | Ca_kabuli_chr03 | 35153792                | CC                              | TT              | 1946780318               |
| SNP_P4_34795_35162681 | NC_021162.1    | Ca_kabuli_chr03 | 35162681                | AA                              | CC              | 1946780319               |
| SNP_P4_34796_35162682 | NC_021162.1    | Ca_kabuli_chr03 | 35162682                | TT                              | CC              | 1946780320               |
| SNP_P4_34799_35177218 | NC_021162.1    | Ca_kabuli_chr03 | 35177218                | AA                              | GG              | 1946780322               |
| SNP_P4_34801_35203964 | NC_021162.1    | Ca_kabuli_chr03 | 35203964                | CC                              | TT              | 1946780324               |
| SNP_P4_34802_35221267 | NC_021162.1    | Ca_kabuli_chr03 | 35221267                | AA                              | CC              | 1946780327               |
| SNP_P4_34803_35229674 | NC_021162.1    | Ca_kabuli_chr03 | 35229674                | CC                              | TT              | 1946780329               |
| SNP_P4_34804_35230097 | NC_021162.1    | Ca_kabuli_chr03 | 35230097                | CC                              | TT              | 1946780331               |
| SNP_P4_34806_35253047 | NC_021162.1    | Ca_kabuli_chr03 | 35253047                | AA                              | GG              | 1946780333               |
| SNP_P4_34807_35253918 | NC_021162.1    | Ca_kabuli_chr03 | 35253918                | GG                              | AA              | 1946780334               |
| SNP_P4_34808_35253988 | NC_021162.1    | Ca_kabuli_chr03 | 35253988                | TT                              | CC              | 1946780336               |
| SNP_P4_34809_35254436 | NC_021162.1    | Ca_kabuli_chr03 | 35254436                | GG                              | TT              | 1946780338               |
| SNP_P4_34812_35267279 | NC_021162.1    | Ca_kabuli_chr03 | 35267279                | AA                              | GG              | 1946780340               |
| SNP_P4_34813_35277713 | NC_021162.1    | Ca_kabuli_chr03 | 35277713                | TT                              | CC              | 1946780343               |
| SNP_P4_34814_35301868 | NC_021162.1    | Ca_kabuli_chr03 | 35301868                | AA                              | TT              | 1946780345               |
| SNP_P4_34816_35310630 | NC_021162.1    | Ca_kabuli_chr03 | 35310630                | GG                              | TT              | 1946780347               |
| SNP_P4_34817_35313324 | NC_021162.1    | Ca_kabuli_chr03 | 35313324                | GG                              | AA              | 1946780349               |
| SNP_P4_34818_35314186 | NC_021162.1    | Ca_kabuli_chr03 | 35314186                | AA                              | GG              | 1946780351               |
| SNP_P4_34820_35347637 | NC_021162.1    | Ca_kabuli_chr03 | 35347637                | TT                              | AA              | 1946780353               |

| SNPs IDs              | Chromosome IDs | Chromosomes     | Physical positions (bp) | CDC Frontier (Reference genome) | (ILWC46 & LPNB) | NCBI SNPdb Accession IDs |
|-----------------------|----------------|-----------------|-------------------------|---------------------------------|-----------------|--------------------------|
| SNP_P4_34821_35376983 | NC_021162.1    | Ca_kabuli_chr03 | 35376983                | TT                              | CC              | 1946780355               |
| SNP_P4_34822_35378745 | NC_021162.1    | Ca_kabuli_chr03 | 35378745                | GG                              | AA              | 1946780357               |
| SNP_P4_34823_35399495 | NC_021162.1    | Ca_kabuli_chr03 | 35399495                | GG                              | AA              | 1946780359               |
| SNP_P4_34824_35423673 | NC_021162.1    | Ca_kabuli_chr03 | 35423673                | CC                              | GG              | 1946780361               |
| SNP_P4_34825_35424106 | NC_021162.1    | Ca_kabuli_chr03 | 35424106                | AA                              | GG              | 1946780363               |
| SNP_P4_34827_35446184 | NC_021162.1    | Ca_kabuli_chr03 | 35446184                | TT                              | CC              | 1946780365               |
| SNP_P4_34828_35452602 | NC_021162.1    | Ca_kabuli_chr03 | 35452602                | CC                              | TT              | 1946780367               |
| SNP_P4_34830_35497174 | NC_021162.1    | Ca_kabuli_chr03 | 35497174                | TT                              | AA              | 1946780369               |
| SNP_P4_34831_35514219 | NC_021162.1    | Ca_kabuli_chr03 | 35514219                | GG                              | AA              | 1946780371               |
| SNP_P4_34832_35526402 | NC_021162.1    | Ca_kabuli_chr03 | 35526402                | GG                              | AA              | 1946780373               |
| SNP_P4_34833_35527392 | NC_021162.1    | Ca_kabuli_chr03 | 35527392                | CC                              | TT              | 1946780375               |
| SNP_P4_34834_35527867 | NC_021162.1    | Ca_kabuli_chr03 | 35527867                | AA                              | CC              | 1946780377               |
| SNP_P4_34836_35548725 | NC_021162.1    | Ca_kabuli_chr03 | 35548725                | AA                              | TT              | 1946780379               |
| SNP_P4_34837_35582986 | NC_021162.1    | Ca_kabuli_chr03 | 35582986                | TT                              | CC              | 1946780381               |
| SNP_P4_34839_35586470 | NC_021162.1    | Ca_kabuli_chr03 | 35586470                | TT                              | CC              | 1946780383               |
| SNP_P4_34840_35610245 | NC_021162.1    | Ca_kabuli_chr03 | 35610245                | TT                              | AA              | 1946780385               |
| SNP_P4_34841_35626843 | NC_021162.1    | Ca_kabuli_chr03 | 35626843                | AA                              | GG              | 1946780387               |
| SNP_P4_34842_35627175 | NC_021162.1    | Ca_kabuli_chr03 | 35627175                | CC                              | TT              | 1946780389               |
| SNP_P4_34844_35631086 | NC_021162.1    | Ca_kabuli_chr03 | 35631086                | TT                              | CC              | 1946780391               |
| SNP_P4_34845_35652556 | NC_021162.1    | Ca_kabuli_chr03 | 35652556                | AA                              | GG              | 1946780393               |
| SNP_P4_34846_35654875 | NC_021162.1    | Ca_kabuli_chr03 | 35654875                | GG                              | AA              | 1946780396               |
| SNP_P4_34848_35662224 | NC_021162.1    | Ca_kabuli_chr03 | 35662224                | AA                              | TT              | 1946780398               |
| SNP_P4_34853_35702671 | NC_021162.1    | Ca_kabuli_chr03 | 35702671                | TT                              | CC              | 1946780400               |
| SNP_P4_34854_35702895 | NC_021162.1    | Ca_kabuli_chr03 | 35702895                | AA                              | TT              | 1946780402               |
| SNP_P4_34856_35732732 | NC_021162.1    | Ca_kabuli_chr03 | 35732732                | GG                              | AA              | 1946780404               |
| SNP_P4_34857_35733263 | NC_021162.1    | Ca_kabuli_chr03 | 35733263                | TT                              | AA              | 1946780406               |
| SNP_P4_34858_35743164 | NC_021162.1    | Ca_kabuli_chr03 | 35743164                | TT                              | CC              | 1946780408               |
| SNP_P4_34862_35799492 | NC_021162.1    | Ca_kabuli_chr03 | 35799492                | AA                              | CC              | 1946780410               |
| SNP_P4_34863_35799493 | NC_021162.1    | Ca_kabuli_chr03 | 35799493                | TT                              | AA              | 1946780412               |
| SNP_P4_34864_35800151 | NC_021162.1    | Ca_kabuli_chr03 | 35800151                | AA                              | GG              | 1946780414               |
| SNP_P4_34865_35811476 | NC_021162.1    | Ca_kabuli_chr03 | 35811476                | AA                              | GG              | 1946780416               |
| SNP_P4_34866_35830255 | NC_021162.1    | Ca_kabuli_chr03 | 35830255                | CC                              | TT              | 1946780418               |
| SNP_P4_34867_35830257 | NC_021162.1    | Ca_kabuli_chr03 | 35830257                | TT                              | CC              | 1946780420               |
| SNP_P4_34868_35830260 | NC_021162.1    | Ca_kabuli_chr03 | 35830260                | GG                              | AA              | 1946780422               |
| SNP_P4_34869_35830261 | NC_021162.1    | Ca_kabuli_chr03 | 35830261                | TT                              | AA              | 1946780425               |
| SNP_P4_34876_35879083 | NC_021162.1    | Ca_kabuli_chr03 | 35879083                | AA                              | GG              | 1946780427               |
| SNP_P4_34878_35897330 | NC_021162.1    | Ca_kabuli_chr03 | 35897330                | GG                              | AA              | 1946780429               |
| SNP_P4_34879_35898598 | NC_021162.1    | Ca_kabuli_chr03 | 35898598                | AA                              | GG              | 1946780431               |
| SNP_P4_34880_35916908 | NC_021162.1    | Ca_kabuli_chr03 | 35916908                | AA                              | GG              | 1946780433               |
| SNP_P4_34881_35918420 | NC_021162.1    | Ca_kabuli_chr03 | 35918420                | GG                              | AA              | 1946780435               |
| SNP_P4_34882_35918709 | NC_021162.1    | Ca_kabuli_chr03 | 35918709                | AA                              | TT              | 1946780437               |
| SNP_P4_34883_35943462 | NC_021162.1    | Ca_kabuli_chr03 | 35943462                | TT                              | CC              | 1946780439               |

| SNPs IDs              | Chromosome IDs | Chromosomes     | Physical positions (bp) | CDC Frontier (Reference genome) | (ILWC46 & LPNB) | NCBI SNPdb Accession IDs |
|-----------------------|----------------|-----------------|-------------------------|---------------------------------|-----------------|--------------------------|
| SNP_P4_34884_35946249 | NC_021162.1    | Ca_kabuli_chr03 | 35946249                | AA                              | TT              | 1946780441               |
| SNP_P4_34885_35946287 | NC_021162.1    | Ca_kabuli_chr03 | 35946287                | CC                              | TT              | 1946780443               |
| SNP_P4_34887_35952123 | NC_021162.1    | Ca_kabuli_chr03 | 35952123                | CC                              | TT              | 1946780445               |
| SNP_P4_34888_35952128 | NC_021162.1    | Ca_kabuli_chr03 | 35952128                | CC                              | TT              | 1946780447               |
| SNP_P4_34890_35952175 | NC_021162.1    | Ca_kabuli_chr03 | 35952175                | GG                              | AA              | 1946780449               |
| SNP_P4_34891_35952202 | NC_021162.1    | Ca_kabuli_chr03 | 35952202                | GG                              | AA              | 1946780451               |
| SNP_P4_34892_35952204 | NC_021162.1    | Ca_kabuli_chr03 | 35952204                | CC                              | TT              | 1946780454               |
| SNP_P4_34893_35952206 | NC_021162.1    | Ca_kabuli_chr03 | 35952206                | CC                              | TT              | 1946780456               |
| SNP_P4_34894_35952454 | NC_021162.1    | Ca_kabuli_chr03 | 35952454                | AA                              | CC              | 1946780458               |
| SNP_P4_34895_35954174 | NC_021162.1    | Ca_kabuli_chr03 | 35954174                | AA                              | GG              | 1946780459               |
| SNP_P4_34897_35954221 | NC_021162.1    | Ca_kabuli_chr03 | 35954221                | TT                              | CC              | 1946780461               |
| SNP_P4_34898_35955461 | NC_021162.1    | Ca_kabuli_chr03 | 35955461                | GG                              | AA              | 1946780463               |
| SNP_P4_34900_35955491 | NC_021162.1    | Ca_kabuli_chr03 | 35955491                | TT                              | AA              | 1946780465               |
| SNP_P4_34902_35959893 | NC_021162.1    | Ca_kabuli_chr03 | 35959893                | CC                              | TT              | 1946780467               |
| SNP_P4_34905_35960018 | NC_021162.1    | Ca_kabuli_chr03 | 35960018                | AA                              | TT              | 1946780469               |
| SNP_P4_34906_35962566 | NC_021162.1    | Ca_kabuli_chr03 | 35962566                | GG                              | CC              | 1946780471               |
| SNP_P4_34907_35962677 | NC_021162.1    | Ca_kabuli_chr03 | 35962677                | TT                              | GG              | 1946780473               |
| SNP_P4_34908_35962678 | NC_021162.1    | Ca_kabuli_chr03 | 35962678                | AA                              | TT              | 1946780474               |
| SNP_P4_34909_35963529 | NC_021162.1    | Ca_kabuli_chr03 | 35963529                | GG                              | AA              | 1946780476               |
| SNP_P4_34910_35963558 | NC_021162.1    | Ca_kabuli_chr03 | 35963558                | TT                              | GG              | 1946780479               |
| SNP_P4_34911_35963582 | NC_021162.1    | Ca_kabuli_chr03 | 35963582                | TT                              | AA              | 1946780481               |
| SNP_P4_34912_35963589 | NC_021162.1    | Ca_kabuli_chr03 | 35963589                | CC                              | TT              | 1946780483               |
| SNP_P4_34915_35965476 | NC_021162.1    | Ca_kabuli_chr03 | 35965476                | AA                              | GG              | 1946780485               |
| SNP_P4_34917_35968932 | NC_021162.1    | Ca_kabuli_chr03 | 35968932                | AA                              | GG              | 1946780487               |
| SNP_P4_34918_35970016 | NC_021162.1    | Ca_kabuli_chr03 | 35970016                | CC                              | TT              | 1946780489               |
| SNP_P4_34919_35976903 | NC_021162.1    | Ca_kabuli_chr03 | 35976903                | AA                              | CC              | 1946780491               |
| SNP_P4_34920_35978828 | NC_021162.1    | Ca_kabuli_chr03 | 35978828                | TT                              | CC              | 1946780493               |
| SNP_P4_34922_35978997 | NC_021162.1    | Ca_kabuli_chr03 | 35978997                | AA                              | GG              | 1946780495               |
| SNP_P4_34923_35979023 | NC_021162.1    | Ca_kabuli_chr03 | 35979023                | GG                              | TT              | 1946780497               |
| SNP_P4_34924_35979094 | NC_021162.1    | Ca_kabuli_chr03 | 35979094                | GG                              | AA              | 1946780499               |
| SNP_P4_34925_35979121 | NC_021162.1    | Ca_kabuli_chr03 | 35979121                | GG                              | AA              | 1946780501               |
| SNP_P4_34926_35979143 | NC_021162.1    | Ca_kabuli_chr03 | 35979143                | AA                              | GG              | 1946780504               |
| SNP_P4_34927_35979150 | NC_021162.1    | Ca_kabuli_chr03 | 35979150                | AA                              | GG              | 1946780506               |
| SNP_P4_34930_35980342 | NC_021162.1    | Ca_kabuli_chr03 | 35980342                | CC                              | TT              | 1946780508               |
| SNP_P4_34931_35980345 | NC_021162.1    | Ca_kabuli_chr03 | 35980345                | CC                              | TT              | 1946780510               |
| SNP_P4_34932_35980380 | NC_021162.1    | Ca_kabuli_chr03 | 35980380                | GG                              | AA              | 1946780512               |
| SNP_P4_34933_35980385 | NC_021162.1    | Ca_kabuli_chr03 | 35980385                | GG                              | AA              | 1946780514               |
| SNP_P4_34934_35980423 | NC_021162.1    | Ca_kabuli_chr03 | 35980423                | AA                              | GG              | 1946780516               |
| SNP_P4_34935_35980432 | NC_021162.1    | Ca_kabuli_chr03 | 35980432                | AA                              | GG              | 1946780518               |
| SNP_P4_34937_35980645 | NC_021162.1    | Ca_kabuli_chr03 | 35980645                | AA                              | GG              | 1946780520               |
| SNP_P4_34938_35981209 | NC_021162.1    | Ca_kabuli_chr03 | 35981209                | CC                              | TT              | 1946780522               |
| SNP_P4_34939_35981211 | NC_021162.1    | Ca_kabuli_chr03 | 35981211                | GG                              | AA              | 1946780524               |

| SNPs IDs              | Chromosome IDs | Chromosomes     | Physical positions (bp) | CDC Frontier (Reference genome) | (ILWC46 & LPNB) | NCBI SNPdb Accession IDs |
|-----------------------|----------------|-----------------|-------------------------|---------------------------------|-----------------|--------------------------|
| SNP_P4_34941_35985959 | NC_021162.1    | Ca_kabuli_chr03 | 35985959                | GG                              | AA              | 1946780526               |
| SNP_P4_34944_35986669 | NC_021162.1    | Ca_kabuli_chr03 | 35986669                | CC                              | TT              | 1946780528               |
| SNP_P4_34945_35986828 | NC_021162.1    | Ca_kabuli_chr03 | 35986828                | AA                              | GG              | 1946780530               |
| SNP_P4_34946_35990479 | NC_021162.1    | Ca_kabuli_chr03 | 35990479                | AA                              | CC              | 1946780532               |
| SNP_P4_34947_35992162 | NC_021162.1    | Ca_kabuli_chr03 | 35992162                | AA                              | CC              | 1946780534               |
| SNP_P4_34948_35992742 | NC_021162.1    | Ca_kabuli_chr03 | 35992742                | GG                              | AA              | 1946780536               |
| SNP_P4_34950_35992994 | NC_021162.1    | Ca_kabuli_chr03 | 35992994                | AA                              | GG              | 1946780538               |
| SNP_P4_34951_35993095 | NC_021162.1    | Ca_kabuli_chr03 | 35993095                | TT                              | CC              | 1946780540               |
| SNP_P4_34952_35993374 | NC_021162.1    | Ca_kabuli_chr03 | 35993374                | AA                              | GG              | 1946780542               |
| SNP_P4_34953_35993388 | NC_021162.1    | Ca_kabuli_chr03 | 35993388                | GG                              | AA              | 1946780544               |
| SNP_P4_34955_35994108 | NC_021162.1    | Ca_kabuli_chr03 | 35994108                | AA                              | GG              | 1946780546               |
| SNP_P4_34956_35994344 | NC_021162.1    | Ca_kabuli_chr03 | 35994344                | CC                              | TT              | 1946780548               |
| SNP_P4_34957_35994372 | NC_021162.1    | Ca_kabuli_chr03 | 35994372                | CC                              | TT              | 1946780550               |
| SNP_P4_34959_35995983 | NC_021162.1    | Ca_kabuli_chr03 | 35995983                | GG                              | TT              | 1946780552               |
| SNP_P4_34960_35997081 | NC_021162.1    | Ca_kabuli_chr03 | 35997081                | GG                              | CC              | 1946780554               |
| SNP_P4_34961_35998445 | NC_021162.1    | Ca_kabuli_chr03 | 35998445                | GG                              | TT              | 1946780556               |
| SNP_P4_34962_35998502 | NC_021162.1    | Ca_kabuli_chr03 | 35998502                | TT                              | AA              | 1946780558               |
| SNP_P4_34963_35998806 | NC_021162.1    | Ca_kabuli_chr03 | 35998806                | TT                              | CC              | 1946780560               |
| SNP_P4_34964_35999492 | NC_021162.1    | Ca_kabuli_chr03 | 35999492                | GG                              | AA              | 1946780562               |
| SNP_P4_34965_35999876 | NC_021162.1    | Ca_kabuli_chr03 | 35999876                | GG                              | AA              | 1946780564               |
| SNP_P4_34968_36000214 | NC_021162.1    | Ca_kabuli_chr03 | 36000214                | GG                              | AA              | 1946780566               |
| SNP_P4_34969_36000275 | NC_021162.1    | Ca_kabuli_chr03 | 36000275                | GG                              | TT              | 1946780568               |
| SNP_P4_34970_36000657 | NC_021162.1    | Ca_kabuli_chr03 | 36000657                | CC                              | AA              | 1946780571               |
| SNP_P4_34971_36002733 | NC_021162.1    | Ca_kabuli_chr03 | 36002733                | TT                              | CC              | 1946780574               |
| SNP_P4_34972_36002796 | NC_021162.1    | Ca_kabuli_chr03 | 36002796                | TT                              | CC              | 1946780576               |
| SNP_P4_34973_36002931 | NC_021162.1    | Ca_kabuli_chr03 | 36002931                | TT                              | CC              | 1946780578               |
| SNP_P4_34974_36003029 | NC_021162.1    | Ca_kabuli_chr03 | 36003029                | GG                              | TT              | 1946780580               |
| SNP_P4_34975_36003060 | NC_021162.1    | Ca_kabuli_chr03 | 36003060                | GG                              | AA              | 1946780582               |
| SNP_P4_34977_36006552 | NC_021162.1    | Ca_kabuli_chr03 | 36006552                | CC                              | AA              | 1946780584               |
| SNP_P4_34978_36009677 | NC_021162.1    | Ca_kabuli_chr03 | 36009677                | TT                              | AA              | 1946780586               |
| SNP_P4_34979_36009787 | NC_021162.1    | Ca_kabuli_chr03 | 36009787                | CC                              | TT              | 1946780589               |
| SNP_P4_34980_36009983 | NC_021162.1    | Ca_kabuli_chr03 | 36009983                | CC                              | GG              | 1946780591               |
| SNP_P4_34981_36013668 | NC_021162.1    | Ca_kabuli_chr03 | 36013668                | AA                              | TT              | 1946780593               |
| SNP_P4_34982_36013673 | NC_021162.1    | Ca_kabuli_chr03 | 36013673                | AA                              | TT              | 1946780595               |
| SNP_P4_34983_36013713 | NC_021162.1    | Ca_kabuli_chr03 | 36013713                | AA                              | GG              | 1946780597               |
| SNP_P4_34984_36013716 | NC_021162.1    | Ca_kabuli_chr03 | 36013716                | AA                              | GG              | 1946780599               |
| SNP_P4_34985_36013746 | NC_021162.1    | Ca_kabuli_chr03 | 36013746                | TT                              | AA              | 1946780601               |
| SNP_P4_34986_36013761 | NC_021162.1    | Ca_kabuli_chr03 | 36013761                | AA                              | GG              | 1946780604               |
| SNP_P4_34987_36014537 | NC_021162.1    | Ca_kabuli_chr03 | 36014537                | CC                              | TT              | 1946780606               |
| SNP_P4_34988_36015225 | NC_021162.1    | Ca_kabuli_chr03 | 36015225                | CC                              | TT              | 1946780608               |
| SNP_P4_34989_36015701 | NC_021162.1    | Ca_kabuli_chr03 | 36015701                | AA                              | GG              | 1946780610               |
| SNP_P4_34990_36015712 | NC_021162.1    | Ca_kabuli_chr03 | 36015712                | TT                              | GG              | 1946780612               |

| SNPs IDs              | Chromosome IDs | Chromosomes     | Physical positions (bp) | CDC Frontier (Reference genome) | (ILWC46 & LPNB) | NCBI SNPdb Accession IDs |
|-----------------------|----------------|-----------------|-------------------------|---------------------------------|-----------------|--------------------------|
| SNP_P4_34992_36017155 | NC_021162.1    | Ca_kabuli_chr03 | 36017155                | CC                              | GG              | 1946780614               |
| SNP_P4_34993_36017310 | NC_021162.1    | Ca_kabuli_chr03 | 36017310                | GG                              | AA              | 1946780616               |
| SNP_P4_34994_36018140 | NC_021162.1    | Ca_kabuli_chr03 | 36018140                | GG                              | CC              | 1946780618               |
| SNP_P4_34995_36018472 | NC_021162.1    | Ca_kabuli_chr03 | 36018472                | AA                              | CC              | 1946780620               |
| SNP_P4_34997_36019556 | NC_021162.1    | Ca_kabuli_chr03 | 36019556                | AA                              | TT              | 1946780623               |
| SNP_P4_34999_36019982 | NC_021162.1    | Ca_kabuli_chr03 | 36019982                | GG                              | AA              | 1946780625               |
| SNP_P4_35000_36020957 | NC_021162.1    | Ca_kabuli_chr03 | 36020957                | GG                              | AA              | 1946780627               |
| SNP_P4_35001_36021256 | NC_021162.1    | Ca_kabuli_chr03 | 36021256                | CC                              | TT              | 1946780629               |
| SNP_P4_35002_36021264 | NC_021162.1    | Ca_kabuli_chr03 | 36021264                | TT                              | AA              | 1946780631               |
| SNP_P4_35003_36021664 | NC_021162.1    | Ca_kabuli_chr03 | 36021664                | GG                              | AA              | 1946780633               |
| SNP_P4_35004_36021723 | NC_021162.1    | Ca_kabuli_chr03 | 36021723                | TT                              | CC              | 1946780635               |
| SNP_P4_35005_36021789 | NC_021162.1    | Ca_kabuli_chr03 | 36021789                | GG                              | AA              | 1946780637               |
| SNP_P4_35006_36021950 | NC_021162.1    | Ca_kabuli_chr03 | 36021950                | TT                              | CC              | 1946780640               |
| SNP_P4_35007_36021980 | NC_021162.1    | Ca_kabuli_chr03 | 36021980                | AA                              | CC              | 1946780642               |
| SNP_P4_35008_36021999 | NC_021162.1    | Ca_kabuli_chr03 | 36021999                | AA                              | GG              | 1946780644               |
| SNP_P4_35009_36022004 | NC_021162.1    | Ca_kabuli_chr03 | 36022004                | GG                              | AA              | 1946780646               |
| SNP_P4_35010_36022015 | NC_021162.1    | Ca_kabuli_chr03 | 36022015                | TT                              | GG              | 1946780648               |
| SNP_P4_35011_36022022 | NC_021162.1    | Ca_kabuli_chr03 | 36022022                | AA                              | GG              | 1946780650               |
| SNP_P4_35012_36022029 | NC_021162.1    | Ca_kabuli_chr03 | 36022029                | CC                              | TT              | 1946780652               |
| SNP_P4_35013_36022030 | NC_021162.1    | Ca_kabuli_chr03 | 36022030                | TT                              | CC              | 1946780654               |
| SNP_P4_35014_36022049 | NC_021162.1    | Ca_kabuli_chr03 | 36022049                | TT                              | AA              | 1946780656               |
| SNP_P4_35017_36022705 | NC_021162.1    | Ca_kabuli_chr03 | 36022705                | AA                              | TT              | 1946780658               |
| SNP_P4_35018_36024014 | NC_021162.1    | Ca_kabuli_chr03 | 36024014                | AA                              | GG              | 1946780661               |
| SNP_P4_35019_36024079 | NC_021162.1    | Ca_kabuli_chr03 | 36024079                | AA                              | GG              | 1946780663               |
| SNP_P4_35020_36024355 | NC_021162.1    | Ca_kabuli_chr03 | 36024355                | CC                              | AA              | 1946780665               |
| SNP_P4_35021_36025544 | NC_021162.1    | Ca_kabuli_chr03 | 36025544                | GG                              | AA              | 1946780667               |
| SNP_P4_35022_36025756 | NC_021162.1    | Ca_kabuli_chr03 | 36025756                | GG                              | AA              | 1946780669               |
| SNP_P4_35023_36025769 | NC_021162.1    | Ca_kabuli_chr03 | 36025769                | AA                              | GG              | 1946780671               |
| SNP_P4_35025_36025846 | NC_021162.1    | Ca_kabuli_chr03 | 36025846                | CC                              | TT              | 1946780673               |
| SNP_P4_35026_36025858 | NC_021162.1    | Ca_kabuli_chr03 | 36025858                | TT                              | CC              | 1946780675               |
| SNP_P4_35027_36025902 | NC_021162.1    | Ca_kabuli_chr03 | 36025902                | GG                              | AA              | 1946780677               |
| SNP_P4_35028_36026724 | NC_021162.1    | Ca_kabuli_chr03 | 36026724                | CC                              | TT              | 1946780680               |
| SNP_P4_35029_36026994 | NC_021162.1    | Ca_kabuli_chr03 | 36026994                | GG                              | AA              | 1946780682               |
| SNP_P4_35030_36027019 | NC_021162.1    | Ca_kabuli_chr03 | 36027019                | TT                              | CC              | 1946780684               |
| SNP_P4_35031_36027044 | NC_021162.1    | Ca_kabuli_chr03 | 36027044                | CC                              | AA              | 1946780686               |
| SNP_P4_35032_36027150 | NC_021162.1    | Ca_kabuli_chr03 | 36027150                | CC                              | GG              | 1946780688               |
| SNP_P4_35033_36027160 | NC_021162.1    | Ca_kabuli_chr03 | 36027160                | TT                              | AA              | 1946780690               |
| SNP_P4_35035_36027611 | NC_021162.1    | Ca_kabuli_chr03 | 36027611                | TT                              | CC              | 1946780692               |
| SNP_P4_35036_36027646 | NC_021162.1    | Ca_kabuli_chr03 | 36027646                | TT                              | GG              | 1946780694               |
| SNP_P4_35037_36027652 | NC_021162.1    | Ca_kabuli_chr03 | 36027652                | TT                              | CC              | 1946780696               |
| SNP_P4_35038_36028091 | NC_021162.1    | Ca_kabuli_chr03 | 36028091                | AA                              | CC              | 1946780698               |
| SNP_P4_35040_36028224 | NC_021162.1    | Ca_kabuli_chr03 | 36028224                | GG                              | AA              | 1946780700               |

| SNPs IDs              | Chromosome IDs | Chromosomes     | Physical positions (bp) | CDC Frontier (Reference genome) | (ILWC46 & LPNB) | NCBI SNPdb Accession IDs |
|-----------------------|----------------|-----------------|-------------------------|---------------------------------|-----------------|--------------------------|
| SNP_P4_35041_36028245 | NC_021162.1    | Ca_kabuli_chr03 | 36028245                | AA                              | GG              | 1946780702               |
| SNP_P4_35043_36031967 | NC_021162.1    | Ca_kabuli_chr03 | 36031967                | GG                              | AA              | 1946780705               |
| SNP_P4_35046_36033176 | NC_021162.1    | Ca_kabuli_chr03 | 36033176                | CC                              | TT              | 1946780707               |
| SNP_P4_35048_36034030 | NC_021162.1    | Ca_kabuli_chr03 | 36034030                | GG                              | AA              | 1946780709               |
| SNP_P4_35051_36038072 | NC_021162.1    | Ca_kabuli_chr03 | 36038072                | TT                              | CC              | 1946780711               |
| SNP_P4_35053_36040036 | NC_021162.1    | Ca_kabuli_chr03 | 36040036                | GG                              | AA              | 1946780713               |
| SNP_P4_35057_36041210 | NC_021162.1    | Ca_kabuli_chr03 | 36041210                | TT                              | CC              | 1946780715               |
| SNP_P4_35058_36041235 | NC_021162.1    | Ca_kabuli_chr03 | 36041235                | TT                              | AA              | 1946780717               |
| SNP_P4_35059_36041460 | NC_021162.1    | Ca_kabuli_chr03 | 36041460                | GG                              | AA              | 1946780719               |
| SNP_P4_35060_36041475 | NC_021162.1    | Ca_kabuli_chr03 | 36041475                | TT                              | CC              | 1946780721               |
| SNP_P4_35061_36041503 | NC_021162.1    | Ca_kabuli_chr03 | 36041503                | AA                              | GG              | 1946780723               |
| SNP_P4_35062_36041549 | NC_021162.1    | Ca_kabuli_chr03 | 36041549                | TT                              | CC              | 1946780725               |
| SNP_P4_35064_36041776 | NC_021162.1    | Ca_kabuli_chr03 | 36041776                | TT                              | CC              | 1946780727               |
| SNP_P4_35065_36041790 | NC_021162.1    | Ca_kabuli_chr03 | 36041790                | AA                              | GG              | 1946780729               |
| SNP_P4_35066_36041914 | NC_021162.1    | Ca_kabuli_chr03 | 36041914                | CC                              | TT              | 1946780731               |
| SNP_P4_35067_36042197 | NC_021162.1    | Ca_kabuli_chr03 | 36042197                | TT                              | CC              | 1946780733               |
| SNP_P4_35068_36042210 | NC_021162.1    | Ca_kabuli_chr03 | 36042210                | CC                              | AA              | 1946780735               |
| SNP_P4_35069_36042503 | NC_021162.1    | Ca_kabuli_chr03 | 36042503                | TT                              | CC              | 1946780737               |
| SNP_P4_35071_36042588 | NC_021162.1    | Ca_kabuli_chr03 | 36042588                | AA                              | CC              | 1946780739               |
| SNP_P4_35072_36042611 | NC_021162.1    | Ca_kabuli_chr03 | 36042611                | AA                              | GG              | 1946780741               |
| SNP_P4_35073_36042613 | NC_021162.1    | Ca_kabuli_chr03 | 36042613                | GG                              | CC              | 1946780743               |
| SNP_P4_35074_36042931 | NC_021162.1    | Ca_kabuli_chr03 | 36042931                | AA                              | GG              | 1946780745               |
| SNP_P4_35075_36042938 | NC_021162.1    | Ca_kabuli_chr03 | 36042938                | AA                              | GG              | 1946780747               |
| SNP_P4_35076_36042945 | NC_021162.1    | Ca_kabuli_chr03 | 36042945                | CC                              | TT              | 1946780749               |
| SNP_P4_35077_36042979 | NC_021162.1    | Ca_kabuli_chr03 | 36042979                | CC                              | AA              | 1946780751               |
| SNP_P4_35078_36042983 | NC_021162.1    | Ca_kabuli_chr03 | 36042983                | GG                              | AA              | 1946780753               |
| SNP_P4_35079_36042998 | NC_021162.1    | Ca_kabuli_chr03 | 36042998                | AA                              | TT              | 1946780755               |
| SNP_P4_35080_36043058 | NC_021162.1    | Ca_kabuli_chr03 | 36043058                | CC                              | GG              | 1946780758               |
| SNP_P4_35081_36043369 | NC_021162.1    | Ca_kabuli_chr03 | 36043369                | TT                              | AA              | 1946780760               |
| SNP_P4_35082_36043569 | NC_021162.1    | Ca_kabuli_chr03 | 36043569                | TT                              | GG              | 1946780762               |
| SNP_P4_35083_36043667 | NC_021162.1    | Ca_kabuli_chr03 | 36043667                | GG                              | AA              | 1946780764               |
| SNP_P4_35084_36043716 | NC_021162.1    | Ca_kabuli_chr03 | 36043716                | CC                              | TT              | 1946780766               |
| SNP_P4_35085_36043756 | NC_021162.1    | Ca_kabuli_chr03 | 36043756                | TT                              | CC              | 1946780768               |
| SNP_P4_35086_36043826 | NC_021162.1    | Ca_kabuli_chr03 | 36043826                | TT                              | AA              | 1946780770               |
| SNP_P4_35087_36043938 | NC_021162.1    | Ca_kabuli_chr03 | 36043938                | TT                              | CC              | 1946780772               |
| SNP_P4_35088_36043982 | NC_021162.1    | Ca_kabuli_chr03 | 36043982                | TT                              | AA              | 1946780774               |
| SNP_P4_35089_36044031 | NC_021162.1    | Ca_kabuli_chr03 | 36044031                | AA                              | GG              | 1946780776               |
| SNP_P4_35090_36044063 | NC_021162.1    | Ca_kabuli_chr03 | 36044063                | GG                              | AA              | 1946780778               |
| SNP_P4_35091_36044117 | NC_021162.1    | Ca_kabuli_chr03 | 36044117                | GG                              | AA              | 1946780780               |
| SNP_P4_35092_36044163 | NC_021162.1    | Ca_kabuli_chr03 | 36044163                | CC                              | TT              | 1946780782               |
| SNP_P4_35093_36044235 | NC_021162.1    | Ca_kabuli_chr03 | 36044235                | GG                              | AA              | 1946780784               |
| SNP_P4_35094_36044244 | NC_021162.1    | Ca_kabuli_chr03 | 36044244                | AA                              | GG              | 1946780786               |



| SNPs IDs              | Chromosome IDs | Chromosomes     | Physical positions (bp) | CDC Frontier (Reference genome) | (ILWC46 & LPNB) | NCBI SNPdb Accession IDs |
|-----------------------|----------------|-----------------|-------------------------|---------------------------------|-----------------|--------------------------|
| SNP_P4_35095_36044284 | NC_021162.1    | Ca_kabuli_chr03 | 36044284                | CC                              | GG              | 1946780788               |
| SNP_P4_35096_36044296 | NC_021162.1    | Ca_kabuli_chr03 | 36044296                | CC                              | GG              | 1946780790               |
| SNP_P4_35098_36044353 | NC_021162.1    | Ca_kabuli_chr03 | 36044353                | GG                              | AA              | 1946780792               |
| SNP_P4_35099_36044440 | NC_021162.1    | Ca_kabuli_chr03 | 36044440                | AA                              | GG              | 1946780794               |
| SNP_P4_35100_36044503 | NC_021162.1    | Ca_kabuli_chr03 | 36044503                | TT                              | CC              | 1946780796               |
| SNP_P4_35102_36046495 | NC_021162.1    | Ca_kabuli_chr03 | 36046495                | AA                              | TT              | 1946780798               |
| SNP_P4_35103_36048032 | NC_021162.1    | Ca_kabuli_chr03 | 36048032                | TT                              | CC              | 1946780800               |
| SNP_P4_35104_36048188 | NC_021162.1    | Ca_kabuli_chr03 | 36048188                | AA                              | GG              | 1946780802               |
| SNP_P4_35105_36048363 | NC_021162.1    | Ca_kabuli_chr03 | 36048363                | CC                              | GG              | 1946780804               |
| SNP_P4_35106_36050049 | NC_021162.1    | Ca_kabuli_chr03 | 36050049                | AA                              | CC              | 1946780806               |
| SNP_P4_35107_36050259 | NC_021162.1    | Ca_kabuli_chr03 | 36050259                | TT                              | GG              | 1946780808               |
| SNP_P4_35108_36050319 | NC_021162.1    | Ca_kabuli_chr03 | 36050319                | TT                              | CC              | 1946780810               |
| SNP_P4_35109_36050860 | NC_021162.1    | Ca_kabuli_chr03 | 36050860                | CC                              | TT              | 1946780812               |
| SNP_P4_35110_36051339 | NC_021162.1    | Ca_kabuli_chr03 | 36051339                | AA                              | CC              | 1946780814               |
| SNP_P4_35111_36051374 | NC_021162.1    | Ca_kabuli_chr03 | 36051374                | CC                              | AA              | 1946780816               |
| SNP_P4_35112_36051385 | NC_021162.1    | Ca_kabuli_chr03 | 36051385                | AA                              | TT              | 1946780818               |
| SNP_P4_35113_36051510 | NC_021162.1    | Ca_kabuli_chr03 | 36051510                | AA                              | GG              | 1946780820               |
| SNP_P4_35114_36051570 | NC_021162.1    | Ca_kabuli_chr03 | 36051570                | TT                              | CC              | 1946780822               |
| SNP_P4_35115_36051575 | NC_021162.1    | Ca_kabuli_chr03 | 36051575                | AA                              | GG              | 1946780824               |
| SNP_P4_35116_36051649 | NC_021162.1    | Ca_kabuli_chr03 | 36051649                | GG                              | AA              | 1946780826               |
| SNP_P4_35117_36052606 | NC_021162.1    | Ca_kabuli_chr03 | 36052606                | CC                              | TT              | 1946780828               |
| SNP_P4_35120_36052900 | NC_021162.1    | Ca_kabuli_chr03 | 36052900                | GG                              | AA              | 1946780830               |
| SNP_P4_35121_36053008 | NC_021162.1    | Ca_kabuli_chr03 | 36053008                | AA                              | TT              | 1946780832               |
| SNP_P4_35122_36053737 | NC_021162.1    | Ca_kabuli_chr03 | 36053737                | GG                              | AA              | 1946780834               |
| SNP_P4_35123_36053825 | NC_021162.1    | Ca_kabuli_chr03 | 36053825                | CC                              | GG              | 1946780836               |
| SNP_P4_35124_36059825 | NC_021162.1    | Ca_kabuli_chr03 | 36059825                | AA                              | GG              | 1946780838               |
| SNP_P4_35125_36065217 | NC_021162.1    | Ca_kabuli_chr03 | 36065217                | GG                              | TT              | 1946780840               |
| SNP_P4_35126_36065341 | NC_021162.1    | Ca_kabuli_chr03 | 36065341                | AA                              | GG              | 1946780842               |
| SNP_P4_35127_36065538 | NC_021162.1    | Ca_kabuli_chr03 | 36065538                | CC                              | AA              | 1946780844               |
| SNP_P4_35128_36067151 | NC_021162.1    | Ca_kabuli_chr03 | 36067151                | AA                              | GG              | 1946780846               |
| SNP_P4_35131_36071755 | NC_021162.1    | Ca_kabuli_chr03 | 36071755                | CC                              | TT              | 1946780848               |
| SNP_P4_35132_36074417 | NC_021162.1    | Ca_kabuli_chr03 | 36074417                | TT                              | CC              | 1946780850               |
| SNP_P4_35133_36074420 | NC_021162.1    | Ca_kabuli_chr03 | 36074420                | TT                              | CC              | 1946780853               |
| SNP_P4_35134_36075285 | NC_021162.1    | Ca_kabuli_chr03 | 36075285                | AA                              | GG              | 1946780855               |
| SNP_P4_35135_36075781 | NC_021162.1    | Ca_kabuli_chr03 | 36075781                | GG                              | AA              | 1946780857               |
| SNP_P4_35136_36075785 | NC_021162.1    | Ca_kabuli_chr03 | 36075785                | CC                              | TT              | 1946780859               |
| SNP_P4_35137_36076102 | NC_021162.1    | Ca_kabuli_chr03 | 36076102                | TT                              | CC              | 1946780861               |
| SNP_P4_35138_36076367 | NC_021162.1    | Ca_kabuli_chr03 | 36076367                | CC                              | AA              | 1946780863               |
| SNP_P4_35139_36076475 | NC_021162.1    | Ca_kabuli_chr03 | 36076475                | TT                              | GG              | 1946780865               |
| SNP_P4_35141_36077982 | NC_021162.1    | Ca_kabuli_chr03 | 36077982                | CC                              | AA              | 1946780867               |
| SNP_P4_35142_36081375 | NC_021162.1    | Ca_kabuli_chr03 | 36081375                | CC                              | TT              | 1946780869               |
| SNP_P4_35144_36081886 | NC_021162.1    | Ca_kabuli_chr03 | 36081886                | TT                              | AA              | 1946780871               |

| SNPs IDs              | Chromosome IDs | Chromosomes     | Physical positions (bp) | CDC Frontier (Reference genome) | (ILWC46 & LPNB) | NCBI SNPdb Accession IDs |
|-----------------------|----------------|-----------------|-------------------------|---------------------------------|-----------------|--------------------------|
| SNP_P4_35145_36081887 | NC_021162.1    | Ca_kabuli_chr03 | 36081887                | AA                              | GG              | 1946780873               |
| SNP_P4_35146_36088981 | NC_021162.1    | Ca_kabuli_chr03 | 36088981                | CC                              | TT              | 1946780875               |
| SNP_P4_35147_36088982 | NC_021162.1    | Ca_kabuli_chr03 | 36088982                | CC                              | TT              | 1946780877               |
| SNP_P4_35149_36089481 | NC_021162.1    | Ca_kabuli_chr03 | 36089481                | AA                              | GG              | 1946780879               |
| SNP_P4_35150_36089501 | NC_021162.1    | Ca_kabuli_chr03 | 36089501                | CC                              | AA              | 1946780881               |
| SNP_P4_35151_36089726 | NC_021162.1    | Ca_kabuli_chr03 | 36089726                | GG                              | AA              | 1946780883               |
| SNP_P4_35152_36089775 | NC_021162.1    | Ca_kabuli_chr03 | 36089775                | CC                              | GG              | 1946780885               |
| SNP_P4_35153_36089969 | NC_021162.1    | Ca_kabuli_chr03 | 36089969                | AA                              | TT              | 1946780887               |
| SNP_P4_35155_36090038 | NC_021162.1    | Ca_kabuli_chr03 | 36090038                | AA                              | GG              | 1946780889               |
| SNP_P4_35156_36090115 | NC_021162.1    | Ca_kabuli_chr03 | 36090115                | TT                              | CC              | 1946780891               |
| SNP_P4_35157_36090118 | NC_021162.1    | Ca_kabuli_chr03 | 36090118                | AA                              | GG              | 1946780894               |
| SNP_P4_35159_36090204 | NC_021162.1    | Ca_kabuli_chr03 | 36090204                | AA                              | GG              | 1946780896               |
| SNP_P4_35160_36090228 | NC_021162.1    | Ca_kabuli_chr03 | 36090228                | TT                              | CC              | 1946780898               |
| SNP_P4_35161_36091025 | NC_021162.1    | Ca_kabuli_chr03 | 36091025                | CC                              | TT              | 1946780900               |
| SNP_P4_35162_36091043 | NC_021162.1    | Ca_kabuli_chr03 | 36091043                | TT                              | AA              | 1946780902               |
| SNP_P4_35163_36091865 | NC_021162.1    | Ca_kabuli_chr03 | 36091865                | CC                              | TT              | 1946780904               |
| SNP_P4_35164_36092747 | NC_021162.1    | Ca_kabuli_chr03 | 36092747                | AA                              | TT              | 1946780906               |
| SNP_P4_35165_36092796 | NC_021162.1    | Ca_kabuli_chr03 | 36092796                | AA                              | GG              | 1946780909               |
| SNP_P4_35166_36092845 | NC_021162.1    | Ca_kabuli_chr03 | 36092845                | TT                              | CC              | 1946780911               |
| SNP_P4_35167_36093038 | NC_021162.1    | Ca_kabuli_chr03 | 36093038                | CC                              | TT              | 1946780913               |
| SNP_P4_35168_36093043 | NC_021162.1    | Ca_kabuli_chr03 | 36093043                | GG                              | TT              | 1946780915               |
| SNP_P4_35169_36093052 | NC_021162.1    | Ca_kabuli_chr03 | 36093052                | TT                              | CC              | 1946780917               |
| SNP_P4_35170_36093199 | NC_021162.1    | Ca_kabuli_chr03 | 36093199                | GG                              | AA              | 1946780919               |
| SNP_P4_35172_36093260 | NC_021162.1    | Ca_kabuli_chr03 | 36093260                | TT                              | CC              | 1946780921               |
| SNP_P4_35173_36093345 | NC_021162.1    | Ca_kabuli_chr03 | 36093345                | AA                              | CC              | 1946780923               |
| SNP_P4_35174_36093369 | NC_021162.1    | Ca_kabuli_chr03 | 36093369                | AA                              | TT              | 1946780925               |
| SNP_P4_35175_36094207 | NC_021162.1    | Ca_kabuli_chr03 | 36094207                | TT                              | CC              | 1946780927               |
| SNP_P4_35176_36094647 | NC_021162.1    | Ca_kabuli_chr03 | 36094647                | TT                              | CC              | 1946780930               |
| SNP_P4_35177_36095058 | NC_021162.1    | Ca_kabuli_chr03 | 36095058                | GG                              | AA              | 1946780933               |
| SNP_P4_35178_36095059 | NC_021162.1    | Ca_kabuli_chr03 | 36095059                | CC                              | TT              | 1946780935               |
| SNP_P4_35179_36095063 | NC_021162.1    | Ca_kabuli_chr03 | 36095063                | GG                              | AA              | 1946780937               |
| SNP_P4_35180_36095292 | NC_021162.1    | Ca_kabuli_chr03 | 36095292                | GG                              | AA              | 1946780939               |
| SNP_P4_35181_36095296 | NC_021162.1    | Ca_kabuli_chr03 | 36095296                | AA                              | CC              | 1946780941               |
| SNP_P4_35182_36095542 | NC_021162.1    | Ca_kabuli_chr03 | 36095542                | CC                              | TT              | 1946780943               |
| SNP_P4_35183_36097106 | NC_021162.1    | Ca_kabuli_chr03 | 36097106                | TT                              | AA              | 1946780945               |
| SNP_P4_35185_36099351 | NC_021162.1    | Ca_kabuli_chr03 | 36099351                | AA                              | GG              | 1946780947               |
| SNP_P4_35187_36101081 | NC_021162.1    | Ca_kabuli_chr03 | 36101081                | AA                              | CC              | 1946780949               |
| SNP_P4_35188_36102322 | NC_021162.1    | Ca_kabuli_chr03 | 36102322                | CC                              | GG              | 1946780951               |
| SNP_P4_35190_36102492 | NC_021162.1    | Ca_kabuli_chr03 | 36102492                | AA                              | TT              | 1946780953               |
| SNP_P4_35191_36104743 | NC_021162.1    | Ca_kabuli_chr03 | 36104743                | GG                              | AA              | 1946780955               |
| SNP_P4_35193_36105384 | NC_021162.1    | Ca_kabuli_chr03 | 36105384                | TT                              | AA              | 1946780958               |
| SNP_P4_35194_36105390 | NC_021162.1    | Ca_kabuli_chr03 | 36105390                | GG                              | TT              | 1946780960               |

| SNPs IDs              | Chromosome IDs | Chromosomes     | Physical positions (bp) | CDC Frontier (Reference genome) | (ILWC46 & LPNB) | NCBI SNPdb Accession IDs |
|-----------------------|----------------|-----------------|-------------------------|---------------------------------|-----------------|--------------------------|
| SNP_P4_35196_36105889 | NC_021162.1    | Ca_kabuli_chr03 | 36105889                | GG                              | AA              | 1946780962               |
| SNP_P4_35197_36105898 | NC_021162.1    | Ca_kabuli_chr03 | 36105898                | CC                              | TT              | 1946780964               |
| SNP_P4_35198_36105917 | NC_021162.1    | Ca_kabuli_chr03 | 36105917                | GG                              | AA              | 1946780966               |
| SNP_P4_35199_36105920 | NC_021162.1    | Ca_kabuli_chr03 | 36105920                | CC                              | TT              | 1946780968               |
| SNP_P4_35200_36105921 | NC_021162.1    | Ca_kabuli_chr03 | 36105921                | AA                              | GG              | 1946780970               |
| SNP_P4_35201_36105953 | NC_021162.1    | Ca_kabuli_chr03 | 36105953                | TT                              | AA              | 1946780972               |
| SNP_P4_35202_36106826 | NC_021162.1    | Ca_kabuli_chr03 | 36106826                | TT                              | CC              | 1946780974               |
| SNP_P4_35203_36106831 | NC_021162.1    | Ca_kabuli_chr03 | 36106831                | TT                              | CC              | 1946780976               |
| SNP_P4_35204_36106852 | NC_021162.1    | Ca_kabuli_chr03 | 36106852                | CC                              | TT              | 1946780978               |
| SNP_P4_35206_36107653 | NC_021162.1    | Ca_kabuli_chr03 | 36107653                | TT                              | CC              | 1946780981               |
| SNP_P4_35207_36107655 | NC_021162.1    | Ca_kabuli_chr03 | 36107655                | GG                              | AA              | 1946780983               |
| SNP_P4_35208_36108263 | NC_021162.1    | Ca_kabuli_chr03 | 36108263                | GG                              | AA              | 1946780985               |
| SNP_P4_35209_36108270 | NC_021162.1    | Ca_kabuli_chr03 | 36108270                | TT                              | CC              | 1946780987               |
| SNP_P4_35210_36108329 | NC_021162.1    | Ca_kabuli_chr03 | 36108329                | CC                              | AA              | 1946780989               |
| SNP_P4_35211_36108331 | NC_021162.1    | Ca_kabuli_chr03 | 36108331                | TT                              | CC              | 1946780991               |
| SNP_P4_35212_36108583 | NC_021162.1    | Ca_kabuli_chr03 | 36108583                | AA                              | CC              | 1946780994               |
| SNP_P4_35213_36108615 | NC_021162.1    | Ca_kabuli_chr03 | 36108615                | AA                              | CC              | 1946780996               |
| SNP_P4_35214_36108875 | NC_021162.1    | Ca_kabuli_chr03 | 36108875                | AA                              | TT              | 1946780998               |
| SNP_P4_35215_36110793 | NC_021162.1    | Ca_kabuli_chr03 | 36110793                | TT                              | CC              | 1946781000               |
| SNP_P4_35216_36112008 | NC_021162.1    | Ca_kabuli_chr03 | 36112008                | TT                              | CC              | 1946781002               |
| SNP_P4_35217_36114132 | NC_021162.1    | Ca_kabuli_chr03 | 36114132                | TT                              | CC              | 1946781004               |
| SNP_P4_35218_36116405 | NC_021162.1    | Ca_kabuli_chr03 | 36116405                | AA                              | CC              | 1946781006               |
| SNP_P4_35221_36116669 | NC_021162.1    | Ca_kabuli_chr03 | 36116669                | GG                              | AA              | 1946781008               |
| SNP_P4_35222_36116697 | NC_021162.1    | Ca_kabuli_chr03 | 36116697                | CC                              | TT              | 1946781010               |
| SNP_P4_35223_36116701 | NC_021162.1    | Ca_kabuli_chr03 | 36116701                | CC                              | TT              | 1946781012               |
| SNP_P4_35226_36116864 | NC_021162.1    | Ca_kabuli_chr03 | 36116864                | AA                              | CC              | 1946781014               |
| SNP_P4_35227_36117130 | NC_021162.1    | Ca_kabuli_chr03 | 36117130                | AA                              | GG              | 1946781016               |
| SNP_P4_35229_36121361 | NC_021162.1    | Ca_kabuli_chr03 | 36121361                | CC                              | AA              | 1946781018               |
| SNP_P4_35230_36121691 | NC_021162.1    | Ca_kabuli_chr03 | 36121691                | TT                              | GG              | 1946781021               |
| SNP_P4_35231_36122498 | NC_021162.1    | Ca_kabuli_chr03 | 36122498                | AA                              | CC              | 1946781023               |
| SNP_P4_35232_36123581 | NC_021162.1    | Ca_kabuli_chr03 | 36123581                | GG                              | AA              | 1946781025               |
| SNP_P4_35233_36123600 | NC_021162.1    | Ca_kabuli_chr03 | 36123600                | CC                              | TT              | 1946781027               |
| SNP_P4_35234_36123626 | NC_021162.1    | Ca_kabuli_chr03 | 36123626                | GG                              | AA              | 1946781029               |
| SNP_P4_35235_36125690 | NC_021162.1    | Ca_kabuli_chr03 | 36125690                | AA                              | CC              | 1946781031               |
| SNP_P4_35237_36127559 | NC_021162.1    | Ca_kabuli_chr03 | 36127559                | CC                              | TT              | 1946781033               |
| SNP_P4_35238_36127835 | NC_021162.1    | Ca_kabuli_chr03 | 36127835                | TT                              | AA              | 1946781035               |
| SNP_P4_35239_36128521 | NC_021162.1    | Ca_kabuli_chr03 | 36128521                | CC                              | TT              | 1946781037               |
| SNP_P4_35240_36129033 | NC_021162.1    | Ca_kabuli_chr03 | 36129033                | CC                              | TT              | 1946781039               |
| SNP_P4_35241_36129083 | NC_021162.1    | Ca_kabuli_chr03 | 36129083                | TT                              | CC              | 1946781041               |
| SNP_P4_35242_36129103 | NC_021162.1    | Ca_kabuli_chr03 | 36129103                | TT                              | GG              | 1946781043               |
| SNP_P4_35244_36129288 | NC_021162.1    | Ca_kabuli_chr03 | 36129288                | GG                              | AA              | 1946781045               |
| SNP_P4_35245_36129305 | NC_021162.1    | Ca_kabuli_chr03 | 36129305                | AA                              | TT              | 1946781047               |

| SNPs IDs              | Chromosome IDs | Chromosomes     | Physical positions (bp) | CDC Frontier (Reference genome) | (ILWC46 & LPNB) | NCBI SNPdb Accession IDs |
|-----------------------|----------------|-----------------|-------------------------|---------------------------------|-----------------|--------------------------|
| SNP_P4_35246_36129335 | NC_021162.1    | Ca_kabuli_chr03 | 36129335                | TT                              | CC              | 1946781049               |
| SNP_P4_35247_36129555 | NC_021162.1    | Ca_kabuli_chr03 | 36129555                | TT                              | CC              | 1946781051               |
| SNP_P4_35248_36130610 | NC_021162.1    | Ca_kabuli_chr03 | 36130610                | AA                              | CC              | 1946781053               |
| SNP_P4_35249_36130901 | NC_021162.1    | Ca_kabuli_chr03 | 36130901                | TT                              | GG              | 1946781055               |
| SNP_P4_35250_36132052 | NC_021162.1    | Ca_kabuli_chr03 | 36132052                | CC                              | TT              | 1946781057               |
| SNP_P4_35251_36132071 | NC_021162.1    | Ca_kabuli_chr03 | 36132071                | AA                              | GG              | 1946781060               |
| SNP_P4_35252_36133195 | NC_021162.1    | Ca_kabuli_chr03 | 36133195                | TT                              | CC              | 1946781062               |
| SNP_P4_35253_36133521 | NC_021162.1    | Ca_kabuli_chr03 | 36133521                | GG                              | AA              | 1946781064               |
| SNP_P4_35254_36133562 | NC_021162.1    | Ca_kabuli_chr03 | 36133562                | CC                              | GG              | 1946781066               |
| SNP_P4_35256_36134932 | NC_021162.1    | Ca_kabuli_chr03 | 36134932                | TT                              | GG              | 1946781068               |
| SNP_P4_35257_36135118 | NC_021162.1    | Ca_kabuli_chr03 | 36135118                | CC                              | GG              | 1946781070               |
| SNP_P4_35258_36135143 | NC_021162.1    | Ca_kabuli_chr03 | 36135143                | CC                              | AA              | 1946781072               |
| SNP_P4_35259_36135383 | NC_021162.1    | Ca_kabuli_chr03 | 36135383                | CC                              | AA              | 1946781074               |
| SNP_P4_35260_36135407 | NC_021162.1    | Ca_kabuli_chr03 | 36135407                | TT                              | GG              | 1946781076               |
| SNP_P4_35261_36135702 | NC_021162.1    | Ca_kabuli_chr03 | 36135702                | CC                              | GG              | 1946781079               |
| SNP_P4_35262_36135954 | NC_021162.1    | Ca_kabuli_chr03 | 36135954                | GG                              | CC              | 1946781081               |
| SNP_P4_35263_36136715 | NC_021162.1    | Ca_kabuli_chr03 | 36136715                | AA                              | GG              | 1946781083               |
| SNP_P4_35264_36137243 | NC_021162.1    | Ca_kabuli_chr03 | 36137243                | GG                              | AA              | 1946781085               |
| SNP_P4_35265_36137281 | NC_021162.1    | Ca_kabuli_chr03 | 36137281                | TT                              | AA              | 1946781087               |
| SNP_P4_35266_36137304 | NC_021162.1    | Ca_kabuli_chr03 | 36137304                | TT                              | AA              | 1946781089               |
| SNP_P4_35267_36138077 | NC_021162.1    | Ca_kabuli_chr03 | 36138077                | GG                              | AA              | 1946781091               |
| SNP_P4_35268_36138544 | NC_021162.1    | Ca_kabuli_chr03 | 36138544                | TT                              | GG              | 1946781093               |
| SNP_P4_35269_36139516 | NC_021162.1    | Ca_kabuli_chr03 | 36139516                | TT                              | CC              | 1946781095               |
| SNP_P4_35270_36139517 | NC_021162.1    | Ca_kabuli_chr03 | 36139517                | TT                              | AA              | 1946781097               |
| SNP_P4_35271_36139543 | NC_021162.1    | Ca_kabuli_chr03 | 36139543                | AA                              | GG              | 1946781099               |
| SNP_P4_35272_36139552 | NC_021162.1    | Ca_kabuli_chr03 | 36139552                | TT                              | AA              | 1946781101               |
| SNP_P4_35274_36139735 | NC_021162.1    | Ca_kabuli_chr03 | 36139735                | GG                              | AA              | 1946781103               |
| SNP_P4_35277_36140581 | NC_021162.1    | Ca_kabuli_chr03 | 36140581                | TT                              | CC              | 1946781105               |
| SNP_P4_35278_36140583 | NC_021162.1    | Ca_kabuli_chr03 | 36140583                | AA                              | GG              | 1946781107               |
| SNP_P4_35280_36140811 | NC_021162.1    | Ca_kabuli_chr03 | 36140811                | AA                              | TT              | 1946781109               |
| SNP_P4_35281_36141133 | NC_021162.1    | Ca_kabuli_chr03 | 36141133                | TT                              | CC              | 1946781111               |
| SNP_P4_35282_36141161 | NC_021162.1    | Ca_kabuli_chr03 | 36141161                | GG                              | AA              | 1946781113               |
| SNP_P4_35283_36141181 | NC_021162.1    | Ca_kabuli_chr03 | 36141181                | TT                              | CC              | 1946781115               |
| SNP_P4_35284_36143311 | NC_021162.1    | Ca_kabuli_chr03 | 36143311                | AA                              | TT              | 1946781117               |
| SNP_P4_35285_36143581 | NC_021162.1    | Ca_kabuli_chr03 | 36143581                | GG                              | CC              | 1946781119               |
| SNP_P4_35286_36145259 | NC_021162.1    | Ca_kabuli_chr03 | 36145259                | AA                              | GG              | 1946781121               |
| SNP_P4_35287_36145459 | NC_021162.1    | Ca_kabuli_chr03 | 36145459                | AA                              | GG              | 1946781123               |
| SNP_P4_35288_36146773 | NC_021162.1    | Ca_kabuli_chr03 | 36146773                | GG                              | AA              | 1946781125               |
| SNP_P4_35289_36146786 | NC_021162.1    | Ca_kabuli_chr03 | 36146786                | TT                              | CC              | 1946781128               |
| SNP_P4_35290_36146797 | NC_021162.1    | Ca_kabuli_chr03 | 36146797                | AA                              | GG              | 1946781130               |
| SNP_P4_35291_36146862 | NC_021162.1    | Ca_kabuli_chr03 | 36146862                | AA                              | CC              | 1946781132               |
| SNP_P4_35292_36146873 | NC_021162.1    | Ca_kabuli_chr03 | 36146873                | TT                              | CC              | 1946781134               |

| SNPs IDs              | Chromosome IDs | Chromosomes     | Physical positions (bp) | CDC Frontier (Reference genome) | (ILWC46 & LPNB) | NCBI SNPdb Accession IDs |
|-----------------------|----------------|-----------------|-------------------------|---------------------------------|-----------------|--------------------------|
| SNP_P4_35293_36147856 | NC_021162.1    | Ca_kabuli_chr03 | 36147856                | TT                              | AA              | 1946781136               |
| SNP_P4_35294_36148956 | NC_021162.1    | Ca_kabuli_chr03 | 36148956                | TT                              | CC              | 1946781138               |
| SNP_P4_35295_36150280 | NC_021162.1    | Ca_kabuli_chr03 | 36150280                | TT                              | GG              | 1946781140               |
| SNP_P4_35296_36151682 | NC_021162.1    | Ca_kabuli_chr03 | 36151682                | TT                              | AA              | 1946781142               |
| SNP_P4_35297_36151754 | NC_021162.1    | Ca_kabuli_chr03 | 36151754                | GG                              | AA              | 1946781144               |
| SNP_P4_35298_36151861 | NC_021162.1    | Ca_kabuli_chr03 | 36151861                | TT                              | AA              | 1946781146               |
| SNP_P4_35300_36151963 | NC_021162.1    | Ca_kabuli_chr03 | 36151963                | AA                              | TT              | 1946781148               |
| SNP_P4_35301_36151979 | NC_021162.1    | Ca_kabuli_chr03 | 36151979                | TT                              | CC              | 1946781150               |
| SNP_P4_35302_36152310 | NC_021162.1    | Ca_kabuli_chr03 | 36152310                | GG                              | AA              | 1946781152               |
| SNP_P4_35304_36152385 | NC_021162.1    | Ca_kabuli_chr03 | 36152385                | AA                              | CC              | 1946781154               |
| SNP_P4_35305_36152391 | NC_021162.1    | Ca_kabuli_chr03 | 36152391                | GG                              | AA              | 1946781157               |
| SNP_P4_35306_36152651 | NC_021162.1    | Ca_kabuli_chr03 | 36152651                | GG                              | AA              | 1946781159               |
| SNP_P4_35308_36152997 | NC_021162.1    | Ca_kabuli_chr03 | 36152997                | CC                              | TT              | 1946781161               |
| SNP_P4_35309_36153261 | NC_021162.1    | Ca_kabuli_chr03 | 36153261                | TT                              | CC              | 1946781163               |
| SNP_P4_35311_36156498 | NC_021162.1    | Ca_kabuli_chr03 | 36156498                | TT                              | CC              | 1946781165               |
| SNP_P4_35312_36156581 | NC_021162.1    | Ca_kabuli_chr03 | 36156581                | CC                              | TT              | 1946781167               |
| SNP_P4_35313_36156592 | NC_021162.1    | Ca_kabuli_chr03 | 36156592                | CC                              | TT              | 1946781169               |
| SNP_P4_35314_36157004 | NC_021162.1    | Ca_kabuli_chr03 | 36157004                | GG                              | AA              | 1946781171               |
| SNP_P4_35315_36157570 | NC_021162.1    | Ca_kabuli_chr03 | 36157570                | AA                              | CC              | 1946781173               |
| SNP_P4_35316_36157598 | NC_021162.1    | Ca_kabuli_chr03 | 36157598                | AA                              | GG              | 1946781175               |
| SNP_P4_35320_36158912 | NC_021162.1    | Ca_kabuli_chr03 | 36158912                | AA                              | GG              | 1946781177               |
| SNP_P4_35322_36166886 | NC_021162.1    | Ca_kabuli_chr03 | 36166886                | GG                              | AA              | 1946781179               |
| SNP_P4_35324_36170099 | NC_021162.1    | Ca_kabuli_chr03 | 36170099                | AA                              | TT              | 1946781181               |
| SNP_P4_35325_36177364 | NC_021162.1    | Ca_kabuli_chr03 | 36177364                | GG                              | CC              | 1946781183               |
| SNP_P4_35326_36177697 | NC_021162.1    | Ca_kabuli_chr03 | 36177697                | AA                              | TT              | 1946781185               |
| SNP_P4_35327_36177734 | NC_021162.1    | Ca_kabuli_chr03 | 36177734                | GG                              | AA              | 1946781187               |
| SNP_P4_35329_36177844 | NC_021162.1    | Ca_kabuli_chr03 | 36177844                | AA                              | GG              | 1946781189               |
| SNP_P4_35330_36177849 | NC_021162.1    | Ca_kabuli_chr03 | 36177849                | GG                              | AA              | 1946781192               |
| SNP_P4_35331_36178002 | NC_021162.1    | Ca_kabuli_chr03 | 36178002                | GG                              | CC              | 1946781194               |
| SNP_P4_35332_36178176 | NC_021162.1    | Ca_kabuli_chr03 | 36178176                | TT                              | CC              | 1946781196               |
| SNP_P4_35333_36178557 | NC_021162.1    | Ca_kabuli_chr03 | 36178557                | AA                              | GG              | 1946781198               |
| SNP_P4_35334_36178558 | NC_021162.1    | Ca_kabuli_chr03 | 36178558                | CC                              | AA              | 1946781200               |
| SNP_P4_35335_36178612 | NC_021162.1    | Ca_kabuli_chr03 | 36178612                | TT                              | CC              | 1946781202               |
| SNP_P4_35338_36179029 | NC_021162.1    | Ca_kabuli_chr03 | 36179029                | CC                              | TT              | 1946781204               |
| SNP_P4_35339_36179041 | NC_021162.1    | Ca_kabuli_chr03 | 36179041                | AA                              | GG              | 1946781206               |
| SNP_P4_35340_36179057 | NC_021162.1    | Ca_kabuli_chr03 | 36179057                | AA                              | TT              | 1946781208               |
| SNP_P4_35341_36179100 | NC_021162.1    | Ca_kabuli_chr03 | 36179100                | GG                              | AA              | 1946781211               |
| SNP_P4_35342_36179101 | NC_021162.1    | Ca_kabuli_chr03 | 36179101                | TT                              | CC              | 1946781213               |
| SNP_P4_35343_36179105 | NC_021162.1    | Ca_kabuli_chr03 | 36179105                | AA                              | GG              | 1946781215               |
| SNP_P4_35344_36179132 | NC_021162.1    | Ca_kabuli_chr03 | 36179132                | CC                              | TT              | 1946781217               |
| SNP_P4_35346_36182722 | NC_021162.1    | Ca_kabuli_chr03 | 36182722                | AA                              | CC              | 1946781220               |
| SNP_P4_35347_36184620 | NC_021162.1    | Ca_kabuli_chr03 | 36184620                | CC                              | AA              | 1946781222               |

| SNPs IDs              | Chromosome IDs | Chromosomes     | Physical positions (bp) | CDC Frontier (Reference genome) | (ILWC46 & LPNB) | NCBI SNPdb Accession IDs |
|-----------------------|----------------|-----------------|-------------------------|---------------------------------|-----------------|--------------------------|
| SNP_P4_35348_36184674 | NC_021162.1    | Ca_kabuli_chr03 | 36184674                | GG                              | TT              | 1946781224               |
| SNP_P4_35350_36184892 | NC_021162.1    | Ca_kabuli_chr03 | 36184892                | AA                              | GG              | 1946781226               |
| SNP_P4_35352_36186775 | NC_021162.1    | Ca_kabuli_chr03 | 36186775                | TT                              | CC              | 1946781228               |
| SNP_P4_35353_36187482 | NC_021162.1    | Ca_kabuli_chr03 | 36187482                | AA                              | CC              | 1946781230               |
| SNP_P4_35354_36187491 | NC_021162.1    | Ca_kabuli_chr03 | 36187491                | GG                              | AA              | 1946781232               |
| SNP_P4_35355_36187494 | NC_021162.1    | Ca_kabuli_chr03 | 36187494                | GG                              | TT              | 1946781235               |
| SNP_P4_35356_36187504 | NC_021162.1    | Ca_kabuli_chr03 | 36187504                | GG                              | AA              | 1946781237               |
| SNP_P4_35359_36188980 | NC_021162.1    | Ca_kabuli_chr03 | 36188980                | TT                              | CC              | 1946781239               |
| SNP_P4_35360_36188982 | NC_021162.1    | Ca_kabuli_chr03 | 36188982                | GG                              | AA              | 1946781241               |
| SNP_P4_35362_36191557 | NC_021162.1    | Ca_kabuli_chr03 | 36191557                | GG                              | CC              | 1946781243               |
| SNP_P4_35363_36193668 | NC_021162.1    | Ca_kabuli_chr03 | 36193668                | CC                              | GG              | 1946781245               |
| SNP_P4_35365_36194086 | NC_021162.1    | Ca_kabuli_chr03 | 36194086                | CC                              | GG              | 1946781247               |
| SNP_P4_35366_36194198 | NC_021162.1    | Ca_kabuli_chr03 | 36194198                | TT                              | CC              | 1946781249               |
| SNP_P4_35368_36194279 | NC_021162.1    | Ca_kabuli_chr03 | 36194279                | GG                              | TT              | 1946781251               |
| SNP_P4_35369_36194563 | NC_021162.1    | Ca_kabuli_chr03 | 36194563                | GG                              | AA              | 1946781253               |
| SNP_P4_35370_36195877 | NC_021162.1    | Ca_kabuli_chr03 | 36195877                | GG                              | AA              | 1946781255               |
| SNP_P4_35371_36196180 | NC_021162.1    | Ca_kabuli_chr03 | 36196180                | CC                              | TT              | 1946781257               |
| SNP_P4_35372_36196535 | NC_021162.1    | Ca_kabuli_chr03 | 36196535                | CC                              | TT              | 1946781259               |
| SNP_P4_35374_36197078 | NC_021162.1    | Ca_kabuli_chr03 | 36197078                | AA                              | CC              | 1946781261               |
| SNP_P4_35375_36197096 | NC_021162.1    | Ca_kabuli_chr03 | 36197096                | GG                              | AA              | 1946781263               |
| SNP_P4_35376_36197264 | NC_021162.1    | Ca_kabuli_chr03 | 36197264                | TT                              | AA              | 1946781265               |
| SNP_P4_35378_36197368 | NC_021162.1    | Ca_kabuli_chr03 | 36197368                | TT                              | GG              | 1946781267               |
| SNP_P4_35379_36197539 | NC_021162.1    | Ca_kabuli_chr03 | 36197539                | TT                              | GG              | 1946781269               |
| SNP_P4_35381_36197664 | NC_021162.1    | Ca_kabuli_chr03 | 36197664                | CC                              | GG              | 1946781271               |
| SNP_P4_35382_36198005 | NC_021162.1    | Ca_kabuli_chr03 | 36198005                | TT                              | GG              | 1946781273               |
| SNP_P4_35383_36198271 | NC_021162.1    | Ca_kabuli_chr03 | 36198271                | AA                              | TT              | 1946781275               |
| SNP_P4_35384_36198275 | NC_021162.1    | Ca_kabuli_chr03 | 36198275                | AA                              | CC              | 1946781277               |
| SNP_P4_35387_36198986 | NC_021162.1    | Ca_kabuli_chr03 | 36198986                | TT                              | AA              | 1946781279               |
| SNP_P4_35389_36199274 | NC_021162.1    | Ca_kabuli_chr03 | 36199274                | AA                              | GG              | 1946781281               |
| SNP_P4_35390_36199287 | NC_021162.1    | Ca_kabuli_chr03 | 36199287                | TT                              | CC              | 1946781283               |
| SNP_P4_35391_36199290 | NC_021162.1    | Ca_kabuli_chr03 | 36199290                | AA                              | CC              | 1946781285               |
| SNP_P4_35392_36199913 | NC_021162.1    | Ca_kabuli_chr03 | 36199913                | AA                              | GG              | 1946781288               |
| SNP_P4_35395_36201751 | NC_021162.1    | Ca_kabuli_chr03 | 36201751                | CC                              | GG              | 1946781290               |
| SNP_P4_35396_36203386 | NC_021162.1    | Ca_kabuli_chr03 | 36203386                | CC                              | AA              | 1946781292               |
| SNP_P4_35397_36203946 | NC_021162.1    | Ca_kabuli_chr03 | 36203946                | GG                              | AA              | 1946781294               |
| SNP_P4_35398_36204134 | NC_021162.1    | Ca_kabuli_chr03 | 36204134                | GG                              | AA              | 1946781297               |
| SNP_P4_35399_36204146 | NC_021162.1    | Ca_kabuli_chr03 | 36204146                | GG                              | AA              | 1946781299               |
| SNP_P4_35401_36204629 | NC_021162.1    | Ca_kabuli_chr03 | 36204629                | CC                              | TT              | 1946781301               |
| SNP_P4_35402_36204636 | NC_021162.1    | Ca_kabuli_chr03 | 36204636                | TT                              | CC              | 1946781303               |
| SNP_P4_35403_36204716 | NC_021162.1    | Ca_kabuli_chr03 | 36204716                | CC                              | TT              | 1946781305               |
| SNP_P4_35406_36205469 | NC_021162.1    | Ca_kabuli_chr03 | 36205469                | TT                              | GG              | 1946781307               |
| SNP_P4_35407_36205473 | NC_021162.1    | Ca_kabuli_chr03 | 36205473                | AA                              | TT              | 1946781309               |

| SNPs IDs              | Chromosome IDs | Chromosomes     | Physical positions (bp) | CDC Frontier (Reference genome) | (ILWC46 & LPNB) | NCBI SNPdb Accession IDs |
|-----------------------|----------------|-----------------|-------------------------|---------------------------------|-----------------|--------------------------|
| SNP_P4_35408_36205508 | NC_021162.1    | Ca_kabuli_chr03 | 36205508                | TT                              | AA              | 1946781311               |
| SNP_P4_35409_36205712 | NC_021162.1    | Ca_kabuli_chr03 | 36205712                | AA                              | GG              | 1946781313               |
| SNP_P4_35410_36205718 | NC_021162.1    | Ca_kabuli_chr03 | 36205718                | AA                              | TT              | 1946781315               |
| SNP_P4_35411_36205719 | NC_021162.1    | Ca_kabuli_chr03 | 36205719                | GG                              | CC              | 1946781317               |
| SNP_P4_35412_36205943 | NC_021162.1    | Ca_kabuli_chr03 | 36205943                | AA                              | GG              | 1946781319               |
| SNP_P4_35413_36205957 | NC_021162.1    | Ca_kabuli_chr03 | 36205957                | TT                              | GG              | 1946781321               |
| SNP_P4_35415_36206864 | NC_021162.1    | Ca_kabuli_chr03 | 36206864                | CC                              | TT              | 1946781323               |
| SNP_P4_35416_36207178 | NC_021162.1    | Ca_kabuli_chr03 | 36207178                | AA                              | TT              | 1946781325               |
| SNP_P4_35418_36210618 | NC_021162.1    | Ca_kabuli_chr03 | 36210618                | AA                              | GG              | 1946781327               |
| SNP_P4_35419_36210675 | NC_021162.1    | Ca_kabuli_chr03 | 36210675                | TT                              | CC              | 1946781329               |
| SNP_P4_35421_36212100 | NC_021162.1    | Ca_kabuli_chr03 | 36212100                | AA                              | TT              | 1946781331               |
| SNP_P4_35422_36212172 | NC_021162.1    | Ca_kabuli_chr03 | 36212172                | TT                              | AA              | 1946781332               |
| SNP_P4_35424_36212363 | NC_021162.1    | Ca_kabuli_chr03 | 36212363                | GG                              | TT              | 1946781335               |
| SNP_P4_35425_36212405 | NC_021162.1    | Ca_kabuli_chr03 | 36212405                | GG                              | AA              | 1946781337               |
| SNP_P4_35427_36212491 | NC_021162.1    | Ca_kabuli_chr03 | 36212491                | CC                              | TT              | 1946781339               |
| SNP_P4_35428_36212521 | NC_021162.1    | Ca_kabuli_chr03 | 36212521                | AA                              | GG              | 1946781341               |
| SNP_P4_35429_36212544 | NC_021162.1    | Ca_kabuli_chr03 | 36212544                | AA                              | TT              | 1946781343               |
| SNP_P4_35430_36212571 | NC_021162.1    | Ca_kabuli_chr03 | 36212571                | GG                              | AA              | 1946781345               |
| SNP_P4_35431_36212581 | NC_021162.1    | Ca_kabuli_chr03 | 36212581                | TT                              | AA              | 1946781347               |
| SNP_P4_35432_36212603 | NC_021162.1    | Ca_kabuli_chr03 | 36212603                | GG                              | AA              | 1946781349               |
| SNP_P4_35433_36212625 | NC_021162.1    | Ca_kabuli_chr03 | 36212625                | TT                              | CC              | 1946781351               |
| SNP_P4_35434_36212843 | NC_021162.1    | Ca_kabuli_chr03 | 36212843                | TT                              | AA              | 1946781353               |
| SNP_P4_35435_36213078 | NC_021162.1    | Ca_kabuli_chr03 | 36213078                | CC                              | TT              | 1946781355               |
| SNP_P4_35436_36213111 | NC_021162.1    | Ca_kabuli_chr03 | 36213111                | TT                              | CC              | 1946781358               |
| SNP_P4_35437_36213118 | NC_021162.1    | Ca_kabuli_chr03 | 36213118                | CC                              | TT              | 1946781360               |
| SNP_P4_35438_36213121 | NC_021162.1    | Ca_kabuli_chr03 | 36213121                | TT                              | GG              | 1946781362               |
| SNP_P4_35439_36213601 | NC_021162.1    | Ca_kabuli_chr03 | 36213601                | AA                              | GG              | 1946781364               |
| SNP_P4_35440_36213606 | NC_021162.1    | Ca_kabuli_chr03 | 36213606                | AA                              | CC              | 1946781366               |
| SNP_P4_35441_36213654 | NC_021162.1    | Ca_kabuli_chr03 | 36213654                | TT                              | CC              | 1946781368               |
| SNP_P4_35442_36213809 | NC_021162.1    | Ca_kabuli_chr03 | 36213809                | CC                              | TT              | 1946781370               |
| SNP_P4_35444_36213848 | NC_021162.1    | Ca_kabuli_chr03 | 36213848                | GG                              | AA              | 1946781372               |
| SNP_P4_35446_36215664 | NC_021162.1    | Ca_kabuli_chr03 | 36215664                | GG                              | CC              | 1946781374               |
| SNP_P4_35448_36215726 | NC_021162.1    | Ca_kabuli_chr03 | 36215726                | CC                              | AA              | 1946781376               |
| SNP_P4_35449_36215748 | NC_021162.1    | Ca_kabuli_chr03 | 36215748                | GG                              | AA              | 1946781378               |
| SNP_P4_35450_36216551 | NC_021162.1    | Ca_kabuli_chr03 | 36216551                | CC                              | TT              | 1946781380               |
| SNP_P4_35452_36217105 | NC_021162.1    | Ca_kabuli_chr03 | 36217105                | TT                              | CC              | 1946781382               |
| SNP_P4_35455_36217298 | NC_021162.1    | Ca_kabuli_chr03 | 36217298                | AA                              | GG              | 1946781384               |
| SNP_P4_35456_36217378 | NC_021162.1    | Ca_kabuli_chr03 | 36217378                | CC                              | TT              | 1946781387               |
| SNP_P4_35457_36217544 | NC_021162.1    | Ca_kabuli_chr03 | 36217544                | CC                              | TT              | 1946781389               |
| SNP_P4_35458_36217556 | NC_021162.1    | Ca_kabuli_chr03 | 36217556                | TT                              | CC              | 1946781390               |
| SNP_P4_35459_36217579 | NC_021162.1    | Ca_kabuli_chr03 | 36217579                | CC                              | GG              | 1946781391               |
| SNP_P4_35461_36218347 | NC_021162.1    | Ca_kabuli_chr03 | 36218347                | AA                              | CC              | 1946781392               |

| SNPs IDs              | Chromosome IDs | Chromosomes     | Physical positions (bp) | CDC Frontier (Reference genome) | (ILWC46 & LPNB) | NCBI SNPdb Accession IDs |
|-----------------------|----------------|-----------------|-------------------------|---------------------------------|-----------------|--------------------------|
| SNP_P4_35463_36218609 | NC_021162.1    | Ca_kabuli_chr03 | 36218609                | GG                              | CC              | 1946781394               |
| SNP_P4_35464_36218621 | NC_021162.1    | Ca_kabuli_chr03 | 36218621                | GG                              | AA              | 1946781396               |
| SNP_P4_35466_36219157 | NC_021162.1    | Ca_kabuli_chr03 | 36219157                | GG                              | TT              | 1946781398               |
| SNP_P4_35467_36219318 | NC_021162.1    | Ca_kabuli_chr03 | 36219318                | TT                              | CC              | 1946781400               |
| SNP_P4_35468_36219335 | NC_021162.1    | Ca_kabuli_chr03 | 36219335                | TT                              | GG              | 1946781402               |
| SNP_P4_35470_36219354 | NC_021162.1    | Ca_kabuli_chr03 | 36219354                | AA                              | GG              | 1946781404               |
| SNP_P4_35471_36219618 | NC_021162.1    | Ca_kabuli_chr03 | 36219618                | AA                              | GG              | 1946781406               |
| SNP_P4_35472_36220387 | NC_021162.1    | Ca_kabuli_chr03 | 36220387                | TT                              | CC              | 1946781408               |
| SNP_P4_35473_36220696 | NC_021162.1    | Ca_kabuli_chr03 | 36220696                | AA                              | GG              | 1946781410               |
| SNP_P4_35474_36220762 | NC_021162.1    | Ca_kabuli_chr03 | 36220762                | AA                              | CC              | 1946781414               |
| SNP_P4_35477_36222052 | NC_021162.1    | Ca_kabuli_chr03 | 36222052                | AA                              | CC              | 1946781416               |
| SNP_P4_35478_36222115 | NC_021162.1    | Ca_kabuli_chr03 | 36222115                | TT                              | CC              | 1946781418               |
| SNP_P4_35479_36222117 | NC_021162.1    | Ca_kabuli_chr03 | 36222117                | AA                              | GG              | 1946781420               |
| SNP_P4_35480_36222139 | NC_021162.1    | Ca_kabuli_chr03 | 36222139                | TT                              | CC              | 1946781422               |
| SNP_P4_35481_36222143 | NC_021162.1    | Ca_kabuli_chr03 | 36222143                | TT                              | GG              | 1946781425               |
| SNP_P4_35482_36222286 | NC_021162.1    | Ca_kabuli_chr03 | 36222286                | GG                              | TT              | 1946781427               |
| SNP_P4_35483_36224606 | NC_021162.1    | Ca_kabuli_chr03 | 36224606                | CC                              | AA              | 1946781430               |
| SNP_P4_35485_36225173 | NC_021162.1    | Ca_kabuli_chr03 | 36225173                | AA                              | GG              | 1946781432               |
| SNP_P4_35486_36225828 | NC_021162.1    | Ca_kabuli_chr03 | 36225828                | AA                              | CC              | 1946781434               |
| SNP_P4_35488_36227142 | NC_021162.1    | Ca_kabuli_chr03 | 36227142                | TT                              | CC              | 1946781436               |
| SNP_P4_35489_36229014 | NC_021162.1    | Ca_kabuli_chr03 | 36229014                | TT                              | CC              | 1946781438               |
| SNP_P4_35490_36229031 | NC_021162.1    | Ca_kabuli_chr03 | 36229031                | GG                              | AA              | 1946781440               |
| SNP_P4_35491_36230156 | NC_021162.1    | Ca_kabuli_chr03 | 36230156                | TT                              | CC              | 1946781443               |
| SNP_P4_35492_36233457 | NC_021162.1    | Ca_kabuli_chr03 | 36233457                | GG                              | AA              | 1946781445               |
| SNP_P4_35493_36234192 | NC_021162.1    | Ca_kabuli_chr03 | 36234192                | CC                              | TT              | 1946781447               |
| SNP_P4_35494_36235946 | NC_021162.1    | Ca_kabuli_chr03 | 36235946                | GG                              | AA              | 1946781449               |
| SNP_P4_35495_36236652 | NC_021162.1    | Ca_kabuli_chr03 | 36236652                | GG                              | AA              | 1946781451               |
| SNP_P4_35497_36236945 | NC_021162.1    | Ca_kabuli_chr03 | 36236945                | TT                              | CC              | 1946781453               |
| SNP_P4_35498_36236982 | NC_021162.1    | Ca_kabuli_chr03 | 36236982                | AA                              | GG              | 1946781455               |
| SNP_P4_35499_36236983 | NC_021162.1    | Ca_kabuli_chr03 | 36236983                | GG                              | AA              | 1946781457               |
| SNP_P4_35500_36237005 | NC_021162.1    | Ca_kabuli_chr03 | 36237005                | CC                              | TT              | 1946781459               |
| SNP_P4_35501_36237020 | NC_021162.1    | Ca_kabuli_chr03 | 36237020                | TT                              | CC              | 1946781461               |
| SNP_P4_35502_36237027 | NC_021162.1    | Ca_kabuli_chr03 | 36237027                | GG                              | TT              | 1946781463               |
| SNP_P4_35503_36240124 | NC_021162.1    | Ca_kabuli_chr03 | 36240124                | CC                              | GG              | 1946781465               |
| SNP_P4_35504_36240223 | NC_021162.1    | Ca_kabuli_chr03 | 36240223                | AA                              | TT              | 1946781467               |
| SNP_P4_35505_36240233 | NC_021162.1    | Ca_kabuli_chr03 | 36240233                | AA                              | GG              | 1946781469               |
| SNP_P4_35506_36240266 | NC_021162.1    | Ca_kabuli_chr03 | 36240266                | CC                              | TT              | 1946781471               |
| SNP_P4_35507_36240274 | NC_021162.1    | Ca_kabuli_chr03 | 36240274                | TT                              | CC              | 1946781473               |
| SNP_P4_35508_36240289 | NC_021162.1    | Ca_kabuli_chr03 | 36240289                | CC                              | TT              | 1946781475               |
| SNP_P4_35509_36240290 | NC_021162.1    | Ca_kabuli_chr03 | 36240290                | CC                              | AA              | 1946781477               |
| SNP_P4_35510_36240310 | NC_021162.1    | Ca_kabuli_chr03 | 36240310                | TT                              | CC              | 1946781479               |
| SNP_P4_35511_36240312 | NC_021162.1    | Ca_kabuli_chr03 | 36240312                | GG                              | AA              | 1946781481               |



| SNPs IDs              | Chromosome IDs | Chromosomes     | Physical positions (bp) | CDC Frontier (Reference genome) | (ILWC46 & LPNB) | NCBI SNPdb Accession IDs |
|-----------------------|----------------|-----------------|-------------------------|---------------------------------|-----------------|--------------------------|
| SNP_P4_35512_36240348 | NC_021162.1    | Ca_kabuli_chr03 | 36240348                | AA                              | GG              | 1946781484               |
| SNP_P4_35513_36240379 | NC_021162.1    | Ca_kabuli_chr03 | 36240379                | AA                              | GG              | 1946781486               |
| SNP_P4_35514_36240392 | NC_021162.1    | Ca_kabuli_chr03 | 36240392                | GG                              | AA              | 1946781488               |
| SNP_P4_35516_36240446 | NC_021162.1    | Ca_kabuli_chr03 | 36240446                | AA                              | CC              | 1946781490               |
| SNP_P4_35517_36240530 | NC_021162.1    | Ca_kabuli_chr03 | 36240530                | TT                              | CC              | 1946781492               |
| SNP_P4_35518_36240531 | NC_021162.1    | Ca_kabuli_chr03 | 36240531                | TT                              | CC              | 1946781495               |
| SNP_P4_35519_36240532 | NC_021162.1    | Ca_kabuli_chr03 | 36240532                | GG                              | AA              | 1946781497               |
| SNP_P4_35520_36240533 | NC_021162.1    | Ca_kabuli_chr03 | 36240533                | AA                              | GG              | 1946781499               |
| SNP_P4_35521_36240645 | NC_021162.1    | Ca_kabuli_chr03 | 36240645                | TT                              | CC              | 1946781501               |
| SNP_P4_35522_36240659 | NC_021162.1    | Ca_kabuli_chr03 | 36240659                | CC                              | AA              | 1946781503               |
| SNP_P4_35523_36240668 | NC_021162.1    | Ca_kabuli_chr03 | 36240668                | GG                              | AA              | 1946781505               |
| SNP_P4_35524_36240707 | NC_021162.1    | Ca_kabuli_chr03 | 36240707                | TT                              | CC              | 1946781507               |
| SNP_P4_35525_36240728 | NC_021162.1    | Ca_kabuli_chr03 | 36240728                | TT                              | AA              | 1946781510               |
| SNP_P4_35526_36241143 | NC_021162.1    | Ca_kabuli_chr03 | 36241143                | GG                              | AA              | 1946781512               |
| SNP_P4_35527_36241153 | NC_021162.1    | Ca_kabuli_chr03 | 36241153                | GG                              | AA              | 1946781514               |
| SNP_P4_35528_36241160 | NC_021162.1    | Ca_kabuli_chr03 | 36241160                | TT                              | CC              | 1946781516               |
| SNP_P4_35529_36241171 | NC_021162.1    | Ca_kabuli_chr03 | 36241171                | AA                              | GG              | 1946781518               |
| SNP_P4_35531_36241597 | NC_021162.1    | Ca_kabuli_chr03 | 36241597                | TT                              | CC              | 1946781521               |
| SNP_P4_35533_36241663 | NC_021162.1    | Ca_kabuli_chr03 | 36241663                | GG                              | TT              | 1946781523               |
| SNP_P4_35534_36241824 | NC_021162.1    | Ca_kabuli_chr03 | 36241824                | GG                              | AA              | 1946781525               |
| SNP_P4_35535_36241853 | NC_021162.1    | Ca_kabuli_chr03 | 36241853                | TT                              | AA              | 1946781527               |
| SNP_P4_35536_36241918 | NC_021162.1    | Ca_kabuli_chr03 | 36241918                | CC                              | TT              | 1946781530               |
| SNP_P4_35537_36242504 | NC_021162.1    | Ca_kabuli_chr03 | 36242504                | CC                              | TT              | 1946781532               |
| SNP_P4_35539_36243218 | NC_021162.1    | Ca_kabuli_chr03 | 36243218                | TT                              | AA              | 1946781534               |
| SNP_P4_35540_36244365 | NC_021162.1    | Ca_kabuli_chr03 | 36244365                | TT                              | CC              | 1946781537               |
| SNP_P4_35541_36246359 | NC_021162.1    | Ca_kabuli_chr03 | 36246359                | CC                              | TT              | 1946781539               |
| SNP_P4_35542_36246463 | NC_021162.1    | Ca_kabuli_chr03 | 36246463                | AA                              | GG              | 1946781541               |
| SNP_P4_35543_36246546 | NC_021162.1    | Ca_kabuli_chr03 | 36246546                | AA                              | TT              | 1946781544               |
| SNP_P4_35544_36248468 | NC_021162.1    | Ca_kabuli_chr03 | 36248468                | AA                              | CC              | 1946781546               |
| SNP_P4_35545_36249150 | NC_021162.1    | Ca_kabuli_chr03 | 36249150                | TT                              | AA              | 1946781548               |
| SNP_P4_35546_36249183 | NC_021162.1    | Ca_kabuli_chr03 | 36249183                | GG                              | AA              | 1946781550               |
| SNP_P4_35547_36249235 | NC_021162.1    | Ca_kabuli_chr03 | 36249235                | AA                              | GG              | 1946781552               |
| SNP_P4_35548_36249282 | NC_021162.1    | Ca_kabuli_chr03 | 36249282                | AA                              | GG              | 1946781554               |
| SNP_P4_35549_36249294 | NC_021162.1    | Ca_kabuli_chr03 | 36249294                | AA                              | GG              | 1946781557               |
| SNP_P4_35550_36249318 | NC_021162.1    | Ca_kabuli_chr03 | 36249318                | CC                              | TT              | 1946781559               |
| SNP_P4_35551_36249414 | NC_021162.1    | Ca_kabuli_chr03 | 36249414                | CC                              | TT              | 1946781561               |
| SNP_P4_35552_36249533 | NC_021162.1    | Ca_kabuli_chr03 | 36249533                | AA                              | TT              | 1946781563               |
| SNP_P4_35553_36249549 | NC_021162.1    | Ca_kabuli_chr03 | 36249549                | TT                              | AA              | 1946781565               |
| SNP_P4_35554_36249595 | NC_021162.1    | Ca_kabuli_chr03 | 36249595                | CC                              | TT              | 1946781567               |
| SNP_P4_35555_36251104 | NC_021162.1    | Ca_kabuli_chr03 | 36251104                | TT                              | GG              | 1946781569               |
| SNP_P4_35557_36253276 | NC_021162.1    | Ca_kabuli_chr03 | 36253276                | AA                              | GG              | 1946781571               |
| SNP_P4_35558_36253291 | NC_021162.1    | Ca_kabuli_chr03 | 36253291                | CC                              | GG              | 1946781573               |

| SNPs IDs              | Chromosome IDs | Chromosomes     | Physical positions (bp) | CDC Frontier (Reference genome) | (ILWC46 & LPNB) | NCBI SNPdb Accession IDs |
|-----------------------|----------------|-----------------|-------------------------|---------------------------------|-----------------|--------------------------|
| SNP_P4_35559_36254132 | NC_021162.1    | Ca_kabuli_chr03 | 36254132                | AA                              | TT              | 1946781575               |
| SNP_P4_35560_36254648 | NC_021162.1    | Ca_kabuli_chr03 | 36254648                | AA                              | GG              | 1946781577               |
| SNP_P4_35561_36255662 | NC_021162.1    | Ca_kabuli_chr03 | 36255662                | TT                              | CC              | 1946781579               |
| SNP_P4_35563_36256081 | NC_021162.1    | Ca_kabuli_chr03 | 36256081                | CC                              | TT              | 1946781582               |
| SNP_P4_35564_36256096 | NC_021162.1    | Ca_kabuli_chr03 | 36256096                | CC                              | AA              | 1946781584               |
| SNP_P4_35565_36256365 | NC_021162.1    | Ca_kabuli_chr03 | 36256365                | GG                              | AA              | 1946781586               |
| SNP_P4_35566_36256566 | NC_021162.1    | Ca_kabuli_chr03 | 36256566                | GG                              | AA              | 1946781588               |
| SNP_P4_35567_36256651 | NC_021162.1    | Ca_kabuli_chr03 | 36256651                | TT                              | CC              | 1946781590               |
| SNP_P4_35568_36257589 | NC_021162.1    | Ca_kabuli_chr03 | 36257589                | GG                              | AA              | 1946781592               |
| SNP_P4_35570_36258020 | NC_021162.1    | Ca_kabuli_chr03 | 36258020                | TT                              | AA              | 1946781594               |
| SNP_P4_35571_36258280 | NC_021162.1    | Ca_kabuli_chr03 | 36258280                | TT                              | CC              | 1946781596               |
| SNP_P4_35572_36258369 | NC_021162.1    | Ca_kabuli_chr03 | 36258369                | CC                              | TT              | 1946781599               |
| SNP_P4_35573_36258733 | NC_021162.1    | Ca_kabuli_chr03 | 36258733                | TT                              | AA              | 1946781601               |
| SNP_P4_35575_36262508 | NC_021162.1    | Ca_kabuli_chr03 | 36262508                | AA                              | TT              | 1946781603               |
| SNP_P4_35577_36263804 | NC_021162.1    | Ca_kabuli_chr03 | 36263804                | AA                              | TT              | 1946781605               |
| SNP_P4_35578_36263811 | NC_021162.1    | Ca_kabuli_chr03 | 36263811                | CC                              | TT              | 1946781607               |
| SNP_P4_35579_36264470 | NC_021162.1    | Ca_kabuli_chr03 | 36264470                | CC                              | TT              | 1946781609               |
| SNP_P4_35580_36264503 | NC_021162.1    | Ca_kabuli_chr03 | 36264503                | AA                              | GG              | 1946781611               |
| SNP_P4_35581_36264704 | NC_021162.1    | Ca_kabuli_chr03 | 36264704                | TT                              | CC              | 1946781613               |
| SNP_P4_35583_36266123 | NC_021162.1    | Ca_kabuli_chr03 | 36266123                | CC                              | GG              | 1946781616               |
| SNP_P4_35584_36266128 | NC_021162.1    | Ca_kabuli_chr03 | 36266128                | AA                              | GG              | 1946781618               |
| SNP_P4_35585_36266151 | NC_021162.1    | Ca_kabuli_chr03 | 36266151                | TT                              | CC              | 1946781620               |
| SNP_P4_35586_36268491 | NC_021162.1    | Ca_kabuli_chr03 | 36268491                | AA                              | TT              | 1946781622               |
| SNP_P4_35588_36268902 | NC_021162.1    | Ca_kabuli_chr03 | 36268902                | TT                              | GG              | 1946781624               |
| SNP_P4_35589_36268909 | NC_021162.1    | Ca_kabuli_chr03 | 36268909                | TT                              | GG              | 1946781626               |
| SNP_P4_35590_36268942 | NC_021162.1    | Ca_kabuli_chr03 | 36268942                | GG                              | CC              | 1946781628               |
| SNP_P4_35591_36268954 | NC_021162.1    | Ca_kabuli_chr03 | 36268954                | AA                              | TT              | 1946781630               |
| SNP_P4_35592_36269405 | NC_021162.1    | Ca_kabuli_chr03 | 36269405                | TT                              | GG              | 1946781632               |
| SNP_P4_35593_36269485 | NC_021162.1    | Ca_kabuli_chr03 | 36269485                | TT                              | GG              | 1946781634               |
| SNP_P4_35594_36269487 | NC_021162.1    | Ca_kabuli_chr03 | 36269487                | TT                              | AA              | 1946781636               |
| SNP_P4_35595_36269503 | NC_021162.1    | Ca_kabuli_chr03 | 36269503                | CC                              | GG              | 1946781638               |
| SNP_P4_35596_36269671 | NC_021162.1    | Ca_kabuli_chr03 | 36269671                | AA                              | TT              | 1946781640               |
| SNP_P4_35597_36269717 | NC_021162.1    | Ca_kabuli_chr03 | 36269717                | AA                              | GG              | 1946781642               |
| SNP_P4_35598_36269787 | NC_021162.1    | Ca_kabuli_chr03 | 36269787                | TT                              | GG              | 1946781644               |
| SNP_P4_35600_36270748 | NC_021162.1    | Ca_kabuli_chr03 | 36270748                | TT                              | AA              | 1946781648               |
| SNP_P4_35601_36270761 | NC_021162.1    | Ca_kabuli_chr03 | 36270761                | GG                              | CC              | 1946781650               |
| SNP_P4_35602_36270770 | NC_021162.1    | Ca_kabuli_chr03 | 36270770                | GG                              | AA              | 1946781652               |
| SNP_P4_35603_36270791 | NC_021162.1    | Ca_kabuli_chr03 | 36270791                | TT                              | AA              | 1946781654               |
| SNP_P4_35604_36270818 | NC_021162.1    | Ca_kabuli_chr03 | 36270818                | TT                              | CC              | 1946781656               |
| SNP_P4_35605_36270833 | NC_021162.1    | Ca_kabuli_chr03 | 36270833                | AA                              | TT              | 1946781658               |
| SNP_P4_35606_36270835 | NC_021162.1    | Ca_kabuli_chr03 | 36270835                | AA                              | TT              | 1946781660               |
| SNP_P4_35607_36270864 | NC_021162.1    | Ca_kabuli_chr03 | 36270864                | TT                              | CC              | 1946781662               |

| SNPs IDs              | Chromosome IDs | Chromosomes     | Physical positions (bp) | CDC Frontier (Reference genome) | (ILWC46 & LPNB) | NCBI SNPdb Accession IDs |
|-----------------------|----------------|-----------------|-------------------------|---------------------------------|-----------------|--------------------------|
| SNP_P4_35608_36271079 | NC_021162.1    | Ca_kabuli_chr03 | 36271079                | TT                              | AA              | 1946781664               |
| SNP_P4_35609_36271709 | NC_021162.1    | Ca_kabuli_chr03 | 36271709                | GG                              | TT              | 1946781666               |
| SNP_P4_35610_36271711 | NC_021162.1    | Ca_kabuli_chr03 | 36271711                | GG                              | TT              | 1946781668               |
| SNP_P4_35611_36273496 | NC_021162.1    | Ca_kabuli_chr03 | 36273496                | CC                              | TT              | 1946781670               |
| SNP_P4_35612_36273505 | NC_021162.1    | Ca_kabuli_chr03 | 36273505                | CC                              | TT              | 1946781672               |
| SNP_P4_35613_36273534 | NC_021162.1    | Ca_kabuli_chr03 | 36273534                | CC                              | AA              | 1946781674               |
| SNP_P4_35614_36273537 | NC_021162.1    | Ca_kabuli_chr03 | 36273537                | GG                              | AA              | 1946781676               |
| SNP_P4_35617_36274541 | NC_021162.1    | Ca_kabuli_chr03 | 36274541                | CC                              | TT              | 1946781678               |
| SNP_P4_35618_36274557 | NC_021162.1    | Ca_kabuli_chr03 | 36274557                | GG                              | AA              | 1946781680               |
| SNP_P4_35619_36274572 | NC_021162.1    | Ca_kabuli_chr03 | 36274572                | AA                              | GG              | 1946781682               |
| SNP_P4_35620_36274580 | NC_021162.1    | Ca_kabuli_chr03 | 36274580                | AA                              | TT              | 1946781684               |
| SNP_P4_35621_36274995 | NC_021162.1    | Ca_kabuli_chr03 | 36274995                | CC                              | AA              | 1946781686               |
| SNP_P4_35622_36275032 | NC_021162.1    | Ca_kabuli_chr03 | 36275032                | CC                              | TT              | 1946781688               |
| SNP_P4_35623_36276367 | NC_021162.1    | Ca_kabuli_chr03 | 36276367                | AA                              | GG              | 1946781691               |
| SNP_P4_35624_36279256 | NC_021162.1    | Ca_kabuli_chr03 | 36279256                | GG                              | TT              | 1946781693               |
| SNP_P4_35625_36279330 | NC_021162.1    | Ca_kabuli_chr03 | 36279330                | CC                              | AA              | 1946781695               |
| SNP_P4_35626_36279332 | NC_021162.1    | Ca_kabuli_chr03 | 36279332                | GG                              | AA              | 1946781697               |
| SNP_P4_35627_36280494 | NC_021162.1    | Ca_kabuli_chr03 | 36280494                | GG                              | AA              | 1946781699               |
| SNP_P4_35628_36280497 | NC_021162.1    | Ca_kabuli_chr03 | 36280497                | AA                              | GG              | 1946781701               |
| SNP_P4_35630_36283827 | NC_021162.1    | Ca_kabuli_chr03 | 36283827                | AA                              | TT              | 1946781703               |
| SNP_P4_35631_36286016 | NC_021162.1    | Ca_kabuli_chr03 | 36286016                | TT                              | CC              | 1946781705               |
| SNP_P4_35632_36286041 | NC_021162.1    | Ca_kabuli_chr03 | 36286041                | AA                              | GG              | 1946781707               |
| SNP_P4_35633_36286165 | NC_021162.1    | Ca_kabuli_chr03 | 36286165                | AA                              | GG              | 1946781709               |
| SNP_P4_35634_36286281 | NC_021162.1    | Ca_kabuli_chr03 | 36286281                | TT                              | CC              | 1946781711               |
| SNP_P4_35635_36286292 | NC_021162.1    | Ca_kabuli_chr03 | 36286292                | AA                              | GG              | 1946781714               |
| SNP_P4_35636_36286358 | NC_021162.1    | Ca_kabuli_chr03 | 36286358                | GG                              | AA              | 1946781716               |
| SNP_P4_35637_36286372 | NC_021162.1    | Ca_kabuli_chr03 | 36286372                | CC                              | TT              | 1946781718               |
| SNP_P4_35638_36286539 | NC_021162.1    | Ca_kabuli_chr03 | 36286539                | CC                              | TT              | 1946781720               |
| SNP_P4_35639_36286578 | NC_021162.1    | Ca_kabuli_chr03 | 36286578                | GG                              | TT              | 1946781722               |
| SNP_P4_35641_36286728 | NC_021162.1    | Ca_kabuli_chr03 | 36286728                | GG                              | TT              | 1946781724               |
| SNP_P4_35642_36286849 | NC_021162.1    | Ca_kabuli_chr03 | 36286849                | CC                              | AA              | 1946781726               |
| SNP_P4_35643_36287123 | NC_021162.1    | Ca_kabuli_chr03 | 36287123                | GG                              | AA              | 1946781728               |
| SNP_P4_35645_36287197 | NC_021162.1    | Ca_kabuli_chr03 | 36287197                | TT                              | CC              | 1946781730               |
| SNP_P4_35646_36287403 | NC_021162.1    | Ca_kabuli_chr03 | 36287403                | GG                              | AA              | 1946781732               |
| SNP_P4_35647_36287437 | NC_021162.1    | Ca_kabuli_chr03 | 36287437                | GG                              | AA              | 1946781734               |
| SNP_P4_35649_36287592 | NC_021162.1    | Ca_kabuli_chr03 | 36287592                | TT                              | CC              | 1946781736               |
| SNP_P4_35650_36287639 | NC_021162.1    | Ca_kabuli_chr03 | 36287639                | TT                              | CC              | 1946781738               |
| SNP_P4_35652_36289346 | NC_021162.1    | Ca_kabuli_chr03 | 36289346                | CC                              | TT              | 1946781740               |
| SNP_P4_35654_36289390 | NC_021162.1    | Ca_kabuli_chr03 | 36289390                | AA                              | GG              | 1946781742               |
| SNP_P4_35655_36289625 | NC_021162.1    | Ca_kabuli_chr03 | 36289625                | GG                              | AA              | 1946781744               |
| SNP_P4_35657_36290068 | NC_021162.1    | Ca_kabuli_chr03 | 36290068                | TT                              | CC              | 1946781746               |
| SNP_P4_35658_36290069 | NC_021162.1    | Ca_kabuli_chr03 | 36290069                | GG                              | AA              | 1946781748               |

| SNPs IDs              | Chromosome IDs | Chromosomes     | Physical positions (bp) | CDC Frontier (Reference genome) | (ILWC46 & LPNB) | NCBI SNPdb Accession IDs |
|-----------------------|----------------|-----------------|-------------------------|---------------------------------|-----------------|--------------------------|
| SNP_P4_35659_36290503 | NC_021162.1    | Ca_kabuli_chr03 | 36290503                | GG                              | AA              | 1946781750               |
| SNP_P4_35660_36290619 | NC_021162.1    | Ca_kabuli_chr03 | 36290619                | TT                              | AA              | 1946781752               |
| SNP_P4_35661_36290621 | NC_021162.1    | Ca_kabuli_chr03 | 36290621                | TT                              | AA              | 1946781754               |
| SNP_P4_35662_36290696 | NC_021162.1    | Ca_kabuli_chr03 | 36290696                | CC                              | TT              | 1946781756               |
| SNP_P4_35664_36290793 | NC_021162.1    | Ca_kabuli_chr03 | 36290793                | AA                              | GG              | 1946781758               |
| SNP_P4_35665_36290882 | NC_021162.1    | Ca_kabuli_chr03 | 36290882                | TT                              | CC              | 1946781760               |
| SNP_P4_35666_36290887 | NC_021162.1    | Ca_kabuli_chr03 | 36290887                | GG                              | CC              | 1946781762               |
| SNP_P4_35667_36290927 | NC_021162.1    | Ca_kabuli_chr03 | 36290927                | TT                              | AA              | 1946781764               |
| SNP_P4_35668_36290928 | NC_021162.1    | Ca_kabuli_chr03 | 36290928                | CC                              | TT              | 1946781766               |
| SNP_P4_35669_36290993 | NC_021162.1    | Ca_kabuli_chr03 | 36290993                | GG                              | AA              | 1946781768               |
| SNP_P4_35670_36291201 | NC_021162.1    | Ca_kabuli_chr03 | 36291201                | TT                              | CC              | 1946781770               |
| SNP_P4_35671_36295652 | NC_021162.1    | Ca_kabuli_chr03 | 36295652                | TT                              | AA              | 1946781772               |
| SNP_P4_35672_36301547 | NC_021162.1    | Ca_kabuli_chr03 | 36301547                | TT                              | GG              | 1946781775               |
| SNP_P4_35673_36302251 | NC_021162.1    | Ca_kabuli_chr03 | 36302251                | CC                              | TT              | 1946781777               |
| SNP_P4_35674_36302515 | NC_021162.1    | Ca_kabuli_chr03 | 36302515                | CC                              | TT              | 1946781779               |
| SNP_P4_35675_36302640 | NC_021162.1    | Ca_kabuli_chr03 | 36302640                | GG                              | AA              | 1946781781               |
| SNP_P4_35676_36303055 | NC_021162.1    | Ca_kabuli_chr03 | 36303055                | CC                              | TT              | 1946781783               |
| SNP_P4_35677_36303268 | NC_021162.1    | Ca_kabuli_chr03 | 36303268                | GG                              | AA              | 1946781785               |
| SNP_P4_35680_36303583 | NC_021162.1    | Ca_kabuli_chr03 | 36303583                | AA                              | GG              | 1946781787               |
| SNP_P4_35682_36306971 | NC_021162.1    | Ca_kabuli_chr03 | 36306971                | CC                              | TT              | 1946781789               |
| SNP_P4_35683_36306994 | NC_021162.1    | Ca_kabuli_chr03 | 36306994                | AA                              | TT              | 1946781791               |
| SNP_P4_35684_36307006 | NC_021162.1    | Ca_kabuli_chr03 | 36307006                | AA                              | GG              | 1946781793               |
| SNP_P4_35685_36307022 | NC_021162.1    | Ca_kabuli_chr03 | 36307022                | CC                              | TT              | 1946781795               |
| SNP_P4_35686_36307966 | NC_021162.1    | Ca_kabuli_chr03 | 36307966                | AA                              | GG              | 1946781797               |
| SNP_P4_35687_36308131 | NC_021162.1    | Ca_kabuli_chr03 | 36308131                | GG                              | AA              | 1946781799               |
| SNP_P4_35688_36308144 | NC_021162.1    | Ca_kabuli_chr03 | 36308144                | AA                              | GG              | 1946781801               |
| SNP_P4_35689_36308160 | NC_021162.1    | Ca_kabuli_chr03 | 36308160                | CC                              | TT              | 1946781803               |
| SNP_P4_35690_36308190 | NC_021162.1    | Ca_kabuli_chr03 | 36308190                | GG                              | AA              | 1946781805               |
| SNP_P4_35692_36308270 | NC_021162.1    | Ca_kabuli_chr03 | 36308270                | CC                              | TT              | 1946781807               |
| SNP_P4_35693_36308272 | NC_021162.1    | Ca_kabuli_chr03 | 36308272                | CC                              | TT              | 1946781809               |
| SNP_P4_35694_36311007 | NC_021162.1    | Ca_kabuli_chr03 | 36311007                | TT                              | CC              | 1946781811               |
| SNP_P4_35695_36313050 | NC_021162.1    | Ca_kabuli_chr03 | 36313050                | GG                              | CC              | 1946781813               |
| SNP_P4_35696_36313508 | NC_021162.1    | Ca_kabuli_chr03 | 36313508                | GG                              | TT              | 1946781815               |
| SNP_P4_35697_36321537 | NC_021162.1    | Ca_kabuli_chr03 | 36321537                | CC                              | AA              | 1946781818               |
| SNP_P4_35698_36321551 | NC_021162.1    | Ca_kabuli_chr03 | 36321551                | CC                              | TT              | 1946781820               |
| SNP_P4_35699_36322622 | NC_021162.1    | Ca_kabuli_chr03 | 36322622                | CC                              | AA              | 1946781822               |
| SNP_P4_35700_36322631 | NC_021162.1    | Ca_kabuli_chr03 | 36322631                | CC                              | AA              | 1946781824               |
| SNP_P4_35702_36323514 | NC_021162.1    | Ca_kabuli_chr03 | 36323514                | TT                              | GG              | 1946781827               |
| SNP_P4_35703_36323847 | NC_021162.1    | Ca_kabuli_chr03 | 36323847                | AA                              | GG              | 1946781829               |
| SNP_P4_35704_36324018 | NC_021162.1    | Ca_kabuli_chr03 | 36324018                | TT                              | GG              | 1946781831               |
| SNP_P4_35705_36324789 | NC_021162.1    | Ca_kabuli_chr03 | 36324789                | GG                              | TT              | 1946781833               |
| SNP_P4_35707_36324833 | NC_021162.1    | Ca_kabuli_chr03 | 36324833                | CC                              | TT              | 1946781835               |

| SNPs IDs              | Chromosome IDs | Chromosomes     | Physical positions (bp) | CDC Frontier (Reference genome) | (ILWC46 & LPNB) | NCBI SNPdb Accession IDs |
|-----------------------|----------------|-----------------|-------------------------|---------------------------------|-----------------|--------------------------|
| SNP_P4_35708_36325103 | NC_021162.1    | Ca_kabuli_chr03 | 36325103                | GG                              | AA              | 1946781837               |
| SNP_P4_35709_36326023 | NC_021162.1    | Ca_kabuli_chr03 | 36326023                | AA                              | TT              | 1946781839               |
| SNP_P4_35710_36326059 | NC_021162.1    | Ca_kabuli_chr03 | 36326059                | AA                              | CC              | 1946781841               |
| SNP_P4_35713_36326313 | NC_021162.1    | Ca_kabuli_chr03 | 36326313                | TT                              | GG              | 1946781843               |
| SNP_P4_35715_36326434 | NC_021162.1    | Ca_kabuli_chr03 | 36326434                | GG                              | TT              | 1946781845               |
| SNP_P4_35716_36326442 | NC_021162.1    | Ca_kabuli_chr03 | 36326442                | AA                              | TT              | 1946781848               |
| SNP_P4_35717_36326515 | NC_021162.1    | Ca_kabuli_chr03 | 36326515                | CC                              | TT              | 1946781850               |
| SNP_P4_35718_36326593 | NC_021162.1    | Ca_kabuli_chr03 | 36326593                | GG                              | TT              | 1946781852               |
| SNP_P4_35719_36326603 | NC_021162.1    | Ca_kabuli_chr03 | 36326603                | GG                              | AA              | 1946781854               |
| SNP_P4_35720_36326643 | NC_021162.1    | Ca_kabuli_chr03 | 36326643                | TT                              | CC              | 1946781856               |
| SNP_P4_35721_36326649 | NC_021162.1    | Ca_kabuli_chr03 | 36326649                | TT                              | CC              | 1946781858               |
| SNP_P4_35722_36326661 | NC_021162.1    | Ca_kabuli_chr03 | 36326661                | TT                              | CC              | 1946781860               |
| SNP_P4_35723_36326762 | NC_021162.1    | Ca_kabuli_chr03 | 36326762                | TT                              | CC              | 1946781862               |
| SNP_P4_35724_36326788 | NC_021162.1    | Ca_kabuli_chr03 | 36326788                | AA                              | GG              | 1946781864               |
| SNP_P4_35725_36327071 | NC_021162.1    | Ca_kabuli_chr03 | 36327071                | CC                              | TT              | 1946781867               |
| SNP_P4_35727_36327248 | NC_021162.1    | Ca_kabuli_chr03 | 36327248                | CC                              | AA              | 1946781869               |
| SNP_P4_35728_36327253 | NC_021162.1    | Ca_kabuli_chr03 | 36327253                | TT                              | AA              | 1946781871               |
| SNP_P4_35729_36327273 | NC_021162.1    | Ca_kabuli_chr03 | 36327273                | AA                              | CC              | 1946781873               |
| SNP_P4_35730_36327294 | NC_021162.1    | Ca_kabuli_chr03 | 36327294                | AA                              | TT              | 1946781875               |
| SNP_P4_35731_36327556 | NC_021162.1    | Ca_kabuli_chr03 | 36327556                | CC                              | TT              | 1946781877               |
| SNP_P4_35732_36328018 | NC_021162.1    | Ca_kabuli_chr03 | 36328018                | TT                              | CC              | 1946781879               |
| SNP_P4_35735_36329158 | NC_021162.1    | Ca_kabuli_chr03 | 36329158                | AA                              | GG              | 1946781881               |
| SNP_P4_35736_36331558 | NC_021162.1    | Ca_kabuli_chr03 | 36331558                | TT                              | CC              | 1946781883               |
| SNP_P4_35737_36331787 | NC_021162.1    | Ca_kabuli_chr03 | 36331787                | TT                              | CC              | 1946781885               |
| SNP_P4_35738_36331798 | NC_021162.1    | Ca_kabuli_chr03 | 36331798                | AA                              | CC              | 1946781887               |
| SNP_P4_35739_36332125 | NC_021162.1    | Ca_kabuli_chr03 | 36332125                | CC                              | TT              | 1946781889               |
| SNP_P4_35740_36332333 | NC_021162.1    | Ca_kabuli_chr03 | 36332333                | CC                              | GG              | 1946781891               |
| SNP_P4_35741_36333280 | NC_021162.1    | Ca_kabuli_chr03 | 36333280                | GG                              | TT              | 1946781893               |
| SNP_P4_35743_36334332 | NC_021162.1    | Ca_kabuli_chr03 | 36334332                | GG                              | AA              | 1946781895               |
| SNP_P4_35744_36335144 | NC_021162.1    | Ca_kabuli_chr03 | 36335144                | TT                              | CC              | 1946781897               |
| SNP_P4_35745_36335430 | NC_021162.1    | Ca_kabuli_chr03 | 36335430                | TT                              | AA              | 1946781899               |
| SNP_P4_35746_36335452 | NC_021162.1    | Ca_kabuli_chr03 | 36335452                | GG                              | CC              | 1946781902               |
| SNP_P4_35747_36335777 | NC_021162.1    | Ca_kabuli_chr03 | 36335777                | CC                              | GG              | 1946781904               |
| SNP_P4_35748_36335886 | NC_021162.1    | Ca_kabuli_chr03 | 36335886                | TT                              | CC              | 1946781906               |
| SNP_P4_35749_36335947 | NC_021162.1    | Ca_kabuli_chr03 | 36335947                | GG                              | TT              | 1946781908               |
| SNP_P4_35750_36336128 | NC_021162.1    | Ca_kabuli_chr03 | 36336128                | CC                              | TT              | 1946781910               |
| SNP_P4_35751_36336131 | NC_021162.1    | Ca_kabuli_chr03 | 36336131                | CC                              | TT              | 1946781912               |
| SNP_P4_35753_36337027 | NC_021162.1    | Ca_kabuli_chr03 | 36337027                | TT                              | CC              | 1946781914               |
| SNP_P4_35755_36341458 | NC_021162.1    | Ca_kabuli_chr03 | 36341458                | TT                              | AA              | 1946781916               |
| SNP_P4_35756_36341516 | NC_021162.1    | Ca_kabuli_chr03 | 36341516                | AA                              | TT              | 1946781918               |
| SNP_P4_35757_36341551 | NC_021162.1    | Ca_kabuli_chr03 | 36341551                | AA                              | GG              | 1946781920               |
| SNP_P4_35758_36342397 | NC_021162.1    | Ca_kabuli_chr03 | 36342397                | TT                              | CC              | 1946781922               |

| SNPs IDs              | Chromosome IDs | Chromosomes     | Physical positions (bp) | CDC Frontier (Reference genome) | (ILWC46 & LPNB) | NCBI SNPdb Accession IDs |
|-----------------------|----------------|-----------------|-------------------------|---------------------------------|-----------------|--------------------------|
| SNP_P4_35760_36342587 | NC_021162.1    | Ca_kabuli_chr03 | 36342587                | TT                              | GG              | 1946781924               |
| SNP_P4_35761_36342668 | NC_021162.1    | Ca_kabuli_chr03 | 36342668                | AA                              | TT              | 1946781926               |
| SNP_P4_35762_36342669 | NC_021162.1    | Ca_kabuli_chr03 | 36342669                | TT                              | GG              | 1946781929               |
| SNP_P4_35763_36342684 | NC_021162.1    | Ca_kabuli_chr03 | 36342684                | GG                              | CC              | 1946781931               |
| SNP_P4_35764_36342685 | NC_021162.1    | Ca_kabuli_chr03 | 36342685                | AA                              | CC              | 1946781933               |
| SNP_P4_35765_36342686 | NC_021162.1    | Ca_kabuli_chr03 | 36342686                | GG                              | CC              | 1946781935               |
| SNP_P4_35766_36342688 | NC_021162.1    | Ca_kabuli_chr03 | 36342688                | GG                              | AA              | 1946781937               |
| SNP_P4_35767_36342707 | NC_021162.1    | Ca_kabuli_chr03 | 36342707                | TT                              | GG              | 1946781939               |
| SNP_P4_35768_36343337 | NC_021162.1    | Ca_kabuli_chr03 | 36343337                | TT                              | AA              | 1946781941               |
| SNP_P4_35769_36343362 | NC_021162.1    | Ca_kabuli_chr03 | 36343362                | TT                              | AA              | 1946781943               |
| SNP_P4_35770_36343363 | NC_021162.1    | Ca_kabuli_chr03 | 36343363                | TT                              | AA              | 1946781945               |
| SNP_P4_35771_36343574 | NC_021162.1    | Ca_kabuli_chr03 | 36343574                | TT                              | CC              | 1946781948               |
| SNP_P4_35772_36343579 | NC_021162.1    | Ca_kabuli_chr03 | 36343579                | CC                              | TT              | 1946781950               |
| SNP_P4_35773_36343629 | NC_021162.1    | Ca_kabuli_chr03 | 36343629                | TT                              | AA              | 1946781952               |
| SNP_P4_35775_36343710 | NC_021162.1    | Ca_kabuli_chr03 | 36343710                | TT                              | CC              | 1946781955               |
| SNP_P4_35777_36343888 | NC_021162.1    | Ca_kabuli_chr03 | 36343888                | GG                              | AA              | 1946781959               |
| SNP_P4_35778_36343983 | NC_021162.1    | Ca_kabuli_chr03 | 36343983                | GG                              | AA              | 1946781961               |
| SNP_P4_35780_36344201 | NC_021162.1    | Ca_kabuli_chr03 | 36344201                | AA                              | GG              | 1946781963               |
| SNP_P4_35781_36344389 | NC_021162.1    | Ca_kabuli_chr03 | 36344389                | GG                              | TT              | 1946781965               |
| SNP_P4_35782_36344574 | NC_021162.1    | Ca_kabuli_chr03 | 36344574                | TT                              | AA              | 1946781968               |
| SNP_P4_35783_36345983 | NC_021162.1    | Ca_kabuli_chr03 | 36345983                | CC                              | TT              | 1946781970               |
| SNP_P4_35784_36345985 | NC_021162.1    | Ca_kabuli_chr03 | 36345985                | CC                              | TT              | 1946781972               |
| SNP_P4_35786_36347692 | NC_021162.1    | Ca_kabuli_chr03 | 36347692                | AA                              | GG              | 1946781974               |
| SNP_P4_35787_36347925 | NC_021162.1    | Ca_kabuli_chr03 | 36347925                | CC                              | TT              | 1946781976               |
| SNP_P4_35788_36348078 | NC_021162.1    | Ca_kabuli_chr03 | 36348078                | TT                              | CC              | 1946781978               |
| SNP_P4_35789_36348085 | NC_021162.1    | Ca_kabuli_chr03 | 36348085                | TT                              | CC              | 1946781980               |
| SNP_P4_35790_36348089 | NC_021162.1    | Ca_kabuli_chr03 | 36348089                | GG                              | AA              | 1946781982               |
| SNP_P4_35791_36348092 | NC_021162.1    | Ca_kabuli_chr03 | 36348092                | CC                              | TT              | 1946781984               |
| SNP_P4_35792_36348093 | NC_021162.1    | Ca_kabuli_chr03 | 36348093                | AA                              | GG              | 1946781986               |
| SNP_P4_35793_36348394 | NC_021162.1    | Ca_kabuli_chr03 | 36348394                | AA                              | GG              | 1946781988               |
| SNP_P4_35794_36348399 | NC_021162.1    | Ca_kabuli_chr03 | 36348399                | GG                              | TT              | 1946781991               |
| SNP_P4_35795_36348405 | NC_021162.1    | Ca_kabuli_chr03 | 36348405                | TT                              | CC              | 1946781993               |
| SNP_P4_35796_36348412 | NC_021162.1    | Ca_kabuli_chr03 | 36348412                | TT                              | CC              | 1946781995               |
| SNP_P4_35798_36348803 | NC_021162.1    | Ca_kabuli_chr03 | 36348803                | CC                              | GG              | 1946781997               |
| SNP_P4_35799_36349026 | NC_021162.1    | Ca_kabuli_chr03 | 36349026                | CC                              | TT              | 1946781999               |
| SNP_P4_35800_36349033 | NC_021162.1    | Ca_kabuli_chr03 | 36349033                | TT                              | AA              | 1946782001               |
| SNP_P4_35801_36349045 | NC_021162.1    | Ca_kabuli_chr03 | 36349045                | TT                              | CC              | 1946782003               |
| SNP_P4_35802_36349083 | NC_021162.1    | Ca_kabuli_chr03 | 36349083                | TT                              | AA              | 1946782005               |
| SNP_P4_35803_36349087 | NC_021162.1    | Ca_kabuli_chr03 | 36349087                | AA                              | TT              | 1946782007               |
| SNP_P4_35804_36349173 | NC_021162.1    | Ca_kabuli_chr03 | 36349173                | CC                              | TT              | 1946782009               |
| SNP_P4_35805_36349182 | NC_021162.1    | Ca_kabuli_chr03 | 36349182                | AA                              | GG              | 1946782011               |
| SNP_P4_35807_36349210 | NC_021162.1    | Ca_kabuli_chr03 | 36349210                | GG                              | CC              | 1946782013               |

| SNPs IDs              | Chromosome IDs | Chromosomes     | Physical positions (bp) | CDC Frontier (Reference genome) | (ILWC46 & LPNB) | NCBI SNPdb Accession IDs |
|-----------------------|----------------|-----------------|-------------------------|---------------------------------|-----------------|--------------------------|
| SNP_P4_35808_36349233 | NC_021162.1    | Ca_kabuli_chr03 | 36349233                | CC                              | TT              | 1946782015               |
| SNP_P4_35809_36349243 | NC_021162.1    | Ca_kabuli_chr03 | 36349243                | CC                              | TT              | 1946782017               |
| SNP_P4_35810_36349244 | NC_021162.1    | Ca_kabuli_chr03 | 36349244                | AA                              | GG              | 1946782019               |
| SNP_P4_35811_36349282 | NC_021162.1    | Ca_kabuli_chr03 | 36349282                | TT                              | CC              | 1946782021               |
| SNP_P4_35813_36349346 | NC_021162.1    | Ca_kabuli_chr03 | 36349346                | TT                              | CC              | 1946782023               |
| SNP_P4_35814_36349500 | NC_021162.1    | Ca_kabuli_chr03 | 36349500                | AA                              | TT              | 1946782027               |
| SNP_P4_35815_36349606 | NC_021162.1    | Ca_kabuli_chr03 | 36349606                | GG                              | AA              | 1946782029               |
| SNP_P4_35816_36349795 | NC_021162.1    | Ca_kabuli_chr03 | 36349795                | CC                              | TT              | 1946782031               |
| SNP_P4_35818_36350373 | NC_021162.1    | Ca_kabuli_chr03 | 36350373                | CC                              | TT              | 1946782033               |
| SNP_P4_35819_36350559 | NC_021162.1    | Ca_kabuli_chr03 | 36350559                | CC                              | GG              | 1946782035               |
| SNP_P4_35821_36351272 | NC_021162.1    | Ca_kabuli_chr03 | 36351272                | TT                              | AA              | 1946782039               |
| SNP_P4_35825_36351797 | NC_021162.1    | Ca_kabuli_chr03 | 36351797                | CC                              | TT              | 1946782041               |
| SNP_P4_35826_36351801 | NC_021162.1    | Ca_kabuli_chr03 | 36351801                | GG                              | AA              | 1946782043               |
| SNP_P4_35827_36351802 | NC_021162.1    | Ca_kabuli_chr03 | 36351802                | AA                              | GG              | 1946782045               |
| SNP_P4_35828_36351843 | NC_021162.1    | Ca_kabuli_chr03 | 36351843                | GG                              | AA              | 1946782047               |
| SNP_P4_35829_36351865 | NC_021162.1    | Ca_kabuli_chr03 | 36351865                | TT                              | CC              | 1946782050               |
| SNP_P4_35830_36351882 | NC_021162.1    | Ca_kabuli_chr03 | 36351882                | CC                              | TT              | 1946782052               |
| SNP_P4_35831_36351908 | NC_021162.1    | Ca_kabuli_chr03 | 36351908                | CC                              | AA              | 1946782054               |
| SNP_P4_35832_36351938 | NC_021162.1    | Ca_kabuli_chr03 | 36351938                | CC                              | TT              | 1946782056               |
| SNP_P4_35833_36352226 | NC_021162.1    | Ca_kabuli_chr03 | 36352226                | GG                              | AA              | 1946782058               |
| SNP_P4_35834_36352241 | NC_021162.1    | Ca_kabuli_chr03 | 36352241                | CC                              | TT              | 1946782060               |
| SNP_P4_35835_36352242 | NC_021162.1    | Ca_kabuli_chr03 | 36352242                | CC                              | GG              | 1946782062               |
| SNP_P4_35836_36352245 | NC_021162.1    | Ca_kabuli_chr03 | 36352245                | GG                              | TT              | 1946782064               |
| SNP_P4_35837_36352261 | NC_021162.1    | Ca_kabuli_chr03 | 36352261                | AA                              | GG              | 1946782066               |
| SNP_P4_35838_36352279 | NC_021162.1    | Ca_kabuli_chr03 | 36352279                | CC                              | TT              | 1946782068               |
| SNP_P4_35839_36352297 | NC_021162.1    | Ca_kabuli_chr03 | 36352297                | GG                              | AA              | 1946782070               |
| SNP_P4_35840_36352672 | NC_021162.1    | Ca_kabuli_chr03 | 36352672                | CC                              | TT              | 1946782072               |
| SNP_P4_35841_36353178 | NC_021162.1    | Ca_kabuli_chr03 | 36353178                | TT                              | GG              | 1946782075               |
| SNP_P4_35842_36353212 | NC_021162.1    | Ca_kabuli_chr03 | 36353212                | AA                              | GG              | 1946782077               |
| SNP_P4_35843_36353555 | NC_021162.1    | Ca_kabuli_chr03 | 36353555                | CC                              | AA              | 1946782079               |
| SNP_P4_35844_36353564 | NC_021162.1    | Ca_kabuli_chr03 | 36353564                | TT                              | AA              | 1946782081               |
| SNP_P4_35845_36353662 | NC_021162.1    | Ca_kabuli_chr03 | 36353662                | CC                              | GG              | 1946782083               |
| SNP_P4_35846_36353664 | NC_021162.1    | Ca_kabuli_chr03 | 36353664                | CC                              | GG              | 1946782085               |
| SNP_P4_35847_36353904 | NC_021162.1    | Ca_kabuli_chr03 | 36353904                | AA                              | GG              | 1946782087               |
| SNP_P4_35848_36353930 | NC_021162.1    | Ca_kabuli_chr03 | 36353930                | CC                              | GG              | 1946782089               |
| SNP_P4_35849_36354094 | NC_021162.1    | Ca_kabuli_chr03 | 36354094                | CC                              | TT              | 1946782091               |
| SNP_P4_35850_36354113 | NC_021162.1    | Ca_kabuli_chr03 | 36354113                | TT                              | CC              | 1946782093               |
| SNP_P4_35851_36354328 | NC_021162.1    | Ca_kabuli_chr03 | 36354328                | GG                              | AA              | 1946782095               |
| SNP_P4_35852_36354360 | NC_021162.1    | Ca_kabuli_chr03 | 36354360                | AA                              | GG              | 1946782097               |
| SNP_P4_35853_36354387 | NC_021162.1    | Ca_kabuli_chr03 | 36354387                | CC                              | TT              | 1946782099               |
| SNP_P4_35854_36354458 | NC_021162.1    | Ca_kabuli_chr03 | 36354458                | GG                              | TT              | 1946782101               |
| SNP_P4_35855_36354467 | NC_021162.1    | Ca_kabuli_chr03 | 36354467                | GG                              | TT              | 1946782103               |

| SNPs IDs              | Chromosome IDs | Chromosomes     | Physical positions (bp) | CDC Frontier (Reference genome) | (ILWC46 & LPNB) | NCBI SNPdb Accession IDs |
|-----------------------|----------------|-----------------|-------------------------|---------------------------------|-----------------|--------------------------|
| SNP_P4_35856_36354855 | NC_021162.1    | Ca_kabuli_chr03 | 36354855                | CC                              | TT              | 1946782105               |
| SNP_P4_35857_36354916 | NC_021162.1    | Ca_kabuli_chr03 | 36354916                | TT                              | CC              | 1946782107               |
| SNP_P4_35858_36358042 | NC_021162.1    | Ca_kabuli_chr03 | 36358042                | GG                              | AA              | 1946782109               |
| SNP_P4_35859_36360676 | NC_021162.1    | Ca_kabuli_chr03 | 36360676                | AA                              | GG              | 1946782111               |
| SNP_P4_35860_36360707 | NC_021162.1    | Ca_kabuli_chr03 | 36360707                | GG                              | AA              | 1946782113               |
| SNP_P4_35861_36361380 | NC_021162.1    | Ca_kabuli_chr03 | 36361380                | AA                              | GG              | 1946782115               |
| SNP_P4_35862_36361604 | NC_021162.1    | Ca_kabuli_chr03 | 36361604                | CC                              | TT              | 1946782117               |
| SNP_P4_35864_36361668 | NC_021162.1    | Ca_kabuli_chr03 | 36361668                | AA                              | TT              | 1946782119               |
| SNP_P4_35865_36361902 | NC_021162.1    | Ca_kabuli_chr03 | 36361902                | GG                              | CC              | 1946782121               |
| SNP_P4_35866_36362831 | NC_021162.1    | Ca_kabuli_chr03 | 36362831                | TT                              | AA              | 1946782123               |
| SNP_P4_35867_36362854 | NC_021162.1    | Ca_kabuli_chr03 | 36362854                | TT                              | CC              | 1946782125               |
| SNP_P4_35868_36362864 | NC_021162.1    | Ca_kabuli_chr03 | 36362864                | AA                              | TT              | 1946782127               |
| SNP_P4_35870_36363042 | NC_021162.1    | Ca_kabuli_chr03 | 36363042                | GG                              | AA              | 1946782129               |
| SNP_P4_35872_36363374 | NC_021162.1    | Ca_kabuli_chr03 | 36363374                | TT                              | GG              | 1946782131               |
| SNP_P4_35874_36363711 | NC_021162.1    | Ca_kabuli_chr03 | 36363711                | GG                              | AA              | 1946782133               |
| SNP_P4_35875_36364388 | NC_021162.1    | Ca_kabuli_chr03 | 36364388                | AA                              | TT              | 1946782135               |
| SNP_P4_35876_36364660 | NC_021162.1    | Ca_kabuli_chr03 | 36364660                | CC                              | TT              | 1946782137               |
| SNP_P4_35877_36364847 | NC_021162.1    | Ca_kabuli_chr03 | 36364847                | GG                              | CC              | 1946782139               |
| SNP_P4_35878_36364894 | NC_021162.1    | Ca_kabuli_chr03 | 36364894                | TT                              | CC              | 1946782141               |
| SNP_P4_35879_36365057 | NC_021162.1    | Ca_kabuli_chr03 | 36365057                | TT                              | AA              | 1946782143               |
| SNP_P4_35880_36365058 | NC_021162.1    | Ca_kabuli_chr03 | 36365058                | CC                              | TT              | 1946782145               |
| SNP_P4_35881_36365060 | NC_021162.1    | Ca_kabuli_chr03 | 36365060                | AA                              | TT              | 1946782147               |
| SNP_P4_35883_36368145 | NC_021162.1    | Ca_kabuli_chr03 | 36368145                | TT                              | GG              | 1946782149               |
| SNP_P4_35884_36369774 | NC_021162.1    | Ca_kabuli_chr03 | 36369774                | TT                              | AA              | 1946782151               |
| SNP_P4_35886_36370109 | NC_021162.1    | Ca_kabuli_chr03 | 36370109                | GG                              | CC              | 1946782154               |
| SNP_P4_35888_36371332 | NC_021162.1    | Ca_kabuli_chr03 | 36371332                | GG                              | AA              | 1946782156               |
| SNP_P4_35889_36371515 | NC_021162.1    | Ca_kabuli_chr03 | 36371515                | TT                              | AA              | 1946782158               |
| SNP_P4_35890_36371539 | NC_021162.1    | Ca_kabuli_chr03 | 36371539                | TT                              | CC              | 1946782159               |
| SNP_P4_35891_36371645 | NC_021162.1    | Ca_kabuli_chr03 | 36371645                | TT                              | GG              | 1946782161               |
| SNP_P4_35892_36371661 | NC_021162.1    | Ca_kabuli_chr03 | 36371661                | GG                              | CC              | 1946782163               |
| SNP_P4_35894_36371795 | NC_021162.1    | Ca_kabuli_chr03 | 36371795                | GG                              | AA              | 1946782165               |
| SNP_P4_35896_36371963 | NC_021162.1    | Ca_kabuli_chr03 | 36371963                | CC                              | TT              | 1946782167               |
| SNP_P4_35897_36372003 | NC_021162.1    | Ca_kabuli_chr03 | 36372003                | AA                              | GG              | 1946782169               |
| SNP_P4_35898_36372479 | NC_021162.1    | Ca_kabuli_chr03 | 36372479                | AA                              | TT              | 1946782171               |
| SNP_P4_35899_36374242 | NC_021162.1    | Ca_kabuli_chr03 | 36374242                | TT                              | GG              | 1946782173               |
| SNP_P4_35900_36374532 | NC_021162.1    | Ca_kabuli_chr03 | 36374532                | CC                              | TT              | 1946782175               |
| SNP_P4_35901_36374540 | NC_021162.1    | Ca_kabuli_chr03 | 36374540                | TT                              | CC              | 1946782178               |
| SNP_P4_35902_36374760 | NC_021162.1    | Ca_kabuli_chr03 | 36374760                | CC                              | TT              | 1946782180               |
| SNP_P4_35903_36374796 | NC_021162.1    | Ca_kabuli_chr03 | 36374796                | GG                              | TT              | 1946782182               |
| SNP_P4_35904_36374837 | NC_021162.1    | Ca_kabuli_chr03 | 36374837                | TT                              | CC              | 1946782184               |
| SNP_P4_35905_36378078 | NC_021162.1    | Ca_kabuli_chr03 | 36378078                | AA                              | GG              | 1946782186               |
| SNP_P4_35906_36379856 | NC_021162.1    | Ca_kabuli_chr03 | 36379856                | AA                              | CC              | 1946782188               |



| SNPs IDs              | Chromosome IDs | Chromosomes     | Physical positions (bp) | CDC Frontier (Reference genome) | (ILWC46 & LPNB) | NCBI SNPdb Accession IDs |
|-----------------------|----------------|-----------------|-------------------------|---------------------------------|-----------------|--------------------------|
| SNP_P4_35907_36379914 | NC_021162.1    | Ca_kabuli_chr03 | 36379914                | TT                              | CC              | 1946782190               |
| SNP_P4_35908_36380200 | NC_021162.1    | Ca_kabuli_chr03 | 36380200                | GG                              | CC              | 1946782192               |
| SNP_P4_35910_36381706 | NC_021162.1    | Ca_kabuli_chr03 | 36381706                | CC                              | GG              | 1946782194               |
| SNP_P4_35911_36381726 | NC_021162.1    | Ca_kabuli_chr03 | 36381726                | GG                              | AA              | 1946782196               |
| SNP_P4_35912_36381728 | NC_021162.1    | Ca_kabuli_chr03 | 36381728                | CC                              | TT              | 1946782198               |
| SNP_P4_35913_36381734 | NC_021162.1    | Ca_kabuli_chr03 | 36381734                | TT                              | CC              | 1946782200               |
| SNP_P4_35914_36381765 | NC_021162.1    | Ca_kabuli_chr03 | 36381765                | TT                              | CC              | 1946782202               |
| SNP_P4_35916_36381801 | NC_021162.1    | Ca_kabuli_chr03 | 36381801                | TT                              | CC              | 1946782204               |
| SNP_P4_35917_36381823 | NC_021162.1    | Ca_kabuli_chr03 | 36381823                | CC                              | TT              | 1946782206               |
| SNP_P4_35918_36381826 | NC_021162.1    | Ca_kabuli_chr03 | 36381826                | AA                              | GG              | 1946782208               |
| SNP_P4_35919_36381849 | NC_021162.1    | Ca_kabuli_chr03 | 36381849                | GG                              | AA              | 1946782210               |
| SNP_P4_35920_36381854 | NC_021162.1    | Ca_kabuli_chr03 | 36381854                | TT                              | CC              | 1946782212               |
| SNP_P4_35921_36381912 | NC_021162.1    | Ca_kabuli_chr03 | 36381912                | CC                              | GG              | 1946782214               |
| SNP_P4_35922_36382089 | NC_021162.1    | Ca_kabuli_chr03 | 36382089                | GG                              | AA              | 1946782216               |
| SNP_P4_35923_36382110 | NC_021162.1    | Ca_kabuli_chr03 | 36382110                | GG                              | TT              | 1946782218               |
| SNP_P4_35924_36382293 | NC_021162.1    | Ca_kabuli_chr03 | 36382293                | TT                              | CC              | 1946782220               |
| SNP_P4_35925_36382299 | NC_021162.1    | Ca_kabuli_chr03 | 36382299                | GG                              | AA              | 1946782222               |
| SNP_P4_35926_36382302 | NC_021162.1    | Ca_kabuli_chr03 | 36382302                | AA                              | GG              | 1946782224               |
| SNP_P4_35927_36385802 | NC_021162.1    | Ca_kabuli_chr03 | 36385802                | CC                              | TT              | 1946782226               |
| SNP_P4_35928_36385905 | NC_021162.1    | Ca_kabuli_chr03 | 36385905                | GG                              | AA              | 1946782228               |
| SNP_P4_35929_36385926 | NC_021162.1    | Ca_kabuli_chr03 | 36385926                | CC                              | AA              | 1946782230               |
| SNP_P4_35930_36385933 | NC_021162.1    | Ca_kabuli_chr03 | 36385933                | AA                              | CC              | 1946782232               |
| SNP_P4_35931_36385934 | NC_021162.1    | Ca_kabuli_chr03 | 36385934                | TT                              | CC              | 1946782234               |
| SNP_P4_35932_36386074 | NC_021162.1    | Ca_kabuli_chr03 | 36386074                | GG                              | AA              | 1946782237               |
| SNP_P4_35933_36386581 | NC_021162.1    | Ca_kabuli_chr03 | 36386581                | TT                              | CC              | 1946782239               |
| SNP_P4_35934_36387031 | NC_021162.1    | Ca_kabuli_chr03 | 36387031                | AA                              | CC              | 1946782241               |
| SNP_P4_35935_36387352 | NC_021162.1    | Ca_kabuli_chr03 | 36387352                | GG                              | CC              | 1946782243               |
| SNP_P4_35936_36387412 | NC_021162.1    | Ca_kabuli_chr03 | 36387412                | AA                              | GG              | 1946782245               |
| SNP_P4_35937_36387464 | NC_021162.1    | Ca_kabuli_chr03 | 36387464                | GG                              | TT              | 1946782247               |
| SNP_P4_35939_36387762 | NC_021162.1    | Ca_kabuli_chr03 | 36387762                | GG                              | AA              | 1946782249               |
| SNP_P4_35940_36389096 | NC_021162.1    | Ca_kabuli_chr03 | 36389096                | GG                              | AA              | 1946782251               |
| SNP_P4_35941_36389394 | NC_021162.1    | Ca_kabuli_chr03 | 36389394                | AA                              | TT              | 1946782253               |
| SNP_P4_35942_36389601 | NC_021162.1    | Ca_kabuli_chr03 | 36389601                | CC                              | AA              | 1946782255               |
| SNP_P4_35943_36392070 | NC_021162.1    | Ca_kabuli_chr03 | 36392070                | TT                              | CC              | 1946782257               |
| SNP_P4_35944_36392074 | NC_021162.1    | Ca_kabuli_chr03 | 36392074                | GG                              | TT              | 1946782259               |
| SNP_P4_35947_36392529 | NC_021162.1    | Ca_kabuli_chr03 | 36392529                | TT                              | CC              | 1946782261               |
| SNP_P4_35948_36392867 | NC_021162.1    | Ca_kabuli_chr03 | 36392867                | GG                              | AA              | 1946782263               |
| SNP_P4_35949_36397269 | NC_021162.1    | Ca_kabuli_chr03 | 36397269                | TT                              | GG              | 1946782265               |
| SNP_P4_35950_36399137 | NC_021162.1    | Ca_kabuli_chr03 | 36399137                | AA                              | GG              | 1946782267               |
| SNP_P4_35951_36399415 | NC_021162.1    | Ca_kabuli_chr03 | 36399415                | TT                              | CC              | 1946782269               |
| SNP_P4_35952_36400040 | NC_021162.1    | Ca_kabuli_chr03 | 36400040                | CC                              | AA              | 1946782271               |
| SNP_P4_35953_36400041 | NC_021162.1    | Ca_kabuli_chr03 | 36400041                | TT                              | CC              | 1946782273               |

| SNPs IDs              | Chromosome IDs | Chromosomes     | Physical positions (bp) | CDC Frontier (Reference genome) | (ILWC46 & LPNB) | NCBI SNPdb Accession IDs |
|-----------------------|----------------|-----------------|-------------------------|---------------------------------|-----------------|--------------------------|
| SNP_P4_35955_36400930 | NC_021162.1    | Ca_kabuli_chr03 | 36400930                | TT                              | CC              | 1946782275               |
| SNP_P4_35956_36401248 | NC_021162.1    | Ca_kabuli_chr03 | 36401248                | GG                              | AA              | 1946782277               |
| SNP_P4_35957_36401254 | NC_021162.1    | Ca_kabuli_chr03 | 36401254                | GG                              | AA              | 1946782279               |
| SNP_P4_35958_36403077 | NC_021162.1    | Ca_kabuli_chr03 | 36403077                | AA                              | GG              | 1946782281               |
| SNP_P4_35959_36403086 | NC_021162.1    | Ca_kabuli_chr03 | 36403086                | TT                              | GG              | 1946782284               |
| SNP_P4_35960_36403373 | NC_021162.1    | Ca_kabuli_chr03 | 36403373                | AA                              | CC              | 1946782286               |
| SNP_P4_35961_36403379 | NC_021162.1    | Ca_kabuli_chr03 | 36403379                | GG                              | AA              | 1946782288               |
| SNP_P4_35962_36403413 | NC_021162.1    | Ca_kabuli_chr03 | 36403413                | TT                              | CC              | 1946782290               |
| SNP_P4_35963_36403423 | NC_021162.1    | Ca_kabuli_chr03 | 36403423                | AA                              | GG              | 1946782292               |
| SNP_P4_35964_36403444 | NC_021162.1    | Ca_kabuli_chr03 | 36403444                | TT                              | CC              | 1946782294               |
| SNP_P4_35965_36403551 | NC_021162.1    | Ca_kabuli_chr03 | 36403551                | AA                              | GG              | 1946782296               |
| SNP_P4_35967_36403586 | NC_021162.1    | Ca_kabuli_chr03 | 36403586                | AA                              | GG              | 1946782298               |
| SNP_P4_35968_36403643 | NC_021162.1    | Ca_kabuli_chr03 | 36403643                | GG                              | AA              | 1946782300               |
| SNP_P4_35969_36403656 | NC_021162.1    | Ca_kabuli_chr03 | 36403656                | GG                              | AA              | 1946782302               |
| SNP_P4_35970_36403726 | NC_021162.1    | Ca_kabuli_chr03 | 36403726                | TT                              | GG              | 1946782304               |
| SNP_P4_35971_36403750 | NC_021162.1    | Ca_kabuli_chr03 | 36403750                | TT                              | GG              | 1946782307               |
| SNP_P4_35972_36403926 | NC_021162.1    | Ca_kabuli_chr03 | 36403926                | AA                              | GG              | 1946782309               |
| SNP_P4_35973_36403952 | NC_021162.1    | Ca_kabuli_chr03 | 36403952                | TT                              | CC              | 1946782311               |
| SNP_P4_35975_36404601 | NC_021162.1    | Ca_kabuli_chr03 | 36404601                | CC                              | TT              | 1946782313               |
| SNP_P4_35976_36404908 | NC_021162.1    | Ca_kabuli_chr03 | 36404908                | GG                              | AA              | 1946782315               |
| SNP_P4_35977_36405245 | NC_021162.1    | Ca_kabuli_chr03 | 36405245                | GG                              | CC              | 1946782316               |
| SNP_P4_35978_36410759 | NC_021162.1    | Ca_kabuli_chr03 | 36410759                | AA                              | GG              | 1946782318               |
| SNP_P4_35979_36410761 | NC_021162.1    | Ca_kabuli_chr03 | 36410761                | CC                              | AA              | 1946782320               |
| SNP_P4_35980_36412292 | NC_021162.1    | Ca_kabuli_chr03 | 36412292                | CC                              | AA              | 1946782322               |
| SNP_P4_35982_36412835 | NC_021162.1    | Ca_kabuli_chr03 | 36412835                | TT                              | GG              | 1946782324               |
| SNP_P4_35983_36412852 | NC_021162.1    | Ca_kabuli_chr03 | 36412852                | TT                              | CC              | 1946782326               |
| SNP_P4_35984_36413350 | NC_021162.1    | Ca_kabuli_chr03 | 36413350                | CC                              | AA              | 1946782328               |
| SNP_P4_35985_36413801 | NC_021162.1    | Ca_kabuli_chr03 | 36413801                | TT                              | CC              | 1946782330               |
| SNP_P4_35987_36414988 | NC_021162.1    | Ca_kabuli_chr03 | 36414988                | TT                              | GG              | 1946782332               |
| SNP_P4_35988_36415012 | NC_021162.1    | Ca_kabuli_chr03 | 36415012                | AA                              | GG              | 1946782334               |
| SNP_P4_35990_36415428 | NC_021162.1    | Ca_kabuli_chr03 | 36415428                | GG                              | AA              | 1946782336               |
| SNP_P4_35991_36415438 | NC_021162.1    | Ca_kabuli_chr03 | 36415438                | AA                              | CC              | 1946782338               |
| SNP_P4_35992_36416393 | NC_021162.1    | Ca_kabuli_chr03 | 36416393                | GG                              | AA              | 1946782340               |
| SNP_P4_35994_36416652 | NC_021162.1    | Ca_kabuli_chr03 | 36416652                | AA                              | GG              | 1946782342               |
| SNP_P4_35995_36416710 | NC_021162.1    | Ca_kabuli_chr03 | 36416710                | AA                              | GG              | 1946782344               |
| SNP_P4_35996_36416732 | NC_021162.1    | Ca_kabuli_chr03 | 36416732                | GG                              | AA              | 1946782346               |
| SNP_P4_35997_36417057 | NC_021162.1    | Ca_kabuli_chr03 | 36417057                | GG                              | AA              | 1946782348               |
| SNP_P4_35998_36419464 | NC_021162.1    | Ca_kabuli_chr03 | 36419464                | TT                              | CC              | 1946782350               |
| SNP_P4_35999_36419471 | NC_021162.1    | Ca_kabuli_chr03 | 36419471                | CC                              | GG              | 1946782352               |
| SNP_P4_36000_36419477 | NC_021162.1    | Ca_kabuli_chr03 | 36419477                | GG                              | CC              | 1946782354               |
| SNP_P4_36001_36419500 | NC_021162.1    | Ca_kabuli_chr03 | 36419500                | TT                              | CC              | 1946782356               |
| SNP_P4_36002_36419609 | NC_021162.1    | Ca_kabuli_chr03 | 36419609                | TT                              | CC              | 1946782358               |

| SNPs IDs              | Chromosome IDs | Chromosomes     | Physical positions (bp) | CDC Frontier (Reference genome) | (ILWC46 & LPNB) | NCBI SNPdb Accession IDs |
|-----------------------|----------------|-----------------|-------------------------|---------------------------------|-----------------|--------------------------|
| SNP_P4_36003_36419675 | NC_021162.1    | Ca_kabuli_chr03 | 36419675                | CC                              | TT              | 1946782360               |
| SNP_P4_36004_36419716 | NC_021162.1    | Ca_kabuli_chr03 | 36419716                | CC                              | TT              | 1946782363               |
| SNP_P4_36005_36419732 | NC_021162.1    | Ca_kabuli_chr03 | 36419732                | GG                              | AA              | 1946782365               |
| SNP_P4_36006_36419740 | NC_021162.1    | Ca_kabuli_chr03 | 36419740                | TT                              | CC              | 1946782367               |
| SNP_P4_36007_36419757 | NC_021162.1    | Ca_kabuli_chr03 | 36419757                | CC                              | TT              | 1946782369               |
| SNP_P4_36009_36419919 | NC_021162.1    | Ca_kabuli_chr03 | 36419919                | AA                              | GG              | 1946782371               |
| SNP_P4_36010_36419925 | NC_021162.1    | Ca_kabuli_chr03 | 36419925                | AA                              | GG              | 1946782373               |
| SNP_P4_36011_36419949 | NC_021162.1    | Ca_kabuli_chr03 | 36419949                | CC                              | TT              | 1946782375               |
| SNP_P4_36012_36419950 | NC_021162.1    | Ca_kabuli_chr03 | 36419950                | AA                              | GG              | 1946782377               |
| SNP_P4_36013_36420013 | NC_021162.1    | Ca_kabuli_chr03 | 36420013                | TT                              | CC              | 1946782379               |
| SNP_P4_36014_36420015 | NC_021162.1    | Ca_kabuli_chr03 | 36420015                | AA                              | GG              | 1946782381               |
| SNP_P4_36017_36420412 | NC_021162.1    | Ca_kabuli_chr03 | 36420412                | CC                              | GG              | 1946782383               |
| SNP_P4_36018_36420670 | NC_021162.1    | Ca_kabuli_chr03 | 36420670                | GG                              | AA              | 1946782385               |
| SNP_P4_36020_36421226 | NC_021162.1    | Ca_kabuli_chr03 | 36421226                | TT                              | CC              | 1946782387               |
| SNP_P4_36021_36421979 | NC_021162.1    | Ca_kabuli_chr03 | 36421979                | GG                              | AA              | 1946782389               |
| SNP_P4_36022_36422053 | NC_021162.1    | Ca_kabuli_chr03 | 36422053                | CC                              | AA              | 1946782391               |
| SNP_P4_36023_36422628 | NC_021162.1    | Ca_kabuli_chr03 | 36422628                | GG                              | AA              | 1946782393               |
| SNP_P4_36024_36422696 | NC_021162.1    | Ca_kabuli_chr03 | 36422696                | AA                              | TT              | 1946782395               |
| SNP_P4_36025_36424067 | NC_021162.1    | Ca_kabuli_chr03 | 36424067                | AA                              | GG              | 1946782397               |
| SNP_P4_36029_36430342 | NC_021162.1    | Ca_kabuli_chr03 | 36430342                | TT                              | CC              | 1946782399               |
| SNP_P4_36030_36430507 | NC_021162.1    | Ca_kabuli_chr03 | 36430507                | TT                              | CC              | 1946782401               |
| SNP_P4_36031_36430584 | NC_021162.1    | Ca_kabuli_chr03 | 36430584                | CC                              | TT              | 1946782404               |
| SNP_P4_36032_36431901 | NC_021162.1    | Ca_kabuli_chr03 | 36431901                | TT                              | CC              | 1946782406               |
| SNP_P4_36034_36432591 | NC_021162.1    | Ca_kabuli_chr03 | 36432591                | TT                              | AA              | 1946782408               |
| SNP_P4_36036_36432762 | NC_021162.1    | Ca_kabuli_chr03 | 36432762                | TT                              | CC              | 1946782410               |
| SNP_P4_36037_36432784 | NC_021162.1    | Ca_kabuli_chr03 | 36432784                | AA                              | CC              | 1946782412               |
| SNP_P4_36038_36433217 | NC_021162.1    | Ca_kabuli_chr03 | 36433217                | TT                              | CC              | 1946782414               |
| SNP_P4_36039_36433534 | NC_021162.1    | Ca_kabuli_chr03 | 36433534                | TT                              | CC              | 1946782416               |
| SNP_P4_36040_36437338 | NC_021162.1    | Ca_kabuli_chr03 | 36437338                | GG                              | AA              | 1946782418               |
| SNP_P4_36041_36437630 | NC_021162.1    | Ca_kabuli_chr03 | 36437630                | GG                              | TT              | 1946782420               |
| SNP_P4_36042_36438656 | NC_021162.1    | Ca_kabuli_chr03 | 36438656                | TT                              | CC              | 1946782422               |
| SNP_P4_36043_36438974 | NC_021162.1    | Ca_kabuli_chr03 | 36438974                | AA                              | CC              | 1946782424               |
| SNP_P4_36044_36439025 | NC_021162.1    | Ca_kabuli_chr03 | 36439025                | CC                              | TT              | 1946782426               |
| SNP_P4_36045_36439074 | NC_021162.1    | Ca_kabuli_chr03 | 36439074                | CC                              | TT              | 1946782428               |
| SNP_P4_36046_36439280 | NC_021162.1    | Ca_kabuli_chr03 | 36439280                | AA                              | CC              | 1946782430               |
| SNP_P4_36047_36440093 | NC_021162.1    | Ca_kabuli_chr03 | 36440093                | GG                              | TT              | 1946782433               |
| SNP_P4_36048_36440156 | NC_021162.1    | Ca_kabuli_chr03 | 36440156                | AA                              | GG              | 1946782435               |
| SNP_P4_36049_36440168 | NC_021162.1    | Ca_kabuli_chr03 | 36440168                | TT                              | CC              | 1946782438               |
| SNP_P4_36050_36440266 | NC_021162.1    | Ca_kabuli_chr03 | 36440266                | CC                              | AA              | 1946782440               |
| SNP_P4_36051_36440278 | NC_021162.1    | Ca_kabuli_chr03 | 36440278                | GG                              | AA              | 1946782443               |
| SNP_P4_36052_36440282 | NC_021162.1    | Ca_kabuli_chr03 | 36440282                | TT                              | GG              | 1946782445               |
| SNP_P4_36053_36440295 | NC_021162.1    | Ca_kabuli_chr03 | 36440295                | AA                              | GG              | 1946782447               |

| SNPs IDs              | Chromosome IDs | Chromosomes     | Physical positions (bp) | CDC Frontier (Reference genome) | (ILWC46 & LPNB) | NCBI SNPdb Accession IDs |
|-----------------------|----------------|-----------------|-------------------------|---------------------------------|-----------------|--------------------------|
| SNP_P4_36054_36440325 | NC_021162.1    | Ca_kabuli_chr03 | 36440325                | AA                              | GG              | 1946782449               |
| SNP_P4_36055_36440495 | NC_021162.1    | Ca_kabuli_chr03 | 36440495                | AA                              | GG              | 1946782451               |
| SNP_P4_36056_36440658 | NC_021162.1    | Ca_kabuli_chr03 | 36440658                | AA                              | GG              | 1946782453               |
| SNP_P4_36057_36440691 | NC_021162.1    | Ca_kabuli_chr03 | 36440691                | TT                              | CC              | 1946782455               |
| SNP_P4_36058_36440715 | NC_021162.1    | Ca_kabuli_chr03 | 36440715                | AA                              | GG              | 1946782458               |
| SNP_P4_36059_36440832 | NC_021162.1    | Ca_kabuli_chr03 | 36440832                | AA                              | GG              | 1946782460               |
| SNP_P4_36060_36441106 | NC_021162.1    | Ca_kabuli_chr03 | 36441106                | TT                              | AA              | 1946782462               |
| SNP_P4_36061_36442468 | NC_021162.1    | Ca_kabuli_chr03 | 36442468                | AA                              | GG              | 1946782464               |
| SNP_P4_36062_36443225 | NC_021162.1    | Ca_kabuli_chr03 | 36443225                | GG                              | AA              | 1946782466               |
| SNP_P4_36063_36444230 | NC_021162.1    | Ca_kabuli_chr03 | 36444230                | CC                              | GG              | 1946782468               |
| SNP_P4_36064_36444401 | NC_021162.1    | Ca_kabuli_chr03 | 36444401                | CC                              | TT              | 1946782470               |
| SNP_P4_36065_36444443 | NC_021162.1    | Ca_kabuli_chr03 | 36444443                | GG                              | AA              | 1946782472               |
| SNP_P4_36067_36444774 | NC_021162.1    | Ca_kabuli_chr03 | 36444774                | TT                              | CC              | 1946782474               |
| SNP_P4_36068_36445039 | NC_021162.1    | Ca_kabuli_chr03 | 36445039                | TT                              | AA              | 1946782476               |
| SNP_P4_36069_36445062 | NC_021162.1    | Ca_kabuli_chr03 | 36445062                | AA                              | CC              | 1946782479               |
| SNP_P4_36071_36445915 | NC_021162.1    | Ca_kabuli_chr03 | 36445915                | TT                              | AA              | 1946782481               |
| SNP_P4_36072_36446102 | NC_021162.1    | Ca_kabuli_chr03 | 36446102                | AA                              | TT              | 1946782483               |
| SNP_P4_36073_36446106 | NC_021162.1    | Ca_kabuli_chr03 | 36446106                | TT                              | AA              | 1946782485               |
| SNP_P4_36074_36446112 | NC_021162.1    | Ca_kabuli_chr03 | 36446112                | AA                              | TT              | 1946782487               |
| SNP_P4_36075_36446117 | NC_021162.1    | Ca_kabuli_chr03 | 36446117                | AA                              | GG              | 1946782489               |
| SNP_P4_36077_36446769 | NC_021162.1    | Ca_kabuli_chr03 | 36446769                | AA                              | TT              | 1946782491               |
| SNP_P4_36078_36447120 | NC_021162.1    | Ca_kabuli_chr03 | 36447120                | TT                              | AA              | 1946782493               |
| SNP_P4_36079_36447122 | NC_021162.1    | Ca_kabuli_chr03 | 36447122                | CC                              | GG              | 1946782496               |
| SNP_P4_36080_36447129 | NC_021162.1    | Ca_kabuli_chr03 | 36447129                | CC                              | TT              | 1946782498               |
| SNP_P4_36082_36447274 | NC_021162.1    | Ca_kabuli_chr03 | 36447274                | GG                              | AA              | 1946782501               |
| SNP_P4_36083_36447666 | NC_021162.1    | Ca_kabuli_chr03 | 36447666                | AA                              | TT              | 1946782503               |
| SNP_P4_36084_36447733 | NC_021162.1    | Ca_kabuli_chr03 | 36447733                | AA                              | GG              | 1946782505               |
| SNP_P4_36085_36448355 | NC_021162.1    | Ca_kabuli_chr03 | 36448355                | AA                              | CC              | 1946782507               |
| SNP_P4_36086_36448556 | NC_021162.1    | Ca_kabuli_chr03 | 36448556                | GG                              | AA              | 1946782509               |
| SNP_P4_36090_36448792 | NC_021162.1    | Ca_kabuli_chr03 | 36448792                | GG                              | CC              | 1946782511               |
| SNP_P4_36091_36449623 | NC_021162.1    | Ca_kabuli_chr03 | 36449623                | CC                              | AA              | 1946782513               |
| SNP_P4_36092_36450362 | NC_021162.1    | Ca_kabuli_chr03 | 36450362                | TT                              | GG              | 1946782515               |
| SNP_P4_36093_36456323 | NC_021162.1    | Ca_kabuli_chr03 | 36456323                | TT                              | AA              | 1946782517               |
| SNP_P4_36094_36475114 | NC_021162.1    | Ca_kabuli_chr03 | 36475114                | GG                              | AA              | 1946782519               |
| SNP_P4_36095_36475811 | NC_021162.1    | Ca_kabuli_chr03 | 36475811                | AA                              | CC              | 1946782521               |
| SNP_P4_36096_36475872 | NC_021162.1    | Ca_kabuli_chr03 | 36475872                | TT                              | CC              | 1946782523               |
| SNP_P4_36097_36476413 | NC_021162.1    | Ca_kabuli_chr03 | 36476413                | TT                              | GG              | 1946782525               |
| SNP_P4_36098_36476535 | NC_021162.1    | Ca_kabuli_chr03 | 36476535                | TT                              | GG              | 1946782527               |
| SNP_P4_36100_36483110 | NC_021162.1    | Ca_kabuli_chr03 | 36483110                | TT                              | CC              | 1946782529               |
| SNP_P4_36101_36483794 | NC_021162.1    | Ca_kabuli_chr03 | 36483794                | CC                              | TT              | 1946782531               |
| SNP_P4_36105_36518481 | NC_021162.1    | Ca_kabuli_chr03 | 36518481                | AA                              | TT              | 1946782533               |
| SNP_P4_36107_36533121 | NC_021162.1    | Ca_kabuli_chr03 | 36533121                | AA                              | CC              | 1946782535               |

| SNPs IDs              | Chromosome IDs | Chromosomes     | Physical positions (bp) | CDC Frontier (Reference genome) | (ILWC46 & LPNB) | NCBI SNPdb Accession IDs |
|-----------------------|----------------|-----------------|-------------------------|---------------------------------|-----------------|--------------------------|
| SNP_P4_36108_36545298 | NC_021162.1    | Ca_kabuli_chr03 | 36545298                | GG                              | AA              | 1946782537               |
| SNP_P4_36109_36545621 | NC_021162.1    | Ca_kabuli_chr03 | 36545621                | TT                              | GG              | 1946782540               |
| SNP_P4_36110_36554821 | NC_021162.1    | Ca_kabuli_chr03 | 36554821                | GG                              | AA              | 1946782542               |
| SNP_P4_36111_36565195 | NC_021162.1    | Ca_kabuli_chr03 | 36565195                | GG                              | AA              | 1946782544               |
| SNP_P4_36112_36580553 | NC_021162.1    | Ca_kabuli_chr03 | 36580553                | AA                              | GG              | 1946782546               |
| SNP_P4_36113_36596015 | NC_021162.1    | Ca_kabuli_chr03 | 36596015                | TT                              | CC              | 1946782548               |
| SNP_P4_36114_36596017 | NC_021162.1    | Ca_kabuli_chr03 | 36596017                | TT                              | GG              | 1946782550               |
| SNP_P4_36115_36613808 | NC_021162.1    | Ca_kabuli_chr03 | 36613808                | TT                              | GG              | 1946782552               |
| SNP_P4_36116_36637601 | NC_021162.1    | Ca_kabuli_chr03 | 36637601                | GG                              | AA              | 1946782554               |
| SNP_P4_36117_36638102 | NC_021162.1    | Ca_kabuli_chr03 | 36638102                | CC                              | TT              | 1946782556               |
| SNP_P4_36119_36639214 | NC_021162.1    | Ca_kabuli_chr03 | 36639214                | AA                              | TT              | 1946782558               |
| SNP_P4_36120_36642488 | NC_021162.1    | Ca_kabuli_chr03 | 36642488                | CC                              | TT              | 1946782560               |
| SNP_P4_36121_36658890 | NC_021162.1    | Ca_kabuli_chr03 | 36658890                | TT                              | AA              | 1946782562               |
| SNP_P4_36123_36673647 | NC_021162.1    | Ca_kabuli_chr03 | 36673647                | CC                              | TT              | 1946782564               |
| SNP_P4_36124_36693503 | NC_021162.1    | Ca_kabuli_chr03 | 36693503                | CC                              | TT              | 1946782566               |
| SNP_P4_36125_36699805 | NC_021162.1    | Ca_kabuli_chr03 | 36699805                | GG                              | AA              | 1946782568               |
| SNP_P4_36126_36704216 | NC_021162.1    | Ca_kabuli_chr03 | 36704216                | GG                              | TT              | 1946782570               |
| SNP_P4_36127_36706225 | NC_021162.1    | Ca_kabuli_chr03 | 36706225                | TT                              | CC              | 1946782572               |
| SNP_P4_36128_36714043 | NC_021162.1    | Ca_kabuli_chr03 | 36714043                | AA                              | GG              | 1946782575               |
| SNP_P4_36129_36738475 | NC_021162.1    | Ca_kabuli_chr03 | 36738475                | GG                              | CC              | 1946782578               |
| SNP_P4_36131_36745118 | NC_021162.1    | Ca_kabuli_chr03 | 36745118                | TT                              | GG              | 1946782580               |
| SNP_P4_36132_36746779 | NC_021162.1    | Ca_kabuli_chr03 | 36746779                | CC                              | TT              | 1946782582               |
| SNP_P4_36133_36756726 | NC_021162.1    | Ca_kabuli_chr03 | 36756726                | GG                              | CC              | 1946782584               |
| SNP_P4_36134_36762313 | NC_021162.1    | Ca_kabuli_chr03 | 36762313                | GG                              | TT              | 1946782586               |
| SNP_P4_36135_36771191 | NC_021162.1    | Ca_kabuli_chr03 | 36771191                | CC                              | TT              | 1946782588               |
| SNP_P4_36136_36815168 | NC_021162.1    | Ca_kabuli_chr03 | 36815168                | TT                              | CC              | 1946782590               |
| SNP_P4_36137_36818074 | NC_021162.1    | Ca_kabuli_chr03 | 36818074                | CC                              | TT              | 1946782592               |
| SNP_P4_36138_36827674 | NC_021162.1    | Ca_kabuli_chr03 | 36827674                | TT                              | CC              | 1946782595               |
| SNP_P4_36139_36827678 | NC_021162.1    | Ca_kabuli_chr03 | 36827678                | TT                              | GG              | 1946782597               |
| SNP_P4_36141_36845456 | NC_021162.1    | Ca_kabuli_chr03 | 36845456                | GG                              | AA              | 1946782599               |
| SNP_P4_36143_36872943 | NC_021162.1    | Ca_kabuli_chr03 | 36872943                | TT                              | GG              | 1946782601               |
| SNP_P4_36144_36898002 | NC_021162.1    | Ca_kabuli_chr03 | 36898002                | GG                              | TT              | 1946782604               |
| SNP_P4_36146_36937312 | NC_021162.1    | Ca_kabuli_chr03 | 36937312                | TT                              | AA              | 1946782606               |
| SNP_P4_36147_36937327 | NC_021162.1    | Ca_kabuli_chr03 | 36937327                | TT                              | GG              | 1946782608               |
| SNP_P4_36148_36942005 | NC_021162.1    | Ca_kabuli_chr03 | 36942005                | CC                              | AA              | 1946782610               |
| SNP_P4_36149_36942006 | NC_021162.1    | Ca_kabuli_chr03 | 36942006                | AA                              | TT              | 1946782612               |
| SNP_P4_36150_36968988 | NC_021162.1    | Ca_kabuli_chr03 | 36968988                | GG                              | AA              | 1946782614               |
| SNP_P4_36151_36984582 | NC_021162.1    | Ca_kabuli_chr03 | 36984582                | TT                              | AA              | 1946782616               |
| SNP_P4_36152_36985776 | NC_021162.1    | Ca_kabuli_chr03 | 36985776                | CC                              | AA              | 1946782618               |
| SNP_P4_36154_36989013 | NC_021162.1    | Ca_kabuli_chr03 | 36989013                | AA                              | TT              | 1946782620               |
| SNP_P4_36156_37014682 | NC_021162.1    | Ca_kabuli_chr03 | 37014682                | AA                              | GG              | 1946782622               |
| SNP_P4_36158_37026533 | NC_021162.1    | Ca_kabuli_chr03 | 37026533                | CC                              | TT              | 1946782624               |

| SNPs IDs              | Chromosome IDs | Chromosomes     | Physical positions (bp) | CDC Frontier (Reference genome) | (ILWC46 & LPNB) | NCBI SNPdb Accession IDs |
|-----------------------|----------------|-----------------|-------------------------|---------------------------------|-----------------|--------------------------|
| SNP_P4_36159_37026538 | NC_021162.1    | Ca_kabuli_chr03 | 37026538                | TT                              | AA              | 1946782627               |
| SNP_P4_36161_37043961 | NC_021162.1    | Ca_kabuli_chr03 | 37043961                | AA                              | GG              | 1946782629               |
| SNP_P4_36163_37128186 | NC_021162.1    | Ca_kabuli_chr03 | 37128186                | CC                              | TT              | 1946782633               |
| SNP_P4_36164_37133206 | NC_021162.1    | Ca_kabuli_chr03 | 37133206                | AA                              | GG              | 1946782635               |
| SNP_P4_36165_37133544 | NC_021162.1    | Ca_kabuli_chr03 | 37133544                | CC                              | TT              | 1946782638               |
| SNP_P4_36166_37149694 | NC_021162.1    | Ca_kabuli_chr03 | 37149694                | TT                              | CC              | 1946782640               |
| SNP_P4_36168_37180770 | NC_021162.1    | Ca_kabuli_chr03 | 37180770                | AA                              | CC              | 1946782642               |
| SNP_P4_36169_37182310 | NC_021162.1    | Ca_kabuli_chr03 | 37182310                | TT                              | AA              | 1946782644               |
| SNP_P4_36170_37184895 | NC_021162.1    | Ca_kabuli_chr03 | 37184895                | AA                              | TT              | 1946782646               |
| SNP_P4_36174_37224785 | NC_021162.1    | Ca_kabuli_chr03 | 37224785                | AA                              | TT              | 1946782648               |
| SNP_P4_36175_37231146 | NC_021162.1    | Ca_kabuli_chr03 | 37231146                | TT                              | AA              | 1946782651               |
| SNP_P4_36176_37238131 | NC_021162.1    | Ca_kabuli_chr03 | 37238131                | TT                              | AA              | 1946782653               |
| SNP_P4_36178_37245624 | NC_021162.1    | Ca_kabuli_chr03 | 37245624                | AA                              | TT              | 1946782655               |
| SNP_P4_36179_37247804 | NC_021162.1    | Ca_kabuli_chr03 | 37247804                | AA                              | CC              | 1946782657               |
| SNP_P4_36180_37255763 | NC_021162.1    | Ca_kabuli_chr03 | 37255763                | TT                              | AA              | 1946782659               |
| SNP_P4_36181_37259203 | NC_021162.1    | Ca_kabuli_chr03 | 37259203                | TT                              | CC              | 1946782661               |
| SNP_P4_36182_37348037 | NC_021162.1    | Ca_kabuli_chr03 | 37348037                | TT                              | AA              | 1946782663               |
| SNP_P4_36183_37348040 | NC_021162.1    | Ca_kabuli_chr03 | 37348040                | AA                              | CC              | 1946782666               |
| SNP_P4_36184_37349467 | NC_021162.1    | Ca_kabuli_chr03 | 37349467                | AA                              | GG              | 1946782668               |
| SNP_P4_36186_37365740 | NC_021162.1    | Ca_kabuli_chr03 | 37365740                | GG                              | AA              | 1946782670               |
| SNP_P4_36187_37366065 | NC_021162.1    | Ca_kabuli_chr03 | 37366065                | TT                              | GG              | 1946782672               |
| SNP_P4_36188_37367472 | NC_021162.1    | Ca_kabuli_chr03 | 37367472                | TT                              | CC              | 1946782674               |
| SNP_P4_36191_37394790 | NC_021162.1    | Ca_kabuli_chr03 | 37394790                | AA                              | GG              | 1946782677               |
| SNP_P4_36192_37396163 | NC_021162.1    | Ca_kabuli_chr03 | 37396163                | TT                              | CC              | 1946782679               |
| SNP_P4_36194_37409331 | NC_021162.1    | Ca_kabuli_chr03 | 37409331                | CC                              | TT              | 1946782681               |
| SNP_P4_36195_37409399 | NC_021162.1    | Ca_kabuli_chr03 | 37409399                | GG                              | AA              | 1946782683               |
| SNP_P4_36197_37454456 | NC_021162.1    | Ca_kabuli_chr03 | 37454456                | TT                              | AA              | 1946782685               |
| SNP_P4_36198_37484401 | NC_021162.1    | Ca_kabuli_chr03 | 37484401                | GG                              | AA              | 1946782688               |
| SNP_P4_36200_37487034 | NC_021162.1    | Ca_kabuli_chr03 | 37487034                | GG                              | TT              | 1946782690               |
| SNP_P4_36201_37492313 | NC_021162.1    | Ca_kabuli_chr03 | 37492313                | TT                              | AA              | 1946782692               |
| SNP_P4_36202_37502257 | NC_021162.1    | Ca_kabuli_chr03 | 37502257                | CC                              | TT              | 1946782694               |
| SNP_P4_36203_37519659 | NC_021162.1    | Ca_kabuli_chr03 | 37519659                | AA                              | TT              | 1946782696               |
| SNP_P4_36204_37519660 | NC_021162.1    | Ca_kabuli_chr03 | 37519660                | AA                              | TT              | 1946782698               |
| SNP_P4_36206_37613636 | NC_021162.1    | Ca_kabuli_chr03 | 37613636                | CC                              | TT              | 1946782700               |
| SNP_P4_36207_37704613 | NC_021162.1    | Ca_kabuli_chr03 | 37704613                | AA                              | GG              | 1946782703               |
| SNP_P4_36208_37704714 | NC_021162.1    | Ca_kabuli_chr03 | 37704714                | CC                              | TT              | 1946782705               |
| SNP_P4_36209_37718173 | NC_021162.1    | Ca_kabuli_chr03 | 37718173                | CC                              | TT              | 1946782707               |
| SNP_P4_36210_37718792 | NC_021162.1    | Ca_kabuli_chr03 | 37718792                | TT                              | CC              | 1946782709               |
| SNP_P4_36211_37718844 | NC_021162.1    | Ca_kabuli_chr03 | 37718844                | AA                              | GG              | 1946782711               |
| SNP_P4_36212_37718862 | NC_021162.1    | Ca_kabuli_chr03 | 37718862                | GG                              | AA              | 1946782713               |
| SNP_P4_36213_37718909 | NC_021162.1    | Ca_kabuli_chr03 | 37718909                | TT                              | AA              | 1946782715               |
| SNP_P4_36215_37719632 | NC_021162.1    | Ca_kabuli_chr03 | 37719632                | GG                              | AA              | 1946782717               |

| SNPs IDs              | Chromosome IDs | Chromosomes     | Physical positions (bp) | CDC Frontier (Reference genome) | (ILWC46 & LPNB) | NCBI SNPdb Accession IDs |
|-----------------------|----------------|-----------------|-------------------------|---------------------------------|-----------------|--------------------------|
| SNP_P4_36216_37719635 | NC_021162.1    | Ca_kabuli_chr03 | 37719635                | TT                              | AA              | 1946782719               |
| SNP_P4_36217_37719653 | NC_021162.1    | Ca_kabuli_chr03 | 37719653                | TT                              | CC              | 1946782722               |
| SNP_P4_36218_37721295 | NC_021162.1    | Ca_kabuli_chr03 | 37721295                | TT                              | AA              | 1946782724               |
| SNP_P4_36219_37724976 | NC_021162.1    | Ca_kabuli_chr03 | 37724976                | GG                              | AA              | 1946782726               |
| SNP_P4_36220_37727104 | NC_021162.1    | Ca_kabuli_chr03 | 37727104                | GG                              | AA              | 1946782728               |
| SNP_P4_36221_37727135 | NC_021162.1    | Ca_kabuli_chr03 | 37727135                | AA                              | GG              | 1946782730               |
| SNP_P4_36222_37727226 | NC_021162.1    | Ca_kabuli_chr03 | 37727226                | AA                              | TT              | 1946782732               |
| SNP_P4_36223_37727230 | NC_021162.1    | Ca_kabuli_chr03 | 37727230                | TT                              | GG              | 1946782734               |
| SNP_P4_36224_37727232 | NC_021162.1    | Ca_kabuli_chr03 | 37727232                | AA                              | TT              | 1946782737               |
| SNP_P4_36225_37727529 | NC_021162.1    | Ca_kabuli_chr03 | 37727529                | TT                              | AA              | 1946782738               |
| SNP_P4_36226_37732805 | NC_021162.1    | Ca_kabuli_chr03 | 37732805                | AA                              | CC              | 1946782739               |
| SNP_P4_36228_37741378 | NC_021162.1    | Ca_kabuli_chr03 | 37741378                | TT                              | AA              | 1946782740               |
| SNP_P4_36229_37743751 | NC_021162.1    | Ca_kabuli_chr03 | 37743751                | CC                              | GG              | 1946782741               |
| SNP_P4_36230_37743754 | NC_021162.1    | Ca_kabuli_chr03 | 37743754                | GG                              | AA              | 1946782742               |
| SNP_P4_36232_37764232 | NC_021162.1    | Ca_kabuli_chr03 | 37764232                | GG                              | AA              | 1946782744               |
| SNP_P4_36233_37764242 | NC_021162.1    | Ca_kabuli_chr03 | 37764242                | TT                              | CC              | 1946782746               |
| SNP_P4_36234_37764353 | NC_021162.1    | Ca_kabuli_chr03 | 37764353                | TT                              | CC              | 1946782749               |
| SNP_P4_36235_37764530 | NC_021162.1    | Ca_kabuli_chr03 | 37764530                | AA                              | GG              | 1946782751               |
| SNP_P4_36236_37764631 | NC_021162.1    | Ca_kabuli_chr03 | 37764631                | TT                              | CC              | 1946782753               |
| SNP_P4_36237_37765265 | NC_021162.1    | Ca_kabuli_chr03 | 37765265                | AA                              | GG              | 1946782755               |
| SNP_P4_36238_37765269 | NC_021162.1    | Ca_kabuli_chr03 | 37765269                | TT                              | CC              | 1946782757               |
| SNP_P4_36239_37765415 | NC_021162.1    | Ca_kabuli_chr03 | 37765415                | AA                              | CC              | 1946782759               |
| SNP_P4_36240_37768893 | NC_021162.1    | Ca_kabuli_chr03 | 37768893                | TT                              | CC              | 1946782761               |
| SNP_P4_36241_37769383 | NC_021162.1    | Ca_kabuli_chr03 | 37769383                | TT                              | GG              | 1946782763               |
| SNP_P4_36242_37784996 | NC_021162.1    | Ca_kabuli_chr03 | 37784996                | CC                              | GG              | 1946782765               |
| SNP_P4_36243_37793942 | NC_021162.1    | Ca_kabuli_chr03 | 37793942                | AA                              | TT              | 1946782767               |
| SNP_P4_36244_37793943 | NC_021162.1    | Ca_kabuli_chr03 | 37793943                | AA                              | GG              | 1946782769               |
| SNP_P4_36245_37808276 | NC_021162.1    | Ca_kabuli_chr03 | 37808276                | TT                              | AA              | 1946782771               |
| SNP_P4_36246_37808282 | NC_021162.1    | Ca_kabuli_chr03 | 37808282                | AA                              | TT              | 1946782773               |
| SNP_P4_36247_37808284 | NC_021162.1    | Ca_kabuli_chr03 | 37808284                | CC                              | TT              | 1946782775               |
| SNP_P4_36248_37811339 | NC_021162.1    | Ca_kabuli_chr03 | 37811339                | GG                              | TT              | 1946782777               |
| SNP_P4_36250_37853449 | NC_021162.1    | Ca_kabuli_chr03 | 37853449                | AA                              | GG              | 1946782780               |
| SNP_P4_36251_37859803 | NC_021162.1    | Ca_kabuli_chr03 | 37859803                | CC                              | AA              | 1946782782               |
| SNP_P4_36253_37884343 | NC_021162.1    | Ca_kabuli_chr03 | 37884343                | GG                              | AA              | 1946782784               |
| SNP_P4_36254_37896137 | NC_021162.1    | Ca_kabuli_chr03 | 37896137                | TT                              | CC              | 1946782787               |
| SNP_P4_36255_37900347 | NC_021162.1    | Ca_kabuli_chr03 | 37900347                | GG                              | AA              | 1946782789               |
| SNP_P4_36256_37900602 | NC_021162.1    | Ca_kabuli_chr03 | 37900602                | TT                              | CC              | 1946782791               |
| SNP_P4_36257_37904577 | NC_021162.1    | Ca_kabuli_chr03 | 37904577                | TT                              | CC              | 1946782793               |
| SNP_P4_36258_37943258 | NC_021162.1    | Ca_kabuli_chr03 | 37943258                | GG                              | TT              | 1946782795               |
| SNP_P4_36259_37954075 | NC_021162.1    | Ca_kabuli_chr03 | 37954075                | CC                              | TT              | 1946782797               |
| SNP_P4_36260_37969020 | NC_021162.1    | Ca_kabuli_chr03 | 37969020                | AA                              | TT              | 1946782799               |
| SNP_P4_36261_37990261 | NC_021162.1    | Ca_kabuli_chr03 | 37990261                | TT                              | GG              | 1946782801               |

| SNPs IDs              | Chromosome IDs | Chromosomes     | Physical positions (bp) | CDC Frontier (Reference genome) | (ILWC46 & LPNB) | NCBI SNPdb Accession IDs |
|-----------------------|----------------|-----------------|-------------------------|---------------------------------|-----------------|--------------------------|
| SNP_P4_36264_38049285 | NC_021162.1    | Ca_kabuli_chr03 | 38049285                | TT                              | AA              | 1946782804               |
| SNP_P4_36265_38060742 | NC_021162.1    | Ca_kabuli_chr03 | 38060742                | CC                              | TT              | 1946782806               |
| SNP_P4_36267_38101023 | NC_021162.1    | Ca_kabuli_chr03 | 38101023                | TT                              | CC              | 1946782808               |
| SNP_P4_36268_38102241 | NC_021162.1    | Ca_kabuli_chr03 | 38102241                | GG                              | CC              | 1946782810               |
| SNP_P4_36269_38115938 | NC_021162.1    | Ca_kabuli_chr03 | 38115938                | GG                              | AA              | 1946782812               |
| SNP_P4_36271_38130334 | NC_021162.1    | Ca_kabuli_chr03 | 38130334                | AA                              | TT              | 1946782814               |
| SNP_P4_36272_38135369 | NC_021162.1    | Ca_kabuli_chr03 | 38135369                | GG                              | AA              | 1946782816               |
| SNP_P4_36273_38135747 | NC_021162.1    | Ca_kabuli_chr03 | 38135747                | TT                              | AA              | 1946782818               |
| SNP_P4_36274_38137190 | NC_021162.1    | Ca_kabuli_chr03 | 38137190                | AA                              | GG              | 1946782821               |
| SNP_P4_36275_38137708 | NC_021162.1    | Ca_kabuli_chr03 | 38137708                | CC                              | TT              | 1946782823               |
| SNP_P4_36276_38137739 | NC_021162.1    | Ca_kabuli_chr03 | 38137739                | AA                              | CC              | 1946782825               |
| SNP_P4_36277_38138970 | NC_021162.1    | Ca_kabuli_chr03 | 38138970                | AA                              | GG              | 1946782827               |
| SNP_P4_36278_38139313 | NC_021162.1    | Ca_kabuli_chr03 | 38139313                | GG                              | TT              | 1946782829               |
| SNP_P4_36279_38139359 | NC_021162.1    | Ca_kabuli_chr03 | 38139359                | CC                              | AA              | 1946782831               |
| SNP_P4_36280_38139925 | NC_021162.1    | Ca_kabuli_chr03 | 38139925                | GG                              | CC              | 1946782833               |
| SNP_P4_36281_38140632 | NC_021162.1    | Ca_kabuli_chr03 | 38140632                | CC                              | TT              | 1946782835               |
| SNP_P4_36282_38140951 | NC_021162.1    | Ca_kabuli_chr03 | 38140951                | AA                              | TT              | 1946782837               |
| SNP_P4_36283_38141036 | NC_021162.1    | Ca_kabuli_chr03 | 38141036                | TT                              | CC              | 1946782840               |
| SNP_P4_36284_38142182 | NC_021162.1    | Ca_kabuli_chr03 | 38142182                | TT                              | CC              | 1946782842               |
| SNP_P4_36285_38142275 | NC_021162.1    | Ca_kabuli_chr03 | 38142275                | TT                              | CC              | 1946782844               |
| SNP_P4_36286_38142308 | NC_021162.1    | Ca_kabuli_chr03 | 38142308                | GG                              | TT              | 1946782846               |
| SNP_P4_36287_38142318 | NC_021162.1    | Ca_kabuli_chr03 | 38142318                | TT                              | GG              | 1946782848               |
| SNP_P4_36289_38142463 | NC_021162.1    | Ca_kabuli_chr03 | 38142463                | AA                              | CC              | 1946782850               |
| SNP_P4_36290_38142535 | NC_021162.1    | Ca_kabuli_chr03 | 38142535                | AA                              | GG              | 1946782852               |
| SNP_P4_36291_38142550 | NC_021162.1    | Ca_kabuli_chr03 | 38142550                | GG                              | AA              | 1946782854               |
| SNP_P4_36292_38142957 | NC_021162.1    | Ca_kabuli_chr03 | 38142957                | CC                              | TT              | 1946782856               |
| SNP_P4_36293_38144518 | NC_021162.1    | Ca_kabuli_chr03 | 38144518                | GG                              | TT              | 1946782858               |
| SNP_P4_36294_38144652 | NC_021162.1    | Ca_kabuli_chr03 | 38144652                | TT                              | CC              | 1946782860               |
| SNP_P4_36297_38146319 | NC_021162.1    | Ca_kabuli_chr03 | 38146319                | GG                              | CC              | 1946782863               |
| SNP_P4_36298_38146349 | NC_021162.1    | Ca_kabuli_chr03 | 38146349                | GG                              | CC              | 1946782865               |
| SNP_P4_36299_38146361 | NC_021162.1    | Ca_kabuli_chr03 | 38146361                | TT                              | CC              | 1946782867               |
| SNP_P4_36300_38146393 | NC_021162.1    | Ca_kabuli_chr03 | 38146393                | TT                              | CC              | 1946782869               |
| SNP_P4_36301_38147883 | NC_021162.1    | Ca_kabuli_chr03 | 38147883                | GG                              | AA              | 1946782871               |
| SNP_P4_36302_38149544 | NC_021162.1    | Ca_kabuli_chr03 | 38149544                | CC                              | TT              | 1946782873               |
| SNP_P4_36303_38155246 | NC_021162.1    | Ca_kabuli_chr03 | 38155246                | AA                              | TT              | 1946782875               |
| SNP_P4_36304_38155280 | NC_021162.1    | Ca_kabuli_chr03 | 38155280                | GG                              | AA              | 1946782877               |
| SNP_P4_36306_38155487 | NC_021162.1    | Ca_kabuli_chr03 | 38155487                | AA                              | GG              | 1946782880               |
| SNP_P4_36307_38155926 | NC_021162.1    | Ca_kabuli_chr03 | 38155926                | TT                              | CC              | 1946782882               |
| SNP_P4_36308_38155985 | NC_021162.1    | Ca_kabuli_chr03 | 38155985                | CC                              | TT              | 1946782884               |
| SNP_P4_36310_38157073 | NC_021162.1    | Ca_kabuli_chr03 | 38157073                | TT                              | AA              | 1946782886               |
| SNP_P4_36311_38157743 | NC_021162.1    | Ca_kabuli_chr03 | 38157743                | CC                              | AA              | 1946782888               |
| SNP_P4_36312_38157747 | NC_021162.1    | Ca_kabuli_chr03 | 38157747                | AA                              | GG              | 1946782890               |



| SNPs IDs              | Chromosome IDs | Chromosomes     | Physical positions (bp) | CDC Frontier (Reference genome) | (ILWC46 & LPNB) | NCBI SNPdb Accession IDs |
|-----------------------|----------------|-----------------|-------------------------|---------------------------------|-----------------|--------------------------|
| SNP_P4_36313_38159632 | NC_021162.1    | Ca_kabuli_chr03 | 38159632                | GG                              | AA              | 1946782892               |
| SNP_P4_36314_38161605 | NC_021162.1    | Ca_kabuli_chr03 | 38161605                | TT                              | CC              | 1946782894               |
| SNP_P4_36316_38163509 | NC_021162.1    | Ca_kabuli_chr03 | 38163509                | AA                              | GG              | 1946782896               |
| SNP_P4_36317_38165274 | NC_021162.1    | Ca_kabuli_chr03 | 38165274                | TT                              | AA              | 1946782899               |
| SNP_P4_36318_38168137 | NC_021162.1    | Ca_kabuli_chr03 | 38168137                | CC                              | GG              | 1946782901               |
| SNP_P4_36319_38168358 | NC_021162.1    | Ca_kabuli_chr03 | 38168358                | AA                              | CC              | 1946782903               |
| SNP_P4_36320_38168364 | NC_021162.1    | Ca_kabuli_chr03 | 38168364                | TT                              | AA              | 1946782905               |
| SNP_P4_36321_38168787 | NC_021162.1    | Ca_kabuli_chr03 | 38168787                | AA                              | CC              | 1946782907               |
| SNP_P4_36322_38169101 | NC_021162.1    | Ca_kabuli_chr03 | 38169101                | GG                              | AA              | 1946782909               |
| SNP_P4_36323_38169157 | NC_021162.1    | Ca_kabuli_chr03 | 38169157                | AA                              | GG              | 1946782911               |
| SNP_P4_36324_38169685 | NC_021162.1    | Ca_kabuli_chr03 | 38169685                | GG                              | AA              | 1946782913               |
| SNP_P4_36325_38169968 | NC_021162.1    | Ca_kabuli_chr03 | 38169968                | AA                              | TT              | 1946782915               |
| SNP_P4_36327_38171015 | NC_021162.1    | Ca_kabuli_chr03 | 38171015                | GG                              | AA              | 1946782917               |
| SNP_P4_36328_38171153 | NC_021162.1    | Ca_kabuli_chr03 | 38171153                | CC                              | TT              | 1946782919               |
| SNP_P4_36329_38171400 | NC_021162.1    | Ca_kabuli_chr03 | 38171400                | CC                              | TT              | 1946782921               |
| SNP_P4_36330_38171434 | NC_021162.1    | Ca_kabuli_chr03 | 38171434                | GG                              | AA              | 1946782923               |
| SNP_P4_36331_38174079 | NC_021162.1    | Ca_kabuli_chr03 | 38174079                | CC                              | TT              | 1946782925               |
| SNP_P4_36333_38174325 | NC_021162.1    | Ca_kabuli_chr03 | 38174325                | AA                              | GG              | 1946782927               |
| SNP_P4_36335_38174455 | NC_021162.1    | Ca_kabuli_chr03 | 38174455                | AA                              | TT              | 1946782930               |
| SNP_P4_36336_38174575 | NC_021162.1    | Ca_kabuli_chr03 | 38174575                | GG                              | AA              | 1946782933               |
| SNP_P4_36337_38175133 | NC_021162.1    | Ca_kabuli_chr03 | 38175133                | AA                              | GG              | 1946782935               |
| SNP_P4_36338_38175653 | NC_021162.1    | Ca_kabuli_chr03 | 38175653                | TT                              | CC              | 1946782937               |
| SNP_P4_36339_38176160 | NC_021162.1    | Ca_kabuli_chr03 | 38176160                | CC                              | TT              | 1946782939               |
| SNP_P4_36340_38177210 | NC_021162.1    | Ca_kabuli_chr03 | 38177210                | AA                              | GG              | 1946782941               |
| SNP_P4_36341_38177281 | NC_021162.1    | Ca_kabuli_chr03 | 38177281                | GG                              | CC              | 1946782943               |
| SNP_P4_36342_38177611 | NC_021162.1    | Ca_kabuli_chr03 | 38177611                | GG                              | TT              | 1946782945               |
| SNP_P4_36343_38177641 | NC_021162.1    | Ca_kabuli_chr03 | 38177641                | GG                              | CC              | 1946782947               |
| SNP_P4_36344_38179700 | NC_021162.1    | Ca_kabuli_chr03 | 38179700                | TT                              | CC              | 1946782949               |
| SNP_P4_36345_38180820 | NC_021162.1    | Ca_kabuli_chr03 | 38180820                | TT                              | AA              | 1946782952               |
| SNP_P4_36346_38180985 | NC_021162.1    | Ca_kabuli_chr03 | 38180985                | AA                              | CC              | 1946782954               |
| SNP_P4_36347_38180994 | NC_021162.1    | Ca_kabuli_chr03 | 38180994                | GG                              | AA              | 1946782956               |
| SNP_P4_36348_38181015 | NC_021162.1    | Ca_kabuli_chr03 | 38181015                | GG                              | AA              | 1946782958               |
| SNP_P4_36349_38181200 | NC_021162.1    | Ca_kabuli_chr03 | 38181200                | GG                              | TT              | 1946782960               |
| SNP_P4_36350_38181225 | NC_021162.1    | Ca_kabuli_chr03 | 38181225                | TT                              | CC              | 1946782963               |
| SNP_P4_36351_38181245 | NC_021162.1    | Ca_kabuli_chr03 | 38181245                | AA                              | GG              | 1946782965               |
| SNP_P4_36352_38181462 | NC_021162.1    | Ca_kabuli_chr03 | 38181462                | AA                              | TT              | 1946782968               |
| SNP_P4_36353_38181573 | NC_021162.1    | Ca_kabuli_chr03 | 38181573                | CC                              | AA              | 1946782970               |
| SNP_P4_36354_38181575 | NC_021162.1    | Ca_kabuli_chr03 | 38181575                | AA                              | TT              | 1946782972               |
| SNP_P4_36355_38181594 | NC_021162.1    | Ca_kabuli_chr03 | 38181594                | TT                              | CC              | 1946782974               |
| SNP_P4_36356_38181613 | NC_021162.1    | Ca_kabuli_chr03 | 38181613                | CC                              | TT              | 1946782976               |
| SNP_P4_36357_38181914 | NC_021162.1    | Ca_kabuli_chr03 | 38181914                | GG                              | TT              | 1946782979               |
| SNP_P4_36361_38183258 | NC_021162.1    | Ca_kabuli_chr03 | 38183258                | CC                              | AA              | 1946782981               |

| SNPs IDs              | Chromosome IDs | Chromosomes     | Physical positions (bp) | CDC Frontier (Reference genome) | (ILWC46 & LPNB) | NCBI SNPdb Accession IDs |
|-----------------------|----------------|-----------------|-------------------------|---------------------------------|-----------------|--------------------------|
| SNP_P4_36362_38183877 | NC_021162.1    | Ca_kabuli_chr03 | 38183877                | GG                              | AA              | 1946782983               |
| SNP_P4_36363_38184255 | NC_021162.1    | Ca_kabuli_chr03 | 38184255                | GG                              | AA              | 1946782985               |
| SNP_P4_36365_38184450 | NC_021162.1    | Ca_kabuli_chr03 | 38184450                | AA                              | TT              | 1946782987               |
| SNP_P4_36367_38184751 | NC_021162.1    | Ca_kabuli_chr03 | 38184751                | TT                              | GG              | 1946782989               |
| SNP_P4_36368_38184939 | NC_021162.1    | Ca_kabuli_chr03 | 38184939                | AA                              | TT              | 1946782992               |
| SNP_P4_36370_38185103 | NC_021162.1    | Ca_kabuli_chr03 | 38185103                | TT                              | CC              | 1946782994               |
| SNP_P4_36371_38185104 | NC_021162.1    | Ca_kabuli_chr03 | 38185104                | CC                              | GG              | 1946782997               |
| SNP_P4_36372_38185116 | NC_021162.1    | Ca_kabuli_chr03 | 38185116                | AA                              | GG              | 1946782999               |
| SNP_P4_36373_38185132 | NC_021162.1    | Ca_kabuli_chr03 | 38185132                | AA                              | TT              | 1946783001               |
| SNP_P4_36374_38185320 | NC_021162.1    | Ca_kabuli_chr03 | 38185320                | GG                              | AA              | 1946783003               |
| SNP_P4_36377_38187652 | NC_021162.1    | Ca_kabuli_chr03 | 38187652                | TT                              | CC              | 1946783005               |
| SNP_P4_36378_38188223 | NC_021162.1    | Ca_kabuli_chr03 | 38188223                | TT                              | AA              | 1946783007               |
| SNP_P4_36379_38188826 | NC_021162.1    | Ca_kabuli_chr03 | 38188826                | TT                              | GG              | 1946783009               |
| SNP_P4_36380_38197480 | NC_021162.1    | Ca_kabuli_chr03 | 38197480                | CC                              | AA              | 1946783011               |
| SNP_P4_36381_38200441 | NC_021162.1    | Ca_kabuli_chr03 | 38200441                | AA                              | CC              | 1946783014               |
| SNP_P4_36382_38200790 | NC_021162.1    | Ca_kabuli_chr03 | 38200790                | CC                              | AA              | 1946783016               |
| SNP_P4_36383_38201595 | NC_021162.1    | Ca_kabuli_chr03 | 38201595                | CC                              | TT              | 1946783018               |
| SNP_P4_36384_38201629 | NC_021162.1    | Ca_kabuli_chr03 | 38201629                | CC                              | GG              | 1946783020               |
| SNP_P4_36385_38202024 | NC_021162.1    | Ca_kabuli_chr03 | 38202024                | TT                              | AA              | 1946783022               |
| SNP_P4_36386_38202077 | NC_021162.1    | Ca_kabuli_chr03 | 38202077                | TT                              | CC              | 1946783024               |
| SNP_P4_36387_38202081 | NC_021162.1    | Ca_kabuli_chr03 | 38202081                | CC                              | GG              | 1946783026               |
| SNP_P4_36388_38202223 | NC_021162.1    | Ca_kabuli_chr03 | 38202223                | CC                              | TT              | 1946783028               |
| SNP_P4_36389_38202261 | NC_021162.1    | Ca_kabuli_chr03 | 38202261                | TT                              | CC              | 1946783031               |
| SNP_P4_36390_38202789 | NC_021162.1    | Ca_kabuli_chr03 | 38202789                | TT                              | GG              | 1946783034               |
| SNP_P4_36391_38203791 | NC_021162.1    | Ca_kabuli_chr03 | 38203791                | CC                              | TT              | 1946783036               |
| SNP_P4_36392_38203821 | NC_021162.1    | Ca_kabuli_chr03 | 38203821                | GG                              | TT              | 1946783038               |
| SNP_P4_36394_38204123 | NC_021162.1    | Ca_kabuli_chr03 | 38204123                | TT                              | CC              | 1946783040               |
| SNP_P4_36396_38204876 | NC_021162.1    | Ca_kabuli_chr03 | 38204876                | CC                              | TT              | 1946783042               |
| SNP_P4_36397_38204878 | NC_021162.1    | Ca_kabuli_chr03 | 38204878                | GG                              | CC              | 1946783045               |
| SNP_P4_36398_38204948 | NC_021162.1    | Ca_kabuli_chr03 | 38204948                | GG                              | AA              | 1946783047               |
| SNP_P4_36399_38204993 | NC_021162.1    | Ca_kabuli_chr03 | 38204993                | GG                              | AA              | 1946783049               |
| SNP_P4_36400_38205098 | NC_021162.1    | Ca_kabuli_chr03 | 38205098                | TT                              | CC              | 1946783051               |
| SNP_P4_36401_38205116 | NC_021162.1    | Ca_kabuli_chr03 | 38205116                | TT                              | CC              | 1946783053               |
| SNP_P4_36402_38205117 | NC_021162.1    | Ca_kabuli_chr03 | 38205117                | TT                              | CC              | 1946783055               |
| SNP_P4_36403_38205154 | NC_021162.1    | Ca_kabuli_chr03 | 38205154                | CC                              | TT              | 1946783057               |
| SNP_P4_36404_38205162 | NC_021162.1    | Ca_kabuli_chr03 | 38205162                | CC                              | TT              | 1946783059               |
| SNP_P4_36405_38205171 | NC_021162.1    | Ca_kabuli_chr03 | 38205171                | AA                              | GG              | 1946783061               |
| SNP_P4_36406_38205216 | NC_021162.1    | Ca_kabuli_chr03 | 38205216                | AA                              | TT              | 1946783063               |
| SNP_P4_36407_38205229 | NC_021162.1    | Ca_kabuli_chr03 | 38205229                | CC                              | TT              | 1946783065               |
| SNP_P4_36408_38205363 | NC_021162.1    | Ca_kabuli_chr03 | 38205363                | GG                              | CC              | 1946783068               |
| SNP_P4_36409_38205377 | NC_021162.1    | Ca_kabuli_chr03 | 38205377                | TT                              | AA              | 1946783070               |
| SNP_P4_36410_38205481 | NC_021162.1    | Ca_kabuli_chr03 | 38205481                | TT                              | AA              | 1946783072               |

| SNPs IDs              | Chromosome IDs | Chromosomes     | Physical positions (bp) | CDC Frontier (Reference genome) | (ILWC46 & LPNB) | NCBI SNPdb Accession IDs |
|-----------------------|----------------|-----------------|-------------------------|---------------------------------|-----------------|--------------------------|
| SNP_P4_36411_38206125 | NC_021162.1    | Ca_kabuli_chr03 | 38206125                | AA                              | GG              | 1946783074               |
| SNP_P4_36413_38206475 | NC_021162.1    | Ca_kabuli_chr03 | 38206475                | CC                              | TT              | 1946783076               |
| SNP_P4_36414_38209361 | NC_021162.1    | Ca_kabuli_chr03 | 38209361                | GG                              | AA              | 1946783078               |
| SNP_P4_36415_38209362 | NC_021162.1    | Ca_kabuli_chr03 | 38209362                | TT                              | GG              | 1946783080               |
| SNP_P4_36416_38210142 | NC_021162.1    | Ca_kabuli_chr03 | 38210142                | GG                              | AA              | 1946783082               |
| SNP_P4_36418_38213335 | NC_021162.1    | Ca_kabuli_chr03 | 38213335                | GG                              | AA              | 1946783084               |
| SNP_P4_36419_38213359 | NC_021162.1    | Ca_kabuli_chr03 | 38213359                | GG                              | AA              | 1946783087               |
| SNP_P4_36420_38213742 | NC_021162.1    | Ca_kabuli_chr03 | 38213742                | AA                              | GG              | 1946783089               |
| SNP_P4_36421_38215368 | NC_021162.1    | Ca_kabuli_chr03 | 38215368                | AA                              | GG              | 1946783091               |
| SNP_P4_36422_38215632 | NC_021162.1    | Ca_kabuli_chr03 | 38215632                | CC                              | GG              | 1946783093               |
| SNP_P4_36423_38215668 | NC_021162.1    | Ca_kabuli_chr03 | 38215668                | TT                              | AA              | 1946783095               |
| SNP_P4_36424_38215792 | NC_021162.1    | Ca_kabuli_chr03 | 38215792                | AA                              | GG              | 1946783097               |
| SNP_P4_36425_38215854 | NC_021162.1    | Ca_kabuli_chr03 | 38215854                | AA                              | CC              | 1946783099               |
| SNP_P4_36427_38215904 | NC_021162.1    | Ca_kabuli_chr03 | 38215904                | GG                              | TT              | 1946783101               |
| SNP_P4_36428_38216379 | NC_021162.1    | Ca_kabuli_chr03 | 38216379                | TT                              | AA              | 1946783104               |
| SNP_P4_36429_38217850 | NC_021162.1    | Ca_kabuli_chr03 | 38217850                | TT                              | CC              | 1946783106               |
| SNP_P4_36430_38218945 | NC_021162.1    | Ca_kabuli_chr03 | 38218945                | AA                              | TT              | 1946783108               |
| SNP_P4_36431_38218959 | NC_021162.1    | Ca_kabuli_chr03 | 38218959                | AA                              | GG              | 1946783110               |
| SNP_P4_36432_38218962 | NC_021162.1    | Ca_kabuli_chr03 | 38218962                | GG                              | TT              | 1946783113               |
| SNP_P4_36433_38219261 | NC_021162.1    | Ca_kabuli_chr03 | 38219261                | TT                              | AA              | 1946783115               |
| SNP_P4_36434_38219270 | NC_021162.1    | Ca_kabuli_chr03 | 38219270                | GG                              | AA              | 1946783117               |
| SNP_P4_36435_38219943 | NC_021162.1    | Ca_kabuli_chr03 | 38219943                | AA                              | GG              | 1946783120               |
| SNP_P4_36436_38219959 | NC_021162.1    | Ca_kabuli_chr03 | 38219959                | TT                              | CC              | 1946783122               |
| SNP_P4_36437_38219962 | NC_021162.1    | Ca_kabuli_chr03 | 38219962                | GG                              | AA              | 1946783124               |
| SNP_P4_36438_38219971 | NC_021162.1    | Ca_kabuli_chr03 | 38219971                | TT                              | CC              | 1946783126               |
| SNP_P4_36439_38219988 | NC_021162.1    | Ca_kabuli_chr03 | 38219988                | TT                              | AA              | 1946783128               |
| SNP_P4_36440_38221405 | NC_021162.1    | Ca_kabuli_chr03 | 38221405                | CC                              | AA              | 1946783130               |
| SNP_P4_36441_38224014 | NC_021162.1    | Ca_kabuli_chr03 | 38224014                | AA                              | GG              | 1946783132               |
| SNP_P4_36442_38224126 | NC_021162.1    | Ca_kabuli_chr03 | 38224126                | AA                              | TT              | 1946783134               |
| SNP_P4_36443_38224558 | NC_021162.1    | Ca_kabuli_chr03 | 38224558                | TT                              | AA              | 1946783136               |
| SNP_P4_36444_38224700 | NC_021162.1    | Ca_kabuli_chr03 | 38224700                | AA                              | GG              | 1946783138               |
| SNP_P4_36445_38226013 | NC_021162.1    | Ca_kabuli_chr03 | 38226013                | CC                              | AA              | 1946783141               |
| SNP_P4_36446_38226019 | NC_021162.1    | Ca_kabuli_chr03 | 38226019                | CC                              | AA              | 1946783143               |
| SNP_P4_36447_38226612 | NC_021162.1    | Ca_kabuli_chr03 | 38226612                | TT                              | CC              | 1946783145               |
| SNP_P4_36448_38226636 | NC_021162.1    | Ca_kabuli_chr03 | 38226636                | AA                              | GG              | 1946783147               |
| SNP_P4_36449_38226637 | NC_021162.1    | Ca_kabuli_chr03 | 38226637                | AA                              | GG              | 1946783149               |
| SNP_P4_36450_38226781 | NC_021162.1    | Ca_kabuli_chr03 | 38226781                | CC                              | TT              | 1946783151               |
| SNP_P4_36451_38226783 | NC_021162.1    | Ca_kabuli_chr03 | 38226783                | AA                              | GG              | 1946783153               |
| SNP_P4_36454_38228328 | NC_021162.1    | Ca_kabuli_chr03 | 38228328                | TT                              | AA              | 1946783155               |
| SNP_P4_36456_38228702 | NC_021162.1    | Ca_kabuli_chr03 | 38228702                | TT                              | GG              | 1946783157               |
| SNP_P4_36458_38230117 | NC_021162.1    | Ca_kabuli_chr03 | 38230117                | GG                              | AA              | 1946783160               |
| SNP_P4_36459_38232382 | NC_021162.1    | Ca_kabuli_chr03 | 38232382                | GG                              | AA              | 1946783162               |

| SNPs IDs              | Chromosome IDs | Chromosomes     | Physical positions (bp) | CDC Frontier (Reference genome) | (ILWC46 & LPNB) | NCBI SNPdb Accession IDs |
|-----------------------|----------------|-----------------|-------------------------|---------------------------------|-----------------|--------------------------|
| SNP_P4_36460_38232399 | NC_021162.1    | Ca_kabuli_chr03 | 38232399                | AA                              | GG              | 1946783164               |
| SNP_P4_36461_38232402 | NC_021162.1    | Ca_kabuli_chr03 | 38232402                | GG                              | CC              | 1946783166               |
| SNP_P4_36462_38232403 | NC_021162.1    | Ca_kabuli_chr03 | 38232403                | GG                              | TT              | 1946783168               |
| SNP_P4_36463_38233273 | NC_021162.1    | Ca_kabuli_chr03 | 38233273                | GG                              | AA              | 1946783170               |
| SNP_P4_36464_38233274 | NC_021162.1    | Ca_kabuli_chr03 | 38233274                | AA                              | CC              | 1946783172               |
| SNP_P4_36465_38233291 | NC_021162.1    | Ca_kabuli_chr03 | 38233291                | CC                              | TT              | 1946783174               |
| SNP_P4_36466_38233511 | NC_021162.1    | Ca_kabuli_chr03 | 38233511                | TT                              | AA              | 1946783176               |
| SNP_P4_36467_38233672 | NC_021162.1    | Ca_kabuli_chr03 | 38233672                | CC                              | TT              | 1946783178               |
| SNP_P4_36468_38235718 | NC_021162.1    | Ca_kabuli_chr03 | 38235718                | CC                              | TT              | 1946783180               |
| SNP_P4_36469_38236243 | NC_021162.1    | Ca_kabuli_chr03 | 38236243                | CC                              | TT              | 1946783182               |
| SNP_P4_36471_38237861 | NC_021162.1    | Ca_kabuli_chr03 | 38237861                | TT                              | CC              | 1946783184               |
| SNP_P4_36472_38238012 | NC_021162.1    | Ca_kabuli_chr03 | 38238012                | AA                              | GG              | 1946783186               |
| SNP_P4_36473_38238323 | NC_021162.1    | Ca_kabuli_chr03 | 38238323                | AA                              | GG              | 1946783188               |
| SNP_P4_36475_38238577 | NC_021162.1    | Ca_kabuli_chr03 | 38238577                | AA                              | CC              | 1946783190               |
| SNP_P4_36476_38238596 | NC_021162.1    | Ca_kabuli_chr03 | 38238596                | CC                              | TT              | 1946783191               |
| SNP_P4_36477_38238655 | NC_021162.1    | Ca_kabuli_chr03 | 38238655                | CC                              | AA              | 1946783193               |
| SNP_P4_36478_38238866 | NC_021162.1    | Ca_kabuli_chr03 | 38238866                | AA                              | GG              | 1946783195               |
| SNP_P4_36479_38240241 | NC_021162.1    | Ca_kabuli_chr03 | 38240241                | AA                              | TT              | 1946783198               |
| SNP_P4_36480_38240589 | NC_021162.1    | Ca_kabuli_chr03 | 38240589                | TT                              | CC              | 1946783200               |
| SNP_P4_36481_38240761 | NC_021162.1    | Ca_kabuli_chr03 | 38240761                | AA                              | GG              | 1946783202               |
| SNP_P4_36482_38240773 | NC_021162.1    | Ca_kabuli_chr03 | 38240773                | AA                              | GG              | 1946783204               |
| SNP_P4_36484_38240949 | NC_021162.1    | Ca_kabuli_chr03 | 38240949                | TT                              | AA              | 1946783206               |
| SNP_P4_36485_38241078 | NC_021162.1    | Ca_kabuli_chr03 | 38241078                | TT                              | GG              | 1946783208               |
| SNP_P4_36486_38241187 | NC_021162.1    | Ca_kabuli_chr03 | 38241187                | CC                              | TT              | 1946783210               |
| SNP_P4_36487_38241194 | NC_021162.1    | Ca_kabuli_chr03 | 38241194                | GG                              | AA              | 1946783212               |
| SNP_P4_36488_38241203 | NC_021162.1    | Ca_kabuli_chr03 | 38241203                | GG                              | AA              | 1946783214               |
| SNP_P4_36489_38241210 | NC_021162.1    | Ca_kabuli_chr03 | 38241210                | AA                              | GG              | 1946783216               |
| SNP_P4_36490_38241234 | NC_021162.1    | Ca_kabuli_chr03 | 38241234                | TT                              | CC              | 1946783218               |
| SNP_P4_36492_38241374 | NC_021162.1    | Ca_kabuli_chr03 | 38241374                | GG                              | AA              | 1946783220               |
| SNP_P4_36493_38250205 | NC_021162.1    | Ca_kabuli_chr03 | 38250205                | TT                              | CC              | 1946783222               |
| SNP_P4_36494_38278229 | NC_021162.1    | Ca_kabuli_chr03 | 38278229                | TT                              | CC              | 1946783225               |
| SNP_P4_36495_38284496 | NC_021162.1    | Ca_kabuli_chr03 | 38284496                | GG                              | AA              | 1946783227               |
| SNP_P4_36496_38316802 | NC_021162.1    | Ca_kabuli_chr03 | 38316802                | AA                              | CC              | 1946783229               |
| SNP_P4_36499_38353156 | NC_021162.1    | Ca_kabuli_chr03 | 38353156                | TT                              | CC              | 1946783231               |
| SNP_P4_36500_38353157 | NC_021162.1    | Ca_kabuli_chr03 | 38353157                | TT                              | GG              | 1946783233               |
| SNP_P4_36501_38364866 | NC_021162.1    | Ca_kabuli_chr03 | 38364866                | TT                              | AA              | 1946783235               |
| SNP_P4_36502_38393904 | NC_021162.1    | Ca_kabuli_chr03 | 38393904                | AA                              | GG              | 1946783237               |
| SNP_P4_36503_38399021 | NC_021162.1    | Ca_kabuli_chr03 | 38399021                | AA                              | GG              | 1946783239               |
| SNP_P4_36505_38408038 | NC_021162.1    | Ca_kabuli_chr03 | 38408038                | TT                              | CC              | 1946783242               |
| SNP_P4_36506_38425556 | NC_021162.1    | Ca_kabuli_chr03 | 38425556                | AA                              | TT              | 1946783244               |
| SNP_P4_36507_38447643 | NC_021162.1    | Ca_kabuli_chr03 | 38447643                | TT                              | CC              | 1946783246               |
| SNP_P4_36508_38519011 | NC_021162.1    | Ca_kabuli_chr03 | 38519011                | TT                              | CC              | 1946783248               |

| SNPs IDs              | Chromosome IDs | Chromosomes     | Physical positions (bp) | CDC Frontier (Reference genome) | (ILWC46 & LPNB) | NCBI SNPdb Accession IDs |
|-----------------------|----------------|-----------------|-------------------------|---------------------------------|-----------------|--------------------------|
| SNP_P4_36509_38521202 | NC_021162.1    | Ca_kabuli_chr03 | 38521202                | AA                              | TT              | 1946783250               |
| SNP_P4_36510_38521244 | NC_021162.1    | Ca_kabuli_chr03 | 38521244                | AA                              | TT              | 1946783252               |
| SNP_P4_36512_38596934 | NC_021162.1    | Ca_kabuli_chr03 | 38596934                | TT                              | AA              | 1946783254               |
| SNP_P4_36514_38623626 | NC_021162.1    | Ca_kabuli_chr03 | 38623626                | CC                              | TT              | 1946783256               |
| SNP_P4_36515_38643753 | NC_021162.1    | Ca_kabuli_chr03 | 38643753                | AA                              | GG              | 1946783258               |
| SNP_P4_36518_38690610 | NC_021162.1    | Ca_kabuli_chr03 | 38690610                | GG                              | AA              | 1946783261               |
| SNP_P4_36519_38690638 | NC_021162.1    | Ca_kabuli_chr03 | 38690638                | GG                              | AA              | 1946783263               |
| SNP_P4_36520_38690651 | NC_021162.1    | Ca_kabuli_chr03 | 38690651                | AA                              | TT              | 1946783265               |
| SNP_P4_36521_38690747 | NC_021162.1    | Ca_kabuli_chr03 | 38690747                | AA                              | TT              | 1946783267               |
| SNP_P4_36522_38690862 | NC_021162.1    | Ca_kabuli_chr03 | 38690862                | CC                              | AA              | 1946783269               |
| SNP_P4_36523_38691177 | NC_021162.1    | Ca_kabuli_chr03 | 38691177                | AA                              | GG              | 1946783271               |
| SNP_P4_36525_38698007 | NC_021162.1    | Ca_kabuli_chr03 | 38698007                | GG                              | AA              | 1946783273               |
| SNP_P4_36526_38708828 | NC_021162.1    | Ca_kabuli_chr03 | 38708828                | GG                              | AA              | 1946783275               |
| SNP_P4_36530_38736001 | NC_021162.1    | Ca_kabuli_chr03 | 38736001                | AA                              | GG              | 1946783277               |
| SNP_P4_36531_38736003 | NC_021162.1    | Ca_kabuli_chr03 | 38736003                | AA                              | TT              | 1946783279               |
| SNP_P4_36532_38747169 | NC_021162.1    | Ca_kabuli_chr03 | 38747169                | CC                              | TT              | 1946783282               |
| SNP_P4_36533_38757186 | NC_021162.1    | Ca_kabuli_chr03 | 38757186                | TT                              | AA              | 1946783284               |
| SNP_P4_36534_38757197 | NC_021162.1    | Ca_kabuli_chr03 | 38757197                | AA                              | GG              | 1946783286               |
| SNP_P4_36535_38757199 | NC_021162.1    | Ca_kabuli_chr03 | 38757199                | TT                              | CC              | 1946783288               |
| SNP_P4_36536_38767119 | NC_021162.1    | Ca_kabuli_chr03 | 38767119                | CC                              | TT              | 1946783290               |
| SNP_P4_36537_38788190 | NC_021162.1    | Ca_kabuli_chr03 | 38788190                | CC                              | GG              | 1946783292               |
| SNP_P4_36538_38795424 | NC_021162.1    | Ca_kabuli_chr03 | 38795424                | TT                              | GG              | 1946783294               |
| SNP_P4_36539_38865014 | NC_021162.1    | Ca_kabuli_chr03 | 38865014                | GG                              | TT              | 1946783296               |
| SNP_P4_36540_38865216 | NC_021162.1    | Ca_kabuli_chr03 | 38865216                | CC                              | TT              | 1946783298               |
| SNP_P4_36541_38865228 | NC_021162.1    | Ca_kabuli_chr03 | 38865228                | AA                              | CC              | 1946783300               |
| SNP_P4_36542_38870483 | NC_021162.1    | Ca_kabuli_chr03 | 38870483                | AA                              | TT              | 1946783302               |
| SNP_P4_36543_38870491 | NC_021162.1    | Ca_kabuli_chr03 | 38870491                | AA                              | TT              | 1946783305               |
| SNP_P4_36544_38870525 | NC_021162.1    | Ca_kabuli_chr03 | 38870525                | AA                              | CC              | 1946783307               |
| SNP_P4_36545_38870527 | NC_021162.1    | Ca_kabuli_chr03 | 38870527                | GG                              | AA              | 1946783309               |
| SNP_P4_36547_38900328 | NC_021162.1    | Ca_kabuli_chr03 | 38900328                | AA                              | TT              | 1946783311               |
| SNP_P4_36548_38902606 | NC_021162.1    | Ca_kabuli_chr03 | 38902606                | AA                              | GG              | 1946783313               |
| SNP_P4_36549_38902671 | NC_021162.1    | Ca_kabuli_chr03 | 38902671                | TT                              | GG              | 1946783315               |
| SNP_P4_36550_38902996 | NC_021162.1    | Ca_kabuli_chr03 | 38902996                | AA                              | GG              | 1946783317               |
| SNP_P4_36551_38908601 | NC_021162.1    | Ca_kabuli_chr03 | 38908601                | CC                              | TT              | 1946783319               |
| SNP_P4_36552_38908913 | NC_021162.1    | Ca_kabuli_chr03 | 38908913                | GG                              | TT              | 1946783321               |
| SNP_P4_36553_38942841 | NC_021162.1    | Ca_kabuli_chr03 | 38942841                | CC                              | TT              | 1946783323               |
| SNP_P4_36554_38955916 | NC_021162.1    | Ca_kabuli_chr03 | 38955916                | TT                              | GG              | 1946783325               |
| SNP_P4_36555_38958295 | NC_021162.1    | Ca_kabuli_chr03 | 38958295                | AA                              | GG              | 1946783327               |
| SNP_P4_36556_38960769 | NC_021162.1    | Ca_kabuli_chr03 | 38960769                | CC                              | TT              | 1946783329               |
| SNP_P4_36557_38966377 | NC_021162.1    | Ca_kabuli_chr03 | 38966377                | TT                              | GG              | 1946783331               |
| SNP_P4_36559_38970461 | NC_021162.1    | Ca_kabuli_chr03 | 38970461                | TT                              | CC              | 1946783334               |
| SNP_P4_36560_38976211 | NC_021162.1    | Ca_kabuli_chr03 | 38976211                | AA                              | GG              | 1946783336               |

| SNPs IDs              | Chromosome IDs | Chromosomes     | Physical positions (bp) | CDC Frontier (Reference genome) | (ILWC46 & LPNB) | NCBI SNPdb Accession IDs |
|-----------------------|----------------|-----------------|-------------------------|---------------------------------|-----------------|--------------------------|
| SNP_P4_36561_39000572 | NC_021162.1    | Ca_kabuli_chr03 | 39000572                | CC                              | AA              | 1946783338               |
| SNP_P4_36563_39020805 | NC_021162.1    | Ca_kabuli_chr03 | 39020805                | AA                              | GG              | 1946783340               |
| SNP_P4_36565_39053394 | NC_021162.1    | Ca_kabuli_chr03 | 39053394                | AA                              | GG              | 1946783342               |
| SNP_P4_36566_39053916 | NC_021162.1    | Ca_kabuli_chr03 | 39053916                | TT                              | CC              | 1946783344               |
| SNP_P4_36567_39054195 | NC_021162.1    | Ca_kabuli_chr03 | 39054195                | AA                              | GG              | 1946783346               |
| SNP_P4_36568_39069396 | NC_021162.1    | Ca_kabuli_chr03 | 39069396                | AA                              | TT              | 1946783348               |
| SNP_P4_36569_39069397 | NC_021162.1    | Ca_kabuli_chr03 | 39069397                | TT                              | CC              | 1946783350               |
| SNP_P4_36570_39108022 | NC_021162.1    | Ca_kabuli_chr03 | 39108022                | AA                              | GG              | 1946783352               |
| SNP_P4_36571_39156034 | NC_021162.1    | Ca_kabuli_chr03 | 39156034                | GG                              | AA              | 1946783354               |
| SNP_P4_36572_39156091 | NC_021162.1    | Ca_kabuli_chr03 | 39156091                | CC                              | GG              | 1946783356               |
| SNP_P4_36573_39156216 | NC_021162.1    | Ca_kabuli_chr03 | 39156216                | GG                              | CC              | 1946783358               |
| SNP_P4_36574_39170623 | NC_021162.1    | Ca_kabuli_chr03 | 39170623                | AA                              | CC              | 1946783360               |
| SNP_P4_36575_39170624 | NC_021162.1    | Ca_kabuli_chr03 | 39170624                | TT                              | AA              | 1946783362               |
| SNP_P4_36576_39170627 | NC_021162.1    | Ca_kabuli_chr03 | 39170627                | AA                              | GG              | 1946783364               |
| SNP_P4_36577_39190615 | NC_021162.1    | Ca_kabuli_chr03 | 39190615                | AA                              | GG              | 1946783366               |
| SNP_P4_36578_39199931 | NC_021162.1    | Ca_kabuli_chr03 | 39199931                | TT                              | CC              | 1946783368               |
| SNP_P4_36579_39227587 | NC_021162.1    | Ca_kabuli_chr03 | 39227587                | TT                              | CC              | 1946783370               |
| SNP_P4_36581_39271343 | NC_021162.1    | Ca_kabuli_chr03 | 39271343                | GG                              | AA              | 1946783372               |
| SNP_P4_36582_39275431 | NC_021162.1    | Ca_kabuli_chr03 | 39275431                | GG                              | AA              | 1946783375               |
| SNP_P4_36583_39326079 | NC_021162.1    | Ca_kabuli_chr03 | 39326079                | TT                              | AA              | 1946783377               |
| SNP_P4_36584_39347797 | NC_021162.1    | Ca_kabuli_chr03 | 39347797                | GG                              | TT              | 1946783379               |
| SNP_P4_36586_39366896 | NC_021162.1    | Ca_kabuli_chr03 | 39366896                | AA                              | CC              | 1946783381               |
| SNP_P4_36587_39366897 | NC_021162.1    | Ca_kabuli_chr03 | 39366897                | AA                              | GG              | 1946783384               |
| SNP_P4_36588_39388844 | NC_021162.1    | Ca_kabuli_chr03 | 39388844                | CC                              | TT              | 1946783386               |
| SNP_P4_36591_39418741 | NC_021162.1    | Ca_kabuli_chr03 | 39418741                | TT                              | CC              | 1946783388               |
| SNP_P4_36592_39418756 | NC_021162.1    | Ca_kabuli_chr03 | 39418756                | GG                              | AA              | 1946783390               |
| SNP_P4_36593_39418759 | NC_021162.1    | Ca_kabuli_chr03 | 39418759                | CC                              | GG              | 1946783392               |
| SNP_P4_36596_39419727 | NC_021162.1    | Ca_kabuli_chr03 | 39419727                | CC                              | TT              | 1946783394               |
| SNP_P4_36598_39422433 | NC_021162.1    | Ca_kabuli_chr03 | 39422433                | GG                              | AA              | 1946783396               |
| SNP_P4_36599_39475462 | NC_021162.1    | Ca_kabuli_chr03 | 39475462                | TT                              | GG              | 1946783398               |
| SNP_P4_36600_39516958 | NC_021162.1    | Ca_kabuli_chr03 | 39516958                | CC                              | AA              | 1946783400               |
| SNP_P4_36603_39564217 | NC_021162.1    | Ca_kabuli_chr03 | 39564217                | CC                              | GG              | 1946783402               |
| SNP_P4_36604_39578578 | NC_021162.1    | Ca_kabuli_chr03 | 39578578                | GG                              | AA              | 1946783404               |
| SNP_P4_36605_39581648 | NC_021162.1    | Ca_kabuli_chr03 | 39581648                | TT                              | AA              | 1946783406               |
| SNP_P4_36606_39603602 | NC_021162.1    | Ca_kabuli_chr03 | 39603602                | TT                              | AA              | 1946783408               |
| SNP_P4_36607_39611027 | NC_021162.1    | Ca_kabuli_chr03 | 39611027                | TT                              | CC              | 1946783410               |
| SNP_P4_36608_39611094 | NC_021162.1    | Ca_kabuli_chr03 | 39611094                | AA                              | CC              | 1946783412               |
| SNP_P4_36609_39611159 | NC_021162.1    | Ca_kabuli_chr03 | 39611159                | GG                              | AA              | 1946783414               |
| SNP_P4_36610_39611170 | NC_021162.1    | Ca_kabuli_chr03 | 39611170                | TT                              | AA              | 1946783416               |
| SNP_P4_36611_39611320 | NC_021162.1    | Ca_kabuli_chr03 | 39611320                | AA                              | GG              | 1946783418               |
| SNP_P4_36612_39611386 | NC_021162.1    | Ca_kabuli_chr03 | 39611386                | TT                              | GG              | 1946783420               |
| SNP_P4_36613_39611410 | NC_021162.1    | Ca_kabuli_chr03 | 39611410                | TT                              | CC              | 1946783422               |

| SNPs IDs              | Chromosome IDs | Chromosomes     | Physical positions (bp) | CDC Frontier (Reference genome) | (ILWC46 & LPNB) | NCBI SNPdb Accession IDs |
|-----------------------|----------------|-----------------|-------------------------|---------------------------------|-----------------|--------------------------|
| SNP_P4_36614_39611444 | NC_021162.1    | Ca_kabuli_chr03 | 39611444                | GG                              | AA              | 1946783424               |
| SNP_P4_36615_39611446 | NC_021162.1    | Ca_kabuli_chr03 | 39611446                | AA                              | TT              | 1946783426               |
| SNP_P4_36616_39611461 | NC_021162.1    | Ca_kabuli_chr03 | 39611461                | GG                              | AA              | 1946783429               |
| SNP_P4_36617_39611468 | NC_021162.1    | Ca_kabuli_chr03 | 39611468                | CC                              | TT              | 1946783431               |
| SNP_P4_36618_39611490 | NC_021162.1    | Ca_kabuli_chr03 | 39611490                | CC                              | TT              | 1946783433               |
| SNP_P4_36619_39611509 | NC_021162.1    | Ca_kabuli_chr03 | 39611509                | GG                              | CC              | 1946783435               |
| SNP_P4_36620_39611687 | NC_021162.1    | Ca_kabuli_chr03 | 39611687                | GG                              | AA              | 1946783437               |
| SNP_P4_36621_39611688 | NC_021162.1    | Ca_kabuli_chr03 | 39611688                | CC                              | TT              | 1946783439               |
| SNP_P4_36622_39611699 | NC_021162.1    | Ca_kabuli_chr03 | 39611699                | TT                              | CC              | 1946783441               |
| SNP_P4_36623_39611718 | NC_021162.1    | Ca_kabuli_chr03 | 39611718                | GG                              | AA              | 1946783443               |
| SNP_P4_36624_39612237 | NC_021162.1    | Ca_kabuli_chr03 | 39612237                | GG                              | TT              | 1946783445               |
| SNP_P4_36625_39612277 | NC_021162.1    | Ca_kabuli_chr03 | 39612277                | GG                              | AA              | 1946783447               |
| SNP_P4_36626_39612279 | NC_021162.1    | Ca_kabuli_chr03 | 39612279                | CC                              | TT              | 1946783449               |
| SNP_P4_36627_39612430 | NC_021162.1    | Ca_kabuli_chr03 | 39612430                | AA                              | TT              | 1946783451               |
| SNP_P4_36628_39612447 | NC_021162.1    | Ca_kabuli_chr03 | 39612447                | AA                              | CC              | 1946783453               |
| SNP_P4_36629_39612458 | NC_021162.1    | Ca_kabuli_chr03 | 39612458                | AA                              | CC              | 1946783455               |
| SNP_P4_36630_39612534 | NC_021162.1    | Ca_kabuli_chr03 | 39612534                | TT                              | CC              | 1946783457               |
| SNP_P4_36631_39612558 | NC_021162.1    | Ca_kabuli_chr03 | 39612558                | AA                              | TT              | 1946783459               |
| SNP_P4_36632_39612568 | NC_021162.1    | Ca_kabuli_chr03 | 39612568                | AA                              | TT              | 1946783460               |
| SNP_P4_36633_39612573 | NC_021162.1    | Ca_kabuli_chr03 | 39612573                | AA                              | TT              | 1946783462               |
| SNP_P4_36634_39612600 | NC_021162.1    | Ca_kabuli_chr03 | 39612600                | GG                              | AA              | 1946783464               |
| SNP_P4_36635_39620065 | NC_021162.1    | Ca_kabuli_chr03 | 39620065                | CC                              | TT              | 1946783466               |
| SNP_P4_36636_39627567 | NC_021162.1    | Ca_kabuli_chr03 | 39627567                | TT                              | GG              | 1946783468               |
| SNP_P4_36637_39627570 | NC_021162.1    | Ca_kabuli_chr03 | 39627570                | TT                              | GG              | 1946783470               |
| SNP_P4_36638_39627906 | NC_021162.1    | Ca_kabuli_chr03 | 39627906                | AA                              | CC              | 1946783472               |
| SNP_P4_36639_39663690 | NC_021162.1    | Ca_kabuli_chr03 | 39663690                | GG                              | AA              | 1946783474               |
| SNP_P4_36641_39692643 | NC_021162.1    | Ca_kabuli_chr03 | 39692643                | GG                              | AA              | 1946783476               |
| SNP_P4_36642_39697488 | NC_021162.1    | Ca_kabuli_chr03 | 39697488                | CC                              | TT              | 1946783478               |
| SNP_P4_36644_39713805 | NC_021162.1    | Ca_kabuli_chr03 | 39713805                | GG                              | AA              | 1946783480               |
| SNP_P4_36645_39756838 | NC_021162.1    | Ca_kabuli_chr03 | 39756838                | CC                              | TT              | 1946783482               |
| SNP_P4_36647_39765722 | NC_021162.1    | Ca_kabuli_chr03 | 39765722                | TT                              | CC              | 1946783483               |
| SNP_P4_36648_39772879 | NC_021162.1    | Ca_kabuli_chr03 | 39772879                | GG                              | AA              | 1946783485               |
| SNP_P4_36650_39846523 | NC_021162.1    | Ca_kabuli_chr03 | 39846523                | CC                              | TT              | 1946783487               |
| SNP_P4_36652_39864815 | NC_021162.1    | Ca_kabuli_chr03 | 39864815                | GG                              | CC              | 1946783489               |
| SNP_P4_36653_39865286 | NC_021162.1    | Ca_kabuli_chr03 | 39865286                | AA                              | TT              | 1946783491               |
| SNP_P4_36654_39865460 | NC_021162.1    | Ca_kabuli_chr03 | 39865460                | AA                              | CC              | 1946783493               |
| SNP_P4_36655_39865465 | NC_021162.1    | Ca_kabuli_chr03 | 39865465                | AA                              | TT              | 1946783495               |
| SNP_P4_36657_39866503 | NC_021162.1    | Ca_kabuli_chr03 | 39866503                | GG                              | AA              | 1946783497               |
| SNP_P4_36658_39874866 | NC_021162.1    | Ca_kabuli_chr03 | 39874866                | AA                              | CC              | 1946783499               |
| SNP_P4_36659_39887901 | NC_021162.1    | Ca_kabuli_chr03 | 39887901                | TT                              | AA              | 1946783501               |
| SNP_P4_36660_39887905 | NC_021162.1    | Ca_kabuli_chr03 | 39887905                | TT                              | AA              | 1946783503               |
| SNP_P4_36662_39907622 | NC_021162.1    | Ca_kabuli_chr03 | 39907622                | AA                              | TT              | 1946783505               |

| SNPs IDs              | Chromosome IDs | Chromosomes     | Physical positions (bp) | CDC Frontier (Reference genome) | (ILWC46 & LPNB) | NCBI SNPdb Accession IDs |
|-----------------------|----------------|-----------------|-------------------------|---------------------------------|-----------------|--------------------------|
| SNP_P4_36663_39926951 | NC_021162.1    | Ca_kabuli_chr03 | 39926951                | CC                              | TT              | 1946783507               |
| SNP_P4_36664_39933820 | NC_021162.1    | Ca_kabuli_chr03 | 39933820                | TT                              | CC              | 1946783509               |
| SNP_P4_36665_39933845 | NC_021162.1    | Ca_kabuli_chr03 | 39933845                | AA                              | GG              | 1946783511               |
| SNP_P4_36666_39933897 | NC_021162.1    | Ca_kabuli_chr03 | 39933897                | CC                              | TT              | 1946783513               |
| SNP_P4_36667_39933905 | NC_021162.1    | Ca_kabuli_chr03 | 39933905                | CC                              | TT              | 1946783515               |
| SNP_P4_36668_39934096 | NC_021162.1    | Ca_kabuli_chr03 | 39934096                | CC                              | TT              | 1946783517               |
| SNP_P4_36669_39934158 | NC_021162.1    | Ca_kabuli_chr03 | 39934158                | TT                              | CC              | 1946783519               |
| SNP_P4_36670_39934891 | NC_021162.1    | Ca_kabuli_chr03 | 39934891                | GG                              | AA              | 1946783521               |
| SNP_P4_36671_39938101 | NC_021162.1    | Ca_kabuli_chr03 | 39938101                | AA                              | GG              | 1946783523               |
| SNP_P4_36672_39956407 | NC_021162.1    | Ca_kabuli_chr03 | 39956407                | TT                              | CC              | 1946783525               |
| SNP_P4_36673_39956440 | NC_021162.1    | Ca_kabuli_chr03 | 39956440                | CC                              | TT              | 1946783528               |
| SNP_P4_36675_39964840 | NC_021162.1    | Ca_kabuli_chr03 | 39964840                | TT                              | GG              | 1946783530               |
| SNP_P4_36676_39977800 | NC_021162.1    | Ca_kabuli_chr03 | 39977800                | AA                              | GG              | 1946783532               |
| SNP_P4_36677_39978056 | NC_021162.1    | Ca_kabuli_chr03 | 39978056                | TT                              | CC              | 1946783534               |
| SNP_P4_36678_39978229 | NC_021162.1    | Ca_kabuli_chr03 | 39978229                | CC                              | AA              | 1946783536               |
| SNP_P4_36679_39978389 | NC_021162.1    | Ca_kabuli_chr03 | 39978389                | AA                              | GG              | 1946783538               |
| SNP_P4_36680_39978427 | NC_021162.1    | Ca_kabuli_chr03 | 39978427                | AA                              | GG              | 1946783540               |
| SNP_P4_36681_39978474 | NC_021162.1    | Ca_kabuli_chr03 | 39978474                | AA                              | TT              | 1946783542               |
| SNP_P4_36682_39978481 | NC_021162.1    | Ca_kabuli_chr03 | 39978481                | TT                              | GG              | 1946783544               |
| SNP_P4_36683_39978492 | NC_021162.1    | Ca_kabuli_chr03 | 39978492                | TT                              | CC              | 1946783546               |
| SNP_P4_36684_39979079 | NC_021162.1    | Ca_kabuli_chr03 | 39979079                | TT                              | GG              | 1946783548               |
| SNP_P4_36685_39979104 | NC_021162.1    | Ca_kabuli_chr03 | 39979104                | TT                              | CC              | 1946783550               |
| SNP_P4_36686_39979173 | NC_021162.1    | Ca_kabuli_chr03 | 39979173                | GG                              | CC              | 1946783552               |
| SNP_P4_36687_39979268 | NC_021162.1    | Ca_kabuli_chr03 | 39979268                | AA                              | CC              | 1946783554               |
| SNP_P4_36688_39981442 | NC_021162.1    | Ca_kabuli_chr03 | 39981442                | AA                              | TT              | 1946783556               |
| SNP_P4_36689_39981443 | NC_021162.1    | Ca_kabuli_chr03 | 39981443                | TT                              | GG              | 1946783558               |
| SNP_P4_36690_39981617 | NC_021162.1    | Ca_kabuli_chr03 | 39981617                | TT                              | CC              | 1946783560               |
| SNP_P4_36691_39981648 | NC_021162.1    | Ca_kabuli_chr03 | 39981648                | GG                              | CC              | 1946783561               |
| SNP_P4_36692_39981974 | NC_021162.1    | Ca_kabuli_chr03 | 39981974                | AA                              | GG              | 1946783563               |
| SNP_P4_36693_39982030 | NC_021162.1    | Ca_kabuli_chr03 | 39982030                | TT                              | CC              | 1946783565               |
| SNP_P4_36694_39984583 | NC_021162.1    | Ca_kabuli_chr03 | 39984583                | TT                              | CC              | 1946783567               |
| SNP_P4_36695_39984608 | NC_021162.1    | Ca_kabuli_chr03 | 39984608                | AA                              | CC              | 1946783569               |
| SNP_P4_36696_39988165 | NC_021162.1    | Ca_kabuli_chr03 | 39988165                | GG                              | CC              | 1946783571               |
| SNP_P4_36697_39988204 | NC_021162.1    | Ca_kabuli_chr03 | 39988204                | AA                              | CC              | 1946783573               |
| SNP_P4_36698_39988217 | NC_021162.1    | Ca_kabuli_chr03 | 39988217                | CC                              | AA              | 1946783575               |
| SNP_P4_36700_39988500 | NC_021162.1    | Ca_kabuli_chr03 | 39988500                | GG                              | CC              | 1946783577               |
| SNP_P4_36701_13991    | NC_021163.1    | Ca_kabuli_chr04 | 13991                   | TT                              | CC              | 1946783579               |
| SNP_P4_36702_24040    | NC_021163.1    | Ca_kabuli_chr04 | 24040                   | TT                              | AA              | 1946783581               |
| SNP_P4_36703_28963    | NC_021163.1    | Ca_kabuli_chr04 | 28963                   | AA                              | GG              | 1946783583               |
| SNP_P4_36704_30623    | NC_021163.1    | Ca_kabuli_chr04 | 30623                   | GG                              | AA              | 1946783585               |
| SNP_P4_36705_43120    | NC_021163.1    | Ca_kabuli_chr04 | 43120                   | AA                              | TT              | 1946783587               |
| SNP_P4_36706_45909    | NC_021163.1    | Ca_kabuli_chr04 | 45909                   | CC                              | GG              | 1946783589               |



| SNPs IDs            | Chromosome IDs | Chromosomes     | Physical positions (bp) | CDC Frontier (Reference genome) | (ILWC46 & LPNB) | NCBI SNPdb Accession IDs |
|---------------------|----------------|-----------------|-------------------------|---------------------------------|-----------------|--------------------------|
| SNP_P4_36707_79769  | NC_021163.1    | Ca_kabuli_chr04 | 79769                   | GG                              | AA              | 1946783590               |
| SNP_P4_36709_80152  | NC_021163.1    | Ca_kabuli_chr04 | 80152                   | CC                              | AA              | 1946783592               |
| SNP_P4_36710_80169  | NC_021163.1    | Ca_kabuli_chr04 | 80169                   | TT                              | CC              | 1946783594               |
| SNP_P4_36711_80212  | NC_021163.1    | Ca_kabuli_chr04 | 80212                   | CC                              | TT              | 1946783596               |
| SNP_P4_36712_80250  | NC_021163.1    | Ca_kabuli_chr04 | 80250                   | AA                              | GG              | 1946783598               |
| SNP_P4_36713_80289  | NC_021163.1    | Ca_kabuli_chr04 | 80289                   | AA                              | GG              | 1946783600               |
| SNP_P4_36714_80321  | NC_021163.1    | Ca_kabuli_chr04 | 80321                   | AA                              | CC              | 1946783602               |
| SNP_P4_36715_85513  | NC_021163.1    | Ca_kabuli_chr04 | 85513                   | TT                              | CC              | 1946783604               |
| SNP_P4_36716_85525  | NC_021163.1    | Ca_kabuli_chr04 | 85525                   | TT                              | AA              | 1946783606               |
| SNP_P4_36717_85556  | NC_021163.1    | Ca_kabuli_chr04 | 85556                   | TT                              | GG              | 1946783608               |
| SNP_P4_36718_85592  | NC_021163.1    | Ca_kabuli_chr04 | 85592                   | GG                              | CC              | 1946783610               |
| SNP_P4_36719_85612  | NC_021163.1    | Ca_kabuli_chr04 | 85612                   | AA                              | TT              | 1946783612               |
| SNP_P4_36720_85714  | NC_021163.1    | Ca_kabuli_chr04 | 85714                   | TT                              | CC              | 1946783614               |
| SNP_P4_36721_85721  | NC_021163.1    | Ca_kabuli_chr04 | 85721                   | CC                              | TT              | 1946783616               |
| SNP_P4_36722_85945  | NC_021163.1    | Ca_kabuli_chr04 | 85945                   | TT                              | CC              | 1946783618               |
| SNP_P4_36723_86019  | NC_021163.1    | Ca_kabuli_chr04 | 86019                   | TT                              | GG              | 1946783620               |
| SNP_P4_36724_89808  | NC_021163.1    | Ca_kabuli_chr04 | 89808                   | GG                              | AA              | 1946783622               |
| SNP_P4_36725_89837  | NC_021163.1    | Ca_kabuli_chr04 | 89837                   | TT                              | AA              | 1946783624               |
| SNP_P4_36726_89884  | NC_021163.1    | Ca_kabuli_chr04 | 89884                   | AA                              | GG              | 1946783626               |
| SNP_P4_36727_90131  | NC_021163.1    | Ca_kabuli_chr04 | 90131                   | GG                              | CC              | 1946783628               |
| SNP_P4_36728_90171  | NC_021163.1    | Ca_kabuli_chr04 | 90171                   | GG                              | TT              | 1946783630               |
| SNP_P4_36729_109883 | NC_021163.1    | Ca_kabuli_chr04 | 109883                  | AA                              | GG              | 1946783632               |
| SNP_P4_36730_113325 | NC_021163.1    | Ca_kabuli_chr04 | 113325                  | GG                              | AA              | 1946783634               |
| SNP_P4_36731_130223 | NC_021163.1    | Ca_kabuli_chr04 | 130223                  | TT                              | AA              | 1946783636               |
| SNP_P4_36732_130718 | NC_021163.1    | Ca_kabuli_chr04 | 130718                  | TT                              | GG              | 1946783638               |
| SNP_P4_36733_130733 | NC_021163.1    | Ca_kabuli_chr04 | 130733                  | CC                              | TT              | 1946783640               |
| SNP_P4_36734_130789 | NC_021163.1    | Ca_kabuli_chr04 | 130789                  | TT                              | CC              | 1946783642               |
| SNP_P4_36735_130827 | NC_021163.1    | Ca_kabuli_chr04 | 130827                  | AA                              | GG              | 1946783644               |
| SNP_P4_36736_130850 | NC_021163.1    | Ca_kabuli_chr04 | 130850                  | TT                              | CC              | 1946783646               |
| SNP_P4_36737_130860 | NC_021163.1    | Ca_kabuli_chr04 | 130860                  | AA                              | GG              | 1946783648               |
| SNP_P4_36738_130974 | NC_021163.1    | Ca_kabuli_chr04 | 130974                  | AA                              | GG              | 1946783650               |
| SNP_P4_36739_130983 | NC_021163.1    | Ca_kabuli_chr04 | 130983                  | AA                              | GG              | 1946783652               |
| SNP_P4_36740_131016 | NC_021163.1    | Ca_kabuli_chr04 | 131016                  | AA                              | GG              | 1946783654               |
| SNP_P4_36741_131032 | NC_021163.1    | Ca_kabuli_chr04 | 131032                  | CC                              | TT              | 1946783656               |
| SNP_P4_36742_131064 | NC_021163.1    | Ca_kabuli_chr04 | 131064                  | CC                              | AA              | 1946783658               |
| SNP_P4_36743_131091 | NC_021163.1    | Ca_kabuli_chr04 | 131091                  | GG                              | AA              | 1946783660               |
| SNP_P4_36744_131166 | NC_021163.1    | Ca_kabuli_chr04 | 131166                  | AA                              | GG              | 1946783662               |
| SNP_P4_36745_131211 | NC_021163.1    | Ca_kabuli_chr04 | 131211                  | TT                              | AA              | 1946783664               |
| SNP_P4_36746_175585 | NC_021163.1    | Ca_kabuli_chr04 | 175585                  | GG                              | CC              | 1946783666               |
| SNP_P4_36747_199765 | NC_021163.1    | Ca_kabuli_chr04 | 199765                  | TT                              | CC              | 1946783668               |
| SNP_P4_36748_209064 | NC_021163.1    | Ca_kabuli_chr04 | 209064                  | GG                              | AA              | 1946783670               |
| SNP_P4_36749_209449 | NC_021163.1    | Ca_kabuli_chr04 | 209449                  | TT                              | CC              | 1946783672               |

| SNPs IDs            | Chromosome IDs | Chromosomes     | Physical positions (bp) | CDC Frontier (Reference genome) | (ILWC46 & LPNB) | NCBI SNPdb Accession IDs |
|---------------------|----------------|-----------------|-------------------------|---------------------------------|-----------------|--------------------------|
| SNP_P4_36750_274479 | NC_021163.1    | Ca_kabuli_chr04 | 274479                  | CC                              | AA              | 1946783674               |
| SNP_P4_36752_335605 | NC_021163.1    | Ca_kabuli_chr04 | 335605                  | AA                              | CC              | 1946783676               |
| SNP_P4_36753_339281 | NC_021163.1    | Ca_kabuli_chr04 | 339281                  | AA                              | GG              | 1946783678               |
| SNP_P4_36754_340122 | NC_021163.1    | Ca_kabuli_chr04 | 340122                  | TT                              | AA              | 1946783680               |
| SNP_P4_36755_340477 | NC_021163.1    | Ca_kabuli_chr04 | 340477                  | AA                              | GG              | 1946783682               |
| SNP_P4_36757_350732 | NC_021163.1    | Ca_kabuli_chr04 | 350732                  | TT                              | AA              | 1946783684               |
| SNP_P4_36758_357290 | NC_021163.1    | Ca_kabuli_chr04 | 357290                  | GG                              | TT              | 1946783686               |
| SNP_P4_36759_357397 | NC_021163.1    | Ca_kabuli_chr04 | 357397                  | TT                              | AA              | 1946783688               |
| SNP_P4_36760_357436 | NC_021163.1    | Ca_kabuli_chr04 | 357436                  | TT                              | AA              | 1946783690               |
| SNP_P4_36761_357498 | NC_021163.1    | Ca_kabuli_chr04 | 357498                  | CC                              | AA              | 1946783692               |
| SNP_P4_36762_357529 | NC_021163.1    | Ca_kabuli_chr04 | 357529                  | CC                              | TT              | 1946783694               |
| SNP_P4_36763_357562 | NC_021163.1    | Ca_kabuli_chr04 | 357562                  | TT                              | CC              | 1946783696               |
| SNP_P4_36764_357582 | NC_021163.1    | Ca_kabuli_chr04 | 357582                  | TT                              | GG              | 1946783698               |
| SNP_P4_36765_357637 | NC_021163.1    | Ca_kabuli_chr04 | 357637                  | AA                              | CC              | 1946783700               |
| SNP_P4_36766_357650 | NC_021163.1    | Ca_kabuli_chr04 | 357650                  | GG                              | AA              | 1946783702               |
| SNP_P4_36767_357724 | NC_021163.1    | Ca_kabuli_chr04 | 357724                  | AA                              | CC              | 1946783704               |
| SNP_P4_36768_357761 | NC_021163.1    | Ca_kabuli_chr04 | 357761                  | TT                              | CC              | 1946783706               |
| SNP_P4_36769_357853 | NC_021163.1    | Ca_kabuli_chr04 | 357853                  | AA                              | GG              | 1946783708               |
| SNP_P4_36770_367222 | NC_021163.1    | Ca_kabuli_chr04 | 367222                  | GG                              | AA              | 1946783710               |
| SNP_P4_36771_368133 | NC_021163.1    | Ca_kabuli_chr04 | 368133                  | AA                              | GG              | 1946783712               |
| SNP_P4_36772_368135 | NC_021163.1    | Ca_kabuli_chr04 | 368135                  | CC                              | TT              | 1946783714               |
| SNP_P4_36773_368139 | NC_021163.1    | Ca_kabuli_chr04 | 368139                  | AA                              | TT              | 1946783716               |
| SNP_P4_36775_391813 | NC_021163.1    | Ca_kabuli_chr04 | 391813                  | AA                              | TT              | 1946783718               |
| SNP_P4_36776_391814 | NC_021163.1    | Ca_kabuli_chr04 | 391814                  | AA                              | CC              | 1946783720               |
| SNP_P4_36777_418082 | NC_021163.1    | Ca_kabuli_chr04 | 418082                  | CC                              | TT              | 1946783722               |
| SNP_P4_36778_419204 | NC_021163.1    | Ca_kabuli_chr04 | 419204                  | GG                              | AA              | 1946783724               |
| SNP_P4_36779_428569 | NC_021163.1    | Ca_kabuli_chr04 | 428569                  | TT                              | CC              | 1946783726               |
| SNP_P4_36780_434225 | NC_021163.1    | Ca_kabuli_chr04 | 434225                  | GG                              | TT              | 1946783728               |
| SNP_P4_36781_468204 | NC_021163.1    | Ca_kabuli_chr04 | 468204                  | TT                              | CC              | 1946783730               |
| SNP_P4_36782_471800 | NC_021163.1    | Ca_kabuli_chr04 | 471800                  | CC                              | TT              | 1946783733               |
| SNP_P4_36783_478439 | NC_021163.1    | Ca_kabuli_chr04 | 478439                  | TT                              | CC              | 1946783735               |
| SNP_P4_36785_531356 | NC_021163.1    | Ca_kabuli_chr04 | 531356                  | GG                              | AA              | 1946783737               |
| SNP_P4_36786_537136 | NC_021163.1    | Ca_kabuli_chr04 | 537136                  | AA                              | TT              | 1946783739               |
| SNP_P4_36787_538472 | NC_021163.1    | Ca_kabuli_chr04 | 538472                  | AA                              | TT              | 1946783741               |
| SNP_P4_36789_568239 | NC_021163.1    | Ca_kabuli_chr04 | 568239                  | GG                              | CC              | 1946783743               |
| SNP_P4_36790_579034 | NC_021163.1    | Ca_kabuli_chr04 | 579034                  | AA                              | CC              | 1946783745               |
| SNP_P4_36792_584089 | NC_021163.1    | Ca_kabuli_chr04 | 584089                  | CC                              | TT              | 1946783747               |
| SNP_P4_36793_584090 | NC_021163.1    | Ca_kabuli_chr04 | 584090                  | CC                              | AA              | 1946783749               |
| SNP_P4_36794_584099 | NC_021163.1    | Ca_kabuli_chr04 | 584099                  | GG                              | AA              | 1946783751               |
| SNP_P4_36795_602189 | NC_021163.1    | Ca_kabuli_chr04 | 602189                  | AA                              | CC              | 1946783753               |
| SNP_P4_36796_602191 | NC_021163.1    | Ca_kabuli_chr04 | 602191                  | AA                              | GG              | 1946783756               |
| SNP_P4_36800_674431 | NC_021163.1    | Ca_kabuli_chr04 | 674431                  | GG                              | AA              | 1946783758               |

| SNPs IDs             | Chromosome IDs | Chromosomes     | Physical positions (bp) | CDC Frontier (Reference genome) | (ILWC46 & LPNB) | NCBI SNPdb Accession IDs |
|----------------------|----------------|-----------------|-------------------------|---------------------------------|-----------------|--------------------------|
| SNP_P4_36803_752883  | NC_021163.1    | Ca_kabuli_chr04 | 752883                  | GG                              | AA              | 1946783760               |
| SNP_P4_36804_776331  | NC_021163.1    | Ca_kabuli_chr04 | 776331                  | CC                              | TT              | 1946783762               |
| SNP_P4_36805_780349  | NC_021163.1    | Ca_kabuli_chr04 | 780349                  | TT                              | CC              | 1946783764               |
| SNP_P4_36806_787436  | NC_021163.1    | Ca_kabuli_chr04 | 787436                  | GG                              | AA              | 1946783766               |
| SNP_P4_36807_814283  | NC_021163.1    | Ca_kabuli_chr04 | 814283                  | AA                              | CC              | 1946783768               |
| SNP_P4_36808_814284  | NC_021163.1    | Ca_kabuli_chr04 | 814284                  | AA                              | CC              | 1946783770               |
| SNP_P4_36810_868069  | NC_021163.1    | Ca_kabuli_chr04 | 868069                  | GG                              | CC              | 1946783772               |
| SNP_P4_36812_940534  | NC_021163.1    | Ca_kabuli_chr04 | 940534                  | AA                              | CC              | 1946783774               |
| SNP_P4_36813_945822  | NC_021163.1    | Ca_kabuli_chr04 | 945822                  | TT                              | AA              | 1946783776               |
| SNP_P4_36814_945824  | NC_021163.1    | Ca_kabuli_chr04 | 945824                  | TT                              | AA              | 1946783778               |
| SNP_P4_36815_949907  | NC_021163.1    | Ca_kabuli_chr04 | 949907                  | CC                              | TT              | 1946783780               |
| SNP_P4_36816_982276  | NC_021163.1    | Ca_kabuli_chr04 | 982276                  | AA                              | GG              | 1946783783               |
| SNP_P4_36817_988320  | NC_021163.1    | Ca_kabuli_chr04 | 988320                  | AA                              | CC              | 1946783784               |
| SNP_P4_36818_988324  | NC_021163.1    | Ca_kabuli_chr04 | 988324                  | GG                              | AA              | 1946783785               |
| SNP_P4_36819_988337  | NC_021163.1    | Ca_kabuli_chr04 | 988337                  | AA                              | GG              | 1946783786               |
| SNP_P4_36820_1042813 | NC_021163.1    | Ca_kabuli_chr04 | 1042813                 | AA                              | GG              | 1946783787               |
| SNP_P4_36821_1043221 | NC_021163.1    | Ca_kabuli_chr04 | 1043221                 | TT                              | CC              | 1946783788               |
| SNP_P4_36822_1059819 | NC_021163.1    | Ca_kabuli_chr04 | 1059819                 | AA                              | GG              | 1946783789               |
| SNP_P4_36824_1172883 | NC_021163.1    | Ca_kabuli_chr04 | 1172883                 | TT                              | GG              | 1946783790               |
| SNP_P4_36825_1178111 | NC_021163.1    | Ca_kabuli_chr04 | 1178111                 | CC                              | TT              | 1946783792               |
| SNP_P4_36826_1218912 | NC_021163.1    | Ca_kabuli_chr04 | 1218912                 | TT                              | AA              | 1946783794               |
| SNP_P4_36827_1231070 | NC_021163.1    | Ca_kabuli_chr04 | 1231070                 | CC                              | TT              | 1946783796               |
| SNP_P4_36830_1252062 | NC_021163.1    | Ca_kabuli_chr04 | 1252062                 | GG                              | AA              | 1946783798               |
| SNP_P4_36831_1272199 | NC_021163.1    | Ca_kabuli_chr04 | 1272199                 | CC                              | TT              | 1946783800               |
| SNP_P4_36832_1281262 | NC_021163.1    | Ca_kabuli_chr04 | 1281262                 | TT                              | CC              | 1946783802               |
| SNP_P4_36834_1332059 | NC_021163.1    | Ca_kabuli_chr04 | 1332059                 | TT                              | CC              | 1946783804               |
| SNP_P4_36835_1334863 | NC_021163.1    | Ca_kabuli_chr04 | 1334863                 | CC                              | TT              | 1946783806               |
| SNP_P4_36836_1366141 | NC_021163.1    | Ca_kabuli_chr04 | 1366141                 | AA                              | GG              | 1946783808               |
| SNP_P4_36839_1408998 | NC_021163.1    | Ca_kabuli_chr04 | 1408998                 | CC                              | TT              | 1946783810               |
| SNP_P4_36840_1409007 | NC_021163.1    | Ca_kabuli_chr04 | 1409007                 | TT                              | GG              | 1946783812               |
| SNP_P4_36841_1409008 | NC_021163.1    | Ca_kabuli_chr04 | 1409008                 | TT                              | CC              | 1946783814               |
| SNP_P4_36842_1416664 | NC_021163.1    | Ca_kabuli_chr04 | 1416664                 | GG                              | AA              | 1946783816               |
| SNP_P4_36843_1423914 | NC_021163.1    | Ca_kabuli_chr04 | 1423914                 | AA                              | TT              | 1946783818               |
| SNP_P4_36845_1466459 | NC_021163.1    | Ca_kabuli_chr04 | 1466459                 | GG                              | AA              | 1946783820               |
| SNP_P4_36846_1484913 | NC_021163.1    | Ca_kabuli_chr04 | 1484913                 | AA                              | GG              | 1946783822               |
| SNP_P4_36847_1488729 | NC_021163.1    | Ca_kabuli_chr04 | 1488729                 | TT                              | GG              | 1946783824               |
| SNP_P4_36848_1499677 | NC_021163.1    | Ca_kabuli_chr04 | 1499677                 | GG                              | TT              | 1946783826               |
| SNP_P4_36849_1520989 | NC_021163.1    | Ca_kabuli_chr04 | 1520989                 | AA                              | CC              | 1946783828               |
| SNP_P4_36850_1521075 | NC_021163.1    | Ca_kabuli_chr04 | 1521075                 | AA                              | GG              | 1946783830               |
| SNP_P4_36851_1536655 | NC_021163.1    | Ca_kabuli_chr04 | 1536655                 | TT                              | CC              | 1946783832               |
| SNP_P4_36852_1536859 | NC_021163.1    | Ca_kabuli_chr04 | 1536859                 | TT                              | CC              | 1946783834               |
| SNP_P4_36854_1553749 | NC_021163.1    | Ca_kabuli_chr04 | 1553749                 | GG                              | TT              | 1946783836               |

| SNPs IDs             | Chromosome IDs | Chromosomes     | Physical positions (bp) | CDC Frontier (Reference genome) | (ILWC46 & LPNB) | NCBI SNPdb Accession IDs |
|----------------------|----------------|-----------------|-------------------------|---------------------------------|-----------------|--------------------------|
| SNP_P4_36855_1556316 | NC_021163.1    | Ca_kabuli_chr04 | 1556316                 | GG                              | AA              | 1946783838               |
| SNP_P4_36856_1590864 | NC_021163.1    | Ca_kabuli_chr04 | 1590864                 | AA                              | CC              | 1946783840               |
| SNP_P4_36857_1591619 | NC_021163.1    | Ca_kabuli_chr04 | 1591619                 | GG                              | AA              | 1946783842               |
| SNP_P4_36859_1592076 | NC_021163.1    | Ca_kabuli_chr04 | 1592076                 | TT                              | GG              | 1946783845               |
| SNP_P4_36860_1592080 | NC_021163.1    | Ca_kabuli_chr04 | 1592080                 | TT                              | AA              | 1946783847               |
| SNP_P4_36861_1596982 | NC_021163.1    | Ca_kabuli_chr04 | 1596982                 | GG                              | AA              | 1946783849               |
| SNP_P4_36862_1597120 | NC_021163.1    | Ca_kabuli_chr04 | 1597120                 | TT                              | CC              | 1946783851               |
| SNP_P4_36863_1623978 | NC_021163.1    | Ca_kabuli_chr04 | 1623978                 | AA                              | CC              | 1946783853               |
| SNP_P4_36865_1646739 | NC_021163.1    | Ca_kabuli_chr04 | 1646739                 | CC                              | TT              | 1946783855               |
| SNP_P4_36866_1675801 | NC_021163.1    | Ca_kabuli_chr04 | 1675801                 | GG                              | TT              | 1946783857               |
| SNP_P4_36867_1677022 | NC_021163.1    | Ca_kabuli_chr04 | 1677022                 | GG                              | AA              | 1946783859               |
| SNP_P4_36868_1677042 | NC_021163.1    | Ca_kabuli_chr04 | 1677042                 | AA                              | CC              | 1946783861               |
| SNP_P4_36869_1677101 | NC_021163.1    | Ca_kabuli_chr04 | 1677101                 | TT                              | AA              | 1946783863               |
| SNP_P4_36870_1677197 | NC_021163.1    | Ca_kabuli_chr04 | 1677197                 | GG                              | AA              | 1946783865               |
| SNP_P4_36871_1677209 | NC_021163.1    | Ca_kabuli_chr04 | 1677209                 | TT                              | AA              | 1946783867               |
| SNP_P4_36872_1677215 | NC_021163.1    | Ca_kabuli_chr04 | 1677215                 | GG                              | CC              | 1946783869               |
| SNP_P4_36873_1677219 | NC_021163.1    | Ca_kabuli_chr04 | 1677219                 | TT                              | GG              | 1946783871               |
| SNP_P4_36874_1677233 | NC_021163.1    | Ca_kabuli_chr04 | 1677233                 | TT                              | CC              | 1946783873               |
| SNP_P4_36875_1677241 | NC_021163.1    | Ca_kabuli_chr04 | 1677241                 | TT                              | CC              | 1946783875               |
| SNP_P4_36876_1677242 | NC_021163.1    | Ca_kabuli_chr04 | 1677242                 | GG                              | AA              | 1946783877               |
| SNP_P4_36878_1677466 | NC_021163.1    | Ca_kabuli_chr04 | 1677466                 | CC                              | TT              | 1946783879               |
| SNP_P4_36879_1678817 | NC_021163.1    | Ca_kabuli_chr04 | 1678817                 | TT                              | AA              | 1946783881               |
| SNP_P4_36880_1697293 | NC_021163.1    | Ca_kabuli_chr04 | 1697293                 | TT                              | CC              | 1946783883               |
| SNP_P4_36881_1702012 | NC_021163.1    | Ca_kabuli_chr04 | 1702012                 | TT                              | GG              | 1946783885               |
| SNP_P4_36882_1702013 | NC_021163.1    | Ca_kabuli_chr04 | 1702013                 | TT                              | GG              | 1946783887               |
| SNP_P4_36883_1708370 | NC_021163.1    | Ca_kabuli_chr04 | 1708370                 | CC                              | TT              | 1946783889               |
| SNP_P4_36884_1763076 | NC_021163.1    | Ca_kabuli_chr04 | 1763076                 | TT                              | AA              | 1946783891               |
| SNP_P4_36885_1763077 | NC_021163.1    | Ca_kabuli_chr04 | 1763077                 | TT                              | AA              | 1946783893               |
| SNP_P4_36887_1763361 | NC_021163.1    | Ca_kabuli_chr04 | 1763361                 | CC                              | TT              | 1946783895               |
| SNP_P4_36888_1763606 | NC_021163.1    | Ca_kabuli_chr04 | 1763606                 | AA                              | GG              | 1946783898               |
| SNP_P4_36890_1767024 | NC_021163.1    | Ca_kabuli_chr04 | 1767024                 | TT                              | AA              | 1946783900               |
| SNP_P4_36891_1767606 | NC_021163.1    | Ca_kabuli_chr04 | 1767606                 | GG                              | AA              | 1946783902               |
| SNP_P4_36892_1772493 | NC_021163.1    | Ca_kabuli_chr04 | 1772493                 | AA                              | CC              | 1946783904               |
| SNP_P4_36893_1772526 | NC_021163.1    | Ca_kabuli_chr04 | 1772526                 | TT                              | CC              | 1946783906               |
| SNP_P4_36894_1772529 | NC_021163.1    | Ca_kabuli_chr04 | 1772529                 | GG                              | CC              | 1946783908               |
| SNP_P4_36895_1773528 | NC_021163.1    | Ca_kabuli_chr04 | 1773528                 | GG                              | TT              | 1946783910               |
| SNP_P4_36896_1773542 | NC_021163.1    | Ca_kabuli_chr04 | 1773542                 | TT                              | CC              | 1946783912               |
| SNP_P4_36897_1773558 | NC_021163.1    | Ca_kabuli_chr04 | 1773558                 | CC                              | TT              | 1946783914               |
| SNP_P4_36899_1774545 | NC_021163.1    | Ca_kabuli_chr04 | 1774545                 | AA                              | GG              | 1946783916               |
| SNP_P4_36900_1774630 | NC_021163.1    | Ca_kabuli_chr04 | 1774630                 | TT                              | CC              | 1946783918               |
| SNP_P4_36901_1774848 | NC_021163.1    | Ca_kabuli_chr04 | 1774848                 | CC                              | TT              | 1946783921               |
| SNP_P4_36902_1774856 | NC_021163.1    | Ca_kabuli_chr04 | 1774856                 | CC                              | AA              | 1946783923               |

| SNPs IDs             | Chromosome IDs | Chromosomes     | Physical positions (bp) | CDC Frontier (Reference genome) | (ILWC46 & LPNB) | NCBI SNPdb Accession IDs |
|----------------------|----------------|-----------------|-------------------------|---------------------------------|-----------------|--------------------------|
| SNP_P4_36903_1774877 | NC_021163.1    | Ca_kabuli_chr04 | 1774877                 | AA                              | GG              | 1946783925               |
| SNP_P4_36904_1775892 | NC_021163.1    | Ca_kabuli_chr04 | 1775892                 | GG                              | AA              | 1946783927               |
| SNP_P4_36905_1775935 | NC_021163.1    | Ca_kabuli_chr04 | 1775935                 | AA                              | CC              | 1946783929               |
| SNP_P4_36906_1775941 | NC_021163.1    | Ca_kabuli_chr04 | 1775941                 | CC                              | TT              | 1946783931               |
| SNP_P4_36907_1776419 | NC_021163.1    | Ca_kabuli_chr04 | 1776419                 | GG                              | AA              | 1946783933               |
| SNP_P4_36908_1776426 | NC_021163.1    | Ca_kabuli_chr04 | 1776426                 | TT                              | CC              | 1946783935               |
| SNP_P4_36909_1776842 | NC_021163.1    | Ca_kabuli_chr04 | 1776842                 | CC                              | AA              | 1946783937               |
| SNP_P4_36911_1777989 | NC_021163.1    | Ca_kabuli_chr04 | 1777989                 | TT                              | CC              | 1946783940               |
| SNP_P4_36912_1778025 | NC_021163.1    | Ca_kabuli_chr04 | 1778025                 | TT                              | CC              | 1946783942               |
| SNP_P4_36913_1779900 | NC_021163.1    | Ca_kabuli_chr04 | 1779900                 | AA                              | TT              | 1946783944               |
| SNP_P4_36914_1779901 | NC_021163.1    | Ca_kabuli_chr04 | 1779901                 | CC                              | AA              | 1946783946               |
| SNP_P4_36915_1779927 | NC_021163.1    | Ca_kabuli_chr04 | 1779927                 | AA                              | GG              | 1946783948               |
| SNP_P4_36916_1779940 | NC_021163.1    | Ca_kabuli_chr04 | 1779940                 | CC                              | TT              | 1946783950               |
| SNP_P4_36917_1780177 | NC_021163.1    | Ca_kabuli_chr04 | 1780177                 | AA                              | GG              | 1946783952               |
| SNP_P4_36919_1780242 | NC_021163.1    | Ca_kabuli_chr04 | 1780242                 | CC                              | TT              | 1946783954               |
| SNP_P4_36920_1780277 | NC_021163.1    | Ca_kabuli_chr04 | 1780277                 | TT                              | GG              | 1946783956               |
| SNP_P4_36921_1780292 | NC_021163.1    | Ca_kabuli_chr04 | 1780292                 | CC                              | TT              | 1946783958               |
| SNP_P4_36922_1780294 | NC_021163.1    | Ca_kabuli_chr04 | 1780294                 | AA                              | GG              | 1946783960               |
| SNP_P4_36923_1781745 | NC_021163.1    | Ca_kabuli_chr04 | 1781745                 | GG                              | AA              | 1946783962               |
| SNP_P4_36924_1781806 | NC_021163.1    | Ca_kabuli_chr04 | 1781806                 | CC                              | AA              | 1946783964               |
| SNP_P4_36925_1782436 | NC_021163.1    | Ca_kabuli_chr04 | 1782436                 | CC                              | AA              | 1946783966               |
| SNP_P4_36926_1782660 | NC_021163.1    | Ca_kabuli_chr04 | 1782660                 | CC                              | AA              | 1946783968               |
| SNP_P4_36927_1783150 | NC_021163.1    | Ca_kabuli_chr04 | 1783150                 | GG                              | AA              | 1946783970               |
| SNP_P4_36928_1783808 | NC_021163.1    | Ca_kabuli_chr04 | 1783808                 | TT                              | CC              | 1946783972               |
| SNP_P4_36929_1786249 | NC_021163.1    | Ca_kabuli_chr04 | 1786249                 | GG                              | TT              | 1946783974               |
| SNP_P4_36931_1786417 | NC_021163.1    | Ca_kabuli_chr04 | 1786417                 | CC                              | GG              | 1946783976               |
| SNP_P4_36932_1786596 | NC_021163.1    | Ca_kabuli_chr04 | 1786596                 | GG                              | TT              | 1946783978               |
| SNP_P4_36933_1786735 | NC_021163.1    | Ca_kabuli_chr04 | 1786735                 | GG                              | AA              | 1946783980               |
| SNP_P4_36934_1786751 | NC_021163.1    | Ca_kabuli_chr04 | 1786751                 | GG                              | AA              | 1946783982               |
| SNP_P4_36935_1786768 | NC_021163.1    | Ca_kabuli_chr04 | 1786768                 | TT                              | GG              | 1946783984               |
| SNP_P4_36936_1787958 | NC_021163.1    | Ca_kabuli_chr04 | 1787958                 | TT                              | GG              | 1946783986               |
| SNP_P4_36937_1789265 | NC_021163.1    | Ca_kabuli_chr04 | 1789265                 | GG                              | AA              | 1946783988               |
| SNP_P4_36938_1789390 | NC_021163.1    | Ca_kabuli_chr04 | 1789390                 | TT                              | CC              | 1946783990               |
| SNP_P4_36939_1789433 | NC_021163.1    | Ca_kabuli_chr04 | 1789433                 | AA                              | CC              | 1946783992               |
| SNP_P4_36940_1789434 | NC_021163.1    | Ca_kabuli_chr04 | 1789434                 | CC                              | AA              | 1946783994               |
| SNP_P4_36941_1789448 | NC_021163.1    | Ca_kabuli_chr04 | 1789448                 | TT                              | CC              | 1946783996               |
| SNP_P4_36942_1789590 | NC_021163.1    | Ca_kabuli_chr04 | 1789590                 | TT                              | GG              | 1946783998               |
| SNP_P4_36943_1789648 | NC_021163.1    | Ca_kabuli_chr04 | 1789648                 | TT                              | GG              | 1946784000               |
| SNP_P4_36945_1791844 | NC_021163.1    | Ca_kabuli_chr04 | 1791844                 | GG                              | AA              | 1946784002               |
| SNP_P4_36946_1791871 | NC_021163.1    | Ca_kabuli_chr04 | 1791871                 | AA                              | GG              | 1946784004               |
| SNP_P4_36948_1791990 | NC_021163.1    | Ca_kabuli_chr04 | 1791990                 | AA                              | GG              | 1946784006               |
| SNP_P4_36949_1792114 | NC_021163.1    | Ca_kabuli_chr04 | 1792114                 | GG                              | AA              | 1946784008               |

| SNPs IDs             | Chromosome IDs | Chromosomes     | Physical positions (bp) | CDC Frontier (Reference genome) | (ILWC46 & LPNB) | NCBI SNPdb Accession IDs |
|----------------------|----------------|-----------------|-------------------------|---------------------------------|-----------------|--------------------------|
| SNP_P4_36950_1794572 | NC_021163.1    | Ca_kabuli_chr04 | 1794572                 | CC                              | TT              | 1946784010               |
| SNP_P4_36951_1795619 | NC_021163.1    | Ca_kabuli_chr04 | 1795619                 | TT                              | CC              | 1946784013               |
| SNP_P4_36952_1796273 | NC_021163.1    | Ca_kabuli_chr04 | 1796273                 | TT                              | GG              | 1946784015               |
| SNP_P4_36953_1800269 | NC_021163.1    | Ca_kabuli_chr04 | 1800269                 | AA                              | GG              | 1946784017               |
| SNP_P4_36954_1801631 | NC_021163.1    | Ca_kabuli_chr04 | 1801631                 | TT                              | CC              | 1946784019               |
| SNP_P4_36955_1801852 | NC_021163.1    | Ca_kabuli_chr04 | 1801852                 | GG                              | TT              | 1946784021               |
| SNP_P4_36957_1802723 | NC_021163.1    | Ca_kabuli_chr04 | 1802723                 | TT                              | CC              | 1946784023               |
| SNP_P4_36958_1802737 | NC_021163.1    | Ca_kabuli_chr04 | 1802737                 | GG                              | AA              | 1946784025               |
| SNP_P4_36959_1802909 | NC_021163.1    | Ca_kabuli_chr04 | 1802909                 | GG                              | AA              | 1946784027               |
| SNP_P4_36960_1806049 | NC_021163.1    | Ca_kabuli_chr04 | 1806049                 | AA                              | GG              | 1946784029               |
| SNP_P4_36961_1806726 | NC_021163.1    | Ca_kabuli_chr04 | 1806726                 | AA                              | GG              | 1946784031               |
| SNP_P4_36962_1806745 | NC_021163.1    | Ca_kabuli_chr04 | 1806745                 | GG                              | AA              | 1946784034               |
| SNP_P4_36963_1807096 | NC_021163.1    | Ca_kabuli_chr04 | 1807096                 | GG                              | AA              | 1946784036               |
| SNP_P4_36965_1808820 | NC_021163.1    | Ca_kabuli_chr04 | 1808820                 | TT                              | CC              | 1946784038               |
| SNP_P4_36966_1811136 | NC_021163.1    | Ca_kabuli_chr04 | 1811136                 | TT                              | GG              | 1946784040               |
| SNP_P4_36967_1811419 | NC_021163.1    | Ca_kabuli_chr04 | 1811419                 | AA                              | CC              | 1946784042               |
| SNP_P4_36968_1812119 | NC_021163.1    | Ca_kabuli_chr04 | 1812119                 | AA                              | GG              | 1946784044               |
| SNP_P4_36969_1814127 | NC_021163.1    | Ca_kabuli_chr04 | 1814127                 | AA                              | TT              | 1946784046               |
| SNP_P4_36970_1818642 | NC_021163.1    | Ca_kabuli_chr04 | 1818642                 | CC                              | TT              | 1946784048               |
| SNP_P4_36974_1819951 | NC_021163.1    | Ca_kabuli_chr04 | 1819951                 | TT                              | CC              | 1946784050               |
| SNP_P4_36975_1819999 | NC_021163.1    | Ca_kabuli_chr04 | 1819999                 | GG                              | AA              | 1946784052               |
| SNP_P4_36977_1820049 | NC_021163.1    | Ca_kabuli_chr04 | 1820049                 | TT                              | CC              | 1946784054               |
| SNP_P4_36978_1820173 | NC_021163.1    | Ca_kabuli_chr04 | 1820173                 | TT                              | CC              | 1946784056               |
| SNP_P4_36979_1820192 | NC_021163.1    | Ca_kabuli_chr04 | 1820192                 | AA                              | GG              | 1946784058               |
| SNP_P4_36980_1820303 | NC_021163.1    | Ca_kabuli_chr04 | 1820303                 | AA                              | GG              | 1946784060               |
| SNP_P4_36981_1820387 | NC_021163.1    | Ca_kabuli_chr04 | 1820387                 | TT                              | AA              | 1946784062               |
| SNP_P4_36982_1820425 | NC_021163.1    | Ca_kabuli_chr04 | 1820425                 | GG                              | TT              | 1946784064               |
| SNP_P4_36983_1820445 | NC_021163.1    | Ca_kabuli_chr04 | 1820445                 | TT                              | CC              | 1946784067               |
| SNP_P4_36984_1820479 | NC_021163.1    | Ca_kabuli_chr04 | 1820479                 | GG                              | CC              | 1946784069               |
| SNP_P4_36985_1820545 | NC_021163.1    | Ca_kabuli_chr04 | 1820545                 | CC                              | GG              | 1946784071               |
| SNP_P4_36986_1820586 | NC_021163.1    | Ca_kabuli_chr04 | 1820586                 | GG                              | TT              | 1946784073               |
| SNP_P4_36987_1820601 | NC_021163.1    | Ca_kabuli_chr04 | 1820601                 | CC                              | AA              | 1946784075               |
| SNP_P4_36988_1820626 | NC_021163.1    | Ca_kabuli_chr04 | 1820626                 | GG                              | AA              | 1946784077               |
| SNP_P4_36989_1820637 | NC_021163.1    | Ca_kabuli_chr04 | 1820637                 | GG                              | AA              | 1946784079               |
| SNP_P4_36990_1821856 | NC_021163.1    | Ca_kabuli_chr04 | 1821856                 | GG                              | TT              | 1946784081               |
| SNP_P4_36991_1822070 | NC_021163.1    | Ca_kabuli_chr04 | 1822070                 | GG                              | AA              | 1946784083               |
| SNP_P4_36992_1822136 | NC_021163.1    | Ca_kabuli_chr04 | 1822136                 | AA                              | GG              | 1946784085               |
| SNP_P4_36993_1822158 | NC_021163.1    | Ca_kabuli_chr04 | 1822158                 | TT                              | CC              | 1946784087               |
| SNP_P4_36994_1822182 | NC_021163.1    | Ca_kabuli_chr04 | 1822182                 | CC                              | GG              | 1946784089               |
| SNP_P4_36995_1822223 | NC_021163.1    | Ca_kabuli_chr04 | 1822223                 | TT                              | CC              | 1946784091               |
| SNP_P4_36996_1822453 | NC_021163.1    | Ca_kabuli_chr04 | 1822453                 | GG                              | CC              | 1946784094               |
| SNP_P4_36997_1822535 | NC_021163.1    | Ca_kabuli_chr04 | 1822535                 | CC                              | AA              | 1946784096               |

| SNPs IDs             | Chromosome IDs | Chromosomes     | Physical positions (bp) | CDC Frontier (Reference genome) | (ILWC46 & LPNB) | NCBI SNPdb Accession IDs |
|----------------------|----------------|-----------------|-------------------------|---------------------------------|-----------------|--------------------------|
| SNP_P4_36998_1822567 | NC_021163.1    | Ca_kabuli_chr04 | 1822567                 | AA                              | GG              | 1946784098               |
| SNP_P4_36999_1822606 | NC_021163.1    | Ca_kabuli_chr04 | 1822606                 | CC                              | TT              | 1946784100               |
| SNP_P4_37000_1823903 | NC_021163.1    | Ca_kabuli_chr04 | 1823903                 | TT                              | CC              | 1946784102               |
| SNP_P4_37001_1823954 | NC_021163.1    | Ca_kabuli_chr04 | 1823954                 | AA                              | CC              | 1946784104               |
| SNP_P4_37002_1824005 | NC_021163.1    | Ca_kabuli_chr04 | 1824005                 | AA                              | GG              | 1946784106               |
| SNP_P4_37003_1824042 | NC_021163.1    | Ca_kabuli_chr04 | 1824042                 | GG                              | AA              | 1946784108               |
| SNP_P4_37004_1824240 | NC_021163.1    | Ca_kabuli_chr04 | 1824240                 | AA                              | TT              | 1946784110               |
| SNP_P4_37005_1824242 | NC_021163.1    | Ca_kabuli_chr04 | 1824242                 | GG                              | TT              | 1946784112               |
| SNP_P4_37006_1824852 | NC_021163.1    | Ca_kabuli_chr04 | 1824852                 | GG                              | CC              | 1946784114               |
| SNP_P4_37007_1824925 | NC_021163.1    | Ca_kabuli_chr04 | 1824925                 | CC                              | TT              | 1946784117               |
| SNP_P4_37008_1824942 | NC_021163.1    | Ca_kabuli_chr04 | 1824942                 | CC                              | TT              | 1946784119               |
| SNP_P4_37009_1825298 | NC_021163.1    | Ca_kabuli_chr04 | 1825298                 | GG                              | AA              | 1946784121               |
| SNP_P4_37010_1825340 | NC_021163.1    | Ca_kabuli_chr04 | 1825340                 | AA                              | TT              | 1946784123               |
| SNP_P4_37013_1826072 | NC_021163.1    | Ca_kabuli_chr04 | 1826072                 | TT                              | CC              | 1946784125               |
| SNP_P4_37014_1826108 | NC_021163.1    | Ca_kabuli_chr04 | 1826108                 | AA                              | GG              | 1946784127               |
| SNP_P4_37015_1826663 | NC_021163.1    | Ca_kabuli_chr04 | 1826663                 | CC                              | AA              | 1946784129               |
| SNP_P4_37016_1826678 | NC_021163.1    | Ca_kabuli_chr04 | 1826678                 | AA                              | GG              | 1946784131               |
| SNP_P4_37017_1826700 | NC_021163.1    | Ca_kabuli_chr04 | 1826700                 | AA                              | GG              | 1946784133               |
| SNP_P4_37018_1826727 | NC_021163.1    | Ca_kabuli_chr04 | 1826727                 | CC                              | TT              | 1946784135               |
| SNP_P4_37020_1826867 | NC_021163.1    | Ca_kabuli_chr04 | 1826867                 | TT                              | CC              | 1946784137               |
| SNP_P4_37023_1827507 | NC_021163.1    | Ca_kabuli_chr04 | 1827507                 | TT                              | CC              | 1946784139               |
| SNP_P4_37024_1827546 | NC_021163.1    | Ca_kabuli_chr04 | 1827546                 | TT                              | CC              | 1946784141               |
| SNP_P4_37025_1827547 | NC_021163.1    | Ca_kabuli_chr04 | 1827547                 | GG                              | AA              | 1946784143               |
| SNP_P4_37026_1827793 | NC_021163.1    | Ca_kabuli_chr04 | 1827793                 | AA                              | GG              | 1946784145               |
| SNP_P4_37027_1827917 | NC_021163.1    | Ca_kabuli_chr04 | 1827917                 | GG                              | CC              | 1946784147               |
| SNP_P4_37028_1828221 | NC_021163.1    | Ca_kabuli_chr04 | 1828221                 | CC                              | GG              | 1946784149               |
| SNP_P4_37029_1828772 | NC_021163.1    | Ca_kabuli_chr04 | 1828772                 | TT                              | GG              | 1946784151               |
| SNP_P4_37030_1828807 | NC_021163.1    | Ca_kabuli_chr04 | 1828807                 | AA                              | GG              | 1946784153               |
| SNP_P4_37031_1828808 | NC_021163.1    | Ca_kabuli_chr04 | 1828808                 | TT                              | CC              | 1946784155               |
| SNP_P4_37032_1828824 | NC_021163.1    | Ca_kabuli_chr04 | 1828824                 | AA                              | CC              | 1946784157               |
| SNP_P4_37035_1830128 | NC_021163.1    | Ca_kabuli_chr04 | 1830128                 | AA                              | TT              | 1946784159               |
| SNP_P4_37036_1830521 | NC_021163.1    | Ca_kabuli_chr04 | 1830521                 | TT                              | GG              | 1946784161               |
| SNP_P4_37037_1830957 | NC_021163.1    | Ca_kabuli_chr04 | 1830957                 | AA                              | CC              | 1946784163               |
| SNP_P4_37039_1831525 | NC_021163.1    | Ca_kabuli_chr04 | 1831525                 | TT                              | CC              | 1946784165               |
| SNP_P4_37040_1831544 | NC_021163.1    | Ca_kabuli_chr04 | 1831544                 | AA                              | TT              | 1946784167               |
| SNP_P4_37041_1832290 | NC_021163.1    | Ca_kabuli_chr04 | 1832290                 | GG                              | CC              | 1946784169               |
| SNP_P4_37042_1832298 | NC_021163.1    | Ca_kabuli_chr04 | 1832298                 | GG                              | CC              | 1946784171               |
| SNP_P4_37043_1832351 | NC_021163.1    | Ca_kabuli_chr04 | 1832351                 | TT                              | AA              | 1946784173               |
| SNP_P4_37044_1834393 | NC_021163.1    | Ca_kabuli_chr04 | 1834393                 | AA                              | TT              | 1946784175               |
| SNP_P4_37045_1834568 | NC_021163.1    | Ca_kabuli_chr04 | 1834568                 | CC                              | TT              | 1946784178               |
| SNP_P4_37046_1836457 | NC_021163.1    | Ca_kabuli_chr04 | 1836457                 | GG                              | TT              | 1946784180               |
| SNP_P4_37047_1836508 | NC_021163.1    | Ca_kabuli_chr04 | 1836508                 | TT                              | CC              | 1946784182               |

| SNPs IDs             | Chromosome IDs | Chromosomes     | Physical positions (bp) | CDC Frontier (Reference genome) | (ILWC46 & LPNB) | NCBI SNPdb Accession IDs |
|----------------------|----------------|-----------------|-------------------------|---------------------------------|-----------------|--------------------------|
| SNP_P4_37048_1836509 | NC_021163.1    | Ca_kabuli_chr04 | 1836509                 | TT                              | CC              | 1946784184               |
| SNP_P4_37049_1836543 | NC_021163.1    | Ca_kabuli_chr04 | 1836543                 | TT                              | CC              | 1946784186               |
| SNP_P4_37050_1836887 | NC_021163.1    | Ca_kabuli_chr04 | 1836887                 | TT                              | CC              | 1946784188               |
| SNP_P4_37051_1838113 | NC_021163.1    | Ca_kabuli_chr04 | 1838113                 | GG                              | AA              | 1946784190               |
| SNP_P4_37052_1839954 | NC_021163.1    | Ca_kabuli_chr04 | 1839954                 | AA                              | TT              | 1946784192               |
| SNP_P4_37053_1840353 | NC_021163.1    | Ca_kabuli_chr04 | 1840353                 | AA                              | GG              | 1946784195               |
| SNP_P4_37055_1840434 | NC_021163.1    | Ca_kabuli_chr04 | 1840434                 | AA                              | GG              | 1946784197               |
| SNP_P4_37057_1844038 | NC_021163.1    | Ca_kabuli_chr04 | 1844038                 | AA                              | GG              | 1946784199               |
| SNP_P4_37058_1844719 | NC_021163.1    | Ca_kabuli_chr04 | 1844719                 | AA                              | GG              | 1946784201               |
| SNP_P4_37059_1846985 | NC_021163.1    | Ca_kabuli_chr04 | 1846985                 | GG                              | AA              | 1946784203               |
| SNP_P4_37060_1847451 | NC_021163.1    | Ca_kabuli_chr04 | 1847451                 | GG                              | CC              | 1946784205               |
| SNP_P4_37062_1847749 | NC_021163.1    | Ca_kabuli_chr04 | 1847749                 | TT                              | GG              | 1946784207               |
| SNP_P4_37064_1848552 | NC_021163.1    | Ca_kabuli_chr04 | 1848552                 | TT                              | CC              | 1946784210               |
| SNP_P4_37065_1848570 | NC_021163.1    | Ca_kabuli_chr04 | 1848570                 | AA                              | GG              | 1946784212               |
| SNP_P4_37066_1848594 | NC_021163.1    | Ca_kabuli_chr04 | 1848594                 | CC                              | TT              | 1946784214               |
| SNP_P4_37067_1848608 | NC_021163.1    | Ca_kabuli_chr04 | 1848608                 | CC                              | GG              | 1946784216               |
| SNP_P4_37068_1848610 | NC_021163.1    | Ca_kabuli_chr04 | 1848610                 | TT                              | CC              | 1946784218               |
| SNP_P4_37069_1848797 | NC_021163.1    | Ca_kabuli_chr04 | 1848797                 | GG                              | AA              | 1946784220               |
| SNP_P4_37070_1849625 | NC_021163.1    | Ca_kabuli_chr04 | 1849625                 | GG                              | AA              | 1946784224               |
| SNP_P4_37071_1849634 | NC_021163.1    | Ca_kabuli_chr04 | 1849634                 | AA                              | GG              | 1946784226               |
| SNP_P4_37072_1855610 | NC_021163.1    | Ca_kabuli_chr04 | 1855610                 | TT                              | CC              | 1946784228               |
| SNP_P4_37073_1855655 | NC_021163.1    | Ca_kabuli_chr04 | 1855655                 | CC                              | GG              | 1946784230               |
| SNP_P4_37074_1858388 | NC_021163.1    | Ca_kabuli_chr04 | 1858388                 | AA                              | CC              | 1946784232               |
| SNP_P4_37076_1858702 | NC_021163.1    | Ca_kabuli_chr04 | 1858702                 | AA                              | CC              | 1946784234               |
| SNP_P4_37077_1859723 | NC_021163.1    | Ca_kabuli_chr04 | 1859723                 | AA                              | GG              | 1946784236               |
| SNP_P4_37078_1859734 | NC_021163.1    | Ca_kabuli_chr04 | 1859734                 | CC                              | AA              | 1946784238               |
| SNP_P4_37079_1860785 | NC_021163.1    | Ca_kabuli_chr04 | 1860785                 | CC                              | TT              | 1946784240               |
| SNP_P4_37080_1861060 | NC_021163.1    | Ca_kabuli_chr04 | 1861060                 | AA                              | TT              | 1946784242               |
| SNP_P4_37081_1861758 | NC_021163.1    | Ca_kabuli_chr04 | 1861758                 | CC                              | TT              | 1946784244               |
| SNP_P4_37085_1863252 | NC_021163.1    | Ca_kabuli_chr04 | 1863252                 | CC                              | TT              | 1946784246               |
| SNP_P4_37086_1863461 | NC_021163.1    | Ca_kabuli_chr04 | 1863461                 | CC                              | AA              | 1946784248               |
| SNP_P4_37087_1864383 | NC_021163.1    | Ca_kabuli_chr04 | 1864383                 | TT                              | AA              | 1946784250               |
| SNP_P4_37088_1864384 | NC_021163.1    | Ca_kabuli_chr04 | 1864384                 | AA                              | TT              | 1946784252               |
| SNP_P4_37089_1864385 | NC_021163.1    | Ca_kabuli_chr04 | 1864385                 | TT                              | AA              | 1946784254               |
| SNP_P4_37091_1864468 | NC_021163.1    | Ca_kabuli_chr04 | 1864468                 | GG                              | TT              | 1946784256               |
| SNP_P4_37092_1866090 | NC_021163.1    | Ca_kabuli_chr04 | 1866090                 | AA                              | GG              | 1946784258               |
| SNP_P4_37093_1866103 | NC_021163.1    | Ca_kabuli_chr04 | 1866103                 | AA                              | GG              | 1946784260               |
| SNP_P4_37094_1867921 | NC_021163.1    | Ca_kabuli_chr04 | 1867921                 | AA                              | GG              | 1946784262               |
| SNP_P4_37095_1868098 | NC_021163.1    | Ca_kabuli_chr04 | 1868098                 | GG                              | AA              | 1946784264               |
| SNP_P4_37096_1869577 | NC_021163.1    | Ca_kabuli_chr04 | 1869577                 | TT                              | CC              | 1946784266               |
| SNP_P4_37097_1870333 | NC_021163.1    | Ca_kabuli_chr04 | 1870333                 | GG                              | AA              | 1946784268               |
| SNP_P4_37098_1870802 | NC_021163.1    | Ca_kabuli_chr04 | 1870802                 | TT                              | CC              | 1946784270               |



| SNPs IDs             | Chromosome IDs | Chromosomes     | Physical positions (bp) | CDC Frontier (Reference genome) | (ILWC46 & LPNB) | NCBI SNPdb Accession IDs |
|----------------------|----------------|-----------------|-------------------------|---------------------------------|-----------------|--------------------------|
| SNP_P4_37099_1870806 | NC_021163.1    | Ca_kabuli_chr04 | 1870806                 | AA                              | CC              | 1946784272               |
| SNP_P4_37100_1872768 | NC_021163.1    | Ca_kabuli_chr04 | 1872768                 | AA                              | TT              | 1946784274               |
| SNP_P4_37101_1872773 | NC_021163.1    | Ca_kabuli_chr04 | 1872773                 | GG                              | AA              | 1946784276               |
| SNP_P4_37102_1877500 | NC_021163.1    | Ca_kabuli_chr04 | 1877500                 | AA                              | TT              | 1946784278               |
| SNP_P4_37103_1877585 | NC_021163.1    | Ca_kabuli_chr04 | 1877585                 | GG                              | AA              | 1946784280               |
| SNP_P4_37105_1908745 | NC_021163.1    | Ca_kabuli_chr04 | 1908745                 | CC                              | TT              | 1946784283               |
| SNP_P4_37107_1928296 | NC_021163.1    | Ca_kabuli_chr04 | 1928296                 | AA                              | TT              | 1946784285               |
| SNP_P4_37108_1928299 | NC_021163.1    | Ca_kabuli_chr04 | 1928299                 | TT                              | GG              | 1946784286               |
| SNP_P4_37109_1941973 | NC_021163.1    | Ca_kabuli_chr04 | 1941973                 | TT                              | CC              | 1946784288               |
| SNP_P4_37111_1977739 | NC_021163.1    | Ca_kabuli_chr04 | 1977739                 | TT                              | GG              | 1946784291               |
| SNP_P4_37112_1994953 | NC_021163.1    | Ca_kabuli_chr04 | 1994953                 | GG                              | TT              | 1946784293               |
| SNP_P4_37113_2011122 | NC_021163.1    | Ca_kabuli_chr04 | 2011122                 | CC                              | TT              | 1946784295               |
| SNP_P4_37114_2011148 | NC_021163.1    | Ca_kabuli_chr04 | 2011148                 | CC                              | AA              | 1946784296               |
| SNP_P4_37115_2022435 | NC_021163.1    | Ca_kabuli_chr04 | 2022435                 | GG                              | AA              | 1946784298               |
| SNP_P4_37117_2024108 | NC_021163.1    | Ca_kabuli_chr04 | 2024108                 | AA                              | GG              | 1946784300               |
| SNP_P4_37118_2024112 | NC_021163.1    | Ca_kabuli_chr04 | 2024112                 | GG                              | AA              | 1946784302               |
| SNP_P4_37120_2030240 | NC_021163.1    | Ca_kabuli_chr04 | 2030240                 | CC                              | TT              | 1946784304               |
| SNP_P4_37122_2032225 | NC_021163.1    | Ca_kabuli_chr04 | 2032225                 | CC                              | TT              | 1946784307               |
| SNP_P4_37123_2032243 | NC_021163.1    | Ca_kabuli_chr04 | 2032243                 | TT                              | CC              | 1946784309               |
| SNP_P4_37124_2032252 | NC_021163.1    | Ca_kabuli_chr04 | 2032252                 | TT                              | GG              | 1946784311               |
| SNP_P4_37125_2032329 | NC_021163.1    | Ca_kabuli_chr04 | 2032329                 | CC                              | TT              | 1946784313               |
| SNP_P4_37126_2032396 | NC_021163.1    | Ca_kabuli_chr04 | 2032396                 | GG                              | CC              | 1946784315               |
| SNP_P4_37127_2032416 | NC_021163.1    | Ca_kabuli_chr04 | 2032416                 | CC                              | GG              | 1946784317               |
| SNP_P4_37128_2032449 | NC_021163.1    | Ca_kabuli_chr04 | 2032449                 | AA                              | GG              | 1946784319               |
| SNP_P4_37129_2032480 | NC_021163.1    | Ca_kabuli_chr04 | 2032480                 | TT                              | CC              | 1946784321               |
| SNP_P4_37130_2032481 | NC_021163.1    | Ca_kabuli_chr04 | 2032481                 | GG                              | TT              | 1946784323               |
| SNP_P4_37131_2032510 | NC_021163.1    | Ca_kabuli_chr04 | 2032510                 | AA                              | TT              | 1946784325               |
| SNP_P4_37132_2032529 | NC_021163.1    | Ca_kabuli_chr04 | 2032529                 | GG                              | AA              | 1946784327               |
| SNP_P4_37134_2032567 | NC_021163.1    | Ca_kabuli_chr04 | 2032567                 | TT                              | CC              | 1946784329               |
| SNP_P4_37135_2032582 | NC_021163.1    | Ca_kabuli_chr04 | 2032582                 | CC                              | TT              | 1946784332               |
| SNP_P4_37136_2032636 | NC_021163.1    | Ca_kabuli_chr04 | 2032636                 | AA                              | GG              | 1946784334               |
| SNP_P4_37137_2032638 | NC_021163.1    | Ca_kabuli_chr04 | 2032638                 | TT                              | AA              | 1946784336               |
| SNP_P4_37138_2032773 | NC_021163.1    | Ca_kabuli_chr04 | 2032773                 | AA                              | TT              | 1946784338               |
| SNP_P4_37139_2032846 | NC_021163.1    | Ca_kabuli_chr04 | 2032846                 | AA                              | GG              | 1946784340               |
| SNP_P4_37140_2032858 | NC_021163.1    | Ca_kabuli_chr04 | 2032858                 | AA                              | GG              | 1946784342               |
| SNP_P4_37141_2032866 | NC_021163.1    | Ca_kabuli_chr04 | 2032866                 | GG                              | CC              | 1946784344               |
| SNP_P4_37142_2034132 | NC_021163.1    | Ca_kabuli_chr04 | 2034132                 | GG                              | AA              | 1946784346               |
| SNP_P4_37143_2034149 | NC_021163.1    | Ca_kabuli_chr04 | 2034149                 | TT                              | CC              | 1946784348               |
| SNP_P4_37144_2034152 | NC_021163.1    | Ca_kabuli_chr04 | 2034152                 | TT                              | CC              | 1946784350               |
| SNP_P4_37145_2034169 | NC_021163.1    | Ca_kabuli_chr04 | 2034169                 | TT                              | CC              | 1946784352               |
| SNP_P4_37146_2034182 | NC_021163.1    | Ca_kabuli_chr04 | 2034182                 | CC                              | AA              | 1946784354               |
| SNP_P4_37147_2034304 | NC_021163.1    | Ca_kabuli_chr04 | 2034304                 | GG                              | AA              | 1946784356               |

| SNPs IDs             | Chromosome IDs | Chromosomes     | Physical positions (bp) | CDC Frontier (Reference genome) | (ILWC46 & LPNB) | NCBI SNPdb Accession IDs |
|----------------------|----------------|-----------------|-------------------------|---------------------------------|-----------------|--------------------------|
| SNP_P4_37148_2034340 | NC_021163.1    | Ca_kabuli_chr04 | 2034340                 | AA                              | CC              | 1946784359               |
| SNP_P4_37149_2034385 | NC_021163.1    | Ca_kabuli_chr04 | 2034385                 | CC                              | AA              | 1946784361               |
| SNP_P4_37150_2034396 | NC_021163.1    | Ca_kabuli_chr04 | 2034396                 | GG                              | AA              | 1946784363               |
| SNP_P4_37151_2034398 | NC_021163.1    | Ca_kabuli_chr04 | 2034398                 | TT                              | CC              | 1946784365               |
| SNP_P4_37153_2034505 | NC_021163.1    | Ca_kabuli_chr04 | 2034505                 | GG                              | AA              | 1946784367               |
| SNP_P4_37154_2034547 | NC_021163.1    | Ca_kabuli_chr04 | 2034547                 | GG                              | AA              | 1946784369               |
| SNP_P4_37155_2034548 | NC_021163.1    | Ca_kabuli_chr04 | 2034548                 | TT                              | CC              | 1946784371               |
| SNP_P4_37156_2034556 | NC_021163.1    | Ca_kabuli_chr04 | 2034556                 | GG                              | AA              | 1946784373               |
| SNP_P4_37158_2034717 | NC_021163.1    | Ca_kabuli_chr04 | 2034717                 | GG                              | CC              | 1946784376               |
| SNP_P4_37159_2034721 | NC_021163.1    | Ca_kabuli_chr04 | 2034721                 | GG                              | AA              | 1946784378               |
| SNP_P4_37160_2034756 | NC_021163.1    | Ca_kabuli_chr04 | 2034756                 | AA                              | GG              | 1946784380               |
| SNP_P4_37161_2034757 | NC_021163.1    | Ca_kabuli_chr04 | 2034757                 | AA                              | CC              | 1946784383               |
| SNP_P4_37162_2034768 | NC_021163.1    | Ca_kabuli_chr04 | 2034768                 | GG                              | AA              | 1946784385               |
| SNP_P4_37163_2034835 | NC_021163.1    | Ca_kabuli_chr04 | 2034835                 | GG                              | CC              | 1946784387               |
| SNP_P4_37164_2034850 | NC_021163.1    | Ca_kabuli_chr04 | 2034850                 | TT                              | CC              | 1946784389               |
| SNP_P4_37165_2034894 | NC_021163.1    | Ca_kabuli_chr04 | 2034894                 | TT                              | CC              | 1946784392               |
| SNP_P4_37166_2034900 | NC_021163.1    | Ca_kabuli_chr04 | 2034900                 | AA                              | TT              | 1946784394               |
| SNP_P4_37167_2034952 | NC_021163.1    | Ca_kabuli_chr04 | 2034952                 | AA                              | GG              | 1946784396               |
| SNP_P4_37168_2034974 | NC_021163.1    | Ca_kabuli_chr04 | 2034974                 | GG                              | TT              | 1946784398               |
| SNP_P4_37169_2035015 | NC_021163.1    | Ca_kabuli_chr04 | 2035015                 | GG                              | TT              | 1946784400               |
| SNP_P4_37170_2035016 | NC_021163.1    | Ca_kabuli_chr04 | 2035016                 | TT                              | AA              | 1946784403               |
| SNP_P4_37171_2035035 | NC_021163.1    | Ca_kabuli_chr04 | 2035035                 | GG                              | CC              | 1946784405               |
| SNP_P4_37172_2035047 | NC_021163.1    | Ca_kabuli_chr04 | 2035047                 | AA                              | TT              | 1946784407               |
| SNP_P4_37173_2035090 | NC_021163.1    | Ca_kabuli_chr04 | 2035090                 | TT                              | CC              | 1946784409               |
| SNP_P4_37175_2035166 | NC_021163.1    | Ca_kabuli_chr04 | 2035166                 | AA                              | GG              | 1946784412               |
| SNP_P4_37176_2035174 | NC_021163.1    | Ca_kabuli_chr04 | 2035174                 | CC                              | TT              | 1946784414               |
| SNP_P4_37179_2035329 | NC_021163.1    | Ca_kabuli_chr04 | 2035329                 | AA                              | CC              | 1946784416               |
| SNP_P4_37180_2035330 | NC_021163.1    | Ca_kabuli_chr04 | 2035330                 | GG                              | CC              | 1946784418               |
| SNP_P4_37181_2035400 | NC_021163.1    | Ca_kabuli_chr04 | 2035400                 | AA                              | GG              | 1946784420               |
| SNP_P4_37182_2035405 | NC_021163.1    | Ca_kabuli_chr04 | 2035405                 | GG                              | AA              | 1946784422               |
| SNP_P4_37183_2035415 | NC_021163.1    | Ca_kabuli_chr04 | 2035415                 | CC                              | TT              | 1946784424               |
| SNP_P4_37184_2035525 | NC_021163.1    | Ca_kabuli_chr04 | 2035525                 | AA                              | GG              | 1946784426               |
| SNP_P4_37185_2035526 | NC_021163.1    | Ca_kabuli_chr04 | 2035526                 | GG                              | AA              | 1946784428               |
| SNP_P4_37186_2035530 | NC_021163.1    | Ca_kabuli_chr04 | 2035530                 | CC                              | TT              | 1946784429               |
| SNP_P4_37187_2035543 | NC_021163.1    | Ca_kabuli_chr04 | 2035543                 | GG                              | TT              | 1946784430               |
| SNP_P4_37188_2035561 | NC_021163.1    | Ca_kabuli_chr04 | 2035561                 | TT                              | GG              | 1946784431               |
| SNP_P4_37189_2035584 | NC_021163.1    | Ca_kabuli_chr04 | 2035584                 | GG                              | AA              | 1946784433               |
| SNP_P4_37190_2035678 | NC_021163.1    | Ca_kabuli_chr04 | 2035678                 | TT                              | CC              | 1946784435               |
| SNP_P4_37191_2035692 | NC_021163.1    | Ca_kabuli_chr04 | 2035692                 | AA                              | CC              | 1946784437               |
| SNP_P4_37193_2035720 | NC_021163.1    | Ca_kabuli_chr04 | 2035720                 | TT                              | CC              | 1946784440               |
| SNP_P4_37194_2035757 | NC_021163.1    | Ca_kabuli_chr04 | 2035757                 | CC                              | TT              | 1946784443               |
| SNP_P4_37196_2035841 | NC_021163.1    | Ca_kabuli_chr04 | 2035841                 | TT                              | CC              | 1946784445               |

| SNPs IDs             | Chromosome IDs | Chromosomes     | Physical positions (bp) | CDC Frontier (Reference genome) | (ILWC46 & LPNB) | NCBI SNPdb Accession IDs |
|----------------------|----------------|-----------------|-------------------------|---------------------------------|-----------------|--------------------------|
| SNP_P4_37197_2035894 | NC_021163.1    | Ca_kabuli_chr04 | 2035894                 | AA                              | CC              | 1946784447               |
| SNP_P4_37198_2035921 | NC_021163.1    | Ca_kabuli_chr04 | 2035921                 | AA                              | TT              | 1946784449               |
| SNP_P4_37199_2035923 | NC_021163.1    | Ca_kabuli_chr04 | 2035923                 | GG                              | AA              | 1946784451               |
| SNP_P4_37200_2035930 | NC_021163.1    | Ca_kabuli_chr04 | 2035930                 | AA                              | TT              | 1946784453               |
| SNP_P4_37201_2035955 | NC_021163.1    | Ca_kabuli_chr04 | 2035955                 | CC                              | AA              | 1946784455               |
| SNP_P4_37202_2035979 | NC_021163.1    | Ca_kabuli_chr04 | 2035979                 | GG                              | AA              | 1946784457               |
| SNP_P4_37203_2036101 | NC_021163.1    | Ca_kabuli_chr04 | 2036101                 | TT                              | AA              | 1946784459               |
| SNP_P4_37204_2036112 | NC_021163.1    | Ca_kabuli_chr04 | 2036112                 | AA                              | CC              | 1946784461               |
| SNP_P4_37205_2050327 | NC_021163.1    | Ca_kabuli_chr04 | 2050327                 | TT                              | CC              | 1946784464               |
| SNP_P4_37207_2054649 | NC_021163.1    | Ca_kabuli_chr04 | 2054649                 | TT                              | GG              | 1946784466               |
| SNP_P4_37208_2054650 | NC_021163.1    | Ca_kabuli_chr04 | 2054650                 | TT                              | GG              | 1946784468               |
| SNP_P4_37209_2083596 | NC_021163.1    | Ca_kabuli_chr04 | 2083596                 | TT                              | CC              | 1946784471               |
| SNP_P4_37210_2097353 | NC_021163.1    | Ca_kabuli_chr04 | 2097353                 | GG                              | AA              | 1946784473               |
| SNP_P4_37211_2099537 | NC_021163.1    | Ca_kabuli_chr04 | 2099537                 | CC                              | TT              | 1946784475               |
| SNP_P4_37213_2110908 | NC_021163.1    | Ca_kabuli_chr04 | 2110908                 | CC                              | TT              | 1946784477               |
| SNP_P4_37214_2122788 | NC_021163.1    | Ca_kabuli_chr04 | 2122788                 | TT                              | CC              | 1946784480               |
| SNP_P4_37215_2130281 | NC_021163.1    | Ca_kabuli_chr04 | 2130281                 | AA                              | GG              | 1946784482               |
| SNP_P4_37217_2139272 | NC_021163.1    | Ca_kabuli_chr04 | 2139272                 | AA                              | TT              | 1946784484               |
| SNP_P4_37219_2141025 | NC_021163.1    | Ca_kabuli_chr04 | 2141025                 | GG                              | AA              | 1946784486               |
| SNP_P4_37221_2169750 | NC_021163.1    | Ca_kabuli_chr04 | 2169750                 | GG                              | AA              | 1946784488               |
| SNP_P4_37222_2208611 | NC_021163.1    | Ca_kabuli_chr04 | 2208611                 | AA                              | TT              | 1946784490               |
| SNP_P4_37223_2208617 | NC_021163.1    | Ca_kabuli_chr04 | 2208617                 | AA                              | TT              | 1946784492               |
| SNP_P4_37224_2208625 | NC_021163.1    | Ca_kabuli_chr04 | 2208625                 | AA                              | GG              | 1946784494               |
| SNP_P4_37225_2211561 | NC_021163.1    | Ca_kabuli_chr04 | 2211561                 | TT                              | CC              | 1946784496               |
| SNP_P4_37226_2223828 | NC_021163.1    | Ca_kabuli_chr04 | 2223828                 | AA                              | CC              | 1946784498               |
| SNP_P4_37228_2233917 | NC_021163.1    | Ca_kabuli_chr04 | 2233917                 | CC                              | GG              | 1946784500               |
| SNP_P4_37229_2249905 | NC_021163.1    | Ca_kabuli_chr04 | 2249905                 | AA                              | TT              | 1946784502               |
| SNP_P4_37230_2274493 | NC_021163.1    | Ca_kabuli_chr04 | 2274493                 | AA                              | GG              | 1946784504               |
| SNP_P4_37232_2298239 | NC_021163.1    | Ca_kabuli_chr04 | 2298239                 | TT                              | CC              | 1946784506               |
| SNP_P4_37233_2323431 | NC_021163.1    | Ca_kabuli_chr04 | 2323431                 | TT                              | CC              | 1946784509               |
| SNP_P4_37234_2351345 | NC_021163.1    | Ca_kabuli_chr04 | 2351345                 | CC                              | TT              | 1946784512               |
| SNP_P4_37235_2366921 | NC_021163.1    | Ca_kabuli_chr04 | 2366921                 | CC                              | TT              | 1946784514               |
| SNP_P4_37236_2381139 | NC_021163.1    | Ca_kabuli_chr04 | 2381139                 | CC                              | TT              | 1946784515               |
| SNP_P4_37237_2388809 | NC_021163.1    | Ca_kabuli_chr04 | 2388809                 | TT                              | AA              | 1946784517               |
| SNP_P4_37238_2390407 | NC_021163.1    | Ca_kabuli_chr04 | 2390407                 | CC                              | AA              | 1946784519               |
| SNP_P4_37240_2405649 | NC_021163.1    | Ca_kabuli_chr04 | 2405649                 | TT                              | CC              | 1946784521               |
| SNP_P4_37241_2445378 | NC_021163.1    | Ca_kabuli_chr04 | 2445378                 | TT                              | GG              | 1946784523               |
| SNP_P4_37243_2449197 | NC_021163.1    | Ca_kabuli_chr04 | 2449197                 | TT                              | GG              | 1946784525               |
| SNP_P4_37244_2459531 | NC_021163.1    | Ca_kabuli_chr04 | 2459531                 | CC                              | TT              | 1946784528               |
| SNP_P4_37245_2468332 | NC_021163.1    | Ca_kabuli_chr04 | 2468332                 | TT                              | CC              | 1946784530               |
| SNP_P4_37246_2469045 | NC_021163.1    | Ca_kabuli_chr04 | 2469045                 | AA                              | TT              | 1946784532               |
| SNP_P4_37248_2487345 | NC_021163.1    | Ca_kabuli_chr04 | 2487345                 | CC                              | TT              | 1946784534               |

| SNPs IDs             | Chromosome IDs | Chromosomes     | Physical positions (bp) | CDC Frontier (Reference genome) | (ILWC46 & LPNB) | NCBI SNPdb Accession IDs |
|----------------------|----------------|-----------------|-------------------------|---------------------------------|-----------------|--------------------------|
| SNP_P4_37249_2504290 | NC_021163.1    | Ca_kabuli_chr04 | 2504290                 | AA                              | GG              | 1946784536               |
| SNP_P4_37250_2563223 | NC_021163.1    | Ca_kabuli_chr04 | 2563223                 | TT                              | GG              | 1946784537               |
| SNP_P4_37253_2680652 | NC_021163.1    | Ca_kabuli_chr04 | 2680652                 | TT                              | CC              | 1946784539               |
| SNP_P4_37254_2680653 | NC_021163.1    | Ca_kabuli_chr04 | 2680653                 | TT                              | AA              | 1946784541               |
| SNP_P4_37255_2680871 | NC_021163.1    | Ca_kabuli_chr04 | 2680871                 | GG                              | CC              | 1946784544               |
| SNP_P4_37256_2687830 | NC_021163.1    | Ca_kabuli_chr04 | 2687830                 | CC                              | AA              | 1946784546               |
| SNP_P4_37257_2687833 | NC_021163.1    | Ca_kabuli_chr04 | 2687833                 | CC                              | TT              | 1946784548               |
| SNP_P4_37258_2687896 | NC_021163.1    | Ca_kabuli_chr04 | 2687896                 | TT                              | CC              | 1946784550               |
| SNP_P4_37259_2688220 | NC_021163.1    | Ca_kabuli_chr04 | 2688220                 | GG                              | AA              | 1946784552               |
| SNP_P4_37260_2688270 | NC_021163.1    | Ca_kabuli_chr04 | 2688270                 | AA                              | GG              | 1946784554               |
| SNP_P4_37261_2690213 | NC_021163.1    | Ca_kabuli_chr04 | 2690213                 | TT                              | CC              | 1946784556               |
| SNP_P4_37262_2690248 | NC_021163.1    | Ca_kabuli_chr04 | 2690248                 | CC                              | AA              | 1946784558               |
| SNP_P4_37264_2692142 | NC_021163.1    | Ca_kabuli_chr04 | 2692142                 | TT                              | CC              | 1946784560               |
| SNP_P4_37266_2741282 | NC_021163.1    | Ca_kabuli_chr04 | 2741282                 | TT                              | CC              | 1946784562               |
| SNP_P4_37268_2812229 | NC_021163.1    | Ca_kabuli_chr04 | 2812229                 | GG                              | AA              | 1946784564               |
| SNP_P4_37269_2828425 | NC_021163.1    | Ca_kabuli_chr04 | 2828425                 | CC                              | AA              | 1946784566               |
| SNP_P4_37270_2894587 | NC_021163.1    | Ca_kabuli_chr04 | 2894587                 | AA                              | TT              | 1946784568               |
| SNP_P4_37271_2952584 | NC_021163.1    | Ca_kabuli_chr04 | 2952584                 | TT                              | AA              | 1946784570               |
| SNP_P4_37272_2958372 | NC_021163.1    | Ca_kabuli_chr04 | 2958372                 | TT                              | CC              | 1946784571               |
| SNP_P4_37273_2973525 | NC_021163.1    | Ca_kabuli_chr04 | 2973525                 | AA                              | CC              | 1946784573               |
| SNP_P4_37275_3029425 | NC_021163.1    | Ca_kabuli_chr04 | 3029425                 | GG                              | AA              | 1946784575               |
| SNP_P4_37277_3054533 | NC_021163.1    | Ca_kabuli_chr04 | 3054533                 | GG                              | AA              | 1946784577               |
| SNP_P4_37279_3087340 | NC_021163.1    | Ca_kabuli_chr04 | 3087340                 | GG                              | CC              | 1946784579               |
| SNP_P4_37280_3121438 | NC_021163.1    | Ca_kabuli_chr04 | 3121438                 | AA                              | CC              | 1946784581               |
| SNP_P4_37281_3121439 | NC_021163.1    | Ca_kabuli_chr04 | 3121439                 | AA                              | CC              | 1946784584               |
| SNP_P4_37282_3136030 | NC_021163.1    | Ca_kabuli_chr04 | 3136030                 | AA                              | TT              | 1946784586               |
| SNP_P4_37283_3182989 | NC_021163.1    | Ca_kabuli_chr04 | 3182989                 | GG                              | AA              | 1946784588               |
| SNP_P4_37285_3232864 | NC_021163.1    | Ca_kabuli_chr04 | 3232864                 | AA                              | TT              | 1946784590               |
| SNP_P4_37286_3239502 | NC_021163.1    | Ca_kabuli_chr04 | 3239502                 | TT                              | AA              | 1946784592               |
| SNP_P4_37287_3239505 | NC_021163.1    | Ca_kabuli_chr04 | 3239505                 | TT                              | AA              | 1946784594               |
| SNP_P4_37289_3345366 | NC_021163.1    | Ca_kabuli_chr04 | 3345366                 | CC                              | TT              | 1946784596               |
| SNP_P4_37291_3345890 | NC_021163.1    | Ca_kabuli_chr04 | 3345890                 | AA                              | GG              | 1946784598               |
| SNP_P4_37292_3345892 | NC_021163.1    | Ca_kabuli_chr04 | 3345892                 | GG                              | AA              | 1946784600               |
| SNP_P4_37293_3351875 | NC_021163.1    | Ca_kabuli_chr04 | 3351875                 | GG                              | TT              | 1946784602               |
| SNP_P4_37294_3355608 | NC_021163.1    | Ca_kabuli_chr04 | 3355608                 | CC                              | TT              | 1946784604               |
| SNP_P4_37295_3355798 | NC_021163.1    | Ca_kabuli_chr04 | 3355798                 | AA                              | CC              | 1946784607               |
| SNP_P4_37297_3355854 | NC_021163.1    | Ca_kabuli_chr04 | 3355854                 | AA                              | GG              | 1946784609               |
| SNP_P4_37298_3355865 | NC_021163.1    | Ca_kabuli_chr04 | 3355865                 | GG                              | CC              | 1946784611               |
| SNP_P4_37299_3355909 | NC_021163.1    | Ca_kabuli_chr04 | 3355909                 | GG                              | CC              | 1946784613               |
| SNP_P4_37300_3355921 | NC_021163.1    | Ca_kabuli_chr04 | 3355921                 | AA                              | CC              | 1946784615               |
| SNP_P4_37303_3392394 | NC_021163.1    | Ca_kabuli_chr04 | 3392394                 | TT                              | AA              | 1946784617               |
| SNP_P4_37305_3445092 | NC_021163.1    | Ca_kabuli_chr04 | 3445092                 | TT                              | GG              | 1946784619               |

| SNPs IDs             | Chromosome IDs | Chromosomes     | Physical positions (bp) | CDC Frontier (Reference genome) | (ILWC46 & LPNB) | NCBI SNPdb Accession IDs |
|----------------------|----------------|-----------------|-------------------------|---------------------------------|-----------------|--------------------------|
| SNP_P4_37306_3445094 | NC_021163.1    | Ca_kabuli_chr04 | 3445094                 | AA                              | GG              | 1946784621               |
| SNP_P4_37307_3476239 | NC_021163.1    | Ca_kabuli_chr04 | 3476239                 | GG                              | AA              | 1946784623               |
| SNP_P4_37309_3506647 | NC_021163.1    | Ca_kabuli_chr04 | 3506647                 | TT                              | CC              | 1946784625               |
| SNP_P4_37310_3542444 | NC_021163.1    | Ca_kabuli_chr04 | 3542444                 | CC                              | TT              | 1946784627               |
| SNP_P4_37311_3556441 | NC_021163.1    | Ca_kabuli_chr04 | 3556441                 | TT                              | AA              | 1946784629               |
| SNP_P4_37312_3556486 | NC_021163.1    | Ca_kabuli_chr04 | 3556486                 | TT                              | CC              | 1946784631               |
| SNP_P4_37313_3559868 | NC_021163.1    | Ca_kabuli_chr04 | 3559868                 | GG                              | AA              | 1946784633               |
| SNP_P4_37314_3560247 | NC_021163.1    | Ca_kabuli_chr04 | 3560247                 | CC                              | TT              | 1946784635               |
| SNP_P4_37315_3567991 | NC_021163.1    | Ca_kabuli_chr04 | 3567991                 | TT                              | AA              | 1946784637               |
| SNP_P4_37316_3579781 | NC_021163.1    | Ca_kabuli_chr04 | 3579781                 | GG                              | AA              | 1946784639               |
| SNP_P4_37317_3602736 | NC_021163.1    | Ca_kabuli_chr04 | 3602736                 | AA                              | CC              | 1946784641               |
| SNP_P4_37318_3629433 | NC_021163.1    | Ca_kabuli_chr04 | 3629433                 | CC                              | GG              | 1946784643               |
| SNP_P4_37322_3723845 | NC_021163.1    | Ca_kabuli_chr04 | 3723845                 | TT                              | CC              | 1946784645               |
| SNP_P4_37323_3733972 | NC_021163.1    | Ca_kabuli_chr04 | 3733972                 | CC                              | TT              | 1946784647               |
| SNP_P4_37326_3778970 | NC_021163.1    | Ca_kabuli_chr04 | 3778970                 | TT                              | GG              | 1946784649               |
| SNP_P4_37328_3780569 | NC_021163.1    | Ca_kabuli_chr04 | 3780569                 | GG                              | AA              | 1946784651               |
| SNP_P4_37329_3794622 | NC_021163.1    | Ca_kabuli_chr04 | 3794622                 | TT                              | CC              | 1946784654               |
| SNP_P4_37331_3833261 | NC_021163.1    | Ca_kabuli_chr04 | 3833261                 | AA                              | TT              | 1946784656               |
| SNP_P4_37332_3833279 | NC_021163.1    | Ca_kabuli_chr04 | 3833279                 | CC                              | TT              | 1946784658               |
| SNP_P4_37333_3833283 | NC_021163.1    | Ca_kabuli_chr04 | 3833283                 | CC                              | TT              | 1946784660               |
| SNP_P4_37334_3833300 | NC_021163.1    | Ca_kabuli_chr04 | 3833300                 | AA                              | TT              | 1946784662               |
| SNP_P4_37335_3833345 | NC_021163.1    | Ca_kabuli_chr04 | 3833345                 | GG                              | AA              | 1946784664               |
| SNP_P4_37336_3833365 | NC_021163.1    | Ca_kabuli_chr04 | 3833365                 | TT                              | CC              | 1946784666               |
| SNP_P4_37337_3833433 | NC_021163.1    | Ca_kabuli_chr04 | 3833433                 | TT                              | AA              | 1946784668               |
| SNP_P4_37338_3833637 | NC_021163.1    | Ca_kabuli_chr04 | 3833637                 | AA                              | GG              | 1946784670               |
| SNP_P4_37339_3833774 | NC_021163.1    | Ca_kabuli_chr04 | 3833774                 | GG                              | AA              | 1946784672               |
| SNP_P4_37340_3833809 | NC_021163.1    | Ca_kabuli_chr04 | 3833809                 | CC                              | TT              | 1946784674               |
| SNP_P4_37341_3847522 | NC_021163.1    | Ca_kabuli_chr04 | 3847522                 | GG                              | AA              | 1946784676               |
| SNP_P4_37342_3851227 | NC_021163.1    | Ca_kabuli_chr04 | 3851227                 | GG                              | CC              | 1946784678               |
| SNP_P4_37344_3868479 | NC_021163.1    | Ca_kabuli_chr04 | 3868479                 | GG                              | AA              | 1946784680               |
| SNP_P4_37345_3869621 | NC_021163.1    | Ca_kabuli_chr04 | 3869621                 | AA                              | CC              | 1946784682               |
| SNP_P4_37346_3869698 | NC_021163.1    | Ca_kabuli_chr04 | 3869698                 | GG                              | TT              | 1946784685               |
| SNP_P4_37347_3869993 | NC_021163.1    | Ca_kabuli_chr04 | 3869993                 | AA                              | TT              | 1946784687               |
| SNP_P4_37348_3870683 | NC_021163.1    | Ca_kabuli_chr04 | 3870683                 | CC                              | AA              | 1946784689               |
| SNP_P4_37350_3871941 | NC_021163.1    | Ca_kabuli_chr04 | 3871941                 | CC                              | AA              | 1946784691               |
| SNP_P4_37351_3871942 | NC_021163.1    | Ca_kabuli_chr04 | 3871942                 | AA                              | TT              | 1946784693               |
| SNP_P4_37352_3872059 | NC_021163.1    | Ca_kabuli_chr04 | 3872059                 | TT                              | GG              | 1946784695               |
| SNP_P4_37353_3872267 | NC_021163.1    | Ca_kabuli_chr04 | 3872267                 | TT                              | AA              | 1946784697               |
| SNP_P4_37354_3872325 | NC_021163.1    | Ca_kabuli_chr04 | 3872325                 | TT                              | CC              | 1946784699               |
| SNP_P4_37355_3872366 | NC_021163.1    | Ca_kabuli_chr04 | 3872366                 | AA                              | GG              | 1946784701               |
| SNP_P4_37356_3872378 | NC_021163.1    | Ca_kabuli_chr04 | 3872378                 | GG                              | AA              | 1946784703               |
| SNP_P4_37357_3872555 | NC_021163.1    | Ca_kabuli_chr04 | 3872555                 | TT                              | CC              | 1946784705               |

| SNPs IDs             | Chromosome IDs | Chromosomes     | Physical positions (bp) | CDC Frontier (Reference genome) | (ILWC46 & LPNB) | NCBI SNPdb Accession IDs |
|----------------------|----------------|-----------------|-------------------------|---------------------------------|-----------------|--------------------------|
| SNP_P4_37358_3872571 | NC_021163.1    | Ca_kabuli_chr04 | 3872571                 | TT                              | AA              | 1946784707               |
| SNP_P4_37359_3872654 | NC_021163.1    | Ca_kabuli_chr04 | 3872654                 | TT                              | CC              | 1946784709               |
| SNP_P4_37360_3877160 | NC_021163.1    | Ca_kabuli_chr04 | 3877160                 | AA                              | TT              | 1946784711               |
| SNP_P4_37361_3894879 | NC_021163.1    | Ca_kabuli_chr04 | 3894879                 | GG                              | AA              | 1946784713               |
| SNP_P4_37362_3897527 | NC_021163.1    | Ca_kabuli_chr04 | 3897527                 | TT                              | CC              | 1946784715               |
| SNP_P4_37363_3903376 | NC_021163.1    | Ca_kabuli_chr04 | 3903376                 | GG                              | TT              | 1946784717               |
| SNP_P4_37364_3906528 | NC_021163.1    | Ca_kabuli_chr04 | 3906528                 | TT                              | CC              | 1946784719               |
| SNP_P4_37366_3917523 | NC_021163.1    | Ca_kabuli_chr04 | 3917523                 | AA                              | CC              | 1946784721               |
| SNP_P4_37367_3924979 | NC_021163.1    | Ca_kabuli_chr04 | 3924979                 | TT                              | AA              | 1946784723               |
| SNP_P4_37368_3927479 | NC_021163.1    | Ca_kabuli_chr04 | 3927479                 | TT                              | CC              | 1946784725               |
| SNP_P4_37369_3951384 | NC_021163.1    | Ca_kabuli_chr04 | 3951384                 | GG                              | AA              | 1946784728               |
| SNP_P4_37371_3990334 | NC_021163.1    | Ca_kabuli_chr04 | 3990334                 | GG                              | AA              | 1946784730               |
| SNP_P4_37372_3990682 | NC_021163.1    | Ca_kabuli_chr04 | 3990682                 | AA                              | GG              | 1946784732               |
| SNP_P4_37373_3991072 | NC_021163.1    | Ca_kabuli_chr04 | 3991072                 | GG                              | TT              | 1946784734               |
| SNP_P4_37375_3991316 | NC_021163.1    | Ca_kabuli_chr04 | 3991316                 | CC                              | TT              | 1946784736               |
| SNP_P4_37376_3991752 | NC_021163.1    | Ca_kabuli_chr04 | 3991752                 | TT                              | CC              | 1946784738               |
| SNP_P4_37377_3992606 | NC_021163.1    | Ca_kabuli_chr04 | 3992606                 | GG                              | AA              | 1946784740               |
| SNP_P4_37378_3992673 | NC_021163.1    | Ca_kabuli_chr04 | 3992673                 | TT                              | AA              | 1946784742               |
| SNP_P4_37379_3992721 | NC_021163.1    | Ca_kabuli_chr04 | 3992721                 | TT                              | GG              | 1946784744               |
| SNP_P4_37380_3992729 | NC_021163.1    | Ca_kabuli_chr04 | 3992729                 | TT                              | CC              | 1946784746               |
| SNP_P4_37381_3993248 | NC_021163.1    | Ca_kabuli_chr04 | 3993248                 | TT                              | CC              | 1946784748               |
| SNP_P4_37383_3993598 | NC_021163.1    | Ca_kabuli_chr04 | 3993598                 | GG                              | CC              | 1946784750               |
| SNP_P4_37384_3993650 | NC_021163.1    | Ca_kabuli_chr04 | 3993650                 | CC                              | AA              | 1946784752               |
| SNP_P4_37385_3993673 | NC_021163.1    | Ca_kabuli_chr04 | 3993673                 | GG                              | AA              | 1946784754               |
| SNP_P4_37386_3993981 | NC_021163.1    | Ca_kabuli_chr04 | 3993981                 | CC                              | GG              | 1946784756               |
| SNP_P4_37387_3994092 | NC_021163.1    | Ca_kabuli_chr04 | 3994092                 | GG                              | AA              | 1946784758               |
| SNP_P4_37388_3994997 | NC_021163.1    | Ca_kabuli_chr04 | 3994997                 | CC                              | GG              | 1946784760               |
| SNP_P4_37389_3996469 | NC_021163.1    | Ca_kabuli_chr04 | 3996469                 | TT                              | CC              | 1946784762               |
| SNP_P4_37390_3996728 | NC_021163.1    | Ca_kabuli_chr04 | 3996728                 | GG                              | AA              | 1946784764               |
| SNP_P4_37391_3996775 | NC_021163.1    | Ca_kabuli_chr04 | 3996775                 | AA                              | TT              | 1946784766               |
| SNP_P4_37392_3996796 | NC_021163.1    | Ca_kabuli_chr04 | 3996796                 | TT                              | AA              | 1946784768               |
| SNP_P4_37393_3996827 | NC_021163.1    | Ca_kabuli_chr04 | 3996827                 | TT                              | GG              | 1946784770               |
| SNP_P4_37394_3998254 | NC_021163.1    | Ca_kabuli_chr04 | 3998254                 | AA                              | GG              | 1946784772               |
| SNP_P4_37395_3998272 | NC_021163.1    | Ca_kabuli_chr04 | 3998272                 | TT                              | AA              | 1946784774               |
| SNP_P4_37396_3998275 | NC_021163.1    | Ca_kabuli_chr04 | 3998275                 | AA                              | TT              | 1946784776               |
| SNP_P4_37397_3998276 | NC_021163.1    | Ca_kabuli_chr04 | 3998276                 | TT                              | AA              | 1946784778               |
| SNP_P4_37398_3998286 | NC_021163.1    | Ca_kabuli_chr04 | 3998286                 | GG                              | AA              | 1946784780               |
| SNP_P4_37399_3998396 | NC_021163.1    | Ca_kabuli_chr04 | 3998396                 | AA                              | TT              | 1946784782               |
| SNP_P4_37401_4000647 | NC_021163.1    | Ca_kabuli_chr04 | 4000647                 | GG                              | AA              | 1946784784               |
| SNP_P4_37402_4000680 | NC_021163.1    | Ca_kabuli_chr04 | 4000680                 | AA                              | GG              | 1946784786               |
| SNP_P4_37403_4000726 | NC_021163.1    | Ca_kabuli_chr04 | 4000726                 | CC                              | TT              | 1946784788               |
| SNP_P4_37404_4001908 | NC_021163.1    | Ca_kabuli_chr04 | 4001908                 | AA                              | CC              | 1946784790               |

| SNPs IDs             | Chromosome IDs | Chromosomes     | Physical positions (bp) | CDC Frontier (Reference genome) | (ILWC46 & LPNB) | NCBI SNPdb Accession IDs |
|----------------------|----------------|-----------------|-------------------------|---------------------------------|-----------------|--------------------------|
| SNP_P4_37405_4007499 | NC_021163.1    | Ca_kabuli_chr04 | 4007499                 | GG                              | TT              | 1946784792               |
| SNP_P4_37406_4008124 | NC_021163.1    | Ca_kabuli_chr04 | 4008124                 | TT                              | AA              | 1946784794               |
| SNP_P4_37407_4008179 | NC_021163.1    | Ca_kabuli_chr04 | 4008179                 | TT                              | CC              | 1946784796               |
| SNP_P4_37410_4008325 | NC_021163.1    | Ca_kabuli_chr04 | 4008325                 | TT                              | AA              | 1946784798               |
| SNP_P4_37411_4008326 | NC_021163.1    | Ca_kabuli_chr04 | 4008326                 | TT                              | AA              | 1946784800               |
| SNP_P4_37412_4008365 | NC_021163.1    | Ca_kabuli_chr04 | 4008365                 | TT                              | AA              | 1946784802               |
| SNP_P4_37413_4008439 | NC_021163.1    | Ca_kabuli_chr04 | 4008439                 | GG                              | AA              | 1946784804               |
| SNP_P4_37414_4008532 | NC_021163.1    | Ca_kabuli_chr04 | 4008532                 | AA                              | TT              | 1946784806               |
| SNP_P4_37415_4008539 | NC_021163.1    | Ca_kabuli_chr04 | 4008539                 | AA                              | GG              | 1946784808               |
| SNP_P4_37416_4008572 | NC_021163.1    | Ca_kabuli_chr04 | 4008572                 | GG                              | AA              | 1946784810               |
| SNP_P4_37417_4008717 | NC_021163.1    | Ca_kabuli_chr04 | 4008717                 | TT                              | CC              | 1946784812               |
| SNP_P4_37418_4008984 | NC_021163.1    | Ca_kabuli_chr04 | 4008984                 | GG                              | AA              | 1946784814               |
| SNP_P4_37419_4009037 | NC_021163.1    | Ca_kabuli_chr04 | 4009037                 | TT                              | CC              | 1946784816               |
| SNP_P4_37420_4011302 | NC_021163.1    | Ca_kabuli_chr04 | 4011302                 | GG                              | AA              | 1946784818               |
| SNP_P4_37421_4011415 | NC_021163.1    | Ca_kabuli_chr04 | 4011415                 | TT                              | CC              | 1946784820               |
| SNP_P4_37423_4011633 | NC_021163.1    | Ca_kabuli_chr04 | 4011633                 | TT                              | AA              | 1946784822               |
| SNP_P4_37424_4011689 | NC_021163.1    | Ca_kabuli_chr04 | 4011689                 | CC                              | TT              | 1946784825               |
| SNP_P4_37425_4012694 | NC_021163.1    | Ca_kabuli_chr04 | 4012694                 | CC                              | GG              | 1946784827               |
| SNP_P4_37426_4012824 | NC_021163.1    | Ca_kabuli_chr04 | 4012824                 | GG                              | CC              | 1946784829               |
| SNP_P4_37429_4013680 | NC_021163.1    | Ca_kabuli_chr04 | 4013680                 | CC                              | TT              | 1946784831               |
| SNP_P4_37430_4013698 | NC_021163.1    | Ca_kabuli_chr04 | 4013698                 | TT                              | AA              | 1946784833               |
| SNP_P4_37431_4013699 | NC_021163.1    | Ca_kabuli_chr04 | 4013699                 | CC                              | AA              | 1946784835               |
| SNP_P4_37432_4013965 | NC_021163.1    | Ca_kabuli_chr04 | 4013965                 | AA                              | GG              | 1946784837               |
| SNP_P4_37433_4013976 | NC_021163.1    | Ca_kabuli_chr04 | 4013976                 | AA                              | GG              | 1946784839               |
| SNP_P4_37434_4013995 | NC_021163.1    | Ca_kabuli_chr04 | 4013995                 | TT                              | CC              | 1946784841               |
| SNP_P4_37435_4014351 | NC_021163.1    | Ca_kabuli_chr04 | 4014351                 | TT                              | AA              | 1946784843               |
| SNP_P4_37437_4016511 | NC_021163.1    | Ca_kabuli_chr04 | 4016511                 | CC                              | AA              | 1946784845               |
| SNP_P4_37438_4016529 | NC_021163.1    | Ca_kabuli_chr04 | 4016529                 | AA                              | GG              | 1946784847               |
| SNP_P4_37439_4016579 | NC_021163.1    | Ca_kabuli_chr04 | 4016579                 | AA                              | GG              | 1946784849               |
| SNP_P4_37440_4016585 | NC_021163.1    | Ca_kabuli_chr04 | 4016585                 | CC                              | TT              | 1946784851               |
| SNP_P4_37441_4016621 | NC_021163.1    | Ca_kabuli_chr04 | 4016621                 | GG                              | AA              | 1946784853               |
| SNP_P4_37442_4016622 | NC_021163.1    | Ca_kabuli_chr04 | 4016622                 | TT                              | CC              | 1946784855               |
| SNP_P4_37443_4016623 | NC_021163.1    | Ca_kabuli_chr04 | 4016623                 | GG                              | AA              | 1946784858               |
| SNP_P4_37444_4016937 | NC_021163.1    | Ca_kabuli_chr04 | 4016937                 | AA                              | CC              | 1946784860               |
| SNP_P4_37445_4017721 | NC_021163.1    | Ca_kabuli_chr04 | 4017721                 | TT                              | GG              | 1946784862               |
| SNP_P4_37446_4017727 | NC_021163.1    | Ca_kabuli_chr04 | 4017727                 | AA                              | GG              | 1946784864               |
| SNP_P4_37447_4020107 | NC_021163.1    | Ca_kabuli_chr04 | 4020107                 | GG                              | TT              | 1946784866               |
| SNP_P4_37448_4021589 | NC_021163.1    | Ca_kabuli_chr04 | 4021589                 | GG                              | AA              | 1946784868               |
| SNP_P4_37449_4021591 | NC_021163.1    | Ca_kabuli_chr04 | 4021591                 | GG                              | AA              | 1946784870               |
| SNP_P4_37450_4021603 | NC_021163.1    | Ca_kabuli_chr04 | 4021603                 | AA                              | GG              | 1946784872               |
| SNP_P4_37451_4021724 | NC_021163.1    | Ca_kabuli_chr04 | 4021724                 | GG                              | CC              | 1946784875               |
| SNP_P4_37452_4021761 | NC_021163.1    | Ca_kabuli_chr04 | 4021761                 | GG                              | TT              | 1946784877               |

| SNPs IDs             | Chromosome IDs | Chromosomes     | Physical positions (bp) | CDC Frontier (Reference genome) | (ILWC46 & LPNB) | NCBI SNPdb Accession IDs |
|----------------------|----------------|-----------------|-------------------------|---------------------------------|-----------------|--------------------------|
| SNP_P4_37453_4021762 | NC_021163.1    | Ca_kabuli_chr04 | 4021762                 | AA                              | GG              | 1946784879               |
| SNP_P4_37454_4021790 | NC_021163.1    | Ca_kabuli_chr04 | 4021790                 | TT                              | GG              | 1946784882               |
| SNP_P4_37455_4021796 | NC_021163.1    | Ca_kabuli_chr04 | 4021796                 | TT                              | AA              | 1946784884               |
| SNP_P4_37456_4021828 | NC_021163.1    | Ca_kabuli_chr04 | 4021828                 | GG                              | AA              | 1946784886               |
| SNP_P4_37457_4021839 | NC_021163.1    | Ca_kabuli_chr04 | 4021839                 | CC                              | AA              | 1946784888               |
| SNP_P4_37458_4021840 | NC_021163.1    | Ca_kabuli_chr04 | 4021840                 | AA                              | TT              | 1946784890               |
| SNP_P4_37459_4022141 | NC_021163.1    | Ca_kabuli_chr04 | 4022141                 | GG                              | AA              | 1946784892               |
| SNP_P4_37460_4022216 | NC_021163.1    | Ca_kabuli_chr04 | 4022216                 | GG                              | TT              | 1946784894               |
| SNP_P4_37461_4022427 | NC_021163.1    | Ca_kabuli_chr04 | 4022427                 | AA                              | TT              | 1946784896               |
| SNP_P4_37462_4022429 | NC_021163.1    | Ca_kabuli_chr04 | 4022429                 | AA                              | GG              | 1946784898               |
| SNP_P4_37463_4022451 | NC_021163.1    | Ca_kabuli_chr04 | 4022451                 | TT                              | AA              | 1946784900               |
| SNP_P4_37464_4022463 | NC_021163.1    | Ca_kabuli_chr04 | 4022463                 | TT                              | CC              | 1946784902               |
| SNP_P4_37465_4022464 | NC_021163.1    | Ca_kabuli_chr04 | 4022464                 | TT                              | CC              | 1946784905               |
| SNP_P4_37466_4022688 | NC_021163.1    | Ca_kabuli_chr04 | 4022688                 | AA                              | GG              | 1946784907               |
| SNP_P4_37467_4022689 | NC_021163.1    | Ca_kabuli_chr04 | 4022689                 | CC                              | TT              | 1946784909               |
| SNP_P4_37468_4022694 | NC_021163.1    | Ca_kabuli_chr04 | 4022694                 | AA                              | GG              | 1946784911               |
| SNP_P4_37469_4022919 | NC_021163.1    | Ca_kabuli_chr04 | 4022919                 | TT                              | AA              | 1946784913               |
| SNP_P4_37470_4022937 | NC_021163.1    | Ca_kabuli_chr04 | 4022937                 | TT                              | AA              | 1946784915               |
| SNP_P4_37471_4023788 | NC_021163.1    | Ca_kabuli_chr04 | 4023788                 | TT                              | GG              | 1946784917               |
| SNP_P4_37472_4023904 | NC_021163.1    | Ca_kabuli_chr04 | 4023904                 | CC                              | TT              | 1946784919               |
| SNP_P4_37473_4024900 | NC_021163.1    | Ca_kabuli_chr04 | 4024900                 | AA                              | TT              | 1946784921               |
| SNP_P4_37474_4024906 | NC_021163.1    | Ca_kabuli_chr04 | 4024906                 | TT                              | AA              | 1946784923               |
| SNP_P4_37475_4024915 | NC_021163.1    | Ca_kabuli_chr04 | 4024915                 | AA                              | GG              | 1946784925               |
| SNP_P4_37476_4024918 | NC_021163.1    | Ca_kabuli_chr04 | 4024918                 | AA                              | TT              | 1946784928               |
| SNP_P4_37478_4025088 | NC_021163.1    | Ca_kabuli_chr04 | 4025088                 | GG                              | AA              | 1946784930               |
| SNP_P4_37479_4025127 | NC_021163.1    | Ca_kabuli_chr04 | 4025127                 | AA                              | GG              | 1946784932               |
| SNP_P4_37480_4025413 | NC_021163.1    | Ca_kabuli_chr04 | 4025413                 | GG                              | TT              | 1946784934               |
| SNP_P4_37481_4025414 | NC_021163.1    | Ca_kabuli_chr04 | 4025414                 | TT                              | CC              | 1946784936               |
| SNP_P4_37482_4025426 | NC_021163.1    | Ca_kabuli_chr04 | 4025426                 | GG                              | AA              | 1946784938               |
| SNP_P4_37483_4025456 | NC_021163.1    | Ca_kabuli_chr04 | 4025456                 | AA                              | TT              | 1946784940               |
| SNP_P4_37484_4025576 | NC_021163.1    | Ca_kabuli_chr04 | 4025576                 | AA                              | CC              | 1946784942               |
| SNP_P4_37485_4025640 | NC_021163.1    | Ca_kabuli_chr04 | 4025640                 | AA                              | GG              | 1946784944               |
| SNP_P4_37486_4027249 | NC_021163.1    | Ca_kabuli_chr04 | 4027249                 | CC                              | TT              | 1946784946               |
| SNP_P4_37487_4027281 | NC_021163.1    | Ca_kabuli_chr04 | 4027281                 | TT                              | CC              | 1946784948               |
| SNP_P4_37488_4028932 | NC_021163.1    | Ca_kabuli_chr04 | 4028932                 | AA                              | GG              | 1946784950               |
| SNP_P4_37490_4030679 | NC_021163.1    | Ca_kabuli_chr04 | 4030679                 | AA                              | CC              | 1946784953               |
| SNP_P4_37491_4030680 | NC_021163.1    | Ca_kabuli_chr04 | 4030680                 | GG                              | TT              | 1946784955               |
| SNP_P4_37492_4030700 | NC_021163.1    | Ca_kabuli_chr04 | 4030700                 | GG                              | AA              | 1946784957               |
| SNP_P4_37493_4031549 | NC_021163.1    | Ca_kabuli_chr04 | 4031549                 | AA                              | GG              | 1946784959               |
| SNP_P4_37494_4031551 | NC_021163.1    | Ca_kabuli_chr04 | 4031551                 | AA                              | CC              | 1946784961               |
| SNP_P4_37496_4031973 | NC_021163.1    | Ca_kabuli_chr04 | 4031973                 | TT                              | CC              | 1946784963               |
| SNP_P4_37497_4031999 | NC_021163.1    | Ca_kabuli_chr04 | 4031999                 | CC                              | TT              | 1946784965               |



| SNPs IDs             | Chromosome IDs | Chromosomes     | Physical positions (bp) | CDC Frontier (Reference genome) | (ILWC46 & LPNB) | NCBI SNPdb Accession IDs |
|----------------------|----------------|-----------------|-------------------------|---------------------------------|-----------------|--------------------------|
| SNP_P4_37498_4032004 | NC_021163.1    | Ca_kabuli_chr04 | 4032004                 | TT                              | AA              | 1946784967               |
| SNP_P4_37499_4032432 | NC_021163.1    | Ca_kabuli_chr04 | 4032432                 | CC                              | TT              | 1946784969               |
| SNP_P4_37501_4032807 | NC_021163.1    | Ca_kabuli_chr04 | 4032807                 | AA                              | CC              | 1946784972               |
| SNP_P4_37502_4034247 | NC_021163.1    | Ca_kabuli_chr04 | 4034247                 | AA                              | TT              | 1946784974               |
| SNP_P4_37503_4034282 | NC_021163.1    | Ca_kabuli_chr04 | 4034282                 | GG                              | AA              | 1946784976               |
| SNP_P4_37504_4034396 | NC_021163.1    | Ca_kabuli_chr04 | 4034396                 | AA                              | GG              | 1946784978               |
| SNP_P4_37505_4034651 | NC_021163.1    | Ca_kabuli_chr04 | 4034651                 | TT                              | CC              | 1946784980               |
| SNP_P4_37508_4035636 | NC_021163.1    | Ca_kabuli_chr04 | 4035636                 | GG                              | TT              | 1946784983               |
| SNP_P4_37509_4035664 | NC_021163.1    | Ca_kabuli_chr04 | 4035664                 | GG                              | AA              | 1946784985               |
| SNP_P4_37510_4036773 | NC_021163.1    | Ca_kabuli_chr04 | 4036773                 | GG                              | AA              | 1946784987               |
| SNP_P4_37513_4038906 | NC_021163.1    | Ca_kabuli_chr04 | 4038906                 | AA                              | GG              | 1946784989               |
| SNP_P4_37514_4038970 | NC_021163.1    | Ca_kabuli_chr04 | 4038970                 | AA                              | CC              | 1946784991               |
| SNP_P4_37516_4039526 | NC_021163.1    | Ca_kabuli_chr04 | 4039526                 | TT                              | GG              | 1946784993               |
| SNP_P4_37517_4039623 | NC_021163.1    | Ca_kabuli_chr04 | 4039623                 | GG                              | AA              | 1946784995               |
| SNP_P4_37518_4040067 | NC_021163.1    | Ca_kabuli_chr04 | 4040067                 | AA                              | TT              | 1946784998               |
| SNP_P4_37519_4040083 | NC_021163.1    | Ca_kabuli_chr04 | 4040083                 | TT                              | CC              | 1946785000               |
| SNP_P4_37520_4040084 | NC_021163.1    | Ca_kabuli_chr04 | 4040084                 | GG                              | AA              | 1946785002               |
| SNP_P4_37521_4040287 | NC_021163.1    | Ca_kabuli_chr04 | 4040287                 | CC                              | TT              | 1946785004               |
| SNP_P4_37522_4040296 | NC_021163.1    | Ca_kabuli_chr04 | 4040296                 | CC                              | TT              | 1946785006               |
| SNP_P4_37523_4040326 | NC_021163.1    | Ca_kabuli_chr04 | 4040326                 | CC                              | TT              | 1946785008               |
| SNP_P4_37524_4040349 | NC_021163.1    | Ca_kabuli_chr04 | 4040349                 | CC                              | TT              | 1946785010               |
| SNP_P4_37525_4040374 | NC_021163.1    | Ca_kabuli_chr04 | 4040374                 | GG                              | AA              | 1946785012               |
| SNP_P4_37526_4040385 | NC_021163.1    | Ca_kabuli_chr04 | 4040385                 | TT                              | GG              | 1946785014               |
| SNP_P4_37527_4040404 | NC_021163.1    | Ca_kabuli_chr04 | 4040404                 | CC                              | AA              | 1946785016               |
| SNP_P4_37528_4040487 | NC_021163.1    | Ca_kabuli_chr04 | 4040487                 | CC                              | AA              | 1946785019               |
| SNP_P4_37529_4040491 | NC_021163.1    | Ca_kabuli_chr04 | 4040491                 | GG                              | TT              | 1946785021               |
| SNP_P4_37530_4040552 | NC_021163.1    | Ca_kabuli_chr04 | 4040552                 | GG                              | AA              | 1946785023               |
| SNP_P4_37531_4040556 | NC_021163.1    | Ca_kabuli_chr04 | 4040556                 | TT                              | AA              | 1946785025               |
| SNP_P4_37533_4042922 | NC_021163.1    | Ca_kabuli_chr04 | 4042922                 | GG                              | CC              | 1946785027               |
| SNP_P4_37534_4043454 | NC_021163.1    | Ca_kabuli_chr04 | 4043454                 | GG                              | CC              | 1946785029               |
| SNP_P4_37535_4043677 | NC_021163.1    | Ca_kabuli_chr04 | 4043677                 | AA                              | TT              | 1946785031               |
| SNP_P4_37536_4043693 | NC_021163.1    | Ca_kabuli_chr04 | 4043693                 | AA                              | GG              | 1946785033               |
| SNP_P4_37537_4043822 | NC_021163.1    | Ca_kabuli_chr04 | 4043822                 | TT                              | AA              | 1946785034               |
| SNP_P4_37538_4044032 | NC_021163.1    | Ca_kabuli_chr04 | 4044032                 | CC                              | TT              | 1946785035               |
| SNP_P4_37539_4045125 | NC_021163.1    | Ca_kabuli_chr04 | 4045125                 | TT                              | CC              | 1946785036               |
| SNP_P4_37541_4045377 | NC_021163.1    | Ca_kabuli_chr04 | 4045377                 | GG                              | AA              | 1946785037               |
| SNP_P4_37542_4045385 | NC_021163.1    | Ca_kabuli_chr04 | 4045385                 | AA                              | TT              | 1946785038               |
| SNP_P4_37543_4045668 | NC_021163.1    | Ca_kabuli_chr04 | 4045668                 | AA                              | GG              | 1946785041               |
| SNP_P4_37544_4047974 | NC_021163.1    | Ca_kabuli_chr04 | 4047974                 | CC                              | TT              | 1946785043               |
| SNP_P4_37545_4051250 | NC_021163.1    | Ca_kabuli_chr04 | 4051250                 | AA                              | GG              | 1946785045               |
| SNP_P4_37546_4052990 | NC_021163.1    | Ca_kabuli_chr04 | 4052990                 | GG                              | AA              | 1946785047               |
| SNP_P4_37547_4053870 | NC_021163.1    | Ca_kabuli_chr04 | 4053870                 | GG                              | AA              | 1946785049               |

| SNPs IDs             | Chromosome IDs | Chromosomes     | Physical positions (bp) | CDC Frontier (Reference genome) | (ILWC46 & LPNB) | NCBI SNPdb Accession IDs |
|----------------------|----------------|-----------------|-------------------------|---------------------------------|-----------------|--------------------------|
| SNP_P4_37548_4054007 | NC_021163.1    | Ca_kabuli_chr04 | 4054007                 | TT                              | CC              | 1946785051               |
| SNP_P4_37549_4054701 | NC_021163.1    | Ca_kabuli_chr04 | 4054701                 | TT                              | GG              | 1946785053               |
| SNP_P4_37550_4054704 | NC_021163.1    | Ca_kabuli_chr04 | 4054704                 | CC                              | GG              | 1946785055               |
| SNP_P4_37551_4054726 | NC_021163.1    | Ca_kabuli_chr04 | 4054726                 | TT                              | AA              | 1946785057               |
| SNP_P4_37552_4055027 | NC_021163.1    | Ca_kabuli_chr04 | 4055027                 | AA                              | TT              | 1946785059               |
| SNP_P4_37553_4055202 | NC_021163.1    | Ca_kabuli_chr04 | 4055202                 | GG                              | AA              | 1946785061               |
| SNP_P4_37554_4055655 | NC_021163.1    | Ca_kabuli_chr04 | 4055655                 | GG                              | AA              | 1946785063               |
| SNP_P4_37555_4056667 | NC_021163.1    | Ca_kabuli_chr04 | 4056667                 | AA                              | GG              | 1946785065               |
| SNP_P4_37557_4066749 | NC_021163.1    | Ca_kabuli_chr04 | 4066749                 | TT                              | CC              | 1946785067               |
| SNP_P4_37558_4067654 | NC_021163.1    | Ca_kabuli_chr04 | 4067654                 | GG                              | CC              | 1946785069               |
| SNP_P4_37559_4067696 | NC_021163.1    | Ca_kabuli_chr04 | 4067696                 | TT                              | AA              | 1946785071               |
| SNP_P4_37560_4068234 | NC_021163.1    | Ca_kabuli_chr04 | 4068234                 | AA                              | GG              | 1946785073               |
| SNP_P4_37563_4068885 | NC_021163.1    | Ca_kabuli_chr04 | 4068885                 | AA                              | GG              | 1946785075               |
| SNP_P4_37564_4069206 | NC_021163.1    | Ca_kabuli_chr04 | 4069206                 | GG                              | AA              | 1946785077               |
| SNP_P4_37565_4072733 | NC_021163.1    | Ca_kabuli_chr04 | 4072733                 | TT                              | CC              | 1946785079               |
| SNP_P4_37567_4078583 | NC_021163.1    | Ca_kabuli_chr04 | 4078583                 | TT                              | AA              | 1946785082               |
| SNP_P4_37568_4078588 | NC_021163.1    | Ca_kabuli_chr04 | 4078588                 | GG                              | TT              | 1946785084               |
| SNP_P4_37569_4079069 | NC_021163.1    | Ca_kabuli_chr04 | 4079069                 | AA                              | TT              | 1946785086               |
| SNP_P4_37570_4080703 | NC_021163.1    | Ca_kabuli_chr04 | 4080703                 | AA                              | GG              | 1946785088               |
| SNP_P4_37571_4081236 | NC_021163.1    | Ca_kabuli_chr04 | 4081236                 | CC                              | GG              | 1946785090               |
| SNP_P4_37572_4081324 | NC_021163.1    | Ca_kabuli_chr04 | 4081324                 | GG                              | TT              | 1946785092               |
| SNP_P4_37573_4081415 | NC_021163.1    | Ca_kabuli_chr04 | 4081415                 | GG                              | AA              | 1946785095               |
| SNP_P4_37574_4081724 | NC_021163.1    | Ca_kabuli_chr04 | 4081724                 | AA                              | GG              | 1946785097               |
| SNP_P4_37575_4081749 | NC_021163.1    | Ca_kabuli_chr04 | 4081749                 | TT                              | AA              | 1946785099               |
| SNP_P4_37576_4081773 | NC_021163.1    | Ca_kabuli_chr04 | 4081773                 | CC                              | AA              | 1946785101               |
| SNP_P4_37577_4081801 | NC_021163.1    | Ca_kabuli_chr04 | 4081801                 | TT                              | CC              | 1946785103               |
| SNP_P4_37578_4081834 | NC_021163.1    | Ca_kabuli_chr04 | 4081834                 | CC                              | TT              | 1946785105               |
| SNP_P4_37579_4081835 | NC_021163.1    | Ca_kabuli_chr04 | 4081835                 | AA                              | GG              | 1946785107               |
| SNP_P4_37580_4082310 | NC_021163.1    | Ca_kabuli_chr04 | 4082310                 | CC                              | TT              | 1946785109               |
| SNP_P4_37581_4082386 | NC_021163.1    | Ca_kabuli_chr04 | 4082386                 | TT                              | CC              | 1946785111               |
| SNP_P4_37582_4082402 | NC_021163.1    | Ca_kabuli_chr04 | 4082402                 | CC                              | TT              | 1946785113               |
| SNP_P4_37583_4084345 | NC_021163.1    | Ca_kabuli_chr04 | 4084345                 | CC                              | TT              | 1946785115               |
| SNP_P4_37585_4084950 | NC_021163.1    | Ca_kabuli_chr04 | 4084950                 | AA                              | GG              | 1946785117               |
| SNP_P4_37586_4085002 | NC_021163.1    | Ca_kabuli_chr04 | 4085002                 | CC                              | GG              | 1946785119               |
| SNP_P4_37587_4085234 | NC_021163.1    | Ca_kabuli_chr04 | 4085234                 | CC                              | TT              | 1946785121               |
| SNP_P4_37588_4085297 | NC_021163.1    | Ca_kabuli_chr04 | 4085297                 | CC                              | TT              | 1946785123               |
| SNP_P4_37589_4085362 | NC_021163.1    | Ca_kabuli_chr04 | 4085362                 | TT                              | CC              | 1946785125               |
| SNP_P4_37590_4085444 | NC_021163.1    | Ca_kabuli_chr04 | 4085444                 | AA                              | GG              | 1946785127               |
| SNP_P4_37591_4089138 | NC_021163.1    | Ca_kabuli_chr04 | 4089138                 | CC                              | GG              | 1946785129               |
| SNP_P4_37592_4089367 | NC_021163.1    | Ca_kabuli_chr04 | 4089367                 | CC                              | AA              | 1946785131               |
| SNP_P4_37594_4089979 | NC_021163.1    | Ca_kabuli_chr04 | 4089979                 | AA                              | GG              | 1946785133               |
| SNP_P4_37595_4090126 | NC_021163.1    | Ca_kabuli_chr04 | 4090126                 | GG                              | CC              | 1946785135               |

| SNPs IDs             | Chromosome IDs | Chromosomes     | Physical positions (bp) | CDC Frontier (Reference genome) | (ILWC46 & LPNB) | NCBI SNPdb Accession IDs |
|----------------------|----------------|-----------------|-------------------------|---------------------------------|-----------------|--------------------------|
| SNP_P4_37596_4090132 | NC_021163.1    | Ca_kabuli_chr04 | 4090132                 | AA                              | GG              | 1946785137               |
| SNP_P4_37597_4090198 | NC_021163.1    | Ca_kabuli_chr04 | 4090198                 | TT                              | GG              | 1946785139               |
| SNP_P4_37598_4090202 | NC_021163.1    | Ca_kabuli_chr04 | 4090202                 | GG                              | CC              | 1946785141               |
| SNP_P4_37599_4090209 | NC_021163.1    | Ca_kabuli_chr04 | 4090209                 | AA                              | GG              | 1946785143               |
| SNP_P4_37600_4090235 | NC_021163.1    | Ca_kabuli_chr04 | 4090235                 | TT                              | AA              | 1946785146               |
| SNP_P4_37601_4090248 | NC_021163.1    | Ca_kabuli_chr04 | 4090248                 | GG                              | AA              | 1946785148               |
| SNP_P4_37602_4090269 | NC_021163.1    | Ca_kabuli_chr04 | 4090269                 | GG                              | AA              | 1946785150               |
| SNP_P4_37603_4090290 | NC_021163.1    | Ca_kabuli_chr04 | 4090290                 | AA                              | GG              | 1946785152               |
| SNP_P4_37604_4090780 | NC_021163.1    | Ca_kabuli_chr04 | 4090780                 | TT                              | CC              | 1946785154               |
| SNP_P4_37605_4090810 | NC_021163.1    | Ca_kabuli_chr04 | 4090810                 | TT                              | GG              | 1946785156               |
| SNP_P4_37606_4090828 | NC_021163.1    | Ca_kabuli_chr04 | 4090828                 | TT                              | CC              | 1946785158               |
| SNP_P4_37607_4090837 | NC_021163.1    | Ca_kabuli_chr04 | 4090837                 | AA                              | CC              | 1946785160               |
| SNP_P4_37608_4092228 | NC_021163.1    | Ca_kabuli_chr04 | 4092228                 | GG                              | AA              | 1946785162               |
| SNP_P4_37609_4092233 | NC_021163.1    | Ca_kabuli_chr04 | 4092233                 | AA                              | TT              | 1946785164               |
| SNP_P4_37610_4092236 | NC_021163.1    | Ca_kabuli_chr04 | 4092236                 | AA                              | CC              | 1946785166               |
| SNP_P4_37611_4092250 | NC_021163.1    | Ca_kabuli_chr04 | 4092250                 | CC                              | TT              | 1946785168               |
| SNP_P4_37612_4092252 | NC_021163.1    | Ca_kabuli_chr04 | 4092252                 | CC                              | TT              | 1946785170               |
| SNP_P4_37613_4092489 | NC_021163.1    | Ca_kabuli_chr04 | 4092489                 | TT                              | GG              | 1946785172               |
| SNP_P4_37614_4092493 | NC_021163.1    | Ca_kabuli_chr04 | 4092493                 | TT                              | GG              | 1946785174               |
| SNP_P4_37615_4092535 | NC_021163.1    | Ca_kabuli_chr04 | 4092535                 | GG                              | CC              | 1946785176               |
| SNP_P4_37616_4092562 | NC_021163.1    | Ca_kabuli_chr04 | 4092562                 | AA                              | CC              | 1946785178               |
| SNP_P4_37617_4092762 | NC_021163.1    | Ca_kabuli_chr04 | 4092762                 | GG                              | TT              | 1946785180               |
| SNP_P4_37618_4092776 | NC_021163.1    | Ca_kabuli_chr04 | 4092776                 | AA                              | GG              | 1946785182               |
| SNP_P4_37619_4092786 | NC_021163.1    | Ca_kabuli_chr04 | 4092786                 | TT                              | AA              | 1946785184               |
| SNP_P4_37620_4093779 | NC_021163.1    | Ca_kabuli_chr04 | 4093779                 | TT                              | CC              | 1946785186               |
| SNP_P4_37621_4096956 | NC_021163.1    | Ca_kabuli_chr04 | 4096956                 | AA                              | CC              | 1946785188               |
| SNP_P4_37622_4097295 | NC_021163.1    | Ca_kabuli_chr04 | 4097295                 | CC                              | TT              | 1946785190               |
| SNP_P4_37623_4097472 | NC_021163.1    | Ca_kabuli_chr04 | 4097472                 | CC                              | TT              | 1946785192               |
| SNP_P4_37624_4097581 | NC_021163.1    | Ca_kabuli_chr04 | 4097581                 | TT                              | CC              | 1946785194               |
| SNP_P4_37625_4097935 | NC_021163.1    | Ca_kabuli_chr04 | 4097935                 | CC                              | TT              | 1946785197               |
| SNP_P4_37627_4098404 | NC_021163.1    | Ca_kabuli_chr04 | 4098404                 | CC                              | TT              | 1946785199               |
| SNP_P4_37628_4100885 | NC_021163.1    | Ca_kabuli_chr04 | 4100885                 | AA                              | CC              | 1946785201               |
| SNP_P4_37629_4101244 | NC_021163.1    | Ca_kabuli_chr04 | 4101244                 | CC                              | TT              | 1946785203               |
| SNP_P4_37630_4101408 | NC_021163.1    | Ca_kabuli_chr04 | 4101408                 | CC                              | AA              | 1946785205               |
| SNP_P4_37631_4101413 | NC_021163.1    | Ca_kabuli_chr04 | 4101413                 | GG                              | TT              | 1946785207               |
| SNP_P4_37632_4101415 | NC_021163.1    | Ca_kabuli_chr04 | 4101415                 | AA                              | TT              | 1946785209               |
| SNP_P4_37633_4101416 | NC_021163.1    | Ca_kabuli_chr04 | 4101416                 | TT                              | AA              | 1946785211               |
| SNP_P4_37635_4107735 | NC_021163.1    | Ca_kabuli_chr04 | 4107735                 | GG                              | AA              | 1946785213               |
| SNP_P4_37636_4109224 | NC_021163.1    | Ca_kabuli_chr04 | 4109224                 | TT                              | GG              | 1946785215               |
| SNP_P4_37637_4109445 | NC_021163.1    | Ca_kabuli_chr04 | 4109445                 | TT                              | AA              | 1946785217               |
| SNP_P4_37638_4110576 | NC_021163.1    | Ca_kabuli_chr04 | 4110576                 | GG                              | AA              | 1946785219               |
| SNP_P4_37639_4111246 | NC_021163.1    | Ca_kabuli_chr04 | 4111246                 | TT                              | CC              | 1946785221               |

| SNPs IDs             | Chromosome IDs | Chromosomes     | Physical positions (bp) | CDC Frontier (Reference genome) | (ILWC46 & LPNB) | NCBI SNPdb Accession IDs |
|----------------------|----------------|-----------------|-------------------------|---------------------------------|-----------------|--------------------------|
| SNP_P4_37640_4112791 | NC_021163.1    | Ca_kabuli_chr04 | 4112791                 | CC                              | TT              | 1946785223               |
| SNP_P4_37641_4113011 | NC_021163.1    | Ca_kabuli_chr04 | 4113011                 | CC                              | GG              | 1946785225               |
| SNP_P4_37643_4116031 | NC_021163.1    | Ca_kabuli_chr04 | 4116031                 | AA                              | TT              | 1946785227               |
| SNP_P4_37644_4116806 | NC_021163.1    | Ca_kabuli_chr04 | 4116806                 | GG                              | TT              | 1946785229               |
| SNP_P4_37645_4116845 | NC_021163.1    | Ca_kabuli_chr04 | 4116845                 | AA                              | CC              | 1946785231               |
| SNP_P4_37646_4116851 | NC_021163.1    | Ca_kabuli_chr04 | 4116851                 | GG                              | CC              | 1946785233               |
| SNP_P4_37647_4117557 | NC_021163.1    | Ca_kabuli_chr04 | 4117557                 | TT                              | CC              | 1946785235               |
| SNP_P4_37648_4117574 | NC_021163.1    | Ca_kabuli_chr04 | 4117574                 | AA                              | CC              | 1946785237               |
| SNP_P4_37649_4117740 | NC_021163.1    | Ca_kabuli_chr04 | 4117740                 | GG                              | TT              | 1946785239               |
| SNP_P4_37651_4118497 | NC_021163.1    | Ca_kabuli_chr04 | 4118497                 | GG                              | CC              | 1946785241               |
| SNP_P4_37652_4121039 | NC_021163.1    | Ca_kabuli_chr04 | 4121039                 | GG                              | AA              | 1946785243               |
| SNP_P4_37653_4121479 | NC_021163.1    | Ca_kabuli_chr04 | 4121479                 | AA                              | GG              | 1946785245               |
| SNP_P4_37654_4121482 | NC_021163.1    | Ca_kabuli_chr04 | 4121482                 | GG                              | TT              | 1946785247               |
| SNP_P4_37655_4121610 | NC_021163.1    | Ca_kabuli_chr04 | 4121610                 | TT                              | AA              | 1946785249               |
| SNP_P4_37656_4121921 | NC_021163.1    | Ca_kabuli_chr04 | 4121921                 | AA                              | GG              | 1946785251               |
| SNP_P4_37657_4121932 | NC_021163.1    | Ca_kabuli_chr04 | 4121932                 | TT                              | CC              | 1946785253               |
| SNP_P4_37658_4121956 | NC_021163.1    | Ca_kabuli_chr04 | 4121956                 | GG                              | AA              | 1946785255               |
| SNP_P4_37659_4122032 | NC_021163.1    | Ca_kabuli_chr04 | 4122032                 | GG                              | TT              | 1946785257               |
| SNP_P4_37660_4122282 | NC_021163.1    | Ca_kabuli_chr04 | 4122282                 | GG                              | CC              | 1946785259               |
| SNP_P4_37661_4122514 | NC_021163.1    | Ca_kabuli_chr04 | 4122514                 | AA                              | GG              | 1946785260               |
| SNP_P4_37662_4122721 | NC_021163.1    | Ca_kabuli_chr04 | 4122721                 | AA                              | TT              | 1946785263               |
| SNP_P4_37663_4122734 | NC_021163.1    | Ca_kabuli_chr04 | 4122734                 | GG                              | AA              | 1946785265               |
| SNP_P4_37664_4122833 | NC_021163.1    | Ca_kabuli_chr04 | 4122833                 | GG                              | AA              | 1946785267               |
| SNP_P4_37665_4122864 | NC_021163.1    | Ca_kabuli_chr04 | 4122864                 | GG                              | AA              | 1946785269               |
| SNP_P4_37666_4122888 | NC_021163.1    | Ca_kabuli_chr04 | 4122888                 | TT                              | CC              | 1946785271               |
| SNP_P4_37667_4122889 | NC_021163.1    | Ca_kabuli_chr04 | 4122889                 | TT                              | AA              | 1946785273               |
| SNP_P4_37668_4122902 | NC_021163.1    | Ca_kabuli_chr04 | 4122902                 | AA                              | CC              | 1946785275               |
| SNP_P4_37669_4122903 | NC_021163.1    | Ca_kabuli_chr04 | 4122903                 | CC                              | TT              | 1946785277               |
| SNP_P4_37670_4123095 | NC_021163.1    | Ca_kabuli_chr04 | 4123095                 | CC                              | TT              | 1946785279               |
| SNP_P4_37671_4123137 | NC_021163.1    | Ca_kabuli_chr04 | 4123137                 | AA                              | GG              | 1946785281               |
| SNP_P4_37672_4123152 | NC_021163.1    | Ca_kabuli_chr04 | 4123152                 | AA                              | CC              | 1946785283               |
| SNP_P4_37673_4123395 | NC_021163.1    | Ca_kabuli_chr04 | 4123395                 | TT                              | CC              | 1946785285               |
| SNP_P4_37674_4123426 | NC_021163.1    | Ca_kabuli_chr04 | 4123426                 | CC                              | TT              | 1946785287               |
| SNP_P4_37675_4123429 | NC_021163.1    | Ca_kabuli_chr04 | 4123429                 | TT                              | CC              | 1946785289               |
| SNP_P4_37676_4123430 | NC_021163.1    | Ca_kabuli_chr04 | 4123430                 | AA                              | CC              | 1946785291               |
| SNP_P4_37677_4123448 | NC_021163.1    | Ca_kabuli_chr04 | 4123448                 | GG                              | TT              | 1946785294               |
| SNP_P4_37678_4123490 | NC_021163.1    | Ca_kabuli_chr04 | 4123490                 | GG                              | AA              | 1946785296               |
| SNP_P4_37679_4123650 | NC_021163.1    | Ca_kabuli_chr04 | 4123650                 | TT                              | GG              | 1946785298               |
| SNP_P4_37680_4123662 | NC_021163.1    | Ca_kabuli_chr04 | 4123662                 | GG                              | AA              | 1946785300               |
| SNP_P4_37681_4123884 | NC_021163.1    | Ca_kabuli_chr04 | 4123884                 | TT                              | CC              | 1946785302               |
| SNP_P4_37682_4124835 | NC_021163.1    | Ca_kabuli_chr04 | 4124835                 | GG                              | AA              | 1946785304               |
| SNP_P4_37683_4124836 | NC_021163.1    | Ca_kabuli_chr04 | 4124836                 | TT                              | CC              | 1946785306               |

| SNPs IDs             | Chromosome IDs | Chromosomes     | Physical positions (bp) | CDC Frontier (Reference genome) | (ILWC46 & LPNB) | NCBI SNPdb Accession IDs |
|----------------------|----------------|-----------------|-------------------------|---------------------------------|-----------------|--------------------------|
| SNP_P4_37684_4124848 | NC_021163.1    | Ca_kabuli_chr04 | 4124848                 | CC                              | TT              | 1946785309               |
| SNP_P4_37685_4124871 | NC_021163.1    | Ca_kabuli_chr04 | 4124871                 | TT                              | CC              | 1946785311               |
| SNP_P4_37686_4124885 | NC_021163.1    | Ca_kabuli_chr04 | 4124885                 | TT                              | CC              | 1946785313               |
| SNP_P4_37687_4125394 | NC_021163.1    | Ca_kabuli_chr04 | 4125394                 | AA                              | CC              | 1946785315               |
| SNP_P4_37688_4125431 | NC_021163.1    | Ca_kabuli_chr04 | 4125431                 | AA                              | GG              | 1946785317               |
| SNP_P4_37689_4125468 | NC_021163.1    | Ca_kabuli_chr04 | 4125468                 | AA                              | GG              | 1946785319               |
| SNP_P4_37690_4125504 | NC_021163.1    | Ca_kabuli_chr04 | 4125504                 | CC                              | TT              | 1946785321               |
| SNP_P4_37691_4125749 | NC_021163.1    | Ca_kabuli_chr04 | 4125749                 | AA                              | GG              | 1946785323               |
| SNP_P4_37692_4125766 | NC_021163.1    | Ca_kabuli_chr04 | 4125766                 | GG                              | AA              | 1946785325               |
| SNP_P4_37693_4125767 | NC_021163.1    | Ca_kabuli_chr04 | 4125767                 | GG                              | TT              | 1946785327               |
| SNP_P4_37694_4125769 | NC_021163.1    | Ca_kabuli_chr04 | 4125769                 | AA                              | CC              | 1946785329               |
| SNP_P4_37695_4126073 | NC_021163.1    | Ca_kabuli_chr04 | 4126073                 | CC                              | AA              | 1946785331               |
| SNP_P4_37696_4126105 | NC_021163.1    | Ca_kabuli_chr04 | 4126105                 | GG                              | AA              | 1946785333               |
| SNP_P4_37697_4126470 | NC_021163.1    | Ca_kabuli_chr04 | 4126470                 | AA                              | GG              | 1946785336               |
| SNP_P4_37698_4126506 | NC_021163.1    | Ca_kabuli_chr04 | 4126506                 | GG                              | AA              | 1946785338               |
| SNP_P4_37699_4127474 | NC_021163.1    | Ca_kabuli_chr04 | 4127474                 | AA                              | CC              | 1946785340               |
| SNP_P4_37701_4127514 | NC_021163.1    | Ca_kabuli_chr04 | 4127514                 | GG                              | TT              | 1946785342               |
| SNP_P4_37702_4127537 | NC_021163.1    | Ca_kabuli_chr04 | 4127537                 | AA                              | GG              | 1946785344               |
| SNP_P4_37704_4129597 | NC_021163.1    | Ca_kabuli_chr04 | 4129597                 | AA                              | GG              | 1946785346               |
| SNP_P4_37705_4129623 | NC_021163.1    | Ca_kabuli_chr04 | 4129623                 | CC                              | TT              | 1946785348               |
| SNP_P4_37706_4129628 | NC_021163.1    | Ca_kabuli_chr04 | 4129628                 | GG                              | CC              | 1946785350               |
| SNP_P4_37707_4129904 | NC_021163.1    | Ca_kabuli_chr04 | 4129904                 | CC                              | TT              | 1946785352               |
| SNP_P4_37709_4130489 | NC_021163.1    | Ca_kabuli_chr04 | 4130489                 | CC                              | TT              | 1946785354               |
| SNP_P4_37710_4132253 | NC_021163.1    | Ca_kabuli_chr04 | 4132253                 | TT                              | AA              | 1946785356               |
| SNP_P4_37711_4132728 | NC_021163.1    | Ca_kabuli_chr04 | 4132728                 | CC                              | TT              | 1946785358               |
| SNP_P4_37712_4132748 | NC_021163.1    | Ca_kabuli_chr04 | 4132748                 | GG                              | AA              | 1946785360               |
| SNP_P4_37713_4133014 | NC_021163.1    | Ca_kabuli_chr04 | 4133014                 | TT                              | CC              | 1946785362               |
| SNP_P4_37715_4133985 | NC_021163.1    | Ca_kabuli_chr04 | 4133985                 | GG                              | TT              | 1946785364               |
| SNP_P4_37716_4134483 | NC_021163.1    | Ca_kabuli_chr04 | 4134483                 | GG                              | AA              | 1946785366               |
| SNP_P4_37717_4134746 | NC_021163.1    | Ca_kabuli_chr04 | 4134746                 | TT                              | CC              | 1946785368               |
| SNP_P4_37718_4134773 | NC_021163.1    | Ca_kabuli_chr04 | 4134773                 | TT                              | CC              | 1946785370               |
| SNP_P4_37719_4136240 | NC_021163.1    | Ca_kabuli_chr04 | 4136240                 | AA                              | GG              | 1946785372               |
| SNP_P4_37720_4136260 | NC_021163.1    | Ca_kabuli_chr04 | 4136260                 | GG                              | AA              | 1946785375               |
| SNP_P4_37721_4136364 | NC_021163.1    | Ca_kabuli_chr04 | 4136364                 | TT                              | CC              | 1946785377               |
| SNP_P4_37722_4136365 | NC_021163.1    | Ca_kabuli_chr04 | 4136365                 | GG                              | AA              | 1946785379               |
| SNP_P4_37723_4136995 | NC_021163.1    | Ca_kabuli_chr04 | 4136995                 | GG                              | AA              | 1946785381               |
| SNP_P4_37724_4137035 | NC_021163.1    | Ca_kabuli_chr04 | 4137035                 | GG                              | AA              | 1946785383               |
| SNP_P4_37725_4137079 | NC_021163.1    | Ca_kabuli_chr04 | 4137079                 | AA                              | GG              | 1946785385               |
| SNP_P4_37726_4137094 | NC_021163.1    | Ca_kabuli_chr04 | 4137094                 | AA                              | GG              | 1946785387               |
| SNP_P4_37727_4137401 | NC_021163.1    | Ca_kabuli_chr04 | 4137401                 | GG                              | AA              | 1946785389               |
| SNP_P4_37728_4137415 | NC_021163.1    | Ca_kabuli_chr04 | 4137415                 | AA                              | GG              | 1946785391               |
| SNP_P4_37729_4138382 | NC_021163.1    | Ca_kabuli_chr04 | 4138382                 | CC                              | TT              | 1946785393               |

| SNPs IDs             | Chromosome IDs | Chromosomes     | Physical positions (bp) | CDC Frontier (Reference genome) | (ILWC46 & LPNB) | NCBI SNPdb Accession IDs |
|----------------------|----------------|-----------------|-------------------------|---------------------------------|-----------------|--------------------------|
| SNP_P4_37730_4138621 | NC_021163.1    | Ca_kabuli_chr04 | 4138621                 | TT                              | AA              | 1946785395               |
| SNP_P4_37731_4139527 | NC_021163.1    | Ca_kabuli_chr04 | 4139527                 | GG                              | TT              | 1946785397               |
| SNP_P4_37732_4139528 | NC_021163.1    | Ca_kabuli_chr04 | 4139528                 | AA                              | GG              | 1946785399               |
| SNP_P4_37734_4140161 | NC_021163.1    | Ca_kabuli_chr04 | 4140161                 | TT                              | CC              | 1946785401               |
| SNP_P4_37735_4140366 | NC_021163.1    | Ca_kabuli_chr04 | 4140366                 | AA                              | TT              | 1946785403               |
| SNP_P4_37736_4140406 | NC_021163.1    | Ca_kabuli_chr04 | 4140406                 | GG                              | TT              | 1946785405               |
| SNP_P4_37737_4140886 | NC_021163.1    | Ca_kabuli_chr04 | 4140886                 | GG                              | AA              | 1946785407               |
| SNP_P4_37738_4141131 | NC_021163.1    | Ca_kabuli_chr04 | 4141131                 | GG                              | TT              | 1946785409               |
| SNP_P4_37740_4145936 | NC_021163.1    | Ca_kabuli_chr04 | 4145936                 | GG                              | AA              | 1946785412               |
| SNP_P4_37741_4147763 | NC_021163.1    | Ca_kabuli_chr04 | 4147763                 | CC                              | TT              | 1946785415               |
| SNP_P4_37742_4148483 | NC_021163.1    | Ca_kabuli_chr04 | 4148483                 | GG                              | AA              | 1946785417               |
| SNP_P4_37744_4150539 | NC_021163.1    | Ca_kabuli_chr04 | 4150539                 | TT                              | CC              | 1946785419               |
| SNP_P4_37745_4150570 | NC_021163.1    | Ca_kabuli_chr04 | 4150570                 | TT                              | CC              | 1946785421               |
| SNP_P4_37746_4154295 | NC_021163.1    | Ca_kabuli_chr04 | 4154295                 | GG                              | TT              | 1946785423               |
| SNP_P4_37747_4155589 | NC_021163.1    | Ca_kabuli_chr04 | 4155589                 | CC                              | AA              | 1946785425               |
| SNP_P4_37748_4155623 | NC_021163.1    | Ca_kabuli_chr04 | 4155623                 | TT                              | CC              | 1946785427               |
| SNP_P4_37749_4156038 | NC_021163.1    | Ca_kabuli_chr04 | 4156038                 | CC                              | AA              | 1946785429               |
| SNP_P4_37750_4156740 | NC_021163.1    | Ca_kabuli_chr04 | 4156740                 | CC                              | TT              | 1946785431               |
| SNP_P4_37751_4156777 | NC_021163.1    | Ca_kabuli_chr04 | 4156777                 | GG                              | AA              | 1946785434               |
| SNP_P4_37752_4157093 | NC_021163.1    | Ca_kabuli_chr04 | 4157093                 | TT                              | CC              | 1946785436               |
| SNP_P4_37753_4157096 | NC_021163.1    | Ca_kabuli_chr04 | 4157096                 | AA                              | TT              | 1946785438               |
| SNP_P4_37754_4157368 | NC_021163.1    | Ca_kabuli_chr04 | 4157368                 | AA                              | GG              | 1946785440               |
| SNP_P4_37755_4157475 | NC_021163.1    | Ca_kabuli_chr04 | 4157475                 | TT                              | CC              | 1946785442               |
| SNP_P4_37757_4159454 | NC_021163.1    | Ca_kabuli_chr04 | 4159454                 | CC                              | AA              | 1946785444               |
| SNP_P4_37758_4161999 | NC_021163.1    | Ca_kabuli_chr04 | 4161999                 | TT                              | CC              | 1946785446               |
| SNP_P4_37761_4162638 | NC_021163.1    | Ca_kabuli_chr04 | 4162638                 | AA                              | TT              | 1946785448               |
| SNP_P4_37763_4163147 | NC_021163.1    | Ca_kabuli_chr04 | 4163147                 | AA                              | TT              | 1946785450               |
| SNP_P4_37766_4166351 | NC_021163.1    | Ca_kabuli_chr04 | 4166351                 | GG                              | TT              | 1946785452               |
| SNP_P4_37767_4167223 | NC_021163.1    | Ca_kabuli_chr04 | 4167223                 | GG                              | AA              | 1946785454               |
| SNP_P4_37768_4167571 | NC_021163.1    | Ca_kabuli_chr04 | 4167571                 | AA                              | GG              | 1946785456               |
| SNP_P4_37769_4167581 | NC_021163.1    | Ca_kabuli_chr04 | 4167581                 | AA                              | CC              | 1946785458               |
| SNP_P4_37770_4167704 | NC_021163.1    | Ca_kabuli_chr04 | 4167704                 | CC                              | AA              | 1946785460               |
| SNP_P4_37771_4167971 | NC_021163.1    | Ca_kabuli_chr04 | 4167971                 | TT                              | AA              | 1946785462               |
| SNP_P4_37772_4167976 | NC_021163.1    | Ca_kabuli_chr04 | 4167976                 | AA                              | TT              | 1946785464               |
| SNP_P4_37773_4167979 | NC_021163.1    | Ca_kabuli_chr04 | 4167979                 | TT                              | CC              | 1946785467               |
| SNP_P4_37774_4169290 | NC_021163.1    | Ca_kabuli_chr04 | 4169290                 | AA                              | TT              | 1946785469               |
| SNP_P4_37775_4169378 | NC_021163.1    | Ca_kabuli_chr04 | 4169378                 | CC                              | TT              | 1946785471               |
| SNP_P4_37776_4169390 | NC_021163.1    | Ca_kabuli_chr04 | 4169390                 | TT                              | AA              | 1946785473               |
| SNP_P4_37777_4169600 | NC_021163.1    | Ca_kabuli_chr04 | 4169600                 | CC                              | AA              | 1946785475               |
| SNP_P4_37778_4169603 | NC_021163.1    | Ca_kabuli_chr04 | 4169603                 | CC                              | GG              | 1946785478               |
| SNP_P4_37779_4169617 | NC_021163.1    | Ca_kabuli_chr04 | 4169617                 | TT                              | CC              | 1946785480               |
| SNP_P4_37780_4169625 | NC_021163.1    | Ca_kabuli_chr04 | 4169625                 | AA                              | CC              | 1946785482               |

| SNPs IDs             | Chromosome IDs | Chromosomes     | Physical positions (bp) | CDC Frontier (Reference genome) | (ILWC46 & LPNB) | NCBI SNPdb Accession IDs |
|----------------------|----------------|-----------------|-------------------------|---------------------------------|-----------------|--------------------------|
| SNP_P4_37781_4169665 | NC_021163.1    | Ca_kabuli_chr04 | 4169665                 | AA                              | CC              | 1946785484               |
| SNP_P4_37782_4169669 | NC_021163.1    | Ca_kabuli_chr04 | 4169669                 | TT                              | GG              | 1946785486               |
| SNP_P4_37783_4169688 | NC_021163.1    | Ca_kabuli_chr04 | 4169688                 | GG                              | AA              | 1946785489               |
| SNP_P4_37784_4169689 | NC_021163.1    | Ca_kabuli_chr04 | 4169689                 | GG                              | AA              | 1946785491               |
| SNP_P4_37785_4169726 | NC_021163.1    | Ca_kabuli_chr04 | 4169726                 | TT                              | CC              | 1946785493               |
| SNP_P4_37786_4169773 | NC_021163.1    | Ca_kabuli_chr04 | 4169773                 | AA                              | TT              | 1946785495               |
| SNP_P4_37787_4170142 | NC_021163.1    | Ca_kabuli_chr04 | 4170142                 | TT                              | AA              | 1946785497               |
| SNP_P4_37788_4170962 | NC_021163.1    | Ca_kabuli_chr04 | 4170962                 | TT                              | CC              | 1946785499               |
| SNP_P4_37789_4170970 | NC_021163.1    | Ca_kabuli_chr04 | 4170970                 | TT                              | CC              | 1946785501               |
| SNP_P4_37790_4170972 | NC_021163.1    | Ca_kabuli_chr04 | 4170972                 | TT                              | CC              | 1946785503               |
| SNP_P4_37791_4170978 | NC_021163.1    | Ca_kabuli_chr04 | 4170978                 | AA                              | CC              | 1946785505               |
| SNP_P4_37792_4171025 | NC_021163.1    | Ca_kabuli_chr04 | 4171025                 | AA                              | TT              | 1946785507               |
| SNP_P4_37793_4172108 | NC_021163.1    | Ca_kabuli_chr04 | 4172108                 | CC                              | TT              | 1946785509               |
| SNP_P4_37794_4173906 | NC_021163.1    | Ca_kabuli_chr04 | 4173906                 | CC                              | AA              | 1946785511               |
| SNP_P4_37796_4173941 | NC_021163.1    | Ca_kabuli_chr04 | 4173941                 | GG                              | AA              | 1946785513               |
| SNP_P4_37797_4174115 | NC_021163.1    | Ca_kabuli_chr04 | 4174115                 | AA                              | GG              | 1946785515               |
| SNP_P4_37798_4174204 | NC_021163.1    | Ca_kabuli_chr04 | 4174204                 | GG                              | CC              | 1946785517               |
| SNP_P4_37799_4174408 | NC_021163.1    | Ca_kabuli_chr04 | 4174408                 | CC                              | TT              | 1946785519               |
| SNP_P4_37800_4174413 | NC_021163.1    | Ca_kabuli_chr04 | 4174413                 | AA                              | TT              | 1946785521               |
| SNP_P4_37801_4175860 | NC_021163.1    | Ca_kabuli_chr04 | 4175860                 | AA                              | GG              | 1946785523               |
| SNP_P4_37802_4175922 | NC_021163.1    | Ca_kabuli_chr04 | 4175922                 | CC                              | TT              | 1946785525               |
| SNP_P4_37803_4176835 | NC_021163.1    | Ca_kabuli_chr04 | 4176835                 | CC                              | AA              | 1946785528               |
| SNP_P4_37804_4177618 | NC_021163.1    | Ca_kabuli_chr04 | 4177618                 | TT                              | CC              | 1946785530               |
| SNP_P4_37805_4177846 | NC_021163.1    | Ca_kabuli_chr04 | 4177846                 | TT                              | CC              | 1946785532               |
| SNP_P4_37806_4178447 | NC_021163.1    | Ca_kabuli_chr04 | 4178447                 | TT                              | CC              | 1946785534               |
| SNP_P4_37807_4178902 | NC_021163.1    | Ca_kabuli_chr04 | 4178902                 | CC                              | TT              | 1946785536               |
| SNP_P4_37808_4179193 | NC_021163.1    | Ca_kabuli_chr04 | 4179193                 | GG                              | AA              | 1946785538               |
| SNP_P4_37809_4179627 | NC_021163.1    | Ca_kabuli_chr04 | 4179627                 | CC                              | TT              | 1946785540               |
| SNP_P4_37810_4179857 | NC_021163.1    | Ca_kabuli_chr04 | 4179857                 | GG                              | TT              | 1946785542               |
| SNP_P4_37811_4179916 | NC_021163.1    | Ca_kabuli_chr04 | 4179916                 | AA                              | GG              | 1946785544               |
| SNP_P4_37812_4179992 | NC_021163.1    | Ca_kabuli_chr04 | 4179992                 | AA                              | CC              | 1946785546               |
| SNP_P4_37813_4180632 | NC_021163.1    | Ca_kabuli_chr04 | 4180632                 | AA                              | CC              | 1946785548               |
| SNP_P4_37815_4180929 | NC_021163.1    | Ca_kabuli_chr04 | 4180929                 | TT                              | CC              | 1946785550               |
| SNP_P4_37816_4180957 | NC_021163.1    | Ca_kabuli_chr04 | 4180957                 | AA                              | TT              | 1946785552               |
| SNP_P4_37817_4180958 | NC_021163.1    | Ca_kabuli_chr04 | 4180958                 | GG                              | TT              | 1946785554               |
| SNP_P4_37818_4180959 | NC_021163.1    | Ca_kabuli_chr04 | 4180959                 | TT                              | CC              | 1946785556               |
| SNP_P4_37819_4181764 | NC_021163.1    | Ca_kabuli_chr04 | 4181764                 | AA                              | GG              | 1946785558               |
| SNP_P4_37821_4182182 | NC_021163.1    | Ca_kabuli_chr04 | 4182182                 | AA                              | CC              | 1946785561               |
| SNP_P4_37822_4182200 | NC_021163.1    | Ca_kabuli_chr04 | 4182200                 | TT                              | CC              | 1946785564               |
| SNP_P4_37823_4182714 | NC_021163.1    | Ca_kabuli_chr04 | 4182714                 | AA                              | GG              | 1946785566               |
| SNP_P4_37824_4182727 | NC_021163.1    | Ca_kabuli_chr04 | 4182727                 | CC                              | TT              | 1946785568               |
| SNP_P4_37825_4182746 | NC_021163.1    | Ca_kabuli_chr04 | 4182746                 | CC                              | TT              | 1946785570               |

| SNPs IDs             | Chromosome IDs | Chromosomes     | Physical positions (bp) | CDC Frontier (Reference genome) | (ILWC46 & LPNB) | NCBI SNPdb Accession IDs |
|----------------------|----------------|-----------------|-------------------------|---------------------------------|-----------------|--------------------------|
| SNP_P4_37826_4182761 | NC_021163.1    | Ca_kabuli_chr04 | 4182761                 | AA                              | TT              | 1946785572               |
| SNP_P4_37827_4182824 | NC_021163.1    | Ca_kabuli_chr04 | 4182824                 | TT                              | CC              | 1946785575               |
| SNP_P4_37829_4186573 | NC_021163.1    | Ca_kabuli_chr04 | 4186573                 | AA                              | GG              | 1946785577               |
| SNP_P4_37830_4186959 | NC_021163.1    | Ca_kabuli_chr04 | 4186959                 | GG                              | AA              | 1946785579               |
| SNP_P4_37831_4186963 | NC_021163.1    | Ca_kabuli_chr04 | 4186963                 | AA                              | GG              | 1946785581               |
| SNP_P4_37832_4187462 | NC_021163.1    | Ca_kabuli_chr04 | 4187462                 | CC                              | AA              | 1946785583               |
| SNP_P4_37833_4187490 | NC_021163.1    | Ca_kabuli_chr04 | 4187490                 | GG                              | AA              | 1946785586               |
| SNP_P4_37834_4187492 | NC_021163.1    | Ca_kabuli_chr04 | 4187492                 | GG                              | CC              | 1946785588               |
| SNP_P4_37835_4187838 | NC_021163.1    | Ca_kabuli_chr04 | 4187838                 | TT                              | GG              | 1946785590               |
| SNP_P4_37836_4188347 | NC_021163.1    | Ca_kabuli_chr04 | 4188347                 | GG                              | AA              | 1946785592               |
| SNP_P4_37838_4188637 | NC_021163.1    | Ca_kabuli_chr04 | 4188637                 | CC                              | TT              | 1946785594               |
| SNP_P4_37839_4188729 | NC_021163.1    | Ca_kabuli_chr04 | 4188729                 | CC                              | AA              | 1946785596               |
| SNP_P4_37840_4189623 | NC_021163.1    | Ca_kabuli_chr04 | 4189623                 | TT                              | CC              | 1946785598               |
| SNP_P4_37841_4189628 | NC_021163.1    | Ca_kabuli_chr04 | 4189628                 | GG                              | TT              | 1946785600               |
| SNP_P4_37842_4189797 | NC_021163.1    | Ca_kabuli_chr04 | 4189797                 | CC                              | AA              | 1946785603               |
| SNP_P4_37843_4189798 | NC_021163.1    | Ca_kabuli_chr04 | 4189798                 | AA                              | CC              | 1946785605               |
| SNP_P4_37844_4189842 | NC_021163.1    | Ca_kabuli_chr04 | 4189842                 | AA                              | TT              | 1946785608               |
| SNP_P4_37845_4189843 | NC_021163.1    | Ca_kabuli_chr04 | 4189843                 | AA                              | TT              | 1946785610               |
| SNP_P4_37846_4189844 | NC_021163.1    | Ca_kabuli_chr04 | 4189844                 | AA                              | TT              | 1946785612               |
| SNP_P4_37847_4189847 | NC_021163.1    | Ca_kabuli_chr04 | 4189847                 | AA                              | TT              | 1946785614               |
| SNP_P4_37848_4190878 | NC_021163.1    | Ca_kabuli_chr04 | 4190878                 | GG                              | AA              | 1946785616               |
| SNP_P4_37849_4195558 | NC_021163.1    | Ca_kabuli_chr04 | 4195558                 | GG                              | AA              | 1946785618               |
| SNP_P4_37850_4196237 | NC_021163.1    | Ca_kabuli_chr04 | 4196237                 | CC                              | TT              | 1946785620               |
| SNP_P4_37853_4197146 | NC_021163.1    | Ca_kabuli_chr04 | 4197146                 | AA                              | TT              | 1946785623               |
| SNP_P4_37854_4199531 | NC_021163.1    | Ca_kabuli_chr04 | 4199531                 | AA                              | GG              | 1946785625               |
| SNP_P4_37855_4211785 | NC_021163.1    | Ca_kabuli_chr04 | 4211785                 | TT                              | GG              | 1946785627               |
| SNP_P4_37856_4211855 | NC_021163.1    | Ca_kabuli_chr04 | 4211855                 | AA                              | GG              | 1946785629               |
| SNP_P4_37857_4213695 | NC_021163.1    | Ca_kabuli_chr04 | 4213695                 | CC                              | TT              | 1946785632               |
| SNP_P4_37858_4241908 | NC_021163.1    | Ca_kabuli_chr04 | 4241908                 | GG                              | AA              | 1946785634               |
| SNP_P4_37863_4268120 | NC_021163.1    | Ca_kabuli_chr04 | 4268120                 | TT                              | AA              | 1946785636               |
| SNP_P4_37864_4268448 | NC_021163.1    | Ca_kabuli_chr04 | 4268448                 | GG                              | AA              | 1946785638               |
| SNP_P4_37867_4272227 | NC_021163.1    | Ca_kabuli_chr04 | 4272227                 | AA                              | GG              | 1946785640               |
| SNP_P4_37868_4272471 | NC_021163.1    | Ca_kabuli_chr04 | 4272471                 | CC                              | TT              | 1946785643               |
| SNP_P4_37870_4283781 | NC_021163.1    | Ca_kabuli_chr04 | 4283781                 | AA                              | GG              | 1946785645               |
| SNP_P4_37872_4312360 | NC_021163.1    | Ca_kabuli_chr04 | 4312360                 | TT                              | GG              | 1946785647               |
| SNP_P4_37873_4320567 | NC_021163.1    | Ca_kabuli_chr04 | 4320567                 | TT                              | AA              | 1946785649               |
| SNP_P4_37876_4354850 | NC_021163.1    | Ca_kabuli_chr04 | 4354850                 | GG                              | TT              | 1946785651               |
| SNP_P4_37877_4363418 | NC_021163.1    | Ca_kabuli_chr04 | 4363418                 | AA                              | TT              | 1946785653               |
| SNP_P4_37878_4370921 | NC_021163.1    | Ca_kabuli_chr04 | 4370921                 | TT                              | CC              | 1946785656               |
| SNP_P4_37879_4374386 | NC_021163.1    | Ca_kabuli_chr04 | 4374386                 | AA                              | TT              | 1946785658               |
| SNP_P4_37882_4380203 | NC_021163.1    | Ca_kabuli_chr04 | 4380203                 | CC                              | TT              | 1946785660               |
| SNP_P4_37883_4383089 | NC_021163.1    | Ca_kabuli_chr04 | 4383089                 | GG                              | TT              | 1946785662               |



| SNPs IDs             | Chromosome IDs | Chromosomes     | Physical positions (bp) | CDC Frontier (Reference genome) | (ILWC46 & LPNB) | NCBI SNPdb Accession IDs |
|----------------------|----------------|-----------------|-------------------------|---------------------------------|-----------------|--------------------------|
| SNP_P4_37884_4383266 | NC_021163.1    | Ca_kabuli_chr04 | 4383266                 | AA                              | GG              | 1946785664               |
| SNP_P4_37885_4383288 | NC_021163.1    | Ca_kabuli_chr04 | 4383288                 | AA                              | GG              | 1946785666               |
| SNP_P4_37886_4429522 | NC_021163.1    | Ca_kabuli_chr04 | 4429522                 | TT                              | CC              | 1946785669               |
| SNP_P4_37887_4432420 | NC_021163.1    | Ca_kabuli_chr04 | 4432420                 | AA                              | TT              | 1946785671               |
| SNP_P4_37888_4432421 | NC_021163.1    | Ca_kabuli_chr04 | 4432421                 | AA                              | GG              | 1946785673               |
| SNP_P4_37889_4432617 | NC_021163.1    | Ca_kabuli_chr04 | 4432617                 | GG                              | CC              | 1946785675               |
| SNP_P4_37890_4437498 | NC_021163.1    | Ca_kabuli_chr04 | 4437498                 | GG                              | AA              | 1946785677               |
| SNP_P4_37891_4443498 | NC_021163.1    | Ca_kabuli_chr04 | 4443498                 | TT                              | AA              | 1946785680               |
| SNP_P4_37892_4448073 | NC_021163.1    | Ca_kabuli_chr04 | 4448073                 | AA                              | TT              | 1946785682               |
| SNP_P4_37893_4452018 | NC_021163.1    | Ca_kabuli_chr04 | 4452018                 | TT                              | AA              | 1946785684               |
| SNP_P4_37894_4454177 | NC_021163.1    | Ca_kabuli_chr04 | 4454177                 | TT                              | CC              | 1946785686               |
| SNP_P4_37895_4454305 | NC_021163.1    | Ca_kabuli_chr04 | 4454305                 | CC                              | AA              | 1946785690               |
| SNP_P4_37898_4454635 | NC_021163.1    | Ca_kabuli_chr04 | 4454635                 | TT                              | CC              | 1946785692               |
| SNP_P4_37899_4454646 | NC_021163.1    | Ca_kabuli_chr04 | 4454646                 | CC                              | AA              | 1946785694               |
| SNP_P4_37900_4455085 | NC_021163.1    | Ca_kabuli_chr04 | 4455085                 | CC                              | TT              | 1946785696               |
| SNP_P4_37901_4457887 | NC_021163.1    | Ca_kabuli_chr04 | 4457887                 | CC                              | TT              | 1946785698               |
| SNP_P4_37904_4460265 | NC_021163.1    | Ca_kabuli_chr04 | 4460265                 | CC                              | TT              | 1946785700               |
| SNP_P4_37905_4460853 | NC_021163.1    | Ca_kabuli_chr04 | 4460853                 | AA                              | GG              | 1946785702               |
| SNP_P4_37906_4463840 | NC_021163.1    | Ca_kabuli_chr04 | 4463840                 | GG                              | AA              | 1946785704               |
| SNP_P4_37907_4463893 | NC_021163.1    | Ca_kabuli_chr04 | 4463893                 | TT                              | AA              | 1946785706               |
| SNP_P4_37908_4463894 | NC_021163.1    | Ca_kabuli_chr04 | 4463894                 | TT                              | AA              | 1946785708               |
| SNP_P4_37909_4464436 | NC_021163.1    | Ca_kabuli_chr04 | 4464436                 | GG                              | AA              | 1946785710               |
| SNP_P4_37910_4464443 | NC_021163.1    | Ca_kabuli_chr04 | 4464443                 | CC                              | TT              | 1946785712               |
| SNP_P4_37911_4464530 | NC_021163.1    | Ca_kabuli_chr04 | 4464530                 | AA                              | GG              | 1946785714               |
| SNP_P4_37912_4464558 | NC_021163.1    | Ca_kabuli_chr04 | 4464558                 | CC                              | TT              | 1946785716               |
| SNP_P4_37913_4464820 | NC_021163.1    | Ca_kabuli_chr04 | 4464820                 | GG                              | TT              | 1946785718               |
| SNP_P4_37914_4464830 | NC_021163.1    | Ca_kabuli_chr04 | 4464830                 | AA                              | TT              | 1946785720               |
| SNP_P4_37915_4465789 | NC_021163.1    | Ca_kabuli_chr04 | 4465789                 | CC                              | TT              | 1946785722               |
| SNP_P4_37916_4465796 | NC_021163.1    | Ca_kabuli_chr04 | 4465796                 | TT                              | CC              | 1946785724               |
| SNP_P4_37918_4465852 | NC_021163.1    | Ca_kabuli_chr04 | 4465852                 | CC                              | TT              | 1946785727               |
| SNP_P4_37919_4465853 | NC_021163.1    | Ca_kabuli_chr04 | 4465853                 | TT                              | GG              | 1946785729               |
| SNP_P4_37920_4467319 | NC_021163.1    | Ca_kabuli_chr04 | 4467319                 | CC                              | TT              | 1946785731               |
| SNP_P4_37921_4467337 | NC_021163.1    | Ca_kabuli_chr04 | 4467337                 | TT                              | CC              | 1946785733               |
| SNP_P4_37922_4468394 | NC_021163.1    | Ca_kabuli_chr04 | 4468394                 | CC                              | TT              | 1946785735               |
| SNP_P4_37925_4469874 | NC_021163.1    | Ca_kabuli_chr04 | 4469874                 | AA                              | TT              | 1946785737               |
| SNP_P4_37926_4469893 | NC_021163.1    | Ca_kabuli_chr04 | 4469893                 | GG                              | AA              | 1946785739               |
| SNP_P4_37927_4470169 | NC_021163.1    | Ca_kabuli_chr04 | 4470169                 | AA                              | GG              | 1946785741               |
| SNP_P4_37928_4471051 | NC_021163.1    | Ca_kabuli_chr04 | 4471051                 | CC                              | AA              | 1946785743               |
| SNP_P4_37929_4471151 | NC_021163.1    | Ca_kabuli_chr04 | 4471151                 | TT                              | AA              | 1946785745               |
| SNP_P4_37930_4471477 | NC_021163.1    | Ca_kabuli_chr04 | 4471477                 | TT                              | CC              | 1946785746               |
| SNP_P4_37932_4471782 | NC_021163.1    | Ca_kabuli_chr04 | 4471782                 | TT                              | AA              | 1946785748               |
| SNP_P4_37933_4471842 | NC_021163.1    | Ca_kabuli_chr04 | 4471842                 | GG                              | AA              | 1946785750               |

| SNPs IDs             | Chromosome IDs | Chromosomes     | Physical positions (bp) | CDC Frontier (Reference genome) | (ILWC46 & LPNB) | NCBI SNPdb Accession IDs |
|----------------------|----------------|-----------------|-------------------------|---------------------------------|-----------------|--------------------------|
| SNP_P4_37934_4473721 | NC_021163.1    | Ca_kabuli_chr04 | 4473721                 | AA                              | GG              | 1946785752               |
| SNP_P4_37935_4473742 | NC_021163.1    | Ca_kabuli_chr04 | 4473742                 | AA                              | GG              | 1946785754               |
| SNP_P4_37936_4473990 | NC_021163.1    | Ca_kabuli_chr04 | 4473990                 | CC                              | TT              | 1946785756               |
| SNP_P4_37937_4474155 | NC_021163.1    | Ca_kabuli_chr04 | 4474155                 | TT                              | GG              | 1946785758               |
| SNP_P4_37938_4474160 | NC_021163.1    | Ca_kabuli_chr04 | 4474160                 | GG                              | TT              | 1946785760               |
| SNP_P4_37939_4474860 | NC_021163.1    | Ca_kabuli_chr04 | 4474860                 | TT                              | AA              | 1946785762               |
| SNP_P4_37940_4475822 | NC_021163.1    | Ca_kabuli_chr04 | 4475822                 | TT                              | GG              | 1946785764               |
| SNP_P4_37941_4476145 | NC_021163.1    | Ca_kabuli_chr04 | 4476145                 | TT                              | CC              | 1946785766               |
| SNP_P4_37942_4476417 | NC_021163.1    | Ca_kabuli_chr04 | 4476417                 | AA                              | GG              | 1946785768               |
| SNP_P4_37943_4479621 | NC_021163.1    | Ca_kabuli_chr04 | 4479621                 | AA                              | GG              | 1946785770               |
| SNP_P4_37944_4479934 | NC_021163.1    | Ca_kabuli_chr04 | 4479934                 | GG                              | TT              | 1946785772               |
| SNP_P4_37945_4480373 | NC_021163.1    | Ca_kabuli_chr04 | 4480373                 | TT                              | CC              | 1946785774               |
| SNP_P4_37949_4481235 | NC_021163.1    | Ca_kabuli_chr04 | 4481235                 | AA                              | TT              | 1946785776               |
| SNP_P4_37950_4481525 | NC_021163.1    | Ca_kabuli_chr04 | 4481525                 | TT                              | GG              | 1946785778               |
| SNP_P4_37951_4481833 | NC_021163.1    | Ca_kabuli_chr04 | 4481833                 | GG                              | TT              | 1946785780               |
| SNP_P4_37952_4481836 | NC_021163.1    | Ca_kabuli_chr04 | 4481836                 | AA                              | GG              | 1946785782               |
| SNP_P4_37953_4481860 | NC_021163.1    | Ca_kabuli_chr04 | 4481860                 | TT                              | CC              | 1946785784               |
| SNP_P4_37955_4481917 | NC_021163.1    | Ca_kabuli_chr04 | 4481917                 | TT                              | AA              | 1946785786               |
| SNP_P4_37956_4482457 | NC_021163.1    | Ca_kabuli_chr04 | 4482457                 | GG                              | AA              | 1946785788               |
| SNP_P4_37957_4483070 | NC_021163.1    | Ca_kabuli_chr04 | 4483070                 | TT                              | CC              | 1946785790               |
| SNP_P4_37958_4483071 | NC_021163.1    | Ca_kabuli_chr04 | 4483071                 | GG                              | TT              | 1946785792               |
| SNP_P4_37959_4483075 | NC_021163.1    | Ca_kabuli_chr04 | 4483075                 | AA                              | TT              | 1946785794               |
| SNP_P4_37960_4483076 | NC_021163.1    | Ca_kabuli_chr04 | 4483076                 | AA                              | GG              | 1946785796               |
| SNP_P4_37961_4484557 | NC_021163.1    | Ca_kabuli_chr04 | 4484557                 | GG                              | AA              | 1946785798               |
| SNP_P4_37962_4486321 | NC_021163.1    | Ca_kabuli_chr04 | 4486321                 | CC                              | AA              | 1946785800               |
| SNP_P4_37963_4486783 | NC_021163.1    | Ca_kabuli_chr04 | 4486783                 | CC                              | TT              | 1946785802               |
| SNP_P4_37964_4486791 | NC_021163.1    | Ca_kabuli_chr04 | 4486791                 | TT                              | AA              | 1946785804               |
| SNP_P4_37968_4487184 | NC_021163.1    | Ca_kabuli_chr04 | 4487184                 | GG                              | AA              | 1946785806               |
| SNP_P4_37969_4487218 | NC_021163.1    | Ca_kabuli_chr04 | 4487218                 | GG                              | AA              | 1946785808               |
| SNP_P4_37970_4487228 | NC_021163.1    | Ca_kabuli_chr04 | 4487228                 | CC                              | AA              | 1946785810               |
| SNP_P4_37971_4487348 | NC_021163.1    | Ca_kabuli_chr04 | 4487348                 | CC                              | TT              | 1946785812               |
| SNP_P4_37973_4487474 | NC_021163.1    | Ca_kabuli_chr04 | 4487474                 | TT                              | AA              | 1946785814               |
| SNP_P4_37975_4489873 | NC_021163.1    | Ca_kabuli_chr04 | 4489873                 | CC                              | TT              | 1946785816               |
| SNP_P4_37976_4491409 | NC_021163.1    | Ca_kabuli_chr04 | 4491409                 | GG                              | TT              | 1946785818               |
| SNP_P4_37977_4492819 | NC_021163.1    | Ca_kabuli_chr04 | 4492819                 | TT                              | CC              | 1946785820               |
| SNP_P4_37979_4496824 | NC_021163.1    | Ca_kabuli_chr04 | 4496824                 | CC                              | TT              | 1946785822               |
| SNP_P4_37981_4498190 | NC_021163.1    | Ca_kabuli_chr04 | 4498190                 | CC                              | TT              | 1946785824               |
| SNP_P4_37982_4498199 | NC_021163.1    | Ca_kabuli_chr04 | 4498199                 | GG                              | AA              | 1946785826               |
| SNP_P4_37983_4498399 | NC_021163.1    | Ca_kabuli_chr04 | 4498399                 | GG                              | AA              | 1946785828               |
| SNP_P4_37984_4498452 | NC_021163.1    | Ca_kabuli_chr04 | 4498452                 | AA                              | GG              | 1946785830               |
| SNP_P4_37985_4500360 | NC_021163.1    | Ca_kabuli_chr04 | 4500360                 | CC                              | AA              | 1946785832               |
| SNP_P4_37988_4500456 | NC_021163.1    | Ca_kabuli_chr04 | 4500456                 | GG                              | AA              | 1946785834               |

| SNPs IDs             | Chromosome IDs | Chromosomes     | Physical positions (bp) | CDC Frontier (Reference genome) | (ILWC46 & LPNB) | NCBI SNPdb Accession IDs |
|----------------------|----------------|-----------------|-------------------------|---------------------------------|-----------------|--------------------------|
| SNP_P4_37989_4500469 | NC_021163.1    | Ca_kabuli_chr04 | 4500469                 | TT                              | GG              | 1946785836               |
| SNP_P4_37990_4500781 | NC_021163.1    | Ca_kabuli_chr04 | 4500781                 | CC                              | AA              | 1946785838               |
| SNP_P4_37991_4500794 | NC_021163.1    | Ca_kabuli_chr04 | 4500794                 | TT                              | AA              | 1946785840               |
| SNP_P4_37992_4500966 | NC_021163.1    | Ca_kabuli_chr04 | 4500966                 | AA                              | GG              | 1946785842               |
| SNP_P4_37993_4500998 | NC_021163.1    | Ca_kabuli_chr04 | 4500998                 | CC                              | TT              | 1946785844               |
| SNP_P4_37994_4501011 | NC_021163.1    | Ca_kabuli_chr04 | 4501011                 | GG                              | AA              | 1946785846               |
| SNP_P4_37995_4501013 | NC_021163.1    | Ca_kabuli_chr04 | 4501013                 | TT                              | CC              | 1946785848               |
| SNP_P4_37996_4501126 | NC_021163.1    | Ca_kabuli_chr04 | 4501126                 | CC                              | TT              | 1946785850               |
| SNP_P4_37997_4501131 | NC_021163.1    | Ca_kabuli_chr04 | 4501131                 | GG                              | AA              | 1946785852               |
| SNP_P4_37998_4501182 | NC_021163.1    | Ca_kabuli_chr04 | 4501182                 | AA                              | GG              | 1946785854               |
| SNP_P4_37999_4501192 | NC_021163.1    | Ca_kabuli_chr04 | 4501192                 | TT                              | CC              | 1946785856               |
| SNP_P4_38000_4501232 | NC_021163.1    | Ca_kabuli_chr04 | 4501232                 | AA                              | GG              | 1946785858               |
| SNP_P4_38001_4501370 | NC_021163.1    | Ca_kabuli_chr04 | 4501370                 | GG                              | TT              | 1946785860               |
| SNP_P4_38003_4501445 | NC_021163.1    | Ca_kabuli_chr04 | 4501445                 | GG                              | TT              | 1946785862               |
| SNP_P4_38005_4501619 | NC_021163.1    | Ca_kabuli_chr04 | 4501619                 | AA                              | TT              | 1946785864               |
| SNP_P4_38006_4501629 | NC_021163.1    | Ca_kabuli_chr04 | 4501629                 | CC                              | TT              | 1946785866               |
| SNP_P4_38007_4501645 | NC_021163.1    | Ca_kabuli_chr04 | 4501645                 | CC                              | GG              | 1946785868               |
| SNP_P4_38008_4501654 | NC_021163.1    | Ca_kabuli_chr04 | 4501654                 | TT                              | CC              | 1946785870               |
| SNP_P4_38009_4501801 | NC_021163.1    | Ca_kabuli_chr04 | 4501801                 | CC                              | TT              | 1946785872               |
| SNP_P4_38010_4502429 | NC_021163.1    | Ca_kabuli_chr04 | 4502429                 | CC                              | AA              | 1946785874               |
| SNP_P4_38011_4502815 | NC_021163.1    | Ca_kabuli_chr04 | 4502815                 | AA                              | TT              | 1946785876               |
| SNP_P4_38012_4503891 | NC_021163.1    | Ca_kabuli_chr04 | 4503891                 | TT                              | CC              | 1946785878               |
| SNP_P4_38014_4505612 | NC_021163.1    | Ca_kabuli_chr04 | 4505612                 | GG                              | TT              | 1946785880               |
| SNP_P4_38015_4505623 | NC_021163.1    | Ca_kabuli_chr04 | 4505623                 | GG                              | AA              | 1946785882               |
| SNP_P4_38016_4505919 | NC_021163.1    | Ca_kabuli_chr04 | 4505919                 | TT                              | AA              | 1946785884               |
| SNP_P4_38017_4506674 | NC_021163.1    | Ca_kabuli_chr04 | 4506674                 | CC                              | GG              | 1946785886               |
| SNP_P4_38018_4506698 | NC_021163.1    | Ca_kabuli_chr04 | 4506698                 | CC                              | AA              | 1946785888               |
| SNP_P4_38019_4507251 | NC_021163.1    | Ca_kabuli_chr04 | 4507251                 | GG                              | AA              | 1946785890               |
| SNP_P4_38020_4507253 | NC_021163.1    | Ca_kabuli_chr04 | 4507253                 | TT                              | CC              | 1946785892               |
| SNP_P4_38022_4507759 | NC_021163.1    | Ca_kabuli_chr04 | 4507759                 | TT                              | CC              | 1946785894               |
| SNP_P4_38023_4507940 | NC_021163.1    | Ca_kabuli_chr04 | 4507940                 | CC                              | TT              | 1946785896               |
| SNP_P4_38024_4508056 | NC_021163.1    | Ca_kabuli_chr04 | 4508056                 | TT                              | CC              | 1946785898               |
| SNP_P4_38025_4508075 | NC_021163.1    | Ca_kabuli_chr04 | 4508075                 | CC                              | GG              | 1946785900               |
| SNP_P4_38026_4508094 | NC_021163.1    | Ca_kabuli_chr04 | 4508094                 | CC                              | TT              | 1946785902               |
| SNP_P4_38027_4508914 | NC_021163.1    | Ca_kabuli_chr04 | 4508914                 | AA                              | TT              | 1946785904               |
| SNP_P4_38029_4509193 | NC_021163.1    | Ca_kabuli_chr04 | 4509193                 | CC                              | TT              | 1946785906               |
| SNP_P4_38030_4509561 | NC_021163.1    | Ca_kabuli_chr04 | 4509561                 | AA                              | GG              | 1946785908               |
| SNP_P4_38031_4510191 | NC_021163.1    | Ca_kabuli_chr04 | 4510191                 | CC                              | TT              | 1946785910               |
| SNP_P4_38032_4510213 | NC_021163.1    | Ca_kabuli_chr04 | 4510213                 | GG                              | AA              | 1946785912               |
| SNP_P4_38033_4510214 | NC_021163.1    | Ca_kabuli_chr04 | 4510214                 | CC                              | TT              | 1946785914               |
| SNP_P4_38034_4510482 | NC_021163.1    | Ca_kabuli_chr04 | 4510482                 | AA                              | TT              | 1946785916               |
| SNP_P4_38035_4510534 | NC_021163.1    | Ca_kabuli_chr04 | 4510534                 | GG                              | TT              | 1946785919               |

| SNPs IDs             | Chromosome IDs | Chromosomes     | Physical positions (bp) | CDC Frontier (Reference genome) | (ILWC46 & LPNB) | NCBI SNPdb Accession IDs |
|----------------------|----------------|-----------------|-------------------------|---------------------------------|-----------------|--------------------------|
| SNP_P4_38037_4513007 | NC_021163.1    | Ca_kabuli_chr04 | 4513007                 | AA                              | TT              | 1946785921               |
| SNP_P4_38038_4513266 | NC_021163.1    | Ca_kabuli_chr04 | 4513266                 | AA                              | GG              | 1946785923               |
| SNP_P4_38039_4516766 | NC_021163.1    | Ca_kabuli_chr04 | 4516766                 | AA                              | GG              | 1946785925               |
| SNP_P4_38040_4516777 | NC_021163.1    | Ca_kabuli_chr04 | 4516777                 | AA                              | GG              | 1946785927               |
| SNP_P4_38041_4516781 | NC_021163.1    | Ca_kabuli_chr04 | 4516781                 | AA                              | GG              | 1946785929               |
| SNP_P4_38044_4517423 | NC_021163.1    | Ca_kabuli_chr04 | 4517423                 | GG                              | AA              | 1946785931               |
| SNP_P4_38045_4517429 | NC_021163.1    | Ca_kabuli_chr04 | 4517429                 | GG                              | AA              | 1946785933               |
| SNP_P4_38046_4517458 | NC_021163.1    | Ca_kabuli_chr04 | 4517458                 | TT                              | CC              | 1946785935               |
| SNP_P4_38047_4517476 | NC_021163.1    | Ca_kabuli_chr04 | 4517476                 | CC                              | TT              | 1946785937               |
| SNP_P4_38049_4520303 | NC_021163.1    | Ca_kabuli_chr04 | 4520303                 | GG                              | AA              | 1946785939               |
| SNP_P4_38051_4520616 | NC_021163.1    | Ca_kabuli_chr04 | 4520616                 | TT                              | CC              | 1946785941               |
| SNP_P4_38053_4521130 | NC_021163.1    | Ca_kabuli_chr04 | 4521130                 | CC                              | TT              | 1946785943               |
| SNP_P4_38054_4521136 | NC_021163.1    | Ca_kabuli_chr04 | 4521136                 | CC                              | AA              | 1946785945               |
| SNP_P4_38055_4521139 | NC_021163.1    | Ca_kabuli_chr04 | 4521139                 | GG                              | AA              | 1946785947               |
| SNP_P4_38056_4521146 | NC_021163.1    | Ca_kabuli_chr04 | 4521146                 | AA                              | TT              | 1946785949               |
| SNP_P4_38057_4521603 | NC_021163.1    | Ca_kabuli_chr04 | 4521603                 | CC                              | TT              | 1946785951               |
| SNP_P4_38058_4521884 | NC_021163.1    | Ca_kabuli_chr04 | 4521884                 | TT                              | GG              | 1946785953               |
| SNP_P4_38060_4522259 | NC_021163.1    | Ca_kabuli_chr04 | 4522259                 | AA                              | GG              | 1946785955               |
| SNP_P4_38061_4522266 | NC_021163.1    | Ca_kabuli_chr04 | 4522266                 | GG                              | CC              | 1946785957               |
| SNP_P4_38063_4522404 | NC_021163.1    | Ca_kabuli_chr04 | 4522404                 | GG                              | CC              | 1946785959               |
| SNP_P4_38064_4522418 | NC_021163.1    | Ca_kabuli_chr04 | 4522418                 | GG                              | AA              | 1946785961               |
| SNP_P4_38065_4522430 | NC_021163.1    | Ca_kabuli_chr04 | 4522430                 | GG                              | TT              | 1946785963               |
| SNP_P4_38067_4523176 | NC_021163.1    | Ca_kabuli_chr04 | 4523176                 | CC                              | GG              | 1946785966               |
| SNP_P4_38068_4525037 | NC_021163.1    | Ca_kabuli_chr04 | 4525037                 | TT                              | CC              | 1946785968               |
| SNP_P4_38069_4525043 | NC_021163.1    | Ca_kabuli_chr04 | 4525043                 | TT                              | AA              | 1946785970               |
| SNP_P4_38070_4525969 | NC_021163.1    | Ca_kabuli_chr04 | 4525969                 | TT                              | GG              | 1946785972               |
| SNP_P4_38072_4527391 | NC_021163.1    | Ca_kabuli_chr04 | 4527391                 | AA                              | TT              | 1946785974               |
| SNP_P4_38074_4527588 | NC_021163.1    | Ca_kabuli_chr04 | 4527588                 | CC                              | TT              | 1946785976               |
| SNP_P4_38075_4527592 | NC_021163.1    | Ca_kabuli_chr04 | 4527592                 | TT                              | GG              | 1946785978               |
| SNP_P4_38077_4527607 | NC_021163.1    | Ca_kabuli_chr04 | 4527607                 | CC                              | TT              | 1946785980               |
| SNP_P4_38080_4533278 | NC_021163.1    | Ca_kabuli_chr04 | 4533278                 | CC                              | TT              | 1946785982               |
| SNP_P4_38083_4538198 | NC_021163.1    | Ca_kabuli_chr04 | 4538198                 | AA                              | CC              | 1946785984               |
| SNP_P4_38085_4538255 | NC_021163.1    | Ca_kabuli_chr04 | 4538255                 | GG                              | AA              | 1946785987               |
| SNP_P4_38086_4538665 | NC_021163.1    | Ca_kabuli_chr04 | 4538665                 | TT                              | CC              | 1946785989               |
| SNP_P4_38087_4540658 | NC_021163.1    | Ca_kabuli_chr04 | 4540658                 | CC                              | AA              | 1946785991               |
| SNP_P4_38088_4540851 | NC_021163.1    | Ca_kabuli_chr04 | 4540851                 | AA                              | CC              | 1946785993               |
| SNP_P4_38089_4540852 | NC_021163.1    | Ca_kabuli_chr04 | 4540852                 | TT                              | CC              | 1946785995               |
| SNP_P4_38090_4540906 | NC_021163.1    | Ca_kabuli_chr04 | 4540906                 | AA                              | CC              | 1946785997               |
| SNP_P4_38091_4541145 | NC_021163.1    | Ca_kabuli_chr04 | 4541145                 | GG                              | AA              | 1946785999               |
| SNP_P4_38092_4541215 | NC_021163.1    | Ca_kabuli_chr04 | 4541215                 | TT                              | CC              | 1946786001               |
| SNP_P4_38093_4541229 | NC_021163.1    | Ca_kabuli_chr04 | 4541229                 | AA                              | GG              | 1946786003               |
| SNP_P4_38095_4541258 | NC_021163.1    | Ca_kabuli_chr04 | 4541258                 | AA                              | GG              | 1946786005               |

| SNPs IDs             | Chromosome IDs | Chromosomes     | Physical positions (bp) | CDC Frontier (Reference genome) | (ILWC46 & LPNB) | NCBI SNPdb Accession IDs |
|----------------------|----------------|-----------------|-------------------------|---------------------------------|-----------------|--------------------------|
| SNP_P4_38096_4541316 | NC_021163.1    | Ca_kabuli_chr04 | 4541316                 | GG                              | AA              | 1946786007               |
| SNP_P4_38097_4541342 | NC_021163.1    | Ca_kabuli_chr04 | 4541342                 | TT                              | GG              | 1946786009               |
| SNP_P4_38099_4541525 | NC_021163.1    | Ca_kabuli_chr04 | 4541525                 | AA                              | GG              | 1946786011               |
| SNP_P4_38100_4542871 | NC_021163.1    | Ca_kabuli_chr04 | 4542871                 | AA                              | GG              | 1946786013               |
| SNP_P4_38101_4543194 | NC_021163.1    | Ca_kabuli_chr04 | 4543194                 | GG                              | CC              | 1946786015               |
| SNP_P4_38102_4543886 | NC_021163.1    | Ca_kabuli_chr04 | 4543886                 | CC                              | TT              | 1946786017               |
| SNP_P4_38104_4545079 | NC_021163.1    | Ca_kabuli_chr04 | 4545079                 | CC                              | TT              | 1946786019               |
| SNP_P4_38105_4545150 | NC_021163.1    | Ca_kabuli_chr04 | 4545150                 | CC                              | TT              | 1946786021               |
| SNP_P4_38106_4545160 | NC_021163.1    | Ca_kabuli_chr04 | 4545160                 | GG                              | CC              | 1946786023               |
| SNP_P4_38108_4549892 | NC_021163.1    | Ca_kabuli_chr04 | 4549892                 | GG                              | CC              | 1946786025               |
| SNP_P4_38109_4549954 | NC_021163.1    | Ca_kabuli_chr04 | 4549954                 | AA                              | CC              | 1946786027               |
| SNP_P4_38110_4549958 | NC_021163.1    | Ca_kabuli_chr04 | 4549958                 | CC                              | TT              | 1946786029               |
| SNP_P4_38111_4556889 | NC_021163.1    | Ca_kabuli_chr04 | 4556889                 | GG                              | AA              | 1946786031               |
| SNP_P4_38112_4557262 | NC_021163.1    | Ca_kabuli_chr04 | 4557262                 | CC                              | AA              | 1946786034               |
| SNP_P4_38113_4557474 | NC_021163.1    | Ca_kabuli_chr04 | 4557474                 | AA                              | TT              | 1946786036               |
| SNP_P4_38114_4558645 | NC_021163.1    | Ca_kabuli_chr04 | 4558645                 | TT                              | AA              | 1946786038               |
| SNP_P4_38115_4560035 | NC_021163.1    | Ca_kabuli_chr04 | 4560035                 | TT                              | CC              | 1946786040               |
| SNP_P4_38116_4560397 | NC_021163.1    | Ca_kabuli_chr04 | 4560397                 | TT                              | CC              | 1946786042               |
| SNP_P4_38117_4560461 | NC_021163.1    | Ca_kabuli_chr04 | 4560461                 | CC                              | TT              | 1946786044               |
| SNP_P4_38118_4560834 | NC_021163.1    | Ca_kabuli_chr04 | 4560834                 | TT                              | GG              | 1946786046               |
| SNP_P4_38119_4560851 | NC_021163.1    | Ca_kabuli_chr04 | 4560851                 | GG                              | AA              | 1946786048               |
| SNP_P4_38120_4561151 | NC_021163.1    | Ca_kabuli_chr04 | 4561151                 | TT                              | GG              | 1946786050               |
| SNP_P4_38122_4563727 | NC_021163.1    | Ca_kabuli_chr04 | 4563727                 | AA                              | CC              | 1946786052               |
| SNP_P4_38125_4563977 | NC_021163.1    | Ca_kabuli_chr04 | 4563977                 | CC                              | TT              | 1946786054               |
| SNP_P4_38128_4564624 | NC_021163.1    | Ca_kabuli_chr04 | 4564624                 | AA                              | CC              | 1946786056               |
| SNP_P4_38129_4564871 | NC_021163.1    | Ca_kabuli_chr04 | 4564871                 | AA                              | CC              | 1946786058               |
| SNP_P4_38130_4567813 | NC_021163.1    | Ca_kabuli_chr04 | 4567813                 | GG                              | AA              | 1946786060               |
| SNP_P4_38131_4567821 | NC_021163.1    | Ca_kabuli_chr04 | 4567821                 | AA                              | GG              | 1946786062               |
| SNP_P4_38134_4568071 | NC_021163.1    | Ca_kabuli_chr04 | 4568071                 | GG                              | AA              | 1946786064               |
| SNP_P4_38135_4569753 | NC_021163.1    | Ca_kabuli_chr04 | 4569753                 | TT                              | CC              | 1946786065               |
| SNP_P4_38136_4569912 | NC_021163.1    | Ca_kabuli_chr04 | 4569912                 | TT                              | AA              | 1946786067               |
| SNP_P4_38138_4572520 | NC_021163.1    | Ca_kabuli_chr04 | 4572520                 | GG                              | AA              | 1946786069               |
| SNP_P4_38139_4572915 | NC_021163.1    | Ca_kabuli_chr04 | 4572915                 | TT                              | AA              | 1946786071               |
| SNP_P4_38140_4573683 | NC_021163.1    | Ca_kabuli_chr04 | 4573683                 | TT                              | GG              | 1946786073               |
| SNP_P4_38141_4574520 | NC_021163.1    | Ca_kabuli_chr04 | 4574520                 | CC                              | TT              | 1946786075               |
| SNP_P4_38142_4574947 | NC_021163.1    | Ca_kabuli_chr04 | 4574947                 | CC                              | GG              | 1946786077               |
| SNP_P4_38144_4578836 | NC_021163.1    | Ca_kabuli_chr04 | 4578836                 | CC                              | TT              | 1946786079               |
| SNP_P4_38145_4579412 | NC_021163.1    | Ca_kabuli_chr04 | 4579412                 | CC                              | TT              | 1946786080               |
| SNP_P4_38146_4582378 | NC_021163.1    | Ca_kabuli_chr04 | 4582378                 | CC                              | GG              | 1946786082               |
| SNP_P4_38147_4583572 | NC_021163.1    | Ca_kabuli_chr04 | 4583572                 | GG                              | AA              | 1946786084               |
| SNP_P4_38148_4583655 | NC_021163.1    | Ca_kabuli_chr04 | 4583655                 | AA                              | CC              | 1946786086               |
| SNP_P4_38150_4584991 | NC_021163.1    | Ca_kabuli_chr04 | 4584991                 | CC                              | TT              | 1946786088               |

| SNPs IDs             | Chromosome IDs | Chromosomes     | Physical positions (bp) | CDC Frontier (Reference genome) | (ILWC46 & LPNB) | NCBI SNPdb Accession IDs |
|----------------------|----------------|-----------------|-------------------------|---------------------------------|-----------------|--------------------------|
| SNP_P4_38151_4584993 | NC_021163.1    | Ca_kabuli_chr04 | 4584993                 | TT                              | CC              | 1946786090               |
| SNP_P4_38153_4585775 | NC_021163.1    | Ca_kabuli_chr04 | 4585775                 | AA                              | GG              | 1946786092               |
| SNP_P4_38154_4585915 | NC_021163.1    | Ca_kabuli_chr04 | 4585915                 | AA                              | GG              | 1946786094               |
| SNP_P4_38155_4586320 | NC_021163.1    | Ca_kabuli_chr04 | 4586320                 | GG                              | TT              | 1946786097               |
| SNP_P4_38156_4586512 | NC_021163.1    | Ca_kabuli_chr04 | 4586512                 | TT                              | AA              | 1946786099               |
| SNP_P4_38157_4586563 | NC_021163.1    | Ca_kabuli_chr04 | 4586563                 | CC                              | TT              | 1946786101               |
| SNP_P4_38158_4586661 | NC_021163.1    | Ca_kabuli_chr04 | 4586661                 | AA                              | GG              | 1946786103               |
| SNP_P4_38159_4587691 | NC_021163.1    | Ca_kabuli_chr04 | 4587691                 | AA                              | GG              | 1946786105               |
| SNP_P4_38160_4587864 | NC_021163.1    | Ca_kabuli_chr04 | 4587864                 | GG                              | AA              | 1946786107               |
| SNP_P4_38161_4587875 | NC_021163.1    | Ca_kabuli_chr04 | 4587875                 | AA                              | GG              | 1946786109               |
| SNP_P4_38162_4587884 | NC_021163.1    | Ca_kabuli_chr04 | 4587884                 | GG                              | AA              | 1946786111               |
| SNP_P4_38163_4587900 | NC_021163.1    | Ca_kabuli_chr04 | 4587900                 | TT                              | GG              | 1946786113               |
| SNP_P4_38164_4588105 | NC_021163.1    | Ca_kabuli_chr04 | 4588105                 | AA                              | TT              | 1946786115               |
| SNP_P4_38165_4588135 | NC_021163.1    | Ca_kabuli_chr04 | 4588135                 | AA                              | TT              | 1946786117               |
| SNP_P4_38166_4588429 | NC_021163.1    | Ca_kabuli_chr04 | 4588429                 | TT                              | CC              | 1946786119               |
| SNP_P4_38167_4588721 | NC_021163.1    | Ca_kabuli_chr04 | 4588721                 | GG                              | AA              | 1946786122               |
| SNP_P4_38168_4589575 | NC_021163.1    | Ca_kabuli_chr04 | 4589575                 | GG                              | TT              | 1946786124               |
| SNP_P4_38169_4589582 | NC_021163.1    | Ca_kabuli_chr04 | 4589582                 | TT                              | AA              | 1946786126               |
| SNP_P4_38170_4589829 | NC_021163.1    | Ca_kabuli_chr04 | 4589829                 | CC                              | TT              | 1946786129               |
| SNP_P4_38173_4590366 | NC_021163.1    | Ca_kabuli_chr04 | 4590366                 | CC                              | GG              | 1946786131               |
| SNP_P4_38174_4591322 | NC_021163.1    | Ca_kabuli_chr04 | 4591322                 | TT                              | CC              | 1946786133               |
| SNP_P4_38176_4591357 | NC_021163.1    | Ca_kabuli_chr04 | 4591357                 | GG                              | AA              | 1946786135               |
| SNP_P4_38177_4591503 | NC_021163.1    | Ca_kabuli_chr04 | 4591503                 | TT                              | CC              | 1946786137               |
| SNP_P4_38178_4591524 | NC_021163.1    | Ca_kabuli_chr04 | 4591524                 | TT                              | AA              | 1946786139               |
| SNP_P4_38180_4592726 | NC_021163.1    | Ca_kabuli_chr04 | 4592726                 | AA                              | GG              | 1946786141               |
| SNP_P4_38181_4592740 | NC_021163.1    | Ca_kabuli_chr04 | 4592740                 | AA                              | GG              | 1946786143               |
| SNP_P4_38182_4592840 | NC_021163.1    | Ca_kabuli_chr04 | 4592840                 | TT                              | AA              | 1946786144               |
| SNP_P4_38183_4592842 | NC_021163.1    | Ca_kabuli_chr04 | 4592842                 | AA                              | CC              | 1946786146               |
| SNP_P4_38184_4592849 | NC_021163.1    | Ca_kabuli_chr04 | 4592849                 | GG                              | AA              | 1946786148               |
| SNP_P4_38187_4602558 | NC_021163.1    | Ca_kabuli_chr04 | 4602558                 | GG                              | AA              | 1946786150               |
| SNP_P4_38188_4631588 | NC_021163.1    | Ca_kabuli_chr04 | 4631588                 | AA                              | TT              | 1946786152               |
| SNP_P4_38189_4633069 | NC_021163.1    | Ca_kabuli_chr04 | 4633069                 | GG                              | AA              | 1946786155               |
| SNP_P4_38190_4646569 | NC_021163.1    | Ca_kabuli_chr04 | 4646569                 | TT                              | CC              | 1946786157               |
| SNP_P4_38191_4654170 | NC_021163.1    | Ca_kabuli_chr04 | 4654170                 | AA                              | TT              | 1946786159               |
| SNP_P4_38192_4683722 | NC_021163.1    | Ca_kabuli_chr04 | 4683722                 | CC                              | AA              | 1946786161               |
| SNP_P4_38193_4740743 | NC_021163.1    | Ca_kabuli_chr04 | 4740743                 | AA                              | CC              | 1946786163               |
| SNP_P4_38196_4817610 | NC_021163.1    | Ca_kabuli_chr04 | 4817610                 | AA                              | GG              | 1946786165               |
| SNP_P4_38197_4817726 | NC_021163.1    | Ca_kabuli_chr04 | 4817726                 | AA                              | CC              | 1946786167               |
| SNP_P4_38198_4818307 | NC_021163.1    | Ca_kabuli_chr04 | 4818307                 | GG                              | AA              | 1946786170               |
| SNP_P4_38199_4818742 | NC_021163.1    | Ca_kabuli_chr04 | 4818742                 | CC                              | AA              | 1946786172               |
| SNP_P4_38200_4823996 | NC_021163.1    | Ca_kabuli_chr04 | 4823996                 | CC                              | TT              | 1946786174               |
| SNP_P4_38201_4825370 | NC_021163.1    | Ca_kabuli_chr04 | 4825370                 | CC                              | TT              | 1946786176               |

| SNPs IDs             | Chromosome IDs | Chromosomes     | Physical positions (bp) | CDC Frontier (Reference genome) | (ILWC46 & LPNB) | NCBI SNPdb Accession IDs |
|----------------------|----------------|-----------------|-------------------------|---------------------------------|-----------------|--------------------------|
| SNP_P4_38202_4825747 | NC_021163.1    | Ca_kabuli_chr04 | 4825747                 | TT                              | CC              | 1946786178               |
| SNP_P4_38203_4827312 | NC_021163.1    | Ca_kabuli_chr04 | 4827312                 | CC                              | TT              | 1946786180               |
| SNP_P4_38204_4830050 | NC_021163.1    | Ca_kabuli_chr04 | 4830050                 | GG                              | AA              | 1946786183               |
| SNP_P4_38206_4830330 | NC_021163.1    | Ca_kabuli_chr04 | 4830330                 | GG                              | AA              | 1946786185               |
| SNP_P4_38207_4830550 | NC_021163.1    | Ca_kabuli_chr04 | 4830550                 | CC                              | AA              | 1946786187               |
| SNP_P4_38208_4830763 | NC_021163.1    | Ca_kabuli_chr04 | 4830763                 | AA                              | GG              | 1946786189               |
| SNP_P4_38210_4839572 | NC_021163.1    | Ca_kabuli_chr04 | 4839572                 | TT                              | AA              | 1946786191               |
| SNP_P4_38212_4839797 | NC_021163.1    | Ca_kabuli_chr04 | 4839797                 | GG                              | TT              | 1946786194               |
| SNP_P4_38213_4839799 | NC_021163.1    | Ca_kabuli_chr04 | 4839799                 | GG                              | CC              | 1946786196               |
| SNP_P4_38214_4841029 | NC_021163.1    | Ca_kabuli_chr04 | 4841029                 | GG                              | AA              | 1946786198               |
| SNP_P4_38215_4841033 | NC_021163.1    | Ca_kabuli_chr04 | 4841033                 | TT                              | AA              | 1946786200               |
| SNP_P4_38216_4841047 | NC_021163.1    | Ca_kabuli_chr04 | 4841047                 | TT                              | GG              | 1946786202               |
| SNP_P4_38217_4841048 | NC_021163.1    | Ca_kabuli_chr04 | 4841048                 | GG                              | TT              | 1946786204               |
| SNP_P4_38218_4841058 | NC_021163.1    | Ca_kabuli_chr04 | 4841058                 | GG                              | CC              | 1946786206               |
| SNP_P4_38220_4847206 | NC_021163.1    | Ca_kabuli_chr04 | 4847206                 | TT                              | AA              | 1946786208               |
| SNP_P4_38221_4847210 | NC_021163.1    | Ca_kabuli_chr04 | 4847210                 | TT                              | CC              | 1946786210               |
| SNP_P4_38222_4847642 | NC_021163.1    | Ca_kabuli_chr04 | 4847642                 | CC                              | TT              | 1946786212               |
| SNP_P4_38223_4847751 | NC_021163.1    | Ca_kabuli_chr04 | 4847751                 | AA                              | GG              | 1946786214               |
| SNP_P4_38224_4847752 | NC_021163.1    | Ca_kabuli_chr04 | 4847752                 | AA                              | GG              | 1946786216               |
| SNP_P4_38225_4847753 | NC_021163.1    | Ca_kabuli_chr04 | 4847753                 | TT                              | CC              | 1946786218               |
| SNP_P4_38226_4847754 | NC_021163.1    | Ca_kabuli_chr04 | 4847754                 | CC                              | TT              | 1946786220               |
| SNP_P4_38227_4847766 | NC_021163.1    | Ca_kabuli_chr04 | 4847766                 | CC                              | TT              | 1946786222               |
| SNP_P4_38228_4847884 | NC_021163.1    | Ca_kabuli_chr04 | 4847884                 | CC                              | TT              | 1946786224               |
| SNP_P4_38229_4847916 | NC_021163.1    | Ca_kabuli_chr04 | 4847916                 | GG                              | TT              | 1946786226               |
| SNP_P4_38230_4847936 | NC_021163.1    | Ca_kabuli_chr04 | 4847936                 | GG                              | AA              | 1946786228               |
| SNP_P4_38231_4847944 | NC_021163.1    | Ca_kabuli_chr04 | 4847944                 | TT                              | CC              | 1946786230               |
| SNP_P4_38232_4847975 | NC_021163.1    | Ca_kabuli_chr04 | 4847975                 | AA                              | GG              | 1946786232               |
| SNP_P4_38233_4848330 | NC_021163.1    | Ca_kabuli_chr04 | 4848330                 | CC                              | TT              | 1946786234               |
| SNP_P4_38236_4848727 | NC_021163.1    | Ca_kabuli_chr04 | 4848727                 | TT                              | GG              | 1946786236               |
| SNP_P4_38237_4849747 | NC_021163.1    | Ca_kabuli_chr04 | 4849747                 | CC                              | TT              | 1946786238               |
| SNP_P4_38238_4849751 | NC_021163.1    | Ca_kabuli_chr04 | 4849751                 | AA                              | CC              | 1946786240               |
| SNP_P4_38239_4850527 | NC_021163.1    | Ca_kabuli_chr04 | 4850527                 | CC                              | TT              | 1946786242               |
| SNP_P4_38240_4850685 | NC_021163.1    | Ca_kabuli_chr04 | 4850685                 | GG                              | AA              | 1946786244               |
| SNP_P4_38241_4850688 | NC_021163.1    | Ca_kabuli_chr04 | 4850688                 | GG                              | CC              | 1946786246               |
| SNP_P4_38242_4850689 | NC_021163.1    | Ca_kabuli_chr04 | 4850689                 | AA                              | GG              | 1946786248               |
| SNP_P4_38243_4850818 | NC_021163.1    | Ca_kabuli_chr04 | 4850818                 | CC                              | AA              | 1946786250               |
| SNP_P4_38244_4850997 | NC_021163.1    | Ca_kabuli_chr04 | 4850997                 | TT                              | AA              | 1946786252               |
| SNP_P4_38246_4851283 | NC_021163.1    | Ca_kabuli_chr04 | 4851283                 | TT                              | AA              | 1946786254               |
| SNP_P4_38247_4853375 | NC_021163.1    | Ca_kabuli_chr04 | 4853375                 | AA                              | TT              | 1946786256               |
| SNP_P4_38248_4854841 | NC_021163.1    | Ca_kabuli_chr04 | 4854841                 | AA                              | GG              | 1946786258               |
| SNP_P4_38249_4854974 | NC_021163.1    | Ca_kabuli_chr04 | 4854974                 | TT                              | CC              | 1946786261               |
| SNP_P4_38251_4858890 | NC_021163.1    | Ca_kabuli_chr04 | 4858890                 | AA                              | TT              | 1946786263               |

| SNPs IDs             | Chromosome IDs | Chromosomes     | Physical positions (bp) | CDC Frontier (Reference genome) | (ILWC46 & LPNB) | NCBI SNPdb Accession IDs |
|----------------------|----------------|-----------------|-------------------------|---------------------------------|-----------------|--------------------------|
| SNP_P4_38252_4858891 | NC_021163.1    | Ca_kabuli_chr04 | 4858891                 | TT                              | AA              | 1946786265               |
| SNP_P4_38253_4859175 | NC_021163.1    | Ca_kabuli_chr04 | 4859175                 | GG                              | TT              | 1946786267               |
| SNP_P4_38255_4859340 | NC_021163.1    | Ca_kabuli_chr04 | 4859340                 | GG                              | AA              | 1946786269               |
| SNP_P4_38257_4859726 | NC_021163.1    | Ca_kabuli_chr04 | 4859726                 | AA                              | GG              | 1946786271               |
| SNP_P4_38258_4861003 | NC_021163.1    | Ca_kabuli_chr04 | 4861003                 | CC                              | TT              | 1946786273               |
| SNP_P4_38259_4867531 | NC_021163.1    | Ca_kabuli_chr04 | 4867531                 | CC                              | AA              | 1946786274               |
| SNP_P4_38260_4867563 | NC_021163.1    | Ca_kabuli_chr04 | 4867563                 | GG                              | TT              | 1946786275               |
| SNP_P4_38261_4867891 | NC_021163.1    | Ca_kabuli_chr04 | 4867891                 | TT                              | AA              | 1946786276               |
| SNP_P4_38262_4867939 | NC_021163.1    | Ca_kabuli_chr04 | 4867939                 | AA                              | GG              | 1946786277               |
| SNP_P4_38264_4872092 | NC_021163.1    | Ca_kabuli_chr04 | 4872092                 | TT                              | AA              | 1946786279               |
| SNP_P4_38265_4872102 | NC_021163.1    | Ca_kabuli_chr04 | 4872102                 | GG                              | TT              | 1946786281               |
| SNP_P4_38266_4873639 | NC_021163.1    | Ca_kabuli_chr04 | 4873639                 | GG                              | AA              | 1946786283               |
| SNP_P4_38269_4874437 | NC_021163.1    | Ca_kabuli_chr04 | 4874437                 | TT                              | CC              | 1946786285               |
| SNP_P4_38270_4875613 | NC_021163.1    | Ca_kabuli_chr04 | 4875613                 | CC                              | TT              | 1946786287               |
| SNP_P4_38271_4883643 | NC_021163.1    | Ca_kabuli_chr04 | 4883643                 | TT                              | GG              | 1946786289               |
| SNP_P4_38272_4884358 | NC_021163.1    | Ca_kabuli_chr04 | 4884358                 | GG                              | TT              | 1946786291               |
| SNP_P4_38273_4884396 | NC_021163.1    | Ca_kabuli_chr04 | 4884396                 | CC                              | TT              | 1946786293               |
| SNP_P4_38274_4884551 | NC_021163.1    | Ca_kabuli_chr04 | 4884551                 | TT                              | CC              | 1946786295               |
| SNP_P4_38275_4888215 | NC_021163.1    | Ca_kabuli_chr04 | 4888215                 | AA                              | GG              | 1946786297               |
| SNP_P4_38277_4888336 | NC_021163.1    | Ca_kabuli_chr04 | 4888336                 | AA                              | GG              | 1946786299               |
| SNP_P4_38278_4888387 | NC_021163.1    | Ca_kabuli_chr04 | 4888387                 | TT                              | CC              | 1946786301               |
| SNP_P4_38279_4889299 | NC_021163.1    | Ca_kabuli_chr04 | 4889299                 | CC                              | TT              | 1946786303               |
| SNP_P4_38280_4890680 | NC_021163.1    | Ca_kabuli_chr04 | 4890680                 | CC                              | AA              | 1946786305               |
| SNP_P4_38283_4893230 | NC_021163.1    | Ca_kabuli_chr04 | 4893230                 | CC                              | GG              | 1946786307               |
| SNP_P4_38285_4896874 | NC_021163.1    | Ca_kabuli_chr04 | 4896874                 | TT                              | CC              | 1946786309               |
| SNP_P4_38287_4899227 | NC_021163.1    | Ca_kabuli_chr04 | 4899227                 | GG                              | AA              | 1946786311               |
| SNP_P4_38288_4899247 | NC_021163.1    | Ca_kabuli_chr04 | 4899247                 | CC                              | GG              | 1946786313               |
| SNP_P4_38289_4899255 | NC_021163.1    | Ca_kabuli_chr04 | 4899255                 | AA                              | GG              | 1946786315               |
| SNP_P4_38290_4899328 | NC_021163.1    | Ca_kabuli_chr04 | 4899328                 | TT                              | CC              | 1946786317               |
| SNP_P4_38291_4899365 | NC_021163.1    | Ca_kabuli_chr04 | 4899365                 | AA                              | TT              | 1946786319               |
| SNP_P4_38292_4899385 | NC_021163.1    | Ca_kabuli_chr04 | 4899385                 | AA                              | TT              | 1946786321               |
| SNP_P4_38293_4899404 | NC_021163.1    | Ca_kabuli_chr04 | 4899404                 | AA                              | GG              | 1946786323               |
| SNP_P4_38294_4899447 | NC_021163.1    | Ca_kabuli_chr04 | 4899447                 | AA                              | TT              | 1946786325               |
| SNP_P4_38295_4899479 | NC_021163.1    | Ca_kabuli_chr04 | 4899479                 | TT                              | CC              | 1946786327               |
| SNP_P4_38296_4899539 | NC_021163.1    | Ca_kabuli_chr04 | 4899539                 | GG                              | AA              | 1946786329               |
| SNP_P4_38297_4899671 | NC_021163.1    | Ca_kabuli_chr04 | 4899671                 | AA                              | CC              | 1946786330               |
| SNP_P4_38298_4899810 | NC_021163.1    | Ca_kabuli_chr04 | 4899810                 | TT                              | CC              | 1946786332               |
| SNP_P4_38299_4900279 | NC_021163.1    | Ca_kabuli_chr04 | 4900279                 | GG                              | AA              | 1946786334               |
| SNP_P4_38300_4900471 | NC_021163.1    | Ca_kabuli_chr04 | 4900471                 | CC                              | AA              | 1946786336               |
| SNP_P4_38301_4901343 | NC_021163.1    | Ca_kabuli_chr04 | 4901343                 | GG                              | TT              | 1946786338               |
| SNP_P4_38302_4901484 | NC_021163.1    | Ca_kabuli_chr04 | 4901484                 | GG                              | AA              | 1946786340               |
| SNP_P4_38303_4901927 | NC_021163.1    | Ca_kabuli_chr04 | 4901927                 | GG                              | CC              | 1946786342               |



| SNPs IDs             | Chromosome IDs | Chromosomes     | Physical positions (bp) | CDC Frontier (Reference genome) | (ILWC46 & LPNB) | NCBI SNPdb Accession IDs |
|----------------------|----------------|-----------------|-------------------------|---------------------------------|-----------------|--------------------------|
| SNP_P4_38304_4902849 | NC_021163.1    | Ca_kabuli_chr04 | 4902849                 | TT                              | GG              | 1946786344               |
| SNP_P4_38305_4903781 | NC_021163.1    | Ca_kabuli_chr04 | 4903781                 | AA                              | GG              | 1946786346               |
| SNP_P4_38307_4903931 | NC_021163.1    | Ca_kabuli_chr04 | 4903931                 | TT                              | AA              | 1946786348               |
| SNP_P4_38308_4905219 | NC_021163.1    | Ca_kabuli_chr04 | 4905219                 | TT                              | CC              | 1946786350               |
| SNP_P4_38309_4906095 | NC_021163.1    | Ca_kabuli_chr04 | 4906095                 | GG                              | AA              | 1946786352               |
| SNP_P4_38310_4906103 | NC_021163.1    | Ca_kabuli_chr04 | 4906103                 | GG                              | AA              | 1946786354               |
| SNP_P4_38311_4906136 | NC_021163.1    | Ca_kabuli_chr04 | 4906136                 | AA                              | GG              | 1946786356               |
| SNP_P4_38312_4906145 | NC_021163.1    | Ca_kabuli_chr04 | 4906145                 | TT                              | AA              | 1946786358               |
| SNP_P4_38313_4906157 | NC_021163.1    | Ca_kabuli_chr04 | 4906157                 | AA                              | GG              | 1946786361               |
| SNP_P4_38314_4906171 | NC_021163.1    | Ca_kabuli_chr04 | 4906171                 | GG                              | AA              | 1946786363               |
| SNP_P4_38315_4906250 | NC_021163.1    | Ca_kabuli_chr04 | 4906250                 | TT                              | CC              | 1946786365               |
| SNP_P4_38316_4906432 | NC_021163.1    | Ca_kabuli_chr04 | 4906432                 | GG                              | AA              | 1946786367               |
| SNP_P4_38317_4906446 | NC_021163.1    | Ca_kabuli_chr04 | 4906446                 | AA                              | TT              | 1946786369               |
| SNP_P4_38318_4906652 | NC_021163.1    | Ca_kabuli_chr04 | 4906652                 | TT                              | CC              | 1946786371               |
| SNP_P4_38320_4907236 | NC_021163.1    | Ca_kabuli_chr04 | 4907236                 | CC                              | GG              | 1946786374               |
| SNP_P4_38321_4908738 | NC_021163.1    | Ca_kabuli_chr04 | 4908738                 | GG                              | AA              | 1946786376               |
| SNP_P4_38324_4909007 | NC_021163.1    | Ca_kabuli_chr04 | 4909007                 | AA                              | GG              | 1946786378               |
| SNP_P4_38325_4909115 | NC_021163.1    | Ca_kabuli_chr04 | 4909115                 | GG                              | AA              | 1946786380               |
| SNP_P4_38326_4909163 | NC_021163.1    | Ca_kabuli_chr04 | 4909163                 | CC                              | TT              | 1946786382               |
| SNP_P4_38327_4909359 | NC_021163.1    | Ca_kabuli_chr04 | 4909359                 | CC                              | TT              | 1946786384               |
| SNP_P4_38328_4910491 | NC_021163.1    | Ca_kabuli_chr04 | 4910491                 | AA                              | GG              | 1946786386               |
| SNP_P4_38329_4910533 | NC_021163.1    | Ca_kabuli_chr04 | 4910533                 | AA                              | CC              | 1946786388               |
| SNP_P4_38330_4910559 | NC_021163.1    | Ca_kabuli_chr04 | 4910559                 | AA                              | TT              | 1946786390               |
| SNP_P4_38331_4910767 | NC_021163.1    | Ca_kabuli_chr04 | 4910767                 | AA                              | CC              | 1946786393               |
| SNP_P4_38332_4910817 | NC_021163.1    | Ca_kabuli_chr04 | 4910817                 | AA                              | TT              | 1946786395               |
| SNP_P4_38333_4911209 | NC_021163.1    | Ca_kabuli_chr04 | 4911209                 | GG                              | AA              | 1946786397               |
| SNP_P4_38334_4913008 | NC_021163.1    | Ca_kabuli_chr04 | 4913008                 | TT                              | CC              | 1946786399               |
| SNP_P4_38335_4913038 | NC_021163.1    | Ca_kabuli_chr04 | 4913038                 | AA                              | GG              | 1946786401               |
| SNP_P4_38336_4913215 | NC_021163.1    | Ca_kabuli_chr04 | 4913215                 | CC                              | TT              | 1946786403               |
| SNP_P4_38337_4913447 | NC_021163.1    | Ca_kabuli_chr04 | 4913447                 | GG                              | CC              | 1946786405               |
| SNP_P4_38338_4913466 | NC_021163.1    | Ca_kabuli_chr04 | 4913466                 | TT                              | GG              | 1946786407               |
| SNP_P4_38339_4913503 | NC_021163.1    | Ca_kabuli_chr04 | 4913503                 | GG                              | AA              | 1946786409               |
| SNP_P4_38340_4913976 | NC_021163.1    | Ca_kabuli_chr04 | 4913976                 | AA                              | TT              | 1946786411               |
| SNP_P4_38341_4915740 | NC_021163.1    | Ca_kabuli_chr04 | 4915740                 | AA                              | GG              | 1946786413               |
| SNP_P4_38342_4915925 | NC_021163.1    | Ca_kabuli_chr04 | 4915925                 | CC                              | TT              | 1946786415               |
| SNP_P4_38343_4915926 | NC_021163.1    | Ca_kabuli_chr04 | 4915926                 | TT                              | CC              | 1946786417               |
| SNP_P4_38344_4917165 | NC_021163.1    | Ca_kabuli_chr04 | 4917165                 | AA                              | GG              | 1946786419               |
| SNP_P4_38345_4917213 | NC_021163.1    | Ca_kabuli_chr04 | 4917213                 | AA                              | TT              | 1946786421               |
| SNP_P4_38346_4917219 | NC_021163.1    | Ca_kabuli_chr04 | 4917219                 | TT                              | GG              | 1946786423               |
| SNP_P4_38347_4917260 | NC_021163.1    | Ca_kabuli_chr04 | 4917260                 | CC                              | TT              | 1946786425               |
| SNP_P4_38348_4917263 | NC_021163.1    | Ca_kabuli_chr04 | 4917263                 | CC                              | TT              | 1946786427               |
| SNP_P4_38349_4917277 | NC_021163.1    | Ca_kabuli_chr04 | 4917277                 | AA                              | GG              | 1946786429               |

| SNPs IDs             | Chromosome IDs | Chromosomes     | Physical positions (bp) | CDC Frontier (Reference genome) | (ILWC46 & LPNB) | NCBI SNPdb Accession IDs |
|----------------------|----------------|-----------------|-------------------------|---------------------------------|-----------------|--------------------------|
| SNP_P4_38350_4917282 | NC_021163.1    | Ca_kabuli_chr04 | 4917282                 | GG                              | AA              | 1946786431               |
| SNP_P4_38351_4917310 | NC_021163.1    | Ca_kabuli_chr04 | 4917310                 | TT                              | AA              | 1946786433               |
| SNP_P4_38352_4917447 | NC_021163.1    | Ca_kabuli_chr04 | 4917447                 | AA                              | GG              | 1946786435               |
| SNP_P4_38353_4917448 | NC_021163.1    | Ca_kabuli_chr04 | 4917448                 | GG                              | TT              | 1946786437               |
| SNP_P4_38354_4917497 | NC_021163.1    | Ca_kabuli_chr04 | 4917497                 | CC                              | TT              | 1946786439               |
| SNP_P4_38356_4917602 | NC_021163.1    | Ca_kabuli_chr04 | 4917602                 | CC                              | TT              | 1946786441               |
| SNP_P4_38357_4917767 | NC_021163.1    | Ca_kabuli_chr04 | 4917767                 | CC                              | TT              | 1946786443               |
| SNP_P4_38358_4917792 | NC_021163.1    | Ca_kabuli_chr04 | 4917792                 | GG                              | TT              | 1946786445               |
| SNP_P4_38359_4917812 | NC_021163.1    | Ca_kabuli_chr04 | 4917812                 | TT                              | GG              | 1946786447               |
| SNP_P4_38360_4917920 | NC_021163.1    | Ca_kabuli_chr04 | 4917920                 | GG                              | AA              | 1946786449               |
| SNP_P4_38361_4917942 | NC_021163.1    | Ca_kabuli_chr04 | 4917942                 | AA                              | GG              | 1946786451               |
| SNP_P4_38362_4917951 | NC_021163.1    | Ca_kabuli_chr04 | 4917951                 | TT                              | CC              | 1946786453               |
| SNP_P4_38363_4917965 | NC_021163.1    | Ca_kabuli_chr04 | 4917965                 | CC                              | TT              | 1946786455               |
| SNP_P4_38364_4917972 | NC_021163.1    | Ca_kabuli_chr04 | 4917972                 | AA                              | GG              | 1946786457               |
| SNP_P4_38365_4919624 | NC_021163.1    | Ca_kabuli_chr04 | 4919624                 | TT                              | AA              | 1946786459               |
| SNP_P4_38366_4921843 | NC_021163.1    | Ca_kabuli_chr04 | 4921843                 | GG                              | TT              | 1946786461               |
| SNP_P4_38367_4922164 | NC_021163.1    | Ca_kabuli_chr04 | 4922164                 | AA                              | GG              | 1946786463               |
| SNP_P4_38368_4924486 | NC_021163.1    | Ca_kabuli_chr04 | 4924486                 | AA                              | GG              | 1946786465               |
| SNP_P4_38369_4924489 | NC_021163.1    | Ca_kabuli_chr04 | 4924489                 | AA                              | TT              | 1946786467               |
| SNP_P4_38370_4924969 | NC_021163.1    | Ca_kabuli_chr04 | 4924969                 | TT                              | CC              | 1946786469               |
| SNP_P4_38371_4925061 | NC_021163.1    | Ca_kabuli_chr04 | 4925061                 | TT                              | AA              | 1946786471               |
| SNP_P4_38372_4925276 | NC_021163.1    | Ca_kabuli_chr04 | 4925276                 | AA                              | GG              | 1946786473               |
| SNP_P4_38373_4925301 | NC_021163.1    | Ca_kabuli_chr04 | 4925301                 | CC                              | TT              | 1946786475               |
| SNP_P4_38374_4925367 | NC_021163.1    | Ca_kabuli_chr04 | 4925367                 | AA                              | TT              | 1946786477               |
| SNP_P4_38375_4925396 | NC_021163.1    | Ca_kabuli_chr04 | 4925396                 | GG                              | CC              | 1946786480               |
| SNP_P4_38376_4925873 | NC_021163.1    | Ca_kabuli_chr04 | 4925873                 | TT                              | AA              | 1946786482               |
| SNP_P4_38377_4925883 | NC_021163.1    | Ca_kabuli_chr04 | 4925883                 | GG                              | AA              | 1946786484               |
| SNP_P4_38378_4929579 | NC_021163.1    | Ca_kabuli_chr04 | 4929579                 | CC                              | AA              | 1946786486               |
| SNP_P4_38379_4931084 | NC_021163.1    | Ca_kabuli_chr04 | 4931084                 | AA                              | GG              | 1946786488               |
| SNP_P4_38380_4932224 | NC_021163.1    | Ca_kabuli_chr04 | 4932224                 | CC                              | TT              | 1946786490               |
| SNP_P4_38381_4932233 | NC_021163.1    | Ca_kabuli_chr04 | 4932233                 | TT                              | CC              | 1946786492               |
| SNP_P4_38382_4933272 | NC_021163.1    | Ca_kabuli_chr04 | 4933272                 | TT                              | GG              | 1946786494               |
| SNP_P4_38383_4933335 | NC_021163.1    | Ca_kabuli_chr04 | 4933335                 | CC                              | TT              | 1946786496               |
| SNP_P4_38384_4933449 | NC_021163.1    | Ca_kabuli_chr04 | 4933449                 | TT                              | CC              | 1946786498               |
| SNP_P4_38385_4933687 | NC_021163.1    | Ca_kabuli_chr04 | 4933687                 | AA                              | TT              | 1946786500               |
| SNP_P4_38386_4933707 | NC_021163.1    | Ca_kabuli_chr04 | 4933707                 | GG                              | AA              | 1946786502               |
| SNP_P4_38387_4933827 | NC_021163.1    | Ca_kabuli_chr04 | 4933827                 | GG                              | AA              | 1946786504               |
| SNP_P4_38388_4933929 | NC_021163.1    | Ca_kabuli_chr04 | 4933929                 | AA                              | TT              | 1946786507               |
| SNP_P4_38389_4934352 | NC_021163.1    | Ca_kabuli_chr04 | 4934352                 | AA                              | GG              | 1946786509               |
| SNP_P4_38391_4943263 | NC_021163.1    | Ca_kabuli_chr04 | 4943263                 | TT                              | CC              | 1946786511               |
| SNP_P4_38393_4944493 | NC_021163.1    | Ca_kabuli_chr04 | 4944493                 | GG                              | TT              | 1946786513               |
| SNP_P4_38394_4945326 | NC_021163.1    | Ca_kabuli_chr04 | 4945326                 | GG                              | AA              | 1946786515               |

| SNPs IDs             | Chromosome IDs | Chromosomes     | Physical positions (bp) | CDC Frontier (Reference genome) | (ILWC46 & LPNB) | NCBI SNPdb Accession IDs |
|----------------------|----------------|-----------------|-------------------------|---------------------------------|-----------------|--------------------------|
| SNP_P4_38395_4945723 | NC_021163.1    | Ca_kabuli_chr04 | 4945723                 | CC                              | AA              | 1946786517               |
| SNP_P4_38396_4946058 | NC_021163.1    | Ca_kabuli_chr04 | 4946058                 | TT                              | CC              | 1946786519               |
| SNP_P4_38397_4955931 | NC_021163.1    | Ca_kabuli_chr04 | 4955931                 | GG                              | AA              | 1946786520               |
| SNP_P4_38398_4956385 | NC_021163.1    | Ca_kabuli_chr04 | 4956385                 | TT                              | CC              | 1946786522               |
| SNP_P4_38399_4956818 | NC_021163.1    | Ca_kabuli_chr04 | 4956818                 | GG                              | TT              | 1946786524               |
| SNP_P4_38400_4956857 | NC_021163.1    | Ca_kabuli_chr04 | 4956857                 | AA                              | GG              | 1946786526               |
| SNP_P4_38401_4966277 | NC_021163.1    | Ca_kabuli_chr04 | 4966277                 | CC                              | TT              | 1946786528               |
| SNP_P4_38402_4970058 | NC_021163.1    | Ca_kabuli_chr04 | 4970058                 | AA                              | GG              | 1946786530               |
| SNP_P4_38403_4982003 | NC_021163.1    | Ca_kabuli_chr04 | 4982003                 | GG                              | AA              | 1946786532               |
| SNP_P4_38404_4992118 | NC_021163.1    | Ca_kabuli_chr04 | 4992118                 | TT                              | CC              | 1946786535               |
| SNP_P4_38405_4992122 | NC_021163.1    | Ca_kabuli_chr04 | 4992122                 | TT                              | CC              | 1946786537               |
| SNP_P4_38406_4994972 | NC_021163.1    | Ca_kabuli_chr04 | 4994972                 | TT                              | AA              | 1946786539               |
| SNP_P4_38408_5010723 | NC_021163.1    | Ca_kabuli_chr04 | 5010723                 | CC                              | TT              | 1946786541               |
| SNP_P4_38409_5010833 | NC_021163.1    | Ca_kabuli_chr04 | 5010833                 | TT                              | CC              | 1946786543               |
| SNP_P4_38411_5017670 | NC_021163.1    | Ca_kabuli_chr04 | 5017670                 | TT                              | GG              | 1946786545               |
| SNP_P4_38415_5038300 | NC_021163.1    | Ca_kabuli_chr04 | 5038300                 | GG                              | CC              | 1946786547               |
| SNP_P4_38417_5045789 | NC_021163.1    | Ca_kabuli_chr04 | 5045789                 | AA                              | GG              | 1946786549               |
| SNP_P4_38418_5056936 | NC_021163.1    | Ca_kabuli_chr04 | 5056936                 | GG                              | AA              | 1946786551               |
| SNP_P4_38419_5088884 | NC_021163.1    | Ca_kabuli_chr04 | 5088884                 | AA                              | GG              | 1946786553               |
| SNP_P4_38420_5089637 | NC_021163.1    | Ca_kabuli_chr04 | 5089637                 | CC                              | TT              | 1946786555               |
| SNP_P4_38422_5107226 | NC_021163.1    | Ca_kabuli_chr04 | 5107226                 | CC                              | AA              | 1946786557               |
| SNP_P4_38423_5126071 | NC_021163.1    | Ca_kabuli_chr04 | 5126071                 | GG                              | TT              | 1946786559               |
| SNP_P4_38425_5209285 | NC_021163.1    | Ca_kabuli_chr04 | 5209285                 | CC                              | AA              | 1946786561               |
| SNP_P4_38426_5209308 | NC_021163.1    | Ca_kabuli_chr04 | 5209308                 | GG                              | AA              | 1946786564               |
| SNP_P4_38427_5209315 | NC_021163.1    | Ca_kabuli_chr04 | 5209315                 | TT                              | CC              | 1946786566               |
| SNP_P4_38428_5220854 | NC_021163.1    | Ca_kabuli_chr04 | 5220854                 | CC                              | AA              | 1946786568               |
| SNP_P4_38429_5243393 | NC_021163.1    | Ca_kabuli_chr04 | 5243393                 | AA                              | TT              | 1946786570               |
| SNP_P4_38430_5249311 | NC_021163.1    | Ca_kabuli_chr04 | 5249311                 | CC                              | TT              | 1946786572               |
| SNP_P4_38431_5287043 | NC_021163.1    | Ca_kabuli_chr04 | 5287043                 | CC                              | AA              | 1946786574               |
| SNP_P4_38432_5287080 | NC_021163.1    | Ca_kabuli_chr04 | 5287080                 | CC                              | AA              | 1946786576               |
| SNP_P4_38434_5305053 | NC_021163.1    | Ca_kabuli_chr04 | 5305053                 | TT                              | AA              | 1946786578               |
| SNP_P4_38437_5349515 | NC_021163.1    | Ca_kabuli_chr04 | 5349515                 | AA                              | CC              | 1946786580               |
| SNP_P4_38438_5369836 | NC_021163.1    | Ca_kabuli_chr04 | 5369836                 | GG                              | AA              | 1946786582               |
| SNP_P4_38441_5438086 | NC_021163.1    | Ca_kabuli_chr04 | 5438086                 | GG                              | AA              | 1946786584               |
| SNP_P4_38444_5483394 | NC_021163.1    | Ca_kabuli_chr04 | 5483394                 | TT                              | CC              | 1946786586               |
| SNP_P4_38445_5483399 | NC_021163.1    | Ca_kabuli_chr04 | 5483399                 | CC                              | AA              | 1946786589               |
| SNP_P4_38446_5483400 | NC_021163.1    | Ca_kabuli_chr04 | 5483400                 | GG                              | AA              | 1946786591               |
| SNP_P4_38447_5483404 | NC_021163.1    | Ca_kabuli_chr04 | 5483404                 | AA                              | GG              | 1946786593               |
| SNP_P4_38448_5483700 | NC_021163.1    | Ca_kabuli_chr04 | 5483700                 | TT                              | CC              | 1946786595               |
| SNP_P4_38449_5483811 | NC_021163.1    | Ca_kabuli_chr04 | 5483811                 | AA                              | GG              | 1946786597               |
| SNP_P4_38451_5484956 | NC_021163.1    | Ca_kabuli_chr04 | 5484956                 | AA                              | GG              | 1946786599               |
| SNP_P4_38453_5556962 | NC_021163.1    | Ca_kabuli_chr04 | 5556962                 | TT                              | CC              | 1946786601               |

| SNPs IDs             | Chromosome IDs | Chromosomes     | Physical positions (bp) | CDC Frontier (Reference genome) | (ILWC46 & LPNB) | NCBI SNPdb Accession IDs |
|----------------------|----------------|-----------------|-------------------------|---------------------------------|-----------------|--------------------------|
| SNP_P4_38454_5562602 | NC_021163.1    | Ca_kabuli_chr04 | 5562602                 | CC                              | TT              | 1946786603               |
| SNP_P4_38455_5616153 | NC_021163.1    | Ca_kabuli_chr04 | 5616153                 | TT                              | CC              | 1946786605               |
| SNP_P4_38456_5616944 | NC_021163.1    | Ca_kabuli_chr04 | 5616944                 | CC                              | AA              | 1946786608               |
| SNP_P4_38459_5657942 | NC_021163.1    | Ca_kabuli_chr04 | 5657942                 | TT                              | AA              | 1946786610               |
| SNP_P4_38462_5701797 | NC_021163.1    | Ca_kabuli_chr04 | 5701797                 | AA                              | TT              | 1946786612               |
| SNP_P4_38463_5701821 | NC_021163.1    | Ca_kabuli_chr04 | 5701821                 | GG                              | AA              | 1946786614               |
| SNP_P4_38465_5774437 | NC_021163.1    | Ca_kabuli_chr04 | 5774437                 | AA                              | GG              | 1946786616               |
| SNP_P4_38467_5816048 | NC_021163.1    | Ca_kabuli_chr04 | 5816048                 | TT                              | AA              | 1946786619               |
| SNP_P4_38469_5828434 | NC_021163.1    | Ca_kabuli_chr04 | 5828434                 | GG                              | AA              | 1946786621               |
| SNP_P4_38470_5828635 | NC_021163.1    | Ca_kabuli_chr04 | 5828635                 | TT                              | AA              | 1946786623               |
| SNP_P4_38471_5849232 | NC_021163.1    | Ca_kabuli_chr04 | 5849232                 | GG                              | AA              | 1946786625               |
| SNP_P4_38472_5856768 | NC_021163.1    | Ca_kabuli_chr04 | 5856768                 | AA                              | GG              | 1946786627               |
| SNP_P4_38473_5869752 | NC_021163.1    | Ca_kabuli_chr04 | 5869752                 | AA                              | GG              | 1946786630               |
| SNP_P4_38476_5913876 | NC_021163.1    | Ca_kabuli_chr04 | 5913876                 | AA                              | TT              | 1946786632               |
| SNP_P4_38477_5915576 | NC_021163.1    | Ca_kabuli_chr04 | 5915576                 | AA                              | GG              | 1946786634               |
| SNP_P4_38478_5925667 | NC_021163.1    | Ca_kabuli_chr04 | 5925667                 | GG                              | TT              | 1946786637               |
| SNP_P4_38480_5941209 | NC_021163.1    | Ca_kabuli_chr04 | 5941209                 | CC                              | TT              | 1946786639               |
| SNP_P4_38481_5951563 | NC_021163.1    | Ca_kabuli_chr04 | 5951563                 | TT                              | CC              | 1946786641               |
| SNP_P4_38482_5954372 | NC_021163.1    | Ca_kabuli_chr04 | 5954372                 | TT                              | CC              | 1946786643               |
| SNP_P4_38485_5973108 | NC_021163.1    | Ca_kabuli_chr04 | 5973108                 | CC                              | TT              | 1946786645               |
| SNP_P4_38486_6013383 | NC_021163.1    | Ca_kabuli_chr04 | 6013383                 | TT                              | CC              | 1946786647               |
| SNP_P4_38487_6028077 | NC_021163.1    | Ca_kabuli_chr04 | 6028077                 | TT                              | CC              | 1946786649               |
| SNP_P4_38488_6050270 | NC_021163.1    | Ca_kabuli_chr04 | 6050270                 | TT                              | CC              | 1946786651               |
| SNP_P4_38489_6050273 | NC_021163.1    | Ca_kabuli_chr04 | 6050273                 | AA                              | TT              | 1946786653               |
| SNP_P4_38490_6050283 | NC_021163.1    | Ca_kabuli_chr04 | 6050283                 | TT                              | GG              | 1946786655               |
| SNP_P4_38491_6073111 | NC_021163.1    | Ca_kabuli_chr04 | 6073111                 | TT                              | GG              | 1946786657               |
| SNP_P4_38493_6095186 | NC_021163.1    | Ca_kabuli_chr04 | 6095186                 | TT                              | CC              | 1946786659               |
| SNP_P4_38494_6115813 | NC_021163.1    | Ca_kabuli_chr04 | 6115813                 | GG                              | TT              | 1946786661               |
| SNP_P4_38495_6122448 | NC_021163.1    | Ca_kabuli_chr04 | 6122448                 | TT                              | CC              | 1946786663               |
| SNP_P4_38496_6123584 | NC_021163.1    | Ca_kabuli_chr04 | 6123584                 | GG                              | AA              | 1946786665               |
| SNP_P4_38497_6124635 | NC_021163.1    | Ca_kabuli_chr04 | 6124635                 | GG                              | AA              | 1946786667               |
| SNP_P4_38498_6124665 | NC_021163.1    | Ca_kabuli_chr04 | 6124665                 | AA                              | GG              | 1946786669               |
| SNP_P4_38499_6124714 | NC_021163.1    | Ca_kabuli_chr04 | 6124714                 | GG                              | AA              | 1946786671               |
| SNP_P4_38500_6124716 | NC_021163.1    | Ca_kabuli_chr04 | 6124716                 | TT                              | CC              | 1946786673               |
| SNP_P4_38501_6127920 | NC_021163.1    | Ca_kabuli_chr04 | 6127920                 | AA                              | TT              | 1946786675               |
| SNP_P4_38502_6127921 | NC_021163.1    | Ca_kabuli_chr04 | 6127921                 | CC                              | AA              | 1946786677               |
| SNP_P4_38504_6145007 | NC_021163.1    | Ca_kabuli_chr04 | 6145007                 | TT                              | AA              | 1946786679               |
| SNP_P4_38506_6167220 | NC_021163.1    | Ca_kabuli_chr04 | 6167220                 | GG                              | AA              | 1946786681               |
| SNP_P4_38507_6168529 | NC_021163.1    | Ca_kabuli_chr04 | 6168529                 | AA                              | TT              | 1946786683               |
| SNP_P4_38509_6190285 | NC_021163.1    | Ca_kabuli_chr04 | 6190285                 | GG                              | CC              | 1946786685               |
| SNP_P4_38510_6198586 | NC_021163.1    | Ca_kabuli_chr04 | 6198586                 | TT                              | CC              | 1946786687               |
| SNP_P4_38511_6206952 | NC_021163.1    | Ca_kabuli_chr04 | 6206952                 | GG                              | AA              | 1946786689               |

| SNPs IDs             | Chromosome IDs | Chromosomes     | Physical positions (bp) | CDC Frontier (Reference genome) | (ILWC46 & LPNB) | NCBI SNPdb Accession IDs |
|----------------------|----------------|-----------------|-------------------------|---------------------------------|-----------------|--------------------------|
| SNP_P4_38513_6210061 | NC_021163.1    | Ca_kabuli_chr04 | 6210061                 | CC                              | AA              | 1946786691               |
| SNP_P4_38514_6212288 | NC_021163.1    | Ca_kabuli_chr04 | 6212288                 | TT                              | CC              | 1946786693               |
| SNP_P4_38515_6212294 | NC_021163.1    | Ca_kabuli_chr04 | 6212294                 | CC                              | AA              | 1946786695               |
| SNP_P4_38516_6212362 | NC_021163.1    | Ca_kabuli_chr04 | 6212362                 | GG                              | AA              | 1946786697               |
| SNP_P4_38517_6212553 | NC_021163.1    | Ca_kabuli_chr04 | 6212553                 | AA                              | CC              | 1946786699               |
| SNP_P4_38518_6212562 | NC_021163.1    | Ca_kabuli_chr04 | 6212562                 | AA                              | GG              | 1946786701               |
| SNP_P4_38519_6212585 | NC_021163.1    | Ca_kabuli_chr04 | 6212585                 | AA                              | GG              | 1946786703               |
| SNP_P4_38520_6212587 | NC_021163.1    | Ca_kabuli_chr04 | 6212587                 | TT                              | CC              | 1946786705               |
| SNP_P4_38521_6212628 | NC_021163.1    | Ca_kabuli_chr04 | 6212628                 | TT                              | GG              | 1946786708               |
| SNP_P4_38522_6212649 | NC_021163.1    | Ca_kabuli_chr04 | 6212649                 | GG                              | AA              | 1946786710               |
| SNP_P4_38523_6212669 | NC_021163.1    | Ca_kabuli_chr04 | 6212669                 | GG                              | AA              | 1946786712               |
| SNP_P4_38524_6212672 | NC_021163.1    | Ca_kabuli_chr04 | 6212672                 | GG                              | AA              | 1946786714               |
| SNP_P4_38525_6219492 | NC_021163.1    | Ca_kabuli_chr04 | 6219492                 | TT                              | CC              | 1946786716               |
| SNP_P4_38526_6247783 | NC_021163.1    | Ca_kabuli_chr04 | 6247783                 | AA                              | GG              | 1946786718               |
| SNP_P4_38527_6249618 | NC_021163.1    | Ca_kabuli_chr04 | 6249618                 | TT                              | CC              | 1946786720               |
| SNP_P4_38528_6254780 | NC_021163.1    | Ca_kabuli_chr04 | 6254780                 | AA                              | GG              | 1946786722               |
| SNP_P4_38529_6256507 | NC_021163.1    | Ca_kabuli_chr04 | 6256507                 | CC                              | TT              | 1946786724               |
| SNP_P4_38530_6268294 | NC_021163.1    | Ca_kabuli_chr04 | 6268294                 | CC                              | TT              | 1946786726               |
| SNP_P4_38531_6282605 | NC_021163.1    | Ca_kabuli_chr04 | 6282605                 | GG                              | CC              | 1946786728               |
| SNP_P4_38532_6303810 | NC_021163.1    | Ca_kabuli_chr04 | 6303810                 | AA                              | GG              | 1946786730               |
| SNP_P4_38533_6311499 | NC_021163.1    | Ca_kabuli_chr04 | 6311499                 | CC                              | TT              | 1946786732               |
| SNP_P4_38534_6313722 | NC_021163.1    | Ca_kabuli_chr04 | 6313722                 | CC                              | TT              | 1946786734               |
| SNP_P4_38535_6322346 | NC_021163.1    | Ca_kabuli_chr04 | 6322346                 | GG                              | AA              | 1946786736               |
| SNP_P4_38537_6371070 | NC_021163.1    | Ca_kabuli_chr04 | 6371070                 | GG                              | TT              | 1946786738               |
| SNP_P4_38539_6386413 | NC_021163.1    | Ca_kabuli_chr04 | 6386413                 | GG                              | TT              | 1946786740               |
| SNP_P4_38540_6395284 | NC_021163.1    | Ca_kabuli_chr04 | 6395284                 | TT                              | AA              | 1946786742               |
| SNP_P4_38541_6395545 | NC_021163.1    | Ca_kabuli_chr04 | 6395545                 | CC                              | AA              | 1946786744               |
| SNP_P4_38542_6397747 | NC_021163.1    | Ca_kabuli_chr04 | 6397747                 | GG                              | TT              | 1946786746               |
| SNP_P4_38543_6418115 | NC_021163.1    | Ca_kabuli_chr04 | 6418115                 | CC                              | TT              | 1946786748               |
| SNP_P4_38544_6418203 | NC_021163.1    | Ca_kabuli_chr04 | 6418203                 | GG                              | AA              | 1946786750               |
| SNP_P4_38545_6424083 | NC_021163.1    | Ca_kabuli_chr04 | 6424083                 | GG                              | AA              | 1946786752               |
| SNP_P4_38546_6436271 | NC_021163.1    | Ca_kabuli_chr04 | 6436271                 | CC                              | GG              | 1946786754               |
| SNP_P4_38547_6443393 | NC_021163.1    | Ca_kabuli_chr04 | 6443393                 | AA                              | GG              | 1946786756               |
| SNP_P4_38548_6455795 | NC_021163.1    | Ca_kabuli_chr04 | 6455795                 | GG                              | AA              | 1946786758               |
| SNP_P4_38549_6480208 | NC_021163.1    | Ca_kabuli_chr04 | 6480208                 | TT                              | GG              | 1946786760               |
| SNP_P4_38550_6480209 | NC_021163.1    | Ca_kabuli_chr04 | 6480209                 | TT                              | AA              | 1946786762               |
| SNP_P4_38552_6521123 | NC_021163.1    | Ca_kabuli_chr04 | 6521123                 | GG                              | TT              | 1946786764               |
| SNP_P4_38554_6537375 | NC_021163.1    | Ca_kabuli_chr04 | 6537375                 | GG                              | AA              | 1946786766               |
| SNP_P4_38555_6537607 | NC_021163.1    | Ca_kabuli_chr04 | 6537607                 | GG                              | CC              | 1946786768               |
| SNP_P4_38558_6577987 | NC_021163.1    | Ca_kabuli_chr04 | 6577987                 | CC                              | TT              | 1946786770               |
| SNP_P4_38559_6587375 | NC_021163.1    | Ca_kabuli_chr04 | 6587375                 | GG                              | TT              | 1946786772               |
| SNP_P4_38560_6588114 | NC_021163.1    | Ca_kabuli_chr04 | 6588114                 | CC                              | TT              | 1946786774               |

| SNPs IDs             | Chromosome IDs | Chromosomes     | Physical positions (bp) | CDC Frontier (Reference genome) | (ILWC46 & LPNB) | NCBI SNPdb Accession IDs |
|----------------------|----------------|-----------------|-------------------------|---------------------------------|-----------------|--------------------------|
| SNP_P4_38561_6593869 | NC_021163.1    | Ca_kabuli_chr04 | 6593869                 | TT                              | CC              | 1946786776               |
| SNP_P4_38562_6607646 | NC_021163.1    | Ca_kabuli_chr04 | 6607646                 | AA                              | GG              | 1946786779               |
| SNP_P4_38563_6608785 | NC_021163.1    | Ca_kabuli_chr04 | 6608785                 | GG                              | AA              | 1946786781               |
| SNP_P4_38565_6620114 | NC_021163.1    | Ca_kabuli_chr04 | 6620114                 | TT                              | CC              | 1946786783               |
| SNP_P4_38566_6706277 | NC_021163.1    | Ca_kabuli_chr04 | 6706277                 | AA                              | GG              | 1946786785               |
| SNP_P4_38567_6712312 | NC_021163.1    | Ca_kabuli_chr04 | 6712312                 | CC                              | TT              | 1946786787               |
| SNP_P4_38568_6746268 | NC_021163.1    | Ca_kabuli_chr04 | 6746268                 | CC                              | GG              | 1946786789               |
| SNP_P4_38570_6795373 | NC_021163.1    | Ca_kabuli_chr04 | 6795373                 | AA                              | TT              | 1946786791               |
| SNP_P4_38572_6822700 | NC_021163.1    | Ca_kabuli_chr04 | 6822700                 | TT                              | AA              | 1946786793               |
| SNP_P4_38573_6864116 | NC_021163.1    | Ca_kabuli_chr04 | 6864116                 | CC                              | TT              | 1946786797               |
| SNP_P4_38574_6865835 | NC_021163.1    | Ca_kabuli_chr04 | 6865835                 | TT                              | GG              | 1946786799               |
| SNP_P4_38576_6901597 | NC_021163.1    | Ca_kabuli_chr04 | 6901597                 | TT                              | CC              | 1946786801               |
| SNP_P4_38578_6907263 | NC_021163.1    | Ca_kabuli_chr04 | 6907263                 | AA                              | TT              | 1946786803               |
| SNP_P4_38579_6907267 | NC_021163.1    | Ca_kabuli_chr04 | 6907267                 | CC                              | TT              | 1946786805               |
| SNP_P4_38580_6907299 | NC_021163.1    | Ca_kabuli_chr04 | 6907299                 | AA                              | GG              | 1946786807               |
| SNP_P4_38582_6913088 | NC_021163.1    | Ca_kabuli_chr04 | 6913088                 | TT                              | AA              | 1946786809               |
| SNP_P4_38583_6916875 | NC_021163.1    | Ca_kabuli_chr04 | 6916875                 | GG                              | AA              | 1946786811               |
| SNP_P4_38584_6975761 | NC_021163.1    | Ca_kabuli_chr04 | 6975761                 | AA                              | CC              | 1946786813               |
| SNP_P4_38585_6975779 | NC_021163.1    | Ca_kabuli_chr04 | 6975779                 | CC                              | AA              | 1946786815               |
| SNP_P4_38588_7010489 | NC_021163.1    | Ca_kabuli_chr04 | 7010489                 | AA                              | CC              | 1946786817               |
| SNP_P4_38589_7010492 | NC_021163.1    | Ca_kabuli_chr04 | 7010492                 | AA                              | TT              | 1946786819               |
| SNP_P4_38592_7032655 | NC_021163.1    | Ca_kabuli_chr04 | 7032655                 | GG                              | AA              | 1946786821               |
| SNP_P4_38593_7071910 | NC_021163.1    | Ca_kabuli_chr04 | 7071910                 | GG                              | TT              | 1946786823               |
| SNP_P4_38594_7074700 | NC_021163.1    | Ca_kabuli_chr04 | 7074700                 | AA                              | GG              | 1946786825               |
| SNP_P4_38597_7106487 | NC_021163.1    | Ca_kabuli_chr04 | 7106487                 | TT                              | GG              | 1946786827               |
| SNP_P4_38598_7107186 | NC_021163.1    | Ca_kabuli_chr04 | 7107186                 | CC                              | AA              | 1946786830               |
| SNP_P4_38599_7107239 | NC_021163.1    | Ca_kabuli_chr04 | 7107239                 | CC                              | AA              | 1946786832               |
| SNP_P4_38600_7108099 | NC_021163.1    | Ca_kabuli_chr04 | 7108099                 | TT                              | GG              | 1946786834               |
| SNP_P4_38601_7108103 | NC_021163.1    | Ca_kabuli_chr04 | 7108103                 | TT                              | AA              | 1946786836               |
| SNP_P4_38602_7110486 | NC_021163.1    | Ca_kabuli_chr04 | 7110486                 | GG                              | AA              | 1946786838               |
| SNP_P4_38603_7110547 | NC_021163.1    | Ca_kabuli_chr04 | 7110547                 | CC                              | TT              | 1946786840               |
| SNP_P4_38604_7127259 | NC_021163.1    | Ca_kabuli_chr04 | 7127259                 | GG                              | AA              | 1946786842               |
| SNP_P4_38605_7128635 | NC_021163.1    | Ca_kabuli_chr04 | 7128635                 | GG                              | AA              | 1946786844               |
| SNP_P4_38606_7128962 | NC_021163.1    | Ca_kabuli_chr04 | 7128962                 | AA                              | CC              | 1946786846               |
| SNP_P4_38608_7154118 | NC_021163.1    | Ca_kabuli_chr04 | 7154118                 | GG                              | AA              | 1946786848               |
| SNP_P4_38609_7159720 | NC_021163.1    | Ca_kabuli_chr04 | 7159720                 | CC                              | TT              | 1946786850               |
| SNP_P4_38610_7179650 | NC_021163.1    | Ca_kabuli_chr04 | 7179650                 | AA                              | GG              | 1946786852               |
| SNP_P4_38612_7181726 | NC_021163.1    | Ca_kabuli_chr04 | 7181726                 | TT                              | CC              | 1946786854               |
| SNP_P4_38613_7263629 | NC_021163.1    | Ca_kabuli_chr04 | 7263629                 | CC                              | TT              | 1946786856               |
| SNP_P4_38614_7264684 | NC_021163.1    | Ca_kabuli_chr04 | 7264684                 | GG                              | TT              | 1946786858               |
| SNP_P4_38615_7269686 | NC_021163.1    | Ca_kabuli_chr04 | 7269686                 | TT                              | CC              | 1946786860               |
| SNP_P4_38616_7272521 | NC_021163.1    | Ca_kabuli_chr04 | 7272521                 | TT                              | CC              | 1946786862               |

| SNPs IDs             | Chromosome IDs | Chromosomes     | Physical positions (bp) | CDC Frontier (Reference genome) | (ILWC46 & LPNB) | NCBI SNPdb Accession IDs |
|----------------------|----------------|-----------------|-------------------------|---------------------------------|-----------------|--------------------------|
| SNP_P4_38617_7273494 | NC_021163.1    | Ca_kabuli_chr04 | 7273494                 | AA                              | GG              | 1946786864               |
| SNP_P4_38618_7290853 | NC_021163.1    | Ca_kabuli_chr04 | 7290853                 | TT                              | AA              | 1946786866               |
| SNP_P4_38621_7323477 | NC_021163.1    | Ca_kabuli_chr04 | 7323477                 | CC                              | TT              | 1946786868               |
| SNP_P4_38622_7325963 | NC_021163.1    | Ca_kabuli_chr04 | 7325963                 | AA                              | GG              | 1946786870               |
| SNP_P4_38625_7431724 | NC_021163.1    | Ca_kabuli_chr04 | 7431724                 | AA                              | GG              | 1946786872               |
| SNP_P4_38626_7440765 | NC_021163.1    | Ca_kabuli_chr04 | 7440765                 | GG                              | AA              | 1946786874               |
| SNP_P4_38628_7479828 | NC_021163.1    | Ca_kabuli_chr04 | 7479828                 | CC                              | TT              | 1946786877               |
| SNP_P4_38629_7480193 | NC_021163.1    | Ca_kabuli_chr04 | 7480193                 | AA                              | GG              | 1946786879               |
| SNP_P4_38630_7492679 | NC_021163.1    | Ca_kabuli_chr04 | 7492679                 | GG                              | AA              | 1946786881               |
| SNP_P4_38631_7542523 | NC_021163.1    | Ca_kabuli_chr04 | 7542523                 | GG                              | AA              | 1946786883               |
| SNP_P4_38632_7543422 | NC_021163.1    | Ca_kabuli_chr04 | 7543422                 | AA                              | GG              | 1946786885               |
| SNP_P4_38633_7550579 | NC_021163.1    | Ca_kabuli_chr04 | 7550579                 | AA                              | TT              | 1946786887               |
| SNP_P4_38634_7552037 | NC_021163.1    | Ca_kabuli_chr04 | 7552037                 | AA                              | GG              | 1946786889               |
| SNP_P4_38635_7562047 | NC_021163.1    | Ca_kabuli_chr04 | 7562047                 | GG                              | TT              | 1946786891               |
| SNP_P4_38636_7579920 | NC_021163.1    | Ca_kabuli_chr04 | 7579920                 | GG                              | AA              | 1946786893               |
| SNP_P4_38638_7625260 | NC_021163.1    | Ca_kabuli_chr04 | 7625260                 | AA                              | GG              | 1946786895               |
| SNP_P4_38639_7632959 | NC_021163.1    | Ca_kabuli_chr04 | 7632959                 | GG                              | AA              | 1946786897               |
| SNP_P4_38640_7634191 | NC_021163.1    | Ca_kabuli_chr04 | 7634191                 | CC                              | TT              | 1946786899               |
| SNP_P4_38641_7637857 | NC_021163.1    | Ca_kabuli_chr04 | 7637857                 | TT                              | CC              | 1946786901               |
| SNP_P4_38642_7638070 | NC_021163.1    | Ca_kabuli_chr04 | 7638070                 | TT                              | AA              | 1946786903               |
| SNP_P4_38643_7638088 | NC_021163.1    | Ca_kabuli_chr04 | 7638088                 | CC                              | AA              | 1946786905               |
| SNP_P4_38644_7638091 | NC_021163.1    | Ca_kabuli_chr04 | 7638091                 | CC                              | AA              | 1946786907               |
| SNP_P4_38645_7638100 | NC_021163.1    | Ca_kabuli_chr04 | 7638100                 | AA                              | GG              | 1946786909               |
| SNP_P4_38646_7638110 | NC_021163.1    | Ca_kabuli_chr04 | 7638110                 | GG                              | AA              | 1946786911               |
| SNP_P4_38647_7638134 | NC_021163.1    | Ca_kabuli_chr04 | 7638134                 | CC                              | TT              | 1946786913               |
| SNP_P4_38648_7638308 | NC_021163.1    | Ca_kabuli_chr04 | 7638308                 | GG                              | TT              | 1946786915               |
| SNP_P4_38649_7638462 | NC_021163.1    | Ca_kabuli_chr04 | 7638462                 | GG                              | AA              | 1946786917               |
| SNP_P4_38651_7638594 | NC_021163.1    | Ca_kabuli_chr04 | 7638594                 | CC                              | AA              | 1946786919               |
| SNP_P4_38652_7638612 | NC_021163.1    | Ca_kabuli_chr04 | 7638612                 | GG                              | AA              | 1946786921               |
| SNP_P4_38653_7638671 | NC_021163.1    | Ca_kabuli_chr04 | 7638671                 | AA                              | GG              | 1946786923               |
| SNP_P4_38655_7657618 | NC_021163.1    | Ca_kabuli_chr04 | 7657618                 | AA                              | TT              | 1946786925               |
| SNP_P4_38656_7667206 | NC_021163.1    | Ca_kabuli_chr04 | 7667206                 | CC                              | TT              | 1946786927               |
| SNP_P4_38657_7673715 | NC_021163.1    | Ca_kabuli_chr04 | 7673715                 | AA                              | CC              | 1946786929               |
| SNP_P4_38659_7686918 | NC_021163.1    | Ca_kabuli_chr04 | 7686918                 | AA                              | TT              | 1946786931               |
| SNP_P4_38661_7714128 | NC_021163.1    | Ca_kabuli_chr04 | 7714128                 | AA                              | TT              | 1946786933               |
| SNP_P4_38662_7733801 | NC_021163.1    | Ca_kabuli_chr04 | 7733801                 | CC                              | TT              | 1946786935               |
| SNP_P4_38663_7818719 | NC_021163.1    | Ca_kabuli_chr04 | 7818719                 | CC                              | GG              | 1946786937               |
| SNP_P4_38664_7820685 | NC_021163.1    | Ca_kabuli_chr04 | 7820685                 | CC                              | TT              | 1946786939               |
| SNP_P4_38665_7825107 | NC_021163.1    | Ca_kabuli_chr04 | 7825107                 | TT                              | AA              | 1946786941               |
| SNP_P4_38667_7826813 | NC_021163.1    | Ca_kabuli_chr04 | 7826813                 | CC                              | TT              | 1946786944               |
| SNP_P4_38668_7842951 | NC_021163.1    | Ca_kabuli_chr04 | 7842951                 | AA                              | GG              | 1946786946               |
| SNP_P4_38669_7876192 | NC_021163.1    | Ca_kabuli_chr04 | 7876192                 | CC                              | TT              | 1946786948               |

| SNPs IDs             | Chromosome IDs | Chromosomes     | Physical positions (bp) | CDC Frontier (Reference genome) | (ILWC46 & LPNB) | NCBI SNPdb Accession IDs |
|----------------------|----------------|-----------------|-------------------------|---------------------------------|-----------------|--------------------------|
| SNP_P4_38670_7897557 | NC_021163.1    | Ca_kabuli_chr04 | 7897557                 | AA                              | GG              | 1946786950               |
| SNP_P4_38671_7920411 | NC_021163.1    | Ca_kabuli_chr04 | 7920411                 | AA                              | GG              | 1946786952               |
| SNP_P4_38674_7943002 | NC_021163.1    | Ca_kabuli_chr04 | 7943002                 | TT                              | CC              | 1946786954               |
| SNP_P4_38675_7947919 | NC_021163.1    | Ca_kabuli_chr04 | 7947919                 | GG                              | AA              | 1946786956               |
| SNP_P4_38676_7949922 | NC_021163.1    | Ca_kabuli_chr04 | 7949922                 | TT                              | AA              | 1946786958               |
| SNP_P4_38677_7949930 | NC_021163.1    | Ca_kabuli_chr04 | 7949930                 | TT                              | AA              | 1946786960               |
| SNP_P4_38679_8007853 | NC_021163.1    | Ca_kabuli_chr04 | 8007853                 | TT                              | CC              | 1946786962               |
| SNP_P4_38680_8029195 | NC_021163.1    | Ca_kabuli_chr04 | 8029195                 | TT                              | AA              | 1946786964               |
| SNP_P4_38682_8035316 | NC_021163.1    | Ca_kabuli_chr04 | 8035316                 | GG                              | AA              | 1946786966               |
| SNP_P4_38683_8035531 | NC_021163.1    | Ca_kabuli_chr04 | 8035531                 | AA                              | TT              | 1946786968               |
| SNP_P4_38684_8040022 | NC_021163.1    | Ca_kabuli_chr04 | 8040022                 | GG                              | AA              | 1946786970               |
| SNP_P4_38685_8042891 | NC_021163.1    | Ca_kabuli_chr04 | 8042891                 | GG                              | AA              | 1946786972               |
| SNP_P4_38686_8052097 | NC_021163.1    | Ca_kabuli_chr04 | 8052097                 | GG                              | AA              | 1946786974               |
| SNP_P4_38687_8058046 | NC_021163.1    | Ca_kabuli_chr04 | 8058046                 | AA                              | GG              | 1946786976               |
| SNP_P4_38688_8095904 | NC_021163.1    | Ca_kabuli_chr04 | 8095904                 | AA                              | TT              | 1946786979               |
| SNP_P4_38689_8095909 | NC_021163.1    | Ca_kabuli_chr04 | 8095909                 | TT                              | GG              | 1946786981               |
| SNP_P4_38690_8101432 | NC_021163.1    | Ca_kabuli_chr04 | 8101432                 | AA                              | TT              | 1946786983               |
| SNP_P4_38692_8159171 | NC_021163.1    | Ca_kabuli_chr04 | 8159171                 | TT                              | AA              | 1946786985               |
| SNP_P4_38693_8159174 | NC_021163.1    | Ca_kabuli_chr04 | 8159174                 | TT                              | GG              | 1946786987               |
| SNP_P4_38694_8166553 | NC_021163.1    | Ca_kabuli_chr04 | 8166553                 | CC                              | TT              | 1946786989               |
| SNP_P4_38696_8167215 | NC_021163.1    | Ca_kabuli_chr04 | 8167215                 | CC                              | AA              | 1946786992               |
| SNP_P4_38698_8167279 | NC_021163.1    | Ca_kabuli_chr04 | 8167279                 | TT                              | GG              | 1946786994               |
| SNP_P4_38700_8167365 | NC_021163.1    | Ca_kabuli_chr04 | 8167365                 | TT                              | CC              | 1946786996               |
| SNP_P4_38701_8167498 | NC_021163.1    | Ca_kabuli_chr04 | 8167498                 | GG                              | TT              | 1946786998               |
| SNP_P4_38703_8167643 | NC_021163.1    | Ca_kabuli_chr04 | 8167643                 | TT                              | CC              | 1946787000               |
| SNP_P4_38704_8168607 | NC_021163.1    | Ca_kabuli_chr04 | 8168607                 | TT                              | GG              | 1946787002               |
| SNP_P4_38705_8168608 | NC_021163.1    | Ca_kabuli_chr04 | 8168608                 | TT                              | AA              | 1946787004               |
| SNP_P4_38706_8168629 | NC_021163.1    | Ca_kabuli_chr04 | 8168629                 | TT                              | CC              | 1946787006               |
| SNP_P4_38707_8169561 | NC_021163.1    | Ca_kabuli_chr04 | 8169561                 | GG                              | CC              | 1946787008               |
| SNP_P4_38710_8170000 | NC_021163.1    | Ca_kabuli_chr04 | 8170000                 | GG                              | TT              | 1946787010               |
| SNP_P4_38711_8170050 | NC_021163.1    | Ca_kabuli_chr04 | 8170050                 | TT                              | AA              | 1946787012               |
| SNP_P4_38712_8170363 | NC_021163.1    | Ca_kabuli_chr04 | 8170363                 | CC                              | TT              | 1946787014               |
| SNP_P4_38713_8170381 | NC_021163.1    | Ca_kabuli_chr04 | 8170381                 | AA                              | GG              | 1946787016               |
| SNP_P4_38714_8170391 | NC_021163.1    | Ca_kabuli_chr04 | 8170391                 | CC                              | TT              | 1946787018               |
| SNP_P4_38715_8170400 | NC_021163.1    | Ca_kabuli_chr04 | 8170400                 | TT                              | CC              | 1946787020               |
| SNP_P4_38716_8170451 | NC_021163.1    | Ca_kabuli_chr04 | 8170451                 | AA                              | CC              | 1946787022               |
| SNP_P4_38718_8170695 | NC_021163.1    | Ca_kabuli_chr04 | 8170695                 | CC                              | GG              | 1946787024               |
| SNP_P4_38719_8170794 | NC_021163.1    | Ca_kabuli_chr04 | 8170794                 | CC                              | TT              | 1946787026               |
| SNP_P4_38720_8170799 | NC_021163.1    | Ca_kabuli_chr04 | 8170799                 | TT                              | AA              | 1946787028               |
| SNP_P4_38721_8171166 | NC_021163.1    | Ca_kabuli_chr04 | 8171166                 | AA                              | GG              | 1946787030               |
| SNP_P4_38722_8171744 | NC_021163.1    | Ca_kabuli_chr04 | 8171744                 | GG                              | AA              | 1946787033               |
| SNP_P4_38723_8171994 | NC_021163.1    | Ca_kabuli_chr04 | 8171994                 | TT                              | CC              | 1946787035               |



| SNPs IDs             | Chromosome IDs | Chromosomes     | Physical positions (bp) | CDC Frontier (Reference genome) | (ILWC46 & LPNB) | NCBI SNPdb Accession IDs |
|----------------------|----------------|-----------------|-------------------------|---------------------------------|-----------------|--------------------------|
| SNP_P4_38724_8172003 | NC_021163.1    | Ca_kabuli_chr04 | 8172003                 | AA                              | TT              | 1946787037               |
| SNP_P4_38726_8173691 | NC_021163.1    | Ca_kabuli_chr04 | 8173691                 | AA                              | GG              | 1946787039               |
| SNP_P4_38728_8176091 | NC_021163.1    | Ca_kabuli_chr04 | 8176091                 | GG                              | CC              | 1946787042               |
| SNP_P4_38729_8176092 | NC_021163.1    | Ca_kabuli_chr04 | 8176092                 | GG                              | CC              | 1946787044               |
| SNP_P4_38730_8176426 | NC_021163.1    | Ca_kabuli_chr04 | 8176426                 | AA                              | GG              | 1946787046               |
| SNP_P4_38731_8176459 | NC_021163.1    | Ca_kabuli_chr04 | 8176459                 | CC                              | TT              | 1946787048               |
| SNP_P4_38732_8176501 | NC_021163.1    | Ca_kabuli_chr04 | 8176501                 | GG                              | AA              | 1946787050               |
| SNP_P4_38733_8176518 | NC_021163.1    | Ca_kabuli_chr04 | 8176518                 | TT                              | CC              | 1946787052               |
| SNP_P4_38734_8177624 | NC_021163.1    | Ca_kabuli_chr04 | 8177624                 | AA                              | GG              | 1946787054               |
| SNP_P4_38735_8178235 | NC_021163.1    | Ca_kabuli_chr04 | 8178235                 | GG                              | TT              | 1946787056               |
| SNP_P4_38736_8179968 | NC_021163.1    | Ca_kabuli_chr04 | 8179968                 | CC                              | TT              | 1946787058               |
| SNP_P4_38737_8180503 | NC_021163.1    | Ca_kabuli_chr04 | 8180503                 | TT                              | CC              | 1946787060               |
| SNP_P4_38738_8182455 | NC_021163.1    | Ca_kabuli_chr04 | 8182455                 | CC                              | GG              | 1946787062               |
| SNP_P4_38739_8182707 | NC_021163.1    | Ca_kabuli_chr04 | 8182707                 | CC                              | TT              | 1946787064               |
| SNP_P4_38742_8184718 | NC_021163.1    | Ca_kabuli_chr04 | 8184718                 | CC                              | TT              | 1946787066               |
| SNP_P4_38743_8184895 | NC_021163.1    | Ca_kabuli_chr04 | 8184895                 | TT                              | CC              | 1946787068               |
| SNP_P4_38744_8185146 | NC_021163.1    | Ca_kabuli_chr04 | 8185146                 | CC                              | TT              | 1946787070               |
| SNP_P4_38745_8185441 | NC_021163.1    | Ca_kabuli_chr04 | 8185441                 | GG                              | AA              | 1946787072               |
| SNP_P4_38746_8185508 | NC_021163.1    | Ca_kabuli_chr04 | 8185508                 | CC                              | TT              | 1946787074               |
| SNP_P4_38747_8185513 | NC_021163.1    | Ca_kabuli_chr04 | 8185513                 | TT                              | CC              | 1946787076               |
| SNP_P4_38748_8185560 | NC_021163.1    | Ca_kabuli_chr04 | 8185560                 | TT                              | CC              | 1946787078               |
| SNP_P4_38749_8185613 | NC_021163.1    | Ca_kabuli_chr04 | 8185613                 | AA                              | GG              | 1946787080               |
| SNP_P4_38750_8185853 | NC_021163.1    | Ca_kabuli_chr04 | 8185853                 | GG                              | AA              | 1946787082               |
| SNP_P4_38751_8186279 | NC_021163.1    | Ca_kabuli_chr04 | 8186279                 | GG                              | AA              | 1946787084               |
| SNP_P4_38753_8187452 | NC_021163.1    | Ca_kabuli_chr04 | 8187452                 | AA                              | TT              | 1946787086               |
| SNP_P4_38754_8187726 | NC_021163.1    | Ca_kabuli_chr04 | 8187726                 | TT                              | CC              | 1946787088               |
| SNP_P4_38756_8188717 | NC_021163.1    | Ca_kabuli_chr04 | 8188717                 | AA                              | GG              | 1946787090               |
| SNP_P4_38757_8189416 | NC_021163.1    | Ca_kabuli_chr04 | 8189416                 | TT                              | CC              | 1946787093               |
| SNP_P4_38758_8189820 | NC_021163.1    | Ca_kabuli_chr04 | 8189820                 | TT                              | CC              | 1946787095               |
| SNP_P4_38759_8190805 | NC_021163.1    | Ca_kabuli_chr04 | 8190805                 | TT                              | AA              | 1946787097               |
| SNP_P4_38760_8191224 | NC_021163.1    | Ca_kabuli_chr04 | 8191224                 | GG                              | AA              | 1946787099               |
| SNP_P4_38762_8194654 | NC_021163.1    | Ca_kabuli_chr04 | 8194654                 | AA                              | GG              | 1946787101               |
| SNP_P4_38764_8195164 | NC_021163.1    | Ca_kabuli_chr04 | 8195164                 | TT                              | GG              | 1946787103               |
| SNP_P4_38766_8197170 | NC_021163.1    | Ca_kabuli_chr04 | 8197170                 | AA                              | GG              | 1946787105               |
| SNP_P4_38767_8197471 | NC_021163.1    | Ca_kabuli_chr04 | 8197471                 | CC                              | AA              | 1946787107               |
| SNP_P4_38768_8198305 | NC_021163.1    | Ca_kabuli_chr04 | 8198305                 | AA                              | TT              | 1946787109               |
| SNP_P4_38769_8198760 | NC_021163.1    | Ca_kabuli_chr04 | 8198760                 | AA                              | GG              | 1946787111               |
| SNP_P4_38770_8198766 | NC_021163.1    | Ca_kabuli_chr04 | 8198766                 | AA                              | CC              | 1946787113               |
| SNP_P4_38771_8198955 | NC_021163.1    | Ca_kabuli_chr04 | 8198955                 | AA                              | TT              | 1946787115               |
| SNP_P4_38772_8198985 | NC_021163.1    | Ca_kabuli_chr04 | 8198985                 | AA                              | GG              | 1946787117               |
| SNP_P4_38773_8199356 | NC_021163.1    | Ca_kabuli_chr04 | 8199356                 | AA                              | GG              | 1946787119               |
| SNP_P4_38775_8200984 | NC_021163.1    | Ca_kabuli_chr04 | 8200984                 | TT                              | AA              | 1946787121               |

| SNPs IDs             | Chromosome IDs | Chromosomes     | Physical positions (bp) | CDC Frontier (Reference genome) | (ILWC46 & LPNB) | NCBI SNPdb Accession IDs |
|----------------------|----------------|-----------------|-------------------------|---------------------------------|-----------------|--------------------------|
| SNP_P4_38777_8204583 | NC_021163.1    | Ca_kabuli_chr04 | 8204583                 | GG                              | TT              | 1946787123               |
| SNP_P4_38778_8204589 | NC_021163.1    | Ca_kabuli_chr04 | 8204589                 | TT                              | CC              | 1946787125               |
| SNP_P4_38779_8204604 | NC_021163.1    | Ca_kabuli_chr04 | 8204604                 | TT                              | CC              | 1946787127               |
| SNP_P4_38780_8204616 | NC_021163.1    | Ca_kabuli_chr04 | 8204616                 | GG                              | TT              | 1946787129               |
| SNP_P4_38781_8205046 | NC_021163.1    | Ca_kabuli_chr04 | 8205046                 | TT                              | AA              | 1946787131               |
| SNP_P4_38782_8207169 | NC_021163.1    | Ca_kabuli_chr04 | 8207169                 | TT                              | AA              | 1946787133               |
| SNP_P4_38783_8207460 | NC_021163.1    | Ca_kabuli_chr04 | 8207460                 | AA                              | CC              | 1946787135               |
| SNP_P4_38784_8207461 | NC_021163.1    | Ca_kabuli_chr04 | 8207461                 | TT                              | AA              | 1946787138               |
| SNP_P4_38785_8207463 | NC_021163.1    | Ca_kabuli_chr04 | 8207463                 | AA                              | TT              | 1946787140               |
| SNP_P4_38786_8208324 | NC_021163.1    | Ca_kabuli_chr04 | 8208324                 | TT                              | CC              | 1946787142               |
| SNP_P4_38787_8208547 | NC_021163.1    | Ca_kabuli_chr04 | 8208547                 | AA                              | GG              | 1946787144               |
| SNP_P4_38788_8209144 | NC_021163.1    | Ca_kabuli_chr04 | 8209144                 | AA                              | GG              | 1946787146               |
| SNP_P4_38789_8209155 | NC_021163.1    | Ca_kabuli_chr04 | 8209155                 | TT                              | CC              | 1946787148               |
| SNP_P4_38790_8209184 | NC_021163.1    | Ca_kabuli_chr04 | 8209184                 | CC                              | GG              | 1946787150               |
| SNP_P4_38791_8209202 | NC_021163.1    | Ca_kabuli_chr04 | 8209202                 | TT                              | CC              | 1946787152               |
| SNP_P4_38792_8209315 | NC_021163.1    | Ca_kabuli_chr04 | 8209315                 | AA                              | TT              | 1946787154               |
| SNP_P4_38793_8209327 | NC_021163.1    | Ca_kabuli_chr04 | 8209327                 | GG                              | CC              | 1946787156               |
| SNP_P4_38794_8209478 | NC_021163.1    | Ca_kabuli_chr04 | 8209478                 | TT                              | GG              | 1946787158               |
| SNP_P4_38796_8209544 | NC_021163.1    | Ca_kabuli_chr04 | 8209544                 | GG                              | AA              | 1946787160               |
| SNP_P4_38797_8209553 | NC_021163.1    | Ca_kabuli_chr04 | 8209553                 | AA                              | GG              | 1946787162               |
| SNP_P4_38798_8209562 | NC_021163.1    | Ca_kabuli_chr04 | 8209562                 | AA                              | GG              | 1946787164               |
| SNP_P4_38800_8209799 | NC_021163.1    | Ca_kabuli_chr04 | 8209799                 | GG                              | CC              | 1946787166               |
| SNP_P4_38802_8210545 | NC_021163.1    | Ca_kabuli_chr04 | 8210545                 | TT                              | CC              | 1946787168               |
| SNP_P4_38803_8210604 | NC_021163.1    | Ca_kabuli_chr04 | 8210604                 | CC                              | TT              | 1946787170               |
| SNP_P4_38805_8210744 | NC_021163.1    | Ca_kabuli_chr04 | 8210744                 | TT                              | CC              | 1946787172               |
| SNP_P4_38806_8210922 | NC_021163.1    | Ca_kabuli_chr04 | 8210922                 | AA                              | GG              | 1946787174               |
| SNP_P4_38807_8210985 | NC_021163.1    | Ca_kabuli_chr04 | 8210985                 | GG                              | TT              | 1946787176               |
| SNP_P4_38808_8211008 | NC_021163.1    | Ca_kabuli_chr04 | 8211008                 | CC                              | TT              | 1946787178               |
| SNP_P4_38809_8211229 | NC_021163.1    | Ca_kabuli_chr04 | 8211229                 | AA                              | CC              | 1946787180               |
| SNP_P4_38810_8211246 | NC_021163.1    | Ca_kabuli_chr04 | 8211246                 | CC                              | TT              | 1946787183               |
| SNP_P4_38811_8211279 | NC_021163.1    | Ca_kabuli_chr04 | 8211279                 | AA                              | GG              | 1946787185               |
| SNP_P4_38813_8211812 | NC_021163.1    | Ca_kabuli_chr04 | 8211812                 | GG                              | AA              | 1946787187               |
| SNP_P4_38814_8212042 | NC_021163.1    | Ca_kabuli_chr04 | 8212042                 | AA                              | CC              | 1946787189               |
| SNP_P4_38815_8214727 | NC_021163.1    | Ca_kabuli_chr04 | 8214727                 | AA                              | GG              | 1946787191               |
| SNP_P4_38816_8214742 | NC_021163.1    | Ca_kabuli_chr04 | 8214742                 | AA                              | CC              | 1946787193               |
| SNP_P4_38818_8214770 | NC_021163.1    | Ca_kabuli_chr04 | 8214770                 | CC                              | AA              | 1946787195               |
| SNP_P4_38819_8214778 | NC_021163.1    | Ca_kabuli_chr04 | 8214778                 | CC                              | TT              | 1946787197               |
| SNP_P4_38820_8214848 | NC_021163.1    | Ca_kabuli_chr04 | 8214848                 | TT                              | GG              | 1946787199               |
| SNP_P4_38821_8215045 | NC_021163.1    | Ca_kabuli_chr04 | 8215045                 | AA                              | TT              | 1946787202               |
| SNP_P4_38822_8215075 | NC_021163.1    | Ca_kabuli_chr04 | 8215075                 | TT                              | AA              | 1946787204               |
| SNP_P4_38823_8215082 | NC_021163.1    | Ca_kabuli_chr04 | 8215082                 | AA                              | TT              | 1946787206               |
| SNP_P4_38824_8215083 | NC_021163.1    | Ca_kabuli_chr04 | 8215083                 | AA                              | TT              | 1946787208               |

| SNPs IDs             | Chromosome IDs | Chromosomes     | Physical positions (bp) | CDC Frontier (Reference genome) | (ILWC46 & LPNB) | NCBI SNPdb Accession IDs |
|----------------------|----------------|-----------------|-------------------------|---------------------------------|-----------------|--------------------------|
| SNP_P4_38826_8215345 | NC_021163.1    | Ca_kabuli_chr04 | 8215345                 | TT                              | GG              | 1946787210               |
| SNP_P4_38827_8215388 | NC_021163.1    | Ca_kabuli_chr04 | 8215388                 | GG                              | AA              | 1946787212               |
| SNP_P4_38828_8215476 | NC_021163.1    | Ca_kabuli_chr04 | 8215476                 | AA                              | GG              | 1946787214               |
| SNP_P4_38829_8215530 | NC_021163.1    | Ca_kabuli_chr04 | 8215530                 | CC                              | TT              | 1946787216               |
| SNP_P4_38831_8215593 | NC_021163.1    | Ca_kabuli_chr04 | 8215593                 | CC                              | TT              | 1946787218               |
| SNP_P4_38832_8215626 | NC_021163.1    | Ca_kabuli_chr04 | 8215626                 | AA                              | TT              | 1946787220               |
| SNP_P4_38833_8215898 | NC_021163.1    | Ca_kabuli_chr04 | 8215898                 | CC                              | TT              | 1946787222               |
| SNP_P4_38834_8217067 | NC_021163.1    | Ca_kabuli_chr04 | 8217067                 | GG                              | AA              | 1946787224               |
| SNP_P4_38835_8217130 | NC_021163.1    | Ca_kabuli_chr04 | 8217130                 | CC                              | TT              | 1946787226               |
| SNP_P4_38836_8217150 | NC_021163.1    | Ca_kabuli_chr04 | 8217150                 | AA                              | GG              | 1946787228               |
| SNP_P4_38837_8217174 | NC_021163.1    | Ca_kabuli_chr04 | 8217174                 | AA                              | GG              | 1946787230               |
| SNP_P4_38838_8217181 | NC_021163.1    | Ca_kabuli_chr04 | 8217181                 | CC                              | TT              | 1946787232               |
| SNP_P4_38840_8217226 | NC_021163.1    | Ca_kabuli_chr04 | 8217226                 | AA                              | CC              | 1946787234               |
| SNP_P4_38841_8217248 | NC_021163.1    | Ca_kabuli_chr04 | 8217248                 | GG                              | AA              | 1946787236               |
| SNP_P4_38842_8217317 | NC_021163.1    | Ca_kabuli_chr04 | 8217317                 | GG                              | AA              | 1946787238               |
| SNP_P4_38843_8217327 | NC_021163.1    | Ca_kabuli_chr04 | 8217327                 | AA                              | GG              | 1946787240               |
| SNP_P4_38844_8219366 | NC_021163.1    | Ca_kabuli_chr04 | 8219366                 | CC                              | GG              | 1946787242               |
| SNP_P4_38845_8219950 | NC_021163.1    | Ca_kabuli_chr04 | 8219950                 | CC                              | GG              | 1946787244               |
| SNP_P4_38846_8220339 | NC_021163.1    | Ca_kabuli_chr04 | 8220339                 | AA                              | GG              | 1946787246               |
| SNP_P4_38847_8220517 | NC_021163.1    | Ca_kabuli_chr04 | 8220517                 | AA                              | GG              | 1946787248               |
| SNP_P4_38848_8220527 | NC_021163.1    | Ca_kabuli_chr04 | 8220527                 | AA                              | GG              | 1946787250               |
| SNP_P4_38849_8220927 | NC_021163.1    | Ca_kabuli_chr04 | 8220927                 | AA                              | GG              | 1946787252               |
| SNP_P4_38851_8221628 | NC_021163.1    | Ca_kabuli_chr04 | 8221628                 | GG                              | AA              | 1946787254               |
| SNP_P4_38852_8221654 | NC_021163.1    | Ca_kabuli_chr04 | 8221654                 | AA                              | GG              | 1946787256               |
| SNP_P4_38853_8221945 | NC_021163.1    | Ca_kabuli_chr04 | 8221945                 | AA                              | TT              | 1946787258               |
| SNP_P4_38854_8221991 | NC_021163.1    | Ca_kabuli_chr04 | 8221991                 | TT                              | GG              | 1946787260               |
| SNP_P4_38856_8223339 | NC_021163.1    | Ca_kabuli_chr04 | 8223339                 | TT                              | CC              | 1946787262               |
| SNP_P4_38857_8223686 | NC_021163.1    | Ca_kabuli_chr04 | 8223686                 | GG                              | TT              | 1946787264               |
| SNP_P4_38858_8223771 | NC_021163.1    | Ca_kabuli_chr04 | 8223771                 | CC                              | TT              | 1946787267               |
| SNP_P4_38859_8226051 | NC_021163.1    | Ca_kabuli_chr04 | 8226051                 | CC                              | GG              | 1946787269               |
| SNP_P4_38860_8226959 | NC_021163.1    | Ca_kabuli_chr04 | 8226959                 | TT                              | CC              | 1946787271               |
| SNP_P4_38861_8227111 | NC_021163.1    | Ca_kabuli_chr04 | 8227111                 | CC                              | GG              | 1946787273               |
| SNP_P4_38862_8227306 | NC_021163.1    | Ca_kabuli_chr04 | 8227306                 | GG                              | AA              | 1946787275               |
| SNP_P4_38863_8227310 | NC_021163.1    | Ca_kabuli_chr04 | 8227310                 | AA                              | GG              | 1946787277               |
| SNP_P4_38864_8227330 | NC_021163.1    | Ca_kabuli_chr04 | 8227330                 | AA                              | GG              | 1946787279               |
| SNP_P4_38865_8227337 | NC_021163.1    | Ca_kabuli_chr04 | 8227337                 | AA                              | GG              | 1946787281               |
| SNP_P4_38866_8227346 | NC_021163.1    | Ca_kabuli_chr04 | 8227346                 | GG                              | AA              | 1946787283               |
| SNP_P4_38867_8227369 | NC_021163.1    | Ca_kabuli_chr04 | 8227369                 | TT                              | CC              | 1946787285               |
| SNP_P4_38868_8230374 | NC_021163.1    | Ca_kabuli_chr04 | 8230374                 | AA                              | GG              | 1946787287               |
| SNP_P4_38869_8230413 | NC_021163.1    | Ca_kabuli_chr04 | 8230413                 | CC                              | AA              | 1946787289               |
| SNP_P4_38870_8230760 | NC_021163.1    | Ca_kabuli_chr04 | 8230760                 | TT                              | CC              | 1946787291               |
| SNP_P4_38871_8230858 | NC_021163.1    | Ca_kabuli_chr04 | 8230858                 | AA                              | CC              | 1946787293               |

| SNPs IDs             | Chromosome IDs | Chromosomes     | Physical positions (bp) | CDC Frontier (Reference genome) | (ILWC46 & LPNB) | NCBI SNPdb Accession IDs |
|----------------------|----------------|-----------------|-------------------------|---------------------------------|-----------------|--------------------------|
| SNP_P4_38872_8231155 | NC_021163.1    | Ca_kabuli_chr04 | 8231155                 | CC                              | TT              | 1946787295               |
| SNP_P4_38873_8235467 | NC_021163.1    | Ca_kabuli_chr04 | 8235467                 | TT                              | AA              | 1946787297               |
| SNP_P4_38874_8237016 | NC_021163.1    | Ca_kabuli_chr04 | 8237016                 | GG                              | AA              | 1946787299               |
| SNP_P4_38876_8238090 | NC_021163.1    | Ca_kabuli_chr04 | 8238090                 | TT                              | AA              | 1946787301               |
| SNP_P4_38878_8238198 | NC_021163.1    | Ca_kabuli_chr04 | 8238198                 | CC                              | TT              | 1946787303               |
| SNP_P4_38881_8239918 | NC_021163.1    | Ca_kabuli_chr04 | 8239918                 | CC                              | TT              | 1946787305               |
| SNP_P4_38883_8241138 | NC_021163.1    | Ca_kabuli_chr04 | 8241138                 | GG                              | AA              | 1946787307               |
| SNP_P4_38884_8241149 | NC_021163.1    | Ca_kabuli_chr04 | 8241149                 | TT                              | AA              | 1946787309               |
| SNP_P4_38886_8241485 | NC_021163.1    | Ca_kabuli_chr04 | 8241485                 | AA                              | TT              | 1946787311               |
| SNP_P4_38887_8241486 | NC_021163.1    | Ca_kabuli_chr04 | 8241486                 | CC                              | TT              | 1946787313               |
| SNP_P4_38888_8241511 | NC_021163.1    | Ca_kabuli_chr04 | 8241511                 | TT                              | AA              | 1946787315               |
| SNP_P4_38889_8241828 | NC_021163.1    | Ca_kabuli_chr04 | 8241828                 | TT                              | AA              | 1946787317               |
| SNP_P4_38890_8241836 | NC_021163.1    | Ca_kabuli_chr04 | 8241836                 | GG                              | CC              | 1946787319               |
| SNP_P4_38891_8241877 | NC_021163.1    | Ca_kabuli_chr04 | 8241877                 | AA                              | GG              | 1946787321               |
| SNP_P4_38892_8241878 | NC_021163.1    | Ca_kabuli_chr04 | 8241878                 | AA                              | TT              | 1946787323               |
| SNP_P4_38893_8241918 | NC_021163.1    | Ca_kabuli_chr04 | 8241918                 | AA                              | GG              | 1946787325               |
| SNP_P4_38895_8243016 | NC_021163.1    | Ca_kabuli_chr04 | 8243016                 | CC                              | AA              | 1946787327               |
| SNP_P4_38896_8243020 | NC_021163.1    | Ca_kabuli_chr04 | 8243020                 | AA                              | CC              | 1946787329               |
| SNP_P4_38897_8243083 | NC_021163.1    | Ca_kabuli_chr04 | 8243083                 | TT                              | AA              | 1946787331               |
| SNP_P4_38898_8243318 | NC_021163.1    | Ca_kabuli_chr04 | 8243318                 | GG                              | AA              | 1946787333               |
| SNP_P4_38899_8243482 | NC_021163.1    | Ca_kabuli_chr04 | 8243482                 | GG                              | AA              | 1946787335               |
| SNP_P4_38902_8248038 | NC_021163.1    | Ca_kabuli_chr04 | 8248038                 | GG                              | AA              | 1946787337               |
| SNP_P4_38903_8248288 | NC_021163.1    | Ca_kabuli_chr04 | 8248288                 | TT                              | CC              | 1946787339               |
| SNP_P4_38904_8252620 | NC_021163.1    | Ca_kabuli_chr04 | 8252620                 | CC                              | TT              | 1946787341               |
| SNP_P4_38905_8253171 | NC_021163.1    | Ca_kabuli_chr04 | 8253171                 | AA                              | GG              | 1946787343               |
| SNP_P4_38906_8253831 | NC_021163.1    | Ca_kabuli_chr04 | 8253831                 | GG                              | AA              | 1946787345               |
| SNP_P4_38907_8254520 | NC_021163.1    | Ca_kabuli_chr04 | 8254520                 | AA                              | GG              | 1946787347               |
| SNP_P4_38908_8256356 | NC_021163.1    | Ca_kabuli_chr04 | 8256356                 | GG                              | TT              | 1946787349               |
| SNP_P4_38909_8256855 | NC_021163.1    | Ca_kabuli_chr04 | 8256855                 | CC                              | TT              | 1946787351               |
| SNP_P4_38910_8257096 | NC_021163.1    | Ca_kabuli_chr04 | 8257096                 | AA                              | TT              | 1946787353               |
| SNP_P4_38911_8257982 | NC_021163.1    | Ca_kabuli_chr04 | 8257982                 | CC                              | TT              | 1946787355               |
| SNP_P4_38913_8264040 | NC_021163.1    | Ca_kabuli_chr04 | 8264040                 | AA                              | GG              | 1946787357               |
| SNP_P4_38914_8264674 | NC_021163.1    | Ca_kabuli_chr04 | 8264674                 | TT                              | AA              | 1946787359               |
| SNP_P4_38915_8264881 | NC_021163.1    | Ca_kabuli_chr04 | 8264881                 | AA                              | GG              | 1946787361               |
| SNP_P4_38917_8264935 | NC_021163.1    | Ca_kabuli_chr04 | 8264935                 | GG                              | AA              | 1946787363               |
| SNP_P4_38919_8265883 | NC_021163.1    | Ca_kabuli_chr04 | 8265883                 | TT                              | CC              | 1946787365               |
| SNP_P4_38920_8267764 | NC_021163.1    | Ca_kabuli_chr04 | 8267764                 | CC                              | GG              | 1946787367               |
| SNP_P4_38921_8267780 | NC_021163.1    | Ca_kabuli_chr04 | 8267780                 | GG                              | AA              | 1946787369               |
| SNP_P4_38922_8267944 | NC_021163.1    | Ca_kabuli_chr04 | 8267944                 | GG                              | AA              | 1946787371               |
| SNP_P4_38923_8268022 | NC_021163.1    | Ca_kabuli_chr04 | 8268022                 | CC                              | TT              | 1946787373               |
| SNP_P4_38924_8268349 | NC_021163.1    | Ca_kabuli_chr04 | 8268349                 | GG                              | AA              | 1946787375               |
| SNP_P4_38925_8269748 | NC_021163.1    | Ca_kabuli_chr04 | 8269748                 | GG                              | AA              | 1946787377               |

| SNPs IDs             | Chromosome IDs | Chromosomes     | Physical positions (bp) | CDC Frontier (Reference genome) | (ILWC46 & LPNB) | NCBI SNPdb Accession IDs |
|----------------------|----------------|-----------------|-------------------------|---------------------------------|-----------------|--------------------------|
| SNP_P4_38926_8269752 | NC_021163.1    | Ca_kabuli_chr04 | 8269752                 | GG                              | AA              | 1946787379               |
| SNP_P4_38928_8271998 | NC_021163.1    | Ca_kabuli_chr04 | 8271998                 | CC                              | TT              | 1946787381               |
| SNP_P4_38929_8274073 | NC_021163.1    | Ca_kabuli_chr04 | 8274073                 | TT                              | GG              | 1946787383               |
| SNP_P4_38930_8274301 | NC_021163.1    | Ca_kabuli_chr04 | 8274301                 | GG                              | AA              | 1946787385               |
| SNP_P4_38931_8275460 | NC_021163.1    | Ca_kabuli_chr04 | 8275460                 | CC                              | AA              | 1946787387               |
| SNP_P4_38933_8277565 | NC_021163.1    | Ca_kabuli_chr04 | 8277565                 | AA                              | TT              | 1946787389               |
| SNP_P4_38934_8280942 | NC_021163.1    | Ca_kabuli_chr04 | 8280942                 | CC                              | TT              | 1946787391               |
| SNP_P4_38937_8281061 | NC_021163.1    | Ca_kabuli_chr04 | 8281061                 | CC                              | AA              | 1946787393               |
| SNP_P4_38938_8281496 | NC_021163.1    | Ca_kabuli_chr04 | 8281496                 | AA                              | CC              | 1946787395               |
| SNP_P4_38941_8289302 | NC_021163.1    | Ca_kabuli_chr04 | 8289302                 | GG                              | AA              | 1946787397               |
| SNP_P4_38942_8290934 | NC_021163.1    | Ca_kabuli_chr04 | 8290934                 | AA                              | GG              | 1946787399               |
| SNP_P4_38943_8291577 | NC_021163.1    | Ca_kabuli_chr04 | 8291577                 | GG                              | CC              | 1946787401               |
| SNP_P4_38944_8291920 | NC_021163.1    | Ca_kabuli_chr04 | 8291920                 | AA                              | GG              | 1946787404               |
| SNP_P4_38945_8292716 | NC_021163.1    | Ca_kabuli_chr04 | 8292716                 | GG                              | AA              | 1946787406               |
| SNP_P4_38946_8292722 | NC_021163.1    | Ca_kabuli_chr04 | 8292722                 | TT                              | GG              | 1946787408               |
| SNP_P4_38948_8293646 | NC_021163.1    | Ca_kabuli_chr04 | 8293646                 | CC                              | TT              | 1946787410               |
| SNP_P4_38949_8293699 | NC_021163.1    | Ca_kabuli_chr04 | 8293699                 | TT                              | CC              | 1946787412               |
| SNP_P4_38950_8293708 | NC_021163.1    | Ca_kabuli_chr04 | 8293708                 | TT                              | CC              | 1946787414               |
| SNP_P4_38951_8294699 | NC_021163.1    | Ca_kabuli_chr04 | 8294699                 | GG                              | AA              | 1946787416               |
| SNP_P4_38952_8294918 | NC_021163.1    | Ca_kabuli_chr04 | 8294918                 | CC                              | TT              | 1946787418               |
| SNP_P4_38953_8294922 | NC_021163.1    | Ca_kabuli_chr04 | 8294922                 | TT                              | CC              | 1946787420               |
| SNP_P4_38954_8294958 | NC_021163.1    | Ca_kabuli_chr04 | 8294958                 | TT                              | GG              | 1946787423               |
| SNP_P4_38955_8295342 | NC_021163.1    | Ca_kabuli_chr04 | 8295342                 | TT                              | CC              | 1946787425               |
| SNP_P4_38956_8295398 | NC_021163.1    | Ca_kabuli_chr04 | 8295398                 | TT                              | CC              | 1946787427               |
| SNP_P4_38957_8295639 | NC_021163.1    | Ca_kabuli_chr04 | 8295639                 | AA                              | TT              | 1946787429               |
| SNP_P4_38958_8296019 | NC_021163.1    | Ca_kabuli_chr04 | 8296019                 | GG                              | AA              | 1946787431               |
| SNP_P4_38959_8297167 | NC_021163.1    | Ca_kabuli_chr04 | 8297167                 | TT                              | CC              | 1946787433               |
| SNP_P4_38960_8297206 | NC_021163.1    | Ca_kabuli_chr04 | 8297206                 | AA                              | GG              | 1946787435               |
| SNP_P4_38962_8297664 | NC_021163.1    | Ca_kabuli_chr04 | 8297664                 | AA                              | TT              | 1946787437               |
| SNP_P4_38963_8297665 | NC_021163.1    | Ca_kabuli_chr04 | 8297665                 | TT                              | GG              | 1946787439               |
| SNP_P4_38964_8297877 | NC_021163.1    | Ca_kabuli_chr04 | 8297877                 | AA                              | GG              | 1946787441               |
| SNP_P4_38965_8298863 | NC_021163.1    | Ca_kabuli_chr04 | 8298863                 | CC                              | GG              | 1946787443               |
| SNP_P4_38966_8299060 | NC_021163.1    | Ca_kabuli_chr04 | 8299060                 | CC                              | TT              | 1946787445               |
| SNP_P4_38967_8300952 | NC_021163.1    | Ca_kabuli_chr04 | 8300952                 | AA                              | GG              | 1946787447               |
| SNP_P4_38968_8301048 | NC_021163.1    | Ca_kabuli_chr04 | 8301048                 | TT                              | CC              | 1946787449               |
| SNP_P4_38969_8301152 | NC_021163.1    | Ca_kabuli_chr04 | 8301152                 | AA                              | GG              | 1946787450               |
| SNP_P4_38970_8301158 | NC_021163.1    | Ca_kabuli_chr04 | 8301158                 | AA                              | GG              | 1946787452               |
| SNP_P4_38971_8301220 | NC_021163.1    | Ca_kabuli_chr04 | 8301220                 | GG                              | AA              | 1946787454               |
| SNP_P4_38972_8301265 | NC_021163.1    | Ca_kabuli_chr04 | 8301265                 | GG                              | TT              | 1946787456               |
| SNP_P4_38973_8301270 | NC_021163.1    | Ca_kabuli_chr04 | 8301270                 | AA                              | GG              | 1946787458               |
| SNP_P4_38976_8301673 | NC_021163.1    | Ca_kabuli_chr04 | 8301673                 | AA                              | TT              | 1946787460               |
| SNP_P4_38977_8301754 | NC_021163.1    | Ca_kabuli_chr04 | 8301754                 | GG                              | AA              | 1946787462               |

| SNPs IDs             | Chromosome IDs | Chromosomes     | Physical positions (bp) | CDC Frontier (Reference genome) | (ILWC46 & LPNB) | NCBI SNPdb Accession IDs |
|----------------------|----------------|-----------------|-------------------------|---------------------------------|-----------------|--------------------------|
| SNP_P4_38978_8301761 | NC_021163.1    | Ca_kabuli_chr04 | 8301761                 | CC                              | GG              | 1946787464               |
| SNP_P4_38981_8307763 | NC_021163.1    | Ca_kabuli_chr04 | 8307763                 | TT                              | AA              | 1946787466               |
| SNP_P4_38984_8308861 | NC_021163.1    | Ca_kabuli_chr04 | 8308861                 | AA                              | TT              | 1946787468               |
| SNP_P4_38985_8308913 | NC_021163.1    | Ca_kabuli_chr04 | 8308913                 | GG                              | AA              | 1946787470               |
| SNP_P4_38986_8309060 | NC_021163.1    | Ca_kabuli_chr04 | 8309060                 | AA                              | TT              | 1946787472               |
| SNP_P4_38987_8309149 | NC_021163.1    | Ca_kabuli_chr04 | 8309149                 | AA                              | GG              | 1946787474               |
| SNP_P4_38989_8309253 | NC_021163.1    | Ca_kabuli_chr04 | 8309253                 | CC                              | TT              | 1946787476               |
| SNP_P4_38991_8309530 | NC_021163.1    | Ca_kabuli_chr04 | 8309530                 | AA                              | TT              | 1946787477               |
| SNP_P4_38992_8310588 | NC_021163.1    | Ca_kabuli_chr04 | 8310588                 | GG                              | CC              | 1946787479               |
| SNP_P4_38993_8310609 | NC_021163.1    | Ca_kabuli_chr04 | 8310609                 | CC                              | GG              | 1946787481               |
| SNP_P4_38994_8311455 | NC_021163.1    | Ca_kabuli_chr04 | 8311455                 | GG                              | AA              | 1946787483               |
| SNP_P4_38995_8311757 | NC_021163.1    | Ca_kabuli_chr04 | 8311757                 | TT                              | AA              | 1946787485               |
| SNP_P4_38997_8311826 | NC_021163.1    | Ca_kabuli_chr04 | 8311826                 | CC                              | TT              | 1946787487               |
| SNP_P4_38999_8311857 | NC_021163.1    | Ca_kabuli_chr04 | 8311857                 | CC                              | TT              | 1946787489               |
| SNP_P4_39000_8312002 | NC_021163.1    | Ca_kabuli_chr04 | 8312002                 | CC                              | TT              | 1946787491               |
| SNP_P4_39001_8312333 | NC_021163.1    | Ca_kabuli_chr04 | 8312333                 | GG                              | TT              | 1946787493               |
| SNP_P4_39002_8312348 | NC_021163.1    | Ca_kabuli_chr04 | 8312348                 | TT                              | CC              | 1946787494               |
| SNP_P4_39003_8312378 | NC_021163.1    | Ca_kabuli_chr04 | 8312378                 | AA                              | GG              | 1946787496               |
| SNP_P4_39004_8312380 | NC_021163.1    | Ca_kabuli_chr04 | 8312380                 | CC                              | TT              | 1946787498               |
| SNP_P4_39005_8312413 | NC_021163.1    | Ca_kabuli_chr04 | 8312413                 | CC                              | AA              | 1946787500               |
| SNP_P4_39006_8312415 | NC_021163.1    | Ca_kabuli_chr04 | 8312415                 | TT                              | CC              | 1946787502               |
| SNP_P4_39009_8313845 | NC_021163.1    | Ca_kabuli_chr04 | 8313845                 | GG                              | CC              | 1946787504               |
| SNP_P4_39010_8313919 | NC_021163.1    | Ca_kabuli_chr04 | 8313919                 | AA                              | GG              | 1946787506               |
| SNP_P4_39011_8313926 | NC_021163.1    | Ca_kabuli_chr04 | 8313926                 | CC                              | TT              | 1946787508               |
| SNP_P4_39012_8314180 | NC_021163.1    | Ca_kabuli_chr04 | 8314180                 | TT                              | CC              | 1946787510               |
| SNP_P4_39013_8314215 | NC_021163.1    | Ca_kabuli_chr04 | 8314215                 | TT                              | CC              | 1946787512               |
| SNP_P4_39014_8314901 | NC_021163.1    | Ca_kabuli_chr04 | 8314901                 | CC                              | TT              | 1946787514               |
| SNP_P4_39015_8315675 | NC_021163.1    | Ca_kabuli_chr04 | 8315675                 | AA                              | GG              | 1946787516               |
| SNP_P4_39016_8315841 | NC_021163.1    | Ca_kabuli_chr04 | 8315841                 | TT                              | CC              | 1946787518               |
| SNP_P4_39017_8315864 | NC_021163.1    | Ca_kabuli_chr04 | 8315864                 | CC                              | TT              | 1946787520               |
| SNP_P4_39018_8315895 | NC_021163.1    | Ca_kabuli_chr04 | 8315895                 | GG                              | AA              | 1946787522               |
| SNP_P4_39021_8316986 | NC_021163.1    | Ca_kabuli_chr04 | 8316986                 | AA                              | TT              | 1946787524               |
| SNP_P4_39022_8317074 | NC_021163.1    | Ca_kabuli_chr04 | 8317074                 | AA                              | GG              | 1946787526               |
| SNP_P4_39025_8320331 | NC_021163.1    | Ca_kabuli_chr04 | 8320331                 | CC                              | TT              | 1946787528               |
| SNP_P4_39026_8320586 | NC_021163.1    | Ca_kabuli_chr04 | 8320586                 | TT                              | GG              | 1946787530               |
| SNP_P4_39027_8320596 | NC_021163.1    | Ca_kabuli_chr04 | 8320596                 | GG                              | AA              | 1946787532               |
| SNP_P4_39028_8320650 | NC_021163.1    | Ca_kabuli_chr04 | 8320650                 | AA                              | TT              | 1946787534               |
| SNP_P4_39030_8320876 | NC_021163.1    | Ca_kabuli_chr04 | 8320876                 | AA                              | GG              | 1946787536               |
| SNP_P4_39032_8321112 | NC_021163.1    | Ca_kabuli_chr04 | 8321112                 | GG                              | AA              | 1946787538               |
| SNP_P4_39033_8321121 | NC_021163.1    | Ca_kabuli_chr04 | 8321121                 | TT                              | CC              | 1946787540               |
| SNP_P4_39034_8321625 | NC_021163.1    | Ca_kabuli_chr04 | 8321625                 | AA                              | GG              | 1946787542               |
| SNP_P4_39035_8321628 | NC_021163.1    | Ca_kabuli_chr04 | 8321628                 | AA                              | GG              | 1946787544               |

| SNPs IDs             | Chromosome IDs | Chromosomes     | Physical positions (bp) | CDC Frontier (Reference genome) | (ILWC46 & LPNB) | NCBI SNPdb Accession IDs |
|----------------------|----------------|-----------------|-------------------------|---------------------------------|-----------------|--------------------------|
| SNP_P4_39036_8321635 | NC_021163.1    | Ca_kabuli_chr04 | 8321635                 | AA                              | GG              | 1946787546               |
| SNP_P4_39037_8321651 | NC_021163.1    | Ca_kabuli_chr04 | 8321651                 | GG                              | AA              | 1946787549               |
| SNP_P4_39038_8321714 | NC_021163.1    | Ca_kabuli_chr04 | 8321714                 | GG                              | AA              | 1946787551               |
| SNP_P4_39039_8321721 | NC_021163.1    | Ca_kabuli_chr04 | 8321721                 | GG                              | AA              | 1946787553               |
| SNP_P4_39040_8321873 | NC_021163.1    | Ca_kabuli_chr04 | 8321873                 | AA                              | GG              | 1946787555               |
| SNP_P4_39042_8325860 | NC_021163.1    | Ca_kabuli_chr04 | 8325860                 | GG                              | AA              | 1946787557               |
| SNP_P4_39043_8325896 | NC_021163.1    | Ca_kabuli_chr04 | 8325896                 | CC                              | TT              | 1946787559               |
| SNP_P4_39044_8325909 | NC_021163.1    | Ca_kabuli_chr04 | 8325909                 | TT                              | CC              | 1946787561               |
| SNP_P4_39045_8325925 | NC_021163.1    | Ca_kabuli_chr04 | 8325925                 | TT                              | CC              | 1946787563               |
| SNP_P4_39046_8325930 | NC_021163.1    | Ca_kabuli_chr04 | 8325930                 | TT                              | AA              | 1946787565               |
| SNP_P4_39047_8325936 | NC_021163.1    | Ca_kabuli_chr04 | 8325936                 | GG                              | AA              | 1946787567               |
| SNP_P4_39049_8326118 | NC_021163.1    | Ca_kabuli_chr04 | 8326118                 | AA                              | TT              | 1946787569               |
| SNP_P4_39050_8326125 | NC_021163.1    | Ca_kabuli_chr04 | 8326125                 | GG                              | AA              | 1946787571               |
| SNP_P4_39052_8328221 | NC_021163.1    | Ca_kabuli_chr04 | 8328221                 | AA                              | GG              | 1946787573               |
| SNP_P4_39053_8329365 | NC_021163.1    | Ca_kabuli_chr04 | 8329365                 | AA                              | TT              | 1946787575               |
| SNP_P4_39054_8331244 | NC_021163.1    | Ca_kabuli_chr04 | 8331244                 | CC                              | TT              | 1946787577               |
| SNP_P4_39055_8332120 | NC_021163.1    | Ca_kabuli_chr04 | 8332120                 | GG                              | CC              | 1946787579               |
| SNP_P4_39056_8332383 | NC_021163.1    | Ca_kabuli_chr04 | 8332383                 | TT                              | CC              | 1946787582               |
| SNP_P4_39059_8333148 | NC_021163.1    | Ca_kabuli_chr04 | 8333148                 | GG                              | AA              | 1946787584               |
| SNP_P4_39061_8334028 | NC_021163.1    | Ca_kabuli_chr04 | 8334028                 | TT                              | CC              | 1946787586               |
| SNP_P4_39062_8334196 | NC_021163.1    | Ca_kabuli_chr04 | 8334196                 | TT                              | CC              | 1946787588               |
| SNP_P4_39063_8334201 | NC_021163.1    | Ca_kabuli_chr04 | 8334201                 | TT                              | CC              | 1946787590               |
| SNP_P4_39064_8334447 | NC_021163.1    | Ca_kabuli_chr04 | 8334447                 | TT                              | CC              | 1946787592               |
| SNP_P4_39065_8334692 | NC_021163.1    | Ca_kabuli_chr04 | 8334692                 | CC                              | TT              | 1946787594               |
| SNP_P4_39066_8334772 | NC_021163.1    | Ca_kabuli_chr04 | 8334772                 | GG                              | AA              | 1946787596               |
| SNP_P4_39067_8335011 | NC_021163.1    | Ca_kabuli_chr04 | 8335011                 | TT                              | CC              | 1946787598               |
| SNP_P4_39069_8338996 | NC_021163.1    | Ca_kabuli_chr04 | 8338996                 | TT                              | CC              | 1946787600               |
| SNP_P4_39071_8339749 | NC_021163.1    | Ca_kabuli_chr04 | 8339749                 | AA                              | TT              | 1946787602               |
| SNP_P4_39072_8340014 | NC_021163.1    | Ca_kabuli_chr04 | 8340014                 | AA                              | TT              | 1946787604               |
| SNP_P4_39074_8341552 | NC_021163.1    | Ca_kabuli_chr04 | 8341552                 | CC                              | GG              | 1946787606               |
| SNP_P4_39075_8341623 | NC_021163.1    | Ca_kabuli_chr04 | 8341623                 | GG                              | AA              | 1946787608               |
| SNP_P4_39076_8341665 | NC_021163.1    | Ca_kabuli_chr04 | 8341665                 | GG                              | AA              | 1946787610               |
| SNP_P4_39077_8341742 | NC_021163.1    | Ca_kabuli_chr04 | 8341742                 | GG                              | TT              | 1946787612               |
| SNP_P4_39078_8341958 | NC_021163.1    | Ca_kabuli_chr04 | 8341958                 | TT                              | GG              | 1946787614               |
| SNP_P4_39080_8342318 | NC_021163.1    | Ca_kabuli_chr04 | 8342318                 | AA                              | TT              | 1946787616               |
| SNP_P4_39082_8342473 | NC_021163.1    | Ca_kabuli_chr04 | 8342473                 | CC                              | AA              | 1946787618               |
| SNP_P4_39084_8343100 | NC_021163.1    | Ca_kabuli_chr04 | 8343100                 | AA                              | CC              | 1946787620               |
| SNP_P4_39085_8343102 | NC_021163.1    | Ca_kabuli_chr04 | 8343102                 | AA                              | TT              | 1946787622               |
| SNP_P4_39086_8343440 | NC_021163.1    | Ca_kabuli_chr04 | 8343440                 | CC                              | AA              | 1946787624               |
| SNP_P4_39087_8343553 | NC_021163.1    | Ca_kabuli_chr04 | 8343553                 | CC                              | GG              | 1946787626               |
| SNP_P4_39088_8343691 | NC_021163.1    | Ca_kabuli_chr04 | 8343691                 | CC                              | TT              | 1946787628               |
| SNP_P4_39089_8343725 | NC_021163.1    | Ca_kabuli_chr04 | 8343725                 | AA                              | GG              | 1946787630               |

| SNPs IDs             | Chromosome IDs | Chromosomes     | Physical positions (bp) | CDC Frontier (Reference genome) | (ILWC46 & LPNB) | NCBI SNPdb Accession IDs |
|----------------------|----------------|-----------------|-------------------------|---------------------------------|-----------------|--------------------------|
| SNP_P4_39090_8343726 | NC_021163.1    | Ca_kabuli_chr04 | 8343726                 | AA                              | CC              | 1946787632               |
| SNP_P4_39091_8343825 | NC_021163.1    | Ca_kabuli_chr04 | 8343825                 | TT                              | CC              | 1946787634               |
| SNP_P4_39092_8343827 | NC_021163.1    | Ca_kabuli_chr04 | 8343827                 | TT                              | CC              | 1946787636               |
| SNP_P4_39093_8343839 | NC_021163.1    | Ca_kabuli_chr04 | 8343839                 | AA                              | TT              | 1946787638               |
| SNP_P4_39094_8343865 | NC_021163.1    | Ca_kabuli_chr04 | 8343865                 | TT                              | AA              | 1946787640               |
| SNP_P4_39095_8343936 | NC_021163.1    | Ca_kabuli_chr04 | 8343936                 | GG                              | CC              | 1946787642               |
| SNP_P4_39097_8344076 | NC_021163.1    | Ca_kabuli_chr04 | 8344076                 | CC                              | TT              | 1946787644               |
| SNP_P4_39098_8344078 | NC_021163.1    | Ca_kabuli_chr04 | 8344078                 | GG                              | AA              | 1946787646               |
| SNP_P4_39099_8344508 | NC_021163.1    | Ca_kabuli_chr04 | 8344508                 | GG                              | CC              | 1946787648               |
| SNP_P4_39101_8344624 | NC_021163.1    | Ca_kabuli_chr04 | 8344624                 | CC                              | TT              | 1946787650               |
| SNP_P4_39102_8344625 | NC_021163.1    | Ca_kabuli_chr04 | 8344625                 | AA                              | GG              | 1946787652               |
| SNP_P4_39104_8348297 | NC_021163.1    | Ca_kabuli_chr04 | 8348297                 | AA                              | GG              | 1946787654               |
| SNP_P4_39105_8348298 | NC_021163.1    | Ca_kabuli_chr04 | 8348298                 | TT                              | CC              | 1946787656               |
| SNP_P4_39106_8349069 | NC_021163.1    | Ca_kabuli_chr04 | 8349069                 | GG                              | CC              | 1946787658               |
| SNP_P4_39107_8349286 | NC_021163.1    | Ca_kabuli_chr04 | 8349286                 | TT                              | GG              | 1946787660               |
| SNP_P4_39108_8349356 | NC_021163.1    | Ca_kabuli_chr04 | 8349356                 | AA                              | CC              | 1946787662               |
| SNP_P4_39109_8349368 | NC_021163.1    | Ca_kabuli_chr04 | 8349368                 | GG                              | AA              | 1946787664               |
| SNP_P4_39110_8349502 | NC_021163.1    | Ca_kabuli_chr04 | 8349502                 | GG                              | CC              | 1946787666               |
| SNP_P4_39111_8350889 | NC_021163.1    | Ca_kabuli_chr04 | 8350889                 | GG                              | TT              | 1946787668               |
| SNP_P4_39112_8350993 | NC_021163.1    | Ca_kabuli_chr04 | 8350993                 | CC                              | TT              | 1946787671               |
| SNP_P4_39113_8351064 | NC_021163.1    | Ca_kabuli_chr04 | 8351064                 | TT                              | CC              | 1946787673               |
| SNP_P4_39115_8351218 | NC_021163.1    | Ca_kabuli_chr04 | 8351218                 | GG                              | CC              | 1946787675               |
| SNP_P4_39116_8351252 | NC_021163.1    | Ca_kabuli_chr04 | 8351252                 | GG                              | AA              | 1946787677               |
| SNP_P4_39117_8351278 | NC_021163.1    | Ca_kabuli_chr04 | 8351278                 | AA                              | GG              | 1946787679               |
| SNP_P4_39118_8352377 | NC_021163.1    | Ca_kabuli_chr04 | 8352377                 | GG                              | AA              | 1946787681               |
| SNP_P4_39119_8352414 | NC_021163.1    | Ca_kabuli_chr04 | 8352414                 | AA                              | TT              | 1946787683               |
| SNP_P4_39120_8352685 | NC_021163.1    | Ca_kabuli_chr04 | 8352685                 | CC                              | TT              | 1946787685               |
| SNP_P4_39121_8352790 | NC_021163.1    | Ca_kabuli_chr04 | 8352790                 | CC                              | TT              | 1946787687               |
| SNP_P4_39122_8353089 | NC_021163.1    | Ca_kabuli_chr04 | 8353089                 | TT                              | CC              | 1946787689               |
| SNP_P4_39123_8353090 | NC_021163.1    | Ca_kabuli_chr04 | 8353090                 | GG                              | AA              | 1946787691               |
| SNP_P4_39124_8353096 | NC_021163.1    | Ca_kabuli_chr04 | 8353096                 | GG                              | AA              | 1946787693               |
| SNP_P4_39125_8353137 | NC_021163.1    | Ca_kabuli_chr04 | 8353137                 | TT                              | CC              | 1946787695               |
| SNP_P4_39126_8353138 | NC_021163.1    | Ca_kabuli_chr04 | 8353138                 | GG                              | AA              | 1946787697               |
| SNP_P4_39127_8353183 | NC_021163.1    | Ca_kabuli_chr04 | 8353183                 | TT                              | CC              | 1946787699               |
| SNP_P4_39129_8353225 | NC_021163.1    | Ca_kabuli_chr04 | 8353225                 | CC                              | TT              | 1946787701               |
| SNP_P4_39130_8353238 | NC_021163.1    | Ca_kabuli_chr04 | 8353238                 | TT                              | CC              | 1946787703               |
| SNP_P4_39131_8353246 | NC_021163.1    | Ca_kabuli_chr04 | 8353246                 | CC                              | TT              | 1946787705               |
| SNP_P4_39132_8353253 | NC_021163.1    | Ca_kabuli_chr04 | 8353253                 | AA                              | GG              | 1946787707               |
| SNP_P4_39133_8353262 | NC_021163.1    | Ca_kabuli_chr04 | 8353262                 | AA                              | CC              | 1946787709               |
| SNP_P4_39134_8353284 | NC_021163.1    | Ca_kabuli_chr04 | 8353284                 | GG                              | AA              | 1946787711               |
| SNP_P4_39135_8353904 | NC_021163.1    | Ca_kabuli_chr04 | 8353904                 | CC                              | TT              | 1946787713               |
| SNP_P4_39136_8354683 | NC_021163.1    | Ca_kabuli_chr04 | 8354683                 | TT                              | GG              | 1946787715               |



| SNPs IDs             | Chromosome IDs | Chromosomes     | Physical positions (bp) | CDC Frontier (Reference genome) | (ILWC46 & LPNB) | NCBI SNPdb Accession IDs |
|----------------------|----------------|-----------------|-------------------------|---------------------------------|-----------------|--------------------------|
| SNP_P4_39137_8354693 | NC_021163.1    | Ca_kabuli_chr04 | 8354693                 | TT                              | AA              | 1946787717               |
| SNP_P4_39138_8354698 | NC_021163.1    | Ca_kabuli_chr04 | 8354698                 | GG                              | CC              | 1946787719               |
| SNP_P4_39139_8354854 | NC_021163.1    | Ca_kabuli_chr04 | 8354854                 | TT                              | CC              | 1946787721               |
| SNP_P4_39142_8355706 | NC_021163.1    | Ca_kabuli_chr04 | 8355706                 | AA                              | GG              | 1946787723               |
| SNP_P4_39143_8356751 | NC_021163.1    | Ca_kabuli_chr04 | 8356751                 | CC                              | TT              | 1946787725               |
| SNP_P4_39145_8357556 | NC_021163.1    | Ca_kabuli_chr04 | 8357556                 | GG                              | AA              | 1946787727               |
| SNP_P4_39146_8357562 | NC_021163.1    | Ca_kabuli_chr04 | 8357562                 | CC                              | AA              | 1946787729               |
| SNP_P4_39147_8357874 | NC_021163.1    | Ca_kabuli_chr04 | 8357874                 | AA                              | GG              | 1946787731               |
| SNP_P4_39148_8359190 | NC_021163.1    | Ca_kabuli_chr04 | 8359190                 | AA                              | GG              | 1946787732               |
| SNP_P4_39149_8360408 | NC_021163.1    | Ca_kabuli_chr04 | 8360408                 | GG                              | AA              | 1946787734               |
| SNP_P4_39150_8361688 | NC_021163.1    | Ca_kabuli_chr04 | 8361688                 | CC                              | GG              | 1946787736               |
| SNP_P4_39151_8361689 | NC_021163.1    | Ca_kabuli_chr04 | 8361689                 | AA                              | GG              | 1946787738               |
| SNP_P4_39152_8362617 | NC_021163.1    | Ca_kabuli_chr04 | 8362617                 | TT                              | GG              | 1946787740               |
| SNP_P4_39154_8362886 | NC_021163.1    | Ca_kabuli_chr04 | 8362886                 | TT                              | CC              | 1946787742               |
| SNP_P4_39155_8362921 | NC_021163.1    | Ca_kabuli_chr04 | 8362921                 | CC                              | GG              | 1946787744               |
| SNP_P4_39156_8362922 | NC_021163.1    | Ca_kabuli_chr04 | 8362922                 | AA                              | TT              | 1946787746               |
| SNP_P4_39157_8363117 | NC_021163.1    | Ca_kabuli_chr04 | 8363117                 | TT                              | GG              | 1946787748               |
| SNP_P4_39158_8363131 | NC_021163.1    | Ca_kabuli_chr04 | 8363131                 | GG                              | AA              | 1946787750               |
| SNP_P4_39159_8363147 | NC_021163.1    | Ca_kabuli_chr04 | 8363147                 | CC                              | TT              | 1946787752               |
| SNP_P4_39160_8363514 | NC_021163.1    | Ca_kabuli_chr04 | 8363514                 | AA                              | GG              | 1946787754               |
| SNP_P4_39161_8363563 | NC_021163.1    | Ca_kabuli_chr04 | 8363563                 | CC                              | TT              | 1946787756               |
| SNP_P4_39162_8363579 | NC_021163.1    | Ca_kabuli_chr04 | 8363579                 | CC                              | AA              | 1946787758               |
| SNP_P4_39163_8363583 | NC_021163.1    | Ca_kabuli_chr04 | 8363583                 | CC                              | TT              | 1946787760               |
| SNP_P4_39165_8365069 | NC_021163.1    | Ca_kabuli_chr04 | 8365069                 | TT                              | GG              | 1946787762               |
| SNP_P4_39166_8367094 | NC_021163.1    | Ca_kabuli_chr04 | 8367094                 | GG                              | AA              | 1946787764               |
| SNP_P4_39167_8370798 | NC_021163.1    | Ca_kabuli_chr04 | 8370798                 | AA                              | CC              | 1946787766               |
| SNP_P4_39168_8372267 | NC_021163.1    | Ca_kabuli_chr04 | 8372267                 | AA                              | GG              | 1946787768               |
| SNP_P4_39169_8372302 | NC_021163.1    | Ca_kabuli_chr04 | 8372302                 | TT                              | CC              | 1946787770               |
| SNP_P4_39170_8372320 | NC_021163.1    | Ca_kabuli_chr04 | 8372320                 | TT                              | CC              | 1946787772               |
| SNP_P4_39171_8372390 | NC_021163.1    | Ca_kabuli_chr04 | 8372390                 | TT                              | CC              | 1946787774               |
| SNP_P4_39172_8372392 | NC_021163.1    | Ca_kabuli_chr04 | 8372392                 | CC                              | TT              | 1946787776               |
| SNP_P4_39173_8372406 | NC_021163.1    | Ca_kabuli_chr04 | 8372406                 | TT                              | CC              | 1946787778               |
| SNP_P4_39174_8372562 | NC_021163.1    | Ca_kabuli_chr04 | 8372562                 | AA                              | GG              | 1946787780               |
| SNP_P4_39175_8372930 | NC_021163.1    | Ca_kabuli_chr04 | 8372930                 | GG                              | CC              | 1946787783               |
| SNP_P4_39176_8373255 | NC_021163.1    | Ca_kabuli_chr04 | 8373255                 | AA                              | GG              | 1946787785               |
| SNP_P4_39177_8373259 | NC_021163.1    | Ca_kabuli_chr04 | 8373259                 | TT                              | CC              | 1946787787               |
| SNP_P4_39178_8373269 | NC_021163.1    | Ca_kabuli_chr04 | 8373269                 | TT                              | CC              | 1946787789               |
| SNP_P4_39179_8373288 | NC_021163.1    | Ca_kabuli_chr04 | 8373288                 | GG                              | AA              | 1946787791               |
| SNP_P4_39180_8373346 | NC_021163.1    | Ca_kabuli_chr04 | 8373346                 | AA                              | TT              | 1946787793               |
| SNP_P4_39181_8373653 | NC_021163.1    | Ca_kabuli_chr04 | 8373653                 | TT                              | AA              | 1946787795               |
| SNP_P4_39182_8375490 | NC_021163.1    | Ca_kabuli_chr04 | 8375490                 | TT                              | CC              | 1946787797               |
| SNP_P4_39183_8375498 | NC_021163.1    | Ca_kabuli_chr04 | 8375498                 | AA                              | TT              | 1946787799               |

| SNPs IDs             | Chromosome IDs | Chromosomes     | Physical positions (bp) | CDC Frontier (Reference genome) | (ILWC46 & LPNB) | NCBI SNPdb Accession IDs |
|----------------------|----------------|-----------------|-------------------------|---------------------------------|-----------------|--------------------------|
| SNP_P4_39184_8375845 | NC_021163.1    | Ca_kabuli_chr04 | 8375845                 | AA                              | GG              | 1946787801               |
| SNP_P4_39186_8376216 | NC_021163.1    | Ca_kabuli_chr04 | 8376216                 | GG                              | AA              | 1946787803               |
| SNP_P4_39188_8376575 | NC_021163.1    | Ca_kabuli_chr04 | 8376575                 | AA                              | GG              | 1946787805               |
| SNP_P4_39190_8376737 | NC_021163.1    | Ca_kabuli_chr04 | 8376737                 | AA                              | TT              | 1946787807               |
| SNP_P4_39191_8376774 | NC_021163.1    | Ca_kabuli_chr04 | 8376774                 | TT                              | CC              | 1946787809               |
| SNP_P4_39193_8377463 | NC_021163.1    | Ca_kabuli_chr04 | 8377463                 | GG                              | AA              | 1946787811               |
| SNP_P4_39195_8377506 | NC_021163.1    | Ca_kabuli_chr04 | 8377506                 | TT                              | GG              | 1946787813               |
| SNP_P4_39196_8377533 | NC_021163.1    | Ca_kabuli_chr04 | 8377533                 | TT                              | CC              | 1946787815               |
| SNP_P4_39198_8377560 | NC_021163.1    | Ca_kabuli_chr04 | 8377560                 | TT                              | CC              | 1946787817               |
| SNP_P4_39200_8377654 | NC_021163.1    | Ca_kabuli_chr04 | 8377654                 | CC                              | TT              | 1946787819               |
| SNP_P4_39201_8377718 | NC_021163.1    | Ca_kabuli_chr04 | 8377718                 | AA                              | CC              | 1946787821               |
| SNP_P4_39202_8381444 | NC_021163.1    | Ca_kabuli_chr04 | 8381444                 | TT                              | CC              | 1946787823               |
| SNP_P4_39204_8381958 | NC_021163.1    | Ca_kabuli_chr04 | 8381958                 | GG                              | AA              | 1946787825               |
| SNP_P4_39205_8382312 | NC_021163.1    | Ca_kabuli_chr04 | 8382312                 | GG                              | CC              | 1946787827               |
| SNP_P4_39206_8382508 | NC_021163.1    | Ca_kabuli_chr04 | 8382508                 | CC                              | TT              | 1946787829               |
| SNP_P4_39207_8386680 | NC_021163.1    | Ca_kabuli_chr04 | 8386680                 | AA                              | TT              | 1946787831               |
| SNP_P4_39209_8387960 | NC_021163.1    | Ca_kabuli_chr04 | 8387960                 | CC                              | TT              | 1946787833               |
| SNP_P4_39210_8388301 | NC_021163.1    | Ca_kabuli_chr04 | 8388301                 | TT                              | AA              | 1946787835               |
| SNP_P4_39211_8388902 | NC_021163.1    | Ca_kabuli_chr04 | 8388902                 | GG                              | AA              | 1946787837               |
| SNP_P4_39212_8389207 | NC_021163.1    | Ca_kabuli_chr04 | 8389207                 | AA                              | GG              | 1946787839               |
| SNP_P4_39213_8389398 | NC_021163.1    | Ca_kabuli_chr04 | 8389398                 | AA                              | TT              | 1946787842               |
| SNP_P4_39214_8389543 | NC_021163.1    | Ca_kabuli_chr04 | 8389543                 | AA                              | GG              | 1946787844               |
| SNP_P4_39215_8391467 | NC_021163.1    | Ca_kabuli_chr04 | 8391467                 | CC                              | GG              | 1946787846               |
| SNP_P4_39216_8391472 | NC_021163.1    | Ca_kabuli_chr04 | 8391472                 | AA                              | GG              | 1946787848               |
| SNP_P4_39217_8392711 | NC_021163.1    | Ca_kabuli_chr04 | 8392711                 | TT                              | CC              | 1946787850               |
| SNP_P4_39218_8395126 | NC_021163.1    | Ca_kabuli_chr04 | 8395126                 | AA                              | TT              | 1946787852               |
| SNP_P4_39219_8395216 | NC_021163.1    | Ca_kabuli_chr04 | 8395216                 | GG                              | TT              | 1946787854               |
| SNP_P4_39220_8395478 | NC_021163.1    | Ca_kabuli_chr04 | 8395478                 | AA                              | CC              | 1946787857               |
| SNP_P4_39221_8396214 | NC_021163.1    | Ca_kabuli_chr04 | 8396214                 | AA                              | GG              | 1946787859               |
| SNP_P4_39223_8396362 | NC_021163.1    | Ca_kabuli_chr04 | 8396362                 | GG                              | AA              | 1946787861               |
| SNP_P4_39224_8396384 | NC_021163.1    | Ca_kabuli_chr04 | 8396384                 | AA                              | GG              | 1946787863               |
| SNP_P4_39225_8397252 | NC_021163.1    | Ca_kabuli_chr04 | 8397252                 | CC                              | GG              | 1946787865               |
| SNP_P4_39226_8397257 | NC_021163.1    | Ca_kabuli_chr04 | 8397257                 | AA                              | GG              | 1946787867               |
| SNP_P4_39227_8397998 | NC_021163.1    | Ca_kabuli_chr04 | 8397998                 | AA                              | TT              | 1946787869               |
| SNP_P4_39228_8399391 | NC_021163.1    | Ca_kabuli_chr04 | 8399391                 | AA                              | TT              | 1946787871               |
| SNP_P4_39229_8399394 | NC_021163.1    | Ca_kabuli_chr04 | 8399394                 | AA                              | CC              | 1946787873               |
| SNP_P4_39231_8401248 | NC_021163.1    | Ca_kabuli_chr04 | 8401248                 | AA                              | TT              | 1946787875               |
| SNP_P4_39232_8402175 | NC_021163.1    | Ca_kabuli_chr04 | 8402175                 | TT                              | CC              | 1946787877               |
| SNP_P4_39233_8402274 | NC_021163.1    | Ca_kabuli_chr04 | 8402274                 | GG                              | AA              | 1946787879               |
| SNP_P4_39234_8402434 | NC_021163.1    | Ca_kabuli_chr04 | 8402434                 | GG                              | CC              | 1946787881               |
| SNP_P4_39235_8402782 | NC_021163.1    | Ca_kabuli_chr04 | 8402782                 | AA                              | CC              | 1946787883               |
| SNP_P4_39236_8405267 | NC_021163.1    | Ca_kabuli_chr04 | 8405267                 | TT                              | AA              | 1946787885               |

| SNPs IDs             | Chromosome IDs | Chromosomes     | Physical positions (bp) | CDC Frontier (Reference genome) | (ILWC46 & LPNB) | NCBI SNPdb Accession IDs |
|----------------------|----------------|-----------------|-------------------------|---------------------------------|-----------------|--------------------------|
| SNP_P4_39238_8405817 | NC_021163.1    | Ca_kabuli_chr04 | 8405817                 | GG                              | CC              | 1946787887               |
| SNP_P4_39239_8407938 | NC_021163.1    | Ca_kabuli_chr04 | 8407938                 | AA                              | GG              | 1946787889               |
| SNP_P4_39240_8408301 | NC_021163.1    | Ca_kabuli_chr04 | 8408301                 | TT                              | CC              | 1946787891               |
| SNP_P4_39241_8408915 | NC_021163.1    | Ca_kabuli_chr04 | 8408915                 | CC                              | TT              | 1946787893               |
| SNP_P4_39242_8409755 | NC_021163.1    | Ca_kabuli_chr04 | 8409755                 | CC                              | TT              | 1946787895               |
| SNP_P4_39243_8409793 | NC_021163.1    | Ca_kabuli_chr04 | 8409793                 | CC                              | TT              | 1946787897               |
| SNP_P4_39244_8409841 | NC_021163.1    | Ca_kabuli_chr04 | 8409841                 | GG                              | AA              | 1946787899               |
| SNP_P4_39246_8410147 | NC_021163.1    | Ca_kabuli_chr04 | 8410147                 | TT                              | GG              | 1946787901               |
| SNP_P4_39248_8410877 | NC_021163.1    | Ca_kabuli_chr04 | 8410877                 | TT                              | AA              | 1946787903               |
| SNP_P4_39249_8410885 | NC_021163.1    | Ca_kabuli_chr04 | 8410885                 | CC                              | AA              | 1946787905               |
| SNP_P4_39250_8411154 | NC_021163.1    | Ca_kabuli_chr04 | 8411154                 | AA                              | GG              | 1946787907               |
| SNP_P4_39251_8411156 | NC_021163.1    | Ca_kabuli_chr04 | 8411156                 | AA                              | GG              | 1946787909               |
| SNP_P4_39252_8411177 | NC_021163.1    | Ca_kabuli_chr04 | 8411177                 | AA                              | GG              | 1946787911               |
| SNP_P4_39253_8411392 | NC_021163.1    | Ca_kabuli_chr04 | 8411392                 | TT                              | CC              | 1946787914               |
| SNP_P4_39254_8411493 | NC_021163.1    | Ca_kabuli_chr04 | 8411493                 | GG                              | AA              | 1946787916               |
| SNP_P4_39255_8411501 | NC_021163.1    | Ca_kabuli_chr04 | 8411501                 | TT                              | GG              | 1946787918               |
| SNP_P4_39256_8411721 | NC_021163.1    | Ca_kabuli_chr04 | 8411721                 | CC                              | TT              | 1946787920               |
| SNP_P4_39257_8411732 | NC_021163.1    | Ca_kabuli_chr04 | 8411732                 | CC                              | TT              | 1946787922               |
| SNP_P4_39258_8411768 | NC_021163.1    | Ca_kabuli_chr04 | 8411768                 | AA                              | GG              | 1946787925               |
| SNP_P4_39259_8411769 | NC_021163.1    | Ca_kabuli_chr04 | 8411769                 | GG                              | TT              | 1946787927               |
| SNP_P4_39260_8411778 | NC_021163.1    | Ca_kabuli_chr04 | 8411778                 | CC                              | TT              | 1946787929               |
| SNP_P4_39261_8411789 | NC_021163.1    | Ca_kabuli_chr04 | 8411789                 | TT                              | GG              | 1946787931               |
| SNP_P4_39262_8411798 | NC_021163.1    | Ca_kabuli_chr04 | 8411798                 | GG                              | AA              | 1946787933               |
| SNP_P4_39263_8412045 | NC_021163.1    | Ca_kabuli_chr04 | 8412045                 | GG                              | AA              | 1946787935               |
| SNP_P4_39264_8412046 | NC_021163.1    | Ca_kabuli_chr04 | 8412046                 | AA                              | GG              | 1946787937               |
| SNP_P4_39265_8412066 | NC_021163.1    | Ca_kabuli_chr04 | 8412066                 | CC                              | TT              | 1946787939               |
| SNP_P4_39266_8412641 | NC_021163.1    | Ca_kabuli_chr04 | 8412641                 | TT                              | CC              | 1946787941               |
| SNP_P4_39268_8412687 | NC_021163.1    | Ca_kabuli_chr04 | 8412687                 | AA                              | GG              | 1946787943               |
| SNP_P4_39269_8412700 | NC_021163.1    | Ca_kabuli_chr04 | 8412700                 | CC                              | TT              | 1946787945               |
| SNP_P4_39270_8412717 | NC_021163.1    | Ca_kabuli_chr04 | 8412717                 | AA                              | GG              | 1946787947               |
| SNP_P4_39271_8413734 | NC_021163.1    | Ca_kabuli_chr04 | 8413734                 | CC                              | AA              | 1946787949               |
| SNP_P4_39273_8413770 | NC_021163.1    | Ca_kabuli_chr04 | 8413770                 | CC                              | TT              | 1946787951               |
| SNP_P4_39274_8413835 | NC_021163.1    | Ca_kabuli_chr04 | 8413835                 | TT                              | CC              | 1946787953               |
| SNP_P4_39275_8413838 | NC_021163.1    | Ca_kabuli_chr04 | 8413838                 | GG                              | AA              | 1946787955               |
| SNP_P4_39276_8413893 | NC_021163.1    | Ca_kabuli_chr04 | 8413893                 | GG                              | AA              | 1946787957               |
| SNP_P4_39277_8414157 | NC_021163.1    | Ca_kabuli_chr04 | 8414157                 | TT                              | CC              | 1946787959               |
| SNP_P4_39278_8414160 | NC_021163.1    | Ca_kabuli_chr04 | 8414160                 | GG                              | AA              | 1946787961               |
| SNP_P4_39281_8415280 | NC_021163.1    | Ca_kabuli_chr04 | 8415280                 | CC                              | GG              | 1946787963               |
| SNP_P4_39282_8415337 | NC_021163.1    | Ca_kabuli_chr04 | 8415337                 | AA                              | GG              | 1946787966               |
| SNP_P4_39283_8416655 | NC_021163.1    | Ca_kabuli_chr04 | 8416655                 | CC                              | TT              | 1946787968               |
| SNP_P4_39284_8416904 | NC_021163.1    | Ca_kabuli_chr04 | 8416904                 | CC                              | AA              | 1946787970               |
| SNP_P4_39285_8416958 | NC_021163.1    | Ca_kabuli_chr04 | 8416958                 | GG                              | AA              | 1946787972               |

| SNPs IDs             | Chromosome IDs | Chromosomes     | Physical positions (bp) | CDC Frontier (Reference genome) | (ILWC46 & LPNB) | NCBI SNPdb Accession IDs |
|----------------------|----------------|-----------------|-------------------------|---------------------------------|-----------------|--------------------------|
| SNP_P4_39286_8417674 | NC_021163.1    | Ca_kabuli_chr04 | 8417674                 | AA                              | TT              | 1946787974               |
| SNP_P4_39288_8418831 | NC_021163.1    | Ca_kabuli_chr04 | 8418831                 | CC                              | GG              | 1946787976               |
| SNP_P4_39289_8418925 | NC_021163.1    | Ca_kabuli_chr04 | 8418925                 | TT                              | CC              | 1946787978               |
| SNP_P4_39290_8419447 | NC_021163.1    | Ca_kabuli_chr04 | 8419447                 | AA                              | TT              | 1946787980               |
| SNP_P4_39291_8420532 | NC_021163.1    | Ca_kabuli_chr04 | 8420532                 | AA                              | GG              | 1946787982               |
| SNP_P4_39292_8420533 | NC_021163.1    | Ca_kabuli_chr04 | 8420533                 | TT                              | CC              | 1946787984               |
| SNP_P4_39293_8420576 | NC_021163.1    | Ca_kabuli_chr04 | 8420576                 | AA                              | GG              | 1946787986               |
| SNP_P4_39294_8421511 | NC_021163.1    | Ca_kabuli_chr04 | 8421511                 | GG                              | TT              | 1946787988               |
| SNP_P4_39295_8421574 | NC_021163.1    | Ca_kabuli_chr04 | 8421574                 | TT                              | CC              | 1946787990               |
| SNP_P4_39296_8421948 | NC_021163.1    | Ca_kabuli_chr04 | 8421948                 | CC                              | AA              | 1946787992               |
| SNP_P4_39297_8422245 | NC_021163.1    | Ca_kabuli_chr04 | 8422245                 | TT                              | CC              | 1946787994               |
| SNP_P4_39298_8422257 | NC_021163.1    | Ca_kabuli_chr04 | 8422257                 | GG                              | AA              | 1946787997               |
| SNP_P4_39299_8422438 | NC_021163.1    | Ca_kabuli_chr04 | 8422438                 | GG                              | AA              | 1946787999               |
| SNP_P4_39300_8422466 | NC_021163.1    | Ca_kabuli_chr04 | 8422466                 | GG                              | TT              | 1946788001               |
| SNP_P4_39301_8422474 | NC_021163.1    | Ca_kabuli_chr04 | 8422474                 | GG                              | AA              | 1946788003               |
| SNP_P4_39302_8425301 | NC_021163.1    | Ca_kabuli_chr04 | 8425301                 | CC                              | TT              | 1946788005               |
| SNP_P4_39303_8425321 | NC_021163.1    | Ca_kabuli_chr04 | 8425321                 | GG                              | AA              | 1946788007               |
| SNP_P4_39304_8425322 | NC_021163.1    | Ca_kabuli_chr04 | 8425322                 | AA                              | TT              | 1946788009               |
| SNP_P4_39305_8425369 | NC_021163.1    | Ca_kabuli_chr04 | 8425369                 | TT                              | AA              | 1946788011               |
| SNP_P4_39306_8425393 | NC_021163.1    | Ca_kabuli_chr04 | 8425393                 | TT                              | CC              | 1946788013               |
| SNP_P4_39307_8427439 | NC_021163.1    | Ca_kabuli_chr04 | 8427439                 | GG                              | AA              | 1946788015               |
| SNP_P4_39308_8427474 | NC_021163.1    | Ca_kabuli_chr04 | 8427474                 | GG                              | TT              | 1946788018               |
| SNP_P4_39309_8427496 | NC_021163.1    | Ca_kabuli_chr04 | 8427496                 | TT                              | AA              | 1946788020               |
| SNP_P4_39310_8429279 | NC_021163.1    | Ca_kabuli_chr04 | 8429279                 | TT                              | AA              | 1946788022               |
| SNP_P4_39311_8429318 | NC_021163.1    | Ca_kabuli_chr04 | 8429318                 | GG                              | AA              | 1946788024               |
| SNP_P4_39312_8430016 | NC_021163.1    | Ca_kabuli_chr04 | 8430016                 | GG                              | AA              | 1946788026               |
| SNP_P4_39314_8432445 | NC_021163.1    | Ca_kabuli_chr04 | 8432445                 | GG                              | AA              | 1946788029               |
| SNP_P4_39315_8432481 | NC_021163.1    | Ca_kabuli_chr04 | 8432481                 | TT                              | CC              | 1946788031               |
| SNP_P4_39317_8436961 | NC_021163.1    | Ca_kabuli_chr04 | 8436961                 | CC                              | GG              | 1946788033               |
| SNP_P4_39319_8439522 | NC_021163.1    | Ca_kabuli_chr04 | 8439522                 | TT                              | CC              | 1946788034               |
| SNP_P4_39321_8444559 | NC_021163.1    | Ca_kabuli_chr04 | 8444559                 | CC                              | TT              | 1946788036               |
| SNP_P4_39322_8446349 | NC_021163.1    | Ca_kabuli_chr04 | 8446349                 | GG                              | CC              | 1946788038               |
| SNP_P4_39323_8447565 | NC_021163.1    | Ca_kabuli_chr04 | 8447565                 | AA                              | TT              | 1946788040               |
| SNP_P4_39324_8449068 | NC_021163.1    | Ca_kabuli_chr04 | 8449068                 | TT                              | AA              | 1946788042               |
| SNP_P4_39326_8449276 | NC_021163.1    | Ca_kabuli_chr04 | 8449276                 | TT                              | AA              | 1946788044               |
| SNP_P4_39327_8449277 | NC_021163.1    | Ca_kabuli_chr04 | 8449277                 | TT                              | AA              | 1946788046               |
| SNP_P4_39328_8449443 | NC_021163.1    | Ca_kabuli_chr04 | 8449443                 | AA                              | GG              | 1946788048               |
| SNP_P4_39330_8449755 | NC_021163.1    | Ca_kabuli_chr04 | 8449755                 | TT                              | AA              | 1946788050               |
| SNP_P4_39331_8449774 | NC_021163.1    | Ca_kabuli_chr04 | 8449774                 | GG                              | AA              | 1946788052               |
| SNP_P4_39332_8449785 | NC_021163.1    | Ca_kabuli_chr04 | 8449785                 | AA                              | GG              | 1946788054               |
| SNP_P4_39333_8450031 | NC_021163.1    | Ca_kabuli_chr04 | 8450031                 | GG                              | AA              | 1946788056               |
| SNP_P4_39334_8454042 | NC_021163.1    | Ca_kabuli_chr04 | 8454042                 | GG                              | AA              | 1946788058               |

| SNPs IDs             | Chromosome IDs | Chromosomes     | Physical positions (bp) | CDC Frontier (Reference genome) | (ILWC46 & LPNB) | NCBI SNPdb Accession IDs |
|----------------------|----------------|-----------------|-------------------------|---------------------------------|-----------------|--------------------------|
| SNP_P4_39336_8454163 | NC_021163.1    | Ca_kabuli_chr04 | 8454163                 | CC                              | TT              | 1946788060               |
| SNP_P4_39337_8454184 | NC_021163.1    | Ca_kabuli_chr04 | 8454184                 | CC                              | GG              | 1946788062               |
| SNP_P4_39338_8454198 | NC_021163.1    | Ca_kabuli_chr04 | 8454198                 | TT                              | CC              | 1946788064               |
| SNP_P4_39339_8454218 | NC_021163.1    | Ca_kabuli_chr04 | 8454218                 | AA                              | GG              | 1946788066               |
| SNP_P4_39340_8454243 | NC_021163.1    | Ca_kabuli_chr04 | 8454243                 | GG                              | AA              | 1946788068               |
| SNP_P4_39341_8454276 | NC_021163.1    | Ca_kabuli_chr04 | 8454276                 | CC                              | AA              | 1946788070               |
| SNP_P4_39342_8456393 | NC_021163.1    | Ca_kabuli_chr04 | 8456393                 | GG                              | AA              | 1946788073               |
| SNP_P4_39343_8457845 | NC_021163.1    | Ca_kabuli_chr04 | 8457845                 | AA                              | GG              | 1946788075               |
| SNP_P4_39344_8457947 | NC_021163.1    | Ca_kabuli_chr04 | 8457947                 | CC                              | GG              | 1946788077               |
| SNP_P4_39345_8457966 | NC_021163.1    | Ca_kabuli_chr04 | 8457966                 | TT                              | CC              | 1946788079               |
| SNP_P4_39346_8457980 | NC_021163.1    | Ca_kabuli_chr04 | 8457980                 | TT                              | AA              | 1946788081               |
| SNP_P4_39348_8458242 | NC_021163.1    | Ca_kabuli_chr04 | 8458242                 | CC                              | TT              | 1946788083               |
| SNP_P4_39349_8458284 | NC_021163.1    | Ca_kabuli_chr04 | 8458284                 | CC                              | TT              | 1946788085               |
| SNP_P4_39350_8458305 | NC_021163.1    | Ca_kabuli_chr04 | 8458305                 | GG                              | AA              | 1946788087               |
| SNP_P4_39352_8458671 | NC_021163.1    | Ca_kabuli_chr04 | 8458671                 | TT                              | AA              | 1946788089               |
| SNP_P4_39353_8458674 | NC_021163.1    | Ca_kabuli_chr04 | 8458674                 | TT                              | GG              | 1946788091               |
| SNP_P4_39354_8458717 | NC_021163.1    | Ca_kabuli_chr04 | 8458717                 | CC                              | TT              | 1946788093               |
| SNP_P4_39355_8459387 | NC_021163.1    | Ca_kabuli_chr04 | 8459387                 | CC                              | TT              | 1946788095               |
| SNP_P4_39356_8461236 | NC_021163.1    | Ca_kabuli_chr04 | 8461236                 | TT                              | CC              | 1946788097               |
| SNP_P4_39357_8461238 | NC_021163.1    | Ca_kabuli_chr04 | 8461238                 | CC                              | TT              | 1946788099               |
| SNP_P4_39358_8461242 | NC_021163.1    | Ca_kabuli_chr04 | 8461242                 | TT                              | CC              | 1946788101               |
| SNP_P4_39359_8461243 | NC_021163.1    | Ca_kabuli_chr04 | 8461243                 | TT                              | CC              | 1946788103               |
| SNP_P4_39360_8461639 | NC_021163.1    | Ca_kabuli_chr04 | 8461639                 | GG                              | AA              | 1946788105               |
| SNP_P4_39361_8461765 | NC_021163.1    | Ca_kabuli_chr04 | 8461765                 | CC                              | TT              | 1946788107               |
| SNP_P4_39362_8461791 | NC_021163.1    | Ca_kabuli_chr04 | 8461791                 | CC                              | TT              | 1946788109               |
| SNP_P4_39363_8461806 | NC_021163.1    | Ca_kabuli_chr04 | 8461806                 | AA                              | GG              | 1946788111               |
| SNP_P4_39364_8461820 | NC_021163.1    | Ca_kabuli_chr04 | 8461820                 | AA                              | GG              | 1946788113               |
| SNP_P4_39365_8462069 | NC_021163.1    | Ca_kabuli_chr04 | 8462069                 | AA                              | TT              | 1946788115               |
| SNP_P4_39366_8463548 | NC_021163.1    | Ca_kabuli_chr04 | 8463548                 | AA                              | GG              | 1946788117               |
| SNP_P4_39367_8463724 | NC_021163.1    | Ca_kabuli_chr04 | 8463724                 | GG                              | AA              | 1946788119               |
| SNP_P4_39368_8463766 | NC_021163.1    | Ca_kabuli_chr04 | 8463766                 | CC                              | TT              | 1946788121               |
| SNP_P4_39369_8465126 | NC_021163.1    | Ca_kabuli_chr04 | 8465126                 | CC                              | TT              | 1946788123               |
| SNP_P4_39370_8465150 | NC_021163.1    | Ca_kabuli_chr04 | 8465150                 | GG                              | AA              | 1946788125               |
| SNP_P4_39371_8466772 | NC_021163.1    | Ca_kabuli_chr04 | 8466772                 | GG                              | TT              | 1946788127               |
| SNP_P4_39372_8466783 | NC_021163.1    | Ca_kabuli_chr04 | 8466783                 | CC                              | AA              | 1946788129               |
| SNP_P4_39373_8466825 | NC_021163.1    | Ca_kabuli_chr04 | 8466825                 | TT                              | AA              | 1946788132               |
| SNP_P4_39374_8467375 | NC_021163.1    | Ca_kabuli_chr04 | 8467375                 | TT                              | GG              | 1946788134               |
| SNP_P4_39375_8467377 | NC_021163.1    | Ca_kabuli_chr04 | 8467377                 | TT                              | GG              | 1946788135               |
| SNP_P4_39376_8467633 | NC_021163.1    | Ca_kabuli_chr04 | 8467633                 | TT                              | AA              | 1946788137               |
| SNP_P4_39377_8468121 | NC_021163.1    | Ca_kabuli_chr04 | 8468121                 | AA                              | GG              | 1946788139               |
| SNP_P4_39378_8468126 | NC_021163.1    | Ca_kabuli_chr04 | 8468126                 | TT                              | AA              | 1946788141               |
| SNP_P4_39379_8468337 | NC_021163.1    | Ca_kabuli_chr04 | 8468337                 | CC                              | TT              | 1946788143               |

| SNPs IDs             | Chromosome IDs | Chromosomes     | Physical positions (bp) | CDC Frontier (Reference genome) | (ILWC46 & LPNB) | NCBI SNPdb Accession IDs |
|----------------------|----------------|-----------------|-------------------------|---------------------------------|-----------------|--------------------------|
| SNP_P4_39380_8468354 | NC_021163.1    | Ca_kabuli_chr04 | 8468354                 | TT                              | CC              | 1946788145               |
| SNP_P4_39381_8468381 | NC_021163.1    | Ca_kabuli_chr04 | 8468381                 | CC                              | TT              | 1946788147               |
| SNP_P4_39382_8468413 | NC_021163.1    | Ca_kabuli_chr04 | 8468413                 | AA                              | GG              | 1946788149               |
| SNP_P4_39383_8468559 | NC_021163.1    | Ca_kabuli_chr04 | 8468559                 | AA                              | CC              | 1946788151               |
| SNP_P4_39384_8468567 | NC_021163.1    | Ca_kabuli_chr04 | 8468567                 | CC                              | TT              | 1946788153               |
| SNP_P4_39385_8468621 | NC_021163.1    | Ca_kabuli_chr04 | 8468621                 | GG                              | TT              | 1946788155               |
| SNP_P4_39386_8471061 | NC_021163.1    | Ca_kabuli_chr04 | 8471061                 | GG                              | CC              | 1946788157               |
| SNP_P4_39387_8473288 | NC_021163.1    | Ca_kabuli_chr04 | 8473288                 | GG                              | AA              | 1946788159               |
| SNP_P4_39388_8473294 | NC_021163.1    | Ca_kabuli_chr04 | 8473294                 | AA                              | GG              | 1946788161               |
| SNP_P4_39389_8473622 | NC_021163.1    | Ca_kabuli_chr04 | 8473622                 | AA                              | TT              | 1946788163               |
| SNP_P4_39391_8474544 | NC_021163.1    | Ca_kabuli_chr04 | 8474544                 | CC                              | TT              | 1946788165               |
| SNP_P4_39392_8474564 | NC_021163.1    | Ca_kabuli_chr04 | 8474564                 | CC                              | TT              | 1946788167               |
| SNP_P4_39393_8474640 | NC_021163.1    | Ca_kabuli_chr04 | 8474640                 | TT                              | CC              | 1946788169               |
| SNP_P4_39394_8474757 | NC_021163.1    | Ca_kabuli_chr04 | 8474757                 | GG                              | AA              | 1946788171               |
| SNP_P4_39395_8474863 | NC_021163.1    | Ca_kabuli_chr04 | 8474863                 | CC                              | GG              | 1946788173               |
| SNP_P4_39396_8475947 | NC_021163.1    | Ca_kabuli_chr04 | 8475947                 | GG                              | AA              | 1946788175               |
| SNP_P4_39397_8476033 | NC_021163.1    | Ca_kabuli_chr04 | 8476033                 | CC                              | TT              | 1946788177               |
| SNP_P4_39398_8476432 | NC_021163.1    | Ca_kabuli_chr04 | 8476432                 | AA                              | GG              | 1946788179               |
| SNP_P4_39400_8477203 | NC_021163.1    | Ca_kabuli_chr04 | 8477203                 | GG                              | AA              | 1946788181               |
| SNP_P4_39401_8477210 | NC_021163.1    | Ca_kabuli_chr04 | 8477210                 | GG                              | CC              | 1946788183               |
| SNP_P4_39402_8477239 | NC_021163.1    | Ca_kabuli_chr04 | 8477239                 | CC                              | TT              | 1946788185               |
| SNP_P4_39403_8477461 | NC_021163.1    | Ca_kabuli_chr04 | 8477461                 | GG                              | AA              | 1946788187               |
| SNP_P4_39404_8477705 | NC_021163.1    | Ca_kabuli_chr04 | 8477705                 | TT                              | GG              | 1946788189               |
| SNP_P4_39406_8478008 | NC_021163.1    | Ca_kabuli_chr04 | 8478008                 | AA                              | CC              | 1946788191               |
| SNP_P4_39407_8478132 | NC_021163.1    | Ca_kabuli_chr04 | 8478132                 | CC                              | TT              | 1946788193               |
| SNP_P4_39408_8478191 | NC_021163.1    | Ca_kabuli_chr04 | 8478191                 | GG                              | AA              | 1946788195               |
| SNP_P4_39409_8479545 | NC_021163.1    | Ca_kabuli_chr04 | 8479545                 | AA                              | GG              | 1946788197               |
| SNP_P4_39410_8479559 | NC_021163.1    | Ca_kabuli_chr04 | 8479559                 | GG                              | TT              | 1946788199               |
| SNP_P4_39411_8480713 | NC_021163.1    | Ca_kabuli_chr04 | 8480713                 | CC                              | AA              | 1946788201               |
| SNP_P4_39412_8480714 | NC_021163.1    | Ca_kabuli_chr04 | 8480714                 | TT                              | CC              | 1946788203               |
| SNP_P4_39413_8480716 | NC_021163.1    | Ca_kabuli_chr04 | 8480716                 | TT                              | AA              | 1946788205               |
| SNP_P4_39414_8481024 | NC_021163.1    | Ca_kabuli_chr04 | 8481024                 | AA                              | GG              | 1946788207               |
| SNP_P4_39415_8481292 | NC_021163.1    | Ca_kabuli_chr04 | 8481292                 | AA                              | TT              | 1946788209               |
| SNP_P4_39416_8481636 | NC_021163.1    | Ca_kabuli_chr04 | 8481636                 | AA                              | GG              | 1946788210               |
| SNP_P4_39417_8482379 | NC_021163.1    | Ca_kabuli_chr04 | 8482379                 | AA                              | GG              | 1946788212               |
| SNP_P4_39418_8482398 | NC_021163.1    | Ca_kabuli_chr04 | 8482398                 | AA                              | GG              | 1946788214               |
| SNP_P4_39419_8482416 | NC_021163.1    | Ca_kabuli_chr04 | 8482416                 | TT                              | CC              | 1946788216               |
| SNP_P4_39420_8482495 | NC_021163.1    | Ca_kabuli_chr04 | 8482495                 | GG                              | AA              | 1946788218               |
| SNP_P4_39421_8482514 | NC_021163.1    | Ca_kabuli_chr04 | 8482514                 | AA                              | GG              | 1946788220               |
| SNP_P4_39422_8482549 | NC_021163.1    | Ca_kabuli_chr04 | 8482549                 | TT                              | CC              | 1946788222               |
| SNP_P4_39423_8482560 | NC_021163.1    | Ca_kabuli_chr04 | 8482560                 | GG                              | CC              | 1946788224               |
| SNP_P4_39426_8484058 | NC_021163.1    | Ca_kabuli_chr04 | 8484058                 | AA                              | GG              | 1946788227               |

| SNPs IDs             | Chromosome IDs | Chromosomes     | Physical positions (bp) | CDC Frontier (Reference genome) | (ILWC46 & LPNB) | NCBI SNPdb Accession IDs |
|----------------------|----------------|-----------------|-------------------------|---------------------------------|-----------------|--------------------------|
| SNP_P4_39428_8487007 | NC_021163.1    | Ca_kabuli_chr04 | 8487007                 | TT                              | CC              | 1946788229               |
| SNP_P4_39429_8487023 | NC_021163.1    | Ca_kabuli_chr04 | 8487023                 | TT                              | GG              | 1946788231               |
| SNP_P4_39430_8488951 | NC_021163.1    | Ca_kabuli_chr04 | 8488951                 | GG                              | TT              | 1946788233               |
| SNP_P4_39431_8489134 | NC_021163.1    | Ca_kabuli_chr04 | 8489134                 | GG                              | AA              | 1946788235               |
| SNP_P4_39436_8499775 | NC_021163.1    | Ca_kabuli_chr04 | 8499775                 | GG                              | AA              | 1946788237               |
| SNP_P4_39438_8499902 | NC_021163.1    | Ca_kabuli_chr04 | 8499902                 | CC                              | TT              | 1946788239               |
| SNP_P4_39439_8499968 | NC_021163.1    | Ca_kabuli_chr04 | 8499968                 | GG                              | CC              | 1946788241               |
| SNP_P4_39440_8500902 | NC_021163.1    | Ca_kabuli_chr04 | 8500902                 | CC                              | AA              | 1946788243               |
| SNP_P4_39441_8501438 | NC_021163.1    | Ca_kabuli_chr04 | 8501438                 | TT                              | AA              | 1946788245               |
| SNP_P4_39442_8503209 | NC_021163.1    | Ca_kabuli_chr04 | 8503209                 | AA                              | TT              | 1946788247               |
| SNP_P4_39443_8503419 | NC_021163.1    | Ca_kabuli_chr04 | 8503419                 | TT                              | CC              | 1946788249               |
| SNP_P4_39444_8503469 | NC_021163.1    | Ca_kabuli_chr04 | 8503469                 | CC                              | TT              | 1946788251               |
| SNP_P4_39445_8504058 | NC_021163.1    | Ca_kabuli_chr04 | 8504058                 | AA                              | CC              | 1946788253               |
| SNP_P4_39447_8504766 | NC_021163.1    | Ca_kabuli_chr04 | 8504766                 | AA                              | GG              | 1946788255               |
| SNP_P4_39448_8505313 | NC_021163.1    | Ca_kabuli_chr04 | 8505313                 | GG                              | AA              | 1946788258               |
| SNP_P4_39449_8505348 | NC_021163.1    | Ca_kabuli_chr04 | 8505348                 | GG                              | AA              | 1946788260               |
| SNP_P4_39450_8505350 | NC_021163.1    | Ca_kabuli_chr04 | 8505350                 | AA                              | GG              | 1946788262               |
| SNP_P4_39451_8505386 | NC_021163.1    | Ca_kabuli_chr04 | 8505386                 | AA                              | GG              | 1946788264               |
| SNP_P4_39452_8506228 | NC_021163.1    | Ca_kabuli_chr04 | 8506228                 | GG                              | AA              | 1946788266               |
| SNP_P4_39453_8507356 | NC_021163.1    | Ca_kabuli_chr04 | 8507356                 | GG                              | TT              | 1946788268               |
| SNP_P4_39454_8508301 | NC_021163.1    | Ca_kabuli_chr04 | 8508301                 | TT                              | CC              | 1946788270               |
| SNP_P4_39455_8508338 | NC_021163.1    | Ca_kabuli_chr04 | 8508338                 | TT                              | AA              | 1946788272               |
| SNP_P4_39456_8508878 | NC_021163.1    | Ca_kabuli_chr04 | 8508878                 | AA                              | GG              | 1946788274               |
| SNP_P4_39457_8508935 | NC_021163.1    | Ca_kabuli_chr04 | 8508935                 | TT                              | AA              | 1946788278               |
| SNP_P4_39460_8509407 | NC_021163.1    | Ca_kabuli_chr04 | 8509407                 | AA                              | GG              | 1946788280               |
| SNP_P4_39461_8509709 | NC_021163.1    | Ca_kabuli_chr04 | 8509709                 | AA                              | CC              | 1946788282               |
| SNP_P4_39462_8512666 | NC_021163.1    | Ca_kabuli_chr04 | 8512666                 | AA                              | GG              | 1946788284               |
| SNP_P4_39463_8512891 | NC_021163.1    | Ca_kabuli_chr04 | 8512891                 | TT                              | CC              | 1946788286               |
| SNP_P4_39464_8513216 | NC_021163.1    | Ca_kabuli_chr04 | 8513216                 | GG                              | AA              | 1946788288               |
| SNP_P4_39465_8514560 | NC_021163.1    | Ca_kabuli_chr04 | 8514560                 | AA                              | CC              | 1946788290               |
| SNP_P4_39466_8514852 | NC_021163.1    | Ca_kabuli_chr04 | 8514852                 | AA                              | GG              | 1946788293               |
| SNP_P4_39467_8514961 | NC_021163.1    | Ca_kabuli_chr04 | 8514961                 | CC                              | TT              | 1946788295               |
| SNP_P4_39468_8514969 | NC_021163.1    | Ca_kabuli_chr04 | 8514969                 | GG                              | TT              | 1946788297               |
| SNP_P4_39470_8515231 | NC_021163.1    | Ca_kabuli_chr04 | 8515231                 | AA                              | GG              | 1946788298               |
| SNP_P4_39471_8515246 | NC_021163.1    | Ca_kabuli_chr04 | 8515246                 | TT                              | GG              | 1946788299               |
| SNP_P4_39473_8518485 | NC_021163.1    | Ca_kabuli_chr04 | 8518485                 | TT                              | CC              | 1946788300               |
| SNP_P4_39474_8518825 | NC_021163.1    | Ca_kabuli_chr04 | 8518825                 | CC                              | TT              | 1946788301               |
| SNP_P4_39475_8521223 | NC_021163.1    | Ca_kabuli_chr04 | 8521223                 | CC                              | TT              | 1946788303               |
| SNP_P4_39476_8522397 | NC_021163.1    | Ca_kabuli_chr04 | 8522397                 | AA                              | GG              | 1946788305               |
| SNP_P4_39477_8522420 | NC_021163.1    | Ca_kabuli_chr04 | 8522420                 | TT                              | CC              | 1946788308               |
| SNP_P4_39478_8522645 | NC_021163.1    | Ca_kabuli_chr04 | 8522645                 | GG                              | TT              | 1946788310               |
| SNP_P4_39479_8522646 | NC_021163.1    | Ca_kabuli_chr04 | 8522646                 | TT                              | AA              | 1946788312               |

| SNPs IDs             | Chromosome IDs | Chromosomes     | Physical positions (bp) | CDC Frontier (Reference genome) | (ILWC46 & LPNB) | NCBI SNPdb Accession IDs |
|----------------------|----------------|-----------------|-------------------------|---------------------------------|-----------------|--------------------------|
| SNP_P4_39480_8522813 | NC_021163.1    | Ca_kabuli_chr04 | 8522813                 | CC                              | TT              | 1946788314               |
| SNP_P4_39481_8524397 | NC_021163.1    | Ca_kabuli_chr04 | 8524397                 | TT                              | CC              | 1946788316               |
| SNP_P4_39482_8524421 | NC_021163.1    | Ca_kabuli_chr04 | 8524421                 | AA                              | CC              | 1946788318               |
| SNP_P4_39484_8524443 | NC_021163.1    | Ca_kabuli_chr04 | 8524443                 | AA                              | CC              | 1946788320               |
| SNP_P4_39485_8524536 | NC_021163.1    | Ca_kabuli_chr04 | 8524536                 | GG                              | AA              | 1946788322               |
| SNP_P4_39486_8532621 | NC_021163.1    | Ca_kabuli_chr04 | 8532621                 | GG                              | TT              | 1946788324               |
| SNP_P4_39487_8548515 | NC_021163.1    | Ca_kabuli_chr04 | 8548515                 | TT                              | AA              | 1946788326               |
| SNP_P4_39488_8567697 | NC_021163.1    | Ca_kabuli_chr04 | 8567697                 | GG                              | AA              | 1946788328               |
| SNP_P4_39489_8573447 | NC_021163.1    | Ca_kabuli_chr04 | 8573447                 | TT                              | GG              | 1946788330               |
| SNP_P4_39490_8575063 | NC_021163.1    | Ca_kabuli_chr04 | 8575063                 | CC                              | TT              | 1946788332               |
| SNP_P4_39492_8576692 | NC_021163.1    | Ca_kabuli_chr04 | 8576692                 | AA                              | GG              | 1946788334               |
| SNP_P4_39494_8581346 | NC_021163.1    | Ca_kabuli_chr04 | 8581346                 | GG                              | AA              | 1946788336               |
| SNP_P4_39496_8607119 | NC_021163.1    | Ca_kabuli_chr04 | 8607119                 | GG                              | AA              | 1946788338               |
| SNP_P4_39498_8611188 | NC_021163.1    | Ca_kabuli_chr04 | 8611188                 | AA                              | CC              | 1946788341               |
| SNP_P4_39500_8612565 | NC_021163.1    | Ca_kabuli_chr04 | 8612565                 | GG                              | AA              | 1946788343               |
| SNP_P4_39501_8613333 | NC_021163.1    | Ca_kabuli_chr04 | 8613333                 | AA                              | GG              | 1946788345               |
| SNP_P4_39502_8613396 | NC_021163.1    | Ca_kabuli_chr04 | 8613396                 | CC                              | TT              | 1946788347               |
| SNP_P4_39503_8613431 | NC_021163.1    | Ca_kabuli_chr04 | 8613431                 | GG                              | AA              | 1946788349               |
| SNP_P4_39504_8613577 | NC_021163.1    | Ca_kabuli_chr04 | 8613577                 | GG                              | AA              | 1946788351               |
| SNP_P4_39506_8613910 | NC_021163.1    | Ca_kabuli_chr04 | 8613910                 | CC                              | TT              | 1946788353               |
| SNP_P4_39507_8614567 | NC_021163.1    | Ca_kabuli_chr04 | 8614567                 | TT                              | CC              | 1946788355               |
| SNP_P4_39508_8614603 | NC_021163.1    | Ca_kabuli_chr04 | 8614603                 | AA                              | GG              | 1946788357               |
| SNP_P4_39509_8614788 | NC_021163.1    | Ca_kabuli_chr04 | 8614788                 | GG                              | AA              | 1946788359               |
| SNP_P4_39510_8614815 | NC_021163.1    | Ca_kabuli_chr04 | 8614815                 | GG                              | AA              | 1946788361               |
| SNP_P4_39511_8614817 | NC_021163.1    | Ca_kabuli_chr04 | 8614817                 | TT                              | CC              | 1946788363               |
| SNP_P4_39512_8615151 | NC_021163.1    | Ca_kabuli_chr04 | 8615151                 | TT                              | AA              | 1946788365               |
| SNP_P4_39514_8616180 | NC_021163.1    | Ca_kabuli_chr04 | 8616180                 | TT                              | GG              | 1946788367               |
| SNP_P4_39515_8616202 | NC_021163.1    | Ca_kabuli_chr04 | 8616202                 | CC                              | AA              | 1946788369               |
| SNP_P4_39517_8617100 | NC_021163.1    | Ca_kabuli_chr04 | 8617100                 | TT                              | CC              | 1946788371               |
| SNP_P4_39518_8617423 | NC_021163.1    | Ca_kabuli_chr04 | 8617423                 | CC                              | GG              | 1946788373               |
| SNP_P4_39519_8617618 | NC_021163.1    | Ca_kabuli_chr04 | 8617618                 | TT                              | CC              | 1946788375               |
| SNP_P4_39520_8617746 | NC_021163.1    | Ca_kabuli_chr04 | 8617746                 | AA                              | GG              | 1946788377               |
| SNP_P4_39521_8619267 | NC_021163.1    | Ca_kabuli_chr04 | 8619267                 | CC                              | AA              | 1946788379               |
| SNP_P4_39522_8619462 | NC_021163.1    | Ca_kabuli_chr04 | 8619462                 | GG                              | TT              | 1946788381               |
| SNP_P4_39524_8622754 | NC_021163.1    | Ca_kabuli_chr04 | 8622754                 | TT                              | GG              | 1946788384               |
| SNP_P4_39525_8622936 | NC_021163.1    | Ca_kabuli_chr04 | 8622936                 | TT                              | CC              | 1946788386               |
| SNP_P4_39526_8622944 | NC_021163.1    | Ca_kabuli_chr04 | 8622944                 | CC                              | TT              | 1946788388               |
| SNP_P4_39527_8623544 | NC_021163.1    | Ca_kabuli_chr04 | 8623544                 | AA                              | TT              | 1946788390               |
| SNP_P4_39528_8623621 | NC_021163.1    | Ca_kabuli_chr04 | 8623621                 | GG                              | TT              | 1946788392               |
| SNP_P4_39529_8623709 | NC_021163.1    | Ca_kabuli_chr04 | 8623709                 | CC                              | GG              | 1946788394               |
| SNP_P4_39530_8623961 | NC_021163.1    | Ca_kabuli_chr04 | 8623961                 | GG                              | TT              | 1946788396               |
| SNP_P4_39531_8623982 | NC_021163.1    | Ca_kabuli_chr04 | 8623982                 | GG                              | AA              | 1946788398               |



| SNPs IDs             | Chromosome IDs | Chromosomes     | Physical positions (bp) | CDC Frontier (Reference genome) | (ILWC46 & LPNB) | NCBI SNPdb Accession IDs |
|----------------------|----------------|-----------------|-------------------------|---------------------------------|-----------------|--------------------------|
| SNP_P4_39532_8624061 | NC_021163.1    | Ca_kabuli_chr04 | 8624061                 | AA                              | GG              | 1946788400               |
| SNP_P4_39533_8624091 | NC_021163.1    | Ca_kabuli_chr04 | 8624091                 | AA                              | GG              | 1946788402               |
| SNP_P4_39534_8624252 | NC_021163.1    | Ca_kabuli_chr04 | 8624252                 | AA                              | GG              | 1946788404               |
| SNP_P4_39535_8625512 | NC_021163.1    | Ca_kabuli_chr04 | 8625512                 | CC                              | GG              | 1946788406               |
| SNP_P4_39536_8625528 | NC_021163.1    | Ca_kabuli_chr04 | 8625528                 | AA                              | GG              | 1946788408               |
| SNP_P4_39537_8625683 | NC_021163.1    | Ca_kabuli_chr04 | 8625683                 | TT                              | CC              | 1946788410               |
| SNP_P4_39538_8625699 | NC_021163.1    | Ca_kabuli_chr04 | 8625699                 | CC                              | TT              | 1946788412               |
| SNP_P4_39539_8625705 | NC_021163.1    | Ca_kabuli_chr04 | 8625705                 | CC                              | TT              | 1946788414               |
| SNP_P4_39541_8626136 | NC_021163.1    | Ca_kabuli_chr04 | 8626136                 | TT                              | AA              | 1946788416               |
| SNP_P4_39542_8626444 | NC_021163.1    | Ca_kabuli_chr04 | 8626444                 | AA                              | TT              | 1946788419               |
| SNP_P4_39543_8626467 | NC_021163.1    | Ca_kabuli_chr04 | 8626467                 | CC                              | TT              | 1946788421               |
| SNP_P4_39544_8627677 | NC_021163.1    | Ca_kabuli_chr04 | 8627677                 | TT                              | CC              | 1946788423               |
| SNP_P4_39545_8628682 | NC_021163.1    | Ca_kabuli_chr04 | 8628682                 | GG                              | AA              | 1946788425               |
| SNP_P4_39546_8628683 | NC_021163.1    | Ca_kabuli_chr04 | 8628683                 | TT                              | CC              | 1946788427               |
| SNP_P4_39547_8629031 | NC_021163.1    | Ca_kabuli_chr04 | 8629031                 | GG                              | TT              | 1946788429               |
| SNP_P4_39548_8630513 | NC_021163.1    | Ca_kabuli_chr04 | 8630513                 | GG                              | TT              | 1946788431               |
| SNP_P4_39549_8630862 | NC_021163.1    | Ca_kabuli_chr04 | 8630862                 | CC                              | AA              | 1946788433               |
| SNP_P4_39550_8632130 | NC_021163.1    | Ca_kabuli_chr04 | 8632130                 | CC                              | TT              | 1946788435               |
| SNP_P4_39551_8632133 | NC_021163.1    | Ca_kabuli_chr04 | 8632133                 | AA                              | GG              | 1946788437               |
| SNP_P4_39552_8632142 | NC_021163.1    | Ca_kabuli_chr04 | 8632142                 | GG                              | AA              | 1946788439               |
| SNP_P4_39553_8632747 | NC_021163.1    | Ca_kabuli_chr04 | 8632747                 | TT                              | AA              | 1946788442               |
| SNP_P4_39555_8633758 | NC_021163.1    | Ca_kabuli_chr04 | 8633758                 | CC                              | TT              | 1946788444               |
| SNP_P4_39556_8633765 | NC_021163.1    | Ca_kabuli_chr04 | 8633765                 | CC                              | GG              | 1946788446               |
| SNP_P4_39557_8633843 | NC_021163.1    | Ca_kabuli_chr04 | 8633843                 | GG                              | AA              | 1946788448               |
| SNP_P4_39558_8633876 | NC_021163.1    | Ca_kabuli_chr04 | 8633876                 | AA                              | TT              | 1946788451               |
| SNP_P4_39559_8633950 | NC_021163.1    | Ca_kabuli_chr04 | 8633950                 | CC                              | TT              | 1946788453               |
| SNP_P4_39561_8634036 | NC_021163.1    | Ca_kabuli_chr04 | 8634036                 | AA                              | GG              | 1946788455               |
| SNP_P4_39562_8634304 | NC_021163.1    | Ca_kabuli_chr04 | 8634304                 | GG                              | AA              | 1946788457               |
| SNP_P4_39563_8634306 | NC_021163.1    | Ca_kabuli_chr04 | 8634306                 | GG                              | AA              | 1946788459               |
| SNP_P4_39564_8635454 | NC_021163.1    | Ca_kabuli_chr04 | 8635454                 | TT                              | CC              | 1946788462               |
| SNP_P4_39565_8635484 | NC_021163.1    | Ca_kabuli_chr04 | 8635484                 | GG                              | AA              | 1946788464               |
| SNP_P4_39566_8635497 | NC_021163.1    | Ca_kabuli_chr04 | 8635497                 | TT                              | CC              | 1946788466               |
| SNP_P4_39567_8635512 | NC_021163.1    | Ca_kabuli_chr04 | 8635512                 | TT                              | GG              | 1946788468               |
| SNP_P4_39568_8635515 | NC_021163.1    | Ca_kabuli_chr04 | 8635515                 | AA                              | CC              | 1946788470               |
| SNP_P4_39569_8635518 | NC_021163.1    | Ca_kabuli_chr04 | 8635518                 | CC                              | TT              | 1946788472               |
| SNP_P4_39570_8635529 | NC_021163.1    | Ca_kabuli_chr04 | 8635529                 | TT                              | AA              | 1946788475               |
| SNP_P4_39571_8635540 | NC_021163.1    | Ca_kabuli_chr04 | 8635540                 | TT                              | AA              | 1946788477               |
| SNP_P4_39572_8635546 | NC_021163.1    | Ca_kabuli_chr04 | 8635546                 | TT                              | GG              | 1946788479               |
| SNP_P4_39573_8635553 | NC_021163.1    | Ca_kabuli_chr04 | 8635553                 | CC                              | AA              | 1946788481               |
| SNP_P4_39574_8635563 | NC_021163.1    | Ca_kabuli_chr04 | 8635563                 | AA                              | GG              | 1946788483               |
| SNP_P4_39575_8635580 | NC_021163.1    | Ca_kabuli_chr04 | 8635580                 | TT                              | AA              | 1946788485               |
| SNP_P4_39576_8635681 | NC_021163.1    | Ca_kabuli_chr04 | 8635681                 | CC                              | GG              | 1946788487               |

| SNPs IDs             | Chromosome IDs | Chromosomes     | Physical positions (bp) | CDC Frontier (Reference genome) | (ILWC46 & LPNB) | NCBI SNPdb Accession IDs |
|----------------------|----------------|-----------------|-------------------------|---------------------------------|-----------------|--------------------------|
| SNP_P4_39577_8636191 | NC_021163.1    | Ca_kabuli_chr04 | 8636191                 | CC                              | TT              | 1946788489               |
| SNP_P4_39578_8636217 | NC_021163.1    | Ca_kabuli_chr04 | 8636217                 | CC                              | GG              | 1946788491               |
| SNP_P4_39580_8636231 | NC_021163.1    | Ca_kabuli_chr04 | 8636231                 | GG                              | AA              | 1946788494               |
| SNP_P4_39582_8636302 | NC_021163.1    | Ca_kabuli_chr04 | 8636302                 | TT                              | CC              | 1946788496               |
| SNP_P4_39583_8636442 | NC_021163.1    | Ca_kabuli_chr04 | 8636442                 | GG                              | TT              | 1946788498               |
| SNP_P4_39584_8636452 | NC_021163.1    | Ca_kabuli_chr04 | 8636452                 | CC                              | AA              | 1946788500               |
| SNP_P4_39585_8637947 | NC_021163.1    | Ca_kabuli_chr04 | 8637947                 | TT                              | CC              | 1946788502               |
| SNP_P4_39586_8638270 | NC_021163.1    | Ca_kabuli_chr04 | 8638270                 | CC                              | AA              | 1946788504               |
| SNP_P4_39587_8638798 | NC_021163.1    | Ca_kabuli_chr04 | 8638798                 | CC                              | GG              | 1946788506               |
| SNP_P4_39588_8639647 | NC_021163.1    | Ca_kabuli_chr04 | 8639647                 | TT                              | CC              | 1946788508               |
| SNP_P4_39589_8639666 | NC_021163.1    | Ca_kabuli_chr04 | 8639666                 | TT                              | AA              | 1946788510               |
| SNP_P4_39590_8639747 | NC_021163.1    | Ca_kabuli_chr04 | 8639747                 | AA                              | GG              | 1946788512               |
| SNP_P4_39591_8639845 | NC_021163.1    | Ca_kabuli_chr04 | 8639845                 | CC                              | TT              | 1946788515               |
| SNP_P4_39593_8639896 | NC_021163.1    | Ca_kabuli_chr04 | 8639896                 | GG                              | TT              | 1946788517               |
| SNP_P4_39594_8640040 | NC_021163.1    | Ca_kabuli_chr04 | 8640040                 | GG                              | AA              | 1946788519               |
| SNP_P4_39595_8640053 | NC_021163.1    | Ca_kabuli_chr04 | 8640053                 | CC                              | GG              | 1946788521               |
| SNP_P4_39596_8640061 | NC_021163.1    | Ca_kabuli_chr04 | 8640061                 | GG                              | TT              | 1946788523               |
| SNP_P4_39597_8640096 | NC_021163.1    | Ca_kabuli_chr04 | 8640096                 | GG                              | AA              | 1946788525               |
| SNP_P4_39598_8642928 | NC_021163.1    | Ca_kabuli_chr04 | 8642928                 | GG                              | TT              | 1946788527               |
| SNP_P4_39599_8643764 | NC_021163.1    | Ca_kabuli_chr04 | 8643764                 | GG                              | TT              | 1946788529               |
| SNP_P4_39600_8643769 | NC_021163.1    | Ca_kabuli_chr04 | 8643769                 | AA                              | TT              | 1946788531               |
| SNP_P4_39601_8643792 | NC_021163.1    | Ca_kabuli_chr04 | 8643792                 | GG                              | TT              | 1946788534               |
| SNP_P4_39602_8643895 | NC_021163.1    | Ca_kabuli_chr04 | 8643895                 | AA                              | GG              | 1946788536               |
| SNP_P4_39603_8643896 | NC_021163.1    | Ca_kabuli_chr04 | 8643896                 | AA                              | GG              | 1946788538               |
| SNP_P4_39604_8644026 | NC_021163.1    | Ca_kabuli_chr04 | 8644026                 | CC                              | TT              | 1946788540               |
| SNP_P4_39605_8644052 | NC_021163.1    | Ca_kabuli_chr04 | 8644052                 | AA                              | GG              | 1946788542               |
| SNP_P4_39607_8644208 | NC_021163.1    | Ca_kabuli_chr04 | 8644208                 | CC                              | TT              | 1946788544               |
| SNP_P4_39608_8644402 | NC_021163.1    | Ca_kabuli_chr04 | 8644402                 | TT                              | GG              | 1946788546               |
| SNP_P4_39609_8644411 | NC_021163.1    | Ca_kabuli_chr04 | 8644411                 | AA                              | GG              | 1946788548               |
| SNP_P4_39610_8644420 | NC_021163.1    | Ca_kabuli_chr04 | 8644420                 | AA                              | GG              | 1946788550               |
| SNP_P4_39611_8644437 | NC_021163.1    | Ca_kabuli_chr04 | 8644437                 | GG                              | AA              | 1946788552               |
| SNP_P4_39612_8647695 | NC_021163.1    | Ca_kabuli_chr04 | 8647695                 | CC                              | TT              | 1946788554               |
| SNP_P4_39613_8647703 | NC_021163.1    | Ca_kabuli_chr04 | 8647703                 | TT                              | AA              | 1946788556               |
| SNP_P4_39615_8648035 | NC_021163.1    | Ca_kabuli_chr04 | 8648035                 | TT                              | CC              | 1946788558               |
| SNP_P4_39616_8648043 | NC_021163.1    | Ca_kabuli_chr04 | 8648043                 | TT                              | AA              | 1946788559               |
| SNP_P4_39617_8648091 | NC_021163.1    | Ca_kabuli_chr04 | 8648091                 | TT                              | GG              | 1946788561               |
| SNP_P4_39618_8648636 | NC_021163.1    | Ca_kabuli_chr04 | 8648636                 | AA                              | GG              | 1946788563               |
| SNP_P4_39620_8650575 | NC_021163.1    | Ca_kabuli_chr04 | 8650575                 | TT                              | CC              | 1946788565               |
| SNP_P4_39621_8650576 | NC_021163.1    | Ca_kabuli_chr04 | 8650576                 | AA                              | CC              | 1946788567               |
| SNP_P4_39622_8650753 | NC_021163.1    | Ca_kabuli_chr04 | 8650753                 | CC                              | TT              | 1946788569               |
| SNP_P4_39623_8650779 | NC_021163.1    | Ca_kabuli_chr04 | 8650779                 | CC                              | TT              | 1946788572               |
| SNP_P4_39625_8651040 | NC_021163.1    | Ca_kabuli_chr04 | 8651040                 | AA                              | TT              | 1946788574               |

| SNPs IDs             | Chromosome IDs | Chromosomes     | Physical positions (bp) | CDC Frontier (Reference genome) | (ILWC46 & LPNB) | NCBI SNPdb Accession IDs |
|----------------------|----------------|-----------------|-------------------------|---------------------------------|-----------------|--------------------------|
| SNP_P4_39626_8651206 | NC_021163.1    | Ca_kabuli_chr04 | 8651206                 | AA                              | TT              | 1946788576               |
| SNP_P4_39627_8651215 | NC_021163.1    | Ca_kabuli_chr04 | 8651215                 | TT                              | AA              | 1946788578               |
| SNP_P4_39628_8651457 | NC_021163.1    | Ca_kabuli_chr04 | 8651457                 | CC                              | AA              | 1946788580               |
| SNP_P4_39629_8653024 | NC_021163.1    | Ca_kabuli_chr04 | 8653024                 | TT                              | CC              | 1946788582               |
| SNP_P4_39630_8653053 | NC_021163.1    | Ca_kabuli_chr04 | 8653053                 | TT                              | AA              | 1946788584               |
| SNP_P4_39631_8655030 | NC_021163.1    | Ca_kabuli_chr04 | 8655030                 | AA                              | TT              | 1946788586               |
| SNP_P4_39632_8656186 | NC_021163.1    | Ca_kabuli_chr04 | 8656186                 | AA                              | GG              | 1946788588               |
| SNP_P4_39633_8656230 | NC_021163.1    | Ca_kabuli_chr04 | 8656230                 | GG                              | TT              | 1946788590               |
| SNP_P4_39634_8656635 | NC_021163.1    | Ca_kabuli_chr04 | 8656635                 | TT                              | CC              | 1946788593               |
| SNP_P4_39635_8659309 | NC_021163.1    | Ca_kabuli_chr04 | 8659309                 | TT                              | GG              | 1946788595               |
| SNP_P4_39636_8662609 | NC_021163.1    | Ca_kabuli_chr04 | 8662609                 | AA                              | CC              | 1946788597               |
| SNP_P4_39637_8662650 | NC_021163.1    | Ca_kabuli_chr04 | 8662650                 | TT                              | CC              | 1946788599               |
| SNP_P4_39638_8663674 | NC_021163.1    | Ca_kabuli_chr04 | 8663674                 | TT                              | AA              | 1946788601               |
| SNP_P4_39639_8663683 | NC_021163.1    | Ca_kabuli_chr04 | 8663683                 | GG                              | CC              | 1946788603               |
| SNP_P4_39640_8663724 | NC_021163.1    | Ca_kabuli_chr04 | 8663724                 | AA                              | CC              | 1946788605               |
| SNP_P4_39641_8663734 | NC_021163.1    | Ca_kabuli_chr04 | 8663734                 | TT                              | GG              | 1946788608               |
| SNP_P4_39642_8665526 | NC_021163.1    | Ca_kabuli_chr04 | 8665526                 | AA                              | GG              | 1946788610               |
| SNP_P4_39643_8665571 | NC_021163.1    | Ca_kabuli_chr04 | 8665571                 | GG                              | AA              | 1946788612               |
| SNP_P4_39644_8665612 | NC_021163.1    | Ca_kabuli_chr04 | 8665612                 | GG                              | AA              | 1946788614               |
| SNP_P4_39645_8665790 | NC_021163.1    | Ca_kabuli_chr04 | 8665790                 | TT                              | CC              | 1946788617               |
| SNP_P4_39646_8665791 | NC_021163.1    | Ca_kabuli_chr04 | 8665791                 | CC                              | GG              | 1946788619               |
| SNP_P4_39647_8665915 | NC_021163.1    | Ca_kabuli_chr04 | 8665915                 | GG                              | AA              | 1946788621               |
| SNP_P4_39648_8665978 | NC_021163.1    | Ca_kabuli_chr04 | 8665978                 | TT                              | CC              | 1946788623               |
| SNP_P4_39649_8668263 | NC_021163.1    | Ca_kabuli_chr04 | 8668263                 | GG                              | CC              | 1946788625               |
| SNP_P4_39650_8669260 | NC_021163.1    | Ca_kabuli_chr04 | 8669260                 | CC                              | TT              | 1946788627               |
| SNP_P4_39651_8669326 | NC_021163.1    | Ca_kabuli_chr04 | 8669326                 | GG                              | CC              | 1946788630               |
| SNP_P4_39652_8669596 | NC_021163.1    | Ca_kabuli_chr04 | 8669596                 | AA                              | CC              | 1946788632               |
| SNP_P4_39653_8669911 | NC_021163.1    | Ca_kabuli_chr04 | 8669911                 | GG                              | CC              | 1946788634               |
| SNP_P4_39654_8669933 | NC_021163.1    | Ca_kabuli_chr04 | 8669933                 | AA                              | GG              | 1946788636               |
| SNP_P4_39655_8670012 | NC_021163.1    | Ca_kabuli_chr04 | 8670012                 | TT                              | GG              | 1946788638               |
| SNP_P4_39656_8670039 | NC_021163.1    | Ca_kabuli_chr04 | 8670039                 | GG                              | AA              | 1946788641               |
| SNP_P4_39657_8670388 | NC_021163.1    | Ca_kabuli_chr04 | 8670388                 | TT                              | CC              | 1946788643               |
| SNP_P4_39658_8670390 | NC_021163.1    | Ca_kabuli_chr04 | 8670390                 | TT                              | GG              | 1946788645               |
| SNP_P4_39659_8677398 | NC_021163.1    | Ca_kabuli_chr04 | 8677398                 | CC                              | AA              | 1946788647               |
| SNP_P4_39660_8678325 | NC_021163.1    | Ca_kabuli_chr04 | 8678325                 | TT                              | CC              | 1946788649               |
| SNP_P4_39661_8678330 | NC_021163.1    | Ca_kabuli_chr04 | 8678330                 | AA                              | GG              | 1946788651               |
| SNP_P4_39662_8678422 | NC_021163.1    | Ca_kabuli_chr04 | 8678422                 | GG                              | AA              | 1946788653               |
| SNP_P4_39663_8678445 | NC_021163.1    | Ca_kabuli_chr04 | 8678445                 | TT                              | CC              | 1946788656               |
| SNP_P4_39664_8678894 | NC_021163.1    | Ca_kabuli_chr04 | 8678894                 | AA                              | CC              | 1946788658               |
| SNP_P4_39665_8678908 | NC_021163.1    | Ca_kabuli_chr04 | 8678908                 | AA                              | GG              | 1946788660               |
| SNP_P4_39666_8678910 | NC_021163.1    | Ca_kabuli_chr04 | 8678910                 | GG                              | CC              | 1946788662               |
| SNP_P4_39667_8678924 | NC_021163.1    | Ca_kabuli_chr04 | 8678924                 | AA                              | CC              | 1946788664               |

| SNPs IDs             | Chromosome IDs | Chromosomes     | Physical positions (bp) | CDC Frontier (Reference genome) | (ILWC46 & LPNB) | NCBI SNPdb Accession IDs |
|----------------------|----------------|-----------------|-------------------------|---------------------------------|-----------------|--------------------------|
| SNP_P4_39668_8679629 | NC_021163.1    | Ca_kabuli_chr04 | 8679629                 | AA                              | CC              | 1946788666               |
| SNP_P4_39669_8679635 | NC_021163.1    | Ca_kabuli_chr04 | 8679635                 | GG                              | AA              | 1946788668               |
| SNP_P4_39670_8679641 | NC_021163.1    | Ca_kabuli_chr04 | 8679641                 | GG                              | AA              | 1946788670               |
| SNP_P4_39672_8682176 | NC_021163.1    | Ca_kabuli_chr04 | 8682176                 | AA                              | CC              | 1946788672               |
| SNP_P4_39673_8682191 | NC_021163.1    | Ca_kabuli_chr04 | 8682191                 | TT                              | CC              | 1946788674               |
| SNP_P4_39674_8683208 | NC_021163.1    | Ca_kabuli_chr04 | 8683208                 | AA                              | GG              | 1946788676               |
| SNP_P4_39675_8683704 | NC_021163.1    | Ca_kabuli_chr04 | 8683704                 | GG                              | TT              | 1946788678               |
| SNP_P4_39676_8684688 | NC_021163.1    | Ca_kabuli_chr04 | 8684688                 | AA                              | GG              | 1946788681               |
| SNP_P4_39677_8684695 | NC_021163.1    | Ca_kabuli_chr04 | 8684695                 | TT                              | CC              | 1946788683               |
| SNP_P4_39678_8686351 | NC_021163.1    | Ca_kabuli_chr04 | 8686351                 | AA                              | GG              | 1946788685               |
| SNP_P4_39679_8686354 | NC_021163.1    | Ca_kabuli_chr04 | 8686354                 | AA                              | GG              | 1946788687               |
| SNP_P4_39680_8688074 | NC_021163.1    | Ca_kabuli_chr04 | 8688074                 | CC                              | TT              | 1946788689               |
| SNP_P4_39681_8688075 | NC_021163.1    | Ca_kabuli_chr04 | 8688075                 | TT                              | CC              | 1946788691               |
| SNP_P4_39682_8688527 | NC_021163.1    | Ca_kabuli_chr04 | 8688527                 | TT                              | CC              | 1946788693               |
| SNP_P4_39684_8688965 | NC_021163.1    | Ca_kabuli_chr04 | 8688965                 | GG                              | AA              | 1946788695               |
| SNP_P4_39686_8689432 | NC_021163.1    | Ca_kabuli_chr04 | 8689432                 | AA                              | GG              | 1946788697               |
| SNP_P4_39687_8689438 | NC_021163.1    | Ca_kabuli_chr04 | 8689438                 | AA                              | GG              | 1946788699               |
| SNP_P4_39689_8690203 | NC_021163.1    | Ca_kabuli_chr04 | 8690203                 | AA                              | GG              | 1946788701               |
| SNP_P4_39690_8690219 | NC_021163.1    | Ca_kabuli_chr04 | 8690219                 | CC                              | TT              | 1946788703               |
| SNP_P4_39691_8690253 | NC_021163.1    | Ca_kabuli_chr04 | 8690253                 | AA                              | TT              | 1946788706               |
| SNP_P4_39692_8690313 | NC_021163.1    | Ca_kabuli_chr04 | 8690313                 | AA                              | GG              | 1946788708               |
| SNP_P4_39693_8690400 | NC_021163.1    | Ca_kabuli_chr04 | 8690400                 | GG                              | AA              | 1946788710               |
| SNP_P4_39694_8690423 | NC_021163.1    | Ca_kabuli_chr04 | 8690423                 | AA                              | GG              | 1946788712               |
| SNP_P4_39695_8690435 | NC_021163.1    | Ca_kabuli_chr04 | 8690435                 | AA                              | CC              | 1946788714               |
| SNP_P4_39696_8690491 | NC_021163.1    | Ca_kabuli_chr04 | 8690491                 | AA                              | GG              | 1946788716               |
| SNP_P4_39699_8691982 | NC_021163.1    | Ca_kabuli_chr04 | 8691982                 | CC                              | GG              | 1946788718               |
| SNP_P4_39700_8692321 | NC_021163.1    | Ca_kabuli_chr04 | 8692321                 | CC                              | TT              | 1946788720               |
| SNP_P4_39701_8696943 | NC_021163.1    | Ca_kabuli_chr04 | 8696943                 | GG                              | AA              | 1946788722               |
| SNP_P4_39702_8698244 | NC_021163.1    | Ca_kabuli_chr04 | 8698244                 | AA                              | GG              | 1946788724               |
| SNP_P4_39703_8698850 | NC_021163.1    | Ca_kabuli_chr04 | 8698850                 | CC                              | TT              | 1946788726               |
| SNP_P4_39705_8700073 | NC_021163.1    | Ca_kabuli_chr04 | 8700073                 | TT                              | CC              | 1946788728               |
| SNP_P4_39707_8701419 | NC_021163.1    | Ca_kabuli_chr04 | 8701419                 | TT                              | CC              | 1946788730               |
| SNP_P4_39708_8701601 | NC_021163.1    | Ca_kabuli_chr04 | 8701601                 | GG                              | AA              | 1946788733               |
| SNP_P4_39709_8701613 | NC_021163.1    | Ca_kabuli_chr04 | 8701613                 | CC                              | TT              | 1946788735               |
| SNP_P4_39710_8701645 | NC_021163.1    | Ca_kabuli_chr04 | 8701645                 | GG                              | AA              | 1946788737               |
| SNP_P4_39711_8703213 | NC_021163.1    | Ca_kabuli_chr04 | 8703213                 | TT                              | CC              | 1946788739               |
| SNP_P4_39712_8704836 | NC_021163.1    | Ca_kabuli_chr04 | 8704836                 | GG                              | AA              | 1946788741               |
| SNP_P4_39713_8704840 | NC_021163.1    | Ca_kabuli_chr04 | 8704840                 | CC                              | AA              | 1946788743               |
| SNP_P4_39714_8704845 | NC_021163.1    | Ca_kabuli_chr04 | 8704845                 | CC                              | AA              | 1946788745               |
| SNP_P4_39715_8704915 | NC_021163.1    | Ca_kabuli_chr04 | 8704915                 | AA                              | TT              | 1946788747               |
| SNP_P4_39716_8704943 | NC_021163.1    | Ca_kabuli_chr04 | 8704943                 | GG                              | CC              | 1946788749               |
| SNP_P4_39717_8705007 | NC_021163.1    | Ca_kabuli_chr04 | 8705007                 | TT                              | CC              | 1946788751               |

| SNPs IDs             | Chromosome IDs | Chromosomes     | Physical positions (bp) | CDC Frontier (Reference genome) | (ILWC46 & LPNB) | NCBI SNPdb Accession IDs |
|----------------------|----------------|-----------------|-------------------------|---------------------------------|-----------------|--------------------------|
| SNP_P4_39718_8705371 | NC_021163.1    | Ca_kabuli_chr04 | 8705371                 | TT                              | CC              | 1946788754               |
| SNP_P4_39719_8705438 | NC_021163.1    | Ca_kabuli_chr04 | 8705438                 | TT                              | CC              | 1946788756               |
| SNP_P4_39720_8705454 | NC_021163.1    | Ca_kabuli_chr04 | 8705454                 | CC                              | TT              | 1946788758               |
| SNP_P4_39721_8705456 | NC_021163.1    | Ca_kabuli_chr04 | 8705456                 | AA                              | GG              | 1946788760               |
| SNP_P4_39722_8705465 | NC_021163.1    | Ca_kabuli_chr04 | 8705465                 | CC                              | GG              | 1946788762               |
| SNP_P4_39723_8705831 | NC_021163.1    | Ca_kabuli_chr04 | 8705831                 | AA                              | GG              | 1946788764               |
| SNP_P4_39724_8705837 | NC_021163.1    | Ca_kabuli_chr04 | 8705837                 | CC                              | TT              | 1946788766               |
| SNP_P4_39725_8705841 | NC_021163.1    | Ca_kabuli_chr04 | 8705841                 | CC                              | TT              | 1946788768               |
| SNP_P4_39726_8705857 | NC_021163.1    | Ca_kabuli_chr04 | 8705857                 | AA                              | GG              | 1946788770               |
| SNP_P4_39727_8705863 | NC_021163.1    | Ca_kabuli_chr04 | 8705863                 | AA                              | GG              | 1946788772               |
| SNP_P4_39728_8706830 | NC_021163.1    | Ca_kabuli_chr04 | 8706830                 | GG                              | AA              | 1946788774               |
| SNP_P4_39729_8707076 | NC_021163.1    | Ca_kabuli_chr04 | 8707076                 | GG                              | AA              | 1946788776               |
| SNP_P4_39731_8707115 | NC_021163.1    | Ca_kabuli_chr04 | 8707115                 | TT                              | AA              | 1946788778               |
| SNP_P4_39732_8708229 | NC_021163.1    | Ca_kabuli_chr04 | 8708229                 | CC                              | AA              | 1946788780               |
| SNP_P4_39733_8708245 | NC_021163.1    | Ca_kabuli_chr04 | 8708245                 | GG                              | AA              | 1946788782               |
| SNP_P4_39734_8708246 | NC_021163.1    | Ca_kabuli_chr04 | 8708246                 | GG                              | AA              | 1946788785               |
| SNP_P4_39736_8709741 | NC_021163.1    | Ca_kabuli_chr04 | 8709741                 | CC                              | TT              | 1946788787               |
| SNP_P4_39737_8710328 | NC_021163.1    | Ca_kabuli_chr04 | 8710328                 | TT                              | CC              | 1946788789               |
| SNP_P4_39738_8710351 | NC_021163.1    | Ca_kabuli_chr04 | 8710351                 | AA                              | GG              | 1946788791               |
| SNP_P4_39739_8710541 | NC_021163.1    | Ca_kabuli_chr04 | 8710541                 | CC                              | AA              | 1946788793               |
| SNP_P4_39740_8710571 | NC_021163.1    | Ca_kabuli_chr04 | 8710571                 | CC                              | GG              | 1946788795               |
| SNP_P4_39741_8711104 | NC_021163.1    | Ca_kabuli_chr04 | 8711104                 | TT                              | CC              | 1946788797               |
| SNP_P4_39742_8711259 | NC_021163.1    | Ca_kabuli_chr04 | 8711259                 | AA                              | GG              | 1946788799               |
| SNP_P4_39743_8711434 | NC_021163.1    | Ca_kabuli_chr04 | 8711434                 | TT                              | CC              | 1946788801               |
| SNP_P4_39744_8711944 | NC_021163.1    | Ca_kabuli_chr04 | 8711944                 | GG                              | AA              | 1946788803               |
| SNP_P4_39746_8712137 | NC_021163.1    | Ca_kabuli_chr04 | 8712137                 | GG                              | AA              | 1946788805               |
| SNP_P4_39748_8713889 | NC_021163.1    | Ca_kabuli_chr04 | 8713889                 | AA                              | TT              | 1946788807               |
| SNP_P4_39749_8713945 | NC_021163.1    | Ca_kabuli_chr04 | 8713945                 | TT                              | GG              | 1946788809               |
| SNP_P4_39750_8713961 | NC_021163.1    | Ca_kabuli_chr04 | 8713961                 | TT                              | CC              | 1946788811               |
| SNP_P4_39751_8713978 | NC_021163.1    | Ca_kabuli_chr04 | 8713978                 | AA                              | GG              | 1946788813               |
| SNP_P4_39752_8714083 | NC_021163.1    | Ca_kabuli_chr04 | 8714083                 | GG                              | AA              | 1946788815               |
| SNP_P4_39753_8714084 | NC_021163.1    | Ca_kabuli_chr04 | 8714084                 | CC                              | TT              | 1946788817               |
| SNP_P4_39754_8714089 | NC_021163.1    | Ca_kabuli_chr04 | 8714089                 | CC                              | AA              | 1946788819               |
| SNP_P4_39755_8714093 | NC_021163.1    | Ca_kabuli_chr04 | 8714093                 | GG                              | TT              | 1946788821               |
| SNP_P4_39756_8714098 | NC_021163.1    | Ca_kabuli_chr04 | 8714098                 | CC                              | GG              | 1946788823               |
| SNP_P4_39758_8715066 | NC_021163.1    | Ca_kabuli_chr04 | 8715066                 | AA                              | GG              | 1946788825               |
| SNP_P4_39759_8715147 | NC_021163.1    | Ca_kabuli_chr04 | 8715147                 | TT                              | AA              | 1946788827               |
| SNP_P4_39760_8715258 | NC_021163.1    | Ca_kabuli_chr04 | 8715258                 | AA                              | TT              | 1946788829               |
| SNP_P4_39761_8715351 | NC_021163.1    | Ca_kabuli_chr04 | 8715351                 | AA                              | CC              | 1946788831               |
| SNP_P4_39762_8715558 | NC_021163.1    | Ca_kabuli_chr04 | 8715558                 | CC                              | TT              | 1946788833               |
| SNP_P4_39763_8715960 | NC_021163.1    | Ca_kabuli_chr04 | 8715960                 | CC                              | GG              | 1946788835               |
| SNP_P4_39764_8715970 | NC_021163.1    | Ca_kabuli_chr04 | 8715970                 | TT                              | CC              | 1946788837               |

| SNPs IDs             | Chromosome IDs | Chromosomes     | Physical positions (bp) | CDC Frontier (Reference genome) | (ILWC46 & LPNB) | NCBI SNPdb Accession IDs |
|----------------------|----------------|-----------------|-------------------------|---------------------------------|-----------------|--------------------------|
| SNP_P4_39765_8715973 | NC_021163.1    | Ca_kabuli_chr04 | 8715973                 | CC                              | TT              | 1946788839               |
| SNP_P4_39766_8716140 | NC_021163.1    | Ca_kabuli_chr04 | 8716140                 | GG                              | CC              | 1946788841               |
| SNP_P4_39768_8716389 | NC_021163.1    | Ca_kabuli_chr04 | 8716389                 | TT                              | AA              | 1946788843               |
| SNP_P4_39769_8716436 | NC_021163.1    | Ca_kabuli_chr04 | 8716436                 | TT                              | CC              | 1946788845               |
| SNP_P4_39770_8717819 | NC_021163.1    | Ca_kabuli_chr04 | 8717819                 | TT                              | AA              | 1946788847               |
| SNP_P4_39771_8717824 | NC_021163.1    | Ca_kabuli_chr04 | 8717824                 | CC                              | GG              | 1946788849               |
| SNP_P4_39772_8718960 | NC_021163.1    | Ca_kabuli_chr04 | 8718960                 | AA                              | TT              | 1946788851               |
| SNP_P4_39773_8719020 | NC_021163.1    | Ca_kabuli_chr04 | 8719020                 | CC                              | AA              | 1946788853               |
| SNP_P4_39774_8720331 | NC_021163.1    | Ca_kabuli_chr04 | 8720331                 | TT                              | CC              | 1946788856               |
| SNP_P4_39775_8720614 | NC_021163.1    | Ca_kabuli_chr04 | 8720614                 | AA                              | GG              | 1946788858               |
| SNP_P4_39776_8720658 | NC_021163.1    | Ca_kabuli_chr04 | 8720658                 | AA                              | TT              | 1946788860               |
| SNP_P4_39777_8720772 | NC_021163.1    | Ca_kabuli_chr04 | 8720772                 | TT                              | CC              | 1946788862               |
| SNP_P4_39778_8720774 | NC_021163.1    | Ca_kabuli_chr04 | 8720774                 | GG                              | TT              | 1946788864               |
| SNP_P4_39779_8721103 | NC_021163.1    | Ca_kabuli_chr04 | 8721103                 | GG                              | AA              | 1946788866               |
| SNP_P4_39780_8721555 | NC_021163.1    | Ca_kabuli_chr04 | 8721555                 | CC                              | TT              | 1946788868               |
| SNP_P4_39781_8722727 | NC_021163.1    | Ca_kabuli_chr04 | 8722727                 | GG                              | TT              | 1946788870               |
| SNP_P4_39782_8722763 | NC_021163.1    | Ca_kabuli_chr04 | 8722763                 | TT                              | AA              | 1946788872               |
| SNP_P4_39783_8722773 | NC_021163.1    | Ca_kabuli_chr04 | 8722773                 | GG                              | TT              | 1946788874               |
| SNP_P4_39784_8722997 | NC_021163.1    | Ca_kabuli_chr04 | 8722997                 | CC                              | AA              | 1946788876               |
| SNP_P4_39785_8723015 | NC_021163.1    | Ca_kabuli_chr04 | 8723015                 | AA                              | CC              | 1946788878               |
| SNP_P4_39786_8723031 | NC_021163.1    | Ca_kabuli_chr04 | 8723031                 | CC                              | AA              | 1946788880               |
| SNP_P4_39788_8723416 | NC_021163.1    | Ca_kabuli_chr04 | 8723416                 | CC                              | TT              | 1946788882               |
| SNP_P4_39789_8723419 | NC_021163.1    | Ca_kabuli_chr04 | 8723419                 | AA                              | TT              | 1946788884               |
| SNP_P4_39790_8724165 | NC_021163.1    | Ca_kabuli_chr04 | 8724165                 | TT                              | AA              | 1946788887               |
| SNP_P4_39791_8724170 | NC_021163.1    | Ca_kabuli_chr04 | 8724170                 | TT                              | CC              | 1946788889               |
| SNP_P4_39792_8724173 | NC_021163.1    | Ca_kabuli_chr04 | 8724173                 | TT                              | AA              | 1946788891               |
| SNP_P4_39793_8724174 | NC_021163.1    | Ca_kabuli_chr04 | 8724174                 | TT                              | AA              | 1946788893               |
| SNP_P4_39794_8725417 | NC_021163.1    | Ca_kabuli_chr04 | 8725417                 | CC                              | AA              | 1946788895               |
| SNP_P4_39795_8725428 | NC_021163.1    | Ca_kabuli_chr04 | 8725428                 | AA                              | CC              | 1946788897               |
| SNP_P4_39796_8726644 | NC_021163.1    | Ca_kabuli_chr04 | 8726644                 | AA                              | GG              | 1946788899               |
| SNP_P4_39798_8727619 | NC_021163.1    | Ca_kabuli_chr04 | 8727619                 | AA                              | GG              | 1946788901               |
| SNP_P4_39799_8727627 | NC_021163.1    | Ca_kabuli_chr04 | 8727627                 | AA                              | GG              | 1946788903               |
| SNP_P4_39800_8727897 | NC_021163.1    | Ca_kabuli_chr04 | 8727897                 | TT                              | GG              | 1946788905               |
| SNP_P4_39801_8727898 | NC_021163.1    | Ca_kabuli_chr04 | 8727898                 | TT                              | AA              | 1946788907               |
| SNP_P4_39804_8728269 | NC_021163.1    | Ca_kabuli_chr04 | 8728269                 | GG                              | AA              | 1946788909               |
| SNP_P4_39805_8728307 | NC_021163.1    | Ca_kabuli_chr04 | 8728307                 | TT                              | CC              | 1946788911               |
| SNP_P4_39807_8728558 | NC_021163.1    | Ca_kabuli_chr04 | 8728558                 | CC                              | AA              | 1946788914               |
| SNP_P4_39808_8728715 | NC_021163.1    | Ca_kabuli_chr04 | 8728715                 | GG                              | AA              | 1946788916               |
| SNP_P4_39809_8728985 | NC_021163.1    | Ca_kabuli_chr04 | 8728985                 | TT                              | CC              | 1946788918               |
| SNP_P4_39810_8733012 | NC_021163.1    | Ca_kabuli_chr04 | 8733012                 | AA                              | GG              | 1946788920               |
| SNP_P4_39811_8733576 | NC_021163.1    | Ca_kabuli_chr04 | 8733576                 | AA                              | GG              | 1946788922               |
| SNP_P4_39812_8734425 | NC_021163.1    | Ca_kabuli_chr04 | 8734425                 | CC                              | TT              | 1946788923               |

| SNPs IDs             | Chromosome IDs | Chromosomes     | Physical positions (bp) | CDC Frontier (Reference genome) | (ILWC46 & LPNB) | NCBI SNPdb Accession IDs |
|----------------------|----------------|-----------------|-------------------------|---------------------------------|-----------------|--------------------------|
| SNP_P4_39814_8734642 | NC_021163.1    | Ca_kabuli_chr04 | 8734642                 | AA                              | TT              | 1946788925               |
| SNP_P4_39815_8735037 | NC_021163.1    | Ca_kabuli_chr04 | 8735037                 | CC                              | AA              | 1946788927               |
| SNP_P4_39816_8737857 | NC_021163.1    | Ca_kabuli_chr04 | 8737857                 | AA                              | GG              | 1946788929               |
| SNP_P4_39817_8737859 | NC_021163.1    | Ca_kabuli_chr04 | 8737859                 | CC                              | TT              | 1946788931               |
| SNP_P4_39818_8740219 | NC_021163.1    | Ca_kabuli_chr04 | 8740219                 | CC                              | TT              | 1946788933               |
| SNP_P4_39819_8740237 | NC_021163.1    | Ca_kabuli_chr04 | 8740237                 | TT                              | AA              | 1946788935               |
| SNP_P4_39820_8740245 | NC_021163.1    | Ca_kabuli_chr04 | 8740245                 | TT                              | CC              | 1946788937               |
| SNP_P4_39821_8741057 | NC_021163.1    | Ca_kabuli_chr04 | 8741057                 | GG                              | AA              | 1946788939               |
| SNP_P4_39823_8741315 | NC_021163.1    | Ca_kabuli_chr04 | 8741315                 | GG                              | AA              | 1946788941               |
| SNP_P4_39824_8741454 | NC_021163.1    | Ca_kabuli_chr04 | 8741454                 | TT                              | AA              | 1946788943               |
| SNP_P4_39825_8742356 | NC_021163.1    | Ca_kabuli_chr04 | 8742356                 | AA                              | GG              | 1946788945               |
| SNP_P4_39826_8742369 | NC_021163.1    | Ca_kabuli_chr04 | 8742369                 | AA                              | TT              | 1946788947               |
| SNP_P4_39827_8742370 | NC_021163.1    | Ca_kabuli_chr04 | 8742370                 | CC                              | AA              | 1946788949               |
| SNP_P4_39828_8742965 | NC_021163.1    | Ca_kabuli_chr04 | 8742965                 | AA                              | GG              | 1946788951               |
| SNP_P4_39829_8743010 | NC_021163.1    | Ca_kabuli_chr04 | 8743010                 | AA                              | GG              | 1946788953               |
| SNP_P4_39830_8743304 | NC_021163.1    | Ca_kabuli_chr04 | 8743304                 | TT                              | AA              | 1946788955               |
| SNP_P4_39831_8743404 | NC_021163.1    | Ca_kabuli_chr04 | 8743404                 | TT                              | AA              | 1946788957               |
| SNP_P4_39832_8743436 | NC_021163.1    | Ca_kabuli_chr04 | 8743436                 | GG                              | AA              | 1946788959               |
| SNP_P4_39833_8743440 | NC_021163.1    | Ca_kabuli_chr04 | 8743440                 | CC                              | AA              | 1946788961               |
| SNP_P4_39834_8743467 | NC_021163.1    | Ca_kabuli_chr04 | 8743467                 | GG                              | AA              | 1946788963               |
| SNP_P4_39835_8743590 | NC_021163.1    | Ca_kabuli_chr04 | 8743590                 | TT                              | CC              | 1946788965               |
| SNP_P4_39836_8743683 | NC_021163.1    | Ca_kabuli_chr04 | 8743683                 | GG                              | AA              | 1946788967               |
| SNP_P4_39837_8743692 | NC_021163.1    | Ca_kabuli_chr04 | 8743692                 | TT                              | CC              | 1946788969               |
| SNP_P4_39838_8743716 | NC_021163.1    | Ca_kabuli_chr04 | 8743716                 | TT                              | CC              | 1946788971               |
| SNP_P4_39839_8743730 | NC_021163.1    | Ca_kabuli_chr04 | 8743730                 | AA                              | GG              | 1946788973               |
| SNP_P4_39841_8744314 | NC_021163.1    | Ca_kabuli_chr04 | 8744314                 | GG                              | AA              | 1946788976               |
| SNP_P4_39842_8744345 | NC_021163.1    | Ca_kabuli_chr04 | 8744345                 | GG                              | AA              | 1946788978               |
| SNP_P4_39843_8744590 | NC_021163.1    | Ca_kabuli_chr04 | 8744590                 | TT                              | CC              | 1946788980               |
| SNP_P4_39844_8744611 | NC_021163.1    | Ca_kabuli_chr04 | 8744611                 | CC                              | TT              | 1946788982               |
| SNP_P4_39845_8744669 | NC_021163.1    | Ca_kabuli_chr04 | 8744669                 | AA                              | GG              | 1946788984               |
| SNP_P4_39846_8744702 | NC_021163.1    | Ca_kabuli_chr04 | 8744702                 | GG                              | TT              | 1946788986               |
| SNP_P4_39847_8744895 | NC_021163.1    | Ca_kabuli_chr04 | 8744895                 | GG                              | AA              | 1946788988               |
| SNP_P4_39848_8744897 | NC_021163.1    | Ca_kabuli_chr04 | 8744897                 | AA                              | GG              | 1946788990               |
| SNP_P4_39849_8744902 | NC_021163.1    | Ca_kabuli_chr04 | 8744902                 | AA                              | GG              | 1946788992               |
| SNP_P4_39850_8745703 | NC_021163.1    | Ca_kabuli_chr04 | 8745703                 | TT                              | CC              | 1946788994               |
| SNP_P4_39851_8745708 | NC_021163.1    | Ca_kabuli_chr04 | 8745708                 | CC                              | TT              | 1946788996               |
| SNP_P4_39852_8745712 | NC_021163.1    | Ca_kabuli_chr04 | 8745712                 | CC                              | TT              | 1946788998               |
| SNP_P4_39853_8745738 | NC_021163.1    | Ca_kabuli_chr04 | 8745738                 | TT                              | CC              | 1946789000               |
| SNP_P4_39855_8745850 | NC_021163.1    | Ca_kabuli_chr04 | 8745850                 | CC                              | TT              | 1946789002               |
| SNP_P4_39856_8746027 | NC_021163.1    | Ca_kabuli_chr04 | 8746027                 | CC                              | TT              | 1946789004               |
| SNP_P4_39857_8746063 | NC_021163.1    | Ca_kabuli_chr04 | 8746063                 | AA                              | GG              | 1946789006               |
| SNP_P4_39858_8746356 | NC_021163.1    | Ca_kabuli_chr04 | 8746356                 | AA                              | GG              | 1946789008               |

| SNPs IDs             | Chromosome IDs | Chromosomes     | Physical positions (bp) | CDC Frontier (Reference genome) | (ILWC46 & LPNB) | NCBI SNPdb Accession IDs |
|----------------------|----------------|-----------------|-------------------------|---------------------------------|-----------------|--------------------------|
| SNP_P4_39859_8747126 | NC_021163.1    | Ca_kabuli_chr04 | 8747126                 | CC                              | TT              | 1946789010               |
| SNP_P4_39860_8747142 | NC_021163.1    | Ca_kabuli_chr04 | 8747142                 | CC                              | TT              | 1946789012               |
| SNP_P4_39861_8747810 | NC_021163.1    | Ca_kabuli_chr04 | 8747810                 | TT                              | CC              | 1946789014               |
| SNP_P4_39862_8747896 | NC_021163.1    | Ca_kabuli_chr04 | 8747896                 | GG                              | AA              | 1946789016               |
| SNP_P4_39863_8747912 | NC_021163.1    | Ca_kabuli_chr04 | 8747912                 | CC                              | TT              | 1946789018               |
| SNP_P4_39864_8747940 | NC_021163.1    | Ca_kabuli_chr04 | 8747940                 | CC                              | TT              | 1946789020               |
| SNP_P4_39865_8747980 | NC_021163.1    | Ca_kabuli_chr04 | 8747980                 | AA                              | GG              | 1946789022               |
| SNP_P4_39866_8748008 | NC_021163.1    | Ca_kabuli_chr04 | 8748008                 | CC                              | TT              | 1946789024               |
| SNP_P4_39868_8748214 | NC_021163.1    | Ca_kabuli_chr04 | 8748214                 | TT                              | GG              | 1946789026               |
| SNP_P4_39869_8748287 | NC_021163.1    | Ca_kabuli_chr04 | 8748287                 | CC                              | TT              | 1946789028               |
| SNP_P4_39870_8748330 | NC_021163.1    | Ca_kabuli_chr04 | 8748330                 | AA                              | GG              | 1946789030               |
| SNP_P4_39871_8748521 | NC_021163.1    | Ca_kabuli_chr04 | 8748521                 | TT                              | CC              | 1946789032               |
| SNP_P4_39873_8748605 | NC_021163.1    | Ca_kabuli_chr04 | 8748605                 | GG                              | AA              | 1946789034               |
| SNP_P4_39874_8748630 | NC_021163.1    | Ca_kabuli_chr04 | 8748630                 | GG                              | CC              | 1946789036               |
| SNP_P4_39875_8748631 | NC_021163.1    | Ca_kabuli_chr04 | 8748631                 | GG                              | AA              | 1946789039               |
| SNP_P4_39876_8748865 | NC_021163.1    | Ca_kabuli_chr04 | 8748865                 | GG                              | AA              | 1946789041               |
| SNP_P4_39879_8749333 | NC_021163.1    | Ca_kabuli_chr04 | 8749333                 | CC                              | AA              | 1946789043               |
| SNP_P4_39880_8749392 | NC_021163.1    | Ca_kabuli_chr04 | 8749392                 | GG                              | AA              | 1946789045               |
| SNP_P4_39882_8749717 | NC_021163.1    | Ca_kabuli_chr04 | 8749717                 | GG                              | AA              | 1946789047               |
| SNP_P4_39883_8750027 | NC_021163.1    | Ca_kabuli_chr04 | 8750027                 | TT                              | AA              | 1946789049               |
| SNP_P4_39884_8751207 | NC_021163.1    | Ca_kabuli_chr04 | 8751207                 | AA                              | TT              | 1946789051               |
| SNP_P4_39885_8751323 | NC_021163.1    | Ca_kabuli_chr04 | 8751323                 | TT                              | AA              | 1946789053               |
| SNP_P4_39886_8751377 | NC_021163.1    | Ca_kabuli_chr04 | 8751377                 | GG                              | CC              | 1946789055               |
| SNP_P4_39887_8754066 | NC_021163.1    | Ca_kabuli_chr04 | 8754066                 | AA                              | TT              | 1946789057               |
| SNP_P4_39888_8754077 | NC_021163.1    | Ca_kabuli_chr04 | 8754077                 | GG                              | CC              | 1946789059               |
| SNP_P4_39889_8754317 | NC_021163.1    | Ca_kabuli_chr04 | 8754317                 | TT                              | CC              | 1946789061               |
| SNP_P4_39891_8756851 | NC_021163.1    | Ca_kabuli_chr04 | 8756851                 | TT                              | AA              | 1946789063               |
| SNP_P4_39892_8756883 | NC_021163.1    | Ca_kabuli_chr04 | 8756883                 | AA                              | TT              | 1946789065               |
| SNP_P4_39894_8758351 | NC_021163.1    | Ca_kabuli_chr04 | 8758351                 | TT                              | AA              | 1946789067               |
| SNP_P4_39896_8758936 | NC_021163.1    | Ca_kabuli_chr04 | 8758936                 | CC                              | TT              | 1946789069               |
| SNP_P4_39897_8759230 | NC_021163.1    | Ca_kabuli_chr04 | 8759230                 | CC                              | TT              | 1946789071               |
| SNP_P4_39898_8759252 | NC_021163.1    | Ca_kabuli_chr04 | 8759252                 | TT                              | CC              | 1946789073               |
| SNP_P4_39899_8760112 | NC_021163.1    | Ca_kabuli_chr04 | 8760112                 | TT                              | CC              | 1946789075               |
| SNP_P4_39900_8760122 | NC_021163.1    | Ca_kabuli_chr04 | 8760122                 | CC                              | GG              | 1946789077               |
| SNP_P4_39901_8760944 | NC_021163.1    | Ca_kabuli_chr04 | 8760944                 | AA                              | TT              | 1946789079               |
| SNP_P4_39902_8762322 | NC_021163.1    | Ca_kabuli_chr04 | 8762322                 | AA                              | GG              | 1946789081               |
| SNP_P4_39903_8762628 | NC_021163.1    | Ca_kabuli_chr04 | 8762628                 | CC                              | TT              | 1946789083               |
| SNP_P4_39904_8762638 | NC_021163.1    | Ca_kabuli_chr04 | 8762638                 | TT                              | AA              | 1946789085               |
| SNP_P4_39905_8762938 | NC_021163.1    | Ca_kabuli_chr04 | 8762938                 | TT                              | CC              | 1946789087               |
| SNP_P4_39906_8762972 | NC_021163.1    | Ca_kabuli_chr04 | 8762972                 | CC                              | TT              | 1946789089               |
| SNP_P4_39907_8763061 | NC_021163.1    | Ca_kabuli_chr04 | 8763061                 | TT                              | CC              | 1946789091               |
| SNP_P4_39908_8763694 | NC_021163.1    | Ca_kabuli_chr04 | 8763694                 | GG                              | TT              | 1946789093               |



| SNPs IDs             | Chromosome IDs | Chromosomes     | Physical positions (bp) | CDC Frontier (Reference genome) | (ILWC46 & LPNB) | NCBI SNPdb Accession IDs |
|----------------------|----------------|-----------------|-------------------------|---------------------------------|-----------------|--------------------------|
| SNP_P4_39909_8763718 | NC_021163.1    | Ca_kabuli_chr04 | 8763718                 | CC                              | TT              | 1946789096               |
| SNP_P4_39910_8763773 | NC_021163.1    | Ca_kabuli_chr04 | 8763773                 | AA                              | GG              | 1946789098               |
| SNP_P4_39911_8765117 | NC_021163.1    | Ca_kabuli_chr04 | 8765117                 | AA                              | GG              | 1946789100               |
| SNP_P4_39912_8765133 | NC_021163.1    | Ca_kabuli_chr04 | 8765133                 | AA                              | GG              | 1946789102               |
| SNP_P4_39913_8765206 | NC_021163.1    | Ca_kabuli_chr04 | 8765206                 | GG                              | AA              | 1946789104               |
| SNP_P4_39914_8765232 | NC_021163.1    | Ca_kabuli_chr04 | 8765232                 | AA                              | GG              | 1946789106               |
| SNP_P4_39915_8765262 | NC_021163.1    | Ca_kabuli_chr04 | 8765262                 | GG                              | AA              | 1946789108               |
| SNP_P4_39916_8765383 | NC_021163.1    | Ca_kabuli_chr04 | 8765383                 | GG                              | CC              | 1946789110               |
| SNP_P4_39917_8766077 | NC_021163.1    | Ca_kabuli_chr04 | 8766077                 | TT                              | CC              | 1946789112               |
| SNP_P4_39918_8766110 | NC_021163.1    | Ca_kabuli_chr04 | 8766110                 | AA                              | GG              | 1946789114               |
| SNP_P4_39919_8766126 | NC_021163.1    | Ca_kabuli_chr04 | 8766126                 | CC                              | AA              | 1946789116               |
| SNP_P4_39921_8766560 | NC_021163.1    | Ca_kabuli_chr04 | 8766560                 | AA                              | TT              | 1946789118               |
| SNP_P4_39922_8766581 | NC_021163.1    | Ca_kabuli_chr04 | 8766581                 | CC                              | TT              | 1946789120               |
| SNP_P4_39923_8766639 | NC_021163.1    | Ca_kabuli_chr04 | 8766639                 | GG                              | CC              | 1946789122               |
| SNP_P4_39924_8766640 | NC_021163.1    | Ca_kabuli_chr04 | 8766640                 | TT                              | CC              | 1946789125               |
| SNP_P4_39926_8766679 | NC_021163.1    | Ca_kabuli_chr04 | 8766679                 | CC                              | TT              | 1946789127               |
| SNP_P4_39927_8766830 | NC_021163.1    | Ca_kabuli_chr04 | 8766830                 | CC                              | AA              | 1946789129               |
| SNP_P4_39928_8766903 | NC_021163.1    | Ca_kabuli_chr04 | 8766903                 | AA                              | GG              | 1946789131               |
| SNP_P4_39929_8767069 | NC_021163.1    | Ca_kabuli_chr04 | 8767069                 | CC                              | GG              | 1946789133               |
| SNP_P4_39930_8767125 | NC_021163.1    | Ca_kabuli_chr04 | 8767125                 | AA                              | GG              | 1946789135               |
| SNP_P4_39931_8767416 | NC_021163.1    | Ca_kabuli_chr04 | 8767416                 | AA                              | CC              | 1946789137               |
| SNP_P4_39932_8767462 | NC_021163.1    | Ca_kabuli_chr04 | 8767462                 | GG                              | CC              | 1946789139               |
| SNP_P4_39933_8767927 | NC_021163.1    | Ca_kabuli_chr04 | 8767927                 | CC                              | GG              | 1946789141               |
| SNP_P4_39934_8768237 | NC_021163.1    | Ca_kabuli_chr04 | 8768237                 | CC                              | TT              | 1946789143               |
| SNP_P4_39935_8768246 | NC_021163.1    | Ca_kabuli_chr04 | 8768246                 | CC                              | TT              | 1946789145               |
| SNP_P4_39936_8768264 | NC_021163.1    | Ca_kabuli_chr04 | 8768264                 | CC                              | AA              | 1946789147               |
| SNP_P4_39937_8768380 | NC_021163.1    | Ca_kabuli_chr04 | 8768380                 | GG                              | AA              | 1946789149               |
| SNP_P4_39938_8768535 | NC_021163.1    | Ca_kabuli_chr04 | 8768535                 | TT                              | AA              | 1946789151               |
| SNP_P4_39940_8774125 | NC_021163.1    | Ca_kabuli_chr04 | 8774125                 | TT                              | CC              | 1946789153               |
| SNP_P4_39941_8774188 | NC_021163.1    | Ca_kabuli_chr04 | 8774188                 | AA                              | GG              | 1946789155               |
| SNP_P4_39942_8774189 | NC_021163.1    | Ca_kabuli_chr04 | 8774189                 | GG                              | AA              | 1946789157               |
| SNP_P4_39943_8774196 | NC_021163.1    | Ca_kabuli_chr04 | 8774196                 | AA                              | TT              | 1946789159               |
| SNP_P4_39944_8774215 | NC_021163.1    | Ca_kabuli_chr04 | 8774215                 | AA                              | GG              | 1946789161               |
| SNP_P4_39945_8774310 | NC_021163.1    | Ca_kabuli_chr04 | 8774310                 | TT                              | CC              | 1946789163               |
| SNP_P4_39946_8774316 | NC_021163.1    | Ca_kabuli_chr04 | 8774316                 | GG                              | AA              | 1946789165               |
| SNP_P4_39948_8774424 | NC_021163.1    | Ca_kabuli_chr04 | 8774424                 | CC                              | TT              | 1946789167               |
| SNP_P4_39949_8774437 | NC_021163.1    | Ca_kabuli_chr04 | 8774437                 | GG                              | AA              | 1946789169               |
| SNP_P4_39950_8774459 | NC_021163.1    | Ca_kabuli_chr04 | 8774459                 | TT                              | GG              | 1946789171               |
| SNP_P4_39951_8774465 | NC_021163.1    | Ca_kabuli_chr04 | 8774465                 | AA                              | GG              | 1946789173               |
| SNP_P4_39952_8774487 | NC_021163.1    | Ca_kabuli_chr04 | 8774487                 | AA                              | TT              | 1946789175               |
| SNP_P4_39953_8774494 | NC_021163.1    | Ca_kabuli_chr04 | 8774494                 | GG                              | AA              | 1946789177               |
| SNP_P4_39954_8774513 | NC_021163.1    | Ca_kabuli_chr04 | 8774513                 | CC                              | TT              | 1946789179               |

| SNPs IDs             | Chromosome IDs | Chromosomes     | Physical positions (bp) | CDC Frontier (Reference genome) | (ILWC46 & LPNB) | NCBI SNPdb Accession IDs |
|----------------------|----------------|-----------------|-------------------------|---------------------------------|-----------------|--------------------------|
| SNP_P4_39955_8774532 | NC_021163.1    | Ca_kabuli_chr04 | 8774532                 | CC                              | TT              | 1946789181               |
| SNP_P4_39956_8774615 | NC_021163.1    | Ca_kabuli_chr04 | 8774615                 | TT                              | CC              | 1946789183               |
| SNP_P4_39957_8775158 | NC_021163.1    | Ca_kabuli_chr04 | 8775158                 | GG                              | CC              | 1946789185               |
| SNP_P4_39959_8778044 | NC_021163.1    | Ca_kabuli_chr04 | 8778044                 | GG                              | AA              | 1946789187               |
| SNP_P4_39960_8778302 | NC_021163.1    | Ca_kabuli_chr04 | 8778302                 | GG                              | AA              | 1946789190               |
| SNP_P4_39961_8779596 | NC_021163.1    | Ca_kabuli_chr04 | 8779596                 | AA                              | GG              | 1946789192               |
| SNP_P4_39962_8780565 | NC_021163.1    | Ca_kabuli_chr04 | 8780565                 | AA                              | GG              | 1946789194               |
| SNP_P4_39963_8780872 | NC_021163.1    | Ca_kabuli_chr04 | 8780872                 | AA                              | CC              | 1946789196               |
| SNP_P4_39965_8780895 | NC_021163.1    | Ca_kabuli_chr04 | 8780895                 | TT                              | CC              | 1946789198               |
| SNP_P4_39967_8781443 | NC_021163.1    | Ca_kabuli_chr04 | 8781443                 | CC                              | TT              | 1946789200               |
| SNP_P4_39968_8781646 | NC_021163.1    | Ca_kabuli_chr04 | 8781646                 | GG                              | CC              | 1946789202               |
| SNP_P4_39969_8781652 | NC_021163.1    | Ca_kabuli_chr04 | 8781652                 | CC                              | TT              | 1946789204               |
| SNP_P4_39970_8781699 | NC_021163.1    | Ca_kabuli_chr04 | 8781699                 | GG                              | AA              | 1946789206               |
| SNP_P4_39971_8781714 | NC_021163.1    | Ca_kabuli_chr04 | 8781714                 | TT                              | CC              | 1946789208               |
| SNP_P4_39972_8781734 | NC_021163.1    | Ca_kabuli_chr04 | 8781734                 | AA                              | GG              | 1946789210               |
| SNP_P4_39973_8781753 | NC_021163.1    | Ca_kabuli_chr04 | 8781753                 | CC                              | TT              | 1946789212               |
| SNP_P4_39974_8781754 | NC_021163.1    | Ca_kabuli_chr04 | 8781754                 | GG                              | AA              | 1946789214               |
| SNP_P4_39975_8781759 | NC_021163.1    | Ca_kabuli_chr04 | 8781759                 | TT                              | CC              | 1946789216               |
| SNP_P4_39976_8782879 | NC_021163.1    | Ca_kabuli_chr04 | 8782879                 | CC                              | GG              | 1946789218               |
| SNP_P4_39977_8783209 | NC_021163.1    | Ca_kabuli_chr04 | 8783209                 | GG                              | AA              | 1946789220               |
| SNP_P4_39978_8784139 | NC_021163.1    | Ca_kabuli_chr04 | 8784139                 | GG                              | AA              | 1946789222               |
| SNP_P4_39979_8785351 | NC_021163.1    | Ca_kabuli_chr04 | 8785351                 | TT                              | GG              | 1946789224               |
| SNP_P4_39980_8785609 | NC_021163.1    | Ca_kabuli_chr04 | 8785609                 | AA                              | CC              | 1946789226               |
| SNP_P4_39981_8786138 | NC_021163.1    | Ca_kabuli_chr04 | 8786138                 | TT                              | CC              | 1946789228               |
| SNP_P4_39982_8786611 | NC_021163.1    | Ca_kabuli_chr04 | 8786611                 | GG                              | AA              | 1946789231               |
| SNP_P4_39983_8787281 | NC_021163.1    | Ca_kabuli_chr04 | 8787281                 | AA                              | GG              | 1946789233               |
| SNP_P4_39985_8787607 | NC_021163.1    | Ca_kabuli_chr04 | 8787607                 | CC                              | TT              | 1946789235               |
| SNP_P4_39986_8788397 | NC_021163.1    | Ca_kabuli_chr04 | 8788397                 | GG                              | AA              | 1946789237               |
| SNP_P4_39987_8788873 | NC_021163.1    | Ca_kabuli_chr04 | 8788873                 | CC                              | TT              | 1946789239               |
| SNP_P4_39988_8788947 | NC_021163.1    | Ca_kabuli_chr04 | 8788947                 | CC                              | AA              | 1946789241               |
| SNP_P4_39989_8789659 | NC_021163.1    | Ca_kabuli_chr04 | 8789659                 | GG                              | AA              | 1946789243               |
| SNP_P4_39990_8791763 | NC_021163.1    | Ca_kabuli_chr04 | 8791763                 | AA                              | CC              | 1946789245               |
| SNP_P4_39991_8792076 | NC_021163.1    | Ca_kabuli_chr04 | 8792076                 | CC                              | GG              | 1946789248               |
| SNP_P4_39992_8792299 | NC_021163.1    | Ca_kabuli_chr04 | 8792299                 | TT                              | CC              | 1946789250               |
| SNP_P4_39993_8792390 | NC_021163.1    | Ca_kabuli_chr04 | 8792390                 | TT                              | CC              | 1946789252               |
| SNP_P4_39994_8792426 | NC_021163.1    | Ca_kabuli_chr04 | 8792426                 | TT                              | CC              | 1946789255               |
| SNP_P4_39995_8792636 | NC_021163.1    | Ca_kabuli_chr04 | 8792636                 | GG                              | AA              | 1946789257               |
| SNP_P4_39996_8793095 | NC_021163.1    | Ca_kabuli_chr04 | 8793095                 | CC                              | GG              | 1946789259               |
| SNP_P4_39997_8795320 | NC_021163.1    | Ca_kabuli_chr04 | 8795320                 | AA                              | GG              | 1946789261               |
| SNP_P4_39998_8795951 | NC_021163.1    | Ca_kabuli_chr04 | 8795951                 | AA                              | CC              | 1946789263               |
| SNP_P4_39999_8796425 | NC_021163.1    | Ca_kabuli_chr04 | 8796425                 | AA                              | CC              | 1946789265               |
| SNP_P4_40000_8797121 | NC_021163.1    | Ca_kabuli_chr04 | 8797121                 | AA                              | GG              | 1946789267               |

| SNPs IDs             | Chromosome IDs | Chromosomes     | Physical positions (bp) | CDC Frontier (Reference genome) | (ILWC46 & LPNB) | NCBI SNPdb Accession IDs |
|----------------------|----------------|-----------------|-------------------------|---------------------------------|-----------------|--------------------------|
| SNP_P4_40001_8797134 | NC_021163.1    | Ca_kabuli_chr04 | 8797134                 | GG                              | AA              | 1946789269               |
| SNP_P4_40002_8797138 | NC_021163.1    | Ca_kabuli_chr04 | 8797138                 | GG                              | AA              | 1946789271               |
| SNP_P4_40003_8797365 | NC_021163.1    | Ca_kabuli_chr04 | 8797365                 | TT                              | CC              | 1946789273               |
| SNP_P4_40004_8797366 | NC_021163.1    | Ca_kabuli_chr04 | 8797366                 | AA                              | GG              | 1946789275               |
| SNP_P4_40005_8797387 | NC_021163.1    | Ca_kabuli_chr04 | 8797387                 | GG                              | AA              | 1946789277               |
| SNP_P4_40006_8797396 | NC_021163.1    | Ca_kabuli_chr04 | 8797396                 | TT                              | AA              | 1946789279               |
| SNP_P4_40007_8797413 | NC_021163.1    | Ca_kabuli_chr04 | 8797413                 | GG                              | AA              | 1946789281               |
| SNP_P4_40009_8799544 | NC_021163.1    | Ca_kabuli_chr04 | 8799544                 | AA                              | TT              | 1946789283               |
| SNP_P4_40010_8800144 | NC_021163.1    | Ca_kabuli_chr04 | 8800144                 | AA                              | GG              | 1946789285               |
| SNP_P4_40011_8800385 | NC_021163.1    | Ca_kabuli_chr04 | 8800385                 | CC                              | TT              | 1946789287               |
| SNP_P4_40012_8800413 | NC_021163.1    | Ca_kabuli_chr04 | 8800413                 | CC                              | TT              | 1946789289               |
| SNP_P4_40013_8800441 | NC_021163.1    | Ca_kabuli_chr04 | 8800441                 | AA                              | GG              | 1946789291               |
| SNP_P4_40014_8800484 | NC_021163.1    | Ca_kabuli_chr04 | 8800484                 | TT                              | AA              | 1946789293               |
| SNP_P4_40016_8802323 | NC_021163.1    | Ca_kabuli_chr04 | 8802323                 | GG                              | AA              | 1946789295               |
| SNP_P4_40017_8802423 | NC_021163.1    | Ca_kabuli_chr04 | 8802423                 | GG                              | AA              | 1946789297               |
| SNP_P4_40018_8802481 | NC_021163.1    | Ca_kabuli_chr04 | 8802481                 | AA                              | CC              | 1946789299               |
| SNP_P4_40020_8802874 | NC_021163.1    | Ca_kabuli_chr04 | 8802874                 | GG                              | CC              | 1946789301               |
| SNP_P4_40021_8804382 | NC_021163.1    | Ca_kabuli_chr04 | 8804382                 | AA                              | GG              | 1946789303               |
| SNP_P4_40022_8804562 | NC_021163.1    | Ca_kabuli_chr04 | 8804562                 | GG                              | AA              | 1946789305               |
| SNP_P4_40023_8804876 | NC_021163.1    | Ca_kabuli_chr04 | 8804876                 | AA                              | GG              | 1946789307               |
| SNP_P4_40024_8808922 | NC_021163.1    | Ca_kabuli_chr04 | 8808922                 | CC                              | GG              | 1946789309               |
| SNP_P4_40025_8808991 | NC_021163.1    | Ca_kabuli_chr04 | 8808991                 | TT                              | GG              | 1946789311               |
| SNP_P4_40026_8809032 | NC_021163.1    | Ca_kabuli_chr04 | 8809032                 | TT                              | CC              | 1946789313               |
| SNP_P4_40027_8810419 | NC_021163.1    | Ca_kabuli_chr04 | 8810419                 | AA                              | TT              | 1946789315               |
| SNP_P4_40028_8810493 | NC_021163.1    | Ca_kabuli_chr04 | 8810493                 | AA                              | TT              | 1946789317               |
| SNP_P4_40030_8811045 | NC_021163.1    | Ca_kabuli_chr04 | 8811045                 | CC                              | TT              | 1946789320               |
| SNP_P4_40031_8811049 | NC_021163.1    | Ca_kabuli_chr04 | 8811049                 | GG                              | AA              | 1946789322               |
| SNP_P4_40035_8818268 | NC_021163.1    | Ca_kabuli_chr04 | 8818268                 | TT                              | CC              | 1946789324               |
| SNP_P4_40036_8827106 | NC_021163.1    | Ca_kabuli_chr04 | 8827106                 | TT                              | CC              | 1946789326               |
| SNP_P4_40037_8827441 | NC_021163.1    | Ca_kabuli_chr04 | 8827441                 | TT                              | CC              | 1946789328               |
| SNP_P4_40038_8827469 | NC_021163.1    | Ca_kabuli_chr04 | 8827469                 | AA                              | GG              | 1946789330               |
| SNP_P4_40039_8827489 | NC_021163.1    | Ca_kabuli_chr04 | 8827489                 | AA                              | GG              | 1946789332               |
| SNP_P4_40040_8827954 | NC_021163.1    | Ca_kabuli_chr04 | 8827954                 | CC                              | AA              | 1946789334               |
| SNP_P4_40041_8828000 | NC_021163.1    | Ca_kabuli_chr04 | 8828000                 | CC                              | TT              | 1946789337               |
| SNP_P4_40042_8828015 | NC_021163.1    | Ca_kabuli_chr04 | 8828015                 | GG                              | CC              | 1946789339               |
| SNP_P4_40043_8828317 | NC_021163.1    | Ca_kabuli_chr04 | 8828317                 | CC                              | GG              | 1946789341               |
| SNP_P4_40044_8828361 | NC_021163.1    | Ca_kabuli_chr04 | 8828361                 | GG                              | TT              | 1946789343               |
| SNP_P4_40045_8828364 | NC_021163.1    | Ca_kabuli_chr04 | 8828364                 | TT                              | GG              | 1946789345               |
| SNP_P4_40047_8828434 | NC_021163.1    | Ca_kabuli_chr04 | 8828434                 | CC                              | TT              | 1946789347               |
| SNP_P4_40048_8828449 | NC_021163.1    | Ca_kabuli_chr04 | 8828449                 | GG                              | AA              | 1946789350               |
| SNP_P4_40049_8829367 | NC_021163.1    | Ca_kabuli_chr04 | 8829367                 | GG                              | AA              | 1946789352               |
| SNP_P4_40050_8829368 | NC_021163.1    | Ca_kabuli_chr04 | 8829368                 | TT                              | CC              | 1946789354               |

| SNPs IDs             | Chromosome IDs | Chromosomes     | Physical positions (bp) | CDC Frontier (Reference genome) | (ILWC46 & LPNB) | NCBI SNPdb Accession IDs |
|----------------------|----------------|-----------------|-------------------------|---------------------------------|-----------------|--------------------------|
| SNP_P4_40052_8829406 | NC_021163.1    | Ca_kabuli_chr04 | 8829406                 | TT                              | CC              | 1946789356               |
| SNP_P4_40054_8830134 | NC_021163.1    | Ca_kabuli_chr04 | 8830134                 | AA                              | GG              | 1946789358               |
| SNP_P4_40056_8830256 | NC_021163.1    | Ca_kabuli_chr04 | 8830256                 | GG                              | AA              | 1946789360               |
| SNP_P4_40057_8830261 | NC_021163.1    | Ca_kabuli_chr04 | 8830261                 | TT                              | GG              | 1946789362               |
| SNP_P4_40058_8830444 | NC_021163.1    | Ca_kabuli_chr04 | 8830444                 | AA                              | GG              | 1946789364               |
| SNP_P4_40059_8830529 | NC_021163.1    | Ca_kabuli_chr04 | 8830529                 | GG                              | AA              | 1946789366               |
| SNP_P4_40060_8830533 | NC_021163.1    | Ca_kabuli_chr04 | 8830533                 | TT                              | AA              | 1946789368               |
| SNP_P4_40061_8830795 | NC_021163.1    | Ca_kabuli_chr04 | 8830795                 | CC                              | TT              | 1946789370               |
| SNP_P4_40062_8831345 | NC_021163.1    | Ca_kabuli_chr04 | 8831345                 | CC                              | TT              | 1946789372               |
| SNP_P4_40063_8831378 | NC_021163.1    | Ca_kabuli_chr04 | 8831378                 | AA                              | GG              | 1946789374               |
| SNP_P4_40064_8831393 | NC_021163.1    | Ca_kabuli_chr04 | 8831393                 | AA                              | GG              | 1946789376               |
| SNP_P4_40065_8831763 | NC_021163.1    | Ca_kabuli_chr04 | 8831763                 | CC                              | TT              | 1946789378               |
| SNP_P4_40066_8832290 | NC_021163.1    | Ca_kabuli_chr04 | 8832290                 | GG                              | AA              | 1946789380               |
| SNP_P4_40067_8832523 | NC_021163.1    | Ca_kabuli_chr04 | 8832523                 | AA                              | TT              | 1946789382               |
| SNP_P4_40068_8833777 | NC_021163.1    | Ca_kabuli_chr04 | 8833777                 | GG                              | AA              | 1946789385               |
| SNP_P4_40069_8833800 | NC_021163.1    | Ca_kabuli_chr04 | 8833800                 | AA                              | GG              | 1946789387               |
| SNP_P4_40070_8833838 | NC_021163.1    | Ca_kabuli_chr04 | 8833838                 | TT                              | CC              | 1946789389               |
| SNP_P4_40071_8834182 | NC_021163.1    | Ca_kabuli_chr04 | 8834182                 | TT                              | GG              | 1946789391               |
| SNP_P4_40072_8834905 | NC_021163.1    | Ca_kabuli_chr04 | 8834905                 | GG                              | AA              | 1946789393               |
| SNP_P4_40073_8834921 | NC_021163.1    | Ca_kabuli_chr04 | 8834921                 | GG                              | AA              | 1946789395               |
| SNP_P4_40074_8835001 | NC_021163.1    | Ca_kabuli_chr04 | 8835001                 | CC                              | TT              | 1946789397               |
| SNP_P4_40075_8835011 | NC_021163.1    | Ca_kabuli_chr04 | 8835011                 | AA                              | GG              | 1946789399               |
| SNP_P4_40076_8835103 | NC_021163.1    | Ca_kabuli_chr04 | 8835103                 | TT                              | CC              | 1946789402               |
| SNP_P4_40077_8835283 | NC_021163.1    | Ca_kabuli_chr04 | 8835283                 | CC                              | TT              | 1946789404               |
| SNP_P4_40078_8835382 | NC_021163.1    | Ca_kabuli_chr04 | 8835382                 | AA                              | TT              | 1946789406               |
| SNP_P4_40079_8835407 | NC_021163.1    | Ca_kabuli_chr04 | 8835407                 | TT                              | CC              | 1946789408               |
| SNP_P4_40080_8836282 | NC_021163.1    | Ca_kabuli_chr04 | 8836282                 | TT                              | CC              | 1946789410               |
| SNP_P4_40081_8836289 | NC_021163.1    | Ca_kabuli_chr04 | 8836289                 | GG                              | AA              | 1946789412               |
| SNP_P4_40084_8837442 | NC_021163.1    | Ca_kabuli_chr04 | 8837442                 | TT                              | AA              | 1946789414               |
| SNP_P4_40085_8837443 | NC_021163.1    | Ca_kabuli_chr04 | 8837443                 | CC                              | TT              | 1946789416               |
| SNP_P4_40087_8839244 | NC_021163.1    | Ca_kabuli_chr04 | 8839244                 | AA                              | GG              | 1946789418               |
| SNP_P4_40088_8839378 | NC_021163.1    | Ca_kabuli_chr04 | 8839378                 | GG                              | CC              | 1946789420               |
| SNP_P4_40089_8839393 | NC_021163.1    | Ca_kabuli_chr04 | 8839393                 | CC                              | TT              | 1946789422               |
| SNP_P4_40090_8839536 | NC_021163.1    | Ca_kabuli_chr04 | 8839536                 | AA                              | TT              | 1946789424               |
| SNP_P4_40091_8840186 | NC_021163.1    | Ca_kabuli_chr04 | 8840186                 | CC                              | AA              | 1946789426               |
| SNP_P4_40092_8840195 | NC_021163.1    | Ca_kabuli_chr04 | 8840195                 | CC                              | TT              | 1946789428               |
| SNP_P4_40093_8840216 | NC_021163.1    | Ca_kabuli_chr04 | 8840216                 | CC                              | TT              | 1946789430               |
| SNP_P4_40094_8840260 | NC_021163.1    | Ca_kabuli_chr04 | 8840260                 | CC                              | TT              | 1946789432               |
| SNP_P4_40095_8840320 | NC_021163.1    | Ca_kabuli_chr04 | 8840320                 | AA                              | GG              | 1946789434               |
| SNP_P4_40096_8840792 | NC_021163.1    | Ca_kabuli_chr04 | 8840792                 | TT                              | CC              | 1946789436               |
| SNP_P4_40097_8840824 | NC_021163.1    | Ca_kabuli_chr04 | 8840824                 | CC                              | TT              | 1946789438               |
| SNP_P4_40098_8840908 | NC_021163.1    | Ca_kabuli_chr04 | 8840908                 | CC                              | GG              | 1946789440               |

| SNPs IDs             | Chromosome IDs | Chromosomes     | Physical positions (bp) | CDC Frontier (Reference genome) | (ILWC46 & LPNB) | NCBI SNPdb Accession IDs |
|----------------------|----------------|-----------------|-------------------------|---------------------------------|-----------------|--------------------------|
| SNP_P4_40100_8840967 | NC_021163.1    | Ca_kabuli_chr04 | 8840967                 | AA                              | GG              | 1946789442               |
| SNP_P4_40101_8840981 | NC_021163.1    | Ca_kabuli_chr04 | 8840981                 | TT                              | CC              | 1946789444               |
| SNP_P4_40102_8841008 | NC_021163.1    | Ca_kabuli_chr04 | 8841008                 | TT                              | AA              | 1946789446               |
| SNP_P4_40103_8841055 | NC_021163.1    | Ca_kabuli_chr04 | 8841055                 | CC                              | TT              | 1946789449               |
| SNP_P4_40104_8841224 | NC_021163.1    | Ca_kabuli_chr04 | 8841224                 | TT                              | CC              | 1946789451               |
| SNP_P4_40105_8841236 | NC_021163.1    | Ca_kabuli_chr04 | 8841236                 | TT                              | CC              | 1946789453               |
| SNP_P4_40106_8842722 | NC_021163.1    | Ca_kabuli_chr04 | 8842722                 | TT                              | GG              | 1946789455               |
| SNP_P4_40107_8842723 | NC_021163.1    | Ca_kabuli_chr04 | 8842723                 | CC                              | TT              | 1946789457               |
| SNP_P4_40108_8842832 | NC_021163.1    | Ca_kabuli_chr04 | 8842832                 | AA                              | GG              | 1946789459               |
| SNP_P4_40109_8842981 | NC_021163.1    | Ca_kabuli_chr04 | 8842981                 | CC                              | TT              | 1946789461               |
| SNP_P4_40110_8842991 | NC_021163.1    | Ca_kabuli_chr04 | 8842991                 | CC                              | AA              | 1946789463               |
| SNP_P4_40111_8846317 | NC_021163.1    | Ca_kabuli_chr04 | 8846317                 | TT                              | GG              | 1946789465               |
| SNP_P4_40112_8846756 | NC_021163.1    | Ca_kabuli_chr04 | 8846756                 | AA                              | TT              | 1946789467               |
| SNP_P4_40113_8846835 | NC_021163.1    | Ca_kabuli_chr04 | 8846835                 | AA                              | GG              | 1946789469               |
| SNP_P4_40115_8847314 | NC_021163.1    | Ca_kabuli_chr04 | 8847314                 | GG                              | AA              | 1946789471               |
| SNP_P4_40116_8847384 | NC_021163.1    | Ca_kabuli_chr04 | 8847384                 | AA                              | TT              | 1946789474               |
| SNP_P4_40117_8848056 | NC_021163.1    | Ca_kabuli_chr04 | 8848056                 | CC                              | TT              | 1946789476               |
| SNP_P4_40119_8851231 | NC_021163.1    | Ca_kabuli_chr04 | 8851231                 | AA                              | CC              | 1946789478               |
| SNP_P4_40120_8851465 | NC_021163.1    | Ca_kabuli_chr04 | 8851465                 | AA                              | TT              | 1946789480               |
| SNP_P4_40121_8851466 | NC_021163.1    | Ca_kabuli_chr04 | 8851466                 | CC                              | GG              | 1946789482               |
| SNP_P4_40122_8851842 | NC_021163.1    | Ca_kabuli_chr04 | 8851842                 | GG                              | AA              | 1946789484               |
| SNP_P4_40123_8852222 | NC_021163.1    | Ca_kabuli_chr04 | 8852222                 | TT                              | CC              | 1946789486               |
| SNP_P4_40124_8852420 | NC_021163.1    | Ca_kabuli_chr04 | 8852420                 | CC                              | TT              | 1946789488               |
| SNP_P4_40125_8857257 | NC_021163.1    | Ca_kabuli_chr04 | 8857257                 | GG                              | TT              | 1946789490               |
| SNP_P4_40126_8857917 | NC_021163.1    | Ca_kabuli_chr04 | 8857917                 | TT                              | CC              | 1946789492               |
| SNP_P4_40127_8858161 | NC_021163.1    | Ca_kabuli_chr04 | 8858161                 | GG                              | CC              | 1946789494               |
| SNP_P4_40128_8858397 | NC_021163.1    | Ca_kabuli_chr04 | 8858397                 | CC                              | GG              | 1946789496               |
| SNP_P4_40129_8858580 | NC_021163.1    | Ca_kabuli_chr04 | 8858580                 | AA                              | TT              | 1946789498               |
| SNP_P4_40130_8858654 | NC_021163.1    | Ca_kabuli_chr04 | 8858654                 | GG                              | AA              | 1946789500               |
| SNP_P4_40131_8858670 | NC_021163.1    | Ca_kabuli_chr04 | 8858670                 | AA                              | GG              | 1946789503               |
| SNP_P4_40132_8860796 | NC_021163.1    | Ca_kabuli_chr04 | 8860796                 | GG                              | AA              | 1946789505               |
| SNP_P4_40133_8862066 | NC_021163.1    | Ca_kabuli_chr04 | 8862066                 | GG                              | AA              | 1946789507               |
| SNP_P4_40134_8864676 | NC_021163.1    | Ca_kabuli_chr04 | 8864676                 | GG                              | AA              | 1946789509               |
| SNP_P4_40136_8865682 | NC_021163.1    | Ca_kabuli_chr04 | 8865682                 | CC                              | AA              | 1946789511               |
| SNP_P4_40137_8866127 | NC_021163.1    | Ca_kabuli_chr04 | 8866127                 | CC                              | TT              | 1946789514               |
| SNP_P4_40138_8866436 | NC_021163.1    | Ca_kabuli_chr04 | 8866436                 | GG                              | AA              | 1946789516               |
| SNP_P4_40139_8866522 | NC_021163.1    | Ca_kabuli_chr04 | 8866522                 | AA                              | TT              | 1946789518               |
| SNP_P4_40141_8872587 | NC_021163.1    | Ca_kabuli_chr04 | 8872587                 | AA                              | GG              | 1946789520               |
| SNP_P4_40143_8876940 | NC_021163.1    | Ca_kabuli_chr04 | 8876940                 | GG                              | AA              | 1946789522               |
| SNP_P4_40144_8877781 | NC_021163.1    | Ca_kabuli_chr04 | 8877781                 | TT                              | GG              | 1946789524               |
| SNP_P4_40145_8877960 | NC_021163.1    | Ca_kabuli_chr04 | 8877960                 | CC                              | TT              | 1946789526               |
| SNP_P4_40146_8878000 | NC_021163.1    | Ca_kabuli_chr04 | 8878000                 | AA                              | GG              | 1946789528               |

| SNPs IDs             | Chromosome IDs | Chromosomes     | Physical positions (bp) | CDC Frontier (Reference genome) | (ILWC46 & LPNB) | NCBI SNPdb Accession IDs |
|----------------------|----------------|-----------------|-------------------------|---------------------------------|-----------------|--------------------------|
| SNP_P4_40147_8878003 | NC_021163.1    | Ca_kabuli_chr04 | 8878003                 | AA                              | GG              | 1946789530               |
| SNP_P4_40148_8878019 | NC_021163.1    | Ca_kabuli_chr04 | 8878019                 | AA                              | GG              | 1946789532               |
| SNP_P4_40149_8878022 | NC_021163.1    | Ca_kabuli_chr04 | 8878022                 | CC                              | TT              | 1946789534               |
| SNP_P4_40150_8878030 | NC_021163.1    | Ca_kabuli_chr04 | 8878030                 | GG                              | AA              | 1946789536               |
| SNP_P4_40151_8878037 | NC_021163.1    | Ca_kabuli_chr04 | 8878037                 | TT                              | CC              | 1946789538               |
| SNP_P4_40152_8878052 | NC_021163.1    | Ca_kabuli_chr04 | 8878052                 | TT                              | CC              | 1946789540               |
| SNP_P4_40153_8878058 | NC_021163.1    | Ca_kabuli_chr04 | 8878058                 | TT                              | CC              | 1946789542               |
| SNP_P4_40154_8878059 | NC_021163.1    | Ca_kabuli_chr04 | 8878059                 | AA                              | GG              | 1946789544               |
| SNP_P4_40155_8878072 | NC_021163.1    | Ca_kabuli_chr04 | 8878072                 | GG                              | AA              | 1946789546               |
| SNP_P4_40156_8878086 | NC_021163.1    | Ca_kabuli_chr04 | 8878086                 | GG                              | TT              | 1946789548               |
| SNP_P4_40157_8878537 | NC_021163.1    | Ca_kabuli_chr04 | 8878537                 | AA                              | GG              | 1946789550               |
| SNP_P4_40158_8878860 | NC_021163.1    | Ca_kabuli_chr04 | 8878860                 | GG                              | TT              | 1946789552               |
| SNP_P4_40160_8879081 | NC_021163.1    | Ca_kabuli_chr04 | 8879081                 | GG                              | AA              | 1946789554               |
| SNP_P4_40161_8879106 | NC_021163.1    | Ca_kabuli_chr04 | 8879106                 | CC                              | GG              | 1946789556               |
| SNP_P4_40162_8879110 | NC_021163.1    | Ca_kabuli_chr04 | 8879110                 | TT                              | GG              | 1946789558               |
| SNP_P4_40163_8879115 | NC_021163.1    | Ca_kabuli_chr04 | 8879115                 | AA                              | TT              | 1946789560               |
| SNP_P4_40164_8879130 | NC_021163.1    | Ca_kabuli_chr04 | 8879130                 | TT                              | AA              | 1946789562               |
| SNP_P4_40165_8880962 | NC_021163.1    | Ca_kabuli_chr04 | 8880962                 | GG                              | AA              | 1946789564               |
| SNP_P4_40166_8881177 | NC_021163.1    | Ca_kabuli_chr04 | 8881177                 | TT                              | AA              | 1946789566               |
| SNP_P4_40167_8881702 | NC_021163.1    | Ca_kabuli_chr04 | 8881702                 | CC                              | TT              | 1946789568               |
| SNP_P4_40168_8881710 | NC_021163.1    | Ca_kabuli_chr04 | 8881710                 | TT                              | AA              | 1946789571               |
| SNP_P4_40169_8881726 | NC_021163.1    | Ca_kabuli_chr04 | 8881726                 | GG                              | AA              | 1946789573               |
| SNP_P4_40170_8881732 | NC_021163.1    | Ca_kabuli_chr04 | 8881732                 | AA                              | TT              | 1946789574               |
| SNP_P4_40171_8881766 | NC_021163.1    | Ca_kabuli_chr04 | 8881766                 | TT                              | GG              | 1946789576               |
| SNP_P4_40172_8881987 | NC_021163.1    | Ca_kabuli_chr04 | 8881987                 | AA                              | GG              | 1946789578               |
| SNP_P4_40173_8882259 | NC_021163.1    | Ca_kabuli_chr04 | 8882259                 | GG                              | AA              | 1946789580               |
| SNP_P4_40174_8882955 | NC_021163.1    | Ca_kabuli_chr04 | 8882955                 | TT                              | CC              | 1946789582               |
| SNP_P4_40176_8884850 | NC_021163.1    | Ca_kabuli_chr04 | 8884850                 | GG                              | TT              | 1946789584               |
| SNP_P4_40177_8884871 | NC_021163.1    | Ca_kabuli_chr04 | 8884871                 | TT                              | CC              | 1946789586               |
| SNP_P4_40178_8884886 | NC_021163.1    | Ca_kabuli_chr04 | 8884886                 | GG                              | AA              | 1946789588               |
| SNP_P4_40179_8885076 | NC_021163.1    | Ca_kabuli_chr04 | 8885076                 | AA                              | GG              | 1946789590               |
| SNP_P4_40180_8885319 | NC_021163.1    | Ca_kabuli_chr04 | 8885319                 | GG                              | AA              | 1946789592               |
| SNP_P4_40181_8885370 | NC_021163.1    | Ca_kabuli_chr04 | 8885370                 | TT                              | CC              | 1946789593               |
| SNP_P4_40182_8885378 | NC_021163.1    | Ca_kabuli_chr04 | 8885378                 | GG                              | AA              | 1946789595               |
| SNP_P4_40183_8885379 | NC_021163.1    | Ca_kabuli_chr04 | 8885379                 | AA                              | TT              | 1946789597               |
| SNP_P4_40184_8885635 | NC_021163.1    | Ca_kabuli_chr04 | 8885635                 | AA                              | GG              | 1946789599               |
| SNP_P4_40187_8887545 | NC_021163.1    | Ca_kabuli_chr04 | 8887545                 | AA                              | CC              | 1946789601               |
| SNP_P4_40188_8887555 | NC_021163.1    | Ca_kabuli_chr04 | 8887555                 | CC                              | AA              | 1946789603               |
| SNP_P4_40190_8887714 | NC_021163.1    | Ca_kabuli_chr04 | 8887714                 | TT                              | CC              | 1946789606               |
| SNP_P4_40191_8887719 | NC_021163.1    | Ca_kabuli_chr04 | 8887719                 | CC                              | AA              | 1946789608               |
| SNP_P4_40192_8887772 | NC_021163.1    | Ca_kabuli_chr04 | 8887772                 | TT                              | AA              | 1946789610               |
| SNP_P4_40193_8887813 | NC_021163.1    | Ca_kabuli_chr04 | 8887813                 | TT                              | AA              | 1946789612               |

| SNPs IDs             | Chromosome IDs | Chromosomes     | Physical positions (bp) | CDC Frontier (Reference genome) | (ILWC46 & LPNB) | NCBI SNPdb Accession IDs |
|----------------------|----------------|-----------------|-------------------------|---------------------------------|-----------------|--------------------------|
| SNP_P4_40194_8887981 | NC_021163.1    | Ca_kabuli_chr04 | 8887981                 | GG                              | AA              | 1946789614               |
| SNP_P4_40195_8888694 | NC_021163.1    | Ca_kabuli_chr04 | 8888694                 | TT                              | CC              | 1946789616               |
| SNP_P4_40196_8888717 | NC_021163.1    | Ca_kabuli_chr04 | 8888717                 | GG                              | AA              | 1946789617               |
| SNP_P4_40197_8888729 | NC_021163.1    | Ca_kabuli_chr04 | 8888729                 | GG                              | TT              | 1946789618               |
| SNP_P4_40198_8889025 | NC_021163.1    | Ca_kabuli_chr04 | 8889025                 | CC                              | AA              | 1946789620               |
| SNP_P4_40199_8889031 | NC_021163.1    | Ca_kabuli_chr04 | 8889031                 | CC                              | TT              | 1946789622               |
| SNP_P4_40200_8889186 | NC_021163.1    | Ca_kabuli_chr04 | 8889186                 | CC                              | TT              | 1946789624               |
| SNP_P4_40201_8889226 | NC_021163.1    | Ca_kabuli_chr04 | 8889226                 | CC                              | TT              | 1946789627               |
| SNP_P4_40202_8889612 | NC_021163.1    | Ca_kabuli_chr04 | 8889612                 | GG                              | AA              | 1946789629               |
| SNP_P4_40203_8889614 | NC_021163.1    | Ca_kabuli_chr04 | 8889614                 | TT                              | CC              | 1946789631               |
| SNP_P4_40204_8889624 | NC_021163.1    | Ca_kabuli_chr04 | 8889624                 | AA                              | TT              | 1946789633               |
| SNP_P4_40205_8889750 | NC_021163.1    | Ca_kabuli_chr04 | 8889750                 | TT                              | CC              | 1946789636               |
| SNP_P4_40207_8889853 | NC_021163.1    | Ca_kabuli_chr04 | 8889853                 | AA                              | GG              | 1946789638               |
| SNP_P4_40208_8889934 | NC_021163.1    | Ca_kabuli_chr04 | 8889934                 | TT                              | CC              | 1946789640               |
| SNP_P4_40210_8891073 | NC_021163.1    | Ca_kabuli_chr04 | 8891073                 | TT                              | AA              | 1946789642               |
| SNP_P4_40211_8891096 | NC_021163.1    | Ca_kabuli_chr04 | 8891096                 | CC                              | TT              | 1946789644               |
| SNP_P4_40212_8891362 | NC_021163.1    | Ca_kabuli_chr04 | 8891362                 | AA                              | TT              | 1946789647               |
| SNP_P4_40214_8892280 | NC_021163.1    | Ca_kabuli_chr04 | 8892280                 | CC                              | AA              | 1946789649               |
| SNP_P4_40215_8894108 | NC_021163.1    | Ca_kabuli_chr04 | 8894108                 | AA                              | GG              | 1946789651               |
| SNP_P4_40217_8895458 | NC_021163.1    | Ca_kabuli_chr04 | 8895458                 | CC                              | TT              | 1946789653               |
| SNP_P4_40218_8896762 | NC_021163.1    | Ca_kabuli_chr04 | 8896762                 | CC                              | TT              | 1946789655               |
| SNP_P4_40220_8897630 | NC_021163.1    | Ca_kabuli_chr04 | 8897630                 | TT                              | AA              | 1946789657               |
| SNP_P4_40221_8898696 | NC_021163.1    | Ca_kabuli_chr04 | 8898696                 | CC                              | AA              | 1946789659               |
| SNP_P4_40222_8903652 | NC_021163.1    | Ca_kabuli_chr04 | 8903652                 | TT                              | AA              | 1946789661               |
| SNP_P4_40223_8903682 | NC_021163.1    | Ca_kabuli_chr04 | 8903682                 | GG                              | TT              | 1946789663               |
| SNP_P4_40224_8903733 | NC_021163.1    | Ca_kabuli_chr04 | 8903733                 | GG                              | AA              | 1946789665               |
| SNP_P4_40225_8903954 | NC_021163.1    | Ca_kabuli_chr04 | 8903954                 | GG                              | CC              | 1946789667               |
| SNP_P4_40227_8945498 | NC_021163.1    | Ca_kabuli_chr04 | 8945498                 | GG                              | AA              | 1946789669               |
| SNP_P4_40230_9000460 | NC_021163.1    | Ca_kabuli_chr04 | 9000460                 | CC                              | TT              | 1946789671               |
| SNP_P4_40232_9026705 | NC_021163.1    | Ca_kabuli_chr04 | 9026705                 | CC                              | TT              | 1946789673               |
| SNP_P4_40234_9034136 | NC_021163.1    | Ca_kabuli_chr04 | 9034136                 | GG                              | AA              | 1946789676               |
| SNP_P4_40235_9041257 | NC_021163.1    | Ca_kabuli_chr04 | 9041257                 | CC                              | GG              | 1946789678               |
| SNP_P4_40237_9059759 | NC_021163.1    | Ca_kabuli_chr04 | 9059759                 | CC                              | TT              | 1946789680               |
| SNP_P4_40238_9060627 | NC_021163.1    | Ca_kabuli_chr04 | 9060627                 | AA                              | CC              | 1946789682               |
| SNP_P4_40239_9060674 | NC_021163.1    | Ca_kabuli_chr04 | 9060674                 | TT                              | CC              | 1946789684               |
| SNP_P4_40241_9065856 | NC_021163.1    | Ca_kabuli_chr04 | 9065856                 | TT                              | AA              | 1946789686               |
| SNP_P4_40242_9066145 | NC_021163.1    | Ca_kabuli_chr04 | 9066145                 | TT                              | GG              | 1946789689               |
| SNP_P4_40244_9066488 | NC_021163.1    | Ca_kabuli_chr04 | 9066488                 | TT                              | CC              | 1946789691               |
| SNP_P4_40246_9066622 | NC_021163.1    | Ca_kabuli_chr04 | 9066622                 | GG                              | AA              | 1946789693               |
| SNP_P4_40248_9075890 | NC_021163.1    | Ca_kabuli_chr04 | 9075890                 | AA                              | TT              | 1946789695               |
| SNP_P4_40249_9077616 | NC_021163.1    | Ca_kabuli_chr04 | 9077616                 | CC                              | TT              | 1946789697               |
| SNP_P4_40251_9083320 | NC_021163.1    | Ca_kabuli_chr04 | 9083320                 | AA                              | GG              | 1946789699               |

| SNPs IDs             | Chromosome IDs | Chromosomes     | Physical positions (bp) | CDC Frontier (Reference genome) | (ILWC46 & LPNB) | NCBI SNPdb Accession IDs |
|----------------------|----------------|-----------------|-------------------------|---------------------------------|-----------------|--------------------------|
| SNP_P4_40252_9083510 | NC_021163.1    | Ca_kabuli_chr04 | 9083510                 | AA                              | GG              | 1946789701               |
| SNP_P4_40253_9083720 | NC_021163.1    | Ca_kabuli_chr04 | 9083720                 | CC                              | TT              | 1946789703               |
| SNP_P4_40254_9126710 | NC_021163.1    | Ca_kabuli_chr04 | 9126710                 | GG                              | AA              | 1946789705               |
| SNP_P4_40255_9126907 | NC_021163.1    | Ca_kabuli_chr04 | 9126907                 | TT                              | AA              | 1946789707               |
| SNP_P4_40256_9131405 | NC_021163.1    | Ca_kabuli_chr04 | 9131405                 | TT                              | AA              | 1946789709               |
| SNP_P4_40257_9131408 | NC_021163.1    | Ca_kabuli_chr04 | 9131408                 | TT                              | CC              | 1946789711               |
| SNP_P4_40258_9147377 | NC_021163.1    | Ca_kabuli_chr04 | 9147377                 | TT                              | CC              | 1946789714               |
| SNP_P4_40259_9147380 | NC_021163.1    | Ca_kabuli_chr04 | 9147380                 | AA                              | GG              | 1946789716               |
| SNP_P4_40260_9156085 | NC_021163.1    | Ca_kabuli_chr04 | 9156085                 | CC                              | TT              | 1946789718               |
| SNP_P4_40261_9157545 | NC_021163.1    | Ca_kabuli_chr04 | 9157545                 | AA                              | GG              | 1946789720               |
| SNP_P4_40262_9157793 | NC_021163.1    | Ca_kabuli_chr04 | 9157793                 | CC                              | TT              | 1946789722               |
| SNP_P4_40263_9168500 | NC_021163.1    | Ca_kabuli_chr04 | 9168500                 | GG                              | AA              | 1946789724               |
| SNP_P4_40264_9172944 | NC_021163.1    | Ca_kabuli_chr04 | 9172944                 | CC                              | TT              | 1946789726               |
| SNP_P4_40265_9176230 | NC_021163.1    | Ca_kabuli_chr04 | 9176230                 | CC                              | TT              | 1946789728               |
| SNP_P4_40266_9176260 | NC_021163.1    | Ca_kabuli_chr04 | 9176260                 | TT                              | CC              | 1946789730               |
| SNP_P4_40267_9177793 | NC_021163.1    | Ca_kabuli_chr04 | 9177793                 | CC                              | TT              | 1946789732               |
| SNP_P4_40268_9177995 | NC_021163.1    | Ca_kabuli_chr04 | 9177995                 | TT                              | CC              | 1946789735               |
| SNP_P4_40270_9206483 | NC_021163.1    | Ca_kabuli_chr04 | 9206483                 | AA                              | TT              | 1946789737               |
| SNP_P4_40271_9211150 | NC_021163.1    | Ca_kabuli_chr04 | 9211150                 | TT                              | GG              | 1946789739               |
| SNP_P4_40272_9222727 | NC_021163.1    | Ca_kabuli_chr04 | 9222727                 | TT                              | CC              | 1946789741               |
| SNP_P4_40275_9230158 | NC_021163.1    | Ca_kabuli_chr04 | 9230158                 | AA                              | CC              | 1946789743               |
| SNP_P4_40276_9233240 | NC_021163.1    | Ca_kabuli_chr04 | 9233240                 | AA                              | GG              | 1946789745               |
| SNP_P4_40277_9233282 | NC_021163.1    | Ca_kabuli_chr04 | 9233282                 | AA                              | GG              | 1946789747               |
| SNP_P4_40278_9233342 | NC_021163.1    | Ca_kabuli_chr04 | 9233342                 | TT                              | AA              | 1946789749               |
| SNP_P4_40279_9233352 | NC_021163.1    | Ca_kabuli_chr04 | 9233352                 | TT                              | AA              | 1946789751               |
| SNP_P4_40280_9233405 | NC_021163.1    | Ca_kabuli_chr04 | 9233405                 | CC                              | AA              | 1946789753               |
| SNP_P4_40281_9233438 | NC_021163.1    | Ca_kabuli_chr04 | 9233438                 | AA                              | GG              | 1946789755               |
| SNP_P4_40282_9233485 | NC_021163.1    | Ca_kabuli_chr04 | 9233485                 | GG                              | AA              | 1946789758               |
| SNP_P4_40283_9233490 | NC_021163.1    | Ca_kabuli_chr04 | 9233490                 | TT                              | GG              | 1946789760               |
| SNP_P4_40284_9277638 | NC_021163.1    | Ca_kabuli_chr04 | 9277638                 | AA                              | GG              | 1946789762               |
| SNP_P4_40285_9285542 | NC_021163.1    | Ca_kabuli_chr04 | 9285542                 | AA                              | TT              | 1946789765               |
| SNP_P4_40286_9285544 | NC_021163.1    | Ca_kabuli_chr04 | 9285544                 | TT                              | CC              | 1946789767               |
| SNP_P4_40287_9292463 | NC_021163.1    | Ca_kabuli_chr04 | 9292463                 | AA                              | GG              | 1946789769               |
| SNP_P4_40288_9300626 | NC_021163.1    | Ca_kabuli_chr04 | 9300626                 | AA                              | GG              | 1946789771               |
| SNP_P4_40290_9347286 | NC_021163.1    | Ca_kabuli_chr04 | 9347286                 | TT                              | AA              | 1946789773               |
| SNP_P4_40291_9361081 | NC_021163.1    | Ca_kabuli_chr04 | 9361081                 | GG                              | AA              | 1946789775               |
| SNP_P4_40292_9363698 | NC_021163.1    | Ca_kabuli_chr04 | 9363698                 | TT                              | AA              | 1946789777               |
| SNP_P4_40293_9370406 | NC_021163.1    | Ca_kabuli_chr04 | 9370406                 | AA                              | GG              | 1946789779               |
| SNP_P4_40295_9371601 | NC_021163.1    | Ca_kabuli_chr04 | 9371601                 | TT                              | AA              | 1946789782               |
| SNP_P4_40296_9372462 | NC_021163.1    | Ca_kabuli_chr04 | 9372462                 | GG                              | AA              | 1946789784               |
| SNP_P4_40297_9372469 | NC_021163.1    | Ca_kabuli_chr04 | 9372469                 | GG                              | AA              | 1946789786               |
| SNP_P4_40299_9387809 | NC_021163.1    | Ca_kabuli_chr04 | 9387809                 | GG                              | AA              | 1946789788               |



| SNPs IDs             | Chromosome IDs | Chromosomes     | Physical positions (bp) | CDC Frontier (Reference genome) | (ILWC46 & LPNB) | NCBI SNPdb Accession IDs |
|----------------------|----------------|-----------------|-------------------------|---------------------------------|-----------------|--------------------------|
| SNP_P4_40300_9387889 | NC_021163.1    | Ca_kabuli_chr04 | 9387889                 | CC                              | GG              | 1946789790               |
| SNP_P4_40301_9387894 | NC_021163.1    | Ca_kabuli_chr04 | 9387894                 | GG                              | TT              | 1946789792               |
| SNP_P4_40302_9387971 | NC_021163.1    | Ca_kabuli_chr04 | 9387971                 | TT                              | CC              | 1946789794               |
| SNP_P4_40303_9387977 | NC_021163.1    | Ca_kabuli_chr04 | 9387977                 | AA                              | CC              | 1946789796               |
| SNP_P4_40304_9388158 | NC_021163.1    | Ca_kabuli_chr04 | 9388158                 | GG                              | AA              | 1946789798               |
| SNP_P4_40305_9388174 | NC_021163.1    | Ca_kabuli_chr04 | 9388174                 | GG                              | CC              | 1946789800               |
| SNP_P4_40306_9388180 | NC_021163.1    | Ca_kabuli_chr04 | 9388180                 | TT                              | AA              | 1946789802               |
| SNP_P4_40307_9388271 | NC_021163.1    | Ca_kabuli_chr04 | 9388271                 | GG                              | TT              | 1946789804               |
| SNP_P4_40308_9388273 | NC_021163.1    | Ca_kabuli_chr04 | 9388273                 | TT                              | CC              | 1946789807               |
| SNP_P4_40309_9435002 | NC_021163.1    | Ca_kabuli_chr04 | 9435002                 | GG                              | AA              | 1946789809               |
| SNP_P4_40310_9453651 | NC_021163.1    | Ca_kabuli_chr04 | 9453651                 | CC                              | TT              | 1946789811               |
| SNP_P4_40313_9477167 | NC_021163.1    | Ca_kabuli_chr04 | 9477167                 | GG                              | AA              | 1946789813               |
| SNP_P4_40315_9547678 | NC_021163.1    | Ca_kabuli_chr04 | 9547678                 | CC                              | TT              | 1946789815               |
| SNP_P4_40316_9552151 | NC_021163.1    | Ca_kabuli_chr04 | 9552151                 | CC                              | TT              | 1946789817               |
| SNP_P4_40317_9552959 | NC_021163.1    | Ca_kabuli_chr04 | 9552959                 | TT                              | AA              | 1946789819               |
| SNP_P4_40318_9555442 | NC_021163.1    | Ca_kabuli_chr04 | 9555442                 | CC                              | TT              | 1946789821               |
| SNP_P4_40319_9573798 | NC_021163.1    | Ca_kabuli_chr04 | 9573798                 | GG                              | TT              | 1946789823               |
| SNP_P4_40321_9577323 | NC_021163.1    | Ca_kabuli_chr04 | 9577323                 | GG                              | AA              | 1946789825               |
| SNP_P4_40322_9580149 | NC_021163.1    | Ca_kabuli_chr04 | 9580149                 | AA                              | CC              | 1946789827               |
| SNP_P4_40324_9617996 | NC_021163.1    | Ca_kabuli_chr04 | 9617996                 | TT                              | AA              | 1946789829               |
| SNP_P4_40326_9627836 | NC_021163.1    | Ca_kabuli_chr04 | 9627836                 | AA                              | GG              | 1946789831               |
| SNP_P4_40327_9627880 | NC_021163.1    | Ca_kabuli_chr04 | 9627880                 | AA                              | CC              | 1946789833               |
| SNP_P4_40328_9627914 | NC_021163.1    | Ca_kabuli_chr04 | 9627914                 | TT                              | CC              | 1946789835               |
| SNP_P4_40329_9628068 | NC_021163.1    | Ca_kabuli_chr04 | 9628068                 | AA                              | GG              | 1946789837               |
| SNP_P4_40330_9628094 | NC_021163.1    | Ca_kabuli_chr04 | 9628094                 | CC                              | TT              | 1946789839               |
| SNP_P4_40331_9628114 | NC_021163.1    | Ca_kabuli_chr04 | 9628114                 | GG                              | CC              | 1946789841               |
| SNP_P4_40332_9628456 | NC_021163.1    | Ca_kabuli_chr04 | 9628456                 | AA                              | GG              | 1946789843               |
| SNP_P4_40333_9628531 | NC_021163.1    | Ca_kabuli_chr04 | 9628531                 | GG                              | AA              | 1946789845               |
| SNP_P4_40334_9628564 | NC_021163.1    | Ca_kabuli_chr04 | 9628564                 | AA                              | TT              | 1946789847               |
| SNP_P4_40335_9628577 | NC_021163.1    | Ca_kabuli_chr04 | 9628577                 | AA                              | GG              | 1946789849               |
| SNP_P4_40336_9628578 | NC_021163.1    | Ca_kabuli_chr04 | 9628578                 | AA                              | GG              | 1946789851               |
| SNP_P4_40337_9628591 | NC_021163.1    | Ca_kabuli_chr04 | 9628591                 | CC                              | TT              | 1946789853               |
| SNP_P4_40338_9628622 | NC_021163.1    | Ca_kabuli_chr04 | 9628622                 | GG                              | AA              | 1946789855               |
| SNP_P4_40339_9628675 | NC_021163.1    | Ca_kabuli_chr04 | 9628675                 | TT                              | CC              | 1946789857               |
| SNP_P4_40340_9628716 | NC_021163.1    | Ca_kabuli_chr04 | 9628716                 | CC                              | TT              | 1946789859               |
| SNP_P4_40341_9628730 | NC_021163.1    | Ca_kabuli_chr04 | 9628730                 | AA                              | GG              | 1946789861               |
| SNP_P4_40342_9628733 | NC_021163.1    | Ca_kabuli_chr04 | 9628733                 | TT                              | AA              | 1946789863               |
| SNP_P4_40343_9628779 | NC_021163.1    | Ca_kabuli_chr04 | 9628779                 | CC                              | TT              | 1946789866               |
| SNP_P4_40344_9628805 | NC_021163.1    | Ca_kabuli_chr04 | 9628805                 | AA                              | TT              | 1946789868               |
| SNP_P4_40345_9628818 | NC_021163.1    | Ca_kabuli_chr04 | 9628818                 | CC                              | TT              | 1946789870               |
| SNP_P4_40346_9628831 | NC_021163.1    | Ca_kabuli_chr04 | 9628831                 | AA                              | TT              | 1946789872               |
| SNP_P4_40347_9628871 | NC_021163.1    | Ca_kabuli_chr04 | 9628871                 | TT                              | GG              | 1946789874               |

| SNPs IDs             | Chromosome IDs | Chromosomes     | Physical positions (bp) | CDC Frontier (Reference genome) | (ILWC46 & LPNB) | NCBI SNPdb Accession IDs |
|----------------------|----------------|-----------------|-------------------------|---------------------------------|-----------------|--------------------------|
| SNP_P4_40348_9628911 | NC_021163.1    | Ca_kabuli_chr04 | 9628911                 | CC                              | TT              | 1946789876               |
| SNP_P4_40349_9628913 | NC_021163.1    | Ca_kabuli_chr04 | 9628913                 | AA                              | GG              | 1946789878               |
| SNP_P4_40350_9628972 | NC_021163.1    | Ca_kabuli_chr04 | 9628972                 | CC                              | AA              | 1946789880               |
| SNP_P4_40351_9629076 | NC_021163.1    | Ca_kabuli_chr04 | 9629076                 | TT                              | CC              | 1946789882               |
| SNP_P4_40352_9629079 | NC_021163.1    | Ca_kabuli_chr04 | 9629079                 | AA                              | TT              | 1946789884               |
| SNP_P4_40353_9629128 | NC_021163.1    | Ca_kabuli_chr04 | 9629128                 | GG                              | AA              | 1946789886               |
| SNP_P4_40354_9629129 | NC_021163.1    | Ca_kabuli_chr04 | 9629129                 | AA                              | GG              | 1946789888               |
| SNP_P4_40355_9629167 | NC_021163.1    | Ca_kabuli_chr04 | 9629167                 | TT                              | GG              | 1946789890               |
| SNP_P4_40356_9629168 | NC_021163.1    | Ca_kabuli_chr04 | 9629168                 | GG                              | TT              | 1946789892               |
| SNP_P4_40357_9629230 | NC_021163.1    | Ca_kabuli_chr04 | 9629230                 | GG                              | CC              | 1946789894               |
| SNP_P4_40358_9629237 | NC_021163.1    | Ca_kabuli_chr04 | 9629237                 | AA                              | TT              | 1946789896               |
| SNP_P4_40359_9629241 | NC_021163.1    | Ca_kabuli_chr04 | 9629241                 | GG                              | TT              | 1946789898               |
| SNP_P4_40360_9629263 | NC_021163.1    | Ca_kabuli_chr04 | 9629263                 | AA                              | GG              | 1946789900               |
| SNP_P4_40361_9629267 | NC_021163.1    | Ca_kabuli_chr04 | 9629267                 | CC                              | TT              | 1946789902               |
| SNP_P4_40362_9629279 | NC_021163.1    | Ca_kabuli_chr04 | 9629279                 | AA                              | GG              | 1946789904               |
| SNP_P4_40363_9629374 | NC_021163.1    | Ca_kabuli_chr04 | 9629374                 | CC                              | TT              | 1946789906               |
| SNP_P4_40364_9629375 | NC_021163.1    | Ca_kabuli_chr04 | 9629375                 | GG                              | AA              | 1946789908               |
| SNP_P4_40365_9629402 | NC_021163.1    | Ca_kabuli_chr04 | 9629402                 | TT                              | CC              | 1946789910               |
| SNP_P4_40366_9629417 | NC_021163.1    | Ca_kabuli_chr04 | 9629417                 | TT                              | GG              | 1946789912               |
| SNP_P4_40367_9629477 | NC_021163.1    | Ca_kabuli_chr04 | 9629477                 | CC                              | TT              | 1946789914               |
| SNP_P4_40368_9629502 | NC_021163.1    | Ca_kabuli_chr04 | 9629502                 | AA                              | GG              | 1946789916               |
| SNP_P4_40369_9629549 | NC_021163.1    | Ca_kabuli_chr04 | 9629549                 | CC                              | TT              | 1946789918               |
| SNP_P4_40370_9629561 | NC_021163.1    | Ca_kabuli_chr04 | 9629561                 | CC                              | TT              | 1946789920               |
| SNP_P4_40371_9629562 | NC_021163.1    | Ca_kabuli_chr04 | 9629562                 | TT                              | CC              | 1946789922               |
| SNP_P4_40372_9629568 | NC_021163.1    | Ca_kabuli_chr04 | 9629568                 | GG                              | AA              | 1946789924               |
| SNP_P4_40373_9629632 | NC_021163.1    | Ca_kabuli_chr04 | 9629632                 | GG                              | AA              | 1946789926               |
| SNP_P4_40374_9629639 | NC_021163.1    | Ca_kabuli_chr04 | 9629639                 | CC                              | TT              | 1946789928               |
| SNP_P4_40375_9629683 | NC_021163.1    | Ca_kabuli_chr04 | 9629683                 | CC                              | AA              | 1946789931               |
| SNP_P4_40376_9629691 | NC_021163.1    | Ca_kabuli_chr04 | 9629691                 | TT                              | CC              | 1946789933               |
| SNP_P4_40377_9629749 | NC_021163.1    | Ca_kabuli_chr04 | 9629749                 | AA                              | GG              | 1946789935               |
| SNP_P4_40378_9629819 | NC_021163.1    | Ca_kabuli_chr04 | 9629819                 | CC                              | TT              | 1946789937               |
| SNP_P4_40379_9629825 | NC_021163.1    | Ca_kabuli_chr04 | 9629825                 | CC                              | GG              | 1946789939               |
| SNP_P4_40380_9629841 | NC_021163.1    | Ca_kabuli_chr04 | 9629841                 | TT                              | CC              | 1946789941               |
| SNP_P4_40381_9629855 | NC_021163.1    | Ca_kabuli_chr04 | 9629855                 | AA                              | TT              | 1946789943               |
| SNP_P4_40383_9629887 | NC_021163.1    | Ca_kabuli_chr04 | 9629887                 | GG                              | TT              | 1946789945               |
| SNP_P4_40384_9629924 | NC_021163.1    | Ca_kabuli_chr04 | 9629924                 | AA                              | GG              | 1946789947               |
| SNP_P4_40385_9629940 | NC_021163.1    | Ca_kabuli_chr04 | 9629940                 | CC                              | TT              | 1946789949               |
| SNP_P4_40386_9629971 | NC_021163.1    | Ca_kabuli_chr04 | 9629971                 | GG                              | AA              | 1946789951               |
| SNP_P4_40387_9629978 | NC_021163.1    | Ca_kabuli_chr04 | 9629978                 | TT                              | GG              | 1946789953               |
| SNP_P4_40388_9629995 | NC_021163.1    | Ca_kabuli_chr04 | 9629995                 | AA                              | CC              | 1946789955               |
| SNP_P4_40389_9630050 | NC_021163.1    | Ca_kabuli_chr04 | 9630050                 | AA                              | TT              | 1946789957               |
| SNP_P4_40390_9630065 | NC_021163.1    | Ca_kabuli_chr04 | 9630065                 | CC                              | TT              | 1946789959               |

| SNPs IDs             | Chromosome IDs | Chromosomes     | Physical positions (bp) | CDC Frontier (Reference genome) | (ILWC46 & LPNB) | NCBI SNPdb Accession IDs |
|----------------------|----------------|-----------------|-------------------------|---------------------------------|-----------------|--------------------------|
| SNP_P4_40391_9630119 | NC_021163.1    | Ca_kabuli_chr04 | 9630119                 | AA                              | GG              | 1946789961               |
| SNP_P4_40393_9630161 | NC_021163.1    | Ca_kabuli_chr04 | 9630161                 | GG                              | AA              | 1946789963               |
| SNP_P4_40394_9630193 | NC_021163.1    | Ca_kabuli_chr04 | 9630193                 | CC                              | GG              | 1946789965               |
| SNP_P4_40395_9630199 | NC_021163.1    | Ca_kabuli_chr04 | 9630199                 | TT                              | GG              | 1946789967               |
| SNP_P4_40396_9630210 | NC_021163.1    | Ca_kabuli_chr04 | 9630210                 | GG                              | TT              | 1946789969               |
| SNP_P4_40397_9630214 | NC_021163.1    | Ca_kabuli_chr04 | 9630214                 | AA                              | GG              | 1946789971               |
| SNP_P4_40398_9630268 | NC_021163.1    | Ca_kabuli_chr04 | 9630268                 | CC                              | AA              | 1946789973               |
| SNP_P4_40399_9630282 | NC_021163.1    | Ca_kabuli_chr04 | 9630282                 | TT                              | CC              | 1946789975               |
| SNP_P4_40401_9630356 | NC_021163.1    | Ca_kabuli_chr04 | 9630356                 | GG                              | TT              | 1946789977               |
| SNP_P4_40402_9630406 | NC_021163.1    | Ca_kabuli_chr04 | 9630406                 | TT                              | AA              | 1946789979               |
| SNP_P4_40403_9630414 | NC_021163.1    | Ca_kabuli_chr04 | 9630414                 | CC                              | GG              | 1946789982               |
| SNP_P4_40404_9630415 | NC_021163.1    | Ca_kabuli_chr04 | 9630415                 | AA                              | TT              | 1946789984               |
| SNP_P4_40405_9630425 | NC_021163.1    | Ca_kabuli_chr04 | 9630425                 | AA                              | GG              | 1946789986               |
| SNP_P4_40406_9630481 | NC_021163.1    | Ca_kabuli_chr04 | 9630481                 | AA                              | GG              | 1946789988               |
| SNP_P4_40407_9630495 | NC_021163.1    | Ca_kabuli_chr04 | 9630495                 | GG                              | AA              | 1946789990               |
| SNP_P4_40408_9630502 | NC_021163.1    | Ca_kabuli_chr04 | 9630502                 | GG                              | AA              | 1946789992               |
| SNP_P4_40409_9630508 | NC_021163.1    | Ca_kabuli_chr04 | 9630508                 | CC                              | TT              | 1946789994               |
| SNP_P4_40410_9630526 | NC_021163.1    | Ca_kabuli_chr04 | 9630526                 | AA                              | GG              | 1946789996               |
| SNP_P4_40411_9630530 | NC_021163.1    | Ca_kabuli_chr04 | 9630530                 | GG                              | TT              | 1946789998               |
| SNP_P4_40412_9630563 | NC_021163.1    | Ca_kabuli_chr04 | 9630563                 | CC                              | TT              | 1946790000               |
| SNP_P4_40413_9630650 | NC_021163.1    | Ca_kabuli_chr04 | 9630650                 | AA                              | CC              | 1946790002               |
| SNP_P4_40414_9630676 | NC_021163.1    | Ca_kabuli_chr04 | 9630676                 | TT                              | CC              | 1946790004               |
| SNP_P4_40415_9630679 | NC_021163.1    | Ca_kabuli_chr04 | 9630679                 | TT                              | CC              | 1946790006               |
| SNP_P4_40416_9630698 | NC_021163.1    | Ca_kabuli_chr04 | 9630698                 | AA                              | GG              | 1946790008               |
| SNP_P4_40417_9630780 | NC_021163.1    | Ca_kabuli_chr04 | 9630780                 | GG                              | TT              | 1946790010               |
| SNP_P4_40418_9630902 | NC_021163.1    | Ca_kabuli_chr04 | 9630902                 | AA                              | TT              | 1946790012               |
| SNP_P4_40420_9631519 | NC_021163.1    | Ca_kabuli_chr04 | 9631519                 | GG                              | CC              | 1946790014               |
| SNP_P4_40421_9631985 | NC_021163.1    | Ca_kabuli_chr04 | 9631985                 | GG                              | AA              | 1946790016               |
| SNP_P4_40422_9631992 | NC_021163.1    | Ca_kabuli_chr04 | 9631992                 | TT                              | CC              | 1946790018               |
| SNP_P4_40423_9632060 | NC_021163.1    | Ca_kabuli_chr04 | 9632060                 | GG                              | CC              | 1946790020               |
| SNP_P4_40424_9632311 | NC_021163.1    | Ca_kabuli_chr04 | 9632311                 | TT                              | AA              | 1946790022               |
| SNP_P4_40426_9632809 | NC_021163.1    | Ca_kabuli_chr04 | 9632809                 | AA                              | TT              | 1946790024               |
| SNP_P4_40427_9632840 | NC_021163.1    | Ca_kabuli_chr04 | 9632840                 | TT                              | AA              | 1946790026               |
| SNP_P4_40428_9632849 | NC_021163.1    | Ca_kabuli_chr04 | 9632849                 | AA                              | GG              | 1946790028               |
| SNP_P4_40429_9632892 | NC_021163.1    | Ca_kabuli_chr04 | 9632892                 | AA                              | CC              | 1946790030               |
| SNP_P4_40430_9632908 | NC_021163.1    | Ca_kabuli_chr04 | 9632908                 | TT                              | AA              | 1946790032               |
| SNP_P4_40431_9632955 | NC_021163.1    | Ca_kabuli_chr04 | 9632955                 | TT                              | AA              | 1946790034               |
| SNP_P4_40432_9632986 | NC_021163.1    | Ca_kabuli_chr04 | 9632986                 | AA                              | GG              | 1946790036               |
| SNP_P4_40433_9632990 | NC_021163.1    | Ca_kabuli_chr04 | 9632990                 | GG                              | TT              | 1946790038               |
| SNP_P4_40434_9633006 | NC_021163.1    | Ca_kabuli_chr04 | 9633006                 | CC                              | GG              | 1946790040               |
| SNP_P4_40435_9633046 | NC_021163.1    | Ca_kabuli_chr04 | 9633046                 | GG                              | AA              | 1946790042               |
| SNP_P4_40436_9633055 | NC_021163.1    | Ca_kabuli_chr04 | 9633055                 | AA                              | GG              | 1946790044               |

| SNPs IDs              | Chromosome IDs | Chromosomes     | Physical positions (bp) | CDC Frontier (Reference genome) | (ILWC46 & LPNB) | NCBI SNPdb Accession IDs |
|-----------------------|----------------|-----------------|-------------------------|---------------------------------|-----------------|--------------------------|
| SNP_P4_40438_9633842  | NC_021163.1    | Ca_kabuli_chr04 | 9633842                 | TT                              | AA              | 1946790046               |
| SNP_P4_40439_9633853  | NC_021163.1    | Ca_kabuli_chr04 | 9633853                 | CC                              | AA              | 1946790048               |
| SNP_P4_40440_9633935  | NC_021163.1    | Ca_kabuli_chr04 | 9633935                 | TT                              | GG              | 1946790050               |
| SNP_P4_40441_9633954  | NC_021163.1    | Ca_kabuli_chr04 | 9633954                 | CC                              | AA              | 1946790053               |
| SNP_P4_40442_9633978  | NC_021163.1    | Ca_kabuli_chr04 | 9633978                 | GG                              | AA              | 1946790055               |
| SNP_P4_40443_9658306  | NC_021163.1    | Ca_kabuli_chr04 | 9658306                 | TT                              | AA              | 1946790057               |
| SNP_P4_40445_9677618  | NC_021163.1    | Ca_kabuli_chr04 | 9677618                 | CC                              | TT              | 1946790059               |
| SNP_P4_40447_9685877  | NC_021163.1    | Ca_kabuli_chr04 | 9685877                 | AA                              | TT              | 1946790061               |
| SNP_P4_40448_9693394  | NC_021163.1    | Ca_kabuli_chr04 | 9693394                 | GG                              | AA              | 1946790063               |
| SNP_P4_40450_9708945  | NC_021163.1    | Ca_kabuli_chr04 | 9708945                 | TT                              | AA              | 1946790065               |
| SNP_P4_40451_9719320  | NC_021163.1    | Ca_kabuli_chr04 | 9719320                 | TT                              | AA              | 1946790067               |
| SNP_P4_40452_9719321  | NC_021163.1    | Ca_kabuli_chr04 | 9719321                 | AA                              | TT              | 1946790069               |
| SNP_P4_40453_9726008  | NC_021163.1    | Ca_kabuli_chr04 | 9726008                 | AA                              | GG              | 1946790071               |
| SNP_P4_40454_9726199  | NC_021163.1    | Ca_kabuli_chr04 | 9726199                 | AA                              | GG              | 1946790073               |
| SNP_P4_40455_9726356  | NC_021163.1    | Ca_kabuli_chr04 | 9726356                 | CC                              | TT              | 1946790075               |
| SNP_P4_40456_9726364  | NC_021163.1    | Ca_kabuli_chr04 | 9726364                 | AA                              | GG              | 1946790077               |
| SNP_P4_40457_9726390  | NC_021163.1    | Ca_kabuli_chr04 | 9726390                 | TT                              | CC              | 1946790079               |
| SNP_P4_40458_9726430  | NC_021163.1    | Ca_kabuli_chr04 | 9726430                 | AA                              | TT              | 1946790081               |
| SNP_P4_40459_9726681  | NC_021163.1    | Ca_kabuli_chr04 | 9726681                 | CC                              | TT              | 1946790083               |
| SNP_P4_40460_9726719  | NC_021163.1    | Ca_kabuli_chr04 | 9726719                 | AA                              | GG              | 1946790085               |
| SNP_P4_40461_9726852  | NC_021163.1    | Ca_kabuli_chr04 | 9726852                 | GG                              | AA              | 1946790088               |
| SNP_P4_40463_9727491  | NC_021163.1    | Ca_kabuli_chr04 | 9727491                 | CC                              | TT              | 1946790090               |
| SNP_P4_40467_9792713  | NC_021163.1    | Ca_kabuli_chr04 | 9792713                 | TT                              | CC              | 1946790092               |
| SNP_P4_40468_9792744  | NC_021163.1    | Ca_kabuli_chr04 | 9792744                 | GG                              | CC              | 1946790094               |
| SNP_P4_40471_9866135  | NC_021163.1    | Ca_kabuli_chr04 | 9866135                 | AA                              | TT              | 1946790096               |
| SNP_P4_40472_9880276  | NC_021163.1    | Ca_kabuli_chr04 | 9880276                 | TT                              | AA              | 1946790098               |
| SNP_P4_40473_9922920  | NC_021163.1    | Ca_kabuli_chr04 | 9922920                 | TT                              | AA              | 1946790100               |
| SNP_P4_40474_9935665  | NC_021163.1    | Ca_kabuli_chr04 | 9935665                 | CC                              | TT              | 1946790102               |
| SNP_P4_40475_9960842  | NC_021163.1    | Ca_kabuli_chr04 | 9960842                 | GG                              | TT              | 1946790104               |
| SNP_P4_40477_10031364 | NC_021163.1    | Ca_kabuli_chr04 | 10031364                | GG                              | TT              | 1946790106               |
| SNP_P4_40479_10035370 | NC_021163.1    | Ca_kabuli_chr04 | 10035370                | TT                              | AA              | 1946790108               |
| SNP_P4_40480_10035395 | NC_021163.1    | Ca_kabuli_chr04 | 10035395                | CC                              | TT              | 1946790110               |
| SNP_P4_40481_10035452 | NC_021163.1    | Ca_kabuli_chr04 | 10035452                | TT                              | CC              | 1946790112               |
| SNP_P4_40482_10035511 | NC_021163.1    | Ca_kabuli_chr04 | 10035511                | CC                              | GG              | 1946790114               |
| SNP_P4_40484_10036376 | NC_021163.1    | Ca_kabuli_chr04 | 10036376                | TT                              | CC              | 1946790116               |
| SNP_P4_40485_10063728 | NC_021163.1    | Ca_kabuli_chr04 | 10063728                | AA                              | TT              | 1946790118               |
| SNP_P4_40486_10070104 | NC_021163.1    | Ca_kabuli_chr04 | 10070104                | CC                              | TT              | 1946790120               |
| SNP_P4_40487_10073518 | NC_021163.1    | Ca_kabuli_chr04 | 10073518                | GG                              | AA              | 1946790122               |
| SNP_P4_40489_10107258 | NC_021163.1    | Ca_kabuli_chr04 | 10107258                | CC                              | TT              | 1946790124               |
| SNP_P4_40490_10122579 | NC_021163.1    | Ca_kabuli_chr04 | 10122579                | CC                              | TT              | 1946790126               |
| SNP_P4_40491_10129660 | NC_021163.1    | Ca_kabuli_chr04 | 10129660                | TT                              | CC              | 1946790128               |
| SNP_P4_40492_10129663 | NC_021163.1    | Ca_kabuli_chr04 | 10129663                | TT                              | AA              | 1946790131               |

| SNPs IDs              | Chromosome IDs | Chromosomes     | Physical positions (bp) | CDC Frontier (Reference genome) | (ILWC46 & LPNB) | NCBI SNPdb Accession IDs |
|-----------------------|----------------|-----------------|-------------------------|---------------------------------|-----------------|--------------------------|
| SNP_P4_40494_10139273 | NC_021163.1    | Ca_kabuli_chr04 | 10139273                | TT                              | AA              | 1946790133               |
| SNP_P4_40496_10158026 | NC_021163.1    | Ca_kabuli_chr04 | 10158026                | AA                              | GG              | 1946790135               |
| SNP_P4_40498_10205947 | NC_021163.1    | Ca_kabuli_chr04 | 10205947                | AA                              | GG              | 1946790137               |
| SNP_P4_40502_10238732 | NC_021163.1    | Ca_kabuli_chr04 | 10238732                | TT                              | CC              | 1946790139               |
| SNP_P4_40503_10240534 | NC_021163.1    | Ca_kabuli_chr04 | 10240534                | GG                              | AA              | 1946790141               |
| SNP_P4_40504_10240756 | NC_021163.1    | Ca_kabuli_chr04 | 10240756                | GG                              | TT              | 1946790143               |
| SNP_P4_40507_10253310 | NC_021163.1    | Ca_kabuli_chr04 | 10253310                | TT                              | GG              | 1946790145               |
| SNP_P4_40508_10253324 | NC_021163.1    | Ca_kabuli_chr04 | 10253324                | CC                              | GG              | 1946790147               |
| SNP_P4_40509_10253370 | NC_021163.1    | Ca_kabuli_chr04 | 10253370                | CC                              | AA              | 1946790149               |
| SNP_P4_40510_10253569 | NC_021163.1    | Ca_kabuli_chr04 | 10253569                | AA                              | GG              | 1946790151               |
| SNP_P4_40512_10255449 | NC_021163.1    | Ca_kabuli_chr04 | 10255449                | CC                              | TT              | 1946790153               |
| SNP_P4_40513_10255857 | NC_021163.1    | Ca_kabuli_chr04 | 10255857                | AA                              | GG              | 1946790155               |
| SNP_P4_40514_10256874 | NC_021163.1    | Ca_kabuli_chr04 | 10256874                | TT                              | GG              | 1946790157               |
| SNP_P4_40516_10278083 | NC_021163.1    | Ca_kabuli_chr04 | 10278083                | TT                              | CC              | 1946790159               |
| SNP_P4_40517_10278607 | NC_021163.1    | Ca_kabuli_chr04 | 10278607                | GG                              | AA              | 1946790161               |
| SNP_P4_40518_10305402 | NC_021163.1    | Ca_kabuli_chr04 | 10305402                | GG                              | TT              | 1946790163               |
| SNP_P4_40519_10312295 | NC_021163.1    | Ca_kabuli_chr04 | 10312295                | GG                              | TT              | 1946790165               |
| SNP_P4_40520_10319935 | NC_021163.1    | Ca_kabuli_chr04 | 10319935                | AA                              | GG              | 1946790167               |
| SNP_P4_40522_10368349 | NC_021163.1    | Ca_kabuli_chr04 | 10368349                | CC                              | TT              | 1946790169               |
| SNP_P4_40523_10374911 | NC_021163.1    | Ca_kabuli_chr04 | 10374911                | CC                              | TT              | 1946790171               |
| SNP_P4_40524_10374933 | NC_021163.1    | Ca_kabuli_chr04 | 10374933                | TT                              | CC              | 1946790173               |
| SNP_P4_40525_10378823 | NC_021163.1    | Ca_kabuli_chr04 | 10378823                | TT                              | CC              | 1946790175               |
| SNP_P4_40526_10452408 | NC_021163.1    | Ca_kabuli_chr04 | 10452408                | CC                              | TT              | 1946790177               |
| SNP_P4_40529_10460294 | NC_021163.1    | Ca_kabuli_chr04 | 10460294                | TT                              | AA              | 1946790179               |
| SNP_P4_40530_10508502 | NC_021163.1    | Ca_kabuli_chr04 | 10508502                | GG                              | AA              | 1946790181               |
| SNP_P4_40531_10524389 | NC_021163.1    | Ca_kabuli_chr04 | 10524389                | GG                              | AA              | 1946790183               |
| SNP_P4_40533_10555869 | NC_021163.1    | Ca_kabuli_chr04 | 10555869                | TT                              | GG              | 1946790185               |
| SNP_P4_40534_10555870 | NC_021163.1    | Ca_kabuli_chr04 | 10555870                | AA                              | GG              | 1946790187               |
| SNP_P4_40535_10568701 | NC_021163.1    | Ca_kabuli_chr04 | 10568701                | GG                              | AA              | 1946790189               |
| SNP_P4_40536_10571898 | NC_021163.1    | Ca_kabuli_chr04 | 10571898                | GG                              | AA              | 1946790191               |
| SNP_P4_40537_10576490 | NC_021163.1    | Ca_kabuli_chr04 | 10576490                | CC                              | AA              | 1946790193               |
| SNP_P4_40539_10589505 | NC_021163.1    | Ca_kabuli_chr04 | 10589505                | CC                              | TT              | 1946790195               |
| SNP_P4_40540_10600158 | NC_021163.1    | Ca_kabuli_chr04 | 10600158                | TT                              | CC              | 1946790197               |
| SNP_P4_40544_10663329 | NC_021163.1    | Ca_kabuli_chr04 | 10663329                | GG                              | AA              | 1946790199               |
| SNP_P4_40545_10666731 | NC_021163.1    | Ca_kabuli_chr04 | 10666731                | CC                              | AA              | 1946790201               |
| SNP_P4_40546_10705802 | NC_021163.1    | Ca_kabuli_chr04 | 10705802                | CC                              | TT              | 1946790203               |
| SNP_P4_40547_10741327 | NC_021163.1    | Ca_kabuli_chr04 | 10741327                | GG                              | AA              | 1946790205               |
| SNP_P4_40548_10757937 | NC_021163.1    | Ca_kabuli_chr04 | 10757937                | TT                              | GG              | 1946790207               |
| SNP_P4_40549_10757939 | NC_021163.1    | Ca_kabuli_chr04 | 10757939                | TT                              | GG              | 1946790210               |
| SNP_P4_40550_10758518 | NC_021163.1    | Ca_kabuli_chr04 | 10758518                | TT                              | CC              | 1946790212               |
| SNP_P4_40551_10781192 | NC_021163.1    | Ca_kabuli_chr04 | 10781192                | TT                              | GG              | 1946790214               |
| SNP_P4_40553_10791691 | NC_021163.1    | Ca_kabuli_chr04 | 10791691                | CC                              | TT              | 1946790216               |

| SNPs IDs              | Chromosome IDs | Chromosomes     | Physical positions (bp) | CDC Frontier (Reference genome) | (ILWC46 & LPNB) | NCBI SNPdb Accession IDs |
|-----------------------|----------------|-----------------|-------------------------|---------------------------------|-----------------|--------------------------|
| SNP_P4_40555_10821907 | NC_021163.1    | Ca_kabuli_chr04 | 10821907                | AA                              | TT              | 1946790218               |
| SNP_P4_40556_10829189 | NC_021163.1    | Ca_kabuli_chr04 | 10829189                | TT                              | CC              | 1946790220               |
| SNP_P4_40557_10866102 | NC_021163.1    | Ca_kabuli_chr04 | 10866102                | GG                              | AA              | 1946790222               |
| SNP_P4_40558_10879065 | NC_021163.1    | Ca_kabuli_chr04 | 10879065                | CC                              | AA              | 1946790224               |
| SNP_P4_40559_10879282 | NC_021163.1    | Ca_kabuli_chr04 | 10879282                | TT                              | CC              | 1946790226               |
| SNP_P4_40561_10880220 | NC_021163.1    | Ca_kabuli_chr04 | 10880220                | TT                              | GG              | 1946790228               |
| SNP_P4_40562_10880225 | NC_021163.1    | Ca_kabuli_chr04 | 10880225                | AA                              | GG              | 1946790230               |
| SNP_P4_40563_10880231 | NC_021163.1    | Ca_kabuli_chr04 | 10880231                | TT                              | AA              | 1946790232               |
| SNP_P4_40564_10880475 | NC_021163.1    | Ca_kabuli_chr04 | 10880475                | TT                              | AA              | 1946790234               |
| SNP_P4_40565_10880480 | NC_021163.1    | Ca_kabuli_chr04 | 10880480                | TT                              | CC              | 1946790236               |
| SNP_P4_40566_10888887 | NC_021163.1    | Ca_kabuli_chr04 | 10888887                | CC                              | TT              | 1946790238               |
| SNP_P4_40567_10893513 | NC_021163.1    | Ca_kabuli_chr04 | 10893513                | AA                              | TT              | 1946790240               |
| SNP_P4_40568_10915004 | NC_021163.1    | Ca_kabuli_chr04 | 10915004                | AA                              | GG              | 1946790242               |
| SNP_P4_40569_10946958 | NC_021163.1    | Ca_kabuli_chr04 | 10946958                | AA                              | GG              | 1946790244               |
| SNP_P4_40571_10955225 | NC_021163.1    | Ca_kabuli_chr04 | 10955225                | CC                              | AA              | 1946790246               |
| SNP_P4_40572_10958260 | NC_021163.1    | Ca_kabuli_chr04 | 10958260                | TT                              | CC              | 1946790248               |
| SNP_P4_40573_10966762 | NC_021163.1    | Ca_kabuli_chr04 | 10966762                | TT                              | CC              | 1946790250               |
| SNP_P4_40574_10972695 | NC_021163.1    | Ca_kabuli_chr04 | 10972695                | GG                              | CC              | 1946790252               |
| SNP_P4_40576_11003102 | NC_021163.1    | Ca_kabuli_chr04 | 11003102                | TT                              | CC              | 1946790254               |
| SNP_P4_40577_11003109 | NC_021163.1    | Ca_kabuli_chr04 | 11003109                | TT                              | CC              | 1946790255               |
| SNP_P4_40578_11003256 | NC_021163.1    | Ca_kabuli_chr04 | 11003256                | AA                              | GG              | 1946790257               |
| SNP_P4_40579_11003479 | NC_021163.1    | Ca_kabuli_chr04 | 11003479                | TT                              | CC              | 1946790259               |
| SNP_P4_40580_11003672 | NC_021163.1    | Ca_kabuli_chr04 | 11003672                | AA                              | GG              | 1946790261               |
| SNP_P4_40581_11011482 | NC_021163.1    | Ca_kabuli_chr04 | 11011482                | CC                              | TT              | 1946790263               |
| SNP_P4_40582_11021386 | NC_021163.1    | Ca_kabuli_chr04 | 11021386                | TT                              | AA              | 1946790265               |
| SNP_P4_40583_11056889 | NC_021163.1    | Ca_kabuli_chr04 | 11056889                | TT                              | AA              | 1946790267               |
| SNP_P4_40584_11057194 | NC_021163.1    | Ca_kabuli_chr04 | 11057194                | AA                              | GG              | 1946790269               |
| SNP_P4_40587_11147012 | NC_021163.1    | Ca_kabuli_chr04 | 11147012                | AA                              | TT              | 1946790271               |
| SNP_P4_40588_11147013 | NC_021163.1    | Ca_kabuli_chr04 | 11147013                | AA                              | TT              | 1946790273               |
| SNP_P4_40589_11172031 | NC_021163.1    | Ca_kabuli_chr04 | 11172031                | AA                              | TT              | 1946790275               |
| SNP_P4_40590_11195976 | NC_021163.1    | Ca_kabuli_chr04 | 11195976                | TT                              | CC              | 1946790277               |
| SNP_P4_40591_11201838 | NC_021163.1    | Ca_kabuli_chr04 | 11201838                | GG                              | AA              | 1946790279               |
| SNP_P4_40592_11209560 | NC_021163.1    | Ca_kabuli_chr04 | 11209560                | TT                              | CC              | 1946790281               |
| SNP_P4_40593_11211225 | NC_021163.1    | Ca_kabuli_chr04 | 11211225                | CC                              | AA              | 1946790283               |
| SNP_P4_40594_11211420 | NC_021163.1    | Ca_kabuli_chr04 | 11211420                | GG                              | TT              | 1946790285               |
| SNP_P4_40596_11213923 | NC_021163.1    | Ca_kabuli_chr04 | 11213923                | AA                              | TT              | 1946790287               |
| SNP_P4_40597_11213924 | NC_021163.1    | Ca_kabuli_chr04 | 11213924                | AA                              | TT              | 1946790289               |
| SNP_P4_40598_11213987 | NC_021163.1    | Ca_kabuli_chr04 | 11213987                | GG                              | CC              | 1946790291               |
| SNP_P4_40599_11214334 | NC_021163.1    | Ca_kabuli_chr04 | 11214334                | AA                              | CC              | 1946790293               |
| SNP_P4_40600_11214337 | NC_021163.1    | Ca_kabuli_chr04 | 11214337                | AA                              | TT              | 1946790295               |
| SNP_P4_40601_11214469 | NC_021163.1    | Ca_kabuli_chr04 | 11214469                | GG                              | AA              | 1946790297               |
| SNP_P4_40602_11215060 | NC_021163.1    | Ca_kabuli_chr04 | 11215060                | AA                              | GG              | 1946790299               |

| SNPs IDs              | Chromosome IDs | Chromosomes     | Physical positions (bp) | CDC Frontier (Reference genome) | (ILWC46 & LPNB) | NCBI SNPdb Accession IDs |
|-----------------------|----------------|-----------------|-------------------------|---------------------------------|-----------------|--------------------------|
| SNP_P4_40603_11215061 | NC_021163.1    | Ca_kabuli_chr04 | 11215061                | CC                              | TT              | 1946790301               |
| SNP_P4_40604_11215123 | NC_021163.1    | Ca_kabuli_chr04 | 11215123                | TT                              | AA              | 1946790303               |
| SNP_P4_40605_11215129 | NC_021163.1    | Ca_kabuli_chr04 | 11215129                | CC                              | TT              | 1946790305               |
| SNP_P4_40606_11215145 | NC_021163.1    | Ca_kabuli_chr04 | 11215145                | AA                              | GG              | 1946790307               |
| SNP_P4_40607_11215177 | NC_021163.1    | Ca_kabuli_chr04 | 11215177                | AA                              | GG              | 1946790309               |
| SNP_P4_40608_11215178 | NC_021163.1    | Ca_kabuli_chr04 | 11215178                | AA                              | TT              | 1946790312               |
| SNP_P4_40609_11215180 | NC_021163.1    | Ca_kabuli_chr04 | 11215180                | CC                              | GG              | 1946790314               |
| SNP_P4_40610_11215190 | NC_021163.1    | Ca_kabuli_chr04 | 11215190                | GG                              | CC              | 1946790315               |
| SNP_P4_40611_11215196 | NC_021163.1    | Ca_kabuli_chr04 | 11215196                | GG                              | AA              | 1946790317               |
| SNP_P4_40612_11215253 | NC_021163.1    | Ca_kabuli_chr04 | 11215253                | TT                              | AA              | 1946790320               |
| SNP_P4_40613_11215373 | NC_021163.1    | Ca_kabuli_chr04 | 11215373                | TT                              | CC              | 1946790322               |
| SNP_P4_40614_11215622 | NC_021163.1    | Ca_kabuli_chr04 | 11215622                | TT                              | GG              | 1946790324               |
| SNP_P4_40615_11216025 | NC_021163.1    | Ca_kabuli_chr04 | 11216025                | TT                              | GG              | 1946790326               |
| SNP_P4_40616_11216027 | NC_021163.1    | Ca_kabuli_chr04 | 11216027                | GG                              | AA              | 1946790328               |
| SNP_P4_40617_11216045 | NC_021163.1    | Ca_kabuli_chr04 | 11216045                | GG                              | AA              | 1946790330               |
| SNP_P4_40618_11216048 | NC_021163.1    | Ca_kabuli_chr04 | 11216048                | TT                              | GG              | 1946790332               |
| SNP_P4_40620_11216294 | NC_021163.1    | Ca_kabuli_chr04 | 11216294                | CC                              | TT              | 1946790334               |
| SNP_P4_40621_11216341 | NC_021163.1    | Ca_kabuli_chr04 | 11216341                | AA                              | GG              | 1946790336               |
| SNP_P4_40622_11216435 | NC_021163.1    | Ca_kabuli_chr04 | 11216435                | CC                              | TT              | 1946790338               |
| SNP_P4_40624_11216560 | NC_021163.1    | Ca_kabuli_chr04 | 11216560                | AA                              | TT              | 1946790340               |
| SNP_P4_40626_11217716 | NC_021163.1    | Ca_kabuli_chr04 | 11217716                | GG                              | CC              | 1946790342               |
| SNP_P4_40627_11218059 | NC_021163.1    | Ca_kabuli_chr04 | 11218059                | AA                              | TT              | 1946790343               |
| SNP_P4_40628_11218102 | NC_021163.1    | Ca_kabuli_chr04 | 11218102                | TT                              | GG              | 1946790345               |
| SNP_P4_40629_11218132 | NC_021163.1    | Ca_kabuli_chr04 | 11218132                | TT                              | AA              | 1946790347               |
| SNP_P4_40630_11218248 | NC_021163.1    | Ca_kabuli_chr04 | 11218248                | AA                              | GG              | 1946790349               |
| SNP_P4_40631_11218249 | NC_021163.1    | Ca_kabuli_chr04 | 11218249                | CC                              | TT              | 1946790351               |
| SNP_P4_40632_11218253 | NC_021163.1    | Ca_kabuli_chr04 | 11218253                | GG                              | TT              | 1946790353               |
| SNP_P4_40633_11218306 | NC_021163.1    | Ca_kabuli_chr04 | 11218306                | TT                              | AA              | 1946790356               |
| SNP_P4_40634_11218314 | NC_021163.1    | Ca_kabuli_chr04 | 11218314                | GG                              | CC              | 1946790358               |
| SNP_P4_40635_11218567 | NC_021163.1    | Ca_kabuli_chr04 | 11218567                | GG                              | AA              | 1946790360               |
| SNP_P4_40636_11218577 | NC_021163.1    | Ca_kabuli_chr04 | 11218577                | CC                              | TT              | 1946790362               |
| SNP_P4_40637_11218694 | NC_021163.1    | Ca_kabuli_chr04 | 11218694                | TT                              | CC              | 1946790364               |
| SNP_P4_40638_11219469 | NC_021163.1    | Ca_kabuli_chr04 | 11219469                | TT                              | CC              | 1946790366               |
| SNP_P4_40639_11219545 | NC_021163.1    | Ca_kabuli_chr04 | 11219545                | AA                              | GG              | 1946790368               |
| SNP_P4_40640_11219579 | NC_021163.1    | Ca_kabuli_chr04 | 11219579                | TT                              | AA              | 1946790370               |
| SNP_P4_40641_11219580 | NC_021163.1    | Ca_kabuli_chr04 | 11219580                | TT                              | AA              | 1946790372               |
| SNP_P4_40642_11219596 | NC_021163.1    | Ca_kabuli_chr04 | 11219596                | GG                              | AA              | 1946790374               |
| SNP_P4_40643_11219603 | NC_021163.1    | Ca_kabuli_chr04 | 11219603                | GG                              | AA              | 1946790376               |
| SNP_P4_40644_11219774 | NC_021163.1    | Ca_kabuli_chr04 | 11219774                | CC                              | TT              | 1946790378               |
| SNP_P4_40645_11219948 | NC_021163.1    | Ca_kabuli_chr04 | 11219948                | AA                              | TT              | 1946790380               |
| SNP_P4_40646_11220156 | NC_021163.1    | Ca_kabuli_chr04 | 11220156                | GG                              | CC              | 1946790382               |
| SNP_P4_40647_11220180 | NC_021163.1    | Ca_kabuli_chr04 | 11220180                | AA                              | TT              | 1946790384               |

| SNPs IDs              | Chromosome IDs | Chromosomes     | Physical positions (bp) | CDC Frontier (Reference genome) | (ILWC46 & LPNB) | NCBI SNPdb Accession IDs |
|-----------------------|----------------|-----------------|-------------------------|---------------------------------|-----------------|--------------------------|
| SNP_P4_40648_11220642 | NC_021163.1    | Ca_kabuli_chr04 | 11220642                | CC                              | TT              | 1946790386               |
| SNP_P4_40649_11220968 | NC_021163.1    | Ca_kabuli_chr04 | 11220968                | GG                              | CC              | 1946790388               |
| SNP_P4_40650_11220975 | NC_021163.1    | Ca_kabuli_chr04 | 11220975                | CC                              | TT              | 1946790390               |
| SNP_P4_40651_11220978 | NC_021163.1    | Ca_kabuli_chr04 | 11220978                | GG                              | AA              | 1946790392               |
| SNP_P4_40652_11221010 | NC_021163.1    | Ca_kabuli_chr04 | 11221010                | AA                              | GG              | 1946790394               |
| SNP_P4_40653_11221029 | NC_021163.1    | Ca_kabuli_chr04 | 11221029                | CC                              | GG              | 1946790396               |
| SNP_P4_40654_11221033 | NC_021163.1    | Ca_kabuli_chr04 | 11221033                | AA                              | TT              | 1946790398               |
| SNP_P4_40655_11221205 | NC_021163.1    | Ca_kabuli_chr04 | 11221205                | AA                              | CC              | 1946790400               |
| SNP_P4_40656_11221255 | NC_021163.1    | Ca_kabuli_chr04 | 11221255                | GG                              | TT              | 1946790402               |
| SNP_P4_40657_11221572 | NC_021163.1    | Ca_kabuli_chr04 | 11221572                | TT                              | CC              | 1946790404               |
| SNP_P4_40660_11225408 | NC_021163.1    | Ca_kabuli_chr04 | 11225408                | AA                              | GG              | 1946790406               |
| SNP_P4_40661_11225935 | NC_021163.1    | Ca_kabuli_chr04 | 11225935                | AA                              | GG              | 1946790408               |
| SNP_P4_40662_11225944 | NC_021163.1    | Ca_kabuli_chr04 | 11225944                | TT                              | CC              | 1946790410               |
| SNP_P4_40663_11225946 | NC_021163.1    | Ca_kabuli_chr04 | 11225946                | AA                              | TT              | 1946790412               |
| SNP_P4_40664_11226326 | NC_021163.1    | Ca_kabuli_chr04 | 11226326                | CC                              | AA              | 1946790414               |
| SNP_P4_40665_11226376 | NC_021163.1    | Ca_kabuli_chr04 | 11226376                | TT                              | CC              | 1946790416               |
| SNP_P4_40666_11226399 | NC_021163.1    | Ca_kabuli_chr04 | 11226399                | AA                              | TT              | 1946790418               |
| SNP_P4_40667_11226687 | NC_021163.1    | Ca_kabuli_chr04 | 11226687                | GG                              | TT              | 1946790420               |
| SNP_P4_40669_11228387 | NC_021163.1    | Ca_kabuli_chr04 | 11228387                | GG                              | AA              | 1946790422               |
| SNP_P4_40670_11228732 | NC_021163.1    | Ca_kabuli_chr04 | 11228732                | TT                              | AA              | 1946790424               |
| SNP_P4_40673_11229005 | NC_021163.1    | Ca_kabuli_chr04 | 11229005                | CC                              | TT              | 1946790426               |
| SNP_P4_40674_11229022 | NC_021163.1    | Ca_kabuli_chr04 | 11229022                | GG                              | AA              | 1946790428               |
| SNP_P4_40675_11229026 | NC_021163.1    | Ca_kabuli_chr04 | 11229026                | AA                              | GG              | 1946790430               |
| SNP_P4_40676_11229031 | NC_021163.1    | Ca_kabuli_chr04 | 11229031                | TT                              | CC              | 1946790432               |
| SNP_P4_40678_11229181 | NC_021163.1    | Ca_kabuli_chr04 | 11229181                | TT                              | CC              | 1946790434               |
| SNP_P4_40679_11229383 | NC_021163.1    | Ca_kabuli_chr04 | 11229383                | TT                              | CC              | 1946790436               |
| SNP_P4_40680_11229538 | NC_021163.1    | Ca_kabuli_chr04 | 11229538                | GG                              | AA              | 1946790438               |
| SNP_P4_40681_11229548 | NC_021163.1    | Ca_kabuli_chr04 | 11229548                | TT                              | CC              | 1946790440               |
| SNP_P4_40683_11229629 | NC_021163.1    | Ca_kabuli_chr04 | 11229629                | TT                              | CC              | 1946790442               |
| SNP_P4_40684_11229839 | NC_021163.1    | Ca_kabuli_chr04 | 11229839                | AA                              | CC              | 1946790443               |
| SNP_P4_40685_11229867 | NC_021163.1    | Ca_kabuli_chr04 | 11229867                | TT                              | AA              | 1946790445               |
| SNP_P4_40686_11230003 | NC_021163.1    | Ca_kabuli_chr04 | 11230003                | GG                              | AA              | 1946790447               |
| SNP_P4_40687_11230184 | NC_021163.1    | Ca_kabuli_chr04 | 11230184                | TT                              | AA              | 1946790449               |
| SNP_P4_40688_11232412 | NC_021163.1    | Ca_kabuli_chr04 | 11232412                | AA                              | GG              | 1946790451               |
| SNP_P4_40689_11232672 | NC_021163.1    | Ca_kabuli_chr04 | 11232672                | TT                              | AA              | 1946790453               |
| SNP_P4_40690_11232990 | NC_021163.1    | Ca_kabuli_chr04 | 11232990                | CC                              | TT              | 1946790455               |
| SNP_P4_40691_11233027 | NC_021163.1    | Ca_kabuli_chr04 | 11233027                | GG                              | AA              | 1946790458               |
| SNP_P4_40692_11233320 | NC_021163.1    | Ca_kabuli_chr04 | 11233320                | AA                              | GG              | 1946790459               |
| SNP_P4_40693_11233710 | NC_021163.1    | Ca_kabuli_chr04 | 11233710                | TT                              | CC              | 1946790461               |
| SNP_P4_40694_11234130 | NC_021163.1    | Ca_kabuli_chr04 | 11234130                | GG                              | AA              | 1946790463               |
| SNP_P4_40695_11236558 | NC_021163.1    | Ca_kabuli_chr04 | 11236558                | AA                              | TT              | 1946790465               |
| SNP_P4_40696_11237603 | NC_021163.1    | Ca_kabuli_chr04 | 11237603                | TT                              | CC              | 1946790467               |



| SNPs IDs              | Chromosome IDs | Chromosomes     | Physical positions (bp) | CDC Frontier (Reference genome) | (ILWC46 & LPNB) | NCBI SNPdb Accession IDs |
|-----------------------|----------------|-----------------|-------------------------|---------------------------------|-----------------|--------------------------|
| SNP_P4_40697_11237628 | NC_021163.1    | Ca_kabuli_chr04 | 11237628                | TT                              | CC              | 1946790469               |
| SNP_P4_40698_11237629 | NC_021163.1    | Ca_kabuli_chr04 | 11237629                | GG                              | CC              | 1946790471               |
| SNP_P4_40699_11237634 | NC_021163.1    | Ca_kabuli_chr04 | 11237634                | AA                              | GG              | 1946790473               |
| SNP_P4_40700_11237858 | NC_021163.1    | Ca_kabuli_chr04 | 11237858                | AA                              | GG              | 1946790475               |
| SNP_P4_40701_11237971 | NC_021163.1    | Ca_kabuli_chr04 | 11237971                | CC                              | TT              | 1946790477               |
| SNP_P4_40702_11238332 | NC_021163.1    | Ca_kabuli_chr04 | 11238332                | AA                              | GG              | 1946790479               |
| SNP_P4_40703_11238922 | NC_021163.1    | Ca_kabuli_chr04 | 11238922                | TT                              | CC              | 1946790481               |
| SNP_P4_40704_11238976 | NC_021163.1    | Ca_kabuli_chr04 | 11238976                | CC                              | TT              | 1946790483               |
| SNP_P4_40705_11239751 | NC_021163.1    | Ca_kabuli_chr04 | 11239751                | CC                              | TT              | 1946790485               |
| SNP_P4_40706_11239778 | NC_021163.1    | Ca_kabuli_chr04 | 11239778                | TT                              | CC              | 1946790487               |
| SNP_P4_40707_11240421 | NC_021163.1    | Ca_kabuli_chr04 | 11240421                | CC                              | TT              | 1946790489               |
| SNP_P4_40709_11241078 | NC_021163.1    | Ca_kabuli_chr04 | 11241078                | CC                              | TT              | 1946790491               |
| SNP_P4_40710_11242997 | NC_021163.1    | Ca_kabuli_chr04 | 11242997                | GG                              | TT              | 1946790493               |
| SNP_P4_40711_11243006 | NC_021163.1    | Ca_kabuli_chr04 | 11243006                | GG                              | AA              | 1946790495               |
| SNP_P4_40712_11243019 | NC_021163.1    | Ca_kabuli_chr04 | 11243019                | AA                              | TT              | 1946790497               |
| SNP_P4_40713_11243083 | NC_021163.1    | Ca_kabuli_chr04 | 11243083                | AA                              | GG              | 1946790498               |
| SNP_P4_40714_11244451 | NC_021163.1    | Ca_kabuli_chr04 | 11244451                | TT                              | CC              | 1946790500               |
| SNP_P4_40715_11246164 | NC_021163.1    | Ca_kabuli_chr04 | 11246164                | GG                              | AA              | 1946790502               |
| SNP_P4_40716_11246173 | NC_021163.1    | Ca_kabuli_chr04 | 11246173                | CC                              | TT              | 1946790504               |
| SNP_P4_40717_11247133 | NC_021163.1    | Ca_kabuli_chr04 | 11247133                | GG                              | AA              | 1946790506               |
| SNP_P4_40718_11247542 | NC_021163.1    | Ca_kabuli_chr04 | 11247542                | CC                              | AA              | 1946790508               |
| SNP_P4_40719_11247778 | NC_021163.1    | Ca_kabuli_chr04 | 11247778                | TT                              | AA              | 1946790510               |
| SNP_P4_40720_11248034 | NC_021163.1    | Ca_kabuli_chr04 | 11248034                | TT                              | CC              | 1946790512               |
| SNP_P4_40721_11248605 | NC_021163.1    | Ca_kabuli_chr04 | 11248605                | TT                              | AA              | 1946790514               |
| SNP_P4_40722_11248988 | NC_021163.1    | Ca_kabuli_chr04 | 11248988                | CC                              | TT              | 1946790516               |
| SNP_P4_40723_11249291 | NC_021163.1    | Ca_kabuli_chr04 | 11249291                | TT                              | CC              | 1946790518               |
| SNP_P4_40724_11249631 | NC_021163.1    | Ca_kabuli_chr04 | 11249631                | CC                              | TT              | 1946790520               |
| SNP_P4_40725_11249675 | NC_021163.1    | Ca_kabuli_chr04 | 11249675                | AA                              | GG              | 1946790522               |
| SNP_P4_40726_11249951 | NC_021163.1    | Ca_kabuli_chr04 | 11249951                | TT                              | AA              | 1946790524               |
| SNP_P4_40727_11250058 | NC_021163.1    | Ca_kabuli_chr04 | 11250058                | TT                              | CC              | 1946790526               |
| SNP_P4_40728_11250992 | NC_021163.1    | Ca_kabuli_chr04 | 11250992                | AA                              | CC              | 1946790528               |
| SNP_P4_40729_11251000 | NC_021163.1    | Ca_kabuli_chr04 | 11251000                | CC                              | TT              | 1946790531               |
| SNP_P4_40730_11251596 | NC_021163.1    | Ca_kabuli_chr04 | 11251596                | CC                              | AA              | 1946790533               |
| SNP_P4_40731_11252374 | NC_021163.1    | Ca_kabuli_chr04 | 11252374                | GG                              | TT              | 1946790535               |
| SNP_P4_40732_11255005 | NC_021163.1    | Ca_kabuli_chr04 | 11255005                | TT                              | CC              | 1946790537               |
| SNP_P4_40733_11255869 | NC_021163.1    | Ca_kabuli_chr04 | 11255869                | TT                              | CC              | 1946790539               |
| SNP_P4_40734_11255983 | NC_021163.1    | Ca_kabuli_chr04 | 11255983                | AA                              | GG              | 1946790541               |
| SNP_P4_40735_11256242 | NC_021163.1    | Ca_kabuli_chr04 | 11256242                | CC                              | GG              | 1946790543               |
| SNP_P4_40736_11256771 | NC_021163.1    | Ca_kabuli_chr04 | 11256771                | TT                              | AA              | 1946790546               |
| SNP_P4_40737_11257370 | NC_021163.1    | Ca_kabuli_chr04 | 11257370                | AA                              | GG              | 1946790548               |
| SNP_P4_40738_11257398 | NC_021163.1    | Ca_kabuli_chr04 | 11257398                | GG                              | AA              | 1946790550               |
| SNP_P4_40739_11259144 | NC_021163.1    | Ca_kabuli_chr04 | 11259144                | CC                              | GG              | 1946790552               |

| SNPs IDs              | Chromosome IDs | Chromosomes     | Physical positions (bp) | CDC Frontier (Reference genome) | (ILWC46 & LPNB) | NCBI SNPdb Accession IDs |
|-----------------------|----------------|-----------------|-------------------------|---------------------------------|-----------------|--------------------------|
| SNP_P4_40740_11259378 | NC_021163.1    | Ca_kabuli_chr04 | 11259378                | TT                              | AA              | 1946790554               |
| SNP_P4_40741_11259601 | NC_021163.1    | Ca_kabuli_chr04 | 11259601                | GG                              | CC              | 1946790556               |
| SNP_P4_40742_11259603 | NC_021163.1    | Ca_kabuli_chr04 | 11259603                | AA                              | GG              | 1946790558               |
| SNP_P4_40743_11261069 | NC_021163.1    | Ca_kabuli_chr04 | 11261069                | AA                              | TT              | 1946790560               |
| SNP_P4_40744_11261078 | NC_021163.1    | Ca_kabuli_chr04 | 11261078                | TT                              | GG              | 1946790562               |
| SNP_P4_40745_11261113 | NC_021163.1    | Ca_kabuli_chr04 | 11261113                | AA                              | TT              | 1946790564               |
| SNP_P4_40746_11261220 | NC_021163.1    | Ca_kabuli_chr04 | 11261220                | CC                              | TT              | 1946790565               |
| SNP_P4_40747_11261439 | NC_021163.1    | Ca_kabuli_chr04 | 11261439                | CC                              | TT              | 1946790566               |
| SNP_P4_40748_11261470 | NC_021163.1    | Ca_kabuli_chr04 | 11261470                | CC                              | TT              | 1946790567               |
| SNP_P4_40749_11261544 | NC_021163.1    | Ca_kabuli_chr04 | 11261544                | AA                              | GG              | 1946790568               |
| SNP_P4_40750_11261559 | NC_021163.1    | Ca_kabuli_chr04 | 11261559                | GG                              | AA              | 1946790569               |
| SNP_P4_40751_11262716 | NC_021163.1    | Ca_kabuli_chr04 | 11262716                | TT                              | GG              | 1946790570               |
| SNP_P4_40752_11262724 | NC_021163.1    | Ca_kabuli_chr04 | 11262724                | TT                              | CC              | 1946790571               |
| SNP_P4_40753_11262727 | NC_021163.1    | Ca_kabuli_chr04 | 11262727                | TT                              | AA              | 1946790572               |
| SNP_P4_40754_11262729 | NC_021163.1    | Ca_kabuli_chr04 | 11262729                | CC                              | TT              | 1946790573               |
| SNP_P4_40755_11262918 | NC_021163.1    | Ca_kabuli_chr04 | 11262918                | GG                              | CC              | 1946790576               |
| SNP_P4_40756_11263852 | NC_021163.1    | Ca_kabuli_chr04 | 11263852                | AA                              | GG              | 1946790578               |
| SNP_P4_40759_11264610 | NC_021163.1    | Ca_kabuli_chr04 | 11264610                | AA                              | TT              | 1946790580               |
| SNP_P4_40760_11264611 | NC_021163.1    | Ca_kabuli_chr04 | 11264611                | TT                              | AA              | 1946790582               |
| SNP_P4_40761_11264828 | NC_021163.1    | Ca_kabuli_chr04 | 11264828                | GG                              | CC              | 1946790584               |
| SNP_P4_40762_11264986 | NC_021163.1    | Ca_kabuli_chr04 | 11264986                | CC                              | TT              | 1946790586               |
| SNP_P4_40763_11265004 | NC_021163.1    | Ca_kabuli_chr04 | 11265004                | AA                              | TT              | 1946790588               |
| SNP_P4_40764_11265170 | NC_021163.1    | Ca_kabuli_chr04 | 11265170                | TT                              | CC              | 1946790590               |
| SNP_P4_40765_11265509 | NC_021163.1    | Ca_kabuli_chr04 | 11265509                | CC                              | TT              | 1946790592               |
| SNP_P4_40766_11265542 | NC_021163.1    | Ca_kabuli_chr04 | 11265542                | CC                              | TT              | 1946790594               |
| SNP_P4_40767_11265559 | NC_021163.1    | Ca_kabuli_chr04 | 11265559                | AA                              | TT              | 1946790596               |
| SNP_P4_40768_11265933 | NC_021163.1    | Ca_kabuli_chr04 | 11265933                | GG                              | AA              | 1946790598               |
| SNP_P4_40769_11265985 | NC_021163.1    | Ca_kabuli_chr04 | 11265985                | TT                              | GG              | 1946790601               |
| SNP_P4_40770_11266188 | NC_021163.1    | Ca_kabuli_chr04 | 11266188                | CC                              | TT              | 1946790603               |
| SNP_P4_40771_11267552 | NC_021163.1    | Ca_kabuli_chr04 | 11267552                | TT                              | CC              | 1946790605               |
| SNP_P4_40773_11268045 | NC_021163.1    | Ca_kabuli_chr04 | 11268045                | CC                              | TT              | 1946790607               |
| SNP_P4_40774_11269445 | NC_021163.1    | Ca_kabuli_chr04 | 11269445                | AA                              | CC              | 1946790609               |
| SNP_P4_40775_11269505 | NC_021163.1    | Ca_kabuli_chr04 | 11269505                | TT                              | CC              | 1946790611               |
| SNP_P4_40776_11269580 | NC_021163.1    | Ca_kabuli_chr04 | 11269580                | TT                              | GG              | 1946790613               |
| SNP_P4_40777_11269699 | NC_021163.1    | Ca_kabuli_chr04 | 11269699                | CC                              | TT              | 1946790615               |
| SNP_P4_40778_11269702 | NC_021163.1    | Ca_kabuli_chr04 | 11269702                | GG                              | AA              | 1946790618               |
| SNP_P4_40779_11270245 | NC_021163.1    | Ca_kabuli_chr04 | 11270245                | CC                              | TT              | 1946790620               |
| SNP_P4_40780_11270475 | NC_021163.1    | Ca_kabuli_chr04 | 11270475                | GG                              | AA              | 1946790622               |
| SNP_P4_40782_11271099 | NC_021163.1    | Ca_kabuli_chr04 | 11271099                | TT                              | AA              | 1946790624               |
| SNP_P4_40783_11272888 | NC_021163.1    | Ca_kabuli_chr04 | 11272888                | TT                              | CC              | 1946790626               |
| SNP_P4_40784_11274132 | NC_021163.1    | Ca_kabuli_chr04 | 11274132                | GG                              | CC              | 1946790628               |
| SNP_P4_40785_11275638 | NC_021163.1    | Ca_kabuli_chr04 | 11275638                | CC                              | TT              | 1946790630               |

| SNPs IDs              | Chromosome IDs | Chromosomes     | Physical positions (bp) | CDC Frontier (Reference genome) | (ILWC46 & LPNB) | NCBI SNPdb Accession IDs |
|-----------------------|----------------|-----------------|-------------------------|---------------------------------|-----------------|--------------------------|
| SNP_P4_40786_11276937 | NC_021163.1    | Ca_kabuli_chr04 | 11276937                | TT                              | CC              | 1946790632               |
| SNP_P4_40787_11280490 | NC_021163.1    | Ca_kabuli_chr04 | 11280490                | GG                              | AA              | 1946790634               |
| SNP_P4_40788_11280839 | NC_021163.1    | Ca_kabuli_chr04 | 11280839                | CC                              | TT              | 1946790637               |
| SNP_P4_40789_11280841 | NC_021163.1    | Ca_kabuli_chr04 | 11280841                | CC                              | TT              | 1946790639               |
| SNP_P4_40791_11280861 | NC_021163.1    | Ca_kabuli_chr04 | 11280861                | CC                              | TT              | 1946790641               |
| SNP_P4_40792_11280905 | NC_021163.1    | Ca_kabuli_chr04 | 11280905                | TT                              | CC              | 1946790643               |
| SNP_P4_40793_11280911 | NC_021163.1    | Ca_kabuli_chr04 | 11280911                | CC                              | TT              | 1946790645               |
| SNP_P4_40794_11280917 | NC_021163.1    | Ca_kabuli_chr04 | 11280917                | GG                              | AA              | 1946790647               |
| SNP_P4_40795_11281298 | NC_021163.1    | Ca_kabuli_chr04 | 11281298                | AA                              | GG              | 1946790649               |
| SNP_P4_40796_11281459 | NC_021163.1    | Ca_kabuli_chr04 | 11281459                | CC                              | AA              | 1946790651               |
| SNP_P4_40797_11281484 | NC_021163.1    | Ca_kabuli_chr04 | 11281484                | AA                              | TT              | 1946790653               |
| SNP_P4_40798_11281566 | NC_021163.1    | Ca_kabuli_chr04 | 11281566                | GG                              | AA              | 1946790655               |
| SNP_P4_40800_11282023 | NC_021163.1    | Ca_kabuli_chr04 | 11282023                | TT                              | CC              | 1946790657               |
| SNP_P4_40801_11282076 | NC_021163.1    | Ca_kabuli_chr04 | 11282076                | CC                              | TT              | 1946790659               |
| SNP_P4_40802_11282096 | NC_021163.1    | Ca_kabuli_chr04 | 11282096                | CC                              | TT              | 1946790662               |
| SNP_P4_40803_11282129 | NC_021163.1    | Ca_kabuli_chr04 | 11282129                | AA                              | CC              | 1946790664               |
| SNP_P4_40805_11282396 | NC_021163.1    | Ca_kabuli_chr04 | 11282396                | CC                              | GG              | 1946790666               |
| SNP_P4_40806_11282402 | NC_021163.1    | Ca_kabuli_chr04 | 11282402                | CC                              | TT              | 1946790668               |
| SNP_P4_40807_11282432 | NC_021163.1    | Ca_kabuli_chr04 | 11282432                | TT                              | AA              | 1946790670               |
| SNP_P4_40808_11282464 | NC_021163.1    | Ca_kabuli_chr04 | 11282464                | GG                              | AA              | 1946790672               |
| SNP_P4_40809_11282795 | NC_021163.1    | Ca_kabuli_chr04 | 11282795                | CC                              | TT              | 1946790674               |
| SNP_P4_40810_11285366 | NC_021163.1    | Ca_kabuli_chr04 | 11285366                | GG                              | AA              | 1946790676               |
| SNP_P4_40812_11289703 | NC_021163.1    | Ca_kabuli_chr04 | 11289703                | AA                              | TT              | 1946790678               |
| SNP_P4_40813_11291213 | NC_021163.1    | Ca_kabuli_chr04 | 11291213                | CC                              | TT              | 1946790680               |
| SNP_P4_40815_11291533 | NC_021163.1    | Ca_kabuli_chr04 | 11291533                | TT                              | GG              | 1946790682               |
| SNP_P4_40816_11291763 | NC_021163.1    | Ca_kabuli_chr04 | 11291763                | AA                              | GG              | 1946790684               |
| SNP_P4_40817_11291809 | NC_021163.1    | Ca_kabuli_chr04 | 11291809                | TT                              | AA              | 1946790686               |
| SNP_P4_40818_11291983 | NC_021163.1    | Ca_kabuli_chr04 | 11291983                | GG                              | AA              | 1946790688               |
| SNP_P4_40819_11297517 | NC_021163.1    | Ca_kabuli_chr04 | 11297517                | TT                              | CC              | 1946790690               |
| SNP_P4_40820_11297544 | NC_021163.1    | Ca_kabuli_chr04 | 11297544                | CC                              | AA              | 1946790692               |
| SNP_P4_40821_11297674 | NC_021163.1    | Ca_kabuli_chr04 | 11297674                | CC                              | TT              | 1946790694               |
| SNP_P4_40823_11300107 | NC_021163.1    | Ca_kabuli_chr04 | 11300107                | CC                              | TT              | 1946790696               |
| SNP_P4_40824_11300138 | NC_021163.1    | Ca_kabuli_chr04 | 11300138                | GG                              | AA              | 1946790698               |
| SNP_P4_40825_11300145 | NC_021163.1    | Ca_kabuli_chr04 | 11300145                | CC                              | TT              | 1946790700               |
| SNP_P4_40826_11300182 | NC_021163.1    | Ca_kabuli_chr04 | 11300182                | CC                              | GG              | 1946790703               |
| SNP_P4_40827_11300362 | NC_021163.1    | Ca_kabuli_chr04 | 11300362                | CC                              | TT              | 1946790705               |
| SNP_P4_40828_11300390 | NC_021163.1    | Ca_kabuli_chr04 | 11300390                | TT                              | AA              | 1946790707               |
| SNP_P4_40830_11300673 | NC_021163.1    | Ca_kabuli_chr04 | 11300673                | TT                              | GG              | 1946790709               |
| SNP_P4_40831_11300777 | NC_021163.1    | Ca_kabuli_chr04 | 11300777                | CC                              | AA              | 1946790711               |
| SNP_P4_40832_11300816 | NC_021163.1    | Ca_kabuli_chr04 | 11300816                | AA                              | GG              | 1946790713               |
| SNP_P4_40833_11300956 | NC_021163.1    | Ca_kabuli_chr04 | 11300956                | AA                              | GG              | 1946790715               |
| SNP_P4_40835_11301391 | NC_021163.1    | Ca_kabuli_chr04 | 11301391                | CC                              | AA              | 1946790717               |

| SNPs IDs              | Chromosome IDs | Chromosomes     | Physical positions (bp) | CDC Frontier (Reference genome) | (ILWC46 & LPNB) | NCBI SNPdb Accession IDs |
|-----------------------|----------------|-----------------|-------------------------|---------------------------------|-----------------|--------------------------|
| SNP_P4_40836_11303490 | NC_021163.1    | Ca_kabuli_chr04 | 11303490                | GG                              | CC              | 1946790719               |
| SNP_P4_40837_11304410 | NC_021163.1    | Ca_kabuli_chr04 | 11304410                | CC                              | TT              | 1946790721               |
| SNP_P4_40838_11306039 | NC_021163.1    | Ca_kabuli_chr04 | 11306039                | CC                              | TT              | 1946790724               |
| SNP_P4_40839_11306420 | NC_021163.1    | Ca_kabuli_chr04 | 11306420                | TT                              | AA              | 1946790726               |
| SNP_P4_40840_11307770 | NC_021163.1    | Ca_kabuli_chr04 | 11307770                | CC                              | TT              | 1946790728               |
| SNP_P4_40841_11308000 | NC_021163.1    | Ca_kabuli_chr04 | 11308000                | GG                              | TT              | 1946790730               |
| SNP_P4_40842_11308006 | NC_021163.1    | Ca_kabuli_chr04 | 11308006                | CC                              | TT              | 1946790732               |
| SNP_P4_40843_11308028 | NC_021163.1    | Ca_kabuli_chr04 | 11308028                | TT                              | GG              | 1946790734               |
| SNP_P4_40845_11309392 | NC_021163.1    | Ca_kabuli_chr04 | 11309392                | GG                              | CC              | 1946790736               |
| SNP_P4_40846_11309800 | NC_021163.1    | Ca_kabuli_chr04 | 11309800                | GG                              | TT              | 1946790738               |
| SNP_P4_40847_11310133 | NC_021163.1    | Ca_kabuli_chr04 | 11310133                | GG                              | AA              | 1946790740               |
| SNP_P4_40848_11310196 | NC_021163.1    | Ca_kabuli_chr04 | 11310196                | TT                              | CC              | 1946790742               |
| SNP_P4_40849_11310451 | NC_021163.1    | Ca_kabuli_chr04 | 11310451                | TT                              | CC              | 1946790744               |
| SNP_P4_40850_11310486 | NC_021163.1    | Ca_kabuli_chr04 | 11310486                | GG                              | AA              | 1946790746               |
| SNP_P4_40851_11310504 | NC_021163.1    | Ca_kabuli_chr04 | 11310504                | AA                              | GG              | 1946790748               |
| SNP_P4_40852_11310515 | NC_021163.1    | Ca_kabuli_chr04 | 11310515                | GG                              | AA              | 1946790750               |
| SNP_P4_40854_11310905 | NC_021163.1    | Ca_kabuli_chr04 | 11310905                | TT                              | CC              | 1946790752               |
| SNP_P4_40855_11310906 | NC_021163.1    | Ca_kabuli_chr04 | 11310906                | GG                              | AA              | 1946790754               |
| SNP_P4_40858_11313261 | NC_021163.1    | Ca_kabuli_chr04 | 11313261                | AA                              | TT              | 1946790756               |
| SNP_P4_40859_11313425 | NC_021163.1    | Ca_kabuli_chr04 | 11313425                | GG                              | AA              | 1946790758               |
| SNP_P4_40860_11313428 | NC_021163.1    | Ca_kabuli_chr04 | 11313428                | GG                              | AA              | 1946790760               |
| SNP_P4_40861_11313434 | NC_021163.1    | Ca_kabuli_chr04 | 11313434                | CC                              | GG              | 1946790763               |
| SNP_P4_40862_11313704 | NC_021163.1    | Ca_kabuli_chr04 | 11313704                | AA                              | GG              | 1946790765               |
| SNP_P4_40863_11313726 | NC_021163.1    | Ca_kabuli_chr04 | 11313726                | GG                              | TT              | 1946790767               |
| SNP_P4_40864_11313830 | NC_021163.1    | Ca_kabuli_chr04 | 11313830                | AA                              | GG              | 1946790769               |
| SNP_P4_40865_11313875 | NC_021163.1    | Ca_kabuli_chr04 | 11313875                | TT                              | GG              | 1946790771               |
| SNP_P4_40866_11314123 | NC_021163.1    | Ca_kabuli_chr04 | 11314123                | AA                              | GG              | 1946790773               |
| SNP_P4_40867_11314124 | NC_021163.1    | Ca_kabuli_chr04 | 11314124                | CC                              | TT              | 1946790775               |
| SNP_P4_40868_11315502 | NC_021163.1    | Ca_kabuli_chr04 | 11315502                | GG                              | AA              | 1946790777               |
| SNP_P4_40869_11316385 | NC_021163.1    | Ca_kabuli_chr04 | 11316385                | TT                              | GG              | 1946790779               |
| SNP_P4_40870_11316401 | NC_021163.1    | Ca_kabuli_chr04 | 11316401                | GG                              | AA              | 1946790781               |
| SNP_P4_40871_11316550 | NC_021163.1    | Ca_kabuli_chr04 | 11316550                | TT                              | CC              | 1946790784               |
| SNP_P4_40872_11316859 | NC_021163.1    | Ca_kabuli_chr04 | 11316859                | CC                              | TT              | 1946790786               |
| SNP_P4_40874_11317428 | NC_021163.1    | Ca_kabuli_chr04 | 11317428                | CC                              | AA              | 1946790788               |
| SNP_P4_40875_11317776 | NC_021163.1    | Ca_kabuli_chr04 | 11317776                | TT                              | AA              | 1946790791               |
| SNP_P4_40877_11318395 | NC_021163.1    | Ca_kabuli_chr04 | 11318395                | CC                              | TT              | 1946790793               |
| SNP_P4_40878_11319167 | NC_021163.1    | Ca_kabuli_chr04 | 11319167                | CC                              | TT              | 1946790795               |
| SNP_P4_40879_11319235 | NC_021163.1    | Ca_kabuli_chr04 | 11319235                | GG                              | AA              | 1946790797               |
| SNP_P4_40883_11321299 | NC_021163.1    | Ca_kabuli_chr04 | 11321299                | TT                              | AA              | 1946790800               |
| SNP_P4_40884_11321361 | NC_021163.1    | Ca_kabuli_chr04 | 11321361                | TT                              | AA              | 1946790802               |
| SNP_P4_40885_11321369 | NC_021163.1    | Ca_kabuli_chr04 | 11321369                | GG                              | AA              | 1946790804               |
| SNP_P4_40886_11321402 | NC_021163.1    | Ca_kabuli_chr04 | 11321402                | CC                              | TT              | 1946790806               |

| SNPs IDs              | Chromosome IDs | Chromosomes     | Physical positions (bp) | CDC Frontier (Reference genome) | (ILWC46 & LPNB) | NCBI SNPdb Accession IDs |
|-----------------------|----------------|-----------------|-------------------------|---------------------------------|-----------------|--------------------------|
| SNP_P4_40888_11321498 | NC_021163.1    | Ca_kabuli_chr04 | 11321498                | CC                              | GG              | 1946790808               |
| SNP_P4_40889_11321643 | NC_021163.1    | Ca_kabuli_chr04 | 11321643                | GG                              | AA              | 1946790810               |
| SNP_P4_40890_11321647 | NC_021163.1    | Ca_kabuli_chr04 | 11321647                | GG                              | TT              | 1946790812               |
| SNP_P4_40892_11321727 | NC_021163.1    | Ca_kabuli_chr04 | 11321727                | TT                              | CC              | 1946790814               |
| SNP_P4_40893_11321745 | NC_021163.1    | Ca_kabuli_chr04 | 11321745                | TT                              | CC              | 1946790816               |
| SNP_P4_40894_11321769 | NC_021163.1    | Ca_kabuli_chr04 | 11321769                | CC                              | TT              | 1946790818               |
| SNP_P4_40895_11321955 | NC_021163.1    | Ca_kabuli_chr04 | 11321955                | GG                              | AA              | 1946790820               |
| SNP_P4_40896_11322070 | NC_021163.1    | Ca_kabuli_chr04 | 11322070                | AA                              | CC              | 1946790822               |
| SNP_P4_40897_11322115 | NC_021163.1    | Ca_kabuli_chr04 | 11322115                | AA                              | CC              | 1946790824               |
| SNP_P4_40898_11322212 | NC_021163.1    | Ca_kabuli_chr04 | 11322212                | CC                              | TT              | 1946790826               |
| SNP_P4_40900_11322401 | NC_021163.1    | Ca_kabuli_chr04 | 11322401                | CC                              | TT              | 1946790828               |
| SNP_P4_40901_11322492 | NC_021163.1    | Ca_kabuli_chr04 | 11322492                | TT                              | CC              | 1946790831               |
| SNP_P4_40902_11322834 | NC_021163.1    | Ca_kabuli_chr04 | 11322834                | AA                              | GG              | 1946790833               |
| SNP_P4_40903_11322905 | NC_021163.1    | Ca_kabuli_chr04 | 11322905                | AA                              | CC              | 1946790835               |
| SNP_P4_40905_11323813 | NC_021163.1    | Ca_kabuli_chr04 | 11323813                | AA                              | GG              | 1946790837               |
| SNP_P4_40906_11323817 | NC_021163.1    | Ca_kabuli_chr04 | 11323817                | AA                              | GG              | 1946790839               |
| SNP_P4_40907_11323853 | NC_021163.1    | Ca_kabuli_chr04 | 11323853                | GG                              | AA              | 1946790841               |
| SNP_P4_40908_11323883 | NC_021163.1    | Ca_kabuli_chr04 | 11323883                | AA                              | CC              | 1946790843               |
| SNP_P4_40909_11323902 | NC_021163.1    | Ca_kabuli_chr04 | 11323902                | AA                              | TT              | 1946790845               |
| SNP_P4_40910_11324052 | NC_021163.1    | Ca_kabuli_chr04 | 11324052                | TT                              | AA              | 1946790847               |
| SNP_P4_40911_11324053 | NC_021163.1    | Ca_kabuli_chr04 | 11324053                | CC                              | AA              | 1946790849               |
| SNP_P4_40912_11325493 | NC_021163.1    | Ca_kabuli_chr04 | 11325493                | AA                              | CC              | 1946790851               |
| SNP_P4_40913_11326428 | NC_021163.1    | Ca_kabuli_chr04 | 11326428                | GG                              | AA              | 1946790853               |
| SNP_P4_40914_11328952 | NC_021163.1    | Ca_kabuli_chr04 | 11328952                | AA                              | GG              | 1946790855               |
| SNP_P4_40915_11328981 | NC_021163.1    | Ca_kabuli_chr04 | 11328981                | TT                              | CC              | 1946790857               |
| SNP_P4_40917_11332327 | NC_021163.1    | Ca_kabuli_chr04 | 11332327                | AA                              | CC              | 1946790859               |
| SNP_P4_40918_11332346 | NC_021163.1    | Ca_kabuli_chr04 | 11332346                | CC                              | TT              | 1946790930               |
| SNP_P4_40919_11332454 | NC_021163.1    | Ca_kabuli_chr04 | 11332454                | GG                              | AA              | 1946790932               |
| SNP_P4_40920_11333618 | NC_021163.1    | Ca_kabuli_chr04 | 11333618                | CC                              | GG              | 1946790934               |
| SNP_P4_40922_11334343 | NC_021163.1    | Ca_kabuli_chr04 | 11334343                | AA                              | TT              | 1946790936               |
| SNP_P4_40923_11334350 | NC_021163.1    | Ca_kabuli_chr04 | 11334350                | AA                              | GG              | 1946790938               |
| SNP_P4_40924_11336489 | NC_021163.1    | Ca_kabuli_chr04 | 11336489                | TT                              | CC              | 1946790941               |
| SNP_P4_40925_11336559 | NC_021163.1    | Ca_kabuli_chr04 | 11336559                | CC                              | TT              | 1946790943               |
| SNP_P4_40926_11337065 | NC_021163.1    | Ca_kabuli_chr04 | 11337065                | CC                              | TT              | 1946790945               |
| SNP_P4_40927_11337133 | NC_021163.1    | Ca_kabuli_chr04 | 11337133                | CC                              | TT              | 1946790947               |
| SNP_P4_40928_11338311 | NC_021163.1    | Ca_kabuli_chr04 | 11338311                | TT                              | GG              | 1946790950               |
| SNP_P4_40930_11338387 | NC_021163.1    | Ca_kabuli_chr04 | 11338387                | TT                              | AA              | 1946790951               |
| SNP_P4_40931_11338722 | NC_021163.1    | Ca_kabuli_chr04 | 11338722                | TT                              | GG              | 1946790952               |
| SNP_P4_40932_11338770 | NC_021163.1    | Ca_kabuli_chr04 | 11338770                | TT                              | CC              | 1946790953               |
| SNP_P4_40933_11338927 | NC_021163.1    | Ca_kabuli_chr04 | 11338927                | AA                              | GG              | 1946790956               |
| SNP_P4_40934_11339249 | NC_021163.1    | Ca_kabuli_chr04 | 11339249                | CC                              | TT              | 1946790958               |
| SNP_P4_40935_11339287 | NC_021163.1    | Ca_kabuli_chr04 | 11339287                | GG                              | AA              | 1946790960               |

| SNPs IDs              | Chromosome IDs | Chromosomes     | Physical positions (bp) | CDC Frontier (Reference genome) | (ILWC46 & LPNB) | NCBI SNPdb Accession IDs |
|-----------------------|----------------|-----------------|-------------------------|---------------------------------|-----------------|--------------------------|
| SNP_P4_40936_11339294 | NC_021163.1    | Ca_kabuli_chr04 | 11339294                | GG                              | AA              | 1946790962               |
| SNP_P4_40937_11339344 | NC_021163.1    | Ca_kabuli_chr04 | 11339344                | CC                              | TT              | 1946790964               |
| SNP_P4_40938_11339390 | NC_021163.1    | Ca_kabuli_chr04 | 11339390                | AA                              | GG              | 1946790966               |
| SNP_P4_40939_11339544 | NC_021163.1    | Ca_kabuli_chr04 | 11339544                | TT                              | AA              | 1946790968               |
| SNP_P4_40940_11340177 | NC_021163.1    | Ca_kabuli_chr04 | 11340177                | AA                              | GG              | 1946790970               |
| SNP_P4_40941_11340226 | NC_021163.1    | Ca_kabuli_chr04 | 11340226                | GG                              | TT              | 1946790972               |
| SNP_P4_40942_11340243 | NC_021163.1    | Ca_kabuli_chr04 | 11340243                | GG                              | AA              | 1946790973               |
| SNP_P4_40943_11340246 | NC_021163.1    | Ca_kabuli_chr04 | 11340246                | CC                              | TT              | 1946790975               |
| SNP_P4_40944_11340307 | NC_021163.1    | Ca_kabuli_chr04 | 11340307                | CC                              | TT              | 1946790977               |
| SNP_P4_40945_11340315 | NC_021163.1    | Ca_kabuli_chr04 | 11340315                | AA                              | GG              | 1946790979               |
| SNP_P4_40946_11340322 | NC_021163.1    | Ca_kabuli_chr04 | 11340322                | TT                              | AA              | 1946790981               |
| SNP_P4_40947_11340329 | NC_021163.1    | Ca_kabuli_chr04 | 11340329                | GG                              | AA              | 1946790984               |
| SNP_P4_40948_11340498 | NC_021163.1    | Ca_kabuli_chr04 | 11340498                | CC                              | TT              | 1946790985               |
| SNP_P4_40949_11341063 | NC_021163.1    | Ca_kabuli_chr04 | 11341063                | AA                              | GG              | 1946790987               |
| SNP_P4_40951_11341346 | NC_021163.1    | Ca_kabuli_chr04 | 11341346                | TT                              | CC              | 1946790989               |
| SNP_P4_40953_11341416 | NC_021163.1    | Ca_kabuli_chr04 | 11341416                | TT                              | AA              | 1946790991               |
| SNP_P4_40954_11341573 | NC_021163.1    | Ca_kabuli_chr04 | 11341573                | CC                              | AA              | 1946790993               |
| SNP_P4_40955_11343649 | NC_021163.1    | Ca_kabuli_chr04 | 11343649                | AA                              | GG              | 1946790995               |
| SNP_P4_40956_11343925 | NC_021163.1    | Ca_kabuli_chr04 | 11343925                | TT                              | AA              | 1946790997               |
| SNP_P4_40957_11344011 | NC_021163.1    | Ca_kabuli_chr04 | 11344011                | GG                              | AA              | 1946790999               |
| SNP_P4_40958_11346333 | NC_021163.1    | Ca_kabuli_chr04 | 11346333                | TT                              | GG              | 1946791001               |
| SNP_P4_40959_11346334 | NC_021163.1    | Ca_kabuli_chr04 | 11346334                | CC                              | TT              | 1946791003               |
| SNP_P4_40961_11347415 | NC_021163.1    | Ca_kabuli_chr04 | 11347415                | GG                              | TT              | 1946791005               |
| SNP_P4_40962_11347426 | NC_021163.1    | Ca_kabuli_chr04 | 11347426                | TT                              | CC              | 1946791007               |
| SNP_P4_40963_11347434 | NC_021163.1    | Ca_kabuli_chr04 | 11347434                | AA                              | GG              | 1946791009               |
| SNP_P4_40964_11347462 | NC_021163.1    | Ca_kabuli_chr04 | 11347462                | CC                              | AA              | 1946791012               |
| SNP_P4_40965_11347464 | NC_021163.1    | Ca_kabuli_chr04 | 11347464                | GG                              | CC              | 1946791014               |
| SNP_P4_40966_11347475 | NC_021163.1    | Ca_kabuli_chr04 | 11347475                | CC                              | TT              | 1946791016               |
| SNP_P4_40967_11347510 | NC_021163.1    | Ca_kabuli_chr04 | 11347510                | TT                              | AA              | 1946791017               |
| SNP_P4_40968_11347512 | NC_021163.1    | Ca_kabuli_chr04 | 11347512                | AA                              | GG              | 1946791019               |
| SNP_P4_40969_11347519 | NC_021163.1    | Ca_kabuli_chr04 | 11347519                | GG                              | AA              | 1946791021               |
| SNP_P4_40970_11347530 | NC_021163.1    | Ca_kabuli_chr04 | 11347530                | AA                              | GG              | 1946791023               |
| SNP_P4_40971_11347560 | NC_021163.1    | Ca_kabuli_chr04 | 11347560                | GG                              | AA              | 1946791025               |
| SNP_P4_40972_11347601 | NC_021163.1    | Ca_kabuli_chr04 | 11347601                | TT                              | CC              | 1946791027               |
| SNP_P4_40973_11347627 | NC_021163.1    | Ca_kabuli_chr04 | 11347627                | GG                              | AA              | 1946791029               |
| SNP_P4_40975_11347798 | NC_021163.1    | Ca_kabuli_chr04 | 11347798                | AA                              | GG              | 1946791031               |
| SNP_P4_40976_11347800 | NC_021163.1    | Ca_kabuli_chr04 | 11347800                | TT                              | AA              | 1946791034               |
| SNP_P4_40977_11347815 | NC_021163.1    | Ca_kabuli_chr04 | 11347815                | GG                              | AA              | 1946791036               |
| SNP_P4_40978_11347818 | NC_021163.1    | Ca_kabuli_chr04 | 11347818                | CC                              | TT              | 1946791038               |
| SNP_P4_40979_11347835 | NC_021163.1    | Ca_kabuli_chr04 | 11347835                | CC                              | TT              | 1946791040               |
| SNP_P4_40980_11347841 | NC_021163.1    | Ca_kabuli_chr04 | 11347841                | GG                              | AA              | 1946791042               |
| SNP_P4_40981_11347852 | NC_021163.1    | Ca_kabuli_chr04 | 11347852                | CC                              | TT              | 1946791044               |

| SNPs IDs              | Chromosome IDs | Chromosomes     | Physical positions (bp) | CDC Frontier (Reference genome) | (ILWC46 & LPNB) | NCBI SNPdb Accession IDs |
|-----------------------|----------------|-----------------|-------------------------|---------------------------------|-----------------|--------------------------|
| SNP_P4_40982_11347864 | NC_021163.1    | Ca_kabuli_chr04 | 11347864                | TT                              | AA              | 1946791046               |
| SNP_P4_40983_11347884 | NC_021163.1    | Ca_kabuli_chr04 | 11347884                | CC                              | TT              | 1946791048               |
| SNP_P4_40984_11347938 | NC_021163.1    | Ca_kabuli_chr04 | 11347938                | AA                              | GG              | 1946791050               |
| SNP_P4_40985_11348102 | NC_021163.1    | Ca_kabuli_chr04 | 11348102                | CC                              | AA              | 1946791051               |
| SNP_P4_40986_11348157 | NC_021163.1    | Ca_kabuli_chr04 | 11348157                | CC                              | GG              | 1946791053               |
| SNP_P4_40987_11348270 | NC_021163.1    | Ca_kabuli_chr04 | 11348270                | TT                              | CC              | 1946791055               |
| SNP_P4_40988_11348328 | NC_021163.1    | Ca_kabuli_chr04 | 11348328                | TT                              | CC              | 1946791057               |
| SNP_P4_40990_11348397 | NC_021163.1    | Ca_kabuli_chr04 | 11348397                | TT                              | CC              | 1946791059               |
| SNP_P4_40991_11348615 | NC_021163.1    | Ca_kabuli_chr04 | 11348615                | GG                              | AA              | 1946791060               |
| SNP_P4_40992_11348616 | NC_021163.1    | Ca_kabuli_chr04 | 11348616                | TT                              | AA              | 1946791062               |
| SNP_P4_40993_11349799 | NC_021163.1    | Ca_kabuli_chr04 | 11349799                | GG                              | AA              | 1946791064               |
| SNP_P4_40994_11349807 | NC_021163.1    | Ca_kabuli_chr04 | 11349807                | AA                              | TT              | 1946791066               |
| SNP_P4_40995_11350439 | NC_021163.1    | Ca_kabuli_chr04 | 11350439                | AA                              | GG              | 1946791068               |
| SNP_P4_40997_11353318 | NC_021163.1    | Ca_kabuli_chr04 | 11353318                | GG                              | AA              | 1946791070               |
| SNP_P4_40998_11354173 | NC_021163.1    | Ca_kabuli_chr04 | 11354173                | AA                              | GG              | 1946791072               |
| SNP_P4_41000_11354441 | NC_021163.1    | Ca_kabuli_chr04 | 11354441                | CC                              | TT              | 1946791074               |
| SNP_P4_41001_11354519 | NC_021163.1    | Ca_kabuli_chr04 | 11354519                | TT                              | GG              | 1946791076               |
| SNP_P4_41002_11354526 | NC_021163.1    | Ca_kabuli_chr04 | 11354526                | GG                              | AA              | 1946791078               |
| SNP_P4_41003_11354528 | NC_021163.1    | Ca_kabuli_chr04 | 11354528                | TT                              | CC              | 1946791080               |
| SNP_P4_41005_11354632 | NC_021163.1    | Ca_kabuli_chr04 | 11354632                | GG                              | AA              | 1946791082               |
| SNP_P4_41006_11354647 | NC_021163.1    | Ca_kabuli_chr04 | 11354647                | TT                              | GG              | 1946791084               |
| SNP_P4_41007_11354655 | NC_021163.1    | Ca_kabuli_chr04 | 11354655                | AA                              | TT              | 1946791086               |
| SNP_P4_41008_11355073 | NC_021163.1    | Ca_kabuli_chr04 | 11355073                | CC                              | TT              | 1946791088               |
| SNP_P4_41009_11355528 | NC_021163.1    | Ca_kabuli_chr04 | 11355528                | CC                              | TT              | 1946791089               |
| SNP_P4_41010_11355625 | NC_021163.1    | Ca_kabuli_chr04 | 11355625                | TT                              | CC              | 1946791091               |
| SNP_P4_41011_11355637 | NC_021163.1    | Ca_kabuli_chr04 | 11355637                | GG                              | AA              | 1946791093               |
| SNP_P4_41012_11355693 | NC_021163.1    | Ca_kabuli_chr04 | 11355693                | TT                              | AA              | 1946791095               |
| SNP_P4_41013_11356335 | NC_021163.1    | Ca_kabuli_chr04 | 11356335                | GG                              | AA              | 1946791097               |
| SNP_P4_41015_11357027 | NC_021163.1    | Ca_kabuli_chr04 | 11357027                | CC                              | TT              | 1946791099               |
| SNP_P4_41016_11357028 | NC_021163.1    | Ca_kabuli_chr04 | 11357028                | GG                              | AA              | 1946791101               |
| SNP_P4_41017_11357064 | NC_021163.1    | Ca_kabuli_chr04 | 11357064                | AA                              | GG              | 1946791103               |
| SNP_P4_41018_11357104 | NC_021163.1    | Ca_kabuli_chr04 | 11357104                | CC                              | TT              | 1946791105               |
| SNP_P4_41019_11357268 | NC_021163.1    | Ca_kabuli_chr04 | 11357268                | TT                              | CC              | 1946791107               |
| SNP_P4_41020_11357290 | NC_021163.1    | Ca_kabuli_chr04 | 11357290                | TT                              | CC              | 1946791109               |
| SNP_P4_41021_11357291 | NC_021163.1    | Ca_kabuli_chr04 | 11357291                | AA                              | GG              | 1946791111               |
| SNP_P4_41022_11357495 | NC_021163.1    | Ca_kabuli_chr04 | 11357495                | AA                              | GG              | 1946791113               |
| SNP_P4_41023_11359736 | NC_021163.1    | Ca_kabuli_chr04 | 11359736                | GG                              | AA              | 1946791115               |
| SNP_P4_41025_11359854 | NC_021163.1    | Ca_kabuli_chr04 | 11359854                | TT                              | AA              | 1946791117               |
| SNP_P4_41026_11359855 | NC_021163.1    | Ca_kabuli_chr04 | 11359855                | TT                              | AA              | 1946791119               |
| SNP_P4_41027_11359918 | NC_021163.1    | Ca_kabuli_chr04 | 11359918                | TT                              | CC              | 1946791121               |
| SNP_P4_41028_11360216 | NC_021163.1    | Ca_kabuli_chr04 | 11360216                | GG                              | AA              | 1946791123               |
| SNP_P4_41030_11364212 | NC_021163.1    | Ca_kabuli_chr04 | 11364212                | CC                              | TT              | 1946791125               |

| SNPs IDs              | Chromosome IDs | Chromosomes     | Physical positions (bp) | CDC Frontier (Reference genome) | (ILWC46 & LPNB) | NCBI SNPdb Accession IDs |
|-----------------------|----------------|-----------------|-------------------------|---------------------------------|-----------------|--------------------------|
| SNP_P4_41031_11364937 | NC_021163.1    | Ca_kabuli_chr04 | 11364937                | AA                              | CC              | 1946791127               |
| SNP_P4_41032_11364979 | NC_021163.1    | Ca_kabuli_chr04 | 11364979                | GG                              | AA              | 1946791129               |
| SNP_P4_41033_11365031 | NC_021163.1    | Ca_kabuli_chr04 | 11365031                | TT                              | GG              | 1946791131               |
| SNP_P4_41034_11365190 | NC_021163.1    | Ca_kabuli_chr04 | 11365190                | TT                              | CC              | 1946791133               |
| SNP_P4_41035_11365197 | NC_021163.1    | Ca_kabuli_chr04 | 11365197                | CC                              | TT              | 1946791135               |
| SNP_P4_41036_11365261 | NC_021163.1    | Ca_kabuli_chr04 | 11365261                | TT                              | GG              | 1946791137               |
| SNP_P4_41037_11365698 | NC_021163.1    | Ca_kabuli_chr04 | 11365698                | TT                              | CC              | 1946791139               |
| SNP_P4_41038_11365716 | NC_021163.1    | Ca_kabuli_chr04 | 11365716                | TT                              | CC              | 1946791141               |
| SNP_P4_41039_11365744 | NC_021163.1    | Ca_kabuli_chr04 | 11365744                | TT                              | CC              | 1946791143               |
| SNP_P4_41040_11365873 | NC_021163.1    | Ca_kabuli_chr04 | 11365873                | AA                              | GG              | 1946791144               |
| SNP_P4_41041_11365921 | NC_021163.1    | Ca_kabuli_chr04 | 11365921                | GG                              | AA              | 1946791146               |
| SNP_P4_41042_11366326 | NC_021163.1    | Ca_kabuli_chr04 | 11366326                | AA                              | GG              | 1946791148               |
| SNP_P4_41043_11366912 | NC_021163.1    | Ca_kabuli_chr04 | 11366912                | CC                              | TT              | 1946791150               |
| SNP_P4_41044_11366921 | NC_021163.1    | Ca_kabuli_chr04 | 11366921                | GG                              | AA              | 1946791152               |
| SNP_P4_41045_11367037 | NC_021163.1    | Ca_kabuli_chr04 | 11367037                | TT                              | CC              | 1946791155               |
| SNP_P4_41046_11367806 | NC_021163.1    | Ca_kabuli_chr04 | 11367806                | GG                              | AA              | 1946791157               |
| SNP_P4_41049_11370524 | NC_021163.1    | Ca_kabuli_chr04 | 11370524                | AA                              | GG              | 1946791159               |
| SNP_P4_41051_11370871 | NC_021163.1    | Ca_kabuli_chr04 | 11370871                | GG                              | AA              | 1946791161               |
| SNP_P4_41052_11370978 | NC_021163.1    | Ca_kabuli_chr04 | 11370978                | TT                              | AA              | 1946791163               |
| SNP_P4_41053_11371592 | NC_021163.1    | Ca_kabuli_chr04 | 11371592                | AA                              | GG              | 1946791165               |
| SNP_P4_41054_11371617 | NC_021163.1    | Ca_kabuli_chr04 | 11371617                | TT                              | GG              | 1946791167               |
| SNP_P4_41055_11371634 | NC_021163.1    | Ca_kabuli_chr04 | 11371634                | CC                              | GG              | 1946791169               |
| SNP_P4_41056_11371980 | NC_021163.1    | Ca_kabuli_chr04 | 11371980                | AA                              | CC              | 1946791171               |
| SNP_P4_41057_11373200 | NC_021163.1    | Ca_kabuli_chr04 | 11373200                | GG                              | AA              | 1946791173               |
| SNP_P4_41058_11373415 | NC_021163.1    | Ca_kabuli_chr04 | 11373415                | AA                              | GG              | 1946791175               |
| SNP_P4_41059_11373504 | NC_021163.1    | Ca_kabuli_chr04 | 11373504                | AA                              | GG              | 1946791177               |
| SNP_P4_41060_11373535 | NC_021163.1    | Ca_kabuli_chr04 | 11373535                | CC                              | TT              | 1946791179               |
| SNP_P4_41061_11373597 | NC_021163.1    | Ca_kabuli_chr04 | 11373597                | TT                              | CC              | 1946791181               |
| SNP_P4_41062_11373687 | NC_021163.1    | Ca_kabuli_chr04 | 11373687                | TT                              | AA              | 1946791183               |
| SNP_P4_41063_11373730 | NC_021163.1    | Ca_kabuli_chr04 | 11373730                | TT                              | CC              | 1946791185               |
| SNP_P4_41064_11373732 | NC_021163.1    | Ca_kabuli_chr04 | 11373732                | CC                              | AA              | 1946791187               |
| SNP_P4_41065_11373811 | NC_021163.1    | Ca_kabuli_chr04 | 11373811                | CC                              | TT              | 1946791189               |
| SNP_P4_41066_11373842 | NC_021163.1    | Ca_kabuli_chr04 | 11373842                | TT                              | CC              | 1946791191               |
| SNP_P4_41067_11374612 | NC_021163.1    | Ca_kabuli_chr04 | 11374612                | CC                              | AA              | 1946791193               |
| SNP_P4_41068_11374785 | NC_021163.1    | Ca_kabuli_chr04 | 11374785                | CC                              | AA              | 1946791195               |
| SNP_P4_41069_11374787 | NC_021163.1    | Ca_kabuli_chr04 | 11374787                | AA                              | CC              | 1946791197               |
| SNP_P4_41070_11374984 | NC_021163.1    | Ca_kabuli_chr04 | 11374984                | CC                              | AA              | 1946791199               |
| SNP_P4_41071_11375716 | NC_021163.1    | Ca_kabuli_chr04 | 11375716                | GG                              | AA              | 1946791201               |
| SNP_P4_41072_11375747 | NC_021163.1    | Ca_kabuli_chr04 | 11375747                | TT                              | CC              | 1946791203               |
| SNP_P4_41073_11375789 | NC_021163.1    | Ca_kabuli_chr04 | 11375789                | AA                              | CC              | 1946791205               |
| SNP_P4_41074_11376317 | NC_021163.1    | Ca_kabuli_chr04 | 11376317                | AA                              | CC              | 1946791207               |
| SNP_P4_41075_11376320 | NC_021163.1    | Ca_kabuli_chr04 | 11376320                | CC                              | GG              | 1946791209               |



| SNPs IDs              | Chromosome IDs | Chromosomes     | Physical positions (bp) | CDC Frontier (Reference genome) | (ILWC46 & LPNB) | NCBI SNPdb Accession IDs |
|-----------------------|----------------|-----------------|-------------------------|---------------------------------|-----------------|--------------------------|
| SNP_P4_41076_11376545 | NC_021163.1    | Ca_kabuli_chr04 | 11376545                | TT                              | GG              | 1946791211               |
| SNP_P4_41077_11376622 | NC_021163.1    | Ca_kabuli_chr04 | 11376622                | AA                              | GG              | 1946791213               |
| SNP_P4_41079_11376684 | NC_021163.1    | Ca_kabuli_chr04 | 11376684                | TT                              | AA              | 1946791215               |
| SNP_P4_41080_11376988 | NC_021163.1    | Ca_kabuli_chr04 | 11376988                | AA                              | CC              | 1946791217               |
| SNP_P4_41081_11377027 | NC_021163.1    | Ca_kabuli_chr04 | 11377027                | CC                              | TT              | 1946791219               |
| SNP_P4_41082_11377034 | NC_021163.1    | Ca_kabuli_chr04 | 11377034                | TT                              | CC              | 1946791221               |
| SNP_P4_41084_11377377 | NC_021163.1    | Ca_kabuli_chr04 | 11377377                | TT                              | GG              | 1946791223               |
| SNP_P4_41085_11377399 | NC_021163.1    | Ca_kabuli_chr04 | 11377399                | TT                              | CC              | 1946791225               |
| SNP_P4_41087_11377637 | NC_021163.1    | Ca_kabuli_chr04 | 11377637                | CC                              | GG              | 1946791227               |
| SNP_P4_41088_11377865 | NC_021163.1    | Ca_kabuli_chr04 | 11377865                | TT                              | AA              | 1946791229               |
| SNP_P4_41089_11379932 | NC_021163.1    | Ca_kabuli_chr04 | 11379932                | AA                              | TT              | 1946791231               |
| SNP_P4_41090_11382006 | NC_021163.1    | Ca_kabuli_chr04 | 11382006                | TT                              | GG              | 1946791233               |
| SNP_P4_41091_11382159 | NC_021163.1    | Ca_kabuli_chr04 | 11382159                | AA                              | GG              | 1946791235               |
| SNP_P4_41092_11382277 | NC_021163.1    | Ca_kabuli_chr04 | 11382277                | CC                              | TT              | 1946791237               |
| SNP_P4_41093_11382348 | NC_021163.1    | Ca_kabuli_chr04 | 11382348                | TT                              | AA              | 1946791239               |
| SNP_P4_41094_11382350 | NC_021163.1    | Ca_kabuli_chr04 | 11382350                | CC                              | TT              | 1946791241               |
| SNP_P4_41095_11382403 | NC_021163.1    | Ca_kabuli_chr04 | 11382403                | AA                              | GG              | 1946791243               |
| SNP_P4_41097_11383377 | NC_021163.1    | Ca_kabuli_chr04 | 11383377                | AA                              | TT              | 1946791245               |
| SNP_P4_41098_11383499 | NC_021163.1    | Ca_kabuli_chr04 | 11383499                | GG                              | AA              | 1946791247               |
| SNP_P4_41099_11383707 | NC_021163.1    | Ca_kabuli_chr04 | 11383707                | CC                              | TT              | 1946791249               |
| SNP_P4_41100_11384678 | NC_021163.1    | Ca_kabuli_chr04 | 11384678                | AA                              | CC              | 1946791251               |
| SNP_P4_41101_11384856 | NC_021163.1    | Ca_kabuli_chr04 | 11384856                | AA                              | TT              | 1946791253               |
| SNP_P4_41102_11384874 | NC_021163.1    | Ca_kabuli_chr04 | 11384874                | AA                              | GG              | 1946791255               |
| SNP_P4_41103_11384887 | NC_021163.1    | Ca_kabuli_chr04 | 11384887                | TT                              | AA              | 1946791257               |
| SNP_P4_41104_11385028 | NC_021163.1    | Ca_kabuli_chr04 | 11385028                | TT                              | AA              | 1946791259               |
| SNP_P4_41105_11385227 | NC_021163.1    | Ca_kabuli_chr04 | 11385227                | CC                              | GG              | 1946791261               |
| SNP_P4_41106_11387391 | NC_021163.1    | Ca_kabuli_chr04 | 11387391                | TT                              | AA              | 1946791263               |
| SNP_P4_41107_11387463 | NC_021163.1    | Ca_kabuli_chr04 | 11387463                | AA                              | GG              | 1946791265               |
| SNP_P4_41108_11390965 | NC_021163.1    | Ca_kabuli_chr04 | 11390965                | CC                              | AA              | 1946791267               |
| SNP_P4_41109_11391254 | NC_021163.1    | Ca_kabuli_chr04 | 11391254                | TT                              | CC              | 1946791269               |
| SNP_P4_41110_11392023 | NC_021163.1    | Ca_kabuli_chr04 | 11392023                | GG                              | TT              | 1946791271               |
| SNP_P4_41111_11393164 | NC_021163.1    | Ca_kabuli_chr04 | 11393164                | AA                              | GG              | 1946791273               |
| SNP_P4_41113_11393464 | NC_021163.1    | Ca_kabuli_chr04 | 11393464                | GG                              | AA              | 1946791275               |
| SNP_P4_41114_11394277 | NC_021163.1    | Ca_kabuli_chr04 | 11394277                | TT                              | GG              | 1946791277               |
| SNP_P4_41116_11395430 | NC_021163.1    | Ca_kabuli_chr04 | 11395430                | TT                              | AA              | 1946791279               |
| SNP_P4_41118_11395697 | NC_021163.1    | Ca_kabuli_chr04 | 11395697                | TT                              | AA              | 1946791281               |
| SNP_P4_41119_11396189 | NC_021163.1    | Ca_kabuli_chr04 | 11396189                | AA                              | GG              | 1946791283               |
| SNP_P4_41120_11396992 | NC_021163.1    | Ca_kabuli_chr04 | 11396992                | CC                              | TT              | 1946791285               |
| SNP_P4_41121_11397336 | NC_021163.1    | Ca_kabuli_chr04 | 11397336                | AA                              | GG              | 1946791288               |
| SNP_P4_41123_11398699 | NC_021163.1    | Ca_kabuli_chr04 | 11398699                | AA                              | GG              | 1946791290               |
| SNP_P4_41124_11400091 | NC_021163.1    | Ca_kabuli_chr04 | 11400091                | AA                              | TT              | 1946791292               |
| SNP_P4_41125_11400134 | NC_021163.1    | Ca_kabuli_chr04 | 11400134                | GG                              | AA              | 1946791294               |

| SNPs IDs              | Chromosome IDs | Chromosomes     | Physical positions (bp) | CDC Frontier (Reference genome) | (ILWC46 & LPNB) | NCBI SNPdb Accession IDs |
|-----------------------|----------------|-----------------|-------------------------|---------------------------------|-----------------|--------------------------|
| SNP_P4_41126_11400483 | NC_021163.1    | Ca_kabuli_chr04 | 11400483                | AA                              | GG              | 1946791296               |
| SNP_P4_41127_11400539 | NC_021163.1    | Ca_kabuli_chr04 | 11400539                | CC                              | GG              | 1946791298               |
| SNP_P4_41128_11400556 | NC_021163.1    | Ca_kabuli_chr04 | 11400556                | TT                              | AA              | 1946791300               |
| SNP_P4_41129_11400742 | NC_021163.1    | Ca_kabuli_chr04 | 11400742                | AA                              | GG              | 1946791302               |
| SNP_P4_41130_11400826 | NC_021163.1    | Ca_kabuli_chr04 | 11400826                | CC                              | AA              | 1946791304               |
| SNP_P4_41131_11400832 | NC_021163.1    | Ca_kabuli_chr04 | 11400832                | TT                              | AA              | 1946791306               |
| SNP_P4_41132_11400905 | NC_021163.1    | Ca_kabuli_chr04 | 11400905                | TT                              | CC              | 1946791308               |
| SNP_P4_41133_11400915 | NC_021163.1    | Ca_kabuli_chr04 | 11400915                | GG                              | AA              | 1946791310               |
| SNP_P4_41134_11401160 | NC_021163.1    | Ca_kabuli_chr04 | 11401160                | CC                              | TT              | 1946791312               |
| SNP_P4_41135_11401254 | NC_021163.1    | Ca_kabuli_chr04 | 11401254                | TT                              | GG              | 1946791314               |
| SNP_P4_41136_11403537 | NC_021163.1    | Ca_kabuli_chr04 | 11403537                | AA                              | CC              | 1946791316               |
| SNP_P4_41137_11403656 | NC_021163.1    | Ca_kabuli_chr04 | 11403656                | AA                              | GG              | 1946791318               |
| SNP_P4_41138_11403697 | NC_021163.1    | Ca_kabuli_chr04 | 11403697                | TT                              | GG              | 1946791320               |
| SNP_P4_41139_11403703 | NC_021163.1    | Ca_kabuli_chr04 | 11403703                | CC                              | AA              | 1946791322               |
| SNP_P4_41140_11403714 | NC_021163.1    | Ca_kabuli_chr04 | 11403714                | GG                              | AA              | 1946791324               |
| SNP_P4_41141_11403941 | NC_021163.1    | Ca_kabuli_chr04 | 11403941                | TT                              | CC              | 1946791326               |
| SNP_P4_41142_11404742 | NC_021163.1    | Ca_kabuli_chr04 | 11404742                | GG                              | AA              | 1946791328               |
| SNP_P4_41143_11404744 | NC_021163.1    | Ca_kabuli_chr04 | 11404744                | TT                              | CC              | 1946791330               |
| SNP_P4_41144_11404762 | NC_021163.1    | Ca_kabuli_chr04 | 11404762                | CC                              | TT              | 1946791332               |
| SNP_P4_41145_11404801 | NC_021163.1    | Ca_kabuli_chr04 | 11404801                | AA                              | CC              | 1946791334               |
| SNP_P4_41146_11404828 | NC_021163.1    | Ca_kabuli_chr04 | 11404828                | TT                              | GG              | 1946791336               |
| SNP_P4_41147_11404876 | NC_021163.1    | Ca_kabuli_chr04 | 11404876                | GG                              | TT              | 1946791338               |
| SNP_P4_41148_11406943 | NC_021163.1    | Ca_kabuli_chr04 | 11406943                | AA                              | CC              | 1946791340               |
| SNP_P4_41149_11408451 | NC_021163.1    | Ca_kabuli_chr04 | 11408451                | GG                              | TT              | 1946791342               |
| SNP_P4_41150_11408840 | NC_021163.1    | Ca_kabuli_chr04 | 11408840                | AA                              | CC              | 1946791344               |
| SNP_P4_41151_11412761 | NC_021163.1    | Ca_kabuli_chr04 | 11412761                | GG                              | CC              | 1946791345               |
| SNP_P4_41152_11412912 | NC_021163.1    | Ca_kabuli_chr04 | 11412912                | TT                              | CC              | 1946791347               |
| SNP_P4_41153_11414655 | NC_021163.1    | Ca_kabuli_chr04 | 11414655                | CC                              | TT              | 1946791349               |
| SNP_P4_41154_11415090 | NC_021163.1    | Ca_kabuli_chr04 | 11415090                | TT                              | CC              | 1946791351               |
| SNP_P4_41155_11415142 | NC_021163.1    | Ca_kabuli_chr04 | 11415142                | GG                              | AA              | 1946791353               |
| SNP_P4_41156_11415190 | NC_021163.1    | Ca_kabuli_chr04 | 11415190                | TT                              | CC              | 1946791355               |
| SNP_P4_41157_11415266 | NC_021163.1    | Ca_kabuli_chr04 | 11415266                | TT                              | GG              | 1946791357               |
| SNP_P4_41158_11415316 | NC_021163.1    | Ca_kabuli_chr04 | 11415316                | GG                              | AA              | 1946791359               |
| SNP_P4_41159_11415521 | NC_021163.1    | Ca_kabuli_chr04 | 11415521                | CC                              | TT              | 1946791361               |
| SNP_P4_41160_11415646 | NC_021163.1    | Ca_kabuli_chr04 | 11415646                | TT                              | CC              | 1946791362               |
| SNP_P4_41161_11415653 | NC_021163.1    | Ca_kabuli_chr04 | 11415653                | TT                              | CC              | 1946791364               |
| SNP_P4_41162_11415874 | NC_021163.1    | Ca_kabuli_chr04 | 11415874                | CC                              | TT              | 1946791366               |
| SNP_P4_41163_11417676 | NC_021163.1    | Ca_kabuli_chr04 | 11417676                | CC                              | TT              | 1946791368               |
| SNP_P4_41164_11417684 | NC_021163.1    | Ca_kabuli_chr04 | 11417684                | TT                              | GG              | 1946791370               |
| SNP_P4_41165_11419544 | NC_021163.1    | Ca_kabuli_chr04 | 11419544                | TT                              | GG              | 1946791372               |
| SNP_P4_41166_11423261 | NC_021163.1    | Ca_kabuli_chr04 | 11423261                | GG                              | AA              | 1946791374               |
| SNP_P4_41168_11425471 | NC_021163.1    | Ca_kabuli_chr04 | 11425471                | GG                              | AA              | 1946791376               |

| SNPs IDs              | Chromosome IDs | Chromosomes     | Physical positions (bp) | CDC Frontier (Reference genome) | (ILWC46 & LPNB) | NCBI SNPdb Accession IDs |
|-----------------------|----------------|-----------------|-------------------------|---------------------------------|-----------------|--------------------------|
| SNP_P4_41169_11425538 | NC_021163.1    | Ca_kabuli_chr04 | 11425538                | TT                              | GG              | 1946791378               |
| SNP_P4_41170_11425682 | NC_021163.1    | Ca_kabuli_chr04 | 11425682                | GG                              | CC              | 1946791380               |
| SNP_P4_41172_11425833 | NC_021163.1    | Ca_kabuli_chr04 | 11425833                | GG                              | AA              | 1946791382               |
| SNP_P4_41173_11425844 | NC_021163.1    | Ca_kabuli_chr04 | 11425844                | AA                              | GG              | 1946791384               |
| SNP_P4_41174_11425868 | NC_021163.1    | Ca_kabuli_chr04 | 11425868                | CC                              | AA              | 1946791387               |
| SNP_P4_41175_11425912 | NC_021163.1    | Ca_kabuli_chr04 | 11425912                | TT                              | CC              | 1946791389               |
| SNP_P4_41176_11425919 | NC_021163.1    | Ca_kabuli_chr04 | 11425919                | TT                              | CC              | 1946791391               |
| SNP_P4_41177_11426107 | NC_021163.1    | Ca_kabuli_chr04 | 11426107                | AA                              | TT              | 1946791393               |
| SNP_P4_41178_11426113 | NC_021163.1    | Ca_kabuli_chr04 | 11426113                | AA                              | GG              | 1946791395               |
| SNP_P4_41179_11426116 | NC_021163.1    | Ca_kabuli_chr04 | 11426116                | AA                              | CC              | 1946791397               |
| SNP_P4_41180_11426473 | NC_021163.1    | Ca_kabuli_chr04 | 11426473                | CC                              | AA              | 1946791399               |
| SNP_P4_41181_11426490 | NC_021163.1    | Ca_kabuli_chr04 | 11426490                | AA                              | CC              | 1946791401               |
| SNP_P4_41182_11426577 | NC_021163.1    | Ca_kabuli_chr04 | 11426577                | GG                              | CC              | 1946791403               |
| SNP_P4_41183_11426583 | NC_021163.1    | Ca_kabuli_chr04 | 11426583                | AA                              | TT              | 1946791405               |
| SNP_P4_41184_11426814 | NC_021163.1    | Ca_kabuli_chr04 | 11426814                | GG                              | AA              | 1946791407               |
| SNP_P4_41185_11429847 | NC_021163.1    | Ca_kabuli_chr04 | 11429847                | AA                              | CC              | 1946791409               |
| SNP_P4_41186_11429852 | NC_021163.1    | Ca_kabuli_chr04 | 11429852                | TT                              | CC              | 1946791411               |
| SNP_P4_41187_11433976 | NC_021163.1    | Ca_kabuli_chr04 | 11433976                | TT                              | GG              | 1946791413               |
| SNP_P4_41188_11434013 | NC_021163.1    | Ca_kabuli_chr04 | 11434013                | CC                              | AA              | 1946791415               |
| SNP_P4_41189_11434088 | NC_021163.1    | Ca_kabuli_chr04 | 11434088                | TT                              | GG              | 1946791417               |
| SNP_P4_41190_11434169 | NC_021163.1    | Ca_kabuli_chr04 | 11434169                | AA                              | TT              | 1946791419               |
| SNP_P4_41191_11434284 | NC_021163.1    | Ca_kabuli_chr04 | 11434284                | CC                              | TT              | 1946791421               |
| SNP_P4_41192_11434343 | NC_021163.1    | Ca_kabuli_chr04 | 11434343                | AA                              | GG              | 1946791423               |
| SNP_P4_41194_11434967 | NC_021163.1    | Ca_kabuli_chr04 | 11434967                | TT                              | CC              | 1946791425               |
| SNP_P4_41195_11435161 | NC_021163.1    | Ca_kabuli_chr04 | 11435161                | AA                              | GG              | 1946791427               |
| SNP_P4_41196_11435947 | NC_021163.1    | Ca_kabuli_chr04 | 11435947                | AA                              | GG              | 1946791429               |
| SNP_P4_41197_11436868 | NC_021163.1    | Ca_kabuli_chr04 | 11436868                | TT                              | CC              | 1946791431               |
| SNP_P4_41199_11437584 | NC_021163.1    | Ca_kabuli_chr04 | 11437584                | AA                              | TT              | 1946791433               |
| SNP_P4_41200_11437794 | NC_021163.1    | Ca_kabuli_chr04 | 11437794                | TT                              | CC              | 1946791435               |
| SNP_P4_41201_11437932 | NC_021163.1    | Ca_kabuli_chr04 | 11437932                | TT                              | AA              | 1946791437               |
| SNP_P4_41202_11437977 | NC_021163.1    | Ca_kabuli_chr04 | 11437977                | GG                              | TT              | 1946791439               |
| SNP_P4_41203_11438106 | NC_021163.1    | Ca_kabuli_chr04 | 11438106                | GG                              | AA              | 1946791441               |
| SNP_P4_41204_11440109 | NC_021163.1    | Ca_kabuli_chr04 | 11440109                | CC                              | TT              | 1946791443               |
| SNP_P4_41205_11440311 | NC_021163.1    | Ca_kabuli_chr04 | 11440311                | AA                              | CC              | 1946791445               |
| SNP_P4_41207_11440964 | NC_021163.1    | Ca_kabuli_chr04 | 11440964                | TT                              | CC              | 1946791447               |
| SNP_P4_41208_11440998 | NC_021163.1    | Ca_kabuli_chr04 | 11440998                | GG                              | AA              | 1946791449               |
| SNP_P4_41209_11441257 | NC_021163.1    | Ca_kabuli_chr04 | 11441257                | CC                              | AA              | 1946791451               |
| SNP_P4_41210_11441263 | NC_021163.1    | Ca_kabuli_chr04 | 11441263                | CC                              | AA              | 1946791453               |
| SNP_P4_41211_11441308 | NC_021163.1    | Ca_kabuli_chr04 | 11441308                | CC                              | TT              | 1946791455               |
| SNP_P4_41212_11441536 | NC_021163.1    | Ca_kabuli_chr04 | 11441536                | AA                              | GG              | 1946791457               |
| SNP_P4_41213_11441553 | NC_021163.1    | Ca_kabuli_chr04 | 11441553                | AA                              | TT              | 1946791459               |
| SNP_P4_41214_11441604 | NC_021163.1    | Ca_kabuli_chr04 | 11441604                | TT                              | AA              | 1946791461               |

| SNPs IDs              | Chromosome IDs | Chromosomes     | Physical positions (bp) | CDC Frontier (Reference genome) | (ILWC46 & LPNB) | NCBI SNPdb Accession IDs |
|-----------------------|----------------|-----------------|-------------------------|---------------------------------|-----------------|--------------------------|
| SNP_P4_41215_11442383 | NC_021163.1    | Ca_kabuli_chr04 | 11442383                | GG                              | CC              | 1946791463               |
| SNP_P4_41217_11443042 | NC_021163.1    | Ca_kabuli_chr04 | 11443042                | AA                              | TT              | 1946791465               |
| SNP_P4_41219_11444433 | NC_021163.1    | Ca_kabuli_chr04 | 11444433                | CC                              | TT              | 1946791467               |
| SNP_P4_41220_11444720 | NC_021163.1    | Ca_kabuli_chr04 | 11444720                | CC                              | TT              | 1946791469               |
| SNP_P4_41221_11444731 | NC_021163.1    | Ca_kabuli_chr04 | 11444731                | CC                              | TT              | 1946791471               |
| SNP_P4_41222_11446048 | NC_021163.1    | Ca_kabuli_chr04 | 11446048                | AA                              | GG              | 1946791473               |
| SNP_P4_41223_11446067 | NC_021163.1    | Ca_kabuli_chr04 | 11446067                | GG                              | AA              | 1946791475               |
| SNP_P4_41224_11446188 | NC_021163.1    | Ca_kabuli_chr04 | 11446188                | AA                              | GG              | 1946791477               |
| SNP_P4_41225_11446194 | NC_021163.1    | Ca_kabuli_chr04 | 11446194                | AA                              | GG              | 1946791479               |
| SNP_P4_41227_11446448 | NC_021163.1    | Ca_kabuli_chr04 | 11446448                | CC                              | AA              | 1946791481               |
| SNP_P4_41228_11446456 | NC_021163.1    | Ca_kabuli_chr04 | 11446456                | CC                              | TT              | 1946791483               |
| SNP_P4_41229_11447407 | NC_021163.1    | Ca_kabuli_chr04 | 11447407                | GG                              | AA              | 1946791485               |
| SNP_P4_41231_11447434 | NC_021163.1    | Ca_kabuli_chr04 | 11447434                | GG                              | AA              | 1946791487               |
| SNP_P4_41232_11447439 | NC_021163.1    | Ca_kabuli_chr04 | 11447439                | CC                              | TT              | 1946791489               |
| SNP_P4_41234_11447899 | NC_021163.1    | Ca_kabuli_chr04 | 11447899                | TT                              | CC              | 1946791491               |
| SNP_P4_41235_11448276 | NC_021163.1    | Ca_kabuli_chr04 | 11448276                | TT                              | CC              | 1946791493               |
| SNP_P4_41238_11449921 | NC_021163.1    | Ca_kabuli_chr04 | 11449921                | GG                              | AA              | 1946791495               |
| SNP_P4_41239_11449954 | NC_021163.1    | Ca_kabuli_chr04 | 11449954                | TT                              | CC              | 1946791496               |
| SNP_P4_41240_11450028 | NC_021163.1    | Ca_kabuli_chr04 | 11450028                | GG                              | TT              | 1946791498               |
| SNP_P4_41241_11450340 | NC_021163.1    | Ca_kabuli_chr04 | 11450340                | CC                              | GG              | 1946791500               |
| SNP_P4_41242_11451197 | NC_021163.1    | Ca_kabuli_chr04 | 11451197                | AA                              | GG              | 1946791502               |
| SNP_P4_41243_11451198 | NC_021163.1    | Ca_kabuli_chr04 | 11451198                | CC                              | GG              | 1946791504               |
| SNP_P4_41244_11451880 | NC_021163.1    | Ca_kabuli_chr04 | 11451880                | TT                              | GG              | 1946791506               |
| SNP_P4_41245_11451925 | NC_021163.1    | Ca_kabuli_chr04 | 11451925                | TT                              | GG              | 1946791508               |
| SNP_P4_41246_11452072 | NC_021163.1    | Ca_kabuli_chr04 | 11452072                | TT                              | CC              | 1946791510               |
| SNP_P4_41247_11453208 | NC_021163.1    | Ca_kabuli_chr04 | 11453208                | AA                              | CC              | 1946791512               |
| SNP_P4_41248_11453212 | NC_021163.1    | Ca_kabuli_chr04 | 11453212                | TT                              | CC              | 1946791514               |
| SNP_P4_41249_11453470 | NC_021163.1    | Ca_kabuli_chr04 | 11453470                | AA                              | GG              | 1946791516               |
| SNP_P4_41250_11453471 | NC_021163.1    | Ca_kabuli_chr04 | 11453471                | GG                              | AA              | 1946791518               |
| SNP_P4_41251_11453477 | NC_021163.1    | Ca_kabuli_chr04 | 11453477                | GG                              | CC              | 1946791520               |
| SNP_P4_41252_11453531 | NC_021163.1    | Ca_kabuli_chr04 | 11453531                | CC                              | TT              | 1946791522               |
| SNP_P4_41253_11453581 | NC_021163.1    | Ca_kabuli_chr04 | 11453581                | GG                              | AA              | 1946791524               |
| SNP_P4_41254_11453602 | NC_021163.1    | Ca_kabuli_chr04 | 11453602                | AA                              | GG              | 1946791526               |
| SNP_P4_41256_11453785 | NC_021163.1    | Ca_kabuli_chr04 | 11453785                | CC                              | GG              | 1946791528               |
| SNP_P4_41257_11453798 | NC_021163.1    | Ca_kabuli_chr04 | 11453798                | GG                              | AA              | 1946791530               |
| SNP_P4_41258_11454640 | NC_021163.1    | Ca_kabuli_chr04 | 11454640                | TT                              | CC              | 1946791532               |
| SNP_P4_41259_11456503 | NC_021163.1    | Ca_kabuli_chr04 | 11456503                | TT                              | CC              | 1946791534               |
| SNP_P4_41260_11457599 | NC_021163.1    | Ca_kabuli_chr04 | 11457599                | CC                              | TT              | 1946791536               |
| SNP_P4_41261_11457606 | NC_021163.1    | Ca_kabuli_chr04 | 11457606                | GG                              | AA              | 1946791538               |
| SNP_P4_41262_11457654 | NC_021163.1    | Ca_kabuli_chr04 | 11457654                | TT                              | CC              | 1946791540               |
| SNP_P4_41263_11459186 | NC_021163.1    | Ca_kabuli_chr04 | 11459186                | CC                              | TT              | 1946791542               |
| SNP_P4_41264_11459221 | NC_021163.1    | Ca_kabuli_chr04 | 11459221                | GG                              | AA              | 1946791544               |

| SNPs IDs              | Chromosome IDs | Chromosomes     | Physical positions (bp) | CDC Frontier (Reference genome) | (ILWC46 & LPNB) | NCBI SNPdb Accession IDs |
|-----------------------|----------------|-----------------|-------------------------|---------------------------------|-----------------|--------------------------|
| SNP_P4_41265_11459600 | NC_021163.1    | Ca_kabuli_chr04 | 11459600                | CC                              | GG              | 1946791546               |
| SNP_P4_41267_11459984 | NC_021163.1    | Ca_kabuli_chr04 | 11459984                | AA                              | TT              | 1946791548               |
| SNP_P4_41268_11460230 | NC_021163.1    | Ca_kabuli_chr04 | 11460230                | GG                              | AA              | 1946791550               |
| SNP_P4_41269_11461766 | NC_021163.1    | Ca_kabuli_chr04 | 11461766                | GG                              | TT              | 1946791552               |
| SNP_P4_41271_11462654 | NC_021163.1    | Ca_kabuli_chr04 | 11462654                | AA                              | TT              | 1946791554               |
| SNP_P4_41272_11462665 | NC_021163.1    | Ca_kabuli_chr04 | 11462665                | AA                              | CC              | 1946791556               |
| SNP_P4_41273_11463026 | NC_021163.1    | Ca_kabuli_chr04 | 11463026                | GG                              | AA              | 1946791558               |
| SNP_P4_41274_11463027 | NC_021163.1    | Ca_kabuli_chr04 | 11463027                | TT                              | AA              | 1946791561               |
| SNP_P4_41275_11463030 | NC_021163.1    | Ca_kabuli_chr04 | 11463030                | AA                              | TT              | 1946791563               |
| SNP_P4_41276_11463034 | NC_021163.1    | Ca_kabuli_chr04 | 11463034                | TT                              | GG              | 1946791565               |
| SNP_P4_41277_11463036 | NC_021163.1    | Ca_kabuli_chr04 | 11463036                | TT                              | AA              | 1946791567               |
| SNP_P4_41278_11463037 | NC_021163.1    | Ca_kabuli_chr04 | 11463037                | TT                              | CC              | 1946791569               |
| SNP_P4_41279_11463040 | NC_021163.1    | Ca_kabuli_chr04 | 11463040                | CC                              | AA              | 1946791570               |
| SNP_P4_41280_11463050 | NC_021163.1    | Ca_kabuli_chr04 | 11463050                | AA                              | GG              | 1946791572               |
| SNP_P4_41281_11463057 | NC_021163.1    | Ca_kabuli_chr04 | 11463057                | GG                              | AA              | 1946791574               |
| SNP_P4_41282_11463066 | NC_021163.1    | Ca_kabuli_chr04 | 11463066                | TT                              | CC              | 1946791576               |
| SNP_P4_41283_11463083 | NC_021163.1    | Ca_kabuli_chr04 | 11463083                | GG                              | AA              | 1946791578               |
| SNP_P4_41284_11463174 | NC_021163.1    | Ca_kabuli_chr04 | 11463174                | AA                              | GG              | 1946791580               |
| SNP_P4_41285_11463181 | NC_021163.1    | Ca_kabuli_chr04 | 11463181                | AA                              | CC              | 1946791582               |
| SNP_P4_41286_11463214 | NC_021163.1    | Ca_kabuli_chr04 | 11463214                | CC                              | TT              | 1946791584               |
| SNP_P4_41287_11463685 | NC_021163.1    | Ca_kabuli_chr04 | 11463685                | AA                              | GG              | 1946791586               |
| SNP_P4_41288_11463687 | NC_021163.1    | Ca_kabuli_chr04 | 11463687                | TT                              | AA              | 1946791588               |
| SNP_P4_41289_11466893 | NC_021163.1    | Ca_kabuli_chr04 | 11466893                | GG                              | AA              | 1946791590               |
| SNP_P4_41290_11466938 | NC_021163.1    | Ca_kabuli_chr04 | 11466938                | AA                              | TT              | 1946791592               |
| SNP_P4_41291_11466952 | NC_021163.1    | Ca_kabuli_chr04 | 11466952                | TT                              | CC              | 1946791594               |
| SNP_P4_41292_11467351 | NC_021163.1    | Ca_kabuli_chr04 | 11467351                | CC                              | AA              | 1946791596               |
| SNP_P4_41293_11467577 | NC_021163.1    | Ca_kabuli_chr04 | 11467577                | TT                              | CC              | 1946791598               |
| SNP_P4_41294_11467608 | NC_021163.1    | Ca_kabuli_chr04 | 11467608                | GG                              | AA              | 1946791600               |
| SNP_P4_41295_11467778 | NC_021163.1    | Ca_kabuli_chr04 | 11467778                | CC                              | TT              | 1946791602               |
| SNP_P4_41296_11467887 | NC_021163.1    | Ca_kabuli_chr04 | 11467887                | AA                              | GG              | 1946791604               |
| SNP_P4_41297_11467924 | NC_021163.1    | Ca_kabuli_chr04 | 11467924                | GG                              | TT              | 1946791606               |
| SNP_P4_41298_11467968 | NC_021163.1    | Ca_kabuli_chr04 | 11467968                | AA                              | GG              | 1946791608               |
| SNP_P4_41299_11467994 | NC_021163.1    | Ca_kabuli_chr04 | 11467994                | CC                              | TT              | 1946791610               |
| SNP_P4_41300_11468008 | NC_021163.1    | Ca_kabuli_chr04 | 11468008                | TT                              | CC              | 1946791612               |
| SNP_P4_41301_11468012 | NC_021163.1    | Ca_kabuli_chr04 | 11468012                | AA                              | TT              | 1946791614               |
| SNP_P4_41302_11468026 | NC_021163.1    | Ca_kabuli_chr04 | 11468026                | TT                              | CC              | 1946791616               |
| SNP_P4_41303_11468049 | NC_021163.1    | Ca_kabuli_chr04 | 11468049                | TT                              | CC              | 1946791618               |
| SNP_P4_41304_11468050 | NC_021163.1    | Ca_kabuli_chr04 | 11468050                | CC                              | TT              | 1946791620               |
| SNP_P4_41305_11468239 | NC_021163.1    | Ca_kabuli_chr04 | 11468239                | GG                              | AA              | 1946791622               |
| SNP_P4_41306_11468259 | NC_021163.1    | Ca_kabuli_chr04 | 11468259                | CC                              | TT              | 1946791624               |
| SNP_P4_41307_11468305 | NC_021163.1    | Ca_kabuli_chr04 | 11468305                | TT                              | CC              | 1946791626               |
| SNP_P4_41309_11468769 | NC_021163.1    | Ca_kabuli_chr04 | 11468769                | AA                              | GG              | 1946791628               |

| SNPs IDs              | Chromosome IDs | Chromosomes     | Physical positions (bp) | CDC Frontier (Reference genome) | (ILWC46 & LPNB) | NCBI SNPdb Accession IDs |
|-----------------------|----------------|-----------------|-------------------------|---------------------------------|-----------------|--------------------------|
| SNP_P4_41310_11468777 | NC_021163.1    | Ca_kabuli_chr04 | 11468777                | CC                              | TT              | 1946791630               |
| SNP_P4_41311_11468822 | NC_021163.1    | Ca_kabuli_chr04 | 11468822                | TT                              | CC              | 1946791632               |
| SNP_P4_41312_11468928 | NC_021163.1    | Ca_kabuli_chr04 | 11468928                | TT                              | CC              | 1946791634               |
| SNP_P4_41313_11469203 | NC_021163.1    | Ca_kabuli_chr04 | 11469203                | GG                              | AA              | 1946791636               |
| SNP_P4_41314_11469538 | NC_021163.1    | Ca_kabuli_chr04 | 11469538                | AA                              | GG              | 1946791638               |
| SNP_P4_41315_11469569 | NC_021163.1    | Ca_kabuli_chr04 | 11469569                | AA                              | TT              | 1946791640               |
| SNP_P4_41316_11469906 | NC_021163.1    | Ca_kabuli_chr04 | 11469906                | CC                              | AA              | 1946791642               |
| SNP_P4_41317_11470018 | NC_021163.1    | Ca_kabuli_chr04 | 11470018                | GG                              | AA              | 1946791644               |
| SNP_P4_41318_11470208 | NC_021163.1    | Ca_kabuli_chr04 | 11470208                | GG                              | CC              | 1946791646               |
| SNP_P4_41319_11470486 | NC_021163.1    | Ca_kabuli_chr04 | 11470486                | GG                              | AA              | 1946791649               |
| SNP_P4_41320_11470701 | NC_021163.1    | Ca_kabuli_chr04 | 11470701                | GG                              | AA              | 1946791651               |
| SNP_P4_41321_11470901 | NC_021163.1    | Ca_kabuli_chr04 | 11470901                | AA                              | TT              | 1946791653               |
| SNP_P4_41322_11471018 | NC_021163.1    | Ca_kabuli_chr04 | 11471018                | CC                              | AA              | 1946791655               |
| SNP_P4_41323_11471233 | NC_021163.1    | Ca_kabuli_chr04 | 11471233                | TT                              | CC              | 1946791657               |
| SNP_P4_41324_11471347 | NC_021163.1    | Ca_kabuli_chr04 | 11471347                | TT                              | CC              | 1946791659               |
| SNP_P4_41325_11471426 | NC_021163.1    | Ca_kabuli_chr04 | 11471426                | TT                              | GG              | 1946791661               |
| SNP_P4_41326_11471596 | NC_021163.1    | Ca_kabuli_chr04 | 11471596                | TT                              | CC              | 1946791663               |
| SNP_P4_41327_11471641 | NC_021163.1    | Ca_kabuli_chr04 | 11471641                | AA                              | GG              | 1946791665               |
| SNP_P4_41328_11472048 | NC_021163.1    | Ca_kabuli_chr04 | 11472048                | CC                              | TT              | 1946791667               |
| SNP_P4_41329_11472055 | NC_021163.1    | Ca_kabuli_chr04 | 11472055                | AA                              | TT              | 1946791669               |
| SNP_P4_41330_11472168 | NC_021163.1    | Ca_kabuli_chr04 | 11472168                | AA                              | GG              | 1946791671               |
| SNP_P4_41331_11472182 | NC_021163.1    | Ca_kabuli_chr04 | 11472182                | TT                              | CC              | 1946791673               |
| SNP_P4_41332_11472183 | NC_021163.1    | Ca_kabuli_chr04 | 11472183                | CC                              | AA              | 1946791675               |
| SNP_P4_41334_11473092 | NC_021163.1    | Ca_kabuli_chr04 | 11473092                | TT                              | CC              | 1946791677               |
| SNP_P4_41337_11473591 | NC_021163.1    | Ca_kabuli_chr04 | 11473591                | CC                              | GG              | 1946791679               |
| SNP_P4_41338_11473979 | NC_021163.1    | Ca_kabuli_chr04 | 11473979                | AA                              | CC              | 1946791681               |
| SNP_P4_41339_11474609 | NC_021163.1    | Ca_kabuli_chr04 | 11474609                | AA                              | GG              | 1946791684               |
| SNP_P4_41340_11476924 | NC_021163.1    | Ca_kabuli_chr04 | 11476924                | TT                              | CC              | 1946791686               |
| SNP_P4_41341_11476984 | NC_021163.1    | Ca_kabuli_chr04 | 11476984                | CC                              | GG              | 1946791688               |
| SNP_P4_41342_11476992 | NC_021163.1    | Ca_kabuli_chr04 | 11476992                | TT                              | AA              | 1946791690               |
| SNP_P4_41343_11477291 | NC_021163.1    | Ca_kabuli_chr04 | 11477291                | AA                              | TT              | 1946791692               |
| SNP_P4_41344_11477326 | NC_021163.1    | Ca_kabuli_chr04 | 11477326                | CC                              | TT              | 1946791694               |
| SNP_P4_41345_11477588 | NC_021163.1    | Ca_kabuli_chr04 | 11477588                | TT                              | CC              | 1946791696               |
| SNP_P4_41346_11477921 | NC_021163.1    | Ca_kabuli_chr04 | 11477921                | CC                              | TT              | 1946791698               |
| SNP_P4_41347_11478063 | NC_021163.1    | Ca_kabuli_chr04 | 11478063                | CC                              | TT              | 1946791700               |
| SNP_P4_41349_11478147 | NC_021163.1    | Ca_kabuli_chr04 | 11478147                | AA                              | CC              | 1946791703               |
| SNP_P4_41350_11478397 | NC_021163.1    | Ca_kabuli_chr04 | 11478397                | CC                              | TT              | 1946791705               |
| SNP_P4_41353_11479158 | NC_021163.1    | Ca_kabuli_chr04 | 11479158                | CC                              | GG              | 1946791707               |
| SNP_P4_41354_11480310 | NC_021163.1    | Ca_kabuli_chr04 | 11480310                | GG                              | TT              | 1946791709               |
| SNP_P4_41355_11481179 | NC_021163.1    | Ca_kabuli_chr04 | 11481179                | AA                              | CC              | 1946791711               |
| SNP_P4_41356_11481469 | NC_021163.1    | Ca_kabuli_chr04 | 11481469                | GG                              | TT              | 1946791713               |
| SNP_P4_41357_11481484 | NC_021163.1    | Ca_kabuli_chr04 | 11481484                | TT                              | CC              | 1946791715               |

| SNPs IDs              | Chromosome IDs | Chromosomes     | Physical positions (bp) | CDC Frontier (Reference genome) | (ILWC46 & LPNB) | NCBI SNPdb Accession IDs |
|-----------------------|----------------|-----------------|-------------------------|---------------------------------|-----------------|--------------------------|
| SNP_P4_41358_11481701 | NC_021163.1    | Ca_kabuli_chr04 | 11481701                | AA                              | GG              | 1946791717               |
| SNP_P4_41359_11481705 | NC_021163.1    | Ca_kabuli_chr04 | 11481705                | CC                              | GG              | 1946791719               |
| SNP_P4_41360_11481943 | NC_021163.1    | Ca_kabuli_chr04 | 11481943                | TT                              | AA              | 1946791721               |
| SNP_P4_41361_11482001 | NC_021163.1    | Ca_kabuli_chr04 | 11482001                | CC                              | AA              | 1946791723               |
| SNP_P4_41362_11482365 | NC_021163.1    | Ca_kabuli_chr04 | 11482365                | AA                              | GG              | 1946791725               |
| SNP_P4_41365_11483761 | NC_021163.1    | Ca_kabuli_chr04 | 11483761                | AA                              | GG              | 1946791727               |
| SNP_P4_41366_11484060 | NC_021163.1    | Ca_kabuli_chr04 | 11484060                | TT                              | AA              | 1946791729               |
| SNP_P4_41367_11484107 | NC_021163.1    | Ca_kabuli_chr04 | 11484107                | TT                              | CC              | 1946791731               |
| SNP_P4_41368_11488876 | NC_021163.1    | Ca_kabuli_chr04 | 11488876                | AA                              | GG              | 1946791733               |
| SNP_P4_41369_11488906 | NC_021163.1    | Ca_kabuli_chr04 | 11488906                | CC                              | TT              | 1946791735               |
| SNP_P4_41370_11488987 | NC_021163.1    | Ca_kabuli_chr04 | 11488987                | TT                              | AA              | 1946791738               |
| SNP_P4_41371_11489186 | NC_021163.1    | Ca_kabuli_chr04 | 11489186                | AA                              | TT              | 1946791740               |
| SNP_P4_41372_11491864 | NC_021163.1    | Ca_kabuli_chr04 | 11491864                | AA                              | CC              | 1946791742               |
| SNP_P4_41373_11492076 | NC_021163.1    | Ca_kabuli_chr04 | 11492076                | TT                              | CC              | 1946791744               |
| SNP_P4_41374_11492185 | NC_021163.1    | Ca_kabuli_chr04 | 11492185                | CC                              | AA              | 1946791746               |
| SNP_P4_41376_11492461 | NC_021163.1    | Ca_kabuli_chr04 | 11492461                | TT                              | CC              | 1946791748               |
| SNP_P4_41377_11492581 | NC_021163.1    | Ca_kabuli_chr04 | 11492581                | TT                              | CC              | 1946791750               |
| SNP_P4_41378_11492588 | NC_021163.1    | Ca_kabuli_chr04 | 11492588                | TT                              | GG              | 1946791752               |
| SNP_P4_41382_11493723 | NC_021163.1    | Ca_kabuli_chr04 | 11493723                | AA                              | GG              | 1946791754               |
| SNP_P4_41384_11493852 | NC_021163.1    | Ca_kabuli_chr04 | 11493852                | CC                              | AA              | 1946791756               |
| SNP_P4_41385_11493898 | NC_021163.1    | Ca_kabuli_chr04 | 11493898                | GG                              | TT              | 1946791758               |
| SNP_P4_41386_11494207 | NC_021163.1    | Ca_kabuli_chr04 | 11494207                | GG                              | TT              | 1946791760               |
| SNP_P4_41388_11494382 | NC_021163.1    | Ca_kabuli_chr04 | 11494382                | TT                              | CC              | 1946791762               |
| SNP_P4_41389_11494440 | NC_021163.1    | Ca_kabuli_chr04 | 11494440                | CC                              | TT              | 1946791764               |
| SNP_P4_41392_11496674 | NC_021163.1    | Ca_kabuli_chr04 | 11496674                | TT                              | CC              | 1946791766               |
| SNP_P4_41393_11496683 | NC_021163.1    | Ca_kabuli_chr04 | 11496683                | AA                              | GG              | 1946791768               |
| SNP_P4_41394_11505325 | NC_021163.1    | Ca_kabuli_chr04 | 11505325                | CC                              | AA              | 1946791770               |
| SNP_P4_41397_11506885 | NC_021163.1    | Ca_kabuli_chr04 | 11506885                | CC                              | TT              | 1946791772               |
| SNP_P4_41398_11512609 | NC_021163.1    | Ca_kabuli_chr04 | 11512609                | GG                              | TT              | 1946791774               |
| SNP_P4_41399_11512638 | NC_021163.1    | Ca_kabuli_chr04 | 11512638                | TT                              | GG              | 1946791776               |
| SNP_P4_41400_11512654 | NC_021163.1    | Ca_kabuli_chr04 | 11512654                | TT                              | CC              | 1946791778               |
| SNP_P4_41401_11512678 | NC_021163.1    | Ca_kabuli_chr04 | 11512678                | GG                              | CC              | 1946791780               |
| SNP_P4_41402_11512872 | NC_021163.1    | Ca_kabuli_chr04 | 11512872                | TT                              | CC              | 1946791783               |
| SNP_P4_41403_11512894 | NC_021163.1    | Ca_kabuli_chr04 | 11512894                | GG                              | AA              | 1946791785               |
| SNP_P4_41404_11513136 | NC_021163.1    | Ca_kabuli_chr04 | 11513136                | TT                              | GG              | 1946791787               |
| SNP_P4_41405_11513426 | NC_021163.1    | Ca_kabuli_chr04 | 11513426                | GG                              | TT              | 1946791789               |
| SNP_P4_41407_11514353 | NC_021163.1    | Ca_kabuli_chr04 | 11514353                | TT                              | CC              | 1946791791               |
| SNP_P4_41408_11514373 | NC_021163.1    | Ca_kabuli_chr04 | 11514373                | GG                              | AA              | 1946791793               |
| SNP_P4_41410_11514456 | NC_021163.1    | Ca_kabuli_chr04 | 11514456                | AA                              | GG              | 1946791795               |
| SNP_P4_41411_11514870 | NC_021163.1    | Ca_kabuli_chr04 | 11514870                | AA                              | CC              | 1946791797               |
| SNP_P4_41412_11515443 | NC_021163.1    | Ca_kabuli_chr04 | 11515443                | GG                              | AA              | 1946791799               |
| SNP_P4_41413_11515735 | NC_021163.1    | Ca_kabuli_chr04 | 11515735                | CC                              | TT              | 1946791801               |

| SNPs IDs              | Chromosome IDs | Chromosomes     | Physical positions (bp) | CDC Frontier (Reference genome) | (ILWC46 & LPNB) | NCBI SNPdb Accession IDs |
|-----------------------|----------------|-----------------|-------------------------|---------------------------------|-----------------|--------------------------|
| SNP_P4_41414_11515774 | NC_021163.1    | Ca_kabuli_chr04 | 11515774                | GG                              | TT              | 1946791804               |
| SNP_P4_41415_11516293 | NC_021163.1    | Ca_kabuli_chr04 | 11516293                | AA                              | GG              | 1946791806               |
| SNP_P4_41416_11516329 | NC_021163.1    | Ca_kabuli_chr04 | 11516329                | AA                              | GG              | 1946791808               |
| SNP_P4_41417_11516379 | NC_021163.1    | Ca_kabuli_chr04 | 11516379                | AA                              | GG              | 1946791810               |
| SNP_P4_41418_11516547 | NC_021163.1    | Ca_kabuli_chr04 | 11516547                | TT                              | CC              | 1946791812               |
| SNP_P4_41419_11517219 | NC_021163.1    | Ca_kabuli_chr04 | 11517219                | TT                              | CC              | 1946791814               |
| SNP_P4_41420_11517517 | NC_021163.1    | Ca_kabuli_chr04 | 11517517                | CC                              | AA              | 1946791816               |
| SNP_P4_41421_11517969 | NC_021163.1    | Ca_kabuli_chr04 | 11517969                | CC                              | TT              | 1946791819               |
| SNP_P4_41422_11518068 | NC_021163.1    | Ca_kabuli_chr04 | 11518068                | AA                              | GG              | 1946791821               |
| SNP_P4_41423_11518846 | NC_021163.1    | Ca_kabuli_chr04 | 11518846                | AA                              | GG              | 1946791823               |
| SNP_P4_41424_11519124 | NC_021163.1    | Ca_kabuli_chr04 | 11519124                | GG                              | AA              | 1946791825               |
| SNP_P4_41425_11519251 | NC_021163.1    | Ca_kabuli_chr04 | 11519251                | CC                              | TT              | 1946791827               |
| SNP_P4_41426_11519400 | NC_021163.1    | Ca_kabuli_chr04 | 11519400                | CC                              | TT              | 1946791829               |
| SNP_P4_41427_11519562 | NC_021163.1    | Ca_kabuli_chr04 | 11519562                | AA                              | GG              | 1946791831               |
| SNP_P4_41428_11520604 | NC_021163.1    | Ca_kabuli_chr04 | 11520604                | GG                              | TT              | 1946791833               |
| SNP_P4_41429_11520644 | NC_021163.1    | Ca_kabuli_chr04 | 11520644                | AA                              | GG              | 1946791835               |
| SNP_P4_41430_11520937 | NC_021163.1    | Ca_kabuli_chr04 | 11520937                | AA                              | GG              | 1946791837               |
| SNP_P4_41431_11521002 | NC_021163.1    | Ca_kabuli_chr04 | 11521002                | CC                              | AA              | 1946791839               |
| SNP_P4_41432_11523977 | NC_021163.1    | Ca_kabuli_chr04 | 11523977                | CC                              | TT              | 1946791841               |
| SNP_P4_41433_11523995 | NC_021163.1    | Ca_kabuli_chr04 | 11523995                | GG                              | AA              | 1946791843               |
| SNP_P4_41434_11524339 | NC_021163.1    | Ca_kabuli_chr04 | 11524339                | TT                              | CC              | 1946791845               |
| SNP_P4_41435_11527360 | NC_021163.1    | Ca_kabuli_chr04 | 11527360                | AA                              | TT              | 1946791848               |
| SNP_P4_41436_11527361 | NC_021163.1    | Ca_kabuli_chr04 | 11527361                | TT                              | GG              | 1946791850               |
| SNP_P4_41437_11527379 | NC_021163.1    | Ca_kabuli_chr04 | 11527379                | GG                              | CC              | 1946791852               |
| SNP_P4_41438_11527412 | NC_021163.1    | Ca_kabuli_chr04 | 11527412                | TT                              | GG              | 1946791854               |
| SNP_P4_41439_11527693 | NC_021163.1    | Ca_kabuli_chr04 | 11527693                | AA                              | GG              | 1946791856               |
| SNP_P4_41440_11527703 | NC_021163.1    | Ca_kabuli_chr04 | 11527703                | CC                              | TT              | 1946791858               |
| SNP_P4_41441_11527754 | NC_021163.1    | Ca_kabuli_chr04 | 11527754                | GG                              | AA              | 1946791861               |
| SNP_P4_41442_11527769 | NC_021163.1    | Ca_kabuli_chr04 | 11527769                | CC                              | TT              | 1946791863               |
| SNP_P4_41443_11527831 | NC_021163.1    | Ca_kabuli_chr04 | 11527831                | CC                              | TT              | 1946791865               |
| SNP_P4_41444_11528144 | NC_021163.1    | Ca_kabuli_chr04 | 11528144                | GG                              | CC              | 1946791867               |
| SNP_P4_41445_11528172 | NC_021163.1    | Ca_kabuli_chr04 | 11528172                | CC                              | TT              | 1946791869               |
| SNP_P4_41446_11529125 | NC_021163.1    | Ca_kabuli_chr04 | 11529125                | AA                              | GG              | 1946791871               |
| SNP_P4_41447_11529193 | NC_021163.1    | Ca_kabuli_chr04 | 11529193                | AA                              | CC              | 1946791873               |
| SNP_P4_41448_11529259 | NC_021163.1    | Ca_kabuli_chr04 | 11529259                | TT                              | GG              | 1946791876               |
| SNP_P4_41449_11532582 | NC_021163.1    | Ca_kabuli_chr04 | 11532582                | CC                              | AA              | 1946791878               |
| SNP_P4_41450_11532623 | NC_021163.1    | Ca_kabuli_chr04 | 11532623                | CC                              | TT              | 1946791881               |
| SNP_P4_41451_11532679 | NC_021163.1    | Ca_kabuli_chr04 | 11532679                | CC                              | TT              | 1946791883               |
| SNP_P4_41452_11533176 | NC_021163.1    | Ca_kabuli_chr04 | 11533176                | AA                              | GG              | 1946791885               |
| SNP_P4_41453_11533502 | NC_021163.1    | Ca_kabuli_chr04 | 11533502                | GG                              | AA              | 1946791887               |
| SNP_P4_41454_11533508 | NC_021163.1    | Ca_kabuli_chr04 | 11533508                | GG                              | AA              | 1946791889               |
| SNP_P4_41455_11534219 | NC_021163.1    | Ca_kabuli_chr04 | 11534219                | AA                              | GG              | 1946791891               |



| SNPs IDs              | Chromosome IDs | Chromosomes     | Physical positions (bp) | CDC Frontier (Reference genome) | (ILWC46 & LPNB) | NCBI SNPdb Accession IDs |
|-----------------------|----------------|-----------------|-------------------------|---------------------------------|-----------------|--------------------------|
| SNP_P4_41456_11535139 | NC_021163.1    | Ca_kabuli_chr04 | 11535139                | CC                              | GG              | 1946791893               |
| SNP_P4_41457_11535170 | NC_021163.1    | Ca_kabuli_chr04 | 11535170                | GG                              | AA              | 1946791896               |
| SNP_P4_41458_11535179 | NC_021163.1    | Ca_kabuli_chr04 | 11535179                | CC                              | TT              | 1946791898               |
| SNP_P4_41459_11535372 | NC_021163.1    | Ca_kabuli_chr04 | 11535372                | CC                              | TT              | 1946791900               |
| SNP_P4_41460_11535422 | NC_021163.1    | Ca_kabuli_chr04 | 11535422                | GG                              | AA              | 1946791902               |
| SNP_P4_41461_11535779 | NC_021163.1    | Ca_kabuli_chr04 | 11535779                | TT                              | AA              | 1946791904               |
| SNP_P4_41462_11535895 | NC_021163.1    | Ca_kabuli_chr04 | 11535895                | GG                              | AA              | 1946791906               |
| SNP_P4_41463_11535919 | NC_021163.1    | Ca_kabuli_chr04 | 11535919                | GG                              | AA              | 1946791908               |
| SNP_P4_41465_11537385 | NC_021163.1    | Ca_kabuli_chr04 | 11537385                | AA                              | GG              | 1946791910               |
| SNP_P4_41466_11537389 | NC_021163.1    | Ca_kabuli_chr04 | 11537389                | CC                              | GG              | 1946791912               |
| SNP_P4_41467_11537392 | NC_021163.1    | Ca_kabuli_chr04 | 11537392                | CC                              | TT              | 1946791914               |
| SNP_P4_41468_11537393 | NC_021163.1    | Ca_kabuli_chr04 | 11537393                | CC                              | TT              | 1946791916               |
| SNP_P4_41469_11537405 | NC_021163.1    | Ca_kabuli_chr04 | 11537405                | GG                              | TT              | 1946791918               |
| SNP_P4_41470_11537634 | NC_021163.1    | Ca_kabuli_chr04 | 11537634                | AA                              | GG              | 1946791920               |
| SNP_P4_41471_11537856 | NC_021163.1    | Ca_kabuli_chr04 | 11537856                | GG                              | AA              | 1946791922               |
| SNP_P4_41472_11539296 | NC_021163.1    | Ca_kabuli_chr04 | 11539296                | CC                              | TT              | 1946791924               |
| SNP_P4_41474_11539400 | NC_021163.1    | Ca_kabuli_chr04 | 11539400                | CC                              | TT              | 1946791926               |
| SNP_P4_41475_11539536 | NC_021163.1    | Ca_kabuli_chr04 | 11539536                | AA                              | TT              | 1946791928               |
| SNP_P4_41476_11539579 | NC_021163.1    | Ca_kabuli_chr04 | 11539579                | CC                              | TT              | 1946791930               |
| SNP_P4_41477_11540218 | NC_021163.1    | Ca_kabuli_chr04 | 11540218                | CC                              | TT              | 1946791932               |
| SNP_P4_41478_11540223 | NC_021163.1    | Ca_kabuli_chr04 | 11540223                | CC                              | TT              | 1946791934               |
| SNP_P4_41479_11541352 | NC_021163.1    | Ca_kabuli_chr04 | 11541352                | GG                              | AA              | 1946791936               |
| SNP_P4_41480_11541376 | NC_021163.1    | Ca_kabuli_chr04 | 11541376                | GG                              | CC              | 1946791938               |
| SNP_P4_41481_11541377 | NC_021163.1    | Ca_kabuli_chr04 | 11541377                | GG                              | AA              | 1946791941               |
| SNP_P4_41482_11541775 | NC_021163.1    | Ca_kabuli_chr04 | 11541775                | CC                              | GG              | 1946791943               |
| SNP_P4_41483_11541784 | NC_021163.1    | Ca_kabuli_chr04 | 11541784                | TT                              | AA              | 1946791945               |
| SNP_P4_41484_11542022 | NC_021163.1    | Ca_kabuli_chr04 | 11542022                | TT                              | CC              | 1946791947               |
| SNP_P4_41485_11542077 | NC_021163.1    | Ca_kabuli_chr04 | 11542077                | TT                              | CC              | 1946791949               |
| SNP_P4_41486_11542112 | NC_021163.1    | Ca_kabuli_chr04 | 11542112                | AA                              | GG              | 1946791951               |
| SNP_P4_41487_11543414 | NC_021163.1    | Ca_kabuli_chr04 | 11543414                | TT                              | AA              | 1946791953               |
| SNP_P4_41488_11543803 | NC_021163.1    | Ca_kabuli_chr04 | 11543803                | GG                              | AA              | 1946791955               |
| SNP_P4_41489_11544530 | NC_021163.1    | Ca_kabuli_chr04 | 11544530                | GG                              | AA              | 1946791957               |
| SNP_P4_41490_11544545 | NC_021163.1    | Ca_kabuli_chr04 | 11544545                | CC                              | TT              | 1946791959               |
| SNP_P4_41491_11544562 | NC_021163.1    | Ca_kabuli_chr04 | 11544562                | AA                              | GG              | 1946791962               |
| SNP_P4_41492_11544582 | NC_021163.1    | Ca_kabuli_chr04 | 11544582                | AA                              | GG              | 1946791964               |
| SNP_P4_41493_11544666 | NC_021163.1    | Ca_kabuli_chr04 | 11544666                | AA                              | GG              | 1946791966               |
| SNP_P4_41494_11544688 | NC_021163.1    | Ca_kabuli_chr04 | 11544688                | TT                              | CC              | 1946791968               |
| SNP_P4_41495_11544694 | NC_021163.1    | Ca_kabuli_chr04 | 11544694                | TT                              | AA              | 1946791970               |
| SNP_P4_41497_11545075 | NC_021163.1    | Ca_kabuli_chr04 | 11545075                | AA                              | GG              | 1946791972               |
| SNP_P4_41498_11545089 | NC_021163.1    | Ca_kabuli_chr04 | 11545089                | AA                              | GG              | 1946791974               |
| SNP_P4_41499_11545152 | NC_021163.1    | Ca_kabuli_chr04 | 11545152                | GG                              | CC              | 1946791976               |
| SNP_P4_41500_11545263 | NC_021163.1    | Ca_kabuli_chr04 | 11545263                | CC                              | AA              | 1946791978               |

| SNPs IDs              | Chromosome IDs | Chromosomes     | Physical positions (bp) | CDC Frontier (Reference genome) | (ILWC46 & LPNB) | NCBI SNPdb Accession IDs |
|-----------------------|----------------|-----------------|-------------------------|---------------------------------|-----------------|--------------------------|
| SNP_P4_41501_11545427 | NC_021163.1    | Ca_kabuli_chr04 | 11545427                | GG                              | AA              | 1946791980               |
| SNP_P4_41502_11545635 | NC_021163.1    | Ca_kabuli_chr04 | 11545635                | AA                              | CC              | 1946791982               |
| SNP_P4_41503_11545669 | NC_021163.1    | Ca_kabuli_chr04 | 11545669                | GG                              | AA              | 1946791984               |
| SNP_P4_41504_11545838 | NC_021163.1    | Ca_kabuli_chr04 | 11545838                | TT                              | GG              | 1946791986               |
| SNP_P4_41505_11545850 | NC_021163.1    | Ca_kabuli_chr04 | 11545850                | TT                              | AA              | 1946791988               |
| SNP_P4_41506_11545867 | NC_021163.1    | Ca_kabuli_chr04 | 11545867                | AA                              | GG              | 1946791990               |
| SNP_P4_41508_11545920 | NC_021163.1    | Ca_kabuli_chr04 | 11545920                | TT                              | AA              | 1946791992               |
| SNP_P4_41509_11546155 | NC_021163.1    | Ca_kabuli_chr04 | 11546155                | CC                              | TT              | 1946791994               |
| SNP_P4_41510_11546217 | NC_021163.1    | Ca_kabuli_chr04 | 11546217                | TT                              | CC              | 1946791996               |
| SNP_P4_41511_11548304 | NC_021163.1    | Ca_kabuli_chr04 | 11548304                | GG                              | AA              | 1946791998               |
| SNP_P4_41512_11548505 | NC_021163.1    | Ca_kabuli_chr04 | 11548505                | AA                              | GG              | 1946792000               |
| SNP_P4_41513_11548516 | NC_021163.1    | Ca_kabuli_chr04 | 11548516                | CC                              | TT              | 1946792002               |
| SNP_P4_41514_11548523 | NC_021163.1    | Ca_kabuli_chr04 | 11548523                | TT                              | GG              | 1946792004               |
| SNP_P4_41515_11548696 | NC_021163.1    | Ca_kabuli_chr04 | 11548696                | GG                              | AA              | 1946792006               |
| SNP_P4_41516_11548882 | NC_021163.1    | Ca_kabuli_chr04 | 11548882                | TT                              | CC              | 1946792008               |
| SNP_P4_41517_11548903 | NC_021163.1    | Ca_kabuli_chr04 | 11548903                | CC                              | TT              | 1946792011               |
| SNP_P4_41518_11548916 | NC_021163.1    | Ca_kabuli_chr04 | 11548916                | CC                              | TT              | 1946792012               |
| SNP_P4_41519_11548952 | NC_021163.1    | Ca_kabuli_chr04 | 11548952                | TT                              | CC              | 1946792014               |
| SNP_P4_41520_11548987 | NC_021163.1    | Ca_kabuli_chr04 | 11548987                | GG                              | TT              | 1946792016               |
| SNP_P4_41521_11548993 | NC_021163.1    | Ca_kabuli_chr04 | 11548993                | CC                              | GG              | 1946792019               |
| SNP_P4_41522_11549021 | NC_021163.1    | Ca_kabuli_chr04 | 11549021                | TT                              | GG              | 1946792021               |
| SNP_P4_41524_11549217 | NC_021163.1    | Ca_kabuli_chr04 | 11549217                | CC                              | TT              | 1946792023               |
| SNP_P4_41525_11549235 | NC_021163.1    | Ca_kabuli_chr04 | 11549235                | CC                              | TT              | 1946792025               |
| SNP_P4_41526_11549279 | NC_021163.1    | Ca_kabuli_chr04 | 11549279                | AA                              | CC              | 1946792027               |
| SNP_P4_41527_11549289 | NC_021163.1    | Ca_kabuli_chr04 | 11549289                | AA                              | TT              | 1946792029               |
| SNP_P4_41528_11549441 | NC_021163.1    | Ca_kabuli_chr04 | 11549441                | TT                              | AA              | 1946792031               |
| SNP_P4_41529_11549552 | NC_021163.1    | Ca_kabuli_chr04 | 11549552                | GG                              | AA              | 1946792034               |
| SNP_P4_41530_11549598 | NC_021163.1    | Ca_kabuli_chr04 | 11549598                | AA                              | GG              | 1946792036               |
| SNP_P4_41531_11549624 | NC_021163.1    | Ca_kabuli_chr04 | 11549624                | CC                              | TT              | 1946792038               |
| SNP_P4_41533_11549727 | NC_021163.1    | Ca_kabuli_chr04 | 11549727                | GG                              | AA              | 1946792040               |
| SNP_P4_41534_11550598 | NC_021163.1    | Ca_kabuli_chr04 | 11550598                | CC                              | AA              | 1946792042               |
| SNP_P4_41536_11551283 | NC_021163.1    | Ca_kabuli_chr04 | 11551283                | GG                              | CC              | 1946792044               |
| SNP_P4_41537_11552811 | NC_021163.1    | Ca_kabuli_chr04 | 11552811                | GG                              | TT              | 1946792046               |
| SNP_P4_41538_11553184 | NC_021163.1    | Ca_kabuli_chr04 | 11553184                | GG                              | AA              | 1946792048               |
| SNP_P4_41539_11555545 | NC_021163.1    | Ca_kabuli_chr04 | 11555545                | TT                              | CC              | 1946792050               |
| SNP_P4_41540_11555583 | NC_021163.1    | Ca_kabuli_chr04 | 11555583                | TT                              | CC              | 1946792052               |
| SNP_P4_41541_11555589 | NC_021163.1    | Ca_kabuli_chr04 | 11555589                | CC                              | AA              | 1946792054               |
| SNP_P4_41542_11555593 | NC_021163.1    | Ca_kabuli_chr04 | 11555593                | GG                              | AA              | 1946792056               |
| SNP_P4_41543_11555811 | NC_021163.1    | Ca_kabuli_chr04 | 11555811                | GG                              | AA              | 1946792058               |
| SNP_P4_41544_11555823 | NC_021163.1    | Ca_kabuli_chr04 | 11555823                | AA                              | CC              | 1946792060               |
| SNP_P4_41545_11555947 | NC_021163.1    | Ca_kabuli_chr04 | 11555947                | GG                              | AA              | 1946792062               |
| SNP_P4_41547_11556057 | NC_021163.1    | Ca_kabuli_chr04 | 11556057                | AA                              | GG              | 1946792064               |

| SNPs IDs              | Chromosome IDs | Chromosomes     | Physical positions (bp) | CDC Frontier (Reference genome) | (ILWC46 & LPNB) | NCBI SNPdb Accession IDs |
|-----------------------|----------------|-----------------|-------------------------|---------------------------------|-----------------|--------------------------|
| SNP_P4_41548_11556224 | NC_021163.1    | Ca_kabuli_chr04 | 11556224                | AA                              | GG              | 1946792066               |
| SNP_P4_41550_11558938 | NC_021163.1    | Ca_kabuli_chr04 | 11558938                | TT                              | CC              | 1946792068               |
| SNP_P4_41551_11558941 | NC_021163.1    | Ca_kabuli_chr04 | 11558941                | GG                              | AA              | 1946792070               |
| SNP_P4_41552_11558987 | NC_021163.1    | Ca_kabuli_chr04 | 11558987                | GG                              | AA              | 1946792072               |
| SNP_P4_41553_11560015 | NC_021163.1    | Ca_kabuli_chr04 | 11560015                | GG                              | AA              | 1946792074               |
| SNP_P4_41554_11560078 | NC_021163.1    | Ca_kabuli_chr04 | 11560078                | CC                              | TT              | 1946792076               |
| SNP_P4_41555_11564069 | NC_021163.1    | Ca_kabuli_chr04 | 11564069                | CC                              | TT              | 1946792078               |
| SNP_P4_41556_11564136 | NC_021163.1    | Ca_kabuli_chr04 | 11564136                | CC                              | TT              | 1946792080               |
| SNP_P4_41557_11564380 | NC_021163.1    | Ca_kabuli_chr04 | 11564380                | AA                              | GG              | 1946792082               |
| SNP_P4_41558_11566098 | NC_021163.1    | Ca_kabuli_chr04 | 11566098                | CC                              | AA              | 1946792084               |
| SNP_P4_41559_11568046 | NC_021163.1    | Ca_kabuli_chr04 | 11568046                | AA                              | CC              | 1946792086               |
| SNP_P4_41560_11568295 | NC_021163.1    | Ca_kabuli_chr04 | 11568295                | TT                              | CC              | 1946792088               |
| SNP_P4_41561_11569297 | NC_021163.1    | Ca_kabuli_chr04 | 11569297                | AA                              | CC              | 1946792090               |
| SNP_P4_41562_11569439 | NC_021163.1    | Ca_kabuli_chr04 | 11569439                | GG                              | TT              | 1946792092               |
| SNP_P4_41563_11569570 | NC_021163.1    | Ca_kabuli_chr04 | 11569570                | AA                              | TT              | 1946792094               |
| SNP_P4_41564_11569652 | NC_021163.1    | Ca_kabuli_chr04 | 11569652                | TT                              | AA              | 1946792096               |
| SNP_P4_41565_11570021 | NC_021163.1    | Ca_kabuli_chr04 | 11570021                | AA                              | CC              | 1946792098               |
| SNP_P4_41566_11570426 | NC_021163.1    | Ca_kabuli_chr04 | 11570426                | AA                              | CC              | 1946792101               |
| SNP_P4_41569_11596526 | NC_021163.1    | Ca_kabuli_chr04 | 11596526                | GG                              | AA              | 1946792103               |
| SNP_P4_41571_11602437 | NC_021163.1    | Ca_kabuli_chr04 | 11602437                | GG                              | TT              | 1946792105               |
| SNP_P4_41574_11672415 | NC_021163.1    | Ca_kabuli_chr04 | 11672415                | TT                              | AA              | 1946792107               |
| SNP_P4_41575_11681726 | NC_021163.1    | Ca_kabuli_chr04 | 11681726                | CC                              | TT              | 1946792109               |
| SNP_P4_41576_11681843 | NC_021163.1    | Ca_kabuli_chr04 | 11681843                | GG                              | AA              | 1946792111               |
| SNP_P4_41577_11717422 | NC_021163.1    | Ca_kabuli_chr04 | 11717422                | TT                              | AA              | 1946792114               |
| SNP_P4_41578_11718318 | NC_021163.1    | Ca_kabuli_chr04 | 11718318                | TT                              | CC              | 1946792116               |
| SNP_P4_41579_11726321 | NC_021163.1    | Ca_kabuli_chr04 | 11726321                | AA                              | GG              | 1946792118               |
| SNP_P4_41580_11742384 | NC_021163.1    | Ca_kabuli_chr04 | 11742384                | TT                              | GG              | 1946792120               |
| SNP_P4_41581_11742385 | NC_021163.1    | Ca_kabuli_chr04 | 11742385                | AA                              | CC              | 1946792122               |
| SNP_P4_41582_11758606 | NC_021163.1    | Ca_kabuli_chr04 | 11758606                | TT                              | CC              | 1946792124               |
| SNP_P4_41583_11758636 | NC_021163.1    | Ca_kabuli_chr04 | 11758636                | AA                              | CC              | 1946792126               |
| SNP_P4_41585_11780056 | NC_021163.1    | Ca_kabuli_chr04 | 11780056                | AA                              | CC              | 1946792128               |
| SNP_P4_41586_11785445 | NC_021163.1    | Ca_kabuli_chr04 | 11785445                | AA                              | GG              | 1946792130               |
| SNP_P4_41587_11788317 | NC_021163.1    | Ca_kabuli_chr04 | 11788317                | CC                              | GG              | 1946792132               |
| SNP_P4_41588_11791501 | NC_021163.1    | Ca_kabuli_chr04 | 11791501                | CC                              | GG              | 1946792134               |
| SNP_P4_41589_11793252 | NC_021163.1    | Ca_kabuli_chr04 | 11793252                | AA                              | GG              | 1946792136               |
| SNP_P4_41590_11793596 | NC_021163.1    | Ca_kabuli_chr04 | 11793596                | TT                              | CC              | 1946792138               |
| SNP_P4_41591_11799645 | NC_021163.1    | Ca_kabuli_chr04 | 11799645                | TT                              | AA              | 1946792140               |
| SNP_P4_41592_11809446 | NC_021163.1    | Ca_kabuli_chr04 | 11809446                | TT                              | AA              | 1946792142               |
| SNP_P4_41593_11812023 | NC_021163.1    | Ca_kabuli_chr04 | 11812023                | TT                              | CC              | 1946792144               |
| SNP_P4_41595_11843914 | NC_021163.1    | Ca_kabuli_chr04 | 11843914                | TT                              | CC              | 1946792146               |
| SNP_P4_41596_11844617 | NC_021163.1    | Ca_kabuli_chr04 | 11844617                | AA                              | TT              | 1946792148               |
| SNP_P4_41598_11854405 | NC_021163.1    | Ca_kabuli_chr04 | 11854405                | TT                              | GG              | 1946792150               |

| SNPs IDs              | Chromosome IDs | Chromosomes     | Physical positions (bp) | CDC Frontier (Reference genome) | (ILWC46 & LPNB) | NCBI SNPdb Accession IDs |
|-----------------------|----------------|-----------------|-------------------------|---------------------------------|-----------------|--------------------------|
| SNP_P4_41599_11877745 | NC_021163.1    | Ca_kabuli_chr04 | 11877745                | GG                              | AA              | 1946792152               |
| SNP_P4_41600_11912180 | NC_021163.1    | Ca_kabuli_chr04 | 11912180                | CC                              | TT              | 1946792154               |
| SNP_P4_41601_11926380 | NC_021163.1    | Ca_kabuli_chr04 | 11926380                | TT                              | AA              | 1946792157               |
| SNP_P4_41602_11974769 | NC_021163.1    | Ca_kabuli_chr04 | 11974769                | TT                              | AA              | 1946792159               |
| SNP_P4_41604_11993067 | NC_021163.1    | Ca_kabuli_chr04 | 11993067                | TT                              | CC              | 1946792161               |
| SNP_P4_41605_11993401 | NC_021163.1    | Ca_kabuli_chr04 | 11993401                | GG                              | AA              | 1946792163               |
| SNP_P4_41608_12033694 | NC_021163.1    | Ca_kabuli_chr04 | 12033694                | TT                              | GG              | 1946792165               |
| SNP_P4_41609_12034942 | NC_021163.1    | Ca_kabuli_chr04 | 12034942                | TT                              | CC              | 1946792167               |
| SNP_P4_41610_12042456 | NC_021163.1    | Ca_kabuli_chr04 | 12042456                | AA                              | TT              | 1946792169               |
| SNP_P4_41611_12042457 | NC_021163.1    | Ca_kabuli_chr04 | 12042457                | TT                              | AA              | 1946792171               |
| SNP_P4_41612_12043012 | NC_021163.1    | Ca_kabuli_chr04 | 12043012                | TT                              | CC              | 1946792173               |
| SNP_P4_41616_12107716 | NC_021163.1    | Ca_kabuli_chr04 | 12107716                | AA                              | GG              | 1946792175               |
| SNP_P4_41617_12119536 | NC_021163.1    | Ca_kabuli_chr04 | 12119536                | AA                              | GG              | 1946792177               |
| SNP_P4_41618_12119559 | NC_021163.1    | Ca_kabuli_chr04 | 12119559                | TT                              | AA              | 1946792179               |
| SNP_P4_41619_12119576 | NC_021163.1    | Ca_kabuli_chr04 | 12119576                | AA                              | GG              | 1946792181               |
| SNP_P4_41621_12127747 | NC_021163.1    | Ca_kabuli_chr04 | 12127747                | AA                              | TT              | 1946792183               |
| SNP_P4_41622_12139607 | NC_021163.1    | Ca_kabuli_chr04 | 12139607                | AA                              | TT              | 1946792185               |
| SNP_P4_41626_12227513 | NC_021163.1    | Ca_kabuli_chr04 | 12227513                | CC                              | AA              | 1946792187               |
| SNP_P4_41627_12255537 | NC_021163.1    | Ca_kabuli_chr04 | 12255537                | GG                              | AA              | 1946792189               |
| SNP_P4_41628_12270147 | NC_021163.1    | Ca_kabuli_chr04 | 12270147                | AA                              | GG              | 1946792191               |
| SNP_P4_41630_12290828 | NC_021163.1    | Ca_kabuli_chr04 | 12290828                | CC                              | TT              | 1946792193               |
| SNP_P4_41631_12292021 | NC_021163.1    | Ca_kabuli_chr04 | 12292021                | TT                              | CC              | 1946792195               |
| SNP_P4_41632_12298586 | NC_021163.1    | Ca_kabuli_chr04 | 12298586                | TT                              | CC              | 1946792197               |
| SNP_P4_41633_12303903 | NC_021163.1    | Ca_kabuli_chr04 | 12303903                | CC                              | AA              | 1946792199               |
| SNP_P4_41634_12322095 | NC_021163.1    | Ca_kabuli_chr04 | 12322095                | AA                              | GG              | 1946792201               |
| SNP_P4_41635_12331116 | NC_021163.1    | Ca_kabuli_chr04 | 12331116                | AA                              | GG              | 1946792203               |
| SNP_P4_41636_12333486 | NC_021163.1    | Ca_kabuli_chr04 | 12333486                | CC                              | TT              | 1946792205               |
| SNP_P4_41637_12333494 | NC_021163.1    | Ca_kabuli_chr04 | 12333494                | GG                              | AA              | 1946792207               |
| SNP_P4_41638_12333495 | NC_021163.1    | Ca_kabuli_chr04 | 12333495                | GG                              | CC              | 1946792209               |
| SNP_P4_41639_12338538 | NC_021163.1    | Ca_kabuli_chr04 | 12338538                | GG                              | TT              | 1946792211               |
| SNP_P4_41640_12338543 | NC_021163.1    | Ca_kabuli_chr04 | 12338543                | CC                              | GG              | 1946792213               |
| SNP_P4_41641_12338562 | NC_021163.1    | Ca_kabuli_chr04 | 12338562                | AA                              | CC              | 1946792215               |
| SNP_P4_41642_12338791 | NC_021163.1    | Ca_kabuli_chr04 | 12338791                | TT                              | GG              | 1946792217               |
| SNP_P4_41643_12338916 | NC_021163.1    | Ca_kabuli_chr04 | 12338916                | AA                              | GG              | 1946792220               |
| SNP_P4_41644_12339153 | NC_021163.1    | Ca_kabuli_chr04 | 12339153                | TT                              | CC              | 1946792222               |
| SNP_P4_41645_12339312 | NC_021163.1    | Ca_kabuli_chr04 | 12339312                | CC                              | TT              | 1946792224               |
| SNP_P4_41646_12339334 | NC_021163.1    | Ca_kabuli_chr04 | 12339334                | GG                              | AA              | 1946792226               |
| SNP_P4_41647_12339362 | NC_021163.1    | Ca_kabuli_chr04 | 12339362                | AA                              | GG              | 1946792228               |
| SNP_P4_41648_12341800 | NC_021163.1    | Ca_kabuli_chr04 | 12341800                | CC                              | AA              | 1946792230               |
| SNP_P4_41650_12371092 | NC_021163.1    | Ca_kabuli_chr04 | 12371092                | CC                              | TT              | 1946792232               |
| SNP_P4_41651_12373989 | NC_021163.1    | Ca_kabuli_chr04 | 12373989                | CC                              | TT              | 1946792234               |
| SNP_P4_41653_12409829 | NC_021163.1    | Ca_kabuli_chr04 | 12409829                | CC                              | TT              | 1946792237               |

| SNPs IDs              | Chromosome IDs | Chromosomes     | Physical positions (bp) | CDC Frontier (Reference genome) | (ILWC46 & LPNB) | NCBI SNPdb Accession IDs |
|-----------------------|----------------|-----------------|-------------------------|---------------------------------|-----------------|--------------------------|
| SNP_P4_41654_12443820 | NC_021163.1    | Ca_kabuli_chr04 | 12443820                | AA                              | CC              | 1946792239               |
| SNP_P4_41655_12446195 | NC_021163.1    | Ca_kabuli_chr04 | 12446195                | AA                              | TT              | 1946792241               |
| SNP_P4_41656_12450825 | NC_021163.1    | Ca_kabuli_chr04 | 12450825                | TT                              | CC              | 1946792243               |
| SNP_P4_41657_12460904 | NC_021163.1    | Ca_kabuli_chr04 | 12460904                | CC                              | TT              | 1946792245               |
| SNP_P4_41658_12461639 | NC_021163.1    | Ca_kabuli_chr04 | 12461639                | GG                              | AA              | 1946792247               |
| SNP_P4_41659_12464362 | NC_021163.1    | Ca_kabuli_chr04 | 12464362                | CC                              | AA              | 1946792249               |
| SNP_P4_41660_12464713 | NC_021163.1    | Ca_kabuli_chr04 | 12464713                | GG                              | TT              | 1946792251               |
| SNP_P4_41662_12472751 | NC_021163.1    | Ca_kabuli_chr04 | 12472751                | TT                              | CC              | 1946792253               |
| SNP_P4_41663_12474989 | NC_021163.1    | Ca_kabuli_chr04 | 12474989                | TT                              | CC              | 1946792255               |
| SNP_P4_41664_12475313 | NC_021163.1    | Ca_kabuli_chr04 | 12475313                | AA                              | GG              | 1946792257               |
| SNP_P4_41665_12475315 | NC_021163.1    | Ca_kabuli_chr04 | 12475315                | GG                              | AA              | 1946792259               |
| SNP_P4_41666_12475640 | NC_021163.1    | Ca_kabuli_chr04 | 12475640                | TT                              | CC              | 1946792261               |
| SNP_P4_41667_12475660 | NC_021163.1    | Ca_kabuli_chr04 | 12475660                | AA                              | GG              | 1946792263               |
| SNP_P4_41668_12475985 | NC_021163.1    | Ca_kabuli_chr04 | 12475985                | GG                              | CC              | 1946792265               |
| SNP_P4_41669_12475993 | NC_021163.1    | Ca_kabuli_chr04 | 12475993                | GG                              | AA              | 1946792267               |
| SNP_P4_41670_12477629 | NC_021163.1    | Ca_kabuli_chr04 | 12477629                | CC                              | TT              | 1946792269               |
| SNP_P4_41671_12477633 | NC_021163.1    | Ca_kabuli_chr04 | 12477633                | GG                              | AA              | 1946792271               |
| SNP_P4_41673_12478463 | NC_021163.1    | Ca_kabuli_chr04 | 12478463                | AA                              | TT              | 1946792273               |
| SNP_P4_41674_12479528 | NC_021163.1    | Ca_kabuli_chr04 | 12479528                | GG                              | CC              | 1946792275               |
| SNP_P4_41675_12479616 | NC_021163.1    | Ca_kabuli_chr04 | 12479616                | GG                              | AA              | 1946792277               |
| SNP_P4_41676_12479878 | NC_021163.1    | Ca_kabuli_chr04 | 12479878                | AA                              | GG              | 1946792279               |
| SNP_P4_41678_12480177 | NC_021163.1    | Ca_kabuli_chr04 | 12480177                | CC                              | TT              | 1946792281               |
| SNP_P4_41680_12481059 | NC_021163.1    | Ca_kabuli_chr04 | 12481059                | GG                              | AA              | 1946792283               |
| SNP_P4_41681_12481076 | NC_021163.1    | Ca_kabuli_chr04 | 12481076                | AA                              | GG              | 1946792285               |
| SNP_P4_41682_12481099 | NC_021163.1    | Ca_kabuli_chr04 | 12481099                | AA                              | GG              | 1946792287               |
| SNP_P4_41683_12481118 | NC_021163.1    | Ca_kabuli_chr04 | 12481118                | TT                              | CC              | 1946792289               |
| SNP_P4_41684_12481176 | NC_021163.1    | Ca_kabuli_chr04 | 12481176                | TT                              | CC              | 1946792291               |
| SNP_P4_41685_12481197 | NC_021163.1    | Ca_kabuli_chr04 | 12481197                | CC                              | TT              | 1946792293               |
| SNP_P4_41686_12481455 | NC_021163.1    | Ca_kabuli_chr04 | 12481455                | TT                              | CC              | 1946792295               |
| SNP_P4_41687_12481469 | NC_021163.1    | Ca_kabuli_chr04 | 12481469                | GG                              | TT              | 1946792297               |
| SNP_P4_41688_12481756 | NC_021163.1    | Ca_kabuli_chr04 | 12481756                | TT                              | CC              | 1946792299               |
| SNP_P4_41689_12481762 | NC_021163.1    | Ca_kabuli_chr04 | 12481762                | AA                              | TT              | 1946792301               |
| SNP_P4_41690_12482093 | NC_021163.1    | Ca_kabuli_chr04 | 12482093                | GG                              | AA              | 1946792303               |
| SNP_P4_41691_12482107 | NC_021163.1    | Ca_kabuli_chr04 | 12482107                | CC                              | TT              | 1946792305               |
| SNP_P4_41692_12483107 | NC_021163.1    | Ca_kabuli_chr04 | 12483107                | AA                              | GG              | 1946792307               |
| SNP_P4_41694_12483734 | NC_021163.1    | Ca_kabuli_chr04 | 12483734                | AA                              | GG              | 1946792310               |
| SNP_P4_41695_12483794 | NC_021163.1    | Ca_kabuli_chr04 | 12483794                | GG                              | AA              | 1946792312               |
| SNP_P4_41696_12483907 | NC_021163.1    | Ca_kabuli_chr04 | 12483907                | AA                              | TT              | 1946792314               |
| SNP_P4_41697_12484160 | NC_021163.1    | Ca_kabuli_chr04 | 12484160                | CC                              | TT              | 1946792316               |
| SNP_P4_41698_12485523 | NC_021163.1    | Ca_kabuli_chr04 | 12485523                | TT                              | GG              | 1946792318               |
| SNP_P4_41699_12485577 | NC_021163.1    | Ca_kabuli_chr04 | 12485577                | CC                              | AA              | 1946792320               |
| SNP_P4_41700_12485612 | NC_021163.1    | Ca_kabuli_chr04 | 12485612                | TT                              | AA              | 1946792322               |

| SNPs IDs              | Chromosome IDs | Chromosomes     | Physical positions (bp) | CDC Frontier (Reference genome) | (ILWC46 & LPNB) | NCBI SNPdb Accession IDs |
|-----------------------|----------------|-----------------|-------------------------|---------------------------------|-----------------|--------------------------|
| SNP_P4_41701_12485615 | NC_021163.1    | Ca_kabuli_chr04 | 12485615                | TT                              | CC              | 1946792324               |
| SNP_P4_41702_12488209 | NC_021163.1    | Ca_kabuli_chr04 | 12488209                | AA                              | TT              | 1946792326               |
| SNP_P4_41703_12489473 | NC_021163.1    | Ca_kabuli_chr04 | 12489473                | TT                              | CC              | 1946792328               |
| SNP_P4_41704_12489765 | NC_021163.1    | Ca_kabuli_chr04 | 12489765                | AA                              | GG              | 1946792330               |
| SNP_P4_41705_12489785 | NC_021163.1    | Ca_kabuli_chr04 | 12489785                | AA                              | TT              | 1946792332               |
| SNP_P4_41706_12489951 | NC_021163.1    | Ca_kabuli_chr04 | 12489951                | AA                              | TT              | 1946792334               |
| SNP_P4_41707_12491870 | NC_021163.1    | Ca_kabuli_chr04 | 12491870                | AA                              | GG              | 1946792336               |
| SNP_P4_41708_12493643 | NC_021163.1    | Ca_kabuli_chr04 | 12493643                | AA                              | GG              | 1946792338               |
| SNP_P4_41710_12493665 | NC_021163.1    | Ca_kabuli_chr04 | 12493665                | AA                              | GG              | 1946792340               |
| SNP_P4_41711_12493668 | NC_021163.1    | Ca_kabuli_chr04 | 12493668                | CC                              | TT              | 1946792342               |
| SNP_P4_41712_12497488 | NC_021163.1    | Ca_kabuli_chr04 | 12497488                | AA                              | GG              | 1946792344               |
| SNP_P4_41713_12497577 | NC_021163.1    | Ca_kabuli_chr04 | 12497577                | CC                              | GG              | 1946792346               |
| SNP_P4_41714_12497631 | NC_021163.1    | Ca_kabuli_chr04 | 12497631                | CC                              | GG              | 1946792348               |
| SNP_P4_41715_12497635 | NC_021163.1    | Ca_kabuli_chr04 | 12497635                | TT                              | GG              | 1946792350               |
| SNP_P4_41716_12498048 | NC_021163.1    | Ca_kabuli_chr04 | 12498048                | AA                              | GG              | 1946792352               |
| SNP_P4_41717_12498106 | NC_021163.1    | Ca_kabuli_chr04 | 12498106                | AA                              | GG              | 1946792354               |
| SNP_P4_41718_12498559 | NC_021163.1    | Ca_kabuli_chr04 | 12498559                | CC                              | TT              | 1946792356               |
| SNP_P4_41719_12498589 | NC_021163.1    | Ca_kabuli_chr04 | 12498589                | AA                              | TT              | 1946792358               |
| SNP_P4_41721_12499010 | NC_021163.1    | Ca_kabuli_chr04 | 12499010                | TT                              | AA              | 1946792360               |
| SNP_P4_41722_12499892 | NC_021163.1    | Ca_kabuli_chr04 | 12499892                | CC                              | TT              | 1946792362               |
| SNP_P4_41723_12501227 | NC_021163.1    | Ca_kabuli_chr04 | 12501227                | CC                              | GG              | 1946792364               |
| SNP_P4_41724_12501232 | NC_021163.1    | Ca_kabuli_chr04 | 12501232                | CC                              | TT              | 1946792366               |
| SNP_P4_41725_12503632 | NC_021163.1    | Ca_kabuli_chr04 | 12503632                | GG                              | AA              | 1946792368               |
| SNP_P4_41726_12503649 | NC_021163.1    | Ca_kabuli_chr04 | 12503649                | GG                              | TT              | 1946792370               |
| SNP_P4_41727_12504111 | NC_021163.1    | Ca_kabuli_chr04 | 12504111                | AA                              | TT              | 1946792372               |
| SNP_P4_41728_12504644 | NC_021163.1    | Ca_kabuli_chr04 | 12504644                | GG                              | AA              | 1946792375               |
| SNP_P4_41730_12505912 | NC_021163.1    | Ca_kabuli_chr04 | 12505912                | AA                              | TT              | 1946792377               |
| SNP_P4_41731_12507364 | NC_021163.1    | Ca_kabuli_chr04 | 12507364                | TT                              | AA              | 1946792379               |
| SNP_P4_41732_12507374 | NC_021163.1    | Ca_kabuli_chr04 | 12507374                | CC                              | GG              | 1946792381               |
| SNP_P4_41733_12507678 | NC_021163.1    | Ca_kabuli_chr04 | 12507678                | GG                              | AA              | 1946792383               |
| SNP_P4_41734_12507685 | NC_021163.1    | Ca_kabuli_chr04 | 12507685                | CC                              | TT              | 1946792385               |
| SNP_P4_41735_12507686 | NC_021163.1    | Ca_kabuli_chr04 | 12507686                | GG                              | AA              | 1946792387               |
| SNP_P4_41736_12507701 | NC_021163.1    | Ca_kabuli_chr04 | 12507701                | TT                              | CC              | 1946792389               |
| SNP_P4_41738_12508123 | NC_021163.1    | Ca_kabuli_chr04 | 12508123                | CC                              | AA              | 1946792391               |
| SNP_P4_41739_12508592 | NC_021163.1    | Ca_kabuli_chr04 | 12508592                | AA                              | TT              | 1946792393               |
| SNP_P4_41740_12508595 | NC_021163.1    | Ca_kabuli_chr04 | 12508595                | GG                              | AA              | 1946792395               |
| SNP_P4_41741_12508603 | NC_021163.1    | Ca_kabuli_chr04 | 12508603                | TT                              | CC              | 1946792397               |
| SNP_P4_41742_12508649 | NC_021163.1    | Ca_kabuli_chr04 | 12508649                | TT                              | CC              | 1946792399               |
| SNP_P4_41743_12508651 | NC_021163.1    | Ca_kabuli_chr04 | 12508651                | AA                              | GG              | 1946792401               |
| SNP_P4_41744_12508657 | NC_021163.1    | Ca_kabuli_chr04 | 12508657                | GG                              | AA              | 1946792403               |
| SNP_P4_41745_12508669 | NC_021163.1    | Ca_kabuli_chr04 | 12508669                | TT                              | CC              | 1946792405               |
| SNP_P4_41746_12508671 | NC_021163.1    | Ca_kabuli_chr04 | 12508671                | AA                              | TT              | 1946792408               |

| SNPs IDs              | Chromosome IDs | Chromosomes     | Physical positions (bp) | CDC Frontier (Reference genome) | (ILWC46 & LPNB) | NCBI SNPdb Accession IDs |
|-----------------------|----------------|-----------------|-------------------------|---------------------------------|-----------------|--------------------------|
| SNP_P4_41747_12508673 | NC_021163.1    | Ca_kabuli_chr04 | 12508673                | GG                              | AA              | 1946792410               |
| SNP_P4_41748_12510397 | NC_021163.1    | Ca_kabuli_chr04 | 12510397                | AA                              | GG              | 1946792412               |
| SNP_P4_41749_12510417 | NC_021163.1    | Ca_kabuli_chr04 | 12510417                | CC                              | TT              | 1946792414               |
| SNP_P4_41750_12510423 | NC_021163.1    | Ca_kabuli_chr04 | 12510423                | AA                              | TT              | 1946792416               |
| SNP_P4_41751_12510425 | NC_021163.1    | Ca_kabuli_chr04 | 12510425                | CC                              | TT              | 1946792418               |
| SNP_P4_41752_12511128 | NC_021163.1    | Ca_kabuli_chr04 | 12511128                | TT                              | CC              | 1946792420               |
| SNP_P4_41753_12511131 | NC_021163.1    | Ca_kabuli_chr04 | 12511131                | GG                              | AA              | 1946792422               |
| SNP_P4_41754_12511328 | NC_021163.1    | Ca_kabuli_chr04 | 12511328                | AA                              | TT              | 1946792424               |
| SNP_P4_41755_12511330 | NC_021163.1    | Ca_kabuli_chr04 | 12511330                | TT                              | AA              | 1946792426               |
| SNP_P4_41756_12511411 | NC_021163.1    | Ca_kabuli_chr04 | 12511411                | TT                              | CC              | 1946792428               |
| SNP_P4_41757_12511435 | NC_021163.1    | Ca_kabuli_chr04 | 12511435                | TT                              | AA              | 1946792430               |
| SNP_P4_41758_12511441 | NC_021163.1    | Ca_kabuli_chr04 | 12511441                | AA                              | TT              | 1946792432               |
| SNP_P4_41759_12512074 | NC_021163.1    | Ca_kabuli_chr04 | 12512074                | TT                              | CC              | 1946792434               |
| SNP_P4_41760_12512174 | NC_021163.1    | Ca_kabuli_chr04 | 12512174                | AA                              | CC              | 1946792436               |
| SNP_P4_41761_12512187 | NC_021163.1    | Ca_kabuli_chr04 | 12512187                | CC                              | TT              | 1946792438               |
| SNP_P4_41762_12512409 | NC_021163.1    | Ca_kabuli_chr04 | 12512409                | AA                              | GG              | 1946792440               |
| SNP_P4_41763_12517945 | NC_021163.1    | Ca_kabuli_chr04 | 12517945                | AA                              | CC              | 1946792442               |
| SNP_P4_41764_12517957 | NC_021163.1    | Ca_kabuli_chr04 | 12517957                | GG                              | CC              | 1946792444               |
| SNP_P4_41765_12518340 | NC_021163.1    | Ca_kabuli_chr04 | 12518340                | AA                              | GG              | 1946792446               |
| SNP_P4_41766_12518363 | NC_021163.1    | Ca_kabuli_chr04 | 12518363                | GG                              | TT              | 1946792448               |
| SNP_P4_41767_12520282 | NC_021163.1    | Ca_kabuli_chr04 | 12520282                | TT                              | AA              | 1946792451               |
| SNP_P4_41769_12520637 | NC_021163.1    | Ca_kabuli_chr04 | 12520637                | GG                              | AA              | 1946792453               |
| SNP_P4_41771_12522804 | NC_021163.1    | Ca_kabuli_chr04 | 12522804                | GG                              | AA              | 1946792455               |
| SNP_P4_41772_12522824 | NC_021163.1    | Ca_kabuli_chr04 | 12522824                | CC                              | GG              | 1946792457               |
| SNP_P4_41774_12522885 | NC_021163.1    | Ca_kabuli_chr04 | 12522885                | CC                              | TT              | 1946792459               |
| SNP_P4_41775_12522933 | NC_021163.1    | Ca_kabuli_chr04 | 12522933                | TT                              | CC              | 1946792461               |
| SNP_P4_41776_12523173 | NC_021163.1    | Ca_kabuli_chr04 | 12523173                | TT                              | AA              | 1946792463               |
| SNP_P4_41777_12523236 | NC_021163.1    | Ca_kabuli_chr04 | 12523236                | CC                              | TT              | 1946792465               |
| SNP_P4_41778_12523238 | NC_021163.1    | Ca_kabuli_chr04 | 12523238                | CC                              | TT              | 1946792467               |
| SNP_P4_41779_12523242 | NC_021163.1    | Ca_kabuli_chr04 | 12523242                | GG                              | TT              | 1946792469               |
| SNP_P4_41781_12523443 | NC_021163.1    | Ca_kabuli_chr04 | 12523443                | TT                              | AA              | 1946792472               |
| SNP_P4_41782_12523456 | NC_021163.1    | Ca_kabuli_chr04 | 12523456                | AA                              | GG              | 1946792474               |
| SNP_P4_41783_12523474 | NC_021163.1    | Ca_kabuli_chr04 | 12523474                | GG                              | TT              | 1946792476               |
| SNP_P4_41784_12523537 | NC_021163.1    | Ca_kabuli_chr04 | 12523537                | GG                              | AA              | 1946792478               |
| SNP_P4_41785_12523543 | NC_021163.1    | Ca_kabuli_chr04 | 12523543                | CC                              | TT              | 1946792480               |
| SNP_P4_41787_12524032 | NC_021163.1    | Ca_kabuli_chr04 | 12524032                | TT                              | AA              | 1946792482               |
| SNP_P4_41788_12524359 | NC_021163.1    | Ca_kabuli_chr04 | 12524359                | AA                              | TT              | 1946792485               |
| SNP_P4_41789_12524937 | NC_021163.1    | Ca_kabuli_chr04 | 12524937                | TT                              | CC              | 1946792487               |
| SNP_P4_41790_12524973 | NC_021163.1    | Ca_kabuli_chr04 | 12524973                | GG                              | TT              | 1946792489               |
| SNP_P4_41791_12524994 | NC_021163.1    | Ca_kabuli_chr04 | 12524994                | AA                              | TT              | 1946792491               |
| SNP_P4_41792_12525209 | NC_021163.1    | Ca_kabuli_chr04 | 12525209                | AA                              | GG              | 1946792493               |
| SNP_P4_41793_12525222 | NC_021163.1    | Ca_kabuli_chr04 | 12525222                | TT                              | CC              | 1946792495               |

| SNPs IDs              | Chromosome IDs | Chromosomes     | Physical positions (bp) | CDC Frontier (Reference genome) | (ILWC46 & LPNB) | NCBI SNPdb Accession IDs |
|-----------------------|----------------|-----------------|-------------------------|---------------------------------|-----------------|--------------------------|
| SNP_P4_41794_12525232 | NC_021163.1    | Ca_kabuli_chr04 | 12525232                | TT                              | AA              | 1946792498               |
| SNP_P4_41795_12525328 | NC_021163.1    | Ca_kabuli_chr04 | 12525328                | AA                              | GG              | 1946792499               |
| SNP_P4_41796_12525379 | NC_021163.1    | Ca_kabuli_chr04 | 12525379                | AA                              | CC              | 1946792501               |
| SNP_P4_41797_12526023 | NC_021163.1    | Ca_kabuli_chr04 | 12526023                | GG                              | TT              | 1946792503               |
| SNP_P4_41798_12527166 | NC_021163.1    | Ca_kabuli_chr04 | 12527166                | CC                              | GG              | 1946792505               |
| SNP_P4_41799_12528154 | NC_021163.1    | Ca_kabuli_chr04 | 12528154                | GG                              | AA              | 1946792507               |
| SNP_P4_41801_12528782 | NC_021163.1    | Ca_kabuli_chr04 | 12528782                | AA                              | CC              | 1946792509               |
| SNP_P4_41803_12528823 | NC_021163.1    | Ca_kabuli_chr04 | 12528823                | AA                              | TT              | 1946792511               |
| SNP_P4_41804_12528853 | NC_021163.1    | Ca_kabuli_chr04 | 12528853                | AA                              | GG              | 1946792513               |
| SNP_P4_41805_12528940 | NC_021163.1    | Ca_kabuli_chr04 | 12528940                | TT                              | CC              | 1946792514               |
| SNP_P4_41807_12529122 | NC_021163.1    | Ca_kabuli_chr04 | 12529122                | TT                              | CC              | 1946792515               |
| SNP_P4_41809_12529509 | NC_021163.1    | Ca_kabuli_chr04 | 12529509                | AA                              | GG              | 1946792516               |
| SNP_P4_41810_12529666 | NC_021163.1    | Ca_kabuli_chr04 | 12529666                | GG                              | TT              | 1946792517               |
| SNP_P4_41811_12529975 | NC_021163.1    | Ca_kabuli_chr04 | 12529975                | GG                              | AA              | 1946792518               |
| SNP_P4_41812_12530084 | NC_021163.1    | Ca_kabuli_chr04 | 12530084                | GG                              | AA              | 1946792520               |
| SNP_P4_41813_12530287 | NC_021163.1    | Ca_kabuli_chr04 | 12530287                | TT                              | CC              | 1946792522               |
| SNP_P4_41815_12535274 | NC_021163.1    | Ca_kabuli_chr04 | 12535274                | GG                              | CC              | 1946792524               |
| SNP_P4_41816_12535281 | NC_021163.1    | Ca_kabuli_chr04 | 12535281                | TT                              | AA              | 1946792526               |
| SNP_P4_41817_12537490 | NC_021163.1    | Ca_kabuli_chr04 | 12537490                | TT                              | CC              | 1946792528               |
| SNP_P4_41818_12537504 | NC_021163.1    | Ca_kabuli_chr04 | 12537504                | GG                              | AA              | 1946792530               |
| SNP_P4_41819_12537515 | NC_021163.1    | Ca_kabuli_chr04 | 12537515                | AA                              | GG              | 1946792532               |
| SNP_P4_41820_12537583 | NC_021163.1    | Ca_kabuli_chr04 | 12537583                | TT                              | CC              | 1946792534               |
| SNP_P4_41821_12539218 | NC_021163.1    | Ca_kabuli_chr04 | 12539218                | TT                              | CC              | 1946792536               |
| SNP_P4_41822_12539512 | NC_021163.1    | Ca_kabuli_chr04 | 12539512                | TT                              | CC              | 1946792539               |
| SNP_P4_41823_12540192 | NC_021163.1    | Ca_kabuli_chr04 | 12540192                | AA                              | GG              | 1946792541               |
| SNP_P4_41824_12540234 | NC_021163.1    | Ca_kabuli_chr04 | 12540234                | TT                              | AA              | 1946792543               |
| SNP_P4_41825_12540239 | NC_021163.1    | Ca_kabuli_chr04 | 12540239                | GG                              | AA              | 1946792545               |
| SNP_P4_41826_12541887 | NC_021163.1    | Ca_kabuli_chr04 | 12541887                | AA                              | GG              | 1946792546               |
| SNP_P4_41827_12542320 | NC_021163.1    | Ca_kabuli_chr04 | 12542320                | CC                              | AA              | 1946792548               |
| SNP_P4_41828_12542364 | NC_021163.1    | Ca_kabuli_chr04 | 12542364                | GG                              | AA              | 1946792550               |
| SNP_P4_41829_12542529 | NC_021163.1    | Ca_kabuli_chr04 | 12542529                | TT                              | CC              | 1946792552               |
| SNP_P4_41830_12546353 | NC_021163.1    | Ca_kabuli_chr04 | 12546353                | AA                              | CC              | 1946792554               |
| SNP_P4_41831_12546396 | NC_021163.1    | Ca_kabuli_chr04 | 12546396                | AA                              | TT              | 1946792556               |
| SNP_P4_41832_12547625 | NC_021163.1    | Ca_kabuli_chr04 | 12547625                | GG                              | AA              | 1946792558               |
| SNP_P4_41833_12547638 | NC_021163.1    | Ca_kabuli_chr04 | 12547638                | AA                              | TT              | 1946792560               |
| SNP_P4_41834_12547673 | NC_021163.1    | Ca_kabuli_chr04 | 12547673                | AA                              | GG              | 1946792563               |
| SNP_P4_41835_12547847 | NC_021163.1    | Ca_kabuli_chr04 | 12547847                | CC                              | TT              | 1946792565               |
| SNP_P4_41836_12549071 | NC_021163.1    | Ca_kabuli_chr04 | 12549071                | AA                              | GG              | 1946792567               |
| SNP_P4_41837_12550849 | NC_021163.1    | Ca_kabuli_chr04 | 12550849                | TT                              | CC              | 1946792569               |
| SNP_P4_41838_12550882 | NC_021163.1    | Ca_kabuli_chr04 | 12550882                | AA                              | CC              | 1946792571               |
| SNP_P4_41839_12550942 | NC_021163.1    | Ca_kabuli_chr04 | 12550942                | CC                              | TT              | 1946792573               |
| SNP_P4_41840_12551202 | NC_021163.1    | Ca_kabuli_chr04 | 12551202                | GG                              | AA              | 1946792575               |



| SNPs IDs              | Chromosome IDs | Chromosomes     | Physical positions (bp) | CDC Frontier (Reference genome) | (ILWC46 & LPNB) | NCBI SNPdb Accession IDs |
|-----------------------|----------------|-----------------|-------------------------|---------------------------------|-----------------|--------------------------|
| SNP_P4_41841_12551665 | NC_021163.1    | Ca_kabuli_chr04 | 12551665                | TT                              | AA              | 1946792577               |
| SNP_P4_41842_12552038 | NC_021163.1    | Ca_kabuli_chr04 | 12552038                | CC                              | AA              | 1946792579               |
| SNP_P4_41843_12552041 | NC_021163.1    | Ca_kabuli_chr04 | 12552041                | AA                              | GG              | 1946792581               |
| SNP_P4_41844_12552186 | NC_021163.1    | Ca_kabuli_chr04 | 12552186                | CC                              | TT              | 1946792583               |
| SNP_P4_41845_12552295 | NC_021163.1    | Ca_kabuli_chr04 | 12552295                | TT                              | CC              | 1946792585               |
| SNP_P4_41846_12552322 | NC_021163.1    | Ca_kabuli_chr04 | 12552322                | CC                              | AA              | 1946792587               |
| SNP_P4_41847_12552349 | NC_021163.1    | Ca_kabuli_chr04 | 12552349                | TT                              | CC              | 1946792589               |
| SNP_P4_41848_12552921 | NC_021163.1    | Ca_kabuli_chr04 | 12552921                | AA                              | CC              | 1946792591               |
| SNP_P4_41849_12554341 | NC_021163.1    | Ca_kabuli_chr04 | 12554341                | CC                              | TT              | 1946792593               |
| SNP_P4_41851_12555232 | NC_021163.1    | Ca_kabuli_chr04 | 12555232                | CC                              | GG              | 1946792595               |
| SNP_P4_41852_12555279 | NC_021163.1    | Ca_kabuli_chr04 | 12555279                | GG                              | CC              | 1946792597               |
| SNP_P4_41853_12556174 | NC_021163.1    | Ca_kabuli_chr04 | 12556174                | GG                              | TT              | 1946792600               |
| SNP_P4_41854_12556605 | NC_021163.1    | Ca_kabuli_chr04 | 12556605                | TT                              | CC              | 1946792602               |
| SNP_P4_41855_12558541 | NC_021163.1    | Ca_kabuli_chr04 | 12558541                | TT                              | CC              | 1946792604               |
| SNP_P4_41857_12561902 | NC_021163.1    | Ca_kabuli_chr04 | 12561902                | CC                              | TT              | 1946792606               |
| SNP_P4_41858_12562261 | NC_021163.1    | Ca_kabuli_chr04 | 12562261                | CC                              | TT              | 1946792608               |
| SNP_P4_41859_12562268 | NC_021163.1    | Ca_kabuli_chr04 | 12562268                | TT                              | GG              | 1946792610               |
| SNP_P4_41860_12562576 | NC_021163.1    | Ca_kabuli_chr04 | 12562576                | AA                              | GG              | 1946792612               |
| SNP_P4_41861_12562595 | NC_021163.1    | Ca_kabuli_chr04 | 12562595                | AA                              | GG              | 1946792614               |
| SNP_P4_41862_12562620 | NC_021163.1    | Ca_kabuli_chr04 | 12562620                | GG                              | AA              | 1946792616               |
| SNP_P4_41863_12562700 | NC_021163.1    | Ca_kabuli_chr04 | 12562700                | GG                              | TT              | 1946792618               |
| SNP_P4_41864_12562756 | NC_021163.1    | Ca_kabuli_chr04 | 12562756                | TT                              | AA              | 1946792620               |
| SNP_P4_41865_12562816 | NC_021163.1    | Ca_kabuli_chr04 | 12562816                | GG                              | AA              | 1946792622               |
| SNP_P4_41866_12562870 | NC_021163.1    | Ca_kabuli_chr04 | 12562870                | AA                              | CC              | 1946792624               |
| SNP_P4_41867_12562912 | NC_021163.1    | Ca_kabuli_chr04 | 12562912                | CC                              | TT              | 1946792626               |
| SNP_P4_41868_12562914 | NC_021163.1    | Ca_kabuli_chr04 | 12562914                | GG                              | AA              | 1946792628               |
| SNP_P4_41869_12562924 | NC_021163.1    | Ca_kabuli_chr04 | 12562924                | AA                              | GG              | 1946792630               |
| SNP_P4_41870_12563005 | NC_021163.1    | Ca_kabuli_chr04 | 12563005                | TT                              | CC              | 1946792633               |
| SNP_P4_41871_12563008 | NC_021163.1    | Ca_kabuli_chr04 | 12563008                | TT                              | CC              | 1946792635               |
| SNP_P4_41872_12563027 | NC_021163.1    | Ca_kabuli_chr04 | 12563027                | TT                              | CC              | 1946792637               |
| SNP_P4_41873_12563092 | NC_021163.1    | Ca_kabuli_chr04 | 12563092                | GG                              | AA              | 1946792639               |
| SNP_P4_41874_12563110 | NC_021163.1    | Ca_kabuli_chr04 | 12563110                | GG                              | AA              | 1946792641               |
| SNP_P4_41875_12563188 | NC_021163.1    | Ca_kabuli_chr04 | 12563188                | GG                              | TT              | 1946792643               |
| SNP_P4_41876_12563196 | NC_021163.1    | Ca_kabuli_chr04 | 12563196                | GG                              | AA              | 1946792645               |
| SNP_P4_41877_12563287 | NC_021163.1    | Ca_kabuli_chr04 | 12563287                | TT                              | CC              | 1946792647               |
| SNP_P4_41878_12563442 | NC_021163.1    | Ca_kabuli_chr04 | 12563442                | GG                              | AA              | 1946792649               |
| SNP_P4_41879_12563598 | NC_021163.1    | Ca_kabuli_chr04 | 12563598                | CC                              | TT              | 1946792653               |
| SNP_P4_41880_12563670 | NC_021163.1    | Ca_kabuli_chr04 | 12563670                | GG                              | TT              | 1946792655               |
| SNP_P4_41881_12563697 | NC_021163.1    | Ca_kabuli_chr04 | 12563697                | GG                              | AA              | 1946792658               |
| SNP_P4_41882_12563743 | NC_021163.1    | Ca_kabuli_chr04 | 12563743                | CC                              | AA              | 1946792660               |
| SNP_P4_41883_12563754 | NC_021163.1    | Ca_kabuli_chr04 | 12563754                | AA                              | GG              | 1946792662               |
| SNP_P4_41885_12563950 | NC_021163.1    | Ca_kabuli_chr04 | 12563950                | AA                              | GG              | 1946792664               |

| SNPs IDs              | Chromosome IDs | Chromosomes     | Physical positions (bp) | CDC Frontier (Reference genome) | (ILWC46 & LPNB) | NCBI SNPdb Accession IDs |
|-----------------------|----------------|-----------------|-------------------------|---------------------------------|-----------------|--------------------------|
| SNP_P4_41886_12563954 | NC_021163.1    | Ca_kabuli_chr04 | 12563954                | CC                              | TT              | 1946792666               |
| SNP_P4_41887_12563967 | NC_021163.1    | Ca_kabuli_chr04 | 12563967                | GG                              | AA              | 1946792669               |
| SNP_P4_41888_12564015 | NC_021163.1    | Ca_kabuli_chr04 | 12564015                | TT                              | CC              | 1946792671               |
| SNP_P4_41889_12564034 | NC_021163.1    | Ca_kabuli_chr04 | 12564034                | TT                              | AA              | 1946792673               |
| SNP_P4_41890_12564036 | NC_021163.1    | Ca_kabuli_chr04 | 12564036                | AA                              | CC              | 1946792675               |
| SNP_P4_41891_12564125 | NC_021163.1    | Ca_kabuli_chr04 | 12564125                | CC                              | GG              | 1946792677               |
| SNP_P4_41892_12564160 | NC_021163.1    | Ca_kabuli_chr04 | 12564160                | CC                              | TT              | 1946792679               |
| SNP_P4_41893_12564434 | NC_021163.1    | Ca_kabuli_chr04 | 12564434                | GG                              | TT              | 1946792682               |
| SNP_P4_41894_12565210 | NC_021163.1    | Ca_kabuli_chr04 | 12565210                | CC                              | TT              | 1946792684               |
| SNP_P4_41895_12565521 | NC_021163.1    | Ca_kabuli_chr04 | 12565521                | CC                              | AA              | 1946792686               |
| SNP_P4_41896_12565567 | NC_021163.1    | Ca_kabuli_chr04 | 12565567                | CC                              | AA              | 1946792688               |
| SNP_P4_41897_12565581 | NC_021163.1    | Ca_kabuli_chr04 | 12565581                | AA                              | TT              | 1946792690               |
| SNP_P4_41898_12566080 | NC_021163.1    | Ca_kabuli_chr04 | 12566080                | GG                              | AA              | 1946792692               |
| SNP_P4_41899_12566148 | NC_021163.1    | Ca_kabuli_chr04 | 12566148                | GG                              | AA              | 1946792694               |
| SNP_P4_41900_12566150 | NC_021163.1    | Ca_kabuli_chr04 | 12566150                | CC                              | TT              | 1946792696               |
| SNP_P4_41901_12566151 | NC_021163.1    | Ca_kabuli_chr04 | 12566151                | TT                              | CC              | 1946792698               |
| SNP_P4_41902_12566192 | NC_021163.1    | Ca_kabuli_chr04 | 12566192                | TT                              | CC              | 1946792700               |
| SNP_P4_41903_12566195 | NC_021163.1    | Ca_kabuli_chr04 | 12566195                | AA                              | GG              | 1946792703               |
| SNP_P4_41904_12566196 | NC_021163.1    | Ca_kabuli_chr04 | 12566196                | TT                              | CC              | 1946792705               |
| SNP_P4_41906_12566319 | NC_021163.1    | Ca_kabuli_chr04 | 12566319                | TT                              | CC              | 1946792707               |
| SNP_P4_41907_12566324 | NC_021163.1    | Ca_kabuli_chr04 | 12566324                | CC                              | AA              | 1946792709               |
| SNP_P4_41908_12566325 | NC_021163.1    | Ca_kabuli_chr04 | 12566325                | GG                              | TT              | 1946792711               |
| SNP_P4_41909_12566413 | NC_021163.1    | Ca_kabuli_chr04 | 12566413                | CC                              | TT              | 1946792713               |
| SNP_P4_41911_12566596 | NC_021163.1    | Ca_kabuli_chr04 | 12566596                | AA                              | GG              | 1946792715               |
| SNP_P4_41913_12566685 | NC_021163.1    | Ca_kabuli_chr04 | 12566685                | AA                              | TT              | 1946792718               |
| SNP_P4_41914_12566762 | NC_021163.1    | Ca_kabuli_chr04 | 12566762                | TT                              | GG              | 1946792720               |
| SNP_P4_41915_12566786 | NC_021163.1    | Ca_kabuli_chr04 | 12566786                | GG                              | AA              | 1946792722               |
| SNP_P4_41916_12566801 | NC_021163.1    | Ca_kabuli_chr04 | 12566801                | GG                              | AA              | 1946792724               |
| SNP_P4_41917_12566840 | NC_021163.1    | Ca_kabuli_chr04 | 12566840                | GG                              | AA              | 1946792726               |
| SNP_P4_41918_12566875 | NC_021163.1    | Ca_kabuli_chr04 | 12566875                | AA                              | CC              | 1946792728               |
| SNP_P4_41919_12566896 | NC_021163.1    | Ca_kabuli_chr04 | 12566896                | TT                              | CC              | 1946792730               |
| SNP_P4_41920_12566922 | NC_021163.1    | Ca_kabuli_chr04 | 12566922                | AA                              | GG              | 1946792732               |
| SNP_P4_41921_12567407 | NC_021163.1    | Ca_kabuli_chr04 | 12567407                | CC                              | GG              | 1946792734               |
| SNP_P4_41922_12567597 | NC_021163.1    | Ca_kabuli_chr04 | 12567597                | AA                              | CC              | 1946792736               |
| SNP_P4_41923_12567909 | NC_021163.1    | Ca_kabuli_chr04 | 12567909                | GG                              | AA              | 1946792738               |
| SNP_P4_41924_12567915 | NC_021163.1    | Ca_kabuli_chr04 | 12567915                | CC                              | TT              | 1946792740               |
| SNP_P4_41926_12570415 | NC_021163.1    | Ca_kabuli_chr04 | 12570415                | GG                              | TT              | 1946792743               |
| SNP_P4_41927_12570488 | NC_021163.1    | Ca_kabuli_chr04 | 12570488                | TT                              | AA              | 1946792745               |
| SNP_P4_41928_12570491 | NC_021163.1    | Ca_kabuli_chr04 | 12570491                | CC                              | TT              | 1946792747               |
| SNP_P4_41929_12570705 | NC_021163.1    | Ca_kabuli_chr04 | 12570705                | CC                              | TT              | 1946792749               |
| SNP_P4_41930_12570762 | NC_021163.1    | Ca_kabuli_chr04 | 12570762                | GG                              | AA              | 1946792751               |
| SNP_P4_41932_12571366 | NC_021163.1    | Ca_kabuli_chr04 | 12571366                | GG                              | AA              | 1946792754               |

| SNPs IDs              | Chromosome IDs | Chromosomes     | Physical positions (bp) | CDC Frontier (Reference genome) | (ILWC46 & LPNB) | NCBI SNPdb Accession IDs |
|-----------------------|----------------|-----------------|-------------------------|---------------------------------|-----------------|--------------------------|
| SNP_P4_41933_12571574 | NC_021163.1    | Ca_kabuli_chr04 | 12571574                | CC                              | GG              | 1946792756               |
| SNP_P4_41934_12571754 | NC_021163.1    | Ca_kabuli_chr04 | 12571754                | AA                              | GG              | 1946792758               |
| SNP_P4_41936_12571866 | NC_021163.1    | Ca_kabuli_chr04 | 12571866                | TT                              | AA              | 1946792760               |
| SNP_P4_41938_12572289 | NC_021163.1    | Ca_kabuli_chr04 | 12572289                | AA                              | GG              | 1946792762               |
| SNP_P4_41939_12572696 | NC_021163.1    | Ca_kabuli_chr04 | 12572696                | AA                              | GG              | 1946792764               |
| SNP_P4_41940_12572704 | NC_021163.1    | Ca_kabuli_chr04 | 12572704                | TT                              | CC              | 1946792766               |
| SNP_P4_41941_12572771 | NC_021163.1    | Ca_kabuli_chr04 | 12572771                | TT                              | GG              | 1946792769               |
| SNP_P4_41942_12572772 | NC_021163.1    | Ca_kabuli_chr04 | 12572772                | GG                              | AA              | 1946792771               |
| SNP_P4_41943_12572822 | NC_021163.1    | Ca_kabuli_chr04 | 12572822                | TT                              | CC              | 1946792773               |
| SNP_P4_41944_12573046 | NC_021163.1    | Ca_kabuli_chr04 | 12573046                | AA                              | GG              | 1946792775               |
| SNP_P4_41945_12573048 | NC_021163.1    | Ca_kabuli_chr04 | 12573048                | GG                              | AA              | 1946792777               |
| SNP_P4_41946_12573142 | NC_021163.1    | Ca_kabuli_chr04 | 12573142                | TT                              | CC              | 1946792779               |
| SNP_P4_41947_12573172 | NC_021163.1    | Ca_kabuli_chr04 | 12573172                | CC                              | TT              | 1946792781               |
| SNP_P4_41948_12573193 | NC_021163.1    | Ca_kabuli_chr04 | 12573193                | TT                              | GG              | 1946792783               |
| SNP_P4_41949_12573804 | NC_021163.1    | Ca_kabuli_chr04 | 12573804                | AA                              | TT              | 1946792785               |
| SNP_P4_41950_12574735 | NC_021163.1    | Ca_kabuli_chr04 | 12574735                | CC                              | TT              | 1946792787               |
| SNP_P4_41951_12574753 | NC_021163.1    | Ca_kabuli_chr04 | 12574753                | TT                              | AA              | 1946792789               |
| SNP_P4_41952_12575100 | NC_021163.1    | Ca_kabuli_chr04 | 12575100                | GG                              | TT              | 1946792791               |
| SNP_P4_41953_12575922 | NC_021163.1    | Ca_kabuli_chr04 | 12575922                | CC                              | TT              | 1946792793               |
| SNP_P4_41954_12576520 | NC_021163.1    | Ca_kabuli_chr04 | 12576520                | TT                              | CC              | 1946792795               |
| SNP_P4_41955_12576536 | NC_021163.1    | Ca_kabuli_chr04 | 12576536                | AA                              | GG              | 1946792797               |
| SNP_P4_41956_12576696 | NC_021163.1    | Ca_kabuli_chr04 | 12576696                | AA                              | CC              | 1946792799               |
| SNP_P4_41957_12576712 | NC_021163.1    | Ca_kabuli_chr04 | 12576712                | AA                              | TT              | 1946792802               |
| SNP_P4_41958_12577258 | NC_021163.1    | Ca_kabuli_chr04 | 12577258                | GG                              | CC              | 1946792804               |
| SNP_P4_41961_12577739 | NC_021163.1    | Ca_kabuli_chr04 | 12577739                | GG                              | CC              | 1946792806               |
| SNP_P4_41962_12577773 | NC_021163.1    | Ca_kabuli_chr04 | 12577773                | TT                              | AA              | 1946792808               |
| SNP_P4_41963_12577800 | NC_021163.1    | Ca_kabuli_chr04 | 12577800                | TT                              | AA              | 1946792810               |
| SNP_P4_41964_12578928 | NC_021163.1    | Ca_kabuli_chr04 | 12578928                | CC                              | AA              | 1946792812               |
| SNP_P4_41965_12579521 | NC_021163.1    | Ca_kabuli_chr04 | 12579521                | AA                              | GG              | 1946792814               |
| SNP_P4_41966_12579528 | NC_021163.1    | Ca_kabuli_chr04 | 12579528                | CC                              | AA              | 1946792816               |
| SNP_P4_41968_12582119 | NC_021163.1    | Ca_kabuli_chr04 | 12582119                | AA                              | GG              | 1946792818               |
| SNP_P4_41969_12582394 | NC_021163.1    | Ca_kabuli_chr04 | 12582394                | GG                              | AA              | 1946792820               |
| SNP_P4_41970_12582418 | NC_021163.1    | Ca_kabuli_chr04 | 12582418                | AA                              | GG              | 1946792822               |
| SNP_P4_41971_12582804 | NC_021163.1    | Ca_kabuli_chr04 | 12582804                | GG                              | AA              | 1946792824               |
| SNP_P4_41972_12582935 | NC_021163.1    | Ca_kabuli_chr04 | 12582935                | GG                              | AA              | 1946792826               |
| SNP_P4_41974_12583345 | NC_021163.1    | Ca_kabuli_chr04 | 12583345                | AA                              | CC              | 1946792828               |
| SNP_P4_41975_12583349 | NC_021163.1    | Ca_kabuli_chr04 | 12583349                | AA                              | TT              | 1946792830               |
| SNP_P4_41976_12583366 | NC_021163.1    | Ca_kabuli_chr04 | 12583366                | CC                              | TT              | 1946792832               |
| SNP_P4_41978_12583937 | NC_021163.1    | Ca_kabuli_chr04 | 12583937                | AA                              | GG              | 1946792834               |
| SNP_P4_41979_12584002 | NC_021163.1    | Ca_kabuli_chr04 | 12584002                | TT                              | GG              | 1946792836               |
| SNP_P4_41980_12584262 | NC_021163.1    | Ca_kabuli_chr04 | 12584262                | GG                              | AA              | 1946792838               |
| SNP_P4_41981_12584270 | NC_021163.1    | Ca_kabuli_chr04 | 12584270                | GG                              | AA              | 1946792840               |

| SNPs IDs              | Chromosome IDs | Chromosomes     | Physical positions (bp) | CDC Frontier (Reference genome) | (ILWC46 & LPNB) | NCBI SNPdb Accession IDs |
|-----------------------|----------------|-----------------|-------------------------|---------------------------------|-----------------|--------------------------|
| SNP_P4_41982_12584932 | NC_021163.1    | Ca_kabuli_chr04 | 12584932                | AA                              | CC              | 1946792842               |
| SNP_P4_41983_12584943 | NC_021163.1    | Ca_kabuli_chr04 | 12584943                | CC                              | TT              | 1946792844               |
| SNP_P4_41984_12585470 | NC_021163.1    | Ca_kabuli_chr04 | 12585470                | GG                              | AA              | 1946792846               |
| SNP_P4_41985_12585490 | NC_021163.1    | Ca_kabuli_chr04 | 12585490                | GG                              | AA              | 1946792848               |
| SNP_P4_41986_12585496 | NC_021163.1    | Ca_kabuli_chr04 | 12585496                | TT                              | CC              | 1946792850               |
| SNP_P4_41987_12585762 | NC_021163.1    | Ca_kabuli_chr04 | 12585762                | TT                              | CC              | 1946792852               |
| SNP_P4_41988_12585800 | NC_021163.1    | Ca_kabuli_chr04 | 12585800                | AA                              | GG              | 1946792854               |
| SNP_P4_41989_12586014 | NC_021163.1    | Ca_kabuli_chr04 | 12586014                | GG                              | AA              | 1946792856               |
| SNP_P4_41990_12586034 | NC_021163.1    | Ca_kabuli_chr04 | 12586034                | CC                              | GG              | 1946792858               |
| SNP_P4_41991_12586335 | NC_021163.1    | Ca_kabuli_chr04 | 12586335                | CC                              | TT              | 1946792860               |
| SNP_P4_41992_12586357 | NC_021163.1    | Ca_kabuli_chr04 | 12586357                | TT                              | CC              | 1946792862               |
| SNP_P4_41993_12586410 | NC_021163.1    | Ca_kabuli_chr04 | 12586410                | GG                              | AA              | 1946792864               |
| SNP_P4_41994_12586446 | NC_021163.1    | Ca_kabuli_chr04 | 12586446                | CC                              | TT              | 1946792867               |
| SNP_P4_41995_12586645 | NC_021163.1    | Ca_kabuli_chr04 | 12586645                | AA                              | CC              | 1946792869               |
| SNP_P4_41996_12586689 | NC_021163.1    | Ca_kabuli_chr04 | 12586689                | TT                              | CC              | 1946792871               |
| SNP_P4_41997_12586696 | NC_021163.1    | Ca_kabuli_chr04 | 12586696                | AA                              | GG              | 1946792873               |
| SNP_P4_41998_12586712 | NC_021163.1    | Ca_kabuli_chr04 | 12586712                | CC                              | TT              | 1946792875               |
| SNP_P4_41999_12586730 | NC_021163.1    | Ca_kabuli_chr04 | 12586730                | CC                              | TT              | 1946792877               |
| SNP_P4_42000_12586745 | NC_021163.1    | Ca_kabuli_chr04 | 12586745                | GG                              | AA              | 1946792879               |
| SNP_P4_42001_12586746 | NC_021163.1    | Ca_kabuli_chr04 | 12586746                | GG                              | AA              | 1946792881               |
| SNP_P4_42002_12586768 | NC_021163.1    | Ca_kabuli_chr04 | 12586768                | CC                              | TT              | 1946792883               |
| SNP_P4_42004_12586868 | NC_021163.1    | Ca_kabuli_chr04 | 12586868                | TT                              | CC              | 1946792885               |
| SNP_P4_42005_12586888 | NC_021163.1    | Ca_kabuli_chr04 | 12586888                | AA                              | CC              | 1946792887               |
| SNP_P4_42008_12589390 | NC_021163.1    | Ca_kabuli_chr04 | 12589390                | CC                              | TT              | 1946792890               |
| SNP_P4_42009_12589402 | NC_021163.1    | Ca_kabuli_chr04 | 12589402                | GG                              | AA              | 1946792892               |
| SNP_P4_42010_12591054 | NC_021163.1    | Ca_kabuli_chr04 | 12591054                | GG                              | CC              | 1946792894               |
| SNP_P4_42011_12591173 | NC_021163.1    | Ca_kabuli_chr04 | 12591173                | TT                              | GG              | 1946792896               |
| SNP_P4_42012_12591240 | NC_021163.1    | Ca_kabuli_chr04 | 12591240                | AA                              | GG              | 1946792898               |
| SNP_P4_42013_12591403 | NC_021163.1    | Ca_kabuli_chr04 | 12591403                | TT                              | AA              | 1946792900               |
| SNP_P4_42014_12591449 | NC_021163.1    | Ca_kabuli_chr04 | 12591449                | GG                              | TT              | 1946792902               |
| SNP_P4_42015_12591708 | NC_021163.1    | Ca_kabuli_chr04 | 12591708                | AA                              | GG              | 1946792904               |
| SNP_P4_42016_12591725 | NC_021163.1    | Ca_kabuli_chr04 | 12591725                | GG                              | AA              | 1946792905               |
| SNP_P4_42017_12591742 | NC_021163.1    | Ca_kabuli_chr04 | 12591742                | AA                              | TT              | 1946792906               |
| SNP_P4_42018_12591749 | NC_021163.1    | Ca_kabuli_chr04 | 12591749                | GG                              | TT              | 1946792907               |
| SNP_P4_42019_12591753 | NC_021163.1    | Ca_kabuli_chr04 | 12591753                | GG                              | CC              | 1946792908               |
| SNP_P4_42020_12591897 | NC_021163.1    | Ca_kabuli_chr04 | 12591897                | AA                              | GG              | 1946792910               |
| SNP_P4_42021_12591938 | NC_021163.1    | Ca_kabuli_chr04 | 12591938                | AA                              | TT              | 1946792912               |
| SNP_P4_42023_12592493 | NC_021163.1    | Ca_kabuli_chr04 | 12592493                | GG                              | AA              | 1946792914               |
| SNP_P4_42024_12592697 | NC_021163.1    | Ca_kabuli_chr04 | 12592697                | CC                              | AA              | 1946792916               |
| SNP_P4_42025_12592698 | NC_021163.1    | Ca_kabuli_chr04 | 12592698                | AA                              | TT              | 1946792918               |
| SNP_P4_42026_12592973 | NC_021163.1    | Ca_kabuli_chr04 | 12592973                | CC                              | AA              | 1946792920               |
| SNP_P4_42027_12593112 | NC_021163.1    | Ca_kabuli_chr04 | 12593112                | TT                              | CC              | 1946792922               |

| SNPs IDs              | Chromosome IDs | Chromosomes     | Physical positions (bp) | CDC Frontier (Reference genome) | (ILWC46 & LPNB) | NCBI SNPdb Accession IDs |
|-----------------------|----------------|-----------------|-------------------------|---------------------------------|-----------------|--------------------------|
| SNP_P4_42028_12593349 | NC_021163.1    | Ca_kabuli_chr04 | 12593349                | AA                              | TT              | 1946792924               |
| SNP_P4_42029_12593359 | NC_021163.1    | Ca_kabuli_chr04 | 12593359                | AA                              | GG              | 1946792926               |
| SNP_P4_42030_12594754 | NC_021163.1    | Ca_kabuli_chr04 | 12594754                | AA                              | TT              | 1946792928               |
| SNP_P4_42032_12595360 | NC_021163.1    | Ca_kabuli_chr04 | 12595360                | TT                              | AA              | 1946792929               |
| SNP_P4_42033_12595607 | NC_021163.1    | Ca_kabuli_chr04 | 12595607                | AA                              | TT              | 1946792931               |
| SNP_P4_42034_12595608 | NC_021163.1    | Ca_kabuli_chr04 | 12595608                | AA                              | GG              | 1946792933               |
| SNP_P4_42035_12595665 | NC_021163.1    | Ca_kabuli_chr04 | 12595665                | AA                              | GG              | 1946792935               |
| SNP_P4_42037_12597123 | NC_021163.1    | Ca_kabuli_chr04 | 12597123                | GG                              | AA              | 1946792938               |
| SNP_P4_42038_12597438 | NC_021163.1    | Ca_kabuli_chr04 | 12597438                | CC                              | TT              | 1946792940               |
| SNP_P4_42039_12597718 | NC_021163.1    | Ca_kabuli_chr04 | 12597718                | TT                              | AA              | 1946792942               |
| SNP_P4_42040_12599315 | NC_021163.1    | Ca_kabuli_chr04 | 12599315                | GG                              | AA              | 1946792944               |
| SNP_P4_42041_12599321 | NC_021163.1    | Ca_kabuli_chr04 | 12599321                | TT                              | CC              | 1946792946               |
| SNP_P4_42042_12599342 | NC_021163.1    | Ca_kabuli_chr04 | 12599342                | GG                              | AA              | 1946792948               |
| SNP_P4_42043_12599350 | NC_021163.1    | Ca_kabuli_chr04 | 12599350                | GG                              | AA              | 1946792950               |
| SNP_P4_42044_12599351 | NC_021163.1    | Ca_kabuli_chr04 | 12599351                | AA                              | CC              | 1946792952               |
| SNP_P4_42045_12600922 | NC_021163.1    | Ca_kabuli_chr04 | 12600922                | TT                              | CC              | 1946792954               |
| SNP_P4_42046_12601148 | NC_021163.1    | Ca_kabuli_chr04 | 12601148                | CC                              | AA              | 1946792956               |
| SNP_P4_42047_12601222 | NC_021163.1    | Ca_kabuli_chr04 | 12601222                | CC                              | TT              | 1946792958               |
| SNP_P4_42048_12601567 | NC_021163.1    | Ca_kabuli_chr04 | 12601567                | TT                              | GG              | 1946792960               |
| SNP_P4_42049_12601984 | NC_021163.1    | Ca_kabuli_chr04 | 12601984                | AA                              | TT              | 1946792962               |
| SNP_P4_42050_12602015 | NC_021163.1    | Ca_kabuli_chr04 | 12602015                | AA                              | GG              | 1946792964               |
| SNP_P4_42051_12602216 | NC_021163.1    | Ca_kabuli_chr04 | 12602216                | AA                              | GG              | 1946792966               |
| SNP_P4_42052_12602321 | NC_021163.1    | Ca_kabuli_chr04 | 12602321                | CC                              | TT              | 1946792968               |
| SNP_P4_42053_12602360 | NC_021163.1    | Ca_kabuli_chr04 | 12602360                | TT                              | AA              | 1946792970               |
| SNP_P4_42054_12602613 | NC_021163.1    | Ca_kabuli_chr04 | 12602613                | GG                              | AA              | 1946792972               |
| SNP_P4_42055_12602651 | NC_021163.1    | Ca_kabuli_chr04 | 12602651                | CC                              | TT              | 1946792974               |
| SNP_P4_42056_12602657 | NC_021163.1    | Ca_kabuli_chr04 | 12602657                | CC                              | TT              | 1946792976               |
| SNP_P4_42057_12602689 | NC_021163.1    | Ca_kabuli_chr04 | 12602689                | TT                              | CC              | 1946792978               |
| SNP_P4_42058_12603606 | NC_021163.1    | Ca_kabuli_chr04 | 12603606                | CC                              | GG              | 1946792980               |
| SNP_P4_42060_12604563 | NC_021163.1    | Ca_kabuli_chr04 | 12604563                | AA                              | GG              | 1946792982               |
| SNP_P4_42061_12604564 | NC_021163.1    | Ca_kabuli_chr04 | 12604564                | TT                              | GG              | 1946792984               |
| SNP_P4_42062_12604571 | NC_021163.1    | Ca_kabuli_chr04 | 12604571                | AA                              | CC              | 1946792986               |
| SNP_P4_42063_12604975 | NC_021163.1    | Ca_kabuli_chr04 | 12604975                | AA                              | GG              | 1946792988               |
| SNP_P4_42064_12605414 | NC_021163.1    | Ca_kabuli_chr04 | 12605414                | GG                              | AA              | 1946792990               |
| SNP_P4_42065_12605619 | NC_021163.1    | Ca_kabuli_chr04 | 12605619                | CC                              | TT              | 1946792992               |
| SNP_P4_42066_12605774 | NC_021163.1    | Ca_kabuli_chr04 | 12605774                | TT                              | CC              | 1946792994               |
| SNP_P4_42067_12605815 | NC_021163.1    | Ca_kabuli_chr04 | 12605815                | TT                              | AA              | 1946792996               |
| SNP_P4_42070_12607409 | NC_021163.1    | Ca_kabuli_chr04 | 12607409                | AA                              | TT              | 1946792998               |
| SNP_P4_42071_12607706 | NC_021163.1    | Ca_kabuli_chr04 | 12607706                | CC                              | AA              | 1946793000               |
| SNP_P4_42072_12607787 | NC_021163.1    | Ca_kabuli_chr04 | 12607787                | GG                              | CC              | 1946793002               |
| SNP_P4_42073_12607854 | NC_021163.1    | Ca_kabuli_chr04 | 12607854                | AA                              | GG              | 1946793004               |
| SNP_P4_42074_12607859 | NC_021163.1    | Ca_kabuli_chr04 | 12607859                | GG                              | CC              | 1946793006               |

| SNPs IDs              | Chromosome IDs | Chromosomes     | Physical positions (bp) | CDC Frontier (Reference genome) | (ILWC46 & LPNB) | NCBI SNPdb Accession IDs |
|-----------------------|----------------|-----------------|-------------------------|---------------------------------|-----------------|--------------------------|
| SNP_P4_42075_12607864 | NC_021163.1    | Ca_kabuli_chr04 | 12607864                | TT                              | AA              | 1946793008               |
| SNP_P4_42076_12607892 | NC_021163.1    | Ca_kabuli_chr04 | 12607892                | AA                              | TT              | 1946793010               |
| SNP_P4_42077_12607924 | NC_021163.1    | Ca_kabuli_chr04 | 12607924                | GG                              | TT              | 1946793012               |
| SNP_P4_42078_12608549 | NC_021163.1    | Ca_kabuli_chr04 | 12608549                | TT                              | AA              | 1946793014               |
| SNP_P4_42079_12608793 | NC_021163.1    | Ca_kabuli_chr04 | 12608793                | CC                              | TT              | 1946793016               |
| SNP_P4_42080_12608795 | NC_021163.1    | Ca_kabuli_chr04 | 12608795                | GG                              | AA              | 1946793018               |
| SNP_P4_42081_12609376 | NC_021163.1    | Ca_kabuli_chr04 | 12609376                | AA                              | TT              | 1946793020               |
| SNP_P4_42082_12612005 | NC_021163.1    | Ca_kabuli_chr04 | 12612005                | AA                              | GG              | 1946793022               |
| SNP_P4_42083_12622076 | NC_021163.1    | Ca_kabuli_chr04 | 12622076                | CC                              | TT              | 1946793024               |
| SNP_P4_42084_12627418 | NC_021163.1    | Ca_kabuli_chr04 | 12627418                | CC                              | TT              | 1946793026               |
| SNP_P4_42085_12627568 | NC_021163.1    | Ca_kabuli_chr04 | 12627568                | AA                              | GG              | 1946793028               |
| SNP_P4_42086_12627730 | NC_021163.1    | Ca_kabuli_chr04 | 12627730                | CC                              | TT              | 1946793030               |
| SNP_P4_42087_12628062 | NC_021163.1    | Ca_kabuli_chr04 | 12628062                | GG                              | TT              | 1946793032               |
| SNP_P4_42088_12656499 | NC_021163.1    | Ca_kabuli_chr04 | 12656499                | CC                              | AA              | 1946793034               |
| SNP_P4_42090_12676345 | NC_021163.1    | Ca_kabuli_chr04 | 12676345                | GG                              | AA              | 1946793036               |
| SNP_P4_42091_12676398 | NC_021163.1    | Ca_kabuli_chr04 | 12676398                | GG                              | AA              | 1946793038               |
| SNP_P4_42092_12676452 | NC_021163.1    | Ca_kabuli_chr04 | 12676452                | GG                              | AA              | 1946793040               |
| SNP_P4_42093_12676486 | NC_021163.1    | Ca_kabuli_chr04 | 12676486                | TT                              | CC              | 1946793042               |
| SNP_P4_42094_12676665 | NC_021163.1    | Ca_kabuli_chr04 | 12676665                | AA                              | GG              | 1946793044               |
| SNP_P4_42095_12676713 | NC_021163.1    | Ca_kabuli_chr04 | 12676713                | AA                              | GG              | 1946793046               |
| SNP_P4_42096_12676757 | NC_021163.1    | Ca_kabuli_chr04 | 12676757                | GG                              | AA              | 1946793048               |
| SNP_P4_42097_12676758 | NC_021163.1    | Ca_kabuli_chr04 | 12676758                | GG                              | CC              | 1946793050               |
| SNP_P4_42098_12676766 | NC_021163.1    | Ca_kabuli_chr04 | 12676766                | AA                              | GG              | 1946793052               |
| SNP_P4_42099_12680229 | NC_021163.1    | Ca_kabuli_chr04 | 12680229                | TT                              | AA              | 1946793054               |
| SNP_P4_42100_12680230 | NC_021163.1    | Ca_kabuli_chr04 | 12680230                | TT                              | AA              | 1946793056               |
| SNP_P4_42101_12700518 | NC_021163.1    | Ca_kabuli_chr04 | 12700518                | GG                              | AA              | 1946793058               |
| SNP_P4_42103_12704195 | NC_021163.1    | Ca_kabuli_chr04 | 12704195                | GG                              | AA              | 1946793060               |
| SNP_P4_42104_12724743 | NC_021163.1    | Ca_kabuli_chr04 | 12724743                | GG                              | AA              | 1946793062               |
| SNP_P4_42106_12756778 | NC_021163.1    | Ca_kabuli_chr04 | 12756778                | CC                              | TT              | 1946793064               |
| SNP_P4_42107_12769779 | NC_021163.1    | Ca_kabuli_chr04 | 12769779                | AA                              | TT              | 1946793067               |
| SNP_P4_42108_12771276 | NC_021163.1    | Ca_kabuli_chr04 | 12771276                | AA                              | TT              | 1946793069               |
| SNP_P4_42109_12772311 | NC_021163.1    | Ca_kabuli_chr04 | 12772311                | GG                              | TT              | 1946793071               |
| SNP_P4_42113_12798952 | NC_021163.1    | Ca_kabuli_chr04 | 12798952                | AA                              | GG              | 1946793073               |
| SNP_P4_42114_12820861 | NC_021163.1    | Ca_kabuli_chr04 | 12820861                | CC                              | TT              | 1946793075               |
| SNP_P4_42115_12828670 | NC_021163.1    | Ca_kabuli_chr04 | 12828670                | TT                              | GG              | 1946793077               |
| SNP_P4_42116_12828673 | NC_021163.1    | Ca_kabuli_chr04 | 12828673                | TT                              | CC              | 1946793079               |
| SNP_P4_42117_12833461 | NC_021163.1    | Ca_kabuli_chr04 | 12833461                | CC                              | TT              | 1946793081               |
| SNP_P4_42118_12833470 | NC_021163.1    | Ca_kabuli_chr04 | 12833470                | TT                              | CC              | 1946793083               |
| SNP_P4_42119_12836541 | NC_021163.1    | Ca_kabuli_chr04 | 12836541                | AA                              | CC              | 1946793085               |
| SNP_P4_42120_12836542 | NC_021163.1    | Ca_kabuli_chr04 | 12836542                | AA                              | GG              | 1946793087               |
| SNP_P4_42124_12888679 | NC_021163.1    | Ca_kabuli_chr04 | 12888679                | CC                              | AA              | 1946793089               |
| SNP_P4_42127_12925888 | NC_021163.1    | Ca_kabuli_chr04 | 12925888                | AA                              | GG              | 1946793091               |

| SNPs IDs              | Chromosome IDs | Chromosomes     | Physical positions (bp) | CDC Frontier (Reference genome) | (ILWC46 & LPNB) | NCBI SNPdb Accession IDs |
|-----------------------|----------------|-----------------|-------------------------|---------------------------------|-----------------|--------------------------|
| SNP_P4_42128_12926117 | NC_021163.1    | Ca_kabuli_chr04 | 12926117                | GG                              | AA              | 1946793094               |
| SNP_P4_42129_12926479 | NC_021163.1    | Ca_kabuli_chr04 | 12926479                | CC                              | TT              | 1946793096               |
| SNP_P4_42130_12935831 | NC_021163.1    | Ca_kabuli_chr04 | 12935831                | TT                              | GG              | 1946793098               |
| SNP_P4_42131_12968464 | NC_021163.1    | Ca_kabuli_chr04 | 12968464                | TT                              | CC              | 1946793100               |
| SNP_P4_42132_12985967 | NC_021163.1    | Ca_kabuli_chr04 | 12985967                | TT                              | CC              | 1946793102               |
| SNP_P4_42133_12985974 | NC_021163.1    | Ca_kabuli_chr04 | 12985974                | AA                              | CC              | 1946793104               |
| SNP_P4_42134_12985981 | NC_021163.1    | Ca_kabuli_chr04 | 12985981                | TT                              | AA              | 1946793106               |
| SNP_P4_42135_12985994 | NC_021163.1    | Ca_kabuli_chr04 | 12985994                | TT                              | GG              | 1946793108               |
| SNP_P4_42136_12986909 | NC_021163.1    | Ca_kabuli_chr04 | 12986909                | TT                              | CC              | 1946793110               |
| SNP_P4_42139_13031878 | NC_021163.1    | Ca_kabuli_chr04 | 13031878                | TT                              | AA              | 1946793112               |
| SNP_P4_42140_13036288 | NC_021163.1    | Ca_kabuli_chr04 | 13036288                | CC                              | TT              | 1946793114               |
| SNP_P4_42141_13047436 | NC_021163.1    | Ca_kabuli_chr04 | 13047436                | TT                              | GG              | 1946793116               |
| SNP_P4_42142_13047469 | NC_021163.1    | Ca_kabuli_chr04 | 13047469                | TT                              | CC              | 1946793118               |
| SNP_P4_42143_13047488 | NC_021163.1    | Ca_kabuli_chr04 | 13047488                | TT                              | CC              | 1946793120               |
| SNP_P4_42144_13048924 | NC_021163.1    | Ca_kabuli_chr04 | 13048924                | TT                              | CC              | 1946793122               |
| SNP_P4_42145_13049973 | NC_021163.1    | Ca_kabuli_chr04 | 13049973                | GG                              | AA              | 1946793125               |
| SNP_P4_42146_13049974 | NC_021163.1    | Ca_kabuli_chr04 | 13049974                | TT                              | AA              | 1946793127               |
| SNP_P4_42147_13075042 | NC_021163.1    | Ca_kabuli_chr04 | 13075042                | CC                              | GG              | 1946793129               |
| SNP_P4_42148_13081123 | NC_021163.1    | Ca_kabuli_chr04 | 13081123                | TT                              | CC              | 1946793131               |
| SNP_P4_42149_13082266 | NC_021163.1    | Ca_kabuli_chr04 | 13082266                | AA                              | TT              | 1946793133               |
| SNP_P4_42150_13082268 | NC_021163.1    | Ca_kabuli_chr04 | 13082268                | AA                              | TT              | 1946793135               |
| SNP_P4_42151_13092972 | NC_021163.1    | Ca_kabuli_chr04 | 13092972                | CC                              | TT              | 1946793138               |
| SNP_P4_42152_13099523 | NC_021163.1    | Ca_kabuli_chr04 | 13099523                | CC                              | TT              | 1946793140               |
| SNP_P4_42153_13104366 | NC_021163.1    | Ca_kabuli_chr04 | 13104366                | CC                              | TT              | 1946793142               |
| SNP_P4_42154_13126290 | NC_021163.1    | Ca_kabuli_chr04 | 13126290                | TT                              | AA              | 1946793144               |
| SNP_P4_42158_13158189 | NC_021163.1    | Ca_kabuli_chr04 | 13158189                | TT                              | CC              | 1946793146               |
| SNP_P4_42159_13161136 | NC_021163.1    | Ca_kabuli_chr04 | 13161136                | TT                              | CC              | 1946793148               |
| SNP_P4_42160_13185209 | NC_021163.1    | Ca_kabuli_chr04 | 13185209                | TT                              | GG              | 1946793150               |
| SNP_P4_42161_13187696 | NC_021163.1    | Ca_kabuli_chr04 | 13187696                | TT                              | AA              | 1946793153               |
| SNP_P4_42162_13189186 | NC_021163.1    | Ca_kabuli_chr04 | 13189186                | TT                              | CC              | 1946793155               |
| SNP_P4_42164_13195891 | NC_021163.1    | Ca_kabuli_chr04 | 13195891                | TT                              | AA              | 1946793157               |
| SNP_P4_42165_13196349 | NC_021163.1    | Ca_kabuli_chr04 | 13196349                | AA                              | CC              | 1946793159               |
| SNP_P4_42166_13205379 | NC_021163.1    | Ca_kabuli_chr04 | 13205379                | GG                              | TT              | 1946793161               |
| SNP_P4_42168_13214301 | NC_021163.1    | Ca_kabuli_chr04 | 13214301                | GG                              | AA              | 1946793163               |
| SNP_P4_42169_13215821 | NC_021163.1    | Ca_kabuli_chr04 | 13215821                | AA                              | GG              | 1946793166               |
| SNP_P4_42170_13233293 | NC_021163.1    | Ca_kabuli_chr04 | 13233293                | TT                              | GG              | 1946793168               |
| SNP_P4_42171_13233309 | NC_021163.1    | Ca_kabuli_chr04 | 13233309                | TT                              | CC              | 1946793170               |
| SNP_P4_42172_13242649 | NC_021163.1    | Ca_kabuli_chr04 | 13242649                | GG                              | AA              | 1946793172               |
| SNP_P4_42173_13242997 | NC_021163.1    | Ca_kabuli_chr04 | 13242997                | CC                              | TT              | 1946793174               |
| SNP_P4_42175_13303871 | NC_021163.1    | Ca_kabuli_chr04 | 13303871                | GG                              | TT              | 1946793176               |
| SNP_P4_42176_13331455 | NC_021163.1    | Ca_kabuli_chr04 | 13331455                | CC                              | AA              | 1946793178               |
| SNP_P4_42178_13404461 | NC_021163.1    | Ca_kabuli_chr04 | 13404461                | TT                              | AA              | 1946793181               |

| SNPs IDs              | Chromosome IDs | Chromosomes     | Physical positions (bp) | CDC Frontier (Reference genome) | (ILWC46 & LPNB) | NCBI SNPdb Accession IDs |
|-----------------------|----------------|-----------------|-------------------------|---------------------------------|-----------------|--------------------------|
| SNP_P4_42179_13420967 | NC_021163.1    | Ca_kabuli_chr04 | 13420967                | CC                              | GG              | 1946793183               |
| SNP_P4_42180_13421126 | NC_021163.1    | Ca_kabuli_chr04 | 13421126                | TT                              | CC              | 1946793185               |
| SNP_P4_42182_13436788 | NC_021163.1    | Ca_kabuli_chr04 | 13436788                | AA                              | GG              | 1946793187               |
| SNP_P4_42184_13459684 | NC_021163.1    | Ca_kabuli_chr04 | 13459684                | AA                              | GG              | 1946793189               |
| SNP_P4_42185_13468270 | NC_021163.1    | Ca_kabuli_chr04 | 13468270                | TT                              | CC              | 1946793191               |
| SNP_P4_42186_13468331 | NC_021163.1    | Ca_kabuli_chr04 | 13468331                | CC                              | AA              | 1946793193               |
| SNP_P4_42187_13468978 | NC_021163.1    | Ca_kabuli_chr04 | 13468978                | AA                              | GG              | 1946793195               |
| SNP_P4_42188_13477419 | NC_021163.1    | Ca_kabuli_chr04 | 13477419                | GG                              | AA              | 1946793197               |
| SNP_P4_42191_13496090 | NC_021163.1    | Ca_kabuli_chr04 | 13496090                | TT                              | AA              | 1946793199               |
| SNP_P4_42192_13496091 | NC_021163.1    | Ca_kabuli_chr04 | 13496091                | TT                              | CC              | 1946793201               |
| SNP_P4_42194_13510544 | NC_021163.1    | Ca_kabuli_chr04 | 13510544                | GG                              | AA              | 1946793203               |
| SNP_P4_42195_13543950 | NC_021163.1    | Ca_kabuli_chr04 | 13543950                | TT                              | AA              | 1946793205               |
| SNP_P4_42197_13550069 | NC_021163.1    | Ca_kabuli_chr04 | 13550069                | CC                              | TT              | 1946793207               |
| SNP_P4_42198_13555014 | NC_021163.1    | Ca_kabuli_chr04 | 13555014                | GG                              | AA              | 1946793209               |
| SNP_P4_42199_13555410 | NC_021163.1    | Ca_kabuli_chr04 | 13555410                | GG                              | AA              | 1946793211               |
| SNP_P4_42201_13555506 | NC_021163.1    | Ca_kabuli_chr04 | 13555506                | CC                              | TT              | 1946793213               |
| SNP_P4_42202_13555515 | NC_021163.1    | Ca_kabuli_chr04 | 13555515                | CC                              | TT              | 1946793215               |
| SNP_P4_42203_13555518 | NC_021163.1    | Ca_kabuli_chr04 | 13555518                | CC                              | TT              | 1946793217               |
| SNP_P4_42204_13555590 | NC_021163.1    | Ca_kabuli_chr04 | 13555590                | GG                              | CC              | 1946793218               |
| SNP_P4_42205_13555705 | NC_021163.1    | Ca_kabuli_chr04 | 13555705                | CC                              | TT              | 1946793220               |
| SNP_P4_42206_13555892 | NC_021163.1    | Ca_kabuli_chr04 | 13555892                | CC                              | TT              | 1946793222               |
| SNP_P4_42209_13556960 | NC_021163.1    | Ca_kabuli_chr04 | 13556960                | CC                              | AA              | 1946793224               |
| SNP_P4_42210_13557026 | NC_021163.1    | Ca_kabuli_chr04 | 13557026                | CC                              | TT              | 1946793226               |
| SNP_P4_42211_13557032 | NC_021163.1    | Ca_kabuli_chr04 | 13557032                | AA                              | GG              | 1946793228               |
| SNP_P4_42212_13557034 | NC_021163.1    | Ca_kabuli_chr04 | 13557034                | TT                              | CC              | 1946793230               |
| SNP_P4_42213_13557160 | NC_021163.1    | Ca_kabuli_chr04 | 13557160                | TT                              | CC              | 1946793232               |
| SNP_P4_42214_13557178 | NC_021163.1    | Ca_kabuli_chr04 | 13557178                | TT                              | CC              | 1946793234               |
| SNP_P4_42215_13557218 | NC_021163.1    | Ca_kabuli_chr04 | 13557218                | CC                              | AA              | 1946793236               |
| SNP_P4_42216_13557514 | NC_021163.1    | Ca_kabuli_chr04 | 13557514                | AA                              | GG              | 1946793238               |
| SNP_P4_42217_13558731 | NC_021163.1    | Ca_kabuli_chr04 | 13558731                | TT                              | GG              | 1946793241               |
| SNP_P4_42218_13559935 | NC_021163.1    | Ca_kabuli_chr04 | 13559935                | CC                              | TT              | 1946793243               |
| SNP_P4_42219_13559960 | NC_021163.1    | Ca_kabuli_chr04 | 13559960                | CC                              | TT              | 1946793245               |
| SNP_P4_42220_13559986 | NC_021163.1    | Ca_kabuli_chr04 | 13559986                | CC                              | GG              | 1946793247               |
| SNP_P4_42221_13560257 | NC_021163.1    | Ca_kabuli_chr04 | 13560257                | AA                              | GG              | 1946793249               |
| SNP_P4_42222_13560266 | NC_021163.1    | Ca_kabuli_chr04 | 13560266                | AA                              | GG              | 1946793251               |
| SNP_P4_42223_13560269 | NC_021163.1    | Ca_kabuli_chr04 | 13560269                | GG                              | CC              | 1946793253               |
| SNP_P4_42224_13574475 | NC_021163.1    | Ca_kabuli_chr04 | 13574475                | CC                              | GG              | 1946793255               |
| SNP_P4_42225_13574718 | NC_021163.1    | Ca_kabuli_chr04 | 13574718                | GG                              | TT              | 1946793257               |
| SNP_P4_42226_13574724 | NC_021163.1    | Ca_kabuli_chr04 | 13574724                | GG                              | AA              | 1946793260               |
| SNP_P4_42227_13574730 | NC_021163.1    | Ca_kabuli_chr04 | 13574730                | CC                              | TT              | 1946793262               |
| SNP_P4_42228_13574738 | NC_021163.1    | Ca_kabuli_chr04 | 13574738                | AA                              | GG              | 1946793264               |
| SNP_P4_42229_13574796 | NC_021163.1    | Ca_kabuli_chr04 | 13574796                | CC                              | TT              | 1946793266               |



| SNPs IDs              | Chromosome IDs | Chromosomes     | Physical positions (bp) | CDC Frontier (Reference genome) | (ILWC46 & LPNB) | NCBI SNPdb Accession IDs |
|-----------------------|----------------|-----------------|-------------------------|---------------------------------|-----------------|--------------------------|
| SNP_P4_42230_13574797 | NC_021163.1    | Ca_kabuli_chr04 | 13574797                | GG                              | AA              | 1946793268               |
| SNP_P4_42231_13577489 | NC_021163.1    | Ca_kabuli_chr04 | 13577489                | GG                              | AA              | 1946793270               |
| SNP_P4_42232_13577526 | NC_021163.1    | Ca_kabuli_chr04 | 13577526                | AA                              | GG              | 1946793272               |
| SNP_P4_42234_13577793 | NC_021163.1    | Ca_kabuli_chr04 | 13577793                | AA                              | CC              | 1946793274               |
| SNP_P4_42235_13577805 | NC_021163.1    | Ca_kabuli_chr04 | 13577805                | TT                              | AA              | 1946793276               |
| SNP_P4_42238_13579927 | NC_021163.1    | Ca_kabuli_chr04 | 13579927                | TT                              | AA              | 1946793278               |
| SNP_P4_42239_13579934 | NC_021163.1    | Ca_kabuli_chr04 | 13579934                | TT                              | AA              | 1946793280               |
| SNP_P4_42240_13580707 | NC_021163.1    | Ca_kabuli_chr04 | 13580707                | TT                              | CC              | 1946793282               |
| SNP_P4_42241_13581736 | NC_021163.1    | Ca_kabuli_chr04 | 13581736                | AA                              | GG              | 1946793284               |
| SNP_P4_42243_13582192 | NC_021163.1    | Ca_kabuli_chr04 | 13582192                | CC                              | TT              | 1946793286               |
| SNP_P4_42244_13582198 | NC_021163.1    | Ca_kabuli_chr04 | 13582198                | GG                              | TT              | 1946793288               |
| SNP_P4_42245_13582206 | NC_021163.1    | Ca_kabuli_chr04 | 13582206                | GG                              | AA              | 1946793290               |
| SNP_P4_42246_13582213 | NC_021163.1    | Ca_kabuli_chr04 | 13582213                | GG                              | AA              | 1946793292               |
| SNP_P4_42247_13582214 | NC_021163.1    | Ca_kabuli_chr04 | 13582214                | AA                              | TT              | 1946793294               |
| SNP_P4_42248_13582227 | NC_021163.1    | Ca_kabuli_chr04 | 13582227                | GG                              | AA              | 1946793296               |
| SNP_P4_42249_13582324 | NC_021163.1    | Ca_kabuli_chr04 | 13582324                | TT                              | CC              | 1946793298               |
| SNP_P4_42250_13582332 | NC_021163.1    | Ca_kabuli_chr04 | 13582332                | TT                              | CC              | 1946793300               |
| SNP_P4_42251_13582334 | NC_021163.1    | Ca_kabuli_chr04 | 13582334                | TT                              | CC              | 1946793302               |
| SNP_P4_42252_13582676 | NC_021163.1    | Ca_kabuli_chr04 | 13582676                | TT                              | GG              | 1946793304               |
| SNP_P4_42253_13582705 | NC_021163.1    | Ca_kabuli_chr04 | 13582705                | AA                              | TT              | 1946793306               |
| SNP_P4_42254_13582727 | NC_021163.1    | Ca_kabuli_chr04 | 13582727                | TT                              | CC              | 1946793308               |
| SNP_P4_42256_13584539 | NC_021163.1    | Ca_kabuli_chr04 | 13584539                | CC                              | TT              | 1946793310               |
| SNP_P4_42257_13584545 | NC_021163.1    | Ca_kabuli_chr04 | 13584545                | GG                              | AA              | 1946793313               |
| SNP_P4_42259_13584886 | NC_021163.1    | Ca_kabuli_chr04 | 13584886                | GG                              | AA              | 1946793315               |
| SNP_P4_42260_13584899 | NC_021163.1    | Ca_kabuli_chr04 | 13584899                | CC                              | TT              | 1946793317               |
| SNP_P4_42261_13585680 | NC_021163.1    | Ca_kabuli_chr04 | 13585680                | AA                              | GG              | 1946793320               |
| SNP_P4_42262_13586114 | NC_021163.1    | Ca_kabuli_chr04 | 13586114                | TT                              | CC              | 1946793322               |
| SNP_P4_42264_13586365 | NC_021163.1    | Ca_kabuli_chr04 | 13586365                | CC                              | AA              | 1946793324               |
| SNP_P4_42265_13586518 | NC_021163.1    | Ca_kabuli_chr04 | 13586518                | CC                              | GG              | 1946793326               |
| SNP_P4_42266_13586555 | NC_021163.1    | Ca_kabuli_chr04 | 13586555                | TT                              | AA              | 1946793328               |
| SNP_P4_42267_13586572 | NC_021163.1    | Ca_kabuli_chr04 | 13586572                | GG                              | TT              | 1946793330               |
| SNP_P4_42269_13586653 | NC_021163.1    | Ca_kabuli_chr04 | 13586653                | AA                              | CC              | 1946793332               |
| SNP_P4_42270_13587329 | NC_021163.1    | Ca_kabuli_chr04 | 13587329                | CC                              | AA              | 1946793334               |
| SNP_P4_42271_13587371 | NC_021163.1    | Ca_kabuli_chr04 | 13587371                | CC                              | TT              | 1946793336               |
| SNP_P4_42272_13587704 | NC_021163.1    | Ca_kabuli_chr04 | 13587704                | AA                              | TT              | 1946793338               |
| SNP_P4_42273_13588759 | NC_021163.1    | Ca_kabuli_chr04 | 13588759                | GG                              | CC              | 1946793341               |
| SNP_P4_42274_13589290 | NC_021163.1    | Ca_kabuli_chr04 | 13589290                | CC                              | TT              | 1946793343               |
| SNP_P4_42275_13589320 | NC_021163.1    | Ca_kabuli_chr04 | 13589320                | GG                              | TT              | 1946793345               |
| SNP_P4_42276_13589618 | NC_021163.1    | Ca_kabuli_chr04 | 13589618                | CC                              | GG              | 1946793347               |
| SNP_P4_42277_13589950 | NC_021163.1    | Ca_kabuli_chr04 | 13589950                | CC                              | TT              | 1946793349               |
| SNP_P4_42278_13589999 | NC_021163.1    | Ca_kabuli_chr04 | 13589999                | TT                              | GG              | 1946793351               |
| SNP_P4_42279_13590760 | NC_021163.1    | Ca_kabuli_chr04 | 13590760                | GG                              | TT              | 1946793353               |

| SNPs IDs              | Chromosome IDs | Chromosomes     | Physical positions (bp) | CDC Frontier (Reference genome) | (ILWC46 & LPNB) | NCBI SNPdb Accession IDs |
|-----------------------|----------------|-----------------|-------------------------|---------------------------------|-----------------|--------------------------|
| SNP_P4_42280_13593502 | NC_021163.1    | Ca_kabuli_chr04 | 13593502                | GG                              | AA              | 1946793355               |
| SNP_P4_42282_13593765 | NC_021163.1    | Ca_kabuli_chr04 | 13593765                | AA                              | GG              | 1946793357               |
| SNP_P4_42283_13593769 | NC_021163.1    | Ca_kabuli_chr04 | 13593769                | CC                              | TT              | 1946793359               |
| SNP_P4_42284_13593996 | NC_021163.1    | Ca_kabuli_chr04 | 13593996                | GG                              | AA              | 1946793361               |
| SNP_P4_42285_13602122 | NC_021163.1    | Ca_kabuli_chr04 | 13602122                | AA                              | GG              | 1946793363               |
| SNP_P4_42287_13604467 | NC_021163.1    | Ca_kabuli_chr04 | 13604467                | CC                              | TT              | 1946793365               |
| SNP_P4_42288_13606639 | NC_021163.1    | Ca_kabuli_chr04 | 13606639                | CC                              | TT              | 1946793367               |
| SNP_P4_42289_13608182 | NC_021163.1    | Ca_kabuli_chr04 | 13608182                | GG                              | AA              | 1946793369               |
| SNP_P4_42291_13608348 | NC_021163.1    | Ca_kabuli_chr04 | 13608348                | AA                              | CC              | 1946793371               |
| SNP_P4_42292_13608376 | NC_021163.1    | Ca_kabuli_chr04 | 13608376                | GG                              | TT              | 1946793372               |
| SNP_P4_42295_13610638 | NC_021163.1    | Ca_kabuli_chr04 | 13610638                | GG                              | TT              | 1946793374               |
| SNP_P4_42298_13613333 | NC_021163.1    | Ca_kabuli_chr04 | 13613333                | AA                              | TT              | 1946793376               |
| SNP_P4_42299_13613334 | NC_021163.1    | Ca_kabuli_chr04 | 13613334                | TT                              | AA              | 1946793378               |
| SNP_P4_42300_13613337 | NC_021163.1    | Ca_kabuli_chr04 | 13613337                | TT                              | AA              | 1946793380               |
| SNP_P4_42301_13613350 | NC_021163.1    | Ca_kabuli_chr04 | 13613350                | CC                              | TT              | 1946793382               |
| SNP_P4_42302_13613901 | NC_021163.1    | Ca_kabuli_chr04 | 13613901                | GG                              | CC              | 1946793384               |
| SNP_P4_42303_13613902 | NC_021163.1    | Ca_kabuli_chr04 | 13613902                | AA                              | CC              | 1946793386               |
| SNP_P4_42304_13614057 | NC_021163.1    | Ca_kabuli_chr04 | 13614057                | CC                              | TT              | 1946793388               |
| SNP_P4_42305_13614104 | NC_021163.1    | Ca_kabuli_chr04 | 13614104                | GG                              | AA              | 1946793391               |
| SNP_P4_42306_13614346 | NC_021163.1    | Ca_kabuli_chr04 | 13614346                | TT                              | GG              | 1946793393               |
| SNP_P4_42307_13614348 | NC_021163.1    | Ca_kabuli_chr04 | 13614348                | AA                              | GG              | 1946793395               |
| SNP_P4_42308_13615062 | NC_021163.1    | Ca_kabuli_chr04 | 13615062                | CC                              | AA              | 1946793397               |
| SNP_P4_42309_13615096 | NC_021163.1    | Ca_kabuli_chr04 | 13615096                | AA                              | GG              | 1946793399               |
| SNP_P4_42310_13615634 | NC_021163.1    | Ca_kabuli_chr04 | 13615634                | GG                              | TT              | 1946793401               |
| SNP_P4_42312_13618841 | NC_021163.1    | Ca_kabuli_chr04 | 13618841                | TT                              | CC              | 1946793403               |
| SNP_P4_42313_13618856 | NC_021163.1    | Ca_kabuli_chr04 | 13618856                | TT                              | CC              | 1946793405               |
| SNP_P4_42315_13619114 | NC_021163.1    | Ca_kabuli_chr04 | 13619114                | AA                              | GG              | 1946793407               |
| SNP_P4_42317_13619698 | NC_021163.1    | Ca_kabuli_chr04 | 13619698                | TT                              | CC              | 1946793409               |
| SNP_P4_42318_13619702 | NC_021163.1    | Ca_kabuli_chr04 | 13619702                | CC                              | TT              | 1946793411               |
| SNP_P4_42319_13619732 | NC_021163.1    | Ca_kabuli_chr04 | 13619732                | TT                              | CC              | 1946793413               |
| SNP_P4_42320_13619799 | NC_021163.1    | Ca_kabuli_chr04 | 13619799                | CC                              | GG              | 1946793415               |
| SNP_P4_42321_13619806 | NC_021163.1    | Ca_kabuli_chr04 | 13619806                | AA                              | CC              | 1946793418               |
| SNP_P4_42322_13619982 | NC_021163.1    | Ca_kabuli_chr04 | 13619982                | GG                              | TT              | 1946793420               |
| SNP_P4_42323_13619983 | NC_021163.1    | Ca_kabuli_chr04 | 13619983                | CC                              | TT              | 1946793422               |
| SNP_P4_42324_13620231 | NC_021163.1    | Ca_kabuli_chr04 | 13620231                | AA                              | GG              | 1946793424               |
| SNP_P4_42325_13620954 | NC_021163.1    | Ca_kabuli_chr04 | 13620954                | CC                              | AA              | 1946793426               |
| SNP_P4_42327_13621454 | NC_021163.1    | Ca_kabuli_chr04 | 13621454                | CC                              | TT              | 1946793428               |
| SNP_P4_42328_13621981 | NC_021163.1    | Ca_kabuli_chr04 | 13621981                | AA                              | GG              | 1946793430               |
| SNP_P4_42333_13624393 | NC_021163.1    | Ca_kabuli_chr04 | 13624393                | CC                              | TT              | 1946793432               |
| SNP_P4_42334_13624467 | NC_021163.1    | Ca_kabuli_chr04 | 13624467                | TT                              | AA              | 1946793434               |
| SNP_P4_42335_13624845 | NC_021163.1    | Ca_kabuli_chr04 | 13624845                | GG                              | CC              | 1946793436               |
| SNP_P4_42336_13624849 | NC_021163.1    | Ca_kabuli_chr04 | 13624849                | CC                              | GG              | 1946793438               |

| SNPs IDs              | Chromosome IDs | Chromosomes     | Physical positions (bp) | CDC Frontier (Reference genome) | (ILWC46 & LPNB) | NCBI SNPdb Accession IDs |
|-----------------------|----------------|-----------------|-------------------------|---------------------------------|-----------------|--------------------------|
| SNP_P4_42337_13624856 | NC_021163.1    | Ca_kabuli_chr04 | 13624856                | CC                              | TT              | 1946793440               |
| SNP_P4_42338_13624872 | NC_021163.1    | Ca_kabuli_chr04 | 13624872                | TT                              | CC              | 1946793442               |
| SNP_P4_42339_13624876 | NC_021163.1    | Ca_kabuli_chr04 | 13624876                | CC                              | TT              | 1946793444               |
| SNP_P4_42340_13626102 | NC_021163.1    | Ca_kabuli_chr04 | 13626102                | TT                              | CC              | 1946793446               |
| SNP_P4_42341_13626160 | NC_021163.1    | Ca_kabuli_chr04 | 13626160                | TT                              | CC              | 1946793448               |
| SNP_P4_42342_13626432 | NC_021163.1    | Ca_kabuli_chr04 | 13626432                | CC                              | TT              | 1946793450               |
| SNP_P4_42343_13626458 | NC_021163.1    | Ca_kabuli_chr04 | 13626458                | TT                              | CC              | 1946793452               |
| SNP_P4_42344_13626484 | NC_021163.1    | Ca_kabuli_chr04 | 13626484                | GG                              | AA              | 1946793454               |
| SNP_P4_42345_13626493 | NC_021163.1    | Ca_kabuli_chr04 | 13626493                | GG                              | AA              | 1946793456               |
| SNP_P4_42346_13626994 | NC_021163.1    | Ca_kabuli_chr04 | 13626994                | CC                              | GG              | 1946793458               |
| SNP_P4_42347_13627281 | NC_021163.1    | Ca_kabuli_chr04 | 13627281                | TT                              | AA              | 1946793460               |
| SNP_P4_42349_13627364 | NC_021163.1    | Ca_kabuli_chr04 | 13627364                | CC                              | AA              | 1946793462               |
| SNP_P4_42350_13627369 | NC_021163.1    | Ca_kabuli_chr04 | 13627369                | GG                              | AA              | 1946793464               |
| SNP_P4_42351_13627412 | NC_021163.1    | Ca_kabuli_chr04 | 13627412                | TT                              | CC              | 1946793466               |
| SNP_P4_42352_13627690 | NC_021163.1    | Ca_kabuli_chr04 | 13627690                | AA                              | GG              | 1946793468               |
| SNP_P4_42353_13627703 | NC_021163.1    | Ca_kabuli_chr04 | 13627703                | AA                              | GG              | 1946793470               |
| SNP_P4_42354_13627707 | NC_021163.1    | Ca_kabuli_chr04 | 13627707                | CC                              | TT              | 1946793473               |
| SNP_P4_42355_13627711 | NC_021163.1    | Ca_kabuli_chr04 | 13627711                | GG                              | TT              | 1946793475               |
| SNP_P4_42356_13627714 | NC_021163.1    | Ca_kabuli_chr04 | 13627714                | GG                              | CC              | 1946793477               |
| SNP_P4_42357_13628286 | NC_021163.1    | Ca_kabuli_chr04 | 13628286                | GG                              | AA              | 1946793479               |
| SNP_P4_42358_13629264 | NC_021163.1    | Ca_kabuli_chr04 | 13629264                | AA                              | GG              | 1946793482               |
| SNP_P4_42359_13629482 | NC_021163.1    | Ca_kabuli_chr04 | 13629482                | GG                              | AA              | 1946793484               |
| SNP_P4_42360_13630600 | NC_021163.1    | Ca_kabuli_chr04 | 13630600                | TT                              | CC              | 1946793486               |
| SNP_P4_42362_13630674 | NC_021163.1    | Ca_kabuli_chr04 | 13630674                | CC                              | AA              | 1946793488               |
| SNP_P4_42363_13630867 | NC_021163.1    | Ca_kabuli_chr04 | 13630867                | CC                              | GG              | 1946793490               |
| SNP_P4_42364_13631031 | NC_021163.1    | Ca_kabuli_chr04 | 13631031                | CC                              | TT              | 1946793492               |
| SNP_P4_42365_13631050 | NC_021163.1    | Ca_kabuli_chr04 | 13631050                | AA                              | CC              | 1946793494               |
| SNP_P4_42367_13631332 | NC_021163.1    | Ca_kabuli_chr04 | 13631332                | CC                              | TT              | 1946793496               |
| SNP_P4_42368_13631671 | NC_021163.1    | Ca_kabuli_chr04 | 13631671                | AA                              | TT              | 1946793498               |
| SNP_P4_42369_13631693 | NC_021163.1    | Ca_kabuli_chr04 | 13631693                | GG                              | AA              | 1946793500               |
| SNP_P4_42370_13632461 | NC_021163.1    | Ca_kabuli_chr04 | 13632461                | TT                              | CC              | 1946793502               |
| SNP_P4_42371_13632463 | NC_021163.1    | Ca_kabuli_chr04 | 13632463                | GG                              | AA              | 1946793504               |
| SNP_P4_42372_13632557 | NC_021163.1    | Ca_kabuli_chr04 | 13632557                | AA                              | GG              | 1946793506               |
| SNP_P4_42373_13632712 | NC_021163.1    | Ca_kabuli_chr04 | 13632712                | AA                              | GG              | 1946793508               |
| SNP_P4_42374_13632740 | NC_021163.1    | Ca_kabuli_chr04 | 13632740                | AA                              | GG              | 1946793510               |
| SNP_P4_42375_13632858 | NC_021163.1    | Ca_kabuli_chr04 | 13632858                | GG                              | AA              | 1946793512               |
| SNP_P4_42376_13632902 | NC_021163.1    | Ca_kabuli_chr04 | 13632902                | CC                              | TT              | 1946793515               |
| SNP_P4_42377_13632975 | NC_021163.1    | Ca_kabuli_chr04 | 13632975                | CC                              | TT              | 1946793517               |
| SNP_P4_42378_13633007 | NC_021163.1    | Ca_kabuli_chr04 | 13633007                | CC                              | TT              | 1946793519               |
| SNP_P4_42379_13633008 | NC_021163.1    | Ca_kabuli_chr04 | 13633008                | TT                              | AA              | 1946793521               |
| SNP_P4_42380_13633023 | NC_021163.1    | Ca_kabuli_chr04 | 13633023                | TT                              | CC              | 1946793523               |
| SNP_P4_42381_13633113 | NC_021163.1    | Ca_kabuli_chr04 | 13633113                | TT                              | GG              | 1946793525               |

| SNPs IDs              | Chromosome IDs | Chromosomes     | Physical positions (bp) | CDC Frontier (Reference genome) | (ILWC46 & LPNB) | NCBI SNPdb Accession IDs |
|-----------------------|----------------|-----------------|-------------------------|---------------------------------|-----------------|--------------------------|
| SNP_P4_42382_13633141 | NC_021163.1    | Ca_kabuli_chr04 | 13633141                | AA                              | GG              | 1946793527               |
| SNP_P4_42383_13633147 | NC_021163.1    | Ca_kabuli_chr04 | 13633147                | GG                              | AA              | 1946793529               |
| SNP_P4_42384_13633231 | NC_021163.1    | Ca_kabuli_chr04 | 13633231                | TT                              | CC              | 1946793531               |
| SNP_P4_42385_13633329 | NC_021163.1    | Ca_kabuli_chr04 | 13633329                | CC                              | TT              | 1946793533               |
| SNP_P4_42386_13633341 | NC_021163.1    | Ca_kabuli_chr04 | 13633341                | GG                              | AA              | 1946793535               |
| SNP_P4_42388_13633405 | NC_021163.1    | Ca_kabuli_chr04 | 13633405                | TT                              | CC              | 1946793537               |
| SNP_P4_42389_13633586 | NC_021163.1    | Ca_kabuli_chr04 | 13633586                | TT                              | GG              | 1946793540               |
| SNP_P4_42390_13633659 | NC_021163.1    | Ca_kabuli_chr04 | 13633659                | AA                              | CC              | 1946793542               |
| SNP_P4_42392_13633804 | NC_021163.1    | Ca_kabuli_chr04 | 13633804                | GG                              | AA              | 1946793544               |
| SNP_P4_42393_13633947 | NC_021163.1    | Ca_kabuli_chr04 | 13633947                | TT                              | AA              | 1946793546               |
| SNP_P4_42394_13634206 | NC_021163.1    | Ca_kabuli_chr04 | 13634206                | AA                              | TT              | 1946793548               |
| SNP_P4_42395_13634432 | NC_021163.1    | Ca_kabuli_chr04 | 13634432                | GG                              | CC              | 1946793550               |
| SNP_P4_42396_13635657 | NC_021163.1    | Ca_kabuli_chr04 | 13635657                | CC                              | TT              | 1946793552               |
| SNP_P4_42397_13635698 | NC_021163.1    | Ca_kabuli_chr04 | 13635698                | TT                              | CC              | 1946793554               |
| SNP_P4_42398_13635753 | NC_021163.1    | Ca_kabuli_chr04 | 13635753                | CC                              | TT              | 1946793556               |
| SNP_P4_42399_13636148 | NC_021163.1    | Ca_kabuli_chr04 | 13636148                | CC                              | AA              | 1946793558               |
| SNP_P4_42400_13636931 | NC_021163.1    | Ca_kabuli_chr04 | 13636931                | GG                              | TT              | 1946793560               |
| SNP_P4_42401_13638348 | NC_021163.1    | Ca_kabuli_chr04 | 13638348                | AA                              | GG              | 1946793562               |
| SNP_P4_42402_13638360 | NC_021163.1    | Ca_kabuli_chr04 | 13638360                | GG                              | AA              | 1946793564               |
| SNP_P4_42403_13638744 | NC_021163.1    | Ca_kabuli_chr04 | 13638744                | TT                              | CC              | 1946793566               |
| SNP_P4_42404_13638757 | NC_021163.1    | Ca_kabuli_chr04 | 13638757                | AA                              | GG              | 1946793568               |
| SNP_P4_42405_13638764 | NC_021163.1    | Ca_kabuli_chr04 | 13638764                | AA                              | CC              | 1946793571               |
| SNP_P4_42406_13638791 | NC_021163.1    | Ca_kabuli_chr04 | 13638791                | GG                              | AA              | 1946793573               |
| SNP_P4_42407_13638820 | NC_021163.1    | Ca_kabuli_chr04 | 13638820                | TT                              | AA              | 1946793575               |
| SNP_P4_42408_13639287 | NC_021163.1    | Ca_kabuli_chr04 | 13639287                | AA                              | GG              | 1946793577               |
| SNP_P4_42409_13639373 | NC_021163.1    | Ca_kabuli_chr04 | 13639373                | CC                              | TT              | 1946793579               |
| SNP_P4_42410_13639481 | NC_021163.1    | Ca_kabuli_chr04 | 13639481                | AA                              | GG              | 1946793581               |
| SNP_P4_42411_13641148 | NC_021163.1    | Ca_kabuli_chr04 | 13641148                | CC                              | AA              | 1946793583               |
| SNP_P4_42412_13641318 | NC_021163.1    | Ca_kabuli_chr04 | 13641318                | CC                              | AA              | 1946793585               |
| SNP_P4_42415_13643806 | NC_021163.1    | Ca_kabuli_chr04 | 13643806                | AA                              | GG              | 1946793587               |
| SNP_P4_42419_13644443 | NC_021163.1    | Ca_kabuli_chr04 | 13644443                | AA                              | CC              | 1946793589               |
| SNP_P4_42420_13644698 | NC_021163.1    | Ca_kabuli_chr04 | 13644698                | GG                              | CC              | 1946793591               |
| SNP_P4_42421_13647555 | NC_021163.1    | Ca_kabuli_chr04 | 13647555                | GG                              | AA              | 1946793593               |
| SNP_P4_42422_13647572 | NC_021163.1    | Ca_kabuli_chr04 | 13647572                | TT                              | CC              | 1946793595               |
| SNP_P4_42423_13647850 | NC_021163.1    | Ca_kabuli_chr04 | 13647850                | CC                              | AA              | 1946793597               |
| SNP_P4_42424_13647856 | NC_021163.1    | Ca_kabuli_chr04 | 13647856                | AA                              | TT              | 1946793599               |
| SNP_P4_42425_13647905 | NC_021163.1    | Ca_kabuli_chr04 | 13647905                | TT                              | AA              | 1946793601               |
| SNP_P4_42426_13647906 | NC_021163.1    | Ca_kabuli_chr04 | 13647906                | TT                              | AA              | 1946793603               |
| SNP_P4_42428_13650151 | NC_021163.1    | Ca_kabuli_chr04 | 13650151                | TT                              | CC              | 1946793606               |
| SNP_P4_42429_13650463 | NC_021163.1    | Ca_kabuli_chr04 | 13650463                | CC                              | GG              | 1946793608               |
| SNP_P4_42431_13650825 | NC_021163.1    | Ca_kabuli_chr04 | 13650825                | CC                              | TT              | 1946793610               |
| SNP_P4_42432_13650995 | NC_021163.1    | Ca_kabuli_chr04 | 13650995                | AA                              | CC              | 1946793612               |

| SNPs IDs              | Chromosome IDs | Chromosomes     | Physical positions (bp) | CDC Frontier (Reference genome) | (ILWC46 & LPNB) | NCBI SNPdb Accession IDs |
|-----------------------|----------------|-----------------|-------------------------|---------------------------------|-----------------|--------------------------|
| SNP_P4_42434_13652246 | NC_021163.1    | Ca_kabuli_chr04 | 13652246                | TT                              | CC              | 1946793614               |
| SNP_P4_42435_13654556 | NC_021163.1    | Ca_kabuli_chr04 | 13654556                | AA                              | GG              | 1946793616               |
| SNP_P4_42436_13654599 | NC_021163.1    | Ca_kabuli_chr04 | 13654599                | AA                              | TT              | 1946793619               |
| SNP_P4_42437_13656180 | NC_021163.1    | Ca_kabuli_chr04 | 13656180                | GG                              | CC              | 1946793621               |
| SNP_P4_42438_13656182 | NC_021163.1    | Ca_kabuli_chr04 | 13656182                | TT                              | CC              | 1946793623               |
| SNP_P4_42439_13656186 | NC_021163.1    | Ca_kabuli_chr04 | 13656186                | CC                              | GG              | 1946793625               |
| SNP_P4_42440_13656211 | NC_021163.1    | Ca_kabuli_chr04 | 13656211                | CC                              | TT              | 1946793627               |
| SNP_P4_42441_13656777 | NC_021163.1    | Ca_kabuli_chr04 | 13656777                | AA                              | GG              | 1946793629               |
| SNP_P4_42443_13657749 | NC_021163.1    | Ca_kabuli_chr04 | 13657749                | TT                              | CC              | 1946793632               |
| SNP_P4_42444_13657953 | NC_021163.1    | Ca_kabuli_chr04 | 13657953                | AA                              | TT              | 1946793634               |
| SNP_P4_42445_13658002 | NC_021163.1    | Ca_kabuli_chr04 | 13658002                | GG                              | CC              | 1946793636               |
| SNP_P4_42446_13658288 | NC_021163.1    | Ca_kabuli_chr04 | 13658288                | TT                              | AA              | 1946793638               |
| SNP_P4_42448_13658408 | NC_021163.1    | Ca_kabuli_chr04 | 13658408                | CC                              | TT              | 1946793640               |
| SNP_P4_42449_13659111 | NC_021163.1    | Ca_kabuli_chr04 | 13659111                | GG                              | AA              | 1946793642               |
| SNP_P4_42450_13659260 | NC_021163.1    | Ca_kabuli_chr04 | 13659260                | TT                              | CC              | 1946793644               |
| SNP_P4_42451_13659300 | NC_021163.1    | Ca_kabuli_chr04 | 13659300                | CC                              | TT              | 1946793646               |
| SNP_P4_42452_13659303 | NC_021163.1    | Ca_kabuli_chr04 | 13659303                | GG                              | AA              | 1946793648               |
| SNP_P4_42453_13659347 | NC_021163.1    | Ca_kabuli_chr04 | 13659347                | GG                              | AA              | 1946793650               |
| SNP_P4_42454_13659350 | NC_021163.1    | Ca_kabuli_chr04 | 13659350                | CC                              | TT              | 1946793652               |
| SNP_P4_42456_13662104 | NC_021163.1    | Ca_kabuli_chr04 | 13662104                | AA                              | GG              | 1946793654               |
| SNP_P4_42457_13662682 | NC_021163.1    | Ca_kabuli_chr04 | 13662682                | GG                              | AA              | 1946793656               |
| SNP_P4_42458_13662876 | NC_021163.1    | Ca_kabuli_chr04 | 13662876                | TT                              | GG              | 1946793658               |
| SNP_P4_42460_13663092 | NC_021163.1    | Ca_kabuli_chr04 | 13663092                | TT                              | CC              | 1946793660               |
| SNP_P4_42461_13663217 | NC_021163.1    | Ca_kabuli_chr04 | 13663217                | AA                              | TT              | 1946793662               |
| SNP_P4_42462_13663219 | NC_021163.1    | Ca_kabuli_chr04 | 13663219                | GG                              | TT              | 1946793664               |
| SNP_P4_42463_13663304 | NC_021163.1    | Ca_kabuli_chr04 | 13663304                | TT                              | AA              | 1946793666               |
| SNP_P4_42464_13663454 | NC_021163.1    | Ca_kabuli_chr04 | 13663454                | TT                              | GG              | 1946793668               |
| SNP_P4_42465_13663523 | NC_021163.1    | Ca_kabuli_chr04 | 13663523                | CC                              | TT              | 1946793670               |
| SNP_P4_42467_13665737 | NC_021163.1    | Ca_kabuli_chr04 | 13665737                | TT                              | AA              | 1946793672               |
| SNP_P4_42468_13666458 | NC_021163.1    | Ca_kabuli_chr04 | 13666458                | AA                              | TT              | 1946793674               |
| SNP_P4_42469_13666728 | NC_021163.1    | Ca_kabuli_chr04 | 13666728                | CC                              | TT              | 1946793677               |
| SNP_P4_42470_13667403 | NC_021163.1    | Ca_kabuli_chr04 | 13667403                | TT                              | CC              | 1946793679               |
| SNP_P4_42471_13667411 | NC_021163.1    | Ca_kabuli_chr04 | 13667411                | CC                              | TT              | 1946793681               |
| SNP_P4_42472_13667686 | NC_021163.1    | Ca_kabuli_chr04 | 13667686                | CC                              | TT              | 1946793683               |
| SNP_P4_42474_13667903 | NC_021163.1    | Ca_kabuli_chr04 | 13667903                | GG                              | AA              | 1946793685               |
| SNP_P4_42476_13669482 | NC_021163.1    | Ca_kabuli_chr04 | 13669482                | GG                              | CC              | 1946793687               |
| SNP_P4_42478_13669790 | NC_021163.1    | Ca_kabuli_chr04 | 13669790                | AA                              | CC              | 1946793689               |
| SNP_P4_42480_13670082 | NC_021163.1    | Ca_kabuli_chr04 | 13670082                | CC                              | TT              | 1946793691               |
| SNP_P4_42481_13670085 | NC_021163.1    | Ca_kabuli_chr04 | 13670085                | AA                              | TT              | 1946793693               |
| SNP_P4_42482_13670637 | NC_021163.1    | Ca_kabuli_chr04 | 13670637                | TT                              | CC              | 1946793695               |
| SNP_P4_42483_13670675 | NC_021163.1    | Ca_kabuli_chr04 | 13670675                | AA                              | GG              | 1946793697               |
| SNP_P4_42484_13670677 | NC_021163.1    | Ca_kabuli_chr04 | 13670677                | CC                              | TT              | 1946793699               |

| SNPs IDs              | Chromosome IDs | Chromosomes     | Physical positions (bp) | CDC Frontier (Reference genome) | (ILWC46 & LPNB) | NCBI SNPdb Accession IDs |
|-----------------------|----------------|-----------------|-------------------------|---------------------------------|-----------------|--------------------------|
| SNP_P4_42485_13670690 | NC_021163.1    | Ca_kabuli_chr04 | 13670690                | CC                              | TT              | 1946793701               |
| SNP_P4_42486_13670817 | NC_021163.1    | Ca_kabuli_chr04 | 13670817                | AA                              | GG              | 1946793703               |
| SNP_P4_42487_13670959 | NC_021163.1    | Ca_kabuli_chr04 | 13670959                | GG                              | CC              | 1946793705               |
| SNP_P4_42488_13670961 | NC_021163.1    | Ca_kabuli_chr04 | 13670961                | CC                              | TT              | 1946793707               |
| SNP_P4_42489_13670977 | NC_021163.1    | Ca_kabuli_chr04 | 13670977                | GG                              | AA              | 1946793709               |
| SNP_P4_42490_13671116 | NC_021163.1    | Ca_kabuli_chr04 | 13671116                | AA                              | GG              | 1946793711               |
| SNP_P4_42491_13671117 | NC_021163.1    | Ca_kabuli_chr04 | 13671117                | AA                              | GG              | 1946793713               |
| SNP_P4_42492_13671137 | NC_021163.1    | Ca_kabuli_chr04 | 13671137                | CC                              | TT              | 1946793715               |
| SNP_P4_42493_13671160 | NC_021163.1    | Ca_kabuli_chr04 | 13671160                | AA                              | GG              | 1946793717               |
| SNP_P4_42497_13674932 | NC_021163.1    | Ca_kabuli_chr04 | 13674932                | GG                              | AA              | 1946793719               |
| SNP_P4_42498_13675263 | NC_021163.1    | Ca_kabuli_chr04 | 13675263                | TT                              | CC              | 1946793721               |
| SNP_P4_42499_13675275 | NC_021163.1    | Ca_kabuli_chr04 | 13675275                | TT                              | GG              | 1946793723               |
| SNP_P4_42500_13675277 | NC_021163.1    | Ca_kabuli_chr04 | 13675277                | GG                              | AA              | 1946793725               |
| SNP_P4_42501_13675287 | NC_021163.1    | Ca_kabuli_chr04 | 13675287                | AA                              | GG              | 1946793727               |
| SNP_P4_42502_13675842 | NC_021163.1    | Ca_kabuli_chr04 | 13675842                | AA                              | TT              | 1946793729               |
| SNP_P4_42503_13675978 | NC_021163.1    | Ca_kabuli_chr04 | 13675978                | GG                              | CC              | 1946793731               |
| SNP_P4_42505_13676251 | NC_021163.1    | Ca_kabuli_chr04 | 13676251                | AA                              | GG              | 1946793733               |
| SNP_P4_42507_13676314 | NC_021163.1    | Ca_kabuli_chr04 | 13676314                | GG                              | CC              | 1946793736               |
| SNP_P4_42508_13676316 | NC_021163.1    | Ca_kabuli_chr04 | 13676316                | TT                              | AA              | 1946793738               |
| SNP_P4_42509_13677885 | NC_021163.1    | Ca_kabuli_chr04 | 13677885                | AA                              | GG              | 1946793740               |
| SNP_P4_42510_13678145 | NC_021163.1    | Ca_kabuli_chr04 | 13678145                | TT                              | CC              | 1946793743               |
| SNP_P4_42511_13678158 | NC_021163.1    | Ca_kabuli_chr04 | 13678158                | CC                              | TT              | 1946793745               |
| SNP_P4_42513_13682276 | NC_021163.1    | Ca_kabuli_chr04 | 13682276                | CC                              | TT              | 1946793747               |
| SNP_P4_42514_13682389 | NC_021163.1    | Ca_kabuli_chr04 | 13682389                | TT                              | AA              | 1946793749               |
| SNP_P4_42515_13682393 | NC_021163.1    | Ca_kabuli_chr04 | 13682393                | AA                              | GG              | 1946793751               |
| SNP_P4_42516_13682491 | NC_021163.1    | Ca_kabuli_chr04 | 13682491                | AA                              | GG              | 1946793753               |
| SNP_P4_42517_13682517 | NC_021163.1    | Ca_kabuli_chr04 | 13682517                | GG                              | AA              | 1946793755               |
| SNP_P4_42518_13682533 | NC_021163.1    | Ca_kabuli_chr04 | 13682533                | GG                              | TT              | 1946793757               |
| SNP_P4_42519_13682742 | NC_021163.1    | Ca_kabuli_chr04 | 13682742                | GG                              | AA              | 1946793759               |
| SNP_P4_42520_13682784 | NC_021163.1    | Ca_kabuli_chr04 | 13682784                | CC                              | TT              | 1946793761               |
| SNP_P4_42521_13683034 | NC_021163.1    | Ca_kabuli_chr04 | 13683034                | GG                              | AA              | 1946793763               |
| SNP_P4_42522_13683060 | NC_021163.1    | Ca_kabuli_chr04 | 13683060                | AA                              | GG              | 1946793765               |
| SNP_P4_42523_13683093 | NC_021163.1    | Ca_kabuli_chr04 | 13683093                | AA                              | GG              | 1946793767               |
| SNP_P4_42524_13683132 | NC_021163.1    | Ca_kabuli_chr04 | 13683132                | GG                              | AA              | 1946793769               |
| SNP_P4_42525_13684843 | NC_021163.1    | Ca_kabuli_chr04 | 13684843                | GG                              | AA              | 1946793771               |
| SNP_P4_42526_13684849 | NC_021163.1    | Ca_kabuli_chr04 | 13684849                | GG                              | AA              | 1946793774               |
| SNP_P4_42527_13687456 | NC_021163.1    | Ca_kabuli_chr04 | 13687456                | GG                              | AA              | 1946793776               |
| SNP_P4_42528_13687636 | NC_021163.1    | Ca_kabuli_chr04 | 13687636                | CC                              | GG              | 1946793778               |
| SNP_P4_42531_13691002 | NC_021163.1    | Ca_kabuli_chr04 | 13691002                | AA                              | GG              | 1946793780               |
| SNP_P4_42532_13691018 | NC_021163.1    | Ca_kabuli_chr04 | 13691018                | CC                              | TT              | 1946793782               |
| SNP_P4_42533_13691820 | NC_021163.1    | Ca_kabuli_chr04 | 13691820                | GG                              | TT              | 1946793784               |
| SNP_P4_42534_13691843 | NC_021163.1    | Ca_kabuli_chr04 | 13691843                | TT                              | CC              | 1946793786               |

| SNPs IDs              | Chromosome IDs | Chromosomes     | Physical positions (bp) | CDC Frontier (Reference genome) | (ILWC46 & LPNB) | NCBI SNPdb Accession IDs |
|-----------------------|----------------|-----------------|-------------------------|---------------------------------|-----------------|--------------------------|
| SNP_P4_42535_13691844 | NC_021163.1    | Ca_kabuli_chr04 | 13691844                | CC                              | AA              | 1946793788               |
| SNP_P4_42536_13691905 | NC_021163.1    | Ca_kabuli_chr04 | 13691905                | AA                              | GG              | 1946793790               |
| SNP_P4_42537_13692461 | NC_021163.1    | Ca_kabuli_chr04 | 13692461                | AA                              | TT              | 1946793792               |
| SNP_P4_42538_13692802 | NC_021163.1    | Ca_kabuli_chr04 | 13692802                | GG                              | AA              | 1946793794               |
| SNP_P4_42539_13693894 | NC_021163.1    | Ca_kabuli_chr04 | 13693894                | TT                              | AA              | 1946793796               |
| SNP_P4_42540_13694225 | NC_021163.1    | Ca_kabuli_chr04 | 13694225                | TT                              | CC              | 1946793798               |
| SNP_P4_42541_13697511 | NC_021163.1    | Ca_kabuli_chr04 | 13697511                | CC                              | TT              | 1946793800               |
| SNP_P4_42543_13698500 | NC_021163.1    | Ca_kabuli_chr04 | 13698500                | TT                              | CC              | 1946793802               |
| SNP_P4_42544_13699400 | NC_021163.1    | Ca_kabuli_chr04 | 13699400                | GG                              | TT              | 1946793804               |
| SNP_P4_42546_13703452 | NC_021163.1    | Ca_kabuli_chr04 | 13703452                | CC                              | AA              | 1946793806               |
| SNP_P4_42547_13703453 | NC_021163.1    | Ca_kabuli_chr04 | 13703453                | AA                              | GG              | 1946793808               |
| SNP_P4_42548_13708182 | NC_021163.1    | Ca_kabuli_chr04 | 13708182                | TT                              | CC              | 1946793810               |
| SNP_P4_42549_13708309 | NC_021163.1    | Ca_kabuli_chr04 | 13708309                | GG                              | AA              | 1946793812               |
| SNP_P4_42551_13709589 | NC_021163.1    | Ca_kabuli_chr04 | 13709589                | GG                              | AA              | 1946793814               |
| SNP_P4_42552_13709614 | NC_021163.1    | Ca_kabuli_chr04 | 13709614                | TT                              | GG              | 1946793816               |
| SNP_P4_42553_13710233 | NC_021163.1    | Ca_kabuli_chr04 | 13710233                | CC                              | TT              | 1946793818               |
| SNP_P4_42555_13712955 | NC_021163.1    | Ca_kabuli_chr04 | 13712955                | GG                              | AA              | 1946793821               |
| SNP_P4_42556_13713550 | NC_021163.1    | Ca_kabuli_chr04 | 13713550                | GG                              | CC              | 1946793823               |
| SNP_P4_42557_13715333 | NC_021163.1    | Ca_kabuli_chr04 | 13715333                | GG                              | AA              | 1946793825               |
| SNP_P4_42558_13718817 | NC_021163.1    | Ca_kabuli_chr04 | 13718817                | GG                              | AA              | 1946793827               |
| SNP_P4_42559_13722342 | NC_021163.1    | Ca_kabuli_chr04 | 13722342                | GG                              | CC              | 1946793829               |
| SNP_P4_42560_13725195 | NC_021163.1    | Ca_kabuli_chr04 | 13725195                | AA                              | GG              | 1946793831               |
| SNP_P4_42561_13728944 | NC_021163.1    | Ca_kabuli_chr04 | 13728944                | TT                              | AA              | 1946793833               |
| SNP_P4_42562_13729786 | NC_021163.1    | Ca_kabuli_chr04 | 13729786                | CC                              | TT              | 1946793835               |
| SNP_P4_42563_13730338 | NC_021163.1    | Ca_kabuli_chr04 | 13730338                | CC                              | TT              | 1946793837               |
| SNP_P4_42564_13731805 | NC_021163.1    | Ca_kabuli_chr04 | 13731805                | GG                              | AA              | 1946793839               |
| SNP_P4_42566_13732621 | NC_021163.1    | Ca_kabuli_chr04 | 13732621                | GG                              | CC              | 1946793841               |
| SNP_P4_42567_13732768 | NC_021163.1    | Ca_kabuli_chr04 | 13732768                | TT                              | GG              | 1946793844               |
| SNP_P4_42568_13732782 | NC_021163.1    | Ca_kabuli_chr04 | 13732782                | AA                              | GG              | 1946793846               |
| SNP_P4_42569_13732797 | NC_021163.1    | Ca_kabuli_chr04 | 13732797                | GG                              | CC              | 1946793848               |
| SNP_P4_42571_13733027 | NC_021163.1    | Ca_kabuli_chr04 | 13733027                | GG                              | AA              | 1946793850               |
| SNP_P4_42572_13733048 | NC_021163.1    | Ca_kabuli_chr04 | 13733048                | GG                              | AA              | 1946793852               |
| SNP_P4_42573_13734262 | NC_021163.1    | Ca_kabuli_chr04 | 13734262                | AA                              | GG              | 1946793855               |
| SNP_P4_42574_13734274 | NC_021163.1    | Ca_kabuli_chr04 | 13734274                | GG                              | AA              | 1946793857               |
| SNP_P4_42575_13735200 | NC_021163.1    | Ca_kabuli_chr04 | 13735200                | TT                              | GG              | 1946793859               |
| SNP_P4_42576_13735477 | NC_021163.1    | Ca_kabuli_chr04 | 13735477                | AA                              | GG              | 1946793861               |
| SNP_P4_42578_13736407 | NC_021163.1    | Ca_kabuli_chr04 | 13736407                | AA                              | TT              | 1946793863               |
| SNP_P4_42579_13737783 | NC_021163.1    | Ca_kabuli_chr04 | 13737783                | AA                              | CC              | 1946793865               |
| SNP_P4_42580_13737792 | NC_021163.1    | Ca_kabuli_chr04 | 13737792                | TT                              | CC              | 1946793867               |
| SNP_P4_42581_13737946 | NC_021163.1    | Ca_kabuli_chr04 | 13737946                | GG                              | AA              | 1946793869               |
| SNP_P4_42582_13738348 | NC_021163.1    | Ca_kabuli_chr04 | 13738348                | CC                              | GG              | 1946793871               |
| SNP_P4_42583_13738426 | NC_021163.1    | Ca_kabuli_chr04 | 13738426                | AA                              | CC              | 1946793873               |

| SNPs IDs              | Chromosome IDs | Chromosomes     | Physical positions (bp) | CDC Frontier (Reference genome) | (ILWC46 & LPNB) | NCBI SNPdb Accession IDs |
|-----------------------|----------------|-----------------|-------------------------|---------------------------------|-----------------|--------------------------|
| SNP_P4_42584_13739141 | NC_021163.1    | Ca_kabuli_chr04 | 13739141                | GG                              | AA              | 1946793876               |
| SNP_P4_42585_13739835 | NC_021163.1    | Ca_kabuli_chr04 | 13739835                | GG                              | AA              | 1946793878               |
| SNP_P4_42586_13739854 | NC_021163.1    | Ca_kabuli_chr04 | 13739854                | GG                              | CC              | 1946793880               |
| SNP_P4_42587_13739916 | NC_021163.1    | Ca_kabuli_chr04 | 13739916                | AA                              | TT              | 1946793882               |
| SNP_P4_42588_13739918 | NC_021163.1    | Ca_kabuli_chr04 | 13739918                | TT                              | CC              | 1946793884               |
| SNP_P4_42590_13740191 | NC_021163.1    | Ca_kabuli_chr04 | 13740191                | GG                              | AA              | 1946793886               |
| SNP_P4_42591_13746894 | NC_021163.1    | Ca_kabuli_chr04 | 13746894                | TT                              | CC              | 1946793888               |
| SNP_P4_42592_13748062 | NC_021163.1    | Ca_kabuli_chr04 | 13748062                | AA                              | CC              | 1946793890               |
| SNP_P4_42593_13748583 | NC_021163.1    | Ca_kabuli_chr04 | 13748583                | AA                              | GG              | 1946793892               |
| SNP_P4_42594_13749516 | NC_021163.1    | Ca_kabuli_chr04 | 13749516                | AA                              | CC              | 1946793894               |
| SNP_P4_42596_13750753 | NC_021163.1    | Ca_kabuli_chr04 | 13750753                | GG                              | AA              | 1946793897               |
| SNP_P4_42598_13751090 | NC_021163.1    | Ca_kabuli_chr04 | 13751090                | CC                              | TT              | 1946793899               |
| SNP_P4_42599_13751107 | NC_021163.1    | Ca_kabuli_chr04 | 13751107                | AA                              | GG              | 1946793901               |
| SNP_P4_42600_13753086 | NC_021163.1    | Ca_kabuli_chr04 | 13753086                | TT                              | CC              | 1946793903               |
| SNP_P4_42601_13753777 | NC_021163.1    | Ca_kabuli_chr04 | 13753777                | CC                              | TT              | 1946793905               |
| SNP_P4_42603_13757791 | NC_021163.1    | Ca_kabuli_chr04 | 13757791                | AA                              | CC              | 1946793907               |
| SNP_P4_42604_13757850 | NC_021163.1    | Ca_kabuli_chr04 | 13757850                | CC                              | AA              | 1946793909               |
| SNP_P4_42606_13758335 | NC_021163.1    | Ca_kabuli_chr04 | 13758335                | AA                              | GG              | 1946793912               |
| SNP_P4_42607_13758459 | NC_021163.1    | Ca_kabuli_chr04 | 13758459                | CC                              | TT              | 1946793914               |
| SNP_P4_42608_13758909 | NC_021163.1    | Ca_kabuli_chr04 | 13758909                | AA                              | GG              | 1946793916               |
| SNP_P4_42609_13759717 | NC_021163.1    | Ca_kabuli_chr04 | 13759717                | CC                              | TT              | 1946793918               |
| SNP_P4_42610_13760326 | NC_021163.1    | Ca_kabuli_chr04 | 13760326                | CC                              | TT              | 1946793920               |
| SNP_P4_42611_13760927 | NC_021163.1    | Ca_kabuli_chr04 | 13760927                | TT                              | GG              | 1946793922               |
| SNP_P4_42612_13761314 | NC_021163.1    | Ca_kabuli_chr04 | 13761314                | AA                              | TT              | 1946793924               |
| SNP_P4_42613_13761511 | NC_021163.1    | Ca_kabuli_chr04 | 13761511                | AA                              | GG              | 1946793926               |
| SNP_P4_42615_13761721 | NC_021163.1    | Ca_kabuli_chr04 | 13761721                | TT                              | AA              | 1946793928               |
| SNP_P4_42616_13761767 | NC_021163.1    | Ca_kabuli_chr04 | 13761767                | TT                              | CC              | 1946793930               |
| SNP_P4_42617_13764379 | NC_021163.1    | Ca_kabuli_chr04 | 13764379                | AA                              | GG              | 1946793932               |
| SNP_P4_42618_13764476 | NC_021163.1    | Ca_kabuli_chr04 | 13764476                | AA                              | TT              | 1946793934               |
| SNP_P4_42619_13765226 | NC_021163.1    | Ca_kabuli_chr04 | 13765226                | AA                              | CC              | 1946793936               |
| SNP_P4_42621_13766508 | NC_021163.1    | Ca_kabuli_chr04 | 13766508                | CC                              | GG              | 1946793938               |
| SNP_P4_42622_13769749 | NC_021163.1    | Ca_kabuli_chr04 | 13769749                | TT                              | AA              | 1946793941               |
| SNP_P4_42623_13769869 | NC_021163.1    | Ca_kabuli_chr04 | 13769869                | TT                              | CC              | 1946793943               |
| SNP_P4_42624_13770030 | NC_021163.1    | Ca_kabuli_chr04 | 13770030                | AA                              | CC              | 1946793945               |
| SNP_P4_42625_13770039 | NC_021163.1    | Ca_kabuli_chr04 | 13770039                | CC                              | TT              | 1946793947               |
| SNP_P4_42626_13770057 | NC_021163.1    | Ca_kabuli_chr04 | 13770057                | TT                              | CC              | 1946793949               |
| SNP_P4_42627_13770062 | NC_021163.1    | Ca_kabuli_chr04 | 13770062                | AA                              | GG              | 1946793951               |
| SNP_P4_42628_13770087 | NC_021163.1    | Ca_kabuli_chr04 | 13770087                | GG                              | AA              | 1946793953               |
| SNP_P4_42629_13770336 | NC_021163.1    | Ca_kabuli_chr04 | 13770336                | CC                              | TT              | 1946793955               |
| SNP_P4_42630_13770337 | NC_021163.1    | Ca_kabuli_chr04 | 13770337                | GG                              | AA              | 1946793957               |
| SNP_P4_42633_13770481 | NC_021163.1    | Ca_kabuli_chr04 | 13770481                | TT                              | CC              | 1946793959               |
| SNP_P4_42634_13770561 | NC_021163.1    | Ca_kabuli_chr04 | 13770561                | CC                              | TT              | 1946793961               |



| SNPs IDs              | Chromosome IDs | Chromosomes     | Physical positions (bp) | CDC Frontier (Reference genome) | (ILWC46 & LPNB) | NCBI SNPdb Accession IDs |
|-----------------------|----------------|-----------------|-------------------------|---------------------------------|-----------------|--------------------------|
| SNP_P4_42635_13770703 | NC_021163.1    | Ca_kabuli_chr04 | 13770703                | TT                              | AA              | 1946793963               |
| SNP_P4_42636_13770732 | NC_021163.1    | Ca_kabuli_chr04 | 13770732                | CC                              | AA              | 1946793965               |
| SNP_P4_42637_13770748 | NC_021163.1    | Ca_kabuli_chr04 | 13770748                | CC                              | TT              | 1946793967               |
| SNP_P4_42638_13772604 | NC_021163.1    | Ca_kabuli_chr04 | 13772604                | TT                              | CC              | 1946793969               |
| SNP_P4_42639_13772654 | NC_021163.1    | Ca_kabuli_chr04 | 13772654                | GG                              | AA              | 1946793971               |
| SNP_P4_42640_13773160 | NC_021163.1    | Ca_kabuli_chr04 | 13773160                | AA                              | TT              | 1946793973               |
| SNP_P4_42641_13773823 | NC_021163.1    | Ca_kabuli_chr04 | 13773823                | TT                              | AA              | 1946793975               |
| SNP_P4_42642_13773829 | NC_021163.1    | Ca_kabuli_chr04 | 13773829                | AA                              | GG              | 1946793977               |
| SNP_P4_42643_13773881 | NC_021163.1    | Ca_kabuli_chr04 | 13773881                | TT                              | GG              | 1946793979               |
| SNP_P4_42644_13774151 | NC_021163.1    | Ca_kabuli_chr04 | 13774151                | AA                              | GG              | 1946793981               |
| SNP_P4_42645_13774214 | NC_021163.1    | Ca_kabuli_chr04 | 13774214                | GG                              | AA              | 1946793983               |
| SNP_P4_42646_13775087 | NC_021163.1    | Ca_kabuli_chr04 | 13775087                | TT                              | GG              | 1946793985               |
| SNP_P4_42647_13776474 | NC_021163.1    | Ca_kabuli_chr04 | 13776474                | GG                              | AA              | 1946793987               |
| SNP_P4_42648_13777039 | NC_021163.1    | Ca_kabuli_chr04 | 13777039                | TT                              | CC              | 1946793989               |
| SNP_P4_42649_13777040 | NC_021163.1    | Ca_kabuli_chr04 | 13777040                | GG                              | TT              | 1946793991               |
| SNP_P4_42650_13777058 | NC_021163.1    | Ca_kabuli_chr04 | 13777058                | CC                              | TT              | 1946793993               |
| SNP_P4_42651_13777081 | NC_021163.1    | Ca_kabuli_chr04 | 13777081                | CC                              | GG              | 1946793995               |
| SNP_P4_42652_13777083 | NC_021163.1    | Ca_kabuli_chr04 | 13777083                | CC                              | TT              | 1946793997               |
| SNP_P4_42653_13780146 | NC_021163.1    | Ca_kabuli_chr04 | 13780146                | CC                              | GG              | 1946794000               |
| SNP_P4_42655_13783024 | NC_021163.1    | Ca_kabuli_chr04 | 13783024                | CC                              | AA              | 1946794002               |
| SNP_P4_42656_13783386 | NC_021163.1    | Ca_kabuli_chr04 | 13783386                | AA                              | GG              | 1946794004               |
| SNP_P4_42657_13785316 | NC_021163.1    | Ca_kabuli_chr04 | 13785316                | TT                              | AA              | 1946794007               |
| SNP_P4_42659_13787353 | NC_021163.1    | Ca_kabuli_chr04 | 13787353                | TT                              | CC              | 1946794009               |
| SNP_P4_42660_13787448 | NC_021163.1    | Ca_kabuli_chr04 | 13787448                | AA                              | CC              | 1946794012               |
| SNP_P4_42661_13788136 | NC_021163.1    | Ca_kabuli_chr04 | 13788136                | AA                              | TT              | 1946794014               |
| SNP_P4_42662_13788437 | NC_021163.1    | Ca_kabuli_chr04 | 13788437                | GG                              | AA              | 1946794016               |
| SNP_P4_42663_13788464 | NC_021163.1    | Ca_kabuli_chr04 | 13788464                | CC                              | TT              | 1946794018               |
| SNP_P4_42665_13788491 | NC_021163.1    | Ca_kabuli_chr04 | 13788491                | CC                              | AA              | 1946794020               |
| SNP_P4_42666_13788535 | NC_021163.1    | Ca_kabuli_chr04 | 13788535                | CC                              | TT              | 1946794022               |
| SNP_P4_42667_13788537 | NC_021163.1    | Ca_kabuli_chr04 | 13788537                | AA                              | GG              | 1946794024               |
| SNP_P4_42668_13788582 | NC_021163.1    | Ca_kabuli_chr04 | 13788582                | GG                              | AA              | 1946794027               |
| SNP_P4_42669_13788659 | NC_021163.1    | Ca_kabuli_chr04 | 13788659                | GG                              | AA              | 1946794028               |
| SNP_P4_42671_13788862 | NC_021163.1    | Ca_kabuli_chr04 | 13788862                | GG                              | AA              | 1946794029               |
| SNP_P4_42672_13788916 | NC_021163.1    | Ca_kabuli_chr04 | 13788916                | TT                              | CC              | 1946794030               |
| SNP_P4_42673_13789114 | NC_021163.1    | Ca_kabuli_chr04 | 13789114                | AA                              | CC              | 1946794032               |
| SNP_P4_42674_13789126 | NC_021163.1    | Ca_kabuli_chr04 | 13789126                | AA                              | GG              | 1946794034               |
| SNP_P4_42676_13789170 | NC_021163.1    | Ca_kabuli_chr04 | 13789170                | CC                              | GG              | 1946794037               |
| SNP_P4_42677_13789658 | NC_021163.1    | Ca_kabuli_chr04 | 13789658                | AA                              | GG              | 1946794039               |
| SNP_P4_42678_13789662 | NC_021163.1    | Ca_kabuli_chr04 | 13789662                | AA                              | TT              | 1946794041               |
| SNP_P4_42679_13789667 | NC_021163.1    | Ca_kabuli_chr04 | 13789667                | CC                              | TT              | 1946794043               |
| SNP_P4_42680_13790820 | NC_021163.1    | Ca_kabuli_chr04 | 13790820                | AA                              | TT              | 1946794045               |
| SNP_P4_42681_13790838 | NC_021163.1    | Ca_kabuli_chr04 | 13790838                | TT                              | CC              | 1946794047               |

| SNPs IDs              | Chromosome IDs | Chromosomes     | Physical positions (bp) | CDC Frontier (Reference genome) | (ILWC46 & LPNB) | NCBI SNPdb Accession IDs |
|-----------------------|----------------|-----------------|-------------------------|---------------------------------|-----------------|--------------------------|
| SNP_P4_42682_13790911 | NC_021163.1    | Ca_kabuli_chr04 | 13790911                | GG                              | AA              | 1946794049               |
| SNP_P4_42683_13791003 | NC_021163.1    | Ca_kabuli_chr04 | 13791003                | CC                              | TT              | 1946794052               |
| SNP_P4_42684_13791061 | NC_021163.1    | Ca_kabuli_chr04 | 13791061                | GG                              | CC              | 1946794054               |
| SNP_P4_42685_13791158 | NC_021163.1    | Ca_kabuli_chr04 | 13791158                | GG                              | CC              | 1946794056               |
| SNP_P4_42686_13792065 | NC_021163.1    | Ca_kabuli_chr04 | 13792065                | CC                              | TT              | 1946794058               |
| SNP_P4_42687_13792099 | NC_021163.1    | Ca_kabuli_chr04 | 13792099                | TT                              | GG              | 1946794060               |
| SNP_P4_42688_13792105 | NC_021163.1    | Ca_kabuli_chr04 | 13792105                | TT                              | CC              | 1946794062               |
| SNP_P4_42691_13794382 | NC_021163.1    | Ca_kabuli_chr04 | 13794382                | TT                              | AA              | 1946794065               |
| SNP_P4_42692_13794387 | NC_021163.1    | Ca_kabuli_chr04 | 13794387                | TT                              | GG              | 1946794067               |
| SNP_P4_42693_13794408 | NC_021163.1    | Ca_kabuli_chr04 | 13794408                | AA                              | TT              | 1946794069               |
| SNP_P4_42694_13794445 | NC_021163.1    | Ca_kabuli_chr04 | 13794445                | TT                              | AA              | 1946794071               |
| SNP_P4_42696_13796045 | NC_021163.1    | Ca_kabuli_chr04 | 13796045                | AA                              | CC              | 1946794073               |
| SNP_P4_42697_13796262 | NC_021163.1    | Ca_kabuli_chr04 | 13796262                | CC                              | TT              | 1946794075               |
| SNP_P4_42698_13796391 | NC_021163.1    | Ca_kabuli_chr04 | 13796391                | GG                              | TT              | 1946794077               |
| SNP_P4_42699_13796396 | NC_021163.1    | Ca_kabuli_chr04 | 13796396                | CC                              | AA              | 1946794079               |
| SNP_P4_42702_13799886 | NC_021163.1    | Ca_kabuli_chr04 | 13799886                | AA                              | CC              | 1946794081               |
| SNP_P4_42703_13799918 | NC_021163.1    | Ca_kabuli_chr04 | 13799918                | TT                              | AA              | 1946794083               |
| SNP_P4_42704_13800584 | NC_021163.1    | Ca_kabuli_chr04 | 13800584                | CC                              | AA              | 1946794086               |
| SNP_P4_42705_13800614 | NC_021163.1    | Ca_kabuli_chr04 | 13800614                | CC                              | AA              | 1946794088               |
| SNP_P4_42706_13802051 | NC_021163.1    | Ca_kabuli_chr04 | 13802051                | CC                              | TT              | 1946794090               |
| SNP_P4_42707_13802081 | NC_021163.1    | Ca_kabuli_chr04 | 13802081                | CC                              | TT              | 1946794092               |
| SNP_P4_42708_13802126 | NC_021163.1    | Ca_kabuli_chr04 | 13802126                | AA                              | CC              | 1946794095               |
| SNP_P4_42709_13802218 | NC_021163.1    | Ca_kabuli_chr04 | 13802218                | TT                              | GG              | 1946794097               |
| SNP_P4_42710_13802223 | NC_021163.1    | Ca_kabuli_chr04 | 13802223                | CC                              | TT              | 1946794099               |
| SNP_P4_42711_13803376 | NC_021163.1    | Ca_kabuli_chr04 | 13803376                | CC                              | GG              | 1946794101               |
| SNP_P4_42712_13803955 | NC_021163.1    | Ca_kabuli_chr04 | 13803955                | GG                              | TT              | 1946794103               |
| SNP_P4_42713_13805873 | NC_021163.1    | Ca_kabuli_chr04 | 13805873                | TT                              | AA              | 1946794106               |
| SNP_P4_42714_13806386 | NC_021163.1    | Ca_kabuli_chr04 | 13806386                | CC                              | AA              | 1946794108               |
| SNP_P4_42715_13806387 | NC_021163.1    | Ca_kabuli_chr04 | 13806387                | CC                              | AA              | 1946794110               |
| SNP_P4_42716_13806496 | NC_021163.1    | Ca_kabuli_chr04 | 13806496                | GG                              | AA              | 1946794112               |
| SNP_P4_42718_13808420 | NC_021163.1    | Ca_kabuli_chr04 | 13808420                | TT                              | CC              | 1946794114               |
| SNP_P4_42719_13808436 | NC_021163.1    | Ca_kabuli_chr04 | 13808436                | AA                              | GG              | 1946794116               |
| SNP_P4_42720_13808642 | NC_021163.1    | Ca_kabuli_chr04 | 13808642                | AA                              | CC              | 1946794118               |
| SNP_P4_42721_13808676 | NC_021163.1    | Ca_kabuli_chr04 | 13808676                | AA                              | TT              | 1946794120               |
| SNP_P4_42723_13809534 | NC_021163.1    | Ca_kabuli_chr04 | 13809534                | CC                              | TT              | 1946794122               |
| SNP_P4_42725_13809805 | NC_021163.1    | Ca_kabuli_chr04 | 13809805                | GG                              | CC              | 1946794124               |
| SNP_P4_42726_13810190 | NC_021163.1    | Ca_kabuli_chr04 | 13810190                | TT                              | CC              | 1946794126               |
| SNP_P4_42727_13811372 | NC_021163.1    | Ca_kabuli_chr04 | 13811372                | AA                              | GG              | 1946794128               |
| SNP_P4_42728_13811377 | NC_021163.1    | Ca_kabuli_chr04 | 13811377                | GG                              | AA              | 1946794130               |
| SNP_P4_42729_13811378 | NC_021163.1    | Ca_kabuli_chr04 | 13811378                | TT                              | CC              | 1946794132               |
| SNP_P4_42730_13811387 | NC_021163.1    | Ca_kabuli_chr04 | 13811387                | TT                              | CC              | 1946794134               |
| SNP_P4_42731_13811403 | NC_021163.1    | Ca_kabuli_chr04 | 13811403                | TT                              | CC              | 1946794136               |

| SNPs IDs              | Chromosome IDs | Chromosomes     | Physical positions (bp) | CDC Frontier (Reference genome) | (ILWC46 & LPNB) | NCBI SNPdb Accession IDs |
|-----------------------|----------------|-----------------|-------------------------|---------------------------------|-----------------|--------------------------|
| SNP_P4_42732_13811410 | NC_021163.1    | Ca_kabuli_chr04 | 13811410                | GG                              | AA              | 1946794138               |
| SNP_P4_42733_13811580 | NC_021163.1    | Ca_kabuli_chr04 | 13811580                | CC                              | AA              | 1946794140               |
| SNP_P4_42734_13812585 | NC_021163.1    | Ca_kabuli_chr04 | 13812585                | TT                              | GG              | 1946794142               |
| SNP_P4_42735_13812649 | NC_021163.1    | Ca_kabuli_chr04 | 13812649                | AA                              | CC              | 1946794144               |
| SNP_P4_42736_13812739 | NC_021163.1    | Ca_kabuli_chr04 | 13812739                | CC                              | TT              | 1946794147               |
| SNP_P4_42737_13812751 | NC_021163.1    | Ca_kabuli_chr04 | 13812751                | TT                              | CC              | 1946794149               |
| SNP_P4_42738_13812814 | NC_021163.1    | Ca_kabuli_chr04 | 13812814                | GG                              | CC              | 1946794151               |
| SNP_P4_42739_13812920 | NC_021163.1    | Ca_kabuli_chr04 | 13812920                | GG                              | AA              | 1946794153               |
| SNP_P4_42740_13812928 | NC_021163.1    | Ca_kabuli_chr04 | 13812928                | CC                              | TT              | 1946794155               |
| SNP_P4_42741_13812937 | NC_021163.1    | Ca_kabuli_chr04 | 13812937                | GG                              | AA              | 1946794157               |
| SNP_P4_42742_13813018 | NC_021163.1    | Ca_kabuli_chr04 | 13813018                | GG                              | AA              | 1946794159               |
| SNP_P4_42743_13813039 | NC_021163.1    | Ca_kabuli_chr04 | 13813039                | GG                              | AA              | 1946794162               |
| SNP_P4_42745_13815377 | NC_021163.1    | Ca_kabuli_chr04 | 13815377                | CC                              | GG              | 1946794164               |
| SNP_P4_42746_13815413 | NC_021163.1    | Ca_kabuli_chr04 | 13815413                | TT                              | AA              | 1946794166               |
| SNP_P4_42747_13815444 | NC_021163.1    | Ca_kabuli_chr04 | 13815444                | TT                              | CC              | 1946794168               |
| SNP_P4_42748_13815446 | NC_021163.1    | Ca_kabuli_chr04 | 13815446                | GG                              | AA              | 1946794170               |
| SNP_P4_42749_13815467 | NC_021163.1    | Ca_kabuli_chr04 | 13815467                | CC                              | AA              | 1946794173               |
| SNP_P4_42750_13815497 | NC_021163.1    | Ca_kabuli_chr04 | 13815497                | CC                              | TT              | 1946794175               |
| SNP_P4_42751_13815827 | NC_021163.1    | Ca_kabuli_chr04 | 13815827                | GG                              | AA              | 1946794177               |
| SNP_P4_42752_13816112 | NC_021163.1    | Ca_kabuli_chr04 | 13816112                | CC                              | TT              | 1946794179               |
| SNP_P4_42753_13816115 | NC_021163.1    | Ca_kabuli_chr04 | 13816115                | GG                              | AA              | 1946794181               |
| SNP_P4_42754_13816239 | NC_021163.1    | Ca_kabuli_chr04 | 13816239                | AA                              | CC              | 1946794184               |
| SNP_P4_42755_13816286 | NC_021163.1    | Ca_kabuli_chr04 | 13816286                | CC                              | TT              | 1946794186               |
| SNP_P4_42756_13816289 | NC_021163.1    | Ca_kabuli_chr04 | 13816289                | TT                              | CC              | 1946794188               |
| SNP_P4_42757_13816563 | NC_021163.1    | Ca_kabuli_chr04 | 13816563                | AA                              | GG              | 1946794190               |
| SNP_P4_42758_13816588 | NC_021163.1    | Ca_kabuli_chr04 | 13816588                | AA                              | CC              | 1946794192               |
| SNP_P4_42759_13816594 | NC_021163.1    | Ca_kabuli_chr04 | 13816594                | CC                              | TT              | 1946794194               |
| SNP_P4_42760_13816771 | NC_021163.1    | Ca_kabuli_chr04 | 13816771                | AA                              | CC              | 1946794196               |
| SNP_P4_42761_13816772 | NC_021163.1    | Ca_kabuli_chr04 | 13816772                | TT                              | GG              | 1946794198               |
| SNP_P4_42762_13818041 | NC_021163.1    | Ca_kabuli_chr04 | 13818041                | GG                              | AA              | 1946794200               |
| SNP_P4_42763_13820543 | NC_021163.1    | Ca_kabuli_chr04 | 13820543                | CC                              | GG              | 1946794202               |
| SNP_P4_42764_13822628 | NC_021163.1    | Ca_kabuli_chr04 | 13822628                | AA                              | TT              | 1946794205               |
| SNP_P4_42766_13822995 | NC_021163.1    | Ca_kabuli_chr04 | 13822995                | AA                              | GG              | 1946794207               |
| SNP_P4_42767_13825357 | NC_021163.1    | Ca_kabuli_chr04 | 13825357                | TT                              | GG              | 1946794209               |
| SNP_P4_42768_13825358 | NC_021163.1    | Ca_kabuli_chr04 | 13825358                | AA                              | GG              | 1946794211               |
| SNP_P4_42769_13825423 | NC_021163.1    | Ca_kabuli_chr04 | 13825423                | CC                              | AA              | 1946794213               |
| SNP_P4_42770_13825451 | NC_021163.1    | Ca_kabuli_chr04 | 13825451                | GG                              | AA              | 1946794215               |
| SNP_P4_42771_13825706 | NC_021163.1    | Ca_kabuli_chr04 | 13825706                | TT                              | CC              | 1946794218               |
| SNP_P4_42772_13825763 | NC_021163.1    | Ca_kabuli_chr04 | 13825763                | TT                              | CC              | 1946794220               |
| SNP_P4_42773_13825787 | NC_021163.1    | Ca_kabuli_chr04 | 13825787                | GG                              | AA              | 1946794222               |
| SNP_P4_42774_13826044 | NC_021163.1    | Ca_kabuli_chr04 | 13826044                | GG                              | AA              | 1946794224               |
| SNP_P4_42775_13826091 | NC_021163.1    | Ca_kabuli_chr04 | 13826091                | CC                              | TT              | 1946794226               |

| SNPs IDs              | Chromosome IDs | Chromosomes     | Physical positions (bp) | CDC Frontier (Reference genome) | (ILWC46 & LPNB) | NCBI SNPdb Accession IDs |
|-----------------------|----------------|-----------------|-------------------------|---------------------------------|-----------------|--------------------------|
| SNP_P4_42777_13826161 | NC_021163.1    | Ca_kabuli_chr04 | 13826161                | GG                              | AA              | 1946794228               |
| SNP_P4_42778_13826378 | NC_021163.1    | Ca_kabuli_chr04 | 13826378                | CC                              | TT              | 1946794230               |
| SNP_P4_42779_13826386 | NC_021163.1    | Ca_kabuli_chr04 | 13826386                | GG                              | AA              | 1946794232               |
| SNP_P4_42780_13826597 | NC_021163.1    | Ca_kabuli_chr04 | 13826597                | AA                              | GG              | 1946794234               |
| SNP_P4_42781_13826626 | NC_021163.1    | Ca_kabuli_chr04 | 13826626                | GG                              | AA              | 1946794236               |
| SNP_P4_42782_13827061 | NC_021163.1    | Ca_kabuli_chr04 | 13827061                | GG                              | AA              | 1946794238               |
| SNP_P4_42783_13827243 | NC_021163.1    | Ca_kabuli_chr04 | 13827243                | CC                              | TT              | 1946794240               |
| SNP_P4_42785_13828284 | NC_021163.1    | Ca_kabuli_chr04 | 13828284                | AA                              | GG              | 1946794242               |
| SNP_P4_42786_13828442 | NC_021163.1    | Ca_kabuli_chr04 | 13828442                | CC                              | TT              | 1946794244               |
| SNP_P4_42787_13829293 | NC_021163.1    | Ca_kabuli_chr04 | 13829293                | CC                              | AA              | 1946794247               |
| SNP_P4_42788_13829438 | NC_021163.1    | Ca_kabuli_chr04 | 13829438                | GG                              | AA              | 1946794249               |
| SNP_P4_42789_13829446 | NC_021163.1    | Ca_kabuli_chr04 | 13829446                | AA                              | GG              | 1946794251               |
| SNP_P4_42791_13829811 | NC_021163.1    | Ca_kabuli_chr04 | 13829811                | TT                              | GG              | 1946794253               |
| SNP_P4_42792_13829822 | NC_021163.1    | Ca_kabuli_chr04 | 13829822                | AA                              | GG              | 1946794255               |
| SNP_P4_42793_13829991 | NC_021163.1    | Ca_kabuli_chr04 | 13829991                | TT                              | GG              | 1946794257               |
| SNP_P4_42794_13830031 | NC_021163.1    | Ca_kabuli_chr04 | 13830031                | TT                              | CC              | 1946794259               |
| SNP_P4_42795_13830153 | NC_021163.1    | Ca_kabuli_chr04 | 13830153                | AA                              | GG              | 1946794261               |
| SNP_P4_42797_13830262 | NC_021163.1    | Ca_kabuli_chr04 | 13830262                | AA                              | GG              | 1946794263               |
| SNP_P4_42798_13830333 | NC_021163.1    | Ca_kabuli_chr04 | 13830333                | CC                              | TT              | 1946794265               |
| SNP_P4_42799_13830568 | NC_021163.1    | Ca_kabuli_chr04 | 13830568                | GG                              | AA              | 1946794267               |
| SNP_P4_42800_13830584 | NC_021163.1    | Ca_kabuli_chr04 | 13830584                | TT                              | CC              | 1946794269               |
| SNP_P4_42801_13830585 | NC_021163.1    | Ca_kabuli_chr04 | 13830585                | CC                              | TT              | 1946794271               |
| SNP_P4_42802_13830590 | NC_021163.1    | Ca_kabuli_chr04 | 13830590                | AA                              | GG              | 1946794273               |
| SNP_P4_42803_13830593 | NC_021163.1    | Ca_kabuli_chr04 | 13830593                | AA                              | GG              | 1946794275               |
| SNP_P4_42804_13831063 | NC_021163.1    | Ca_kabuli_chr04 | 13831063                | CC                              | TT              | 1946794277               |
| SNP_P4_42805_13831230 | NC_021163.1    | Ca_kabuli_chr04 | 13831230                | TT                              | AA              | 1946794280               |
| SNP_P4_42806_13831332 | NC_021163.1    | Ca_kabuli_chr04 | 13831332                | TT                              | CC              | 1946794282               |
| SNP_P4_42807_13831337 | NC_021163.1    | Ca_kabuli_chr04 | 13831337                | GG                              | AA              | 1946794284               |
| SNP_P4_42808_13831357 | NC_021163.1    | Ca_kabuli_chr04 | 13831357                | GG                              | CC              | 1946794286               |
| SNP_P4_42810_13831576 | NC_021163.1    | Ca_kabuli_chr04 | 13831576                | TT                              | AA              | 1946794288               |
| SNP_P4_42811_13831836 | NC_021163.1    | Ca_kabuli_chr04 | 13831836                | AA                              | TT              | 1946794290               |
| SNP_P4_42812_13831867 | NC_021163.1    | Ca_kabuli_chr04 | 13831867                | CC                              | AA              | 1946794292               |
| SNP_P4_42813_13831875 | NC_021163.1    | Ca_kabuli_chr04 | 13831875                | CC                              | AA              | 1946794294               |
| SNP_P4_42814_13831889 | NC_021163.1    | Ca_kabuli_chr04 | 13831889                | CC                              | AA              | 1946794296               |
| SNP_P4_42815_13832258 | NC_021163.1    | Ca_kabuli_chr04 | 13832258                | AA                              | TT              | 1946794298               |
| SNP_P4_42816_13832379 | NC_021163.1    | Ca_kabuli_chr04 | 13832379                | TT                              | AA              | 1946794300               |
| SNP_P4_42817_13832380 | NC_021163.1    | Ca_kabuli_chr04 | 13832380                | GG                              | AA              | 1946794302               |
| SNP_P4_42818_13832416 | NC_021163.1    | Ca_kabuli_chr04 | 13832416                | CC                              | GG              | 1946794304               |
| SNP_P4_42819_13832425 | NC_021163.1    | Ca_kabuli_chr04 | 13832425                | TT                              | CC              | 1946794306               |
| SNP_P4_42820_13832443 | NC_021163.1    | Ca_kabuli_chr04 | 13832443                | TT                              | CC              | 1946794308               |
| SNP_P4_42821_13833816 | NC_021163.1    | Ca_kabuli_chr04 | 13833816                | AA                              | GG              | 1946794310               |
| SNP_P4_42822_13834065 | NC_021163.1    | Ca_kabuli_chr04 | 13834065                | TT                              | CC              | 1946794312               |

| SNPs IDs              | Chromosome IDs | Chromosomes     | Physical positions (bp) | CDC Frontier (Reference genome) | (ILWC46 & LPNB) | NCBI SNPdb Accession IDs |
|-----------------------|----------------|-----------------|-------------------------|---------------------------------|-----------------|--------------------------|
| SNP_P4_42823_13834503 | NC_021163.1    | Ca_kabuli_chr04 | 13834503                | AA                              | TT              | 1946794314               |
| SNP_P4_42825_13836146 | NC_021163.1    | Ca_kabuli_chr04 | 13836146                | GG                              | TT              | 1946794316               |
| SNP_P4_42826_13841279 | NC_021163.1    | Ca_kabuli_chr04 | 13841279                | CC                              | AA              | 1946794318               |
| SNP_P4_42827_13841340 | NC_021163.1    | Ca_kabuli_chr04 | 13841340                | GG                              | TT              | 1946794320               |
| SNP_P4_42828_13845235 | NC_021163.1    | Ca_kabuli_chr04 | 13845235                | GG                              | TT              | 1946794322               |
| SNP_P4_42829_13845260 | NC_021163.1    | Ca_kabuli_chr04 | 13845260                | AA                              | CC              | 1946794325               |
| SNP_P4_42830_13845846 | NC_021163.1    | Ca_kabuli_chr04 | 13845846                | TT                              | GG              | 1946794327               |
| SNP_P4_42831_13846717 | NC_021163.1    | Ca_kabuli_chr04 | 13846717                | GG                              | AA              | 1946794329               |
| SNP_P4_42832_13846775 | NC_021163.1    | Ca_kabuli_chr04 | 13846775                | CC                              | AA              | 1946794331               |
| SNP_P4_42833_13846790 | NC_021163.1    | Ca_kabuli_chr04 | 13846790                | AA                              | GG              | 1946794333               |
| SNP_P4_42834_13846814 | NC_021163.1    | Ca_kabuli_chr04 | 13846814                | GG                              | AA              | 1946794335               |
| SNP_P4_42835_13846820 | NC_021163.1    | Ca_kabuli_chr04 | 13846820                | TT                              | GG              | 1946794337               |
| SNP_P4_42836_13846834 | NC_021163.1    | Ca_kabuli_chr04 | 13846834                | GG                              | TT              | 1946794339               |
| SNP_P4_42837_13846848 | NC_021163.1    | Ca_kabuli_chr04 | 13846848                | AA                              | TT              | 1946794342               |
| SNP_P4_42838_13846867 | NC_021163.1    | Ca_kabuli_chr04 | 13846867                | GG                              | AA              | 1946794344               |
| SNP_P4_42839_13846929 | NC_021163.1    | Ca_kabuli_chr04 | 13846929                | AA                              | CC              | 1946794346               |
| SNP_P4_42840_13846973 | NC_021163.1    | Ca_kabuli_chr04 | 13846973                | AA                              | CC              | 1946794348               |
| SNP_P4_42841_13846991 | NC_021163.1    | Ca_kabuli_chr04 | 13846991                | GG                              | AA              | 1946794350               |
| SNP_P4_42842_13847234 | NC_021163.1    | Ca_kabuli_chr04 | 13847234                | CC                              | AA              | 1946794353               |
| SNP_P4_42843_13847263 | NC_021163.1    | Ca_kabuli_chr04 | 13847263                | AA                              | TT              | 1946794355               |
| SNP_P4_42844_13847610 | NC_021163.1    | Ca_kabuli_chr04 | 13847610                | TT                              | GG              | 1946794357               |
| SNP_P4_42845_13847628 | NC_021163.1    | Ca_kabuli_chr04 | 13847628                | TT                              | CC              | 1946794359               |
| SNP_P4_42847_13847702 | NC_021163.1    | Ca_kabuli_chr04 | 13847702                | TT                              | CC              | 1946794361               |
| SNP_P4_42848_13848369 | NC_021163.1    | Ca_kabuli_chr04 | 13848369                | TT                              | CC              | 1946794363               |
| SNP_P4_42849_13848404 | NC_021163.1    | Ca_kabuli_chr04 | 13848404                | AA                              | TT              | 1946794366               |
| SNP_P4_42850_13848406 | NC_021163.1    | Ca_kabuli_chr04 | 13848406                | CC                              | TT              | 1946794368               |
| SNP_P4_42852_13850868 | NC_021163.1    | Ca_kabuli_chr04 | 13850868                | TT                              | CC              | 1946794370               |
| SNP_P4_42853_13851248 | NC_021163.1    | Ca_kabuli_chr04 | 13851248                | AA                              | TT              | 1946794372               |
| SNP_P4_42854_13851257 | NC_021163.1    | Ca_kabuli_chr04 | 13851257                | TT                              | AA              | 1946794374               |
| SNP_P4_42855_13851638 | NC_021163.1    | Ca_kabuli_chr04 | 13851638                | AA                              | CC              | 1946794376               |
| SNP_P4_42856_13852082 | NC_021163.1    | Ca_kabuli_chr04 | 13852082                | CC                              | TT              | 1946794378               |
| SNP_P4_42858_13852471 | NC_021163.1    | Ca_kabuli_chr04 | 13852471                | CC                              | AA              | 1946794380               |
| SNP_P4_42859_13853196 | NC_021163.1    | Ca_kabuli_chr04 | 13853196                | GG                              | AA              | 1946794382               |
| SNP_P4_42861_13853512 | NC_021163.1    | Ca_kabuli_chr04 | 13853512                | AA                              | TT              | 1946794384               |
| SNP_P4_42862_13853558 | NC_021163.1    | Ca_kabuli_chr04 | 13853558                | TT                              | CC              | 1946794387               |
| SNP_P4_42864_13853589 | NC_021163.1    | Ca_kabuli_chr04 | 13853589                | AA                              | GG              | 1946794389               |
| SNP_P4_42865_13853831 | NC_021163.1    | Ca_kabuli_chr04 | 13853831                | GG                              | AA              | 1946794391               |
| SNP_P4_42866_13854044 | NC_021163.1    | Ca_kabuli_chr04 | 13854044                | AA                              | GG              | 1946794393               |
| SNP_P4_42868_13854207 | NC_021163.1    | Ca_kabuli_chr04 | 13854207                | CC                              | TT              | 1946794395               |
| SNP_P4_42869_13854366 | NC_021163.1    | Ca_kabuli_chr04 | 13854366                | AA                              | GG              | 1946794397               |
| SNP_P4_42870_13855734 | NC_021163.1    | Ca_kabuli_chr04 | 13855734                | CC                              | TT              | 1946794399               |
| SNP_P4_42871_13856347 | NC_021163.1    | Ca_kabuli_chr04 | 13856347                | GG                              | AA              | 1946794401               |

| SNPs IDs              | Chromosome IDs | Chromosomes     | Physical positions (bp) | CDC Frontier (Reference genome) | (ILWC46 & LPNB) | NCBI SNPdb Accession IDs |
|-----------------------|----------------|-----------------|-------------------------|---------------------------------|-----------------|--------------------------|
| SNP_P4_42872_13856425 | NC_021163.1    | Ca_kabuli_chr04 | 13856425                | GG                              | CC              | 1946794403               |
| SNP_P4_42873_13856431 | NC_021163.1    | Ca_kabuli_chr04 | 13856431                | AA                              | CC              | 1946794405               |
| SNP_P4_42875_13856730 | NC_021163.1    | Ca_kabuli_chr04 | 13856730                | CC                              | TT              | 1946794407               |
| SNP_P4_42876_13857453 | NC_021163.1    | Ca_kabuli_chr04 | 13857453                | GG                              | TT              | 1946794409               |
| SNP_P4_42877_13857515 | NC_021163.1    | Ca_kabuli_chr04 | 13857515                | GG                              | AA              | 1946794411               |
| SNP_P4_42878_13857602 | NC_021163.1    | Ca_kabuli_chr04 | 13857602                | TT                              | CC              | 1946794413               |
| SNP_P4_42879_13858089 | NC_021163.1    | Ca_kabuli_chr04 | 13858089                | TT                              | CC              | 1946794416               |
| SNP_P4_42880_13858097 | NC_021163.1    | Ca_kabuli_chr04 | 13858097                | AA                              | TT              | 1946794418               |
| SNP_P4_42881_13858113 | NC_021163.1    | Ca_kabuli_chr04 | 13858113                | AA                              | GG              | 1946794420               |
| SNP_P4_42882_13858972 | NC_021163.1    | Ca_kabuli_chr04 | 13858972                | AA                              | GG              | 1946794422               |
| SNP_P4_42883_13860259 | NC_021163.1    | Ca_kabuli_chr04 | 13860259                | GG                              | AA              | 1946794424               |
| SNP_P4_42884_13861131 | NC_021163.1    | Ca_kabuli_chr04 | 13861131                | TT                              | GG              | 1946794426               |
| SNP_P4_42885_13861136 | NC_021163.1    | Ca_kabuli_chr04 | 13861136                | GG                              | AA              | 1946794428               |
| SNP_P4_42886_13861957 | NC_021163.1    | Ca_kabuli_chr04 | 13861957                | GG                              | AA              | 1946794430               |
| SNP_P4_42887_13862003 | NC_021163.1    | Ca_kabuli_chr04 | 13862003                | GG                              | AA              | 1946794432               |
| SNP_P4_42888_13862085 | NC_021163.1    | Ca_kabuli_chr04 | 13862085                | GG                              | AA              | 1946794434               |
| SNP_P4_42889_13862361 | NC_021163.1    | Ca_kabuli_chr04 | 13862361                | TT                              | AA              | 1946794436               |
| SNP_P4_42890_13862362 | NC_021163.1    | Ca_kabuli_chr04 | 13862362                | TT                              | AA              | 1946794438               |
| SNP_P4_42891_13862620 | NC_021163.1    | Ca_kabuli_chr04 | 13862620                | AA                              | GG              | 1946794440               |
| SNP_P4_42892_13862675 | NC_021163.1    | Ca_kabuli_chr04 | 13862675                | TT                              | AA              | 1946794442               |
| SNP_P4_42893_13862678 | NC_021163.1    | Ca_kabuli_chr04 | 13862678                | CC                              | TT              | 1946794444               |
| SNP_P4_42894_13862688 | NC_021163.1    | Ca_kabuli_chr04 | 13862688                | AA                              | TT              | 1946794446               |
| SNP_P4_42895_13863075 | NC_021163.1    | Ca_kabuli_chr04 | 13863075                | CC                              | GG              | 1946794448               |
| SNP_P4_42896_13864883 | NC_021163.1    | Ca_kabuli_chr04 | 13864883                | TT                              | AA              | 1946794450               |
| SNP_P4_42897_13865164 | NC_021163.1    | Ca_kabuli_chr04 | 13865164                | CC                              | TT              | 1946794452               |
| SNP_P4_42898_13865179 | NC_021163.1    | Ca_kabuli_chr04 | 13865179                | TT                              | CC              | 1946794454               |
| SNP_P4_42899_13865474 | NC_021163.1    | Ca_kabuli_chr04 | 13865474                | AA                              | TT              | 1946794456               |
| SNP_P4_42901_13865858 | NC_021163.1    | Ca_kabuli_chr04 | 13865858                | CC                              | TT              | 1946794458               |
| SNP_P4_42903_13865888 | NC_021163.1    | Ca_kabuli_chr04 | 13865888                | CC                              | TT              | 1946794460               |
| SNP_P4_42904_13865889 | NC_021163.1    | Ca_kabuli_chr04 | 13865889                | CC                              | TT              | 1946794462               |
| SNP_P4_42905_13865969 | NC_021163.1    | Ca_kabuli_chr04 | 13865969                | AA                              | GG              | 1946794464               |
| SNP_P4_42906_13866085 | NC_021163.1    | Ca_kabuli_chr04 | 13866085                | AA                              | GG              | 1946794466               |
| SNP_P4_42907_13866882 | NC_021163.1    | Ca_kabuli_chr04 | 13866882                | GG                              | AA              | 1946794468               |
| SNP_P4_42908_13867195 | NC_021163.1    | Ca_kabuli_chr04 | 13867195                | AA                              | GG              | 1946794470               |
| SNP_P4_42909_13869114 | NC_021163.1    | Ca_kabuli_chr04 | 13869114                | TT                              | GG              | 1946794472               |
| SNP_P4_42910_13907751 | NC_021163.1    | Ca_kabuli_chr04 | 13907751                | GG                              | AA              | 1946794474               |
| SNP_P4_42911_13908395 | NC_021163.1    | Ca_kabuli_chr04 | 13908395                | GG                              | AA              | 1946794476               |
| SNP_P4_42913_13908749 | NC_021163.1    | Ca_kabuli_chr04 | 13908749                | GG                              | AA              | 1946794478               |
| SNP_P4_42914_13908798 | NC_021163.1    | Ca_kabuli_chr04 | 13908798                | GG                              | AA              | 1946794480               |
| SNP_P4_42915_13908943 | NC_021163.1    | Ca_kabuli_chr04 | 13908943                | AA                              | GG              | 1946794482               |
| SNP_P4_42916_13908979 | NC_021163.1    | Ca_kabuli_chr04 | 13908979                | GG                              | TT              | 1946794485               |
| SNP_P4_42917_13909130 | NC_021163.1    | Ca_kabuli_chr04 | 13909130                | TT                              | CC              | 1946794487               |

| SNPs IDs              | Chromosome IDs | Chromosomes     | Physical positions (bp) | CDC Frontier (Reference genome) | (ILWC46 & LPNB) | NCBI SNPdb Accession IDs |
|-----------------------|----------------|-----------------|-------------------------|---------------------------------|-----------------|--------------------------|
| SNP_P4_42918_13909246 | NC_021163.1    | Ca_kabuli_chr04 | 13909246                | CC                              | TT              | 1946794489               |
| SNP_P4_42920_13909307 | NC_021163.1    | Ca_kabuli_chr04 | 13909307                | GG                              | AA              | 1946794491               |
| SNP_P4_42921_13911299 | NC_021163.1    | Ca_kabuli_chr04 | 13911299                | TT                              | CC              | 1946794493               |
| SNP_P4_42922_13912327 | NC_021163.1    | Ca_kabuli_chr04 | 13912327                | AA                              | GG              | 1946794495               |
| SNP_P4_42923_13917650 | NC_021163.1    | Ca_kabuli_chr04 | 13917650                | CC                              | TT              | 1946794497               |
| SNP_P4_42924_13946266 | NC_021163.1    | Ca_kabuli_chr04 | 13946266                | CC                              | TT              | 1946794499               |
| SNP_P4_42925_13946602 | NC_021163.1    | Ca_kabuli_chr04 | 13946602                | GG                              | AA              | 1946794501               |
| SNP_P4_42926_13962641 | NC_021163.1    | Ca_kabuli_chr04 | 13962641                | TT                              | GG              | 1946794503               |
| SNP_P4_42927_13962644 | NC_021163.1    | Ca_kabuli_chr04 | 13962644                | AA                              | GG              | 1946794505               |
| SNP_P4_42929_14043021 | NC_021163.1    | Ca_kabuli_chr04 | 14043021                | CC                              | TT              | 1946794507               |
| SNP_P4_42930_14061829 | NC_021163.1    | Ca_kabuli_chr04 | 14061829                | AA                              | GG              | 1946794510               |
| SNP_P4_42932_14108091 | NC_021163.1    | Ca_kabuli_chr04 | 14108091                | AA                              | TT              | 1946794512               |
| SNP_P4_42933_14111779 | NC_021163.1    | Ca_kabuli_chr04 | 14111779                | AA                              | CC              | 1946794514               |
| SNP_P4_42934_14141768 | NC_021163.1    | Ca_kabuli_chr04 | 14141768                | AA                              | GG              | 1946794516               |
| SNP_P4_42935_14159448 | NC_021163.1    | Ca_kabuli_chr04 | 14159448                | CC                              | TT              | 1946794518               |
| SNP_P4_42936_14180446 | NC_021163.1    | Ca_kabuli_chr04 | 14180446                | GG                              | TT              | 1946794520               |
| SNP_P4_42938_14188181 | NC_021163.1    | Ca_kabuli_chr04 | 14188181                | AA                              | GG              | 1946794523               |
| SNP_P4_42939_14204997 | NC_021163.1    | Ca_kabuli_chr04 | 14204997                | AA                              | TT              | 1946794525               |
| SNP_P4_42940_14205449 | NC_021163.1    | Ca_kabuli_chr04 | 14205449                | GG                              | AA              | 1946794527               |
| SNP_P4_42941_14205490 | NC_021163.1    | Ca_kabuli_chr04 | 14205490                | TT                              | CC              | 1946794529               |
| SNP_P4_42942_14205510 | NC_021163.1    | Ca_kabuli_chr04 | 14205510                | TT                              | CC              | 1946794531               |
| SNP_P4_42943_14205511 | NC_021163.1    | Ca_kabuli_chr04 | 14205511                | AA                              | GG              | 1946794533               |
| SNP_P4_42944_14221691 | NC_021163.1    | Ca_kabuli_chr04 | 14221691                | TT                              | GG              | 1946794535               |
| SNP_P4_42945_14224321 | NC_021163.1    | Ca_kabuli_chr04 | 14224321                | AA                              | TT              | 1946794537               |
| SNP_P4_42946_14235417 | NC_021163.1    | Ca_kabuli_chr04 | 14235417                | TT                              | CC              | 1946794539               |
| SNP_P4_42947_14248703 | NC_021163.1    | Ca_kabuli_chr04 | 14248703                | CC                              | TT              | 1946794541               |
| SNP_P4_42948_14260276 | NC_021163.1    | Ca_kabuli_chr04 | 14260276                | TT                              | GG              | 1946794543               |
| SNP_P4_42949_14260354 | NC_021163.1    | Ca_kabuli_chr04 | 14260354                | TT                              | CC              | 1946794545               |
| SNP_P4_42950_14260581 | NC_021163.1    | Ca_kabuli_chr04 | 14260581                | AA                              | GG              | 1946794547               |
| SNP_P4_42951_14260607 | NC_021163.1    | Ca_kabuli_chr04 | 14260607                | GG                              | AA              | 1946794549               |
| SNP_P4_42952_14260648 | NC_021163.1    | Ca_kabuli_chr04 | 14260648                | GG                              | AA              | 1946794551               |
| SNP_P4_42953_14264894 | NC_021163.1    | Ca_kabuli_chr04 | 14264894                | GG                              | TT              | 1946794553               |
| SNP_P4_42954_14271489 | NC_021163.1    | Ca_kabuli_chr04 | 14271489                | TT                              | AA              | 1946794555               |
| SNP_P4_42955_14271531 | NC_021163.1    | Ca_kabuli_chr04 | 14271531                | TT                              | CC              | 1946794557               |
| SNP_P4_42957_14297414 | NC_021163.1    | Ca_kabuli_chr04 | 14297414                | CC                              | TT              | 1946794559               |
| SNP_P4_42958_14308963 | NC_021163.1    | Ca_kabuli_chr04 | 14308963                | GG                              | AA              | 1946794561               |
| SNP_P4_42959_14329783 | NC_021163.1    | Ca_kabuli_chr04 | 14329783                | GG                              | AA              | 1946794564               |
| SNP_P4_42960_14329853 | NC_021163.1    | Ca_kabuli_chr04 | 14329853                | AA                              | GG              | 1946794566               |
| SNP_P4_42961_14329858 | NC_021163.1    | Ca_kabuli_chr04 | 14329858                | CC                              | GG              | 1946794568               |
| SNP_P4_42962_14329863 | NC_021163.1    | Ca_kabuli_chr04 | 14329863                | TT                              | CC              | 1946794570               |
| SNP_P4_42963_14329884 | NC_021163.1    | Ca_kabuli_chr04 | 14329884                | AA                              | GG              | 1946794572               |
| SNP_P4_42964_14329941 | NC_021163.1    | Ca_kabuli_chr04 | 14329941                | TT                              | CC              | 1946794574               |

| SNPs IDs              | Chromosome IDs | Chromosomes     | Physical positions (bp) | CDC Frontier (Reference genome) | (ILWC46 & LPNB) | NCBI SNPdb Accession IDs |
|-----------------------|----------------|-----------------|-------------------------|---------------------------------|-----------------|--------------------------|
| SNP_P4_42965_14329999 | NC_021163.1    | Ca_kabuli_chr04 | 14329999                | AA                              | GG              | 1946794576               |
| SNP_P4_42966_14330013 | NC_021163.1    | Ca_kabuli_chr04 | 14330013                | TT                              | CC              | 1946794578               |
| SNP_P4_42967_14330037 | NC_021163.1    | Ca_kabuli_chr04 | 14330037                | TT                              | CC              | 1946794580               |
| SNP_P4_42968_14330178 | NC_021163.1    | Ca_kabuli_chr04 | 14330178                | TT                              | CC              | 1946794582               |
| SNP_P4_42969_14330332 | NC_021163.1    | Ca_kabuli_chr04 | 14330332                | AA                              | GG              | 1946794584               |
| SNP_P4_42970_14330355 | NC_021163.1    | Ca_kabuli_chr04 | 14330355                | AA                              | TT              | 1946794586               |
| SNP_P4_42972_14385105 | NC_021163.1    | Ca_kabuli_chr04 | 14385105                | AA                              | GG              | 1946794588               |
| SNP_P4_42973_14392703 | NC_021163.1    | Ca_kabuli_chr04 | 14392703                | AA                              | GG              | 1946794590               |
| SNP_P4_42974_14392721 | NC_021163.1    | Ca_kabuli_chr04 | 14392721                | TT                              | GG              | 1946794592               |
| SNP_P4_42975_14392822 | NC_021163.1    | Ca_kabuli_chr04 | 14392822                | AA                              | CC              | 1946794594               |
| SNP_P4_42978_14397207 | NC_021163.1    | Ca_kabuli_chr04 | 14397207                | TT                              | CC              | 1946794596               |
| SNP_P4_42979_14397224 | NC_021163.1    | Ca_kabuli_chr04 | 14397224                | GG                              | AA              | 1946794598               |
| SNP_P4_42981_14397378 | NC_021163.1    | Ca_kabuli_chr04 | 14397378                | TT                              | CC              | 1946794600               |
| SNP_P4_42982_14397425 | NC_021163.1    | Ca_kabuli_chr04 | 14397425                | AA                              | GG              | 1946794602               |
| SNP_P4_42983_14397507 | NC_021163.1    | Ca_kabuli_chr04 | 14397507                | AA                              | CC              | 1946794604               |
| SNP_P4_42984_14397520 | NC_021163.1    | Ca_kabuli_chr04 | 14397520                | GG                              | AA              | 1946794606               |
| SNP_P4_42985_14397570 | NC_021163.1    | Ca_kabuli_chr04 | 14397570                | GG                              | AA              | 1946794608               |
| SNP_P4_42986_14397591 | NC_021163.1    | Ca_kabuli_chr04 | 14397591                | CC                              | TT              | 1946794610               |
| SNP_P4_42988_14398704 | NC_021163.1    | Ca_kabuli_chr04 | 14398704                | TT                              | CC              | 1946794612               |
| SNP_P4_42989_14398726 | NC_021163.1    | Ca_kabuli_chr04 | 14398726                | AA                              | GG              | 1946794614               |
| SNP_P4_42990_14399029 | NC_021163.1    | Ca_kabuli_chr04 | 14399029                | TT                              | CC              | 1946794616               |
| SNP_P4_42991_14399086 | NC_021163.1    | Ca_kabuli_chr04 | 14399086                | TT                              | CC              | 1946794618               |
| SNP_P4_42992_14399137 | NC_021163.1    | Ca_kabuli_chr04 | 14399137                | AA                              | GG              | 1946794620               |
| SNP_P4_42993_14399150 | NC_021163.1    | Ca_kabuli_chr04 | 14399150                | TT                              | GG              | 1946794622               |
| SNP_P4_42994_14399444 | NC_021163.1    | Ca_kabuli_chr04 | 14399444                | TT                              | GG              | 1946794624               |
| SNP_P4_42995_14403108 | NC_021163.1    | Ca_kabuli_chr04 | 14403108                | CC                              | TT              | 1946794626               |
| SNP_P4_42996_14405509 | NC_021163.1    | Ca_kabuli_chr04 | 14405509                | CC                              | TT              | 1946794628               |
| SNP_P4_42997_14405514 | NC_021163.1    | Ca_kabuli_chr04 | 14405514                | TT                              | GG              | 1946794630               |
| SNP_P4_42998_14405577 | NC_021163.1    | Ca_kabuli_chr04 | 14405577                | AA                              | GG              | 1946794632               |
| SNP_P4_42999_14405593 | NC_021163.1    | Ca_kabuli_chr04 | 14405593                | GG                              | TT              | 1946794634               |
| SNP_P4_43000_14405603 | NC_021163.1    | Ca_kabuli_chr04 | 14405603                | AA                              | TT              | 1946794636               |
| SNP_P4_43002_14405699 | NC_021163.1    | Ca_kabuli_chr04 | 14405699                | GG                              | TT              | 1946794638               |
| SNP_P4_43003_14405707 | NC_021163.1    | Ca_kabuli_chr04 | 14405707                | CC                              | TT              | 1946794640               |
| SNP_P4_43004_14405722 | NC_021163.1    | Ca_kabuli_chr04 | 14405722                | GG                              | AA              | 1946794642               |
| SNP_P4_43006_14405819 | NC_021163.1    | Ca_kabuli_chr04 | 14405819                | AA                              | GG              | 1946794644               |
| SNP_P4_43007_14405826 | NC_021163.1    | Ca_kabuli_chr04 | 14405826                | CC                              | TT              | 1946794647               |
| SNP_P4_43008_14405834 | NC_021163.1    | Ca_kabuli_chr04 | 14405834                | TT                              | CC              | 1946794649               |
| SNP_P4_43009_14405862 | NC_021163.1    | Ca_kabuli_chr04 | 14405862                | GG                              | AA              | 1946794651               |
| SNP_P4_43010_14405865 | NC_021163.1    | Ca_kabuli_chr04 | 14405865                | GG                              | CC              | 1946794653               |
| SNP_P4_43011_14406021 | NC_021163.1    | Ca_kabuli_chr04 | 14406021                | AA                              | TT              | 1946794655               |
| SNP_P4_43013_14406059 | NC_021163.1    | Ca_kabuli_chr04 | 14406059                | TT                              | AA              | 1946794657               |
| SNP_P4_43014_14406071 | NC_021163.1    | Ca_kabuli_chr04 | 14406071                | TT                              | CC              | 1946794659               |



| SNPs IDs              | Chromosome IDs | Chromosomes     | Physical positions (bp) | CDC Frontier (Reference genome) | (ILWC46 & LPNB) | NCBI SNPdb Accession IDs |
|-----------------------|----------------|-----------------|-------------------------|---------------------------------|-----------------|--------------------------|
| SNP_P4_43015_14406085 | NC_021163.1    | Ca_kabuli_chr04 | 14406085                | AA                              | TT              | 1946794661               |
| SNP_P4_43016_14406101 | NC_021163.1    | Ca_kabuli_chr04 | 14406101                | TT                              | CC              | 1946794663               |
| SNP_P4_43017_14406116 | NC_021163.1    | Ca_kabuli_chr04 | 14406116                | TT                              | CC              | 1946794665               |
| SNP_P4_43019_14406143 | NC_021163.1    | Ca_kabuli_chr04 | 14406143                | TT                              | GG              | 1946794667               |
| SNP_P4_43020_14406166 | NC_021163.1    | Ca_kabuli_chr04 | 14406166                | GG                              | AA              | 1946794669               |
| SNP_P4_43021_14406185 | NC_021163.1    | Ca_kabuli_chr04 | 14406185                | GG                              | AA              | 1946794671               |
| SNP_P4_43022_14406220 | NC_021163.1    | Ca_kabuli_chr04 | 14406220                | AA                              | TT              | 1946794673               |
| SNP_P4_43023_14406221 | NC_021163.1    | Ca_kabuli_chr04 | 14406221                | GG                              | AA              | 1946794675               |
| SNP_P4_43024_14406277 | NC_021163.1    | Ca_kabuli_chr04 | 14406277                | CC                              | GG              | 1946794677               |
| SNP_P4_43025_14406348 | NC_021163.1    | Ca_kabuli_chr04 | 14406348                | TT                              | GG              | 1946794679               |
| SNP_P4_43026_14406381 | NC_021163.1    | Ca_kabuli_chr04 | 14406381                | TT                              | GG              | 1946794681               |
| SNP_P4_43027_14406395 | NC_021163.1    | Ca_kabuli_chr04 | 14406395                | TT                              | AA              | 1946794683               |
| SNP_P4_43028_14406422 | NC_021163.1    | Ca_kabuli_chr04 | 14406422                | AA                              | CC              | 1946794685               |
| SNP_P4_43029_14406474 | NC_021163.1    | Ca_kabuli_chr04 | 14406474                | GG                              | CC              | 1946794687               |
| SNP_P4_43030_14406528 | NC_021163.1    | Ca_kabuli_chr04 | 14406528                | CC                              | TT              | 1946794689               |
| SNP_P4_43031_14407154 | NC_021163.1    | Ca_kabuli_chr04 | 14407154                | AA                              | CC              | 1946794691               |
| SNP_P4_43032_14407155 | NC_021163.1    | Ca_kabuli_chr04 | 14407155                | TT                              | AA              | 1946794694               |
| SNP_P4_43033_14407570 | NC_021163.1    | Ca_kabuli_chr04 | 14407570                | GG                              | TT              | 1946794696               |
| SNP_P4_43035_14421622 | NC_021163.1    | Ca_kabuli_chr04 | 14421622                | AA                              | TT              | 1946794698               |
| SNP_P4_43036_14421887 | NC_021163.1    | Ca_kabuli_chr04 | 14421887                | AA                              | GG              | 1946794700               |
| SNP_P4_43037_14422154 | NC_021163.1    | Ca_kabuli_chr04 | 14422154                | AA                              | TT              | 1946794702               |
| SNP_P4_43038_14422166 | NC_021163.1    | Ca_kabuli_chr04 | 14422166                | TT                              | CC              | 1946794704               |
| SNP_P4_43039_14422183 | NC_021163.1    | Ca_kabuli_chr04 | 14422183                | CC                              | GG              | 1946794706               |
| SNP_P4_43040_14422197 | NC_021163.1    | Ca_kabuli_chr04 | 14422197                | AA                              | CC              | 1946794708               |
| SNP_P4_43041_14422218 | NC_021163.1    | Ca_kabuli_chr04 | 14422218                | CC                              | TT              | 1946794710               |
| SNP_P4_43042_14423490 | NC_021163.1    | Ca_kabuli_chr04 | 14423490                | CC                              | GG              | 1946794712               |
| SNP_P4_43043_14471770 | NC_021163.1    | Ca_kabuli_chr04 | 14471770                | TT                              | CC              | 1946794714               |
| SNP_P4_43044_14473361 | NC_021163.1    | Ca_kabuli_chr04 | 14473361                | TT                              | GG              | 1946794716               |
| SNP_P4_43045_14491148 | NC_021163.1    | Ca_kabuli_chr04 | 14491148                | TT                              | GG              | 1946794718               |
| SNP_P4_43046_14491603 | NC_021163.1    | Ca_kabuli_chr04 | 14491603                | AA                              | TT              | 1946794720               |
| SNP_P4_43047_14491604 | NC_021163.1    | Ca_kabuli_chr04 | 14491604                | CC                              | AA              | 1946794722               |
| SNP_P4_43048_14491605 | NC_021163.1    | Ca_kabuli_chr04 | 14491605                | TT                              | CC              | 1946794725               |
| SNP_P4_43049_14491606 | NC_021163.1    | Ca_kabuli_chr04 | 14491606                | GG                              | AA              | 1946794727               |
| SNP_P4_43050_14491627 | NC_021163.1    | Ca_kabuli_chr04 | 14491627                | CC                              | TT              | 1946794729               |
| SNP_P4_43051_14491645 | NC_021163.1    | Ca_kabuli_chr04 | 14491645                | GG                              | AA              | 1946794731               |
| SNP_P4_43052_14491647 | NC_021163.1    | Ca_kabuli_chr04 | 14491647                | AA                              | TT              | 1946794733               |
| SNP_P4_43053_14491681 | NC_021163.1    | Ca_kabuli_chr04 | 14491681                | GG                              | AA              | 1946794735               |
| SNP_P4_43054_14491685 | NC_021163.1    | Ca_kabuli_chr04 | 14491685                | AA                              | TT              | 1946794737               |
| SNP_P4_43055_14537577 | NC_021163.1    | Ca_kabuli_chr04 | 14537577                | AA                              | TT              | 1946794739               |
| SNP_P4_43056_14544895 | NC_021163.1    | Ca_kabuli_chr04 | 14544895                | TT                              | CC              | 1946794741               |
| SNP_P4_43057_14556047 | NC_021163.1    | Ca_kabuli_chr04 | 14556047                | GG                              | AA              | 1946794743               |
| SNP_P4_43058_14556368 | NC_021163.1    | Ca_kabuli_chr04 | 14556368                | CC                              | AA              | 1946794745               |

| SNPs IDs              | Chromosome IDs | Chromosomes     | Physical positions (bp) | CDC Frontier (Reference genome) | (ILWC46 & LPNB) | NCBI SNPdb Accession IDs |
|-----------------------|----------------|-----------------|-------------------------|---------------------------------|-----------------|--------------------------|
| SNP_P4_43059_14556421 | NC_021163.1    | Ca_kabuli_chr04 | 14556421                | TT                              | GG              | 1946794747               |
| SNP_P4_43060_14556477 | NC_021163.1    | Ca_kabuli_chr04 | 14556477                | TT                              | CC              | 1946794749               |
| SNP_P4_43061_14556489 | NC_021163.1    | Ca_kabuli_chr04 | 14556489                | AA                              | GG              | 1946794752               |
| SNP_P4_43062_14590181 | NC_021163.1    | Ca_kabuli_chr04 | 14590181                | TT                              | CC              | 1946794754               |
| SNP_P4_43063_14590657 | NC_021163.1    | Ca_kabuli_chr04 | 14590657                | CC                              | TT              | 1946794756               |
| SNP_P4_43064_14620234 | NC_021163.1    | Ca_kabuli_chr04 | 14620234                | GG                              | TT              | 1946794758               |
| SNP_P4_43065_14635995 | NC_021163.1    | Ca_kabuli_chr04 | 14635995                | TT                              | AA              | 1946794760               |
| SNP_P4_43066_14651295 | NC_021163.1    | Ca_kabuli_chr04 | 14651295                | AA                              | TT              | 1946794762               |
| SNP_P4_43067_14651309 | NC_021163.1    | Ca_kabuli_chr04 | 14651309                | AA                              | GG              | 1946794765               |
| SNP_P4_43068_14651315 | NC_021163.1    | Ca_kabuli_chr04 | 14651315                | AA                              | GG              | 1946794767               |
| SNP_P4_43070_14700699 | NC_021163.1    | Ca_kabuli_chr04 | 14700699                | AA                              | GG              | 1946794769               |
| SNP_P4_43071_14793944 | NC_021163.1    | Ca_kabuli_chr04 | 14793944                | GG                              | AA              | 1946794771               |
| SNP_P4_43072_14793989 | NC_021163.1    | Ca_kabuli_chr04 | 14793989                | TT                              | AA              | 1946794773               |
| SNP_P4_43074_14814071 | NC_021163.1    | Ca_kabuli_chr04 | 14814071                | AA                              | TT              | 1946794775               |
| SNP_P4_43075_14846175 | NC_021163.1    | Ca_kabuli_chr04 | 14846175                | TT                              | CC              | 1946794778               |
| SNP_P4_43076_14860899 | NC_021163.1    | Ca_kabuli_chr04 | 14860899                | GG                              | TT              | 1946794780               |
| SNP_P4_43077_14867245 | NC_021163.1    | Ca_kabuli_chr04 | 14867245                | TT                              | CC              | 1946794782               |
| SNP_P4_43078_14867416 | NC_021163.1    | Ca_kabuli_chr04 | 14867416                | TT                              | CC              | 1946794784               |
| SNP_P4_43079_14867849 | NC_021163.1    | Ca_kabuli_chr04 | 14867849                | GG                              | AA              | 1946794786               |
| SNP_P4_43080_14886235 | NC_021163.1    | Ca_kabuli_chr04 | 14886235                | CC                              | GG              | 1946794788               |
| SNP_P4_43081_14911703 | NC_021163.1    | Ca_kabuli_chr04 | 14911703                | CC                              | GG              | 1946794790               |
| SNP_P4_43082_14911719 | NC_021163.1    | Ca_kabuli_chr04 | 14911719                | TT                              | AA              | 1946794792               |
| SNP_P4_43083_14911774 | NC_021163.1    | Ca_kabuli_chr04 | 14911774                | CC                              | AA              | 1946794794               |
| SNP_P4_43084_14911845 | NC_021163.1    | Ca_kabuli_chr04 | 14911845                | AA                              | CC              | 1946794796               |
| SNP_P4_43085_14911867 | NC_021163.1    | Ca_kabuli_chr04 | 14911867                | AA                              | GG              | 1946794798               |
| SNP_P4_43086_14912372 | NC_021163.1    | Ca_kabuli_chr04 | 14912372                | TT                              | AA              | 1946794800               |
| SNP_P4_43087_14932690 | NC_021163.1    | Ca_kabuli_chr04 | 14932690                | AA                              | GG              | 1946794803               |
| SNP_P4_43088_14932739 | NC_021163.1    | Ca_kabuli_chr04 | 14932739                | TT                              | AA              | 1946794805               |
| SNP_P4_43089_14932838 | NC_021163.1    | Ca_kabuli_chr04 | 14932838                | CC                              | AA              | 1946794807               |
| SNP_P4_43091_14933063 | NC_021163.1    | Ca_kabuli_chr04 | 14933063                | AA                              | GG              | 1946794809               |
| SNP_P4_43092_14933118 | NC_021163.1    | Ca_kabuli_chr04 | 14933118                | GG                              | TT              | 1946794811               |
| SNP_P4_43093_14997066 | NC_021163.1    | Ca_kabuli_chr04 | 14997066                | CC                              | TT              | 1946794813               |
| SNP_P4_43095_14999722 | NC_021163.1    | Ca_kabuli_chr04 | 14999722                | AA                              | CC              | 1946794815               |
| SNP_P4_43096_14999727 | NC_021163.1    | Ca_kabuli_chr04 | 14999727                | CC                              | TT              | 1946794817               |
| SNP_P4_43097_14999754 | NC_021163.1    | Ca_kabuli_chr04 | 14999754                | AA                              | CC              | 1946794819               |
| SNP_P4_43098_14999768 | NC_021163.1    | Ca_kabuli_chr04 | 14999768                | CC                              | TT              | 1946794821               |
| SNP_P4_43099_14999788 | NC_021163.1    | Ca_kabuli_chr04 | 14999788                | CC                              | TT              | 1946794823               |
| SNP_P4_43100_14999871 | NC_021163.1    | Ca_kabuli_chr04 | 14999871                | GG                              | TT              | 1946794825               |
| SNP_P4_43101_14999899 | NC_021163.1    | Ca_kabuli_chr04 | 14999899                | TT                              | CC              | 1946794827               |
| SNP_P4_43102_14999984 | NC_021163.1    | Ca_kabuli_chr04 | 14999984                | CC                              | TT              | 1946794829               |
| SNP_P4_43103_14999994 | NC_021163.1    | Ca_kabuli_chr04 | 14999994                | TT                              | CC              | 1946794831               |
| SNP_P4_43104_15000054 | NC_021163.1    | Ca_kabuli_chr04 | 15000054                | TT                              | AA              | 1946794833               |

| SNPs IDs              | Chromosome IDs | Chromosomes     | Physical positions (bp) | CDC Frontier (Reference genome) | (ILWC46 & LPNB) | NCBI SNPdb Accession IDs |
|-----------------------|----------------|-----------------|-------------------------|---------------------------------|-----------------|--------------------------|
| SNP_P4_43105_15000059 | NC_021163.1    | Ca_kabuli_chr04 | 15000059                | AA                              | TT              | 1946794835               |
| SNP_P4_43106_15000076 | NC_021163.1    | Ca_kabuli_chr04 | 15000076                | CC                              | AA              | 1946794837               |
| SNP_P4_43107_15000079 | NC_021163.1    | Ca_kabuli_chr04 | 15000079                | AA                              | CC              | 1946794839               |
| SNP_P4_43108_15000165 | NC_021163.1    | Ca_kabuli_chr04 | 15000165                | TT                              | GG              | 1946794841               |
| SNP_P4_43109_15000171 | NC_021163.1    | Ca_kabuli_chr04 | 15000171                | AA                              | GG              | 1946794843               |
| SNP_P4_43110_15000207 | NC_021163.1    | Ca_kabuli_chr04 | 15000207                | TT                              | AA              | 1946794845               |
| SNP_P4_43111_15000636 | NC_021163.1    | Ca_kabuli_chr04 | 15000636                | GG                              | AA              | 1946794847               |
| SNP_P4_43112_15004610 | NC_021163.1    | Ca_kabuli_chr04 | 15004610                | TT                              | CC              | 1946794849               |
| SNP_P4_43113_15004759 | NC_021163.1    | Ca_kabuli_chr04 | 15004759                | TT                              | GG              | 1946794851               |
| SNP_P4_43114_15004797 | NC_021163.1    | Ca_kabuli_chr04 | 15004797                | TT                              | CC              | 1946794853               |
| SNP_P4_43115_15004851 | NC_021163.1    | Ca_kabuli_chr04 | 15004851                | GG                              | TT              | 1946794855               |
| SNP_P4_43116_15004852 | NC_021163.1    | Ca_kabuli_chr04 | 15004852                | TT                              | GG              | 1946794857               |
| SNP_P4_43117_15004920 | NC_021163.1    | Ca_kabuli_chr04 | 15004920                | AA                              | GG              | 1946794859               |
| SNP_P4_43118_15004949 | NC_021163.1    | Ca_kabuli_chr04 | 15004949                | AA                              | TT              | 1946794861               |
| SNP_P4_43119_15005007 | NC_021163.1    | Ca_kabuli_chr04 | 15005007                | CC                              | AA              | 1946794863               |
| SNP_P4_43120_15005022 | NC_021163.1    | Ca_kabuli_chr04 | 15005022                | AA                              | GG              | 1946794865               |
| SNP_P4_43121_15005027 | NC_021163.1    | Ca_kabuli_chr04 | 15005027                | TT                              | CC              | 1946794867               |
| SNP_P4_43124_15013659 | NC_021163.1    | Ca_kabuli_chr04 | 15013659                | GG                              | AA              | 1946794869               |
| SNP_P4_43125_15016372 | NC_021163.1    | Ca_kabuli_chr04 | 15016372                | AA                              | TT              | 1946794871               |
| SNP_P4_43126_15048106 | NC_021163.1    | Ca_kabuli_chr04 | 15048106                | TT                              | AA              | 1946794873               |
| SNP_P4_43127_15048121 | NC_021163.1    | Ca_kabuli_chr04 | 15048121                | AA                              | CC              | 1946794875               |
| SNP_P4_43128_15048137 | NC_021163.1    | Ca_kabuli_chr04 | 15048137                | AA                              | TT              | 1946794877               |
| SNP_P4_43129_15048142 | NC_021163.1    | Ca_kabuli_chr04 | 15048142                | AA                              | CC              | 1946794879               |
| SNP_P4_43131_15061397 | NC_021163.1    | Ca_kabuli_chr04 | 15061397                | GG                              | AA              | 1946794881               |
| SNP_P4_43132_15080965 | NC_021163.1    | Ca_kabuli_chr04 | 15080965                | CC                              | TT              | 1946794883               |
| SNP_P4_43133_15080966 | NC_021163.1    | Ca_kabuli_chr04 | 15080966                | GG                              | CC              | 1946794885               |
| SNP_P4_43134_15081007 | NC_021163.1    | Ca_kabuli_chr04 | 15081007                | CC                              | TT              | 1946794887               |
| SNP_P4_43135_15081028 | NC_021163.1    | Ca_kabuli_chr04 | 15081028                | TT                              | CC              | 1946794889               |
| SNP_P4_43136_15081033 | NC_021163.1    | Ca_kabuli_chr04 | 15081033                | GG                              | AA              | 1946794891               |
| SNP_P4_43138_15081062 | NC_021163.1    | Ca_kabuli_chr04 | 15081062                | TT                              | AA              | 1946794893               |
| SNP_P4_43139_15081093 | NC_021163.1    | Ca_kabuli_chr04 | 15081093                | AA                              | GG              | 1946794895               |
| SNP_P4_43140_15081094 | NC_021163.1    | Ca_kabuli_chr04 | 15081094                | TT                              | GG              | 1946794898               |
| SNP_P4_43141_15081144 | NC_021163.1    | Ca_kabuli_chr04 | 15081144                | GG                              | TT              | 1946794900               |
| SNP_P4_43142_15081185 | NC_021163.1    | Ca_kabuli_chr04 | 15081185                | GG                              | AA              | 1946794902               |
| SNP_P4_43143_15095608 | NC_021163.1    | Ca_kabuli_chr04 | 15095608                | AA                              | TT              | 1946794904               |
| SNP_P4_43145_15116906 | NC_021163.1    | Ca_kabuli_chr04 | 15116906                | TT                              | CC              | 1946794906               |
| SNP_P4_43146_15116907 | NC_021163.1    | Ca_kabuli_chr04 | 15116907                | TT                              | AA              | 1946794908               |
| SNP_P4_43147_15118226 | NC_021163.1    | Ca_kabuli_chr04 | 15118226                | TT                              | CC              | 1946794910               |
| SNP_P4_43148_15118309 | NC_021163.1    | Ca_kabuli_chr04 | 15118309                | TT                              | GG              | 1946794913               |
| SNP_P4_43149_15118538 | NC_021163.1    | Ca_kabuli_chr04 | 15118538                | CC                              | TT              | 1946794915               |
| SNP_P4_43150_15118728 | NC_021163.1    | Ca_kabuli_chr04 | 15118728                | CC                              | TT              | 1946794917               |
| SNP_P4_43151_15118778 | NC_021163.1    | Ca_kabuli_chr04 | 15118778                | AA                              | TT              | 1946794919               |

| SNPs IDs              | Chromosome IDs | Chromosomes     | Physical positions (bp) | CDC Frontier (Reference genome) | (ILWC46 & LPNB) | NCBI SNPdb Accession IDs |
|-----------------------|----------------|-----------------|-------------------------|---------------------------------|-----------------|--------------------------|
| SNP_P4_43152_15119207 | NC_021163.1    | Ca_kabuli_chr04 | 15119207                | TT                              | GG              | 1946794921               |
| SNP_P4_43153_15170782 | NC_021163.1    | Ca_kabuli_chr04 | 15170782                | AA                              | GG              | 1946794923               |
| SNP_P4_43154_15174276 | NC_021163.1    | Ca_kabuli_chr04 | 15174276                | GG                              | AA              | 1946794924               |
| SNP_P4_43155_15175371 | NC_021163.1    | Ca_kabuli_chr04 | 15175371                | TT                              | GG              | 1946794925               |
| SNP_P4_43156_15181183 | NC_021163.1    | Ca_kabuli_chr04 | 15181183                | AA                              | GG              | 1946794926               |
| SNP_P4_43157_15201673 | NC_021163.1    | Ca_kabuli_chr04 | 15201673                | AA                              | TT              | 1946794927               |
| SNP_P4_43158_15208564 | NC_021163.1    | Ca_kabuli_chr04 | 15208564                | AA                              | GG              | 1946794928               |
| SNP_P4_43159_15208578 | NC_021163.1    | Ca_kabuli_chr04 | 15208578                | AA                              | TT              | 1946794930               |
| SNP_P4_43160_15208600 | NC_021163.1    | Ca_kabuli_chr04 | 15208600                | CC                              | GG              | 1946794932               |
| SNP_P4_43161_15222672 | NC_021163.1    | Ca_kabuli_chr04 | 15222672                | AA                              | TT              | 1946794934               |
| SNP_P4_43162_15223056 | NC_021163.1    | Ca_kabuli_chr04 | 15223056                | GG                              | AA              | 1946794936               |
| SNP_P4_43163_15252015 | NC_021163.1    | Ca_kabuli_chr04 | 15252015                | CC                              | TT              | 1946794938               |
| SNP_P4_43165_15292097 | NC_021163.1    | Ca_kabuli_chr04 | 15292097                | AA                              | GG              | 1946794940               |
| SNP_P4_43166_15330280 | NC_021163.1    | Ca_kabuli_chr04 | 15330280                | AA                              | TT              | 1946794942               |
| SNP_P4_43168_15333258 | NC_021163.1    | Ca_kabuli_chr04 | 15333258                | TT                              | CC              | 1946794944               |
| SNP_P4_43169_15333300 | NC_021163.1    | Ca_kabuli_chr04 | 15333300                | AA                              | GG              | 1946794946               |
| SNP_P4_43170_15333325 | NC_021163.1    | Ca_kabuli_chr04 | 15333325                | CC                              | TT              | 1946794948               |
| SNP_P4_43171_15333354 | NC_021163.1    | Ca_kabuli_chr04 | 15333354                | GG                              | AA              | 1946794950               |
| SNP_P4_43172_15333356 | NC_021163.1    | Ca_kabuli_chr04 | 15333356                | TT                              | CC              | 1946794952               |
| SNP_P4_43173_15333413 | NC_021163.1    | Ca_kabuli_chr04 | 15333413                | AA                              | GG              | 1946794954               |
| SNP_P4_43174_15333422 | NC_021163.1    | Ca_kabuli_chr04 | 15333422                | GG                              | AA              | 1946794956               |
| SNP_P4_43175_15333426 | NC_021163.1    | Ca_kabuli_chr04 | 15333426                | TT                              | GG              | 1946794958               |
| SNP_P4_43176_15333443 | NC_021163.1    | Ca_kabuli_chr04 | 15333443                | CC                              | TT              | 1946794960               |
| SNP_P4_43177_15333673 | NC_021163.1    | Ca_kabuli_chr04 | 15333673                | AA                              | TT              | 1946794962               |
| SNP_P4_43178_15333727 | NC_021163.1    | Ca_kabuli_chr04 | 15333727                | AA                              | CC              | 1946794964               |
| SNP_P4_43179_15343042 | NC_021163.1    | Ca_kabuli_chr04 | 15343042                | TT                              | AA              | 1946794965               |
| SNP_P4_43180_15343488 | NC_021163.1    | Ca_kabuli_chr04 | 15343488                | GG                              | AA              | 1946794968               |
| SNP_P4_43181_15347087 | NC_021163.1    | Ca_kabuli_chr04 | 15347087                | TT                              | CC              | 1946794970               |
| SNP_P4_43183_15419035 | NC_021163.1    | Ca_kabuli_chr04 | 15419035                | AA                              | GG              | 1946794972               |
| SNP_P4_43184_15439412 | NC_021163.1    | Ca_kabuli_chr04 | 15439412                | TT                              | CC              | 1946794974               |
| SNP_P4_43186_15465084 | NC_021163.1    | Ca_kabuli_chr04 | 15465084                | TT                              | AA              | 1946794975               |
| SNP_P4_43187_15465090 | NC_021163.1    | Ca_kabuli_chr04 | 15465090                | TT                              | AA              | 1946794978               |
| SNP_P4_43189_15499310 | NC_021163.1    | Ca_kabuli_chr04 | 15499310                | CC                              | TT              | 1946794980               |
| SNP_P4_43190_15500343 | NC_021163.1    | Ca_kabuli_chr04 | 15500343                | CC                              | TT              | 1946794982               |
| SNP_P4_43191_15549624 | NC_021163.1    | Ca_kabuli_chr04 | 15549624                | AA                              | TT              | 1946794984               |
| SNP_P4_43192_15573138 | NC_021163.1    | Ca_kabuli_chr04 | 15573138                | GG                              | AA              | 1946794986               |
| SNP_P4_43193_15573144 | NC_021163.1    | Ca_kabuli_chr04 | 15573144                | TT                              | AA              | 1946794988               |
| SNP_P4_43194_15579812 | NC_021163.1    | Ca_kabuli_chr04 | 15579812                | CC                              | TT              | 1946794989               |
| SNP_P4_43195_15579814 | NC_021163.1    | Ca_kabuli_chr04 | 15579814                | CC                              | TT              | 1946794992               |
| SNP_P4_43197_15595736 | NC_021163.1    | Ca_kabuli_chr04 | 15595736                | TT                              | CC              | 1946794994               |
| SNP_P4_43198_15595799 | NC_021163.1    | Ca_kabuli_chr04 | 15595799                | AA                              | CC              | 1946794996               |
| SNP_P4_43199_15608255 | NC_021163.1    | Ca_kabuli_chr04 | 15608255                | AA                              | TT              | 1946794998               |

| SNPs IDs              | Chromosome IDs | Chromosomes     | Physical positions (bp) | CDC Frontier (Reference genome) | (ILWC46 & LPNB) | NCBI SNPdb Accession IDs |
|-----------------------|----------------|-----------------|-------------------------|---------------------------------|-----------------|--------------------------|
| SNP_P4_43201_15618717 | NC_021163.1    | Ca_kabuli_chr04 | 15618717                | TT                              | CC              | 1946795000               |
| SNP_P4_43202_15620825 | NC_021163.1    | Ca_kabuli_chr04 | 15620825                | TT                              | CC              | 1946795002               |
| SNP_P4_43204_15632522 | NC_021163.1    | Ca_kabuli_chr04 | 15632522                | CC                              | TT              | 1946795004               |
| SNP_P4_43205_15632625 | NC_021163.1    | Ca_kabuli_chr04 | 15632625                | TT                              | CC              | 1946795006               |
| SNP_P4_43206_15632683 | NC_021163.1    | Ca_kabuli_chr04 | 15632683                | CC                              | TT              | 1946795007               |
| SNP_P4_43207_15632697 | NC_021163.1    | Ca_kabuli_chr04 | 15632697                | TT                              | CC              | 1946795009               |
| SNP_P4_43208_15632699 | NC_021163.1    | Ca_kabuli_chr04 | 15632699                | GG                              | TT              | 1946795011               |
| SNP_P4_43209_15632765 | NC_021163.1    | Ca_kabuli_chr04 | 15632765                | CC                              | TT              | 1946795013               |
| SNP_P4_43210_15632924 | NC_021163.1    | Ca_kabuli_chr04 | 15632924                | TT                              | AA              | 1946795015               |
| SNP_P4_43211_15632926 | NC_021163.1    | Ca_kabuli_chr04 | 15632926                | TT                              | CC              | 1946795017               |
| SNP_P4_43212_15632927 | NC_021163.1    | Ca_kabuli_chr04 | 15632927                | TT                              | CC              | 1946795019               |
| SNP_P4_43213_15672030 | NC_021163.1    | Ca_kabuli_chr04 | 15672030                | AA                              | TT              | 1946795021               |
| SNP_P4_43216_15683232 | NC_021163.1    | Ca_kabuli_chr04 | 15683232                | AA                              | GG              | 1946795023               |
| SNP_P4_43217_15698212 | NC_021163.1    | Ca_kabuli_chr04 | 15698212                | GG                              | TT              | 1946795025               |
| SNP_P4_43218_15712400 | NC_021163.1    | Ca_kabuli_chr04 | 15712400                | GG                              | AA              | 1946795026               |
| SNP_P4_43219_15719950 | NC_021163.1    | Ca_kabuli_chr04 | 15719950                | TT                              | CC              | 1946795028               |
| SNP_P4_43220_15719955 | NC_021163.1    | Ca_kabuli_chr04 | 15719955                | AA                              | TT              | 1946795030               |
| SNP_P4_43221_15719956 | NC_021163.1    | Ca_kabuli_chr04 | 15719956                | AA                              | TT              | 1946795032               |
| SNP_P4_43222_15722159 | NC_021163.1    | Ca_kabuli_chr04 | 15722159                | TT                              | CC              | 1946795034               |
| SNP_P4_43223_15722177 | NC_021163.1    | Ca_kabuli_chr04 | 15722177                | TT                              | CC              | 1946795036               |
| SNP_P4_43224_15729658 | NC_021163.1    | Ca_kabuli_chr04 | 15729658                | AA                              | TT              | 1946795038               |
| SNP_P4_43226_15769321 | NC_021163.1    | Ca_kabuli_chr04 | 15769321                | TT                              | CC              | 1946795040               |
| SNP_P4_43227_15769877 | NC_021163.1    | Ca_kabuli_chr04 | 15769877                | GG                              | AA              | 1946795042               |
| SNP_P4_43228_15788354 | NC_021163.1    | Ca_kabuli_chr04 | 15788354                | AA                              | GG              | 1946795044               |
| SNP_P4_43229_15788493 | NC_021163.1    | Ca_kabuli_chr04 | 15788493                | GG                              | AA              | 1946795046               |
| SNP_P4_43230_15788495 | NC_021163.1    | Ca_kabuli_chr04 | 15788495                | GG                              | CC              | 1946795048               |
| SNP_P4_43231_15788519 | NC_021163.1    | Ca_kabuli_chr04 | 15788519                | TT                              | CC              | 1946795050               |
| SNP_P4_43232_15788546 | NC_021163.1    | Ca_kabuli_chr04 | 15788546                | TT                              | CC              | 1946795052               |
| SNP_P4_43233_15788555 | NC_021163.1    | Ca_kabuli_chr04 | 15788555                | AA                              | GG              | 1946795054               |
| SNP_P4_43234_15788564 | NC_021163.1    | Ca_kabuli_chr04 | 15788564                | GG                              | AA              | 1946795056               |
| SNP_P4_43235_15788718 | NC_021163.1    | Ca_kabuli_chr04 | 15788718                | GG                              | TT              | 1946795058               |
| SNP_P4_43237_15800481 | NC_021163.1    | Ca_kabuli_chr04 | 15800481                | GG                              | AA              | 1946795060               |
| SNP_P4_43238_15801277 | NC_021163.1    | Ca_kabuli_chr04 | 15801277                | TT                              | CC              | 1946795062               |
| SNP_P4_43239_15801308 | NC_021163.1    | Ca_kabuli_chr04 | 15801308                | CC                              | TT              | 1946795064               |
| SNP_P4_43240_15815202 | NC_021163.1    | Ca_kabuli_chr04 | 15815202                | TT                              | CC              | 1946795066               |
| SNP_P4_43241_15862712 | NC_021163.1    | Ca_kabuli_chr04 | 15862712                | GG                              | AA              | 1946795068               |
| SNP_P4_43242_15865077 | NC_021163.1    | Ca_kabuli_chr04 | 15865077                | GG                              | TT              | 1946795070               |
| SNP_P4_43243_15869748 | NC_021163.1    | Ca_kabuli_chr04 | 15869748                | TT                              | GG              | 1946795072               |
| SNP_P4_43244_15869762 | NC_021163.1    | Ca_kabuli_chr04 | 15869762                | AA                              | GG              | 1946795074               |
| SNP_P4_43245_15884383 | NC_021163.1    | Ca_kabuli_chr04 | 15884383                | GG                              | TT              | 1946795076               |
| SNP_P4_43246_15896550 | NC_021163.1    | Ca_kabuli_chr04 | 15896550                | GG                              | TT              | 1946795079               |
| SNP_P4_43247_15907205 | NC_021163.1    | Ca_kabuli_chr04 | 15907205                | TT                              | CC              | 1946795081               |

| SNPs IDs              | Chromosome IDs | Chromosomes     | Physical positions (bp) | CDC Frontier (Reference genome) | (ILWC46 & LPNB) | NCBI SNPdb Accession IDs |
|-----------------------|----------------|-----------------|-------------------------|---------------------------------|-----------------|--------------------------|
| SNP_P4_43248_15916534 | NC_021163.1    | Ca_kabuli_chr04 | 15916534                | GG                              | AA              | 1946795083               |
| SNP_P4_43249_15916935 | NC_021163.1    | Ca_kabuli_chr04 | 15916935                | CC                              | AA              | 1946795085               |
| SNP_P4_43253_15920404 | NC_021163.1    | Ca_kabuli_chr04 | 15920404                | GG                              | TT              | 1946795087               |
| SNP_P4_43255_15922793 | NC_021163.1    | Ca_kabuli_chr04 | 15922793                | GG                              | TT              | 1946795089               |
| SNP_P4_43256_15923944 | NC_021163.1    | Ca_kabuli_chr04 | 15923944                | CC                              | GG              | 1946795091               |
| SNP_P4_43257_15924323 | NC_021163.1    | Ca_kabuli_chr04 | 15924323                | GG                              | AA              | 1946795093               |
| SNP_P4_43258_15924645 | NC_021163.1    | Ca_kabuli_chr04 | 15924645                | GG                              | CC              | 1946795095               |
| SNP_P4_43259_15924652 | NC_021163.1    | Ca_kabuli_chr04 | 15924652                | GG                              | CC              | 1946795097               |
| SNP_P4_43260_15925312 | NC_021163.1    | Ca_kabuli_chr04 | 15925312                | TT                              | GG              | 1946795099               |
| SNP_P4_43261_15925792 | NC_021163.1    | Ca_kabuli_chr04 | 15925792                | CC                              | TT              | 1946795101               |
| SNP_P4_43263_15926280 | NC_021163.1    | Ca_kabuli_chr04 | 15926280                | AA                              | GG              | 1946795103               |
| SNP_P4_43264_15926318 | NC_021163.1    | Ca_kabuli_chr04 | 15926318                | GG                              | AA              | 1946795105               |
| SNP_P4_43265_15927912 | NC_021163.1    | Ca_kabuli_chr04 | 15927912                | AA                              | GG              | 1946795106               |
| SNP_P4_43266_15927962 | NC_021163.1    | Ca_kabuli_chr04 | 15927962                | CC                              | AA              | 1946795108               |
| SNP_P4_43267_15928441 | NC_021163.1    | Ca_kabuli_chr04 | 15928441                | CC                              | TT              | 1946795110               |
| SNP_P4_43268_15929931 | NC_021163.1    | Ca_kabuli_chr04 | 15929931                | TT                              | AA              | 1946795112               |
| SNP_P4_43269_15930498 | NC_021163.1    | Ca_kabuli_chr04 | 15930498                | GG                              | CC              | 1946795114               |
| SNP_P4_43270_15930674 | NC_021163.1    | Ca_kabuli_chr04 | 15930674                | AA                              | TT              | 1946795116               |
| SNP_P4_43271_15930841 | NC_021163.1    | Ca_kabuli_chr04 | 15930841                | TT                              | CC              | 1946795118               |
| SNP_P4_43272_15930860 | NC_021163.1    | Ca_kabuli_chr04 | 15930860                | TT                              | AA              | 1946795120               |
| SNP_P4_43274_15931844 | NC_021163.1    | Ca_kabuli_chr04 | 15931844                | CC                              | GG              | 1946795122               |
| SNP_P4_43275_15932843 | NC_021163.1    | Ca_kabuli_chr04 | 15932843                | TT                              | CC              | 1946795124               |
| SNP_P4_43277_15933422 | NC_021163.1    | Ca_kabuli_chr04 | 15933422                | CC                              | TT              | 1946795126               |
| SNP_P4_43278_15934462 | NC_021163.1    | Ca_kabuli_chr04 | 15934462                | GG                              | AA              | 1946795129               |
| SNP_P4_43279_15935270 | NC_021163.1    | Ca_kabuli_chr04 | 15935270                | AA                              | GG              | 1946795131               |
| SNP_P4_43280_15936145 | NC_021163.1    | Ca_kabuli_chr04 | 15936145                | AA                              | GG              | 1946795133               |
| SNP_P4_43281_15936906 | NC_021163.1    | Ca_kabuli_chr04 | 15936906                | AA                              | CC              | 1946795135               |
| SNP_P4_43282_15937238 | NC_021163.1    | Ca_kabuli_chr04 | 15937238                | AA                              | CC              | 1946795137               |
| SNP_P4_43283_15937243 | NC_021163.1    | Ca_kabuli_chr04 | 15937243                | GG                              | CC              | 1946795139               |
| SNP_P4_43284_15937354 | NC_021163.1    | Ca_kabuli_chr04 | 15937354                | GG                              | TT              | 1946795141               |
| SNP_P4_43285_15937795 | NC_021163.1    | Ca_kabuli_chr04 | 15937795                | CC                              | TT              | 1946795143               |
| SNP_P4_43287_15938882 | NC_021163.1    | Ca_kabuli_chr04 | 15938882                | AA                              | GG              | 1946795145               |
| SNP_P4_43288_15938887 | NC_021163.1    | Ca_kabuli_chr04 | 15938887                | CC                              | TT              | 1946795147               |
| SNP_P4_43289_15938917 | NC_021163.1    | Ca_kabuli_chr04 | 15938917                | CC                              | TT              | 1946795149               |
| SNP_P4_43290_15938924 | NC_021163.1    | Ca_kabuli_chr04 | 15938924                | GG                              | AA              | 1946795151               |
| SNP_P4_43291_15938971 | NC_021163.1    | Ca_kabuli_chr04 | 15938971                | AA                              | TT              | 1946795153               |
| SNP_P4_43293_15941236 | NC_021163.1    | Ca_kabuli_chr04 | 15941236                | AA                              | TT              | 1946795155               |
| SNP_P4_43294_15942039 | NC_021163.1    | Ca_kabuli_chr04 | 15942039                | AA                              | GG              | 1946795157               |
| SNP_P4_43295_15947987 | NC_021163.1    | Ca_kabuli_chr04 | 15947987                | AA                              | GG              | 1946795159               |
| SNP_P4_43296_15948309 | NC_021163.1    | Ca_kabuli_chr04 | 15948309                | GG                              | AA              | 1946795162               |
| SNP_P4_43297_15948376 | NC_021163.1    | Ca_kabuli_chr04 | 15948376                | CC                              | GG              | 1946795164               |
| SNP_P4_43298_15948813 | NC_021163.1    | Ca_kabuli_chr04 | 15948813                | AA                              | TT              | 1946795166               |

| SNPs IDs              | Chromosome IDs | Chromosomes     | Physical positions (bp) | CDC Frontier (Reference genome) | (ILWC46 & LPNB) | NCBI SNPdb Accession IDs |
|-----------------------|----------------|-----------------|-------------------------|---------------------------------|-----------------|--------------------------|
| SNP_P4_43299_15948815 | NC_021163.1    | Ca_kabuli_chr04 | 15948815                | AA                              | CC              | 1946795168               |
| SNP_P4_43300_15948832 | NC_021163.1    | Ca_kabuli_chr04 | 15948832                | TT                              | CC              | 1946795170               |
| SNP_P4_43301_15948842 | NC_021163.1    | Ca_kabuli_chr04 | 15948842                | GG                              | TT              | 1946795172               |
| SNP_P4_43302_15952007 | NC_021163.1    | Ca_kabuli_chr04 | 15952007                | GG                              | AA              | 1946795174               |
| SNP_P4_43303_15952518 | NC_021163.1    | Ca_kabuli_chr04 | 15952518                | TT                              | CC              | 1946795176               |
| SNP_P4_43304_15952520 | NC_021163.1    | Ca_kabuli_chr04 | 15952520                | TT                              | GG              | 1946795178               |
| SNP_P4_43305_15952555 | NC_021163.1    | Ca_kabuli_chr04 | 15952555                | AA                              | GG              | 1946795180               |
| SNP_P4_43306_15952587 | NC_021163.1    | Ca_kabuli_chr04 | 15952587                | AA                              | CC              | 1946795182               |
| SNP_P4_43308_15952676 | NC_021163.1    | Ca_kabuli_chr04 | 15952676                | AA                              | GG              | 1946795184               |
| SNP_P4_43309_15952705 | NC_021163.1    | Ca_kabuli_chr04 | 15952705                | TT                              | GG              | 1946795186               |
| SNP_P4_43310_15952764 | NC_021163.1    | Ca_kabuli_chr04 | 15952764                | TT                              | AA              | 1946795188               |
| SNP_P4_43311_15953163 | NC_021163.1    | Ca_kabuli_chr04 | 15953163                | AA                              | TT              | 1946795190               |
| SNP_P4_43312_15954443 | NC_021163.1    | Ca_kabuli_chr04 | 15954443                | GG                              | AA              | 1946795192               |
| SNP_P4_43313_15954773 | NC_021163.1    | Ca_kabuli_chr04 | 15954773                | AA                              | GG              | 1946795194               |
| SNP_P4_43315_15958821 | NC_021163.1    | Ca_kabuli_chr04 | 15958821                | AA                              | GG              | 1946795196               |
| SNP_P4_43317_15959748 | NC_021163.1    | Ca_kabuli_chr04 | 15959748                | TT                              | GG              | 1946795199               |
| SNP_P4_43318_15959914 | NC_021163.1    | Ca_kabuli_chr04 | 15959914                | CC                              | TT              | 1946795201               |
| SNP_P4_43319_15959936 | NC_021163.1    | Ca_kabuli_chr04 | 15959936                | CC                              | TT              | 1946795203               |
| SNP_P4_43321_15960170 | NC_021163.1    | Ca_kabuli_chr04 | 15960170                | AA                              | CC              | 1946795205               |
| SNP_P4_43323_15960964 | NC_021163.1    | Ca_kabuli_chr04 | 15960964                | TT                              | AA              | 1946795207               |
| SNP_P4_43324_15961111 | NC_021163.1    | Ca_kabuli_chr04 | 15961111                | GG                              | AA              | 1946795209               |
| SNP_P4_43325_15962521 | NC_021163.1    | Ca_kabuli_chr04 | 15962521                | CC                              | TT              | 1946795211               |
| SNP_P4_43326_15962552 | NC_021163.1    | Ca_kabuli_chr04 | 15962552                | AA                              | GG              | 1946795213               |
| SNP_P4_43328_15962643 | NC_021163.1    | Ca_kabuli_chr04 | 15962643                | TT                              | CC              | 1946795215               |
| SNP_P4_43329_15963255 | NC_021163.1    | Ca_kabuli_chr04 | 15963255                | TT                              | CC              | 1946795217               |
| SNP_P4_43330_15963332 | NC_021163.1    | Ca_kabuli_chr04 | 15963332                | TT                              | CC              | 1946795219               |
| SNP_P4_43331_15966814 | NC_021163.1    | Ca_kabuli_chr04 | 15966814                | AA                              | CC              | 1946795221               |
| SNP_P4_43332_15967169 | NC_021163.1    | Ca_kabuli_chr04 | 15967169                | AA                              | GG              | 1946795223               |
| SNP_P4_43333_15967216 | NC_021163.1    | Ca_kabuli_chr04 | 15967216                | CC                              | TT              | 1946795225               |
| SNP_P4_43334_15967479 | NC_021163.1    | Ca_kabuli_chr04 | 15967479                | CC                              | GG              | 1946795227               |
| SNP_P4_43335_15968040 | NC_021163.1    | Ca_kabuli_chr04 | 15968040                | AA                              | GG              | 1946795229               |
| SNP_P4_43337_15969210 | NC_021163.1    | Ca_kabuli_chr04 | 15969210                | CC                              | GG              | 1946795231               |
| SNP_P4_43338_15969278 | NC_021163.1    | Ca_kabuli_chr04 | 15969278                | TT                              | AA              | 1946795233               |
| SNP_P4_43339_15971713 | NC_021163.1    | Ca_kabuli_chr04 | 15971713                | CC                              | AA              | 1946795235               |
| SNP_P4_43340_15972941 | NC_021163.1    | Ca_kabuli_chr04 | 15972941                | TT                              | GG              | 1946795238               |
| SNP_P4_43341_15972976 | NC_021163.1    | Ca_kabuli_chr04 | 15972976                | AA                              | CC              | 1946795240               |
| SNP_P4_43342_15974549 | NC_021163.1    | Ca_kabuli_chr04 | 15974549                | GG                              | TT              | 1946795242               |
| SNP_P4_43344_15981887 | NC_021163.1    | Ca_kabuli_chr04 | 15981887                | AA                              | TT              | 1946795244               |
| SNP_P4_43345_15981949 | NC_021163.1    | Ca_kabuli_chr04 | 15981949                | TT                              | CC              | 1946795246               |
| SNP_P4_43346_15982270 | NC_021163.1    | Ca_kabuli_chr04 | 15982270                | AA                              | CC              | 1946795248               |
| SNP_P4_43347_15982337 | NC_021163.1    | Ca_kabuli_chr04 | 15982337                | AA                              | GG              | 1946795250               |
| SNP_P4_43348_15983274 | NC_021163.1    | Ca_kabuli_chr04 | 15983274                | AA                              | GG              | 1946795252               |

| SNPs IDs              | Chromosome IDs | Chromosomes     | Physical positions (bp) | CDC Frontier (Reference genome) | (ILWC46 & LPNB) | NCBI SNPdb Accession IDs |
|-----------------------|----------------|-----------------|-------------------------|---------------------------------|-----------------|--------------------------|
| SNP_P4_43349_15983404 | NC_021163.1    | Ca_kabuli_chr04 | 15983404                | CC                              | GG              | 1946795254               |
| SNP_P4_43350_15984042 | NC_021163.1    | Ca_kabuli_chr04 | 15984042                | AA                              | GG              | 1946795256               |
| SNP_P4_43351_15984259 | NC_021163.1    | Ca_kabuli_chr04 | 15984259                | TT                              | GG              | 1946795258               |
| SNP_P4_43352_15984833 | NC_021163.1    | Ca_kabuli_chr04 | 15984833                | CC                              | TT              | 1946795260               |
| SNP_P4_43353_15984995 | NC_021163.1    | Ca_kabuli_chr04 | 15984995                | CC                              | TT              | 1946795262               |
| SNP_P4_43354_15985935 | NC_021163.1    | Ca_kabuli_chr04 | 15985935                | CC                              | AA              | 1946795264               |
| SNP_P4_43356_15989410 | NC_021163.1    | Ca_kabuli_chr04 | 15989410                | GG                              | TT              | 1946795266               |
| SNP_P4_43357_15989591 | NC_021163.1    | Ca_kabuli_chr04 | 15989591                | AA                              | GG              | 1946795268               |
| SNP_P4_43360_15990847 | NC_021163.1    | Ca_kabuli_chr04 | 15990847                | TT                              | CC              | 1946795270               |
| SNP_P4_43361_15990894 | NC_021163.1    | Ca_kabuli_chr04 | 15990894                | CC                              | TT              | 1946795272               |
| SNP_P4_43362_15991205 | NC_021163.1    | Ca_kabuli_chr04 | 15991205                | TT                              | CC              | 1946795274               |
| SNP_P4_43363_15991847 | NC_021163.1    | Ca_kabuli_chr04 | 15991847                | TT                              | AA              | 1946795276               |
| SNP_P4_43364_15991855 | NC_021163.1    | Ca_kabuli_chr04 | 15991855                | GG                              | AA              | 1946795278               |
| SNP_P4_43365_15991869 | NC_021163.1    | Ca_kabuli_chr04 | 15991869                | CC                              | AA              | 1946795281               |
| SNP_P4_43366_15992636 | NC_021163.1    | Ca_kabuli_chr04 | 15992636                | TT                              | GG              | 1946795283               |
| SNP_P4_43367_15994127 | NC_021163.1    | Ca_kabuli_chr04 | 15994127                | AA                              | TT              | 1946795285               |
| SNP_P4_43368_15994816 | NC_021163.1    | Ca_kabuli_chr04 | 15994816                | CC                              | TT              | 1946795287               |
| SNP_P4_43369_15994818 | NC_021163.1    | Ca_kabuli_chr04 | 15994818                | AA                              | CC              | 1946795289               |
| SNP_P4_43370_15996112 | NC_021163.1    | Ca_kabuli_chr04 | 15996112                | TT                              | CC              | 1946795291               |
| SNP_P4_43371_15996183 | NC_021163.1    | Ca_kabuli_chr04 | 15996183                | AA                              | GG              | 1946795293               |
| SNP_P4_43372_16001306 | NC_021163.1    | Ca_kabuli_chr04 | 16001306                | CC                              | TT              | 1946795295               |
| SNP_P4_43373_16001553 | NC_021163.1    | Ca_kabuli_chr04 | 16001553                | AA                              | GG              | 1946795297               |
| SNP_P4_43374_16006150 | NC_021163.1    | Ca_kabuli_chr04 | 16006150                | AA                              | GG              | 1946795299               |
| SNP_P4_43376_16015843 | NC_021163.1    | Ca_kabuli_chr04 | 16015843                | AA                              | TT              | 1946795301               |
| SNP_P4_43377_16016308 | NC_021163.1    | Ca_kabuli_chr04 | 16016308                | TT                              | CC              | 1946795303               |
| SNP_P4_43378_16022858 | NC_021163.1    | Ca_kabuli_chr04 | 16022858                | CC                              | GG              | 1946795305               |
| SNP_P4_43379_16025144 | NC_021163.1    | Ca_kabuli_chr04 | 16025144                | TT                              | CC              | 1946795307               |
| SNP_P4_43380_16025436 | NC_021163.1    | Ca_kabuli_chr04 | 16025436                | CC                              | TT              | 1946795309               |
| SNP_P4_43381_16025745 | NC_021163.1    | Ca_kabuli_chr04 | 16025745                | CC                              | TT              | 1946795311               |
| SNP_P4_43382_16025753 | NC_021163.1    | Ca_kabuli_chr04 | 16025753                | AA                              | GG              | 1946795313               |
| SNP_P4_43383_16026131 | NC_021163.1    | Ca_kabuli_chr04 | 16026131                | AA                              | GG              | 1946795315               |
| SNP_P4_43384_16027272 | NC_021163.1    | Ca_kabuli_chr04 | 16027272                | GG                              | AA              | 1946795317               |
| SNP_P4_43385_16027292 | NC_021163.1    | Ca_kabuli_chr04 | 16027292                | AA                              | CC              | 1946795319               |
| SNP_P4_43386_16027299 | NC_021163.1    | Ca_kabuli_chr04 | 16027299                | TT                              | AA              | 1946795321               |
| SNP_P4_43387_16027457 | NC_021163.1    | Ca_kabuli_chr04 | 16027457                | TT                              | GG              | 1946795323               |
| SNP_P4_43388_16028011 | NC_021163.1    | Ca_kabuli_chr04 | 16028011                | TT                              | GG              | 1946795325               |
| SNP_P4_43390_16028227 | NC_021163.1    | Ca_kabuli_chr04 | 16028227                | AA                              | GG              | 1946795327               |
| SNP_P4_43391_16028585 | NC_021163.1    | Ca_kabuli_chr04 | 16028585                | CC                              | TT              | 1946795329               |
| SNP_P4_43392_16028709 | NC_021163.1    | Ca_kabuli_chr04 | 16028709                | TT                              | GG              | 1946795331               |
| SNP_P4_43393_16028729 | NC_021163.1    | Ca_kabuli_chr04 | 16028729                | GG                              | TT              | 1946795333               |
| SNP_P4_43394_16028774 | NC_021163.1    | Ca_kabuli_chr04 | 16028774                | GG                              | AA              | 1946795335               |
| SNP_P4_43395_16028778 | NC_021163.1    | Ca_kabuli_chr04 | 16028778                | CC                              | TT              | 1946795337               |



| SNPs IDs              | Chromosome IDs | Chromosomes     | Physical positions (bp) | CDC Frontier (Reference genome) | (ILWC46 & LPNB) | NCBI SNPdb Accession IDs |
|-----------------------|----------------|-----------------|-------------------------|---------------------------------|-----------------|--------------------------|
| SNP_P4_43397_16028877 | NC_021163.1    | Ca_kabuli_chr04 | 16028877                | TT                              | CC              | 1946795339               |
| SNP_P4_43398_16028899 | NC_021163.1    | Ca_kabuli_chr04 | 16028899                | TT                              | CC              | 1946795341               |
| SNP_P4_43399_16028938 | NC_021163.1    | Ca_kabuli_chr04 | 16028938                | AA                              | GG              | 1946795343               |
| SNP_P4_43400_16029195 | NC_021163.1    | Ca_kabuli_chr04 | 16029195                | AA                              | GG              | 1946795345               |
| SNP_P4_43401_16030878 | NC_021163.1    | Ca_kabuli_chr04 | 16030878                | AA                              | GG              | 1946795347               |
| SNP_P4_43402_16031556 | NC_021163.1    | Ca_kabuli_chr04 | 16031556                | TT                              | CC              | 1946795349               |
| SNP_P4_43403_16031557 | NC_021163.1    | Ca_kabuli_chr04 | 16031557                | CC                              | GG              | 1946795351               |
| SNP_P4_43404_16031562 | NC_021163.1    | Ca_kabuli_chr04 | 16031562                | CC                              | AA              | 1946795353               |
| SNP_P4_43405_16031842 | NC_021163.1    | Ca_kabuli_chr04 | 16031842                | CC                              | GG              | 1946795355               |
| SNP_P4_43406_16033220 | NC_021163.1    | Ca_kabuli_chr04 | 16033220                | CC                              | GG              | 1946795357               |
| SNP_P4_43407_16035252 | NC_021163.1    | Ca_kabuli_chr04 | 16035252                | TT                              | CC              | 1946795359               |
| SNP_P4_43409_16035296 | NC_021163.1    | Ca_kabuli_chr04 | 16035296                | TT                              | CC              | 1946795361               |
| SNP_P4_43410_16039028 | NC_021163.1    | Ca_kabuli_chr04 | 16039028                | TT                              | AA              | 1946795363               |
| SNP_P4_43411_16042155 | NC_021163.1    | Ca_kabuli_chr04 | 16042155                | GG                              | AA              | 1946795365               |
| SNP_P4_43412_16042350 | NC_021163.1    | Ca_kabuli_chr04 | 16042350                | TT                              | CC              | 1946795367               |
| SNP_P4_43413_16043451 | NC_021163.1    | Ca_kabuli_chr04 | 16043451                | AA                              | TT              | 1946795369               |
| SNP_P4_43414_16044069 | NC_021163.1    | Ca_kabuli_chr04 | 16044069                | GG                              | AA              | 1946795371               |
| SNP_P4_43415_16044074 | NC_021163.1    | Ca_kabuli_chr04 | 16044074                | CC                              | TT              | 1946795373               |
| SNP_P4_43416_16044075 | NC_021163.1    | Ca_kabuli_chr04 | 16044075                | CC                              | TT              | 1946795375               |
| SNP_P4_43417_16044081 | NC_021163.1    | Ca_kabuli_chr04 | 16044081                | CC                              | TT              | 1946795377               |
| SNP_P4_43418_16044338 | NC_021163.1    | Ca_kabuli_chr04 | 16044338                | TT                              | CC              | 1946795379               |
| SNP_P4_43419_16044361 | NC_021163.1    | Ca_kabuli_chr04 | 16044361                | TT                              | AA              | 1946795381               |
| SNP_P4_43420_16044371 | NC_021163.1    | Ca_kabuli_chr04 | 16044371                | CC                              | TT              | 1946795383               |
| SNP_P4_43421_16045870 | NC_021163.1    | Ca_kabuli_chr04 | 16045870                | GG                              | AA              | 1946795385               |
| SNP_P4_43423_16048787 | NC_021163.1    | Ca_kabuli_chr04 | 16048787                | AA                              | GG              | 1946795387               |
| SNP_P4_43424_16048919 | NC_021163.1    | Ca_kabuli_chr04 | 16048919                | AA                              | TT              | 1946795389               |
| SNP_P4_43425_16049010 | NC_021163.1    | Ca_kabuli_chr04 | 16049010                | AA                              | GG              | 1946795392               |
| SNP_P4_43426_16051721 | NC_021163.1    | Ca_kabuli_chr04 | 16051721                | AA                              | GG              | 1946795394               |
| SNP_P4_43427_16052515 | NC_021163.1    | Ca_kabuli_chr04 | 16052515                | GG                              | TT              | 1946795396               |
| SNP_P4_43428_16053020 | NC_021163.1    | Ca_kabuli_chr04 | 16053020                | GG                              | AA              | 1946795398               |
| SNP_P4_43429_16055627 | NC_021163.1    | Ca_kabuli_chr04 | 16055627                | CC                              | AA              | 1946795400               |
| SNP_P4_43430_16055785 | NC_021163.1    | Ca_kabuli_chr04 | 16055785                | CC                              | TT              | 1946795402               |
| SNP_P4_43431_16056773 | NC_021163.1    | Ca_kabuli_chr04 | 16056773                | TT                              | CC              | 1946795404               |
| SNP_P4_43434_16057681 | NC_021163.1    | Ca_kabuli_chr04 | 16057681                | GG                              | AA              | 1946795406               |
| SNP_P4_43435_16059141 | NC_021163.1    | Ca_kabuli_chr04 | 16059141                | GG                              | TT              | 1946795408               |
| SNP_P4_43436_16059172 | NC_021163.1    | Ca_kabuli_chr04 | 16059172                | GG                              | TT              | 1946795410               |
| SNP_P4_43437_16059354 | NC_021163.1    | Ca_kabuli_chr04 | 16059354                | GG                              | AA              | 1946795412               |
| SNP_P4_43438_16059393 | NC_021163.1    | Ca_kabuli_chr04 | 16059393                | CC                              | AA              | 1946795414               |
| SNP_P4_43439_16059403 | NC_021163.1    | Ca_kabuli_chr04 | 16059403                | AA                              | GG              | 1946795416               |
| SNP_P4_43440_16059426 | NC_021163.1    | Ca_kabuli_chr04 | 16059426                | CC                              | TT              | 1946795419               |
| SNP_P4_43441_16059508 | NC_021163.1    | Ca_kabuli_chr04 | 16059508                | AA                              | GG              | 1946795421               |
| SNP_P4_43442_16059541 | NC_021163.1    | Ca_kabuli_chr04 | 16059541                | AA                              | GG              | 1946795423               |

| SNPs IDs              | Chromosome IDs | Chromosomes     | Physical positions (bp) | CDC Frontier (Reference genome) | (ILWC46 & LPNB) | NCBI SNPdb Accession IDs |
|-----------------------|----------------|-----------------|-------------------------|---------------------------------|-----------------|--------------------------|
| SNP_P4_43443_16059547 | NC_021163.1    | Ca_kabuli_chr04 | 16059547                | TT                              | CC              | 1946795425               |
| SNP_P4_43444_16059609 | NC_021163.1    | Ca_kabuli_chr04 | 16059609                | TT                              | CC              | 1946795427               |
| SNP_P4_43445_16059619 | NC_021163.1    | Ca_kabuli_chr04 | 16059619                | TT                              | AA              | 1946795429               |
| SNP_P4_43446_16061164 | NC_021163.1    | Ca_kabuli_chr04 | 16061164                | CC                              | AA              | 1946795431               |
| SNP_P4_43447_16061165 | NC_021163.1    | Ca_kabuli_chr04 | 16061165                | AA                              | CC              | 1946795434               |
| SNP_P4_43449_16064259 | NC_021163.1    | Ca_kabuli_chr04 | 16064259                | CC                              | AA              | 1946795436               |
| SNP_P4_43452_16066167 | NC_021163.1    | Ca_kabuli_chr04 | 16066167                | CC                              | GG              | 1946795438               |
| SNP_P4_43453_16066480 | NC_021163.1    | Ca_kabuli_chr04 | 16066480                | TT                              | CC              | 1946795440               |
| SNP_P4_43454_16067339 | NC_021163.1    | Ca_kabuli_chr04 | 16067339                | TT                              | GG              | 1946795442               |
| SNP_P4_43455_16067407 | NC_021163.1    | Ca_kabuli_chr04 | 16067407                | TT                              | AA              | 1946795444               |
| SNP_P4_43456_16067422 | NC_021163.1    | Ca_kabuli_chr04 | 16067422                | AA                              | GG              | 1946795446               |
| SNP_P4_43457_16067484 | NC_021163.1    | Ca_kabuli_chr04 | 16067484                | GG                              | AA              | 1946795448               |
| SNP_P4_43458_16067497 | NC_021163.1    | Ca_kabuli_chr04 | 16067497                | GG                              | CC              | 1946795450               |
| SNP_P4_43460_16072589 | NC_021163.1    | Ca_kabuli_chr04 | 16072589                | TT                              | GG              | 1946795452               |
| SNP_P4_43461_16072597 | NC_021163.1    | Ca_kabuli_chr04 | 16072597                | AA                              | TT              | 1946795454               |
| SNP_P4_43462_16074072 | NC_021163.1    | Ca_kabuli_chr04 | 16074072                | CC                              | AA              | 1946795456               |
| SNP_P4_43464_16077020 | NC_021163.1    | Ca_kabuli_chr04 | 16077020                | AA                              | TT              | 1946795458               |
| SNP_P4_43465_16077021 | NC_021163.1    | Ca_kabuli_chr04 | 16077021                | CC                              | TT              | 1946795460               |
| SNP_P4_43466_16077075 | NC_021163.1    | Ca_kabuli_chr04 | 16077075                | GG                              | AA              | 1946795462               |
| SNP_P4_43467_16077149 | NC_021163.1    | Ca_kabuli_chr04 | 16077149                | CC                              | GG              | 1946795465               |
| SNP_P4_43468_16077316 | NC_021163.1    | Ca_kabuli_chr04 | 16077316                | GG                              | CC              | 1946795467               |
| SNP_P4_43471_16080199 | NC_021163.1    | Ca_kabuli_chr04 | 16080199                | AA                              | TT              | 1946795469               |
| SNP_P4_43472_16080208 | NC_021163.1    | Ca_kabuli_chr04 | 16080208                | CC                              | TT              | 1946795471               |
| SNP_P4_43473_16080221 | NC_021163.1    | Ca_kabuli_chr04 | 16080221                | TT                              | CC              | 1946795473               |
| SNP_P4_43474_16080224 | NC_021163.1    | Ca_kabuli_chr04 | 16080224                | TT                              | AA              | 1946795475               |
| SNP_P4_43477_16080595 | NC_021163.1    | Ca_kabuli_chr04 | 16080595                | GG                              | TT              | 1946795477               |
| SNP_P4_43478_16082718 | NC_021163.1    | Ca_kabuli_chr04 | 16082718                | AA                              | TT              | 1946795479               |
| SNP_P4_43479_16082729 | NC_021163.1    | Ca_kabuli_chr04 | 16082729                | AA                              | TT              | 1946795481               |
| SNP_P4_43480_16082874 | NC_021163.1    | Ca_kabuli_chr04 | 16082874                | TT                              | CC              | 1946795483               |
| SNP_P4_43481_16084856 | NC_021163.1    | Ca_kabuli_chr04 | 16084856                | GG                              | AA              | 1946795485               |
| SNP_P4_43482_16085164 | NC_021163.1    | Ca_kabuli_chr04 | 16085164                | AA                              | CC              | 1946795487               |
| SNP_P4_43483_16085169 | NC_021163.1    | Ca_kabuli_chr04 | 16085169                | TT                              | CC              | 1946795489               |
| SNP_P4_43484_16085206 | NC_021163.1    | Ca_kabuli_chr04 | 16085206                | TT                              | CC              | 1946795491               |
| SNP_P4_43485_16085297 | NC_021163.1    | Ca_kabuli_chr04 | 16085297                | AA                              | GG              | 1946795493               |
| SNP_P4_43486_16085316 | NC_021163.1    | Ca_kabuli_chr04 | 16085316                | AA                              | GG              | 1946795495               |
| SNP_P4_43487_16085322 | NC_021163.1    | Ca_kabuli_chr04 | 16085322                | TT                              | CC              | 1946795497               |
| SNP_P4_43488_16085375 | NC_021163.1    | Ca_kabuli_chr04 | 16085375                | TT                              | CC              | 1946795499               |
| SNP_P4_43489_16085982 | NC_021163.1    | Ca_kabuli_chr04 | 16085982                | CC                              | TT              | 1946795501               |
| SNP_P4_43491_16086054 | NC_021163.1    | Ca_kabuli_chr04 | 16086054                | AA                              | GG              | 1946795503               |
| SNP_P4_43494_16088500 | NC_021163.1    | Ca_kabuli_chr04 | 16088500                | AA                              | GG              | 1946795505               |
| SNP_P4_43495_16088531 | NC_021163.1    | Ca_kabuli_chr04 | 16088531                | AA                              | TT              | 1946795507               |
| SNP_P4_43496_16088814 | NC_021163.1    | Ca_kabuli_chr04 | 16088814                | AA                              | CC              | 1946795509               |

| SNPs IDs              | Chromosome IDs | Chromosomes     | Physical positions (bp) | CDC Frontier (Reference genome) | (ILWC46 & LPNB) | NCBI SNPdb Accession IDs |
|-----------------------|----------------|-----------------|-------------------------|---------------------------------|-----------------|--------------------------|
| SNP_P4_43497_16089682 | NC_021163.1    | Ca_kabuli_chr04 | 16089682                | GG                              | TT              | 1946795511               |
| SNP_P4_43498_16089686 | NC_021163.1    | Ca_kabuli_chr04 | 16089686                | AA                              | TT              | 1946795513               |
| SNP_P4_43499_16089712 | NC_021163.1    | Ca_kabuli_chr04 | 16089712                | GG                              | TT              | 1946795515               |
| SNP_P4_43500_16089718 | NC_021163.1    | Ca_kabuli_chr04 | 16089718                | GG                              | CC              | 1946795517               |
| SNP_P4_43501_16089747 | NC_021163.1    | Ca_kabuli_chr04 | 16089747                | TT                              | GG              | 1946795519               |
| SNP_P4_43502_16095961 | NC_021163.1    | Ca_kabuli_chr04 | 16095961                | GG                              | TT              | 1946795521               |
| SNP_P4_43503_16095989 | NC_021163.1    | Ca_kabuli_chr04 | 16095989                | CC                              | TT              | 1946795523               |
| SNP_P4_43504_16096759 | NC_021163.1    | Ca_kabuli_chr04 | 16096759                | AA                              | CC              | 1946795525               |
| SNP_P4_43505_16097775 | NC_021163.1    | Ca_kabuli_chr04 | 16097775                | CC                              | TT              | 1946795527               |
| SNP_P4_43507_16098284 | NC_021163.1    | Ca_kabuli_chr04 | 16098284                | GG                              | AA              | 1946795529               |
| SNP_P4_43508_16098287 | NC_021163.1    | Ca_kabuli_chr04 | 16098287                | AA                              | TT              | 1946795532               |
| SNP_P4_43509_16098294 | NC_021163.1    | Ca_kabuli_chr04 | 16098294                | CC                              | TT              | 1946795534               |
| SNP_P4_43511_16098362 | NC_021163.1    | Ca_kabuli_chr04 | 16098362                | TT                              | CC              | 1946795536               |
| SNP_P4_43512_16098392 | NC_021163.1    | Ca_kabuli_chr04 | 16098392                | AA                              | GG              | 1946795538               |
| SNP_P4_43513_16098426 | NC_021163.1    | Ca_kabuli_chr04 | 16098426                | GG                              | AA              | 1946795540               |
| SNP_P4_43515_16098495 | NC_021163.1    | Ca_kabuli_chr04 | 16098495                | TT                              | AA              | 1946795542               |
| SNP_P4_43516_16098514 | NC_021163.1    | Ca_kabuli_chr04 | 16098514                | CC                              | TT              | 1946795544               |
| SNP_P4_43517_16098548 | NC_021163.1    | Ca_kabuli_chr04 | 16098548                | GG                              | AA              | 1946795546               |
| SNP_P4_43518_16098563 | NC_021163.1    | Ca_kabuli_chr04 | 16098563                | CC                              | AA              | 1946795548               |
| SNP_P4_43519_16098774 | NC_021163.1    | Ca_kabuli_chr04 | 16098774                | GG                              | AA              | 1946795550               |
| SNP_P4_43520_16100038 | NC_021163.1    | Ca_kabuli_chr04 | 16100038                | GG                              | AA              | 1946795552               |
| SNP_P4_43521_16100950 | NC_021163.1    | Ca_kabuli_chr04 | 16100950                | AA                              | GG              | 1946795554               |
| SNP_P4_43522_16101024 | NC_021163.1    | Ca_kabuli_chr04 | 16101024                | TT                              | GG              | 1946795556               |
| SNP_P4_43523_16101338 | NC_021163.1    | Ca_kabuli_chr04 | 16101338                | AA                              | GG              | 1946795558               |
| SNP_P4_43525_16102118 | NC_021163.1    | Ca_kabuli_chr04 | 16102118                | GG                              | AA              | 1946795560               |
| SNP_P4_43526_16102891 | NC_021163.1    | Ca_kabuli_chr04 | 16102891                | AA                              | TT              | 1946795562               |
| SNP_P4_43529_16130942 | NC_021163.1    | Ca_kabuli_chr04 | 16130942                | TT                              | AA              | 1946795564               |
| SNP_P4_43530_16132011 | NC_021163.1    | Ca_kabuli_chr04 | 16132011                | TT                              | GG              | 1946795566               |
| SNP_P4_43533_16146596 | NC_021163.1    | Ca_kabuli_chr04 | 16146596                | CC                              | TT              | 1946795568               |
| SNP_P4_43534_16146601 | NC_021163.1    | Ca_kabuli_chr04 | 16146601                | AA                              | GG              | 1946795570               |
| SNP_P4_43535_16149795 | NC_021163.1    | Ca_kabuli_chr04 | 16149795                | CC                              | TT              | 1946795572               |
| SNP_P4_43536_16155503 | NC_021163.1    | Ca_kabuli_chr04 | 16155503                | AA                              | GG              | 1946795575               |
| SNP_P4_43537_16157243 | NC_021163.1    | Ca_kabuli_chr04 | 16157243                | GG                              | AA              | 1946795577               |
| SNP_P4_43539_16208083 | NC_021163.1    | Ca_kabuli_chr04 | 16208083                | AA                              | TT              | 1946795579               |
| SNP_P4_43542_16249151 | NC_021163.1    | Ca_kabuli_chr04 | 16249151                | AA                              | GG              | 1946795581               |
| SNP_P4_43544_16262073 | NC_021163.1    | Ca_kabuli_chr04 | 16262073                | AA                              | GG              | 1946795583               |
| SNP_P4_43545_16263226 | NC_021163.1    | Ca_kabuli_chr04 | 16263226                | AA                              | TT              | 1946795585               |
| SNP_P4_43546_16287429 | NC_021163.1    | Ca_kabuli_chr04 | 16287429                | TT                              | GG              | 1946795587               |
| SNP_P4_43548_16320237 | NC_021163.1    | Ca_kabuli_chr04 | 16320237                | AA                              | CC              | 1946795589               |
| SNP_P4_43549_16337168 | NC_021163.1    | Ca_kabuli_chr04 | 16337168                | AA                              | GG              | 1946795591               |
| SNP_P4_43550_16347012 | NC_021163.1    | Ca_kabuli_chr04 | 16347012                | CC                              | GG              | 1946795593               |
| SNP_P4_43551_16355503 | NC_021163.1    | Ca_kabuli_chr04 | 16355503                | CC                              | TT              | 1946795595               |

| SNPs IDs              | Chromosome IDs | Chromosomes     | Physical positions (bp) | CDC Frontier (Reference genome) | (ILWC46 & LPNB) | NCBI SNPdb Accession IDs |
|-----------------------|----------------|-----------------|-------------------------|---------------------------------|-----------------|--------------------------|
| SNP_P4_43552_16356760 | NC_021163.1    | Ca_kabuli_chr04 | 16356760                | AA                              | TT              | 1946795597               |
| SNP_P4_43553_16363936 | NC_021163.1    | Ca_kabuli_chr04 | 16363936                | AA                              | TT              | 1946795600               |
| SNP_P4_43554_16379798 | NC_021163.1    | Ca_kabuli_chr04 | 16379798                | AA                              | TT              | 1946795602               |
| SNP_P4_43555_16379864 | NC_021163.1    | Ca_kabuli_chr04 | 16379864                | AA                              | TT              | 1946795604               |
| SNP_P4_43556_16380510 | NC_021163.1    | Ca_kabuli_chr04 | 16380510                | TT                              | CC              | 1946795606               |
| SNP_P4_43557_16382487 | NC_021163.1    | Ca_kabuli_chr04 | 16382487                | AA                              | TT              | 1946795608               |
| SNP_P4_43558_16399893 | NC_021163.1    | Ca_kabuli_chr04 | 16399893                | AA                              | GG              | 1946795611               |
| SNP_P4_43559_16403337 | NC_021163.1    | Ca_kabuli_chr04 | 16403337                | TT                              | AA              | 1946795613               |
| SNP_P4_43560_16403338 | NC_021163.1    | Ca_kabuli_chr04 | 16403338                | AA                              | CC              | 1946795615               |
| SNP_P4_43561_16404607 | NC_021163.1    | Ca_kabuli_chr04 | 16404607                | AA                              | CC              | 1946795617               |
| SNP_P4_43562_16404619 | NC_021163.1    | Ca_kabuli_chr04 | 16404619                | CC                              | TT              | 1946795619               |
| SNP_P4_43563_16408751 | NC_021163.1    | Ca_kabuli_chr04 | 16408751                | AA                              | GG              | 1946795621               |
| SNP_P4_43564_16408754 | NC_021163.1    | Ca_kabuli_chr04 | 16408754                | AA                              | GG              | 1946795623               |
| SNP_P4_43565_16425821 | NC_021163.1    | Ca_kabuli_chr04 | 16425821                | TT                              | AA              | 1946795626               |
| SNP_P4_43566_16425822 | NC_021163.1    | Ca_kabuli_chr04 | 16425822                | TT                              | AA              | 1946795628               |
| SNP_P4_43567_16465752 | NC_021163.1    | Ca_kabuli_chr04 | 16465752                | CC                              | TT              | 1946795630               |
| SNP_P4_43569_16475717 | NC_021163.1    | Ca_kabuli_chr04 | 16475717                | GG                              | AA              | 1946795632               |
| SNP_P4_43571_16483302 | NC_021163.1    | Ca_kabuli_chr04 | 16483302                | AA                              | GG              | 1946795634               |
| SNP_P4_43572_16493846 | NC_021163.1    | Ca_kabuli_chr04 | 16493846                | CC                              | TT              | 1946795636               |
| SNP_P4_43574_16498518 | NC_021163.1    | Ca_kabuli_chr04 | 16498518                | CC                              | TT              | 1946795638               |
| SNP_P4_43575_16526809 | NC_021163.1    | Ca_kabuli_chr04 | 16526809                | TT                              | CC              | 1946795640               |
| SNP_P4_43577_16560757 | NC_021163.1    | Ca_kabuli_chr04 | 16560757                | AA                              | GG              | 1946795642               |
| SNP_P4_43578_16593865 | NC_021163.1    | Ca_kabuli_chr04 | 16593865                | CC                              | TT              | 1946795644               |
| SNP_P4_43579_16594182 | NC_021163.1    | Ca_kabuli_chr04 | 16594182                | CC                              | TT              | 1946795646               |
| SNP_P4_43580_16600794 | NC_021163.1    | Ca_kabuli_chr04 | 16600794                | AA                              | TT              | 1946795649               |
| SNP_P4_43581_16671857 | NC_021163.1    | Ca_kabuli_chr04 | 16671857                | GG                              | AA              | 1946795651               |
| SNP_P4_43582_16679971 | NC_021163.1    | Ca_kabuli_chr04 | 16679971                | TT                              | CC              | 1946795653               |
| SNP_P4_43583_16683523 | NC_021163.1    | Ca_kabuli_chr04 | 16683523                | AA                              | GG              | 1946795655               |
| SNP_P4_43584_16687953 | NC_021163.1    | Ca_kabuli_chr04 | 16687953                | GG                              | AA              | 1946795657               |
| SNP_P4_43585_16688460 | NC_021163.1    | Ca_kabuli_chr04 | 16688460                | GG                              | CC              | 1946795659               |
| SNP_P4_43586_16688862 | NC_021163.1    | Ca_kabuli_chr04 | 16688862                | AA                              | GG              | 1946795661               |
| SNP_P4_43587_16724278 | NC_021163.1    | Ca_kabuli_chr04 | 16724278                | AA                              | GG              | 1946795664               |
| SNP_P4_43589_16728768 | NC_021163.1    | Ca_kabuli_chr04 | 16728768                | GG                              | AA              | 1946795666               |
| SNP_P4_43590_16728772 | NC_021163.1    | Ca_kabuli_chr04 | 16728772                | TT                              | AA              | 1946795668               |
| SNP_P4_43591_16733718 | NC_021163.1    | Ca_kabuli_chr04 | 16733718                | TT                              | CC              | 1946795670               |
| SNP_P4_43593_16785937 | NC_021163.1    | Ca_kabuli_chr04 | 16785937                | CC                              | AA              | 1946795672               |
| SNP_P4_43595_16803352 | NC_021163.1    | Ca_kabuli_chr04 | 16803352                | AA                              | CC              | 1946795674               |
| SNP_P4_43596_16803536 | NC_021163.1    | Ca_kabuli_chr04 | 16803536                | GG                              | AA              | 1946795676               |
| SNP_P4_43598_16803787 | NC_021163.1    | Ca_kabuli_chr04 | 16803787                | AA                              | TT              | 1946795678               |
| SNP_P4_43599_16803789 | NC_021163.1    | Ca_kabuli_chr04 | 16803789                | AA                              | TT              | 1946795680               |
| SNP_P4_43600_16804549 | NC_021163.1    | Ca_kabuli_chr04 | 16804549                | AA                              | GG              | 1946795682               |
| SNP_P4_43602_16816025 | NC_021163.1    | Ca_kabuli_chr04 | 16816025                | AA                              | GG              | 1946795684               |

| SNPs IDs              | Chromosome IDs | Chromosomes     | Physical positions (bp) | CDC Frontier (Reference genome) | (ILWC46 & LPNB) | NCBI SNPdb Accession IDs |
|-----------------------|----------------|-----------------|-------------------------|---------------------------------|-----------------|--------------------------|
| SNP_P4_43603_16819105 | NC_021163.1    | Ca_kabuli_chr04 | 16819105                | AA                              | GG              | 1946795687               |
| SNP_P4_43605_16826064 | NC_021163.1    | Ca_kabuli_chr04 | 16826064                | CC                              | GG              | 1946795689               |
| SNP_P4_43606_16826107 | NC_021163.1    | Ca_kabuli_chr04 | 16826107                | CC                              | TT              | 1946795691               |
| SNP_P4_43608_16826272 | NC_021163.1    | Ca_kabuli_chr04 | 16826272                | GG                              | AA              | 1946795694               |
| SNP_P4_43610_16834345 | NC_021163.1    | Ca_kabuli_chr04 | 16834345                | TT                              | CC              | 1946795696               |
| SNP_P4_43611_16834422 | NC_021163.1    | Ca_kabuli_chr04 | 16834422                | AA                              | GG              | 1946795698               |
| SNP_P4_43613_16862005 | NC_021163.1    | Ca_kabuli_chr04 | 16862005                | GG                              | AA              | 1946795700               |
| SNP_P4_43615_16879410 | NC_021163.1    | Ca_kabuli_chr04 | 16879410                | AA                              | GG              | 1946795702               |
| SNP_P4_43616_16879411 | NC_021163.1    | Ca_kabuli_chr04 | 16879411                | AA                              | GG              | 1946795705               |
| SNP_P4_43617_16879754 | NC_021163.1    | Ca_kabuli_chr04 | 16879754                | AA                              | GG              | 1946795707               |
| SNP_P4_43618_16883369 | NC_021163.1    | Ca_kabuli_chr04 | 16883369                | CC                              | TT              | 1946795709               |
| SNP_P4_43619_16897460 | NC_021163.1    | Ca_kabuli_chr04 | 16897460                | AA                              | CC              | 1946795711               |
| SNP_P4_43620_16906791 | NC_021163.1    | Ca_kabuli_chr04 | 16906791                | GG                              | AA              | 1946795713               |
| SNP_P4_43621_16906801 | NC_021163.1    | Ca_kabuli_chr04 | 16906801                | CC                              | AA              | 1946795715               |
| SNP_P4_43623_16936300 | NC_021163.1    | Ca_kabuli_chr04 | 16936300                | CC                              | TT              | 1946795717               |
| SNP_P4_43624_16936896 | NC_021163.1    | Ca_kabuli_chr04 | 16936896                | TT                              | AA              | 1946795719               |
| SNP_P4_43625_16936912 | NC_021163.1    | Ca_kabuli_chr04 | 16936912                | TT                              | CC              | 1946795721               |
| SNP_P4_43626_16936947 | NC_021163.1    | Ca_kabuli_chr04 | 16936947                | TT                              | CC              | 1946795723               |
| SNP_P4_43628_16943239 | NC_021163.1    | Ca_kabuli_chr04 | 16943239                | GG                              | AA              | 1946795725               |
| SNP_P4_43629_16943240 | NC_021163.1    | Ca_kabuli_chr04 | 16943240                | GG                              | AA              | 1946795727               |
| SNP_P4_43632_16960812 | NC_021163.1    | Ca_kabuli_chr04 | 16960812                | CC                              | AA              | 1946795729               |
| SNP_P4_43633_16961142 | NC_021163.1    | Ca_kabuli_chr04 | 16961142                | TT                              | CC              | 1946795731               |
| SNP_P4_43634_16963533 | NC_021163.1    | Ca_kabuli_chr04 | 16963533                | TT                              | CC              | 1946795733               |
| SNP_P4_43635_16963563 | NC_021163.1    | Ca_kabuli_chr04 | 16963563                | GG                              | AA              | 1946795735               |
| SNP_P4_43636_16971245 | NC_021163.1    | Ca_kabuli_chr04 | 16971245                | AA                              | TT              | 1946795737               |
| SNP_P4_43637_16978881 | NC_021163.1    | Ca_kabuli_chr04 | 16978881                | AA                              | CC              | 1946795739               |
| SNP_P4_43639_16985138 | NC_021163.1    | Ca_kabuli_chr04 | 16985138                | CC                              | TT              | 1946795741               |
| SNP_P4_43640_16987305 | NC_021163.1    | Ca_kabuli_chr04 | 16987305                | AA                              | CC              | 1946795743               |
| SNP_P4_43641_16987383 | NC_021163.1    | Ca_kabuli_chr04 | 16987383                | TT                              | CC              | 1946795745               |
| SNP_P4_43642_16990405 | NC_021163.1    | Ca_kabuli_chr04 | 16990405                | GG                              | AA              | 1946795747               |
| SNP_P4_43643_16991407 | NC_021163.1    | Ca_kabuli_chr04 | 16991407                | GG                              | CC              | 1946795749               |
| SNP_P4_43644_16993406 | NC_021163.1    | Ca_kabuli_chr04 | 16993406                | AA                              | CC              | 1946795751               |
| SNP_P4_43646_16998825 | NC_021163.1    | Ca_kabuli_chr04 | 16998825                | GG                              | AA              | 1946795753               |
| SNP_P4_43647_16999054 | NC_021163.1    | Ca_kabuli_chr04 | 16999054                | AA                              | TT              | 1946795755               |
| SNP_P4_43648_16999409 | NC_021163.1    | Ca_kabuli_chr04 | 16999409                | GG                              | AA              | 1946795757               |
| SNP_P4_43649_16999529 | NC_021163.1    | Ca_kabuli_chr04 | 16999529                | CC                              | AA              | 1946795759               |
| SNP_P4_43650_17000273 | NC_021163.1    | Ca_kabuli_chr04 | 17000273                | CC                              | TT              | 1946795761               |
| SNP_P4_43651_17001121 | NC_021163.1    | Ca_kabuli_chr04 | 17001121                | GG                              | AA              | 1946795763               |
| SNP_P4_43653_17001487 | NC_021163.1    | Ca_kabuli_chr04 | 17001487                | GG                              | CC              | 1946795765               |
| SNP_P4_43656_17003110 | NC_021163.1    | Ca_kabuli_chr04 | 17003110                | CC                              | TT              | 1946795767               |
| SNP_P4_43657_17003119 | NC_021163.1    | Ca_kabuli_chr04 | 17003119                | AA                              | CC              | 1946795769               |
| SNP_P4_43658_17003759 | NC_021163.1    | Ca_kabuli_chr04 | 17003759                | TT                              | GG              | 1946795771               |

| SNPs IDs              | Chromosome IDs | Chromosomes     | Physical positions (bp) | CDC Frontier (Reference genome) | (ILWC46 & LPNB) | NCBI SNPdb Accession IDs |
|-----------------------|----------------|-----------------|-------------------------|---------------------------------|-----------------|--------------------------|
| SNP_P4_43660_17004001 | NC_021163.1    | Ca_kabuli_chr04 | 17004001                | TT                              | GG              | 1946795773               |
| SNP_P4_43661_17006187 | NC_021163.1    | Ca_kabuli_chr04 | 17006187                | CC                              | TT              | 1946795775               |
| SNP_P4_43662_17007318 | NC_021163.1    | Ca_kabuli_chr04 | 17007318                | AA                              | TT              | 1946795777               |
| SNP_P4_43663_17007397 | NC_021163.1    | Ca_kabuli_chr04 | 17007397                | TT                              | GG              | 1946795779               |
| SNP_P4_43664_17007444 | NC_021163.1    | Ca_kabuli_chr04 | 17007444                | AA                              | CC              | 1946795781               |
| SNP_P4_43665_17007695 | NC_021163.1    | Ca_kabuli_chr04 | 17007695                | CC                              | TT              | 1946795783               |
| SNP_P4_43666_17007852 | NC_021163.1    | Ca_kabuli_chr04 | 17007852                | AA                              | CC              | 1946795786               |
| SNP_P4_43667_17008032 | NC_021163.1    | Ca_kabuli_chr04 | 17008032                | GG                              | TT              | 1946795788               |
| SNP_P4_43668_17008379 | NC_021163.1    | Ca_kabuli_chr04 | 17008379                | GG                              | AA              | 1946795790               |
| SNP_P4_43671_17011218 | NC_021163.1    | Ca_kabuli_chr04 | 17011218                | TT                              | GG              | 1946795792               |
| SNP_P4_43672_17011438 | NC_021163.1    | Ca_kabuli_chr04 | 17011438                | GG                              | TT              | 1946795794               |
| SNP_P4_43674_17012112 | NC_021163.1    | Ca_kabuli_chr04 | 17012112                | TT                              | GG              | 1946795796               |
| SNP_P4_43675_17012145 | NC_021163.1    | Ca_kabuli_chr04 | 17012145                | AA                              | CC              | 1946795798               |
| SNP_P4_43676_17012674 | NC_021163.1    | Ca_kabuli_chr04 | 17012674                | TT                              | CC              | 1946795800               |
| SNP_P4_43677_17012688 | NC_021163.1    | Ca_kabuli_chr04 | 17012688                | AA                              | GG              | 1946795802               |
| SNP_P4_43678_17013283 | NC_021163.1    | Ca_kabuli_chr04 | 17013283                | CC                              | TT              | 1946795805               |
| SNP_P4_43680_17015429 | NC_021163.1    | Ca_kabuli_chr04 | 17015429                | TT                              | CC              | 1946795807               |
| SNP_P4_43681_17015434 | NC_021163.1    | Ca_kabuli_chr04 | 17015434                | CC                              | TT              | 1946795809               |
| SNP_P4_43682_17015542 | NC_021163.1    | Ca_kabuli_chr04 | 17015542                | AA                              | TT              | 1946795811               |
| SNP_P4_43684_17015703 | NC_021163.1    | Ca_kabuli_chr04 | 17015703                | GG                              | AA              | 1946795813               |
| SNP_P4_43685_17015909 | NC_021163.1    | Ca_kabuli_chr04 | 17015909                | TT                              | GG              | 1946795815               |
| SNP_P4_43687_17015954 | NC_021163.1    | Ca_kabuli_chr04 | 17015954                | TT                              | AA              | 1946795817               |
| SNP_P4_43688_17016151 | NC_021163.1    | Ca_kabuli_chr04 | 17016151                | AA                              | GG              | 1946795819               |
| SNP_P4_43689_17016230 | NC_021163.1    | Ca_kabuli_chr04 | 17016230                | GG                              | AA              | 1946795821               |
| SNP_P4_43690_17016232 | NC_021163.1    | Ca_kabuli_chr04 | 17016232                | GG                              | CC              | 1946795823               |
| SNP_P4_43691_17016262 | NC_021163.1    | Ca_kabuli_chr04 | 17016262                | CC                              | TT              | 1946795825               |
| SNP_P4_43692_17016285 | NC_021163.1    | Ca_kabuli_chr04 | 17016285                | TT                              | CC              | 1946795827               |
| SNP_P4_43693_17016754 | NC_021163.1    | Ca_kabuli_chr04 | 17016754                | TT                              | CC              | 1946795829               |
| SNP_P4_43694_17018011 | NC_021163.1    | Ca_kabuli_chr04 | 17018011                | AA                              | TT              | 1946795831               |
| SNP_P4_43695_17018194 | NC_021163.1    | Ca_kabuli_chr04 | 17018194                | GG                              | AA              | 1946795833               |
| SNP_P4_43696_17018207 | NC_021163.1    | Ca_kabuli_chr04 | 17018207                | AA                              | TT              | 1946795835               |
| SNP_P4_43697_17018457 | NC_021163.1    | Ca_kabuli_chr04 | 17018457                | CC                              | TT              | 1946795837               |
| SNP_P4_43698_17018831 | NC_021163.1    | Ca_kabuli_chr04 | 17018831                | AA                              | GG              | 1946795839               |
| SNP_P4_43700_17019480 | NC_021163.1    | Ca_kabuli_chr04 | 17019480                | AA                              | CC              | 1946795841               |
| SNP_P4_43701_17019486 | NC_021163.1    | Ca_kabuli_chr04 | 17019486                | TT                              | CC              | 1946795843               |
| SNP_P4_43702_17021038 | NC_021163.1    | Ca_kabuli_chr04 | 17021038                | CC                              | TT              | 1946795846               |
| SNP_P4_43703_17021189 | NC_021163.1    | Ca_kabuli_chr04 | 17021189                | TT                              | GG              | 1946795848               |
| SNP_P4_43704_17021216 | NC_021163.1    | Ca_kabuli_chr04 | 17021216                | CC                              | GG              | 1946795850               |
| SNP_P4_43705_17021225 | NC_021163.1    | Ca_kabuli_chr04 | 17021225                | CC                              | TT              | 1946795852               |
| SNP_P4_43706_17021239 | NC_021163.1    | Ca_kabuli_chr04 | 17021239                | TT                              | AA              | 1946795854               |
| SNP_P4_43707_17023158 | NC_021163.1    | Ca_kabuli_chr04 | 17023158                | AA                              | TT              | 1946795856               |
| SNP_P4_43708_17023910 | NC_021163.1    | Ca_kabuli_chr04 | 17023910                | CC                              | TT              | 1946795858               |

| SNPs IDs              | Chromosome IDs | Chromosomes     | Physical positions (bp) | CDC Frontier (Reference genome) | (ILWC46 & LPNB) | NCBI SNPdb Accession IDs |
|-----------------------|----------------|-----------------|-------------------------|---------------------------------|-----------------|--------------------------|
| SNP_P4_43710_17024340 | NC_021163.1    | Ca_kabuli_chr04 | 17024340                | AA                              | TT              | 1946795860               |
| SNP_P4_43711_17025588 | NC_021163.1    | Ca_kabuli_chr04 | 17025588                | TT                              | CC              | 1946795862               |
| SNP_P4_43714_17030566 | NC_021163.1    | Ca_kabuli_chr04 | 17030566                | GG                              | AA              | 1946795865               |
| SNP_P4_43715_17031485 | NC_021163.1    | Ca_kabuli_chr04 | 17031485                | CC                              | AA              | 1946795867               |
| SNP_P4_43716_17031612 | NC_021163.1    | Ca_kabuli_chr04 | 17031612                | AA                              | GG              | 1946795869               |
| SNP_P4_43718_17036719 | NC_021163.1    | Ca_kabuli_chr04 | 17036719                | AA                              | TT              | 1946795871               |
| SNP_P4_43719_17037314 | NC_021163.1    | Ca_kabuli_chr04 | 17037314                | AA                              | CC              | 1946795873               |
| SNP_P4_43720_17037355 | NC_021163.1    | Ca_kabuli_chr04 | 17037355                | CC                              | GG              | 1946795875               |
| SNP_P4_43722_17037485 | NC_021163.1    | Ca_kabuli_chr04 | 17037485                | TT                              | GG              | 1946795877               |
| SNP_P4_43723_17037544 | NC_021163.1    | Ca_kabuli_chr04 | 17037544                | AA                              | TT              | 1946795879               |
| SNP_P4_43724_17040837 | NC_021163.1    | Ca_kabuli_chr04 | 17040837                | CC                              | TT              | 1946795881               |
| SNP_P4_43726_17042551 | NC_021163.1    | Ca_kabuli_chr04 | 17042551                | CC                              | TT              | 1946795883               |
| SNP_P4_43727_17044210 | NC_021163.1    | Ca_kabuli_chr04 | 17044210                | CC                              | TT              | 1946795885               |
| SNP_P4_43728_17044936 | NC_021163.1    | Ca_kabuli_chr04 | 17044936                | CC                              | TT              | 1946795887               |
| SNP_P4_43729_17045005 | NC_021163.1    | Ca_kabuli_chr04 | 17045005                | TT                              | CC              | 1946795890               |
| SNP_P4_43730_17045240 | NC_021163.1    | Ca_kabuli_chr04 | 17045240                | AA                              | GG              | 1946795892               |
| SNP_P4_43731_17045361 | NC_021163.1    | Ca_kabuli_chr04 | 17045361                | TT                              | CC              | 1946795894               |
| SNP_P4_43732_17045416 | NC_021163.1    | Ca_kabuli_chr04 | 17045416                | CC                              | TT              | 1946795896               |
| SNP_P4_43733_17045428 | NC_021163.1    | Ca_kabuli_chr04 | 17045428                | TT                              | AA              | 1946795898               |
| SNP_P4_43734_17046141 | NC_021163.1    | Ca_kabuli_chr04 | 17046141                | CC                              | TT              | 1946795900               |
| SNP_P4_43735_17046874 | NC_021163.1    | Ca_kabuli_chr04 | 17046874                | CC                              | TT              | 1946795902               |
| SNP_P4_43738_17049599 | NC_021163.1    | Ca_kabuli_chr04 | 17049599                | TT                              | CC              | 1946795904               |
| SNP_P4_43739_17050149 | NC_021163.1    | Ca_kabuli_chr04 | 17050149                | GG                              | TT              | 1946795907               |
| SNP_P4_43740_17052241 | NC_021163.1    | Ca_kabuli_chr04 | 17052241                | TT                              | GG              | 1946795909               |
| SNP_P4_43741_17058820 | NC_021163.1    | Ca_kabuli_chr04 | 17058820                | CC                              | TT              | 1946795911               |
| SNP_P4_43742_17058878 | NC_021163.1    | Ca_kabuli_chr04 | 17058878                | TT                              | AA              | 1946795913               |
| SNP_P4_43743_17061840 | NC_021163.1    | Ca_kabuli_chr04 | 17061840                | GG                              | CC              | 1946795915               |
| SNP_P4_43744_17063788 | NC_021163.1    | Ca_kabuli_chr04 | 17063788                | CC                              | TT              | 1946795917               |
| SNP_P4_43745_17064735 | NC_021163.1    | Ca_kabuli_chr04 | 17064735                | AA                              | GG              | 1946795919               |
| SNP_P4_43746_17064832 | NC_021163.1    | Ca_kabuli_chr04 | 17064832                | GG                              | AA              | 1946795921               |
| SNP_P4_43747_17066730 | NC_021163.1    | Ca_kabuli_chr04 | 17066730                | AA                              | TT              | 1946795923               |
| SNP_P4_43748_17067438 | NC_021163.1    | Ca_kabuli_chr04 | 17067438                | GG                              | AA              | 1946795926               |
| SNP_P4_43749_17067453 | NC_021163.1    | Ca_kabuli_chr04 | 17067453                | GG                              | AA              | 1946795928               |
| SNP_P4_43750_17067798 | NC_021163.1    | Ca_kabuli_chr04 | 17067798                | CC                              | AA              | 1946795929               |
| SNP_P4_43751_17068503 | NC_021163.1    | Ca_kabuli_chr04 | 17068503                | CC                              | TT              | 1946795931               |
| SNP_P4_43752_17071708 | NC_021163.1    | Ca_kabuli_chr04 | 17071708                | TT                              | AA              | 1946795933               |
| SNP_P4_43754_17073989 | NC_021163.1    | Ca_kabuli_chr04 | 17073989                | AA                              | GG              | 1946795935               |
| SNP_P4_43755_17077875 | NC_021163.1    | Ca_kabuli_chr04 | 17077875                | GG                              | AA              | 1946795937               |
| SNP_P4_43756_17078996 | NC_021163.1    | Ca_kabuli_chr04 | 17078996                | CC                              | TT              | 1946795939               |
| SNP_P4_43757_17081211 | NC_021163.1    | Ca_kabuli_chr04 | 17081211                | TT                              | CC              | 1946795941               |
| SNP_P4_43758_17081458 | NC_021163.1    | Ca_kabuli_chr04 | 17081458                | GG                              | AA              | 1946795943               |
| SNP_P4_43759_17081489 | NC_021163.1    | Ca_kabuli_chr04 | 17081489                | TT                              | CC              | 1946795945               |

| SNPs IDs              | Chromosome IDs | Chromosomes     | Physical positions (bp) | CDC Frontier (Reference genome) | (ILWC46 & LPNB) | NCBI SNPdb Accession IDs |
|-----------------------|----------------|-----------------|-------------------------|---------------------------------|-----------------|--------------------------|
| SNP_P4_43760_17081510 | NC_021163.1    | Ca_kabuli_chr04 | 17081510                | AA                              | GG              | 1946795948               |
| SNP_P4_43761_17081524 | NC_021163.1    | Ca_kabuli_chr04 | 17081524                | GG                              | AA              | 1946795950               |
| SNP_P4_43762_17081535 | NC_021163.1    | Ca_kabuli_chr04 | 17081535                | CC                              | TT              | 1946795952               |
| SNP_P4_43763_17081536 | NC_021163.1    | Ca_kabuli_chr04 | 17081536                | AA                              | GG              | 1946795954               |
| SNP_P4_43764_17081546 | NC_021163.1    | Ca_kabuli_chr04 | 17081546                | CC                              | TT              | 1946795956               |
| SNP_P4_43765_17081588 | NC_021163.1    | Ca_kabuli_chr04 | 17081588                | GG                              | AA              | 1946795958               |
| SNP_P4_43766_17081628 | NC_021163.1    | Ca_kabuli_chr04 | 17081628                | AA                              | GG              | 1946795960               |
| SNP_P4_43767_17081639 | NC_021163.1    | Ca_kabuli_chr04 | 17081639                | AA                              | GG              | 1946795962               |
| SNP_P4_43768_17081662 | NC_021163.1    | Ca_kabuli_chr04 | 17081662                | CC                              | TT              | 1946795964               |
| SNP_P4_43769_17081694 | NC_021163.1    | Ca_kabuli_chr04 | 17081694                | TT                              | GG              | 1946795967               |
| SNP_P4_43772_17081945 | NC_021163.1    | Ca_kabuli_chr04 | 17081945                | AA                              | TT              | 1946795969               |
| SNP_P4_43773_17081985 | NC_021163.1    | Ca_kabuli_chr04 | 17081985                | AA                              | TT              | 1946795971               |
| SNP_P4_43775_17082019 | NC_021163.1    | Ca_kabuli_chr04 | 17082019                | AA                              | TT              | 1946795973               |
| SNP_P4_43776_17086904 | NC_021163.1    | Ca_kabuli_chr04 | 17086904                | GG                              | AA              | 1946795975               |
| SNP_P4_43777_17086966 | NC_021163.1    | Ca_kabuli_chr04 | 17086966                | TT                              | GG              | 1946795978               |
| SNP_P4_43778_17087031 | NC_021163.1    | Ca_kabuli_chr04 | 17087031                | GG                              | AA              | 1946795980               |
| SNP_P4_43779_17087772 | NC_021163.1    | Ca_kabuli_chr04 | 17087772                | CC                              | TT              | 1946795982               |
| SNP_P4_43780_17087866 | NC_021163.1    | Ca_kabuli_chr04 | 17087866                | AA                              | GG              | 1946795984               |
| SNP_P4_43781_17087969 | NC_021163.1    | Ca_kabuli_chr04 | 17087969                | CC                              | TT              | 1946795986               |
| SNP_P4_43782_17087979 | NC_021163.1    | Ca_kabuli_chr04 | 17087979                | TT                              | AA              | 1946795988               |
| SNP_P4_43783_17088154 | NC_021163.1    | Ca_kabuli_chr04 | 17088154                | AA                              | CC              | 1946795991               |
| SNP_P4_43784_17088176 | NC_021163.1    | Ca_kabuli_chr04 | 17088176                | TT                              | AA              | 1946795993               |
| SNP_P4_43785_17088202 | NC_021163.1    | Ca_kabuli_chr04 | 17088202                | CC                              | TT              | 1946795995               |
| SNP_P4_43786_17088269 | NC_021163.1    | Ca_kabuli_chr04 | 17088269                | CC                              | TT              | 1946795997               |
| SNP_P4_43787_17089240 | NC_021163.1    | Ca_kabuli_chr04 | 17089240                | GG                              | TT              | 1946796000               |
| SNP_P4_43788_17089248 | NC_021163.1    | Ca_kabuli_chr04 | 17089248                | TT                              | CC              | 1946796002               |
| SNP_P4_43789_17089251 | NC_021163.1    | Ca_kabuli_chr04 | 17089251                | TT                              | CC              | 1946796004               |
| SNP_P4_43790_17095041 | NC_021163.1    | Ca_kabuli_chr04 | 17095041                | GG                              | AA              | 1946796006               |
| SNP_P4_43791_17095262 | NC_021163.1    | Ca_kabuli_chr04 | 17095262                | AA                              | GG              | 1946796008               |
| SNP_P4_43792_17095714 | NC_021163.1    | Ca_kabuli_chr04 | 17095714                | AA                              | TT              | 1946796010               |
| SNP_P4_43794_17095977 | NC_021163.1    | Ca_kabuli_chr04 | 17095977                | GG                              | AA              | 1946796012               |
| SNP_P4_43795_17096010 | NC_021163.1    | Ca_kabuli_chr04 | 17096010                | GG                              | AA              | 1946796014               |
| SNP_P4_43797_17096081 | NC_021163.1    | Ca_kabuli_chr04 | 17096081                | TT                              | CC              | 1946796017               |
| SNP_P4_43798_17096125 | NC_021163.1    | Ca_kabuli_chr04 | 17096125                | GG                              | AA              | 1946796019               |
| SNP_P4_43799_17096298 | NC_021163.1    | Ca_kabuli_chr04 | 17096298                | GG                              | AA              | 1946796021               |
| SNP_P4_43800_17096299 | NC_021163.1    | Ca_kabuli_chr04 | 17096299                | TT                              | CC              | 1946796023               |
| SNP_P4_43801_17096920 | NC_021163.1    | Ca_kabuli_chr04 | 17096920                | GG                              | CC              | 1946796025               |
| SNP_P4_43802_17096928 | NC_021163.1    | Ca_kabuli_chr04 | 17096928                | AA                              | CC              | 1946796027               |
| SNP_P4_43803_17096939 | NC_021163.1    | Ca_kabuli_chr04 | 17096939                | TT                              | CC              | 1946796029               |
| SNP_P4_43804_17098118 | NC_021163.1    | Ca_kabuli_chr04 | 17098118                | TT                              | CC              | 1946796031               |
| SNP_P4_43805_17098435 | NC_021163.1    | Ca_kabuli_chr04 | 17098435                | GG                              | CC              | 1946796033               |
| SNP_P4_43806_17098557 | NC_021163.1    | Ca_kabuli_chr04 | 17098557                | CC                              | AA              | 1946796035               |



| SNPs IDs              | Chromosome IDs | Chromosomes     | Physical positions (bp) | CDC Frontier (Reference genome) | (ILWC46 & LPNB) | NCBI SNPdb Accession IDs |
|-----------------------|----------------|-----------------|-------------------------|---------------------------------|-----------------|--------------------------|
| SNP_P4_43807_17099330 | NC_021163.1    | Ca_kabuli_chr04 | 17099330                | TT                              | GG              | 1946796037               |
| SNP_P4_43808_17099356 | NC_021163.1    | Ca_kabuli_chr04 | 17099356                | GG                              | AA              | 1946796039               |
| SNP_P4_43809_17099366 | NC_021163.1    | Ca_kabuli_chr04 | 17099366                | GG                              | AA              | 1946796042               |
| SNP_P4_43810_17099643 | NC_021163.1    | Ca_kabuli_chr04 | 17099643                | GG                              | AA              | 1946796044               |
| SNP_P4_43811_17099664 | NC_021163.1    | Ca_kabuli_chr04 | 17099664                | TT                              | GG              | 1946796046               |
| SNP_P4_43812_17101475 | NC_021163.1    | Ca_kabuli_chr04 | 17101475                | CC                              | TT              | 1946796048               |
| SNP_P4_43814_17102203 | NC_021163.1    | Ca_kabuli_chr04 | 17102203                | CC                              | TT              | 1946796050               |
| SNP_P4_43815_17102396 | NC_021163.1    | Ca_kabuli_chr04 | 17102396                | GG                              | CC              | 1946796052               |
| SNP_P4_43816_17103722 | NC_021163.1    | Ca_kabuli_chr04 | 17103722                | GG                              | AA              | 1946796054               |
| SNP_P4_43817_17103728 | NC_021163.1    | Ca_kabuli_chr04 | 17103728                | AA                              | GG              | 1946796057               |
| SNP_P4_43818_17103748 | NC_021163.1    | Ca_kabuli_chr04 | 17103748                | CC                              | TT              | 1946796059               |
| SNP_P4_43819_17103771 | NC_021163.1    | Ca_kabuli_chr04 | 17103771                | TT                              | GG              | 1946796061               |
| SNP_P4_43820_17105292 | NC_021163.1    | Ca_kabuli_chr04 | 17105292                | TT                              | CC              | 1946796063               |
| SNP_P4_43821_17105715 | NC_021163.1    | Ca_kabuli_chr04 | 17105715                | AA                              | CC              | 1946796065               |
| SNP_P4_43822_17105765 | NC_021163.1    | Ca_kabuli_chr04 | 17105765                | GG                              | AA              | 1946796067               |
| SNP_P4_43823_17114382 | NC_021163.1    | Ca_kabuli_chr04 | 17114382                | CC                              | TT              | 1946796069               |
| SNP_P4_43824_17114957 | NC_021163.1    | Ca_kabuli_chr04 | 17114957                | AA                              | GG              | 1946796071               |
| SNP_P4_43826_17115296 | NC_021163.1    | Ca_kabuli_chr04 | 17115296                | AA                              | GG              | 1946796073               |
| SNP_P4_43827_17115324 | NC_021163.1    | Ca_kabuli_chr04 | 17115324                | TT                              | AA              | 1946796076               |
| SNP_P4_43828_17116468 | NC_021163.1    | Ca_kabuli_chr04 | 17116468                | TT                              | CC              | 1946796078               |
| SNP_P4_43829_17130893 | NC_021163.1    | Ca_kabuli_chr04 | 17130893                | GG                              | AA              | 1946796080               |
| SNP_P4_43831_17131256 | NC_021163.1    | Ca_kabuli_chr04 | 17131256                | TT                              | GG              | 1946796082               |
| SNP_P4_43832_17131304 | NC_021163.1    | Ca_kabuli_chr04 | 17131304                | GG                              | AA              | 1946796084               |
| SNP_P4_43833_17131403 | NC_021163.1    | Ca_kabuli_chr04 | 17131403                | AA                              | GG              | 1946796086               |
| SNP_P4_43834_17131682 | NC_021163.1    | Ca_kabuli_chr04 | 17131682                | AA                              | CC              | 1946796088               |
| SNP_P4_43835_17131739 | NC_021163.1    | Ca_kabuli_chr04 | 17131739                | AA                              | GG              | 1946796090               |
| SNP_P4_43836_17131977 | NC_021163.1    | Ca_kabuli_chr04 | 17131977                | CC                              | TT              | 1946796092               |
| SNP_P4_43837_17132190 | NC_021163.1    | Ca_kabuli_chr04 | 17132190                | AA                              | GG              | 1946796094               |
| SNP_P4_43838_17133083 | NC_021163.1    | Ca_kabuli_chr04 | 17133083                | GG                              | AA              | 1946796096               |
| SNP_P4_43839_17133336 | NC_021163.1    | Ca_kabuli_chr04 | 17133336                | TT                              | CC              | 1946796098               |
| SNP_P4_43840_17133360 | NC_021163.1    | Ca_kabuli_chr04 | 17133360                | TT                              | CC              | 1946796100               |
| SNP_P4_43841_17133450 | NC_021163.1    | Ca_kabuli_chr04 | 17133450                | CC                              | TT              | 1946796102               |
| SNP_P4_43842_17133466 | NC_021163.1    | Ca_kabuli_chr04 | 17133466                | TT                              | CC              | 1946796104               |
| SNP_P4_43844_17134135 | NC_021163.1    | Ca_kabuli_chr04 | 17134135                | TT                              | AA              | 1946796106               |
| SNP_P4_43845_17134444 | NC_021163.1    | Ca_kabuli_chr04 | 17134444                | AA                              | GG              | 1946796108               |
| SNP_P4_43846_17134450 | NC_021163.1    | Ca_kabuli_chr04 | 17134450                | AA                              | CC              | 1946796110               |
| SNP_P4_43847_17134476 | NC_021163.1    | Ca_kabuli_chr04 | 17134476                | CC                              | AA              | 1946796113               |
| SNP_P4_43848_17134511 | NC_021163.1    | Ca_kabuli_chr04 | 17134511                | TT                              | CC              | 1946796115               |
| SNP_P4_43849_17135330 | NC_021163.1    | Ca_kabuli_chr04 | 17135330                | GG                              | AA              | 1946796117               |
| SNP_P4_43850_17135633 | NC_021163.1    | Ca_kabuli_chr04 | 17135633                | AA                              | GG              | 1946796119               |
| SNP_P4_43851_17135664 | NC_021163.1    | Ca_kabuli_chr04 | 17135664                | CC                              | TT              | 1946796121               |
| SNP_P4_43852_17136974 | NC_021163.1    | Ca_kabuli_chr04 | 17136974                | GG                              | AA              | 1946796123               |

| SNPs IDs              | Chromosome IDs | Chromosomes     | Physical positions (bp) | CDC Frontier (Reference genome) | (ILWC46 & LPNB) | NCBI SNPdb Accession IDs |
|-----------------------|----------------|-----------------|-------------------------|---------------------------------|-----------------|--------------------------|
| SNP_P4_43853_17137519 | NC_021163.1    | Ca_kabuli_chr04 | 17137519                | AA                              | GG              | 1946796125               |
| SNP_P4_43854_17139395 | NC_021163.1    | Ca_kabuli_chr04 | 17139395                | CC                              | TT              | 1946796127               |
| SNP_P4_43855_17140399 | NC_021163.1    | Ca_kabuli_chr04 | 17140399                | AA                              | GG              | 1946796130               |
| SNP_P4_43856_17140440 | NC_021163.1    | Ca_kabuli_chr04 | 17140440                | GG                              | CC              | 1946796132               |
| SNP_P4_43859_17142450 | NC_021163.1    | Ca_kabuli_chr04 | 17142450                | CC                              | AA              | 1946796134               |
| SNP_P4_43860_17143399 | NC_021163.1    | Ca_kabuli_chr04 | 17143399                | CC                              | TT              | 1946796136               |
| SNP_P4_43861_17143417 | NC_021163.1    | Ca_kabuli_chr04 | 17143417                | GG                              | AA              | 1946796138               |
| SNP_P4_43862_17143445 | NC_021163.1    | Ca_kabuli_chr04 | 17143445                | CC                              | TT              | 1946796140               |
| SNP_P4_43863_17143451 | NC_021163.1    | Ca_kabuli_chr04 | 17143451                | GG                              | AA              | 1946796142               |
| SNP_P4_43864_17143452 | NC_021163.1    | Ca_kabuli_chr04 | 17143452                | GG                              | AA              | 1946796144               |
| SNP_P4_43865_17143483 | NC_021163.1    | Ca_kabuli_chr04 | 17143483                | GG                              | AA              | 1946796145               |
| SNP_P4_43866_17143627 | NC_021163.1    | Ca_kabuli_chr04 | 17143627                | AA                              | GG              | 1946796146               |
| SNP_P4_43868_17143697 | NC_021163.1    | Ca_kabuli_chr04 | 17143697                | GG                              | TT              | 1946796147               |
| SNP_P4_43869_17143717 | NC_021163.1    | Ca_kabuli_chr04 | 17143717                | GG                              | AA              | 1946796149               |
| SNP_P4_43870_17143737 | NC_021163.1    | Ca_kabuli_chr04 | 17143737                | GG                              | TT              | 1946796151               |
| SNP_P4_43871_17143739 | NC_021163.1    | Ca_kabuli_chr04 | 17143739                | AA                              | GG              | 1946796153               |
| SNP_P4_43872_17143775 | NC_021163.1    | Ca_kabuli_chr04 | 17143775                | CC                              | TT              | 1946796155               |
| SNP_P4_43873_17143940 | NC_021163.1    | Ca_kabuli_chr04 | 17143940                | CC                              | TT              | 1946796157               |
| SNP_P4_43874_17145908 | NC_021163.1    | Ca_kabuli_chr04 | 17145908                | GG                              | CC              | 1946796159               |
| SNP_P4_43875_17145962 | NC_021163.1    | Ca_kabuli_chr04 | 17145962                | AA                              | CC              | 1946796161               |
| SNP_P4_43876_17146063 | NC_021163.1    | Ca_kabuli_chr04 | 17146063                | TT                              | CC              | 1946796163               |
| SNP_P4_43877_17146127 | NC_021163.1    | Ca_kabuli_chr04 | 17146127                | CC                              | TT              | 1946796165               |
| SNP_P4_43880_17146427 | NC_021163.1    | Ca_kabuli_chr04 | 17146427                | TT                              | AA              | 1946796167               |
| SNP_P4_43881_17146528 | NC_021163.1    | Ca_kabuli_chr04 | 17146528                | TT                              | AA              | 1946796169               |
| SNP_P4_43882_17148145 | NC_021163.1    | Ca_kabuli_chr04 | 17148145                | GG                              | AA              | 1946796172               |
| SNP_P4_43883_17148434 | NC_021163.1    | Ca_kabuli_chr04 | 17148434                | AA                              | GG              | 1946796174               |
| SNP_P4_43884_17148894 | NC_021163.1    | Ca_kabuli_chr04 | 17148894                | GG                              | CC              | 1946796176               |
| SNP_P4_43885_17149190 | NC_021163.1    | Ca_kabuli_chr04 | 17149190                | TT                              | CC              | 1946796178               |
| SNP_P4_43886_17149498 | NC_021163.1    | Ca_kabuli_chr04 | 17149498                | CC                              | TT              | 1946796180               |
| SNP_P4_43887_17150293 | NC_021163.1    | Ca_kabuli_chr04 | 17150293                | TT                              | GG              | 1946796182               |
| SNP_P4_43888_17150467 | NC_021163.1    | Ca_kabuli_chr04 | 17150467                | TT                              | AA              | 1946796184               |
| SNP_P4_43889_17151129 | NC_021163.1    | Ca_kabuli_chr04 | 17151129                | CC                              | TT              | 1946796186               |
| SNP_P4_43890_17151432 | NC_021163.1    | Ca_kabuli_chr04 | 17151432                | CC                              | TT              | 1946796188               |
| SNP_P4_43892_17154033 | NC_021163.1    | Ca_kabuli_chr04 | 17154033                | AA                              | GG              | 1946796190               |
| SNP_P4_43893_17154455 | NC_021163.1    | Ca_kabuli_chr04 | 17154455                | AA                              | GG              | 1946796192               |
| SNP_P4_43894_17155519 | NC_021163.1    | Ca_kabuli_chr04 | 17155519                | AA                              | GG              | 1946796194               |
| SNP_P4_43895_17157245 | NC_021163.1    | Ca_kabuli_chr04 | 17157245                | AA                              | GG              | 1946796197               |
| SNP_P4_43897_17158098 | NC_021163.1    | Ca_kabuli_chr04 | 17158098                | TT                              | CC              | 1946796199               |
| SNP_P4_43898_17158313 | NC_021163.1    | Ca_kabuli_chr04 | 17158313                | GG                              | AA              | 1946796201               |
| SNP_P4_43899_17158336 | NC_021163.1    | Ca_kabuli_chr04 | 17158336                | GG                              | AA              | 1946796203               |
| SNP_P4_43901_17158376 | NC_021163.1    | Ca_kabuli_chr04 | 17158376                | GG                              | CC              | 1946796204               |
| SNP_P4_43902_17158546 | NC_021163.1    | Ca_kabuli_chr04 | 17158546                | TT                              | CC              | 1946796207               |

| SNPs IDs              | Chromosome IDs | Chromosomes     | Physical positions (bp) | CDC Frontier (Reference genome) | (ILWC46 & LPNB) | NCBI SNPdb Accession IDs |
|-----------------------|----------------|-----------------|-------------------------|---------------------------------|-----------------|--------------------------|
| SNP_P4_43903_17158559 | NC_021163.1    | Ca_kabuli_chr04 | 17158559                | TT                              | AA              | 1946796209               |
| SNP_P4_43904_17158561 | NC_021163.1    | Ca_kabuli_chr04 | 17158561                | TT                              | CC              | 1946796211               |
| SNP_P4_43905_17158568 | NC_021163.1    | Ca_kabuli_chr04 | 17158568                | TT                              | CC              | 1946796213               |
| SNP_P4_43906_17158697 | NC_021163.1    | Ca_kabuli_chr04 | 17158697                | AA                              | GG              | 1946796215               |
| SNP_P4_43908_17161685 | NC_021163.1    | Ca_kabuli_chr04 | 17161685                | TT                              | AA              | 1946796217               |
| SNP_P4_43909_17163440 | NC_021163.1    | Ca_kabuli_chr04 | 17163440                | CC                              | AA              | 1946796220               |
| SNP_P4_43910_17166319 | NC_021163.1    | Ca_kabuli_chr04 | 17166319                | CC                              | TT              | 1946796222               |
| SNP_P4_43911_17166333 | NC_021163.1    | Ca_kabuli_chr04 | 17166333                | CC                              | AA              | 1946796224               |
| SNP_P4_43912_17166356 | NC_021163.1    | Ca_kabuli_chr04 | 17166356                | TT                              | CC              | 1946796226               |
| SNP_P4_43913_17167420 | NC_021163.1    | Ca_kabuli_chr04 | 17167420                | TT                              | CC              | 1946796228               |
| SNP_P4_43914_17167464 | NC_021163.1    | Ca_kabuli_chr04 | 17167464                | CC                              | TT              | 1946796230               |
| SNP_P4_43915_17167719 | NC_021163.1    | Ca_kabuli_chr04 | 17167719                | TT                              | CC              | 1946796232               |
| SNP_P4_43916_17167728 | NC_021163.1    | Ca_kabuli_chr04 | 17167728                | AA                              | TT              | 1946796234               |
| SNP_P4_43917_17167766 | NC_021163.1    | Ca_kabuli_chr04 | 17167766                | CC                              | TT              | 1946796236               |
| SNP_P4_43918_17167767 | NC_021163.1    | Ca_kabuli_chr04 | 17167767                | AA                              | GG              | 1946796238               |
| SNP_P4_43919_17167918 | NC_021163.1    | Ca_kabuli_chr04 | 17167918                | TT                              | GG              | 1946796241               |
| SNP_P4_43920_17167998 | NC_021163.1    | Ca_kabuli_chr04 | 17167998                | TT                              | AA              | 1946796243               |
| SNP_P4_43922_17168369 | NC_021163.1    | Ca_kabuli_chr04 | 17168369                | CC                              | TT              | 1946796245               |
| SNP_P4_43923_17168455 | NC_021163.1    | Ca_kabuli_chr04 | 17168455                | GG                              | AA              | 1946796247               |
| SNP_P4_43924_17168531 | NC_021163.1    | Ca_kabuli_chr04 | 17168531                | TT                              | GG              | 1946796249               |
| SNP_P4_43925_17169556 | NC_021163.1    | Ca_kabuli_chr04 | 17169556                | TT                              | CC              | 1946796251               |
| SNP_P4_43926_17169629 | NC_021163.1    | Ca_kabuli_chr04 | 17169629                | AA                              | GG              | 1946796253               |
| SNP_P4_43927_17169745 | NC_021163.1    | Ca_kabuli_chr04 | 17169745                | TT                              | CC              | 1946796255               |
| SNP_P4_43928_17169860 | NC_021163.1    | Ca_kabuli_chr04 | 17169860                | CC                              | TT              | 1946796257               |
| SNP_P4_43929_17169901 | NC_021163.1    | Ca_kabuli_chr04 | 17169901                | AA                              | GG              | 1946796259               |
| SNP_P4_43930_17170172 | NC_021163.1    | Ca_kabuli_chr04 | 17170172                | GG                              | TT              | 1946796261               |
| SNP_P4_43931_17170194 | NC_021163.1    | Ca_kabuli_chr04 | 17170194                | GG                              | AA              | 1946796263               |
| SNP_P4_43932_17170987 | NC_021163.1    | Ca_kabuli_chr04 | 17170987                | TT                              | CC              | 1946796265               |
| SNP_P4_43933_17170998 | NC_021163.1    | Ca_kabuli_chr04 | 17170998                | TT                              | CC              | 1946796268               |
| SNP_P4_43934_17171012 | NC_021163.1    | Ca_kabuli_chr04 | 17171012                | AA                              | GG              | 1946796270               |
| SNP_P4_43935_17171013 | NC_021163.1    | Ca_kabuli_chr04 | 17171013                | GG                              | AA              | 1946796272               |
| SNP_P4_43936_17171081 | NC_021163.1    | Ca_kabuli_chr04 | 17171081                | AA                              | GG              | 1946796274               |
| SNP_P4_43937_17171092 | NC_021163.1    | Ca_kabuli_chr04 | 17171092                | GG                              | TT              | 1946796276               |
| SNP_P4_43938_17171113 | NC_021163.1    | Ca_kabuli_chr04 | 17171113                | CC                              | GG              | 1946796278               |
| SNP_P4_43939_17171120 | NC_021163.1    | Ca_kabuli_chr04 | 17171120                | AA                              | GG              | 1946796280               |
| SNP_P4_43940_17171266 | NC_021163.1    | Ca_kabuli_chr04 | 17171266                | CC                              | TT              | 1946796282               |
| SNP_P4_43941_17171287 | NC_021163.1    | Ca_kabuli_chr04 | 17171287                | GG                              | AA              | 1946796284               |
| SNP_P4_43942_17171298 | NC_021163.1    | Ca_kabuli_chr04 | 17171298                | CC                              | TT              | 1946796286               |
| SNP_P4_43943_17171367 | NC_021163.1    | Ca_kabuli_chr04 | 17171367                | CC                              | TT              | 1946796288               |
| SNP_P4_43945_17171526 | NC_021163.1    | Ca_kabuli_chr04 | 17171526                | AA                              | GG              | 1946796290               |
| SNP_P4_43946_17172048 | NC_021163.1    | Ca_kabuli_chr04 | 17172048                | TT                              | AA              | 1946796292               |
| SNP_P4_43947_17172099 | NC_021163.1    | Ca_kabuli_chr04 | 17172099                | AA                              | GG              | 1946796294               |

| SNPs IDs              | Chromosome IDs | Chromosomes     | Physical positions (bp) | CDC Frontier (Reference genome) | (ILWC46 & LPNB) | NCBI SNPdb Accession IDs |
|-----------------------|----------------|-----------------|-------------------------|---------------------------------|-----------------|--------------------------|
| SNP_P4_43948_17172101 | NC_021163.1    | Ca_kabuli_chr04 | 17172101                | TT                              | CC              | 1946796296               |
| SNP_P4_43949_17172356 | NC_021163.1    | Ca_kabuli_chr04 | 17172356                | CC                              | AA              | 1946796298               |
| SNP_P4_43950_17172801 | NC_021163.1    | Ca_kabuli_chr04 | 17172801                | GG                              | TT              | 1946796300               |
| SNP_P4_43951_17185175 | NC_021163.1    | Ca_kabuli_chr04 | 17185175                | AA                              | GG              | 1946796302               |
| SNP_P4_43952_17185215 | NC_021163.1    | Ca_kabuli_chr04 | 17185215                | TT                              | AA              | 1946796304               |
| SNP_P4_43953_17185284 | NC_021163.1    | Ca_kabuli_chr04 | 17185284                | CC                              | TT              | 1946796306               |
| SNP_P4_43954_17185444 | NC_021163.1    | Ca_kabuli_chr04 | 17185444                | CC                              | TT              | 1946796308               |
| SNP_P4_43955_17185447 | NC_021163.1    | Ca_kabuli_chr04 | 17185447                | AA                              | GG              | 1946796310               |
| SNP_P4_43956_17185449 | NC_021163.1    | Ca_kabuli_chr04 | 17185449                | AA                              | GG              | 1946796312               |
| SNP_P4_43957_17185469 | NC_021163.1    | Ca_kabuli_chr04 | 17185469                | TT                              | CC              | 1946796315               |
| SNP_P4_43958_17185504 | NC_021163.1    | Ca_kabuli_chr04 | 17185504                | AA                              | TT              | 1946796317               |
| SNP_P4_43959_17185516 | NC_021163.1    | Ca_kabuli_chr04 | 17185516                | TT                              | AA              | 1946796319               |
| SNP_P4_43960_17185518 | NC_021163.1    | Ca_kabuli_chr04 | 17185518                | AA                              | TT              | 1946796322               |
| SNP_P4_43961_17186721 | NC_021163.1    | Ca_kabuli_chr04 | 17186721                | GG                              | AA              | 1946796324               |
| SNP_P4_43962_17186742 | NC_021163.1    | Ca_kabuli_chr04 | 17186742                | AA                              | GG              | 1946796326               |
| SNP_P4_43964_17186888 | NC_021163.1    | Ca_kabuli_chr04 | 17186888                | GG                              | AA              | 1946796328               |
| SNP_P4_43965_17186901 | NC_021163.1    | Ca_kabuli_chr04 | 17186901                | GG                              | AA              | 1946796330               |
| SNP_P4_43966_17186903 | NC_021163.1    | Ca_kabuli_chr04 | 17186903                | TT                              | CC              | 1946796332               |
| SNP_P4_43967_17186910 | NC_021163.1    | Ca_kabuli_chr04 | 17186910                | AA                              | TT              | 1946796334               |
| SNP_P4_43969_17187222 | NC_021163.1    | Ca_kabuli_chr04 | 17187222                | TT                              | GG              | 1946796336               |
| SNP_P4_43970_17187385 | NC_021163.1    | Ca_kabuli_chr04 | 17187385                | GG                              | AA              | 1946796339               |
| SNP_P4_43971_17187713 | NC_021163.1    | Ca_kabuli_chr04 | 17187713                | AA                              | TT              | 1946796341               |
| SNP_P4_43972_17187740 | NC_021163.1    | Ca_kabuli_chr04 | 17187740                | TT                              | CC              | 1946796343               |
| SNP_P4_43973_17187908 | NC_021163.1    | Ca_kabuli_chr04 | 17187908                | GG                              | AA              | 1946796345               |
| SNP_P4_43974_17193106 | NC_021163.1    | Ca_kabuli_chr04 | 17193106                | TT                              | CC              | 1946796347               |
| SNP_P4_43976_17193804 | NC_021163.1    | Ca_kabuli_chr04 | 17193804                | GG                              | TT              | 1946796349               |
| SNP_P4_43977_17195431 | NC_021163.1    | Ca_kabuli_chr04 | 17195431                | TT                              | GG              | 1946796351               |
| SNP_P4_43979_17195635 | NC_021163.1    | Ca_kabuli_chr04 | 17195635                | AA                              | TT              | 1946796353               |
| SNP_P4_43980_17195836 | NC_021163.1    | Ca_kabuli_chr04 | 17195836                | GG                              | AA              | 1946796355               |
| SNP_P4_43981_17195974 | NC_021163.1    | Ca_kabuli_chr04 | 17195974                | TT                              | AA              | 1946796358               |
| SNP_P4_43982_17195975 | NC_021163.1    | Ca_kabuli_chr04 | 17195975                | AA                              | TT              | 1946796360               |
| SNP_P4_43984_17197233 | NC_021163.1    | Ca_kabuli_chr04 | 17197233                | GG                              | AA              | 1946796362               |
| SNP_P4_43986_17200658 | NC_021163.1    | Ca_kabuli_chr04 | 17200658                | AA                              | GG              | 1946796364               |
| SNP_P4_43987_17201153 | NC_021163.1    | Ca_kabuli_chr04 | 17201153                | AA                              | TT              | 1946796366               |
| SNP_P4_43988_17201158 | NC_021163.1    | Ca_kabuli_chr04 | 17201158                | AA                              | TT              | 1946796368               |
| SNP_P4_43989_17201166 | NC_021163.1    | Ca_kabuli_chr04 | 17201166                | AA                              | GG              | 1946796370               |
| SNP_P4_43990_17201283 | NC_021163.1    | Ca_kabuli_chr04 | 17201283                | TT                              | AA              | 1946796372               |
| SNP_P4_43991_17201336 | NC_021163.1    | Ca_kabuli_chr04 | 17201336                | GG                              | CC              | 1946796374               |
| SNP_P4_43993_17204871 | NC_021163.1    | Ca_kabuli_chr04 | 17204871                | AA                              | CC              | 1946796377               |
| SNP_P4_43994_17204952 | NC_021163.1    | Ca_kabuli_chr04 | 17204952                | TT                              | AA              | 1946796379               |
| SNP_P4_43995_17205038 | NC_021163.1    | Ca_kabuli_chr04 | 17205038                | TT                              | CC              | 1946796381               |
| SNP_P4_43996_17205044 | NC_021163.1    | Ca_kabuli_chr04 | 17205044                | TT                              | CC              | 1946796383               |

| SNPs IDs              | Chromosome IDs | Chromosomes     | Physical positions (bp) | CDC Frontier (Reference genome) | (ILWC46 & LPNB) | NCBI SNPdb Accession IDs |
|-----------------------|----------------|-----------------|-------------------------|---------------------------------|-----------------|--------------------------|
| SNP_P4_43997_17206081 | NC_021163.1    | Ca_kabuli_chr04 | 17206081                | CC                              | GG              | 1946796385               |
| SNP_P4_43999_17206453 | NC_021163.1    | Ca_kabuli_chr04 | 17206453                | TT                              | CC              | 1946796387               |
| SNP_P4_44000_17206463 | NC_021163.1    | Ca_kabuli_chr04 | 17206463                | CC                              | TT              | 1946796389               |
| SNP_P4_44001_17206614 | NC_021163.1    | Ca_kabuli_chr04 | 17206614                | CC                              | GG              | 1946796391               |
| SNP_P4_44002_17206636 | NC_021163.1    | Ca_kabuli_chr04 | 17206636                | AA                              | TT              | 1946796393               |
| SNP_P4_44003_17206637 | NC_021163.1    | Ca_kabuli_chr04 | 17206637                | AA                              | TT              | 1946796395               |
| SNP_P4_44004_17206641 | NC_021163.1    | Ca_kabuli_chr04 | 17206641                | AA                              | TT              | 1946796397               |
| SNP_P4_44006_17206761 | NC_021163.1    | Ca_kabuli_chr04 | 17206761                | TT                              | CC              | 1946796399               |
| SNP_P4_44007_17207973 | NC_021163.1    | Ca_kabuli_chr04 | 17207973                | AA                              | GG              | 1946796401               |
| SNP_P4_44008_17207974 | NC_021163.1    | Ca_kabuli_chr04 | 17207974                | GG                              | AA              | 1946796403               |
| SNP_P4_44009_17207984 | NC_021163.1    | Ca_kabuli_chr04 | 17207984                | GG                              | AA              | 1946796405               |
| SNP_P4_44010_17208006 | NC_021163.1    | Ca_kabuli_chr04 | 17208006                | TT                              | AA              | 1946796408               |
| SNP_P4_44011_17208176 | NC_021163.1    | Ca_kabuli_chr04 | 17208176                | TT                              | AA              | 1946796410               |
| SNP_P4_44012_17208831 | NC_021163.1    | Ca_kabuli_chr04 | 17208831                | TT                              | AA              | 1946796412               |
| SNP_P4_44013_17208832 | NC_021163.1    | Ca_kabuli_chr04 | 17208832                | CC                              | AA              | 1946796414               |
| SNP_P4_44014_17208880 | NC_021163.1    | Ca_kabuli_chr04 | 17208880                | CC                              | GG              | 1946796416               |
| SNP_P4_44015_17209519 | NC_021163.1    | Ca_kabuli_chr04 | 17209519                | CC                              | TT              | 1946796418               |
| SNP_P4_44018_17211141 | NC_021163.1    | Ca_kabuli_chr04 | 17211141                | TT                              | CC              | 1946796420               |
| SNP_P4_44019_17211941 | NC_021163.1    | Ca_kabuli_chr04 | 17211941                | TT                              | GG              | 1946796422               |
| SNP_P4_44020_17211970 | NC_021163.1    | Ca_kabuli_chr04 | 17211970                | CC                              | TT              | 1946796424               |
| SNP_P4_44021_17212987 | NC_021163.1    | Ca_kabuli_chr04 | 17212987                | CC                              | TT              | 1946796426               |
| SNP_P4_44022_17213016 | NC_021163.1    | Ca_kabuli_chr04 | 17213016                | TT                              | GG              | 1946796428               |
| SNP_P4_44024_17214473 | NC_021163.1    | Ca_kabuli_chr04 | 17214473                | GG                              | AA              | 1946796430               |
| SNP_P4_44025_17214493 | NC_021163.1    | Ca_kabuli_chr04 | 17214493                | GG                              | AA              | 1946796432               |
| SNP_P4_44026_17214503 | NC_021163.1    | Ca_kabuli_chr04 | 17214503                | GG                              | AA              | 1946796434               |
| SNP_P4_44029_17214679 | NC_021163.1    | Ca_kabuli_chr04 | 17214679                | AA                              | TT              | 1946796436               |
| SNP_P4_44030_17214680 | NC_021163.1    | Ca_kabuli_chr04 | 17214680                | GG                              | CC              | 1946796438               |
| SNP_P4_44032_17219687 | NC_021163.1    | Ca_kabuli_chr04 | 17219687                | GG                              | AA              | 1946796440               |
| SNP_P4_44033_17219705 | NC_021163.1    | Ca_kabuli_chr04 | 17219705                | AA                              | GG              | 1946796442               |
| SNP_P4_44034_17223030 | NC_021163.1    | Ca_kabuli_chr04 | 17223030                | AA                              | CC              | 1946796445               |
| SNP_P4_44035_17223046 | NC_021163.1    | Ca_kabuli_chr04 | 17223046                | GG                              | TT              | 1946796446               |
| SNP_P4_44036_17223330 | NC_021163.1    | Ca_kabuli_chr04 | 17223330                | GG                              | TT              | 1946796448               |
| SNP_P4_44037_17224532 | NC_021163.1    | Ca_kabuli_chr04 | 17224532                | CC                              | TT              | 1946796450               |
| SNP_P4_44038_17224537 | NC_021163.1    | Ca_kabuli_chr04 | 17224537                | CC                              | GG              | 1946796453               |
| SNP_P4_44039_17224572 | NC_021163.1    | Ca_kabuli_chr04 | 17224572                | AA                              | TT              | 1946796455               |
| SNP_P4_44040_17225681 | NC_021163.1    | Ca_kabuli_chr04 | 17225681                | TT                              | AA              | 1946796457               |
| SNP_P4_44041_17226377 | NC_021163.1    | Ca_kabuli_chr04 | 17226377                | CC                              | TT              | 1946796459               |
| SNP_P4_44042_17226678 | NC_021163.1    | Ca_kabuli_chr04 | 17226678                | TT                              | CC              | 1946796461               |
| SNP_P4_44043_17227655 | NC_021163.1    | Ca_kabuli_chr04 | 17227655                | AA                              | TT              | 1946796463               |
| SNP_P4_44044_17228005 | NC_021163.1    | Ca_kabuli_chr04 | 17228005                | CC                              | GG              | 1946796465               |
| SNP_P4_44045_17230036 | NC_021163.1    | Ca_kabuli_chr04 | 17230036                | AA                              | GG              | 1946796467               |
| SNP_P4_44046_17230638 | NC_021163.1    | Ca_kabuli_chr04 | 17230638                | TT                              | AA              | 1946796469               |

| SNPs IDs              | Chromosome IDs | Chromosomes     | Physical positions (bp) | CDC Frontier (Reference genome) | (ILWC46 & LPNB) | NCBI SNPdb Accession IDs |
|-----------------------|----------------|-----------------|-------------------------|---------------------------------|-----------------|--------------------------|
| SNP_P4_44047_17230667 | NC_021163.1    | Ca_kabuli_chr04 | 17230667                | TT                              | AA              | 1946796471               |
| SNP_P4_44048_17231693 | NC_021163.1    | Ca_kabuli_chr04 | 17231693                | AA                              | GG              | 1946796473               |
| SNP_P4_44049_17234821 | NC_021163.1    | Ca_kabuli_chr04 | 17234821                | GG                              | AA              | 1946796475               |
| SNP_P4_44050_17235243 | NC_021163.1    | Ca_kabuli_chr04 | 17235243                | AA                              | GG              | 1946796477               |
| SNP_P4_44051_17235737 | NC_021163.1    | Ca_kabuli_chr04 | 17235737                | CC                              | TT              | 1946796479               |
| SNP_P4_44052_17236600 | NC_021163.1    | Ca_kabuli_chr04 | 17236600                | TT                              | AA              | 1946796481               |
| SNP_P4_44053_17236634 | NC_021163.1    | Ca_kabuli_chr04 | 17236634                | AA                              | GG              | 1946796483               |
| SNP_P4_44054_17237825 | NC_021163.1    | Ca_kabuli_chr04 | 17237825                | AA                              | CC              | 1946796485               |
| SNP_P4_44055_17238106 | NC_021163.1    | Ca_kabuli_chr04 | 17238106                | CC                              | GG              | 1946796487               |
| SNP_P4_44057_17238660 | NC_021163.1    | Ca_kabuli_chr04 | 17238660                | AA                              | TT              | 1946796489               |
| SNP_P4_44058_17239360 | NC_021163.1    | Ca_kabuli_chr04 | 17239360                | GG                              | AA              | 1946796491               |
| SNP_P4_44059_17239364 | NC_021163.1    | Ca_kabuli_chr04 | 17239364                | TT                              | CC              | 1946796493               |
| SNP_P4_44060_17239391 | NC_021163.1    | Ca_kabuli_chr04 | 17239391                | CC                              | AA              | 1946796495               |
| SNP_P4_44061_17239421 | NC_021163.1    | Ca_kabuli_chr04 | 17239421                | GG                              | AA              | 1946796497               |
| SNP_P4_44062_17239709 | NC_021163.1    | Ca_kabuli_chr04 | 17239709                | CC                              | TT              | 1946796499               |
| SNP_P4_44063_17239745 | NC_021163.1    | Ca_kabuli_chr04 | 17239745                | GG                              | AA              | 1946796502               |
| SNP_P4_44065_17241203 | NC_021163.1    | Ca_kabuli_chr04 | 17241203                | TT                              | CC              | 1946796504               |
| SNP_P4_44066_17241611 | NC_021163.1    | Ca_kabuli_chr04 | 17241611                | GG                              | AA              | 1946796506               |
| SNP_P4_44067_17241622 | NC_021163.1    | Ca_kabuli_chr04 | 17241622                | GG                              | AA              | 1946796508               |
| SNP_P4_44068_17241649 | NC_021163.1    | Ca_kabuli_chr04 | 17241649                | TT                              | CC              | 1946796510               |
| SNP_P4_44069_17241660 | NC_021163.1    | Ca_kabuli_chr04 | 17241660                | TT                              | CC              | 1946796512               |
| SNP_P4_44072_17243645 | NC_021163.1    | Ca_kabuli_chr04 | 17243645                | TT                              | GG              | 1946796514               |
| SNP_P4_44073_17243650 | NC_021163.1    | Ca_kabuli_chr04 | 17243650                | GG                              | TT              | 1946796516               |
| SNP_P4_44074_17243711 | NC_021163.1    | Ca_kabuli_chr04 | 17243711                | CC                              | TT              | 1946796518               |
| SNP_P4_44075_17245087 | NC_021163.1    | Ca_kabuli_chr04 | 17245087                | TT                              | CC              | 1946796520               |
| SNP_P4_44076_17245175 | NC_021163.1    | Ca_kabuli_chr04 | 17245175                | AA                              | GG              | 1946796522               |
| SNP_P4_44077_17245236 | NC_021163.1    | Ca_kabuli_chr04 | 17245236                | AA                              | TT              | 1946796524               |
| SNP_P4_44078_17246540 | NC_021163.1    | Ca_kabuli_chr04 | 17246540                | GG                              | AA              | 1946796526               |
| SNP_P4_44079_17246555 | NC_021163.1    | Ca_kabuli_chr04 | 17246555                | TT                              | CC              | 1946796529               |
| SNP_P4_44080_17246574 | NC_021163.1    | Ca_kabuli_chr04 | 17246574                | AA                              | GG              | 1946796531               |
| SNP_P4_44081_17246905 | NC_021163.1    | Ca_kabuli_chr04 | 17246905                | GG                              | TT              | 1946796533               |
| SNP_P4_44082_17247062 | NC_021163.1    | Ca_kabuli_chr04 | 17247062                | CC                              | TT              | 1946796535               |
| SNP_P4_44083_17247359 | NC_021163.1    | Ca_kabuli_chr04 | 17247359                | AA                              | CC              | 1946796537               |
| SNP_P4_44084_17247534 | NC_021163.1    | Ca_kabuli_chr04 | 17247534                | TT                              | AA              | 1946796539               |
| SNP_P4_44086_17247875 | NC_021163.1    | Ca_kabuli_chr04 | 17247875                | CC                              | TT              | 1946796541               |
| SNP_P4_44087_17247991 | NC_021163.1    | Ca_kabuli_chr04 | 17247991                | AA                              | TT              | 1946796543               |
| SNP_P4_44088_17248071 | NC_021163.1    | Ca_kabuli_chr04 | 17248071                | GG                              | AA              | 1946796545               |
| SNP_P4_44090_17248343 | NC_021163.1    | Ca_kabuli_chr04 | 17248343                | GG                              | AA              | 1946796547               |
| SNP_P4_44091_17248344 | NC_021163.1    | Ca_kabuli_chr04 | 17248344                | CC                              | TT              | 1946796549               |
| SNP_P4_44092_17248773 | NC_021163.1    | Ca_kabuli_chr04 | 17248773                | AA                              | GG              | 1946796551               |
| SNP_P4_44094_17250575 | NC_021163.1    | Ca_kabuli_chr04 | 17250575                | GG                              | TT              | 1946796553               |
| SNP_P4_44095_17250685 | NC_021163.1    | Ca_kabuli_chr04 | 17250685                | AA                              | TT              | 1946796555               |

| SNPs IDs              | Chromosome IDs | Chromosomes     | Physical positions (bp) | CDC Frontier (Reference genome) | (ILWC46 & LPNB) | NCBI SNPdb Accession IDs |
|-----------------------|----------------|-----------------|-------------------------|---------------------------------|-----------------|--------------------------|
| SNP_P4_44098_17251463 | NC_021163.1    | Ca_kabuli_chr04 | 17251463                | CC                              | TT              | 1946796557               |
| SNP_P4_44099_17251527 | NC_021163.1    | Ca_kabuli_chr04 | 17251527                | AA                              | CC              | 1946796559               |
| SNP_P4_44100_17251563 | NC_021163.1    | Ca_kabuli_chr04 | 17251563                | CC                              | AA              | 1946796561               |
| SNP_P4_44102_17251774 | NC_021163.1    | Ca_kabuli_chr04 | 17251774                | GG                              | AA              | 1946796563               |
| SNP_P4_44103_17251809 | NC_021163.1    | Ca_kabuli_chr04 | 17251809                | TT                              | AA              | 1946796565               |
| SNP_P4_44104_17251876 | NC_021163.1    | Ca_kabuli_chr04 | 17251876                | TT                              | AA              | 1946796567               |
| SNP_P4_44105_17252013 | NC_021163.1    | Ca_kabuli_chr04 | 17252013                | AA                              | CC              | 1946796569               |
| SNP_P4_44107_17252097 | NC_021163.1    | Ca_kabuli_chr04 | 17252097                | CC                              | TT              | 1946796571               |
| SNP_P4_44108_17252102 | NC_021163.1    | Ca_kabuli_chr04 | 17252102                | CC                              | GG              | 1946796573               |
| SNP_P4_44109_17252104 | NC_021163.1    | Ca_kabuli_chr04 | 17252104                | TT                              | CC              | 1946796575               |
| SNP_P4_44110_17252235 | NC_021163.1    | Ca_kabuli_chr04 | 17252235                | CC                              | TT              | 1946796577               |
| SNP_P4_44111_17252248 | NC_021163.1    | Ca_kabuli_chr04 | 17252248                | CC                              | TT              | 1946796579               |
| SNP_P4_44112_17252424 | NC_021163.1    | Ca_kabuli_chr04 | 17252424                | TT                              | CC              | 1946796581               |
| SNP_P4_44113_17252677 | NC_021163.1    | Ca_kabuli_chr04 | 17252677                | AA                              | GG              | 1946796583               |
| SNP_P4_44114_17252969 | NC_021163.1    | Ca_kabuli_chr04 | 17252969                | TT                              | CC              | 1946796585               |
| SNP_P4_44115_17253064 | NC_021163.1    | Ca_kabuli_chr04 | 17253064                | AA                              | CC              | 1946796587               |
| SNP_P4_44116_17253078 | NC_021163.1    | Ca_kabuli_chr04 | 17253078                | AA                              | GG              | 1946796589               |
| SNP_P4_44117_17253098 | NC_021163.1    | Ca_kabuli_chr04 | 17253098                | AA                              | CC              | 1946796591               |
| SNP_P4_44118_17253099 | NC_021163.1    | Ca_kabuli_chr04 | 17253099                | TT                              | AA              | 1946796593               |
| SNP_P4_44119_17253112 | NC_021163.1    | Ca_kabuli_chr04 | 17253112                | CC                              | AA              | 1946796595               |
| SNP_P4_44120_17253125 | NC_021163.1    | Ca_kabuli_chr04 | 17253125                | AA                              | GG              | 1946796597               |
| SNP_P4_44121_17253234 | NC_021163.1    | Ca_kabuli_chr04 | 17253234                | AA                              | GG              | 1946796599               |
| SNP_P4_44122_17253589 | NC_021163.1    | Ca_kabuli_chr04 | 17253589                | TT                              | CC              | 1946796601               |
| SNP_P4_44123_17253928 | NC_021163.1    | Ca_kabuli_chr04 | 17253928                | AA                              | CC              | 1946796603               |
| SNP_P4_44124_17254133 | NC_021163.1    | Ca_kabuli_chr04 | 17254133                | AA                              | CC              | 1946796606               |
| SNP_P4_44125_17254155 | NC_021163.1    | Ca_kabuli_chr04 | 17254155                | GG                              | CC              | 1946796608               |
| SNP_P4_44126_17254592 | NC_021163.1    | Ca_kabuli_chr04 | 17254592                | AA                              | TT              | 1946796609               |
| SNP_P4_44127_17254622 | NC_021163.1    | Ca_kabuli_chr04 | 17254622                | GG                              | AA              | 1946796611               |
| SNP_P4_44129_17255398 | NC_021163.1    | Ca_kabuli_chr04 | 17255398                | TT                              | CC              | 1946796613               |
| SNP_P4_44130_17256142 | NC_021163.1    | Ca_kabuli_chr04 | 17256142                | AA                              | GG              | 1946796615               |
| SNP_P4_44131_17256144 | NC_021163.1    | Ca_kabuli_chr04 | 17256144                | AA                              | TT              | 1946796617               |
| SNP_P4_44132_17257453 | NC_021163.1    | Ca_kabuli_chr04 | 17257453                | CC                              | AA              | 1946796619               |
| SNP_P4_44133_17257467 | NC_021163.1    | Ca_kabuli_chr04 | 17257467                | CC                              | TT              | 1946796621               |
| SNP_P4_44134_17257625 | NC_021163.1    | Ca_kabuli_chr04 | 17257625                | GG                              | TT              | 1946796623               |
| SNP_P4_44135_17257878 | NC_021163.1    | Ca_kabuli_chr04 | 17257878                | TT                              | CC              | 1946796625               |
| SNP_P4_44137_17258172 | NC_021163.1    | Ca_kabuli_chr04 | 17258172                | AA                              | GG              | 1946796627               |
| SNP_P4_44138_17258262 | NC_021163.1    | Ca_kabuli_chr04 | 17258262                | GG                              | AA              | 1946796629               |
| SNP_P4_44139_17258279 | NC_021163.1    | Ca_kabuli_chr04 | 17258279                | AA                              | TT              | 1946796631               |
| SNP_P4_44141_17258362 | NC_021163.1    | Ca_kabuli_chr04 | 17258362                | GG                              | AA              | 1946796633               |
| SNP_P4_44142_17258506 | NC_021163.1    | Ca_kabuli_chr04 | 17258506                | TT                              | AA              | 1946796635               |
| SNP_P4_44143_17258510 | NC_021163.1    | Ca_kabuli_chr04 | 17258510                | TT                              | AA              | 1946796636               |
| SNP_P4_44144_17258556 | NC_021163.1    | Ca_kabuli_chr04 | 17258556                | CC                              | TT              | 1946796638               |

| SNPs IDs              | Chromosome IDs | Chromosomes     | Physical positions (bp) | CDC Frontier (Reference genome) | (ILWC46 & LPNB) | NCBI SNPdb Accession IDs |
|-----------------------|----------------|-----------------|-------------------------|---------------------------------|-----------------|--------------------------|
| SNP_P4_44145_17258639 | NC_021163.1    | Ca_kabuli_chr04 | 17258639                | AA                              | TT              | 1946796640               |
| SNP_P4_44146_17259025 | NC_021163.1    | Ca_kabuli_chr04 | 17259025                | AA                              | GG              | 1946796642               |
| SNP_P4_44147_17259027 | NC_021163.1    | Ca_kabuli_chr04 | 17259027                | CC                              | TT              | 1946796644               |
| SNP_P4_44149_17259256 | NC_021163.1    | Ca_kabuli_chr04 | 17259256                | TT                              | GG              | 1946796646               |
| SNP_P4_44150_17259350 | NC_021163.1    | Ca_kabuli_chr04 | 17259350                | GG                              | AA              | 1946796648               |
| SNP_P4_44152_17259419 | NC_021163.1    | Ca_kabuli_chr04 | 17259419                | TT                              | CC              | 1946796650               |
| SNP_P4_44153_17259893 | NC_021163.1    | Ca_kabuli_chr04 | 17259893                | TT                              | GG              | 1946796652               |
| SNP_P4_44154_17259924 | NC_021163.1    | Ca_kabuli_chr04 | 17259924                | TT                              | AA              | 1946796654               |
| SNP_P4_44155_17259991 | NC_021163.1    | Ca_kabuli_chr04 | 17259991                | CC                              | TT              | 1946796656               |
| SNP_P4_44156_17260184 | NC_021163.1    | Ca_kabuli_chr04 | 17260184                | CC                              | GG              | 1946796658               |
| SNP_P4_44157_17260294 | NC_021163.1    | Ca_kabuli_chr04 | 17260294                | GG                              | AA              | 1946796660               |
| SNP_P4_44158_17260299 | NC_021163.1    | Ca_kabuli_chr04 | 17260299                | TT                              | AA              | 1946796662               |
| SNP_P4_44159_17260341 | NC_021163.1    | Ca_kabuli_chr04 | 17260341                | AA                              | GG              | 1946796664               |
| SNP_P4_44160_17260363 | NC_021163.1    | Ca_kabuli_chr04 | 17260363                | AA                              | GG              | 1946796666               |
| SNP_P4_44161_17260521 | NC_021163.1    | Ca_kabuli_chr04 | 17260521                | GG                              | AA              | 1946796668               |
| SNP_P4_44162_17260556 | NC_021163.1    | Ca_kabuli_chr04 | 17260556                | AA                              | GG              | 1946796670               |
| SNP_P4_44163_17260568 | NC_021163.1    | Ca_kabuli_chr04 | 17260568                | CC                              | TT              | 1946796671               |
| SNP_P4_44164_17261915 | NC_021163.1    | Ca_kabuli_chr04 | 17261915                | CC                              | GG              | 1946796673               |
| SNP_P4_44165_17262306 | NC_021163.1    | Ca_kabuli_chr04 | 17262306                | GG                              | TT              | 1946796675               |
| SNP_P4_44166_17262491 | NC_021163.1    | Ca_kabuli_chr04 | 17262491                | AA                              | GG              | 1946796677               |
| SNP_P4_44167_17262498 | NC_021163.1    | Ca_kabuli_chr04 | 17262498                | TT                              | AA              | 1946796679               |
| SNP_P4_44168_17262506 | NC_021163.1    | Ca_kabuli_chr04 | 17262506                | AA                              | GG              | 1946796681               |
| SNP_P4_44169_17262512 | NC_021163.1    | Ca_kabuli_chr04 | 17262512                | CC                              | TT              | 1946796683               |
| SNP_P4_44170_17266044 | NC_021163.1    | Ca_kabuli_chr04 | 17266044                | CC                              | TT              | 1946796685               |
| SNP_P4_44172_17269077 | NC_021163.1    | Ca_kabuli_chr04 | 17269077                | TT                              | AA              | 1946796687               |
| SNP_P4_44173_17270524 | NC_021163.1    | Ca_kabuli_chr04 | 17270524                | CC                              | GG              | 1946796689               |
| SNP_P4_44174_17270576 | NC_021163.1    | Ca_kabuli_chr04 | 17270576                | AA                              | CC              | 1946796691               |
| SNP_P4_44175_17270587 | NC_021163.1    | Ca_kabuli_chr04 | 17270587                | AA                              | TT              | 1946796693               |
| SNP_P4_44176_17270588 | NC_021163.1    | Ca_kabuli_chr04 | 17270588                | TT                              | CC              | 1946796695               |
| SNP_P4_44177_17271209 | NC_021163.1    | Ca_kabuli_chr04 | 17271209                | AA                              | CC              | 1946796697               |
| SNP_P4_44178_17271210 | NC_021163.1    | Ca_kabuli_chr04 | 17271210                | GG                              | AA              | 1946796699               |
| SNP_P4_44179_17271831 | NC_021163.1    | Ca_kabuli_chr04 | 17271831                | AA                              | GG              | 1946796701               |
| SNP_P4_44180_17271839 | NC_021163.1    | Ca_kabuli_chr04 | 17271839                | TT                              | CC              | 1946796703               |
| SNP_P4_44181_17271853 | NC_021163.1    | Ca_kabuli_chr04 | 17271853                | TT                              | CC              | 1946796706               |
| SNP_P4_44182_17284303 | NC_021163.1    | Ca_kabuli_chr04 | 17284303                | AA                              | TT              | 1946796708               |
| SNP_P4_44183_17284490 | NC_021163.1    | Ca_kabuli_chr04 | 17284490                | AA                              | GG              | 1946796710               |
| SNP_P4_44184_17285206 | NC_021163.1    | Ca_kabuli_chr04 | 17285206                | TT                              | AA              | 1946796712               |
| SNP_P4_44185_17286617 | NC_021163.1    | Ca_kabuli_chr04 | 17286617                | AA                              | GG              | 1946796714               |
| SNP_P4_44186_17286647 | NC_021163.1    | Ca_kabuli_chr04 | 17286647                | CC                              | TT              | 1946796716               |
| SNP_P4_44189_17287353 | NC_021163.1    | Ca_kabuli_chr04 | 17287353                | GG                              | AA              | 1946796718               |
| SNP_P4_44190_17287619 | NC_021163.1    | Ca_kabuli_chr04 | 17287619                | AA                              | GG              | 1946796720               |
| SNP_P4_44191_17287847 | NC_021163.1    | Ca_kabuli_chr04 | 17287847                | AA                              | GG              | 1946796722               |



| SNPs IDs              | Chromosome IDs | Chromosomes     | Physical positions (bp) | CDC Frontier (Reference genome) | (ILWC46 & LPNB) | NCBI SNPdb Accession IDs |
|-----------------------|----------------|-----------------|-------------------------|---------------------------------|-----------------|--------------------------|
| SNP_P4_44192_17288291 | NC_021163.1    | Ca_kabuli_chr04 | 17288291                | AA                              | GG              | 1946796724               |
| SNP_P4_44193_17288313 | NC_021163.1    | Ca_kabuli_chr04 | 17288313                | GG                              | CC              | 1946796726               |
| SNP_P4_44194_17288315 | NC_021163.1    | Ca_kabuli_chr04 | 17288315                | GG                              | AA              | 1946796728               |
| SNP_P4_44195_17288358 | NC_021163.1    | Ca_kabuli_chr04 | 17288358                | TT                              | GG              | 1946796730               |
| SNP_P4_44196_17288873 | NC_021163.1    | Ca_kabuli_chr04 | 17288873                | AA                              | TT              | 1946796732               |
| SNP_P4_44197_17288914 | NC_021163.1    | Ca_kabuli_chr04 | 17288914                | GG                              | AA              | 1946796734               |
| SNP_P4_44198_17288932 | NC_021163.1    | Ca_kabuli_chr04 | 17288932                | GG                              | AA              | 1946796736               |
| SNP_P4_44199_17289312 | NC_021163.1    | Ca_kabuli_chr04 | 17289312                | GG                              | AA              | 1946796738               |
| SNP_P4_44200_17289320 | NC_021163.1    | Ca_kabuli_chr04 | 17289320                | AA                              | CC              | 1946796740               |
| SNP_P4_44201_17289327 | NC_021163.1    | Ca_kabuli_chr04 | 17289327                | AA                              | GG              | 1946796742               |
| SNP_P4_44202_17289883 | NC_021163.1    | Ca_kabuli_chr04 | 17289883                | GG                              | AA              | 1946796744               |
| SNP_P4_44205_17290793 | NC_021163.1    | Ca_kabuli_chr04 | 17290793                | CC                              | TT              | 1946796746               |
| SNP_P4_44206_17290958 | NC_021163.1    | Ca_kabuli_chr04 | 17290958                | TT                              | CC              | 1946796748               |
| SNP_P4_44207_17290964 | NC_021163.1    | Ca_kabuli_chr04 | 17290964                | CC                              | TT              | 1946796750               |
| SNP_P4_44208_17290969 | NC_021163.1    | Ca_kabuli_chr04 | 17290969                | AA                              | TT              | 1946796752               |
| SNP_P4_44209_17290976 | NC_021163.1    | Ca_kabuli_chr04 | 17290976                | TT                              | CC              | 1946796754               |
| SNP_P4_44210_17290987 | NC_021163.1    | Ca_kabuli_chr04 | 17290987                | AA                              | TT              | 1946796756               |
| SNP_P4_44211_17290989 | NC_021163.1    | Ca_kabuli_chr04 | 17290989                | GG                              | AA              | 1946796758               |
| SNP_P4_44212_17291028 | NC_021163.1    | Ca_kabuli_chr04 | 17291028                | GG                              | TT              | 1946796760               |
| SNP_P4_44213_17292282 | NC_021163.1    | Ca_kabuli_chr04 | 17292282                | TT                              | GG              | 1946796762               |
| SNP_P4_44214_17292292 | NC_021163.1    | Ca_kabuli_chr04 | 17292292                | AA                              | GG              | 1946796764               |
| SNP_P4_44215_17292336 | NC_021163.1    | Ca_kabuli_chr04 | 17292336                | TT                              | CC              | 1946796766               |
| SNP_P4_44216_17292356 | NC_021163.1    | Ca_kabuli_chr04 | 17292356                | TT                              | CC              | 1946796768               |
| SNP_P4_44217_17292374 | NC_021163.1    | Ca_kabuli_chr04 | 17292374                | AA                              | CC              | 1946796770               |
| SNP_P4_44218_17292388 | NC_021163.1    | Ca_kabuli_chr04 | 17292388                | TT                              | CC              | 1946796772               |
| SNP_P4_44219_17292391 | NC_021163.1    | Ca_kabuli_chr04 | 17292391                | AA                              | GG              | 1946796774               |
| SNP_P4_44220_17292402 | NC_021163.1    | Ca_kabuli_chr04 | 17292402                | CC                              | TT              | 1946796776               |
| SNP_P4_44221_17292617 | NC_021163.1    | Ca_kabuli_chr04 | 17292617                | AA                              | GG              | 1946796778               |
| SNP_P4_44222_17292639 | NC_021163.1    | Ca_kabuli_chr04 | 17292639                | AA                              | GG              | 1946796780               |
| SNP_P4_44223_17292699 | NC_021163.1    | Ca_kabuli_chr04 | 17292699                | AA                              | GG              | 1946796782               |
| SNP_P4_44224_17292700 | NC_021163.1    | Ca_kabuli_chr04 | 17292700                | TT                              | AA              | 1946796784               |
| SNP_P4_44225_17292706 | NC_021163.1    | Ca_kabuli_chr04 | 17292706                | AA                              | GG              | 1946796786               |
| SNP_P4_44226_17292727 | NC_021163.1    | Ca_kabuli_chr04 | 17292727                | TT                              | CC              | 1946796788               |
| SNP_P4_44228_17293633 | NC_021163.1    | Ca_kabuli_chr04 | 17293633                | AA                              | GG              | 1946796790               |
| SNP_P4_44230_17293768 | NC_021163.1    | Ca_kabuli_chr04 | 17293768                | AA                              | GG              | 1946796792               |
| SNP_P4_44231_17294886 | NC_021163.1    | Ca_kabuli_chr04 | 17294886                | GG                              | AA              | 1946796794               |
| SNP_P4_44232_17295114 | NC_021163.1    | Ca_kabuli_chr04 | 17295114                | AA                              | TT              | 1946796797               |
| SNP_P4_44234_17297563 | NC_021163.1    | Ca_kabuli_chr04 | 17297563                | GG                              | AA              | 1946796799               |
| SNP_P4_44235_17297567 | NC_021163.1    | Ca_kabuli_chr04 | 17297567                | AA                              | GG              | 1946796801               |
| SNP_P4_44236_17297866 | NC_021163.1    | Ca_kabuli_chr04 | 17297866                | CC                              | TT              | 1946796803               |
| SNP_P4_44237_17298555 | NC_021163.1    | Ca_kabuli_chr04 | 17298555                | TT                              | CC              | 1946796805               |
| SNP_P4_44239_17299377 | NC_021163.1    | Ca_kabuli_chr04 | 17299377                | TT                              | CC              | 1946796807               |

| SNPs IDs              | Chromosome IDs | Chromosomes     | Physical positions (bp) | CDC Frontier (Reference genome) | (ILWC46 & LPNB) | NCBI SNPdb Accession IDs |
|-----------------------|----------------|-----------------|-------------------------|---------------------------------|-----------------|--------------------------|
| SNP_P4_44241_17300856 | NC_021163.1    | Ca_kabuli_chr04 | 17300856                | CC                              | TT              | 1946796809               |
| SNP_P4_44242_17305839 | NC_021163.1    | Ca_kabuli_chr04 | 17305839                | AA                              | TT              | 1946796811               |
| SNP_P4_44243_17309827 | NC_021163.1    | Ca_kabuli_chr04 | 17309827                | GG                              | CC              | 1946796813               |
| SNP_P4_44244_17312414 | NC_021163.1    | Ca_kabuli_chr04 | 17312414                | TT                              | CC              | 1946796815               |
| SNP_P4_44246_17313161 | NC_021163.1    | Ca_kabuli_chr04 | 17313161                | TT                              | CC              | 1946796817               |
| SNP_P4_44248_17314130 | NC_021163.1    | Ca_kabuli_chr04 | 17314130                | AA                              | GG              | 1946796819               |
| SNP_P4_44249_17314543 | NC_021163.1    | Ca_kabuli_chr04 | 17314543                | AA                              | TT              | 1946796821               |
| SNP_P4_44251_17314901 | NC_021163.1    | Ca_kabuli_chr04 | 17314901                | AA                              | GG              | 1946796823               |
| SNP_P4_44252_17315181 | NC_021163.1    | Ca_kabuli_chr04 | 17315181                | CC                              | TT              | 1946796825               |
| SNP_P4_44254_17315205 | NC_021163.1    | Ca_kabuli_chr04 | 17315205                | GG                              | AA              | 1946796827               |
| SNP_P4_44255_17315206 | NC_021163.1    | Ca_kabuli_chr04 | 17315206                | TT                              | CC              | 1946796829               |
| SNP_P4_44256_17315289 | NC_021163.1    | Ca_kabuli_chr04 | 17315289                | GG                              | AA              | 1946796831               |
| SNP_P4_44257_17315465 | NC_021163.1    | Ca_kabuli_chr04 | 17315465                | AA                              | TT              | 1946796833               |
| SNP_P4_44258_17315476 | NC_021163.1    | Ca_kabuli_chr04 | 17315476                | TT                              | AA              | 1946796835               |
| SNP_P4_44259_17317662 | NC_021163.1    | Ca_kabuli_chr04 | 17317662                | TT                              | CC              | 1946796837               |
| SNP_P4_44260_17317985 | NC_021163.1    | Ca_kabuli_chr04 | 17317985                | GG                              | AA              | 1946796839               |
| SNP_P4_44261_17318000 | NC_021163.1    | Ca_kabuli_chr04 | 17318000                | GG                              | AA              | 1946796841               |
| SNP_P4_44264_17318759 | NC_021163.1    | Ca_kabuli_chr04 | 17318759                | AA                              | GG              | 1946796844               |
| SNP_P4_44265_17321701 | NC_021163.1    | Ca_kabuli_chr04 | 17321701                | TT                              | CC              | 1946796846               |
| SNP_P4_44266_17321709 | NC_021163.1    | Ca_kabuli_chr04 | 17321709                | AA                              | TT              | 1946796849               |
| SNP_P4_44267_17321925 | NC_021163.1    | Ca_kabuli_chr04 | 17321925                | TT                              | AA              | 1946796851               |
| SNP_P4_44269_17322164 | NC_021163.1    | Ca_kabuli_chr04 | 17322164                | TT                              | CC              | 1946796853               |
| SNP_P4_44270_17322236 | NC_021163.1    | Ca_kabuli_chr04 | 17322236                | AA                              | TT              | 1946796855               |
| SNP_P4_44272_17324163 | NC_021163.1    | Ca_kabuli_chr04 | 17324163                | GG                              | AA              | 1946796857               |
| SNP_P4_44273_17324177 | NC_021163.1    | Ca_kabuli_chr04 | 17324177                | GG                              | TT              | 1946796859               |
| SNP_P4_44274_17324285 | NC_021163.1    | Ca_kabuli_chr04 | 17324285                | AA                              | TT              | 1946796861               |
| SNP_P4_44275_17324324 | NC_021163.1    | Ca_kabuli_chr04 | 17324324                | GG                              | TT              | 1946796863               |
| SNP_P4_44277_17324406 | NC_021163.1    | Ca_kabuli_chr04 | 17324406                | TT                              | AA              | 1946796865               |
| SNP_P4_44278_17324473 | NC_021163.1    | Ca_kabuli_chr04 | 17324473                | CC                              | TT              | 1946796867               |
| SNP_P4_44279_17324637 | NC_021163.1    | Ca_kabuli_chr04 | 17324637                | AA                              | TT              | 1946796869               |
| SNP_P4_44280_17324660 | NC_021163.1    | Ca_kabuli_chr04 | 17324660                | CC                              | GG              | 1946796871               |
| SNP_P4_44281_17325494 | NC_021163.1    | Ca_kabuli_chr04 | 17325494                | TT                              | CC              | 1946796874               |
| SNP_P4_44282_17325500 | NC_021163.1    | Ca_kabuli_chr04 | 17325500                | AA                              | CC              | 1946796876               |
| SNP_P4_44283_17325648 | NC_021163.1    | Ca_kabuli_chr04 | 17325648                | TT                              | CC              | 1946796879               |
| SNP_P4_44284_17325695 | NC_021163.1    | Ca_kabuli_chr04 | 17325695                | AA                              | TT              | 1946796881               |
| SNP_P4_44285_17325701 | NC_021163.1    | Ca_kabuli_chr04 | 17325701                | AA                              | TT              | 1946796883               |
| SNP_P4_44286_17327331 | NC_021163.1    | Ca_kabuli_chr04 | 17327331                | AA                              | GG              | 1946796885               |
| SNP_P4_44287_17327335 | NC_021163.1    | Ca_kabuli_chr04 | 17327335                | AA                              | GG              | 1946796887               |
| SNP_P4_44288_17327497 | NC_021163.1    | Ca_kabuli_chr04 | 17327497                | CC                              | TT              | 1946796889               |
| SNP_P4_44289_17327498 | NC_021163.1    | Ca_kabuli_chr04 | 17327498                | TT                              | AA              | 1946796891               |
| SNP_P4_44290_17327525 | NC_021163.1    | Ca_kabuli_chr04 | 17327525                | AA                              | GG              | 1946796893               |
| SNP_P4_44292_17328480 | NC_021163.1    | Ca_kabuli_chr04 | 17328480                | TT                              | CC              | 1946796895               |

| SNPs IDs              | Chromosome IDs | Chromosomes     | Physical positions (bp) | CDC Frontier (Reference genome) | (ILWC46 & LPNB) | NCBI SNPdb Accession IDs |
|-----------------------|----------------|-----------------|-------------------------|---------------------------------|-----------------|--------------------------|
| SNP_P4_44293_17328519 | NC_021163.1    | Ca_kabuli_chr04 | 17328519                | TT                              | CC              | 1946796897               |
| SNP_P4_44294_17328524 | NC_021163.1    | Ca_kabuli_chr04 | 17328524                | TT                              | AA              | 1946796900               |
| SNP_P4_44295_17328537 | NC_021163.1    | Ca_kabuli_chr04 | 17328537                | AA                              | GG              | 1946796902               |
| SNP_P4_44296_17328539 | NC_021163.1    | Ca_kabuli_chr04 | 17328539                | GG                              | CC              | 1946796904               |
| SNP_P4_44297_17328544 | NC_021163.1    | Ca_kabuli_chr04 | 17328544                | TT                              | AA              | 1946796906               |
| SNP_P4_44298_17328624 | NC_021163.1    | Ca_kabuli_chr04 | 17328624                | TT                              | AA              | 1946796908               |
| SNP_P4_44301_17329282 | NC_021163.1    | Ca_kabuli_chr04 | 17329282                | AA                              | GG              | 1946796910               |
| SNP_P4_44302_17329306 | NC_021163.1    | Ca_kabuli_chr04 | 17329306                | AA                              | GG              | 1946796912               |
| SNP_P4_44304_17329576 | NC_021163.1    | Ca_kabuli_chr04 | 17329576                | TT                              | CC              | 1946796914               |
| SNP_P4_44305_17329828 | NC_021163.1    | Ca_kabuli_chr04 | 17329828                | TT                              | AA              | 1946796916               |
| SNP_P4_44306_17330667 | NC_021163.1    | Ca_kabuli_chr04 | 17330667                | AA                              | GG              | 1946796918               |
| SNP_P4_44307_17330768 | NC_021163.1    | Ca_kabuli_chr04 | 17330768                | CC                              | TT              | 1946796920               |
| SNP_P4_44308_17330831 | NC_021163.1    | Ca_kabuli_chr04 | 17330831                | TT                              | CC              | 1946796922               |
| SNP_P4_44309_17331101 | NC_021163.1    | Ca_kabuli_chr04 | 17331101                | CC                              | TT              | 1946796924               |
| SNP_P4_44310_17331268 | NC_021163.1    | Ca_kabuli_chr04 | 17331268                | CC                              | TT              | 1946796926               |
| SNP_P4_44311_17331599 | NC_021163.1    | Ca_kabuli_chr04 | 17331599                | CC                              | TT              | 1946796928               |
| SNP_P4_44313_17332275 | NC_021163.1    | Ca_kabuli_chr04 | 17332275                | CC                              | AA              | 1946796930               |
| SNP_P4_44314_17332328 | NC_021163.1    | Ca_kabuli_chr04 | 17332328                | GG                              | AA              | 1946796933               |
| SNP_P4_44315_17332488 | NC_021163.1    | Ca_kabuli_chr04 | 17332488                | TT                              | GG              | 1946796935               |
| SNP_P4_44317_17332764 | NC_021163.1    | Ca_kabuli_chr04 | 17332764                | AA                              | TT              | 1946796937               |
| SNP_P4_44318_17333820 | NC_021163.1    | Ca_kabuli_chr04 | 17333820                | TT                              | CC              | 1946796939               |
| SNP_P4_44319_17333822 | NC_021163.1    | Ca_kabuli_chr04 | 17333822                | CC                              | TT              | 1946796941               |
| SNP_P4_44320_17333887 | NC_021163.1    | Ca_kabuli_chr04 | 17333887                | CC                              | AA              | 1946796943               |
| SNP_P4_44321_17334093 | NC_021163.1    | Ca_kabuli_chr04 | 17334093                | GG                              | TT              | 1946796945               |
| SNP_P4_44322_17334204 | NC_021163.1    | Ca_kabuli_chr04 | 17334204                | GG                              | AA              | 1946796947               |
| SNP_P4_44323_17334359 | NC_021163.1    | Ca_kabuli_chr04 | 17334359                | TT                              | AA              | 1946796949               |
| SNP_P4_44324_17334394 | NC_021163.1    | Ca_kabuli_chr04 | 17334394                | TT                              | GG              | 1946796951               |
| SNP_P4_44325_17334490 | NC_021163.1    | Ca_kabuli_chr04 | 17334490                | CC                              | TT              | 1946796953               |
| SNP_P4_44326_17336709 | NC_021163.1    | Ca_kabuli_chr04 | 17336709                | GG                              | AA              | 1946796955               |
| SNP_P4_44327_17337281 | NC_021163.1    | Ca_kabuli_chr04 | 17337281                | GG                              | AA              | 1946796957               |
| SNP_P4_44328_17338491 | NC_021163.1    | Ca_kabuli_chr04 | 17338491                | GG                              | AA              | 1946796959               |
| SNP_P4_44329_17338610 | NC_021163.1    | Ca_kabuli_chr04 | 17338610                | GG                              | CC              | 1946796961               |
| SNP_P4_44330_17339200 | NC_021163.1    | Ca_kabuli_chr04 | 17339200                | GG                              | AA              | 1946796963               |
| SNP_P4_44331_17339301 | NC_021163.1    | Ca_kabuli_chr04 | 17339301                | TT                              | CC              | 1946796965               |
| SNP_P4_44332_17339350 | NC_021163.1    | Ca_kabuli_chr04 | 17339350                | CC                              | TT              | 1946796967               |
| SNP_P4_44334_17342051 | NC_021163.1    | Ca_kabuli_chr04 | 17342051                | TT                              | CC              | 1946796969               |
| SNP_P4_44335_17342053 | NC_021163.1    | Ca_kabuli_chr04 | 17342053                | GG                              | AA              | 1946796971               |
| SNP_P4_44337_17342347 | NC_021163.1    | Ca_kabuli_chr04 | 17342347                | GG                              | AA              | 1946796974               |
| SNP_P4_44338_17342431 | NC_021163.1    | Ca_kabuli_chr04 | 17342431                | TT                              | CC              | 1946796976               |
| SNP_P4_44339_17343730 | NC_021163.1    | Ca_kabuli_chr04 | 17343730                | GG                              | AA              | 1946796978               |
| SNP_P4_44340_17344627 | NC_021163.1    | Ca_kabuli_chr04 | 17344627                | AA                              | GG              | 1946796980               |
| SNP_P4_44341_17348700 | NC_021163.1    | Ca_kabuli_chr04 | 17348700                | CC                              | TT              | 1946796982               |

| SNPs IDs              | Chromosome IDs | Chromosomes     | Physical positions (bp) | CDC Frontier (Reference genome) | (ILWC46 & LPNB) | NCBI SNPdb Accession IDs |
|-----------------------|----------------|-----------------|-------------------------|---------------------------------|-----------------|--------------------------|
| SNP_P4_44343_17349267 | NC_021163.1    | Ca_kabuli_chr04 | 17349267                | GG                              | TT              | 1946796984               |
| SNP_P4_44344_17349298 | NC_021163.1    | Ca_kabuli_chr04 | 17349298                | TT                              | CC              | 1946796986               |
| SNP_P4_44345_17349331 | NC_021163.1    | Ca_kabuli_chr04 | 17349331                | TT                              | CC              | 1946796988               |
| SNP_P4_44346_17349367 | NC_021163.1    | Ca_kabuli_chr04 | 17349367                | TT                              | CC              | 1946796990               |
| SNP_P4_44347_17349404 | NC_021163.1    | Ca_kabuli_chr04 | 17349404                | AA                              | TT              | 1946796992               |
| SNP_P4_44348_17349557 | NC_021163.1    | Ca_kabuli_chr04 | 17349557                | TT                              | AA              | 1946796994               |
| SNP_P4_44349_17352895 | NC_021163.1    | Ca_kabuli_chr04 | 17352895                | CC                              | AA              | 1946796996               |
| SNP_P4_44350_17353118 | NC_021163.1    | Ca_kabuli_chr04 | 17353118                | CC                              | TT              | 1946796999               |
| SNP_P4_44351_17353145 | NC_021163.1    | Ca_kabuli_chr04 | 17353145                | CC                              | TT              | 1946797001               |
| SNP_P4_44352_17353174 | NC_021163.1    | Ca_kabuli_chr04 | 17353174                | GG                              | TT              | 1946797003               |
| SNP_P4_44353_17353211 | NC_021163.1    | Ca_kabuli_chr04 | 17353211                | AA                              | GG              | 1946797005               |
| SNP_P4_44354_17353216 | NC_021163.1    | Ca_kabuli_chr04 | 17353216                | AA                              | TT              | 1946797007               |
| SNP_P4_44355_17353946 | NC_021163.1    | Ca_kabuli_chr04 | 17353946                | TT                              | GG              | 1946797009               |
| SNP_P4_44356_17354126 | NC_021163.1    | Ca_kabuli_chr04 | 17354126                | TT                              | GG              | 1946797011               |
| SNP_P4_44357_17354196 | NC_021163.1    | Ca_kabuli_chr04 | 17354196                | TT                              | CC              | 1946797013               |
| SNP_P4_44358_17354444 | NC_021163.1    | Ca_kabuli_chr04 | 17354444                | AA                              | TT              | 1946797015               |
| SNP_P4_44359_17354838 | NC_021163.1    | Ca_kabuli_chr04 | 17354838                | TT                              | CC              | 1946797017               |
| SNP_P4_44360_17354867 | NC_021163.1    | Ca_kabuli_chr04 | 17354867                | AA                              | GG              | 1946797019               |
| SNP_P4_44361_17355029 | NC_021163.1    | Ca_kabuli_chr04 | 17355029                | GG                              | AA              | 1946797021               |
| SNP_P4_44362_17355117 | NC_021163.1    | Ca_kabuli_chr04 | 17355117                | CC                              | TT              | 1946797023               |
| SNP_P4_44363_17355406 | NC_021163.1    | Ca_kabuli_chr04 | 17355406                | CC                              | AA              | 1946797025               |
| SNP_P4_44364_17355998 | NC_021163.1    | Ca_kabuli_chr04 | 17355998                | GG                              | AA              | 1946797027               |
| SNP_P4_44365_17356320 | NC_021163.1    | Ca_kabuli_chr04 | 17356320                | GG                              | CC              | 1946797029               |
| SNP_P4_44366_17357309 | NC_021163.1    | Ca_kabuli_chr04 | 17357309                | GG                              | AA              | 1946797031               |
| SNP_P4_44367_17357341 | NC_021163.1    | Ca_kabuli_chr04 | 17357341                | CC                              | TT              | 1946797033               |
| SNP_P4_44368_17358921 | NC_021163.1    | Ca_kabuli_chr04 | 17358921                | TT                              | AA              | 1946797036               |
| SNP_P4_44369_17358922 | NC_021163.1    | Ca_kabuli_chr04 | 17358922                | TT                              | AA              | 1946797038               |
| SNP_P4_44370_17359264 | NC_021163.1    | Ca_kabuli_chr04 | 17359264                | GG                              | AA              | 1946797040               |
| SNP_P4_44371_17359600 | NC_021163.1    | Ca_kabuli_chr04 | 17359600                | TT                              | AA              | 1946797042               |
| SNP_P4_44372_17360064 | NC_021163.1    | Ca_kabuli_chr04 | 17360064                | GG                              | AA              | 1946797044               |
| SNP_P4_44374_17361601 | NC_021163.1    | Ca_kabuli_chr04 | 17361601                | CC                              | AA              | 1946797046               |
| SNP_P4_44375_17363378 | NC_021163.1    | Ca_kabuli_chr04 | 17363378                | AA                              | GG              | 1946797048               |
| SNP_P4_44376_17366584 | NC_021163.1    | Ca_kabuli_chr04 | 17366584                | GG                              | CC              | 1946797050               |
| SNP_P4_44377_17366772 | NC_021163.1    | Ca_kabuli_chr04 | 17366772                | AA                              | CC              | 1946797052               |
| SNP_P4_44378_17367052 | NC_021163.1    | Ca_kabuli_chr04 | 17367052                | TT                              | AA              | 1946797054               |
| SNP_P4_44379_17367056 | NC_021163.1    | Ca_kabuli_chr04 | 17367056                | TT                              | CC              | 1946797056               |
| SNP_P4_44380_17367134 | NC_021163.1    | Ca_kabuli_chr04 | 17367134                | GG                              | AA              | 1946797058               |
| SNP_P4_44382_17367173 | NC_021163.1    | Ca_kabuli_chr04 | 17367173                | CC                              | TT              | 1946797060               |
| SNP_P4_44383_17367359 | NC_021163.1    | Ca_kabuli_chr04 | 17367359                | AA                              | GG              | 1946797062               |
| SNP_P4_44384_17367366 | NC_021163.1    | Ca_kabuli_chr04 | 17367366                | TT                              | AA              | 1946797064               |
| SNP_P4_44385_17367430 | NC_021163.1    | Ca_kabuli_chr04 | 17367430                | TT                              | GG              | 1946797066               |
| SNP_P4_44386_17367641 | NC_021163.1    | Ca_kabuli_chr04 | 17367641                | TT                              | AA              | 1946797068               |

| SNPs IDs              | Chromosome IDs | Chromosomes     | Physical positions (bp) | CDC Frontier (Reference genome) | (ILWC46 & LPNB) | NCBI SNPdb Accession IDs |
|-----------------------|----------------|-----------------|-------------------------|---------------------------------|-----------------|--------------------------|
| SNP_P4_44388_17367677 | NC_021163.1    | Ca_kabuli_chr04 | 17367677                | CC                              | AA              | 1946797070               |
| SNP_P4_44390_17367760 | NC_021163.1    | Ca_kabuli_chr04 | 17367760                | TT                              | AA              | 1946797072               |
| SNP_P4_44391_17368744 | NC_021163.1    | Ca_kabuli_chr04 | 17368744                | AA                              | GG              | 1946797074               |
| SNP_P4_44392_17368762 | NC_021163.1    | Ca_kabuli_chr04 | 17368762                | TT                              | CC              | 1946797077               |
| SNP_P4_44393_17371868 | NC_021163.1    | Ca_kabuli_chr04 | 17371868                | AA                              | GG              | 1946797079               |
| SNP_P4_44394_17372056 | NC_021163.1    | Ca_kabuli_chr04 | 17372056                | GG                              | TT              | 1946797081               |
| SNP_P4_44395_17372062 | NC_021163.1    | Ca_kabuli_chr04 | 17372062                | GG                              | AA              | 1946797083               |
| SNP_P4_44396_17372451 | NC_021163.1    | Ca_kabuli_chr04 | 17372451                | AA                              | GG              | 1946797085               |
| SNP_P4_44397_17372469 | NC_021163.1    | Ca_kabuli_chr04 | 17372469                | GG                              | AA              | 1946797087               |
| SNP_P4_44398_17372946 | NC_021163.1    | Ca_kabuli_chr04 | 17372946                | TT                              | AA              | 1946797089               |
| SNP_P4_44399_17373082 | NC_021163.1    | Ca_kabuli_chr04 | 17373082                | TT                              | GG              | 1946797091               |
| SNP_P4_44400_17373612 | NC_021163.1    | Ca_kabuli_chr04 | 17373612                | GG                              | CC              | 1946797093               |
| SNP_P4_44402_17376800 | NC_021163.1    | Ca_kabuli_chr04 | 17376800                | TT                              | CC              | 1946797095               |
| SNP_P4_44404_17382525 | NC_021163.1    | Ca_kabuli_chr04 | 17382525                | TT                              | GG              | 1946797097               |
| SNP_P4_44405_17382554 | NC_021163.1    | Ca_kabuli_chr04 | 17382554                | TT                              | CC              | 1946797099               |
| SNP_P4_44406_17383869 | NC_021163.1    | Ca_kabuli_chr04 | 17383869                | CC                              | TT              | 1946797101               |
| SNP_P4_44407_17383870 | NC_021163.1    | Ca_kabuli_chr04 | 17383870                | AA                              | GG              | 1946797103               |
| SNP_P4_44408_17384599 | NC_021163.1    | Ca_kabuli_chr04 | 17384599                | GG                              | TT              | 1946797105               |
| SNP_P4_44409_17384929 | NC_021163.1    | Ca_kabuli_chr04 | 17384929                | CC                              | TT              | 1946797107               |
| SNP_P4_44410_17385351 | NC_021163.1    | Ca_kabuli_chr04 | 17385351                | GG                              | AA              | 1946797109               |
| SNP_P4_44411_17385936 | NC_021163.1    | Ca_kabuli_chr04 | 17385936                | GG                              | AA              | 1946797111               |
| SNP_P4_44412_17386205 | NC_021163.1    | Ca_kabuli_chr04 | 17386205                | AA                              | GG              | 1946797113               |
| SNP_P4_44413_17386333 | NC_021163.1    | Ca_kabuli_chr04 | 17386333                | AA                              | CC              | 1946797115               |
| SNP_P4_44414_17386651 | NC_021163.1    | Ca_kabuli_chr04 | 17386651                | CC                              | GG              | 1946797118               |
| SNP_P4_44415_17386677 | NC_021163.1    | Ca_kabuli_chr04 | 17386677                | GG                              | AA              | 1946797120               |
| SNP_P4_44416_17386681 | NC_021163.1    | Ca_kabuli_chr04 | 17386681                | TT                              | AA              | 1946797122               |
| SNP_P4_44417_17386694 | NC_021163.1    | Ca_kabuli_chr04 | 17386694                | GG                              | TT              | 1946797124               |
| SNP_P4_44418_17387010 | NC_021163.1    | Ca_kabuli_chr04 | 17387010                | AA                              | GG              | 1946797126               |
| SNP_P4_44419_17387026 | NC_021163.1    | Ca_kabuli_chr04 | 17387026                | AA                              | CC              | 1946797128               |
| SNP_P4_44420_17387030 | NC_021163.1    | Ca_kabuli_chr04 | 17387030                | AA                              | CC              | 1946797130               |
| SNP_P4_44421_17387047 | NC_021163.1    | Ca_kabuli_chr04 | 17387047                | GG                              | AA              | 1946797132               |
| SNP_P4_44422_17387514 | NC_021163.1    | Ca_kabuli_chr04 | 17387514                | AA                              | GG              | 1946797134               |
| SNP_P4_44423_17388206 | NC_021163.1    | Ca_kabuli_chr04 | 17388206                | CC                              | TT              | 1946797136               |
| SNP_P4_44424_17388234 | NC_021163.1    | Ca_kabuli_chr04 | 17388234                | GG                              | AA              | 1946797138               |
| SNP_P4_44425_17388239 | NC_021163.1    | Ca_kabuli_chr04 | 17388239                | TT                              | CC              | 1946797140               |
| SNP_P4_44426_17388621 | NC_021163.1    | Ca_kabuli_chr04 | 17388621                | CC                              | AA              | 1946797142               |
| SNP_P4_44427_17388625 | NC_021163.1    | Ca_kabuli_chr04 | 17388625                | TT                              | CC              | 1946797144               |
| SNP_P4_44428_17389036 | NC_021163.1    | Ca_kabuli_chr04 | 17389036                | TT                              | CC              | 1946797146               |
| SNP_P4_44429_17389212 | NC_021163.1    | Ca_kabuli_chr04 | 17389212                | AA                              | GG              | 1946797149               |
| SNP_P4_44430_17389220 | NC_021163.1    | Ca_kabuli_chr04 | 17389220                | AA                              | CC              | 1946797151               |
| SNP_P4_44431_17389238 | NC_021163.1    | Ca_kabuli_chr04 | 17389238                | GG                              | TT              | 1946797153               |
| SNP_P4_44432_17393811 | NC_021163.1    | Ca_kabuli_chr04 | 17393811                | TT                              | CC              | 1946797155               |

| SNPs IDs              | Chromosome IDs | Chromosomes     | Physical positions (bp) | CDC Frontier (Reference genome) | (ILWC46 & LPNB) | NCBI SNPdb Accession IDs |
|-----------------------|----------------|-----------------|-------------------------|---------------------------------|-----------------|--------------------------|
| SNP_P4_44433_17395128 | NC_021163.1    | Ca_kabuli_chr04 | 17395128                | AA                              | GG              | 1946797157               |
| SNP_P4_44434_17395146 | NC_021163.1    | Ca_kabuli_chr04 | 17395146                | AA                              | GG              | 1946797159               |
| SNP_P4_44436_17396325 | NC_021163.1    | Ca_kabuli_chr04 | 17396325                | GG                              | AA              | 1946797161               |
| SNP_P4_44437_17396407 | NC_021163.1    | Ca_kabuli_chr04 | 17396407                | TT                              | CC              | 1946797163               |
| SNP_P4_44438_17396594 | NC_021163.1    | Ca_kabuli_chr04 | 17396594                | GG                              | TT              | 1946797165               |
| SNP_P4_44439_17398168 | NC_021163.1    | Ca_kabuli_chr04 | 17398168                | CC                              | GG              | 1946797167               |
| SNP_P4_44440_17399071 | NC_021163.1    | Ca_kabuli_chr04 | 17399071                | AA                              | TT              | 1946797169               |
| SNP_P4_44441_17399873 | NC_021163.1    | Ca_kabuli_chr04 | 17399873                | CC                              | GG              | 1946797171               |
| SNP_P4_44442_17400982 | NC_021163.1    | Ca_kabuli_chr04 | 17400982                | CC                              | TT              | 1946797173               |
| SNP_P4_44443_17404500 | NC_021163.1    | Ca_kabuli_chr04 | 17404500                | AA                              | CC              | 1946797175               |
| SNP_P4_44444_17405476 | NC_021163.1    | Ca_kabuli_chr04 | 17405476                | CC                              | TT              | 1946797177               |
| SNP_P4_44445_17406305 | NC_021163.1    | Ca_kabuli_chr04 | 17406305                | AA                              | GG              | 1946797179               |
| SNP_P4_44446_17407614 | NC_021163.1    | Ca_kabuli_chr04 | 17407614                | GG                              | AA              | 1946797181               |
| SNP_P4_44447_17407736 | NC_021163.1    | Ca_kabuli_chr04 | 17407736                | AA                              | GG              | 1946797183               |
| SNP_P4_44448_17409922 | NC_021163.1    | Ca_kabuli_chr04 | 17409922                | AA                              | GG              | 1946797185               |
| SNP_P4_44449_17409936 | NC_021163.1    | Ca_kabuli_chr04 | 17409936                | AA                              | GG              | 1946797187               |
| SNP_P4_44450_17410435 | NC_021163.1    | Ca_kabuli_chr04 | 17410435                | CC                              | TT              | 1946797189               |
| SNP_P4_44451_17410749 | NC_021163.1    | Ca_kabuli_chr04 | 17410749                | GG                              | AA              | 1946797191               |
| SNP_P4_44452_17411711 | NC_021163.1    | Ca_kabuli_chr04 | 17411711                | AA                              | GG              | 1946797193               |
| SNP_P4_44453_17412057 | NC_021163.1    | Ca_kabuli_chr04 | 17412057                | TT                              | CC              | 1946797195               |
| SNP_P4_44454_17415588 | NC_021163.1    | Ca_kabuli_chr04 | 17415588                | AA                              | GG              | 1946797197               |
| SNP_P4_44455_17415600 | NC_021163.1    | Ca_kabuli_chr04 | 17415600                | AA                              | GG              | 1946797199               |
| SNP_P4_44456_17415609 | NC_021163.1    | Ca_kabuli_chr04 | 17415609                | TT                              | AA              | 1946797201               |
| SNP_P4_44457_17419980 | NC_021163.1    | Ca_kabuli_chr04 | 17419980                | TT                              | GG              | 1946797203               |
| SNP_P4_44458_17420010 | NC_021163.1    | Ca_kabuli_chr04 | 17420010                | TT                              | CC              | 1946797205               |
| SNP_P4_44459_17420033 | NC_021163.1    | Ca_kabuli_chr04 | 17420033                | CC                              | TT              | 1946797207               |
| SNP_P4_44460_17420047 | NC_021163.1    | Ca_kabuli_chr04 | 17420047                | CC                              | TT              | 1946797209               |
| SNP_P4_44461_17420530 | NC_021163.1    | Ca_kabuli_chr04 | 17420530                | AA                              | GG              | 1946797212               |
| SNP_P4_44462_17420543 | NC_021163.1    | Ca_kabuli_chr04 | 17420543                | TT                              | GG              | 1946797214               |
| SNP_P4_44463_17420547 | NC_021163.1    | Ca_kabuli_chr04 | 17420547                | TT                              | CC              | 1946797216               |
| SNP_P4_44464_17420560 | NC_021163.1    | Ca_kabuli_chr04 | 17420560                | AA                              | GG              | 1946797218               |
| SNP_P4_44465_17420561 | NC_021163.1    | Ca_kabuli_chr04 | 17420561                | AA                              | GG              | 1946797221               |
| SNP_P4_44466_17420579 | NC_021163.1    | Ca_kabuli_chr04 | 17420579                | TT                              | GG              | 1946797223               |
| SNP_P4_44467_17420764 | NC_021163.1    | Ca_kabuli_chr04 | 17420764                | AA                              | GG              | 1946797225               |
| SNP_P4_44468_17420788 | NC_021163.1    | Ca_kabuli_chr04 | 17420788                | TT                              | AA              | 1946797227               |
| SNP_P4_44469_17420794 | NC_021163.1    | Ca_kabuli_chr04 | 17420794                | AA                              | TT              | 1946797229               |
| SNP_P4_44470_17420850 | NC_021163.1    | Ca_kabuli_chr04 | 17420850                | TT                              | AA              | 1946797231               |
| SNP_P4_44471_17420852 | NC_021163.1    | Ca_kabuli_chr04 | 17420852                | TT                              | CC              | 1946797233               |
| SNP_P4_44472_17420870 | NC_021163.1    | Ca_kabuli_chr04 | 17420870                | GG                              | AA              | 1946797235               |
| SNP_P4_44473_17420904 | NC_021163.1    | Ca_kabuli_chr04 | 17420904                | CC                              | TT              | 1946797238               |
| SNP_P4_44474_17420936 | NC_021163.1    | Ca_kabuli_chr04 | 17420936                | AA                              | CC              | 1946797240               |
| SNP_P4_44475_17420943 | NC_021163.1    | Ca_kabuli_chr04 | 17420943                | TT                              | AA              | 1946797242               |

| SNPs IDs              | Chromosome IDs | Chromosomes     | Physical positions (bp) | CDC Frontier (Reference genome) | (ILWC46 & LPNB) | NCBI SNPdb Accession IDs |
|-----------------------|----------------|-----------------|-------------------------|---------------------------------|-----------------|--------------------------|
| SNP_P4_44476_17420958 | NC_021163.1    | Ca_kabuli_chr04 | 17420958                | AA                              | GG              | 1946797244               |
| SNP_P4_44477_17421111 | NC_021163.1    | Ca_kabuli_chr04 | 17421111                | CC                              | AA              | 1946797246               |
| SNP_P4_44480_17421296 | NC_021163.1    | Ca_kabuli_chr04 | 17421296                | CC                              | GG              | 1946797248               |
| SNP_P4_44481_17421619 | NC_021163.1    | Ca_kabuli_chr04 | 17421619                | AA                              | GG              | 1946797250               |
| SNP_P4_44482_17421634 | NC_021163.1    | Ca_kabuli_chr04 | 17421634                | AA                              | GG              | 1946797253               |
| SNP_P4_44483_17421635 | NC_021163.1    | Ca_kabuli_chr04 | 17421635                | AA                              | GG              | 1946797255               |
| SNP_P4_44484_17421665 | NC_021163.1    | Ca_kabuli_chr04 | 17421665                | GG                              | AA              | 1946797257               |
| SNP_P4_44486_17424446 | NC_021163.1    | Ca_kabuli_chr04 | 17424446                | TT                              | CC              | 1946797259               |
| SNP_P4_44487_17424955 | NC_021163.1    | Ca_kabuli_chr04 | 17424955                | GG                              | AA              | 1946797261               |
| SNP_P4_44488_17424989 | NC_021163.1    | Ca_kabuli_chr04 | 17424989                | CC                              | TT              | 1946797264               |
| SNP_P4_44489_17425002 | NC_021163.1    | Ca_kabuli_chr04 | 17425002                | TT                              | AA              | 1946797266               |
| SNP_P4_44490_17425018 | NC_021163.1    | Ca_kabuli_chr04 | 17425018                | TT                              | CC              | 1946797268               |
| SNP_P4_44491_17425610 | NC_021163.1    | Ca_kabuli_chr04 | 17425610                | CC                              | TT              | 1946797270               |
| SNP_P4_44492_17425659 | NC_021163.1    | Ca_kabuli_chr04 | 17425659                | CC                              | TT              | 1946797272               |
| SNP_P4_44493_17425660 | NC_021163.1    | Ca_kabuli_chr04 | 17425660                | GG                              | AA              | 1946797274               |
| SNP_P4_44494_17425665 | NC_021163.1    | Ca_kabuli_chr04 | 17425665                | TT                              | CC              | 1946797276               |
| SNP_P4_44495_17425952 | NC_021163.1    | Ca_kabuli_chr04 | 17425952                | AA                              | GG              | 1946797279               |
| SNP_P4_44496_17426424 | NC_021163.1    | Ca_kabuli_chr04 | 17426424                | CC                              | AA              | 1946797281               |
| SNP_P4_44497_17429113 | NC_021163.1    | Ca_kabuli_chr04 | 17429113                | TT                              | AA              | 1946797283               |
| SNP_P4_44498_17429116 | NC_021163.1    | Ca_kabuli_chr04 | 17429116                | TT                              | CC              | 1946797285               |
| SNP_P4_44499_17429165 | NC_021163.1    | Ca_kabuli_chr04 | 17429165                | TT                              | GG              | 1946797287               |
| SNP_P4_44500_17430084 | NC_021163.1    | Ca_kabuli_chr04 | 17430084                | TT                              | CC              | 1946797290               |
| SNP_P4_44501_17430504 | NC_021163.1    | Ca_kabuli_chr04 | 17430504                | CC                              | AA              | 1946797292               |
| SNP_P4_44502_17431248 | NC_021163.1    | Ca_kabuli_chr04 | 17431248                | GG                              | TT              | 1946797294               |
| SNP_P4_44503_17431464 | NC_021163.1    | Ca_kabuli_chr04 | 17431464                | GG                              | AA              | 1946797296               |
| SNP_P4_44504_17431553 | NC_021163.1    | Ca_kabuli_chr04 | 17431553                | AA                              | GG              | 1946797298               |
| SNP_P4_44506_17431595 | NC_021163.1    | Ca_kabuli_chr04 | 17431595                | GG                              | AA              | 1946797300               |
| SNP_P4_44509_17431814 | NC_021163.1    | Ca_kabuli_chr04 | 17431814                | GG                              | AA              | 1946797302               |
| SNP_P4_44510_17432208 | NC_021163.1    | Ca_kabuli_chr04 | 17432208                | CC                              | TT              | 1946797304               |
| SNP_P4_44511_17432209 | NC_021163.1    | Ca_kabuli_chr04 | 17432209                | GG                              | AA              | 1946797307               |
| SNP_P4_44512_17432425 | NC_021163.1    | Ca_kabuli_chr04 | 17432425                | GG                              | TT              | 1946797309               |
| SNP_P4_44514_17432850 | NC_021163.1    | Ca_kabuli_chr04 | 17432850                | TT                              | AA              | 1946797311               |
| SNP_P4_44517_17434081 | NC_021163.1    | Ca_kabuli_chr04 | 17434081                | GG                              | TT              | 1946797313               |
| SNP_P4_44518_17434664 | NC_021163.1    | Ca_kabuli_chr04 | 17434664                | CC                              | TT              | 1946797315               |
| SNP_P4_44519_17434687 | NC_021163.1    | Ca_kabuli_chr04 | 17434687                | TT                              | CC              | 1946797317               |
| SNP_P4_44520_17434712 | NC_021163.1    | Ca_kabuli_chr04 | 17434712                | GG                              | AA              | 1946797319               |
| SNP_P4_44521_17434716 | NC_021163.1    | Ca_kabuli_chr04 | 17434716                | GG                              | AA              | 1946797321               |
| SNP_P4_44522_17434765 | NC_021163.1    | Ca_kabuli_chr04 | 17434765                | AA                              | GG              | 1946797323               |
| SNP_P4_44523_17435030 | NC_021163.1    | Ca_kabuli_chr04 | 17435030                | AA                              | GG              | 1946797325               |
| SNP_P4_44524_17435036 | NC_021163.1    | Ca_kabuli_chr04 | 17435036                | TT                              | CC              | 1946797328               |
| SNP_P4_44525_17435058 | NC_021163.1    | Ca_kabuli_chr04 | 17435058                | AA                              | GG              | 1946797329               |
| SNP_P4_44526_17435064 | NC_021163.1    | Ca_kabuli_chr04 | 17435064                | AA                              | TT              | 1946797331               |

| SNPs IDs              | Chromosome IDs | Chromosomes     | Physical positions (bp) | CDC Frontier (Reference genome) | (ILWC46 & LPNB) | NCBI SNPdb Accession IDs |
|-----------------------|----------------|-----------------|-------------------------|---------------------------------|-----------------|--------------------------|
| SNP_P4_44527_17435084 | NC_021163.1    | Ca_kabuli_chr04 | 17435084                | GG                              | AA              | 1946797333               |
| SNP_P4_44528_17435419 | NC_021163.1    | Ca_kabuli_chr04 | 17435419                | AA                              | GG              | 1946797335               |
| SNP_P4_44529_17435422 | NC_021163.1    | Ca_kabuli_chr04 | 17435422                | AA                              | GG              | 1946797338               |
| SNP_P4_44530_17435437 | NC_021163.1    | Ca_kabuli_chr04 | 17435437                | AA                              | GG              | 1946797339               |
| SNP_P4_44531_17435443 | NC_021163.1    | Ca_kabuli_chr04 | 17435443                | GG                              | AA              | 1946797341               |
| SNP_P4_44532_17436250 | NC_021163.1    | Ca_kabuli_chr04 | 17436250                | TT                              | AA              | 1946797343               |
| SNP_P4_44533_17436279 | NC_021163.1    | Ca_kabuli_chr04 | 17436279                | TT                              | GG              | 1946797345               |
| SNP_P4_44534_17436281 | NC_021163.1    | Ca_kabuli_chr04 | 17436281                | GG                              | TT              | 1946797347               |
| SNP_P4_44535_17436288 | NC_021163.1    | Ca_kabuli_chr04 | 17436288                | AA                              | GG              | 1946797349               |
| SNP_P4_44536_17436359 | NC_021163.1    | Ca_kabuli_chr04 | 17436359                | AA                              | GG              | 1946797351               |
| SNP_P4_44537_17436363 | NC_021163.1    | Ca_kabuli_chr04 | 17436363                | CC                              | TT              | 1946797353               |
| SNP_P4_44538_17436792 | NC_021163.1    | Ca_kabuli_chr04 | 17436792                | CC                              | TT              | 1946797356               |
| SNP_P4_44539_17436799 | NC_021163.1    | Ca_kabuli_chr04 | 17436799                | GG                              | AA              | 1946797358               |
| SNP_P4_44540_17436804 | NC_021163.1    | Ca_kabuli_chr04 | 17436804                | CC                              | TT              | 1946797360               |
| SNP_P4_44541_17437640 | NC_021163.1    | Ca_kabuli_chr04 | 17437640                | CC                              | TT              | 1946797362               |
| SNP_P4_44542_17438875 | NC_021163.1    | Ca_kabuli_chr04 | 17438875                | CC                              | AA              | 1946797364               |
| SNP_P4_44543_17438893 | NC_021163.1    | Ca_kabuli_chr04 | 17438893                | CC                              | AA              | 1946797366               |
| SNP_P4_44544_17438947 | NC_021163.1    | Ca_kabuli_chr04 | 17438947                | AA                              | TT              | 1946797368               |
| SNP_P4_44547_17439333 | NC_021163.1    | Ca_kabuli_chr04 | 17439333                | CC                              | TT              | 1946797370               |
| SNP_P4_44548_17439595 | NC_021163.1    | Ca_kabuli_chr04 | 17439595                | CC                              | AA              | 1946797372               |
| SNP_P4_44549_17439634 | NC_021163.1    | Ca_kabuli_chr04 | 17439634                | TT                              | CC              | 1946797374               |
| SNP_P4_44550_17440096 | NC_021163.1    | Ca_kabuli_chr04 | 17440096                | AA                              | TT              | 1946797377               |
| SNP_P4_44551_17440110 | NC_021163.1    | Ca_kabuli_chr04 | 17440110                | GG                              | AA              | 1946797379               |
| SNP_P4_44552_17440677 | NC_021163.1    | Ca_kabuli_chr04 | 17440677                | TT                              | AA              | 1946797381               |
| SNP_P4_44553_17440860 | NC_021163.1    | Ca_kabuli_chr04 | 17440860                | CC                              | TT              | 1946797383               |
| SNP_P4_44554_17442460 | NC_021163.1    | Ca_kabuli_chr04 | 17442460                | TT                              | CC              | 1946797385               |
| SNP_P4_44555_17443056 | NC_021163.1    | Ca_kabuli_chr04 | 17443056                | AA                              | GG              | 1946797387               |
| SNP_P4_44556_17443121 | NC_021163.1    | Ca_kabuli_chr04 | 17443121                | CC                              | TT              | 1946797390               |
| SNP_P4_44558_17452837 | NC_021163.1    | Ca_kabuli_chr04 | 17452837                | AA                              | CC              | 1946797392               |
| SNP_P4_44559_17455570 | NC_021163.1    | Ca_kabuli_chr04 | 17455570                | TT                              | GG              | 1946797394               |
| SNP_P4_44560_17457665 | NC_021163.1    | Ca_kabuli_chr04 | 17457665                | CC                              | TT              | 1946797396               |
| SNP_P4_44561_17457908 | NC_021163.1    | Ca_kabuli_chr04 | 17457908                | GG                              | TT              | 1946797398               |
| SNP_P4_44562_17458120 | NC_021163.1    | Ca_kabuli_chr04 | 17458120                | GG                              | AA              | 1946797400               |
| SNP_P4_44563_17458154 | NC_021163.1    | Ca_kabuli_chr04 | 17458154                | GG                              | AA              | 1946797402               |
| SNP_P4_44564_17458318 | NC_021163.1    | Ca_kabuli_chr04 | 17458318                | TT                              | CC              | 1946797404               |
| SNP_P4_44565_17458322 | NC_021163.1    | Ca_kabuli_chr04 | 17458322                | AA                              | CC              | 1946797406               |
| SNP_P4_44566_17458331 | NC_021163.1    | Ca_kabuli_chr04 | 17458331                | AA                              | GG              | 1946797408               |
| SNP_P4_44567_17458374 | NC_021163.1    | Ca_kabuli_chr04 | 17458374                | CC                              | TT              | 1946797411               |
| SNP_P4_44568_17458396 | NC_021163.1    | Ca_kabuli_chr04 | 17458396                | GG                              | AA              | 1946797413               |
| SNP_P4_44569_17459620 | NC_021163.1    | Ca_kabuli_chr04 | 17459620                | AA                              | GG              | 1946797415               |
| SNP_P4_44570_17459659 | NC_021163.1    | Ca_kabuli_chr04 | 17459659                | CC                              | TT              | 1946797417               |
| SNP_P4_44572_17461204 | NC_021163.1    | Ca_kabuli_chr04 | 17461204                | TT                              | GG              | 1946797419               |



| SNPs IDs              | Chromosome IDs | Chromosomes     | Physical positions (bp) | CDC Frontier (Reference genome) | (ILWC46 & LPNB) | NCBI SNPdb Accession IDs |
|-----------------------|----------------|-----------------|-------------------------|---------------------------------|-----------------|--------------------------|
| SNP_P4_44573_17461473 | NC_021163.1    | Ca_kabuli_chr04 | 17461473                | CC                              | TT              | 1946797421               |
| SNP_P4_44574_17462034 | NC_021163.1    | Ca_kabuli_chr04 | 17462034                | TT                              | CC              | 1946797424               |
| SNP_P4_44575_17462146 | NC_021163.1    | Ca_kabuli_chr04 | 17462146                | TT                              | CC              | 1946797426               |
| SNP_P4_44576_17462437 | NC_021163.1    | Ca_kabuli_chr04 | 17462437                | GG                              | TT              | 1946797428               |
| SNP_P4_44577_17462628 | NC_021163.1    | Ca_kabuli_chr04 | 17462628                | AA                              | GG              | 1946797430               |
| SNP_P4_44578_17462725 | NC_021163.1    | Ca_kabuli_chr04 | 17462725                | AA                              | GG              | 1946797432               |
| SNP_P4_44579_17462821 | NC_021163.1    | Ca_kabuli_chr04 | 17462821                | CC                              | TT              | 1946797434               |
| SNP_P4_44580_17462827 | NC_021163.1    | Ca_kabuli_chr04 | 17462827                | TT                              | CC              | 1946797436               |
| SNP_P4_44581_17462842 | NC_021163.1    | Ca_kabuli_chr04 | 17462842                | AA                              | GG              | 1946797438               |
| SNP_P4_44582_17462865 | NC_021163.1    | Ca_kabuli_chr04 | 17462865                | AA                              | TT              | 1946797440               |
| SNP_P4_44583_17462874 | NC_021163.1    | Ca_kabuli_chr04 | 17462874                | AA                              | GG              | 1946797442               |
| SNP_P4_44584_17462920 | NC_021163.1    | Ca_kabuli_chr04 | 17462920                | CC                              | TT              | 1946797444               |
| SNP_P4_44585_17462977 | NC_021163.1    | Ca_kabuli_chr04 | 17462977                | GG                              | AA              | 1946797446               |
| SNP_P4_44587_17463045 | NC_021163.1    | Ca_kabuli_chr04 | 17463045                | GG                              | AA              | 1946797448               |
| SNP_P4_44588_17463051 | NC_021163.1    | Ca_kabuli_chr04 | 17463051                | GG                              | AA              | 1946797450               |
| SNP_P4_44589_17463403 | NC_021163.1    | Ca_kabuli_chr04 | 17463403                | CC                              | TT              | 1946797452               |
| SNP_P4_44590_17464171 | NC_021163.1    | Ca_kabuli_chr04 | 17464171                | TT                              | AA              | 1946797454               |
| SNP_P4_44593_17464282 | NC_021163.1    | Ca_kabuli_chr04 | 17464282                | CC                              | TT              | 1946797456               |
| SNP_P4_44594_17464338 | NC_021163.1    | Ca_kabuli_chr04 | 17464338                | GG                              | AA              | 1946797458               |
| SNP_P4_44595_17464956 | NC_021163.1    | Ca_kabuli_chr04 | 17464956                | CC                              | TT              | 1946797460               |
| SNP_P4_44596_17465547 | NC_021163.1    | Ca_kabuli_chr04 | 17465547                | GG                              | AA              | 1946797462               |
| SNP_P4_44597_17466772 | NC_021163.1    | Ca_kabuli_chr04 | 17466772                | TT                              | CC              | 1946797464               |
| SNP_P4_44598_17467667 | NC_021163.1    | Ca_kabuli_chr04 | 17467667                | TT                              | AA              | 1946797466               |
| SNP_P4_44599_17467687 | NC_021163.1    | Ca_kabuli_chr04 | 17467687                | CC                              | TT              | 1946797468               |
| SNP_P4_44600_17467875 | NC_021163.1    | Ca_kabuli_chr04 | 17467875                | TT                              | GG              | 1946797470               |
| SNP_P4_44601_17468085 | NC_021163.1    | Ca_kabuli_chr04 | 17468085                | GG                              | AA              | 1946797472               |
| SNP_P4_44602_17468290 | NC_021163.1    | Ca_kabuli_chr04 | 17468290                | GG                              | AA              | 1946797474               |
| SNP_P4_44603_17468316 | NC_021163.1    | Ca_kabuli_chr04 | 17468316                | GG                              | AA              | 1946797476               |
| SNP_P4_44604_17468335 | NC_021163.1    | Ca_kabuli_chr04 | 17468335                | CC                              | TT              | 1946797478               |
| SNP_P4_44605_17468347 | NC_021163.1    | Ca_kabuli_chr04 | 17468347                | GG                              | TT              | 1946797480               |
| SNP_P4_44606_17468485 | NC_021163.1    | Ca_kabuli_chr04 | 17468485                | AA                              | TT              | 1946797482               |
| SNP_P4_44607_17469278 | NC_021163.1    | Ca_kabuli_chr04 | 17469278                | CC                              | TT              | 1946797484               |
| SNP_P4_44608_17469316 | NC_021163.1    | Ca_kabuli_chr04 | 17469316                | TT                              | CC              | 1946797486               |
| SNP_P4_44609_17469526 | NC_021163.1    | Ca_kabuli_chr04 | 17469526                | AA                              | TT              | 1946797488               |
| SNP_P4_44610_17469553 | NC_021163.1    | Ca_kabuli_chr04 | 17469553                | GG                              | AA              | 1946797490               |
| SNP_P4_44611_17469786 | NC_021163.1    | Ca_kabuli_chr04 | 17469786                | CC                              | TT              | 1946797492               |
| SNP_P4_44612_17470037 | NC_021163.1    | Ca_kabuli_chr04 | 17470037                | AA                              | CC              | 1946797494               |
| SNP_P4_44613_17470838 | NC_021163.1    | Ca_kabuli_chr04 | 17470838                | GG                              | AA              | 1946797496               |
| SNP_P4_44615_17471452 | NC_021163.1    | Ca_kabuli_chr04 | 17471452                | GG                              | AA              | 1946797498               |
| SNP_P4_44616_17471700 | NC_021163.1    | Ca_kabuli_chr04 | 17471700                | CC                              | GG              | 1946797500               |
| SNP_P4_44617_17475106 | NC_021163.1    | Ca_kabuli_chr04 | 17475106                | TT                              | AA              | 1946797502               |
| SNP_P4_44619_17475790 | NC_021163.1    | Ca_kabuli_chr04 | 17475790                | CC                              | TT              | 1946797504               |

| SNPs IDs              | Chromosome IDs | Chromosomes     | Physical positions (bp) | CDC Frontier (Reference genome) | (ILWC46 & LPNB) | NCBI SNPdb Accession IDs |
|-----------------------|----------------|-----------------|-------------------------|---------------------------------|-----------------|--------------------------|
| SNP_P4_44620_17475828 | NC_021163.1    | Ca_kabuli_chr04 | 17475828                | TT                              | AA              | 1946797506               |
| SNP_P4_44621_17475852 | NC_021163.1    | Ca_kabuli_chr04 | 17475852                | GG                              | AA              | 1946797508               |
| SNP_P4_44622_17476401 | NC_021163.1    | Ca_kabuli_chr04 | 17476401                | CC                              | AA              | 1946797510               |
| SNP_P4_44623_17476411 | NC_021163.1    | Ca_kabuli_chr04 | 17476411                | TT                              | AA              | 1946797512               |
| SNP_P4_44624_17477488 | NC_021163.1    | Ca_kabuli_chr04 | 17477488                | GG                              | CC              | 1946797514               |
| SNP_P4_44625_17478676 | NC_021163.1    | Ca_kabuli_chr04 | 17478676                | GG                              | AA              | 1946797516               |
| SNP_P4_44627_17480621 | NC_021163.1    | Ca_kabuli_chr04 | 17480621                | GG                              | AA              | 1946797518               |
| SNP_P4_44628_17481872 | NC_021163.1    | Ca_kabuli_chr04 | 17481872                | GG                              | TT              | 1946797520               |
| SNP_P4_44631_17483403 | NC_021163.1    | Ca_kabuli_chr04 | 17483403                | CC                              | TT              | 1946797522               |
| SNP_P4_44632_17483838 | NC_021163.1    | Ca_kabuli_chr04 | 17483838                | TT                              | CC              | 1946797524               |
| SNP_P4_44633_17483852 | NC_021163.1    | Ca_kabuli_chr04 | 17483852                | TT                              | CC              | 1946797527               |
| SNP_P4_44635_17485430 | NC_021163.1    | Ca_kabuli_chr04 | 17485430                | GG                              | AA              | 1946797529               |
| SNP_P4_44636_17485575 | NC_021163.1    | Ca_kabuli_chr04 | 17485575                | TT                              | CC              | 1946797531               |
| SNP_P4_44637_17486879 | NC_021163.1    | Ca_kabuli_chr04 | 17486879                | TT                              | GG              | 1946797533               |
| SNP_P4_44638_17486908 | NC_021163.1    | Ca_kabuli_chr04 | 17486908                | GG                              | AA              | 1946797535               |
| SNP_P4_44639_17487044 | NC_021163.1    | Ca_kabuli_chr04 | 17487044                | GG                              | AA              | 1946797537               |
| SNP_P4_44640_17488616 | NC_021163.1    | Ca_kabuli_chr04 | 17488616                | CC                              | TT              | 1946797539               |
| SNP_P4_44641_17488685 | NC_021163.1    | Ca_kabuli_chr04 | 17488685                | TT                              | CC              | 1946797541               |
| SNP_P4_44642_17489309 | NC_021163.1    | Ca_kabuli_chr04 | 17489309                | CC                              | TT              | 1946797544               |
| SNP_P4_44643_17491063 | NC_021163.1    | Ca_kabuli_chr04 | 17491063                | TT                              | CC              | 1946797546               |
| SNP_P4_44644_17491107 | NC_021163.1    | Ca_kabuli_chr04 | 17491107                | CC                              | TT              | 1946797548               |
| SNP_P4_44645_17491527 | NC_021163.1    | Ca_kabuli_chr04 | 17491527                | TT                              | AA              | 1946797550               |
| SNP_P4_44647_17491887 | NC_021163.1    | Ca_kabuli_chr04 | 17491887                | TT                              | AA              | 1946797552               |
| SNP_P4_44648_17493127 | NC_021163.1    | Ca_kabuli_chr04 | 17493127                | GG                              | AA              | 1946797554               |
| SNP_P4_44649_17493422 | NC_021163.1    | Ca_kabuli_chr04 | 17493422                | GG                              | TT              | 1946797556               |
| SNP_P4_44651_17495176 | NC_021163.1    | Ca_kabuli_chr04 | 17495176                | GG                              | AA              | 1946797559               |
| SNP_P4_44653_17495211 | NC_021163.1    | Ca_kabuli_chr04 | 17495211                | GG                              | CC              | 1946797561               |
| SNP_P4_44654_17495227 | NC_021163.1    | Ca_kabuli_chr04 | 17495227                | GG                              | AA              | 1946797563               |
| SNP_P4_44655_17495318 | NC_021163.1    | Ca_kabuli_chr04 | 17495318                | TT                              | CC              | 1946797565               |
| SNP_P4_44659_17495450 | NC_021163.1    | Ca_kabuli_chr04 | 17495450                | AA                              | GG              | 1946797567               |
| SNP_P4_44660_17495678 | NC_021163.1    | Ca_kabuli_chr04 | 17495678                | CC                              | AA              | 1946797569               |
| SNP_P4_44662_17497197 | NC_021163.1    | Ca_kabuli_chr04 | 17497197                | CC                              | TT              | 1946797571               |
| SNP_P4_44663_17497227 | NC_021163.1    | Ca_kabuli_chr04 | 17497227                | CC                              | TT              | 1946797573               |
| SNP_P4_44664_17497609 | NC_021163.1    | Ca_kabuli_chr04 | 17497609                | CC                              | TT              | 1946797575               |
| SNP_P4_44665_17498345 | NC_021163.1    | Ca_kabuli_chr04 | 17498345                | CC                              | TT              | 1946797578               |
| SNP_P4_44666_17515057 | NC_021163.1    | Ca_kabuli_chr04 | 17515057                | AA                              | CC              | 1946797580               |
| SNP_P4_44667_17523529 | NC_021163.1    | Ca_kabuli_chr04 | 17523529                | GG                              | TT              | 1946797582               |
| SNP_P4_44669_17524659 | NC_021163.1    | Ca_kabuli_chr04 | 17524659                | TT                              | AA              | 1946797584               |
| SNP_P4_44670_17525957 | NC_021163.1    | Ca_kabuli_chr04 | 17525957                | GG                              | TT              | 1946797586               |
| SNP_P4_44671_17526167 | NC_021163.1    | Ca_kabuli_chr04 | 17526167                | AA                              | TT              | 1946797588               |
| SNP_P4_44672_17526610 | NC_021163.1    | Ca_kabuli_chr04 | 17526610                | GG                              | AA              | 1946797590               |
| SNP_P4_44673_17526907 | NC_021163.1    | Ca_kabuli_chr04 | 17526907                | TT                              | CC              | 1946797592               |

| SNPs IDs              | Chromosome IDs | Chromosomes     | Physical positions (bp) | CDC Frontier (Reference genome) | (ILWC46 & LPNB) | NCBI SNPdb Accession IDs |
|-----------------------|----------------|-----------------|-------------------------|---------------------------------|-----------------|--------------------------|
| SNP_P4_44675_17527586 | NC_021163.1    | Ca_kabuli_chr04 | 17527586                | AA                              | GG              | 1946797594               |
| SNP_P4_44676_17527605 | NC_021163.1    | Ca_kabuli_chr04 | 17527605                | CC                              | TT              | 1946797596               |
| SNP_P4_44677_17528094 | NC_021163.1    | Ca_kabuli_chr04 | 17528094                | AA                              | CC              | 1946797598               |
| SNP_P4_44678_17528158 | NC_021163.1    | Ca_kabuli_chr04 | 17528158                | CC                              | TT              | 1946797600               |
| SNP_P4_44679_17528462 | NC_021163.1    | Ca_kabuli_chr04 | 17528462                | GG                              | AA              | 1946797602               |
| SNP_P4_44680_17530458 | NC_021163.1    | Ca_kabuli_chr04 | 17530458                | GG                              | AA              | 1946797604               |
| SNP_P4_44681_17530874 | NC_021163.1    | Ca_kabuli_chr04 | 17530874                | AA                              | GG              | 1946797606               |
| SNP_P4_44682_17531649 | NC_021163.1    | Ca_kabuli_chr04 | 17531649                | GG                              | TT              | 1946797608               |
| SNP_P4_44686_17533158 | NC_021163.1    | Ca_kabuli_chr04 | 17533158                | GG                              | TT              | 1946797610               |
| SNP_P4_44689_17533549 | NC_021163.1    | Ca_kabuli_chr04 | 17533549                | TT                              | CC              | 1946797612               |
| SNP_P4_44690_17533622 | NC_021163.1    | Ca_kabuli_chr04 | 17533622                | CC                              | AA              | 1946797614               |
| SNP_P4_44691_17533675 | NC_021163.1    | Ca_kabuli_chr04 | 17533675                | AA                              | GG              | 1946797616               |
| SNP_P4_44693_17534055 | NC_021163.1    | Ca_kabuli_chr04 | 17534055                | GG                              | AA              | 1946797618               |
| SNP_P4_44694_17534136 | NC_021163.1    | Ca_kabuli_chr04 | 17534136                | TT                              | AA              | 1946797620               |
| SNP_P4_44695_17534186 | NC_021163.1    | Ca_kabuli_chr04 | 17534186                | AA                              | CC              | 1946797622               |
| SNP_P4_44696_17534463 | NC_021163.1    | Ca_kabuli_chr04 | 17534463                | CC                              | TT              | 1946797624               |
| SNP_P4_44697_17534529 | NC_021163.1    | Ca_kabuli_chr04 | 17534529                | TT                              | AA              | 1946797626               |
| SNP_P4_44699_17534738 | NC_021163.1    | Ca_kabuli_chr04 | 17534738                | TT                              | CC              | 1946797628               |
| SNP_P4_44700_17534807 | NC_021163.1    | Ca_kabuli_chr04 | 17534807                | TT                              | CC              | 1946797630               |
| SNP_P4_44701_17534847 | NC_021163.1    | Ca_kabuli_chr04 | 17534847                | CC                              | TT              | 1946797633               |
| SNP_P4_44702_17534888 | NC_021163.1    | Ca_kabuli_chr04 | 17534888                | AA                              | TT              | 1946797635               |
| SNP_P4_44703_17534944 | NC_021163.1    | Ca_kabuli_chr04 | 17534944                | GG                              | AA              | 1946797637               |
| SNP_P4_44705_17535053 | NC_021163.1    | Ca_kabuli_chr04 | 17535053                | AA                              | GG              | 1946797639               |
| SNP_P4_44706_17535275 | NC_021163.1    | Ca_kabuli_chr04 | 17535275                | GG                              | AA              | 1946797641               |
| SNP_P4_44707_17535297 | NC_021163.1    | Ca_kabuli_chr04 | 17535297                | AA                              | TT              | 1946797643               |
| SNP_P4_44708_17536750 | NC_021163.1    | Ca_kabuli_chr04 | 17536750                | GG                              | AA              | 1946797645               |
| SNP_P4_44709_17536751 | NC_021163.1    | Ca_kabuli_chr04 | 17536751                | TT                              | GG              | 1946797647               |
| SNP_P4_44710_17538063 | NC_021163.1    | Ca_kabuli_chr04 | 17538063                | CC                              | TT              | 1946797649               |
| SNP_P4_44711_17542928 | NC_021163.1    | Ca_kabuli_chr04 | 17542928                | AA                              | CC              | 1946797651               |
| SNP_P4_44713_17545746 | NC_021163.1    | Ca_kabuli_chr04 | 17545746                | TT                              | AA              | 1946797653               |
| SNP_P4_44714_17546268 | NC_021163.1    | Ca_kabuli_chr04 | 17546268                | AA                              | GG              | 1946797655               |
| SNP_P4_44715_17546415 | NC_021163.1    | Ca_kabuli_chr04 | 17546415                | GG                              | TT              | 1946797657               |
| SNP_P4_44716_17548975 | NC_021163.1    | Ca_kabuli_chr04 | 17548975                | AA                              | CC              | 1946797659               |
| SNP_P4_44717_17549220 | NC_021163.1    | Ca_kabuli_chr04 | 17549220                | GG                              | AA              | 1946797661               |
| SNP_P4_44718_17550024 | NC_021163.1    | Ca_kabuli_chr04 | 17550024                | GG                              | AA              | 1946797663               |
| SNP_P4_44719_17551844 | NC_021163.1    | Ca_kabuli_chr04 | 17551844                | GG                              | AA              | 1946797665               |
| SNP_P4_44720_17552224 | NC_021163.1    | Ca_kabuli_chr04 | 17552224                | GG                              | AA              | 1946797667               |
| SNP_P4_44721_17554811 | NC_021163.1    | Ca_kabuli_chr04 | 17554811                | AA                              | TT              | 1946797669               |
| SNP_P4_44722_17556596 | NC_021163.1    | Ca_kabuli_chr04 | 17556596                | CC                              | TT              | 1946797671               |
| SNP_P4_44723_17556822 | NC_021163.1    | Ca_kabuli_chr04 | 17556822                | GG                              | AA              | 1946797673               |
| SNP_P4_44724_17557932 | NC_021163.1    | Ca_kabuli_chr04 | 17557932                | GG                              | TT              | 1946797675               |
| SNP_P4_44725_17558801 | NC_021163.1    | Ca_kabuli_chr04 | 17558801                | AA                              | GG              | 1946797677               |

| SNPs IDs              | Chromosome IDs | Chromosomes     | Physical positions (bp) | CDC Frontier (Reference genome) | (ILWC46 & LPNB) | NCBI SNPdb Accession IDs |
|-----------------------|----------------|-----------------|-------------------------|---------------------------------|-----------------|--------------------------|
| SNP_P4_44726_17560590 | NC_021163.1    | Ca_kabuli_chr04 | 17560590                | TT                              | CC              | 1946797679               |
| SNP_P4_44727_17560995 | NC_021163.1    | Ca_kabuli_chr04 | 17560995                | GG                              | AA              | 1946797681               |
| SNP_P4_44728_17561103 | NC_021163.1    | Ca_kabuli_chr04 | 17561103                | AA                              | CC              | 1946797683               |
| SNP_P4_44729_17561114 | NC_021163.1    | Ca_kabuli_chr04 | 17561114                | CC                              | TT              | 1946797685               |
| SNP_P4_44730_17562075 | NC_021163.1    | Ca_kabuli_chr04 | 17562075                | TT                              | GG              | 1946797687               |
| SNP_P4_44731_17562084 | NC_021163.1    | Ca_kabuli_chr04 | 17562084                | TT                              | CC              | 1946797689               |
| SNP_P4_44732_17563560 | NC_021163.1    | Ca_kabuli_chr04 | 17563560                | CC                              | TT              | 1946797691               |
| SNP_P4_44733_17566576 | NC_021163.1    | Ca_kabuli_chr04 | 17566576                | CC                              | TT              | 1946797693               |
| SNP_P4_44734_17567079 | NC_021163.1    | Ca_kabuli_chr04 | 17567079                | TT                              | CC              | 1946797695               |
| SNP_P4_44736_17568228 | NC_021163.1    | Ca_kabuli_chr04 | 17568228                | TT                              | AA              | 1946797697               |
| SNP_P4_44737_17573679 | NC_021163.1    | Ca_kabuli_chr04 | 17573679                | TT                              | CC              | 1946797700               |
| SNP_P4_44738_17580830 | NC_021163.1    | Ca_kabuli_chr04 | 17580830                | CC                              | TT              | 1946797702               |
| SNP_P4_44739_17581562 | NC_021163.1    | Ca_kabuli_chr04 | 17581562                | GG                              | AA              | 1946797704               |
| SNP_P4_44740_17581593 | NC_021163.1    | Ca_kabuli_chr04 | 17581593                | AA                              | GG              | 1946797706               |
| SNP_P4_44741_17581611 | NC_021163.1    | Ca_kabuli_chr04 | 17581611                | AA                              | TT              | 1946797708               |
| SNP_P4_44742_17581647 | NC_021163.1    | Ca_kabuli_chr04 | 17581647                | CC                              | TT              | 1946797710               |
| SNP_P4_44743_17581676 | NC_021163.1    | Ca_kabuli_chr04 | 17581676                | CC                              | GG              | 1946797712               |
| SNP_P4_44744_17581942 | NC_021163.1    | Ca_kabuli_chr04 | 17581942                | AA                              | GG              | 1946797714               |
| SNP_P4_44745_17581947 | NC_021163.1    | Ca_kabuli_chr04 | 17581947                | AA                              | GG              | 1946797716               |
| SNP_P4_44746_17583276 | NC_021163.1    | Ca_kabuli_chr04 | 17583276                | GG                              | CC              | 1946797718               |
| SNP_P4_44747_17585413 | NC_021163.1    | Ca_kabuli_chr04 | 17585413                | AA                              | CC              | 1946797720               |
| SNP_P4_44748_17585992 | NC_021163.1    | Ca_kabuli_chr04 | 17585992                | CC                              | TT              | 1946797722               |
| SNP_P4_44749_17588425 | NC_021163.1    | Ca_kabuli_chr04 | 17588425                | AA                              | GG              | 1946797725               |
| SNP_P4_44751_17588837 | NC_021163.1    | Ca_kabuli_chr04 | 17588837                | AA                              | GG              | 1946797727               |
| SNP_P4_44752_17589143 | NC_021163.1    | Ca_kabuli_chr04 | 17589143                | GG                              | AA              | 1946797729               |
| SNP_P4_44753_17595546 | NC_021163.1    | Ca_kabuli_chr04 | 17595546                | CC                              | AA              | 1946797731               |
| SNP_P4_44754_17595763 | NC_021163.1    | Ca_kabuli_chr04 | 17595763                | TT                              | CC              | 1946797733               |
| SNP_P4_44755_17595864 | NC_021163.1    | Ca_kabuli_chr04 | 17595864                | TT                              | AA              | 1946797736               |
| SNP_P4_44756_17596054 | NC_021163.1    | Ca_kabuli_chr04 | 17596054                | GG                              | TT              | 1946797738               |
| SNP_P4_44757_17596360 | NC_021163.1    | Ca_kabuli_chr04 | 17596360                | AA                              | GG              | 1946797740               |
| SNP_P4_44758_17596515 | NC_021163.1    | Ca_kabuli_chr04 | 17596515                | GG                              | AA              | 1946797742               |
| SNP_P4_44759_17597909 | NC_021163.1    | Ca_kabuli_chr04 | 17597909                | CC                              | AA              | 1946797744               |
| SNP_P4_44760_17597982 | NC_021163.1    | Ca_kabuli_chr04 | 17597982                | TT                              | GG              | 1946797746               |
| SNP_P4_44761_17598088 | NC_021163.1    | Ca_kabuli_chr04 | 17598088                | CC                              | GG              | 1946797748               |
| SNP_P4_44762_17598790 | NC_021163.1    | Ca_kabuli_chr04 | 17598790                | TT                              | GG              | 1946797750               |
| SNP_P4_44763_17599005 | NC_021163.1    | Ca_kabuli_chr04 | 17599005                | GG                              | CC              | 1946797752               |
| SNP_P4_44764_17599183 | NC_021163.1    | Ca_kabuli_chr04 | 17599183                | AA                              | TT              | 1946797754               |
| SNP_P4_44765_17599223 | NC_021163.1    | Ca_kabuli_chr04 | 17599223                | TT                              | AA              | 1946797756               |
| SNP_P4_44766_17599307 | NC_021163.1    | Ca_kabuli_chr04 | 17599307                | AA                              | GG              | 1946797758               |
| SNP_P4_44767_17599326 | NC_021163.1    | Ca_kabuli_chr04 | 17599326                | AA                              | GG              | 1946797761               |
| SNP_P4_44768_17599438 | NC_021163.1    | Ca_kabuli_chr04 | 17599438                | GG                              | CC              | 1946797763               |
| SNP_P4_44769_17599439 | NC_021163.1    | Ca_kabuli_chr04 | 17599439                | AA                              | GG              | 1946797765               |

| SNPs IDs              | Chromosome IDs | Chromosomes     | Physical positions (bp) | CDC Frontier (Reference genome) | (ILWC46 & LPNB) | NCBI SNPdb Accession IDs |
|-----------------------|----------------|-----------------|-------------------------|---------------------------------|-----------------|--------------------------|
| SNP_P4_44770_17599483 | NC_021163.1    | Ca_kabuli_chr04 | 17599483                | AA                              | GG              | 1946797766               |
| SNP_P4_44771_17600067 | NC_021163.1    | Ca_kabuli_chr04 | 17600067                | CC                              | AA              | 1946797767               |
| SNP_P4_44772_17600078 | NC_021163.1    | Ca_kabuli_chr04 | 17600078                | TT                              | CC              | 1946797769               |
| SNP_P4_44773_17600259 | NC_021163.1    | Ca_kabuli_chr04 | 17600259                | GG                              | AA              | 1946797771               |
| SNP_P4_44774_17600264 | NC_021163.1    | Ca_kabuli_chr04 | 17600264                | AA                              | TT              | 1946797773               |
| SNP_P4_44775_17600292 | NC_021163.1    | Ca_kabuli_chr04 | 17600292                | CC                              | GG              | 1946797775               |
| SNP_P4_44776_17600298 | NC_021163.1    | Ca_kabuli_chr04 | 17600298                | TT                              | GG              | 1946797777               |
| SNP_P4_44777_17600324 | NC_021163.1    | Ca_kabuli_chr04 | 17600324                | TT                              | CC              | 1946797779               |
| SNP_P4_44778_17600388 | NC_021163.1    | Ca_kabuli_chr04 | 17600388                | TT                              | GG              | 1946797781               |
| SNP_P4_44779_17600429 | NC_021163.1    | Ca_kabuli_chr04 | 17600429                | AA                              | GG              | 1946797783               |
| SNP_P4_44780_17600467 | NC_021163.1    | Ca_kabuli_chr04 | 17600467                | AA                              | GG              | 1946797785               |
| SNP_P4_44781_17600562 | NC_021163.1    | Ca_kabuli_chr04 | 17600562                | TT                              | GG              | 1946797787               |
| SNP_P4_44782_17600618 | NC_021163.1    | Ca_kabuli_chr04 | 17600618                | CC                              | TT              | 1946797789               |
| SNP_P4_44783_17600744 | NC_021163.1    | Ca_kabuli_chr04 | 17600744                | GG                              | AA              | 1946797791               |
| SNP_P4_44784_17600774 | NC_021163.1    | Ca_kabuli_chr04 | 17600774                | GG                              | CC              | 1946797793               |
| SNP_P4_44787_17600936 | NC_021163.1    | Ca_kabuli_chr04 | 17600936                | AA                              | TT              | 1946797795               |
| SNP_P4_44788_17601012 | NC_021163.1    | Ca_kabuli_chr04 | 17601012                | TT                              | CC              | 1946797797               |
| SNP_P4_44789_17601081 | NC_021163.1    | Ca_kabuli_chr04 | 17601081                | TT                              | AA              | 1946797799               |
| SNP_P4_44790_17601539 | NC_021163.1    | Ca_kabuli_chr04 | 17601539                | CC                              | TT              | 1946797801               |
| SNP_P4_44791_17601603 | NC_021163.1    | Ca_kabuli_chr04 | 17601603                | GG                              | AA              | 1946797804               |
| SNP_P4_44792_17601607 | NC_021163.1    | Ca_kabuli_chr04 | 17601607                | CC                              | AA              | 1946797806               |
| SNP_P4_44794_17601646 | NC_021163.1    | Ca_kabuli_chr04 | 17601646                | TT                              | AA              | 1946797808               |
| SNP_P4_44795_17601815 | NC_021163.1    | Ca_kabuli_chr04 | 17601815                | CC                              | TT              | 1946797810               |
| SNP_P4_44796_17601830 | NC_021163.1    | Ca_kabuli_chr04 | 17601830                | GG                              | AA              | 1946797812               |
| SNP_P4_44797_17601835 | NC_021163.1    | Ca_kabuli_chr04 | 17601835                | GG                              | AA              | 1946797814               |
| SNP_P4_44799_17601933 | NC_021163.1    | Ca_kabuli_chr04 | 17601933                | TT                              | GG              | 1946797816               |
| SNP_P4_44800_17602199 | NC_021163.1    | Ca_kabuli_chr04 | 17602199                | GG                              | AA              | 1946797818               |
| SNP_P4_44801_17602202 | NC_021163.1    | Ca_kabuli_chr04 | 17602202                | GG                              | AA              | 1946797820               |
| SNP_P4_44802_17602228 | NC_021163.1    | Ca_kabuli_chr04 | 17602228                | GG                              | AA              | 1946797822               |
| SNP_P4_44803_17602232 | NC_021163.1    | Ca_kabuli_chr04 | 17602232                | GG                              | AA              | 1946797824               |
| SNP_P4_44804_17602243 | NC_021163.1    | Ca_kabuli_chr04 | 17602243                | GG                              | AA              | 1946797826               |
| SNP_P4_44805_17602244 | NC_021163.1    | Ca_kabuli_chr04 | 17602244                | TT                              | GG              | 1946797828               |
| SNP_P4_44806_17602321 | NC_021163.1    | Ca_kabuli_chr04 | 17602321                | CC                              | TT              | 1946797830               |
| SNP_P4_44807_17602346 | NC_021163.1    | Ca_kabuli_chr04 | 17602346                | CC                              | TT              | 1946797832               |
| SNP_P4_44809_17608551 | NC_021163.1    | Ca_kabuli_chr04 | 17608551                | TT                              | CC              | 1946797834               |
| SNP_P4_44811_17608847 | NC_021163.1    | Ca_kabuli_chr04 | 17608847                | GG                              | AA              | 1946797836               |
| SNP_P4_44812_17609043 | NC_021163.1    | Ca_kabuli_chr04 | 17609043                | TT                              | CC              | 1946797838               |
| SNP_P4_44813_17609489 | NC_021163.1    | Ca_kabuli_chr04 | 17609489                | GG                              | TT              | 1946797840               |
| SNP_P4_44814_17610040 | NC_021163.1    | Ca_kabuli_chr04 | 17610040                | AA                              | TT              | 1946797842               |
| SNP_P4_44815_17610610 | NC_021163.1    | Ca_kabuli_chr04 | 17610610                | CC                              | AA              | 1946797844               |
| SNP_P4_44816_17610727 | NC_021163.1    | Ca_kabuli_chr04 | 17610727                | TT                              | CC              | 1946797846               |
| SNP_P4_44817_17610951 | NC_021163.1    | Ca_kabuli_chr04 | 17610951                | AA                              | GG              | 1946797848               |

| SNPs IDs              | Chromosome IDs | Chromosomes     | Physical positions (bp) | CDC Frontier (Reference genome) | (ILWC46 & LPNB) | NCBI SNPdb Accession IDs |
|-----------------------|----------------|-----------------|-------------------------|---------------------------------|-----------------|--------------------------|
| SNP_P4_44818_17610987 | NC_021163.1    | Ca_kabuli_chr04 | 17610987                | TT                              | CC              | 1946797850               |
| SNP_P4_44819_17611323 | NC_021163.1    | Ca_kabuli_chr04 | 17611323                | CC                              | TT              | 1946797852               |
| SNP_P4_44820_17611497 | NC_021163.1    | Ca_kabuli_chr04 | 17611497                | GG                              | AA              | 1946797854               |
| SNP_P4_44822_17614741 | NC_021163.1    | Ca_kabuli_chr04 | 17614741                | TT                              | GG              | 1946797857               |
| SNP_P4_44823_17614817 | NC_021163.1    | Ca_kabuli_chr04 | 17614817                | AA                              | CC              | 1946797859               |
| SNP_P4_44824_17616662 | NC_021163.1    | Ca_kabuli_chr04 | 17616662                | AA                              | GG              | 1946797861               |
| SNP_P4_44825_17617191 | NC_021163.1    | Ca_kabuli_chr04 | 17617191                | AA                              | GG              | 1946797863               |
| SNP_P4_44826_17617489 | NC_021163.1    | Ca_kabuli_chr04 | 17617489                | GG                              | TT              | 1946797865               |
| SNP_P4_44827_17617670 | NC_021163.1    | Ca_kabuli_chr04 | 17617670                | GG                              | AA              | 1946797867               |
| SNP_P4_44828_17617701 | NC_021163.1    | Ca_kabuli_chr04 | 17617701                | CC                              | TT              | 1946797869               |
| SNP_P4_44829_17618625 | NC_021163.1    | Ca_kabuli_chr04 | 17618625                | TT                              | CC              | 1946797871               |
| SNP_P4_44830_17620396 | NC_021163.1    | Ca_kabuli_chr04 | 17620396                | TT                              | CC              | 1946797873               |
| SNP_P4_44831_17620704 | NC_021163.1    | Ca_kabuli_chr04 | 17620704                | AA                              | GG              | 1946797875               |
| SNP_P4_44832_17620756 | NC_021163.1    | Ca_kabuli_chr04 | 17620756                | TT                              | AA              | 1946797877               |
| SNP_P4_44833_17621380 | NC_021163.1    | Ca_kabuli_chr04 | 17621380                | TT                              | AA              | 1946797879               |
| SNP_P4_44834_17621423 | NC_021163.1    | Ca_kabuli_chr04 | 17621423                | GG                              | CC              | 1946797882               |
| SNP_P4_44835_17624930 | NC_021163.1    | Ca_kabuli_chr04 | 17624930                | TT                              | CC              | 1946797884               |
| SNP_P4_44836_17625163 | NC_021163.1    | Ca_kabuli_chr04 | 17625163                | TT                              | CC              | 1946797886               |
| SNP_P4_44837_17625168 | NC_021163.1    | Ca_kabuli_chr04 | 17625168                | AA                              | GG              | 1946797888               |
| SNP_P4_44838_17625171 | NC_021163.1    | Ca_kabuli_chr04 | 17625171                | GG                              | AA              | 1946797890               |
| SNP_P4_44839_17625176 | NC_021163.1    | Ca_kabuli_chr04 | 17625176                | TT                              | AA              | 1946797892               |
| SNP_P4_44840_17625198 | NC_021163.1    | Ca_kabuli_chr04 | 17625198                | TT                              | CC              | 1946797894               |
| SNP_P4_44841_17625771 | NC_021163.1    | Ca_kabuli_chr04 | 17625771                | TT                              | CC              | 1946797896               |
| SNP_P4_44843_17626731 | NC_021163.1    | Ca_kabuli_chr04 | 17626731                | AA                              | GG              | 1946797898               |
| SNP_P4_44844_17627028 | NC_021163.1    | Ca_kabuli_chr04 | 17627028                | CC                              | TT              | 1946797900               |
| SNP_P4_44845_17627039 | NC_021163.1    | Ca_kabuli_chr04 | 17627039                | TT                              | GG              | 1946797902               |
| SNP_P4_44846_17628231 | NC_021163.1    | Ca_kabuli_chr04 | 17628231                | TT                              | CC              | 1946797904               |
| SNP_P4_44847_17628278 | NC_021163.1    | Ca_kabuli_chr04 | 17628278                | AA                              | TT              | 1946797906               |
| SNP_P4_44849_17628892 | NC_021163.1    | Ca_kabuli_chr04 | 17628892                | CC                              | AA              | 1946797908               |
| SNP_P4_44850_17628910 | NC_021163.1    | Ca_kabuli_chr04 | 17628910                | GG                              | AA              | 1946797910               |
| SNP_P4_44851_17629415 | NC_021163.1    | Ca_kabuli_chr04 | 17629415                | TT                              | GG              | 1946797912               |
| SNP_P4_44852_17631450 | NC_021163.1    | Ca_kabuli_chr04 | 17631450                | GG                              | AA              | 1946797914               |
| SNP_P4_44853_17631456 | NC_021163.1    | Ca_kabuli_chr04 | 17631456                | GG                              | CC              | 1946797916               |
| SNP_P4_44855_17632470 | NC_021163.1    | Ca_kabuli_chr04 | 17632470                | TT                              | CC              | 1946797918               |
| SNP_P4_44856_17632556 | NC_021163.1    | Ca_kabuli_chr04 | 17632556                | CC                              | TT              | 1946797919               |
| SNP_P4_44857_17632621 | NC_021163.1    | Ca_kabuli_chr04 | 17632621                | TT                              | CC              | 1946797921               |
| SNP_P4_44858_17632682 | NC_021163.1    | Ca_kabuli_chr04 | 17632682                | CC                              | TT              | 1946797923               |
| SNP_P4_44859_17632695 | NC_021163.1    | Ca_kabuli_chr04 | 17632695                | GG                              | AA              | 1946797925               |
| SNP_P4_44860_17633666 | NC_021163.1    | Ca_kabuli_chr04 | 17633666                | TT                              | CC              | 1946797927               |
| SNP_P4_44861_17634865 | NC_021163.1    | Ca_kabuli_chr04 | 17634865                | GG                              | AA              | 1946797929               |
| SNP_P4_44864_17636250 | NC_021163.1    | Ca_kabuli_chr04 | 17636250                | AA                              | GG              | 1946797931               |
| SNP_P4_44865_17636811 | NC_021163.1    | Ca_kabuli_chr04 | 17636811                | AA                              | GG              | 1946797934               |

| SNPs IDs              | Chromosome IDs | Chromosomes     | Physical positions (bp) | CDC Frontier (Reference genome) | (ILWC46 & LPNB) | NCBI SNPdb Accession IDs |
|-----------------------|----------------|-----------------|-------------------------|---------------------------------|-----------------|--------------------------|
| SNP_P4_44866_17636882 | NC_021163.1    | Ca_kabuli_chr04 | 17636882                | TT                              | CC              | 1946797936               |
| SNP_P4_44867_17637196 | NC_021163.1    | Ca_kabuli_chr04 | 17637196                | CC                              | TT              | 1946797938               |
| SNP_P4_44868_17638788 | NC_021163.1    | Ca_kabuli_chr04 | 17638788                | TT                              | CC              | 1946797940               |
| SNP_P4_44870_17640357 | NC_021163.1    | Ca_kabuli_chr04 | 17640357                | GG                              | TT              | 1946797942               |
| SNP_P4_44872_17640707 | NC_021163.1    | Ca_kabuli_chr04 | 17640707                | GG                              | AA              | 1946797944               |
| SNP_P4_44873_17640760 | NC_021163.1    | Ca_kabuli_chr04 | 17640760                | CC                              | TT              | 1946797946               |
| SNP_P4_44874_17641750 | NC_021163.1    | Ca_kabuli_chr04 | 17641750                | GG                              | AA              | 1946797949               |
| SNP_P4_44875_17642087 | NC_021163.1    | Ca_kabuli_chr04 | 17642087                | CC                              | TT              | 1946797951               |
| SNP_P4_44876_17642136 | NC_021163.1    | Ca_kabuli_chr04 | 17642136                | TT                              | AA              | 1946797953               |
| SNP_P4_44877_17642427 | NC_021163.1    | Ca_kabuli_chr04 | 17642427                | TT                              | CC              | 1946797955               |
| SNP_P4_44878_17642451 | NC_021163.1    | Ca_kabuli_chr04 | 17642451                | GG                              | AA              | 1946797957               |
| SNP_P4_44879_17643177 | NC_021163.1    | Ca_kabuli_chr04 | 17643177                | AA                              | GG              | 1946797959               |
| SNP_P4_44880_17645014 | NC_021163.1    | Ca_kabuli_chr04 | 17645014                | CC                              | TT              | 1946797961               |
| SNP_P4_44882_17645707 | NC_021163.1    | Ca_kabuli_chr04 | 17645707                | TT                              | CC              | 1946797963               |
| SNP_P4_44883_17646014 | NC_021163.1    | Ca_kabuli_chr04 | 17646014                | GG                              | CC              | 1946797965               |
| SNP_P4_44884_17646108 | NC_021163.1    | Ca_kabuli_chr04 | 17646108                | AA                              | TT              | 1946797968               |
| SNP_P4_44885_17647478 | NC_021163.1    | Ca_kabuli_chr04 | 17647478                | AA                              | GG              | 1946797970               |
| SNP_P4_44886_17647558 | NC_021163.1    | Ca_kabuli_chr04 | 17647558                | AA                              | GG              | 1946797972               |
| SNP_P4_44887_17647905 | NC_021163.1    | Ca_kabuli_chr04 | 17647905                | AA                              | GG              | 1946797974               |
| SNP_P4_44888_17648836 | NC_021163.1    | Ca_kabuli_chr04 | 17648836                | TT                              | CC              | 1946797976               |
| SNP_P4_44889_17648970 | NC_021163.1    | Ca_kabuli_chr04 | 17648970                | AA                              | GG              | 1946797978               |
| SNP_P4_44890_17648975 | NC_021163.1    | Ca_kabuli_chr04 | 17648975                | GG                              | AA              | 1946797980               |
| SNP_P4_44891_17649235 | NC_021163.1    | Ca_kabuli_chr04 | 17649235                | CC                              | TT              | 1946797982               |
| SNP_P4_44892_17649537 | NC_021163.1    | Ca_kabuli_chr04 | 17649537                | CC                              | AA              | 1946797984               |
| SNP_P4_44893_17649550 | NC_021163.1    | Ca_kabuli_chr04 | 17649550                | TT                              | AA              | 1946797986               |
| SNP_P4_44894_17649577 | NC_021163.1    | Ca_kabuli_chr04 | 17649577                | AA                              | TT              | 1946797988               |
| SNP_P4_44896_17649830 | NC_021163.1    | Ca_kabuli_chr04 | 17649830                | GG                              | AA              | 1946797990               |
| SNP_P4_44897_17649847 | NC_021163.1    | Ca_kabuli_chr04 | 17649847                | AA                              | GG              | 1946797992               |
| SNP_P4_44898_17649884 | NC_021163.1    | Ca_kabuli_chr04 | 17649884                | CC                              | TT              | 1946797995               |
| SNP_P4_44899_17649888 | NC_021163.1    | Ca_kabuli_chr04 | 17649888                | TT                              | CC              | 1946797997               |
| SNP_P4_44900_17650144 | NC_021163.1    | Ca_kabuli_chr04 | 17650144                | CC                              | AA              | 1946797999               |
| SNP_P4_44903_17650634 | NC_021163.1    | Ca_kabuli_chr04 | 17650634                | GG                              | CC              | 1946798001               |
| SNP_P4_44904_17650639 | NC_021163.1    | Ca_kabuli_chr04 | 17650639                | AA                              | GG              | 1946798003               |
| SNP_P4_44906_17653724 | NC_021163.1    | Ca_kabuli_chr04 | 17653724                | TT                              | CC              | 1946798005               |
| SNP_P4_44907_17653739 | NC_021163.1    | Ca_kabuli_chr04 | 17653739                | TT                              | CC              | 1946798007               |
| SNP_P4_44909_17654163 | NC_021163.1    | Ca_kabuli_chr04 | 17654163                | TT                              | AA              | 1946798009               |
| SNP_P4_44911_17654613 | NC_021163.1    | Ca_kabuli_chr04 | 17654613                | GG                              | TT              | 1946798011               |
| SNP_P4_44912_17654954 | NC_021163.1    | Ca_kabuli_chr04 | 17654954                | TT                              | CC              | 1946798013               |
| SNP_P4_44913_17654957 | NC_021163.1    | Ca_kabuli_chr04 | 17654957                | AA                              | GG              | 1946798015               |
| SNP_P4_44914_17656339 | NC_021163.1    | Ca_kabuli_chr04 | 17656339                | GG                              | AA              | 1946798017               |
| SNP_P4_44915_17656357 | NC_021163.1    | Ca_kabuli_chr04 | 17656357                | TT                              | CC              | 1946798019               |
| SNP_P4_44916_17656406 | NC_021163.1    | Ca_kabuli_chr04 | 17656406                | AA                              | GG              | 1946798022               |

| SNPs IDs              | Chromosome IDs | Chromosomes     | Physical positions (bp) | CDC Frontier (Reference genome) | (ILWC46 & LPNB) | NCBI SNPdb Accession IDs |
|-----------------------|----------------|-----------------|-------------------------|---------------------------------|-----------------|--------------------------|
| SNP_P4_44917_17656723 | NC_021163.1    | Ca_kabuli_chr04 | 17656723                | GG                              | TT              | 1946798024               |
| SNP_P4_44918_17656809 | NC_021163.1    | Ca_kabuli_chr04 | 17656809                | GG                              | AA              | 1946798026               |
| SNP_P4_44919_17656876 | NC_021163.1    | Ca_kabuli_chr04 | 17656876                | TT                              | GG              | 1946798028               |
| SNP_P4_44920_17656877 | NC_021163.1    | Ca_kabuli_chr04 | 17656877                | GG                              | AA              | 1946798030               |
| SNP_P4_44921_17659173 | NC_021163.1    | Ca_kabuli_chr04 | 17659173                | CC                              | TT              | 1946798032               |
| SNP_P4_44922_17659174 | NC_021163.1    | Ca_kabuli_chr04 | 17659174                | TT                              | CC              | 1946798034               |
| SNP_P4_44923_17659357 | NC_021163.1    | Ca_kabuli_chr04 | 17659357                | GG                              | AA              | 1946798036               |
| SNP_P4_44924_17659358 | NC_021163.1    | Ca_kabuli_chr04 | 17659358                | CC                              | TT              | 1946798038               |
| SNP_P4_44925_17659565 | NC_021163.1    | Ca_kabuli_chr04 | 17659565                | AA                              | GG              | 1946798040               |
| SNP_P4_44926_17661077 | NC_021163.1    | Ca_kabuli_chr04 | 17661077                | GG                              | AA              | 1946798042               |
| SNP_P4_44929_17662437 | NC_021163.1    | Ca_kabuli_chr04 | 17662437                | GG                              | AA              | 1946798045               |
| SNP_P4_44930_17663577 | NC_021163.1    | Ca_kabuli_chr04 | 17663577                | TT                              | CC              | 1946798047               |
| SNP_P4_44932_17663691 | NC_021163.1    | Ca_kabuli_chr04 | 17663691                | AA                              | CC              | 1946798049               |
| SNP_P4_44933_17664510 | NC_021163.1    | Ca_kabuli_chr04 | 17664510                | AA                              | GG              | 1946798051               |
| SNP_P4_44934_17664741 | NC_021163.1    | Ca_kabuli_chr04 | 17664741                | AA                              | GG              | 1946798053               |
| SNP_P4_44935_17665757 | NC_021163.1    | Ca_kabuli_chr04 | 17665757                | CC                              | TT              | 1946798055               |
| SNP_P4_44936_17666312 | NC_021163.1    | Ca_kabuli_chr04 | 17666312                | TT                              | CC              | 1946798057               |
| SNP_P4_44937_17666731 | NC_021163.1    | Ca_kabuli_chr04 | 17666731                | CC                              | GG              | 1946798059               |
| SNP_P4_44938_17666776 | NC_021163.1    | Ca_kabuli_chr04 | 17666776                | AA                              | GG              | 1946798061               |
| SNP_P4_44939_17667100 | NC_021163.1    | Ca_kabuli_chr04 | 17667100                | AA                              | GG              | 1946798063               |
| SNP_P4_44940_17667146 | NC_021163.1    | Ca_kabuli_chr04 | 17667146                | CC                              | AA              | 1946798065               |
| SNP_P4_44941_17667811 | NC_021163.1    | Ca_kabuli_chr04 | 17667811                | AA                              | GG              | 1946798067               |
| SNP_P4_44942_17669217 | NC_021163.1    | Ca_kabuli_chr04 | 17669217                | AA                              | GG              | 1946798069               |
| SNP_P4_44943_17671685 | NC_021163.1    | Ca_kabuli_chr04 | 17671685                | GG                              | TT              | 1946798071               |
| SNP_P4_44944_17671697 | NC_021163.1    | Ca_kabuli_chr04 | 17671697                | CC                              | TT              | 1946798073               |
| SNP_P4_44945_17671988 | NC_021163.1    | Ca_kabuli_chr04 | 17671988                | TT                              | GG              | 1946798075               |
| SNP_P4_44946_17672447 | NC_021163.1    | Ca_kabuli_chr04 | 17672447                | GG                              | AA              | 1946798077               |
| SNP_P4_44948_17672722 | NC_021163.1    | Ca_kabuli_chr04 | 17672722                | AA                              | GG              | 1946798079               |
| SNP_P4_44949_17672747 | NC_021163.1    | Ca_kabuli_chr04 | 17672747                | GG                              | AA              | 1946798081               |
| SNP_P4_44950_17672755 | NC_021163.1    | Ca_kabuli_chr04 | 17672755                | TT                              | CC              | 1946798083               |
| SNP_P4_44951_17672756 | NC_021163.1    | Ca_kabuli_chr04 | 17672756                | TT                              | CC              | 1946798085               |
| SNP_P4_44952_17672861 | NC_021163.1    | Ca_kabuli_chr04 | 17672861                | TT                              | CC              | 1946798087               |
| SNP_P4_44953_17672867 | NC_021163.1    | Ca_kabuli_chr04 | 17672867                | TT                              | CC              | 1946798089               |
| SNP_P4_44955_17674760 | NC_021163.1    | Ca_kabuli_chr04 | 17674760                | CC                              | TT              | 1946798091               |
| SNP_P4_44956_17675387 | NC_021163.1    | Ca_kabuli_chr04 | 17675387                | TT                              | GG              | 1946798093               |
| SNP_P4_44957_17675500 | NC_021163.1    | Ca_kabuli_chr04 | 17675500                | AA                              | CC              | 1946798095               |
| SNP_P4_44959_17675684 | NC_021163.1    | Ca_kabuli_chr04 | 17675684                | GG                              | AA              | 1946798097               |
| SNP_P4_44960_17676521 | NC_021163.1    | Ca_kabuli_chr04 | 17676521                | TT                              | GG              | 1946798099               |
| SNP_P4_44961_17676983 | NC_021163.1    | Ca_kabuli_chr04 | 17676983                | CC                              | TT              | 1946798101               |
| SNP_P4_44962_17677076 | NC_021163.1    | Ca_kabuli_chr04 | 17677076                | TT                              | CC              | 1946798103               |
| SNP_P4_44963_17677429 | NC_021163.1    | Ca_kabuli_chr04 | 17677429                | AA                              | GG              | 1946798105               |
| SNP_P4_44965_17677736 | NC_021163.1    | Ca_kabuli_chr04 | 17677736                | AA                              | GG              | 1946798107               |



| SNPs IDs              | Chromosome IDs | Chromosomes     | Physical positions (bp) | CDC Frontier (Reference genome) | (ILWC46 & LPNB) | NCBI SNPdb Accession IDs |
|-----------------------|----------------|-----------------|-------------------------|---------------------------------|-----------------|--------------------------|
| SNP_P4_44966_17678851 | NC_021163.1    | Ca_kabuli_chr04 | 17678851                | GG                              | TT              | 1946798109               |
| SNP_P4_44967_17680244 | NC_021163.1    | Ca_kabuli_chr04 | 17680244                | AA                              | GG              | 1946798111               |
| SNP_P4_44968_17680429 | NC_021163.1    | Ca_kabuli_chr04 | 17680429                | CC                              | TT              | 1946798113               |
| SNP_P4_44969_17680577 | NC_021163.1    | Ca_kabuli_chr04 | 17680577                | CC                              | TT              | 1946798115               |
| SNP_P4_44970_17680599 | NC_021163.1    | Ca_kabuli_chr04 | 17680599                | AA                              | GG              | 1946798118               |
| SNP_P4_44971_17680911 | NC_021163.1    | Ca_kabuli_chr04 | 17680911                | AA                              | GG              | 1946798120               |
| SNP_P4_44972_17690387 | NC_021163.1    | Ca_kabuli_chr04 | 17690387                | GG                              | TT              | 1946798122               |
| SNP_P4_44973_17690428 | NC_021163.1    | Ca_kabuli_chr04 | 17690428                | AA                              | CC              | 1946798124               |
| SNP_P4_44974_17690454 | NC_021163.1    | Ca_kabuli_chr04 | 17690454                | TT                              | CC              | 1946798126               |
| SNP_P4_44975_17691490 | NC_021163.1    | Ca_kabuli_chr04 | 17691490                | CC                              | TT              | 1946798128               |
| SNP_P4_44976_17693454 | NC_021163.1    | Ca_kabuli_chr04 | 17693454                | GG                              | AA              | 1946798130               |
| SNP_P4_44977_17697694 | NC_021163.1    | Ca_kabuli_chr04 | 17697694                | CC                              | TT              | 1946798132               |
| SNP_P4_44978_17697743 | NC_021163.1    | Ca_kabuli_chr04 | 17697743                | CC                              | TT              | 1946798134               |
| SNP_P4_44979_17697789 | NC_021163.1    | Ca_kabuli_chr04 | 17697789                | AA                              | TT              | 1946798136               |
| SNP_P4_44980_17697799 | NC_021163.1    | Ca_kabuli_chr04 | 17697799                | AA                              | GG              | 1946798138               |
| SNP_P4_44981_17698228 | NC_021163.1    | Ca_kabuli_chr04 | 17698228                | GG                              | CC              | 1946798141               |
| SNP_P4_44982_17699551 | NC_021163.1    | Ca_kabuli_chr04 | 17699551                | TT                              | CC              | 1946798143               |
| SNP_P4_44983_17700183 | NC_021163.1    | Ca_kabuli_chr04 | 17700183                | AA                              | GG              | 1946798145               |
| SNP_P4_44984_17701225 | NC_021163.1    | Ca_kabuli_chr04 | 17701225                | CC                              | AA              | 1946798147               |
| SNP_P4_44985_17701618 | NC_021163.1    | Ca_kabuli_chr04 | 17701618                | TT                              | GG              | 1946798149               |
| SNP_P4_44987_17701956 | NC_021163.1    | Ca_kabuli_chr04 | 17701956                | AA                              | TT              | 1946798151               |
| SNP_P4_44988_17702280 | NC_021163.1    | Ca_kabuli_chr04 | 17702280                | TT                              | CC              | 1946798153               |
| SNP_P4_44989_17703495 | NC_021163.1    | Ca_kabuli_chr04 | 17703495                | AA                              | GG              | 1946798155               |
| SNP_P4_44990_17703569 | NC_021163.1    | Ca_kabuli_chr04 | 17703569                | GG                              | AA              | 1946798158               |
| SNP_P4_44991_17703703 | NC_021163.1    | Ca_kabuli_chr04 | 17703703                | TT                              | AA              | 1946798160               |
| SNP_P4_44992_17703704 | NC_021163.1    | Ca_kabuli_chr04 | 17703704                | GG                              | TT              | 1946798162               |
| SNP_P4_44993_17703801 | NC_021163.1    | Ca_kabuli_chr04 | 17703801                | TT                              | CC              | 1946798164               |
| SNP_P4_44994_17704930 | NC_021163.1    | Ca_kabuli_chr04 | 17704930                | TT                              | CC              | 1946798166               |
| SNP_P4_44996_17704977 | NC_021163.1    | Ca_kabuli_chr04 | 17704977                | TT                              | CC              | 1946798168               |
| SNP_P4_44997_17705239 | NC_021163.1    | Ca_kabuli_chr04 | 17705239                | GG                              | AA              | 1946798170               |
| SNP_P4_44998_17705264 | NC_021163.1    | Ca_kabuli_chr04 | 17705264                | AA                              | GG              | 1946798172               |
| SNP_P4_44999_17705308 | NC_021163.1    | Ca_kabuli_chr04 | 17705308                | GG                              | AA              | 1946798175               |
| SNP_P4_45000_17705378 | NC_021163.1    | Ca_kabuli_chr04 | 17705378                | TT                              | CC              | 1946798177               |
| SNP_P4_45001_17705395 | NC_021163.1    | Ca_kabuli_chr04 | 17705395                | TT                              | CC              | 1946798179               |
| SNP_P4_45003_17707029 | NC_021163.1    | Ca_kabuli_chr04 | 17707029                | AA                              | GG              | 1946798181               |
| SNP_P4_45004_17707038 | NC_021163.1    | Ca_kabuli_chr04 | 17707038                | GG                              | AA              | 1946798183               |
| SNP_P4_45006_17707333 | NC_021163.1    | Ca_kabuli_chr04 | 17707333                | CC                              | GG              | 1946798185               |
| SNP_P4_45007_17707345 | NC_021163.1    | Ca_kabuli_chr04 | 17707345                | TT                              | CC              | 1946798187               |
| SNP_P4_45008_17707714 | NC_021163.1    | Ca_kabuli_chr04 | 17707714                | TT                              | GG              | 1946798189               |
| SNP_P4_45009_17712755 | NC_021163.1    | Ca_kabuli_chr04 | 17712755                | CC                              | TT              | 1946798191               |
| SNP_P4_45010_17712884 | NC_021163.1    | Ca_kabuli_chr04 | 17712884                | GG                              | AA              | 1946798193               |
| SNP_P4_45011_17713025 | NC_021163.1    | Ca_kabuli_chr04 | 17713025                | CC                              | AA              | 1946798195               |

| SNPs IDs              | Chromosome IDs | Chromosomes     | Physical positions (bp) | CDC Frontier (Reference genome) | (ILWC46 & LPNB) | NCBI SNPdb Accession IDs |
|-----------------------|----------------|-----------------|-------------------------|---------------------------------|-----------------|--------------------------|
| SNP_P4_45012_17713040 | NC_021163.1    | Ca_kabuli_chr04 | 17713040                | TT                              | AA              | 1946798197               |
| SNP_P4_45013_17713086 | NC_021163.1    | Ca_kabuli_chr04 | 17713086                | TT                              | AA              | 1946798199               |
| SNP_P4_45014_17713087 | NC_021163.1    | Ca_kabuli_chr04 | 17713087                | AA                              | CC              | 1946798202               |
| SNP_P4_45016_17713522 | NC_021163.1    | Ca_kabuli_chr04 | 17713522                | TT                              | CC              | 1946798204               |
| SNP_P4_45017_17714847 | NC_021163.1    | Ca_kabuli_chr04 | 17714847                | TT                              | AA              | 1946798206               |
| SNP_P4_45018_17715016 | NC_021163.1    | Ca_kabuli_chr04 | 17715016                | TT                              | GG              | 1946798208               |
| SNP_P4_45020_17715526 | NC_021163.1    | Ca_kabuli_chr04 | 17715526                | CC                              | TT              | 1946798210               |
| SNP_P4_45023_17717170 | NC_021163.1    | Ca_kabuli_chr04 | 17717170                | TT                              | CC              | 1946798212               |
| SNP_P4_45024_17717441 | NC_021163.1    | Ca_kabuli_chr04 | 17717441                | TT                              | CC              | 1946798214               |
| SNP_P4_45025_17718882 | NC_021163.1    | Ca_kabuli_chr04 | 17718882                | CC                              | AA              | 1946798216               |
| SNP_P4_45026_17720730 | NC_021163.1    | Ca_kabuli_chr04 | 17720730                | AA                              | CC              | 1946798218               |
| SNP_P4_45027_17720905 | NC_021163.1    | Ca_kabuli_chr04 | 17720905                | GG                              | AA              | 1946798220               |
| SNP_P4_45028_17721198 | NC_021163.1    | Ca_kabuli_chr04 | 17721198                | GG                              | AA              | 1946798222               |
| SNP_P4_45030_17722061 | NC_021163.1    | Ca_kabuli_chr04 | 17722061                | GG                              | AA              | 1946798224               |
| SNP_P4_45031_17722334 | NC_021163.1    | Ca_kabuli_chr04 | 17722334                | TT                              | GG              | 1946798226               |
| SNP_P4_45032_17722340 | NC_021163.1    | Ca_kabuli_chr04 | 17722340                | CC                              | TT              | 1946798228               |
| SNP_P4_45033_17723871 | NC_021163.1    | Ca_kabuli_chr04 | 17723871                | TT                              | CC              | 1946798230               |
| SNP_P4_45034_17726295 | NC_021163.1    | Ca_kabuli_chr04 | 17726295                | TT                              | CC              | 1946798232               |
| SNP_P4_45035_17726789 | NC_021163.1    | Ca_kabuli_chr04 | 17726789                | GG                              | AA              | 1946798234               |
| SNP_P4_45036_17730535 | NC_021163.1    | Ca_kabuli_chr04 | 17730535                | CC                              | TT              | 1946798236               |
| SNP_P4_45037_17731958 | NC_021163.1    | Ca_kabuli_chr04 | 17731958                | TT                              | AA              | 1946798238               |
| SNP_P4_45038_17732902 | NC_021163.1    | Ca_kabuli_chr04 | 17732902                | AA                              | TT              | 1946798240               |
| SNP_P4_45039_17732933 | NC_021163.1    | Ca_kabuli_chr04 | 17732933                | AA                              | GG              | 1946798242               |
| SNP_P4_45040_17732942 | NC_021163.1    | Ca_kabuli_chr04 | 17732942                | TT                              | GG              | 1946798244               |
| SNP_P4_45041_17732960 | NC_021163.1    | Ca_kabuli_chr04 | 17732960                | TT                              | AA              | 1946798246               |
| SNP_P4_45042_17732973 | NC_021163.1    | Ca_kabuli_chr04 | 17732973                | AA                              | GG              | 1946798248               |
| SNP_P4_45043_17734713 | NC_021163.1    | Ca_kabuli_chr04 | 17734713                | CC                              | TT              | 1946798250               |
| SNP_P4_45045_17735538 | NC_021163.1    | Ca_kabuli_chr04 | 17735538                | CC                              | TT              | 1946798252               |
| SNP_P4_45046_17735569 | NC_021163.1    | Ca_kabuli_chr04 | 17735569                | AA                              | TT              | 1946798254               |
| SNP_P4_45048_17735617 | NC_021163.1    | Ca_kabuli_chr04 | 17735617                | TT                              | AA              | 1946798256               |
| SNP_P4_45049_17735618 | NC_021163.1    | Ca_kabuli_chr04 | 17735618                | TT                              | AA              | 1946798258               |
| SNP_P4_45050_17735627 | NC_021163.1    | Ca_kabuli_chr04 | 17735627                | TT                              | GG              | 1946798260               |
| SNP_P4_45051_17735639 | NC_021163.1    | Ca_kabuli_chr04 | 17735639                | GG                              | TT              | 1946798262               |
| SNP_P4_45052_17735648 | NC_021163.1    | Ca_kabuli_chr04 | 17735648                | CC                              | AA              | 1946798264               |
| SNP_P4_45054_17735828 | NC_021163.1    | Ca_kabuli_chr04 | 17735828                | CC                              | AA              | 1946798266               |
| SNP_P4_45055_17735888 | NC_021163.1    | Ca_kabuli_chr04 | 17735888                | CC                              | TT              | 1946798268               |
| SNP_P4_45056_17735913 | NC_021163.1    | Ca_kabuli_chr04 | 17735913                | AA                              | GG              | 1946798270               |
| SNP_P4_45057_17735916 | NC_021163.1    | Ca_kabuli_chr04 | 17735916                | GG                              | TT              | 1946798272               |
| SNP_P4_45058_17735926 | NC_021163.1    | Ca_kabuli_chr04 | 17735926                | CC                              | AA              | 1946798274               |
| SNP_P4_45059_17735934 | NC_021163.1    | Ca_kabuli_chr04 | 17735934                | GG                              | AA              | 1946798276               |
| SNP_P4_45060_17737570 | NC_021163.1    | Ca_kabuli_chr04 | 17737570                | AA                              | GG              | 1946798278               |
| SNP_P4_45061_17737600 | NC_021163.1    | Ca_kabuli_chr04 | 17737600                | TT                              | CC              | 1946798280               |

| SNPs IDs              | Chromosome IDs | Chromosomes     | Physical positions (bp) | CDC Frontier (Reference genome) | (ILWC46 & LPNB) | NCBI SNPdb Accession IDs |
|-----------------------|----------------|-----------------|-------------------------|---------------------------------|-----------------|--------------------------|
| SNP_P4_45062_17737929 | NC_021163.1    | Ca_kabuli_chr04 | 17737929                | AA                              | GG              | 1946798282               |
| SNP_P4_45063_17737958 | NC_021163.1    | Ca_kabuli_chr04 | 17737958                | TT                              | CC              | 1946798284               |
| SNP_P4_45064_17737961 | NC_021163.1    | Ca_kabuli_chr04 | 17737961                | CC                              | GG              | 1946798286               |
| SNP_P4_45065_17738334 | NC_021163.1    | Ca_kabuli_chr04 | 17738334                | GG                              | AA              | 1946798289               |
| SNP_P4_45066_17738850 | NC_021163.1    | Ca_kabuli_chr04 | 17738850                | CC                              | TT              | 1946798291               |
| SNP_P4_45068_17739172 | NC_021163.1    | Ca_kabuli_chr04 | 17739172                | CC                              | GG              | 1946798293               |
| SNP_P4_45070_17739772 | NC_021163.1    | Ca_kabuli_chr04 | 17739772                | TT                              | GG              | 1946798295               |
| SNP_P4_45071_17739798 | NC_021163.1    | Ca_kabuli_chr04 | 17739798                | TT                              | GG              | 1946798297               |
| SNP_P4_45072_17739845 | NC_021163.1    | Ca_kabuli_chr04 | 17739845                | GG                              | AA              | 1946798299               |
| SNP_P4_45073_17739857 | NC_021163.1    | Ca_kabuli_chr04 | 17739857                | TT                              | CC              | 1946798301               |
| SNP_P4_45074_17740029 | NC_021163.1    | Ca_kabuli_chr04 | 17740029                | TT                              | GG              | 1946798303               |
| SNP_P4_45075_17740069 | NC_021163.1    | Ca_kabuli_chr04 | 17740069                | TT                              | GG              | 1946798305               |
| SNP_P4_45076_17740074 | NC_021163.1    | Ca_kabuli_chr04 | 17740074                | TT                              | CC              | 1946798307               |
| SNP_P4_45077_17740082 | NC_021163.1    | Ca_kabuli_chr04 | 17740082                | AA                              | TT              | 1946798309               |
| SNP_P4_45078_17740128 | NC_021163.1    | Ca_kabuli_chr04 | 17740128                | AA                              | GG              | 1946798311               |
| SNP_P4_45079_17740130 | NC_021163.1    | Ca_kabuli_chr04 | 17740130                | GG                              | AA              | 1946798313               |
| SNP_P4_45080_17740152 | NC_021163.1    | Ca_kabuli_chr04 | 17740152                | AA                              | GG              | 1946798315               |
| SNP_P4_45081_17740159 | NC_021163.1    | Ca_kabuli_chr04 | 17740159                | TT                              | GG              | 1946798317               |
| SNP_P4_45082_17740202 | NC_021163.1    | Ca_kabuli_chr04 | 17740202                | CC                              | AA              | 1946798319               |
| SNP_P4_45083_17740275 | NC_021163.1    | Ca_kabuli_chr04 | 17740275                | AA                              | CC              | 1946798321               |
| SNP_P4_45084_17740290 | NC_021163.1    | Ca_kabuli_chr04 | 17740290                | AA                              | GG              | 1946798323               |
| SNP_P4_45085_17740322 | NC_021163.1    | Ca_kabuli_chr04 | 17740322                | AA                              | GG              | 1946798325               |
| SNP_P4_45086_17740637 | NC_021163.1    | Ca_kabuli_chr04 | 17740637                | AA                              | CC              | 1946798327               |
| SNP_P4_45087_17740658 | NC_021163.1    | Ca_kabuli_chr04 | 17740658                | GG                              | TT              | 1946798329               |
| SNP_P4_45088_17740872 | NC_021163.1    | Ca_kabuli_chr04 | 17740872                | AA                              | GG              | 1946798332               |
| SNP_P4_45089_17740947 | NC_021163.1    | Ca_kabuli_chr04 | 17740947                | AA                              | TT              | 1946798334               |
| SNP_P4_45090_17740966 | NC_021163.1    | Ca_kabuli_chr04 | 17740966                | GG                              | AA              | 1946798336               |
| SNP_P4_45091_17740983 | NC_021163.1    | Ca_kabuli_chr04 | 17740983                | CC                              | TT              | 1946798338               |
| SNP_P4_45092_17741162 | NC_021163.1    | Ca_kabuli_chr04 | 17741162                | CC                              | AA              | 1946798340               |
| SNP_P4_45093_17741214 | NC_021163.1    | Ca_kabuli_chr04 | 17741214                | CC                              | TT              | 1946798342               |
| SNP_P4_45094_17741220 | NC_021163.1    | Ca_kabuli_chr04 | 17741220                | AA                              | GG              | 1946798344               |
| SNP_P4_45095_17741496 | NC_021163.1    | Ca_kabuli_chr04 | 17741496                | CC                              | TT              | 1946798346               |
| SNP_P4_45096_17741513 | NC_021163.1    | Ca_kabuli_chr04 | 17741513                | CC                              | TT              | 1946798348               |
| SNP_P4_45097_17741543 | NC_021163.1    | Ca_kabuli_chr04 | 17741543                | TT                              | AA              | 1946798350               |
| SNP_P4_45098_17741553 | NC_021163.1    | Ca_kabuli_chr04 | 17741553                | AA                              | CC              | 1946798352               |
| SNP_P4_45099_17741759 | NC_021163.1    | Ca_kabuli_chr04 | 17741759                | TT                              | CC              | 1946798354               |
| SNP_P4_45100_17741808 | NC_021163.1    | Ca_kabuli_chr04 | 17741808                | TT                              | GG              | 1946798356               |
| SNP_P4_45101_17743436 | NC_021163.1    | Ca_kabuli_chr04 | 17743436                | TT                              | CC              | 1946798358               |
| SNP_P4_45102_17743682 | NC_021163.1    | Ca_kabuli_chr04 | 17743682                | AA                              | CC              | 1946798360               |
| SNP_P4_45103_17743686 | NC_021163.1    | Ca_kabuli_chr04 | 17743686                | GG                              | AA              | 1946798362               |
| SNP_P4_45104_17743723 | NC_021163.1    | Ca_kabuli_chr04 | 17743723                | GG                              | TT              | 1946798364               |
| SNP_P4_45105_17743909 | NC_021163.1    | Ca_kabuli_chr04 | 17743909                | TT                              | GG              | 1946798366               |

| SNPs IDs              | Chromosome IDs | Chromosomes     | Physical positions (bp) | CDC Frontier (Reference genome) | (ILWC46 & LPNB) | NCBI SNPdb Accession IDs |
|-----------------------|----------------|-----------------|-------------------------|---------------------------------|-----------------|--------------------------|
| SNP_P4_45106_17743911 | NC_021163.1    | Ca_kabuli_chr04 | 17743911                | TT                              | GG              | 1946798368               |
| SNP_P4_45107_17743919 | NC_021163.1    | Ca_kabuli_chr04 | 17743919                | CC                              | AA              | 1946798370               |
| SNP_P4_45108_17743941 | NC_021163.1    | Ca_kabuli_chr04 | 17743941                | GG                              | AA              | 1946798372               |
| SNP_P4_45110_17744465 | NC_021163.1    | Ca_kabuli_chr04 | 17744465                | TT                              | CC              | 1946798375               |
| SNP_P4_45111_17744884 | NC_021163.1    | Ca_kabuli_chr04 | 17744884                | GG                              | TT              | 1946798377               |
| SNP_P4_45112_17745564 | NC_021163.1    | Ca_kabuli_chr04 | 17745564                | TT                              | CC              | 1946798379               |
| SNP_P4_45113_17745565 | NC_021163.1    | Ca_kabuli_chr04 | 17745565                | AA                              | GG              | 1946798381               |
| SNP_P4_45114_17745699 | NC_021163.1    | Ca_kabuli_chr04 | 17745699                | AA                              | GG              | 1946798383               |
| SNP_P4_45115_17749758 | NC_021163.1    | Ca_kabuli_chr04 | 17749758                | GG                              | AA              | 1946798385               |
| SNP_P4_45116_17749856 | NC_021163.1    | Ca_kabuli_chr04 | 17749856                | TT                              | CC              | 1946798387               |
| SNP_P4_45117_17749991 | NC_021163.1    | Ca_kabuli_chr04 | 17749991                | GG                              | AA              | 1946798389               |
| SNP_P4_45118_17753419 | NC_021163.1    | Ca_kabuli_chr04 | 17753419                | AA                              | CC              | 1946798391               |
| SNP_P4_45120_17754479 | NC_021163.1    | Ca_kabuli_chr04 | 17754479                | GG                              | AA              | 1946798393               |
| SNP_P4_45121_17755386 | NC_021163.1    | Ca_kabuli_chr04 | 17755386                | CC                              | TT              | 1946798395               |
| SNP_P4_45122_17756550 | NC_021163.1    | Ca_kabuli_chr04 | 17756550                | AA                              | GG              | 1946798397               |
| SNP_P4_45123_17758348 | NC_021163.1    | Ca_kabuli_chr04 | 17758348                | TT                              | CC              | 1946798398               |
| SNP_P4_45124_17758824 | NC_021163.1    | Ca_kabuli_chr04 | 17758824                | CC                              | GG              | 1946798400               |
| SNP_P4_45127_17759568 | NC_021163.1    | Ca_kabuli_chr04 | 17759568                | TT                              | CC              | 1946798402               |
| SNP_P4_45128_17760284 | NC_021163.1    | Ca_kabuli_chr04 | 17760284                | GG                              | CC              | 1946798404               |
| SNP_P4_45129_17760497 | NC_021163.1    | Ca_kabuli_chr04 | 17760497                | TT                              | GG              | 1946798406               |
| SNP_P4_45130_17760759 | NC_021163.1    | Ca_kabuli_chr04 | 17760759                | AA                              | GG              | 1946798408               |
| SNP_P4_45131_17760853 | NC_021163.1    | Ca_kabuli_chr04 | 17760853                | GG                              | TT              | 1946798410               |
| SNP_P4_45132_17761188 | NC_021163.1    | Ca_kabuli_chr04 | 17761188                | TT                              | AA              | 1946798412               |
| SNP_P4_45133_17761326 | NC_021163.1    | Ca_kabuli_chr04 | 17761326                | CC                              | AA              | 1946798414               |
| SNP_P4_45134_17761649 | NC_021163.1    | Ca_kabuli_chr04 | 17761649                | GG                              | TT              | 1946798416               |
| SNP_P4_45135_17762203 | NC_021163.1    | Ca_kabuli_chr04 | 17762203                | CC                              | TT              | 1946798418               |
| SNP_P4_45136_17762600 | NC_021163.1    | Ca_kabuli_chr04 | 17762600                | AA                              | GG              | 1946798420               |
| SNP_P4_45137_17762792 | NC_021163.1    | Ca_kabuli_chr04 | 17762792                | AA                              | CC              | 1946798422               |
| SNP_P4_45138_17762794 | NC_021163.1    | Ca_kabuli_chr04 | 17762794                | CC                              | TT              | 1946798424               |
| SNP_P4_45139_17763666 | NC_021163.1    | Ca_kabuli_chr04 | 17763666                | AA                              | GG              | 1946798426               |
| SNP_P4_45140_17765250 | NC_021163.1    | Ca_kabuli_chr04 | 17765250                | GG                              | CC              | 1946798429               |
| SNP_P4_45141_17765288 | NC_021163.1    | Ca_kabuli_chr04 | 17765288                | CC                              | TT              | 1946798431               |
| SNP_P4_45142_17765326 | NC_021163.1    | Ca_kabuli_chr04 | 17765326                | TT                              | AA              | 1946798433               |
| SNP_P4_45146_17766909 | NC_021163.1    | Ca_kabuli_chr04 | 17766909                | AA                              | TT              | 1946798435               |
| SNP_P4_45147_17766946 | NC_021163.1    | Ca_kabuli_chr04 | 17766946                | TT                              | AA              | 1946798437               |
| SNP_P4_45148_17766970 | NC_021163.1    | Ca_kabuli_chr04 | 17766970                | CC                              | TT              | 1946798439               |
| SNP_P4_45149_17767127 | NC_021163.1    | Ca_kabuli_chr04 | 17767127                | TT                              | CC              | 1946798441               |
| SNP_P4_45150_17767134 | NC_021163.1    | Ca_kabuli_chr04 | 17767134                | CC                              | GG              | 1946798443               |
| SNP_P4_45151_17768650 | NC_021163.1    | Ca_kabuli_chr04 | 17768650                | CC                              | TT              | 1946798445               |
| SNP_P4_45154_17770150 | NC_021163.1    | Ca_kabuli_chr04 | 17770150                | TT                              | GG              | 1946798447               |
| SNP_P4_45155_17771658 | NC_021163.1    | Ca_kabuli_chr04 | 17771658                | GG                              | AA              | 1946798449               |
| SNP_P4_45156_17771714 | NC_021163.1    | Ca_kabuli_chr04 | 17771714                | GG                              | AA              | 1946798451               |

| SNPs IDs              | Chromosome IDs | Chromosomes     | Physical positions (bp) | CDC Frontier (Reference genome) | (ILWC46 & LPNB) | NCBI SNPdb Accession IDs |
|-----------------------|----------------|-----------------|-------------------------|---------------------------------|-----------------|--------------------------|
| SNP_P4_45157_17772762 | NC_021163.1    | Ca_kabuli_chr04 | 17772762                | AA                              | GG              | 1946798453               |
| SNP_P4_45158_17773372 | NC_021163.1    | Ca_kabuli_chr04 | 17773372                | GG                              | AA              | 1946798455               |
| SNP_P4_45159_17773634 | NC_021163.1    | Ca_kabuli_chr04 | 17773634                | GG                              | AA              | 1946798457               |
| SNP_P4_45160_17773675 | NC_021163.1    | Ca_kabuli_chr04 | 17773675                | TT                              | AA              | 1946798459               |
| SNP_P4_45161_17774816 | NC_021163.1    | Ca_kabuli_chr04 | 17774816                | GG                              | TT              | 1946798461               |
| SNP_P4_45163_17775186 | NC_021163.1    | Ca_kabuli_chr04 | 17775186                | CC                              | TT              | 1946798463               |
| SNP_P4_45164_17775206 | NC_021163.1    | Ca_kabuli_chr04 | 17775206                | CC                              | TT              | 1946798465               |
| SNP_P4_45165_17775209 | NC_021163.1    | Ca_kabuli_chr04 | 17775209                | GG                              | TT              | 1946798467               |
| SNP_P4_45166_17775920 | NC_021163.1    | Ca_kabuli_chr04 | 17775920                | CC                              | TT              | 1946798469               |
| SNP_P4_45167_17778510 | NC_021163.1    | Ca_kabuli_chr04 | 17778510                | GG                              | AA              | 1946798471               |
| SNP_P4_45168_17778716 | NC_021163.1    | Ca_kabuli_chr04 | 17778716                | GG                              | AA              | 1946798473               |
| SNP_P4_45169_17778718 | NC_021163.1    | Ca_kabuli_chr04 | 17778718                | AA                              | GG              | 1946798475               |
| SNP_P4_45171_17783438 | NC_021163.1    | Ca_kabuli_chr04 | 17783438                | TT                              | CC              | 1946798477               |
| SNP_P4_45172_17784654 | NC_021163.1    | Ca_kabuli_chr04 | 17784654                | TT                              | GG              | 1946798479               |
| SNP_P4_45174_17786731 | NC_021163.1    | Ca_kabuli_chr04 | 17786731                | GG                              | AA              | 1946798481               |
| SNP_P4_45175_17786734 | NC_021163.1    | Ca_kabuli_chr04 | 17786734                | AA                              | GG              | 1946798483               |
| SNP_P4_45176_17786787 | NC_021163.1    | Ca_kabuli_chr04 | 17786787                | GG                              | AA              | 1946798485               |
| SNP_P4_45177_17787053 | NC_021163.1    | Ca_kabuli_chr04 | 17787053                | AA                              | TT              | 1946798488               |
| SNP_P4_45178_17787116 | NC_021163.1    | Ca_kabuli_chr04 | 17787116                | GG                              | AA              | 1946798490               |
| SNP_P4_45179_17793179 | NC_021163.1    | Ca_kabuli_chr04 | 17793179                | TT                              | CC              | 1946798492               |
| SNP_P4_45180_17795870 | NC_021163.1    | Ca_kabuli_chr04 | 17795870                | GG                              | CC              | 1946798494               |
| SNP_P4_45181_17799621 | NC_021163.1    | Ca_kabuli_chr04 | 17799621                | TT                              | CC              | 1946798496               |
| SNP_P4_45182_17810283 | NC_021163.1    | Ca_kabuli_chr04 | 17810283                | AA                              | GG              | 1946798498               |
| SNP_P4_45183_17810295 | NC_021163.1    | Ca_kabuli_chr04 | 17810295                | TT                              | CC              | 1946798501               |
| SNP_P4_45184_17810380 | NC_021163.1    | Ca_kabuli_chr04 | 17810380                | CC                              | TT              | 1946798503               |
| SNP_P4_45185_17810480 | NC_021163.1    | Ca_kabuli_chr04 | 17810480                | AA                              | GG              | 1946798505               |
| SNP_P4_45186_17810556 | NC_021163.1    | Ca_kabuli_chr04 | 17810556                | AA                              | GG              | 1946798507               |
| SNP_P4_45187_17810731 | NC_021163.1    | Ca_kabuli_chr04 | 17810731                | GG                              | AA              | 1946798509               |
| SNP_P4_45188_17810750 | NC_021163.1    | Ca_kabuli_chr04 | 17810750                | TT                              | CC              | 1946798512               |
| SNP_P4_45189_17810752 | NC_021163.1    | Ca_kabuli_chr04 | 17810752                | TT                              | AA              | 1946798514               |
| SNP_P4_45190_17815132 | NC_021163.1    | Ca_kabuli_chr04 | 17815132                | TT                              | CC              | 1946798516               |
| SNP_P4_45191_17816630 | NC_021163.1    | Ca_kabuli_chr04 | 17816630                | AA                              | TT              | 1946798518               |
| SNP_P4_45192_17816643 | NC_021163.1    | Ca_kabuli_chr04 | 17816643                | GG                              | AA              | 1946798520               |
| SNP_P4_45193_17816659 | NC_021163.1    | Ca_kabuli_chr04 | 17816659                | TT                              | CC              | 1946798522               |
| SNP_P4_45194_17819541 | NC_021163.1    | Ca_kabuli_chr04 | 17819541                | AA                              | CC              | 1946798524               |
| SNP_P4_45195_17819937 | NC_021163.1    | Ca_kabuli_chr04 | 17819937                | CC                              | TT              | 1946798526               |
| SNP_P4_45196_17819968 | NC_021163.1    | Ca_kabuli_chr04 | 17819968                | CC                              | TT              | 1946798528               |
| SNP_P4_45198_17823137 | NC_021163.1    | Ca_kabuli_chr04 | 17823137                | GG                              | CC              | 1946798530               |
| SNP_P4_45199_17823505 | NC_021163.1    | Ca_kabuli_chr04 | 17823505                | AA                              | GG              | 1946798532               |
| SNP_P4_45202_17823853 | NC_021163.1    | Ca_kabuli_chr04 | 17823853                | AA                              | TT              | 1946798534               |
| SNP_P4_45203_17823922 | NC_021163.1    | Ca_kabuli_chr04 | 17823922                | TT                              | GG              | 1946798536               |
| SNP_P4_45204_17825076 | NC_021163.1    | Ca_kabuli_chr04 | 17825076                | AA                              | GG              | 1946798538               |

| SNPs IDs              | Chromosome IDs | Chromosomes     | Physical positions (bp) | CDC Frontier (Reference genome) | (ILWC46 & LPNB) | NCBI SNPdb Accession IDs |
|-----------------------|----------------|-----------------|-------------------------|---------------------------------|-----------------|--------------------------|
| SNP_P4_45206_17825402 | NC_021163.1    | Ca_kabuli_chr04 | 17825402                | AA                              | GG              | 1946798540               |
| SNP_P4_45207_17825442 | NC_021163.1    | Ca_kabuli_chr04 | 17825442                | GG                              | TT              | 1946798542               |
| SNP_P4_45209_17825542 | NC_021163.1    | Ca_kabuli_chr04 | 17825542                | GG                              | TT              | 1946798545               |
| SNP_P4_45211_17825605 | NC_021163.1    | Ca_kabuli_chr04 | 17825605                | CC                              | TT              | 1946798547               |
| SNP_P4_45212_17825607 | NC_021163.1    | Ca_kabuli_chr04 | 17825607                | CC                              | TT              | 1946798549               |
| SNP_P4_45213_17825626 | NC_021163.1    | Ca_kabuli_chr04 | 17825626                | CC                              | TT              | 1946798551               |
| SNP_P4_45214_17825685 | NC_021163.1    | Ca_kabuli_chr04 | 17825685                | GG                              | AA              | 1946798553               |
| SNP_P4_45215_17825707 | NC_021163.1    | Ca_kabuli_chr04 | 17825707                | CC                              | AA              | 1946798555               |
| SNP_P4_45216_17825748 | NC_021163.1    | Ca_kabuli_chr04 | 17825748                | GG                              | AA              | 1946798558               |
| SNP_P4_45217_17825753 | NC_021163.1    | Ca_kabuli_chr04 | 17825753                | CC                              | TT              | 1946798560               |
| SNP_P4_45218_17825773 | NC_021163.1    | Ca_kabuli_chr04 | 17825773                | GG                              | AA              | 1946798562               |
| SNP_P4_45219_17825804 | NC_021163.1    | Ca_kabuli_chr04 | 17825804                | CC                              | TT              | 1946798564               |
| SNP_P4_45220_17825874 | NC_021163.1    | Ca_kabuli_chr04 | 17825874                | TT                              | AA              | 1946798566               |
| SNP_P4_45222_17825956 | NC_021163.1    | Ca_kabuli_chr04 | 17825956                | TT                              | CC              | 1946798568               |
| SNP_P4_45223_17825974 | NC_021163.1    | Ca_kabuli_chr04 | 17825974                | TT                              | AA              | 1946798570               |
| SNP_P4_45225_17826082 | NC_021163.1    | Ca_kabuli_chr04 | 17826082                | TT                              | CC              | 1946798572               |
| SNP_P4_45226_17826110 | NC_021163.1    | Ca_kabuli_chr04 | 17826110                | TT                              | CC              | 1946798575               |
| SNP_P4_45227_17826165 | NC_021163.1    | Ca_kabuli_chr04 | 17826165                | TT                              | CC              | 1946798577               |
| SNP_P4_45228_17827426 | NC_021163.1    | Ca_kabuli_chr04 | 17827426                | GG                              | TT              | 1946798579               |
| SNP_P4_45229_17827454 | NC_021163.1    | Ca_kabuli_chr04 | 17827454                | AA                              | CC              | 1946798581               |
| SNP_P4_45230_17827458 | NC_021163.1    | Ca_kabuli_chr04 | 17827458                | GG                              | AA              | 1946798583               |
| SNP_P4_45231_17829041 | NC_021163.1    | Ca_kabuli_chr04 | 17829041                | AA                              | GG              | 1946798585               |
| SNP_P4_45232_17829105 | NC_021163.1    | Ca_kabuli_chr04 | 17829105                | TT                              | GG              | 1946798587               |
| SNP_P4_45233_17829162 | NC_021163.1    | Ca_kabuli_chr04 | 17829162                | TT                              | GG              | 1946798589               |
| SNP_P4_45234_17829471 | NC_021163.1    | Ca_kabuli_chr04 | 17829471                | TT                              | AA              | 1946798591               |
| SNP_P4_45235_17829807 | NC_021163.1    | Ca_kabuli_chr04 | 17829807                | AA                              | GG              | 1946798594               |
| SNP_P4_45236_17829877 | NC_021163.1    | Ca_kabuli_chr04 | 17829877                | GG                              | AA              | 1946798596               |
| SNP_P4_45237_17830155 | NC_021163.1    | Ca_kabuli_chr04 | 17830155                | CC                              | AA              | 1946798598               |
| SNP_P4_45238_17830754 | NC_021163.1    | Ca_kabuli_chr04 | 17830754                | TT                              | CC              | 1946798600               |
| SNP_P4_45239_17831005 | NC_021163.1    | Ca_kabuli_chr04 | 17831005                | TT                              | CC              | 1946798602               |
| SNP_P4_45240_17831216 | NC_021163.1    | Ca_kabuli_chr04 | 17831216                | GG                              | TT              | 1946798604               |
| SNP_P4_45241_17831254 | NC_021163.1    | Ca_kabuli_chr04 | 17831254                | CC                              | TT              | 1946798606               |
| SNP_P4_45242_17831652 | NC_021163.1    | Ca_kabuli_chr04 | 17831652                | CC                              | TT              | 1946798608               |
| SNP_P4_45243_17831653 | NC_021163.1    | Ca_kabuli_chr04 | 17831653                | AA                              | GG              | 1946798610               |
| SNP_P4_45244_17831718 | NC_021163.1    | Ca_kabuli_chr04 | 17831718                | GG                              | AA              | 1946798612               |
| SNP_P4_45245_17831726 | NC_021163.1    | Ca_kabuli_chr04 | 17831726                | GG                              | AA              | 1946798614               |
| SNP_P4_45246_17831966 | NC_021163.1    | Ca_kabuli_chr04 | 17831966                | TT                              | CC              | 1946798616               |
| SNP_P4_45247_17837514 | NC_021163.1    | Ca_kabuli_chr04 | 17837514                | TT                              | CC              | 1946798618               |
| SNP_P4_45248_17839487 | NC_021163.1    | Ca_kabuli_chr04 | 17839487                | CC                              | TT              | 1946798620               |
| SNP_P4_45249_17842630 | NC_021163.1    | Ca_kabuli_chr04 | 17842630                | TT                              | CC              | 1946798622               |
| SNP_P4_45250_17842631 | NC_021163.1    | Ca_kabuli_chr04 | 17842631                | TT                              | CC              | 1946798625               |
| SNP_P4_45251_17842656 | NC_021163.1    | Ca_kabuli_chr04 | 17842656                | AA                              | GG              | 1946798627               |

| SNPs IDs              | Chromosome IDs | Chromosomes     | Physical positions (bp) | CDC Frontier (Reference genome) | (ILWC46 & LPNB) | NCBI SNPdb Accession IDs |
|-----------------------|----------------|-----------------|-------------------------|---------------------------------|-----------------|--------------------------|
| SNP_P4_45252_17842662 | NC_021163.1    | Ca_kabuli_chr04 | 17842662                | TT                              | CC              | 1946798629               |
| SNP_P4_45253_17842664 | NC_021163.1    | Ca_kabuli_chr04 | 17842664                | CC                              | AA              | 1946798631               |
| SNP_P4_45254_17842667 | NC_021163.1    | Ca_kabuli_chr04 | 17842667                | TT                              | CC              | 1946798633               |
| SNP_P4_45255_17842727 | NC_021163.1    | Ca_kabuli_chr04 | 17842727                | TT                              | CC              | 1946798635               |
| SNP_P4_45256_17842734 | NC_021163.1    | Ca_kabuli_chr04 | 17842734                | GG                              | CC              | 1946798637               |
| SNP_P4_45257_17842736 | NC_021163.1    | Ca_kabuli_chr04 | 17842736                | GG                              | AA              | 1946798639               |
| SNP_P4_45258_17842965 | NC_021163.1    | Ca_kabuli_chr04 | 17842965                | TT                              | AA              | 1946798641               |
| SNP_P4_45259_17843003 | NC_021163.1    | Ca_kabuli_chr04 | 17843003                | CC                              | AA              | 1946798643               |
| SNP_P4_45260_17843088 | NC_021163.1    | Ca_kabuli_chr04 | 17843088                | AA                              | CC              | 1946798645               |
| SNP_P4_45262_17843329 | NC_021163.1    | Ca_kabuli_chr04 | 17843329                | AA                              | TT              | 1946798647               |
| SNP_P4_45263_17844242 | NC_021163.1    | Ca_kabuli_chr04 | 17844242                | TT                              | CC              | 1946798649               |
| SNP_P4_45264_17846396 | NC_021163.1    | Ca_kabuli_chr04 | 17846396                | GG                              | CC              | 1946798651               |
| SNP_P4_45265_17846440 | NC_021163.1    | Ca_kabuli_chr04 | 17846440                | AA                              | CC              | 1946798653               |
| SNP_P4_45266_17846786 | NC_021163.1    | Ca_kabuli_chr04 | 17846786                | GG                              | AA              | 1946798655               |
| SNP_P4_45267_17846814 | NC_021163.1    | Ca_kabuli_chr04 | 17846814                | AA                              | GG              | 1946798657               |
| SNP_P4_45268_17846899 | NC_021163.1    | Ca_kabuli_chr04 | 17846899                | TT                              | CC              | 1946798660               |
| SNP_P4_45269_17846994 | NC_021163.1    | Ca_kabuli_chr04 | 17846994                | CC                              | TT              | 1946798662               |
| SNP_P4_45270_17847225 | NC_021163.1    | Ca_kabuli_chr04 | 17847225                | GG                              | AA              | 1946798664               |
| SNP_P4_45271_17847248 | NC_021163.1    | Ca_kabuli_chr04 | 17847248                | AA                              | GG              | 1946798666               |
| SNP_P4_45272_17847553 | NC_021163.1    | Ca_kabuli_chr04 | 17847553                | CC                              | TT              | 1946798668               |
| SNP_P4_45273_17847929 | NC_021163.1    | Ca_kabuli_chr04 | 17847929                | AA                              | GG              | 1946798670               |
| SNP_P4_45274_17848037 | NC_021163.1    | Ca_kabuli_chr04 | 17848037                | AA                              | TT              | 1946798672               |
| SNP_P4_45276_17848729 | NC_021163.1    | Ca_kabuli_chr04 | 17848729                | AA                              | CC              | 1946798674               |
| SNP_P4_45277_17849389 | NC_021163.1    | Ca_kabuli_chr04 | 17849389                | TT                              | CC              | 1946798676               |
| SNP_P4_45279_17850668 | NC_021163.1    | Ca_kabuli_chr04 | 17850668                | AA                              | TT              | 1946798678               |
| SNP_P4_45280_17850701 | NC_021163.1    | Ca_kabuli_chr04 | 17850701                | TT                              | CC              | 1946798680               |
| SNP_P4_45281_17850762 | NC_021163.1    | Ca_kabuli_chr04 | 17850762                | AA                              | CC              | 1946798683               |
| SNP_P4_45282_17850763 | NC_021163.1    | Ca_kabuli_chr04 | 17850763                | AA                              | GG              | 1946798685               |
| SNP_P4_45283_17851311 | NC_021163.1    | Ca_kabuli_chr04 | 17851311                | CC                              | TT              | 1946798687               |
| SNP_P4_45284_17851548 | NC_021163.1    | Ca_kabuli_chr04 | 17851548                | TT                              | AA              | 1946798689               |
| SNP_P4_45285_17851583 | NC_021163.1    | Ca_kabuli_chr04 | 17851583                | AA                              | TT              | 1946798691               |
| SNP_P4_45286_17851839 | NC_021163.1    | Ca_kabuli_chr04 | 17851839                | TT                              | AA              | 1946798693               |
| SNP_P4_45290_17854162 | NC_021163.1    | Ca_kabuli_chr04 | 17854162                | GG                              | AA              | 1946798695               |
| SNP_P4_45291_17854798 | NC_021163.1    | Ca_kabuli_chr04 | 17854798                | CC                              | GG              | 1946798697               |
| SNP_P4_45293_17855686 | NC_021163.1    | Ca_kabuli_chr04 | 17855686                | AA                              | GG              | 1946798700               |
| SNP_P4_45294_17855733 | NC_021163.1    | Ca_kabuli_chr04 | 17855733                | GG                              | AA              | 1946798702               |
| SNP_P4_45295_17855992 | NC_021163.1    | Ca_kabuli_chr04 | 17855992                | AA                              | GG              | 1946798704               |
| SNP_P4_45296_17856190 | NC_021163.1    | Ca_kabuli_chr04 | 17856190                | AA                              | GG              | 1946798707               |
| SNP_P4_45297_17856694 | NC_021163.1    | Ca_kabuli_chr04 | 17856694                | TT                              | CC              | 1946798709               |
| SNP_P4_45298_17857421 | NC_021163.1    | Ca_kabuli_chr04 | 17857421                | TT                              | GG              | 1946798711               |
| SNP_P4_45299_17859847 | NC_021163.1    | Ca_kabuli_chr04 | 17859847                | GG                              | AA              | 1946798713               |
| SNP_P4_45300_17861432 | NC_021163.1    | Ca_kabuli_chr04 | 17861432                | AA                              | TT              | 1946798715               |

| SNPs IDs              | Chromosome IDs | Chromosomes     | Physical positions (bp) | CDC Frontier (Reference genome) | (ILWC46 & LPNB) | NCBI SNPdb Accession IDs |
|-----------------------|----------------|-----------------|-------------------------|---------------------------------|-----------------|--------------------------|
| SNP_P4_45301_17861544 | NC_021163.1    | Ca_kabuli_chr04 | 17861544                | GG                              | AA              | 1946798717               |
| SNP_P4_45302_17861558 | NC_021163.1    | Ca_kabuli_chr04 | 17861558                | GG                              | AA              | 1946798719               |
| SNP_P4_45303_17861575 | NC_021163.1    | Ca_kabuli_chr04 | 17861575                | TT                              | AA              | 1946798722               |
| SNP_P4_45304_17861579 | NC_021163.1    | Ca_kabuli_chr04 | 17861579                | AA                              | TT              | 1946798724               |
| SNP_P4_45305_17861606 | NC_021163.1    | Ca_kabuli_chr04 | 17861606                | CC                              | AA              | 1946798726               |
| SNP_P4_45306_17862757 | NC_021163.1    | Ca_kabuli_chr04 | 17862757                | AA                              | TT              | 1946798728               |
| SNP_P4_45307_17862762 | NC_021163.1    | Ca_kabuli_chr04 | 17862762                | AA                              | CC              | 1946798730               |
| SNP_P4_45309_17863115 | NC_021163.1    | Ca_kabuli_chr04 | 17863115                | AA                              | GG              | 1946798732               |
| SNP_P4_45310_17863388 | NC_021163.1    | Ca_kabuli_chr04 | 17863388                | TT                              | GG              | 1946798734               |
| SNP_P4_45312_17863925 | NC_021163.1    | Ca_kabuli_chr04 | 17863925                | GG                              | AA              | 1946798736               |
| SNP_P4_45314_17864212 | NC_021163.1    | Ca_kabuli_chr04 | 17864212                | CC                              | TT              | 1946798738               |
| SNP_P4_45316_17864515 | NC_021163.1    | Ca_kabuli_chr04 | 17864515                | GG                              | AA              | 1946798740               |
| SNP_P4_45320_17867909 | NC_021163.1    | Ca_kabuli_chr04 | 17867909                | AA                              | GG              | 1946798742               |
| SNP_P4_45321_17871397 | NC_021163.1    | Ca_kabuli_chr04 | 17871397                | CC                              | GG              | 1946798745               |
| SNP_P4_45322_17872441 | NC_021163.1    | Ca_kabuli_chr04 | 17872441                | CC                              | TT              | 1946798747               |
| SNP_P4_45324_17906200 | NC_021163.1    | Ca_kabuli_chr04 | 17906200                | CC                              | TT              | 1946798749               |
| SNP_P4_45325_17921523 | NC_021163.1    | Ca_kabuli_chr04 | 17921523                | TT                              | CC              | 1946798751               |
| SNP_P4_45326_17933336 | NC_021163.1    | Ca_kabuli_chr04 | 17933336                | GG                              | AA              | 1946798753               |
| SNP_P4_45328_17955592 | NC_021163.1    | Ca_kabuli_chr04 | 17955592                | TT                              | CC              | 1946798755               |
| SNP_P4_45330_17975630 | NC_021163.1    | Ca_kabuli_chr04 | 17975630                | TT                              | CC              | 1946798757               |
| SNP_P4_45332_18033495 | NC_021163.1    | Ca_kabuli_chr04 | 18033495                | GG                              | AA              | 1946798759               |
| SNP_P4_45334_18051262 | NC_021163.1    | Ca_kabuli_chr04 | 18051262                | AA                              | GG              | 1946798761               |
| SNP_P4_45336_18069937 | NC_021163.1    | Ca_kabuli_chr04 | 18069937                | TT                              | AA              | 1946798763               |
| SNP_P4_45337_18069938 | NC_021163.1    | Ca_kabuli_chr04 | 18069938                | TT                              | CC              | 1946798766               |
| SNP_P4_45338_18081472 | NC_021163.1    | Ca_kabuli_chr04 | 18081472                | CC                              | TT              | 1946798768               |
| SNP_P4_45340_18101424 | NC_021163.1    | Ca_kabuli_chr04 | 18101424                | CC                              | TT              | 1946798770               |
| SNP_P4_45341_18106199 | NC_021163.1    | Ca_kabuli_chr04 | 18106199                | TT                              | CC              | 1946798772               |
| SNP_P4_45343_18115782 | NC_021163.1    | Ca_kabuli_chr04 | 18115782                | GG                              | AA              | 1946798774               |
| SNP_P4_45345_18131073 | NC_021163.1    | Ca_kabuli_chr04 | 18131073                | AA                              | CC              | 1946798776               |
| SNP_P4_45346_18131155 | NC_021163.1    | Ca_kabuli_chr04 | 18131155                | AA                              | GG              | 1946798778               |
| SNP_P4_45347_18131201 | NC_021163.1    | Ca_kabuli_chr04 | 18131201                | TT                              | GG              | 1946798780               |
| SNP_P4_45348_18131236 | NC_021163.1    | Ca_kabuli_chr04 | 18131236                | CC                              | TT              | 1946798783               |
| SNP_P4_45349_18131269 | NC_021163.1    | Ca_kabuli_chr04 | 18131269                | CC                              | AA              | 1946798785               |
| SNP_P4_45350_18131283 | NC_021163.1    | Ca_kabuli_chr04 | 18131283                | TT                              | CC              | 1946798787               |
| SNP_P4_45351_18131477 | NC_021163.1    | Ca_kabuli_chr04 | 18131477                | TT                              | GG              | 1946798789               |
| SNP_P4_45352_18131497 | NC_021163.1    | Ca_kabuli_chr04 | 18131497                | TT                              | CC              | 1946798791               |
| SNP_P4_45353_18131553 | NC_021163.1    | Ca_kabuli_chr04 | 18131553                | AA                              | GG              | 1946798793               |
| SNP_P4_45354_18131556 | NC_021163.1    | Ca_kabuli_chr04 | 18131556                | TT                              | GG              | 1946798795               |
| SNP_P4_45355_18131653 | NC_021163.1    | Ca_kabuli_chr04 | 18131653                | AA                              | TT              | 1946798797               |
| SNP_P4_45356_18138022 | NC_021163.1    | Ca_kabuli_chr04 | 18138022                | TT                              | AA              | 1946798799               |
| SNP_P4_45357_18138102 | NC_021163.1    | Ca_kabuli_chr04 | 18138102                | AA                              | TT              | 1946798801               |
| SNP_P4_45358_18138248 | NC_021163.1    | Ca_kabuli_chr04 | 18138248                | CC                              | AA              | 1946798803               |



| SNPs IDs              | Chromosome IDs | Chromosomes     | Physical positions (bp) | CDC Frontier (Reference genome) | (ILWC46 & LPNB) | NCBI SNPdb Accession IDs |
|-----------------------|----------------|-----------------|-------------------------|---------------------------------|-----------------|--------------------------|
| SNP_P4_45359_18138431 | NC_021163.1    | Ca_kabuli_chr04 | 18138431                | CC                              | TT              | 1946798805               |
| SNP_P4_45360_18138738 | NC_021163.1    | Ca_kabuli_chr04 | 18138738                | GG                              | AA              | 1946798807               |
| SNP_P4_45361_18138758 | NC_021163.1    | Ca_kabuli_chr04 | 18138758                | AA                              | GG              | 1946798809               |
| SNP_P4_45362_18143080 | NC_021163.1    | Ca_kabuli_chr04 | 18143080                | AA                              | TT              | 1946798811               |
| SNP_P4_45364_18148303 | NC_021163.1    | Ca_kabuli_chr04 | 18148303                | GG                              | AA              | 1946798813               |
| SNP_P4_45366_18175078 | NC_021163.1    | Ca_kabuli_chr04 | 18175078                | CC                              | TT              | 1946798815               |
| SNP_P4_45368_18201091 | NC_021163.1    | Ca_kabuli_chr04 | 18201091                | TT                              | GG              | 1946798817               |
| SNP_P4_45369_18201095 | NC_021163.1    | Ca_kabuli_chr04 | 18201095                | TT                              | CC              | 1946798819               |
| SNP_P4_45370_18203331 | NC_021163.1    | Ca_kabuli_chr04 | 18203331                | TT                              | CC              | 1946798821               |
| SNP_P4_45371_18213802 | NC_021163.1    | Ca_kabuli_chr04 | 18213802                | GG                              | AA              | 1946798823               |
| SNP_P4_45372_18248198 | NC_021163.1    | Ca_kabuli_chr04 | 18248198                | AA                              | GG              | 1946798825               |
| SNP_P4_45373_18250851 | NC_021163.1    | Ca_kabuli_chr04 | 18250851                | AA                              | GG              | 1946798827               |
| SNP_P4_45374_18253946 | NC_021163.1    | Ca_kabuli_chr04 | 18253946                | CC                              | GG              | 1946798829               |
| SNP_P4_45375_18262308 | NC_021163.1    | Ca_kabuli_chr04 | 18262308                | TT                              | AA              | 1946798831               |
| SNP_P4_45376_18262376 | NC_021163.1    | Ca_kabuli_chr04 | 18262376                | AA                              | GG              | 1946798833               |
| SNP_P4_45377_18262395 | NC_021163.1    | Ca_kabuli_chr04 | 18262395                | TT                              | CC              | 1946798835               |
| SNP_P4_45378_18263815 | NC_021163.1    | Ca_kabuli_chr04 | 18263815                | AA                              | GG              | 1946798837               |
| SNP_P4_45379_18264022 | NC_021163.1    | Ca_kabuli_chr04 | 18264022                | TT                              | CC              | 1946798839               |
| SNP_P4_45380_18264406 | NC_021163.1    | Ca_kabuli_chr04 | 18264406                | TT                              | CC              | 1946798841               |
| SNP_P4_45381_18264423 | NC_021163.1    | Ca_kabuli_chr04 | 18264423                | TT                              | AA              | 1946798843               |
| SNP_P4_45382_18264520 | NC_021163.1    | Ca_kabuli_chr04 | 18264520                | AA                              | GG              | 1946798845               |
| SNP_P4_45383_18264713 | NC_021163.1    | Ca_kabuli_chr04 | 18264713                | TT                              | AA              | 1946798847               |
| SNP_P4_45384_18264802 | NC_021163.1    | Ca_kabuli_chr04 | 18264802                | TT                              | CC              | 1946798849               |
| SNP_P4_45386_18269171 | NC_021163.1    | Ca_kabuli_chr04 | 18269171                | TT                              | CC              | 1946798850               |
| SNP_P4_45387_18269172 | NC_021163.1    | Ca_kabuli_chr04 | 18269172                | TT                              | AA              | 1946798851               |
| SNP_P4_45388_18269200 | NC_021163.1    | Ca_kabuli_chr04 | 18269200                | TT                              | CC              | 1946798853               |
| SNP_P4_45389_18269277 | NC_021163.1    | Ca_kabuli_chr04 | 18269277                | TT                              | GG              | 1946798855               |
| SNP_P4_45390_18291950 | NC_021163.1    | Ca_kabuli_chr04 | 18291950                | GG                              | CC              | 1946798857               |
| SNP_P4_45391_18295254 | NC_021163.1    | Ca_kabuli_chr04 | 18295254                | AA                              | GG              | 1946798859               |
| SNP_P4_45393_18295473 | NC_021163.1    | Ca_kabuli_chr04 | 18295473                | CC                              | TT              | 1946798861               |
| SNP_P4_45394_18295493 | NC_021163.1    | Ca_kabuli_chr04 | 18295493                | CC                              | TT              | 1946798863               |
| SNP_P4_45395_18295502 | NC_021163.1    | Ca_kabuli_chr04 | 18295502                | AA                              | TT              | 1946798865               |
| SNP_P4_45396_18296461 | NC_021163.1    | Ca_kabuli_chr04 | 18296461                | AA                              | CC              | 1946798867               |
| SNP_P4_45397_18296469 | NC_021163.1    | Ca_kabuli_chr04 | 18296469                | TT                              | CC              | 1946798869               |
| SNP_P4_45398_18296982 | NC_021163.1    | Ca_kabuli_chr04 | 18296982                | GG                              | TT              | 1946798871               |
| SNP_P4_45399_18309654 | NC_021163.1    | Ca_kabuli_chr04 | 18309654                | GG                              | TT              | 1946798873               |
| SNP_P4_45400_18310636 | NC_021163.1    | Ca_kabuli_chr04 | 18310636                | AA                              | TT              | 1946798875               |
| SNP_P4_45401_18310770 | NC_021163.1    | Ca_kabuli_chr04 | 18310770                | GG                              | AA              | 1946798877               |
| SNP_P4_45402_18310792 | NC_021163.1    | Ca_kabuli_chr04 | 18310792                | TT                              | AA              | 1946798879               |
| SNP_P4_45403_18335062 | NC_021163.1    | Ca_kabuli_chr04 | 18335062                | TT                              | AA              | 1946798881               |
| SNP_P4_45404_18335362 | NC_021163.1    | Ca_kabuli_chr04 | 18335362                | GG                              | TT              | 1946798883               |
| SNP_P4_45405_18342783 | NC_021163.1    | Ca_kabuli_chr04 | 18342783                | AA                              | TT              | 1946798885               |

| SNPs IDs              | Chromosome IDs | Chromosomes     | Physical positions (bp) | CDC Frontier (Reference genome) | (ILWC46 & LPNB) | NCBI SNPdb Accession IDs |
|-----------------------|----------------|-----------------|-------------------------|---------------------------------|-----------------|--------------------------|
| SNP_P4_45406_18342973 | NC_021163.1    | Ca_kabuli_chr04 | 18342973                | AA                              | TT              | 1946798887               |
| SNP_P4_45407_18345995 | NC_021163.1    | Ca_kabuli_chr04 | 18345995                | GG                              | AA              | 1946798889               |
| SNP_P4_45408_18346502 | NC_021163.1    | Ca_kabuli_chr04 | 18346502                | AA                              | GG              | 1946798891               |
| SNP_P4_45409_18353393 | NC_021163.1    | Ca_kabuli_chr04 | 18353393                | CC                              | TT              | 1946798894               |
| SNP_P4_45410_18369514 | NC_021163.1    | Ca_kabuli_chr04 | 18369514                | CC                              | AA              | 1946798896               |
| SNP_P4_45411_18379966 | NC_021163.1    | Ca_kabuli_chr04 | 18379966                | GG                              | TT              | 1946798898               |
| SNP_P4_45412_18388451 | NC_021163.1    | Ca_kabuli_chr04 | 18388451                | TT                              | CC              | 1946798900               |
| SNP_P4_45413_18388616 | NC_021163.1    | Ca_kabuli_chr04 | 18388616                | AA                              | TT              | 1946798902               |
| SNP_P4_45415_18417523 | NC_021163.1    | Ca_kabuli_chr04 | 18417523                | TT                              | CC              | 1946798904               |
| SNP_P4_45417_18512024 | NC_021163.1    | Ca_kabuli_chr04 | 18512024                | AA                              | GG              | 1946798906               |
| SNP_P4_45418_18513426 | NC_021163.1    | Ca_kabuli_chr04 | 18513426                | GG                              | AA              | 1946798908               |
| SNP_P4_45419_18515433 | NC_021163.1    | Ca_kabuli_chr04 | 18515433                | TT                              | AA              | 1946798910               |
| SNP_P4_45422_18544115 | NC_021163.1    | Ca_kabuli_chr04 | 18544115                | TT                              | CC              | 1946798912               |
| SNP_P4_45424_18554885 | NC_021163.1    | Ca_kabuli_chr04 | 18554885                | CC                              | TT              | 1946798914               |
| SNP_P4_45425_18558588 | NC_021163.1    | Ca_kabuli_chr04 | 18558588                | GG                              | AA              | 1946798916               |
| SNP_P4_45426_18561503 | NC_021163.1    | Ca_kabuli_chr04 | 18561503                | TT                              | CC              | 1946798918               |
| SNP_P4_45427_18588241 | NC_021163.1    | Ca_kabuli_chr04 | 18588241                | GG                              | AA              | 1946798921               |
| SNP_P4_45428_18617386 | NC_021163.1    | Ca_kabuli_chr04 | 18617386                | CC                              | AA              | 1946798923               |
| SNP_P4_45429_18626830 | NC_021163.1    | Ca_kabuli_chr04 | 18626830                | CC                              | TT              | 1946798925               |
| SNP_P4_45430_18646435 | NC_021163.1    | Ca_kabuli_chr04 | 18646435                | TT                              | AA              | 1946798927               |
| SNP_P4_45431_18650251 | NC_021163.1    | Ca_kabuli_chr04 | 18650251                | TT                              | CC              | 1946798930               |
| SNP_P4_45432_18650473 | NC_021163.1    | Ca_kabuli_chr04 | 18650473                | CC                              | AA              | 1946798932               |
| SNP_P4_45434_18651426 | NC_021163.1    | Ca_kabuli_chr04 | 18651426                | TT                              | CC              | 1946798934               |
| SNP_P4_45435_18653012 | NC_021163.1    | Ca_kabuli_chr04 | 18653012                | CC                              | TT              | 1946798936               |
| SNP_P4_45436_18656940 | NC_021163.1    | Ca_kabuli_chr04 | 18656940                | AA                              | GG              | 1946798938               |
| SNP_P4_45437_18673134 | NC_021163.1    | Ca_kabuli_chr04 | 18673134                | GG                              | AA              | 1946798940               |
| SNP_P4_45438_18676428 | NC_021163.1    | Ca_kabuli_chr04 | 18676428                | TT                              | GG              | 1946798942               |
| SNP_P4_45439_18676647 | NC_021163.1    | Ca_kabuli_chr04 | 18676647                | AA                              | TT              | 1946798944               |
| SNP_P4_45440_18676838 | NC_021163.1    | Ca_kabuli_chr04 | 18676838                | TT                              | CC              | 1946798946               |
| SNP_P4_45441_18677131 | NC_021163.1    | Ca_kabuli_chr04 | 18677131                | TT                              | CC              | 1946798948               |
| SNP_P4_45442_18677169 | NC_021163.1    | Ca_kabuli_chr04 | 18677169                | TT                              | CC              | 1946798950               |
| SNP_P4_45443_18677191 | NC_021163.1    | Ca_kabuli_chr04 | 18677191                | GG                              | AA              | 1946798952               |
| SNP_P4_45444_18703967 | NC_021163.1    | Ca_kabuli_chr04 | 18703967                | TT                              | CC              | 1946798954               |
| SNP_P4_45446_18704126 | NC_021163.1    | Ca_kabuli_chr04 | 18704126                | GG                              | AA              | 1946798956               |
| SNP_P4_45447_18704377 | NC_021163.1    | Ca_kabuli_chr04 | 18704377                | AA                              | GG              | 1946798958               |
| SNP_P4_45449_18770235 | NC_021163.1    | Ca_kabuli_chr04 | 18770235                | CC                              | TT              | 1946798960               |
| SNP_P4_45450_18784725 | NC_021163.1    | Ca_kabuli_chr04 | 18784725                | CC                              | TT              | 1946798962               |
| SNP_P4_45451_18795305 | NC_021163.1    | Ca_kabuli_chr04 | 18795305                | CC                              | GG              | 1946798964               |
| SNP_P4_45452_18801138 | NC_021163.1    | Ca_kabuli_chr04 | 18801138                | TT                              | GG              | 1946798966               |
| SNP_P4_45453_18801999 | NC_021163.1    | Ca_kabuli_chr04 | 18801999                | GG                              | TT              | 1946798968               |
| SNP_P4_45454_18809711 | NC_021163.1    | Ca_kabuli_chr04 | 18809711                | AA                              | GG              | 1946798970               |
| SNP_P4_45455_18810121 | NC_021163.1    | Ca_kabuli_chr04 | 18810121                | GG                              | AA              | 1946798972               |

| SNPs IDs              | Chromosome IDs | Chromosomes     | Physical positions (bp) | CDC Frontier (Reference genome) | (ILWC46 & LPNB) | NCBI SNPdb Accession IDs |
|-----------------------|----------------|-----------------|-------------------------|---------------------------------|-----------------|--------------------------|
| SNP_P4_45456_18826320 | NC_021163.1    | Ca_kabuli_chr04 | 18826320                | AA                              | TT              | 1946798975               |
| SNP_P4_45457_18829962 | NC_021163.1    | Ca_kabuli_chr04 | 18829962                | TT                              | AA              | 1946798977               |
| SNP_P4_45458_18836506 | NC_021163.1    | Ca_kabuli_chr04 | 18836506                | AA                              | GG              | 1946798979               |
| SNP_P4_45459_18837011 | NC_021163.1    | Ca_kabuli_chr04 | 18837011                | AA                              | GG              | 1946798981               |
| SNP_P4_45460_18837692 | NC_021163.1    | Ca_kabuli_chr04 | 18837692                | CC                              | GG              | 1946798983               |
| SNP_P4_45461_18837698 | NC_021163.1    | Ca_kabuli_chr04 | 18837698                | AA                              | CC              | 1946798985               |
| SNP_P4_45462_18837714 | NC_021163.1    | Ca_kabuli_chr04 | 18837714                | CC                              | GG              | 1946798987               |
| SNP_P4_45463_18837717 | NC_021163.1    | Ca_kabuli_chr04 | 18837717                | CC                              | TT              | 1946798989               |
| SNP_P4_45464_18837721 | NC_021163.1    | Ca_kabuli_chr04 | 18837721                | AA                              | GG              | 1946798992               |
| SNP_P4_45465_18837745 | NC_021163.1    | Ca_kabuli_chr04 | 18837745                | TT                              | CC              | 1946798994               |
| SNP_P4_45467_18837992 | NC_021163.1    | Ca_kabuli_chr04 | 18837992                | TT                              | GG              | 1946798996               |
| SNP_P4_45468_18864277 | NC_021163.1    | Ca_kabuli_chr04 | 18864277                | TT                              | CC              | 1946798998               |
| SNP_P4_45469_18881507 | NC_021163.1    | Ca_kabuli_chr04 | 18881507                | AA                              | TT              | 1946799000               |
| SNP_P4_45470_18881510 | NC_021163.1    | Ca_kabuli_chr04 | 18881510                | AA                              | TT              | 1946799002               |
| SNP_P4_45471_18881513 | NC_021163.1    | Ca_kabuli_chr04 | 18881513                | AA                              | TT              | 1946799004               |
| SNP_P4_45472_18883631 | NC_021163.1    | Ca_kabuli_chr04 | 18883631                | TT                              | CC              | 1946799006               |
| SNP_P4_45474_18895633 | NC_021163.1    | Ca_kabuli_chr04 | 18895633                | GG                              | AA              | 1946799008               |
| SNP_P4_45475_18901425 | NC_021163.1    | Ca_kabuli_chr04 | 18901425                | TT                              | AA              | 1946799010               |
| SNP_P4_45477_18968693 | NC_021163.1    | Ca_kabuli_chr04 | 18968693                | TT                              | CC              | 1946799012               |
| SNP_P4_45478_18969384 | NC_021163.1    | Ca_kabuli_chr04 | 18969384                | AA                              | GG              | 1946799014               |
| SNP_P4_45479_18970279 | NC_021163.1    | Ca_kabuli_chr04 | 18970279                | AA                              | GG              | 1946799016               |
| SNP_P4_45480_18980315 | NC_021163.1    | Ca_kabuli_chr04 | 18980315                | TT                              | AA              | 1946799018               |
| SNP_P4_45481_18988312 | NC_021163.1    | Ca_kabuli_chr04 | 18988312                | GG                              | TT              | 1946799020               |
| SNP_P4_45482_18991864 | NC_021163.1    | Ca_kabuli_chr04 | 18991864                | TT                              | AA              | 1946799022               |
| SNP_P4_45484_19031279 | NC_021163.1    | Ca_kabuli_chr04 | 19031279                | CC                              | TT              | 1946799025               |
| SNP_P4_45486_19045979 | NC_021163.1    | Ca_kabuli_chr04 | 19045979                | CC                              | TT              | 1946799027               |
| SNP_P4_45487_19046014 | NC_021163.1    | Ca_kabuli_chr04 | 19046014                | AA                              | TT              | 1946799029               |
| SNP_P4_45488_19046122 | NC_021163.1    | Ca_kabuli_chr04 | 19046122                | AA                              | CC              | 1946799031               |
| SNP_P4_45489_19046132 | NC_021163.1    | Ca_kabuli_chr04 | 19046132                | AA                              | CC              | 1946799033               |
| SNP_P4_45490_19046282 | NC_021163.1    | Ca_kabuli_chr04 | 19046282                | GG                              | AA              | 1946799035               |
| SNP_P4_45491_19046288 | NC_021163.1    | Ca_kabuli_chr04 | 19046288                | TT                              | GG              | 1946799037               |
| SNP_P4_45492_19068947 | NC_021163.1    | Ca_kabuli_chr04 | 19068947                | TT                              | AA              | 1946799040               |
| SNP_P4_45494_19082324 | NC_021163.1    | Ca_kabuli_chr04 | 19082324                | GG                              | AA              | 1946799042               |
| SNP_P4_45496_19082756 | NC_021163.1    | Ca_kabuli_chr04 | 19082756                | CC                              | TT              | 1946799044               |
| SNP_P4_45497_19084375 | NC_021163.1    | Ca_kabuli_chr04 | 19084375                | CC                              | TT              | 1946799046               |
| SNP_P4_45498_19084384 | NC_021163.1    | Ca_kabuli_chr04 | 19084384                | CC                              | AA              | 1946799048               |
| SNP_P4_45499_19084562 | NC_021163.1    | Ca_kabuli_chr04 | 19084562                | TT                              | CC              | 1946799050               |
| SNP_P4_45500_19084600 | NC_021163.1    | Ca_kabuli_chr04 | 19084600                | AA                              | GG              | 1946799052               |
| SNP_P4_45501_19084665 | NC_021163.1    | Ca_kabuli_chr04 | 19084665                | GG                              | TT              | 1946799055               |
| SNP_P4_45502_19085050 | NC_021163.1    | Ca_kabuli_chr04 | 19085050                | AA                              | GG              | 1946799057               |
| SNP_P4_45503_19085437 | NC_021163.1    | Ca_kabuli_chr04 | 19085437                | TT                              | GG              | 1946799059               |
| SNP_P4_45504_19085439 | NC_021163.1    | Ca_kabuli_chr04 | 19085439                | GG                              | TT              | 1946799061               |

| SNPs IDs              | Chromosome IDs | Chromosomes     | Physical positions (bp) | CDC Frontier (Reference genome) | (ILWC46 & LPNB) | NCBI SNPdb Accession IDs |
|-----------------------|----------------|-----------------|-------------------------|---------------------------------|-----------------|--------------------------|
| SNP_P4_45505_19085442 | NC_021163.1    | Ca_kabuli_chr04 | 19085442                | TT                              | CC              | 1946799063               |
| SNP_P4_45506_19101844 | NC_021163.1    | Ca_kabuli_chr04 | 19101844                | GG                              | TT              | 1946799065               |
| SNP_P4_45507_19103892 | NC_021163.1    | Ca_kabuli_chr04 | 19103892                | GG                              | CC              | 1946799067               |
| SNP_P4_45508_19110450 | NC_021163.1    | Ca_kabuli_chr04 | 19110450                | GG                              | CC              | 1946799069               |
| SNP_P4_45509_19115935 | NC_021163.1    | Ca_kabuli_chr04 | 19115935                | CC                              | GG              | 1946799071               |
| SNP_P4_45510_19147101 | NC_021163.1    | Ca_kabuli_chr04 | 19147101                | TT                              | GG              | 1946799073               |
| SNP_P4_45512_19163488 | NC_021163.1    | Ca_kabuli_chr04 | 19163488                | AA                              | GG              | 1946799076               |
| SNP_P4_45513_19163510 | NC_021163.1    | Ca_kabuli_chr04 | 19163510                | TT                              | CC              | 1946799078               |
| SNP_P4_45514_19163529 | NC_021163.1    | Ca_kabuli_chr04 | 19163529                | GG                              | AA              | 1946799080               |
| SNP_P4_45515_19164417 | NC_021163.1    | Ca_kabuli_chr04 | 19164417                | AA                              | TT              | 1946799082               |
| SNP_P4_45516_19164800 | NC_021163.1    | Ca_kabuli_chr04 | 19164800                | GG                              | AA              | 1946799084               |
| SNP_P4_45519_19288812 | NC_021163.1    | Ca_kabuli_chr04 | 19288812                | CC                              | TT              | 1946799086               |
| SNP_P4_45520_19296688 | NC_021163.1    | Ca_kabuli_chr04 | 19296688                | AA                              | TT              | 1946799089               |
| SNP_P4_45521_19296691 | NC_021163.1    | Ca_kabuli_chr04 | 19296691                | AA                              | CC              | 1946799091               |
| SNP_P4_45522_19303443 | NC_021163.1    | Ca_kabuli_chr04 | 19303443                | TT                              | CC              | 1946799093               |
| SNP_P4_45523_19303445 | NC_021163.1    | Ca_kabuli_chr04 | 19303445                | TT                              | CC              | 1946799095               |
| SNP_P4_45524_19335273 | NC_021163.1    | Ca_kabuli_chr04 | 19335273                | CC                              | TT              | 1946799097               |
| SNP_P4_45525_19335275 | NC_021163.1    | Ca_kabuli_chr04 | 19335275                | CC                              | TT              | 1946799099               |
| SNP_P4_45526_19335647 | NC_021163.1    | Ca_kabuli_chr04 | 19335647                | CC                              | TT              | 1946799101               |
| SNP_P4_45527_19337504 | NC_021163.1    | Ca_kabuli_chr04 | 19337504                | CC                              | AA              | 1946799103               |
| SNP_P4_45528_19341573 | NC_021163.1    | Ca_kabuli_chr04 | 19341573                | TT                              | AA              | 1946799105               |
| SNP_P4_45530_19342420 | NC_021163.1    | Ca_kabuli_chr04 | 19342420                | GG                              | AA              | 1946799107               |
| SNP_P4_45531_19342455 | NC_021163.1    | Ca_kabuli_chr04 | 19342455                | TT                              | CC              | 1946799109               |
| SNP_P4_45532_19342490 | NC_021163.1    | Ca_kabuli_chr04 | 19342490                | AA                              | TT              | 1946799111               |
| SNP_P4_45533_19363990 | NC_021163.1    | Ca_kabuli_chr04 | 19363990                | TT                              | CC              | 1946799113               |
| SNP_P4_45534_19368213 | NC_021163.1    | Ca_kabuli_chr04 | 19368213                | TT                              | GG              | 1946799115               |
| SNP_P4_45535_19368217 | NC_021163.1    | Ca_kabuli_chr04 | 19368217                | TT                              | GG              | 1946799117               |
| SNP_P4_45536_19368222 | NC_021163.1    | Ca_kabuli_chr04 | 19368222                | TT                              | GG              | 1946799119               |
| SNP_P4_45539_19397350 | NC_021163.1    | Ca_kabuli_chr04 | 19397350                | AA                              | TT              | 1946799122               |
| SNP_P4_45540_19397407 | NC_021163.1    | Ca_kabuli_chr04 | 19397407                | CC                              | TT              | 1946799124               |
| SNP_P4_45542_19400448 | NC_021163.1    | Ca_kabuli_chr04 | 19400448                | TT                              | CC              | 1946799126               |
| SNP_P4_45544_19423717 | NC_021163.1    | Ca_kabuli_chr04 | 19423717                | GG                              | AA              | 1946799128               |
| SNP_P4_45545_19445892 | NC_021163.1    | Ca_kabuli_chr04 | 19445892                | AA                              | GG              | 1946799131               |
| SNP_P4_45547_19445972 | NC_021163.1    | Ca_kabuli_chr04 | 19445972                | TT                              | GG              | 1946799133               |
| SNP_P4_45548_19446025 | NC_021163.1    | Ca_kabuli_chr04 | 19446025                | AA                              | CC              | 1946799136               |
| SNP_P4_45549_19446052 | NC_021163.1    | Ca_kabuli_chr04 | 19446052                | AA                              | GG              | 1946799138               |
| SNP_P4_45550_19446068 | NC_021163.1    | Ca_kabuli_chr04 | 19446068                | CC                              | AA              | 1946799140               |
| SNP_P4_45551_19446108 | NC_021163.1    | Ca_kabuli_chr04 | 19446108                | AA                              | GG              | 1946799142               |
| SNP_P4_45552_19446272 | NC_021163.1    | Ca_kabuli_chr04 | 19446272                | AA                              | GG              | 1946799144               |
| SNP_P4_45553_19446307 | NC_021163.1    | Ca_kabuli_chr04 | 19446307                | TT                              | CC              | 1946799147               |
| SNP_P4_45554_19446481 | NC_021163.1    | Ca_kabuli_chr04 | 19446481                | AA                              | CC              | 1946799149               |
| SNP_P4_45555_19455032 | NC_021163.1    | Ca_kabuli_chr04 | 19455032                | AA                              | GG              | 1946799151               |

| SNPs IDs              | Chromosome IDs | Chromosomes     | Physical positions (bp) | CDC Frontier (Reference genome) | (ILWC46 & LPNB) | NCBI SNPdb Accession IDs |
|-----------------------|----------------|-----------------|-------------------------|---------------------------------|-----------------|--------------------------|
| SNP_P4_45556_19462258 | NC_021163.1    | Ca_kabuli_chr04 | 19462258                | CC                              | TT              | 1946799154               |
| SNP_P4_45557_19473885 | NC_021163.1    | Ca_kabuli_chr04 | 19473885                | TT                              | CC              | 1946799156               |
| SNP_P4_45558_19517367 | NC_021163.1    | Ca_kabuli_chr04 | 19517367                | TT                              | GG              | 1946799158               |
| SNP_P4_45559_19517423 | NC_021163.1    | Ca_kabuli_chr04 | 19517423                | TT                              | CC              | 1946799160               |
| SNP_P4_45560_19535442 | NC_021163.1    | Ca_kabuli_chr04 | 19535442                | GG                              | AA              | 1946799163               |
| SNP_P4_45561_19562083 | NC_021163.1    | Ca_kabuli_chr04 | 19562083                | TT                              | CC              | 1946799165               |
| SNP_P4_45562_19563608 | NC_021163.1    | Ca_kabuli_chr04 | 19563608                | AA                              | CC              | 1946799168               |
| SNP_P4_45563_19570779 | NC_021163.1    | Ca_kabuli_chr04 | 19570779                | AA                              | GG              | 1946799171               |
| SNP_P4_45564_19570781 | NC_021163.1    | Ca_kabuli_chr04 | 19570781                | GG                              | AA              | 1946799173               |
| SNP_P4_45565_19577135 | NC_021163.1    | Ca_kabuli_chr04 | 19577135                | CC                              | TT              | 1946799175               |
| SNP_P4_45566_19607593 | NC_021163.1    | Ca_kabuli_chr04 | 19607593                | AA                              | GG              | 1946799177               |
| SNP_P4_45567_19623514 | NC_021163.1    | Ca_kabuli_chr04 | 19623514                | TT                              | CC              | 1946799179               |
| SNP_P4_45568_19629611 | NC_021163.1    | Ca_kabuli_chr04 | 19629611                | AA                              | TT              | 1946799181               |
| SNP_P4_45569_19640894 | NC_021163.1    | Ca_kabuli_chr04 | 19640894                | GG                              | CC              | 1946799183               |
| SNP_P4_45570_19643120 | NC_021163.1    | Ca_kabuli_chr04 | 19643120                | AA                              | GG              | 1946799186               |
| SNP_P4_45572_19644612 | NC_021163.1    | Ca_kabuli_chr04 | 19644612                | GG                              | TT              | 1946799188               |
| SNP_P4_45573_19649039 | NC_021163.1    | Ca_kabuli_chr04 | 19649039                | GG                              | AA              | 1946799190               |
| SNP_P4_45574_19675297 | NC_021163.1    | Ca_kabuli_chr04 | 19675297                | GG                              | AA              | 1946799192               |
| SNP_P4_45577_19692033 | NC_021163.1    | Ca_kabuli_chr04 | 19692033                | GG                              | TT              | 1946799195               |
| SNP_P4_45578_19700385 | NC_021163.1    | Ca_kabuli_chr04 | 19700385                | AA                              | GG              | 1946799197               |
| SNP_P4_45581_19783679 | NC_021163.1    | Ca_kabuli_chr04 | 19783679                | CC                              | GG              | 1946799199               |
| SNP_P4_45582_19783682 | NC_021163.1    | Ca_kabuli_chr04 | 19783682                | GG                              | AA              | 1946799201               |
| SNP_P4_45583_19783692 | NC_021163.1    | Ca_kabuli_chr04 | 19783692                | TT                              | AA              | 1946799204               |
| SNP_P4_45584_19783701 | NC_021163.1    | Ca_kabuli_chr04 | 19783701                | GG                              | TT              | 1946799206               |
| SNP_P4_45585_19783702 | NC_021163.1    | Ca_kabuli_chr04 | 19783702                | CC                              | AA              | 1946799208               |
| SNP_P4_45586_19783715 | NC_021163.1    | Ca_kabuli_chr04 | 19783715                | TT                              | CC              | 1946799210               |
| SNP_P4_45587_19783870 | NC_021163.1    | Ca_kabuli_chr04 | 19783870                | AA                              | GG              | 1946799212               |
| SNP_P4_45588_19783925 | NC_021163.1    | Ca_kabuli_chr04 | 19783925                | AA                              | GG              | 1946799215               |
| SNP_P4_45589_19783987 | NC_021163.1    | Ca_kabuli_chr04 | 19783987                | AA                              | TT              | 1946799217               |
| SNP_P4_45590_19784143 | NC_021163.1    | Ca_kabuli_chr04 | 19784143                | GG                              | TT              | 1946799219               |
| SNP_P4_45592_19789350 | NC_021163.1    | Ca_kabuli_chr04 | 19789350                | CC                              | TT              | 1946799221               |
| SNP_P4_45593_19805342 | NC_021163.1    | Ca_kabuli_chr04 | 19805342                | GG                              | CC              | 1946799223               |
| SNP_P4_45594_19825308 | NC_021163.1    | Ca_kabuli_chr04 | 19825308                | TT                              | AA              | 1946799225               |
| SNP_P4_45595_19856643 | NC_021163.1    | Ca_kabuli_chr04 | 19856643                | AA                              | GG              | 1946799228               |
| SNP_P4_45596_19878638 | NC_021163.1    | Ca_kabuli_chr04 | 19878638                | CC                              | TT              | 1946799230               |
| SNP_P4_45598_19954515 | NC_021163.1    | Ca_kabuli_chr04 | 19954515                | TT                              | CC              | 1946799232               |
| SNP_P4_45599_19955288 | NC_021163.1    | Ca_kabuli_chr04 | 19955288                | CC                              | TT              | 1946799234               |
| SNP_P4_45601_19960546 | NC_021163.1    | Ca_kabuli_chr04 | 19960546                | GG                              | AA              | 1946799236               |
| SNP_P4_45602_19968479 | NC_021163.1    | Ca_kabuli_chr04 | 19968479                | GG                              | TT              | 1946799238               |
| SNP_P4_45603_19968833 | NC_021163.1    | Ca_kabuli_chr04 | 19968833                | AA                              | CC              | 1946799240               |
| SNP_P4_45604_19968887 | NC_021163.1    | Ca_kabuli_chr04 | 19968887                | AA                              | CC              | 1946799243               |
| SNP_P4_45605_19968897 | NC_021163.1    | Ca_kabuli_chr04 | 19968897                | GG                              | AA              | 1946799245               |

| SNPs IDs              | Chromosome IDs | Chromosomes     | Physical positions (bp) | CDC Frontier (Reference genome) | (ILWC46 & LPNB) | NCBI SNPdb Accession IDs |
|-----------------------|----------------|-----------------|-------------------------|---------------------------------|-----------------|--------------------------|
| SNP_P4_45606_19968923 | NC_021163.1    | Ca_kabuli_chr04 | 19968923                | CC                              | TT              | 1946799247               |
| SNP_P4_45607_19997350 | NC_021163.1    | Ca_kabuli_chr04 | 19997350                | TT                              | AA              | 1946799249               |
| SNP_P4_45608_20014434 | NC_021163.1    | Ca_kabuli_chr04 | 20014434                | AA                              | CC              | 1946799251               |
| SNP_P4_45609_20030872 | NC_021163.1    | Ca_kabuli_chr04 | 20030872                | CC                              | TT              | 1946799254               |
| SNP_P4_45610_20035345 | NC_021163.1    | Ca_kabuli_chr04 | 20035345                | CC                              | TT              | 1946799256               |
| SNP_P4_45611_20038251 | NC_021163.1    | Ca_kabuli_chr04 | 20038251                | CC                              | TT              | 1946799258               |
| SNP_P4_45612_20045646 | NC_021163.1    | Ca_kabuli_chr04 | 20045646                | CC                              | TT              | 1946799260               |
| SNP_P4_45614_20057471 | NC_021163.1    | Ca_kabuli_chr04 | 20057471                | TT                              | GG              | 1946799262               |
| SNP_P4_45616_20068535 | NC_021163.1    | Ca_kabuli_chr04 | 20068535                | CC                              | AA              | 1946799264               |
| SNP_P4_45617_20072254 | NC_021163.1    | Ca_kabuli_chr04 | 20072254                | GG                              | CC              | 1946799266               |
| SNP_P4_45618_20072432 | NC_021163.1    | Ca_kabuli_chr04 | 20072432                | AA                              | GG              | 1946799269               |
| SNP_P4_45619_20075633 | NC_021163.1    | Ca_kabuli_chr04 | 20075633                | TT                              | CC              | 1946799271               |
| SNP_P4_45620_20087647 | NC_021163.1    | Ca_kabuli_chr04 | 20087647                | GG                              | TT              | 1946799273               |
| SNP_P4_45621_20088239 | NC_021163.1    | Ca_kabuli_chr04 | 20088239                | TT                              | CC              | 1946799275               |
| SNP_P4_45622_20091187 | NC_021163.1    | Ca_kabuli_chr04 | 20091187                | TT                              | GG              | 1946799277               |
| SNP_P4_45623_20091714 | NC_021163.1    | Ca_kabuli_chr04 | 20091714                | TT                              | GG              | 1946799279               |
| SNP_P4_45624_20097143 | NC_021163.1    | Ca_kabuli_chr04 | 20097143                | AA                              | GG              | 1946799281               |
| SNP_P4_45625_20097455 | NC_021163.1    | Ca_kabuli_chr04 | 20097455                | AA                              | GG              | 1946799284               |
| SNP_P4_45627_20110427 | NC_021163.1    | Ca_kabuli_chr04 | 20110427                | GG                              | AA              | 1946799286               |
| SNP_P4_45628_20110471 | NC_021163.1    | Ca_kabuli_chr04 | 20110471                | AA                              | CC              | 1946799288               |
| SNP_P4_45629_20110860 | NC_021163.1    | Ca_kabuli_chr04 | 20110860                | AA                              | GG              | 1946799290               |
| SNP_P4_45630_20110882 | NC_021163.1    | Ca_kabuli_chr04 | 20110882                | TT                              | GG              | 1946799292               |
| SNP_P4_45631_20111975 | NC_021163.1    | Ca_kabuli_chr04 | 20111975                | TT                              | CC              | 1946799294               |
| SNP_P4_45632_20112198 | NC_021163.1    | Ca_kabuli_chr04 | 20112198                | AA                              | GG              | 1946799296               |
| SNP_P4_45633_20115726 | NC_021163.1    | Ca_kabuli_chr04 | 20115726                | GG                              | AA              | 1946799298               |
| SNP_P4_45634_20130608 | NC_021163.1    | Ca_kabuli_chr04 | 20130608                | AA                              | GG              | 1946799300               |
| SNP_P4_45635_20131214 | NC_021163.1    | Ca_kabuli_chr04 | 20131214                | TT                              | CC              | 1946799302               |
| SNP_P4_45637_20134802 | NC_021163.1    | Ca_kabuli_chr04 | 20134802                | CC                              | TT              | 1946799305               |
| SNP_P4_45638_20140190 | NC_021163.1    | Ca_kabuli_chr04 | 20140190                | CC                              | TT              | 1946799307               |
| SNP_P4_45639_20141072 | NC_021163.1    | Ca_kabuli_chr04 | 20141072                | AA                              | TT              | 1946799309               |
| SNP_P4_45640_20141075 | NC_021163.1    | Ca_kabuli_chr04 | 20141075                | TT                              | GG              | 1946799311               |
| SNP_P4_45641_20145697 | NC_021163.1    | Ca_kabuli_chr04 | 20145697                | AA                              | TT              | 1946799313               |
| SNP_P4_45642_20145788 | NC_021163.1    | Ca_kabuli_chr04 | 20145788                | TT                              | CC              | 1946799315               |
| SNP_P4_45643_20145797 | NC_021163.1    | Ca_kabuli_chr04 | 20145797                | TT                              | CC              | 1946799318               |
| SNP_P4_45644_20147541 | NC_021163.1    | Ca_kabuli_chr04 | 20147541                | AA                              | GG              | 1946799320               |
| SNP_P4_45645_20148341 | NC_021163.1    | Ca_kabuli_chr04 | 20148341                | TT                              | GG              | 1946799322               |
| SNP_P4_45646_20156678 | NC_021163.1    | Ca_kabuli_chr04 | 20156678                | AA                              | CC              | 1946799324               |
| SNP_P4_45647_20156684 | NC_021163.1    | Ca_kabuli_chr04 | 20156684                | GG                              | CC              | 1946799326               |
| SNP_P4_45650_20208155 | NC_021163.1    | Ca_kabuli_chr04 | 20208155                | GG                              | AA              | 1946799329               |
| SNP_P4_45651_20211303 | NC_021163.1    | Ca_kabuli_chr04 | 20211303                | AA                              | GG              | 1946799331               |
| SNP_P4_45652_20212198 | NC_021163.1    | Ca_kabuli_chr04 | 20212198                | GG                              | AA              | 1946799333               |
| SNP_P4_45653_20213398 | NC_021163.1    | Ca_kabuli_chr04 | 20213398                | AA                              | GG              | 1946799335               |

| SNPs IDs              | Chromosome IDs | Chromosomes     | Physical positions (bp) | CDC Frontier (Reference genome) | (ILWC46 & LPNB) | NCBI SNPdb Accession IDs |
|-----------------------|----------------|-----------------|-------------------------|---------------------------------|-----------------|--------------------------|
| SNP_P4_45655_20233667 | NC_021163.1    | Ca_kabuli_chr04 | 20233667                | TT                              | GG              | 1946799338               |
| SNP_P4_45656_20264515 | NC_021163.1    | Ca_kabuli_chr04 | 20264515                | TT                              | CC              | 1946799340               |
| SNP_P4_45657_20266495 | NC_021163.1    | Ca_kabuli_chr04 | 20266495                | AA                              | GG              | 1946799342               |
| SNP_P4_45658_20266508 | NC_021163.1    | Ca_kabuli_chr04 | 20266508                | AA                              | CC              | 1946799344               |
| SNP_P4_45659_20266540 | NC_021163.1    | Ca_kabuli_chr04 | 20266540                | CC                              | TT              | 1946799346               |
| SNP_P4_45660_20266651 | NC_021163.1    | Ca_kabuli_chr04 | 20266651                | GG                              | AA              | 1946799348               |
| SNP_P4_45661_20266670 | NC_021163.1    | Ca_kabuli_chr04 | 20266670                | TT                              | CC              | 1946799350               |
| SNP_P4_45662_20266684 | NC_021163.1    | Ca_kabuli_chr04 | 20266684                | CC                              | AA              | 1946799352               |
| SNP_P4_45663_20266805 | NC_021163.1    | Ca_kabuli_chr04 | 20266805                | TT                              | CC              | 1946799354               |
| SNP_P4_45664_20271633 | NC_021163.1    | Ca_kabuli_chr04 | 20271633                | CC                              | TT              | 1946799356               |
| SNP_P4_45665_20296627 | NC_021163.1    | Ca_kabuli_chr04 | 20296627                | AA                              | TT              | 1946799359               |
| SNP_P4_45666_20317928 | NC_021163.1    | Ca_kabuli_chr04 | 20317928                | TT                              | CC              | 1946799361               |
| SNP_P4_45667_20322386 | NC_021163.1    | Ca_kabuli_chr04 | 20322386                | GG                              | CC              | 1946799363               |
| SNP_P4_45669_20333868 | NC_021163.1    | Ca_kabuli_chr04 | 20333868                | AA                              | TT              | 1946799365               |
| SNP_P4_45670_20340525 | NC_021163.1    | Ca_kabuli_chr04 | 20340525                | TT                              | GG              | 1946799367               |
| SNP_P4_45672_20349134 | NC_021163.1    | Ca_kabuli_chr04 | 20349134                | GG                              | CC              | 1946799369               |
| SNP_P4_45673_20353814 | NC_021163.1    | Ca_kabuli_chr04 | 20353814                | GG                              | AA              | 1946799371               |
| SNP_P4_45675_20408050 | NC_021163.1    | Ca_kabuli_chr04 | 20408050                | CC                              | TT              | 1946799373               |
| SNP_P4_45677_20455141 | NC_021163.1    | Ca_kabuli_chr04 | 20455141                | GG                              | TT              | 1946799375               |
| SNP_P4_45678_20489152 | NC_021163.1    | Ca_kabuli_chr04 | 20489152                | GG                              | AA              | 1946799377               |
| SNP_P4_45681_20509551 | NC_021163.1    | Ca_kabuli_chr04 | 20509551                | TT                              | GG              | 1946799380               |
| SNP_P4_45682_20539785 | NC_021163.1    | Ca_kabuli_chr04 | 20539785                | AA                              | GG              | 1946799382               |
| SNP_P4_45684_20540455 | NC_021163.1    | Ca_kabuli_chr04 | 20540455                | TT                              | CC              | 1946799384               |
| SNP_P4_45685_20540466 | NC_021163.1    | Ca_kabuli_chr04 | 20540466                | CC                              | TT              | 1946799386               |
| SNP_P4_45686_20540589 | NC_021163.1    | Ca_kabuli_chr04 | 20540589                | GG                              | AA              | 1946799388               |
| SNP_P4_45687_20540610 | NC_021163.1    | Ca_kabuli_chr04 | 20540610                | CC                              | TT              | 1946799390               |
| SNP_P4_45688_20544330 | NC_021163.1    | Ca_kabuli_chr04 | 20544330                | TT                              | AA              | 1946799392               |
| SNP_P4_45689_20605481 | NC_021163.1    | Ca_kabuli_chr04 | 20605481                | AA                              | CC              | 1946799394               |
| SNP_P4_45690_20608810 | NC_021163.1    | Ca_kabuli_chr04 | 20608810                | CC                              | AA              | 1946799396               |
| SNP_P4_45692_20625629 | NC_021163.1    | Ca_kabuli_chr04 | 20625629                | CC                              | TT              | 1946799398               |
| SNP_P4_45693_20650666 | NC_021163.1    | Ca_kabuli_chr04 | 20650666                | TT                              | AA              | 1946799400               |
| SNP_P4_45694_20682147 | NC_021163.1    | Ca_kabuli_chr04 | 20682147                | GG                              | AA              | 1946799402               |
| SNP_P4_45696_20713134 | NC_021163.1    | Ca_kabuli_chr04 | 20713134                | CC                              | AA              | 1946799404               |
| SNP_P4_45697_20729418 | NC_021163.1    | Ca_kabuli_chr04 | 20729418                | CC                              | TT              | 1946799406               |
| SNP_P4_45698_20732739 | NC_021163.1    | Ca_kabuli_chr04 | 20732739                | CC                              | TT              | 1946799408               |
| SNP_P4_45699_20733116 | NC_021163.1    | Ca_kabuli_chr04 | 20733116                | AA                              | GG              | 1946799410               |
| SNP_P4_45700_20733123 | NC_021163.1    | Ca_kabuli_chr04 | 20733123                | TT                              | AA              | 1946799412               |
| SNP_P4_45702_20738472 | NC_021163.1    | Ca_kabuli_chr04 | 20738472                | AA                              | GG              | 1946799414               |
| SNP_P4_45703_20738499 | NC_021163.1    | Ca_kabuli_chr04 | 20738499                | AA                              | GG              | 1946799416               |
| SNP_P4_45704_20738517 | NC_021163.1    | Ca_kabuli_chr04 | 20738517                | TT                              | GG              | 1946799418               |
| SNP_P4_45705_20738526 | NC_021163.1    | Ca_kabuli_chr04 | 20738526                | GG                              | AA              | 1946799420               |
| SNP_P4_45708_20798490 | NC_021163.1    | Ca_kabuli_chr04 | 20798490                | AA                              | GG              | 1946799422               |

| SNPs IDs              | Chromosome IDs | Chromosomes     | Physical positions (bp) | CDC Frontier (Reference genome) | (ILWC46 & LPNB) | NCBI SNPdb Accession IDs |
|-----------------------|----------------|-----------------|-------------------------|---------------------------------|-----------------|--------------------------|
| SNP_P4_45709_20798510 | NC_021163.1    | Ca_kabuli_chr04 | 20798510                | CC                              | TT              | 1946799424               |
| SNP_P4_45710_20798814 | NC_021163.1    | Ca_kabuli_chr04 | 20798814                | GG                              | TT              | 1946799427               |
| SNP_P4_45712_20798875 | NC_021163.1    | Ca_kabuli_chr04 | 20798875                | CC                              | AA              | 1946799429               |
| SNP_P4_45713_20798885 | NC_021163.1    | Ca_kabuli_chr04 | 20798885                | AA                              | TT              | 1946799431               |
| SNP_P4_45714_20798892 | NC_021163.1    | Ca_kabuli_chr04 | 20798892                | TT                              | CC              | 1946799433               |
| SNP_P4_45715_20804936 | NC_021163.1    | Ca_kabuli_chr04 | 20804936                | GG                              | AA              | 1946799435               |
| SNP_P4_45716_20811082 | NC_021163.1    | Ca_kabuli_chr04 | 20811082                | TT                              | CC              | 1946799437               |
| SNP_P4_45717_20811410 | NC_021163.1    | Ca_kabuli_chr04 | 20811410                | AA                              | CC              | 1946799439               |
| SNP_P4_45718_20811451 | NC_021163.1    | Ca_kabuli_chr04 | 20811451                | GG                              | AA              | 1946799441               |
| SNP_P4_45719_20819593 | NC_021163.1    | Ca_kabuli_chr04 | 20819593                | GG                              | CC              | 1946799443               |
| SNP_P4_45720_20819595 | NC_021163.1    | Ca_kabuli_chr04 | 20819595                | GG                              | AA              | 1946799445               |
| SNP_P4_45721_20819639 | NC_021163.1    | Ca_kabuli_chr04 | 20819639                | TT                              | GG              | 1946799447               |
| SNP_P4_45722_20819651 | NC_021163.1    | Ca_kabuli_chr04 | 20819651                | TT                              | AA              | 1946799449               |
| SNP_P4_45723_20819655 | NC_021163.1    | Ca_kabuli_chr04 | 20819655                | AA                              | GG              | 1946799451               |
| SNP_P4_45724_20819656 | NC_021163.1    | Ca_kabuli_chr04 | 20819656                | GG                              | AA              | 1946799453               |
| SNP_P4_45725_20819671 | NC_021163.1    | Ca_kabuli_chr04 | 20819671                | GG                              | AA              | 1946799455               |
| SNP_P4_45726_20819686 | NC_021163.1    | Ca_kabuli_chr04 | 20819686                | AA                              | GG              | 1946799457               |
| SNP_P4_45727_20819755 | NC_021163.1    | Ca_kabuli_chr04 | 20819755                | TT                              | CC              | 1946799459               |
| SNP_P4_45728_20819763 | NC_021163.1    | Ca_kabuli_chr04 | 20819763                | AA                              | GG              | 1946799461               |
| SNP_P4_45729_20819803 | NC_021163.1    | Ca_kabuli_chr04 | 20819803                | AA                              | CC              | 1946799463               |
| SNP_P4_45730_20819806 | NC_021163.1    | Ca_kabuli_chr04 | 20819806                | CC                              | TT              | 1946799465               |
| SNP_P4_45731_20819839 | NC_021163.1    | Ca_kabuli_chr04 | 20819839                | AA                              | CC              | 1946799467               |
| SNP_P4_45732_20819913 | NC_021163.1    | Ca_kabuli_chr04 | 20819913                | TT                              | GG              | 1946799469               |
| SNP_P4_45733_20819925 | NC_021163.1    | Ca_kabuli_chr04 | 20819925                | AA                              | GG              | 1946799472               |
| SNP_P4_45734_20820085 | NC_021163.1    | Ca_kabuli_chr04 | 20820085                | GG                              | TT              | 1946799474               |
| SNP_P4_45735_20820629 | NC_021163.1    | Ca_kabuli_chr04 | 20820629                | TT                              | CC              | 1946799476               |
| SNP_P4_45736_20829920 | NC_021163.1    | Ca_kabuli_chr04 | 20829920                | CC                              | GG              | 1946799478               |
| SNP_P4_45737_20829928 | NC_021163.1    | Ca_kabuli_chr04 | 20829928                | TT                              | AA              | 1946799480               |
| SNP_P4_45738_20830163 | NC_021163.1    | Ca_kabuli_chr04 | 20830163                | TT                              | AA              | 1946799482               |
| SNP_P4_45739_20830228 | NC_021163.1    | Ca_kabuli_chr04 | 20830228                | GG                              | TT              | 1946799484               |
| SNP_P4_45740_20830263 | NC_021163.1    | Ca_kabuli_chr04 | 20830263                | TT                              | CC              | 1946799486               |
| SNP_P4_45741_20830597 | NC_021163.1    | Ca_kabuli_chr04 | 20830597                | GG                              | TT              | 1946799488               |
| SNP_P4_45742_20851006 | NC_021163.1    | Ca_kabuli_chr04 | 20851006                | AA                              | GG              | 1946799490               |
| SNP_P4_45744_20884565 | NC_021163.1    | Ca_kabuli_chr04 | 20884565                | TT                              | AA              | 1946799492               |
| SNP_P4_45746_20910567 | NC_021163.1    | Ca_kabuli_chr04 | 20910567                | CC                              | TT              | 1946799494               |
| SNP_P4_45747_20918233 | NC_021163.1    | Ca_kabuli_chr04 | 20918233                | AA                              | GG              | 1946799496               |
| SNP_P4_45749_20928529 | NC_021163.1    | Ca_kabuli_chr04 | 20928529                | GG                              | TT              | 1946799498               |
| SNP_P4_45752_20969639 | NC_021163.1    | Ca_kabuli_chr04 | 20969639                | TT                              | GG              | 1946799500               |
| SNP_P4_45753_20997743 | NC_021163.1    | Ca_kabuli_chr04 | 20997743                | GG                              | CC              | 1946799502               |
| SNP_P4_45754_20997946 | NC_021163.1    | Ca_kabuli_chr04 | 20997946                | CC                              | AA              | 1946799505               |
| SNP_P4_45755_20997961 | NC_021163.1    | Ca_kabuli_chr04 | 20997961                | CC                              | GG              | 1946799507               |
| SNP_P4_45756_20997965 | NC_021163.1    | Ca_kabuli_chr04 | 20997965                | TT                              | GG              | 1946799509               |



| SNPs IDs              | Chromosome IDs | Chromosomes     | Physical positions (bp) | CDC Frontier (Reference genome) | (ILWC46 & LPNB) | NCBI SNPdb Accession IDs |
|-----------------------|----------------|-----------------|-------------------------|---------------------------------|-----------------|--------------------------|
| SNP_P4_45757_20998007 | NC_021163.1    | Ca_kabuli_chr04 | 20998007                | TT                              | CC              | 1946799511               |
| SNP_P4_45758_20998741 | NC_021163.1    | Ca_kabuli_chr04 | 20998741                | CC                              | TT              | 1946799513               |
| SNP_P4_45759_21002004 | NC_021163.1    | Ca_kabuli_chr04 | 21002004                | TT                              | CC              | 1946799515               |
| SNP_P4_45760_21006316 | NC_021163.1    | Ca_kabuli_chr04 | 21006316                | AA                              | CC              | 1946799517               |
| SNP_P4_45761_21033938 | NC_021163.1    | Ca_kabuli_chr04 | 21033938                | CC                              | TT              | 1946799519               |
| SNP_P4_45762_21043607 | NC_021163.1    | Ca_kabuli_chr04 | 21043607                | AA                              | GG              | 1946799521               |
| SNP_P4_45763_21063343 | NC_021163.1    | Ca_kabuli_chr04 | 21063343                | TT                              | CC              | 1946799523               |
| SNP_P4_45764_21063349 | NC_021163.1    | Ca_kabuli_chr04 | 21063349                | TT                              | GG              | 1946799525               |
| SNP_P4_45765_21063361 | NC_021163.1    | Ca_kabuli_chr04 | 21063361                | TT                              | GG              | 1946799528               |
| SNP_P4_45766_21063381 | NC_021163.1    | Ca_kabuli_chr04 | 21063381                | GG                              | AA              | 1946799530               |
| SNP_P4_45767_21063392 | NC_021163.1    | Ca_kabuli_chr04 | 21063392                | TT                              | CC              | 1946799532               |
| SNP_P4_45768_21063413 | NC_021163.1    | Ca_kabuli_chr04 | 21063413                | CC                              | TT              | 1946799534               |
| SNP_P4_45769_21063552 | NC_021163.1    | Ca_kabuli_chr04 | 21063552                | TT                              | CC              | 1946799536               |
| SNP_P4_45770_21063560 | NC_021163.1    | Ca_kabuli_chr04 | 21063560                | AA                              | CC              | 1946799538               |
| SNP_P4_45771_21067645 | NC_021163.1    | Ca_kabuli_chr04 | 21067645                | TT                              | CC              | 1946799540               |
| SNP_P4_45772_21067977 | NC_021163.1    | Ca_kabuli_chr04 | 21067977                | CC                              | TT              | 1946799542               |
| SNP_P4_45773_21067983 | NC_021163.1    | Ca_kabuli_chr04 | 21067983                | AA                              | CC              | 1946799544               |
| SNP_P4_45774_21068024 | NC_021163.1    | Ca_kabuli_chr04 | 21068024                | CC                              | TT              | 1946799547               |
| SNP_P4_45775_21068054 | NC_021163.1    | Ca_kabuli_chr04 | 21068054                | AA                              | GG              | 1946799549               |
| SNP_P4_45776_21068705 | NC_021163.1    | Ca_kabuli_chr04 | 21068705                | AA                              | GG              | 1946799551               |
| SNP_P4_45777_21070092 | NC_021163.1    | Ca_kabuli_chr04 | 21070092                | TT                              | AA              | 1946799553               |
| SNP_P4_45778_21070755 | NC_021163.1    | Ca_kabuli_chr04 | 21070755                | CC                              | TT              | 1946799556               |
| SNP_P4_45779_21071758 | NC_021163.1    | Ca_kabuli_chr04 | 21071758                | TT                              | AA              | 1946799558               |
| SNP_P4_45780_21082586 | NC_021163.1    | Ca_kabuli_chr04 | 21082586                | AA                              | TT              | 1946799560               |
| SNP_P4_45781_21082588 | NC_021163.1    | Ca_kabuli_chr04 | 21082588                | TT                              | AA              | 1946799562               |
| SNP_P4_45783_21105903 | NC_021163.1    | Ca_kabuli_chr04 | 21105903                | GG                              | AA              | 1946799564               |
| SNP_P4_45784_21106641 | NC_021163.1    | Ca_kabuli_chr04 | 21106641                | GG                              | TT              | 1946799566               |
| SNP_P4_45785_21106662 | NC_021163.1    | Ca_kabuli_chr04 | 21106662                | GG                              | AA              | 1946799569               |
| SNP_P4_45786_21125560 | NC_021163.1    | Ca_kabuli_chr04 | 21125560                | GG                              | AA              | 1946799571               |
| SNP_P4_45787_21125684 | NC_021163.1    | Ca_kabuli_chr04 | 21125684                | AA                              | CC              | 1946799573               |
| SNP_P4_45788_21160946 | NC_021163.1    | Ca_kabuli_chr04 | 21160946                | AA                              | GG              | 1946799575               |
| SNP_P4_45790_21160967 | NC_021163.1    | Ca_kabuli_chr04 | 21160967                | AA                              | GG              | 1946799577               |
| SNP_P4_45791_21161001 | NC_021163.1    | Ca_kabuli_chr04 | 21161001                | CC                              | TT              | 1946799579               |
| SNP_P4_45792_21161025 | NC_021163.1    | Ca_kabuli_chr04 | 21161025                | AA                              | GG              | 1946799581               |
| SNP_P4_45793_21175052 | NC_021163.1    | Ca_kabuli_chr04 | 21175052                | TT                              | CC              | 1946799583               |
| SNP_P4_45795_21175364 | NC_021163.1    | Ca_kabuli_chr04 | 21175364                | GG                              | AA              | 1946799585               |
| SNP_P4_45796_21183326 | NC_021163.1    | Ca_kabuli_chr04 | 21183326                | AA                              | GG              | 1946799587               |
| SNP_P4_45797_21183341 | NC_021163.1    | Ca_kabuli_chr04 | 21183341                | GG                              | AA              | 1946799590               |
| SNP_P4_45798_21183347 | NC_021163.1    | Ca_kabuli_chr04 | 21183347                | AA                              | GG              | 1946799592               |
| SNP_P4_45800_21229628 | NC_021163.1    | Ca_kabuli_chr04 | 21229628                | CC                              | AA              | 1946799594               |
| SNP_P4_45801_21229669 | NC_021163.1    | Ca_kabuli_chr04 | 21229669                | AA                              | TT              | 1946799596               |
| SNP_P4_45802_21229753 | NC_021163.1    | Ca_kabuli_chr04 | 21229753                | GG                              | CC              | 1946799598               |

| SNPs IDs              | Chromosome IDs | Chromosomes     | Physical positions (bp) | CDC Frontier (Reference genome) | (ILWC46 & LPNB) | NCBI SNPdb Accession IDs |
|-----------------------|----------------|-----------------|-------------------------|---------------------------------|-----------------|--------------------------|
| SNP_P4_45803_21229861 | NC_021163.1    | Ca_kabuli_chr04 | 21229861                | AA                              | CC              | 1946799600               |
| SNP_P4_45804_21229884 | NC_021163.1    | Ca_kabuli_chr04 | 21229884                | TT                              | CC              | 1946799602               |
| SNP_P4_45805_21229968 | NC_021163.1    | Ca_kabuli_chr04 | 21229968                | GG                              | TT              | 1946799604               |
| SNP_P4_45807_21231328 | NC_021163.1    | Ca_kabuli_chr04 | 21231328                | AA                              | GG              | 1946799606               |
| SNP_P4_45808_21231353 | NC_021163.1    | Ca_kabuli_chr04 | 21231353                | CC                              | TT              | 1946799608               |
| SNP_P4_45809_21231441 | NC_021163.1    | Ca_kabuli_chr04 | 21231441                | GG                              | CC              | 1946799610               |
| SNP_P4_45810_21231506 | NC_021163.1    | Ca_kabuli_chr04 | 21231506                | TT                              | CC              | 1946799612               |
| SNP_P4_45811_21231550 | NC_021163.1    | Ca_kabuli_chr04 | 21231550                | TT                              | GG              | 1946799614               |
| SNP_P4_45812_21231591 | NC_021163.1    | Ca_kabuli_chr04 | 21231591                | AA                              | GG              | 1946799616               |
| SNP_P4_45813_21231601 | NC_021163.1    | Ca_kabuli_chr04 | 21231601                | TT                              | CC              | 1946799618               |
| SNP_P4_45814_21234316 | NC_021163.1    | Ca_kabuli_chr04 | 21234316                | AA                              | GG              | 1946799620               |
| SNP_P4_45815_21234709 | NC_021163.1    | Ca_kabuli_chr04 | 21234709                | TT                              | GG              | 1946799622               |
| SNP_P4_45816_21235377 | NC_021163.1    | Ca_kabuli_chr04 | 21235377                | AA                              | GG              | 1946799624               |
| SNP_P4_45817_21239758 | NC_021163.1    | Ca_kabuli_chr04 | 21239758                | AA                              | GG              | 1946799627               |
| SNP_P4_45818_21240167 | NC_021163.1    | Ca_kabuli_chr04 | 21240167                | AA                              | TT              | 1946799629               |
| SNP_P4_45819_21240207 | NC_021163.1    | Ca_kabuli_chr04 | 21240207                | TT                              | AA              | 1946799631               |
| SNP_P4_45820_21243203 | NC_021163.1    | Ca_kabuli_chr04 | 21243203                | AA                              | CC              | 1946799633               |
| SNP_P4_45821_21243734 | NC_021163.1    | Ca_kabuli_chr04 | 21243734                | GG                              | AA              | 1946799635               |
| SNP_P4_45822_21244355 | NC_021163.1    | Ca_kabuli_chr04 | 21244355                | GG                              | AA              | 1946799637               |
| SNP_P4_45823_21244632 | NC_021163.1    | Ca_kabuli_chr04 | 21244632                | AA                              | TT              | 1946799639               |
| SNP_P4_45825_21260220 | NC_021163.1    | Ca_kabuli_chr04 | 21260220                | GG                              | AA              | 1946799641               |
| SNP_P4_45826_21261668 | NC_021163.1    | Ca_kabuli_chr04 | 21261668                | TT                              | CC              | 1946799643               |
| SNP_P4_45828_21318127 | NC_021163.1    | Ca_kabuli_chr04 | 21318127                | AA                              | GG              | 1946799645               |
| SNP_P4_45829_21318138 | NC_021163.1    | Ca_kabuli_chr04 | 21318138                | CC                              | AA              | 1946799647               |
| SNP_P4_45830_21323825 | NC_021163.1    | Ca_kabuli_chr04 | 21323825                | AA                              | TT              | 1946799649               |
| SNP_P4_45831_21346316 | NC_021163.1    | Ca_kabuli_chr04 | 21346316                | AA                              | TT              | 1946799652               |
| SNP_P4_45832_21347292 | NC_021163.1    | Ca_kabuli_chr04 | 21347292                | AA                              | GG              | 1946799654               |
| SNP_P4_45833_21347293 | NC_021163.1    | Ca_kabuli_chr04 | 21347293                | AA                              | CC              | 1946799656               |
| SNP_P4_45834_21347515 | NC_021163.1    | Ca_kabuli_chr04 | 21347515                | TT                              | AA              | 1946799658               |
| SNP_P4_45835_21347905 | NC_021163.1    | Ca_kabuli_chr04 | 21347905                | CC                              | AA              | 1946799660               |
| SNP_P4_45836_21355823 | NC_021163.1    | Ca_kabuli_chr04 | 21355823                | AA                              | TT              | 1946799662               |
| SNP_P4_45837_21357886 | NC_021163.1    | Ca_kabuli_chr04 | 21357886                | TT                              | CC              | 1946799664               |
| SNP_P4_45838_21375338 | NC_021163.1    | Ca_kabuli_chr04 | 21375338                | AA                              | CC              | 1946799666               |
| SNP_P4_45839_21375339 | NC_021163.1    | Ca_kabuli_chr04 | 21375339                | TT                              | AA              | 1946799668               |
| SNP_P4_45840_21381041 | NC_021163.1    | Ca_kabuli_chr04 | 21381041                | TT                              | GG              | 1946799670               |
| SNP_P4_45841_21384314 | NC_021163.1    | Ca_kabuli_chr04 | 21384314                | CC                              | TT              | 1946799672               |
| SNP_P4_45842_21400931 | NC_021163.1    | Ca_kabuli_chr04 | 21400931                | CC                              | TT              | 1946799674               |
| SNP_P4_45843_21405032 | NC_021163.1    | Ca_kabuli_chr04 | 21405032                | TT                              | CC              | 1946799676               |
| SNP_P4_45844_21420982 | NC_021163.1    | Ca_kabuli_chr04 | 21420982                | CC                              | TT              | 1946799678               |
| SNP_P4_45845_21463462 | NC_021163.1    | Ca_kabuli_chr04 | 21463462                | TT                              | CC              | 1946799680               |
| SNP_P4_45846_21498763 | NC_021163.1    | Ca_kabuli_chr04 | 21498763                | AA                              | CC              | 1946799682               |
| SNP_P4_45847_21511779 | NC_021163.1    | Ca_kabuli_chr04 | 21511779                | TT                              | GG              | 1946799684               |

| SNPs IDs              | Chromosome IDs | Chromosomes     | Physical positions (bp) | CDC Frontier (Reference genome) | (ILWC46 & LPNB) | NCBI SNPdb Accession IDs |
|-----------------------|----------------|-----------------|-------------------------|---------------------------------|-----------------|--------------------------|
| SNP_P4_45848_21511820 | NC_021163.1    | Ca_kabuli_chr04 | 21511820                | AA                              | GG              | 1946799686               |
| SNP_P4_45849_21511869 | NC_021163.1    | Ca_kabuli_chr04 | 21511869                | CC                              | TT              | 1946799688               |
| SNP_P4_45850_21511904 | NC_021163.1    | Ca_kabuli_chr04 | 21511904                | GG                              | TT              | 1946799690               |
| SNP_P4_45851_21514458 | NC_021163.1    | Ca_kabuli_chr04 | 21514458                | AA                              | TT              | 1946799692               |
| SNP_P4_45852_21520119 | NC_021163.1    | Ca_kabuli_chr04 | 21520119                | CC                              | AA              | 1946799694               |
| SNP_P4_45853_21520128 | NC_021163.1    | Ca_kabuli_chr04 | 21520128                | GG                              | AA              | 1946799696               |
| SNP_P4_45854_21520282 | NC_021163.1    | Ca_kabuli_chr04 | 21520282                | AA                              | GG              | 1946799698               |
| SNP_P4_45855_21520323 | NC_021163.1    | Ca_kabuli_chr04 | 21520323                | CC                              | AA              | 1946799700               |
| SNP_P4_45856_21520325 | NC_021163.1    | Ca_kabuli_chr04 | 21520325                | AA                              | TT              | 1946799702               |
| SNP_P4_45857_21528970 | NC_021163.1    | Ca_kabuli_chr04 | 21528970                | CC                              | AA              | 1946799704               |
| SNP_P4_45858_21528972 | NC_021163.1    | Ca_kabuli_chr04 | 21528972                | TT                              | AA              | 1946799706               |
| SNP_P4_45859_21528973 | NC_021163.1    | Ca_kabuli_chr04 | 21528973                | AA                              | TT              | 1946799708               |
| SNP_P4_45860_21529154 | NC_021163.1    | Ca_kabuli_chr04 | 21529154                | CC                              | TT              | 1946799710               |
| SNP_P4_45862_21529200 | NC_021163.1    | Ca_kabuli_chr04 | 21529200                | GG                              | AA              | 1946799712               |
| SNP_P4_45864_21529508 | NC_021163.1    | Ca_kabuli_chr04 | 21529508                | GG                              | TT              | 1946799714               |
| SNP_P4_45865_21544129 | NC_021163.1    | Ca_kabuli_chr04 | 21544129                | GG                              | CC              | 1946799716               |
| SNP_P4_45866_21569919 | NC_021163.1    | Ca_kabuli_chr04 | 21569919                | TT                              | GG              | 1946799718               |
| SNP_P4_45867_21569945 | NC_021163.1    | Ca_kabuli_chr04 | 21569945                | TT                              | AA              | 1946799720               |
| SNP_P4_45868_21570243 | NC_021163.1    | Ca_kabuli_chr04 | 21570243                | AA                              | GG              | 1946799722               |
| SNP_P4_45869_21570311 | NC_021163.1    | Ca_kabuli_chr04 | 21570311                | CC                              | TT              | 1946799724               |
| SNP_P4_45870_21571058 | NC_021163.1    | Ca_kabuli_chr04 | 21571058                | AA                              | GG              | 1946799726               |
| SNP_P4_45871_21578362 | NC_021163.1    | Ca_kabuli_chr04 | 21578362                | CC                              | TT              | 1946799728               |
| SNP_P4_45872_21599885 | NC_021163.1    | Ca_kabuli_chr04 | 21599885                | AA                              | GG              | 1946799730               |
| SNP_P4_45873_21601596 | NC_021163.1    | Ca_kabuli_chr04 | 21601596                | AA                              | GG              | 1946799732               |
| SNP_P4_45874_21601795 | NC_021163.1    | Ca_kabuli_chr04 | 21601795                | CC                              | TT              | 1946799734               |
| SNP_P4_45875_21601812 | NC_021163.1    | Ca_kabuli_chr04 | 21601812                | TT                              | AA              | 1946799736               |
| SNP_P4_45876_21601824 | NC_021163.1    | Ca_kabuli_chr04 | 21601824                | AA                              | TT              | 1946799737               |
| SNP_P4_45877_21601835 | NC_021163.1    | Ca_kabuli_chr04 | 21601835                | CC                              | TT              | 1946799738               |
| SNP_P4_45878_21601868 | NC_021163.1    | Ca_kabuli_chr04 | 21601868                | TT                              | CC              | 1946799740               |
| SNP_P4_45879_21601908 | NC_021163.1    | Ca_kabuli_chr04 | 21601908                | TT                              | AA              | 1946799742               |
| SNP_P4_45880_21602279 | NC_021163.1    | Ca_kabuli_chr04 | 21602279                | AA                              | CC              | 1946799744               |
| SNP_P4_45881_21607300 | NC_021163.1    | Ca_kabuli_chr04 | 21607300                | TT                              | CC              | 1946799746               |
| SNP_P4_45882_21607368 | NC_021163.1    | Ca_kabuli_chr04 | 21607368                | GG                              | TT              | 1946799748               |
| SNP_P4_45883_21607768 | NC_021163.1    | Ca_kabuli_chr04 | 21607768                | TT                              | GG              | 1946799750               |
| SNP_P4_45884_21607788 | NC_021163.1    | Ca_kabuli_chr04 | 21607788                | TT                              | CC              | 1946799752               |
| SNP_P4_45885_21607903 | NC_021163.1    | Ca_kabuli_chr04 | 21607903                | GG                              | AA              | 1946799754               |
| SNP_P4_45886_21609261 | NC_021163.1    | Ca_kabuli_chr04 | 21609261                | TT                              | AA              | 1946799756               |
| SNP_P4_45887_21622187 | NC_021163.1    | Ca_kabuli_chr04 | 21622187                | TT                              | CC              | 1946799758               |
| SNP_P4_45889_21622641 | NC_021163.1    | Ca_kabuli_chr04 | 21622641                | AA                              | GG              | 1946799760               |
| SNP_P4_45890_21625751 | NC_021163.1    | Ca_kabuli_chr04 | 21625751                | GG                              | AA              | 1946799762               |
| SNP_P4_45891_21638479 | NC_021163.1    | Ca_kabuli_chr04 | 21638479                | CC                              | TT              | 1946799764               |
| SNP_P4_45892_21638686 | NC_021163.1    | Ca_kabuli_chr04 | 21638686                | GG                              | AA              | 1946799766               |

| SNPs IDs              | Chromosome IDs | Chromosomes     | Physical positions (bp) | CDC Frontier (Reference genome) | (ILWC46 & LPNB) | NCBI SNPdb Accession IDs |
|-----------------------|----------------|-----------------|-------------------------|---------------------------------|-----------------|--------------------------|
| SNP_P4_45893_21638690 | NC_021163.1    | Ca_kabuli_chr04 | 21638690                | CC                              | TT              | 1946799768               |
| SNP_P4_45895_21645233 | NC_021163.1    | Ca_kabuli_chr04 | 21645233                | AA                              | GG              | 1946799770               |
| SNP_P4_45897_21660697 | NC_021163.1    | Ca_kabuli_chr04 | 21660697                | CC                              | TT              | 1946799772               |
| SNP_P4_45898_21684038 | NC_021163.1    | Ca_kabuli_chr04 | 21684038                | AA                              | CC              | 1946799774               |
| SNP_P4_45899_21684093 | NC_021163.1    | Ca_kabuli_chr04 | 21684093                | TT                              | AA              | 1946799776               |
| SNP_P4_45900_21684347 | NC_021163.1    | Ca_kabuli_chr04 | 21684347                | TT                              | AA              | 1946799778               |
| SNP_P4_45901_21684736 | NC_021163.1    | Ca_kabuli_chr04 | 21684736                | CC                              | TT              | 1946799780               |
| SNP_P4_45902_21690361 | NC_021163.1    | Ca_kabuli_chr04 | 21690361                | CC                              | TT              | 1946799782               |
| SNP_P4_45903_21690616 | NC_021163.1    | Ca_kabuli_chr04 | 21690616                | CC                              | AA              | 1946799784               |
| SNP_P4_45904_21690748 | NC_021163.1    | Ca_kabuli_chr04 | 21690748                | AA                              | GG              | 1946799786               |
| SNP_P4_45905_21691033 | NC_021163.1    | Ca_kabuli_chr04 | 21691033                | CC                              | TT              | 1946799788               |
| SNP_P4_45906_21691060 | NC_021163.1    | Ca_kabuli_chr04 | 21691060                | CC                              | TT              | 1946799790               |
| SNP_P4_45907_21691100 | NC_021163.1    | Ca_kabuli_chr04 | 21691100                | AA                              | GG              | 1946799792               |
| SNP_P4_45908_21692584 | NC_021163.1    | Ca_kabuli_chr04 | 21692584                | CC                              | TT              | 1946799794               |
| SNP_P4_45909_21693494 | NC_021163.1    | Ca_kabuli_chr04 | 21693494                | GG                              | TT              | 1946799796               |
| SNP_P4_45911_21726908 | NC_021163.1    | Ca_kabuli_chr04 | 21726908                | AA                              | TT              | 1946799798               |
| SNP_P4_45913_21729033 | NC_021163.1    | Ca_kabuli_chr04 | 21729033                | AA                              | GG              | 1946799800               |
| SNP_P4_45914_21729050 | NC_021163.1    | Ca_kabuli_chr04 | 21729050                | AA                              | TT              | 1946799802               |
| SNP_P4_45915_21731646 | NC_021163.1    | Ca_kabuli_chr04 | 21731646                | TT                              | CC              | 1946799804               |
| SNP_P4_45916_21731811 | NC_021163.1    | Ca_kabuli_chr04 | 21731811                | GG                              | CC              | 1946799807               |
| SNP_P4_45917_21745318 | NC_021163.1    | Ca_kabuli_chr04 | 21745318                | TT                              | CC              | 1946799809               |
| SNP_P4_45918_21745371 | NC_021163.1    | Ca_kabuli_chr04 | 21745371                | GG                              | AA              | 1946799811               |
| SNP_P4_45919_21767445 | NC_021163.1    | Ca_kabuli_chr04 | 21767445                | TT                              | CC              | 1946799813               |
| SNP_P4_45920_21767447 | NC_021163.1    | Ca_kabuli_chr04 | 21767447                | AA                              | GG              | 1946799815               |
| SNP_P4_45922_21790467 | NC_021163.1    | Ca_kabuli_chr04 | 21790467                | CC                              | TT              | 1946799817               |
| SNP_P4_45923_21793090 | NC_021163.1    | Ca_kabuli_chr04 | 21793090                | GG                              | CC              | 1946799819               |
| SNP_P4_45924_21804619 | NC_021163.1    | Ca_kabuli_chr04 | 21804619                | GG                              | AA              | 1946799821               |
| SNP_P4_45925_21804742 | NC_021163.1    | Ca_kabuli_chr04 | 21804742                | AA                              | GG              | 1946799823               |
| SNP_P4_45927_21804788 | NC_021163.1    | Ca_kabuli_chr04 | 21804788                | TT                              | GG              | 1946799825               |
| SNP_P4_45928_21804812 | NC_021163.1    | Ca_kabuli_chr04 | 21804812                | AA                              | GG              | 1946799827               |
| SNP_P4_45929_21804822 | NC_021163.1    | Ca_kabuli_chr04 | 21804822                | GG                              | AA              | 1946799829               |
| SNP_P4_45931_21839323 | NC_021163.1    | Ca_kabuli_chr04 | 21839323                | GG                              | AA              | 1946799831               |
| SNP_P4_45932_21848587 | NC_021163.1    | Ca_kabuli_chr04 | 21848587                | CC                              | TT              | 1946799833               |
| SNP_P4_45933_21848597 | NC_021163.1    | Ca_kabuli_chr04 | 21848597                | TT                              | CC              | 1946799835               |
| SNP_P4_45934_21848991 | NC_021163.1    | Ca_kabuli_chr04 | 21848991                | GG                              | AA              | 1946799837               |
| SNP_P4_45936_21849031 | NC_021163.1    | Ca_kabuli_chr04 | 21849031                | AA                              | GG              | 1946799839               |
| SNP_P4_45937_21849050 | NC_021163.1    | Ca_kabuli_chr04 | 21849050                | AA                              | CC              | 1946799841               |
| SNP_P4_45938_21849246 | NC_021163.1    | Ca_kabuli_chr04 | 21849246                | GG                              | AA              | 1946799843               |
| SNP_P4_45939_21849255 | NC_021163.1    | Ca_kabuli_chr04 | 21849255                | GG                              | TT              | 1946799845               |
| SNP_P4_45940_21849282 | NC_021163.1    | Ca_kabuli_chr04 | 21849282                | CC                              | GG              | 1946799847               |
| SNP_P4_45941_21849320 | NC_021163.1    | Ca_kabuli_chr04 | 21849320                | TT                              | CC              | 1946799849               |
| SNP_P4_45942_21849528 | NC_021163.1    | Ca_kabuli_chr04 | 21849528                | GG                              | AA              | 1946799851               |

| SNPs IDs              | Chromosome IDs | Chromosomes     | Physical positions (bp) | CDC Frontier (Reference genome) | (ILWC46 & LPNB) | NCBI SNPdb Accession IDs |
|-----------------------|----------------|-----------------|-------------------------|---------------------------------|-----------------|--------------------------|
| SNP_P4_45943_21856429 | NC_021163.1    | Ca_kabuli_chr04 | 21856429                | TT                              | CC              | 1946799853               |
| SNP_P4_45944_21865111 | NC_021163.1    | Ca_kabuli_chr04 | 21865111                | CC                              | AA              | 1946799855               |
| SNP_P4_45945_21865692 | NC_021163.1    | Ca_kabuli_chr04 | 21865692                | GG                              | AA              | 1946799857               |
| SNP_P4_45946_21894234 | NC_021163.1    | Ca_kabuli_chr04 | 21894234                | CC                              | TT              | 1946799859               |
| SNP_P4_45947_21904215 | NC_021163.1    | Ca_kabuli_chr04 | 21904215                | GG                              | TT              | 1946799861               |
| SNP_P4_45948_21905563 | NC_021163.1    | Ca_kabuli_chr04 | 21905563                | CC                              | TT              | 1946799863               |
| SNP_P4_45949_21909717 | NC_021163.1    | Ca_kabuli_chr04 | 21909717                | CC                              | TT              | 1946799865               |
| SNP_P4_45950_21915039 | NC_021163.1    | Ca_kabuli_chr04 | 21915039                | GG                              | AA              | 1946799867               |
| SNP_P4_45952_21928816 | NC_021163.1    | Ca_kabuli_chr04 | 21928816                | GG                              | AA              | 1946799869               |
| SNP_P4_45954_21936764 | NC_021163.1    | Ca_kabuli_chr04 | 21936764                | GG                              | TT              | 1946799871               |
| SNP_P4_45955_21936785 | NC_021163.1    | Ca_kabuli_chr04 | 21936785                | CC                              | TT              | 1946799873               |
| SNP_P4_45956_21936801 | NC_021163.1    | Ca_kabuli_chr04 | 21936801                | AA                              | TT              | 1946799875               |
| SNP_P4_45957_21946535 | NC_021163.1    | Ca_kabuli_chr04 | 21946535                | TT                              | GG              | 1946799877               |
| SNP_P4_45958_21946672 | NC_021163.1    | Ca_kabuli_chr04 | 21946672                | GG                              | AA              | 1946799879               |
| SNP_P4_45959_21958840 | NC_021163.1    | Ca_kabuli_chr04 | 21958840                | AA                              | TT              | 1946799881               |
| SNP_P4_45960_21958915 | NC_021163.1    | Ca_kabuli_chr04 | 21958915                | GG                              | TT              | 1946799883               |
| SNP_P4_45961_21958918 | NC_021163.1    | Ca_kabuli_chr04 | 21958918                | TT                              | GG              | 1946799885               |
| SNP_P4_45963_21992596 | NC_021163.1    | Ca_kabuli_chr04 | 21992596                | CC                              | AA              | 1946799887               |
| SNP_P4_45964_21996554 | NC_021163.1    | Ca_kabuli_chr04 | 21996554                | GG                              | AA              | 1946799889               |
| SNP_P4_45965_22052591 | NC_021163.1    | Ca_kabuli_chr04 | 22052591                | TT                              | GG              | 1946799891               |
| SNP_P4_45967_22052628 | NC_021163.1    | Ca_kabuli_chr04 | 22052628                | TT                              | AA              | 1946799893               |
| SNP_P4_45968_22052881 | NC_021163.1    | Ca_kabuli_chr04 | 22052881                | GG                              | AA              | 1946799895               |
| SNP_P4_45969_22052910 | NC_021163.1    | Ca_kabuli_chr04 | 22052910                | AA                              | TT              | 1946799897               |
| SNP_P4_45971_22067286 | NC_021163.1    | Ca_kabuli_chr04 | 22067286                | CC                              | TT              | 1946799899               |
| SNP_P4_45972_22071228 | NC_021163.1    | Ca_kabuli_chr04 | 22071228                | CC                              | AA              | 1946799901               |
| SNP_P4_45973_22075712 | NC_021163.1    | Ca_kabuli_chr04 | 22075712                | AA                              | TT              | 1946799903               |
| SNP_P4_45974_22089471 | NC_021163.1    | Ca_kabuli_chr04 | 22089471                | AA                              | GG              | 1946799906               |
| SNP_P4_45975_22092886 | NC_021163.1    | Ca_kabuli_chr04 | 22092886                | GG                              | AA              | 1946799908               |
| SNP_P4_45976_22115061 | NC_021163.1    | Ca_kabuli_chr04 | 22115061                | AA                              | GG              | 1946799910               |
| SNP_P4_45977_22134669 | NC_021163.1    | Ca_kabuli_chr04 | 22134669                | AA                              | TT              | 1946799912               |
| SNP_P4_45978_22134969 | NC_021163.1    | Ca_kabuli_chr04 | 22134969                | GG                              | CC              | 1946799914               |
| SNP_P4_45980_22135016 | NC_021163.1    | Ca_kabuli_chr04 | 22135016                | TT                              | GG              | 1946799916               |
| SNP_P4_45981_22135023 | NC_021163.1    | Ca_kabuli_chr04 | 22135023                | AA                              | CC              | 1946799918               |
| SNP_P4_45982_22135052 | NC_021163.1    | Ca_kabuli_chr04 | 22135052                | TT                              | CC              | 1946799920               |
| SNP_P4_45983_22135108 | NC_021163.1    | Ca_kabuli_chr04 | 22135108                | AA                              | TT              | 1946799922               |
| SNP_P4_45984_22135118 | NC_021163.1    | Ca_kabuli_chr04 | 22135118                | CC                              | AA              | 1946799924               |
| SNP_P4_45985_22135290 | NC_021163.1    | Ca_kabuli_chr04 | 22135290                | CC                              | TT              | 1946799926               |
| SNP_P4_45986_22135296 | NC_021163.1    | Ca_kabuli_chr04 | 22135296                | TT                              | CC              | 1946799928               |
| SNP_P4_45987_22135299 | NC_021163.1    | Ca_kabuli_chr04 | 22135299                | CC                              | TT              | 1946799930               |
| SNP_P4_45988_22135326 | NC_021163.1    | Ca_kabuli_chr04 | 22135326                | CC                              | AA              | 1946799932               |
| SNP_P4_45989_22135389 | NC_021163.1    | Ca_kabuli_chr04 | 22135389                | GG                              | AA              | 1946799934               |
| SNP_P4_45990_22135393 | NC_021163.1    | Ca_kabuli_chr04 | 22135393                | CC                              | AA              | 1946799936               |

| SNPs IDs              | Chromosome IDs | Chromosomes     | Physical positions (bp) | CDC Frontier (Reference genome) | (ILWC46 & LPNB) | NCBI SNPdb Accession IDs |
|-----------------------|----------------|-----------------|-------------------------|---------------------------------|-----------------|--------------------------|
| SNP_P4_45991_22135405 | NC_021163.1    | Ca_kabuli_chr04 | 22135405                | AA                              | CC              | 1946799938               |
| SNP_P4_45992_22135409 | NC_021163.1    | Ca_kabuli_chr04 | 22135409                | TT                              | CC              | 1946799940               |
| SNP_P4_45993_22135439 | NC_021163.1    | Ca_kabuli_chr04 | 22135439                | AA                              | GG              | 1946799942               |
| SNP_P4_45994_22135451 | NC_021163.1    | Ca_kabuli_chr04 | 22135451                | CC                              | TT              | 1946799944               |
| SNP_P4_45995_22135485 | NC_021163.1    | Ca_kabuli_chr04 | 22135485                | GG                              | CC              | 1946799946               |
| SNP_P4_45996_22135519 | NC_021163.1    | Ca_kabuli_chr04 | 22135519                | GG                              | AA              | 1946799948               |
| SNP_P4_45997_22135523 | NC_021163.1    | Ca_kabuli_chr04 | 22135523                | AA                              | TT              | 1946799950               |
| SNP_P4_45998_22135542 | NC_021163.1    | Ca_kabuli_chr04 | 22135542                | AA                              | CC              | 1946799952               |
| SNP_P4_45999_22135556 | NC_021163.1    | Ca_kabuli_chr04 | 22135556                | TT                              | CC              | 1946799954               |
| SNP_P4_46000_22135622 | NC_021163.1    | Ca_kabuli_chr04 | 22135622                | TT                              | AA              | 1946799956               |
| SNP_P4_46001_22135690 | NC_021163.1    | Ca_kabuli_chr04 | 22135690                | AA                              | GG              | 1946799958               |
| SNP_P4_46002_22135714 | NC_021163.1    | Ca_kabuli_chr04 | 22135714                | GG                              | AA              | 1946799960               |
| SNP_P4_46003_22135718 | NC_021163.1    | Ca_kabuli_chr04 | 22135718                | GG                              | TT              | 1946799962               |
| SNP_P4_46004_22135724 | NC_021163.1    | Ca_kabuli_chr04 | 22135724                | CC                              | AA              | 1946799964               |
| SNP_P4_46005_22135737 | NC_021163.1    | Ca_kabuli_chr04 | 22135737                | GG                              | TT              | 1946799966               |
| SNP_P4_46006_22135746 | NC_021163.1    | Ca_kabuli_chr04 | 22135746                | AA                              | GG              | 1946799968               |
| SNP_P4_46007_22135751 | NC_021163.1    | Ca_kabuli_chr04 | 22135751                | GG                              | CC              | 1946799970               |
| SNP_P4_46008_22135754 | NC_021163.1    | Ca_kabuli_chr04 | 22135754                | AA                              | CC              | 1946799972               |
| SNP_P4_46009_22135756 | NC_021163.1    | Ca_kabuli_chr04 | 22135756                | CC                              | AA              | 1946799974               |
| SNP_P4_46010_22135765 | NC_021163.1    | Ca_kabuli_chr04 | 22135765                | CC                              | AA              | 1946799976               |
| SNP_P4_46011_22135774 | NC_021163.1    | Ca_kabuli_chr04 | 22135774                | GG                              | AA              | 1946799978               |
| SNP_P4_46012_22135787 | NC_021163.1    | Ca_kabuli_chr04 | 22135787                | GG                              | AA              | 1946799980               |
| SNP_P4_46013_22135788 | NC_021163.1    | Ca_kabuli_chr04 | 22135788                | TT                              | CC              | 1946799982               |
| SNP_P4_46014_22135818 | NC_021163.1    | Ca_kabuli_chr04 | 22135818                | CC                              | TT              | 1946799984               |
| SNP_P4_46015_22135886 | NC_021163.1    | Ca_kabuli_chr04 | 22135886                | AA                              | CC              | 1946799986               |
| SNP_P4_46016_22135901 | NC_021163.1    | Ca_kabuli_chr04 | 22135901                | TT                              | CC              | 1946799988               |
| SNP_P4_46017_22135922 | NC_021163.1    | Ca_kabuli_chr04 | 22135922                | CC                              | AA              | 1946799990               |
| SNP_P4_46018_22135932 | NC_021163.1    | Ca_kabuli_chr04 | 22135932                | GG                              | CC              | 1946799992               |
| SNP_P4_46019_22135973 | NC_021163.1    | Ca_kabuli_chr04 | 22135973                | AA                              | TT              | 1946799994               |
| SNP_P4_46020_22135999 | NC_021163.1    | Ca_kabuli_chr04 | 22135999                | AA                              | GG              | 1946799996               |
| SNP_P4_46021_22136020 | NC_021163.1    | Ca_kabuli_chr04 | 22136020                | GG                              | AA              | 1946799998               |
| SNP_P4_46022_22136088 | NC_021163.1    | Ca_kabuli_chr04 | 22136088                | GG                              | TT              | 1946800000               |
| SNP_P4_46023_22136125 | NC_021163.1    | Ca_kabuli_chr04 | 22136125                | TT                              | AA              | 1946800002               |
| SNP_P4_46024_22136128 | NC_021163.1    | Ca_kabuli_chr04 | 22136128                | GG                              | AA              | 1946800004               |
| SNP_P4_46025_22136129 | NC_021163.1    | Ca_kabuli_chr04 | 22136129                | AA                              | TT              | 1946800006               |
| SNP_P4_46026_22136281 | NC_021163.1    | Ca_kabuli_chr04 | 22136281                | AA                              | GG              | 1946800008               |
| SNP_P4_46027_22136283 | NC_021163.1    | Ca_kabuli_chr04 | 22136283                | TT                              | CC              | 1946800010               |
| SNP_P4_46028_22136289 | NC_021163.1    | Ca_kabuli_chr04 | 22136289                | AA                              | CC              | 1946800012               |
| SNP_P4_46029_22136525 | NC_021163.1    | Ca_kabuli_chr04 | 22136525                | TT                              | CC              | 1946800014               |
| SNP_P4_46030_22136898 | NC_021163.1    | Ca_kabuli_chr04 | 22136898                | AA                              | GG              | 1946800016               |
| SNP_P4_46031_22137399 | NC_021163.1    | Ca_kabuli_chr04 | 22137399                | AA                              | GG              | 1946800018               |
| SNP_P4_46032_22138121 | NC_021163.1    | Ca_kabuli_chr04 | 22138121                | CC                              | AA              | 1946800020               |

| SNPs IDs              | Chromosome IDs | Chromosomes     | Physical positions (bp) | CDC Frontier (Reference genome) | (ILWC46 & LPNB) | NCBI SNPdb Accession IDs |
|-----------------------|----------------|-----------------|-------------------------|---------------------------------|-----------------|--------------------------|
| SNP_P4_46033_22138643 | NC_021163.1    | Ca_kabuli_chr04 | 22138643                | GG                              | AA              | 1946800022               |
| SNP_P4_46034_22139323 | NC_021163.1    | Ca_kabuli_chr04 | 22139323                | AA                              | GG              | 1946800024               |
| SNP_P4_46035_22156895 | NC_021163.1    | Ca_kabuli_chr04 | 22156895                | TT                              | AA              | 1946800026               |
| SNP_P4_46036_22171457 | NC_021163.1    | Ca_kabuli_chr04 | 22171457                | TT                              | CC              | 1946800028               |
| SNP_P4_46037_22181083 | NC_021163.1    | Ca_kabuli_chr04 | 22181083                | AA                              | CC              | 1946800030               |
| SNP_P4_46038_22191794 | NC_021163.1    | Ca_kabuli_chr04 | 22191794                | CC                              | TT              | 1946800032               |
| SNP_P4_46039_22206101 | NC_021163.1    | Ca_kabuli_chr04 | 22206101                | TT                              | AA              | 1946800034               |
| SNP_P4_46040_22206105 | NC_021163.1    | Ca_kabuli_chr04 | 22206105                | GG                              | AA              | 1946800036               |
| SNP_P4_46042_22241508 | NC_021163.1    | Ca_kabuli_chr04 | 22241508                | AA                              | GG              | 1946800038               |
| SNP_P4_46043_22255791 | NC_021163.1    | Ca_kabuli_chr04 | 22255791                | TT                              | GG              | 1946800040               |
| SNP_P4_46044_22256308 | NC_021163.1    | Ca_kabuli_chr04 | 22256308                | TT                              | AA              | 1946800042               |
| SNP_P4_46045_22279450 | NC_021163.1    | Ca_kabuli_chr04 | 22279450                | TT                              | GG              | 1946800044               |
| SNP_P4_46048_22338587 | NC_021163.1    | Ca_kabuli_chr04 | 22338587                | GG                              | AA              | 1946800046               |
| SNP_P4_46049_22352264 | NC_021163.1    | Ca_kabuli_chr04 | 22352264                | AA                              | CC              | 1946800048               |
| SNP_P4_46050_22369526 | NC_021163.1    | Ca_kabuli_chr04 | 22369526                | AA                              | GG              | 1946800050               |
| SNP_P4_46052_22412124 | NC_021163.1    | Ca_kabuli_chr04 | 22412124                | AA                              | GG              | 1946800052               |
| SNP_P4_46053_22412185 | NC_021163.1    | Ca_kabuli_chr04 | 22412185                | GG                              | AA              | 1946800054               |
| SNP_P4_46054_22412201 | NC_021163.1    | Ca_kabuli_chr04 | 22412201                | TT                              | CC              | 1946800056               |
| SNP_P4_46055_22412216 | NC_021163.1    | Ca_kabuli_chr04 | 22412216                | AA                              | GG              | 1946800058               |
| SNP_P4_46056_22412220 | NC_021163.1    | Ca_kabuli_chr04 | 22412220                | TT                              | CC              | 1946800060               |
| SNP_P4_46057_22441575 | NC_021163.1    | Ca_kabuli_chr04 | 22441575                | GG                              | AA              | 1946800062               |
| SNP_P4_46058_22441743 | NC_021163.1    | Ca_kabuli_chr04 | 22441743                | GG                              | AA              | 1946800064               |
| SNP_P4_46060_22443925 | NC_021163.1    | Ca_kabuli_chr04 | 22443925                | TT                              | CC              | 1946800066               |
| SNP_P4_46061_22444004 | NC_021163.1    | Ca_kabuli_chr04 | 22444004                | CC                              | TT              | 1946800068               |
| SNP_P4_46062_22444241 | NC_021163.1    | Ca_kabuli_chr04 | 22444241                | GG                              | AA              | 1946800070               |
| SNP_P4_46063_22444694 | NC_021163.1    | Ca_kabuli_chr04 | 22444694                | CC                              | TT              | 1946800072               |
| SNP_P4_46065_22472751 | NC_021163.1    | Ca_kabuli_chr04 | 22472751                | AA                              | CC              | 1946800074               |
| SNP_P4_46066_22476632 | NC_021163.1    | Ca_kabuli_chr04 | 22476632                | TT                              | GG              | 1946800076               |
| SNP_P4_46067_22476833 | NC_021163.1    | Ca_kabuli_chr04 | 22476833                | GG                              | AA              | 1946800078               |
| SNP_P4_46068_22483553 | NC_021163.1    | Ca_kabuli_chr04 | 22483553                | TT                              | CC              | 1946800080               |
| SNP_P4_46069_22483695 | NC_021163.1    | Ca_kabuli_chr04 | 22483695                | CC                              | TT              | 1946800082               |
| SNP_P4_46070_22483854 | NC_021163.1    | Ca_kabuli_chr04 | 22483854                | AA                              | GG              | 1946800084               |
| SNP_P4_46071_22483941 | NC_021163.1    | Ca_kabuli_chr04 | 22483941                | TT                              | CC              | 1946800086               |
| SNP_P4_46072_22484203 | NC_021163.1    | Ca_kabuli_chr04 | 22484203                | CC                              | TT              | 1946800088               |
| SNP_P4_46073_22484236 | NC_021163.1    | Ca_kabuli_chr04 | 22484236                | TT                              | GG              | 1946800090               |
| SNP_P4_46074_22521172 | NC_021163.1    | Ca_kabuli_chr04 | 22521172                | GG                              | TT              | 1946800092               |
| SNP_P4_46077_22548674 | NC_021163.1    | Ca_kabuli_chr04 | 22548674                | GG                              | AA              | 1946800094               |
| SNP_P4_46078_22570264 | NC_021163.1    | Ca_kabuli_chr04 | 22570264                | TT                              | CC              | 1946800097               |
| SNP_P4_46079_22570384 | NC_021163.1    | Ca_kabuli_chr04 | 22570384                | TT                              | CC              | 1946800099               |
| SNP_P4_46080_22570443 | NC_021163.1    | Ca_kabuli_chr04 | 22570443                | TT                              | CC              | 1946800101               |
| SNP_P4_46081_22570496 | NC_021163.1    | Ca_kabuli_chr04 | 22570496                | AA                              | GG              | 1946800103               |
| SNP_P4_46082_22570989 | NC_021163.1    | Ca_kabuli_chr04 | 22570989                | AA                              | GG              | 1946800105               |

| SNPs IDs              | Chromosome IDs | Chromosomes     | Physical positions (bp) | CDC Frontier (Reference genome) | (ILWC46 & LPNB) | NCBI SNPdb Accession IDs |
|-----------------------|----------------|-----------------|-------------------------|---------------------------------|-----------------|--------------------------|
| SNP_P4_46084_22601338 | NC_021163.1    | Ca_kabuli_chr04 | 22601338                | TT                              | AA              | 1946800107               |
| SNP_P4_46085_22601350 | NC_021163.1    | Ca_kabuli_chr04 | 22601350                | AA                              | TT              | 1946800109               |
| SNP_P4_46086_22601429 | NC_021163.1    | Ca_kabuli_chr04 | 22601429                | AA                              | CC              | 1946800111               |
| SNP_P4_46087_22601657 | NC_021163.1    | Ca_kabuli_chr04 | 22601657                | TT                              | GG              | 1946800114               |
| SNP_P4_46089_22608737 | NC_021163.1    | Ca_kabuli_chr04 | 22608737                | GG                              | CC              | 1946800116               |
| SNP_P4_46090_22609155 | NC_021163.1    | Ca_kabuli_chr04 | 22609155                | AA                              | GG              | 1946800118               |
| SNP_P4_46091_22618011 | NC_021163.1    | Ca_kabuli_chr04 | 22618011                | TT                              | GG              | 1946800120               |
| SNP_P4_46092_22618309 | NC_021163.1    | Ca_kabuli_chr04 | 22618309                | TT                              | CC              | 1946800122               |
| SNP_P4_46097_22656027 | NC_021163.1    | Ca_kabuli_chr04 | 22656027                | GG                              | AA              | 1946800124               |
| SNP_P4_46098_22660147 | NC_021163.1    | Ca_kabuli_chr04 | 22660147                | GG                              | TT              | 1946800126               |
| SNP_P4_46099_22660180 | NC_021163.1    | Ca_kabuli_chr04 | 22660180                | TT                              | GG              | 1946800128               |
| SNP_P4_46100_22660254 | NC_021163.1    | Ca_kabuli_chr04 | 22660254                | CC                              | AA              | 1946800130               |
| SNP_P4_46101_22660408 | NC_021163.1    | Ca_kabuli_chr04 | 22660408                | CC                              | GG              | 1946800132               |
| SNP_P4_46102_22662063 | NC_021163.1    | Ca_kabuli_chr04 | 22662063                | AA                              | CC              | 1946800134               |
| SNP_P4_46103_22662082 | NC_021163.1    | Ca_kabuli_chr04 | 22662082                | TT                              | CC              | 1946800136               |
| SNP_P4_46105_22664477 | NC_021163.1    | Ca_kabuli_chr04 | 22664477                | AA                              | TT              | 1946800138               |
| SNP_P4_46106_22664503 | NC_021163.1    | Ca_kabuli_chr04 | 22664503                | AA                              | TT              | 1946800140               |
| SNP_P4_46107_22664540 | NC_021163.1    | Ca_kabuli_chr04 | 22664540                | GG                              | AA              | 1946800142               |
| SNP_P4_46108_22664610 | NC_021163.1    | Ca_kabuli_chr04 | 22664610                | TT                              | AA              | 1946800144               |
| SNP_P4_46109_22664611 | NC_021163.1    | Ca_kabuli_chr04 | 22664611                | AA                              | TT              | 1946800146               |
| SNP_P4_46110_22664612 | NC_021163.1    | Ca_kabuli_chr04 | 22664612                | AA                              | GG              | 1946800148               |
| SNP_P4_46111_22664626 | NC_021163.1    | Ca_kabuli_chr04 | 22664626                | AA                              | TT              | 1946800150               |
| SNP_P4_46112_22664748 | NC_021163.1    | Ca_kabuli_chr04 | 22664748                | CC                              | AA              | 1946800152               |
| SNP_P4_46113_22664759 | NC_021163.1    | Ca_kabuli_chr04 | 22664759                | GG                              | AA              | 1946800154               |
| SNP_P4_46114_22664777 | NC_021163.1    | Ca_kabuli_chr04 | 22664777                | AA                              | GG              | 1946800156               |
| SNP_P4_46115_22664808 | NC_021163.1    | Ca_kabuli_chr04 | 22664808                | AA                              | CC              | 1946800158               |
| SNP_P4_46116_22664810 | NC_021163.1    | Ca_kabuli_chr04 | 22664810                | TT                              | AA              | 1946800160               |
| SNP_P4_46118_22664892 | NC_021163.1    | Ca_kabuli_chr04 | 22664892                | CC                              | AA              | 1946800162               |
| SNP_P4_46119_22664921 | NC_021163.1    | Ca_kabuli_chr04 | 22664921                | GG                              | TT              | 1946800164               |
| SNP_P4_46120_22665239 | NC_021163.1    | Ca_kabuli_chr04 | 22665239                | CC                              | AA              | 1946800166               |
| SNP_P4_46121_22665591 | NC_021163.1    | Ca_kabuli_chr04 | 22665591                | CC                              | AA              | 1946800168               |
| SNP_P4_46122_22666511 | NC_021163.1    | Ca_kabuli_chr04 | 22666511                | TT                              | AA              | 1946800170               |
| SNP_P4_46123_22667019 | NC_021163.1    | Ca_kabuli_chr04 | 22667019                | CC                              | AA              | 1946800172               |
| SNP_P4_46124_22667965 | NC_021163.1    | Ca_kabuli_chr04 | 22667965                | AA                              | TT              | 1946800174               |
| SNP_P4_46125_22668226 | NC_021163.1    | Ca_kabuli_chr04 | 22668226                | TT                              | CC              | 1946800177               |
| SNP_P4_46127_22668710 | NC_021163.1    | Ca_kabuli_chr04 | 22668710                | CC                              | AA              | 1946800179               |
| SNP_P4_46128_22668975 | NC_021163.1    | Ca_kabuli_chr04 | 22668975                | CC                              | AA              | 1946800181               |
| SNP_P4_46129_22670294 | NC_021163.1    | Ca_kabuli_chr04 | 22670294                | CC                              | TT              | 1946800183               |
| SNP_P4_46130_22670387 | NC_021163.1    | Ca_kabuli_chr04 | 22670387                | CC                              | TT              | 1946800185               |
| SNP_P4_46131_22670410 | NC_021163.1    | Ca_kabuli_chr04 | 22670410                | GG                              | TT              | 1946800187               |
| SNP_P4_46132_22670445 | NC_021163.1    | Ca_kabuli_chr04 | 22670445                | GG                              | CC              | 1946800189               |
| SNP_P4_46133_22670532 | NC_021163.1    | Ca_kabuli_chr04 | 22670532                | CC                              | AA              | 1946800191               |



| SNPs IDs              | Chromosome IDs | Chromosomes     | Physical positions (bp) | CDC Frontier (Reference genome) | (ILWC46 & LPNB) | NCBI SNPdb Accession IDs |
|-----------------------|----------------|-----------------|-------------------------|---------------------------------|-----------------|--------------------------|
| SNP_P4_46134_22670565 | NC_021163.1    | Ca_kabuli_chr04 | 22670565                | CC                              | GG              | 1946800193               |
| SNP_P4_46135_22670921 | NC_021163.1    | Ca_kabuli_chr04 | 22670921                | AA                              | CC              | 1946800195               |
| SNP_P4_46136_22671309 | NC_021163.1    | Ca_kabuli_chr04 | 22671309                | CC                              | TT              | 1946800197               |
| SNP_P4_46137_22671373 | NC_021163.1    | Ca_kabuli_chr04 | 22671373                | AA                              | GG              | 1946800199               |
| SNP_P4_46138_22671416 | NC_021163.1    | Ca_kabuli_chr04 | 22671416                | TT                              | GG              | 1946800201               |
| SNP_P4_46139_22671682 | NC_021163.1    | Ca_kabuli_chr04 | 22671682                | AA                              | GG              | 1946800203               |
| SNP_P4_46140_22671730 | NC_021163.1    | Ca_kabuli_chr04 | 22671730                | AA                              | GG              | 1946800205               |
| SNP_P4_46141_22672412 | NC_021163.1    | Ca_kabuli_chr04 | 22672412                | TT                              | AA              | 1946800207               |
| SNP_P4_46142_22672623 | NC_021163.1    | Ca_kabuli_chr04 | 22672623                | GG                              | CC              | 1946800209               |
| SNP_P4_46143_22672669 | NC_021163.1    | Ca_kabuli_chr04 | 22672669                | CC                              | GG              | 1946800211               |
| SNP_P4_46144_22675868 | NC_021163.1    | Ca_kabuli_chr04 | 22675868                | TT                              | CC              | 1946800213               |
| SNP_P4_46145_22676018 | NC_021163.1    | Ca_kabuli_chr04 | 22676018                | TT                              | AA              | 1946800215               |
| SNP_P4_46146_22676697 | NC_021163.1    | Ca_kabuli_chr04 | 22676697                | TT                              | GG              | 1946800217               |
| SNP_P4_46147_22676874 | NC_021163.1    | Ca_kabuli_chr04 | 22676874                | CC                              | TT              | 1946800219               |
| SNP_P4_46148_22676920 | NC_021163.1    | Ca_kabuli_chr04 | 22676920                | GG                              | AA              | 1946800221               |
| SNP_P4_46149_22677518 | NC_021163.1    | Ca_kabuli_chr04 | 22677518                | CC                              | TT              | 1946800223               |
| SNP_P4_46150_22677802 | NC_021163.1    | Ca_kabuli_chr04 | 22677802                | CC                              | TT              | 1946800225               |
| SNP_P4_46152_22678149 | NC_021163.1    | Ca_kabuli_chr04 | 22678149                | CC                              | TT              | 1946800227               |
| SNP_P4_46153_22678183 | NC_021163.1    | Ca_kabuli_chr04 | 22678183                | GG                              | AA              | 1946800229               |
| SNP_P4_46154_22678528 | NC_021163.1    | Ca_kabuli_chr04 | 22678528                | AA                              | GG              | 1946800231               |
| SNP_P4_46155_22678823 | NC_021163.1    | Ca_kabuli_chr04 | 22678823                | AA                              | GG              | 1946800233               |
| SNP_P4_46156_22679414 | NC_021163.1    | Ca_kabuli_chr04 | 22679414                | TT                              | AA              | 1946800235               |
| SNP_P4_46157_22679887 | NC_021163.1    | Ca_kabuli_chr04 | 22679887                | TT                              | CC              | 1946800237               |
| SNP_P4_46158_22680257 | NC_021163.1    | Ca_kabuli_chr04 | 22680257                | GG                              | TT              | 1946800239               |
| SNP_P4_46159_22680270 | NC_021163.1    | Ca_kabuli_chr04 | 22680270                | AA                              | GG              | 1946800241               |
| SNP_P4_46160_22686672 | NC_021163.1    | Ca_kabuli_chr04 | 22686672                | TT                              | CC              | 1946800243               |
| SNP_P4_46161_22686673 | NC_021163.1    | Ca_kabuli_chr04 | 22686673                | GG                              | AA              | 1946800245               |
| SNP_P4_46162_22686686 | NC_021163.1    | Ca_kabuli_chr04 | 22686686                | AA                              | TT              | 1946800247               |
| SNP_P4_46163_22686844 | NC_021163.1    | Ca_kabuli_chr04 | 22686844                | GG                              | AA              | 1946800249               |
| SNP_P4_46164_22686893 | NC_021163.1    | Ca_kabuli_chr04 | 22686893                | AA                              | GG              | 1946800251               |
| SNP_P4_46165_22695403 | NC_021163.1    | Ca_kabuli_chr04 | 22695403                | TT                              | CC              | 1946800253               |
| SNP_P4_46166_22696689 | NC_021163.1    | Ca_kabuli_chr04 | 22696689                | CC                              | TT              | 1946800255               |
| SNP_P4_46167_22696690 | NC_021163.1    | Ca_kabuli_chr04 | 22696690                | TT                              | GG              | 1946800257               |
| SNP_P4_46168_22696790 | NC_021163.1    | Ca_kabuli_chr04 | 22696790                | GG                              | TT              | 1946800259               |
| SNP_P4_46169_22697015 | NC_021163.1    | Ca_kabuli_chr04 | 22697015                | CC                              | AA              | 1946800261               |
| SNP_P4_46170_22697029 | NC_021163.1    | Ca_kabuli_chr04 | 22697029                | AA                              | TT              | 1946800263               |
| SNP_P4_46171_22697042 | NC_021163.1    | Ca_kabuli_chr04 | 22697042                | AA                              | GG              | 1946800265               |
| SNP_P4_46172_22697554 | NC_021163.1    | Ca_kabuli_chr04 | 22697554                | AA                              | GG              | 1946800267               |
| SNP_P4_46173_22698002 | NC_021163.1    | Ca_kabuli_chr04 | 22698002                | CC                              | TT              | 1946800269               |
| SNP_P4_46174_22698006 | NC_021163.1    | Ca_kabuli_chr04 | 22698006                | TT                              | CC              | 1946800271               |
| SNP_P4_46175_22698167 | NC_021163.1    | Ca_kabuli_chr04 | 22698167                | TT                              | CC              | 1946800273               |
| SNP_P4_46176_22698172 | NC_021163.1    | Ca_kabuli_chr04 | 22698172                | TT                              | CC              | 1946800275               |

| SNPs IDs              | Chromosome IDs | Chromosomes     | Physical positions (bp) | CDC Frontier (Reference genome) | (ILWC46 & LPNB) | NCBI SNPdb Accession IDs |
|-----------------------|----------------|-----------------|-------------------------|---------------------------------|-----------------|--------------------------|
| SNP_P4_46177_22699087 | NC_021163.1    | Ca_kabuli_chr04 | 22699087                | CC                              | AA              | 1946800277               |
| SNP_P4_46178_22699611 | NC_021163.1    | Ca_kabuli_chr04 | 22699611                | AA                              | CC              | 1946800279               |
| SNP_P4_46179_22699651 | NC_021163.1    | Ca_kabuli_chr04 | 22699651                | CC                              | TT              | 1946800280               |
| SNP_P4_46180_22699771 | NC_021163.1    | Ca_kabuli_chr04 | 22699771                | TT                              | CC              | 1946800282               |
| SNP_P4_46181_22700678 | NC_021163.1    | Ca_kabuli_chr04 | 22700678                | AA                              | GG              | 1946800284               |
| SNP_P4_46182_22700686 | NC_021163.1    | Ca_kabuli_chr04 | 22700686                | TT                              | AA              | 1946800286               |
| SNP_P4_46183_22700692 | NC_021163.1    | Ca_kabuli_chr04 | 22700692                | TT                              | AA              | 1946800288               |
| SNP_P4_46184_22700839 | NC_021163.1    | Ca_kabuli_chr04 | 22700839                | GG                              | AA              | 1946800290               |
| SNP_P4_46185_22700850 | NC_021163.1    | Ca_kabuli_chr04 | 22700850                | TT                              | CC              | 1946800292               |
| SNP_P4_46186_22703496 | NC_021163.1    | Ca_kabuli_chr04 | 22703496                | CC                              | TT              | 1946800294               |
| SNP_P4_46187_22703847 | NC_021163.1    | Ca_kabuli_chr04 | 22703847                | AA                              | TT              | 1946800297               |
| SNP_P4_46188_22704061 | NC_021163.1    | Ca_kabuli_chr04 | 22704061                | AA                              | TT              | 1946800299               |
| SNP_P4_46189_22704087 | NC_021163.1    | Ca_kabuli_chr04 | 22704087                | CC                              | TT              | 1946800301               |
| SNP_P4_46190_22704323 | NC_021163.1    | Ca_kabuli_chr04 | 22704323                | TT                              | CC              | 1946800303               |
| SNP_P4_46191_22704991 | NC_021163.1    | Ca_kabuli_chr04 | 22704991                | AA                              | TT              | 1946800305               |
| SNP_P4_46192_22705190 | NC_021163.1    | Ca_kabuli_chr04 | 22705190                | AA                              | GG              | 1946800307               |
| SNP_P4_46194_22707882 | NC_021163.1    | Ca_kabuli_chr04 | 22707882                | GG                              | AA              | 1946800309               |
| SNP_P4_46195_22711938 | NC_021163.1    | Ca_kabuli_chr04 | 22711938                | GG                              | AA              | 1946800311               |
| SNP_P4_46196_22718282 | NC_021163.1    | Ca_kabuli_chr04 | 22718282                | CC                              | AA              | 1946800313               |
| SNP_P4_46197_22718633 | NC_021163.1    | Ca_kabuli_chr04 | 22718633                | CC                              | TT              | 1946800315               |
| SNP_P4_46198_22719162 | NC_021163.1    | Ca_kabuli_chr04 | 22719162                | TT                              | CC              | 1946800317               |
| SNP_P4_46200_22720324 | NC_021163.1    | Ca_kabuli_chr04 | 22720324                | AA                              | GG              | 1946800319               |
| SNP_P4_46202_22728309 | NC_021163.1    | Ca_kabuli_chr04 | 22728309                | AA                              | GG              | 1946800321               |
| SNP_P4_46205_22730637 | NC_021163.1    | Ca_kabuli_chr04 | 22730637                | TT                              | GG              | 1946800323               |
| SNP_P4_46206_22730964 | NC_021163.1    | Ca_kabuli_chr04 | 22730964                | GG                              | TT              | 1946800325               |
| SNP_P4_46208_22735375 | NC_021163.1    | Ca_kabuli_chr04 | 22735375                | CC                              | TT              | 1946800327               |
| SNP_P4_46209_22735450 | NC_021163.1    | Ca_kabuli_chr04 | 22735450                | CC                              | TT              | 1946800329               |
| SNP_P4_46210_22735687 | NC_021163.1    | Ca_kabuli_chr04 | 22735687                | GG                              | AA              | 1946800331               |
| SNP_P4_46211_22735691 | NC_021163.1    | Ca_kabuli_chr04 | 22735691                | AA                              | GG              | 1946800333               |
| SNP_P4_46212_22735882 | NC_021163.1    | Ca_kabuli_chr04 | 22735882                | GG                              | AA              | 1946800335               |
| SNP_P4_46213_22735883 | NC_021163.1    | Ca_kabuli_chr04 | 22735883                | AA                              | GG              | 1946800337               |
| SNP_P4_46214_22736175 | NC_021163.1    | Ca_kabuli_chr04 | 22736175                | CC                              | AA              | 1946800339               |
| SNP_P4_46215_22736189 | NC_021163.1    | Ca_kabuli_chr04 | 22736189                | TT                              | CC              | 1946800341               |
| SNP_P4_46216_22736191 | NC_021163.1    | Ca_kabuli_chr04 | 22736191                | GG                              | TT              | 1946800343               |
| SNP_P4_46217_22736581 | NC_021163.1    | Ca_kabuli_chr04 | 22736581                | CC                              | TT              | 1946800345               |
| SNP_P4_46218_22736613 | NC_021163.1    | Ca_kabuli_chr04 | 22736613                | TT                              | GG              | 1946800347               |
| SNP_P4_46219_22738255 | NC_021163.1    | Ca_kabuli_chr04 | 22738255                | GG                              | AA              | 1946800349               |
| SNP_P4_46220_22738281 | NC_021163.1    | Ca_kabuli_chr04 | 22738281                | AA                              | GG              | 1946800351               |
| SNP_P4_46221_22738680 | NC_021163.1    | Ca_kabuli_chr04 | 22738680                | TT                              | CC              | 1946800353               |
| SNP_P4_46222_22741194 | NC_021163.1    | Ca_kabuli_chr04 | 22741194                | TT                              | AA              | 1946800355               |
| SNP_P4_46223_22741239 | NC_021163.1    | Ca_kabuli_chr04 | 22741239                | CC                              | AA              | 1946800357               |
| SNP_P4_46224_22741352 | NC_021163.1    | Ca_kabuli_chr04 | 22741352                | GG                              | AA              | 1946800359               |

| SNPs IDs              | Chromosome IDs | Chromosomes     | Physical positions (bp) | CDC Frontier (Reference genome) | (ILWC46 & LPNB) | NCBI SNPdb Accession IDs |
|-----------------------|----------------|-----------------|-------------------------|---------------------------------|-----------------|--------------------------|
| SNP_P4_46225_22741631 | NC_021163.1    | Ca_kabuli_chr04 | 22741631                | AA                              | TT              | 1946800362               |
| SNP_P4_46226_22743402 | NC_021163.1    | Ca_kabuli_chr04 | 22743402                | CC                              | AA              | 1946800364               |
| SNP_P4_46227_22744225 | NC_021163.1    | Ca_kabuli_chr04 | 22744225                | AA                              | CC              | 1946800366               |
| SNP_P4_46228_22744247 | NC_021163.1    | Ca_kabuli_chr04 | 22744247                | CC                              | TT              | 1946800368               |
| SNP_P4_46229_22744265 | NC_021163.1    | Ca_kabuli_chr04 | 22744265                | AA                              | CC              | 1946800370               |
| SNP_P4_46230_22744401 | NC_021163.1    | Ca_kabuli_chr04 | 22744401                | CC                              | AA              | 1946800372               |
| SNP_P4_46233_22744975 | NC_021163.1    | Ca_kabuli_chr04 | 22744975                | TT                              | AA              | 1946800374               |
| SNP_P4_46234_22745173 | NC_021163.1    | Ca_kabuli_chr04 | 22745173                | CC                              | TT              | 1946800376               |
| SNP_P4_46235_22745217 | NC_021163.1    | Ca_kabuli_chr04 | 22745217                | GG                              | AA              | 1946800378               |
| SNP_P4_46236_22745525 | NC_021163.1    | Ca_kabuli_chr04 | 22745525                | GG                              | AA              | 1946800380               |
| SNP_P4_46237_22745534 | NC_021163.1    | Ca_kabuli_chr04 | 22745534                | GG                              | AA              | 1946800382               |
| SNP_P4_46238_22747730 | NC_021163.1    | Ca_kabuli_chr04 | 22747730                | GG                              | AA              | 1946800384               |
| SNP_P4_46239_22748619 | NC_021163.1    | Ca_kabuli_chr04 | 22748619                | TT                              | GG              | 1946800386               |
| SNP_P4_46240_22748925 | NC_021163.1    | Ca_kabuli_chr04 | 22748925                | CC                              | TT              | 1946800388               |
| SNP_P4_46241_22749718 | NC_021163.1    | Ca_kabuli_chr04 | 22749718                | TT                              | CC              | 1946800390               |
| SNP_P4_46242_22749762 | NC_021163.1    | Ca_kabuli_chr04 | 22749762                | CC                              | AA              | 1946800392               |
| SNP_P4_46243_22749967 | NC_021163.1    | Ca_kabuli_chr04 | 22749967                | GG                              | TT              | 1946800394               |
| SNP_P4_46244_22750249 | NC_021163.1    | Ca_kabuli_chr04 | 22750249                | TT                              | CC              | 1946800396               |
| SNP_P4_46245_22750251 | NC_021163.1    | Ca_kabuli_chr04 | 22750251                | TT                              | AA              | 1946800398               |
| SNP_P4_46246_22750324 | NC_021163.1    | Ca_kabuli_chr04 | 22750324                | AA                              | TT              | 1946800400               |
| SNP_P4_46247_22752086 | NC_021163.1    | Ca_kabuli_chr04 | 22752086                | CC                              | TT              | 1946800402               |
| SNP_P4_46248_22753354 | NC_021163.1    | Ca_kabuli_chr04 | 22753354                | AA                              | GG              | 1946800404               |
| SNP_P4_46249_22753429 | NC_021163.1    | Ca_kabuli_chr04 | 22753429                | CC                              | GG              | 1946800406               |
| SNP_P4_46250_22753578 | NC_021163.1    | Ca_kabuli_chr04 | 22753578                | AA                              | GG              | 1946800408               |
| SNP_P4_46251_22753960 | NC_021163.1    | Ca_kabuli_chr04 | 22753960                | AA                              | TT              | 1946800410               |
| SNP_P4_46252_22755119 | NC_021163.1    | Ca_kabuli_chr04 | 22755119                | GG                              | TT              | 1946800412               |
| SNP_P4_46254_22755183 | NC_021163.1    | Ca_kabuli_chr04 | 22755183                | GG                              | AA              | 1946800414               |
| SNP_P4_46255_22755496 | NC_021163.1    | Ca_kabuli_chr04 | 22755496                | GG                              | AA              | 1946800416               |
| SNP_P4_46256_22757172 | NC_021163.1    | Ca_kabuli_chr04 | 22757172                | CC                              | TT              | 1946800418               |
| SNP_P4_46257_22757197 | NC_021163.1    | Ca_kabuli_chr04 | 22757197                | CC                              | TT              | 1946800420               |
| SNP_P4_46258_22757224 | NC_021163.1    | Ca_kabuli_chr04 | 22757224                | TT                              | CC              | 1946800422               |
| SNP_P4_46259_22762799 | NC_021163.1    | Ca_kabuli_chr04 | 22762799                | TT                              | CC              | 1946800424               |
| SNP_P4_46260_22762828 | NC_021163.1    | Ca_kabuli_chr04 | 22762828                | CC                              | TT              | 1946800426               |
| SNP_P4_46261_22762999 | NC_021163.1    | Ca_kabuli_chr04 | 22762999                | AA                              | CC              | 1946800428               |
| SNP_P4_46262_22763037 | NC_021163.1    | Ca_kabuli_chr04 | 22763037                | TT                              | AA              | 1946800430               |
| SNP_P4_46263_22763038 | NC_021163.1    | Ca_kabuli_chr04 | 22763038                | GG                              | AA              | 1946800432               |
| SNP_P4_46264_22763040 | NC_021163.1    | Ca_kabuli_chr04 | 22763040                | AA                              | GG              | 1946800434               |
| SNP_P4_46265_22764141 | NC_021163.1    | Ca_kabuli_chr04 | 22764141                | TT                              | GG              | 1946800436               |
| SNP_P4_46266_22766161 | NC_021163.1    | Ca_kabuli_chr04 | 22766161                | GG                              | AA              | 1946800438               |
| SNP_P4_46267_22766516 | NC_021163.1    | Ca_kabuli_chr04 | 22766516                | AA                              | GG              | 1946800440               |
| SNP_P4_46268_22766520 | NC_021163.1    | Ca_kabuli_chr04 | 22766520                | AA                              | TT              | 1946800442               |
| SNP_P4_46269_22766521 | NC_021163.1    | Ca_kabuli_chr04 | 22766521                | AA                              | TT              | 1946800444               |

| SNPs IDs              | Chromosome IDs | Chromosomes     | Physical positions (bp) | CDC Frontier (Reference genome) | (ILWC46 & LPNB) | NCBI SNPdb Accession IDs |
|-----------------------|----------------|-----------------|-------------------------|---------------------------------|-----------------|--------------------------|
| SNP_P4_46270_22766761 | NC_021163.1    | Ca_kabuli_chr04 | 22766761                | AA                              | GG              | 1946800446               |
| SNP_P4_46271_22767364 | NC_021163.1    | Ca_kabuli_chr04 | 22767364                | AA                              | GG              | 1946800448               |
| SNP_P4_46272_22767369 | NC_021163.1    | Ca_kabuli_chr04 | 22767369                | TT                              | CC              | 1946800450               |
| SNP_P4_46273_22767399 | NC_021163.1    | Ca_kabuli_chr04 | 22767399                | CC                              | TT              | 1946800452               |
| SNP_P4_46274_22767402 | NC_021163.1    | Ca_kabuli_chr04 | 22767402                | AA                              | GG              | 1946800455               |
| SNP_P4_46275_22767737 | NC_021163.1    | Ca_kabuli_chr04 | 22767737                | AA                              | TT              | 1946800457               |
| SNP_P4_46276_22767751 | NC_021163.1    | Ca_kabuli_chr04 | 22767751                | GG                              | AA              | 1946800459               |
| SNP_P4_46277_22767752 | NC_021163.1    | Ca_kabuli_chr04 | 22767752                | TT                              | AA              | 1946800461               |
| SNP_P4_46278_22767778 | NC_021163.1    | Ca_kabuli_chr04 | 22767778                | TT                              | CC              | 1946800463               |
| SNP_P4_46279_22767780 | NC_021163.1    | Ca_kabuli_chr04 | 22767780                | GG                              | AA              | 1946800465               |
| SNP_P4_46280_22767842 | NC_021163.1    | Ca_kabuli_chr04 | 22767842                | AA                              | GG              | 1946800467               |
| SNP_P4_46281_22767879 | NC_021163.1    | Ca_kabuli_chr04 | 22767879                | TT                              | AA              | 1946800469               |
| SNP_P4_46282_22767975 | NC_021163.1    | Ca_kabuli_chr04 | 22767975                | TT                              | CC              | 1946800471               |
| SNP_P4_46283_22768059 | NC_021163.1    | Ca_kabuli_chr04 | 22768059                | GG                              | AA              | 1946800472               |
| SNP_P4_46284_22768168 | NC_021163.1    | Ca_kabuli_chr04 | 22768168                | CC                              | GG              | 1946800474               |
| SNP_P4_46285_22768178 | NC_021163.1    | Ca_kabuli_chr04 | 22768178                | AA                              | GG              | 1946800476               |
| SNP_P4_46286_22772534 | NC_021163.1    | Ca_kabuli_chr04 | 22772534                | AA                              | GG              | 1946800478               |
| SNP_P4_46289_22774735 | NC_021163.1    | Ca_kabuli_chr04 | 22774735                | AA                              | GG              | 1946800480               |
| SNP_P4_46290_22774784 | NC_021163.1    | Ca_kabuli_chr04 | 22774784                | AA                              | GG              | 1946800482               |
| SNP_P4_46291_22774787 | NC_021163.1    | Ca_kabuli_chr04 | 22774787                | AA                              | TT              | 1946800484               |
| SNP_P4_46293_22774984 | NC_021163.1    | Ca_kabuli_chr04 | 22774984                | GG                              | AA              | 1946800486               |
| SNP_P4_46294_22775011 | NC_021163.1    | Ca_kabuli_chr04 | 22775011                | CC                              | TT              | 1946800488               |
| SNP_P4_46295_22775021 | NC_021163.1    | Ca_kabuli_chr04 | 22775021                | TT                              | AA              | 1946800490               |
| SNP_P4_46296_22775038 | NC_021163.1    | Ca_kabuli_chr04 | 22775038                | TT                              | CC              | 1946800493               |
| SNP_P4_46297_22775040 | NC_021163.1    | Ca_kabuli_chr04 | 22775040                | GG                              | AA              | 1946800495               |
| SNP_P4_46298_22775092 | NC_021163.1    | Ca_kabuli_chr04 | 22775092                | AA                              | TT              | 1946800497               |
| SNP_P4_46299_22775704 | NC_021163.1    | Ca_kabuli_chr04 | 22775704                | GG                              | AA              | 1946800499               |
| SNP_P4_46300_22775709 | NC_021163.1    | Ca_kabuli_chr04 | 22775709                | TT                              | CC              | 1946800501               |
| SNP_P4_46301_22775734 | NC_021163.1    | Ca_kabuli_chr04 | 22775734                | CC                              | AA              | 1946800503               |
| SNP_P4_46302_22780656 | NC_021163.1    | Ca_kabuli_chr04 | 22780656                | TT                              | AA              | 1946800505               |
| SNP_P4_46303_22780705 | NC_021163.1    | Ca_kabuli_chr04 | 22780705                | CC                              | TT              | 1946800507               |
| SNP_P4_46305_22780844 | NC_021163.1    | Ca_kabuli_chr04 | 22780844                | TT                              | CC              | 1946800509               |
| SNP_P4_46306_22782562 | NC_021163.1    | Ca_kabuli_chr04 | 22782562                | TT                              | CC              | 1946800511               |
| SNP_P4_46307_22782577 | NC_021163.1    | Ca_kabuli_chr04 | 22782577                | TT                              | CC              | 1946800513               |
| SNP_P4_46308_22782583 | NC_021163.1    | Ca_kabuli_chr04 | 22782583                | TT                              | CC              | 1946800515               |
| SNP_P4_46309_22782592 | NC_021163.1    | Ca_kabuli_chr04 | 22782592                | CC                              | TT              | 1946800517               |
| SNP_P4_46311_22782814 | NC_021163.1    | Ca_kabuli_chr04 | 22782814                | TT                              | CC              | 1946800519               |
| SNP_P4_46312_22783222 | NC_021163.1    | Ca_kabuli_chr04 | 22783222                | CC                              | TT              | 1946800521               |
| SNP_P4_46313_22783471 | NC_021163.1    | Ca_kabuli_chr04 | 22783471                | CC                              | AA              | 1946800523               |
| SNP_P4_46314_22783476 | NC_021163.1    | Ca_kabuli_chr04 | 22783476                | TT                              | CC              | 1946800525               |
| SNP_P4_46315_22786674 | NC_021163.1    | Ca_kabuli_chr04 | 22786674                | GG                              | AA              | 1946800527               |
| SNP_P4_46316_22786690 | NC_021163.1    | Ca_kabuli_chr04 | 22786690                | TT                              | CC              | 1946800529               |

| SNPs IDs              | Chromosome IDs | Chromosomes     | Physical positions (bp) | CDC Frontier (Reference genome) | (ILWC46 & LPNB) | NCBI SNPdb Accession IDs |
|-----------------------|----------------|-----------------|-------------------------|---------------------------------|-----------------|--------------------------|
| SNP_P4_46317_22788512 | NC_021163.1    | Ca_kabuli_chr04 | 22788512                | TT                              | CC              | 1946800531               |
| SNP_P4_46318_22788785 | NC_021163.1    | Ca_kabuli_chr04 | 22788785                | CC                              | TT              | 1946800533               |
| SNP_P4_46319_22788802 | NC_021163.1    | Ca_kabuli_chr04 | 22788802                | CC                              | TT              | 1946800535               |
| SNP_P4_46321_22792938 | NC_021163.1    | Ca_kabuli_chr04 | 22792938                | TT                              | AA              | 1946800537               |
| SNP_P4_46322_22793065 | NC_021163.1    | Ca_kabuli_chr04 | 22793065                | CC                              | TT              | 1946800539               |
| SNP_P4_46323_22793170 | NC_021163.1    | Ca_kabuli_chr04 | 22793170                | CC                              | TT              | 1946800541               |
| SNP_P4_46324_22794312 | NC_021163.1    | Ca_kabuli_chr04 | 22794312                | AA                              | CC              | 1946800543               |
| SNP_P4_46325_22794318 | NC_021163.1    | Ca_kabuli_chr04 | 22794318                | GG                              | TT              | 1946800545               |
| SNP_P4_46327_22794617 | NC_021163.1    | Ca_kabuli_chr04 | 22794617                | CC                              | TT              | 1946800547               |
| SNP_P4_46328_22794656 | NC_021163.1    | Ca_kabuli_chr04 | 22794656                | TT                              | CC              | 1946800549               |
| SNP_P4_46329_22794666 | NC_021163.1    | Ca_kabuli_chr04 | 22794666                | TT                              | CC              | 1946800551               |
| SNP_P4_46331_22796923 | NC_021163.1    | Ca_kabuli_chr04 | 22796923                | CC                              | TT              | 1946800553               |
| SNP_P4_46332_22796931 | NC_021163.1    | Ca_kabuli_chr04 | 22796931                | CC                              | TT              | 1946800555               |
| SNP_P4_46333_22797549 | NC_021163.1    | Ca_kabuli_chr04 | 22797549                | CC                              | TT              | 1946800557               |
| SNP_P4_46335_22798013 | NC_021163.1    | Ca_kabuli_chr04 | 22798013                | CC                              | TT              | 1946800559               |
| SNP_P4_46336_22798360 | NC_021163.1    | Ca_kabuli_chr04 | 22798360                | AA                              | CC              | 1946800561               |
| SNP_P4_46337_22798492 | NC_021163.1    | Ca_kabuli_chr04 | 22798492                | TT                              | CC              | 1946800563               |
| SNP_P4_46338_22798704 | NC_021163.1    | Ca_kabuli_chr04 | 22798704                | CC                              | GG              | 1946800565               |
| SNP_P4_46339_22798733 | NC_021163.1    | Ca_kabuli_chr04 | 22798733                | CC                              | TT              | 1946800567               |
| SNP_P4_46340_22798763 | NC_021163.1    | Ca_kabuli_chr04 | 22798763                | TT                              | CC              | 1946800569               |
| SNP_P4_46342_22799949 | NC_021163.1    | Ca_kabuli_chr04 | 22799949                | GG                              | AA              | 1946800571               |
| SNP_P4_46343_22799951 | NC_021163.1    | Ca_kabuli_chr04 | 22799951                | GG                              | CC              | 1946800573               |
| SNP_P4_46344_22800129 | NC_021163.1    | Ca_kabuli_chr04 | 22800129                | GG                              | AA              | 1946800575               |
| SNP_P4_46345_22800171 | NC_021163.1    | Ca_kabuli_chr04 | 22800171                | TT                              | CC              | 1946800577               |
| SNP_P4_46346_22800210 | NC_021163.1    | Ca_kabuli_chr04 | 22800210                | TT                              | CC              | 1946800579               |
| SNP_P4_46348_22800381 | NC_021163.1    | Ca_kabuli_chr04 | 22800381                | GG                              | AA              | 1946800581               |
| SNP_P4_46349_22800562 | NC_021163.1    | Ca_kabuli_chr04 | 22800562                | CC                              | TT              | 1946800583               |
| SNP_P4_46350_22800602 | NC_021163.1    | Ca_kabuli_chr04 | 22800602                | AA                              | GG              | 1946800585               |
| SNP_P4_46351_22801118 | NC_021163.1    | Ca_kabuli_chr04 | 22801118                | CC                              | TT              | 1946800587               |
| SNP_P4_46353_22803958 | NC_021163.1    | Ca_kabuli_chr04 | 22803958                | AA                              | GG              | 1946800589               |
| SNP_P4_46354_22805064 | NC_021163.1    | Ca_kabuli_chr04 | 22805064                | TT                              | CC              | 1946800591               |
| SNP_P4_46355_22806873 | NC_021163.1    | Ca_kabuli_chr04 | 22806873                | GG                              | AA              | 1946800593               |
| SNP_P4_46357_22808692 | NC_021163.1    | Ca_kabuli_chr04 | 22808692                | AA                              | TT              | 1946800595               |
| SNP_P4_46358_22812831 | NC_021163.1    | Ca_kabuli_chr04 | 22812831                | TT                              | CC              | 1946800596               |
| SNP_P4_46360_22816582 | NC_021163.1    | Ca_kabuli_chr04 | 22816582                | AA                              | GG              | 1946800598               |
| SNP_P4_46361_22816596 | NC_021163.1    | Ca_kabuli_chr04 | 22816596                | TT                              | AA              | 1946800600               |
| SNP_P4_46362_22816609 | NC_021163.1    | Ca_kabuli_chr04 | 22816609                | AA                              | TT              | 1946800602               |
| SNP_P4_46363_22816685 | NC_021163.1    | Ca_kabuli_chr04 | 22816685                | GG                              | AA              | 1946800604               |
| SNP_P4_46364_22816772 | NC_021163.1    | Ca_kabuli_chr04 | 22816772                | TT                              | AA              | 1946800606               |
| SNP_P4_46365_22816783 | NC_021163.1    | Ca_kabuli_chr04 | 22816783                | TT                              | AA              | 1946800608               |
| SNP_P4_46366_22816892 | NC_021163.1    | Ca_kabuli_chr04 | 22816892                | TT                              | CC              | 1946800610               |
| SNP_P4_46367_22816901 | NC_021163.1    | Ca_kabuli_chr04 | 22816901                | CC                              | TT              | 1946800612               |

| SNPs IDs              | Chromosome IDs | Chromosomes     | Physical positions (bp) | CDC Frontier (Reference genome) | (ILWC46 & LPNB) | NCBI SNPdb Accession IDs |
|-----------------------|----------------|-----------------|-------------------------|---------------------------------|-----------------|--------------------------|
| SNP_P4_46368_22816915 | NC_021163.1    | Ca_kabuli_chr04 | 22816915                | CC                              | AA              | 1946800614               |
| SNP_P4_46369_22817065 | NC_021163.1    | Ca_kabuli_chr04 | 22817065                | CC                              | TT              | 1946800616               |
| SNP_P4_46370_22817813 | NC_021163.1    | Ca_kabuli_chr04 | 22817813                | GG                              | AA              | 1946800618               |
| SNP_P4_46371_22818105 | NC_021163.1    | Ca_kabuli_chr04 | 22818105                | GG                              | AA              | 1946800620               |
| SNP_P4_46372_22818111 | NC_021163.1    | Ca_kabuli_chr04 | 22818111                | TT                              | AA              | 1946800622               |
| SNP_P4_46373_22818158 | NC_021163.1    | Ca_kabuli_chr04 | 22818158                | CC                              | TT              | 1946800624               |
| SNP_P4_46374_22818180 | NC_021163.1    | Ca_kabuli_chr04 | 22818180                | GG                              | AA              | 1946800626               |
| SNP_P4_46375_22818183 | NC_021163.1    | Ca_kabuli_chr04 | 22818183                | TT                              | CC              | 1946800627               |
| SNP_P4_46376_22818218 | NC_021163.1    | Ca_kabuli_chr04 | 22818218                | TT                              | CC              | 1946800629               |
| SNP_P4_46377_22818390 | NC_021163.1    | Ca_kabuli_chr04 | 22818390                | TT                              | GG              | 1946800631               |
| SNP_P4_46379_22818540 | NC_021163.1    | Ca_kabuli_chr04 | 22818540                | AA                              | CC              | 1946800633               |
| SNP_P4_46380_22818616 | NC_021163.1    | Ca_kabuli_chr04 | 22818616                | TT                              | CC              | 1946800635               |
| SNP_P4_46381_22818638 | NC_021163.1    | Ca_kabuli_chr04 | 22818638                | CC                              | TT              | 1946800637               |
| SNP_P4_46382_22818647 | NC_021163.1    | Ca_kabuli_chr04 | 22818647                | TT                              | CC              | 1946800639               |
| SNP_P4_46383_22818908 | NC_021163.1    | Ca_kabuli_chr04 | 22818908                | AA                              | GG              | 1946800641               |
| SNP_P4_46384_22818973 | NC_021163.1    | Ca_kabuli_chr04 | 22818973                | TT                              | GG              | 1946800643               |
| SNP_P4_46385_22818995 | NC_021163.1    | Ca_kabuli_chr04 | 22818995                | AA                              | GG              | 1946800645               |
| SNP_P4_46386_22819012 | NC_021163.1    | Ca_kabuli_chr04 | 22819012                | CC                              | GG              | 1946800647               |
| SNP_P4_46387_22819020 | NC_021163.1    | Ca_kabuli_chr04 | 22819020                | GG                              | AA              | 1946800649               |
| SNP_P4_46388_22820479 | NC_021163.1    | Ca_kabuli_chr04 | 22820479                | TT                              | CC              | 1946800651               |
| SNP_P4_46389_22820880 | NC_021163.1    | Ca_kabuli_chr04 | 22820880                | AA                              | GG              | 1946800653               |
| SNP_P4_46390_22821700 | NC_021163.1    | Ca_kabuli_chr04 | 22821700                | GG                              | TT              | 1946800655               |
| SNP_P4_46391_22822513 | NC_021163.1    | Ca_kabuli_chr04 | 22822513                | CC                              | TT              | 1946800657               |
| SNP_P4_46392_22822527 | NC_021163.1    | Ca_kabuli_chr04 | 22822527                | CC                              | AA              | 1946800659               |
| SNP_P4_46393_22822609 | NC_021163.1    | Ca_kabuli_chr04 | 22822609                | GG                              | AA              | 1946800661               |
| SNP_P4_46395_22824661 | NC_021163.1    | Ca_kabuli_chr04 | 22824661                | AA                              | GG              | 1946800664               |
| SNP_P4_46396_22825104 | NC_021163.1    | Ca_kabuli_chr04 | 22825104                | TT                              | CC              | 1946800666               |
| SNP_P4_46397_22825111 | NC_021163.1    | Ca_kabuli_chr04 | 22825111                | AA                              | GG              | 1946800668               |
| SNP_P4_46398_22825169 | NC_021163.1    | Ca_kabuli_chr04 | 22825169                | AA                              | TT              | 1946800670               |
| SNP_P4_46400_22825343 | NC_021163.1    | Ca_kabuli_chr04 | 22825343                | GG                              | AA              | 1946800672               |
| SNP_P4_46401_22825359 | NC_021163.1    | Ca_kabuli_chr04 | 22825359                | TT                              | CC              | 1946800674               |
| SNP_P4_46402_22825372 | NC_021163.1    | Ca_kabuli_chr04 | 22825372                | TT                              | CC              | 1946800676               |
| SNP_P4_46403_22825381 | NC_021163.1    | Ca_kabuli_chr04 | 22825381                | AA                              | GG              | 1946800678               |
| SNP_P4_46404_22825396 | NC_021163.1    | Ca_kabuli_chr04 | 22825396                | AA                              | CC              | 1946800681               |
| SNP_P4_46405_22825416 | NC_021163.1    | Ca_kabuli_chr04 | 22825416                | CC                              | TT              | 1946800683               |
| SNP_P4_46406_22825427 | NC_021163.1    | Ca_kabuli_chr04 | 22825427                | TT                              | GG              | 1946800685               |
| SNP_P4_46407_22825460 | NC_021163.1    | Ca_kabuli_chr04 | 22825460                | GG                              | AA              | 1946800687               |
| SNP_P4_46408_22825463 | NC_021163.1    | Ca_kabuli_chr04 | 22825463                | CC                              | TT              | 1946800689               |
| SNP_P4_46409_22827207 | NC_021163.1    | Ca_kabuli_chr04 | 22827207                | CC                              | TT              | 1946800691               |
| SNP_P4_46410_22827300 | NC_021163.1    | Ca_kabuli_chr04 | 22827300                | CC                              | TT              | 1946800693               |
| SNP_P4_46412_22833560 | NC_021163.1    | Ca_kabuli_chr04 | 22833560                | GG                              | AA              | 1946800695               |
| SNP_P4_46413_22833937 | NC_021163.1    | Ca_kabuli_chr04 | 22833937                | TT                              | CC              | 1946800697               |

| SNPs IDs              | Chromosome IDs | Chromosomes     | Physical positions (bp) | CDC Frontier (Reference genome) | (ILWC46 & LPNB) | NCBI SNPdb Accession IDs |
|-----------------------|----------------|-----------------|-------------------------|---------------------------------|-----------------|--------------------------|
| SNP_P4_46414_22836190 | NC_021163.1    | Ca_kabuli_chr04 | 22836190                | TT                              | AA              | 1946800699               |
| SNP_P4_46415_22837072 | NC_021163.1    | Ca_kabuli_chr04 | 22837072                | AA                              | CC              | 1946800701               |
| SNP_P4_46416_22837701 | NC_021163.1    | Ca_kabuli_chr04 | 22837701                | GG                              | AA              | 1946800704               |
| SNP_P4_46418_22837745 | NC_021163.1    | Ca_kabuli_chr04 | 22837745                | GG                              | CC              | 1946800706               |
| SNP_P4_46419_22837765 | NC_021163.1    | Ca_kabuli_chr04 | 22837765                | GG                              | AA              | 1946800708               |
| SNP_P4_46420_22848252 | NC_021163.1    | Ca_kabuli_chr04 | 22848252                | GG                              | AA              | 1946800710               |
| SNP_P4_46421_22848597 | NC_021163.1    | Ca_kabuli_chr04 | 22848597                | TT                              | CC              | 1946800712               |
| SNP_P4_46422_22848647 | NC_021163.1    | Ca_kabuli_chr04 | 22848647                | AA                              | CC              | 1946800714               |
| SNP_P4_46424_22848798 | NC_021163.1    | Ca_kabuli_chr04 | 22848798                | TT                              | CC              | 1946800716               |
| SNP_P4_46425_22851499 | NC_021163.1    | Ca_kabuli_chr04 | 22851499                | AA                              | TT              | 1946800718               |
| SNP_P4_46426_22851515 | NC_021163.1    | Ca_kabuli_chr04 | 22851515                | AA                              | GG              | 1946800720               |
| SNP_P4_46427_22851539 | NC_021163.1    | Ca_kabuli_chr04 | 22851539                | CC                              | GG              | 1946800723               |
| SNP_P4_46429_22853938 | NC_021163.1    | Ca_kabuli_chr04 | 22853938                | CC                              | TT              | 1946800725               |
| SNP_P4_46430_22853960 | NC_021163.1    | Ca_kabuli_chr04 | 22853960                | AA                              | GG              | 1946800727               |
| SNP_P4_46432_22855774 | NC_021163.1    | Ca_kabuli_chr04 | 22855774                | TT                              | CC              | 1946800729               |
| SNP_P4_46436_22856629 | NC_021163.1    | Ca_kabuli_chr04 | 22856629                | AA                              | TT              | 1946800731               |
| SNP_P4_46437_22856723 | NC_021163.1    | Ca_kabuli_chr04 | 22856723                | GG                              | CC              | 1946800733               |
| SNP_P4_46438_22856734 | NC_021163.1    | Ca_kabuli_chr04 | 22856734                | TT                              | CC              | 1946800735               |
| SNP_P4_46439_22857032 | NC_021163.1    | Ca_kabuli_chr04 | 22857032                | CC                              | TT              | 1946800737               |
| SNP_P4_46440_22857711 | NC_021163.1    | Ca_kabuli_chr04 | 22857711                | TT                              | AA              | 1946800739               |
| SNP_P4_46441_22858803 | NC_021163.1    | Ca_kabuli_chr04 | 22858803                | TT                              | GG              | 1946800741               |
| SNP_P4_46442_22862030 | NC_021163.1    | Ca_kabuli_chr04 | 22862030                | GG                              | AA              | 1946800743               |
| SNP_P4_46443_22865009 | NC_021163.1    | Ca_kabuli_chr04 | 22865009                | CC                              | TT              | 1946800745               |
| SNP_P4_46445_22867170 | NC_021163.1    | Ca_kabuli_chr04 | 22867170                | TT                              | AA              | 1946800747               |
| SNP_P4_46446_22867182 | NC_021163.1    | Ca_kabuli_chr04 | 22867182                | TT                              | CC              | 1946800749               |
| SNP_P4_46447_22867205 | NC_021163.1    | Ca_kabuli_chr04 | 22867205                | AA                              | GG              | 1946800751               |
| SNP_P4_46450_22869688 | NC_021163.1    | Ca_kabuli_chr04 | 22869688                | CC                              | GG              | 1946800753               |
| SNP_P4_46451_22869779 | NC_021163.1    | Ca_kabuli_chr04 | 22869779                | AA                              | CC              | 1946800755               |
| SNP_P4_46454_22870184 | NC_021163.1    | Ca_kabuli_chr04 | 22870184                | CC                              | TT              | 1946800757               |
| SNP_P4_46455_22876509 | NC_021163.1    | Ca_kabuli_chr04 | 22876509                | CC                              | TT              | 1946800759               |
| SNP_P4_46456_22876810 | NC_021163.1    | Ca_kabuli_chr04 | 22876810                | GG                              | AA              | 1946800761               |
| SNP_P4_46457_22876816 | NC_021163.1    | Ca_kabuli_chr04 | 22876816                | TT                              | GG              | 1946800763               |
| SNP_P4_46458_22876820 | NC_021163.1    | Ca_kabuli_chr04 | 22876820                | AA                              | GG              | 1946800765               |
| SNP_P4_46460_22879225 | NC_021163.1    | Ca_kabuli_chr04 | 22879225                | CC                              | AA              | 1946800767               |
| SNP_P4_46461_22879458 | NC_021163.1    | Ca_kabuli_chr04 | 22879458                | GG                              | TT              | 1946800769               |
| SNP_P4_46462_22879465 | NC_021163.1    | Ca_kabuli_chr04 | 22879465                | GG                              | AA              | 1946800771               |
| SNP_P4_46463_22879722 | NC_021163.1    | Ca_kabuli_chr04 | 22879722                | CC                              | TT              | 1946800773               |
| SNP_P4_46464_22879782 | NC_021163.1    | Ca_kabuli_chr04 | 22879782                | GG                              | AA              | 1946800775               |
| SNP_P4_46465_22880280 | NC_021163.1    | Ca_kabuli_chr04 | 22880280                | TT                              | AA              | 1946800777               |
| SNP_P4_46466_22880546 | NC_021163.1    | Ca_kabuli_chr04 | 22880546                | AA                              | GG              | 1946800779               |
| SNP_P4_46467_22881586 | NC_021163.1    | Ca_kabuli_chr04 | 22881586                | AA                              | GG              | 1946800782               |
| SNP_P4_46468_22883241 | NC_021163.1    | Ca_kabuli_chr04 | 22883241                | GG                              | AA              | 1946800784               |

| SNPs IDs              | Chromosome IDs | Chromosomes     | Physical positions (bp) | CDC Frontier (Reference genome) | (ILWC46 & LPNB) | NCBI SNPdb Accession IDs |
|-----------------------|----------------|-----------------|-------------------------|---------------------------------|-----------------|--------------------------|
| SNP_P4_46469_22883243 | NC_021163.1    | Ca_kabuli_chr04 | 22883243                | AA                              | GG              | 1946800786               |
| SNP_P4_46470_22883317 | NC_021163.1    | Ca_kabuli_chr04 | 22883317                | GG                              | AA              | 1946800788               |
| SNP_P4_46471_22883493 | NC_021163.1    | Ca_kabuli_chr04 | 22883493                | GG                              | AA              | 1946800790               |
| SNP_P4_46472_22883556 | NC_021163.1    | Ca_kabuli_chr04 | 22883556                | AA                              | GG              | 1946800792               |
| SNP_P4_46473_22883674 | NC_021163.1    | Ca_kabuli_chr04 | 22883674                | GG                              | TT              | 1946800794               |
| SNP_P4_46474_22883970 | NC_021163.1    | Ca_kabuli_chr04 | 22883970                | CC                              | GG              | 1946800797               |
| SNP_P4_46475_22884026 | NC_021163.1    | Ca_kabuli_chr04 | 22884026                | TT                              | AA              | 1946800799               |
| SNP_P4_46476_22884341 | NC_021163.1    | Ca_kabuli_chr04 | 22884341                | TT                              | GG              | 1946800801               |
| SNP_P4_46477_22884748 | NC_021163.1    | Ca_kabuli_chr04 | 22884748                | GG                              | CC              | 1946800803               |
| SNP_P4_46478_22884796 | NC_021163.1    | Ca_kabuli_chr04 | 22884796                | AA                              | GG              | 1946800805               |
| SNP_P4_46479_22889556 | NC_021163.1    | Ca_kabuli_chr04 | 22889556                | CC                              | TT              | 1946800807               |
| SNP_P4_46481_22889586 | NC_021163.1    | Ca_kabuli_chr04 | 22889586                | CC                              | GG              | 1946800809               |
| SNP_P4_46482_22889612 | NC_021163.1    | Ca_kabuli_chr04 | 22889612                | CC                              | AA              | 1946800811               |
| SNP_P4_46483_22889943 | NC_021163.1    | Ca_kabuli_chr04 | 22889943                | GG                              | CC              | 1946800813               |
| SNP_P4_46484_22890107 | NC_021163.1    | Ca_kabuli_chr04 | 22890107                | AA                              | GG              | 1946800815               |
| SNP_P4_46485_22890174 | NC_021163.1    | Ca_kabuli_chr04 | 22890174                | CC                              | GG              | 1946800817               |
| SNP_P4_46486_22890290 | NC_021163.1    | Ca_kabuli_chr04 | 22890290                | CC                              | AA              | 1946800819               |
| SNP_P4_46488_22890355 | NC_021163.1    | Ca_kabuli_chr04 | 22890355                | TT                              | CC              | 1946800821               |
| SNP_P4_46490_22890628 | NC_021163.1    | Ca_kabuli_chr04 | 22890628                | AA                              | GG              | 1946800823               |
| SNP_P4_46492_22890854 | NC_021163.1    | Ca_kabuli_chr04 | 22890854                | AA                              | GG              | 1946800825               |
| SNP_P4_46493_22894041 | NC_021163.1    | Ca_kabuli_chr04 | 22894041                | AA                              | TT              | 1946800827               |
| SNP_P4_46494_22894416 | NC_021163.1    | Ca_kabuli_chr04 | 22894416                | TT                              | GG              | 1946800829               |
| SNP_P4_46495_22894725 | NC_021163.1    | Ca_kabuli_chr04 | 22894725                | AA                              | GG              | 1946800832               |
| SNP_P4_46496_22894835 | NC_021163.1    | Ca_kabuli_chr04 | 22894835                | TT                              | AA              | 1946800834               |
| SNP_P4_46497_22894897 | NC_021163.1    | Ca_kabuli_chr04 | 22894897                | CC                              | AA              | 1946800836               |
| SNP_P4_46498_22895153 | NC_021163.1    | Ca_kabuli_chr04 | 22895153                | GG                              | AA              | 1946800838               |
| SNP_P4_46499_22895211 | NC_021163.1    | Ca_kabuli_chr04 | 22895211                | CC                              | TT              | 1946800840               |
| SNP_P4_46501_22895453 | NC_021163.1    | Ca_kabuli_chr04 | 22895453                | GG                              | CC              | 1946800842               |
| SNP_P4_46502_22895508 | NC_021163.1    | Ca_kabuli_chr04 | 22895508                | TT                              | CC              | 1946800844               |
| SNP_P4_46503_22896020 | NC_021163.1    | Ca_kabuli_chr04 | 22896020                | AA                              | GG              | 1946800846               |
| SNP_P4_46504_22896739 | NC_021163.1    | Ca_kabuli_chr04 | 22896739                | TT                              | CC              | 1946800848               |
| SNP_P4_46505_22898054 | NC_021163.1    | Ca_kabuli_chr04 | 22898054                | CC                              | TT              | 1946800850               |
| SNP_P4_46506_22900812 | NC_021163.1    | Ca_kabuli_chr04 | 22900812                | AA                              | GG              | 1946800852               |
| SNP_P4_46507_22900814 | NC_021163.1    | Ca_kabuli_chr04 | 22900814                | TT                              | AA              | 1946800854               |
| SNP_P4_46508_22900878 | NC_021163.1    | Ca_kabuli_chr04 | 22900878                | GG                              | AA              | 1946800856               |
| SNP_P4_46509_22901184 | NC_021163.1    | Ca_kabuli_chr04 | 22901184                | CC                              | TT              | 1946800858               |
| SNP_P4_46510_22902256 | NC_021163.1    | Ca_kabuli_chr04 | 22902256                | TT                              | AA              | 1946800860               |
| SNP_P4_46511_22902346 | NC_021163.1    | Ca_kabuli_chr04 | 22902346                | TT                              | AA              | 1946800862               |
| SNP_P4_46513_22905588 | NC_021163.1    | Ca_kabuli_chr04 | 22905588                | CC                              | TT              | 1946800864               |
| SNP_P4_46515_22914536 | NC_021163.1    | Ca_kabuli_chr04 | 22914536                | CC                              | TT              | 1946800866               |
| SNP_P4_46516_22914628 | NC_021163.1    | Ca_kabuli_chr04 | 22914628                | GG                              | TT              | 1946800868               |
| SNP_P4_46517_22916453 | NC_021163.1    | Ca_kabuli_chr04 | 22916453                | AA                              | GG              | 1946800870               |



| SNPs IDs              | Chromosome IDs | Chromosomes     | Physical positions (bp) | CDC Frontier (Reference genome) | (ILWC46 & LPNB) | NCBI SNPdb Accession IDs |
|-----------------------|----------------|-----------------|-------------------------|---------------------------------|-----------------|--------------------------|
| SNP_P4_46518_22916782 | NC_021163.1    | Ca_kabuli_chr04 | 22916782                | TT                              | CC              | 1946800872               |
| SNP_P4_46519_22916839 | NC_021163.1    | Ca_kabuli_chr04 | 22916839                | TT                              | GG              | 1946800874               |
| SNP_P4_46520_22917544 | NC_021163.1    | Ca_kabuli_chr04 | 22917544                | AA                              | GG              | 1946800876               |
| SNP_P4_46521_22917729 | NC_021163.1    | Ca_kabuli_chr04 | 22917729                | TT                              | CC              | 1946800878               |
| SNP_P4_46522_22917742 | NC_021163.1    | Ca_kabuli_chr04 | 22917742                | AA                              | GG              | 1946800880               |
| SNP_P4_46523_22917759 | NC_021163.1    | Ca_kabuli_chr04 | 22917759                | TT                              | AA              | 1946800882               |
| SNP_P4_46524_22917943 | NC_021163.1    | Ca_kabuli_chr04 | 22917943                | TT                              | CC              | 1946800884               |
| SNP_P4_46525_22917973 | NC_021163.1    | Ca_kabuli_chr04 | 22917973                | CC                              | TT              | 1946800886               |
| SNP_P4_46526_22917980 | NC_021163.1    | Ca_kabuli_chr04 | 22917980                | GG                              | AA              | 1946800888               |
| SNP_P4_46527_22918181 | NC_021163.1    | Ca_kabuli_chr04 | 22918181                | AA                              | CC              | 1946800890               |
| SNP_P4_46529_22924021 | NC_021163.1    | Ca_kabuli_chr04 | 22924021                | TT                              | CC              | 1946800893               |
| SNP_P4_46530_22924498 | NC_021163.1    | Ca_kabuli_chr04 | 22924498                | AA                              | GG              | 1946800895               |
| SNP_P4_46531_22925351 | NC_021163.1    | Ca_kabuli_chr04 | 22925351                | TT                              | CC              | 1946800897               |
| SNP_P4_46532_22927817 | NC_021163.1    | Ca_kabuli_chr04 | 22927817                | GG                              | AA              | 1946800899               |
| SNP_P4_46533_22930475 | NC_021163.1    | Ca_kabuli_chr04 | 22930475                | GG                              | AA              | 1946800901               |
| SNP_P4_46534_22931749 | NC_021163.1    | Ca_kabuli_chr04 | 22931749                | CC                              | TT              | 1946800903               |
| SNP_P4_46536_22932510 | NC_021163.1    | Ca_kabuli_chr04 | 22932510                | TT                              | CC              | 1946800905               |
| SNP_P4_46537_22932683 | NC_021163.1    | Ca_kabuli_chr04 | 22932683                | CC                              | TT              | 1946800907               |
| SNP_P4_46538_22932932 | NC_021163.1    | Ca_kabuli_chr04 | 22932932                | CC                              | TT              | 1946800909               |
| SNP_P4_46539_22934538 | NC_021163.1    | Ca_kabuli_chr04 | 22934538                | TT                              | AA              | 1946800911               |
| SNP_P4_46540_22934732 | NC_021163.1    | Ca_kabuli_chr04 | 22934732                | CC                              | AA              | 1946800913               |
| SNP_P4_46541_22934788 | NC_021163.1    | Ca_kabuli_chr04 | 22934788                | CC                              | TT              | 1946800915               |
| SNP_P4_46542_22934827 | NC_021163.1    | Ca_kabuli_chr04 | 22934827                | AA                              | CC              | 1946800917               |
| SNP_P4_46543_22936652 | NC_021163.1    | Ca_kabuli_chr04 | 22936652                | AA                              | GG              | 1946800919               |
| SNP_P4_46544_22937486 | NC_021163.1    | Ca_kabuli_chr04 | 22937486                | AA                              | GG              | 1946800921               |
| SNP_P4_46545_22937614 | NC_021163.1    | Ca_kabuli_chr04 | 22937614                | TT                              | CC              | 1946800923               |
| SNP_P4_46546_22937663 | NC_021163.1    | Ca_kabuli_chr04 | 22937663                | AA                              | TT              | 1946800925               |
| SNP_P4_46547_22937866 | NC_021163.1    | Ca_kabuli_chr04 | 22937866                | TT                              | CC              | 1946800927               |
| SNP_P4_46548_22938331 | NC_021163.1    | Ca_kabuli_chr04 | 22938331                | AA                              | GG              | 1946800929               |
| SNP_P4_46549_22938359 | NC_021163.1    | Ca_kabuli_chr04 | 22938359                | TT                              | CC              | 1946800932               |
| SNP_P4_46550_22938667 | NC_021163.1    | Ca_kabuli_chr04 | 22938667                | CC                              | TT              | 1946800934               |
| SNP_P4_46551_22939719 | NC_021163.1    | Ca_kabuli_chr04 | 22939719                | AA                              | GG              | 1946800936               |
| SNP_P4_46552_22939972 | NC_021163.1    | Ca_kabuli_chr04 | 22939972                | TT                              | CC              | 1946800938               |
| SNP_P4_46553_22941701 | NC_021163.1    | Ca_kabuli_chr04 | 22941701                | TT                              | CC              | 1946800940               |
| SNP_P4_46554_22942418 | NC_021163.1    | Ca_kabuli_chr04 | 22942418                | GG                              | AA              | 1946800942               |
| SNP_P4_46555_22943447 | NC_021163.1    | Ca_kabuli_chr04 | 22943447                | CC                              | TT              | 1946800944               |
| SNP_P4_46556_22943465 | NC_021163.1    | Ca_kabuli_chr04 | 22943465                | TT                              | GG              | 1946800946               |
| SNP_P4_46557_22943494 | NC_021163.1    | Ca_kabuli_chr04 | 22943494                | GG                              | AA              | 1946800948               |
| SNP_P4_46558_22943582 | NC_021163.1    | Ca_kabuli_chr04 | 22943582                | TT                              | CC              | 1946800950               |
| SNP_P4_46560_22943711 | NC_021163.1    | Ca_kabuli_chr04 | 22943711                | GG                              | AA              | 1946800952               |
| SNP_P4_46561_22943812 | NC_021163.1    | Ca_kabuli_chr04 | 22943812                | TT                              | GG              | 1946800954               |
| SNP_P4_46562_22944159 | NC_021163.1    | Ca_kabuli_chr04 | 22944159                | TT                              | CC              | 1946800956               |

| SNPs IDs              | Chromosome IDs | Chromosomes     | Physical positions (bp) | CDC Frontier (Reference genome) | (ILWC46 & LPNB) | NCBI SNPdb Accession IDs |
|-----------------------|----------------|-----------------|-------------------------|---------------------------------|-----------------|--------------------------|
| SNP_P4_46563_22944382 | NC_021163.1    | Ca_kabuli_chr04 | 22944382                | TT                              | CC              | 1946800958               |
| SNP_P4_46564_22944912 | NC_021163.1    | Ca_kabuli_chr04 | 22944912                | CC                              | TT              | 1946800960               |
| SNP_P4_46565_22944965 | NC_021163.1    | Ca_kabuli_chr04 | 22944965                | AA                              | TT              | 1946800962               |
| SNP_P4_46566_22944989 | NC_021163.1    | Ca_kabuli_chr04 | 22944989                | AA                              | GG              | 1946800964               |
| SNP_P4_46567_22945261 | NC_021163.1    | Ca_kabuli_chr04 | 22945261                | TT                              | CC              | 1946800966               |
| SNP_P4_46569_22946182 | NC_021163.1    | Ca_kabuli_chr04 | 22946182                | GG                              | AA              | 1946800968               |
| SNP_P4_46570_22946209 | NC_021163.1    | Ca_kabuli_chr04 | 22946209                | GG                              | AA              | 1946800970               |
| SNP_P4_46571_22946218 | NC_021163.1    | Ca_kabuli_chr04 | 22946218                | AA                              | CC              | 1946800972               |
| SNP_P4_46572_22947045 | NC_021163.1    | Ca_kabuli_chr04 | 22947045                | AA                              | GG              | 1946800974               |
| SNP_P4_46573_22947049 | NC_021163.1    | Ca_kabuli_chr04 | 22947049                | GG                              | AA              | 1946800976               |
| SNP_P4_46575_22947094 | NC_021163.1    | Ca_kabuli_chr04 | 22947094                | AA                              | GG              | 1946800978               |
| SNP_P4_46576_22947877 | NC_021163.1    | Ca_kabuli_chr04 | 22947877                | CC                              | TT              | 1946800980               |
| SNP_P4_46577_22948298 | NC_021163.1    | Ca_kabuli_chr04 | 22948298                | CC                              | TT              | 1946800982               |
| SNP_P4_46578_22949000 | NC_021163.1    | Ca_kabuli_chr04 | 22949000                | TT                              | CC              | 1946800984               |
| SNP_P4_46579_22950077 | NC_021163.1    | Ca_kabuli_chr04 | 22950077                | CC                              | TT              | 1946800986               |
| SNP_P4_46580_22950354 | NC_021163.1    | Ca_kabuli_chr04 | 22950354                | CC                              | TT              | 1946800988               |
| SNP_P4_46581_22950800 | NC_021163.1    | Ca_kabuli_chr04 | 22950800                | GG                              | AA              | 1946800990               |
| SNP_P4_46582_22950834 | NC_021163.1    | Ca_kabuli_chr04 | 22950834                | CC                              | TT              | 1946800992               |
| SNP_P4_46583_22951273 | NC_021163.1    | Ca_kabuli_chr04 | 22951273                | GG                              | AA              | 1946800994               |
| SNP_P4_46584_22951564 | NC_021163.1    | Ca_kabuli_chr04 | 22951564                | TT                              | CC              | 1946800996               |
| SNP_P4_46585_22954737 | NC_021163.1    | Ca_kabuli_chr04 | 22954737                | CC                              | TT              | 1946800998               |
| SNP_P4_46586_22957628 | NC_021163.1    | Ca_kabuli_chr04 | 22957628                | TT                              | CC              | 1946801000               |
| SNP_P4_46587_22957661 | NC_021163.1    | Ca_kabuli_chr04 | 22957661                | TT                              | CC              | 1946801002               |
| SNP_P4_46588_22961219 | NC_021163.1    | Ca_kabuli_chr04 | 22961219                | AA                              | GG              | 1946801004               |
| SNP_P4_46589_22966959 | NC_021163.1    | Ca_kabuli_chr04 | 22966959                | CC                              | TT              | 1946801006               |
| SNP_P4_46590_22969275 | NC_021163.1    | Ca_kabuli_chr04 | 22969275                | AA                              | GG              | 1946801008               |
| SNP_P4_46591_22969281 | NC_021163.1    | Ca_kabuli_chr04 | 22969281                | GG                              | AA              | 1946801010               |
| SNP_P4_46593_22970515 | NC_021163.1    | Ca_kabuli_chr04 | 22970515                | TT                              | CC              | 1946801012               |
| SNP_P4_46594_22970599 | NC_021163.1    | Ca_kabuli_chr04 | 22970599                | TT                              | CC              | 1946801014               |
| SNP_P4_46595_22970710 | NC_021163.1    | Ca_kabuli_chr04 | 22970710                | CC                              | TT              | 1946801016               |
| SNP_P4_46596_22970883 | NC_021163.1    | Ca_kabuli_chr04 | 22970883                | AA                              | GG              | 1946801018               |
| SNP_P4_46598_22971608 | NC_021163.1    | Ca_kabuli_chr04 | 22971608                | TT                              | AA              | 1946801020               |
| SNP_P4_46599_22971853 | NC_021163.1    | Ca_kabuli_chr04 | 22971853                | CC                              | AA              | 1946801022               |
| SNP_P4_46600_22973089 | NC_021163.1    | Ca_kabuli_chr04 | 22973089                | AA                              | GG              | 1946801025               |
| SNP_P4_46602_22973424 | NC_021163.1    | Ca_kabuli_chr04 | 22973424                | CC                              | TT              | 1946801027               |
| SNP_P4_46603_22973947 | NC_021163.1    | Ca_kabuli_chr04 | 22973947                | AA                              | GG              | 1946801029               |
| SNP_P4_46606_22975114 | NC_021163.1    | Ca_kabuli_chr04 | 22975114                | TT                              | GG              | 1946801031               |
| SNP_P4_46607_22975418 | NC_021163.1    | Ca_kabuli_chr04 | 22975418                | CC                              | TT              | 1946801033               |
| SNP_P4_46608_22976029 | NC_021163.1    | Ca_kabuli_chr04 | 22976029                | TT                              | CC              | 1946801035               |
| SNP_P4_46609_22976587 | NC_021163.1    | Ca_kabuli_chr04 | 22976587                | AA                              | GG              | 1946801037               |
| SNP_P4_46610_22981332 | NC_021163.1    | Ca_kabuli_chr04 | 22981332                | GG                              | AA              | 1946801039               |
| SNP_P4_46611_22981451 | NC_021163.1    | Ca_kabuli_chr04 | 22981451                | TT                              | AA              | 1946801041               |

| SNPs IDs              | Chromosome IDs | Chromosomes     | Physical positions (bp) | CDC Frontier (Reference genome) | (ILWC46 & LPNB) | NCBI SNPdb Accession IDs |
|-----------------------|----------------|-----------------|-------------------------|---------------------------------|-----------------|--------------------------|
| SNP_P4_46612_22981469 | NC_021163.1    | Ca_kabuli_chr04 | 22981469                | GG                              | AA              | 1946801043               |
| SNP_P4_46613_22981489 | NC_021163.1    | Ca_kabuli_chr04 | 22981489                | AA                              | CC              | 1946801045               |
| SNP_P4_46614_22981495 | NC_021163.1    | Ca_kabuli_chr04 | 22981495                | CC                              | TT              | 1946801047               |
| SNP_P4_46615_22981526 | NC_021163.1    | Ca_kabuli_chr04 | 22981526                | TT                              | GG              | 1946801049               |
| SNP_P4_46616_22981559 | NC_021163.1    | Ca_kabuli_chr04 | 22981559                | GG                              | AA              | 1946801051               |
| SNP_P4_46617_22981597 | NC_021163.1    | Ca_kabuli_chr04 | 22981597                | AA                              | GG              | 1946801053               |
| SNP_P4_46618_22981769 | NC_021163.1    | Ca_kabuli_chr04 | 22981769                | GG                              | CC              | 1946801055               |
| SNP_P4_46619_22981781 | NC_021163.1    | Ca_kabuli_chr04 | 22981781                | AA                              | CC              | 1946801057               |
| SNP_P4_46620_22982395 | NC_021163.1    | Ca_kabuli_chr04 | 22982395                | AA                              | TT              | 1946801059               |
| SNP_P4_46621_22982762 | NC_021163.1    | Ca_kabuli_chr04 | 22982762                | GG                              | AA              | 1946801061               |
| SNP_P4_46622_22982766 | NC_021163.1    | Ca_kabuli_chr04 | 22982766                | TT                              | CC              | 1946801063               |
| SNP_P4_46623_22982774 | NC_021163.1    | Ca_kabuli_chr04 | 22982774                | TT                              | GG              | 1946801065               |
| SNP_P4_46624_22983764 | NC_021163.1    | Ca_kabuli_chr04 | 22983764                | AA                              | TT              | 1946801067               |
| SNP_P4_46625_22983780 | NC_021163.1    | Ca_kabuli_chr04 | 22983780                | CC                              | TT              | 1946801069               |
| SNP_P4_46627_22988085 | NC_021163.1    | Ca_kabuli_chr04 | 22988085                | TT                              | AA              | 1946801072               |
| SNP_P4_46628_22988122 | NC_021163.1    | Ca_kabuli_chr04 | 22988122                | GG                              | AA              | 1946801074               |
| SNP_P4_46629_22988147 | NC_021163.1    | Ca_kabuli_chr04 | 22988147                | GG                              | AA              | 1946801076               |
| SNP_P4_46631_22988552 | NC_021163.1    | Ca_kabuli_chr04 | 22988552                | GG                              | TT              | 1946801078               |
| SNP_P4_46632_22988575 | NC_021163.1    | Ca_kabuli_chr04 | 22988575                | CC                              | TT              | 1946801080               |
| SNP_P4_46633_22988796 | NC_021163.1    | Ca_kabuli_chr04 | 22988796                | CC                              | TT              | 1946801082               |
| SNP_P4_46634_22989530 | NC_021163.1    | Ca_kabuli_chr04 | 22989530                | TT                              | CC              | 1946801084               |
| SNP_P4_46635_23002188 | NC_021163.1    | Ca_kabuli_chr04 | 23002188                | AA                              | GG              | 1946801086               |
| SNP_P4_46636_23002392 | NC_021163.1    | Ca_kabuli_chr04 | 23002392                | TT                              | CC              | 1946801088               |
| SNP_P4_46637_23002428 | NC_021163.1    | Ca_kabuli_chr04 | 23002428                | CC                              | GG              | 1946801090               |
| SNP_P4_46638_23002465 | NC_021163.1    | Ca_kabuli_chr04 | 23002465                | GG                              | AA              | 1946801093               |
| SNP_P4_46639_23002472 | NC_021163.1    | Ca_kabuli_chr04 | 23002472                | TT                              | CC              | 1946801095               |
| SNP_P4_46641_23002527 | NC_021163.1    | Ca_kabuli_chr04 | 23002527                | CC                              | TT              | 1946801097               |
| SNP_P4_46644_23002791 | NC_021163.1    | Ca_kabuli_chr04 | 23002791                | TT                              | AA              | 1946801099               |
| SNP_P4_46645_23002880 | NC_021163.1    | Ca_kabuli_chr04 | 23002880                | CC                              | TT              | 1946801101               |
| SNP_P4_46646_23002931 | NC_021163.1    | Ca_kabuli_chr04 | 23002931                | AA                              | CC              | 1946801103               |
| SNP_P4_46647_23002934 | NC_021163.1    | Ca_kabuli_chr04 | 23002934                | AA                              | GG              | 1946801105               |
| SNP_P4_46649_23003034 | NC_021163.1    | Ca_kabuli_chr04 | 23003034                | GG                              | AA              | 1946801107               |
| SNP_P4_46650_23003055 | NC_021163.1    | Ca_kabuli_chr04 | 23003055                | TT                              | CC              | 1946801109               |
| SNP_P4_46651_23003082 | NC_021163.1    | Ca_kabuli_chr04 | 23003082                | AA                              | GG              | 1946801111               |
| SNP_P4_46654_23015300 | NC_021163.1    | Ca_kabuli_chr04 | 23015300                | AA                              | CC              | 1946801113               |
| SNP_P4_46655_23015459 | NC_021163.1    | Ca_kabuli_chr04 | 23015459                | GG                              | AA              | 1946801115               |
| SNP_P4_46656_23016386 | NC_021163.1    | Ca_kabuli_chr04 | 23016386                | CC                              | TT              | 1946801117               |
| SNP_P4_46657_23016437 | NC_021163.1    | Ca_kabuli_chr04 | 23016437                | GG                              | AA              | 1946801119               |
| SNP_P4_46658_23018113 | NC_021163.1    | Ca_kabuli_chr04 | 23018113                | TT                              | GG              | 1946801121               |
| SNP_P4_46659_23018231 | NC_021163.1    | Ca_kabuli_chr04 | 23018231                | CC                              | TT              | 1946801123               |
| SNP_P4_46660_23018274 | NC_021163.1    | Ca_kabuli_chr04 | 23018274                | CC                              | AA              | 1946801125               |
| SNP_P4_46661_23018280 | NC_021163.1    | Ca_kabuli_chr04 | 23018280                | TT                              | AA              | 1946801127               |

| SNPs IDs              | Chromosome IDs | Chromosomes     | Physical positions (bp) | CDC Frontier (Reference genome) | (ILWC46 & LPNB) | NCBI SNPdb Accession IDs |
|-----------------------|----------------|-----------------|-------------------------|---------------------------------|-----------------|--------------------------|
| SNP_P4_46663_23018523 | NC_021163.1    | Ca_kabuli_chr04 | 23018523                | TT                              | GG              | 1946801129               |
| SNP_P4_46665_23019259 | NC_021163.1    | Ca_kabuli_chr04 | 23019259                | GG                              | AA              | 1946801131               |
| SNP_P4_46667_23019685 | NC_021163.1    | Ca_kabuli_chr04 | 23019685                | TT                              | AA              | 1946801133               |
| SNP_P4_46668_23019686 | NC_021163.1    | Ca_kabuli_chr04 | 23019686                | TT                              | AA              | 1946801135               |
| SNP_P4_46669_23019702 | NC_021163.1    | Ca_kabuli_chr04 | 23019702                | CC                              | TT              | 1946801137               |
| SNP_P4_46670_23019846 | NC_021163.1    | Ca_kabuli_chr04 | 23019846                | CC                              | AA              | 1946801139               |
| SNP_P4_46671_23020108 | NC_021163.1    | Ca_kabuli_chr04 | 23020108                | GG                              | AA              | 1946801142               |
| SNP_P4_46672_23020132 | NC_021163.1    | Ca_kabuli_chr04 | 23020132                | CC                              | TT              | 1946801144               |
| SNP_P4_46673_23029806 | NC_021163.1    | Ca_kabuli_chr04 | 23029806                | AA                              | TT              | 1946801146               |
| SNP_P4_46674_23030166 | NC_021163.1    | Ca_kabuli_chr04 | 23030166                | TT                              | CC              | 1946801148               |
| SNP_P4_46675_23030623 | NC_021163.1    | Ca_kabuli_chr04 | 23030623                | AA                              | GG              | 1946801150               |
| SNP_P4_46676_23031865 | NC_021163.1    | Ca_kabuli_chr04 | 23031865                | CC                              | TT              | 1946801152               |
| SNP_P4_46677_23032315 | NC_021163.1    | Ca_kabuli_chr04 | 23032315                | CC                              | TT              | 1946801154               |
| SNP_P4_46678_23033811 | NC_021163.1    | Ca_kabuli_chr04 | 23033811                | CC                              | TT              | 1946801156               |
| SNP_P4_46679_23034066 | NC_021163.1    | Ca_kabuli_chr04 | 23034066                | AA                              | GG              | 1946801158               |
| SNP_P4_46680_23034261 | NC_021163.1    | Ca_kabuli_chr04 | 23034261                | AA                              | TT              | 1946801160               |
| SNP_P4_46681_23034838 | NC_021163.1    | Ca_kabuli_chr04 | 23034838                | GG                              | AA              | 1946801162               |
| SNP_P4_46682_23036564 | NC_021163.1    | Ca_kabuli_chr04 | 23036564                | TT                              | GG              | 1946801164               |
| SNP_P4_46683_23036675 | NC_021163.1    | Ca_kabuli_chr04 | 23036675                | GG                              | CC              | 1946801166               |
| SNP_P4_46684_23036734 | NC_021163.1    | Ca_kabuli_chr04 | 23036734                | CC                              | TT              | 1946801168               |
| SNP_P4_46685_23036790 | NC_021163.1    | Ca_kabuli_chr04 | 23036790                | CC                              | TT              | 1946801170               |
| SNP_P4_46686_23036811 | NC_021163.1    | Ca_kabuli_chr04 | 23036811                | GG                              | AA              | 1946801172               |
| SNP_P4_46687_23037044 | NC_021163.1    | Ca_kabuli_chr04 | 23037044                | TT                              | GG              | 1946801174               |
| SNP_P4_46688_23037049 | NC_021163.1    | Ca_kabuli_chr04 | 23037049                | AA                              | GG              | 1946801176               |
| SNP_P4_46689_23037051 | NC_021163.1    | Ca_kabuli_chr04 | 23037051                | GG                              | TT              | 1946801178               |
| SNP_P4_46690_23037086 | NC_021163.1    | Ca_kabuli_chr04 | 23037086                | GG                              | CC              | 1946801180               |
| SNP_P4_46691_23037096 | NC_021163.1    | Ca_kabuli_chr04 | 23037096                | GG                              | AA              | 1946801182               |
| SNP_P4_46692_23037127 | NC_021163.1    | Ca_kabuli_chr04 | 23037127                | TT                              | CC              | 1946801184               |
| SNP_P4_46693_23037150 | NC_021163.1    | Ca_kabuli_chr04 | 23037150                | GG                              | AA              | 1946801186               |
| SNP_P4_46694_23037157 | NC_021163.1    | Ca_kabuli_chr04 | 23037157                | GG                              | AA              | 1946801188               |
| SNP_P4_46695_23037405 | NC_021163.1    | Ca_kabuli_chr04 | 23037405                | TT                              | CC              | 1946801190               |
| SNP_P4_46696_23037477 | NC_021163.1    | Ca_kabuli_chr04 | 23037477                | TT                              | CC              | 1946801192               |
| SNP_P4_46697_23037783 | NC_021163.1    | Ca_kabuli_chr04 | 23037783                | CC                              | GG              | 1946801194               |
| SNP_P4_46699_23037815 | NC_021163.1    | Ca_kabuli_chr04 | 23037815                | GG                              | AA              | 1946801196               |
| SNP_P4_46700_23038594 | NC_021163.1    | Ca_kabuli_chr04 | 23038594                | CC                              | TT              | 1946801198               |
| SNP_P4_46701_23038786 | NC_021163.1    | Ca_kabuli_chr04 | 23038786                | AA                              | GG              | 1946801200               |
| SNP_P4_46702_23038940 | NC_021163.1    | Ca_kabuli_chr04 | 23038940                | CC                              | AA              | 1946801202               |
| SNP_P4_46703_23038951 | NC_021163.1    | Ca_kabuli_chr04 | 23038951                | AA                              | CC              | 1946801204               |
| SNP_P4_46704_23038965 | NC_021163.1    | Ca_kabuli_chr04 | 23038965                | AA                              | GG              | 1946801206               |
| SNP_P4_46705_23038970 | NC_021163.1    | Ca_kabuli_chr04 | 23038970                | CC                              | TT              | 1946801208               |
| SNP_P4_46706_23039005 | NC_021163.1    | Ca_kabuli_chr04 | 23039005                | CC                              | TT              | 1946801210               |
| SNP_P4_46707_23039036 | NC_021163.1    | Ca_kabuli_chr04 | 23039036                | CC                              | TT              | 1946801212               |

| SNPs IDs              | Chromosome IDs | Chromosomes     | Physical positions (bp) | CDC Frontier (Reference genome) | (ILWC46 & LPNB) | NCBI SNPdb Accession IDs |
|-----------------------|----------------|-----------------|-------------------------|---------------------------------|-----------------|--------------------------|
| SNP_P4_46708_23039037 | NC_021163.1    | Ca_kabuli_chr04 | 23039037                | GG                              | AA              | 1946801215               |
| SNP_P4_46709_23039155 | NC_021163.1    | Ca_kabuli_chr04 | 23039155                | CC                              | GG              | 1946801217               |
| SNP_P4_46710_23039157 | NC_021163.1    | Ca_kabuli_chr04 | 23039157                | AA                              | GG              | 1946801219               |
| SNP_P4_46711_23039165 | NC_021163.1    | Ca_kabuli_chr04 | 23039165                | GG                              | TT              | 1946801221               |
| SNP_P4_46712_23039169 | NC_021163.1    | Ca_kabuli_chr04 | 23039169                | AA                              | GG              | 1946801223               |
| SNP_P4_46713_23039217 | NC_021163.1    | Ca_kabuli_chr04 | 23039217                | AA                              | CC              | 1946801225               |
| SNP_P4_46714_23039595 | NC_021163.1    | Ca_kabuli_chr04 | 23039595                | CC                              | TT              | 1946801227               |
| SNP_P4_46716_23039853 | NC_021163.1    | Ca_kabuli_chr04 | 23039853                | TT                              | CC              | 1946801229               |
| SNP_P4_46717_23039908 | NC_021163.1    | Ca_kabuli_chr04 | 23039908                | TT                              | CC              | 1946801231               |
| SNP_P4_46718_23039914 | NC_021163.1    | Ca_kabuli_chr04 | 23039914                | GG                              | TT              | 1946801233               |
| SNP_P4_46719_23039946 | NC_021163.1    | Ca_kabuli_chr04 | 23039946                | TT                              | GG              | 1946801235               |
| SNP_P4_46720_23040200 | NC_021163.1    | Ca_kabuli_chr04 | 23040200                | GG                              | TT              | 1946801237               |
| SNP_P4_46721_23041454 | NC_021163.1    | Ca_kabuli_chr04 | 23041454                | CC                              | AA              | 1946801239               |
| SNP_P4_46722_23041456 | NC_021163.1    | Ca_kabuli_chr04 | 23041456                | GG                              | AA              | 1946801241               |
| SNP_P4_46723_23041478 | NC_021163.1    | Ca_kabuli_chr04 | 23041478                | AA                              | CC              | 1946801243               |
| SNP_P4_46724_23041515 | NC_021163.1    | Ca_kabuli_chr04 | 23041515                | GG                              | AA              | 1946801245               |
| SNP_P4_46725_23041758 | NC_021163.1    | Ca_kabuli_chr04 | 23041758                | CC                              | TT              | 1946801247               |
| SNP_P4_46726_23041765 | NC_021163.1    | Ca_kabuli_chr04 | 23041765                | TT                              | CC              | 1946801249               |
| SNP_P4_46727_23043800 | NC_021163.1    | Ca_kabuli_chr04 | 23043800                | CC                              | AA              | 1946801251               |
| SNP_P4_46728_23043824 | NC_021163.1    | Ca_kabuli_chr04 | 23043824                | TT                              | CC              | 1946801253               |
| SNP_P4_46729_23043826 | NC_021163.1    | Ca_kabuli_chr04 | 23043826                | AA                              | GG              | 1946801255               |
| SNP_P4_46730_23044331 | NC_021163.1    | Ca_kabuli_chr04 | 23044331                | AA                              | GG              | 1946801257               |
| SNP_P4_46731_23046087 | NC_021163.1    | Ca_kabuli_chr04 | 23046087                | TT                              | GG              | 1946801259               |
| SNP_P4_46732_23046235 | NC_021163.1    | Ca_kabuli_chr04 | 23046235                | AA                              | GG              | 1946801261               |
| SNP_P4_46733_23046263 | NC_021163.1    | Ca_kabuli_chr04 | 23046263                | AA                              | GG              | 1946801263               |
| SNP_P4_46734_23046527 | NC_021163.1    | Ca_kabuli_chr04 | 23046527                | CC                              | TT              | 1946801265               |
| SNP_P4_46735_23047041 | NC_021163.1    | Ca_kabuli_chr04 | 23047041                | TT                              | AA              | 1946801267               |
| SNP_P4_46736_23047961 | NC_021163.1    | Ca_kabuli_chr04 | 23047961                | TT                              | CC              | 1946801269               |
| SNP_P4_46738_23050192 | NC_021163.1    | Ca_kabuli_chr04 | 23050192                | GG                              | AA              | 1946801271               |
| SNP_P4_46739_23050194 | NC_021163.1    | Ca_kabuli_chr04 | 23050194                | AA                              | TT              | 1946801273               |
| SNP_P4_46740_23050204 | NC_021163.1    | Ca_kabuli_chr04 | 23050204                | CC                              | AA              | 1946801275               |
| SNP_P4_46741_23050269 | NC_021163.1    | Ca_kabuli_chr04 | 23050269                | GG                              | TT              | 1946801277               |
| SNP_P4_46742_23050283 | NC_021163.1    | Ca_kabuli_chr04 | 23050283                | AA                              | GG              | 1946801279               |
| SNP_P4_46743_23050285 | NC_021163.1    | Ca_kabuli_chr04 | 23050285                | TT                              | GG              | 1946801281               |
| SNP_P4_46744_23050294 | NC_021163.1    | Ca_kabuli_chr04 | 23050294                | CC                              | TT              | 1946801283               |
| SNP_P4_46745_23050308 | NC_021163.1    | Ca_kabuli_chr04 | 23050308                | CC                              | TT              | 1946801285               |
| SNP_P4_46746_23054669 | NC_021163.1    | Ca_kabuli_chr04 | 23054669                | GG                              | TT              | 1946801287               |
| SNP_P4_46747_23054682 | NC_021163.1    | Ca_kabuli_chr04 | 23054682                | TT                              | CC              | 1946801289               |
| SNP_P4_46748_23054741 | NC_021163.1    | Ca_kabuli_chr04 | 23054741                | CC                              | TT              | 1946801291               |
| SNP_P4_46749_23054833 | NC_021163.1    | Ca_kabuli_chr04 | 23054833                | AA                              | GG              | 1946801293               |
| SNP_P4_46750_23054926 | NC_021163.1    | Ca_kabuli_chr04 | 23054926                | AA                              | GG              | 1946801295               |
| SNP_P4_46752_23055092 | NC_021163.1    | Ca_kabuli_chr04 | 23055092                | TT                              | CC              | 1946801297               |

| SNPs IDs              | Chromosome IDs | Chromosomes     | Physical positions (bp) | CDC Frontier (Reference genome) | (ILWC46 & LPNB) | NCBI SNPdb Accession IDs |
|-----------------------|----------------|-----------------|-------------------------|---------------------------------|-----------------|--------------------------|
| SNP_P4_46754_23055428 | NC_021163.1    | Ca_kabuli_chr04 | 23055428                | GG                              | AA              | 1946801299               |
| SNP_P4_46755_23055468 | NC_021163.1    | Ca_kabuli_chr04 | 23055468                | AA                              | GG              | 1946801301               |
| SNP_P4_46756_23055594 | NC_021163.1    | Ca_kabuli_chr04 | 23055594                | TT                              | CC              | 1946801303               |
| SNP_P4_46757_23055599 | NC_021163.1    | Ca_kabuli_chr04 | 23055599                | GG                              | TT              | 1946801305               |
| SNP_P4_46758_23055601 | NC_021163.1    | Ca_kabuli_chr04 | 23055601                | AA                              | GG              | 1946801307               |
| SNP_P4_46760_23058223 | NC_021163.1    | Ca_kabuli_chr04 | 23058223                | AA                              | GG              | 1946801309               |
| SNP_P4_46761_23058224 | NC_021163.1    | Ca_kabuli_chr04 | 23058224                | CC                              | TT              | 1946801311               |
| SNP_P4_46762_23058230 | NC_021163.1    | Ca_kabuli_chr04 | 23058230                | TT                              | CC              | 1946801313               |
| SNP_P4_46763_23058249 | NC_021163.1    | Ca_kabuli_chr04 | 23058249                | CC                              | TT              | 1946801315               |
| SNP_P4_46764_23058259 | NC_021163.1    | Ca_kabuli_chr04 | 23058259                | TT                              | CC              | 1946801317               |
| SNP_P4_46765_23058395 | NC_021163.1    | Ca_kabuli_chr04 | 23058395                | GG                              | AA              | 1946801319               |
| SNP_P4_46766_23058484 | NC_021163.1    | Ca_kabuli_chr04 | 23058484                | GG                              | AA              | 1946801321               |
| SNP_P4_46768_23058548 | NC_021163.1    | Ca_kabuli_chr04 | 23058548                | AA                              | TT              | 1946801323               |
| SNP_P4_46769_23058585 | NC_021163.1    | Ca_kabuli_chr04 | 23058585                | GG                              | AA              | 1946801325               |
| SNP_P4_46771_23060360 | NC_021163.1    | Ca_kabuli_chr04 | 23060360                | AA                              | CC              | 1946801327               |
| SNP_P4_46772_23060363 | NC_021163.1    | Ca_kabuli_chr04 | 23060363                | TT                              | GG              | 1946801329               |
| SNP_P4_46773_23060475 | NC_021163.1    | Ca_kabuli_chr04 | 23060475                | AA                              | CC              | 1946801331               |
| SNP_P4_46774_23060633 | NC_021163.1    | Ca_kabuli_chr04 | 23060633                | TT                              | CC              | 1946801334               |
| SNP_P4_46775_23061742 | NC_021163.1    | Ca_kabuli_chr04 | 23061742                | TT                              | CC              | 1946801336               |
| SNP_P4_46776_23064524 | NC_021163.1    | Ca_kabuli_chr04 | 23064524                | GG                              | CC              | 1946801338               |
| SNP_P4_46778_23064810 | NC_021163.1    | Ca_kabuli_chr04 | 23064810                | TT                              | CC              | 1946801340               |
| SNP_P4_46779_23064825 | NC_021163.1    | Ca_kabuli_chr04 | 23064825                | TT                              | GG              | 1946801342               |
| SNP_P4_46780_23064831 | NC_021163.1    | Ca_kabuli_chr04 | 23064831                | TT                              | CC              | 1946801344               |
| SNP_P4_46781_23064935 | NC_021163.1    | Ca_kabuli_chr04 | 23064935                | AA                              | GG              | 1946801346               |
| SNP_P4_46782_23067247 | NC_021163.1    | Ca_kabuli_chr04 | 23067247                | GG                              | TT              | 1946801348               |
| SNP_P4_46783_23067319 | NC_021163.1    | Ca_kabuli_chr04 | 23067319                | CC                              | TT              | 1946801350               |
| SNP_P4_46784_23075353 | NC_021163.1    | Ca_kabuli_chr04 | 23075353                | GG                              | CC              | 1946801352               |
| SNP_P4_46785_23075860 | NC_021163.1    | Ca_kabuli_chr04 | 23075860                | CC                              | AA              | 1946801354               |
| SNP_P4_46786_23076070 | NC_021163.1    | Ca_kabuli_chr04 | 23076070                | CC                              | TT              | 1946801356               |
| SNP_P4_46787_23076086 | NC_021163.1    | Ca_kabuli_chr04 | 23076086                | TT                              | AA              | 1946801358               |
| SNP_P4_46788_23076093 | NC_021163.1    | Ca_kabuli_chr04 | 23076093                | GG                              | TT              | 1946801360               |
| SNP_P4_46790_23076260 | NC_021163.1    | Ca_kabuli_chr04 | 23076260                | CC                              | TT              | 1946801362               |
| SNP_P4_46791_23076287 | NC_021163.1    | Ca_kabuli_chr04 | 23076287                | TT                              | CC              | 1946801364               |
| SNP_P4_46792_23076306 | NC_021163.1    | Ca_kabuli_chr04 | 23076306                | CC                              | TT              | 1946801366               |
| SNP_P4_46793_23076307 | NC_021163.1    | Ca_kabuli_chr04 | 23076307                | CC                              | GG              | 1946801368               |
| SNP_P4_46794_23076396 | NC_021163.1    | Ca_kabuli_chr04 | 23076396                | TT                              | CC              | 1946801370               |
| SNP_P4_46795_23076417 | NC_021163.1    | Ca_kabuli_chr04 | 23076417                | GG                              | AA              | 1946801372               |
| SNP_P4_46796_23077474 | NC_021163.1    | Ca_kabuli_chr04 | 23077474                | CC                              | TT              | 1946801374               |
| SNP_P4_46797_23077479 | NC_021163.1    | Ca_kabuli_chr04 | 23077479                | CC                              | TT              | 1946801376               |
| SNP_P4_46798_23077490 | NC_021163.1    | Ca_kabuli_chr04 | 23077490                | AA                              | GG              | 1946801378               |
| SNP_P4_46799_23077505 | NC_021163.1    | Ca_kabuli_chr04 | 23077505                | TT                              | CC              | 1946801380               |
| SNP_P4_46800_23077538 | NC_021163.1    | Ca_kabuli_chr04 | 23077538                | AA                              | GG              | 1946801382               |

| SNPs IDs              | Chromosome IDs | Chromosomes     | Physical positions (bp) | CDC Frontier (Reference genome) | (ILWC46 & LPNB) | NCBI SNPdb Accession IDs |
|-----------------------|----------------|-----------------|-------------------------|---------------------------------|-----------------|--------------------------|
| SNP_P4_46801_23077541 | NC_021163.1    | Ca_kabuli_chr04 | 23077541                | TT                              | CC              | 1946801384               |
| SNP_P4_46803_23077692 | NC_021163.1    | Ca_kabuli_chr04 | 23077692                | TT                              | AA              | 1946801386               |
| SNP_P4_46804_23077768 | NC_021163.1    | Ca_kabuli_chr04 | 23077768                | TT                              | CC              | 1946801388               |
| SNP_P4_46805_23077775 | NC_021163.1    | Ca_kabuli_chr04 | 23077775                | GG                              | TT              | 1946801390               |
| SNP_P4_46806_23077784 | NC_021163.1    | Ca_kabuli_chr04 | 23077784                | CC                              | TT              | 1946801392               |
| SNP_P4_46807_23077795 | NC_021163.1    | Ca_kabuli_chr04 | 23077795                | TT                              | CC              | 1946801394               |
| SNP_P4_46808_23077850 | NC_021163.1    | Ca_kabuli_chr04 | 23077850                | GG                              | AA              | 1946801396               |
| SNP_P4_46811_23078191 | NC_021163.1    | Ca_kabuli_chr04 | 23078191                | TT                              | AA              | 1946801398               |
| SNP_P4_46813_23078747 | NC_021163.1    | Ca_kabuli_chr04 | 23078747                | GG                              | CC              | 1946801400               |
| SNP_P4_46814_23078751 | NC_021163.1    | Ca_kabuli_chr04 | 23078751                | CC                              | AA              | 1946801402               |
| SNP_P4_46815_23079115 | NC_021163.1    | Ca_kabuli_chr04 | 23079115                | AA                              | GG              | 1946801404               |
| SNP_P4_46816_23079127 | NC_021163.1    | Ca_kabuli_chr04 | 23079127                | GG                              | CC              | 1946801406               |
| SNP_P4_46819_23097925 | NC_021163.1    | Ca_kabuli_chr04 | 23097925                | CC                              | GG              | 1946801408               |
| SNP_P4_46820_23098144 | NC_021163.1    | Ca_kabuli_chr04 | 23098144                | TT                              | AA              | 1946801410               |
| SNP_P4_46823_23098303 | NC_021163.1    | Ca_kabuli_chr04 | 23098303                | CC                              | TT              | 1946801412               |
| SNP_P4_46824_23098305 | NC_021163.1    | Ca_kabuli_chr04 | 23098305                | TT                              | CC              | 1946801414               |
| SNP_P4_46825_23098669 | NC_021163.1    | Ca_kabuli_chr04 | 23098669                | GG                              | AA              | 1946801416               |
| SNP_P4_46826_23098851 | NC_021163.1    | Ca_kabuli_chr04 | 23098851                | CC                              | TT              | 1946801418               |
| SNP_P4_46827_23099103 | NC_021163.1    | Ca_kabuli_chr04 | 23099103                | CC                              | TT              | 1946801420               |
| SNP_P4_46828_23099843 | NC_021163.1    | Ca_kabuli_chr04 | 23099843                | AA                              | GG              | 1946801422               |
| SNP_P4_46829_23099844 | NC_021163.1    | Ca_kabuli_chr04 | 23099844                | TT                              | CC              | 1946801424               |
| SNP_P4_46830_23099870 | NC_021163.1    | Ca_kabuli_chr04 | 23099870                | TT                              | CC              | 1946801426               |
| SNP_P4_46831_23100122 | NC_021163.1    | Ca_kabuli_chr04 | 23100122                | AA                              | TT              | 1946801428               |
| SNP_P4_46832_23100488 | NC_021163.1    | Ca_kabuli_chr04 | 23100488                | GG                              | TT              | 1946801430               |
| SNP_P4_46834_23100701 | NC_021163.1    | Ca_kabuli_chr04 | 23100701                | GG                              | AA              | 1946801432               |
| SNP_P4_46835_23100800 | NC_021163.1    | Ca_kabuli_chr04 | 23100800                | TT                              | CC              | 1946801434               |
| SNP_P4_46836_23100918 | NC_021163.1    | Ca_kabuli_chr04 | 23100918                | TT                              | CC              | 1946801436               |
| SNP_P4_46837_23102455 | NC_021163.1    | Ca_kabuli_chr04 | 23102455                | TT                              | CC              | 1946801438               |
| SNP_P4_46839_23106291 | NC_021163.1    | Ca_kabuli_chr04 | 23106291                | TT                              | AA              | 1946801440               |
| SNP_P4_46841_23108239 | NC_021163.1    | Ca_kabuli_chr04 | 23108239                | GG                              | AA              | 1946801442               |
| SNP_P4_46842_23108257 | NC_021163.1    | Ca_kabuli_chr04 | 23108257                | CC                              | AA              | 1946801444               |
| SNP_P4_46843_23108289 | NC_021163.1    | Ca_kabuli_chr04 | 23108289                | TT                              | GG              | 1946801446               |
| SNP_P4_46844_23108291 | NC_021163.1    | Ca_kabuli_chr04 | 23108291                | GG                              | TT              | 1946801448               |
| SNP_P4_46845_23108518 | NC_021163.1    | Ca_kabuli_chr04 | 23108518                | TT                              | CC              | 1946801450               |
| SNP_P4_46846_23108626 | NC_021163.1    | Ca_kabuli_chr04 | 23108626                | TT                              | GG              | 1946801452               |
| SNP_P4_46847_23108654 | NC_021163.1    | Ca_kabuli_chr04 | 23108654                | AA                              | GG              | 1946801454               |
| SNP_P4_46848_23108668 | NC_021163.1    | Ca_kabuli_chr04 | 23108668                | TT                              | GG              | 1946801456               |
| SNP_P4_46849_23108682 | NC_021163.1    | Ca_kabuli_chr04 | 23108682                | GG                              | AA              | 1946801458               |
| SNP_P4_46851_23108856 | NC_021163.1    | Ca_kabuli_chr04 | 23108856                | CC                              | TT              | 1946801460               |
| SNP_P4_46852_23108876 | NC_021163.1    | Ca_kabuli_chr04 | 23108876                | AA                              | GG              | 1946801462               |
| SNP_P4_46853_23109677 | NC_021163.1    | Ca_kabuli_chr04 | 23109677                | GG                              | AA              | 1946801464               |
| SNP_P4_46854_23111426 | NC_021163.1    | Ca_kabuli_chr04 | 23111426                | CC                              | TT              | 1946801466               |

| SNPs IDs              | Chromosome IDs | Chromosomes     | Physical positions (bp) | CDC Frontier (Reference genome) | (ILWC46 & LPNB) | NCBI SNPdb Accession IDs |
|-----------------------|----------------|-----------------|-------------------------|---------------------------------|-----------------|--------------------------|
| SNP_P4_46855_23112032 | NC_021163.1    | Ca_kabuli_chr04 | 23112032                | TT                              | GG              | 1946801468               |
| SNP_P4_46856_23112383 | NC_021163.1    | Ca_kabuli_chr04 | 23112383                | AA                              | GG              | 1946801470               |
| SNP_P4_46857_23112441 | NC_021163.1    | Ca_kabuli_chr04 | 23112441                | CC                              | TT              | 1946801472               |
| SNP_P4_46858_23112474 | NC_021163.1    | Ca_kabuli_chr04 | 23112474                | TT                              | CC              | 1946801474               |
| SNP_P4_46859_23116634 | NC_021163.1    | Ca_kabuli_chr04 | 23116634                | AA                              | CC              | 1946801476               |
| SNP_P4_46860_23116702 | NC_021163.1    | Ca_kabuli_chr04 | 23116702                | AA                              | GG              | 1946801478               |
| SNP_P4_46861_23116709 | NC_021163.1    | Ca_kabuli_chr04 | 23116709                | AA                              | TT              | 1946801480               |
| SNP_P4_46862_23116714 | NC_021163.1    | Ca_kabuli_chr04 | 23116714                | AA                              | TT              | 1946801482               |
| SNP_P4_46863_23116722 | NC_021163.1    | Ca_kabuli_chr04 | 23116722                | AA                              | GG              | 1946801484               |
| SNP_P4_46864_23117668 | NC_021163.1    | Ca_kabuli_chr04 | 23117668                | TT                              | GG              | 1946801486               |
| SNP_P4_46865_23117716 | NC_021163.1    | Ca_kabuli_chr04 | 23117716                | GG                              | AA              | 1946801488               |
| SNP_P4_46866_23117736 | NC_021163.1    | Ca_kabuli_chr04 | 23117736                | TT                              | CC              | 1946801490               |
| SNP_P4_46867_23117817 | NC_021163.1    | Ca_kabuli_chr04 | 23117817                | CC                              | TT              | 1946801492               |
| SNP_P4_46868_23117836 | NC_021163.1    | Ca_kabuli_chr04 | 23117836                | AA                              | CC              | 1946801494               |
| SNP_P4_46869_23117898 | NC_021163.1    | Ca_kabuli_chr04 | 23117898                | TT                              | CC              | 1946801497               |
| SNP_P4_46870_23117930 | NC_021163.1    | Ca_kabuli_chr04 | 23117930                | AA                              | GG              | 1946801499               |
| SNP_P4_46871_23118005 | NC_021163.1    | Ca_kabuli_chr04 | 23118005                | TT                              | AA              | 1946801501               |
| SNP_P4_46872_23118097 | NC_021163.1    | Ca_kabuli_chr04 | 23118097                | CC                              | AA              | 1946801503               |
| SNP_P4_46873_23118108 | NC_021163.1    | Ca_kabuli_chr04 | 23118108                | CC                              | TT              | 1946801505               |
| SNP_P4_46874_23118429 | NC_021163.1    | Ca_kabuli_chr04 | 23118429                | TT                              | CC              | 1946801507               |
| SNP_P4_46875_23118451 | NC_021163.1    | Ca_kabuli_chr04 | 23118451                | TT                              | CC              | 1946801509               |
| SNP_P4_46876_23118499 | NC_021163.1    | Ca_kabuli_chr04 | 23118499                | TT                              | GG              | 1946801511               |
| SNP_P4_46877_23118540 | NC_021163.1    | Ca_kabuli_chr04 | 23118540                | AA                              | TT              | 1946801513               |
| SNP_P4_46878_23118829 | NC_021163.1    | Ca_kabuli_chr04 | 23118829                | TT                              | CC              | 1946801515               |
| SNP_P4_46879_23118880 | NC_021163.1    | Ca_kabuli_chr04 | 23118880                | CC                              | TT              | 1946801517               |
| SNP_P4_46880_23118885 | NC_021163.1    | Ca_kabuli_chr04 | 23118885                | GG                              | TT              | 1946801519               |
| SNP_P4_46881_23118895 | NC_021163.1    | Ca_kabuli_chr04 | 23118895                | CC                              | TT              | 1946801521               |
| SNP_P4_46882_23119182 | NC_021163.1    | Ca_kabuli_chr04 | 23119182                | AA                              | GG              | 1946801523               |
| SNP_P4_46883_23119222 | NC_021163.1    | Ca_kabuli_chr04 | 23119222                | AA                              | CC              | 1946801525               |
| SNP_P4_46884_23119228 | NC_021163.1    | Ca_kabuli_chr04 | 23119228                | GG                              | AA              | 1946801527               |
| SNP_P4_46885_23119325 | NC_021163.1    | Ca_kabuli_chr04 | 23119325                | AA                              | GG              | 1946801529               |
| SNP_P4_46886_23119331 | NC_021163.1    | Ca_kabuli_chr04 | 23119331                | GG                              | AA              | 1946801531               |
| SNP_P4_46887_23119634 | NC_021163.1    | Ca_kabuli_chr04 | 23119634                | GG                              | AA              | 1946801533               |
| SNP_P4_46888_23120199 | NC_021163.1    | Ca_kabuli_chr04 | 23120199                | TT                              | CC              | 1946801535               |
| SNP_P4_46889_23120511 | NC_021163.1    | Ca_kabuli_chr04 | 23120511                | CC                              | TT              | 1946801537               |
| SNP_P4_46890_23120568 | NC_021163.1    | Ca_kabuli_chr04 | 23120568                | CC                              | TT              | 1946801539               |
| SNP_P4_46891_23121362 | NC_021163.1    | Ca_kabuli_chr04 | 23121362                | TT                              | GG              | 1946801541               |
| SNP_P4_46892_23121397 | NC_021163.1    | Ca_kabuli_chr04 | 23121397                | TT                              | CC              | 1946801543               |
| SNP_P4_46893_23121664 | NC_021163.1    | Ca_kabuli_chr04 | 23121664                | GG                              | AA              | 1946801545               |
| SNP_P4_46894_23121729 | NC_021163.1    | Ca_kabuli_chr04 | 23121729                | GG                              | AA              | 1946801547               |
| SNP_P4_46895_23122255 | NC_021163.1    | Ca_kabuli_chr04 | 23122255                | AA                              | GG              | 1946801549               |
| SNP_P4_46896_23122257 | NC_021163.1    | Ca_kabuli_chr04 | 23122257                | CC                              | GG              | 1946801551               |



| SNPs IDs              | Chromosome IDs | Chromosomes     | Physical positions (bp) | CDC Frontier (Reference genome) | (ILWC46 & LPNB) | NCBI SNPdb Accession IDs |
|-----------------------|----------------|-----------------|-------------------------|---------------------------------|-----------------|--------------------------|
| SNP_P4_46897_23122269 | NC_021163.1    | Ca_kabuli_chr04 | 23122269                | TT                              | CC              | 1946801553               |
| SNP_P4_46898_23122293 | NC_021163.1    | Ca_kabuli_chr04 | 23122293                | TT                              | AA              | 1946801555               |
| SNP_P4_46899_23122298 | NC_021163.1    | Ca_kabuli_chr04 | 23122298                | CC                              | TT              | 1946801557               |
| SNP_P4_46900_23122307 | NC_021163.1    | Ca_kabuli_chr04 | 23122307                | AA                              | CC              | 1946801559               |
| SNP_P4_46901_23129521 | NC_021163.1    | Ca_kabuli_chr04 | 23129521                | CC                              | AA              | 1946801561               |
| SNP_P4_46903_23134526 | NC_021163.1    | Ca_kabuli_chr04 | 23134526                | GG                              | AA              | 1946801563               |
| SNP_P4_46904_23134751 | NC_021163.1    | Ca_kabuli_chr04 | 23134751                | CC                              | TT              | 1946801565               |
| SNP_P4_46905_23134769 | NC_021163.1    | Ca_kabuli_chr04 | 23134769                | TT                              | CC              | 1946801567               |
| SNP_P4_46907_23134813 | NC_021163.1    | Ca_kabuli_chr04 | 23134813                | CC                              | TT              | 1946801569               |
| SNP_P4_46908_23136284 | NC_021163.1    | Ca_kabuli_chr04 | 23136284                | CC                              | TT              | 1946801571               |
| SNP_P4_46909_23136300 | NC_021163.1    | Ca_kabuli_chr04 | 23136300                | TT                              | CC              | 1946801573               |
| SNP_P4_46910_23136373 | NC_021163.1    | Ca_kabuli_chr04 | 23136373                | TT                              | CC              | 1946801575               |
| SNP_P4_46911_23136376 | NC_021163.1    | Ca_kabuli_chr04 | 23136376                | TT                              | CC              | 1946801577               |
| SNP_P4_46912_23136411 | NC_021163.1    | Ca_kabuli_chr04 | 23136411                | AA                              | CC              | 1946801579               |
| SNP_P4_46913_23136431 | NC_021163.1    | Ca_kabuli_chr04 | 23136431                | TT                              | CC              | 1946801581               |
| SNP_P4_46914_23136531 | NC_021163.1    | Ca_kabuli_chr04 | 23136531                | AA                              | GG              | 1946801583               |
| SNP_P4_46915_23136545 | NC_021163.1    | Ca_kabuli_chr04 | 23136545                | TT                              | AA              | 1946801585               |
| SNP_P4_46916_23136599 | NC_021163.1    | Ca_kabuli_chr04 | 23136599                | TT                              | CC              | 1946801587               |
| SNP_P4_46917_23136631 | NC_021163.1    | Ca_kabuli_chr04 | 23136631                | TT                              | CC              | 1946801589               |
| SNP_P4_46918_23136650 | NC_021163.1    | Ca_kabuli_chr04 | 23136650                | TT                              | CC              | 1946801591               |
| SNP_P4_46919_23136655 | NC_021163.1    | Ca_kabuli_chr04 | 23136655                | GG                              | TT              | 1946801593               |
| SNP_P4_46920_23136703 | NC_021163.1    | Ca_kabuli_chr04 | 23136703                | TT                              | CC              | 1946801595               |
| SNP_P4_46921_23136740 | NC_021163.1    | Ca_kabuli_chr04 | 23136740                | CC                              | GG              | 1946801596               |
| SNP_P4_46922_23136744 | NC_021163.1    | Ca_kabuli_chr04 | 23136744                | TT                              | CC              | 1946801598               |
| SNP_P4_46923_23136755 | NC_021163.1    | Ca_kabuli_chr04 | 23136755                | AA                              | GG              | 1946801600               |
| SNP_P4_46924_23136761 | NC_021163.1    | Ca_kabuli_chr04 | 23136761                | AA                              | GG              | 1946801602               |
| SNP_P4_46925_23136774 | NC_021163.1    | Ca_kabuli_chr04 | 23136774                | GG                              | AA              | 1946801604               |
| SNP_P4_46926_23136810 | NC_021163.1    | Ca_kabuli_chr04 | 23136810                | AA                              | GG              | 1946801606               |
| SNP_P4_46927_23137518 | NC_021163.1    | Ca_kabuli_chr04 | 23137518                | CC                              | TT              | 1946801608               |
| SNP_P4_46928_23137556 | NC_021163.1    | Ca_kabuli_chr04 | 23137556                | GG                              | AA              | 1946801610               |
| SNP_P4_46929_23137603 | NC_021163.1    | Ca_kabuli_chr04 | 23137603                | CC                              | TT              | 1946801612               |
| SNP_P4_46930_23137780 | NC_021163.1    | Ca_kabuli_chr04 | 23137780                | TT                              | CC              | 1946801614               |
| SNP_P4_46931_23139541 | NC_021163.1    | Ca_kabuli_chr04 | 23139541                | TT                              | AA              | 1946801616               |
| SNP_P4_46932_23139599 | NC_021163.1    | Ca_kabuli_chr04 | 23139599                | GG                              | CC              | 1946801618               |
| SNP_P4_46933_23144481 | NC_021163.1    | Ca_kabuli_chr04 | 23144481                | TT                              | CC              | 1946801620               |
| SNP_P4_46934_23144498 | NC_021163.1    | Ca_kabuli_chr04 | 23144498                | AA                              | GG              | 1946801622               |
| SNP_P4_46935_23144500 | NC_021163.1    | Ca_kabuli_chr04 | 23144500                | GG                              | CC              | 1946801624               |
| SNP_P4_46938_23145711 | NC_021163.1    | Ca_kabuli_chr04 | 23145711                | AA                              | GG              | 1946801626               |
| SNP_P4_46940_23145956 | NC_021163.1    | Ca_kabuli_chr04 | 23145956                | GG                              | TT              | 1946801628               |
| SNP_P4_46941_23147504 | NC_021163.1    | Ca_kabuli_chr04 | 23147504                | CC                              | GG              | 1946801630               |
| SNP_P4_46942_23147799 | NC_021163.1    | Ca_kabuli_chr04 | 23147799                | CC                              | TT              | 1946801631               |
| SNP_P4_46943_23147850 | NC_021163.1    | Ca_kabuli_chr04 | 23147850                | AA                              | CC              | 1946801633               |

| SNPs IDs              | Chromosome IDs | Chromosomes     | Physical positions (bp) | CDC Frontier (Reference genome) | (ILWC46 & LPNB) | NCBI SNPdb Accession IDs |
|-----------------------|----------------|-----------------|-------------------------|---------------------------------|-----------------|--------------------------|
| SNP_P4_46944_23147862 | NC_021163.1    | Ca_kabuli_chr04 | 23147862                | AA                              | GG              | 1946801635               |
| SNP_P4_46945_23148116 | NC_021163.1    | Ca_kabuli_chr04 | 23148116                | GG                              | AA              | 1946801637               |
| SNP_P4_46946_23148604 | NC_021163.1    | Ca_kabuli_chr04 | 23148604                | CC                              | TT              | 1946801639               |
| SNP_P4_46947_23165964 | NC_021163.1    | Ca_kabuli_chr04 | 23165964                | AA                              | GG              | 1946801641               |
| SNP_P4_46948_23188687 | NC_021163.1    | Ca_kabuli_chr04 | 23188687                | CC                              | TT              | 1946801643               |
| SNP_P4_46949_23191666 | NC_021163.1    | Ca_kabuli_chr04 | 23191666                | CC                              | AA              | 1946801645               |
| SNP_P4_46951_23200546 | NC_021163.1    | Ca_kabuli_chr04 | 23200546                | AA                              | GG              | 1946801647               |
| SNP_P4_46952_23206093 | NC_021163.1    | Ca_kabuli_chr04 | 23206093                | AA                              | TT              | 1946801649               |
| SNP_P4_46955_23228399 | NC_021163.1    | Ca_kabuli_chr04 | 23228399                | CC                              | TT              | 1946801651               |
| SNP_P4_46956_23251609 | NC_021163.1    | Ca_kabuli_chr04 | 23251609                | AA                              | GG              | 1946801653               |
| SNP_P4_46958_23310260 | NC_021163.1    | Ca_kabuli_chr04 | 23310260                | AA                              | TT              | 1946801655               |
| SNP_P4_46959_23310297 | NC_021163.1    | Ca_kabuli_chr04 | 23310297                | CC                              | AA              | 1946801657               |
| SNP_P4_46961_23343534 | NC_021163.1    | Ca_kabuli_chr04 | 23343534                | TT                              | GG              | 1946801659               |
| SNP_P4_46962_23361358 | NC_021163.1    | Ca_kabuli_chr04 | 23361358                | TT                              | CC              | 1946801661               |
| SNP_P4_46963_23361430 | NC_021163.1    | Ca_kabuli_chr04 | 23361430                | TT                              | GG              | 1946801664               |
| SNP_P4_46964_23361484 | NC_021163.1    | Ca_kabuli_chr04 | 23361484                | TT                              | CC              | 1946801666               |
| SNP_P4_46965_23361546 | NC_021163.1    | Ca_kabuli_chr04 | 23361546                | TT                              | CC              | 1946801668               |
| SNP_P4_46966_23361800 | NC_021163.1    | Ca_kabuli_chr04 | 23361800                | CC                              | TT              | 1946801670               |
| SNP_P4_46968_23421217 | NC_021163.1    | Ca_kabuli_chr04 | 23421217                | TT                              | GG              | 1946801671               |
| SNP_P4_46969_23421483 | NC_021163.1    | Ca_kabuli_chr04 | 23421483                | AA                              | CC              | 1946801673               |
| SNP_P4_46970_23421703 | NC_021163.1    | Ca_kabuli_chr04 | 23421703                | GG                              | AA              | 1946801675               |
| SNP_P4_46971_23421711 | NC_021163.1    | Ca_kabuli_chr04 | 23421711                | CC                              | AA              | 1946801677               |
| SNP_P4_46972_23421798 | NC_021163.1    | Ca_kabuli_chr04 | 23421798                | AA                              | GG              | 1946801679               |
| SNP_P4_46973_23421800 | NC_021163.1    | Ca_kabuli_chr04 | 23421800                | AA                              | GG              | 1946801681               |
| SNP_P4_46974_23421865 | NC_021163.1    | Ca_kabuli_chr04 | 23421865                | TT                              | CC              | 1946801683               |
| SNP_P4_46975_23421922 | NC_021163.1    | Ca_kabuli_chr04 | 23421922                | TT                              | CC              | 1946801685               |
| SNP_P4_46976_23422256 | NC_021163.1    | Ca_kabuli_chr04 | 23422256                | AA                              | GG              | 1946801687               |
| SNP_P4_46977_23422257 | NC_021163.1    | Ca_kabuli_chr04 | 23422257                | GG                              | AA              | 1946801689               |
| SNP_P4_46980_23462469 | NC_021163.1    | Ca_kabuli_chr04 | 23462469                | GG                              | TT              | 1946801691               |
| SNP_P4_46981_23470582 | NC_021163.1    | Ca_kabuli_chr04 | 23470582                | TT                              | CC              | 1946801693               |
| SNP_P4_46982_23470592 | NC_021163.1    | Ca_kabuli_chr04 | 23470592                | TT                              | CC              | 1946801695               |
| SNP_P4_46983_23470894 | NC_021163.1    | Ca_kabuli_chr04 | 23470894                | TT                              | CC              | 1946801697               |
| SNP_P4_46985_23503614 | NC_021163.1    | Ca_kabuli_chr04 | 23503614                | TT                              | CC              | 1946801700               |
| SNP_P4_46986_23508620 | NC_021163.1    | Ca_kabuli_chr04 | 23508620                | TT                              | CC              | 1946801702               |
| SNP_P4_46987_23508654 | NC_021163.1    | Ca_kabuli_chr04 | 23508654                | TT                              | CC              | 1946801704               |
| SNP_P4_46988_23508740 | NC_021163.1    | Ca_kabuli_chr04 | 23508740                | TT                              | CC              | 1946801706               |
| SNP_P4_46989_23508757 | NC_021163.1    | Ca_kabuli_chr04 | 23508757                | CC                              | TT              | 1946801708               |
| SNP_P4_46991_23535087 | NC_021163.1    | Ca_kabuli_chr04 | 23535087                | TT                              | CC              | 1946801710               |
| SNP_P4_46992_23535094 | NC_021163.1    | Ca_kabuli_chr04 | 23535094                | CC                              | AA              | 1946801712               |
| SNP_P4_46993_23535100 | NC_021163.1    | Ca_kabuli_chr04 | 23535100                | GG                              | TT              | 1946801714               |
| SNP_P4_46994_23535274 | NC_021163.1    | Ca_kabuli_chr04 | 23535274                | AA                              | GG              | 1946801716               |
| SNP_P4_46995_23535312 | NC_021163.1    | Ca_kabuli_chr04 | 23535312                | CC                              | TT              | 1946801718               |

| SNPs IDs              | Chromosome IDs | Chromosomes     | Physical positions (bp) | CDC Frontier (Reference genome) | (ILWC46 & LPNB) | NCBI SNPdb Accession IDs |
|-----------------------|----------------|-----------------|-------------------------|---------------------------------|-----------------|--------------------------|
| SNP_P4_46996_23535313 | NC_021163.1    | Ca_kabuli_chr04 | 23535313                | AA                              | GG              | 1946801720               |
| SNP_P4_46997_23536273 | NC_021163.1    | Ca_kabuli_chr04 | 23536273                | TT                              | CC              | 1946801722               |
| SNP_P4_46998_23536533 | NC_021163.1    | Ca_kabuli_chr04 | 23536533                | GG                              | CC              | 1946801724               |
| SNP_P4_46999_23536548 | NC_021163.1    | Ca_kabuli_chr04 | 23536548                | GG                              | AA              | 1946801726               |
| SNP_P4_47000_23538359 | NC_021163.1    | Ca_kabuli_chr04 | 23538359                | TT                              | AA              | 1946801728               |
| SNP_P4_47001_23538470 | NC_021163.1    | Ca_kabuli_chr04 | 23538470                | TT                              | CC              | 1946801730               |
| SNP_P4_47002_23543471 | NC_021163.1    | Ca_kabuli_chr04 | 23543471                | TT                              | GG              | 1946801732               |
| SNP_P4_47003_23543474 | NC_021163.1    | Ca_kabuli_chr04 | 23543474                | AA                              | TT              | 1946801734               |
| SNP_P4_47004_23545375 | NC_021163.1    | Ca_kabuli_chr04 | 23545375                | TT                              | GG              | 1946801736               |
| SNP_P4_47005_23547379 | NC_021163.1    | Ca_kabuli_chr04 | 23547379                | CC                              | TT              | 1946801738               |
| SNP_P4_47006_23570640 | NC_021163.1    | Ca_kabuli_chr04 | 23570640                | AA                              | CC              | 1946801740               |
| SNP_P4_47007_23573297 | NC_021163.1    | Ca_kabuli_chr04 | 23573297                | AA                              | GG              | 1946801742               |
| SNP_P4_47009_23576665 | NC_021163.1    | Ca_kabuli_chr04 | 23576665                | TT                              | CC              | 1946801744               |
| SNP_P4_47010_23585669 | NC_021163.1    | Ca_kabuli_chr04 | 23585669                | TT                              | AA              | 1946801746               |
| SNP_P4_47011_23585727 | NC_021163.1    | Ca_kabuli_chr04 | 23585727                | TT                              | CC              | 1946801748               |
| SNP_P4_47012_23587183 | NC_021163.1    | Ca_kabuli_chr04 | 23587183                | GG                              | CC              | 1946801750               |
| SNP_P4_47013_23590151 | NC_021163.1    | Ca_kabuli_chr04 | 23590151                | CC                              | AA              | 1946801752               |
| SNP_P4_47014_23640829 | NC_021163.1    | Ca_kabuli_chr04 | 23640829                | GG                              | AA              | 1946801754               |
| SNP_P4_47015_23664000 | NC_021163.1    | Ca_kabuli_chr04 | 23664000                | TT                              | CC              | 1946801757               |
| SNP_P4_47016_23665071 | NC_021163.1    | Ca_kabuli_chr04 | 23665071                | CC                              | AA              | 1946801759               |
| SNP_P4_47017_23694347 | NC_021163.1    | Ca_kabuli_chr04 | 23694347                | TT                              | GG              | 1946801761               |
| SNP_P4_47018_23694349 | NC_021163.1    | Ca_kabuli_chr04 | 23694349                | AA                              | GG              | 1946801763               |
| SNP_P4_47019_23694362 | NC_021163.1    | Ca_kabuli_chr04 | 23694362                | CC                              | AA              | 1946801765               |
| SNP_P4_47020_23694367 | NC_021163.1    | Ca_kabuli_chr04 | 23694367                | GG                              | AA              | 1946801767               |
| SNP_P4_47021_23697734 | NC_021163.1    | Ca_kabuli_chr04 | 23697734                | AA                              | GG              | 1946801769               |
| SNP_P4_47022_23699517 | NC_021163.1    | Ca_kabuli_chr04 | 23699517                | TT                              | GG              | 1946801771               |
| SNP_P4_47023_23699525 | NC_021163.1    | Ca_kabuli_chr04 | 23699525                | AA                              | TT              | 1946801773               |
| SNP_P4_47024_23699628 | NC_021163.1    | Ca_kabuli_chr04 | 23699628                | GG                              | CC              | 1946801775               |
| SNP_P4_47025_23699629 | NC_021163.1    | Ca_kabuli_chr04 | 23699629                | TT                              | CC              | 1946801777               |
| SNP_P4_47026_23699658 | NC_021163.1    | Ca_kabuli_chr04 | 23699658                | AA                              | GG              | 1946801779               |
| SNP_P4_47027_23699807 | NC_021163.1    | Ca_kabuli_chr04 | 23699807                | CC                              | TT              | 1946801781               |
| SNP_P4_47028_23701480 | NC_021163.1    | Ca_kabuli_chr04 | 23701480                | CC                              | AA              | 1946801783               |
| SNP_P4_47029_23711979 | NC_021163.1    | Ca_kabuli_chr04 | 23711979                | GG                              | AA              | 1946801785               |
| SNP_P4_47030_23717030 | NC_021163.1    | Ca_kabuli_chr04 | 23717030                | GG                              | AA              | 1946801787               |
| SNP_P4_47031_23717138 | NC_021163.1    | Ca_kabuli_chr04 | 23717138                | GG                              | AA              | 1946801789               |
| SNP_P4_47032_23720323 | NC_021163.1    | Ca_kabuli_chr04 | 23720323                | GG                              | AA              | 1946801791               |
| SNP_P4_47033_23720338 | NC_021163.1    | Ca_kabuli_chr04 | 23720338                | AA                              | GG              | 1946801793               |
| SNP_P4_47034_23720360 | NC_021163.1    | Ca_kabuli_chr04 | 23720360                | TT                              | CC              | 1946801795               |
| SNP_P4_47035_23720625 | NC_021163.1    | Ca_kabuli_chr04 | 23720625                | CC                              | TT              | 1946801797               |
| SNP_P4_47036_23720873 | NC_021163.1    | Ca_kabuli_chr04 | 23720873                | AA                              | GG              | 1946801799               |
| SNP_P4_47039_23757424 | NC_021163.1    | Ca_kabuli_chr04 | 23757424                | TT                              | AA              | 1946801801               |
| SNP_P4_47040_23758168 | NC_021163.1    | Ca_kabuli_chr04 | 23758168                | AA                              | GG              | 1946801803               |

| SNPs IDs              | Chromosome IDs | Chromosomes     | Physical positions (bp) | CDC Frontier (Reference genome) | (ILWC46 & LPNB) | NCBI SNPdb Accession IDs |
|-----------------------|----------------|-----------------|-------------------------|---------------------------------|-----------------|--------------------------|
| SNP_P4_47041_23759792 | NC_021163.1    | Ca_kabuli_chr04 | 23759792                | GG                              | CC              | 1946801805               |
| SNP_P4_47043_23760468 | NC_021163.1    | Ca_kabuli_chr04 | 23760468                | TT                              | GG              | 1946801807               |
| SNP_P4_47044_23760470 | NC_021163.1    | Ca_kabuli_chr04 | 23760470                | AA                              | TT              | 1946801809               |
| SNP_P4_47046_23765275 | NC_021163.1    | Ca_kabuli_chr04 | 23765275                | TT                              | AA              | 1946801811               |
| SNP_P4_47047_23771051 | NC_021163.1    | Ca_kabuli_chr04 | 23771051                | TT                              | AA              | 1946801813               |
| SNP_P4_47048_23788124 | NC_021163.1    | Ca_kabuli_chr04 | 23788124                | AA                              | TT              | 1946801815               |
| SNP_P4_47049_23806777 | NC_021163.1    | Ca_kabuli_chr04 | 23806777                | CC                              | AA              | 1946801817               |
| SNP_P4_47050_23806778 | NC_021163.1    | Ca_kabuli_chr04 | 23806778                | AA                              | TT              | 1946801819               |
| SNP_P4_47052_23824759 | NC_021163.1    | Ca_kabuli_chr04 | 23824759                | AA                              | TT              | 1946801821               |
| SNP_P4_47053_23824761 | NC_021163.1    | Ca_kabuli_chr04 | 23824761                | GG                              | CC              | 1946801823               |
| SNP_P4_47054_23827904 | NC_021163.1    | Ca_kabuli_chr04 | 23827904                | CC                              | TT              | 1946801825               |
| SNP_P4_47055_23827913 | NC_021163.1    | Ca_kabuli_chr04 | 23827913                | TT                              | GG              | 1946801827               |
| SNP_P4_47056_23828006 | NC_021163.1    | Ca_kabuli_chr04 | 23828006                | CC                              | TT              | 1946801829               |
| SNP_P4_47057_23828033 | NC_021163.1    | Ca_kabuli_chr04 | 23828033                | AA                              | TT              | 1946801831               |
| SNP_P4_47058_23828135 | NC_021163.1    | Ca_kabuli_chr04 | 23828135                | GG                              | AA              | 1946801833               |
| SNP_P4_47059_23828187 | NC_021163.1    | Ca_kabuli_chr04 | 23828187                | AA                              | TT              | 1946801835               |
| SNP_P4_47060_23828193 | NC_021163.1    | Ca_kabuli_chr04 | 23828193                | GG                              | AA              | 1946801838               |
| SNP_P4_47061_23828307 | NC_021163.1    | Ca_kabuli_chr04 | 23828307                | CC                              | TT              | 1946801840               |
| SNP_P4_47062_23828330 | NC_021163.1    | Ca_kabuli_chr04 | 23828330                | CC                              | TT              | 1946801842               |
| SNP_P4_47063_23828353 | NC_021163.1    | Ca_kabuli_chr04 | 23828353                | AA                              | CC              | 1946801844               |
| SNP_P4_47064_23856541 | NC_021163.1    | Ca_kabuli_chr04 | 23856541                | TT                              | AA              | 1946801846               |
| SNP_P4_47067_23941952 | NC_021163.1    | Ca_kabuli_chr04 | 23941952                | AA                              | GG              | 1946801848               |
| SNP_P4_47068_23962927 | NC_021163.1    | Ca_kabuli_chr04 | 23962927                | AA                              | TT              | 1946801850               |
| SNP_P4_47069_23962929 | NC_021163.1    | Ca_kabuli_chr04 | 23962929                | AA                              | CC              | 1946801852               |
| SNP_P4_47070_23975452 | NC_021163.1    | Ca_kabuli_chr04 | 23975452                | GG                              | AA              | 1946801854               |
| SNP_P4_47071_23998357 | NC_021163.1    | Ca_kabuli_chr04 | 23998357                | TT                              | CC              | 1946801857               |
| SNP_P4_47072_24021161 | NC_021163.1    | Ca_kabuli_chr04 | 24021161                | TT                              | CC              | 1946801859               |
| SNP_P4_47073_24021662 | NC_021163.1    | Ca_kabuli_chr04 | 24021662                | GG                              | TT              | 1946801861               |
| SNP_P4_47074_24023395 | NC_021163.1    | Ca_kabuli_chr04 | 24023395                | CC                              | TT              | 1946801863               |
| SNP_P4_47075_24034321 | NC_021163.1    | Ca_kabuli_chr04 | 24034321                | CC                              | TT              | 1946801865               |
| SNP_P4_47076_24063617 | NC_021163.1    | Ca_kabuli_chr04 | 24063617                | TT                              | CC              | 1946801867               |
| SNP_P4_47077_24063619 | NC_021163.1    | Ca_kabuli_chr04 | 24063619                | AA                              | GG              | 1946801869               |
| SNP_P4_47078_24063635 | NC_021163.1    | Ca_kabuli_chr04 | 24063635                | CC                              | TT              | 1946801871               |
| SNP_P4_47079_24063970 | NC_021163.1    | Ca_kabuli_chr04 | 24063970                | CC                              | TT              | 1946801873               |
| SNP_P4_47080_24064239 | NC_021163.1    | Ca_kabuli_chr04 | 24064239                | CC                              | TT              | 1946801875               |
| SNP_P4_47081_24064252 | NC_021163.1    | Ca_kabuli_chr04 | 24064252                | CC                              | AA              | 1946801877               |
| SNP_P4_47082_24064715 | NC_021163.1    | Ca_kabuli_chr04 | 24064715                | AA                              | GG              | 1946801879               |
| SNP_P4_47083_24064727 | NC_021163.1    | Ca_kabuli_chr04 | 24064727                | AA                              | CC              | 1946801881               |
| SNP_P4_47084_24096017 | NC_021163.1    | Ca_kabuli_chr04 | 24096017                | TT                              | CC              | 1946801884               |
| SNP_P4_47085_24096072 | NC_021163.1    | Ca_kabuli_chr04 | 24096072                | AA                              | GG              | 1946801886               |
| SNP_P4_47086_24104266 | NC_021163.1    | Ca_kabuli_chr04 | 24104266                | GG                              | AA              | 1946801888               |
| SNP_P4_47087_24115582 | NC_021163.1    | Ca_kabuli_chr04 | 24115582                | CC                              | TT              | 1946801890               |

| SNPs IDs              | Chromosome IDs | Chromosomes     | Physical positions (bp) | CDC Frontier (Reference genome) | (ILWC46 & LPNB) | NCBI SNPdb Accession IDs |
|-----------------------|----------------|-----------------|-------------------------|---------------------------------|-----------------|--------------------------|
| SNP_P4_47088_24119079 | NC_021163.1    | Ca_kabuli_chr04 | 24119079                | GG                              | AA              | 1946801892               |
| SNP_P4_47090_24143322 | NC_021163.1    | Ca_kabuli_chr04 | 24143322                | GG                              | AA              | 1946801894               |
| SNP_P4_47091_24147253 | NC_021163.1    | Ca_kabuli_chr04 | 24147253                | CC                              | TT              | 1946801896               |
| SNP_P4_47093_24148223 | NC_021163.1    | Ca_kabuli_chr04 | 24148223                | TT                              | AA              | 1946801899               |
| SNP_P4_47094_24160330 | NC_021163.1    | Ca_kabuli_chr04 | 24160330                | AA                              | GG              | 1946801901               |
| SNP_P4_47095_24161705 | NC_021163.1    | Ca_kabuli_chr04 | 24161705                | TT                              | CC              | 1946801903               |
| SNP_P4_47096_24166046 | NC_021163.1    | Ca_kabuli_chr04 | 24166046                | CC                              | TT              | 1946801905               |
| SNP_P4_47097_24167739 | NC_021163.1    | Ca_kabuli_chr04 | 24167739                | CC                              | TT              | 1946801907               |
| SNP_P4_47098_24178369 | NC_021163.1    | Ca_kabuli_chr04 | 24178369                | TT                              | AA              | 1946801909               |
| SNP_P4_47099_24180061 | NC_021163.1    | Ca_kabuli_chr04 | 24180061                | TT                              | GG              | 1946801911               |
| SNP_P4_47100_24180105 | NC_021163.1    | Ca_kabuli_chr04 | 24180105                | AA                              | GG              | 1946801913               |
| SNP_P4_47101_24212708 | NC_021163.1    | Ca_kabuli_chr04 | 24212708                | CC                              | TT              | 1946801915               |
| SNP_P4_47102_24215995 | NC_021163.1    | Ca_kabuli_chr04 | 24215995                | AA                              | TT              | 1946801917               |
| SNP_P4_47104_24230971 | NC_021163.1    | Ca_kabuli_chr04 | 24230971                | GG                              | AA              | 1946801919               |
| SNP_P4_47105_24231338 | NC_021163.1    | Ca_kabuli_chr04 | 24231338                | AA                              | GG              | 1946801921               |
| SNP_P4_47106_24231367 | NC_021163.1    | Ca_kabuli_chr04 | 24231367                | GG                              | AA              | 1946801923               |
| SNP_P4_47107_24231389 | NC_021163.1    | Ca_kabuli_chr04 | 24231389                | TT                              | CC              | 1946801925               |
| SNP_P4_47108_24231738 | NC_021163.1    | Ca_kabuli_chr04 | 24231738                | CC                              | TT              | 1946801927               |
| SNP_P4_47109_24236706 | NC_021163.1    | Ca_kabuli_chr04 | 24236706                | GG                              | AA              | 1946801929               |
| SNP_P4_47110_24239224 | NC_021163.1    | Ca_kabuli_chr04 | 24239224                | CC                              | TT              | 1946801931               |
| SNP_P4_47111_24239512 | NC_021163.1    | Ca_kabuli_chr04 | 24239512                | AA                              | CC              | 1946801933               |
| SNP_P4_47114_24326929 | NC_021163.1    | Ca_kabuli_chr04 | 24326929                | AA                              | GG              | 1946801935               |
| SNP_P4_47115_24344420 | NC_021163.1    | Ca_kabuli_chr04 | 24344420                | GG                              | AA              | 1946801937               |
| SNP_P4_47116_24347838 | NC_021163.1    | Ca_kabuli_chr04 | 24347838                | AA                              | TT              | 1946801939               |
| SNP_P4_47117_24347995 | NC_021163.1    | Ca_kabuli_chr04 | 24347995                | CC                              | TT              | 1946801941               |
| SNP_P4_47118_24350107 | NC_021163.1    | Ca_kabuli_chr04 | 24350107                | TT                              | CC              | 1946801943               |
| SNP_P4_47119_24350109 | NC_021163.1    | Ca_kabuli_chr04 | 24350109                | TT                              | AA              | 1946801945               |
| SNP_P4_47120_24350112 | NC_021163.1    | Ca_kabuli_chr04 | 24350112                | TT                              | CC              | 1946801947               |
| SNP_P4_47121_24350118 | NC_021163.1    | Ca_kabuli_chr04 | 24350118                | GG                              | AA              | 1946801950               |
| SNP_P4_47122_24350136 | NC_021163.1    | Ca_kabuli_chr04 | 24350136                | TT                              | CC              | 1946801952               |
| SNP_P4_47123_24350213 | NC_021163.1    | Ca_kabuli_chr04 | 24350213                | TT                              | CC              | 1946801954               |
| SNP_P4_47124_24350219 | NC_021163.1    | Ca_kabuli_chr04 | 24350219                | TT                              | CC              | 1946801956               |
| SNP_P4_47125_24356007 | NC_021163.1    | Ca_kabuli_chr04 | 24356007                | AA                              | GG              | 1946801959               |
| SNP_P4_47126_24356008 | NC_021163.1    | Ca_kabuli_chr04 | 24356008                | TT                              | GG              | 1946801961               |
| SNP_P4_47128_24356940 | NC_021163.1    | Ca_kabuli_chr04 | 24356940                | AA                              | GG              | 1946801963               |
| SNP_P4_47129_24356954 | NC_021163.1    | Ca_kabuli_chr04 | 24356954                | TT                              | GG              | 1946801965               |
| SNP_P4_47130_24357039 | NC_021163.1    | Ca_kabuli_chr04 | 24357039                | TT                              | CC              | 1946801967               |
| SNP_P4_47131_24357057 | NC_021163.1    | Ca_kabuli_chr04 | 24357057                | TT                              | GG              | 1946801969               |
| SNP_P4_47132_24357070 | NC_021163.1    | Ca_kabuli_chr04 | 24357070                | TT                              | GG              | 1946801971               |
| SNP_P4_47135_24379715 | NC_021163.1    | Ca_kabuli_chr04 | 24379715                | GG                              | AA              | 1946801973               |
| SNP_P4_47136_24384418 | NC_021163.1    | Ca_kabuli_chr04 | 24384418                | AA                              | GG              | 1946801976               |
| SNP_P4_47137_24402508 | NC_021163.1    | Ca_kabuli_chr04 | 24402508                | TT                              | CC              | 1946801978               |

| SNPs IDs              | Chromosome IDs | Chromosomes     | Physical positions (bp) | CDC Frontier (Reference genome) | (ILWC46 & LPNB) | NCBI SNPdb Accession IDs |
|-----------------------|----------------|-----------------|-------------------------|---------------------------------|-----------------|--------------------------|
| SNP_P4_47138_24402943 | NC_021163.1    | Ca_kabuli_chr04 | 24402943                | CC                              | AA              | 1946801980               |
| SNP_P4_47139_24407510 | NC_021163.1    | Ca_kabuli_chr04 | 24407510                | AA                              | TT              | 1946801982               |
| SNP_P4_47140_24419135 | NC_021163.1    | Ca_kabuli_chr04 | 24419135                | AA                              | CC              | 1946801984               |
| SNP_P4_47141_24420729 | NC_021163.1    | Ca_kabuli_chr04 | 24420729                | CC                              | TT              | 1946801986               |
| SNP_P4_47144_24428566 | NC_021163.1    | Ca_kabuli_chr04 | 24428566                | GG                              | AA              | 1946801988               |
| SNP_P4_47145_24428600 | NC_021163.1    | Ca_kabuli_chr04 | 24428600                | TT                              | CC              | 1946801990               |
| SNP_P4_47146_24430273 | NC_021163.1    | Ca_kabuli_chr04 | 24430273                | AA                              | GG              | 1946801992               |
| SNP_P4_47147_24430460 | NC_021163.1    | Ca_kabuli_chr04 | 24430460                | AA                              | GG              | 1946801994               |
| SNP_P4_47148_24430468 | NC_021163.1    | Ca_kabuli_chr04 | 24430468                | AA                              | GG              | 1946801996               |
| SNP_P4_47149_24430480 | NC_021163.1    | Ca_kabuli_chr04 | 24430480                | GG                              | AA              | 1946801998               |
| SNP_P4_47150_24430523 | NC_021163.1    | Ca_kabuli_chr04 | 24430523                | TT                              | CC              | 1946802000               |
| SNP_P4_47151_24430540 | NC_021163.1    | Ca_kabuli_chr04 | 24430540                | TT                              | CC              | 1946802002               |
| SNP_P4_47152_24434423 | NC_021163.1    | Ca_kabuli_chr04 | 24434423                | GG                              | TT              | 1946802004               |
| SNP_P4_47153_24435997 | NC_021163.1    | Ca_kabuli_chr04 | 24435997                | TT                              | AA              | 1946802006               |
| SNP_P4_47154_24437737 | NC_021163.1    | Ca_kabuli_chr04 | 24437737                | TT                              | CC              | 1946802008               |
| SNP_P4_47156_24438228 | NC_021163.1    | Ca_kabuli_chr04 | 24438228                | TT                              | CC              | 1946802011               |
| SNP_P4_47157_24438231 | NC_021163.1    | Ca_kabuli_chr04 | 24438231                | TT                              | CC              | 1946802013               |
| SNP_P4_47158_24438244 | NC_021163.1    | Ca_kabuli_chr04 | 24438244                | CC                              | TT              | 1946802015               |
| SNP_P4_47159_24449305 | NC_021163.1    | Ca_kabuli_chr04 | 24449305                | AA                              | CC              | 1946802017               |
| SNP_P4_47160_24453336 | NC_021163.1    | Ca_kabuli_chr04 | 24453336                | GG                              | AA              | 1946802019               |
| SNP_P4_47161_24453377 | NC_021163.1    | Ca_kabuli_chr04 | 24453377                | TT                              | GG              | 1946802021               |
| SNP_P4_47162_24453397 | NC_021163.1    | Ca_kabuli_chr04 | 24453397                | AA                              | CC              | 1946802023               |
| SNP_P4_47163_24453419 | NC_021163.1    | Ca_kabuli_chr04 | 24453419                | AA                              | TT              | 1946802025               |
| SNP_P4_47164_24453421 | NC_021163.1    | Ca_kabuli_chr04 | 24453421                | AA                              | CC              | 1946802028               |
| SNP_P4_47165_24453422 | NC_021163.1    | Ca_kabuli_chr04 | 24453422                | AA                              | GG              | 1946802030               |
| SNP_P4_47166_24453433 | NC_021163.1    | Ca_kabuli_chr04 | 24453433                | AA                              | TT              | 1946802032               |
| SNP_P4_47167_24453739 | NC_021163.1    | Ca_kabuli_chr04 | 24453739                | TT                              | AA              | 1946802034               |
| SNP_P4_47168_24453750 | NC_021163.1    | Ca_kabuli_chr04 | 24453750                | AA                              | GG              | 1946802036               |
| SNP_P4_47169_24453752 | NC_021163.1    | Ca_kabuli_chr04 | 24453752                | AA                              | TT              | 1946802038               |
| SNP_P4_47170_24460050 | NC_021163.1    | Ca_kabuli_chr04 | 24460050                | TT                              | GG              | 1946802040               |
| SNP_P4_47171_24460918 | NC_021163.1    | Ca_kabuli_chr04 | 24460918                | CC                              | TT              | 1946802042               |
| SNP_P4_47172_24474342 | NC_021163.1    | Ca_kabuli_chr04 | 24474342                | TT                              | GG              | 1946802044               |
| SNP_P4_47173_24476083 | NC_021163.1    | Ca_kabuli_chr04 | 24476083                | AA                              | GG              | 1946802046               |
| SNP_P4_47174_24478364 | NC_021163.1    | Ca_kabuli_chr04 | 24478364                | GG                              | AA              | 1946802047               |
| SNP_P4_47175_24478431 | NC_021163.1    | Ca_kabuli_chr04 | 24478431                | TT                              | GG              | 1946802048               |
| SNP_P4_47176_24478677 | NC_021163.1    | Ca_kabuli_chr04 | 24478677                | AA                              | GG              | 1946802049               |
| SNP_P4_47177_24478812 | NC_021163.1    | Ca_kabuli_chr04 | 24478812                | AA                              | GG              | 1946802050               |
| SNP_P4_47178_24478837 | NC_021163.1    | Ca_kabuli_chr04 | 24478837                | TT                              | CC              | 1946802051               |
| SNP_P4_47179_24478841 | NC_021163.1    | Ca_kabuli_chr04 | 24478841                | AA                              | CC              | 1946802052               |
| SNP_P4_47180_24478931 | NC_021163.1    | Ca_kabuli_chr04 | 24478931                | GG                              | CC              | 1946802054               |
| SNP_P4_47183_24479137 | NC_021163.1    | Ca_kabuli_chr04 | 24479137                | CC                              | TT              | 1946802056               |
| SNP_P4_47184_24479172 | NC_021163.1    | Ca_kabuli_chr04 | 24479172                | CC                              | TT              | 1946802058               |

| SNPs IDs              | Chromosome IDs | Chromosomes     | Physical positions (bp) | CDC Frontier (Reference genome) | (ILWC46 & LPNB) | NCBI SNPdb Accession IDs |
|-----------------------|----------------|-----------------|-------------------------|---------------------------------|-----------------|--------------------------|
| SNP_P4_47185_24479189 | NC_021163.1    | Ca_kabuli_chr04 | 24479189                | TT                              | AA              | 1946802060               |
| SNP_P4_47186_24479205 | NC_021163.1    | Ca_kabuli_chr04 | 24479205                | GG                              | AA              | 1946802062               |
| SNP_P4_47187_24479225 | NC_021163.1    | Ca_kabuli_chr04 | 24479225                | CC                              | AA              | 1946802064               |
| SNP_P4_47188_24479248 | NC_021163.1    | Ca_kabuli_chr04 | 24479248                | TT                              | AA              | 1946802066               |
| SNP_P4_47189_24479308 | NC_021163.1    | Ca_kabuli_chr04 | 24479308                | GG                              | AA              | 1946802068               |
| SNP_P4_47190_24479334 | NC_021163.1    | Ca_kabuli_chr04 | 24479334                | CC                              | TT              | 1946802071               |
| SNP_P4_47191_24479348 | NC_021163.1    | Ca_kabuli_chr04 | 24479348                | CC                              | GG              | 1946802073               |
| SNP_P4_47192_24479443 | NC_021163.1    | Ca_kabuli_chr04 | 24479443                | TT                              | CC              | 1946802075               |
| SNP_P4_47193_24482474 | NC_021163.1    | Ca_kabuli_chr04 | 24482474                | CC                              | TT              | 1946802077               |
| SNP_P4_47194_24482476 | NC_021163.1    | Ca_kabuli_chr04 | 24482476                | AA                              | GG              | 1946802079               |
| SNP_P4_47195_24483846 | NC_021163.1    | Ca_kabuli_chr04 | 24483846                | CC                              | AA              | 1946802081               |
| SNP_P4_47196_24484708 | NC_021163.1    | Ca_kabuli_chr04 | 24484708                | GG                              | AA              | 1946802083               |
| SNP_P4_47198_24488871 | NC_021163.1    | Ca_kabuli_chr04 | 24488871                | CC                              | AA              | 1946802085               |
| SNP_P4_47199_24495118 | NC_021163.1    | Ca_kabuli_chr04 | 24495118                | TT                              | CC              | 1946802087               |
| SNP_P4_47200_24496195 | NC_021163.1    | Ca_kabuli_chr04 | 24496195                | TT                              | AA              | 1946802089               |
| SNP_P4_47201_24503506 | NC_021163.1    | Ca_kabuli_chr04 | 24503506                | GG                              | AA              | 1946802091               |
| SNP_P4_47202_24517353 | NC_021163.1    | Ca_kabuli_chr04 | 24517353                | AA                              | GG              | 1946802093               |
| SNP_P4_47203_24523555 | NC_021163.1    | Ca_kabuli_chr04 | 24523555                | GG                              | AA              | 1946802095               |
| SNP_P4_47205_24538326 | NC_021163.1    | Ca_kabuli_chr04 | 24538326                | TT                              | AA              | 1946802097               |
| SNP_P4_47206_24547807 | NC_021163.1    | Ca_kabuli_chr04 | 24547807                | CC                              | GG              | 1946802099               |
| SNP_P4_47207_24550771 | NC_021163.1    | Ca_kabuli_chr04 | 24550771                | TT                              | CC              | 1946802101               |
| SNP_P4_47209_24554148 | NC_021163.1    | Ca_kabuli_chr04 | 24554148                | GG                              | AA              | 1946802103               |
| SNP_P4_47211_24556522 | NC_021163.1    | Ca_kabuli_chr04 | 24556522                | CC                              | AA              | 1946802105               |
| SNP_P4_47212_24556523 | NC_021163.1    | Ca_kabuli_chr04 | 24556523                | CC                              | AA              | 1946802107               |
| SNP_P4_47213_24556535 | NC_021163.1    | Ca_kabuli_chr04 | 24556535                | CC                              | TT              | 1946802109               |
| SNP_P4_47214_24562940 | NC_021163.1    | Ca_kabuli_chr04 | 24562940                | CC                              | TT              | 1946802112               |
| SNP_P4_47215_24565614 | NC_021163.1    | Ca_kabuli_chr04 | 24565614                | AA                              | GG              | 1946802114               |
| SNP_P4_47216_24565633 | NC_021163.1    | Ca_kabuli_chr04 | 24565633                | TT                              | CC              | 1946802116               |
| SNP_P4_47217_24565636 | NC_021163.1    | Ca_kabuli_chr04 | 24565636                | AA                              | CC              | 1946802118               |
| SNP_P4_47218_24565894 | NC_021163.1    | Ca_kabuli_chr04 | 24565894                | CC                              | TT              | 1946802120               |
| SNP_P4_47219_24566024 | NC_021163.1    | Ca_kabuli_chr04 | 24566024                | AA                              | TT              | 1946802122               |
| SNP_P4_47220_24566377 | NC_021163.1    | Ca_kabuli_chr04 | 24566377                | AA                              | TT              | 1946802123               |
| SNP_P4_47221_24566880 | NC_021163.1    | Ca_kabuli_chr04 | 24566880                | TT                              | CC              | 1946802125               |
| SNP_P4_47222_24568261 | NC_021163.1    | Ca_kabuli_chr04 | 24568261                | GG                              | TT              | 1946802127               |
| SNP_P4_47223_24572781 | NC_021163.1    | Ca_kabuli_chr04 | 24572781                | GG                              | AA              | 1946802129               |
| SNP_P4_47224_24572817 | NC_021163.1    | Ca_kabuli_chr04 | 24572817                | GG                              | AA              | 1946802131               |
| SNP_P4_47225_24572837 | NC_021163.1    | Ca_kabuli_chr04 | 24572837                | TT                              | GG              | 1946802133               |
| SNP_P4_47226_24576997 | NC_021163.1    | Ca_kabuli_chr04 | 24576997                | AA                              | TT              | 1946802135               |
| SNP_P4_47228_24581610 | NC_021163.1    | Ca_kabuli_chr04 | 24581610                | GG                              | AA              | 1946802137               |
| SNP_P4_47229_24581822 | NC_021163.1    | Ca_kabuli_chr04 | 24581822                | AA                              | GG              | 1946802139               |
| SNP_P4_47230_24581967 | NC_021163.1    | Ca_kabuli_chr04 | 24581967                | CC                              | AA              | 1946802141               |
| SNP_P4_47231_24584157 | NC_021163.1    | Ca_kabuli_chr04 | 24584157                | GG                              | TT              | 1946802143               |

| SNPs IDs              | Chromosome IDs | Chromosomes     | Physical positions (bp) | CDC Frontier (Reference genome) | (ILWC46 & LPNB) | NCBI SNPdb Accession IDs |
|-----------------------|----------------|-----------------|-------------------------|---------------------------------|-----------------|--------------------------|
| SNP_P4_47232_24590805 | NC_021163.1    | Ca_kabuli_chr04 | 24590805                | GG                              | CC              | 1946802145               |
| SNP_P4_47233_24602568 | NC_021163.1    | Ca_kabuli_chr04 | 24602568                | GG                              | TT              | 1946802147               |
| SNP_P4_47234_24602919 | NC_021163.1    | Ca_kabuli_chr04 | 24602919                | CC                              | TT              | 1946802149               |
| SNP_P4_47239_24628556 | NC_021163.1    | Ca_kabuli_chr04 | 24628556                | CC                              | TT              | 1946802151               |
| SNP_P4_47240_24628721 | NC_021163.1    | Ca_kabuli_chr04 | 24628721                | TT                              | GG              | 1946802153               |
| SNP_P4_47241_24628729 | NC_021163.1    | Ca_kabuli_chr04 | 24628729                | AA                              | TT              | 1946802155               |
| SNP_P4_47242_24640733 | NC_021163.1    | Ca_kabuli_chr04 | 24640733                | AA                              | GG              | 1946802156               |
| SNP_P4_47243_24642023 | NC_021163.1    | Ca_kabuli_chr04 | 24642023                | CC                              | TT              | 1946802158               |
| SNP_P4_47244_24666771 | NC_021163.1    | Ca_kabuli_chr04 | 24666771                | CC                              | TT              | 1946802160               |
| SNP_P4_47245_24666997 | NC_021163.1    | Ca_kabuli_chr04 | 24666997                | CC                              | AA              | 1946802162               |
| SNP_P4_47246_24676058 | NC_021163.1    | Ca_kabuli_chr04 | 24676058                | CC                              | TT              | 1946802164               |
| SNP_P4_47248_24685620 | NC_021163.1    | Ca_kabuli_chr04 | 24685620                | AA                              | GG              | 1946802166               |
| SNP_P4_47249_24687605 | NC_021163.1    | Ca_kabuli_chr04 | 24687605                | CC                              | TT              | 1946802168               |
| SNP_P4_47250_24689149 | NC_021163.1    | Ca_kabuli_chr04 | 24689149                | TT                              | AA              | 1946802170               |
| SNP_P4_47251_24690522 | NC_021163.1    | Ca_kabuli_chr04 | 24690522                | TT                              | CC              | 1946802172               |
| SNP_P4_47252_24693389 | NC_021163.1    | Ca_kabuli_chr04 | 24693389                | CC                              | AA              | 1946802174               |
| SNP_P4_47253_24698498 | NC_021163.1    | Ca_kabuli_chr04 | 24698498                | CC                              | GG              | 1946802176               |
| SNP_P4_47254_24704170 | NC_021163.1    | Ca_kabuli_chr04 | 24704170                | CC                              | AA              | 1946802178               |
| SNP_P4_47255_24722350 | NC_021163.1    | Ca_kabuli_chr04 | 24722350                | GG                              | TT              | 1946802180               |
| SNP_P4_47256_24722520 | NC_021163.1    | Ca_kabuli_chr04 | 24722520                | TT                              | CC              | 1946802182               |
| SNP_P4_47257_24728576 | NC_021163.1    | Ca_kabuli_chr04 | 24728576                | GG                              | AA              | 1946802184               |
| SNP_P4_47259_24738940 | NC_021163.1    | Ca_kabuli_chr04 | 24738940                | AA                              | TT              | 1946802186               |
| SNP_P4_47260_24738944 | NC_021163.1    | Ca_kabuli_chr04 | 24738944                | CC                              | TT              | 1946802188               |
| SNP_P4_47261_24739982 | NC_021163.1    | Ca_kabuli_chr04 | 24739982                | TT                              | CC              | 1946802190               |
| SNP_P4_47263_24750568 | NC_021163.1    | Ca_kabuli_chr04 | 24750568                | TT                              | AA              | 1946802192               |
| SNP_P4_47264_24756545 | NC_021163.1    | Ca_kabuli_chr04 | 24756545                | CC                              | TT              | 1946802194               |
| SNP_P4_47265_24760058 | NC_021163.1    | Ca_kabuli_chr04 | 24760058                | AA                              | GG              | 1946802196               |
| SNP_P4_47266_24760113 | NC_021163.1    | Ca_kabuli_chr04 | 24760113                | AA                              | TT              | 1946802198               |
| SNP_P4_47267_24760391 | NC_021163.1    | Ca_kabuli_chr04 | 24760391                | TT                              | GG              | 1946802199               |
| SNP_P4_47268_24760394 | NC_021163.1    | Ca_kabuli_chr04 | 24760394                | TT                              | CC              | 1946802201               |
| SNP_P4_47269_24760416 | NC_021163.1    | Ca_kabuli_chr04 | 24760416                | TT                              | CC              | 1946802203               |
| SNP_P4_47270_24760417 | NC_021163.1    | Ca_kabuli_chr04 | 24760417                | GG                              | AA              | 1946802205               |
| SNP_P4_47271_24760491 | NC_021163.1    | Ca_kabuli_chr04 | 24760491                | GG                              | AA              | 1946802207               |
| SNP_P4_47272_24760505 | NC_021163.1    | Ca_kabuli_chr04 | 24760505                | AA                              | CC              | 1946802209               |
| SNP_P4_47273_24777146 | NC_021163.1    | Ca_kabuli_chr04 | 24777146                | TT                              | CC              | 1946802211               |
| SNP_P4_47274_24777531 | NC_021163.1    | Ca_kabuli_chr04 | 24777531                | TT                              | CC              | 1946802213               |
| SNP_P4_47275_24777563 | NC_021163.1    | Ca_kabuli_chr04 | 24777563                | AA                              | GG              | 1946802215               |
| SNP_P4_47277_24786415 | NC_021163.1    | Ca_kabuli_chr04 | 24786415                | CC                              | TT              | 1946802217               |
| SNP_P4_47278_24786799 | NC_021163.1    | Ca_kabuli_chr04 | 24786799                | AA                              | GG              | 1946802219               |
| SNP_P4_47279_24786856 | NC_021163.1    | Ca_kabuli_chr04 | 24786856                | AA                              | GG              | 1946802221               |
| SNP_P4_47280_24786866 | NC_021163.1    | Ca_kabuli_chr04 | 24786866                | TT                              | CC              | 1946802223               |
| SNP_P4_47281_24786867 | NC_021163.1    | Ca_kabuli_chr04 | 24786867                | GG                              | AA              | 1946802225               |



| SNPs IDs              | Chromosome IDs | Chromosomes     | Physical positions (bp) | CDC Frontier (Reference genome) | (ILWC46 & LPNB) | NCBI SNPdb Accession IDs |
|-----------------------|----------------|-----------------|-------------------------|---------------------------------|-----------------|--------------------------|
| SNP_P4_47282_24787141 | NC_021163.1    | Ca_kabuli_chr04 | 24787141                | TT                              | CC              | 1946802227               |
| SNP_P4_47283_24792991 | NC_021163.1    | Ca_kabuli_chr04 | 24792991                | GG                              | AA              | 1946802228               |
| SNP_P4_47284_24793011 | NC_021163.1    | Ca_kabuli_chr04 | 24793011                | GG                              | TT              | 1946802230               |
| SNP_P4_47285_24793029 | NC_021163.1    | Ca_kabuli_chr04 | 24793029                | CC                              | TT              | 1946802232               |
| SNP_P4_47286_24796048 | NC_021163.1    | Ca_kabuli_chr04 | 24796048                | CC                              | AA              | 1946802234               |
| SNP_P4_47287_24798170 | NC_021163.1    | Ca_kabuli_chr04 | 24798170                | AA                              | GG              | 1946802236               |
| SNP_P4_47288_24798437 | NC_021163.1    | Ca_kabuli_chr04 | 24798437                | TT                              | GG              | 1946802238               |
| SNP_P4_47289_24800422 | NC_021163.1    | Ca_kabuli_chr04 | 24800422                | CC                              | TT              | 1946802240               |
| SNP_P4_47290_24809140 | NC_021163.1    | Ca_kabuli_chr04 | 24809140                | AA                              | GG              | 1946802242               |
| SNP_P4_47291_24810431 | NC_021163.1    | Ca_kabuli_chr04 | 24810431                | GG                              | AA              | 1946802244               |
| SNP_P4_47293_24827196 | NC_021163.1    | Ca_kabuli_chr04 | 24827196                | TT                              | GG              | 1946802246               |
| SNP_P4_47294_24827949 | NC_021163.1    | Ca_kabuli_chr04 | 24827949                | CC                              | AA              | 1946802248               |
| SNP_P4_47295_24828178 | NC_021163.1    | Ca_kabuli_chr04 | 24828178                | AA                              | GG              | 1946802250               |
| SNP_P4_47296_24828181 | NC_021163.1    | Ca_kabuli_chr04 | 24828181                | TT                              | GG              | 1946802252               |
| SNP_P4_47297_24828207 | NC_021163.1    | Ca_kabuli_chr04 | 24828207                | TT                              | CC              | 1946802254               |
| SNP_P4_47299_24840434 | NC_021163.1    | Ca_kabuli_chr04 | 24840434                | GG                              | TT              | 1946802256               |
| SNP_P4_47300_24843322 | NC_021163.1    | Ca_kabuli_chr04 | 24843322                | AA                              | GG              | 1946802258               |
| SNP_P4_47301_24843393 | NC_021163.1    | Ca_kabuli_chr04 | 24843393                | TT                              | CC              | 1946802261               |
| SNP_P4_47302_24847689 | NC_021163.1    | Ca_kabuli_chr04 | 24847689                | GG                              | AA              | 1946802263               |
| SNP_P4_47304_24871715 | NC_021163.1    | Ca_kabuli_chr04 | 24871715                | CC                              | AA              | 1946802265               |
| SNP_P4_47305_24877245 | NC_021163.1    | Ca_kabuli_chr04 | 24877245                | AA                              | CC              | 1946802267               |
| SNP_P4_47306_24877472 | NC_021163.1    | Ca_kabuli_chr04 | 24877472                | CC                              | AA              | 1946802269               |
| SNP_P4_47307_24877556 | NC_021163.1    | Ca_kabuli_chr04 | 24877556                | AA                              | CC              | 1946802271               |
| SNP_P4_47308_24877575 | NC_021163.1    | Ca_kabuli_chr04 | 24877575                | AA                              | GG              | 1946802273               |
| SNP_P4_47309_24877584 | NC_021163.1    | Ca_kabuli_chr04 | 24877584                | AA                              | GG              | 1946802275               |
| SNP_P4_47310_24877619 | NC_021163.1    | Ca_kabuli_chr04 | 24877619                | TT                              | CC              | 1946802277               |
| SNP_P4_47311_24877904 | NC_021163.1    | Ca_kabuli_chr04 | 24877904                | CC                              | TT              | 1946802279               |
| SNP_P4_47312_24877963 | NC_021163.1    | Ca_kabuli_chr04 | 24877963                | GG                              | AA              | 1946802281               |
| SNP_P4_47313_24888479 | NC_021163.1    | Ca_kabuli_chr04 | 24888479                | TT                              | AA              | 1946802283               |
| SNP_P4_47314_24906804 | NC_021163.1    | Ca_kabuli_chr04 | 24906804                | TT                              | CC              | 1946802285               |
| SNP_P4_47315_24914825 | NC_021163.1    | Ca_kabuli_chr04 | 24914825                | TT                              | GG              | 1946802287               |
| SNP_P4_47316_24918028 | NC_021163.1    | Ca_kabuli_chr04 | 24918028                | AA                              | GG              | 1946802289               |
| SNP_P4_47318_24919841 | NC_021163.1    | Ca_kabuli_chr04 | 24919841                | CC                              | AA              | 1946802291               |
| SNP_P4_47319_24921438 | NC_021163.1    | Ca_kabuli_chr04 | 24921438                | TT                              | CC              | 1946802293               |
| SNP_P4_47321_24929314 | NC_021163.1    | Ca_kabuli_chr04 | 24929314                | AA                              | GG              | 1946802295               |
| SNP_P4_47322_24929516 | NC_021163.1    | Ca_kabuli_chr04 | 24929516                | TT                              | CC              | 1946802297               |
| SNP_P4_47323_24931535 | NC_021163.1    | Ca_kabuli_chr04 | 24931535                | AA                              | CC              | 1946802299               |
| SNP_P4_47324_24931569 | NC_021163.1    | Ca_kabuli_chr04 | 24931569                | CC                              | TT              | 1946802301               |
| SNP_P4_47325_24931570 | NC_021163.1    | Ca_kabuli_chr04 | 24931570                | AA                              | GG              | 1946802303               |
| SNP_P4_47326_24931843 | NC_021163.1    | Ca_kabuli_chr04 | 24931843                | TT                              | GG              | 1946802305               |
| SNP_P4_47327_24932843 | NC_021163.1    | Ca_kabuli_chr04 | 24932843                | TT                              | CC              | 1946802307               |
| SNP_P4_47328_24936696 | NC_021163.1    | Ca_kabuli_chr04 | 24936696                | AA                              | GG              | 1946802309               |

| SNPs IDs              | Chromosome IDs | Chromosomes     | Physical positions (bp) | CDC Frontier (Reference genome) | (ILWC46 & LPNB) | NCBI SNPdb Accession IDs |
|-----------------------|----------------|-----------------|-------------------------|---------------------------------|-----------------|--------------------------|
| SNP_P4_47329_24942020 | NC_021163.1    | Ca_kabuli_chr04 | 24942020                | TT                              | AA              | 1946802311               |
| SNP_P4_47330_24948799 | NC_021163.1    | Ca_kabuli_chr04 | 24948799                | TT                              | AA              | 1946802313               |
| SNP_P4_47331_24956633 | NC_021163.1    | Ca_kabuli_chr04 | 24956633                | AA                              | GG              | 1946802315               |
| SNP_P4_47333_24960140 | NC_021163.1    | Ca_kabuli_chr04 | 24960140                | AA                              | GG              | 1946802317               |
| SNP_P4_47334_24961855 | NC_021163.1    | Ca_kabuli_chr04 | 24961855                | AA                              | GG              | 1946802319               |
| SNP_P4_47335_24970340 | NC_021163.1    | Ca_kabuli_chr04 | 24970340                | AA                              | TT              | 1946802321               |
| SNP_P4_47336_24972541 | NC_021163.1    | Ca_kabuli_chr04 | 24972541                | AA                              | GG              | 1946802323               |
| SNP_P4_47338_24996662 | NC_021163.1    | Ca_kabuli_chr04 | 24996662                | GG                              | AA              | 1946802325               |
| SNP_P4_47339_24996716 | NC_021163.1    | Ca_kabuli_chr04 | 24996716                | AA                              | GG              | 1946802327               |
| SNP_P4_47340_24996722 | NC_021163.1    | Ca_kabuli_chr04 | 24996722                | TT                              | CC              | 1946802329               |
| SNP_P4_47341_24996749 | NC_021163.1    | Ca_kabuli_chr04 | 24996749                | GG                              | AA              | 1946802332               |
| SNP_P4_47342_24996858 | NC_021163.1    | Ca_kabuli_chr04 | 24996858                | TT                              | CC              | 1946802334               |
| SNP_P4_47343_24996985 | NC_021163.1    | Ca_kabuli_chr04 | 24996985                | GG                              | AA              | 1946802336               |
| SNP_P4_47344_24997314 | NC_021163.1    | Ca_kabuli_chr04 | 24997314                | TT                              | CC              | 1946802338               |
| SNP_P4_47345_24997954 | NC_021163.1    | Ca_kabuli_chr04 | 24997954                | CC                              | TT              | 1946802340               |
| SNP_P4_47346_25011192 | NC_021163.1    | Ca_kabuli_chr04 | 25011192                | GG                              | AA              | 1946802342               |
| SNP_P4_47347_25011197 | NC_021163.1    | Ca_kabuli_chr04 | 25011197                | TT                              | AA              | 1946802344               |
| SNP_P4_47348_25011199 | NC_021163.1    | Ca_kabuli_chr04 | 25011199                | TT                              | CC              | 1946802346               |
| SNP_P4_47349_25011236 | NC_021163.1    | Ca_kabuli_chr04 | 25011236                | AA                              | GG              | 1946802348               |
| SNP_P4_47350_25011251 | NC_021163.1    | Ca_kabuli_chr04 | 25011251                | AA                              | TT              | 1946802350               |
| SNP_P4_47351_25011271 | NC_021163.1    | Ca_kabuli_chr04 | 25011271                | CC                              | TT              | 1946802352               |
| SNP_P4_47352_25011320 | NC_021163.1    | Ca_kabuli_chr04 | 25011320                | AA                              | TT              | 1946802354               |
| SNP_P4_47354_25018847 | NC_021163.1    | Ca_kabuli_chr04 | 25018847                | AA                              | GG              | 1946802356               |
| SNP_P4_47355_25024256 | NC_021163.1    | Ca_kabuli_chr04 | 25024256                | GG                              | TT              | 1946802358               |
| SNP_P4_47356_25024623 | NC_021163.1    | Ca_kabuli_chr04 | 25024623                | AA                              | CC              | 1946802360               |
| SNP_P4_47357_25024947 | NC_021163.1    | Ca_kabuli_chr04 | 25024947                | GG                              | AA              | 1946802362               |
| SNP_P4_47358_25025206 | NC_021163.1    | Ca_kabuli_chr04 | 25025206                | CC                              | TT              | 1946802364               |
| SNP_P4_47359_25026799 | NC_021163.1    | Ca_kabuli_chr04 | 25026799                | AA                              | GG              | 1946802366               |
| SNP_P4_47360_25027183 | NC_021163.1    | Ca_kabuli_chr04 | 25027183                | GG                              | AA              | 1946802368               |
| SNP_P4_47361_25028567 | NC_021163.1    | Ca_kabuli_chr04 | 25028567                | AA                              | TT              | 1946802370               |
| SNP_P4_47364_25041771 | NC_021163.1    | Ca_kabuli_chr04 | 25041771                | GG                              | AA              | 1946802372               |
| SNP_P4_47365_25041796 | NC_021163.1    | Ca_kabuli_chr04 | 25041796                | GG                              | AA              | 1946802374               |
| SNP_P4_47366_25046010 | NC_021163.1    | Ca_kabuli_chr04 | 25046010                | AA                              | CC              | 1946802376               |
| SNP_P4_47367_25046415 | NC_021163.1    | Ca_kabuli_chr04 | 25046415                | CC                              | TT              | 1946802378               |
| SNP_P4_47368_25046884 | NC_021163.1    | Ca_kabuli_chr04 | 25046884                | AA                              | CC              | 1946802380               |
| SNP_P4_47369_25046963 | NC_021163.1    | Ca_kabuli_chr04 | 25046963                | AA                              | GG              | 1946802382               |
| SNP_P4_47371_25047032 | NC_021163.1    | Ca_kabuli_chr04 | 25047032                | AA                              | GG              | 1946802385               |
| SNP_P4_47372_25047033 | NC_021163.1    | Ca_kabuli_chr04 | 25047033                | TT                              | GG              | 1946802387               |
| SNP_P4_47373_25047046 | NC_021163.1    | Ca_kabuli_chr04 | 25047046                | TT                              | GG              | 1946802389               |
| SNP_P4_47374_25047110 | NC_021163.1    | Ca_kabuli_chr04 | 25047110                | GG                              | AA              | 1946802391               |
| SNP_P4_47375_25047171 | NC_021163.1    | Ca_kabuli_chr04 | 25047171                | GG                              | CC              | 1946802393               |
| SNP_P4_47376_25047231 | NC_021163.1    | Ca_kabuli_chr04 | 25047231                | CC                              | TT              | 1946802395               |

| SNPs IDs              | Chromosome IDs | Chromosomes     | Physical positions (bp) | CDC Frontier (Reference genome) | (ILWC46 & LPNB) | NCBI SNPdb Accession IDs |
|-----------------------|----------------|-----------------|-------------------------|---------------------------------|-----------------|--------------------------|
| SNP_P4_47377_25047279 | NC_021163.1    | Ca_kabuli_chr04 | 25047279                | CC                              | GG              | 1946802397               |
| SNP_P4_47378_25047334 | NC_021163.1    | Ca_kabuli_chr04 | 25047334                | TT                              | CC              | 1946802399               |
| SNP_P4_47379_25047478 | NC_021163.1    | Ca_kabuli_chr04 | 25047478                | TT                              | CC              | 1946802401               |
| SNP_P4_47380_25047712 | NC_021163.1    | Ca_kabuli_chr04 | 25047712                | CC                              | GG              | 1946802403               |
| SNP_P4_47381_25051118 | NC_021163.1    | Ca_kabuli_chr04 | 25051118                | AA                              | CC              | 1946802405               |
| SNP_P4_47382_25051487 | NC_021163.1    | Ca_kabuli_chr04 | 25051487                | TT                              | CC              | 1946802407               |
| SNP_P4_47383_25051513 | NC_021163.1    | Ca_kabuli_chr04 | 25051513                | GG                              | TT              | 1946802409               |
| SNP_P4_47384_25051925 | NC_021163.1    | Ca_kabuli_chr04 | 25051925                | GG                              | AA              | 1946802411               |
| SNP_P4_47385_25052542 | NC_021163.1    | Ca_kabuli_chr04 | 25052542                | GG                              | AA              | 1946802414               |
| SNP_P4_47387_25053677 | NC_021163.1    | Ca_kabuli_chr04 | 25053677                | TT                              | GG              | 1946802416               |
| SNP_P4_47388_25053796 | NC_021163.1    | Ca_kabuli_chr04 | 25053796                | CC                              | TT              | 1946802418               |
| SNP_P4_47389_25054020 | NC_021163.1    | Ca_kabuli_chr04 | 25054020                | AA                              | CC              | 1946802420               |
| SNP_P4_47390_25054468 | NC_021163.1    | Ca_kabuli_chr04 | 25054468                | AA                              | GG              | 1946802422               |
| SNP_P4_47391_25055248 | NC_021163.1    | Ca_kabuli_chr04 | 25055248                | CC                              | TT              | 1946802424               |
| SNP_P4_47392_25059383 | NC_021163.1    | Ca_kabuli_chr04 | 25059383                | CC                              | AA              | 1946802426               |
| SNP_P4_47393_25059399 | NC_021163.1    | Ca_kabuli_chr04 | 25059399                | GG                              | AA              | 1946802428               |
| SNP_P4_47394_25059432 | NC_021163.1    | Ca_kabuli_chr04 | 25059432                | AA                              | GG              | 1946802430               |
| SNP_P4_47395_25059482 | NC_021163.1    | Ca_kabuli_chr04 | 25059482                | AA                              | GG              | 1946802432               |
| SNP_P4_47396_25059593 | NC_021163.1    | Ca_kabuli_chr04 | 25059593                | TT                              | CC              | 1946802435               |
| SNP_P4_47399_25064235 | NC_021163.1    | Ca_kabuli_chr04 | 25064235                | GG                              | AA              | 1946802437               |
| SNP_P4_47401_25064488 | NC_021163.1    | Ca_kabuli_chr04 | 25064488                | CC                              | AA              | 1946802439               |
| SNP_P4_47402_25064503 | NC_021163.1    | Ca_kabuli_chr04 | 25064503                | GG                              | AA              | 1946802442               |
| SNP_P4_47403_25067159 | NC_021163.1    | Ca_kabuli_chr04 | 25067159                | GG                              | AA              | 1946802444               |
| SNP_P4_47404_25067267 | NC_021163.1    | Ca_kabuli_chr04 | 25067267                | TT                              | CC              | 1946802446               |
| SNP_P4_47405_25067762 | NC_021163.1    | Ca_kabuli_chr04 | 25067762                | AA                              | CC              | 1946802448               |
| SNP_P4_47406_25067764 | NC_021163.1    | Ca_kabuli_chr04 | 25067764                | GG                              | AA              | 1946802450               |
| SNP_P4_47407_25067765 | NC_021163.1    | Ca_kabuli_chr04 | 25067765                | AA                              | CC              | 1946802453               |
| SNP_P4_47408_25067823 | NC_021163.1    | Ca_kabuli_chr04 | 25067823                | GG                              | AA              | 1946802455               |
| SNP_P4_47409_25068354 | NC_021163.1    | Ca_kabuli_chr04 | 25068354                | AA                              | GG              | 1946802457               |
| SNP_P4_47410_25068414 | NC_021163.1    | Ca_kabuli_chr04 | 25068414                | CC                              | AA              | 1946802460               |
| SNP_P4_47411_25068800 | NC_021163.1    | Ca_kabuli_chr04 | 25068800                | AA                              | GG              | 1946802462               |
| SNP_P4_47412_25069256 | NC_021163.1    | Ca_kabuli_chr04 | 25069256                | CC                              | GG              | 1946802464               |
| SNP_P4_47413_25070308 | NC_021163.1    | Ca_kabuli_chr04 | 25070308                | GG                              | AA              | 1946802466               |
| SNP_P4_47414_25070326 | NC_021163.1    | Ca_kabuli_chr04 | 25070326                | CC                              | TT              | 1946802469               |
| SNP_P4_47415_25070433 | NC_021163.1    | Ca_kabuli_chr04 | 25070433                | CC                              | AA              | 1946802471               |
| SNP_P4_47416_25071036 | NC_021163.1    | Ca_kabuli_chr04 | 25071036                | TT                              | GG              | 1946802473               |
| SNP_P4_47417_25071094 | NC_021163.1    | Ca_kabuli_chr04 | 25071094                | CC                              | TT              | 1946802475               |
| SNP_P4_47419_25071346 | NC_021163.1    | Ca_kabuli_chr04 | 25071346                | CC                              | GG              | 1946802477               |
| SNP_P4_47420_25074157 | NC_021163.1    | Ca_kabuli_chr04 | 25074157                | GG                              | AA              | 1946802479               |
| SNP_P4_47421_25074226 | NC_021163.1    | Ca_kabuli_chr04 | 25074226                | AA                              | GG              | 1946802481               |
| SNP_P4_47422_25074251 | NC_021163.1    | Ca_kabuli_chr04 | 25074251                | TT                              | CC              | 1946802483               |
| SNP_P4_47423_25074287 | NC_021163.1    | Ca_kabuli_chr04 | 25074287                | AA                              | GG              | 1946802485               |

| SNPs IDs              | Chromosome IDs | Chromosomes     | Physical positions (bp) | CDC Frontier (Reference genome) | (ILWC46 & LPNB) | NCBI SNPdb Accession IDs |
|-----------------------|----------------|-----------------|-------------------------|---------------------------------|-----------------|--------------------------|
| SNP_P4_47424_25074306 | NC_021163.1    | Ca_kabuli_chr04 | 25074306                | TT                              | CC              | 1946802487               |
| SNP_P4_47425_25074508 | NC_021163.1    | Ca_kabuli_chr04 | 25074508                | TT                              | CC              | 1946802490               |
| SNP_P4_47426_25074559 | NC_021163.1    | Ca_kabuli_chr04 | 25074559                | CC                              | TT              | 1946802492               |
| SNP_P4_47427_25074574 | NC_021163.1    | Ca_kabuli_chr04 | 25074574                | CC                              | TT              | 1946802494               |
| SNP_P4_47428_25074637 | NC_021163.1    | Ca_kabuli_chr04 | 25074637                | AA                              | GG              | 1946802496               |
| SNP_P4_47429_25074654 | NC_021163.1    | Ca_kabuli_chr04 | 25074654                | AA                              | CC              | 1946802498               |
| SNP_P4_47431_25089310 | NC_021163.1    | Ca_kabuli_chr04 | 25089310                | TT                              | CC              | 1946802500               |
| SNP_P4_47432_25089497 | NC_021163.1    | Ca_kabuli_chr04 | 25089497                | TT                              | CC              | 1946802503               |
| SNP_P4_47433_25089610 | NC_021163.1    | Ca_kabuli_chr04 | 25089610                | TT                              | CC              | 1946802505               |
| SNP_P4_47434_25097754 | NC_021163.1    | Ca_kabuli_chr04 | 25097754                | AA                              | GG              | 1946802507               |
| SNP_P4_47435_25104070 | NC_021163.1    | Ca_kabuli_chr04 | 25104070                | CC                              | TT              | 1946802508               |
| SNP_P4_47436_25104513 | NC_021163.1    | Ca_kabuli_chr04 | 25104513                | AA                              | GG              | 1946802510               |
| SNP_P4_47437_25104611 | NC_021163.1    | Ca_kabuli_chr04 | 25104611                | GG                              | AA              | 1946802512               |
| SNP_P4_47438_25104685 | NC_021163.1    | Ca_kabuli_chr04 | 25104685                | CC                              | AA              | 1946802514               |
| SNP_P4_47439_25104708 | NC_021163.1    | Ca_kabuli_chr04 | 25104708                | AA                              | TT              | 1946802516               |
| SNP_P4_47440_25106400 | NC_021163.1    | Ca_kabuli_chr04 | 25106400                | CC                              | AA              | 1946802518               |
| SNP_P4_47442_25111752 | NC_021163.1    | Ca_kabuli_chr04 | 25111752                | TT                              | GG              | 1946802520               |
| SNP_P4_47443_25113298 | NC_021163.1    | Ca_kabuli_chr04 | 25113298                | GG                              | AA              | 1946802523               |
| SNP_P4_47444_25115373 | NC_021163.1    | Ca_kabuli_chr04 | 25115373                | AA                              | GG              | 1946802525               |
| SNP_P4_47446_25116887 | NC_021163.1    | Ca_kabuli_chr04 | 25116887                | GG                              | AA              | 1946802527               |
| SNP_P4_47447_25117197 | NC_021163.1    | Ca_kabuli_chr04 | 25117197                | AA                              | GG              | 1946802529               |
| SNP_P4_47448_25117235 | NC_021163.1    | Ca_kabuli_chr04 | 25117235                | TT                              | CC              | 1946802531               |
| SNP_P4_47449_25117365 | NC_021163.1    | Ca_kabuli_chr04 | 25117365                | GG                              | AA              | 1946802533               |
| SNP_P4_47450_25117456 | NC_021163.1    | Ca_kabuli_chr04 | 25117456                | CC                              | TT              | 1946802535               |
| SNP_P4_47451_25118634 | NC_021163.1    | Ca_kabuli_chr04 | 25118634                | AA                              | TT              | 1946802537               |
| SNP_P4_47452_25119362 | NC_021163.1    | Ca_kabuli_chr04 | 25119362                | AA                              | GG              | 1946802539               |
| SNP_P4_47453_25124904 | NC_021163.1    | Ca_kabuli_chr04 | 25124904                | AA                              | CC              | 1946802541               |
| SNP_P4_47454_25125328 | NC_021163.1    | Ca_kabuli_chr04 | 25125328                | GG                              | AA              | 1946802543               |
| SNP_P4_47455_25125632 | NC_021163.1    | Ca_kabuli_chr04 | 25125632                | AA                              | GG              | 1946802545               |
| SNP_P4_47456_25125649 | NC_021163.1    | Ca_kabuli_chr04 | 25125649                | GG                              | AA              | 1946802547               |
| SNP_P4_47457_25136982 | NC_021163.1    | Ca_kabuli_chr04 | 25136982                | GG                              | AA              | 1946802549               |
| SNP_P4_47458_25138559 | NC_021163.1    | Ca_kabuli_chr04 | 25138559                | AA                              | GG              | 1946802551               |
| SNP_P4_47460_25142834 | NC_021163.1    | Ca_kabuli_chr04 | 25142834                | CC                              | TT              | 1946802553               |
| SNP_P4_47462_25154833 | NC_021163.1    | Ca_kabuli_chr04 | 25154833                | TT                              | AA              | 1946802555               |
| SNP_P4_47463_25156043 | NC_021163.1    | Ca_kabuli_chr04 | 25156043                | TT                              | AA              | 1946802557               |
| SNP_P4_47464_25157229 | NC_021163.1    | Ca_kabuli_chr04 | 25157229                | GG                              | CC              | 1946802559               |
| SNP_P4_47465_25158967 | NC_021163.1    | Ca_kabuli_chr04 | 25158967                | CC                              | TT              | 1946802561               |
| SNP_P4_47466_25158970 | NC_021163.1    | Ca_kabuli_chr04 | 25158970                | TT                              | CC              | 1946802563               |
| SNP_P4_47468_25159005 | NC_021163.1    | Ca_kabuli_chr04 | 25159005                | GG                              | AA              | 1946802565               |
| SNP_P4_47469_25159006 | NC_021163.1    | Ca_kabuli_chr04 | 25159006                | TT                              | CC              | 1946802567               |
| SNP_P4_47471_25160086 | NC_021163.1    | Ca_kabuli_chr04 | 25160086                | AA                              | GG              | 1946802569               |
| SNP_P4_47472_25161199 | NC_021163.1    | Ca_kabuli_chr04 | 25161199                | CC                              | TT              | 1946802571               |

| SNPs IDs              | Chromosome IDs | Chromosomes     | Physical positions (bp) | CDC Frontier (Reference genome) | (ILWC46 & LPNB) | NCBI SNPdb Accession IDs |
|-----------------------|----------------|-----------------|-------------------------|---------------------------------|-----------------|--------------------------|
| SNP_P4_47473_25161374 | NC_021163.1    | Ca_kabuli_chr04 | 25161374                | GG                              | AA              | 1946802573               |
| SNP_P4_47474_25163007 | NC_021163.1    | Ca_kabuli_chr04 | 25163007                | GG                              | AA              | 1946802575               |
| SNP_P4_47475_25164979 | NC_021163.1    | Ca_kabuli_chr04 | 25164979                | CC                              | TT              | 1946802577               |
| SNP_P4_47476_25165010 | NC_021163.1    | Ca_kabuli_chr04 | 25165010                | TT                              | CC              | 1946802579               |
| SNP_P4_47477_25166376 | NC_021163.1    | Ca_kabuli_chr04 | 25166376                | GG                              | AA              | 1946802581               |
| SNP_P4_47478_25168094 | NC_021163.1    | Ca_kabuli_chr04 | 25168094                | TT                              | GG              | 1946802583               |
| SNP_P4_47479_25168210 | NC_021163.1    | Ca_kabuli_chr04 | 25168210                | GG                              | AA              | 1946802585               |
| SNP_P4_47481_25168789 | NC_021163.1    | Ca_kabuli_chr04 | 25168789                | CC                              | AA              | 1946802587               |
| SNP_P4_47482_25168802 | NC_021163.1    | Ca_kabuli_chr04 | 25168802                | CC                              | TT              | 1946802589               |
| SNP_P4_47483_25169458 | NC_021163.1    | Ca_kabuli_chr04 | 25169458                | CC                              | TT              | 1946802591               |
| SNP_P4_47484_25169459 | NC_021163.1    | Ca_kabuli_chr04 | 25169459                | AA                              | TT              | 1946802593               |
| SNP_P4_47486_25178924 | NC_021163.1    | Ca_kabuli_chr04 | 25178924                | TT                              | CC              | 1946802595               |
| SNP_P4_47487_25180662 | NC_021163.1    | Ca_kabuli_chr04 | 25180662                | TT                              | CC              | 1946802597               |
| SNP_P4_47488_25183590 | NC_021163.1    | Ca_kabuli_chr04 | 25183590                | AA                              | TT              | 1946802599               |
| SNP_P4_47489_25185247 | NC_021163.1    | Ca_kabuli_chr04 | 25185247                | CC                              | TT              | 1946802601               |
| SNP_P4_47490_25187687 | NC_021163.1    | Ca_kabuli_chr04 | 25187687                | CC                              | TT              | 1946802603               |
| SNP_P4_47492_25190129 | NC_021163.1    | Ca_kabuli_chr04 | 25190129                | AA                              | GG              | 1946802605               |
| SNP_P4_47493_25190215 | NC_021163.1    | Ca_kabuli_chr04 | 25190215                | AA                              | CC              | 1946802607               |
| SNP_P4_47495_25193204 | NC_021163.1    | Ca_kabuli_chr04 | 25193204                | CC                              | TT              | 1946802609               |
| SNP_P4_47496_25200782 | NC_021163.1    | Ca_kabuli_chr04 | 25200782                | TT                              | CC              | 1946802610               |
| SNP_P4_47497_25200978 | NC_021163.1    | Ca_kabuli_chr04 | 25200978                | GG                              | TT              | 1946802612               |
| SNP_P4_47498_25202318 | NC_021163.1    | Ca_kabuli_chr04 | 25202318                | GG                              | TT              | 1946802614               |
| SNP_P4_47500_25207259 | NC_021163.1    | Ca_kabuli_chr04 | 25207259                | GG                              | AA              | 1946802616               |
| SNP_P4_47501_25209983 | NC_021163.1    | Ca_kabuli_chr04 | 25209983                | CC                              | TT              | 1946802618               |
| SNP_P4_47502_25210709 | NC_021163.1    | Ca_kabuli_chr04 | 25210709                | AA                              | CC              | 1946802620               |
| SNP_P4_47503_25213166 | NC_021163.1    | Ca_kabuli_chr04 | 25213166                | AA                              | CC              | 1946802622               |
| SNP_P4_47504_25213585 | NC_021163.1    | Ca_kabuli_chr04 | 25213585                | AA                              | GG              | 1946802624               |
| SNP_P4_47506_25213878 | NC_021163.1    | Ca_kabuli_chr04 | 25213878                | GG                              | TT              | 1946802626               |
| SNP_P4_47507_25215643 | NC_021163.1    | Ca_kabuli_chr04 | 25215643                | AA                              | TT              | 1946802628               |
| SNP_P4_47508_25215650 | NC_021163.1    | Ca_kabuli_chr04 | 25215650                | GG                              | AA              | 1946802630               |
| SNP_P4_47509_25215664 | NC_021163.1    | Ca_kabuli_chr04 | 25215664                | CC                              | TT              | 1946802632               |
| SNP_P4_47510_25215669 | NC_021163.1    | Ca_kabuli_chr04 | 25215669                | GG                              | CC              | 1946802634               |
| SNP_P4_47511_25215683 | NC_021163.1    | Ca_kabuli_chr04 | 25215683                | AA                              | GG              | 1946802636               |
| SNP_P4_47512_25215829 | NC_021163.1    | Ca_kabuli_chr04 | 25215829                | GG                              | TT              | 1946802638               |
| SNP_P4_47513_25216158 | NC_021163.1    | Ca_kabuli_chr04 | 25216158                | AA                              | GG              | 1946802640               |
| SNP_P4_47514_25216163 | NC_021163.1    | Ca_kabuli_chr04 | 25216163                | GG                              | AA              | 1946802642               |
| SNP_P4_47515_25216501 | NC_021163.1    | Ca_kabuli_chr04 | 25216501                | AA                              | GG              | 1946802644               |
| SNP_P4_47516_25216519 | NC_021163.1    | Ca_kabuli_chr04 | 25216519                | CC                              | AA              | 1946802646               |
| SNP_P4_47517_25216526 | NC_021163.1    | Ca_kabuli_chr04 | 25216526                | GG                              | AA              | 1946802648               |
| SNP_P4_47518_25216532 | NC_021163.1    | Ca_kabuli_chr04 | 25216532                | CC                              | TT              | 1946802651               |
| SNP_P4_47519_25216702 | NC_021163.1    | Ca_kabuli_chr04 | 25216702                | TT                              | AA              | 1946802653               |
| SNP_P4_47520_25217739 | NC_021163.1    | Ca_kabuli_chr04 | 25217739                | TT                              | CC              | 1946802655               |

| SNPs IDs              | Chromosome IDs | Chromosomes     | Physical positions (bp) | CDC Frontier (Reference genome) | (ILWC46 & LPNB) | NCBI SNPdb Accession IDs |
|-----------------------|----------------|-----------------|-------------------------|---------------------------------|-----------------|--------------------------|
| SNP_P4_47521_25222392 | NC_021163.1    | Ca_kabuli_chr04 | 25222392                | TT                              | CC              | 1946802657               |
| SNP_P4_47522_25223163 | NC_021163.1    | Ca_kabuli_chr04 | 25223163                | CC                              | AA              | 1946802659               |
| SNP_P4_47523_25223374 | NC_021163.1    | Ca_kabuli_chr04 | 25223374                | TT                              | CC              | 1946802660               |
| SNP_P4_47524_25223502 | NC_021163.1    | Ca_kabuli_chr04 | 25223502                | GG                              | TT              | 1946802662               |
| SNP_P4_47525_25224822 | NC_021163.1    | Ca_kabuli_chr04 | 25224822                | TT                              | CC              | 1946802664               |
| SNP_P4_47526_25227406 | NC_021163.1    | Ca_kabuli_chr04 | 25227406                | AA                              | GG              | 1946802666               |
| SNP_P4_47527_25227714 | NC_021163.1    | Ca_kabuli_chr04 | 25227714                | TT                              | GG              | 1946802668               |
| SNP_P4_47529_25231636 | NC_021163.1    | Ca_kabuli_chr04 | 25231636                | GG                              | AA              | 1946802670               |
| SNP_P4_47530_25235964 | NC_021163.1    | Ca_kabuli_chr04 | 25235964                | TT                              | CC              | 1946802672               |
| SNP_P4_47532_25236199 | NC_021163.1    | Ca_kabuli_chr04 | 25236199                | AA                              | CC              | 1946802675               |
| SNP_P4_47533_25236212 | NC_021163.1    | Ca_kabuli_chr04 | 25236212                | TT                              | CC              | 1946802677               |
| SNP_P4_47534_25236595 | NC_021163.1    | Ca_kabuli_chr04 | 25236595                | TT                              | CC              | 1946802679               |
| SNP_P4_47535_25237175 | NC_021163.1    | Ca_kabuli_chr04 | 25237175                | TT                              | CC              | 1946802681               |
| SNP_P4_47536_25237194 | NC_021163.1    | Ca_kabuli_chr04 | 25237194                | AA                              | GG              | 1946802683               |
| SNP_P4_47537_25237195 | NC_021163.1    | Ca_kabuli_chr04 | 25237195                | CC                              | TT              | 1946802685               |
| SNP_P4_47538_25237506 | NC_021163.1    | Ca_kabuli_chr04 | 25237506                | GG                              | AA              | 1946802687               |
| SNP_P4_47539_25237657 | NC_021163.1    | Ca_kabuli_chr04 | 25237657                | CC                              | GG              | 1946802689               |
| SNP_P4_47540_25237702 | NC_021163.1    | Ca_kabuli_chr04 | 25237702                | TT                              | CC              | 1946802691               |
| SNP_P4_47541_25237707 | NC_021163.1    | Ca_kabuli_chr04 | 25237707                | TT                              | CC              | 1946802693               |
| SNP_P4_47542_25238342 | NC_021163.1    | Ca_kabuli_chr04 | 25238342                | CC                              | TT              | 1946802695               |
| SNP_P4_47543_25238344 | NC_021163.1    | Ca_kabuli_chr04 | 25238344                | CC                              | TT              | 1946802698               |
| SNP_P4_47544_25238373 | NC_021163.1    | Ca_kabuli_chr04 | 25238373                | CC                              | AA              | 1946802700               |
| SNP_P4_47545_25238375 | NC_021163.1    | Ca_kabuli_chr04 | 25238375                | AA                              | CC              | 1946802702               |
| SNP_P4_47546_25238698 | NC_021163.1    | Ca_kabuli_chr04 | 25238698                | TT                              | CC              | 1946802704               |
| SNP_P4_47547_25238709 | NC_021163.1    | Ca_kabuli_chr04 | 25238709                | TT                              | CC              | 1946802706               |
| SNP_P4_47548_25239491 | NC_021163.1    | Ca_kabuli_chr04 | 25239491                | TT                              | CC              | 1946802708               |
| SNP_P4_47549_25241598 | NC_021163.1    | Ca_kabuli_chr04 | 25241598                | CC                              | GG              | 1946802710               |
| SNP_P4_47550_25241617 | NC_021163.1    | Ca_kabuli_chr04 | 25241617                | GG                              | TT              | 1946802712               |
| SNP_P4_47551_25241654 | NC_021163.1    | Ca_kabuli_chr04 | 25241654                | GG                              | AA              | 1946802714               |
| SNP_P4_47552_25241961 | NC_021163.1    | Ca_kabuli_chr04 | 25241961                | GG                              | AA              | 1946802716               |
| SNP_P4_47554_25243071 | NC_021163.1    | Ca_kabuli_chr04 | 25243071                | CC                              | TT              | 1946802718               |
| SNP_P4_47556_25248140 | NC_021163.1    | Ca_kabuli_chr04 | 25248140                | TT                              | CC              | 1946802720               |
| SNP_P4_47557_25248150 | NC_021163.1    | Ca_kabuli_chr04 | 25248150                | GG                              | TT              | 1946802722               |
| SNP_P4_47558_25250222 | NC_021163.1    | Ca_kabuli_chr04 | 25250222                | CC                              | GG              | 1946802724               |
| SNP_P4_47559_25251080 | NC_021163.1    | Ca_kabuli_chr04 | 25251080                | AA                              | TT              | 1946802726               |
| SNP_P4_47560_25251808 | NC_021163.1    | Ca_kabuli_chr04 | 25251808                | CC                              | AA              | 1946802728               |
| SNP_P4_47561_25251825 | NC_021163.1    | Ca_kabuli_chr04 | 25251825                | TT                              | CC              | 1946802730               |
| SNP_P4_47562_25251842 | NC_021163.1    | Ca_kabuli_chr04 | 25251842                | AA                              | TT              | 1946802732               |
| SNP_P4_47564_25255773 | NC_021163.1    | Ca_kabuli_chr04 | 25255773                | GG                              | AA              | 1946802734               |
| SNP_P4_47566_25258608 | NC_021163.1    | Ca_kabuli_chr04 | 25258608                | TT                              | AA              | 1946802736               |
| SNP_P4_47567_25258648 | NC_021163.1    | Ca_kabuli_chr04 | 25258648                | GG                              | AA              | 1946802739               |
| SNP_P4_47568_25258924 | NC_021163.1    | Ca_kabuli_chr04 | 25258924                | CC                              | TT              | 1946802741               |

| SNPs IDs              | Chromosome IDs | Chromosomes     | Physical positions (bp) | CDC Frontier (Reference genome) | (ILWC46 & LPNB) | NCBI SNPdb Accession IDs |
|-----------------------|----------------|-----------------|-------------------------|---------------------------------|-----------------|--------------------------|
| SNP_P4_47569_25258956 | NC_021163.1    | Ca_kabuli_chr04 | 25258956                | TT                              | CC              | 1946802743               |
| SNP_P4_47570_25259416 | NC_021163.1    | Ca_kabuli_chr04 | 25259416                | TT                              | CC              | 1946802745               |
| SNP_P4_47571_25259430 | NC_021163.1    | Ca_kabuli_chr04 | 25259430                | AA                              | TT              | 1946802747               |
| SNP_P4_47573_25260061 | NC_021163.1    | Ca_kabuli_chr04 | 25260061                | GG                              | TT              | 1946802749               |
| SNP_P4_47574_25260394 | NC_021163.1    | Ca_kabuli_chr04 | 25260394                | GG                              | AA              | 1946802751               |
| SNP_P4_47575_25260424 | NC_021163.1    | Ca_kabuli_chr04 | 25260424                | GG                              | AA              | 1946802753               |
| SNP_P4_47576_25260618 | NC_021163.1    | Ca_kabuli_chr04 | 25260618                | CC                              | AA              | 1946802755               |
| SNP_P4_47577_25260893 | NC_021163.1    | Ca_kabuli_chr04 | 25260893                | TT                              | AA              | 1946802757               |
| SNP_P4_47578_25275378 | NC_021163.1    | Ca_kabuli_chr04 | 25275378                | TT                              | AA              | 1946802759               |
| SNP_P4_47579_25275421 | NC_021163.1    | Ca_kabuli_chr04 | 25275421                | TT                              | CC              | 1946802761               |
| SNP_P4_47580_25275424 | NC_021163.1    | Ca_kabuli_chr04 | 25275424                | TT                              | CC              | 1946802763               |
| SNP_P4_47581_25275465 | NC_021163.1    | Ca_kabuli_chr04 | 25275465                | GG                              | AA              | 1946802765               |
| SNP_P4_47582_25279839 | NC_021163.1    | Ca_kabuli_chr04 | 25279839                | GG                              | CC              | 1946802767               |
| SNP_P4_47583_25279886 | NC_021163.1    | Ca_kabuli_chr04 | 25279886                | CC                              | TT              | 1946802769               |
| SNP_P4_47585_25282343 | NC_021163.1    | Ca_kabuli_chr04 | 25282343                | GG                              | TT              | 1946802771               |
| SNP_P4_47587_25285317 | NC_021163.1    | Ca_kabuli_chr04 | 25285317                | GG                              | AA              | 1946802773               |
| SNP_P4_47588_25285763 | NC_021163.1    | Ca_kabuli_chr04 | 25285763                | CC                              | GG              | 1946802775               |
| SNP_P4_47589_25287445 | NC_021163.1    | Ca_kabuli_chr04 | 25287445                | TT                              | GG              | 1946802777               |
| SNP_P4_47590_25287450 | NC_021163.1    | Ca_kabuli_chr04 | 25287450                | CC                              | TT              | 1946802779               |
| SNP_P4_47591_25290086 | NC_021163.1    | Ca_kabuli_chr04 | 25290086                | CC                              | TT              | 1946802781               |
| SNP_P4_47592_25290496 | NC_021163.1    | Ca_kabuli_chr04 | 25290496                | AA                              | GG              | 1946802783               |
| SNP_P4_47593_25290577 | NC_021163.1    | Ca_kabuli_chr04 | 25290577                | GG                              | AA              | 1946802785               |
| SNP_P4_47594_25290636 | NC_021163.1    | Ca_kabuli_chr04 | 25290636                | TT                              | CC              | 1946802787               |
| SNP_P4_47595_25291288 | NC_021163.1    | Ca_kabuli_chr04 | 25291288                | CC                              | GG              | 1946802789               |
| SNP_P4_47596_25291314 | NC_021163.1    | Ca_kabuli_chr04 | 25291314                | TT                              | CC              | 1946802791               |
| SNP_P4_47597_25291403 | NC_021163.1    | Ca_kabuli_chr04 | 25291403                | TT                              | AA              | 1946802793               |
| SNP_P4_47598_25291437 | NC_021163.1    | Ca_kabuli_chr04 | 25291437                | TT                              | AA              | 1946802795               |
| SNP_P4_47599_25291450 | NC_021163.1    | Ca_kabuli_chr04 | 25291450                | TT                              | CC              | 1946802797               |
| SNP_P4_47600_25293243 | NC_021163.1    | Ca_kabuli_chr04 | 25293243                | CC                              | AA              | 1946802799               |
| SNP_P4_47601_25293570 | NC_021163.1    | Ca_kabuli_chr04 | 25293570                | CC                              | TT              | 1946802801               |
| SNP_P4_47602_25293812 | NC_021163.1    | Ca_kabuli_chr04 | 25293812                | CC                              | AA              | 1946802803               |
| SNP_P4_47603_25293817 | NC_021163.1    | Ca_kabuli_chr04 | 25293817                | CC                              | GG              | 1946802805               |
| SNP_P4_47604_25293874 | NC_021163.1    | Ca_kabuli_chr04 | 25293874                | TT                              | CC              | 1946802807               |
| SNP_P4_47605_25294880 | NC_021163.1    | Ca_kabuli_chr04 | 25294880                | CC                              | AA              | 1946802809               |
| SNP_P4_47606_25296771 | NC_021163.1    | Ca_kabuli_chr04 | 25296771                | CC                              | GG              | 1946802811               |
| SNP_P4_47607_25297090 | NC_021163.1    | Ca_kabuli_chr04 | 25297090                | CC                              | AA              | 1946802813               |
| SNP_P4_47608_25298945 | NC_021163.1    | Ca_kabuli_chr04 | 25298945                | AA                              | CC              | 1946802815               |
| SNP_P4_47609_25299536 | NC_021163.1    | Ca_kabuli_chr04 | 25299536                | TT                              | CC              | 1946802817               |
| SNP_P4_47610_25299545 | NC_021163.1    | Ca_kabuli_chr04 | 25299545                | GG                              | TT              | 1946802819               |
| SNP_P4_47611_25299547 | NC_021163.1    | Ca_kabuli_chr04 | 25299547                | AA                              | CC              | 1946802821               |
| SNP_P4_47612_25299990 | NC_021163.1    | Ca_kabuli_chr04 | 25299990                | CC                              | TT              | 1946802824               |
| SNP_P4_47613_25300039 | NC_021163.1    | Ca_kabuli_chr04 | 25300039                | GG                              | TT              | 1946802826               |

| SNPs IDs              | Chromosome IDs | Chromosomes     | Physical positions (bp) | CDC Frontier (Reference genome) | (ILWC46 & LPNB) | NCBI SNPdb Accession IDs |
|-----------------------|----------------|-----------------|-------------------------|---------------------------------|-----------------|--------------------------|
| SNP_P4_47614_25300492 | NC_021163.1    | Ca_kabuli_chr04 | 25300492                | AA                              | GG              | 1946802828               |
| SNP_P4_47615_25303354 | NC_021163.1    | Ca_kabuli_chr04 | 25303354                | CC                              | TT              | 1946802830               |
| SNP_P4_47616_25303417 | NC_021163.1    | Ca_kabuli_chr04 | 25303417                | CC                              | GG              | 1946802832               |
| SNP_P4_47617_25303494 | NC_021163.1    | Ca_kabuli_chr04 | 25303494                | AA                              | GG              | 1946802834               |
| SNP_P4_47618_25303588 | NC_021163.1    | Ca_kabuli_chr04 | 25303588                | AA                              | GG              | 1946802836               |
| SNP_P4_47619_25303597 | NC_021163.1    | Ca_kabuli_chr04 | 25303597                | CC                              | TT              | 1946802838               |
| SNP_P4_47621_25303632 | NC_021163.1    | Ca_kabuli_chr04 | 25303632                | AA                              | GG              | 1946802840               |
| SNP_P4_47622_25303647 | NC_021163.1    | Ca_kabuli_chr04 | 25303647                | CC                              | TT              | 1946802842               |
| SNP_P4_47623_25303797 | NC_021163.1    | Ca_kabuli_chr04 | 25303797                | AA                              | GG              | 1946802844               |
| SNP_P4_47624_25305073 | NC_021163.1    | Ca_kabuli_chr04 | 25305073                | CC                              | TT              | 1946802846               |
| SNP_P4_47625_25305121 | NC_021163.1    | Ca_kabuli_chr04 | 25305121                | TT                              | CC              | 1946802848               |
| SNP_P4_47626_25305147 | NC_021163.1    | Ca_kabuli_chr04 | 25305147                | AA                              | GG              | 1946802850               |
| SNP_P4_47627_25306477 | NC_021163.1    | Ca_kabuli_chr04 | 25306477                | AA                              | GG              | 1946802852               |
| SNP_P4_47628_25306479 | NC_021163.1    | Ca_kabuli_chr04 | 25306479                | AA                              | GG              | 1946802854               |
| SNP_P4_47629_25326903 | NC_021163.1    | Ca_kabuli_chr04 | 25326903                | AA                              | GG              | 1946802856               |
| SNP_P4_47630_25326990 | NC_021163.1    | Ca_kabuli_chr04 | 25326990                | CC                              | AA              | 1946802858               |
| SNP_P4_47631_25326998 | NC_021163.1    | Ca_kabuli_chr04 | 25326998                | AA                              | GG              | 1946802860               |
| SNP_P4_47632_25327019 | NC_021163.1    | Ca_kabuli_chr04 | 25327019                | GG                              | AA              | 1946802862               |
| SNP_P4_47633_25327040 | NC_021163.1    | Ca_kabuli_chr04 | 25327040                | AA                              | CC              | 1946802864               |
| SNP_P4_47634_25327068 | NC_021163.1    | Ca_kabuli_chr04 | 25327068                | AA                              | GG              | 1946802866               |
| SNP_P4_47635_25327095 | NC_021163.1    | Ca_kabuli_chr04 | 25327095                | TT                              | CC              | 1946802868               |
| SNP_P4_47636_25327101 | NC_021163.1    | Ca_kabuli_chr04 | 25327101                | CC                              | TT              | 1946802870               |
| SNP_P4_47637_25327104 | NC_021163.1    | Ca_kabuli_chr04 | 25327104                | CC                              | TT              | 1946802872               |
| SNP_P4_47638_25327119 | NC_021163.1    | Ca_kabuli_chr04 | 25327119                | AA                              | GG              | 1946802874               |
| SNP_P4_47639_25327131 | NC_021163.1    | Ca_kabuli_chr04 | 25327131                | TT                              | CC              | 1946802876               |
| SNP_P4_47640_25327171 | NC_021163.1    | Ca_kabuli_chr04 | 25327171                | TT                              | CC              | 1946802878               |
| SNP_P4_47641_25327187 | NC_021163.1    | Ca_kabuli_chr04 | 25327187                | GG                              | TT              | 1946802880               |
| SNP_P4_47642_25327311 | NC_021163.1    | Ca_kabuli_chr04 | 25327311                | TT                              | GG              | 1946802882               |
| SNP_P4_47643_25327420 | NC_021163.1    | Ca_kabuli_chr04 | 25327420                | TT                              | GG              | 1946802884               |
| SNP_P4_47644_25327458 | NC_021163.1    | Ca_kabuli_chr04 | 25327458                | CC                              | TT              | 1946802886               |
| SNP_P4_47645_25327460 | NC_021163.1    | Ca_kabuli_chr04 | 25327460                | TT                              | GG              | 1946802888               |
| SNP_P4_47646_25327468 | NC_021163.1    | Ca_kabuli_chr04 | 25327468                | TT                              | CC              | 1946802890               |
| SNP_P4_47647_25342189 | NC_021163.1    | Ca_kabuli_chr04 | 25342189                | TT                              | CC              | 1946802892               |
| SNP_P4_47648_25342206 | NC_021163.1    | Ca_kabuli_chr04 | 25342206                | GG                              | AA              | 1946802894               |
| SNP_P4_47649_25342250 | NC_021163.1    | Ca_kabuli_chr04 | 25342250                | TT                              | GG              | 1946802896               |
| SNP_P4_47650_25342272 | NC_021163.1    | Ca_kabuli_chr04 | 25342272                | AA                              | GG              | 1946802898               |
| SNP_P4_47651_25342295 | NC_021163.1    | Ca_kabuli_chr04 | 25342295                | GG                              | TT              | 1946802900               |
| SNP_P4_47652_25344578 | NC_021163.1    | Ca_kabuli_chr04 | 25344578                | AA                              | CC              | 1946802902               |
| SNP_P4_47654_25348868 | NC_021163.1    | Ca_kabuli_chr04 | 25348868                | CC                              | TT              | 1946802904               |
| SNP_P4_47655_25351298 | NC_021163.1    | Ca_kabuli_chr04 | 25351298                | TT                              | AA              | 1946802906               |
| SNP_P4_47656_25351680 | NC_021163.1    | Ca_kabuli_chr04 | 25351680                | GG                              | CC              | 1946802908               |
| SNP_P4_47657_25352311 | NC_021163.1    | Ca_kabuli_chr04 | 25352311                | GG                              | AA              | 1946802910               |



| SNPs IDs              | Chromosome IDs | Chromosomes     | Physical positions (bp) | CDC Frontier (Reference genome) | (ILWC46 & LPNB) | NCBI SNPdb Accession IDs |
|-----------------------|----------------|-----------------|-------------------------|---------------------------------|-----------------|--------------------------|
| SNP_P4_47658_25352322 | NC_021163.1    | Ca_kabuli_chr04 | 25352322                | CC                              | AA              | 1946802913               |
| SNP_P4_47659_25352391 | NC_021163.1    | Ca_kabuli_chr04 | 25352391                | GG                              | AA              | 1946802915               |
| SNP_P4_47660_25352408 | NC_021163.1    | Ca_kabuli_chr04 | 25352408                | TT                              | CC              | 1946802917               |
| SNP_P4_47661_25352414 | NC_021163.1    | Ca_kabuli_chr04 | 25352414                | GG                              | CC              | 1946802919               |
| SNP_P4_47664_25352637 | NC_021163.1    | Ca_kabuli_chr04 | 25352637                | TT                              | CC              | 1946802921               |
| SNP_P4_47665_25352693 | NC_021163.1    | Ca_kabuli_chr04 | 25352693                | AA                              | TT              | 1946802923               |
| SNP_P4_47666_25352701 | NC_021163.1    | Ca_kabuli_chr04 | 25352701                | CC                              | AA              | 1946802925               |
| SNP_P4_47667_25352705 | NC_021163.1    | Ca_kabuli_chr04 | 25352705                | TT                              | CC              | 1946802927               |
| SNP_P4_47668_25352709 | NC_021163.1    | Ca_kabuli_chr04 | 25352709                | CC                              | TT              | 1946802929               |
| SNP_P4_47669_25352772 | NC_021163.1    | Ca_kabuli_chr04 | 25352772                | GG                              | AA              | 1946802931               |
| SNP_P4_47670_25352936 | NC_021163.1    | Ca_kabuli_chr04 | 25352936                | CC                              | TT              | 1946802933               |
| SNP_P4_47671_25352965 | NC_021163.1    | Ca_kabuli_chr04 | 25352965                | TT                              | AA              | 1946802936               |
| SNP_P4_47672_25352971 | NC_021163.1    | Ca_kabuli_chr04 | 25352971                | CC                              | AA              | 1946802938               |
| SNP_P4_47673_25352988 | NC_021163.1    | Ca_kabuli_chr04 | 25352988                | CC                              | TT              | 1946802940               |
| SNP_P4_47674_25353023 | NC_021163.1    | Ca_kabuli_chr04 | 25353023                | GG                              | AA              | 1946802943               |
| SNP_P4_47675_25353035 | NC_021163.1    | Ca_kabuli_chr04 | 25353035                | GG                              | AA              | 1946802945               |
| SNP_P4_47676_25353219 | NC_021163.1    | Ca_kabuli_chr04 | 25353219                | CC                              | TT              | 1946802947               |
| SNP_P4_47677_25353230 | NC_021163.1    | Ca_kabuli_chr04 | 25353230                | GG                              | TT              | 1946802949               |
| SNP_P4_47678_25353240 | NC_021163.1    | Ca_kabuli_chr04 | 25353240                | TT                              | GG              | 1946802951               |
| SNP_P4_47679_25353282 | NC_021163.1    | Ca_kabuli_chr04 | 25353282                | CC                              | AA              | 1946802953               |
| SNP_P4_47680_25353292 | NC_021163.1    | Ca_kabuli_chr04 | 25353292                | GG                              | AA              | 1946802955               |
| SNP_P4_47681_25353302 | NC_021163.1    | Ca_kabuli_chr04 | 25353302                | AA                              | GG              | 1946802957               |
| SNP_P4_47682_25353314 | NC_021163.1    | Ca_kabuli_chr04 | 25353314                | AA                              | TT              | 1946802959               |
| SNP_P4_47683_25353340 | NC_021163.1    | Ca_kabuli_chr04 | 25353340                | GG                              | TT              | 1946802961               |
| SNP_P4_47684_25353351 | NC_021163.1    | Ca_kabuli_chr04 | 25353351                | TT                              | AA              | 1946802963               |
| SNP_P4_47685_25353360 | NC_021163.1    | Ca_kabuli_chr04 | 25353360                | GG                              | TT              | 1946802965               |
| SNP_P4_47686_25353473 | NC_021163.1    | Ca_kabuli_chr04 | 25353473                | AA                              | TT              | 1946802967               |
| SNP_P4_47687_25353665 | NC_021163.1    | Ca_kabuli_chr04 | 25353665                | TT                              | AA              | 1946802969               |
| SNP_P4_47688_25353689 | NC_021163.1    | Ca_kabuli_chr04 | 25353689                | TT                              | CC              | 1946802971               |
| SNP_P4_47689_25354016 | NC_021163.1    | Ca_kabuli_chr04 | 25354016                | CC                              | TT              | 1946802973               |
| SNP_P4_47690_25355452 | NC_021163.1    | Ca_kabuli_chr04 | 25355452                | AA                              | GG              | 1946802975               |
| SNP_P4_47691_25357560 | NC_021163.1    | Ca_kabuli_chr04 | 25357560                | AA                              | GG              | 1946802977               |
| SNP_P4_47692_25357576 | NC_021163.1    | Ca_kabuli_chr04 | 25357576                | TT                              | AA              | 1946802979               |
| SNP_P4_47695_25358164 | NC_021163.1    | Ca_kabuli_chr04 | 25358164                | GG                              | AA              | 1946802981               |
| SNP_P4_47696_25358376 | NC_021163.1    | Ca_kabuli_chr04 | 25358376                | CC                              | TT              | 1946802983               |
| SNP_P4_47697_25358616 | NC_021163.1    | Ca_kabuli_chr04 | 25358616                | AA                              | GG              | 1946802986               |
| SNP_P4_47698_25358692 | NC_021163.1    | Ca_kabuli_chr04 | 25358692                | AA                              | GG              | 1946802988               |
| SNP_P4_47699_25359225 | NC_021163.1    | Ca_kabuli_chr04 | 25359225                | AA                              | CC              | 1946802990               |
| SNP_P4_47700_25359252 | NC_021163.1    | Ca_kabuli_chr04 | 25359252                | CC                              | GG              | 1946802992               |
| SNP_P4_47702_25359549 | NC_021163.1    | Ca_kabuli_chr04 | 25359549                | TT                              | AA              | 1946802994               |
| SNP_P4_47703_25359563 | NC_021163.1    | Ca_kabuli_chr04 | 25359563                | TT                              | CC              | 1946802995               |
| SNP_P4_47704_25360109 | NC_021163.1    | Ca_kabuli_chr04 | 25360109                | TT                              | CC              | 1946802997               |

| SNPs IDs              | Chromosome IDs | Chromosomes     | Physical positions (bp) | CDC Frontier (Reference genome) | (ILWC46 & LPNB) | NCBI SNPdb Accession IDs |
|-----------------------|----------------|-----------------|-------------------------|---------------------------------|-----------------|--------------------------|
| SNP_P4_47705_25365539 | NC_021163.1    | Ca_kabuli_chr04 | 25365539                | CC                              | TT              | 1946802999               |
| SNP_P4_47708_25366329 | NC_021163.1    | Ca_kabuli_chr04 | 25366329                | GG                              | AA              | 1946803002               |
| SNP_P4_47709_25366484 | NC_021163.1    | Ca_kabuli_chr04 | 25366484                | AA                              | GG              | 1946803004               |
| SNP_P4_47711_25366668 | NC_021163.1    | Ca_kabuli_chr04 | 25366668                | TT                              | CC              | 1946803006               |
| SNP_P4_47712_25366699 | NC_021163.1    | Ca_kabuli_chr04 | 25366699                | GG                              | AA              | 1946803008               |
| SNP_P4_47713_25366762 | NC_021163.1    | Ca_kabuli_chr04 | 25366762                | AA                              | CC              | 1946803010               |
| SNP_P4_47714_25366813 | NC_021163.1    | Ca_kabuli_chr04 | 25366813                | CC                              | AA              | 1946803012               |
| SNP_P4_47715_25366892 | NC_021163.1    | Ca_kabuli_chr04 | 25366892                | CC                              | TT              | 1946803014               |
| SNP_P4_47716_25366908 | NC_021163.1    | Ca_kabuli_chr04 | 25366908                | AA                              | GG              | 1946803016               |
| SNP_P4_47717_25368585 | NC_021163.1    | Ca_kabuli_chr04 | 25368585                | GG                              | AA              | 1946803018               |
| SNP_P4_47718_25368589 | NC_021163.1    | Ca_kabuli_chr04 | 25368589                | GG                              | CC              | 1946803020               |
| SNP_P4_47719_25368631 | NC_021163.1    | Ca_kabuli_chr04 | 25368631                | AA                              | CC              | 1946803022               |
| SNP_P4_47720_25368889 | NC_021163.1    | Ca_kabuli_chr04 | 25368889                | TT                              | AA              | 1946803024               |
| SNP_P4_47721_25368921 | NC_021163.1    | Ca_kabuli_chr04 | 25368921                | TT                              | AA              | 1946803026               |
| SNP_P4_47722_25370836 | NC_021163.1    | Ca_kabuli_chr04 | 25370836                | TT                              | CC              | 1946803028               |
| SNP_P4_47723_25370958 | NC_021163.1    | Ca_kabuli_chr04 | 25370958                | TT                              | CC              | 1946803030               |
| SNP_P4_47724_25375081 | NC_021163.1    | Ca_kabuli_chr04 | 25375081                | GG                              | AA              | 1946803032               |
| SNP_P4_47725_25375397 | NC_021163.1    | Ca_kabuli_chr04 | 25375397                | TT                              | AA              | 1946803034               |
| SNP_P4_47726_25375449 | NC_021163.1    | Ca_kabuli_chr04 | 25375449                | TT                              | AA              | 1946803036               |
| SNP_P4_47727_25375483 | NC_021163.1    | Ca_kabuli_chr04 | 25375483                | TT                              | CC              | 1946803038               |
| SNP_P4_47728_25375500 | NC_021163.1    | Ca_kabuli_chr04 | 25375500                | TT                              | CC              | 1946803040               |
| SNP_P4_47729_25375895 | NC_021163.1    | Ca_kabuli_chr04 | 25375895                | GG                              | AA              | 1946803042               |
| SNP_P4_47730_25375933 | NC_021163.1    | Ca_kabuli_chr04 | 25375933                | GG                              | AA              | 1946803044               |
| SNP_P4_47731_25376077 | NC_021163.1    | Ca_kabuli_chr04 | 25376077                | CC                              | TT              | 1946803046               |
| SNP_P4_47732_25376079 | NC_021163.1    | Ca_kabuli_chr04 | 25376079                | TT                              | GG              | 1946803048               |
| SNP_P4_47733_25376103 | NC_021163.1    | Ca_kabuli_chr04 | 25376103                | TT                              | CC              | 1946803050               |
| SNP_P4_47734_25376115 | NC_021163.1    | Ca_kabuli_chr04 | 25376115                | CC                              | AA              | 1946803052               |
| SNP_P4_47735_25376263 | NC_021163.1    | Ca_kabuli_chr04 | 25376263                | GG                              | TT              | 1946803054               |
| SNP_P4_47736_25376331 | NC_021163.1    | Ca_kabuli_chr04 | 25376331                | GG                              | TT              | 1946803056               |
| SNP_P4_47737_25376434 | NC_021163.1    | Ca_kabuli_chr04 | 25376434                | TT                              | AA              | 1946803058               |
| SNP_P4_47738_25376456 | NC_021163.1    | Ca_kabuli_chr04 | 25376456                | CC                              | TT              | 1946803060               |
| SNP_P4_47739_25376734 | NC_021163.1    | Ca_kabuli_chr04 | 25376734                | TT                              | CC              | 1946803062               |
| SNP_P4_47740_25376746 | NC_021163.1    | Ca_kabuli_chr04 | 25376746                | AA                              | CC              | 1946803064               |
| SNP_P4_47741_25376855 | NC_021163.1    | Ca_kabuli_chr04 | 25376855                | AA                              | GG              | 1946803066               |
| SNP_P4_47742_25389389 | NC_021163.1    | Ca_kabuli_chr04 | 25389389                | CC                              | TT              | 1946803068               |
| SNP_P4_47743_25389446 | NC_021163.1    | Ca_kabuli_chr04 | 25389446                | AA                              | GG              | 1946803070               |
| SNP_P4_47744_25389453 | NC_021163.1    | Ca_kabuli_chr04 | 25389453                | AA                              | GG              | 1946803072               |
| SNP_P4_47745_25389457 | NC_021163.1    | Ca_kabuli_chr04 | 25389457                | TT                              | CC              | 1946803074               |
| SNP_P4_47746_25389458 | NC_021163.1    | Ca_kabuli_chr04 | 25389458                | CC                              | TT              | 1946803076               |
| SNP_P4_47747_25390727 | NC_021163.1    | Ca_kabuli_chr04 | 25390727                | AA                              | CC              | 1946803078               |
| SNP_P4_47748_25390989 | NC_021163.1    | Ca_kabuli_chr04 | 25390989                | AA                              | GG              | 1946803080               |
| SNP_P4_47749_25391186 | NC_021163.1    | Ca_kabuli_chr04 | 25391186                | CC                              | AA              | 1946803082               |

| SNPs IDs              | Chromosome IDs | Chromosomes     | Physical positions (bp) | CDC Frontier (Reference genome) | (ILWC46 & LPNB) | NCBI SNPdb Accession IDs |
|-----------------------|----------------|-----------------|-------------------------|---------------------------------|-----------------|--------------------------|
| SNP_P4_47750_25391577 | NC_021163.1    | Ca_kabuli_chr04 | 25391577                | GG                              | TT              | 1946803084               |
| SNP_P4_47751_25391614 | NC_021163.1    | Ca_kabuli_chr04 | 25391614                | AA                              | GG              | 1946803086               |
| SNP_P4_47753_25392466 | NC_021163.1    | Ca_kabuli_chr04 | 25392466                | TT                              | CC              | 1946803088               |
| SNP_P4_47754_25393974 | NC_021163.1    | Ca_kabuli_chr04 | 25393974                | GG                              | AA              | 1946803090               |
| SNP_P4_47755_25394956 | NC_021163.1    | Ca_kabuli_chr04 | 25394956                | AA                              | GG              | 1946803092               |
| SNP_P4_47756_25399762 | NC_021163.1    | Ca_kabuli_chr04 | 25399762                | GG                              | AA              | 1946803094               |
| SNP_P4_47758_25409825 | NC_021163.1    | Ca_kabuli_chr04 | 25409825                | GG                              | CC              | 1946803096               |
| SNP_P4_47759_25409861 | NC_021163.1    | Ca_kabuli_chr04 | 25409861                | CC                              | TT              | 1946803098               |
| SNP_P4_47760_25434325 | NC_021163.1    | Ca_kabuli_chr04 | 25434325                | TT                              | GG              | 1946803100               |
| SNP_P4_47761_25434418 | NC_021163.1    | Ca_kabuli_chr04 | 25434418                | TT                              | CC              | 1946803102               |
| SNP_P4_47762_25434472 | NC_021163.1    | Ca_kabuli_chr04 | 25434472                | GG                              | AA              | 1946803104               |
| SNP_P4_47763_25434590 | NC_021163.1    | Ca_kabuli_chr04 | 25434590                | GG                              | CC              | 1946803106               |
| SNP_P4_47764_25434642 | NC_021163.1    | Ca_kabuli_chr04 | 25434642                | AA                              | TT              | 1946803108               |
| SNP_P4_47765_25434658 | NC_021163.1    | Ca_kabuli_chr04 | 25434658                | CC                              | GG              | 1946803111               |
| SNP_P4_47767_25440131 | NC_021163.1    | Ca_kabuli_chr04 | 25440131                | CC                              | AA              | 1946803113               |
| SNP_P4_47768_25440338 | NC_021163.1    | Ca_kabuli_chr04 | 25440338                | GG                              | TT              | 1946803115               |
| SNP_P4_47769_25440582 | NC_021163.1    | Ca_kabuli_chr04 | 25440582                | CC                              | AA              | 1946803117               |
| SNP_P4_47770_25440737 | NC_021163.1    | Ca_kabuli_chr04 | 25440737                | TT                              | CC              | 1946803119               |
| SNP_P4_47771_25440812 | NC_021163.1    | Ca_kabuli_chr04 | 25440812                | AA                              | TT              | 1946803121               |
| SNP_P4_47772_25440845 | NC_021163.1    | Ca_kabuli_chr04 | 25440845                | GG                              | AA              | 1946803123               |
| SNP_P4_47773_25440915 | NC_021163.1    | Ca_kabuli_chr04 | 25440915                | TT                              | AA              | 1946803125               |
| SNP_P4_47774_25441076 | NC_021163.1    | Ca_kabuli_chr04 | 25441076                | AA                              | GG              | 1946803127               |
| SNP_P4_47775_25441141 | NC_021163.1    | Ca_kabuli_chr04 | 25441141                | CC                              | AA              | 1946803129               |
| SNP_P4_47776_25441982 | NC_021163.1    | Ca_kabuli_chr04 | 25441982                | CC                              | AA              | 1946803131               |
| SNP_P4_47777_25443329 | NC_021163.1    | Ca_kabuli_chr04 | 25443329                | TT                              | CC              | 1946803133               |
| SNP_P4_47778_25446359 | NC_021163.1    | Ca_kabuli_chr04 | 25446359                | TT                              | GG              | 1946803135               |
| SNP_P4_47779_25446387 | NC_021163.1    | Ca_kabuli_chr04 | 25446387                | CC                              | TT              | 1946803138               |
| SNP_P4_47780_25446412 | NC_021163.1    | Ca_kabuli_chr04 | 25446412                | AA                              | GG              | 1946803140               |
| SNP_P4_47781_25446421 | NC_021163.1    | Ca_kabuli_chr04 | 25446421                | TT                              | CC              | 1946803142               |
| SNP_P4_47782_25447524 | NC_021163.1    | Ca_kabuli_chr04 | 25447524                | CC                              | GG              | 1946803144               |
| SNP_P4_47783_25447790 | NC_021163.1    | Ca_kabuli_chr04 | 25447790                | TT                              | AA              | 1946803146               |
| SNP_P4_47784_25447791 | NC_021163.1    | Ca_kabuli_chr04 | 25447791                | CC                              | AA              | 1946803148               |
| SNP_P4_47787_25457834 | NC_021163.1    | Ca_kabuli_chr04 | 25457834                | AA                              | GG              | 1946803150               |
| SNP_P4_47788_25458344 | NC_021163.1    | Ca_kabuli_chr04 | 25458344                | GG                              | TT              | 1946803152               |
| SNP_P4_47789_25460349 | NC_021163.1    | Ca_kabuli_chr04 | 25460349                | AA                              | CC              | 1946803154               |
| SNP_P4_47790_25460356 | NC_021163.1    | Ca_kabuli_chr04 | 25460356                | GG                              | AA              | 1946803156               |
| SNP_P4_47791_25460913 | NC_021163.1    | Ca_kabuli_chr04 | 25460913                | TT                              | GG              | 1946803158               |
| SNP_P4_47792_25461051 | NC_021163.1    | Ca_kabuli_chr04 | 25461051                | CC                              | TT              | 1946803160               |
| SNP_P4_47793_25462294 | NC_021163.1    | Ca_kabuli_chr04 | 25462294                | AA                              | GG              | 1946803163               |
| SNP_P4_47794_25463306 | NC_021163.1    | Ca_kabuli_chr04 | 25463306                | AA                              | TT              | 1946803165               |
| SNP_P4_47795_25463318 | NC_021163.1    | Ca_kabuli_chr04 | 25463318                | AA                              | GG              | 1946803167               |
| SNP_P4_47796_25463676 | NC_021163.1    | Ca_kabuli_chr04 | 25463676                | TT                              | CC              | 1946803170               |

| SNPs IDs              | Chromosome IDs | Chromosomes     | Physical positions (bp) | CDC Frontier (Reference genome) | (ILWC46 & LPNB) | NCBI SNPdb Accession IDs |
|-----------------------|----------------|-----------------|-------------------------|---------------------------------|-----------------|--------------------------|
| SNP_P4_47797_25463687 | NC_021163.1    | Ca_kabuli_chr04 | 25463687                | TT                              | AA              | 1946803172               |
| SNP_P4_47798_25463688 | NC_021163.1    | Ca_kabuli_chr04 | 25463688                | GG                              | AA              | 1946803174               |
| SNP_P4_47799_25463689 | NC_021163.1    | Ca_kabuli_chr04 | 25463689                | GG                              | CC              | 1946803177               |
| SNP_P4_47800_25464162 | NC_021163.1    | Ca_kabuli_chr04 | 25464162                | AA                              | GG              | 1946803179               |
| SNP_P4_47801_25465117 | NC_021163.1    | Ca_kabuli_chr04 | 25465117                | GG                              | CC              | 1946803182               |
| SNP_P4_47803_25467478 | NC_021163.1    | Ca_kabuli_chr04 | 25467478                | TT                              | CC              | 1946803184               |
| SNP_P4_47804_25467607 | NC_021163.1    | Ca_kabuli_chr04 | 25467607                | TT                              | AA              | 1946803186               |
| SNP_P4_47806_25467911 | NC_021163.1    | Ca_kabuli_chr04 | 25467911                | AA                              | GG              | 1946803188               |
| SNP_P4_47807_25467920 | NC_021163.1    | Ca_kabuli_chr04 | 25467920                | AA                              | GG              | 1946803191               |
| SNP_P4_47809_25470559 | NC_021163.1    | Ca_kabuli_chr04 | 25470559                | CC                              | AA              | 1946803193               |
| SNP_P4_47810_25477605 | NC_021163.1    | Ca_kabuli_chr04 | 25477605                | GG                              | AA              | 1946803195               |
| SNP_P4_47812_25479893 | NC_021163.1    | Ca_kabuli_chr04 | 25479893                | AA                              | GG              | 1946803198               |
| SNP_P4_47813_25485895 | NC_021163.1    | Ca_kabuli_chr04 | 25485895                | AA                              | GG              | 1946803200               |
| SNP_P4_47814_25487047 | NC_021163.1    | Ca_kabuli_chr04 | 25487047                | TT                              | AA              | 1946803202               |
| SNP_P4_47815_25487056 | NC_021163.1    | Ca_kabuli_chr04 | 25487056                | AA                              | TT              | 1946803205               |
| SNP_P4_47816_25488568 | NC_021163.1    | Ca_kabuli_chr04 | 25488568                | AA                              | TT              | 1946803207               |
| SNP_P4_47817_25489158 | NC_021163.1    | Ca_kabuli_chr04 | 25489158                | TT                              | CC              | 1946803209               |
| SNP_P4_47818_25489899 | NC_021163.1    | Ca_kabuli_chr04 | 25489899                | CC                              | TT              | 1946803211               |
| SNP_P4_47819_25489992 | NC_021163.1    | Ca_kabuli_chr04 | 25489992                | CC                              | TT              | 1946803214               |
| SNP_P4_47820_25491920 | NC_021163.1    | Ca_kabuli_chr04 | 25491920                | AA                              | GG              | 1946803216               |
| SNP_P4_47821_25492472 | NC_021163.1    | Ca_kabuli_chr04 | 25492472                | CC                              | TT              | 1946803218               |
| SNP_P4_47822_25494105 | NC_021163.1    | Ca_kabuli_chr04 | 25494105                | AA                              | GG              | 1946803220               |
| SNP_P4_47823_25495813 | NC_021163.1    | Ca_kabuli_chr04 | 25495813                | AA                              | GG              | 1946803223               |
| SNP_P4_47824_25497465 | NC_021163.1    | Ca_kabuli_chr04 | 25497465                | TT                              | CC              | 1946803225               |
| SNP_P4_47825_25497678 | NC_021163.1    | Ca_kabuli_chr04 | 25497678                | TT                              | GG              | 1946803227               |
| SNP_P4_47826_25500789 | NC_021163.1    | Ca_kabuli_chr04 | 25500789                | CC                              | AA              | 1946803229               |
| SNP_P4_47827_25502529 | NC_021163.1    | Ca_kabuli_chr04 | 25502529                | CC                              | TT              | 1946803232               |
| SNP_P4_47828_25505905 | NC_021163.1    | Ca_kabuli_chr04 | 25505905                | GG                              | AA              | 1946803234               |
| SNP_P4_47829_25513035 | NC_021163.1    | Ca_kabuli_chr04 | 25513035                | GG                              | TT              | 1946803236               |
| SNP_P4_47830_25513053 | NC_021163.1    | Ca_kabuli_chr04 | 25513053                | GG                              | CC              | 1946803238               |
| SNP_P4_47831_25513059 | NC_021163.1    | Ca_kabuli_chr04 | 25513059                | GG                              | CC              | 1946803240               |
| SNP_P4_47832_25516131 | NC_021163.1    | Ca_kabuli_chr04 | 25516131                | AA                              | TT              | 1946803243               |
| SNP_P4_47833_25516393 | NC_021163.1    | Ca_kabuli_chr04 | 25516393                | AA                              | GG              | 1946803245               |
| SNP_P4_47835_25522701 | NC_021163.1    | Ca_kabuli_chr04 | 25522701                | GG                              | TT              | 1946803247               |
| SNP_P4_47836_25523962 | NC_021163.1    | Ca_kabuli_chr04 | 25523962                | CC                              | TT              | 1946803249               |
| SNP_P4_47841_25541860 | NC_021163.1    | Ca_kabuli_chr04 | 25541860                | GG                              | TT              | 1946803251               |
| SNP_P4_47842_25542976 | NC_021163.1    | Ca_kabuli_chr04 | 25542976                | TT                              | GG              | 1946803253               |
| SNP_P4_47843_25543726 | NC_021163.1    | Ca_kabuli_chr04 | 25543726                | GG                              | AA              | 1946803255               |
| SNP_P4_47845_25543890 | NC_021163.1    | Ca_kabuli_chr04 | 25543890                | TT                              | CC              | 1946803258               |
| SNP_P4_47846_25544454 | NC_021163.1    | Ca_kabuli_chr04 | 25544454                | TT                              | CC              | 1946803260               |
| SNP_P4_47847_25544455 | NC_021163.1    | Ca_kabuli_chr04 | 25544455                | GG                              | AA              | 1946803262               |
| SNP_P4_47848_25544652 | NC_021163.1    | Ca_kabuli_chr04 | 25544652                | AA                              | GG              | 1946803264               |

| SNPs IDs              | Chromosome IDs | Chromosomes     | Physical positions (bp) | CDC Frontier (Reference genome) | (ILWC46 & LPNB) | NCBI SNPdb Accession IDs |
|-----------------------|----------------|-----------------|-------------------------|---------------------------------|-----------------|--------------------------|
| SNP_P4_47849_25544747 | NC_021163.1    | Ca_kabuli_chr04 | 25544747                | TT                              | GG              | 1946803267               |
| SNP_P4_47850_25544759 | NC_021163.1    | Ca_kabuli_chr04 | 25544759                | GG                              | AA              | 1946803269               |
| SNP_P4_47851_25557556 | NC_021163.1    | Ca_kabuli_chr04 | 25557556                | AA                              | TT              | 1946803271               |
| SNP_P4_47852_25557557 | NC_021163.1    | Ca_kabuli_chr04 | 25557557                | AA                              | CC              | 1946803273               |
| SNP_P4_47853_25557575 | NC_021163.1    | Ca_kabuli_chr04 | 25557575                | TT                              | GG              | 1946803275               |
| SNP_P4_47854_25558115 | NC_021163.1    | Ca_kabuli_chr04 | 25558115                | AA                              | GG              | 1946803277               |
| SNP_P4_47855_25558136 | NC_021163.1    | Ca_kabuli_chr04 | 25558136                | CC                              | TT              | 1946803279               |
| SNP_P4_47856_25558149 | NC_021163.1    | Ca_kabuli_chr04 | 25558149                | AA                              | GG              | 1946803282               |
| SNP_P4_47857_25560082 | NC_021163.1    | Ca_kabuli_chr04 | 25560082                | TT                              | AA              | 1946803284               |
| SNP_P4_47858_25577794 | NC_021163.1    | Ca_kabuli_chr04 | 25577794                | GG                              | AA              | 1946803286               |
| SNP_P4_47859_25578498 | NC_021163.1    | Ca_kabuli_chr04 | 25578498                | CC                              | GG              | 1946803288               |
| SNP_P4_47860_25579919 | NC_021163.1    | Ca_kabuli_chr04 | 25579919                | GG                              | AA              | 1946803290               |
| SNP_P4_47861_25587670 | NC_021163.1    | Ca_kabuli_chr04 | 25587670                | CC                              | TT              | 1946803292               |
| SNP_P4_47864_25594394 | NC_021163.1    | Ca_kabuli_chr04 | 25594394                | CC                              | AA              | 1946803294               |
| SNP_P4_47867_25604028 | NC_021163.1    | Ca_kabuli_chr04 | 25604028                | AA                              | GG              | 1946803296               |
| SNP_P4_47868_25606298 | NC_021163.1    | Ca_kabuli_chr04 | 25606298                | AA                              | GG              | 1946803299               |
| SNP_P4_47869_25608854 | NC_021163.1    | Ca_kabuli_chr04 | 25608854                | AA                              | CC              | 1946803301               |
| SNP_P4_47870_25608860 | NC_021163.1    | Ca_kabuli_chr04 | 25608860                | CC                              | TT              | 1946803303               |
| SNP_P4_47871_25608871 | NC_021163.1    | Ca_kabuli_chr04 | 25608871                | TT                              | CC              | 1946803305               |
| SNP_P4_47872_25610087 | NC_021163.1    | Ca_kabuli_chr04 | 25610087                | TT                              | GG              | 1946803307               |
| SNP_P4_47873_25617666 | NC_021163.1    | Ca_kabuli_chr04 | 25617666                | GG                              | AA              | 1946803309               |
| SNP_P4_47874_25619393 | NC_021163.1    | Ca_kabuli_chr04 | 25619393                | CC                              | TT              | 1946803311               |
| SNP_P4_47875_25625312 | NC_021163.1    | Ca_kabuli_chr04 | 25625312                | AA                              | TT              | 1946803313               |
| SNP_P4_47876_25626351 | NC_021163.1    | Ca_kabuli_chr04 | 25626351                | GG                              | AA              | 1946803315               |
| SNP_P4_47877_25627361 | NC_021163.1    | Ca_kabuli_chr04 | 25627361                | TT                              | CC              | 1946803317               |
| SNP_P4_47878_25627883 | NC_021163.1    | Ca_kabuli_chr04 | 25627883                | AA                              | CC              | 1946803319               |
| SNP_P4_47880_25630357 | NC_021163.1    | Ca_kabuli_chr04 | 25630357                | GG                              | AA              | 1946803322               |
| SNP_P4_47881_25630706 | NC_021163.1    | Ca_kabuli_chr04 | 25630706                | AA                              | CC              | 1946803324               |
| SNP_P4_47882_25634840 | NC_021163.1    | Ca_kabuli_chr04 | 25634840                | TT                              | AA              | 1946803326               |
| SNP_P4_47883_25634843 | NC_021163.1    | Ca_kabuli_chr04 | 25634843                | TT                              | AA              | 1946803328               |
| SNP_P4_47884_25638404 | NC_021163.1    | Ca_kabuli_chr04 | 25638404                | GG                              | CC              | 1946803330               |
| SNP_P4_47885_25638461 | NC_021163.1    | Ca_kabuli_chr04 | 25638461                | TT                              | CC              | 1946803332               |
| SNP_P4_47887_25642762 | NC_021163.1    | Ca_kabuli_chr04 | 25642762                | TT                              | CC              | 1946803334               |
| SNP_P4_47889_25665962 | NC_021163.1    | Ca_kabuli_chr04 | 25665962                | CC                              | AA              | 1946803336               |
| SNP_P4_47890_25666174 | NC_021163.1    | Ca_kabuli_chr04 | 25666174                | CC                              | TT              | 1946803339               |
| SNP_P4_47891_25668680 | NC_021163.1    | Ca_kabuli_chr04 | 25668680                | CC                              | TT              | 1946803341               |
| SNP_P4_47892_25670327 | NC_021163.1    | Ca_kabuli_chr04 | 25670327                | GG                              | AA              | 1946803343               |
| SNP_P4_47893_25670381 | NC_021163.1    | Ca_kabuli_chr04 | 25670381                | CC                              | TT              | 1946803346               |
| SNP_P4_47894_25670761 | NC_021163.1    | Ca_kabuli_chr04 | 25670761                | TT                              | CC              | 1946803348               |
| SNP_P4_47896_25675046 | NC_021163.1    | Ca_kabuli_chr04 | 25675046                | GG                              | AA              | 1946803350               |
| SNP_P4_47897_25677111 | NC_021163.1    | Ca_kabuli_chr04 | 25677111                | GG                              | TT              | 1946803352               |
| SNP_P4_47899_25683594 | NC_021163.1    | Ca_kabuli_chr04 | 25683594                | TT                              | GG              | 1946803354               |

| SNPs IDs              | Chromosome IDs | Chromosomes     | Physical positions (bp) | CDC Frontier (Reference genome) | (ILWC46 & LPNB) | NCBI SNPdb Accession IDs |
|-----------------------|----------------|-----------------|-------------------------|---------------------------------|-----------------|--------------------------|
| SNP_P4_47900_25683634 | NC_021163.1    | Ca_kabuli_chr04 | 25683634                | AA                              | GG              | 1946803356               |
| SNP_P4_47901_25683890 | NC_021163.1    | Ca_kabuli_chr04 | 25683890                | GG                              | AA              | 1946803358               |
| SNP_P4_47902_25685306 | NC_021163.1    | Ca_kabuli_chr04 | 25685306                | AA                              | GG              | 1946803361               |
| SNP_P4_47903_25686198 | NC_021163.1    | Ca_kabuli_chr04 | 25686198                | GG                              | AA              | 1946803363               |
| SNP_P4_47904_25686396 | NC_021163.1    | Ca_kabuli_chr04 | 25686396                | TT                              | CC              | 1946803365               |
| SNP_P4_47905_25686789 | NC_021163.1    | Ca_kabuli_chr04 | 25686789                | AA                              | GG              | 1946803367               |
| SNP_P4_47906_25690590 | NC_021163.1    | Ca_kabuli_chr04 | 25690590                | TT                              | CC              | 1946803369               |
| SNP_P4_47907_25693558 | NC_021163.1    | Ca_kabuli_chr04 | 25693558                | GG                              | AA              | 1946803371               |
| SNP_P4_47908_25693684 | NC_021163.1    | Ca_kabuli_chr04 | 25693684                | AA                              | CC              | 1946803373               |
| SNP_P4_47910_25695080 | NC_021163.1    | Ca_kabuli_chr04 | 25695080                | AA                              | CC              | 1946803375               |
| SNP_P4_47911_25695958 | NC_021163.1    | Ca_kabuli_chr04 | 25695958                | TT                              | CC              | 1946803377               |
| SNP_P4_47912_25695974 | NC_021163.1    | Ca_kabuli_chr04 | 25695974                | CC                              | TT              | 1946803379               |
| SNP_P4_47913_25698629 | NC_021163.1    | Ca_kabuli_chr04 | 25698629                | GG                              | AA              | 1946803381               |
| SNP_P4_47914_25699256 | NC_021163.1    | Ca_kabuli_chr04 | 25699256                | GG                              | CC              | 1946803383               |
| SNP_P4_47915_25701886 | NC_021163.1    | Ca_kabuli_chr04 | 25701886                | GG                              | AA              | 1946803385               |
| SNP_P4_47916_25712962 | NC_021163.1    | Ca_kabuli_chr04 | 25712962                | GG                              | CC              | 1946803387               |
| SNP_P4_47917_25716055 | NC_021163.1    | Ca_kabuli_chr04 | 25716055                | CC                              | GG              | 1946803389               |
| SNP_P4_47918_25719468 | NC_021163.1    | Ca_kabuli_chr04 | 25719468                | AA                              | CC              | 1946803391               |
| SNP_P4_47919_25720868 | NC_021163.1    | Ca_kabuli_chr04 | 25720868                | GG                              | AA              | 1946803393               |
| SNP_P4_47920_25720950 | NC_021163.1    | Ca_kabuli_chr04 | 25720950                | AA                              | GG              | 1946803395               |
| SNP_P4_47922_25723398 | NC_021163.1    | Ca_kabuli_chr04 | 25723398                | GG                              | AA              | 1946803397               |
| SNP_P4_47923_25723399 | NC_021163.1    | Ca_kabuli_chr04 | 25723399                | TT                              | CC              | 1946803399               |
| SNP_P4_47924_25723783 | NC_021163.1    | Ca_kabuli_chr04 | 25723783                | AA                              | TT              | 1946803401               |
| SNP_P4_47925_25724105 | NC_021163.1    | Ca_kabuli_chr04 | 25724105                | CC                              | GG              | 1946803403               |
| SNP_P4_47926_25724588 | NC_021163.1    | Ca_kabuli_chr04 | 25724588                | AA                              | CC              | 1946803405               |
| SNP_P4_47927_25727137 | NC_021163.1    | Ca_kabuli_chr04 | 25727137                | GG                              | AA              | 1946803407               |
| SNP_P4_47928_25731043 | NC_021163.1    | Ca_kabuli_chr04 | 25731043                | CC                              | TT              | 1946803409               |
| SNP_P4_47929_25738523 | NC_021163.1    | Ca_kabuli_chr04 | 25738523                | TT                              | CC              | 1946803411               |
| SNP_P4_47930_25738920 | NC_021163.1    | Ca_kabuli_chr04 | 25738920                | GG                              | AA              | 1946803413               |
| SNP_P4_47931_25741517 | NC_021163.1    | Ca_kabuli_chr04 | 25741517                | AA                              | GG              | 1946803415               |
| SNP_P4_47932_25743694 | NC_021163.1    | Ca_kabuli_chr04 | 25743694                | CC                              | AA              | 1946803417               |
| SNP_P4_47934_25756377 | NC_021163.1    | Ca_kabuli_chr04 | 25756377                | AA                              | GG              | 1946803420               |
| SNP_P4_47935_25756897 | NC_021163.1    | Ca_kabuli_chr04 | 25756897                | TT                              | CC              | 1946803422               |
| SNP_P4_47936_25758049 | NC_021163.1    | Ca_kabuli_chr04 | 25758049                | CC                              | TT              | 1946803424               |
| SNP_P4_47938_25758254 | NC_021163.1    | Ca_kabuli_chr04 | 25758254                | AA                              | GG              | 1946803426               |
| SNP_P4_47939_25758945 | NC_021163.1    | Ca_kabuli_chr04 | 25758945                | GG                              | TT              | 1946803428               |
| SNP_P4_47942_25760857 | NC_021163.1    | Ca_kabuli_chr04 | 25760857                | CC                              | TT              | 1946803430               |
| SNP_P4_47944_25762790 | NC_021163.1    | Ca_kabuli_chr04 | 25762790                | GG                              | AA              | 1946803432               |
| SNP_P4_47946_25763196 | NC_021163.1    | Ca_kabuli_chr04 | 25763196                | GG                              | TT              | 1946803434               |
| SNP_P4_47947_25763396 | NC_021163.1    | Ca_kabuli_chr04 | 25763396                | CC                              | TT              | 1946803436               |
| SNP_P4_47948_25763416 | NC_021163.1    | Ca_kabuli_chr04 | 25763416                | GG                              | AA              | 1946803438               |
| SNP_P4_47949_25768063 | NC_021163.1    | Ca_kabuli_chr04 | 25768063                | GG                              | AA              | 1946803440               |

| SNPs IDs              | Chromosome IDs | Chromosomes     | Physical positions (bp) | CDC Frontier (Reference genome) | (ILWC46 & LPNB) | NCBI SNPdb Accession IDs |
|-----------------------|----------------|-----------------|-------------------------|---------------------------------|-----------------|--------------------------|
| SNP_P4_47950_25768465 | NC_021163.1    | Ca_kabuli_chr04 | 25768465                | AA                              | GG              | 1946803442               |
| SNP_P4_47951_25768466 | NC_021163.1    | Ca_kabuli_chr04 | 25768466                | AA                              | GG              | 1946803444               |
| SNP_P4_47952_25768479 | NC_021163.1    | Ca_kabuli_chr04 | 25768479                | GG                              | TT              | 1946803447               |
| SNP_P4_47953_25768481 | NC_021163.1    | Ca_kabuli_chr04 | 25768481                | AA                              | GG              | 1946803449               |
| SNP_P4_47954_25769226 | NC_021163.1    | Ca_kabuli_chr04 | 25769226                | AA                              | GG              | 1946803451               |
| SNP_P4_47955_25769632 | NC_021163.1    | Ca_kabuli_chr04 | 25769632                | CC                              | GG              | 1946803453               |
| SNP_P4_47956_25770537 | NC_021163.1    | Ca_kabuli_chr04 | 25770537                | TT                              | CC              | 1946803455               |
| SNP_P4_47957_25773324 | NC_021163.1    | Ca_kabuli_chr04 | 25773324                | GG                              | AA              | 1946803457               |
| SNP_P4_47958_25773761 | NC_021163.1    | Ca_kabuli_chr04 | 25773761                | TT                              | AA              | 1946803459               |
| SNP_P4_47960_25774534 | NC_021163.1    | Ca_kabuli_chr04 | 25774534                | AA                              | GG              | 1946803461               |
| SNP_P4_47962_25776377 | NC_021163.1    | Ca_kabuli_chr04 | 25776377                | GG                              | AA              | 1946803463               |
| SNP_P4_47963_25776557 | NC_021163.1    | Ca_kabuli_chr04 | 25776557                | CC                              | TT              | 1946803465               |
| SNP_P4_47964_25777935 | NC_021163.1    | Ca_kabuli_chr04 | 25777935                | AA                              | GG              | 1946803467               |
| SNP_P4_47965_25777981 | NC_021163.1    | Ca_kabuli_chr04 | 25777981                | TT                              | CC              | 1946803469               |
| SNP_P4_47966_25778041 | NC_021163.1    | Ca_kabuli_chr04 | 25778041                | AA                              | GG              | 1946803471               |
| SNP_P4_47967_25778212 | NC_021163.1    | Ca_kabuli_chr04 | 25778212                | GG                              | AA              | 1946803473               |
| SNP_P4_47969_25779272 | NC_021163.1    | Ca_kabuli_chr04 | 25779272                | TT                              | CC              | 1946803475               |
| SNP_P4_47971_25779526 | NC_021163.1    | Ca_kabuli_chr04 | 25779526                | GG                              | AA              | 1946803477               |
| SNP_P4_47972_25779556 | NC_021163.1    | Ca_kabuli_chr04 | 25779556                | GG                              | AA              | 1946803479               |
| SNP_P4_47973_25780821 | NC_021163.1    | Ca_kabuli_chr04 | 25780821                | AA                              | TT              | 1946803481               |
| SNP_P4_47974_25781808 | NC_021163.1    | Ca_kabuli_chr04 | 25781808                | AA                              | GG              | 1946803483               |
| SNP_P4_47975_25783289 | NC_021163.1    | Ca_kabuli_chr04 | 25783289                | GG                              | AA              | 1946803485               |
| SNP_P4_47976_25785042 | NC_021163.1    | Ca_kabuli_chr04 | 25785042                | TT                              | AA              | 1946803487               |
| SNP_P4_47977_25787261 | NC_021163.1    | Ca_kabuli_chr04 | 25787261                | GG                              | TT              | 1946803489               |
| SNP_P4_47978_25787277 | NC_021163.1    | Ca_kabuli_chr04 | 25787277                | TT                              | CC              | 1946803492               |
| SNP_P4_47979_25787294 | NC_021163.1    | Ca_kabuli_chr04 | 25787294                | GG                              | AA              | 1946803494               |
| SNP_P4_47980_25790132 | NC_021163.1    | Ca_kabuli_chr04 | 25790132                | CC                              | TT              | 1946803496               |
| SNP_P4_47981_25790206 | NC_021163.1    | Ca_kabuli_chr04 | 25790206                | TT                              | GG              | 1946803499               |
| SNP_P4_47982_25790421 | NC_021163.1    | Ca_kabuli_chr04 | 25790421                | GG                              | TT              | 1946803501               |
| SNP_P4_47984_25790779 | NC_021163.1    | Ca_kabuli_chr04 | 25790779                | CC                              | TT              | 1946803503               |
| SNP_P4_47985_25791689 | NC_021163.1    | Ca_kabuli_chr04 | 25791689                | CC                              | AA              | 1946803505               |
| SNP_P4_47986_25796206 | NC_021163.1    | Ca_kabuli_chr04 | 25796206                | GG                              | AA              | 1946803507               |
| SNP_P4_47987_25796492 | NC_021163.1    | Ca_kabuli_chr04 | 25796492                | CC                              | TT              | 1946803509               |
| SNP_P4_47988_25803410 | NC_021163.1    | Ca_kabuli_chr04 | 25803410                | CC                              | TT              | 1946803511               |
| SNP_P4_47989_25803723 | NC_021163.1    | Ca_kabuli_chr04 | 25803723                | GG                              | AA              | 1946803513               |
| SNP_P4_47990_25804035 | NC_021163.1    | Ca_kabuli_chr04 | 25804035                | GG                              | AA              | 1946803515               |
| SNP_P4_47991_25804090 | NC_021163.1    | Ca_kabuli_chr04 | 25804090                | TT                              | CC              | 1946803517               |
| SNP_P4_47992_25804124 | NC_021163.1    | Ca_kabuli_chr04 | 25804124                | GG                              | TT              | 1946803519               |
| SNP_P4_47993_25805072 | NC_021163.1    | Ca_kabuli_chr04 | 25805072                | AA                              | CC              | 1946803521               |
| SNP_P4_47994_25808736 | NC_021163.1    | Ca_kabuli_chr04 | 25808736                | AA                              | GG              | 1946803523               |
| SNP_P4_47995_25814068 | NC_021163.1    | Ca_kabuli_chr04 | 25814068                | CC                              | GG              | 1946803526               |
| SNP_P4_47996_25817442 | NC_021163.1    | Ca_kabuli_chr04 | 25817442                | AA                              | CC              | 1946803528               |

| SNPs IDs              | Chromosome IDs | Chromosomes     | Physical positions (bp) | CDC Frontier (Reference genome) | (ILWC46 & LPNB) | NCBI SNPdb Accession IDs |
|-----------------------|----------------|-----------------|-------------------------|---------------------------------|-----------------|--------------------------|
| SNP_P4_47998_25824625 | NC_021163.1    | Ca_kabuli_chr04 | 25824625                | GG                              | AA              | 1946803530               |
| SNP_P4_47999_25824737 | NC_021163.1    | Ca_kabuli_chr04 | 25824737                | TT                              | AA              | 1946803532               |
| SNP_P4_48000_25824859 | NC_021163.1    | Ca_kabuli_chr04 | 25824859                | TT                              | CC              | 1946803535               |
| SNP_P4_48002_25825140 | NC_021163.1    | Ca_kabuli_chr04 | 25825140                | AA                              | CC              | 1946803537               |
| SNP_P4_48004_25834606 | NC_021163.1    | Ca_kabuli_chr04 | 25834606                | TT                              | GG              | 1946803539               |
| SNP_P4_48005_25834920 | NC_021163.1    | Ca_kabuli_chr04 | 25834920                | AA                              | GG              | 1946803541               |
| SNP_P4_48006_25834945 | NC_021163.1    | Ca_kabuli_chr04 | 25834945                | TT                              | CC              | 1946803543               |
| SNP_P4_48008_25834982 | NC_021163.1    | Ca_kabuli_chr04 | 25834982                | CC                              | TT              | 1946803545               |
| SNP_P4_48009_25847277 | NC_021163.1    | Ca_kabuli_chr04 | 25847277                | GG                              | AA              | 1946803548               |
| SNP_P4_48010_25847288 | NC_021163.1    | Ca_kabuli_chr04 | 25847288                | GG                              | TT              | 1946803550               |
| SNP_P4_48011_25847303 | NC_021163.1    | Ca_kabuli_chr04 | 25847303                | CC                              | TT              | 1946803552               |
| SNP_P4_48012_25847598 | NC_021163.1    | Ca_kabuli_chr04 | 25847598                | GG                              | TT              | 1946803554               |
| SNP_P4_48013_25847655 | NC_021163.1    | Ca_kabuli_chr04 | 25847655                | CC                              | AA              | 1946803556               |
| SNP_P4_48015_25847740 | NC_021163.1    | Ca_kabuli_chr04 | 25847740                | GG                              | TT              | 1946803558               |
| SNP_P4_48017_25852254 | NC_021163.1    | Ca_kabuli_chr04 | 25852254                | CC                              | TT              | 1946803560               |
| SNP_P4_48018_25854351 | NC_021163.1    | Ca_kabuli_chr04 | 25854351                | TT                              | GG              | 1946803562               |
| SNP_P4_48019_25854352 | NC_021163.1    | Ca_kabuli_chr04 | 25854352                | AA                              | CC              | 1946803564               |
| SNP_P4_48020_25857538 | NC_021163.1    | Ca_kabuli_chr04 | 25857538                | TT                              | GG              | 1946803566               |
| SNP_P4_48021_25857682 | NC_021163.1    | Ca_kabuli_chr04 | 25857682                | TT                              | CC              | 1946803568               |
| SNP_P4_48022_25857726 | NC_021163.1    | Ca_kabuli_chr04 | 25857726                | TT                              | CC              | 1946803570               |
| SNP_P4_48023_25860451 | NC_021163.1    | Ca_kabuli_chr04 | 25860451                | CC                              | TT              | 1946803572               |
| SNP_P4_48025_25866443 | NC_021163.1    | Ca_kabuli_chr04 | 25866443                | GG                              | CC              | 1946803574               |
| SNP_P4_48026_25867568 | NC_021163.1    | Ca_kabuli_chr04 | 25867568                | AA                              | GG              | 1946803577               |
| SNP_P4_48028_25869122 | NC_021163.1    | Ca_kabuli_chr04 | 25869122                | GG                              | AA              | 1946803579               |
| SNP_P4_48029_25869132 | NC_021163.1    | Ca_kabuli_chr04 | 25869132                | TT                              | CC              | 1946803581               |
| SNP_P4_48030_25869133 | NC_021163.1    | Ca_kabuli_chr04 | 25869133                | AA                              | GG              | 1946803583               |
| SNP_P4_48031_25870644 | NC_021163.1    | Ca_kabuli_chr04 | 25870644                | CC                              | TT              | 1946803585               |
| SNP_P4_48032_25877077 | NC_021163.1    | Ca_kabuli_chr04 | 25877077                | CC                              | TT              | 1946803587               |
| SNP_P4_48033_25880771 | NC_021163.1    | Ca_kabuli_chr04 | 25880771                | GG                              | TT              | 1946803589               |
| SNP_P4_48034_25882218 | NC_021163.1    | Ca_kabuli_chr04 | 25882218                | CC                              | TT              | 1946803591               |
| SNP_P4_48035_25883625 | NC_021163.1    | Ca_kabuli_chr04 | 25883625                | AA                              | CC              | 1946803593               |
| SNP_P4_48036_25883627 | NC_021163.1    | Ca_kabuli_chr04 | 25883627                | CC                              | AA              | 1946803595               |
| SNP_P4_48037_25883910 | NC_021163.1    | Ca_kabuli_chr04 | 25883910                | AA                              | GG              | 1946803597               |
| SNP_P4_48038_25883945 | NC_021163.1    | Ca_kabuli_chr04 | 25883945                | CC                              | TT              | 1946803599               |
| SNP_P4_48039_25887822 | NC_021163.1    | Ca_kabuli_chr04 | 25887822                | GG                              | TT              | 1946803601               |
| SNP_P4_48040_25887885 | NC_021163.1    | Ca_kabuli_chr04 | 25887885                | TT                              | GG              | 1946803603               |
| SNP_P4_48041_25887963 | NC_021163.1    | Ca_kabuli_chr04 | 25887963                | AA                              | GG              | 1946803605               |
| SNP_P4_48042_25889475 | NC_021163.1    | Ca_kabuli_chr04 | 25889475                | TT                              | CC              | 1946803607               |
| SNP_P4_48043_25892771 | NC_021163.1    | Ca_kabuli_chr04 | 25892771                | AA                              | CC              | 1946803609               |
| SNP_P4_48044_25894582 | NC_021163.1    | Ca_kabuli_chr04 | 25894582                | TT                              | CC              | 1946803611               |
| SNP_P4_48045_25896069 | NC_021163.1    | Ca_kabuli_chr04 | 25896069                | CC                              | AA              | 1946803613               |
| SNP_P4_48046_25896309 | NC_021163.1    | Ca_kabuli_chr04 | 25896309                | TT                              | GG              | 1946803615               |



| SNPs IDs              | Chromosome IDs | Chromosomes     | Physical positions (bp) | CDC Frontier (Reference genome) | (ILWC46 & LPNB) | NCBI SNPdb Accession IDs |
|-----------------------|----------------|-----------------|-------------------------|---------------------------------|-----------------|--------------------------|
| SNP_P4_48047_25896319 | NC_021163.1    | Ca_kabuli_chr04 | 25896319                | CC                              | GG              | 1946803617               |
| SNP_P4_48048_25896322 | NC_021163.1    | Ca_kabuli_chr04 | 25896322                | TT                              | CC              | 1946803619               |
| SNP_P4_48049_25896387 | NC_021163.1    | Ca_kabuli_chr04 | 25896387                | AA                              | GG              | 1946803621               |
| SNP_P4_48050_25898034 | NC_021163.1    | Ca_kabuli_chr04 | 25898034                | TT                              | CC              | 1946803623               |
| SNP_P4_48051_25905184 | NC_021163.1    | Ca_kabuli_chr04 | 25905184                | TT                              | CC              | 1946803625               |
| SNP_P4_48052_25905226 | NC_021163.1    | Ca_kabuli_chr04 | 25905226                | TT                              | CC              | 1946803627               |
| SNP_P4_48053_25905378 | NC_021163.1    | Ca_kabuli_chr04 | 25905378                | CC                              | TT              | 1946803629               |
| SNP_P4_48054_25910328 | NC_021163.1    | Ca_kabuli_chr04 | 25910328                | TT                              | AA              | 1946803631               |
| SNP_P4_48055_25910329 | NC_021163.1    | Ca_kabuli_chr04 | 25910329                | TT                              | CC              | 1946803633               |
| SNP_P4_48056_25910468 | NC_021163.1    | Ca_kabuli_chr04 | 25910468                | AA                              | CC              | 1946803635               |
| SNP_P4_48057_25910523 | NC_021163.1    | Ca_kabuli_chr04 | 25910523                | AA                              | GG              | 1946803637               |
| SNP_P4_48058_25910544 | NC_021163.1    | Ca_kabuli_chr04 | 25910544                | GG                              | AA              | 1946803639               |
| SNP_P4_48059_25910547 | NC_021163.1    | Ca_kabuli_chr04 | 25910547                | AA                              | GG              | 1946803641               |
| SNP_P4_48060_25910672 | NC_021163.1    | Ca_kabuli_chr04 | 25910672                | TT                              | CC              | 1946803643               |
| SNP_P4_48061_25910696 | NC_021163.1    | Ca_kabuli_chr04 | 25910696                | TT                              | CC              | 1946803645               |
| SNP_P4_48062_25911059 | NC_021163.1    | Ca_kabuli_chr04 | 25911059                | AA                              | GG              | 1946803647               |
| SNP_P4_48063_25911214 | NC_021163.1    | Ca_kabuli_chr04 | 25911214                | TT                              | CC              | 1946803649               |
| SNP_P4_48064_25911394 | NC_021163.1    | Ca_kabuli_chr04 | 25911394                | CC                              | TT              | 1946803651               |
| SNP_P4_48065_25911444 | NC_021163.1    | Ca_kabuli_chr04 | 25911444                | CC                              | AA              | 1946803653               |
| SNP_P4_48066_25912821 | NC_021163.1    | Ca_kabuli_chr04 | 25912821                | AA                              | GG              | 1946803655               |
| SNP_P4_48067_25912835 | NC_021163.1    | Ca_kabuli_chr04 | 25912835                | CC                              | TT              | 1946803657               |
| SNP_P4_48068_25912899 | NC_021163.1    | Ca_kabuli_chr04 | 25912899                | GG                              | AA              | 1946803659               |
| SNP_P4_48069_25913183 | NC_021163.1    | Ca_kabuli_chr04 | 25913183                | CC                              | TT              | 1946803661               |
| SNP_P4_48070_25913474 | NC_021163.1    | Ca_kabuli_chr04 | 25913474                | TT                              | AA              | 1946803663               |
| SNP_P4_48071_25913604 | NC_021163.1    | Ca_kabuli_chr04 | 25913604                | CC                              | TT              | 1946803665               |
| SNP_P4_48072_25916766 | NC_021163.1    | Ca_kabuli_chr04 | 25916766                | TT                              | AA              | 1946803667               |
| SNP_P4_48074_25917031 | NC_021163.1    | Ca_kabuli_chr04 | 25917031                | CC                              | TT              | 1946803669               |
| SNP_P4_48075_25917105 | NC_021163.1    | Ca_kabuli_chr04 | 25917105                | CC                              | TT              | 1946803671               |
| SNP_P4_48076_25917994 | NC_021163.1    | Ca_kabuli_chr04 | 25917994                | GG                              | AA              | 1946803673               |
| SNP_P4_48077_25922220 | NC_021163.1    | Ca_kabuli_chr04 | 25922220                | CC                              | TT              | 1946803675               |
| SNP_P4_48078_25923959 | NC_021163.1    | Ca_kabuli_chr04 | 25923959                | GG                              | TT              | 1946803677               |
| SNP_P4_48079_25923977 | NC_021163.1    | Ca_kabuli_chr04 | 25923977                | GG                              | AA              | 1946803679               |
| SNP_P4_48080_25924681 | NC_021163.1    | Ca_kabuli_chr04 | 25924681                | TT                              | AA              | 1946803681               |
| SNP_P4_48082_25925406 | NC_021163.1    | Ca_kabuli_chr04 | 25925406                | TT                              | CC              | 1946803683               |
| SNP_P4_48083_25925539 | NC_021163.1    | Ca_kabuli_chr04 | 25925539                | GG                              | TT              | 1946803685               |
| SNP_P4_48084_25927055 | NC_021163.1    | Ca_kabuli_chr04 | 25927055                | CC                              | TT              | 1946803687               |
| SNP_P4_48085_25927086 | NC_021163.1    | Ca_kabuli_chr04 | 25927086                | AA                              | CC              | 1946803689               |
| SNP_P4_48086_25933716 | NC_021163.1    | Ca_kabuli_chr04 | 25933716                | AA                              | CC              | 1946803691               |
| SNP_P4_48090_25936876 | NC_021163.1    | Ca_kabuli_chr04 | 25936876                | CC                              | TT              | 1946803693               |
| SNP_P4_48092_25937309 | NC_021163.1    | Ca_kabuli_chr04 | 25937309                | GG                              | AA              | 1946803695               |
| SNP_P4_48094_25940115 | NC_021163.1    | Ca_kabuli_chr04 | 25940115                | TT                              | CC              | 1946803697               |
| SNP_P4_48095_25940156 | NC_021163.1    | Ca_kabuli_chr04 | 25940156                | AA                              | GG              | 1946803699               |

| SNPs IDs              | Chromosome IDs | Chromosomes     | Physical positions (bp) | CDC Frontier (Reference genome) | (ILWC46 & LPNB) | NCBI SNPdb Accession IDs |
|-----------------------|----------------|-----------------|-------------------------|---------------------------------|-----------------|--------------------------|
| SNP_P4_48096_25940234 | NC_021163.1    | Ca_kabuli_chr04 | 25940234                | AA                              | GG              | 1946803701               |
| SNP_P4_48097_25940831 | NC_021163.1    | Ca_kabuli_chr04 | 25940831                | CC                              | TT              | 1946803704               |
| SNP_P4_48098_25941482 | NC_021163.1    | Ca_kabuli_chr04 | 25941482                | AA                              | GG              | 1946803706               |
| SNP_P4_48101_25942286 | NC_021163.1    | Ca_kabuli_chr04 | 25942286                | CC                              | TT              | 1946803709               |
| SNP_P4_48102_25943450 | NC_021163.1    | Ca_kabuli_chr04 | 25943450                | CC                              | AA              | 1946803711               |
| SNP_P4_48103_25943464 | NC_021163.1    | Ca_kabuli_chr04 | 25943464                | GG                              | CC              | 1946803713               |
| SNP_P4_48104_25943820 | NC_021163.1    | Ca_kabuli_chr04 | 25943820                | CC                              | TT              | 1946803715               |
| SNP_P4_48105_25944098 | NC_021163.1    | Ca_kabuli_chr04 | 25944098                | AA                              | TT              | 1946803717               |
| SNP_P4_48106_25944443 | NC_021163.1    | Ca_kabuli_chr04 | 25944443                | CC                              | TT              | 1946803720               |
| SNP_P4_48107_25947115 | NC_021163.1    | Ca_kabuli_chr04 | 25947115                | CC                              | TT              | 1946803722               |
| SNP_P4_48108_25947841 | NC_021163.1    | Ca_kabuli_chr04 | 25947841                | CC                              | TT              | 1946803724               |
| SNP_P4_48109_25947856 | NC_021163.1    | Ca_kabuli_chr04 | 25947856                | CC                              | TT              | 1946803726               |
| SNP_P4_48110_25947879 | NC_021163.1    | Ca_kabuli_chr04 | 25947879                | AA                              | CC              | 1946803728               |
| SNP_P4_48111_25948055 | NC_021163.1    | Ca_kabuli_chr04 | 25948055                | CC                              | TT              | 1946803730               |
| SNP_P4_48112_25948167 | NC_021163.1    | Ca_kabuli_chr04 | 25948167                | TT                              | CC              | 1946803732               |
| SNP_P4_48113_25948211 | NC_021163.1    | Ca_kabuli_chr04 | 25948211                | CC                              | GG              | 1946803734               |
| SNP_P4_48114_25948430 | NC_021163.1    | Ca_kabuli_chr04 | 25948430                | CC                              | TT              | 1946803736               |
| SNP_P4_48115_25948525 | NC_021163.1    | Ca_kabuli_chr04 | 25948525                | AA                              | TT              | 1946803738               |
| SNP_P4_48116_25948794 | NC_021163.1    | Ca_kabuli_chr04 | 25948794                | TT                              | CC              | 1946803740               |
| SNP_P4_48117_25948813 | NC_021163.1    | Ca_kabuli_chr04 | 25948813                | CC                              | TT              | 1946803742               |
| SNP_P4_48118_25948981 | NC_021163.1    | Ca_kabuli_chr04 | 25948981                | AA                              | CC              | 1946803744               |
| SNP_P4_48119_25948982 | NC_021163.1    | Ca_kabuli_chr04 | 25948982                | TT                              | CC              | 1946803746               |
| SNP_P4_48120_25949018 | NC_021163.1    | Ca_kabuli_chr04 | 25949018                | CC                              | GG              | 1946803749               |
| SNP_P4_48122_25949384 | NC_021163.1    | Ca_kabuli_chr04 | 25949384                | CC                              | TT              | 1946803752               |
| SNP_P4_48123_25950419 | NC_021163.1    | Ca_kabuli_chr04 | 25950419                | AA                              | GG              | 1946803754               |
| SNP_P4_48124_25950593 | NC_021163.1    | Ca_kabuli_chr04 | 25950593                | TT                              | AA              | 1946803756               |
| SNP_P4_48125_25950624 | NC_021163.1    | Ca_kabuli_chr04 | 25950624                | CC                              | TT              | 1946803758               |
| SNP_P4_48127_25951216 | NC_021163.1    | Ca_kabuli_chr04 | 25951216                | TT                              | CC              | 1946803760               |
| SNP_P4_48128_25954225 | NC_021163.1    | Ca_kabuli_chr04 | 25954225                | GG                              | AA              | 1946803762               |
| SNP_P4_48129_25954304 | NC_021163.1    | Ca_kabuli_chr04 | 25954304                | CC                              | TT              | 1946803764               |
| SNP_P4_48130_25954609 | NC_021163.1    | Ca_kabuli_chr04 | 25954609                | AA                              | GG              | 1946803766               |
| SNP_P4_48131_25954900 | NC_021163.1    | Ca_kabuli_chr04 | 25954900                | TT                              | AA              | 1946803768               |
| SNP_P4_48132_25955843 | NC_021163.1    | Ca_kabuli_chr04 | 25955843                | CC                              | TT              | 1946803770               |
| SNP_P4_48133_25956290 | NC_021163.1    | Ca_kabuli_chr04 | 25956290                | GG                              | CC              | 1946803772               |
| SNP_P4_48134_25956691 | NC_021163.1    | Ca_kabuli_chr04 | 25956691                | GG                              | TT              | 1946803775               |
| SNP_P4_48137_25960032 | NC_021163.1    | Ca_kabuli_chr04 | 25960032                | CC                              | TT              | 1946803777               |
| SNP_P4_48138_25960156 | NC_021163.1    | Ca_kabuli_chr04 | 25960156                | TT                              | GG              | 1946803779               |
| SNP_P4_48139_25960278 | NC_021163.1    | Ca_kabuli_chr04 | 25960278                | AA                              | TT              | 1946803781               |
| SNP_P4_48140_25960293 | NC_021163.1    | Ca_kabuli_chr04 | 25960293                | TT                              | AA              | 1946803783               |
| SNP_P4_48141_25960386 | NC_021163.1    | Ca_kabuli_chr04 | 25960386                | GG                              | AA              | 1946803785               |
| SNP_P4_48142_25960545 | NC_021163.1    | Ca_kabuli_chr04 | 25960545                | CC                              | TT              | 1946803787               |
| SNP_P4_48143_25960731 | NC_021163.1    | Ca_kabuli_chr04 | 25960731                | AA                              | GG              | 1946803789               |

| SNPs IDs              | Chromosome IDs | Chromosomes     | Physical positions (bp) | CDC Frontier (Reference genome) | (ILWC46 & LPNB) | NCBI SNPdb Accession IDs |
|-----------------------|----------------|-----------------|-------------------------|---------------------------------|-----------------|--------------------------|
| SNP_P4_48144_25960746 | NC_021163.1    | Ca_kabuli_chr04 | 25960746                | CC                              | AA              | 1946803793               |
| SNP_P4_48145_25962491 | NC_021163.1    | Ca_kabuli_chr04 | 25962491                | AA                              | TT              | 1946803795               |
| SNP_P4_48146_25962522 | NC_021163.1    | Ca_kabuli_chr04 | 25962522                | TT                              | CC              | 1946803797               |
| SNP_P4_48147_25962651 | NC_021163.1    | Ca_kabuli_chr04 | 25962651                | CC                              | TT              | 1946803799               |
| SNP_P4_48148_25962799 | NC_021163.1    | Ca_kabuli_chr04 | 25962799                | TT                              | AA              | 1946803801               |
| SNP_P4_48150_25962875 | NC_021163.1    | Ca_kabuli_chr04 | 25962875                | AA                              | TT              | 1946803803               |
| SNP_P4_48151_25963410 | NC_021163.1    | Ca_kabuli_chr04 | 25963410                | CC                              | TT              | 1946803805               |
| SNP_P4_48152_25963540 | NC_021163.1    | Ca_kabuli_chr04 | 25963540                | TT                              | CC              | 1946803807               |
| SNP_P4_48153_25963542 | NC_021163.1    | Ca_kabuli_chr04 | 25963542                | GG                              | AA              | 1946803809               |
| SNP_P4_48154_25963705 | NC_021163.1    | Ca_kabuli_chr04 | 25963705                | AA                              | TT              | 1946803811               |
| SNP_P4_48156_25964219 | NC_021163.1    | Ca_kabuli_chr04 | 25964219                | AA                              | TT              | 1946803813               |
| SNP_P4_48157_25964269 | NC_021163.1    | Ca_kabuli_chr04 | 25964269                | CC                              | AA              | 1946803815               |
| SNP_P4_48158_25964286 | NC_021163.1    | Ca_kabuli_chr04 | 25964286                | TT                              | CC              | 1946803817               |
| SNP_P4_48159_25964296 | NC_021163.1    | Ca_kabuli_chr04 | 25964296                | CC                              | TT              | 1946803819               |
| SNP_P4_48160_25964368 | NC_021163.1    | Ca_kabuli_chr04 | 25964368                | GG                              | AA              | 1946803821               |
| SNP_P4_48161_25964478 | NC_021163.1    | Ca_kabuli_chr04 | 25964478                | AA                              | GG              | 1946803823               |
| SNP_P4_48162_25964543 | NC_021163.1    | Ca_kabuli_chr04 | 25964543                | AA                              | GG              | 1946803825               |
| SNP_P4_48163_25964692 | NC_021163.1    | Ca_kabuli_chr04 | 25964692                | AA                              | CC              | 1946803827               |
| SNP_P4_48164_25964701 | NC_021163.1    | Ca_kabuli_chr04 | 25964701                | CC                              | TT              | 1946803829               |
| SNP_P4_48165_25964738 | NC_021163.1    | Ca_kabuli_chr04 | 25964738                | AA                              | GG              | 1946803831               |
| SNP_P4_48166_25964847 | NC_021163.1    | Ca_kabuli_chr04 | 25964847                | GG                              | TT              | 1946803833               |
| SNP_P4_48167_25964855 | NC_021163.1    | Ca_kabuli_chr04 | 25964855                | AA                              | CC              | 1946803835               |
| SNP_P4_48169_25965337 | NC_021163.1    | Ca_kabuli_chr04 | 25965337                | AA                              | CC              | 1946803836               |
| SNP_P4_48170_25965466 | NC_021163.1    | Ca_kabuli_chr04 | 25965466                | CC                              | AA              | 1946803838               |
| SNP_P4_48171_25965544 | NC_021163.1    | Ca_kabuli_chr04 | 25965544                | GG                              | CC              | 1946803840               |
| SNP_P4_48172_25965801 | NC_021163.1    | Ca_kabuli_chr04 | 25965801                | GG                              | TT              | 1946803842               |
| SNP_P4_48173_25965820 | NC_021163.1    | Ca_kabuli_chr04 | 25965820                | GG                              | AA              | 1946803845               |
| SNP_P4_48174_25965854 | NC_021163.1    | Ca_kabuli_chr04 | 25965854                | AA                              | CC              | 1946803847               |
| SNP_P4_48175_25965883 | NC_021163.1    | Ca_kabuli_chr04 | 25965883                | GG                              | AA              | 1946803849               |
| SNP_P4_48176_25965993 | NC_021163.1    | Ca_kabuli_chr04 | 25965993                | GG                              | AA              | 1946803851               |
| SNP_P4_48177_25966048 | NC_021163.1    | Ca_kabuli_chr04 | 25966048                | CC                              | TT              | 1946803853               |
| SNP_P4_48178_25966064 | NC_021163.1    | Ca_kabuli_chr04 | 25966064                | CC                              | GG              | 1946803855               |
| SNP_P4_48180_25966076 | NC_021163.1    | Ca_kabuli_chr04 | 25966076                | GG                              | AA              | 1946803857               |
| SNP_P4_48181_25966085 | NC_021163.1    | Ca_kabuli_chr04 | 25966085                | TT                              | AA              | 1946803859               |
| SNP_P4_48182_25966093 | NC_021163.1    | Ca_kabuli_chr04 | 25966093                | TT                              | GG              | 1946803861               |
| SNP_P4_48183_25966111 | NC_021163.1    | Ca_kabuli_chr04 | 25966111                | TT                              | GG              | 1946803863               |
| SNP_P4_48184_25966173 | NC_021163.1    | Ca_kabuli_chr04 | 25966173                | CC                              | TT              | 1946803865               |
| SNP_P4_48185_25966192 | NC_021163.1    | Ca_kabuli_chr04 | 25966192                | GG                              | TT              | 1946803867               |
| SNP_P4_48186_25966283 | NC_021163.1    | Ca_kabuli_chr04 | 25966283                | TT                              | GG              | 1946803870               |
| SNP_P4_48187_25966307 | NC_021163.1    | Ca_kabuli_chr04 | 25966307                | GG                              | AA              | 1946803872               |
| SNP_P4_48188_25966309 | NC_021163.1    | Ca_kabuli_chr04 | 25966309                | AA                              | GG              | 1946803874               |
| SNP_P4_48189_25966318 | NC_021163.1    | Ca_kabuli_chr04 | 25966318                | CC                              | TT              | 1946803876               |

| SNPs IDs              | Chromosome IDs | Chromosomes     | Physical positions (bp) | CDC Frontier (Reference genome) | (ILWC46 & LPNB) | NCBI SNPdb Accession IDs |
|-----------------------|----------------|-----------------|-------------------------|---------------------------------|-----------------|--------------------------|
| SNP_P4_48190_25966360 | NC_021163.1    | Ca_kabuli_chr04 | 25966360                | CC                              | TT              | 1946803878               |
| SNP_P4_48191_25966366 | NC_021163.1    | Ca_kabuli_chr04 | 25966366                | CC                              | TT              | 1946803880               |
| SNP_P4_48192_25966379 | NC_021163.1    | Ca_kabuli_chr04 | 25966379                | GG                              | AA              | 1946803883               |
| SNP_P4_48193_25966399 | NC_021163.1    | Ca_kabuli_chr04 | 25966399                | CC                              | AA              | 1946803885               |
| SNP_P4_48194_25966407 | NC_021163.1    | Ca_kabuli_chr04 | 25966407                | AA                              | GG              | 1946803887               |
| SNP_P4_48195_25966420 | NC_021163.1    | Ca_kabuli_chr04 | 25966420                | GG                              | AA              | 1946803889               |
| SNP_P4_48196_25966445 | NC_021163.1    | Ca_kabuli_chr04 | 25966445                | TT                              | AA              | 1946803891               |
| SNP_P4_48197_25966458 | NC_021163.1    | Ca_kabuli_chr04 | 25966458                | TT                              | AA              | 1946803893               |
| SNP_P4_48198_25966544 | NC_021163.1    | Ca_kabuli_chr04 | 25966544                | CC                              | GG              | 1946803896               |
| SNP_P4_48199_25966548 | NC_021163.1    | Ca_kabuli_chr04 | 25966548                | AA                              | GG              | 1946803898               |
| SNP_P4_48200_25966590 | NC_021163.1    | Ca_kabuli_chr04 | 25966590                | CC                              | TT              | 1946803900               |
| SNP_P4_48201_25966709 | NC_021163.1    | Ca_kabuli_chr04 | 25966709                | AA                              | GG              | 1946803902               |
| SNP_P4_48202_25966726 | NC_021163.1    | Ca_kabuli_chr04 | 25966726                | AA                              | GG              | 1946803904               |
| SNP_P4_48203_25966738 | NC_021163.1    | Ca_kabuli_chr04 | 25966738                | TT                              | GG              | 1946803907               |
| SNP_P4_48204_25966741 | NC_021163.1    | Ca_kabuli_chr04 | 25966741                | CC                              | AA              | 1946803909               |
| SNP_P4_48205_25966756 | NC_021163.1    | Ca_kabuli_chr04 | 25966756                | AA                              | TT              | 1946803911               |
| SNP_P4_48206_25966782 | NC_021163.1    | Ca_kabuli_chr04 | 25966782                | CC                              | AA              | 1946803913               |
| SNP_P4_48207_25966860 | NC_021163.1    | Ca_kabuli_chr04 | 25966860                | AA                              | TT              | 1946803915               |
| SNP_P4_48208_25966887 | NC_021163.1    | Ca_kabuli_chr04 | 25966887                | AA                              | TT              | 1946803917               |
| SNP_P4_48209_25966909 | NC_021163.1    | Ca_kabuli_chr04 | 25966909                | AA                              | GG              | 1946803920               |
| SNP_P4_48210_25966927 | NC_021163.1    | Ca_kabuli_chr04 | 25966927                | AA                              | GG              | 1946803922               |
| SNP_P4_48211_25966935 | NC_021163.1    | Ca_kabuli_chr04 | 25966935                | CC                              | TT              | 1946803924               |
| SNP_P4_48212_25966953 | NC_021163.1    | Ca_kabuli_chr04 | 25966953                | GG                              | TT              | 1946803927               |
| SNP_P4_48213_25966999 | NC_021163.1    | Ca_kabuli_chr04 | 25966999                | CC                              | AA              | 1946803929               |
| SNP_P4_48214_25967884 | NC_021163.1    | Ca_kabuli_chr04 | 25967884                | CC                              | TT              | 1946803931               |
| SNP_P4_48215_25967968 | NC_021163.1    | Ca_kabuli_chr04 | 25967968                | CC                              | TT              | 1946803933               |
| SNP_P4_48217_25968001 | NC_021163.1    | Ca_kabuli_chr04 | 25968001                | CC                              | GG              | 1946803935               |
| SNP_P4_48218_25968019 | NC_021163.1    | Ca_kabuli_chr04 | 25968019                | CC                              | AA              | 1946803937               |
| SNP_P4_48219_25968020 | NC_021163.1    | Ca_kabuli_chr04 | 25968020                | AA                              | TT              | 1946803939               |
| SNP_P4_48220_25968028 | NC_021163.1    | Ca_kabuli_chr04 | 25968028                | CC                              | TT              | 1946803941               |
| SNP_P4_48221_25968065 | NC_021163.1    | Ca_kabuli_chr04 | 25968065                | TT                              | GG              | 1946803944               |
| SNP_P4_48222_25968240 | NC_021163.1    | Ca_kabuli_chr04 | 25968240                | TT                              | CC              | 1946803946               |
| SNP_P4_48223_25968297 | NC_021163.1    | Ca_kabuli_chr04 | 25968297                | TT                              | AA              | 1946803948               |
| SNP_P4_48224_25968319 | NC_021163.1    | Ca_kabuli_chr04 | 25968319                | CC                              | AA              | 1946803950               |
| SNP_P4_48225_25968364 | NC_021163.1    | Ca_kabuli_chr04 | 25968364                | AA                              | CC              | 1946803952               |
| SNP_P4_48226_25968422 | NC_021163.1    | Ca_kabuli_chr04 | 25968422                | CC                              | AA              | 1946803954               |
| SNP_P4_48227_25968462 | NC_021163.1    | Ca_kabuli_chr04 | 25968462                | TT                              | CC              | 1946803956               |
| SNP_P4_48228_25968501 | NC_021163.1    | Ca_kabuli_chr04 | 25968501                | TT                              | GG              | 1946803959               |
| SNP_P4_48229_25968743 | NC_021163.1    | Ca_kabuli_chr04 | 25968743                | TT                              | AA              | 1946803961               |
| SNP_P4_48230_25968765 | NC_021163.1    | Ca_kabuli_chr04 | 25968765                | TT                              | CC              | 1946803963               |
| SNP_P4_48232_25968852 | NC_021163.1    | Ca_kabuli_chr04 | 25968852                | TT                              | CC              | 1946803965               |
| SNP_P4_48233_25968923 | NC_021163.1    | Ca_kabuli_chr04 | 25968923                | TT                              | CC              | 1946803967               |

| SNPs IDs              | Chromosome IDs | Chromosomes     | Physical positions (bp) | CDC Frontier (Reference genome) | (ILWC46 & LPNB) | NCBI SNPdb Accession IDs |
|-----------------------|----------------|-----------------|-------------------------|---------------------------------|-----------------|--------------------------|
| SNP_P4_48234_25968976 | NC_021163.1    | Ca_kabuli_chr04 | 25968976                | CC                              | TT              | 1946803969               |
| SNP_P4_48235_25969138 | NC_021163.1    | Ca_kabuli_chr04 | 25969138                | TT                              | CC              | 1946803971               |
| SNP_P4_48236_25969257 | NC_021163.1    | Ca_kabuli_chr04 | 25969257                | AA                              | GG              | 1946803972               |
| SNP_P4_48237_25969297 | NC_021163.1    | Ca_kabuli_chr04 | 25969297                | GG                              | AA              | 1946803973               |
| SNP_P4_48238_25969321 | NC_021163.1    | Ca_kabuli_chr04 | 25969321                | AA                              | GG              | 1946803974               |
| SNP_P4_48239_25969326 | NC_021163.1    | Ca_kabuli_chr04 | 25969326                | GG                              | AA              | 1946803976               |
| SNP_P4_48240_25969351 | NC_021163.1    | Ca_kabuli_chr04 | 25969351                | GG                              | TT              | 1946803978               |
| SNP_P4_48241_25969370 | NC_021163.1    | Ca_kabuli_chr04 | 25969370                | CC                              | AA              | 1946803980               |
| SNP_P4_48242_25969373 | NC_021163.1    | Ca_kabuli_chr04 | 25969373                | TT                              | CC              | 1946803982               |
| SNP_P4_48243_25969489 | NC_021163.1    | Ca_kabuli_chr04 | 25969489                | CC                              | AA              | 1946803984               |
| SNP_P4_48245_25969551 | NC_021163.1    | Ca_kabuli_chr04 | 25969551                | GG                              | AA              | 1946803986               |
| SNP_P4_48246_25969578 | NC_021163.1    | Ca_kabuli_chr04 | 25969578                | CC                              | TT              | 1946803988               |
| SNP_P4_48247_25969613 | NC_021163.1    | Ca_kabuli_chr04 | 25969613                | CC                              | TT              | 1946803991               |
| SNP_P4_48248_25969625 | NC_021163.1    | Ca_kabuli_chr04 | 25969625                | CC                              | TT              | 1946803993               |
| SNP_P4_48249_25969630 | NC_021163.1    | Ca_kabuli_chr04 | 25969630                | GG                              | AA              | 1946803995               |
| SNP_P4_48250_25969715 | NC_021163.1    | Ca_kabuli_chr04 | 25969715                | GG                              | AA              | 1946803997               |
| SNP_P4_48251_25969738 | NC_021163.1    | Ca_kabuli_chr04 | 25969738                | AA                              | GG              | 1946803999               |
| SNP_P4_48252_25969813 | NC_021163.1    | Ca_kabuli_chr04 | 25969813                | AA                              | GG              | 1946804001               |
| SNP_P4_48253_25969849 | NC_021163.1    | Ca_kabuli_chr04 | 25969849                | TT                              | CC              | 1946804003               |
| SNP_P4_48254_25969872 | NC_021163.1    | Ca_kabuli_chr04 | 25969872                | AA                              | GG              | 1946804006               |
| SNP_P4_48255_25969892 | NC_021163.1    | Ca_kabuli_chr04 | 25969892                | AA                              | GG              | 1946804008               |
| SNP_P4_48256_25970135 | NC_021163.1    | Ca_kabuli_chr04 | 25970135                | AA                              | GG              | 1946804010               |
| SNP_P4_48258_25970296 | NC_021163.1    | Ca_kabuli_chr04 | 25970296                | CC                              | TT              | 1946804012               |
| SNP_P4_48259_25970386 | NC_021163.1    | Ca_kabuli_chr04 | 25970386                | GG                              | AA              | 1946804014               |
| SNP_P4_48260_25970396 | NC_021163.1    | Ca_kabuli_chr04 | 25970396                | CC                              | TT              | 1946804016               |
| SNP_P4_48261_25970399 | NC_021163.1    | Ca_kabuli_chr04 | 25970399                | GG                              | AA              | 1946804018               |
| SNP_P4_48262_25970426 | NC_021163.1    | Ca_kabuli_chr04 | 25970426                | CC                              | AA              | 1946804020               |
| SNP_P4_48263_25970467 | NC_021163.1    | Ca_kabuli_chr04 | 25970467                | AA                              | CC              | 1946804023               |
| SNP_P4_48264_25970527 | NC_021163.1    | Ca_kabuli_chr04 | 25970527                | CC                              | AA              | 1946804025               |
| SNP_P4_48265_25970562 | NC_021163.1    | Ca_kabuli_chr04 | 25970562                | TT                              | GG              | 1946804027               |
| SNP_P4_48266_25970563 | NC_021163.1    | Ca_kabuli_chr04 | 25970563                | CC                              | AA              | 1946804029               |
| SNP_P4_48267_25970583 | NC_021163.1    | Ca_kabuli_chr04 | 25970583                | TT                              | AA              | 1946804031               |
| SNP_P4_48268_25970599 | NC_021163.1    | Ca_kabuli_chr04 | 25970599                | GG                              | TT              | 1946804033               |
| SNP_P4_48269_25970609 | NC_021163.1    | Ca_kabuli_chr04 | 25970609                | AA                              | CC              | 1946804035               |
| SNP_P4_48270_25970671 | NC_021163.1    | Ca_kabuli_chr04 | 25970671                | GG                              | AA              | 1946804037               |
| SNP_P4_48271_25970730 | NC_021163.1    | Ca_kabuli_chr04 | 25970730                | TT                              | GG              | 1946804040               |
| SNP_P4_48272_25970766 | NC_021163.1    | Ca_kabuli_chr04 | 25970766                | AA                              | GG              | 1946804042               |
| SNP_P4_48273_25970795 | NC_021163.1    | Ca_kabuli_chr04 | 25970795                | CC                              | AA              | 1946804045               |
| SNP_P4_48274_25970855 | NC_021163.1    | Ca_kabuli_chr04 | 25970855                | GG                              | AA              | 1946804047               |
| SNP_P4_48275_25970866 | NC_021163.1    | Ca_kabuli_chr04 | 25970866                | AA                              | CC              | 1946804049               |
| SNP_P4_48276_25970867 | NC_021163.1    | Ca_kabuli_chr04 | 25970867                | CC                              | TT              | 1946804051               |
| SNP_P4_48277_25970880 | NC_021163.1    | Ca_kabuli_chr04 | 25970880                | GG                              | AA              | 1946804053               |

| SNPs IDs              | Chromosome IDs | Chromosomes     | Physical positions (bp) | CDC Frontier (Reference genome) | (ILWC46 & LPNB) | NCBI SNPdb Accession IDs |
|-----------------------|----------------|-----------------|-------------------------|---------------------------------|-----------------|--------------------------|
| SNP_P4_48278_25970912 | NC_021163.1    | Ca_kabuli_chr04 | 25970912                | TT                              | GG              | 1946804056               |
| SNP_P4_48279_25970917 | NC_021163.1    | Ca_kabuli_chr04 | 25970917                | TT                              | AA              | 1946804058               |
| SNP_P4_48280_25970943 | NC_021163.1    | Ca_kabuli_chr04 | 25970943                | TT                              | AA              | 1946804060               |
| SNP_P4_48281_25970944 | NC_021163.1    | Ca_kabuli_chr04 | 25970944                | AA                              | TT              | 1946804062               |
| SNP_P4_48282_25970957 | NC_021163.1    | Ca_kabuli_chr04 | 25970957                | TT                              | CC              | 1946804064               |
| SNP_P4_48283_25971024 | NC_021163.1    | Ca_kabuli_chr04 | 25971024                | GG                              | TT              | 1946804066               |
| SNP_P4_48284_25971030 | NC_021163.1    | Ca_kabuli_chr04 | 25971030                | CC                              | TT              | 1946804068               |
| SNP_P4_48285_25971077 | NC_021163.1    | Ca_kabuli_chr04 | 25971077                | TT                              | CC              | 1946804070               |
| SNP_P4_48286_25971140 | NC_021163.1    | Ca_kabuli_chr04 | 25971140                | TT                              | CC              | 1946804072               |
| SNP_P4_48287_25971158 | NC_021163.1    | Ca_kabuli_chr04 | 25971158                | GG                              | AA              | 1946804074               |
| SNP_P4_48288_25971179 | NC_021163.1    | Ca_kabuli_chr04 | 25971179                | CC                              | AA              | 1946804076               |
| SNP_P4_48289_25971221 | NC_021163.1    | Ca_kabuli_chr04 | 25971221                | TT                              | CC              | 1946804078               |
| SNP_P4_48291_25971301 | NC_021163.1    | Ca_kabuli_chr04 | 25971301                | GG                              | CC              | 1946804080               |
| SNP_P4_48292_25971334 | NC_021163.1    | Ca_kabuli_chr04 | 25971334                | TT                              | GG              | 1946804083               |
| SNP_P4_48293_25971402 | NC_021163.1    | Ca_kabuli_chr04 | 25971402                | TT                              | GG              | 1946804085               |
| SNP_P4_48294_25971651 | NC_021163.1    | Ca_kabuli_chr04 | 25971651                | TT                              | CC              | 1946804087               |
| SNP_P4_48295_25971711 | NC_021163.1    | Ca_kabuli_chr04 | 25971711                | TT                              | GG              | 1946804089               |
| SNP_P4_48296_25971778 | NC_021163.1    | Ca_kabuli_chr04 | 25971778                | AA                              | CC              | 1946804091               |
| SNP_P4_48298_25971859 | NC_021163.1    | Ca_kabuli_chr04 | 25971859                | TT                              | GG              | 1946804093               |
| SNP_P4_48299_25971914 | NC_021163.1    | Ca_kabuli_chr04 | 25971914                | GG                              | AA              | 1946804095               |
| SNP_P4_48300_25971935 | NC_021163.1    | Ca_kabuli_chr04 | 25971935                | GG                              | TT              | 1946804097               |
| SNP_P4_48301_25971970 | NC_021163.1    | Ca_kabuli_chr04 | 25971970                | AA                              | CC              | 1946804098               |
| SNP_P4_48302_25971982 | NC_021163.1    | Ca_kabuli_chr04 | 25971982                | AA                              | GG              | 1946804099               |
| SNP_P4_48303_25972027 | NC_021163.1    | Ca_kabuli_chr04 | 25972027                | CC                              | TT              | 1946804100               |
| SNP_P4_48304_25972028 | NC_021163.1    | Ca_kabuli_chr04 | 25972028                | AA                              | GG              | 1946804102               |
| SNP_P4_48305_25972067 | NC_021163.1    | Ca_kabuli_chr04 | 25972067                | CC                              | AA              | 1946804104               |
| SNP_P4_48306_25972073 | NC_021163.1    | Ca_kabuli_chr04 | 25972073                | GG                              | TT              | 1946804106               |
| SNP_P4_48307_25972099 | NC_021163.1    | Ca_kabuli_chr04 | 25972099                | TT                              | AA              | 1946804108               |
| SNP_P4_48308_25972155 | NC_021163.1    | Ca_kabuli_chr04 | 25972155                | TT                              | CC              | 1946804110               |
| SNP_P4_48309_25972173 | NC_021163.1    | Ca_kabuli_chr04 | 25972173                | CC                              | AA              | 1946804112               |
| SNP_P4_48310_25972204 | NC_021163.1    | Ca_kabuli_chr04 | 25972204                | CC                              | AA              | 1946804114               |
| SNP_P4_48311_25972211 | NC_021163.1    | Ca_kabuli_chr04 | 25972211                | GG                              | TT              | 1946804116               |
| SNP_P4_48312_25972223 | NC_021163.1    | Ca_kabuli_chr04 | 25972223                | AA                              | CC              | 1946804118               |
| SNP_P4_48313_25972505 | NC_021163.1    | Ca_kabuli_chr04 | 25972505                | CC                              | AA              | 1946804120               |
| SNP_P4_48314_25972702 | NC_021163.1    | Ca_kabuli_chr04 | 25972702                | AA                              | GG              | 1946804122               |
| SNP_P4_48315_25972745 | NC_021163.1    | Ca_kabuli_chr04 | 25972745                | AA                              | GG              | 1946804124               |
| SNP_P4_48316_25973013 | NC_021163.1    | Ca_kabuli_chr04 | 25973013                | AA                              | TT              | 1946804126               |
| SNP_P4_48317_25973395 | NC_021163.1    | Ca_kabuli_chr04 | 25973395                | CC                              | TT              | 1946804128               |
| SNP_P4_48318_25973398 | NC_021163.1    | Ca_kabuli_chr04 | 25973398                | TT                              | CC              | 1946804130               |
| SNP_P4_48320_25973415 | NC_021163.1    | Ca_kabuli_chr04 | 25973415                | AA                              | GG              | 1946804132               |
| SNP_P4_48321_25973522 | NC_021163.1    | Ca_kabuli_chr04 | 25973522                | AA                              | TT              | 1946804134               |
| SNP_P4_48322_25973588 | NC_021163.1    | Ca_kabuli_chr04 | 25973588                | TT                              | AA              | 1946804136               |

| SNPs IDs              | Chromosome IDs | Chromosomes     | Physical positions (bp) | CDC Frontier (Reference genome) | (ILWC46 & LPNB) | NCBI SNPdb Accession IDs |
|-----------------------|----------------|-----------------|-------------------------|---------------------------------|-----------------|--------------------------|
| SNP_P4_48323_25973671 | NC_021163.1    | Ca_kabuli_chr04 | 25973671                | CC                              | TT              | 1946804138               |
| SNP_P4_48324_25973933 | NC_021163.1    | Ca_kabuli_chr04 | 25973933                | TT                              | CC              | 1946804140               |
| SNP_P4_48325_25973984 | NC_021163.1    | Ca_kabuli_chr04 | 25973984                | TT                              | CC              | 1946804142               |
| SNP_P4_48326_25973985 | NC_021163.1    | Ca_kabuli_chr04 | 25973985                | TT                              | CC              | 1946804144               |
| SNP_P4_48327_25974035 | NC_021163.1    | Ca_kabuli_chr04 | 25974035                | GG                              | CC              | 1946804146               |
| SNP_P4_48328_25974065 | NC_021163.1    | Ca_kabuli_chr04 | 25974065                | GG                              | TT              | 1946804148               |
| SNP_P4_48330_25974143 | NC_021163.1    | Ca_kabuli_chr04 | 25974143                | AA                              | GG              | 1946804150               |
| SNP_P4_48331_25974174 | NC_021163.1    | Ca_kabuli_chr04 | 25974174                | GG                              | AA              | 1946804152               |
| SNP_P4_48332_25974226 | NC_021163.1    | Ca_kabuli_chr04 | 25974226                | CC                              | TT              | 1946804154               |
| SNP_P4_48333_25974300 | NC_021163.1    | Ca_kabuli_chr04 | 25974300                | GG                              | AA              | 1946804156               |
| SNP_P4_48334_25974320 | NC_021163.1    | Ca_kabuli_chr04 | 25974320                | GG                              | AA              | 1946804158               |
| SNP_P4_48335_25974357 | NC_021163.1    | Ca_kabuli_chr04 | 25974357                | TT                              | CC              | 1946804160               |
| SNP_P4_48336_25974649 | NC_021163.1    | Ca_kabuli_chr04 | 25974649                | TT                              | CC              | 1946804162               |
| SNP_P4_48337_25974728 | NC_021163.1    | Ca_kabuli_chr04 | 25974728                | CC                              | TT              | 1946804164               |
| SNP_P4_48338_25974771 | NC_021163.1    | Ca_kabuli_chr04 | 25974771                | GG                              | AA              | 1946804166               |
| SNP_P4_48339_25974777 | NC_021163.1    | Ca_kabuli_chr04 | 25974777                | TT                              | CC              | 1946804168               |
| SNP_P4_48340_25974803 | NC_021163.1    | Ca_kabuli_chr04 | 25974803                | AA                              | GG              | 1946804170               |
| SNP_P4_48341_25974945 | NC_021163.1    | Ca_kabuli_chr04 | 25974945                | CC                              | GG              | 1946804173               |
| SNP_P4_48342_25974960 | NC_021163.1    | Ca_kabuli_chr04 | 25974960                | GG                              | TT              | 1946804175               |
| SNP_P4_48343_25975083 | NC_021163.1    | Ca_kabuli_chr04 | 25975083                | AA                              | GG              | 1946804177               |
| SNP_P4_48344_25975092 | NC_021163.1    | Ca_kabuli_chr04 | 25975092                | TT                              | CC              | 1946804179               |
| SNP_P4_48346_25975245 | NC_021163.1    | Ca_kabuli_chr04 | 25975245                | CC                              | TT              | 1946804181               |
| SNP_P4_48347_25975267 | NC_021163.1    | Ca_kabuli_chr04 | 25975267                | CC                              | TT              | 1946804183               |
| SNP_P4_48348_25975280 | NC_021163.1    | Ca_kabuli_chr04 | 25975280                | CC                              | TT              | 1946804185               |
| SNP_P4_48349_25975282 | NC_021163.1    | Ca_kabuli_chr04 | 25975282                | GG                              | AA              | 1946804187               |
| SNP_P4_48350_25975305 | NC_021163.1    | Ca_kabuli_chr04 | 25975305                | AA                              | GG              | 1946804189               |
| SNP_P4_48351_25975319 | NC_021163.1    | Ca_kabuli_chr04 | 25975319                | CC                              | TT              | 1946804191               |
| SNP_P4_48352_25975339 | NC_021163.1    | Ca_kabuli_chr04 | 25975339                | GG                              | TT              | 1946804194               |
| SNP_P4_48353_25975391 | NC_021163.1    | Ca_kabuli_chr04 | 25975391                | AA                              | CC              | 1946804196               |
| SNP_P4_48354_25975479 | NC_021163.1    | Ca_kabuli_chr04 | 25975479                | AA                              | GG              | 1946804198               |
| SNP_P4_48355_25975484 | NC_021163.1    | Ca_kabuli_chr04 | 25975484                | CC                              | TT              | 1946804200               |
| SNP_P4_48356_25975487 | NC_021163.1    | Ca_kabuli_chr04 | 25975487                | GG                              | TT              | 1946804202               |
| SNP_P4_48357_25975550 | NC_021163.1    | Ca_kabuli_chr04 | 25975550                | GG                              | TT              | 1946804204               |
| SNP_P4_48358_25975582 | NC_021163.1    | Ca_kabuli_chr04 | 25975582                | CC                              | TT              | 1946804206               |
| SNP_P4_48359_25975601 | NC_021163.1    | Ca_kabuli_chr04 | 25975601                | TT                              | CC              | 1946804208               |
| SNP_P4_48360_25975675 | NC_021163.1    | Ca_kabuli_chr04 | 25975675                | GG                              | CC              | 1946804210               |
| SNP_P4_48361_25975878 | NC_021163.1    | Ca_kabuli_chr04 | 25975878                | CC                              | TT              | 1946804212               |
| SNP_P4_48363_25976487 | NC_021163.1    | Ca_kabuli_chr04 | 25976487                | CC                              | AA              | 1946804214               |
| SNP_P4_48364_25976524 | NC_021163.1    | Ca_kabuli_chr04 | 25976524                | GG                              | AA              | 1946804217               |
| SNP_P4_48365_25976744 | NC_021163.1    | Ca_kabuli_chr04 | 25976744                | AA                              | GG              | 1946804219               |
| SNP_P4_48366_25976767 | NC_021163.1    | Ca_kabuli_chr04 | 25976767                | GG                              | AA              | 1946804221               |
| SNP_P4_48367_25976885 | NC_021163.1    | Ca_kabuli_chr04 | 25976885                | CC                              | TT              | 1946804223               |

| SNPs IDs              | Chromosome IDs | Chromosomes     | Physical positions (bp) | CDC Frontier (Reference genome) | (ILWC46 & LPNB) | NCBI SNPdb Accession IDs |
|-----------------------|----------------|-----------------|-------------------------|---------------------------------|-----------------|--------------------------|
| SNP_P4_48368_25976980 | NC_021163.1    | Ca_kabuli_chr04 | 25976980                | TT                              | CC              | 1946804225               |
| SNP_P4_48369_25977012 | NC_021163.1    | Ca_kabuli_chr04 | 25977012                | AA                              | GG              | 1946804227               |
| SNP_P4_48370_25977122 | NC_021163.1    | Ca_kabuli_chr04 | 25977122                | TT                              | AA              | 1946804229               |
| SNP_P4_48371_25977322 | NC_021163.1    | Ca_kabuli_chr04 | 25977322                | TT                              | GG              | 1946804231               |
| SNP_P4_48372_25977345 | NC_021163.1    | Ca_kabuli_chr04 | 25977345                | TT                              | CC              | 1946804233               |
| SNP_P4_48373_25977508 | NC_021163.1    | Ca_kabuli_chr04 | 25977508                | TT                              | CC              | 1946804235               |
| SNP_P4_48374_25977545 | NC_021163.1    | Ca_kabuli_chr04 | 25977545                | GG                              | TT              | 1946804237               |
| SNP_P4_48375_25977819 | NC_021163.1    | Ca_kabuli_chr04 | 25977819                | TT                              | CC              | 1946804239               |
| SNP_P4_48376_25977915 | NC_021163.1    | Ca_kabuli_chr04 | 25977915                | GG                              | CC              | 1946804241               |
| SNP_P4_48377_25977932 | NC_021163.1    | Ca_kabuli_chr04 | 25977932                | AA                              | TT              | 1946804244               |
| SNP_P4_48378_25978079 | NC_021163.1    | Ca_kabuli_chr04 | 25978079                | GG                              | AA              | 1946804246               |
| SNP_P4_48379_25978130 | NC_021163.1    | Ca_kabuli_chr04 | 25978130                | GG                              | TT              | 1946804248               |
| SNP_P4_48381_25978520 | NC_021163.1    | Ca_kabuli_chr04 | 25978520                | TT                              | CC              | 1946804250               |
| SNP_P4_48382_25978751 | NC_021163.1    | Ca_kabuli_chr04 | 25978751                | TT                              | CC              | 1946804252               |
| SNP_P4_48383_25978919 | NC_021163.1    | Ca_kabuli_chr04 | 25978919                | AA                              | CC              | 1946804254               |
| SNP_P4_48384_25978935 | NC_021163.1    | Ca_kabuli_chr04 | 25978935                | GG                              | AA              | 1946804256               |
| SNP_P4_48385_25978974 | NC_021163.1    | Ca_kabuli_chr04 | 25978974                | TT                              | GG              | 1946804258               |
| SNP_P4_48386_25979093 | NC_021163.1    | Ca_kabuli_chr04 | 25979093                | AA                              | TT              | 1946804260               |
| SNP_P4_48387_25979184 | NC_021163.1    | Ca_kabuli_chr04 | 25979184                | CC                              | AA              | 1946804262               |
| SNP_P4_48388_25979225 | NC_021163.1    | Ca_kabuli_chr04 | 25979225                | CC                              | TT              | 1946804264               |
| SNP_P4_48389_25979313 | NC_021163.1    | Ca_kabuli_chr04 | 25979313                | GG                              | AA              | 1946804266               |
| SNP_P4_48390_25979324 | NC_021163.1    | Ca_kabuli_chr04 | 25979324                | GG                              | AA              | 1946804268               |
| SNP_P4_48391_25979377 | NC_021163.1    | Ca_kabuli_chr04 | 25979377                | GG                              | CC              | 1946804270               |
| SNP_P4_48392_25979582 | NC_021163.1    | Ca_kabuli_chr04 | 25979582                | CC                              | TT              | 1946804272               |
| SNP_P4_48393_25979606 | NC_021163.1    | Ca_kabuli_chr04 | 25979606                | TT                              | AA              | 1946804274               |
| SNP_P4_48394_25979657 | NC_021163.1    | Ca_kabuli_chr04 | 25979657                | AA                              | GG              | 1946804276               |
| SNP_P4_48396_25979943 | NC_021163.1    | Ca_kabuli_chr04 | 25979943                | AA                              | CC              | 1946804278               |
| SNP_P4_48397_25979949 | NC_021163.1    | Ca_kabuli_chr04 | 25979949                | CC                              | TT              | 1946804280               |
| SNP_P4_48398_25980075 | NC_021163.1    | Ca_kabuli_chr04 | 25980075                | CC                              | TT              | 1946804282               |
| SNP_P4_48399_25980196 | NC_021163.1    | Ca_kabuli_chr04 | 25980196                | AA                              | TT              | 1946804284               |
| SNP_P4_48400_25980550 | NC_021163.1    | Ca_kabuli_chr04 | 25980550                | CC                              | TT              | 1946804286               |
| SNP_P4_48401_25980630 | NC_021163.1    | Ca_kabuli_chr04 | 25980630                | CC                              | TT              | 1946804288               |
| SNP_P4_48402_25980796 | NC_021163.1    | Ca_kabuli_chr04 | 25980796                | CC                              | AA              | 1946804290               |
| SNP_P4_48403_25980965 | NC_021163.1    | Ca_kabuli_chr04 | 25980965                | GG                              | AA              | 1946804292               |
| SNP_P4_48404_25980995 | NC_021163.1    | Ca_kabuli_chr04 | 25980995                | GG                              | AA              | 1946804294               |
| SNP_P4_48405_25981293 | NC_021163.1    | Ca_kabuli_chr04 | 25981293                | AA                              | TT              | 1946804296               |
| SNP_P4_48406_25981530 | NC_021163.1    | Ca_kabuli_chr04 | 25981530                | CC                              | TT              | 1946804299               |
| SNP_P4_48407_25981533 | NC_021163.1    | Ca_kabuli_chr04 | 25981533                | GG                              | AA              | 1946804301               |
| SNP_P4_48408_25981534 | NC_021163.1    | Ca_kabuli_chr04 | 25981534                | GG                              | AA              | 1946804303               |
| SNP_P4_48409_25981541 | NC_021163.1    | Ca_kabuli_chr04 | 25981541                | AA                              | CC              | 1946804305               |
| SNP_P4_48410_25981653 | NC_021163.1    | Ca_kabuli_chr04 | 25981653                | AA                              | CC              | 1946804307               |
| SNP_P4_48411_25981679 | NC_021163.1    | Ca_kabuli_chr04 | 25981679                | GG                              | AA              | 1946804309               |



| SNPs IDs              | Chromosome IDs | Chromosomes     | Physical positions (bp) | CDC Frontier (Reference genome) | (ILWC46 & LPNB) | NCBI SNPdb Accession IDs |
|-----------------------|----------------|-----------------|-------------------------|---------------------------------|-----------------|--------------------------|
| SNP_P4_48412_25981697 | NC_021163.1    | Ca_kabuli_chr04 | 25981697                | TT                              | CC              | 1946804311               |
| SNP_P4_48413_25981891 | NC_021163.1    | Ca_kabuli_chr04 | 25981891                | GG                              | AA              | 1946804313               |
| SNP_P4_48414_25981973 | NC_021163.1    | Ca_kabuli_chr04 | 25981973                | AA                              | GG              | 1946804315               |
| SNP_P4_48415_25981974 | NC_021163.1    | Ca_kabuli_chr04 | 25981974                | TT                              | CC              | 1946804317               |
| SNP_P4_48416_25982065 | NC_021163.1    | Ca_kabuli_chr04 | 25982065                | GG                              | AA              | 1946804319               |
| SNP_P4_48417_25982121 | NC_021163.1    | Ca_kabuli_chr04 | 25982121                | AA                              | TT              | 1946804321               |
| SNP_P4_48418_25982137 | NC_021163.1    | Ca_kabuli_chr04 | 25982137                | TT                              | CC              | 1946804324               |
| SNP_P4_48419_25982149 | NC_021163.1    | Ca_kabuli_chr04 | 25982149                | CC                              | TT              | 1946804326               |
| SNP_P4_48420_25982188 | NC_021163.1    | Ca_kabuli_chr04 | 25982188                | CC                              | TT              | 1946804328               |
| SNP_P4_48421_25982226 | NC_021163.1    | Ca_kabuli_chr04 | 25982226                | CC                              | AA              | 1946804330               |
| SNP_P4_48422_25982275 | NC_021163.1    | Ca_kabuli_chr04 | 25982275                | GG                              | AA              | 1946804332               |
| SNP_P4_48423_25982330 | NC_021163.1    | Ca_kabuli_chr04 | 25982330                | AA                              | GG              | 1946804334               |
| SNP_P4_48425_25982534 | NC_021163.1    | Ca_kabuli_chr04 | 25982534                | GG                              | AA              | 1946804336               |
| SNP_P4_48426_25982538 | NC_021163.1    | Ca_kabuli_chr04 | 25982538                | GG                              | AA              | 1946804338               |
| SNP_P4_48427_25982573 | NC_021163.1    | Ca_kabuli_chr04 | 25982573                | CC                              | TT              | 1946804340               |
| SNP_P4_48428_25982587 | NC_021163.1    | Ca_kabuli_chr04 | 25982587                | GG                              | TT              | 1946804343               |
| SNP_P4_48429_25982670 | NC_021163.1    | Ca_kabuli_chr04 | 25982670                | AA                              | GG              | 1946804345               |
| SNP_P4_48430_25982678 | NC_021163.1    | Ca_kabuli_chr04 | 25982678                | CC                              | AA              | 1946804347               |
| SNP_P4_48431_25982679 | NC_021163.1    | Ca_kabuli_chr04 | 25982679                | AA                              | TT              | 1946804349               |
| SNP_P4_48432_25982697 | NC_021163.1    | Ca_kabuli_chr04 | 25982697                | AA                              | GG              | 1946804351               |
| SNP_P4_48434_25982763 | NC_021163.1    | Ca_kabuli_chr04 | 25982763                | TT                              | CC              | 1946804353               |
| SNP_P4_48435_25982767 | NC_021163.1    | Ca_kabuli_chr04 | 25982767                | TT                              | AA              | 1946804355               |
| SNP_P4_48436_25982774 | NC_021163.1    | Ca_kabuli_chr04 | 25982774                | AA                              | TT              | 1946804357               |
| SNP_P4_48437_25982797 | NC_021163.1    | Ca_kabuli_chr04 | 25982797                | CC                              | GG              | 1946804359               |
| SNP_P4_48438_25982943 | NC_021163.1    | Ca_kabuli_chr04 | 25982943                | AA                              | CC              | 1946804361               |
| SNP_P4_48439_25982960 | NC_021163.1    | Ca_kabuli_chr04 | 25982960                | CC                              | TT              | 1946804363               |
| SNP_P4_48440_25982968 | NC_021163.1    | Ca_kabuli_chr04 | 25982968                | AA                              | GG              | 1946804366               |
| SNP_P4_48441_25983045 | NC_021163.1    | Ca_kabuli_chr04 | 25983045                | AA                              | CC              | 1946804368               |
| SNP_P4_48442_25983110 | NC_021163.1    | Ca_kabuli_chr04 | 25983110                | TT                              | AA              | 1946804370               |
| SNP_P4_48443_25983119 | NC_021163.1    | Ca_kabuli_chr04 | 25983119                | CC                              | AA              | 1946804372               |
| SNP_P4_48444_25983139 | NC_021163.1    | Ca_kabuli_chr04 | 25983139                | CC                              | TT              | 1946804374               |
| SNP_P4_48445_25983311 | NC_021163.1    | Ca_kabuli_chr04 | 25983311                | AA                              | GG              | 1946804376               |
| SNP_P4_48446_25983366 | NC_021163.1    | Ca_kabuli_chr04 | 25983366                | TT                              | CC              | 1946804378               |
| SNP_P4_48447_25983525 | NC_021163.1    | Ca_kabuli_chr04 | 25983525                | TT                              | GG              | 1946804380               |
| SNP_P4_48448_25983541 | NC_021163.1    | Ca_kabuli_chr04 | 25983541                | TT                              | GG              | 1946804382               |
| SNP_P4_48449_25983567 | NC_021163.1    | Ca_kabuli_chr04 | 25983567                | TT                              | GG              | 1946804384               |
| SNP_P4_48450_25983581 | NC_021163.1    | Ca_kabuli_chr04 | 25983581                | TT                              | GG              | 1946804386               |
| SNP_P4_48451_25983691 | NC_021163.1    | Ca_kabuli_chr04 | 25983691                | AA                              | GG              | 1946804389               |
| SNP_P4_48452_25983776 | NC_021163.1    | Ca_kabuli_chr04 | 25983776                | TT                              | GG              | 1946804391               |
| SNP_P4_48453_25983787 | NC_021163.1    | Ca_kabuli_chr04 | 25983787                | TT                              | AA              | 1946804393               |
| SNP_P4_48454_25983788 | NC_021163.1    | Ca_kabuli_chr04 | 25983788                | TT                              | AA              | 1946804395               |
| SNP_P4_48455_25983825 | NC_021163.1    | Ca_kabuli_chr04 | 25983825                | CC                              | AA              | 1946804397               |

| SNPs IDs              | Chromosome IDs | Chromosomes     | Physical positions (bp) | CDC Frontier (Reference genome) | (ILWC46 & LPNB) | NCBI SNPdb Accession IDs |
|-----------------------|----------------|-----------------|-------------------------|---------------------------------|-----------------|--------------------------|
| SNP_P4_48456_25983886 | NC_021163.1    | Ca_kabuli_chr04 | 25983886                | AA                              | CC              | 1946804399               |
| SNP_P4_48457_25983911 | NC_021163.1    | Ca_kabuli_chr04 | 25983911                | GG                              | AA              | 1946804401               |
| SNP_P4_48458_25983972 | NC_021163.1    | Ca_kabuli_chr04 | 25983972                | CC                              | TT              | 1946804403               |
| SNP_P4_48459_25983975 | NC_021163.1    | Ca_kabuli_chr04 | 25983975                | CC                              | GG              | 1946804405               |
| SNP_P4_48460_25983978 | NC_021163.1    | Ca_kabuli_chr04 | 25983978                | GG                              | TT              | 1946804407               |
| SNP_P4_48461_25983994 | NC_021163.1    | Ca_kabuli_chr04 | 25983994                | CC                              | AA              | 1946804409               |
| SNP_P4_48462_25984010 | NC_021163.1    | Ca_kabuli_chr04 | 25984010                | AA                              | TT              | 1946804411               |
| SNP_P4_48463_25984012 | NC_021163.1    | Ca_kabuli_chr04 | 25984012                | GG                              | AA              | 1946804412               |
| SNP_P4_48464_25984015 | NC_021163.1    | Ca_kabuli_chr04 | 25984015                | CC                              | AA              | 1946804414               |
| SNP_P4_48465_25984043 | NC_021163.1    | Ca_kabuli_chr04 | 25984043                | TT                              | CC              | 1946804416               |
| SNP_P4_48466_25984118 | NC_021163.1    | Ca_kabuli_chr04 | 25984118                | GG                              | AA              | 1946804418               |
| SNP_P4_48467_25984139 | NC_021163.1    | Ca_kabuli_chr04 | 25984139                | CC                              | TT              | 1946804420               |
| SNP_P4_48468_25984180 | NC_021163.1    | Ca_kabuli_chr04 | 25984180                | TT                              | AA              | 1946804422               |
| SNP_P4_48470_25984211 | NC_021163.1    | Ca_kabuli_chr04 | 25984211                | TT                              | CC              | 1946804424               |
| SNP_P4_48471_25984285 | NC_021163.1    | Ca_kabuli_chr04 | 25984285                | TT                              | AA              | 1946804426               |
| SNP_P4_48472_25984330 | NC_021163.1    | Ca_kabuli_chr04 | 25984330                | GG                              | AA              | 1946804428               |
| SNP_P4_48473_25984368 | NC_021163.1    | Ca_kabuli_chr04 | 25984368                | GG                              | AA              | 1946804431               |
| SNP_P4_48474_25984403 | NC_021163.1    | Ca_kabuli_chr04 | 25984403                | CC                              | TT              | 1946804433               |
| SNP_P4_48476_25984623 | NC_021163.1    | Ca_kabuli_chr04 | 25984623                | AA                              | GG              | 1946804435               |
| SNP_P4_48477_25984647 | NC_021163.1    | Ca_kabuli_chr04 | 25984647                | AA                              | GG              | 1946804437               |
| SNP_P4_48478_25984679 | NC_021163.1    | Ca_kabuli_chr04 | 25984679                | TT                              | GG              | 1946804439               |
| SNP_P4_48479_25984680 | NC_021163.1    | Ca_kabuli_chr04 | 25984680                | CC                              | TT              | 1946804441               |
| SNP_P4_48480_25984785 | NC_021163.1    | Ca_kabuli_chr04 | 25984785                | AA                              | CC              | 1946804443               |
| SNP_P4_48481_25984857 | NC_021163.1    | Ca_kabuli_chr04 | 25984857                | GG                              | AA              | 1946804445               |
| SNP_P4_48482_25984933 | NC_021163.1    | Ca_kabuli_chr04 | 25984933                | CC                              | GG              | 1946804447               |
| SNP_P4_48483_25984965 | NC_021163.1    | Ca_kabuli_chr04 | 25984965                | CC                              | TT              | 1946804449               |
| SNP_P4_48484_25984985 | NC_021163.1    | Ca_kabuli_chr04 | 25984985                | TT                              | CC              | 1946804451               |
| SNP_P4_48485_25985017 | NC_021163.1    | Ca_kabuli_chr04 | 25985017                | GG                              | AA              | 1946804453               |
| SNP_P4_48486_25985099 | NC_021163.1    | Ca_kabuli_chr04 | 25985099                | TT                              | GG              | 1946804455               |
| SNP_P4_48487_25985120 | NC_021163.1    | Ca_kabuli_chr04 | 25985120                | CC                              | AA              | 1946804457               |
| SNP_P4_48488_25985217 | NC_021163.1    | Ca_kabuli_chr04 | 25985217                | GG                              | AA              | 1946804459               |
| SNP_P4_48489_25985231 | NC_021163.1    | Ca_kabuli_chr04 | 25985231                | TT                              | CC              | 1946804461               |
| SNP_P4_48490_25985465 | NC_021163.1    | Ca_kabuli_chr04 | 25985465                | TT                              | CC              | 1946804463               |
| SNP_P4_48491_25985469 | NC_021163.1    | Ca_kabuli_chr04 | 25985469                | TT                              | CC              | 1946804465               |
| SNP_P4_48492_25985484 | NC_021163.1    | Ca_kabuli_chr04 | 25985484                | CC                              | GG              | 1946804467               |
| SNP_P4_48493_25985498 | NC_021163.1    | Ca_kabuli_chr04 | 25985498                | CC                              | TT              | 1946804469               |
| SNP_P4_48494_25985500 | NC_021163.1    | Ca_kabuli_chr04 | 25985500                | CC                              | TT              | 1946804471               |
| SNP_P4_48495_25985801 | NC_021163.1    | Ca_kabuli_chr04 | 25985801                | TT                              | CC              | 1946804473               |
| SNP_P4_48496_25985819 | NC_021163.1    | Ca_kabuli_chr04 | 25985819                | AA                              | CC              | 1946804475               |
| SNP_P4_48497_25985871 | NC_021163.1    | Ca_kabuli_chr04 | 25985871                | TT                              | GG              | 1946804477               |
| SNP_P4_48498_25985982 | NC_021163.1    | Ca_kabuli_chr04 | 25985982                | GG                              | AA              | 1946804479               |
| SNP_P4_48499_25986031 | NC_021163.1    | Ca_kabuli_chr04 | 25986031                | TT                              | CC              | 1946804481               |

| SNPs IDs              | Chromosome IDs | Chromosomes     | Physical positions (bp) | CDC Frontier (Reference genome) | (ILWC46 & LPNB) | NCBI SNPdb Accession IDs |
|-----------------------|----------------|-----------------|-------------------------|---------------------------------|-----------------|--------------------------|
| SNP_P4_48500_25986047 | NC_021163.1    | Ca_kabuli_chr04 | 25986047                | CC                              | TT              | 1946804483               |
| SNP_P4_48501_25986063 | NC_021163.1    | Ca_kabuli_chr04 | 25986063                | AA                              | CC              | 1946804485               |
| SNP_P4_48502_25986124 | NC_021163.1    | Ca_kabuli_chr04 | 25986124                | CC                              | AA              | 1946804487               |
| SNP_P4_48503_25986176 | NC_021163.1    | Ca_kabuli_chr04 | 25986176                | TT                              | CC              | 1946804489               |
| SNP_P4_48504_25986382 | NC_021163.1    | Ca_kabuli_chr04 | 25986382                | CC                              | TT              | 1946804491               |
| SNP_P4_48505_25986503 | NC_021163.1    | Ca_kabuli_chr04 | 25986503                | GG                              | CC              | 1946804493               |
| SNP_P4_48506_25986623 | NC_021163.1    | Ca_kabuli_chr04 | 25986623                | GG                              | AA              | 1946804496               |
| SNP_P4_48507_25986658 | NC_021163.1    | Ca_kabuli_chr04 | 25986658                | TT                              | GG              | 1946804498               |
| SNP_P4_48508_25986858 | NC_021163.1    | Ca_kabuli_chr04 | 25986858                | AA                              | GG              | 1946804500               |
| SNP_P4_48509_25986900 | NC_021163.1    | Ca_kabuli_chr04 | 25986900                | TT                              | GG              | 1946804502               |
| SNP_P4_48510_25986904 | NC_021163.1    | Ca_kabuli_chr04 | 25986904                | GG                              | CC              | 1946804504               |
| SNP_P4_48511_25987121 | NC_021163.1    | Ca_kabuli_chr04 | 25987121                | GG                              | AA              | 1946804506               |
| SNP_P4_48513_25987138 | NC_021163.1    | Ca_kabuli_chr04 | 25987138                | TT                              | AA              | 1946804508               |
| SNP_P4_48514_25987151 | NC_021163.1    | Ca_kabuli_chr04 | 25987151                | TT                              | CC              | 1946804510               |
| SNP_P4_48515_25987159 | NC_021163.1    | Ca_kabuli_chr04 | 25987159                | AA                              | TT              | 1946804512               |
| SNP_P4_48516_25987187 | NC_021163.1    | Ca_kabuli_chr04 | 25987187                | TT                              | AA              | 1946804514               |
| SNP_P4_48517_25987285 | NC_021163.1    | Ca_kabuli_chr04 | 25987285                | TT                              | GG              | 1946804516               |
| SNP_P4_48518_25987336 | NC_021163.1    | Ca_kabuli_chr04 | 25987336                | CC                              | TT              | 1946804518               |
| SNP_P4_48519_25987341 | NC_021163.1    | Ca_kabuli_chr04 | 25987341                | GG                              | AA              | 1946804520               |
| SNP_P4_48520_25987513 | NC_021163.1    | Ca_kabuli_chr04 | 25987513                | TT                              | GG              | 1946804522               |
| SNP_P4_48521_25987529 | NC_021163.1    | Ca_kabuli_chr04 | 25987529                | GG                              | AA              | 1946804524               |
| SNP_P4_48522_25987571 | NC_021163.1    | Ca_kabuli_chr04 | 25987571                | GG                              | AA              | 1946804526               |
| SNP_P4_48523_25987575 | NC_021163.1    | Ca_kabuli_chr04 | 25987575                | AA                              | GG              | 1946804528               |
| SNP_P4_48525_25987634 | NC_021163.1    | Ca_kabuli_chr04 | 25987634                | TT                              | CC              | 1946804530               |
| SNP_P4_48526_25987706 | NC_021163.1    | Ca_kabuli_chr04 | 25987706                | AA                              | CC              | 1946804532               |
| SNP_P4_48527_25987773 | NC_021163.1    | Ca_kabuli_chr04 | 25987773                | GG                              | TT              | 1946804534               |
| SNP_P4_48529_25987914 | NC_021163.1    | Ca_kabuli_chr04 | 25987914                | CC                              | TT              | 1946804536               |
| SNP_P4_48530_25987961 | NC_021163.1    | Ca_kabuli_chr04 | 25987961                | TT                              | CC              | 1946804538               |
| SNP_P4_48531_25988031 | NC_021163.1    | Ca_kabuli_chr04 | 25988031                | GG                              | CC              | 1946804541               |
| SNP_P4_48532_25988033 | NC_021163.1    | Ca_kabuli_chr04 | 25988033                | TT                              | AA              | 1946804543               |
| SNP_P4_48534_25989057 | NC_021163.1    | Ca_kabuli_chr04 | 25989057                | CC                              | TT              | 1946804545               |
| SNP_P4_48535_25989121 | NC_021163.1    | Ca_kabuli_chr04 | 25989121                | TT                              | CC              | 1946804547               |
| SNP_P4_48536_25989226 | NC_021163.1    | Ca_kabuli_chr04 | 25989226                | CC                              | TT              | 1946804549               |
| SNP_P4_48537_25989271 | NC_021163.1    | Ca_kabuli_chr04 | 25989271                | CC                              | TT              | 1946804551               |
| SNP_P4_48540_25989354 | NC_021163.1    | Ca_kabuli_chr04 | 25989354                | GG                              | TT              | 1946804553               |
| SNP_P4_48541_25989461 | NC_021163.1    | Ca_kabuli_chr04 | 25989461                | TT                              | CC              | 1946804555               |
| SNP_P4_48542_25989518 | NC_021163.1    | Ca_kabuli_chr04 | 25989518                | AA                              | CC              | 1946804557               |
| SNP_P4_48543_25989602 | NC_021163.1    | Ca_kabuli_chr04 | 25989602                | CC                              | TT              | 1946804559               |
| SNP_P4_48544_25989998 | NC_021163.1    | Ca_kabuli_chr04 | 25989998                | GG                              | AA              | 1946804562               |
| SNP_P4_48545_25990052 | NC_021163.1    | Ca_kabuli_chr04 | 25990052                | CC                              | AA              | 1946804564               |
| SNP_P4_48546_25990055 | NC_021163.1    | Ca_kabuli_chr04 | 25990055                | TT                              | CC              | 1946804566               |
| SNP_P4_48547_25990107 | NC_021163.1    | Ca_kabuli_chr04 | 25990107                | AA                              | GG              | 1946804568               |

| SNPs IDs              | Chromosome IDs | Chromosomes     | Physical positions (bp) | CDC Frontier (Reference genome) | (ILWC46 & LPNB) | NCBI SNPdb Accession IDs |
|-----------------------|----------------|-----------------|-------------------------|---------------------------------|-----------------|--------------------------|
| SNP_P4_48549_25990218 | NC_021163.1    | Ca_kabuli_chr04 | 25990218                | TT                              | AA              | 1946804570               |
| SNP_P4_48550_25990259 | NC_021163.1    | Ca_kabuli_chr04 | 25990259                | AA                              | GG              | 1946804572               |
| SNP_P4_48551_25990267 | NC_021163.1    | Ca_kabuli_chr04 | 25990267                | TT                              | AA              | 1946804574               |
| SNP_P4_48552_25990277 | NC_021163.1    | Ca_kabuli_chr04 | 25990277                | TT                              | GG              | 1946804576               |
| SNP_P4_48553_25990343 | NC_021163.1    | Ca_kabuli_chr04 | 25990343                | CC                              | TT              | 1946804579               |
| SNP_P4_48554_25990353 | NC_021163.1    | Ca_kabuli_chr04 | 25990353                | TT                              | CC              | 1946804581               |
| SNP_P4_48555_25990401 | NC_021163.1    | Ca_kabuli_chr04 | 25990401                | AA                              | TT              | 1946804583               |
| SNP_P4_48556_25990429 | NC_021163.1    | Ca_kabuli_chr04 | 25990429                | GG                              | AA              | 1946804585               |
| SNP_P4_48557_25990450 | NC_021163.1    | Ca_kabuli_chr04 | 25990450                | GG                              | AA              | 1946804587               |
| SNP_P4_48558_25990556 | NC_021163.1    | Ca_kabuli_chr04 | 25990556                | CC                              | TT              | 1946804589               |
| SNP_P4_48559_25990592 | NC_021163.1    | Ca_kabuli_chr04 | 25990592                | AA                              | GG              | 1946804591               |
| SNP_P4_48560_25990670 | NC_021163.1    | Ca_kabuli_chr04 | 25990670                | CC                              | TT              | 1946804593               |
| SNP_P4_48561_25990720 | NC_021163.1    | Ca_kabuli_chr04 | 25990720                | AA                              | GG              | 1946804595               |
| SNP_P4_48562_25990816 | NC_021163.1    | Ca_kabuli_chr04 | 25990816                | CC                              | GG              | 1946804597               |
| SNP_P4_48563_25990827 | NC_021163.1    | Ca_kabuli_chr04 | 25990827                | GG                              | CC              | 1946804599               |
| SNP_P4_48564_25990879 | NC_021163.1    | Ca_kabuli_chr04 | 25990879                | TT                              | GG              | 1946804601               |
| SNP_P4_48565_25991026 | NC_021163.1    | Ca_kabuli_chr04 | 25991026                | AA                              | GG              | 1946804603               |
| SNP_P4_48566_25991032 | NC_021163.1    | Ca_kabuli_chr04 | 25991032                | CC                              | TT              | 1946804605               |
| SNP_P4_48567_25991039 | NC_021163.1    | Ca_kabuli_chr04 | 25991039                | AA                              | GG              | 1946804607               |
| SNP_P4_48568_25991056 | NC_021163.1    | Ca_kabuli_chr04 | 25991056                | GG                              | TT              | 1946804609               |
| SNP_P4_48569_25991375 | NC_021163.1    | Ca_kabuli_chr04 | 25991375                | AA                              | TT              | 1946804611               |
| SNP_P4_48570_25994294 | NC_021163.1    | Ca_kabuli_chr04 | 25994294                | GG                              | AA              | 1946804613               |
| SNP_P4_48571_25994341 | NC_021163.1    | Ca_kabuli_chr04 | 25994341                | GG                              | AA              | 1946804615               |
| SNP_P4_48573_25994468 | NC_021163.1    | Ca_kabuli_chr04 | 25994468                | GG                              | CC              | 1946804617               |
| SNP_P4_48575_25994645 | NC_021163.1    | Ca_kabuli_chr04 | 25994645                | TT                              | CC              | 1946804619               |
| SNP_P4_48576_25994652 | NC_021163.1    | Ca_kabuli_chr04 | 25994652                | CC                              | TT              | 1946804621               |
| SNP_P4_48578_25994789 | NC_021163.1    | Ca_kabuli_chr04 | 25994789                | AA                              | GG              | 1946804623               |
| SNP_P4_48579_25995054 | NC_021163.1    | Ca_kabuli_chr04 | 25995054                | TT                              | AA              | 1946804625               |
| SNP_P4_48581_25995103 | NC_021163.1    | Ca_kabuli_chr04 | 25995103                | CC                              | TT              | 1946804627               |
| SNP_P4_48582_25995382 | NC_021163.1    | Ca_kabuli_chr04 | 25995382                | CC                              | GG              | 1946804630               |
| SNP_P4_48583_25995406 | NC_021163.1    | Ca_kabuli_chr04 | 25995406                | TT                              | CC              | 1946804632               |
| SNP_P4_48584_25995425 | NC_021163.1    | Ca_kabuli_chr04 | 25995425                | GG                              | TT              | 1946804634               |
| SNP_P4_48585_25995457 | NC_021163.1    | Ca_kabuli_chr04 | 25995457                | GG                              | AA              | 1946804636               |
| SNP_P4_48586_25995499 | NC_021163.1    | Ca_kabuli_chr04 | 25995499                | AA                              | GG              | 1946804638               |
| SNP_P4_48587_25995694 | NC_021163.1    | Ca_kabuli_chr04 | 25995694                | TT                              | GG              | 1946804640               |
| SNP_P4_48588_25995698 | NC_021163.1    | Ca_kabuli_chr04 | 25995698                | GG                              | AA              | 1946804643               |
| SNP_P4_48589_25995728 | NC_021163.1    | Ca_kabuli_chr04 | 25995728                | AA                              | GG              | 1946804645               |
| SNP_P4_48590_25995781 | NC_021163.1    | Ca_kabuli_chr04 | 25995781                | CC                              | TT              | 1946804647               |
| SNP_P4_48592_25995843 | NC_021163.1    | Ca_kabuli_chr04 | 25995843                | TT                              | CC              | 1946804649               |
| SNP_P4_48593_25995985 | NC_021163.1    | Ca_kabuli_chr04 | 25995985                | TT                              | AA              | 1946804651               |
| SNP_P4_48594_25995986 | NC_021163.1    | Ca_kabuli_chr04 | 25995986                | TT                              | AA              | 1946804653               |
| SNP_P4_48595_25996071 | NC_021163.1    | Ca_kabuli_chr04 | 25996071                | CC                              | GG              | 1946804655               |

| SNPs IDs              | Chromosome IDs | Chromosomes     | Physical positions (bp) | CDC Frontier (Reference genome) | (ILWC46 & LPNB) | NCBI SNPdb Accession IDs |
|-----------------------|----------------|-----------------|-------------------------|---------------------------------|-----------------|--------------------------|
| SNP_P4_48596_25997705 | NC_021163.1    | Ca_kabuli_chr04 | 25997705                | AA                              | GG              | 1946804658               |
| SNP_P4_48597_25997706 | NC_021163.1    | Ca_kabuli_chr04 | 25997706                | CC                              | TT              | 1946804660               |
| SNP_P4_48598_25997933 | NC_021163.1    | Ca_kabuli_chr04 | 25997933                | AA                              | GG              | 1946804662               |
| SNP_P4_48599_25997970 | NC_021163.1    | Ca_kabuli_chr04 | 25997970                | AA                              | GG              | 1946804664               |
| SNP_P4_48600_25999229 | NC_021163.1    | Ca_kabuli_chr04 | 25999229                | CC                              | GG              | 1946804667               |
| SNP_P4_48601_25999265 | NC_021163.1    | Ca_kabuli_chr04 | 25999265                | TT                              | GG              | 1946804669               |
| SNP_P4_48603_26002212 | NC_021163.1    | Ca_kabuli_chr04 | 26002212                | TT                              | CC              | 1946804671               |
| SNP_P4_48604_26002325 | NC_021163.1    | Ca_kabuli_chr04 | 26002325                | GG                              | TT              | 1946804673               |
| SNP_P4_48605_26002344 | NC_021163.1    | Ca_kabuli_chr04 | 26002344                | GG                              | AA              | 1946804675               |
| SNP_P4_48606_26009438 | NC_021163.1    | Ca_kabuli_chr04 | 26009438                | TT                              | GG              | 1946804677               |
| SNP_P4_48607_26009439 | NC_021163.1    | Ca_kabuli_chr04 | 26009439                | TT                              | GG              | 1946804680               |
| SNP_P4_48609_26010777 | NC_021163.1    | Ca_kabuli_chr04 | 26010777                | CC                              | AA              | 1946804682               |
| SNP_P4_48611_26011681 | NC_021163.1    | Ca_kabuli_chr04 | 26011681                | GG                              | AA              | 1946804684               |
| SNP_P4_48613_26012938 | NC_021163.1    | Ca_kabuli_chr04 | 26012938                | GG                              | AA              | 1946804686               |
| SNP_P4_48614_26013563 | NC_021163.1    | Ca_kabuli_chr04 | 26013563                | TT                              | CC              | 1946804688               |
| SNP_P4_48615_26017985 | NC_021163.1    | Ca_kabuli_chr04 | 26017985                | TT                              | CC              | 1946804691               |
| SNP_P4_48617_26018686 | NC_021163.1    | Ca_kabuli_chr04 | 26018686                | AA                              | CC              | 1946804693               |
| SNP_P4_48618_26018997 | NC_021163.1    | Ca_kabuli_chr04 | 26018997                | CC                              | GG              | 1946804695               |
| SNP_P4_48619_26019082 | NC_021163.1    | Ca_kabuli_chr04 | 26019082                | AA                              | GG              | 1946804697               |
| SNP_P4_48621_26020613 | NC_021163.1    | Ca_kabuli_chr04 | 26020613                | TT                              | CC              | 1946804699               |
| SNP_P4_48622_26021116 | NC_021163.1    | Ca_kabuli_chr04 | 26021116                | TT                              | CC              | 1946804701               |
| SNP_P4_48623_26023493 | NC_021163.1    | Ca_kabuli_chr04 | 26023493                | AA                              | TT              | 1946804704               |
| SNP_P4_48624_26023515 | NC_021163.1    | Ca_kabuli_chr04 | 26023515                | TT                              | GG              | 1946804706               |
| SNP_P4_48625_26025321 | NC_021163.1    | Ca_kabuli_chr04 | 26025321                | CC                              | TT              | 1946804708               |
| SNP_P4_48626_26025635 | NC_021163.1    | Ca_kabuli_chr04 | 26025635                | TT                              | AA              | 1946804710               |
| SNP_P4_48627_26025636 | NC_021163.1    | Ca_kabuli_chr04 | 26025636                | AA                              | TT              | 1946804712               |
| SNP_P4_48628_26029915 | NC_021163.1    | Ca_kabuli_chr04 | 26029915                | AA                              | GG              | 1946804714               |
| SNP_P4_48629_26029973 | NC_021163.1    | Ca_kabuli_chr04 | 26029973                | TT                              | CC              | 1946804716               |
| SNP_P4_48630_26030294 | NC_021163.1    | Ca_kabuli_chr04 | 26030294                | TT                              | CC              | 1946804718               |
| SNP_P4_48631_26030553 | NC_021163.1    | Ca_kabuli_chr04 | 26030553                | GG                              | AA              | 1946804721               |
| SNP_P4_48632_26030578 | NC_021163.1    | Ca_kabuli_chr04 | 26030578                | AA                              | CC              | 1946804723               |
| SNP_P4_48633_26030895 | NC_021163.1    | Ca_kabuli_chr04 | 26030895                | CC                              | AA              | 1946804725               |
| SNP_P4_48634_26030896 | NC_021163.1    | Ca_kabuli_chr04 | 26030896                | AA                              | CC              | 1946804727               |
| SNP_P4_48635_26031225 | NC_021163.1    | Ca_kabuli_chr04 | 26031225                | AA                              | CC              | 1946804729               |
| SNP_P4_48636_26031226 | NC_021163.1    | Ca_kabuli_chr04 | 26031226                | AA                              | GG              | 1946804731               |
| SNP_P4_48637_26031242 | NC_021163.1    | Ca_kabuli_chr04 | 26031242                | AA                              | GG              | 1946804733               |
| SNP_P4_48638_26031250 | NC_021163.1    | Ca_kabuli_chr04 | 26031250                | AA                              | GG              | 1946804735               |
| SNP_P4_48639_26031546 | NC_021163.1    | Ca_kabuli_chr04 | 26031546                | CC                              | AA              | 1946804738               |
| SNP_P4_48640_26031762 | NC_021163.1    | Ca_kabuli_chr04 | 26031762                | AA                              | CC              | 1946804740               |
| SNP_P4_48641_26035078 | NC_021163.1    | Ca_kabuli_chr04 | 26035078                | CC                              | TT              | 1946804742               |
| SNP_P4_48642_26036891 | NC_021163.1    | Ca_kabuli_chr04 | 26036891                | CC                              | TT              | 1946804744               |
| SNP_P4_48643_26037452 | NC_021163.1    | Ca_kabuli_chr04 | 26037452                | TT                              | GG              | 1946804746               |

| SNPs IDs              | Chromosome IDs | Chromosomes     | Physical positions (bp) | CDC Frontier (Reference genome) | (ILWC46 & LPNB) | NCBI SNPdb Accession IDs |
|-----------------------|----------------|-----------------|-------------------------|---------------------------------|-----------------|--------------------------|
| SNP_P4_48644_26052281 | NC_021163.1    | Ca_kabuli_chr04 | 26052281                | CC                              | TT              | 1946804749               |
| SNP_P4_48645_26057971 | NC_021163.1    | Ca_kabuli_chr04 | 26057971                | TT                              | CC              | 1946804751               |
| SNP_P4_48647_26060530 | NC_021163.1    | Ca_kabuli_chr04 | 26060530                | GG                              | AA              | 1946804753               |
| SNP_P4_48648_26062707 | NC_021163.1    | Ca_kabuli_chr04 | 26062707                | GG                              | TT              | 1946804755               |
| SNP_P4_48649_26062710 | NC_021163.1    | Ca_kabuli_chr04 | 26062710                | TT                              | GG              | 1946804757               |
| SNP_P4_48650_26062977 | NC_021163.1    | Ca_kabuli_chr04 | 26062977                | CC                              | TT              | 1946804760               |
| SNP_P4_48651_26065248 | NC_021163.1    | Ca_kabuli_chr04 | 26065248                | TT                              | CC              | 1946804762               |
| SNP_P4_48652_26069323 | NC_021163.1    | Ca_kabuli_chr04 | 26069323                | CC                              | GG              | 1946804764               |
| SNP_P4_48653_26069472 | NC_021163.1    | Ca_kabuli_chr04 | 26069472                | AA                              | TT              | 1946804767               |
| SNP_P4_48654_26070404 | NC_021163.1    | Ca_kabuli_chr04 | 26070404                | GG                              | AA              | 1946804769               |
| SNP_P4_48655_26070405 | NC_021163.1    | Ca_kabuli_chr04 | 26070405                | CC                              | TT              | 1946804772               |
| SNP_P4_48656_26071730 | NC_021163.1    | Ca_kabuli_chr04 | 26071730                | GG                              | AA              | 1946804774               |
| SNP_P4_48658_26072512 | NC_021163.1    | Ca_kabuli_chr04 | 26072512                | AA                              | GG              | 1946804776               |
| SNP_P4_48659_26072542 | NC_021163.1    | Ca_kabuli_chr04 | 26072542                | AA                              | TT              | 1946804778               |
| SNP_P4_48660_26072890 | NC_021163.1    | Ca_kabuli_chr04 | 26072890                | CC                              | AA              | 1946804781               |
| SNP_P4_48661_26072900 | NC_021163.1    | Ca_kabuli_chr04 | 26072900                | GG                              | AA              | 1946804783               |
| SNP_P4_48662_26073631 | NC_021163.1    | Ca_kabuli_chr04 | 26073631                | TT                              | CC              | 1946804785               |
| SNP_P4_48665_26075602 | NC_021163.1    | Ca_kabuli_chr04 | 26075602                | TT                              | AA              | 1946804787               |
| SNP_P4_48666_26075612 | NC_021163.1    | Ca_kabuli_chr04 | 26075612                | TT                              | AA              | 1946804790               |
| SNP_P4_48668_26076223 | NC_021163.1    | Ca_kabuli_chr04 | 26076223                | TT                              | CC              | 1946804792               |
| SNP_P4_48669_26079249 | NC_021163.1    | Ca_kabuli_chr04 | 26079249                | GG                              | TT              | 1946804794               |
| SNP_P4_48670_26080170 | NC_021163.1    | Ca_kabuli_chr04 | 26080170                | GG                              | AA              | 1946804796               |
| SNP_P4_48672_26086949 | NC_021163.1    | Ca_kabuli_chr04 | 26086949                | AA                              | GG              | 1946804798               |
| SNP_P4_48673_26089458 | NC_021163.1    | Ca_kabuli_chr04 | 26089458                | AA                              | GG              | 1946804801               |
| SNP_P4_48674_26100751 | NC_021163.1    | Ca_kabuli_chr04 | 26100751                | AA                              | GG              | 1946804803               |
| SNP_P4_48676_26109618 | NC_021163.1    | Ca_kabuli_chr04 | 26109618                | AA                              | CC              | 1946804806               |
| SNP_P4_48677_26110309 | NC_021163.1    | Ca_kabuli_chr04 | 26110309                | CC                              | TT              | 1946804808               |
| SNP_P4_48680_26111180 | NC_021163.1    | Ca_kabuli_chr04 | 26111180                | TT                              | CC              | 1946804810               |
| SNP_P4_48681_26114038 | NC_021163.1    | Ca_kabuli_chr04 | 26114038                | CC                              | TT              | 1946804812               |
| SNP_P4_48682_26114291 | NC_021163.1    | Ca_kabuli_chr04 | 26114291                | AA                              | GG              | 1946804814               |
| SNP_P4_48683_26114639 | NC_021163.1    | Ca_kabuli_chr04 | 26114639                | GG                              | AA              | 1946804817               |
| SNP_P4_48684_26114645 | NC_021163.1    | Ca_kabuli_chr04 | 26114645                | CC                              | TT              | 1946804819               |
| SNP_P4_48685_26115924 | NC_021163.1    | Ca_kabuli_chr04 | 26115924                | CC                              | TT              | 1946804821               |
| SNP_P4_48686_26115933 | NC_021163.1    | Ca_kabuli_chr04 | 26115933                | AA                              | TT              | 1946804823               |
| SNP_P4_48687_26116962 | NC_021163.1    | Ca_kabuli_chr04 | 26116962                | AA                              | GG              | 1946804825               |
| SNP_P4_48688_26117044 | NC_021163.1    | Ca_kabuli_chr04 | 26117044                | TT                              | CC              | 1946804827               |
| SNP_P4_48689_26117103 | NC_021163.1    | Ca_kabuli_chr04 | 26117103                | GG                              | AA              | 1946804829               |
| SNP_P4_48690_26117500 | NC_021163.1    | Ca_kabuli_chr04 | 26117500                | CC                              | TT              | 1946804831               |
| SNP_P4_48691_26118202 | NC_021163.1    | Ca_kabuli_chr04 | 26118202                | GG                              | CC              | 1946804833               |
| SNP_P4_48692_26118416 | NC_021163.1    | Ca_kabuli_chr04 | 26118416                | CC                              | AA              | 1946804835               |
| SNP_P4_48693_26118503 | NC_021163.1    | Ca_kabuli_chr04 | 26118503                | CC                              | TT              | 1946804838               |
| SNP_P4_48696_26128476 | NC_021163.1    | Ca_kabuli_chr04 | 26128476                | GG                              | TT              | 1946804840               |

| SNPs IDs              | Chromosome IDs | Chromosomes     | Physical positions (bp) | CDC Frontier (Reference genome) | (ILWC46 & LPNB) | NCBI SNPdb Accession IDs |
|-----------------------|----------------|-----------------|-------------------------|---------------------------------|-----------------|--------------------------|
| SNP_P4_48697_26128477 | NC_021163.1    | Ca_kabuli_chr04 | 26128477                | AA                              | TT              | 1946804842               |
| SNP_P4_48698_26128818 | NC_021163.1    | Ca_kabuli_chr04 | 26128818                | TT                              | AA              | 1946804844               |
| SNP_P4_48699_26135385 | NC_021163.1    | Ca_kabuli_chr04 | 26135385                | CC                              | GG              | 1946804846               |
| SNP_P4_48701_26136386 | NC_021163.1    | Ca_kabuli_chr04 | 26136386                | CC                              | TT              | 1946804848               |
| SNP_P4_48702_26136483 | NC_021163.1    | Ca_kabuli_chr04 | 26136483                | CC                              | AA              | 1946804850               |
| SNP_P4_48703_26138705 | NC_021163.1    | Ca_kabuli_chr04 | 26138705                | CC                              | TT              | 1946804853               |
| SNP_P4_48704_26138756 | NC_021163.1    | Ca_kabuli_chr04 | 26138756                | GG                              | AA              | 1946804855               |
| SNP_P4_48705_26138773 | NC_021163.1    | Ca_kabuli_chr04 | 26138773                | CC                              | AA              | 1946804857               |
| SNP_P4_48706_26139667 | NC_021163.1    | Ca_kabuli_chr04 | 26139667                | TT                              | GG              | 1946804859               |
| SNP_P4_48708_26140585 | NC_021163.1    | Ca_kabuli_chr04 | 26140585                | GG                              | TT              | 1946804861               |
| SNP_P4_48709_26144199 | NC_021163.1    | Ca_kabuli_chr04 | 26144199                | TT                              | GG              | 1946804863               |
| SNP_P4_48710_26144568 | NC_021163.1    | Ca_kabuli_chr04 | 26144568                | AA                              | GG              | 1946804865               |
| SNP_P4_48711_26154733 | NC_021163.1    | Ca_kabuli_chr04 | 26154733                | AA                              | GG              | 1946804868               |
| SNP_P4_48712_26161480 | NC_021163.1    | Ca_kabuli_chr04 | 26161480                | TT                              | CC              | 1946804870               |
| SNP_P4_48713_26164614 | NC_021163.1    | Ca_kabuli_chr04 | 26164614                | CC                              | TT              | 1946804872               |
| SNP_P4_48715_26171026 | NC_021163.1    | Ca_kabuli_chr04 | 26171026                | AA                              | TT              | 1946804875               |
| SNP_P4_48716_26171768 | NC_021163.1    | Ca_kabuli_chr04 | 26171768                | GG                              | AA              | 1946804877               |
| SNP_P4_48717_26172504 | NC_021163.1    | Ca_kabuli_chr04 | 26172504                | AA                              | GG              | 1946804879               |
| SNP_P4_48719_26174176 | NC_021163.1    | Ca_kabuli_chr04 | 26174176                | AA                              | GG              | 1946804881               |
| SNP_P4_48720_26175976 | NC_021163.1    | Ca_kabuli_chr04 | 26175976                | CC                              | TT              | 1946804883               |
| SNP_P4_48721_26176412 | NC_021163.1    | Ca_kabuli_chr04 | 26176412                | CC                              | TT              | 1946804885               |
| SNP_P4_48722_26186139 | NC_021163.1    | Ca_kabuli_chr04 | 26186139                | GG                              | AA              | 1946804887               |
| SNP_P4_48723_26186515 | NC_021163.1    | Ca_kabuli_chr04 | 26186515                | GG                              | AA              | 1946804889               |
| SNP_P4_48724_26186760 | NC_021163.1    | Ca_kabuli_chr04 | 26186760                | GG                              | AA              | 1946804891               |
| SNP_P4_48725_26187146 | NC_021163.1    | Ca_kabuli_chr04 | 26187146                | TT                              | CC              | 1946804893               |
| SNP_P4_48726_26187400 | NC_021163.1    | Ca_kabuli_chr04 | 26187400                | TT                              | GG              | 1946804895               |
| SNP_P4_48727_26187810 | NC_021163.1    | Ca_kabuli_chr04 | 26187810                | CC                              | TT              | 1946804898               |
| SNP_P4_48728_26187882 | NC_021163.1    | Ca_kabuli_chr04 | 26187882                | AA                              | GG              | 1946804900               |
| SNP_P4_48729_26188463 | NC_021163.1    | Ca_kabuli_chr04 | 26188463                | AA                              | CC              | 1946804902               |
| SNP_P4_48730_26189103 | NC_021163.1    | Ca_kabuli_chr04 | 26189103                | AA                              | TT              | 1946804904               |
| SNP_P4_48731_26193940 | NC_021163.1    | Ca_kabuli_chr04 | 26193940                | AA                              | CC              | 1946804906               |
| SNP_P4_48732_26194838 | NC_021163.1    | Ca_kabuli_chr04 | 26194838                | CC                              | TT              | 1946804908               |
| SNP_P4_48733_26194892 | NC_021163.1    | Ca_kabuli_chr04 | 26194892                | AA                              | GG              | 1946804910               |
| SNP_P4_48734_26195194 | NC_021163.1    | Ca_kabuli_chr04 | 26195194                | GG                              | AA              | 1946804912               |
| SNP_P4_48735_26195852 | NC_021163.1    | Ca_kabuli_chr04 | 26195852                | AA                              | CC              | 1946804914               |
| SNP_P4_48736_26199445 | NC_021163.1    | Ca_kabuli_chr04 | 26199445                | CC                              | TT              | 1946804916               |
| SNP_P4_48738_26200017 | NC_021163.1    | Ca_kabuli_chr04 | 26200017                | GG                              | TT              | 1946804918               |
| SNP_P4_48739_26200028 | NC_021163.1    | Ca_kabuli_chr04 | 26200028                | GG                              | TT              | 1946804920               |
| SNP_P4_48740_26200029 | NC_021163.1    | Ca_kabuli_chr04 | 26200029                | CC                              | TT              | 1946804922               |
| SNP_P4_48741_26200062 | NC_021163.1    | Ca_kabuli_chr04 | 26200062                | TT                              | CC              | 1946804925               |
| SNP_P4_48742_26200121 | NC_021163.1    | Ca_kabuli_chr04 | 26200121                | AA                              | GG              | 1946804927               |
| SNP_P4_48743_26203300 | NC_021163.1    | Ca_kabuli_chr04 | 26203300                | TT                              | CC              | 1946804929               |

| SNPs IDs              | Chromosome IDs | Chromosomes     | Physical positions (bp) | CDC Frontier (Reference genome) | (ILWC46 & LPNB) | NCBI SNPdb Accession IDs |
|-----------------------|----------------|-----------------|-------------------------|---------------------------------|-----------------|--------------------------|
| SNP_P4_48745_26206056 | NC_021163.1    | Ca_kabuli_chr04 | 26206056                | GG                              | AA              | 1946804931               |
| SNP_P4_48746_26209095 | NC_021163.1    | Ca_kabuli_chr04 | 26209095                | TT                              | CC              | 1946804933               |
| SNP_P4_48747_26209113 | NC_021163.1    | Ca_kabuli_chr04 | 26209113                | AA                              | TT              | 1946804935               |
| SNP_P4_48748_26209177 | NC_021163.1    | Ca_kabuli_chr04 | 26209177                | CC                              | TT              | 1946804938               |
| SNP_P4_48749_26209193 | NC_021163.1    | Ca_kabuli_chr04 | 26209193                | TT                              | CC              | 1946804940               |
| SNP_P4_48750_26214210 | NC_021163.1    | Ca_kabuli_chr04 | 26214210                | TT                              | CC              | 1946804942               |
| SNP_P4_48751_26214280 | NC_021163.1    | Ca_kabuli_chr04 | 26214280                | GG                              | CC              | 1946804944               |
| SNP_P4_48752_26214631 | NC_021163.1    | Ca_kabuli_chr04 | 26214631                | GG                              | AA              | 1946804946               |
| SNP_P4_48753_26216921 | NC_021163.1    | Ca_kabuli_chr04 | 26216921                | GG                              | AA              | 1946804949               |
| SNP_P4_48754_26223242 | NC_021163.1    | Ca_kabuli_chr04 | 26223242                | GG                              | AA              | 1946804951               |
| SNP_P4_48755_26223911 | NC_021163.1    | Ca_kabuli_chr04 | 26223911                | CC                              | AA              | 1946804953               |
| SNP_P4_48756_26223914 | NC_021163.1    | Ca_kabuli_chr04 | 26223914                | GG                              | TT              | 1946804955               |
| SNP_P4_48757_26223927 | NC_021163.1    | Ca_kabuli_chr04 | 26223927                | TT                              | CC              | 1946804957               |
| SNP_P4_48758_26223941 | NC_021163.1    | Ca_kabuli_chr04 | 26223941                | TT                              | CC              | 1946804959               |
| SNP_P4_48759_26223958 | NC_021163.1    | Ca_kabuli_chr04 | 26223958                | CC                              | TT              | 1946804962               |
| SNP_P4_48760_26232917 | NC_021163.1    | Ca_kabuli_chr04 | 26232917                | CC                              | TT              | 1946804964               |
| SNP_P4_48761_26234181 | NC_021163.1    | Ca_kabuli_chr04 | 26234181                | GG                              | AA              | 1946804966               |
| SNP_P4_48763_26239324 | NC_021163.1    | Ca_kabuli_chr04 | 26239324                | AA                              | CC              | 1946804969               |
| SNP_P4_48764_26241402 | NC_021163.1    | Ca_kabuli_chr04 | 26241402                | TT                              | GG              | 1946804971               |
| SNP_P4_48765_26243097 | NC_021163.1    | Ca_kabuli_chr04 | 26243097                | GG                              | CC              | 1946804973               |
| SNP_P4_48766_26243357 | NC_021163.1    | Ca_kabuli_chr04 | 26243357                | AA                              | GG              | 1946804975               |
| SNP_P4_48767_26243390 | NC_021163.1    | Ca_kabuli_chr04 | 26243390                | TT                              | CC              | 1946804977               |
| SNP_P4_48768_26245170 | NC_021163.1    | Ca_kabuli_chr04 | 26245170                | AA                              | GG              | 1946804980               |
| SNP_P4_48769_26250193 | NC_021163.1    | Ca_kabuli_chr04 | 26250193                | TT                              | CC              | 1946804982               |
| SNP_P4_48770_26257186 | NC_021163.1    | Ca_kabuli_chr04 | 26257186                | TT                              | AA              | 1946804985               |
| SNP_P4_48771_26257699 | NC_021163.1    | Ca_kabuli_chr04 | 26257699                | TT                              | CC              | 1946804987               |
| SNP_P4_48772_26258985 | NC_021163.1    | Ca_kabuli_chr04 | 26258985                | AA                              | GG              | 1946804989               |
| SNP_P4_48773_26259001 | NC_021163.1    | Ca_kabuli_chr04 | 26259001                | AA                              | GG              | 1946804991               |
| SNP_P4_48775_26259138 | NC_021163.1    | Ca_kabuli_chr04 | 26259138                | AA                              | GG              | 1946804993               |
| SNP_P4_48776_26259497 | NC_021163.1    | Ca_kabuli_chr04 | 26259497                | AA                              | CC              | 1946804995               |
| SNP_P4_48777_26259787 | NC_021163.1    | Ca_kabuli_chr04 | 26259787                | CC                              | AA              | 1946804997               |
| SNP_P4_48778_26261398 | NC_021163.1    | Ca_kabuli_chr04 | 26261398                | GG                              | CC              | 1946804999               |
| SNP_P4_48779_26262780 | NC_021163.1    | Ca_kabuli_chr04 | 26262780                | GG                              | TT              | 1946805001               |
| SNP_P4_48780_26262925 | NC_021163.1    | Ca_kabuli_chr04 | 26262925                | AA                              | GG              | 1946805003               |
| SNP_P4_48781_26263313 | NC_021163.1    | Ca_kabuli_chr04 | 26263313                | AA                              | GG              | 1946805005               |
| SNP_P4_48782_26263444 | NC_021163.1    | Ca_kabuli_chr04 | 26263444                | TT                              | CC              | 1946805007               |
| SNP_P4_48783_26263447 | NC_021163.1    | Ca_kabuli_chr04 | 26263447                | TT                              | CC              | 1946805010               |
| SNP_P4_48784_26263528 | NC_021163.1    | Ca_kabuli_chr04 | 26263528                | TT                              | CC              | 1946805012               |
| SNP_P4_48785_26263560 | NC_021163.1    | Ca_kabuli_chr04 | 26263560                | AA                              | GG              | 1946805014               |
| SNP_P4_48786_26263628 | NC_021163.1    | Ca_kabuli_chr04 | 26263628                | AA                              | GG              | 1946805016               |
| SNP_P4_48787_26264183 | NC_021163.1    | Ca_kabuli_chr04 | 26264183                | GG                              | AA              | 1946805018               |
| SNP_P4_48788_26264534 | NC_021163.1    | Ca_kabuli_chr04 | 26264534                | AA                              | TT              | 1946805020               |



| SNPs IDs              | Chromosome IDs | Chromosomes     | Physical positions (bp) | CDC Frontier (Reference genome) | (ILWC46 & LPNB) | NCBI SNPdb Accession IDs |
|-----------------------|----------------|-----------------|-------------------------|---------------------------------|-----------------|--------------------------|
| SNP_P4_48789_26283849 | NC_021163.1    | Ca_kabuli_chr04 | 26283849                | AA                              | TT              | 1946805023               |
| SNP_P4_48790_26289764 | NC_021163.1    | Ca_kabuli_chr04 | 26289764                | CC                              | TT              | 1946805025               |
| SNP_P4_48791_26294865 | NC_021163.1    | Ca_kabuli_chr04 | 26294865                | TT                              | CC              | 1946805027               |
| SNP_P4_48792_26295027 | NC_021163.1    | Ca_kabuli_chr04 | 26295027                | AA                              | TT              | 1946805030               |
| SNP_P4_48793_26295399 | NC_021163.1    | Ca_kabuli_chr04 | 26295399                | TT                              | CC              | 1946805032               |
| SNP_P4_48794_26295404 | NC_021163.1    | Ca_kabuli_chr04 | 26295404                | CC                              | AA              | 1946805034               |
| SNP_P4_48795_26301694 | NC_021163.1    | Ca_kabuli_chr04 | 26301694                | CC                              | TT              | 1946805036               |
| SNP_P4_48797_26304024 | NC_021163.1    | Ca_kabuli_chr04 | 26304024                | AA                              | TT              | 1946805039               |
| SNP_P4_48798_26305192 | NC_021163.1    | Ca_kabuli_chr04 | 26305192                | AA                              | GG              | 1946805041               |
| SNP_P4_48799_26306713 | NC_021163.1    | Ca_kabuli_chr04 | 26306713                | AA                              | CC              | 1946805043               |
| SNP_P4_48800_26307169 | NC_021163.1    | Ca_kabuli_chr04 | 26307169                | TT                              | CC              | 1946805045               |
| SNP_P4_48801_26307236 | NC_021163.1    | Ca_kabuli_chr04 | 26307236                | CC                              | TT              | 1946805047               |
| SNP_P4_48802_26307461 | NC_021163.1    | Ca_kabuli_chr04 | 26307461                | TT                              | CC              | 1946805049               |
| SNP_P4_48803_26307465 | NC_021163.1    | Ca_kabuli_chr04 | 26307465                | GG                              | CC              | 1946805051               |
| SNP_P4_48804_26307468 | NC_021163.1    | Ca_kabuli_chr04 | 26307468                | AA                              | GG              | 1946805053               |
| SNP_P4_48805_26307478 | NC_021163.1    | Ca_kabuli_chr04 | 26307478                | GG                              | AA              | 1946805055               |
| SNP_P4_48806_26307486 | NC_021163.1    | Ca_kabuli_chr04 | 26307486                | TT                              | GG              | 1946805057               |
| SNP_P4_48807_26307493 | NC_021163.1    | Ca_kabuli_chr04 | 26307493                | TT                              | CC              | 1946805059               |
| SNP_P4_48808_26307508 | NC_021163.1    | Ca_kabuli_chr04 | 26307508                | CC                              | TT              | 1946805061               |
| SNP_P4_48811_26314640 | NC_021163.1    | Ca_kabuli_chr04 | 26314640                | GG                              | AA              | 1946805063               |
| SNP_P4_48815_26329591 | NC_021163.1    | Ca_kabuli_chr04 | 26329591                | GG                              | AA              | 1946805065               |
| SNP_P4_48816_26330198 | NC_021163.1    | Ca_kabuli_chr04 | 26330198                | TT                              | GG              | 1946805067               |
| SNP_P4_48817_26331172 | NC_021163.1    | Ca_kabuli_chr04 | 26331172                | TT                              | CC              | 1946805069               |
| SNP_P4_48818_26332862 | NC_021163.1    | Ca_kabuli_chr04 | 26332862                | TT                              | CC              | 1946805071               |
| SNP_P4_48819_26337135 | NC_021163.1    | Ca_kabuli_chr04 | 26337135                | TT                              | GG              | 1946805073               |
| SNP_P4_48820_26337329 | NC_021163.1    | Ca_kabuli_chr04 | 26337329                | CC                              | TT              | 1946805075               |
| SNP_P4_48821_26337360 | NC_021163.1    | Ca_kabuli_chr04 | 26337360                | GG                              | TT              | 1946805077               |
| SNP_P4_48824_26341850 | NC_021163.1    | Ca_kabuli_chr04 | 26341850                | GG                              | AA              | 1946805079               |
| SNP_P4_48825_26343414 | NC_021163.1    | Ca_kabuli_chr04 | 26343414                | GG                              | AA              | 1946805081               |
| SNP_P4_48826_26349990 | NC_021163.1    | Ca_kabuli_chr04 | 26349990                | GG                              | AA              | 1946805083               |
| SNP_P4_48827_26353726 | NC_021163.1    | Ca_kabuli_chr04 | 26353726                | TT                              | CC              | 1946805085               |
| SNP_P4_48828_26355266 | NC_021163.1    | Ca_kabuli_chr04 | 26355266                | GG                              | AA              | 1946805088               |
| SNP_P4_48829_26355466 | NC_021163.1    | Ca_kabuli_chr04 | 26355466                | CC                              | TT              | 1946805090               |
| SNP_P4_48830_26355700 | NC_021163.1    | Ca_kabuli_chr04 | 26355700                | CC                              | TT              | 1946805092               |
| SNP_P4_48834_26365292 | NC_021163.1    | Ca_kabuli_chr04 | 26365292                | AA                              | CC              | 1946805094               |
| SNP_P4_48835_26365302 | NC_021163.1    | Ca_kabuli_chr04 | 26365302                | TT                              | AA              | 1946805096               |
| SNP_P4_48836_26367810 | NC_021163.1    | Ca_kabuli_chr04 | 26367810                | CC                              | TT              | 1946805099               |
| SNP_P4_48837_26370513 | NC_021163.1    | Ca_kabuli_chr04 | 26370513                | TT                              | CC              | 1946805101               |
| SNP_P4_48838_26370753 | NC_021163.1    | Ca_kabuli_chr04 | 26370753                | TT                              | GG              | 1946805103               |
| SNP_P4_48839_26370815 | NC_021163.1    | Ca_kabuli_chr04 | 26370815                | CC                              | TT              | 1946805105               |
| SNP_P4_48840_26370957 | NC_021163.1    | Ca_kabuli_chr04 | 26370957                | AA                              | CC              | 1946805107               |
| SNP_P4_48841_26372844 | NC_021163.1    | Ca_kabuli_chr04 | 26372844                | TT                              | CC              | 1946805109               |

| SNPs IDs              | Chromosome IDs | Chromosomes     | Physical positions (bp) | CDC Frontier (Reference genome) | (ILWC46 & LPNB) | NCBI SNPdb Accession IDs |
|-----------------------|----------------|-----------------|-------------------------|---------------------------------|-----------------|--------------------------|
| SNP_P4_48842_26373171 | NC_021163.1    | Ca_kabuli_chr04 | 26373171                | CC                              | TT              | 1946805111               |
| SNP_P4_48843_26373180 | NC_021163.1    | Ca_kabuli_chr04 | 26373180                | TT                              | GG              | 1946805113               |
| SNP_P4_48844_26379203 | NC_021163.1    | Ca_kabuli_chr04 | 26379203                | TT                              | CC              | 1946805116               |
| SNP_P4_48845_26379377 | NC_021163.1    | Ca_kabuli_chr04 | 26379377                | CC                              | TT              | 1946805118               |
| SNP_P4_48846_26379516 | NC_021163.1    | Ca_kabuli_chr04 | 26379516                | GG                              | AA              | 1946805120               |
| SNP_P4_48847_26379880 | NC_021163.1    | Ca_kabuli_chr04 | 26379880                | CC                              | TT              | 1946805122               |
| SNP_P4_48848_26382408 | NC_021163.1    | Ca_kabuli_chr04 | 26382408                | TT                              | CC              | 1946805124               |
| SNP_P4_48849_26383747 | NC_021163.1    | Ca_kabuli_chr04 | 26383747                | GG                              | AA              | 1946805126               |
| SNP_P4_48850_26384134 | NC_021163.1    | Ca_kabuli_chr04 | 26384134                | TT                              | GG              | 1946805128               |
| SNP_P4_48852_26389703 | NC_021163.1    | Ca_kabuli_chr04 | 26389703                | TT                              | CC              | 1946805130               |
| SNP_P4_48853_26389917 | NC_021163.1    | Ca_kabuli_chr04 | 26389917                | AA                              | GG              | 1946805132               |
| SNP_P4_48854_26394986 | NC_021163.1    | Ca_kabuli_chr04 | 26394986                | GG                              | TT              | 1946805134               |
| SNP_P4_48855_26395086 | NC_021163.1    | Ca_kabuli_chr04 | 26395086                | TT                              | GG              | 1946805136               |
| SNP_P4_48856_26397396 | NC_021163.1    | Ca_kabuli_chr04 | 26397396                | CC                              | TT              | 1946805138               |
| SNP_P4_48857_26397458 | NC_021163.1    | Ca_kabuli_chr04 | 26397458                | TT                              | CC              | 1946805140               |
| SNP_P4_48858_26397500 | NC_021163.1    | Ca_kabuli_chr04 | 26397500                | AA                              | GG              | 1946805142               |
| SNP_P4_48859_26397656 | NC_021163.1    | Ca_kabuli_chr04 | 26397656                | GG                              | AA              | 1946805144               |
| SNP_P4_48860_26397957 | NC_021163.1    | Ca_kabuli_chr04 | 26397957                | CC                              | TT              | 1946805146               |
| SNP_P4_48861_26398296 | NC_021163.1    | Ca_kabuli_chr04 | 26398296                | CC                              | TT              | 1946805148               |
| SNP_P4_48862_26398671 | NC_021163.1    | Ca_kabuli_chr04 | 26398671                | AA                              | GG              | 1946805150               |
| SNP_P4_48864_26399000 | NC_021163.1    | Ca_kabuli_chr04 | 26399000                | CC                              | TT              | 1946805152               |
| SNP_P4_48865_26399442 | NC_021163.1    | Ca_kabuli_chr04 | 26399442                | GG                              | AA              | 1946805154               |
| SNP_P4_48866_26402560 | NC_021163.1    | Ca_kabuli_chr04 | 26402560                | GG                              | CC              | 1946805156               |
| SNP_P4_48867_26405445 | NC_021163.1    | Ca_kabuli_chr04 | 26405445                | AA                              | GG              | 1946805158               |
| SNP_P4_48868_26408593 | NC_021163.1    | Ca_kabuli_chr04 | 26408593                | GG                              | AA              | 1946805160               |
| SNP_P4_48869_26408676 | NC_021163.1    | Ca_kabuli_chr04 | 26408676                | TT                              | CC              | 1946805162               |
| SNP_P4_48870_26409507 | NC_021163.1    | Ca_kabuli_chr04 | 26409507                | AA                              | TT              | 1946805164               |
| SNP_P4_48871_26409749 | NC_021163.1    | Ca_kabuli_chr04 | 26409749                | CC                              | TT              | 1946805166               |
| SNP_P4_48872_26409880 | NC_021163.1    | Ca_kabuli_chr04 | 26409880                | AA                              | GG              | 1946805168               |
| SNP_P4_48873_26410288 | NC_021163.1    | Ca_kabuli_chr04 | 26410288                | AA                              | GG              | 1946805170               |
| SNP_P4_48874_26410990 | NC_021163.1    | Ca_kabuli_chr04 | 26410990                | TT                              | CC              | 1946805172               |
| SNP_P4_48875_26411090 | NC_021163.1    | Ca_kabuli_chr04 | 26411090                | AA                              | TT              | 1946805174               |
| SNP_P4_48876_26411091 | NC_021163.1    | Ca_kabuli_chr04 | 26411091                | GG                              | AA              | 1946805176               |
| SNP_P4_48877_26411141 | NC_021163.1    | Ca_kabuli_chr04 | 26411141                | AA                              | TT              | 1946805178               |
| SNP_P4_48878_26411203 | NC_021163.1    | Ca_kabuli_chr04 | 26411203                | TT                              | CC              | 1946805181               |
| SNP_P4_48880_26411400 | NC_021163.1    | Ca_kabuli_chr04 | 26411400                | GG                              | AA              | 1946805183               |
| SNP_P4_48881_26411481 | NC_021163.1    | Ca_kabuli_chr04 | 26411481                | TT                              | AA              | 1946805185               |
| SNP_P4_48882_26413953 | NC_021163.1    | Ca_kabuli_chr04 | 26413953                | TT                              | AA              | 1946805187               |
| SNP_P4_48884_26419463 | NC_021163.1    | Ca_kabuli_chr04 | 26419463                | TT                              | CC              | 1946805189               |
| SNP_P4_48885_26456459 | NC_021163.1    | Ca_kabuli_chr04 | 26456459                | TT                              | AA              | 1946805191               |
| SNP_P4_48887_26456558 | NC_021163.1    | Ca_kabuli_chr04 | 26456558                | TT                              | AA              | 1946805193               |
| SNP_P4_48888_26456794 | NC_021163.1    | Ca_kabuli_chr04 | 26456794                | AA                              | TT              | 1946805195               |

| SNPs IDs              | Chromosome IDs | Chromosomes     | Physical positions (bp) | CDC Frontier (Reference genome) | (ILWC46 & LPNB) | NCBI SNPdb Accession IDs |
|-----------------------|----------------|-----------------|-------------------------|---------------------------------|-----------------|--------------------------|
| SNP_P4_48889_26458360 | NC_021163.1    | Ca_kabuli_chr04 | 26458360                | CC                              | TT              | 1946805197               |
| SNP_P4_48890_26458366 | NC_021163.1    | Ca_kabuli_chr04 | 26458366                | GG                              | AA              | 1946805200               |
| SNP_P4_48893_26464347 | NC_021163.1    | Ca_kabuli_chr04 | 26464347                | AA                              | GG              | 1946805202               |
| SNP_P4_48894_26464564 | NC_021163.1    | Ca_kabuli_chr04 | 26464564                | CC                              | TT              | 1946805204               |
| SNP_P4_48895_26464566 | NC_021163.1    | Ca_kabuli_chr04 | 26464566                | AA                              | TT              | 1946805206               |
| SNP_P4_48896_26464689 | NC_021163.1    | Ca_kabuli_chr04 | 26464689                | TT                              | CC              | 1946805208               |
| SNP_P4_48897_26466423 | NC_021163.1    | Ca_kabuli_chr04 | 26466423                | GG                              | AA              | 1946805211               |
| SNP_P4_48898_26467402 | NC_021163.1    | Ca_kabuli_chr04 | 26467402                | AA                              | GG              | 1946805213               |
| SNP_P4_48899_26468171 | NC_021163.1    | Ca_kabuli_chr04 | 26468171                | CC                              | TT              | 1946805215               |
| SNP_P4_48900_26469196 | NC_021163.1    | Ca_kabuli_chr04 | 26469196                | TT                              | CC              | 1946805217               |
| SNP_P4_48901_26480909 | NC_021163.1    | Ca_kabuli_chr04 | 26480909                | AA                              | GG              | 1946805219               |
| SNP_P4_48902_26481228 | NC_021163.1    | Ca_kabuli_chr04 | 26481228                | TT                              | CC              | 1946805221               |
| SNP_P4_48904_26483830 | NC_021163.1    | Ca_kabuli_chr04 | 26483830                | AA                              | TT              | 1946805224               |
| SNP_P4_48905_26487857 | NC_021163.1    | Ca_kabuli_chr04 | 26487857                | GG                              | AA              | 1946805226               |
| SNP_P4_48907_26489185 | NC_021163.1    | Ca_kabuli_chr04 | 26489185                | TT                              | CC              | 1946805228               |
| SNP_P4_48908_26491091 | NC_021163.1    | Ca_kabuli_chr04 | 26491091                | GG                              | AA              | 1946805230               |
| SNP_P4_48910_26492266 | NC_021163.1    | Ca_kabuli_chr04 | 26492266                | GG                              | AA              | 1946805232               |
| SNP_P4_48911_26494319 | NC_021163.1    | Ca_kabuli_chr04 | 26494319                | AA                              | GG              | 1946805234               |
| SNP_P4_48912_26494387 | NC_021163.1    | Ca_kabuli_chr04 | 26494387                | TT                              | CC              | 1946805236               |
| SNP_P4_48913_26495187 | NC_021163.1    | Ca_kabuli_chr04 | 26495187                | TT                              | GG              | 1946805238               |
| SNP_P4_48915_26495644 | NC_021163.1    | Ca_kabuli_chr04 | 26495644                | GG                              | AA              | 1946805240               |
| SNP_P4_48917_26498409 | NC_021163.1    | Ca_kabuli_chr04 | 26498409                | GG                              | AA              | 1946805242               |
| SNP_P4_48918_26506104 | NC_021163.1    | Ca_kabuli_chr04 | 26506104                | CC                              | AA              | 1946805244               |
| SNP_P4_48919_26506994 | NC_021163.1    | Ca_kabuli_chr04 | 26506994                | AA                              | GG              | 1946805246               |
| SNP_P4_48920_26510055 | NC_021163.1    | Ca_kabuli_chr04 | 26510055                | GG                              | TT              | 1946805248               |
| SNP_P4_48921_26513010 | NC_021163.1    | Ca_kabuli_chr04 | 26513010                | TT                              | CC              | 1946805250               |
| SNP_P4_48922_26514427 | NC_021163.1    | Ca_kabuli_chr04 | 26514427                | CC                              | TT              | 1946805252               |
| SNP_P4_48924_26514931 | NC_021163.1    | Ca_kabuli_chr04 | 26514931                | TT                              | GG              | 1946805254               |
| SNP_P4_48925_26515104 | NC_021163.1    | Ca_kabuli_chr04 | 26515104                | CC                              | TT              | 1946805256               |
| SNP_P4_48926_26515106 | NC_021163.1    | Ca_kabuli_chr04 | 26515106                | GG                              | AA              | 1946805258               |
| SNP_P4_48927_26515212 | NC_021163.1    | Ca_kabuli_chr04 | 26515212                | AA                              | GG              | 1946805260               |
| SNP_P4_48928_26515322 | NC_021163.1    | Ca_kabuli_chr04 | 26515322                | GG                              | AA              | 1946805262               |
| SNP_P4_48929_26515360 | NC_021163.1    | Ca_kabuli_chr04 | 26515360                | AA                              | GG              | 1946805264               |
| SNP_P4_48930_26517565 | NC_021163.1    | Ca_kabuli_chr04 | 26517565                | CC                              | AA              | 1946805266               |
| SNP_P4_48934_26524849 | NC_021163.1    | Ca_kabuli_chr04 | 26524849                | CC                              | TT              | 1946805268               |
| SNP_P4_48936_26526372 | NC_021163.1    | Ca_kabuli_chr04 | 26526372                | CC                              | TT              | 1946805270               |
| SNP_P4_48937_26526377 | NC_021163.1    | Ca_kabuli_chr04 | 26526377                | AA                              | GG              | 1946805272               |
| SNP_P4_48938_26526641 | NC_021163.1    | Ca_kabuli_chr04 | 26526641                | AA                              | GG              | 1946805274               |
| SNP_P4_48940_26528910 | NC_021163.1    | Ca_kabuli_chr04 | 26528910                | TT                              | CC              | 1946805276               |
| SNP_P4_48942_26533887 | NC_021163.1    | Ca_kabuli_chr04 | 26533887                | AA                              | TT              | 1946805278               |
| SNP_P4_48943_26537258 | NC_021163.1    | Ca_kabuli_chr04 | 26537258                | CC                              | AA              | 1946805280               |
| SNP_P4_48945_26543227 | NC_021163.1    | Ca_kabuli_chr04 | 26543227                | TT                              | CC              | 1946805282               |

| SNPs IDs              | Chromosome IDs | Chromosomes     | Physical positions (bp) | CDC Frontier (Reference genome) | (ILWC46 & LPNB) | NCBI SNPdb Accession IDs |
|-----------------------|----------------|-----------------|-------------------------|---------------------------------|-----------------|--------------------------|
| SNP_P4_48946_26546293 | NC_021163.1    | Ca_kabuli_chr04 | 26546293                | TT                              | CC              | 1946805284               |
| SNP_P4_48947_26546944 | NC_021163.1    | Ca_kabuli_chr04 | 26546944                | GG                              | AA              | 1946805286               |
| SNP_P4_48948_26547027 | NC_021163.1    | Ca_kabuli_chr04 | 26547027                | GG                              | TT              | 1946805288               |
| SNP_P4_48949_26547393 | NC_021163.1    | Ca_kabuli_chr04 | 26547393                | GG                              | TT              | 1946805290               |
| SNP_P4_48951_26551678 | NC_021163.1    | Ca_kabuli_chr04 | 26551678                | AA                              | GG              | 1946805292               |
| SNP_P4_48953_26555539 | NC_021163.1    | Ca_kabuli_chr04 | 26555539                | TT                              | CC              | 1946805294               |
| SNP_P4_48954_26555987 | NC_021163.1    | Ca_kabuli_chr04 | 26555987                | GG                              | CC              | 1946805296               |
| SNP_P4_48955_26556298 | NC_021163.1    | Ca_kabuli_chr04 | 26556298                | TT                              | CC              | 1946805298               |
| SNP_P4_48956_26556502 | NC_021163.1    | Ca_kabuli_chr04 | 26556502                | AA                              | CC              | 1946805301               |
| SNP_P4_48957_26556665 | NC_021163.1    | Ca_kabuli_chr04 | 26556665                | TT                              | CC              | 1946805303               |
| SNP_P4_48958_26584672 | NC_021163.1    | Ca_kabuli_chr04 | 26584672                | AA                              | GG              | 1946805305               |
| SNP_P4_48959_26590142 | NC_021163.1    | Ca_kabuli_chr04 | 26590142                | GG                              | TT              | 1946805307               |
| SNP_P4_48960_26590145 | NC_021163.1    | Ca_kabuli_chr04 | 26590145                | GG                              | AA              | 1946805309               |
| SNP_P4_48961_26591392 | NC_021163.1    | Ca_kabuli_chr04 | 26591392                | CC                              | TT              | 1946805311               |
| SNP_P4_48962_26591509 | NC_021163.1    | Ca_kabuli_chr04 | 26591509                | GG                              | TT              | 1946805313               |
| SNP_P4_48963_26592063 | NC_021163.1    | Ca_kabuli_chr04 | 26592063                | GG                              | AA              | 1946805315               |
| SNP_P4_48964_26596705 | NC_021163.1    | Ca_kabuli_chr04 | 26596705                | CC                              | GG              | 1946805317               |
| SNP_P4_48965_26596988 | NC_021163.1    | Ca_kabuli_chr04 | 26596988                | TT                              | CC              | 1946805319               |
| SNP_P4_48966_26599369 | NC_021163.1    | Ca_kabuli_chr04 | 26599369                | GG                              | AA              | 1946805322               |
| SNP_P4_48967_26600954 | NC_021163.1    | Ca_kabuli_chr04 | 26600954                | TT                              | GG              | 1946805324               |
| SNP_P4_48968_26601672 | NC_021163.1    | Ca_kabuli_chr04 | 26601672                | TT                              | GG              | 1946805326               |
| SNP_P4_48969_26603070 | NC_021163.1    | Ca_kabuli_chr04 | 26603070                | TT                              | GG              | 1946805328               |
| SNP_P4_48970_26603343 | NC_021163.1    | Ca_kabuli_chr04 | 26603343                | GG                              | AA              | 1946805330               |
| SNP_P4_48971_26603367 | NC_021163.1    | Ca_kabuli_chr04 | 26603367                | CC                              | AA              | 1946805332               |
| SNP_P4_48972_26603888 | NC_021163.1    | Ca_kabuli_chr04 | 26603888                | TT                              | CC              | 1946805334               |
| SNP_P4_48973_26606278 | NC_021163.1    | Ca_kabuli_chr04 | 26606278                | TT                              | CC              | 1946805336               |
| SNP_P4_48974_26606722 | NC_021163.1    | Ca_kabuli_chr04 | 26606722                | AA                              | TT              | 1946805338               |
| SNP_P4_48975_26607125 | NC_021163.1    | Ca_kabuli_chr04 | 26607125                | AA                              | GG              | 1946805340               |
| SNP_P4_48976_26608172 | NC_021163.1    | Ca_kabuli_chr04 | 26608172                | GG                              | TT              | 1946805342               |
| SNP_P4_48977_26608249 | NC_021163.1    | Ca_kabuli_chr04 | 26608249                | TT                              | CC              | 1946805344               |
| SNP_P4_48978_26608275 | NC_021163.1    | Ca_kabuli_chr04 | 26608275                | TT                              | CC              | 1946805346               |
| SNP_P4_48979_26608936 | NC_021163.1    | Ca_kabuli_chr04 | 26608936                | GG                              | AA              | 1946805348               |
| SNP_P4_48980_26608958 | NC_021163.1    | Ca_kabuli_chr04 | 26608958                | CC                              | GG              | 1946805350               |
| SNP_P4_48981_26617142 | NC_021163.1    | Ca_kabuli_chr04 | 26617142                | GG                              | AA              | 1946805352               |
| SNP_P4_48982_26619033 | NC_021163.1    | Ca_kabuli_chr04 | 26619033                | TT                              | AA              | 1946805354               |
| SNP_P4_48984_26621376 | NC_021163.1    | Ca_kabuli_chr04 | 26621376                | GG                              | TT              | 1946805356               |
| SNP_P4_48985_26622317 | NC_021163.1    | Ca_kabuli_chr04 | 26622317                | GG                              | AA              | 1946805358               |
| SNP_P4_48987_26623414 | NC_021163.1    | Ca_kabuli_chr04 | 26623414                | GG                              | CC              | 1946805360               |
| SNP_P4_48988_26623556 | NC_021163.1    | Ca_kabuli_chr04 | 26623556                | GG                              | AA              | 1946805362               |
| SNP_P4_48989_26624751 | NC_021163.1    | Ca_kabuli_chr04 | 26624751                | TT                              | GG              | 1946805364               |
| SNP_P4_48990_26634974 | NC_021163.1    | Ca_kabuli_chr04 | 26634974                | CC                              | TT              | 1946805366               |
| SNP_P4_48992_26635781 | NC_021163.1    | Ca_kabuli_chr04 | 26635781                | TT                              | CC              | 1946805368               |

| SNPs IDs              | Chromosome IDs | Chromosomes     | Physical positions (bp) | CDC Frontier (Reference genome) | (ILWC46 & LPNB) | NCBI SNPdb Accession IDs |
|-----------------------|----------------|-----------------|-------------------------|---------------------------------|-----------------|--------------------------|
| SNP_P4_48993_26638061 | NC_021163.1    | Ca_kabuli_chr04 | 26638061                | TT                              | CC              | 1946805370               |
| SNP_P4_48994_26643108 | NC_021163.1    | Ca_kabuli_chr04 | 26643108                | GG                              | AA              | 1946805373               |
| SNP_P4_48996_26647381 | NC_021163.1    | Ca_kabuli_chr04 | 26647381                | CC                              | TT              | 1946805375               |
| SNP_P4_48998_26648326 | NC_021163.1    | Ca_kabuli_chr04 | 26648326                | TT                              | CC              | 1946805377               |
| SNP_P4_48999_26649974 | NC_021163.1    | Ca_kabuli_chr04 | 26649974                | CC                              | TT              | 1946805379               |
| SNP_P4_49000_26650036 | NC_021163.1    | Ca_kabuli_chr04 | 26650036                | TT                              | CC              | 1946805381               |
| SNP_P4_49001_26651146 | NC_021163.1    | Ca_kabuli_chr04 | 26651146                | AA                              | GG              | 1946805383               |
| SNP_P4_49002_26651207 | NC_021163.1    | Ca_kabuli_chr04 | 26651207                | AA                              | GG              | 1946805385               |
| SNP_P4_49003_26652489 | NC_021163.1    | Ca_kabuli_chr04 | 26652489                | AA                              | GG              | 1946805387               |
| SNP_P4_49004_26652586 | NC_021163.1    | Ca_kabuli_chr04 | 26652586                | GG                              | AA              | 1946805389               |
| SNP_P4_49005_26653082 | NC_021163.1    | Ca_kabuli_chr04 | 26653082                | CC                              | AA              | 1946805391               |
| SNP_P4_49006_26654553 | NC_021163.1    | Ca_kabuli_chr04 | 26654553                | TT                              | GG              | 1946805393               |
| SNP_P4_49007_26660195 | NC_021163.1    | Ca_kabuli_chr04 | 26660195                | AA                              | TT              | 1946805395               |
| SNP_P4_49008_26660498 | NC_021163.1    | Ca_kabuli_chr04 | 26660498                | AA                              | GG              | 1946805397               |
| SNP_P4_49009_26660840 | NC_021163.1    | Ca_kabuli_chr04 | 26660840                | CC                              | TT              | 1946805400               |
| SNP_P4_49010_26661299 | NC_021163.1    | Ca_kabuli_chr04 | 26661299                | AA                              | GG              | 1946805402               |
| SNP_P4_49011_26661477 | NC_021163.1    | Ca_kabuli_chr04 | 26661477                | AA                              | GG              | 1946805404               |
| SNP_P4_49012_26662408 | NC_021163.1    | Ca_kabuli_chr04 | 26662408                | TT                              | CC              | 1946805406               |
| SNP_P4_49014_26662752 | NC_021163.1    | Ca_kabuli_chr04 | 26662752                | AA                              | TT              | 1946805408               |
| SNP_P4_49015_26662920 | NC_021163.1    | Ca_kabuli_chr04 | 26662920                | GG                              | AA              | 1946805410               |
| SNP_P4_49016_26663115 | NC_021163.1    | Ca_kabuli_chr04 | 26663115                | GG                              | AA              | 1946805412               |
| SNP_P4_49017_26665913 | NC_021163.1    | Ca_kabuli_chr04 | 26665913                | GG                              | AA              | 1946805414               |
| SNP_P4_49018_26666230 | NC_021163.1    | Ca_kabuli_chr04 | 26666230                | CC                              | GG              | 1946805416               |
| SNP_P4_49019_26666363 | NC_021163.1    | Ca_kabuli_chr04 | 26666363                | CC                              | TT              | 1946805418               |
| SNP_P4_49020_26668191 | NC_021163.1    | Ca_kabuli_chr04 | 26668191                | CC                              | AA              | 1946805420               |
| SNP_P4_49021_26670248 | NC_021163.1    | Ca_kabuli_chr04 | 26670248                | GG                              | AA              | 1946805422               |
| SNP_P4_49022_26670340 | NC_021163.1    | Ca_kabuli_chr04 | 26670340                | CC                              | GG              | 1946805424               |
| SNP_P4_49023_26683838 | NC_021163.1    | Ca_kabuli_chr04 | 26683838                | GG                              | TT              | 1946805426               |
| SNP_P4_49024_26684060 | NC_021163.1    | Ca_kabuli_chr04 | 26684060                | GG                              | AA              | 1946805428               |
| SNP_P4_49026_26720711 | NC_021163.1    | Ca_kabuli_chr04 | 26720711                | AA                              | GG              | 1946805430               |
| SNP_P4_49027_26726282 | NC_021163.1    | Ca_kabuli_chr04 | 26726282                | AA                              | GG              | 1946805432               |
| SNP_P4_49028_26726293 | NC_021163.1    | Ca_kabuli_chr04 | 26726293                | GG                              | AA              | 1946805434               |
| SNP_P4_49030_26726347 | NC_021163.1    | Ca_kabuli_chr04 | 26726347                | AA                              | CC              | 1946805437               |
| SNP_P4_49031_26727805 | NC_021163.1    | Ca_kabuli_chr04 | 26727805                | GG                              | AA              | 1946805439               |
| SNP_P4_49033_26729482 | NC_021163.1    | Ca_kabuli_chr04 | 26729482                | CC                              | TT              | 1946805441               |
| SNP_P4_49034_26731802 | NC_021163.1    | Ca_kabuli_chr04 | 26731802                | TT                              | CC              | 1946805443               |
| SNP_P4_49035_26732863 | NC_021163.1    | Ca_kabuli_chr04 | 26732863                | TT                              | CC              | 1946805445               |
| SNP_P4_49037_26733523 | NC_021163.1    | Ca_kabuli_chr04 | 26733523                | TT                              | CC              | 1946805447               |
| SNP_P4_49038_26733534 | NC_021163.1    | Ca_kabuli_chr04 | 26733534                | TT                              | CC              | 1946805449               |
| SNP_P4_49041_26746221 | NC_021163.1    | Ca_kabuli_chr04 | 26746221                | CC                              | TT              | 1946805451               |
| SNP_P4_49044_26760875 | NC_021163.1    | Ca_kabuli_chr04 | 26760875                | TT                              | CC              | 1946805453               |
| SNP_P4_49045_26764896 | NC_021163.1    | Ca_kabuli_chr04 | 26764896                | AA                              | GG              | 1946805455               |

| SNPs IDs              | Chromosome IDs | Chromosomes     | Physical positions (bp) | CDC Frontier (Reference genome) | (ILWC46 & LPNB) | NCBI SNPdb Accession IDs |
|-----------------------|----------------|-----------------|-------------------------|---------------------------------|-----------------|--------------------------|
| SNP_P4_49046_26766108 | NC_021163.1    | Ca_kabuli_chr04 | 26766108                | AA                              | GG              | 1946805457               |
| SNP_P4_49048_26766430 | NC_021163.1    | Ca_kabuli_chr04 | 26766430                | AA                              | GG              | 1946805459               |
| SNP_P4_49049_26773641 | NC_021163.1    | Ca_kabuli_chr04 | 26773641                | TT                              | CC              | 1946805461               |
| SNP_P4_49051_26775477 | NC_021163.1    | Ca_kabuli_chr04 | 26775477                | CC                              | TT              | 1946805463               |
| SNP_P4_49052_26776588 | NC_021163.1    | Ca_kabuli_chr04 | 26776588                | AA                              | GG              | 1946805465               |
| SNP_P4_49053_26778404 | NC_021163.1    | Ca_kabuli_chr04 | 26778404                | TT                              | AA              | 1946805467               |
| SNP_P4_49056_26779067 | NC_021163.1    | Ca_kabuli_chr04 | 26779067                | AA                              | GG              | 1946805469               |
| SNP_P4_49057_26779532 | NC_021163.1    | Ca_kabuli_chr04 | 26779532                | CC                              | GG              | 1946805471               |
| SNP_P4_49058_26781894 | NC_021163.1    | Ca_kabuli_chr04 | 26781894                | CC                              | TT              | 1946805473               |
| SNP_P4_49059_26789090 | NC_021163.1    | Ca_kabuli_chr04 | 26789090                | AA                              | TT              | 1946805475               |
| SNP_P4_49061_26793896 | NC_021163.1    | Ca_kabuli_chr04 | 26793896                | AA                              | CC              | 1946805477               |
| SNP_P4_49062_26794110 | NC_021163.1    | Ca_kabuli_chr04 | 26794110                | AA                              | CC              | 1946805479               |
| SNP_P4_49063_26797736 | NC_021163.1    | Ca_kabuli_chr04 | 26797736                | TT                              | CC              | 1946805481               |
| SNP_P4_49064_26805605 | NC_021163.1    | Ca_kabuli_chr04 | 26805605                | GG                              | AA              | 1946805483               |
| SNP_P4_49065_26805821 | NC_021163.1    | Ca_kabuli_chr04 | 26805821                | AA                              | GG              | 1946805485               |
| SNP_P4_49066_26807395 | NC_021163.1    | Ca_kabuli_chr04 | 26807395                | AA                              | GG              | 1946805488               |
| SNP_P4_49067_26807851 | NC_021163.1    | Ca_kabuli_chr04 | 26807851                | GG                              | AA              | 1946805490               |
| SNP_P4_49068_26810481 | NC_021163.1    | Ca_kabuli_chr04 | 26810481                | TT                              | CC              | 1946805492               |
| SNP_P4_49069_26810599 | NC_021163.1    | Ca_kabuli_chr04 | 26810599                | GG                              | TT              | 1946805494               |
| SNP_P4_49070_26810674 | NC_021163.1    | Ca_kabuli_chr04 | 26810674                | AA                              | CC              | 1946805496               |
| SNP_P4_49071_26810680 | NC_021163.1    | Ca_kabuli_chr04 | 26810680                | CC                              | TT              | 1946805498               |
| SNP_P4_49072_26810689 | NC_021163.1    | Ca_kabuli_chr04 | 26810689                | TT                              | CC              | 1946805500               |
| SNP_P4_49073_26810737 | NC_021163.1    | Ca_kabuli_chr04 | 26810737                | CC                              | TT              | 1946805502               |
| SNP_P4_49074_26810749 | NC_021163.1    | Ca_kabuli_chr04 | 26810749                | GG                              | AA              | 1946805504               |
| SNP_P4_49075_26810862 | NC_021163.1    | Ca_kabuli_chr04 | 26810862                | CC                              | TT              | 1946805506               |
| SNP_P4_49076_26814835 | NC_021163.1    | Ca_kabuli_chr04 | 26814835                | GG                              | AA              | 1946805509               |
| SNP_P4_49077_26818111 | NC_021163.1    | Ca_kabuli_chr04 | 26818111                | AA                              | TT              | 1946805511               |
| SNP_P4_49078_26818112 | NC_021163.1    | Ca_kabuli_chr04 | 26818112                | TT                              | CC              | 1946805513               |
| SNP_P4_49079_26819643 | NC_021163.1    | Ca_kabuli_chr04 | 26819643                | TT                              | AA              | 1946805515               |
| SNP_P4_49080_26821666 | NC_021163.1    | Ca_kabuli_chr04 | 26821666                | AA                              | TT              | 1946805517               |
| SNP_P4_49081_26821667 | NC_021163.1    | Ca_kabuli_chr04 | 26821667                | CC                              | AA              | 1946805519               |
| SNP_P4_49082_26822516 | NC_021163.1    | Ca_kabuli_chr04 | 26822516                | GG                              | AA              | 1946805521               |
| SNP_P4_49083_26827058 | NC_021163.1    | Ca_kabuli_chr04 | 26827058                | CC                              | TT              | 1946805523               |
| SNP_P4_49084_26827284 | NC_021163.1    | Ca_kabuli_chr04 | 26827284                | TT                              | CC              | 1946805525               |
| SNP_P4_49085_26828921 | NC_021163.1    | Ca_kabuli_chr04 | 26828921                | GG                              | AA              | 1946805527               |
| SNP_P4_49086_26828931 | NC_021163.1    | Ca_kabuli_chr04 | 26828931                | GG                              | CC              | 1946805529               |
| SNP_P4_49087_26831657 | NC_021163.1    | Ca_kabuli_chr04 | 26831657                | TT                              | CC              | 1946805531               |
| SNP_P4_49088_26833829 | NC_021163.1    | Ca_kabuli_chr04 | 26833829                | CC                              | TT              | 1946805533               |
| SNP_P4_49089_26838861 | NC_021163.1    | Ca_kabuli_chr04 | 26838861                | CC                              | TT              | 1946805535               |
| SNP_P4_49090_26840399 | NC_021163.1    | Ca_kabuli_chr04 | 26840399                | GG                              | AA              | 1946805537               |
| SNP_P4_49091_26840451 | NC_021163.1    | Ca_kabuli_chr04 | 26840451                | AA                              | CC              | 1946805540               |
| SNP_P4_49093_26842935 | NC_021163.1    | Ca_kabuli_chr04 | 26842935                | GG                              | CC              | 1946805542               |

| SNPs IDs              | Chromosome IDs | Chromosomes     | Physical positions (bp) | CDC Frontier (Reference genome) | (ILWC46 & LPNB) | NCBI SNPdb Accession IDs |
|-----------------------|----------------|-----------------|-------------------------|---------------------------------|-----------------|--------------------------|
| SNP_P4_49094_26843399 | NC_021163.1    | Ca_kabuli_chr04 | 26843399                | TT                              | AA              | 1946805544               |
| SNP_P4_49095_26843421 | NC_021163.1    | Ca_kabuli_chr04 | 26843421                | AA                              | CC              | 1946805546               |
| SNP_P4_49096_26843783 | NC_021163.1    | Ca_kabuli_chr04 | 26843783                | AA                              | GG              | 1946805548               |
| SNP_P4_49097_26844954 | NC_021163.1    | Ca_kabuli_chr04 | 26844954                | TT                              | CC              | 1946805550               |
| SNP_P4_49098_26844968 | NC_021163.1    | Ca_kabuli_chr04 | 26844968                | TT                              | CC              | 1946805552               |
| SNP_P4_49099_26845170 | NC_021163.1    | Ca_kabuli_chr04 | 26845170                | GG                              | TT              | 1946805554               |
| SNP_P4_49100_26845267 | NC_021163.1    | Ca_kabuli_chr04 | 26845267                | AA                              | CC              | 1946805556               |
| SNP_P4_49102_26847187 | NC_021163.1    | Ca_kabuli_chr04 | 26847187                | AA                              | GG              | 1946805558               |
| SNP_P4_49103_26847344 | NC_021163.1    | Ca_kabuli_chr04 | 26847344                | CC                              | TT              | 1946805560               |
| SNP_P4_49104_26847401 | NC_021163.1    | Ca_kabuli_chr04 | 26847401                | TT                              | CC              | 1946805562               |
| SNP_P4_49105_26847454 | NC_021163.1    | Ca_kabuli_chr04 | 26847454                | AA                              | GG              | 1946805564               |
| SNP_P4_49106_26847461 | NC_021163.1    | Ca_kabuli_chr04 | 26847461                | GG                              | TT              | 1946805566               |
| SNP_P4_49107_26847470 | NC_021163.1    | Ca_kabuli_chr04 | 26847470                | TT                              | CC              | 1946805568               |
| SNP_P4_49109_26850093 | NC_021163.1    | Ca_kabuli_chr04 | 26850093                | TT                              | CC              | 1946805570               |
| SNP_P4_49110_26850227 | NC_021163.1    | Ca_kabuli_chr04 | 26850227                | TT                              | CC              | 1946805573               |
| SNP_P4_49111_26850562 | NC_021163.1    | Ca_kabuli_chr04 | 26850562                | GG                              | AA              | 1946805575               |
| SNP_P4_49113_26850731 | NC_021163.1    | Ca_kabuli_chr04 | 26850731                | TT                              | CC              | 1946805577               |
| SNP_P4_49114_26851097 | NC_021163.1    | Ca_kabuli_chr04 | 26851097                | AA                              | CC              | 1946805579               |
| SNP_P4_49115_26857868 | NC_021163.1    | Ca_kabuli_chr04 | 26857868                | CC                              | TT              | 1946805581               |
| SNP_P4_49116_26858372 | NC_021163.1    | Ca_kabuli_chr04 | 26858372                | AA                              | GG              | 1946805583               |
| SNP_P4_49117_26899256 | NC_021163.1    | Ca_kabuli_chr04 | 26899256                | AA                              | CC              | 1946805585               |
| SNP_P4_49118_26900443 | NC_021163.1    | Ca_kabuli_chr04 | 26900443                | TT                              | CC              | 1946805587               |
| SNP_P4_49121_26902778 | NC_021163.1    | Ca_kabuli_chr04 | 26902778                | TT                              | GG              | 1946805589               |
| SNP_P4_49122_26902794 | NC_021163.1    | Ca_kabuli_chr04 | 26902794                | TT                              | CC              | 1946805591               |
| SNP_P4_49123_26902814 | NC_021163.1    | Ca_kabuli_chr04 | 26902814                | AA                              | CC              | 1946805593               |
| SNP_P4_49124_26903017 | NC_021163.1    | Ca_kabuli_chr04 | 26903017                | AA                              | GG              | 1946805596               |
| SNP_P4_49125_26903245 | NC_021163.1    | Ca_kabuli_chr04 | 26903245                | AA                              | GG              | 1946805598               |
| SNP_P4_49126_26903279 | NC_021163.1    | Ca_kabuli_chr04 | 26903279                | AA                              | CC              | 1946805600               |
| SNP_P4_49128_26915837 | NC_021163.1    | Ca_kabuli_chr04 | 26915837                | CC                              | TT              | 1946805602               |
| SNP_P4_49129_26915893 | NC_021163.1    | Ca_kabuli_chr04 | 26915893                | AA                              | CC              | 1946805604               |
| SNP_P4_49130_26916177 | NC_021163.1    | Ca_kabuli_chr04 | 26916177                | TT                              | CC              | 1946805606               |
| SNP_P4_49131_26917108 | NC_021163.1    | Ca_kabuli_chr04 | 26917108                | AA                              | TT              | 1946805608               |
| SNP_P4_49132_26918433 | NC_021163.1    | Ca_kabuli_chr04 | 26918433                | TT                              | CC              | 1946805610               |
| SNP_P4_49133_26918831 | NC_021163.1    | Ca_kabuli_chr04 | 26918831                | TT                              | CC              | 1946805612               |
| SNP_P4_49134_26919498 | NC_021163.1    | Ca_kabuli_chr04 | 26919498                | GG                              | CC              | 1946805614               |
| SNP_P4_49135_26930194 | NC_021163.1    | Ca_kabuli_chr04 | 26930194                | AA                              | GG              | 1946805617               |
| SNP_P4_49136_26935703 | NC_021163.1    | Ca_kabuli_chr04 | 26935703                | AA                              | GG              | 1946805619               |
| SNP_P4_49137_26936463 | NC_021163.1    | Ca_kabuli_chr04 | 26936463                | TT                              | CC              | 1946805622               |
| SNP_P4_49138_26936495 | NC_021163.1    | Ca_kabuli_chr04 | 26936495                | AA                              | TT              | 1946805624               |
| SNP_P4_49139_26936497 | NC_021163.1    | Ca_kabuli_chr04 | 26936497                | AA                              | GG              | 1946805627               |
| SNP_P4_49140_26936524 | NC_021163.1    | Ca_kabuli_chr04 | 26936524                | CC                              | TT              | 1946805629               |
| SNP_P4_49141_26936554 | NC_021163.1    | Ca_kabuli_chr04 | 26936554                | GG                              | AA              | 1946805631               |

| SNPs IDs              | Chromosome IDs | Chromosomes     | Physical positions (bp) | CDC Frontier (Reference genome) | (ILWC46 & LPNB) | NCBI SNPdb Accession IDs |
|-----------------------|----------------|-----------------|-------------------------|---------------------------------|-----------------|--------------------------|
| SNP_P4_49142_26936771 | NC_021163.1    | Ca_kabuli_chr04 | 26936771                | GG                              | AA              | 1946805633               |
| SNP_P4_49143_26936787 | NC_021163.1    | Ca_kabuli_chr04 | 26936787                | TT                              | GG              | 1946805635               |
| SNP_P4_49145_26936951 | NC_021163.1    | Ca_kabuli_chr04 | 26936951                | AA                              | GG              | 1946805638               |
| SNP_P4_49146_26936954 | NC_021163.1    | Ca_kabuli_chr04 | 26936954                | TT                              | AA              | 1946805640               |
| SNP_P4_49147_26936964 | NC_021163.1    | Ca_kabuli_chr04 | 26936964                | TT                              | AA              | 1946805642               |
| SNP_P4_49148_26937009 | NC_021163.1    | Ca_kabuli_chr04 | 26937009                | GG                              | AA              | 1946805644               |
| SNP_P4_49149_26937019 | NC_021163.1    | Ca_kabuli_chr04 | 26937019                | TT                              | AA              | 1946805646               |
| SNP_P4_49150_26937041 | NC_021163.1    | Ca_kabuli_chr04 | 26937041                | AA                              | CC              | 1946805648               |
| SNP_P4_49151_26937045 | NC_021163.1    | Ca_kabuli_chr04 | 26937045                | CC                              | TT              | 1946805651               |
| SNP_P4_49152_26937046 | NC_021163.1    | Ca_kabuli_chr04 | 26937046                | TT                              | CC              | 1946805653               |
| SNP_P4_49153_26937283 | NC_021163.1    | Ca_kabuli_chr04 | 26937283                | CC                              | TT              | 1946805656               |
| SNP_P4_49155_26947601 | NC_021163.1    | Ca_kabuli_chr04 | 26947601                | TT                              | AA              | 1946805658               |
| SNP_P4_49156_26947662 | NC_021163.1    | Ca_kabuli_chr04 | 26947662                | AA                              | GG              | 1946805660               |
| SNP_P4_49157_26947663 | NC_021163.1    | Ca_kabuli_chr04 | 26947663                | AA                              | GG              | 1946805662               |
| SNP_P4_49158_26947666 | NC_021163.1    | Ca_kabuli_chr04 | 26947666                | AA                              | TT              | 1946805665               |
| SNP_P4_49159_26952429 | NC_021163.1    | Ca_kabuli_chr04 | 26952429                | GG                              | AA              | 1946805668               |
| SNP_P4_49160_26953383 | NC_021163.1    | Ca_kabuli_chr04 | 26953383                | TT                              | CC              | 1946805670               |
| SNP_P4_49163_26957591 | NC_021163.1    | Ca_kabuli_chr04 | 26957591                | CC                              | TT              | 1946805672               |
| SNP_P4_49166_26970286 | NC_021163.1    | Ca_kabuli_chr04 | 26970286                | TT                              | AA              | 1946805674               |
| SNP_P4_49168_26970368 | NC_021163.1    | Ca_kabuli_chr04 | 26970368                | CC                              | AA              | 1946805676               |
| SNP_P4_49169_26970580 | NC_021163.1    | Ca_kabuli_chr04 | 26970580                | AA                              | TT              | 1946805679               |
| SNP_P4_49170_26970670 | NC_021163.1    | Ca_kabuli_chr04 | 26970670                | CC                              | AA              | 1946805681               |
| SNP_P4_49172_26971249 | NC_021163.1    | Ca_kabuli_chr04 | 26971249                | AA                              | GG              | 1946805683               |
| SNP_P4_49173_26972637 | NC_021163.1    | Ca_kabuli_chr04 | 26972637                | TT                              | CC              | 1946805685               |
| SNP_P4_49174_26974666 | NC_021163.1    | Ca_kabuli_chr04 | 26974666                | CC                              | TT              | 1946805687               |
| SNP_P4_49175_26975820 | NC_021163.1    | Ca_kabuli_chr04 | 26975820                | AA                              | GG              | 1946805689               |
| SNP_P4_49176_26975885 | NC_021163.1    | Ca_kabuli_chr04 | 26975885                | CC                              | TT              | 1946805691               |
| SNP_P4_49177_26979144 | NC_021163.1    | Ca_kabuli_chr04 | 26979144                | TT                              | CC              | 1946805693               |
| SNP_P4_49178_26980572 | NC_021163.1    | Ca_kabuli_chr04 | 26980572                | AA                              | GG              | 1946805695               |
| SNP_P4_49179_26990495 | NC_021163.1    | Ca_kabuli_chr04 | 26990495                | GG                              | AA              | 1946805697               |
| SNP_P4_49180_26990509 | NC_021163.1    | Ca_kabuli_chr04 | 26990509                | TT                              | AA              | 1946805700               |
| SNP_P4_49181_26990510 | NC_021163.1    | Ca_kabuli_chr04 | 26990510                | TT                              | AA              | 1946805702               |
| SNP_P4_49183_26993919 | NC_021163.1    | Ca_kabuli_chr04 | 26993919                | CC                              | TT              | 1946805704               |
| SNP_P4_49184_26997465 | NC_021163.1    | Ca_kabuli_chr04 | 26997465                | CC                              | TT              | 1946805706               |
| SNP_P4_49185_26997482 | NC_021163.1    | Ca_kabuli_chr04 | 26997482                | TT                              | CC              | 1946805709               |
| SNP_P4_49186_27003118 | NC_021163.1    | Ca_kabuli_chr04 | 27003118                | TT                              | GG              | 1946805711               |
| SNP_P4_49187_27006652 | NC_021163.1    | Ca_kabuli_chr04 | 27006652                | CC                              | TT              | 1946805713               |
| SNP_P4_49188_27006718 | NC_021163.1    | Ca_kabuli_chr04 | 27006718                | CC                              | TT              | 1946805715               |
| SNP_P4_49189_27007607 | NC_021163.1    | Ca_kabuli_chr04 | 27007607                | TT                              | AA              | 1946805717               |
| SNP_P4_49190_27010315 | NC_021163.1    | Ca_kabuli_chr04 | 27010315                | AA                              | CC              | 1946805720               |
| SNP_P4_49191_27016029 | NC_021163.1    | Ca_kabuli_chr04 | 27016029                | TT                              | CC              | 1946805722               |
| SNP_P4_49192_27016058 | NC_021163.1    | Ca_kabuli_chr04 | 27016058                | GG                              | AA              | 1946805724               |



| SNPs IDs              | Chromosome IDs | Chromosomes     | Physical positions (bp) | CDC Frontier (Reference genome) | (ILWC46 & LPNB) | NCBI SNPdb Accession IDs |
|-----------------------|----------------|-----------------|-------------------------|---------------------------------|-----------------|--------------------------|
| SNP_P4_49193_27016304 | NC_021163.1    | Ca_kabuli_chr04 | 27016304                | GG                              | AA              | 1946805726               |
| SNP_P4_49194_27016707 | NC_021163.1    | Ca_kabuli_chr04 | 27016707                | AA                              | CC              | 1946805729               |
| SNP_P4_49195_27017121 | NC_021163.1    | Ca_kabuli_chr04 | 27017121                | AA                              | GG              | 1946805732               |
| SNP_P4_49197_27017429 | NC_021163.1    | Ca_kabuli_chr04 | 27017429                | CC                              | AA              | 1946805734               |
| SNP_P4_49198_27017698 | NC_021163.1    | Ca_kabuli_chr04 | 27017698                | CC                              | TT              | 1946805736               |
| SNP_P4_49199_27018012 | NC_021163.1    | Ca_kabuli_chr04 | 27018012                | CC                              | TT              | 1946805738               |
| SNP_P4_49200_27018594 | NC_021163.1    | Ca_kabuli_chr04 | 27018594                | TT                              | CC              | 1946805740               |
| SNP_P4_49201_27018689 | NC_021163.1    | Ca_kabuli_chr04 | 27018689                | AA                              | TT              | 1946805742               |
| SNP_P4_49202_27019383 | NC_021163.1    | Ca_kabuli_chr04 | 27019383                | CC                              | TT              | 1946805744               |
| SNP_P4_49203_27019613 | NC_021163.1    | Ca_kabuli_chr04 | 27019613                | CC                              | TT              | 1946805746               |
| SNP_P4_49204_27019750 | NC_021163.1    | Ca_kabuli_chr04 | 27019750                | CC                              | AA              | 1946805749               |
| SNP_P4_49205_27019754 | NC_021163.1    | Ca_kabuli_chr04 | 27019754                | CC                              | AA              | 1946805751               |
| SNP_P4_49206_27020032 | NC_021163.1    | Ca_kabuli_chr04 | 27020032                | TT                              | GG              | 1946805753               |
| SNP_P4_49207_27020035 | NC_021163.1    | Ca_kabuli_chr04 | 27020035                | AA                              | GG              | 1946805755               |
| SNP_P4_49208_27021007 | NC_021163.1    | Ca_kabuli_chr04 | 27021007                | AA                              | GG              | 1946805757               |
| SNP_P4_49209_27021282 | NC_021163.1    | Ca_kabuli_chr04 | 27021282                | CC                              | TT              | 1946805759               |
| SNP_P4_49210_27021482 | NC_021163.1    | Ca_kabuli_chr04 | 27021482                | GG                              | AA              | 1946805761               |
| SNP_P4_49211_27021491 | NC_021163.1    | Ca_kabuli_chr04 | 27021491                | GG                              | AA              | 1946805763               |
| SNP_P4_49212_27021577 | NC_021163.1    | Ca_kabuli_chr04 | 27021577                | CC                              | AA              | 1946805766               |
| SNP_P4_49213_27022074 | NC_021163.1    | Ca_kabuli_chr04 | 27022074                | CC                              | GG              | 1946805768               |
| SNP_P4_49214_27022890 | NC_021163.1    | Ca_kabuli_chr04 | 27022890                | GG                              | TT              | 1946805770               |
| SNP_P4_49215_27027068 | NC_021163.1    | Ca_kabuli_chr04 | 27027068                | AA                              | TT              | 1946805772               |
| SNP_P4_49216_27030413 | NC_021163.1    | Ca_kabuli_chr04 | 27030413                | TT                              | CC              | 1946805775               |
| SNP_P4_49217_27032958 | NC_021163.1    | Ca_kabuli_chr04 | 27032958                | GG                              | AA              | 1946805777               |
| SNP_P4_49218_27032979 | NC_021163.1    | Ca_kabuli_chr04 | 27032979                | AA                              | GG              | 1946805779               |
| SNP_P4_49219_27035894 | NC_021163.1    | Ca_kabuli_chr04 | 27035894                | CC                              | GG              | 1946805781               |
| SNP_P4_49220_27036560 | NC_021163.1    | Ca_kabuli_chr04 | 27036560                | AA                              | GG              | 1946805783               |
| SNP_P4_49221_27037135 | NC_021163.1    | Ca_kabuli_chr04 | 27037135                | CC                              | TT              | 1946805785               |
| SNP_P4_49222_27037378 | NC_021163.1    | Ca_kabuli_chr04 | 27037378                | CC                              | TT              | 1946805787               |
| SNP_P4_49223_27037449 | NC_021163.1    | Ca_kabuli_chr04 | 27037449                | TT                              | GG              | 1946805789               |
| SNP_P4_49224_27037486 | NC_021163.1    | Ca_kabuli_chr04 | 27037486                | AA                              | GG              | 1946805791               |
| SNP_P4_49225_27038141 | NC_021163.1    | Ca_kabuli_chr04 | 27038141                | CC                              | GG              | 1946805793               |
| SNP_P4_49226_27038220 | NC_021163.1    | Ca_kabuli_chr04 | 27038220                | CC                              | TT              | 1946805795               |
| SNP_P4_49227_27038368 | NC_021163.1    | Ca_kabuli_chr04 | 27038368                | AA                              | CC              | 1946805797               |
| SNP_P4_49228_27038646 | NC_021163.1    | Ca_kabuli_chr04 | 27038646                | CC                              | TT              | 1946805799               |
| SNP_P4_49229_27038658 | NC_021163.1    | Ca_kabuli_chr04 | 27038658                | GG                              | AA              | 1946805801               |
| SNP_P4_49230_27045908 | NC_021163.1    | Ca_kabuli_chr04 | 27045908                | GG                              | AA              | 1946805803               |
| SNP_P4_49231_27051636 | NC_021163.1    | Ca_kabuli_chr04 | 27051636                | AA                              | GG              | 1946805805               |
| SNP_P4_49232_27052054 | NC_021163.1    | Ca_kabuli_chr04 | 27052054                | CC                              | TT              | 1946805807               |
| SNP_P4_49234_27057073 | NC_021163.1    | Ca_kabuli_chr04 | 27057073                | AA                              | CC              | 1946805809               |
| SNP_P4_49235_27058910 | NC_021163.1    | Ca_kabuli_chr04 | 27058910                | TT                              | GG              | 1946805811               |
| SNP_P4_49236_27065069 | NC_021163.1    | Ca_kabuli_chr04 | 27065069                | AA                              | CC              | 1946805813               |

| SNPs IDs              | Chromosome IDs | Chromosomes     | Physical positions (bp) | CDC Frontier (Reference genome) | (ILWC46 & LPNB) | NCBI SNPdb Accession IDs |
|-----------------------|----------------|-----------------|-------------------------|---------------------------------|-----------------|--------------------------|
| SNP_P4_49237_27065196 | NC_021163.1    | Ca_kabuli_chr04 | 27065196                | GG                              | TT              | 1946805815               |
| SNP_P4_49238_27065197 | NC_021163.1    | Ca_kabuli_chr04 | 27065197                | GG                              | TT              | 1946805817               |
| SNP_P4_49239_27065199 | NC_021163.1    | Ca_kabuli_chr04 | 27065199                | GG                              | AA              | 1946805819               |
| SNP_P4_49240_27066165 | NC_021163.1    | Ca_kabuli_chr04 | 27066165                | GG                              | AA              | 1946805821               |
| SNP_P4_49241_27067080 | NC_021163.1    | Ca_kabuli_chr04 | 27067080                | AA                              | GG              | 1946805823               |
| SNP_P4_49243_27067957 | NC_021163.1    | Ca_kabuli_chr04 | 27067957                | CC                              | AA              | 1946805825               |
| SNP_P4_49244_27068984 | NC_021163.1    | Ca_kabuli_chr04 | 27068984                | GG                              | CC              | 1946805827               |
| SNP_P4_49245_27069048 | NC_021163.1    | Ca_kabuli_chr04 | 27069048                | TT                              | AA              | 1946805829               |
| SNP_P4_49246_27070430 | NC_021163.1    | Ca_kabuli_chr04 | 27070430                | TT                              | AA              | 1946805831               |
| SNP_P4_49247_27070454 | NC_021163.1    | Ca_kabuli_chr04 | 27070454                | AA                              | GG              | 1946805833               |
| SNP_P4_49248_27070513 | NC_021163.1    | Ca_kabuli_chr04 | 27070513                | CC                              | TT              | 1946805835               |
| SNP_P4_49249_27070881 | NC_021163.1    | Ca_kabuli_chr04 | 27070881                | GG                              | CC              | 1946805837               |
| SNP_P4_49250_27070970 | NC_021163.1    | Ca_kabuli_chr04 | 27070970                | GG                              | AA              | 1946805839               |
| SNP_P4_49251_27071119 | NC_021163.1    | Ca_kabuli_chr04 | 27071119                | CC                              | GG              | 1946805841               |
| SNP_P4_49252_27071270 | NC_021163.1    | Ca_kabuli_chr04 | 27071270                | TT                              | AA              | 1946805843               |
| SNP_P4_49253_27071321 | NC_021163.1    | Ca_kabuli_chr04 | 27071321                | GG                              | AA              | 1946805846               |
| SNP_P4_49254_27074060 | NC_021163.1    | Ca_kabuli_chr04 | 27074060                | AA                              | GG              | 1946805848               |
| SNP_P4_49255_27074449 | NC_021163.1    | Ca_kabuli_chr04 | 27074449                | GG                              | TT              | 1946805850               |
| SNP_P4_49256_27074454 | NC_021163.1    | Ca_kabuli_chr04 | 27074454                | AA                              | GG              | 1946805852               |
| SNP_P4_49258_27076631 | NC_021163.1    | Ca_kabuli_chr04 | 27076631                | TT                              | GG              | 1946805854               |
| SNP_P4_49259_27079458 | NC_021163.1    | Ca_kabuli_chr04 | 27079458                | CC                              | GG              | 1946805856               |
| SNP_P4_49260_27080429 | NC_021163.1    | Ca_kabuli_chr04 | 27080429                | CC                              | TT              | 1946805858               |
| SNP_P4_49261_27080899 | NC_021163.1    | Ca_kabuli_chr04 | 27080899                | GG                              | AA              | 1946805860               |
| SNP_P4_49262_27080966 | NC_021163.1    | Ca_kabuli_chr04 | 27080966                | TT                              | CC              | 1946805862               |
| SNP_P4_49263_27081229 | NC_021163.1    | Ca_kabuli_chr04 | 27081229                | GG                              | AA              | 1946805864               |
| SNP_P4_49264_27081760 | NC_021163.1    | Ca_kabuli_chr04 | 27081760                | CC                              | TT              | 1946805866               |
| SNP_P4_49265_27081896 | NC_021163.1    | Ca_kabuli_chr04 | 27081896                | CC                              | TT              | 1946805868               |
| SNP_P4_49266_27082279 | NC_021163.1    | Ca_kabuli_chr04 | 27082279                | AA                              | GG              | 1946805870               |
| SNP_P4_49267_27082391 | NC_021163.1    | Ca_kabuli_chr04 | 27082391                | TT                              | AA              | 1946805872               |
| SNP_P4_49268_27082859 | NC_021163.1    | Ca_kabuli_chr04 | 27082859                | GG                              | AA              | 1946805874               |
| SNP_P4_49269_27082993 | NC_021163.1    | Ca_kabuli_chr04 | 27082993                | GG                              | TT              | 1946805876               |
| SNP_P4_49271_27088723 | NC_021163.1    | Ca_kabuli_chr04 | 27088723                | GG                              | TT              | 1946805878               |
| SNP_P4_49272_27089403 | NC_021163.1    | Ca_kabuli_chr04 | 27089403                | AA                              | GG              | 1946805880               |
| SNP_P4_49273_27090681 | NC_021163.1    | Ca_kabuli_chr04 | 27090681                | GG                              | TT              | 1946805882               |
| SNP_P4_49274_27091260 | NC_021163.1    | Ca_kabuli_chr04 | 27091260                | CC                              | TT              | 1946805884               |
| SNP_P4_49275_27091278 | NC_021163.1    | Ca_kabuli_chr04 | 27091278                | AA                              | TT              | 1946805886               |
| SNP_P4_49276_27093762 | NC_021163.1    | Ca_kabuli_chr04 | 27093762                | TT                              | CC              | 1946805888               |
| SNP_P4_49277_27094755 | NC_021163.1    | Ca_kabuli_chr04 | 27094755                | TT                              | GG              | 1946805890               |
| SNP_P4_49278_27094992 | NC_021163.1    | Ca_kabuli_chr04 | 27094992                | GG                              | AA              | 1946805892               |
| SNP_P4_49279_27095014 | NC_021163.1    | Ca_kabuli_chr04 | 27095014                | GG                              | AA              | 1946805894               |
| SNP_P4_49282_27103199 | NC_021163.1    | Ca_kabuli_chr04 | 27103199                | CC                              | TT              | 1946805896               |
| SNP_P4_49283_27103792 | NC_021163.1    | Ca_kabuli_chr04 | 27103792                | CC                              | AA              | 1946805898               |

| SNPs IDs              | Chromosome IDs | Chromosomes     | Physical positions (bp) | CDC Frontier (Reference genome) | (ILWC46 & LPNB) | NCBI SNPdb Accession IDs |
|-----------------------|----------------|-----------------|-------------------------|---------------------------------|-----------------|--------------------------|
| SNP_P4_49284_27113050 | NC_021163.1    | Ca_kabuli_chr04 | 27113050                | TT                              | CC              | 1946805900               |
| SNP_P4_49285_27113361 | NC_021163.1    | Ca_kabuli_chr04 | 27113361                | TT                              | CC              | 1946805902               |
| SNP_P4_49286_27114584 | NC_021163.1    | Ca_kabuli_chr04 | 27114584                | AA                              | GG              | 1946805904               |
| SNP_P4_49287_27114595 | NC_021163.1    | Ca_kabuli_chr04 | 27114595                | GG                              | AA              | 1946805906               |
| SNP_P4_49288_27114614 | NC_021163.1    | Ca_kabuli_chr04 | 27114614                | CC                              | AA              | 1946805908               |
| SNP_P4_49289_27115014 | NC_021163.1    | Ca_kabuli_chr04 | 27115014                | GG                              | AA              | 1946805910               |
| SNP_P4_49291_27115603 | NC_021163.1    | Ca_kabuli_chr04 | 27115603                | AA                              | GG              | 1946805912               |
| SNP_P4_49292_27116320 | NC_021163.1    | Ca_kabuli_chr04 | 27116320                | TT                              | CC              | 1946805914               |
| SNP_P4_49293_27119255 | NC_021163.1    | Ca_kabuli_chr04 | 27119255                | GG                              | AA              | 1946805916               |
| SNP_P4_49294_27119281 | NC_021163.1    | Ca_kabuli_chr04 | 27119281                | CC                              | TT              | 1946805918               |
| SNP_P4_49295_27121633 | NC_021163.1    | Ca_kabuli_chr04 | 27121633                | GG                              | AA              | 1946805920               |
| SNP_P4_49296_27124359 | NC_021163.1    | Ca_kabuli_chr04 | 27124359                | CC                              | TT              | 1946805922               |
| SNP_P4_49297_27124361 | NC_021163.1    | Ca_kabuli_chr04 | 27124361                | AA                              | TT              | 1946805924               |
| SNP_P4_49298_27124747 | NC_021163.1    | Ca_kabuli_chr04 | 27124747                | AA                              | GG              | 1946805926               |
| SNP_P4_49299_27133061 | NC_021163.1    | Ca_kabuli_chr04 | 27133061                | CC                              | TT              | 1946805928               |
| SNP_P4_49300_27134116 | NC_021163.1    | Ca_kabuli_chr04 | 27134116                | GG                              | AA              | 1946805930               |
| SNP_P4_49301_27135758 | NC_021163.1    | Ca_kabuli_chr04 | 27135758                | GG                              | AA              | 1946805932               |
| SNP_P4_49302_27136072 | NC_021163.1    | Ca_kabuli_chr04 | 27136072                | AA                              | GG              | 1946805935               |
| SNP_P4_49303_27136112 | NC_021163.1    | Ca_kabuli_chr04 | 27136112                | GG                              | AA              | 1946805937               |
| SNP_P4_49305_27141872 | NC_021163.1    | Ca_kabuli_chr04 | 27141872                | GG                              | TT              | 1946805939               |
| SNP_P4_49306_27143024 | NC_021163.1    | Ca_kabuli_chr04 | 27143024                | CC                              | GG              | 1946805941               |
| SNP_P4_49307_27143030 | NC_021163.1    | Ca_kabuli_chr04 | 27143030                | CC                              | TT              | 1946805943               |
| SNP_P4_49308_27143069 | NC_021163.1    | Ca_kabuli_chr04 | 27143069                | AA                              | CC              | 1946805945               |
| SNP_P4_49309_27143070 | NC_021163.1    | Ca_kabuli_chr04 | 27143070                | GG                              | TT              | 1946805947               |
| SNP_P4_49310_27143276 | NC_021163.1    | Ca_kabuli_chr04 | 27143276                | GG                              | AA              | 1946805949               |
| SNP_P4_49311_27143279 | NC_021163.1    | Ca_kabuli_chr04 | 27143279                | GG                              | AA              | 1946805951               |
| SNP_P4_49312_27143303 | NC_021163.1    | Ca_kabuli_chr04 | 27143303                | AA                              | GG              | 1946805953               |
| SNP_P4_49313_27143433 | NC_021163.1    | Ca_kabuli_chr04 | 27143433                | AA                              | CC              | 1946805955               |
| SNP_P4_49314_27143441 | NC_021163.1    | Ca_kabuli_chr04 | 27143441                | TT                              | CC              | 1946805957               |
| SNP_P4_49315_27143443 | NC_021163.1    | Ca_kabuli_chr04 | 27143443                | GG                              | CC              | 1946805959               |
| SNP_P4_49316_27144775 | NC_021163.1    | Ca_kabuli_chr04 | 27144775                | GG                              | TT              | 1946805961               |
| SNP_P4_49317_27144785 | NC_021163.1    | Ca_kabuli_chr04 | 27144785                | GG                              | AA              | 1946805963               |
| SNP_P4_49318_27147012 | NC_021163.1    | Ca_kabuli_chr04 | 27147012                | AA                              | CC              | 1946805965               |
| SNP_P4_49319_27149861 | NC_021163.1    | Ca_kabuli_chr04 | 27149861                | TT                              | GG              | 1946805967               |
| SNP_P4_49321_27153010 | NC_021163.1    | Ca_kabuli_chr04 | 27153010                | CC                              | AA              | 1946805969               |
| SNP_P4_49322_27153064 | NC_021163.1    | Ca_kabuli_chr04 | 27153064                | CC                              | TT              | 1946805971               |
| SNP_P4_49324_27159681 | NC_021163.1    | Ca_kabuli_chr04 | 27159681                | CC                              | GG              | 1946805973               |
| SNP_P4_49325_27159952 | NC_021163.1    | Ca_kabuli_chr04 | 27159952                | AA                              | GG              | 1946805975               |
| SNP_P4_49326_27162785 | NC_021163.1    | Ca_kabuli_chr04 | 27162785                | AA                              | TT              | 1946805977               |
| SNP_P4_49328_27165485 | NC_021163.1    | Ca_kabuli_chr04 | 27165485                | TT                              | CC              | 1946805979               |
| SNP_P4_49329_27167037 | NC_021163.1    | Ca_kabuli_chr04 | 27167037                | AA                              | TT              | 1946805981               |
| SNP_P4_49331_27173278 | NC_021163.1    | Ca_kabuli_chr04 | 27173278                | AA                              | GG              | 1946805984               |

| SNPs IDs              | Chromosome IDs | Chromosomes     | Physical positions (bp) | CDC Frontier (Reference genome) | (ILWC46 & LPNB) | NCBI SNPdb Accession IDs |
|-----------------------|----------------|-----------------|-------------------------|---------------------------------|-----------------|--------------------------|
| SNP_P4_49332_27174709 | NC_021163.1    | Ca_kabuli_chr04 | 27174709                | GG                              | TT              | 1946805986               |
| SNP_P4_49333_27182656 | NC_021163.1    | Ca_kabuli_chr04 | 27182656                | GG                              | AA              | 1946805988               |
| SNP_P4_49334_27183504 | NC_021163.1    | Ca_kabuli_chr04 | 27183504                | AA                              | TT              | 1946805990               |
| SNP_P4_49335_27183506 | NC_021163.1    | Ca_kabuli_chr04 | 27183506                | AA                              | GG              | 1946805991               |
| SNP_P4_49336_27185767 | NC_021163.1    | Ca_kabuli_chr04 | 27185767                | TT                              | AA              | 1946805993               |
| SNP_P4_49338_27185920 | NC_021163.1    | Ca_kabuli_chr04 | 27185920                | CC                              | TT              | 1946805995               |
| SNP_P4_49339_27185974 | NC_021163.1    | Ca_kabuli_chr04 | 27185974                | GG                              | CC              | 1946805997               |
| SNP_P4_49340_27191005 | NC_021163.1    | Ca_kabuli_chr04 | 27191005                | CC                              | TT              | 1946805999               |
| SNP_P4_49343_27199028 | NC_021163.1    | Ca_kabuli_chr04 | 27199028                | CC                              | AA              | 1946806001               |
| SNP_P4_49344_27199039 | NC_021163.1    | Ca_kabuli_chr04 | 27199039                | AA                              | GG              | 1946806003               |
| SNP_P4_49345_27199187 | NC_021163.1    | Ca_kabuli_chr04 | 27199187                | GG                              | AA              | 1946806005               |
| SNP_P4_49346_27199249 | NC_021163.1    | Ca_kabuli_chr04 | 27199249                | TT                              | CC              | 1946806007               |
| SNP_P4_49347_27199543 | NC_021163.1    | Ca_kabuli_chr04 | 27199543                | AA                              | GG              | 1946806009               |
| SNP_P4_49348_27200982 | NC_021163.1    | Ca_kabuli_chr04 | 27200982                | AA                              | GG              | 1946806011               |
| SNP_P4_49349_27201040 | NC_021163.1    | Ca_kabuli_chr04 | 27201040                | CC                              | TT              | 1946806013               |
| SNP_P4_49350_27201081 | NC_021163.1    | Ca_kabuli_chr04 | 27201081                | GG                              | AA              | 1946806016               |
| SNP_P4_49352_27206835 | NC_021163.1    | Ca_kabuli_chr04 | 27206835                | GG                              | AA              | 1946806018               |
| SNP_P4_49353_27207357 | NC_021163.1    | Ca_kabuli_chr04 | 27207357                | AA                              | TT              | 1946806020               |
| SNP_P4_49354_27210217 | NC_021163.1    | Ca_kabuli_chr04 | 27210217                | CC                              | GG              | 1946806022               |
| SNP_P4_49355_27210259 | NC_021163.1    | Ca_kabuli_chr04 | 27210259                | CC                              | AA              | 1946806024               |
| SNP_P4_49356_27210284 | NC_021163.1    | Ca_kabuli_chr04 | 27210284                | AA                              | GG              | 1946806026               |
| SNP_P4_49357_27212829 | NC_021163.1    | Ca_kabuli_chr04 | 27212829                | TT                              | AA              | 1946806028               |
| SNP_P4_49358_27213136 | NC_021163.1    | Ca_kabuli_chr04 | 27213136                | AA                              | CC              | 1946806030               |
| SNP_P4_49359_27213170 | NC_021163.1    | Ca_kabuli_chr04 | 27213170                | AA                              | GG              | 1946806032               |
| SNP_P4_49360_27213182 | NC_021163.1    | Ca_kabuli_chr04 | 27213182                | GG                              | AA              | 1946806034               |
| SNP_P4_49361_27213197 | NC_021163.1    | Ca_kabuli_chr04 | 27213197                | GG                              | AA              | 1946806036               |
| SNP_P4_49362_27213241 | NC_021163.1    | Ca_kabuli_chr04 | 27213241                | CC                              | AA              | 1946806038               |
| SNP_P4_49363_27213247 | NC_021163.1    | Ca_kabuli_chr04 | 27213247                | AA                              | GG              | 1946806040               |
| SNP_P4_49364_27213588 | NC_021163.1    | Ca_kabuli_chr04 | 27213588                | AA                              | CC              | 1946806042               |
| SNP_P4_49365_27215519 | NC_021163.1    | Ca_kabuli_chr04 | 27215519                | TT                              | CC              | 1946806044               |
| SNP_P4_49366_27215806 | NC_021163.1    | Ca_kabuli_chr04 | 27215806                | TT                              | CC              | 1946806046               |
| SNP_P4_49367_27215834 | NC_021163.1    | Ca_kabuli_chr04 | 27215834                | TT                              | CC              | 1946806048               |
| SNP_P4_49368_27217626 | NC_021163.1    | Ca_kabuli_chr04 | 27217626                | GG                              | AA              | 1946806050               |
| SNP_P4_49369_27219689 | NC_021163.1    | Ca_kabuli_chr04 | 27219689                | GG                              | TT              | 1946806052               |
| SNP_P4_49370_27219947 | NC_021163.1    | Ca_kabuli_chr04 | 27219947                | GG                              | AA              | 1946806054               |
| SNP_P4_49371_27220289 | NC_021163.1    | Ca_kabuli_chr04 | 27220289                | AA                              | GG              | 1946806056               |
| SNP_P4_49373_27233702 | NC_021163.1    | Ca_kabuli_chr04 | 27233702                | CC                              | TT              | 1946806058               |
| SNP_P4_49374_27233719 | NC_021163.1    | Ca_kabuli_chr04 | 27233719                | TT                              | CC              | 1946806060               |
| SNP_P4_49375_27235264 | NC_021163.1    | Ca_kabuli_chr04 | 27235264                | CC                              | GG              | 1946806062               |
| SNP_P4_49377_27236408 | NC_021163.1    | Ca_kabuli_chr04 | 27236408                | GG                              | CC              | 1946806064               |
| SNP_P4_49378_27240725 | NC_021163.1    | Ca_kabuli_chr04 | 27240725                | CC                              | TT              | 1946806066               |
| SNP_P4_49379_27240882 | NC_021163.1    | Ca_kabuli_chr04 | 27240882                | TT                              | AA              | 1946806068               |

| SNPs IDs              | Chromosome IDs | Chromosomes     | Physical positions (bp) | CDC Frontier (Reference genome) | (ILWC46 & LPNB) | NCBI SNPdb Accession IDs |
|-----------------------|----------------|-----------------|-------------------------|---------------------------------|-----------------|--------------------------|
| SNP_P4_49383_27244481 | NC_021163.1    | Ca_kabuli_chr04 | 27244481                | CC                              | TT              | 1946806070               |
| SNP_P4_49384_27246464 | NC_021163.1    | Ca_kabuli_chr04 | 27246464                | AA                              | TT              | 1946806072               |
| SNP_P4_49385_27246990 | NC_021163.1    | Ca_kabuli_chr04 | 27246990                | AA                              | GG              | 1946806074               |
| SNP_P4_49386_27248346 | NC_021163.1    | Ca_kabuli_chr04 | 27248346                | CC                              | TT              | 1946806076               |
| SNP_P4_49387_27254764 | NC_021163.1    | Ca_kabuli_chr04 | 27254764                | GG                              | AA              | 1946806078               |
| SNP_P4_49388_27256785 | NC_021163.1    | Ca_kabuli_chr04 | 27256785                | GG                              | CC              | 1946806080               |
| SNP_P4_49389_27257137 | NC_021163.1    | Ca_kabuli_chr04 | 27257137                | CC                              | GG              | 1946806082               |
| SNP_P4_49390_27257788 | NC_021163.1    | Ca_kabuli_chr04 | 27257788                | TT                              | GG              | 1946806084               |
| SNP_P4_49391_27259632 | NC_021163.1    | Ca_kabuli_chr04 | 27259632                | GG                              | AA              | 1946806086               |
| SNP_P4_49392_27259863 | NC_021163.1    | Ca_kabuli_chr04 | 27259863                | GG                              | AA              | 1946806088               |
| SNP_P4_49393_27260023 | NC_021163.1    | Ca_kabuli_chr04 | 27260023                | TT                              | GG              | 1946806090               |
| SNP_P4_49395_27260356 | NC_021163.1    | Ca_kabuli_chr04 | 27260356                | CC                              | TT              | 1946806092               |
| SNP_P4_49397_27266248 | NC_021163.1    | Ca_kabuli_chr04 | 27266248                | TT                              | CC              | 1946806095               |
| SNP_P4_49398_27266298 | NC_021163.1    | Ca_kabuli_chr04 | 27266298                | AA                              | GG              | 1946806097               |
| SNP_P4_49399_27266316 | NC_021163.1    | Ca_kabuli_chr04 | 27266316                | CC                              | GG              | 1946806099               |
| SNP_P4_49400_27266317 | NC_021163.1    | Ca_kabuli_chr04 | 27266317                | CC                              | AA              | 1946806101               |
| SNP_P4_49401_27266370 | NC_021163.1    | Ca_kabuli_chr04 | 27266370                | GG                              | AA              | 1946806103               |
| SNP_P4_49402_27266403 | NC_021163.1    | Ca_kabuli_chr04 | 27266403                | AA                              | GG              | 1946806105               |
| SNP_P4_49403_27266481 | NC_021163.1    | Ca_kabuli_chr04 | 27266481                | GG                              | AA              | 1946806107               |
| SNP_P4_49404_27266505 | NC_021163.1    | Ca_kabuli_chr04 | 27266505                | CC                              | GG              | 1946806109               |
| SNP_P4_49405_27266567 | NC_021163.1    | Ca_kabuli_chr04 | 27266567                | AA                              | GG              | 1946806111               |
| SNP_P4_49406_27266594 | NC_021163.1    | Ca_kabuli_chr04 | 27266594                | AA                              | TT              | 1946806113               |
| SNP_P4_49407_27266607 | NC_021163.1    | Ca_kabuli_chr04 | 27266607                | GG                              | AA              | 1946806115               |
| SNP_P4_49408_27266635 | NC_021163.1    | Ca_kabuli_chr04 | 27266635                | CC                              | TT              | 1946806117               |
| SNP_P4_49409_27266644 | NC_021163.1    | Ca_kabuli_chr04 | 27266644                | CC                              | AA              | 1946806119               |
| SNP_P4_49410_27266658 | NC_021163.1    | Ca_kabuli_chr04 | 27266658                | TT                              | CC              | 1946806121               |
| SNP_P4_49411_27266660 | NC_021163.1    | Ca_kabuli_chr04 | 27266660                | AA                              | TT              | 1946806123               |
| SNP_P4_49412_27266748 | NC_021163.1    | Ca_kabuli_chr04 | 27266748                | TT                              | AA              | 1946806125               |
| SNP_P4_49413_27266780 | NC_021163.1    | Ca_kabuli_chr04 | 27266780                | GG                              | TT              | 1946806127               |
| SNP_P4_49414_27266849 | NC_021163.1    | Ca_kabuli_chr04 | 27266849                | AA                              | CC              | 1946806129               |
| SNP_P4_49415_27266887 | NC_021163.1    | Ca_kabuli_chr04 | 27266887                | AA                              | TT              | 1946806131               |
| SNP_P4_49416_27266933 | NC_021163.1    | Ca_kabuli_chr04 | 27266933                | TT                              | GG              | 1946806133               |
| SNP_P4_49417_27266957 | NC_021163.1    | Ca_kabuli_chr04 | 27266957                | CC                              | TT              | 1946806135               |
| SNP_P4_49418_27266973 | NC_021163.1    | Ca_kabuli_chr04 | 27266973                | AA                              | GG              | 1946806137               |
| SNP_P4_49419_27267083 | NC_021163.1    | Ca_kabuli_chr04 | 27267083                | AA                              | GG              | 1946806139               |
| SNP_P4_49421_27267220 | NC_021163.1    | Ca_kabuli_chr04 | 27267220                | AA                              | GG              | 1946806142               |
| SNP_P4_49422_27267294 | NC_021163.1    | Ca_kabuli_chr04 | 27267294                | CC                              | TT              | 1946806144               |
| SNP_P4_49423_27270709 | NC_021163.1    | Ca_kabuli_chr04 | 27270709                | AA                              | GG              | 1946806146               |
| SNP_P4_49424_27270763 | NC_021163.1    | Ca_kabuli_chr04 | 27270763                | TT                              | CC              | 1946806148               |
| SNP_P4_49425_27270882 | NC_021163.1    | Ca_kabuli_chr04 | 27270882                | AA                              | GG              | 1946806150               |
| SNP_P4_49426_27270894 | NC_021163.1    | Ca_kabuli_chr04 | 27270894                | AA                              | GG              | 1946806152               |
| SNP_P4_49427_27270905 | NC_021163.1    | Ca_kabuli_chr04 | 27270905                | CC                              | TT              | 1946806154               |

| SNPs IDs              | Chromosome IDs | Chromosomes     | Physical positions (bp) | CDC Frontier (Reference genome) | (ILWC46 & LPNB) | NCBI SNPdb Accession IDs |
|-----------------------|----------------|-----------------|-------------------------|---------------------------------|-----------------|--------------------------|
| SNP_P4_49428_27270957 | NC_021163.1    | Ca_kabuli_chr04 | 27270957                | CC                              | AA              | 1946806156               |
| SNP_P4_49429_27271019 | NC_021163.1    | Ca_kabuli_chr04 | 27271019                | AA                              | GG              | 1946806158               |
| SNP_P4_49430_27271021 | NC_021163.1    | Ca_kabuli_chr04 | 27271021                | CC                              | TT              | 1946806160               |
| SNP_P4_49431_27271046 | NC_021163.1    | Ca_kabuli_chr04 | 27271046                | AA                              | TT              | 1946806162               |
| SNP_P4_49432_27272116 | NC_021163.1    | Ca_kabuli_chr04 | 27272116                | GG                              | TT              | 1946806164               |
| SNP_P4_49433_27272522 | NC_021163.1    | Ca_kabuli_chr04 | 27272522                | GG                              | AA              | 1946806166               |
| SNP_P4_49434_27272604 | NC_021163.1    | Ca_kabuli_chr04 | 27272604                | CC                              | TT              | 1946806168               |
| SNP_P4_49435_27274106 | NC_021163.1    | Ca_kabuli_chr04 | 27274106                | GG                              | TT              | 1946806169               |
| SNP_P4_49436_27274151 | NC_021163.1    | Ca_kabuli_chr04 | 27274151                | AA                              | CC              | 1946806170               |
| SNP_P4_49437_27274165 | NC_021163.1    | Ca_kabuli_chr04 | 27274165                | CC                              | GG              | 1946806171               |
| SNP_P4_49438_27274172 | NC_021163.1    | Ca_kabuli_chr04 | 27274172                | CC                              | TT              | 1946806173               |
| SNP_P4_49439_27274177 | NC_021163.1    | Ca_kabuli_chr04 | 27274177                | TT                              | AA              | 1946806175               |
| SNP_P4_49440_27274413 | NC_021163.1    | Ca_kabuli_chr04 | 27274413                | CC                              | TT              | 1946806177               |
| SNP_P4_49441_27274418 | NC_021163.1    | Ca_kabuli_chr04 | 27274418                | CC                              | TT              | 1946806179               |
| SNP_P4_49442_27283442 | NC_021163.1    | Ca_kabuli_chr04 | 27283442                | AA                              | GG              | 1946806181               |
| SNP_P4_49444_27283904 | NC_021163.1    | Ca_kabuli_chr04 | 27283904                | TT                              | CC              | 1946806183               |
| SNP_P4_49445_27285126 | NC_021163.1    | Ca_kabuli_chr04 | 27285126                | TT                              | CC              | 1946806185               |
| SNP_P4_49446_27285248 | NC_021163.1    | Ca_kabuli_chr04 | 27285248                | GG                              | AA              | 1946806186               |
| SNP_P4_49447_27285286 | NC_021163.1    | Ca_kabuli_chr04 | 27285286                | AA                              | GG              | 1946806188               |
| SNP_P4_49448_27285379 | NC_021163.1    | Ca_kabuli_chr04 | 27285379                | AA                              | GG              | 1946806190               |
| SNP_P4_49449_27285392 | NC_021163.1    | Ca_kabuli_chr04 | 27285392                | GG                              | TT              | 1946806192               |
| SNP_P4_49450_27285518 | NC_021163.1    | Ca_kabuli_chr04 | 27285518                | CC                              | TT              | 1946806194               |
| SNP_P4_49451_27285562 | NC_021163.1    | Ca_kabuli_chr04 | 27285562                | CC                              | AA              | 1946806196               |
| SNP_P4_49452_27285563 | NC_021163.1    | Ca_kabuli_chr04 | 27285563                | GG                              | AA              | 1946806198               |
| SNP_P4_49453_27285594 | NC_021163.1    | Ca_kabuli_chr04 | 27285594                | GG                              | CC              | 1946806200               |
| SNP_P4_49454_27285601 | NC_021163.1    | Ca_kabuli_chr04 | 27285601                | AA                              | CC              | 1946806202               |
| SNP_P4_49456_27313800 | NC_021163.1    | Ca_kabuli_chr04 | 27313800                | CC                              | GG              | 1946806204               |
| SNP_P4_49457_27313880 | NC_021163.1    | Ca_kabuli_chr04 | 27313880                | AA                              | TT              | 1946806206               |
| SNP_P4_49458_27313961 | NC_021163.1    | Ca_kabuli_chr04 | 27313961                | AA                              | GG              | 1946806208               |
| SNP_P4_49459_27314013 | NC_021163.1    | Ca_kabuli_chr04 | 27314013                | CC                              | AA              | 1946806210               |
| SNP_P4_49460_27314014 | NC_021163.1    | Ca_kabuli_chr04 | 27314014                | AA                              | TT              | 1946806212               |
| SNP_P4_49461_27314032 | NC_021163.1    | Ca_kabuli_chr04 | 27314032                | AA                              | TT              | 1946806214               |
| SNP_P4_49462_27314046 | NC_021163.1    | Ca_kabuli_chr04 | 27314046                | TT                              | GG              | 1946806217               |
| SNP_P4_49463_27314065 | NC_021163.1    | Ca_kabuli_chr04 | 27314065                | TT                              | CC              | 1946806219               |
| SNP_P4_49465_27314091 | NC_021163.1    | Ca_kabuli_chr04 | 27314091                | TT                              | CC              | 1946806221               |
| SNP_P4_49466_27314304 | NC_021163.1    | Ca_kabuli_chr04 | 27314304                | CC                              | TT              | 1946806223               |
| SNP_P4_49467_27314343 | NC_021163.1    | Ca_kabuli_chr04 | 27314343                | TT                              | CC              | 1946806226               |
| SNP_P4_49468_27314573 | NC_021163.1    | Ca_kabuli_chr04 | 27314573                | AA                              | GG              | 1946806228               |
| SNP_P4_49469_27314646 | NC_021163.1    | Ca_kabuli_chr04 | 27314646                | GG                              | AA              | 1946806230               |
| SNP_P4_49470_27316294 | NC_021163.1    | Ca_kabuli_chr04 | 27316294                | GG                              | AA              | 1946806232               |
| SNP_P4_49471_27317582 | NC_021163.1    | Ca_kabuli_chr04 | 27317582                | TT                              | AA              | 1946806234               |
| SNP_P4_49472_27317912 | NC_021163.1    | Ca_kabuli_chr04 | 27317912                | TT                              | CC              | 1946806236               |

| SNPs IDs              | Chromosome IDs | Chromosomes     | Physical positions (bp) | CDC Frontier (Reference genome) | (ILWC46 & LPNB) | NCBI SNPdb Accession IDs |
|-----------------------|----------------|-----------------|-------------------------|---------------------------------|-----------------|--------------------------|
| SNP_P4_49473_27317925 | NC_021163.1    | Ca_kabuli_chr04 | 27317925                | CC                              | TT              | 1946806238               |
| SNP_P4_49474_27317931 | NC_021163.1    | Ca_kabuli_chr04 | 27317931                | TT                              | CC              | 1946806240               |
| SNP_P4_49475_27317941 | NC_021163.1    | Ca_kabuli_chr04 | 27317941                | AA                              | GG              | 1946806242               |
| SNP_P4_49476_27317959 | NC_021163.1    | Ca_kabuli_chr04 | 27317959                | TT                              | AA              | 1946806244               |
| SNP_P4_49477_27318035 | NC_021163.1    | Ca_kabuli_chr04 | 27318035                | AA                              | GG              | 1946806246               |
| SNP_P4_49478_27318798 | NC_021163.1    | Ca_kabuli_chr04 | 27318798                | TT                              | GG              | 1946806248               |
| SNP_P4_49479_27318804 | NC_021163.1    | Ca_kabuli_chr04 | 27318804                | AA                              | GG              | 1946806250               |
| SNP_P4_49480_27318811 | NC_021163.1    | Ca_kabuli_chr04 | 27318811                | TT                              | GG              | 1946806252               |
| SNP_P4_49481_27318812 | NC_021163.1    | Ca_kabuli_chr04 | 27318812                | GG                              | AA              | 1946806254               |
| SNP_P4_49482_27318828 | NC_021163.1    | Ca_kabuli_chr04 | 27318828                | GG                              | AA              | 1946806256               |
| SNP_P4_49484_27318877 | NC_021163.1    | Ca_kabuli_chr04 | 27318877                | GG                              | AA              | 1946806258               |
| SNP_P4_49486_27319057 | NC_021163.1    | Ca_kabuli_chr04 | 27319057                | TT                              | CC              | 1946806260               |
| SNP_P4_49487_27319104 | NC_021163.1    | Ca_kabuli_chr04 | 27319104                | GG                              | AA              | 1946806263               |
| SNP_P4_49488_27322899 | NC_021163.1    | Ca_kabuli_chr04 | 27322899                | GG                              | AA              | 1946806265               |
| SNP_P4_49489_27322900 | NC_021163.1    | Ca_kabuli_chr04 | 27322900                | TT                              | CC              | 1946806267               |
| SNP_P4_49490_27322908 | NC_021163.1    | Ca_kabuli_chr04 | 27322908                | AA                              | GG              | 1946806269               |
| SNP_P4_49491_27323618 | NC_021163.1    | Ca_kabuli_chr04 | 27323618                | AA                              | GG              | 1946806271               |
| SNP_P4_49492_27323657 | NC_021163.1    | Ca_kabuli_chr04 | 27323657                | TT                              | AA              | 1946806273               |
| SNP_P4_49493_27323668 | NC_021163.1    | Ca_kabuli_chr04 | 27323668                | TT                              | AA              | 1946806274               |
| SNP_P4_49494_27323669 | NC_021163.1    | Ca_kabuli_chr04 | 27323669                | GG                              | CC              | 1946806275               |
| SNP_P4_49495_27325786 | NC_021163.1    | Ca_kabuli_chr04 | 27325786                | TT                              | CC              | 1946806276               |
| SNP_P4_49496_27325792 | NC_021163.1    | Ca_kabuli_chr04 | 27325792                | TT                              | AA              | 1946806277               |
| SNP_P4_49497_27325804 | NC_021163.1    | Ca_kabuli_chr04 | 27325804                | TT                              | GG              | 1946806279               |
| SNP_P4_49499_27326189 | NC_021163.1    | Ca_kabuli_chr04 | 27326189                | GG                              | AA              | 1946806281               |
| SNP_P4_49500_27326235 | NC_021163.1    | Ca_kabuli_chr04 | 27326235                | AA                              | TT              | 1946806283               |
| SNP_P4_49501_27326244 | NC_021163.1    | Ca_kabuli_chr04 | 27326244                | TT                              | GG              | 1946806285               |
| SNP_P4_49502_27326250 | NC_021163.1    | Ca_kabuli_chr04 | 27326250                | TT                              | CC              | 1946806287               |
| SNP_P4_49503_27326271 | NC_021163.1    | Ca_kabuli_chr04 | 27326271                | TT                              | CC              | 1946806289               |
| SNP_P4_49504_27326294 | NC_021163.1    | Ca_kabuli_chr04 | 27326294                | AA                              | CC              | 1946806291               |
| SNP_P4_49505_27328646 | NC_021163.1    | Ca_kabuli_chr04 | 27328646                | TT                              | GG              | 1946806293               |
| SNP_P4_49506_27328654 | NC_021163.1    | Ca_kabuli_chr04 | 27328654                | CC                              | TT              | 1946806295               |
| SNP_P4_49507_27329363 | NC_021163.1    | Ca_kabuli_chr04 | 27329363                | AA                              | CC              | 1946806297               |
| SNP_P4_49508_27329377 | NC_021163.1    | Ca_kabuli_chr04 | 27329377                | TT                              | AA              | 1946806299               |
| SNP_P4_49509_27329399 | NC_021163.1    | Ca_kabuli_chr04 | 27329399                | AA                              | GG              | 1946806301               |
| SNP_P4_49511_27340739 | NC_021163.1    | Ca_kabuli_chr04 | 27340739                | GG                              | TT              | 1946806303               |
| SNP_P4_49512_27340827 | NC_021163.1    | Ca_kabuli_chr04 | 27340827                | GG                              | TT              | 1946806305               |
| SNP_P4_49513_27340903 | NC_021163.1    | Ca_kabuli_chr04 | 27340903                | TT                              | AA              | 1946806307               |
| SNP_P4_49514_27340909 | NC_021163.1    | Ca_kabuli_chr04 | 27340909                | GG                              | AA              | 1946806309               |
| SNP_P4_49515_27340941 | NC_021163.1    | Ca_kabuli_chr04 | 27340941                | GG                              | TT              | 1946806312               |
| SNP_P4_49516_27341141 | NC_021163.1    | Ca_kabuli_chr04 | 27341141                | AA                              | GG              | 1946806314               |
| SNP_P4_49517_27346801 | NC_021163.1    | Ca_kabuli_chr04 | 27346801                | AA                              | GG              | 1946806316               |
| SNP_P4_49518_27348338 | NC_021163.1    | Ca_kabuli_chr04 | 27348338                | AA                              | CC              | 1946806318               |

| SNPs IDs              | Chromosome IDs | Chromosomes     | Physical positions (bp) | CDC Frontier (Reference genome) | (ILWC46 & LPNB) | NCBI SNPdb Accession IDs |
|-----------------------|----------------|-----------------|-------------------------|---------------------------------|-----------------|--------------------------|
| SNP_P4_49519_27349881 | NC_021163.1    | Ca_kabuli_chr04 | 27349881                | CC                              | AA              | 1946806320               |
| SNP_P4_49520_27350616 | NC_021163.1    | Ca_kabuli_chr04 | 27350616                | TT                              | GG              | 1946806322               |
| SNP_P4_49521_27350627 | NC_021163.1    | Ca_kabuli_chr04 | 27350627                | CC                              | TT              | 1946806324               |
| SNP_P4_49522_27350632 | NC_021163.1    | Ca_kabuli_chr04 | 27350632                | CC                              | TT              | 1946806327               |
| SNP_P4_49523_27350649 | NC_021163.1    | Ca_kabuli_chr04 | 27350649                | AA                              | TT              | 1946806329               |
| SNP_P4_49524_27350693 | NC_021163.1    | Ca_kabuli_chr04 | 27350693                | TT                              | CC              | 1946806331               |
| SNP_P4_49525_27350699 | NC_021163.1    | Ca_kabuli_chr04 | 27350699                | CC                              | TT              | 1946806334               |
| SNP_P4_49527_27351069 | NC_021163.1    | Ca_kabuli_chr04 | 27351069                | GG                              | AA              | 1946806336               |
| SNP_P4_49528_27354313 | NC_021163.1    | Ca_kabuli_chr04 | 27354313                | CC                              | GG              | 1946806338               |
| SNP_P4_49529_27355399 | NC_021163.1    | Ca_kabuli_chr04 | 27355399                | CC                              | GG              | 1946806340               |
| SNP_P4_49530_27355435 | NC_021163.1    | Ca_kabuli_chr04 | 27355435                | TT                              | CC              | 1946806342               |
| SNP_P4_49531_27355687 | NC_021163.1    | Ca_kabuli_chr04 | 27355687                | GG                              | AA              | 1946806345               |
| SNP_P4_49532_27355695 | NC_021163.1    | Ca_kabuli_chr04 | 27355695                | AA                              | GG              | 1946806347               |
| SNP_P4_49533_27355728 | NC_021163.1    | Ca_kabuli_chr04 | 27355728                | TT                              | CC              | 1946806350               |
| SNP_P4_49534_27355982 | NC_021163.1    | Ca_kabuli_chr04 | 27355982                | TT                              | AA              | 1946806352               |
| SNP_P4_49535_27356000 | NC_021163.1    | Ca_kabuli_chr04 | 27356000                | CC                              | TT              | 1946806354               |
| SNP_P4_49536_27356897 | NC_021163.1    | Ca_kabuli_chr04 | 27356897                | TT                              | CC              | 1946806357               |
| SNP_P4_49537_27356922 | NC_021163.1    | Ca_kabuli_chr04 | 27356922                | CC                              | TT              | 1946806359               |
| SNP_P4_49538_27356923 | NC_021163.1    | Ca_kabuli_chr04 | 27356923                | AA                              | GG              | 1946806361               |
| SNP_P4_49539_27356929 | NC_021163.1    | Ca_kabuli_chr04 | 27356929                | CC                              | TT              | 1946806363               |
| SNP_P4_49540_27356960 | NC_021163.1    | Ca_kabuli_chr04 | 27356960                | TT                              | CC              | 1946806365               |
| SNP_P4_49542_27357115 | NC_021163.1    | Ca_kabuli_chr04 | 27357115                | AA                              | GG              | 1946806367               |
| SNP_P4_49543_27360426 | NC_021163.1    | Ca_kabuli_chr04 | 27360426                | TT                              | GG              | 1946806369               |
| SNP_P4_49544_27362120 | NC_021163.1    | Ca_kabuli_chr04 | 27362120                | AA                              | GG              | 1946806371               |
| SNP_P4_49545_27362164 | NC_021163.1    | Ca_kabuli_chr04 | 27362164                | AA                              | GG              | 1946806373               |
| SNP_P4_49546_27362210 | NC_021163.1    | Ca_kabuli_chr04 | 27362210                | CC                              | TT              | 1946806375               |
| SNP_P4_49547_27362506 | NC_021163.1    | Ca_kabuli_chr04 | 27362506                | CC                              | GG              | 1946806378               |
| SNP_P4_49548_27362558 | NC_021163.1    | Ca_kabuli_chr04 | 27362558                | AA                              | GG              | 1946806380               |
| SNP_P4_49549_27363863 | NC_021163.1    | Ca_kabuli_chr04 | 27363863                | TT                              | CC              | 1946806382               |
| SNP_P4_49550_27364259 | NC_021163.1    | Ca_kabuli_chr04 | 27364259                | CC                              | AA              | 1946806384               |
| SNP_P4_49551_27364294 | NC_021163.1    | Ca_kabuli_chr04 | 27364294                | GG                              | TT              | 1946806386               |
| SNP_P4_49552_27364296 | NC_021163.1    | Ca_kabuli_chr04 | 27364296                | CC                              | GG              | 1946806389               |
| SNP_P4_49553_27364312 | NC_021163.1    | Ca_kabuli_chr04 | 27364312                | AA                              | GG              | 1946806391               |
| SNP_P4_49554_27364649 | NC_021163.1    | Ca_kabuli_chr04 | 27364649                | AA                              | GG              | 1946806393               |
| SNP_P4_49555_27364651 | NC_021163.1    | Ca_kabuli_chr04 | 27364651                | CC                              | TT              | 1946806395               |
| SNP_P4_49556_27364655 | NC_021163.1    | Ca_kabuli_chr04 | 27364655                | AA                              | GG              | 1946806397               |
| SNP_P4_49558_27364898 | NC_021163.1    | Ca_kabuli_chr04 | 27364898                | AA                              | CC              | 1946806399               |
| SNP_P4_49561_27367025 | NC_021163.1    | Ca_kabuli_chr04 | 27367025                | GG                              | AA              | 1946806401               |
| SNP_P4_49562_27367099 | NC_021163.1    | Ca_kabuli_chr04 | 27367099                | CC                              | TT              | 1946806403               |
| SNP_P4_49563_27367122 | NC_021163.1    | Ca_kabuli_chr04 | 27367122                | AA                              | GG              | 1946806405               |
| SNP_P4_49564_27367869 | NC_021163.1    | Ca_kabuli_chr04 | 27367869                | AA                              | GG              | 1946806407               |
| SNP_P4_49565_27367886 | NC_021163.1    | Ca_kabuli_chr04 | 27367886                | AA                              | GG              | 1946806409               |



| SNPs IDs              | Chromosome IDs | Chromosomes     | Physical positions (bp) | CDC Frontier (Reference genome) | (ILWC46 & LPNB) | NCBI SNPdb Accession IDs |
|-----------------------|----------------|-----------------|-------------------------|---------------------------------|-----------------|--------------------------|
| SNP_P4_49566_27367903 | NC_021163.1    | Ca_kabuli_chr04 | 27367903                | TT                              | CC              | 1946806411               |
| SNP_P4_49567_27368198 | NC_021163.1    | Ca_kabuli_chr04 | 27368198                | TT                              | AA              | 1946806413               |
| SNP_P4_49568_27368375 | NC_021163.1    | Ca_kabuli_chr04 | 27368375                | TT                              | CC              | 1946806415               |
| SNP_P4_49569_27368382 | NC_021163.1    | Ca_kabuli_chr04 | 27368382                | GG                              | CC              | 1946806417               |
| SNP_P4_49570_27368409 | NC_021163.1    | Ca_kabuli_chr04 | 27368409                | CC                              | TT              | 1946806419               |
| SNP_P4_49571_27369259 | NC_021163.1    | Ca_kabuli_chr04 | 27369259                | GG                              | AA              | 1946806420               |
| SNP_P4_49572_27369264 | NC_021163.1    | Ca_kabuli_chr04 | 27369264                | TT                              | CC              | 1946806421               |
| SNP_P4_49573_27369331 | NC_021163.1    | Ca_kabuli_chr04 | 27369331                | GG                              | CC              | 1946806422               |
| SNP_P4_49575_27376607 | NC_021163.1    | Ca_kabuli_chr04 | 27376607                | TT                              | CC              | 1946806424               |
| SNP_P4_49576_27376615 | NC_021163.1    | Ca_kabuli_chr04 | 27376615                | CC                              | TT              | 1946806426               |
| SNP_P4_49577_27377580 | NC_021163.1    | Ca_kabuli_chr04 | 27377580                | CC                              | TT              | 1946806428               |
| SNP_P4_49579_27378530 | NC_021163.1    | Ca_kabuli_chr04 | 27378530                | AA                              | GG              | 1946806430               |
| SNP_P4_49580_27379892 | NC_021163.1    | Ca_kabuli_chr04 | 27379892                | AA                              | GG              | 1946806432               |
| SNP_P4_49581_27380028 | NC_021163.1    | Ca_kabuli_chr04 | 27380028                | TT                              | CC              | 1946806434               |
| SNP_P4_49582_27380507 | NC_021163.1    | Ca_kabuli_chr04 | 27380507                | AA                              | GG              | 1946806436               |
| SNP_P4_49583_27383574 | NC_021163.1    | Ca_kabuli_chr04 | 27383574                | GG                              | AA              | 1946806438               |
| SNP_P4_49585_27388610 | NC_021163.1    | Ca_kabuli_chr04 | 27388610                | AA                              | TT              | 1946806440               |
| SNP_P4_49586_27388611 | NC_021163.1    | Ca_kabuli_chr04 | 27388611                | CC                              | GG              | 1946806442               |
| SNP_P4_49587_27388629 | NC_021163.1    | Ca_kabuli_chr04 | 27388629                | TT                              | CC              | 1946806444               |
| SNP_P4_49588_27388636 | NC_021163.1    | Ca_kabuli_chr04 | 27388636                | GG                              | AA              | 1946806446               |
| SNP_P4_49589_27390010 | NC_021163.1    | Ca_kabuli_chr04 | 27390010                | CC                              | TT              | 1946806448               |
| SNP_P4_49590_27390415 | NC_021163.1    | Ca_kabuli_chr04 | 27390415                | AA                              | GG              | 1946806450               |
| SNP_P4_49591_27390872 | NC_021163.1    | Ca_kabuli_chr04 | 27390872                | CC                              | GG              | 1946806453               |
| SNP_P4_49592_27394120 | NC_021163.1    | Ca_kabuli_chr04 | 27394120                | GG                              | TT              | 1946806454               |
| SNP_P4_49593_27394493 | NC_021163.1    | Ca_kabuli_chr04 | 27394493                | TT                              | GG              | 1946806456               |
| SNP_P4_49594_27394840 | NC_021163.1    | Ca_kabuli_chr04 | 27394840                | GG                              | AA              | 1946806458               |
| SNP_P4_49595_27394951 | NC_021163.1    | Ca_kabuli_chr04 | 27394951                | GG                              | AA              | 1946806460               |
| SNP_P4_49596_27394957 | NC_021163.1    | Ca_kabuli_chr04 | 27394957                | TT                              | AA              | 1946806462               |
| SNP_P4_49597_27394958 | NC_021163.1    | Ca_kabuli_chr04 | 27394958                | TT                              | AA              | 1946806464               |
| SNP_P4_49599_27396609 | NC_021163.1    | Ca_kabuli_chr04 | 27396609                | GG                              | AA              | 1946806466               |
| SNP_P4_49600_27398512 | NC_021163.1    | Ca_kabuli_chr04 | 27398512                | GG                              | TT              | 1946806468               |
| SNP_P4_49601_27398513 | NC_021163.1    | Ca_kabuli_chr04 | 27398513                | CC                              | TT              | 1946806470               |
| SNP_P4_49602_27398785 | NC_021163.1    | Ca_kabuli_chr04 | 27398785                | TT                              | CC              | 1946806472               |
| SNP_P4_49603_27399175 | NC_021163.1    | Ca_kabuli_chr04 | 27399175                | GG                              | TT              | 1946806474               |
| SNP_P4_49604_27399413 | NC_021163.1    | Ca_kabuli_chr04 | 27399413                | CC                              | TT              | 1946806476               |
| SNP_P4_49605_27400250 | NC_021163.1    | Ca_kabuli_chr04 | 27400250                | GG                              | CC              | 1946806478               |
| SNP_P4_49608_27402882 | NC_021163.1    | Ca_kabuli_chr04 | 27402882                | CC                              | GG              | 1946806480               |
| SNP_P4_49609_27403145 | NC_021163.1    | Ca_kabuli_chr04 | 27403145                | GG                              | AA              | 1946806482               |
| SNP_P4_49611_27403405 | NC_021163.1    | Ca_kabuli_chr04 | 27403405                | GG                              | AA              | 1946806484               |
| SNP_P4_49612_27403563 | NC_021163.1    | Ca_kabuli_chr04 | 27403563                | CC                              | TT              | 1946806486               |
| SNP_P4_49613_27404936 | NC_021163.1    | Ca_kabuli_chr04 | 27404936                | AA                              | TT              | 1946806488               |
| SNP_P4_49614_27404944 | NC_021163.1    | Ca_kabuli_chr04 | 27404944                | AA                              | GG              | 1946806490               |

| SNPs IDs              | Chromosome IDs | Chromosomes     | Physical positions (bp) | CDC Frontier (Reference genome) | (ILWC46 & LPNB) | NCBI SNPdb Accession IDs |
|-----------------------|----------------|-----------------|-------------------------|---------------------------------|-----------------|--------------------------|
| SNP_P4_49615_27405476 | NC_021163.1    | Ca_kabuli_chr04 | 27405476                | GG                              | AA              | 1946806492               |
| SNP_P4_49616_27405479 | NC_021163.1    | Ca_kabuli_chr04 | 27405479                | CC                              | TT              | 1946806494               |
| SNP_P4_49619_27405724 | NC_021163.1    | Ca_kabuli_chr04 | 27405724                | GG                              | CC              | 1946806496               |
| SNP_P4_49620_27405902 | NC_021163.1    | Ca_kabuli_chr04 | 27405902                | TT                              | CC              | 1946806498               |
| SNP_P4_49621_27406100 | NC_021163.1    | Ca_kabuli_chr04 | 27406100                | GG                              | AA              | 1946806500               |
| SNP_P4_49623_27406136 | NC_021163.1    | Ca_kabuli_chr04 | 27406136                | TT                              | CC              | 1946806502               |
| SNP_P4_49625_27406437 | NC_021163.1    | Ca_kabuli_chr04 | 27406437                | GG                              | AA              | 1946806504               |
| SNP_P4_49626_27406452 | NC_021163.1    | Ca_kabuli_chr04 | 27406452                | GG                              | AA              | 1946806507               |
| SNP_P4_49628_27410784 | NC_021163.1    | Ca_kabuli_chr04 | 27410784                | CC                              | AA              | 1946806509               |
| SNP_P4_49629_27417399 | NC_021163.1    | Ca_kabuli_chr04 | 27417399                | TT                              | CC              | 1946806511               |
| SNP_P4_49630_27417427 | NC_021163.1    | Ca_kabuli_chr04 | 27417427                | CC                              | TT              | 1946806513               |
| SNP_P4_49631_27417454 | NC_021163.1    | Ca_kabuli_chr04 | 27417454                | TT                              | CC              | 1946806515               |
| SNP_P4_49632_27417459 | NC_021163.1    | Ca_kabuli_chr04 | 27417459                | CC                              | AA              | 1946806516               |
| SNP_P4_49633_27417678 | NC_021163.1    | Ca_kabuli_chr04 | 27417678                | GG                              | CC              | 1946806518               |
| SNP_P4_49634_27417712 | NC_021163.1    | Ca_kabuli_chr04 | 27417712                | AA                              | GG              | 1946806520               |
| SNP_P4_49635_27417833 | NC_021163.1    | Ca_kabuli_chr04 | 27417833                | CC                              | GG              | 1946806522               |
| SNP_P4_49636_27418000 | NC_021163.1    | Ca_kabuli_chr04 | 27418000                | TT                              | CC              | 1946806524               |
| SNP_P4_49637_27418035 | NC_021163.1    | Ca_kabuli_chr04 | 27418035                | TT                              | CC              | 1946806526               |
| SNP_P4_49638_27418149 | NC_021163.1    | Ca_kabuli_chr04 | 27418149                | CC                              | TT              | 1946806528               |
| SNP_P4_49639_27418175 | NC_021163.1    | Ca_kabuli_chr04 | 27418175                | CC                              | TT              | 1946806530               |
| SNP_P4_49640_27418180 | NC_021163.1    | Ca_kabuli_chr04 | 27418180                | GG                              | TT              | 1946806532               |
| SNP_P4_49641_27418198 | NC_021163.1    | Ca_kabuli_chr04 | 27418198                | AA                              | GG              | 1946806534               |
| SNP_P4_49642_27418203 | NC_021163.1    | Ca_kabuli_chr04 | 27418203                | AA                              | TT              | 1946806536               |
| SNP_P4_49643_27418252 | NC_021163.1    | Ca_kabuli_chr04 | 27418252                | GG                              | AA              | 1946806538               |
| SNP_P4_49644_27418255 | NC_021163.1    | Ca_kabuli_chr04 | 27418255                | AA                              | CC              | 1946806540               |
| SNP_P4_49645_27418274 | NC_021163.1    | Ca_kabuli_chr04 | 27418274                | AA                              | GG              | 1946806542               |
| SNP_P4_49646_27418287 | NC_021163.1    | Ca_kabuli_chr04 | 27418287                | CC                              | TT              | 1946806544               |
| SNP_P4_49647_27418288 | NC_021163.1    | Ca_kabuli_chr04 | 27418288                | GG                              | CC              | 1946806546               |
| SNP_P4_49648_27418289 | NC_021163.1    | Ca_kabuli_chr04 | 27418289                | CC                              | TT              | 1946806548               |
| SNP_P4_49649_27419286 | NC_021163.1    | Ca_kabuli_chr04 | 27419286                | TT                              | CC              | 1946806550               |
| SNP_P4_49650_27419295 | NC_021163.1    | Ca_kabuli_chr04 | 27419295                | GG                              | CC              | 1946806552               |
| SNP_P4_49651_27419580 | NC_021163.1    | Ca_kabuli_chr04 | 27419580                | AA                              | GG              | 1946806554               |
| SNP_P4_49652_27419590 | NC_021163.1    | Ca_kabuli_chr04 | 27419590                | AA                              | GG              | 1946806556               |
| SNP_P4_49653_27419595 | NC_021163.1    | Ca_kabuli_chr04 | 27419595                | TT                              | GG              | 1946806558               |
| SNP_P4_49654_27419616 | NC_021163.1    | Ca_kabuli_chr04 | 27419616                | AA                              | GG              | 1946806560               |
| SNP_P4_49655_27419651 | NC_021163.1    | Ca_kabuli_chr04 | 27419651                | TT                              | CC              | 1946806562               |
| SNP_P4_49656_27421091 | NC_021163.1    | Ca_kabuli_chr04 | 27421091                | AA                              | TT              | 1946806564               |
| SNP_P4_49657_27421092 | NC_021163.1    | Ca_kabuli_chr04 | 27421092                | TT                              | AA              | 1946806566               |
| SNP_P4_49658_27423124 | NC_021163.1    | Ca_kabuli_chr04 | 27423124                | CC                              | TT              | 1946806568               |
| SNP_P4_49659_27423635 | NC_021163.1    | Ca_kabuli_chr04 | 27423635                | AA                              | TT              | 1946806570               |
| SNP_P4_49660_27423675 | NC_021163.1    | Ca_kabuli_chr04 | 27423675                | AA                              | GG              | 1946806572               |
| SNP_P4_49661_27423684 | NC_021163.1    | Ca_kabuli_chr04 | 27423684                | AA                              | GG              | 1946806574               |

| SNPs IDs              | Chromosome IDs | Chromosomes     | Physical positions (bp) | CDC Frontier (Reference genome) | (ILWC46 & LPNB) | NCBI SNPdb Accession IDs |
|-----------------------|----------------|-----------------|-------------------------|---------------------------------|-----------------|--------------------------|
| SNP_P4_49662_27423704 | NC_021163.1    | Ca_kabuli_chr04 | 27423704                | TT                              | AA              | 1946806575               |
| SNP_P4_49663_27424209 | NC_021163.1    | Ca_kabuli_chr04 | 27424209                | CC                              | TT              | 1946806577               |
| SNP_P4_49664_27424280 | NC_021163.1    | Ca_kabuli_chr04 | 27424280                | CC                              | TT              | 1946806580               |
| SNP_P4_49665_27424306 | NC_021163.1    | Ca_kabuli_chr04 | 27424306                | AA                              | GG              | 1946806582               |
| SNP_P4_49667_27424586 | NC_021163.1    | Ca_kabuli_chr04 | 27424586                | AA                              | GG              | 1946806584               |
| SNP_P4_49668_27424596 | NC_021163.1    | Ca_kabuli_chr04 | 27424596                | GG                              | TT              | 1946806586               |
| SNP_P4_49669_27424602 | NC_021163.1    | Ca_kabuli_chr04 | 27424602                | GG                              | TT              | 1946806588               |
| SNP_P4_49670_27426806 | NC_021163.1    | Ca_kabuli_chr04 | 27426806                | AA                              | GG              | 1946806590               |
| SNP_P4_49671_27426859 | NC_021163.1    | Ca_kabuli_chr04 | 27426859                | CC                              | AA              | 1946806592               |
| SNP_P4_49672_27427168 | NC_021163.1    | Ca_kabuli_chr04 | 27427168                | AA                              | GG              | 1946806594               |
| SNP_P4_49673_27427173 | NC_021163.1    | Ca_kabuli_chr04 | 27427173                | TT                              | GG              | 1946806596               |
| SNP_P4_49674_27427182 | NC_021163.1    | Ca_kabuli_chr04 | 27427182                | TT                              | GG              | 1946806598               |
| SNP_P4_49676_27432908 | NC_021163.1    | Ca_kabuli_chr04 | 27432908                | TT                              | CC              | 1946806600               |
| SNP_P4_49677_27432910 | NC_021163.1    | Ca_kabuli_chr04 | 27432910                | TT                              | CC              | 1946806602               |
| SNP_P4_49678_27432912 | NC_021163.1    | Ca_kabuli_chr04 | 27432912                | GG                              | TT              | 1946806604               |
| SNP_P4_49679_27432914 | NC_021163.1    | Ca_kabuli_chr04 | 27432914                | AA                              | GG              | 1946806606               |
| SNP_P4_49680_27433199 | NC_021163.1    | Ca_kabuli_chr04 | 27433199                | AA                              | TT              | 1946806608               |
| SNP_P4_49681_27433835 | NC_021163.1    | Ca_kabuli_chr04 | 27433835                | CC                              | AA              | 1946806610               |
| SNP_P4_49682_27433851 | NC_021163.1    | Ca_kabuli_chr04 | 27433851                | CC                              | GG              | 1946806612               |
| SNP_P4_49683_27434014 | NC_021163.1    | Ca_kabuli_chr04 | 27434014                | CC                              | GG              | 1946806614               |
| SNP_P4_49684_27434017 | NC_021163.1    | Ca_kabuli_chr04 | 27434017                | AA                              | TT              | 1946806616               |
| SNP_P4_49685_27434048 | NC_021163.1    | Ca_kabuli_chr04 | 27434048                | GG                              | AA              | 1946806618               |
| SNP_P4_49686_27434050 | NC_021163.1    | Ca_kabuli_chr04 | 27434050                | CC                              | TT              | 1946806620               |
| SNP_P4_49687_27434343 | NC_021163.1    | Ca_kabuli_chr04 | 27434343                | CC                              | TT              | 1946806622               |
| SNP_P4_49688_27434836 | NC_021163.1    | Ca_kabuli_chr04 | 27434836                | TT                              | CC              | 1946806624               |
| SNP_P4_49690_27435882 | NC_021163.1    | Ca_kabuli_chr04 | 27435882                | GG                              | AA              | 1946806626               |
| SNP_P4_49691_27436295 | NC_021163.1    | Ca_kabuli_chr04 | 27436295                | GG                              | AA              | 1946806628               |
| SNP_P4_49692_27436486 | NC_021163.1    | Ca_kabuli_chr04 | 27436486                | CC                              | TT              | 1946806630               |
| SNP_P4_49693_27436776 | NC_021163.1    | Ca_kabuli_chr04 | 27436776                | AA                              | TT              | 1946806632               |
| SNP_P4_49694_27440475 | NC_021163.1    | Ca_kabuli_chr04 | 27440475                | GG                              | AA              | 1946806634               |
| SNP_P4_49695_27440687 | NC_021163.1    | Ca_kabuli_chr04 | 27440687                | GG                              | AA              | 1946806636               |
| SNP_P4_49696_27440692 | NC_021163.1    | Ca_kabuli_chr04 | 27440692                | TT                              | CC              | 1946806638               |
| SNP_P4_49697_27440693 | NC_021163.1    | Ca_kabuli_chr04 | 27440693                | AA                              | CC              | 1946806640               |
| SNP_P4_49698_27440925 | NC_021163.1    | Ca_kabuli_chr04 | 27440925                | GG                              | AA              | 1946806642               |
| SNP_P4_49699_27440938 | NC_021163.1    | Ca_kabuli_chr04 | 27440938                | CC                              | TT              | 1946806644               |
| SNP_P4_49700_27444510 | NC_021163.1    | Ca_kabuli_chr04 | 27444510                | TT                              | CC              | 1946806646               |
| SNP_P4_49701_27444528 | NC_021163.1    | Ca_kabuli_chr04 | 27444528                | AA                              | GG              | 1946806648               |
| SNP_P4_49702_27444535 | NC_021163.1    | Ca_kabuli_chr04 | 27444535                | TT                              | AA              | 1946806650               |
| SNP_P4_49703_27444964 | NC_021163.1    | Ca_kabuli_chr04 | 27444964                | TT                              | CC              | 1946806652               |
| SNP_P4_49704_27462647 | NC_021163.1    | Ca_kabuli_chr04 | 27462647                | CC                              | TT              | 1946806654               |
| SNP_P4_49706_27478005 | NC_021163.1    | Ca_kabuli_chr04 | 27478005                | GG                              | AA              | 1946806656               |
| SNP_P4_49707_27478243 | NC_021163.1    | Ca_kabuli_chr04 | 27478243                | TT                              | CC              | 1946806658               |

| SNPs IDs              | Chromosome IDs | Chromosomes     | Physical positions (bp) | CDC Frontier (Reference genome) | (ILWC46 & LPNB) | NCBI SNPdb Accession IDs |
|-----------------------|----------------|-----------------|-------------------------|---------------------------------|-----------------|--------------------------|
| SNP_P4_49709_27478320 | NC_021163.1    | Ca_kabuli_chr04 | 27478320                | CC                              | TT              | 1946806660               |
| SNP_P4_49710_27478340 | NC_021163.1    | Ca_kabuli_chr04 | 27478340                | GG                              | AA              | 1946806662               |
| SNP_P4_49711_27478344 | NC_021163.1    | Ca_kabuli_chr04 | 27478344                | AA                              | GG              | 1946806664               |
| SNP_P4_49712_27478345 | NC_021163.1    | Ca_kabuli_chr04 | 27478345                | GG                              | CC              | 1946806666               |
| SNP_P4_49713_27478525 | NC_021163.1    | Ca_kabuli_chr04 | 27478525                | AA                              | GG              | 1946806668               |
| SNP_P4_49714_27478717 | NC_021163.1    | Ca_kabuli_chr04 | 27478717                | AA                              | GG              | 1946806671               |
| SNP_P4_49716_27481304 | NC_021163.1    | Ca_kabuli_chr04 | 27481304                | CC                              | TT              | 1946806673               |
| SNP_P4_49717_27481414 | NC_021163.1    | Ca_kabuli_chr04 | 27481414                | GG                              | AA              | 1946806675               |
| SNP_P4_49718_27481421 | NC_021163.1    | Ca_kabuli_chr04 | 27481421                | CC                              | TT              | 1946806677               |
| SNP_P4_49719_27481422 | NC_021163.1    | Ca_kabuli_chr04 | 27481422                | CC                              | TT              | 1946806679               |
| SNP_P4_49720_27481427 | NC_021163.1    | Ca_kabuli_chr04 | 27481427                | TT                              | CC              | 1946806681               |
| SNP_P4_49721_27481496 | NC_021163.1    | Ca_kabuli_chr04 | 27481496                | AA                              | GG              | 1946806683               |
| SNP_P4_49722_27481516 | NC_021163.1    | Ca_kabuli_chr04 | 27481516                | CC                              | TT              | 1946806686               |
| SNP_P4_49723_27481722 | NC_021163.1    | Ca_kabuli_chr04 | 27481722                | GG                              | AA              | 1946806688               |
| SNP_P4_49724_27481794 | NC_021163.1    | Ca_kabuli_chr04 | 27481794                | GG                              | TT              | 1946806690               |
| SNP_P4_49726_27484314 | NC_021163.1    | Ca_kabuli_chr04 | 27484314                | TT                              | AA              | 1946806692               |
| SNP_P4_49727_27484380 | NC_021163.1    | Ca_kabuli_chr04 | 27484380                | GG                              | AA              | 1946806694               |
| SNP_P4_49728_27484652 | NC_021163.1    | Ca_kabuli_chr04 | 27484652                | AA                              | GG              | 1946806696               |
| SNP_P4_49729_27484658 | NC_021163.1    | Ca_kabuli_chr04 | 27484658                | AA                              | GG              | 1946806698               |
| SNP_P4_49731_27491062 | NC_021163.1    | Ca_kabuli_chr04 | 27491062                | TT                              | AA              | 1946806700               |
| SNP_P4_49732_27491072 | NC_021163.1    | Ca_kabuli_chr04 | 27491072                | AA                              | GG              | 1946806702               |
| SNP_P4_49733_27491094 | NC_021163.1    | Ca_kabuli_chr04 | 27491094                | GG                              | CC              | 1946806704               |
| SNP_P4_49734_27491095 | NC_021163.1    | Ca_kabuli_chr04 | 27491095                | TT                              | AA              | 1946806706               |
| SNP_P4_49735_27491829 | NC_021163.1    | Ca_kabuli_chr04 | 27491829                | TT                              | AA              | 1946806707               |
| SNP_P4_49736_27491879 | NC_021163.1    | Ca_kabuli_chr04 | 27491879                | GG                              | AA              | 1946806709               |
| SNP_P4_49737_27493246 | NC_021163.1    | Ca_kabuli_chr04 | 27493246                | AA                              | TT              | 1946806711               |
| SNP_P4_49738_27494565 | NC_021163.1    | Ca_kabuli_chr04 | 27494565                | AA                              | TT              | 1946806713               |
| SNP_P4_49739_27496098 | NC_021163.1    | Ca_kabuli_chr04 | 27496098                | CC                              | TT              | 1946806715               |
| SNP_P4_49740_27496381 | NC_021163.1    | Ca_kabuli_chr04 | 27496381                | GG                              | CC              | 1946806717               |
| SNP_P4_49742_27497443 | NC_021163.1    | Ca_kabuli_chr04 | 27497443                | GG                              | CC              | 1946806719               |
| SNP_P4_49745_27498604 | NC_021163.1    | Ca_kabuli_chr04 | 27498604                | TT                              | CC              | 1946806721               |
| SNP_P4_49746_27499561 | NC_021163.1    | Ca_kabuli_chr04 | 27499561                | CC                              | GG              | 1946806723               |
| SNP_P4_49747_27499576 | NC_021163.1    | Ca_kabuli_chr04 | 27499576                | GG                              | AA              | 1946806725               |
| SNP_P4_49748_27500246 | NC_021163.1    | Ca_kabuli_chr04 | 27500246                | TT                              | CC              | 1946806727               |
| SNP_P4_49749_27500270 | NC_021163.1    | Ca_kabuli_chr04 | 27500270                | AA                              | TT              | 1946806729               |
| SNP_P4_49750_27500278 | NC_021163.1    | Ca_kabuli_chr04 | 27500278                | AA                              | GG              | 1946806730               |
| SNP_P4_49751_27500295 | NC_021163.1    | Ca_kabuli_chr04 | 27500295                | AA                              | CC              | 1946806732               |
| SNP_P4_49752_27501197 | NC_021163.1    | Ca_kabuli_chr04 | 27501197                | TT                              | CC              | 1946806734               |
| SNP_P4_49754_27503309 | NC_021163.1    | Ca_kabuli_chr04 | 27503309                | CC                              | AA              | 1946806736               |
| SNP_P4_49755_27503548 | NC_021163.1    | Ca_kabuli_chr04 | 27503548                | CC                              | GG              | 1946806738               |
| SNP_P4_49756_27503625 | NC_021163.1    | Ca_kabuli_chr04 | 27503625                | AA                              | GG              | 1946806740               |
| SNP_P4_49758_27504332 | NC_021163.1    | Ca_kabuli_chr04 | 27504332                | TT                              | CC              | 1946806742               |

| SNPs IDs              | Chromosome IDs | Chromosomes     | Physical positions (bp) | CDC Frontier (Reference genome) | (ILWC46 & LPNB) | NCBI SNPdb Accession IDs |
|-----------------------|----------------|-----------------|-------------------------|---------------------------------|-----------------|--------------------------|
| SNP_P4_49759_27505639 | NC_021163.1    | Ca_kabuli_chr04 | 27505639                | CC                              | TT              | 1946806744               |
| SNP_P4_49760_27505685 | NC_021163.1    | Ca_kabuli_chr04 | 27505685                | GG                              | AA              | 1946806746               |
| SNP_P4_49761_27505854 | NC_021163.1    | Ca_kabuli_chr04 | 27505854                | GG                              | CC              | 1946806748               |
| SNP_P4_49763_27506357 | NC_021163.1    | Ca_kabuli_chr04 | 27506357                | TT                              | CC              | 1946806750               |
| SNP_P4_49764_27506371 | NC_021163.1    | Ca_kabuli_chr04 | 27506371                | AA                              | GG              | 1946806752               |
| SNP_P4_49766_27509057 | NC_021163.1    | Ca_kabuli_chr04 | 27509057                | CC                              | AA              | 1946806754               |
| SNP_P4_49768_27509830 | NC_021163.1    | Ca_kabuli_chr04 | 27509830                | GG                              | AA              | 1946806756               |
| SNP_P4_49769_27509849 | NC_021163.1    | Ca_kabuli_chr04 | 27509849                | TT                              | GG              | 1946806758               |
| SNP_P4_49770_27510784 | NC_021163.1    | Ca_kabuli_chr04 | 27510784                | TT                              | AA              | 1946806760               |
| SNP_P4_49771_27510948 | NC_021163.1    | Ca_kabuli_chr04 | 27510948                | TT                              | CC              | 1946806762               |
| SNP_P4_49772_27512358 | NC_021163.1    | Ca_kabuli_chr04 | 27512358                | TT                              | GG              | 1946806764               |
| SNP_P4_49775_27514150 | NC_021163.1    | Ca_kabuli_chr04 | 27514150                | AA                              | GG              | 1946806766               |
| SNP_P4_49777_27515699 | NC_021163.1    | Ca_kabuli_chr04 | 27515699                | AA                              | GG              | 1946806768               |
| SNP_P4_49778_27516401 | NC_021163.1    | Ca_kabuli_chr04 | 27516401                | GG                              | AA              | 1946806770               |
| SNP_P4_49779_27517340 | NC_021163.1    | Ca_kabuli_chr04 | 27517340                | TT                              | GG              | 1946806772               |
| SNP_P4_49780_27519188 | NC_021163.1    | Ca_kabuli_chr04 | 27519188                | AA                              | TT              | 1946806774               |
| SNP_P4_49782_27530375 | NC_021163.1    | Ca_kabuli_chr04 | 27530375                | CC                              | AA              | 1946806776               |
| SNP_P4_49783_27531060 | NC_021163.1    | Ca_kabuli_chr04 | 27531060                | TT                              | CC              | 1946806778               |
| SNP_P4_49784_27531378 | NC_021163.1    | Ca_kabuli_chr04 | 27531378                | TT                              | GG              | 1946806780               |
| SNP_P4_49785_27536595 | NC_021163.1    | Ca_kabuli_chr04 | 27536595                | GG                              | AA              | 1946806782               |
| SNP_P4_49787_27538530 | NC_021163.1    | Ca_kabuli_chr04 | 27538530                | AA                              | CC              | 1946806784               |
| SNP_P4_49788_27538708 | NC_021163.1    | Ca_kabuli_chr04 | 27538708                | AA                              | GG              | 1946806786               |
| SNP_P4_49789_27538909 | NC_021163.1    | Ca_kabuli_chr04 | 27538909                | AA                              | CC              | 1946806788               |
| SNP_P4_49792_27540315 | NC_021163.1    | Ca_kabuli_chr04 | 27540315                | AA                              | CC              | 1946806790               |
| SNP_P4_49793_27540326 | NC_021163.1    | Ca_kabuli_chr04 | 27540326                | CC                              | TT              | 1946806792               |
| SNP_P4_49794_27545195 | NC_021163.1    | Ca_kabuli_chr04 | 27545195                | AA                              | CC              | 1946806794               |
| SNP_P4_49795_27545196 | NC_021163.1    | Ca_kabuli_chr04 | 27545196                | TT                              | CC              | 1946806796               |
| SNP_P4_49796_27545242 | NC_021163.1    | Ca_kabuli_chr04 | 27545242                | CC                              | TT              | 1946806798               |
| SNP_P4_49797_27545247 | NC_021163.1    | Ca_kabuli_chr04 | 27545247                | CC                              | TT              | 1946806801               |
| SNP_P4_49798_27545546 | NC_021163.1    | Ca_kabuli_chr04 | 27545546                | TT                              | AA              | 1946806803               |
| SNP_P4_49799_27545576 | NC_021163.1    | Ca_kabuli_chr04 | 27545576                | CC                              | TT              | 1946806805               |
| SNP_P4_49800_27545577 | NC_021163.1    | Ca_kabuli_chr04 | 27545577                | CC                              | TT              | 1946806807               |
| SNP_P4_49801_27548253 | NC_021163.1    | Ca_kabuli_chr04 | 27548253                | TT                              | AA              | 1946806809               |
| SNP_P4_49803_27549091 | NC_021163.1    | Ca_kabuli_chr04 | 27549091                | GG                              | AA              | 1946806811               |
| SNP_P4_49804_27549284 | NC_021163.1    | Ca_kabuli_chr04 | 27549284                | AA                              | GG              | 1946806813               |
| SNP_P4_49805_27549693 | NC_021163.1    | Ca_kabuli_chr04 | 27549693                | AA                              | GG              | 1946806815               |
| SNP_P4_49806_27549707 | NC_021163.1    | Ca_kabuli_chr04 | 27549707                | CC                              | TT              | 1946806818               |
| SNP_P4_49807_27549826 | NC_021163.1    | Ca_kabuli_chr04 | 27549826                | GG                              | AA              | 1946806820               |
| SNP_P4_49808_27550063 | NC_021163.1    | Ca_kabuli_chr04 | 27550063                | TT                              | AA              | 1946806822               |
| SNP_P4_49809_27550595 | NC_021163.1    | Ca_kabuli_chr04 | 27550595                | TT                              | CC              | 1946806824               |
| SNP_P4_49810_27551176 | NC_021163.1    | Ca_kabuli_chr04 | 27551176                | TT                              | GG              | 1946806826               |
| SNP_P4_49811_27551505 | NC_021163.1    | Ca_kabuli_chr04 | 27551505                | AA                              | GG              | 1946806828               |

| SNPs IDs              | Chromosome IDs | Chromosomes     | Physical positions (bp) | CDC Frontier (Reference genome) | (ILWC46 & LPNB) | NCBI SNPdb Accession IDs |
|-----------------------|----------------|-----------------|-------------------------|---------------------------------|-----------------|--------------------------|
| SNP_P4_49812_27551521 | NC_021163.1    | Ca_kabuli_chr04 | 27551521                | TT                              | GG              | 1946806830               |
| SNP_P4_49813_27553256 | NC_021163.1    | Ca_kabuli_chr04 | 27553256                | TT                              | AA              | 1946806832               |
| SNP_P4_49814_27553343 | NC_021163.1    | Ca_kabuli_chr04 | 27553343                | CC                              | TT              | 1946806834               |
| SNP_P4_49815_27553442 | NC_021163.1    | Ca_kabuli_chr04 | 27553442                | TT                              | CC              | 1946806836               |
| SNP_P4_49816_27554287 | NC_021163.1    | Ca_kabuli_chr04 | 27554287                | AA                              | CC              | 1946806838               |
| SNP_P4_49817_27554405 | NC_021163.1    | Ca_kabuli_chr04 | 27554405                | TT                              | CC              | 1946806840               |
| SNP_P4_49818_27554408 | NC_021163.1    | Ca_kabuli_chr04 | 27554408                | TT                              | CC              | 1946806842               |
| SNP_P4_49819_27554412 | NC_021163.1    | Ca_kabuli_chr04 | 27554412                | AA                              | GG              | 1946806844               |
| SNP_P4_49820_27554429 | NC_021163.1    | Ca_kabuli_chr04 | 27554429                | TT                              | CC              | 1946806846               |
| SNP_P4_49821_27554579 | NC_021163.1    | Ca_kabuli_chr04 | 27554579                | AA                              | GG              | 1946806848               |
| SNP_P4_49823_27554664 | NC_021163.1    | Ca_kabuli_chr04 | 27554664                | AA                              | TT              | 1946806850               |
| SNP_P4_49824_27554669 | NC_021163.1    | Ca_kabuli_chr04 | 27554669                | GG                              | TT              | 1946806852               |
| SNP_P4_49825_27554675 | NC_021163.1    | Ca_kabuli_chr04 | 27554675                | AA                              | GG              | 1946806854               |
| SNP_P4_49826_27554681 | NC_021163.1    | Ca_kabuli_chr04 | 27554681                | TT                              | CC              | 1946806856               |
| SNP_P4_49827_27554831 | NC_021163.1    | Ca_kabuli_chr04 | 27554831                | TT                              | CC              | 1946806858               |
| SNP_P4_49828_27554975 | NC_021163.1    | Ca_kabuli_chr04 | 27554975                | AA                              | GG              | 1946806860               |
| SNP_P4_49830_27555439 | NC_021163.1    | Ca_kabuli_chr04 | 27555439                | CC                              | AA              | 1946806862               |
| SNP_P4_49831_27555446 | NC_021163.1    | Ca_kabuli_chr04 | 27555446                | AA                              | GG              | 1946806864               |
| SNP_P4_49832_27555457 | NC_021163.1    | Ca_kabuli_chr04 | 27555457                | AA                              | CC              | 1946806866               |
| SNP_P4_49833_27555488 | NC_021163.1    | Ca_kabuli_chr04 | 27555488                | GG                              | AA              | 1946806868               |
| SNP_P4_49834_27555494 | NC_021163.1    | Ca_kabuli_chr04 | 27555494                | TT                              | AA              | 1946806870               |
| SNP_P4_49835_27555496 | NC_021163.1    | Ca_kabuli_chr04 | 27555496                | GG                              | AA              | 1946806872               |
| SNP_P4_49836_27555573 | NC_021163.1    | Ca_kabuli_chr04 | 27555573                | AA                              | TT              | 1946806874               |
| SNP_P4_49837_27555581 | NC_021163.1    | Ca_kabuli_chr04 | 27555581                | TT                              | CC              | 1946806876               |
| SNP_P4_49838_27555609 | NC_021163.1    | Ca_kabuli_chr04 | 27555609                | AA                              | GG              | 1946806878               |
| SNP_P4_49839_27555664 | NC_021163.1    | Ca_kabuli_chr04 | 27555664                | CC                              | AA              | 1946806880               |
| SNP_P4_49840_27558181 | NC_021163.1    | Ca_kabuli_chr04 | 27558181                | GG                              | AA              | 1946806882               |
| SNP_P4_49842_27562729 | NC_021163.1    | Ca_kabuli_chr04 | 27562729                | TT                              | GG              | 1946806884               |
| SNP_P4_49843_27567251 | NC_021163.1    | Ca_kabuli_chr04 | 27567251                | AA                              | GG              | 1946806886               |
| SNP_P4_49844_27567256 | NC_021163.1    | Ca_kabuli_chr04 | 27567256                | GG                              | AA              | 1946806888               |
| SNP_P4_49845_27569850 | NC_021163.1    | Ca_kabuli_chr04 | 27569850                | AA                              | CC              | 1946806890               |
| SNP_P4_49846_27569861 | NC_021163.1    | Ca_kabuli_chr04 | 27569861                | GG                              | AA              | 1946806892               |
| SNP_P4_49847_27570360 | NC_021163.1    | Ca_kabuli_chr04 | 27570360                | TT                              | CC              | 1946806894               |
| SNP_P4_49848_27571474 | NC_021163.1    | Ca_kabuli_chr04 | 27571474                | TT                              | GG              | 1946806896               |
| SNP_P4_49850_27573849 | NC_021163.1    | Ca_kabuli_chr04 | 27573849                | TT                              | GG              | 1946806898               |
| SNP_P4_49852_27574573 | NC_021163.1    | Ca_kabuli_chr04 | 27574573                | TT                              | CC              | 1946806900               |
| SNP_P4_49853_27578626 | NC_021163.1    | Ca_kabuli_chr04 | 27578626                | AA                              | GG              | 1946806901               |
| SNP_P4_49854_27579091 | NC_021163.1    | Ca_kabuli_chr04 | 27579091                | CC                              | TT              | 1946806903               |
| SNP_P4_49855_27579469 | NC_021163.1    | Ca_kabuli_chr04 | 27579469                | GG                              | AA              | 1946806907               |
| SNP_P4_49856_27579967 | NC_021163.1    | Ca_kabuli_chr04 | 27579967                | GG                              | AA              | 1946806909               |
| SNP_P4_49858_27580896 | NC_021163.1    | Ca_kabuli_chr04 | 27580896                | TT                              | AA              | 1946806911               |
| SNP_P4_49859_27581153 | NC_021163.1    | Ca_kabuli_chr04 | 27581153                | AA                              | TT              | 1946806914               |

| SNPs IDs              | Chromosome IDs | Chromosomes     | Physical positions (bp) | CDC Frontier (Reference genome) | (ILWC46 & LPNB) | NCBI SNPdb Accession IDs |
|-----------------------|----------------|-----------------|-------------------------|---------------------------------|-----------------|--------------------------|
| SNP_P4_49860_27583485 | NC_021163.1    | Ca_kabuli_chr04 | 27583485                | GG                              | CC              | 1946806916               |
| SNP_P4_49861_27587074 | NC_021163.1    | Ca_kabuli_chr04 | 27587074                | AA                              | CC              | 1946806918               |
| SNP_P4_49862_27587221 | NC_021163.1    | Ca_kabuli_chr04 | 27587221                | GG                              | AA              | 1946806920               |
| SNP_P4_49863_27587308 | NC_021163.1    | Ca_kabuli_chr04 | 27587308                | GG                              | AA              | 1946806923               |
| SNP_P4_49864_27587423 | NC_021163.1    | Ca_kabuli_chr04 | 27587423                | AA                              | CC              | 1946806925               |
| SNP_P4_49865_27587446 | NC_021163.1    | Ca_kabuli_chr04 | 27587446                | AA                              | GG              | 1946806927               |
| SNP_P4_49866_27587578 | NC_021163.1    | Ca_kabuli_chr04 | 27587578                | CC                              | TT              | 1946806929               |
| SNP_P4_49867_27588110 | NC_021163.1    | Ca_kabuli_chr04 | 27588110                | TT                              | CC              | 1946806931               |
| SNP_P4_49868_27588669 | NC_021163.1    | Ca_kabuli_chr04 | 27588669                | TT                              | CC              | 1946806933               |
| SNP_P4_49869_27588745 | NC_021163.1    | Ca_kabuli_chr04 | 27588745                | GG                              | CC              | 1946806935               |
| SNP_P4_49870_27588750 | NC_021163.1    | Ca_kabuli_chr04 | 27588750                | CC                              | TT              | 1946806938               |
| SNP_P4_49871_27593034 | NC_021163.1    | Ca_kabuli_chr04 | 27593034                | TT                              | CC              | 1946806940               |
| SNP_P4_49872_27593319 | NC_021163.1    | Ca_kabuli_chr04 | 27593319                | AA                              | GG              | 1946806942               |
| SNP_P4_49874_27603495 | NC_021163.1    | Ca_kabuli_chr04 | 27603495                | CC                              | TT              | 1946806945               |
| SNP_P4_49875_27604761 | NC_021163.1    | Ca_kabuli_chr04 | 27604761                | AA                              | GG              | 1946806947               |
| SNP_P4_49876_27611361 | NC_021163.1    | Ca_kabuli_chr04 | 27611361                | GG                              | AA              | 1946806949               |
| SNP_P4_49877_27615308 | NC_021163.1    | Ca_kabuli_chr04 | 27615308                | GG                              | AA              | 1946806951               |
| SNP_P4_49878_27618457 | NC_021163.1    | Ca_kabuli_chr04 | 27618457                | CC                              | AA              | 1946806953               |
| SNP_P4_49879_27618513 | NC_021163.1    | Ca_kabuli_chr04 | 27618513                | TT                              | CC              | 1946806955               |
| SNP_P4_49881_27626999 | NC_021163.1    | Ca_kabuli_chr04 | 27626999                | TT                              | CC              | 1946806957               |
| SNP_P4_49882_27627082 | NC_021163.1    | Ca_kabuli_chr04 | 27627082                | AA                              | GG              | 1946806959               |
| SNP_P4_49884_27631660 | NC_021163.1    | Ca_kabuli_chr04 | 27631660                | TT                              | CC              | 1946806961               |
| SNP_P4_49885_27631675 | NC_021163.1    | Ca_kabuli_chr04 | 27631675                | CC                              | TT              | 1946806964               |
| SNP_P4_49886_27631680 | NC_021163.1    | Ca_kabuli_chr04 | 27631680                | TT                              | CC              | 1946806966               |
| SNP_P4_49887_27631754 | NC_021163.1    | Ca_kabuli_chr04 | 27631754                | TT                              | CC              | 1946806968               |
| SNP_P4_49888_27631758 | NC_021163.1    | Ca_kabuli_chr04 | 27631758                | GG                              | AA              | 1946806970               |
| SNP_P4_49889_27631761 | NC_021163.1    | Ca_kabuli_chr04 | 27631761                | AA                              | GG              | 1946806972               |
| SNP_P4_49890_27631773 | NC_021163.1    | Ca_kabuli_chr04 | 27631773                | AA                              | GG              | 1946806975               |
| SNP_P4_49891_27631774 | NC_021163.1    | Ca_kabuli_chr04 | 27631774                | TT                              | CC              | 1946806977               |
| SNP_P4_49892_27631781 | NC_021163.1    | Ca_kabuli_chr04 | 27631781                | CC                              | AA              | 1946806979               |
| SNP_P4_49893_27631784 | NC_021163.1    | Ca_kabuli_chr04 | 27631784                | TT                              | AA              | 1946806981               |
| SNP_P4_49894_27631922 | NC_021163.1    | Ca_kabuli_chr04 | 27631922                | AA                              | GG              | 1946806983               |
| SNP_P4_49895_27631930 | NC_021163.1    | Ca_kabuli_chr04 | 27631930                | AA                              | GG              | 1946806986               |
| SNP_P4_49896_27631943 | NC_021163.1    | Ca_kabuli_chr04 | 27631943                | AA                              | TT              | 1946806988               |
| SNP_P4_49897_27634482 | NC_021163.1    | Ca_kabuli_chr04 | 27634482                | GG                              | AA              | 1946806990               |
| SNP_P4_49898_27635037 | NC_021163.1    | Ca_kabuli_chr04 | 27635037                | GG                              | TT              | 1946806993               |
| SNP_P4_49899_27635038 | NC_021163.1    | Ca_kabuli_chr04 | 27635038                | GG                              | AA              | 1946806995               |
| SNP_P4_49900_27635080 | NC_021163.1    | Ca_kabuli_chr04 | 27635080                | GG                              | AA              | 1946806997               |
| SNP_P4_49901_27635142 | NC_021163.1    | Ca_kabuli_chr04 | 27635142                | GG                              | AA              | 1946806999               |
| SNP_P4_49902_27635155 | NC_021163.1    | Ca_kabuli_chr04 | 27635155                | TT                              | GG              | 1946807002               |
| SNP_P4_49903_27635202 | NC_021163.1    | Ca_kabuli_chr04 | 27635202                | CC                              | TT              | 1946807004               |
| SNP_P4_49905_27636795 | NC_021163.1    | Ca_kabuli_chr04 | 27636795                | CC                              | TT              | 1946807006               |

| SNPs IDs              | Chromosome IDs | Chromosomes     | Physical positions (bp) | CDC Frontier (Reference genome) | (ILWC46 & LPNB) | NCBI SNPdb Accession IDs |
|-----------------------|----------------|-----------------|-------------------------|---------------------------------|-----------------|--------------------------|
| SNP_P4_49906_27636994 | NC_021163.1    | Ca_kabuli_chr04 | 27636994                | GG                              | TT              | 1946807008               |
| SNP_P4_49908_27637331 | NC_021163.1    | Ca_kabuli_chr04 | 27637331                | CC                              | TT              | 1946807010               |
| SNP_P4_49910_27637682 | NC_021163.1    | Ca_kabuli_chr04 | 27637682                | GG                              | AA              | 1946807012               |
| SNP_P4_49912_27638128 | NC_021163.1    | Ca_kabuli_chr04 | 27638128                | CC                              | TT              | 1946807014               |
| SNP_P4_49913_27638261 | NC_021163.1    | Ca_kabuli_chr04 | 27638261                | AA                              | GG              | 1946807016               |
| SNP_P4_49915_27639562 | NC_021163.1    | Ca_kabuli_chr04 | 27639562                | GG                              | AA              | 1946807018               |
| SNP_P4_49916_27639575 | NC_021163.1    | Ca_kabuli_chr04 | 27639575                | GG                              | AA              | 1946807020               |
| SNP_P4_49917_27639586 | NC_021163.1    | Ca_kabuli_chr04 | 27639586                | TT                              | AA              | 1946807022               |
| SNP_P4_49918_27639619 | NC_021163.1    | Ca_kabuli_chr04 | 27639619                | TT                              | AA              | 1946807024               |
| SNP_P4_49919_27639620 | NC_021163.1    | Ca_kabuli_chr04 | 27639620                | TT                              | AA              | 1946807026               |
| SNP_P4_49920_27639621 | NC_021163.1    | Ca_kabuli_chr04 | 27639621                | TT                              | AA              | 1946807028               |
| SNP_P4_49921_27639622 | NC_021163.1    | Ca_kabuli_chr04 | 27639622                | TT                              | AA              | 1946807030               |
| SNP_P4_49922_27647413 | NC_021163.1    | Ca_kabuli_chr04 | 27647413                | CC                              | TT              | 1946807032               |
| SNP_P4_49923_27647558 | NC_021163.1    | Ca_kabuli_chr04 | 27647558                | CC                              | TT              | 1946807034               |
| SNP_P4_49925_27647783 | NC_021163.1    | Ca_kabuli_chr04 | 27647783                | GG                              | AA              | 1946807036               |
| SNP_P4_49926_27650331 | NC_021163.1    | Ca_kabuli_chr04 | 27650331                | TT                              | CC              | 1946807038               |
| SNP_P4_49927_27653645 | NC_021163.1    | Ca_kabuli_chr04 | 27653645                | CC                              | TT              | 1946807040               |
| SNP_P4_49928_27654187 | NC_021163.1    | Ca_kabuli_chr04 | 27654187                | TT                              | CC              | 1946807042               |
| SNP_P4_49929_27656590 | NC_021163.1    | Ca_kabuli_chr04 | 27656590                | TT                              | GG              | 1946807044               |
| SNP_P4_49930_27657055 | NC_021163.1    | Ca_kabuli_chr04 | 27657055                | TT                              | CC              | 1946807046               |
| SNP_P4_49931_27657071 | NC_021163.1    | Ca_kabuli_chr04 | 27657071                | TT                              | GG              | 1946807048               |
| SNP_P4_49932_27657148 | NC_021163.1    | Ca_kabuli_chr04 | 27657148                | TT                              | AA              | 1946807050               |
| SNP_P4_49933_27657272 | NC_021163.1    | Ca_kabuli_chr04 | 27657272                | AA                              | GG              | 1946807051               |
| SNP_P4_49934_27657456 | NC_021163.1    | Ca_kabuli_chr04 | 27657456                | TT                              | GG              | 1946807054               |
| SNP_P4_49935_27659499 | NC_021163.1    | Ca_kabuli_chr04 | 27659499                | AA                              | GG              | 1946807056               |
| SNP_P4_49936_27664476 | NC_021163.1    | Ca_kabuli_chr04 | 27664476                | AA                              | GG              | 1946807058               |
| SNP_P4_49938_27675479 | NC_021163.1    | Ca_kabuli_chr04 | 27675479                | CC                              | TT              | 1946807060               |
| SNP_P4_49939_27675820 | NC_021163.1    | Ca_kabuli_chr04 | 27675820                | CC                              | GG              | 1946807062               |
| SNP_P4_49940_27675858 | NC_021163.1    | Ca_kabuli_chr04 | 27675858                | CC                              | TT              | 1946807064               |
| SNP_P4_49941_27678024 | NC_021163.1    | Ca_kabuli_chr04 | 27678024                | CC                              | TT              | 1946807066               |
| SNP_P4_49943_27682672 | NC_021163.1    | Ca_kabuli_chr04 | 27682672                | AA                              | GG              | 1946807068               |
| SNP_P4_49944_27684351 | NC_021163.1    | Ca_kabuli_chr04 | 27684351                | CC                              | TT              | 1946807070               |
| SNP_P4_49945_27684573 | NC_021163.1    | Ca_kabuli_chr04 | 27684573                | GG                              | TT              | 1946807072               |
| SNP_P4_49946_27687134 | NC_021163.1    | Ca_kabuli_chr04 | 27687134                | AA                              | GG              | 1946807074               |
| SNP_P4_49947_27687143 | NC_021163.1    | Ca_kabuli_chr04 | 27687143                | AA                              | GG              | 1946807076               |
| SNP_P4_49949_27690863 | NC_021163.1    | Ca_kabuli_chr04 | 27690863                | CC                              | TT              | 1946807078               |
| SNP_P4_49950_27692026 | NC_021163.1    | Ca_kabuli_chr04 | 27692026                | AA                              | GG              | 1946807080               |
| SNP_P4_49951_27693189 | NC_021163.1    | Ca_kabuli_chr04 | 27693189                | GG                              | AA              | 1946807082               |
| SNP_P4_49952_27693513 | NC_021163.1    | Ca_kabuli_chr04 | 27693513                | TT                              | AA              | 1946807084               |
| SNP_P4_49953_27694501 | NC_021163.1    | Ca_kabuli_chr04 | 27694501                | GG                              | TT              | 1946807086               |
| SNP_P4_49954_27695750 | NC_021163.1    | Ca_kabuli_chr04 | 27695750                | AA                              | GG              | 1946807088               |
| SNP_P4_49955_27696132 | NC_021163.1    | Ca_kabuli_chr04 | 27696132                | AA                              | GG              | 1946807091               |



| SNPs IDs              | Chromosome IDs | Chromosomes     | Physical positions (bp) | CDC Frontier (Reference genome) | (ILWC46 & LPNB) | NCBI SNPdb Accession IDs |
|-----------------------|----------------|-----------------|-------------------------|---------------------------------|-----------------|--------------------------|
| SNP_P4_49956_27696585 | NC_021163.1    | Ca_kabuli_chr04 | 27696585                | AA                              | GG              | 1946807093               |
| SNP_P4_49957_27698267 | NC_021163.1    | Ca_kabuli_chr04 | 27698267                | GG                              | AA              | 1946807095               |
| SNP_P4_49958_27698989 | NC_021163.1    | Ca_kabuli_chr04 | 27698989                | GG                              | AA              | 1946807097               |
| SNP_P4_49959_27705578 | NC_021163.1    | Ca_kabuli_chr04 | 27705578                | TT                              | AA              | 1946807099               |
| SNP_P4_49960_27706026 | NC_021163.1    | Ca_kabuli_chr04 | 27706026                | AA                              | CC              | 1946807101               |
| SNP_P4_49961_27710474 | NC_021163.1    | Ca_kabuli_chr04 | 27710474                | GG                              | CC              | 1946807103               |
| SNP_P4_49962_27715717 | NC_021163.1    | Ca_kabuli_chr04 | 27715717                | CC                              | AA              | 1946807105               |
| SNP_P4_49963_27718590 | NC_021163.1    | Ca_kabuli_chr04 | 27718590                | AA                              | TT              | 1946807107               |
| SNP_P4_49964_27719525 | NC_021163.1    | Ca_kabuli_chr04 | 27719525                | AA                              | GG              | 1946807109               |
| SNP_P4_49965_27719745 | NC_021163.1    | Ca_kabuli_chr04 | 27719745                | CC                              | TT              | 1946807111               |
| SNP_P4_49966_27724832 | NC_021163.1    | Ca_kabuli_chr04 | 27724832                | GG                              | TT              | 1946807113               |
| SNP_P4_49967_27724894 | NC_021163.1    | Ca_kabuli_chr04 | 27724894                | CC                              | TT              | 1946807115               |
| SNP_P4_49968_27724947 | NC_021163.1    | Ca_kabuli_chr04 | 27724947                | GG                              | CC              | 1946807118               |
| SNP_P4_49969_27724987 | NC_021163.1    | Ca_kabuli_chr04 | 27724987                | GG                              | CC              | 1946807120               |
| SNP_P4_49970_27725196 | NC_021163.1    | Ca_kabuli_chr04 | 27725196                | AA                              | TT              | 1946807122               |
| SNP_P4_49971_27725264 | NC_021163.1    | Ca_kabuli_chr04 | 27725264                | TT                              | CC              | 1946807124               |
| SNP_P4_49972_27731359 | NC_021163.1    | Ca_kabuli_chr04 | 27731359                | CC                              | AA              | 1946807126               |
| SNP_P4_49973_27731577 | NC_021163.1    | Ca_kabuli_chr04 | 27731577                | AA                              | GG              | 1946807128               |
| SNP_P4_49974_27731585 | NC_021163.1    | Ca_kabuli_chr04 | 27731585                | GG                              | TT              | 1946807130               |
| SNP_P4_49975_27732662 | NC_021163.1    | Ca_kabuli_chr04 | 27732662                | GG                              | AA              | 1946807132               |
| SNP_P4_49976_27732886 | NC_021163.1    | Ca_kabuli_chr04 | 27732886                | AA                              | GG              | 1946807134               |
| SNP_P4_49977_27733890 | NC_021163.1    | Ca_kabuli_chr04 | 27733890                | CC                              | TT              | 1946807136               |
| SNP_P4_49978_27734187 | NC_021163.1    | Ca_kabuli_chr04 | 27734187                | AA                              | TT              | 1946807138               |
| SNP_P4_49979_27734472 | NC_021163.1    | Ca_kabuli_chr04 | 27734472                | CC                              | AA              | 1946807141               |
| SNP_P4_49980_27735108 | NC_021163.1    | Ca_kabuli_chr04 | 27735108                | AA                              | CC              | 1946807143               |
| SNP_P4_49981_27739295 | NC_021163.1    | Ca_kabuli_chr04 | 27739295                | CC                              | TT              | 1946807145               |
| SNP_P4_49982_27739310 | NC_021163.1    | Ca_kabuli_chr04 | 27739310                | TT                              | GG              | 1946807147               |
| SNP_P4_49983_27739741 | NC_021163.1    | Ca_kabuli_chr04 | 27739741                | AA                              | CC              | 1946807149               |
| SNP_P4_49984_27740757 | NC_021163.1    | Ca_kabuli_chr04 | 27740757                | AA                              | GG              | 1946807150               |
| SNP_P4_49985_27741546 | NC_021163.1    | Ca_kabuli_chr04 | 27741546                | GG                              | CC              | 1946807153               |
| SNP_P4_49986_27742599 | NC_021163.1    | Ca_kabuli_chr04 | 27742599                | TT                              | AA              | 1946807155               |
| SNP_P4_49987_27746243 | NC_021163.1    | Ca_kabuli_chr04 | 27746243                | TT                              | GG              | 1946807157               |
| SNP_P4_49989_27746551 | NC_021163.1    | Ca_kabuli_chr04 | 27746551                | CC                              | TT              | 1946807159               |
| SNP_P4_49990_27746568 | NC_021163.1    | Ca_kabuli_chr04 | 27746568                | TT                              | AA              | 1946807161               |
| SNP_P4_49991_27746689 | NC_021163.1    | Ca_kabuli_chr04 | 27746689                | CC                              | TT              | 1946807163               |
| SNP_P4_49992_27746721 | NC_021163.1    | Ca_kabuli_chr04 | 27746721                | TT                              | CC              | 1946807165               |
| SNP_P4_49993_27747443 | NC_021163.1    | Ca_kabuli_chr04 | 27747443                | TT                              | CC              | 1946807167               |
| SNP_P4_49994_27752848 | NC_021163.1    | Ca_kabuli_chr04 | 27752848                | CC                              | TT              | 1946807169               |
| SNP_P4_49995_27753131 | NC_021163.1    | Ca_kabuli_chr04 | 27753131                | CC                              | TT              | 1946807171               |
| SNP_P4_49996_27753296 | NC_021163.1    | Ca_kabuli_chr04 | 27753296                | AA                              | TT              | 1946807173               |
| SNP_P4_49997_27759383 | NC_021163.1    | Ca_kabuli_chr04 | 27759383                | TT                              | GG              | 1946807176               |
| SNP_P4_49998_27762725 | NC_021163.1    | Ca_kabuli_chr04 | 27762725                | GG                              | CC              | 1946807178               |

| SNPs IDs              | Chromosome IDs | Chromosomes     | Physical positions (bp) | CDC Frontier (Reference genome) | (ILWC46 & LPNB) | NCBI SNPdb Accession IDs |
|-----------------------|----------------|-----------------|-------------------------|---------------------------------|-----------------|--------------------------|
| SNP_P4_49999_27763740 | NC_021163.1    | Ca_kabuli_chr04 | 27763740                | GG                              | TT              | 1946807180               |
| SNP_P4_50001_27766257 | NC_021163.1    | Ca_kabuli_chr04 | 27766257                | GG                              | CC              | 1946807182               |
| SNP_P4_50003_27789915 | NC_021163.1    | Ca_kabuli_chr04 | 27789915                | TT                              | CC              | 1946807184               |
| SNP_P4_50004_27790757 | NC_021163.1    | Ca_kabuli_chr04 | 27790757                | AA                              | CC              | 1946807186               |
| SNP_P4_50006_27797719 | NC_021163.1    | Ca_kabuli_chr04 | 27797719                | CC                              | TT              | 1946807188               |
| SNP_P4_50007_27799664 | NC_021163.1    | Ca_kabuli_chr04 | 27799664                | CC                              | AA              | 1946807190               |
| SNP_P4_50008_27800272 | NC_021163.1    | Ca_kabuli_chr04 | 27800272                | GG                              | TT              | 1946807192               |
| SNP_P4_50009_27801522 | NC_021163.1    | Ca_kabuli_chr04 | 27801522                | AA                              | TT              | 1946807194               |
| SNP_P4_50010_27807270 | NC_021163.1    | Ca_kabuli_chr04 | 27807270                | TT                              | CC              | 1946807196               |
| SNP_P4_50011_27819510 | NC_021163.1    | Ca_kabuli_chr04 | 27819510                | AA                              | CC              | 1946807198               |
| SNP_P4_50013_27822874 | NC_021163.1    | Ca_kabuli_chr04 | 27822874                | CC                              | AA              | 1946807200               |
| SNP_P4_50014_27828358 | NC_021163.1    | Ca_kabuli_chr04 | 27828358                | TT                              | CC              | 1946807202               |
| SNP_P4_50015_27837199 | NC_021163.1    | Ca_kabuli_chr04 | 27837199                | AA                              | GG              | 1946807204               |
| SNP_P4_50016_27837312 | NC_021163.1    | Ca_kabuli_chr04 | 27837312                | AA                              | GG              | 1946807206               |
| SNP_P4_50017_27842595 | NC_021163.1    | Ca_kabuli_chr04 | 27842595                | CC                              | TT              | 1946807209               |
| SNP_P4_50018_27843280 | NC_021163.1    | Ca_kabuli_chr04 | 27843280                | AA                              | GG              | 1946807211               |
| SNP_P4_50020_27847393 | NC_021163.1    | Ca_kabuli_chr04 | 27847393                | GG                              | AA              | 1946807213               |
| SNP_P4_50021_27849614 | NC_021163.1    | Ca_kabuli_chr04 | 27849614                | GG                              | AA              | 1946807215               |
| SNP_P4_50022_27849701 | NC_021163.1    | Ca_kabuli_chr04 | 27849701                | CC                              | TT              | 1946807217               |
| SNP_P4_50023_27849734 | NC_021163.1    | Ca_kabuli_chr04 | 27849734                | GG                              | AA              | 1946807219               |
| SNP_P4_50025_27852016 | NC_021163.1    | Ca_kabuli_chr04 | 27852016                | AA                              | CC              | 1946807221               |
| SNP_P4_50027_27853227 | NC_021163.1    | Ca_kabuli_chr04 | 27853227                | CC                              | AA              | 1946807223               |
| SNP_P4_50028_27853230 | NC_021163.1    | Ca_kabuli_chr04 | 27853230                | TT                              | CC              | 1946807225               |
| SNP_P4_50029_27853806 | NC_021163.1    | Ca_kabuli_chr04 | 27853806                | CC                              | TT              | 1946807227               |
| SNP_P4_50030_27854370 | NC_021163.1    | Ca_kabuli_chr04 | 27854370                | TT                              | GG              | 1946807229               |
| SNP_P4_50032_27856914 | NC_021163.1    | Ca_kabuli_chr04 | 27856914                | TT                              | AA              | 1946807231               |
| SNP_P4_50033_27860343 | NC_021163.1    | Ca_kabuli_chr04 | 27860343                | TT                              | CC              | 1946807233               |
| SNP_P4_50034_27860770 | NC_021163.1    | Ca_kabuli_chr04 | 27860770                | AA                              | GG              | 1946807235               |
| SNP_P4_50035_27861838 | NC_021163.1    | Ca_kabuli_chr04 | 27861838                | TT                              | CC              | 1946807237               |
| SNP_P4_50036_27862238 | NC_021163.1    | Ca_kabuli_chr04 | 27862238                | TT                              | GG              | 1946807239               |
| SNP_P4_50038_27868907 | NC_021163.1    | Ca_kabuli_chr04 | 27868907                | GG                              | AA              | 1946807241               |
| SNP_P4_50039_27870536 | NC_021163.1    | Ca_kabuli_chr04 | 27870536                | AA                              | GG              | 1946807244               |
| SNP_P4_50040_27872775 | NC_021163.1    | Ca_kabuli_chr04 | 27872775                | TT                              | GG              | 1946807246               |
| SNP_P4_50042_27874449 | NC_021163.1    | Ca_kabuli_chr04 | 27874449                | AA                              | GG              | 1946807248               |
| SNP_P4_50044_27887936 | NC_021163.1    | Ca_kabuli_chr04 | 27887936                | AA                              | GG              | 1946807250               |
| SNP_P4_50045_27896974 | NC_021163.1    | Ca_kabuli_chr04 | 27896974                | AA                              | TT              | 1946807252               |
| SNP_P4_50047_27906848 | NC_021163.1    | Ca_kabuli_chr04 | 27906848                | TT                              | CC              | 1946807254               |
| SNP_P4_50048_27906861 | NC_021163.1    | Ca_kabuli_chr04 | 27906861                | GG                              | AA              | 1946807257               |
| SNP_P4_50049_27907407 | NC_021163.1    | Ca_kabuli_chr04 | 27907407                | GG                              | TT              | 1946807259               |
| SNP_P4_50050_27910206 | NC_021163.1    | Ca_kabuli_chr04 | 27910206                | TT                              | CC              | 1946807261               |
| SNP_P4_50051_27911754 | NC_021163.1    | Ca_kabuli_chr04 | 27911754                | TT                              | CC              | 1946807263               |
| SNP_P4_50052_27924897 | NC_021163.1    | Ca_kabuli_chr04 | 27924897                | GG                              | AA              | 1946807265               |

| SNPs IDs              | Chromosome IDs | Chromosomes     | Physical positions (bp) | CDC Frontier (Reference genome) | (ILWC46 & LPNB) | NCBI SNPdb Accession IDs |
|-----------------------|----------------|-----------------|-------------------------|---------------------------------|-----------------|--------------------------|
| SNP_P4_50053_27925657 | NC_021163.1    | Ca_kabuli_chr04 | 27925657                | GG                              | AA              | 1946807267               |
| SNP_P4_50054_27927897 | NC_021163.1    | Ca_kabuli_chr04 | 27927897                | GG                              | AA              | 1946807269               |
| SNP_P4_50055_27928558 | NC_021163.1    | Ca_kabuli_chr04 | 27928558                | TT                              | CC              | 1946807271               |
| SNP_P4_50056_27928723 | NC_021163.1    | Ca_kabuli_chr04 | 27928723                | GG                              | TT              | 1946807273               |
| SNP_P4_50057_27928726 | NC_021163.1    | Ca_kabuli_chr04 | 27928726                | GG                              | AA              | 1946807275               |
| SNP_P4_50058_27928746 | NC_021163.1    | Ca_kabuli_chr04 | 27928746                | TT                              | CC              | 1946807278               |
| SNP_P4_50059_27928758 | NC_021163.1    | Ca_kabuli_chr04 | 27928758                | GG                              | TT              | 1946807280               |
| SNP_P4_50060_27928793 | NC_021163.1    | Ca_kabuli_chr04 | 27928793                | CC                              | TT              | 1946807282               |
| SNP_P4_50061_27928804 | NC_021163.1    | Ca_kabuli_chr04 | 27928804                | AA                              | CC              | 1946807284               |
| SNP_P4_50062_27928809 | NC_021163.1    | Ca_kabuli_chr04 | 27928809                | CC                              | AA              | 1946807287               |
| SNP_P4_50064_27928844 | NC_021163.1    | Ca_kabuli_chr04 | 27928844                | TT                              | CC              | 1946807289               |
| SNP_P4_50065_27928869 | NC_021163.1    | Ca_kabuli_chr04 | 27928869                | CC                              | TT              | 1946807291               |
| SNP_P4_50066_27928890 | NC_021163.1    | Ca_kabuli_chr04 | 27928890                | CC                              | GG              | 1946807293               |
| SNP_P4_50067_27928914 | NC_021163.1    | Ca_kabuli_chr04 | 27928914                | TT                              | AA              | 1946807295               |
| SNP_P4_50068_27928930 | NC_021163.1    | Ca_kabuli_chr04 | 27928930                | TT                              | GG              | 1946807298               |
| SNP_P4_50069_27928936 | NC_021163.1    | Ca_kabuli_chr04 | 27928936                | CC                              | GG              | 1946807300               |
| SNP_P4_50070_27928937 | NC_021163.1    | Ca_kabuli_chr04 | 27928937                | CC                              | TT              | 1946807302               |
| SNP_P4_50071_27928958 | NC_021163.1    | Ca_kabuli_chr04 | 27928958                | AA                              | CC              | 1946807305               |
| SNP_P4_50073_27929961 | NC_021163.1    | Ca_kabuli_chr04 | 27929961                | GG                              | TT              | 1946807307               |
| SNP_P4_50074_27930479 | NC_021163.1    | Ca_kabuli_chr04 | 27930479                | TT                              | CC              | 1946807309               |
| SNP_P4_50075_27930489 | NC_021163.1    | Ca_kabuli_chr04 | 27930489                | TT                              | CC              | 1946807312               |
| SNP_P4_50076_27930548 | NC_021163.1    | Ca_kabuli_chr04 | 27930548                | AA                              | GG              | 1946807314               |
| SNP_P4_50077_27930558 | NC_021163.1    | Ca_kabuli_chr04 | 27930558                | AA                              | CC              | 1946807316               |
| SNP_P4_50078_27930572 | NC_021163.1    | Ca_kabuli_chr04 | 27930572                | TT                              | CC              | 1946807318               |
| SNP_P4_50079_27930647 | NC_021163.1    | Ca_kabuli_chr04 | 27930647                | TT                              | CC              | 1946807320               |
| SNP_P4_50080_27931021 | NC_021163.1    | Ca_kabuli_chr04 | 27931021                | AA                              | GG              | 1946807323               |
| SNP_P4_50081_27931024 | NC_021163.1    | Ca_kabuli_chr04 | 27931024                | TT                              | CC              | 1946807325               |
| SNP_P4_50082_27936690 | NC_021163.1    | Ca_kabuli_chr04 | 27936690                | GG                              | AA              | 1946807327               |
| SNP_P4_50083_27938039 | NC_021163.1    | Ca_kabuli_chr04 | 27938039                | TT                              | CC              | 1946807329               |
| SNP_P4_50084_27938445 | NC_021163.1    | Ca_kabuli_chr04 | 27938445                | AA                              | GG              | 1946807331               |
| SNP_P4_50085_27938480 | NC_021163.1    | Ca_kabuli_chr04 | 27938480                | AA                              | GG              | 1946807333               |
| SNP_P4_50086_27943461 | NC_021163.1    | Ca_kabuli_chr04 | 27943461                | TT                              | GG              | 1946807335               |
| SNP_P4_50087_27943477 | NC_021163.1    | Ca_kabuli_chr04 | 27943477                | TT                              | CC              | 1946807337               |
| SNP_P4_50088_27943511 | NC_021163.1    | Ca_kabuli_chr04 | 27943511                | GG                              | AA              | 1946807339               |
| SNP_P4_50089_27943636 | NC_021163.1    | Ca_kabuli_chr04 | 27943636                | TT                              | GG              | 1946807341               |
| SNP_P4_50090_27943642 | NC_021163.1    | Ca_kabuli_chr04 | 27943642                | CC                              | TT              | 1946807343               |
| SNP_P4_50091_27943693 | NC_021163.1    | Ca_kabuli_chr04 | 27943693                | TT                              | CC              | 1946807345               |
| SNP_P4_50092_27946409 | NC_021163.1    | Ca_kabuli_chr04 | 27946409                | GG                              | TT              | 1946807347               |
| SNP_P4_50093_27946410 | NC_021163.1    | Ca_kabuli_chr04 | 27946410                | TT                              | AA              | 1946807349               |
| SNP_P4_50094_27953155 | NC_021163.1    | Ca_kabuli_chr04 | 27953155                | CC                              | TT              | 1946807351               |
| SNP_P4_50096_27961328 | NC_021163.1    | Ca_kabuli_chr04 | 27961328                | TT                              | CC              | 1946807353               |
| SNP_P4_50097_27962250 | NC_021163.1    | Ca_kabuli_chr04 | 27962250                | TT                              | CC              | 1946807355               |

| SNPs IDs              | Chromosome IDs | Chromosomes     | Physical positions (bp) | CDC Frontier (Reference genome) | (ILWC46 & LPNB) | NCBI SNPdb Accession IDs |
|-----------------------|----------------|-----------------|-------------------------|---------------------------------|-----------------|--------------------------|
| SNP_P4_50098_27963792 | NC_021163.1    | Ca_kabuli_chr04 | 27963792                | GG                              | AA              | 1946807357               |
| SNP_P4_50099_27964301 | NC_021163.1    | Ca_kabuli_chr04 | 27964301                | AA                              | GG              | 1946807360               |
| SNP_P4_50100_27965034 | NC_021163.1    | Ca_kabuli_chr04 | 27965034                | TT                              | AA              | 1946807362               |
| SNP_P4_50101_27967076 | NC_021163.1    | Ca_kabuli_chr04 | 27967076                | CC                              | TT              | 1946807364               |
| SNP_P4_50102_27976346 | NC_021163.1    | Ca_kabuli_chr04 | 27976346                | AA                              | GG              | 1946807366               |
| SNP_P4_50103_27979161 | NC_021163.1    | Ca_kabuli_chr04 | 27979161                | AA                              | GG              | 1946807368               |
| SNP_P4_50104_27981651 | NC_021163.1    | Ca_kabuli_chr04 | 27981651                | CC                              | TT              | 1946807370               |
| SNP_P4_50105_27983516 | NC_021163.1    | Ca_kabuli_chr04 | 27983516                | GG                              | AA              | 1946807372               |
| SNP_P4_50106_27983785 | NC_021163.1    | Ca_kabuli_chr04 | 27983785                | TT                              | AA              | 1946807374               |
| SNP_P4_50107_27984614 | NC_021163.1    | Ca_kabuli_chr04 | 27984614                | TT                              | AA              | 1946807376               |
| SNP_P4_50108_27984835 | NC_021163.1    | Ca_kabuli_chr04 | 27984835                | TT                              | AA              | 1946807379               |
| SNP_P4_50109_27996949 | NC_021163.1    | Ca_kabuli_chr04 | 27996949                | CC                              | TT              | 1946807381               |
| SNP_P4_50110_27996958 | NC_021163.1    | Ca_kabuli_chr04 | 27996958                | CC                              | AA              | 1946807383               |
| SNP_P4_50111_27997226 | NC_021163.1    | Ca_kabuli_chr04 | 27997226                | CC                              | AA              | 1946807385               |
| SNP_P4_50112_27997230 | NC_021163.1    | Ca_kabuli_chr04 | 27997230                | CC                              | TT              | 1946807387               |
| SNP_P4_50113_27997235 | NC_021163.1    | Ca_kabuli_chr04 | 27997235                | CC                              | TT              | 1946807389               |
| SNP_P4_50114_27997239 | NC_021163.1    | Ca_kabuli_chr04 | 27997239                | AA                              | TT              | 1946807391               |
| SNP_P4_50115_27997243 | NC_021163.1    | Ca_kabuli_chr04 | 27997243                | AA                              | TT              | 1946807393               |
| SNP_P4_50116_27997335 | NC_021163.1    | Ca_kabuli_chr04 | 27997335                | CC                              | TT              | 1946807395               |
| SNP_P4_50117_27997512 | NC_021163.1    | Ca_kabuli_chr04 | 27997512                | AA                              | CC              | 1946807397               |
| SNP_P4_50118_27997527 | NC_021163.1    | Ca_kabuli_chr04 | 27997527                | CC                              | TT              | 1946807399               |
| SNP_P4_50119_27997536 | NC_021163.1    | Ca_kabuli_chr04 | 27997536                | AA                              | TT              | 1946807401               |
| SNP_P4_50120_27997538 | NC_021163.1    | Ca_kabuli_chr04 | 27997538                | TT                              | GG              | 1946807404               |
| SNP_P4_50121_27997595 | NC_021163.1    | Ca_kabuli_chr04 | 27997595                | AA                              | GG              | 1946807406               |
| SNP_P4_50122_27998188 | NC_021163.1    | Ca_kabuli_chr04 | 27998188                | TT                              | AA              | 1946807408               |
| SNP_P4_50124_28013390 | NC_021163.1    | Ca_kabuli_chr04 | 28013390                | TT                              | GG              | 1946807410               |
| SNP_P4_50125_28013415 | NC_021163.1    | Ca_kabuli_chr04 | 28013415                | GG                              | AA              | 1946807412               |
| SNP_P4_50126_28013429 | NC_021163.1    | Ca_kabuli_chr04 | 28013429                | AA                              | TT              | 1946807414               |
| SNP_P4_50127_28013475 | NC_021163.1    | Ca_kabuli_chr04 | 28013475                | AA                              | GG              | 1946807416               |
| SNP_P4_50128_28013476 | NC_021163.1    | Ca_kabuli_chr04 | 28013476                | AA                              | GG              | 1946807418               |
| SNP_P4_50129_28017835 | NC_021163.1    | Ca_kabuli_chr04 | 28017835                | AA                              | TT              | 1946807420               |
| SNP_P4_50130_28017842 | NC_021163.1    | Ca_kabuli_chr04 | 28017842                | TT                              | GG              | 1946807422               |
| SNP_P4_50131_28017871 | NC_021163.1    | Ca_kabuli_chr04 | 28017871                | TT                              | CC              | 1946807424               |
| SNP_P4_50132_28018314 | NC_021163.1    | Ca_kabuli_chr04 | 28018314                | CC                              | TT              | 1946807426               |
| SNP_P4_50133_28018565 | NC_021163.1    | Ca_kabuli_chr04 | 28018565                | GG                              | AA              | 1946807428               |
| SNP_P4_50135_28018610 | NC_021163.1    | Ca_kabuli_chr04 | 28018610                | CC                              | TT              | 1946807430               |
| SNP_P4_50136_28018661 | NC_021163.1    | Ca_kabuli_chr04 | 28018661                | AA                              | TT              | 1946807433               |
| SNP_P4_50137_28018945 | NC_021163.1    | Ca_kabuli_chr04 | 28018945                | CC                              | TT              | 1946807435               |
| SNP_P4_50138_28018969 | NC_021163.1    | Ca_kabuli_chr04 | 28018969                | AA                              | GG              | 1946807437               |
| SNP_P4_50139_28019047 | NC_021163.1    | Ca_kabuli_chr04 | 28019047                | GG                              | TT              | 1946807439               |
| SNP_P4_50140_28019093 | NC_021163.1    | Ca_kabuli_chr04 | 28019093                | AA                              | TT              | 1946807441               |
| SNP_P4_50141_28019097 | NC_021163.1    | Ca_kabuli_chr04 | 28019097                | TT                              | AA              | 1946807443               |

| SNPs IDs              | Chromosome IDs | Chromosomes     | Physical positions (bp) | CDC Frontier (Reference genome) | (ILWC46 & LPNB) | NCBI SNPdb Accession IDs |
|-----------------------|----------------|-----------------|-------------------------|---------------------------------|-----------------|--------------------------|
| SNP_P4_50142_28019122 | NC_021163.1    | Ca_kabuli_chr04 | 28019122                | TT                              | AA              | 1946807445               |
| SNP_P4_50143_28019271 | NC_021163.1    | Ca_kabuli_chr04 | 28019271                | GG                              | CC              | 1946807447               |
| SNP_P4_50144_28019565 | NC_021163.1    | Ca_kabuli_chr04 | 28019565                | TT                              | AA              | 1946807449               |
| SNP_P4_50146_28020274 | NC_021163.1    | Ca_kabuli_chr04 | 28020274                | AA                              | GG              | 1946807451               |
| SNP_P4_50147_28020286 | NC_021163.1    | Ca_kabuli_chr04 | 28020286                | AA                              | GG              | 1946807453               |
| SNP_P4_50148_28020287 | NC_021163.1    | Ca_kabuli_chr04 | 28020287                | TT                              | CC              | 1946807456               |
| SNP_P4_50149_28020296 | NC_021163.1    | Ca_kabuli_chr04 | 28020296                | GG                              | AA              | 1946807458               |
| SNP_P4_50150_28020569 | NC_021163.1    | Ca_kabuli_chr04 | 28020569                | TT                              | GG              | 1946807460               |
| SNP_P4_50152_28020589 | NC_021163.1    | Ca_kabuli_chr04 | 28020589                | GG                              | AA              | 1946807462               |
| SNP_P4_50153_28020591 | NC_021163.1    | Ca_kabuli_chr04 | 28020591                | CC                              | TT              | 1946807464               |
| SNP_P4_50154_28020614 | NC_021163.1    | Ca_kabuli_chr04 | 28020614                | GG                              | AA              | 1946807466               |
| SNP_P4_50155_28021608 | NC_021163.1    | Ca_kabuli_chr04 | 28021608                | GG                              | AA              | 1946807468               |
| SNP_P4_50156_28021649 | NC_021163.1    | Ca_kabuli_chr04 | 28021649                | TT                              | GG              | 1946807470               |
| SNP_P4_50157_28021696 | NC_021163.1    | Ca_kabuli_chr04 | 28021696                | GG                              | AA              | 1946807472               |
| SNP_P4_50158_28021845 | NC_021163.1    | Ca_kabuli_chr04 | 28021845                | GG                              | AA              | 1946807474               |
| SNP_P4_50159_28022567 | NC_021163.1    | Ca_kabuli_chr04 | 28022567                | CC                              | TT              | 1946807476               |
| SNP_P4_50160_28022606 | NC_021163.1    | Ca_kabuli_chr04 | 28022606                | TT                              | AA              | 1946807478               |
| SNP_P4_50161_28023281 | NC_021163.1    | Ca_kabuli_chr04 | 28023281                | CC                              | TT              | 1946807480               |
| SNP_P4_50163_28023634 | NC_021163.1    | Ca_kabuli_chr04 | 28023634                | AA                              | GG              | 1946807482               |
| SNP_P4_50164_28023654 | NC_021163.1    | Ca_kabuli_chr04 | 28023654                | TT                              | CC              | 1946807484               |
| SNP_P4_50165_28023661 | NC_021163.1    | Ca_kabuli_chr04 | 28023661                | TT                              | GG              | 1946807486               |
| SNP_P4_50166_28023753 | NC_021163.1    | Ca_kabuli_chr04 | 28023753                | AA                              | GG              | 1946807488               |
| SNP_P4_50167_28023757 | NC_021163.1    | Ca_kabuli_chr04 | 28023757                | CC                              | AA              | 1946807490               |
| SNP_P4_50168_28023859 | NC_021163.1    | Ca_kabuli_chr04 | 28023859                | CC                              | TT              | 1946807492               |
| SNP_P4_50169_28024898 | NC_021163.1    | Ca_kabuli_chr04 | 28024898                | GG                              | AA              | 1946807494               |
| SNP_P4_50170_28024917 | NC_021163.1    | Ca_kabuli_chr04 | 28024917                | GG                              | TT              | 1946807497               |
| SNP_P4_50171_28025314 | NC_021163.1    | Ca_kabuli_chr04 | 28025314                | CC                              | TT              | 1946807499               |
| SNP_P4_50172_28025365 | NC_021163.1    | Ca_kabuli_chr04 | 28025365                | TT                              | CC              | 1946807501               |
| SNP_P4_50173_28025367 | NC_021163.1    | Ca_kabuli_chr04 | 28025367                | CC                              | TT              | 1946807503               |
| SNP_P4_50174_28025374 | NC_021163.1    | Ca_kabuli_chr04 | 28025374                | GG                              | AA              | 1946807505               |
| SNP_P4_50175_28025539 | NC_021163.1    | Ca_kabuli_chr04 | 28025539                | GG                              | AA              | 1946807508               |
| SNP_P4_50176_28025738 | NC_021163.1    | Ca_kabuli_chr04 | 28025738                | AA                              | TT              | 1946807510               |
| SNP_P4_50177_28025757 | NC_021163.1    | Ca_kabuli_chr04 | 28025757                | AA                              | CC              | 1946807512               |
| SNP_P4_50178_28026351 | NC_021163.1    | Ca_kabuli_chr04 | 28026351                | GG                              | AA              | 1946807514               |
| SNP_P4_50179_28026367 | NC_021163.1    | Ca_kabuli_chr04 | 28026367                | AA                              | GG              | 1946807516               |
| SNP_P4_50180_28026488 | NC_021163.1    | Ca_kabuli_chr04 | 28026488                | CC                              | AA              | 1946807519               |
| SNP_P4_50181_28026704 | NC_021163.1    | Ca_kabuli_chr04 | 28026704                | GG                              | AA              | 1946807521               |
| SNP_P4_50182_28026708 | NC_021163.1    | Ca_kabuli_chr04 | 28026708                | AA                              | GG              | 1946807523               |
| SNP_P4_50183_28026730 | NC_021163.1    | Ca_kabuli_chr04 | 28026730                | AA                              | GG              | 1946807525               |
| SNP_P4_50184_28026785 | NC_021163.1    | Ca_kabuli_chr04 | 28026785                | GG                              | AA              | 1946807527               |
| SNP_P4_50185_28026819 | NC_021163.1    | Ca_kabuli_chr04 | 28026819                | GG                              | AA              | 1946807529               |
| SNP_P4_50187_28026893 | NC_021163.1    | Ca_kabuli_chr04 | 28026893                | GG                              | TT              | 1946807531               |

| SNPs IDs              | Chromosome IDs | Chromosomes     | Physical positions (bp) | CDC Frontier (Reference genome) | (ILWC46 & LPNB) | NCBI SNPdb Accession IDs |
|-----------------------|----------------|-----------------|-------------------------|---------------------------------|-----------------|--------------------------|
| SNP_P4_50188_28027120 | NC_021163.1    | Ca_kabuli_chr04 | 28027120                | AA                              | GG              | 1946807533               |
| SNP_P4_50189_28027167 | NC_021163.1    | Ca_kabuli_chr04 | 28027167                | GG                              | TT              | 1946807535               |
| SNP_P4_50190_28027173 | NC_021163.1    | Ca_kabuli_chr04 | 28027173                | AA                              | GG              | 1946807537               |
| SNP_P4_50191_28027209 | NC_021163.1    | Ca_kabuli_chr04 | 28027209                | GG                              | AA              | 1946807539               |
| SNP_P4_50192_28027210 | NC_021163.1    | Ca_kabuli_chr04 | 28027210                | GG                              | TT              | 1946807541               |
| SNP_P4_50193_28027233 | NC_021163.1    | Ca_kabuli_chr04 | 28027233                | TT                              | GG              | 1946807543               |
| SNP_P4_50194_28034833 | NC_021163.1    | Ca_kabuli_chr04 | 28034833                | CC                              | GG              | 1946807545               |
| SNP_P4_50195_28035330 | NC_021163.1    | Ca_kabuli_chr04 | 28035330                | AA                              | TT              | 1946807547               |
| SNP_P4_50196_28039066 | NC_021163.1    | Ca_kabuli_chr04 | 28039066                | CC                              | GG              | 1946807549               |
| SNP_P4_50197_28039079 | NC_021163.1    | Ca_kabuli_chr04 | 28039079                | AA                              | GG              | 1946807551               |
| SNP_P4_50198_28039082 | NC_021163.1    | Ca_kabuli_chr04 | 28039082                | AA                              | GG              | 1946807553               |
| SNP_P4_50199_28041576 | NC_021163.1    | Ca_kabuli_chr04 | 28041576                | GG                              | AA              | 1946807555               |
| SNP_P4_50200_28041577 | NC_021163.1    | Ca_kabuli_chr04 | 28041577                | GG                              | TT              | 1946807557               |
| SNP_P4_50201_28042439 | NC_021163.1    | Ca_kabuli_chr04 | 28042439                | TT                              | AA              | 1946807559               |
| SNP_P4_50202_28042442 | NC_021163.1    | Ca_kabuli_chr04 | 28042442                | GG                              | TT              | 1946807561               |
| SNP_P4_50203_28042454 | NC_021163.1    | Ca_kabuli_chr04 | 28042454                | CC                              | TT              | 1946807563               |
| SNP_P4_50205_28042774 | NC_021163.1    | Ca_kabuli_chr04 | 28042774                | GG                              | AA              | 1946807566               |
| SNP_P4_50206_28042776 | NC_021163.1    | Ca_kabuli_chr04 | 28042776                | CC                              | TT              | 1946807568               |
| SNP_P4_50207_28042820 | NC_021163.1    | Ca_kabuli_chr04 | 28042820                | GG                              | AA              | 1946807570               |
| SNP_P4_50208_28042822 | NC_021163.1    | Ca_kabuli_chr04 | 28042822                | AA                              | TT              | 1946807572               |
| SNP_P4_50209_28042938 | NC_021163.1    | Ca_kabuli_chr04 | 28042938                | GG                              | AA              | 1946807574               |
| SNP_P4_50210_28042988 | NC_021163.1    | Ca_kabuli_chr04 | 28042988                | AA                              | CC              | 1946807576               |
| SNP_P4_50211_28043006 | NC_021163.1    | Ca_kabuli_chr04 | 28043006                | AA                              | GG              | 1946807578               |
| SNP_P4_50212_28043762 | NC_021163.1    | Ca_kabuli_chr04 | 28043762                | AA                              | GG              | 1946807580               |
| SNP_P4_50213_28043764 | NC_021163.1    | Ca_kabuli_chr04 | 28043764                | GG                              | TT              | 1946807582               |
| SNP_P4_50214_28043771 | NC_021163.1    | Ca_kabuli_chr04 | 28043771                | TT                              | CC              | 1946807584               |
| SNP_P4_50215_28044130 | NC_021163.1    | Ca_kabuli_chr04 | 28044130                | CC                              | TT              | 1946807587               |
| SNP_P4_50216_28046780 | NC_021163.1    | Ca_kabuli_chr04 | 28046780                | CC                              | AA              | 1946807589               |
| SNP_P4_50217_28049613 | NC_021163.1    | Ca_kabuli_chr04 | 28049613                | CC                              | AA              | 1946807591               |
| SNP_P4_50218_28049687 | NC_021163.1    | Ca_kabuli_chr04 | 28049687                | CC                              | AA              | 1946807593               |
| SNP_P4_50219_28049938 | NC_021163.1    | Ca_kabuli_chr04 | 28049938                | GG                              | TT              | 1946807595               |
| SNP_P4_50220_28050985 | NC_021163.1    | Ca_kabuli_chr04 | 28050985                | GG                              | AA              | 1946807597               |
| SNP_P4_50221_28050989 | NC_021163.1    | Ca_kabuli_chr04 | 28050989                | GG                              | AA              | 1946807599               |
| SNP_P4_50222_28051043 | NC_021163.1    | Ca_kabuli_chr04 | 28051043                | CC                              | TT              | 1946807601               |
| SNP_P4_50223_28053023 | NC_021163.1    | Ca_kabuli_chr04 | 28053023                | GG                              | AA              | 1946807604               |
| SNP_P4_50224_28056742 | NC_021163.1    | Ca_kabuli_chr04 | 28056742                | AA                              | GG              | 1946807606               |
| SNP_P4_50225_28058182 | NC_021163.1    | Ca_kabuli_chr04 | 28058182                | AA                              | GG              | 1946807608               |
| SNP_P4_50226_28058258 | NC_021163.1    | Ca_kabuli_chr04 | 28058258                | CC                              | TT              | 1946807610               |
| SNP_P4_50229_28061983 | NC_021163.1    | Ca_kabuli_chr04 | 28061983                | TT                              | CC              | 1946807612               |
| SNP_P4_50231_28062476 | NC_021163.1    | Ca_kabuli_chr04 | 28062476                | AA                              | GG              | 1946807615               |
| SNP_P4_50232_28064446 | NC_021163.1    | Ca_kabuli_chr04 | 28064446                | TT                              | AA              | 1946807617               |
| SNP_P4_50233_28064476 | NC_021163.1    | Ca_kabuli_chr04 | 28064476                | CC                              | TT              | 1946807619               |

| SNPs IDs              | Chromosome IDs | Chromosomes     | Physical positions (bp) | CDC Frontier (Reference genome) | (ILWC46 & LPNB) | NCBI SNPdb Accession IDs |
|-----------------------|----------------|-----------------|-------------------------|---------------------------------|-----------------|--------------------------|
| SNP_P4_50234_28066548 | NC_021163.1    | Ca_kabuli_chr04 | 28066548                | GG                              | AA              | 1946807621               |
| SNP_P4_50235_28067801 | NC_021163.1    | Ca_kabuli_chr04 | 28067801                | AA                              | CC              | 1946807623               |
| SNP_P4_50236_28067815 | NC_021163.1    | Ca_kabuli_chr04 | 28067815                | GG                              | AA              | 1946807625               |
| SNP_P4_50237_28068071 | NC_021163.1    | Ca_kabuli_chr04 | 28068071                | AA                              | TT              | 1946807627               |
| SNP_P4_50238_28074708 | NC_021163.1    | Ca_kabuli_chr04 | 28074708                | CC                              | TT              | 1946807629               |
| SNP_P4_50239_28076936 | NC_021163.1    | Ca_kabuli_chr04 | 28076936                | AA                              | TT              | 1946807631               |
| SNP_P4_50240_28078475 | NC_021163.1    | Ca_kabuli_chr04 | 28078475                | AA                              | GG              | 1946807633               |
| SNP_P4_50242_28089178 | NC_021163.1    | Ca_kabuli_chr04 | 28089178                | GG                              | AA              | 1946807635               |
| SNP_P4_50243_28089427 | NC_021163.1    | Ca_kabuli_chr04 | 28089427                | GG                              | AA              | 1946807637               |
| SNP_P4_50244_28098982 | NC_021163.1    | Ca_kabuli_chr04 | 28098982                | TT                              | CC              | 1946807640               |
| SNP_P4_50245_28099190 | NC_021163.1    | Ca_kabuli_chr04 | 28099190                | GG                              | AA              | 1946807642               |
| SNP_P4_50246_28099384 | NC_021163.1    | Ca_kabuli_chr04 | 28099384                | TT                              | AA              | 1946807644               |
| SNP_P4_50247_28101408 | NC_021163.1    | Ca_kabuli_chr04 | 28101408                | GG                              | AA              | 1946807646               |
| SNP_P4_50248_28101520 | NC_021163.1    | Ca_kabuli_chr04 | 28101520                | CC                              | AA              | 1946807648               |
| SNP_P4_50249_28101540 | NC_021163.1    | Ca_kabuli_chr04 | 28101540                | CC                              | AA              | 1946807650               |
| SNP_P4_50250_28101918 | NC_021163.1    | Ca_kabuli_chr04 | 28101918                | GG                              | AA              | 1946807652               |
| SNP_P4_50251_28102976 | NC_021163.1    | Ca_kabuli_chr04 | 28102976                | CC                              | TT              | 1946807654               |
| SNP_P4_50252_28103545 | NC_021163.1    | Ca_kabuli_chr04 | 28103545                | AA                              | CC              | 1946807656               |
| SNP_P4_50253_28103659 | NC_021163.1    | Ca_kabuli_chr04 | 28103659                | TT                              | CC              | 1946807658               |
| SNP_P4_50254_28106442 | NC_021163.1    | Ca_kabuli_chr04 | 28106442                | TT                              | AA              | 1946807660               |
| SNP_P4_50256_28111288 | NC_021163.1    | Ca_kabuli_chr04 | 28111288                | TT                              | GG              | 1946807662               |
| SNP_P4_50257_28112743 | NC_021163.1    | Ca_kabuli_chr04 | 28112743                | TT                              | AA              | 1946807665               |
| SNP_P4_50258_28116321 | NC_021163.1    | Ca_kabuli_chr04 | 28116321                | GG                              | CC              | 1946807667               |
| SNP_P4_50259_28116496 | NC_021163.1    | Ca_kabuli_chr04 | 28116496                | GG                              | AA              | 1946807669               |
| SNP_P4_50260_28116497 | NC_021163.1    | Ca_kabuli_chr04 | 28116497                | GG                              | AA              | 1946807670               |
| SNP_P4_50261_28119542 | NC_021163.1    | Ca_kabuli_chr04 | 28119542                | CC                              | TT              | 1946807672               |
| SNP_P4_50265_28121867 | NC_021163.1    | Ca_kabuli_chr04 | 28121867                | CC                              | AA              | 1946807674               |
| SNP_P4_50266_28122050 | NC_021163.1    | Ca_kabuli_chr04 | 28122050                | AA                              | GG              | 1946807676               |
| SNP_P4_50267_28122090 | NC_021163.1    | Ca_kabuli_chr04 | 28122090                | TT                              | CC              | 1946807678               |
| SNP_P4_50268_28122222 | NC_021163.1    | Ca_kabuli_chr04 | 28122222                | TT                              | CC              | 1946807680               |
| SNP_P4_50269_28123536 | NC_021163.1    | Ca_kabuli_chr04 | 28123536                | TT                              | GG              | 1946807682               |
| SNP_P4_50270_28129097 | NC_021163.1    | Ca_kabuli_chr04 | 28129097                | AA                              | TT              | 1946807684               |
| SNP_P4_50272_28134532 | NC_021163.1    | Ca_kabuli_chr04 | 28134532                | TT                              | CC              | 1946807686               |
| SNP_P4_50273_28139033 | NC_021163.1    | Ca_kabuli_chr04 | 28139033                | GG                              | AA              | 1946807688               |
| SNP_P4_50274_28139041 | NC_021163.1    | Ca_kabuli_chr04 | 28139041                | AA                              | GG              | 1946807690               |
| SNP_P4_50275_28139064 | NC_021163.1    | Ca_kabuli_chr04 | 28139064                | GG                              | AA              | 1946807692               |
| SNP_P4_50276_28139838 | NC_021163.1    | Ca_kabuli_chr04 | 28139838                | TT                              | CC              | 1946807694               |
| SNP_P4_50277_28139930 | NC_021163.1    | Ca_kabuli_chr04 | 28139930                | CC                              | AA              | 1946807696               |
| SNP_P4_50278_28139968 | NC_021163.1    | Ca_kabuli_chr04 | 28139968                | GG                              | TT              | 1946807698               |
| SNP_P4_50279_28140004 | NC_021163.1    | Ca_kabuli_chr04 | 28140004                | TT                              | CC              | 1946807700               |
| SNP_P4_50280_28140051 | NC_021163.1    | Ca_kabuli_chr04 | 28140051                | CC                              | GG              | 1946807702               |
| SNP_P4_50281_28140073 | NC_021163.1    | Ca_kabuli_chr04 | 28140073                | AA                              | GG              | 1946807704               |

| SNPs IDs              | Chromosome IDs | Chromosomes     | Physical positions (bp) | CDC Frontier (Reference genome) | (ILWC46 & LPNB) | NCBI SNPdb Accession IDs |
|-----------------------|----------------|-----------------|-------------------------|---------------------------------|-----------------|--------------------------|
| SNP_P4_50282_28140090 | NC_021163.1    | Ca_kabuli_chr04 | 28140090                | TT                              | CC              | 1946807706               |
| SNP_P4_50283_28140094 | NC_021163.1    | Ca_kabuli_chr04 | 28140094                | TT                              | CC              | 1946807708               |
| SNP_P4_50284_28140226 | NC_021163.1    | Ca_kabuli_chr04 | 28140226                | AA                              | GG              | 1946807710               |
| SNP_P4_50285_28140234 | NC_021163.1    | Ca_kabuli_chr04 | 28140234                | GG                              | AA              | 1946807712               |
| SNP_P4_50286_28140276 | NC_021163.1    | Ca_kabuli_chr04 | 28140276                | GG                              | AA              | 1946807714               |
| SNP_P4_50287_28140281 | NC_021163.1    | Ca_kabuli_chr04 | 28140281                | AA                              | CC              | 1946807716               |
| SNP_P4_50288_28140331 | NC_021163.1    | Ca_kabuli_chr04 | 28140331                | TT                              | CC              | 1946807718               |
| SNP_P4_50289_28140376 | NC_021163.1    | Ca_kabuli_chr04 | 28140376                | CC                              | TT              | 1946807720               |
| SNP_P4_50290_28141050 | NC_021163.1    | Ca_kabuli_chr04 | 28141050                | CC                              | TT              | 1946807722               |
| SNP_P4_50291_28142303 | NC_021163.1    | Ca_kabuli_chr04 | 28142303                | GG                              | AA              | 1946807724               |
| SNP_P4_50293_28144385 | NC_021163.1    | Ca_kabuli_chr04 | 28144385                | AA                              | CC              | 1946807726               |
| SNP_P4_50294_28145141 | NC_021163.1    | Ca_kabuli_chr04 | 28145141                | AA                              | GG              | 1946807728               |
| SNP_P4_50295_28145307 | NC_021163.1    | Ca_kabuli_chr04 | 28145307                | CC                              | TT              | 1946807730               |
| SNP_P4_50296_28145351 | NC_021163.1    | Ca_kabuli_chr04 | 28145351                | GG                              | AA              | 1946807732               |
| SNP_P4_50297_28145489 | NC_021163.1    | Ca_kabuli_chr04 | 28145489                | CC                              | AA              | 1946807734               |
| SNP_P4_50298_28145675 | NC_021163.1    | Ca_kabuli_chr04 | 28145675                | TT                              | GG              | 1946807736               |
| SNP_P4_50299_28145832 | NC_021163.1    | Ca_kabuli_chr04 | 28145832                | AA                              | GG              | 1946807738               |
| SNP_P4_50300_28148089 | NC_021163.1    | Ca_kabuli_chr04 | 28148089                | TT                              | CC              | 1946807740               |
| SNP_P4_50301_28148272 | NC_021163.1    | Ca_kabuli_chr04 | 28148272                | AA                              | GG              | 1946807742               |
| SNP_P4_50303_28150054 | NC_021163.1    | Ca_kabuli_chr04 | 28150054                | CC                              | TT              | 1946807744               |
| SNP_P4_50305_28150152 | NC_021163.1    | Ca_kabuli_chr04 | 28150152                | CC                              | TT              | 1946807746               |
| SNP_P4_50306_28150522 | NC_021163.1    | Ca_kabuli_chr04 | 28150522                | GG                              | AA              | 1946807748               |
| SNP_P4_50307_28150612 | NC_021163.1    | Ca_kabuli_chr04 | 28150612                | AA                              | GG              | 1946807750               |
| SNP_P4_50308_28150618 | NC_021163.1    | Ca_kabuli_chr04 | 28150618                | GG                              | AA              | 1946807752               |
| SNP_P4_50309_28150697 | NC_021163.1    | Ca_kabuli_chr04 | 28150697                | GG                              | AA              | 1946807754               |
| SNP_P4_50310_28150698 | NC_021163.1    | Ca_kabuli_chr04 | 28150698                | CC                              | TT              | 1946807756               |
| SNP_P4_50311_28150907 | NC_021163.1    | Ca_kabuli_chr04 | 28150907                | GG                              | AA              | 1946807758               |
| SNP_P4_50312_28151113 | NC_021163.1    | Ca_kabuli_chr04 | 28151113                | TT                              | CC              | 1946807760               |
| SNP_P4_50313_28151240 | NC_021163.1    | Ca_kabuli_chr04 | 28151240                | AA                              | GG              | 1946807762               |
| SNP_P4_50314_28151526 | NC_021163.1    | Ca_kabuli_chr04 | 28151526                | TT                              | CC              | 1946807764               |
| SNP_P4_50315_28151537 | NC_021163.1    | Ca_kabuli_chr04 | 28151537                | AA                              | GG              | 1946807766               |
| SNP_P4_50316_28151729 | NC_021163.1    | Ca_kabuli_chr04 | 28151729                | TT                              | CC              | 1946807768               |
| SNP_P4_50317_28152028 | NC_021163.1    | Ca_kabuli_chr04 | 28152028                | GG                              | AA              | 1946807770               |
| SNP_P4_50318_28152276 | NC_021163.1    | Ca_kabuli_chr04 | 28152276                | CC                              | AA              | 1946807772               |
| SNP_P4_50319_28152351 | NC_021163.1    | Ca_kabuli_chr04 | 28152351                | CC                              | TT              | 1946807774               |
| SNP_P4_50320_28152415 | NC_021163.1    | Ca_kabuli_chr04 | 28152415                | CC                              | TT              | 1946807776               |
| SNP_P4_50321_28152462 | NC_021163.1    | Ca_kabuli_chr04 | 28152462                | GG                              | CC              | 1946807778               |
| SNP_P4_50322_28153147 | NC_021163.1    | Ca_kabuli_chr04 | 28153147                | TT                              | CC              | 1946807779               |
| SNP_P4_50324_28153271 | NC_021163.1    | Ca_kabuli_chr04 | 28153271                | CC                              | TT              | 1946807781               |
| SNP_P4_50325_28153351 | NC_021163.1    | Ca_kabuli_chr04 | 28153351                | CC                              | TT              | 1946807783               |
| SNP_P4_50326_28153436 | NC_021163.1    | Ca_kabuli_chr04 | 28153436                | GG                              | AA              | 1946807785               |
| SNP_P4_50328_28159885 | NC_021163.1    | Ca_kabuli_chr04 | 28159885                | GG                              | CC              | 1946807787               |



| SNPs IDs              | Chromosome IDs | Chromosomes     | Physical positions (bp) | CDC Frontier (Reference genome) | (ILWC46 & LPNB) | NCBI SNPdb Accession IDs |
|-----------------------|----------------|-----------------|-------------------------|---------------------------------|-----------------|--------------------------|
| SNP_P4_50329_28160131 | NC_021163.1    | Ca_kabuli_chr04 | 28160131                | AA                              | GG              | 1946807789               |
| SNP_P4_50330_28160163 | NC_021163.1    | Ca_kabuli_chr04 | 28160163                | AA                              | CC              | 1946807791               |
| SNP_P4_50331_28160517 | NC_021163.1    | Ca_kabuli_chr04 | 28160517                | TT                              | GG              | 1946807793               |
| SNP_P4_50332_28160572 | NC_021163.1    | Ca_kabuli_chr04 | 28160572                | GG                              | AA              | 1946807795               |
| SNP_P4_50334_28163326 | NC_021163.1    | Ca_kabuli_chr04 | 28163326                | GG                              | AA              | 1946807797               |
| SNP_P4_50336_28164830 | NC_021163.1    | Ca_kabuli_chr04 | 28164830                | TT                              | CC              | 1946807799               |
| SNP_P4_50337_28166047 | NC_021163.1    | Ca_kabuli_chr04 | 28166047                | GG                              | AA              | 1946807801               |
| SNP_P4_50338_28168679 | NC_021163.1    | Ca_kabuli_chr04 | 28168679                | CC                              | AA              | 1946807803               |
| SNP_P4_50339_28168989 | NC_021163.1    | Ca_kabuli_chr04 | 28168989                | AA                              | GG              | 1946807805               |
| SNP_P4_50340_28168994 | NC_021163.1    | Ca_kabuli_chr04 | 28168994                | AA                              | CC              | 1946807807               |
| SNP_P4_50341_28168998 | NC_021163.1    | Ca_kabuli_chr04 | 28168998                | TT                              | GG              | 1946807809               |
| SNP_P4_50343_28169227 | NC_021163.1    | Ca_kabuli_chr04 | 28169227                | AA                              | TT              | 1946807811               |
| SNP_P4_50345_28169360 | NC_021163.1    | Ca_kabuli_chr04 | 28169360                | GG                              | AA              | 1946807813               |
| SNP_P4_50346_28169750 | NC_021163.1    | Ca_kabuli_chr04 | 28169750                | GG                              | CC              | 1946807815               |
| SNP_P4_50347_28169759 | NC_021163.1    | Ca_kabuli_chr04 | 28169759                | GG                              | AA              | 1946807817               |
| SNP_P4_50348_28171312 | NC_021163.1    | Ca_kabuli_chr04 | 28171312                | CC                              | AA              | 1946807819               |
| SNP_P4_50349_28171545 | NC_021163.1    | Ca_kabuli_chr04 | 28171545                | GG                              | AA              | 1946807821               |
| SNP_P4_50350_28171636 | NC_021163.1    | Ca_kabuli_chr04 | 28171636                | AA                              | CC              | 1946807823               |
| SNP_P4_50351_28172104 | NC_021163.1    | Ca_kabuli_chr04 | 28172104                | AA                              | GG              | 1946807825               |
| SNP_P4_50352_28172236 | NC_021163.1    | Ca_kabuli_chr04 | 28172236                | TT                              | AA              | 1946807827               |
| SNP_P4_50353_28172855 | NC_021163.1    | Ca_kabuli_chr04 | 28172855                | AA                              | GG              | 1946807829               |
| SNP_P4_50354_28172889 | NC_021163.1    | Ca_kabuli_chr04 | 28172889                | TT                              | CC              | 1946807831               |
| SNP_P4_50355_28173646 | NC_021163.1    | Ca_kabuli_chr04 | 28173646                | CC                              | AA              | 1946807833               |
| SNP_P4_50356_28174753 | NC_021163.1    | Ca_kabuli_chr04 | 28174753                | GG                              | TT              | 1946807835               |
| SNP_P4_50357_28175239 | NC_021163.1    | Ca_kabuli_chr04 | 28175239                | AA                              | GG              | 1946807837               |
| SNP_P4_50358_28175567 | NC_021163.1    | Ca_kabuli_chr04 | 28175567                | TT                              | GG              | 1946807839               |
| SNP_P4_50359_28175593 | NC_021163.1    | Ca_kabuli_chr04 | 28175593                | CC                              | TT              | 1946807842               |
| SNP_P4_50360_28175769 | NC_021163.1    | Ca_kabuli_chr04 | 28175769                | GG                              | AA              | 1946807844               |
| SNP_P4_50361_28175770 | NC_021163.1    | Ca_kabuli_chr04 | 28175770                | CC                              | TT              | 1946807846               |
| SNP_P4_50362_28177086 | NC_021163.1    | Ca_kabuli_chr04 | 28177086                | TT                              | AA              | 1946807848               |
| SNP_P4_50363_28177087 | NC_021163.1    | Ca_kabuli_chr04 | 28177087                | TT                              | CC              | 1946807850               |
| SNP_P4_50364_28177412 | NC_021163.1    | Ca_kabuli_chr04 | 28177412                | AA                              | TT              | 1946807852               |
| SNP_P4_50366_28177525 | NC_021163.1    | Ca_kabuli_chr04 | 28177525                | GG                              | TT              | 1946807854               |
| SNP_P4_50367_28177733 | NC_021163.1    | Ca_kabuli_chr04 | 28177733                | TT                              | CC              | 1946807856               |
| SNP_P4_50368_28177780 | NC_021163.1    | Ca_kabuli_chr04 | 28177780                | AA                              | GG              | 1946807858               |
| SNP_P4_50369_28178472 | NC_021163.1    | Ca_kabuli_chr04 | 28178472                | AA                              | GG              | 1946807860               |
| SNP_P4_50370_28178531 | NC_021163.1    | Ca_kabuli_chr04 | 28178531                | TT                              | CC              | 1946807862               |
| SNP_P4_50371_28178543 | NC_021163.1    | Ca_kabuli_chr04 | 28178543                | CC                              | TT              | 1946807864               |
| SNP_P4_50372_28178591 | NC_021163.1    | Ca_kabuli_chr04 | 28178591                | TT                              | CC              | 1946807867               |
| SNP_P4_50373_28178615 | NC_021163.1    | Ca_kabuli_chr04 | 28178615                | TT                              | AA              | 1946807870               |
| SNP_P4_50374_28179156 | NC_021163.1    | Ca_kabuli_chr04 | 28179156                | CC                              | GG              | 1946807872               |
| SNP_P4_50375_28180155 | NC_021163.1    | Ca_kabuli_chr04 | 28180155                | AA                              | TT              | 1946807874               |

| SNPs IDs              | Chromosome IDs | Chromosomes     | Physical positions (bp) | CDC Frontier (Reference genome) | (ILWC46 & LPNB) | NCBI SNPdb Accession IDs |
|-----------------------|----------------|-----------------|-------------------------|---------------------------------|-----------------|--------------------------|
| SNP_P4_50376_28180218 | NC_021163.1    | Ca_kabuli_chr04 | 28180218                | GG                              | TT              | 1946807876               |
| SNP_P4_50377_28180402 | NC_021163.1    | Ca_kabuli_chr04 | 28180402                | AA                              | GG              | 1946807879               |
| SNP_P4_50378_28180426 | NC_021163.1    | Ca_kabuli_chr04 | 28180426                | TT                              | GG              | 1946807881               |
| SNP_P4_50380_28180459 | NC_021163.1    | Ca_kabuli_chr04 | 28180459                | TT                              | CC              | 1946807883               |
| SNP_P4_50381_28181528 | NC_021163.1    | Ca_kabuli_chr04 | 28181528                | AA                              | GG              | 1946807885               |
| SNP_P4_50382_28181534 | NC_021163.1    | Ca_kabuli_chr04 | 28181534                | AA                              | GG              | 1946807887               |
| SNP_P4_50383_28181787 | NC_021163.1    | Ca_kabuli_chr04 | 28181787                | TT                              | CC              | 1946807889               |
| SNP_P4_50384_28181841 | NC_021163.1    | Ca_kabuli_chr04 | 28181841                | TT                              | CC              | 1946807891               |
| SNP_P4_50385_28181921 | NC_021163.1    | Ca_kabuli_chr04 | 28181921                | TT                              | AA              | 1946807893               |
| SNP_P4_50386_28181926 | NC_021163.1    | Ca_kabuli_chr04 | 28181926                | TT                              | AA              | 1946807895               |
| SNP_P4_50387_28181928 | NC_021163.1    | Ca_kabuli_chr04 | 28181928                | GG                              | AA              | 1946807898               |
| SNP_P4_50388_28181942 | NC_021163.1    | Ca_kabuli_chr04 | 28181942                | AA                              | GG              | 1946807900               |
| SNP_P4_50389_28182064 | NC_021163.1    | Ca_kabuli_chr04 | 28182064                | AA                              | GG              | 1946807902               |
| SNP_P4_50390_28182209 | NC_021163.1    | Ca_kabuli_chr04 | 28182209                | AA                              | CC              | 1946807904               |
| SNP_P4_50391_28182846 | NC_021163.1    | Ca_kabuli_chr04 | 28182846                | TT                              | AA              | 1946807907               |
| SNP_P4_50392_28183140 | NC_021163.1    | Ca_kabuli_chr04 | 28183140                | GG                              | TT              | 1946807909               |
| SNP_P4_50393_28183195 | NC_021163.1    | Ca_kabuli_chr04 | 28183195                | GG                              | AA              | 1946807911               |
| SNP_P4_50394_28183306 | NC_021163.1    | Ca_kabuli_chr04 | 28183306                | AA                              | CC              | 1946807913               |
| SNP_P4_50395_28183323 | NC_021163.1    | Ca_kabuli_chr04 | 28183323                | CC                              | AA              | 1946807915               |
| SNP_P4_50396_28183327 | NC_021163.1    | Ca_kabuli_chr04 | 28183327                | AA                              | GG              | 1946807917               |
| SNP_P4_50397_28183371 | NC_021163.1    | Ca_kabuli_chr04 | 28183371                | CC                              | TT              | 1946807919               |
| SNP_P4_50398_28183460 | NC_021163.1    | Ca_kabuli_chr04 | 28183460                | AA                              | GG              | 1946807921               |
| SNP_P4_50400_28183587 | NC_021163.1    | Ca_kabuli_chr04 | 28183587                | CC                              | GG              | 1946807923               |
| SNP_P4_50401_28183628 | NC_021163.1    | Ca_kabuli_chr04 | 28183628                | GG                              | AA              | 1946807925               |
| SNP_P4_50402_28183808 | NC_021163.1    | Ca_kabuli_chr04 | 28183808                | CC                              | AA              | 1946807927               |
| SNP_P4_50403_28183810 | NC_021163.1    | Ca_kabuli_chr04 | 28183810                | AA                              | CC              | 1946807929               |
| SNP_P4_50404_28183971 | NC_021163.1    | Ca_kabuli_chr04 | 28183971                | CC                              | GG              | 1946807931               |
| SNP_P4_50406_28184138 | NC_021163.1    | Ca_kabuli_chr04 | 28184138                | AA                              | TT              | 1946807933               |
| SNP_P4_50407_28184689 | NC_021163.1    | Ca_kabuli_chr04 | 28184689                | GG                              | AA              | 1946807935               |
| SNP_P4_50409_28201024 | NC_021163.1    | Ca_kabuli_chr04 | 28201024                | TT                              | AA              | 1946807937               |
| SNP_P4_50410_28201408 | NC_021163.1    | Ca_kabuli_chr04 | 28201408                | GG                              | AA              | 1946807939               |
| SNP_P4_50411_28201651 | NC_021163.1    | Ca_kabuli_chr04 | 28201651                | CC                              | TT              | 1946807941               |
| SNP_P4_50412_28201654 | NC_021163.1    | Ca_kabuli_chr04 | 28201654                | CC                              | AA              | 1946807943               |
| SNP_P4_50413_28201685 | NC_021163.1    | Ca_kabuli_chr04 | 28201685                | AA                              | TT              | 1946807945               |
| SNP_P4_50414_28201816 | NC_021163.1    | Ca_kabuli_chr04 | 28201816                | TT                              | AA              | 1946807947               |
| SNP_P4_50415_28201821 | NC_021163.1    | Ca_kabuli_chr04 | 28201821                | TT                              | AA              | 1946807949               |
| SNP_P4_50416_28202148 | NC_021163.1    | Ca_kabuli_chr04 | 28202148                | CC                              | AA              | 1946807951               |
| SNP_P4_50417_28202189 | NC_021163.1    | Ca_kabuli_chr04 | 28202189                | TT                              | AA              | 1946807953               |
| SNP_P4_50418_28202501 | NC_021163.1    | Ca_kabuli_chr04 | 28202501                | AA                              | CC              | 1946807955               |
| SNP_P4_50419_28202522 | NC_021163.1    | Ca_kabuli_chr04 | 28202522                | CC                              | TT              | 1946807957               |
| SNP_P4_50420_28205231 | NC_021163.1    | Ca_kabuli_chr04 | 28205231                | GG                              | AA              | 1946807959               |
| SNP_P4_50422_28206856 | NC_021163.1    | Ca_kabuli_chr04 | 28206856                | TT                              | GG              | 1946807961               |

| SNPs IDs              | Chromosome IDs | Chromosomes     | Physical positions (bp) | CDC Frontier (Reference genome) | (ILWC46 & LPNB) | NCBI SNPdb Accession IDs |
|-----------------------|----------------|-----------------|-------------------------|---------------------------------|-----------------|--------------------------|
| SNP_P4_50423_28206873 | NC_021163.1    | Ca_kabuli_chr04 | 28206873                | AA                              | GG              | 1946807963               |
| SNP_P4_50424_28206894 | NC_021163.1    | Ca_kabuli_chr04 | 28206894                | CC                              | TT              | 1946807965               |
| SNP_P4_50425_28207375 | NC_021163.1    | Ca_kabuli_chr04 | 28207375                | CC                              | TT              | 1946807967               |
| SNP_P4_50426_28208226 | NC_021163.1    | Ca_kabuli_chr04 | 28208226                | AA                              | GG              | 1946807969               |
| SNP_P4_50427_28208299 | NC_021163.1    | Ca_kabuli_chr04 | 28208299                | GG                              | AA              | 1946807971               |
| SNP_P4_50428_28208313 | NC_021163.1    | Ca_kabuli_chr04 | 28208313                | AA                              | GG              | 1946807973               |
| SNP_P4_50431_28209975 | NC_021163.1    | Ca_kabuli_chr04 | 28209975                | AA                              | TT              | 1946807976               |
| SNP_P4_50432_28213311 | NC_021163.1    | Ca_kabuli_chr04 | 28213311                | AA                              | GG              | 1946807978               |
| SNP_P4_50433_28213316 | NC_021163.1    | Ca_kabuli_chr04 | 28213316                | CC                              | TT              | 1946807980               |
| SNP_P4_50435_28213634 | NC_021163.1    | Ca_kabuli_chr04 | 28213634                | GG                              | AA              | 1946807982               |
| SNP_P4_50436_28213858 | NC_021163.1    | Ca_kabuli_chr04 | 28213858                | CC                              | TT              | 1946807984               |
| SNP_P4_50437_28214236 | NC_021163.1    | Ca_kabuli_chr04 | 28214236                | TT                              | CC              | 1946807986               |
| SNP_P4_50438_28214310 | NC_021163.1    | Ca_kabuli_chr04 | 28214310                | TT                              | CC              | 1946807988               |
| SNP_P4_50439_28214327 | NC_021163.1    | Ca_kabuli_chr04 | 28214327                | CC                              | TT              | 1946807990               |
| SNP_P4_50441_28225466 | NC_021163.1    | Ca_kabuli_chr04 | 28225466                | AA                              | GG              | 1946807993               |
| SNP_P4_50442_28225483 | NC_021163.1    | Ca_kabuli_chr04 | 28225483                | GG                              | AA              | 1946807995               |
| SNP_P4_50443_28225702 | NC_021163.1    | Ca_kabuli_chr04 | 28225702                | TT                              | CC              | 1946807998               |
| SNP_P4_50444_28225714 | NC_021163.1    | Ca_kabuli_chr04 | 28225714                | TT                              | CC              | 1946808000               |
| SNP_P4_50445_28226287 | NC_021163.1    | Ca_kabuli_chr04 | 28226287                | TT                              | CC              | 1946808002               |
| SNP_P4_50446_28232525 | NC_021163.1    | Ca_kabuli_chr04 | 28232525                | CC                              | TT              | 1946808004               |
| SNP_P4_50447_28232709 | NC_021163.1    | Ca_kabuli_chr04 | 28232709                | AA                              | GG              | 1946808006               |
| SNP_P4_50448_28232718 | NC_021163.1    | Ca_kabuli_chr04 | 28232718                | AA                              | TT              | 1946808008               |
| SNP_P4_50449_28234429 | NC_021163.1    | Ca_kabuli_chr04 | 28234429                | TT                              | CC              | 1946808010               |
| SNP_P4_50451_28234757 | NC_021163.1    | Ca_kabuli_chr04 | 28234757                | CC                              | AA              | 1946808012               |
| SNP_P4_50452_28234778 | NC_021163.1    | Ca_kabuli_chr04 | 28234778                | GG                              | TT              | 1946808014               |
| SNP_P4_50453_28234794 | NC_021163.1    | Ca_kabuli_chr04 | 28234794                | GG                              | AA              | 1946808016               |
| SNP_P4_50454_28234809 | NC_021163.1    | Ca_kabuli_chr04 | 28234809                | TT                              | AA              | 1946808018               |
| SNP_P4_50455_28235600 | NC_021163.1    | Ca_kabuli_chr04 | 28235600                | CC                              | AA              | 1946808020               |
| SNP_P4_50456_28235615 | NC_021163.1    | Ca_kabuli_chr04 | 28235615                | AA                              | CC              | 1946808022               |
| SNP_P4_50457_28235651 | NC_021163.1    | Ca_kabuli_chr04 | 28235651                | GG                              | AA              | 1946808024               |
| SNP_P4_50458_28235852 | NC_021163.1    | Ca_kabuli_chr04 | 28235852                | AA                              | GG              | 1946808026               |
| SNP_P4_50459_28235881 | NC_021163.1    | Ca_kabuli_chr04 | 28235881                | AA                              | GG              | 1946808028               |
| SNP_P4_50460_28235891 | NC_021163.1    | Ca_kabuli_chr04 | 28235891                | AA                              | TT              | 1946808030               |
| SNP_P4_50461_28235924 | NC_021163.1    | Ca_kabuli_chr04 | 28235924                | TT                              | CC              | 1946808032               |
| SNP_P4_50462_28236235 | NC_021163.1    | Ca_kabuli_chr04 | 28236235                | TT                              | CC              | 1946808034               |
| SNP_P4_50464_28236776 | NC_021163.1    | Ca_kabuli_chr04 | 28236776                | GG                              | CC              | 1946808037               |
| SNP_P4_50465_28236807 | NC_021163.1    | Ca_kabuli_chr04 | 28236807                | TT                              | CC              | 1946808039               |
| SNP_P4_50466_28236812 | NC_021163.1    | Ca_kabuli_chr04 | 28236812                | AA                              | GG              | 1946808041               |
| SNP_P4_50467_28236845 | NC_021163.1    | Ca_kabuli_chr04 | 28236845                | AA                              | TT              | 1946808043               |
| SNP_P4_50468_28236868 | NC_021163.1    | Ca_kabuli_chr04 | 28236868                | GG                              | AA              | 1946808045               |
| SNP_P4_50469_28236886 | NC_021163.1    | Ca_kabuli_chr04 | 28236886                | TT                              | AA              | 1946808047               |
| SNP_P4_50470_28236928 | NC_021163.1    | Ca_kabuli_chr04 | 28236928                | GG                              | AA              | 1946808050               |

| SNPs IDs              | Chromosome IDs | Chromosomes     | Physical positions (bp) | CDC Frontier (Reference genome) | (ILWC46 & LPNB) | NCBI SNPdb Accession IDs |
|-----------------------|----------------|-----------------|-------------------------|---------------------------------|-----------------|--------------------------|
| SNP_P4_50471_28236940 | NC_021163.1    | Ca_kabuli_chr04 | 28236940                | CC                              | AA              | 1946808052               |
| SNP_P4_50472_28236953 | NC_021163.1    | Ca_kabuli_chr04 | 28236953                | GG                              | AA              | 1946808054               |
| SNP_P4_50474_28237135 | NC_021163.1    | Ca_kabuli_chr04 | 28237135                | TT                              | CC              | 1946808057               |
| SNP_P4_50475_28237155 | NC_021163.1    | Ca_kabuli_chr04 | 28237155                | GG                              | TT              | 1946808059               |
| SNP_P4_50476_28237170 | NC_021163.1    | Ca_kabuli_chr04 | 28237170                | TT                              | AA              | 1946808061               |
| SNP_P4_50477_28237178 | NC_021163.1    | Ca_kabuli_chr04 | 28237178                | CC                              | AA              | 1946808063               |
| SNP_P4_50478_28237248 | NC_021163.1    | Ca_kabuli_chr04 | 28237248                | GG                              | TT              | 1946808065               |
| SNP_P4_50479_28237278 | NC_021163.1    | Ca_kabuli_chr04 | 28237278                | CC                              | AA              | 1946808068               |
| SNP_P4_50480_28237345 | NC_021163.1    | Ca_kabuli_chr04 | 28237345                | CC                              | AA              | 1946808070               |
| SNP_P4_50481_28237442 | NC_021163.1    | Ca_kabuli_chr04 | 28237442                | TT                              | CC              | 1946808072               |
| SNP_P4_50482_28237462 | NC_021163.1    | Ca_kabuli_chr04 | 28237462                | CC                              | TT              | 1946808074               |
| SNP_P4_50483_28237705 | NC_021163.1    | Ca_kabuli_chr04 | 28237705                | CC                              | TT              | 1946808076               |
| SNP_P4_50484_28237718 | NC_021163.1    | Ca_kabuli_chr04 | 28237718                | CC                              | TT              | 1946808079               |
| SNP_P4_50485_28237730 | NC_021163.1    | Ca_kabuli_chr04 | 28237730                | AA                              | GG              | 1946808081               |
| SNP_P4_50486_28237874 | NC_021163.1    | Ca_kabuli_chr04 | 28237874                | CC                              | AA              | 1946808083               |
| SNP_P4_50488_28237900 | NC_021163.1    | Ca_kabuli_chr04 | 28237900                | GG                              | TT              | 1946808085               |
| SNP_P4_50489_28246771 | NC_021163.1    | Ca_kabuli_chr04 | 28246771                | AA                              | GG              | 1946808087               |
| SNP_P4_50490_28246772 | NC_021163.1    | Ca_kabuli_chr04 | 28246772                | TT                              | GG              | 1946808090               |
| SNP_P4_50492_28263977 | NC_021163.1    | Ca_kabuli_chr04 | 28263977                | GG                              | AA              | 1946808092               |
| SNP_P4_50493_28265157 | NC_021163.1    | Ca_kabuli_chr04 | 28265157                | GG                              | AA              | 1946808094               |
| SNP_P4_50494_28266562 | NC_021163.1    | Ca_kabuli_chr04 | 28266562                | TT                              | AA              | 1946808096               |
| SNP_P4_50495_28266743 | NC_021163.1    | Ca_kabuli_chr04 | 28266743                | TT                              | AA              | 1946808098               |
| SNP_P4_50496_28266960 | NC_021163.1    | Ca_kabuli_chr04 | 28266960                | AA                              | GG              | 1946808101               |
| SNP_P4_50497_28267062 | NC_021163.1    | Ca_kabuli_chr04 | 28267062                | AA                              | TT              | 1946808103               |
| SNP_P4_50498_28267527 | NC_021163.1    | Ca_kabuli_chr04 | 28267527                | CC                              | TT              | 1946808105               |
| SNP_P4_50499_28267932 | NC_021163.1    | Ca_kabuli_chr04 | 28267932                | CC                              | TT              | 1946808107               |
| SNP_P4_50501_28277060 | NC_021163.1    | Ca_kabuli_chr04 | 28277060                | AA                              | GG              | 1946808110               |
| SNP_P4_50502_28277061 | NC_021163.1    | Ca_kabuli_chr04 | 28277061                | TT                              | AA              | 1946808112               |
| SNP_P4_50504_28277398 | NC_021163.1    | Ca_kabuli_chr04 | 28277398                | TT                              | AA              | 1946808114               |
| SNP_P4_50506_28277621 | NC_021163.1    | Ca_kabuli_chr04 | 28277621                | AA                              | GG              | 1946808116               |
| SNP_P4_50507_28277674 | NC_021163.1    | Ca_kabuli_chr04 | 28277674                | AA                              | GG              | 1946808118               |
| SNP_P4_50508_28277758 | NC_021163.1    | Ca_kabuli_chr04 | 28277758                | CC                              | TT              | 1946808121               |
| SNP_P4_50510_28279309 | NC_021163.1    | Ca_kabuli_chr04 | 28279309                | TT                              | GG              | 1946808123               |
| SNP_P4_50511_28279753 | NC_021163.1    | Ca_kabuli_chr04 | 28279753                | CC                              | TT              | 1946808126               |
| SNP_P4_50512_28281363 | NC_021163.1    | Ca_kabuli_chr04 | 28281363                | AA                              | GG              | 1946808128               |
| SNP_P4_50513_28281392 | NC_021163.1    | Ca_kabuli_chr04 | 28281392                | CC                              | GG              | 1946808130               |
| SNP_P4_50514_28281396 | NC_021163.1    | Ca_kabuli_chr04 | 28281396                | CC                              | TT              | 1946808132               |
| SNP_P4_50515_28281403 | NC_021163.1    | Ca_kabuli_chr04 | 28281403                | TT                              | CC              | 1946808135               |
| SNP_P4_50520_28282508 | NC_021163.1    | Ca_kabuli_chr04 | 28282508                | AA                              | GG              | 1946808137               |
| SNP_P4_50521_28282546 | NC_021163.1    | Ca_kabuli_chr04 | 28282546                | CC                              | TT              | 1946808139               |
| SNP_P4_50522_28286049 | NC_021163.1    | Ca_kabuli_chr04 | 28286049                | CC                              | TT              | 1946808141               |
| SNP_P4_50523_28286128 | NC_021163.1    | Ca_kabuli_chr04 | 28286128                | GG                              | AA              | 1946808143               |

| SNPs IDs              | Chromosome IDs | Chromosomes     | Physical positions (bp) | CDC Frontier (Reference genome) | (ILWC46 & LPNB) | NCBI SNPdb Accession IDs |
|-----------------------|----------------|-----------------|-------------------------|---------------------------------|-----------------|--------------------------|
| SNP_P4_50524_28286137 | NC_021163.1    | Ca_kabuli_chr04 | 28286137                | TT                              | CC              | 1946808145               |
| SNP_P4_50525_28287362 | NC_021163.1    | Ca_kabuli_chr04 | 28287362                | GG                              | AA              | 1946808148               |
| SNP_P4_50526_28287937 | NC_021163.1    | Ca_kabuli_chr04 | 28287937                | TT                              | GG              | 1946808150               |
| SNP_P4_50527_28288201 | NC_021163.1    | Ca_kabuli_chr04 | 28288201                | TT                              | CC              | 1946808152               |
| SNP_P4_50528_28290117 | NC_021163.1    | Ca_kabuli_chr04 | 28290117                | AA                              | GG              | 1946808154               |
| SNP_P4_50532_28295149 | NC_021163.1    | Ca_kabuli_chr04 | 28295149                | GG                              | AA              | 1946808156               |
| SNP_P4_50534_28296624 | NC_021163.1    | Ca_kabuli_chr04 | 28296624                | TT                              | CC              | 1946808158               |
| SNP_P4_50535_28297906 | NC_021163.1    | Ca_kabuli_chr04 | 28297906                | CC                              | AA              | 1946808160               |
| SNP_P4_50536_28297909 | NC_021163.1    | Ca_kabuli_chr04 | 28297909                | AA                              | TT              | 1946808161               |
| SNP_P4_50537_28298534 | NC_021163.1    | Ca_kabuli_chr04 | 28298534                | AA                              | TT              | 1946808163               |
| SNP_P4_50538_28298546 | NC_021163.1    | Ca_kabuli_chr04 | 28298546                | AA                              | TT              | 1946808165               |
| SNP_P4_50539_28300544 | NC_021163.1    | Ca_kabuli_chr04 | 28300544                | AA                              | CC              | 1946808168               |
| SNP_P4_50540_28301096 | NC_021163.1    | Ca_kabuli_chr04 | 28301096                | GG                              | AA              | 1946808170               |
| SNP_P4_50541_28301101 | NC_021163.1    | Ca_kabuli_chr04 | 28301101                | GG                              | AA              | 1946808172               |
| SNP_P4_50542_28302441 | NC_021163.1    | Ca_kabuli_chr04 | 28302441                | CC                              | TT              | 1946808174               |
| SNP_P4_50546_28314951 | NC_021163.1    | Ca_kabuli_chr04 | 28314951                | AA                              | TT              | 1946808176               |
| SNP_P4_50547_28315035 | NC_021163.1    | Ca_kabuli_chr04 | 28315035                | AA                              | GG              | 1946808178               |
| SNP_P4_50548_28315240 | NC_021163.1    | Ca_kabuli_chr04 | 28315240                | AA                              | GG              | 1946808180               |
| SNP_P4_50549_28315574 | NC_021163.1    | Ca_kabuli_chr04 | 28315574                | TT                              | GG              | 1946808182               |
| SNP_P4_50550_28316972 | NC_021163.1    | Ca_kabuli_chr04 | 28316972                | GG                              | CC              | 1946808184               |
| SNP_P4_50551_28317032 | NC_021163.1    | Ca_kabuli_chr04 | 28317032                | TT                              | CC              | 1946808186               |
| SNP_P4_50552_28318587 | NC_021163.1    | Ca_kabuli_chr04 | 28318587                | CC                              | GG              | 1946808188               |
| SNP_P4_50553_28319202 | NC_021163.1    | Ca_kabuli_chr04 | 28319202                | AA                              | TT              | 1946808190               |
| SNP_P4_50554_28319230 | NC_021163.1    | Ca_kabuli_chr04 | 28319230                | GG                              | AA              | 1946808192               |
| SNP_P4_50558_28322647 | NC_021163.1    | Ca_kabuli_chr04 | 28322647                | TT                              | CC              | 1946808194               |
| SNP_P4_50559_28322708 | NC_021163.1    | Ca_kabuli_chr04 | 28322708                | CC                              | TT              | 1946808196               |
| SNP_P4_50560_28322733 | NC_021163.1    | Ca_kabuli_chr04 | 28322733                | CC                              | TT              | 1946808198               |
| SNP_P4_50561_28323365 | NC_021163.1    | Ca_kabuli_chr04 | 28323365                | GG                              | AA              | 1946808200               |
| SNP_P4_50562_28323374 | NC_021163.1    | Ca_kabuli_chr04 | 28323374                | CC                              | TT              | 1946808202               |
| SNP_P4_50564_28331527 | NC_021163.1    | Ca_kabuli_chr04 | 28331527                | CC                              | TT              | 1946808205               |
| SNP_P4_50565_28331530 | NC_021163.1    | Ca_kabuli_chr04 | 28331530                | GG                              | AA              | 1946808207               |
| SNP_P4_50566_28331962 | NC_021163.1    | Ca_kabuli_chr04 | 28331962                | AA                              | GG              | 1946808209               |
| SNP_P4_50567_28332144 | NC_021163.1    | Ca_kabuli_chr04 | 28332144                | TT                              | GG              | 1946808211               |
| SNP_P4_50568_28332947 | NC_021163.1    | Ca_kabuli_chr04 | 28332947                | CC                              | AA              | 1946808213               |
| SNP_P4_50569_28333269 | NC_021163.1    | Ca_kabuli_chr04 | 28333269                | CC                              | TT              | 1946808215               |
| SNP_P4_50571_28334415 | NC_021163.1    | Ca_kabuli_chr04 | 28334415                | TT                              | CC              | 1946808217               |
| SNP_P4_50573_28336710 | NC_021163.1    | Ca_kabuli_chr04 | 28336710                | CC                              | TT              | 1946808219               |
| SNP_P4_50574_28337359 | NC_021163.1    | Ca_kabuli_chr04 | 28337359                | TT                              | CC              | 1946808221               |
| SNP_P4_50575_28337372 | NC_021163.1    | Ca_kabuli_chr04 | 28337372                | CC                              | TT              | 1946808223               |
| SNP_P4_50576_28337637 | NC_021163.1    | Ca_kabuli_chr04 | 28337637                | AA                              | CC              | 1946808225               |
| SNP_P4_50577_28337667 | NC_021163.1    | Ca_kabuli_chr04 | 28337667                | AA                              | GG              | 1946808227               |
| SNP_P4_50578_28337997 | NC_021163.1    | Ca_kabuli_chr04 | 28337997                | TT                              | GG              | 1946808229               |

| SNPs IDs              | Chromosome IDs | Chromosomes     | Physical positions (bp) | CDC Frontier (Reference genome) | (ILWC46 & LPNB) | NCBI SNPdb Accession IDs |
|-----------------------|----------------|-----------------|-------------------------|---------------------------------|-----------------|--------------------------|
| SNP_P4_50579_28338217 | NC_021163.1    | Ca_kabuli_chr04 | 28338217                | AA                              | CC              | 1946808232               |
| SNP_P4_50581_28338666 | NC_021163.1    | Ca_kabuli_chr04 | 28338666                | CC                              | TT              | 1946808234               |
| SNP_P4_50582_28338677 | NC_021163.1    | Ca_kabuli_chr04 | 28338677                | CC                              | TT              | 1946808236               |
| SNP_P4_50585_28338968 | NC_021163.1    | Ca_kabuli_chr04 | 28338968                | AA                              | GG              | 1946808239               |
| SNP_P4_50586_28339392 | NC_021163.1    | Ca_kabuli_chr04 | 28339392                | AA                              | TT              | 1946808241               |
| SNP_P4_50587_28339779 | NC_021163.1    | Ca_kabuli_chr04 | 28339779                | GG                              | AA              | 1946808243               |
| SNP_P4_50588_28339959 | NC_021163.1    | Ca_kabuli_chr04 | 28339959                | AA                              | TT              | 1946808245               |
| SNP_P4_50589_28340316 | NC_021163.1    | Ca_kabuli_chr04 | 28340316                | CC                              | TT              | 1946808247               |
| SNP_P4_50590_28340335 | NC_021163.1    | Ca_kabuli_chr04 | 28340335                | GG                              | AA              | 1946808249               |
| SNP_P4_50591_28340339 | NC_021163.1    | Ca_kabuli_chr04 | 28340339                | GG                              | AA              | 1946808251               |
| SNP_P4_50592_28342169 | NC_021163.1    | Ca_kabuli_chr04 | 28342169                | TT                              | CC              | 1946808253               |
| SNP_P4_50593_28342954 | NC_021163.1    | Ca_kabuli_chr04 | 28342954                | GG                              | AA              | 1946808255               |
| SNP_P4_50594_28344282 | NC_021163.1    | Ca_kabuli_chr04 | 28344282                | GG                              | TT              | 1946808257               |
| SNP_P4_50595_28344284 | NC_021163.1    | Ca_kabuli_chr04 | 28344284                | CC                              | TT              | 1946808259               |
| SNP_P4_50596_28344505 | NC_021163.1    | Ca_kabuli_chr04 | 28344505                | TT                              | CC              | 1946808261               |
| SNP_P4_50597_28345228 | NC_021163.1    | Ca_kabuli_chr04 | 28345228                | AA                              | CC              | 1946808263               |
| SNP_P4_50598_28345344 | NC_021163.1    | Ca_kabuli_chr04 | 28345344                | AA                              | GG              | 1946808265               |
| SNP_P4_50599_28345518 | NC_021163.1    | Ca_kabuli_chr04 | 28345518                | GG                              | TT              | 1946808267               |
| SNP_P4_50600_28345600 | NC_021163.1    | Ca_kabuli_chr04 | 28345600                | TT                              | CC              | 1946808270               |
| SNP_P4_50601_28345615 | NC_021163.1    | Ca_kabuli_chr04 | 28345615                | AA                              | GG              | 1946808272               |
| SNP_P4_50603_28346711 | NC_021163.1    | Ca_kabuli_chr04 | 28346711                | AA                              | TT              | 1946808274               |
| SNP_P4_50604_28346921 | NC_021163.1    | Ca_kabuli_chr04 | 28346921                | TT                              | AA              | 1946808276               |
| SNP_P4_50605_28346962 | NC_021163.1    | Ca_kabuli_chr04 | 28346962                | GG                              | AA              | 1946808278               |
| SNP_P4_50606_28346971 | NC_021163.1    | Ca_kabuli_chr04 | 28346971                | TT                              | GG              | 1946808280               |
| SNP_P4_50607_28347164 | NC_021163.1    | Ca_kabuli_chr04 | 28347164                | CC                              | GG              | 1946808282               |
| SNP_P4_50608_28347356 | NC_021163.1    | Ca_kabuli_chr04 | 28347356                | TT                              | CC              | 1946808284               |
| SNP_P4_50609_28348651 | NC_021163.1    | Ca_kabuli_chr04 | 28348651                | TT                              | GG              | 1946808286               |
| SNP_P4_50610_28348658 | NC_021163.1    | Ca_kabuli_chr04 | 28348658                | CC                              | TT              | 1946808288               |
| SNP_P4_50611_28348993 | NC_021163.1    | Ca_kabuli_chr04 | 28348993                | GG                              | CC              | 1946808290               |
| SNP_P4_50612_28349088 | NC_021163.1    | Ca_kabuli_chr04 | 28349088                | TT                              | CC              | 1946808292               |
| SNP_P4_50613_28349094 | NC_021163.1    | Ca_kabuli_chr04 | 28349094                | CC                              | TT              | 1946808294               |
| SNP_P4_50614_28349110 | NC_021163.1    | Ca_kabuli_chr04 | 28349110                | GG                              | AA              | 1946808296               |
| SNP_P4_50615_28349118 | NC_021163.1    | Ca_kabuli_chr04 | 28349118                | GG                              | AA              | 1946808297               |
| SNP_P4_50616_28349126 | NC_021163.1    | Ca_kabuli_chr04 | 28349126                | AA                              | CC              | 1946808298               |
| SNP_P4_50618_28349180 | NC_021163.1    | Ca_kabuli_chr04 | 28349180                | CC                              | AA              | 1946808299               |
| SNP_P4_50619_28349385 | NC_021163.1    | Ca_kabuli_chr04 | 28349385                | CC                              | GG              | 1946808300               |
| SNP_P4_50620_28349420 | NC_021163.1    | Ca_kabuli_chr04 | 28349420                | CC                              | TT              | 1946808301               |
| SNP_P4_50621_28349431 | NC_021163.1    | Ca_kabuli_chr04 | 28349431                | GG                              | AA              | 1946808302               |
| SNP_P4_50622_28349482 | NC_021163.1    | Ca_kabuli_chr04 | 28349482                | CC                              | AA              | 1946808304               |
| SNP_P4_50623_28349499 | NC_021163.1    | Ca_kabuli_chr04 | 28349499                | AA                              | CC              | 1946808306               |
| SNP_P4_50624_28351261 | NC_021163.1    | Ca_kabuli_chr04 | 28351261                | TT                              | GG              | 1946808308               |
| SNP_P4_50625_28351702 | NC_021163.1    | Ca_kabuli_chr04 | 28351702                | AA                              | GG              | 1946808310               |

| SNPs IDs              | Chromosome IDs | Chromosomes     | Physical positions (bp) | CDC Frontier (Reference genome) | (ILWC46 & LPNB) | NCBI SNPdb Accession IDs |
|-----------------------|----------------|-----------------|-------------------------|---------------------------------|-----------------|--------------------------|
| SNP_P4_50626_28352231 | NC_021163.1    | Ca_kabuli_chr04 | 28352231                | TT                              | CC              | 1946808312               |
| SNP_P4_50628_28353224 | NC_021163.1    | Ca_kabuli_chr04 | 28353224                | GG                              | AA              | 1946808314               |
| SNP_P4_50629_28353717 | NC_021163.1    | Ca_kabuli_chr04 | 28353717                | CC                              | TT              | 1946808316               |
| SNP_P4_50630_28353718 | NC_021163.1    | Ca_kabuli_chr04 | 28353718                | CC                              | TT              | 1946808318               |
| SNP_P4_50631_28354336 | NC_021163.1    | Ca_kabuli_chr04 | 28354336                | TT                              | CC              | 1946808321               |
| SNP_P4_50632_28354345 | NC_021163.1    | Ca_kabuli_chr04 | 28354345                | TT                              | CC              | 1946808323               |
| SNP_P4_50633_28354387 | NC_021163.1    | Ca_kabuli_chr04 | 28354387                | CC                              | AA              | 1946808325               |
| SNP_P4_50634_28356042 | NC_021163.1    | Ca_kabuli_chr04 | 28356042                | GG                              | AA              | 1946808327               |
| SNP_P4_50635_28356429 | NC_021163.1    | Ca_kabuli_chr04 | 28356429                | TT                              | CC              | 1946808329               |
| SNP_P4_50636_28356832 | NC_021163.1    | Ca_kabuli_chr04 | 28356832                | GG                              | AA              | 1946808331               |
| SNP_P4_50637_28356833 | NC_021163.1    | Ca_kabuli_chr04 | 28356833                | GG                              | TT              | 1946808333               |
| SNP_P4_50638_28357981 | NC_021163.1    | Ca_kabuli_chr04 | 28357981                | TT                              | CC              | 1946808335               |
| SNP_P4_50640_28358422 | NC_021163.1    | Ca_kabuli_chr04 | 28358422                | CC                              | GG              | 1946808337               |
| SNP_P4_50641_28358587 | NC_021163.1    | Ca_kabuli_chr04 | 28358587                | AA                              | TT              | 1946808339               |
| SNP_P4_50642_28359414 | NC_021163.1    | Ca_kabuli_chr04 | 28359414                | AA                              | TT              | 1946808341               |
| SNP_P4_50643_28359538 | NC_021163.1    | Ca_kabuli_chr04 | 28359538                | TT                              | CC              | 1946808343               |
| SNP_P4_50644_28359765 | NC_021163.1    | Ca_kabuli_chr04 | 28359765                | TT                              | AA              | 1946808345               |
| SNP_P4_50645_28359801 | NC_021163.1    | Ca_kabuli_chr04 | 28359801                | TT                              | AA              | 1946808347               |
| SNP_P4_50646_28360293 | NC_021163.1    | Ca_kabuli_chr04 | 28360293                | AA                              | GG              | 1946808350               |
| SNP_P4_50647_28360363 | NC_021163.1    | Ca_kabuli_chr04 | 28360363                | TT                              | CC              | 1946808352               |
| SNP_P4_50648_28360640 | NC_021163.1    | Ca_kabuli_chr04 | 28360640                | CC                              | TT              | 1946808354               |
| SNP_P4_50649_28363261 | NC_021163.1    | Ca_kabuli_chr04 | 28363261                | TT                              | CC              | 1946808356               |
| SNP_P4_50650_28363324 | NC_021163.1    | Ca_kabuli_chr04 | 28363324                | AA                              | GG              | 1946808358               |
| SNP_P4_50651_28363333 | NC_021163.1    | Ca_kabuli_chr04 | 28363333                | TT                              | CC              | 1946808360               |
| SNP_P4_50652_28363923 | NC_021163.1    | Ca_kabuli_chr04 | 28363923                | AA                              | TT              | 1946808362               |
| SNP_P4_50653_28363945 | NC_021163.1    | Ca_kabuli_chr04 | 28363945                | CC                              | GG              | 1946808365               |
| SNP_P4_50654_28363991 | NC_021163.1    | Ca_kabuli_chr04 | 28363991                | GG                              | AA              | 1946808367               |
| SNP_P4_50655_28363992 | NC_021163.1    | Ca_kabuli_chr04 | 28363992                | TT                              | CC              | 1946808369               |
| SNP_P4_50656_28364040 | NC_021163.1    | Ca_kabuli_chr04 | 28364040                | GG                              | AA              | 1946808371               |
| SNP_P4_50657_28364236 | NC_021163.1    | Ca_kabuli_chr04 | 28364236                | TT                              | CC              | 1946808373               |
| SNP_P4_50658_28364317 | NC_021163.1    | Ca_kabuli_chr04 | 28364317                | GG                              | AA              | 1946808376               |
| SNP_P4_50659_28364466 | NC_021163.1    | Ca_kabuli_chr04 | 28364466                | CC                              | AA              | 1946808378               |
| SNP_P4_50661_28368571 | NC_021163.1    | Ca_kabuli_chr04 | 28368571                | CC                              | TT              | 1946808380               |
| SNP_P4_50662_28369414 | NC_021163.1    | Ca_kabuli_chr04 | 28369414                | CC                              | TT              | 1946808382               |
| SNP_P4_50663_28369616 | NC_021163.1    | Ca_kabuli_chr04 | 28369616                | CC                              | TT              | 1946808385               |
| SNP_P4_50664_28369638 | NC_021163.1    | Ca_kabuli_chr04 | 28369638                | AA                              | CC              | 1946808387               |
| SNP_P4_50665_28369747 | NC_021163.1    | Ca_kabuli_chr04 | 28369747                | CC                              | TT              | 1946808389               |
| SNP_P4_50666_28371020 | NC_021163.1    | Ca_kabuli_chr04 | 28371020                | GG                              | AA              | 1946808391               |
| SNP_P4_50667_28371687 | NC_021163.1    | Ca_kabuli_chr04 | 28371687                | AA                              | TT              | 1946808393               |
| SNP_P4_50668_28373313 | NC_021163.1    | Ca_kabuli_chr04 | 28373313                | TT                              | GG              | 1946808395               |
| SNP_P4_50669_28373526 | NC_021163.1    | Ca_kabuli_chr04 | 28373526                | GG                              | AA              | 1946808397               |
| SNP_P4_50670_28373591 | NC_021163.1    | Ca_kabuli_chr04 | 28373591                | TT                              | AA              | 1946808399               |

| SNPs IDs              | Chromosome IDs | Chromosomes     | Physical positions (bp) | CDC Frontier (Reference genome) | (ILWC46 & LPNB) | NCBI SNPdb Accession IDs |
|-----------------------|----------------|-----------------|-------------------------|---------------------------------|-----------------|--------------------------|
| SNP_P4_50671_28373640 | NC_021163.1    | Ca_kabuli_chr04 | 28373640                | TT                              | CC              | 1946808401               |
| SNP_P4_50672_28373696 | NC_021163.1    | Ca_kabuli_chr04 | 28373696                | CC                              | TT              | 1946808404               |
| SNP_P4_50673_28374033 | NC_021163.1    | Ca_kabuli_chr04 | 28374033                | GG                              | CC              | 1946808406               |
| SNP_P4_50674_28374052 | NC_021163.1    | Ca_kabuli_chr04 | 28374052                | GG                              | AA              | 1946808408               |
| SNP_P4_50675_28375003 | NC_021163.1    | Ca_kabuli_chr04 | 28375003                | GG                              | AA              | 1946808410               |
| SNP_P4_50676_28375006 | NC_021163.1    | Ca_kabuli_chr04 | 28375006                | CC                              | GG              | 1946808412               |
| SNP_P4_50677_28377294 | NC_021163.1    | Ca_kabuli_chr04 | 28377294                | CC                              | TT              | 1946808414               |
| SNP_P4_50678_28377498 | NC_021163.1    | Ca_kabuli_chr04 | 28377498                | TT                              | CC              | 1946808416               |
| SNP_P4_50679_28377513 | NC_021163.1    | Ca_kabuli_chr04 | 28377513                | CC                              | TT              | 1946808418               |
| SNP_P4_50680_28377785 | NC_021163.1    | Ca_kabuli_chr04 | 28377785                | AA                              | TT              | 1946808420               |
| SNP_P4_50681_28378478 | NC_021163.1    | Ca_kabuli_chr04 | 28378478                | AA                              | GG              | 1946808422               |
| SNP_P4_50682_28378790 | NC_021163.1    | Ca_kabuli_chr04 | 28378790                | AA                              | GG              | 1946808424               |
| SNP_P4_50684_28378914 | NC_021163.1    | Ca_kabuli_chr04 | 28378914                | GG                              | TT              | 1946808426               |
| SNP_P4_50685_28379779 | NC_021163.1    | Ca_kabuli_chr04 | 28379779                | TT                              | CC              | 1946808428               |
| SNP_P4_50686_28380592 | NC_021163.1    | Ca_kabuli_chr04 | 28380592                | CC                              | TT              | 1946808430               |
| SNP_P4_50687_28380769 | NC_021163.1    | Ca_kabuli_chr04 | 28380769                | GG                              | TT              | 1946808432               |
| SNP_P4_50688_28383114 | NC_021163.1    | Ca_kabuli_chr04 | 28383114                | AA                              | GG              | 1946808434               |
| SNP_P4_50689_28383138 | NC_021163.1    | Ca_kabuli_chr04 | 28383138                | AA                              | GG              | 1946808436               |
| SNP_P4_50690_28383749 | NC_021163.1    | Ca_kabuli_chr04 | 28383749                | TT                              | CC              | 1946808438               |
| SNP_P4_50691_28383773 | NC_021163.1    | Ca_kabuli_chr04 | 28383773                | TT                              | CC              | 1946808441               |
| SNP_P4_50692_28383815 | NC_021163.1    | Ca_kabuli_chr04 | 28383815                | CC                              | GG              | 1946808443               |
| SNP_P4_50693_28383818 | NC_021163.1    | Ca_kabuli_chr04 | 28383818                | TT                              | AA              | 1946808445               |
| SNP_P4_50694_28384849 | NC_021163.1    | Ca_kabuli_chr04 | 28384849                | AA                              | GG              | 1946808447               |
| SNP_P4_50695_28387435 | NC_021163.1    | Ca_kabuli_chr04 | 28387435                | AA                              | GG              | 1946808449               |
| SNP_P4_50696_28388158 | NC_021163.1    | Ca_kabuli_chr04 | 28388158                | TT                              | CC              | 1946808451               |
| SNP_P4_50697_28389668 | NC_021163.1    | Ca_kabuli_chr04 | 28389668                | TT                              | AA              | 1946808453               |
| SNP_P4_50698_28389956 | NC_021163.1    | Ca_kabuli_chr04 | 28389956                | AA                              | CC              | 1946808455               |
| SNP_P4_50699_28389957 | NC_021163.1    | Ca_kabuli_chr04 | 28389957                | AA                              | TT              | 1946808457               |
| SNP_P4_50700_28389958 | NC_021163.1    | Ca_kabuli_chr04 | 28389958                | AA                              | TT              | 1946808459               |
| SNP_P4_50701_28390017 | NC_021163.1    | Ca_kabuli_chr04 | 28390017                | TT                              | CC              | 1946808461               |
| SNP_P4_50702_28390147 | NC_021163.1    | Ca_kabuli_chr04 | 28390147                | GG                              | AA              | 1946808463               |
| SNP_P4_50703_28390149 | NC_021163.1    | Ca_kabuli_chr04 | 28390149                | GG                              | AA              | 1946808465               |
| SNP_P4_50704_28390163 | NC_021163.1    | Ca_kabuli_chr04 | 28390163                | GG                              | AA              | 1946808467               |
| SNP_P4_50705_28390231 | NC_021163.1    | Ca_kabuli_chr04 | 28390231                | TT                              | CC              | 1946808469               |
| SNP_P4_50706_28390235 | NC_021163.1    | Ca_kabuli_chr04 | 28390235                | AA                              | TT              | 1946808471               |
| SNP_P4_50708_28390285 | NC_021163.1    | Ca_kabuli_chr04 | 28390285                | TT                              | CC              | 1946808473               |
| SNP_P4_50709_28390394 | NC_021163.1    | Ca_kabuli_chr04 | 28390394                | GG                              | TT              | 1946808475               |
| SNP_P4_50710_28390410 | NC_021163.1    | Ca_kabuli_chr04 | 28390410                | GG                              | AA              | 1946808477               |
| SNP_P4_50712_28390674 | NC_021163.1    | Ca_kabuli_chr04 | 28390674                | GG                              | AA              | 1946808479               |
| SNP_P4_50713_28390675 | NC_021163.1    | Ca_kabuli_chr04 | 28390675                | GG                              | AA              | 1946808481               |
| SNP_P4_50714_28390682 | NC_021163.1    | Ca_kabuli_chr04 | 28390682                | CC                              | TT              | 1946808483               |
| SNP_P4_50715_28390697 | NC_021163.1    | Ca_kabuli_chr04 | 28390697                | CC                              | AA              | 1946808485               |



| SNPs IDs              | Chromosome IDs | Chromosomes     | Physical positions (bp) | CDC Frontier (Reference genome) | (ILWC46 & LPNB) | NCBI SNPdb Accession IDs |
|-----------------------|----------------|-----------------|-------------------------|---------------------------------|-----------------|--------------------------|
| SNP_P4_50716_28401607 | NC_021163.1    | Ca_kabuli_chr04 | 28401607                | GG                              | AA              | 1946808487               |
| SNP_P4_50718_28402942 | NC_021163.1    | Ca_kabuli_chr04 | 28402942                | GG                              | AA              | 1946808489               |
| SNP_P4_50720_28403142 | NC_021163.1    | Ca_kabuli_chr04 | 28403142                | AA                              | GG              | 1946808491               |
| SNP_P4_50721_28403197 | NC_021163.1    | Ca_kabuli_chr04 | 28403197                | CC                              | TT              | 1946808493               |
| SNP_P4_50722_28403227 | NC_021163.1    | Ca_kabuli_chr04 | 28403227                | CC                              | TT              | 1946808496               |
| SNP_P4_50723_28403280 | NC_021163.1    | Ca_kabuli_chr04 | 28403280                | CC                              | TT              | 1946808498               |
| SNP_P4_50724_28404826 | NC_021163.1    | Ca_kabuli_chr04 | 28404826                | AA                              | GG              | 1946808500               |
| SNP_P4_50725_28406987 | NC_021163.1    | Ca_kabuli_chr04 | 28406987                | GG                              | TT              | 1946808502               |
| SNP_P4_50726_28407190 | NC_021163.1    | Ca_kabuli_chr04 | 28407190                | CC                              | AA              | 1946808504               |
| SNP_P4_50727_28407238 | NC_021163.1    | Ca_kabuli_chr04 | 28407238                | CC                              | TT              | 1946808506               |
| SNP_P4_50728_28407296 | NC_021163.1    | Ca_kabuli_chr04 | 28407296                | TT                              | GG              | 1946808508               |
| SNP_P4_50729_28407560 | NC_021163.1    | Ca_kabuli_chr04 | 28407560                | AA                              | CC              | 1946808510               |
| SNP_P4_50732_28409003 | NC_021163.1    | Ca_kabuli_chr04 | 28409003                | TT                              | CC              | 1946808513               |
| SNP_P4_50733_28409004 | NC_021163.1    | Ca_kabuli_chr04 | 28409004                | TT                              | CC              | 1946808515               |
| SNP_P4_50734_28409884 | NC_021163.1    | Ca_kabuli_chr04 | 28409884                | GG                              | AA              | 1946808517               |
| SNP_P4_50735_28409888 | NC_021163.1    | Ca_kabuli_chr04 | 28409888                | GG                              | AA              | 1946808519               |
| SNP_P4_50736_28409889 | NC_021163.1    | Ca_kabuli_chr04 | 28409889                | CC                              | TT              | 1946808521               |
| SNP_P4_50737_28410000 | NC_021163.1    | Ca_kabuli_chr04 | 28410000                | GG                              | TT              | 1946808523               |
| SNP_P4_50738_28410050 | NC_021163.1    | Ca_kabuli_chr04 | 28410050                | TT                              | CC              | 1946808525               |
| SNP_P4_50739_28410086 | NC_021163.1    | Ca_kabuli_chr04 | 28410086                | CC                              | AA              | 1946808527               |
| SNP_P4_50740_28410089 | NC_021163.1    | Ca_kabuli_chr04 | 28410089                | TT                              | CC              | 1946808529               |
| SNP_P4_50741_28410209 | NC_021163.1    | Ca_kabuli_chr04 | 28410209                | TT                              | AA              | 1946808531               |
| SNP_P4_50743_28410349 | NC_021163.1    | Ca_kabuli_chr04 | 28410349                | AA                              | TT              | 1946808533               |
| SNP_P4_50744_28410359 | NC_021163.1    | Ca_kabuli_chr04 | 28410359                | AA                              | GG              | 1946808535               |
| SNP_P4_50745_28412156 | NC_021163.1    | Ca_kabuli_chr04 | 28412156                | TT                              | GG              | 1946808537               |
| SNP_P4_50746_28412214 | NC_021163.1    | Ca_kabuli_chr04 | 28412214                | GG                              | AA              | 1946808539               |
| SNP_P4_50747_28412556 | NC_021163.1    | Ca_kabuli_chr04 | 28412556                | AA                              | CC              | 1946808541               |
| SNP_P4_50748_28412888 | NC_021163.1    | Ca_kabuli_chr04 | 28412888                | AA                              | GG              | 1946808543               |
| SNP_P4_50749_28413212 | NC_021163.1    | Ca_kabuli_chr04 | 28413212                | GG                              | AA              | 1946808546               |
| SNP_P4_50750_28413277 | NC_021163.1    | Ca_kabuli_chr04 | 28413277                | AA                              | TT              | 1946808548               |
| SNP_P4_50751_28413297 | NC_021163.1    | Ca_kabuli_chr04 | 28413297                | TT                              | AA              | 1946808550               |
| SNP_P4_50752_28413617 | NC_021163.1    | Ca_kabuli_chr04 | 28413617                | AA                              | CC              | 1946808552               |
| SNP_P4_50753_28413659 | NC_021163.1    | Ca_kabuli_chr04 | 28413659                | GG                              | AA              | 1946808554               |
| SNP_P4_50754_28413671 | NC_021163.1    | Ca_kabuli_chr04 | 28413671                | CC                              | TT              | 1946808556               |
| SNP_P4_50755_28413675 | NC_021163.1    | Ca_kabuli_chr04 | 28413675                | AA                              | GG              | 1946808558               |
| SNP_P4_50756_28414260 | NC_021163.1    | Ca_kabuli_chr04 | 28414260                | CC                              | GG              | 1946808560               |
| SNP_P4_50757_28414277 | NC_021163.1    | Ca_kabuli_chr04 | 28414277                | AA                              | GG              | 1946808562               |
| SNP_P4_50758_28414785 | NC_021163.1    | Ca_kabuli_chr04 | 28414785                | CC                              | GG              | 1946808564               |
| SNP_P4_50760_28414949 | NC_021163.1    | Ca_kabuli_chr04 | 28414949                | AA                              | GG              | 1946808566               |
| SNP_P4_50761_28414950 | NC_021163.1    | Ca_kabuli_chr04 | 28414950                | AA                              | CC              | 1946808568               |
| SNP_P4_50762_28415000 | NC_021163.1    | Ca_kabuli_chr04 | 28415000                | TT                              | GG              | 1946808570               |
| SNP_P4_50763_28415117 | NC_021163.1    | Ca_kabuli_chr04 | 28415117                | TT                              | CC              | 1946808572               |

| SNPs IDs              | Chromosome IDs | Chromosomes     | Physical positions (bp) | CDC Frontier (Reference genome) | (ILWC46 & LPNB) | NCBI SNPdb Accession IDs |
|-----------------------|----------------|-----------------|-------------------------|---------------------------------|-----------------|--------------------------|
| SNP_P4_50764_28415142 | NC_021163.1    | Ca_kabuli_chr04 | 28415142                | AA                              | GG              | 1946808574               |
| SNP_P4_50765_28415176 | NC_021163.1    | Ca_kabuli_chr04 | 28415176                | CC                              | TT              | 1946808576               |
| SNP_P4_50766_28415190 | NC_021163.1    | Ca_kabuli_chr04 | 28415190                | CC                              | TT              | 1946808578               |
| SNP_P4_50767_28415392 | NC_021163.1    | Ca_kabuli_chr04 | 28415392                | TT                              | CC              | 1946808580               |
| SNP_P4_50768_28415403 | NC_021163.1    | Ca_kabuli_chr04 | 28415403                | GG                              | AA              | 1946808582               |
| SNP_P4_50769_28415466 | NC_021163.1    | Ca_kabuli_chr04 | 28415466                | CC                              | TT              | 1946808584               |
| SNP_P4_50771_28417868 | NC_021163.1    | Ca_kabuli_chr04 | 28417868                | AA                              | GG              | 1946808586               |
| SNP_P4_50772_28418069 | NC_021163.1    | Ca_kabuli_chr04 | 28418069                | GG                              | AA              | 1946808588               |
| SNP_P4_50773_28418081 | NC_021163.1    | Ca_kabuli_chr04 | 28418081                | CC                              | TT              | 1946808590               |
| SNP_P4_50774_28418090 | NC_021163.1    | Ca_kabuli_chr04 | 28418090                | TT                              | CC              | 1946808592               |
| SNP_P4_50775_28418142 | NC_021163.1    | Ca_kabuli_chr04 | 28418142                | CC                              | TT              | 1946808594               |
| SNP_P4_50776_28418743 | NC_021163.1    | Ca_kabuli_chr04 | 28418743                | TT                              | CC              | 1946808596               |
| SNP_P4_50777_28418915 | NC_021163.1    | Ca_kabuli_chr04 | 28418915                | CC                              | GG              | 1946808598               |
| SNP_P4_50778_28418967 | NC_021163.1    | Ca_kabuli_chr04 | 28418967                | CC                              | AA              | 1946808601               |
| SNP_P4_50779_28419019 | NC_021163.1    | Ca_kabuli_chr04 | 28419019                | CC                              | GG              | 1946808603               |
| SNP_P4_50781_28422077 | NC_021163.1    | Ca_kabuli_chr04 | 28422077                | AA                              | GG              | 1946808605               |
| SNP_P4_50783_28422649 | NC_021163.1    | Ca_kabuli_chr04 | 28422649                | TT                              | GG              | 1946808607               |
| SNP_P4_50784_28422759 | NC_021163.1    | Ca_kabuli_chr04 | 28422759                | GG                              | TT              | 1946808609               |
| SNP_P4_50785_28425696 | NC_021163.1    | Ca_kabuli_chr04 | 28425696                | CC                              | AA              | 1946808611               |
| SNP_P4_50786_28428249 | NC_021163.1    | Ca_kabuli_chr04 | 28428249                | GG                              | AA              | 1946808613               |
| SNP_P4_50787_28431706 | NC_021163.1    | Ca_kabuli_chr04 | 28431706                | AA                              | GG              | 1946808615               |
| SNP_P4_50788_28439855 | NC_021163.1    | Ca_kabuli_chr04 | 28439855                | TT                              | GG              | 1946808617               |
| SNP_P4_50789_28440015 | NC_021163.1    | Ca_kabuli_chr04 | 28440015                | TT                              | GG              | 1946808619               |
| SNP_P4_50790_28440023 | NC_021163.1    | Ca_kabuli_chr04 | 28440023                | AA                              | GG              | 1946808621               |
| SNP_P4_50791_28442231 | NC_021163.1    | Ca_kabuli_chr04 | 28442231                | TT                              | CC              | 1946808623               |
| SNP_P4_50792_28442309 | NC_021163.1    | Ca_kabuli_chr04 | 28442309                | CC                              | TT              | 1946808625               |
| SNP_P4_50793_28443433 | NC_021163.1    | Ca_kabuli_chr04 | 28443433                | TT                              | AA              | 1946808627               |
| SNP_P4_50794_28443434 | NC_021163.1    | Ca_kabuli_chr04 | 28443434                | AA                              | TT              | 1946808629               |
| SNP_P4_50795_28444180 | NC_021163.1    | Ca_kabuli_chr04 | 28444180                | CC                              | TT              | 1946808631               |
| SNP_P4_50796_28444688 | NC_021163.1    | Ca_kabuli_chr04 | 28444688                | AA                              | CC              | 1946808633               |
| SNP_P4_50797_28447896 | NC_021163.1    | Ca_kabuli_chr04 | 28447896                | CC                              | AA              | 1946808635               |
| SNP_P4_50798_28451314 | NC_021163.1    | Ca_kabuli_chr04 | 28451314                | CC                              | AA              | 1946808637               |
| SNP_P4_50799_28451743 | NC_021163.1    | Ca_kabuli_chr04 | 28451743                | TT                              | CC              | 1946808640               |
| SNP_P4_50800_28451820 | NC_021163.1    | Ca_kabuli_chr04 | 28451820                | CC                              | TT              | 1946808642               |
| SNP_P4_50801_28451839 | NC_021163.1    | Ca_kabuli_chr04 | 28451839                | TT                              | AA              | 1946808644               |
| SNP_P4_50802_28452117 | NC_021163.1    | Ca_kabuli_chr04 | 28452117                | GG                              | AA              | 1946808646               |
| SNP_P4_50803_28452892 | NC_021163.1    | Ca_kabuli_chr04 | 28452892                | TT                              | CC              | 1946808648               |
| SNP_P4_50804_28452927 | NC_021163.1    | Ca_kabuli_chr04 | 28452927                | CC                              | AA              | 1946808650               |
| SNP_P4_50805_28452948 | NC_021163.1    | Ca_kabuli_chr04 | 28452948                | TT                              | CC              | 1946808652               |
| SNP_P4_50806_28453257 | NC_021163.1    | Ca_kabuli_chr04 | 28453257                | AA                              | CC              | 1946808654               |
| SNP_P4_50807_28453489 | NC_021163.1    | Ca_kabuli_chr04 | 28453489                | TT                              | CC              | 1946808656               |
| SNP_P4_50808_28453757 | NC_021163.1    | Ca_kabuli_chr04 | 28453757                | GG                              | AA              | 1946808658               |

| SNPs IDs              | Chromosome IDs | Chromosomes     | Physical positions (bp) | CDC Frontier (Reference genome) | (ILWC46 & LPNB) | NCBI SNPdb Accession IDs |
|-----------------------|----------------|-----------------|-------------------------|---------------------------------|-----------------|--------------------------|
| SNP_P4_50809_28453811 | NC_021163.1    | Ca_kabuli_chr04 | 28453811                | GG                              | AA              | 1946808660               |
| SNP_P4_50810_28457083 | NC_021163.1    | Ca_kabuli_chr04 | 28457083                | AA                              | GG              | 1946808662               |
| SNP_P4_50811_28457470 | NC_021163.1    | Ca_kabuli_chr04 | 28457470                | GG                              | AA              | 1946808664               |
| SNP_P4_50812_28457478 | NC_021163.1    | Ca_kabuli_chr04 | 28457478                | CC                              | AA              | 1946808666               |
| SNP_P4_50813_28457481 | NC_021163.1    | Ca_kabuli_chr04 | 28457481                | AA                              | GG              | 1946808668               |
| SNP_P4_50814_28457515 | NC_021163.1    | Ca_kabuli_chr04 | 28457515                | GG                              | AA              | 1946808671               |
| SNP_P4_50815_28457524 | NC_021163.1    | Ca_kabuli_chr04 | 28457524                | GG                              | TT              | 1946808673               |
| SNP_P4_50816_28457538 | NC_021163.1    | Ca_kabuli_chr04 | 28457538                | TT                              | CC              | 1946808675               |
| SNP_P4_50817_28457553 | NC_021163.1    | Ca_kabuli_chr04 | 28457553                | CC                              | TT              | 1946808676               |
| SNP_P4_50818_28457554 | NC_021163.1    | Ca_kabuli_chr04 | 28457554                | AA                              | GG              | 1946808678               |
| SNP_P4_50820_28457925 | NC_021163.1    | Ca_kabuli_chr04 | 28457925                | GG                              | AA              | 1946808680               |
| SNP_P4_50821_28458157 | NC_021163.1    | Ca_kabuli_chr04 | 28458157                | GG                              | AA              | 1946808682               |
| SNP_P4_50822_28461619 | NC_021163.1    | Ca_kabuli_chr04 | 28461619                | TT                              | CC              | 1946808684               |
| SNP_P4_50823_28461675 | NC_021163.1    | Ca_kabuli_chr04 | 28461675                | AA                              | GG              | 1946808686               |
| SNP_P4_50824_28461684 | NC_021163.1    | Ca_kabuli_chr04 | 28461684                | AA                              | CC              | 1946808688               |
| SNP_P4_50825_28484288 | NC_021163.1    | Ca_kabuli_chr04 | 28484288                | CC                              | AA              | 1946808690               |
| SNP_P4_50826_28501327 | NC_021163.1    | Ca_kabuli_chr04 | 28501327                | GG                              | TT              | 1946808692               |
| SNP_P4_50828_28504769 | NC_021163.1    | Ca_kabuli_chr04 | 28504769                | AA                              | TT              | 1946808694               |
| SNP_P4_50829_28505701 | NC_021163.1    | Ca_kabuli_chr04 | 28505701                | TT                              | CC              | 1946808696               |
| SNP_P4_50830_28510567 | NC_021163.1    | Ca_kabuli_chr04 | 28510567                | GG                              | AA              | 1946808698               |
| SNP_P4_50831_28511322 | NC_021163.1    | Ca_kabuli_chr04 | 28511322                | GG                              | AA              | 1946808700               |
| SNP_P4_50832_28512601 | NC_021163.1    | Ca_kabuli_chr04 | 28512601                | GG                              | AA              | 1946808702               |
| SNP_P4_50836_28519702 | NC_021163.1    | Ca_kabuli_chr04 | 28519702                | AA                              | GG              | 1946808704               |
| SNP_P4_50839_28525317 | NC_021163.1    | Ca_kabuli_chr04 | 28525317                | AA                              | TT              | 1946808706               |
| SNP_P4_50840_28525892 | NC_021163.1    | Ca_kabuli_chr04 | 28525892                | AA                              | GG              | 1946808708               |
| SNP_P4_50841_28528522 | NC_021163.1    | Ca_kabuli_chr04 | 28528522                | TT                              | AA              | 1946808710               |
| SNP_P4_50842_28531376 | NC_021163.1    | Ca_kabuli_chr04 | 28531376                | CC                              | GG              | 1946808712               |
| SNP_P4_50843_28533437 | NC_021163.1    | Ca_kabuli_chr04 | 28533437                | GG                              | AA              | 1946808714               |
| SNP_P4_50844_28533639 | NC_021163.1    | Ca_kabuli_chr04 | 28533639                | TT                              | CC              | 1946808717               |
| SNP_P4_50845_28535679 | NC_021163.1    | Ca_kabuli_chr04 | 28535679                | GG                              | AA              | 1946808719               |
| SNP_P4_50846_28535830 | NC_021163.1    | Ca_kabuli_chr04 | 28535830                | GG                              | AA              | 1946808721               |
| SNP_P4_50847_28535872 | NC_021163.1    | Ca_kabuli_chr04 | 28535872                | GG                              | AA              | 1946808723               |
| SNP_P4_50848_28536182 | NC_021163.1    | Ca_kabuli_chr04 | 28536182                | CC                              | GG              | 1946808725               |
| SNP_P4_50850_28541053 | NC_021163.1    | Ca_kabuli_chr04 | 28541053                | TT                              | CC              | 1946808726               |
| SNP_P4_50851_28541376 | NC_021163.1    | Ca_kabuli_chr04 | 28541376                | GG                              | CC              | 1946808728               |
| SNP_P4_50853_28542079 | NC_021163.1    | Ca_kabuli_chr04 | 28542079                | CC                              | AA              | 1946808730               |
| SNP_P4_50854_28542290 | NC_021163.1    | Ca_kabuli_chr04 | 28542290                | AA                              | GG              | 1946808733               |
| SNP_P4_50855_28542424 | NC_021163.1    | Ca_kabuli_chr04 | 28542424                | TT                              | AA              | 1946808735               |
| SNP_P4_50856_28542425 | NC_021163.1    | Ca_kabuli_chr04 | 28542425                | AA                              | TT              | 1946808737               |
| SNP_P4_50857_28542872 | NC_021163.1    | Ca_kabuli_chr04 | 28542872                | GG                              | AA              | 1946808739               |
| SNP_P4_50858_28546983 | NC_021163.1    | Ca_kabuli_chr04 | 28546983                | AA                              | GG              | 1946808741               |
| SNP_P4_50859_28549398 | NC_021163.1    | Ca_kabuli_chr04 | 28549398                | AA                              | TT              | 1946808743               |

| SNPs IDs              | Chromosome IDs | Chromosomes     | Physical positions (bp) | CDC Frontier (Reference genome) | (ILWC46 & LPNB) | NCBI SNPdb Accession IDs |
|-----------------------|----------------|-----------------|-------------------------|---------------------------------|-----------------|--------------------------|
| SNP_P4_50860_28550613 | NC_021163.1    | Ca_kabuli_chr04 | 28550613                | CC                              | GG              | 1946808745               |
| SNP_P4_50861_28555442 | NC_021163.1    | Ca_kabuli_chr04 | 28555442                | AA                              | GG              | 1946808747               |
| SNP_P4_50862_28555798 | NC_021163.1    | Ca_kabuli_chr04 | 28555798                | AA                              | GG              | 1946808749               |
| SNP_P4_50865_28558921 | NC_021163.1    | Ca_kabuli_chr04 | 28558921                | TT                              | AA              | 1946808751               |
| SNP_P4_50867_28559494 | NC_021163.1    | Ca_kabuli_chr04 | 28559494                | AA                              | CC              | 1946808753               |
| SNP_P4_50868_28559791 | NC_021163.1    | Ca_kabuli_chr04 | 28559791                | TT                              | AA              | 1946808755               |
| SNP_P4_50869_28563893 | NC_021163.1    | Ca_kabuli_chr04 | 28563893                | GG                              | AA              | 1946808757               |
| SNP_P4_50870_28564203 | NC_021163.1    | Ca_kabuli_chr04 | 28564203                | TT                              | GG              | 1946808759               |
| SNP_P4_50871_28577393 | NC_021163.1    | Ca_kabuli_chr04 | 28577393                | CC                              | AA              | 1946808761               |
| SNP_P4_50872_28577414 | NC_021163.1    | Ca_kabuli_chr04 | 28577414                | GG                              | AA              | 1946808763               |
| SNP_P4_50874_28581984 | NC_021163.1    | Ca_kabuli_chr04 | 28581984                | AA                              | GG              | 1946808765               |
| SNP_P4_50875_28582111 | NC_021163.1    | Ca_kabuli_chr04 | 28582111                | CC                              | TT              | 1946808767               |
| SNP_P4_50876_28582312 | NC_021163.1    | Ca_kabuli_chr04 | 28582312                | TT                              | CC              | 1946808769               |
| SNP_P4_50877_28582950 | NC_021163.1    | Ca_kabuli_chr04 | 28582950                | AA                              | TT              | 1946808771               |
| SNP_P4_50878_28582952 | NC_021163.1    | Ca_kabuli_chr04 | 28582952                | GG                              | AA              | 1946808774               |
| SNP_P4_50879_28583725 | NC_021163.1    | Ca_kabuli_chr04 | 28583725                | AA                              | GG              | 1946808776               |
| SNP_P4_50881_28583883 | NC_021163.1    | Ca_kabuli_chr04 | 28583883                | CC                              | TT              | 1946808778               |
| SNP_P4_50882_28584103 | NC_021163.1    | Ca_kabuli_chr04 | 28584103                | GG                              | TT              | 1946808780               |
| SNP_P4_50883_28584417 | NC_021163.1    | Ca_kabuli_chr04 | 28584417                | AA                              | CC              | 1946808782               |
| SNP_P4_50884_28584606 | NC_021163.1    | Ca_kabuli_chr04 | 28584606                | AA                              | GG              | 1946808784               |
| SNP_P4_50885_28585200 | NC_021163.1    | Ca_kabuli_chr04 | 28585200                | TT                              | CC              | 1946808786               |
| SNP_P4_50886_28585520 | NC_021163.1    | Ca_kabuli_chr04 | 28585520                | CC                              | AA              | 1946808788               |
| SNP_P4_50887_28585654 | NC_021163.1    | Ca_kabuli_chr04 | 28585654                | TT                              | AA              | 1946808790               |
| SNP_P4_50888_28585731 | NC_021163.1    | Ca_kabuli_chr04 | 28585731                | AA                              | GG              | 1946808791               |
| SNP_P4_50889_28586511 | NC_021163.1    | Ca_kabuli_chr04 | 28586511                | CC                              | TT              | 1946808792               |
| SNP_P4_50891_28587571 | NC_021163.1    | Ca_kabuli_chr04 | 28587571                | CC                              | AA              | 1946808793               |
| SNP_P4_50892_28588161 | NC_021163.1    | Ca_kabuli_chr04 | 28588161                | GG                              | AA              | 1946808795               |
| SNP_P4_50893_28588430 | NC_021163.1    | Ca_kabuli_chr04 | 28588430                | AA                              | GG              | 1946808797               |
| SNP_P4_50894_28591327 | NC_021163.1    | Ca_kabuli_chr04 | 28591327                | GG                              | AA              | 1946808799               |
| SNP_P4_50896_28600438 | NC_021163.1    | Ca_kabuli_chr04 | 28600438                | GG                              | TT              | 1946808801               |
| SNP_P4_50897_28604347 | NC_021163.1    | Ca_kabuli_chr04 | 28604347                | TT                              | CC              | 1946808803               |
| SNP_P4_50898_28604371 | NC_021163.1    | Ca_kabuli_chr04 | 28604371                | TT                              | CC              | 1946808806               |
| SNP_P4_50899_28612496 | NC_021163.1    | Ca_kabuli_chr04 | 28612496                | TT                              | AA              | 1946808808               |
| SNP_P4_50900_28617287 | NC_021163.1    | Ca_kabuli_chr04 | 28617287                | TT                              | CC              | 1946808810               |
| SNP_P4_50901_28619103 | NC_021163.1    | Ca_kabuli_chr04 | 28619103                | CC                              | TT              | 1946808812               |
| SNP_P4_50902_28622013 | NC_021163.1    | Ca_kabuli_chr04 | 28622013                | CC                              | AA              | 1946808814               |
| SNP_P4_50903_28622280 | NC_021163.1    | Ca_kabuli_chr04 | 28622280                | CC                              | TT              | 1946808816               |
| SNP_P4_50904_28622291 | NC_021163.1    | Ca_kabuli_chr04 | 28622291                | GG                              | AA              | 1946808818               |
| SNP_P4_50907_28623364 | NC_021163.1    | Ca_kabuli_chr04 | 28623364                | CC                              | TT              | 1946808820               |
| SNP_P4_50908_28629497 | NC_021163.1    | Ca_kabuli_chr04 | 28629497                | AA                              | GG              | 1946808822               |
| SNP_P4_50909_28630055 | NC_021163.1    | Ca_kabuli_chr04 | 28630055                | TT                              | AA              | 1946808824               |
| SNP_P4_50910_28631070 | NC_021163.1    | Ca_kabuli_chr04 | 28631070                | AA                              | GG              | 1946808826               |

| SNPs IDs              | Chromosome IDs | Chromosomes     | Physical positions (bp) | CDC Frontier (Reference genome) | (ILWC46 & LPNB) | NCBI SNPdb Accession IDs |
|-----------------------|----------------|-----------------|-------------------------|---------------------------------|-----------------|--------------------------|
| SNP_P4_50911_28633469 | NC_021163.1    | Ca_kabuli_chr04 | 28633469                | GG                              | AA              | 1946808828               |
| SNP_P4_50912_28635850 | NC_021163.1    | Ca_kabuli_chr04 | 28635850                | TT                              | CC              | 1946808830               |
| SNP_P4_50913_28637929 | NC_021163.1    | Ca_kabuli_chr04 | 28637929                | TT                              | CC              | 1946808832               |
| SNP_P4_50914_28638280 | NC_021163.1    | Ca_kabuli_chr04 | 28638280                | GG                              | AA              | 1946808834               |
| SNP_P4_50915_28638296 | NC_021163.1    | Ca_kabuli_chr04 | 28638296                | TT                              | CC              | 1946808836               |
| SNP_P4_50916_28638650 | NC_021163.1    | Ca_kabuli_chr04 | 28638650                | AA                              | CC              | 1946808839               |
| SNP_P4_50917_28638740 | NC_021163.1    | Ca_kabuli_chr04 | 28638740                | CC                              | TT              | 1946808841               |
| SNP_P4_50918_28639974 | NC_021163.1    | Ca_kabuli_chr04 | 28639974                | GG                              | TT              | 1946808843               |
| SNP_P4_50919_28640117 | NC_021163.1    | Ca_kabuli_chr04 | 28640117                | GG                              | AA              | 1946808845               |
| SNP_P4_50920_28640316 | NC_021163.1    | Ca_kabuli_chr04 | 28640316                | TT                              | AA              | 1946808847               |
| SNP_P4_50921_28640374 | NC_021163.1    | Ca_kabuli_chr04 | 28640374                | CC                              | TT              | 1946808850               |
| SNP_P4_50922_28640401 | NC_021163.1    | Ca_kabuli_chr04 | 28640401                | GG                              | AA              | 1946808852               |
| SNP_P4_50923_28642096 | NC_021163.1    | Ca_kabuli_chr04 | 28642096                | CC                              | TT              | 1946808854               |
| SNP_P4_50924_28663622 | NC_021163.1    | Ca_kabuli_chr04 | 28663622                | GG                              | TT              | 1946808856               |
| SNP_P4_50925_28663623 | NC_021163.1    | Ca_kabuli_chr04 | 28663623                | CC                              | TT              | 1946808858               |
| SNP_P4_50926_28663633 | NC_021163.1    | Ca_kabuli_chr04 | 28663633                | AA                              | TT              | 1946808860               |
| SNP_P4_50927_28663804 | NC_021163.1    | Ca_kabuli_chr04 | 28663804                | AA                              | GG              | 1946808862               |
| SNP_P4_50928_28663907 | NC_021163.1    | Ca_kabuli_chr04 | 28663907                | TT                              | CC              | 1946808864               |
| SNP_P4_50929_28663976 | NC_021163.1    | Ca_kabuli_chr04 | 28663976                | GG                              | AA              | 1946808867               |
| SNP_P4_50930_28668069 | NC_021163.1    | Ca_kabuli_chr04 | 28668069                | AA                              | TT              | 1946808869               |
| SNP_P4_50931_28668072 | NC_021163.1    | Ca_kabuli_chr04 | 28668072                | GG                              | AA              | 1946808871               |
| SNP_P4_50932_28668148 | NC_021163.1    | Ca_kabuli_chr04 | 28668148                | CC                              | GG              | 1946808873               |
| SNP_P4_50933_28668152 | NC_021163.1    | Ca_kabuli_chr04 | 28668152                | TT                              | CC              | 1946808875               |
| SNP_P4_50934_28668155 | NC_021163.1    | Ca_kabuli_chr04 | 28668155                | AA                              | GG              | 1946808877               |
| SNP_P4_50935_28669450 | NC_021163.1    | Ca_kabuli_chr04 | 28669450                | CC                              | AA              | 1946808880               |
| SNP_P4_50936_28674375 | NC_021163.1    | Ca_kabuli_chr04 | 28674375                | CC                              | TT              | 1946808882               |
| SNP_P4_50937_28674718 | NC_021163.1    | Ca_kabuli_chr04 | 28674718                | GG                              | AA              | 1946808884               |
| SNP_P4_50938_28703148 | NC_021163.1    | Ca_kabuli_chr04 | 28703148                | TT                              | GG              | 1946808886               |
| SNP_P4_50939_28710938 | NC_021163.1    | Ca_kabuli_chr04 | 28710938                | TT                              | CC              | 1946808889               |
| SNP_P4_50940_28714888 | NC_021163.1    | Ca_kabuli_chr04 | 28714888                | CC                              | AA              | 1946808891               |
| SNP_P4_50941_28714936 | NC_021163.1    | Ca_kabuli_chr04 | 28714936                | AA                              | GG              | 1946808893               |
| SNP_P4_50942_28714938 | NC_021163.1    | Ca_kabuli_chr04 | 28714938                | CC                              | TT              | 1946808895               |
| SNP_P4_50943_28714941 | NC_021163.1    | Ca_kabuli_chr04 | 28714941                | CC                              | TT              | 1946808897               |
| SNP_P4_50944_28714950 | NC_021163.1    | Ca_kabuli_chr04 | 28714950                | CC                              | TT              | 1946808899               |
| SNP_P4_50945_28714968 | NC_021163.1    | Ca_kabuli_chr04 | 28714968                | CC                              | GG              | 1946808902               |
| SNP_P4_50946_28714986 | NC_021163.1    | Ca_kabuli_chr04 | 28714986                | GG                              | AA              | 1946808904               |
| SNP_P4_50948_28715024 | NC_021163.1    | Ca_kabuli_chr04 | 28715024                | GG                              | AA              | 1946808906               |
| SNP_P4_50949_28715129 | NC_021163.1    | Ca_kabuli_chr04 | 28715129                | CC                              | TT              | 1946808909               |
| SNP_P4_50951_28715242 | NC_021163.1    | Ca_kabuli_chr04 | 28715242                | GG                              | AA              | 1946808911               |
| SNP_P4_50952_28727151 | NC_021163.1    | Ca_kabuli_chr04 | 28727151                | TT                              | AA              | 1946808913               |
| SNP_P4_50953_28727170 | NC_021163.1    | Ca_kabuli_chr04 | 28727170                | TT                              | AA              | 1946808915               |
| SNP_P4_50954_28755003 | NC_021163.1    | Ca_kabuli_chr04 | 28755003                | CC                              | GG              | 1946808917               |

| SNPs IDs              | Chromosome IDs | Chromosomes     | Physical positions (bp) | CDC Frontier (Reference genome) | (ILWC46 & LPNB) | NCBI SNPdb Accession IDs |
|-----------------------|----------------|-----------------|-------------------------|---------------------------------|-----------------|--------------------------|
| SNP_P4_50955_28771795 | NC_021163.1    | Ca_kabuli_chr04 | 28771795                | AA                              | TT              | 1946808920               |
| SNP_P4_50956_28777992 | NC_021163.1    | Ca_kabuli_chr04 | 28777992                | CC                              | TT              | 1946808922               |
| SNP_P4_50957_28778012 | NC_021163.1    | Ca_kabuli_chr04 | 28778012                | TT                              | GG              | 1946808924               |
| SNP_P4_50958_28780076 | NC_021163.1    | Ca_kabuli_chr04 | 28780076                | CC                              | TT              | 1946808926               |
| SNP_P4_50960_28783252 | NC_021163.1    | Ca_kabuli_chr04 | 28783252                | CC                              | TT              | 1946808928               |
| SNP_P4_50961_28783771 | NC_021163.1    | Ca_kabuli_chr04 | 28783771                | GG                              | AA              | 1946808931               |
| SNP_P4_50962_28783956 | NC_021163.1    | Ca_kabuli_chr04 | 28783956                | CC                              | AA              | 1946808933               |
| SNP_P4_50963_28783970 | NC_021163.1    | Ca_kabuli_chr04 | 28783970                | TT                              | CC              | 1946808935               |
| SNP_P4_50964_28784308 | NC_021163.1    | Ca_kabuli_chr04 | 28784308                | CC                              | TT              | 1946808937               |
| SNP_P4_50965_28786215 | NC_021163.1    | Ca_kabuli_chr04 | 28786215                | CC                              | TT              | 1946808939               |
| SNP_P4_50966_28786275 | NC_021163.1    | Ca_kabuli_chr04 | 28786275                | AA                              | CC              | 1946808941               |
| SNP_P4_50968_28792283 | NC_021163.1    | Ca_kabuli_chr04 | 28792283                | TT                              | GG              | 1946808943               |
| SNP_P4_50970_28793706 | NC_021163.1    | Ca_kabuli_chr04 | 28793706                | AA                              | GG              | 1946808945               |
| SNP_P4_50971_28793823 | NC_021163.1    | Ca_kabuli_chr04 | 28793823                | CC                              | AA              | 1946808947               |
| SNP_P4_50972_28794130 | NC_021163.1    | Ca_kabuli_chr04 | 28794130                | GG                              | TT              | 1946808949               |
| SNP_P4_50973_28797152 | NC_021163.1    | Ca_kabuli_chr04 | 28797152                | AA                              | GG              | 1946808951               |
| SNP_P4_50975_28799352 | NC_021163.1    | Ca_kabuli_chr04 | 28799352                | TT                              | AA              | 1946808954               |
| SNP_P4_50976_28799368 | NC_021163.1    | Ca_kabuli_chr04 | 28799368                | GG                              | AA              | 1946808957               |
| SNP_P4_50977_28799646 | NC_021163.1    | Ca_kabuli_chr04 | 28799646                | GG                              | TT              | 1946808959               |
| SNP_P4_50978_28799661 | NC_021163.1    | Ca_kabuli_chr04 | 28799661                | TT                              | AA              | 1946808961               |
| SNP_P4_50979_28799670 | NC_021163.1    | Ca_kabuli_chr04 | 28799670                | TT                              | CC              | 1946808963               |
| SNP_P4_50980_28800831 | NC_021163.1    | Ca_kabuli_chr04 | 28800831                | TT                              | AA              | 1946808965               |
| SNP_P4_50981_28800834 | NC_021163.1    | Ca_kabuli_chr04 | 28800834                | GG                              | TT              | 1946808968               |
| SNP_P4_50982_28800901 | NC_021163.1    | Ca_kabuli_chr04 | 28800901                | CC                              | TT              | 1946808970               |
| SNP_P4_50984_28801600 | NC_021163.1    | Ca_kabuli_chr04 | 28801600                | GG                              | AA              | 1946808972               |
| SNP_P4_50985_28801643 | NC_021163.1    | Ca_kabuli_chr04 | 28801643                | GG                              | CC              | 1946808974               |
| SNP_P4_50986_28801674 | NC_021163.1    | Ca_kabuli_chr04 | 28801674                | CC                              | TT              | 1946808976               |
| SNP_P4_50987_28801813 | NC_021163.1    | Ca_kabuli_chr04 | 28801813                | CC                              | TT              | 1946808978               |
| SNP_P4_50988_28802071 | NC_021163.1    | Ca_kabuli_chr04 | 28802071                | GG                              | TT              | 1946808981               |
| SNP_P4_50990_28802122 | NC_021163.1    | Ca_kabuli_chr04 | 28802122                | CC                              | TT              | 1946808983               |
| SNP_P4_50991_28802133 | NC_021163.1    | Ca_kabuli_chr04 | 28802133                | TT                              | GG              | 1946808985               |
| SNP_P4_50992_28802148 | NC_021163.1    | Ca_kabuli_chr04 | 28802148                | AA                              | GG              | 1946808987               |
| SNP_P4_50993_28802213 | NC_021163.1    | Ca_kabuli_chr04 | 28802213                | TT                              | GG              | 1946808989               |
| SNP_P4_50994_28802226 | NC_021163.1    | Ca_kabuli_chr04 | 28802226                | GG                              | AA              | 1946808991               |
| SNP_P4_50995_28802255 | NC_021163.1    | Ca_kabuli_chr04 | 28802255                | TT                              | CC              | 1946808994               |
| SNP_P4_50997_28802405 | NC_021163.1    | Ca_kabuli_chr04 | 28802405                | TT                              | CC              | 1946808996               |
| SNP_P4_50998_28802472 | NC_021163.1    | Ca_kabuli_chr04 | 28802472                | AA                              | TT              | 1946808998               |
| SNP_P4_50999_28802661 | NC_021163.1    | Ca_kabuli_chr04 | 28802661                | GG                              | AA              | 1946809000               |
| SNP_P4_51000_28802700 | NC_021163.1    | Ca_kabuli_chr04 | 28802700                | GG                              | AA              | 1946809002               |
| SNP_P4_51001_28802717 | NC_021163.1    | Ca_kabuli_chr04 | 28802717                | CC                              | TT              | 1946809004               |
| SNP_P4_51002_28802726 | NC_021163.1    | Ca_kabuli_chr04 | 28802726                | CC                              | GG              | 1946809006               |
| SNP_P4_51003_28802729 | NC_021163.1    | Ca_kabuli_chr04 | 28802729                | CC                              | GG              | 1946809009               |

| SNPs IDs              | Chromosome IDs | Chromosomes     | Physical positions (bp) | CDC Frontier (Reference genome) | (ILWC46 & LPNB) | NCBI SNPdb Accession IDs |
|-----------------------|----------------|-----------------|-------------------------|---------------------------------|-----------------|--------------------------|
| SNP_P4_51004_28802748 | NC_021163.1    | Ca_kabuli_chr04 | 28802748                | TT                              | CC              | 1946809011               |
| SNP_P4_51005_28803881 | NC_021163.1    | Ca_kabuli_chr04 | 28803881                | GG                              | AA              | 1946809013               |
| SNP_P4_51006_28806639 | NC_021163.1    | Ca_kabuli_chr04 | 28806639                | CC                              | TT              | 1946809015               |
| SNP_P4_51007_28806709 | NC_021163.1    | Ca_kabuli_chr04 | 28806709                | CC                              | TT              | 1946809017               |
| SNP_P4_51008_28807023 | NC_021163.1    | Ca_kabuli_chr04 | 28807023                | TT                              | CC              | 1946809019               |
| SNP_P4_51009_28817296 | NC_021163.1    | Ca_kabuli_chr04 | 28817296                | TT                              | GG              | 1946809021               |
| SNP_P4_51010_28818392 | NC_021163.1    | Ca_kabuli_chr04 | 28818392                | TT                              | CC              | 1946809023               |
| SNP_P4_51011_28818400 | NC_021163.1    | Ca_kabuli_chr04 | 28818400                | CC                              | TT              | 1946809025               |
| SNP_P4_51012_28818436 | NC_021163.1    | Ca_kabuli_chr04 | 28818436                | TT                              | CC              | 1946809027               |
| SNP_P4_51013_28818438 | NC_021163.1    | Ca_kabuli_chr04 | 28818438                | GG                              | AA              | 1946809030               |
| SNP_P4_51014_28818517 | NC_021163.1    | Ca_kabuli_chr04 | 28818517                | AA                              | CC              | 1946809032               |
| SNP_P4_51015_28818539 | NC_021163.1    | Ca_kabuli_chr04 | 28818539                | GG                              | CC              | 1946809034               |
| SNP_P4_51016_28818560 | NC_021163.1    | Ca_kabuli_chr04 | 28818560                | CC                              | GG              | 1946809036               |
| SNP_P4_51017_28820238 | NC_021163.1    | Ca_kabuli_chr04 | 28820238                | GG                              | AA              | 1946809037               |
| SNP_P4_51018_28820244 | NC_021163.1    | Ca_kabuli_chr04 | 28820244                | CC                              | TT              | 1946809039               |
| SNP_P4_51019_28820245 | NC_021163.1    | Ca_kabuli_chr04 | 28820245                | TT                              | CC              | 1946809041               |
| SNP_P4_51020_28820270 | NC_021163.1    | Ca_kabuli_chr04 | 28820270                | TT                              | CC              | 1946809043               |
| SNP_P4_51021_28820276 | NC_021163.1    | Ca_kabuli_chr04 | 28820276                | AA                              | GG              | 1946809045               |
| SNP_P4_51022_28820282 | NC_021163.1    | Ca_kabuli_chr04 | 28820282                | AA                              | TT              | 1946809047               |
| SNP_P4_51023_28820778 | NC_021163.1    | Ca_kabuli_chr04 | 28820778                | CC                              | TT              | 1946809049               |
| SNP_P4_51024_28820805 | NC_021163.1    | Ca_kabuli_chr04 | 28820805                | CC                              | TT              | 1946809051               |
| SNP_P4_51025_28822111 | NC_021163.1    | Ca_kabuli_chr04 | 28822111                | CC                              | TT              | 1946809054               |
| SNP_P4_51027_28822372 | NC_021163.1    | Ca_kabuli_chr04 | 28822372                | AA                              | CC              | 1946809056               |
| SNP_P4_51029_28822429 | NC_021163.1    | Ca_kabuli_chr04 | 28822429                | CC                              | TT              | 1946809058               |
| SNP_P4_51030_28822450 | NC_021163.1    | Ca_kabuli_chr04 | 28822450                | AA                              | CC              | 1946809060               |
| SNP_P4_51034_28823583 | NC_021163.1    | Ca_kabuli_chr04 | 28823583                | AA                              | GG              | 1946809062               |
| SNP_P4_51035_28825199 | NC_021163.1    | Ca_kabuli_chr04 | 28825199                | TT                              | CC              | 1946809064               |
| SNP_P4_51036_28825201 | NC_021163.1    | Ca_kabuli_chr04 | 28825201                | AA                              | CC              | 1946809066               |
| SNP_P4_51037_28825724 | NC_021163.1    | Ca_kabuli_chr04 | 28825724                | CC                              | TT              | 1946809068               |
| SNP_P4_51038_28825980 | NC_021163.1    | Ca_kabuli_chr04 | 28825980                | CC                              | TT              | 1946809070               |
| SNP_P4_51040_28826325 | NC_021163.1    | Ca_kabuli_chr04 | 28826325                | AA                              | GG              | 1946809072               |
| SNP_P4_51041_28827161 | NC_021163.1    | Ca_kabuli_chr04 | 28827161                | CC                              | TT              | 1946809075               |
| SNP_P4_51042_28827171 | NC_021163.1    | Ca_kabuli_chr04 | 28827171                | AA                              | GG              | 1946809077               |
| SNP_P4_51043_28827525 | NC_021163.1    | Ca_kabuli_chr04 | 28827525                | GG                              | CC              | 1946809079               |
| SNP_P4_51044_28829846 | NC_021163.1    | Ca_kabuli_chr04 | 28829846                | GG                              | AA              | 1946809081               |
| SNP_P4_51045_28830289 | NC_021163.1    | Ca_kabuli_chr04 | 28830289                | AA                              | GG              | 1946809083               |
| SNP_P4_51046_28831254 | NC_021163.1    | Ca_kabuli_chr04 | 28831254                | CC                              | TT              | 1946809086               |
| SNP_P4_51047_28832275 | NC_021163.1    | Ca_kabuli_chr04 | 28832275                | TT                              | CC              | 1946809088               |
| SNP_P4_51049_28834513 | NC_021163.1    | Ca_kabuli_chr04 | 28834513                | GG                              | TT              | 1946809090               |
| SNP_P4_51050_28835536 | NC_021163.1    | Ca_kabuli_chr04 | 28835536                | GG                              | AA              | 1946809092               |
| SNP_P4_51051_28835538 | NC_021163.1    | Ca_kabuli_chr04 | 28835538                | CC                              | TT              | 1946809094               |
| SNP_P4_51052_28835752 | NC_021163.1    | Ca_kabuli_chr04 | 28835752                | TT                              | AA              | 1946809096               |

| SNPs IDs              | Chromosome IDs | Chromosomes     | Physical positions (bp) | CDC Frontier (Reference genome) | (ILWC46 & LPNB) | NCBI SNPdb Accession IDs |
|-----------------------|----------------|-----------------|-------------------------|---------------------------------|-----------------|--------------------------|
| SNP_P4_51053_28839036 | NC_021163.1    | Ca_kabuli_chr04 | 28839036                | GG                              | AA              | 1946809098               |
| SNP_P4_51054_28842263 | NC_021163.1    | Ca_kabuli_chr04 | 28842263                | AA                              | GG              | 1946809100               |
| SNP_P4_51055_28842278 | NC_021163.1    | Ca_kabuli_chr04 | 28842278                | GG                              | AA              | 1946809103               |
| SNP_P4_51057_28847931 | NC_021163.1    | Ca_kabuli_chr04 | 28847931                | GG                              | AA              | 1946809105               |
| SNP_P4_51059_28848599 | NC_021163.1    | Ca_kabuli_chr04 | 28848599                | AA                              | TT              | 1946809107               |
| SNP_P4_51060_28848719 | NC_021163.1    | Ca_kabuli_chr04 | 28848719                | GG                              | AA              | 1946809109               |
| SNP_P4_51061_28849982 | NC_021163.1    | Ca_kabuli_chr04 | 28849982                | AA                              | GG              | 1946809111               |
| SNP_P4_51063_28851061 | NC_021163.1    | Ca_kabuli_chr04 | 28851061                | CC                              | TT              | 1946809113               |
| SNP_P4_51064_28851303 | NC_021163.1    | Ca_kabuli_chr04 | 28851303                | CC                              | TT              | 1946809115               |
| SNP_P4_51066_28855173 | NC_021163.1    | Ca_kabuli_chr04 | 28855173                | TT                              | CC              | 1946809117               |
| SNP_P4_51067_28855175 | NC_021163.1    | Ca_kabuli_chr04 | 28855175                | TT                              | CC              | 1946809119               |
| SNP_P4_51068_28855663 | NC_021163.1    | Ca_kabuli_chr04 | 28855663                | AA                              | TT              | 1946809121               |
| SNP_P4_51069_28855776 | NC_021163.1    | Ca_kabuli_chr04 | 28855776                | TT                              | CC              | 1946809123               |
| SNP_P4_51070_28855976 | NC_021163.1    | Ca_kabuli_chr04 | 28855976                | TT                              | CC              | 1946809125               |
| SNP_P4_51071_28857130 | NC_021163.1    | Ca_kabuli_chr04 | 28857130                | TT                              | CC              | 1946809127               |
| SNP_P4_51072_28860771 | NC_021163.1    | Ca_kabuli_chr04 | 28860771                | CC                              | AA              | 1946809129               |
| SNP_P4_51073_28862838 | NC_021163.1    | Ca_kabuli_chr04 | 28862838                | AA                              | GG              | 1946809131               |
| SNP_P4_51074_28864866 | NC_021163.1    | Ca_kabuli_chr04 | 28864866                | CC                              | TT              | 1946809133               |
| SNP_P4_51075_28865650 | NC_021163.1    | Ca_kabuli_chr04 | 28865650                | AA                              | TT              | 1946809135               |
| SNP_P4_51076_28871493 | NC_021163.1    | Ca_kabuli_chr04 | 28871493                | CC                              | GG              | 1946809137               |
| SNP_P4_51077_28871702 | NC_021163.1    | Ca_kabuli_chr04 | 28871702                | AA                              | GG              | 1946809139               |
| SNP_P4_51078_28872796 | NC_021163.1    | Ca_kabuli_chr04 | 28872796                | AA                              | GG              | 1946809141               |
| SNP_P4_51079_28880039 | NC_021163.1    | Ca_kabuli_chr04 | 28880039                | GG                              | AA              | 1946809143               |
| SNP_P4_51080_28885929 | NC_021163.1    | Ca_kabuli_chr04 | 28885929                | TT                              | CC              | 1946809145               |
| SNP_P4_51081_28886259 | NC_021163.1    | Ca_kabuli_chr04 | 28886259                | TT                              | CC              | 1946809147               |
| SNP_P4_51082_28886292 | NC_021163.1    | Ca_kabuli_chr04 | 28886292                | CC                              | TT              | 1946809149               |
| SNP_P4_51083_28886719 | NC_021163.1    | Ca_kabuli_chr04 | 28886719                | TT                              | CC              | 1946809151               |
| SNP_P4_51084_28887325 | NC_021163.1    | Ca_kabuli_chr04 | 28887325                | CC                              | TT              | 1946809153               |
| SNP_P4_51085_28887375 | NC_021163.1    | Ca_kabuli_chr04 | 28887375                | GG                              | TT              | 1946809155               |
| SNP_P4_51086_28892209 | NC_021163.1    | Ca_kabuli_chr04 | 28892209                | CC                              | TT              | 1946809157               |
| SNP_P4_51087_28895113 | NC_021163.1    | Ca_kabuli_chr04 | 28895113                | GG                              | TT              | 1946809159               |
| SNP_P4_51088_28900350 | NC_021163.1    | Ca_kabuli_chr04 | 28900350                | GG                              | AA              | 1946809161               |
| SNP_P4_51089_28900358 | NC_021163.1    | Ca_kabuli_chr04 | 28900358                | CC                              | TT              | 1946809163               |
| SNP_P4_51090_28900529 | NC_021163.1    | Ca_kabuli_chr04 | 28900529                | GG                              | AA              | 1946809165               |
| SNP_P4_51091_28901127 | NC_021163.1    | Ca_kabuli_chr04 | 28901127                | CC                              | TT              | 1946809167               |
| SNP_P4_51092_28901262 | NC_021163.1    | Ca_kabuli_chr04 | 28901262                | CC                              | AA              | 1946809170               |
| SNP_P4_51093_28903525 | NC_021163.1    | Ca_kabuli_chr04 | 28903525                | CC                              | AA              | 1946809172               |
| SNP_P4_51095_28911272 | NC_021163.1    | Ca_kabuli_chr04 | 28911272                | TT                              | AA              | 1946809174               |
| SNP_P4_51096_28911274 | NC_021163.1    | Ca_kabuli_chr04 | 28911274                | AA                              | GG              | 1946809176               |
| SNP_P4_51097_28913740 | NC_021163.1    | Ca_kabuli_chr04 | 28913740                | GG                              | AA              | 1946809178               |
| SNP_P4_51099_28914031 | NC_021163.1    | Ca_kabuli_chr04 | 28914031                | CC                              | TT              | 1946809180               |
| SNP_P4_51100_28914111 | NC_021163.1    | Ca_kabuli_chr04 | 28914111                | AA                              | CC              | 1946809182               |



| SNPs IDs              | Chromosome IDs | Chromosomes     | Physical positions (bp) | CDC Frontier (Reference genome) | (ILWC46 & LPNB) | NCBI SNPdb Accession IDs |
|-----------------------|----------------|-----------------|-------------------------|---------------------------------|-----------------|--------------------------|
| SNP_P4_51101_28914168 | NC_021163.1    | Ca_kabuli_chr04 | 28914168                | GG                              | TT              | 1946809184               |
| SNP_P4_51102_28914717 | NC_021163.1    | Ca_kabuli_chr04 | 28914717                | AA                              | TT              | 1946809187               |
| SNP_P4_51104_28916054 | NC_021163.1    | Ca_kabuli_chr04 | 28916054                | TT                              | CC              | 1946809189               |
| SNP_P4_51105_28917623 | NC_021163.1    | Ca_kabuli_chr04 | 28917623                | CC                              | AA              | 1946809191               |
| SNP_P4_51107_28922045 | NC_021163.1    | Ca_kabuli_chr04 | 28922045                | CC                              | TT              | 1946809193               |
| SNP_P4_51108_28922368 | NC_021163.1    | Ca_kabuli_chr04 | 28922368                | TT                              | GG              | 1946809195               |
| SNP_P4_51109_28924939 | NC_021163.1    | Ca_kabuli_chr04 | 28924939                | AA                              | TT              | 1946809197               |
| SNP_P4_51110_28924999 | NC_021163.1    | Ca_kabuli_chr04 | 28924999                | AA                              | GG              | 1946809199               |
| SNP_P4_51111_28927798 | NC_021163.1    | Ca_kabuli_chr04 | 28927798                | GG                              | TT              | 1946809201               |
| SNP_P4_51112_28928273 | NC_021163.1    | Ca_kabuli_chr04 | 28928273                | TT                              | CC              | 1946809203               |
| SNP_P4_51114_28931739 | NC_021163.1    | Ca_kabuli_chr04 | 28931739                | GG                              | AA              | 1946809206               |
| SNP_P4_51116_28935629 | NC_021163.1    | Ca_kabuli_chr04 | 28935629                | GG                              | CC              | 1946809208               |
| SNP_P4_51118_28939228 | NC_021163.1    | Ca_kabuli_chr04 | 28939228                | AA                              | GG              | 1946809210               |
| SNP_P4_51119_28939622 | NC_021163.1    | Ca_kabuli_chr04 | 28939622                | TT                              | CC              | 1946809212               |
| SNP_P4_51120_28940807 | NC_021163.1    | Ca_kabuli_chr04 | 28940807                | GG                              | AA              | 1946809214               |
| SNP_P4_51122_28952731 | NC_021163.1    | Ca_kabuli_chr04 | 28952731                | GG                              | AA              | 1946809217               |
| SNP_P4_51123_28953540 | NC_021163.1    | Ca_kabuli_chr04 | 28953540                | GG                              | AA              | 1946809219               |
| SNP_P4_51124_28953597 | NC_021163.1    | Ca_kabuli_chr04 | 28953597                | TT                              | CC              | 1946809221               |
| SNP_P4_51125_28954090 | NC_021163.1    | Ca_kabuli_chr04 | 28954090                | AA                              | GG              | 1946809224               |
| SNP_P4_51126_28954333 | NC_021163.1    | Ca_kabuli_chr04 | 28954333                | CC                              | AA              | 1946809226               |
| SNP_P4_51127_28954749 | NC_021163.1    | Ca_kabuli_chr04 | 28954749                | CC                              | AA              | 1946809228               |
| SNP_P4_51128_28957946 | NC_021163.1    | Ca_kabuli_chr04 | 28957946                | TT                              | GG              | 1946809230               |
| SNP_P4_51129_28958003 | NC_021163.1    | Ca_kabuli_chr04 | 28958003                | TT                              | GG              | 1946809232               |
| SNP_P4_51130_28969470 | NC_021163.1    | Ca_kabuli_chr04 | 28969470                | CC                              | TT              | 1946809234               |
| SNP_P4_51131_28969476 | NC_021163.1    | Ca_kabuli_chr04 | 28969476                | GG                              | AA              | 1946809236               |
| SNP_P4_51132_28981315 | NC_021163.1    | Ca_kabuli_chr04 | 28981315                | GG                              | TT              | 1946809239               |
| SNP_P4_51133_28981396 | NC_021163.1    | Ca_kabuli_chr04 | 28981396                | CC                              | TT              | 1946809241               |
| SNP_P4_51134_28981476 | NC_021163.1    | Ca_kabuli_chr04 | 28981476                | CC                              | TT              | 1946809243               |
| SNP_P4_51135_28982457 | NC_021163.1    | Ca_kabuli_chr04 | 28982457                | TT                              | AA              | 1946809245               |
| SNP_P4_51136_28982860 | NC_021163.1    | Ca_kabuli_chr04 | 28982860                | TT                              | CC              | 1946809247               |
| SNP_P4_51137_28982883 | NC_021163.1    | Ca_kabuli_chr04 | 28982883                | TT                              | CC              | 1946809249               |
| SNP_P4_51138_28982942 | NC_021163.1    | Ca_kabuli_chr04 | 28982942                | CC                              | TT              | 1946809251               |
| SNP_P4_51139_28985994 | NC_021163.1    | Ca_kabuli_chr04 | 28985994                | AA                              | TT              | 1946809253               |
| SNP_P4_51140_28986023 | NC_021163.1    | Ca_kabuli_chr04 | 28986023                | TT                              | CC              | 1946809256               |
| SNP_P4_51141_28986145 | NC_021163.1    | Ca_kabuli_chr04 | 28986145                | GG                              | AA              | 1946809258               |
| SNP_P4_51142_28986395 | NC_021163.1    | Ca_kabuli_chr04 | 28986395                | CC                              | TT              | 1946809260               |
| SNP_P4_51143_28986423 | NC_021163.1    | Ca_kabuli_chr04 | 28986423                | GG                              | AA              | 1946809262               |
| SNP_P4_51144_28986433 | NC_021163.1    | Ca_kabuli_chr04 | 28986433                | AA                              | TT              | 1946809264               |
| SNP_P4_51145_28986491 | NC_021163.1    | Ca_kabuli_chr04 | 28986491                | AA                              | GG              | 1946809266               |
| SNP_P4_51146_28986929 | NC_021163.1    | Ca_kabuli_chr04 | 28986929                | TT                              | CC              | 1946809268               |
| SNP_P4_51147_28988612 | NC_021163.1    | Ca_kabuli_chr04 | 28988612                | TT                              | GG              | 1946809270               |
| SNP_P4_51148_28988648 | NC_021163.1    | Ca_kabuli_chr04 | 28988648                | TT                              | CC              | 1946809273               |

| SNPs IDs              | Chromosome IDs | Chromosomes     | Physical positions (bp) | CDC Frontier (Reference genome) | (ILWC46 & LPNB) | NCBI SNPdb Accession IDs |
|-----------------------|----------------|-----------------|-------------------------|---------------------------------|-----------------|--------------------------|
| SNP_P4_51150_28990478 | NC_021163.1    | Ca_kabuli_chr04 | 28990478                | GG                              | AA              | 1946809275               |
| SNP_P4_51151_28990519 | NC_021163.1    | Ca_kabuli_chr04 | 28990519                | GG                              | AA              | 1946809277               |
| SNP_P4_51152_28990846 | NC_021163.1    | Ca_kabuli_chr04 | 28990846                | CC                              | TT              | 1946809279               |
| SNP_P4_51153_28991647 | NC_021163.1    | Ca_kabuli_chr04 | 28991647                | GG                              | CC              | 1946809281               |
| SNP_P4_51155_28993331 | NC_021163.1    | Ca_kabuli_chr04 | 28993331                | GG                              | AA              | 1946809283               |
| SNP_P4_51156_28993362 | NC_021163.1    | Ca_kabuli_chr04 | 28993362                | GG                              | AA              | 1946809285               |
| SNP_P4_51157_28994453 | NC_021163.1    | Ca_kabuli_chr04 | 28994453                | GG                              | TT              | 1946809287               |
| SNP_P4_51159_28996399 | NC_021163.1    | Ca_kabuli_chr04 | 28996399                | AA                              | GG              | 1946809289               |
| SNP_P4_51160_28997714 | NC_021163.1    | Ca_kabuli_chr04 | 28997714                | TT                              | CC              | 1946809291               |
| SNP_P4_51161_28997715 | NC_021163.1    | Ca_kabuli_chr04 | 28997715                | TT                              | CC              | 1946809293               |
| SNP_P4_51162_29007676 | NC_021163.1    | Ca_kabuli_chr04 | 29007676                | GG                              | AA              | 1946809295               |
| SNP_P4_51163_29007679 | NC_021163.1    | Ca_kabuli_chr04 | 29007679                | AA                              | GG              | 1946809297               |
| SNP_P4_51164_29007686 | NC_021163.1    | Ca_kabuli_chr04 | 29007686                | CC                              | TT              | 1946809300               |
| SNP_P4_51165_29007690 | NC_021163.1    | Ca_kabuli_chr04 | 29007690                | GG                              | AA              | 1946809302               |
| SNP_P4_51166_29007711 | NC_021163.1    | Ca_kabuli_chr04 | 29007711                | CC                              | AA              | 1946809304               |
| SNP_P4_51167_29007747 | NC_021163.1    | Ca_kabuli_chr04 | 29007747                | CC                              | TT              | 1946809306               |
| SNP_P4_51168_29007886 | NC_021163.1    | Ca_kabuli_chr04 | 29007886                | AA                              | GG              | 1946809308               |
| SNP_P4_51169_29007894 | NC_021163.1    | Ca_kabuli_chr04 | 29007894                | TT                              | CC              | 1946809310               |
| SNP_P4_51170_29007908 | NC_021163.1    | Ca_kabuli_chr04 | 29007908                | GG                              | AA              | 1946809312               |
| SNP_P4_51171_29007911 | NC_021163.1    | Ca_kabuli_chr04 | 29007911                | CC                              | AA              | 1946809314               |
| SNP_P4_51172_29007949 | NC_021163.1    | Ca_kabuli_chr04 | 29007949                | CC                              | TT              | 1946809316               |
| SNP_P4_51173_29007994 | NC_021163.1    | Ca_kabuli_chr04 | 29007994                | GG                              | AA              | 1946809318               |
| SNP_P4_51174_29008004 | NC_021163.1    | Ca_kabuli_chr04 | 29008004                | GG                              | AA              | 1946809320               |
| SNP_P4_51175_29008029 | NC_021163.1    | Ca_kabuli_chr04 | 29008029                | GG                              | AA              | 1946809322               |
| SNP_P4_51176_29008100 | NC_021163.1    | Ca_kabuli_chr04 | 29008100                | GG                              | AA              | 1946809324               |
| SNP_P4_51178_29008267 | NC_021163.1    | Ca_kabuli_chr04 | 29008267                | TT                              | AA              | 1946809326               |
| SNP_P4_51179_29020032 | NC_021163.1    | Ca_kabuli_chr04 | 29020032                | GG                              | AA              | 1946809328               |
| SNP_P4_51180_29028279 | NC_021163.1    | Ca_kabuli_chr04 | 29028279                | TT                              | CC              | 1946809331               |
| SNP_P4_51181_29028313 | NC_021163.1    | Ca_kabuli_chr04 | 29028313                | TT                              | GG              | 1946809333               |
| SNP_P4_51182_29028335 | NC_021163.1    | Ca_kabuli_chr04 | 29028335                | GG                              | TT              | 1946809335               |
| SNP_P4_51183_29029737 | NC_021163.1    | Ca_kabuli_chr04 | 29029737                | AA                              | TT              | 1946809337               |
| SNP_P4_51184_29029765 | NC_021163.1    | Ca_kabuli_chr04 | 29029765                | CC                              | TT              | 1946809339               |
| SNP_P4_51185_29031808 | NC_021163.1    | Ca_kabuli_chr04 | 29031808                | AA                              | CC              | 1946809341               |
| SNP_P4_51186_29033889 | NC_021163.1    | Ca_kabuli_chr04 | 29033889                | GG                              | AA              | 1946809343               |
| SNP_P4_51188_29034188 | NC_021163.1    | Ca_kabuli_chr04 | 29034188                | GG                              | AA              | 1946809346               |
| SNP_P4_51189_29034454 | NC_021163.1    | Ca_kabuli_chr04 | 29034454                | CC                              | TT              | 1946809348               |
| SNP_P4_51190_29035116 | NC_021163.1    | Ca_kabuli_chr04 | 29035116                | AA                              | TT              | 1946809350               |
| SNP_P4_51191_29035132 | NC_021163.1    | Ca_kabuli_chr04 | 29035132                | TT                              | CC              | 1946809352               |
| SNP_P4_51192_29035147 | NC_021163.1    | Ca_kabuli_chr04 | 29035147                | GG                              | AA              | 1946809354               |
| SNP_P4_51193_29035157 | NC_021163.1    | Ca_kabuli_chr04 | 29035157                | AA                              | GG              | 1946809357               |
| SNP_P4_51195_29037347 | NC_021163.1    | Ca_kabuli_chr04 | 29037347                | CC                              | TT              | 1946809359               |
| SNP_P4_51196_29037669 | NC_021163.1    | Ca_kabuli_chr04 | 29037669                | TT                              | CC              | 1946809361               |

| SNPs IDs              | Chromosome IDs | Chromosomes     | Physical positions (bp) | CDC Frontier (Reference genome) | (ILWC46 & LPNB) | NCBI SNPdb Accession IDs |
|-----------------------|----------------|-----------------|-------------------------|---------------------------------|-----------------|--------------------------|
| SNP_P4_51197_29037749 | NC_021163.1    | Ca_kabuli_chr04 | 29037749                | TT                              | GG              | 1946809363               |
| SNP_P4_51198_29037854 | NC_021163.1    | Ca_kabuli_chr04 | 29037854                | GG                              | AA              | 1946809365               |
| SNP_P4_51200_29038002 | NC_021163.1    | Ca_kabuli_chr04 | 29038002                | TT                              | CC              | 1946809367               |
| SNP_P4_51201_29038237 | NC_021163.1    | Ca_kabuli_chr04 | 29038237                | CC                              | AA              | 1946809370               |
| SNP_P4_51202_29038253 | NC_021163.1    | Ca_kabuli_chr04 | 29038253                | CC                              | TT              | 1946809372               |
| SNP_P4_51203_29038924 | NC_021163.1    | Ca_kabuli_chr04 | 29038924                | TT                              | AA              | 1946809374               |
| SNP_P4_51204_29048601 | NC_021163.1    | Ca_kabuli_chr04 | 29048601                | AA                              | TT              | 1946809376               |
| SNP_P4_51205_29049570 | NC_021163.1    | Ca_kabuli_chr04 | 29049570                | GG                              | TT              | 1946809378               |
| SNP_P4_51206_29049574 | NC_021163.1    | Ca_kabuli_chr04 | 29049574                | TT                              | AA              | 1946809380               |
| SNP_P4_51207_29049580 | NC_021163.1    | Ca_kabuli_chr04 | 29049580                | GG                              | AA              | 1946809382               |
| SNP_P4_51208_29049584 | NC_021163.1    | Ca_kabuli_chr04 | 29049584                | GG                              | AA              | 1946809384               |
| SNP_P4_51209_29049664 | NC_021163.1    | Ca_kabuli_chr04 | 29049664                | TT                              | CC              | 1946809386               |
| SNP_P4_51210_29049856 | NC_021163.1    | Ca_kabuli_chr04 | 29049856                | AA                              | GG              | 1946809388               |
| SNP_P4_51211_29049908 | NC_021163.1    | Ca_kabuli_chr04 | 29049908                | TT                              | CC              | 1946809390               |
| SNP_P4_51212_29049923 | NC_021163.1    | Ca_kabuli_chr04 | 29049923                | TT                              | CC              | 1946809392               |
| SNP_P4_51213_29049939 | NC_021163.1    | Ca_kabuli_chr04 | 29049939                | TT                              | AA              | 1946809395               |
| SNP_P4_51214_29051192 | NC_021163.1    | Ca_kabuli_chr04 | 29051192                | TT                              | CC              | 1946809397               |
| SNP_P4_51215_29051193 | NC_021163.1    | Ca_kabuli_chr04 | 29051193                | TT                              | CC              | 1946809399               |
| SNP_P4_51216_29051215 | NC_021163.1    | Ca_kabuli_chr04 | 29051215                | AA                              | GG              | 1946809401               |
| SNP_P4_51217_29051223 | NC_021163.1    | Ca_kabuli_chr04 | 29051223                | TT                              | AA              | 1946809403               |
| SNP_P4_51218_29051823 | NC_021163.1    | Ca_kabuli_chr04 | 29051823                | TT                              | CC              | 1946809405               |
| SNP_P4_51220_29053244 | NC_021163.1    | Ca_kabuli_chr04 | 29053244                | AA                              | GG              | 1946809407               |
| SNP_P4_51221_29053612 | NC_021163.1    | Ca_kabuli_chr04 | 29053612                | CC                              | TT              | 1946809409               |
| SNP_P4_51222_29053648 | NC_021163.1    | Ca_kabuli_chr04 | 29053648                | TT                              | CC              | 1946809411               |
| SNP_P4_51223_29053654 | NC_021163.1    | Ca_kabuli_chr04 | 29053654                | AA                              | GG              | 1946809413               |
| SNP_P4_51224_29053678 | NC_021163.1    | Ca_kabuli_chr04 | 29053678                | AA                              | CC              | 1946809415               |
| SNP_P4_51225_29053711 | NC_021163.1    | Ca_kabuli_chr04 | 29053711                | TT                              | AA              | 1946809417               |
| SNP_P4_51226_29053891 | NC_021163.1    | Ca_kabuli_chr04 | 29053891                | AA                              | GG              | 1946809419               |
| SNP_P4_51227_29053940 | NC_021163.1    | Ca_kabuli_chr04 | 29053940                | CC                              | GG              | 1946809421               |
| SNP_P4_51228_29054169 | NC_021163.1    | Ca_kabuli_chr04 | 29054169                | AA                              | CC              | 1946809423               |
| SNP_P4_51229_29054582 | NC_021163.1    | Ca_kabuli_chr04 | 29054582                | TT                              | AA              | 1946809425               |
| SNP_P4_51230_29054605 | NC_021163.1    | Ca_kabuli_chr04 | 29054605                | CC                              | TT              | 1946809427               |
| SNP_P4_51231_29055244 | NC_021163.1    | Ca_kabuli_chr04 | 29055244                | TT                              | CC              | 1946809429               |
| SNP_P4_51232_29055302 | NC_021163.1    | Ca_kabuli_chr04 | 29055302                | AA                              | TT              | 1946809432               |
| SNP_P4_51233_29055309 | NC_021163.1    | Ca_kabuli_chr04 | 29055309                | AA                              | GG              | 1946809434               |
| SNP_P4_51234_29056423 | NC_021163.1    | Ca_kabuli_chr04 | 29056423                | GG                              | AA              | 1946809436               |
| SNP_P4_51235_29057136 | NC_021163.1    | Ca_kabuli_chr04 | 29057136                | CC                              | TT              | 1946809438               |
| SNP_P4_51236_29057197 | NC_021163.1    | Ca_kabuli_chr04 | 29057197                | TT                              | CC              | 1946809440               |
| SNP_P4_51237_29058991 | NC_021163.1    | Ca_kabuli_chr04 | 29058991                | AA                              | TT              | 1946809442               |
| SNP_P4_51238_29059215 | NC_021163.1    | Ca_kabuli_chr04 | 29059215                | AA                              | CC              | 1946809444               |
| SNP_P4_51239_29059226 | NC_021163.1    | Ca_kabuli_chr04 | 29059226                | AA                              | GG              | 1946809447               |
| SNP_P4_51240_29059257 | NC_021163.1    | Ca_kabuli_chr04 | 29059257                | GG                              | TT              | 1946809449               |

| SNPs IDs              | Chromosome IDs | Chromosomes     | Physical positions (bp) | CDC Frontier (Reference genome) | (ILWC46 & LPNB) | NCBI SNPdb Accession IDs |
|-----------------------|----------------|-----------------|-------------------------|---------------------------------|-----------------|--------------------------|
| SNP_P4_51241_29059276 | NC_021163.1    | Ca_kabuli_chr04 | 29059276                | CC                              | TT              | 1946809451               |
| SNP_P4_51242_29059278 | NC_021163.1    | Ca_kabuli_chr04 | 29059278                | TT                              | CC              | 1946809454               |
| SNP_P4_51243_29061631 | NC_021163.1    | Ca_kabuli_chr04 | 29061631                | GG                              | TT              | 1946809456               |
| SNP_P4_51244_29061644 | NC_021163.1    | Ca_kabuli_chr04 | 29061644                | CC                              | GG              | 1946809458               |
| SNP_P4_51245_29061671 | NC_021163.1    | Ca_kabuli_chr04 | 29061671                | AA                              | GG              | 1946809460               |
| SNP_P4_51246_29062116 | NC_021163.1    | Ca_kabuli_chr04 | 29062116                | TT                              | GG              | 1946809462               |
| SNP_P4_51247_29062228 | NC_021163.1    | Ca_kabuli_chr04 | 29062228                | TT                              | CC              | 1946809464               |
| SNP_P4_51248_29062766 | NC_021163.1    | Ca_kabuli_chr04 | 29062766                | GG                              | TT              | 1946809467               |
| SNP_P4_51249_29062770 | NC_021163.1    | Ca_kabuli_chr04 | 29062770                | AA                              | TT              | 1946809469               |
| SNP_P4_51250_29063089 | NC_021163.1    | Ca_kabuli_chr04 | 29063089                | GG                              | TT              | 1946809471               |
| SNP_P4_51251_29063097 | NC_021163.1    | Ca_kabuli_chr04 | 29063097                | TT                              | CC              | 1946809473               |
| SNP_P4_51252_29064483 | NC_021163.1    | Ca_kabuli_chr04 | 29064483                | GG                              | AA              | 1946809475               |
| SNP_P4_51253_29064845 | NC_021163.1    | Ca_kabuli_chr04 | 29064845                | TT                              | CC              | 1946809478               |
| SNP_P4_51254_29064858 | NC_021163.1    | Ca_kabuli_chr04 | 29064858                | GG                              | AA              | 1946809480               |
| SNP_P4_51255_29067006 | NC_021163.1    | Ca_kabuli_chr04 | 29067006                | CC                              | AA              | 1946809482               |
| SNP_P4_51256_29067452 | NC_021163.1    | Ca_kabuli_chr04 | 29067452                | GG                              | AA              | 1946809484               |
| SNP_P4_51257_29069914 | NC_021163.1    | Ca_kabuli_chr04 | 29069914                | TT                              | CC              | 1946809486               |
| SNP_P4_51259_29070185 | NC_021163.1    | Ca_kabuli_chr04 | 29070185                | AA                              | CC              | 1946809488               |
| SNP_P4_51260_29070534 | NC_021163.1    | Ca_kabuli_chr04 | 29070534                | GG                              | TT              | 1946809491               |
| SNP_P4_51261_29070544 | NC_021163.1    | Ca_kabuli_chr04 | 29070544                | TT                              | CC              | 1946809493               |
| SNP_P4_51262_29070596 | NC_021163.1    | Ca_kabuli_chr04 | 29070596                | CC                              | TT              | 1946809495               |
| SNP_P4_51263_29071172 | NC_021163.1    | Ca_kabuli_chr04 | 29071172                | GG                              | TT              | 1946809497               |
| SNP_P4_51264_29071427 | NC_021163.1    | Ca_kabuli_chr04 | 29071427                | GG                              | TT              | 1946809499               |
| SNP_P4_51265_29071988 | NC_021163.1    | Ca_kabuli_chr04 | 29071988                | GG                              | AA              | 1946809501               |
| SNP_P4_51266_29072255 | NC_021163.1    | Ca_kabuli_chr04 | 29072255                | AA                              | GG              | 1946809503               |
| SNP_P4_51267_29072275 | NC_021163.1    | Ca_kabuli_chr04 | 29072275                | AA                              | CC              | 1946809505               |
| SNP_P4_51268_29073521 | NC_021163.1    | Ca_kabuli_chr04 | 29073521                | CC                              | GG              | 1946809507               |
| SNP_P4_51270_29073709 | NC_021163.1    | Ca_kabuli_chr04 | 29073709                | GG                              | TT              | 1946809510               |
| SNP_P4_51271_29074034 | NC_021163.1    | Ca_kabuli_chr04 | 29074034                | TT                              | CC              | 1946809512               |
| SNP_P4_51272_29074040 | NC_021163.1    | Ca_kabuli_chr04 | 29074040                | CC                              | TT              | 1946809514               |
| SNP_P4_51273_29074484 | NC_021163.1    | Ca_kabuli_chr04 | 29074484                | TT                              | GG              | 1946809516               |
| SNP_P4_51274_29084202 | NC_021163.1    | Ca_kabuli_chr04 | 29084202                | AA                              | GG              | 1946809519               |
| SNP_P4_51275_29084399 | NC_021163.1    | Ca_kabuli_chr04 | 29084399                | CC                              | GG              | 1946809521               |
| SNP_P4_51276_29084430 | NC_021163.1    | Ca_kabuli_chr04 | 29084430                | CC                              | TT              | 1946809523               |
| SNP_P4_51277_29084698 | NC_021163.1    | Ca_kabuli_chr04 | 29084698                | CC                              | AA              | 1946809525               |
| SNP_P4_51278_29084704 | NC_021163.1    | Ca_kabuli_chr04 | 29084704                | CC                              | TT              | 1946809527               |
| SNP_P4_51279_29084779 | NC_021163.1    | Ca_kabuli_chr04 | 29084779                | GG                              | AA              | 1946809529               |
| SNP_P4_51280_29084832 | NC_021163.1    | Ca_kabuli_chr04 | 29084832                | GG                              | AA              | 1946809531               |
| SNP_P4_51281_29085178 | NC_021163.1    | Ca_kabuli_chr04 | 29085178                | CC                              | TT              | 1946809533               |
| SNP_P4_51282_29086551 | NC_021163.1    | Ca_kabuli_chr04 | 29086551                | AA                              | TT              | 1946809535               |
| SNP_P4_51283_29086557 | NC_021163.1    | Ca_kabuli_chr04 | 29086557                | GG                              | AA              | 1946809537               |
| SNP_P4_51284_29086567 | NC_021163.1    | Ca_kabuli_chr04 | 29086567                | AA                              | GG              | 1946809539               |

| SNPs IDs              | Chromosome IDs | Chromosomes     | Physical positions (bp) | CDC Frontier (Reference genome) | (ILWC46 & LPNB) | NCBI SNPdb Accession IDs |
|-----------------------|----------------|-----------------|-------------------------|---------------------------------|-----------------|--------------------------|
| SNP_P4_51285_29086678 | NC_021163.1    | Ca_kabuli_chr04 | 29086678                | AA                              | GG              | 1946809541               |
| SNP_P4_51286_29086739 | NC_021163.1    | Ca_kabuli_chr04 | 29086739                | GG                              | AA              | 1946809543               |
| SNP_P4_51287_29087591 | NC_021163.1    | Ca_kabuli_chr04 | 29087591                | CC                              | TT              | 1946809545               |
| SNP_P4_51288_29089228 | NC_021163.1    | Ca_kabuli_chr04 | 29089228                | GG                              | AA              | 1946809548               |
| SNP_P4_51289_29090094 | NC_021163.1    | Ca_kabuli_chr04 | 29090094                | TT                              | GG              | 1946809550               |
| SNP_P4_51290_29090884 | NC_021163.1    | Ca_kabuli_chr04 | 29090884                | TT                              | AA              | 1946809552               |
| SNP_P4_51293_29091340 | NC_021163.1    | Ca_kabuli_chr04 | 29091340                | CC                              | AA              | 1946809554               |
| SNP_P4_51294_29091704 | NC_021163.1    | Ca_kabuli_chr04 | 29091704                | CC                              | TT              | 1946809556               |
| SNP_P4_51295_29091854 | NC_021163.1    | Ca_kabuli_chr04 | 29091854                | TT                              | CC              | 1946809558               |
| SNP_P4_51296_29091875 | NC_021163.1    | Ca_kabuli_chr04 | 29091875                | CC                              | GG              | 1946809560               |
| SNP_P4_51297_29092147 | NC_021163.1    | Ca_kabuli_chr04 | 29092147                | CC                              | TT              | 1946809562               |
| SNP_P4_51298_29092148 | NC_021163.1    | Ca_kabuli_chr04 | 29092148                | CC                              | TT              | 1946809565               |
| SNP_P4_51299_29092608 | NC_021163.1    | Ca_kabuli_chr04 | 29092608                | TT                              | AA              | 1946809567               |
| SNP_P4_51300_29092609 | NC_021163.1    | Ca_kabuli_chr04 | 29092609                | AA                              | CC              | 1946809569               |
| SNP_P4_51301_29092905 | NC_021163.1    | Ca_kabuli_chr04 | 29092905                | GG                              | AA              | 1946809571               |
| SNP_P4_51304_29093813 | NC_021163.1    | Ca_kabuli_chr04 | 29093813                | AA                              | GG              | 1946809573               |
| SNP_P4_51305_29094017 | NC_021163.1    | Ca_kabuli_chr04 | 29094017                | CC                              | TT              | 1946809575               |
| SNP_P4_51306_29094144 | NC_021163.1    | Ca_kabuli_chr04 | 29094144                | CC                              | GG              | 1946809577               |
| SNP_P4_51307_29096692 | NC_021163.1    | Ca_kabuli_chr04 | 29096692                | TT                              | AA              | 1946809579               |
| SNP_P4_51308_29097494 | NC_021163.1    | Ca_kabuli_chr04 | 29097494                | GG                              | CC              | 1946809582               |
| SNP_P4_51309_29098086 | NC_021163.1    | Ca_kabuli_chr04 | 29098086                | GG                              | AA              | 1946809584               |
| SNP_P4_51310_29098145 | NC_021163.1    | Ca_kabuli_chr04 | 29098145                | CC                              | TT              | 1946809586               |
| SNP_P4_51311_29100390 | NC_021163.1    | Ca_kabuli_chr04 | 29100390                | TT                              | GG              | 1946809588               |
| SNP_P4_51312_29100485 | NC_021163.1    | Ca_kabuli_chr04 | 29100485                | AA                              | GG              | 1946809590               |
| SNP_P4_51313_29100731 | NC_021163.1    | Ca_kabuli_chr04 | 29100731                | CC                              | TT              | 1946809592               |
| SNP_P4_51314_29100761 | NC_021163.1    | Ca_kabuli_chr04 | 29100761                | CC                              | TT              | 1946809594               |
| SNP_P4_51316_29100876 | NC_021163.1    | Ca_kabuli_chr04 | 29100876                | AA                              | GG              | 1946809596               |
| SNP_P4_51317_29100999 | NC_021163.1    | Ca_kabuli_chr04 | 29100999                | TT                              | CC              | 1946809598               |
| SNP_P4_51318_29108314 | NC_021163.1    | Ca_kabuli_chr04 | 29108314                | AA                              | CC              | 1946809600               |
| SNP_P4_51319_29108318 | NC_021163.1    | Ca_kabuli_chr04 | 29108318                | CC                              | TT              | 1946809602               |
| SNP_P4_51320_29108344 | NC_021163.1    | Ca_kabuli_chr04 | 29108344                | TT                              | CC              | 1946809604               |
| SNP_P4_51321_29108352 | NC_021163.1    | Ca_kabuli_chr04 | 29108352                | GG                              | AA              | 1946809606               |
| SNP_P4_51323_29110761 | NC_021163.1    | Ca_kabuli_chr04 | 29110761                | AA                              | CC              | 1946809608               |
| SNP_P4_51324_29111365 | NC_021163.1    | Ca_kabuli_chr04 | 29111365                | GG                              | AA              | 1946809610               |
| SNP_P4_51325_29111612 | NC_021163.1    | Ca_kabuli_chr04 | 29111612                | AA                              | CC              | 1946809612               |
| SNP_P4_51326_29111682 | NC_021163.1    | Ca_kabuli_chr04 | 29111682                | AA                              | CC              | 1946809614               |
| SNP_P4_51327_29111909 | NC_021163.1    | Ca_kabuli_chr04 | 29111909                | AA                              | GG              | 1946809616               |
| SNP_P4_51328_29112069 | NC_021163.1    | Ca_kabuli_chr04 | 29112069                | GG                              | CC              | 1946809618               |
| SNP_P4_51329_29112084 | NC_021163.1    | Ca_kabuli_chr04 | 29112084                | GG                              | AA              | 1946809620               |
| SNP_P4_51330_29112100 | NC_021163.1    | Ca_kabuli_chr04 | 29112100                | CC                              | TT              | 1946809623               |
| SNP_P4_51331_29112137 | NC_021163.1    | Ca_kabuli_chr04 | 29112137                | CC                              | TT              | 1946809625               |
| SNP_P4_51332_29112138 | NC_021163.1    | Ca_kabuli_chr04 | 29112138                | TT                              | GG              | 1946809627               |

| SNPs IDs              | Chromosome IDs | Chromosomes     | Physical positions (bp) | CDC Frontier (Reference genome) | (ILWC46 & LPNB) | NCBI SNPdb Accession IDs |
|-----------------------|----------------|-----------------|-------------------------|---------------------------------|-----------------|--------------------------|
| SNP_P4_51333_29112276 | NC_021163.1    | Ca_kabuli_chr04 | 29112276                | GG                              | TT              | 1946809629               |
| SNP_P4_51334_29112289 | NC_021163.1    | Ca_kabuli_chr04 | 29112289                | CC                              | TT              | 1946809631               |
| SNP_P4_51335_29112324 | NC_021163.1    | Ca_kabuli_chr04 | 29112324                | TT                              | AA              | 1946809633               |
| SNP_P4_51336_29112415 | NC_021163.1    | Ca_kabuli_chr04 | 29112415                | CC                              | AA              | 1946809635               |
| SNP_P4_51337_29112453 | NC_021163.1    | Ca_kabuli_chr04 | 29112453                | AA                              | GG              | 1946809637               |
| SNP_P4_51338_29113235 | NC_021163.1    | Ca_kabuli_chr04 | 29113235                | AA                              | GG              | 1946809639               |
| SNP_P4_51339_29113521 | NC_021163.1    | Ca_kabuli_chr04 | 29113521                | TT                              | CC              | 1946809641               |
| SNP_P4_51340_29113591 | NC_021163.1    | Ca_kabuli_chr04 | 29113591                | AA                              | GG              | 1946809643               |
| SNP_P4_51341_29113651 | NC_021163.1    | Ca_kabuli_chr04 | 29113651                | TT                              | CC              | 1946809645               |
| SNP_P4_51342_29113754 | NC_021163.1    | Ca_kabuli_chr04 | 29113754                | AA                              | GG              | 1946809647               |
| SNP_P4_51343_29113790 | NC_021163.1    | Ca_kabuli_chr04 | 29113790                | TT                              | CC              | 1946809649               |
| SNP_P4_51344_29114713 | NC_021163.1    | Ca_kabuli_chr04 | 29114713                | GG                              | AA              | 1946809651               |
| SNP_P4_51345_29114895 | NC_021163.1    | Ca_kabuli_chr04 | 29114895                | AA                              | TT              | 1946809653               |
| SNP_P4_51346_29115222 | NC_021163.1    | Ca_kabuli_chr04 | 29115222                | TT                              | CC              | 1946809655               |
| SNP_P4_51347_29115227 | NC_021163.1    | Ca_kabuli_chr04 | 29115227                | AA                              | GG              | 1946809657               |
| SNP_P4_51348_29115892 | NC_021163.1    | Ca_kabuli_chr04 | 29115892                | AA                              | GG              | 1946809659               |
| SNP_P4_51349_29115964 | NC_021163.1    | Ca_kabuli_chr04 | 29115964                | AA                              | CC              | 1946809661               |
| SNP_P4_51350_29117645 | NC_021163.1    | Ca_kabuli_chr04 | 29117645                | TT                              | CC              | 1946809663               |
| SNP_P4_51351_29117691 | NC_021163.1    | Ca_kabuli_chr04 | 29117691                | GG                              | TT              | 1946809665               |
| SNP_P4_51352_29118395 | NC_021163.1    | Ca_kabuli_chr04 | 29118395                | GG                              | TT              | 1946809667               |
| SNP_P4_51353_29121102 | NC_021163.1    | Ca_kabuli_chr04 | 29121102                | AA                              | GG              | 1946809669               |
| SNP_P4_51354_29121131 | NC_021163.1    | Ca_kabuli_chr04 | 29121131                | AA                              | TT              | 1946809671               |
| SNP_P4_51355_29121161 | NC_021163.1    | Ca_kabuli_chr04 | 29121161                | GG                              | AA              | 1946809673               |
| SNP_P4_51356_29121204 | NC_021163.1    | Ca_kabuli_chr04 | 29121204                | CC                              | GG              | 1946809675               |
| SNP_P4_51357_29121246 | NC_021163.1    | Ca_kabuli_chr04 | 29121246                | TT                              | GG              | 1946809677               |
| SNP_P4_51358_29121622 | NC_021163.1    | Ca_kabuli_chr04 | 29121622                | AA                              | CC              | 1946809679               |
| SNP_P4_51359_29121677 | NC_021163.1    | Ca_kabuli_chr04 | 29121677                | GG                              | TT              | 1946809681               |
| SNP_P4_51361_29122921 | NC_021163.1    | Ca_kabuli_chr04 | 29122921                | TT                              | CC              | 1946809683               |
| SNP_P4_51362_29122992 | NC_021163.1    | Ca_kabuli_chr04 | 29122992                | TT                              | CC              | 1946809685               |
| SNP_P4_51363_29123756 | NC_021163.1    | Ca_kabuli_chr04 | 29123756                | AA                              | GG              | 1946809687               |
| SNP_P4_51364_29123762 | NC_021163.1    | Ca_kabuli_chr04 | 29123762                | AA                              | GG              | 1946809690               |
| SNP_P4_51365_29123873 | NC_021163.1    | Ca_kabuli_chr04 | 29123873                | CC                              | AA              | 1946809692               |
| SNP_P4_51366_29123875 | NC_021163.1    | Ca_kabuli_chr04 | 29123875                | AA                              | CC              | 1946809694               |
| SNP_P4_51367_29124190 | NC_021163.1    | Ca_kabuli_chr04 | 29124190                | CC                              | TT              | 1946809696               |
| SNP_P4_51368_29124785 | NC_021163.1    | Ca_kabuli_chr04 | 29124785                | AA                              | GG              | 1946809698               |
| SNP_P4_51369_29130778 | NC_021163.1    | Ca_kabuli_chr04 | 29130778                | CC                              | TT              | 1946809700               |
| SNP_P4_51370_29134959 | NC_021163.1    | Ca_kabuli_chr04 | 29134959                | AA                              | GG              | 1946809702               |
| SNP_P4_51371_29134969 | NC_021163.1    | Ca_kabuli_chr04 | 29134969                | GG                              | AA              | 1946809704               |
| SNP_P4_51372_29134988 | NC_021163.1    | Ca_kabuli_chr04 | 29134988                | GG                              | AA              | 1946809706               |
| SNP_P4_51373_29135595 | NC_021163.1    | Ca_kabuli_chr04 | 29135595                | TT                              | CC              | 1946809708               |
| SNP_P4_51374_29135930 | NC_021163.1    | Ca_kabuli_chr04 | 29135930                | AA                              | GG              | 1946809710               |
| SNP_P4_51375_29136857 | NC_021163.1    | Ca_kabuli_chr04 | 29136857                | AA                              | TT              | 1946809712               |

| SNPs IDs              | Chromosome IDs | Chromosomes     | Physical positions (bp) | CDC Frontier (Reference genome) | (ILWC46 & LPNB) | NCBI SNPdb Accession IDs |
|-----------------------|----------------|-----------------|-------------------------|---------------------------------|-----------------|--------------------------|
| SNP_P4_51376_29156310 | NC_021163.1    | Ca_kabuli_chr04 | 29156310                | AA                              | CC              | 1946809714               |
| SNP_P4_51377_29156311 | NC_021163.1    | Ca_kabuli_chr04 | 29156311                | AA                              | TT              | 1946809716               |
| SNP_P4_51378_29156352 | NC_021163.1    | Ca_kabuli_chr04 | 29156352                | CC                              | TT              | 1946809718               |
| SNP_P4_51379_29156376 | NC_021163.1    | Ca_kabuli_chr04 | 29156376                | AA                              | TT              | 1946809720               |
| SNP_P4_51381_29156578 | NC_021163.1    | Ca_kabuli_chr04 | 29156578                | GG                              | TT              | 1946809722               |
| SNP_P4_51383_29158242 | NC_021163.1    | Ca_kabuli_chr04 | 29158242                | AA                              | GG              | 1946809724               |
| SNP_P4_51384_29158389 | NC_021163.1    | Ca_kabuli_chr04 | 29158389                | GG                              | AA              | 1946809726               |
| SNP_P4_51385_29158392 | NC_021163.1    | Ca_kabuli_chr04 | 29158392                | CC                              | TT              | 1946809728               |
| SNP_P4_51388_29161971 | NC_021163.1    | Ca_kabuli_chr04 | 29161971                | AA                              | CC              | 1946809730               |
| SNP_P4_51390_29162362 | NC_021163.1    | Ca_kabuli_chr04 | 29162362                | AA                              | GG              | 1946809732               |
| SNP_P4_51392_29162405 | NC_021163.1    | Ca_kabuli_chr04 | 29162405                | GG                              | AA              | 1946809734               |
| SNP_P4_51393_29162408 | NC_021163.1    | Ca_kabuli_chr04 | 29162408                | TT                              | AA              | 1946809736               |
| SNP_P4_51394_29162417 | NC_021163.1    | Ca_kabuli_chr04 | 29162417                | GG                              | AA              | 1946809738               |
| SNP_P4_51395_29162506 | NC_021163.1    | Ca_kabuli_chr04 | 29162506                | TT                              | CC              | 1946809740               |
| SNP_P4_51396_29163045 | NC_021163.1    | Ca_kabuli_chr04 | 29163045                | AA                              | GG              | 1946809742               |
| SNP_P4_51397_29163103 | NC_021163.1    | Ca_kabuli_chr04 | 29163103                | CC                              | TT              | 1946809744               |
| SNP_P4_51398_29163115 | NC_021163.1    | Ca_kabuli_chr04 | 29163115                | AA                              | GG              | 1946809746               |
| SNP_P4_51399_29174942 | NC_021163.1    | Ca_kabuli_chr04 | 29174942                | TT                              | AA              | 1946809748               |
| SNP_P4_51400_29175378 | NC_021163.1    | Ca_kabuli_chr04 | 29175378                | TT                              | CC              | 1946809749               |
| SNP_P4_51401_29175948 | NC_021163.1    | Ca_kabuli_chr04 | 29175948                | TT                              | CC              | 1946809751               |
| SNP_P4_51402_29176336 | NC_021163.1    | Ca_kabuli_chr04 | 29176336                | AA                              | TT              | 1946809753               |
| SNP_P4_51403_29183825 | NC_021163.1    | Ca_kabuli_chr04 | 29183825                | AA                              | GG              | 1946809755               |
| SNP_P4_51404_29183986 | NC_021163.1    | Ca_kabuli_chr04 | 29183986                | AA                              | GG              | 1946809757               |
| SNP_P4_51405_29184558 | NC_021163.1    | Ca_kabuli_chr04 | 29184558                | AA                              | CC              | 1946809759               |
| SNP_P4_51406_29186725 | NC_021163.1    | Ca_kabuli_chr04 | 29186725                | AA                              | TT              | 1946809761               |
| SNP_P4_51407_29187017 | NC_021163.1    | Ca_kabuli_chr04 | 29187017                | CC                              | TT              | 1946809763               |
| SNP_P4_51408_29187841 | NC_021163.1    | Ca_kabuli_chr04 | 29187841                | AA                              | GG              | 1946809766               |
| SNP_P4_51409_29188060 | NC_021163.1    | Ca_kabuli_chr04 | 29188060                | TT                              | CC              | 1946809768               |
| SNP_P4_51411_29191403 | NC_021163.1    | Ca_kabuli_chr04 | 29191403                | CC                              | TT              | 1946809770               |
| SNP_P4_51412_29191427 | NC_021163.1    | Ca_kabuli_chr04 | 29191427                | TT                              | GG              | 1946809772               |
| SNP_P4_51413_29195251 | NC_021163.1    | Ca_kabuli_chr04 | 29195251                | TT                              | AA              | 1946809774               |
| SNP_P4_51414_29195333 | NC_021163.1    | Ca_kabuli_chr04 | 29195333                | TT                              | CC              | 1946809776               |
| SNP_P4_51415_29195335 | NC_021163.1    | Ca_kabuli_chr04 | 29195335                | AA                              | GG              | 1946809778               |
| SNP_P4_51416_29195480 | NC_021163.1    | Ca_kabuli_chr04 | 29195480                | GG                              | TT              | 1946809780               |
| SNP_P4_51417_29195506 | NC_021163.1    | Ca_kabuli_chr04 | 29195506                | CC                              | TT              | 1946809782               |
| SNP_P4_51418_29196647 | NC_021163.1    | Ca_kabuli_chr04 | 29196647                | GG                              | AA              | 1946809784               |
| SNP_P4_51419_29202472 | NC_021163.1    | Ca_kabuli_chr04 | 29202472                | GG                              | TT              | 1946809786               |
| SNP_P4_51420_29202507 | NC_021163.1    | Ca_kabuli_chr04 | 29202507                | AA                              | CC              | 1946809788               |
| SNP_P4_51421_29202635 | NC_021163.1    | Ca_kabuli_chr04 | 29202635                | CC                              | TT              | 1946809791               |
| SNP_P4_51422_29202638 | NC_021163.1    | Ca_kabuli_chr04 | 29202638                | GG                              | AA              | 1946809793               |
| SNP_P4_51423_29202659 | NC_021163.1    | Ca_kabuli_chr04 | 29202659                | TT                              | GG              | 1946809795               |
| SNP_P4_51424_29202666 | NC_021163.1    | Ca_kabuli_chr04 | 29202666                | TT                              | CC              | 1946809797               |

| SNPs IDs              | Chromosome IDs | Chromosomes     | Physical positions (bp) | CDC Frontier (Reference genome) | (ILWC46 & LPNB) | NCBI SNPdb Accession IDs |
|-----------------------|----------------|-----------------|-------------------------|---------------------------------|-----------------|--------------------------|
| SNP_P4_51425_29202692 | NC_021163.1    | Ca_kabuli_chr04 | 29202692                | CC                              | AA              | 1946809799               |
| SNP_P4_51426_29202728 | NC_021163.1    | Ca_kabuli_chr04 | 29202728                | TT                              | CC              | 1946809801               |
| SNP_P4_51427_29205657 | NC_021163.1    | Ca_kabuli_chr04 | 29205657                | TT                              | AA              | 1946809803               |
| SNP_P4_51428_29207594 | NC_021163.1    | Ca_kabuli_chr04 | 29207594                | CC                              | TT              | 1946809805               |
| SNP_P4_51429_29207608 | NC_021163.1    | Ca_kabuli_chr04 | 29207608                | GG                              | TT              | 1946809807               |
| SNP_P4_51430_29208185 | NC_021163.1    | Ca_kabuli_chr04 | 29208185                | CC                              | TT              | 1946809809               |
| SNP_P4_51431_29208387 | NC_021163.1    | Ca_kabuli_chr04 | 29208387                | AA                              | TT              | 1946809811               |
| SNP_P4_51432_29208410 | NC_021163.1    | Ca_kabuli_chr04 | 29208410                | TT                              | CC              | 1946809813               |
| SNP_P4_51433_29208444 | NC_021163.1    | Ca_kabuli_chr04 | 29208444                | TT                              | CC              | 1946809815               |
| SNP_P4_51434_29208471 | NC_021163.1    | Ca_kabuli_chr04 | 29208471                | CC                              | TT              | 1946809817               |
| SNP_P4_51436_29209381 | NC_021163.1    | Ca_kabuli_chr04 | 29209381                | TT                              | CC              | 1946809819               |
| SNP_P4_51439_29211164 | NC_021163.1    | Ca_kabuli_chr04 | 29211164                | AA                              | CC              | 1946809821               |
| SNP_P4_51440_29211507 | NC_021163.1    | Ca_kabuli_chr04 | 29211507                | TT                              | AA              | 1946809823               |
| SNP_P4_51441_29211556 | NC_021163.1    | Ca_kabuli_chr04 | 29211556                | CC                              | AA              | 1946809825               |
| SNP_P4_51442_29211768 | NC_021163.1    | Ca_kabuli_chr04 | 29211768                | CC                              | TT              | 1946809827               |
| SNP_P4_51443_29212133 | NC_021163.1    | Ca_kabuli_chr04 | 29212133                | GG                              | AA              | 1946809829               |
| SNP_P4_51444_29212136 | NC_021163.1    | Ca_kabuli_chr04 | 29212136                | TT                              | CC              | 1946809832               |
| SNP_P4_51445_29212151 | NC_021163.1    | Ca_kabuli_chr04 | 29212151                | TT                              | CC              | 1946809834               |
| SNP_P4_51446_29212454 | NC_021163.1    | Ca_kabuli_chr04 | 29212454                | CC                              | TT              | 1946809836               |
| SNP_P4_51447_29212455 | NC_021163.1    | Ca_kabuli_chr04 | 29212455                | GG                              | TT              | 1946809838               |
| SNP_P4_51448_29212488 | NC_021163.1    | Ca_kabuli_chr04 | 29212488                | CC                              | GG              | 1946809840               |
| SNP_P4_51449_29212492 | NC_021163.1    | Ca_kabuli_chr04 | 29212492                | AA                              | CC              | 1946809842               |
| SNP_P4_51450_29215757 | NC_021163.1    | Ca_kabuli_chr04 | 29215757                | AA                              | CC              | 1946809844               |
| SNP_P4_51451_29216365 | NC_021163.1    | Ca_kabuli_chr04 | 29216365                | AA                              | CC              | 1946809846               |
| SNP_P4_51452_29218105 | NC_021163.1    | Ca_kabuli_chr04 | 29218105                | TT                              | CC              | 1946809848               |
| SNP_P4_51453_29218129 | NC_021163.1    | Ca_kabuli_chr04 | 29218129                | GG                              | AA              | 1946809850               |
| SNP_P4_51454_29219338 | NC_021163.1    | Ca_kabuli_chr04 | 29219338                | TT                              | CC              | 1946809852               |
| SNP_P4_51455_29219354 | NC_021163.1    | Ca_kabuli_chr04 | 29219354                | GG                              | AA              | 1946809854               |
| SNP_P4_51456_29219355 | NC_021163.1    | Ca_kabuli_chr04 | 29219355                | TT                              | GG              | 1946809856               |
| SNP_P4_51457_29219735 | NC_021163.1    | Ca_kabuli_chr04 | 29219735                | AA                              | GG              | 1946809858               |
| SNP_P4_51458_29220481 | NC_021163.1    | Ca_kabuli_chr04 | 29220481                | TT                              | CC              | 1946809860               |
| SNP_P4_51459_29220504 | NC_021163.1    | Ca_kabuli_chr04 | 29220504                | GG                              | AA              | 1946809862               |
| SNP_P4_51460_29220553 | NC_021163.1    | Ca_kabuli_chr04 | 29220553                | AA                              | GG              | 1946809865               |
| SNP_P4_51461_29220633 | NC_021163.1    | Ca_kabuli_chr04 | 29220633                | TT                              | CC              | 1946809867               |
| SNP_P4_51462_29220792 | NC_021163.1    | Ca_kabuli_chr04 | 29220792                | GG                              | TT              | 1946809869               |
| SNP_P4_51463_29220852 | NC_021163.1    | Ca_kabuli_chr04 | 29220852                | AA                              | GG              | 1946809871               |
| SNP_P4_51465_29220937 | NC_021163.1    | Ca_kabuli_chr04 | 29220937                | AA                              | GG              | 1946809873               |
| SNP_P4_51466_29221013 | NC_021163.1    | Ca_kabuli_chr04 | 29221013                | TT                              | CC              | 1946809875               |
| SNP_P4_51467_29221660 | NC_021163.1    | Ca_kabuli_chr04 | 29221660                | TT                              | AA              | 1946809877               |
| SNP_P4_51468_29221666 | NC_021163.1    | Ca_kabuli_chr04 | 29221666                | TT                              | GG              | 1946809879               |
| SNP_P4_51469_29221679 | NC_021163.1    | Ca_kabuli_chr04 | 29221679                | TT                              | CC              | 1946809881               |
| SNP_P4_51470_29221682 | NC_021163.1    | Ca_kabuli_chr04 | 29221682                | AA                              | TT              | 1946809884               |



| SNPs IDs              | Chromosome IDs | Chromosomes     | Physical positions (bp) | CDC Frontier (Reference genome) | (ILWC46 & LPNB) | NCBI SNPdb Accession IDs |
|-----------------------|----------------|-----------------|-------------------------|---------------------------------|-----------------|--------------------------|
| SNP_P4_51473_29222001 | NC_021163.1    | Ca_kabuli_chr04 | 29222001                | TT                              | AA              | 1946809886               |
| SNP_P4_51474_29222060 | NC_021163.1    | Ca_kabuli_chr04 | 29222060                | TT                              | AA              | 1946809888               |
| SNP_P4_51476_29222451 | NC_021163.1    | Ca_kabuli_chr04 | 29222451                | GG                              | AA              | 1946809890               |
| SNP_P4_51477_29223202 | NC_021163.1    | Ca_kabuli_chr04 | 29223202                | CC                              | TT              | 1946809892               |
| SNP_P4_51478_29224248 | NC_021163.1    | Ca_kabuli_chr04 | 29224248                | TT                              | GG              | 1946809894               |
| SNP_P4_51479_29224274 | NC_021163.1    | Ca_kabuli_chr04 | 29224274                | TT                              | AA              | 1946809897               |
| SNP_P4_51480_29224275 | NC_021163.1    | Ca_kabuli_chr04 | 29224275                | AA                              | TT              | 1946809899               |
| SNP_P4_51481_29225997 | NC_021163.1    | Ca_kabuli_chr04 | 29225997                | CC                              | AA              | 1946809901               |
| SNP_P4_51482_29226167 | NC_021163.1    | Ca_kabuli_chr04 | 29226167                | CC                              | AA              | 1946809903               |
| SNP_P4_51483_29226216 | NC_021163.1    | Ca_kabuli_chr04 | 29226216                | TT                              | AA              | 1946809905               |
| SNP_P4_51484_29226318 | NC_021163.1    | Ca_kabuli_chr04 | 29226318                | AA                              | TT              | 1946809907               |
| SNP_P4_51485_29226644 | NC_021163.1    | Ca_kabuli_chr04 | 29226644                | AA                              | GG              | 1946809909               |
| SNP_P4_51486_29226681 | NC_021163.1    | Ca_kabuli_chr04 | 29226681                | CC                              | TT              | 1946809911               |
| SNP_P4_51489_29230721 | NC_021163.1    | Ca_kabuli_chr04 | 29230721                | GG                              | AA              | 1946809913               |
| SNP_P4_51490_29230723 | NC_021163.1    | Ca_kabuli_chr04 | 29230723                | CC                              | TT              | 1946809916               |
| SNP_P4_51491_29230763 | NC_021163.1    | Ca_kabuli_chr04 | 29230763                | TT                              | AA              | 1946809918               |
| SNP_P4_51492_29230920 | NC_021163.1    | Ca_kabuli_chr04 | 29230920                | CC                              | TT              | 1946809920               |
| SNP_P4_51493_29230952 | NC_021163.1    | Ca_kabuli_chr04 | 29230952                | AA                              | CC              | 1946809922               |
| SNP_P4_51495_29231709 | NC_021163.1    | Ca_kabuli_chr04 | 29231709                | TT                              | CC              | 1946809924               |
| SNP_P4_51496_29233571 | NC_021163.1    | Ca_kabuli_chr04 | 29233571                | TT                              | GG              | 1946809926               |
| SNP_P4_51498_29235538 | NC_021163.1    | Ca_kabuli_chr04 | 29235538                | CC                              | TT              | 1946809928               |
| SNP_P4_51499_29235761 | NC_021163.1    | Ca_kabuli_chr04 | 29235761                | GG                              | AA              | 1946809930               |
| SNP_P4_51500_29235776 | NC_021163.1    | Ca_kabuli_chr04 | 29235776                | GG                              | CC              | 1946809932               |
| SNP_P4_51501_29235779 | NC_021163.1    | Ca_kabuli_chr04 | 29235779                | CC                              | TT              | 1946809934               |
| SNP_P4_51502_29235786 | NC_021163.1    | Ca_kabuli_chr04 | 29235786                | TT                              | CC              | 1946809936               |
| SNP_P4_51503_29236626 | NC_021163.1    | Ca_kabuli_chr04 | 29236626                | TT                              | GG              | 1946809939               |
| SNP_P4_51504_29237107 | NC_021163.1    | Ca_kabuli_chr04 | 29237107                | TT                              | CC              | 1946809941               |
| SNP_P4_51505_29237381 | NC_021163.1    | Ca_kabuli_chr04 | 29237381                | GG                              | AA              | 1946809943               |
| SNP_P4_51506_29237398 | NC_021163.1    | Ca_kabuli_chr04 | 29237398                | GG                              | AA              | 1946809945               |
| SNP_P4_51507_29237418 | NC_021163.1    | Ca_kabuli_chr04 | 29237418                | GG                              | AA              | 1946809947               |
| SNP_P4_51508_29238083 | NC_021163.1    | Ca_kabuli_chr04 | 29238083                | GG                              | AA              | 1946809949               |
| SNP_P4_51509_29238342 | NC_021163.1    | Ca_kabuli_chr04 | 29238342                | AA                              | GG              | 1946809951               |
| SNP_P4_51510_29238813 | NC_021163.1    | Ca_kabuli_chr04 | 29238813                | CC                              | TT              | 1946809953               |
| SNP_P4_51512_29238864 | NC_021163.1    | Ca_kabuli_chr04 | 29238864                | TT                              | GG              | 1946809955               |
| SNP_P4_51513_29239134 | NC_021163.1    | Ca_kabuli_chr04 | 29239134                | TT                              | CC              | 1946809957               |
| SNP_P4_51514_29239171 | NC_021163.1    | Ca_kabuli_chr04 | 29239171                | GG                              | AA              | 1946809959               |
| SNP_P4_51515_29239403 | NC_021163.1    | Ca_kabuli_chr04 | 29239403                | AA                              | GG              | 1946809961               |
| SNP_P4_51516_29239418 | NC_021163.1    | Ca_kabuli_chr04 | 29239418                | AA                              | GG              | 1946809963               |
| SNP_P4_51517_29239483 | NC_021163.1    | Ca_kabuli_chr04 | 29239483                | TT                              | GG              | 1946809966               |
| SNP_P4_51518_29239720 | NC_021163.1    | Ca_kabuli_chr04 | 29239720                | TT                              | GG              | 1946809968               |
| SNP_P4_51519_29240025 | NC_021163.1    | Ca_kabuli_chr04 | 29240025                | CC                              | AA              | 1946809970               |
| SNP_P4_51520_29240031 | NC_021163.1    | Ca_kabuli_chr04 | 29240031                | TT                              | CC              | 1946809972               |

| SNPs IDs              | Chromosome IDs | Chromosomes     | Physical positions (bp) | CDC Frontier (Reference genome) | (ILWC46 & LPNB) | NCBI SNPdb Accession IDs |
|-----------------------|----------------|-----------------|-------------------------|---------------------------------|-----------------|--------------------------|
| SNP_P4_51521_29240065 | NC_021163.1    | Ca_kabuli_chr04 | 29240065                | TT                              | CC              | 1946809974               |
| SNP_P4_51522_29242865 | NC_021163.1    | Ca_kabuli_chr04 | 29242865                | AA                              | GG              | 1946809976               |
| SNP_P4_51523_29243442 | NC_021163.1    | Ca_kabuli_chr04 | 29243442                | AA                              | GG              | 1946809978               |
| SNP_P4_51524_29243866 | NC_021163.1    | Ca_kabuli_chr04 | 29243866                | AA                              | GG              | 1946809980               |
| SNP_P4_51526_29243935 | NC_021163.1    | Ca_kabuli_chr04 | 29243935                | TT                              | CC              | 1946809982               |
| SNP_P4_51527_29244371 | NC_021163.1    | Ca_kabuli_chr04 | 29244371                | TT                              | GG              | 1946809984               |
| SNP_P4_51528_29244669 | NC_021163.1    | Ca_kabuli_chr04 | 29244669                | GG                              | AA              | 1946809987               |
| SNP_P4_51530_29249203 | NC_021163.1    | Ca_kabuli_chr04 | 29249203                | TT                              | CC              | 1946809989               |
| SNP_P4_51531_29249260 | NC_021163.1    | Ca_kabuli_chr04 | 29249260                | CC                              | TT              | 1946809991               |
| SNP_P4_51532_29249263 | NC_021163.1    | Ca_kabuli_chr04 | 29249263                | AA                              | GG              | 1946809993               |
| SNP_P4_51533_29249533 | NC_021163.1    | Ca_kabuli_chr04 | 29249533                | GG                              | AA              | 1946809995               |
| SNP_P4_51534_29261694 | NC_021163.1    | Ca_kabuli_chr04 | 29261694                | CC                              | AA              | 1946809997               |
| SNP_P4_51536_29264236 | NC_021163.1    | Ca_kabuli_chr04 | 29264236                | TT                              | CC              | 1946809999               |
| SNP_P4_51537_29265350 | NC_021163.1    | Ca_kabuli_chr04 | 29265350                | AA                              | CC              | 1946810001               |
| SNP_P4_51538_29265484 | NC_021163.1    | Ca_kabuli_chr04 | 29265484                | CC                              | TT              | 1946810003               |
| SNP_P4_51539_29265544 | NC_021163.1    | Ca_kabuli_chr04 | 29265544                | GG                              | CC              | 1946810005               |
| SNP_P4_51540_29265872 | NC_021163.1    | Ca_kabuli_chr04 | 29265872                | CC                              | TT              | 1946810007               |
| SNP_P4_51541_29265914 | NC_021163.1    | Ca_kabuli_chr04 | 29265914                | TT                              | AA              | 1946810009               |
| SNP_P4_51542_29265962 | NC_021163.1    | Ca_kabuli_chr04 | 29265962                | AA                              | GG              | 1946810011               |
| SNP_P4_51543_29265966 | NC_021163.1    | Ca_kabuli_chr04 | 29265966                | GG                              | AA              | 1946810013               |
| SNP_P4_51544_29265973 | NC_021163.1    | Ca_kabuli_chr04 | 29265973                | GG                              | AA              | 1946810015               |
| SNP_P4_51545_29265974 | NC_021163.1    | Ca_kabuli_chr04 | 29265974                | CC                              | GG              | 1946810017               |
| SNP_P4_51546_29266685 | NC_021163.1    | Ca_kabuli_chr04 | 29266685                | GG                              | AA              | 1946810019               |
| SNP_P4_51547_29266720 | NC_021163.1    | Ca_kabuli_chr04 | 29266720                | GG                              | AA              | 1946810021               |
| SNP_P4_51548_29266766 | NC_021163.1    | Ca_kabuli_chr04 | 29266766                | GG                              | CC              | 1946810023               |
| SNP_P4_51549_29269481 | NC_021163.1    | Ca_kabuli_chr04 | 29269481                | GG                              | AA              | 1946810025               |
| SNP_P4_51550_29269506 | NC_021163.1    | Ca_kabuli_chr04 | 29269506                | CC                              | AA              | 1946810028               |
| SNP_P4_51551_29272994 | NC_021163.1    | Ca_kabuli_chr04 | 29272994                | GG                              | AA              | 1946810030               |
| SNP_P4_51552_29272995 | NC_021163.1    | Ca_kabuli_chr04 | 29272995                | TT                              | AA              | 1946810032               |
| SNP_P4_51554_29291902 | NC_021163.1    | Ca_kabuli_chr04 | 29291902                | GG                              | AA              | 1946810034               |
| SNP_P4_51555_29292314 | NC_021163.1    | Ca_kabuli_chr04 | 29292314                | GG                              | AA              | 1946810036               |
| SNP_P4_51556_29292346 | NC_021163.1    | Ca_kabuli_chr04 | 29292346                | AA                              | CC              | 1946810038               |
| SNP_P4_51557_29292497 | NC_021163.1    | Ca_kabuli_chr04 | 29292497                | AA                              | GG              | 1946810040               |
| SNP_P4_51559_29298129 | NC_021163.1    | Ca_kabuli_chr04 | 29298129                | CC                              | AA              | 1946810043               |
| SNP_P4_51560_29298385 | NC_021163.1    | Ca_kabuli_chr04 | 29298385                | CC                              | TT              | 1946810045               |
| SNP_P4_51561_29298844 | NC_021163.1    | Ca_kabuli_chr04 | 29298844                | GG                              | AA              | 1946810047               |
| SNP_P4_51562_29298884 | NC_021163.1    | Ca_kabuli_chr04 | 29298884                | TT                              | CC              | 1946810050               |
| SNP_P4_51563_29304655 | NC_021163.1    | Ca_kabuli_chr04 | 29304655                | GG                              | AA              | 1946810052               |
| SNP_P4_51564_29305055 | NC_021163.1    | Ca_kabuli_chr04 | 29305055                | TT                              | GG              | 1946810054               |
| SNP_P4_51565_29305060 | NC_021163.1    | Ca_kabuli_chr04 | 29305060                | GG                              | AA              | 1946810056               |
| SNP_P4_51566_29305061 | NC_021163.1    | Ca_kabuli_chr04 | 29305061                | TT                              | CC              | 1946810058               |
| SNP_P4_51567_29305094 | NC_021163.1    | Ca_kabuli_chr04 | 29305094                | CC                              | TT              | 1946810060               |

| SNPs IDs              | Chromosome IDs | Chromosomes     | Physical positions (bp) | CDC Frontier (Reference genome) | (ILWC46 & LPNB) | NCBI SNPdb Accession IDs |
|-----------------------|----------------|-----------------|-------------------------|---------------------------------|-----------------|--------------------------|
| SNP_P4_51568_29306336 | NC_021163.1    | Ca_kabuli_chr04 | 29306336                | GG                              | AA              | 1946810062               |
| SNP_P4_51569_29308350 | NC_021163.1    | Ca_kabuli_chr04 | 29308350                | GG                              | AA              | 1946810064               |
| SNP_P4_51570_29308616 | NC_021163.1    | Ca_kabuli_chr04 | 29308616                | TT                              | AA              | 1946810066               |
| SNP_P4_51571_29308673 | NC_021163.1    | Ca_kabuli_chr04 | 29308673                | TT                              | CC              | 1946810068               |
| SNP_P4_51572_29308865 | NC_021163.1    | Ca_kabuli_chr04 | 29308865                | AA                              | GG              | 1946810071               |
| SNP_P4_51573_29308923 | NC_021163.1    | Ca_kabuli_chr04 | 29308923                | CC                              | TT              | 1946810073               |
| SNP_P4_51574_29308929 | NC_021163.1    | Ca_kabuli_chr04 | 29308929                | TT                              | AA              | 1946810075               |
| SNP_P4_51575_29310387 | NC_021163.1    | Ca_kabuli_chr04 | 29310387                | GG                              | TT              | 1946810077               |
| SNP_P4_51577_29311859 | NC_021163.1    | Ca_kabuli_chr04 | 29311859                | CC                              | TT              | 1946810079               |
| SNP_P4_51578_29311861 | NC_021163.1    | Ca_kabuli_chr04 | 29311861                | GG                              | AA              | 1946810081               |
| SNP_P4_51579_29312074 | NC_021163.1    | Ca_kabuli_chr04 | 29312074                | CC                              | TT              | 1946810083               |
| SNP_P4_51580_29312335 | NC_021163.1    | Ca_kabuli_chr04 | 29312335                | CC                              | TT              | 1946810085               |
| SNP_P4_51581_29312767 | NC_021163.1    | Ca_kabuli_chr04 | 29312767                | AA                              | TT              | 1946810087               |
| SNP_P4_51582_29312959 | NC_021163.1    | Ca_kabuli_chr04 | 29312959                | CC                              | GG              | 1946810089               |
| SNP_P4_51583_29313891 | NC_021163.1    | Ca_kabuli_chr04 | 29313891                | CC                              | TT              | 1946810091               |
| SNP_P4_51584_29314108 | NC_021163.1    | Ca_kabuli_chr04 | 29314108                | TT                              | CC              | 1946810093               |
| SNP_P4_51585_29314646 | NC_021163.1    | Ca_kabuli_chr04 | 29314646                | AA                              | GG              | 1946810095               |
| SNP_P4_51586_29314869 | NC_021163.1    | Ca_kabuli_chr04 | 29314869                | TT                              | GG              | 1946810097               |
| SNP_P4_51588_29316127 | NC_021163.1    | Ca_kabuli_chr04 | 29316127                | TT                              | CC              | 1946810099               |
| SNP_P4_51589_29316725 | NC_021163.1    | Ca_kabuli_chr04 | 29316725                | TT                              | GG              | 1946810101               |
| SNP_P4_51590_29319615 | NC_021163.1    | Ca_kabuli_chr04 | 29319615                | TT                              | CC              | 1946810103               |
| SNP_P4_51591_29319700 | NC_021163.1    | Ca_kabuli_chr04 | 29319700                | GG                              | AA              | 1946810105               |
| SNP_P4_51593_29320489 | NC_021163.1    | Ca_kabuli_chr04 | 29320489                | CC                              | TT              | 1946810107               |
| SNP_P4_51594_29320553 | NC_021163.1    | Ca_kabuli_chr04 | 29320553                | GG                              | AA              | 1946810109               |
| SNP_P4_51595_29320848 | NC_021163.1    | Ca_kabuli_chr04 | 29320848                | TT                              | CC              | 1946810111               |
| SNP_P4_51596_29320881 | NC_021163.1    | Ca_kabuli_chr04 | 29320881                | CC                              | TT              | 1946810113               |
| SNP_P4_51597_29320898 | NC_021163.1    | Ca_kabuli_chr04 | 29320898                | CC                              | AA              | 1946810115               |
| SNP_P4_51598_29320930 | NC_021163.1    | Ca_kabuli_chr04 | 29320930                | GG                              | AA              | 1946810117               |
| SNP_P4_51600_29321272 | NC_021163.1    | Ca_kabuli_chr04 | 29321272                | GG                              | AA              | 1946810119               |
| SNP_P4_51601_29321538 | NC_021163.1    | Ca_kabuli_chr04 | 29321538                | GG                              | TT              | 1946810121               |
| SNP_P4_51602_29323587 | NC_021163.1    | Ca_kabuli_chr04 | 29323587                | TT                              | AA              | 1946810123               |
| SNP_P4_51603_29323623 | NC_021163.1    | Ca_kabuli_chr04 | 29323623                | TT                              | CC              | 1946810126               |
| SNP_P4_51604_29323719 | NC_021163.1    | Ca_kabuli_chr04 | 29323719                | CC                              | TT              | 1946810128               |
| SNP_P4_51605_29323739 | NC_021163.1    | Ca_kabuli_chr04 | 29323739                | CC                              | TT              | 1946810130               |
| SNP_P4_51606_29323741 | NC_021163.1    | Ca_kabuli_chr04 | 29323741                | CC                              | TT              | 1946810133               |
| SNP_P4_51607_29323746 | NC_021163.1    | Ca_kabuli_chr04 | 29323746                | GG                              | AA              | 1946810135               |
| SNP_P4_51608_29323752 | NC_021163.1    | Ca_kabuli_chr04 | 29323752                | TT                              | CC              | 1946810137               |
| SNP_P4_51609_29323996 | NC_021163.1    | Ca_kabuli_chr04 | 29323996                | TT                              | CC              | 1946810139               |
| SNP_P4_51610_29324272 | NC_021163.1    | Ca_kabuli_chr04 | 29324272                | AA                              | CC              | 1946810141               |
| SNP_P4_51611_29324746 | NC_021163.1    | Ca_kabuli_chr04 | 29324746                | AA                              | CC              | 1946810143               |
| SNP_P4_51612_29325458 | NC_021163.1    | Ca_kabuli_chr04 | 29325458                | AA                              | GG              | 1946810145               |
| SNP_P4_51613_29325828 | NC_021163.1    | Ca_kabuli_chr04 | 29325828                | AA                              | CC              | 1946810147               |

| SNPs IDs              | Chromosome IDs | Chromosomes     | Physical positions (bp) | CDC Frontier (Reference genome) | (ILWC46 & LPNB) | NCBI SNPdb Accession IDs |
|-----------------------|----------------|-----------------|-------------------------|---------------------------------|-----------------|--------------------------|
| SNP_P4_51614_29326084 | NC_021163.1    | Ca_kabuli_chr04 | 29326084                | TT                              | GG              | 1946810149               |
| SNP_P4_51615_29326411 | NC_021163.1    | Ca_kabuli_chr04 | 29326411                | GG                              | AA              | 1946810151               |
| SNP_P4_51616_29326423 | NC_021163.1    | Ca_kabuli_chr04 | 29326423                | CC                              | TT              | 1946810154               |
| SNP_P4_51617_29326477 | NC_021163.1    | Ca_kabuli_chr04 | 29326477                | GG                              | TT              | 1946810156               |
| SNP_P4_51618_29326706 | NC_021163.1    | Ca_kabuli_chr04 | 29326706                | CC                              | AA              | 1946810158               |
| SNP_P4_51619_29326725 | NC_021163.1    | Ca_kabuli_chr04 | 29326725                | TT                              | CC              | 1946810160               |
| SNP_P4_51620_29326824 | NC_021163.1    | Ca_kabuli_chr04 | 29326824                | AA                              | CC              | 1946810162               |
| SNP_P4_51621_29326889 | NC_021163.1    | Ca_kabuli_chr04 | 29326889                | CC                              | AA              | 1946810164               |
| SNP_P4_51622_29326972 | NC_021163.1    | Ca_kabuli_chr04 | 29326972                | GG                              | AA              | 1946810166               |
| SNP_P4_51623_29327098 | NC_021163.1    | Ca_kabuli_chr04 | 29327098                | TT                              | CC              | 1946810168               |
| SNP_P4_51624_29327249 | NC_021163.1    | Ca_kabuli_chr04 | 29327249                | TT                              | CC              | 1946810170               |
| SNP_P4_51625_29327379 | NC_021163.1    | Ca_kabuli_chr04 | 29327379                | AA                              | GG              | 1946810172               |
| SNP_P4_51626_29327793 | NC_021163.1    | Ca_kabuli_chr04 | 29327793                | TT                              | CC              | 1946810174               |
| SNP_P4_51627_29330731 | NC_021163.1    | Ca_kabuli_chr04 | 29330731                | TT                              | AA              | 1946810176               |
| SNP_P4_51628_29330764 | NC_021163.1    | Ca_kabuli_chr04 | 29330764                | CC                              | TT              | 1946810178               |
| SNP_P4_51630_29332164 | NC_021163.1    | Ca_kabuli_chr04 | 29332164                | CC                              | GG              | 1946810180               |
| SNP_P4_51631_29332169 | NC_021163.1    | Ca_kabuli_chr04 | 29332169                | TT                              | CC              | 1946810182               |
| SNP_P4_51632_29338382 | NC_021163.1    | Ca_kabuli_chr04 | 29338382                | GG                              | AA              | 1946810184               |
| SNP_P4_51633_29338656 | NC_021163.1    | Ca_kabuli_chr04 | 29338656                | GG                              | AA              | 1946810186               |
| SNP_P4_51634_29343210 | NC_021163.1    | Ca_kabuli_chr04 | 29343210                | GG                              | TT              | 1946810188               |
| SNP_P4_51635_29343480 | NC_021163.1    | Ca_kabuli_chr04 | 29343480                | GG                              | AA              | 1946810190               |
| SNP_P4_51636_29343558 | NC_021163.1    | Ca_kabuli_chr04 | 29343558                | AA                              | TT              | 1946810192               |
| SNP_P4_51638_29350264 | NC_021163.1    | Ca_kabuli_chr04 | 29350264                | CC                              | TT              | 1946810194               |
| SNP_P4_51639_29350292 | NC_021163.1    | Ca_kabuli_chr04 | 29350292                | TT                              | AA              | 1946810196               |
| SNP_P4_51640_29350572 | NC_021163.1    | Ca_kabuli_chr04 | 29350572                | CC                              | AA              | 1946810198               |
| SNP_P4_51641_29350607 | NC_021163.1    | Ca_kabuli_chr04 | 29350607                | AA                              | TT              | 1946810200               |
| SNP_P4_51642_29351273 | NC_021163.1    | Ca_kabuli_chr04 | 29351273                | AA                              | GG              | 1946810202               |
| SNP_P4_51643_29351293 | NC_021163.1    | Ca_kabuli_chr04 | 29351293                | AA                              | GG              | 1946810204               |
| SNP_P4_51644_29351298 | NC_021163.1    | Ca_kabuli_chr04 | 29351298                | TT                              | AA              | 1946810206               |
| SNP_P4_51645_29351891 | NC_021163.1    | Ca_kabuli_chr04 | 29351891                | GG                              | AA              | 1946810208               |
| SNP_P4_51646_29357366 | NC_021163.1    | Ca_kabuli_chr04 | 29357366                | TT                              | AA              | 1946810210               |
| SNP_P4_51647_29357680 | NC_021163.1    | Ca_kabuli_chr04 | 29357680                | TT                              | AA              | 1946810212               |
| SNP_P4_51648_29358287 | NC_021163.1    | Ca_kabuli_chr04 | 29358287                | TT                              | CC              | 1946810214               |
| SNP_P4_51649_29358538 | NC_021163.1    | Ca_kabuli_chr04 | 29358538                | TT                              | CC              | 1946810216               |
| SNP_P4_51651_29358626 | NC_021163.1    | Ca_kabuli_chr04 | 29358626                | TT                              | CC              | 1946810218               |
| SNP_P4_51652_29358683 | NC_021163.1    | Ca_kabuli_chr04 | 29358683                | TT                              | CC              | 1946810220               |
| SNP_P4_51653_29358918 | NC_021163.1    | Ca_kabuli_chr04 | 29358918                | TT                              | CC              | 1946810222               |
| SNP_P4_51654_29359097 | NC_021163.1    | Ca_kabuli_chr04 | 29359097                | TT                              | CC              | 1946810224               |
| SNP_P4_51655_29363949 | NC_021163.1    | Ca_kabuli_chr04 | 29363949                | TT                              | GG              | 1946810226               |
| SNP_P4_51657_29366478 | NC_021163.1    | Ca_kabuli_chr04 | 29366478                | GG                              | AA              | 1946810228               |
| SNP_P4_51658_29366793 | NC_021163.1    | Ca_kabuli_chr04 | 29366793                | TT                              | CC              | 1946810230               |
| SNP_P4_51659_29367542 | NC_021163.1    | Ca_kabuli_chr04 | 29367542                | TT                              | CC              | 1946810232               |

| SNPs IDs              | Chromosome IDs | Chromosomes     | Physical positions (bp) | CDC Frontier (Reference genome) | (ILWC46 & LPNB) | NCBI SNPdb Accession IDs |
|-----------------------|----------------|-----------------|-------------------------|---------------------------------|-----------------|--------------------------|
| SNP_P4_51664_29372540 | NC_021163.1    | Ca_kabuli_chr04 | 29372540                | CC                              | TT              | 1946810234               |
| SNP_P4_51666_29379263 | NC_021163.1    | Ca_kabuli_chr04 | 29379263                | CC                              | TT              | 1946810236               |
| SNP_P4_51667_29379295 | NC_021163.1    | Ca_kabuli_chr04 | 29379295                | AA                              | CC              | 1946810238               |
| SNP_P4_51668_29384732 | NC_021163.1    | Ca_kabuli_chr04 | 29384732                | GG                              | TT              | 1946810240               |
| SNP_P4_51669_29386920 | NC_021163.1    | Ca_kabuli_chr04 | 29386920                | CC                              | AA              | 1946810243               |
| SNP_P4_51670_29389769 | NC_021163.1    | Ca_kabuli_chr04 | 29389769                | TT                              | GG              | 1946810245               |
| SNP_P4_51671_29391474 | NC_021163.1    | Ca_kabuli_chr04 | 29391474                | TT                              | GG              | 1946810247               |
| SNP_P4_51672_29393129 | NC_021163.1    | Ca_kabuli_chr04 | 29393129                | GG                              | AA              | 1946810249               |
| SNP_P4_51674_29400754 | NC_021163.1    | Ca_kabuli_chr04 | 29400754                | GG                              | AA              | 1946810251               |
| SNP_P4_51675_29402452 | NC_021163.1    | Ca_kabuli_chr04 | 29402452                | TT                              | CC              | 1946810254               |
| SNP_P4_51676_29411443 | NC_021163.1    | Ca_kabuli_chr04 | 29411443                | AA                              | GG              | 1946810256               |
| SNP_P4_51677_29415532 | NC_021163.1    | Ca_kabuli_chr04 | 29415532                | AA                              | TT              | 1946810258               |
| SNP_P4_51679_29415578 | NC_021163.1    | Ca_kabuli_chr04 | 29415578                | AA                              | GG              | 1946810260               |
| SNP_P4_51680_29415819 | NC_021163.1    | Ca_kabuli_chr04 | 29415819                | CC                              | GG              | 1946810262               |
| SNP_P4_51681_29416004 | NC_021163.1    | Ca_kabuli_chr04 | 29416004                | CC                              | TT              | 1946810265               |
| SNP_P4_51682_29416290 | NC_021163.1    | Ca_kabuli_chr04 | 29416290                | AA                              | CC              | 1946810267               |
| SNP_P4_51683_29418211 | NC_021163.1    | Ca_kabuli_chr04 | 29418211                | AA                              | TT              | 1946810269               |
| SNP_P4_51685_29419929 | NC_021163.1    | Ca_kabuli_chr04 | 29419929                | GG                              | AA              | 1946810271               |
| SNP_P4_51686_29419933 | NC_021163.1    | Ca_kabuli_chr04 | 29419933                | TT                              | CC              | 1946810273               |
| SNP_P4_51687_29419964 | NC_021163.1    | Ca_kabuli_chr04 | 29419964                | AA                              | TT              | 1946810275               |
| SNP_P4_51688_29420203 | NC_021163.1    | Ca_kabuli_chr04 | 29420203                | CC                              | TT              | 1946810277               |
| SNP_P4_51690_29420231 | NC_021163.1    | Ca_kabuli_chr04 | 29420231                | AA                              | GG              | 1946810279               |
| SNP_P4_51691_29420673 | NC_021163.1    | Ca_kabuli_chr04 | 29420673                | TT                              | AA              | 1946810281               |
| SNP_P4_51692_29420674 | NC_021163.1    | Ca_kabuli_chr04 | 29420674                | TT                              | AA              | 1946810283               |
| SNP_P4_51694_29420935 | NC_021163.1    | Ca_kabuli_chr04 | 29420935                | AA                              | GG              | 1946810286               |
| SNP_P4_51695_29420973 | NC_021163.1    | Ca_kabuli_chr04 | 29420973                | GG                              | AA              | 1946810288               |
| SNP_P4_51696_29421180 | NC_021163.1    | Ca_kabuli_chr04 | 29421180                | TT                              | AA              | 1946810290               |
| SNP_P4_51698_29423023 | NC_021163.1    | Ca_kabuli_chr04 | 29423023                | CC                              | GG              | 1946810292               |
| SNP_P4_51699_29423554 | NC_021163.1    | Ca_kabuli_chr04 | 29423554                | TT                              | CC              | 1946810294               |
| SNP_P4_51700_29424664 | NC_021163.1    | Ca_kabuli_chr04 | 29424664                | GG                              | AA              | 1946810296               |
| SNP_P4_51701_29428182 | NC_021163.1    | Ca_kabuli_chr04 | 29428182                | AA                              | TT              | 1946810299               |
| SNP_P4_51703_29429153 | NC_021163.1    | Ca_kabuli_chr04 | 29429153                | TT                              | AA              | 1946810301               |
| SNP_P4_51705_29433360 | NC_021163.1    | Ca_kabuli_chr04 | 29433360                | AA                              | GG              | 1946810303               |
| SNP_P4_51706_29435126 | NC_021163.1    | Ca_kabuli_chr04 | 29435126                | AA                              | GG              | 1946810305               |
| SNP_P4_51707_29435986 | NC_021163.1    | Ca_kabuli_chr04 | 29435986                | AA                              | GG              | 1946810307               |
| SNP_P4_51708_29439053 | NC_021163.1    | Ca_kabuli_chr04 | 29439053                | AA                              | CC              | 1946810309               |
| SNP_P4_51709_29439110 | NC_021163.1    | Ca_kabuli_chr04 | 29439110                | CC                              | TT              | 1946810312               |
| SNP_P4_51710_29439292 | NC_021163.1    | Ca_kabuli_chr04 | 29439292                | AA                              | CC              | 1946810313               |
| SNP_P4_51712_29443293 | NC_021163.1    | Ca_kabuli_chr04 | 29443293                | GG                              | AA              | 1946810315               |
| SNP_P4_51714_29444223 | NC_021163.1    | Ca_kabuli_chr04 | 29444223                | AA                              | GG              | 1946810317               |
| SNP_P4_51715_29444655 | NC_021163.1    | Ca_kabuli_chr04 | 29444655                | TT                              | CC              | 1946810319               |
| SNP_P4_51716_29445125 | NC_021163.1    | Ca_kabuli_chr04 | 29445125                | TT                              | CC              | 1946810321               |

| SNPs IDs              | Chromosome IDs | Chromosomes     | Physical positions (bp) | CDC Frontier (Reference genome) | (ILWC46 & LPNB) | NCBI SNPdb Accession IDs |
|-----------------------|----------------|-----------------|-------------------------|---------------------------------|-----------------|--------------------------|
| SNP_P4_51717_29447331 | NC_021163.1    | Ca_kabuli_chr04 | 29447331                | AA                              | GG              | 1946810324               |
| SNP_P4_51718_29447793 | NC_021163.1    | Ca_kabuli_chr04 | 29447793                | GG                              | AA              | 1946810326               |
| SNP_P4_51719_29449125 | NC_021163.1    | Ca_kabuli_chr04 | 29449125                | GG                              | AA              | 1946810328               |
| SNP_P4_51720_29452715 | NC_021163.1    | Ca_kabuli_chr04 | 29452715                | TT                              | AA              | 1946810331               |
| SNP_P4_51721_29453110 | NC_021163.1    | Ca_kabuli_chr04 | 29453110                | AA                              | GG              | 1946810333               |
| SNP_P4_51722_29453113 | NC_021163.1    | Ca_kabuli_chr04 | 29453113                | CC                              | TT              | 1946810335               |
| SNP_P4_51723_29453144 | NC_021163.1    | Ca_kabuli_chr04 | 29453144                | TT                              | CC              | 1946810337               |
| SNP_P4_51724_29453145 | NC_021163.1    | Ca_kabuli_chr04 | 29453145                | GG                              | AA              | 1946810340               |
| SNP_P4_51725_29453157 | NC_021163.1    | Ca_kabuli_chr04 | 29453157                | TT                              | GG              | 1946810342               |
| SNP_P4_51726_29453208 | NC_021163.1    | Ca_kabuli_chr04 | 29453208                | GG                              | AA              | 1946810344               |
| SNP_P4_51727_29456245 | NC_021163.1    | Ca_kabuli_chr04 | 29456245                | AA                              | GG              | 1946810346               |
| SNP_P4_51728_29456685 | NC_021163.1    | Ca_kabuli_chr04 | 29456685                | CC                              | TT              | 1946810349               |
| SNP_P4_51729_29457612 | NC_021163.1    | Ca_kabuli_chr04 | 29457612                | TT                              | CC              | 1946810351               |
| SNP_P4_51730_29457875 | NC_021163.1    | Ca_kabuli_chr04 | 29457875                | AA                              | GG              | 1946810353               |
| SNP_P4_51731_29461084 | NC_021163.1    | Ca_kabuli_chr04 | 29461084                | CC                              | TT              | 1946810355               |
| SNP_P4_51732_29461197 | NC_021163.1    | Ca_kabuli_chr04 | 29461197                | AA                              | GG              | 1946810357               |
| SNP_P4_51733_29464434 | NC_021163.1    | Ca_kabuli_chr04 | 29464434                | TT                              | CC              | 1946810359               |
| SNP_P4_51734_29466893 | NC_021163.1    | Ca_kabuli_chr04 | 29466893                | CC                              | TT              | 1946810361               |
| SNP_P4_51735_29469568 | NC_021163.1    | Ca_kabuli_chr04 | 29469568                | CC                              | TT              | 1946810363               |
| SNP_P4_51736_29469619 | NC_021163.1    | Ca_kabuli_chr04 | 29469619                | AA                              | TT              | 1946810365               |
| SNP_P4_51737_29472191 | NC_021163.1    | Ca_kabuli_chr04 | 29472191                | CC                              | GG              | 1946810367               |
| SNP_P4_51738_29472256 | NC_021163.1    | Ca_kabuli_chr04 | 29472256                | AA                              | GG              | 1946810370               |
| SNP_P4_51739_29472263 | NC_021163.1    | Ca_kabuli_chr04 | 29472263                | TT                              | CC              | 1946810372               |
| SNP_P4_51740_29475029 | NC_021163.1    | Ca_kabuli_chr04 | 29475029                | TT                              | AA              | 1946810374               |
| SNP_P4_51741_29475085 | NC_021163.1    | Ca_kabuli_chr04 | 29475085                | CC                              | TT              | 1946810376               |
| SNP_P4_51742_29475117 | NC_021163.1    | Ca_kabuli_chr04 | 29475117                | GG                              | TT              | 1946810378               |
| SNP_P4_51743_29475366 | NC_021163.1    | Ca_kabuli_chr04 | 29475366                | AA                              | GG              | 1946810380               |
| SNP_P4_51744_29475408 | NC_021163.1    | Ca_kabuli_chr04 | 29475408                | AA                              | GG              | 1946810382               |
| SNP_P4_51745_29477954 | NC_021163.1    | Ca_kabuli_chr04 | 29477954                | GG                              | AA              | 1946810384               |
| SNP_P4_51746_29480645 | NC_021163.1    | Ca_kabuli_chr04 | 29480645                | TT                              | GG              | 1946810386               |
| SNP_P4_51747_29481187 | NC_021163.1    | Ca_kabuli_chr04 | 29481187                | AA                              | CC              | 1946810388               |
| SNP_P4_51748_29481206 | NC_021163.1    | Ca_kabuli_chr04 | 29481206                | CC                              | TT              | 1946810390               |
| SNP_P4_51749_29483186 | NC_021163.1    | Ca_kabuli_chr04 | 29483186                | CC                              | TT              | 1946810392               |
| SNP_P4_51750_29487889 | NC_021163.1    | Ca_kabuli_chr04 | 29487889                | CC                              | TT              | 1946810394               |
| SNP_P4_51751_29487899 | NC_021163.1    | Ca_kabuli_chr04 | 29487899                | GG                              | AA              | 1946810396               |
| SNP_P4_51752_29490702 | NC_021163.1    | Ca_kabuli_chr04 | 29490702                | TT                              | GG              | 1946810398               |
| SNP_P4_51753_29490800 | NC_021163.1    | Ca_kabuli_chr04 | 29490800                | TT                              | AA              | 1946810400               |
| SNP_P4_51754_29490826 | NC_021163.1    | Ca_kabuli_chr04 | 29490826                | GG                              | AA              | 1946810402               |
| SNP_P4_51755_29490839 | NC_021163.1    | Ca_kabuli_chr04 | 29490839                | AA                              | GG              | 1946810404               |
| SNP_P4_51756_29491024 | NC_021163.1    | Ca_kabuli_chr04 | 29491024                | TT                              | GG              | 1946810406               |
| SNP_P4_51757_29491031 | NC_021163.1    | Ca_kabuli_chr04 | 29491031                | CC                              | TT              | 1946810408               |
| SNP_P4_51758_29491092 | NC_021163.1    | Ca_kabuli_chr04 | 29491092                | TT                              | AA              | 1946810410               |

| SNPs IDs              | Chromosome IDs | Chromosomes     | Physical positions (bp) | CDC Frontier (Reference genome) | (ILWC46 & LPNB) | NCBI SNPdb Accession IDs |
|-----------------------|----------------|-----------------|-------------------------|---------------------------------|-----------------|--------------------------|
| SNP_P4_51759_29491163 | NC_021163.1    | Ca_kabuli_chr04 | 29491163                | AA                              | GG              | 1946810412               |
| SNP_P4_51760_29492860 | NC_021163.1    | Ca_kabuli_chr04 | 29492860                | AA                              | TT              | 1946810414               |
| SNP_P4_51761_29492862 | NC_021163.1    | Ca_kabuli_chr04 | 29492862                | AA                              | TT              | 1946810416               |
| SNP_P4_51762_29492884 | NC_021163.1    | Ca_kabuli_chr04 | 29492884                | AA                              | GG              | 1946810418               |
| SNP_P4_51763_29493217 | NC_021163.1    | Ca_kabuli_chr04 | 29493217                | TT                              | CC              | 1946810420               |
| SNP_P4_51765_29499002 | NC_021163.1    | Ca_kabuli_chr04 | 29499002                | GG                              | CC              | 1946810422               |
| SNP_P4_51767_29509576 | NC_021163.1    | Ca_kabuli_chr04 | 29509576                | AA                              | TT              | 1946810425               |
| SNP_P4_51769_29511922 | NC_021163.1    | Ca_kabuli_chr04 | 29511922                | GG                              | AA              | 1946810427               |
| SNP_P4_51770_29517121 | NC_021163.1    | Ca_kabuli_chr04 | 29517121                | AA                              | CC              | 1946810429               |
| SNP_P4_51771_29520652 | NC_021163.1    | Ca_kabuli_chr04 | 29520652                | GG                              | TT              | 1946810431               |
| SNP_P4_51772_29521490 | NC_021163.1    | Ca_kabuli_chr04 | 29521490                | CC                              | TT              | 1946810433               |
| SNP_P4_51773_29522445 | NC_021163.1    | Ca_kabuli_chr04 | 29522445                | CC                              | AA              | 1946810435               |
| SNP_P4_51774_29528689 | NC_021163.1    | Ca_kabuli_chr04 | 29528689                | GG                              | AA              | 1946810437               |
| SNP_P4_51777_29532867 | NC_021163.1    | Ca_kabuli_chr04 | 29532867                | TT                              | AA              | 1946810439               |
| SNP_P4_51778_29532879 | NC_021163.1    | Ca_kabuli_chr04 | 29532879                | AA                              | TT              | 1946810441               |
| SNP_P4_51780_29534014 | NC_021163.1    | Ca_kabuli_chr04 | 29534014                | GG                              | TT              | 1946810443               |
| SNP_P4_51781_29534241 | NC_021163.1    | Ca_kabuli_chr04 | 29534241                | GG                              | AA              | 1946810445               |
| SNP_P4_51783_29535989 | NC_021163.1    | Ca_kabuli_chr04 | 29535989                | AA                              | GG              | 1946810447               |
| SNP_P4_51784_29542920 | NC_021163.1    | Ca_kabuli_chr04 | 29542920                | GG                              | TT              | 1946810449               |
| SNP_P4_51788_29545621 | NC_021163.1    | Ca_kabuli_chr04 | 29545621                | GG                              | AA              | 1946810451               |
| SNP_P4_51789_29550682 | NC_021163.1    | Ca_kabuli_chr04 | 29550682                | CC                              | TT              | 1946810453               |
| SNP_P4_51790_29553569 | NC_021163.1    | Ca_kabuli_chr04 | 29553569                | TT                              | GG              | 1946810455               |
| SNP_P4_51791_29553830 | NC_021163.1    | Ca_kabuli_chr04 | 29553830                | CC                              | TT              | 1946810457               |
| SNP_P4_51792_29558523 | NC_021163.1    | Ca_kabuli_chr04 | 29558523                | TT                              | CC              | 1946810459               |
| SNP_P4_51793_29558632 | NC_021163.1    | Ca_kabuli_chr04 | 29558632                | CC                              | TT              | 1946810461               |
| SNP_P4_51794_29559281 | NC_021163.1    | Ca_kabuli_chr04 | 29559281                | CC                              | TT              | 1946810463               |
| SNP_P4_51795_29564341 | NC_021163.1    | Ca_kabuli_chr04 | 29564341                | GG                              | CC              | 1946810465               |
| SNP_P4_51796_29564349 | NC_021163.1    | Ca_kabuli_chr04 | 29564349                | TT                              | CC              | 1946810467               |
| SNP_P4_51797_29564364 | NC_021163.1    | Ca_kabuli_chr04 | 29564364                | AA                              | GG              | 1946810470               |
| SNP_P4_51798_29564541 | NC_021163.1    | Ca_kabuli_chr04 | 29564541                | CC                              | TT              | 1946810472               |
| SNP_P4_51799_29564590 | NC_021163.1    | Ca_kabuli_chr04 | 29564590                | CC                              | TT              | 1946810474               |
| SNP_P4_51800_29564613 | NC_021163.1    | Ca_kabuli_chr04 | 29564613                | GG                              | AA              | 1946810476               |
| SNP_P4_51802_29570251 | NC_021163.1    | Ca_kabuli_chr04 | 29570251                | TT                              | AA              | 1946810478               |
| SNP_P4_51803_29570480 | NC_021163.1    | Ca_kabuli_chr04 | 29570480                | AA                              | GG              | 1946810480               |
| SNP_P4_51804_29571385 | NC_021163.1    | Ca_kabuli_chr04 | 29571385                | GG                              | AA              | 1946810483               |
| SNP_P4_51805_29571466 | NC_021163.1    | Ca_kabuli_chr04 | 29571466                | TT                              | AA              | 1946810485               |
| SNP_P4_51806_29575141 | NC_021163.1    | Ca_kabuli_chr04 | 29575141                | TT                              | AA              | 1946810487               |
| SNP_P4_51807_29575365 | NC_021163.1    | Ca_kabuli_chr04 | 29575365                | AA                              | CC              | 1946810489               |
| SNP_P4_51808_29575416 | NC_021163.1    | Ca_kabuli_chr04 | 29575416                | GG                              | TT              | 1946810491               |
| SNP_P4_51809_29575420 | NC_021163.1    | Ca_kabuli_chr04 | 29575420                | AA                              | TT              | 1946810493               |
| SNP_P4_51811_29582524 | NC_021163.1    | Ca_kabuli_chr04 | 29582524                | CC                              | GG              | 1946810495               |
| SNP_P4_51813_29584417 | NC_021163.1    | Ca_kabuli_chr04 | 29584417                | TT                              | CC              | 1946810497               |

| SNPs IDs              | Chromosome IDs | Chromosomes     | Physical positions (bp) | CDC Frontier (Reference genome) | (ILWC46 & LPNB) | NCBI SNPdb Accession IDs |
|-----------------------|----------------|-----------------|-------------------------|---------------------------------|-----------------|--------------------------|
| SNP_P4_51814_29587631 | NC_021163.1    | Ca_kabuli_chr04 | 29587631                | AA                              | GG              | 1946810499               |
| SNP_P4_51815_29591451 | NC_021163.1    | Ca_kabuli_chr04 | 29591451                | TT                              | AA              | 1946810501               |
| SNP_P4_51816_29591530 | NC_021163.1    | Ca_kabuli_chr04 | 29591530                | CC                              | AA              | 1946810504               |
| SNP_P4_51818_29602552 | NC_021163.1    | Ca_kabuli_chr04 | 29602552                | CC                              | GG              | 1946810506               |
| SNP_P4_51819_29602565 | NC_021163.1    | Ca_kabuli_chr04 | 29602565                | GG                              | CC              | 1946810508               |
| SNP_P4_51820_29602578 | NC_021163.1    | Ca_kabuli_chr04 | 29602578                | TT                              | CC              | 1946810510               |
| SNP_P4_51821_29602643 | NC_021163.1    | Ca_kabuli_chr04 | 29602643                | AA                              | TT              | 1946810513               |
| SNP_P4_51822_29602919 | NC_021163.1    | Ca_kabuli_chr04 | 29602919                | GG                              | AA              | 1946810515               |
| SNP_P4_51823_29604814 | NC_021163.1    | Ca_kabuli_chr04 | 29604814                | CC                              | TT              | 1946810517               |
| SNP_P4_51825_29604924 | NC_021163.1    | Ca_kabuli_chr04 | 29604924                | CC                              | TT              | 1946810519               |
| SNP_P4_51826_29604962 | NC_021163.1    | Ca_kabuli_chr04 | 29604962                | CC                              | TT              | 1946810521               |
| SNP_P4_51827_29604995 | NC_021163.1    | Ca_kabuli_chr04 | 29604995                | CC                              | TT              | 1946810523               |
| SNP_P4_51828_29605327 | NC_021163.1    | Ca_kabuli_chr04 | 29605327                | AA                              | GG              | 1946810525               |
| SNP_P4_51829_29605817 | NC_021163.1    | Ca_kabuli_chr04 | 29605817                | CC                              | TT              | 1946810527               |
| SNP_P4_51830_29605822 | NC_021163.1    | Ca_kabuli_chr04 | 29605822                | GG                              | TT              | 1946810529               |
| SNP_P4_51832_29616196 | NC_021163.1    | Ca_kabuli_chr04 | 29616196                | AA                              | CC              | 1946810531               |
| SNP_P4_51833_29616284 | NC_021163.1    | Ca_kabuli_chr04 | 29616284                | GG                              | AA              | 1946810533               |
| SNP_P4_51835_29618097 | NC_021163.1    | Ca_kabuli_chr04 | 29618097                | CC                              | TT              | 1946810535               |
| SNP_P4_51837_29619130 | NC_021163.1    | Ca_kabuli_chr04 | 29619130                | GG                              | AA              | 1946810537               |
| SNP_P4_51838_29619677 | NC_021163.1    | Ca_kabuli_chr04 | 29619677                | AA                              | TT              | 1946810539               |
| SNP_P4_51839_29619709 | NC_021163.1    | Ca_kabuli_chr04 | 29619709                | TT                              | CC              | 1946810541               |
| SNP_P4_51840_29619951 | NC_021163.1    | Ca_kabuli_chr04 | 29619951                | CC                              | GG              | 1946810543               |
| SNP_P4_51841_29620903 | NC_021163.1    | Ca_kabuli_chr04 | 29620903                | CC                              | AA              | 1946810545               |
| SNP_P4_51842_29621873 | NC_021163.1    | Ca_kabuli_chr04 | 29621873                | AA                              | GG              | 1946810547               |
| SNP_P4_51843_29622342 | NC_021163.1    | Ca_kabuli_chr04 | 29622342                | GG                              | AA              | 1946810549               |
| SNP_P4_51844_29622548 | NC_021163.1    | Ca_kabuli_chr04 | 29622548                | GG                              | TT              | 1946810551               |
| SNP_P4_51846_29622837 | NC_021163.1    | Ca_kabuli_chr04 | 29622837                | CC                              | TT              | 1946810553               |
| SNP_P4_51848_29624153 | NC_021163.1    | Ca_kabuli_chr04 | 29624153                | AA                              | TT              | 1946810556               |
| SNP_P4_51849_29624267 | NC_021163.1    | Ca_kabuli_chr04 | 29624267                | GG                              | AA              | 1946810558               |
| SNP_P4_51850_29624547 | NC_021163.1    | Ca_kabuli_chr04 | 29624547                | TT                              | GG              | 1946810560               |
| SNP_P4_51851_29624615 | NC_021163.1    | Ca_kabuli_chr04 | 29624615                | TT                              | CC              | 1946810562               |
| SNP_P4_51852_29624652 | NC_021163.1    | Ca_kabuli_chr04 | 29624652                | TT                              | CC              | 1946810564               |
| SNP_P4_51853_29625726 | NC_021163.1    | Ca_kabuli_chr04 | 29625726                | AA                              | GG              | 1946810566               |
| SNP_P4_51854_29625750 | NC_021163.1    | Ca_kabuli_chr04 | 29625750                | GG                              | TT              | 1946810568               |
| SNP_P4_51856_29626061 | NC_021163.1    | Ca_kabuli_chr04 | 29626061                | CC                              | TT              | 1946810570               |
| SNP_P4_51857_29627088 | NC_021163.1    | Ca_kabuli_chr04 | 29627088                | CC                              | AA              | 1946810572               |
| SNP_P4_51858_29627716 | NC_021163.1    | Ca_kabuli_chr04 | 29627716                | AA                              | TT              | 1946810574               |
| SNP_P4_51859_29627840 | NC_021163.1    | Ca_kabuli_chr04 | 29627840                | AA                              | TT              | 1946810576               |
| SNP_P4_51861_29629807 | NC_021163.1    | Ca_kabuli_chr04 | 29629807                | TT                              | GG              | 1946810578               |
| SNP_P4_51862_29634768 | NC_021163.1    | Ca_kabuli_chr04 | 29634768                | TT                              | CC              | 1946810580               |
| SNP_P4_51863_29635104 | NC_021163.1    | Ca_kabuli_chr04 | 29635104                | AA                              | TT              | 1946810582               |
| SNP_P4_51864_29635157 | NC_021163.1    | Ca_kabuli_chr04 | 29635157                | GG                              | TT              | 1946810584               |



| SNPs IDs              | Chromosome IDs | Chromosomes     | Physical positions (bp) | CDC Frontier (Reference genome) | (ILWC46 & LPNB) | NCBI SNPdb Accession IDs |
|-----------------------|----------------|-----------------|-------------------------|---------------------------------|-----------------|--------------------------|
| SNP_P4_51865_29635194 | NC_021163.1    | Ca_kabuli_chr04 | 29635194                | CC                              | TT              | 1946810586               |
| SNP_P4_51866_29635197 | NC_021163.1    | Ca_kabuli_chr04 | 29635197                | TT                              | CC              | 1946810588               |
| SNP_P4_51867_29635812 | NC_021163.1    | Ca_kabuli_chr04 | 29635812                | TT                              | CC              | 1946810590               |
| SNP_P4_51868_29635817 | NC_021163.1    | Ca_kabuli_chr04 | 29635817                | TT                              | CC              | 1946810592               |
| SNP_P4_51869_29635886 | NC_021163.1    | Ca_kabuli_chr04 | 29635886                | CC                              | TT              | 1946810594               |
| SNP_P4_51870_29636174 | NC_021163.1    | Ca_kabuli_chr04 | 29636174                | CC                              | GG              | 1946810596               |
| SNP_P4_51871_29638720 | NC_021163.1    | Ca_kabuli_chr04 | 29638720                | AA                              | CC              | 1946810598               |
| SNP_P4_51872_29638737 | NC_021163.1    | Ca_kabuli_chr04 | 29638737                | CC                              | AA              | 1946810600               |
| SNP_P4_51873_29639049 | NC_021163.1    | Ca_kabuli_chr04 | 29639049                | TT                              | CC              | 1946810602               |
| SNP_P4_51874_29639234 | NC_021163.1    | Ca_kabuli_chr04 | 29639234                | GG                              | AA              | 1946810604               |
| SNP_P4_51875_29641022 | NC_021163.1    | Ca_kabuli_chr04 | 29641022                | GG                              | CC              | 1946810606               |
| SNP_P4_51876_29641062 | NC_021163.1    | Ca_kabuli_chr04 | 29641062                | AA                              | TT              | 1946810608               |
| SNP_P4_51877_29641087 | NC_021163.1    | Ca_kabuli_chr04 | 29641087                | CC                              | TT              | 1946810611               |
| SNP_P4_51878_29641095 | NC_021163.1    | Ca_kabuli_chr04 | 29641095                | GG                              | TT              | 1946810613               |
| SNP_P4_51879_29641115 | NC_021163.1    | Ca_kabuli_chr04 | 29641115                | GG                              | AA              | 1946810615               |
| SNP_P4_51880_29642018 | NC_021163.1    | Ca_kabuli_chr04 | 29642018                | CC                              | TT              | 1946810617               |
| SNP_P4_51881_29642088 | NC_021163.1    | Ca_kabuli_chr04 | 29642088                | AA                              | GG              | 1946810619               |
| SNP_P4_51882_29642166 | NC_021163.1    | Ca_kabuli_chr04 | 29642166                | AA                              | TT              | 1946810621               |
| SNP_P4_51883_29642173 | NC_021163.1    | Ca_kabuli_chr04 | 29642173                | TT                              | AA              | 1946810623               |
| SNP_P4_51884_29642627 | NC_021163.1    | Ca_kabuli_chr04 | 29642627                | AA                              | CC              | 1946810625               |
| SNP_P4_51885_29644066 | NC_021163.1    | Ca_kabuli_chr04 | 29644066                | CC                              | TT              | 1946810627               |
| SNP_P4_51886_29646572 | NC_021163.1    | Ca_kabuli_chr04 | 29646572                | GG                              | AA              | 1946810629               |
| SNP_P4_51887_29646784 | NC_021163.1    | Ca_kabuli_chr04 | 29646784                | TT                              | GG              | 1946810631               |
| SNP_P4_51888_29646940 | NC_021163.1    | Ca_kabuli_chr04 | 29646940                | AA                              | GG              | 1946810633               |
| SNP_P4_51889_29646966 | NC_021163.1    | Ca_kabuli_chr04 | 29646966                | GG                              | AA              | 1946810636               |
| SNP_P4_51891_29647409 | NC_021163.1    | Ca_kabuli_chr04 | 29647409                | CC                              | TT              | 1946810638               |
| SNP_P4_51892_29647432 | NC_021163.1    | Ca_kabuli_chr04 | 29647432                | AA                              | GG              | 1946810640               |
| SNP_P4_51893_29647835 | NC_021163.1    | Ca_kabuli_chr04 | 29647835                | GG                              | AA              | 1946810641               |
| SNP_P4_51894_29647884 | NC_021163.1    | Ca_kabuli_chr04 | 29647884                | TT                              | AA              | 1946810642               |
| SNP_P4_51895_29647898 | NC_021163.1    | Ca_kabuli_chr04 | 29647898                | TT                              | CC              | 1946810643               |
| SNP_P4_51896_29648259 | NC_021163.1    | Ca_kabuli_chr04 | 29648259                | CC                              | TT              | 1946810644               |
| SNP_P4_51897_29648286 | NC_021163.1    | Ca_kabuli_chr04 | 29648286                | AA                              | TT              | 1946810645               |
| SNP_P4_51898_29648487 | NC_021163.1    | Ca_kabuli_chr04 | 29648487                | TT                              | AA              | 1946810646               |
| SNP_P4_51899_29648508 | NC_021163.1    | Ca_kabuli_chr04 | 29648508                | GG                              | TT              | 1946810647               |
| SNP_P4_51900_29648556 | NC_021163.1    | Ca_kabuli_chr04 | 29648556                | CC                              | AA              | 1946810649               |
| SNP_P4_51902_29650609 | NC_021163.1    | Ca_kabuli_chr04 | 29650609                | TT                              | CC              | 1946810651               |
| SNP_P4_51903_29650897 | NC_021163.1    | Ca_kabuli_chr04 | 29650897                | TT                              | CC              | 1946810653               |
| SNP_P4_51904_29650937 | NC_021163.1    | Ca_kabuli_chr04 | 29650937                | TT                              | CC              | 1946810655               |
| SNP_P4_51905_29651201 | NC_021163.1    | Ca_kabuli_chr04 | 29651201                | CC                              | TT              | 1946810657               |
| SNP_P4_51906_29651357 | NC_021163.1    | Ca_kabuli_chr04 | 29651357                | CC                              | TT              | 1946810659               |
| SNP_P4_51907_29651760 | NC_021163.1    | Ca_kabuli_chr04 | 29651760                | TT                              | CC              | 1946810661               |
| SNP_P4_51908_29651767 | NC_021163.1    | Ca_kabuli_chr04 | 29651767                | GG                              | AA              | 1946810663               |

| SNPs IDs              | Chromosome IDs | Chromosomes     | Physical positions (bp) | CDC Frontier (Reference genome) | (ILWC46 & LPNB) | NCBI SNPdb Accession IDs |
|-----------------------|----------------|-----------------|-------------------------|---------------------------------|-----------------|--------------------------|
| SNP_P4_51909_29652293 | NC_021163.1    | Ca_kabuli_chr04 | 29652293                | TT                              | CC              | 1946810665               |
| SNP_P4_51910_29652305 | NC_021163.1    | Ca_kabuli_chr04 | 29652305                | GG                              | TT              | 1946810667               |
| SNP_P4_51911_29652874 | NC_021163.1    | Ca_kabuli_chr04 | 29652874                | CC                              | TT              | 1946810669               |
| SNP_P4_51912_29652899 | NC_021163.1    | Ca_kabuli_chr04 | 29652899                | TT                              | CC              | 1946810671               |
| SNP_P4_51913_29653203 | NC_021163.1    | Ca_kabuli_chr04 | 29653203                | AA                              | GG              | 1946810674               |
| SNP_P4_51914_29653248 | NC_021163.1    | Ca_kabuli_chr04 | 29653248                | AA                              | CC              | 1946810676               |
| SNP_P4_51915_29653255 | NC_021163.1    | Ca_kabuli_chr04 | 29653255                | TT                              | GG              | 1946810678               |
| SNP_P4_51916_29653327 | NC_021163.1    | Ca_kabuli_chr04 | 29653327                | GG                              | TT              | 1946810680               |
| SNP_P4_51917_29653520 | NC_021163.1    | Ca_kabuli_chr04 | 29653520                | CC                              | TT              | 1946810682               |
| SNP_P4_51918_29653813 | NC_021163.1    | Ca_kabuli_chr04 | 29653813                | CC                              | TT              | 1946810684               |
| SNP_P4_51919_29653829 | NC_021163.1    | Ca_kabuli_chr04 | 29653829                | AA                              | GG              | 1946810686               |
| SNP_P4_51920_29656965 | NC_021163.1    | Ca_kabuli_chr04 | 29656965                | CC                              | TT              | 1946810688               |
| SNP_P4_51921_29656966 | NC_021163.1    | Ca_kabuli_chr04 | 29656966                | GG                              | AA              | 1946810690               |
| SNP_P4_51922_29659255 | NC_021163.1    | Ca_kabuli_chr04 | 29659255                | AA                              | GG              | 1946810692               |
| SNP_P4_51923_29659481 | NC_021163.1    | Ca_kabuli_chr04 | 29659481                | CC                              | TT              | 1946810694               |
| SNP_P4_51924_29659765 | NC_021163.1    | Ca_kabuli_chr04 | 29659765                | AA                              | GG              | 1946810696               |
| SNP_P4_51925_29659769 | NC_021163.1    | Ca_kabuli_chr04 | 29659769                | CC                              | AA              | 1946810698               |
| SNP_P4_51926_29659999 | NC_021163.1    | Ca_kabuli_chr04 | 29659999                | GG                              | AA              | 1946810700               |
| SNP_P4_51927_29660018 | NC_021163.1    | Ca_kabuli_chr04 | 29660018                | TT                              | CC              | 1946810702               |
| SNP_P4_51928_29660317 | NC_021163.1    | Ca_kabuli_chr04 | 29660317                | AA                              | TT              | 1946810704               |
| SNP_P4_51929_29660324 | NC_021163.1    | Ca_kabuli_chr04 | 29660324                | CC                              | TT              | 1946810706               |
| SNP_P4_51930_29660665 | NC_021163.1    | Ca_kabuli_chr04 | 29660665                | TT                              | GG              | 1946810708               |
| SNP_P4_51931_29660712 | NC_021163.1    | Ca_kabuli_chr04 | 29660712                | CC                              | TT              | 1946810710               |
| SNP_P4_51932_29661353 | NC_021163.1    | Ca_kabuli_chr04 | 29661353                | TT                              | CC              | 1946810712               |
| SNP_P4_51933_29661544 | NC_021163.1    | Ca_kabuli_chr04 | 29661544                | CC                              | AA              | 1946810714               |
| SNP_P4_51934_29661654 | NC_021163.1    | Ca_kabuli_chr04 | 29661654                | TT                              | CC              | 1946810716               |
| SNP_P4_51935_29661689 | NC_021163.1    | Ca_kabuli_chr04 | 29661689                | TT                              | GG              | 1946810718               |
| SNP_P4_51936_29661859 | NC_021163.1    | Ca_kabuli_chr04 | 29661859                | CC                              | AA              | 1946810720               |
| SNP_P4_51937_29666634 | NC_021163.1    | Ca_kabuli_chr04 | 29666634                | AA                              | CC              | 1946810723               |
| SNP_P4_51938_29666662 | NC_021163.1    | Ca_kabuli_chr04 | 29666662                | AA                              | TT              | 1946810725               |
| SNP_P4_51939_29669403 | NC_021163.1    | Ca_kabuli_chr04 | 29669403                | AA                              | GG              | 1946810727               |
| SNP_P4_51941_29670266 | NC_021163.1    | Ca_kabuli_chr04 | 29670266                | CC                              | TT              | 1946810729               |
| SNP_P4_51942_29671042 | NC_021163.1    | Ca_kabuli_chr04 | 29671042                | CC                              | TT              | 1946810731               |
| SNP_P4_51943_29672190 | NC_021163.1    | Ca_kabuli_chr04 | 29672190                | CC                              | TT              | 1946810733               |
| SNP_P4_51944_29672200 | NC_021163.1    | Ca_kabuli_chr04 | 29672200                | TT                              | CC              | 1946810735               |
| SNP_P4_51945_29672823 | NC_021163.1    | Ca_kabuli_chr04 | 29672823                | CC                              | AA              | 1946810737               |
| SNP_P4_51946_29673375 | NC_021163.1    | Ca_kabuli_chr04 | 29673375                | GG                              | AA              | 1946810739               |
| SNP_P4_51947_29680525 | NC_021163.1    | Ca_kabuli_chr04 | 29680525                | AA                              | GG              | 1946810741               |
| SNP_P4_51948_29681723 | NC_021163.1    | Ca_kabuli_chr04 | 29681723                | AA                              | GG              | 1946810743               |
| SNP_P4_51949_29682090 | NC_021163.1    | Ca_kabuli_chr04 | 29682090                | AA                              | GG              | 1946810745               |
| SNP_P4_51951_29683718 | NC_021163.1    | Ca_kabuli_chr04 | 29683718                | AA                              | TT              | 1946810747               |
| SNP_P4_51952_29684096 | NC_021163.1    | Ca_kabuli_chr04 | 29684096                | TT                              | CC              | 1946810750               |

| SNPs IDs              | Chromosome IDs | Chromosomes     | Physical positions (bp) | CDC Frontier (Reference genome) | (ILWC46 & LPNB) | NCBI SNPdb Accession IDs |
|-----------------------|----------------|-----------------|-------------------------|---------------------------------|-----------------|--------------------------|
| SNP_P4_51953_29685286 | NC_021163.1    | Ca_kabuli_chr04 | 29685286                | AA                              | GG              | 1946810752               |
| SNP_P4_51954_29686848 | NC_021163.1    | Ca_kabuli_chr04 | 29686848                | CC                              | AA              | 1946810754               |
| SNP_P4_51955_29687819 | NC_021163.1    | Ca_kabuli_chr04 | 29687819                | AA                              | GG              | 1946810756               |
| SNP_P4_51956_29695789 | NC_021163.1    | Ca_kabuli_chr04 | 29695789                | GG                              | CC              | 1946810758               |
| SNP_P4_51957_29695923 | NC_021163.1    | Ca_kabuli_chr04 | 29695923                | TT                              | CC              | 1946810760               |
| SNP_P4_51958_29696128 | NC_021163.1    | Ca_kabuli_chr04 | 29696128                | AA                              | CC              | 1946810762               |
| SNP_P4_51961_29697618 | NC_021163.1    | Ca_kabuli_chr04 | 29697618                | CC                              | GG              | 1946810764               |
| SNP_P4_51963_29697939 | NC_021163.1    | Ca_kabuli_chr04 | 29697939                | CC                              | TT              | 1946810766               |
| SNP_P4_51964_29699392 | NC_021163.1    | Ca_kabuli_chr04 | 29699392                | CC                              | TT              | 1946810768               |
| SNP_P4_51965_29700810 | NC_021163.1    | Ca_kabuli_chr04 | 29700810                | GG                              | AA              | 1946810770               |
| SNP_P4_51966_29701075 | NC_021163.1    | Ca_kabuli_chr04 | 29701075                | CC                              | AA              | 1946810772               |
| SNP_P4_51967_29701087 | NC_021163.1    | Ca_kabuli_chr04 | 29701087                | AA                              | CC              | 1946810774               |
| SNP_P4_51969_29701799 | NC_021163.1    | Ca_kabuli_chr04 | 29701799                | GG                              | TT              | 1946810776               |
| SNP_P4_51970_29702439 | NC_021163.1    | Ca_kabuli_chr04 | 29702439                | AA                              | GG              | 1946810779               |
| SNP_P4_51971_29702460 | NC_021163.1    | Ca_kabuli_chr04 | 29702460                | CC                              | TT              | 1946810781               |
| SNP_P4_51972_29703064 | NC_021163.1    | Ca_kabuli_chr04 | 29703064                | TT                              | CC              | 1946810783               |
| SNP_P4_51973_29703503 | NC_021163.1    | Ca_kabuli_chr04 | 29703503                | CC                              | TT              | 1946810785               |
| SNP_P4_51974_29704177 | NC_021163.1    | Ca_kabuli_chr04 | 29704177                | CC                              | TT              | 1946810787               |
| SNP_P4_51976_29709055 | NC_021163.1    | Ca_kabuli_chr04 | 29709055                | GG                              | AA              | 1946810789               |
| SNP_P4_51977_29709989 | NC_021163.1    | Ca_kabuli_chr04 | 29709989                | GG                              | CC              | 1946810791               |
| SNP_P4_51978_29710168 | NC_021163.1    | Ca_kabuli_chr04 | 29710168                | AA                              | GG              | 1946810793               |
| SNP_P4_51979_29710170 | NC_021163.1    | Ca_kabuli_chr04 | 29710170                | TT                              | AA              | 1946810795               |
| SNP_P4_51980_29711467 | NC_021163.1    | Ca_kabuli_chr04 | 29711467                | AA                              | GG              | 1946810797               |
| SNP_P4_51981_29712681 | NC_021163.1    | Ca_kabuli_chr04 | 29712681                | AA                              | GG              | 1946810800               |
| SNP_P4_51983_29712698 | NC_021163.1    | Ca_kabuli_chr04 | 29712698                | AA                              | TT              | 1946810802               |
| SNP_P4_51985_29712987 | NC_021163.1    | Ca_kabuli_chr04 | 29712987                | TT                              | AA              | 1946810804               |
| SNP_P4_51986_29715689 | NC_021163.1    | Ca_kabuli_chr04 | 29715689                | TT                              | GG              | 1946810806               |
| SNP_P4_51987_29717029 | NC_021163.1    | Ca_kabuli_chr04 | 29717029                | CC                              | TT              | 1946810808               |
| SNP_P4_51988_29717350 | NC_021163.1    | Ca_kabuli_chr04 | 29717350                | TT                              | GG              | 1946810810               |
| SNP_P4_51990_29717594 | NC_021163.1    | Ca_kabuli_chr04 | 29717594                | TT                              | CC              | 1946810812               |
| SNP_P4_51992_29717895 | NC_021163.1    | Ca_kabuli_chr04 | 29717895                | AA                              | CC              | 1946810814               |
| SNP_P4_51993_29718229 | NC_021163.1    | Ca_kabuli_chr04 | 29718229                | CC                              | AA              | 1946810816               |
| SNP_P4_51996_29721805 | NC_021163.1    | Ca_kabuli_chr04 | 29721805                | AA                              | TT              | 1946810818               |
| SNP_P4_51997_29722369 | NC_021163.1    | Ca_kabuli_chr04 | 29722369                | TT                              | AA              | 1946810820               |
| SNP_P4_51999_29722503 | NC_021163.1    | Ca_kabuli_chr04 | 29722503                | AA                              | TT              | 1946810822               |
| SNP_P4_52000_29722567 | NC_021163.1    | Ca_kabuli_chr04 | 29722567                | AA                              | GG              | 1946810824               |
| SNP_P4_52001_29722588 | NC_021163.1    | Ca_kabuli_chr04 | 29722588                | AA                              | CC              | 1946810826               |
| SNP_P4_52002_29722670 | NC_021163.1    | Ca_kabuli_chr04 | 29722670                | GG                              | AA              | 1946810828               |
| SNP_P4_52003_29722975 | NC_021163.1    | Ca_kabuli_chr04 | 29722975                | AA                              | GG              | 1946810830               |
| SNP_P4_52004_29723043 | NC_021163.1    | Ca_kabuli_chr04 | 29723043                | CC                              | GG              | 1946810833               |
| SNP_P4_52005_29723087 | NC_021163.1    | Ca_kabuli_chr04 | 29723087                | CC                              | TT              | 1946810835               |
| SNP_P4_52006_29730241 | NC_021163.1    | Ca_kabuli_chr04 | 29730241                | TT                              | CC              | 1946810837               |

| SNPs IDs              | Chromosome IDs | Chromosomes     | Physical positions (bp) | CDC Frontier (Reference genome) | (ILWC46 & LPNB) | NCBI SNPdb Accession IDs |
|-----------------------|----------------|-----------------|-------------------------|---------------------------------|-----------------|--------------------------|
| SNP_P4_52007_29730254 | NC_021163.1    | Ca_kabuli_chr04 | 29730254                | GG                              | TT              | 1946810839               |
| SNP_P4_52008_29730269 | NC_021163.1    | Ca_kabuli_chr04 | 29730269                | GG                              | AA              | 1946810841               |
| SNP_P4_52009_29730272 | NC_021163.1    | Ca_kabuli_chr04 | 29730272                | AA                              | TT              | 1946810843               |
| SNP_P4_52010_29730459 | NC_021163.1    | Ca_kabuli_chr04 | 29730459                | AA                              | GG              | 1946810845               |
| SNP_P4_52011_29730504 | NC_021163.1    | Ca_kabuli_chr04 | 29730504                | GG                              | AA              | 1946810847               |
| SNP_P4_52013_29730527 | NC_021163.1    | Ca_kabuli_chr04 | 29730527                | AA                              | GG              | 1946810849               |
| SNP_P4_52014_29730550 | NC_021163.1    | Ca_kabuli_chr04 | 29730550                | TT                              | CC              | 1946810851               |
| SNP_P4_52015_29730562 | NC_021163.1    | Ca_kabuli_chr04 | 29730562                | AA                              | GG              | 1946810853               |
| SNP_P4_52016_29730600 | NC_021163.1    | Ca_kabuli_chr04 | 29730600                | AA                              | GG              | 1946810855               |
| SNP_P4_52017_29747527 | NC_021163.1    | Ca_kabuli_chr04 | 29747527                | CC                              | TT              | 1946810857               |
| SNP_P4_52018_29747528 | NC_021163.1    | Ca_kabuli_chr04 | 29747528                | AA                              | GG              | 1946810859               |
| SNP_P4_52019_29747533 | NC_021163.1    | Ca_kabuli_chr04 | 29747533                | CC                              | TT              | 1946810861               |
| SNP_P4_52020_29747545 | NC_021163.1    | Ca_kabuli_chr04 | 29747545                | TT                              | CC              | 1946810863               |
| SNP_P4_52021_29753553 | NC_021163.1    | Ca_kabuli_chr04 | 29753553                | GG                              | AA              | 1946810865               |
| SNP_P4_52022_29753558 | NC_021163.1    | Ca_kabuli_chr04 | 29753558                | CC                              | TT              | 1946810867               |
| SNP_P4_52023_29754395 | NC_021163.1    | Ca_kabuli_chr04 | 29754395                | AA                              | GG              | 1946810869               |
| SNP_P4_52024_29754398 | NC_021163.1    | Ca_kabuli_chr04 | 29754398                | AA                              | GG              | 1946810871               |
| SNP_P4_52025_29754413 | NC_021163.1    | Ca_kabuli_chr04 | 29754413                | GG                              | AA              | 1946810873               |
| SNP_P4_52026_29754428 | NC_021163.1    | Ca_kabuli_chr04 | 29754428                | TT                              | CC              | 1946810875               |
| SNP_P4_52027_29762927 | NC_021163.1    | Ca_kabuli_chr04 | 29762927                | TT                              | AA              | 1946810877               |
| SNP_P4_52028_29768671 | NC_021163.1    | Ca_kabuli_chr04 | 29768671                | CC                              | TT              | 1946810879               |
| SNP_P4_52030_29769351 | NC_021163.1    | Ca_kabuli_chr04 | 29769351                | AA                              | CC              | 1946810881               |
| SNP_P4_52031_29769366 | NC_021163.1    | Ca_kabuli_chr04 | 29769366                | AA                              | CC              | 1946810883               |
| SNP_P4_52032_29769622 | NC_021163.1    | Ca_kabuli_chr04 | 29769622                | TT                              | CC              | 1946810885               |
| SNP_P4_52033_29769697 | NC_021163.1    | Ca_kabuli_chr04 | 29769697                | TT                              | CC              | 1946810887               |
| SNP_P4_52035_29769926 | NC_021163.1    | Ca_kabuli_chr04 | 29769926                | GG                              | AA              | 1946810889               |
| SNP_P4_52036_29770176 | NC_021163.1    | Ca_kabuli_chr04 | 29770176                | AA                              | GG              | 1946810891               |
| SNP_P4_52037_29770308 | NC_021163.1    | Ca_kabuli_chr04 | 29770308                | GG                              | AA              | 1946810893               |
| SNP_P4_52038_29770370 | NC_021163.1    | Ca_kabuli_chr04 | 29770370                | CC                              | TT              | 1946810896               |
| SNP_P4_52039_29771364 | NC_021163.1    | Ca_kabuli_chr04 | 29771364                | AA                              | CC              | 1946810898               |
| SNP_P4_52040_29771810 | NC_021163.1    | Ca_kabuli_chr04 | 29771810                | AA                              | TT              | 1946810900               |
| SNP_P4_52041_29772304 | NC_021163.1    | Ca_kabuli_chr04 | 29772304                | CC                              | TT              | 1946810902               |
| SNP_P4_52042_29772309 | NC_021163.1    | Ca_kabuli_chr04 | 29772309                | TT                              | CC              | 1946810904               |
| SNP_P4_52043_29772608 | NC_021163.1    | Ca_kabuli_chr04 | 29772608                | AA                              | GG              | 1946810906               |
| SNP_P4_52044_29776665 | NC_021163.1    | Ca_kabuli_chr04 | 29776665                | TT                              | GG              | 1946810908               |
| SNP_P4_52045_29780551 | NC_021163.1    | Ca_kabuli_chr04 | 29780551                | CC                              | AA              | 1946810910               |
| SNP_P4_52046_29784257 | NC_021163.1    | Ca_kabuli_chr04 | 29784257                | GG                              | AA              | 1946810912               |
| SNP_P4_52047_29784488 | NC_021163.1    | Ca_kabuli_chr04 | 29784488                | AA                              | CC              | 1946810914               |
| SNP_P4_52048_29784852 | NC_021163.1    | Ca_kabuli_chr04 | 29784852                | GG                              | CC              | 1946810916               |
| SNP_P4_52049_29785249 | NC_021163.1    | Ca_kabuli_chr04 | 29785249                | AA                              | GG              | 1946810918               |
| SNP_P4_52050_29787504 | NC_021163.1    | Ca_kabuli_chr04 | 29787504                | TT                              | CC              | 1946810920               |
| SNP_P4_52051_29797095 | NC_021163.1    | Ca_kabuli_chr04 | 29797095                | AA                              | GG              | 1946810923               |

| SNPs IDs              | Chromosome IDs | Chromosomes     | Physical positions (bp) | CDC Frontier (Reference genome) | (ILWC46 & LPNB) | NCBI SNPdb Accession IDs |
|-----------------------|----------------|-----------------|-------------------------|---------------------------------|-----------------|--------------------------|
| SNP_P4_52052_29805092 | NC_021163.1    | Ca_kabuli_chr04 | 29805092                | AA                              | TT              | 1946810925               |
| SNP_P4_52054_29816622 | NC_021163.1    | Ca_kabuli_chr04 | 29816622                | AA                              | GG              | 1946810927               |
| SNP_P4_52055_29817139 | NC_021163.1    | Ca_kabuli_chr04 | 29817139                | GG                              | AA              | 1946810929               |
| SNP_P4_52056_29820253 | NC_021163.1    | Ca_kabuli_chr04 | 29820253                | AA                              | GG              | 1946810931               |
| SNP_P4_52057_29821599 | NC_021163.1    | Ca_kabuli_chr04 | 29821599                | GG                              | TT              | 1946810933               |
| SNP_P4_52059_29821918 | NC_021163.1    | Ca_kabuli_chr04 | 29821918                | GG                              | TT              | 1946810935               |
| SNP_P4_52060_29821919 | NC_021163.1    | Ca_kabuli_chr04 | 29821919                | GG                              | CC              | 1946810937               |
| SNP_P4_52061_29821920 | NC_021163.1    | Ca_kabuli_chr04 | 29821920                | AA                              | TT              | 1946810939               |
| SNP_P4_52062_29821989 | NC_021163.1    | Ca_kabuli_chr04 | 29821989                | GG                              | AA              | 1946810941               |
| SNP_P4_52064_29826330 | NC_021163.1    | Ca_kabuli_chr04 | 29826330                | AA                              | GG              | 1946810943               |
| SNP_P4_52065_29826344 | NC_021163.1    | Ca_kabuli_chr04 | 29826344                | CC                              | TT              | 1946810945               |
| SNP_P4_52066_29826375 | NC_021163.1    | Ca_kabuli_chr04 | 29826375                | CC                              | AA              | 1946810947               |
| SNP_P4_52068_29829402 | NC_021163.1    | Ca_kabuli_chr04 | 29829402                | AA                              | GG              | 1946810949               |
| SNP_P4_52069_29829434 | NC_021163.1    | Ca_kabuli_chr04 | 29829434                | TT                              | CC              | 1946810952               |
| SNP_P4_52070_29829992 | NC_021163.1    | Ca_kabuli_chr04 | 29829992                | CC                              | AA              | 1946810954               |
| SNP_P4_52071_29836860 | NC_021163.1    | Ca_kabuli_chr04 | 29836860                | AA                              | GG              | 1946810956               |
| SNP_P4_52072_29837048 | NC_021163.1    | Ca_kabuli_chr04 | 29837048                | AA                              | GG              | 1946810958               |
| SNP_P4_52074_29851520 | NC_021163.1    | Ca_kabuli_chr04 | 29851520                | AA                              | GG              | 1946810960               |
| SNP_P4_52075_29851737 | NC_021163.1    | Ca_kabuli_chr04 | 29851737                | TT                              | CC              | 1946810962               |
| SNP_P4_52076_29856080 | NC_021163.1    | Ca_kabuli_chr04 | 29856080                | TT                              | CC              | 1946810964               |
| SNP_P4_52077_29858538 | NC_021163.1    | Ca_kabuli_chr04 | 29858538                | AA                              | TT              | 1946810966               |
| SNP_P4_52078_29859792 | NC_021163.1    | Ca_kabuli_chr04 | 29859792                | CC                              | TT              | 1946810968               |
| SNP_P4_52079_29859960 | NC_021163.1    | Ca_kabuli_chr04 | 29859960                | GG                              | AA              | 1946810970               |
| SNP_P4_52080_29862605 | NC_021163.1    | Ca_kabuli_chr04 | 29862605                | GG                              | TT              | 1946810972               |
| SNP_P4_52082_29865898 | NC_021163.1    | Ca_kabuli_chr04 | 29865898                | TT                              | CC              | 1946810974               |
| SNP_P4_52083_29866531 | NC_021163.1    | Ca_kabuli_chr04 | 29866531                | AA                              | GG              | 1946810976               |
| SNP_P4_52084_29867012 | NC_021163.1    | Ca_kabuli_chr04 | 29867012                | GG                              | AA              | 1946810979               |
| SNP_P4_52085_29867084 | NC_021163.1    | Ca_kabuli_chr04 | 29867084                | GG                              | AA              | 1946810981               |
| SNP_P4_52086_29867178 | NC_021163.1    | Ca_kabuli_chr04 | 29867178                | AA                              | TT              | 1946810983               |
| SNP_P4_52087_29868331 | NC_021163.1    | Ca_kabuli_chr04 | 29868331                | TT                              | CC              | 1946810985               |
| SNP_P4_52088_29869713 | NC_021163.1    | Ca_kabuli_chr04 | 29869713                | TT                              | CC              | 1946810987               |
| SNP_P4_52089_29871636 | NC_021163.1    | Ca_kabuli_chr04 | 29871636                | TT                              | AA              | 1946810989               |
| SNP_P4_52091_29875712 | NC_021163.1    | Ca_kabuli_chr04 | 29875712                | GG                              | TT              | 1946810991               |
| SNP_P4_52092_29876014 | NC_021163.1    | Ca_kabuli_chr04 | 29876014                | CC                              | TT              | 1946810993               |
| SNP_P4_52093_29876333 | NC_021163.1    | Ca_kabuli_chr04 | 29876333                | TT                              | GG              | 1946810995               |
| SNP_P4_52094_29879553 | NC_021163.1    | Ca_kabuli_chr04 | 29879553                | TT                              | AA              | 1946810997               |
| SNP_P4_52095_29885108 | NC_021163.1    | Ca_kabuli_chr04 | 29885108                | CC                              | TT              | 1946810999               |
| SNP_P4_52096_29886847 | NC_021163.1    | Ca_kabuli_chr04 | 29886847                | GG                              | AA              | 1946811001               |
| SNP_P4_52097_29896349 | NC_021163.1    | Ca_kabuli_chr04 | 29896349                | GG                              | CC              | 1946811003               |
| SNP_P4_52098_29900191 | NC_021163.1    | Ca_kabuli_chr04 | 29900191                | CC                              | TT              | 1946811005               |
| SNP_P4_52099_29900787 | NC_021163.1    | Ca_kabuli_chr04 | 29900787                | TT                              | AA              | 1946811007               |
| SNP_P4_52100_29902511 | NC_021163.1    | Ca_kabuli_chr04 | 29902511                | TT                              | GG              | 1946811010               |

| SNPs IDs              | Chromosome IDs | Chromosomes     | Physical positions (bp) | CDC Frontier (Reference genome) | (ILWC46 & LPNB) | NCBI SNPdb Accession IDs |
|-----------------------|----------------|-----------------|-------------------------|---------------------------------|-----------------|--------------------------|
| SNP_P4_52102_29907472 | NC_021163.1    | Ca_kabuli_chr04 | 29907472                | TT                              | GG              | 1946811012               |
| SNP_P4_52103_29907710 | NC_021163.1    | Ca_kabuli_chr04 | 29907710                | AA                              | GG              | 1946811014               |
| SNP_P4_52104_29907943 | NC_021163.1    | Ca_kabuli_chr04 | 29907943                | AA                              | TT              | 1946811016               |
| SNP_P4_52105_29907944 | NC_021163.1    | Ca_kabuli_chr04 | 29907944                | TT                              | GG              | 1946811018               |
| SNP_P4_52107_29910626 | NC_021163.1    | Ca_kabuli_chr04 | 29910626                | AA                              | GG              | 1946811021               |
| SNP_P4_52108_29910722 | NC_021163.1    | Ca_kabuli_chr04 | 29910722                | CC                              | TT              | 1946811023               |
| SNP_P4_52114_29915233 | NC_021163.1    | Ca_kabuli_chr04 | 29915233                | AA                              | GG              | 1946811025               |
| SNP_P4_52115_29916905 | NC_021163.1    | Ca_kabuli_chr04 | 29916905                | AA                              | GG              | 1946811027               |
| SNP_P4_52116_29918805 | NC_021163.1    | Ca_kabuli_chr04 | 29918805                | CC                              | TT              | 1946811029               |
| SNP_P4_52118_29930617 | NC_021163.1    | Ca_kabuli_chr04 | 29930617                | CC                              | TT              | 1946811031               |
| SNP_P4_52120_29930748 | NC_021163.1    | Ca_kabuli_chr04 | 29930748                | CC                              | TT              | 1946811033               |
| SNP_P4_52121_29930879 | NC_021163.1    | Ca_kabuli_chr04 | 29930879                | GG                              | CC              | 1946811035               |
| SNP_P4_52122_29930911 | NC_021163.1    | Ca_kabuli_chr04 | 29930911                | CC                              | TT              | 1946811037               |
| SNP_P4_52123_29930916 | NC_021163.1    | Ca_kabuli_chr04 | 29930916                | AA                              | CC              | 1946811039               |
| SNP_P4_52124_29931040 | NC_021163.1    | Ca_kabuli_chr04 | 29931040                | CC                              | TT              | 1946811041               |
| SNP_P4_52126_29931103 | NC_021163.1    | Ca_kabuli_chr04 | 29931103                | AA                              | GG              | 1946811043               |
| SNP_P4_52127_29931250 | NC_021163.1    | Ca_kabuli_chr04 | 29931250                | AA                              | GG              | 1946811045               |
| SNP_P4_52128_29931260 | NC_021163.1    | Ca_kabuli_chr04 | 29931260                | GG                              | CC              | 1946811047               |
| SNP_P4_52129_29931262 | NC_021163.1    | Ca_kabuli_chr04 | 29931262                | GG                              | CC              | 1946811049               |
| SNP_P4_52130_29931270 | NC_021163.1    | Ca_kabuli_chr04 | 29931270                | GG                              | CC              | 1946811051               |
| SNP_P4_52131_29931275 | NC_021163.1    | Ca_kabuli_chr04 | 29931275                | TT                              | CC              | 1946811053               |
| SNP_P4_52132_29931277 | NC_021163.1    | Ca_kabuli_chr04 | 29931277                | TT                              | AA              | 1946811055               |
| SNP_P4_52133_29931283 | NC_021163.1    | Ca_kabuli_chr04 | 29931283                | AA                              | CC              | 1946811057               |
| SNP_P4_52134_29931290 | NC_021163.1    | Ca_kabuli_chr04 | 29931290                | TT                              | CC              | 1946811059               |
| SNP_P4_52135_29931292 | NC_021163.1    | Ca_kabuli_chr04 | 29931292                | TT                              | CC              | 1946811061               |
| SNP_P4_52136_29931296 | NC_021163.1    | Ca_kabuli_chr04 | 29931296                | TT                              | CC              | 1946811063               |
| SNP_P4_52137_29931298 | NC_021163.1    | Ca_kabuli_chr04 | 29931298                | GG                              | AA              | 1946811065               |
| SNP_P4_52139_29932843 | NC_021163.1    | Ca_kabuli_chr04 | 29932843                | GG                              | TT              | 1946811067               |
| SNP_P4_52140_29932852 | NC_021163.1    | Ca_kabuli_chr04 | 29932852                | TT                              | CC              | 1946811069               |
| SNP_P4_52141_29932853 | NC_021163.1    | Ca_kabuli_chr04 | 29932853                | TT                              | CC              | 1946811071               |
| SNP_P4_52142_29932863 | NC_021163.1    | Ca_kabuli_chr04 | 29932863                | TT                              | CC              | 1946811073               |
| SNP_P4_52143_29932885 | NC_021163.1    | Ca_kabuli_chr04 | 29932885                | AA                              | CC              | 1946811075               |
| SNP_P4_52144_29932895 | NC_021163.1    | Ca_kabuli_chr04 | 29932895                | AA                              | TT              | 1946811077               |
| SNP_P4_52145_29933315 | NC_021163.1    | Ca_kabuli_chr04 | 29933315                | AA                              | GG              | 1946811079               |
| SNP_P4_52146_29933323 | NC_021163.1    | Ca_kabuli_chr04 | 29933323                | TT                              | CC              | 1946811082               |
| SNP_P4_52147_29933464 | NC_021163.1    | Ca_kabuli_chr04 | 29933464                | CC                              | AA              | 1946811084               |
| SNP_P4_52148_29933718 | NC_021163.1    | Ca_kabuli_chr04 | 29933718                | CC                              | GG              | 1946811086               |
| SNP_P4_52149_29933734 | NC_021163.1    | Ca_kabuli_chr04 | 29933734                | AA                              | CC              | 1946811088               |
| SNP_P4_52151_29933794 | NC_021163.1    | Ca_kabuli_chr04 | 29933794                | TT                              | GG              | 1946811090               |
| SNP_P4_52152_29933800 | NC_021163.1    | Ca_kabuli_chr04 | 29933800                | GG                              | TT              | 1946811092               |
| SNP_P4_52153_29934081 | NC_021163.1    | Ca_kabuli_chr04 | 29934081                | TT                              | CC              | 1946811094               |
| SNP_P4_52154_29934096 | NC_021163.1    | Ca_kabuli_chr04 | 29934096                | GG                              | TT              | 1946811096               |

| SNPs IDs              | Chromosome IDs | Chromosomes     | Physical positions (bp) | CDC Frontier (Reference genome) | (ILWC46 & LPNB) | NCBI SNPdb Accession IDs |
|-----------------------|----------------|-----------------|-------------------------|---------------------------------|-----------------|--------------------------|
| SNP_P4_52155_29934139 | NC_021163.1    | Ca_kabuli_chr04 | 29934139                | AA                              | GG              | 1946811098               |
| SNP_P4_52156_29934143 | NC_021163.1    | Ca_kabuli_chr04 | 29934143                | TT                              | CC              | 1946811100               |
| SNP_P4_52157_29934176 | NC_021163.1    | Ca_kabuli_chr04 | 29934176                | GG                              | CC              | 1946811102               |
| SNP_P4_52158_29934197 | NC_021163.1    | Ca_kabuli_chr04 | 29934197                | TT                              | CC              | 1946811104               |
| SNP_P4_52159_29934219 | NC_021163.1    | Ca_kabuli_chr04 | 29934219                | GG                              | TT              | 1946811106               |
| SNP_P4_52160_29934232 | NC_021163.1    | Ca_kabuli_chr04 | 29934232                | TT                              | GG              | 1946811108               |
| SNP_P4_52161_29934260 | NC_021163.1    | Ca_kabuli_chr04 | 29934260                | AA                              | CC              | 1946811110               |
| SNP_P4_52162_29934425 | NC_021163.1    | Ca_kabuli_chr04 | 29934425                | TT                              | AA              | 1946811112               |
| SNP_P4_52163_29934437 | NC_021163.1    | Ca_kabuli_chr04 | 29934437                | TT                              | CC              | 1946811114               |
| SNP_P4_52164_29934446 | NC_021163.1    | Ca_kabuli_chr04 | 29934446                | AA                              | CC              | 1946811116               |
| SNP_P4_52165_29934561 | NC_021163.1    | Ca_kabuli_chr04 | 29934561                | GG                              | TT              | 1946811118               |
| SNP_P4_52166_29934638 | NC_021163.1    | Ca_kabuli_chr04 | 29934638                | CC                              | TT              | 1946811120               |
| SNP_P4_52167_29934644 | NC_021163.1    | Ca_kabuli_chr04 | 29934644                | GG                              | CC              | 1946811122               |
| SNP_P4_52168_29934832 | NC_021163.1    | Ca_kabuli_chr04 | 29934832                | AA                              | TT              | 1946811124               |
| SNP_P4_52169_29936504 | NC_021163.1    | Ca_kabuli_chr04 | 29936504                | TT                              | CC              | 1946811126               |
| SNP_P4_52170_29938140 | NC_021163.1    | Ca_kabuli_chr04 | 29938140                | CC                              | TT              | 1946811129               |
| SNP_P4_52171_29939231 | NC_021163.1    | Ca_kabuli_chr04 | 29939231                | GG                              | TT              | 1946811131               |
| SNP_P4_52172_29939273 | NC_021163.1    | Ca_kabuli_chr04 | 29939273                | AA                              | GG              | 1946811133               |
| SNP_P4_52174_29941504 | NC_021163.1    | Ca_kabuli_chr04 | 29941504                | TT                              | CC              | 1946811135               |
| SNP_P4_52175_29942529 | NC_021163.1    | Ca_kabuli_chr04 | 29942529                | CC                              | GG              | 1946811137               |
| SNP_P4_52176_29942545 | NC_021163.1    | Ca_kabuli_chr04 | 29942545                | TT                              | CC              | 1946811139               |
| SNP_P4_52177_29942826 | NC_021163.1    | Ca_kabuli_chr04 | 29942826                | AA                              | GG              | 1946811141               |
| SNP_P4_52178_29943542 | NC_021163.1    | Ca_kabuli_chr04 | 29943542                | CC                              | TT              | 1946811143               |
| SNP_P4_52180_29944641 | NC_021163.1    | Ca_kabuli_chr04 | 29944641                | GG                              | CC              | 1946811145               |
| SNP_P4_52181_29944953 | NC_021163.1    | Ca_kabuli_chr04 | 29944953                | TT                              | AA              | 1946811148               |
| SNP_P4_52182_29944963 | NC_021163.1    | Ca_kabuli_chr04 | 29944963                | AA                              | TT              | 1946811150               |
| SNP_P4_52183_29944992 | NC_021163.1    | Ca_kabuli_chr04 | 29944992                | AA                              | TT              | 1946811152               |
| SNP_P4_52184_29945017 | NC_021163.1    | Ca_kabuli_chr04 | 29945017                | GG                              | AA              | 1946811154               |
| SNP_P4_52186_29945328 | NC_021163.1    | Ca_kabuli_chr04 | 29945328                | TT                              | GG              | 1946811156               |
| SNP_P4_52187_29945329 | NC_021163.1    | Ca_kabuli_chr04 | 29945329                | GG                              | AA              | 1946811158               |
| SNP_P4_52188_29945335 | NC_021163.1    | Ca_kabuli_chr04 | 29945335                | CC                              | AA              | 1946811160               |
| SNP_P4_52189_29945341 | NC_021163.1    | Ca_kabuli_chr04 | 29945341                | GG                              | AA              | 1946811162               |
| SNP_P4_52190_29945825 | NC_021163.1    | Ca_kabuli_chr04 | 29945825                | TT                              | AA              | 1946811164               |
| SNP_P4_52191_29945846 | NC_021163.1    | Ca_kabuli_chr04 | 29945846                | TT                              | CC              | 1946811166               |
| SNP_P4_52193_29960178 | NC_021163.1    | Ca_kabuli_chr04 | 29960178                | AA                              | GG              | 1946811168               |
| SNP_P4_52194_29961708 | NC_021163.1    | Ca_kabuli_chr04 | 29961708                | CC                              | TT              | 1946811170               |
| SNP_P4_52195_29961731 | NC_021163.1    | Ca_kabuli_chr04 | 29961731                | AA                              | GG              | 1946811172               |
| SNP_P4_52196_29962001 | NC_021163.1    | Ca_kabuli_chr04 | 29962001                | TT                              | AA              | 1946811174               |
| SNP_P4_52197_29962014 | NC_021163.1    | Ca_kabuli_chr04 | 29962014                | AA                              | TT              | 1946811176               |
| SNP_P4_52198_29962058 | NC_021163.1    | Ca_kabuli_chr04 | 29962058                | TT                              | CC              | 1946811178               |
| SNP_P4_52199_29962168 | NC_021163.1    | Ca_kabuli_chr04 | 29962168                | CC                              | TT              | 1946811180               |
| SNP_P4_52201_29962215 | NC_021163.1    | Ca_kabuli_chr04 | 29962215                | CC                              | AA              | 1946811182               |

| SNPs IDs              | Chromosome IDs | Chromosomes     | Physical positions (bp) | CDC Frontier (Reference genome) | (ILWC46 & LPNB) | NCBI SNPdb Accession IDs |
|-----------------------|----------------|-----------------|-------------------------|---------------------------------|-----------------|--------------------------|
| SNP_P4_52204_29962447 | NC_021163.1    | Ca_kabuli_chr04 | 29962447                | CC                              | AA              | 1946811184               |
| SNP_P4_52205_29975310 | NC_021163.1    | Ca_kabuli_chr04 | 29975310                | AA                              | GG              | 1946811186               |
| SNP_P4_52206_29975408 | NC_021163.1    | Ca_kabuli_chr04 | 29975408                | TT                              | AA              | 1946811188               |
| SNP_P4_52207_29975468 | NC_021163.1    | Ca_kabuli_chr04 | 29975468                | GG                              | AA              | 1946811190               |
| SNP_P4_52208_29975691 | NC_021163.1    | Ca_kabuli_chr04 | 29975691                | AA                              | GG              | 1946811192               |
| SNP_P4_52209_29977728 | NC_021163.1    | Ca_kabuli_chr04 | 29977728                | AA                              | CC              | 1946811194               |
| SNP_P4_52210_29977762 | NC_021163.1    | Ca_kabuli_chr04 | 29977762                | AA                              | GG              | 1946811196               |
| SNP_P4_52211_29977799 | NC_021163.1    | Ca_kabuli_chr04 | 29977799                | GG                              | TT              | 1946811198               |
| SNP_P4_52212_29986237 | NC_021163.1    | Ca_kabuli_chr04 | 29986237                | GG                              | AA              | 1946811200               |
| SNP_P4_52213_29986355 | NC_021163.1    | Ca_kabuli_chr04 | 29986355                | AA                              | CC              | 1946811202               |
| SNP_P4_52214_29986395 | NC_021163.1    | Ca_kabuli_chr04 | 29986395                | CC                              | AA              | 1946811204               |
| SNP_P4_52215_29986491 | NC_021163.1    | Ca_kabuli_chr04 | 29986491                | CC                              | TT              | 1946811206               |
| SNP_P4_52217_29986692 | NC_021163.1    | Ca_kabuli_chr04 | 29986692                | TT                              | CC              | 1946811208               |
| SNP_P4_52218_29986722 | NC_021163.1    | Ca_kabuli_chr04 | 29986722                | CC                              | TT              | 1946811210               |
| SNP_P4_52220_29987939 | NC_021163.1    | Ca_kabuli_chr04 | 29987939                | GG                              | TT              | 1946811212               |
| SNP_P4_52221_29987940 | NC_021163.1    | Ca_kabuli_chr04 | 29987940                | CC                              | AA              | 1946811214               |
| SNP_P4_52222_29987948 | NC_021163.1    | Ca_kabuli_chr04 | 29987948                | AA                              | CC              | 1946811216               |
| SNP_P4_52223_29987956 | NC_021163.1    | Ca_kabuli_chr04 | 29987956                | CC                              | TT              | 1946811218               |
| SNP_P4_52224_30009697 | NC_021163.1    | Ca_kabuli_chr04 | 30009697                | GG                              | CC              | 1946811220               |
| SNP_P4_52225_30009701 | NC_021163.1    | Ca_kabuli_chr04 | 30009701                | AA                              | CC              | 1946811222               |
| SNP_P4_52226_30009737 | NC_021163.1    | Ca_kabuli_chr04 | 30009737                | TT                              | AA              | 1946811223               |
| SNP_P4_52227_30009743 | NC_021163.1    | Ca_kabuli_chr04 | 30009743                | AA                              | GG              | 1946811225               |
| SNP_P4_52228_30009744 | NC_021163.1    | Ca_kabuli_chr04 | 30009744                | GG                              | AA              | 1946811227               |
| SNP_P4_52229_30009749 | NC_021163.1    | Ca_kabuli_chr04 | 30009749                | GG                              | CC              | 1946811229               |
| SNP_P4_52230_30010098 | NC_021163.1    | Ca_kabuli_chr04 | 30010098                | GG                              | AA              | 1946811231               |
| SNP_P4_52231_30010107 | NC_021163.1    | Ca_kabuli_chr04 | 30010107                | AA                              | CC              | 1946811233               |
| SNP_P4_52232_30010130 | NC_021163.1    | Ca_kabuli_chr04 | 30010130                | CC                              | AA              | 1946811235               |
| SNP_P4_52233_30010138 | NC_021163.1    | Ca_kabuli_chr04 | 30010138                | TT                              | CC              | 1946811237               |
| SNP_P4_52234_30019723 | NC_021163.1    | Ca_kabuli_chr04 | 30019723                | TT                              | AA              | 1946811239               |
| SNP_P4_52235_30019740 | NC_021163.1    | Ca_kabuli_chr04 | 30019740                | GG                              | AA              | 1946811241               |
| SNP_P4_52236_30019747 | NC_021163.1    | Ca_kabuli_chr04 | 30019747                | CC                              | TT              | 1946811243               |
| SNP_P4_52237_30019768 | NC_021163.1    | Ca_kabuli_chr04 | 30019768                | AA                              | GG              | 1946811245               |
| SNP_P4_52238_30019800 | NC_021163.1    | Ca_kabuli_chr04 | 30019800                | TT                              | AA              | 1946811247               |
| SNP_P4_52239_30019822 | NC_021163.1    | Ca_kabuli_chr04 | 30019822                | AA                              | TT              | 1946811249               |
| SNP_P4_52240_30025676 | NC_021163.1    | Ca_kabuli_chr04 | 30025676                | TT                              | CC              | 1946811251               |
| SNP_P4_52241_30025708 | NC_021163.1    | Ca_kabuli_chr04 | 30025708                | AA                              | GG              | 1946811253               |
| SNP_P4_52242_30025716 | NC_021163.1    | Ca_kabuli_chr04 | 30025716                | TT                              | CC              | 1946811255               |
| SNP_P4_52243_30025751 | NC_021163.1    | Ca_kabuli_chr04 | 30025751                | CC                              | TT              | 1946811257               |
| SNP_P4_52244_30025770 | NC_021163.1    | Ca_kabuli_chr04 | 30025770                | GG                              | AA              | 1946811259               |
| SNP_P4_52245_30025784 | NC_021163.1    | Ca_kabuli_chr04 | 30025784                | AA                              | GG              | 1946811261               |
| SNP_P4_52246_30025785 | NC_021163.1    | Ca_kabuli_chr04 | 30025785                | CC                              | TT              | 1946811263               |
| SNP_P4_52247_30025828 | NC_021163.1    | Ca_kabuli_chr04 | 30025828                | AA                              | GG              | 1946811265               |



| SNPs IDs              | Chromosome IDs | Chromosomes     | Physical positions (bp) | CDC Frontier (Reference genome) | (ILWC46 & LPNB) | NCBI SNPdb Accession IDs |
|-----------------------|----------------|-----------------|-------------------------|---------------------------------|-----------------|--------------------------|
| SNP_P4_52248_30026090 | NC_021163.1    | Ca_kabuli_chr04 | 30026090                | GG                              | AA              | 1946811267               |
| SNP_P4_52249_30026101 | NC_021163.1    | Ca_kabuli_chr04 | 30026101                | TT                              | CC              | 1946811269               |
| SNP_P4_52250_30026136 | NC_021163.1    | Ca_kabuli_chr04 | 30026136                | CC                              | TT              | 1946811271               |
| SNP_P4_52252_30033028 | NC_021163.1    | Ca_kabuli_chr04 | 30033028                | AA                              | CC              | 1946811273               |
| SNP_P4_52254_30033348 | NC_021163.1    | Ca_kabuli_chr04 | 30033348                | GG                              | TT              | 1946811275               |
| SNP_P4_52257_30046009 | NC_021163.1    | Ca_kabuli_chr04 | 30046009                | TT                              | AA              | 1946811277               |
| SNP_P4_52259_30047715 | NC_021163.1    | Ca_kabuli_chr04 | 30047715                | AA                              | TT              | 1946811279               |
| SNP_P4_52262_30052047 | NC_021163.1    | Ca_kabuli_chr04 | 30052047                | TT                              | CC              | 1946811281               |
| SNP_P4_52264_30055114 | NC_021163.1    | Ca_kabuli_chr04 | 30055114                | CC                              | TT              | 1946811283               |
| SNP_P4_52265_30055144 | NC_021163.1    | Ca_kabuli_chr04 | 30055144                | AA                              | GG              | 1946811285               |
| SNP_P4_52266_30060530 | NC_021163.1    | Ca_kabuli_chr04 | 30060530                | CC                              | TT              | 1946811287               |
| SNP_P4_52267_30069656 | NC_021163.1    | Ca_kabuli_chr04 | 30069656                | AA                              | TT              | 1946811289               |
| SNP_P4_52268_30069662 | NC_021163.1    | Ca_kabuli_chr04 | 30069662                | TT                              | CC              | 1946811291               |
| SNP_P4_52269_30070419 | NC_021163.1    | Ca_kabuli_chr04 | 30070419                | CC                              | TT              | 1946811293               |
| SNP_P4_52270_30070436 | NC_021163.1    | Ca_kabuli_chr04 | 30070436                | GG                              | AA              | 1946811296               |
| SNP_P4_52271_30070729 | NC_021163.1    | Ca_kabuli_chr04 | 30070729                | CC                              | TT              | 1946811298               |
| SNP_P4_52272_30071922 | NC_021163.1    | Ca_kabuli_chr04 | 30071922                | GG                              | AA              | 1946811300               |
| SNP_P4_52274_30072781 | NC_021163.1    | Ca_kabuli_chr04 | 30072781                | CC                              | TT              | 1946811302               |
| SNP_P4_52276_30075401 | NC_021163.1    | Ca_kabuli_chr04 | 30075401                | CC                              | AA              | 1946811304               |
| SNP_P4_52277_30075460 | NC_021163.1    | Ca_kabuli_chr04 | 30075460                | GG                              | AA              | 1946811306               |
| SNP_P4_52278_30076753 | NC_021163.1    | Ca_kabuli_chr04 | 30076753                | CC                              | TT              | 1946811308               |
| SNP_P4_52280_30076986 | NC_021163.1    | Ca_kabuli_chr04 | 30076986                | GG                              | AA              | 1946811310               |
| SNP_P4_52283_30078196 | NC_021163.1    | Ca_kabuli_chr04 | 30078196                | TT                              | CC              | 1946811312               |
| SNP_P4_52284_30078236 | NC_021163.1    | Ca_kabuli_chr04 | 30078236                | GG                              | CC              | 1946811314               |
| SNP_P4_52285_30079692 | NC_021163.1    | Ca_kabuli_chr04 | 30079692                | AA                              | GG              | 1946811317               |
| SNP_P4_52286_30080732 | NC_021163.1    | Ca_kabuli_chr04 | 30080732                | AA                              | CC              | 1946811319               |
| SNP_P4_52287_30081172 | NC_021163.1    | Ca_kabuli_chr04 | 30081172                | CC                              | TT              | 1946811321               |
| SNP_P4_52288_30081415 | NC_021163.1    | Ca_kabuli_chr04 | 30081415                | GG                              | AA              | 1946811323               |
| SNP_P4_52289_30081779 | NC_021163.1    | Ca_kabuli_chr04 | 30081779                | CC                              | TT              | 1946811325               |
| SNP_P4_52291_30081861 | NC_021163.1    | Ca_kabuli_chr04 | 30081861                | AA                              | GG              | 1946811327               |
| SNP_P4_52292_30081876 | NC_021163.1    | Ca_kabuli_chr04 | 30081876                | TT                              | GG              | 1946811330               |
| SNP_P4_52293_30082043 | NC_021163.1    | Ca_kabuli_chr04 | 30082043                | CC                              | TT              | 1946811332               |
| SNP_P4_52295_30084280 | NC_021163.1    | Ca_kabuli_chr04 | 30084280                | TT                              | CC              | 1946811334               |
| SNP_P4_52297_30084962 | NC_021163.1    | Ca_kabuli_chr04 | 30084962                | GG                              | CC              | 1946811336               |
| SNP_P4_52298_30084973 | NC_021163.1    | Ca_kabuli_chr04 | 30084973                | GG                              | AA              | 1946811338               |
| SNP_P4_52299_30085127 | NC_021163.1    | Ca_kabuli_chr04 | 30085127                | CC                              | TT              | 1946811341               |
| SNP_P4_52300_30085214 | NC_021163.1    | Ca_kabuli_chr04 | 30085214                | TT                              | CC              | 1946811343               |
| SNP_P4_52301_30085292 | NC_021163.1    | Ca_kabuli_chr04 | 30085292                | AA                              | GG              | 1946811345               |
| SNP_P4_52302_30085369 | NC_021163.1    | Ca_kabuli_chr04 | 30085369                | TT                              | AA              | 1946811347               |
| SNP_P4_52303_30085711 | NC_021163.1    | Ca_kabuli_chr04 | 30085711                | GG                              | AA              | 1946811349               |
| SNP_P4_52304_30086792 | NC_021163.1    | Ca_kabuli_chr04 | 30086792                | AA                              | TT              | 1946811351               |
| SNP_P4_52305_30086793 | NC_021163.1    | Ca_kabuli_chr04 | 30086793                | TT                              | AA              | 1946811353               |

| SNPs IDs              | Chromosome IDs | Chromosomes     | Physical positions (bp) | CDC Frontier (Reference genome) | (ILWC46 & LPNB) | NCBI SNPdb Accession IDs |
|-----------------------|----------------|-----------------|-------------------------|---------------------------------|-----------------|--------------------------|
| SNP_P4_52306_30086815 | NC_021163.1    | Ca_kabuli_chr04 | 30086815                | AA                              | GG              | 1946811355               |
| SNP_P4_52307_30086844 | NC_021163.1    | Ca_kabuli_chr04 | 30086844                | TT                              | CC              | 1946811357               |
| SNP_P4_52309_30086961 | NC_021163.1    | Ca_kabuli_chr04 | 30086961                | AA                              | CC              | 1946811359               |
| SNP_P4_52310_30086966 | NC_021163.1    | Ca_kabuli_chr04 | 30086966                | TT                              | CC              | 1946811361               |
| SNP_P4_52311_30086970 | NC_021163.1    | Ca_kabuli_chr04 | 30086970                | TT                              | CC              | 1946811363               |
| SNP_P4_52312_30087126 | NC_021163.1    | Ca_kabuli_chr04 | 30087126                | GG                              | AA              | 1946811365               |
| SNP_P4_52313_30087179 | NC_021163.1    | Ca_kabuli_chr04 | 30087179                | TT                              | AA              | 1946811367               |
| SNP_P4_52314_30087186 | NC_021163.1    | Ca_kabuli_chr04 | 30087186                | CC                              | TT              | 1946811370               |
| SNP_P4_52315_30087209 | NC_021163.1    | Ca_kabuli_chr04 | 30087209                | AA                              | GG              | 1946811372               |
| SNP_P4_52316_30090770 | NC_021163.1    | Ca_kabuli_chr04 | 30090770                | CC                              | TT              | 1946811374               |
| SNP_P4_52317_30090957 | NC_021163.1    | Ca_kabuli_chr04 | 30090957                | TT                              | CC              | 1946811376               |
| SNP_P4_52319_30093491 | NC_021163.1    | Ca_kabuli_chr04 | 30093491                | TT                              | CC              | 1946811378               |
| SNP_P4_52320_30097775 | NC_021163.1    | Ca_kabuli_chr04 | 30097775                | CC                              | GG              | 1946811380               |
| SNP_P4_52321_30097842 | NC_021163.1    | Ca_kabuli_chr04 | 30097842                | AA                              | CC              | 1946811382               |
| SNP_P4_52322_30097869 | NC_021163.1    | Ca_kabuli_chr04 | 30097869                | GG                              | AA              | 1946811384               |
| SNP_P4_52323_30098153 | NC_021163.1    | Ca_kabuli_chr04 | 30098153                | CC                              | TT              | 1946811386               |
| SNP_P4_52324_30098520 | NC_021163.1    | Ca_kabuli_chr04 | 30098520                | CC                              | AA              | 1946811388               |
| SNP_P4_52325_30098835 | NC_021163.1    | Ca_kabuli_chr04 | 30098835                | AA                              | TT              | 1946811390               |
| SNP_P4_52327_30099122 | NC_021163.1    | Ca_kabuli_chr04 | 30099122                | TT                              | GG              | 1946811393               |
| SNP_P4_52328_30099129 | NC_021163.1    | Ca_kabuli_chr04 | 30099129                | AA                              | CC              | 1946811395               |
| SNP_P4_52329_30100260 | NC_021163.1    | Ca_kabuli_chr04 | 30100260                | GG                              | TT              | 1946811397               |
| SNP_P4_52330_30101544 | NC_021163.1    | Ca_kabuli_chr04 | 30101544                | TT                              | CC              | 1946811399               |
| SNP_P4_52331_30101899 | NC_021163.1    | Ca_kabuli_chr04 | 30101899                | GG                              | TT              | 1946811401               |
| SNP_P4_52332_30102116 | NC_021163.1    | Ca_kabuli_chr04 | 30102116                | AA                              | GG              | 1946811403               |
| SNP_P4_52334_30102135 | NC_021163.1    | Ca_kabuli_chr04 | 30102135                | AA                              | GG              | 1946811405               |
| SNP_P4_52335_30102143 | NC_021163.1    | Ca_kabuli_chr04 | 30102143                | GG                              | AA              | 1946811407               |
| SNP_P4_52336_30102196 | NC_021163.1    | Ca_kabuli_chr04 | 30102196                | TT                              | CC              | 1946811409               |
| SNP_P4_52337_30102341 | NC_021163.1    | Ca_kabuli_chr04 | 30102341                | GG                              | AA              | 1946811411               |
| SNP_P4_52339_30102499 | NC_021163.1    | Ca_kabuli_chr04 | 30102499                | GG                              | AA              | 1946811413               |
| SNP_P4_52340_30102500 | NC_021163.1    | Ca_kabuli_chr04 | 30102500                | CC                              | TT              | 1946811415               |
| SNP_P4_52342_30110004 | NC_021163.1    | Ca_kabuli_chr04 | 30110004                | GG                              | CC              | 1946811417               |
| SNP_P4_52343_30111461 | NC_021163.1    | Ca_kabuli_chr04 | 30111461                | TT                              | GG              | 1946811419               |
| SNP_P4_52344_30111496 | NC_021163.1    | Ca_kabuli_chr04 | 30111496                | GG                              | TT              | 1946811421               |
| SNP_P4_52345_30113748 | NC_021163.1    | Ca_kabuli_chr04 | 30113748                | GG                              | AA              | 1946811424               |
| SNP_P4_52346_30113749 | NC_021163.1    | Ca_kabuli_chr04 | 30113749                | TT                              | AA              | 1946811426               |
| SNP_P4_52347_30113760 | NC_021163.1    | Ca_kabuli_chr04 | 30113760                | CC                              | TT              | 1946811428               |
| SNP_P4_52348_30114151 | NC_021163.1    | Ca_kabuli_chr04 | 30114151                | TT                              | CC              | 1946811430               |
| SNP_P4_52349_30114403 | NC_021163.1    | Ca_kabuli_chr04 | 30114403                | GG                              | TT              | 1946811432               |
| SNP_P4_52350_30114433 | NC_021163.1    | Ca_kabuli_chr04 | 30114433                | CC                              | TT              | 1946811434               |
| SNP_P4_52352_30114981 | NC_021163.1    | Ca_kabuli_chr04 | 30114981                | GG                              | AA              | 1946811436               |
| SNP_P4_52353_30115018 | NC_021163.1    | Ca_kabuli_chr04 | 30115018                | AA                              | GG              | 1946811438               |
| SNP_P4_52354_30115437 | NC_021163.1    | Ca_kabuli_chr04 | 30115437                | GG                              | TT              | 1946811440               |

| SNPs IDs              | Chromosome IDs | Chromosomes     | Physical positions (bp) | CDC Frontier (Reference genome) | (ILWC46 & LPNB) | NCBI SNPdb Accession IDs |
|-----------------------|----------------|-----------------|-------------------------|---------------------------------|-----------------|--------------------------|
| SNP_P4_52355_30115444 | NC_021163.1    | Ca_kabuli_chr04 | 30115444                | AA                              | GG              | 1946811442               |
| SNP_P4_52356_30116163 | NC_021163.1    | Ca_kabuli_chr04 | 30116163                | TT                              | CC              | 1946811444               |
| SNP_P4_52358_30116886 | NC_021163.1    | Ca_kabuli_chr04 | 30116886                | GG                              | AA              | 1946811446               |
| SNP_P4_52359_30117018 | NC_021163.1    | Ca_kabuli_chr04 | 30117018                | AA                              | GG              | 1946811448               |
| SNP_P4_52360_30117023 | NC_021163.1    | Ca_kabuli_chr04 | 30117023                | CC                              | GG              | 1946811450               |
| SNP_P4_52361_30118292 | NC_021163.1    | Ca_kabuli_chr04 | 30118292                | TT                              | CC              | 1946811452               |
| SNP_P4_52362_30118295 | NC_021163.1    | Ca_kabuli_chr04 | 30118295                | TT                              | AA              | 1946811454               |
| SNP_P4_52363_30118642 | NC_021163.1    | Ca_kabuli_chr04 | 30118642                | GG                              | AA              | 1946811456               |
| SNP_P4_52365_30119008 | NC_021163.1    | Ca_kabuli_chr04 | 30119008                | TT                              | CC              | 1946811458               |
| SNP_P4_52366_30119150 | NC_021163.1    | Ca_kabuli_chr04 | 30119150                | GG                              | CC              | 1946811460               |
| SNP_P4_52367_30119241 | NC_021163.1    | Ca_kabuli_chr04 | 30119241                | AA                              | GG              | 1946811462               |
| SNP_P4_52368_30120215 | NC_021163.1    | Ca_kabuli_chr04 | 30120215                | GG                              | CC              | 1946811464               |
| SNP_P4_52369_30120224 | NC_021163.1    | Ca_kabuli_chr04 | 30120224                | GG                              | AA              | 1946811466               |
| SNP_P4_52370_30120254 | NC_021163.1    | Ca_kabuli_chr04 | 30120254                | GG                              | TT              | 1946811469               |
| SNP_P4_52371_30120555 | NC_021163.1    | Ca_kabuli_chr04 | 30120555                | TT                              | GG              | 1946811471               |
| SNP_P4_52372_30120593 | NC_021163.1    | Ca_kabuli_chr04 | 30120593                | TT                              | CC              | 1946811473               |
| SNP_P4_52373_30120651 | NC_021163.1    | Ca_kabuli_chr04 | 30120651                | TT                              | CC              | 1946811475               |
| SNP_P4_52375_30120709 | NC_021163.1    | Ca_kabuli_chr04 | 30120709                | CC                              | TT              | 1946811477               |
| SNP_P4_52376_30121001 | NC_021163.1    | Ca_kabuli_chr04 | 30121001                | AA                              | GG              | 1946811479               |
| SNP_P4_52378_30124792 | NC_021163.1    | Ca_kabuli_chr04 | 30124792                | GG                              | CC              | 1946811481               |
| SNP_P4_52379_30125274 | NC_021163.1    | Ca_kabuli_chr04 | 30125274                | TT                              | GG              | 1946811483               |
| SNP_P4_52380_30125558 | NC_021163.1    | Ca_kabuli_chr04 | 30125558                | TT                              | CC              | 1946811485               |
| SNP_P4_52381_30125619 | NC_021163.1    | Ca_kabuli_chr04 | 30125619                | GG                              | AA              | 1946811487               |
| SNP_P4_52382_30125652 | NC_021163.1    | Ca_kabuli_chr04 | 30125652                | GG                              | AA              | 1946811489               |
| SNP_P4_52383_30125712 | NC_021163.1    | Ca_kabuli_chr04 | 30125712                | TT                              | GG              | 1946811492               |
| SNP_P4_52384_30125718 | NC_021163.1    | Ca_kabuli_chr04 | 30125718                | CC                              | TT              | 1946811494               |
| SNP_P4_52385_30125960 | NC_021163.1    | Ca_kabuli_chr04 | 30125960                | GG                              | AA              | 1946811496               |
| SNP_P4_52386_30126053 | NC_021163.1    | Ca_kabuli_chr04 | 30126053                | AA                              | GG              | 1946811498               |
| SNP_P4_52387_30131663 | NC_021163.1    | Ca_kabuli_chr04 | 30131663                | AA                              | GG              | 1946811500               |
| SNP_P4_52388_30131886 | NC_021163.1    | Ca_kabuli_chr04 | 30131886                | CC                              | TT              | 1946811502               |
| SNP_P4_52390_30132004 | NC_021163.1    | Ca_kabuli_chr04 | 30132004                | TT                              | GG              | 1946811504               |
| SNP_P4_52391_30134582 | NC_021163.1    | Ca_kabuli_chr04 | 30134582                | TT                              | AA              | 1946811506               |
| SNP_P4_52392_30134586 | NC_021163.1    | Ca_kabuli_chr04 | 30134586                | TT                              | CC              | 1946811508               |
| SNP_P4_52393_30134619 | NC_021163.1    | Ca_kabuli_chr04 | 30134619                | AA                              | TT              | 1946811510               |
| SNP_P4_52394_30137402 | NC_021163.1    | Ca_kabuli_chr04 | 30137402                | CC                              | TT              | 1946811512               |
| SNP_P4_52396_30138302 | NC_021163.1    | Ca_kabuli_chr04 | 30138302                | CC                              | TT              | 1946811514               |
| SNP_P4_52397_30138476 | NC_021163.1    | Ca_kabuli_chr04 | 30138476                | AA                              | GG              | 1946811516               |
| SNP_P4_52398_30138520 | NC_021163.1    | Ca_kabuli_chr04 | 30138520                | GG                              | AA              | 1946811518               |
| SNP_P4_52399_30138554 | NC_021163.1    | Ca_kabuli_chr04 | 30138554                | TT                              | GG              | 1946811520               |
| SNP_P4_52400_30138574 | NC_021163.1    | Ca_kabuli_chr04 | 30138574                | AA                              | GG              | 1946811522               |
| SNP_P4_52401_30138656 | NC_021163.1    | Ca_kabuli_chr04 | 30138656                | GG                              | AA              | 1946811524               |
| SNP_P4_52402_30138744 | NC_021163.1    | Ca_kabuli_chr04 | 30138744                | GG                              | AA              | 1946811526               |

| SNPs IDs              | Chromosome IDs | Chromosomes     | Physical positions (bp) | CDC Frontier (Reference genome) | (ILWC46 & LPNB) | NCBI SNPdb Accession IDs |
|-----------------------|----------------|-----------------|-------------------------|---------------------------------|-----------------|--------------------------|
| SNP_P4_52403_30139021 | NC_021163.1    | Ca_kabuli_chr04 | 30139021                | CC                              | AA              | 1946811528               |
| SNP_P4_52404_30139170 | NC_021163.1    | Ca_kabuli_chr04 | 30139170                | GG                              | AA              | 1946811530               |
| SNP_P4_52406_30140762 | NC_021163.1    | Ca_kabuli_chr04 | 30140762                | AA                              | GG              | 1946811533               |
| SNP_P4_52407_30142340 | NC_021163.1    | Ca_kabuli_chr04 | 30142340                | TT                              | AA              | 1946811535               |
| SNP_P4_52408_30142343 | NC_021163.1    | Ca_kabuli_chr04 | 30142343                | GG                              | CC              | 1946811537               |
| SNP_P4_52409_30142629 | NC_021163.1    | Ca_kabuli_chr04 | 30142629                | TT                              | CC              | 1946811539               |
| SNP_P4_52410_30142884 | NC_021163.1    | Ca_kabuli_chr04 | 30142884                | GG                              | TT              | 1946811541               |
| SNP_P4_52412_30142946 | NC_021163.1    | Ca_kabuli_chr04 | 30142946                | GG                              | AA              | 1946811543               |
| SNP_P4_52413_30144533 | NC_021163.1    | Ca_kabuli_chr04 | 30144533                | CC                              | GG              | 1946811545               |
| SNP_P4_52414_30144535 | NC_021163.1    | Ca_kabuli_chr04 | 30144535                | AA                              | GG              | 1946811547               |
| SNP_P4_52415_30144577 | NC_021163.1    | Ca_kabuli_chr04 | 30144577                | CC                              | AA              | 1946811549               |
| SNP_P4_52416_30144690 | NC_021163.1    | Ca_kabuli_chr04 | 30144690                | GG                              | AA              | 1946811551               |
| SNP_P4_52417_30144734 | NC_021163.1    | Ca_kabuli_chr04 | 30144734                | TT                              | CC              | 1946811553               |
| SNP_P4_52418_30144735 | NC_021163.1    | Ca_kabuli_chr04 | 30144735                | GG                              | AA              | 1946811555               |
| SNP_P4_52419_30144749 | NC_021163.1    | Ca_kabuli_chr04 | 30144749                | AA                              | CC              | 1946811557               |
| SNP_P4_52420_30144778 | NC_021163.1    | Ca_kabuli_chr04 | 30144778                | TT                              | CC              | 1946811559               |
| SNP_P4_52421_30144780 | NC_021163.1    | Ca_kabuli_chr04 | 30144780                | AA                              | CC              | 1946811561               |
| SNP_P4_52422_30146956 | NC_021163.1    | Ca_kabuli_chr04 | 30146956                | CC                              | TT              | 1946811563               |
| SNP_P4_52423_30146974 | NC_021163.1    | Ca_kabuli_chr04 | 30146974                | TT                              | CC              | 1946811565               |
| SNP_P4_52424_30147020 | NC_021163.1    | Ca_kabuli_chr04 | 30147020                | TT                              | GG              | 1946811567               |
| SNP_P4_52425_30147021 | NC_021163.1    | Ca_kabuli_chr04 | 30147021                | TT                              | AA              | 1946811569               |
| SNP_P4_52426_30147073 | NC_021163.1    | Ca_kabuli_chr04 | 30147073                | TT                              | GG              | 1946811571               |
| SNP_P4_52427_30147828 | NC_021163.1    | Ca_kabuli_chr04 | 30147828                | AA                              | GG              | 1946811573               |
| SNP_P4_52428_30149592 | NC_021163.1    | Ca_kabuli_chr04 | 30149592                | GG                              | CC              | 1946811575               |
| SNP_P4_52429_30149596 | NC_021163.1    | Ca_kabuli_chr04 | 30149596                | GG                              | AA              | 1946811577               |
| SNP_P4_52430_30149705 | NC_021163.1    | Ca_kabuli_chr04 | 30149705                | TT                              | AA              | 1946811579               |
| SNP_P4_52431_30151143 | NC_021163.1    | Ca_kabuli_chr04 | 30151143                | TT                              | AA              | 1946811581               |
| SNP_P4_52432_30151416 | NC_021163.1    | Ca_kabuli_chr04 | 30151416                | GG                              | AA              | 1946811583               |
| SNP_P4_52433_30154958 | NC_021163.1    | Ca_kabuli_chr04 | 30154958                | AA                              | GG              | 1946811585               |
| SNP_P4_52434_30155517 | NC_021163.1    | Ca_kabuli_chr04 | 30155517                | GG                              | AA              | 1946811587               |
| SNP_P4_52435_30170932 | NC_021163.1    | Ca_kabuli_chr04 | 30170932                | TT                              | CC              | 1946811589               |
| SNP_P4_52436_30171323 | NC_021163.1    | Ca_kabuli_chr04 | 30171323                | AA                              | GG              | 1946811591               |
| SNP_P4_52437_30171837 | NC_021163.1    | Ca_kabuli_chr04 | 30171837                | GG                              | AA              | 1946811593               |
| SNP_P4_52438_30171902 | NC_021163.1    | Ca_kabuli_chr04 | 30171902                | CC                              | GG              | 1946811595               |
| SNP_P4_52440_30172049 | NC_021163.1    | Ca_kabuli_chr04 | 30172049                | AA                              | GG              | 1946811597               |
| SNP_P4_52441_30172064 | NC_021163.1    | Ca_kabuli_chr04 | 30172064                | CC                              | TT              | 1946811599               |
| SNP_P4_52442_30172144 | NC_021163.1    | Ca_kabuli_chr04 | 30172144                | AA                              | GG              | 1946811601               |
| SNP_P4_52443_30172214 | NC_021163.1    | Ca_kabuli_chr04 | 30172214                | GG                              | AA              | 1946811603               |
| SNP_P4_52444_30172227 | NC_021163.1    | Ca_kabuli_chr04 | 30172227                | GG                              | AA              | 1946811605               |
| SNP_P4_52446_30173816 | NC_021163.1    | Ca_kabuli_chr04 | 30173816                | GG                              | AA              | 1946811607               |
| SNP_P4_52447_30175444 | NC_021163.1    | Ca_kabuli_chr04 | 30175444                | AA                              | CC              | 1946811609               |
| SNP_P4_52448_30175579 | NC_021163.1    | Ca_kabuli_chr04 | 30175579                | TT                              | CC              | 1946811611               |

| SNPs IDs              | Chromosome IDs | Chromosomes     | Physical positions (bp) | CDC Frontier (Reference genome) | (ILWC46 & LPNB) | NCBI SNPdb Accession IDs |
|-----------------------|----------------|-----------------|-------------------------|---------------------------------|-----------------|--------------------------|
| SNP_P4_52449_30175608 | NC_021163.1    | Ca_kabuli_chr04 | 30175608                | GG                              | AA              | 1946811613               |
| SNP_P4_52450_30175858 | NC_021163.1    | Ca_kabuli_chr04 | 30175858                | GG                              | AA              | 1946811615               |
| SNP_P4_52451_30175859 | NC_021163.1    | Ca_kabuli_chr04 | 30175859                | TT                              | CC              | 1946811617               |
| SNP_P4_52452_30175883 | NC_021163.1    | Ca_kabuli_chr04 | 30175883                | GG                              | AA              | 1946811619               |
| SNP_P4_52453_30175884 | NC_021163.1    | Ca_kabuli_chr04 | 30175884                | TT                              | CC              | 1946811621               |
| SNP_P4_52454_30175889 | NC_021163.1    | Ca_kabuli_chr04 | 30175889                | GG                              | AA              | 1946811623               |
| SNP_P4_52455_30175903 | NC_021163.1    | Ca_kabuli_chr04 | 30175903                | CC                              | GG              | 1946811625               |
| SNP_P4_52456_30175913 | NC_021163.1    | Ca_kabuli_chr04 | 30175913                | CC                              | GG              | 1946811627               |
| SNP_P4_52457_30175921 | NC_021163.1    | Ca_kabuli_chr04 | 30175921                | CC                              | TT              | 1946811629               |
| SNP_P4_52458_30175930 | NC_021163.1    | Ca_kabuli_chr04 | 30175930                | AA                              | CC              | 1946811631               |
| SNP_P4_52459_30176165 | NC_021163.1    | Ca_kabuli_chr04 | 30176165                | AA                              | CC              | 1946811633               |
| SNP_P4_52460_30176180 | NC_021163.1    | Ca_kabuli_chr04 | 30176180                | AA                              | TT              | 1946811635               |
| SNP_P4_52461_30176228 | NC_021163.1    | Ca_kabuli_chr04 | 30176228                | TT                              | CC              | 1946811638               |
| SNP_P4_52462_30176229 | NC_021163.1    | Ca_kabuli_chr04 | 30176229                | GG                              | AA              | 1946811640               |
| SNP_P4_52463_30176490 | NC_021163.1    | Ca_kabuli_chr04 | 30176490                | CC                              | TT              | 1946811642               |
| SNP_P4_52464_30176919 | NC_021163.1    | Ca_kabuli_chr04 | 30176919                | CC                              | TT              | 1946811644               |
| SNP_P4_52465_30176922 | NC_021163.1    | Ca_kabuli_chr04 | 30176922                | CC                              | TT              | 1946811646               |
| SNP_P4_52466_30177005 | NC_021163.1    | Ca_kabuli_chr04 | 30177005                | CC                              | TT              | 1946811648               |
| SNP_P4_52467_30177296 | NC_021163.1    | Ca_kabuli_chr04 | 30177296                | TT                              | GG              | 1946811650               |
| SNP_P4_52469_30178200 | NC_021163.1    | Ca_kabuli_chr04 | 30178200                | AA                              | CC              | 1946811652               |
| SNP_P4_52470_30178201 | NC_021163.1    | Ca_kabuli_chr04 | 30178201                | AA                              | GG              | 1946811654               |
| SNP_P4_52471_30180469 | NC_021163.1    | Ca_kabuli_chr04 | 30180469                | AA                              | GG              | 1946811656               |
| SNP_P4_52472_30183667 | NC_021163.1    | Ca_kabuli_chr04 | 30183667                | TT                              | AA              | 1946811658               |
| SNP_P4_52473_30183685 | NC_021163.1    | Ca_kabuli_chr04 | 30183685                | AA                              | GG              | 1946811660               |
| SNP_P4_52474_30184196 | NC_021163.1    | Ca_kabuli_chr04 | 30184196                | CC                              | TT              | 1946811662               |
| SNP_P4_52475_30184445 | NC_021163.1    | Ca_kabuli_chr04 | 30184445                | AA                              | CC              | 1946811664               |
| SNP_P4_52476_30184462 | NC_021163.1    | Ca_kabuli_chr04 | 30184462                | TT                              | CC              | 1946811666               |
| SNP_P4_52478_30184825 | NC_021163.1    | Ca_kabuli_chr04 | 30184825                | CC                              | AA              | 1946811668               |
| SNP_P4_52479_30184868 | NC_021163.1    | Ca_kabuli_chr04 | 30184868                | TT                              | GG              | 1946811670               |
| SNP_P4_52480_30184876 | NC_021163.1    | Ca_kabuli_chr04 | 30184876                | CC                              | GG              | 1946811672               |
| SNP_P4_52481_30184908 | NC_021163.1    | Ca_kabuli_chr04 | 30184908                | TT                              | CC              | 1946811675               |
| SNP_P4_52482_30185060 | NC_021163.1    | Ca_kabuli_chr04 | 30185060                | TT                              | CC              | 1946811677               |
| SNP_P4_52483_30185089 | NC_021163.1    | Ca_kabuli_chr04 | 30185089                | CC                              | TT              | 1946811680               |
| SNP_P4_52484_30185156 | NC_021163.1    | Ca_kabuli_chr04 | 30185156                | CC                              | AA              | 1946811682               |
| SNP_P4_52485_30188081 | NC_021163.1    | Ca_kabuli_chr04 | 30188081                | TT                              | CC              | 1946811684               |
| SNP_P4_52486_30188085 | NC_021163.1    | Ca_kabuli_chr04 | 30188085                | TT                              | GG              | 1946811686               |
| SNP_P4_52487_30188122 | NC_021163.1    | Ca_kabuli_chr04 | 30188122                | GG                              | TT              | 1946811688               |
| SNP_P4_52488_30188128 | NC_021163.1    | Ca_kabuli_chr04 | 30188128                | GG                              | AA              | 1946811690               |
| SNP_P4_52489_30188141 | NC_021163.1    | Ca_kabuli_chr04 | 30188141                | AA                              | GG              | 1946811692               |
| SNP_P4_52491_30188599 | NC_021163.1    | Ca_kabuli_chr04 | 30188599                | TT                              | CC              | 1946811694               |
| SNP_P4_52492_30188608 | NC_021163.1    | Ca_kabuli_chr04 | 30188608                | CC                              | TT              | 1946811696               |
| SNP_P4_52493_30188612 | NC_021163.1    | Ca_kabuli_chr04 | 30188612                | TT                              | AA              | 1946811698               |

| SNPs IDs              | Chromosome IDs | Chromosomes     | Physical positions (bp) | CDC Frontier (Reference genome) | (ILWC46 & LPNB) | NCBI SNPdb Accession IDs |
|-----------------------|----------------|-----------------|-------------------------|---------------------------------|-----------------|--------------------------|
| SNP_P4_52494_30188966 | NC_021163.1    | Ca_kabuli_chr04 | 30188966                | AA                              | GG              | 1946811700               |
| SNP_P4_52495_30188968 | NC_021163.1    | Ca_kabuli_chr04 | 30188968                | AA                              | TT              | 1946811702               |
| SNP_P4_52497_30189086 | NC_021163.1    | Ca_kabuli_chr04 | 30189086                | AA                              | GG              | 1946811704               |
| SNP_P4_52498_30192246 | NC_021163.1    | Ca_kabuli_chr04 | 30192246                | TT                              | CC              | 1946811706               |
| SNP_P4_52499_30192256 | NC_021163.1    | Ca_kabuli_chr04 | 30192256                | CC                              | TT              | 1946811708               |
| SNP_P4_52500_30192295 | NC_021163.1    | Ca_kabuli_chr04 | 30192295                | CC                              | TT              | 1946811710               |
| SNP_P4_52501_30193139 | NC_021163.1    | Ca_kabuli_chr04 | 30193139                | CC                              | AA              | 1946811712               |
| SNP_P4_52502_30195101 | NC_021163.1    | Ca_kabuli_chr04 | 30195101                | CC                              | TT              | 1946811714               |
| SNP_P4_52503_30195142 | NC_021163.1    | Ca_kabuli_chr04 | 30195142                | AA                              | TT              | 1946811716               |
| SNP_P4_52504_30195344 | NC_021163.1    | Ca_kabuli_chr04 | 30195344                | AA                              | CC              | 1946811718               |
| SNP_P4_52505_30195354 | NC_021163.1    | Ca_kabuli_chr04 | 30195354                | GG                              | TT              | 1946811720               |
| SNP_P4_52506_30195378 | NC_021163.1    | Ca_kabuli_chr04 | 30195378                | AA                              | CC              | 1946811722               |
| SNP_P4_52507_30195386 | NC_021163.1    | Ca_kabuli_chr04 | 30195386                | CC                              | TT              | 1946811724               |
| SNP_P4_52508_30195502 | NC_021163.1    | Ca_kabuli_chr04 | 30195502                | GG                              | AA              | 1946811726               |
| SNP_P4_52509_30195531 | NC_021163.1    | Ca_kabuli_chr04 | 30195531                | CC                              | TT              | 1946811728               |
| SNP_P4_52510_30195867 | NC_021163.1    | Ca_kabuli_chr04 | 30195867                | TT                              | CC              | 1946811730               |
| SNP_P4_52511_30195868 | NC_021163.1    | Ca_kabuli_chr04 | 30195868                | GG                              | TT              | 1946811732               |
| SNP_P4_52512_30195878 | NC_021163.1    | Ca_kabuli_chr04 | 30195878                | CC                              | TT              | 1946811734               |
| SNP_P4_52513_30195905 | NC_021163.1    | Ca_kabuli_chr04 | 30195905                | GG                              | AA              | 1946811736               |
| SNP_P4_52514_30196378 | NC_021163.1    | Ca_kabuli_chr04 | 30196378                | CC                              | TT              | 1946811738               |
| SNP_P4_52515_30196633 | NC_021163.1    | Ca_kabuli_chr04 | 30196633                | CC                              | AA              | 1946811740               |
| SNP_P4_52517_30196835 | NC_021163.1    | Ca_kabuli_chr04 | 30196835                | TT                              | AA              | 1946811742               |
| SNP_P4_52518_30196868 | NC_021163.1    | Ca_kabuli_chr04 | 30196868                | TT                              | CC              | 1946811745               |
| SNP_P4_52519_30196880 | NC_021163.1    | Ca_kabuli_chr04 | 30196880                | TT                              | AA              | 1946811747               |
| SNP_P4_52520_30196919 | NC_021163.1    | Ca_kabuli_chr04 | 30196919                | CC                              | AA              | 1946811749               |
| SNP_P4_52521_30196926 | NC_021163.1    | Ca_kabuli_chr04 | 30196926                | AA                              | GG              | 1946811751               |
| SNP_P4_52522_30197018 | NC_021163.1    | Ca_kabuli_chr04 | 30197018                | AA                              | CC              | 1946811753               |
| SNP_P4_52523_30197036 | NC_021163.1    | Ca_kabuli_chr04 | 30197036                | GG                              | AA              | 1946811755               |
| SNP_P4_52524_30197056 | NC_021163.1    | Ca_kabuli_chr04 | 30197056                | CC                              | AA              | 1946811757               |
| SNP_P4_52525_30197134 | NC_021163.1    | Ca_kabuli_chr04 | 30197134                | GG                              | AA              | 1946811759               |
| SNP_P4_52526_30197160 | NC_021163.1    | Ca_kabuli_chr04 | 30197160                | TT                              | CC              | 1946811761               |
| SNP_P4_52528_30197434 | NC_021163.1    | Ca_kabuli_chr04 | 30197434                | TT                              | AA              | 1946811763               |
| SNP_P4_52529_30197564 | NC_021163.1    | Ca_kabuli_chr04 | 30197564                | CC                              | TT              | 1946811765               |
| SNP_P4_52530_30197587 | NC_021163.1    | Ca_kabuli_chr04 | 30197587                | TT                              | CC              | 1946811767               |
| SNP_P4_52531_30197614 | NC_021163.1    | Ca_kabuli_chr04 | 30197614                | AA                              | GG              | 1946811769               |
| SNP_P4_52532_30197705 | NC_021163.1    | Ca_kabuli_chr04 | 30197705                | GG                              | TT              | 1946811771               |
| SNP_P4_52533_30197767 | NC_021163.1    | Ca_kabuli_chr04 | 30197767                | CC                              | AA              | 1946811773               |
| SNP_P4_52534_30197968 | NC_021163.1    | Ca_kabuli_chr04 | 30197968                | GG                              | AA              | 1946811775               |
| SNP_P4_52535_30197991 | NC_021163.1    | Ca_kabuli_chr04 | 30197991                | TT                              | CC              | 1946811777               |
| SNP_P4_52536_30198347 | NC_021163.1    | Ca_kabuli_chr04 | 30198347                | AA                              | TT              | 1946811779               |
| SNP_P4_52537_30198487 | NC_021163.1    | Ca_kabuli_chr04 | 30198487                | GG                              | AA              | 1946811782               |
| SNP_P4_52538_30198533 | NC_021163.1    | Ca_kabuli_chr04 | 30198533                | TT                              | CC              | 1946811784               |

| SNPs IDs              | Chromosome IDs | Chromosomes     | Physical positions (bp) | CDC Frontier (Reference genome) | (ILWC46 & LPNB) | NCBI SNPdb Accession IDs |
|-----------------------|----------------|-----------------|-------------------------|---------------------------------|-----------------|--------------------------|
| SNP_P4_52539_30198558 | NC_021163.1    | Ca_kabuli_chr04 | 30198558                | AA                              | CC              | 1946811786               |
| SNP_P4_52540_30198601 | NC_021163.1    | Ca_kabuli_chr04 | 30198601                | CC                              | TT              | 1946811788               |
| SNP_P4_52541_30198636 | NC_021163.1    | Ca_kabuli_chr04 | 30198636                | GG                              | TT              | 1946811790               |
| SNP_P4_52542_30198651 | NC_021163.1    | Ca_kabuli_chr04 | 30198651                | GG                              | CC              | 1946811792               |
| SNP_P4_52543_30198829 | NC_021163.1    | Ca_kabuli_chr04 | 30198829                | GG                              | AA              | 1946811794               |
| SNP_P4_52544_30198976 | NC_021163.1    | Ca_kabuli_chr04 | 30198976                | CC                              | TT              | 1946811796               |
| SNP_P4_52545_30199243 | NC_021163.1    | Ca_kabuli_chr04 | 30199243                | TT                              | AA              | 1946811798               |
| SNP_P4_52546_30199273 | NC_021163.1    | Ca_kabuli_chr04 | 30199273                | AA                              | TT              | 1946811800               |
| SNP_P4_52547_30199516 | NC_021163.1    | Ca_kabuli_chr04 | 30199516                | CC                              | AA              | 1946811802               |
| SNP_P4_52548_30199527 | NC_021163.1    | Ca_kabuli_chr04 | 30199527                | TT                              | CC              | 1946811804               |
| SNP_P4_52549_30199563 | NC_021163.1    | Ca_kabuli_chr04 | 30199563                | CC                              | TT              | 1946811806               |
| SNP_P4_52550_30199602 | NC_021163.1    | Ca_kabuli_chr04 | 30199602                | CC                              | AA              | 1946811808               |
| SNP_P4_52551_30199686 | NC_021163.1    | Ca_kabuli_chr04 | 30199686                | TT                              | CC              | 1946811810               |
| SNP_P4_52552_30199728 | NC_021163.1    | Ca_kabuli_chr04 | 30199728                | TT                              | GG              | 1946811812               |
| SNP_P4_52553_30199753 | NC_021163.1    | Ca_kabuli_chr04 | 30199753                | TT                              | CC              | 1946811814               |
| SNP_P4_52554_30199829 | NC_021163.1    | Ca_kabuli_chr04 | 30199829                | GG                              | AA              | 1946811816               |
| SNP_P4_52555_30199847 | NC_021163.1    | Ca_kabuli_chr04 | 30199847                | TT                              | CC              | 1946811818               |
| SNP_P4_52556_30199870 | NC_021163.1    | Ca_kabuli_chr04 | 30199870                | GG                              | AA              | 1946811820               |
| SNP_P4_52557_30200126 | NC_021163.1    | Ca_kabuli_chr04 | 30200126                | CC                              | TT              | 1946811822               |
| SNP_P4_52558_30200141 | NC_021163.1    | Ca_kabuli_chr04 | 30200141                | TT                              | CC              | 1946811824               |
| SNP_P4_52559_30200385 | NC_021163.1    | Ca_kabuli_chr04 | 30200385                | GG                              | AA              | 1946811826               |
| SNP_P4_52560_30200400 | NC_021163.1    | Ca_kabuli_chr04 | 30200400                | AA                              | GG              | 1946811828               |
| SNP_P4_52561_30200404 | NC_021163.1    | Ca_kabuli_chr04 | 30200404                | GG                              | AA              | 1946811830               |
| SNP_P4_52562_30200425 | NC_021163.1    | Ca_kabuli_chr04 | 30200425                | GG                              | TT              | 1946811832               |
| SNP_P4_52563_30200978 | NC_021163.1    | Ca_kabuli_chr04 | 30200978                | CC                              | TT              | 1946811834               |
| SNP_P4_52564_30201043 | NC_021163.1    | Ca_kabuli_chr04 | 30201043                | TT                              | AA              | 1946811836               |
| SNP_P4_52565_30201393 | NC_021163.1    | Ca_kabuli_chr04 | 30201393                | TT                              | CC              | 1946811838               |
| SNP_P4_52566_30202710 | NC_021163.1    | Ca_kabuli_chr04 | 30202710                | CC                              | TT              | 1946811840               |
| SNP_P4_52567_30203041 | NC_021163.1    | Ca_kabuli_chr04 | 30203041                | CC                              | TT              | 1946811842               |
| SNP_P4_52568_30204280 | NC_021163.1    | Ca_kabuli_chr04 | 30204280                | AA                              | TT              | 1946811844               |
| SNP_P4_52569_30204300 | NC_021163.1    | Ca_kabuli_chr04 | 30204300                | AA                              | GG              | 1946811846               |
| SNP_P4_52570_30204303 | NC_021163.1    | Ca_kabuli_chr04 | 30204303                | GG                              | AA              | 1946811848               |
| SNP_P4_52571_30204308 | NC_021163.1    | Ca_kabuli_chr04 | 30204308                | GG                              | CC              | 1946811850               |
| SNP_P4_52572_30204329 | NC_021163.1    | Ca_kabuli_chr04 | 30204329                | GG                              | TT              | 1946811852               |
| SNP_P4_52573_30204334 | NC_021163.1    | Ca_kabuli_chr04 | 30204334                | GG                              | TT              | 1946811854               |
| SNP_P4_52575_30207459 | NC_021163.1    | Ca_kabuli_chr04 | 30207459                | AA                              | GG              | 1946811856               |
| SNP_P4_52576_30210756 | NC_021163.1    | Ca_kabuli_chr04 | 30210756                | CC                              | TT              | 1946811858               |
| SNP_P4_52577_30211423 | NC_021163.1    | Ca_kabuli_chr04 | 30211423                | TT                              | CC              | 1946811860               |
| SNP_P4_52579_30211689 | NC_021163.1    | Ca_kabuli_chr04 | 30211689                | CC                              | TT              | 1946811862               |
| SNP_P4_52580_30211709 | NC_021163.1    | Ca_kabuli_chr04 | 30211709                | GG                              | CC              | 1946811864               |
| SNP_P4_52581_30211746 | NC_021163.1    | Ca_kabuli_chr04 | 30211746                | GG                              | AA              | 1946811866               |
| SNP_P4_52582_30211785 | NC_021163.1    | Ca_kabuli_chr04 | 30211785                | AA                              | GG              | 1946811868               |

| SNPs IDs              | Chromosome IDs | Chromosomes     | Physical positions (bp) | CDC Frontier (Reference genome) | (ILWC46 & LPNB) | NCBI SNPdb Accession IDs |
|-----------------------|----------------|-----------------|-------------------------|---------------------------------|-----------------|--------------------------|
| SNP_P4_52583_30211898 | NC_021163.1    | Ca_kabuli_chr04 | 30211898                | AA                              | TT              | 1946811870               |
| SNP_P4_52585_30214012 | NC_021163.1    | Ca_kabuli_chr04 | 30214012                | TT                              | CC              | 1946811872               |
| SNP_P4_52586_30214343 | NC_021163.1    | Ca_kabuli_chr04 | 30214343                | TT                              | CC              | 1946811874               |
| SNP_P4_52587_30214573 | NC_021163.1    | Ca_kabuli_chr04 | 30214573                | TT                              | CC              | 1946811876               |
| SNP_P4_52588_30218625 | NC_021163.1    | Ca_kabuli_chr04 | 30218625                | AA                              | CC              | 1946811878               |
| SNP_P4_52589_30218953 | NC_021163.1    | Ca_kabuli_chr04 | 30218953                | TT                              | AA              | 1946811880               |
| SNP_P4_52590_30218954 | NC_021163.1    | Ca_kabuli_chr04 | 30218954                | AA                              | TT              | 1946811882               |
| SNP_P4_52591_30218995 | NC_021163.1    | Ca_kabuli_chr04 | 30218995                | CC                              | AA              | 1946811884               |
| SNP_P4_52592_30219007 | NC_021163.1    | Ca_kabuli_chr04 | 30219007                | AA                              | GG              | 1946811886               |
| SNP_P4_52593_30219016 | NC_021163.1    | Ca_kabuli_chr04 | 30219016                | AA                              | GG              | 1946811889               |
| SNP_P4_52594_30221176 | NC_021163.1    | Ca_kabuli_chr04 | 30221176                | AA                              | TT              | 1946811891               |
| SNP_P4_52595_30224500 | NC_021163.1    | Ca_kabuli_chr04 | 30224500                | TT                              | AA              | 1946811893               |
| SNP_P4_52597_30225228 | NC_021163.1    | Ca_kabuli_chr04 | 30225228                | AA                              | TT              | 1946811895               |
| SNP_P4_52598_30225572 | NC_021163.1    | Ca_kabuli_chr04 | 30225572                | TT                              | AA              | 1946811897               |
| SNP_P4_52599_30226132 | NC_021163.1    | Ca_kabuli_chr04 | 30226132                | GG                              | AA              | 1946811899               |
| SNP_P4_52600_30228076 | NC_021163.1    | Ca_kabuli_chr04 | 30228076                | TT                              | AA              | 1946811901               |
| SNP_P4_52601_30228425 | NC_021163.1    | Ca_kabuli_chr04 | 30228425                | CC                              | TT              | 1946811903               |
| SNP_P4_52602_30228728 | NC_021163.1    | Ca_kabuli_chr04 | 30228728                | CC                              | TT              | 1946811905               |
| SNP_P4_52604_30230544 | NC_021163.1    | Ca_kabuli_chr04 | 30230544                | CC                              | TT              | 1946811907               |
| SNP_P4_52606_30231013 | NC_021163.1    | Ca_kabuli_chr04 | 30231013                | GG                              | CC              | 1946811909               |
| SNP_P4_52608_30237365 | NC_021163.1    | Ca_kabuli_chr04 | 30237365                | TT                              | CC              | 1946811911               |
| SNP_P4_52609_30237413 | NC_021163.1    | Ca_kabuli_chr04 | 30237413                | TT                              | AA              | 1946811913               |
| SNP_P4_52611_30240355 | NC_021163.1    | Ca_kabuli_chr04 | 30240355                | CC                              | TT              | 1946811915               |
| SNP_P4_52613_30252352 | NC_021163.1    | Ca_kabuli_chr04 | 30252352                | CC                              | TT              | 1946811917               |
| SNP_P4_52615_30257214 | NC_021163.1    | Ca_kabuli_chr04 | 30257214                | TT                              | CC              | 1946811920               |
| SNP_P4_52618_30268087 | NC_021163.1    | Ca_kabuli_chr04 | 30268087                | GG                              | AA              | 1946811922               |
| SNP_P4_52619_30277069 | NC_021163.1    | Ca_kabuli_chr04 | 30277069                | GG                              | CC              | 1946811924               |
| SNP_P4_52620_30278622 | NC_021163.1    | Ca_kabuli_chr04 | 30278622                | TT                              | GG              | 1946811926               |
| SNP_P4_52621_30279102 | NC_021163.1    | Ca_kabuli_chr04 | 30279102                | CC                              | TT              | 1946811928               |
| SNP_P4_52622_30279441 | NC_021163.1    | Ca_kabuli_chr04 | 30279441                | CC                              | TT              | 1946811930               |
| SNP_P4_52623_30279892 | NC_021163.1    | Ca_kabuli_chr04 | 30279892                | AA                              | GG              | 1946811932               |
| SNP_P4_52624_30285178 | NC_021163.1    | Ca_kabuli_chr04 | 30285178                | GG                              | AA              | 1946811934               |
| SNP_P4_52625_30286155 | NC_021163.1    | Ca_kabuli_chr04 | 30286155                | AA                              | TT              | 1946811936               |
| SNP_P4_52626_30286198 | NC_021163.1    | Ca_kabuli_chr04 | 30286198                | CC                              | GG              | 1946811938               |
| SNP_P4_52627_30286777 | NC_021163.1    | Ca_kabuli_chr04 | 30286777                | CC                              | AA              | 1946811940               |
| SNP_P4_52628_30289709 | NC_021163.1    | Ca_kabuli_chr04 | 30289709                | GG                              | TT              | 1946811942               |
| SNP_P4_52629_30290002 | NC_021163.1    | Ca_kabuli_chr04 | 30290002                | AA                              | GG              | 1946811944               |
| SNP_P4_52630_30295020 | NC_021163.1    | Ca_kabuli_chr04 | 30295020                | GG                              | TT              | 1946811946               |
| SNP_P4_52631_30295021 | NC_021163.1    | Ca_kabuli_chr04 | 30295021                | AA                              | TT              | 1946811948               |
| SNP_P4_52632_30296406 | NC_021163.1    | Ca_kabuli_chr04 | 30296406                | CC                              | TT              | 1946811950               |
| SNP_P4_52634_30316983 | NC_021163.1    | Ca_kabuli_chr04 | 30316983                | GG                              | CC              | 1946811953               |
| SNP_P4_52635_30319440 | NC_021163.1    | Ca_kabuli_chr04 | 30319440                | GG                              | TT              | 1946811955               |



| SNPs IDs              | Chromosome IDs | Chromosomes     | Physical positions (bp) | CDC Frontier (Reference genome) | (ILWC46 & LPNB) | NCBI SNPdb Accession IDs |
|-----------------------|----------------|-----------------|-------------------------|---------------------------------|-----------------|--------------------------|
| SNP_P4_52636_30321414 | NC_021163.1    | Ca_kabuli_chr04 | 30321414                | AA                              | TT              | 1946811957               |
| SNP_P4_52637_30327024 | NC_021163.1    | Ca_kabuli_chr04 | 30327024                | AA                              | TT              | 1946811959               |
| SNP_P4_52640_30338778 | NC_021163.1    | Ca_kabuli_chr04 | 30338778                | TT                              | AA              | 1946811961               |
| SNP_P4_52641_30351183 | NC_021163.1    | Ca_kabuli_chr04 | 30351183                | GG                              | AA              | 1946811963               |
| SNP_P4_52643_30351930 | NC_021163.1    | Ca_kabuli_chr04 | 30351930                | TT                              | AA              | 1946811965               |
| SNP_P4_52644_30352790 | NC_021163.1    | Ca_kabuli_chr04 | 30352790                | CC                              | GG              | 1946811967               |
| SNP_P4_52645_30355179 | NC_021163.1    | Ca_kabuli_chr04 | 30355179                | GG                              | AA              | 1946811969               |
| SNP_P4_52646_30361089 | NC_021163.1    | Ca_kabuli_chr04 | 30361089                | CC                              | TT              | 1946811971               |
| SNP_P4_52647_30361420 | NC_021163.1    | Ca_kabuli_chr04 | 30361420                | TT                              | CC              | 1946811973               |
| SNP_P4_52648_30361445 | NC_021163.1    | Ca_kabuli_chr04 | 30361445                | AA                              | CC              | 1946811975               |
| SNP_P4_52649_30361458 | NC_021163.1    | Ca_kabuli_chr04 | 30361458                | GG                              | TT              | 1946811977               |
| SNP_P4_52650_30361494 | NC_021163.1    | Ca_kabuli_chr04 | 30361494                | AA                              | CC              | 1946811979               |
| SNP_P4_52651_30363167 | NC_021163.1    | Ca_kabuli_chr04 | 30363167                | GG                              | AA              | 1946811982               |
| SNP_P4_52652_30363192 | NC_021163.1    | Ca_kabuli_chr04 | 30363192                | CC                              | TT              | 1946811984               |
| SNP_P4_52653_30366411 | NC_021163.1    | Ca_kabuli_chr04 | 30366411                | TT                              | CC              | 1946811986               |
| SNP_P4_52654_30368207 | NC_021163.1    | Ca_kabuli_chr04 | 30368207                | TT                              | CC              | 1946811988               |
| SNP_P4_52655_30369181 | NC_021163.1    | Ca_kabuli_chr04 | 30369181                | GG                              | AA              | 1946811990               |
| SNP_P4_52657_30376885 | NC_021163.1    | Ca_kabuli_chr04 | 30376885                | TT                              | CC              | 1946811992               |
| SNP_P4_52658_30377717 | NC_021163.1    | Ca_kabuli_chr04 | 30377717                | AA                              | GG              | 1946811994               |
| SNP_P4_52659_30379297 | NC_021163.1    | Ca_kabuli_chr04 | 30379297                | AA                              | GG              | 1946811996               |
| SNP_P4_52660_30380825 | NC_021163.1    | Ca_kabuli_chr04 | 30380825                | CC                              | TT              | 1946811998               |
| SNP_P4_52662_30384169 | NC_021163.1    | Ca_kabuli_chr04 | 30384169                | GG                              | TT              | 1946812000               |
| SNP_P4_52663_30390717 | NC_021163.1    | Ca_kabuli_chr04 | 30390717                | GG                              | TT              | 1946812002               |
| SNP_P4_52664_30390747 | NC_021163.1    | Ca_kabuli_chr04 | 30390747                | AA                              | TT              | 1946812004               |
| SNP_P4_52665_30398511 | NC_021163.1    | Ca_kabuli_chr04 | 30398511                | TT                              | CC              | 1946812006               |
| SNP_P4_52666_30398521 | NC_021163.1    | Ca_kabuli_chr04 | 30398521                | AA                              | GG              | 1946812008               |
| SNP_P4_52667_30398634 | NC_021163.1    | Ca_kabuli_chr04 | 30398634                | AA                              | GG              | 1946812010               |
| SNP_P4_52668_30398650 | NC_021163.1    | Ca_kabuli_chr04 | 30398650                | AA                              | CC              | 1946812012               |
| SNP_P4_52669_30398763 | NC_021163.1    | Ca_kabuli_chr04 | 30398763                | AA                              | GG              | 1946812014               |
| SNP_P4_52670_30398803 | NC_021163.1    | Ca_kabuli_chr04 | 30398803                | AA                              | GG              | 1946812016               |
| SNP_P4_52671_30398817 | NC_021163.1    | Ca_kabuli_chr04 | 30398817                | TT                              | CC              | 1946812018               |
| SNP_P4_52672_30398834 | NC_021163.1    | Ca_kabuli_chr04 | 30398834                | GG                              | AA              | 1946812020               |
| SNP_P4_52673_30398936 | NC_021163.1    | Ca_kabuli_chr04 | 30398936                | GG                              | CC              | 1946812022               |
| SNP_P4_52675_30405123 | NC_021163.1    | Ca_kabuli_chr04 | 30405123                | CC                              | TT              | 1946812024               |
| SNP_P4_52676_30406660 | NC_021163.1    | Ca_kabuli_chr04 | 30406660                | CC                              | GG              | 1946812026               |
| SNP_P4_52677_30408409 | NC_021163.1    | Ca_kabuli_chr04 | 30408409                | GG                              | AA              | 1946812028               |
| SNP_P4_52680_30408601 | NC_021163.1    | Ca_kabuli_chr04 | 30408601                | AA                              | GG              | 1946812030               |
| SNP_P4_52683_30408671 | NC_021163.1    | Ca_kabuli_chr04 | 30408671                | TT                              | AA              | 1946812032               |
| SNP_P4_52684_30408673 | NC_021163.1    | Ca_kabuli_chr04 | 30408673                | CC                              | AA              | 1946812034               |
| SNP_P4_52686_30408895 | NC_021163.1    | Ca_kabuli_chr04 | 30408895                | GG                              | AA              | 1946812036               |
| SNP_P4_52687_30415032 | NC_021163.1    | Ca_kabuli_chr04 | 30415032                | GG                              | CC              | 1946812038               |
| SNP_P4_52688_30418096 | NC_021163.1    | Ca_kabuli_chr04 | 30418096                | GG                              | AA              | 1946812040               |

| SNPs IDs              | Chromosome IDs | Chromosomes     | Physical positions (bp) | CDC Frontier (Reference genome) | (ILWC46 & LPNB) | NCBI SNPdb Accession IDs |
|-----------------------|----------------|-----------------|-------------------------|---------------------------------|-----------------|--------------------------|
| SNP_P4_52689_30418363 | NC_021163.1    | Ca_kabuli_chr04 | 30418363                | GG                              | AA              | 1946812042               |
| SNP_P4_52690_30419007 | NC_021163.1    | Ca_kabuli_chr04 | 30419007                | TT                              | CC              | 1946812044               |
| SNP_P4_52691_30421011 | NC_021163.1    | Ca_kabuli_chr04 | 30421011                | TT                              | CC              | 1946812046               |
| SNP_P4_52692_30421196 | NC_021163.1    | Ca_kabuli_chr04 | 30421196                | GG                              | TT              | 1946812048               |
| SNP_P4_52693_30421284 | NC_021163.1    | Ca_kabuli_chr04 | 30421284                | CC                              | AA              | 1946812050               |
| SNP_P4_52694_30421377 | NC_021163.1    | Ca_kabuli_chr04 | 30421377                | GG                              | CC              | 1946812052               |
| SNP_P4_52695_30422233 | NC_021163.1    | Ca_kabuli_chr04 | 30422233                | AA                              | CC              | 1946812054               |
| SNP_P4_52696_30422240 | NC_021163.1    | Ca_kabuli_chr04 | 30422240                | AA                              | TT              | 1946812056               |
| SNP_P4_52697_30422279 | NC_021163.1    | Ca_kabuli_chr04 | 30422279                | TT                              | CC              | 1946812059               |
| SNP_P4_52698_30422713 | NC_021163.1    | Ca_kabuli_chr04 | 30422713                | TT                              | AA              | 1946812061               |
| SNP_P4_52699_30423233 | NC_021163.1    | Ca_kabuli_chr04 | 30423233                | AA                              | GG              | 1946812063               |
| SNP_P4_52700_30423277 | NC_021163.1    | Ca_kabuli_chr04 | 30423277                | AA                              | GG              | 1946812065               |
| SNP_P4_52701_30423299 | NC_021163.1    | Ca_kabuli_chr04 | 30423299                | AA                              | GG              | 1946812067               |
| SNP_P4_52702_30423555 | NC_021163.1    | Ca_kabuli_chr04 | 30423555                | AA                              | TT              | 1946812069               |
| SNP_P4_52703_30423579 | NC_021163.1    | Ca_kabuli_chr04 | 30423579                | CC                              | AA              | 1946812071               |
| SNP_P4_52704_30423580 | NC_021163.1    | Ca_kabuli_chr04 | 30423580                | CC                              | TT              | 1946812073               |
| SNP_P4_52705_30423751 | NC_021163.1    | Ca_kabuli_chr04 | 30423751                | TT                              | CC              | 1946812075               |
| SNP_P4_52706_30423757 | NC_021163.1    | Ca_kabuli_chr04 | 30423757                | TT                              | CC              | 1946812077               |
| SNP_P4_52707_30423897 | NC_021163.1    | Ca_kabuli_chr04 | 30423897                | CC                              | TT              | 1946812080               |
| SNP_P4_52708_30424068 | NC_021163.1    | Ca_kabuli_chr04 | 30424068                | AA                              | CC              | 1946812082               |
| SNP_P4_52709_30424076 | NC_021163.1    | Ca_kabuli_chr04 | 30424076                | CC                              | TT              | 1946812084               |
| SNP_P4_52710_30424138 | NC_021163.1    | Ca_kabuli_chr04 | 30424138                | TT                              | CC              | 1946812086               |
| SNP_P4_52711_30424185 | NC_021163.1    | Ca_kabuli_chr04 | 30424185                | AA                              | GG              | 1946812088               |
| SNP_P4_52712_30424353 | NC_021163.1    | Ca_kabuli_chr04 | 30424353                | CC                              | AA              | 1946812090               |
| SNP_P4_52713_30424356 | NC_021163.1    | Ca_kabuli_chr04 | 30424356                | CC                              | TT              | 1946812092               |
| SNP_P4_52714_30426068 | NC_021163.1    | Ca_kabuli_chr04 | 30426068                | TT                              | AA              | 1946812094               |
| SNP_P4_52715_30426197 | NC_021163.1    | Ca_kabuli_chr04 | 30426197                | TT                              | AA              | 1946812096               |
| SNP_P4_52716_30426290 | NC_021163.1    | Ca_kabuli_chr04 | 30426290                | CC                              | TT              | 1946812098               |
| SNP_P4_52717_30426393 | NC_021163.1    | Ca_kabuli_chr04 | 30426393                | AA                              | GG              | 1946812100               |
| SNP_P4_52719_30426534 | NC_021163.1    | Ca_kabuli_chr04 | 30426534                | GG                              | TT              | 1946812102               |
| SNP_P4_52720_30426541 | NC_021163.1    | Ca_kabuli_chr04 | 30426541                | TT                              | GG              | 1946812105               |
| SNP_P4_52721_30429137 | NC_021163.1    | Ca_kabuli_chr04 | 30429137                | CC                              | TT              | 1946812107               |
| SNP_P4_52724_30436343 | NC_021163.1    | Ca_kabuli_chr04 | 30436343                | GG                              | CC              | 1946812109               |
| SNP_P4_52725_30436732 | NC_021163.1    | Ca_kabuli_chr04 | 30436732                | GG                              | TT              | 1946812111               |
| SNP_P4_52726_30440949 | NC_021163.1    | Ca_kabuli_chr04 | 30440949                | CC                              | AA              | 1946812113               |
| SNP_P4_52727_30445444 | NC_021163.1    | Ca_kabuli_chr04 | 30445444                | TT                              | CC              | 1946812115               |
| SNP_P4_52728_30445481 | NC_021163.1    | Ca_kabuli_chr04 | 30445481                | TT                              | CC              | 1946812118               |
| SNP_P4_52731_30449278 | NC_021163.1    | Ca_kabuli_chr04 | 30449278                | TT                              | GG              | 1946812120               |
| SNP_P4_52733_30452671 | NC_021163.1    | Ca_kabuli_chr04 | 30452671                | TT                              | CC              | 1946812122               |
| SNP_P4_52734_30452673 | NC_021163.1    | Ca_kabuli_chr04 | 30452673                | GG                              | TT              | 1946812124               |
| SNP_P4_52735_30453958 | NC_021163.1    | Ca_kabuli_chr04 | 30453958                | AA                              | GG              | 1946812126               |
| SNP_P4_52738_30457310 | NC_021163.1    | Ca_kabuli_chr04 | 30457310                | CC                              | TT              | 1946812128               |

| SNPs IDs              | Chromosome IDs | Chromosomes     | Physical positions (bp) | CDC Frontier (Reference genome) | (ILWC46 & LPNB) | NCBI SNPdb Accession IDs |
|-----------------------|----------------|-----------------|-------------------------|---------------------------------|-----------------|--------------------------|
| SNP_P4_52741_30463525 | NC_021163.1    | Ca_kabuli_chr04 | 30463525                | AA                              | GG              | 1946812131               |
| SNP_P4_52745_30465156 | NC_021163.1    | Ca_kabuli_chr04 | 30465156                | TT                              | AA              | 1946812133               |
| SNP_P4_52746_30466072 | NC_021163.1    | Ca_kabuli_chr04 | 30466072                | TT                              | CC              | 1946812135               |
| SNP_P4_52748_30466124 | NC_021163.1    | Ca_kabuli_chr04 | 30466124                | CC                              | TT              | 1946812137               |
| SNP_P4_52749_30466397 | NC_021163.1    | Ca_kabuli_chr04 | 30466397                | TT                              | CC              | 1946812139               |
| SNP_P4_52750_30466398 | NC_021163.1    | Ca_kabuli_chr04 | 30466398                | AA                              | CC              | 1946812141               |
| SNP_P4_52751_30466399 | NC_021163.1    | Ca_kabuli_chr04 | 30466399                | TT                              | AA              | 1946812143               |
| SNP_P4_52752_30466417 | NC_021163.1    | Ca_kabuli_chr04 | 30466417                | GG                              | AA              | 1946812146               |
| SNP_P4_52753_30466474 | NC_021163.1    | Ca_kabuli_chr04 | 30466474                | GG                              | AA              | 1946812148               |
| SNP_P4_52754_30466482 | NC_021163.1    | Ca_kabuli_chr04 | 30466482                | CC                              | AA              | 1946812150               |
| SNP_P4_52755_30468767 | NC_021163.1    | Ca_kabuli_chr04 | 30468767                | AA                              | GG              | 1946812152               |
| SNP_P4_52756_30469856 | NC_021163.1    | Ca_kabuli_chr04 | 30469856                | AA                              | TT              | 1946812154               |
| SNP_P4_52757_30470413 | NC_021163.1    | Ca_kabuli_chr04 | 30470413                | CC                              | TT              | 1946812156               |
| SNP_P4_52758_30470848 | NC_021163.1    | Ca_kabuli_chr04 | 30470848                | AA                              | GG              | 1946812158               |
| SNP_P4_52759_30470849 | NC_021163.1    | Ca_kabuli_chr04 | 30470849                | CC                              | AA              | 1946812160               |
| SNP_P4_52760_30470857 | NC_021163.1    | Ca_kabuli_chr04 | 30470857                | AA                              | GG              | 1946812162               |
| SNP_P4_52762_30470880 | NC_021163.1    | Ca_kabuli_chr04 | 30470880                | AA                              | GG              | 1946812164               |
| SNP_P4_52763_30471855 | NC_021163.1    | Ca_kabuli_chr04 | 30471855                | CC                              | TT              | 1946812167               |
| SNP_P4_52764_30471865 | NC_021163.1    | Ca_kabuli_chr04 | 30471865                | CC                              | TT              | 1946812169               |
| SNP_P4_52765_30471969 | NC_021163.1    | Ca_kabuli_chr04 | 30471969                | CC                              | TT              | 1946812171               |
| SNP_P4_52766_30472002 | NC_021163.1    | Ca_kabuli_chr04 | 30472002                | CC                              | TT              | 1946812173               |
| SNP_P4_52767_30472137 | NC_021163.1    | Ca_kabuli_chr04 | 30472137                | AA                              | GG              | 1946812175               |
| SNP_P4_52768_30472160 | NC_021163.1    | Ca_kabuli_chr04 | 30472160                | CC                              | AA              | 1946812177               |
| SNP_P4_52769_30472168 | NC_021163.1    | Ca_kabuli_chr04 | 30472168                | AA                              | GG              | 1946812179               |
| SNP_P4_52770_30472380 | NC_021163.1    | Ca_kabuli_chr04 | 30472380                | CC                              | TT              | 1946812181               |
| SNP_P4_52771_30478728 | NC_021163.1    | Ca_kabuli_chr04 | 30478728                | CC                              | TT              | 1946812183               |
| SNP_P4_52772_30495760 | NC_021163.1    | Ca_kabuli_chr04 | 30495760                | CC                              | TT              | 1946812185               |
| SNP_P4_52775_30497201 | NC_021163.1    | Ca_kabuli_chr04 | 30497201                | TT                              | CC              | 1946812187               |
| SNP_P4_52776_30497669 | NC_021163.1    | Ca_kabuli_chr04 | 30497669                | TT                              | CC              | 1946812190               |
| SNP_P4_52777_30499385 | NC_021163.1    | Ca_kabuli_chr04 | 30499385                | AA                              | TT              | 1946812192               |
| SNP_P4_52778_30500000 | NC_021163.1    | Ca_kabuli_chr04 | 30500000                | CC                              | TT              | 1946812194               |
| SNP_P4_52779_30505021 | NC_021163.1    | Ca_kabuli_chr04 | 30505021                | AA                              | GG              | 1946812196               |
| SNP_P4_52780_30510406 | NC_021163.1    | Ca_kabuli_chr04 | 30510406                | GG                              | TT              | 1946812198               |
| SNP_P4_52781_30510411 | NC_021163.1    | Ca_kabuli_chr04 | 30510411                | CC                              | TT              | 1946812200               |
| SNP_P4_52782_30510420 | NC_021163.1    | Ca_kabuli_chr04 | 30510420                | GG                              | AA              | 1946812202               |
| SNP_P4_52783_30520011 | NC_021163.1    | Ca_kabuli_chr04 | 30520011                | TT                              | CC              | 1946812204               |
| SNP_P4_52784_30521115 | NC_021163.1    | Ca_kabuli_chr04 | 30521115                | TT                              | CC              | 1946812206               |
| SNP_P4_52785_30521185 | NC_021163.1    | Ca_kabuli_chr04 | 30521185                | AA                              | GG              | 1946812208               |
| SNP_P4_52786_30521194 | NC_021163.1    | Ca_kabuli_chr04 | 30521194                | TT                              | AA              | 1946812210               |
| SNP_P4_52787_30521275 | NC_021163.1    | Ca_kabuli_chr04 | 30521275                | AA                              | TT              | 1946812212               |
| SNP_P4_52788_30521893 | NC_021163.1    | Ca_kabuli_chr04 | 30521893                | TT                              | CC              | 1946812214               |
| SNP_P4_52789_30527051 | NC_021163.1    | Ca_kabuli_chr04 | 30527051                | AA                              | GG              | 1946812216               |

| SNPs IDs              | Chromosome IDs | Chromosomes     | Physical positions (bp) | CDC Frontier (Reference genome) | (ILWC46 & LPNB) | NCBI SNPdb Accession IDs |
|-----------------------|----------------|-----------------|-------------------------|---------------------------------|-----------------|--------------------------|
| SNP_P4_52790_30531522 | NC_021163.1    | Ca_kabuli_chr04 | 30531522                | GG                              | AA              | 1946812218               |
| SNP_P4_52791_30532504 | NC_021163.1    | Ca_kabuli_chr04 | 30532504                | AA                              | GG              | 1946812220               |
| SNP_P4_52792_30533554 | NC_021163.1    | Ca_kabuli_chr04 | 30533554                | CC                              | TT              | 1946812222               |
| SNP_P4_52793_30534343 | NC_021163.1    | Ca_kabuli_chr04 | 30534343                | CC                              | TT              | 1946812224               |
| SNP_P4_52794_30534621 | NC_021163.1    | Ca_kabuli_chr04 | 30534621                | TT                              | AA              | 1946812226               |
| SNP_P4_52795_30535523 | NC_021163.1    | Ca_kabuli_chr04 | 30535523                | CC                              | TT              | 1946812228               |
| SNP_P4_52797_30536004 | NC_021163.1    | Ca_kabuli_chr04 | 30536004                | CC                              | TT              | 1946812230               |
| SNP_P4_52798_30536366 | NC_021163.1    | Ca_kabuli_chr04 | 30536366                | AA                              | GG              | 1946812232               |
| SNP_P4_52799_30537134 | NC_021163.1    | Ca_kabuli_chr04 | 30537134                | TT                              | GG              | 1946812234               |
| SNP_P4_52800_30537349 | NC_021163.1    | Ca_kabuli_chr04 | 30537349                | CC                              | TT              | 1946812236               |
| SNP_P4_52801_30537482 | NC_021163.1    | Ca_kabuli_chr04 | 30537482                | AA                              | GG              | 1946812239               |
| SNP_P4_52803_30537740 | NC_021163.1    | Ca_kabuli_chr04 | 30537740                | CC                              | TT              | 1946812241               |
| SNP_P4_52804_30537764 | NC_021163.1    | Ca_kabuli_chr04 | 30537764                | CC                              | AA              | 1946812243               |
| SNP_P4_52806_30538411 | NC_021163.1    | Ca_kabuli_chr04 | 30538411                | AA                              | GG              | 1946812245               |
| SNP_P4_52807_30538580 | NC_021163.1    | Ca_kabuli_chr04 | 30538580                | AA                              | GG              | 1946812247               |
| SNP_P4_52808_30538679 | NC_021163.1    | Ca_kabuli_chr04 | 30538679                | AA                              | TT              | 1946812249               |
| SNP_P4_52809_30538680 | NC_021163.1    | Ca_kabuli_chr04 | 30538680                | AA                              | TT              | 1946812251               |
| SNP_P4_52810_30538681 | NC_021163.1    | Ca_kabuli_chr04 | 30538681                | AA                              | TT              | 1946812253               |
| SNP_P4_52811_30538934 | NC_021163.1    | Ca_kabuli_chr04 | 30538934                | GG                              | CC              | 1946812255               |
| SNP_P4_52812_30538964 | NC_021163.1    | Ca_kabuli_chr04 | 30538964                | CC                              | AA              | 1946812257               |
| SNP_P4_52813_30539154 | NC_021163.1    | Ca_kabuli_chr04 | 30539154                | GG                              | AA              | 1946812259               |
| SNP_P4_52814_30539162 | NC_021163.1    | Ca_kabuli_chr04 | 30539162                | CC                              | TT              | 1946812261               |
| SNP_P4_52815_30539175 | NC_021163.1    | Ca_kabuli_chr04 | 30539175                | GG                              | AA              | 1946812263               |
| SNP_P4_52816_30539198 | NC_021163.1    | Ca_kabuli_chr04 | 30539198                | TT                              | CC              | 1946812265               |
| SNP_P4_52817_30539301 | NC_021163.1    | Ca_kabuli_chr04 | 30539301                | GG                              | AA              | 1946812267               |
| SNP_P4_52818_30539306 | NC_021163.1    | Ca_kabuli_chr04 | 30539306                | GG                              | AA              | 1946812269               |
| SNP_P4_52819_30539313 | NC_021163.1    | Ca_kabuli_chr04 | 30539313                | TT                              | GG              | 1946812271               |
| SNP_P4_52820_30540718 | NC_021163.1    | Ca_kabuli_chr04 | 30540718                | AA                              | TT              | 1946812273               |
| SNP_P4_52821_30540780 | NC_021163.1    | Ca_kabuli_chr04 | 30540780                | TT                              | CC              | 1946812276               |
| SNP_P4_52822_30540847 | NC_021163.1    | Ca_kabuli_chr04 | 30540847                | TT                              | GG              | 1946812278               |
| SNP_P4_52823_30540932 | NC_021163.1    | Ca_kabuli_chr04 | 30540932                | GG                              | AA              | 1946812280               |
| SNP_P4_52824_30540954 | NC_021163.1    | Ca_kabuli_chr04 | 30540954                | CC                              | TT              | 1946812282               |
| SNP_P4_52825_30541352 | NC_021163.1    | Ca_kabuli_chr04 | 30541352                | AA                              | GG              | 1946812284               |
| SNP_P4_52826_30541371 | NC_021163.1    | Ca_kabuli_chr04 | 30541371                | GG                              | AA              | 1946812286               |
| SNP_P4_52827_30541374 | NC_021163.1    | Ca_kabuli_chr04 | 30541374                | CC                              | TT              | 1946812288               |
| SNP_P4_52828_30541400 | NC_021163.1    | Ca_kabuli_chr04 | 30541400                | CC                              | GG              | 1946812290               |
| SNP_P4_52829_30541444 | NC_021163.1    | Ca_kabuli_chr04 | 30541444                | GG                              | AA              | 1946812292               |
| SNP_P4_52830_30541497 | NC_021163.1    | Ca_kabuli_chr04 | 30541497                | TT                              | CC              | 1946812294               |
| SNP_P4_52831_30541538 | NC_021163.1    | Ca_kabuli_chr04 | 30541538                | TT                              | CC              | 1946812296               |
| SNP_P4_52832_30541542 | NC_021163.1    | Ca_kabuli_chr04 | 30541542                | GG                              | TT              | 1946812298               |
| SNP_P4_52833_30541548 | NC_021163.1    | Ca_kabuli_chr04 | 30541548                | TT                              | CC              | 1946812300               |
| SNP_P4_52834_30541556 | NC_021163.1    | Ca_kabuli_chr04 | 30541556                | AA                              | GG              | 1946812303               |

| SNPs IDs              | Chromosome IDs | Chromosomes     | Physical positions (bp) | CDC Frontier (Reference genome) | (ILWC46 & LPNB) | NCBI SNPdb Accession IDs |
|-----------------------|----------------|-----------------|-------------------------|---------------------------------|-----------------|--------------------------|
| SNP_P4_52835_30541561 | NC_021163.1    | Ca_kabuli_chr04 | 30541561                | GG                              | AA              | 1946812305               |
| SNP_P4_52836_30541578 | NC_021163.1    | Ca_kabuli_chr04 | 30541578                | CC                              | TT              | 1946812308               |
| SNP_P4_52837_30541582 | NC_021163.1    | Ca_kabuli_chr04 | 30541582                | GG                              | AA              | 1946812310               |
| SNP_P4_52838_30541592 | NC_021163.1    | Ca_kabuli_chr04 | 30541592                | CC                              | TT              | 1946812312               |
| SNP_P4_52839_30541598 | NC_021163.1    | Ca_kabuli_chr04 | 30541598                | CC                              | TT              | 1946812314               |
| SNP_P4_52840_30541607 | NC_021163.1    | Ca_kabuli_chr04 | 30541607                | AA                              | GG              | 1946812316               |
| SNP_P4_52841_30541634 | NC_021163.1    | Ca_kabuli_chr04 | 30541634                | AA                              | GG              | 1946812318               |
| SNP_P4_52842_30541645 | NC_021163.1    | Ca_kabuli_chr04 | 30541645                | GG                              | AA              | 1946812320               |
| SNP_P4_52843_30541656 | NC_021163.1    | Ca_kabuli_chr04 | 30541656                | TT                              | CC              | 1946812323               |
| SNP_P4_52844_30541657 | NC_021163.1    | Ca_kabuli_chr04 | 30541657                | TT                              | CC              | 1946812325               |
| SNP_P4_52845_30541736 | NC_021163.1    | Ca_kabuli_chr04 | 30541736                | GG                              | AA              | 1946812327               |
| SNP_P4_52846_30541791 | NC_021163.1    | Ca_kabuli_chr04 | 30541791                | TT                              | CC              | 1946812329               |
| SNP_P4_52847_30541795 | NC_021163.1    | Ca_kabuli_chr04 | 30541795                | CC                              | TT              | 1946812331               |
| SNP_P4_52848_30541812 | NC_021163.1    | Ca_kabuli_chr04 | 30541812                | AA                              | GG              | 1946812333               |
| SNP_P4_52849_30541818 | NC_021163.1    | Ca_kabuli_chr04 | 30541818                | AA                              | GG              | 1946812335               |
| SNP_P4_52850_30541866 | NC_021163.1    | Ca_kabuli_chr04 | 30541866                | AA                              | GG              | 1946812337               |
| SNP_P4_52851_30541868 | NC_021163.1    | Ca_kabuli_chr04 | 30541868                | AA                              | GG              | 1946812339               |
| SNP_P4_52852_30541918 | NC_021163.1    | Ca_kabuli_chr04 | 30541918                | CC                              | AA              | 1946812341               |
| SNP_P4_52853_30541936 | NC_021163.1    | Ca_kabuli_chr04 | 30541936                | AA                              | GG              | 1946812343               |
| SNP_P4_52854_30541961 | NC_021163.1    | Ca_kabuli_chr04 | 30541961                | GG                              | AA              | 1946812345               |
| SNP_P4_52855_30541998 | NC_021163.1    | Ca_kabuli_chr04 | 30541998                | AA                              | CC              | 1946812347               |
| SNP_P4_52856_30542003 | NC_021163.1    | Ca_kabuli_chr04 | 30542003                | TT                              | CC              | 1946812349               |
| SNP_P4_52857_30542004 | NC_021163.1    | Ca_kabuli_chr04 | 30542004                | TT                              | AA              | 1946812352               |
| SNP_P4_52858_30542034 | NC_021163.1    | Ca_kabuli_chr04 | 30542034                | CC                              | TT              | 1946812354               |
| SNP_P4_52859_30542109 | NC_021163.1    | Ca_kabuli_chr04 | 30542109                | AA                              | CC              | 1946812356               |
| SNP_P4_52860_30542184 | NC_021163.1    | Ca_kabuli_chr04 | 30542184                | CC                              | TT              | 1946812358               |
| SNP_P4_52861_30542288 | NC_021163.1    | Ca_kabuli_chr04 | 30542288                | CC                              | AA              | 1946812360               |
| SNP_P4_52862_30542428 | NC_021163.1    | Ca_kabuli_chr04 | 30542428                | AA                              | GG              | 1946812362               |
| SNP_P4_52863_30542541 | NC_021163.1    | Ca_kabuli_chr04 | 30542541                | TT                              | GG              | 1946812364               |
| SNP_P4_52864_30542598 | NC_021163.1    | Ca_kabuli_chr04 | 30542598                | GG                              | AA              | 1946812366               |
| SNP_P4_52865_30542611 | NC_021163.1    | Ca_kabuli_chr04 | 30542611                | GG                              | CC              | 1946812368               |
| SNP_P4_52866_30542638 | NC_021163.1    | Ca_kabuli_chr04 | 30542638                | TT                              | CC              | 1946812370               |
| SNP_P4_52867_30542640 | NC_021163.1    | Ca_kabuli_chr04 | 30542640                | TT                              | GG              | 1946812372               |
| SNP_P4_52868_30542659 | NC_021163.1    | Ca_kabuli_chr04 | 30542659                | CC                              | TT              | 1946812374               |
| SNP_P4_52869_30542702 | NC_021163.1    | Ca_kabuli_chr04 | 30542702                | GG                              | TT              | 1946812376               |
| SNP_P4_52870_30542722 | NC_021163.1    | Ca_kabuli_chr04 | 30542722                | CC                              | TT              | 1946812378               |
| SNP_P4_52871_30542905 | NC_021163.1    | Ca_kabuli_chr04 | 30542905                | CC                              | GG              | 1946812380               |
| SNP_P4_52872_30542929 | NC_021163.1    | Ca_kabuli_chr04 | 30542929                | GG                              | TT              | 1946812382               |
| SNP_P4_52873_30542945 | NC_021163.1    | Ca_kabuli_chr04 | 30542945                | AA                              | CC              | 1946812384               |
| SNP_P4_52874_30542950 | NC_021163.1    | Ca_kabuli_chr04 | 30542950                | TT                              | CC              | 1946812386               |
| SNP_P4_52875_30543482 | NC_021163.1    | Ca_kabuli_chr04 | 30543482                | AA                              | GG              | 1946812388               |
| SNP_P4_52877_30544027 | NC_021163.1    | Ca_kabuli_chr04 | 30544027                | GG                              | CC              | 1946812390               |

| SNPs IDs              | Chromosome IDs | Chromosomes     | Physical positions (bp) | CDC Frontier (Reference genome) | (ILWC46 & LPNB) | NCBI SNPdb Accession IDs |
|-----------------------|----------------|-----------------|-------------------------|---------------------------------|-----------------|--------------------------|
| SNP_P4_52878_30544037 | NC_021163.1    | Ca_kabuli_chr04 | 30544037                | GG                              | AA              | 1946812392               |
| SNP_P4_52879_30544144 | NC_021163.1    | Ca_kabuli_chr04 | 30544144                | CC                              | GG              | 1946812394               |
| SNP_P4_52880_30544193 | NC_021163.1    | Ca_kabuli_chr04 | 30544193                | CC                              | TT              | 1946812396               |
| SNP_P4_52881_30544282 | NC_021163.1    | Ca_kabuli_chr04 | 30544282                | CC                              | TT              | 1946812398               |
| SNP_P4_52882_30544300 | NC_021163.1    | Ca_kabuli_chr04 | 30544300                | AA                              | CC              | 1946812400               |
| SNP_P4_52883_30544325 | NC_021163.1    | Ca_kabuli_chr04 | 30544325                | GG                              | AA              | 1946812402               |
| SNP_P4_52884_30544329 | NC_021163.1    | Ca_kabuli_chr04 | 30544329                | AA                              | GG              | 1946812404               |
| SNP_P4_52885_30544360 | NC_021163.1    | Ca_kabuli_chr04 | 30544360                | CC                              | TT              | 1946812406               |
| SNP_P4_52886_30544665 | NC_021163.1    | Ca_kabuli_chr04 | 30544665                | CC                              | TT              | 1946812408               |
| SNP_P4_52887_30544687 | NC_021163.1    | Ca_kabuli_chr04 | 30544687                | GG                              | AA              | 1946812410               |
| SNP_P4_52888_30544689 | NC_021163.1    | Ca_kabuli_chr04 | 30544689                | GG                              | TT              | 1946812412               |
| SNP_P4_52889_30546080 | NC_021163.1    | Ca_kabuli_chr04 | 30546080                | GG                              | CC              | 1946812414               |
| SNP_P4_52890_30546084 | NC_021163.1    | Ca_kabuli_chr04 | 30546084                | CC                              | AA              | 1946812416               |
| SNP_P4_52891_30546092 | NC_021163.1    | Ca_kabuli_chr04 | 30546092                | TT                              | AA              | 1946812418               |
| SNP_P4_52892_30546110 | NC_021163.1    | Ca_kabuli_chr04 | 30546110                | CC                              | TT              | 1946812420               |
| SNP_P4_52893_30546121 | NC_021163.1    | Ca_kabuli_chr04 | 30546121                | CC                              | AA              | 1946812422               |
| SNP_P4_52894_30546358 | NC_021163.1    | Ca_kabuli_chr04 | 30546358                | CC                              | TT              | 1946812424               |
| SNP_P4_52895_30546566 | NC_021163.1    | Ca_kabuli_chr04 | 30546566                | CC                              | TT              | 1946812426               |
| SNP_P4_52896_30546666 | NC_021163.1    | Ca_kabuli_chr04 | 30546666                | TT                              | GG              | 1946812428               |
| SNP_P4_52897_30546684 | NC_021163.1    | Ca_kabuli_chr04 | 30546684                | AA                              | GG              | 1946812430               |
| SNP_P4_52898_30546688 | NC_021163.1    | Ca_kabuli_chr04 | 30546688                | TT                              | AA              | 1946812432               |
| SNP_P4_52899_30546701 | NC_021163.1    | Ca_kabuli_chr04 | 30546701                | CC                              | TT              | 1946812434               |
| SNP_P4_52900_30546702 | NC_021163.1    | Ca_kabuli_chr04 | 30546702                | CC                              | TT              | 1946812436               |
| SNP_P4_52901_30546716 | NC_021163.1    | Ca_kabuli_chr04 | 30546716                | TT                              | CC              | 1946812438               |
| SNP_P4_52902_30546780 | NC_021163.1    | Ca_kabuli_chr04 | 30546780                | AA                              | CC              | 1946812440               |
| SNP_P4_52903_30546795 | NC_021163.1    | Ca_kabuli_chr04 | 30546795                | CC                              | TT              | 1946812442               |
| SNP_P4_52904_30546960 | NC_021163.1    | Ca_kabuli_chr04 | 30546960                | TT                              | CC              | 1946812444               |
| SNP_P4_52905_30546983 | NC_021163.1    | Ca_kabuli_chr04 | 30546983                | AA                              | CC              | 1946812446               |
| SNP_P4_52906_30546985 | NC_021163.1    | Ca_kabuli_chr04 | 30546985                | TT                              | CC              | 1946812448               |
| SNP_P4_52907_30546986 | NC_021163.1    | Ca_kabuli_chr04 | 30546986                | CC                              | AA              | 1946812450               |
| SNP_P4_52908_30549246 | NC_021163.1    | Ca_kabuli_chr04 | 30549246                | CC                              | TT              | 1946812452               |
| SNP_P4_52909_30549446 | NC_021163.1    | Ca_kabuli_chr04 | 30549446                | CC                              | AA              | 1946812454               |
| SNP_P4_52910_30550557 | NC_021163.1    | Ca_kabuli_chr04 | 30550557                | AA                              | CC              | 1946812456               |
| SNP_P4_52913_30554352 | NC_021163.1    | Ca_kabuli_chr04 | 30554352                | GG                              | AA              | 1946812458               |
| SNP_P4_52914_30554374 | NC_021163.1    | Ca_kabuli_chr04 | 30554374                | CC                              | TT              | 1946812460               |
| SNP_P4_52915_30554399 | NC_021163.1    | Ca_kabuli_chr04 | 30554399                | AA                              | GG              | 1946812462               |
| SNP_P4_52916_30554792 | NC_021163.1    | Ca_kabuli_chr04 | 30554792                | GG                              | AA              | 1946812464               |
| SNP_P4_52917_30555078 | NC_021163.1    | Ca_kabuli_chr04 | 30555078                | CC                              | TT              | 1946812466               |
| SNP_P4_52918_30556124 | NC_021163.1    | Ca_kabuli_chr04 | 30556124                | CC                              | TT              | 1946812469               |
| SNP_P4_52919_30557390 | NC_021163.1    | Ca_kabuli_chr04 | 30557390                | AA                              | GG              | 1946812471               |
| SNP_P4_52920_30558132 | NC_021163.1    | Ca_kabuli_chr04 | 30558132                | GG                              | TT              | 1946812473               |
| SNP_P4_52921_30558686 | NC_021163.1    | Ca_kabuli_chr04 | 30558686                | AA                              | GG              | 1946812475               |

| SNPs IDs              | Chromosome IDs | Chromosomes     | Physical positions (bp) | CDC Frontier (Reference genome) | (ILWC46 & LPNB) | NCBI SNPdb Accession IDs |
|-----------------------|----------------|-----------------|-------------------------|---------------------------------|-----------------|--------------------------|
| SNP_P4_52922_30558795 | NC_021163.1    | Ca_kabuli_chr04 | 30558795                | AA                              | TT              | 1946812477               |
| SNP_P4_52923_30560443 | NC_021163.1    | Ca_kabuli_chr04 | 30560443                | TT                              | CC              | 1946812479               |
| SNP_P4_52925_30561698 | NC_021163.1    | Ca_kabuli_chr04 | 30561698                | GG                              | TT              | 1946812481               |
| SNP_P4_52926_30563855 | NC_021163.1    | Ca_kabuli_chr04 | 30563855                | TT                              | CC              | 1946812483               |
| SNP_P4_52927_30563863 | NC_021163.1    | Ca_kabuli_chr04 | 30563863                | AA                              | GG              | 1946812485               |
| SNP_P4_52928_30564196 | NC_021163.1    | Ca_kabuli_chr04 | 30564196                | TT                              | CC              | 1946812487               |
| SNP_P4_52929_30564298 | NC_021163.1    | Ca_kabuli_chr04 | 30564298                | TT                              | AA              | 1946812489               |
| SNP_P4_52931_30572781 | NC_021163.1    | Ca_kabuli_chr04 | 30572781                | GG                              | TT              | 1946812491               |
| SNP_P4_52932_30574844 | NC_021163.1    | Ca_kabuli_chr04 | 30574844                | AA                              | GG              | 1946812493               |
| SNP_P4_52934_30578949 | NC_021163.1    | Ca_kabuli_chr04 | 30578949                | AA                              | GG              | 1946812495               |
| SNP_P4_52935_30582606 | NC_021163.1    | Ca_kabuli_chr04 | 30582606                | AA                              | TT              | 1946812497               |
| SNP_P4_52937_30584237 | NC_021163.1    | Ca_kabuli_chr04 | 30584237                | CC                              | TT              | 1946812499               |
| SNP_P4_52938_30584831 | NC_021163.1    | Ca_kabuli_chr04 | 30584831                | AA                              | CC              | 1946812501               |
| SNP_P4_52940_30585443 | NC_021163.1    | Ca_kabuli_chr04 | 30585443                | AA                              | GG              | 1946812504               |
| SNP_P4_52942_30586268 | NC_021163.1    | Ca_kabuli_chr04 | 30586268                | TT                              | CC              | 1946812506               |
| SNP_P4_52943_30587357 | NC_021163.1    | Ca_kabuli_chr04 | 30587357                | TT                              | CC              | 1946812508               |
| SNP_P4_52944_30587400 | NC_021163.1    | Ca_kabuli_chr04 | 30587400                | AA                              | GG              | 1946812510               |
| SNP_P4_52945_30588004 | NC_021163.1    | Ca_kabuli_chr04 | 30588004                | GG                              | AA              | 1946812512               |
| SNP_P4_52946_30588049 | NC_021163.1    | Ca_kabuli_chr04 | 30588049                | AA                              | GG              | 1946812514               |
| SNP_P4_52947_30588068 | NC_021163.1    | Ca_kabuli_chr04 | 30588068                | TT                              | GG              | 1946812516               |
| SNP_P4_52948_30588123 | NC_021163.1    | Ca_kabuli_chr04 | 30588123                | AA                              | GG              | 1946812518               |
| SNP_P4_52949_30588462 | NC_021163.1    | Ca_kabuli_chr04 | 30588462                | TT                              | GG              | 1946812520               |
| SNP_P4_52950_30588741 | NC_021163.1    | Ca_kabuli_chr04 | 30588741                | TT                              | GG              | 1946812522               |
| SNP_P4_52951_30588745 | NC_021163.1    | Ca_kabuli_chr04 | 30588745                | TT                              | CC              | 1946812524               |
| SNP_P4_52952_30592175 | NC_021163.1    | Ca_kabuli_chr04 | 30592175                | GG                              | AA              | 1946812526               |
| SNP_P4_52953_30597193 | NC_021163.1    | Ca_kabuli_chr04 | 30597193                | TT                              | CC              | 1946812529               |
| SNP_P4_52954_30600451 | NC_021163.1    | Ca_kabuli_chr04 | 30600451                | CC                              | AA              | 1946812531               |
| SNP_P4_52955_30603655 | NC_021163.1    | Ca_kabuli_chr04 | 30603655                | TT                              | CC              | 1946812533               |
| SNP_P4_52958_30607701 | NC_021163.1    | Ca_kabuli_chr04 | 30607701                | CC                              | TT              | 1946812535               |
| SNP_P4_52959_30607962 | NC_021163.1    | Ca_kabuli_chr04 | 30607962                | GG                              | AA              | 1946812537               |
| SNP_P4_52960_30618472 | NC_021163.1    | Ca_kabuli_chr04 | 30618472                | AA                              | GG              | 1946812539               |
| SNP_P4_52961_30618617 | NC_021163.1    | Ca_kabuli_chr04 | 30618617                | CC                              | GG              | 1946812541               |
| SNP_P4_52962_30619688 | NC_021163.1    | Ca_kabuli_chr04 | 30619688                | AA                              | TT              | 1946812543               |
| SNP_P4_52964_30619868 | NC_021163.1    | Ca_kabuli_chr04 | 30619868                | CC                              | AA              | 1946812545               |
| SNP_P4_52967_30621752 | NC_021163.1    | Ca_kabuli_chr04 | 30621752                | TT                              | CC              | 1946812547               |
| SNP_P4_52968_30626515 | NC_021163.1    | Ca_kabuli_chr04 | 30626515                | TT                              | CC              | 1946812549               |
| SNP_P4_52969_30626581 | NC_021163.1    | Ca_kabuli_chr04 | 30626581                | TT                              | CC              | 1946812551               |
| SNP_P4_52970_30628286 | NC_021163.1    | Ca_kabuli_chr04 | 30628286                | CC                              | TT              | 1946812553               |
| SNP_P4_52973_30630999 | NC_021163.1    | Ca_kabuli_chr04 | 30630999                | CC                              | TT              | 1946812555               |
| SNP_P4_52974_30637639 | NC_021163.1    | Ca_kabuli_chr04 | 30637639                | AA                              | GG              | 1946812557               |
| SNP_P4_52975_30637659 | NC_021163.1    | Ca_kabuli_chr04 | 30637659                | CC                              | TT              | 1946812559               |
| SNP_P4_52976_30637688 | NC_021163.1    | Ca_kabuli_chr04 | 30637688                | TT                              | GG              | 1946812561               |

| SNPs IDs              | Chromosome IDs | Chromosomes     | Physical positions (bp) | CDC Frontier (Reference genome) | (ILWC46 & LPNB) | NCBI SNPdb Accession IDs |
|-----------------------|----------------|-----------------|-------------------------|---------------------------------|-----------------|--------------------------|
| SNP_P4_52977_30637709 | NC_021163.1    | Ca_kabuli_chr04 | 30637709                | AA                              | CC              | 1946812563               |
| SNP_P4_52978_30638091 | NC_021163.1    | Ca_kabuli_chr04 | 30638091                | CC                              | AA              | 1946812565               |
| SNP_P4_52979_30638588 | NC_021163.1    | Ca_kabuli_chr04 | 30638588                | TT                              | CC              | 1946812567               |
| SNP_P4_52981_30652726 | NC_021163.1    | Ca_kabuli_chr04 | 30652726                | GG                              | AA              | 1946812569               |
| SNP_P4_52982_30653013 | NC_021163.1    | Ca_kabuli_chr04 | 30653013                | TT                              | CC              | 1946812571               |
| SNP_P4_52983_30653085 | NC_021163.1    | Ca_kabuli_chr04 | 30653085                | TT                              | AA              | 1946812573               |
| SNP_P4_52984_30658608 | NC_021163.1    | Ca_kabuli_chr04 | 30658608                | TT                              | AA              | 1946812575               |
| SNP_P4_52985_30659778 | NC_021163.1    | Ca_kabuli_chr04 | 30659778                | AA                              | GG              | 1946812577               |
| SNP_P4_52986_30660091 | NC_021163.1    | Ca_kabuli_chr04 | 30660091                | GG                              | AA              | 1946812579               |
| SNP_P4_52987_30660173 | NC_021163.1    | Ca_kabuli_chr04 | 30660173                | CC                              | TT              | 1946812581               |
| SNP_P4_52989_30664177 | NC_021163.1    | Ca_kabuli_chr04 | 30664177                | GG                              | AA              | 1946812584               |
| SNP_P4_52990_30664624 | NC_021163.1    | Ca_kabuli_chr04 | 30664624                | GG                              | TT              | 1946812586               |
| SNP_P4_52991_30673458 | NC_021163.1    | Ca_kabuli_chr04 | 30673458                | AA                              | TT              | 1946812588               |
| SNP_P4_52992_30677901 | NC_021163.1    | Ca_kabuli_chr04 | 30677901                | AA                              | GG              | 1946812590               |
| SNP_P4_52993_30681128 | NC_021163.1    | Ca_kabuli_chr04 | 30681128                | TT                              | CC              | 1946812592               |
| SNP_P4_52995_30686908 | NC_021163.1    | Ca_kabuli_chr04 | 30686908                | TT                              | CC              | 1946812594               |
| SNP_P4_52996_30687126 | NC_021163.1    | Ca_kabuli_chr04 | 30687126                | CC                              | GG              | 1946812596               |
| SNP_P4_52998_30689184 | NC_021163.1    | Ca_kabuli_chr04 | 30689184                | CC                              | TT              | 1946812598               |
| SNP_P4_53000_30698223 | NC_021163.1    | Ca_kabuli_chr04 | 30698223                | AA                              | GG              | 1946812600               |
| SNP_P4_53001_30702756 | NC_021163.1    | Ca_kabuli_chr04 | 30702756                | AA                              | GG              | 1946812602               |
| SNP_P4_53002_30703822 | NC_021163.1    | Ca_kabuli_chr04 | 30703822                | CC                              | GG              | 1946812604               |
| SNP_P4_53003_30706484 | NC_021163.1    | Ca_kabuli_chr04 | 30706484                | AA                              | TT              | 1946812605               |
| SNP_P4_53004_30713634 | NC_021163.1    | Ca_kabuli_chr04 | 30713634                | CC                              | AA              | 1946812607               |
| SNP_P4_53006_30716002 | NC_021163.1    | Ca_kabuli_chr04 | 30716002                | AA                              | GG              | 1946812609               |
| SNP_P4_53007_30716015 | NC_021163.1    | Ca_kabuli_chr04 | 30716015                | CC                              | TT              | 1946812611               |
| SNP_P4_53008_30716351 | NC_021163.1    | Ca_kabuli_chr04 | 30716351                | CC                              | AA              | 1946812613               |
| SNP_P4_53009_30716405 | NC_021163.1    | Ca_kabuli_chr04 | 30716405                | AA                              | GG              | 1946812615               |
| SNP_P4_53010_30716478 | NC_021163.1    | Ca_kabuli_chr04 | 30716478                | AA                              | TT              | 1946812617               |
| SNP_P4_53011_30717561 | NC_021163.1    | Ca_kabuli_chr04 | 30717561                | CC                              | AA              | 1946812619               |
| SNP_P4_53012_30717634 | NC_021163.1    | Ca_kabuli_chr04 | 30717634                | CC                              | AA              | 1946812621               |
| SNP_P4_53013_30717651 | NC_021163.1    | Ca_kabuli_chr04 | 30717651                | CC                              | TT              | 1946812623               |
| SNP_P4_53014_30718057 | NC_021163.1    | Ca_kabuli_chr04 | 30718057                | GG                              | TT              | 1946812625               |
| SNP_P4_53015_30718353 | NC_021163.1    | Ca_kabuli_chr04 | 30718353                | AA                              | GG              | 1946812627               |
| SNP_P4_53016_30718491 | NC_021163.1    | Ca_kabuli_chr04 | 30718491                | AA                              | TT              | 1946812629               |
| SNP_P4_53017_30718897 | NC_021163.1    | Ca_kabuli_chr04 | 30718897                | GG                              | CC              | 1946812631               |
| SNP_P4_53018_30718914 | NC_021163.1    | Ca_kabuli_chr04 | 30718914                | AA                              | TT              | 1946812633               |
| SNP_P4_53019_30719647 | NC_021163.1    | Ca_kabuli_chr04 | 30719647                | TT                              | GG              | 1946812635               |
| SNP_P4_53020_30719648 | NC_021163.1    | Ca_kabuli_chr04 | 30719648                | TT                              | AA              | 1946812637               |
| SNP_P4_53021_30719760 | NC_021163.1    | Ca_kabuli_chr04 | 30719760                | TT                              | GG              | 1946812639               |
| SNP_P4_53022_30720012 | NC_021163.1    | Ca_kabuli_chr04 | 30720012                | TT                              | GG              | 1946812641               |
| SNP_P4_53023_30720276 | NC_021163.1    | Ca_kabuli_chr04 | 30720276                | CC                              | TT              | 1946812643               |
| SNP_P4_53024_30720316 | NC_021163.1    | Ca_kabuli_chr04 | 30720316                | AA                              | TT              | 1946812645               |



| SNPs IDs              | Chromosome IDs | Chromosomes     | Physical positions (bp) | CDC Frontier (Reference genome) | (ILWC46 & LPNB) | NCBI SNPdb Accession IDs |
|-----------------------|----------------|-----------------|-------------------------|---------------------------------|-----------------|--------------------------|
| SNP_P4_53025_30721433 | NC_021163.1    | Ca_kabuli_chr04 | 30721433                | GG                              | AA              | 1946812647               |
| SNP_P4_53026_30721441 | NC_021163.1    | Ca_kabuli_chr04 | 30721441                | TT                              | CC              | 1946812649               |
| SNP_P4_53027_30721736 | NC_021163.1    | Ca_kabuli_chr04 | 30721736                | GG                              | TT              | 1946812651               |
| SNP_P4_53029_30726938 | NC_021163.1    | Ca_kabuli_chr04 | 30726938                | TT                              | CC              | 1946812653               |
| SNP_P4_53031_30730538 | NC_021163.1    | Ca_kabuli_chr04 | 30730538                | GG                              | AA              | 1946812655               |
| SNP_P4_53032_30735680 | NC_021163.1    | Ca_kabuli_chr04 | 30735680                | GG                              | CC              | 1946812657               |
| SNP_P4_53033_30735725 | NC_021163.1    | Ca_kabuli_chr04 | 30735725                | GG                              | AA              | 1946812659               |
| SNP_P4_53034_30735735 | NC_021163.1    | Ca_kabuli_chr04 | 30735735                | AA                              | GG              | 1946812661               |
| SNP_P4_53035_30735991 | NC_021163.1    | Ca_kabuli_chr04 | 30735991                | GG                              | CC              | 1946812663               |
| SNP_P4_53036_30739171 | NC_021163.1    | Ca_kabuli_chr04 | 30739171                | AA                              | GG              | 1946812665               |
| SNP_P4_53037_30739177 | NC_021163.1    | Ca_kabuli_chr04 | 30739177                | GG                              | AA              | 1946812666               |
| SNP_P4_53038_30739188 | NC_021163.1    | Ca_kabuli_chr04 | 30739188                | AA                              | GG              | 1946812668               |
| SNP_P4_53039_30739210 | NC_021163.1    | Ca_kabuli_chr04 | 30739210                | AA                              | TT              | 1946812670               |
| SNP_P4_53040_30740117 | NC_021163.1    | Ca_kabuli_chr04 | 30740117                | GG                              | CC              | 1946812672               |
| SNP_P4_53041_30740237 | NC_021163.1    | Ca_kabuli_chr04 | 30740237                | TT                              | AA              | 1946812674               |
| SNP_P4_53042_30741541 | NC_021163.1    | Ca_kabuli_chr04 | 30741541                | GG                              | TT              | 1946812676               |
| SNP_P4_53043_30742913 | NC_021163.1    | Ca_kabuli_chr04 | 30742913                | AA                              | GG              | 1946812678               |
| SNP_P4_53044_30742915 | NC_021163.1    | Ca_kabuli_chr04 | 30742915                | TT                              | CC              | 1946812680               |
| SNP_P4_53045_30744192 | NC_021163.1    | Ca_kabuli_chr04 | 30744192                | GG                              | CC              | 1946812682               |
| SNP_P4_53046_30747206 | NC_021163.1    | Ca_kabuli_chr04 | 30747206                | AA                              | GG              | 1946812684               |
| SNP_P4_53047_30747586 | NC_021163.1    | Ca_kabuli_chr04 | 30747586                | CC                              | TT              | 1946812686               |
| SNP_P4_53048_30749629 | NC_021163.1    | Ca_kabuli_chr04 | 30749629                | GG                              | AA              | 1946812688               |
| SNP_P4_53049_30749631 | NC_021163.1    | Ca_kabuli_chr04 | 30749631                | GG                              | AA              | 1946812690               |
| SNP_P4_53051_30750436 | NC_021163.1    | Ca_kabuli_chr04 | 30750436                | TT                              | CC              | 1946812692               |
| SNP_P4_53052_30750456 | NC_021163.1    | Ca_kabuli_chr04 | 30750456                | CC                              | TT              | 1946812694               |
| SNP_P4_53053_30754779 | NC_021163.1    | Ca_kabuli_chr04 | 30754779                | CC                              | TT              | 1946812696               |
| SNP_P4_53054_30754937 | NC_021163.1    | Ca_kabuli_chr04 | 30754937                | TT                              | CC              | 1946812698               |
| SNP_P4_53055_30759799 | NC_021163.1    | Ca_kabuli_chr04 | 30759799                | AA                              | TT              | 1946812700               |
| SNP_P4_53056_30763136 | NC_021163.1    | Ca_kabuli_chr04 | 30763136                | TT                              | CC              | 1946812703               |
| SNP_P4_53057_30763821 | NC_021163.1    | Ca_kabuli_chr04 | 30763821                | GG                              | AA              | 1946812705               |
| SNP_P4_53058_30765774 | NC_021163.1    | Ca_kabuli_chr04 | 30765774                | CC                              | TT              | 1946812707               |
| SNP_P4_53059_30766356 | NC_021163.1    | Ca_kabuli_chr04 | 30766356                | CC                              | TT              | 1946812709               |
| SNP_P4_53060_30767731 | NC_021163.1    | Ca_kabuli_chr04 | 30767731                | CC                              | TT              | 1946812711               |
| SNP_P4_53061_30768017 | NC_021163.1    | Ca_kabuli_chr04 | 30768017                | GG                              | TT              | 1946812713               |
| SNP_P4_53062_30768458 | NC_021163.1    | Ca_kabuli_chr04 | 30768458                | GG                              | TT              | 1946812715               |
| SNP_P4_53063_30769470 | NC_021163.1    | Ca_kabuli_chr04 | 30769470                | GG                              | TT              | 1946812717               |
| SNP_P4_53064_30770815 | NC_021163.1    | Ca_kabuli_chr04 | 30770815                | AA                              | GG              | 1946812719               |
| SNP_P4_53067_30776368 | NC_021163.1    | Ca_kabuli_chr04 | 30776368                | GG                              | AA              | 1946812721               |
| SNP_P4_53068_30781970 | NC_021163.1    | Ca_kabuli_chr04 | 30781970                | AA                              | GG              | 1946812723               |
| SNP_P4_53069_30782513 | NC_021163.1    | Ca_kabuli_chr04 | 30782513                | CC                              | TT              | 1946812725               |
| SNP_P4_53070_30782525 | NC_021163.1    | Ca_kabuli_chr04 | 30782525                | AA                              | GG              | 1946812727               |
| SNP_P4_53071_30782542 | NC_021163.1    | Ca_kabuli_chr04 | 30782542                | CC                              | TT              | 1946812729               |

| SNPs IDs              | Chromosome IDs | Chromosomes     | Physical positions (bp) | CDC Frontier (Reference genome) | (ILWC46 & LPNB) | NCBI SNPdb Accession IDs |
|-----------------------|----------------|-----------------|-------------------------|---------------------------------|-----------------|--------------------------|
| SNP_P4_53072_30782621 | NC_021163.1    | Ca_kabuli_chr04 | 30782621                | TT                              | CC              | 1946812731               |
| SNP_P4_53074_30790303 | NC_021163.1    | Ca_kabuli_chr04 | 30790303                | CC                              | AA              | 1946812733               |
| SNP_P4_53077_30795094 | NC_021163.1    | Ca_kabuli_chr04 | 30795094                | TT                              | CC              | 1946812735               |
| SNP_P4_53078_30799090 | NC_021163.1    | Ca_kabuli_chr04 | 30799090                | TT                              | CC              | 1946812737               |
| SNP_P4_53079_30801965 | NC_021163.1    | Ca_kabuli_chr04 | 30801965                | TT                              | GG              | 1946812739               |
| SNP_P4_53080_30802155 | NC_021163.1    | Ca_kabuli_chr04 | 30802155                | CC                              | AA              | 1946812741               |
| SNP_P4_53081_30805739 | NC_021163.1    | Ca_kabuli_chr04 | 30805739                | TT                              | AA              | 1946812743               |
| SNP_P4_53082_30818937 | NC_021163.1    | Ca_kabuli_chr04 | 30818937                | AA                              | GG              | 1946812745               |
| SNP_P4_53083_30819879 | NC_021163.1    | Ca_kabuli_chr04 | 30819879                | GG                              | AA              | 1946812747               |
| SNP_P4_53084_30820129 | NC_021163.1    | Ca_kabuli_chr04 | 30820129                | CC                              | TT              | 1946812749               |
| SNP_P4_53085_30820460 | NC_021163.1    | Ca_kabuli_chr04 | 30820460                | CC                              | AA              | 1946812751               |
| SNP_P4_53086_30820562 | NC_021163.1    | Ca_kabuli_chr04 | 30820562                | GG                              | AA              | 1946812753               |
| SNP_P4_53087_30822862 | NC_021163.1    | Ca_kabuli_chr04 | 30822862                | GG                              | AA              | 1946812755               |
| SNP_P4_53089_30823387 | NC_021163.1    | Ca_kabuli_chr04 | 30823387                | GG                              | AA              | 1946812757               |
| SNP_P4_53090_30824258 | NC_021163.1    | Ca_kabuli_chr04 | 30824258                | AA                              | CC              | 1946812759               |
| SNP_P4_53092_30826036 | NC_021163.1    | Ca_kabuli_chr04 | 30826036                | TT                              | CC              | 1946812761               |
| SNP_P4_53093_30827427 | NC_021163.1    | Ca_kabuli_chr04 | 30827427                | GG                              | AA              | 1946812763               |
| SNP_P4_53094_30827437 | NC_021163.1    | Ca_kabuli_chr04 | 30827437                | GG                              | TT              | 1946812765               |
| SNP_P4_53095_30827657 | NC_021163.1    | Ca_kabuli_chr04 | 30827657                | AA                              | CC              | 1946812767               |
| SNP_P4_53096_30828557 | NC_021163.1    | Ca_kabuli_chr04 | 30828557                | TT                              | CC              | 1946812769               |
| SNP_P4_53097_30828641 | NC_021163.1    | Ca_kabuli_chr04 | 30828641                | CC                              | TT              | 1946812771               |
| SNP_P4_53098_30828729 | NC_021163.1    | Ca_kabuli_chr04 | 30828729                | GG                              | AA              | 1946812773               |
| SNP_P4_53099_30828912 | NC_021163.1    | Ca_kabuli_chr04 | 30828912                | TT                              | AA              | 1946812775               |
| SNP_P4_53100_30828938 | NC_021163.1    | Ca_kabuli_chr04 | 30828938                | TT                              | GG              | 1946812777               |
| SNP_P4_53101_30829404 | NC_021163.1    | Ca_kabuli_chr04 | 30829404                | AA                              | GG              | 1946812779               |
| SNP_P4_53102_30829655 | NC_021163.1    | Ca_kabuli_chr04 | 30829655                | TT                              | CC              | 1946812781               |
| SNP_P4_53103_30829672 | NC_021163.1    | Ca_kabuli_chr04 | 30829672                | TT                              | GG              | 1946812783               |
| SNP_P4_53104_30829681 | NC_021163.1    | Ca_kabuli_chr04 | 30829681                | AA                              | CC              | 1946812785               |
| SNP_P4_53105_30829706 | NC_021163.1    | Ca_kabuli_chr04 | 30829706                | TT                              | GG              | 1946812787               |
| SNP_P4_53106_30829877 | NC_021163.1    | Ca_kabuli_chr04 | 30829877                | TT                              | CC              | 1946812789               |
| SNP_P4_53107_30829934 | NC_021163.1    | Ca_kabuli_chr04 | 30829934                | GG                              | AA              | 1946812791               |
| SNP_P4_53108_30829942 | NC_021163.1    | Ca_kabuli_chr04 | 30829942                | TT                              | GG              | 1946812793               |
| SNP_P4_53109_30830250 | NC_021163.1    | Ca_kabuli_chr04 | 30830250                | AA                              | TT              | 1946812795               |
| SNP_P4_53110_30831862 | NC_021163.1    | Ca_kabuli_chr04 | 30831862                | CC                              | GG              | 1946812797               |
| SNP_P4_53111_30832190 | NC_021163.1    | Ca_kabuli_chr04 | 30832190                | CC                              | TT              | 1946812800               |
| SNP_P4_53112_30833915 | NC_021163.1    | Ca_kabuli_chr04 | 30833915                | GG                              | AA              | 1946812802               |
| SNP_P4_53113_30843200 | NC_021163.1    | Ca_kabuli_chr04 | 30843200                | CC                              | TT              | 1946812804               |
| SNP_P4_53114_30843569 | NC_021163.1    | Ca_kabuli_chr04 | 30843569                | AA                              | CC              | 1946812806               |
| SNP_P4_53117_30861531 | NC_021163.1    | Ca_kabuli_chr04 | 30861531                | CC                              | TT              | 1946812808               |
| SNP_P4_53118_30861539 | NC_021163.1    | Ca_kabuli_chr04 | 30861539                | GG                              | AA              | 1946812810               |
| SNP_P4_53119_30861554 | NC_021163.1    | Ca_kabuli_chr04 | 30861554                | GG                              | AA              | 1946812812               |
| SNP_P4_53120_30861558 | NC_021163.1    | Ca_kabuli_chr04 | 30861558                | TT                              | AA              | 1946812814               |

| SNPs IDs              | Chromosome IDs | Chromosomes     | Physical positions (bp) | CDC Frontier (Reference genome) | (ILWC46 & LPNB) | NCBI SNPdb Accession IDs |
|-----------------------|----------------|-----------------|-------------------------|---------------------------------|-----------------|--------------------------|
| SNP_P4_53121_30861578 | NC_021163.1    | Ca_kabuli_chr04 | 30861578                | CC                              | GG              | 1946812816               |
| SNP_P4_53122_30861582 | NC_021163.1    | Ca_kabuli_chr04 | 30861582                | AA                              | GG              | 1946812818               |
| SNP_P4_53123_30861942 | NC_021163.1    | Ca_kabuli_chr04 | 30861942                | AA                              | GG              | 1946812820               |
| SNP_P4_53124_30863297 | NC_021163.1    | Ca_kabuli_chr04 | 30863297                | GG                              | AA              | 1946812822               |
| SNP_P4_53125_30867930 | NC_021163.1    | Ca_kabuli_chr04 | 30867930                | GG                              | AA              | 1946812824               |
| SNP_P4_53126_30868062 | NC_021163.1    | Ca_kabuli_chr04 | 30868062                | TT                              | GG              | 1946812826               |
| SNP_P4_53127_30868126 | NC_021163.1    | Ca_kabuli_chr04 | 30868126                | AA                              | GG              | 1946812828               |
| SNP_P4_53128_30868439 | NC_021163.1    | Ca_kabuli_chr04 | 30868439                | GG                              | AA              | 1946812831               |
| SNP_P4_53129_30869280 | NC_021163.1    | Ca_kabuli_chr04 | 30869280                | GG                              | AA              | 1946812833               |
| SNP_P4_53130_30869287 | NC_021163.1    | Ca_kabuli_chr04 | 30869287                | AA                              | CC              | 1946812835               |
| SNP_P4_53131_30869663 | NC_021163.1    | Ca_kabuli_chr04 | 30869663                | AA                              | GG              | 1946812837               |
| SNP_P4_53132_30869667 | NC_021163.1    | Ca_kabuli_chr04 | 30869667                | GG                              | CC              | 1946812839               |
| SNP_P4_53133_30869988 | NC_021163.1    | Ca_kabuli_chr04 | 30869988                | AA                              | TT              | 1946812841               |
| SNP_P4_53134_30870189 | NC_021163.1    | Ca_kabuli_chr04 | 30870189                | TT                              | AA              | 1946812843               |
| SNP_P4_53135_30870212 | NC_021163.1    | Ca_kabuli_chr04 | 30870212                | GG                              | AA              | 1946812845               |
| SNP_P4_53137_30870268 | NC_021163.1    | Ca_kabuli_chr04 | 30870268                | CC                              | TT              | 1946812847               |
| SNP_P4_53138_30871036 | NC_021163.1    | Ca_kabuli_chr04 | 30871036                | AA                              | GG              | 1946812849               |
| SNP_P4_53139_30871065 | NC_021163.1    | Ca_kabuli_chr04 | 30871065                | AA                              | GG              | 1946812851               |
| SNP_P4_53140_30871493 | NC_021163.1    | Ca_kabuli_chr04 | 30871493                | AA                              | TT              | 1946812853               |
| SNP_P4_53141_30871657 | NC_021163.1    | Ca_kabuli_chr04 | 30871657                | GG                              | AA              | 1946812855               |
| SNP_P4_53142_30871717 | NC_021163.1    | Ca_kabuli_chr04 | 30871717                | CC                              | TT              | 1946812857               |
| SNP_P4_53143_30871722 | NC_021163.1    | Ca_kabuli_chr04 | 30871722                | CC                              | AA              | 1946812859               |
| SNP_P4_53144_30871723 | NC_021163.1    | Ca_kabuli_chr04 | 30871723                | TT                              | CC              | 1946812861               |
| SNP_P4_53145_30871727 | NC_021163.1    | Ca_kabuli_chr04 | 30871727                | GG                              | TT              | 1946812863               |
| SNP_P4_53146_30871733 | NC_021163.1    | Ca_kabuli_chr04 | 30871733                | TT                              | CC              | 1946812865               |
| SNP_P4_53147_30872380 | NC_021163.1    | Ca_kabuli_chr04 | 30872380                | AA                              | GG              | 1946812867               |
| SNP_P4_53148_30872632 | NC_021163.1    | Ca_kabuli_chr04 | 30872632                | AA                              | GG              | 1946812869               |
| SNP_P4_53149_30872646 | NC_021163.1    | Ca_kabuli_chr04 | 30872646                | GG                              | TT              | 1946812871               |
| SNP_P4_53151_30872717 | NC_021163.1    | Ca_kabuli_chr04 | 30872717                | GG                              | AA              | 1946812873               |
| SNP_P4_53153_30872870 | NC_021163.1    | Ca_kabuli_chr04 | 30872870                | TT                              | CC              | 1946812875               |
| SNP_P4_53154_30872900 | NC_021163.1    | Ca_kabuli_chr04 | 30872900                | AA                              | CC              | 1946812877               |
| SNP_P4_53155_30872956 | NC_021163.1    | Ca_kabuli_chr04 | 30872956                | AA                              | CC              | 1946812879               |
| SNP_P4_53156_30873502 | NC_021163.1    | Ca_kabuli_chr04 | 30873502                | CC                              | TT              | 1946812881               |
| SNP_P4_53157_30873509 | NC_021163.1    | Ca_kabuli_chr04 | 30873509                | GG                              | AA              | 1946812883               |
| SNP_P4_53158_30873544 | NC_021163.1    | Ca_kabuli_chr04 | 30873544                | TT                              | CC              | 1946812885               |
| SNP_P4_53160_30874557 | NC_021163.1    | Ca_kabuli_chr04 | 30874557                | GG                              | AA              | 1946812887               |
| SNP_P4_53161_30874571 | NC_021163.1    | Ca_kabuli_chr04 | 30874571                | GG                              | TT              | 1946812889               |
| SNP_P4_53162_30877630 | NC_021163.1    | Ca_kabuli_chr04 | 30877630                | CC                              | TT              | 1946812891               |
| SNP_P4_53163_30881631 | NC_021163.1    | Ca_kabuli_chr04 | 30881631                | CC                              | AA              | 1946812893               |
| SNP_P4_53164_30881642 | NC_021163.1    | Ca_kabuli_chr04 | 30881642                | CC                              | AA              | 1946812895               |
| SNP_P4_53165_30882397 | NC_021163.1    | Ca_kabuli_chr04 | 30882397                | TT                              | CC              | 1946812897               |
| SNP_P4_53167_30883391 | NC_021163.1    | Ca_kabuli_chr04 | 30883391                | AA                              | CC              | 1946812899               |

| SNPs IDs              | Chromosome IDs | Chromosomes     | Physical positions (bp) | CDC Frontier (Reference genome) | (ILWC46 & LPNB) | NCBI SNPdb Accession IDs |
|-----------------------|----------------|-----------------|-------------------------|---------------------------------|-----------------|--------------------------|
| SNP_P4_53169_30883532 | NC_021163.1    | Ca_kabuli_chr04 | 30883532                | CC                              | TT              | 1946812901               |
| SNP_P4_53170_30884725 | NC_021163.1    | Ca_kabuli_chr04 | 30884725                | AA                              | GG              | 1946812903               |
| SNP_P4_53171_30884756 | NC_021163.1    | Ca_kabuli_chr04 | 30884756                | CC                              | TT              | 1946812905               |
| SNP_P4_53172_30884762 | NC_021163.1    | Ca_kabuli_chr04 | 30884762                | GG                              | AA              | 1946812907               |
| SNP_P4_53173_30884772 | NC_021163.1    | Ca_kabuli_chr04 | 30884772                | CC                              | TT              | 1946812909               |
| SNP_P4_53174_30885000 | NC_021163.1    | Ca_kabuli_chr04 | 30885000                | CC                              | TT              | 1946812911               |
| SNP_P4_53175_30886056 | NC_021163.1    | Ca_kabuli_chr04 | 30886056                | CC                              | TT              | 1946812913               |
| SNP_P4_53176_30886088 | NC_021163.1    | Ca_kabuli_chr04 | 30886088                | TT                              | AA              | 1946812915               |
| SNP_P4_53177_30886286 | NC_021163.1    | Ca_kabuli_chr04 | 30886286                | AA                              | GG              | 1946812917               |
| SNP_P4_53178_30886293 | NC_021163.1    | Ca_kabuli_chr04 | 30886293                | TT                              | GG              | 1946812919               |
| SNP_P4_53179_30886405 | NC_021163.1    | Ca_kabuli_chr04 | 30886405                | GG                              | AA              | 1946812921               |
| SNP_P4_53180_30886764 | NC_021163.1    | Ca_kabuli_chr04 | 30886764                | CC                              | TT              | 1946812923               |
| SNP_P4_53181_30886774 | NC_021163.1    | Ca_kabuli_chr04 | 30886774                | AA                              | GG              | 1946812925               |
| SNP_P4_53182_30886936 | NC_021163.1    | Ca_kabuli_chr04 | 30886936                | TT                              | CC              | 1946812927               |
| SNP_P4_53183_30886940 | NC_021163.1    | Ca_kabuli_chr04 | 30886940                | TT                              | CC              | 1946812929               |
| SNP_P4_53184_30886960 | NC_021163.1    | Ca_kabuli_chr04 | 30886960                | AA                              | GG              | 1946812931               |
| SNP_P4_53185_30887477 | NC_021163.1    | Ca_kabuli_chr04 | 30887477                | CC                              | TT              | 1946812933               |
| SNP_P4_53186_30887752 | NC_021163.1    | Ca_kabuli_chr04 | 30887752                | TT                              | GG              | 1946812935               |
| SNP_P4_53187_30887767 | NC_021163.1    | Ca_kabuli_chr04 | 30887767                | GG                              | TT              | 1946812937               |
| SNP_P4_53188_30888035 | NC_021163.1    | Ca_kabuli_chr04 | 30888035                | GG                              | AA              | 1946812939               |
| SNP_P4_53189_30888082 | NC_021163.1    | Ca_kabuli_chr04 | 30888082                | AA                              | TT              | 1946812941               |
| SNP_P4_53190_30889129 | NC_021163.1    | Ca_kabuli_chr04 | 30889129                | CC                              | TT              | 1946812943               |
| SNP_P4_53191_30889130 | NC_021163.1    | Ca_kabuli_chr04 | 30889130                | GG                              | AA              | 1946812945               |
| SNP_P4_53192_30889146 | NC_021163.1    | Ca_kabuli_chr04 | 30889146                | TT                              | AA              | 1946812947               |
| SNP_P4_53193_30897372 | NC_021163.1    | Ca_kabuli_chr04 | 30897372                | TT                              | CC              | 1946812949               |
| SNP_P4_53194_30897398 | NC_021163.1    | Ca_kabuli_chr04 | 30897398                | TT                              | CC              | 1946812951               |
| SNP_P4_53195_30897428 | NC_021163.1    | Ca_kabuli_chr04 | 30897428                | TT                              | CC              | 1946812953               |
| SNP_P4_53196_30897545 | NC_021163.1    | Ca_kabuli_chr04 | 30897545                | CC                              | TT              | 1946812955               |
| SNP_P4_53197_30897574 | NC_021163.1    | Ca_kabuli_chr04 | 30897574                | TT                              | CC              | 1946812957               |
| SNP_P4_53198_30897584 | NC_021163.1    | Ca_kabuli_chr04 | 30897584                | TT                              | AA              | 1946812959               |
| SNP_P4_53199_30897594 | NC_021163.1    | Ca_kabuli_chr04 | 30897594                | GG                              | AA              | 1946812961               |
| SNP_P4_53200_30897849 | NC_021163.1    | Ca_kabuli_chr04 | 30897849                | AA                              | GG              | 1946812963               |
| SNP_P4_53201_30897870 | NC_021163.1    | Ca_kabuli_chr04 | 30897870                | AA                              | GG              | 1946812965               |
| SNP_P4_53202_30897873 | NC_021163.1    | Ca_kabuli_chr04 | 30897873                | TT                              | GG              | 1946812966               |
| SNP_P4_53203_30897959 | NC_021163.1    | Ca_kabuli_chr04 | 30897959                | CC                              | TT              | 1946812968               |
| SNP_P4_53204_30897960 | NC_021163.1    | Ca_kabuli_chr04 | 30897960                | AA                              | TT              | 1946812970               |
| SNP_P4_53205_30898028 | NC_021163.1    | Ca_kabuli_chr04 | 30898028                | CC                              | AA              | 1946812972               |
| SNP_P4_53206_30918821 | NC_021163.1    | Ca_kabuli_chr04 | 30918821                | TT                              | GG              | 1946812974               |
| SNP_P4_53207_30924415 | NC_021163.1    | Ca_kabuli_chr04 | 30924415                | AA                              | GG              | 1946812976               |
| SNP_P4_53208_30928669 | NC_021163.1    | Ca_kabuli_chr04 | 30928669                | AA                              | GG              | 1946812977               |
| SNP_P4_53209_30928671 | NC_021163.1    | Ca_kabuli_chr04 | 30928671                | GG                              | TT              | 1946812978               |
| SNP_P4_53210_30928674 | NC_021163.1    | Ca_kabuli_chr04 | 30928674                | CC                              | GG              | 1946812979               |

| SNPs IDs              | Chromosome IDs | Chromosomes     | Physical positions (bp) | CDC Frontier (Reference genome) | (ILWC46 & LPNB) | NCBI SNPdb Accession IDs |
|-----------------------|----------------|-----------------|-------------------------|---------------------------------|-----------------|--------------------------|
| SNP_P4_53212_30928825 | NC_021163.1    | Ca_kabuli_chr04 | 30928825                | CC                              | TT              | 1946812980               |
| SNP_P4_53213_30928842 | NC_021163.1    | Ca_kabuli_chr04 | 30928842                | AA                              | CC              | 1946812981               |
| SNP_P4_53214_30928872 | NC_021163.1    | Ca_kabuli_chr04 | 30928872                | TT                              | CC              | 1946812982               |
| SNP_P4_53215_30940007 | NC_021163.1    | Ca_kabuli_chr04 | 30940007                | TT                              | GG              | 1946812983               |
| SNP_P4_53216_30940141 | NC_021163.1    | Ca_kabuli_chr04 | 30940141                | AA                              | TT              | 1946812984               |
| SNP_P4_53217_30940189 | NC_021163.1    | Ca_kabuli_chr04 | 30940189                | GG                              | TT              | 1946812985               |
| SNP_P4_53218_30940480 | NC_021163.1    | Ca_kabuli_chr04 | 30940480                | CC                              | TT              | 1946812986               |
| SNP_P4_53219_30945352 | NC_021163.1    | Ca_kabuli_chr04 | 30945352                | AA                              | GG              | 1946812987               |
| SNP_P4_53220_30945578 | NC_021163.1    | Ca_kabuli_chr04 | 30945578                | AA                              | GG              | 1946812988               |
| SNP_P4_53221_30945809 | NC_021163.1    | Ca_kabuli_chr04 | 30945809                | GG                              | AA              | 1946812989               |
| SNP_P4_53222_30946345 | NC_021163.1    | Ca_kabuli_chr04 | 30946345                | CC                              | GG              | 1946812990               |
| SNP_P4_53224_30946359 | NC_021163.1    | Ca_kabuli_chr04 | 30946359                | TT                              | CC              | 1946812991               |
| SNP_P4_53225_30946375 | NC_021163.1    | Ca_kabuli_chr04 | 30946375                | CC                              | AA              | 1946812992               |
| SNP_P4_53226_30946379 | NC_021163.1    | Ca_kabuli_chr04 | 30946379                | GG                              | AA              | 1946812993               |
| SNP_P4_53227_30946417 | NC_021163.1    | Ca_kabuli_chr04 | 30946417                | CC                              | TT              | 1946812994               |
| SNP_P4_53228_30946688 | NC_021163.1    | Ca_kabuli_chr04 | 30946688                | GG                              | AA              | 1946812995               |
| SNP_P4_53229_30951498 | NC_021163.1    | Ca_kabuli_chr04 | 30951498                | CC                              | TT              | 1946812996               |
| SNP_P4_53230_30951680 | NC_021163.1    | Ca_kabuli_chr04 | 30951680                | AA                              | CC              | 1946812997               |
| SNP_P4_53231_30951835 | NC_021163.1    | Ca_kabuli_chr04 | 30951835                | AA                              | GG              | 1946812998               |
| SNP_P4_53232_30952222 | NC_021163.1    | Ca_kabuli_chr04 | 30952222                | TT                              | AA              | 1946812999               |
| SNP_P4_53233_30952403 | NC_021163.1    | Ca_kabuli_chr04 | 30952403                | CC                              | AA              | 1946813000               |
| SNP_P4_53234_30952909 | NC_021163.1    | Ca_kabuli_chr04 | 30952909                | CC                              | TT              | 1946813001               |
| SNP_P4_53235_30953041 | NC_021163.1    | Ca_kabuli_chr04 | 30953041                | CC                              | TT              | 1946813002               |
| SNP_P4_53236_30953054 | NC_021163.1    | Ca_kabuli_chr04 | 30953054                | TT                              | AA              | 1946813003               |
| SNP_P4_53237_30953247 | NC_021163.1    | Ca_kabuli_chr04 | 30953247                | GG                              | AA              | 1946813004               |
| SNP_P4_53238_30953269 | NC_021163.1    | Ca_kabuli_chr04 | 30953269                | CC                              | TT              | 1946813005               |
| SNP_P4_53239_30954202 | NC_021163.1    | Ca_kabuli_chr04 | 30954202                | GG                              | AA              | 1946813006               |
| SNP_P4_53240_30954217 | NC_021163.1    | Ca_kabuli_chr04 | 30954217                | TT                              | CC              | 1946813007               |
| SNP_P4_53241_30954512 | NC_021163.1    | Ca_kabuli_chr04 | 30954512                | AA                              | GG              | 1946813008               |
| SNP_P4_53243_30955665 | NC_021163.1    | Ca_kabuli_chr04 | 30955665                | GG                              | AA              | 1946813009               |
| SNP_P4_53244_30956472 | NC_021163.1    | Ca_kabuli_chr04 | 30956472                | GG                              | AA              | 1946813010               |
| SNP_P4_53246_30957161 | NC_021163.1    | Ca_kabuli_chr04 | 30957161                | CC                              | TT              | 1946813011               |
| SNP_P4_53248_30957346 | NC_021163.1    | Ca_kabuli_chr04 | 30957346                | TT                              | AA              | 1946813012               |
| SNP_P4_53249_30957390 | NC_021163.1    | Ca_kabuli_chr04 | 30957390                | AA                              | CC              | 1946813014               |
| SNP_P4_53251_30957651 | NC_021163.1    | Ca_kabuli_chr04 | 30957651                | GG                              | TT              | 1946813016               |
| SNP_P4_53252_30957906 | NC_021163.1    | Ca_kabuli_chr04 | 30957906                | TT                              | GG              | 1946813018               |
| SNP_P4_53253_30957980 | NC_021163.1    | Ca_kabuli_chr04 | 30957980                | GG                              | AA              | 1946813020               |
| SNP_P4_53254_30958013 | NC_021163.1    | Ca_kabuli_chr04 | 30958013                | TT                              | GG              | 1946813022               |
| SNP_P4_53255_30958040 | NC_021163.1    | Ca_kabuli_chr04 | 30958040                | AA                              | GG              | 1946813024               |
| SNP_P4_53256_30958086 | NC_021163.1    | Ca_kabuli_chr04 | 30958086                | GG                              | AA              | 1946813026               |
| SNP_P4_53257_30958382 | NC_021163.1    | Ca_kabuli_chr04 | 30958382                | AA                              | GG              | 1946813028               |
| SNP_P4_53258_30958534 | NC_021163.1    | Ca_kabuli_chr04 | 30958534                | AA                              | TT              | 1946813030               |

| SNPs IDs              | Chromosome IDs | Chromosomes     | Physical positions (bp) | CDC Frontier (Reference genome) | (ILWC46 & LPNB) | NCBI SNPdb Accession IDs |
|-----------------------|----------------|-----------------|-------------------------|---------------------------------|-----------------|--------------------------|
| SNP_P4_53260_30958679 | NC_021163.1    | Ca_kabuli_chr04 | 30958679                | AA                              | GG              | 1946813032               |
| SNP_P4_53261_30958702 | NC_021163.1    | Ca_kabuli_chr04 | 30958702                | GG                              | TT              | 1946813034               |
| SNP_P4_53262_30958703 | NC_021163.1    | Ca_kabuli_chr04 | 30958703                | TT                              | GG              | 1946813037               |
| SNP_P4_53263_30958729 | NC_021163.1    | Ca_kabuli_chr04 | 30958729                | TT                              | CC              | 1946813039               |
| SNP_P4_53264_30958966 | NC_021163.1    | Ca_kabuli_chr04 | 30958966                | TT                              | AA              | 1946813041               |
| SNP_P4_53265_30959223 | NC_021163.1    | Ca_kabuli_chr04 | 30959223                | GG                              | CC              | 1946813043               |
| SNP_P4_53266_30962022 | NC_021163.1    | Ca_kabuli_chr04 | 30962022                | CC                              | TT              | 1946813046               |
| SNP_P4_53267_30964579 | NC_021163.1    | Ca_kabuli_chr04 | 30964579                | GG                              | CC              | 1946813048               |
| SNP_P4_53268_30964953 | NC_021163.1    | Ca_kabuli_chr04 | 30964953                | CC                              | GG              | 1946813050               |
| SNP_P4_53269_30965279 | NC_021163.1    | Ca_kabuli_chr04 | 30965279                | TT                              | GG              | 1946813052               |
| SNP_P4_53270_30965322 | NC_021163.1    | Ca_kabuli_chr04 | 30965322                | CC                              | AA              | 1946813054               |
| SNP_P4_53272_30965974 | NC_021163.1    | Ca_kabuli_chr04 | 30965974                | TT                              | CC              | 1946813056               |
| SNP_P4_53273_30980299 | NC_021163.1    | Ca_kabuli_chr04 | 30980299                | CC                              | GG              | 1946813059               |
| SNP_P4_53274_30980344 | NC_021163.1    | Ca_kabuli_chr04 | 30980344                | CC                              | TT              | 1946813061               |
| SNP_P4_53275_30980357 | NC_021163.1    | Ca_kabuli_chr04 | 30980357                | CC                              | TT              | 1946813063               |
| SNP_P4_53276_30980363 | NC_021163.1    | Ca_kabuli_chr04 | 30980363                | CC                              | TT              | 1946813065               |
| SNP_P4_53277_30982341 | NC_021163.1    | Ca_kabuli_chr04 | 30982341                | GG                              | AA              | 1946813067               |
| SNP_P4_53278_30982606 | NC_021163.1    | Ca_kabuli_chr04 | 30982606                | GG                              | AA              | 1946813069               |
| SNP_P4_53279_30982877 | NC_021163.1    | Ca_kabuli_chr04 | 30982877                | AA                              | TT              | 1946813071               |
| SNP_P4_53280_30982993 | NC_021163.1    | Ca_kabuli_chr04 | 30982993                | CC                              | AA              | 1946813073               |
| SNP_P4_53281_30983079 | NC_021163.1    | Ca_kabuli_chr04 | 30983079                | AA                              | GG              | 1946813075               |
| SNP_P4_53282_30983112 | NC_021163.1    | Ca_kabuli_chr04 | 30983112                | AA                              | GG              | 1946813077               |
| SNP_P4_53283_30983205 | NC_021163.1    | Ca_kabuli_chr04 | 30983205                | AA                              | TT              | 1946813079               |
| SNP_P4_53284_30983244 | NC_021163.1    | Ca_kabuli_chr04 | 30983244                | GG                              | AA              | 1946813081               |
| SNP_P4_53285_30983351 | NC_021163.1    | Ca_kabuli_chr04 | 30983351                | TT                              | GG              | 1946813084               |
| SNP_P4_53286_30983392 | NC_021163.1    | Ca_kabuli_chr04 | 30983392                | TT                              | CC              | 1946813086               |
| SNP_P4_53287_30983460 | NC_021163.1    | Ca_kabuli_chr04 | 30983460                | TT                              | GG              | 1946813088               |
| SNP_P4_53288_30983700 | NC_021163.1    | Ca_kabuli_chr04 | 30983700                | GG                              | AA              | 1946813090               |
| SNP_P4_53289_30983901 | NC_021163.1    | Ca_kabuli_chr04 | 30983901                | TT                              | CC              | 1946813092               |
| SNP_P4_53290_30998072 | NC_021163.1    | Ca_kabuli_chr04 | 30998072                | AA                              | GG              | 1946813094               |
| SNP_P4_53291_30998109 | NC_021163.1    | Ca_kabuli_chr04 | 30998109                | AA                              | GG              | 1946813096               |
| SNP_P4_53292_30999031 | NC_021163.1    | Ca_kabuli_chr04 | 30999031                | TT                              | CC              | 1946813098               |
| SNP_P4_53293_31000125 | NC_021163.1    | Ca_kabuli_chr04 | 31000125                | GG                              | AA              | 1946813100               |
| SNP_P4_53294_31000134 | NC_021163.1    | Ca_kabuli_chr04 | 31000134                | TT                              | AA              | 1946813102               |
| SNP_P4_53295_31000144 | NC_021163.1    | Ca_kabuli_chr04 | 31000144                | CC                              | AA              | 1946813104               |
| SNP_P4_53296_31001287 | NC_021163.1    | Ca_kabuli_chr04 | 31001287                | GG                              | AA              | 1946813106               |
| SNP_P4_53297_31001425 | NC_021163.1    | Ca_kabuli_chr04 | 31001425                | AA                              | GG              | 1946813108               |
| SNP_P4_53298_31001470 | NC_021163.1    | Ca_kabuli_chr04 | 31001470                | AA                              | GG              | 1946813110               |
| SNP_P4_53300_31012369 | NC_021163.1    | Ca_kabuli_chr04 | 31012369                | AA                              | CC              | 1946813112               |
| SNP_P4_53301_31012446 | NC_021163.1    | Ca_kabuli_chr04 | 31012446                | GG                              | AA              | 1946813114               |
| SNP_P4_53302_31012453 | NC_021163.1    | Ca_kabuli_chr04 | 31012453                | CC                              | TT              | 1946813116               |
| SNP_P4_53303_31012586 | NC_021163.1    | Ca_kabuli_chr04 | 31012586                | GG                              | AA              | 1946813118               |

| SNPs IDs              | Chromosome IDs | Chromosomes     | Physical positions (bp) | CDC Frontier (Reference genome) | (ILWC46 & LPNB) | NCBI SNPdb Accession IDs |
|-----------------------|----------------|-----------------|-------------------------|---------------------------------|-----------------|--------------------------|
| SNP_P4_53304_31012589 | NC_021163.1    | Ca_kabuli_chr04 | 31012589                | CC                              | TT              | 1946813120               |
| SNP_P4_53305_31012590 | NC_021163.1    | Ca_kabuli_chr04 | 31012590                | GG                              | CC              | 1946813122               |
| SNP_P4_53306_31012597 | NC_021163.1    | Ca_kabuli_chr04 | 31012597                | AA                              | GG              | 1946813124               |
| SNP_P4_53307_31012604 | NC_021163.1    | Ca_kabuli_chr04 | 31012604                | TT                              | CC              | 1946813126               |
| SNP_P4_53308_31012678 | NC_021163.1    | Ca_kabuli_chr04 | 31012678                | TT                              | CC              | 1946813128               |
| SNP_P4_53309_31015100 | NC_021163.1    | Ca_kabuli_chr04 | 31015100                | CC                              | TT              | 1946813130               |
| SNP_P4_53310_31015913 | NC_021163.1    | Ca_kabuli_chr04 | 31015913                | AA                              | GG              | 1946813132               |
| SNP_P4_53311_31015918 | NC_021163.1    | Ca_kabuli_chr04 | 31015918                | CC                              | TT              | 1946813134               |
| SNP_P4_53312_31015941 | NC_021163.1    | Ca_kabuli_chr04 | 31015941                | CC                              | GG              | 1946813136               |
| SNP_P4_53313_31015950 | NC_021163.1    | Ca_kabuli_chr04 | 31015950                | GG                              | AA              | 1946813138               |
| SNP_P4_53315_31016051 | NC_021163.1    | Ca_kabuli_chr04 | 31016051                | GG                              | AA              | 1946813140               |
| SNP_P4_53316_31016547 | NC_021163.1    | Ca_kabuli_chr04 | 31016547                | GG                              | AA              | 1946813142               |
| SNP_P4_53317_31016580 | NC_021163.1    | Ca_kabuli_chr04 | 31016580                | GG                              | TT              | 1946813144               |
| SNP_P4_53318_31016585 | NC_021163.1    | Ca_kabuli_chr04 | 31016585                | TT                              | CC              | 1946813146               |
| SNP_P4_53319_31016587 | NC_021163.1    | Ca_kabuli_chr04 | 31016587                | GG                              | AA              | 1946813148               |
| SNP_P4_53320_31022916 | NC_021163.1    | Ca_kabuli_chr04 | 31022916                | GG                              | AA              | 1946813150               |
| SNP_P4_53321_31022971 | NC_021163.1    | Ca_kabuli_chr04 | 31022971                | CC                              | TT              | 1946813152               |
| SNP_P4_53322_31023021 | NC_021163.1    | Ca_kabuli_chr04 | 31023021                | CC                              | AA              | 1946813154               |
| SNP_P4_53323_31023243 | NC_021163.1    | Ca_kabuli_chr04 | 31023243                | CC                              | TT              | 1946813156               |
| SNP_P4_53324_31023244 | NC_021163.1    | Ca_kabuli_chr04 | 31023244                | AA                              | CC              | 1946813158               |
| SNP_P4_53326_31024552 | NC_021163.1    | Ca_kabuli_chr04 | 31024552                | GG                              | AA              | 1946813160               |
| SNP_P4_53327_31025544 | NC_021163.1    | Ca_kabuli_chr04 | 31025544                | AA                              | GG              | 1946813162               |
| SNP_P4_53328_31025920 | NC_021163.1    | Ca_kabuli_chr04 | 31025920                | GG                              | AA              | 1946813164               |
| SNP_P4_53329_31025930 | NC_021163.1    | Ca_kabuli_chr04 | 31025930                | AA                              | TT              | 1946813166               |
| SNP_P4_53330_31025937 | NC_021163.1    | Ca_kabuli_chr04 | 31025937                | GG                              | CC              | 1946813168               |
| SNP_P4_53331_31025939 | NC_021163.1    | Ca_kabuli_chr04 | 31025939                | GG                              | CC              | 1946813170               |
| SNP_P4_53332_31026395 | NC_021163.1    | Ca_kabuli_chr04 | 31026395                | TT                              | CC              | 1946813172               |
| SNP_P4_53333_31026400 | NC_021163.1    | Ca_kabuli_chr04 | 31026400                | AA                              | GG              | 1946813174               |
| SNP_P4_53334_31026582 | NC_021163.1    | Ca_kabuli_chr04 | 31026582                | AA                              | TT              | 1946813176               |
| SNP_P4_53335_31026585 | NC_021163.1    | Ca_kabuli_chr04 | 31026585                | TT                              | CC              | 1946813178               |
| SNP_P4_53336_31026590 | NC_021163.1    | Ca_kabuli_chr04 | 31026590                | TT                              | GG              | 1946813180               |
| SNP_P4_53337_31026618 | NC_021163.1    | Ca_kabuli_chr04 | 31026618                | CC                              | TT              | 1946813182               |
| SNP_P4_53338_31026663 | NC_021163.1    | Ca_kabuli_chr04 | 31026663                | TT                              | CC              | 1946813184               |
| SNP_P4_53339_31026665 | NC_021163.1    | Ca_kabuli_chr04 | 31026665                | GG                              | AA              | 1946813186               |
| SNP_P4_53340_31027784 | NC_021163.1    | Ca_kabuli_chr04 | 31027784                | TT                              | CC              | 1946813188               |
| SNP_P4_53341_31028655 | NC_021163.1    | Ca_kabuli_chr04 | 31028655                | CC                              | TT              | 1946813190               |
| SNP_P4_53342_31029104 | NC_021163.1    | Ca_kabuli_chr04 | 31029104                | CC                              | GG              | 1946813192               |
| SNP_P4_53344_31029252 | NC_021163.1    | Ca_kabuli_chr04 | 31029252                | CC                              | AA              | 1946813194               |
| SNP_P4_53345_31029260 | NC_021163.1    | Ca_kabuli_chr04 | 31029260                | GG                              | AA              | 1946813196               |
| SNP_P4_53346_31029346 | NC_021163.1    | Ca_kabuli_chr04 | 31029346                | AA                              | TT              | 1946813198               |
| SNP_P4_53347_31041512 | NC_021163.1    | Ca_kabuli_chr04 | 31041512                | TT                              | AA              | 1946813200               |
| SNP_P4_53348_31051358 | NC_021163.1    | Ca_kabuli_chr04 | 31051358                | GG                              | AA              | 1946813202               |

| SNPs IDs              | Chromosome IDs | Chromosomes     | Physical positions (bp) | CDC Frontier (Reference genome) | (ILWC46 & LPNB) | NCBI SNPdb Accession IDs |
|-----------------------|----------------|-----------------|-------------------------|---------------------------------|-----------------|--------------------------|
| SNP_P4_53349_31051361 | NC_021163.1    | Ca_kabuli_chr04 | 31051361                | TT                              | CC              | 1946813204               |
| SNP_P4_53350_31051424 | NC_021163.1    | Ca_kabuli_chr04 | 31051424                | CC                              | TT              | 1946813206               |
| SNP_P4_53351_31051426 | NC_021163.1    | Ca_kabuli_chr04 | 31051426                | AA                              | GG              | 1946813208               |
| SNP_P4_53352_31051453 | NC_021163.1    | Ca_kabuli_chr04 | 31051453                | TT                              | CC              | 1946813210               |
| SNP_P4_53353_31051627 | NC_021163.1    | Ca_kabuli_chr04 | 31051627                | GG                              | AA              | 1946813212               |
| SNP_P4_53354_31051674 | NC_021163.1    | Ca_kabuli_chr04 | 31051674                | GG                              | AA              | 1946813214               |
| SNP_P4_53355_31051677 | NC_021163.1    | Ca_kabuli_chr04 | 31051677                | GG                              | CC              | 1946813216               |
| SNP_P4_53356_31052251 | NC_021163.1    | Ca_kabuli_chr04 | 31052251                | AA                              | CC              | 1946813218               |
| SNP_P4_53357_31052276 | NC_021163.1    | Ca_kabuli_chr04 | 31052276                | TT                              | CC              | 1946813220               |
| SNP_P4_53358_31052282 | NC_021163.1    | Ca_kabuli_chr04 | 31052282                | CC                              | TT              | 1946813222               |
| SNP_P4_53359_31053250 | NC_021163.1    | Ca_kabuli_chr04 | 31053250                | GG                              | AA              | 1946813224               |
| SNP_P4_53360_31053281 | NC_021163.1    | Ca_kabuli_chr04 | 31053281                | GG                              | TT              | 1946813226               |
| SNP_P4_53361_31053622 | NC_021163.1    | Ca_kabuli_chr04 | 31053622                | CC                              | TT              | 1946813228               |
| SNP_P4_53362_31053660 | NC_021163.1    | Ca_kabuli_chr04 | 31053660                | AA                              | TT              | 1946813230               |
| SNP_P4_53363_31053784 | NC_021163.1    | Ca_kabuli_chr04 | 31053784                | AA                              | GG              | 1946813232               |
| SNP_P4_53364_31053804 | NC_021163.1    | Ca_kabuli_chr04 | 31053804                | GG                              | AA              | 1946813234               |
| SNP_P4_53365_31053862 | NC_021163.1    | Ca_kabuli_chr04 | 31053862                | CC                              | GG              | 1946813236               |
| SNP_P4_53366_31053898 | NC_021163.1    | Ca_kabuli_chr04 | 31053898                | CC                              | TT              | 1946813238               |
| SNP_P4_53367_31053925 | NC_021163.1    | Ca_kabuli_chr04 | 31053925                | TT                              | AA              | 1946813240               |
| SNP_P4_53368_31053945 | NC_021163.1    | Ca_kabuli_chr04 | 31053945                | GG                              | AA              | 1946813242               |
| SNP_P4_53369_31054078 | NC_021163.1    | Ca_kabuli_chr04 | 31054078                | AA                              | TT              | 1946813244               |
| SNP_P4_53370_31054276 | NC_021163.1    | Ca_kabuli_chr04 | 31054276                | TT                              | CC              | 1946813246               |
| SNP_P4_53371_31054277 | NC_021163.1    | Ca_kabuli_chr04 | 31054277                | TT                              | CC              | 1946813248               |
| SNP_P4_53372_31054896 | NC_021163.1    | Ca_kabuli_chr04 | 31054896                | GG                              | AA              | 1946813250               |
| SNP_P4_53373_31054900 | NC_021163.1    | Ca_kabuli_chr04 | 31054900                | TT                              | CC              | 1946813252               |
| SNP_P4_53374_31054902 | NC_021163.1    | Ca_kabuli_chr04 | 31054902                | TT                              | CC              | 1946813254               |
| SNP_P4_53375_31055212 | NC_021163.1    | Ca_kabuli_chr04 | 31055212                | GG                              | AA              | 1946813256               |
| SNP_P4_53376_31055221 | NC_021163.1    | Ca_kabuli_chr04 | 31055221                | TT                              | AA              | 1946813258               |
| SNP_P4_53379_31055780 | NC_021163.1    | Ca_kabuli_chr04 | 31055780                | AA                              | CC              | 1946813260               |
| SNP_P4_53380_31055787 | NC_021163.1    | Ca_kabuli_chr04 | 31055787                | AA                              | GG              | 1946813262               |
| SNP_P4_53381_31055811 | NC_021163.1    | Ca_kabuli_chr04 | 31055811                | AA                              | GG              | 1946813264               |
| SNP_P4_53382_31055918 | NC_021163.1    | Ca_kabuli_chr04 | 31055918                | AA                              | GG              | 1946813266               |
| SNP_P4_53383_31056001 | NC_021163.1    | Ca_kabuli_chr04 | 31056001                | AA                              | GG              | 1946813268               |
| SNP_P4_53384_31056205 | NC_021163.1    | Ca_kabuli_chr04 | 31056205                | TT                              | AA              | 1946813270               |
| SNP_P4_53385_31056417 | NC_021163.1    | Ca_kabuli_chr04 | 31056417                | GG                              | AA              | 1946813272               |
| SNP_P4_53386_31056418 | NC_021163.1    | Ca_kabuli_chr04 | 31056418                | GG                              | AA              | 1946813274               |
| SNP_P4_53387_31057610 | NC_021163.1    | Ca_kabuli_chr04 | 31057610                | GG                              | CC              | 1946813276               |
| SNP_P4_53388_31057623 | NC_021163.1    | Ca_kabuli_chr04 | 31057623                | AA                              | CC              | 1946813278               |
| SNP_P4_53389_31057813 | NC_021163.1    | Ca_kabuli_chr04 | 31057813                | TT                              | CC              | 1946813280               |
| SNP_P4_53390_31057962 | NC_021163.1    | Ca_kabuli_chr04 | 31057962                | GG                              | TT              | 1946813282               |
| SNP_P4_53391_31060881 | NC_021163.1    | Ca_kabuli_chr04 | 31060881                | AA                              | TT              | 1946813284               |
| SNP_P4_53392_31061098 | NC_021163.1    | Ca_kabuli_chr04 | 31061098                | GG                              | AA              | 1946813286               |



| SNPs IDs              | Chromosome IDs | Chromosomes     | Physical positions (bp) | CDC Frontier (Reference genome) | (ILWC46 & LPNB) | NCBI SNPdb Accession IDs |
|-----------------------|----------------|-----------------|-------------------------|---------------------------------|-----------------|--------------------------|
| SNP_P4_53393_31061121 | NC_021163.1    | Ca_kabuli_chr04 | 31061121                | CC                              | TT              | 1946813288               |
| SNP_P4_53394_31061157 | NC_021163.1    | Ca_kabuli_chr04 | 31061157                | CC                              | TT              | 1946813290               |
| SNP_P4_53395_31061191 | NC_021163.1    | Ca_kabuli_chr04 | 31061191                | CC                              | TT              | 1946813292               |
| SNP_P4_53396_31061211 | NC_021163.1    | Ca_kabuli_chr04 | 31061211                | AA                              | CC              | 1946813294               |
| SNP_P4_53397_31061287 | NC_021163.1    | Ca_kabuli_chr04 | 31061287                | GG                              | AA              | 1946813296               |
| SNP_P4_53398_31061293 | NC_021163.1    | Ca_kabuli_chr04 | 31061293                | GG                              | AA              | 1946813298               |
| SNP_P4_53399_31061295 | NC_021163.1    | Ca_kabuli_chr04 | 31061295                | GG                              | TT              | 1946813300               |
| SNP_P4_53400_31061445 | NC_021163.1    | Ca_kabuli_chr04 | 31061445                | AA                              | GG              | 1946813302               |
| SNP_P4_53401_31061499 | NC_021163.1    | Ca_kabuli_chr04 | 31061499                | CC                              | GG              | 1946813304               |
| SNP_P4_53402_31061842 | NC_021163.1    | Ca_kabuli_chr04 | 31061842                | CC                              | TT              | 1946813306               |
| SNP_P4_53403_31062672 | NC_021163.1    | Ca_kabuli_chr04 | 31062672                | CC                              | TT              | 1946813308               |
| SNP_P4_53404_31062686 | NC_021163.1    | Ca_kabuli_chr04 | 31062686                | CC                              | TT              | 1946813310               |
| SNP_P4_53405_31062863 | NC_021163.1    | Ca_kabuli_chr04 | 31062863                | TT                              | AA              | 1946813312               |
| SNP_P4_53406_31063853 | NC_021163.1    | Ca_kabuli_chr04 | 31063853                | CC                              | TT              | 1946813314               |
| SNP_P4_53407_31063884 | NC_021163.1    | Ca_kabuli_chr04 | 31063884                | AA                              | CC              | 1946813316               |
| SNP_P4_53408_31066094 | NC_021163.1    | Ca_kabuli_chr04 | 31066094                | TT                              | GG              | 1946813318               |
| SNP_P4_53409_31066124 | NC_021163.1    | Ca_kabuli_chr04 | 31066124                | AA                              | GG              | 1946813320               |
| SNP_P4_53410_31066169 | NC_021163.1    | Ca_kabuli_chr04 | 31066169                | TT                              | AA              | 1946813322               |
| SNP_P4_53411_31070521 | NC_021163.1    | Ca_kabuli_chr04 | 31070521                | CC                              | TT              | 1946813324               |
| SNP_P4_53412_31071039 | NC_021163.1    | Ca_kabuli_chr04 | 31071039                | TT                              | AA              | 1946813326               |
| SNP_P4_53413_31071277 | NC_021163.1    | Ca_kabuli_chr04 | 31071277                | TT                              | CC              | 1946813328               |
| SNP_P4_53414_31071299 | NC_021163.1    | Ca_kabuli_chr04 | 31071299                | GG                              | AA              | 1946813330               |
| SNP_P4_53415_31071302 | NC_021163.1    | Ca_kabuli_chr04 | 31071302                | TT                              | CC              | 1946813332               |
| SNP_P4_53416_31071534 | NC_021163.1    | Ca_kabuli_chr04 | 31071534                | TT                              | CC              | 1946813334               |
| SNP_P4_53417_31071583 | NC_021163.1    | Ca_kabuli_chr04 | 31071583                | AA                              | GG              | 1946813336               |
| SNP_P4_53418_31075287 | NC_021163.1    | Ca_kabuli_chr04 | 31075287                | TT                              | GG              | 1946813338               |
| SNP_P4_53419_31075612 | NC_021163.1    | Ca_kabuli_chr04 | 31075612                | TT                              | CC              | 1946813340               |
| SNP_P4_53420_31075694 | NC_021163.1    | Ca_kabuli_chr04 | 31075694                | GG                              | TT              | 1946813342               |
| SNP_P4_53421_31077499 | NC_021163.1    | Ca_kabuli_chr04 | 31077499                | CC                              | TT              | 1946813344               |
| SNP_P4_53422_31077501 | NC_021163.1    | Ca_kabuli_chr04 | 31077501                | AA                              | GG              | 1946813346               |
| SNP_P4_53423_31079279 | NC_021163.1    | Ca_kabuli_chr04 | 31079279                | TT                              | GG              | 1946813348               |
| SNP_P4_53424_31079302 | NC_021163.1    | Ca_kabuli_chr04 | 31079302                | AA                              | GG              | 1946813350               |
| SNP_P4_53425_31079310 | NC_021163.1    | Ca_kabuli_chr04 | 31079310                | AA                              | CC              | 1946813352               |
| SNP_P4_53426_31079327 | NC_021163.1    | Ca_kabuli_chr04 | 31079327                | AA                              | GG              | 1946813354               |
| SNP_P4_53427_31079332 | NC_021163.1    | Ca_kabuli_chr04 | 31079332                | AA                              | GG              | 1946813356               |
| SNP_P4_53428_31079529 | NC_021163.1    | Ca_kabuli_chr04 | 31079529                | AA                              | GG              | 1946813358               |
| SNP_P4_53429_31079854 | NC_021163.1    | Ca_kabuli_chr04 | 31079854                | TT                              | CC              | 1946813360               |
| SNP_P4_53430_31079881 | NC_021163.1    | Ca_kabuli_chr04 | 31079881                | TT                              | GG              | 1946813362               |
| SNP_P4_53431_31080136 | NC_021163.1    | Ca_kabuli_chr04 | 31080136                | GG                              | AA              | 1946813364               |
| SNP_P4_53432_31080140 | NC_021163.1    | Ca_kabuli_chr04 | 31080140                | AA                              | GG              | 1946813366               |
| SNP_P4_53433_31080161 | NC_021163.1    | Ca_kabuli_chr04 | 31080161                | TT                              | CC              | 1946813368               |
| SNP_P4_53434_31081929 | NC_021163.1    | Ca_kabuli_chr04 | 31081929                | CC                              | TT              | 1946813370               |

| SNPs IDs              | Chromosome IDs | Chromosomes     | Physical positions (bp) | CDC Frontier (Reference genome) | (ILWC46 & LPNB) | NCBI SNPdb Accession IDs |
|-----------------------|----------------|-----------------|-------------------------|---------------------------------|-----------------|--------------------------|
| SNP_P4_53435_31100137 | NC_021163.1    | Ca_kabuli_chr04 | 31100137                | AA                              | TT              | 1946813372               |
| SNP_P4_53436_31101006 | NC_021163.1    | Ca_kabuli_chr04 | 31101006                | GG                              | TT              | 1946813374               |
| SNP_P4_53437_31101273 | NC_021163.1    | Ca_kabuli_chr04 | 31101273                | AA                              | GG              | 1946813376               |
| SNP_P4_53438_31101275 | NC_021163.1    | Ca_kabuli_chr04 | 31101275                | TT                              | CC              | 1946813378               |
| SNP_P4_53439_31101311 | NC_021163.1    | Ca_kabuli_chr04 | 31101311                | TT                              | AA              | 1946813380               |
| SNP_P4_53441_31101614 | NC_021163.1    | Ca_kabuli_chr04 | 31101614                | TT                              | GG              | 1946813382               |
| SNP_P4_53442_31102556 | NC_021163.1    | Ca_kabuli_chr04 | 31102556                | TT                              | CC              | 1946813384               |
| SNP_P4_53443_31104667 | NC_021163.1    | Ca_kabuli_chr04 | 31104667                | TT                              | AA              | 1946813386               |
| SNP_P4_53444_31104713 | NC_021163.1    | Ca_kabuli_chr04 | 31104713                | CC                              | AA              | 1946813388               |
| SNP_P4_53445_31104881 | NC_021163.1    | Ca_kabuli_chr04 | 31104881                | GG                              | AA              | 1946813390               |
| SNP_P4_53446_31106271 | NC_021163.1    | Ca_kabuli_chr04 | 31106271                | TT                              | GG              | 1946813392               |
| SNP_P4_53448_31106368 | NC_021163.1    | Ca_kabuli_chr04 | 31106368                | TT                              | AA              | 1946813394               |
| SNP_P4_53450_31106918 | NC_021163.1    | Ca_kabuli_chr04 | 31106918                | TT                              | GG              | 1946813396               |
| SNP_P4_53451_31107076 | NC_021163.1    | Ca_kabuli_chr04 | 31107076                | AA                              | GG              | 1946813398               |
| SNP_P4_53452_31107627 | NC_021163.1    | Ca_kabuli_chr04 | 31107627                | CC                              | AA              | 1946813400               |
| SNP_P4_53454_31107743 | NC_021163.1    | Ca_kabuli_chr04 | 31107743                | AA                              | GG              | 1946813402               |
| SNP_P4_53455_31107762 | NC_021163.1    | Ca_kabuli_chr04 | 31107762                | GG                              | AA              | 1946813404               |
| SNP_P4_53456_31107845 | NC_021163.1    | Ca_kabuli_chr04 | 31107845                | CC                              | TT              | 1946813406               |
| SNP_P4_53457_31107846 | NC_021163.1    | Ca_kabuli_chr04 | 31107846                | AA                              | GG              | 1946813408               |
| SNP_P4_53458_31107955 | NC_021163.1    | Ca_kabuli_chr04 | 31107955                | CC                              | TT              | 1946813410               |
| SNP_P4_53459_31107957 | NC_021163.1    | Ca_kabuli_chr04 | 31107957                | GG                              | AA              | 1946813412               |
| SNP_P4_53460_31107977 | NC_021163.1    | Ca_kabuli_chr04 | 31107977                | TT                              | GG              | 1946813414               |
| SNP_P4_53461_31107986 | NC_021163.1    | Ca_kabuli_chr04 | 31107986                | GG                              | AA              | 1946813416               |
| SNP_P4_53462_31108047 | NC_021163.1    | Ca_kabuli_chr04 | 31108047                | GG                              | TT              | 1946813418               |
| SNP_P4_53463_31108098 | NC_021163.1    | Ca_kabuli_chr04 | 31108098                | AA                              | GG              | 1946813420               |
| SNP_P4_53464_31108452 | NC_021163.1    | Ca_kabuli_chr04 | 31108452                | AA                              | TT              | 1946813422               |
| SNP_P4_53465_31108537 | NC_021163.1    | Ca_kabuli_chr04 | 31108537                | AA                              | GG              | 1946813424               |
| SNP_P4_53466_31108728 | NC_021163.1    | Ca_kabuli_chr04 | 31108728                | CC                              | TT              | 1946813426               |
| SNP_P4_53467_31108746 | NC_021163.1    | Ca_kabuli_chr04 | 31108746                | CC                              | AA              | 1946813428               |
| SNP_P4_53468_31109541 | NC_021163.1    | Ca_kabuli_chr04 | 31109541                | TT                              | GG              | 1946813430               |
| SNP_P4_53469_31109565 | NC_021163.1    | Ca_kabuli_chr04 | 31109565                | CC                              | GG              | 1946813432               |
| SNP_P4_53470_31109789 | NC_021163.1    | Ca_kabuli_chr04 | 31109789                | AA                              | GG              | 1946813434               |
| SNP_P4_53471_31109951 | NC_021163.1    | Ca_kabuli_chr04 | 31109951                | CC                              | TT              | 1946813436               |
| SNP_P4_53472_31110765 | NC_021163.1    | Ca_kabuli_chr04 | 31110765                | TT                              | CC              | 1946813438               |
| SNP_P4_53473_31111559 | NC_021163.1    | Ca_kabuli_chr04 | 31111559                | AA                              | CC              | 1946813440               |
| SNP_P4_53474_31111588 | NC_021163.1    | Ca_kabuli_chr04 | 31111588                | TT                              | CC              | 1946813442               |
| SNP_P4_53475_31111597 | NC_021163.1    | Ca_kabuli_chr04 | 31111597                | TT                              | CC              | 1946813444               |
| SNP_P4_53476_31111621 | NC_021163.1    | Ca_kabuli_chr04 | 31111621                | TT                              | CC              | 1946813446               |
| SNP_P4_53477_31113104 | NC_021163.1    | Ca_kabuli_chr04 | 31113104                | CC                              | TT              | 1946813449               |
| SNP_P4_53478_31113137 | NC_021163.1    | Ca_kabuli_chr04 | 31113137                | TT                              | GG              | 1946813451               |
| SNP_P4_53479_31113174 | NC_021163.1    | Ca_kabuli_chr04 | 31113174                | GG                              | AA              | 1946813453               |
| SNP_P4_53480_31113212 | NC_021163.1    | Ca_kabuli_chr04 | 31113212                | GG                              | AA              | 1946813455               |

| SNPs IDs              | Chromosome IDs | Chromosomes     | Physical positions (bp) | CDC Frontier (Reference genome) | (ILWC46 & LPNB) | NCBI SNPdb Accession IDs |
|-----------------------|----------------|-----------------|-------------------------|---------------------------------|-----------------|--------------------------|
| SNP_P4_53481_31113220 | NC_021163.1    | Ca_kabuli_chr04 | 31113220                | CC                              | TT              | 1946813457               |
| SNP_P4_53483_31114434 | NC_021163.1    | Ca_kabuli_chr04 | 31114434                | TT                              | CC              | 1946813459               |
| SNP_P4_53484_31114438 | NC_021163.1    | Ca_kabuli_chr04 | 31114438                | GG                              | AA              | 1946813461               |
| SNP_P4_53485_31114452 | NC_021163.1    | Ca_kabuli_chr04 | 31114452                | TT                              | AA              | 1946813463               |
| SNP_P4_53486_31114472 | NC_021163.1    | Ca_kabuli_chr04 | 31114472                | GG                              | AA              | 1946813465               |
| SNP_P4_53487_31114624 | NC_021163.1    | Ca_kabuli_chr04 | 31114624                | CC                              | GG              | 1946813467               |
| SNP_P4_53488_31114628 | NC_021163.1    | Ca_kabuli_chr04 | 31114628                | CC                              | TT              | 1946813469               |
| SNP_P4_53489_31114661 | NC_021163.1    | Ca_kabuli_chr04 | 31114661                | GG                              | AA              | 1946813471               |
| SNP_P4_53490_31114745 | NC_021163.1    | Ca_kabuli_chr04 | 31114745                | CC                              | AA              | 1946813473               |
| SNP_P4_53492_31115009 | NC_021163.1    | Ca_kabuli_chr04 | 31115009                | TT                              | GG              | 1946813475               |
| SNP_P4_53493_31115049 | NC_021163.1    | Ca_kabuli_chr04 | 31115049                | CC                              | TT              | 1946813477               |
| SNP_P4_53494_31115068 | NC_021163.1    | Ca_kabuli_chr04 | 31115068                | TT                              | CC              | 1946813479               |
| SNP_P4_53495_31115117 | NC_021163.1    | Ca_kabuli_chr04 | 31115117                | CC                              | TT              | 1946813480               |
| SNP_P4_53496_31115381 | NC_021163.1    | Ca_kabuli_chr04 | 31115381                | GG                              | AA              | 1946813482               |
| SNP_P4_53497_31115621 | NC_021163.1    | Ca_kabuli_chr04 | 31115621                | GG                              | AA              | 1946813484               |
| SNP_P4_53498_31115627 | NC_021163.1    | Ca_kabuli_chr04 | 31115627                | AA                              | CC              | 1946813486               |
| SNP_P4_53499_31115867 | NC_021163.1    | Ca_kabuli_chr04 | 31115867                | TT                              | AA              | 1946813488               |
| SNP_P4_53500_31115871 | NC_021163.1    | Ca_kabuli_chr04 | 31115871                | CC                              | TT              | 1946813491               |
| SNP_P4_53501_31115900 | NC_021163.1    | Ca_kabuli_chr04 | 31115900                | GG                              | TT              | 1946813493               |
| SNP_P4_53502_31116389 | NC_021163.1    | Ca_kabuli_chr04 | 31116389                | TT                              | CC              | 1946813495               |
| SNP_P4_53503_31116416 | NC_021163.1    | Ca_kabuli_chr04 | 31116416                | TT                              | GG              | 1946813497               |
| SNP_P4_53505_31118051 | NC_021163.1    | Ca_kabuli_chr04 | 31118051                | GG                              | AA              | 1946813499               |
| SNP_P4_53506_31118062 | NC_021163.1    | Ca_kabuli_chr04 | 31118062                | CC                              | AA              | 1946813501               |
| SNP_P4_53507_31119219 | NC_021163.1    | Ca_kabuli_chr04 | 31119219                | AA                              | CC              | 1946813503               |
| SNP_P4_53508_31119257 | NC_021163.1    | Ca_kabuli_chr04 | 31119257                | TT                              | GG              | 1946813505               |
| SNP_P4_53509_31119308 | NC_021163.1    | Ca_kabuli_chr04 | 31119308                | GG                              | AA              | 1946813507               |
| SNP_P4_53510_31119309 | NC_021163.1    | Ca_kabuli_chr04 | 31119309                | GG                              | AA              | 1946813509               |
| SNP_P4_53511_31119311 | NC_021163.1    | Ca_kabuli_chr04 | 31119311                | AA                              | TT              | 1946813511               |
| SNP_P4_53512_31120517 | NC_021163.1    | Ca_kabuli_chr04 | 31120517                | TT                              | CC              | 1946813513               |
| SNP_P4_53513_31120524 | NC_021163.1    | Ca_kabuli_chr04 | 31120524                | GG                              | TT              | 1946813514               |
| SNP_P4_53514_31120534 | NC_021163.1    | Ca_kabuli_chr04 | 31120534                | CC                              | TT              | 1946813516               |
| SNP_P4_53515_31120606 | NC_021163.1    | Ca_kabuli_chr04 | 31120606                | TT                              | CC              | 1946813518               |
| SNP_P4_53516_31120635 | NC_021163.1    | Ca_kabuli_chr04 | 31120635                | GG                              | AA              | 1946813520               |
| SNP_P4_53517_31120975 | NC_021163.1    | Ca_kabuli_chr04 | 31120975                | CC                              | AA              | 1946813522               |
| SNP_P4_53518_31121298 | NC_021163.1    | Ca_kabuli_chr04 | 31121298                | CC                              | TT              | 1946813524               |
| SNP_P4_53519_31121326 | NC_021163.1    | Ca_kabuli_chr04 | 31121326                | TT                              | CC              | 1946813526               |
| SNP_P4_53520_31122093 | NC_021163.1    | Ca_kabuli_chr04 | 31122093                | TT                              | CC              | 1946813528               |
| SNP_P4_53522_31123245 | NC_021163.1    | Ca_kabuli_chr04 | 31123245                | CC                              | TT              | 1946813530               |
| SNP_P4_53523_31123248 | NC_021163.1    | Ca_kabuli_chr04 | 31123248                | AA                              | TT              | 1946813531               |
| SNP_P4_53524_31123284 | NC_021163.1    | Ca_kabuli_chr04 | 31123284                | TT                              | CC              | 1946813533               |
| SNP_P4_53525_31123559 | NC_021163.1    | Ca_kabuli_chr04 | 31123559                | AA                              | TT              | 1946813535               |
| SNP_P4_53526_31123659 | NC_021163.1    | Ca_kabuli_chr04 | 31123659                | AA                              | GG              | 1946813537               |

| SNPs IDs              | Chromosome IDs | Chromosomes     | Physical positions (bp) | CDC Frontier (Reference genome) | (ILWC46 & LPNB) | NCBI SNPdb Accession IDs |
|-----------------------|----------------|-----------------|-------------------------|---------------------------------|-----------------|--------------------------|
| SNP_P4_53527_31123684 | NC_021163.1    | Ca_kabuli_chr04 | 31123684                | GG                              | AA              | 1946813539               |
| SNP_P4_53528_31124490 | NC_021163.1    | Ca_kabuli_chr04 | 31124490                | CC                              | AA              | 1946813541               |
| SNP_P4_53529_31124590 | NC_021163.1    | Ca_kabuli_chr04 | 31124590                | TT                              | GG              | 1946813542               |
| SNP_P4_53530_31124624 | NC_021163.1    | Ca_kabuli_chr04 | 31124624                | CC                              | AA              | 1946813543               |
| SNP_P4_53531_31124926 | NC_021163.1    | Ca_kabuli_chr04 | 31124926                | GG                              | AA              | 1946813545               |
| SNP_P4_53532_31127193 | NC_021163.1    | Ca_kabuli_chr04 | 31127193                | GG                              | AA              | 1946813546               |
| SNP_P4_53533_31127194 | NC_021163.1    | Ca_kabuli_chr04 | 31127194                | CC                              | AA              | 1946813548               |
| SNP_P4_53534_31127215 | NC_021163.1    | Ca_kabuli_chr04 | 31127215                | AA                              | CC              | 1946813550               |
| SNP_P4_53535_31127514 | NC_021163.1    | Ca_kabuli_chr04 | 31127514                | CC                              | TT              | 1946813552               |
| SNP_P4_53537_31129439 | NC_021163.1    | Ca_kabuli_chr04 | 31129439                | TT                              | AA              | 1946813554               |
| SNP_P4_53539_31129775 | NC_021163.1    | Ca_kabuli_chr04 | 31129775                | GG                              | AA              | 1946813556               |
| SNP_P4_53540_31129808 | NC_021163.1    | Ca_kabuli_chr04 | 31129808                | CC                              | AA              | 1946813558               |
| SNP_P4_53541_31135399 | NC_021163.1    | Ca_kabuli_chr04 | 31135399                | TT                              | CC              | 1946813560               |
| SNP_P4_53542_31135704 | NC_021163.1    | Ca_kabuli_chr04 | 31135704                | GG                              | AA              | 1946813563               |
| SNP_P4_53543_31136453 | NC_021163.1    | Ca_kabuli_chr04 | 31136453                | GG                              | AA              | 1946813565               |
| SNP_P4_53544_31138249 | NC_021163.1    | Ca_kabuli_chr04 | 31138249                | AA                              | GG              | 1946813567               |
| SNP_P4_53545_31138280 | NC_021163.1    | Ca_kabuli_chr04 | 31138280                | TT                              | CC              | 1946813569               |
| SNP_P4_53546_31143667 | NC_021163.1    | Ca_kabuli_chr04 | 31143667                | GG                              | CC              | 1946813571               |
| SNP_P4_53547_31143677 | NC_021163.1    | Ca_kabuli_chr04 | 31143677                | GG                              | AA              | 1946813573               |
| SNP_P4_53549_31144808 | NC_021163.1    | Ca_kabuli_chr04 | 31144808                | AA                              | GG              | 1946813575               |
| SNP_P4_53550_31147737 | NC_021163.1    | Ca_kabuli_chr04 | 31147737                | GG                              | AA              | 1946813577               |
| SNP_P4_53551_31148553 | NC_021163.1    | Ca_kabuli_chr04 | 31148553                | TT                              | CC              | 1946813579               |
| SNP_P4_53553_31150177 | NC_021163.1    | Ca_kabuli_chr04 | 31150177                | GG                              | AA              | 1946813581               |
| SNP_P4_53554_31153153 | NC_021163.1    | Ca_kabuli_chr04 | 31153153                | TT                              | GG              | 1946813583               |
| SNP_P4_53555_31157702 | NC_021163.1    | Ca_kabuli_chr04 | 31157702                | AA                              | GG              | 1946813585               |
| SNP_P4_53558_31173183 | NC_021163.1    | Ca_kabuli_chr04 | 31173183                | TT                              | CC              | 1946813587               |
| SNP_P4_53559_31176309 | NC_021163.1    | Ca_kabuli_chr04 | 31176309                | AA                              | TT              | 1946813589               |
| SNP_P4_53560_31180815 | NC_021163.1    | Ca_kabuli_chr04 | 31180815                | GG                              | TT              | 1946813591               |
| SNP_P4_53561_31182314 | NC_021163.1    | Ca_kabuli_chr04 | 31182314                | TT                              | CC              | 1946813593               |
| SNP_P4_53562_31182635 | NC_021163.1    | Ca_kabuli_chr04 | 31182635                | TT                              | AA              | 1946813594               |
| SNP_P4_53563_31182658 | NC_021163.1    | Ca_kabuli_chr04 | 31182658                | TT                              | CC              | 1946813596               |
| SNP_P4_53564_31182675 | NC_021163.1    | Ca_kabuli_chr04 | 31182675                | GG                              | AA              | 1946813598               |
| SNP_P4_53565_31182680 | NC_021163.1    | Ca_kabuli_chr04 | 31182680                | AA                              | GG              | 1946813600               |
| SNP_P4_53566_31184630 | NC_021163.1    | Ca_kabuli_chr04 | 31184630                | AA                              | GG              | 1946813602               |
| SNP_P4_53567_31186437 | NC_021163.1    | Ca_kabuli_chr04 | 31186437                | TT                              | CC              | 1946813604               |
| SNP_P4_53568_31187928 | NC_021163.1    | Ca_kabuli_chr04 | 31187928                | GG                              | AA              | 1946813606               |
| SNP_P4_53569_31189832 | NC_021163.1    | Ca_kabuli_chr04 | 31189832                | AA                              | GG              | 1946813608               |
| SNP_P4_53572_31206670 | NC_021163.1    | Ca_kabuli_chr04 | 31206670                | GG                              | CC              | 1946813611               |
| SNP_P4_53573_31206722 | NC_021163.1    | Ca_kabuli_chr04 | 31206722                | CC                              | AA              | 1946813613               |
| SNP_P4_53574_31206741 | NC_021163.1    | Ca_kabuli_chr04 | 31206741                | AA                              | TT              | 1946813615               |
| SNP_P4_53575_31207358 | NC_021163.1    | Ca_kabuli_chr04 | 31207358                | GG                              | TT              | 1946813617               |
| SNP_P4_53576_31208013 | NC_021163.1    | Ca_kabuli_chr04 | 31208013                | CC                              | TT              | 1946813619               |

| SNPs IDs              | Chromosome IDs | Chromosomes     | Physical positions (bp) | CDC Frontier (Reference genome) | (ILWC46 & LPNB) | NCBI SNPdb Accession IDs |
|-----------------------|----------------|-----------------|-------------------------|---------------------------------|-----------------|--------------------------|
| SNP_P4_53577_31211327 | NC_021163.1    | Ca_kabuli_chr04 | 31211327                | CC                              | AA              | 1946813621               |
| SNP_P4_53578_31212342 | NC_021163.1    | Ca_kabuli_chr04 | 31212342                | GG                              | AA              | 1946813623               |
| SNP_P4_53579_31212352 | NC_021163.1    | Ca_kabuli_chr04 | 31212352                | AA                              | TT              | 1946813625               |
| SNP_P4_53580_31220869 | NC_021163.1    | Ca_kabuli_chr04 | 31220869                | AA                              | GG              | 1946813627               |
| SNP_P4_53583_31221993 | NC_021163.1    | Ca_kabuli_chr04 | 31221993                | GG                              | AA              | 1946813629               |
| SNP_P4_53584_31222197 | NC_021163.1    | Ca_kabuli_chr04 | 31222197                | CC                              | TT              | 1946813631               |
| SNP_P4_53585_31222645 | NC_021163.1    | Ca_kabuli_chr04 | 31222645                | AA                              | GG              | 1946813633               |
| SNP_P4_53586_31222868 | NC_021163.1    | Ca_kabuli_chr04 | 31222868                | GG                              | AA              | 1946813635               |
| SNP_P4_53587_31223193 | NC_021163.1    | Ca_kabuli_chr04 | 31223193                | TT                              | CC              | 1946813637               |
| SNP_P4_53588_31224985 | NC_021163.1    | Ca_kabuli_chr04 | 31224985                | AA                              | TT              | 1946813639               |
| SNP_P4_53589_31225894 | NC_021163.1    | Ca_kabuli_chr04 | 31225894                | GG                              | TT              | 1946813641               |
| SNP_P4_53590_31226887 | NC_021163.1    | Ca_kabuli_chr04 | 31226887                | GG                              | AA              | 1946813643               |
| SNP_P4_53591_31231053 | NC_021163.1    | Ca_kabuli_chr04 | 31231053                | CC                              | GG              | 1946813645               |
| SNP_P4_53592_31231150 | NC_021163.1    | Ca_kabuli_chr04 | 31231150                | AA                              | GG              | 1946813647               |
| SNP_P4_53593_31231209 | NC_021163.1    | Ca_kabuli_chr04 | 31231209                | TT                              | GG              | 1946813649               |
| SNP_P4_53594_31231230 | NC_021163.1    | Ca_kabuli_chr04 | 31231230                | CC                              | TT              | 1946813651               |
| SNP_P4_53595_31232853 | NC_021163.1    | Ca_kabuli_chr04 | 31232853                | GG                              | AA              | 1946813653               |
| SNP_P4_53596_31233818 | NC_021163.1    | Ca_kabuli_chr04 | 31233818                | CC                              | TT              | 1946813655               |
| SNP_P4_53597_31233820 | NC_021163.1    | Ca_kabuli_chr04 | 31233820                | TT                              | CC              | 1946813657               |
| SNP_P4_53598_31233865 | NC_021163.1    | Ca_kabuli_chr04 | 31233865                | GG                              | AA              | 1946813659               |
| SNP_P4_53599_31234047 | NC_021163.1    | Ca_kabuli_chr04 | 31234047                | CC                              | AA              | 1946813661               |
| SNP_P4_53600_31234456 | NC_021163.1    | Ca_kabuli_chr04 | 31234456                | TT                              | CC              | 1946813663               |
| SNP_P4_53601_31234600 | NC_021163.1    | Ca_kabuli_chr04 | 31234600                | CC                              | TT              | 1946813665               |
| SNP_P4_53602_31234628 | NC_021163.1    | Ca_kabuli_chr04 | 31234628                | AA                              | GG              | 1946813667               |
| SNP_P4_53603_31234797 | NC_021163.1    | Ca_kabuli_chr04 | 31234797                | GG                              | TT              | 1946813669               |
| SNP_P4_53604_31234800 | NC_021163.1    | Ca_kabuli_chr04 | 31234800                | TT                              | CC              | 1946813671               |
| SNP_P4_53605_31234898 | NC_021163.1    | Ca_kabuli_chr04 | 31234898                | TT                              | CC              | 1946813673               |
| SNP_P4_53607_31248559 | NC_021163.1    | Ca_kabuli_chr04 | 31248559                | AA                              | TT              | 1946813675               |
| SNP_P4_53608_31248560 | NC_021163.1    | Ca_kabuli_chr04 | 31248560                | CC                              | TT              | 1946813677               |
| SNP_P4_53611_31250568 | NC_021163.1    | Ca_kabuli_chr04 | 31250568                | CC                              | GG              | 1946813679               |
| SNP_P4_53614_31251680 | NC_021163.1    | Ca_kabuli_chr04 | 31251680                | TT                              | CC              | 1946813681               |
| SNP_P4_53615_31251793 | NC_021163.1    | Ca_kabuli_chr04 | 31251793                | AA                              | GG              | 1946813683               |
| SNP_P4_53616_31252018 | NC_021163.1    | Ca_kabuli_chr04 | 31252018                | GG                              | CC              | 1946813685               |
| SNP_P4_53617_31252019 | NC_021163.1    | Ca_kabuli_chr04 | 31252019                | GG                              | AA              | 1946813687               |
| SNP_P4_53618_31252022 | NC_021163.1    | Ca_kabuli_chr04 | 31252022                | CC                              | GG              | 1946813689               |
| SNP_P4_53619_31252023 | NC_021163.1    | Ca_kabuli_chr04 | 31252023                | TT                              | CC              | 1946813691               |
| SNP_P4_53620_31252070 | NC_021163.1    | Ca_kabuli_chr04 | 31252070                | CC                              | TT              | 1946813693               |
| SNP_P4_53621_31252078 | NC_021163.1    | Ca_kabuli_chr04 | 31252078                | CC                              | TT              | 1946813695               |
| SNP_P4_53622_31252193 | NC_021163.1    | Ca_kabuli_chr04 | 31252193                | TT                              | CC              | 1946813697               |
| SNP_P4_53623_31252328 | NC_021163.1    | Ca_kabuli_chr04 | 31252328                | TT                              | CC              | 1946813699               |
| SNP_P4_53624_31253448 | NC_021163.1    | Ca_kabuli_chr04 | 31253448                | CC                              | AA              | 1946813701               |
| SNP_P4_53625_31253455 | NC_021163.1    | Ca_kabuli_chr04 | 31253455                | AA                              | GG              | 1946813703               |

| SNPs IDs              | Chromosome IDs | Chromosomes     | Physical positions (bp) | CDC Frontier (Reference genome) | (ILWC46 & LPNB) | NCBI SNPdb Accession IDs |
|-----------------------|----------------|-----------------|-------------------------|---------------------------------|-----------------|--------------------------|
| SNP_P4_53626_31253925 | NC_021163.1    | Ca_kabuli_chr04 | 31253925                | AA                              | GG              | 1946813705               |
| SNP_P4_53627_31254151 | NC_021163.1    | Ca_kabuli_chr04 | 31254151                | TT                              | AA              | 1946813707               |
| SNP_P4_53628_31254281 | NC_021163.1    | Ca_kabuli_chr04 | 31254281                | GG                              | AA              | 1946813709               |
| SNP_P4_53629_31254309 | NC_021163.1    | Ca_kabuli_chr04 | 31254309                | TT                              | CC              | 1946813711               |
| SNP_P4_53631_31257622 | NC_021163.1    | Ca_kabuli_chr04 | 31257622                | TT                              | AA              | 1946813713               |
| SNP_P4_53632_31259323 | NC_021163.1    | Ca_kabuli_chr04 | 31259323                | TT                              | CC              | 1946813715               |
| SNP_P4_53633_31259336 | NC_021163.1    | Ca_kabuli_chr04 | 31259336                | AA                              | GG              | 1946813717               |
| SNP_P4_53635_31262371 | NC_021163.1    | Ca_kabuli_chr04 | 31262371                | AA                              | GG              | 1946813719               |
| SNP_P4_53636_31263900 | NC_021163.1    | Ca_kabuli_chr04 | 31263900                | TT                              | CC              | 1946813721               |
| SNP_P4_53638_31270683 | NC_021163.1    | Ca_kabuli_chr04 | 31270683                | TT                              | CC              | 1946813723               |
| SNP_P4_53640_31275441 | NC_021163.1    | Ca_kabuli_chr04 | 31275441                | AA                              | GG              | 1946813725               |
| SNP_P4_53642_31276654 | NC_021163.1    | Ca_kabuli_chr04 | 31276654                | TT                              | CC              | 1946813727               |
| SNP_P4_53643_31276944 | NC_021163.1    | Ca_kabuli_chr04 | 31276944                | GG                              | AA              | 1946813729               |
| SNP_P4_53644_31282559 | NC_021163.1    | Ca_kabuli_chr04 | 31282559                | TT                              | CC              | 1946813731               |
| SNP_P4_53645_31282784 | NC_021163.1    | Ca_kabuli_chr04 | 31282784                | GG                              | AA              | 1946813733               |
| SNP_P4_53646_31282880 | NC_021163.1    | Ca_kabuli_chr04 | 31282880                | TT                              | AA              | 1946813735               |
| SNP_P4_53647_31283635 | NC_021163.1    | Ca_kabuli_chr04 | 31283635                | TT                              | CC              | 1946813737               |
| SNP_P4_53649_31285193 | NC_021163.1    | Ca_kabuli_chr04 | 31285193                | TT                              | GG              | 1946813739               |
| SNP_P4_53650_31287276 | NC_021163.1    | Ca_kabuli_chr04 | 31287276                | TT                              | AA              | 1946813741               |
| SNP_P4_53652_31287927 | NC_021163.1    | Ca_kabuli_chr04 | 31287927                | GG                              | TT              | 1946813743               |
| SNP_P4_53653_31287940 | NC_021163.1    | Ca_kabuli_chr04 | 31287940                | GG                              | AA              | 1946813745               |
| SNP_P4_53654_31287988 | NC_021163.1    | Ca_kabuli_chr04 | 31287988                | GG                              | AA              | 1946813747               |
| SNP_P4_53655_31287989 | NC_021163.1    | Ca_kabuli_chr04 | 31287989                | AA                              | TT              | 1946813749               |
| SNP_P4_53656_31288346 | NC_021163.1    | Ca_kabuli_chr04 | 31288346                | AA                              | CC              | 1946813751               |
| SNP_P4_53657_31288355 | NC_021163.1    | Ca_kabuli_chr04 | 31288355                | AA                              | GG              | 1946813753               |
| SNP_P4_53658_31288365 | NC_021163.1    | Ca_kabuli_chr04 | 31288365                | GG                              | AA              | 1946813755               |
| SNP_P4_53659_31288676 | NC_021163.1    | Ca_kabuli_chr04 | 31288676                | CC                              | TT              | 1946813757               |
| SNP_P4_53660_31290951 | NC_021163.1    | Ca_kabuli_chr04 | 31290951                | TT                              | GG              | 1946813759               |
| SNP_P4_53661_31291277 | NC_021163.1    | Ca_kabuli_chr04 | 31291277                | TT                              | CC              | 1946813761               |
| SNP_P4_53662_31291340 | NC_021163.1    | Ca_kabuli_chr04 | 31291340                | CC                              | AA              | 1946813763               |
| SNP_P4_53663_31291844 | NC_021163.1    | Ca_kabuli_chr04 | 31291844                | TT                              | CC              | 1946813765               |
| SNP_P4_53664_31291855 | NC_021163.1    | Ca_kabuli_chr04 | 31291855                | TT                              | AA              | 1946813767               |
| SNP_P4_53665_31295131 | NC_021163.1    | Ca_kabuli_chr04 | 31295131                | TT                              | AA              | 1946813769               |
| SNP_P4_53666_31295707 | NC_021163.1    | Ca_kabuli_chr04 | 31295707                | GG                              | AA              | 1946813771               |
| SNP_P4_53667_31295936 | NC_021163.1    | Ca_kabuli_chr04 | 31295936                | AA                              | GG              | 1946813772               |
| SNP_P4_53668_31296040 | NC_021163.1    | Ca_kabuli_chr04 | 31296040                | AA                              | TT              | 1946813774               |
| SNP_P4_53669_31296067 | NC_021163.1    | Ca_kabuli_chr04 | 31296067                | TT                              | AA              | 1946813776               |
| SNP_P4_53670_31296431 | NC_021163.1    | Ca_kabuli_chr04 | 31296431                | GG                              | CC              | 1946813778               |
| SNP_P4_53671_31297514 | NC_021163.1    | Ca_kabuli_chr04 | 31297514                | AA                              | GG              | 1946813780               |
| SNP_P4_53672_31303120 | NC_021163.1    | Ca_kabuli_chr04 | 31303120                | TT                              | CC              | 1946813782               |
| SNP_P4_53673_31303157 | NC_021163.1    | Ca_kabuli_chr04 | 31303157                | GG                              | AA              | 1946813784               |
| SNP_P4_53675_31303972 | NC_021163.1    | Ca_kabuli_chr04 | 31303972                | TT                              | AA              | 1946813786               |

| SNPs IDs              | Chromosome IDs | Chromosomes     | Physical positions (bp) | CDC Frontier (Reference genome) | (ILWC46 & LPNB) | NCBI SNPdb Accession IDs |
|-----------------------|----------------|-----------------|-------------------------|---------------------------------|-----------------|--------------------------|
| SNP_P4_53676_31304208 | NC_021163.1    | Ca_kabuli_chr04 | 31304208                | AA                              | TT              | 1946813788               |
| SNP_P4_53677_31305780 | NC_021163.1    | Ca_kabuli_chr04 | 31305780                | AA                              | GG              | 1946813790               |
| SNP_P4_53678_31305787 | NC_021163.1    | Ca_kabuli_chr04 | 31305787                | CC                              | TT              | 1946813792               |
| SNP_P4_53679_31305810 | NC_021163.1    | Ca_kabuli_chr04 | 31305810                | AA                              | GG              | 1946813794               |
| SNP_P4_53680_31305840 | NC_021163.1    | Ca_kabuli_chr04 | 31305840                | TT                              | CC              | 1946813796               |
| SNP_P4_53681_31305946 | NC_021163.1    | Ca_kabuli_chr04 | 31305946                | AA                              | CC              | 1946813798               |
| SNP_P4_53682_31305947 | NC_021163.1    | Ca_kabuli_chr04 | 31305947                | TT                              | CC              | 1946813800               |
| SNP_P4_53683_31306190 | NC_021163.1    | Ca_kabuli_chr04 | 31306190                | TT                              | CC              | 1946813802               |
| SNP_P4_53684_31306349 | NC_021163.1    | Ca_kabuli_chr04 | 31306349                | TT                              | CC              | 1946813804               |
| SNP_P4_53685_31306390 | NC_021163.1    | Ca_kabuli_chr04 | 31306390                | CC                              | AA              | 1946813806               |
| SNP_P4_53686_31307147 | NC_021163.1    | Ca_kabuli_chr04 | 31307147                | TT                              | CC              | 1946813808               |
| SNP_P4_53687_31307280 | NC_021163.1    | Ca_kabuli_chr04 | 31307280                | AA                              | GG              | 1946813810               |
| SNP_P4_53688_31308494 | NC_021163.1    | Ca_kabuli_chr04 | 31308494                | GG                              | TT              | 1946813812               |
| SNP_P4_53689_31311604 | NC_021163.1    | Ca_kabuli_chr04 | 31311604                | CC                              | TT              | 1946813814               |
| SNP_P4_53690_31311968 | NC_021163.1    | Ca_kabuli_chr04 | 31311968                | TT                              | CC              | 1946813816               |
| SNP_P4_53691_31312392 | NC_021163.1    | Ca_kabuli_chr04 | 31312392                | AA                              | CC              | 1946813818               |
| SNP_P4_53693_31317873 | NC_021163.1    | Ca_kabuli_chr04 | 31317873                | TT                              | CC              | 1946813820               |
| SNP_P4_53694_31317965 | NC_021163.1    | Ca_kabuli_chr04 | 31317965                | TT                              | GG              | 1946813822               |
| SNP_P4_53695_31317981 | NC_021163.1    | Ca_kabuli_chr04 | 31317981                | CC                              | TT              | 1946813824               |
| SNP_P4_53696_31318328 | NC_021163.1    | Ca_kabuli_chr04 | 31318328                | GG                              | AA              | 1946813826               |
| SNP_P4_53697_31318336 | NC_021163.1    | Ca_kabuli_chr04 | 31318336                | CC                              | TT              | 1946813828               |
| SNP_P4_53698_31319076 | NC_021163.1    | Ca_kabuli_chr04 | 31319076                | CC                              | AA              | 1946813830               |
| SNP_P4_53699_31320060 | NC_021163.1    | Ca_kabuli_chr04 | 31320060                | CC                              | TT              | 1946813832               |
| SNP_P4_53700_31321459 | NC_021163.1    | Ca_kabuli_chr04 | 31321459                | GG                              | AA              | 1946813834               |
| SNP_P4_53702_31322999 | NC_021163.1    | Ca_kabuli_chr04 | 31322999                | CC                              | TT              | 1946813836               |
| SNP_P4_53703_31323223 | NC_021163.1    | Ca_kabuli_chr04 | 31323223                | TT                              | CC              | 1946813838               |
| SNP_P4_53704_31325404 | NC_021163.1    | Ca_kabuli_chr04 | 31325404                | AA                              | CC              | 1946813840               |
| SNP_P4_53705_31325998 | NC_021163.1    | Ca_kabuli_chr04 | 31325998                | GG                              | AA              | 1946813842               |
| SNP_P4_53706_31328672 | NC_021163.1    | Ca_kabuli_chr04 | 31328672                | AA                              | CC              | 1946813844               |
| SNP_P4_53707_31330995 | NC_021163.1    | Ca_kabuli_chr04 | 31330995                | AA                              | TT              | 1946813846               |
| SNP_P4_53708_31331398 | NC_021163.1    | Ca_kabuli_chr04 | 31331398                | GG                              | AA              | 1946813848               |
| SNP_P4_53709_31331608 | NC_021163.1    | Ca_kabuli_chr04 | 31331608                | CC                              | AA              | 1946813850               |
| SNP_P4_53710_31331879 | NC_021163.1    | Ca_kabuli_chr04 | 31331879                | TT                              | AA              | 1946813852               |
| SNP_P4_53711_31332093 | NC_021163.1    | Ca_kabuli_chr04 | 31332093                | AA                              | GG              | 1946813854               |
| SNP_P4_53713_31332382 | NC_021163.1    | Ca_kabuli_chr04 | 31332382                | CC                              | AA              | 1946813856               |
| SNP_P4_53714_31333049 | NC_021163.1    | Ca_kabuli_chr04 | 31333049                | GG                              | CC              | 1946813858               |
| SNP_P4_53715_31333306 | NC_021163.1    | Ca_kabuli_chr04 | 31333306                | TT                              | CC              | 1946813860               |
| SNP_P4_53716_31333408 | NC_021163.1    | Ca_kabuli_chr04 | 31333408                | CC                              | TT              | 1946813862               |
| SNP_P4_53717_31333492 | NC_021163.1    | Ca_kabuli_chr04 | 31333492                | AA                              | TT              | 1946813864               |
| SNP_P4_53718_31333786 | NC_021163.1    | Ca_kabuli_chr04 | 31333786                | TT                              | CC              | 1946813866               |
| SNP_P4_53719_31333959 | NC_021163.1    | Ca_kabuli_chr04 | 31333959                | AA                              | TT              | 1946813868               |
| SNP_P4_53721_31347169 | NC_021163.1    | Ca_kabuli_chr04 | 31347169                | CC                              | TT              | 1946813870               |

| SNPs IDs              | Chromosome IDs | Chromosomes     | Physical positions (bp) | CDC Frontier (Reference genome) | (ILWC46 & LPNB) | NCBI SNPdb Accession IDs |
|-----------------------|----------------|-----------------|-------------------------|---------------------------------|-----------------|--------------------------|
| SNP_P4_53723_31360724 | NC_021163.1    | Ca_kabuli_chr04 | 31360724                | GG                              | CC              | 1946813872               |
| SNP_P4_53724_31365685 | NC_021163.1    | Ca_kabuli_chr04 | 31365685                | GG                              | AA              | 1946813874               |
| SNP_P4_53725_31366062 | NC_021163.1    | Ca_kabuli_chr04 | 31366062                | GG                              | AA              | 1946813876               |
| SNP_P4_53726_31367904 | NC_021163.1    | Ca_kabuli_chr04 | 31367904                | TT                              | CC              | 1946813878               |
| SNP_P4_53727_31375851 | NC_021163.1    | Ca_kabuli_chr04 | 31375851                | GG                              | AA              | 1946813880               |
| SNP_P4_53728_31384516 | NC_021163.1    | Ca_kabuli_chr04 | 31384516                | AA                              | GG              | 1946813882               |
| SNP_P4_53729_31385214 | NC_021163.1    | Ca_kabuli_chr04 | 31385214                | TT                              | CC              | 1946813884               |
| SNP_P4_53730_31388578 | NC_021163.1    | Ca_kabuli_chr04 | 31388578                | CC                              | AA              | 1946813886               |
| SNP_P4_53731_31388593 | NC_021163.1    | Ca_kabuli_chr04 | 31388593                | TT                              | GG              | 1946813888               |
| SNP_P4_53732_31388980 | NC_021163.1    | Ca_kabuli_chr04 | 31388980                | GG                              | AA              | 1946813890               |
| SNP_P4_53733_31390613 | NC_021163.1    | Ca_kabuli_chr04 | 31390613                | GG                              | AA              | 1946813892               |
| SNP_P4_53735_31400441 | NC_021163.1    | Ca_kabuli_chr04 | 31400441                | AA                              | CC              | 1946813894               |
| SNP_P4_53736_31400788 | NC_021163.1    | Ca_kabuli_chr04 | 31400788                | TT                              | GG              | 1946813896               |
| SNP_P4_53737_31400795 | NC_021163.1    | Ca_kabuli_chr04 | 31400795                | TT                              | CC              | 1946813899               |
| SNP_P4_53738_31400814 | NC_021163.1    | Ca_kabuli_chr04 | 31400814                | AA                              | GG              | 1946813901               |
| SNP_P4_53739_31400823 | NC_021163.1    | Ca_kabuli_chr04 | 31400823                | CC                              | TT              | 1946813903               |
| SNP_P4_53740_31400828 | NC_021163.1    | Ca_kabuli_chr04 | 31400828                | TT                              | CC              | 1946813905               |
| SNP_P4_53741_31400928 | NC_021163.1    | Ca_kabuli_chr04 | 31400928                | AA                              | GG              | 1946813907               |
| SNP_P4_53742_31410498 | NC_021163.1    | Ca_kabuli_chr04 | 31410498                | GG                              | CC              | 1946813909               |
| SNP_P4_53743_31410522 | NC_021163.1    | Ca_kabuli_chr04 | 31410522                | AA                              | TT              | 1946813911               |
| SNP_P4_53744_31410541 | NC_021163.1    | Ca_kabuli_chr04 | 31410541                | AA                              | CC              | 1946813913               |
| SNP_P4_53745_31410580 | NC_021163.1    | Ca_kabuli_chr04 | 31410580                | AA                              | TT              | 1946813915               |
| SNP_P4_53746_31410929 | NC_021163.1    | Ca_kabuli_chr04 | 31410929                | TT                              | AA              | 1946813917               |
| SNP_P4_53748_31415903 | NC_021163.1    | Ca_kabuli_chr04 | 31415903                | TT                              | CC              | 1946813919               |
| SNP_P4_53749_31416238 | NC_021163.1    | Ca_kabuli_chr04 | 31416238                | GG                              | AA              | 1946813921               |
| SNP_P4_53750_31416258 | NC_021163.1    | Ca_kabuli_chr04 | 31416258                | CC                              | TT              | 1946813923               |
| SNP_P4_53751_31416297 | NC_021163.1    | Ca_kabuli_chr04 | 31416297                | AA                              | CC              | 1946813925               |
| SNP_P4_53752_31424640 | NC_021163.1    | Ca_kabuli_chr04 | 31424640                | AA                              | GG              | 1946813927               |
| SNP_P4_53753_31424686 | NC_021163.1    | Ca_kabuli_chr04 | 31424686                | TT                              | GG              | 1946813929               |
| SNP_P4_53754_31424774 | NC_021163.1    | Ca_kabuli_chr04 | 31424774                | TT                              | CC              | 1946813932               |
| SNP_P4_53755_31424860 | NC_021163.1    | Ca_kabuli_chr04 | 31424860                | CC                              | GG              | 1946813934               |
| SNP_P4_53756_31424884 | NC_021163.1    | Ca_kabuli_chr04 | 31424884                | CC                              | TT              | 1946813936               |
| SNP_P4_53757_31424888 | NC_021163.1    | Ca_kabuli_chr04 | 31424888                | AA                              | CC              | 1946813938               |
| SNP_P4_53758_31425097 | NC_021163.1    | Ca_kabuli_chr04 | 31425097                | TT                              | CC              | 1946813940               |
| SNP_P4_53759_31426028 | NC_021163.1    | Ca_kabuli_chr04 | 31426028                | CC                              | AA              | 1946813942               |
| SNP_P4_53761_31444983 | NC_021163.1    | Ca_kabuli_chr04 | 31444983                | TT                              | CC              | 1946813944               |
| SNP_P4_53762_31445165 | NC_021163.1    | Ca_kabuli_chr04 | 31445165                | TT                              | CC              | 1946813946               |
| SNP_P4_53763_31445198 | NC_021163.1    | Ca_kabuli_chr04 | 31445198                | TT                              | CC              | 1946813948               |
| SNP_P4_53764_31445200 | NC_021163.1    | Ca_kabuli_chr04 | 31445200                | AA                              | GG              | 1946813950               |
| SNP_P4_53765_31445232 | NC_021163.1    | Ca_kabuli_chr04 | 31445232                | TT                              | CC              | 1946813952               |
| SNP_P4_53766_31445237 | NC_021163.1    | Ca_kabuli_chr04 | 31445237                | TT                              | AA              | 1946813954               |
| SNP_P4_53768_31449620 | NC_021163.1    | Ca_kabuli_chr04 | 31449620                | TT                              | CC              | 1946813956               |



| SNPs IDs              | Chromosome IDs | Chromosomes     | Physical positions (bp) | CDC Frontier (Reference genome) | (ILWC46 & LPNB) | NCBI SNPdb Accession IDs |
|-----------------------|----------------|-----------------|-------------------------|---------------------------------|-----------------|--------------------------|
| SNP_P4_53769_31452710 | NC_021163.1    | Ca_kabuli_chr04 | 31452710                | TT                              | CC              | 1946813958               |
| SNP_P4_53771_31453826 | NC_021163.1    | Ca_kabuli_chr04 | 31453826                | AA                              | GG              | 1946813960               |
| SNP_P4_53772_31454365 | NC_021163.1    | Ca_kabuli_chr04 | 31454365                | CC                              | TT              | 1946813962               |
| SNP_P4_53773_31463416 | NC_021163.1    | Ca_kabuli_chr04 | 31463416                | AA                              | TT              | 1946813964               |
| SNP_P4_53775_31464014 | NC_021163.1    | Ca_kabuli_chr04 | 31464014                | AA                              | GG              | 1946813966               |
| SNP_P4_53776_31467918 | NC_021163.1    | Ca_kabuli_chr04 | 31467918                | TT                              | CC              | 1946813968               |
| SNP_P4_53777_31470393 | NC_021163.1    | Ca_kabuli_chr04 | 31470393                | GG                              | AA              | 1946813970               |
| SNP_P4_53778_31471156 | NC_021163.1    | Ca_kabuli_chr04 | 31471156                | GG                              | AA              | 1946813972               |
| SNP_P4_53780_31511947 | NC_021163.1    | Ca_kabuli_chr04 | 31511947                | AA                              | TT              | 1946813974               |
| SNP_P4_53782_31518716 | NC_021163.1    | Ca_kabuli_chr04 | 31518716                | AA                              | TT              | 1946813976               |
| SNP_P4_53783_31522982 | NC_021163.1    | Ca_kabuli_chr04 | 31522982                | AA                              | GG              | 1946813978               |
| SNP_P4_53785_31525602 | NC_021163.1    | Ca_kabuli_chr04 | 31525602                | TT                              | AA              | 1946813980               |
| SNP_P4_53787_31531499 | NC_021163.1    | Ca_kabuli_chr04 | 31531499                | AA                              | GG              | 1946813983               |
| SNP_P4_53788_31531507 | NC_021163.1    | Ca_kabuli_chr04 | 31531507                | GG                              | AA              | 1946813985               |
| SNP_P4_53789_31531615 | NC_021163.1    | Ca_kabuli_chr04 | 31531615                | GG                              | TT              | 1946813987               |
| SNP_P4_53790_31531644 | NC_021163.1    | Ca_kabuli_chr04 | 31531644                | GG                              | TT              | 1946813989               |
| SNP_P4_53791_31531661 | NC_021163.1    | Ca_kabuli_chr04 | 31531661                | TT                              | CC              | 1946813991               |
| SNP_P4_53792_31533032 | NC_021163.1    | Ca_kabuli_chr04 | 31533032                | TT                              | CC              | 1946813993               |
| SNP_P4_53793_31533047 | NC_021163.1    | Ca_kabuli_chr04 | 31533047                | TT                              | AA              | 1946813995               |
| SNP_P4_53794_31533384 | NC_021163.1    | Ca_kabuli_chr04 | 31533384                | AA                              | GG              | 1946813997               |
| SNP_P4_53795_31533653 | NC_021163.1    | Ca_kabuli_chr04 | 31533653                | TT                              | AA              | 1946813999               |
| SNP_P4_53796_31534190 | NC_021163.1    | Ca_kabuli_chr04 | 31534190                | CC                              | TT              | 1946814001               |
| SNP_P4_53798_31534845 | NC_021163.1    | Ca_kabuli_chr04 | 31534845                | CC                              | AA              | 1946814004               |
| SNP_P4_53799_31534850 | NC_021163.1    | Ca_kabuli_chr04 | 31534850                | TT                              | GG              | 1946814006               |
| SNP_P4_53800_31545519 | NC_021163.1    | Ca_kabuli_chr04 | 31545519                | CC                              | AA              | 1946814008               |
| SNP_P4_53801_31546233 | NC_021163.1    | Ca_kabuli_chr04 | 31546233                | TT                              | CC              | 1946814010               |
| SNP_P4_53803_31549227 | NC_021163.1    | Ca_kabuli_chr04 | 31549227                | AA                              | CC              | 1946814012               |
| SNP_P4_53804_31549231 | NC_021163.1    | Ca_kabuli_chr04 | 31549231                | TT                              | AA              | 1946814014               |
| SNP_P4_53805_31549910 | NC_021163.1    | Ca_kabuli_chr04 | 31549910                | CC                              | TT              | 1946814016               |
| SNP_P4_53806_31549914 | NC_021163.1    | Ca_kabuli_chr04 | 31549914                | TT                              | CC              | 1946814019               |
| SNP_P4_53807_31552416 | NC_021163.1    | Ca_kabuli_chr04 | 31552416                | AA                              | GG              | 1946814021               |
| SNP_P4_53808_31552683 | NC_021163.1    | Ca_kabuli_chr04 | 31552683                | TT                              | CC              | 1946814023               |
| SNP_P4_53809_31554384 | NC_021163.1    | Ca_kabuli_chr04 | 31554384                | TT                              | AA              | 1946814026               |
| SNP_P4_53810_31554403 | NC_021163.1    | Ca_kabuli_chr04 | 31554403                | AA                              | CC              | 1946814028               |
| SNP_P4_53811_31555271 | NC_021163.1    | Ca_kabuli_chr04 | 31555271                | AA                              | GG              | 1946814030               |
| SNP_P4_53812_31556277 | NC_021163.1    | Ca_kabuli_chr04 | 31556277                | AA                              | GG              | 1946814032               |
| SNP_P4_53814_31558627 | NC_021163.1    | Ca_kabuli_chr04 | 31558627                | TT                              | CC              | 1946814034               |
| SNP_P4_53815_31558693 | NC_021163.1    | Ca_kabuli_chr04 | 31558693                | TT                              | GG              | 1946814036               |
| SNP_P4_53816_31559450 | NC_021163.1    | Ca_kabuli_chr04 | 31559450                | TT                              | GG              | 1946814039               |
| SNP_P4_53817_31559475 | NC_021163.1    | Ca_kabuli_chr04 | 31559475                | TT                              | CC              | 1946814041               |
| SNP_P4_53818_31559483 | NC_021163.1    | Ca_kabuli_chr04 | 31559483                | TT                              | CC              | 1946814043               |
| SNP_P4_53819_31559520 | NC_021163.1    | Ca_kabuli_chr04 | 31559520                | GG                              | AA              | 1946814045               |

| SNPs IDs              | Chromosome IDs | Chromosomes     | Physical positions (bp) | CDC Frontier (Reference genome) | (ILWC46 & LPNB) | NCBI SNPdb Accession IDs |
|-----------------------|----------------|-----------------|-------------------------|---------------------------------|-----------------|--------------------------|
| SNP_P4_53820_31559768 | NC_021163.1    | Ca_kabuli_chr04 | 31559768                | CC                              | TT              | 1946814047               |
| SNP_P4_53822_31561057 | NC_021163.1    | Ca_kabuli_chr04 | 31561057                | GG                              | AA              | 1946814049               |
| SNP_P4_53823_31561325 | NC_021163.1    | Ca_kabuli_chr04 | 31561325                | AA                              | GG              | 1946814051               |
| SNP_P4_53824_31561361 | NC_021163.1    | Ca_kabuli_chr04 | 31561361                | TT                              | CC              | 1946814053               |
| SNP_P4_53825_31561426 | NC_021163.1    | Ca_kabuli_chr04 | 31561426                | CC                              | TT              | 1946814055               |
| SNP_P4_53826_31561520 | NC_021163.1    | Ca_kabuli_chr04 | 31561520                | GG                              | TT              | 1946814057               |
| SNP_P4_53827_31561809 | NC_021163.1    | Ca_kabuli_chr04 | 31561809                | AA                              | GG              | 1946814059               |
| SNP_P4_53828_31562081 | NC_021163.1    | Ca_kabuli_chr04 | 31562081                | TT                              | AA              | 1946814061               |
| SNP_P4_53829_31567853 | NC_021163.1    | Ca_kabuli_chr04 | 31567853                | AA                              | TT              | 1946814063               |
| SNP_P4_53830_31569977 | NC_021163.1    | Ca_kabuli_chr04 | 31569977                | GG                              | AA              | 1946814066               |
| SNP_P4_53831_31571350 | NC_021163.1    | Ca_kabuli_chr04 | 31571350                | AA                              | GG              | 1946814068               |
| SNP_P4_53832_31578577 | NC_021163.1    | Ca_kabuli_chr04 | 31578577                | AA                              | GG              | 1946814070               |
| SNP_P4_53833_31578579 | NC_021163.1    | Ca_kabuli_chr04 | 31578579                | CC                              | TT              | 1946814072               |
| SNP_P4_53834_31578906 | NC_021163.1    | Ca_kabuli_chr04 | 31578906                | CC                              | TT              | 1946814074               |
| SNP_P4_53835_31579229 | NC_021163.1    | Ca_kabuli_chr04 | 31579229                | AA                              | GG              | 1946814076               |
| SNP_P4_53836_31579266 | NC_021163.1    | Ca_kabuli_chr04 | 31579266                | GG                              | TT              | 1946814078               |
| SNP_P4_53837_31590645 | NC_021163.1    | Ca_kabuli_chr04 | 31590645                | CC                              | TT              | 1946814081               |
| SNP_P4_53838_31600787 | NC_021163.1    | Ca_kabuli_chr04 | 31600787                | TT                              | CC              | 1946814083               |
| SNP_P4_53839_31611826 | NC_021163.1    | Ca_kabuli_chr04 | 31611826                | GG                              | AA              | 1946814085               |
| SNP_P4_53842_31611887 | NC_021163.1    | Ca_kabuli_chr04 | 31611887                | AA                              | GG              | 1946814087               |
| SNP_P4_53844_31614792 | NC_021163.1    | Ca_kabuli_chr04 | 31614792                | AA                              | TT              | 1946814089               |
| SNP_P4_53845_31614804 | NC_021163.1    | Ca_kabuli_chr04 | 31614804                | CC                              | AA              | 1946814091               |
| SNP_P4_53846_31614809 | NC_021163.1    | Ca_kabuli_chr04 | 31614809                | TT                              | CC              | 1946814093               |
| SNP_P4_53847_31614824 | NC_021163.1    | Ca_kabuli_chr04 | 31614824                | GG                              | AA              | 1946814095               |
| SNP_P4_53848_31615069 | NC_021163.1    | Ca_kabuli_chr04 | 31615069                | AA                              | GG              | 1946814097               |
| SNP_P4_53849_31616593 | NC_021163.1    | Ca_kabuli_chr04 | 31616593                | CC                              | TT              | 1946814099               |
| SNP_P4_53850_31618086 | NC_021163.1    | Ca_kabuli_chr04 | 31618086                | TT                              | CC              | 1946814102               |
| SNP_P4_53851_31619044 | NC_021163.1    | Ca_kabuli_chr04 | 31619044                | GG                              | AA              | 1946814104               |
| SNP_P4_53852_31619071 | NC_021163.1    | Ca_kabuli_chr04 | 31619071                | CC                              | TT              | 1946814106               |
| SNP_P4_53853_31619074 | NC_021163.1    | Ca_kabuli_chr04 | 31619074                | GG                              | AA              | 1946814108               |
| SNP_P4_53854_31619288 | NC_021163.1    | Ca_kabuli_chr04 | 31619288                | TT                              | CC              | 1946814110               |
| SNP_P4_53855_31619317 | NC_021163.1    | Ca_kabuli_chr04 | 31619317                | CC                              | TT              | 1946814112               |
| SNP_P4_53856_31619322 | NC_021163.1    | Ca_kabuli_chr04 | 31619322                | AA                              | GG              | 1946814114               |
| SNP_P4_53857_31619386 | NC_021163.1    | Ca_kabuli_chr04 | 31619386                | CC                              | TT              | 1946814116               |
| SNP_P4_53859_31620383 | NC_021163.1    | Ca_kabuli_chr04 | 31620383                | GG                              | AA              | 1946814118               |
| SNP_P4_53860_31620618 | NC_021163.1    | Ca_kabuli_chr04 | 31620618                | TT                              | CC              | 1946814121               |
| SNP_P4_53861_31621209 | NC_021163.1    | Ca_kabuli_chr04 | 31621209                | AA                              | CC              | 1946814123               |
| SNP_P4_53862_31621228 | NC_021163.1    | Ca_kabuli_chr04 | 31621228                | GG                              | CC              | 1946814125               |
| SNP_P4_53863_31621481 | NC_021163.1    | Ca_kabuli_chr04 | 31621481                | TT                              | GG              | 1946814127               |
| SNP_P4_53864_31621727 | NC_021163.1    | Ca_kabuli_chr04 | 31621727                | GG                              | AA              | 1946814129               |
| SNP_P4_53865_31622045 | NC_021163.1    | Ca_kabuli_chr04 | 31622045                | GG                              | AA              | 1946814131               |
| SNP_P4_53866_31622077 | NC_021163.1    | Ca_kabuli_chr04 | 31622077                | CC                              | TT              | 1946814134               |

| SNPs IDs              | Chromosome IDs | Chromosomes     | Physical positions (bp) | CDC Frontier (Reference genome) | (ILWC46 & LPNB) | NCBI SNPdb Accession IDs |
|-----------------------|----------------|-----------------|-------------------------|---------------------------------|-----------------|--------------------------|
| SNP_P4_53867_31623663 | NC_021163.1    | Ca_kabuli_chr04 | 31623663                | AA                              | TT              | 1946814136               |
| SNP_P4_53868_31623696 | NC_021163.1    | Ca_kabuli_chr04 | 31623696                | CC                              | TT              | 1946814138               |
| SNP_P4_53869_31624176 | NC_021163.1    | Ca_kabuli_chr04 | 31624176                | GG                              | AA              | 1946814140               |
| SNP_P4_53870_31624419 | NC_021163.1    | Ca_kabuli_chr04 | 31624419                | AA                              | GG              | 1946814142               |
| SNP_P4_53871_31626549 | NC_021163.1    | Ca_kabuli_chr04 | 31626549                | GG                              | TT              | 1946814144               |
| SNP_P4_53872_31626624 | NC_021163.1    | Ca_kabuli_chr04 | 31626624                | AA                              | GG              | 1946814147               |
| SNP_P4_53873_31626809 | NC_021163.1    | Ca_kabuli_chr04 | 31626809                | CC                              | GG              | 1946814149               |
| SNP_P4_53874_31626989 | NC_021163.1    | Ca_kabuli_chr04 | 31626989                | CC                              | AA              | 1946814151               |
| SNP_P4_53875_31628016 | NC_021163.1    | Ca_kabuli_chr04 | 31628016                | CC                              | AA              | 1946814153               |
| SNP_P4_53876_31628144 | NC_021163.1    | Ca_kabuli_chr04 | 31628144                | CC                              | GG              | 1946814155               |
| SNP_P4_53877_31628194 | NC_021163.1    | Ca_kabuli_chr04 | 31628194                | AA                              | GG              | 1946814158               |
| SNP_P4_53878_31628499 | NC_021163.1    | Ca_kabuli_chr04 | 31628499                | TT                              | CC              | 1946814160               |
| SNP_P4_53879_31628987 | NC_021163.1    | Ca_kabuli_chr04 | 31628987                | CC                              | TT              | 1946814162               |
| SNP_P4_53882_31629702 | NC_021163.1    | Ca_kabuli_chr04 | 31629702                | TT                              | CC              | 1946814164               |
| SNP_P4_53883_31629726 | NC_021163.1    | Ca_kabuli_chr04 | 31629726                | AA                              | GG              | 1946814166               |
| SNP_P4_53884_31630014 | NC_021163.1    | Ca_kabuli_chr04 | 31630014                | TT                              | GG              | 1946814168               |
| SNP_P4_53885_31630016 | NC_021163.1    | Ca_kabuli_chr04 | 31630016                | GG                              | TT              | 1946814170               |
| SNP_P4_53886_31630032 | NC_021163.1    | Ca_kabuli_chr04 | 31630032                | CC                              | TT              | 1946814173               |
| SNP_P4_53887_31630959 | NC_021163.1    | Ca_kabuli_chr04 | 31630959                | GG                              | AA              | 1946814175               |
| SNP_P4_53888_31630998 | NC_021163.1    | Ca_kabuli_chr04 | 31630998                | GG                              | AA              | 1946814177               |
| SNP_P4_53889_31631050 | NC_021163.1    | Ca_kabuli_chr04 | 31631050                | AA                              | GG              | 1946814179               |
| SNP_P4_53890_31632045 | NC_021163.1    | Ca_kabuli_chr04 | 31632045                | AA                              | TT              | 1946814181               |
| SNP_P4_53891_31632682 | NC_021163.1    | Ca_kabuli_chr04 | 31632682                | AA                              | CC              | 1946814183               |
| SNP_P4_53892_31632692 | NC_021163.1    | Ca_kabuli_chr04 | 31632692                | CC                              | GG              | 1946814185               |
| SNP_P4_53895_31632958 | NC_021163.1    | Ca_kabuli_chr04 | 31632958                | AA                              | GG              | 1946814187               |
| SNP_P4_53896_31633003 | NC_021163.1    | Ca_kabuli_chr04 | 31633003                | TT                              | AA              | 1946814189               |
| SNP_P4_53898_31634058 | NC_021163.1    | Ca_kabuli_chr04 | 31634058                | TT                              | AA              | 1946814191               |
| SNP_P4_53899_31634065 | NC_021163.1    | Ca_kabuli_chr04 | 31634065                | GG                              | AA              | 1946814194               |
| SNP_P4_53900_31636173 | NC_021163.1    | Ca_kabuli_chr04 | 31636173                | CC                              | TT              | 1946814196               |
| SNP_P4_53901_31636178 | NC_021163.1    | Ca_kabuli_chr04 | 31636178                | TT                              | GG              | 1946814198               |
| SNP_P4_53902_31636193 | NC_021163.1    | Ca_kabuli_chr04 | 31636193                | AA                              | GG              | 1946814200               |
| SNP_P4_53903_31636210 | NC_021163.1    | Ca_kabuli_chr04 | 31636210                | GG                              | AA              | 1946814202               |
| SNP_P4_53904_31636231 | NC_021163.1    | Ca_kabuli_chr04 | 31636231                | CC                              | TT              | 1946814204               |
| SNP_P4_53905_31636481 | NC_021163.1    | Ca_kabuli_chr04 | 31636481                | GG                              | AA              | 1946814206               |
| SNP_P4_53906_31636483 | NC_021163.1    | Ca_kabuli_chr04 | 31636483                | TT                              | AA              | 1946814208               |
| SNP_P4_53908_31638781 | NC_021163.1    | Ca_kabuli_chr04 | 31638781                | AA                              | GG              | 1946814210               |
| SNP_P4_53909_31638803 | NC_021163.1    | Ca_kabuli_chr04 | 31638803                | TT                              | AA              | 1946814212               |
| SNP_P4_53910_31638838 | NC_021163.1    | Ca_kabuli_chr04 | 31638838                | CC                              | TT              | 1946814214               |
| SNP_P4_53911_31638848 | NC_021163.1    | Ca_kabuli_chr04 | 31638848                | AA                              | TT              | 1946814216               |
| SNP_P4_53912_31638856 | NC_021163.1    | Ca_kabuli_chr04 | 31638856                | AA                              | GG              | 1946814218               |
| SNP_P4_53913_31639442 | NC_021163.1    | Ca_kabuli_chr04 | 31639442                | CC                              | TT              | 1946814220               |
| SNP_P4_53914_31639443 | NC_021163.1    | Ca_kabuli_chr04 | 31639443                | AA                              | GG              | 1946814222               |

| SNPs IDs              | Chromosome IDs | Chromosomes     | Physical positions (bp) | CDC Frontier (Reference genome) | (ILWC46 & LPNB) | NCBI SNPdb Accession IDs |
|-----------------------|----------------|-----------------|-------------------------|---------------------------------|-----------------|--------------------------|
| SNP_P4_53915_31639453 | NC_021163.1    | Ca_kabuli_chr04 | 31639453                | GG                              | CC              | 1946814224               |
| SNP_P4_53916_31639457 | NC_021163.1    | Ca_kabuli_chr04 | 31639457                | GG                              | AA              | 1946814227               |
| SNP_P4_53918_31639795 | NC_021163.1    | Ca_kabuli_chr04 | 31639795                | TT                              | CC              | 1946814229               |
| SNP_P4_53919_31639807 | NC_021163.1    | Ca_kabuli_chr04 | 31639807                | AA                              | GG              | 1946814231               |
| SNP_P4_53920_31639812 | NC_021163.1    | Ca_kabuli_chr04 | 31639812                | CC                              | TT              | 1946814233               |
| SNP_P4_53921_31639844 | NC_021163.1    | Ca_kabuli_chr04 | 31639844                | AA                              | GG              | 1946814235               |
| SNP_P4_53922_31639928 | NC_021163.1    | Ca_kabuli_chr04 | 31639928                | CC                              | AA              | 1946814237               |
| SNP_P4_53923_31639933 | NC_021163.1    | Ca_kabuli_chr04 | 31639933                | CC                              | GG              | 1946814239               |
| SNP_P4_53924_31639942 | NC_021163.1    | Ca_kabuli_chr04 | 31639942                | TT                              | GG              | 1946814241               |
| SNP_P4_53925_31639947 | NC_021163.1    | Ca_kabuli_chr04 | 31639947                | CC                              | TT              | 1946814244               |
| SNP_P4_53926_31639965 | NC_021163.1    | Ca_kabuli_chr04 | 31639965                | AA                              | GG              | 1946814246               |
| SNP_P4_53927_31640010 | NC_021163.1    | Ca_kabuli_chr04 | 31640010                | CC                              | GG              | 1946814248               |
| SNP_P4_53929_31642549 | NC_021163.1    | Ca_kabuli_chr04 | 31642549                | GG                              | CC              | 1946814250               |
| SNP_P4_53930_31642683 | NC_021163.1    | Ca_kabuli_chr04 | 31642683                | CC                              | TT              | 1946814252               |
| SNP_P4_53931_31644030 | NC_021163.1    | Ca_kabuli_chr04 | 31644030                | TT                              | AA              | 1946814254               |
| SNP_P4_53932_31644360 | NC_021163.1    | Ca_kabuli_chr04 | 31644360                | AA                              | CC              | 1946814256               |
| SNP_P4_53933_31644630 | NC_021163.1    | Ca_kabuli_chr04 | 31644630                | AA                              | CC              | 1946814258               |
| SNP_P4_53934_31644657 | NC_021163.1    | Ca_kabuli_chr04 | 31644657                | GG                              | CC              | 1946814260               |
| SNP_P4_53935_31644668 | NC_021163.1    | Ca_kabuli_chr04 | 31644668                | GG                              | TT              | 1946814262               |
| SNP_P4_53939_31647808 | NC_021163.1    | Ca_kabuli_chr04 | 31647808                | GG                              | TT              | 1946814264               |
| SNP_P4_53940_31647841 | NC_021163.1    | Ca_kabuli_chr04 | 31647841                | TT                              | CC              | 1946814266               |
| SNP_P4_53941_31648799 | NC_021163.1    | Ca_kabuli_chr04 | 31648799                | TT                              | CC              | 1946814269               |
| SNP_P4_53942_31649256 | NC_021163.1    | Ca_kabuli_chr04 | 31649256                | TT                              | CC              | 1946814271               |
| SNP_P4_53943_31649283 | NC_021163.1    | Ca_kabuli_chr04 | 31649283                | CC                              | AA              | 1946814273               |
| SNP_P4_53946_31652815 | NC_021163.1    | Ca_kabuli_chr04 | 31652815                | AA                              | GG              | 1946814275               |
| SNP_P4_53947_31653167 | NC_021163.1    | Ca_kabuli_chr04 | 31653167                | CC                              | AA              | 1946814277               |
| SNP_P4_53948_31653177 | NC_021163.1    | Ca_kabuli_chr04 | 31653177                | GG                              | TT              | 1946814279               |
| SNP_P4_53949_31653230 | NC_021163.1    | Ca_kabuli_chr04 | 31653230                | TT                              | AA              | 1946814281               |
| SNP_P4_53951_31653505 | NC_021163.1    | Ca_kabuli_chr04 | 31653505                | CC                              | TT              | 1946814283               |
| SNP_P4_53952_31653507 | NC_021163.1    | Ca_kabuli_chr04 | 31653507                | TT                              | GG              | 1946814285               |
| SNP_P4_53953_31653518 | NC_021163.1    | Ca_kabuli_chr04 | 31653518                | TT                              | CC              | 1946814287               |
| SNP_P4_53954_31653559 | NC_021163.1    | Ca_kabuli_chr04 | 31653559                | TT                              | AA              | 1946814289               |
| SNP_P4_53955_31653724 | NC_021163.1    | Ca_kabuli_chr04 | 31653724                | TT                              | GG              | 1946814291               |
| SNP_P4_53956_31653966 | NC_021163.1    | Ca_kabuli_chr04 | 31653966                | TT                              | GG              | 1946814293               |
| SNP_P4_53957_31654032 | NC_021163.1    | Ca_kabuli_chr04 | 31654032                | CC                              | AA              | 1946814295               |
| SNP_P4_53958_31654035 | NC_021163.1    | Ca_kabuli_chr04 | 31654035                | CC                              | GG              | 1946814297               |
| SNP_P4_53959_31654104 | NC_021163.1    | Ca_kabuli_chr04 | 31654104                | AA                              | GG              | 1946814299               |
| SNP_P4_53960_31658140 | NC_021163.1    | Ca_kabuli_chr04 | 31658140                | TT                              | CC              | 1946814301               |
| SNP_P4_53961_31659111 | NC_021163.1    | Ca_kabuli_chr04 | 31659111                | GG                              | TT              | 1946814303               |
| SNP_P4_53962_31663678 | NC_021163.1    | Ca_kabuli_chr04 | 31663678                | TT                              | GG              | 1946814305               |
| SNP_P4_53963_31663761 | NC_021163.1    | Ca_kabuli_chr04 | 31663761                | AA                              | GG              | 1946814307               |
| SNP_P4_53964_31668065 | NC_021163.1    | Ca_kabuli_chr04 | 31668065                | CC                              | TT              | 1946814309               |

| SNPs IDs              | Chromosome IDs | Chromosomes     | Physical positions (bp) | CDC Frontier (Reference genome) | (ILWC46 & LPNB) | NCBI SNPdb Accession IDs |
|-----------------------|----------------|-----------------|-------------------------|---------------------------------|-----------------|--------------------------|
| SNP_P4_53965_31671930 | NC_021163.1    | Ca_kabuli_chr04 | 31671930                | GG                              | AA              | 1946814311               |
| SNP_P4_53966_31674747 | NC_021163.1    | Ca_kabuli_chr04 | 31674747                | GG                              | TT              | 1946814313               |
| SNP_P4_53967_31679618 | NC_021163.1    | Ca_kabuli_chr04 | 31679618                | GG                              | AA              | 1946814315               |
| SNP_P4_53968_31682998 | NC_021163.1    | Ca_kabuli_chr04 | 31682998                | TT                              | GG              | 1946814317               |
| SNP_P4_53969_31684236 | NC_021163.1    | Ca_kabuli_chr04 | 31684236                | CC                              | AA              | 1946814319               |
| SNP_P4_53970_31684340 | NC_021163.1    | Ca_kabuli_chr04 | 31684340                | AA                              | TT              | 1946814321               |
| SNP_P4_53971_31703189 | NC_021163.1    | Ca_kabuli_chr04 | 31703189                | AA                              | GG              | 1946814323               |
| SNP_P4_53972_31703400 | NC_021163.1    | Ca_kabuli_chr04 | 31703400                | GG                              | TT              | 1946814325               |
| SNP_P4_53973_31703403 | NC_021163.1    | Ca_kabuli_chr04 | 31703403                | AA                              | TT              | 1946814327               |
| SNP_P4_53974_31703543 | NC_021163.1    | Ca_kabuli_chr04 | 31703543                | AA                              | GG              | 1946814329               |
| SNP_P4_53975_31711865 | NC_021163.1    | Ca_kabuli_chr04 | 31711865                | AA                              | GG              | 1946814331               |
| SNP_P4_53976_31713214 | NC_021163.1    | Ca_kabuli_chr04 | 31713214                | TT                              | CC              | 1946814333               |
| SNP_P4_53978_31719811 | NC_021163.1    | Ca_kabuli_chr04 | 31719811                | GG                              | TT              | 1946814335               |
| SNP_P4_53979_31721937 | NC_021163.1    | Ca_kabuli_chr04 | 31721937                | CC                              | TT              | 1946814337               |
| SNP_P4_53981_31734024 | NC_021163.1    | Ca_kabuli_chr04 | 31734024                | CC                              | AA              | 1946814339               |
| SNP_P4_53982_31734288 | NC_021163.1    | Ca_kabuli_chr04 | 31734288                | CC                              | AA              | 1946814341               |
| SNP_P4_53983_31737608 | NC_021163.1    | Ca_kabuli_chr04 | 31737608                | GG                              | AA              | 1946814343               |
| SNP_P4_53984_31745366 | NC_021163.1    | Ca_kabuli_chr04 | 31745366                | CC                              | AA              | 1946814345               |
| SNP_P4_53985_31748284 | NC_021163.1    | Ca_kabuli_chr04 | 31748284                | CC                              | AA              | 1946814347               |
| SNP_P4_53986_31749114 | NC_021163.1    | Ca_kabuli_chr04 | 31749114                | TT                              | CC              | 1946814349               |
| SNP_P4_53987_31749815 | NC_021163.1    | Ca_kabuli_chr04 | 31749815                | GG                              | TT              | 1946814351               |
| SNP_P4_53988_31749823 | NC_021163.1    | Ca_kabuli_chr04 | 31749823                | AA                              | GG              | 1946814353               |
| SNP_P4_53989_31751653 | NC_021163.1    | Ca_kabuli_chr04 | 31751653                | CC                              | TT              | 1946814355               |
| SNP_P4_53990_31752359 | NC_021163.1    | Ca_kabuli_chr04 | 31752359                | CC                              | TT              | 1946814358               |
| SNP_P4_53993_31753402 | NC_021163.1    | Ca_kabuli_chr04 | 31753402                | AA                              | GG              | 1946814360               |
| SNP_P4_53995_31757282 | NC_021163.1    | Ca_kabuli_chr04 | 31757282                | CC                              | AA              | 1946814362               |
| SNP_P4_53996_31757299 | NC_021163.1    | Ca_kabuli_chr04 | 31757299                | AA                              | TT              | 1946814364               |
| SNP_P4_53997_31759332 | NC_021163.1    | Ca_kabuli_chr04 | 31759332                | AA                              | GG              | 1946814366               |
| SNP_P4_53998_31763428 | NC_021163.1    | Ca_kabuli_chr04 | 31763428                | AA                              | TT              | 1946814368               |
| SNP_P4_54000_31768410 | NC_021163.1    | Ca_kabuli_chr04 | 31768410                | CC                              | TT              | 1946814370               |
| SNP_P4_54001_31769568 | NC_021163.1    | Ca_kabuli_chr04 | 31769568                | GG                              | AA              | 1946814372               |
| SNP_P4_54002_31769855 | NC_021163.1    | Ca_kabuli_chr04 | 31769855                | TT                              | AA              | 1946814374               |
| SNP_P4_54003_31771366 | NC_021163.1    | Ca_kabuli_chr04 | 31771366                | AA                              | TT              | 1946814376               |
| SNP_P4_54004_31771786 | NC_021163.1    | Ca_kabuli_chr04 | 31771786                | AA                              | TT              | 1946814378               |
| SNP_P4_54005_31773388 | NC_021163.1    | Ca_kabuli_chr04 | 31773388                | GG                              | AA              | 1946814380               |
| SNP_P4_54006_31775130 | NC_021163.1    | Ca_kabuli_chr04 | 31775130                | TT                              | CC              | 1946814382               |
| SNP_P4_54007_31775157 | NC_021163.1    | Ca_kabuli_chr04 | 31775157                | TT                              | GG              | 1946814384               |
| SNP_P4_54008_31778047 | NC_021163.1    | Ca_kabuli_chr04 | 31778047                | CC                              | TT              | 1946814386               |
| SNP_P4_54009_31780082 | NC_021163.1    | Ca_kabuli_chr04 | 31780082                | AA                              | TT              | 1946814388               |
| SNP_P4_54010_31780432 | NC_021163.1    | Ca_kabuli_chr04 | 31780432                | GG                              | AA              | 1946814390               |
| SNP_P4_54011_31780486 | NC_021163.1    | Ca_kabuli_chr04 | 31780486                | AA                              | CC              | 1946814392               |
| SNP_P4_54012_31781811 | NC_021163.1    | Ca_kabuli_chr04 | 31781811                | CC                              | TT              | 1946814394               |

| SNPs IDs              | Chromosome IDs | Chromosomes     | Physical positions (bp) | CDC Frontier (Reference genome) | (ILWC46 & LPNB) | NCBI SNPdb Accession IDs |
|-----------------------|----------------|-----------------|-------------------------|---------------------------------|-----------------|--------------------------|
| SNP_P4_54013_31781847 | NC_021163.1    | Ca_kabuli_chr04 | 31781847                | AA                              | TT              | 1946814396               |
| SNP_P4_54014_31781857 | NC_021163.1    | Ca_kabuli_chr04 | 31781857                | TT                              | CC              | 1946814398               |
| SNP_P4_54015_31781878 | NC_021163.1    | Ca_kabuli_chr04 | 31781878                | TT                              | CC              | 1946814400               |
| SNP_P4_54016_31790030 | NC_021163.1    | Ca_kabuli_chr04 | 31790030                | TT                              | GG              | 1946814402               |
| SNP_P4_54017_31797527 | NC_021163.1    | Ca_kabuli_chr04 | 31797527                | TT                              | CC              | 1946814404               |
| SNP_P4_54018_31800949 | NC_021163.1    | Ca_kabuli_chr04 | 31800949                | CC                              | AA              | 1946814406               |
| SNP_P4_54019_31803228 | NC_021163.1    | Ca_kabuli_chr04 | 31803228                | CC                              | AA              | 1946814408               |
| SNP_P4_54021_31807419 | NC_021163.1    | Ca_kabuli_chr04 | 31807419                | CC                              | AA              | 1946814410               |
| SNP_P4_54022_31807506 | NC_021163.1    | Ca_kabuli_chr04 | 31807506                | AA                              | CC              | 1946814413               |
| SNP_P4_54023_31808854 | NC_021163.1    | Ca_kabuli_chr04 | 31808854                | GG                              | AA              | 1946814415               |
| SNP_P4_54024_31812236 | NC_021163.1    | Ca_kabuli_chr04 | 31812236                | CC                              | TT              | 1946814417               |
| SNP_P4_54025_31812253 | NC_021163.1    | Ca_kabuli_chr04 | 31812253                | GG                              | AA              | 1946814419               |
| SNP_P4_54026_31812362 | NC_021163.1    | Ca_kabuli_chr04 | 31812362                | CC                              | TT              | 1946814421               |
| SNP_P4_54027_31813602 | NC_021163.1    | Ca_kabuli_chr04 | 31813602                | AA                              | CC              | 1946814423               |
| SNP_P4_54028_31814205 | NC_021163.1    | Ca_kabuli_chr04 | 31814205                | TT                              | AA              | 1946814425               |
| SNP_P4_54030_31822942 | NC_021163.1    | Ca_kabuli_chr04 | 31822942                | TT                              | CC              | 1946814427               |
| SNP_P4_54031_31824905 | NC_021163.1    | Ca_kabuli_chr04 | 31824905                | CC                              | TT              | 1946814429               |
| SNP_P4_54032_31825015 | NC_021163.1    | Ca_kabuli_chr04 | 31825015                | CC                              | GG              | 1946814431               |
| SNP_P4_54033_31827863 | NC_021163.1    | Ca_kabuli_chr04 | 31827863                | TT                              | AA              | 1946814433               |
| SNP_P4_54034_31831634 | NC_021163.1    | Ca_kabuli_chr04 | 31831634                | CC                              | TT              | 1946814435               |
| SNP_P4_54035_31831837 | NC_021163.1    | Ca_kabuli_chr04 | 31831837                | AA                              | TT              | 1946814437               |
| SNP_P4_54036_31832079 | NC_021163.1    | Ca_kabuli_chr04 | 31832079                | TT                              | CC              | 1946814439               |
| SNP_P4_54037_31832146 | NC_021163.1    | Ca_kabuli_chr04 | 31832146                | AA                              | GG              | 1946814441               |
| SNP_P4_54038_31832157 | NC_021163.1    | Ca_kabuli_chr04 | 31832157                | GG                              | TT              | 1946814443               |
| SNP_P4_54039_31832162 | NC_021163.1    | Ca_kabuli_chr04 | 31832162                | CC                              | TT              | 1946814445               |
| SNP_P4_54040_31832247 | NC_021163.1    | Ca_kabuli_chr04 | 31832247                | CC                              | AA              | 1946814447               |
| SNP_P4_54041_31832396 | NC_021163.1    | Ca_kabuli_chr04 | 31832396                | TT                              | CC              | 1946814449               |
| SNP_P4_54042_31832431 | NC_021163.1    | Ca_kabuli_chr04 | 31832431                | CC                              | TT              | 1946814451               |
| SNP_P4_54043_31832446 | NC_021163.1    | Ca_kabuli_chr04 | 31832446                | CC                              | GG              | 1946814453               |
| SNP_P4_54044_31832456 | NC_021163.1    | Ca_kabuli_chr04 | 31832456                | TT                              | CC              | 1946814455               |
| SNP_P4_54045_31832471 | NC_021163.1    | Ca_kabuli_chr04 | 31832471                | TT                              | CC              | 1946814457               |
| SNP_P4_54046_31832525 | NC_021163.1    | Ca_kabuli_chr04 | 31832525                | TT                              | CC              | 1946814459               |
| SNP_P4_54047_31832532 | NC_021163.1    | Ca_kabuli_chr04 | 31832532                | TT                              | CC              | 1946814460               |
| SNP_P4_54048_31835173 | NC_021163.1    | Ca_kabuli_chr04 | 31835173                | GG                              | AA              | 1946814462               |
| SNP_P4_54050_31839575 | NC_021163.1    | Ca_kabuli_chr04 | 31839575                | GG                              | AA              | 1946814464               |
| SNP_P4_54051_31852159 | NC_021163.1    | Ca_kabuli_chr04 | 31852159                | AA                              | CC              | 1946814466               |
| SNP_P4_54053_31855791 | NC_021163.1    | Ca_kabuli_chr04 | 31855791                | TT                              | CC              | 1946814468               |
| SNP_P4_54054_31857097 | NC_021163.1    | Ca_kabuli_chr04 | 31857097                | CC                              | TT              | 1946814470               |
| SNP_P4_54055_31857732 | NC_021163.1    | Ca_kabuli_chr04 | 31857732                | GG                              | AA              | 1946814472               |
| SNP_P4_54056_31858693 | NC_021163.1    | Ca_kabuli_chr04 | 31858693                | TT                              | CC              | 1946814474               |
| SNP_P4_54059_31867163 | NC_021163.1    | Ca_kabuli_chr04 | 31867163                | CC                              | GG              | 1946814476               |
| SNP_P4_54060_31870722 | NC_021163.1    | Ca_kabuli_chr04 | 31870722                | AA                              | CC              | 1946814478               |

| SNPs IDs              | Chromosome IDs | Chromosomes     | Physical positions (bp) | CDC Frontier (Reference genome) | (ILWC46 & LPNB) | NCBI SNPdb Accession IDs |
|-----------------------|----------------|-----------------|-------------------------|---------------------------------|-----------------|--------------------------|
| SNP_P4_54061_31871891 | NC_021163.1    | Ca_kabuli_chr04 | 31871891                | TT                              | AA              | 1946814480               |
| SNP_P4_54062_31871920 | NC_021163.1    | Ca_kabuli_chr04 | 31871920                | TT                              | CC              | 1946814482               |
| SNP_P4_54064_31873939 | NC_021163.1    | Ca_kabuli_chr04 | 31873939                | AA                              | TT              | 1946814483               |
| SNP_P4_54065_31875493 | NC_021163.1    | Ca_kabuli_chr04 | 31875493                | GG                              | AA              | 1946814486               |
| SNP_P4_54066_31881527 | NC_021163.1    | Ca_kabuli_chr04 | 31881527                | TT                              | GG              | 1946814488               |
| SNP_P4_54070_31887000 | NC_021163.1    | Ca_kabuli_chr04 | 31887000                | CC                              | TT              | 1946814490               |
| SNP_P4_54071_31887538 | NC_021163.1    | Ca_kabuli_chr04 | 31887538                | TT                              | AA              | 1946814492               |
| SNP_P4_54072_31887541 | NC_021163.1    | Ca_kabuli_chr04 | 31887541                | GG                              | AA              | 1946814494               |
| SNP_P4_54073_31889340 | NC_021163.1    | Ca_kabuli_chr04 | 31889340                | TT                              | GG              | 1946814496               |
| SNP_P4_54074_31891756 | NC_021163.1    | Ca_kabuli_chr04 | 31891756                | TT                              | CC              | 1946814498               |
| SNP_P4_54076_31892272 | NC_021163.1    | Ca_kabuli_chr04 | 31892272                | TT                              | CC              | 1946814500               |
| SNP_P4_54078_31895633 | NC_021163.1    | Ca_kabuli_chr04 | 31895633                | AA                              | TT              | 1946814502               |
| SNP_P4_54079_31895654 | NC_021163.1    | Ca_kabuli_chr04 | 31895654                | CC                              | AA              | 1946814504               |
| SNP_P4_54080_31910002 | NC_021163.1    | Ca_kabuli_chr04 | 31910002                | TT                              | GG              | 1946814506               |
| SNP_P4_54081_31910527 | NC_021163.1    | Ca_kabuli_chr04 | 31910527                | AA                              | GG              | 1946814508               |
| SNP_P4_54082_31911863 | NC_021163.1    | Ca_kabuli_chr04 | 31911863                | CC                              | TT              | 1946814510               |
| SNP_P4_54083_31914936 | NC_021163.1    | Ca_kabuli_chr04 | 31914936                | TT                              | CC              | 1946814512               |
| SNP_P4_54084_31915715 | NC_021163.1    | Ca_kabuli_chr04 | 31915715                | GG                              | AA              | 1946814514               |
| SNP_P4_54085_31916019 | NC_021163.1    | Ca_kabuli_chr04 | 31916019                | TT                              | CC              | 1946814516               |
| SNP_P4_54086_31916136 | NC_021163.1    | Ca_kabuli_chr04 | 31916136                | TT                              | CC              | 1946814518               |
| SNP_P4_54087_31916281 | NC_021163.1    | Ca_kabuli_chr04 | 31916281                | CC                              | GG              | 1946814520               |
| SNP_P4_54088_31916306 | NC_021163.1    | Ca_kabuli_chr04 | 31916306                | TT                              | GG              | 1946814522               |
| SNP_P4_54089_31916541 | NC_021163.1    | Ca_kabuli_chr04 | 31916541                | AA                              | GG              | 1946814524               |
| SNP_P4_54092_31924402 | NC_021163.1    | Ca_kabuli_chr04 | 31924402                | TT                              | CC              | 1946814526               |
| SNP_P4_54093_31925411 | NC_021163.1    | Ca_kabuli_chr04 | 31925411                | TT                              | CC              | 1946814528               |
| SNP_P4_54094_31925739 | NC_021163.1    | Ca_kabuli_chr04 | 31925739                | CC                              | TT              | 1946814530               |
| SNP_P4_54095_31929055 | NC_021163.1    | Ca_kabuli_chr04 | 31929055                | AA                              | TT              | 1946814532               |
| SNP_P4_54096_31929144 | NC_021163.1    | Ca_kabuli_chr04 | 31929144                | TT                              | CC              | 1946814534               |
| SNP_P4_54097_31932165 | NC_021163.1    | Ca_kabuli_chr04 | 31932165                | CC                              | TT              | 1946814536               |
| SNP_P4_54098_31936145 | NC_021163.1    | Ca_kabuli_chr04 | 31936145                | GG                              | AA              | 1946814538               |
| SNP_P4_54099_31937163 | NC_021163.1    | Ca_kabuli_chr04 | 31937163                | CC                              | TT              | 1946814540               |
| SNP_P4_54100_31938071 | NC_021163.1    | Ca_kabuli_chr04 | 31938071                | AA                              | CC              | 1946814542               |
| SNP_P4_54101_31941431 | NC_021163.1    | Ca_kabuli_chr04 | 31941431                | GG                              | AA              | 1946814544               |
| SNP_P4_54102_31941768 | NC_021163.1    | Ca_kabuli_chr04 | 31941768                | AA                              | GG              | 1946814546               |
| SNP_P4_54103_31943970 | NC_021163.1    | Ca_kabuli_chr04 | 31943970                | AA                              | GG              | 1946814548               |
| SNP_P4_54105_31948705 | NC_021163.1    | Ca_kabuli_chr04 | 31948705                | TT                              | GG              | 1946814550               |
| SNP_P4_54106_31951878 | NC_021163.1    | Ca_kabuli_chr04 | 31951878                | CC                              | GG              | 1946814552               |
| SNP_P4_54107_31954625 | NC_021163.1    | Ca_kabuli_chr04 | 31954625                | GG                              | AA              | 1946814554               |
| SNP_P4_54108_31954628 | NC_021163.1    | Ca_kabuli_chr04 | 31954628                | AA                              | GG              | 1946814556               |
| SNP_P4_54109_31954629 | NC_021163.1    | Ca_kabuli_chr04 | 31954629                | CC                              | TT              | 1946814558               |
| SNP_P4_54110_31955943 | NC_021163.1    | Ca_kabuli_chr04 | 31955943                | GG                              | AA              | 1946814560               |
| SNP_P4_54111_31955948 | NC_021163.1    | Ca_kabuli_chr04 | 31955948                | AA                              | GG              | 1946814562               |

| SNPs IDs              | Chromosome IDs | Chromosomes     | Physical positions (bp) | CDC Frontier (Reference genome) | (ILWC46 & LPNB) | NCBI SNPdb Accession IDs |
|-----------------------|----------------|-----------------|-------------------------|---------------------------------|-----------------|--------------------------|
| SNP_P4_54112_31955988 | NC_021163.1    | Ca_kabuli_chr04 | 31955988                | TT                              | GG              | 1946814564               |
| SNP_P4_54114_31956274 | NC_021163.1    | Ca_kabuli_chr04 | 31956274                | GG                              | TT              | 1946814567               |
| SNP_P4_54115_31956278 | NC_021163.1    | Ca_kabuli_chr04 | 31956278                | TT                              | CC              | 1946814569               |
| SNP_P4_54116_31956296 | NC_021163.1    | Ca_kabuli_chr04 | 31956296                | TT                              | CC              | 1946814571               |
| SNP_P4_54117_31956305 | NC_021163.1    | Ca_kabuli_chr04 | 31956305                | CC                              | TT              | 1946814573               |
| SNP_P4_54118_31957338 | NC_021163.1    | Ca_kabuli_chr04 | 31957338                | AA                              | GG              | 1946814575               |
| SNP_P4_54119_31960056 | NC_021163.1    | Ca_kabuli_chr04 | 31960056                | CC                              | TT              | 1946814577               |
| SNP_P4_54120_31960093 | NC_021163.1    | Ca_kabuli_chr04 | 31960093                | GG                              | CC              | 1946814579               |
| SNP_P4_54121_31960126 | NC_021163.1    | Ca_kabuli_chr04 | 31960126                | CC                              | TT              | 1946814581               |
| SNP_P4_54122_31960128 | NC_021163.1    | Ca_kabuli_chr04 | 31960128                | TT                              | AA              | 1946814583               |
| SNP_P4_54123_31960227 | NC_021163.1    | Ca_kabuli_chr04 | 31960227                | GG                              | CC              | 1946814585               |
| SNP_P4_54124_31960231 | NC_021163.1    | Ca_kabuli_chr04 | 31960231                | TT                              | CC              | 1946814587               |
| SNP_P4_54125_31960333 | NC_021163.1    | Ca_kabuli_chr04 | 31960333                | GG                              | AA              | 1946814589               |
| SNP_P4_54126_31960343 | NC_021163.1    | Ca_kabuli_chr04 | 31960343                | AA                              | GG              | 1946814591               |
| SNP_P4_54127_31960362 | NC_021163.1    | Ca_kabuli_chr04 | 31960362                | TT                              | CC              | 1946814593               |
| SNP_P4_54128_31960375 | NC_021163.1    | Ca_kabuli_chr04 | 31960375                | TT                              | CC              | 1946814595               |
| SNP_P4_54129_31960391 | NC_021163.1    | Ca_kabuli_chr04 | 31960391                | CC                              | TT              | 1946814597               |
| SNP_P4_54130_31960459 | NC_021163.1    | Ca_kabuli_chr04 | 31960459                | TT                              | GG              | 1946814599               |
| SNP_P4_54131_31960465 | NC_021163.1    | Ca_kabuli_chr04 | 31960465                | CC                              | TT              | 1946814601               |
| SNP_P4_54132_31960593 | NC_021163.1    | Ca_kabuli_chr04 | 31960593                | AA                              | CC              | 1946814603               |
| SNP_P4_54133_31960612 | NC_021163.1    | Ca_kabuli_chr04 | 31960612                | TT                              | GG              | 1946814605               |
| SNP_P4_54134_31962515 | NC_021163.1    | Ca_kabuli_chr04 | 31962515                | CC                              | TT              | 1946814607               |
| SNP_P4_54135_31962517 | NC_021163.1    | Ca_kabuli_chr04 | 31962517                | GG                              | CC              | 1946814609               |
| SNP_P4_54136_31962963 | NC_021163.1    | Ca_kabuli_chr04 | 31962963                | CC                              | TT              | 1946814611               |
| SNP_P4_54137_31962965 | NC_021163.1    | Ca_kabuli_chr04 | 31962965                | GG                              | TT              | 1946814613               |
| SNP_P4_54138_31963404 | NC_021163.1    | Ca_kabuli_chr04 | 31963404                | CC                              | TT              | 1946814614               |
| SNP_P4_54140_31963426 | NC_021163.1    | Ca_kabuli_chr04 | 31963426                | AA                              | GG              | 1946814616               |
| SNP_P4_54141_31963432 | NC_021163.1    | Ca_kabuli_chr04 | 31963432                | CC                              | AA              | 1946814618               |
| SNP_P4_54142_31963441 | NC_021163.1    | Ca_kabuli_chr04 | 31963441                | CC                              | TT              | 1946814620               |
| SNP_P4_54143_31963443 | NC_021163.1    | Ca_kabuli_chr04 | 31963443                | CC                              | TT              | 1946814622               |
| SNP_P4_54144_31965195 | NC_021163.1    | Ca_kabuli_chr04 | 31965195                | CC                              | GG              | 1946814624               |
| SNP_P4_54146_31967592 | NC_021163.1    | Ca_kabuli_chr04 | 31967592                | GG                              | TT              | 1946814626               |
| SNP_P4_54147_31969722 | NC_021163.1    | Ca_kabuli_chr04 | 31969722                | GG                              | AA              | 1946814628               |
| SNP_P4_54148_31969728 | NC_021163.1    | Ca_kabuli_chr04 | 31969728                | AA                              | GG              | 1946814630               |
| SNP_P4_54149_31969907 | NC_021163.1    | Ca_kabuli_chr04 | 31969907                | AA                              | CC              | 1946814632               |
| SNP_P4_54150_31970704 | NC_021163.1    | Ca_kabuli_chr04 | 31970704                | TT                              | CC              | 1946814634               |
| SNP_P4_54152_31973087 | NC_021163.1    | Ca_kabuli_chr04 | 31973087                | TT                              | GG              | 1946814636               |
| SNP_P4_54153_31973099 | NC_021163.1    | Ca_kabuli_chr04 | 31973099                | CC                              | GG              | 1946814638               |
| SNP_P4_54154_31973102 | NC_021163.1    | Ca_kabuli_chr04 | 31973102                | GG                              | AA              | 1946814641               |
| SNP_P4_54155_31973109 | NC_021163.1    | Ca_kabuli_chr04 | 31973109                | TT                              | CC              | 1946814643               |
| SNP_P4_54156_31973123 | NC_021163.1    | Ca_kabuli_chr04 | 31973123                | CC                              | TT              | 1946814645               |
| SNP_P4_54157_31973125 | NC_021163.1    | Ca_kabuli_chr04 | 31973125                | GG                              | AA              | 1946814647               |



| SNPs IDs              | Chromosome IDs | Chromosomes     | Physical positions (bp) | CDC Frontier (Reference genome) | (ILWC46 & LPNB) | NCBI SNPdb Accession IDs |
|-----------------------|----------------|-----------------|-------------------------|---------------------------------|-----------------|--------------------------|
| SNP_P4_54158_31973137 | NC_021163.1    | Ca_kabuli_chr04 | 31973137                | GG                              | AA              | 1946814649               |
| SNP_P4_54159_31973175 | NC_021163.1    | Ca_kabuli_chr04 | 31973175                | GG                              | AA              | 1946814651               |
| SNP_P4_54160_31973178 | NC_021163.1    | Ca_kabuli_chr04 | 31973178                | AA                              | TT              | 1946814654               |
| SNP_P4_54161_31973180 | NC_021163.1    | Ca_kabuli_chr04 | 31973180                | AA                              | GG              | 1946814656               |
| SNP_P4_54162_31973181 | NC_021163.1    | Ca_kabuli_chr04 | 31973181                | CC                              | TT              | 1946814658               |
| SNP_P4_54163_31973204 | NC_021163.1    | Ca_kabuli_chr04 | 31973204                | GG                              | AA              | 1946814660               |
| SNP_P4_54164_31973209 | NC_021163.1    | Ca_kabuli_chr04 | 31973209                | CC                              | TT              | 1946814662               |
| SNP_P4_54165_31973264 | NC_021163.1    | Ca_kabuli_chr04 | 31973264                | AA                              | CC              | 1946814664               |
| SNP_P4_54166_31973278 | NC_021163.1    | Ca_kabuli_chr04 | 31973278                | TT                              | CC              | 1946814666               |
| SNP_P4_54168_31973437 | NC_021163.1    | Ca_kabuli_chr04 | 31973437                | CC                              | TT              | 1946814668               |
| SNP_P4_54170_31973478 | NC_021163.1    | Ca_kabuli_chr04 | 31973478                | TT                              | AA              | 1946814670               |
| SNP_P4_54171_31973523 | NC_021163.1    | Ca_kabuli_chr04 | 31973523                | GG                              | AA              | 1946814672               |
| SNP_P4_54172_31973534 | NC_021163.1    | Ca_kabuli_chr04 | 31973534                | AA                              | GG              | 1946814674               |
| SNP_P4_54173_31973553 | NC_021163.1    | Ca_kabuli_chr04 | 31973553                | CC                              | TT              | 1946814676               |
| SNP_P4_54174_31973554 | NC_021163.1    | Ca_kabuli_chr04 | 31973554                | AA                              | TT              | 1946814678               |
| SNP_P4_54175_31973579 | NC_021163.1    | Ca_kabuli_chr04 | 31973579                | AA                              | GG              | 1946814680               |
| SNP_P4_54176_31973581 | NC_021163.1    | Ca_kabuli_chr04 | 31973581                | TT                              | CC              | 1946814682               |
| SNP_P4_54177_31973585 | NC_021163.1    | Ca_kabuli_chr04 | 31973585                | AA                              | GG              | 1946814684               |
| SNP_P4_54178_31973785 | NC_021163.1    | Ca_kabuli_chr04 | 31973785                | TT                              | AA              | 1946814686               |
| SNP_P4_54179_31974880 | NC_021163.1    | Ca_kabuli_chr04 | 31974880                | GG                              | CC              | 1946814688               |
| SNP_P4_54181_31974944 | NC_021163.1    | Ca_kabuli_chr04 | 31974944                | TT                              | CC              | 1946814690               |
| SNP_P4_54182_31975081 | NC_021163.1    | Ca_kabuli_chr04 | 31975081                | AA                              | GG              | 1946814692               |
| SNP_P4_54183_31975092 | NC_021163.1    | Ca_kabuli_chr04 | 31975092                | TT                              | AA              | 1946814694               |
| SNP_P4_54184_31975096 | NC_021163.1    | Ca_kabuli_chr04 | 31975096                | GG                              | AA              | 1946814696               |
| SNP_P4_54185_31975314 | NC_021163.1    | Ca_kabuli_chr04 | 31975314                | TT                              | AA              | 1946814699               |
| SNP_P4_54186_31975316 | NC_021163.1    | Ca_kabuli_chr04 | 31975316                | TT                              | GG              | 1946814701               |
| SNP_P4_54188_31977296 | NC_021163.1    | Ca_kabuli_chr04 | 31977296                | CC                              | AA              | 1946814703               |
| SNP_P4_54189_31978210 | NC_021163.1    | Ca_kabuli_chr04 | 31978210                | AA                              | TT              | 1946814705               |
| SNP_P4_54190_31978505 | NC_021163.1    | Ca_kabuli_chr04 | 31978505                | CC                              | TT              | 1946814707               |
| SNP_P4_54191_31978506 | NC_021163.1    | Ca_kabuli_chr04 | 31978506                | CC                              | TT              | 1946814709               |
| SNP_P4_54192_31978823 | NC_021163.1    | Ca_kabuli_chr04 | 31978823                | TT                              | GG              | 1946814711               |
| SNP_P4_54193_31978827 | NC_021163.1    | Ca_kabuli_chr04 | 31978827                | CC                              | AA              | 1946814713               |
| SNP_P4_54194_31978845 | NC_021163.1    | Ca_kabuli_chr04 | 31978845                | AA                              | GG              | 1946814715               |
| SNP_P4_54196_31981127 | NC_021163.1    | Ca_kabuli_chr04 | 31981127                | GG                              | AA              | 1946814717               |
| SNP_P4_54197_31982631 | NC_021163.1    | Ca_kabuli_chr04 | 31982631                | GG                              | AA              | 1946814719               |
| SNP_P4_54198_31985073 | NC_021163.1    | Ca_kabuli_chr04 | 31985073                | CC                              | TT              | 1946814721               |
| SNP_P4_54199_31988330 | NC_021163.1    | Ca_kabuli_chr04 | 31988330                | TT                              | CC              | 1946814723               |
| SNP_P4_54200_31988754 | NC_021163.1    | Ca_kabuli_chr04 | 31988754                | CC                              | GG              | 1946814725               |
| SNP_P4_54201_31989033 | NC_021163.1    | Ca_kabuli_chr04 | 31989033                | CC                              | TT              | 1946814727               |
| SNP_P4_54202_31989291 | NC_021163.1    | Ca_kabuli_chr04 | 31989291                | GG                              | AA              | 1946814729               |
| SNP_P4_54203_31989292 | NC_021163.1    | Ca_kabuli_chr04 | 31989292                | GG                              | TT              | 1946814731               |
| SNP_P4_54204_31989312 | NC_021163.1    | Ca_kabuli_chr04 | 31989312                | GG                              | AA              | 1946814733               |

| SNPs IDs              | Chromosome IDs | Chromosomes     | Physical positions (bp) | CDC Frontier (Reference genome) | (ILWC46 & LPNB) | NCBI SNPdb Accession IDs |
|-----------------------|----------------|-----------------|-------------------------|---------------------------------|-----------------|--------------------------|
| SNP_P4_54205_31989323 | NC_021163.1    | Ca_kabuli_chr04 | 31989323                | CC                              | TT              | 1946814735               |
| SNP_P4_54206_31989334 | NC_021163.1    | Ca_kabuli_chr04 | 31989334                | AA                              | GG              | 1946814737               |
| SNP_P4_54207_31989593 | NC_021163.1    | Ca_kabuli_chr04 | 31989593                | CC                              | GG              | 1946814739               |
| SNP_P4_54208_31989604 | NC_021163.1    | Ca_kabuli_chr04 | 31989604                | TT                              | CC              | 1946814741               |
| SNP_P4_54209_31989635 | NC_021163.1    | Ca_kabuli_chr04 | 31989635                | AA                              | TT              | 1946814743               |
| SNP_P4_54211_31989655 | NC_021163.1    | Ca_kabuli_chr04 | 31989655                | TT                              | GG              | 1946814745               |
| SNP_P4_54212_31989786 | NC_021163.1    | Ca_kabuli_chr04 | 31989786                | AA                              | GG              | 1946814747               |
| SNP_P4_54213_31989810 | NC_021163.1    | Ca_kabuli_chr04 | 31989810                | AA                              | TT              | 1946814749               |
| SNP_P4_54214_31990086 | NC_021163.1    | Ca_kabuli_chr04 | 31990086                | TT                              | GG              | 1946814751               |
| SNP_P4_54215_31991222 | NC_021163.1    | Ca_kabuli_chr04 | 31991222                | AA                              | CC              | 1946814753               |
| SNP_P4_54216_31991232 | NC_021163.1    | Ca_kabuli_chr04 | 31991232                | AA                              | TT              | 1946814755               |
| SNP_P4_54217_31991273 | NC_021163.1    | Ca_kabuli_chr04 | 31991273                | TT                              | GG              | 1946814757               |
| SNP_P4_54218_31991515 | NC_021163.1    | Ca_kabuli_chr04 | 31991515                | CC                              | TT              | 1946814759               |
| SNP_P4_54219_31991578 | NC_021163.1    | Ca_kabuli_chr04 | 31991578                | AA                              | GG              | 1946814761               |
| SNP_P4_54221_31992502 | NC_021163.1    | Ca_kabuli_chr04 | 31992502                | TT                              | CC              | 1946814763               |
| SNP_P4_54222_31992843 | NC_021163.1    | Ca_kabuli_chr04 | 31992843                | CC                              | TT              | 1946814765               |
| SNP_P4_54223_31992976 | NC_021163.1    | Ca_kabuli_chr04 | 31992976                | CC                              | AA              | 1946814767               |
| SNP_P4_54224_31993199 | NC_021163.1    | Ca_kabuli_chr04 | 31993199                | AA                              | TT              | 1946814769               |
| SNP_P4_54225_31994356 | NC_021163.1    | Ca_kabuli_chr04 | 31994356                | TT                              | CC              | 1946814771               |
| SNP_P4_54227_31994547 | NC_021163.1    | Ca_kabuli_chr04 | 31994547                | TT                              | CC              | 1946814773               |
| SNP_P4_54228_31994597 | NC_021163.1    | Ca_kabuli_chr04 | 31994597                | AA                              | CC              | 1946814775               |
| SNP_P4_54229_31997468 | NC_021163.1    | Ca_kabuli_chr04 | 31997468                | GG                              | AA              | 1946814777               |
| SNP_P4_54230_31997770 | NC_021163.1    | Ca_kabuli_chr04 | 31997770                | CC                              | TT              | 1946814779               |
| SNP_P4_54231_31997813 | NC_021163.1    | Ca_kabuli_chr04 | 31997813                | TT                              | AA              | 1946814781               |
| SNP_P4_54232_31998044 | NC_021163.1    | Ca_kabuli_chr04 | 31998044                | GG                              | AA              | 1946814783               |
| SNP_P4_54233_31998672 | NC_021163.1    | Ca_kabuli_chr04 | 31998672                | GG                              | CC              | 1946814785               |
| SNP_P4_54234_31999386 | NC_021163.1    | Ca_kabuli_chr04 | 31999386                | CC                              | TT              | 1946814787               |
| SNP_P4_54235_31999454 | NC_021163.1    | Ca_kabuli_chr04 | 31999454                | AA                              | GG              | 1946814789               |
| SNP_P4_54236_31999785 | NC_021163.1    | Ca_kabuli_chr04 | 31999785                | TT                              | CC              | 1946814791               |
| SNP_P4_54237_32000133 | NC_021163.1    | Ca_kabuli_chr04 | 32000133                | GG                              | AA              | 1946814793               |
| SNP_P4_54238_32000161 | NC_021163.1    | Ca_kabuli_chr04 | 32000161                | GG                              | TT              | 1946814795               |
| SNP_P4_54239_32000189 | NC_021163.1    | Ca_kabuli_chr04 | 32000189                | AA                              | GG              | 1946814797               |
| SNP_P4_54240_32000214 | NC_021163.1    | Ca_kabuli_chr04 | 32000214                | AA                              | GG              | 1946814799               |
| SNP_P4_54241_32000217 | NC_021163.1    | Ca_kabuli_chr04 | 32000217                | AA                              | TT              | 1946814801               |
| SNP_P4_54242_32000242 | NC_021163.1    | Ca_kabuli_chr04 | 32000242                | GG                              | AA              | 1946814803               |
| SNP_P4_54243_32000308 | NC_021163.1    | Ca_kabuli_chr04 | 32000308                | AA                              | CC              | 1946814805               |
| SNP_P4_54245_32001798 | NC_021163.1    | Ca_kabuli_chr04 | 32001798                | TT                              | CC              | 1946814807               |
| SNP_P4_54246_32002086 | NC_021163.1    | Ca_kabuli_chr04 | 32002086                | TT                              | CC              | 1946814809               |
| SNP_P4_54247_32002380 | NC_021163.1    | Ca_kabuli_chr04 | 32002380                | TT                              | AA              | 1946814811               |
| SNP_P4_54248_32002516 | NC_021163.1    | Ca_kabuli_chr04 | 32002516                | CC                              | TT              | 1946814813               |
| SNP_P4_54249_32002539 | NC_021163.1    | Ca_kabuli_chr04 | 32002539                | TT                              | CC              | 1946814815               |
| SNP_P4_54250_32002559 | NC_021163.1    | Ca_kabuli_chr04 | 32002559                | CC                              | TT              | 1946814817               |

| SNPs IDs              | Chromosome IDs | Chromosomes     | Physical positions (bp) | CDC Frontier (Reference genome) | (ILWC46 & LPNB) | NCBI SNPdb Accession IDs |
|-----------------------|----------------|-----------------|-------------------------|---------------------------------|-----------------|--------------------------|
| SNP_P4_54252_32004209 | NC_021163.1    | Ca_kabuli_chr04 | 32004209                | AA                              | GG              | 1946814819               |
| SNP_P4_54253_32005186 | NC_021163.1    | Ca_kabuli_chr04 | 32005186                | CC                              | TT              | 1946814821               |
| SNP_P4_54254_32006523 | NC_021163.1    | Ca_kabuli_chr04 | 32006523                | GG                              | CC              | 1946814823               |
| SNP_P4_54256_32006669 | NC_021163.1    | Ca_kabuli_chr04 | 32006669                | AA                              | GG              | 1946814825               |
| SNP_P4_54257_32006677 | NC_021163.1    | Ca_kabuli_chr04 | 32006677                | GG                              | AA              | 1946814827               |
| SNP_P4_54258_32007427 | NC_021163.1    | Ca_kabuli_chr04 | 32007427                | GG                              | CC              | 1946814829               |
| SNP_P4_54259_32008705 | NC_021163.1    | Ca_kabuli_chr04 | 32008705                | TT                              | CC              | 1946814831               |
| SNP_P4_54260_32008964 | NC_021163.1    | Ca_kabuli_chr04 | 32008964                | GG                              | AA              | 1946814833               |
| SNP_P4_54261_32009024 | NC_021163.1    | Ca_kabuli_chr04 | 32009024                | GG                              | AA              | 1946814835               |
| SNP_P4_54262_32009460 | NC_021163.1    | Ca_kabuli_chr04 | 32009460                | AA                              | TT              | 1946814837               |
| SNP_P4_54263_32009477 | NC_021163.1    | Ca_kabuli_chr04 | 32009477                | GG                              | AA              | 1946814839               |
| SNP_P4_54264_32009491 | NC_021163.1    | Ca_kabuli_chr04 | 32009491                | AA                              | GG              | 1946814841               |
| SNP_P4_54265_32009854 | NC_021163.1    | Ca_kabuli_chr04 | 32009854                | GG                              | AA              | 1946814843               |
| SNP_P4_54266_32010083 | NC_021163.1    | Ca_kabuli_chr04 | 32010083                | GG                              | AA              | 1946814845               |
| SNP_P4_54267_32010096 | NC_021163.1    | Ca_kabuli_chr04 | 32010096                | GG                              | AA              | 1946814847               |
| SNP_P4_54268_32010102 | NC_021163.1    | Ca_kabuli_chr04 | 32010102                | CC                              | TT              | 1946814849               |
| SNP_P4_54269_32011900 | NC_021163.1    | Ca_kabuli_chr04 | 32011900                | AA                              | GG              | 1946814851               |
| SNP_P4_54270_32011948 | NC_021163.1    | Ca_kabuli_chr04 | 32011948                | AA                              | TT              | 1946814853               |
| SNP_P4_54271_32011989 | NC_021163.1    | Ca_kabuli_chr04 | 32011989                | AA                              | CC              | 1946814855               |
| SNP_P4_54272_32012035 | NC_021163.1    | Ca_kabuli_chr04 | 32012035                | CC                              | GG              | 1946814857               |
| SNP_P4_54273_32012772 | NC_021163.1    | Ca_kabuli_chr04 | 32012772                | TT                              | AA              | 1946814859               |
| SNP_P4_54274_32013053 | NC_021163.1    | Ca_kabuli_chr04 | 32013053                | CC                              | TT              | 1946814861               |
| SNP_P4_54275_32013083 | NC_021163.1    | Ca_kabuli_chr04 | 32013083                | CC                              | TT              | 1946814863               |
| SNP_P4_54276_32013089 | NC_021163.1    | Ca_kabuli_chr04 | 32013089                | GG                              | TT              | 1946814865               |
| SNP_P4_54277_32013549 | NC_021163.1    | Ca_kabuli_chr04 | 32013549                | AA                              | TT              | 1946814867               |
| SNP_P4_54278_32014381 | NC_021163.1    | Ca_kabuli_chr04 | 32014381                | CC                              | AA              | 1946814869               |
| SNP_P4_54279_32014388 | NC_021163.1    | Ca_kabuli_chr04 | 32014388                | TT                              | CC              | 1946814871               |
| SNP_P4_54280_32014577 | NC_021163.1    | Ca_kabuli_chr04 | 32014577                | CC                              | TT              | 1946814873               |
| SNP_P4_54281_32014632 | NC_021163.1    | Ca_kabuli_chr04 | 32014632                | TT                              | CC              | 1946814876               |
| SNP_P4_54282_32015091 | NC_021163.1    | Ca_kabuli_chr04 | 32015091                | AA                              | GG              | 1946814878               |
| SNP_P4_54283_32015649 | NC_021163.1    | Ca_kabuli_chr04 | 32015649                | TT                              | CC              | 1946814880               |
| SNP_P4_54284_32015843 | NC_021163.1    | Ca_kabuli_chr04 | 32015843                | CC                              | TT              | 1946814882               |
| SNP_P4_54285_32015980 | NC_021163.1    | Ca_kabuli_chr04 | 32015980                | TT                              | CC              | 1946814884               |
| SNP_P4_54286_32016005 | NC_021163.1    | Ca_kabuli_chr04 | 32016005                | TT                              | CC              | 1946814886               |
| SNP_P4_54288_32016421 | NC_021163.1    | Ca_kabuli_chr04 | 32016421                | GG                              | AA              | 1946814888               |
| SNP_P4_54289_32016556 | NC_021163.1    | Ca_kabuli_chr04 | 32016556                | CC                              | GG              | 1946814890               |
| SNP_P4_54290_32016593 | NC_021163.1    | Ca_kabuli_chr04 | 32016593                | TT                              | CC              | 1946814892               |
| SNP_P4_54291_32017314 | NC_021163.1    | Ca_kabuli_chr04 | 32017314                | AA                              | GG              | 1946814894               |
| SNP_P4_54292_32017474 | NC_021163.1    | Ca_kabuli_chr04 | 32017474                | AA                              | GG              | 1946814896               |
| SNP_P4_54293_32017617 | NC_021163.1    | Ca_kabuli_chr04 | 32017617                | TT                              | CC              | 1946814898               |
| SNP_P4_54294_32017626 | NC_021163.1    | Ca_kabuli_chr04 | 32017626                | AA                              | CC              | 1946814900               |
| SNP_P4_54295_32017660 | NC_021163.1    | Ca_kabuli_chr04 | 32017660                | CC                              | TT              | 1946814902               |

| SNPs IDs              | Chromosome IDs | Chromosomes     | Physical positions (bp) | CDC Frontier (Reference genome) | (ILWC46 & LPNB) | NCBI SNPdb Accession IDs |
|-----------------------|----------------|-----------------|-------------------------|---------------------------------|-----------------|--------------------------|
| SNP_P4_54296_32018032 | NC_021163.1    | Ca_kabuli_chr04 | 32018032                | GG                              | TT              | 1946814904               |
| SNP_P4_54297_32018084 | NC_021163.1    | Ca_kabuli_chr04 | 32018084                | AA                              | GG              | 1946814906               |
| SNP_P4_54298_32018283 | NC_021163.1    | Ca_kabuli_chr04 | 32018283                | AA                              | TT              | 1946814908               |
| SNP_P4_54299_32018286 | NC_021163.1    | Ca_kabuli_chr04 | 32018286                | TT                              | AA              | 1946814910               |
| SNP_P4_54300_32018352 | NC_021163.1    | Ca_kabuli_chr04 | 32018352                | GG                              | AA              | 1946814912               |
| SNP_P4_54301_32019150 | NC_021163.1    | Ca_kabuli_chr04 | 32019150                | AA                              | TT              | 1946814915               |
| SNP_P4_54302_32019198 | NC_021163.1    | Ca_kabuli_chr04 | 32019198                | GG                              | AA              | 1946814917               |
| SNP_P4_54303_32019507 | NC_021163.1    | Ca_kabuli_chr04 | 32019507                | CC                              | TT              | 1946814919               |
| SNP_P4_54304_32019508 | NC_021163.1    | Ca_kabuli_chr04 | 32019508                | TT                              | GG              | 1946814921               |
| SNP_P4_54305_32019520 | NC_021163.1    | Ca_kabuli_chr04 | 32019520                | AA                              | GG              | 1946814923               |
| SNP_P4_54306_32019574 | NC_021163.1    | Ca_kabuli_chr04 | 32019574                | AA                              | GG              | 1946814925               |
| SNP_P4_54307_32019579 | NC_021163.1    | Ca_kabuli_chr04 | 32019579                | AA                              | GG              | 1946814927               |
| SNP_P4_54308_32019581 | NC_021163.1    | Ca_kabuli_chr04 | 32019581                | TT                              | CC              | 1946814929               |
| SNP_P4_54309_32019593 | NC_021163.1    | Ca_kabuli_chr04 | 32019593                | CC                              | TT              | 1946814931               |
| SNP_P4_54310_32021062 | NC_021163.1    | Ca_kabuli_chr04 | 32021062                | TT                              | CC              | 1946814933               |
| SNP_P4_54312_32021081 | NC_021163.1    | Ca_kabuli_chr04 | 32021081                | CC                              | AA              | 1946814935               |
| SNP_P4_54313_32021968 | NC_021163.1    | Ca_kabuli_chr04 | 32021968                | CC                              | TT              | 1946814937               |
| SNP_P4_54314_32022249 | NC_021163.1    | Ca_kabuli_chr04 | 32022249                | GG                              | AA              | 1946814939               |
| SNP_P4_54315_32022305 | NC_021163.1    | Ca_kabuli_chr04 | 32022305                | GG                              | CC              | 1946814941               |
| SNP_P4_54316_32022563 | NC_021163.1    | Ca_kabuli_chr04 | 32022563                | TT                              | CC              | 1946814943               |
| SNP_P4_54317_32022571 | NC_021163.1    | Ca_kabuli_chr04 | 32022571                | TT                              | GG              | 1946814945               |
| SNP_P4_54318_32022579 | NC_021163.1    | Ca_kabuli_chr04 | 32022579                | TT                              | CC              | 1946814947               |
| SNP_P4_54319_32022630 | NC_021163.1    | Ca_kabuli_chr04 | 32022630                | TT                              | CC              | 1946814949               |
| SNP_P4_54320_32031837 | NC_021163.1    | Ca_kabuli_chr04 | 32031837                | AA                              | GG              | 1946814951               |
| SNP_P4_54321_32031912 | NC_021163.1    | Ca_kabuli_chr04 | 32031912                | CC                              | TT              | 1946814953               |
| SNP_P4_54322_32032014 | NC_021163.1    | Ca_kabuli_chr04 | 32032014                | TT                              | CC              | 1946814955               |
| SNP_P4_54323_32032074 | NC_021163.1    | Ca_kabuli_chr04 | 32032074                | GG                              | AA              | 1946814957               |
| SNP_P4_54324_32035302 | NC_021163.1    | Ca_kabuli_chr04 | 32035302                | CC                              | AA              | 1946814959               |
| SNP_P4_54325_32036273 | NC_021163.1    | Ca_kabuli_chr04 | 32036273                | TT                              | CC              | 1946814961               |
| SNP_P4_54326_32036317 | NC_021163.1    | Ca_kabuli_chr04 | 32036317                | CC                              | TT              | 1946814964               |
| SNP_P4_54327_32036330 | NC_021163.1    | Ca_kabuli_chr04 | 32036330                | AA                              | GG              | 1946814966               |
| SNP_P4_54328_32038032 | NC_021163.1    | Ca_kabuli_chr04 | 32038032                | GG                              | CC              | 1946814968               |
| SNP_P4_54330_32038241 | NC_021163.1    | Ca_kabuli_chr04 | 32038241                | AA                              | GG              | 1946814970               |
| SNP_P4_54331_32038295 | NC_021163.1    | Ca_kabuli_chr04 | 32038295                | GG                              | CC              | 1946814972               |
| SNP_P4_54332_32038307 | NC_021163.1    | Ca_kabuli_chr04 | 32038307                | AA                              | GG              | 1946814974               |
| SNP_P4_54333_32038618 | NC_021163.1    | Ca_kabuli_chr04 | 32038618                | CC                              | TT              | 1946814976               |
| SNP_P4_54334_32038974 | NC_021163.1    | Ca_kabuli_chr04 | 32038974                | TT                              | CC              | 1946814978               |
| SNP_P4_54335_32039391 | NC_021163.1    | Ca_kabuli_chr04 | 32039391                | AA                              | GG              | 1946814980               |
| SNP_P4_54336_32041547 | NC_021163.1    | Ca_kabuli_chr04 | 32041547                | AA                              | GG              | 1946814982               |
| SNP_P4_54338_32042317 | NC_021163.1    | Ca_kabuli_chr04 | 32042317                | TT                              | CC              | 1946814984               |
| SNP_P4_54340_32043237 | NC_021163.1    | Ca_kabuli_chr04 | 32043237                | GG                              | AA              | 1946814986               |
| SNP_P4_54341_32043693 | NC_021163.1    | Ca_kabuli_chr04 | 32043693                | TT                              | CC              | 1946814988               |

| SNPs IDs              | Chromosome IDs | Chromosomes     | Physical positions (bp) | CDC Frontier (Reference genome) | (ILWC46 & LPNB) | NCBI SNPdb Accession IDs |
|-----------------------|----------------|-----------------|-------------------------|---------------------------------|-----------------|--------------------------|
| SNP_P4_54343_32043875 | NC_021163.1    | Ca_kabuli_chr04 | 32043875                | CC                              | TT              | 1946814990               |
| SNP_P4_54345_32044319 | NC_021163.1    | Ca_kabuli_chr04 | 32044319                | GG                              | TT              | 1946814992               |
| SNP_P4_54346_32044349 | NC_021163.1    | Ca_kabuli_chr04 | 32044349                | CC                              | TT              | 1946814994               |
| SNP_P4_54347_32044359 | NC_021163.1    | Ca_kabuli_chr04 | 32044359                | GG                              | AA              | 1946814996               |
| SNP_P4_54348_32045040 | NC_021163.1    | Ca_kabuli_chr04 | 32045040                | AA                              | GG              | 1946814998               |
| SNP_P4_54349_32045045 | NC_021163.1    | Ca_kabuli_chr04 | 32045045                | TT                              | CC              | 1946815000               |
| SNP_P4_54352_32047453 | NC_021163.1    | Ca_kabuli_chr04 | 32047453                | AA                              | GG              | 1946815002               |
| SNP_P4_54353_32048170 | NC_021163.1    | Ca_kabuli_chr04 | 32048170                | TT                              | CC              | 1946815004               |
| SNP_P4_54354_32048185 | NC_021163.1    | Ca_kabuli_chr04 | 32048185                | TT                              | CC              | 1946815006               |
| SNP_P4_54355_32048202 | NC_021163.1    | Ca_kabuli_chr04 | 32048202                | TT                              | CC              | 1946815008               |
| SNP_P4_54356_32048322 | NC_021163.1    | Ca_kabuli_chr04 | 32048322                | AA                              | TT              | 1946815011               |
| SNP_P4_54357_32048506 | NC_021163.1    | Ca_kabuli_chr04 | 32048506                | GG                              | CC              | 1946815013               |
| SNP_P4_54359_32048572 | NC_021163.1    | Ca_kabuli_chr04 | 32048572                | TT                              | CC              | 1946815015               |
| SNP_P4_54360_32048656 | NC_021163.1    | Ca_kabuli_chr04 | 32048656                | TT                              | CC              | 1946815017               |
| SNP_P4_54361_32048679 | NC_021163.1    | Ca_kabuli_chr04 | 32048679                | CC                              | TT              | 1946815019               |
| SNP_P4_54362_32048800 | NC_021163.1    | Ca_kabuli_chr04 | 32048800                | AA                              | GG              | 1946815022               |
| SNP_P4_54363_32048804 | NC_021163.1    | Ca_kabuli_chr04 | 32048804                | AA                              | TT              | 1946815024               |
| SNP_P4_54368_32053423 | NC_021163.1    | Ca_kabuli_chr04 | 32053423                | CC                              | AA              | 1946815026               |
| SNP_P4_54369_32053463 | NC_021163.1    | Ca_kabuli_chr04 | 32053463                | TT                              | AA              | 1946815028               |
| SNP_P4_54370_32053635 | NC_021163.1    | Ca_kabuli_chr04 | 32053635                | TT                              | CC              | 1946815030               |
| SNP_P4_54373_32055142 | NC_021163.1    | Ca_kabuli_chr04 | 32055142                | AA                              | GG              | 1946815032               |
| SNP_P4_54374_32055499 | NC_021163.1    | Ca_kabuli_chr04 | 32055499                | TT                              | AA              | 1946815034               |
| SNP_P4_54376_32057269 | NC_021163.1    | Ca_kabuli_chr04 | 32057269                | TT                              | CC              | 1946815037               |
| SNP_P4_54377_32057316 | NC_021163.1    | Ca_kabuli_chr04 | 32057316                | TT                              | CC              | 1946815039               |
| SNP_P4_54379_32057344 | NC_021163.1    | Ca_kabuli_chr04 | 32057344                | AA                              | TT              | 1946815041               |
| SNP_P4_54381_32057483 | NC_021163.1    | Ca_kabuli_chr04 | 32057483                | CC                              | TT              | 1946815043               |
| SNP_P4_54382_32057507 | NC_021163.1    | Ca_kabuli_chr04 | 32057507                | TT                              | CC              | 1946815045               |
| SNP_P4_54383_32057635 | NC_021163.1    | Ca_kabuli_chr04 | 32057635                | AA                              | CC              | 1946815048               |
| SNP_P4_54384_32057636 | NC_021163.1    | Ca_kabuli_chr04 | 32057636                | CC                              | TT              | 1946815050               |
| SNP_P4_54385_32057667 | NC_021163.1    | Ca_kabuli_chr04 | 32057667                | TT                              | GG              | 1946815052               |
| SNP_P4_54386_32057672 | NC_021163.1    | Ca_kabuli_chr04 | 32057672                | TT                              | CC              | 1946815054               |
| SNP_P4_54387_32057675 | NC_021163.1    | Ca_kabuli_chr04 | 32057675                | AA                              | GG              | 1946815056               |
| SNP_P4_54388_32058006 | NC_021163.1    | Ca_kabuli_chr04 | 32058006                | GG                              | CC              | 1946815059               |
| SNP_P4_54389_32058021 | NC_021163.1    | Ca_kabuli_chr04 | 32058021                | TT                              | CC              | 1946815061               |
| SNP_P4_54391_32058258 | NC_021163.1    | Ca_kabuli_chr04 | 32058258                | CC                              | AA              | 1946815063               |
| SNP_P4_54392_32058281 | NC_021163.1    | Ca_kabuli_chr04 | 32058281                | CC                              | TT              | 1946815065               |
| SNP_P4_54393_32060334 | NC_021163.1    | Ca_kabuli_chr04 | 32060334                | TT                              | AA              | 1946815067               |
| SNP_P4_54394_32060411 | NC_021163.1    | Ca_kabuli_chr04 | 32060411                | CC                              | TT              | 1946815069               |
| SNP_P4_54395_32060420 | NC_021163.1    | Ca_kabuli_chr04 | 32060420                | GG                              | CC              | 1946815071               |
| SNP_P4_54396_32062223 | NC_021163.1    | Ca_kabuli_chr04 | 32062223                | AA                              | GG              | 1946815073               |
| SNP_P4_54397_32062418 | NC_021163.1    | Ca_kabuli_chr04 | 32062418                | TT                              | CC              | 1946815075               |
| SNP_P4_54398_32062468 | NC_021163.1    | Ca_kabuli_chr04 | 32062468                | GG                              | CC              | 1946815077               |

| SNPs IDs              | Chromosome IDs | Chromosomes     | Physical positions (bp) | CDC Frontier (Reference genome) | (ILWC46 & LPNB) | NCBI SNPdb Accession IDs |
|-----------------------|----------------|-----------------|-------------------------|---------------------------------|-----------------|--------------------------|
| SNP_P4_54399_32062745 | NC_021163.1    | Ca_kabuli_chr04 | 32062745                | AA                              | GG              | 1946815079               |
| SNP_P4_54400_32067356 | NC_021163.1    | Ca_kabuli_chr04 | 32067356                | CC                              | TT              | 1946815081               |
| SNP_P4_54401_32067364 | NC_021163.1    | Ca_kabuli_chr04 | 32067364                | CC                              | TT              | 1946815083               |
| SNP_P4_54402_32067401 | NC_021163.1    | Ca_kabuli_chr04 | 32067401                | GG                              | AA              | 1946815085               |
| SNP_P4_54403_32067405 | NC_021163.1    | Ca_kabuli_chr04 | 32067405                | GG                              | AA              | 1946815087               |
| SNP_P4_54404_32068250 | NC_021163.1    | Ca_kabuli_chr04 | 32068250                | CC                              | TT              | 1946815089               |
| SNP_P4_54405_32069381 | NC_021163.1    | Ca_kabuli_chr04 | 32069381                | CC                              | TT              | 1946815091               |
| SNP_P4_54407_32069414 | NC_021163.1    | Ca_kabuli_chr04 | 32069414                | GG                              | CC              | 1946815093               |
| SNP_P4_54408_32069431 | NC_021163.1    | Ca_kabuli_chr04 | 32069431                | TT                              | CC              | 1946815096               |
| SNP_P4_54409_32069789 | NC_021163.1    | Ca_kabuli_chr04 | 32069789                | TT                              | CC              | 1946815098               |
| SNP_P4_54410_32069814 | NC_021163.1    | Ca_kabuli_chr04 | 32069814                | GG                              | AA              | 1946815100               |
| SNP_P4_54411_32069817 | NC_021163.1    | Ca_kabuli_chr04 | 32069817                | AA                              | TT              | 1946815102               |
| SNP_P4_54412_32069820 | NC_021163.1    | Ca_kabuli_chr04 | 32069820                | TT                              | GG              | 1946815104               |
| SNP_P4_54413_32069823 | NC_021163.1    | Ca_kabuli_chr04 | 32069823                | CC                              | TT              | 1946815106               |
| SNP_P4_54414_32083185 | NC_021163.1    | Ca_kabuli_chr04 | 32083185                | AA                              | GG              | 1946815108               |
| SNP_P4_54415_32083299 | NC_021163.1    | Ca_kabuli_chr04 | 32083299                | AA                              | GG              | 1946815110               |
| SNP_P4_54416_32083302 | NC_021163.1    | Ca_kabuli_chr04 | 32083302                | AA                              | TT              | 1946815113               |
| SNP_P4_54417_32083348 | NC_021163.1    | Ca_kabuli_chr04 | 32083348                | GG                              | TT              | 1946815115               |
| SNP_P4_54418_32083354 | NC_021163.1    | Ca_kabuli_chr04 | 32083354                | GG                              | AA              | 1946815117               |
| SNP_P4_54419_32083372 | NC_021163.1    | Ca_kabuli_chr04 | 32083372                | GG                              | AA              | 1946815119               |
| SNP_P4_54420_32083421 | NC_021163.1    | Ca_kabuli_chr04 | 32083421                | AA                              | GG              | 1946815121               |
| SNP_P4_54421_32083491 | NC_021163.1    | Ca_kabuli_chr04 | 32083491                | AA                              | GG              | 1946815123               |
| SNP_P4_54422_32083500 | NC_021163.1    | Ca_kabuli_chr04 | 32083500                | GG                              | AA              | 1946815126               |
| SNP_P4_54423_32083760 | NC_021163.1    | Ca_kabuli_chr04 | 32083760                | AA                              | GG              | 1946815128               |
| SNP_P4_54424_32083774 | NC_021163.1    | Ca_kabuli_chr04 | 32083774                | TT                              | CC              | 1946815130               |
| SNP_P4_54425_32085937 | NC_021163.1    | Ca_kabuli_chr04 | 32085937                | CC                              | TT              | 1946815132               |
| SNP_P4_54426_32085938 | NC_021163.1    | Ca_kabuli_chr04 | 32085938                | AA                              | GG              | 1946815134               |
| SNP_P4_54427_32100606 | NC_021163.1    | Ca_kabuli_chr04 | 32100606                | GG                              | AA              | 1946815136               |
| SNP_P4_54428_32100608 | NC_021163.1    | Ca_kabuli_chr04 | 32100608                | CC                              | AA              | 1946815138               |
| SNP_P4_54429_32100609 | NC_021163.1    | Ca_kabuli_chr04 | 32100609                | AA                              | GG              | 1946815140               |
| SNP_P4_54431_32100648 | NC_021163.1    | Ca_kabuli_chr04 | 32100648                | AA                              | GG              | 1946815142               |
| SNP_P4_54432_32101235 | NC_021163.1    | Ca_kabuli_chr04 | 32101235                | TT                              | AA              | 1946815144               |
| SNP_P4_54433_32101569 | NC_021163.1    | Ca_kabuli_chr04 | 32101569                | AA                              | GG              | 1946815146               |
| SNP_P4_54434_32101576 | NC_021163.1    | Ca_kabuli_chr04 | 32101576                | AA                              | TT              | 1946815148               |
| SNP_P4_54436_32103296 | NC_021163.1    | Ca_kabuli_chr04 | 32103296                | AA                              | CC              | 1946815150               |
| SNP_P4_54437_32103572 | NC_021163.1    | Ca_kabuli_chr04 | 32103572                | GG                              | AA              | 1946815152               |
| SNP_P4_54438_32103944 | NC_021163.1    | Ca_kabuli_chr04 | 32103944                | AA                              | GG              | 1946815154               |
| SNP_P4_54439_32106831 | NC_021163.1    | Ca_kabuli_chr04 | 32106831                | GG                              | AA              | 1946815156               |
| SNP_P4_54440_32106878 | NC_021163.1    | Ca_kabuli_chr04 | 32106878                | AA                              | CC              | 1946815158               |
| SNP_P4_54441_32107168 | NC_021163.1    | Ca_kabuli_chr04 | 32107168                | CC                              | TT              | 1946815160               |
| SNP_P4_54442_32107211 | NC_021163.1    | Ca_kabuli_chr04 | 32107211                | GG                              | AA              | 1946815163               |
| SNP_P4_54443_32107217 | NC_021163.1    | Ca_kabuli_chr04 | 32107217                | TT                              | CC              | 1946815165               |

| SNPs IDs              | Chromosome IDs | Chromosomes     | Physical positions (bp) | CDC Frontier (Reference genome) | (ILWC46 & LPNB) | NCBI SNPdb Accession IDs |
|-----------------------|----------------|-----------------|-------------------------|---------------------------------|-----------------|--------------------------|
| SNP_P4_54444_32111155 | NC_021163.1    | Ca_kabuli_chr04 | 32111155                | GG                              | AA              | 1946815167               |
| SNP_P4_54445_32111175 | NC_021163.1    | Ca_kabuli_chr04 | 32111175                | CC                              | TT              | 1946815169               |
| SNP_P4_54446_32112369 | NC_021163.1    | Ca_kabuli_chr04 | 32112369                | CC                              | AA              | 1946815171               |
| SNP_P4_54447_32112407 | NC_021163.1    | Ca_kabuli_chr04 | 32112407                | AA                              | TT              | 1946815173               |
| SNP_P4_54448_32112416 | NC_021163.1    | Ca_kabuli_chr04 | 32112416                | TT                              | CC              | 1946815175               |
| SNP_P4_54449_32115728 | NC_021163.1    | Ca_kabuli_chr04 | 32115728                | AA                              | GG              | 1946815177               |
| SNP_P4_54450_32115737 | NC_021163.1    | Ca_kabuli_chr04 | 32115737                | GG                              | CC              | 1946815179               |
| SNP_P4_54451_32116051 | NC_021163.1    | Ca_kabuli_chr04 | 32116051                | CC                              | TT              | 1946815181               |
| SNP_P4_54452_32116248 | NC_021163.1    | Ca_kabuli_chr04 | 32116248                | AA                              | TT              | 1946815183               |
| SNP_P4_54453_32116468 | NC_021163.1    | Ca_kabuli_chr04 | 32116468                | CC                              | TT              | 1946815185               |
| SNP_P4_54454_32117153 | NC_021163.1    | Ca_kabuli_chr04 | 32117153                | TT                              | CC              | 1946815188               |
| SNP_P4_54455_32117155 | NC_021163.1    | Ca_kabuli_chr04 | 32117155                | GG                              | AA              | 1946815190               |
| SNP_P4_54456_32117180 | NC_021163.1    | Ca_kabuli_chr04 | 32117180                | CC                              | TT              | 1946815192               |
| SNP_P4_54457_32117384 | NC_021163.1    | Ca_kabuli_chr04 | 32117384                | CC                              | GG              | 1946815194               |
| SNP_P4_54458_32118122 | NC_021163.1    | Ca_kabuli_chr04 | 32118122                | GG                              | TT              | 1946815196               |
| SNP_P4_54459_32118181 | NC_021163.1    | Ca_kabuli_chr04 | 32118181                | AA                              | GG              | 1946815198               |
| SNP_P4_54460_32118344 | NC_021163.1    | Ca_kabuli_chr04 | 32118344                | TT                              | CC              | 1946815200               |
| SNP_P4_54461_32118559 | NC_021163.1    | Ca_kabuli_chr04 | 32118559                | CC                              | AA              | 1946815202               |
| SNP_P4_54462_32118605 | NC_021163.1    | Ca_kabuli_chr04 | 32118605                | TT                              | GG              | 1946815204               |
| SNP_P4_54464_32118922 | NC_021163.1    | Ca_kabuli_chr04 | 32118922                | GG                              | AA              | 1946815206               |
| SNP_P4_54465_32121016 | NC_021163.1    | Ca_kabuli_chr04 | 32121016                | AA                              | GG              | 1946815208               |
| SNP_P4_54467_32121529 | NC_021163.1    | Ca_kabuli_chr04 | 32121529                | AA                              | GG              | 1946815211               |
| SNP_P4_54470_32121900 | NC_021163.1    | Ca_kabuli_chr04 | 32121900                | AA                              | GG              | 1946815213               |
| SNP_P4_54471_32122880 | NC_021163.1    | Ca_kabuli_chr04 | 32122880                | TT                              | CC              | 1946815215               |
| SNP_P4_54472_32122986 | NC_021163.1    | Ca_kabuli_chr04 | 32122986                | TT                              | CC              | 1946815217               |
| SNP_P4_54473_32123141 | NC_021163.1    | Ca_kabuli_chr04 | 32123141                | TT                              | CC              | 1946815219               |
| SNP_P4_54474_32123143 | NC_021163.1    | Ca_kabuli_chr04 | 32123143                | GG                              | TT              | 1946815221               |
| SNP_P4_54475_32123169 | NC_021163.1    | Ca_kabuli_chr04 | 32123169                | GG                              | AA              | 1946815223               |
| SNP_P4_54476_32123184 | NC_021163.1    | Ca_kabuli_chr04 | 32123184                | GG                              | CC              | 1946815226               |
| SNP_P4_54477_32123362 | NC_021163.1    | Ca_kabuli_chr04 | 32123362                | GG                              | TT              | 1946815228               |
| SNP_P4_54478_32124971 | NC_021163.1    | Ca_kabuli_chr04 | 32124971                | CC                              | AA              | 1946815230               |
| SNP_P4_54480_32128774 | NC_021163.1    | Ca_kabuli_chr04 | 32128774                | TT                              | GG              | 1946815232               |
| SNP_P4_54481_32136737 | NC_021163.1    | Ca_kabuli_chr04 | 32136737                | AA                              | TT              | 1946815234               |
| SNP_P4_54483_32138080 | NC_021163.1    | Ca_kabuli_chr04 | 32138080                | CC                              | AA              | 1946815236               |
| SNP_P4_54484_32138124 | NC_021163.1    | Ca_kabuli_chr04 | 32138124                | AA                              | TT              | 1946815239               |
| SNP_P4_54486_32139052 | NC_021163.1    | Ca_kabuli_chr04 | 32139052                | GG                              | AA              | 1946815241               |
| SNP_P4_54487_32139239 | NC_021163.1    | Ca_kabuli_chr04 | 32139239                | TT                              | CC              | 1946815243               |
| SNP_P4_54488_32139329 | NC_021163.1    | Ca_kabuli_chr04 | 32139329                | TT                              | CC              | 1946815245               |
| SNP_P4_54489_32140352 | NC_021163.1    | Ca_kabuli_chr04 | 32140352                | AA                              | TT              | 1946815247               |
| SNP_P4_54490_32140774 | NC_021163.1    | Ca_kabuli_chr04 | 32140774                | TT                              | GG              | 1946815249               |
| SNP_P4_54491_32140776 | NC_021163.1    | Ca_kabuli_chr04 | 32140776                | GG                              | AA              | 1946815251               |
| SNP_P4_54492_32140794 | NC_021163.1    | Ca_kabuli_chr04 | 32140794                | GG                              | TT              | 1946815253               |

| SNPs IDs              | Chromosome IDs | Chromosomes     | Physical positions (bp) | CDC Frontier (Reference genome) | (ILWC46 & LPNB) | NCBI SNPdb Accession IDs |
|-----------------------|----------------|-----------------|-------------------------|---------------------------------|-----------------|--------------------------|
| SNP_P4_54494_32141398 | NC_021163.1    | Ca_kabuli_chr04 | 32141398                | GG                              | AA              | 1946815255               |
| SNP_P4_54495_32141403 | NC_021163.1    | Ca_kabuli_chr04 | 32141403                | AA                              | GG              | 1946815257               |
| SNP_P4_54496_32141405 | NC_021163.1    | Ca_kabuli_chr04 | 32141405                | AA                              | GG              | 1946815260               |
| SNP_P4_54497_32141411 | NC_021163.1    | Ca_kabuli_chr04 | 32141411                | TT                              | GG              | 1946815262               |
| SNP_P4_54498_32141447 | NC_021163.1    | Ca_kabuli_chr04 | 32141447                | CC                              | TT              | 1946815264               |
| SNP_P4_54499_32141475 | NC_021163.1    | Ca_kabuli_chr04 | 32141475                | TT                              | GG              | 1946815266               |
| SNP_P4_54500_32141550 | NC_021163.1    | Ca_kabuli_chr04 | 32141550                | CC                              | TT              | 1946815268               |
| SNP_P4_54501_32141560 | NC_021163.1    | Ca_kabuli_chr04 | 32141560                | CC                              | TT              | 1946815270               |
| SNP_P4_54502_32141758 | NC_021163.1    | Ca_kabuli_chr04 | 32141758                | GG                              | AA              | 1946815272               |
| SNP_P4_54503_32141812 | NC_021163.1    | Ca_kabuli_chr04 | 32141812                | AA                              | GG              | 1946815274               |
| SNP_P4_54504_32141818 | NC_021163.1    | Ca_kabuli_chr04 | 32141818                | TT                              | GG              | 1946815276               |
| SNP_P4_54505_32142775 | NC_021163.1    | Ca_kabuli_chr04 | 32142775                | TT                              | AA              | 1946815279               |
| SNP_P4_54506_32142784 | NC_021163.1    | Ca_kabuli_chr04 | 32142784                | AA                              | GG              | 1946815281               |
| SNP_P4_54507_32142787 | NC_021163.1    | Ca_kabuli_chr04 | 32142787                | GG                              | TT              | 1946815283               |
| SNP_P4_54509_32144754 | NC_021163.1    | Ca_kabuli_chr04 | 32144754                | CC                              | TT              | 1946815285               |
| SNP_P4_54510_32144802 | NC_021163.1    | Ca_kabuli_chr04 | 32144802                | CC                              | TT              | 1946815287               |
| SNP_P4_54511_32144807 | NC_021163.1    | Ca_kabuli_chr04 | 32144807                | CC                              | TT              | 1946815289               |
| SNP_P4_54512_32144813 | NC_021163.1    | Ca_kabuli_chr04 | 32144813                | GG                              | TT              | 1946815291               |
| SNP_P4_54513_32145028 | NC_021163.1    | Ca_kabuli_chr04 | 32145028                | CC                              | AA              | 1946815293               |
| SNP_P4_54514_32146201 | NC_021163.1    | Ca_kabuli_chr04 | 32146201                | CC                              | TT              | 1946815295               |
| SNP_P4_54515_32146236 | NC_021163.1    | Ca_kabuli_chr04 | 32146236                | TT                              | CC              | 1946815297               |
| SNP_P4_54516_32146238 | NC_021163.1    | Ca_kabuli_chr04 | 32146238                | CC                              | TT              | 1946815299               |
| SNP_P4_54517_32146265 | NC_021163.1    | Ca_kabuli_chr04 | 32146265                | GG                              | AA              | 1946815301               |
| SNP_P4_54518_32146975 | NC_021163.1    | Ca_kabuli_chr04 | 32146975                | CC                              | TT              | 1946815303               |
| SNP_P4_54519_32147641 | NC_021163.1    | Ca_kabuli_chr04 | 32147641                | TT                              | CC              | 1946815305               |
| SNP_P4_54521_32148365 | NC_021163.1    | Ca_kabuli_chr04 | 32148365                | GG                              | AA              | 1946815307               |
| SNP_P4_54522_32148848 | NC_021163.1    | Ca_kabuli_chr04 | 32148848                | AA                              | TT              | 1946815309               |
| SNP_P4_54524_32149301 | NC_021163.1    | Ca_kabuli_chr04 | 32149301                | TT                              | AA              | 1946815311               |
| SNP_P4_54526_32149531 | NC_021163.1    | Ca_kabuli_chr04 | 32149531                | GG                              | AA              | 1946815313               |
| SNP_P4_54527_32149532 | NC_021163.1    | Ca_kabuli_chr04 | 32149532                | TT                              | CC              | 1946815315               |
| SNP_P4_54528_32149581 | NC_021163.1    | Ca_kabuli_chr04 | 32149581                | GG                              | AA              | 1946815317               |
| SNP_P4_54530_32149995 | NC_021163.1    | Ca_kabuli_chr04 | 32149995                | GG                              | AA              | 1946815319               |
| SNP_P4_54531_32150022 | NC_021163.1    | Ca_kabuli_chr04 | 32150022                | AA                              | TT              | 1946815321               |
| SNP_P4_54532_32150041 | NC_021163.1    | Ca_kabuli_chr04 | 32150041                | CC                              | AA              | 1946815323               |
| SNP_P4_54533_32150437 | NC_021163.1    | Ca_kabuli_chr04 | 32150437                | TT                              | AA              | 1946815325               |
| SNP_P4_54534_32150852 | NC_021163.1    | Ca_kabuli_chr04 | 32150852                | AA                              | TT              | 1946815327               |
| SNP_P4_54535_32150992 | NC_021163.1    | Ca_kabuli_chr04 | 32150992                | AA                              | GG              | 1946815329               |
| SNP_P4_54536_32151560 | NC_021163.1    | Ca_kabuli_chr04 | 32151560                | GG                              | AA              | 1946815331               |
| SNP_P4_54537_32151900 | NC_021163.1    | Ca_kabuli_chr04 | 32151900                | GG                              | AA              | 1946815333               |
| SNP_P4_54538_32152181 | NC_021163.1    | Ca_kabuli_chr04 | 32152181                | TT                              | CC              | 1946815336               |
| SNP_P4_54539_32152206 | NC_021163.1    | Ca_kabuli_chr04 | 32152206                | GG                              | AA              | 1946815338               |
| SNP_P4_54540_32152250 | NC_021163.1    | Ca_kabuli_chr04 | 32152250                | TT                              | AA              | 1946815340               |



| SNPs IDs              | Chromosome IDs | Chromosomes     | Physical positions (bp) | CDC Frontier (Reference genome) | (ILWC46 & LPNB) | NCBI SNPdb Accession IDs |
|-----------------------|----------------|-----------------|-------------------------|---------------------------------|-----------------|--------------------------|
| SNP_P4_54541_32152251 | NC_021163.1    | Ca_kabuli_chr04 | 32152251                | TT                              | AA              | 1946815342               |
| SNP_P4_54542_32155670 | NC_021163.1    | Ca_kabuli_chr04 | 32155670                | TT                              | AA              | 1946815344               |
| SNP_P4_54543_32155672 | NC_021163.1    | Ca_kabuli_chr04 | 32155672                | TT                              | CC              | 1946815346               |
| SNP_P4_54544_32155700 | NC_021163.1    | Ca_kabuli_chr04 | 32155700                | TT                              | CC              | 1946815348               |
| SNP_P4_54545_32155716 | NC_021163.1    | Ca_kabuli_chr04 | 32155716                | TT                              | AA              | 1946815350               |
| SNP_P4_54546_32155746 | NC_021163.1    | Ca_kabuli_chr04 | 32155746                | TT                              | CC              | 1946815352               |
| SNP_P4_54547_32155782 | NC_021163.1    | Ca_kabuli_chr04 | 32155782                | CC                              | TT              | 1946815354               |
| SNP_P4_54548_32155865 | NC_021163.1    | Ca_kabuli_chr04 | 32155865                | CC                              | TT              | 1946815356               |
| SNP_P4_54549_32155907 | NC_021163.1    | Ca_kabuli_chr04 | 32155907                | AA                              | CC              | 1946815358               |
| SNP_P4_54550_32156008 | NC_021163.1    | Ca_kabuli_chr04 | 32156008                | TT                              | AA              | 1946815360               |
| SNP_P4_54551_32156181 | NC_021163.1    | Ca_kabuli_chr04 | 32156181                | AA                              | CC              | 1946815362               |
| SNP_P4_54552_32156188 | NC_021163.1    | Ca_kabuli_chr04 | 32156188                | TT                              | CC              | 1946815364               |
| SNP_P4_54553_32156214 | NC_021163.1    | Ca_kabuli_chr04 | 32156214                | CC                              | GG              | 1946815366               |
| SNP_P4_54554_32156485 | NC_021163.1    | Ca_kabuli_chr04 | 32156485                | AA                              | GG              | 1946815368               |
| SNP_P4_54555_32156489 | NC_021163.1    | Ca_kabuli_chr04 | 32156489                | GG                              | AA              | 1946815370               |
| SNP_P4_54559_32161733 | NC_021163.1    | Ca_kabuli_chr04 | 32161733                | CC                              | TT              | 1946815372               |
| SNP_P4_54560_32163181 | NC_021163.1    | Ca_kabuli_chr04 | 32163181                | CC                              | TT              | 1946815374               |
| SNP_P4_54561_32163322 | NC_021163.1    | Ca_kabuli_chr04 | 32163322                | TT                              | CC              | 1946815376               |
| SNP_P4_54562_32163324 | NC_021163.1    | Ca_kabuli_chr04 | 32163324                | CC                              | TT              | 1946815377               |
| SNP_P4_54563_32163346 | NC_021163.1    | Ca_kabuli_chr04 | 32163346                | TT                              | CC              | 1946815379               |
| SNP_P4_54564_32163358 | NC_021163.1    | Ca_kabuli_chr04 | 32163358                | AA                              | TT              | 1946815381               |
| SNP_P4_54565_32163465 | NC_021163.1    | Ca_kabuli_chr04 | 32163465                | CC                              | TT              | 1946815383               |
| SNP_P4_54566_32163503 | NC_021163.1    | Ca_kabuli_chr04 | 32163503                | CC                              | TT              | 1946815385               |
| SNP_P4_54567_32163538 | NC_021163.1    | Ca_kabuli_chr04 | 32163538                | CC                              | TT              | 1946815387               |
| SNP_P4_54568_32167596 | NC_021163.1    | Ca_kabuli_chr04 | 32167596                | TT                              | GG              | 1946815389               |
| SNP_P4_54569_32167630 | NC_021163.1    | Ca_kabuli_chr04 | 32167630                | CC                              | TT              | 1946815391               |
| SNP_P4_54570_32167651 | NC_021163.1    | Ca_kabuli_chr04 | 32167651                | CC                              | TT              | 1946815393               |
| SNP_P4_54571_32167684 | NC_021163.1    | Ca_kabuli_chr04 | 32167684                | AA                              | GG              | 1946815395               |
| SNP_P4_54572_32167736 | NC_021163.1    | Ca_kabuli_chr04 | 32167736                | GG                              | CC              | 1946815397               |
| SNP_P4_54574_32167907 | NC_021163.1    | Ca_kabuli_chr04 | 32167907                | TT                              | CC              | 1946815399               |
| SNP_P4_54575_32167949 | NC_021163.1    | Ca_kabuli_chr04 | 32167949                | AA                              | GG              | 1946815401               |
| SNP_P4_54576_32167956 | NC_021163.1    | Ca_kabuli_chr04 | 32167956                | AA                              | CC              | 1946815403               |
| SNP_P4_54577_32167991 | NC_021163.1    | Ca_kabuli_chr04 | 32167991                | CC                              | TT              | 1946815405               |
| SNP_P4_54578_32168230 | NC_021163.1    | Ca_kabuli_chr04 | 32168230                | CC                              | AA              | 1946815407               |
| SNP_P4_54579_32168236 | NC_021163.1    | Ca_kabuli_chr04 | 32168236                | GG                              | AA              | 1946815409               |
| SNP_P4_54580_32168254 | NC_021163.1    | Ca_kabuli_chr04 | 32168254                | TT                              | GG              | 1946815411               |
| SNP_P4_54581_32168289 | NC_021163.1    | Ca_kabuli_chr04 | 32168289                | GG                              | AA              | 1946815413               |
| SNP_P4_54582_32168307 | NC_021163.1    | Ca_kabuli_chr04 | 32168307                | GG                              | AA              | 1946815415               |
| SNP_P4_54583_32168973 | NC_021163.1    | Ca_kabuli_chr04 | 32168973                | CC                              | GG              | 1946815417               |
| SNP_P4_54584_32168989 | NC_021163.1    | Ca_kabuli_chr04 | 32168989                | CC                              | TT              | 1946815419               |
| SNP_P4_54585_32169015 | NC_021163.1    | Ca_kabuli_chr04 | 32169015                | GG                              | AA              | 1946815421               |
| SNP_P4_54586_32169016 | NC_021163.1    | Ca_kabuli_chr04 | 32169016                | TT                              | GG              | 1946815423               |

| SNPs IDs              | Chromosome IDs | Chromosomes     | Physical positions (bp) | CDC Frontier (Reference genome) | (ILWC46 & LPNB) | NCBI SNPdb Accession IDs |
|-----------------------|----------------|-----------------|-------------------------|---------------------------------|-----------------|--------------------------|
| SNP_P4_54587_32172724 | NC_021163.1    | Ca_kabuli_chr04 | 32172724                | AA                              | GG              | 1946815425               |
| SNP_P4_54588_32173571 | NC_021163.1    | Ca_kabuli_chr04 | 32173571                | TT                              | CC              | 1946815427               |
| SNP_P4_54589_32173602 | NC_021163.1    | Ca_kabuli_chr04 | 32173602                | TT                              | AA              | 1946815429               |
| SNP_P4_54590_32173942 | NC_021163.1    | Ca_kabuli_chr04 | 32173942                | AA                              | TT              | 1946815431               |
| SNP_P4_54591_32174166 | NC_021163.1    | Ca_kabuli_chr04 | 32174166                | CC                              | GG              | 1946815433               |
| SNP_P4_54593_32174625 | NC_021163.1    | Ca_kabuli_chr04 | 32174625                | GG                              | TT              | 1946815435               |
| SNP_P4_54594_32174754 | NC_021163.1    | Ca_kabuli_chr04 | 32174754                | TT                              | AA              | 1946815437               |
| SNP_P4_54595_32174871 | NC_021163.1    | Ca_kabuli_chr04 | 32174871                | TT                              | CC              | 1946815439               |
| SNP_P4_54596_32179061 | NC_021163.1    | Ca_kabuli_chr04 | 32179061                | CC                              | TT              | 1946815441               |
| SNP_P4_54597_32179432 | NC_021163.1    | Ca_kabuli_chr04 | 32179432                | CC                              | TT              | 1946815443               |
| SNP_P4_54598_32179441 | NC_021163.1    | Ca_kabuli_chr04 | 32179441                | CC                              | AA              | 1946815445               |
| SNP_P4_54599_32179444 | NC_021163.1    | Ca_kabuli_chr04 | 32179444                | CC                              | TT              | 1946815447               |
| SNP_P4_54600_32179598 | NC_021163.1    | Ca_kabuli_chr04 | 32179598                | TT                              | CC              | 1946815449               |
| SNP_P4_54601_32179599 | NC_021163.1    | Ca_kabuli_chr04 | 32179599                | AA                              | CC              | 1946815451               |
| SNP_P4_54603_32179674 | NC_021163.1    | Ca_kabuli_chr04 | 32179674                | GG                              | TT              | 1946815453               |
| SNP_P4_54605_32181718 | NC_021163.1    | Ca_kabuli_chr04 | 32181718                | AA                              | GG              | 1946815455               |
| SNP_P4_54606_32181724 | NC_021163.1    | Ca_kabuli_chr04 | 32181724                | AA                              | TT              | 1946815457               |
| SNP_P4_54607_32181725 | NC_021163.1    | Ca_kabuli_chr04 | 32181725                | GG                              | TT              | 1946815459               |
| SNP_P4_54609_32182759 | NC_021163.1    | Ca_kabuli_chr04 | 32182759                | GG                              | TT              | 1946815461               |
| SNP_P4_54610_32182796 | NC_021163.1    | Ca_kabuli_chr04 | 32182796                | AA                              | TT              | 1946815463               |
| SNP_P4_54611_32182842 | NC_021163.1    | Ca_kabuli_chr04 | 32182842                | CC                              | TT              | 1946815465               |
| SNP_P4_54612_32182869 | NC_021163.1    | Ca_kabuli_chr04 | 32182869                | CC                              | TT              | 1946815467               |
| SNP_P4_54613_32182871 | NC_021163.1    | Ca_kabuli_chr04 | 32182871                | AA                              | TT              | 1946815469               |
| SNP_P4_54614_32183307 | NC_021163.1    | Ca_kabuli_chr04 | 32183307                | GG                              | CC              | 1946815471               |
| SNP_P4_54615_32183493 | NC_021163.1    | Ca_kabuli_chr04 | 32183493                | GG                              | AA              | 1946815473               |
| SNP_P4_54617_32183659 | NC_021163.1    | Ca_kabuli_chr04 | 32183659                | TT                              | AA              | 1946815475               |
| SNP_P4_54618_32183754 | NC_021163.1    | Ca_kabuli_chr04 | 32183754                | CC                              | TT              | 1946815477               |
| SNP_P4_54619_32184340 | NC_021163.1    | Ca_kabuli_chr04 | 32184340                | GG                              | AA              | 1946815479               |
| SNP_P4_54620_32184628 | NC_021163.1    | Ca_kabuli_chr04 | 32184628                | GG                              | AA              | 1946815481               |
| SNP_P4_54621_32188375 | NC_021163.1    | Ca_kabuli_chr04 | 32188375                | GG                              | TT              | 1946815483               |
| SNP_P4_54622_32189137 | NC_021163.1    | Ca_kabuli_chr04 | 32189137                | AA                              | CC              | 1946815485               |
| SNP_P4_54623_32189590 | NC_021163.1    | Ca_kabuli_chr04 | 32189590                | AA                              | CC              | 1946815487               |
| SNP_P4_54624_32190526 | NC_021163.1    | Ca_kabuli_chr04 | 32190526                | GG                              | AA              | 1946815489               |
| SNP_P4_54625_32203152 | NC_021163.1    | Ca_kabuli_chr04 | 32203152                | AA                              | GG              | 1946815491               |
| SNP_P4_54626_32203160 | NC_021163.1    | Ca_kabuli_chr04 | 32203160                | GG                              | TT              | 1946815493               |
| SNP_P4_54627_32203186 | NC_021163.1    | Ca_kabuli_chr04 | 32203186                | TT                              | GG              | 1946815495               |
| SNP_P4_54628_32204042 | NC_021163.1    | Ca_kabuli_chr04 | 32204042                | GG                              | CC              | 1946815497               |
| SNP_P4_54629_32206082 | NC_021163.1    | Ca_kabuli_chr04 | 32206082                | GG                              | AA              | 1946815499               |
| SNP_P4_54630_32206498 | NC_021163.1    | Ca_kabuli_chr04 | 32206498                | CC                              | TT              | 1946815501               |
| SNP_P4_54631_32206524 | NC_021163.1    | Ca_kabuli_chr04 | 32206524                | CC                              | AA              | 1946815503               |
| SNP_P4_54632_32206658 | NC_021163.1    | Ca_kabuli_chr04 | 32206658                | AA                              | TT              | 1946815505               |
| SNP_P4_54633_32208797 | NC_021163.1    | Ca_kabuli_chr04 | 32208797                | GG                              | AA              | 1946815507               |

| SNPs IDs              | Chromosome IDs | Chromosomes     | Physical positions (bp) | CDC Frontier (Reference genome) | (ILWC46 & LPNB) | NCBI SNPdb Accession IDs |
|-----------------------|----------------|-----------------|-------------------------|---------------------------------|-----------------|--------------------------|
| SNP_P4_54634_32208830 | NC_021163.1    | Ca_kabuli_chr04 | 32208830                | AA                              | GG              | 1946815509               |
| SNP_P4_54635_32208831 | NC_021163.1    | Ca_kabuli_chr04 | 32208831                | AA                              | GG              | 1946815511               |
| SNP_P4_54636_32208849 | NC_021163.1    | Ca_kabuli_chr04 | 32208849                | GG                              | AA              | 1946815513               |
| SNP_P4_54637_32208856 | NC_021163.1    | Ca_kabuli_chr04 | 32208856                | AA                              | GG              | 1946815515               |
| SNP_P4_54638_32209156 | NC_021163.1    | Ca_kabuli_chr04 | 32209156                | GG                              | TT              | 1946815517               |
| SNP_P4_54639_32209160 | NC_021163.1    | Ca_kabuli_chr04 | 32209160                | CC                              | TT              | 1946815519               |
| SNP_P4_54640_32209188 | NC_021163.1    | Ca_kabuli_chr04 | 32209188                | TT                              | CC              | 1946815521               |
| SNP_P4_54641_32209213 | NC_021163.1    | Ca_kabuli_chr04 | 32209213                | CC                              | TT              | 1946815523               |
| SNP_P4_54642_32209218 | NC_021163.1    | Ca_kabuli_chr04 | 32209218                | GG                              | AA              | 1946815525               |
| SNP_P4_54643_32209375 | NC_021163.1    | Ca_kabuli_chr04 | 32209375                | TT                              | CC              | 1946815527               |
| SNP_P4_54644_32209383 | NC_021163.1    | Ca_kabuli_chr04 | 32209383                | TT                              | CC              | 1946815529               |
| SNP_P4_54645_32209428 | NC_021163.1    | Ca_kabuli_chr04 | 32209428                | TT                              | CC              | 1946815531               |
| SNP_P4_54646_32209455 | NC_021163.1    | Ca_kabuli_chr04 | 32209455                | CC                              | TT              | 1946815533               |
| SNP_P4_54647_32209467 | NC_021163.1    | Ca_kabuli_chr04 | 32209467                | CC                              | TT              | 1946815535               |
| SNP_P4_54648_32209469 | NC_021163.1    | Ca_kabuli_chr04 | 32209469                | AA                              | GG              | 1946815537               |
| SNP_P4_54649_32209586 | NC_021163.1    | Ca_kabuli_chr04 | 32209586                | AA                              | GG              | 1946815539               |
| SNP_P4_54650_32209590 | NC_021163.1    | Ca_kabuli_chr04 | 32209590                | CC                              | TT              | 1946815541               |
| SNP_P4_54651_32209610 | NC_021163.1    | Ca_kabuli_chr04 | 32209610                | TT                              | CC              | 1946815543               |
| SNP_P4_54652_32209659 | NC_021163.1    | Ca_kabuli_chr04 | 32209659                | GG                              | AA              | 1946815545               |
| SNP_P4_54653_32209804 | NC_021163.1    | Ca_kabuli_chr04 | 32209804                | GG                              | AA              | 1946815547               |
| SNP_P4_54654_32211162 | NC_021163.1    | Ca_kabuli_chr04 | 32211162                | CC                              | AA              | 1946815549               |
| SNP_P4_54655_32212690 | NC_021163.1    | Ca_kabuli_chr04 | 32212690                | AA                              | GG              | 1946815551               |
| SNP_P4_54656_32212700 | NC_021163.1    | Ca_kabuli_chr04 | 32212700                | TT                              | CC              | 1946815553               |
| SNP_P4_54658_32214893 | NC_021163.1    | Ca_kabuli_chr04 | 32214893                | AA                              | TT              | 1946815555               |
| SNP_P4_54659_32215685 | NC_021163.1    | Ca_kabuli_chr04 | 32215685                | TT                              | AA              | 1946815557               |
| SNP_P4_54660_32215690 | NC_021163.1    | Ca_kabuli_chr04 | 32215690                | CC                              | AA              | 1946815559               |
| SNP_P4_54662_32216885 | NC_021163.1    | Ca_kabuli_chr04 | 32216885                | AA                              | GG              | 1946815561               |
| SNP_P4_54663_32216929 | NC_021163.1    | Ca_kabuli_chr04 | 32216929                | GG                              | AA              | 1946815563               |
| SNP_P4_54664_32217744 | NC_021163.1    | Ca_kabuli_chr04 | 32217744                | AA                              | GG              | 1946815565               |
| SNP_P4_54665_32217864 | NC_021163.1    | Ca_kabuli_chr04 | 32217864                | CC                              | TT              | 1946815567               |
| SNP_P4_54666_32217897 | NC_021163.1    | Ca_kabuli_chr04 | 32217897                | TT                              | CC              | 1946815569               |
| SNP_P4_54667_32218147 | NC_021163.1    | Ca_kabuli_chr04 | 32218147                | CC                              | TT              | 1946815571               |
| SNP_P4_54668_32218176 | NC_021163.1    | Ca_kabuli_chr04 | 32218176                | GG                              | AA              | 1946815573               |
| SNP_P4_54669_32218739 | NC_021163.1    | Ca_kabuli_chr04 | 32218739                | CC                              | GG              | 1946815575               |
| SNP_P4_54670_32219638 | NC_021163.1    | Ca_kabuli_chr04 | 32219638                | CC                              | TT              | 1946815577               |
| SNP_P4_54671_32219963 | NC_021163.1    | Ca_kabuli_chr04 | 32219963                | AA                              | CC              | 1946815579               |
| SNP_P4_54672_32219972 | NC_021163.1    | Ca_kabuli_chr04 | 32219972                | GG                              | AA              | 1946815581               |
| SNP_P4_54674_32220159 | NC_021163.1    | Ca_kabuli_chr04 | 32220159                | TT                              | CC              | 1946815583               |
| SNP_P4_54675_32220163 | NC_021163.1    | Ca_kabuli_chr04 | 32220163                | AA                              | GG              | 1946815585               |
| SNP_P4_54676_32220522 | NC_021163.1    | Ca_kabuli_chr04 | 32220522                | GG                              | AA              | 1946815587               |
| SNP_P4_54677_32220704 | NC_021163.1    | Ca_kabuli_chr04 | 32220704                | CC                              | TT              | 1946815589               |
| SNP_P4_54678_32220759 | NC_021163.1    | Ca_kabuli_chr04 | 32220759                | TT                              | CC              | 1946815591               |

| SNPs IDs              | Chromosome IDs | Chromosomes     | Physical positions (bp) | CDC Frontier (Reference genome) | (ILWC46 & LPNB) | NCBI SNPdb Accession IDs |
|-----------------------|----------------|-----------------|-------------------------|---------------------------------|-----------------|--------------------------|
| SNP_P4_54679_32220769 | NC_021163.1    | Ca_kabuli_chr04 | 32220769                | TT                              | CC              | 1946815593               |
| SNP_P4_54680_32220770 | NC_021163.1    | Ca_kabuli_chr04 | 32220770                | AA                              | GG              | 1946815595               |
| SNP_P4_54681_32220771 | NC_021163.1    | Ca_kabuli_chr04 | 32220771                | GG                              | TT              | 1946815597               |
| SNP_P4_54682_32220807 | NC_021163.1    | Ca_kabuli_chr04 | 32220807                | AA                              | GG              | 1946815599               |
| SNP_P4_54683_32220897 | NC_021163.1    | Ca_kabuli_chr04 | 32220897                | TT                              | CC              | 1946815601               |
| SNP_P4_54684_32220955 | NC_021163.1    | Ca_kabuli_chr04 | 32220955                | CC                              | TT              | 1946815603               |
| SNP_P4_54685_32221017 | NC_021163.1    | Ca_kabuli_chr04 | 32221017                | GG                              | TT              | 1946815605               |
| SNP_P4_54686_32221091 | NC_021163.1    | Ca_kabuli_chr04 | 32221091                | TT                              | AA              | 1946815607               |
| SNP_P4_54687_32221111 | NC_021163.1    | Ca_kabuli_chr04 | 32221111                | AA                              | GG              | 1946815609               |
| SNP_P4_54688_32221112 | NC_021163.1    | Ca_kabuli_chr04 | 32221112                | AA                              | TT              | 1946815611               |
| SNP_P4_54689_32221131 | NC_021163.1    | Ca_kabuli_chr04 | 32221131                | CC                              | TT              | 1946815613               |
| SNP_P4_54690_32221157 | NC_021163.1    | Ca_kabuli_chr04 | 32221157                | TT                              | CC              | 1946815615               |
| SNP_P4_54691_32221158 | NC_021163.1    | Ca_kabuli_chr04 | 32221158                | CC                              | TT              | 1946815617               |
| SNP_P4_54692_32221179 | NC_021163.1    | Ca_kabuli_chr04 | 32221179                | CC                              | TT              | 1946815619               |
| SNP_P4_54693_32221313 | NC_021163.1    | Ca_kabuli_chr04 | 32221313                | AA                              | CC              | 1946815621               |
| SNP_P4_54694_32221981 | NC_021163.1    | Ca_kabuli_chr04 | 32221981                | TT                              | CC              | 1946815623               |
| SNP_P4_54695_32221992 | NC_021163.1    | Ca_kabuli_chr04 | 32221992                | GG                              | AA              | 1946815625               |
| SNP_P4_54696_32222395 | NC_021163.1    | Ca_kabuli_chr04 | 32222395                | GG                              | AA              | 1946815627               |
| SNP_P4_54697_32222405 | NC_021163.1    | Ca_kabuli_chr04 | 32222405                | GG                              | AA              | 1946815630               |
| SNP_P4_54698_32222431 | NC_021163.1    | Ca_kabuli_chr04 | 32222431                | AA                              | GG              | 1946815632               |
| SNP_P4_54699_32222451 | NC_021163.1    | Ca_kabuli_chr04 | 32222451                | TT                              | GG              | 1946815634               |
| SNP_P4_54700_32223066 | NC_021163.1    | Ca_kabuli_chr04 | 32223066                | TT                              | CC              | 1946815636               |
| SNP_P4_54701_32223074 | NC_021163.1    | Ca_kabuli_chr04 | 32223074                | TT                              | GG              | 1946815638               |
| SNP_P4_54702_32223105 | NC_021163.1    | Ca_kabuli_chr04 | 32223105                | TT                              | AA              | 1946815640               |
| SNP_P4_54703_32223153 | NC_021163.1    | Ca_kabuli_chr04 | 32223153                | AA                              | GG              | 1946815642               |
| SNP_P4_54704_32223214 | NC_021163.1    | Ca_kabuli_chr04 | 32223214                | GG                              | AA              | 1946815644               |
| SNP_P4_54705_32223228 | NC_021163.1    | Ca_kabuli_chr04 | 32223228                | GG                              | TT              | 1946815646               |
| SNP_P4_54706_32223258 | NC_021163.1    | Ca_kabuli_chr04 | 32223258                | TT                              | GG              | 1946815648               |
| SNP_P4_54707_32223292 | NC_021163.1    | Ca_kabuli_chr04 | 32223292                | GG                              | AA              | 1946815650               |
| SNP_P4_54708_32223320 | NC_021163.1    | Ca_kabuli_chr04 | 32223320                | CC                              | TT              | 1946815652               |
| SNP_P4_54709_32223430 | NC_021163.1    | Ca_kabuli_chr04 | 32223430                | CC                              | AA              | 1946815654               |
| SNP_P4_54710_32223464 | NC_021163.1    | Ca_kabuli_chr04 | 32223464                | GG                              | TT              | 1946815656               |
| SNP_P4_54711_32223510 | NC_021163.1    | Ca_kabuli_chr04 | 32223510                | GG                              | AA              | 1946815658               |
| SNP_P4_54712_32223522 | NC_021163.1    | Ca_kabuli_chr04 | 32223522                | TT                              | GG              | 1946815660               |
| SNP_P4_54713_32223620 | NC_021163.1    | Ca_kabuli_chr04 | 32223620                | AA                              | CC              | 1946815662               |
| SNP_P4_54714_32223736 | NC_021163.1    | Ca_kabuli_chr04 | 32223736                | CC                              | AA              | 1946815665               |
| SNP_P4_54716_32224286 | NC_021163.1    | Ca_kabuli_chr04 | 32224286                | TT                              | CC              | 1946815666               |
| SNP_P4_54717_32224305 | NC_021163.1    | Ca_kabuli_chr04 | 32224305                | CC                              | TT              | 1946815667               |
| SNP_P4_54718_32224535 | NC_021163.1    | Ca_kabuli_chr04 | 32224535                | TT                              | AA              | 1946815668               |
| SNP_P4_54719_32224543 | NC_021163.1    | Ca_kabuli_chr04 | 32224543                | AA                              | GG              | 1946815669               |
| SNP_P4_54720_32224627 | NC_021163.1    | Ca_kabuli_chr04 | 32224627                | CC                              | TT              | 1946815670               |
| SNP_P4_54721_32224696 | NC_021163.1    | Ca_kabuli_chr04 | 32224696                | AA                              | GG              | 1946815671               |

| SNPs IDs              | Chromosome IDs | Chromosomes     | Physical positions (bp) | CDC Frontier (Reference genome) | (ILWC46 & LPNB) | NCBI SNPdb Accession IDs |
|-----------------------|----------------|-----------------|-------------------------|---------------------------------|-----------------|--------------------------|
| SNP_P4_54722_32224699 | NC_021163.1    | Ca_kabuli_chr04 | 32224699                | AA                              | GG              | 1946815672               |
| SNP_P4_54724_32224852 | NC_021163.1    | Ca_kabuli_chr04 | 32224852                | CC                              | TT              | 1946815673               |
| SNP_P4_54725_32224857 | NC_021163.1    | Ca_kabuli_chr04 | 32224857                | GG                              | AA              | 1946815674               |
| SNP_P4_54726_32224911 | NC_021163.1    | Ca_kabuli_chr04 | 32224911                | GG                              | AA              | 1946815675               |
| SNP_P4_54727_32224942 | NC_021163.1    | Ca_kabuli_chr04 | 32224942                | CC                              | TT              | 1946815676               |
| SNP_P4_54728_32225054 | NC_021163.1    | Ca_kabuli_chr04 | 32225054                | TT                              | CC              | 1946815677               |
| SNP_P4_54729_32225062 | NC_021163.1    | Ca_kabuli_chr04 | 32225062                | AA                              | GG              | 1946815678               |
| SNP_P4_54730_32225081 | NC_021163.1    | Ca_kabuli_chr04 | 32225081                | AA                              | GG              | 1946815679               |
| SNP_P4_54731_32225100 | NC_021163.1    | Ca_kabuli_chr04 | 32225100                | TT                              | AA              | 1946815680               |
| SNP_P4_54732_32225127 | NC_021163.1    | Ca_kabuli_chr04 | 32225127                | AA                              | CC              | 1946815681               |
| SNP_P4_54733_32225135 | NC_021163.1    | Ca_kabuli_chr04 | 32225135                | CC                              | TT              | 1946815683               |
| SNP_P4_54734_32225173 | NC_021163.1    | Ca_kabuli_chr04 | 32225173                | CC                              | TT              | 1946815685               |
| SNP_P4_54735_32225231 | NC_021163.1    | Ca_kabuli_chr04 | 32225231                | AA                              | GG              | 1946815687               |
| SNP_P4_54736_32225341 | NC_021163.1    | Ca_kabuli_chr04 | 32225341                | TT                              | CC              | 1946815689               |
| SNP_P4_54737_32225389 | NC_021163.1    | Ca_kabuli_chr04 | 32225389                | TT                              | CC              | 1946815691               |
| SNP_P4_54739_32225469 | NC_021163.1    | Ca_kabuli_chr04 | 32225469                | GG                              | TT              | 1946815693               |
| SNP_P4_54740_32225490 | NC_021163.1    | Ca_kabuli_chr04 | 32225490                | GG                              | AA              | 1946815695               |
| SNP_P4_54742_32226288 | NC_021163.1    | Ca_kabuli_chr04 | 32226288                | GG                              | CC              | 1946815697               |
| SNP_P4_54743_32227174 | NC_021163.1    | Ca_kabuli_chr04 | 32227174                | GG                              | AA              | 1946815699               |
| SNP_P4_54744_32227204 | NC_021163.1    | Ca_kabuli_chr04 | 32227204                | CC                              | AA              | 1946815701               |
| SNP_P4_54746_32227337 | NC_021163.1    | Ca_kabuli_chr04 | 32227337                | AA                              | CC              | 1946815703               |
| SNP_P4_54748_32227679 | NC_021163.1    | Ca_kabuli_chr04 | 32227679                | GG                              | AA              | 1946815705               |
| SNP_P4_54749_32227759 | NC_021163.1    | Ca_kabuli_chr04 | 32227759                | GG                              | AA              | 1946815707               |
| SNP_P4_54750_32231537 | NC_021163.1    | Ca_kabuli_chr04 | 32231537                | GG                              | AA              | 1946815709               |
| SNP_P4_54751_32232019 | NC_021163.1    | Ca_kabuli_chr04 | 32232019                | CC                              | TT              | 1946815711               |
| SNP_P4_54752_32236177 | NC_021163.1    | Ca_kabuli_chr04 | 32236177                | TT                              | AA              | 1946815713               |
| SNP_P4_54754_32236466 | NC_021163.1    | Ca_kabuli_chr04 | 32236466                | AA                              | CC              | 1946815716               |
| SNP_P4_54755_32236498 | NC_021163.1    | Ca_kabuli_chr04 | 32236498                | TT                              | CC              | 1946815718               |
| SNP_P4_54756_32236613 | NC_021163.1    | Ca_kabuli_chr04 | 32236613                | AA                              | GG              | 1946815720               |
| SNP_P4_54757_32236618 | NC_021163.1    | Ca_kabuli_chr04 | 32236618                | TT                              | CC              | 1946815722               |
| SNP_P4_54758_32236620 | NC_021163.1    | Ca_kabuli_chr04 | 32236620                | CC                              | TT              | 1946815724               |
| SNP_P4_54759_32238509 | NC_021163.1    | Ca_kabuli_chr04 | 32238509                | TT                              | AA              | 1946815726               |
| SNP_P4_54760_32239443 | NC_021163.1    | Ca_kabuli_chr04 | 32239443                | TT                              | CC              | 1946815728               |
| SNP_P4_54761_32239935 | NC_021163.1    | Ca_kabuli_chr04 | 32239935                | TT                              | AA              | 1946815730               |
| SNP_P4_54763_32241722 | NC_021163.1    | Ca_kabuli_chr04 | 32241722                | GG                              | CC              | 1946815732               |
| SNP_P4_54764_32241731 | NC_021163.1    | Ca_kabuli_chr04 | 32241731                | GG                              | CC              | 1946815734               |
| SNP_P4_54766_32242528 | NC_021163.1    | Ca_kabuli_chr04 | 32242528                | CC                              | AA              | 1946815736               |
| SNP_P4_54767_32243858 | NC_021163.1    | Ca_kabuli_chr04 | 32243858                | TT                              | CC              | 1946815738               |
| SNP_P4_54768_32255618 | NC_021163.1    | Ca_kabuli_chr04 | 32255618                | TT                              | CC              | 1946815740               |
| SNP_P4_54769_32255638 | NC_021163.1    | Ca_kabuli_chr04 | 32255638                | GG                              | CC              | 1946815742               |
| SNP_P4_54770_32255644 | NC_021163.1    | Ca_kabuli_chr04 | 32255644                | GG                              | AA              | 1946815744               |
| SNP_P4_54771_32256007 | NC_021163.1    | Ca_kabuli_chr04 | 32256007                | GG                              | AA              | 1946815746               |

| SNPs IDs              | Chromosome IDs | Chromosomes     | Physical positions (bp) | CDC Frontier (Reference genome) | (ILWC46 & LPNB) | NCBI SNPdb Accession IDs |
|-----------------------|----------------|-----------------|-------------------------|---------------------------------|-----------------|--------------------------|
| SNP_P4_54773_32256327 | NC_021163.1    | Ca_kabuli_chr04 | 32256327                | TT                              | CC              | 1946815748               |
| SNP_P4_54775_32258269 | NC_021163.1    | Ca_kabuli_chr04 | 32258269                | CC                              | TT              | 1946815750               |
| SNP_P4_54776_32258673 | NC_021163.1    | Ca_kabuli_chr04 | 32258673                | CC                              | TT              | 1946815752               |
| SNP_P4_54777_32258707 | NC_021163.1    | Ca_kabuli_chr04 | 32258707                | AA                              | TT              | 1946815755               |
| SNP_P4_54778_32258711 | NC_021163.1    | Ca_kabuli_chr04 | 32258711                | AA                              | GG              | 1946815757               |
| SNP_P4_54779_32258716 | NC_021163.1    | Ca_kabuli_chr04 | 32258716                | GG                              | AA              | 1946815759               |
| SNP_P4_54780_32259136 | NC_021163.1    | Ca_kabuli_chr04 | 32259136                | CC                              | TT              | 1946815761               |
| SNP_P4_54781_32262450 | NC_021163.1    | Ca_kabuli_chr04 | 32262450                | CC                              | TT              | 1946815763               |
| SNP_P4_54782_32262451 | NC_021163.1    | Ca_kabuli_chr04 | 32262451                | TT                              | AA              | 1946815765               |
| SNP_P4_54783_32262532 | NC_021163.1    | Ca_kabuli_chr04 | 32262532                | GG                              | AA              | 1946815767               |
| SNP_P4_54784_32262553 | NC_021163.1    | Ca_kabuli_chr04 | 32262553                | CC                              | TT              | 1946815769               |
| SNP_P4_54785_32262633 | NC_021163.1    | Ca_kabuli_chr04 | 32262633                | GG                              | AA              | 1946815771               |
| SNP_P4_54786_32262645 | NC_021163.1    | Ca_kabuli_chr04 | 32262645                | TT                              | GG              | 1946815773               |
| SNP_P4_54787_32262672 | NC_021163.1    | Ca_kabuli_chr04 | 32262672                | TT                              | CC              | 1946815775               |
| SNP_P4_54788_32262686 | NC_021163.1    | Ca_kabuli_chr04 | 32262686                | TT                              | CC              | 1946815777               |
| SNP_P4_54789_32262689 | NC_021163.1    | Ca_kabuli_chr04 | 32262689                | CC                              | TT              | 1946815779               |
| SNP_P4_54790_32262850 | NC_021163.1    | Ca_kabuli_chr04 | 32262850                | GG                              | TT              | 1946815781               |
| SNP_P4_54791_32262861 | NC_021163.1    | Ca_kabuli_chr04 | 32262861                | GG                              | AA              | 1946815783               |
| SNP_P4_54792_32262884 | NC_021163.1    | Ca_kabuli_chr04 | 32262884                | GG                              | AA              | 1946815786               |
| SNP_P4_54793_32263078 | NC_021163.1    | Ca_kabuli_chr04 | 32263078                | AA                              | GG              | 1946815788               |
| SNP_P4_54794_32263276 | NC_021163.1    | Ca_kabuli_chr04 | 32263276                | GG                              | AA              | 1946815790               |
| SNP_P4_54795_32263323 | NC_021163.1    | Ca_kabuli_chr04 | 32263323                | AA                              | CC              | 1946815792               |
| SNP_P4_54797_32263666 | NC_021163.1    | Ca_kabuli_chr04 | 32263666                | CC                              | TT              | 1946815794               |
| SNP_P4_54798_32263857 | NC_021163.1    | Ca_kabuli_chr04 | 32263857                | GG                              | CC              | 1946815796               |
| SNP_P4_54800_32263971 | NC_021163.1    | Ca_kabuli_chr04 | 32263971                | TT                              | CC              | 1946815798               |
| SNP_P4_54801_32264217 | NC_021163.1    | Ca_kabuli_chr04 | 32264217                | CC                              | TT              | 1946815800               |
| SNP_P4_54802_32264256 | NC_021163.1    | Ca_kabuli_chr04 | 32264256                | CC                              | TT              | 1946815802               |
| SNP_P4_54804_32264338 | NC_021163.1    | Ca_kabuli_chr04 | 32264338                | GG                              | AA              | 1946815804               |
| SNP_P4_54805_32264355 | NC_021163.1    | Ca_kabuli_chr04 | 32264355                | TT                              | CC              | 1946815806               |
| SNP_P4_54806_32264378 | NC_021163.1    | Ca_kabuli_chr04 | 32264378                | CC                              | TT              | 1946815808               |
| SNP_P4_54807_32264382 | NC_021163.1    | Ca_kabuli_chr04 | 32264382                | AA                              | TT              | 1946815810               |
| SNP_P4_54808_32264383 | NC_021163.1    | Ca_kabuli_chr04 | 32264383                | AA                              | TT              | 1946815812               |
| SNP_P4_54809_32264384 | NC_021163.1    | Ca_kabuli_chr04 | 32264384                | AA                              | TT              | 1946815814               |
| SNP_P4_54812_32264654 | NC_021163.1    | Ca_kabuli_chr04 | 32264654                | AA                              | CC              | 1946815816               |
| SNP_P4_54813_32264962 | NC_021163.1    | Ca_kabuli_chr04 | 32264962                | TT                              | CC              | 1946815818               |
| SNP_P4_54815_32265004 | NC_021163.1    | Ca_kabuli_chr04 | 32265004                | CC                              | TT              | 1946815820               |
| SNP_P4_54816_32265038 | NC_021163.1    | Ca_kabuli_chr04 | 32265038                | GG                              | CC              | 1946815822               |
| SNP_P4_54817_32266350 | NC_021163.1    | Ca_kabuli_chr04 | 32266350                | TT                              | CC              | 1946815824               |
| SNP_P4_54818_32266353 | NC_021163.1    | Ca_kabuli_chr04 | 32266353                | AA                              | GG              | 1946815826               |
| SNP_P4_54819_32266513 | NC_021163.1    | Ca_kabuli_chr04 | 32266513                | CC                              | TT              | 1946815828               |
| SNP_P4_54820_32266574 | NC_021163.1    | Ca_kabuli_chr04 | 32266574                | TT                              | CC              | 1946815830               |
| SNP_P4_54821_32266662 | NC_021163.1    | Ca_kabuli_chr04 | 32266662                | CC                              | TT              | 1946815832               |

| SNPs IDs              | Chromosome IDs | Chromosomes     | Physical positions (bp) | CDC Frontier (Reference genome) | (ILWC46 & LPNB) | NCBI SNPdb Accession IDs |
|-----------------------|----------------|-----------------|-------------------------|---------------------------------|-----------------|--------------------------|
| SNP_P4_54822_32266988 | NC_021163.1    | Ca_kabuli_chr04 | 32266988                | AA                              | GG              | 1946815835               |
| SNP_P4_54823_32267017 | NC_021163.1    | Ca_kabuli_chr04 | 32267017                | TT                              | CC              | 1946815837               |
| SNP_P4_54824_32267021 | NC_021163.1    | Ca_kabuli_chr04 | 32267021                | TT                              | CC              | 1946815839               |
| SNP_P4_54825_32267070 | NC_021163.1    | Ca_kabuli_chr04 | 32267070                | AA                              | CC              | 1946815841               |
| SNP_P4_54826_32267631 | NC_021163.1    | Ca_kabuli_chr04 | 32267631                | TT                              | GG              | 1946815843               |
| SNP_P4_54827_32267933 | NC_021163.1    | Ca_kabuli_chr04 | 32267933                | TT                              | CC              | 1946815845               |
| SNP_P4_54828_32271682 | NC_021163.1    | Ca_kabuli_chr04 | 32271682                | CC                              | TT              | 1946815847               |
| SNP_P4_54829_32271683 | NC_021163.1    | Ca_kabuli_chr04 | 32271683                | CC                              | TT              | 1946815849               |
| SNP_P4_54830_32271684 | NC_021163.1    | Ca_kabuli_chr04 | 32271684                | AA                              | TT              | 1946815851               |
| SNP_P4_54831_32280823 | NC_021163.1    | Ca_kabuli_chr04 | 32280823                | CC                              | TT              | 1946815853               |
| SNP_P4_54833_32291411 | NC_021163.1    | Ca_kabuli_chr04 | 32291411                | CC                              | TT              | 1946815855               |
| SNP_P4_54834_32291706 | NC_021163.1    | Ca_kabuli_chr04 | 32291706                | TT                              | AA              | 1946815857               |
| SNP_P4_54835_32291737 | NC_021163.1    | Ca_kabuli_chr04 | 32291737                | GG                              | TT              | 1946815859               |
| SNP_P4_54836_32291738 | NC_021163.1    | Ca_kabuli_chr04 | 32291738                | AA                              | TT              | 1946815861               |
| SNP_P4_54837_32292369 | NC_021163.1    | Ca_kabuli_chr04 | 32292369                | GG                              | AA              | 1946815863               |
| SNP_P4_54838_32297830 | NC_021163.1    | Ca_kabuli_chr04 | 32297830                | CC                              | GG              | 1946815865               |
| SNP_P4_54839_32297848 | NC_021163.1    | Ca_kabuli_chr04 | 32297848                | GG                              | AA              | 1946815866               |
| SNP_P4_54841_32297993 | NC_021163.1    | Ca_kabuli_chr04 | 32297993                | AA                              | CC              | 1946815868               |
| SNP_P4_54842_32298017 | NC_021163.1    | Ca_kabuli_chr04 | 32298017                | AA                              | GG              | 1946815870               |
| SNP_P4_54843_32298033 | NC_021163.1    | Ca_kabuli_chr04 | 32298033                | GG                              | AA              | 1946815872               |
| SNP_P4_54845_32300844 | NC_021163.1    | Ca_kabuli_chr04 | 32300844                | AA                              | CC              | 1946815874               |
| SNP_P4_54846_32301444 | NC_021163.1    | Ca_kabuli_chr04 | 32301444                | AA                              | GG              | 1946815876               |
| SNP_P4_54847_32316703 | NC_021163.1    | Ca_kabuli_chr04 | 32316703                | TT                              | CC              | 1946815878               |
| SNP_P4_54848_32316714 | NC_021163.1    | Ca_kabuli_chr04 | 32316714                | TT                              | AA              | 1946815880               |
| SNP_P4_54849_32316983 | NC_021163.1    | Ca_kabuli_chr04 | 32316983                | AA                              | GG              | 1946815882               |
| SNP_P4_54850_32316996 | NC_021163.1    | Ca_kabuli_chr04 | 32316996                | GG                              | TT              | 1946815884               |
| SNP_P4_54851_32316998 | NC_021163.1    | Ca_kabuli_chr04 | 32316998                | CC                              | AA              | 1946815886               |
| SNP_P4_54852_32316999 | NC_021163.1    | Ca_kabuli_chr04 | 32316999                | CC                              | TT              | 1946815888               |
| SNP_P4_54853_32317031 | NC_021163.1    | Ca_kabuli_chr04 | 32317031                | AA                              | GG              | 1946815891               |
| SNP_P4_54854_32317063 | NC_021163.1    | Ca_kabuli_chr04 | 32317063                | TT                              | AA              | 1946815893               |
| SNP_P4_54855_32317214 | NC_021163.1    | Ca_kabuli_chr04 | 32317214                | GG                              | TT              | 1946815895               |
| SNP_P4_54856_32317223 | NC_021163.1    | Ca_kabuli_chr04 | 32317223                | GG                              | AA              | 1946815897               |
| SNP_P4_54857_32318167 | NC_021163.1    | Ca_kabuli_chr04 | 32318167                | CC                              | AA              | 1946815899               |
| SNP_P4_54858_32318224 | NC_021163.1    | Ca_kabuli_chr04 | 32318224                | AA                              | GG              | 1946815901               |
| SNP_P4_54859_32318349 | NC_021163.1    | Ca_kabuli_chr04 | 32318349                | CC                              | TT              | 1946815903               |
| SNP_P4_54860_32318351 | NC_021163.1    | Ca_kabuli_chr04 | 32318351                | AA                              | GG              | 1946815905               |
| SNP_P4_54861_32318368 | NC_021163.1    | Ca_kabuli_chr04 | 32318368                | TT                              | CC              | 1946815907               |
| SNP_P4_54862_32318382 | NC_021163.1    | Ca_kabuli_chr04 | 32318382                | GG                              | AA              | 1946815910               |
| SNP_P4_54863_32318389 | NC_021163.1    | Ca_kabuli_chr04 | 32318389                | TT                              | CC              | 1946815912               |
| SNP_P4_54864_32321714 | NC_021163.1    | Ca_kabuli_chr04 | 32321714                | TT                              | CC              | 1946815914               |
| SNP_P4_54865_32331905 | NC_021163.1    | Ca_kabuli_chr04 | 32331905                | AA                              | TT              | 1946815916               |
| SNP_P4_54866_32331935 | NC_021163.1    | Ca_kabuli_chr04 | 32331935                | TT                              | CC              | 1946815918               |

| SNPs IDs              | Chromosome IDs | Chromosomes     | Physical positions (bp) | CDC Frontier (Reference genome) | (ILWC46 & LPNB) | NCBI SNPdb Accession IDs |
|-----------------------|----------------|-----------------|-------------------------|---------------------------------|-----------------|--------------------------|
| SNP_P4_54867_32331943 | NC_021163.1    | Ca_kabuli_chr04 | 32331943                | CC                              | TT              | 1946815920               |
| SNP_P4_54868_32335153 | NC_021163.1    | Ca_kabuli_chr04 | 32335153                | TT                              | CC              | 1946815922               |
| SNP_P4_54870_32335220 | NC_021163.1    | Ca_kabuli_chr04 | 32335220                | TT                              | AA              | 1946815924               |
| SNP_P4_54871_32335276 | NC_021163.1    | Ca_kabuli_chr04 | 32335276                | AA                              | GG              | 1946815926               |
| SNP_P4_54872_32335461 | NC_021163.1    | Ca_kabuli_chr04 | 32335461                | TT                              | CC              | 1946815928               |
| SNP_P4_54873_32335620 | NC_021163.1    | Ca_kabuli_chr04 | 32335620                | CC                              | GG              | 1946815930               |
| SNP_P4_54874_32335699 | NC_021163.1    | Ca_kabuli_chr04 | 32335699                | TT                              | CC              | 1946815932               |
| SNP_P4_54875_32335720 | NC_021163.1    | Ca_kabuli_chr04 | 32335720                | CC                              | TT              | 1946815934               |
| SNP_P4_54876_32335742 | NC_021163.1    | Ca_kabuli_chr04 | 32335742                | TT                              | GG              | 1946815936               |
| SNP_P4_54877_32336986 | NC_021163.1    | Ca_kabuli_chr04 | 32336986                | AA                              | TT              | 1946815938               |
| SNP_P4_54878_32339316 | NC_021163.1    | Ca_kabuli_chr04 | 32339316                | AA                              | GG              | 1946815940               |
| SNP_P4_54879_32344941 | NC_021163.1    | Ca_kabuli_chr04 | 32344941                | CC                              | TT              | 1946815942               |
| SNP_P4_54880_32348069 | NC_021163.1    | Ca_kabuli_chr04 | 32348069                | AA                              | TT              | 1946815944               |
| SNP_P4_54881_32350936 | NC_021163.1    | Ca_kabuli_chr04 | 32350936                | CC                              | TT              | 1946815946               |
| SNP_P4_54882_32351225 | NC_021163.1    | Ca_kabuli_chr04 | 32351225                | TT                              | CC              | 1946815948               |
| SNP_P4_54883_32351227 | NC_021163.1    | Ca_kabuli_chr04 | 32351227                | TT                              | CC              | 1946815950               |
| SNP_P4_54884_32351239 | NC_021163.1    | Ca_kabuli_chr04 | 32351239                | TT                              | CC              | 1946815952               |
| SNP_P4_54885_32351244 | NC_021163.1    | Ca_kabuli_chr04 | 32351244                | CC                              | AA              | 1946815954               |
| SNP_P4_54887_32351884 | NC_021163.1    | Ca_kabuli_chr04 | 32351884                | AA                              | GG              | 1946815956               |
| SNP_P4_54888_32363877 | NC_021163.1    | Ca_kabuli_chr04 | 32363877                | TT                              | GG              | 1946815957               |
| SNP_P4_54889_32363899 | NC_021163.1    | Ca_kabuli_chr04 | 32363899                | TT                              | CC              | 1946815959               |
| SNP_P4_54890_32363943 | NC_021163.1    | Ca_kabuli_chr04 | 32363943                | GG                              | AA              | 1946815961               |
| SNP_P4_54891_32364564 | NC_021163.1    | Ca_kabuli_chr04 | 32364564                | CC                              | TT              | 1946815963               |
| SNP_P4_54892_32364617 | NC_021163.1    | Ca_kabuli_chr04 | 32364617                | TT                              | AA              | 1946815965               |
| SNP_P4_54893_32364898 | NC_021163.1    | Ca_kabuli_chr04 | 32364898                | GG                              | CC              | 1946815967               |
| SNP_P4_54894_32365010 | NC_021163.1    | Ca_kabuli_chr04 | 32365010                | TT                              | CC              | 1946815969               |
| SNP_P4_54895_32365051 | NC_021163.1    | Ca_kabuli_chr04 | 32365051                | TT                              | AA              | 1946815971               |
| SNP_P4_54896_32365244 | NC_021163.1    | Ca_kabuli_chr04 | 32365244                | CC                              | AA              | 1946815973               |
| SNP_P4_54897_32365374 | NC_021163.1    | Ca_kabuli_chr04 | 32365374                | GG                              | AA              | 1946815975               |
| SNP_P4_54898_32365718 | NC_021163.1    | Ca_kabuli_chr04 | 32365718                | CC                              | TT              | 1946815977               |
| SNP_P4_54899_32366364 | NC_021163.1    | Ca_kabuli_chr04 | 32366364                | GG                              | AA              | 1946815979               |
| SNP_P4_54900_32367242 | NC_021163.1    | Ca_kabuli_chr04 | 32367242                | TT                              | AA              | 1946815981               |
| SNP_P4_54901_32368333 | NC_021163.1    | Ca_kabuli_chr04 | 32368333                | GG                              | CC              | 1946815983               |
| SNP_P4_54902_32373256 | NC_021163.1    | Ca_kabuli_chr04 | 32373256                | GG                              | AA              | 1946815985               |
| SNP_P4_54903_32373345 | NC_021163.1    | Ca_kabuli_chr04 | 32373345                | GG                              | TT              | 1946815987               |
| SNP_P4_54904_32373384 | NC_021163.1    | Ca_kabuli_chr04 | 32373384                | AA                              | GG              | 1946815989               |
| SNP_P4_54905_32373421 | NC_021163.1    | Ca_kabuli_chr04 | 32373421                | CC                              | TT              | 1946815991               |
| SNP_P4_54906_32373569 | NC_021163.1    | Ca_kabuli_chr04 | 32373569                | CC                              | AA              | 1946815993               |
| SNP_P4_54907_32373603 | NC_021163.1    | Ca_kabuli_chr04 | 32373603                | AA                              | GG              | 1946815995               |
| SNP_P4_54909_32373632 | NC_021163.1    | Ca_kabuli_chr04 | 32373632                | CC                              | AA              | 1946815997               |
| SNP_P4_54910_32373650 | NC_021163.1    | Ca_kabuli_chr04 | 32373650                | GG                              | TT              | 1946816000               |
| SNP_P4_54912_32373700 | NC_021163.1    | Ca_kabuli_chr04 | 32373700                | AA                              | GG              | 1946816002               |



| SNPs IDs              | Chromosome IDs | Chromosomes     | Physical positions (bp) | CDC Frontier (Reference genome) | (ILWC46 & LPNB) | NCBI SNPdb Accession IDs |
|-----------------------|----------------|-----------------|-------------------------|---------------------------------|-----------------|--------------------------|
| SNP_P4_54913_32373772 | NC_021163.1    | Ca_kabuli_chr04 | 32373772                | AA                              | TT              | 1946816004               |
| SNP_P4_54914_32373773 | NC_021163.1    | Ca_kabuli_chr04 | 32373773                | AA                              | TT              | 1946816006               |
| SNP_P4_54915_32373774 | NC_021163.1    | Ca_kabuli_chr04 | 32373774                | AA                              | TT              | 1946816008               |
| SNP_P4_54916_32373930 | NC_021163.1    | Ca_kabuli_chr04 | 32373930                | CC                              | TT              | 1946816010               |
| SNP_P4_54917_32374161 | NC_021163.1    | Ca_kabuli_chr04 | 32374161                | CC                              | GG              | 1946816011               |
| SNP_P4_54918_32374359 | NC_021163.1    | Ca_kabuli_chr04 | 32374359                | GG                              | AA              | 1946816013               |
| SNP_P4_54919_32375390 | NC_021163.1    | Ca_kabuli_chr04 | 32375390                | AA                              | GG              | 1946816015               |
| SNP_P4_54920_32375391 | NC_021163.1    | Ca_kabuli_chr04 | 32375391                | AA                              | GG              | 1946816017               |
| SNP_P4_54921_32375471 | NC_021163.1    | Ca_kabuli_chr04 | 32375471                | TT                              | CC              | 1946816019               |
| SNP_P4_54922_32375496 | NC_021163.1    | Ca_kabuli_chr04 | 32375496                | GG                              | AA              | 1946816021               |
| SNP_P4_54923_32375500 | NC_021163.1    | Ca_kabuli_chr04 | 32375500                | TT                              | CC              | 1946816023               |
| SNP_P4_54924_32375811 | NC_021163.1    | Ca_kabuli_chr04 | 32375811                | CC                              | TT              | 1946816025               |
| SNP_P4_54925_32376026 | NC_021163.1    | Ca_kabuli_chr04 | 32376026                | GG                              | TT              | 1946816027               |
| SNP_P4_54926_32376245 | NC_021163.1    | Ca_kabuli_chr04 | 32376245                | CC                              | TT              | 1946816029               |
| SNP_P4_54927_32376502 | NC_021163.1    | Ca_kabuli_chr04 | 32376502                | GG                              | CC              | 1946816031               |
| SNP_P4_54928_32376745 | NC_021163.1    | Ca_kabuli_chr04 | 32376745                | GG                              | AA              | 1946816033               |
| SNP_P4_54929_32376746 | NC_021163.1    | Ca_kabuli_chr04 | 32376746                | TT                              | CC              | 1946816035               |
| SNP_P4_54930_32376776 | NC_021163.1    | Ca_kabuli_chr04 | 32376776                | GG                              | TT              | 1946816037               |
| SNP_P4_54931_32377884 | NC_021163.1    | Ca_kabuli_chr04 | 32377884                | AA                              | CC              | 1946816039               |
| SNP_P4_54932_32378137 | NC_021163.1    | Ca_kabuli_chr04 | 32378137                | AA                              | GG              | 1946816041               |
| SNP_P4_54933_32378169 | NC_021163.1    | Ca_kabuli_chr04 | 32378169                | TT                              | CC              | 1946816043               |
| SNP_P4_54934_32378359 | NC_021163.1    | Ca_kabuli_chr04 | 32378359                | AA                              | TT              | 1946816046               |
| SNP_P4_54935_32378376 | NC_021163.1    | Ca_kabuli_chr04 | 32378376                | CC                              | TT              | 1946816048               |
| SNP_P4_54936_32378580 | NC_021163.1    | Ca_kabuli_chr04 | 32378580                | CC                              | TT              | 1946816051               |
| SNP_P4_54938_32380371 | NC_021163.1    | Ca_kabuli_chr04 | 32380371                | TT                              | GG              | 1946816053               |
| SNP_P4_54939_32380422 | NC_021163.1    | Ca_kabuli_chr04 | 32380422                | TT                              | CC              | 1946816055               |
| SNP_P4_54940_32381396 | NC_021163.1    | Ca_kabuli_chr04 | 32381396                | TT                              | GG              | 1946816057               |
| SNP_P4_54941_32381903 | NC_021163.1    | Ca_kabuli_chr04 | 32381903                | TT                              | AA              | 1946816059               |
| SNP_P4_54943_32382152 | NC_021163.1    | Ca_kabuli_chr04 | 32382152                | CC                              | TT              | 1946816061               |
| SNP_P4_54944_32383371 | NC_021163.1    | Ca_kabuli_chr04 | 32383371                | GG                              | TT              | 1946816063               |
| SNP_P4_54945_32386922 | NC_021163.1    | Ca_kabuli_chr04 | 32386922                | GG                              | TT              | 1946816065               |
| SNP_P4_54946_32387089 | NC_021163.1    | Ca_kabuli_chr04 | 32387089                | TT                              | GG              | 1946816067               |
| SNP_P4_54947_32387705 | NC_021163.1    | Ca_kabuli_chr04 | 32387705                | AA                              | GG              | 1946816069               |
| SNP_P4_54948_32387757 | NC_021163.1    | Ca_kabuli_chr04 | 32387757                | GG                              | AA              | 1946816071               |
| SNP_P4_54949_32388280 | NC_021163.1    | Ca_kabuli_chr04 | 32388280                | CC                              | TT              | 1946816073               |
| SNP_P4_54951_32388950 | NC_021163.1    | Ca_kabuli_chr04 | 32388950                | GG                              | CC              | 1946816075               |
| SNP_P4_54952_32388955 | NC_021163.1    | Ca_kabuli_chr04 | 32388955                | GG                              | AA              | 1946816077               |
| SNP_P4_54954_32389006 | NC_021163.1    | Ca_kabuli_chr04 | 32389006                | CC                              | TT              | 1946816079               |
| SNP_P4_54955_32389012 | NC_021163.1    | Ca_kabuli_chr04 | 32389012                | TT                              | AA              | 1946816081               |
| SNP_P4_54956_32389021 | NC_021163.1    | Ca_kabuli_chr04 | 32389021                | GG                              | AA              | 1946816083               |
| SNP_P4_54957_32392330 | NC_021163.1    | Ca_kabuli_chr04 | 32392330                | CC                              | TT              | 1946816085               |
| SNP_P4_54958_32393001 | NC_021163.1    | Ca_kabuli_chr04 | 32393001                | TT                              | GG              | 1946816087               |

| SNPs IDs              | Chromosome IDs | Chromosomes     | Physical positions (bp) | CDC Frontier (Reference genome) | (ILWC46 & LPNB) | NCBI SNPdb Accession IDs |
|-----------------------|----------------|-----------------|-------------------------|---------------------------------|-----------------|--------------------------|
| SNP_P4_54959_32393038 | NC_021163.1    | Ca_kabuli_chr04 | 32393038                | TT                              | AA              | 1946816089               |
| SNP_P4_54962_32395942 | NC_021163.1    | Ca_kabuli_chr04 | 32395942                | AA                              | GG              | 1946816091               |
| SNP_P4_54963_32397439 | NC_021163.1    | Ca_kabuli_chr04 | 32397439                | TT                              | GG              | 1946816094               |
| SNP_P4_54964_32397486 | NC_021163.1    | Ca_kabuli_chr04 | 32397486                | AA                              | TT              | 1946816096               |
| SNP_P4_54965_32397745 | NC_021163.1    | Ca_kabuli_chr04 | 32397745                | TT                              | AA              | 1946816098               |
| SNP_P4_54966_32397791 | NC_021163.1    | Ca_kabuli_chr04 | 32397791                | CC                              | TT              | 1946816100               |
| SNP_P4_54967_32397804 | NC_021163.1    | Ca_kabuli_chr04 | 32397804                | GG                              | AA              | 1946816102               |
| SNP_P4_54968_32398049 | NC_021163.1    | Ca_kabuli_chr04 | 32398049                | GG                              | AA              | 1946816104               |
| SNP_P4_54969_32398075 | NC_021163.1    | Ca_kabuli_chr04 | 32398075                | TT                              | CC              | 1946816106               |
| SNP_P4_54970_32400244 | NC_021163.1    | Ca_kabuli_chr04 | 32400244                | TT                              | CC              | 1946816108               |
| SNP_P4_54971_32402031 | NC_021163.1    | Ca_kabuli_chr04 | 32402031                | GG                              | CC              | 1946816110               |
| SNP_P4_54972_32402066 | NC_021163.1    | Ca_kabuli_chr04 | 32402066                | TT                              | CC              | 1946816112               |
| SNP_P4_54973_32404326 | NC_021163.1    | Ca_kabuli_chr04 | 32404326                | TT                              | CC              | 1946816114               |
| SNP_P4_54974_32404398 | NC_021163.1    | Ca_kabuli_chr04 | 32404398                | AA                              | CC              | 1946816116               |
| SNP_P4_54975_32404433 | NC_021163.1    | Ca_kabuli_chr04 | 32404433                | TT                              | CC              | 1946816118               |
| SNP_P4_54976_32404604 | NC_021163.1    | Ca_kabuli_chr04 | 32404604                | TT                              | CC              | 1946816120               |
| SNP_P4_54979_32411652 | NC_021163.1    | Ca_kabuli_chr04 | 32411652                | AA                              | GG              | 1946816122               |
| SNP_P4_54980_32411657 | NC_021163.1    | Ca_kabuli_chr04 | 32411657                | GG                              | TT              | 1946816124               |
| SNP_P4_54981_32412012 | NC_021163.1    | Ca_kabuli_chr04 | 32412012                | TT                              | CC              | 1946816126               |
| SNP_P4_54982_32412288 | NC_021163.1    | Ca_kabuli_chr04 | 32412288                | GG                              | AA              | 1946816128               |
| SNP_P4_54983_32412289 | NC_021163.1    | Ca_kabuli_chr04 | 32412289                | CC                              | AA              | 1946816131               |
| SNP_P4_54984_32412330 | NC_021163.1    | Ca_kabuli_chr04 | 32412330                | CC                              | TT              | 1946816133               |
| SNP_P4_54985_32412335 | NC_021163.1    | Ca_kabuli_chr04 | 32412335                | AA                              | TT              | 1946816135               |
| SNP_P4_54986_32412339 | NC_021163.1    | Ca_kabuli_chr04 | 32412339                | AA                              | TT              | 1946816137               |
| SNP_P4_54987_32412340 | NC_021163.1    | Ca_kabuli_chr04 | 32412340                | GG                              | TT              | 1946816139               |
| SNP_P4_54988_32412664 | NC_021163.1    | Ca_kabuli_chr04 | 32412664                | AA                              | GG              | 1946816141               |
| SNP_P4_54990_32413589 | NC_021163.1    | Ca_kabuli_chr04 | 32413589                | AA                              | GG              | 1946816143               |
| SNP_P4_54991_32413782 | NC_021163.1    | Ca_kabuli_chr04 | 32413782                | TT                              | CC              | 1946816145               |
| SNP_P4_54992_32415669 | NC_021163.1    | Ca_kabuli_chr04 | 32415669                | CC                              | TT              | 1946816147               |
| SNP_P4_54993_32415738 | NC_021163.1    | Ca_kabuli_chr04 | 32415738                | GG                              | AA              | 1946816149               |
| SNP_P4_54994_32415762 | NC_021163.1    | Ca_kabuli_chr04 | 32415762                | CC                              | TT              | 1946816151               |
| SNP_P4_54995_32415765 | NC_021163.1    | Ca_kabuli_chr04 | 32415765                | TT                              | CC              | 1946816153               |
| SNP_P4_54996_32415768 | NC_021163.1    | Ca_kabuli_chr04 | 32415768                | GG                              | AA              | 1946816155               |
| SNP_P4_54997_32415804 | NC_021163.1    | Ca_kabuli_chr04 | 32415804                | AA                              | CC              | 1946816157               |
| SNP_P4_54998_32415853 | NC_021163.1    | Ca_kabuli_chr04 | 32415853                | CC                              | GG              | 1946816159               |
| SNP_P4_54999_32415856 | NC_021163.1    | Ca_kabuli_chr04 | 32415856                | AA                              | GG              | 1946816161               |
| SNP_P4_55000_32415857 | NC_021163.1    | Ca_kabuli_chr04 | 32415857                | GG                              | AA              | 1946816163               |
| SNP_P4_55001_32416917 | NC_021163.1    | Ca_kabuli_chr04 | 32416917                | TT                              | CC              | 1946816166               |
| SNP_P4_55002_32416947 | NC_021163.1    | Ca_kabuli_chr04 | 32416947                | CC                              | TT              | 1946816168               |
| SNP_P4_55003_32416964 | NC_021163.1    | Ca_kabuli_chr04 | 32416964                | TT                              | CC              | 1946816170               |
| SNP_P4_55004_32417325 | NC_021163.1    | Ca_kabuli_chr04 | 32417325                | AA                              | TT              | 1946816172               |
| SNP_P4_55005_32422848 | NC_021163.1    | Ca_kabuli_chr04 | 32422848                | GG                              | TT              | 1946816174               |

| SNPs IDs              | Chromosome IDs | Chromosomes     | Physical positions (bp) | CDC Frontier (Reference genome) | (ILWC46 & LPNB) | NCBI SNPdb Accession IDs |
|-----------------------|----------------|-----------------|-------------------------|---------------------------------|-----------------|--------------------------|
| SNP_P4_55006_32431849 | NC_021163.1    | Ca_kabuli_chr04 | 32431849                | AA                              | GG              | 1946816176               |
| SNP_P4_55007_32431899 | NC_021163.1    | Ca_kabuli_chr04 | 32431899                | GG                              | TT              | 1946816178               |
| SNP_P4_55008_32431971 | NC_021163.1    | Ca_kabuli_chr04 | 32431971                | CC                              | TT              | 1946816180               |
| SNP_P4_55009_32432124 | NC_021163.1    | Ca_kabuli_chr04 | 32432124                | GG                              | AA              | 1946816182               |
| SNP_P4_55010_32432148 | NC_021163.1    | Ca_kabuli_chr04 | 32432148                | TT                              | CC              | 1946816184               |
| SNP_P4_55012_32432222 | NC_021163.1    | Ca_kabuli_chr04 | 32432222                | TT                              | AA              | 1946816186               |
| SNP_P4_55013_32432422 | NC_021163.1    | Ca_kabuli_chr04 | 32432422                | AA                              | GG              | 1946816188               |
| SNP_P4_55014_32445950 | NC_021163.1    | Ca_kabuli_chr04 | 32445950                | GG                              | AA              | 1946816190               |
| SNP_P4_55015_32450390 | NC_021163.1    | Ca_kabuli_chr04 | 32450390                | TT                              | CC              | 1946816192               |
| SNP_P4_55017_32450654 | NC_021163.1    | Ca_kabuli_chr04 | 32450654                | TT                              | AA              | 1946816194               |
| SNP_P4_55018_32454996 | NC_021163.1    | Ca_kabuli_chr04 | 32454996                | TT                              | GG              | 1946816196               |
| SNP_P4_55019_32455603 | NC_021163.1    | Ca_kabuli_chr04 | 32455603                | GG                              | CC              | 1946816198               |
| SNP_P4_55020_32455765 | NC_021163.1    | Ca_kabuli_chr04 | 32455765                | GG                              | AA              | 1946816200               |
| SNP_P4_55021_32455823 | NC_021163.1    | Ca_kabuli_chr04 | 32455823                | AA                              | GG              | 1946816202               |
| SNP_P4_55022_32455963 | NC_021163.1    | Ca_kabuli_chr04 | 32455963                | CC                              | TT              | 1946816204               |
| SNP_P4_55024_32457668 | NC_021163.1    | Ca_kabuli_chr04 | 32457668                | CC                              | AA              | 1946816206               |
| SNP_P4_55025_32458057 | NC_021163.1    | Ca_kabuli_chr04 | 32458057                | GG                              | AA              | 1946816208               |
| SNP_P4_55026_32458880 | NC_021163.1    | Ca_kabuli_chr04 | 32458880                | GG                              | AA              | 1946816210               |
| SNP_P4_55027_32458961 | NC_021163.1    | Ca_kabuli_chr04 | 32458961                | GG                              | AA              | 1946816212               |
| SNP_P4_55028_32459106 | NC_021163.1    | Ca_kabuli_chr04 | 32459106                | CC                              | AA              | 1946816214               |
| SNP_P4_55029_32459201 | NC_021163.1    | Ca_kabuli_chr04 | 32459201                | TT                              | AA              | 1946816217               |
| SNP_P4_55031_32465396 | NC_021163.1    | Ca_kabuli_chr04 | 32465396                | TT                              | AA              | 1946816219               |
| SNP_P4_55033_32466515 | NC_021163.1    | Ca_kabuli_chr04 | 32466515                | AA                              | CC              | 1946816221               |
| SNP_P4_55034_32466717 | NC_021163.1    | Ca_kabuli_chr04 | 32466717                | AA                              | CC              | 1946816223               |
| SNP_P4_55035_32466817 | NC_021163.1    | Ca_kabuli_chr04 | 32466817                | TT                              | CC              | 1946816225               |
| SNP_P4_55036_32466826 | NC_021163.1    | Ca_kabuli_chr04 | 32466826                | GG                              | CC              | 1946816227               |
| SNP_P4_55037_32468239 | NC_021163.1    | Ca_kabuli_chr04 | 32468239                | TT                              | AA              | 1946816229               |
| SNP_P4_55038_32468258 | NC_021163.1    | Ca_kabuli_chr04 | 32468258                | AA                              | GG              | 1946816231               |
| SNP_P4_55039_32468333 | NC_021163.1    | Ca_kabuli_chr04 | 32468333                | CC                              | TT              | 1946816233               |
| SNP_P4_55040_32470155 | NC_021163.1    | Ca_kabuli_chr04 | 32470155                | TT                              | CC              | 1946816235               |
| SNP_P4_55042_32470205 | NC_021163.1    | Ca_kabuli_chr04 | 32470205                | CC                              | TT              | 1946816237               |
| SNP_P4_55043_32470210 | NC_021163.1    | Ca_kabuli_chr04 | 32470210                | GG                              | AA              | 1946816239               |
| SNP_P4_55044_32470231 | NC_021163.1    | Ca_kabuli_chr04 | 32470231                | CC                              | TT              | 1946816241               |
| SNP_P4_55045_32470492 | NC_021163.1    | Ca_kabuli_chr04 | 32470492                | GG                              | AA              | 1946816243               |
| SNP_P4_55046_32471622 | NC_021163.1    | Ca_kabuli_chr04 | 32471622                | GG                              | TT              | 1946816245               |
| SNP_P4_55047_32471651 | NC_021163.1    | Ca_kabuli_chr04 | 32471651                | GG                              | AA              | 1946816247               |
| SNP_P4_55048_32473200 | NC_021163.1    | Ca_kabuli_chr04 | 32473200                | GG                              | AA              | 1946816249               |
| SNP_P4_55049_32474436 | NC_021163.1    | Ca_kabuli_chr04 | 32474436                | GG                              | TT              | 1946816251               |
| SNP_P4_55050_32474735 | NC_021163.1    | Ca_kabuli_chr04 | 32474735                | TT                              | CC              | 1946816253               |
| SNP_P4_55051_32474877 | NC_021163.1    | Ca_kabuli_chr04 | 32474877                | AA                              | GG              | 1946816255               |
| SNP_P4_55053_32475095 | NC_021163.1    | Ca_kabuli_chr04 | 32475095                | GG                              | AA              | 1946816257               |
| SNP_P4_55054_32481187 | NC_021163.1    | Ca_kabuli_chr04 | 32481187                | AA                              | CC              | 1946816259               |

| SNPs IDs              | Chromosome IDs | Chromosomes     | Physical positions (bp) | CDC Frontier (Reference genome) | (ILWC46 & LPNB) | NCBI SNPdb Accession IDs |
|-----------------------|----------------|-----------------|-------------------------|---------------------------------|-----------------|--------------------------|
| SNP_P4_55055_32481191 | NC_021163.1    | Ca_kabuli_chr04 | 32481191                | TT                              | CC              | 1946816261               |
| SNP_P4_55056_32481218 | NC_021163.1    | Ca_kabuli_chr04 | 32481218                | AA                              | GG              | 1946816263               |
| SNP_P4_55057_32481367 | NC_021163.1    | Ca_kabuli_chr04 | 32481367                | GG                              | AA              | 1946816265               |
| SNP_P4_55058_32481426 | NC_021163.1    | Ca_kabuli_chr04 | 32481426                | GG                              | AA              | 1946816267               |
| SNP_P4_55059_32481452 | NC_021163.1    | Ca_kabuli_chr04 | 32481452                | CC                              | TT              | 1946816269               |
| SNP_P4_55060_32481453 | NC_021163.1    | Ca_kabuli_chr04 | 32481453                | CC                              | AA              | 1946816271               |
| SNP_P4_55061_32481948 | NC_021163.1    | Ca_kabuli_chr04 | 32481948                | TT                              | CC              | 1946816273               |
| SNP_P4_55062_32481950 | NC_021163.1    | Ca_kabuli_chr04 | 32481950                | TT                              | GG              | 1946816275               |
| SNP_P4_55063_32483254 | NC_021163.1    | Ca_kabuli_chr04 | 32483254                | CC                              | AA              | 1946816277               |
| SNP_P4_55064_32483260 | NC_021163.1    | Ca_kabuli_chr04 | 32483260                | AA                              | TT              | 1946816279               |
| SNP_P4_55065_32483357 | NC_021163.1    | Ca_kabuli_chr04 | 32483357                | CC                              | AA              | 1946816281               |
| SNP_P4_55066_32483552 | NC_021163.1    | Ca_kabuli_chr04 | 32483552                | CC                              | AA              | 1946816283               |
| SNP_P4_55067_32483585 | NC_021163.1    | Ca_kabuli_chr04 | 32483585                | CC                              | TT              | 1946816285               |
| SNP_P4_55068_32483615 | NC_021163.1    | Ca_kabuli_chr04 | 32483615                | AA                              | CC              | 1946816287               |
| SNP_P4_55069_32483851 | NC_021163.1    | Ca_kabuli_chr04 | 32483851                | CC                              | TT              | 1946816289               |
| SNP_P4_55070_32485524 | NC_021163.1    | Ca_kabuli_chr04 | 32485524                | CC                              | TT              | 1946816291               |
| SNP_P4_55072_32485791 | NC_021163.1    | Ca_kabuli_chr04 | 32485791                | CC                              | TT              | 1946816293               |
| SNP_P4_55073_32487014 | NC_021163.1    | Ca_kabuli_chr04 | 32487014                | TT                              | AA              | 1946816296               |
| SNP_P4_55074_32487021 | NC_021163.1    | Ca_kabuli_chr04 | 32487021                | GG                              | AA              | 1946816298               |
| SNP_P4_55076_32488738 | NC_021163.1    | Ca_kabuli_chr04 | 32488738                | TT                              | CC              | 1946816300               |
| SNP_P4_55077_32488748 | NC_021163.1    | Ca_kabuli_chr04 | 32488748                | AA                              | GG              | 1946816302               |
| SNP_P4_55078_32488910 | NC_021163.1    | Ca_kabuli_chr04 | 32488910                | GG                              | AA              | 1946816304               |
| SNP_P4_55079_32488914 | NC_021163.1    | Ca_kabuli_chr04 | 32488914                | AA                              | GG              | 1946816306               |
| SNP_P4_55080_32489426 | NC_021163.1    | Ca_kabuli_chr04 | 32489426                | CC                              | AA              | 1946816308               |
| SNP_P4_55081_32489699 | NC_021163.1    | Ca_kabuli_chr04 | 32489699                | GG                              | AA              | 1946816310               |
| SNP_P4_55082_32489724 | NC_021163.1    | Ca_kabuli_chr04 | 32489724                | TT                              | CC              | 1946816312               |
| SNP_P4_55084_32489945 | NC_021163.1    | Ca_kabuli_chr04 | 32489945                | CC                              | AA              | 1946816314               |
| SNP_P4_55085_32489957 | NC_021163.1    | Ca_kabuli_chr04 | 32489957                | AA                              | GG              | 1946816316               |
| SNP_P4_55087_32492637 | NC_021163.1    | Ca_kabuli_chr04 | 32492637                | CC                              | TT              | 1946816319               |
| SNP_P4_55088_32492642 | NC_021163.1    | Ca_kabuli_chr04 | 32492642                | AA                              | GG              | 1946816321               |
| SNP_P4_55089_32493316 | NC_021163.1    | Ca_kabuli_chr04 | 32493316                | AA                              | GG              | 1946816323               |
| SNP_P4_55091_32494495 | NC_021163.1    | Ca_kabuli_chr04 | 32494495                | AA                              | TT              | 1946816325               |
| SNP_P4_55092_32494509 | NC_021163.1    | Ca_kabuli_chr04 | 32494509                | TT                              | CC              | 1946816327               |
| SNP_P4_55093_32494741 | NC_021163.1    | Ca_kabuli_chr04 | 32494741                | AA                              | TT              | 1946816329               |
| SNP_P4_55094_32494816 | NC_021163.1    | Ca_kabuli_chr04 | 32494816                | AA                              | GG              | 1946816331               |
| SNP_P4_55095_32495146 | NC_021163.1    | Ca_kabuli_chr04 | 32495146                | AA                              | TT              | 1946816333               |
| SNP_P4_55096_32496960 | NC_021163.1    | Ca_kabuli_chr04 | 32496960                | AA                              | CC              | 1946816335               |
| SNP_P4_55097_32497075 | NC_021163.1    | Ca_kabuli_chr04 | 32497075                | GG                              | AA              | 1946816337               |
| SNP_P4_55098_32497256 | NC_021163.1    | Ca_kabuli_chr04 | 32497256                | GG                              | AA              | 1946816339               |
| SNP_P4_55099_32497827 | NC_021163.1    | Ca_kabuli_chr04 | 32497827                | TT                              | CC              | 1946816341               |
| SNP_P4_55101_32500164 | NC_021163.1    | Ca_kabuli_chr04 | 32500164                | AA                              | TT              | 1946816343               |
| SNP_P4_55102_32500454 | NC_021163.1    | Ca_kabuli_chr04 | 32500454                | AA                              | TT              | 1946816345               |

| SNPs IDs              | Chromosome IDs | Chromosomes     | Physical positions (bp) | CDC Frontier (Reference genome) | (ILWC46 & LPNB) | NCBI SNPdb Accession IDs |
|-----------------------|----------------|-----------------|-------------------------|---------------------------------|-----------------|--------------------------|
| SNP_P4_55103_32502137 | NC_021163.1    | Ca_kabuli_chr04 | 32502137                | TT                              | GG              | 1946816347               |
| SNP_P4_55104_32509008 | NC_021163.1    | Ca_kabuli_chr04 | 32509008                | GG                              | AA              | 1946816349               |
| SNP_P4_55105_32509150 | NC_021163.1    | Ca_kabuli_chr04 | 32509150                | TT                              | CC              | 1946816351               |
| SNP_P4_55106_32509167 | NC_021163.1    | Ca_kabuli_chr04 | 32509167                | CC                              | AA              | 1946816353               |
| SNP_P4_55107_32509332 | NC_021163.1    | Ca_kabuli_chr04 | 32509332                | GG                              | AA              | 1946816355               |
| SNP_P4_55109_32509692 | NC_021163.1    | Ca_kabuli_chr04 | 32509692                | TT                              | CC              | 1946816357               |
| SNP_P4_55111_32510240 | NC_021163.1    | Ca_kabuli_chr04 | 32510240                | TT                              | CC              | 1946816359               |
| SNP_P4_55112_32510495 | NC_021163.1    | Ca_kabuli_chr04 | 32510495                | TT                              | CC              | 1946816361               |
| SNP_P4_55113_32510512 | NC_021163.1    | Ca_kabuli_chr04 | 32510512                | AA                              | TT              | 1946816363               |
| SNP_P4_55114_32510536 | NC_021163.1    | Ca_kabuli_chr04 | 32510536                | TT                              | CC              | 1946816365               |
| SNP_P4_55115_32510625 | NC_021163.1    | Ca_kabuli_chr04 | 32510625                | TT                              | CC              | 1946816367               |
| SNP_P4_55116_32510684 | NC_021163.1    | Ca_kabuli_chr04 | 32510684                | CC                              | TT              | 1946816369               |
| SNP_P4_55117_32510730 | NC_021163.1    | Ca_kabuli_chr04 | 32510730                | AA                              | GG              | 1946816371               |
| SNP_P4_55118_32510795 | NC_021163.1    | Ca_kabuli_chr04 | 32510795                | CC                              | AA              | 1946816373               |
| SNP_P4_55119_32510977 | NC_021163.1    | Ca_kabuli_chr04 | 32510977                | TT                              | CC              | 1946816375               |
| SNP_P4_55120_32511010 | NC_021163.1    | Ca_kabuli_chr04 | 32511010                | AA                              | CC              | 1946816377               |
| SNP_P4_55123_32511898 | NC_021163.1    | Ca_kabuli_chr04 | 32511898                | CC                              | TT              | 1946816379               |
| SNP_P4_55125_32511942 | NC_021163.1    | Ca_kabuli_chr04 | 32511942                | CC                              | TT              | 1946816381               |
| SNP_P4_55126_32512774 | NC_021163.1    | Ca_kabuli_chr04 | 32512774                | GG                              | AA              | 1946816383               |
| SNP_P4_55127_32513081 | NC_021163.1    | Ca_kabuli_chr04 | 32513081                | AA                              | CC              | 1946816385               |
| SNP_P4_55129_32513507 | NC_021163.1    | Ca_kabuli_chr04 | 32513507                | TT                              | GG              | 1946816387               |
| SNP_P4_55130_32514193 | NC_021163.1    | Ca_kabuli_chr04 | 32514193                | AA                              | GG              | 1946816389               |
| SNP_P4_55132_32516308 | NC_021163.1    | Ca_kabuli_chr04 | 32516308                | GG                              | AA              | 1946816392               |
| SNP_P4_55133_32516418 | NC_021163.1    | Ca_kabuli_chr04 | 32516418                | AA                              | GG              | 1946816394               |
| SNP_P4_55134_32519875 | NC_021163.1    | Ca_kabuli_chr04 | 32519875                | CC                              | TT              | 1946816396               |
| SNP_P4_55135_32519908 | NC_021163.1    | Ca_kabuli_chr04 | 32519908                | GG                              | AA              | 1946816398               |
| SNP_P4_55137_32522537 | NC_021163.1    | Ca_kabuli_chr04 | 32522537                | TT                              | GG              | 1946816400               |
| SNP_P4_55139_32523496 | NC_021163.1    | Ca_kabuli_chr04 | 32523496                | GG                              | AA              | 1946816402               |
| SNP_P4_55140_32523530 | NC_021163.1    | Ca_kabuli_chr04 | 32523530                | CC                              | TT              | 1946816404               |
| SNP_P4_55141_32523542 | NC_021163.1    | Ca_kabuli_chr04 | 32523542                | TT                              | AA              | 1946816406               |
| SNP_P4_55143_32523578 | NC_021163.1    | Ca_kabuli_chr04 | 32523578                | TT                              | AA              | 1946816408               |
| SNP_P4_55144_32523587 | NC_021163.1    | Ca_kabuli_chr04 | 32523587                | AA                              | GG              | 1946816410               |
| SNP_P4_55145_32523854 | NC_021163.1    | Ca_kabuli_chr04 | 32523854                | TT                              | CC              | 1946816412               |
| SNP_P4_55146_32523994 | NC_021163.1    | Ca_kabuli_chr04 | 32523994                | AA                              | GG              | 1946816414               |
| SNP_P4_55147_32524240 | NC_021163.1    | Ca_kabuli_chr04 | 32524240                | CC                              | TT              | 1946816416               |
| SNP_P4_55148_32524305 | NC_021163.1    | Ca_kabuli_chr04 | 32524305                | GG                              | CC              | 1946816418               |
| SNP_P4_55149_32524440 | NC_021163.1    | Ca_kabuli_chr04 | 32524440                | GG                              | AA              | 1946816420               |
| SNP_P4_55150_32524442 | NC_021163.1    | Ca_kabuli_chr04 | 32524442                | TT                              | AA              | 1946816422               |
| SNP_P4_55151_32524472 | NC_021163.1    | Ca_kabuli_chr04 | 32524472                | AA                              | GG              | 1946816424               |
| SNP_P4_55152_32524532 | NC_021163.1    | Ca_kabuli_chr04 | 32524532                | AA                              | GG              | 1946816426               |
| SNP_P4_55153_32524545 | NC_021163.1    | Ca_kabuli_chr04 | 32524545                | TT                              | CC              | 1946816428               |
| SNP_P4_55155_32525524 | NC_021163.1    | Ca_kabuli_chr04 | 32525524                | GG                              | TT              | 1946816430               |

| SNPs IDs              | Chromosome IDs | Chromosomes     | Physical positions (bp) | CDC Frontier (Reference genome) | (ILWC46 & LPNB) | NCBI SNPdb Accession IDs |
|-----------------------|----------------|-----------------|-------------------------|---------------------------------|-----------------|--------------------------|
| SNP_P4_55156_32525823 | NC_021163.1    | Ca_kabuli_chr04 | 32525823                | AA                              | GG              | 1946816432               |
| SNP_P4_55157_32526807 | NC_021163.1    | Ca_kabuli_chr04 | 32526807                | TT                              | CC              | 1946816434               |
| SNP_P4_55158_32526905 | NC_021163.1    | Ca_kabuli_chr04 | 32526905                | CC                              | TT              | 1946816436               |
| SNP_P4_55159_32526920 | NC_021163.1    | Ca_kabuli_chr04 | 32526920                | GG                              | AA              | 1946816438               |
| SNP_P4_55160_32527307 | NC_021163.1    | Ca_kabuli_chr04 | 32527307                | CC                              | TT              | 1946816440               |
| SNP_P4_55161_32527308 | NC_021163.1    | Ca_kabuli_chr04 | 32527308                | AA                              | TT              | 1946816442               |
| SNP_P4_55162_32529117 | NC_021163.1    | Ca_kabuli_chr04 | 32529117                | TT                              | AA              | 1946816444               |
| SNP_P4_55163_32530565 | NC_021163.1    | Ca_kabuli_chr04 | 32530565                | CC                              | TT              | 1946816446               |
| SNP_P4_55164_32530910 | NC_021163.1    | Ca_kabuli_chr04 | 32530910                | GG                              | AA              | 1946816448               |
| SNP_P4_55165_32531221 | NC_021163.1    | Ca_kabuli_chr04 | 32531221                | CC                              | TT              | 1946816450               |
| SNP_P4_55166_32531412 | NC_021163.1    | Ca_kabuli_chr04 | 32531412                | TT                              | CC              | 1946816452               |
| SNP_P4_55168_32531488 | NC_021163.1    | Ca_kabuli_chr04 | 32531488                | GG                              | CC              | 1946816454               |
| SNP_P4_55169_32531949 | NC_021163.1    | Ca_kabuli_chr04 | 32531949                | CC                              | AA              | 1946816456               |
| SNP_P4_55170_32531976 | NC_021163.1    | Ca_kabuli_chr04 | 32531976                | AA                              | TT              | 1946816458               |
| SNP_P4_55171_32531983 | NC_021163.1    | Ca_kabuli_chr04 | 32531983                | CC                              | TT              | 1946816461               |
| SNP_P4_55172_32534166 | NC_021163.1    | Ca_kabuli_chr04 | 32534166                | CC                              | TT              | 1946816463               |
| SNP_P4_55173_32534195 | NC_021163.1    | Ca_kabuli_chr04 | 32534195                | CC                              | GG              | 1946816465               |
| SNP_P4_55174_32534441 | NC_021163.1    | Ca_kabuli_chr04 | 32534441                | CC                              | AA              | 1946816467               |
| SNP_P4_55175_32537072 | NC_021163.1    | Ca_kabuli_chr04 | 32537072                | GG                              | CC              | 1946816469               |
| SNP_P4_55176_32537426 | NC_021163.1    | Ca_kabuli_chr04 | 32537426                | CC                              | AA              | 1946816471               |
| SNP_P4_55177_32537952 | NC_021163.1    | Ca_kabuli_chr04 | 32537952                | CC                              | TT              | 1946816473               |
| SNP_P4_55178_32538416 | NC_021163.1    | Ca_kabuli_chr04 | 32538416                | TT                              | CC              | 1946816475               |
| SNP_P4_55179_32538452 | NC_021163.1    | Ca_kabuli_chr04 | 32538452                | GG                              | AA              | 1946816477               |
| SNP_P4_55180_32538747 | NC_021163.1    | Ca_kabuli_chr04 | 32538747                | TT                              | CC              | 1946816479               |
| SNP_P4_55181_32545496 | NC_021163.1    | Ca_kabuli_chr04 | 32545496                | AA                              | GG              | 1946816481               |
| SNP_P4_55182_32545500 | NC_021163.1    | Ca_kabuli_chr04 | 32545500                | CC                              | TT              | 1946816483               |
| SNP_P4_55183_32545523 | NC_021163.1    | Ca_kabuli_chr04 | 32545523                | CC                              | TT              | 1946816485               |
| SNP_P4_55184_32545548 | NC_021163.1    | Ca_kabuli_chr04 | 32545548                | GG                              | CC              | 1946816487               |
| SNP_P4_55186_32550418 | NC_021163.1    | Ca_kabuli_chr04 | 32550418                | AA                              | GG              | 1946816489               |
| SNP_P4_55187_32550910 | NC_021163.1    | Ca_kabuli_chr04 | 32550910                | TT                              | AA              | 1946816491               |
| SNP_P4_55188_32550916 | NC_021163.1    | Ca_kabuli_chr04 | 32550916                | AA                              | GG              | 1946816493               |
| SNP_P4_55189_32550932 | NC_021163.1    | Ca_kabuli_chr04 | 32550932                | AA                              | GG              | 1946816495               |
| SNP_P4_55190_32551390 | NC_021163.1    | Ca_kabuli_chr04 | 32551390                | AA                              | GG              | 1946816497               |
| SNP_P4_55191_32551760 | NC_021163.1    | Ca_kabuli_chr04 | 32551760                | AA                              | GG              | 1946816499               |
| SNP_P4_55192_32551832 | NC_021163.1    | Ca_kabuli_chr04 | 32551832                | CC                              | TT              | 1946816501               |
| SNP_P4_55193_32552885 | NC_021163.1    | Ca_kabuli_chr04 | 32552885                | AA                              | TT              | 1946816503               |
| SNP_P4_55194_32552919 | NC_021163.1    | Ca_kabuli_chr04 | 32552919                | AA                              | GG              | 1946816505               |
| SNP_P4_55195_32554124 | NC_021163.1    | Ca_kabuli_chr04 | 32554124                | TT                              | CC              | 1946816507               |
| SNP_P4_55196_32554281 | NC_021163.1    | Ca_kabuli_chr04 | 32554281                | GG                              | AA              | 1946816509               |
| SNP_P4_55198_32554449 | NC_021163.1    | Ca_kabuli_chr04 | 32554449                | AA                              | GG              | 1946816511               |
| SNP_P4_55199_32554498 | NC_021163.1    | Ca_kabuli_chr04 | 32554498                | CC                              | TT              | 1946816513               |
| SNP_P4_55200_32554502 | NC_021163.1    | Ca_kabuli_chr04 | 32554502                | CC                              | TT              | 1946816515               |

| SNPs IDs              | Chromosome IDs | Chromosomes     | Physical positions (bp) | CDC Frontier (Reference genome) | (ILWC46 & LPNB) | NCBI SNPdb Accession IDs |
|-----------------------|----------------|-----------------|-------------------------|---------------------------------|-----------------|--------------------------|
| SNP_P4_55201_32554850 | NC_021163.1    | Ca_kabuli_chr04 | 32554850                | TT                              | GG              | 1946816517               |
| SNP_P4_55202_32556032 | NC_021163.1    | Ca_kabuli_chr04 | 32556032                | AA                              | GG              | 1946816519               |
| SNP_P4_55203_32556973 | NC_021163.1    | Ca_kabuli_chr04 | 32556973                | CC                              | TT              | 1946816521               |
| SNP_P4_55204_32558071 | NC_021163.1    | Ca_kabuli_chr04 | 32558071                | AA                              | GG              | 1946816523               |
| SNP_P4_55205_32558086 | NC_021163.1    | Ca_kabuli_chr04 | 32558086                | AA                              | GG              | 1946816525               |
| SNP_P4_55208_32559951 | NC_021163.1    | Ca_kabuli_chr04 | 32559951                | TT                              | CC              | 1946816527               |
| SNP_P4_55209_32560079 | NC_021163.1    | Ca_kabuli_chr04 | 32560079                | CC                              | TT              | 1946816529               |
| SNP_P4_55210_32561718 | NC_021163.1    | Ca_kabuli_chr04 | 32561718                | TT                              | CC              | 1946816531               |
| SNP_P4_55211_32561953 | NC_021163.1    | Ca_kabuli_chr04 | 32561953                | TT                              | CC              | 1946816533               |
| SNP_P4_55212_32562148 | NC_021163.1    | Ca_kabuli_chr04 | 32562148                | GG                              | AA              | 1946816535               |
| SNP_P4_55214_32562586 | NC_021163.1    | Ca_kabuli_chr04 | 32562586                | AA                              | GG              | 1946816537               |
| SNP_P4_55215_32565446 | NC_021163.1    | Ca_kabuli_chr04 | 32565446                | CC                              | GG              | 1946816540               |
| SNP_P4_55217_32567093 | NC_021163.1    | Ca_kabuli_chr04 | 32567093                | CC                              | GG              | 1946816542               |
| SNP_P4_55220_32568221 | NC_021163.1    | Ca_kabuli_chr04 | 32568221                | CC                              | TT              | 1946816544               |
| SNP_P4_55221_32568512 | NC_021163.1    | Ca_kabuli_chr04 | 32568512                | AA                              | GG              | 1946816546               |
| SNP_P4_55222_32568976 | NC_021163.1    | Ca_kabuli_chr04 | 32568976                | TT                              | AA              | 1946816548               |
| SNP_P4_55223_32569008 | NC_021163.1    | Ca_kabuli_chr04 | 32569008                | CC                              | GG              | 1946816550               |
| SNP_P4_55224_32569165 | NC_021163.1    | Ca_kabuli_chr04 | 32569165                | TT                              | CC              | 1946816552               |
| SNP_P4_55225_32569790 | NC_021163.1    | Ca_kabuli_chr04 | 32569790                | AA                              | GG              | 1946816554               |
| SNP_P4_55226_32570501 | NC_021163.1    | Ca_kabuli_chr04 | 32570501                | GG                              | AA              | 1946816556               |
| SNP_P4_55227_32576348 | NC_021163.1    | Ca_kabuli_chr04 | 32576348                | GG                              | AA              | 1946816558               |
| SNP_P4_55228_32576558 | NC_021163.1    | Ca_kabuli_chr04 | 32576558                | AA                              | CC              | 1946816560               |
| SNP_P4_55229_32576581 | NC_021163.1    | Ca_kabuli_chr04 | 32576581                | TT                              | CC              | 1946816562               |
| SNP_P4_55230_32576622 | NC_021163.1    | Ca_kabuli_chr04 | 32576622                | TT                              | AA              | 1946816564               |
| SNP_P4_55231_32576638 | NC_021163.1    | Ca_kabuli_chr04 | 32576638                | AA                              | GG              | 1946816566               |
| SNP_P4_55232_32578903 | NC_021163.1    | Ca_kabuli_chr04 | 32578903                | GG                              | AA              | 1946816568               |
| SNP_P4_55233_32578950 | NC_021163.1    | Ca_kabuli_chr04 | 32578950                | GG                              | TT              | 1946816570               |
| SNP_P4_55234_32579558 | NC_021163.1    | Ca_kabuli_chr04 | 32579558                | AA                              | CC              | 1946816572               |
| SNP_P4_55235_32580847 | NC_021163.1    | Ca_kabuli_chr04 | 32580847                | AA                              | GG              | 1946816574               |
| SNP_P4_55236_32581366 | NC_021163.1    | Ca_kabuli_chr04 | 32581366                | TT                              | GG              | 1946816576               |
| SNP_P4_55237_32581371 | NC_021163.1    | Ca_kabuli_chr04 | 32581371                | TT                              | CC              | 1946816578               |
| SNP_P4_55238_32581393 | NC_021163.1    | Ca_kabuli_chr04 | 32581393                | AA                              | GG              | 1946816580               |
| SNP_P4_55239_32581441 | NC_021163.1    | Ca_kabuli_chr04 | 32581441                | GG                              | TT              | 1946816582               |
| SNP_P4_55240_32581442 | NC_021163.1    | Ca_kabuli_chr04 | 32581442                | AA                              | GG              | 1946816584               |
| SNP_P4_55241_32581460 | NC_021163.1    | Ca_kabuli_chr04 | 32581460                | CC                              | AA              | 1946816586               |
| SNP_P4_55242_32581734 | NC_021163.1    | Ca_kabuli_chr04 | 32581734                | GG                              | AA              | 1946816588               |
| SNP_P4_55243_32581878 | NC_021163.1    | Ca_kabuli_chr04 | 32581878                | GG                              | AA              | 1946816590               |
| SNP_P4_55244_32581902 | NC_021163.1    | Ca_kabuli_chr04 | 32581902                | TT                              | CC              | 1946816592               |
| SNP_P4_55245_32583457 | NC_021163.1    | Ca_kabuli_chr04 | 32583457                | AA                              | TT              | 1946816594               |
| SNP_P4_55248_32587903 | NC_021163.1    | Ca_kabuli_chr04 | 32587903                | TT                              | CC              | 1946816596               |
| SNP_P4_55249_32587904 | NC_021163.1    | Ca_kabuli_chr04 | 32587904                | AA                              | TT              | 1946816598               |
| SNP_P4_55250_32588077 | NC_021163.1    | Ca_kabuli_chr04 | 32588077                | CC                              | TT              | 1946816600               |

| SNPs IDs              | Chromosome IDs | Chromosomes     | Physical positions (bp) | CDC Frontier (Reference genome) | (ILWC46 & LPNB) | NCBI SNPdb Accession IDs |
|-----------------------|----------------|-----------------|-------------------------|---------------------------------|-----------------|--------------------------|
| SNP_P4_55251_32588654 | NC_021163.1    | Ca_kabuli_chr04 | 32588654                | TT                              | CC              | 1946816602               |
| SNP_P4_55252_32589704 | NC_021163.1    | Ca_kabuli_chr04 | 32589704                | TT                              | AA              | 1946816604               |
| SNP_P4_55253_32590130 | NC_021163.1    | Ca_kabuli_chr04 | 32590130                | GG                              | TT              | 1946816606               |
| SNP_P4_55255_32590591 | NC_021163.1    | Ca_kabuli_chr04 | 32590591                | TT                              | CC              | 1946816608               |
| SNP_P4_55256_32590667 | NC_021163.1    | Ca_kabuli_chr04 | 32590667                | GG                              | TT              | 1946816610               |
| SNP_P4_55257_32590805 | NC_021163.1    | Ca_kabuli_chr04 | 32590805                | GG                              | AA              | 1946816612               |
| SNP_P4_55259_32593013 | NC_021163.1    | Ca_kabuli_chr04 | 32593013                | GG                              | AA              | 1946816614               |
| SNP_P4_55260_32594385 | NC_021163.1    | Ca_kabuli_chr04 | 32594385                | CC                              | TT              | 1946816616               |
| SNP_P4_55261_32594923 | NC_021163.1    | Ca_kabuli_chr04 | 32594923                | TT                              | CC              | 1946816618               |
| SNP_P4_55262_32595056 | NC_021163.1    | Ca_kabuli_chr04 | 32595056                | CC                              | TT              | 1946816620               |
| SNP_P4_55263_32597457 | NC_021163.1    | Ca_kabuli_chr04 | 32597457                | AA                              | GG              | 1946816622               |
| SNP_P4_55264_32598208 | NC_021163.1    | Ca_kabuli_chr04 | 32598208                | CC                              | TT              | 1946816625               |
| SNP_P4_55265_32598458 | NC_021163.1    | Ca_kabuli_chr04 | 32598458                | GG                              | AA              | 1946816627               |
| SNP_P4_55266_32601318 | NC_021163.1    | Ca_kabuli_chr04 | 32601318                | AA                              | GG              | 1946816629               |
| SNP_P4_55267_32602011 | NC_021163.1    | Ca_kabuli_chr04 | 32602011                | GG                              | AA              | 1946816631               |
| SNP_P4_55269_32602382 | NC_021163.1    | Ca_kabuli_chr04 | 32602382                | AA                              | TT              | 1946816633               |
| SNP_P4_55270_32602586 | NC_021163.1    | Ca_kabuli_chr04 | 32602586                | CC                              | TT              | 1946816635               |
| SNP_P4_55272_32603146 | NC_021163.1    | Ca_kabuli_chr04 | 32603146                | TT                              | AA              | 1946816637               |
| SNP_P4_55273_32603371 | NC_021163.1    | Ca_kabuli_chr04 | 32603371                | AA                              | GG              | 1946816639               |
| SNP_P4_55274_32603390 | NC_021163.1    | Ca_kabuli_chr04 | 32603390                | AA                              | GG              | 1946816641               |
| SNP_P4_55275_32603828 | NC_021163.1    | Ca_kabuli_chr04 | 32603828                | CC                              | TT              | 1946816643               |
| SNP_P4_55276_32604313 | NC_021163.1    | Ca_kabuli_chr04 | 32604313                | TT                              | CC              | 1946816645               |
| SNP_P4_55277_32604538 | NC_021163.1    | Ca_kabuli_chr04 | 32604538                | CC                              | TT              | 1946816647               |
| SNP_P4_55278_32604997 | NC_021163.1    | Ca_kabuli_chr04 | 32604997                | AA                              | GG              | 1946816649               |
| SNP_P4_55279_32605580 | NC_021163.1    | Ca_kabuli_chr04 | 32605580                | TT                              | CC              | 1946816651               |
| SNP_P4_55280_32606622 | NC_021163.1    | Ca_kabuli_chr04 | 32606622                | TT                              | AA              | 1946816653               |
| SNP_P4_55281_32608905 | NC_021163.1    | Ca_kabuli_chr04 | 32608905                | GG                              | AA              | 1946816655               |
| SNP_P4_55282_32608908 | NC_021163.1    | Ca_kabuli_chr04 | 32608908                | GG                              | AA              | 1946816657               |
| SNP_P4_55283_32609130 | NC_021163.1    | Ca_kabuli_chr04 | 32609130                | GG                              | AA              | 1946816659               |
| SNP_P4_55284_32609375 | NC_021163.1    | Ca_kabuli_chr04 | 32609375                | AA                              | GG              | 1946816661               |
| SNP_P4_55285_32609649 | NC_021163.1    | Ca_kabuli_chr04 | 32609649                | GG                              | TT              | 1946816663               |
| SNP_P4_55286_32609695 | NC_021163.1    | Ca_kabuli_chr04 | 32609695                | TT                              | CC              | 1946816665               |
| SNP_P4_55287_32609701 | NC_021163.1    | Ca_kabuli_chr04 | 32609701                | CC                              | AA              | 1946816667               |
| SNP_P4_55288_32610160 | NC_021163.1    | Ca_kabuli_chr04 | 32610160                | AA                              | GG              | 1946816669               |
| SNP_P4_55289_32615579 | NC_021163.1    | Ca_kabuli_chr04 | 32615579                | TT                              | CC              | 1946816671               |
| SNP_P4_55291_32615640 | NC_021163.1    | Ca_kabuli_chr04 | 32615640                | CC                              | TT              | 1946816673               |
| SNP_P4_55292_32615923 | NC_021163.1    | Ca_kabuli_chr04 | 32615923                | TT                              | CC              | 1946816675               |
| SNP_P4_55293_32615953 | NC_021163.1    | Ca_kabuli_chr04 | 32615953                | CC                              | AA              | 1946816677               |
| SNP_P4_55294_32616185 | NC_021163.1    | Ca_kabuli_chr04 | 32616185                | TT                              | CC              | 1946816679               |
| SNP_P4_55295_32618624 | NC_021163.1    | Ca_kabuli_chr04 | 32618624                | CC                              | AA              | 1946816681               |
| SNP_P4_55296_32618630 | NC_021163.1    | Ca_kabuli_chr04 | 32618630                | CC                              | TT              | 1946816683               |
| SNP_P4_55297_32618650 | NC_021163.1    | Ca_kabuli_chr04 | 32618650                | CC                              | TT              | 1946816685               |



| SNPs IDs              | Chromosome IDs | Chromosomes     | Physical positions (bp) | CDC Frontier (Reference genome) | (ILWC46 & LPNB) | NCBI SNPdb Accession IDs |
|-----------------------|----------------|-----------------|-------------------------|---------------------------------|-----------------|--------------------------|
| SNP_P4_55298_32618653 | NC_021163.1    | Ca_kabuli_chr04 | 32618653                | CC                              | TT              | 1946816687               |
| SNP_P4_55299_32619638 | NC_021163.1    | Ca_kabuli_chr04 | 32619638                | GG                              | CC              | 1946816689               |
| SNP_P4_55300_32619680 | NC_021163.1    | Ca_kabuli_chr04 | 32619680                | GG                              | AA              | 1946816691               |
| SNP_P4_55301_32620150 | NC_021163.1    | Ca_kabuli_chr04 | 32620150                | TT                              | GG              | 1946816693               |
| SNP_P4_55302_32620162 | NC_021163.1    | Ca_kabuli_chr04 | 32620162                | GG                              | AA              | 1946816696               |
| SNP_P4_55303_32620667 | NC_021163.1    | Ca_kabuli_chr04 | 32620667                | CC                              | TT              | 1946816698               |
| SNP_P4_55304_32621011 | NC_021163.1    | Ca_kabuli_chr04 | 32621011                | TT                              | CC              | 1946816700               |
| SNP_P4_55306_32629535 | NC_021163.1    | Ca_kabuli_chr04 | 32629535                | GG                              | AA              | 1946816702               |
| SNP_P4_55307_32629573 | NC_021163.1    | Ca_kabuli_chr04 | 32629573                | TT                              | AA              | 1946816704               |
| SNP_P4_55309_32634194 | NC_021163.1    | Ca_kabuli_chr04 | 32634194                | TT                              | CC              | 1946816706               |
| SNP_P4_55311_32635638 | NC_021163.1    | Ca_kabuli_chr04 | 32635638                | GG                              | AA              | 1946816709               |
| SNP_P4_55313_32636459 | NC_021163.1    | Ca_kabuli_chr04 | 32636459                | GG                              | AA              | 1946816711               |
| SNP_P4_55314_32638022 | NC_021163.1    | Ca_kabuli_chr04 | 32638022                | GG                              | TT              | 1946816713               |
| SNP_P4_55315_32638542 | NC_021163.1    | Ca_kabuli_chr04 | 32638542                | CC                              | GG              | 1946816715               |
| SNP_P4_55316_32638994 | NC_021163.1    | Ca_kabuli_chr04 | 32638994                | GG                              | AA              | 1946816717               |
| SNP_P4_55317_32639860 | NC_021163.1    | Ca_kabuli_chr04 | 32639860                | TT                              | CC              | 1946816719               |
| SNP_P4_55318_32640058 | NC_021163.1    | Ca_kabuli_chr04 | 32640058                | CC                              | TT              | 1946816721               |
| SNP_P4_55319_32640373 | NC_021163.1    | Ca_kabuli_chr04 | 32640373                | AA                              | GG              | 1946816724               |
| SNP_P4_55320_32641121 | NC_021163.1    | Ca_kabuli_chr04 | 32641121                | AA                              | TT              | 1946816726               |
| SNP_P4_55321_32641428 | NC_021163.1    | Ca_kabuli_chr04 | 32641428                | CC                              | TT              | 1946816728               |
| SNP_P4_55322_32641469 | NC_021163.1    | Ca_kabuli_chr04 | 32641469                | GG                              | AA              | 1946816730               |
| SNP_P4_55323_32641538 | NC_021163.1    | Ca_kabuli_chr04 | 32641538                | TT                              | CC              | 1946816732               |
| SNP_P4_55324_32644084 | NC_021163.1    | Ca_kabuli_chr04 | 32644084                | AA                              | CC              | 1946816734               |
| SNP_P4_55325_32644122 | NC_021163.1    | Ca_kabuli_chr04 | 32644122                | CC                              | TT              | 1946816736               |
| SNP_P4_55327_32644210 | NC_021163.1    | Ca_kabuli_chr04 | 32644210                | AA                              | CC              | 1946816738               |
| SNP_P4_55328_32644211 | NC_021163.1    | Ca_kabuli_chr04 | 32644211                | GG                              | AA              | 1946816740               |
| SNP_P4_55329_32648855 | NC_021163.1    | Ca_kabuli_chr04 | 32648855                | AA                              | GG              | 1946816742               |
| SNP_P4_55330_32649000 | NC_021163.1    | Ca_kabuli_chr04 | 32649000                | TT                              | CC              | 1946816744               |
| SNP_P4_55332_32656623 | NC_021163.1    | Ca_kabuli_chr04 | 32656623                | GG                              | AA              | 1946816746               |
| SNP_P4_55333_32657648 | NC_021163.1    | Ca_kabuli_chr04 | 32657648                | CC                              | TT              | 1946816748               |
| SNP_P4_55335_32665874 | NC_021163.1    | Ca_kabuli_chr04 | 32665874                | CC                              | AA              | 1946816750               |
| SNP_P4_55336_32673206 | NC_021163.1    | Ca_kabuli_chr04 | 32673206                | TT                              | CC              | 1946816752               |
| SNP_P4_55337_32673237 | NC_021163.1    | Ca_kabuli_chr04 | 32673237                | AA                              | GG              | 1946816754               |
| SNP_P4_55338_32673764 | NC_021163.1    | Ca_kabuli_chr04 | 32673764                | AA                              | GG              | 1946816756               |
| SNP_P4_55339_32681007 | NC_021163.1    | Ca_kabuli_chr04 | 32681007                | TT                              | CC              | 1946816758               |
| SNP_P4_55340_32682653 | NC_021163.1    | Ca_kabuli_chr04 | 32682653                | TT                              | AA              | 1946816760               |
| SNP_P4_55341_32682883 | NC_021163.1    | Ca_kabuli_chr04 | 32682883                | GG                              | AA              | 1946816763               |
| SNP_P4_55347_32699643 | NC_021163.1    | Ca_kabuli_chr04 | 32699643                | AA                              | CC              | 1946816765               |
| SNP_P4_55349_32717726 | NC_021163.1    | Ca_kabuli_chr04 | 32717726                | TT                              | GG              | 1946816767               |
| SNP_P4_55350_32735829 | NC_021163.1    | Ca_kabuli_chr04 | 32735829                | GG                              | AA              | 1946816769               |
| SNP_P4_55351_32738700 | NC_021163.1    | Ca_kabuli_chr04 | 32738700                | AA                              | CC              | 1946816771               |
| SNP_P4_55352_32738704 | NC_021163.1    | Ca_kabuli_chr04 | 32738704                | TT                              | CC              | 1946816773               |

| SNPs IDs              | Chromosome IDs | Chromosomes     | Physical positions (bp) | CDC Frontier (Reference genome) | (ILWC46 & LPNB) | NCBI SNPdb Accession IDs |
|-----------------------|----------------|-----------------|-------------------------|---------------------------------|-----------------|--------------------------|
| SNP_P4_55353_32738729 | NC_021163.1    | Ca_kabuli_chr04 | 32738729                | TT                              | CC              | 1946816775               |
| SNP_P4_55354_32738733 | NC_021163.1    | Ca_kabuli_chr04 | 32738733                | GG                              | AA              | 1946816777               |
| SNP_P4_55355_32738739 | NC_021163.1    | Ca_kabuli_chr04 | 32738739                | CC                              | AA              | 1946816779               |
| SNP_P4_55356_32738754 | NC_021163.1    | Ca_kabuli_chr04 | 32738754                | GG                              | AA              | 1946816781               |
| SNP_P4_55357_32739909 | NC_021163.1    | Ca_kabuli_chr04 | 32739909                | GG                              | AA              | 1946816783               |
| SNP_P4_55358_32739929 | NC_021163.1    | Ca_kabuli_chr04 | 32739929                | CC                              | TT              | 1946816785               |
| SNP_P4_55360_32765112 | NC_021163.1    | Ca_kabuli_chr04 | 32765112                | TT                              | CC              | 1946816787               |
| SNP_P4_55361_32765146 | NC_021163.1    | Ca_kabuli_chr04 | 32765146                | GG                              | AA              | 1946816789               |
| SNP_P4_55362_32766058 | NC_021163.1    | Ca_kabuli_chr04 | 32766058                | TT                              | CC              | 1946816791               |
| SNP_P4_55363_32766152 | NC_021163.1    | Ca_kabuli_chr04 | 32766152                | CC                              | TT              | 1946816793               |
| SNP_P4_55364_32767031 | NC_021163.1    | Ca_kabuli_chr04 | 32767031                | CC                              | AA              | 1946816795               |
| SNP_P4_55365_32767038 | NC_021163.1    | Ca_kabuli_chr04 | 32767038                | TT                              | GG              | 1946816797               |
| SNP_P4_55366_32767057 | NC_021163.1    | Ca_kabuli_chr04 | 32767057                | GG                              | AA              | 1946816799               |
| SNP_P4_55367_32767069 | NC_021163.1    | Ca_kabuli_chr04 | 32767069                | AA                              | TT              | 1946816801               |
| SNP_P4_55368_32767079 | NC_021163.1    | Ca_kabuli_chr04 | 32767079                | CC                              | TT              | 1946816803               |
| SNP_P4_55369_32767287 | NC_021163.1    | Ca_kabuli_chr04 | 32767287                | CC                              | TT              | 1946816805               |
| SNP_P4_55370_32767306 | NC_021163.1    | Ca_kabuli_chr04 | 32767306                | TT                              | CC              | 1946816807               |
| SNP_P4_55371_32767318 | NC_021163.1    | Ca_kabuli_chr04 | 32767318                | AA                              | CC              | 1946816809               |
| SNP_P4_55372_32768828 | NC_021163.1    | Ca_kabuli_chr04 | 32768828                | TT                              | CC              | 1946816811               |
| SNP_P4_55373_32768829 | NC_021163.1    | Ca_kabuli_chr04 | 32768829                | TT                              | CC              | 1946816813               |
| SNP_P4_55374_32768830 | NC_021163.1    | Ca_kabuli_chr04 | 32768830                | GG                              | TT              | 1946816815               |
| SNP_P4_55375_32768835 | NC_021163.1    | Ca_kabuli_chr04 | 32768835                | GG                              | AA              | 1946816817               |
| SNP_P4_55376_32783211 | NC_021163.1    | Ca_kabuli_chr04 | 32783211                | CC                              | TT              | 1946816819               |
| SNP_P4_55377_32792107 | NC_021163.1    | Ca_kabuli_chr04 | 32792107                | TT                              | AA              | 1946816821               |
| SNP_P4_55378_32793483 | NC_021163.1    | Ca_kabuli_chr04 | 32793483                | AA                              | GG              | 1946816823               |
| SNP_P4_55379_32793967 | NC_021163.1    | Ca_kabuli_chr04 | 32793967                | AA                              | GG              | 1946816825               |
| SNP_P4_55380_32795325 | NC_021163.1    | Ca_kabuli_chr04 | 32795325                | AA                              | GG              | 1946816827               |
| SNP_P4_55381_32795328 | NC_021163.1    | Ca_kabuli_chr04 | 32795328                | GG                              | TT              | 1946816829               |
| SNP_P4_55383_32830178 | NC_021163.1    | Ca_kabuli_chr04 | 32830178                | TT                              | CC              | 1946816832               |
| SNP_P4_55384_32861899 | NC_021163.1    | Ca_kabuli_chr04 | 32861899                | AA                              | GG              | 1946816834               |
| SNP_P4_55385_32861926 | NC_021163.1    | Ca_kabuli_chr04 | 32861926                | GG                              | AA              | 1946816836               |
| SNP_P4_55386_32861935 | NC_021163.1    | Ca_kabuli_chr04 | 32861935                | TT                              | CC              | 1946816838               |
| SNP_P4_55387_32861978 | NC_021163.1    | Ca_kabuli_chr04 | 32861978                | AA                              | GG              | 1946816840               |
| SNP_P4_55388_32871626 | NC_021163.1    | Ca_kabuli_chr04 | 32871626                | TT                              | GG              | 1946816842               |
| SNP_P4_55389_32871648 | NC_021163.1    | Ca_kabuli_chr04 | 32871648                | GG                              | TT              | 1946816844               |
| SNP_P4_55390_32873074 | NC_021163.1    | Ca_kabuli_chr04 | 32873074                | TT                              | AA              | 1946816846               |
| SNP_P4_55392_32873093 | NC_021163.1    | Ca_kabuli_chr04 | 32873093                | TT                              | AA              | 1946816848               |
| SNP_P4_55393_32884368 | NC_021163.1    | Ca_kabuli_chr04 | 32884368                | AA                              | GG              | 1946816850               |
| SNP_P4_55394_32885181 | NC_021163.1    | Ca_kabuli_chr04 | 32885181                | AA                              | GG              | 1946816851               |
| SNP_P4_55395_32885342 | NC_021163.1    | Ca_kabuli_chr04 | 32885342                | AA                              | GG              | 1946816852               |
| SNP_P4_55396_32885360 | NC_021163.1    | Ca_kabuli_chr04 | 32885360                | AA                              | GG              | 1946816853               |
| SNP_P4_55397_32885364 | NC_021163.1    | Ca_kabuli_chr04 | 32885364                | CC                              | TT              | 1946816854               |

| SNPs IDs              | Chromosome IDs | Chromosomes     | Physical positions (bp) | CDC Frontier (Reference genome) | (ILWC46 & LPNB) | NCBI SNPdb Accession IDs |
|-----------------------|----------------|-----------------|-------------------------|---------------------------------|-----------------|--------------------------|
| SNP_P4_55398_32885377 | NC_021163.1    | Ca_kabuli_chr04 | 32885377                | AA                              | GG              | 1946816855               |
| SNP_P4_55399_32885397 | NC_021163.1    | Ca_kabuli_chr04 | 32885397                | CC                              | AA              | 1946816856               |
| SNP_P4_55400_32885401 | NC_021163.1    | Ca_kabuli_chr04 | 32885401                | TT                              | GG              | 1946816857               |
| SNP_P4_55401_32885493 | NC_021163.1    | Ca_kabuli_chr04 | 32885493                | CC                              | TT              | 1946816858               |
| SNP_P4_55402_32885560 | NC_021163.1    | Ca_kabuli_chr04 | 32885560                | GG                              | AA              | 1946816860               |
| SNP_P4_55403_32885592 | NC_021163.1    | Ca_kabuli_chr04 | 32885592                | CC                              | GG              | 1946816862               |
| SNP_P4_55404_32885614 | NC_021163.1    | Ca_kabuli_chr04 | 32885614                | AA                              | GG              | 1946816865               |
| SNP_P4_55405_32885640 | NC_021163.1    | Ca_kabuli_chr04 | 32885640                | TT                              | CC              | 1946816867               |
| SNP_P4_55406_32885657 | NC_021163.1    | Ca_kabuli_chr04 | 32885657                | CC                              | TT              | 1946816869               |
| SNP_P4_55407_32885687 | NC_021163.1    | Ca_kabuli_chr04 | 32885687                | TT                              | CC              | 1946816871               |
| SNP_P4_55408_32885694 | NC_021163.1    | Ca_kabuli_chr04 | 32885694                | AA                              | CC              | 1946816873               |
| SNP_P4_55409_32885833 | NC_021163.1    | Ca_kabuli_chr04 | 32885833                | AA                              | CC              | 1946816876               |
| SNP_P4_55410_32885912 | NC_021163.1    | Ca_kabuli_chr04 | 32885912                | GG                              | AA              | 1946816879               |
| SNP_P4_55411_32885987 | NC_021163.1    | Ca_kabuli_chr04 | 32885987                | AA                              | CC              | 1946816881               |
| SNP_P4_55412_32886065 | NC_021163.1    | Ca_kabuli_chr04 | 32886065                | GG                              | AA              | 1946816883               |
| SNP_P4_55413_32886077 | NC_021163.1    | Ca_kabuli_chr04 | 32886077                | TT                              | AA              | 1946816885               |
| SNP_P4_55414_32886092 | NC_021163.1    | Ca_kabuli_chr04 | 32886092                | CC                              | AA              | 1946816887               |
| SNP_P4_55415_32886149 | NC_021163.1    | Ca_kabuli_chr04 | 32886149                | AA                              | CC              | 1946816889               |
| SNP_P4_55416_32886200 | NC_021163.1    | Ca_kabuli_chr04 | 32886200                | AA                              | TT              | 1946816891               |
| SNP_P4_55417_32886217 | NC_021163.1    | Ca_kabuli_chr04 | 32886217                | CC                              | TT              | 1946816893               |
| SNP_P4_55418_32886233 | NC_021163.1    | Ca_kabuli_chr04 | 32886233                | GG                              | AA              | 1946816895               |
| SNP_P4_55419_32886312 | NC_021163.1    | Ca_kabuli_chr04 | 32886312                | GG                              | TT              | 1946816897               |
| SNP_P4_55420_32886314 | NC_021163.1    | Ca_kabuli_chr04 | 32886314                | AA                              | GG              | 1946816900               |
| SNP_P4_55421_32886372 | NC_021163.1    | Ca_kabuli_chr04 | 32886372                | AA                              | GG              | 1946816902               |
| SNP_P4_55422_32886385 | NC_021163.1    | Ca_kabuli_chr04 | 32886385                | AA                              | GG              | 1946816904               |
| SNP_P4_55424_32886408 | NC_021163.1    | Ca_kabuli_chr04 | 32886408                | TT                              | CC              | 1946816906               |
| SNP_P4_55425_32886442 | NC_021163.1    | Ca_kabuli_chr04 | 32886442                | TT                              | CC              | 1946816909               |
| SNP_P4_55426_32886445 | NC_021163.1    | Ca_kabuli_chr04 | 32886445                | AA                              | GG              | 1946816911               |
| SNP_P4_55427_32886446 | NC_021163.1    | Ca_kabuli_chr04 | 32886446                | CC                              | TT              | 1946816913               |
| SNP_P4_55428_32886469 | NC_021163.1    | Ca_kabuli_chr04 | 32886469                | GG                              | AA              | 1946816915               |
| SNP_P4_55429_32886477 | NC_021163.1    | Ca_kabuli_chr04 | 32886477                | GG                              | CC              | 1946816918               |
| SNP_P4_55430_32886482 | NC_021163.1    | Ca_kabuli_chr04 | 32886482                | GG                              | AA              | 1946816920               |
| SNP_P4_55431_32886496 | NC_021163.1    | Ca_kabuli_chr04 | 32886496                | TT                              | CC              | 1946816922               |
| SNP_P4_55432_32886525 | NC_021163.1    | Ca_kabuli_chr04 | 32886525                | GG                              | AA              | 1946816924               |
| SNP_P4_55433_32886676 | NC_021163.1    | Ca_kabuli_chr04 | 32886676                | AA                              | GG              | 1946816926               |
| SNP_P4_55434_32886720 | NC_021163.1    | Ca_kabuli_chr04 | 32886720                | GG                              | AA              | 1946816929               |
| SNP_P4_55435_32886749 | NC_021163.1    | Ca_kabuli_chr04 | 32886749                | AA                              | CC              | 1946816931               |
| SNP_P4_55436_32886801 | NC_021163.1    | Ca_kabuli_chr04 | 32886801                | TT                              | CC              | 1946816933               |
| SNP_P4_55437_32886887 | NC_021163.1    | Ca_kabuli_chr04 | 32886887                | AA                              | GG              | 1946816935               |
| SNP_P4_55438_32888536 | NC_021163.1    | Ca_kabuli_chr04 | 32888536                | AA                              | CC              | 1946816937               |
| SNP_P4_55439_32888538 | NC_021163.1    | Ca_kabuli_chr04 | 32888538                | GG                              | TT              | 1946816939               |
| SNP_P4_55440_32888760 | NC_021163.1    | Ca_kabuli_chr04 | 32888760                | AA                              | CC              | 1946816941               |

| SNPs IDs              | Chromosome IDs | Chromosomes     | Physical positions (bp) | CDC Frontier (Reference genome) | (ILWC46 & LPNB) | NCBI SNPdb Accession IDs |
|-----------------------|----------------|-----------------|-------------------------|---------------------------------|-----------------|--------------------------|
| SNP_P4_55441_32888837 | NC_021163.1    | Ca_kabuli_chr04 | 32888837                | AA                              | TT              | 1946816943               |
| SNP_P4_55442_32888845 | NC_021163.1    | Ca_kabuli_chr04 | 32888845                | TT                              | CC              | 1946816945               |
| SNP_P4_55443_32888869 | NC_021163.1    | Ca_kabuli_chr04 | 32888869                | AA                              | GG              | 1946816947               |
| SNP_P4_55444_32890253 | NC_021163.1    | Ca_kabuli_chr04 | 32890253                | GG                              | AA              | 1946816950               |
| SNP_P4_55445_32890258 | NC_021163.1    | Ca_kabuli_chr04 | 32890258                | TT                              | CC              | 1946816952               |
| SNP_P4_55446_32890265 | NC_021163.1    | Ca_kabuli_chr04 | 32890265                | TT                              | CC              | 1946816954               |
| SNP_P4_55447_32890271 | NC_021163.1    | Ca_kabuli_chr04 | 32890271                | TT                              | GG              | 1946816956               |
| SNP_P4_55448_32902298 | NC_021163.1    | Ca_kabuli_chr04 | 32902298                | AA                              | GG              | 1946816958               |
| SNP_P4_55449_32902349 | NC_021163.1    | Ca_kabuli_chr04 | 32902349                | GG                              | AA              | 1946816960               |
| SNP_P4_55451_32902638 | NC_021163.1    | Ca_kabuli_chr04 | 32902638                | AA                              | CC              | 1946816962               |
| SNP_P4_55452_32902670 | NC_021163.1    | Ca_kabuli_chr04 | 32902670                | CC                              | GG              | 1946816964               |
| SNP_P4_55453_32902704 | NC_021163.1    | Ca_kabuli_chr04 | 32902704                | GG                              | AA              | 1946816966               |
| SNP_P4_55454_32902763 | NC_021163.1    | Ca_kabuli_chr04 | 32902763                | CC                              | TT              | 1946816968               |
| SNP_P4_55455_32902771 | NC_021163.1    | Ca_kabuli_chr04 | 32902771                | CC                              | TT              | 1946816970               |
| SNP_P4_55456_32902780 | NC_021163.1    | Ca_kabuli_chr04 | 32902780                | AA                              | CC              | 1946816972               |
| SNP_P4_55457_32902786 | NC_021163.1    | Ca_kabuli_chr04 | 32902786                | TT                              | CC              | 1946816974               |
| SNP_P4_55458_32902812 | NC_021163.1    | Ca_kabuli_chr04 | 32902812                | GG                              | CC              | 1946816976               |
| SNP_P4_55460_32909963 | NC_021163.1    | Ca_kabuli_chr04 | 32909963                | AA                              | GG              | 1946816978               |
| SNP_P4_55462_32917124 | NC_021163.1    | Ca_kabuli_chr04 | 32917124                | CC                              | TT              | 1946816980               |
| SNP_P4_55463_32936922 | NC_021163.1    | Ca_kabuli_chr04 | 32936922                | CC                              | GG              | 1946816982               |
| SNP_P4_55464_32946856 | NC_021163.1    | Ca_kabuli_chr04 | 32946856                | TT                              | AA              | 1946816985               |
| SNP_P4_55465_32946900 | NC_021163.1    | Ca_kabuli_chr04 | 32946900                | AA                              | TT              | 1946816987               |
| SNP_P4_55466_32959305 | NC_021163.1    | Ca_kabuli_chr04 | 32959305                | AA                              | TT              | 1946816989               |
| SNP_P4_55467_32959308 | NC_021163.1    | Ca_kabuli_chr04 | 32959308                | GG                              | TT              | 1946816991               |
| SNP_P4_55468_32959315 | NC_021163.1    | Ca_kabuli_chr04 | 32959315                | AA                              | CC              | 1946816993               |
| SNP_P4_55469_32959670 | NC_021163.1    | Ca_kabuli_chr04 | 32959670                | TT                              | CC              | 1946816995               |
| SNP_P4_55470_32967406 | NC_021163.1    | Ca_kabuli_chr04 | 32967406                | CC                              | TT              | 1946816997               |
| SNP_P4_55471_32967410 | NC_021163.1    | Ca_kabuli_chr04 | 32967410                | CC                              | GG              | 1946816999               |
| SNP_P4_55472_32967975 | NC_021163.1    | Ca_kabuli_chr04 | 32967975                | AA                              | CC              | 1946817001               |
| SNP_P4_55473_32968008 | NC_021163.1    | Ca_kabuli_chr04 | 32968008                | CC                              | TT              | 1946817003               |
| SNP_P4_55474_33030394 | NC_021163.1    | Ca_kabuli_chr04 | 33030394                | TT                              | AA              | 1946817005               |
| SNP_P4_55475_33035819 | NC_021163.1    | Ca_kabuli_chr04 | 33035819                | TT                              | AA              | 1946817007               |
| SNP_P4_55476_33050006 | NC_021163.1    | Ca_kabuli_chr04 | 33050006                | GG                              | AA              | 1946817009               |
| SNP_P4_55477_33050523 | NC_021163.1    | Ca_kabuli_chr04 | 33050523                | AA                              | GG              | 1946817011               |
| SNP_P4_55481_33055232 | NC_021163.1    | Ca_kabuli_chr04 | 33055232                | AA                              | GG              | 1946817013               |
| SNP_P4_55482_33060815 | NC_021163.1    | Ca_kabuli_chr04 | 33060815                | GG                              | TT              | 1946817015               |
| SNP_P4_55484_33069658 | NC_021163.1    | Ca_kabuli_chr04 | 33069658                | CC                              | AA              | 1946817017               |
| SNP_P4_55485_33071060 | NC_021163.1    | Ca_kabuli_chr04 | 33071060                | AA                              | GG              | 1946817019               |
| SNP_P4_55486_33076776 | NC_021163.1    | Ca_kabuli_chr04 | 33076776                | AA                              | GG              | 1946817021               |
| SNP_P4_55487_33076781 | NC_021163.1    | Ca_kabuli_chr04 | 33076781                | GG                              | AA              | 1946817023               |
| SNP_P4_55489_33087597 | NC_021163.1    | Ca_kabuli_chr04 | 33087597                | CC                              | TT              | 1946817025               |
| SNP_P4_55490_33089412 | NC_021163.1    | Ca_kabuli_chr04 | 33089412                | CC                              | AA              | 1946817027               |

| SNPs IDs              | Chromosome IDs | Chromosomes     | Physical positions (bp) | CDC Frontier (Reference genome) | (ILWC46 & LPNB) | NCBI SNPdb Accession IDs |
|-----------------------|----------------|-----------------|-------------------------|---------------------------------|-----------------|--------------------------|
| SNP_P4_55491_33089478 | NC_021163.1    | Ca_kabuli_chr04 | 33089478                | TT                              | CC              | 1946817029               |
| SNP_P4_55492_33090083 | NC_021163.1    | Ca_kabuli_chr04 | 33090083                | GG                              | CC              | 1946817031               |
| SNP_P4_55493_33091145 | NC_021163.1    | Ca_kabuli_chr04 | 33091145                | AA                              | TT              | 1946817033               |
| SNP_P4_55494_33094369 | NC_021163.1    | Ca_kabuli_chr04 | 33094369                | TT                              | CC              | 1946817036               |
| SNP_P4_55495_33094874 | NC_021163.1    | Ca_kabuli_chr04 | 33094874                | CC                              | TT              | 1946817038               |
| SNP_P4_55496_33095008 | NC_021163.1    | Ca_kabuli_chr04 | 33095008                | CC                              | GG              | 1946817040               |
| SNP_P4_55497_33095026 | NC_021163.1    | Ca_kabuli_chr04 | 33095026                | CC                              | GG              | 1946817042               |
| SNP_P4_55498_33096130 | NC_021163.1    | Ca_kabuli_chr04 | 33096130                | GG                              | AA              | 1946817044               |
| SNP_P4_55499_33098003 | NC_021163.1    | Ca_kabuli_chr04 | 33098003                | GG                              | CC              | 1946817046               |
| SNP_P4_55500_33101544 | NC_021163.1    | Ca_kabuli_chr04 | 33101544                | TT                              | CC              | 1946817048               |
| SNP_P4_55501_33101591 | NC_021163.1    | Ca_kabuli_chr04 | 33101591                | TT                              | GG              | 1946817050               |
| SNP_P4_55502_33101999 | NC_021163.1    | Ca_kabuli_chr04 | 33101999                | GG                              | TT              | 1946817053               |
| SNP_P4_55503_33102636 | NC_021163.1    | Ca_kabuli_chr04 | 33102636                | CC                              | GG              | 1946817055               |
| SNP_P4_55504_33105392 | NC_021163.1    | Ca_kabuli_chr04 | 33105392                | TT                              | GG              | 1946817057               |
| SNP_P4_55505_33106054 | NC_021163.1    | Ca_kabuli_chr04 | 33106054                | AA                              | GG              | 1946817059               |
| SNP_P4_55506_33106613 | NC_021163.1    | Ca_kabuli_chr04 | 33106613                | AA                              | GG              | 1946817061               |
| SNP_P4_55507_33108855 | NC_021163.1    | Ca_kabuli_chr04 | 33108855                | CC                              | GG              | 1946817063               |
| SNP_P4_55508_33115145 | NC_021163.1    | Ca_kabuli_chr04 | 33115145                | CC                              | TT              | 1946817065               |
| SNP_P4_55509_33115235 | NC_021163.1    | Ca_kabuli_chr04 | 33115235                | GG                              | TT              | 1946817067               |
| SNP_P4_55510_33115391 | NC_021163.1    | Ca_kabuli_chr04 | 33115391                | TT                              | CC              | 1946817069               |
| SNP_P4_55511_33120751 | NC_021163.1    | Ca_kabuli_chr04 | 33120751                | TT                              | CC              | 1946817071               |
| SNP_P4_55512_33121083 | NC_021163.1    | Ca_kabuli_chr04 | 33121083                | CC                              | TT              | 1946817074               |
| SNP_P4_55513_33121105 | NC_021163.1    | Ca_kabuli_chr04 | 33121105                | TT                              | CC              | 1946817076               |
| SNP_P4_55514_33121189 | NC_021163.1    | Ca_kabuli_chr04 | 33121189                | CC                              | TT              | 1946817078               |
| SNP_P4_55515_33125779 | NC_021163.1    | Ca_kabuli_chr04 | 33125779                | TT                              | AA              | 1946817080               |
| SNP_P4_55516_33128452 | NC_021163.1    | Ca_kabuli_chr04 | 33128452                | CC                              | GG              | 1946817082               |
| SNP_P4_55517_33129817 | NC_021163.1    | Ca_kabuli_chr04 | 33129817                | TT                              | CC              | 1946817084               |
| SNP_P4_55518_33130017 | NC_021163.1    | Ca_kabuli_chr04 | 33130017                | GG                              | TT              | 1946817086               |
| SNP_P4_55519_33130445 | NC_021163.1    | Ca_kabuli_chr04 | 33130445                | GG                              | TT              | 1946817088               |
| SNP_P4_55520_33130979 | NC_021163.1    | Ca_kabuli_chr04 | 33130979                | AA                              | CC              | 1946817090               |
| SNP_P4_55521_33132306 | NC_021163.1    | Ca_kabuli_chr04 | 33132306                | AA                              | GG              | 1946817092               |
| SNP_P4_55522_33132546 | NC_021163.1    | Ca_kabuli_chr04 | 33132546                | TT                              | CC              | 1946817094               |
| SNP_P4_55523_33133917 | NC_021163.1    | Ca_kabuli_chr04 | 33133917                | TT                              | AA              | 1946817096               |
| SNP_P4_55524_33135278 | NC_021163.1    | Ca_kabuli_chr04 | 33135278                | CC                              | TT              | 1946817098               |
| SNP_P4_55525_33135327 | NC_021163.1    | Ca_kabuli_chr04 | 33135327                | TT                              | CC              | 1946817100               |
| SNP_P4_55526_33135421 | NC_021163.1    | Ca_kabuli_chr04 | 33135421                | AA                              | GG              | 1946817102               |
| SNP_P4_55527_33137108 | NC_021163.1    | Ca_kabuli_chr04 | 33137108                | GG                              | TT              | 1946817104               |
| SNP_P4_55528_33141011 | NC_021163.1    | Ca_kabuli_chr04 | 33141011                | AA                              | GG              | 1946817106               |
| SNP_P4_55529_33143001 | NC_021163.1    | Ca_kabuli_chr04 | 33143001                | TT                              | CC              | 1946817108               |
| SNP_P4_55530_33143052 | NC_021163.1    | Ca_kabuli_chr04 | 33143052                | AA                              | GG              | 1946817110               |
| SNP_P4_55531_33143941 | NC_021163.1    | Ca_kabuli_chr04 | 33143941                | AA                              | GG              | 1946817112               |
| SNP_P4_55532_33145591 | NC_021163.1    | Ca_kabuli_chr04 | 33145591                | GG                              | TT              | 1946817114               |

| SNPs IDs              | Chromosome IDs | Chromosomes     | Physical positions (bp) | CDC Frontier (Reference genome) | (ILWC46 & LPNB) | NCBI SNPdb Accession IDs |
|-----------------------|----------------|-----------------|-------------------------|---------------------------------|-----------------|--------------------------|
| SNP_P4_55534_33162328 | NC_021163.1    | Ca_kabuli_chr04 | 33162328                | TT                              | CC              | 1946817117               |
| SNP_P4_55535_33166087 | NC_021163.1    | Ca_kabuli_chr04 | 33166087                | TT                              | CC              | 1946817119               |
| SNP_P4_55536_33167701 | NC_021163.1    | Ca_kabuli_chr04 | 33167701                | TT                              | CC              | 1946817121               |
| SNP_P4_55537_33173580 | NC_021163.1    | Ca_kabuli_chr04 | 33173580                | TT                              | GG              | 1946817123               |
| SNP_P4_55539_33179160 | NC_021163.1    | Ca_kabuli_chr04 | 33179160                | TT                              | GG              | 1946817125               |
| SNP_P4_55540_33179286 | NC_021163.1    | Ca_kabuli_chr04 | 33179286                | AA                              | GG              | 1946817127               |
| SNP_P4_55541_33179298 | NC_021163.1    | Ca_kabuli_chr04 | 33179298                | AA                              | GG              | 1946817129               |
| SNP_P4_55542_33185947 | NC_021163.1    | Ca_kabuli_chr04 | 33185947                | CC                              | TT              | 1946817131               |
| SNP_P4_55544_33189487 | NC_021163.1    | Ca_kabuli_chr04 | 33189487                | TT                              | GG              | 1946817133               |
| SNP_P4_55545_33189518 | NC_021163.1    | Ca_kabuli_chr04 | 33189518                | AA                              | TT              | 1946817135               |
| SNP_P4_55546_33194000 | NC_021163.1    | Ca_kabuli_chr04 | 33194000                | CC                              | TT              | 1946817137               |
| SNP_P4_55547_33195083 | NC_021163.1    | Ca_kabuli_chr04 | 33195083                | CC                              | TT              | 1946817139               |
| SNP_P4_55548_33195088 | NC_021163.1    | Ca_kabuli_chr04 | 33195088                | TT                              | CC              | 1946817141               |
| SNP_P4_55549_33195135 | NC_021163.1    | Ca_kabuli_chr04 | 33195135                | TT                              | AA              | 1946817143               |
| SNP_P4_55550_33195226 | NC_021163.1    | Ca_kabuli_chr04 | 33195226                | GG                              | AA              | 1946817145               |
| SNP_P4_55551_33195284 | NC_021163.1    | Ca_kabuli_chr04 | 33195284                | GG                              | AA              | 1946817147               |
| SNP_P4_55552_33195296 | NC_021163.1    | Ca_kabuli_chr04 | 33195296                | AA                              | CC              | 1946817149               |
| SNP_P4_55553_33195437 | NC_021163.1    | Ca_kabuli_chr04 | 33195437                | CC                              | TT              | 1946817151               |
| SNP_P4_55554_33195461 | NC_021163.1    | Ca_kabuli_chr04 | 33195461                | GG                              | TT              | 1946817153               |
| SNP_P4_55555_33195462 | NC_021163.1    | Ca_kabuli_chr04 | 33195462                | CC                              | TT              | 1946817155               |
| SNP_P4_55556_33195533 | NC_021163.1    | Ca_kabuli_chr04 | 33195533                | AA                              | GG              | 1946817157               |
| SNP_P4_55557_33195542 | NC_021163.1    | Ca_kabuli_chr04 | 33195542                | GG                              | AA              | 1946817159               |
| SNP_P4_55558_33195601 | NC_021163.1    | Ca_kabuli_chr04 | 33195601                | GG                              | AA              | 1946817161               |
| SNP_P4_55559_33195625 | NC_021163.1    | Ca_kabuli_chr04 | 33195625                | CC                              | AA              | 1946817163               |
| SNP_P4_55560_33198779 | NC_021163.1    | Ca_kabuli_chr04 | 33198779                | TT                              | GG              | 1946817165               |
| SNP_P4_55561_33200124 | NC_021163.1    | Ca_kabuli_chr04 | 33200124                | TT                              | GG              | 1946817167               |
| SNP_P4_55562_33200704 | NC_021163.1    | Ca_kabuli_chr04 | 33200704                | AA                              | GG              | 1946817169               |
| SNP_P4_55563_33203368 | NC_021163.1    | Ca_kabuli_chr04 | 33203368                | AA                              | GG              | 1946817171               |
| SNP_P4_55564_33203369 | NC_021163.1    | Ca_kabuli_chr04 | 33203369                | AA                              | TT              | 1946817173               |
| SNP_P4_55565_33203370 | NC_021163.1    | Ca_kabuli_chr04 | 33203370                | AA                              | TT              | 1946817175               |
| SNP_P4_55566_33203393 | NC_021163.1    | Ca_kabuli_chr04 | 33203393                | TT                              | GG              | 1946817177               |
| SNP_P4_55568_33207698 | NC_021163.1    | Ca_kabuli_chr04 | 33207698                | TT                              | CC              | 1946817179               |
| SNP_P4_55569_33208327 | NC_021163.1    | Ca_kabuli_chr04 | 33208327                | CC                              | AA              | 1946817181               |
| SNP_P4_55570_33210371 | NC_021163.1    | Ca_kabuli_chr04 | 33210371                | AA                              | GG              | 1946817183               |
| SNP_P4_55571_33210373 | NC_021163.1    | Ca_kabuli_chr04 | 33210373                | CC                              | TT              | 1946817185               |
| SNP_P4_55573_33212267 | NC_021163.1    | Ca_kabuli_chr04 | 33212267                | AA                              | CC              | 1946817187               |
| SNP_P4_55576_33215269 | NC_021163.1    | Ca_kabuli_chr04 | 33215269                | TT                              | CC              | 1946817190               |
| SNP_P4_55577_33215585 | NC_021163.1    | Ca_kabuli_chr04 | 33215585                | TT                              | CC              | 1946817192               |
| SNP_P4_55578_33222955 | NC_021163.1    | Ca_kabuli_chr04 | 33222955                | GG                              | AA              | 1946817194               |
| SNP_P4_55579_33223101 | NC_021163.1    | Ca_kabuli_chr04 | 33223101                | TT                              | CC              | 1946817196               |
| SNP_P4_55580_33223186 | NC_021163.1    | Ca_kabuli_chr04 | 33223186                | GG                              | TT              | 1946817198               |
| SNP_P4_55581_33239287 | NC_021163.1    | Ca_kabuli_chr04 | 33239287                | GG                              | AA              | 1946817200               |

| SNPs IDs              | Chromosome IDs | Chromosomes     | Physical positions (bp) | CDC Frontier (Reference genome) | (ILWC46 & LPNB) | NCBI SNPdb Accession IDs |
|-----------------------|----------------|-----------------|-------------------------|---------------------------------|-----------------|--------------------------|
| SNP_P4_55582_33239540 | NC_021163.1    | Ca_kabuli_chr04 | 33239540                | GG                              | AA              | 1946817202               |
| SNP_P4_55583_33242258 | NC_021163.1    | Ca_kabuli_chr04 | 33242258                | TT                              | AA              | 1946817204               |
| SNP_P4_55584_33243916 | NC_021163.1    | Ca_kabuli_chr04 | 33243916                | AA                              | GG              | 1946817206               |
| SNP_P4_55585_33252781 | NC_021163.1    | Ca_kabuli_chr04 | 33252781                | GG                              | AA              | 1946817208               |
| SNP_P4_55586_33255537 | NC_021163.1    | Ca_kabuli_chr04 | 33255537                | GG                              | TT              | 1946817210               |
| SNP_P4_55587_33255725 | NC_021163.1    | Ca_kabuli_chr04 | 33255725                | AA                              | GG              | 1946817212               |
| SNP_P4_55588_33256057 | NC_021163.1    | Ca_kabuli_chr04 | 33256057                | TT                              | GG              | 1946817214               |
| SNP_P4_55590_33259039 | NC_021163.1    | Ca_kabuli_chr04 | 33259039                | AA                              | CC              | 1946817216               |
| SNP_P4_55592_33262293 | NC_021163.1    | Ca_kabuli_chr04 | 33262293                | GG                              | CC              | 1946817218               |
| SNP_P4_55593_33264467 | NC_021163.1    | Ca_kabuli_chr04 | 33264467                | GG                              | AA              | 1946817220               |
| SNP_P4_55594_33265849 | NC_021163.1    | Ca_kabuli_chr04 | 33265849                | TT                              | CC              | 1946817222               |
| SNP_P4_55595_33266030 | NC_021163.1    | Ca_kabuli_chr04 | 33266030                | GG                              | AA              | 1946817224               |
| SNP_P4_55596_33269906 | NC_021163.1    | Ca_kabuli_chr04 | 33269906                | CC                              | TT              | 1946817226               |
| SNP_P4_55597_33272476 | NC_021163.1    | Ca_kabuli_chr04 | 33272476                | TT                              | GG              | 1946817229               |
| SNP_P4_55598_33272900 | NC_021163.1    | Ca_kabuli_chr04 | 33272900                | GG                              | AA              | 1946817231               |
| SNP_P4_55599_33274157 | NC_021163.1    | Ca_kabuli_chr04 | 33274157                | GG                              | AA              | 1946817233               |
| SNP_P4_55601_33293410 | NC_021163.1    | Ca_kabuli_chr04 | 33293410                | AA                              | GG              | 1946817235               |
| SNP_P4_55602_33293494 | NC_021163.1    | Ca_kabuli_chr04 | 33293494                | CC                              | GG              | 1946817237               |
| SNP_P4_55604_33300006 | NC_021163.1    | Ca_kabuli_chr04 | 33300006                | CC                              | TT              | 1946817239               |
| SNP_P4_55605_33306758 | NC_021163.1    | Ca_kabuli_chr04 | 33306758                | GG                              | AA              | 1946817241               |
| SNP_P4_55606_33307224 | NC_021163.1    | Ca_kabuli_chr04 | 33307224                | GG                              | AA              | 1946817243               |
| SNP_P4_55607_33307840 | NC_021163.1    | Ca_kabuli_chr04 | 33307840                | AA                              | CC              | 1946817245               |
| SNP_P4_55609_33309002 | NC_021163.1    | Ca_kabuli_chr04 | 33309002                | TT                              | CC              | 1946817247               |
| SNP_P4_55610_33309412 | NC_021163.1    | Ca_kabuli_chr04 | 33309412                | AA                              | GG              | 1946817249               |
| SNP_P4_55611_33311339 | NC_021163.1    | Ca_kabuli_chr04 | 33311339                | CC                              | TT              | 1946817251               |
| SNP_P4_55612_33312098 | NC_021163.1    | Ca_kabuli_chr04 | 33312098                | CC                              | TT              | 1946817253               |
| SNP_P4_55613_33312100 | NC_021163.1    | Ca_kabuli_chr04 | 33312100                | AA                              | GG              | 1946817255               |
| SNP_P4_55614_33312157 | NC_021163.1    | Ca_kabuli_chr04 | 33312157                | CC                              | AA              | 1946817258               |
| SNP_P4_55615_33312288 | NC_021163.1    | Ca_kabuli_chr04 | 33312288                | TT                              | CC              | 1946817260               |
| SNP_P4_55616_33312304 | NC_021163.1    | Ca_kabuli_chr04 | 33312304                | GG                              | TT              | 1946817262               |
| SNP_P4_55617_33314006 | NC_021163.1    | Ca_kabuli_chr04 | 33314006                | CC                              | AA              | 1946817264               |
| SNP_P4_55618_33314008 | NC_021163.1    | Ca_kabuli_chr04 | 33314008                | TT                              | AA              | 1946817266               |
| SNP_P4_55619_33314014 | NC_021163.1    | Ca_kabuli_chr04 | 33314014                | CC                              | GG              | 1946817268               |
| SNP_P4_55620_33314589 | NC_021163.1    | Ca_kabuli_chr04 | 33314589                | TT                              | CC              | 1946817270               |
| SNP_P4_55621_33314592 | NC_021163.1    | Ca_kabuli_chr04 | 33314592                | GG                              | TT              | 1946817272               |
| SNP_P4_55622_33315581 | NC_021163.1    | Ca_kabuli_chr04 | 33315581                | GG                              | AA              | 1946817274               |
| SNP_P4_55623_33315658 | NC_021163.1    | Ca_kabuli_chr04 | 33315658                | AA                              | CC              | 1946817276               |
| SNP_P4_55625_33315735 | NC_021163.1    | Ca_kabuli_chr04 | 33315735                | GG                              | TT              | 1946817278               |
| SNP_P4_55627_33316552 | NC_021163.1    | Ca_kabuli_chr04 | 33316552                | TT                              | CC              | 1946817280               |
| SNP_P4_55628_33317464 | NC_021163.1    | Ca_kabuli_chr04 | 33317464                | GG                              | TT              | 1946817283               |
| SNP_P4_55629_33320435 | NC_021163.1    | Ca_kabuli_chr04 | 33320435                | TT                              | CC              | 1946817285               |
| SNP_P4_55630_33320727 | NC_021163.1    | Ca_kabuli_chr04 | 33320727                | TT                              | GG              | 1946817287               |

| SNPs IDs              | Chromosome IDs | Chromosomes     | Physical positions (bp) | CDC Frontier (Reference genome) | (ILWC46 & LPNB) | NCBI SNPdb Accession IDs |
|-----------------------|----------------|-----------------|-------------------------|---------------------------------|-----------------|--------------------------|
| SNP_P4_55631_33320728 | NC_021163.1    | Ca_kabuli_chr04 | 33320728                | TT                              | AA              | 1946817289               |
| SNP_P4_55634_33327067 | NC_021163.1    | Ca_kabuli_chr04 | 33327067                | TT                              | AA              | 1946817291               |
| SNP_P4_55635_33329447 | NC_021163.1    | Ca_kabuli_chr04 | 33329447                | AA                              | GG              | 1946817293               |
| SNP_P4_55636_33329448 | NC_021163.1    | Ca_kabuli_chr04 | 33329448                | GG                              | AA              | 1946817295               |
| SNP_P4_55637_33329578 | NC_021163.1    | Ca_kabuli_chr04 | 33329578                | CC                              | TT              | 1946817297               |
| SNP_P4_55638_33329979 | NC_021163.1    | Ca_kabuli_chr04 | 33329979                | TT                              | CC              | 1946817299               |
| SNP_P4_55639_33330731 | NC_021163.1    | Ca_kabuli_chr04 | 33330731                | CC                              | GG              | 1946817301               |
| SNP_P4_55640_33331488 | NC_021163.1    | Ca_kabuli_chr04 | 33331488                | GG                              | AA              | 1946817303               |
| SNP_P4_55641_33331916 | NC_021163.1    | Ca_kabuli_chr04 | 33331916                | CC                              | TT              | 1946817305               |
| SNP_P4_55642_33332119 | NC_021163.1    | Ca_kabuli_chr04 | 33332119                | AA                              | CC              | 1946817307               |
| SNP_P4_55643_33334729 | NC_021163.1    | Ca_kabuli_chr04 | 33334729                | GG                              | CC              | 1946817309               |
| SNP_P4_55644_33334979 | NC_021163.1    | Ca_kabuli_chr04 | 33334979                | CC                              | TT              | 1946817311               |
| SNP_P4_55645_33334992 | NC_021163.1    | Ca_kabuli_chr04 | 33334992                | TT                              | CC              | 1946817313               |
| SNP_P4_55646_33335129 | NC_021163.1    | Ca_kabuli_chr04 | 33335129                | CC                              | TT              | 1946817315               |
| SNP_P4_55648_33337353 | NC_021163.1    | Ca_kabuli_chr04 | 33337353                | GG                              | CC              | 1946817317               |
| SNP_P4_55649_33337364 | NC_021163.1    | Ca_kabuli_chr04 | 33337364                | GG                              | AA              | 1946817319               |
| SNP_P4_55650_33338024 | NC_021163.1    | Ca_kabuli_chr04 | 33338024                | TT                              | CC              | 1946817321               |
| SNP_P4_55651_33339687 | NC_021163.1    | Ca_kabuli_chr04 | 33339687                | AA                              | TT              | 1946817323               |
| SNP_P4_55652_33339688 | NC_021163.1    | Ca_kabuli_chr04 | 33339688                | CC                              | TT              | 1946817325               |
| SNP_P4_55653_33339689 | NC_021163.1    | Ca_kabuli_chr04 | 33339689                | TT                              | CC              | 1946817327               |
| SNP_P4_55654_33340067 | NC_021163.1    | Ca_kabuli_chr04 | 33340067                | TT                              | GG              | 1946817329               |
| SNP_P4_55655_33340151 | NC_021163.1    | Ca_kabuli_chr04 | 33340151                | AA                              | GG              | 1946817331               |
| SNP_P4_55656_33340309 | NC_021163.1    | Ca_kabuli_chr04 | 33340309                | TT                              | CC              | 1946817333               |
| SNP_P4_55657_33341180 | NC_021163.1    | Ca_kabuli_chr04 | 33341180                | GG                              | AA              | 1946817335               |
| SNP_P4_55658_33342306 | NC_021163.1    | Ca_kabuli_chr04 | 33342306                | AA                              | GG              | 1946817337               |
| SNP_P4_55659_33342307 | NC_021163.1    | Ca_kabuli_chr04 | 33342307                | AA                              | CC              | 1946817339               |
| SNP_P4_55661_33342877 | NC_021163.1    | Ca_kabuli_chr04 | 33342877                | CC                              | TT              | 1946817341               |
| SNP_P4_55662_33346340 | NC_021163.1    | Ca_kabuli_chr04 | 33346340                | TT                              | GG              | 1946817343               |
| SNP_P4_55663_33346347 | NC_021163.1    | Ca_kabuli_chr04 | 33346347                | TT                              | GG              | 1946817345               |
| SNP_P4_55664_33346358 | NC_021163.1    | Ca_kabuli_chr04 | 33346358                | AA                              | TT              | 1946817347               |
| SNP_P4_55665_33346395 | NC_021163.1    | Ca_kabuli_chr04 | 33346395                | AA                              | CC              | 1946817349               |
| SNP_P4_55666_33346565 | NC_021163.1    | Ca_kabuli_chr04 | 33346565                | TT                              | AA              | 1946817352               |
| SNP_P4_55667_33346582 | NC_021163.1    | Ca_kabuli_chr04 | 33346582                | GG                              | TT              | 1946817354               |
| SNP_P4_55668_33346586 | NC_021163.1    | Ca_kabuli_chr04 | 33346586                | AA                              | TT              | 1946817356               |
| SNP_P4_55669_33346741 | NC_021163.1    | Ca_kabuli_chr04 | 33346741                | AA                              | GG              | 1946817358               |
| SNP_P4_55670_33346804 | NC_021163.1    | Ca_kabuli_chr04 | 33346804                | GG                              | TT              | 1946817360               |
| SNP_P4_55671_33346832 | NC_021163.1    | Ca_kabuli_chr04 | 33346832                | TT                              | GG              | 1946817362               |
| SNP_P4_55673_33347072 | NC_021163.1    | Ca_kabuli_chr04 | 33347072                | CC                              | TT              | 1946817364               |
| SNP_P4_55674_33347134 | NC_021163.1    | Ca_kabuli_chr04 | 33347134                | AA                              | TT              | 1946817366               |
| SNP_P4_55675_33347258 | NC_021163.1    | Ca_kabuli_chr04 | 33347258                | AA                              | CC              | 1946817368               |
| SNP_P4_55676_33347299 | NC_021163.1    | Ca_kabuli_chr04 | 33347299                | TT                              | CC              | 1946817370               |
| SNP_P4_55677_33347416 | NC_021163.1    | Ca_kabuli_chr04 | 33347416                | GG                              | TT              | 1946817372               |



| SNPs IDs              | Chromosome IDs | Chromosomes     | Physical positions (bp) | CDC Frontier (Reference genome) | (ILWC46 & LPNB) | NCBI SNPdb Accession IDs |
|-----------------------|----------------|-----------------|-------------------------|---------------------------------|-----------------|--------------------------|
| SNP_P4_55678_33347451 | NC_021163.1    | Ca_kabuli_chr04 | 33347451                | TT                              | AA              | 1946817374               |
| SNP_P4_55679_33347508 | NC_021163.1    | Ca_kabuli_chr04 | 33347508                | TT                              | GG              | 1946817376               |
| SNP_P4_55680_33347516 | NC_021163.1    | Ca_kabuli_chr04 | 33347516                | TT                              | CC              | 1946817378               |
| SNP_P4_55681_33347529 | NC_021163.1    | Ca_kabuli_chr04 | 33347529                | CC                              | TT              | 1946817380               |
| SNP_P4_55682_33347559 | NC_021163.1    | Ca_kabuli_chr04 | 33347559                | GG                              | AA              | 1946817382               |
| SNP_P4_55683_33347589 | NC_021163.1    | Ca_kabuli_chr04 | 33347589                | AA                              | CC              | 1946817384               |
| SNP_P4_55684_33347651 | NC_021163.1    | Ca_kabuli_chr04 | 33347651                | TT                              | CC              | 1946817386               |
| SNP_P4_55685_33347670 | NC_021163.1    | Ca_kabuli_chr04 | 33347670                | AA                              | CC              | 1946817388               |
| SNP_P4_55686_33347692 | NC_021163.1    | Ca_kabuli_chr04 | 33347692                | TT                              | CC              | 1946817390               |
| SNP_P4_55687_33347732 | NC_021163.1    | Ca_kabuli_chr04 | 33347732                | GG                              | AA              | 1946817392               |
| SNP_P4_55688_33347736 | NC_021163.1    | Ca_kabuli_chr04 | 33347736                | TT                              | CC              | 1946817394               |
| SNP_P4_55689_33347746 | NC_021163.1    | Ca_kabuli_chr04 | 33347746                | AA                              | GG              | 1946817396               |
| SNP_P4_55690_33347829 | NC_021163.1    | Ca_kabuli_chr04 | 33347829                | AA                              | TT              | 1946817399               |
| SNP_P4_55691_33347837 | NC_021163.1    | Ca_kabuli_chr04 | 33347837                | CC                              | TT              | 1946817401               |
| SNP_P4_55692_33347870 | NC_021163.1    | Ca_kabuli_chr04 | 33347870                | AA                              | GG              | 1946817403               |
| SNP_P4_55693_33347913 | NC_021163.1    | Ca_kabuli_chr04 | 33347913                | CC                              | TT              | 1946817405               |
| SNP_P4_55694_33347924 | NC_021163.1    | Ca_kabuli_chr04 | 33347924                | AA                              | TT              | 1946817407               |
| SNP_P4_55695_33348054 | NC_021163.1    | Ca_kabuli_chr04 | 33348054                | CC                              | TT              | 1946817409               |
| SNP_P4_55696_33348163 | NC_021163.1    | Ca_kabuli_chr04 | 33348163                | AA                              | GG              | 1946817411               |
| SNP_P4_55698_33348285 | NC_021163.1    | Ca_kabuli_chr04 | 33348285                | GG                              | TT              | 1946817413               |
| SNP_P4_55699_33348530 | NC_021163.1    | Ca_kabuli_chr04 | 33348530                | GG                              | TT              | 1946817415               |
| SNP_P4_55700_33348558 | NC_021163.1    | Ca_kabuli_chr04 | 33348558                | GG                              | TT              | 1946817417               |
| SNP_P4_55701_33348677 | NC_021163.1    | Ca_kabuli_chr04 | 33348677                | GG                              | TT              | 1946817419               |
| SNP_P4_55702_33353982 | NC_021163.1    | Ca_kabuli_chr04 | 33353982                | TT                              | CC              | 1946817421               |
| SNP_P4_55703_33354712 | NC_021163.1    | Ca_kabuli_chr04 | 33354712                | AA                              | GG              | 1946817423               |
| SNP_P4_55704_33356253 | NC_021163.1    | Ca_kabuli_chr04 | 33356253                | GG                              | TT              | 1946817425               |
| SNP_P4_55705_33356262 | NC_021163.1    | Ca_kabuli_chr04 | 33356262                | GG                              | TT              | 1946817427               |
| SNP_P4_55706_33356410 | NC_021163.1    | Ca_kabuli_chr04 | 33356410                | AA                              | GG              | 1946817429               |
| SNP_P4_55707_33356687 | NC_021163.1    | Ca_kabuli_chr04 | 33356687                | CC                              | AA              | 1946817431               |
| SNP_P4_55708_33356972 | NC_021163.1    | Ca_kabuli_chr04 | 33356972                | CC                              | TT              | 1946817433               |
| SNP_P4_55709_33357057 | NC_021163.1    | Ca_kabuli_chr04 | 33357057                | AA                              | GG              | 1946817435               |
| SNP_P4_55710_33357117 | NC_021163.1    | Ca_kabuli_chr04 | 33357117                | TT                              | CC              | 1946817437               |
| SNP_P4_55711_33357125 | NC_021163.1    | Ca_kabuli_chr04 | 33357125                | TT                              | AA              | 1946817439               |
| SNP_P4_55712_33357147 | NC_021163.1    | Ca_kabuli_chr04 | 33357147                | GG                              | AA              | 1946817441               |
| SNP_P4_55713_33357771 | NC_021163.1    | Ca_kabuli_chr04 | 33357771                | TT                              | GG              | 1946817443               |
| SNP_P4_55714_33358170 | NC_021163.1    | Ca_kabuli_chr04 | 33358170                | GG                              | AA              | 1946817445               |
| SNP_P4_55715_33358460 | NC_021163.1    | Ca_kabuli_chr04 | 33358460                | CC                              | GG              | 1946817447               |
| SNP_P4_55716_33358467 | NC_021163.1    | Ca_kabuli_chr04 | 33358467                | CC                              | AA              | 1946817449               |
| SNP_P4_55717_33359621 | NC_021163.1    | Ca_kabuli_chr04 | 33359621                | CC                              | TT              | 1946817451               |
| SNP_P4_55718_33359687 | NC_021163.1    | Ca_kabuli_chr04 | 33359687                | TT                              | GG              | 1946817453               |
| SNP_P4_55719_33361120 | NC_021163.1    | Ca_kabuli_chr04 | 33361120                | CC                              | TT              | 1946817455               |
| SNP_P4_55720_33362869 | NC_021163.1    | Ca_kabuli_chr04 | 33362869                | CC                              | TT              | 1946817457               |

| SNPs IDs              | Chromosome IDs | Chromosomes     | Physical positions (bp) | CDC Frontier (Reference genome) | (ILWC46 & LPNB) | NCBI SNPdb Accession IDs |
|-----------------------|----------------|-----------------|-------------------------|---------------------------------|-----------------|--------------------------|
| SNP_P4_55722_33373736 | NC_021163.1    | Ca_kabuli_chr04 | 33373736                | CC                              | TT              | 1946817459               |
| SNP_P4_55723_33373780 | NC_021163.1    | Ca_kabuli_chr04 | 33373780                | CC                              | TT              | 1946817461               |
| SNP_P4_55724_33373784 | NC_021163.1    | Ca_kabuli_chr04 | 33373784                | AA                              | GG              | 1946817463               |
| SNP_P4_55725_33373806 | NC_021163.1    | Ca_kabuli_chr04 | 33373806                | GG                              | AA              | 1946817465               |
| SNP_P4_55726_33375316 | NC_021163.1    | Ca_kabuli_chr04 | 33375316                | CC                              | TT              | 1946817467               |
| SNP_P4_55727_33377264 | NC_021163.1    | Ca_kabuli_chr04 | 33377264                | CC                              | TT              | 1946817469               |
| SNP_P4_55728_33377314 | NC_021163.1    | Ca_kabuli_chr04 | 33377314                | TT                              | GG              | 1946817471               |
| SNP_P4_55729_33377530 | NC_021163.1    | Ca_kabuli_chr04 | 33377530                | CC                              | TT              | 1946817473               |
| SNP_P4_55730_33377567 | NC_021163.1    | Ca_kabuli_chr04 | 33377567                | CC                              | TT              | 1946817475               |
| SNP_P4_55731_33386529 | NC_021163.1    | Ca_kabuli_chr04 | 33386529                | TT                              | CC              | 1946817477               |
| SNP_P4_55733_33387019 | NC_021163.1    | Ca_kabuli_chr04 | 33387019                | CC                              | TT              | 1946817479               |
| SNP_P4_55734_33388786 | NC_021163.1    | Ca_kabuli_chr04 | 33388786                | AA                              | TT              | 1946817481               |
| SNP_P4_55735_33389960 | NC_021163.1    | Ca_kabuli_chr04 | 33389960                | GG                              | AA              | 1946817483               |
| SNP_P4_55736_33390862 | NC_021163.1    | Ca_kabuli_chr04 | 33390862                | AA                              | GG              | 1946817485               |
| SNP_P4_55737_33391837 | NC_021163.1    | Ca_kabuli_chr04 | 33391837                | GG                              | AA              | 1946817487               |
| SNP_P4_55738_33391867 | NC_021163.1    | Ca_kabuli_chr04 | 33391867                | AA                              | TT              | 1946817489               |
| SNP_P4_55739_33391868 | NC_021163.1    | Ca_kabuli_chr04 | 33391868                | TT                              | AA              | 1946817491               |
| SNP_P4_55740_33392091 | NC_021163.1    | Ca_kabuli_chr04 | 33392091                | TT                              | AA              | 1946817493               |
| SNP_P4_55741_33392207 | NC_021163.1    | Ca_kabuli_chr04 | 33392207                | GG                              | CC              | 1946817495               |
| SNP_P4_55742_33392294 | NC_021163.1    | Ca_kabuli_chr04 | 33392294                | TT                              | CC              | 1946817498               |
| SNP_P4_55744_33392367 | NC_021163.1    | Ca_kabuli_chr04 | 33392367                | TT                              | CC              | 1946817500               |
| SNP_P4_55745_33394920 | NC_021163.1    | Ca_kabuli_chr04 | 33394920                | CC                              | TT              | 1946817502               |
| SNP_P4_55746_33394926 | NC_021163.1    | Ca_kabuli_chr04 | 33394926                | TT                              | CC              | 1946817504               |
| SNP_P4_55747_33396245 | NC_021163.1    | Ca_kabuli_chr04 | 33396245                | AA                              | TT              | 1946817506               |
| SNP_P4_55748_33396297 | NC_021163.1    | Ca_kabuli_chr04 | 33396297                | GG                              | TT              | 1946817508               |
| SNP_P4_55750_33401199 | NC_021163.1    | Ca_kabuli_chr04 | 33401199                | CC                              | TT              | 1946817510               |
| SNP_P4_55752_33410034 | NC_021163.1    | Ca_kabuli_chr04 | 33410034                | TT                              | GG              | 1946817512               |
| SNP_P4_55753_33411491 | NC_021163.1    | Ca_kabuli_chr04 | 33411491                | AA                              | GG              | 1946817514               |
| SNP_P4_55755_33413639 | NC_021163.1    | Ca_kabuli_chr04 | 33413639                | AA                              | CC              | 1946817516               |
| SNP_P4_55756_33413645 | NC_021163.1    | Ca_kabuli_chr04 | 33413645                | TT                              | GG              | 1946817518               |
| SNP_P4_55757_33414128 | NC_021163.1    | Ca_kabuli_chr04 | 33414128                | CC                              | TT              | 1946817520               |
| SNP_P4_55758_33416814 | NC_021163.1    | Ca_kabuli_chr04 | 33416814                | CC                              | GG              | 1946817523               |
| SNP_P4_55759_33416922 | NC_021163.1    | Ca_kabuli_chr04 | 33416922                | AA                              | CC              | 1946817525               |
| SNP_P4_55760_33417207 | NC_021163.1    | Ca_kabuli_chr04 | 33417207                | AA                              | GG              | 1946817527               |
| SNP_P4_55761_33417621 | NC_021163.1    | Ca_kabuli_chr04 | 33417621                | GG                              | TT              | 1946817529               |
| SNP_P4_55762_33419450 | NC_021163.1    | Ca_kabuli_chr04 | 33419450                | TT                              | CC              | 1946817531               |
| SNP_P4_55763_33426363 | NC_021163.1    | Ca_kabuli_chr04 | 33426363                | AA                              | CC              | 1946817533               |
| SNP_P4_55765_33434567 | NC_021163.1    | Ca_kabuli_chr04 | 33434567                | AA                              | GG              | 1946817535               |
| SNP_P4_55766_33435714 | NC_021163.1    | Ca_kabuli_chr04 | 33435714                | AA                              | GG              | 1946817537               |
| SNP_P4_55767_33444070 | NC_021163.1    | Ca_kabuli_chr04 | 33444070                | AA                              | GG              | 1946817539               |
| SNP_P4_55768_33444524 | NC_021163.1    | Ca_kabuli_chr04 | 33444524                | GG                              | CC              | 1946817541               |
| SNP_P4_55769_33454032 | NC_021163.1    | Ca_kabuli_chr04 | 33454032                | GG                              | AA              | 1946817543               |

| SNPs IDs              | Chromosome IDs | Chromosomes     | Physical positions (bp) | CDC Frontier (Reference genome) | (ILWC46 & LPNB) | NCBI SNPdb Accession IDs |
|-----------------------|----------------|-----------------|-------------------------|---------------------------------|-----------------|--------------------------|
| SNP_P4_55771_33468169 | NC_021163.1    | Ca_kabuli_chr04 | 33468169                | TT                              | CC              | 1946817545               |
| SNP_P4_55772_33469132 | NC_021163.1    | Ca_kabuli_chr04 | 33469132                | AA                              | GG              | 1946817547               |
| SNP_P4_55773_33469352 | NC_021163.1    | Ca_kabuli_chr04 | 33469352                | TT                              | CC              | 1946817549               |
| SNP_P4_55774_33483926 | NC_021163.1    | Ca_kabuli_chr04 | 33483926                | TT                              | CC              | 1946817551               |
| SNP_P4_55776_33494414 | NC_021163.1    | Ca_kabuli_chr04 | 33494414                | AA                              | GG              | 1946817553               |
| SNP_P4_55777_33495286 | NC_021163.1    | Ca_kabuli_chr04 | 33495286                | TT                              | AA              | 1946817555               |
| SNP_P4_55778_33495621 | NC_021163.1    | Ca_kabuli_chr04 | 33495621                | AA                              | GG              | 1946817557               |
| SNP_P4_55779_33495753 | NC_021163.1    | Ca_kabuli_chr04 | 33495753                | TT                              | AA              | 1946817559               |
| SNP_P4_55780_33496241 | NC_021163.1    | Ca_kabuli_chr04 | 33496241                | AA                              | GG              | 1946817561               |
| SNP_P4_55781_33497460 | NC_021163.1    | Ca_kabuli_chr04 | 33497460                | AA                              | TT              | 1946817563               |
| SNP_P4_55783_33500490 | NC_021163.1    | Ca_kabuli_chr04 | 33500490                | CC                              | AA              | 1946817565               |
| SNP_P4_55785_33503710 | NC_021163.1    | Ca_kabuli_chr04 | 33503710                | AA                              | TT              | 1946817567               |
| SNP_P4_55786_33508800 | NC_021163.1    | Ca_kabuli_chr04 | 33508800                | GG                              | AA              | 1946817569               |
| SNP_P4_55787_33509373 | NC_021163.1    | Ca_kabuli_chr04 | 33509373                | CC                              | TT              | 1946817571               |
| SNP_P4_55788_33509434 | NC_021163.1    | Ca_kabuli_chr04 | 33509434                | GG                              | TT              | 1946817573               |
| SNP_P4_55789_33513271 | NC_021163.1    | Ca_kabuli_chr04 | 33513271                | TT                              | CC              | 1946817576               |
| SNP_P4_55790_33513281 | NC_021163.1    | Ca_kabuli_chr04 | 33513281                | CC                              | AA              | 1946817578               |
| SNP_P4_55791_33516045 | NC_021163.1    | Ca_kabuli_chr04 | 33516045                | AA                              | GG              | 1946817580               |
| SNP_P4_55792_33516654 | NC_021163.1    | Ca_kabuli_chr04 | 33516654                | GG                              | AA              | 1946817582               |
| SNP_P4_55793_33520303 | NC_021163.1    | Ca_kabuli_chr04 | 33520303                | TT                              | GG              | 1946817584               |
| SNP_P4_55794_33529670 | NC_021163.1    | Ca_kabuli_chr04 | 33529670                | GG                              | AA              | 1946817586               |
| SNP_P4_55795_33533586 | NC_021163.1    | Ca_kabuli_chr04 | 33533586                | CC                              | AA              | 1946817588               |
| SNP_P4_55796_33538357 | NC_021163.1    | Ca_kabuli_chr04 | 33538357                | AA                              | CC              | 1946817590               |
| SNP_P4_55797_33541800 | NC_021163.1    | Ca_kabuli_chr04 | 33541800                | CC                              | AA              | 1946817592               |
| SNP_P4_55798_33543072 | NC_021163.1    | Ca_kabuli_chr04 | 33543072                | TT                              | GG              | 1946817594               |
| SNP_P4_55799_33546798 | NC_021163.1    | Ca_kabuli_chr04 | 33546798                | TT                              | GG              | 1946817596               |
| SNP_P4_55800_33553524 | NC_021163.1    | Ca_kabuli_chr04 | 33553524                | CC                              | AA              | 1946817599               |
| SNP_P4_55801_33553655 | NC_021163.1    | Ca_kabuli_chr04 | 33553655                | CC                              | TT              | 1946817601               |
| SNP_P4_55802_33554568 | NC_021163.1    | Ca_kabuli_chr04 | 33554568                | TT                              | CC              | 1946817603               |
| SNP_P4_55804_33555136 | NC_021163.1    | Ca_kabuli_chr04 | 33555136                | GG                              | AA              | 1946817605               |
| SNP_P4_55805_33558453 | NC_021163.1    | Ca_kabuli_chr04 | 33558453                | CC                              | TT              | 1946817607               |
| SNP_P4_55806_33561198 | NC_021163.1    | Ca_kabuli_chr04 | 33561198                | GG                              | TT              | 1946817609               |
| SNP_P4_55807_33561516 | NC_021163.1    | Ca_kabuli_chr04 | 33561516                | TT                              | AA              | 1946817611               |
| SNP_P4_55808_33562764 | NC_021163.1    | Ca_kabuli_chr04 | 33562764                | TT                              | GG              | 1946817613               |
| SNP_P4_55809_33562789 | NC_021163.1    | Ca_kabuli_chr04 | 33562789                | TT                              | CC              | 1946817615               |
| SNP_P4_55810_33562813 | NC_021163.1    | Ca_kabuli_chr04 | 33562813                | GG                              | AA              | 1946817618               |
| SNP_P4_55811_33562834 | NC_021163.1    | Ca_kabuli_chr04 | 33562834                | TT                              | GG              | 1946817620               |
| SNP_P4_55812_33565776 | NC_021163.1    | Ca_kabuli_chr04 | 33565776                | GG                              | TT              | 1946817622               |
| SNP_P4_55814_33567812 | NC_021163.1    | Ca_kabuli_chr04 | 33567812                | TT                              | CC              | 1946817624               |
| SNP_P4_55815_33570222 | NC_021163.1    | Ca_kabuli_chr04 | 33570222                | TT                              | AA              | 1946817626               |
| SNP_P4_55816_33570374 | NC_021163.1    | Ca_kabuli_chr04 | 33570374                | TT                              | CC              | 1946817628               |
| SNP_P4_55817_33570375 | NC_021163.1    | Ca_kabuli_chr04 | 33570375                | TT                              | CC              | 1946817630               |

| SNPs IDs              | Chromosome IDs | Chromosomes     | Physical positions (bp) | CDC Frontier (Reference genome) | (ILWC46 & LPNB) | NCBI SNPdb Accession IDs |
|-----------------------|----------------|-----------------|-------------------------|---------------------------------|-----------------|--------------------------|
| SNP_P4_55818_33570393 | NC_021163.1    | Ca_kabuli_chr04 | 33570393                | TT                              | CC              | 1946817632               |
| SNP_P4_55819_33570515 | NC_021163.1    | Ca_kabuli_chr04 | 33570515                | CC                              | GG              | 1946817634               |
| SNP_P4_55820_33570574 | NC_021163.1    | Ca_kabuli_chr04 | 33570574                | TT                              | AA              | 1946817636               |
| SNP_P4_55821_33570654 | NC_021163.1    | Ca_kabuli_chr04 | 33570654                | TT                              | CC              | 1946817638               |
| SNP_P4_55822_33570888 | NC_021163.1    | Ca_kabuli_chr04 | 33570888                | GG                              | AA              | 1946817640               |
| SNP_P4_55823_33570951 | NC_021163.1    | Ca_kabuli_chr04 | 33570951                | GG                              | AA              | 1946817642               |
| SNP_P4_55824_33572761 | NC_021163.1    | Ca_kabuli_chr04 | 33572761                | AA                              | GG              | 1946817644               |
| SNP_P4_55825_33585700 | NC_021163.1    | Ca_kabuli_chr04 | 33585700                | GG                              | AA              | 1946817646               |
| SNP_P4_55826_33587285 | NC_021163.1    | Ca_kabuli_chr04 | 33587285                | AA                              | GG              | 1946817648               |
| SNP_P4_55827_33599746 | NC_021163.1    | Ca_kabuli_chr04 | 33599746                | AA                              | GG              | 1946817650               |
| SNP_P4_55828_33600915 | NC_021163.1    | Ca_kabuli_chr04 | 33600915                | GG                              | AA              | 1946817652               |
| SNP_P4_55829_33602550 | NC_021163.1    | Ca_kabuli_chr04 | 33602550                | GG                              | CC              | 1946817654               |
| SNP_P4_55830_33607352 | NC_021163.1    | Ca_kabuli_chr04 | 33607352                | AA                              | GG              | 1946817656               |
| SNP_P4_55831_33611915 | NC_021163.1    | Ca_kabuli_chr04 | 33611915                | CC                              | AA              | 1946817658               |
| SNP_P4_55832_33612523 | NC_021163.1    | Ca_kabuli_chr04 | 33612523                | GG                              | TT              | 1946817660               |
| SNP_P4_55833_33613316 | NC_021163.1    | Ca_kabuli_chr04 | 33613316                | CC                              | TT              | 1946817662               |
| SNP_P4_55834_33614767 | NC_021163.1    | Ca_kabuli_chr04 | 33614767                | CC                              | AA              | 1946817664               |
| SNP_P4_55835_33614768 | NC_021163.1    | Ca_kabuli_chr04 | 33614768                | TT                              | AA              | 1946817666               |
| SNP_P4_55836_33614769 | NC_021163.1    | Ca_kabuli_chr04 | 33614769                | TT                              | AA              | 1946817668               |
| SNP_P4_55837_33614853 | NC_021163.1    | Ca_kabuli_chr04 | 33614853                | TT                              | AA              | 1946817670               |
| SNP_P4_55838_33615115 | NC_021163.1    | Ca_kabuli_chr04 | 33615115                | GG                              | TT              | 1946817672               |
| SNP_P4_55839_33615195 | NC_021163.1    | Ca_kabuli_chr04 | 33615195                | CC                              | TT              | 1946817674               |
| SNP_P4_55840_33615454 | NC_021163.1    | Ca_kabuli_chr04 | 33615454                | TT                              | CC              | 1946817676               |
| SNP_P4_55842_33615503 | NC_021163.1    | Ca_kabuli_chr04 | 33615503                | AA                              | GG              | 1946817678               |
| SNP_P4_55843_33615709 | NC_021163.1    | Ca_kabuli_chr04 | 33615709                | TT                              | AA              | 1946817680               |
| SNP_P4_55844_33615795 | NC_021163.1    | Ca_kabuli_chr04 | 33615795                | AA                              | GG              | 1946817682               |
| SNP_P4_55845_33615837 | NC_021163.1    | Ca_kabuli_chr04 | 33615837                | CC                              | TT              | 1946817685               |
| SNP_P4_55846_33616030 | NC_021163.1    | Ca_kabuli_chr04 | 33616030                | CC                              | TT              | 1946817687               |
| SNP_P4_55847_33616062 | NC_021163.1    | Ca_kabuli_chr04 | 33616062                | CC                              | TT              | 1946817689               |
| SNP_P4_55848_33616081 | NC_021163.1    | Ca_kabuli_chr04 | 33616081                | AA                              | TT              | 1946817691               |
| SNP_P4_55849_33616090 | NC_021163.1    | Ca_kabuli_chr04 | 33616090                | CC                              | AA              | 1946817693               |
| SNP_P4_55850_33616162 | NC_021163.1    | Ca_kabuli_chr04 | 33616162                | TT                              | CC              | 1946817695               |
| SNP_P4_55851_33616165 | NC_021163.1    | Ca_kabuli_chr04 | 33616165                | AA                              | TT              | 1946817697               |
| SNP_P4_55852_33616178 | NC_021163.1    | Ca_kabuli_chr04 | 33616178                | CC                              | TT              | 1946817699               |
| SNP_P4_55853_33616370 | NC_021163.1    | Ca_kabuli_chr04 | 33616370                | GG                              | AA              | 1946817701               |
| SNP_P4_55854_33616432 | NC_021163.1    | Ca_kabuli_chr04 | 33616432                | CC                              | AA              | 1946817703               |
| SNP_P4_55855_33616550 | NC_021163.1    | Ca_kabuli_chr04 | 33616550                | AA                              | GG              | 1946817705               |
| SNP_P4_55856_33616657 | NC_021163.1    | Ca_kabuli_chr04 | 33616657                | AA                              | GG              | 1946817707               |
| SNP_P4_55857_33616676 | NC_021163.1    | Ca_kabuli_chr04 | 33616676                | AA                              | GG              | 1946817709               |
| SNP_P4_55858_33616734 | NC_021163.1    | Ca_kabuli_chr04 | 33616734                | AA                              | GG              | 1946817711               |
| SNP_P4_55859_33616999 | NC_021163.1    | Ca_kabuli_chr04 | 33616999                | CC                              | TT              | 1946817713               |
| SNP_P4_55860_33617101 | NC_021163.1    | Ca_kabuli_chr04 | 33617101                | TT                              | CC              | 1946817715               |

| SNPs IDs              | Chromosome IDs | Chromosomes     | Physical positions (bp) | CDC Frontier (Reference genome) | (ILWC46 & LPNB) | NCBI SNPdb Accession IDs |
|-----------------------|----------------|-----------------|-------------------------|---------------------------------|-----------------|--------------------------|
| SNP_P4_55861_33617244 | NC_021163.1    | Ca_kabuli_chr04 | 33617244                | TT                              | AA              | 1946817717               |
| SNP_P4_55862_33617274 | NC_021163.1    | Ca_kabuli_chr04 | 33617274                | TT                              | CC              | 1946817719               |
| SNP_P4_55864_33617664 | NC_021163.1    | Ca_kabuli_chr04 | 33617664                | AA                              | GG              | 1946817721               |
| SNP_P4_55865_33617720 | NC_021163.1    | Ca_kabuli_chr04 | 33617720                | GG                              | AA              | 1946817723               |
| SNP_P4_55867_33617818 | NC_021163.1    | Ca_kabuli_chr04 | 33617818                | CC                              | TT              | 1946817725               |
| SNP_P4_55868_33617847 | NC_021163.1    | Ca_kabuli_chr04 | 33617847                | AA                              | GG              | 1946817727               |
| SNP_P4_55869_33618689 | NC_021163.1    | Ca_kabuli_chr04 | 33618689                | CC                              | TT              | 1946817729               |
| SNP_P4_55870_33618888 | NC_021163.1    | Ca_kabuli_chr04 | 33618888                | TT                              | CC              | 1946817731               |
| SNP_P4_55871_33619084 | NC_021163.1    | Ca_kabuli_chr04 | 33619084                | AA                              | GG              | 1946817733               |
| SNP_P4_55872_33619100 | NC_021163.1    | Ca_kabuli_chr04 | 33619100                | TT                              | AA              | 1946817735               |
| SNP_P4_55873_33619106 | NC_021163.1    | Ca_kabuli_chr04 | 33619106                | CC                              | AA              | 1946817737               |
| SNP_P4_55875_33619267 | NC_021163.1    | Ca_kabuli_chr04 | 33619267                | TT                              | GG              | 1946817739               |
| SNP_P4_55877_33619709 | NC_021163.1    | Ca_kabuli_chr04 | 33619709                | GG                              | CC              | 1946817741               |
| SNP_P4_55878_33620078 | NC_021163.1    | Ca_kabuli_chr04 | 33620078                | CC                              | AA              | 1946817743               |
| SNP_P4_55879_33620129 | NC_021163.1    | Ca_kabuli_chr04 | 33620129                | GG                              | TT              | 1946817745               |
| SNP_P4_55880_33620406 | NC_021163.1    | Ca_kabuli_chr04 | 33620406                | GG                              | AA              | 1946817747               |
| SNP_P4_55881_33620432 | NC_021163.1    | Ca_kabuli_chr04 | 33620432                | TT                              | AA              | 1946817750               |
| SNP_P4_55882_33620543 | NC_021163.1    | Ca_kabuli_chr04 | 33620543                | CC                              | TT              | 1946817752               |
| SNP_P4_55883_33620552 | NC_021163.1    | Ca_kabuli_chr04 | 33620552                | TT                              | CC              | 1946817754               |
| SNP_P4_55884_33620567 | NC_021163.1    | Ca_kabuli_chr04 | 33620567                | TT                              | CC              | 1946817756               |
| SNP_P4_55885_33620607 | NC_021163.1    | Ca_kabuli_chr04 | 33620607                | CC                              | TT              | 1946817758               |
| SNP_P4_55886_33620611 | NC_021163.1    | Ca_kabuli_chr04 | 33620611                | GG                              | AA              | 1946817760               |
| SNP_P4_55887_33620619 | NC_021163.1    | Ca_kabuli_chr04 | 33620619                | AA                              | GG              | 1946817762               |
| SNP_P4_55888_33620670 | NC_021163.1    | Ca_kabuli_chr04 | 33620670                | TT                              | CC              | 1946817764               |
| SNP_P4_55889_33620740 | NC_021163.1    | Ca_kabuli_chr04 | 33620740                | TT                              | CC              | 1946817766               |
| SNP_P4_55890_33620761 | NC_021163.1    | Ca_kabuli_chr04 | 33620761                | GG                              | AA              | 1946817768               |
| SNP_P4_55891_33620764 | NC_021163.1    | Ca_kabuli_chr04 | 33620764                | GG                              | AA              | 1946817770               |
| SNP_P4_55892_33620778 | NC_021163.1    | Ca_kabuli_chr04 | 33620778                | CC                              | TT              | 1946817772               |
| SNP_P4_55893_33620781 | NC_021163.1    | Ca_kabuli_chr04 | 33620781                | AA                              | CC              | 1946817774               |
| SNP_P4_55894_33620782 | NC_021163.1    | Ca_kabuli_chr04 | 33620782                | TT                              | CC              | 1946817776               |
| SNP_P4_55895_33620786 | NC_021163.1    | Ca_kabuli_chr04 | 33620786                | GG                              | AA              | 1946817779               |
| SNP_P4_55896_33620787 | NC_021163.1    | Ca_kabuli_chr04 | 33620787                | AA                              | TT              | 1946817781               |
| SNP_P4_55897_33620823 | NC_021163.1    | Ca_kabuli_chr04 | 33620823                | TT                              | CC              | 1946817783               |
| SNP_P4_55898_33620843 | NC_021163.1    | Ca_kabuli_chr04 | 33620843                | CC                              | TT              | 1946817785               |
| SNP_P4_55899_33620861 | NC_021163.1    | Ca_kabuli_chr04 | 33620861                | TT                              | CC              | 1946817787               |
| SNP_P4_55900_33620867 | NC_021163.1    | Ca_kabuli_chr04 | 33620867                | TT                              | CC              | 1946817789               |
| SNP_P4_55901_33620876 | NC_021163.1    | Ca_kabuli_chr04 | 33620876                | GG                              | CC              | 1946817791               |
| SNP_P4_55902_33620880 | NC_021163.1    | Ca_kabuli_chr04 | 33620880                | AA                              | GG              | 1946817793               |
| SNP_P4_55903_33620908 | NC_021163.1    | Ca_kabuli_chr04 | 33620908                | AA                              | GG              | 1946817795               |
| SNP_P4_55904_33620984 | NC_021163.1    | Ca_kabuli_chr04 | 33620984                | TT                              | CC              | 1946817797               |
| SNP_P4_55905_33621317 | NC_021163.1    | Ca_kabuli_chr04 | 33621317                | GG                              | TT              | 1946817800               |
| SNP_P4_55906_33621320 | NC_021163.1    | Ca_kabuli_chr04 | 33621320                | GG                              | AA              | 1946817802               |

| SNPs IDs              | Chromosome IDs | Chromosomes     | Physical positions (bp) | CDC Frontier (Reference genome) | (ILWC46 & LPNB) | NCBI SNPdb Accession IDs |
|-----------------------|----------------|-----------------|-------------------------|---------------------------------|-----------------|--------------------------|
| SNP_P4_55907_33621364 | NC_021163.1    | Ca_kabuli_chr04 | 33621364                | GG                              | AA              | 1946817804               |
| SNP_P4_55908_33621681 | NC_021163.1    | Ca_kabuli_chr04 | 33621681                | CC                              | TT              | 1946817806               |
| SNP_P4_55909_33621773 | NC_021163.1    | Ca_kabuli_chr04 | 33621773                | AA                              | TT              | 1946817808               |
| SNP_P4_55910_33625770 | NC_021163.1    | Ca_kabuli_chr04 | 33625770                | GG                              | TT              | 1946817810               |
| SNP_P4_55911_33625787 | NC_021163.1    | Ca_kabuli_chr04 | 33625787                | CC                              | TT              | 1946817812               |
| SNP_P4_55912_33625840 | NC_021163.1    | Ca_kabuli_chr04 | 33625840                | TT                              | CC              | 1946817815               |
| SNP_P4_55913_33625860 | NC_021163.1    | Ca_kabuli_chr04 | 33625860                | CC                              | TT              | 1946817817               |
| SNP_P4_55914_33626146 | NC_021163.1    | Ca_kabuli_chr04 | 33626146                | CC                              | GG              | 1946817819               |
| SNP_P4_55915_33626163 | NC_021163.1    | Ca_kabuli_chr04 | 33626163                | CC                              | GG              | 1946817821               |
| SNP_P4_55916_33626165 | NC_021163.1    | Ca_kabuli_chr04 | 33626165                | CC                              | TT              | 1946817823               |
| SNP_P4_55917_33626194 | NC_021163.1    | Ca_kabuli_chr04 | 33626194                | AA                              | TT              | 1946817825               |
| SNP_P4_55918_33626245 | NC_021163.1    | Ca_kabuli_chr04 | 33626245                | AA                              | GG              | 1946817827               |
| SNP_P4_55919_33626250 | NC_021163.1    | Ca_kabuli_chr04 | 33626250                | CC                              | TT              | 1946817829               |
| SNP_P4_55920_33626279 | NC_021163.1    | Ca_kabuli_chr04 | 33626279                | CC                              | TT              | 1946817831               |
| SNP_P4_55921_33626283 | NC_021163.1    | Ca_kabuli_chr04 | 33626283                | AA                              | CC              | 1946817833               |
| SNP_P4_55922_33626286 | NC_021163.1    | Ca_kabuli_chr04 | 33626286                | AA                              | CC              | 1946817835               |
| SNP_P4_55923_33626305 | NC_021163.1    | Ca_kabuli_chr04 | 33626305                | CC                              | TT              | 1946817837               |
| SNP_P4_55924_33626311 | NC_021163.1    | Ca_kabuli_chr04 | 33626311                | TT                              | CC              | 1946817840               |
| SNP_P4_55925_33626384 | NC_021163.1    | Ca_kabuli_chr04 | 33626384                | CC                              | TT              | 1946817842               |
| SNP_P4_55926_33627054 | NC_021163.1    | Ca_kabuli_chr04 | 33627054                | TT                              | AA              | 1946817844               |
| SNP_P4_55927_33627088 | NC_021163.1    | Ca_kabuli_chr04 | 33627088                | AA                              | GG              | 1946817846               |
| SNP_P4_55928_33627131 | NC_021163.1    | Ca_kabuli_chr04 | 33627131                | GG                              | AA              | 1946817848               |
| SNP_P4_55929_33627147 | NC_021163.1    | Ca_kabuli_chr04 | 33627147                | GG                              | AA              | 1946817850               |
| SNP_P4_55931_33627707 | NC_021163.1    | Ca_kabuli_chr04 | 33627707                | AA                              | GG              | 1946817852               |
| SNP_P4_55932_33627871 | NC_021163.1    | Ca_kabuli_chr04 | 33627871                | TT                              | CC              | 1946817854               |
| SNP_P4_55933_33628693 | NC_021163.1    | Ca_kabuli_chr04 | 33628693                | AA                              | TT              | 1946817856               |
| SNP_P4_55934_33629872 | NC_021163.1    | Ca_kabuli_chr04 | 33629872                | TT                              | CC              | 1946817858               |
| SNP_P4_55935_33629887 | NC_021163.1    | Ca_kabuli_chr04 | 33629887                | GG                              | AA              | 1946817860               |
| SNP_P4_55936_33629896 | NC_021163.1    | Ca_kabuli_chr04 | 33629896                | CC                              | TT              | 1946817862               |
| SNP_P4_55937_33629904 | NC_021163.1    | Ca_kabuli_chr04 | 33629904                | AA                              | GG              | 1946817864               |
| SNP_P4_55938_33629912 | NC_021163.1    | Ca_kabuli_chr04 | 33629912                | GG                              | AA              | 1946817866               |
| SNP_P4_55939_33629914 | NC_021163.1    | Ca_kabuli_chr04 | 33629914                | AA                              | GG              | 1946817868               |
| SNP_P4_55941_33629980 | NC_021163.1    | Ca_kabuli_chr04 | 33629980                | TT                              | CC              | 1946817870               |
| SNP_P4_55942_33629992 | NC_021163.1    | Ca_kabuli_chr04 | 33629992                | TT                              | CC              | 1946817872               |
| SNP_P4_55943_33629995 | NC_021163.1    | Ca_kabuli_chr04 | 33629995                | AA                              | CC              | 1946817874               |
| SNP_P4_55944_33630007 | NC_021163.1    | Ca_kabuli_chr04 | 33630007                | GG                              | AA              | 1946817876               |
| SNP_P4_55945_33630014 | NC_021163.1    | Ca_kabuli_chr04 | 33630014                | TT                              | CC              | 1946817878               |
| SNP_P4_55946_33630025 | NC_021163.1    | Ca_kabuli_chr04 | 33630025                | AA                              | TT              | 1946817880               |
| SNP_P4_55947_33630027 | NC_021163.1    | Ca_kabuli_chr04 | 33630027                | CC                              | GG              | 1946817882               |
| SNP_P4_55948_33630038 | NC_021163.1    | Ca_kabuli_chr04 | 33630038                | GG                              | CC              | 1946817884               |
| SNP_P4_55949_33630039 | NC_021163.1    | Ca_kabuli_chr04 | 33630039                | GG                              | AA              | 1946817886               |
| SNP_P4_55950_33630078 | NC_021163.1    | Ca_kabuli_chr04 | 33630078                | CC                              | TT              | 1946817888               |

| SNPs IDs              | Chromosome IDs | Chromosomes     | Physical positions (bp) | CDC Frontier (Reference genome) | (ILWC46 & LPNB) | NCBI SNPdb Accession IDs |
|-----------------------|----------------|-----------------|-------------------------|---------------------------------|-----------------|--------------------------|
| SNP_P4_55951_33630080 | NC_021163.1    | Ca_kabuli_chr04 | 33630080                | GG                              | AA              | 1946817890               |
| SNP_P4_55952_33630081 | NC_021163.1    | Ca_kabuli_chr04 | 33630081                | AA                              | GG              | 1946817892               |
| SNP_P4_55953_33630090 | NC_021163.1    | Ca_kabuli_chr04 | 33630090                | TT                              | CC              | 1946817894               |
| SNP_P4_55955_33634988 | NC_021163.1    | Ca_kabuli_chr04 | 33634988                | AA                              | TT              | 1946817896               |
| SNP_P4_55956_33651114 | NC_021163.1    | Ca_kabuli_chr04 | 33651114                | AA                              | GG              | 1946817898               |
| SNP_P4_55957_33655275 | NC_021163.1    | Ca_kabuli_chr04 | 33655275                | AA                              | GG              | 1946817900               |
| SNP_P4_55958_33664422 | NC_021163.1    | Ca_kabuli_chr04 | 33664422                | TT                              | CC              | 1946817902               |
| SNP_P4_55959_33669024 | NC_021163.1    | Ca_kabuli_chr04 | 33669024                | GG                              | AA              | 1946817904               |
| SNP_P4_55960_33670441 | NC_021163.1    | Ca_kabuli_chr04 | 33670441                | TT                              | GG              | 1946817907               |
| SNP_P4_55961_33675061 | NC_021163.1    | Ca_kabuli_chr04 | 33675061                | CC                              | AA              | 1946817909               |
| SNP_P4_55962_33675509 | NC_021163.1    | Ca_kabuli_chr04 | 33675509                | AA                              | GG              | 1946817911               |
| SNP_P4_55963_33693960 | NC_021163.1    | Ca_kabuli_chr04 | 33693960                | GG                              | AA              | 1946817913               |
| SNP_P4_55965_33702642 | NC_021163.1    | Ca_kabuli_chr04 | 33702642                | GG                              | AA              | 1946817915               |
| SNP_P4_55966_33702649 | NC_021163.1    | Ca_kabuli_chr04 | 33702649                | CC                              | TT              | 1946817917               |
| SNP_P4_55967_33712394 | NC_021163.1    | Ca_kabuli_chr04 | 33712394                | AA                              | GG              | 1946817919               |
| SNP_P4_55968_33713233 | NC_021163.1    | Ca_kabuli_chr04 | 33713233                | TT                              | CC              | 1946817921               |
| SNP_P4_55969_33713245 | NC_021163.1    | Ca_kabuli_chr04 | 33713245                | CC                              | TT              | 1946817923               |
| SNP_P4_55970_33713866 | NC_021163.1    | Ca_kabuli_chr04 | 33713866                | TT                              | CC              | 1946817925               |
| SNP_P4_55971_33713955 | NC_021163.1    | Ca_kabuli_chr04 | 33713955                | CC                              | AA              | 1946817927               |
| SNP_P4_55972_33714031 | NC_021163.1    | Ca_kabuli_chr04 | 33714031                | GG                              | AA              | 1946817929               |
| SNP_P4_55973_33714074 | NC_021163.1    | Ca_kabuli_chr04 | 33714074                | TT                              | AA              | 1946817931               |
| SNP_P4_55976_33714593 | NC_021163.1    | Ca_kabuli_chr04 | 33714593                | GG                              | TT              | 1946817933               |
| SNP_P4_55977_33714737 | NC_021163.1    | Ca_kabuli_chr04 | 33714737                | AA                              | GG              | 1946817935               |
| SNP_P4_55978_33715120 | NC_021163.1    | Ca_kabuli_chr04 | 33715120                | GG                              | AA              | 1946817937               |
| SNP_P4_55979_33715134 | NC_021163.1    | Ca_kabuli_chr04 | 33715134                | CC                              | TT              | 1946817939               |
| SNP_P4_55980_33715138 | NC_021163.1    | Ca_kabuli_chr04 | 33715138                | GG                              | AA              | 1946817942               |
| SNP_P4_55981_33715217 | NC_021163.1    | Ca_kabuli_chr04 | 33715217                | AA                              | GG              | 1946817944               |
| SNP_P4_55983_33715962 | NC_021163.1    | Ca_kabuli_chr04 | 33715962                | CC                              | GG              | 1946817946               |
| SNP_P4_55984_33716339 | NC_021163.1    | Ca_kabuli_chr04 | 33716339                | AA                              | TT              | 1946817948               |
| SNP_P4_55985_33716607 | NC_021163.1    | Ca_kabuli_chr04 | 33716607                | GG                              | AA              | 1946817950               |
| SNP_P4_55986_33717044 | NC_021163.1    | Ca_kabuli_chr04 | 33717044                | GG                              | AA              | 1946817952               |
| SNP_P4_55987_33717195 | NC_021163.1    | Ca_kabuli_chr04 | 33717195                | AA                              | CC              | 1946817954               |
| SNP_P4_55988_33717350 | NC_021163.1    | Ca_kabuli_chr04 | 33717350                | TT                              | CC              | 1946817956               |
| SNP_P4_55989_33717427 | NC_021163.1    | Ca_kabuli_chr04 | 33717427                | AA                              | GG              | 1946817958               |
| SNP_P4_55990_33717748 | NC_021163.1    | Ca_kabuli_chr04 | 33717748                | GG                              | AA              | 1946817960               |
| SNP_P4_55991_33717802 | NC_021163.1    | Ca_kabuli_chr04 | 33717802                | TT                              | AA              | 1946817963               |
| SNP_P4_55993_33717957 | NC_021163.1    | Ca_kabuli_chr04 | 33717957                | AA                              | CC              | 1946817965               |
| SNP_P4_55994_33717964 | NC_021163.1    | Ca_kabuli_chr04 | 33717964                | GG                              | TT              | 1946817967               |
| SNP_P4_55995_33718341 | NC_021163.1    | Ca_kabuli_chr04 | 33718341                | TT                              | CC              | 1946817969               |
| SNP_P4_55996_33718355 | NC_021163.1    | Ca_kabuli_chr04 | 33718355                | TT                              | GG              | 1946817971               |
| SNP_P4_55997_33718511 | NC_021163.1    | Ca_kabuli_chr04 | 33718511                | CC                              | TT              | 1946817973               |
| SNP_P4_55998_33719215 | NC_021163.1    | Ca_kabuli_chr04 | 33719215                | TT                              | CC              | 1946817975               |

| SNPs IDs              | Chromosome IDs | Chromosomes     | Physical positions (bp) | CDC Frontier (Reference genome) | (ILWC46 & LPNB) | NCBI SNPdb Accession IDs |
|-----------------------|----------------|-----------------|-------------------------|---------------------------------|-----------------|--------------------------|
| SNP_P4_55999_33719243 | NC_021163.1    | Ca_kabuli_chr04 | 33719243                | CC                              | AA              | 1946817977               |
| SNP_P4_56000_33719502 | NC_021163.1    | Ca_kabuli_chr04 | 33719502                | AA                              | GG              | 1946817979               |
| SNP_P4_56001_33719553 | NC_021163.1    | Ca_kabuli_chr04 | 33719553                | CC                              | GG              | 1946817981               |
| SNP_P4_56002_33719576 | NC_021163.1    | Ca_kabuli_chr04 | 33719576                | TT                              | AA              | 1946817983               |
| SNP_P4_56003_33719687 | NC_021163.1    | Ca_kabuli_chr04 | 33719687                | AA                              | GG              | 1946817985               |
| SNP_P4_56004_33720042 | NC_021163.1    | Ca_kabuli_chr04 | 33720042                | CC                              | TT              | 1946817987               |
| SNP_P4_56005_33720303 | NC_021163.1    | Ca_kabuli_chr04 | 33720303                | CC                              | AA              | 1946817989               |
| SNP_P4_56006_33720513 | NC_021163.1    | Ca_kabuli_chr04 | 33720513                | AA                              | CC              | 1946817991               |
| SNP_P4_56007_33720742 | NC_021163.1    | Ca_kabuli_chr04 | 33720742                | AA                              | CC              | 1946817993               |
| SNP_P4_56008_33721019 | NC_021163.1    | Ca_kabuli_chr04 | 33721019                | TT                              | AA              | 1946817995               |
| SNP_P4_56009_33721137 | NC_021163.1    | Ca_kabuli_chr04 | 33721137                | GG                              | TT              | 1946817997               |
| SNP_P4_56010_33721142 | NC_021163.1    | Ca_kabuli_chr04 | 33721142                | AA                              | CC              | 1946817999               |
| SNP_P4_56011_33721236 | NC_021163.1    | Ca_kabuli_chr04 | 33721236                | CC                              | AA              | 1946818001               |
| SNP_P4_56012_33721381 | NC_021163.1    | Ca_kabuli_chr04 | 33721381                | AA                              | TT              | 1946818003               |
| SNP_P4_56013_33721404 | NC_021163.1    | Ca_kabuli_chr04 | 33721404                | TT                              | AA              | 1946818006               |
| SNP_P4_56014_33721410 | NC_021163.1    | Ca_kabuli_chr04 | 33721410                | AA                              | GG              | 1946818008               |
| SNP_P4_56015_33721483 | NC_021163.1    | Ca_kabuli_chr04 | 33721483                | GG                              | AA              | 1946818010               |
| SNP_P4_56016_33721536 | NC_021163.1    | Ca_kabuli_chr04 | 33721536                | CC                              | TT              | 1946818012               |
| SNP_P4_56017_33721846 | NC_021163.1    | Ca_kabuli_chr04 | 33721846                | GG                              | AA              | 1946818014               |
| SNP_P4_56018_33721975 | NC_021163.1    | Ca_kabuli_chr04 | 33721975                | GG                              | AA              | 1946818016               |
| SNP_P4_56019_33721990 | NC_021163.1    | Ca_kabuli_chr04 | 33721990                | TT                              | CC              | 1946818018               |
| SNP_P4_56020_33722064 | NC_021163.1    | Ca_kabuli_chr04 | 33722064                | TT                              | CC              | 1946818020               |
| SNP_P4_56021_33722159 | NC_021163.1    | Ca_kabuli_chr04 | 33722159                | GG                              | CC              | 1946818022               |
| SNP_P4_56022_33732799 | NC_021163.1    | Ca_kabuli_chr04 | 33732799                | GG                              | AA              | 1946818024               |
| SNP_P4_56023_33732979 | NC_021163.1    | Ca_kabuli_chr04 | 33732979                | AA                              | CC              | 1946818026               |
| SNP_P4_56024_33733178 | NC_021163.1    | Ca_kabuli_chr04 | 33733178                | GG                              | AA              | 1946818028               |
| SNP_P4_56026_33739176 | NC_021163.1    | Ca_kabuli_chr04 | 33739176                | AA                              | GG              | 1946818030               |
| SNP_P4_56027_33739190 | NC_021163.1    | Ca_kabuli_chr04 | 33739190                | TT                              | AA              | 1946818032               |
| SNP_P4_56029_33741404 | NC_021163.1    | Ca_kabuli_chr04 | 33741404                | CC                              | TT              | 1946818034               |
| SNP_P4_56030_33742031 | NC_021163.1    | Ca_kabuli_chr04 | 33742031                | CC                              | AA              | 1946818036               |
| SNP_P4_56031_33742318 | NC_021163.1    | Ca_kabuli_chr04 | 33742318                | AA                              | CC              | 1946818038               |
| SNP_P4_56032_33742332 | NC_021163.1    | Ca_kabuli_chr04 | 33742332                | CC                              | TT              | 1946818040               |
| SNP_P4_56033_33743686 | NC_021163.1    | Ca_kabuli_chr04 | 33743686                | AA                              | GG              | 1946818042               |
| SNP_P4_56035_33746897 | NC_021163.1    | Ca_kabuli_chr04 | 33746897                | CC                              | TT              | 1946818044               |
| SNP_P4_56036_33747360 | NC_021163.1    | Ca_kabuli_chr04 | 33747360                | CC                              | TT              | 1946818046               |
| SNP_P4_56037_33750122 | NC_021163.1    | Ca_kabuli_chr04 | 33750122                | AA                              | GG              | 1946818048               |
| SNP_P4_56038_33750704 | NC_021163.1    | Ca_kabuli_chr04 | 33750704                | GG                              | AA              | 1946818049               |
| SNP_P4_56039_33751114 | NC_021163.1    | Ca_kabuli_chr04 | 33751114                | AA                              | GG              | 1946818051               |
| SNP_P4_56040_33752350 | NC_021163.1    | Ca_kabuli_chr04 | 33752350                | TT                              | AA              | 1946818053               |
| SNP_P4_56041_33752657 | NC_021163.1    | Ca_kabuli_chr04 | 33752657                | GG                              | AA              | 1946818055               |
| SNP_P4_56042_33753652 | NC_021163.1    | Ca_kabuli_chr04 | 33753652                | GG                              | CC              | 1946818057               |
| SNP_P4_56043_33755607 | NC_021163.1    | Ca_kabuli_chr04 | 33755607                | TT                              | GG              | 1946818059               |



| SNPs IDs              | Chromosome IDs | Chromosomes     | Physical positions (bp) | CDC Frontier (Reference genome) | (ILWC46 & LPNB) | NCBI SNPdb Accession IDs |
|-----------------------|----------------|-----------------|-------------------------|---------------------------------|-----------------|--------------------------|
| SNP_P4_56044_33757723 | NC_021163.1    | Ca_kabuli_chr04 | 33757723                | GG                              | AA              | 1946818061               |
| SNP_P4_56045_33757761 | NC_021163.1    | Ca_kabuli_chr04 | 33757761                | GG                              | AA              | 1946818063               |
| SNP_P4_56046_33758053 | NC_021163.1    | Ca_kabuli_chr04 | 33758053                | TT                              | GG              | 1946818065               |
| SNP_P4_56047_33762630 | NC_021163.1    | Ca_kabuli_chr04 | 33762630                | GG                              | AA              | 1946818067               |
| SNP_P4_56048_33763297 | NC_021163.1    | Ca_kabuli_chr04 | 33763297                | GG                              | AA              | 1946818069               |
| SNP_P4_56049_33763529 | NC_021163.1    | Ca_kabuli_chr04 | 33763529                | GG                              | AA              | 1946818071               |
| SNP_P4_56050_33768136 | NC_021163.1    | Ca_kabuli_chr04 | 33768136                | GG                              | AA              | 1946818073               |
| SNP_P4_56051_33768834 | NC_021163.1    | Ca_kabuli_chr04 | 33768834                | AA                              | TT              | 1946818075               |
| SNP_P4_56052_33772093 | NC_021163.1    | Ca_kabuli_chr04 | 33772093                | TT                              | CC              | 1946818076               |
| SNP_P4_56053_33772884 | NC_021163.1    | Ca_kabuli_chr04 | 33772884                | TT                              | CC              | 1946818077               |
| SNP_P4_56054_33773421 | NC_021163.1    | Ca_kabuli_chr04 | 33773421                | GG                              | TT              | 1946818078               |
| SNP_P4_56055_33773427 | NC_021163.1    | Ca_kabuli_chr04 | 33773427                | AA                              | GG              | 1946818079               |
| SNP_P4_56057_33773447 | NC_021163.1    | Ca_kabuli_chr04 | 33773447                | CC                              | TT              | 1946818080               |
| SNP_P4_56058_33773853 | NC_021163.1    | Ca_kabuli_chr04 | 33773853                | AA                              | GG              | 1946818081               |
| SNP_P4_56059_33773927 | NC_021163.1    | Ca_kabuli_chr04 | 33773927                | CC                              | GG              | 1946818083               |
| SNP_P4_56060_33774308 | NC_021163.1    | Ca_kabuli_chr04 | 33774308                | TT                              | AA              | 1946818085               |
| SNP_P4_56061_33776827 | NC_021163.1    | Ca_kabuli_chr04 | 33776827                | CC                              | TT              | 1946818087               |
| SNP_P4_56062_33777032 | NC_021163.1    | Ca_kabuli_chr04 | 33777032                | GG                              | AA              | 1946818089               |
| SNP_P4_56063_33777120 | NC_021163.1    | Ca_kabuli_chr04 | 33777120                | TT                              | AA              | 1946818091               |
| SNP_P4_56065_33777360 | NC_021163.1    | Ca_kabuli_chr04 | 33777360                | GG                              | AA              | 1946818093               |
| SNP_P4_56066_33779231 | NC_021163.1    | Ca_kabuli_chr04 | 33779231                | CC                              | TT              | 1946818095               |
| SNP_P4_56067_33779655 | NC_021163.1    | Ca_kabuli_chr04 | 33779655                | AA                              | GG              | 1946818097               |
| SNP_P4_56068_33781859 | NC_021163.1    | Ca_kabuli_chr04 | 33781859                | GG                              | AA              | 1946818099               |
| SNP_P4_56069_33783770 | NC_021163.1    | Ca_kabuli_chr04 | 33783770                | AA                              | TT              | 1946818101               |
| SNP_P4_56070_33786844 | NC_021163.1    | Ca_kabuli_chr04 | 33786844                | CC                              | TT              | 1946818103               |
| SNP_P4_56071_33787798 | NC_021163.1    | Ca_kabuli_chr04 | 33787798                | GG                              | CC              | 1946818105               |
| SNP_P4_56072_33787996 | NC_021163.1    | Ca_kabuli_chr04 | 33787996                | GG                              | AA              | 1946818107               |
| SNP_P4_56073_33790830 | NC_021163.1    | Ca_kabuli_chr04 | 33790830                | AA                              | GG              | 1946818109               |
| SNP_P4_56074_33793561 | NC_021163.1    | Ca_kabuli_chr04 | 33793561                | CC                              | TT              | 1946818111               |
| SNP_P4_56076_33797447 | NC_021163.1    | Ca_kabuli_chr04 | 33797447                | AA                              | GG              | 1946818113               |
| SNP_P4_56077_33797841 | NC_021163.1    | Ca_kabuli_chr04 | 33797841                | GG                              | AA              | 1946818115               |
| SNP_P4_56078_33799112 | NC_021163.1    | Ca_kabuli_chr04 | 33799112                | CC                              | TT              | 1946818117               |
| SNP_P4_56079_33799168 | NC_021163.1    | Ca_kabuli_chr04 | 33799168                | TT                              | GG              | 1946818120               |
| SNP_P4_56080_33803088 | NC_021163.1    | Ca_kabuli_chr04 | 33803088                | AA                              | GG              | 1946818122               |
| SNP_P4_56081_33803220 | NC_021163.1    | Ca_kabuli_chr04 | 33803220                | AA                              | GG              | 1946818124               |
| SNP_P4_56083_33810648 | NC_021163.1    | Ca_kabuli_chr04 | 33810648                | TT                              | GG              | 1946818126               |
| SNP_P4_56084_33810691 | NC_021163.1    | Ca_kabuli_chr04 | 33810691                | AA                              | TT              | 1946818128               |
| SNP_P4_56085_33810713 | NC_021163.1    | Ca_kabuli_chr04 | 33810713                | AA                              | TT              | 1946818130               |
| SNP_P4_56086_33810950 | NC_021163.1    | Ca_kabuli_chr04 | 33810950                | GG                              | AA              | 1946818132               |
| SNP_P4_56087_33811060 | NC_021163.1    | Ca_kabuli_chr04 | 33811060                | AA                              | GG              | 1946818134               |
| SNP_P4_56089_33817185 | NC_021163.1    | Ca_kabuli_chr04 | 33817185                | AA                              | GG              | 1946818136               |
| SNP_P4_56090_33817215 | NC_021163.1    | Ca_kabuli_chr04 | 33817215                | CC                              | AA              | 1946818138               |

| SNPs IDs              | Chromosome IDs | Chromosomes     | Physical positions (bp) | CDC Frontier (Reference genome) | (ILWC46 & LPNB) | NCBI SNPdb Accession IDs |
|-----------------------|----------------|-----------------|-------------------------|---------------------------------|-----------------|--------------------------|
| SNP_P4_56091_33817993 | NC_021163.1    | Ca_kabuli_chr04 | 33817993                | CC                              | TT              | 1946818140               |
| SNP_P4_56092_33822204 | NC_021163.1    | Ca_kabuli_chr04 | 33822204                | TT                              | AA              | 1946818142               |
| SNP_P4_56093_33825993 | NC_021163.1    | Ca_kabuli_chr04 | 33825993                | AA                              | GG              | 1946818144               |
| SNP_P4_56094_33826072 | NC_021163.1    | Ca_kabuli_chr04 | 33826072                | GG                              | AA              | 1946818146               |
| SNP_P4_56095_33826073 | NC_021163.1    | Ca_kabuli_chr04 | 33826073                | TT                              | GG              | 1946818148               |
| SNP_P4_56096_33828705 | NC_021163.1    | Ca_kabuli_chr04 | 33828705                | TT                              | AA              | 1946818150               |
| SNP_P4_56097_33833532 | NC_021163.1    | Ca_kabuli_chr04 | 33833532                | AA                              | TT              | 1946818152               |
| SNP_P4_56100_33834197 | NC_021163.1    | Ca_kabuli_chr04 | 33834197                | AA                              | TT              | 1946818154               |
| SNP_P4_56101_33834358 | NC_021163.1    | Ca_kabuli_chr04 | 33834358                | TT                              | CC              | 1946818156               |
| SNP_P4_56102_33834510 | NC_021163.1    | Ca_kabuli_chr04 | 33834510                | CC                              | GG              | 1946818158               |
| SNP_P4_56107_33836313 | NC_021163.1    | Ca_kabuli_chr04 | 33836313                | TT                              | GG              | 1946818160               |
| SNP_P4_56109_33837672 | NC_021163.1    | Ca_kabuli_chr04 | 33837672                | TT                              | GG              | 1946818162               |
| SNP_P4_56112_33840542 | NC_021163.1    | Ca_kabuli_chr04 | 33840542                | TT                              | CC              | 1946818164               |
| SNP_P4_56113_33845014 | NC_021163.1    | Ca_kabuli_chr04 | 33845014                | CC                              | TT              | 1946818166               |
| SNP_P4_56114_33849639 | NC_021163.1    | Ca_kabuli_chr04 | 33849639                | CC                              | TT              | 1946818168               |
| SNP_P4_56115_33849651 | NC_021163.1    | Ca_kabuli_chr04 | 33849651                | CC                              | TT              | 1946818170               |
| SNP_P4_56116_33853299 | NC_021163.1    | Ca_kabuli_chr04 | 33853299                | TT                              | CC              | 1946818172               |
| SNP_P4_56117_33853391 | NC_021163.1    | Ca_kabuli_chr04 | 33853391                | TT                              | AA              | 1946818175               |
| SNP_P4_56118_33853402 | NC_021163.1    | Ca_kabuli_chr04 | 33853402                | AA                              | TT              | 1946818177               |
| SNP_P4_56119_33853438 | NC_021163.1    | Ca_kabuli_chr04 | 33853438                | CC                              | TT              | 1946818179               |
| SNP_P4_56120_33853439 | NC_021163.1    | Ca_kabuli_chr04 | 33853439                | AA                              | GG              | 1946818181               |
| SNP_P4_56121_33853523 | NC_021163.1    | Ca_kabuli_chr04 | 33853523                | CC                              | TT              | 1946818183               |
| SNP_P4_56122_33853781 | NC_021163.1    | Ca_kabuli_chr04 | 33853781                | AA                              | GG              | 1946818185               |
| SNP_P4_56123_33853816 | NC_021163.1    | Ca_kabuli_chr04 | 33853816                | TT                              | CC              | 1946818187               |
| SNP_P4_56124_33853820 | NC_021163.1    | Ca_kabuli_chr04 | 33853820                | CC                              | TT              | 1946818189               |
| SNP_P4_56125_33853821 | NC_021163.1    | Ca_kabuli_chr04 | 33853821                | CC                              | AA              | 1946818191               |
| SNP_P4_56126_33856182 | NC_021163.1    | Ca_kabuli_chr04 | 33856182                | GG                              | AA              | 1946818193               |
| SNP_P4_56128_33856623 | NC_021163.1    | Ca_kabuli_chr04 | 33856623                | TT                              | AA              | 1946818195               |
| SNP_P4_56129_33857891 | NC_021163.1    | Ca_kabuli_chr04 | 33857891                | TT                              | GG              | 1946818197               |
| SNP_P4_56130_33857934 | NC_021163.1    | Ca_kabuli_chr04 | 33857934                | CC                              | GG              | 1946818199               |
| SNP_P4_56133_33865182 | NC_021163.1    | Ca_kabuli_chr04 | 33865182                | AA                              | CC              | 1946818201               |
| SNP_P4_56135_33865726 | NC_021163.1    | Ca_kabuli_chr04 | 33865726                | GG                              | TT              | 1946818203               |
| SNP_P4_56136_33866963 | NC_021163.1    | Ca_kabuli_chr04 | 33866963                | AA                              | TT              | 1946818205               |
| SNP_P4_56137_33868236 | NC_021163.1    | Ca_kabuli_chr04 | 33868236                | CC                              | AA              | 1946818207               |
| SNP_P4_56138_33871111 | NC_021163.1    | Ca_kabuli_chr04 | 33871111                | AA                              | GG              | 1946818209               |
| SNP_P4_56139_33871350 | NC_021163.1    | Ca_kabuli_chr04 | 33871350                | AA                              | GG              | 1946818211               |
| SNP_P4_56140_33871356 | NC_021163.1    | Ca_kabuli_chr04 | 33871356                | TT                              | CC              | 1946818213               |
| SNP_P4_56141_33871358 | NC_021163.1    | Ca_kabuli_chr04 | 33871358                | GG                              | AA              | 1946818215               |
| SNP_P4_56142_33871368 | NC_021163.1    | Ca_kabuli_chr04 | 33871368                | CC                              | TT              | 1946818217               |
| SNP_P4_56143_33871451 | NC_021163.1    | Ca_kabuli_chr04 | 33871451                | CC                              | TT              | 1946818219               |
| SNP_P4_56144_33871508 | NC_021163.1    | Ca_kabuli_chr04 | 33871508                | AA                              | TT              | 1946818221               |
| SNP_P4_56145_33871509 | NC_021163.1    | Ca_kabuli_chr04 | 33871509                | CC                              | GG              | 1946818223               |

| SNPs IDs              | Chromosome IDs | Chromosomes     | Physical positions (bp) | CDC Frontier (Reference genome) | (ILWC46 & LPNB) | NCBI SNPdb Accession IDs |
|-----------------------|----------------|-----------------|-------------------------|---------------------------------|-----------------|--------------------------|
| SNP_P4_56146_33871514 | NC_021163.1    | Ca_kabuli_chr04 | 33871514                | GG                              | CC              | 1946818225               |
| SNP_P4_56147_33871525 | NC_021163.1    | Ca_kabuli_chr04 | 33871525                | CC                              | AA              | 1946818227               |
| SNP_P4_56148_33871623 | NC_021163.1    | Ca_kabuli_chr04 | 33871623                | AA                              | CC              | 1946818229               |
| SNP_P4_56149_33871660 | NC_021163.1    | Ca_kabuli_chr04 | 33871660                | GG                              | TT              | 1946818231               |
| SNP_P4_56150_33873045 | NC_021163.1    | Ca_kabuli_chr04 | 33873045                | GG                              | AA              | 1946818233               |
| SNP_P4_56151_33873255 | NC_021163.1    | Ca_kabuli_chr04 | 33873255                | CC                              | TT              | 1946818235               |
| SNP_P4_56153_33873396 | NC_021163.1    | Ca_kabuli_chr04 | 33873396                | AA                              | GG              | 1946818237               |
| SNP_P4_56154_33875060 | NC_021163.1    | Ca_kabuli_chr04 | 33875060                | AA                              | GG              | 1946818239               |
| SNP_P4_56155_33876158 | NC_021163.1    | Ca_kabuli_chr04 | 33876158                | GG                              | TT              | 1946818241               |
| SNP_P4_56157_33879869 | NC_021163.1    | Ca_kabuli_chr04 | 33879869                | GG                              | AA              | 1946818243               |
| SNP_P4_56158_33882286 | NC_021163.1    | Ca_kabuli_chr04 | 33882286                | GG                              | CC              | 1946818245               |
| SNP_P4_56160_33886847 | NC_021163.1    | Ca_kabuli_chr04 | 33886847                | CC                              | TT              | 1946818247               |
| SNP_P4_56161_33891055 | NC_021163.1    | Ca_kabuli_chr04 | 33891055                | CC                              | TT              | 1946818249               |
| SNP_P4_56162_33893364 | NC_021163.1    | Ca_kabuli_chr04 | 33893364                | AA                              | GG              | 1946818251               |
| SNP_P4_56163_33897491 | NC_021163.1    | Ca_kabuli_chr04 | 33897491                | AA                              | GG              | 1946818253               |
| SNP_P4_56164_33897494 | NC_021163.1    | Ca_kabuli_chr04 | 33897494                | AA                              | TT              | 1946818255               |
| SNP_P4_56165_33897956 | NC_021163.1    | Ca_kabuli_chr04 | 33897956                | TT                              | AA              | 1946818257               |
| SNP_P4_56166_33899416 | NC_021163.1    | Ca_kabuli_chr04 | 33899416                | GG                              | TT              | 1946818259               |
| SNP_P4_56167_33900650 | NC_021163.1    | Ca_kabuli_chr04 | 33900650                | AA                              | GG              | 1946818261               |
| SNP_P4_56168_33901098 | NC_021163.1    | Ca_kabuli_chr04 | 33901098                | CC                              | TT              | 1946818263               |
| SNP_P4_56169_33905376 | NC_021163.1    | Ca_kabuli_chr04 | 33905376                | GG                              | AA              | 1946818265               |
| SNP_P4_56170_33908525 | NC_021163.1    | Ca_kabuli_chr04 | 33908525                | CC                              | TT              | 1946818267               |
| SNP_P4_56171_33913973 | NC_021163.1    | Ca_kabuli_chr04 | 33913973                | TT                              | CC              | 1946818269               |
| SNP_P4_56172_33922759 | NC_021163.1    | Ca_kabuli_chr04 | 33922759                | TT                              | CC              | 1946818271               |
| SNP_P4_56173_33923004 | NC_021163.1    | Ca_kabuli_chr04 | 33923004                | TT                              | AA              | 1946818273               |
| SNP_P4_56175_33936588 | NC_021163.1    | Ca_kabuli_chr04 | 33936588                | CC                              | TT              | 1946818275               |
| SNP_P4_56176_33936941 | NC_021163.1    | Ca_kabuli_chr04 | 33936941                | CC                              | TT              | 1946818277               |
| SNP_P4_56177_33939035 | NC_021163.1    | Ca_kabuli_chr04 | 33939035                | CC                              | TT              | 1946818279               |
| SNP_P4_56178_33939124 | NC_021163.1    | Ca_kabuli_chr04 | 33939124                | CC                              | TT              | 1946818281               |
| SNP_P4_56179_33940904 | NC_021163.1    | Ca_kabuli_chr04 | 33940904                | TT                              | CC              | 1946818283               |
| SNP_P4_56180_33953055 | NC_021163.1    | Ca_kabuli_chr04 | 33953055                | AA                              | GG              | 1946818285               |
| SNP_P4_56183_33955116 | NC_021163.1    | Ca_kabuli_chr04 | 33955116                | AA                              | GG              | 1946818287               |
| SNP_P4_56184_33957403 | NC_021163.1    | Ca_kabuli_chr04 | 33957403                | CC                              | GG              | 1946818289               |
| SNP_P4_56185_33957743 | NC_021163.1    | Ca_kabuli_chr04 | 33957743                | GG                              | AA              | 1946818291               |
| SNP_P4_56189_33979019 | NC_021163.1    | Ca_kabuli_chr04 | 33979019                | CC                              | AA              | 1946818293               |
| SNP_P4_56190_33980122 | NC_021163.1    | Ca_kabuli_chr04 | 33980122                | TT                              | GG              | 1946818295               |
| SNP_P4_56191_33986565 | NC_021163.1    | Ca_kabuli_chr04 | 33986565                | CC                              | AA              | 1946818297               |
| SNP_P4_56192_33996398 | NC_021163.1    | Ca_kabuli_chr04 | 33996398                | GG                              | AA              | 1946818299               |
| SNP_P4_56193_33998508 | NC_021163.1    | Ca_kabuli_chr04 | 33998508                | CC                              | AA              | 1946818301               |
| SNP_P4_56194_33999567 | NC_021163.1    | Ca_kabuli_chr04 | 33999567                | TT                              | CC              | 1946818303               |
| SNP_P4_56195_33999879 | NC_021163.1    | Ca_kabuli_chr04 | 33999879                | AA                              | TT              | 1946818305               |
| SNP_P4_56196_34002035 | NC_021163.1    | Ca_kabuli_chr04 | 34002035                | TT                              | CC              | 1946818307               |

| SNPs IDs              | Chromosome IDs | Chromosomes     | Physical positions (bp) | CDC Frontier (Reference genome) | (ILWC46 & LPNB) | NCBI SNPdb Accession IDs |
|-----------------------|----------------|-----------------|-------------------------|---------------------------------|-----------------|--------------------------|
| SNP_P4_56197_34003493 | NC_021163.1    | Ca_kabuli_chr04 | 34003493                | GG                              | CC              | 1946818309               |
| SNP_P4_56198_34004468 | NC_021163.1    | Ca_kabuli_chr04 | 34004468                | GG                              | TT              | 1946818311               |
| SNP_P4_56199_34005984 | NC_021163.1    | Ca_kabuli_chr04 | 34005984                | TT                              | CC              | 1946818313               |
| SNP_P4_56200_34009073 | NC_021163.1    | Ca_kabuli_chr04 | 34009073                | CC                              | TT              | 1946818314               |
| SNP_P4_56201_34011067 | NC_021163.1    | Ca_kabuli_chr04 | 34011067                | AA                              | GG              | 1946818316               |
| SNP_P4_56202_34040939 | NC_021163.1    | Ca_kabuli_chr04 | 34040939                | TT                              | GG              | 1946818318               |
| SNP_P4_56203_34041540 | NC_021163.1    | Ca_kabuli_chr04 | 34041540                | TT                              | CC              | 1946818320               |
| SNP_P4_56204_34043793 | NC_021163.1    | Ca_kabuli_chr04 | 34043793                | TT                              | CC              | 1946818322               |
| SNP_P4_56205_34052308 | NC_021163.1    | Ca_kabuli_chr04 | 34052308                | TT                              | CC              | 1946818324               |
| SNP_P4_56206_34053024 | NC_021163.1    | Ca_kabuli_chr04 | 34053024                | CC                              | AA              | 1946818326               |
| SNP_P4_56209_34071929 | NC_021163.1    | Ca_kabuli_chr04 | 34071929                | CC                              | TT              | 1946818328               |
| SNP_P4_56210_34072419 | NC_021163.1    | Ca_kabuli_chr04 | 34072419                | CC                              | TT              | 1946818330               |
| SNP_P4_56211_34078194 | NC_021163.1    | Ca_kabuli_chr04 | 34078194                | GG                              | AA              | 1946818332               |
| SNP_P4_56212_34078616 | NC_021163.1    | Ca_kabuli_chr04 | 34078616                | AA                              | CC              | 1946818334               |
| SNP_P4_56213_34078617 | NC_021163.1    | Ca_kabuli_chr04 | 34078617                | TT                              | AA              | 1946818336               |
| SNP_P4_56214_34078623 | NC_021163.1    | Ca_kabuli_chr04 | 34078623                | TT                              | CC              | 1946818338               |
| SNP_P4_56215_34078656 | NC_021163.1    | Ca_kabuli_chr04 | 34078656                | AA                              | GG              | 1946818340               |
| SNP_P4_56216_34078760 | NC_021163.1    | Ca_kabuli_chr04 | 34078760                | GG                              | AA              | 1946818342               |
| SNP_P4_56217_34083769 | NC_021163.1    | Ca_kabuli_chr04 | 34083769                | GG                              | AA              | 1946818344               |
| SNP_P4_56218_34087330 | NC_021163.1    | Ca_kabuli_chr04 | 34087330                | GG                              | TT              | 1946818346               |
| SNP_P4_56219_34096890 | NC_021163.1    | Ca_kabuli_chr04 | 34096890                | TT                              | CC              | 1946818348               |
| SNP_P4_56220_34097830 | NC_021163.1    | Ca_kabuli_chr04 | 34097830                | AA                              | GG              | 1946818350               |
| SNP_P4_56221_34100220 | NC_021163.1    | Ca_kabuli_chr04 | 34100220                | TT                              | GG              | 1946818352               |
| SNP_P4_56222_34117757 | NC_021163.1    | Ca_kabuli_chr04 | 34117757                | TT                              | GG              | 1946818355               |
| SNP_P4_56223_34117855 | NC_021163.1    | Ca_kabuli_chr04 | 34117855                | AA                              | TT              | 1946818357               |
| SNP_P4_56224_34118053 | NC_021163.1    | Ca_kabuli_chr04 | 34118053                | CC                              | TT              | 1946818359               |
| SNP_P4_56225_34126738 | NC_021163.1    | Ca_kabuli_chr04 | 34126738                | AA                              | TT              | 1946818361               |
| SNP_P4_56226_34129628 | NC_021163.1    | Ca_kabuli_chr04 | 34129628                | AA                              | GG              | 1946818363               |
| SNP_P4_56227_34130424 | NC_021163.1    | Ca_kabuli_chr04 | 34130424                | AA                              | GG              | 1946818365               |
| SNP_P4_56228_34131309 | NC_021163.1    | Ca_kabuli_chr04 | 34131309                | GG                              | TT              | 1946818367               |
| SNP_P4_56229_34133289 | NC_021163.1    | Ca_kabuli_chr04 | 34133289                | CC                              | TT              | 1946818369               |
| SNP_P4_56231_34152859 | NC_021163.1    | Ca_kabuli_chr04 | 34152859                | CC                              | TT              | 1946818371               |
| SNP_P4_56232_34156391 | NC_021163.1    | Ca_kabuli_chr04 | 34156391                | CC                              | TT              | 1946818373               |
| SNP_P4_56233_34159968 | NC_021163.1    | Ca_kabuli_chr04 | 34159968                | AA                              | GG              | 1946818375               |
| SNP_P4_56234_34160104 | NC_021163.1    | Ca_kabuli_chr04 | 34160104                | GG                              | AA              | 1946818377               |
| SNP_P4_56235_34160149 | NC_021163.1    | Ca_kabuli_chr04 | 34160149                | GG                              | TT              | 1946818379               |
| SNP_P4_56236_34161367 | NC_021163.1    | Ca_kabuli_chr04 | 34161367                | AA                              | CC              | 1946818381               |
| SNP_P4_56237_34161398 | NC_021163.1    | Ca_kabuli_chr04 | 34161398                | CC                              | GG              | 1946818383               |
| SNP_P4_56238_34161400 | NC_021163.1    | Ca_kabuli_chr04 | 34161400                | CC                              | TT              | 1946818385               |
| SNP_P4_56239_34161445 | NC_021163.1    | Ca_kabuli_chr04 | 34161445                | GG                              | AA              | 1946818387               |
| SNP_P4_56240_34161476 | NC_021163.1    | Ca_kabuli_chr04 | 34161476                | GG                              | AA              | 1946818389               |
| SNP_P4_56241_34166639 | NC_021163.1    | Ca_kabuli_chr04 | 34166639                | AA                              | TT              | 1946818391               |

| SNPs IDs              | Chromosome IDs | Chromosomes     | Physical positions (bp) | CDC Frontier (Reference genome) | (ILWC46 & LPNB) | NCBI SNPdb Accession IDs |
|-----------------------|----------------|-----------------|-------------------------|---------------------------------|-----------------|--------------------------|
| SNP_P4_56242_34167185 | NC_021163.1    | Ca_kabuli_chr04 | 34167185                | TT                              | AA              | 1946818393               |
| SNP_P4_56243_34167385 | NC_021163.1    | Ca_kabuli_chr04 | 34167385                | TT                              | CC              | 1946818395               |
| SNP_P4_56244_34167513 | NC_021163.1    | Ca_kabuli_chr04 | 34167513                | AA                              | CC              | 1946818397               |
| SNP_P4_56246_34170628 | NC_021163.1    | Ca_kabuli_chr04 | 34170628                | AA                              | CC              | 1946818400               |
| SNP_P4_56247_34173543 | NC_021163.1    | Ca_kabuli_chr04 | 34173543                | CC                              | TT              | 1946818402               |
| SNP_P4_56248_34177504 | NC_021163.1    | Ca_kabuli_chr04 | 34177504                | TT                              | CC              | 1946818404               |
| SNP_P4_56249_34177505 | NC_021163.1    | Ca_kabuli_chr04 | 34177505                | AA                              | CC              | 1946818406               |
| SNP_P4_56250_34184581 | NC_021163.1    | Ca_kabuli_chr04 | 34184581                | AA                              | GG              | 1946818408               |
| SNP_P4_56251_34188494 | NC_021163.1    | Ca_kabuli_chr04 | 34188494                | TT                              | CC              | 1946818410               |
| SNP_P4_56252_34200016 | NC_021163.1    | Ca_kabuli_chr04 | 34200016                | CC                              | AA              | 1946818412               |
| SNP_P4_56253_34200044 | NC_021163.1    | Ca_kabuli_chr04 | 34200044                | TT                              | CC              | 1946818414               |
| SNP_P4_56254_34200048 | NC_021163.1    | Ca_kabuli_chr04 | 34200048                | AA                              | TT              | 1946818416               |
| SNP_P4_56255_34200388 | NC_021163.1    | Ca_kabuli_chr04 | 34200388                | AA                              | GG              | 1946818418               |
| SNP_P4_56256_34202963 | NC_021163.1    | Ca_kabuli_chr04 | 34202963                | GG                              | TT              | 1946818421               |
| SNP_P4_56257_34202985 | NC_021163.1    | Ca_kabuli_chr04 | 34202985                | TT                              | CC              | 1946818423               |
| SNP_P4_56258_34203015 | NC_021163.1    | Ca_kabuli_chr04 | 34203015                | CC                              | AA              | 1946818425               |
| SNP_P4_56259_34203027 | NC_021163.1    | Ca_kabuli_chr04 | 34203027                | GG                              | AA              | 1946818427               |
| SNP_P4_56260_34203028 | NC_021163.1    | Ca_kabuli_chr04 | 34203028                | AA                              | TT              | 1946818429               |
| SNP_P4_56261_34203030 | NC_021163.1    | Ca_kabuli_chr04 | 34203030                | TT                              | CC              | 1946818431               |
| SNP_P4_56262_34203096 | NC_021163.1    | Ca_kabuli_chr04 | 34203096                | AA                              | GG              | 1946818433               |
| SNP_P4_56263_34203130 | NC_021163.1    | Ca_kabuli_chr04 | 34203130                | TT                              | CC              | 1946818435               |
| SNP_P4_56264_34209558 | NC_021163.1    | Ca_kabuli_chr04 | 34209558                | TT                              | AA              | 1946818437               |
| SNP_P4_56265_34212192 | NC_021163.1    | Ca_kabuli_chr04 | 34212192                | CC                              | TT              | 1946818439               |
| SNP_P4_56266_34212193 | NC_021163.1    | Ca_kabuli_chr04 | 34212193                | CC                              | TT              | 1946818441               |
| SNP_P4_56267_34213114 | NC_021163.1    | Ca_kabuli_chr04 | 34213114                | GG                              | AA              | 1946818443               |
| SNP_P4_56268_34213838 | NC_021163.1    | Ca_kabuli_chr04 | 34213838                | GG                              | TT              | 1946818445               |
| SNP_P4_56269_34213859 | NC_021163.1    | Ca_kabuli_chr04 | 34213859                | CC                              | TT              | 1946818447               |
| SNP_P4_56270_34215407 | NC_021163.1    | Ca_kabuli_chr04 | 34215407                | TT                              | CC              | 1946818450               |
| SNP_P4_56271_34216306 | NC_021163.1    | Ca_kabuli_chr04 | 34216306                | AA                              | GG              | 1946818452               |
| SNP_P4_56272_34216311 | NC_021163.1    | Ca_kabuli_chr04 | 34216311                | TT                              | CC              | 1946818454               |
| SNP_P4_56273_34217921 | NC_021163.1    | Ca_kabuli_chr04 | 34217921                | AA                              | GG              | 1946818456               |
| SNP_P4_56274_34218580 | NC_021163.1    | Ca_kabuli_chr04 | 34218580                | AA                              | GG              | 1946818458               |
| SNP_P4_56275_34219029 | NC_021163.1    | Ca_kabuli_chr04 | 34219029                | TT                              | CC              | 1946818460               |
| SNP_P4_56276_34219139 | NC_021163.1    | Ca_kabuli_chr04 | 34219139                | GG                              | AA              | 1946818463               |
| SNP_P4_56277_34225229 | NC_021163.1    | Ca_kabuli_chr04 | 34225229                | AA                              | GG              | 1946818465               |
| SNP_P4_56279_34232769 | NC_021163.1    | Ca_kabuli_chr04 | 34232769                | AA                              | GG              | 1946818467               |
| SNP_P4_56280_34233577 | NC_021163.1    | Ca_kabuli_chr04 | 34233577                | GG                              | TT              | 1946818469               |
| SNP_P4_56281_34235063 | NC_021163.1    | Ca_kabuli_chr04 | 34235063                | CC                              | GG              | 1946818471               |
| SNP_P4_56282_34236243 | NC_021163.1    | Ca_kabuli_chr04 | 34236243                | AA                              | GG              | 1946818473               |
| SNP_P4_56283_34240005 | NC_021163.1    | Ca_kabuli_chr04 | 34240005                | CC                              | GG              | 1946818475               |
| SNP_P4_56284_34240408 | NC_021163.1    | Ca_kabuli_chr04 | 34240408                | CC                              | TT              | 1946818477               |
| SNP_P4_56285_34240465 | NC_021163.1    | Ca_kabuli_chr04 | 34240465                | GG                              | AA              | 1946818479               |

| SNPs IDs              | Chromosome IDs | Chromosomes     | Physical positions (bp) | CDC Frontier (Reference genome) | (ILWC46 & LPNB) | NCBI SNPdb Accession IDs |
|-----------------------|----------------|-----------------|-------------------------|---------------------------------|-----------------|--------------------------|
| SNP_P4_56287_34249048 | NC_021163.1    | Ca_kabuli_chr04 | 34249048                | CC                              | AA              | 1946818482               |
| SNP_P4_56288_34249053 | NC_021163.1    | Ca_kabuli_chr04 | 34249053                | CC                              | GG              | 1946818484               |
| SNP_P4_56289_34252882 | NC_021163.1    | Ca_kabuli_chr04 | 34252882                | CC                              | TT              | 1946818486               |
| SNP_P4_56290_34252884 | NC_021163.1    | Ca_kabuli_chr04 | 34252884                | AA                              | GG              | 1946818488               |
| SNP_P4_56291_34253461 | NC_021163.1    | Ca_kabuli_chr04 | 34253461                | CC                              | AA              | 1946818490               |
| SNP_P4_56292_34260268 | NC_021163.1    | Ca_kabuli_chr04 | 34260268                | AA                              | GG              | 1946818492               |
| SNP_P4_56293_34260343 | NC_021163.1    | Ca_kabuli_chr04 | 34260343                | GG                              | TT              | 1946818494               |
| SNP_P4_56294_34262341 | NC_021163.1    | Ca_kabuli_chr04 | 34262341                | TT                              | CC              | 1946818496               |
| SNP_P4_56297_34266313 | NC_021163.1    | Ca_kabuli_chr04 | 34266313                | AA                              | GG              | 1946818498               |
| SNP_P4_56298_34266579 | NC_021163.1    | Ca_kabuli_chr04 | 34266579                | TT                              | CC              | 1946818500               |
| SNP_P4_56299_34266746 | NC_021163.1    | Ca_kabuli_chr04 | 34266746                | AA                              | GG              | 1946818502               |
| SNP_P4_56300_34266755 | NC_021163.1    | Ca_kabuli_chr04 | 34266755                | AA                              | GG              | 1946818504               |
| SNP_P4_56301_34271113 | NC_021163.1    | Ca_kabuli_chr04 | 34271113                | TT                              | CC              | 1946818506               |
| SNP_P4_56302_34271997 | NC_021163.1    | Ca_kabuli_chr04 | 34271997                | TT                              | CC              | 1946818508               |
| SNP_P4_56303_34272265 | NC_021163.1    | Ca_kabuli_chr04 | 34272265                | GG                              | AA              | 1946818510               |
| SNP_P4_56304_34272520 | NC_021163.1    | Ca_kabuli_chr04 | 34272520                | CC                              | TT              | 1946818512               |
| SNP_P4_56305_34276247 | NC_021163.1    | Ca_kabuli_chr04 | 34276247                | AA                              | TT              | 1946818514               |
| SNP_P4_56306_34280335 | NC_021163.1    | Ca_kabuli_chr04 | 34280335                | CC                              | TT              | 1946818516               |
| SNP_P4_56307_34286807 | NC_021163.1    | Ca_kabuli_chr04 | 34286807                | CC                              | TT              | 1946818518               |
| SNP_P4_56308_34287065 | NC_021163.1    | Ca_kabuli_chr04 | 34287065                | TT                              | AA              | 1946818520               |
| SNP_P4_56309_34288364 | NC_021163.1    | Ca_kabuli_chr04 | 34288364                | CC                              | TT              | 1946818523               |
| SNP_P4_56310_34292691 | NC_021163.1    | Ca_kabuli_chr04 | 34292691                | AA                              | GG              | 1946818525               |
| SNP_P4_56311_34294430 | NC_021163.1    | Ca_kabuli_chr04 | 34294430                | AA                              | GG              | 1946818527               |
| SNP_P4_56312_34294880 | NC_021163.1    | Ca_kabuli_chr04 | 34294880                | CC                              | TT              | 1946818529               |
| SNP_P4_56313_34294881 | NC_021163.1    | Ca_kabuli_chr04 | 34294881                | TT                              | CC              | 1946818531               |
| SNP_P4_56314_34301460 | NC_021163.1    | Ca_kabuli_chr04 | 34301460                | AA                              | GG              | 1946818533               |
| SNP_P4_56315_34301574 | NC_021163.1    | Ca_kabuli_chr04 | 34301574                | CC                              | TT              | 1946818535               |
| SNP_P4_56317_34325406 | NC_021163.1    | Ca_kabuli_chr04 | 34325406                | TT                              | AA              | 1946818537               |
| SNP_P4_56318_34325664 | NC_021163.1    | Ca_kabuli_chr04 | 34325664                | GG                              | AA              | 1946818539               |
| SNP_P4_56320_34330906 | NC_021163.1    | Ca_kabuli_chr04 | 34330906                | TT                              | CC              | 1946818541               |
| SNP_P4_56321_34331221 | NC_021163.1    | Ca_kabuli_chr04 | 34331221                | GG                              | AA              | 1946818543               |
| SNP_P4_56322_34332092 | NC_021163.1    | Ca_kabuli_chr04 | 34332092                | CC                              | GG              | 1946818545               |
| SNP_P4_56323_34333275 | NC_021163.1    | Ca_kabuli_chr04 | 34333275                | GG                              | AA              | 1946818547               |
| SNP_P4_56325_34335856 | NC_021163.1    | Ca_kabuli_chr04 | 34335856                | AA                              | GG              | 1946818549               |
| SNP_P4_56326_34339822 | NC_021163.1    | Ca_kabuli_chr04 | 34339822                | TT                              | CC              | 1946818551               |
| SNP_P4_56327_34342170 | NC_021163.1    | Ca_kabuli_chr04 | 34342170                | AA                              | CC              | 1946818553               |
| SNP_P4_56328_34342188 | NC_021163.1    | Ca_kabuli_chr04 | 34342188                | CC                              | TT              | 1946818555               |
| SNP_P4_56329_34354227 | NC_021163.1    | Ca_kabuli_chr04 | 34354227                | AA                              | TT              | 1946818557               |
| SNP_P4_56331_34376812 | NC_021163.1    | Ca_kabuli_chr04 | 34376812                | CC                              | TT              | 1946818559               |
| SNP_P4_56332_34380437 | NC_021163.1    | Ca_kabuli_chr04 | 34380437                | GG                              | AA              | 1946818561               |
| SNP_P4_56333_34384596 | NC_021163.1    | Ca_kabuli_chr04 | 34384596                | TT                              | CC              | 1946818563               |
| SNP_P4_56334_34384696 | NC_021163.1    | Ca_kabuli_chr04 | 34384696                | AA                              | TT              | 1946818565               |

| SNPs IDs              | Chromosome IDs | Chromosomes     | Physical positions (bp) | CDC Frontier (Reference genome) | (ILWC46 & LPNB) | NCBI SNPdb Accession IDs |
|-----------------------|----------------|-----------------|-------------------------|---------------------------------|-----------------|--------------------------|
| SNP_P4_56335_34384698 | NC_021163.1    | Ca_kabuli_chr04 | 34384698                | AA                              | CC              | 1946818567               |
| SNP_P4_56336_34384734 | NC_021163.1    | Ca_kabuli_chr04 | 34384734                | AA                              | CC              | 1946818569               |
| SNP_P4_56337_34384813 | NC_021163.1    | Ca_kabuli_chr04 | 34384813                | CC                              | TT              | 1946818571               |
| SNP_P4_56339_34387600 | NC_021163.1    | Ca_kabuli_chr04 | 34387600                | GG                              | CC              | 1946818573               |
| SNP_P4_56340_34387924 | NC_021163.1    | Ca_kabuli_chr04 | 34387924                | CC                              | TT              | 1946818575               |
| SNP_P4_56341_34387996 | NC_021163.1    | Ca_kabuli_chr04 | 34387996                | TT                              | GG              | 1946818577               |
| SNP_P4_56344_34389100 | NC_021163.1    | Ca_kabuli_chr04 | 34389100                | AA                              | GG              | 1946818579               |
| SNP_P4_56345_34390975 | NC_021163.1    | Ca_kabuli_chr04 | 34390975                | GG                              | TT              | 1946818581               |
| SNP_P4_56346_34394032 | NC_021163.1    | Ca_kabuli_chr04 | 34394032                | AA                              | GG              | 1946818583               |
| SNP_P4_56347_34404493 | NC_021163.1    | Ca_kabuli_chr04 | 34404493                | GG                              | AA              | 1946818585               |
| SNP_P4_56348_34406293 | NC_021163.1    | Ca_kabuli_chr04 | 34406293                | AA                              | CC              | 1946818587               |
| SNP_P4_56349_34407343 | NC_021163.1    | Ca_kabuli_chr04 | 34407343                | TT                              | AA              | 1946818589               |
| SNP_P4_56350_34407349 | NC_021163.1    | Ca_kabuli_chr04 | 34407349                | GG                              | TT              | 1946818591               |
| SNP_P4_56351_34407458 | NC_021163.1    | Ca_kabuli_chr04 | 34407458                | AA                              | GG              | 1946818593               |
| SNP_P4_56353_34412628 | NC_021163.1    | Ca_kabuli_chr04 | 34412628                | AA                              | GG              | 1946818595               |
| SNP_P4_56354_34412645 | NC_021163.1    | Ca_kabuli_chr04 | 34412645                | TT                              | CC              | 1946818597               |
| SNP_P4_56356_34417701 | NC_021163.1    | Ca_kabuli_chr04 | 34417701                | TT                              | CC              | 1946818599               |
| SNP_P4_56357_34417939 | NC_021163.1    | Ca_kabuli_chr04 | 34417939                | GG                              | AA              | 1946818601               |
| SNP_P4_56358_34421287 | NC_021163.1    | Ca_kabuli_chr04 | 34421287                | TT                              | CC              | 1946818603               |
| SNP_P4_56359_34423282 | NC_021163.1    | Ca_kabuli_chr04 | 34423282                | CC                              | TT              | 1946818605               |
| SNP_P4_56360_34423751 | NC_021163.1    | Ca_kabuli_chr04 | 34423751                | AA                              | GG              | 1946818607               |
| SNP_P4_56361_34424020 | NC_021163.1    | Ca_kabuli_chr04 | 34424020                | TT                              | CC              | 1946818609               |
| SNP_P4_56362_34430231 | NC_021163.1    | Ca_kabuli_chr04 | 34430231                | AA                              | GG              | 1946818611               |
| SNP_P4_56363_34431258 | NC_021163.1    | Ca_kabuli_chr04 | 34431258                | CC                              | TT              | 1946818613               |
| SNP_P4_56364_34432063 | NC_021163.1    | Ca_kabuli_chr04 | 34432063                | AA                              | GG              | 1946818615               |
| SNP_P4_56365_34432147 | NC_021163.1    | Ca_kabuli_chr04 | 34432147                | CC                              | GG              | 1946818617               |
| SNP_P4_56367_34436552 | NC_021163.1    | Ca_kabuli_chr04 | 34436552                | CC                              | TT              | 1946818620               |
| SNP_P4_56368_34442705 | NC_021163.1    | Ca_kabuli_chr04 | 34442705                | TT                              | CC              | 1946818622               |
| SNP_P4_56369_34444107 | NC_021163.1    | Ca_kabuli_chr04 | 34444107                | TT                              | GG              | 1946818624               |
| SNP_P4_56370_34444315 | NC_021163.1    | Ca_kabuli_chr04 | 34444315                | GG                              | TT              | 1946818626               |
| SNP_P4_56371_34445230 | NC_021163.1    | Ca_kabuli_chr04 | 34445230                | CC                              | TT              | 1946818628               |
| SNP_P4_56372_34446825 | NC_021163.1    | Ca_kabuli_chr04 | 34446825                | AA                              | GG              | 1946818630               |
| SNP_P4_56373_34448082 | NC_021163.1    | Ca_kabuli_chr04 | 34448082                | CC                              | TT              | 1946818632               |
| SNP_P4_56374_34449401 | NC_021163.1    | Ca_kabuli_chr04 | 34449401                | GG                              | AA              | 1946818634               |
| SNP_P4_56375_34458791 | NC_021163.1    | Ca_kabuli_chr04 | 34458791                | AA                              | GG              | 1946818637               |
| SNP_P4_56376_34458801 | NC_021163.1    | Ca_kabuli_chr04 | 34458801                | AA                              | GG              | 1946818639               |
| SNP_P4_56378_34461554 | NC_021163.1    | Ca_kabuli_chr04 | 34461554                | CC                              | GG              | 1946818641               |
| SNP_P4_56383_34472342 | NC_021163.1    | Ca_kabuli_chr04 | 34472342                | TT                              | CC              | 1946818643               |
| SNP_P4_56385_34490566 | NC_021163.1    | Ca_kabuli_chr04 | 34490566                | TT                              | CC              | 1946818645               |
| SNP_P4_56386_34491652 | NC_021163.1    | Ca_kabuli_chr04 | 34491652                | AA                              | CC              | 1946818647               |
| SNP_P4_56387_34491653 | NC_021163.1    | Ca_kabuli_chr04 | 34491653                | AA                              | TT              | 1946818649               |
| SNP_P4_56389_34493325 | NC_021163.1    | Ca_kabuli_chr04 | 34493325                | CC                              | TT              | 1946818651               |

| SNPs IDs              | Chromosome IDs | Chromosomes     | Physical positions (bp) | CDC Frontier (Reference genome) | (ILWC46 & LPNB) | NCBI SNPdb Accession IDs |
|-----------------------|----------------|-----------------|-------------------------|---------------------------------|-----------------|--------------------------|
| SNP_P4_56390_34495541 | NC_021163.1    | Ca_kabuli_chr04 | 34495541                | TT                              | CC              | 1946818653               |
| SNP_P4_56391_34496956 | NC_021163.1    | Ca_kabuli_chr04 | 34496956                | CC                              | TT              | 1946818655               |
| SNP_P4_56392_34496962 | NC_021163.1    | Ca_kabuli_chr04 | 34496962                | GG                              | AA              | 1946818657               |
| SNP_P4_56393_34503298 | NC_021163.1    | Ca_kabuli_chr04 | 34503298                | GG                              | AA              | 1946818659               |
| SNP_P4_56395_34503637 | NC_021163.1    | Ca_kabuli_chr04 | 34503637                | CC                              | TT              | 1946818661               |
| SNP_P4_56396_34503644 | NC_021163.1    | Ca_kabuli_chr04 | 34503644                | AA                              | GG              | 1946818663               |
| SNP_P4_56397_34503797 | NC_021163.1    | Ca_kabuli_chr04 | 34503797                | CC                              | TT              | 1946818665               |
| SNP_P4_56398_34507800 | NC_021163.1    | Ca_kabuli_chr04 | 34507800                | CC                              | GG              | 1946818667               |
| SNP_P4_56399_34513411 | NC_021163.1    | Ca_kabuli_chr04 | 34513411                | AA                              | GG              | 1946818669               |
| SNP_P4_56401_34520659 | NC_021163.1    | Ca_kabuli_chr04 | 34520659                | CC                              | GG              | 1946818671               |
| SNP_P4_56402_34520775 | NC_021163.1    | Ca_kabuli_chr04 | 34520775                | AA                              | TT              | 1946818673               |
| SNP_P4_56403_34520848 | NC_021163.1    | Ca_kabuli_chr04 | 34520848                | TT                              | AA              | 1946818675               |
| SNP_P4_56404_34520878 | NC_021163.1    | Ca_kabuli_chr04 | 34520878                | TT                              | CC              | 1946818677               |
| SNP_P4_56405_34520974 | NC_021163.1    | Ca_kabuli_chr04 | 34520974                | AA                              | TT              | 1946818679               |
| SNP_P4_56406_34525158 | NC_021163.1    | Ca_kabuli_chr04 | 34525158                | TT                              | CC              | 1946818681               |
| SNP_P4_56407_34525236 | NC_021163.1    | Ca_kabuli_chr04 | 34525236                | TT                              | CC              | 1946818683               |
| SNP_P4_56408_34526980 | NC_021163.1    | Ca_kabuli_chr04 | 34526980                | AA                              | GG              | 1946818685               |
| SNP_P4_56409_34527008 | NC_021163.1    | Ca_kabuli_chr04 | 34527008                | AA                              | GG              | 1946818687               |
| SNP_P4_56410_34527026 | NC_021163.1    | Ca_kabuli_chr04 | 34527026                | AA                              | GG              | 1946818689               |
| SNP_P4_56411_34554541 | NC_021163.1    | Ca_kabuli_chr04 | 34554541                | AA                              | GG              | 1946818691               |
| SNP_P4_56412_34557892 | NC_021163.1    | Ca_kabuli_chr04 | 34557892                | GG                              | TT              | 1946818693               |
| SNP_P4_56413_34557908 | NC_021163.1    | Ca_kabuli_chr04 | 34557908                | CC                              | AA              | 1946818695               |
| SNP_P4_56414_34566166 | NC_021163.1    | Ca_kabuli_chr04 | 34566166                | CC                              | TT              | 1946818697               |
| SNP_P4_56416_34566337 | NC_021163.1    | Ca_kabuli_chr04 | 34566337                | AA                              | GG              | 1946818699               |
| SNP_P4_56418_34568184 | NC_021163.1    | Ca_kabuli_chr04 | 34568184                | AA                              | GG              | 1946818701               |
| SNP_P4_56419_34568796 | NC_021163.1    | Ca_kabuli_chr04 | 34568796                | GG                              | AA              | 1946818703               |
| SNP_P4_56420_34568822 | NC_021163.1    | Ca_kabuli_chr04 | 34568822                | GG                              | AA              | 1946818706               |
| SNP_P4_56421_34568829 | NC_021163.1    | Ca_kabuli_chr04 | 34568829                | AA                              | TT              | 1946818708               |
| SNP_P4_56422_34570263 | NC_021163.1    | Ca_kabuli_chr04 | 34570263                | CC                              | AA              | 1946818710               |
| SNP_P4_56423_34582083 | NC_021163.1    | Ca_kabuli_chr04 | 34582083                | CC                              | GG              | 1946818712               |
| SNP_P4_56424_34582114 | NC_021163.1    | Ca_kabuli_chr04 | 34582114                | CC                              | TT              | 1946818714               |
| SNP_P4_56425_34582328 | NC_021163.1    | Ca_kabuli_chr04 | 34582328                | TT                              | AA              | 1946818716               |
| SNP_P4_56426_34582570 | NC_021163.1    | Ca_kabuli_chr04 | 34582570                | CC                              | AA              | 1946818718               |
| SNP_P4_56427_34582594 | NC_021163.1    | Ca_kabuli_chr04 | 34582594                | TT                              | GG              | 1946818720               |
| SNP_P4_56428_34586455 | NC_021163.1    | Ca_kabuli_chr04 | 34586455                | CC                              | TT              | 1946818722               |
| SNP_P4_56429_34586566 | NC_021163.1    | Ca_kabuli_chr04 | 34586566                | AA                              | GG              | 1946818724               |
| SNP_P4_56430_34586570 | NC_021163.1    | Ca_kabuli_chr04 | 34586570                | AA                              | TT              | 1946818726               |
| SNP_P4_56431_34586657 | NC_021163.1    | Ca_kabuli_chr04 | 34586657                | TT                              | GG              | 1946818728               |
| SNP_P4_56432_34586668 | NC_021163.1    | Ca_kabuli_chr04 | 34586668                | AA                              | CC              | 1946818730               |
| SNP_P4_56433_34586669 | NC_021163.1    | Ca_kabuli_chr04 | 34586669                | TT                              | AA              | 1946818732               |
| SNP_P4_56434_34586762 | NC_021163.1    | Ca_kabuli_chr04 | 34586762                | CC                              | TT              | 1946818734               |
| SNP_P4_56435_34586792 | NC_021163.1    | Ca_kabuli_chr04 | 34586792                | TT                              | AA              | 1946818736               |



| SNPs IDs              | Chromosome IDs | Chromosomes     | Physical positions (bp) | CDC Frontier (Reference genome) | (ILWC46 & LPNB) | NCBI SNPdb Accession IDs |
|-----------------------|----------------|-----------------|-------------------------|---------------------------------|-----------------|--------------------------|
| SNP_P4_56436_34587250 | NC_021163.1    | Ca_kabuli_chr04 | 34587250                | CC                              | GG              | 1946818737               |
| SNP_P4_56437_34588023 | NC_021163.1    | Ca_kabuli_chr04 | 34588023                | GG                              | CC              | 1946818738               |
| SNP_P4_56438_34588673 | NC_021163.1    | Ca_kabuli_chr04 | 34588673                | CC                              | GG              | 1946818739               |
| SNP_P4_56439_34590757 | NC_021163.1    | Ca_kabuli_chr04 | 34590757                | GG                              | CC              | 1946818740               |
| SNP_P4_56440_34590761 | NC_021163.1    | Ca_kabuli_chr04 | 34590761                | AA                              | GG              | 1946818741               |
| SNP_P4_56441_34598904 | NC_021163.1    | Ca_kabuli_chr04 | 34598904                | AA                              | TT              | 1946818743               |
| SNP_P4_56442_34599117 | NC_021163.1    | Ca_kabuli_chr04 | 34599117                | CC                              | AA              | 1946818745               |
| SNP_P4_56443_34599239 | NC_021163.1    | Ca_kabuli_chr04 | 34599239                | GG                              | CC              | 1946818747               |
| SNP_P4_56444_34601674 | NC_021163.1    | Ca_kabuli_chr04 | 34601674                | TT                              | AA              | 1946818749               |
| SNP_P4_56445_34601691 | NC_021163.1    | Ca_kabuli_chr04 | 34601691                | TT                              | CC              | 1946818751               |
| SNP_P4_56448_34605419 | NC_021163.1    | Ca_kabuli_chr04 | 34605419                | TT                              | AA              | 1946818753               |
| SNP_P4_56449_34605424 | NC_021163.1    | Ca_kabuli_chr04 | 34605424                | AA                              | GG              | 1946818755               |
| SNP_P4_56450_34605539 | NC_021163.1    | Ca_kabuli_chr04 | 34605539                | TT                              | CC              | 1946818757               |
| SNP_P4_56451_34605540 | NC_021163.1    | Ca_kabuli_chr04 | 34605540                | CC                              | GG              | 1946818759               |
| SNP_P4_56452_34605544 | NC_021163.1    | Ca_kabuli_chr04 | 34605544                | GG                              | AA              | 1946818761               |
| SNP_P4_56453_34605545 | NC_021163.1    | Ca_kabuli_chr04 | 34605545                | CC                              | AA              | 1946818763               |
| SNP_P4_56454_34605547 | NC_021163.1    | Ca_kabuli_chr04 | 34605547                | AA                              | TT              | 1946818765               |
| SNP_P4_56455_34605564 | NC_021163.1    | Ca_kabuli_chr04 | 34605564                | GG                              | AA              | 1946818767               |
| SNP_P4_56456_34605570 | NC_021163.1    | Ca_kabuli_chr04 | 34605570                | TT                              | GG              | 1946818769               |
| SNP_P4_56458_34605595 | NC_021163.1    | Ca_kabuli_chr04 | 34605595                | TT                              | CC              | 1946818771               |
| SNP_P4_56459_34606687 | NC_021163.1    | Ca_kabuli_chr04 | 34606687                | GG                              | CC              | 1946818773               |
| SNP_P4_56460_34634905 | NC_021163.1    | Ca_kabuli_chr04 | 34634905                | TT                              | CC              | 1946818775               |
| SNP_P4_56461_34634914 | NC_021163.1    | Ca_kabuli_chr04 | 34634914                | AA                              | TT              | 1946818777               |
| SNP_P4_56462_34634921 | NC_021163.1    | Ca_kabuli_chr04 | 34634921                | AA                              | TT              | 1946818779               |
| SNP_P4_56463_34642259 | NC_021163.1    | Ca_kabuli_chr04 | 34642259                | TT                              | GG              | 1946818781               |
| SNP_P4_56464_34647722 | NC_021163.1    | Ca_kabuli_chr04 | 34647722                | AA                              | GG              | 1946818784               |
| SNP_P4_56465_34649337 | NC_021163.1    | Ca_kabuli_chr04 | 34649337                | AA                              | TT              | 1946818786               |
| SNP_P4_56466_34664310 | NC_021163.1    | Ca_kabuli_chr04 | 34664310                | TT                              | GG              | 1946818788               |
| SNP_P4_56467_34664329 | NC_021163.1    | Ca_kabuli_chr04 | 34664329                | GG                              | TT              | 1946818790               |
| SNP_P4_56468_34683690 | NC_021163.1    | Ca_kabuli_chr04 | 34683690                | TT                              | CC              | 1946818792               |
| SNP_P4_56469_34683694 | NC_021163.1    | Ca_kabuli_chr04 | 34683694                | GG                              | AA              | 1946818794               |
| SNP_P4_56470_34695504 | NC_021163.1    | Ca_kabuli_chr04 | 34695504                | CC                              | TT              | 1946818796               |
| SNP_P4_56471_34695505 | NC_021163.1    | Ca_kabuli_chr04 | 34695505                | CC                              | AA              | 1946818798               |
| SNP_P4_56472_34695510 | NC_021163.1    | Ca_kabuli_chr04 | 34695510                | TT                              | AA              | 1946818800               |
| SNP_P4_56473_34695514 | NC_021163.1    | Ca_kabuli_chr04 | 34695514                | CC                              | AA              | 1946818802               |
| SNP_P4_56474_34695520 | NC_021163.1    | Ca_kabuli_chr04 | 34695520                | CC                              | AA              | 1946818804               |
| SNP_P4_56475_34695531 | NC_021163.1    | Ca_kabuli_chr04 | 34695531                | GG                              | CC              | 1946818806               |
| SNP_P4_56476_34695533 | NC_021163.1    | Ca_kabuli_chr04 | 34695533                | AA                              | TT              | 1946818808               |
| SNP_P4_56477_34704178 | NC_021163.1    | Ca_kabuli_chr04 | 34704178                | GG                              | AA              | 1946818810               |
| SNP_P4_56478_34704215 | NC_021163.1    | Ca_kabuli_chr04 | 34704215                | TT                              | CC              | 1946818813               |
| SNP_P4_56479_34704245 | NC_021163.1    | Ca_kabuli_chr04 | 34704245                | TT                              | CC              | 1946818815               |
| SNP_P4_56480_34704249 | NC_021163.1    | Ca_kabuli_chr04 | 34704249                | CC                              | GG              | 1946818817               |

| SNPs IDs              | Chromosome IDs | Chromosomes     | Physical positions (bp) | CDC Frontier (Reference genome) | (ILWC46 & LPNB) | NCBI SNPdb Accession IDs |
|-----------------------|----------------|-----------------|-------------------------|---------------------------------|-----------------|--------------------------|
| SNP_P4_56481_34704436 | NC_021163.1    | Ca_kabuli_chr04 | 34704436                | TT                              | CC              | 1946818819               |
| SNP_P4_56482_34704507 | NC_021163.1    | Ca_kabuli_chr04 | 34704507                | AA                              | GG              | 1946818821               |
| SNP_P4_56484_34704510 | NC_021163.1    | Ca_kabuli_chr04 | 34704510                | GG                              | AA              | 1946818823               |
| SNP_P4_56485_34704511 | NC_021163.1    | Ca_kabuli_chr04 | 34704511                | GG                              | AA              | 1946818825               |
| SNP_P4_56486_34704636 | NC_021163.1    | Ca_kabuli_chr04 | 34704636                | AA                              | GG              | 1946818827               |
| SNP_P4_56487_34704802 | NC_021163.1    | Ca_kabuli_chr04 | 34704802                | GG                              | AA              | 1946818829               |
| SNP_P4_56488_34712597 | NC_021163.1    | Ca_kabuli_chr04 | 34712597                | TT                              | AA              | 1946818831               |
| SNP_P4_56489_34715464 | NC_021163.1    | Ca_kabuli_chr04 | 34715464                | GG                              | AA              | 1946818833               |
| SNP_P4_56490_34743426 | NC_021163.1    | Ca_kabuli_chr04 | 34743426                | TT                              | CC              | 1946818835               |
| SNP_P4_56491_34774264 | NC_021163.1    | Ca_kabuli_chr04 | 34774264                | AA                              | CC              | 1946818837               |
| SNP_P4_56492_34785902 | NC_021163.1    | Ca_kabuli_chr04 | 34785902                | AA                              | GG              | 1946818839               |
| SNP_P4_56493_34794377 | NC_021163.1    | Ca_kabuli_chr04 | 34794377                | CC                              | TT              | 1946818841               |
| SNP_P4_56494_34831908 | NC_021163.1    | Ca_kabuli_chr04 | 34831908                | AA                              | GG              | 1946818843               |
| SNP_P4_56495_34832375 | NC_021163.1    | Ca_kabuli_chr04 | 34832375                | GG                              | AA              | 1946818845               |
| SNP_P4_56496_34833925 | NC_021163.1    | Ca_kabuli_chr04 | 34833925                | AA                              | GG              | 1946818847               |
| SNP_P4_56497_34833955 | NC_021163.1    | Ca_kabuli_chr04 | 34833955                | GG                              | TT              | 1946818849               |
| SNP_P4_56498_34833971 | NC_021163.1    | Ca_kabuli_chr04 | 34833971                | AA                              | GG              | 1946818852               |
| SNP_P4_56499_34834025 | NC_021163.1    | Ca_kabuli_chr04 | 34834025                | TT                              | CC              | 1946818854               |
| SNP_P4_56500_34834395 | NC_021163.1    | Ca_kabuli_chr04 | 34834395                | TT                              | CC              | 1946818856               |
| SNP_P4_56501_34840681 | NC_021163.1    | Ca_kabuli_chr04 | 34840681                | TT                              | GG              | 1946818858               |
| SNP_P4_56502_34840688 | NC_021163.1    | Ca_kabuli_chr04 | 34840688                | AA                              | GG              | 1946818860               |
| SNP_P4_56503_34840714 | NC_021163.1    | Ca_kabuli_chr04 | 34840714                | AA                              | GG              | 1946818862               |
| SNP_P4_56504_34850214 | NC_021163.1    | Ca_kabuli_chr04 | 34850214                | TT                              | AA              | 1946818864               |
| SNP_P4_56505_34854231 | NC_021163.1    | Ca_kabuli_chr04 | 34854231                | AA                              | GG              | 1946818866               |
| SNP_P4_56506_34854672 | NC_021163.1    | Ca_kabuli_chr04 | 34854672                | CC                              | TT              | 1946818868               |
| SNP_P4_56507_34854681 | NC_021163.1    | Ca_kabuli_chr04 | 34854681                | CC                              | TT              | 1946818870               |
| SNP_P4_56508_34883297 | NC_021163.1    | Ca_kabuli_chr04 | 34883297                | CC                              | TT              | 1946818872               |
| SNP_P4_56509_34883315 | NC_021163.1    | Ca_kabuli_chr04 | 34883315                | TT                              | CC              | 1946818874               |
| SNP_P4_56510_34883316 | NC_021163.1    | Ca_kabuli_chr04 | 34883316                | TT                              | CC              | 1946818876               |
| SNP_P4_56511_34883320 | NC_021163.1    | Ca_kabuli_chr04 | 34883320                | CC                              | TT              | 1946818878               |
| SNP_P4_56512_34883366 | NC_021163.1    | Ca_kabuli_chr04 | 34883366                | AA                              | GG              | 1946818881               |
| SNP_P4_56513_34883508 | NC_021163.1    | Ca_kabuli_chr04 | 34883508                | TT                              | GG              | 1946818883               |
| SNP_P4_56514_34883519 | NC_021163.1    | Ca_kabuli_chr04 | 34883519                | TT                              | CC              | 1946818885               |
| SNP_P4_56515_34883526 | NC_021163.1    | Ca_kabuli_chr04 | 34883526                | TT                              | CC              | 1946818887               |
| SNP_P4_56516_34883528 | NC_021163.1    | Ca_kabuli_chr04 | 34883528                | CC                              | TT              | 1946818889               |
| SNP_P4_56517_34883539 | NC_021163.1    | Ca_kabuli_chr04 | 34883539                | TT                              | CC              | 1946818891               |
| SNP_P4_56518_34883572 | NC_021163.1    | Ca_kabuli_chr04 | 34883572                | TT                              | GG              | 1946818893               |
| SNP_P4_56519_34883604 | NC_021163.1    | Ca_kabuli_chr04 | 34883604                | AA                              | GG              | 1946818895               |
| SNP_P4_56520_34883620 | NC_021163.1    | Ca_kabuli_chr04 | 34883620                | AA                              | GG              | 1946818897               |
| SNP_P4_56521_34883627 | NC_021163.1    | Ca_kabuli_chr04 | 34883627                | AA                              | GG              | 1946818899               |
| SNP_P4_56522_34883652 | NC_021163.1    | Ca_kabuli_chr04 | 34883652                | AA                              | GG              | 1946818901               |
| SNP_P4_56523_34883663 | NC_021163.1    | Ca_kabuli_chr04 | 34883663                | AA                              | GG              | 1946818903               |

| SNPs IDs              | Chromosome IDs | Chromosomes     | Physical positions (bp) | CDC Frontier (Reference genome) | (ILWC46 & LPNB) | NCBI SNPdb Accession IDs |
|-----------------------|----------------|-----------------|-------------------------|---------------------------------|-----------------|--------------------------|
| SNP_P4_56524_34883671 | NC_021163.1    | Ca_kabuli_chr04 | 34883671                | AA                              | GG              | 1946818905               |
| SNP_P4_56525_34883678 | NC_021163.1    | Ca_kabuli_chr04 | 34883678                | CC                              | TT              | 1946818907               |
| SNP_P4_56526_34883724 | NC_021163.1    | Ca_kabuli_chr04 | 34883724                | AA                              | CC              | 1946818909               |
| SNP_P4_56527_34883727 | NC_021163.1    | Ca_kabuli_chr04 | 34883727                | TT                              | AA              | 1946818911               |
| SNP_P4_56528_34883734 | NC_021163.1    | Ca_kabuli_chr04 | 34883734                | AA                              | GG              | 1946818913               |
| SNP_P4_56529_34883796 | NC_021163.1    | Ca_kabuli_chr04 | 34883796                | TT                              | GG              | 1946818915               |
| SNP_P4_56530_34883885 | NC_021163.1    | Ca_kabuli_chr04 | 34883885                | TT                              | AA              | 1946818917               |
| SNP_P4_56531_34883887 | NC_021163.1    | Ca_kabuli_chr04 | 34883887                | TT                              | CC              | 1946818919               |
| SNP_P4_56532_34883893 | NC_021163.1    | Ca_kabuli_chr04 | 34883893                | TT                              | AA              | 1946818921               |
| SNP_P4_56533_34883941 | NC_021163.1    | Ca_kabuli_chr04 | 34883941                | CC                              | AA              | 1946818923               |
| SNP_P4_56534_34883945 | NC_021163.1    | Ca_kabuli_chr04 | 34883945                | GG                              | AA              | 1946818925               |
| SNP_P4_56535_34883960 | NC_021163.1    | Ca_kabuli_chr04 | 34883960                | AA                              | GG              | 1946818927               |
| SNP_P4_56536_34883965 | NC_021163.1    | Ca_kabuli_chr04 | 34883965                | TT                              | GG              | 1946818929               |
| SNP_P4_56537_34883978 | NC_021163.1    | Ca_kabuli_chr04 | 34883978                | TT                              | GG              | 1946818931               |
| SNP_P4_56538_34883996 | NC_021163.1    | Ca_kabuli_chr04 | 34883996                | AA                              | TT              | 1946818933               |
| SNP_P4_56539_34884038 | NC_021163.1    | Ca_kabuli_chr04 | 34884038                | AA                              | GG              | 1946818935               |
| SNP_P4_56540_34884092 | NC_021163.1    | Ca_kabuli_chr04 | 34884092                | TT                              | GG              | 1946818937               |
| SNP_P4_56541_34884096 | NC_021163.1    | Ca_kabuli_chr04 | 34884096                | CC                              | TT              | 1946818939               |
| SNP_P4_56542_34884112 | NC_021163.1    | Ca_kabuli_chr04 | 34884112                | TT                              | CC              | 1946818941               |
| SNP_P4_56543_34884377 | NC_021163.1    | Ca_kabuli_chr04 | 34884377                | AA                              | CC              | 1946818943               |
| SNP_P4_56544_34884380 | NC_021163.1    | Ca_kabuli_chr04 | 34884380                | TT                              | CC              | 1946818945               |
| SNP_P4_56545_34884386 | NC_021163.1    | Ca_kabuli_chr04 | 34884386                | TT                              | GG              | 1946818947               |
| SNP_P4_56546_34884505 | NC_021163.1    | Ca_kabuli_chr04 | 34884505                | AA                              | TT              | 1946818949               |
| SNP_P4_56547_34884518 | NC_021163.1    | Ca_kabuli_chr04 | 34884518                | AA                              | TT              | 1946818951               |
| SNP_P4_56548_34884536 | NC_021163.1    | Ca_kabuli_chr04 | 34884536                | CC                              | TT              | 1946818953               |
| SNP_P4_56549_34884558 | NC_021163.1    | Ca_kabuli_chr04 | 34884558                | TT                              | GG              | 1946818955               |
| SNP_P4_56551_34884589 | NC_021163.1    | Ca_kabuli_chr04 | 34884589                | TT                              | GG              | 1946818957               |
| SNP_P4_56552_34884590 | NC_021163.1    | Ca_kabuli_chr04 | 34884590                | TT                              | GG              | 1946818959               |
| SNP_P4_56553_34884594 | NC_021163.1    | Ca_kabuli_chr04 | 34884594                | AA                              | TT              | 1946818961               |
| SNP_P4_56554_34884603 | NC_021163.1    | Ca_kabuli_chr04 | 34884603                | TT                              | CC              | 1946818963               |
| SNP_P4_56555_34884737 | NC_021163.1    | Ca_kabuli_chr04 | 34884737                | AA                              | TT              | 1946818965               |
| SNP_P4_56556_34884750 | NC_021163.1    | Ca_kabuli_chr04 | 34884750                | TT                              | GG              | 1946818967               |
| SNP_P4_56557_34884756 | NC_021163.1    | Ca_kabuli_chr04 | 34884756                | TT                              | CC              | 1946818969               |
| SNP_P4_56559_34902938 | NC_021163.1    | Ca_kabuli_chr04 | 34902938                | GG                              | AA              | 1946818971               |
| SNP_P4_56560_34902955 | NC_021163.1    | Ca_kabuli_chr04 | 34902955                | AA                              | TT              | 1946818973               |
| SNP_P4_56561_34902963 | NC_021163.1    | Ca_kabuli_chr04 | 34902963                | CC                              | TT              | 1946818975               |
| SNP_P4_56562_34903226 | NC_021163.1    | Ca_kabuli_chr04 | 34903226                | TT                              | CC              | 1946818978               |
| SNP_P4_56563_34903239 | NC_021163.1    | Ca_kabuli_chr04 | 34903239                | CC                              | AA              | 1946818980               |
| SNP_P4_56564_34903255 | NC_021163.1    | Ca_kabuli_chr04 | 34903255                | TT                              | CC              | 1946818982               |
| SNP_P4_56565_34911075 | NC_021163.1    | Ca_kabuli_chr04 | 34911075                | GG                              | AA              | 1946818985               |
| SNP_P4_56566_34911076 | NC_021163.1    | Ca_kabuli_chr04 | 34911076                | AA                              | TT              | 1946818987               |
| SNP_P4_56567_34911077 | NC_021163.1    | Ca_kabuli_chr04 | 34911077                | CC                              | TT              | 1946818989               |

| SNPs IDs              | Chromosome IDs | Chromosomes     | Physical positions (bp) | CDC Frontier (Reference genome) | (ILWC46 & LPNB) | NCBI SNPdb Accession IDs |
|-----------------------|----------------|-----------------|-------------------------|---------------------------------|-----------------|--------------------------|
| SNP_P4_56568_34912961 | NC_021163.1    | Ca_kabuli_chr04 | 34912961                | CC                              | TT              | 1946818991               |
| SNP_P4_56569_34912982 | NC_021163.1    | Ca_kabuli_chr04 | 34912982                | CC                              | TT              | 1946818993               |
| SNP_P4_56570_34912990 | NC_021163.1    | Ca_kabuli_chr04 | 34912990                | TT                              | CC              | 1946818995               |
| SNP_P4_56571_34912995 | NC_021163.1    | Ca_kabuli_chr04 | 34912995                | TT                              | AA              | 1946818997               |
| SNP_P4_56572_34913006 | NC_021163.1    | Ca_kabuli_chr04 | 34913006                | AA                              | CC              | 1946819000               |
| SNP_P4_56573_34913083 | NC_021163.1    | Ca_kabuli_chr04 | 34913083                | AA                              | GG              | 1946819002               |
| SNP_P4_56574_34920873 | NC_021163.1    | Ca_kabuli_chr04 | 34920873                | TT                              | AA              | 1946819004               |
| SNP_P4_56575_34937139 | NC_021163.1    | Ca_kabuli_chr04 | 34937139                | GG                              | AA              | 1946819006               |
| SNP_P4_56576_34937644 | NC_021163.1    | Ca_kabuli_chr04 | 34937644                | CC                              | TT              | 1946819008               |
| SNP_P4_56578_34955174 | NC_021163.1    | Ca_kabuli_chr04 | 34955174                | GG                              | TT              | 1946819010               |
| SNP_P4_56579_34964961 | NC_021163.1    | Ca_kabuli_chr04 | 34964961                | TT                              | AA              | 1946819012               |
| SNP_P4_56581_34972094 | NC_021163.1    | Ca_kabuli_chr04 | 34972094                | TT                              | GG              | 1946819014               |
| SNP_P4_56582_34973955 | NC_021163.1    | Ca_kabuli_chr04 | 34973955                | GG                              | AA              | 1946819017               |
| SNP_P4_56583_34990622 | NC_021163.1    | Ca_kabuli_chr04 | 34990622                | GG                              | AA              | 1946819019               |
| SNP_P4_56584_35018635 | NC_021163.1    | Ca_kabuli_chr04 | 35018635                | AA                              | CC              | 1946819021               |
| SNP_P4_56585_35019342 | NC_021163.1    | Ca_kabuli_chr04 | 35019342                | CC                              | TT              | 1946819023               |
| SNP_P4_56586_35021374 | NC_021163.1    | Ca_kabuli_chr04 | 35021374                | AA                              | CC              | 1946819025               |
| SNP_P4_56587_35027136 | NC_021163.1    | Ca_kabuli_chr04 | 35027136                | CC                              | AA              | 1946819027               |
| SNP_P4_56588_35037251 | NC_021163.1    | Ca_kabuli_chr04 | 35037251                | AA                              | CC              | 1946819029               |
| SNP_P4_56589_35043751 | NC_021163.1    | Ca_kabuli_chr04 | 35043751                | CC                              | TT              | 1946819031               |
| SNP_P4_56590_35047703 | NC_021163.1    | Ca_kabuli_chr04 | 35047703                | CC                              | TT              | 1946819033               |
| SNP_P4_56591_35051557 | NC_021163.1    | Ca_kabuli_chr04 | 35051557                | AA                              | GG              | 1946819035               |
| SNP_P4_56592_35053421 | NC_021163.1    | Ca_kabuli_chr04 | 35053421                | GG                              | AA              | 1946819037               |
| SNP_P4_56593_35061110 | NC_021163.1    | Ca_kabuli_chr04 | 35061110                | TT                              | CC              | 1946819039               |
| SNP_P4_56594_35077127 | NC_021163.1    | Ca_kabuli_chr04 | 35077127                | AA                              | CC              | 1946819042               |
| SNP_P4_56595_35077140 | NC_021163.1    | Ca_kabuli_chr04 | 35077140                | AA                              | CC              | 1946819044               |
| SNP_P4_56596_35095188 | NC_021163.1    | Ca_kabuli_chr04 | 35095188                | AA                              | TT              | 1946819046               |
| SNP_P4_56597_35095189 | NC_021163.1    | Ca_kabuli_chr04 | 35095189                | TT                              | AA              | 1946819048               |
| SNP_P4_56598_35095630 | NC_021163.1    | Ca_kabuli_chr04 | 35095630                | AA                              | GG              | 1946819050               |
| SNP_P4_56599_35095636 | NC_021163.1    | Ca_kabuli_chr04 | 35095636                | CC                              | GG              | 1946819052               |
| SNP_P4_56600_35099486 | NC_021163.1    | Ca_kabuli_chr04 | 35099486                | TT                              | CC              | 1946819055               |
| SNP_P4_56601_35111353 | NC_021163.1    | Ca_kabuli_chr04 | 35111353                | AA                              | CC              | 1946819057               |
| SNP_P4_56603_35114980 | NC_021163.1    | Ca_kabuli_chr04 | 35114980                | AA                              | GG              | 1946819059               |
| SNP_P4_56604_35115012 | NC_021163.1    | Ca_kabuli_chr04 | 35115012                | CC                              | AA              | 1946819061               |
| SNP_P4_56605_35115173 | NC_021163.1    | Ca_kabuli_chr04 | 35115173                | TT                              | AA              | 1946819063               |
| SNP_P4_56606_35115181 | NC_021163.1    | Ca_kabuli_chr04 | 35115181                | TT                              | CC              | 1946819065               |
| SNP_P4_56607_35115209 | NC_021163.1    | Ca_kabuli_chr04 | 35115209                | GG                              | AA              | 1946819067               |
| SNP_P4_56608_35115215 | NC_021163.1    | Ca_kabuli_chr04 | 35115215                | AA                              | CC              | 1946819069               |
| SNP_P4_56609_35115248 | NC_021163.1    | Ca_kabuli_chr04 | 35115248                | AA                              | GG              | 1946819071               |
| SNP_P4_56610_35115266 | NC_021163.1    | Ca_kabuli_chr04 | 35115266                | AA                              | GG              | 1946819073               |
| SNP_P4_56611_35115281 | NC_021163.1    | Ca_kabuli_chr04 | 35115281                | GG                              | AA              | 1946819075               |
| SNP_P4_56612_35115299 | NC_021163.1    | Ca_kabuli_chr04 | 35115299                | AA                              | GG              | 1946819077               |

| SNPs IDs              | Chromosome IDs | Chromosomes     | Physical positions (bp) | CDC Frontier (Reference genome) | (ILWC46 & LPNB) | NCBI SNPdb Accession IDs |
|-----------------------|----------------|-----------------|-------------------------|---------------------------------|-----------------|--------------------------|
| SNP_P4_56613_35115320 | NC_021163.1    | Ca_kabuli_chr04 | 35115320                | GG                              | TT              | 1946819079               |
| SNP_P4_56614_35115356 | NC_021163.1    | Ca_kabuli_chr04 | 35115356                | AA                              | TT              | 1946819081               |
| SNP_P4_56615_35136166 | NC_021163.1    | Ca_kabuli_chr04 | 35136166                | TT                              | AA              | 1946819083               |
| SNP_P4_56616_35139446 | NC_021163.1    | Ca_kabuli_chr04 | 35139446                | AA                              | TT              | 1946819085               |
| SNP_P4_56617_35141778 | NC_021163.1    | Ca_kabuli_chr04 | 35141778                | AA                              | TT              | 1946819087               |
| SNP_P4_56618_35182259 | NC_021163.1    | Ca_kabuli_chr04 | 35182259                | AA                              | GG              | 1946819089               |
| SNP_P4_56619_35182318 | NC_021163.1    | Ca_kabuli_chr04 | 35182318                | CC                              | TT              | 1946819091               |
| SNP_P4_56620_35185386 | NC_021163.1    | Ca_kabuli_chr04 | 35185386                | CC                              | TT              | 1946819093               |
| SNP_P4_56621_35187464 | NC_021163.1    | Ca_kabuli_chr04 | 35187464                | AA                              | GG              | 1946819095               |
| SNP_P4_56622_35187517 | NC_021163.1    | Ca_kabuli_chr04 | 35187517                | AA                              | TT              | 1946819097               |
| SNP_P4_56623_35187536 | NC_021163.1    | Ca_kabuli_chr04 | 35187536                | AA                              | TT              | 1946819099               |
| SNP_P4_56624_35187553 | NC_021163.1    | Ca_kabuli_chr04 | 35187553                | GG                              | TT              | 1946819101               |
| SNP_P4_56625_35195303 | NC_021163.1    | Ca_kabuli_chr04 | 35195303                | TT                              | CC              | 1946819103               |
| SNP_P4_56626_35213101 | NC_021163.1    | Ca_kabuli_chr04 | 35213101                | AA                              | GG              | 1946819105               |
| SNP_P4_56627_35222682 | NC_021163.1    | Ca_kabuli_chr04 | 35222682                | AA                              | GG              | 1946819107               |
| SNP_P4_56628_35246316 | NC_021163.1    | Ca_kabuli_chr04 | 35246316                | GG                              | AA              | 1946819109               |
| SNP_P4_56629_35257274 | NC_021163.1    | Ca_kabuli_chr04 | 35257274                | CC                              | TT              | 1946819111               |
| SNP_P4_56630_35257617 | NC_021163.1    | Ca_kabuli_chr04 | 35257617                | CC                              | AA              | 1946819113               |
| SNP_P4_56631_35258030 | NC_021163.1    | Ca_kabuli_chr04 | 35258030                | AA                              | CC              | 1946819115               |
| SNP_P4_56632_35267781 | NC_021163.1    | Ca_kabuli_chr04 | 35267781                | TT                              | GG              | 1946819117               |
| SNP_P4_56633_35267787 | NC_021163.1    | Ca_kabuli_chr04 | 35267787                | GG                              | CC              | 1946819119               |
| SNP_P4_56634_35284433 | NC_021163.1    | Ca_kabuli_chr04 | 35284433                | TT                              | AA              | 1946819121               |
| SNP_P4_56636_35342311 | NC_021163.1    | Ca_kabuli_chr04 | 35342311                | CC                              | TT              | 1946819123               |
| SNP_P4_56637_35342386 | NC_021163.1    | Ca_kabuli_chr04 | 35342386                | GG                              | AA              | 1946819125               |
| SNP_P4_56638_35342671 | NC_021163.1    | Ca_kabuli_chr04 | 35342671                | GG                              | TT              | 1946819126               |
| SNP_P4_56639_35342724 | NC_021163.1    | Ca_kabuli_chr04 | 35342724                | AA                              | GG              | 1946819128               |
| SNP_P4_56640_35342858 | NC_021163.1    | Ca_kabuli_chr04 | 35342858                | TT                              | CC              | 1946819130               |
| SNP_P4_56641_35342923 | NC_021163.1    | Ca_kabuli_chr04 | 35342923                | GG                              | AA              | 1946819132               |
| SNP_P4_56642_35343917 | NC_021163.1    | Ca_kabuli_chr04 | 35343917                | CC                              | TT              | 1946819134               |
| SNP_P4_56643_35343934 | NC_021163.1    | Ca_kabuli_chr04 | 35343934                | AA                              | GG              | 1946819136               |
| SNP_P4_56644_35343974 | NC_021163.1    | Ca_kabuli_chr04 | 35343974                | CC                              | TT              | 1946819138               |
| SNP_P4_56646_35345936 | NC_021163.1    | Ca_kabuli_chr04 | 35345936                | CC                              | TT              | 1946819140               |
| SNP_P4_56647_35369564 | NC_021163.1    | Ca_kabuli_chr04 | 35369564                | TT                              | GG              | 1946819142               |
| SNP_P4_56648_35377035 | NC_021163.1    | Ca_kabuli_chr04 | 35377035                | CC                              | TT              | 1946819144               |
| SNP_P4_56649_35390634 | NC_021163.1    | Ca_kabuli_chr04 | 35390634                | CC                              | AA              | 1946819146               |
| SNP_P4_56650_35391598 | NC_021163.1    | Ca_kabuli_chr04 | 35391598                | CC                              | GG              | 1946819148               |
| SNP_P4_56651_35391918 | NC_021163.1    | Ca_kabuli_chr04 | 35391918                | TT                              | GG              | 1946819150               |
| SNP_P4_56652_35391939 | NC_021163.1    | Ca_kabuli_chr04 | 35391939                | AA                              | TT              | 1946819152               |
| SNP_P4_56653_35391951 | NC_021163.1    | Ca_kabuli_chr04 | 35391951                | AA                              | TT              | 1946819154               |
| SNP_P4_56655_35430317 | NC_021163.1    | Ca_kabuli_chr04 | 35430317                | GG                              | AA              | 1946819156               |
| SNP_P4_56656_35430378 | NC_021163.1    | Ca_kabuli_chr04 | 35430378                | GG                              | AA              | 1946819158               |
| SNP_P4_56657_35430382 | NC_021163.1    | Ca_kabuli_chr04 | 35430382                | TT                              | AA              | 1946819160               |

| SNPs IDs              | Chromosome IDs | Chromosomes     | Physical positions (bp) | CDC Frontier (Reference genome) | (ILWC46 & LPNB) | NCBI SNPdb Accession IDs |
|-----------------------|----------------|-----------------|-------------------------|---------------------------------|-----------------|--------------------------|
| SNP_P4_56658_35430854 | NC_021163.1    | Ca_kabuli_chr04 | 35430854                | TT                              | CC              | 1946819162               |
| SNP_P4_56659_35430892 | NC_021163.1    | Ca_kabuli_chr04 | 35430892                | TT                              | AA              | 1946819164               |
| SNP_P4_56660_35430948 | NC_021163.1    | Ca_kabuli_chr04 | 35430948                | TT                              | CC              | 1946819165               |
| SNP_P4_56661_35431031 | NC_021163.1    | Ca_kabuli_chr04 | 35431031                | AA                              | GG              | 1946819167               |
| SNP_P4_56662_35431538 | NC_021163.1    | Ca_kabuli_chr04 | 35431538                | AA                              | CC              | 1946819169               |
| SNP_P4_56663_35431549 | NC_021163.1    | Ca_kabuli_chr04 | 35431549                | TT                              | AA              | 1946819171               |
| SNP_P4_56664_35431567 | NC_021163.1    | Ca_kabuli_chr04 | 35431567                | CC                              | GG              | 1946819173               |
| SNP_P4_56665_35431591 | NC_021163.1    | Ca_kabuli_chr04 | 35431591                | CC                              | TT              | 1946819175               |
| SNP_P4_56667_35431628 | NC_021163.1    | Ca_kabuli_chr04 | 35431628                | AA                              | GG              | 1946819177               |
| SNP_P4_56668_35431680 | NC_021163.1    | Ca_kabuli_chr04 | 35431680                | CC                              | AA              | 1946819179               |
| SNP_P4_56669_35431816 | NC_021163.1    | Ca_kabuli_chr04 | 35431816                | CC                              | TT              | 1946819181               |
| SNP_P4_56670_35431897 | NC_021163.1    | Ca_kabuli_chr04 | 35431897                | AA                              | CC              | 1946819183               |
| SNP_P4_56671_35431910 | NC_021163.1    | Ca_kabuli_chr04 | 35431910                | AA                              | GG              | 1946819185               |
| SNP_P4_56672_35431944 | NC_021163.1    | Ca_kabuli_chr04 | 35431944                | CC                              | AA              | 1946819187               |
| SNP_P4_56673_35431977 | NC_021163.1    | Ca_kabuli_chr04 | 35431977                | TT                              | CC              | 1946819189               |
| SNP_P4_56674_35431995 | NC_021163.1    | Ca_kabuli_chr04 | 35431995                | CC                              | TT              | 1946819191               |
| SNP_P4_56676_35432022 | NC_021163.1    | Ca_kabuli_chr04 | 35432022                | GG                              | AA              | 1946819193               |
| SNP_P4_56677_35432082 | NC_021163.1    | Ca_kabuli_chr04 | 35432082                | GG                              | AA              | 1946819195               |
| SNP_P4_56678_35432335 | NC_021163.1    | Ca_kabuli_chr04 | 35432335                | AA                              | GG              | 1946819197               |
| SNP_P4_56679_35432465 | NC_021163.1    | Ca_kabuli_chr04 | 35432465                | GG                              | AA              | 1946819199               |
| SNP_P4_56680_35432506 | NC_021163.1    | Ca_kabuli_chr04 | 35432506                | TT                              | CC              | 1946819201               |
| SNP_P4_56681_35432513 | NC_021163.1    | Ca_kabuli_chr04 | 35432513                | GG                              | CC              | 1946819204               |
| SNP_P4_56682_35432547 | NC_021163.1    | Ca_kabuli_chr04 | 35432547                | TT                              | CC              | 1946819206               |
| SNP_P4_56683_35432552 | NC_021163.1    | Ca_kabuli_chr04 | 35432552                | GG                              | AA              | 1946819208               |
| SNP_P4_56684_35432589 | NC_021163.1    | Ca_kabuli_chr04 | 35432589                | AA                              | GG              | 1946819210               |
| SNP_P4_56685_35432599 | NC_021163.1    | Ca_kabuli_chr04 | 35432599                | GG                              | TT              | 1946819212               |
| SNP_P4_56686_35432683 | NC_021163.1    | Ca_kabuli_chr04 | 35432683                | TT                              | GG              | 1946819214               |
| SNP_P4_56687_35432763 | NC_021163.1    | Ca_kabuli_chr04 | 35432763                | TT                              | GG              | 1946819216               |
| SNP_P4_56688_35432814 | NC_021163.1    | Ca_kabuli_chr04 | 35432814                | CC                              | TT              | 1946819218               |
| SNP_P4_56689_35432824 | NC_021163.1    | Ca_kabuli_chr04 | 35432824                | GG                              | AA              | 1946819220               |
| SNP_P4_56691_35432884 | NC_021163.1    | Ca_kabuli_chr04 | 35432884                | TT                              | GG              | 1946819222               |
| SNP_P4_56693_35433183 | NC_021163.1    | Ca_kabuli_chr04 | 35433183                | GG                              | TT              | 1946819224               |
| SNP_P4_56695_35433358 | NC_021163.1    | Ca_kabuli_chr04 | 35433358                | AA                              | TT              | 1946819227               |
| SNP_P4_56696_35433360 | NC_021163.1    | Ca_kabuli_chr04 | 35433360                | TT                              | CC              | 1946819229               |
| SNP_P4_56698_35446156 | NC_021163.1    | Ca_kabuli_chr04 | 35446156                | TT                              | AA              | 1946819231               |
| SNP_P4_56699_35450940 | NC_021163.1    | Ca_kabuli_chr04 | 35450940                | AA                              | GG              | 1946819233               |
| SNP_P4_56700_35453631 | NC_021163.1    | Ca_kabuli_chr04 | 35453631                | GG                              | AA              | 1946819235               |
| SNP_P4_56701_35454842 | NC_021163.1    | Ca_kabuli_chr04 | 35454842                | CC                              | AA              | 1946819237               |
| SNP_P4_56702_35454883 | NC_021163.1    | Ca_kabuli_chr04 | 35454883                | CC                              | AA              | 1946819239               |
| SNP_P4_56703_35455062 | NC_021163.1    | Ca_kabuli_chr04 | 35455062                | TT                              | AA              | 1946819241               |
| SNP_P4_56704_35455218 | NC_021163.1    | Ca_kabuli_chr04 | 35455218                | CC                              | TT              | 1946819243               |
| SNP_P4_56705_35455648 | NC_021163.1    | Ca_kabuli_chr04 | 35455648                | CC                              | TT              | 1946819245               |

| SNPs IDs              | Chromosome IDs | Chromosomes     | Physical positions (bp) | CDC Frontier (Reference genome) | (ILWC46 & LPNB) | NCBI SNPdb Accession IDs |
|-----------------------|----------------|-----------------|-------------------------|---------------------------------|-----------------|--------------------------|
| SNP_P4_56706_35456636 | NC_021163.1    | Ca_kabuli_chr04 | 35456636                | AA                              | CC              | 1946819247               |
| SNP_P4_56708_35457119 | NC_021163.1    | Ca_kabuli_chr04 | 35457119                | TT                              | AA              | 1946819249               |
| SNP_P4_56709_35457161 | NC_021163.1    | Ca_kabuli_chr04 | 35457161                | GG                              | TT              | 1946819252               |
| SNP_P4_56710_35457303 | NC_021163.1    | Ca_kabuli_chr04 | 35457303                | GG                              | AA              | 1946819254               |
| SNP_P4_56711_35457316 | NC_021163.1    | Ca_kabuli_chr04 | 35457316                | TT                              | CC              | 1946819256               |
| SNP_P4_56712_35457511 | NC_021163.1    | Ca_kabuli_chr04 | 35457511                | CC                              | GG              | 1946819258               |
| SNP_P4_56713_35461251 | NC_021163.1    | Ca_kabuli_chr04 | 35461251                | TT                              | CC              | 1946819260               |
| SNP_P4_56714_35462130 | NC_021163.1    | Ca_kabuli_chr04 | 35462130                | TT                              | AA              | 1946819262               |
| SNP_P4_56715_35469224 | NC_021163.1    | Ca_kabuli_chr04 | 35469224                | TT                              | CC              | 1946819264               |
| SNP_P4_56716_35469304 | NC_021163.1    | Ca_kabuli_chr04 | 35469304                | GG                              | AA              | 1946819266               |
| SNP_P4_56717_35469394 | NC_021163.1    | Ca_kabuli_chr04 | 35469394                | CC                              | TT              | 1946819268               |
| SNP_P4_56718_35469506 | NC_021163.1    | Ca_kabuli_chr04 | 35469506                | CC                              | TT              | 1946819270               |
| SNP_P4_56719_35469609 | NC_021163.1    | Ca_kabuli_chr04 | 35469609                | CC                              | TT              | 1946819272               |
| SNP_P4_56720_35469667 | NC_021163.1    | Ca_kabuli_chr04 | 35469667                | AA                              | CC              | 1946819274               |
| SNP_P4_56721_35469740 | NC_021163.1    | Ca_kabuli_chr04 | 35469740                | AA                              | TT              | 1946819276               |
| SNP_P4_56722_35469741 | NC_021163.1    | Ca_kabuli_chr04 | 35469741                | TT                              | GG              | 1946819278               |
| SNP_P4_56723_35469851 | NC_021163.1    | Ca_kabuli_chr04 | 35469851                | GG                              | AA              | 1946819280               |
| SNP_P4_56724_35469868 | NC_021163.1    | Ca_kabuli_chr04 | 35469868                | GG                              | AA              | 1946819282               |
| SNP_P4_56725_35469894 | NC_021163.1    | Ca_kabuli_chr04 | 35469894                | AA                              | TT              | 1946819284               |
| SNP_P4_56726_35469930 | NC_021163.1    | Ca_kabuli_chr04 | 35469930                | AA                              | TT              | 1946819286               |
| SNP_P4_56727_35469972 | NC_021163.1    | Ca_kabuli_chr04 | 35469972                | GG                              | AA              | 1946819288               |
| SNP_P4_56728_35470016 | NC_021163.1    | Ca_kabuli_chr04 | 35470016                | AA                              | GG              | 1946819290               |
| SNP_P4_56729_35470027 | NC_021163.1    | Ca_kabuli_chr04 | 35470027                | CC                              | TT              | 1946819292               |
| SNP_P4_56730_35470103 | NC_021163.1    | Ca_kabuli_chr04 | 35470103                | TT                              | AA              | 1946819294               |
| SNP_P4_56731_35470158 | NC_021163.1    | Ca_kabuli_chr04 | 35470158                | GG                              | CC              | 1946819296               |
| SNP_P4_56732_35470160 | NC_021163.1    | Ca_kabuli_chr04 | 35470160                | TT                              | CC              | 1946819298               |
| SNP_P4_56733_35470167 | NC_021163.1    | Ca_kabuli_chr04 | 35470167                | CC                              | TT              | 1946819300               |
| SNP_P4_56734_35470186 | NC_021163.1    | Ca_kabuli_chr04 | 35470186                | TT                              | CC              | 1946819302               |
| SNP_P4_56735_35470200 | NC_021163.1    | Ca_kabuli_chr04 | 35470200                | CC                              | TT              | 1946819304               |
| SNP_P4_56736_35470241 | NC_021163.1    | Ca_kabuli_chr04 | 35470241                | GG                              | AA              | 1946819306               |
| SNP_P4_56737_35470291 | NC_021163.1    | Ca_kabuli_chr04 | 35470291                | GG                              | AA              | 1946819308               |
| SNP_P4_56738_35470304 | NC_021163.1    | Ca_kabuli_chr04 | 35470304                | TT                              | CC              | 1946819310               |
| SNP_P4_56739_35470319 | NC_021163.1    | Ca_kabuli_chr04 | 35470319                | GG                              | AA              | 1946819312               |
| SNP_P4_56740_35477528 | NC_021163.1    | Ca_kabuli_chr04 | 35477528                | TT                              | GG              | 1946819314               |
| SNP_P4_56741_35486535 | NC_021163.1    | Ca_kabuli_chr04 | 35486535                | GG                              | TT              | 1946819316               |
| SNP_P4_56742_35486602 | NC_021163.1    | Ca_kabuli_chr04 | 35486602                | TT                              | AA              | 1946819318               |
| SNP_P4_56743_35487121 | NC_021163.1    | Ca_kabuli_chr04 | 35487121                | GG                              | AA              | 1946819320               |
| SNP_P4_56744_35490885 | NC_021163.1    | Ca_kabuli_chr04 | 35490885                | CC                              | TT              | 1946819322               |
| SNP_P4_56745_35511787 | NC_021163.1    | Ca_kabuli_chr04 | 35511787                | TT                              | CC              | 1946819324               |
| SNP_P4_56746_35511830 | NC_021163.1    | Ca_kabuli_chr04 | 35511830                | TT                              | CC              | 1946819326               |
| SNP_P4_56747_35511845 | NC_021163.1    | Ca_kabuli_chr04 | 35511845                | GG                              | AA              | 1946819328               |
| SNP_P4_56748_35511873 | NC_021163.1    | Ca_kabuli_chr04 | 35511873                | TT                              | CC              | 1946819330               |

| SNPs IDs              | Chromosome IDs | Chromosomes     | Physical positions (bp) | CDC Frontier (Reference genome) | (ILWC46 & LPNB) | NCBI SNPdb Accession IDs |
|-----------------------|----------------|-----------------|-------------------------|---------------------------------|-----------------|--------------------------|
| SNP_P4_56749_35511955 | NC_021163.1    | Ca_kabuli_chr04 | 35511955                | GG                              | CC              | 1946819332               |
| SNP_P4_56750_35512169 | NC_021163.1    | Ca_kabuli_chr04 | 35512169                | CC                              | GG              | 1946819335               |
| SNP_P4_56751_35512303 | NC_021163.1    | Ca_kabuli_chr04 | 35512303                | GG                              | AA              | 1946819337               |
| SNP_P4_56752_35512312 | NC_021163.1    | Ca_kabuli_chr04 | 35512312                | CC                              | AA              | 1946819339               |
| SNP_P4_56753_35512474 | NC_021163.1    | Ca_kabuli_chr04 | 35512474                | CC                              | AA              | 1946819341               |
| SNP_P4_56754_35521739 | NC_021163.1    | Ca_kabuli_chr04 | 35521739                | AA                              | TT              | 1946819343               |
| SNP_P4_56755_35521740 | NC_021163.1    | Ca_kabuli_chr04 | 35521740                | TT                              | AA              | 1946819345               |
| SNP_P4_56756_35563436 | NC_021163.1    | Ca_kabuli_chr04 | 35563436                | AA                              | CC              | 1946819347               |
| SNP_P4_56757_35563462 | NC_021163.1    | Ca_kabuli_chr04 | 35563462                | CC                              | AA              | 1946819349               |
| SNP_P4_56758_35563515 | NC_021163.1    | Ca_kabuli_chr04 | 35563515                | TT                              | CC              | 1946819351               |
| SNP_P4_56759_35567519 | NC_021163.1    | Ca_kabuli_chr04 | 35567519                | GG                              | AA              | 1946819353               |
| SNP_P4_56760_35580332 | NC_021163.1    | Ca_kabuli_chr04 | 35580332                | TT                              | GG              | 1946819355               |
| SNP_P4_56761_35580336 | NC_021163.1    | Ca_kabuli_chr04 | 35580336                | AA                              | GG              | 1946819357               |
| SNP_P4_56762_35597845 | NC_021163.1    | Ca_kabuli_chr04 | 35597845                | CC                              | AA              | 1946819359               |
| SNP_P4_56763_35600793 | NC_021163.1    | Ca_kabuli_chr04 | 35600793                | CC                              | TT              | 1946819361               |
| SNP_P4_56764_35600897 | NC_021163.1    | Ca_kabuli_chr04 | 35600897                | CC                              | AA              | 1946819363               |
| SNP_P4_56765_35609724 | NC_021163.1    | Ca_kabuli_chr04 | 35609724                | GG                              | AA              | 1946819365               |
| SNP_P4_56766_35610487 | NC_021163.1    | Ca_kabuli_chr04 | 35610487                | TT                              | CC              | 1946819367               |
| SNP_P4_56767_35610516 | NC_021163.1    | Ca_kabuli_chr04 | 35610516                | TT                              | GG              | 1946819369               |
| SNP_P4_56768_35610743 | NC_021163.1    | Ca_kabuli_chr04 | 35610743                | AA                              | CC              | 1946819371               |
| SNP_P4_56769_35610766 | NC_021163.1    | Ca_kabuli_chr04 | 35610766                | TT                              | CC              | 1946819373               |
| SNP_P4_56770_35610772 | NC_021163.1    | Ca_kabuli_chr04 | 35610772                | GG                              | TT              | 1946819375               |
| SNP_P4_56771_35615862 | NC_021163.1    | Ca_kabuli_chr04 | 35615862                | TT                              | CC              | 1946819377               |
| SNP_P4_56772_35615895 | NC_021163.1    | Ca_kabuli_chr04 | 35615895                | AA                              | GG              | 1946819379               |
| SNP_P4_56773_35615912 | NC_021163.1    | Ca_kabuli_chr04 | 35615912                | TT                              | GG              | 1946819382               |
| SNP_P4_56774_35615979 | NC_021163.1    | Ca_kabuli_chr04 | 35615979                | GG                              | AA              | 1946819384               |
| SNP_P4_56775_35616071 | NC_021163.1    | Ca_kabuli_chr04 | 35616071                | TT                              | CC              | 1946819386               |
| SNP_P4_56776_35616382 | NC_021163.1    | Ca_kabuli_chr04 | 35616382                | AA                              | CC              | 1946819388               |
| SNP_P4_56777_35616719 | NC_021163.1    | Ca_kabuli_chr04 | 35616719                | TT                              | CC              | 1946819390               |
| SNP_P4_56778_35616725 | NC_021163.1    | Ca_kabuli_chr04 | 35616725                | CC                              | AA              | 1946819392               |
| SNP_P4_56779_35616749 | NC_021163.1    | Ca_kabuli_chr04 | 35616749                | GG                              | AA              | 1946819394               |
| SNP_P4_56780_35616942 | NC_021163.1    | Ca_kabuli_chr04 | 35616942                | CC                              | AA              | 1946819396               |
| SNP_P4_56781_35617089 | NC_021163.1    | Ca_kabuli_chr04 | 35617089                | GG                              | CC              | 1946819398               |
| SNP_P4_56782_35617112 | NC_021163.1    | Ca_kabuli_chr04 | 35617112                | AA                              | GG              | 1946819400               |
| SNP_P4_56783_35617119 | NC_021163.1    | Ca_kabuli_chr04 | 35617119                | AA                              | GG              | 1946819402               |
| SNP_P4_56784_35617122 | NC_021163.1    | Ca_kabuli_chr04 | 35617122                | TT                              | CC              | 1946819404               |
| SNP_P4_56785_35617155 | NC_021163.1    | Ca_kabuli_chr04 | 35617155                | CC                              | TT              | 1946819406               |
| SNP_P4_56786_35617195 | NC_021163.1    | Ca_kabuli_chr04 | 35617195                | TT                              | CC              | 1946819408               |
| SNP_P4_56787_35617252 | NC_021163.1    | Ca_kabuli_chr04 | 35617252                | GG                              | AA              | 1946819410               |
| SNP_P4_56788_35617354 | NC_021163.1    | Ca_kabuli_chr04 | 35617354                | TT                              | AA              | 1946819412               |
| SNP_P4_56789_35617372 | NC_021163.1    | Ca_kabuli_chr04 | 35617372                | CC                              | AA              | 1946819414               |
| SNP_P4_56790_35617377 | NC_021163.1    | Ca_kabuli_chr04 | 35617377                | CC                              | AA              | 1946819416               |



| SNPs IDs              | Chromosome IDs | Chromosomes     | Physical positions (bp) | CDC Frontier (Reference genome) | (ILWC46 & LPNB) | NCBI SNPdb Accession IDs |
|-----------------------|----------------|-----------------|-------------------------|---------------------------------|-----------------|--------------------------|
| SNP_P4_56791_35620125 | NC_021163.1    | Ca_kabuli_chr04 | 35620125                | CC                              | TT              | 1946819418               |
| SNP_P4_56792_35626157 | NC_021163.1    | Ca_kabuli_chr04 | 35626157                | GG                              | AA              | 1946819421               |
| SNP_P4_56793_35628213 | NC_021163.1    | Ca_kabuli_chr04 | 35628213                | CC                              | TT              | 1946819423               |
| SNP_P4_56794_35628813 | NC_021163.1    | Ca_kabuli_chr04 | 35628813                | TT                              | GG              | 1946819425               |
| SNP_P4_56795_35628815 | NC_021163.1    | Ca_kabuli_chr04 | 35628815                | AA                              | CC              | 1946819427               |
| SNP_P4_56796_35629151 | NC_021163.1    | Ca_kabuli_chr04 | 35629151                | GG                              | TT              | 1946819429               |
| SNP_P4_56797_35629680 | NC_021163.1    | Ca_kabuli_chr04 | 35629680                | AA                              | TT              | 1946819431               |
| SNP_P4_56798_35643538 | NC_021163.1    | Ca_kabuli_chr04 | 35643538                | CC                              | TT              | 1946819433               |
| SNP_P4_56800_35691584 | NC_021163.1    | Ca_kabuli_chr04 | 35691584                | CC                              | TT              | 1946819435               |
| SNP_P4_56801_35691657 | NC_021163.1    | Ca_kabuli_chr04 | 35691657                | CC                              | AA              | 1946819437               |
| SNP_P4_56802_35691710 | NC_021163.1    | Ca_kabuli_chr04 | 35691710                | CC                              | GG              | 1946819439               |
| SNP_P4_56803_35695333 | NC_021163.1    | Ca_kabuli_chr04 | 35695333                | TT                              | GG              | 1946819442               |
| SNP_P4_56804_35695354 | NC_021163.1    | Ca_kabuli_chr04 | 35695354                | GG                              | AA              | 1946819444               |
| SNP_P4_56805_35695400 | NC_021163.1    | Ca_kabuli_chr04 | 35695400                | CC                              | AA              | 1946819446               |
| SNP_P4_56806_35695427 | NC_021163.1    | Ca_kabuli_chr04 | 35695427                | TT                              | AA              | 1946819448               |
| SNP_P4_56807_35695729 | NC_021163.1    | Ca_kabuli_chr04 | 35695729                | TT                              | GG              | 1946819450               |
| SNP_P4_56808_35695794 | NC_021163.1    | Ca_kabuli_chr04 | 35695794                | GG                              | AA              | 1946819452               |
| SNP_P4_56809_35700975 | NC_021163.1    | Ca_kabuli_chr04 | 35700975                | TT                              | CC              | 1946819454               |
| SNP_P4_56810_35708706 | NC_021163.1    | Ca_kabuli_chr04 | 35708706                | CC                              | TT              | 1946819456               |
| SNP_P4_56811_35708734 | NC_021163.1    | Ca_kabuli_chr04 | 35708734                | AA                              | GG              | 1946819458               |
| SNP_P4_56812_35708738 | NC_021163.1    | Ca_kabuli_chr04 | 35708738                | GG                              | AA              | 1946819460               |
| SNP_P4_56813_35711966 | NC_021163.1    | Ca_kabuli_chr04 | 35711966                | TT                              | GG              | 1946819462               |
| SNP_P4_56814_35711998 | NC_021163.1    | Ca_kabuli_chr04 | 35711998                | TT                              | GG              | 1946819464               |
| SNP_P4_56815_35712317 | NC_021163.1    | Ca_kabuli_chr04 | 35712317                | AA                              | GG              | 1946819466               |
| SNP_P4_56816_35712329 | NC_021163.1    | Ca_kabuli_chr04 | 35712329                | AA                              | GG              | 1946819468               |
| SNP_P4_56817_35712394 | NC_021163.1    | Ca_kabuli_chr04 | 35712394                | AA                              | CC              | 1946819470               |
| SNP_P4_56818_35723244 | NC_021163.1    | Ca_kabuli_chr04 | 35723244                | CC                              | AA              | 1946819472               |
| SNP_P4_56819_35728180 | NC_021163.1    | Ca_kabuli_chr04 | 35728180                | GG                              | AA              | 1946819474               |
| SNP_P4_56820_35740717 | NC_021163.1    | Ca_kabuli_chr04 | 35740717                | CC                              | TT              | 1946819476               |
| SNP_P4_56821_35762731 | NC_021163.1    | Ca_kabuli_chr04 | 35762731                | TT                              | CC              | 1946819478               |
| SNP_P4_56822_35768413 | NC_021163.1    | Ca_kabuli_chr04 | 35768413                | AA                              | TT              | 1946819480               |
| SNP_P4_56823_35768557 | NC_021163.1    | Ca_kabuli_chr04 | 35768557                | AA                              | TT              | 1946819482               |
| SNP_P4_56824_35779968 | NC_021163.1    | Ca_kabuli_chr04 | 35779968                | TT                              | AA              | 1946819484               |
| SNP_P4_56825_35779972 | NC_021163.1    | Ca_kabuli_chr04 | 35779972                | AA                              | TT              | 1946819486               |
| SNP_P4_56826_35780031 | NC_021163.1    | Ca_kabuli_chr04 | 35780031                | AA                              | GG              | 1946819488               |
| SNP_P4_56827_35780209 | NC_021163.1    | Ca_kabuli_chr04 | 35780209                | TT                              | CC              | 1946819490               |
| SNP_P4_56828_35780234 | NC_021163.1    | Ca_kabuli_chr04 | 35780234                | CC                              | AA              | 1946819492               |
| SNP_P4_56829_35780302 | NC_021163.1    | Ca_kabuli_chr04 | 35780302                | TT                              | AA              | 1946819494               |
| SNP_P4_56830_35780428 | NC_021163.1    | Ca_kabuli_chr04 | 35780428                | GG                              | AA              | 1946819496               |
| SNP_P4_56831_35780505 | NC_021163.1    | Ca_kabuli_chr04 | 35780505                | GG                              | AA              | 1946819498               |
| SNP_P4_56832_35780538 | NC_021163.1    | Ca_kabuli_chr04 | 35780538                | CC                              | TT              | 1946819500               |
| SNP_P4_56833_35791340 | NC_021163.1    | Ca_kabuli_chr04 | 35791340                | CC                              | GG              | 1946819502               |

| SNPs IDs              | Chromosome IDs | Chromosomes     | Physical positions (bp) | CDC Frontier (Reference genome) | (ILWC46 & LPNB) | NCBI SNPdb Accession IDs |
|-----------------------|----------------|-----------------|-------------------------|---------------------------------|-----------------|--------------------------|
| SNP_P4_56834_35791499 | NC_021163.1    | Ca_kabuli_chr04 | 35791499                | CC                              | TT              | 1946819505               |
| SNP_P4_56835_35791567 | NC_021163.1    | Ca_kabuli_chr04 | 35791567                | AA                              | TT              | 1946819507               |
| SNP_P4_56836_35791676 | NC_021163.1    | Ca_kabuli_chr04 | 35791676                | GG                              | CC              | 1946819509               |
| SNP_P4_56837_35791756 | NC_021163.1    | Ca_kabuli_chr04 | 35791756                | TT                              | AA              | 1946819511               |
| SNP_P4_56838_35791774 | NC_021163.1    | Ca_kabuli_chr04 | 35791774                | TT                              | AA              | 1946819513               |
| SNP_P4_56839_35791781 | NC_021163.1    | Ca_kabuli_chr04 | 35791781                | AA                              | TT              | 1946819515               |
| SNP_P4_56840_35791839 | NC_021163.1    | Ca_kabuli_chr04 | 35791839                | TT                              | CC              | 1946819517               |
| SNP_P4_56841_35791840 | NC_021163.1    | Ca_kabuli_chr04 | 35791840                | GG                              | AA              | 1946819519               |
| SNP_P4_56842_35792129 | NC_021163.1    | Ca_kabuli_chr04 | 35792129                | AA                              | TT              | 1946819521               |
| SNP_P4_56843_35792208 | NC_021163.1    | Ca_kabuli_chr04 | 35792208                | GG                              | AA              | 1946819523               |
| SNP_P4_56844_35793320 | NC_021163.1    | Ca_kabuli_chr04 | 35793320                | AA                              | TT              | 1946819525               |
| SNP_P4_56845_35793474 | NC_021163.1    | Ca_kabuli_chr04 | 35793474                | GG                              | AA              | 1946819527               |
| SNP_P4_56846_35793809 | NC_021163.1    | Ca_kabuli_chr04 | 35793809                | CC                              | GG              | 1946819529               |
| SNP_P4_56847_35796585 | NC_021163.1    | Ca_kabuli_chr04 | 35796585                | GG                              | AA              | 1946819531               |
| SNP_P4_56848_35798271 | NC_021163.1    | Ca_kabuli_chr04 | 35798271                | CC                              | TT              | 1946819532               |
| SNP_P4_56849_35798285 | NC_021163.1    | Ca_kabuli_chr04 | 35798285                | AA                              | TT              | 1946819534               |
| SNP_P4_56850_35798391 | NC_021163.1    | Ca_kabuli_chr04 | 35798391                | CC                              | AA              | 1946819536               |
| SNP_P4_56851_35798427 | NC_021163.1    | Ca_kabuli_chr04 | 35798427                | TT                              | AA              | 1946819538               |
| SNP_P4_56852_35798514 | NC_021163.1    | Ca_kabuli_chr04 | 35798514                | TT                              | GG              | 1946819540               |
| SNP_P4_56853_35802496 | NC_021163.1    | Ca_kabuli_chr04 | 35802496                | AA                              | GG              | 1946819542               |
| SNP_P4_56854_35803664 | NC_021163.1    | Ca_kabuli_chr04 | 35803664                | GG                              | AA              | 1946819544               |
| SNP_P4_56855_35803666 | NC_021163.1    | Ca_kabuli_chr04 | 35803666                | AA                              | GG              | 1946819546               |
| SNP_P4_56856_35808010 | NC_021163.1    | Ca_kabuli_chr04 | 35808010                | AA                              | TT              | 1946819548               |
| SNP_P4_56857_35808011 | NC_021163.1    | Ca_kabuli_chr04 | 35808011                | TT                              | AA              | 1946819550               |
| SNP_P4_56859_35819027 | NC_021163.1    | Ca_kabuli_chr04 | 35819027                | CC                              | TT              | 1946819552               |
| SNP_P4_56860_35819088 | NC_021163.1    | Ca_kabuli_chr04 | 35819088                | AA                              | GG              | 1946819554               |
| SNP_P4_56861_35819162 | NC_021163.1    | Ca_kabuli_chr04 | 35819162                | TT                              | GG              | 1946819556               |
| SNP_P4_56862_35819233 | NC_021163.1    | Ca_kabuli_chr04 | 35819233                | TT                              | CC              | 1946819558               |
| SNP_P4_56863_35819523 | NC_021163.1    | Ca_kabuli_chr04 | 35819523                | GG                              | TT              | 1946819560               |
| SNP_P4_56864_35819525 | NC_021163.1    | Ca_kabuli_chr04 | 35819525                | TT                              | CC              | 1946819563               |
| SNP_P4_56865_35822286 | NC_021163.1    | Ca_kabuli_chr04 | 35822286                | CC                              | TT              | 1946819565               |
| SNP_P4_56866_35822336 | NC_021163.1    | Ca_kabuli_chr04 | 35822336                | AA                              | GG              | 1946819567               |
| SNP_P4_56868_35828698 | NC_021163.1    | Ca_kabuli_chr04 | 35828698                | TT                              | GG              | 1946819569               |
| SNP_P4_56869_35828742 | NC_021163.1    | Ca_kabuli_chr04 | 35828742                | AA                              | CC              | 1946819571               |
| SNP_P4_56870_35828798 | NC_021163.1    | Ca_kabuli_chr04 | 35828798                | AA                              | GG              | 1946819574               |
| SNP_P4_56871_35828819 | NC_021163.1    | Ca_kabuli_chr04 | 35828819                | AA                              | CC              | 1946819577               |
| SNP_P4_56872_35828919 | NC_021163.1    | Ca_kabuli_chr04 | 35828919                | CC                              | TT              | 1946819579               |
| SNP_P4_56873_35828930 | NC_021163.1    | Ca_kabuli_chr04 | 35828930                | GG                              | AA              | 1946819581               |
| SNP_P4_56874_35828974 | NC_021163.1    | Ca_kabuli_chr04 | 35828974                | CC                              | TT              | 1946819583               |
| SNP_P4_56875_35829015 | NC_021163.1    | Ca_kabuli_chr04 | 35829015                | TT                              | CC              | 1946819585               |
| SNP_P4_56876_35831323 | NC_021163.1    | Ca_kabuli_chr04 | 35831323                | CC                              | TT              | 1946819587               |
| SNP_P4_56877_35831365 | NC_021163.1    | Ca_kabuli_chr04 | 35831365                | AA                              | CC              | 1946819589               |

| SNPs IDs              | Chromosome IDs | Chromosomes     | Physical positions (bp) | CDC Frontier (Reference genome) | (ILWC46 & LPNB) | NCBI SNPdb Accession IDs |
|-----------------------|----------------|-----------------|-------------------------|---------------------------------|-----------------|--------------------------|
| SNP_P4_56878_35831770 | NC_021163.1    | Ca_kabuli_chr04 | 35831770                | CC                              | GG              | 1946819591               |
| SNP_P4_56879_35876200 | NC_021163.1    | Ca_kabuli_chr04 | 35876200                | GG                              | AA              | 1946819593               |
| SNP_P4_56880_35876201 | NC_021163.1    | Ca_kabuli_chr04 | 35876201                | TT                              | CC              | 1946819595               |
| SNP_P4_56881_35891213 | NC_021163.1    | Ca_kabuli_chr04 | 35891213                | TT                              | GG              | 1946819597               |
| SNP_P4_56882_35891229 | NC_021163.1    | Ca_kabuli_chr04 | 35891229                | AA                              | GG              | 1946819599               |
| SNP_P4_56883_35893488 | NC_021163.1    | Ca_kabuli_chr04 | 35893488                | CC                              | TT              | 1946819601               |
| SNP_P4_56884_35900757 | NC_021163.1    | Ca_kabuli_chr04 | 35900757                | AA                              | CC              | 1946819603               |
| SNP_P4_56885_35901183 | NC_021163.1    | Ca_kabuli_chr04 | 35901183                | TT                              | GG              | 1946819605               |
| SNP_P4_56888_35960557 | NC_021163.1    | Ca_kabuli_chr04 | 35960557                | AA                              | GG              | 1946819607               |
| SNP_P4_56890_35984541 | NC_021163.1    | Ca_kabuli_chr04 | 35984541                | TT                              | AA              | 1946819609               |
| SNP_P4_56891_35984560 | NC_021163.1    | Ca_kabuli_chr04 | 35984560                | AA                              | CC              | 1946819611               |
| SNP_P4_56892_36012964 | NC_021163.1    | Ca_kabuli_chr04 | 36012964                | AA                              | TT              | 1946819613               |
| SNP_P4_56893_36027244 | NC_021163.1    | Ca_kabuli_chr04 | 36027244                | CC                              | GG              | 1946819615               |
| SNP_P4_56894_36027246 | NC_021163.1    | Ca_kabuli_chr04 | 36027246                | TT                              | GG              | 1946819617               |
| SNP_P4_56895_36052421 | NC_021163.1    | Ca_kabuli_chr04 | 36052421                | AA                              | GG              | 1946819619               |
| SNP_P4_56896_36065567 | NC_021163.1    | Ca_kabuli_chr04 | 36065567                | GG                              | CC              | 1946819621               |
| SNP_P4_56897_36068793 | NC_021163.1    | Ca_kabuli_chr04 | 36068793                | AA                              | CC              | 1946819623               |
| SNP_P4_56898_36068835 | NC_021163.1    | Ca_kabuli_chr04 | 36068835                | AA                              | GG              | 1946819625               |
| SNP_P4_56900_36079188 | NC_021163.1    | Ca_kabuli_chr04 | 36079188                | GG                              | AA              | 1946819627               |
| SNP_P4_56901_36079331 | NC_021163.1    | Ca_kabuli_chr04 | 36079331                | CC                              | AA              | 1946819629               |
| SNP_P4_56902_36079340 | NC_021163.1    | Ca_kabuli_chr04 | 36079340                | GG                              | AA              | 1946819631               |
| SNP_P4_56903_36079543 | NC_021163.1    | Ca_kabuli_chr04 | 36079543                | CC                              | TT              | 1946819633               |
| SNP_P4_56904_36079554 | NC_021163.1    | Ca_kabuli_chr04 | 36079554                | CC                              | TT              | 1946819635               |
| SNP_P4_56905_36079588 | NC_021163.1    | Ca_kabuli_chr04 | 36079588                | GG                              | TT              | 1946819637               |
| SNP_P4_56907_36096096 | NC_021163.1    | Ca_kabuli_chr04 | 36096096                | CC                              | TT              | 1946819639               |
| SNP_P4_56908_36098975 | NC_021163.1    | Ca_kabuli_chr04 | 36098975                | CC                              | TT              | 1946819641               |
| SNP_P4_56909_36099025 | NC_021163.1    | Ca_kabuli_chr04 | 36099025                | GG                              | AA              | 1946819643               |
| SNP_P4_56910_36099075 | NC_021163.1    | Ca_kabuli_chr04 | 36099075                | TT                              | GG              | 1946819645               |
| SNP_P4_56911_36099100 | NC_021163.1    | Ca_kabuli_chr04 | 36099100                | TT                              | AA              | 1946819647               |
| SNP_P4_56912_36099425 | NC_021163.1    | Ca_kabuli_chr04 | 36099425                | TT                              | CC              | 1946819649               |
| SNP_P4_56913_36106762 | NC_021163.1    | Ca_kabuli_chr04 | 36106762                | AA                              | CC              | 1946819651               |
| SNP_P4_56914_36118930 | NC_021163.1    | Ca_kabuli_chr04 | 36118930                | GG                              | TT              | 1946819652               |
| SNP_P4_56915_36118936 | NC_021163.1    | Ca_kabuli_chr04 | 36118936                | GG                              | TT              | 1946819654               |
| SNP_P4_56916_36118947 | NC_021163.1    | Ca_kabuli_chr04 | 36118947                | CC                              | AA              | 1946819656               |
| SNP_P4_56917_36118948 | NC_021163.1    | Ca_kabuli_chr04 | 36118948                | CC                              | TT              | 1946819658               |
| SNP_P4_56918_36118965 | NC_021163.1    | Ca_kabuli_chr04 | 36118965                | CC                              | TT              | 1946819660               |
| SNP_P4_56919_36129045 | NC_021163.1    | Ca_kabuli_chr04 | 36129045                | AA                              | GG              | 1946819662               |
| SNP_P4_56920_36138268 | NC_021163.1    | Ca_kabuli_chr04 | 36138268                | GG                              | TT              | 1946819664               |
| SNP_P4_56922_36140244 | NC_021163.1    | Ca_kabuli_chr04 | 36140244                | TT                              | CC              | 1946819666               |
| SNP_P4_56923_36189697 | NC_021163.1    | Ca_kabuli_chr04 | 36189697                | GG                              | AA              | 1946819668               |
| SNP_P4_56925_36235387 | NC_021163.1    | Ca_kabuli_chr04 | 36235387                | TT                              | CC              | 1946819670               |
| SNP_P4_56928_36249973 | NC_021163.1    | Ca_kabuli_chr04 | 36249973                | TT                              | CC              | 1946819672               |

| SNPs IDs              | Chromosome IDs | Chromosomes     | Physical positions (bp) | CDC Frontier (Reference genome) | (ILWC46 & LPNB) | NCBI SNPdb Accession IDs |
|-----------------------|----------------|-----------------|-------------------------|---------------------------------|-----------------|--------------------------|
| SNP_P4_56929_36257339 | NC_021163.1    | Ca_kabuli_chr04 | 36257339                | GG                              | AA              | 1946819674               |
| SNP_P4_56930_36269066 | NC_021163.1    | Ca_kabuli_chr04 | 36269066                | GG                              | AA              | 1946819676               |
| SNP_P4_56931_36291048 | NC_021163.1    | Ca_kabuli_chr04 | 36291048                | GG                              | AA              | 1946819678               |
| SNP_P4_56932_36299798 | NC_021163.1    | Ca_kabuli_chr04 | 36299798                | GG                              | AA              | 1946819680               |
| SNP_P4_56933_36300103 | NC_021163.1    | Ca_kabuli_chr04 | 36300103                | TT                              | CC              | 1946819682               |
| SNP_P4_56934_36300176 | NC_021163.1    | Ca_kabuli_chr04 | 36300176                | AA                              | GG              | 1946819684               |
| SNP_P4_56935_36300222 | NC_021163.1    | Ca_kabuli_chr04 | 36300222                | AA                              | GG              | 1946819686               |
| SNP_P4_56936_36334952 | NC_021163.1    | Ca_kabuli_chr04 | 36334952                | AA                              | GG              | 1946819688               |
| SNP_P4_56937_36334981 | NC_021163.1    | Ca_kabuli_chr04 | 36334981                | CC                              | TT              | 1946819690               |
| SNP_P4_56938_36335023 | NC_021163.1    | Ca_kabuli_chr04 | 36335023                | TT                              | AA              | 1946819692               |
| SNP_P4_56939_36335061 | NC_021163.1    | Ca_kabuli_chr04 | 36335061                | GG                              | AA              | 1946819694               |
| SNP_P4_56940_36335296 | NC_021163.1    | Ca_kabuli_chr04 | 36335296                | CC                              | TT              | 1946819696               |
| SNP_P4_56942_36335399 | NC_021163.1    | Ca_kabuli_chr04 | 36335399                | TT                              | CC              | 1946819698               |
| SNP_P4_56943_36335840 | NC_021163.1    | Ca_kabuli_chr04 | 36335840                | TT                              | GG              | 1946819700               |
| SNP_P4_56944_36335873 | NC_021163.1    | Ca_kabuli_chr04 | 36335873                | CC                              | TT              | 1946819702               |
| SNP_P4_56945_36335983 | NC_021163.1    | Ca_kabuli_chr04 | 36335983                | TT                              | CC              | 1946819704               |
| SNP_P4_56946_36336016 | NC_021163.1    | Ca_kabuli_chr04 | 36336016                | CC                              | AA              | 1946819706               |
| SNP_P4_56947_36336040 | NC_021163.1    | Ca_kabuli_chr04 | 36336040                | CC                              | TT              | 1946819708               |
| SNP_P4_56948_36336043 | NC_021163.1    | Ca_kabuli_chr04 | 36336043                | AA                              | GG              | 1946819710               |
| SNP_P4_56949_36336049 | NC_021163.1    | Ca_kabuli_chr04 | 36336049                | AA                              | TT              | 1946819712               |
| SNP_P4_56950_36336059 | NC_021163.1    | Ca_kabuli_chr04 | 36336059                | CC                              | TT              | 1946819714               |
| SNP_P4_56951_36336107 | NC_021163.1    | Ca_kabuli_chr04 | 36336107                | TT                              | CC              | 1946819716               |
| SNP_P4_56952_36336201 | NC_021163.1    | Ca_kabuli_chr04 | 36336201                | CC                              | TT              | 1946819718               |
| SNP_P4_56953_36336220 | NC_021163.1    | Ca_kabuli_chr04 | 36336220                | CC                              | TT              | 1946819720               |
| SNP_P4_56954_36336701 | NC_021163.1    | Ca_kabuli_chr04 | 36336701                | GG                              | AA              | 1946819722               |
| SNP_P4_56955_36336712 | NC_021163.1    | Ca_kabuli_chr04 | 36336712                | TT                              | AA              | 1946819724               |
| SNP_P4_56956_36336741 | NC_021163.1    | Ca_kabuli_chr04 | 36336741                | TT                              | CC              | 1946819726               |
| SNP_P4_56957_36336755 | NC_021163.1    | Ca_kabuli_chr04 | 36336755                | CC                              | GG              | 1946819728               |
| SNP_P4_56958_36336872 | NC_021163.1    | Ca_kabuli_chr04 | 36336872                | GG                              | AA              | 1946819730               |
| SNP_P4_56960_36336927 | NC_021163.1    | Ca_kabuli_chr04 | 36336927                | CC                              | AA              | 1946819732               |
| SNP_P4_56961_36336951 | NC_021163.1    | Ca_kabuli_chr04 | 36336951                | CC                              | TT              | 1946819734               |
| SNP_P4_56962_36336967 | NC_021163.1    | Ca_kabuli_chr04 | 36336967                | AA                              | TT              | 1946819736               |
| SNP_P4_56963_36336968 | NC_021163.1    | Ca_kabuli_chr04 | 36336968                | AA                              | GG              | 1946819738               |
| SNP_P4_56964_36337004 | NC_021163.1    | Ca_kabuli_chr04 | 36337004                | AA                              | GG              | 1946819740               |
| SNP_P4_56965_36337010 | NC_021163.1    | Ca_kabuli_chr04 | 36337010                | CC                              | TT              | 1946819742               |
| SNP_P4_56966_36337106 | NC_021163.1    | Ca_kabuli_chr04 | 36337106                | AA                              | GG              | 1946819744               |
| SNP_P4_56967_36337115 | NC_021163.1    | Ca_kabuli_chr04 | 36337115                | AA                              | GG              | 1946819746               |
| SNP_P4_56969_36337230 | NC_021163.1    | Ca_kabuli_chr04 | 36337230                | GG                              | AA              | 1946819748               |
| SNP_P4_56971_36337313 | NC_021163.1    | Ca_kabuli_chr04 | 36337313                | AA                              | GG              | 1946819750               |
| SNP_P4_56972_36337318 | NC_021163.1    | Ca_kabuli_chr04 | 36337318                | CC                              | GG              | 1946819752               |
| SNP_P4_56974_36342440 | NC_021163.1    | Ca_kabuli_chr04 | 36342440                | TT                              | GG              | 1946819754               |
| SNP_P4_56975_36342450 | NC_021163.1    | Ca_kabuli_chr04 | 36342450                | GG                              | AA              | 1946819756               |

| SNPs IDs              | Chromosome IDs | Chromosomes     | Physical positions (bp) | CDC Frontier (Reference genome) | (ILWC46 & LPNB) | NCBI SNPdb Accession IDs |
|-----------------------|----------------|-----------------|-------------------------|---------------------------------|-----------------|--------------------------|
| SNP_P4_56976_36342456 | NC_021163.1    | Ca_kabuli_chr04 | 36342456                | CC                              | TT              | 1946819758               |
| SNP_P4_56977_36342572 | NC_021163.1    | Ca_kabuli_chr04 | 36342572                | AA                              | CC              | 1946819760               |
| SNP_P4_56978_36342735 | NC_021163.1    | Ca_kabuli_chr04 | 36342735                | CC                              | TT              | 1946819762               |
| SNP_P4_56979_36342800 | NC_021163.1    | Ca_kabuli_chr04 | 36342800                | AA                              | CC              | 1946819764               |
| SNP_P4_56980_36375830 | NC_021163.1    | Ca_kabuli_chr04 | 36375830                | GG                              | TT              | 1946819765               |
| SNP_P4_56981_36377192 | NC_021163.1    | Ca_kabuli_chr04 | 36377192                | TT                              | CC              | 1946819767               |
| SNP_P4_56982_36377385 | NC_021163.1    | Ca_kabuli_chr04 | 36377385                | GG                              | AA              | 1946819769               |
| SNP_P4_56983_36377398 | NC_021163.1    | Ca_kabuli_chr04 | 36377398                | CC                              | AA              | 1946819771               |
| SNP_P4_56984_36377401 | NC_021163.1    | Ca_kabuli_chr04 | 36377401                | TT                              | CC              | 1946819773               |
| SNP_P4_56985_36377402 | NC_021163.1    | Ca_kabuli_chr04 | 36377402                | CC                              | AA              | 1946819775               |
| SNP_P4_56986_36377453 | NC_021163.1    | Ca_kabuli_chr04 | 36377453                | TT                              | CC              | 1946819777               |
| SNP_P4_56987_36377491 | NC_021163.1    | Ca_kabuli_chr04 | 36377491                | AA                              | GG              | 1946819779               |
| SNP_P4_56989_36377577 | NC_021163.1    | Ca_kabuli_chr04 | 36377577                | AA                              | TT              | 1946819781               |
| SNP_P4_56990_36377676 | NC_021163.1    | Ca_kabuli_chr04 | 36377676                | GG                              | CC              | 1946819783               |
| SNP_P4_56991_36378808 | NC_021163.1    | Ca_kabuli_chr04 | 36378808                | CC                              | TT              | 1946819785               |
| SNP_P4_56992_36380319 | NC_021163.1    | Ca_kabuli_chr04 | 36380319                | TT                              | CC              | 1946819787               |
| SNP_P4_56993_36380548 | NC_021163.1    | Ca_kabuli_chr04 | 36380548                | GG                              | AA              | 1946819789               |
| SNP_P4_56994_36380572 | NC_021163.1    | Ca_kabuli_chr04 | 36380572                | AA                              | GG              | 1946819791               |
| SNP_P4_56995_36380583 | NC_021163.1    | Ca_kabuli_chr04 | 36380583                | GG                              | AA              | 1946819793               |
| SNP_P4_56996_36380714 | NC_021163.1    | Ca_kabuli_chr04 | 36380714                | AA                              | GG              | 1946819795               |
| SNP_P4_56997_36380719 | NC_021163.1    | Ca_kabuli_chr04 | 36380719                | TT                              | CC              | 1946819797               |
| SNP_P4_56998_36380720 | NC_021163.1    | Ca_kabuli_chr04 | 36380720                | AA                              | GG              | 1946819799               |
| SNP_P4_56999_36380741 | NC_021163.1    | Ca_kabuli_chr04 | 36380741                | CC                              | TT              | 1946819801               |
| SNP_P4_57000_36380867 | NC_021163.1    | Ca_kabuli_chr04 | 36380867                | AA                              | TT              | 1946819803               |
| SNP_P4_57001_36380986 | NC_021163.1    | Ca_kabuli_chr04 | 36380986                | CC                              | TT              | 1946819805               |
| SNP_P4_57002_36381071 | NC_021163.1    | Ca_kabuli_chr04 | 36381071                | CC                              | TT              | 1946819807               |
| SNP_P4_57003_36381097 | NC_021163.1    | Ca_kabuli_chr04 | 36381097                | AA                              | GG              | 1946819809               |
| SNP_P4_57004_36381301 | NC_021163.1    | Ca_kabuli_chr04 | 36381301                | GG                              | AA              | 1946819810               |
| SNP_P4_57005_36381303 | NC_021163.1    | Ca_kabuli_chr04 | 36381303                | CC                              | TT              | 1946819812               |
| SNP_P4_57006_36381610 | NC_021163.1    | Ca_kabuli_chr04 | 36381610                | AA                              | GG              | 1946819814               |
| SNP_P4_57007_36381642 | NC_021163.1    | Ca_kabuli_chr04 | 36381642                | TT                              | CC              | 1946819816               |
| SNP_P4_57008_36382413 | NC_021163.1    | Ca_kabuli_chr04 | 36382413                | CC                              | TT              | 1946819818               |
| SNP_P4_57009_36382457 | NC_021163.1    | Ca_kabuli_chr04 | 36382457                | AA                              | GG              | 1946819820               |
| SNP_P4_57010_36382515 | NC_021163.1    | Ca_kabuli_chr04 | 36382515                | GG                              | AA              | 1946819822               |
| SNP_P4_57011_36382575 | NC_021163.1    | Ca_kabuli_chr04 | 36382575                | TT                              | GG              | 1946819824               |
| SNP_P4_57012_36382613 | NC_021163.1    | Ca_kabuli_chr04 | 36382613                | TT                              | CC              | 1946819826               |
| SNP_P4_57013_36382615 | NC_021163.1    | Ca_kabuli_chr04 | 36382615                | AA                              | GG              | 1946819828               |
| SNP_P4_57014_36382743 | NC_021163.1    | Ca_kabuli_chr04 | 36382743                | AA                              | GG              | 1946819830               |
| SNP_P4_57015_36382786 | NC_021163.1    | Ca_kabuli_chr04 | 36382786                | TT                              | CC              | 1946819832               |
| SNP_P4_57016_36382790 | NC_021163.1    | Ca_kabuli_chr04 | 36382790                | AA                              | GG              | 1946819833               |
| SNP_P4_57017_36382791 | NC_021163.1    | Ca_kabuli_chr04 | 36382791                | CC                              | TT              | 1946819835               |
| SNP_P4_57018_36382814 | NC_021163.1    | Ca_kabuli_chr04 | 36382814                | AA                              | GG              | 1946819837               |

| SNPs IDs              | Chromosome IDs | Chromosomes     | Physical positions (bp) | CDC Frontier (Reference genome) | (ILWC46 & LPNB) | NCBI SNPdb Accession IDs |
|-----------------------|----------------|-----------------|-------------------------|---------------------------------|-----------------|--------------------------|
| SNP_P4_57019_36382819 | NC_021163.1    | Ca_kabuli_chr04 | 36382819                | AA                              | CC              | 1946819839               |
| SNP_P4_57020_36383391 | NC_021163.1    | Ca_kabuli_chr04 | 36383391                | TT                              | CC              | 1946819842               |
| SNP_P4_57021_36383657 | NC_021163.1    | Ca_kabuli_chr04 | 36383657                | AA                              | GG              | 1946819844               |
| SNP_P4_57022_36383662 | NC_021163.1    | Ca_kabuli_chr04 | 36383662                | AA                              | GG              | 1946819846               |
| SNP_P4_57023_36383766 | NC_021163.1    | Ca_kabuli_chr04 | 36383766                | GG                              | TT              | 1946819848               |
| SNP_P4_57024_36383771 | NC_021163.1    | Ca_kabuli_chr04 | 36383771                | TT                              | GG              | 1946819850               |
| SNP_P4_57025_36384928 | NC_021163.1    | Ca_kabuli_chr04 | 36384928                | CC                              | GG              | 1946819852               |
| SNP_P4_57026_36385083 | NC_021163.1    | Ca_kabuli_chr04 | 36385083                | CC                              | TT              | 1946819854               |
| SNP_P4_57027_36385284 | NC_021163.1    | Ca_kabuli_chr04 | 36385284                | GG                              | TT              | 1946819856               |
| SNP_P4_57028_36385326 | NC_021163.1    | Ca_kabuli_chr04 | 36385326                | CC                              | TT              | 1946819858               |
| SNP_P4_57029_36386041 | NC_021163.1    | Ca_kabuli_chr04 | 36386041                | TT                              | CC              | 1946819860               |
| SNP_P4_57030_36386046 | NC_021163.1    | Ca_kabuli_chr04 | 36386046                | GG                              | TT              | 1946819862               |
| SNP_P4_57031_36386057 | NC_021163.1    | Ca_kabuli_chr04 | 36386057                | TT                              | GG              | 1946819864               |
| SNP_P4_57032_36386069 | NC_021163.1    | Ca_kabuli_chr04 | 36386069                | AA                              | GG              | 1946819866               |
| SNP_P4_57033_36386074 | NC_021163.1    | Ca_kabuli_chr04 | 36386074                | CC                              | TT              | 1946819868               |
| SNP_P4_57034_36386613 | NC_021163.1    | Ca_kabuli_chr04 | 36386613                | TT                              | CC              | 1946819870               |
| SNP_P4_57035_36386903 | NC_021163.1    | Ca_kabuli_chr04 | 36386903                | CC                              | TT              | 1946819872               |
| SNP_P4_57036_36387069 | NC_021163.1    | Ca_kabuli_chr04 | 36387069                | GG                              | AA              | 1946819874               |
| SNP_P4_57037_36387097 | NC_021163.1    | Ca_kabuli_chr04 | 36387097                | AA                              | GG              | 1946819876               |
| SNP_P4_57038_36387366 | NC_021163.1    | Ca_kabuli_chr04 | 36387366                | GG                              | AA              | 1946819878               |
| SNP_P4_57039_36387394 | NC_021163.1    | Ca_kabuli_chr04 | 36387394                | GG                              | CC              | 1946819880               |
| SNP_P4_57040_36388348 | NC_021163.1    | Ca_kabuli_chr04 | 36388348                | GG                              | AA              | 1946819882               |
| SNP_P4_57041_36388352 | NC_021163.1    | Ca_kabuli_chr04 | 36388352                | TT                              | AA              | 1946819885               |
| SNP_P4_57042_36388636 | NC_021163.1    | Ca_kabuli_chr04 | 36388636                | AA                              | GG              | 1946819887               |
| SNP_P4_57043_36388637 | NC_021163.1    | Ca_kabuli_chr04 | 36388637                | GG                              | AA              | 1946819889               |
| SNP_P4_57044_36388665 | NC_021163.1    | Ca_kabuli_chr04 | 36388665                | AA                              | GG              | 1946819891               |
| SNP_P4_57045_36388693 | NC_021163.1    | Ca_kabuli_chr04 | 36388693                | CC                              | AA              | 1946819893               |
| SNP_P4_57048_36392841 | NC_021163.1    | Ca_kabuli_chr04 | 36392841                | GG                              | AA              | 1946819895               |
| SNP_P4_57049_36392848 | NC_021163.1    | Ca_kabuli_chr04 | 36392848                | GG                              | AA              | 1946819897               |
| SNP_P4_57050_36392851 | NC_021163.1    | Ca_kabuli_chr04 | 36392851                | CC                              | TT              | 1946819899               |
| SNP_P4_57051_36394123 | NC_021163.1    | Ca_kabuli_chr04 | 36394123                | AA                              | CC              | 1946819901               |
| SNP_P4_57052_36394189 | NC_021163.1    | Ca_kabuli_chr04 | 36394189                | AA                              | GG              | 1946819903               |
| SNP_P4_57053_36394197 | NC_021163.1    | Ca_kabuli_chr04 | 36394197                | AA                              | TT              | 1946819905               |
| SNP_P4_57054_36394296 | NC_021163.1    | Ca_kabuli_chr04 | 36394296                | GG                              | CC              | 1946819907               |
| SNP_P4_57055_36394950 | NC_021163.1    | Ca_kabuli_chr04 | 36394950                | TT                              | CC              | 1946819909               |
| SNP_P4_57056_36396717 | NC_021163.1    | Ca_kabuli_chr04 | 36396717                | TT                              | CC              | 1946819911               |
| SNP_P4_57057_36401345 | NC_021163.1    | Ca_kabuli_chr04 | 36401345                | CC                              | TT              | 1946819913               |
| SNP_P4_57058_36401348 | NC_021163.1    | Ca_kabuli_chr04 | 36401348                | CC                              | TT              | 1946819915               |
| SNP_P4_57059_36401360 | NC_021163.1    | Ca_kabuli_chr04 | 36401360                | GG                              | TT              | 1946819918               |
| SNP_P4_57060_36401378 | NC_021163.1    | Ca_kabuli_chr04 | 36401378                | TT                              | CC              | 1946819920               |
| SNP_P4_57061_36404258 | NC_021163.1    | Ca_kabuli_chr04 | 36404258                | GG                              | AA              | 1946819922               |
| SNP_P4_57062_36404283 | NC_021163.1    | Ca_kabuli_chr04 | 36404283                | GG                              | AA              | 1946819924               |

| SNPs IDs              | Chromosome IDs | Chromosomes     | Physical positions (bp) | CDC Frontier (Reference genome) | (ILWC46 & LPNB) | NCBI SNPdb Accession IDs |
|-----------------------|----------------|-----------------|-------------------------|---------------------------------|-----------------|--------------------------|
| SNP_P4_57064_36405025 | NC_021163.1    | Ca_kabuli_chr04 | 36405025                | CC                              | TT              | 1946819926               |
| SNP_P4_57066_36408096 | NC_021163.1    | Ca_kabuli_chr04 | 36408096                | TT                              | CC              | 1946819928               |
| SNP_P4_57067_36408157 | NC_021163.1    | Ca_kabuli_chr04 | 36408157                | GG                              | AA              | 1946819930               |
| SNP_P4_57068_36408180 | NC_021163.1    | Ca_kabuli_chr04 | 36408180                | TT                              | AA              | 1946819932               |
| SNP_P4_57069_36408319 | NC_021163.1    | Ca_kabuli_chr04 | 36408319                | AA                              | GG              | 1946819934               |
| SNP_P4_57070_36408330 | NC_021163.1    | Ca_kabuli_chr04 | 36408330                | TT                              | AA              | 1946819936               |
| SNP_P4_57071_36408348 | NC_021163.1    | Ca_kabuli_chr04 | 36408348                | GG                              | AA              | 1946819938               |
| SNP_P4_57072_36408380 | NC_021163.1    | Ca_kabuli_chr04 | 36408380                | TT                              | CC              | 1946819940               |
| SNP_P4_57073_36408383 | NC_021163.1    | Ca_kabuli_chr04 | 36408383                | CC                              | GG              | 1946819942               |
| SNP_P4_57074_36408619 | NC_021163.1    | Ca_kabuli_chr04 | 36408619                | AA                              | CC              | 1946819944               |
| SNP_P4_57075_36408641 | NC_021163.1    | Ca_kabuli_chr04 | 36408641                | AA                              | GG              | 1946819946               |
| SNP_P4_57076_36408649 | NC_021163.1    | Ca_kabuli_chr04 | 36408649                | AA                              | CC              | 1946819949               |
| SNP_P4_57077_36408727 | NC_021163.1    | Ca_kabuli_chr04 | 36408727                | GG                              | TT              | 1946819951               |
| SNP_P4_57078_36408770 | NC_021163.1    | Ca_kabuli_chr04 | 36408770                | GG                              | TT              | 1946819953               |
| SNP_P4_57079_36408833 | NC_021163.1    | Ca_kabuli_chr04 | 36408833                | TT                              | CC              | 1946819954               |
| SNP_P4_57080_36408834 | NC_021163.1    | Ca_kabuli_chr04 | 36408834                | CC                              | TT              | 1946819955               |
| SNP_P4_57081_36408842 | NC_021163.1    | Ca_kabuli_chr04 | 36408842                | TT                              | CC              | 1946819956               |
| SNP_P4_57082_36409091 | NC_021163.1    | Ca_kabuli_chr04 | 36409091                | AA                              | TT              | 1946819957               |
| SNP_P4_57083_36409113 | NC_021163.1    | Ca_kabuli_chr04 | 36409113                | AA                              | GG              | 1946819959               |
| SNP_P4_57084_36409429 | NC_021163.1    | Ca_kabuli_chr04 | 36409429                | GG                              | TT              | 1946819961               |
| SNP_P4_57085_36409509 | NC_021163.1    | Ca_kabuli_chr04 | 36409509                | CC                              | TT              | 1946819963               |
| SNP_P4_57086_36409745 | NC_021163.1    | Ca_kabuli_chr04 | 36409745                | TT                              | GG              | 1946819966               |
| SNP_P4_57087_36410139 | NC_021163.1    | Ca_kabuli_chr04 | 36410139                | AA                              | GG              | 1946819968               |
| SNP_P4_57088_36410369 | NC_021163.1    | Ca_kabuli_chr04 | 36410369                | AA                              | TT              | 1946819970               |
| SNP_P4_57089_36410515 | NC_021163.1    | Ca_kabuli_chr04 | 36410515                | CC                              | TT              | 1946819972               |
| SNP_P4_57090_36410553 | NC_021163.1    | Ca_kabuli_chr04 | 36410553                | TT                              | CC              | 1946819974               |
| SNP_P4_57091_36412078 | NC_021163.1    | Ca_kabuli_chr04 | 36412078                | CC                              | GG              | 1946819976               |
| SNP_P4_57092_36413407 | NC_021163.1    | Ca_kabuli_chr04 | 36413407                | AA                              | GG              | 1946819978               |
| SNP_P4_57093_36413421 | NC_021163.1    | Ca_kabuli_chr04 | 36413421                | TT                              | GG              | 1946819980               |
| SNP_P4_57094_36413627 | NC_021163.1    | Ca_kabuli_chr04 | 36413627                | CC                              | TT              | 1946819982               |
| SNP_P4_57095_36413644 | NC_021163.1    | Ca_kabuli_chr04 | 36413644                | TT                              | CC              | 1946819984               |
| SNP_P4_57096_36413647 | NC_021163.1    | Ca_kabuli_chr04 | 36413647                | AA                              | GG              | 1946819986               |
| SNP_P4_57097_36413658 | NC_021163.1    | Ca_kabuli_chr04 | 36413658                | CC                              | GG              | 1946819988               |
| SNP_P4_57098_36413670 | NC_021163.1    | Ca_kabuli_chr04 | 36413670                | AA                              | CC              | 1946819990               |
| SNP_P4_57099_36413717 | NC_021163.1    | Ca_kabuli_chr04 | 36413717                | GG                              | AA              | 1946819992               |
| SNP_P4_57100_36413718 | NC_021163.1    | Ca_kabuli_chr04 | 36413718                | GG                              | AA              | 1946819994               |
| SNP_P4_57101_36419212 | NC_021163.1    | Ca_kabuli_chr04 | 36419212                | AA                              | TT              | 1946819996               |
| SNP_P4_57102_36419216 | NC_021163.1    | Ca_kabuli_chr04 | 36419216                | TT                              | AA              | 1946819998               |
| SNP_P4_57104_36419469 | NC_021163.1    | Ca_kabuli_chr04 | 36419469                | TT                              | AA              | 1946820000               |
| SNP_P4_57105_36419482 | NC_021163.1    | Ca_kabuli_chr04 | 36419482                | CC                              | GG              | 1946820002               |
| SNP_P4_57106_36419511 | NC_021163.1    | Ca_kabuli_chr04 | 36419511                | AA                              | CC              | 1946820004               |
| SNP_P4_57107_36419531 | NC_021163.1    | Ca_kabuli_chr04 | 36419531                | AA                              | TT              | 1946820006               |

| SNPs IDs              | Chromosome IDs | Chromosomes     | Physical positions (bp) | CDC Frontier (Reference genome) | (ILWC46 & LPNB) | NCBI SNPdb Accession IDs |
|-----------------------|----------------|-----------------|-------------------------|---------------------------------|-----------------|--------------------------|
| SNP_P4_57108_36419627 | NC_021163.1    | Ca_kabuli_chr04 | 36419627                | AA                              | CC              | 1946820008               |
| SNP_P4_57110_36420908 | NC_021163.1    | Ca_kabuli_chr04 | 36420908                | CC                              | TT              | 1946820010               |
| SNP_P4_57111_36420911 | NC_021163.1    | Ca_kabuli_chr04 | 36420911                | CC                              | AA              | 1946820012               |
| SNP_P4_57112_36422404 | NC_021163.1    | Ca_kabuli_chr04 | 36422404                | AA                              | TT              | 1946820014               |
| SNP_P4_57113_36422532 | NC_021163.1    | Ca_kabuli_chr04 | 36422532                | GG                              | AA              | 1946820016               |
| SNP_P4_57114_36422537 | NC_021163.1    | Ca_kabuli_chr04 | 36422537                | GG                              | TT              | 1946820018               |
| SNP_P4_57115_36422697 | NC_021163.1    | Ca_kabuli_chr04 | 36422697                | GG                              | TT              | 1946820020               |
| SNP_P4_57116_36423045 | NC_021163.1    | Ca_kabuli_chr04 | 36423045                | AA                              | GG              | 1946820022               |
| SNP_P4_57117_36423055 | NC_021163.1    | Ca_kabuli_chr04 | 36423055                | TT                              | CC              | 1946820024               |
| SNP_P4_57118_36423398 | NC_021163.1    | Ca_kabuli_chr04 | 36423398                | CC                              | GG              | 1946820026               |
| SNP_P4_57119_36424126 | NC_021163.1    | Ca_kabuli_chr04 | 36424126                | AA                              | GG              | 1946820028               |
| SNP_P4_57120_36424181 | NC_021163.1    | Ca_kabuli_chr04 | 36424181                | AA                              | CC              | 1946820030               |
| SNP_P4_57121_36425012 | NC_021163.1    | Ca_kabuli_chr04 | 36425012                | AA                              | GG              | 1946820032               |
| SNP_P4_57122_36425015 | NC_021163.1    | Ca_kabuli_chr04 | 36425015                | AA                              | GG              | 1946820034               |
| SNP_P4_57123_36427557 | NC_021163.1    | Ca_kabuli_chr04 | 36427557                | TT                              | CC              | 1946820036               |
| SNP_P4_57124_36428498 | NC_021163.1    | Ca_kabuli_chr04 | 36428498                | CC                              | TT              | 1946820038               |
| SNP_P4_57125_36428500 | NC_021163.1    | Ca_kabuli_chr04 | 36428500                | AA                              | GG              | 1946820040               |
| SNP_P4_57126_36429014 | NC_021163.1    | Ca_kabuli_chr04 | 36429014                | AA                              | GG              | 1946820042               |
| SNP_P4_57127_36429354 | NC_021163.1    | Ca_kabuli_chr04 | 36429354                | GG                              | AA              | 1946820044               |
| SNP_P4_57128_36434282 | NC_021163.1    | Ca_kabuli_chr04 | 36434282                | CC                              | TT              | 1946820046               |
| SNP_P4_57129_36434289 | NC_021163.1    | Ca_kabuli_chr04 | 36434289                | CC                              | AA              | 1946820048               |
| SNP_P4_57130_36434495 | NC_021163.1    | Ca_kabuli_chr04 | 36434495                | GG                              | TT              | 1946820050               |
| SNP_P4_57131_36434531 | NC_021163.1    | Ca_kabuli_chr04 | 36434531                | GG                              | AA              | 1946820052               |
| SNP_P4_57132_36435037 | NC_021163.1    | Ca_kabuli_chr04 | 36435037                | CC                              | TT              | 1946820055               |
| SNP_P4_57133_36435105 | NC_021163.1    | Ca_kabuli_chr04 | 36435105                | AA                              | TT              | 1946820057               |
| SNP_P4_57134_36436361 | NC_021163.1    | Ca_kabuli_chr04 | 36436361                | CC                              | TT              | 1946820059               |
| SNP_P4_57135_36436421 | NC_021163.1    | Ca_kabuli_chr04 | 36436421                | CC                              | TT              | 1946820061               |
| SNP_P4_57136_36436432 | NC_021163.1    | Ca_kabuli_chr04 | 36436432                | CC                              | TT              | 1946820063               |
| SNP_P4_57137_36436435 | NC_021163.1    | Ca_kabuli_chr04 | 36436435                | GG                              | AA              | 1946820065               |
| SNP_P4_57138_36436817 | NC_021163.1    | Ca_kabuli_chr04 | 36436817                | AA                              | GG              | 1946820067               |
| SNP_P4_57139_36436920 | NC_021163.1    | Ca_kabuli_chr04 | 36436920                | CC                              | GG              | 1946820069               |
| SNP_P4_57140_36436950 | NC_021163.1    | Ca_kabuli_chr04 | 36436950                | GG                              | TT              | 1946820071               |
| SNP_P4_57141_36436951 | NC_021163.1    | Ca_kabuli_chr04 | 36436951                | TT                              | AA              | 1946820073               |
| SNP_P4_57142_36436987 | NC_021163.1    | Ca_kabuli_chr04 | 36436987                | TT                              | GG              | 1946820075               |
| SNP_P4_57143_36437002 | NC_021163.1    | Ca_kabuli_chr04 | 36437002                | TT                              | CC              | 1946820077               |
| SNP_P4_57144_36437190 | NC_021163.1    | Ca_kabuli_chr04 | 36437190                | AA                              | GG              | 1946820079               |
| SNP_P4_57145_36437281 | NC_021163.1    | Ca_kabuli_chr04 | 36437281                | GG                              | CC              | 1946820081               |
| SNP_P4_57146_36437315 | NC_021163.1    | Ca_kabuli_chr04 | 36437315                | AA                              | TT              | 1946820083               |
| SNP_P4_57147_36437622 | NC_021163.1    | Ca_kabuli_chr04 | 36437622                | TT                              | GG              | 1946820085               |
| SNP_P4_57148_36437815 | NC_021163.1    | Ca_kabuli_chr04 | 36437815                | TT                              | AA              | 1946820087               |
| SNP_P4_57149_36437909 | NC_021163.1    | Ca_kabuli_chr04 | 36437909                | AA                              | TT              | 1946820089               |
| SNP_P4_57150_36438006 | NC_021163.1    | Ca_kabuli_chr04 | 36438006                | AA                              | TT              | 1946820091               |



| SNPs IDs              | Chromosome IDs | Chromosomes     | Physical positions (bp) | CDC Frontier (Reference genome) | (ILWC46 & LPNB) | NCBI SNPdb Accession IDs |
|-----------------------|----------------|-----------------|-------------------------|---------------------------------|-----------------|--------------------------|
| SNP_P4_57151_36438444 | NC_021163.1    | Ca_kabuli_chr04 | 36438444                | AA                              | GG              | 1946820094               |
| SNP_P4_57152_36438506 | NC_021163.1    | Ca_kabuli_chr04 | 36438506                | TT                              | AA              | 1946820096               |
| SNP_P4_57153_36438509 | NC_021163.1    | Ca_kabuli_chr04 | 36438509                | AA                              | GG              | 1946820098               |
| SNP_P4_57154_36438515 | NC_021163.1    | Ca_kabuli_chr04 | 36438515                | TT                              | CC              | 1946820100               |
| SNP_P4_57155_36438519 | NC_021163.1    | Ca_kabuli_chr04 | 36438519                | AA                              | GG              | 1946820102               |
| SNP_P4_57156_36438569 | NC_021163.1    | Ca_kabuli_chr04 | 36438569                | CC                              | AA              | 1946820104               |
| SNP_P4_57158_36438855 | NC_021163.1    | Ca_kabuli_chr04 | 36438855                | GG                              | AA              | 1946820106               |
| SNP_P4_57159_36438856 | NC_021163.1    | Ca_kabuli_chr04 | 36438856                | AA                              | GG              | 1946820108               |
| SNP_P4_57160_36442489 | NC_021163.1    | Ca_kabuli_chr04 | 36442489                | CC                              | AA              | 1946820110               |
| SNP_P4_57161_36444508 | NC_021163.1    | Ca_kabuli_chr04 | 36444508                | GG                              | AA              | 1946820112               |
| SNP_P4_57162_36445345 | NC_021163.1    | Ca_kabuli_chr04 | 36445345                | GG                              | AA              | 1946820114               |
| SNP_P4_57163_36450292 | NC_021163.1    | Ca_kabuli_chr04 | 36450292                | AA                              | GG              | 1946820116               |
| SNP_P4_57164_36450497 | NC_021163.1    | Ca_kabuli_chr04 | 36450497                | TT                              | CC              | 1946820118               |
| SNP_P4_57166_36450543 | NC_021163.1    | Ca_kabuli_chr04 | 36450543                | TT                              | CC              | 1946820120               |
| SNP_P4_57167_36450556 | NC_021163.1    | Ca_kabuli_chr04 | 36450556                | CC                              | TT              | 1946820122               |
| SNP_P4_57168_36450567 | NC_021163.1    | Ca_kabuli_chr04 | 36450567                | TT                              | GG              | 1946820124               |
| SNP_P4_57169_36450582 | NC_021163.1    | Ca_kabuli_chr04 | 36450582                | CC                              | TT              | 1946820126               |
| SNP_P4_57170_36450591 | NC_021163.1    | Ca_kabuli_chr04 | 36450591                | CC                              | GG              | 1946820128               |
| SNP_P4_57171_36452074 | NC_021163.1    | Ca_kabuli_chr04 | 36452074                | GG                              | AA              | 1946820130               |
| SNP_P4_57172_36452718 | NC_021163.1    | Ca_kabuli_chr04 | 36452718                | GG                              | AA              | 1946820132               |
| SNP_P4_57173_36452725 | NC_021163.1    | Ca_kabuli_chr04 | 36452725                | TT                              | GG              | 1946820134               |
| SNP_P4_57174_36452767 | NC_021163.1    | Ca_kabuli_chr04 | 36452767                | CC                              | GG              | 1946820136               |
| SNP_P4_57175_36452793 | NC_021163.1    | Ca_kabuli_chr04 | 36452793                | AA                              | GG              | 1946820138               |
| SNP_P4_57176_36452938 | NC_021163.1    | Ca_kabuli_chr04 | 36452938                | CC                              | TT              | 1946820140               |
| SNP_P4_57177_36452980 | NC_021163.1    | Ca_kabuli_chr04 | 36452980                | TT                              | CC              | 1946820142               |
| SNP_P4_57178_36452991 | NC_021163.1    | Ca_kabuli_chr04 | 36452991                | CC                              | TT              | 1946820144               |
| SNP_P4_57179_36453035 | NC_021163.1    | Ca_kabuli_chr04 | 36453035                | CC                              | AA              | 1946820146               |
| SNP_P4_57180_36453060 | NC_021163.1    | Ca_kabuli_chr04 | 36453060                | GG                              | AA              | 1946820148               |
| SNP_P4_57181_36453243 | NC_021163.1    | Ca_kabuli_chr04 | 36453243                | CC                              | TT              | 1946820150               |
| SNP_P4_57183_36453564 | NC_021163.1    | Ca_kabuli_chr04 | 36453564                | GG                              | AA              | 1946820152               |
| SNP_P4_57184_36455745 | NC_021163.1    | Ca_kabuli_chr04 | 36455745                | CC                              | AA              | 1946820154               |
| SNP_P4_57186_36458304 | NC_021163.1    | Ca_kabuli_chr04 | 36458304                | GG                              | TT              | 1946820156               |
| SNP_P4_57187_36458306 | NC_021163.1    | Ca_kabuli_chr04 | 36458306                | GG                              | TT              | 1946820158               |
| SNP_P4_57188_36458308 | NC_021163.1    | Ca_kabuli_chr04 | 36458308                | GG                              | TT              | 1946820160               |
| SNP_P4_57190_36458418 | NC_021163.1    | Ca_kabuli_chr04 | 36458418                | GG                              | TT              | 1946820162               |
| SNP_P4_57191_36458564 | NC_021163.1    | Ca_kabuli_chr04 | 36458564                | TT                              | CC              | 1946820164               |
| SNP_P4_57193_36462625 | NC_021163.1    | Ca_kabuli_chr04 | 36462625                | GG                              | CC              | 1946820166               |
| SNP_P4_57194_36464074 | NC_021163.1    | Ca_kabuli_chr04 | 36464074                | CC                              | TT              | 1946820168               |
| SNP_P4_57195_36464077 | NC_021163.1    | Ca_kabuli_chr04 | 36464077                | TT                              | AA              | 1946820170               |
| SNP_P4_57196_36464121 | NC_021163.1    | Ca_kabuli_chr04 | 36464121                | GG                              | TT              | 1946820172               |
| SNP_P4_57197_36464177 | NC_021163.1    | Ca_kabuli_chr04 | 36464177                | AA                              | GG              | 1946820174               |
| SNP_P4_57198_36464226 | NC_021163.1    | Ca_kabuli_chr04 | 36464226                | CC                              | AA              | 1946820176               |

| SNPs IDs              | Chromosome IDs | Chromosomes     | Physical positions (bp) | CDC Frontier (Reference genome) | (ILWC46 & LPNB) | NCBI SNPdb Accession IDs |
|-----------------------|----------------|-----------------|-------------------------|---------------------------------|-----------------|--------------------------|
| SNP_P4_57199_36464467 | NC_021163.1    | Ca_kabuli_chr04 | 36464467                | CC                              | GG              | 1946820178               |
| SNP_P4_57200_36464486 | NC_021163.1    | Ca_kabuli_chr04 | 36464486                | CC                              | AA              | 1946820180               |
| SNP_P4_57201_36464518 | NC_021163.1    | Ca_kabuli_chr04 | 36464518                | AA                              | CC              | 1946820182               |
| SNP_P4_57202_36466557 | NC_021163.1    | Ca_kabuli_chr04 | 36466557                | CC                              | GG              | 1946820184               |
| SNP_P4_57203_36467016 | NC_021163.1    | Ca_kabuli_chr04 | 36467016                | TT                              | CC              | 1946820186               |
| SNP_P4_57204_36467421 | NC_021163.1    | Ca_kabuli_chr04 | 36467421                | GG                              | AA              | 1946820188               |
| SNP_P4_57205_36467706 | NC_021163.1    | Ca_kabuli_chr04 | 36467706                | CC                              | TT              | 1946820190               |
| SNP_P4_57206_36467943 | NC_021163.1    | Ca_kabuli_chr04 | 36467943                | AA                              | GG              | 1946820192               |
| SNP_P4_57207_36468545 | NC_021163.1    | Ca_kabuli_chr04 | 36468545                | AA                              | GG              | 1946820194               |
| SNP_P4_57208_36468562 | NC_021163.1    | Ca_kabuli_chr04 | 36468562                | TT                              | AA              | 1946820196               |
| SNP_P4_57209_36469012 | NC_021163.1    | Ca_kabuli_chr04 | 36469012                | TT                              | CC              | 1946820198               |
| SNP_P4_57210_36469223 | NC_021163.1    | Ca_kabuli_chr04 | 36469223                | TT                              | CC              | 1946820200               |
| SNP_P4_57211_36469282 | NC_021163.1    | Ca_kabuli_chr04 | 36469282                | GG                              | AA              | 1946820202               |
| SNP_P4_57212_36470890 | NC_021163.1    | Ca_kabuli_chr04 | 36470890                | AA                              | TT              | 1946820204               |
| SNP_P4_57213_36470961 | NC_021163.1    | Ca_kabuli_chr04 | 36470961                | GG                              | TT              | 1946820206               |
| SNP_P4_57214_36470972 | NC_021163.1    | Ca_kabuli_chr04 | 36470972                | TT                              | CC              | 1946820208               |
| SNP_P4_57215_36471475 | NC_021163.1    | Ca_kabuli_chr04 | 36471475                | CC                              | TT              | 1946820210               |
| SNP_P4_57217_36472097 | NC_021163.1    | Ca_kabuli_chr04 | 36472097                | GG                              | AA              | 1946820212               |
| SNP_P4_57218_36472204 | NC_021163.1    | Ca_kabuli_chr04 | 36472204                | CC                              | TT              | 1946820214               |
| SNP_P4_57220_36473208 | NC_021163.1    | Ca_kabuli_chr04 | 36473208                | GG                              | AA              | 1946820216               |
| SNP_P4_57221_36473558 | NC_021163.1    | Ca_kabuli_chr04 | 36473558                | GG                              | AA              | 1946820218               |
| SNP_P4_57222_36474063 | NC_021163.1    | Ca_kabuli_chr04 | 36474063                | TT                              | CC              | 1946820220               |
| SNP_P4_57224_36474647 | NC_021163.1    | Ca_kabuli_chr04 | 36474647                | TT                              | GG              | 1946820222               |
| SNP_P4_57225_36474857 | NC_021163.1    | Ca_kabuli_chr04 | 36474857                | TT                              | CC              | 1946820224               |
| SNP_P4_57226_36478028 | NC_021163.1    | Ca_kabuli_chr04 | 36478028                | TT                              | GG              | 1946820226               |
| SNP_P4_57227_36478040 | NC_021163.1    | Ca_kabuli_chr04 | 36478040                | CC                              | AA              | 1946820228               |
| SNP_P4_57228_36478385 | NC_021163.1    | Ca_kabuli_chr04 | 36478385                | CC                              | TT              | 1946820230               |
| SNP_P4_57229_36478804 | NC_021163.1    | Ca_kabuli_chr04 | 36478804                | CC                              | TT              | 1946820232               |
| SNP_P4_57230_36479167 | NC_021163.1    | Ca_kabuli_chr04 | 36479167                | GG                              | AA              | 1946820234               |
| SNP_P4_57231_36482643 | NC_021163.1    | Ca_kabuli_chr04 | 36482643                | TT                              | GG              | 1946820236               |
| SNP_P4_57232_36483814 | NC_021163.1    | Ca_kabuli_chr04 | 36483814                | AA                              | GG              | 1946820238               |
| SNP_P4_57233_36483833 | NC_021163.1    | Ca_kabuli_chr04 | 36483833                | AA                              | GG              | 1946820240               |
| SNP_P4_57235_36484147 | NC_021163.1    | Ca_kabuli_chr04 | 36484147                | TT                              | AA              | 1946820242               |
| SNP_P4_57236_36484166 | NC_021163.1    | Ca_kabuli_chr04 | 36484166                | AA                              | GG              | 1946820244               |
| SNP_P4_57237_36484194 | NC_021163.1    | Ca_kabuli_chr04 | 36484194                | GG                              | TT              | 1946820245               |
| SNP_P4_57238_36484593 | NC_021163.1    | Ca_kabuli_chr04 | 36484593                | GG                              | AA              | 1946820247               |
| SNP_P4_57239_36484617 | NC_021163.1    | Ca_kabuli_chr04 | 36484617                | GG                              | AA              | 1946820249               |
| SNP_P4_57240_36484638 | NC_021163.1    | Ca_kabuli_chr04 | 36484638                | CC                              | TT              | 1946820251               |
| SNP_P4_57241_36484661 | NC_021163.1    | Ca_kabuli_chr04 | 36484661                | AA                              | GG              | 1946820253               |
| SNP_P4_57244_36488114 | NC_021163.1    | Ca_kabuli_chr04 | 36488114                | GG                              | TT              | 1946820255               |
| SNP_P4_57245_36489335 | NC_021163.1    | Ca_kabuli_chr04 | 36489335                | TT                              | AA              | 1946820257               |
| SNP_P4_57246_36489507 | NC_021163.1    | Ca_kabuli_chr04 | 36489507                | CC                              | TT              | 1946820259               |

| SNPs IDs              | Chromosome IDs | Chromosomes     | Physical positions (bp) | CDC Frontier (Reference genome) | (ILWC46 & LPNB) | NCBI SNPdb Accession IDs |
|-----------------------|----------------|-----------------|-------------------------|---------------------------------|-----------------|--------------------------|
| SNP_P4_57247_36489522 | NC_021163.1    | Ca_kabuli_chr04 | 36489522                | TT                              | AA              | 1946820261               |
| SNP_P4_57248_36489547 | NC_021163.1    | Ca_kabuli_chr04 | 36489547                | GG                              | AA              | 1946820263               |
| SNP_P4_57249_36489623 | NC_021163.1    | Ca_kabuli_chr04 | 36489623                | CC                              | AA              | 1946820266               |
| SNP_P4_57252_36495397 | NC_021163.1    | Ca_kabuli_chr04 | 36495397                | CC                              | TT              | 1946820268               |
| SNP_P4_57253_36495401 | NC_021163.1    | Ca_kabuli_chr04 | 36495401                | TT                              | CC              | 1946820270               |
| SNP_P4_57254_36495433 | NC_021163.1    | Ca_kabuli_chr04 | 36495433                | TT                              | CC              | 1946820272               |
| SNP_P4_57255_36496841 | NC_021163.1    | Ca_kabuli_chr04 | 36496841                | GG                              | TT              | 1946820274               |
| SNP_P4_57256_36497022 | NC_021163.1    | Ca_kabuli_chr04 | 36497022                | AA                              | GG              | 1946820276               |
| SNP_P4_57257_36497241 | NC_021163.1    | Ca_kabuli_chr04 | 36497241                | GG                              | CC              | 1946820278               |
| SNP_P4_57258_36499553 | NC_021163.1    | Ca_kabuli_chr04 | 36499553                | GG                              | AA              | 1946820280               |
| SNP_P4_57259_36501485 | NC_021163.1    | Ca_kabuli_chr04 | 36501485                | GG                              | AA              | 1946820282               |
| SNP_P4_57260_36501551 | NC_021163.1    | Ca_kabuli_chr04 | 36501551                | CC                              | TT              | 1946820284               |
| SNP_P4_57261_36501557 | NC_021163.1    | Ca_kabuli_chr04 | 36501557                | AA                              | CC              | 1946820286               |
| SNP_P4_57262_36501663 | NC_021163.1    | Ca_kabuli_chr04 | 36501663                | TT                              | AA              | 1946820288               |
| SNP_P4_57263_36501675 | NC_021163.1    | Ca_kabuli_chr04 | 36501675                | AA                              | GG              | 1946820290               |
| SNP_P4_57264_36501689 | NC_021163.1    | Ca_kabuli_chr04 | 36501689                | GG                              | AA              | 1946820292               |
| SNP_P4_57265_36501820 | NC_021163.1    | Ca_kabuli_chr04 | 36501820                | AA                              | CC              | 1946820294               |
| SNP_P4_57266_36501855 | NC_021163.1    | Ca_kabuli_chr04 | 36501855                | GG                              | TT              | 1946820296               |
| SNP_P4_57268_36506706 | NC_021163.1    | Ca_kabuli_chr04 | 36506706                | CC                              | AA              | 1946820298               |
| SNP_P4_57269_36507307 | NC_021163.1    | Ca_kabuli_chr04 | 36507307                | TT                              | GG              | 1946820300               |
| SNP_P4_57270_36507759 | NC_021163.1    | Ca_kabuli_chr04 | 36507759                | TT                              | AA              | 1946820302               |
| SNP_P4_57271_36508235 | NC_021163.1    | Ca_kabuli_chr04 | 36508235                | CC                              | TT              | 1946820304               |
| SNP_P4_57272_36508256 | NC_021163.1    | Ca_kabuli_chr04 | 36508256                | AA                              | GG              | 1946820306               |
| SNP_P4_57273_36508261 | NC_021163.1    | Ca_kabuli_chr04 | 36508261                | CC                              | TT              | 1946820308               |
| SNP_P4_57274_36508283 | NC_021163.1    | Ca_kabuli_chr04 | 36508283                | TT                              | CC              | 1946820310               |
| SNP_P4_57275_36508353 | NC_021163.1    | Ca_kabuli_chr04 | 36508353                | GG                              | AA              | 1946820312               |
| SNP_P4_57276_36508407 | NC_021163.1    | Ca_kabuli_chr04 | 36508407                | CC                              | TT              | 1946820314               |
| SNP_P4_57277_36508425 | NC_021163.1    | Ca_kabuli_chr04 | 36508425                | TT                              | CC              | 1946820316               |
| SNP_P4_57278_36509362 | NC_021163.1    | Ca_kabuli_chr04 | 36509362                | CC                              | TT              | 1946820318               |
| SNP_P4_57279_36509364 | NC_021163.1    | Ca_kabuli_chr04 | 36509364                | TT                              | CC              | 1946820320               |
| SNP_P4_57280_36509406 | NC_021163.1    | Ca_kabuli_chr04 | 36509406                | GG                              | AA              | 1946820322               |
| SNP_P4_57282_36510187 | NC_021163.1    | Ca_kabuli_chr04 | 36510187                | AA                              | CC              | 1946820324               |
| SNP_P4_57283_36510236 | NC_021163.1    | Ca_kabuli_chr04 | 36510236                | CC                              | AA              | 1946820326               |
| SNP_P4_57284_36510371 | NC_021163.1    | Ca_kabuli_chr04 | 36510371                | CC                              | TT              | 1946820328               |
| SNP_P4_57285_36510385 | NC_021163.1    | Ca_kabuli_chr04 | 36510385                | TT                              | CC              | 1946820330               |
| SNP_P4_57286_36510499 | NC_021163.1    | Ca_kabuli_chr04 | 36510499                | TT                              | CC              | 1946820332               |
| SNP_P4_57287_36510508 | NC_021163.1    | Ca_kabuli_chr04 | 36510508                | AA                              | CC              | 1946820334               |
| SNP_P4_57289_36510558 | NC_021163.1    | Ca_kabuli_chr04 | 36510558                | GG                              | TT              | 1946820336               |
| SNP_P4_57290_36510583 | NC_021163.1    | Ca_kabuli_chr04 | 36510583                | AA                              | GG              | 1946820338               |
| SNP_P4_57291_36511530 | NC_021163.1    | Ca_kabuli_chr04 | 36511530                | TT                              | CC              | 1946820340               |
| SNP_P4_57292_36515777 | NC_021163.1    | Ca_kabuli_chr04 | 36515777                | GG                              | AA              | 1946820342               |
| SNP_P4_57293_36516328 | NC_021163.1    | Ca_kabuli_chr04 | 36516328                | CC                              | AA              | 1946820344               |

| SNPs IDs              | Chromosome IDs | Chromosomes     | Physical positions (bp) | CDC Frontier (Reference genome) | (ILWC46 & LPNB) | NCBI SNPdb Accession IDs |
|-----------------------|----------------|-----------------|-------------------------|---------------------------------|-----------------|--------------------------|
| SNP_P4_57294_36516650 | NC_021163.1    | Ca_kabuli_chr04 | 36516650                | CC                              | TT              | 1946820346               |
| SNP_P4_57295_36516684 | NC_021163.1    | Ca_kabuli_chr04 | 36516684                | AA                              | GG              | 1946820348               |
| SNP_P4_57296_36516720 | NC_021163.1    | Ca_kabuli_chr04 | 36516720                | AA                              | CC              | 1946820350               |
| SNP_P4_57297_36517842 | NC_021163.1    | Ca_kabuli_chr04 | 36517842                | AA                              | CC              | 1946820352               |
| SNP_P4_57298_36517877 | NC_021163.1    | Ca_kabuli_chr04 | 36517877                | CC                              | TT              | 1946820354               |
| SNP_P4_57299_36518078 | NC_021163.1    | Ca_kabuli_chr04 | 36518078                | CC                              | TT              | 1946820356               |
| SNP_P4_57300_36518102 | NC_021163.1    | Ca_kabuli_chr04 | 36518102                | TT                              | CC              | 1946820358               |
| SNP_P4_57301_36518151 | NC_021163.1    | Ca_kabuli_chr04 | 36518151                | AA                              | GG              | 1946820360               |
| SNP_P4_57302_36518547 | NC_021163.1    | Ca_kabuli_chr04 | 36518547                | AA                              | GG              | 1946820362               |
| SNP_P4_57303_36527020 | NC_021163.1    | Ca_kabuli_chr04 | 36527020                | CC                              | TT              | 1946820364               |
| SNP_P4_57304_36527128 | NC_021163.1    | Ca_kabuli_chr04 | 36527128                | CC                              | AA              | 1946820366               |
| SNP_P4_57306_36527992 | NC_021163.1    | Ca_kabuli_chr04 | 36527992                | GG                              | AA              | 1946820368               |
| SNP_P4_57307_36529504 | NC_021163.1    | Ca_kabuli_chr04 | 36529504                | GG                              | AA              | 1946820370               |
| SNP_P4_57308_36530294 | NC_021163.1    | Ca_kabuli_chr04 | 36530294                | CC                              | TT              | 1946820372               |
| SNP_P4_57309_36533234 | NC_021163.1    | Ca_kabuli_chr04 | 36533234                | GG                              | AA              | 1946820374               |
| SNP_P4_57310_36533244 | NC_021163.1    | Ca_kabuli_chr04 | 36533244                | CC                              | AA              | 1946820376               |
| SNP_P4_57311_36533256 | NC_021163.1    | Ca_kabuli_chr04 | 36533256                | TT                              | CC              | 1946820378               |
| SNP_P4_57312_36533515 | NC_021163.1    | Ca_kabuli_chr04 | 36533515                | GG                              | AA              | 1946820380               |
| SNP_P4_57313_36533522 | NC_021163.1    | Ca_kabuli_chr04 | 36533522                | AA                              | TT              | 1946820382               |
| SNP_P4_57314_36533712 | NC_021163.1    | Ca_kabuli_chr04 | 36533712                | TT                              | CC              | 1946820384               |
| SNP_P4_57315_36534468 | NC_021163.1    | Ca_kabuli_chr04 | 36534468                | TT                              | CC              | 1946820386               |
| SNP_P4_57317_36536416 | NC_021163.1    | Ca_kabuli_chr04 | 36536416                | GG                              | TT              | 1946820388               |
| SNP_P4_57318_36539612 | NC_021163.1    | Ca_kabuli_chr04 | 36539612                | TT                              | CC              | 1946820390               |
| SNP_P4_57319_36540223 | NC_021163.1    | Ca_kabuli_chr04 | 36540223                | CC                              | TT              | 1946820392               |
| SNP_P4_57320_36541409 | NC_021163.1    | Ca_kabuli_chr04 | 36541409                | AA                              | GG              | 1946820394               |
| SNP_P4_57321_36542201 | NC_021163.1    | Ca_kabuli_chr04 | 36542201                | GG                              | AA              | 1946820396               |
| SNP_P4_57322_36542684 | NC_021163.1    | Ca_kabuli_chr04 | 36542684                | TT                              | CC              | 1946820398               |
| SNP_P4_57323_36542860 | NC_021163.1    | Ca_kabuli_chr04 | 36542860                | GG                              | AA              | 1946820400               |
| SNP_P4_57324_36543092 | NC_021163.1    | Ca_kabuli_chr04 | 36543092                | CC                              | AA              | 1946820402               |
| SNP_P4_57325_36543374 | NC_021163.1    | Ca_kabuli_chr04 | 36543374                | AA                              | CC              | 1946820404               |
| SNP_P4_57326_36543399 | NC_021163.1    | Ca_kabuli_chr04 | 36543399                | CC                              | AA              | 1946820406               |
| SNP_P4_57327_36544009 | NC_021163.1    | Ca_kabuli_chr04 | 36544009                | TT                              | CC              | 1946820408               |
| SNP_P4_57328_36544020 | NC_021163.1    | Ca_kabuli_chr04 | 36544020                | AA                              | TT              | 1946820410               |
| SNP_P4_57329_36544296 | NC_021163.1    | Ca_kabuli_chr04 | 36544296                | GG                              | AA              | 1946820412               |
| SNP_P4_57330_36545271 | NC_021163.1    | Ca_kabuli_chr04 | 36545271                | GG                              | AA              | 1946820414               |
| SNP_P4_57331_36545281 | NC_021163.1    | Ca_kabuli_chr04 | 36545281                | CC                              | AA              | 1946820416               |
| SNP_P4_57332_36545836 | NC_021163.1    | Ca_kabuli_chr04 | 36545836                | TT                              | CC              | 1946820418               |
| SNP_P4_57333_36545864 | NC_021163.1    | Ca_kabuli_chr04 | 36545864                | CC                              | AA              | 1946820420               |
| SNP_P4_57334_36553896 | NC_021163.1    | Ca_kabuli_chr04 | 36553896                | CC                              | TT              | 1946820422               |
| SNP_P4_57335_36559031 | NC_021163.1    | Ca_kabuli_chr04 | 36559031                | AA                              | GG              | 1946820424               |
| SNP_P4_57336_36560939 | NC_021163.1    | Ca_kabuli_chr04 | 36560939                | AA                              | GG              | 1946820426               |
| SNP_P4_57338_36561006 | NC_021163.1    | Ca_kabuli_chr04 | 36561006                | GG                              | AA              | 1946820428               |

| SNPs IDs              | Chromosome IDs | Chromosomes     | Physical positions (bp) | CDC Frontier (Reference genome) | (ILWC46 & LPNB) | NCBI SNPdb Accession IDs |
|-----------------------|----------------|-----------------|-------------------------|---------------------------------|-----------------|--------------------------|
| SNP_P4_57339_36561268 | NC_021163.1    | Ca_kabuli_chr04 | 36561268                | GG                              | AA              | 1946820430               |
| SNP_P4_57341_36561890 | NC_021163.1    | Ca_kabuli_chr04 | 36561890                | CC                              | TT              | 1946820432               |
| SNP_P4_57342_36562072 | NC_021163.1    | Ca_kabuli_chr04 | 36562072                | TT                              | AA              | 1946820434               |
| SNP_P4_57343_36562085 | NC_021163.1    | Ca_kabuli_chr04 | 36562085                | TT                              | CC              | 1946820436               |
| SNP_P4_57344_36563839 | NC_021163.1    | Ca_kabuli_chr04 | 36563839                | AA                              | CC              | 1946820438               |
| SNP_P4_57345_36563841 | NC_021163.1    | Ca_kabuli_chr04 | 36563841                | TT                              | CC              | 1946820440               |
| SNP_P4_57346_36563857 | NC_021163.1    | Ca_kabuli_chr04 | 36563857                | TT                              | CC              | 1946820442               |
| SNP_P4_57347_36565153 | NC_021163.1    | Ca_kabuli_chr04 | 36565153                | GG                              | TT              | 1946820444               |
| SNP_P4_57348_36565155 | NC_021163.1    | Ca_kabuli_chr04 | 36565155                | GG                              | AA              | 1946820447               |
| SNP_P4_57349_36565403 | NC_021163.1    | Ca_kabuli_chr04 | 36565403                | CC                              | TT              | 1946820449               |
| SNP_P4_57350_36565413 | NC_021163.1    | Ca_kabuli_chr04 | 36565413                | TT                              | CC              | 1946820451               |
| SNP_P4_57352_36565675 | NC_021163.1    | Ca_kabuli_chr04 | 36565675                | TT                              | AA              | 1946820453               |
| SNP_P4_57354_36567207 | NC_021163.1    | Ca_kabuli_chr04 | 36567207                | CC                              | TT              | 1946820455               |
| SNP_P4_57355_36567239 | NC_021163.1    | Ca_kabuli_chr04 | 36567239                | CC                              | TT              | 1946820458               |
| SNP_P4_57356_36567319 | NC_021163.1    | Ca_kabuli_chr04 | 36567319                | AA                              | GG              | 1946820460               |
| SNP_P4_57357_36567373 | NC_021163.1    | Ca_kabuli_chr04 | 36567373                | GG                              | TT              | 1946820462               |
| SNP_P4_57358_36567515 | NC_021163.1    | Ca_kabuli_chr04 | 36567515                | GG                              | AA              | 1946820464               |
| SNP_P4_57359_36567563 | NC_021163.1    | Ca_kabuli_chr04 | 36567563                | TT                              | CC              | 1946820467               |
| SNP_P4_57360_36568331 | NC_021163.1    | Ca_kabuli_chr04 | 36568331                | GG                              | CC              | 1946820469               |
| SNP_P4_57361_36572768 | NC_021163.1    | Ca_kabuli_chr04 | 36572768                | TT                              | GG              | 1946820471               |
| SNP_P4_57362_36573034 | NC_021163.1    | Ca_kabuli_chr04 | 36573034                | GG                              | TT              | 1946820473               |
| SNP_P4_57363_36573039 | NC_021163.1    | Ca_kabuli_chr04 | 36573039                | AA                              | GG              | 1946820475               |
| SNP_P4_57364_36575031 | NC_021163.1    | Ca_kabuli_chr04 | 36575031                | TT                              | CC              | 1946820478               |
| SNP_P4_57365_36576173 | NC_021163.1    | Ca_kabuli_chr04 | 36576173                | GG                              | AA              | 1946820480               |
| SNP_P4_57366_36576299 | NC_021163.1    | Ca_kabuli_chr04 | 36576299                | TT                              | CC              | 1946820482               |
| SNP_P4_57367_36576390 | NC_021163.1    | Ca_kabuli_chr04 | 36576390                | CC                              | TT              | 1946820484               |
| SNP_P4_57368_36576683 | NC_021163.1    | Ca_kabuli_chr04 | 36576683                | AA                              | CC              | 1946820486               |
| SNP_P4_57369_36587349 | NC_021163.1    | Ca_kabuli_chr04 | 36587349                | AA                              | GG              | 1946820488               |
| SNP_P4_57370_36588379 | NC_021163.1    | Ca_kabuli_chr04 | 36588379                | GG                              | TT              | 1946820490               |
| SNP_P4_57371_36588431 | NC_021163.1    | Ca_kabuli_chr04 | 36588431                | TT                              | CC              | 1946820493               |
| SNP_P4_57372_36589553 | NC_021163.1    | Ca_kabuli_chr04 | 36589553                | AA                              | TT              | 1946820495               |
| SNP_P4_57373_36589557 | NC_021163.1    | Ca_kabuli_chr04 | 36589557                | GG                              | AA              | 1946820497               |
| SNP_P4_57374_36589597 | NC_021163.1    | Ca_kabuli_chr04 | 36589597                | AA                              | TT              | 1946820499               |
| SNP_P4_57375_36589598 | NC_021163.1    | Ca_kabuli_chr04 | 36589598                | AA                              | GG              | 1946820502               |
| SNP_P4_57376_36592952 | NC_021163.1    | Ca_kabuli_chr04 | 36592952                | CC                              | AA              | 1946820504               |
| SNP_P4_57377_36592999 | NC_021163.1    | Ca_kabuli_chr04 | 36592999                | GG                              | AA              | 1946820506               |
| SNP_P4_57378_36593269 | NC_021163.1    | Ca_kabuli_chr04 | 36593269                | AA                              | CC              | 1946820509               |
| SNP_P4_57379_36593488 | NC_021163.1    | Ca_kabuli_chr04 | 36593488                | TT                              | CC              | 1946820511               |
| SNP_P4_57380_36593499 | NC_021163.1    | Ca_kabuli_chr04 | 36593499                | CC                              | TT              | 1946820513               |
| SNP_P4_57381_36593539 | NC_021163.1    | Ca_kabuli_chr04 | 36593539                | GG                              | TT              | 1946820515               |
| SNP_P4_57382_36593695 | NC_021163.1    | Ca_kabuli_chr04 | 36593695                | GG                              | AA              | 1946820517               |
| SNP_P4_57383_36593811 | NC_021163.1    | Ca_kabuli_chr04 | 36593811                | TT                              | GG              | 1946820519               |

| SNPs IDs              | Chromosome IDs | Chromosomes     | Physical positions (bp) | CDC Frontier (Reference genome) | (ILWC46 & LPNB) | NCBI SNPdb Accession IDs |
|-----------------------|----------------|-----------------|-------------------------|---------------------------------|-----------------|--------------------------|
| SNP_P4_57384_36593847 | NC_021163.1    | Ca_kabuli_chr04 | 36593847                | CC                              | TT              | 1946820522               |
| SNP_P4_57385_36593848 | NC_021163.1    | Ca_kabuli_chr04 | 36593848                | TT                              | CC              | 1946820524               |
| SNP_P4_57386_36593880 | NC_021163.1    | Ca_kabuli_chr04 | 36593880                | GG                              | AA              | 1946820526               |
| SNP_P4_57387_36593882 | NC_021163.1    | Ca_kabuli_chr04 | 36593882                | CC                              | TT              | 1946820528               |
| SNP_P4_57388_36593923 | NC_021163.1    | Ca_kabuli_chr04 | 36593923                | GG                              | AA              | 1946820530               |
| SNP_P4_57389_36593943 | NC_021163.1    | Ca_kabuli_chr04 | 36593943                | CC                              | AA              | 1946820532               |
| SNP_P4_57390_36593957 | NC_021163.1    | Ca_kabuli_chr04 | 36593957                | TT                              | CC              | 1946820534               |
| SNP_P4_57391_36595452 | NC_021163.1    | Ca_kabuli_chr04 | 36595452                | AA                              | GG              | 1946820537               |
| SNP_P4_57392_36595646 | NC_021163.1    | Ca_kabuli_chr04 | 36595646                | AA                              | GG              | 1946820539               |
| SNP_P4_57393_36595718 | NC_021163.1    | Ca_kabuli_chr04 | 36595718                | AA                              | TT              | 1946820541               |
| SNP_P4_57394_36595735 | NC_021163.1    | Ca_kabuli_chr04 | 36595735                | TT                              | CC              | 1946820543               |
| SNP_P4_57395_36595964 | NC_021163.1    | Ca_kabuli_chr04 | 36595964                | CC                              | TT              | 1946820545               |
| SNP_P4_57396_36595976 | NC_021163.1    | Ca_kabuli_chr04 | 36595976                | CC                              | AA              | 1946820547               |
| SNP_P4_57397_36596013 | NC_021163.1    | Ca_kabuli_chr04 | 36596013                | AA                              | TT              | 1946820549               |
| SNP_P4_57398_36596027 | NC_021163.1    | Ca_kabuli_chr04 | 36596027                | AA                              | TT              | 1946820551               |
| SNP_P4_57399_36596049 | NC_021163.1    | Ca_kabuli_chr04 | 36596049                | CC                              | GG              | 1946820553               |
| SNP_P4_57400_36596262 | NC_021163.1    | Ca_kabuli_chr04 | 36596262                | CC                              | AA              | 1946820555               |
| SNP_P4_57401_36596314 | NC_021163.1    | Ca_kabuli_chr04 | 36596314                | GG                              | TT              | 1946820557               |
| SNP_P4_57402_36597812 | NC_021163.1    | Ca_kabuli_chr04 | 36597812                | CC                              | TT              | 1946820559               |
| SNP_P4_57403_36597854 | NC_021163.1    | Ca_kabuli_chr04 | 36597854                | TT                              | CC              | 1946820561               |
| SNP_P4_57404_36597881 | NC_021163.1    | Ca_kabuli_chr04 | 36597881                | TT                              | AA              | 1946820563               |
| SNP_P4_57405_36599968 | NC_021163.1    | Ca_kabuli_chr04 | 36599968                | TT                              | CC              | 1946820565               |
| SNP_P4_57406_36600132 | NC_021163.1    | Ca_kabuli_chr04 | 36600132                | GG                              | AA              | 1946820567               |
| SNP_P4_57407_36600164 | NC_021163.1    | Ca_kabuli_chr04 | 36600164                | AA                              | TT              | 1946820569               |
| SNP_P4_57408_36600492 | NC_021163.1    | Ca_kabuli_chr04 | 36600492                | AA                              | GG              | 1946820571               |
| SNP_P4_57410_36601322 | NC_021163.1    | Ca_kabuli_chr04 | 36601322                | CC                              | TT              | 1946820573               |
| SNP_P4_57411_36601523 | NC_021163.1    | Ca_kabuli_chr04 | 36601523                | GG                              | AA              | 1946820575               |
| SNP_P4_57412_36601565 | NC_021163.1    | Ca_kabuli_chr04 | 36601565                | CC                              | AA              | 1946820577               |
| SNP_P4_57414_36603837 | NC_021163.1    | Ca_kabuli_chr04 | 36603837                | CC                              | TT              | 1946820579               |
| SNP_P4_57415_36604030 | NC_021163.1    | Ca_kabuli_chr04 | 36604030                | GG                              | AA              | 1946820581               |
| SNP_P4_57416_36604067 | NC_021163.1    | Ca_kabuli_chr04 | 36604067                | AA                              | CC              | 1946820583               |
| SNP_P4_57417_36609185 | NC_021163.1    | Ca_kabuli_chr04 | 36609185                | CC                              | TT              | 1946820585               |
| SNP_P4_57418_36609192 | NC_021163.1    | Ca_kabuli_chr04 | 36609192                | GG                              | AA              | 1946820588               |
| SNP_P4_57419_36616495 | NC_021163.1    | Ca_kabuli_chr04 | 36616495                | AA                              | TT              | 1946820590               |
| SNP_P4_57420_36617839 | NC_021163.1    | Ca_kabuli_chr04 | 36617839                | AA                              | TT              | 1946820592               |
| SNP_P4_57421_36617889 | NC_021163.1    | Ca_kabuli_chr04 | 36617889                | TT                              | CC              | 1946820594               |
| SNP_P4_57422_36619939 | NC_021163.1    | Ca_kabuli_chr04 | 36619939                | CC                              | TT              | 1946820596               |
| SNP_P4_57423_36620535 | NC_021163.1    | Ca_kabuli_chr04 | 36620535                | TT                              | GG              | 1946820598               |
| SNP_P4_57424_36620554 | NC_021163.1    | Ca_kabuli_chr04 | 36620554                | TT                              | CC              | 1946820600               |
| SNP_P4_57425_36621142 | NC_021163.1    | Ca_kabuli_chr04 | 36621142                | AA                              | GG              | 1946820602               |
| SNP_P4_57426_36621171 | NC_021163.1    | Ca_kabuli_chr04 | 36621171                | CC                              | TT              | 1946820604               |
| SNP_P4_57427_36621195 | NC_021163.1    | Ca_kabuli_chr04 | 36621195                | GG                              | AA              | 1946820606               |

| SNPs IDs              | Chromosome IDs | Chromosomes     | Physical positions (bp) | CDC Frontier (Reference genome) | (ILWC46 & LPNB) | NCBI SNPdb Accession IDs |
|-----------------------|----------------|-----------------|-------------------------|---------------------------------|-----------------|--------------------------|
| SNP_P4_57428_36621407 | NC_021163.1    | Ca_kabuli_chr04 | 36621407                | GG                              | CC              | 1946820608               |
| SNP_P4_57429_36621421 | NC_021163.1    | Ca_kabuli_chr04 | 36621421                | TT                              | GG              | 1946820610               |
| SNP_P4_57430_36621778 | NC_021163.1    | Ca_kabuli_chr04 | 36621778                | AA                              | GG              | 1946820612               |
| SNP_P4_57431_36622047 | NC_021163.1    | Ca_kabuli_chr04 | 36622047                | AA                              | GG              | 1946820613               |
| SNP_P4_57433_36622252 | NC_021163.1    | Ca_kabuli_chr04 | 36622252                | AA                              | CC              | 1946820616               |
| SNP_P4_57434_36622773 | NC_021163.1    | Ca_kabuli_chr04 | 36622773                | GG                              | TT              | 1946820618               |
| SNP_P4_57435_36622828 | NC_021163.1    | Ca_kabuli_chr04 | 36622828                | AA                              | TT              | 1946820620               |
| SNP_P4_57437_36623374 | NC_021163.1    | Ca_kabuli_chr04 | 36623374                | TT                              | AA              | 1946820622               |
| SNP_P4_57439_36624763 | NC_021163.1    | Ca_kabuli_chr04 | 36624763                | GG                              | CC              | 1946820624               |
| SNP_P4_57440_36624786 | NC_021163.1    | Ca_kabuli_chr04 | 36624786                | AA                              | GG              | 1946820626               |
| SNP_P4_57441_36627918 | NC_021163.1    | Ca_kabuli_chr04 | 36627918                | AA                              | TT              | 1946820628               |
| SNP_P4_57442_36627944 | NC_021163.1    | Ca_kabuli_chr04 | 36627944                | TT                              | CC              | 1946820630               |
| SNP_P4_57443_36628138 | NC_021163.1    | Ca_kabuli_chr04 | 36628138                | TT                              | CC              | 1946820632               |
| SNP_P4_57444_36629787 | NC_021163.1    | Ca_kabuli_chr04 | 36629787                | GG                              | AA              | 1946820634               |
| SNP_P4_57445_36629859 | NC_021163.1    | Ca_kabuli_chr04 | 36629859                | TT                              | CC              | 1946820636               |
| SNP_P4_57446_36629973 | NC_021163.1    | Ca_kabuli_chr04 | 36629973                | AA                              | GG              | 1946820638               |
| SNP_P4_57447_36631064 | NC_021163.1    | Ca_kabuli_chr04 | 36631064                | AA                              | CC              | 1946820640               |
| SNP_P4_57448_36631344 | NC_021163.1    | Ca_kabuli_chr04 | 36631344                | GG                              | TT              | 1946820642               |
| SNP_P4_57450_36631684 | NC_021163.1    | Ca_kabuli_chr04 | 36631684                | AA                              | GG              | 1946820644               |
| SNP_P4_57451_36631899 | NC_021163.1    | Ca_kabuli_chr04 | 36631899                | GG                              | AA              | 1946820646               |
| SNP_P4_57452_36631936 | NC_021163.1    | Ca_kabuli_chr04 | 36631936                | AA                              | TT              | 1946820647               |
| SNP_P4_57453_36632217 | NC_021163.1    | Ca_kabuli_chr04 | 36632217                | TT                              | CC              | 1946820649               |
| SNP_P4_57454_36632549 | NC_021163.1    | Ca_kabuli_chr04 | 36632549                | GG                              | AA              | 1946820651               |
| SNP_P4_57455_36633138 | NC_021163.1    | Ca_kabuli_chr04 | 36633138                | TT                              | CC              | 1946820653               |
| SNP_P4_57457_36633185 | NC_021163.1    | Ca_kabuli_chr04 | 36633185                | CC                              | TT              | 1946820655               |
| SNP_P4_57458_36633226 | NC_021163.1    | Ca_kabuli_chr04 | 36633226                | GG                              | AA              | 1946820657               |
| SNP_P4_57459_36633286 | NC_021163.1    | Ca_kabuli_chr04 | 36633286                | TT                              | GG              | 1946820659               |
| SNP_P4_57460_36633303 | NC_021163.1    | Ca_kabuli_chr04 | 36633303                | GG                              | TT              | 1946820661               |
| SNP_P4_57461_36633578 | NC_021163.1    | Ca_kabuli_chr04 | 36633578                | GG                              | AA              | 1946820663               |
| SNP_P4_57462_36634272 | NC_021163.1    | Ca_kabuli_chr04 | 36634272                | CC                              | TT              | 1946820665               |
| SNP_P4_57463_36634414 | NC_021163.1    | Ca_kabuli_chr04 | 36634414                | GG                              | AA              | 1946820667               |
| SNP_P4_57464_36634682 | NC_021163.1    | Ca_kabuli_chr04 | 36634682                | AA                              | GG              | 1946820669               |
| SNP_P4_57465_36634692 | NC_021163.1    | Ca_kabuli_chr04 | 36634692                | GG                              | AA              | 1946820670               |
| SNP_P4_57466_36634725 | NC_021163.1    | Ca_kabuli_chr04 | 36634725                | CC                              | TT              | 1946820672               |
| SNP_P4_57467_36634866 | NC_021163.1    | Ca_kabuli_chr04 | 36634866                | CC                              | AA              | 1946820674               |
| SNP_P4_57468_36637574 | NC_021163.1    | Ca_kabuli_chr04 | 36637574                | CC                              | TT              | 1946820676               |
| SNP_P4_57469_36637922 | NC_021163.1    | Ca_kabuli_chr04 | 36637922                | CC                              | TT              | 1946820678               |
| SNP_P4_57470_36638037 | NC_021163.1    | Ca_kabuli_chr04 | 36638037                | CC                              | AA              | 1946820680               |
| SNP_P4_57472_36639442 | NC_021163.1    | Ca_kabuli_chr04 | 36639442                | AA                              | GG              | 1946820682               |
| SNP_P4_57473_36639831 | NC_021163.1    | Ca_kabuli_chr04 | 36639831                | CC                              | TT              | 1946820684               |
| SNP_P4_57475_36644567 | NC_021163.1    | Ca_kabuli_chr04 | 36644567                | CC                              | TT              | 1946820686               |
| SNP_P4_57476_36645270 | NC_021163.1    | Ca_kabuli_chr04 | 36645270                | AA                              | TT              | 1946820688               |

| SNPs IDs              | Chromosome IDs | Chromosomes     | Physical positions (bp) | CDC Frontier (Reference genome) | (ILWC46 & LPNB) | NCBI SNPdb Accession IDs |
|-----------------------|----------------|-----------------|-------------------------|---------------------------------|-----------------|--------------------------|
| SNP_P4_57477_36645313 | NC_021163.1    | Ca_kabuli_chr04 | 36645313                | GG                              | AA              | 1946820690               |
| SNP_P4_57478_36645979 | NC_021163.1    | Ca_kabuli_chr04 | 36645979                | GG                              | AA              | 1946820692               |
| SNP_P4_57479_36646015 | NC_021163.1    | Ca_kabuli_chr04 | 36646015                | GG                              | AA              | 1946820694               |
| SNP_P4_57480_36647686 | NC_021163.1    | Ca_kabuli_chr04 | 36647686                | GG                              | AA              | 1946820696               |
| SNP_P4_57481_36648372 | NC_021163.1    | Ca_kabuli_chr04 | 36648372                | TT                              | CC              | 1946820698               |
| SNP_P4_57482_36663465 | NC_021163.1    | Ca_kabuli_chr04 | 36663465                | AA                              | GG              | 1946820700               |
| SNP_P4_57483_36663863 | NC_021163.1    | Ca_kabuli_chr04 | 36663863                | AA                              | GG              | 1946820702               |
| SNP_P4_57484_36663880 | NC_021163.1    | Ca_kabuli_chr04 | 36663880                | CC                              | TT              | 1946820704               |
| SNP_P4_57485_36663883 | NC_021163.1    | Ca_kabuli_chr04 | 36663883                | AA                              | GG              | 1946820706               |
| SNP_P4_57486_36665196 | NC_021163.1    | Ca_kabuli_chr04 | 36665196                | AA                              | GG              | 1946820708               |
| SNP_P4_57487_36667369 | NC_021163.1    | Ca_kabuli_chr04 | 36667369                | AA                              | GG              | 1946820710               |
| SNP_P4_57488_36674183 | NC_021163.1    | Ca_kabuli_chr04 | 36674183                | TT                              | CC              | 1946820712               |
| SNP_P4_57489_36676658 | NC_021163.1    | Ca_kabuli_chr04 | 36676658                | AA                              | GG              | 1946820714               |
| SNP_P4_57490_36682523 | NC_021163.1    | Ca_kabuli_chr04 | 36682523                | AA                              | GG              | 1946820716               |
| SNP_P4_57491_36690403 | NC_021163.1    | Ca_kabuli_chr04 | 36690403                | AA                              | CC              | 1946820718               |
| SNP_P4_57492_36693515 | NC_021163.1    | Ca_kabuli_chr04 | 36693515                | GG                              | TT              | 1946820720               |
| SNP_P4_57494_36726607 | NC_021163.1    | Ca_kabuli_chr04 | 36726607                | TT                              | CC              | 1946820722               |
| SNP_P4_57495_36726627 | NC_021163.1    | Ca_kabuli_chr04 | 36726627                | TT                              | CC              | 1946820724               |
| SNP_P4_57496_36726657 | NC_021163.1    | Ca_kabuli_chr04 | 36726657                | TT                              | CC              | 1946820726               |
| SNP_P4_57497_36726681 | NC_021163.1    | Ca_kabuli_chr04 | 36726681                | CC                              | TT              | 1946820728               |
| SNP_P4_57498_36726704 | NC_021163.1    | Ca_kabuli_chr04 | 36726704                | TT                              | CC              | 1946820730               |
| SNP_P4_57499_36726720 | NC_021163.1    | Ca_kabuli_chr04 | 36726720                | AA                              | CC              | 1946820732               |
| SNP_P4_57500_36726745 | NC_021163.1    | Ca_kabuli_chr04 | 36726745                | TT                              | CC              | 1946820734               |
| SNP_P4_57501_36726750 | NC_021163.1    | Ca_kabuli_chr04 | 36726750                | AA                              | GG              | 1946820736               |
| SNP_P4_57502_36726819 | NC_021163.1    | Ca_kabuli_chr04 | 36726819                | CC                              | AA              | 1946820738               |
| SNP_P4_57503_36726986 | NC_021163.1    | Ca_kabuli_chr04 | 36726986                | AA                              | GG              | 1946820740               |
| SNP_P4_57504_36727121 | NC_021163.1    | Ca_kabuli_chr04 | 36727121                | TT                              | AA              | 1946820742               |
| SNP_P4_57505_36727163 | NC_021163.1    | Ca_kabuli_chr04 | 36727163                | TT                              | CC              | 1946820744               |
| SNP_P4_57506_36735153 | NC_021163.1    | Ca_kabuli_chr04 | 36735153                | CC                              | TT              | 1946820746               |
| SNP_P4_57507_36735293 | NC_021163.1    | Ca_kabuli_chr04 | 36735293                | CC                              | TT              | 1946820748               |
| SNP_P4_57508_36761432 | NC_021163.1    | Ca_kabuli_chr04 | 36761432                | CC                              | AA              | 1946820750               |
| SNP_P4_57509_36777104 | NC_021163.1    | Ca_kabuli_chr04 | 36777104                | TT                              | GG              | 1946820752               |
| SNP_P4_57510_36785197 | NC_021163.1    | Ca_kabuli_chr04 | 36785197                | GG                              | AA              | 1946820753               |
| SNP_P4_57511_36810042 | NC_021163.1    | Ca_kabuli_chr04 | 36810042                | AA                              | GG              | 1946820755               |
| SNP_P4_57512_36814829 | NC_021163.1    | Ca_kabuli_chr04 | 36814829                | CC                              | TT              | 1946820757               |
| SNP_P4_57514_36859655 | NC_021163.1    | Ca_kabuli_chr04 | 36859655                | GG                              | TT              | 1946820759               |
| SNP_P4_57515_36882751 | NC_021163.1    | Ca_kabuli_chr04 | 36882751                | GG                              | AA              | 1946820761               |
| SNP_P4_57516_36897993 | NC_021163.1    | Ca_kabuli_chr04 | 36897993                | CC                              | AA              | 1946820763               |
| SNP_P4_57517_36899487 | NC_021163.1    | Ca_kabuli_chr04 | 36899487                | TT                              | CC              | 1946820765               |
| SNP_P4_57519_36907623 | NC_021163.1    | Ca_kabuli_chr04 | 36907623                | AA                              | GG              | 1946820767               |
| SNP_P4_57520_36907686 | NC_021163.1    | Ca_kabuli_chr04 | 36907686                | AA                              | GG              | 1946820769               |
| SNP_P4_57521_36917722 | NC_021163.1    | Ca_kabuli_chr04 | 36917722                | CC                              | AA              | 1946820771               |



| SNPs IDs              | Chromosome IDs | Chromosomes     | Physical positions (bp) | CDC Frontier (Reference genome) | (ILWC46 & LPNB) | NCBI SNPdb Accession IDs |
|-----------------------|----------------|-----------------|-------------------------|---------------------------------|-----------------|--------------------------|
| SNP_P4_57523_36928753 | NC_021163.1    | Ca_kabuli_chr04 | 36928753                | TT                              | GG              | 1946820772               |
| SNP_P4_57524_36931530 | NC_021163.1    | Ca_kabuli_chr04 | 36931530                | TT                              | CC              | 1946820774               |
| SNP_P4_57525_36931832 | NC_021163.1    | Ca_kabuli_chr04 | 36931832                | CC                              | TT              | 1946820776               |
| SNP_P4_57526_36931880 | NC_021163.1    | Ca_kabuli_chr04 | 36931880                | AA                              | GG              | 1946820778               |
| SNP_P4_57527_36931881 | NC_021163.1    | Ca_kabuli_chr04 | 36931881                | TT                              | GG              | 1946820780               |
| SNP_P4_57528_36932554 | NC_021163.1    | Ca_kabuli_chr04 | 36932554                | CC                              | TT              | 1946820782               |
| SNP_P4_57529_36937984 | NC_021163.1    | Ca_kabuli_chr04 | 36937984                | GG                              | TT              | 1946820784               |
| SNP_P4_57530_36947977 | NC_021163.1    | Ca_kabuli_chr04 | 36947977                | AA                              | GG              | 1946820786               |
| SNP_P4_57531_36952554 | NC_021163.1    | Ca_kabuli_chr04 | 36952554                | CC                              | TT              | 1946820788               |
| SNP_P4_57532_36952588 | NC_021163.1    | Ca_kabuli_chr04 | 36952588                | GG                              | TT              | 1946820790               |
| SNP_P4_57534_36952750 | NC_021163.1    | Ca_kabuli_chr04 | 36952750                | GG                              | TT              | 1946820792               |
| SNP_P4_57536_36955203 | NC_021163.1    | Ca_kabuli_chr04 | 36955203                | TT                              | AA              | 1946820794               |
| SNP_P4_57537_36956982 | NC_021163.1    | Ca_kabuli_chr04 | 36956982                | TT                              | AA              | 1946820796               |
| SNP_P4_57538_36957135 | NC_021163.1    | Ca_kabuli_chr04 | 36957135                | CC                              | GG              | 1946820798               |
| SNP_P4_57539_36957146 | NC_021163.1    | Ca_kabuli_chr04 | 36957146                | CC                              | AA              | 1946820800               |
| SNP_P4_57540_36957325 | NC_021163.1    | Ca_kabuli_chr04 | 36957325                | CC                              | TT              | 1946820802               |
| SNP_P4_57542_36957460 | NC_021163.1    | Ca_kabuli_chr04 | 36957460                | GG                              | TT              | 1946820804               |
| SNP_P4_57544_36957739 | NC_021163.1    | Ca_kabuli_chr04 | 36957739                | CC                              | TT              | 1946820806               |
| SNP_P4_57545_36959216 | NC_021163.1    | Ca_kabuli_chr04 | 36959216                | TT                              | CC              | 1946820808               |
| SNP_P4_57546_36959401 | NC_021163.1    | Ca_kabuli_chr04 | 36959401                | CC                              | GG              | 1946820810               |
| SNP_P4_57547_36959493 | NC_021163.1    | Ca_kabuli_chr04 | 36959493                | TT                              | CC              | 1946820812               |
| SNP_P4_57548_36959511 | NC_021163.1    | Ca_kabuli_chr04 | 36959511                | AA                              | GG              | 1946820814               |
| SNP_P4_57549_36959618 | NC_021163.1    | Ca_kabuli_chr04 | 36959618                | TT                              | AA              | 1946820816               |
| SNP_P4_57550_36959631 | NC_021163.1    | Ca_kabuli_chr04 | 36959631                | GG                              | AA              | 1946820818               |
| SNP_P4_57552_36959823 | NC_021163.1    | Ca_kabuli_chr04 | 36959823                | CC                              | AA              | 1946820820               |
| SNP_P4_57553_36960459 | NC_021163.1    | Ca_kabuli_chr04 | 36960459                | CC                              | GG              | 1946820822               |
| SNP_P4_57554_36960494 | NC_021163.1    | Ca_kabuli_chr04 | 36960494                | GG                              | AA              | 1946820825               |
| SNP_P4_57555_36960521 | NC_021163.1    | Ca_kabuli_chr04 | 36960521                | GG                              | AA              | 1946820827               |
| SNP_P4_57557_36962418 | NC_021163.1    | Ca_kabuli_chr04 | 36962418                | AA                              | GG              | 1946820829               |
| SNP_P4_57558_36962419 | NC_021163.1    | Ca_kabuli_chr04 | 36962419                | AA                              | GG              | 1946820831               |
| SNP_P4_57559_36965282 | NC_021163.1    | Ca_kabuli_chr04 | 36965282                | GG                              | AA              | 1946820833               |
| SNP_P4_57563_36968824 | NC_021163.1    | Ca_kabuli_chr04 | 36968824                | GG                              | AA              | 1946820835               |
| SNP_P4_57564_36969393 | NC_021163.1    | Ca_kabuli_chr04 | 36969393                | GG                              | AA              | 1946820837               |
| SNP_P4_57565_36969466 | NC_021163.1    | Ca_kabuli_chr04 | 36969466                | AA                              | GG              | 1946820839               |
| SNP_P4_57567_36969685 | NC_021163.1    | Ca_kabuli_chr04 | 36969685                | CC                              | GG              | 1946820841               |
| SNP_P4_57568_36969702 | NC_021163.1    | Ca_kabuli_chr04 | 36969702                | GG                              | TT              | 1946820843               |
| SNP_P4_57569_36969768 | NC_021163.1    | Ca_kabuli_chr04 | 36969768                | AA                              | GG              | 1946820845               |
| SNP_P4_57570_36969774 | NC_021163.1    | Ca_kabuli_chr04 | 36969774                | TT                              | CC              | 1946820847               |
| SNP_P4_57571_36971373 | NC_021163.1    | Ca_kabuli_chr04 | 36971373                | GG                              | AA              | 1946820850               |
| SNP_P4_57574_36971435 | NC_021163.1    | Ca_kabuli_chr04 | 36971435                | AA                              | GG              | 1946820852               |
| SNP_P4_57575_36971526 | NC_021163.1    | Ca_kabuli_chr04 | 36971526                | AA                              | GG              | 1946820854               |
| SNP_P4_57576_36971597 | NC_021163.1    | Ca_kabuli_chr04 | 36971597                | AA                              | GG              | 1946820856               |

| SNPs IDs              | Chromosome IDs | Chromosomes     | Physical positions (bp) | CDC Frontier (Reference genome) | (ILWC46 & LPNB) | NCBI SNPdb Accession IDs |
|-----------------------|----------------|-----------------|-------------------------|---------------------------------|-----------------|--------------------------|
| SNP_P4_57577_36972077 | NC_021163.1    | Ca_kabuli_chr04 | 36972077                | AA                              | GG              | 1946820858               |
| SNP_P4_57580_36972582 | NC_021163.1    | Ca_kabuli_chr04 | 36972582                | AA                              | TT              | 1946820860               |
| SNP_P4_57581_36972613 | NC_021163.1    | Ca_kabuli_chr04 | 36972613                | CC                              | GG              | 1946820862               |
| SNP_P4_57582_36976279 | NC_021163.1    | Ca_kabuli_chr04 | 36976279                | TT                              | GG              | 1946820864               |
| SNP_P4_57584_36976494 | NC_021163.1    | Ca_kabuli_chr04 | 36976494                | TT                              | CC              | 1946820867               |
| SNP_P4_57585_36976544 | NC_021163.1    | Ca_kabuli_chr04 | 36976544                | TT                              | CC              | 1946820869               |
| SNP_P4_57586_36977631 | NC_021163.1    | Ca_kabuli_chr04 | 36977631                | CC                              | TT              | 1946820871               |
| SNP_P4_57587_36977961 | NC_021163.1    | Ca_kabuli_chr04 | 36977961                | TT                              | GG              | 1946820873               |
| SNP_P4_57588_36978092 | NC_021163.1    | Ca_kabuli_chr04 | 36978092                | TT                              | GG              | 1946820875               |
| SNP_P4_57589_36978158 | NC_021163.1    | Ca_kabuli_chr04 | 36978158                | GG                              | AA              | 1946820877               |
| SNP_P4_57590_36978159 | NC_021163.1    | Ca_kabuli_chr04 | 36978159                | GG                              | AA              | 1946820879               |
| SNP_P4_57591_36979879 | NC_021163.1    | Ca_kabuli_chr04 | 36979879                | CC                              | TT              | 1946820881               |
| SNP_P4_57592_36981057 | NC_021163.1    | Ca_kabuli_chr04 | 36981057                | GG                              | AA              | 1946820883               |
| SNP_P4_57593_36981273 | NC_021163.1    | Ca_kabuli_chr04 | 36981273                | GG                              | AA              | 1946820885               |
| SNP_P4_57594_36983851 | NC_021163.1    | Ca_kabuli_chr04 | 36983851                | GG                              | AA              | 1946820887               |
| SNP_P4_57595_36986791 | NC_021163.1    | Ca_kabuli_chr04 | 36986791                | TT                              | GG              | 1946820889               |
| SNP_P4_57596_37004425 | NC_021163.1    | Ca_kabuli_chr04 | 37004425                | TT                              | GG              | 1946820891               |
| SNP_P4_57597_37007372 | NC_021163.1    | Ca_kabuli_chr04 | 37007372                | TT                              | CC              | 1946820893               |
| SNP_P4_57598_37007409 | NC_021163.1    | Ca_kabuli_chr04 | 37007409                | TT                              | GG              | 1946820895               |
| SNP_P4_57599_37007411 | NC_021163.1    | Ca_kabuli_chr04 | 37007411                | TT                              | CC              | 1946820897               |
| SNP_P4_57600_37007413 | NC_021163.1    | Ca_kabuli_chr04 | 37007413                | TT                              | GG              | 1946820899               |
| SNP_P4_57602_37007484 | NC_021163.1    | Ca_kabuli_chr04 | 37007484                | AA                              | GG              | 1946820901               |
| SNP_P4_57603_37007518 | NC_021163.1    | Ca_kabuli_chr04 | 37007518                | AA                              | CC              | 1946820903               |
| SNP_P4_57604_37007726 | NC_021163.1    | Ca_kabuli_chr04 | 37007726                | GG                              | AA              | 1946820905               |
| SNP_P4_57605_37007732 | NC_021163.1    | Ca_kabuli_chr04 | 37007732                | GG                              | AA              | 1946820907               |
| SNP_P4_57606_37007740 | NC_021163.1    | Ca_kabuli_chr04 | 37007740                | GG                              | AA              | 1946820909               |
| SNP_P4_57607_37007758 | NC_021163.1    | Ca_kabuli_chr04 | 37007758                | AA                              | GG              | 1946820911               |
| SNP_P4_57608_37007785 | NC_021163.1    | Ca_kabuli_chr04 | 37007785                | GG                              | AA              | 1946820913               |
| SNP_P4_57609_37007813 | NC_021163.1    | Ca_kabuli_chr04 | 37007813                | CC                              | TT              | 1946820915               |
| SNP_P4_57610_37008879 | NC_021163.1    | Ca_kabuli_chr04 | 37008879                | TT                              | CC              | 1946820917               |
| SNP_P4_57611_37008881 | NC_021163.1    | Ca_kabuli_chr04 | 37008881                | TT                              | CC              | 1946820919               |
| SNP_P4_57612_37008884 | NC_021163.1    | Ca_kabuli_chr04 | 37008884                | AA                              | CC              | 1946820921               |
| SNP_P4_57613_37008893 | NC_021163.1    | Ca_kabuli_chr04 | 37008893                | GG                              | TT              | 1946820924               |
| SNP_P4_57614_37008901 | NC_021163.1    | Ca_kabuli_chr04 | 37008901                | TT                              | CC              | 1946820926               |
| SNP_P4_57615_37008952 | NC_021163.1    | Ca_kabuli_chr04 | 37008952                | TT                              | CC              | 1946820928               |
| SNP_P4_57616_37008963 | NC_021163.1    | Ca_kabuli_chr04 | 37008963                | CC                              | TT              | 1946820930               |
| SNP_P4_57617_37008969 | NC_021163.1    | Ca_kabuli_chr04 | 37008969                | CC                              | AA              | 1946820932               |
| SNP_P4_57618_37009219 | NC_021163.1    | Ca_kabuli_chr04 | 37009219                | AA                              | GG              | 1946820934               |
| SNP_P4_57619_37011820 | NC_021163.1    | Ca_kabuli_chr04 | 37011820                | TT                              | AA              | 1946820936               |
| SNP_P4_57621_37012778 | NC_021163.1    | Ca_kabuli_chr04 | 37012778                | TT                              | GG              | 1946820938               |
| SNP_P4_57622_37013005 | NC_021163.1    | Ca_kabuli_chr04 | 37013005                | AA                              | TT              | 1946820940               |
| SNP_P4_57623_37013071 | NC_021163.1    | Ca_kabuli_chr04 | 37013071                | AA                              | TT              | 1946820942               |

| SNPs IDs              | Chromosome IDs | Chromosomes     | Physical positions (bp) | CDC Frontier (Reference genome) | (ILWC46 & LPNB) | NCBI SNPdb Accession IDs |
|-----------------------|----------------|-----------------|-------------------------|---------------------------------|-----------------|--------------------------|
| SNP_P4_57624_37013263 | NC_021163.1    | Ca_kabuli_chr04 | 37013263                | GG                              | AA              | 1946820944               |
| SNP_P4_57625_37013556 | NC_021163.1    | Ca_kabuli_chr04 | 37013556                | CC                              | TT              | 1946820946               |
| SNP_P4_57626_37013579 | NC_021163.1    | Ca_kabuli_chr04 | 37013579                | AA                              | TT              | 1946820948               |
| SNP_P4_57627_37013684 | NC_021163.1    | Ca_kabuli_chr04 | 37013684                | GG                              | TT              | 1946820950               |
| SNP_P4_57628_37013776 | NC_021163.1    | Ca_kabuli_chr04 | 37013776                | AA                              | GG              | 1946820952               |
| SNP_P4_57629_37013797 | NC_021163.1    | Ca_kabuli_chr04 | 37013797                | GG                              | AA              | 1946820954               |
| SNP_P4_57630_37013829 | NC_021163.1    | Ca_kabuli_chr04 | 37013829                | TT                              | CC              | 1946820956               |
| SNP_P4_57631_37013855 | NC_021163.1    | Ca_kabuli_chr04 | 37013855                | CC                              | TT              | 1946820958               |
| SNP_P4_57632_37013861 | NC_021163.1    | Ca_kabuli_chr04 | 37013861                | AA                              | TT              | 1946820960               |
| SNP_P4_57633_37015014 | NC_021163.1    | Ca_kabuli_chr04 | 37015014                | AA                              | CC              | 1946820962               |
| SNP_P4_57634_37015020 | NC_021163.1    | Ca_kabuli_chr04 | 37015020                | AA                              | GG              | 1946820964               |
| SNP_P4_57635_37015347 | NC_021163.1    | Ca_kabuli_chr04 | 37015347                | AA                              | GG              | 1946820966               |
| SNP_P4_57636_37015379 | NC_021163.1    | Ca_kabuli_chr04 | 37015379                | TT                              | CC              | 1946820968               |
| SNP_P4_57637_37015686 | NC_021163.1    | Ca_kabuli_chr04 | 37015686                | AA                              | CC              | 1946820970               |
| SNP_P4_57638_37015865 | NC_021163.1    | Ca_kabuli_chr04 | 37015865                | GG                              | TT              | 1946820972               |
| SNP_P4_57639_37015870 | NC_021163.1    | Ca_kabuli_chr04 | 37015870                | TT                              | CC              | 1946820974               |
| SNP_P4_57640_37024175 | NC_021163.1    | Ca_kabuli_chr04 | 37024175                | TT                              | GG              | 1946820976               |
| SNP_P4_57641_37024182 | NC_021163.1    | Ca_kabuli_chr04 | 37024182                | AA                              | GG              | 1946820978               |
| SNP_P4_57642_37024534 | NC_021163.1    | Ca_kabuli_chr04 | 37024534                | TT                              | CC              | 1946820980               |
| SNP_P4_57643_37025432 | NC_021163.1    | Ca_kabuli_chr04 | 37025432                | CC                              | TT              | 1946820982               |
| SNP_P4_57644_37025436 | NC_021163.1    | Ca_kabuli_chr04 | 37025436                | AA                              | CC              | 1946820984               |
| SNP_P4_57645_37025697 | NC_021163.1    | Ca_kabuli_chr04 | 37025697                | TT                              | CC              | 1946820986               |
| SNP_P4_57646_37025750 | NC_021163.1    | Ca_kabuli_chr04 | 37025750                | TT                              | AA              | 1946820988               |
| SNP_P4_57647_37027585 | NC_021163.1    | Ca_kabuli_chr04 | 37027585                | CC                              | TT              | 1946820990               |
| SNP_P4_57648_37027593 | NC_021163.1    | Ca_kabuli_chr04 | 37027593                | AA                              | GG              | 1946820992               |
| SNP_P4_57649_37027614 | NC_021163.1    | Ca_kabuli_chr04 | 37027614                | AA                              | TT              | 1946820994               |
| SNP_P4_57650_37027649 | NC_021163.1    | Ca_kabuli_chr04 | 37027649                | AA                              | TT              | 1946820996               |
| SNP_P4_57651_37032705 | NC_021163.1    | Ca_kabuli_chr04 | 37032705                | CC                              | TT              | 1946820998               |
| SNP_P4_57652_37034332 | NC_021163.1    | Ca_kabuli_chr04 | 37034332                | GG                              | AA              | 1946821000               |
| SNP_P4_57653_37034341 | NC_021163.1    | Ca_kabuli_chr04 | 37034341                | GG                              | AA              | 1946821002               |
| SNP_P4_57655_37034722 | NC_021163.1    | Ca_kabuli_chr04 | 37034722                | TT                              | CC              | 1946821004               |
| SNP_P4_57656_37038472 | NC_021163.1    | Ca_kabuli_chr04 | 37038472                | GG                              | AA              | 1946821006               |
| SNP_P4_57657_37038491 | NC_021163.1    | Ca_kabuli_chr04 | 37038491                | AA                              | GG              | 1946821008               |
| SNP_P4_57658_37038495 | NC_021163.1    | Ca_kabuli_chr04 | 37038495                | CC                              | TT              | 1946821010               |
| SNP_P4_57660_37038604 | NC_021163.1    | Ca_kabuli_chr04 | 37038604                | AA                              | TT              | 1946821012               |
| SNP_P4_57661_37039140 | NC_021163.1    | Ca_kabuli_chr04 | 37039140                | CC                              | TT              | 1946821014               |
| SNP_P4_57662_37039143 | NC_021163.1    | Ca_kabuli_chr04 | 37039143                | GG                              | AA              | 1946821016               |
| SNP_P4_57664_37040396 | NC_021163.1    | Ca_kabuli_chr04 | 37040396                | AA                              | GG              | 1946821018               |
| SNP_P4_57666_37040495 | NC_021163.1    | Ca_kabuli_chr04 | 37040495                | CC                              | TT              | 1946821020               |
| SNP_P4_57667_37040843 | NC_021163.1    | Ca_kabuli_chr04 | 37040843                | AA                              | GG              | 1946821022               |
| SNP_P4_57668_37042574 | NC_021163.1    | Ca_kabuli_chr04 | 37042574                | AA                              | GG              | 1946821024               |
| SNP_P4_57669_37042596 | NC_021163.1    | Ca_kabuli_chr04 | 37042596                | GG                              | AA              | 1946821026               |

| SNPs IDs              | Chromosome IDs | Chromosomes     | Physical positions (bp) | CDC Frontier (Reference genome) | (ILWC46 & LPNB) | NCBI SNPdb Accession IDs |
|-----------------------|----------------|-----------------|-------------------------|---------------------------------|-----------------|--------------------------|
| SNP_P4_57670_37042643 | NC_021163.1    | Ca_kabuli_chr04 | 37042643                | TT                              | CC              | 1946821028               |
| SNP_P4_57671_37042917 | NC_021163.1    | Ca_kabuli_chr04 | 37042917                | GG                              | AA              | 1946821030               |
| SNP_P4_57673_37044407 | NC_021163.1    | Ca_kabuli_chr04 | 37044407                | TT                              | CC              | 1946821032               |
| SNP_P4_57674_37044422 | NC_021163.1    | Ca_kabuli_chr04 | 37044422                | GG                              | AA              | 1946821034               |
| SNP_P4_57675_37044426 | NC_021163.1    | Ca_kabuli_chr04 | 37044426                | GG                              | AA              | 1946821036               |
| SNP_P4_57676_37044824 | NC_021163.1    | Ca_kabuli_chr04 | 37044824                | AA                              | TT              | 1946821038               |
| SNP_P4_57678_37045748 | NC_021163.1    | Ca_kabuli_chr04 | 37045748                | GG                              | CC              | 1946821040               |
| SNP_P4_57679_37045786 | NC_021163.1    | Ca_kabuli_chr04 | 37045786                | CC                              | TT              | 1946821042               |
| SNP_P4_57680_37046460 | NC_021163.1    | Ca_kabuli_chr04 | 37046460                | AA                              | CC              | 1946821044               |
| SNP_P4_57681_37046480 | NC_021163.1    | Ca_kabuli_chr04 | 37046480                | TT                              | CC              | 1946821046               |
| SNP_P4_57682_37046494 | NC_021163.1    | Ca_kabuli_chr04 | 37046494                | TT                              | CC              | 1946821048               |
| SNP_P4_57683_37046504 | NC_021163.1    | Ca_kabuli_chr04 | 37046504                | TT                              | GG              | 1946821050               |
| SNP_P4_57684_37046893 | NC_021163.1    | Ca_kabuli_chr04 | 37046893                | AA                              | TT              | 1946821052               |
| SNP_P4_57685_37046902 | NC_021163.1    | Ca_kabuli_chr04 | 37046902                | TT                              | CC              | 1946821054               |
| SNP_P4_57686_37046928 | NC_021163.1    | Ca_kabuli_chr04 | 37046928                | GG                              | TT              | 1946821056               |
| SNP_P4_57687_37046965 | NC_021163.1    | Ca_kabuli_chr04 | 37046965                | AA                              | GG              | 1946821058               |
| SNP_P4_57688_37046976 | NC_021163.1    | Ca_kabuli_chr04 | 37046976                | AA                              | GG              | 1946821061               |
| SNP_P4_57690_37047160 | NC_021163.1    | Ca_kabuli_chr04 | 37047160                | CC                              | TT              | 1946821063               |
| SNP_P4_57691_37047364 | NC_021163.1    | Ca_kabuli_chr04 | 37047364                | GG                              | TT              | 1946821065               |
| SNP_P4_57692_37047691 | NC_021163.1    | Ca_kabuli_chr04 | 37047691                | AA                              | GG              | 1946821067               |
| SNP_P4_57694_37047884 | NC_021163.1    | Ca_kabuli_chr04 | 37047884                | GG                              | CC              | 1946821069               |
| SNP_P4_57695_37047900 | NC_021163.1    | Ca_kabuli_chr04 | 37047900                | TT                              | CC              | 1946821071               |
| SNP_P4_57696_37047910 | NC_021163.1    | Ca_kabuli_chr04 | 37047910                | GG                              | AA              | 1946821073               |
| SNP_P4_57697_37047921 | NC_021163.1    | Ca_kabuli_chr04 | 37047921                | AA                              | GG              | 1946821075               |
| SNP_P4_57698_37047941 | NC_021163.1    | Ca_kabuli_chr04 | 37047941                | TT                              | CC              | 1946821077               |
| SNP_P4_57699_37048575 | NC_021163.1    | Ca_kabuli_chr04 | 37048575                | GG                              | AA              | 1946821079               |
| SNP_P4_57700_37048738 | NC_021163.1    | Ca_kabuli_chr04 | 37048738                | TT                              | CC              | 1946821081               |
| SNP_P4_57701_37053239 | NC_021163.1    | Ca_kabuli_chr04 | 37053239                | AA                              | GG              | 1946821083               |
| SNP_P4_57702_37053245 | NC_021163.1    | Ca_kabuli_chr04 | 37053245                | CC                              | AA              | 1946821085               |
| SNP_P4_57703_37053377 | NC_021163.1    | Ca_kabuli_chr04 | 37053377                | TT                              | AA              | 1946821087               |
| SNP_P4_57704_37053732 | NC_021163.1    | Ca_kabuli_chr04 | 37053732                | AA                              | CC              | 1946821089               |
| SNP_P4_57705_37054979 | NC_021163.1    | Ca_kabuli_chr04 | 37054979                | GG                              | TT              | 1946821091               |
| SNP_P4_57706_37055197 | NC_021163.1    | Ca_kabuli_chr04 | 37055197                | CC                              | GG              | 1946821093               |
| SNP_P4_57707_37055205 | NC_021163.1    | Ca_kabuli_chr04 | 37055205                | TT                              | GG              | 1946821095               |
| SNP_P4_57708_37055267 | NC_021163.1    | Ca_kabuli_chr04 | 37055267                | CC                              | TT              | 1946821098               |
| SNP_P4_57709_37055334 | NC_021163.1    | Ca_kabuli_chr04 | 37055334                | AA                              | GG              | 1946821100               |
| SNP_P4_57711_37055521 | NC_021163.1    | Ca_kabuli_chr04 | 37055521                | TT                              | AA              | 1946821102               |
| SNP_P4_57713_37055597 | NC_021163.1    | Ca_kabuli_chr04 | 37055597                | CC                              | TT              | 1946821104               |
| SNP_P4_57714_37055923 | NC_021163.1    | Ca_kabuli_chr04 | 37055923                | GG                              | AA              | 1946821106               |
| SNP_P4_57717_37059633 | NC_021163.1    | Ca_kabuli_chr04 | 37059633                | AA                              | GG              | 1946821108               |
| SNP_P4_57719_37066032 | NC_021163.1    | Ca_kabuli_chr04 | 37066032                | CC                              | TT              | 1946821110               |
| SNP_P4_57720_37066082 | NC_021163.1    | Ca_kabuli_chr04 | 37066082                | GG                              | TT              | 1946821112               |

| SNPs IDs              | Chromosome IDs | Chromosomes     | Physical positions (bp) | CDC Frontier (Reference genome) | (ILWC46 & LPNB) | NCBI SNPdb Accession IDs |
|-----------------------|----------------|-----------------|-------------------------|---------------------------------|-----------------|--------------------------|
| SNP_P4_57721_37068390 | NC_021163.1    | Ca_kabuli_chr04 | 37068390                | TT                              | CC              | 1946821114               |
| SNP_P4_57722_37070110 | NC_021163.1    | Ca_kabuli_chr04 | 37070110                | CC                              | AA              | 1946821116               |
| SNP_P4_57723_37070153 | NC_021163.1    | Ca_kabuli_chr04 | 37070153                | TT                              | CC              | 1946821118               |
| SNP_P4_57725_37070307 | NC_021163.1    | Ca_kabuli_chr04 | 37070307                | TT                              | GG              | 1946821120               |
| SNP_P4_57726_37076418 | NC_021163.1    | Ca_kabuli_chr04 | 37076418                | TT                              | GG              | 1946821122               |
| SNP_P4_57727_37076450 | NC_021163.1    | Ca_kabuli_chr04 | 37076450                | TT                              | CC              | 1946821124               |
| SNP_P4_57728_37076452 | NC_021163.1    | Ca_kabuli_chr04 | 37076452                | GG                              | AA              | 1946821126               |
| SNP_P4_57729_37076459 | NC_021163.1    | Ca_kabuli_chr04 | 37076459                | TT                              | AA              | 1946821128               |
| SNP_P4_57730_37076460 | NC_021163.1    | Ca_kabuli_chr04 | 37076460                | CC                              | TT              | 1946821130               |
| SNP_P4_57731_37082980 | NC_021163.1    | Ca_kabuli_chr04 | 37082980                | AA                              | TT              | 1946821132               |
| SNP_P4_57732_37083190 | NC_021163.1    | Ca_kabuli_chr04 | 37083190                | AA                              | GG              | 1946821134               |
| SNP_P4_57733_37083223 | NC_021163.1    | Ca_kabuli_chr04 | 37083223                | TT                              | GG              | 1946821137               |
| SNP_P4_57734_37083253 | NC_021163.1    | Ca_kabuli_chr04 | 37083253                | CC                              | AA              | 1946821139               |
| SNP_P4_57735_37083311 | NC_021163.1    | Ca_kabuli_chr04 | 37083311                | TT                              | AA              | 1946821141               |
| SNP_P4_57736_37083338 | NC_021163.1    | Ca_kabuli_chr04 | 37083338                | AA                              | GG              | 1946821143               |
| SNP_P4_57737_37086938 | NC_021163.1    | Ca_kabuli_chr04 | 37086938                | AA                              | TT              | 1946821145               |
| SNP_P4_57738_37086966 | NC_021163.1    | Ca_kabuli_chr04 | 37086966                | AA                              | GG              | 1946821147               |
| SNP_P4_57739_37087002 | NC_021163.1    | Ca_kabuli_chr04 | 37087002                | TT                              | AA              | 1946821149               |
| SNP_P4_57740_37087004 | NC_021163.1    | Ca_kabuli_chr04 | 37087004                | AA                              | TT              | 1946821151               |
| SNP_P4_57741_37087060 | NC_021163.1    | Ca_kabuli_chr04 | 37087060                | AA                              | CC              | 1946821153               |
| SNP_P4_57742_37087089 | NC_021163.1    | Ca_kabuli_chr04 | 37087089                | CC                              | TT              | 1946821155               |
| SNP_P4_57743_37087109 | NC_021163.1    | Ca_kabuli_chr04 | 37087109                | AA                              | GG              | 1946821157               |
| SNP_P4_57744_37087238 | NC_021163.1    | Ca_kabuli_chr04 | 37087238                | CC                              | TT              | 1946821159               |
| SNP_P4_57745_37087251 | NC_021163.1    | Ca_kabuli_chr04 | 37087251                | CC                              | TT              | 1946821161               |
| SNP_P4_57746_37087253 | NC_021163.1    | Ca_kabuli_chr04 | 37087253                | CC                              | GG              | 1946821163               |
| SNP_P4_57747_37087296 | NC_021163.1    | Ca_kabuli_chr04 | 37087296                | AA                              | GG              | 1946821165               |
| SNP_P4_57748_37087331 | NC_021163.1    | Ca_kabuli_chr04 | 37087331                | CC                              | GG              | 1946821167               |
| SNP_P4_57749_37087556 | NC_021163.1    | Ca_kabuli_chr04 | 37087556                | AA                              | GG              | 1946821169               |
| SNP_P4_57750_37087822 | NC_021163.1    | Ca_kabuli_chr04 | 37087822                | CC                              | TT              | 1946821171               |
| SNP_P4_57751_37087827 | NC_021163.1    | Ca_kabuli_chr04 | 37087827                | GG                              | TT              | 1946821173               |
| SNP_P4_57752_37087845 | NC_021163.1    | Ca_kabuli_chr04 | 37087845                | AA                              | GG              | 1946821175               |
| SNP_P4_57753_37089503 | NC_021163.1    | Ca_kabuli_chr04 | 37089503                | AA                              | TT              | 1946821177               |
| SNP_P4_57754_37089555 | NC_021163.1    | Ca_kabuli_chr04 | 37089555                | TT                              | CC              | 1946821179               |
| SNP_P4_57755_37090359 | NC_021163.1    | Ca_kabuli_chr04 | 37090359                | AA                              | GG              | 1946821181               |
| SNP_P4_57756_37090724 | NC_021163.1    | Ca_kabuli_chr04 | 37090724                | AA                              | TT              | 1946821183               |
| SNP_P4_57757_37090739 | NC_021163.1    | Ca_kabuli_chr04 | 37090739                | CC                              | TT              | 1946821185               |
| SNP_P4_57758_37090766 | NC_021163.1    | Ca_kabuli_chr04 | 37090766                | GG                              | AA              | 1946821187               |
| SNP_P4_57759_37091640 | NC_021163.1    | Ca_kabuli_chr04 | 37091640                | AA                              | GG              | 1946821189               |
| SNP_P4_57761_37092069 | NC_021163.1    | Ca_kabuli_chr04 | 37092069                | GG                              | AA              | 1946821191               |
| SNP_P4_57762_37092098 | NC_021163.1    | Ca_kabuli_chr04 | 37092098                | CC                              | GG              | 1946821193               |
| SNP_P4_57763_37092109 | NC_021163.1    | Ca_kabuli_chr04 | 37092109                | CC                              | TT              | 1946821195               |
| SNP_P4_57764_37093415 | NC_021163.1    | Ca_kabuli_chr04 | 37093415                | CC                              | AA              | 1946821197               |

| SNPs IDs              | Chromosome IDs | Chromosomes     | Physical positions (bp) | CDC Frontier (Reference genome) | (ILWC46 & LPNB) | NCBI SNPdb Accession IDs |
|-----------------------|----------------|-----------------|-------------------------|---------------------------------|-----------------|--------------------------|
| SNP_P4_57765_37093816 | NC_021163.1    | Ca_kabuli_chr04 | 37093816                | AA                              | GG              | 1946821199               |
| SNP_P4_57766_37095046 | NC_021163.1    | Ca_kabuli_chr04 | 37095046                | CC                              | TT              | 1946821201               |
| SNP_P4_57767_37095079 | NC_021163.1    | Ca_kabuli_chr04 | 37095079                | GG                              | AA              | 1946821203               |
| SNP_P4_57769_37096879 | NC_021163.1    | Ca_kabuli_chr04 | 37096879                | TT                              | GG              | 1946821205               |
| SNP_P4_57770_37098468 | NC_021163.1    | Ca_kabuli_chr04 | 37098468                | CC                              | TT              | 1946821207               |
| SNP_P4_57771_37099437 | NC_021163.1    | Ca_kabuli_chr04 | 37099437                | GG                              | TT              | 1946821208               |
| SNP_P4_57772_37099785 | NC_021163.1    | Ca_kabuli_chr04 | 37099785                | AA                              | CC              | 1946821210               |
| SNP_P4_57774_37099853 | NC_021163.1    | Ca_kabuli_chr04 | 37099853                | TT                              | GG              | 1946821212               |
| SNP_P4_57775_37099987 | NC_021163.1    | Ca_kabuli_chr04 | 37099987                | GG                              | AA              | 1946821214               |
| SNP_P4_57776_37100076 | NC_021163.1    | Ca_kabuli_chr04 | 37100076                | CC                              | TT              | 1946821216               |
| SNP_P4_57777_37100208 | NC_021163.1    | Ca_kabuli_chr04 | 37100208                | GG                              | AA              | 1946821218               |
| SNP_P4_57778_37100245 | NC_021163.1    | Ca_kabuli_chr04 | 37100245                | TT                              | AA              | 1946821220               |
| SNP_P4_57779_37100290 | NC_021163.1    | Ca_kabuli_chr04 | 37100290                | TT                              | GG              | 1946821222               |
| SNP_P4_57780_37100320 | NC_021163.1    | Ca_kabuli_chr04 | 37100320                | GG                              | AA              | 1946821224               |
| SNP_P4_57781_37100345 | NC_021163.1    | Ca_kabuli_chr04 | 37100345                | CC                              | TT              | 1946821226               |
| SNP_P4_57782_37100353 | NC_021163.1    | Ca_kabuli_chr04 | 37100353                | CC                              | TT              | 1946821228               |
| SNP_P4_57783_37100362 | NC_021163.1    | Ca_kabuli_chr04 | 37100362                | AA                              | TT              | 1946821230               |
| SNP_P4_57784_37100383 | NC_021163.1    | Ca_kabuli_chr04 | 37100383                | CC                              | TT              | 1946821232               |
| SNP_P4_57785_37101508 | NC_021163.1    | Ca_kabuli_chr04 | 37101508                | GG                              | AA              | 1946821234               |
| SNP_P4_57786_37101531 | NC_021163.1    | Ca_kabuli_chr04 | 37101531                | GG                              | AA              | 1946821236               |
| SNP_P4_57787_37101533 | NC_021163.1    | Ca_kabuli_chr04 | 37101533                | CC                              | TT              | 1946821238               |
| SNP_P4_57788_37101759 | NC_021163.1    | Ca_kabuli_chr04 | 37101759                | AA                              | GG              | 1946821240               |
| SNP_P4_57789_37101770 | NC_021163.1    | Ca_kabuli_chr04 | 37101770                | GG                              | CC              | 1946821242               |
| SNP_P4_57790_37101771 | NC_021163.1    | Ca_kabuli_chr04 | 37101771                | CC                              | TT              | 1946821244               |
| SNP_P4_57791_37101781 | NC_021163.1    | Ca_kabuli_chr04 | 37101781                | TT                              | CC              | 1946821246               |
| SNP_P4_57792_37104423 | NC_021163.1    | Ca_kabuli_chr04 | 37104423                | AA                              | TT              | 1946821248               |
| SNP_P4_57793_37104453 | NC_021163.1    | Ca_kabuli_chr04 | 37104453                | AA                              | GG              | 1946821250               |
| SNP_P4_57794_37104463 | NC_021163.1    | Ca_kabuli_chr04 | 37104463                | GG                              | AA              | 1946821252               |
| SNP_P4_57796_37104832 | NC_021163.1    | Ca_kabuli_chr04 | 37104832                | TT                              | AA              | 1946821254               |
| SNP_P4_57797_37105263 | NC_021163.1    | Ca_kabuli_chr04 | 37105263                | CC                              | TT              | 1946821256               |
| SNP_P4_57798_37105272 | NC_021163.1    | Ca_kabuli_chr04 | 37105272                | GG                              | TT              | 1946821258               |
| SNP_P4_57799_37105304 | NC_021163.1    | Ca_kabuli_chr04 | 37105304                | GG                              | AA              | 1946821260               |
| SNP_P4_57800_37105310 | NC_021163.1    | Ca_kabuli_chr04 | 37105310                | TT                              | GG              | 1946821262               |
| SNP_P4_57801_37105312 | NC_021163.1    | Ca_kabuli_chr04 | 37105312                | TT                              | CC              | 1946821264               |
| SNP_P4_57802_37105333 | NC_021163.1    | Ca_kabuli_chr04 | 37105333                | AA                              | CC              | 1946821266               |
| SNP_P4_57804_37105904 | NC_021163.1    | Ca_kabuli_chr04 | 37105904                | GG                              | AA              | 1946821268               |
| SNP_P4_57805_37106560 | NC_021163.1    | Ca_kabuli_chr04 | 37106560                | AA                              | GG              | 1946821270               |
| SNP_P4_57806_37106568 | NC_021163.1    | Ca_kabuli_chr04 | 37106568                | GG                              | CC              | 1946821272               |
| SNP_P4_57807_37106752 | NC_021163.1    | Ca_kabuli_chr04 | 37106752                | GG                              | AA              | 1946821274               |
| SNP_P4_57808_37106758 | NC_021163.1    | Ca_kabuli_chr04 | 37106758                | CC                              | TT              | 1946821276               |
| SNP_P4_57809_37106812 | NC_021163.1    | Ca_kabuli_chr04 | 37106812                | TT                              | CC              | 1946821278               |
| SNP_P4_57810_37107167 | NC_021163.1    | Ca_kabuli_chr04 | 37107167                | CC                              | TT              | 1946821280               |

| SNPs IDs              | Chromosome IDs | Chromosomes     | Physical positions (bp) | CDC Frontier (Reference genome) | (ILWC46 & LPNB) | NCBI SNPdb Accession IDs |
|-----------------------|----------------|-----------------|-------------------------|---------------------------------|-----------------|--------------------------|
| SNP_P4_57811_37107209 | NC_021163.1    | Ca_kabuli_chr04 | 37107209                | CC                              | AA              | 1946821283               |
| SNP_P4_57813_37107262 | NC_021163.1    | Ca_kabuli_chr04 | 37107262                | AA                              | GG              | 1946821285               |
| SNP_P4_57814_37107266 | NC_021163.1    | Ca_kabuli_chr04 | 37107266                | CC                              | AA              | 1946821287               |
| SNP_P4_57815_37107505 | NC_021163.1    | Ca_kabuli_chr04 | 37107505                | TT                              | GG              | 1946821289               |
| SNP_P4_57817_37107776 | NC_021163.1    | Ca_kabuli_chr04 | 37107776                | TT                              | CC              | 1946821291               |
| SNP_P4_57818_37107791 | NC_021163.1    | Ca_kabuli_chr04 | 37107791                | AA                              | GG              | 1946821293               |
| SNP_P4_57820_37107873 | NC_021163.1    | Ca_kabuli_chr04 | 37107873                | CC                              | TT              | 1946821295               |
| SNP_P4_57821_37107904 | NC_021163.1    | Ca_kabuli_chr04 | 37107904                | TT                              | GG              | 1946821297               |
| SNP_P4_57822_37107948 | NC_021163.1    | Ca_kabuli_chr04 | 37107948                | CC                              | TT              | 1946821299               |
| SNP_P4_57823_37108072 | NC_021163.1    | Ca_kabuli_chr04 | 37108072                | TT                              | GG              | 1946821301               |
| SNP_P4_57825_37108422 | NC_021163.1    | Ca_kabuli_chr04 | 37108422                | TT                              | GG              | 1946821304               |
| SNP_P4_57826_37108449 | NC_021163.1    | Ca_kabuli_chr04 | 37108449                | AA                              | CC              | 1946821306               |
| SNP_P4_57827_37108503 | NC_021163.1    | Ca_kabuli_chr04 | 37108503                | CC                              | TT              | 1946821308               |
| SNP_P4_57828_37108721 | NC_021163.1    | Ca_kabuli_chr04 | 37108721                | CC                              | TT              | 1946821310               |
| SNP_P4_57829_37108723 | NC_021163.1    | Ca_kabuli_chr04 | 37108723                | CC                              | TT              | 1946821312               |
| SNP_P4_57830_37109183 | NC_021163.1    | Ca_kabuli_chr04 | 37109183                | TT                              | CC              | 1946821314               |
| SNP_P4_57831_37109190 | NC_021163.1    | Ca_kabuli_chr04 | 37109190                | CC                              | TT              | 1946821316               |
| SNP_P4_57832_37109373 | NC_021163.1    | Ca_kabuli_chr04 | 37109373                | GG                              | AA              | 1946821318               |
| SNP_P4_57833_37109388 | NC_021163.1    | Ca_kabuli_chr04 | 37109388                | GG                              | TT              | 1946821320               |
| SNP_P4_57834_37109393 | NC_021163.1    | Ca_kabuli_chr04 | 37109393                | GG                              | AA              | 1946821322               |
| SNP_P4_57835_37109469 | NC_021163.1    | Ca_kabuli_chr04 | 37109469                | TT                              | CC              | 1946821324               |
| SNP_P4_57836_37109475 | NC_021163.1    | Ca_kabuli_chr04 | 37109475                | GG                              | TT              | 1946821326               |
| SNP_P4_57837_37109511 | NC_021163.1    | Ca_kabuli_chr04 | 37109511                | TT                              | AA              | 1946821328               |
| SNP_P4_57838_37109569 | NC_021163.1    | Ca_kabuli_chr04 | 37109569                | TT                              | CC              | 1946821330               |
| SNP_P4_57839_37109584 | NC_021163.1    | Ca_kabuli_chr04 | 37109584                | AA                              | GG              | 1946821332               |
| SNP_P4_57840_37109585 | NC_021163.1    | Ca_kabuli_chr04 | 37109585                | GG                              | CC              | 1946821334               |
| SNP_P4_57841_37109598 | NC_021163.1    | Ca_kabuli_chr04 | 37109598                | GG                              | AA              | 1946821336               |
| SNP_P4_57842_37109620 | NC_021163.1    | Ca_kabuli_chr04 | 37109620                | GG                              | AA              | 1946821338               |
| SNP_P4_57843_37109775 | NC_021163.1    | Ca_kabuli_chr04 | 37109775                | GG                              | AA              | 1946821340               |
| SNP_P4_57844_37110279 | NC_021163.1    | Ca_kabuli_chr04 | 37110279                | GG                              | AA              | 1946821342               |
| SNP_P4_57845_37110282 | NC_021163.1    | Ca_kabuli_chr04 | 37110282                | CC                              | TT              | 1946821344               |
| SNP_P4_57847_37110323 | NC_021163.1    | Ca_kabuli_chr04 | 37110323                | AA                              | CC              | 1946821346               |
| SNP_P4_57848_37117810 | NC_021163.1    | Ca_kabuli_chr04 | 37117810                | CC                              | TT              | 1946821348               |
| SNP_P4_57849_37119583 | NC_021163.1    | Ca_kabuli_chr04 | 37119583                | TT                              | AA              | 1946821350               |
| SNP_P4_57850_37119655 | NC_021163.1    | Ca_kabuli_chr04 | 37119655                | AA                              | GG              | 1946821351               |
| SNP_P4_57853_37119937 | NC_021163.1    | Ca_kabuli_chr04 | 37119937                | AA                              | TT              | 1946821353               |
| SNP_P4_57854_37120017 | NC_021163.1    | Ca_kabuli_chr04 | 37120017                | AA                              | CC              | 1946821355               |
| SNP_P4_57855_37121352 | NC_021163.1    | Ca_kabuli_chr04 | 37121352                | AA                              | GG              | 1946821357               |
| SNP_P4_57856_37121485 | NC_021163.1    | Ca_kabuli_chr04 | 37121485                | AA                              | TT              | 1946821359               |
| SNP_P4_57857_37121517 | NC_021163.1    | Ca_kabuli_chr04 | 37121517                | TT                              | AA              | 1946821361               |
| SNP_P4_57858_37121735 | NC_021163.1    | Ca_kabuli_chr04 | 37121735                | TT                              | CC              | 1946821363               |
| SNP_P4_57859_37121771 | NC_021163.1    | Ca_kabuli_chr04 | 37121771                | CC                              | TT              | 1946821365               |

| SNPs IDs              | Chromosome IDs | Chromosomes     | Physical positions (bp) | CDC Frontier (Reference genome) | (ILWC46 & LPNB) | NCBI SNPdb Accession IDs |
|-----------------------|----------------|-----------------|-------------------------|---------------------------------|-----------------|--------------------------|
| SNP_P4_57860_37121914 | NC_021163.1    | Ca_kabuli_chr04 | 37121914                | CC                              | TT              | 1946821367               |
| SNP_P4_57862_37122691 | NC_021163.1    | Ca_kabuli_chr04 | 37122691                | TT                              | AA              | 1946821369               |
| SNP_P4_57863_37127646 | NC_021163.1    | Ca_kabuli_chr04 | 37127646                | CC                              | GG              | 1946821371               |
| SNP_P4_57864_37127672 | NC_021163.1    | Ca_kabuli_chr04 | 37127672                | CC                              | TT              | 1946821373               |
| SNP_P4_57865_37128566 | NC_021163.1    | Ca_kabuli_chr04 | 37128566                | GG                              | AA              | 1946821375               |
| SNP_P4_57866_37128760 | NC_021163.1    | Ca_kabuli_chr04 | 37128760                | GG                              | TT              | 1946821377               |
| SNP_P4_57868_37128899 | NC_021163.1    | Ca_kabuli_chr04 | 37128899                | AA                              | TT              | 1946821379               |
| SNP_P4_57869_37128904 | NC_021163.1    | Ca_kabuli_chr04 | 37128904                | GG                              | TT              | 1946821381               |
| SNP_P4_57871_37130941 | NC_021163.1    | Ca_kabuli_chr04 | 37130941                | TT                              | GG              | 1946821383               |
| SNP_P4_57872_37131123 | NC_021163.1    | Ca_kabuli_chr04 | 37131123                | GG                              | AA              | 1946821385               |
| SNP_P4_57873_37131157 | NC_021163.1    | Ca_kabuli_chr04 | 37131157                | CC                              | TT              | 1946821387               |
| SNP_P4_57874_37131175 | NC_021163.1    | Ca_kabuli_chr04 | 37131175                | AA                              | GG              | 1946821388               |
| SNP_P4_57875_37131179 | NC_021163.1    | Ca_kabuli_chr04 | 37131179                | TT                              | AA              | 1946821390               |
| SNP_P4_57877_37131248 | NC_021163.1    | Ca_kabuli_chr04 | 37131248                | GG                              | AA              | 1946821392               |
| SNP_P4_57878_37131249 | NC_021163.1    | Ca_kabuli_chr04 | 37131249                | GG                              | AA              | 1946821394               |
| SNP_P4_57879_37131284 | NC_021163.1    | Ca_kabuli_chr04 | 37131284                | CC                              | GG              | 1946821396               |
| SNP_P4_57881_37131343 | NC_021163.1    | Ca_kabuli_chr04 | 37131343                | GG                              | AA              | 1946821398               |
| SNP_P4_57884_37146456 | NC_021163.1    | Ca_kabuli_chr04 | 37146456                | CC                              | TT              | 1946821400               |
| SNP_P4_57885_37146994 | NC_021163.1    | Ca_kabuli_chr04 | 37146994                | AA                              | GG              | 1946821402               |
| SNP_P4_57887_37151444 | NC_021163.1    | Ca_kabuli_chr04 | 37151444                | AA                              | GG              | 1946821404               |
| SNP_P4_57888_37151985 | NC_021163.1    | Ca_kabuli_chr04 | 37151985                | GG                              | AA              | 1946821406               |
| SNP_P4_57889_37155245 | NC_021163.1    | Ca_kabuli_chr04 | 37155245                | CC                              | GG              | 1946821408               |
| SNP_P4_57892_37156946 | NC_021163.1    | Ca_kabuli_chr04 | 37156946                | CC                              | AA              | 1946821410               |
| SNP_P4_57893_37157237 | NC_021163.1    | Ca_kabuli_chr04 | 37157237                | CC                              | TT              | 1946821412               |
| SNP_P4_57894_37157247 | NC_021163.1    | Ca_kabuli_chr04 | 37157247                | AA                              | GG              | 1946821414               |
| SNP_P4_57895_37158676 | NC_021163.1    | Ca_kabuli_chr04 | 37158676                | AA                              | TT              | 1946821416               |
| SNP_P4_57896_37159292 | NC_021163.1    | Ca_kabuli_chr04 | 37159292                | CC                              | TT              | 1946821418               |
| SNP_P4_57897_37159390 | NC_021163.1    | Ca_kabuli_chr04 | 37159390                | CC                              | TT              | 1946821420               |
| SNP_P4_57898_37159438 | NC_021163.1    | Ca_kabuli_chr04 | 37159438                | TT                              | CC              | 1946821422               |
| SNP_P4_57899_37160346 | NC_021163.1    | Ca_kabuli_chr04 | 37160346                | GG                              | AA              | 1946821424               |
| SNP_P4_57900_37160622 | NC_021163.1    | Ca_kabuli_chr04 | 37160622                | TT                              | CC              | 1946821426               |
| SNP_P4_57901_37161232 | NC_021163.1    | Ca_kabuli_chr04 | 37161232                | GG                              | AA              | 1946821428               |
| SNP_P4_57902_37161313 | NC_021163.1    | Ca_kabuli_chr04 | 37161313                | AA                              | GG              | 1946821430               |
| SNP_P4_57903_37166949 | NC_021163.1    | Ca_kabuli_chr04 | 37166949                | CC                              | TT              | 1946821432               |
| SNP_P4_57904_37168284 | NC_021163.1    | Ca_kabuli_chr04 | 37168284                | AA                              | GG              | 1946821434               |
| SNP_P4_57905_37173240 | NC_021163.1    | Ca_kabuli_chr04 | 37173240                | TT                              | AA              | 1946821436               |
| SNP_P4_57906_37174254 | NC_021163.1    | Ca_kabuli_chr04 | 37174254                | AA                              | GG              | 1946821438               |
| SNP_P4_57908_37176632 | NC_021163.1    | Ca_kabuli_chr04 | 37176632                | TT                              | GG              | 1946821440               |
| SNP_P4_57909_37181965 | NC_021163.1    | Ca_kabuli_chr04 | 37181965                | GG                              | AA              | 1946821442               |
| SNP_P4_57910_37182619 | NC_021163.1    | Ca_kabuli_chr04 | 37182619                | AA                              | GG              | 1946821444               |
| SNP_P4_57911_37185703 | NC_021163.1    | Ca_kabuli_chr04 | 37185703                | AA                              | GG              | 1946821446               |
| SNP_P4_57912_37185725 | NC_021163.1    | Ca_kabuli_chr04 | 37185725                | TT                              | CC              | 1946821448               |



| SNPs IDs              | Chromosome IDs | Chromosomes     | Physical positions (bp) | CDC Frontier (Reference genome) | (ILWC46 & LPNB) | NCBI SNPdb Accession IDs |
|-----------------------|----------------|-----------------|-------------------------|---------------------------------|-----------------|--------------------------|
| SNP_P4_57913_37187512 | NC_021163.1    | Ca_kabuli_chr04 | 37187512                | CC                              | TT              | 1946821450               |
| SNP_P4_57914_37187656 | NC_021163.1    | Ca_kabuli_chr04 | 37187656                | AA                              | TT              | 1946821452               |
| SNP_P4_57916_37189167 | NC_021163.1    | Ca_kabuli_chr04 | 37189167                | AA                              | CC              | 1946821454               |
| SNP_P4_57917_37190011 | NC_021163.1    | Ca_kabuli_chr04 | 37190011                | TT                              | CC              | 1946821456               |
| SNP_P4_57919_37194350 | NC_021163.1    | Ca_kabuli_chr04 | 37194350                | TT                              | CC              | 1946821458               |
| SNP_P4_57920_37194370 | NC_021163.1    | Ca_kabuli_chr04 | 37194370                | AA                              | CC              | 1946821461               |
| SNP_P4_57921_37195137 | NC_021163.1    | Ca_kabuli_chr04 | 37195137                | CC                              | TT              | 1946821463               |
| SNP_P4_57922_37195890 | NC_021163.1    | Ca_kabuli_chr04 | 37195890                | AA                              | CC              | 1946821465               |
| SNP_P4_57923_37196919 | NC_021163.1    | Ca_kabuli_chr04 | 37196919                | AA                              | CC              | 1946821467               |
| SNP_P4_57925_37197688 | NC_021163.1    | Ca_kabuli_chr04 | 37197688                | AA                              | GG              | 1946821469               |
| SNP_P4_57926_37198828 | NC_021163.1    | Ca_kabuli_chr04 | 37198828                | CC                              | TT              | 1946821471               |
| SNP_P4_57927_37200514 | NC_021163.1    | Ca_kabuli_chr04 | 37200514                | AA                              | GG              | 1946821473               |
| SNP_P4_57928_37200567 | NC_021163.1    | Ca_kabuli_chr04 | 37200567                | AA                              | GG              | 1946821475               |
| SNP_P4_57929_37200796 | NC_021163.1    | Ca_kabuli_chr04 | 37200796                | AA                              | CC              | 1946821477               |
| SNP_P4_57930_37200983 | NC_021163.1    | Ca_kabuli_chr04 | 37200983                | GG                              | AA              | 1946821479               |
| SNP_P4_57932_37202637 | NC_021163.1    | Ca_kabuli_chr04 | 37202637                | AA                              | TT              | 1946821481               |
| SNP_P4_57934_37203575 | NC_021163.1    | Ca_kabuli_chr04 | 37203575                | TT                              | AA              | 1946821483               |
| SNP_P4_57936_37203820 | NC_021163.1    | Ca_kabuli_chr04 | 37203820                | TT                              | AA              | 1946821485               |
| SNP_P4_57937_37203996 | NC_021163.1    | Ca_kabuli_chr04 | 37203996                | AA                              | TT              | 1946821487               |
| SNP_P4_57939_37204019 | NC_021163.1    | Ca_kabuli_chr04 | 37204019                | TT                              | GG              | 1946821489               |
| SNP_P4_57940_37204450 | NC_021163.1    | Ca_kabuli_chr04 | 37204450                | CC                              | TT              | 1946821491               |
| SNP_P4_57941_37204768 | NC_021163.1    | Ca_kabuli_chr04 | 37204768                | CC                              | AA              | 1946821493               |
| SNP_P4_57942_37204792 | NC_021163.1    | Ca_kabuli_chr04 | 37204792                | TT                              | AA              | 1946821495               |
| SNP_P4_57943_37204812 | NC_021163.1    | Ca_kabuli_chr04 | 37204812                | CC                              | GG              | 1946821497               |
| SNP_P4_57944_37204823 | NC_021163.1    | Ca_kabuli_chr04 | 37204823                | TT                              | CC              | 1946821499               |
| SNP_P4_57945_37205316 | NC_021163.1    | Ca_kabuli_chr04 | 37205316                | AA                              | TT              | 1946821501               |
| SNP_P4_57946_37206016 | NC_021163.1    | Ca_kabuli_chr04 | 37206016                | TT                              | GG              | 1946821503               |
| SNP_P4_57947_37206035 | NC_021163.1    | Ca_kabuli_chr04 | 37206035                | GG                              | AA              | 1946821505               |
| SNP_P4_57948_37206036 | NC_021163.1    | Ca_kabuli_chr04 | 37206036                | CC                              | TT              | 1946821507               |
| SNP_P4_57949_37206073 | NC_021163.1    | Ca_kabuli_chr04 | 37206073                | CC                              | TT              | 1946821509               |
| SNP_P4_57950_37206819 | NC_021163.1    | Ca_kabuli_chr04 | 37206819                | CC                              | AA              | 1946821511               |
| SNP_P4_57951_37206920 | NC_021163.1    | Ca_kabuli_chr04 | 37206920                | AA                              | TT              | 1946821513               |
| SNP_P4_57952_37207660 | NC_021163.1    | Ca_kabuli_chr04 | 37207660                | TT                              | GG              | 1946821516               |
| SNP_P4_57953_37207873 | NC_021163.1    | Ca_kabuli_chr04 | 37207873                | AA                              | CC              | 1946821518               |
| SNP_P4_57954_37208216 | NC_021163.1    | Ca_kabuli_chr04 | 37208216                | TT                              | CC              | 1946821520               |
| SNP_P4_57955_37209039 | NC_021163.1    | Ca_kabuli_chr04 | 37209039                | TT                              | AA              | 1946821522               |
| SNP_P4_57956_37209768 | NC_021163.1    | Ca_kabuli_chr04 | 37209768                | AA                              | GG              | 1946821524               |
| SNP_P4_57957_37213603 | NC_021163.1    | Ca_kabuli_chr04 | 37213603                | TT                              | AA              | 1946821526               |
| SNP_P4_57958_37214796 | NC_021163.1    | Ca_kabuli_chr04 | 37214796                | GG                              | AA              | 1946821528               |
| SNP_P4_57959_37214843 | NC_021163.1    | Ca_kabuli_chr04 | 37214843                | GG                              | AA              | 1946821530               |
| SNP_P4_57960_37214847 | NC_021163.1    | Ca_kabuli_chr04 | 37214847                | GG                              | AA              | 1946821532               |
| SNP_P4_57961_37214859 | NC_021163.1    | Ca_kabuli_chr04 | 37214859                | CC                              | TT              | 1946821534               |

| SNPs IDs              | Chromosome IDs | Chromosomes     | Physical positions (bp) | CDC Frontier (Reference genome) | (ILWC46 & LPNB) | NCBI SNPdb Accession IDs |
|-----------------------|----------------|-----------------|-------------------------|---------------------------------|-----------------|--------------------------|
| SNP_P4_57962_37214865 | NC_021163.1    | Ca_kabuli_chr04 | 37214865                | CC                              | TT              | 1946821536               |
| SNP_P4_57963_37215735 | NC_021163.1    | Ca_kabuli_chr04 | 37215735                | AA                              | GG              | 1946821538               |
| SNP_P4_57964_37215825 | NC_021163.1    | Ca_kabuli_chr04 | 37215825                | TT                              | CC              | 1946821540               |
| SNP_P4_57965_37215833 | NC_021163.1    | Ca_kabuli_chr04 | 37215833                | AA                              | TT              | 1946821542               |
| SNP_P4_57966_37215872 | NC_021163.1    | Ca_kabuli_chr04 | 37215872                | CC                              | TT              | 1946821544               |
| SNP_P4_57967_37216152 | NC_021163.1    | Ca_kabuli_chr04 | 37216152                | TT                              | AA              | 1946821546               |
| SNP_P4_57968_37216835 | NC_021163.1    | Ca_kabuli_chr04 | 37216835                | TT                              | CC              | 1946821548               |
| SNP_P4_57969_37216919 | NC_021163.1    | Ca_kabuli_chr04 | 37216919                | AA                              | TT              | 1946821550               |
| SNP_P4_57970_37217115 | NC_021163.1    | Ca_kabuli_chr04 | 37217115                | CC                              | TT              | 1946821552               |
| SNP_P4_57971_37217146 | NC_021163.1    | Ca_kabuli_chr04 | 37217146                | AA                              | TT              | 1946821554               |
| SNP_P4_57972_37217494 | NC_021163.1    | Ca_kabuli_chr04 | 37217494                | CC                              | TT              | 1946821557               |
| SNP_P4_57973_37217500 | NC_021163.1    | Ca_kabuli_chr04 | 37217500                | CC                              | AA              | 1946821559               |
| SNP_P4_57974_37217535 | NC_021163.1    | Ca_kabuli_chr04 | 37217535                | GG                              | TT              | 1946821561               |
| SNP_P4_57975_37217760 | NC_021163.1    | Ca_kabuli_chr04 | 37217760                | GG                              | TT              | 1946821563               |
| SNP_P4_57976_37217832 | NC_021163.1    | Ca_kabuli_chr04 | 37217832                | TT                              | CC              | 1946821565               |
| SNP_P4_57977_37217833 | NC_021163.1    | Ca_kabuli_chr04 | 37217833                | GG                              | AA              | 1946821567               |
| SNP_P4_57978_37218017 | NC_021163.1    | Ca_kabuli_chr04 | 37218017                | AA                              | GG              | 1946821569               |
| SNP_P4_57979_37218023 | NC_021163.1    | Ca_kabuli_chr04 | 37218023                | CC                              | TT              | 1946821571               |
| SNP_P4_57980_37218241 | NC_021163.1    | Ca_kabuli_chr04 | 37218241                | CC                              | TT              | 1946821573               |
| SNP_P4_57981_37218263 | NC_021163.1    | Ca_kabuli_chr04 | 37218263                | AA                              | GG              | 1946821575               |
| SNP_P4_57982_37218278 | NC_021163.1    | Ca_kabuli_chr04 | 37218278                | CC                              | AA              | 1946821577               |
| SNP_P4_57983_37218296 | NC_021163.1    | Ca_kabuli_chr04 | 37218296                | GG                              | AA              | 1946821579               |
| SNP_P4_57984_37218367 | NC_021163.1    | Ca_kabuli_chr04 | 37218367                | TT                              | CC              | 1946821581               |
| SNP_P4_57985_37219116 | NC_021163.1    | Ca_kabuli_chr04 | 37219116                | TT                              | AA              | 1946821583               |
| SNP_P4_57986_37219188 | NC_021163.1    | Ca_kabuli_chr04 | 37219188                | AA                              | GG              | 1946821585               |
| SNP_P4_57987_37219219 | NC_021163.1    | Ca_kabuli_chr04 | 37219219                | CC                              | TT              | 1946821587               |
| SNP_P4_57988_37219303 | NC_021163.1    | Ca_kabuli_chr04 | 37219303                | CC                              | TT              | 1946821589               |
| SNP_P4_57989_37220339 | NC_021163.1    | Ca_kabuli_chr04 | 37220339                | CC                              | TT              | 1946821591               |
| SNP_P4_57990_37220563 | NC_021163.1    | Ca_kabuli_chr04 | 37220563                | GG                              | AA              | 1946821593               |
| SNP_P4_57991_37220588 | NC_021163.1    | Ca_kabuli_chr04 | 37220588                | GG                              | AA              | 1946821595               |
| SNP_P4_57992_37220621 | NC_021163.1    | Ca_kabuli_chr04 | 37220621                | CC                              | TT              | 1946821597               |
| SNP_P4_57993_37220670 | NC_021163.1    | Ca_kabuli_chr04 | 37220670                | GG                              | AA              | 1946821599               |
| SNP_P4_57994_37220672 | NC_021163.1    | Ca_kabuli_chr04 | 37220672                | TT                              | AA              | 1946821601               |
| SNP_P4_57995_37220964 | NC_021163.1    | Ca_kabuli_chr04 | 37220964                | CC                              | AA              | 1946821603               |
| SNP_P4_57997_37221271 | NC_021163.1    | Ca_kabuli_chr04 | 37221271                | AA                              | GG              | 1946821605               |
| SNP_P4_57998_37221283 | NC_021163.1    | Ca_kabuli_chr04 | 37221283                | GG                              | AA              | 1946821607               |
| SNP_P4_58000_37222460 | NC_021163.1    | Ca_kabuli_chr04 | 37222460                | AA                              | TT              | 1946821609               |
| SNP_P4_58001_37222520 | NC_021163.1    | Ca_kabuli_chr04 | 37222520                | CC                              | AA              | 1946821611               |
| SNP_P4_58002_37222538 | NC_021163.1    | Ca_kabuli_chr04 | 37222538                | GG                              | AA              | 1946821613               |
| SNP_P4_58003_37222848 | NC_021163.1    | Ca_kabuli_chr04 | 37222848                | CC                              | AA              | 1946821614               |
| SNP_P4_58004_37223630 | NC_021163.1    | Ca_kabuli_chr04 | 37223630                | GG                              | TT              | 1946821616               |
| SNP_P4_58005_37223670 | NC_021163.1    | Ca_kabuli_chr04 | 37223670                | CC                              | AA              | 1946821618               |

| SNPs IDs              | Chromosome IDs | Chromosomes     | Physical positions (bp) | CDC Frontier (Reference genome) | (ILWC46 & LPNB) | NCBI SNPdb Accession IDs |
|-----------------------|----------------|-----------------|-------------------------|---------------------------------|-----------------|--------------------------|
| SNP_P4_58006_37224825 | NC_021163.1    | Ca_kabuli_chr04 | 37224825                | AA                              | GG              | 1946821620               |
| SNP_P4_58007_37227809 | NC_021163.1    | Ca_kabuli_chr04 | 37227809                | TT                              | CC              | 1946821622               |
| SNP_P4_58008_37229598 | NC_021163.1    | Ca_kabuli_chr04 | 37229598                | GG                              | AA              | 1946821624               |
| SNP_P4_58009_37229929 | NC_021163.1    | Ca_kabuli_chr04 | 37229929                | AA                              | GG              | 1946821626               |
| SNP_P4_58010_37230325 | NC_021163.1    | Ca_kabuli_chr04 | 37230325                | CC                              | AA              | 1946821627               |
| SNP_P4_58011_37230740 | NC_021163.1    | Ca_kabuli_chr04 | 37230740                | AA                              | GG              | 1946821628               |
| SNP_P4_58012_37230791 | NC_021163.1    | Ca_kabuli_chr04 | 37230791                | AA                              | GG              | 1946821629               |
| SNP_P4_58013_37231008 | NC_021163.1    | Ca_kabuli_chr04 | 37231008                | GG                              | AA              | 1946821630               |
| SNP_P4_58014_37231243 | NC_021163.1    | Ca_kabuli_chr04 | 37231243                | TT                              | CC              | 1946821631               |
| SNP_P4_58015_37232639 | NC_021163.1    | Ca_kabuli_chr04 | 37232639                | AA                              | GG              | 1946821632               |
| SNP_P4_58016_37232848 | NC_021163.1    | Ca_kabuli_chr04 | 37232848                | TT                              | GG              | 1946821633               |
| SNP_P4_58017_37233057 | NC_021163.1    | Ca_kabuli_chr04 | 37233057                | CC                              | AA              | 1946821634               |
| SNP_P4_58018_37233130 | NC_021163.1    | Ca_kabuli_chr04 | 37233130                | AA                              | GG              | 1946821636               |
| SNP_P4_58019_37233988 | NC_021163.1    | Ca_kabuli_chr04 | 37233988                | CC                              | GG              | 1946821638               |
| SNP_P4_58020_37234977 | NC_021163.1    | Ca_kabuli_chr04 | 37234977                | AA                              | GG              | 1946821640               |
| SNP_P4_58021_37235370 | NC_021163.1    | Ca_kabuli_chr04 | 37235370                | AA                              | TT              | 1946821642               |
| SNP_P4_58022_37235393 | NC_021163.1    | Ca_kabuli_chr04 | 37235393                | TT                              | CC              | 1946821644               |
| SNP_P4_58023_37235394 | NC_021163.1    | Ca_kabuli_chr04 | 37235394                | AA                              | GG              | 1946821646               |
| SNP_P4_58024_37235541 | NC_021163.1    | Ca_kabuli_chr04 | 37235541                | GG                              | AA              | 1946821648               |
| SNP_P4_58025_37238323 | NC_021163.1    | Ca_kabuli_chr04 | 37238323                | AA                              | GG              | 1946821650               |
| SNP_P4_58026_37239566 | NC_021163.1    | Ca_kabuli_chr04 | 37239566                | CC                              | AA              | 1946821652               |
| SNP_P4_58027_37241235 | NC_021163.1    | Ca_kabuli_chr04 | 37241235                | GG                              | AA              | 1946821654               |
| SNP_P4_58028_37242851 | NC_021163.1    | Ca_kabuli_chr04 | 37242851                | CC                              | AA              | 1946821656               |
| SNP_P4_58029_37242861 | NC_021163.1    | Ca_kabuli_chr04 | 37242861                | CC                              | TT              | 1946821658               |
| SNP_P4_58030_37242862 | NC_021163.1    | Ca_kabuli_chr04 | 37242862                | AA                              | TT              | 1946821660               |
| SNP_P4_58031_37242902 | NC_021163.1    | Ca_kabuli_chr04 | 37242902                | CC                              | AA              | 1946821662               |
| SNP_P4_58033_37245293 | NC_021163.1    | Ca_kabuli_chr04 | 37245293                | AA                              | GG              | 1946821664               |
| SNP_P4_58034_37246314 | NC_021163.1    | Ca_kabuli_chr04 | 37246314                | AA                              | TT              | 1946821666               |
| SNP_P4_58035_37247305 | NC_021163.1    | Ca_kabuli_chr04 | 37247305                | GG                              | AA              | 1946821668               |
| SNP_P4_58036_37247473 | NC_021163.1    | Ca_kabuli_chr04 | 37247473                | GG                              | AA              | 1946821670               |
| SNP_P4_58037_37247493 | NC_021163.1    | Ca_kabuli_chr04 | 37247493                | TT                              | GG              | 1946821672               |
| SNP_P4_58038_37247533 | NC_021163.1    | Ca_kabuli_chr04 | 37247533                | GG                              | AA              | 1946821674               |
| SNP_P4_58039_37248915 | NC_021163.1    | Ca_kabuli_chr04 | 37248915                | TT                              | CC              | 1946821676               |
| SNP_P4_58040_37248916 | NC_021163.1    | Ca_kabuli_chr04 | 37248916                | GG                              | AA              | 1946821678               |
| SNP_P4_58041_37249207 | NC_021163.1    | Ca_kabuli_chr04 | 37249207                | AA                              | CC              | 1946821680               |
| SNP_P4_58043_37253114 | NC_021163.1    | Ca_kabuli_chr04 | 37253114                | GG                              | CC              | 1946821682               |
| SNP_P4_58044_37254302 | NC_021163.1    | Ca_kabuli_chr04 | 37254302                | CC                              | TT              | 1946821684               |
| SNP_P4_58045_37255462 | NC_021163.1    | Ca_kabuli_chr04 | 37255462                | AA                              | GG              | 1946821686               |
| SNP_P4_58046_37257730 | NC_021163.1    | Ca_kabuli_chr04 | 37257730                | AA                              | GG              | 1946821688               |
| SNP_P4_58047_37257750 | NC_021163.1    | Ca_kabuli_chr04 | 37257750                | GG                              | AA              | 1946821690               |
| SNP_P4_58048_37257834 | NC_021163.1    | Ca_kabuli_chr04 | 37257834                | GG                              | AA              | 1946821692               |
| SNP_P4_58049_37257955 | NC_021163.1    | Ca_kabuli_chr04 | 37257955                | TT                              | CC              | 1946821694               |

| SNPs IDs              | Chromosome IDs | Chromosomes     | Physical positions (bp) | CDC Frontier (Reference genome) | (ILWC46 & LPNB) | NCBI SNPdb Accession IDs |
|-----------------------|----------------|-----------------|-------------------------|---------------------------------|-----------------|--------------------------|
| SNP_P4_58050_37258515 | NC_021163.1    | Ca_kabuli_chr04 | 37258515                | GG                              | TT              | 1946821696               |
| SNP_P4_58051_37258904 | NC_021163.1    | Ca_kabuli_chr04 | 37258904                | AA                              | TT              | 1946821698               |
| SNP_P4_58052_37258905 | NC_021163.1    | Ca_kabuli_chr04 | 37258905                | AA                              | TT              | 1946821700               |
| SNP_P4_58053_37261270 | NC_021163.1    | Ca_kabuli_chr04 | 37261270                | TT                              | CC              | 1946821702               |
| SNP_P4_58054_37265638 | NC_021163.1    | Ca_kabuli_chr04 | 37265638                | TT                              | CC              | 1946821704               |
| SNP_P4_58055_37267144 | NC_021163.1    | Ca_kabuli_chr04 | 37267144                | GG                              | CC              | 1946821706               |
| SNP_P4_58056_37267364 | NC_021163.1    | Ca_kabuli_chr04 | 37267364                | CC                              | TT              | 1946821708               |
| SNP_P4_58058_37270022 | NC_021163.1    | Ca_kabuli_chr04 | 37270022                | GG                              | CC              | 1946821710               |
| SNP_P4_58059_37270527 | NC_021163.1    | Ca_kabuli_chr04 | 37270527                | CC                              | AA              | 1946821712               |
| SNP_P4_58060_37270704 | NC_021163.1    | Ca_kabuli_chr04 | 37270704                | AA                              | TT              | 1946821714               |
| SNP_P4_58062_37273260 | NC_021163.1    | Ca_kabuli_chr04 | 37273260                | AA                              | TT              | 1946821716               |
| SNP_P4_58063_37273592 | NC_021163.1    | Ca_kabuli_chr04 | 37273592                | TT                              | CC              | 1946821718               |
| SNP_P4_58064_37273671 | NC_021163.1    | Ca_kabuli_chr04 | 37273671                | CC                              | AA              | 1946821720               |
| SNP_P4_58065_37274931 | NC_021163.1    | Ca_kabuli_chr04 | 37274931                | CC                              | TT              | 1946821723               |
| SNP_P4_58066_37276789 | NC_021163.1    | Ca_kabuli_chr04 | 37276789                | CC                              | TT              | 1946821725               |
| SNP_P4_58067_37277188 | NC_021163.1    | Ca_kabuli_chr04 | 37277188                | AA                              | CC              | 1946821727               |
| SNP_P4_58068_37278266 | NC_021163.1    | Ca_kabuli_chr04 | 37278266                | AA                              | TT              | 1946821729               |
| SNP_P4_58069_37281053 | NC_021163.1    | Ca_kabuli_chr04 | 37281053                | TT                              | AA              | 1946821731               |
| SNP_P4_58070_37281072 | NC_021163.1    | Ca_kabuli_chr04 | 37281072                | AA                              | CC              | 1946821733               |
| SNP_P4_58071_37281184 | NC_021163.1    | Ca_kabuli_chr04 | 37281184                | GG                              | TT              | 1946821735               |
| SNP_P4_58072_37281257 | NC_021163.1    | Ca_kabuli_chr04 | 37281257                | CC                              | GG              | 1946821737               |
| SNP_P4_58073_37281327 | NC_021163.1    | Ca_kabuli_chr04 | 37281327                | GG                              | AA              | 1946821739               |
| SNP_P4_58074_37281328 | NC_021163.1    | Ca_kabuli_chr04 | 37281328                | AA                              | TT              | 1946821741               |
| SNP_P4_58075_37281360 | NC_021163.1    | Ca_kabuli_chr04 | 37281360                | TT                              | GG              | 1946821743               |
| SNP_P4_58076_37281362 | NC_021163.1    | Ca_kabuli_chr04 | 37281362                | AA                              | TT              | 1946821745               |
| SNP_P4_58077_37281381 | NC_021163.1    | Ca_kabuli_chr04 | 37281381                | TT                              | CC              | 1946821747               |
| SNP_P4_58078_37281401 | NC_021163.1    | Ca_kabuli_chr04 | 37281401                | TT                              | AA              | 1946821749               |
| SNP_P4_58079_37281404 | NC_021163.1    | Ca_kabuli_chr04 | 37281404                | TT                              | GG              | 1946821751               |
| SNP_P4_58080_37281414 | NC_021163.1    | Ca_kabuli_chr04 | 37281414                | CC                              | TT              | 1946821753               |
| SNP_P4_58081_37281418 | NC_021163.1    | Ca_kabuli_chr04 | 37281418                | GG                              | TT              | 1946821756               |
| SNP_P4_58082_37281420 | NC_021163.1    | Ca_kabuli_chr04 | 37281420                | TT                              | GG              | 1946821758               |
| SNP_P4_58083_37281423 | NC_021163.1    | Ca_kabuli_chr04 | 37281423                | CC                              | TT              | 1946821760               |
| SNP_P4_58084_37281431 | NC_021163.1    | Ca_kabuli_chr04 | 37281431                | CC                              | TT              | 1946821762               |
| SNP_P4_58085_37281534 | NC_021163.1    | Ca_kabuli_chr04 | 37281534                | GG                              | AA              | 1946821764               |
| SNP_P4_58086_37282754 | NC_021163.1    | Ca_kabuli_chr04 | 37282754                | CC                              | TT              | 1946821766               |
| SNP_P4_58087_37282858 | NC_021163.1    | Ca_kabuli_chr04 | 37282858                | TT                              | CC              | 1946821768               |
| SNP_P4_58088_37283141 | NC_021163.1    | Ca_kabuli_chr04 | 37283141                | CC                              | GG              | 1946821770               |
| SNP_P4_58089_37283160 | NC_021163.1    | Ca_kabuli_chr04 | 37283160                | TT                              | AA              | 1946821772               |
| SNP_P4_58091_37283568 | NC_021163.1    | Ca_kabuli_chr04 | 37283568                | GG                              | AA              | 1946821774               |
| SNP_P4_58092_37285405 | NC_021163.1    | Ca_kabuli_chr04 | 37285405                | TT                              | CC              | 1946821776               |
| SNP_P4_58093_37292735 | NC_021163.1    | Ca_kabuli_chr04 | 37292735                | GG                              | AA              | 1946821778               |
| SNP_P4_58094_37293540 | NC_021163.1    | Ca_kabuli_chr04 | 37293540                | GG                              | AA              | 1946821780               |

| SNPs IDs              | Chromosome IDs | Chromosomes     | Physical positions (bp) | CDC Frontier (Reference genome) | (ILWC46 & LPNB) | NCBI SNPdb Accession IDs |
|-----------------------|----------------|-----------------|-------------------------|---------------------------------|-----------------|--------------------------|
| SNP_P4_58095_37293572 | NC_021163.1    | Ca_kabuli_chr04 | 37293572                | GG                              | AA              | 1946821782               |
| SNP_P4_58097_37294396 | NC_021163.1    | Ca_kabuli_chr04 | 37294396                | GG                              | AA              | 1946821784               |
| SNP_P4_58098_37295317 | NC_021163.1    | Ca_kabuli_chr04 | 37295317                | GG                              | AA              | 1946821786               |
| SNP_P4_58099_37299244 | NC_021163.1    | Ca_kabuli_chr04 | 37299244                | CC                              | TT              | 1946821788               |
| SNP_P4_58100_37299288 | NC_021163.1    | Ca_kabuli_chr04 | 37299288                | TT                              | GG              | 1946821790               |
| SNP_P4_58102_37300412 | NC_021163.1    | Ca_kabuli_chr04 | 37300412                | AA                              | GG              | 1946821792               |
| SNP_P4_58103_37300654 | NC_021163.1    | Ca_kabuli_chr04 | 37300654                | TT                              | CC              | 1946821794               |
| SNP_P4_58104_37300968 | NC_021163.1    | Ca_kabuli_chr04 | 37300968                | TT                              | CC              | 1946821796               |
| SNP_P4_58105_37301927 | NC_021163.1    | Ca_kabuli_chr04 | 37301927                | CC                              | AA              | 1946821798               |
| SNP_P4_58106_37302378 | NC_021163.1    | Ca_kabuli_chr04 | 37302378                | GG                              | AA              | 1946821800               |
| SNP_P4_58107_37302380 | NC_021163.1    | Ca_kabuli_chr04 | 37302380                | CC                              | AA              | 1946821802               |
| SNP_P4_58108_37302400 | NC_021163.1    | Ca_kabuli_chr04 | 37302400                | TT                              | AA              | 1946821804               |
| SNP_P4_58109_37302429 | NC_021163.1    | Ca_kabuli_chr04 | 37302429                | CC                              | TT              | 1946821806               |
| SNP_P4_58110_37303011 | NC_021163.1    | Ca_kabuli_chr04 | 37303011                | AA                              | GG              | 1946821809               |
| SNP_P4_58111_37303016 | NC_021163.1    | Ca_kabuli_chr04 | 37303016                | GG                              | TT              | 1946821811               |
| SNP_P4_58112_37303017 | NC_021163.1    | Ca_kabuli_chr04 | 37303017                | CC                              | TT              | 1946821813               |
| SNP_P4_58113_37303094 | NC_021163.1    | Ca_kabuli_chr04 | 37303094                | TT                              | CC              | 1946821815               |
| SNP_P4_58114_37303203 | NC_021163.1    | Ca_kabuli_chr04 | 37303203                | TT                              | CC              | 1946821817               |
| SNP_P4_58116_37304993 | NC_021163.1    | Ca_kabuli_chr04 | 37304993                | GG                              | AA              | 1946821819               |
| SNP_P4_58117_37304998 | NC_021163.1    | Ca_kabuli_chr04 | 37304998                | CC                              | TT              | 1946821821               |
| SNP_P4_58118_37305121 | NC_021163.1    | Ca_kabuli_chr04 | 37305121                | CC                              | TT              | 1946821823               |
| SNP_P4_58119_37305260 | NC_021163.1    | Ca_kabuli_chr04 | 37305260                | GG                              | AA              | 1946821825               |
| SNP_P4_58120_37305278 | NC_021163.1    | Ca_kabuli_chr04 | 37305278                | AA                              | TT              | 1946821827               |
| SNP_P4_58121_37305281 | NC_021163.1    | Ca_kabuli_chr04 | 37305281                | TT                              | AA              | 1946821829               |
| SNP_P4_58122_37305322 | NC_021163.1    | Ca_kabuli_chr04 | 37305322                | AA                              | GG              | 1946821831               |
| SNP_P4_58123_37305358 | NC_021163.1    | Ca_kabuli_chr04 | 37305358                | CC                              | GG              | 1946821833               |
| SNP_P4_58124_37305431 | NC_021163.1    | Ca_kabuli_chr04 | 37305431                | TT                              | AA              | 1946821835               |
| SNP_P4_58125_37305476 | NC_021163.1    | Ca_kabuli_chr04 | 37305476                | AA                              | CC              | 1946821837               |
| SNP_P4_58126_37305495 | NC_021163.1    | Ca_kabuli_chr04 | 37305495                | GG                              | AA              | 1946821839               |
| SNP_P4_58128_37305795 | NC_021163.1    | Ca_kabuli_chr04 | 37305795                | GG                              | AA              | 1946821841               |
| SNP_P4_58129_37306266 | NC_021163.1    | Ca_kabuli_chr04 | 37306266                | CC                              | TT              | 1946821843               |
| SNP_P4_58131_37306642 | NC_021163.1    | Ca_kabuli_chr04 | 37306642                | GG                              | CC              | 1946821845               |
| SNP_P4_58132_37306648 | NC_021163.1    | Ca_kabuli_chr04 | 37306648                | GG                              | AA              | 1946821847               |
| SNP_P4_58133_37306650 | NC_021163.1    | Ca_kabuli_chr04 | 37306650                | AA                              | GG              | 1946821849               |
| SNP_P4_58134_37306654 | NC_021163.1    | Ca_kabuli_chr04 | 37306654                | CC                              | TT              | 1946821851               |
| SNP_P4_58135_37306672 | NC_021163.1    | Ca_kabuli_chr04 | 37306672                | GG                              | AA              | 1946821853               |
| SNP_P4_58136_37306692 | NC_021163.1    | Ca_kabuli_chr04 | 37306692                | TT                              | CC              | 1946821855               |
| SNP_P4_58137_37306694 | NC_021163.1    | Ca_kabuli_chr04 | 37306694                | GG                              | AA              | 1946821857               |
| SNP_P4_58138_37306768 | NC_021163.1    | Ca_kabuli_chr04 | 37306768                | TT                              | CC              | 1946821859               |
| SNP_P4_58139_37306782 | NC_021163.1    | Ca_kabuli_chr04 | 37306782                | CC                              | TT              | 1946821861               |
| SNP_P4_58140_37306824 | NC_021163.1    | Ca_kabuli_chr04 | 37306824                | TT                              | CC              | 1946821863               |
| SNP_P4_58141_37306832 | NC_021163.1    | Ca_kabuli_chr04 | 37306832                | GG                              | CC              | 1946821865               |

| SNPs IDs              | Chromosome IDs | Chromosomes     | Physical positions (bp) | CDC Frontier (Reference genome) | (ILWC46 & LPNB) | NCBI SNPdb Accession IDs |
|-----------------------|----------------|-----------------|-------------------------|---------------------------------|-----------------|--------------------------|
| SNP_P4_58142_37306846 | NC_021163.1    | Ca_kabuli_chr04 | 37306846                | AA                              | GG              | 1946821867               |
| SNP_P4_58143_37308090 | NC_021163.1    | Ca_kabuli_chr04 | 37308090                | GG                              | TT              | 1946821869               |
| SNP_P4_58144_37308122 | NC_021163.1    | Ca_kabuli_chr04 | 37308122                | GG                              | AA              | 1946821871               |
| SNP_P4_58145_37308123 | NC_021163.1    | Ca_kabuli_chr04 | 37308123                | CC                              | TT              | 1946821873               |
| SNP_P4_58146_37308247 | NC_021163.1    | Ca_kabuli_chr04 | 37308247                | AA                              | TT              | 1946821876               |
| SNP_P4_58149_37308895 | NC_021163.1    | Ca_kabuli_chr04 | 37308895                | GG                              | CC              | 1946821878               |
| SNP_P4_58150_37309151 | NC_021163.1    | Ca_kabuli_chr04 | 37309151                | GG                              | AA              | 1946821880               |
| SNP_P4_58151_37309168 | NC_021163.1    | Ca_kabuli_chr04 | 37309168                | GG                              | TT              | 1946821882               |
| SNP_P4_58152_37309178 | NC_021163.1    | Ca_kabuli_chr04 | 37309178                | GG                              | AA              | 1946821884               |
| SNP_P4_58153_37309204 | NC_021163.1    | Ca_kabuli_chr04 | 37309204                | TT                              | CC              | 1946821886               |
| SNP_P4_58154_37309208 | NC_021163.1    | Ca_kabuli_chr04 | 37309208                | CC                              | TT              | 1946821888               |
| SNP_P4_58155_37312730 | NC_021163.1    | Ca_kabuli_chr04 | 37312730                | TT                              | AA              | 1946821890               |
| SNP_P4_58156_37312757 | NC_021163.1    | Ca_kabuli_chr04 | 37312757                | AA                              | GG              | 1946821892               |
| SNP_P4_58157_37312778 | NC_021163.1    | Ca_kabuli_chr04 | 37312778                | TT                              | CC              | 1946821894               |
| SNP_P4_58158_37313067 | NC_021163.1    | Ca_kabuli_chr04 | 37313067                | TT                              | CC              | 1946821896               |
| SNP_P4_58159_37313372 | NC_021163.1    | Ca_kabuli_chr04 | 37313372                | AA                              | GG              | 1946821898               |
| SNP_P4_58160_37315239 | NC_021163.1    | Ca_kabuli_chr04 | 37315239                | CC                              | TT              | 1946821900               |
| SNP_P4_58161_37317069 | NC_021163.1    | Ca_kabuli_chr04 | 37317069                | AA                              | GG              | 1946821902               |
| SNP_P4_58162_37317463 | NC_021163.1    | Ca_kabuli_chr04 | 37317463                | AA                              | GG              | 1946821904               |
| SNP_P4_58163_37317591 | NC_021163.1    | Ca_kabuli_chr04 | 37317591                | AA                              | GG              | 1946821906               |
| SNP_P4_58164_37317609 | NC_021163.1    | Ca_kabuli_chr04 | 37317609                | TT                              | CC              | 1946821908               |
| SNP_P4_58165_37317834 | NC_021163.1    | Ca_kabuli_chr04 | 37317834                | AA                              | TT              | 1946821910               |
| SNP_P4_58166_37317922 | NC_021163.1    | Ca_kabuli_chr04 | 37317922                | TT                              | CC              | 1946821912               |
| SNP_P4_58167_37318004 | NC_021163.1    | Ca_kabuli_chr04 | 37318004                | CC                              | TT              | 1946821914               |
| SNP_P4_58168_37318006 | NC_021163.1    | Ca_kabuli_chr04 | 37318006                | TT                              | CC              | 1946821916               |
| SNP_P4_58169_37318025 | NC_021163.1    | Ca_kabuli_chr04 | 37318025                | AA                              | CC              | 1946821918               |
| SNP_P4_58170_37318368 | NC_021163.1    | Ca_kabuli_chr04 | 37318368                | AA                              | GG              | 1946821920               |
| SNP_P4_58171_37318546 | NC_021163.1    | Ca_kabuli_chr04 | 37318546                | CC                              | AA              | 1946821922               |
| SNP_P4_58172_37318602 | NC_021163.1    | Ca_kabuli_chr04 | 37318602                | GG                              | AA              | 1946821924               |
| SNP_P4_58173_37329069 | NC_021163.1    | Ca_kabuli_chr04 | 37329069                | AA                              | GG              | 1946821926               |
| SNP_P4_58174_37329111 | NC_021163.1    | Ca_kabuli_chr04 | 37329111                | TT                              | CC              | 1946821928               |
| SNP_P4_58175_37330938 | NC_021163.1    | Ca_kabuli_chr04 | 37330938                | CC                              | TT              | 1946821930               |
| SNP_P4_58176_37331708 | NC_021163.1    | Ca_kabuli_chr04 | 37331708                | TT                              | CC              | 1946821932               |
| SNP_P4_58177_37331850 | NC_021163.1    | Ca_kabuli_chr04 | 37331850                | TT                              | CC              | 1946821935               |
| SNP_P4_58179_37331905 | NC_021163.1    | Ca_kabuli_chr04 | 37331905                | AA                              | GG              | 1946821937               |
| SNP_P4_58180_37332055 | NC_021163.1    | Ca_kabuli_chr04 | 37332055                | CC                              | TT              | 1946821939               |
| SNP_P4_58181_37332207 | NC_021163.1    | Ca_kabuli_chr04 | 37332207                | AA                              | GG              | 1946821941               |
| SNP_P4_58182_37332240 | NC_021163.1    | Ca_kabuli_chr04 | 37332240                | AA                              | TT              | 1946821943               |
| SNP_P4_58183_37332246 | NC_021163.1    | Ca_kabuli_chr04 | 37332246                | TT                              | CC              | 1946821945               |
| SNP_P4_58184_37332279 | NC_021163.1    | Ca_kabuli_chr04 | 37332279                | TT                              | CC              | 1946821947               |
| SNP_P4_58186_37332373 | NC_021163.1    | Ca_kabuli_chr04 | 37332373                | TT                              | GG              | 1946821949               |
| SNP_P4_58187_37332378 | NC_021163.1    | Ca_kabuli_chr04 | 37332378                | CC                              | GG              | 1946821951               |

| SNPs IDs              | Chromosome IDs | Chromosomes     | Physical positions (bp) | CDC Frontier (Reference genome) | (ILWC46 & LPNB) | NCBI SNPdb Accession IDs |
|-----------------------|----------------|-----------------|-------------------------|---------------------------------|-----------------|--------------------------|
| SNP_P4_58188_37332397 | NC_021163.1    | Ca_kabuli_chr04 | 37332397                | AA                              | CC              | 1946821953               |
| SNP_P4_58189_37332443 | NC_021163.1    | Ca_kabuli_chr04 | 37332443                | AA                              | GG              | 1946821955               |
| SNP_P4_58190_37332448 | NC_021163.1    | Ca_kabuli_chr04 | 37332448                | CC                              | AA              | 1946821957               |
| SNP_P4_58191_37332456 | NC_021163.1    | Ca_kabuli_chr04 | 37332456                | GG                              | TT              | 1946821959               |
| SNP_P4_58192_37332495 | NC_021163.1    | Ca_kabuli_chr04 | 37332495                | TT                              | AA              | 1946821961               |
| SNP_P4_58194_37332779 | NC_021163.1    | Ca_kabuli_chr04 | 37332779                | TT                              | AA              | 1946821963               |
| SNP_P4_58195_37333376 | NC_021163.1    | Ca_kabuli_chr04 | 37333376                | CC                              | TT              | 1946821965               |
| SNP_P4_58196_37333401 | NC_021163.1    | Ca_kabuli_chr04 | 37333401                | GG                              | AA              | 1946821967               |
| SNP_P4_58197_37333670 | NC_021163.1    | Ca_kabuli_chr04 | 37333670                | TT                              | CC              | 1946821969               |
| SNP_P4_58198_37333744 | NC_021163.1    | Ca_kabuli_chr04 | 37333744                | GG                              | AA              | 1946821971               |
| SNP_P4_58199_37340195 | NC_021163.1    | Ca_kabuli_chr04 | 37340195                | AA                              | CC              | 1946821973               |
| SNP_P4_58200_37341713 | NC_021163.1    | Ca_kabuli_chr04 | 37341713                | AA                              | CC              | 1946821975               |
| SNP_P4_58201_37341786 | NC_021163.1    | Ca_kabuli_chr04 | 37341786                | CC                              | TT              | 1946821978               |
| SNP_P4_58202_37342085 | NC_021163.1    | Ca_kabuli_chr04 | 37342085                | CC                              | AA              | 1946821980               |
| SNP_P4_58203_37342088 | NC_021163.1    | Ca_kabuli_chr04 | 37342088                | GG                              | AA              | 1946821982               |
| SNP_P4_58204_37342105 | NC_021163.1    | Ca_kabuli_chr04 | 37342105                | CC                              | TT              | 1946821984               |
| SNP_P4_58205_37342111 | NC_021163.1    | Ca_kabuli_chr04 | 37342111                | TT                              | GG              | 1946821986               |
| SNP_P4_58206_37342502 | NC_021163.1    | Ca_kabuli_chr04 | 37342502                | TT                              | CC              | 1946821988               |
| SNP_P4_58207_37342718 | NC_021163.1    | Ca_kabuli_chr04 | 37342718                | TT                              | CC              | 1946821990               |
| SNP_P4_58208_37342872 | NC_021163.1    | Ca_kabuli_chr04 | 37342872                | TT                              | AA              | 1946821992               |
| SNP_P4_58209_37343193 | NC_021163.1    | Ca_kabuli_chr04 | 37343193                | GG                              | AA              | 1946821994               |
| SNP_P4_58210_37343199 | NC_021163.1    | Ca_kabuli_chr04 | 37343199                | GG                              | TT              | 1946821996               |
| SNP_P4_58211_37343210 | NC_021163.1    | Ca_kabuli_chr04 | 37343210                | TT                              | CC              | 1946821998               |
| SNP_P4_58212_37343214 | NC_021163.1    | Ca_kabuli_chr04 | 37343214                | TT                              | CC              | 1946822000               |
| SNP_P4_58213_37343220 | NC_021163.1    | Ca_kabuli_chr04 | 37343220                | AA                              | GG              | 1946822002               |
| SNP_P4_58214_37343240 | NC_021163.1    | Ca_kabuli_chr04 | 37343240                | CC                              | TT              | 1946822004               |
| SNP_P4_58215_37343299 | NC_021163.1    | Ca_kabuli_chr04 | 37343299                | CC                              | TT              | 1946822006               |
| SNP_P4_58216_37343311 | NC_021163.1    | Ca_kabuli_chr04 | 37343311                | GG                              | TT              | 1946822008               |
| SNP_P4_58217_37343340 | NC_021163.1    | Ca_kabuli_chr04 | 37343340                | TT                              | CC              | 1946822010               |
| SNP_P4_58218_37343452 | NC_021163.1    | Ca_kabuli_chr04 | 37343452                | GG                              | AA              | 1946822012               |
| SNP_P4_58219_37343514 | NC_021163.1    | Ca_kabuli_chr04 | 37343514                | TT                              | CC              | 1946822014               |
| SNP_P4_58220_37343577 | NC_021163.1    | Ca_kabuli_chr04 | 37343577                | CC                              | TT              | 1946822016               |
| SNP_P4_58221_37344255 | NC_021163.1    | Ca_kabuli_chr04 | 37344255                | TT                              | CC              | 1946822018               |
| SNP_P4_58224_37345011 | NC_021163.1    | Ca_kabuli_chr04 | 37345011                | AA                              | CC              | 1946822020               |
| SNP_P4_58225_37345023 | NC_021163.1    | Ca_kabuli_chr04 | 37345023                | AA                              | CC              | 1946822022               |
| SNP_P4_58226_37345277 | NC_021163.1    | Ca_kabuli_chr04 | 37345277                | CC                              | AA              | 1946822025               |
| SNP_P4_58227_37345287 | NC_021163.1    | Ca_kabuli_chr04 | 37345287                | AA                              | GG              | 1946822027               |
| SNP_P4_58228_37345291 | NC_021163.1    | Ca_kabuli_chr04 | 37345291                | CC                              | TT              | 1946822029               |
| SNP_P4_58229_37345885 | NC_021163.1    | Ca_kabuli_chr04 | 37345885                | TT                              | GG              | 1946822031               |
| SNP_P4_58230_37345915 | NC_021163.1    | Ca_kabuli_chr04 | 37345915                | CC                              | TT              | 1946822033               |
| SNP_P4_58232_37346631 | NC_021163.1    | Ca_kabuli_chr04 | 37346631                | AA                              | GG              | 1946822035               |
| SNP_P4_58233_37346795 | NC_021163.1    | Ca_kabuli_chr04 | 37346795                | CC                              | TT              | 1946822037               |

| SNPs IDs              | Chromosome IDs | Chromosomes     | Physical positions (bp) | CDC Frontier (Reference genome) | (ILWC46 & LPNB) | NCBI SNPdb Accession IDs |
|-----------------------|----------------|-----------------|-------------------------|---------------------------------|-----------------|--------------------------|
| SNP_P4_58234_37346800 | NC_021163.1    | Ca_kabuli_chr04 | 37346800                | AA                              | TT              | 1946822039               |
| SNP_P4_58235_37347787 | NC_021163.1    | Ca_kabuli_chr04 | 37347787                | CC                              | AA              | 1946822041               |
| SNP_P4_58236_37347792 | NC_021163.1    | Ca_kabuli_chr04 | 37347792                | CC                              | AA              | 1946822043               |
| SNP_P4_58237_37348012 | NC_021163.1    | Ca_kabuli_chr04 | 37348012                | CC                              | GG              | 1946822045               |
| SNP_P4_58238_37348105 | NC_021163.1    | Ca_kabuli_chr04 | 37348105                | TT                              | CC              | 1946822047               |
| SNP_P4_58239_37348869 | NC_021163.1    | Ca_kabuli_chr04 | 37348869                | CC                              | GG              | 1946822049               |
| SNP_P4_58240_37349055 | NC_021163.1    | Ca_kabuli_chr04 | 37349055                | TT                              | GG              | 1946822051               |
| SNP_P4_58241_37349212 | NC_021163.1    | Ca_kabuli_chr04 | 37349212                | CC                              | AA              | 1946822053               |
| SNP_P4_58242_37350052 | NC_021163.1    | Ca_kabuli_chr04 | 37350052                | TT                              | CC              | 1946822055               |
| SNP_P4_58243_37350204 | NC_021163.1    | Ca_kabuli_chr04 | 37350204                | GG                              | AA              | 1946822057               |
| SNP_P4_58244_37350212 | NC_021163.1    | Ca_kabuli_chr04 | 37350212                | CC                              | TT              | 1946822059               |
| SNP_P4_58245_37350476 | NC_021163.1    | Ca_kabuli_chr04 | 37350476                | CC                              | TT              | 1946822061               |
| SNP_P4_58246_37350507 | NC_021163.1    | Ca_kabuli_chr04 | 37350507                | TT                              | CC              | 1946822063               |
| SNP_P4_58247_37350534 | NC_021163.1    | Ca_kabuli_chr04 | 37350534                | GG                              | AA              | 1946822065               |
| SNP_P4_58248_37350786 | NC_021163.1    | Ca_kabuli_chr04 | 37350786                | GG                              | TT              | 1946822067               |
| SNP_P4_58249_37352985 | NC_021163.1    | Ca_kabuli_chr04 | 37352985                | TT                              | CC              | 1946822069               |
| SNP_P4_58250_37354860 | NC_021163.1    | Ca_kabuli_chr04 | 37354860                | AA                              | GG              | 1946822072               |
| SNP_P4_58251_37355160 | NC_021163.1    | Ca_kabuli_chr04 | 37355160                | GG                              | AA              | 1946822074               |
| SNP_P4_58252_37355296 | NC_021163.1    | Ca_kabuli_chr04 | 37355296                | AA                              | GG              | 1946822076               |
| SNP_P4_58253_37358073 | NC_021163.1    | Ca_kabuli_chr04 | 37358073                | AA                              | CC              | 1946822078               |
| SNP_P4_58254_37361644 | NC_021163.1    | Ca_kabuli_chr04 | 37361644                | GG                              | TT              | 1946822080               |
| SNP_P4_58256_37361809 | NC_021163.1    | Ca_kabuli_chr04 | 37361809                | AA                              | TT              | 1946822082               |
| SNP_P4_58257_37361954 | NC_021163.1    | Ca_kabuli_chr04 | 37361954                | AA                              | GG              | 1946822084               |
| SNP_P4_58258_37362040 | NC_021163.1    | Ca_kabuli_chr04 | 37362040                | TT                              | AA              | 1946822086               |
| SNP_P4_58259_37362049 | NC_021163.1    | Ca_kabuli_chr04 | 37362049                | GG                              | CC              | 1946822088               |
| SNP_P4_58261_37362257 | NC_021163.1    | Ca_kabuli_chr04 | 37362257                | CC                              | TT              | 1946822090               |
| SNP_P4_58262_37362381 | NC_021163.1    | Ca_kabuli_chr04 | 37362381                | GG                              | AA              | 1946822092               |
| SNP_P4_58263_37363917 | NC_021163.1    | Ca_kabuli_chr04 | 37363917                | GG                              | CC              | 1946822094               |
| SNP_P4_58264_37364166 | NC_021163.1    | Ca_kabuli_chr04 | 37364166                | GG                              | TT              | 1946822096               |
| SNP_P4_58265_37364357 | NC_021163.1    | Ca_kabuli_chr04 | 37364357                | CC                              | TT              | 1946822098               |
| SNP_P4_58266_37364815 | NC_021163.1    | Ca_kabuli_chr04 | 37364815                | CC                              | TT              | 1946822100               |
| SNP_P4_58267_37365299 | NC_021163.1    | Ca_kabuli_chr04 | 37365299                | TT                              | GG              | 1946822102               |
| SNP_P4_58268_37366279 | NC_021163.1    | Ca_kabuli_chr04 | 37366279                | AA                              | CC              | 1946822104               |
| SNP_P4_58269_37366687 | NC_021163.1    | Ca_kabuli_chr04 | 37366687                | CC                              | GG              | 1946822106               |
| SNP_P4_58270_37366690 | NC_021163.1    | Ca_kabuli_chr04 | 37366690                | AA                              | TT              | 1946822108               |
| SNP_P4_58272_37366744 | NC_021163.1    | Ca_kabuli_chr04 | 37366744                | TT                              | CC              | 1946822110               |
| SNP_P4_58273_37366758 | NC_021163.1    | Ca_kabuli_chr04 | 37366758                | GG                              | AA              | 1946822112               |
| SNP_P4_58276_37367680 | NC_021163.1    | Ca_kabuli_chr04 | 37367680                | AA                              | GG              | 1946822114               |
| SNP_P4_58277_37370892 | NC_021163.1    | Ca_kabuli_chr04 | 37370892                | TT                              | CC              | 1946822116               |
| SNP_P4_58279_37371079 | NC_021163.1    | Ca_kabuli_chr04 | 37371079                | GG                              | CC              | 1946822118               |
| SNP_P4_58280_37373394 | NC_021163.1    | Ca_kabuli_chr04 | 37373394                | GG                              | TT              | 1946822120               |
| SNP_P4_58281_37373606 | NC_021163.1    | Ca_kabuli_chr04 | 37373606                | TT                              | GG              | 1946822122               |



| SNPs IDs              | Chromosome IDs | Chromosomes     | Physical positions (bp) | CDC Frontier (Reference genome) | (ILWC46 & LPNB) | NCBI SNPdb Accession IDs |
|-----------------------|----------------|-----------------|-------------------------|---------------------------------|-----------------|--------------------------|
| SNP_P4_58282_37374578 | NC_021163.1    | Ca_kabuli_chr04 | 37374578                | AA                              | GG              | 1946822124               |
| SNP_P4_58283_37374860 | NC_021163.1    | Ca_kabuli_chr04 | 37374860                | GG                              | AA              | 1946822126               |
| SNP_P4_58284_37374861 | NC_021163.1    | Ca_kabuli_chr04 | 37374861                | GG                              | AA              | 1946822128               |
| SNP_P4_58285_37374867 | NC_021163.1    | Ca_kabuli_chr04 | 37374867                | TT                              | CC              | 1946822130               |
| SNP_P4_58286_37374871 | NC_021163.1    | Ca_kabuli_chr04 | 37374871                | AA                              | GG              | 1946822132               |
| SNP_P4_58287_37375955 | NC_021163.1    | Ca_kabuli_chr04 | 37375955                | CC                              | TT              | 1946822134               |
| SNP_P4_58288_37377408 | NC_021163.1    | Ca_kabuli_chr04 | 37377408                | CC                              | GG              | 1946822136               |
| SNP_P4_58289_37381238 | NC_021163.1    | Ca_kabuli_chr04 | 37381238                | GG                              | AA              | 1946822138               |
| SNP_P4_58290_37385952 | NC_021163.1    | Ca_kabuli_chr04 | 37385952                | AA                              | TT              | 1946822140               |
| SNP_P4_58291_37385980 | NC_021163.1    | Ca_kabuli_chr04 | 37385980                | CC                              | AA              | 1946822142               |
| SNP_P4_58293_37388950 | NC_021163.1    | Ca_kabuli_chr04 | 37388950                | GG                              | TT              | 1946822144               |
| SNP_P4_58294_37389971 | NC_021163.1    | Ca_kabuli_chr04 | 37389971                | TT                              | CC              | 1946822146               |
| SNP_P4_58295_37390009 | NC_021163.1    | Ca_kabuli_chr04 | 37390009                | AA                              | CC              | 1946822147               |
| SNP_P4_58296_37390017 | NC_021163.1    | Ca_kabuli_chr04 | 37390017                | CC                              | TT              | 1946822149               |
| SNP_P4_58297_37390048 | NC_021163.1    | Ca_kabuli_chr04 | 37390048                | GG                              | AA              | 1946822151               |
| SNP_P4_58298_37390075 | NC_021163.1    | Ca_kabuli_chr04 | 37390075                | AA                              | CC              | 1946822153               |
| SNP_P4_58299_37390086 | NC_021163.1    | Ca_kabuli_chr04 | 37390086                | TT                              | CC              | 1946822155               |
| SNP_P4_58301_37390255 | NC_021163.1    | Ca_kabuli_chr04 | 37390255                | GG                              | AA              | 1946822157               |
| SNP_P4_58302_37390270 | NC_021163.1    | Ca_kabuli_chr04 | 37390270                | GG                              | AA              | 1946822159               |
| SNP_P4_58303_37390281 | NC_021163.1    | Ca_kabuli_chr04 | 37390281                | TT                              | AA              | 1946822161               |
| SNP_P4_58304_37390315 | NC_021163.1    | Ca_kabuli_chr04 | 37390315                | TT                              | CC              | 1946822163               |
| SNP_P4_58305_37390556 | NC_021163.1    | Ca_kabuli_chr04 | 37390556                | CC                              | TT              | 1946822165               |
| SNP_P4_58306_37390614 | NC_021163.1    | Ca_kabuli_chr04 | 37390614                | CC                              | GG              | 1946822167               |
| SNP_P4_58307_37390652 | NC_021163.1    | Ca_kabuli_chr04 | 37390652                | AA                              | GG              | 1946822170               |
| SNP_P4_58308_37390684 | NC_021163.1    | Ca_kabuli_chr04 | 37390684                | CC                              | TT              | 1946822172               |
| SNP_P4_58309_37390787 | NC_021163.1    | Ca_kabuli_chr04 | 37390787                | AA                              | GG              | 1946822174               |
| SNP_P4_58310_37392045 | NC_021163.1    | Ca_kabuli_chr04 | 37392045                | CC                              | TT              | 1946822176               |
| SNP_P4_58311_37393210 | NC_021163.1    | Ca_kabuli_chr04 | 37393210                | AA                              | TT              | 1946822178               |
| SNP_P4_58312_37396680 | NC_021163.1    | Ca_kabuli_chr04 | 37396680                | TT                              | GG              | 1946822180               |
| SNP_P4_58313_37396681 | NC_021163.1    | Ca_kabuli_chr04 | 37396681                | GG                              | AA              | 1946822182               |
| SNP_P4_58314_37396685 | NC_021163.1    | Ca_kabuli_chr04 | 37396685                | CC                              | TT              | 1946822184               |
| SNP_P4_58315_37396692 | NC_021163.1    | Ca_kabuli_chr04 | 37396692                | AA                              | GG              | 1946822186               |
| SNP_P4_58316_37396714 | NC_021163.1    | Ca_kabuli_chr04 | 37396714                | GG                              | AA              | 1946822188               |
| SNP_P4_58317_37396715 | NC_021163.1    | Ca_kabuli_chr04 | 37396715                | TT                              | AA              | 1946822190               |
| SNP_P4_58319_37397053 | NC_021163.1    | Ca_kabuli_chr04 | 37397053                | CC                              | AA              | 1946822192               |
| SNP_P4_58321_37397154 | NC_021163.1    | Ca_kabuli_chr04 | 37397154                | AA                              | GG              | 1946822194               |
| SNP_P4_58322_37397221 | NC_021163.1    | Ca_kabuli_chr04 | 37397221                | CC                              | TT              | 1946822196               |
| SNP_P4_58323_37403171 | NC_021163.1    | Ca_kabuli_chr04 | 37403171                | CC                              | GG              | 1946822198               |
| SNP_P4_58324_37403182 | NC_021163.1    | Ca_kabuli_chr04 | 37403182                | GG                              | CC              | 1946822200               |
| SNP_P4_58325_37403206 | NC_021163.1    | Ca_kabuli_chr04 | 37403206                | CC                              | TT              | 1946822202               |
| SNP_P4_58326_37403210 | NC_021163.1    | Ca_kabuli_chr04 | 37403210                | GG                              | CC              | 1946822204               |
| SNP_P4_58327_37403227 | NC_021163.1    | Ca_kabuli_chr04 | 37403227                | TT                              | AA              | 1946822206               |

| SNPs IDs              | Chromosome IDs | Chromosomes     | Physical positions (bp) | CDC Frontier (Reference genome) | (ILWC46 & LPNB) | NCBI SNPdb Accession IDs |
|-----------------------|----------------|-----------------|-------------------------|---------------------------------|-----------------|--------------------------|
| SNP_P4_58328_37403228 | NC_021163.1    | Ca_kabuli_chr04 | 37403228                | AA                              | TT              | 1946822208               |
| SNP_P4_58329_37403584 | NC_021163.1    | Ca_kabuli_chr04 | 37403584                | GG                              | AA              | 1946822210               |
| SNP_P4_58330_37403605 | NC_021163.1    | Ca_kabuli_chr04 | 37403605                | AA                              | TT              | 1946822212               |
| SNP_P4_58332_37403743 | NC_021163.1    | Ca_kabuli_chr04 | 37403743                | AA                              | CC              | 1946822214               |
| SNP_P4_58333_37403745 | NC_021163.1    | Ca_kabuli_chr04 | 37403745                | GG                              | AA              | 1946822216               |
| SNP_P4_58334_37403767 | NC_021163.1    | Ca_kabuli_chr04 | 37403767                | CC                              | TT              | 1946822218               |
| SNP_P4_58336_37404260 | NC_021163.1    | Ca_kabuli_chr04 | 37404260                | GG                              | AA              | 1946822220               |
| SNP_P4_58337_37404297 | NC_021163.1    | Ca_kabuli_chr04 | 37404297                | GG                              | AA              | 1946822222               |
| SNP_P4_58338_37404318 | NC_021163.1    | Ca_kabuli_chr04 | 37404318                | AA                              | GG              | 1946822224               |
| SNP_P4_58339_37404351 | NC_021163.1    | Ca_kabuli_chr04 | 37404351                | CC                              | TT              | 1946822226               |
| SNP_P4_58340_37404982 | NC_021163.1    | Ca_kabuli_chr04 | 37404982                | AA                              | CC              | 1946822228               |
| SNP_P4_58341_37404997 | NC_021163.1    | Ca_kabuli_chr04 | 37404997                | TT                              | GG              | 1946822230               |
| SNP_P4_58342_37405231 | NC_021163.1    | Ca_kabuli_chr04 | 37405231                | AA                              | TT              | 1946822232               |
| SNP_P4_58343_37405252 | NC_021163.1    | Ca_kabuli_chr04 | 37405252                | CC                              | TT              | 1946822234               |
| SNP_P4_58344_37405293 | NC_021163.1    | Ca_kabuli_chr04 | 37405293                | CC                              | TT              | 1946822236               |
| SNP_P4_58345_37405313 | NC_021163.1    | Ca_kabuli_chr04 | 37405313                | TT                              | GG              | 1946822238               |
| SNP_P4_58346_37405552 | NC_021163.1    | Ca_kabuli_chr04 | 37405552                | TT                              | AA              | 1946822240               |
| SNP_P4_58348_37407822 | NC_021163.1    | Ca_kabuli_chr04 | 37407822                | AA                              | GG              | 1946822243               |
| SNP_P4_58349_37407911 | NC_021163.1    | Ca_kabuli_chr04 | 37407911                | CC                              | GG              | 1946822245               |
| SNP_P4_58350_37407918 | NC_021163.1    | Ca_kabuli_chr04 | 37407918                | GG                              | AA              | 1946822247               |
| SNP_P4_58351_37408035 | NC_021163.1    | Ca_kabuli_chr04 | 37408035                | TT                              | AA              | 1946822249               |
| SNP_P4_58353_37409969 | NC_021163.1    | Ca_kabuli_chr04 | 37409969                | CC                              | TT              | 1946822251               |
| SNP_P4_58354_37410764 | NC_021163.1    | Ca_kabuli_chr04 | 37410764                | TT                              | AA              | 1946822253               |
| SNP_P4_58355_37410817 | NC_021163.1    | Ca_kabuli_chr04 | 37410817                | TT                              | CC              | 1946822255               |
| SNP_P4_58356_37416676 | NC_021163.1    | Ca_kabuli_chr04 | 37416676                | GG                              | CC              | 1946822257               |
| SNP_P4_58357_37416911 | NC_021163.1    | Ca_kabuli_chr04 | 37416911                | TT                              | GG              | 1946822259               |
| SNP_P4_58358_37416934 | NC_021163.1    | Ca_kabuli_chr04 | 37416934                | CC                              | TT              | 1946822261               |
| SNP_P4_58359_37417511 | NC_021163.1    | Ca_kabuli_chr04 | 37417511                | AA                              | CC              | 1946822263               |
| SNP_P4_58360_37420609 | NC_021163.1    | Ca_kabuli_chr04 | 37420609                | TT                              | CC              | 1946822265               |
| SNP_P4_58361_37420804 | NC_021163.1    | Ca_kabuli_chr04 | 37420804                | GG                              | TT              | 1946822267               |
| SNP_P4_58362_37421924 | NC_021163.1    | Ca_kabuli_chr04 | 37421924                | TT                              | CC              | 1946822269               |
| SNP_P4_58363_37422441 | NC_021163.1    | Ca_kabuli_chr04 | 37422441                | CC                              | TT              | 1946822271               |
| SNP_P4_58364_37422479 | NC_021163.1    | Ca_kabuli_chr04 | 37422479                | AA                              | TT              | 1946822273               |
| SNP_P4_58365_37422796 | NC_021163.1    | Ca_kabuli_chr04 | 37422796                | TT                              | CC              | 1946822275               |
| SNP_P4_58366_37434751 | NC_021163.1    | Ca_kabuli_chr04 | 37434751                | TT                              | CC              | 1946822277               |
| SNP_P4_58367_37434789 | NC_021163.1    | Ca_kabuli_chr04 | 37434789                | AA                              | TT              | 1946822279               |
| SNP_P4_58368_37434829 | NC_021163.1    | Ca_kabuli_chr04 | 37434829                | CC                              | TT              | 1946822282               |
| SNP_P4_58369_37435114 | NC_021163.1    | Ca_kabuli_chr04 | 37435114                | TT                              | AA              | 1946822284               |
| SNP_P4_58370_37435133 | NC_021163.1    | Ca_kabuli_chr04 | 37435133                | TT                              | CC              | 1946822286               |
| SNP_P4_58371_37435170 | NC_021163.1    | Ca_kabuli_chr04 | 37435170                | TT                              | CC              | 1946822288               |
| SNP_P4_58372_37435634 | NC_021163.1    | Ca_kabuli_chr04 | 37435634                | AA                              | GG              | 1946822290               |
| SNP_P4_58373_37436576 | NC_021163.1    | Ca_kabuli_chr04 | 37436576                | CC                              | TT              | 1946822292               |

| SNPs IDs              | Chromosome IDs | Chromosomes     | Physical positions (bp) | CDC Frontier (Reference genome) | (ILWC46 & LPNB) | NCBI SNPdb Accession IDs |
|-----------------------|----------------|-----------------|-------------------------|---------------------------------|-----------------|--------------------------|
| SNP_P4_58374_37438540 | NC_021163.1    | Ca_kabuli_chr04 | 37438540                | TT                              | CC              | 1946822294               |
| SNP_P4_58375_37438626 | NC_021163.1    | Ca_kabuli_chr04 | 37438626                | CC                              | TT              | 1946822296               |
| SNP_P4_58376_37439441 | NC_021163.1    | Ca_kabuli_chr04 | 37439441                | GG                              | CC              | 1946822298               |
| SNP_P4_58377_37439657 | NC_021163.1    | Ca_kabuli_chr04 | 37439657                | TT                              | CC              | 1946822301               |
| SNP_P4_58378_37439797 | NC_021163.1    | Ca_kabuli_chr04 | 37439797                | CC                              | TT              | 1946822303               |
| SNP_P4_58379_37440015 | NC_021163.1    | Ca_kabuli_chr04 | 37440015                | AA                              | GG              | 1946822305               |
| SNP_P4_58380_37440031 | NC_021163.1    | Ca_kabuli_chr04 | 37440031                | CC                              | TT              | 1946822307               |
| SNP_P4_58381_37440032 | NC_021163.1    | Ca_kabuli_chr04 | 37440032                | TT                              | GG              | 1946822309               |
| SNP_P4_58382_37440625 | NC_021163.1    | Ca_kabuli_chr04 | 37440625                | TT                              | CC              | 1946822311               |
| SNP_P4_58383_37441542 | NC_021163.1    | Ca_kabuli_chr04 | 37441542                | AA                              | GG              | 1946822313               |
| SNP_P4_58384_37441921 | NC_021163.1    | Ca_kabuli_chr04 | 37441921                | AA                              | GG              | 1946822315               |
| SNP_P4_58385_37442072 | NC_021163.1    | Ca_kabuli_chr04 | 37442072                | TT                              | CC              | 1946822317               |
| SNP_P4_58386_37442076 | NC_021163.1    | Ca_kabuli_chr04 | 37442076                | AA                              | GG              | 1946822319               |
| SNP_P4_58387_37442092 | NC_021163.1    | Ca_kabuli_chr04 | 37442092                | GG                              | AA              | 1946822321               |
| SNP_P4_58388_37442115 | NC_021163.1    | Ca_kabuli_chr04 | 37442115                | TT                              | CC              | 1946822323               |
| SNP_P4_58389_37442816 | NC_021163.1    | Ca_kabuli_chr04 | 37442816                | AA                              | GG              | 1946822325               |
| SNP_P4_58390_37443204 | NC_021163.1    | Ca_kabuli_chr04 | 37443204                | TT                              | CC              | 1946822327               |
| SNP_P4_58391_37443311 | NC_021163.1    | Ca_kabuli_chr04 | 37443311                | AA                              | GG              | 1946822329               |
| SNP_P4_58393_37444102 | NC_021163.1    | Ca_kabuli_chr04 | 37444102                | CC                              | TT              | 1946822331               |
| SNP_P4_58394_37447270 | NC_021163.1    | Ca_kabuli_chr04 | 37447270                | AA                              | GG              | 1946822333               |
| SNP_P4_58395_37447949 | NC_021163.1    | Ca_kabuli_chr04 | 37447949                | CC                              | AA              | 1946822335               |
| SNP_P4_58396_37448089 | NC_021163.1    | Ca_kabuli_chr04 | 37448089                | AA                              | TT              | 1946822337               |
| SNP_P4_58397_37448260 | NC_021163.1    | Ca_kabuli_chr04 | 37448260                | GG                              | AA              | 1946822339               |
| SNP_P4_58398_37448279 | NC_021163.1    | Ca_kabuli_chr04 | 37448279                | GG                              | AA              | 1946822341               |
| SNP_P4_58399_37448767 | NC_021163.1    | Ca_kabuli_chr04 | 37448767                | CC                              | GG              | 1946822343               |
| SNP_P4_58400_37448823 | NC_021163.1    | Ca_kabuli_chr04 | 37448823                | AA                              | GG              | 1946822345               |
| SNP_P4_58401_37450836 | NC_021163.1    | Ca_kabuli_chr04 | 37450836                | AA                              | TT              | 1946822347               |
| SNP_P4_58402_37450873 | NC_021163.1    | Ca_kabuli_chr04 | 37450873                | TT                              | CC              | 1946822349               |
| SNP_P4_58403_37452598 | NC_021163.1    | Ca_kabuli_chr04 | 37452598                | AA                              | GG              | 1946822351               |
| SNP_P4_58404_37452606 | NC_021163.1    | Ca_kabuli_chr04 | 37452606                | TT                              | CC              | 1946822353               |
| SNP_P4_58405_37452613 | NC_021163.1    | Ca_kabuli_chr04 | 37452613                | TT                              | AA              | 1946822355               |
| SNP_P4_58406_37452618 | NC_021163.1    | Ca_kabuli_chr04 | 37452618                | GG                              | CC              | 1946822357               |
| SNP_P4_58407_37453209 | NC_021163.1    | Ca_kabuli_chr04 | 37453209                | GG                              | AA              | 1946822359               |
| SNP_P4_58408_37460337 | NC_021163.1    | Ca_kabuli_chr04 | 37460337                | AA                              | TT              | 1946822362               |
| SNP_P4_58409_37460516 | NC_021163.1    | Ca_kabuli_chr04 | 37460516                | TT                              | GG              | 1946822364               |
| SNP_P4_58410_37468494 | NC_021163.1    | Ca_kabuli_chr04 | 37468494                | AA                              | GG              | 1946822366               |
| SNP_P4_58411_37468937 | NC_021163.1    | Ca_kabuli_chr04 | 37468937                | CC                              | TT              | 1946822368               |
| SNP_P4_58412_37469490 | NC_021163.1    | Ca_kabuli_chr04 | 37469490                | AA                              | GG              | 1946822370               |
| SNP_P4_58413_37469551 | NC_021163.1    | Ca_kabuli_chr04 | 37469551                | GG                              | AA              | 1946822372               |
| SNP_P4_58414_37469857 | NC_021163.1    | Ca_kabuli_chr04 | 37469857                | TT                              | CC              | 1946822374               |
| SNP_P4_58415_37469868 | NC_021163.1    | Ca_kabuli_chr04 | 37469868                | GG                              | AA              | 1946822376               |
| SNP_P4_58416_37469967 | NC_021163.1    | Ca_kabuli_chr04 | 37469967                | GG                              | AA              | 1946822378               |

| SNPs IDs              | Chromosome IDs | Chromosomes     | Physical positions (bp) | CDC Frontier (Reference genome) | (ILWC46 & LPNB) | NCBI SNPdb Accession IDs |
|-----------------------|----------------|-----------------|-------------------------|---------------------------------|-----------------|--------------------------|
| SNP_P4_58417_37472438 | NC_021163.1    | Ca_kabuli_chr04 | 37472438                | AA                              | CC              | 1946822380               |
| SNP_P4_58418_37472887 | NC_021163.1    | Ca_kabuli_chr04 | 37472887                | AA                              | GG              | 1946822381               |
| SNP_P4_58419_37475495 | NC_021163.1    | Ca_kabuli_chr04 | 37475495                | TT                              | CC              | 1946822382               |
| SNP_P4_58420_37476668 | NC_021163.1    | Ca_kabuli_chr04 | 37476668                | AA                              | GG              | 1946822383               |
| SNP_P4_58421_37476819 | NC_021163.1    | Ca_kabuli_chr04 | 37476819                | TT                              | CC              | 1946822384               |
| SNP_P4_58422_37479850 | NC_021163.1    | Ca_kabuli_chr04 | 37479850                | CC                              | TT              | 1946822385               |
| SNP_P4_58424_37480779 | NC_021163.1    | Ca_kabuli_chr04 | 37480779                | TT                              | GG              | 1946822386               |
| SNP_P4_58425_37482528 | NC_021163.1    | Ca_kabuli_chr04 | 37482528                | AA                              | TT              | 1946822388               |
| SNP_P4_58427_37483232 | NC_021163.1    | Ca_kabuli_chr04 | 37483232                | TT                              | CC              | 1946822390               |
| SNP_P4_58428_37483698 | NC_021163.1    | Ca_kabuli_chr04 | 37483698                | AA                              | CC              | 1946822392               |
| SNP_P4_58429_37483897 | NC_021163.1    | Ca_kabuli_chr04 | 37483897                | CC                              | AA              | 1946822394               |
| SNP_P4_58430_37484375 | NC_021163.1    | Ca_kabuli_chr04 | 37484375                | GG                              | AA              | 1946822396               |
| SNP_P4_58431_37484376 | NC_021163.1    | Ca_kabuli_chr04 | 37484376                | TT                              | AA              | 1946822398               |
| SNP_P4_58432_37484385 | NC_021163.1    | Ca_kabuli_chr04 | 37484385                | CC                              | TT              | 1946822400               |
| SNP_P4_58433_37484407 | NC_021163.1    | Ca_kabuli_chr04 | 37484407                | CC                              | TT              | 1946822402               |
| SNP_P4_58434_37484680 | NC_021163.1    | Ca_kabuli_chr04 | 37484680                | GG                              | AA              | 1946822404               |
| SNP_P4_58435_37484693 | NC_021163.1    | Ca_kabuli_chr04 | 37484693                | AA                              | TT              | 1946822406               |
| SNP_P4_58436_37485209 | NC_021163.1    | Ca_kabuli_chr04 | 37485209                | GG                              | AA              | 1946822408               |
| SNP_P4_58437_37485300 | NC_021163.1    | Ca_kabuli_chr04 | 37485300                | TT                              | CC              | 1946822410               |
| SNP_P4_58438_37490552 | NC_021163.1    | Ca_kabuli_chr04 | 37490552                | TT                              | CC              | 1946822412               |
| SNP_P4_58439_37490886 | NC_021163.1    | Ca_kabuli_chr04 | 37490886                | GG                              | AA              | 1946822414               |
| SNP_P4_58440_37490965 | NC_021163.1    | Ca_kabuli_chr04 | 37490965                | AA                              | GG              | 1946822416               |
| SNP_P4_58441_37490992 | NC_021163.1    | Ca_kabuli_chr04 | 37490992                | GG                              | AA              | 1946822418               |
| SNP_P4_58442_37491014 | NC_021163.1    | Ca_kabuli_chr04 | 37491014                | CC                              | AA              | 1946822420               |
| SNP_P4_58443_37491235 | NC_021163.1    | Ca_kabuli_chr04 | 37491235                | TT                              | CC              | 1946822422               |
| SNP_P4_58444_37491238 | NC_021163.1    | Ca_kabuli_chr04 | 37491238                | AA                              | TT              | 1946822424               |
| SNP_P4_58445_37491251 | NC_021163.1    | Ca_kabuli_chr04 | 37491251                | AA                              | GG              | 1946822426               |
| SNP_P4_58446_37491272 | NC_021163.1    | Ca_kabuli_chr04 | 37491272                | GG                              | AA              | 1946822428               |
| SNP_P4_58447_37491334 | NC_021163.1    | Ca_kabuli_chr04 | 37491334                | CC                              | TT              | 1946822431               |
| SNP_P4_58448_37491339 | NC_021163.1    | Ca_kabuli_chr04 | 37491339                | AA                              | GG              | 1946822433               |
| SNP_P4_58449_37491460 | NC_021163.1    | Ca_kabuli_chr04 | 37491460                | TT                              | CC              | 1946822435               |
| SNP_P4_58450_37491463 | NC_021163.1    | Ca_kabuli_chr04 | 37491463                | CC                              | TT              | 1946822437               |
| SNP_P4_58451_37491522 | NC_021163.1    | Ca_kabuli_chr04 | 37491522                | CC                              | AA              | 1946822439               |
| SNP_P4_58452_37492371 | NC_021163.1    | Ca_kabuli_chr04 | 37492371                | GG                              | CC              | 1946822441               |
| SNP_P4_58453_37492422 | NC_021163.1    | Ca_kabuli_chr04 | 37492422                | AA                              | CC              | 1946822443               |
| SNP_P4_58454_37492689 | NC_021163.1    | Ca_kabuli_chr04 | 37492689                | AA                              | TT              | 1946822445               |
| SNP_P4_58455_37492716 | NC_021163.1    | Ca_kabuli_chr04 | 37492716                | AA                              | GG              | 1946822447               |
| SNP_P4_58456_37492718 | NC_021163.1    | Ca_kabuli_chr04 | 37492718                | GG                              | AA              | 1946822449               |
| SNP_P4_58457_37492750 | NC_021163.1    | Ca_kabuli_chr04 | 37492750                | AA                              | CC              | 1946822451               |
| SNP_P4_58458_37492787 | NC_021163.1    | Ca_kabuli_chr04 | 37492787                | AA                              | CC              | 1946822453               |
| SNP_P4_58459_37493579 | NC_021163.1    | Ca_kabuli_chr04 | 37493579                | AA                              | GG              | 1946822455               |
| SNP_P4_58460_37494192 | NC_021163.1    | Ca_kabuli_chr04 | 37494192                | GG                              | TT              | 1946822457               |

| SNPs IDs              | Chromosome IDs | Chromosomes     | Physical positions (bp) | CDC Frontier (Reference genome) | (ILWC46 & LPNB) | NCBI SNPdb Accession IDs |
|-----------------------|----------------|-----------------|-------------------------|---------------------------------|-----------------|--------------------------|
| SNP_P4_58461_37494571 | NC_021163.1    | Ca_kabuli_chr04 | 37494571                | AA                              | GG              | 1946822459               |
| SNP_P4_58462_37495178 | NC_021163.1    | Ca_kabuli_chr04 | 37495178                | TT                              | AA              | 1946822461               |
| SNP_P4_58463_37495183 | NC_021163.1    | Ca_kabuli_chr04 | 37495183                | GG                              | AA              | 1946822463               |
| SNP_P4_58464_37495203 | NC_021163.1    | Ca_kabuli_chr04 | 37495203                | CC                              | AA              | 1946822465               |
| SNP_P4_58465_37496172 | NC_021163.1    | Ca_kabuli_chr04 | 37496172                | GG                              | AA              | 1946822467               |
| SNP_P4_58466_37498083 | NC_021163.1    | Ca_kabuli_chr04 | 37498083                | TT                              | CC              | 1946822469               |
| SNP_P4_58467_37498298 | NC_021163.1    | Ca_kabuli_chr04 | 37498298                | TT                              | CC              | 1946822471               |
| SNP_P4_58468_37498358 | NC_021163.1    | Ca_kabuli_chr04 | 37498358                | GG                              | TT              | 1946822473               |
| SNP_P4_58469_37498363 | NC_021163.1    | Ca_kabuli_chr04 | 37498363                | AA                              | GG              | 1946822475               |
| SNP_P4_58470_37498843 | NC_021163.1    | Ca_kabuli_chr04 | 37498843                | TT                              | AA              | 1946822477               |
| SNP_P4_58471_37498889 | NC_021163.1    | Ca_kabuli_chr04 | 37498889                | TT                              | CC              | 1946822479               |
| SNP_P4_58472_37499729 | NC_021163.1    | Ca_kabuli_chr04 | 37499729                | GG                              | AA              | 1946822481               |
| SNP_P4_58473_37499750 | NC_021163.1    | Ca_kabuli_chr04 | 37499750                | CC                              | TT              | 1946822483               |
| SNP_P4_58474_37500193 | NC_021163.1    | Ca_kabuli_chr04 | 37500193                | TT                              | AA              | 1946822485               |
| SNP_P4_58475_37500467 | NC_021163.1    | Ca_kabuli_chr04 | 37500467                | CC                              | TT              | 1946822487               |
| SNP_P4_58476_37502882 | NC_021163.1    | Ca_kabuli_chr04 | 37502882                | GG                              | AA              | 1946822489               |
| SNP_P4_58477_37503208 | NC_021163.1    | Ca_kabuli_chr04 | 37503208                | AA                              | GG              | 1946822491               |
| SNP_P4_58478_37503218 | NC_021163.1    | Ca_kabuli_chr04 | 37503218                | CC                              | TT              | 1946822493               |
| SNP_P4_58479_37503846 | NC_021163.1    | Ca_kabuli_chr04 | 37503846                | GG                              | AA              | 1946822495               |
| SNP_P4_58480_37504024 | NC_021163.1    | Ca_kabuli_chr04 | 37504024                | GG                              | AA              | 1946822497               |
| SNP_P4_58481_37504709 | NC_021163.1    | Ca_kabuli_chr04 | 37504709                | TT                              | CC              | 1946822499               |
| SNP_P4_58482_37504915 | NC_021163.1    | Ca_kabuli_chr04 | 37504915                | TT                              | AA              | 1946822501               |
| SNP_P4_58483_37504929 | NC_021163.1    | Ca_kabuli_chr04 | 37504929                | AA                              | GG              | 1946822503               |
| SNP_P4_58484_37505336 | NC_021163.1    | Ca_kabuli_chr04 | 37505336                | CC                              | TT              | 1946822505               |
| SNP_P4_58485_37505585 | NC_021163.1    | Ca_kabuli_chr04 | 37505585                | TT                              | GG              | 1946822507               |
| SNP_P4_58486_37505590 | NC_021163.1    | Ca_kabuli_chr04 | 37505590                | AA                              | GG              | 1946822509               |
| SNP_P4_58487_37505607 | NC_021163.1    | Ca_kabuli_chr04 | 37505607                | GG                              | TT              | 1946822511               |
| SNP_P4_58488_37505924 | NC_021163.1    | Ca_kabuli_chr04 | 37505924                | CC                              | TT              | 1946822513               |
| SNP_P4_58489_37505935 | NC_021163.1    | Ca_kabuli_chr04 | 37505935                | AA                              | GG              | 1946822515               |
| SNP_P4_58490_37506409 | NC_021163.1    | Ca_kabuli_chr04 | 37506409                | TT                              | CC              | 1946822517               |
| SNP_P4_58491_37506423 | NC_021163.1    | Ca_kabuli_chr04 | 37506423                | TT                              | CC              | 1946822519               |
| SNP_P4_58492_37507157 | NC_021163.1    | Ca_kabuli_chr04 | 37507157                | GG                              | TT              | 1946822521               |
| SNP_P4_58493_37507180 | NC_021163.1    | Ca_kabuli_chr04 | 37507180                | TT                              | AA              | 1946822523               |
| SNP_P4_58494_37507181 | NC_021163.1    | Ca_kabuli_chr04 | 37507181                | AA                              | TT              | 1946822525               |
| SNP_P4_58495_37507206 | NC_021163.1    | Ca_kabuli_chr04 | 37507206                | CC                              | GG              | 1946822527               |
| SNP_P4_58496_37507602 | NC_021163.1    | Ca_kabuli_chr04 | 37507602                | TT                              | AA              | 1946822529               |
| SNP_P4_58497_37507935 | NC_021163.1    | Ca_kabuli_chr04 | 37507935                | GG                              | AA              | 1946822531               |
| SNP_P4_58498_37508173 | NC_021163.1    | Ca_kabuli_chr04 | 37508173                | TT                              | GG              | 1946822533               |
| SNP_P4_58499_37508189 | NC_021163.1    | Ca_kabuli_chr04 | 37508189                | AA                              | TT              | 1946822535               |
| SNP_P4_58501_37508742 | NC_021163.1    | Ca_kabuli_chr04 | 37508742                | AA                              | TT              | 1946822537               |
| SNP_P4_58502_37508743 | NC_021163.1    | Ca_kabuli_chr04 | 37508743                | AA                              | TT              | 1946822539               |
| SNP_P4_58503_37508839 | NC_021163.1    | Ca_kabuli_chr04 | 37508839                | CC                              | TT              | 1946822540               |

| SNPs IDs              | Chromosome IDs | Chromosomes     | Physical positions (bp) | CDC Frontier (Reference genome) | (ILWC46 & LPNB) | NCBI SNPdb Accession IDs |
|-----------------------|----------------|-----------------|-------------------------|---------------------------------|-----------------|--------------------------|
| SNP_P4_58504_37509105 | NC_021163.1    | Ca_kabuli_chr04 | 37509105                | AA                              | GG              | 1946822542               |
| SNP_P4_58505_37509110 | NC_021163.1    | Ca_kabuli_chr04 | 37509110                | AA                              | CC              | 1946822544               |
| SNP_P4_58506_37509686 | NC_021163.1    | Ca_kabuli_chr04 | 37509686                | AA                              | GG              | 1946822546               |
| SNP_P4_58507_37511900 | NC_021163.1    | Ca_kabuli_chr04 | 37511900                | AA                              | TT              | 1946822548               |
| SNP_P4_58508_37512086 | NC_021163.1    | Ca_kabuli_chr04 | 37512086                | TT                              | CC              | 1946822550               |
| SNP_P4_58509_37512364 | NC_021163.1    | Ca_kabuli_chr04 | 37512364                | GG                              | AA              | 1946822552               |
| SNP_P4_58510_37512505 | NC_021163.1    | Ca_kabuli_chr04 | 37512505                | AA                              | TT              | 1946822554               |
| SNP_P4_58511_37513337 | NC_021163.1    | Ca_kabuli_chr04 | 37513337                | CC                              | TT              | 1946822556               |
| SNP_P4_58512_37516466 | NC_021163.1    | Ca_kabuli_chr04 | 37516466                | CC                              | TT              | 1946822558               |
| SNP_P4_58513_37516468 | NC_021163.1    | Ca_kabuli_chr04 | 37516468                | AA                              | GG              | 1946822560               |
| SNP_P4_58514_37519455 | NC_021163.1    | Ca_kabuli_chr04 | 37519455                | TT                              | CC              | 1946822562               |
| SNP_P4_58515_37519467 | NC_021163.1    | Ca_kabuli_chr04 | 37519467                | TT                              | CC              | 1946822564               |
| SNP_P4_58516_37519893 | NC_021163.1    | Ca_kabuli_chr04 | 37519893                | AA                              | GG              | 1946822566               |
| SNP_P4_58517_37533182 | NC_021163.1    | Ca_kabuli_chr04 | 37533182                | TT                              | CC              | 1946822568               |
| SNP_P4_58518_37533402 | NC_021163.1    | Ca_kabuli_chr04 | 37533402                | AA                              | GG              | 1946822570               |
| SNP_P4_58520_37540599 | NC_021163.1    | Ca_kabuli_chr04 | 37540599                | GG                              | CC              | 1946822572               |
| SNP_P4_58521_37540894 | NC_021163.1    | Ca_kabuli_chr04 | 37540894                | AA                              | CC              | 1946822574               |
| SNP_P4_58522_37541095 | NC_021163.1    | Ca_kabuli_chr04 | 37541095                | CC                              | TT              | 1946822576               |
| SNP_P4_58523_37541311 | NC_021163.1    | Ca_kabuli_chr04 | 37541311                | CC                              | TT              | 1946822578               |
| SNP_P4_58524_37541733 | NC_021163.1    | Ca_kabuli_chr04 | 37541733                | TT                              | CC              | 1946822580               |
| SNP_P4_58525_37543392 | NC_021163.1    | Ca_kabuli_chr04 | 37543392                | GG                              | CC              | 1946822582               |
| SNP_P4_58527_37544511 | NC_021163.1    | Ca_kabuli_chr04 | 37544511                | TT                              | GG              | 1946822584               |
| SNP_P4_58528_37545754 | NC_021163.1    | Ca_kabuli_chr04 | 37545754                | AA                              | CC              | 1946822586               |
| SNP_P4_58529_37545780 | NC_021163.1    | Ca_kabuli_chr04 | 37545780                | TT                              | CC              | 1946822588               |
| SNP_P4_58530_37547383 | NC_021163.1    | Ca_kabuli_chr04 | 37547383                | TT                              | AA              | 1946822590               |
| SNP_P4_58531_37547552 | NC_021163.1    | Ca_kabuli_chr04 | 37547552                | GG                              | AA              | 1946822592               |
| SNP_P4_58532_37547651 | NC_021163.1    | Ca_kabuli_chr04 | 37547651                | AA                              | CC              | 1946822594               |
| SNP_P4_58533_37548350 | NC_021163.1    | Ca_kabuli_chr04 | 37548350                | CC                              | TT              | 1946822596               |
| SNP_P4_58534_37549410 | NC_021163.1    | Ca_kabuli_chr04 | 37549410                | TT                              | CC              | 1946822598               |
| SNP_P4_58535_37551663 | NC_021163.1    | Ca_kabuli_chr04 | 37551663                | TT                              | AA              | 1946822600               |
| SNP_P4_58536_37552201 | NC_021163.1    | Ca_kabuli_chr04 | 37552201                | GG                              | AA              | 1946822602               |
| SNP_P4_58537_37554827 | NC_021163.1    | Ca_kabuli_chr04 | 37554827                | CC                              | GG              | 1946822604               |
| SNP_P4_58538_37555886 | NC_021163.1    | Ca_kabuli_chr04 | 37555886                | TT                              | CC              | 1946822606               |
| SNP_P4_58539_37558418 | NC_021163.1    | Ca_kabuli_chr04 | 37558418                | CC                              | TT              | 1946822608               |
| SNP_P4_58540_37562395 | NC_021163.1    | Ca_kabuli_chr04 | 37562395                | GG                              | AA              | 1946822610               |
| SNP_P4_58541_37564104 | NC_021163.1    | Ca_kabuli_chr04 | 37564104                | AA                              | TT              | 1946822611               |
| SNP_P4_58542_37565167 | NC_021163.1    | Ca_kabuli_chr04 | 37565167                | GG                              | AA              | 1946822612               |
| SNP_P4_58543_37565644 | NC_021163.1    | Ca_kabuli_chr04 | 37565644                | GG                              | AA              | 1946822613               |
| SNP_P4_58544_37565765 | NC_021163.1    | Ca_kabuli_chr04 | 37565765                | CC                              | TT              | 1946822615               |
| SNP_P4_58545_37568948 | NC_021163.1    | Ca_kabuli_chr04 | 37568948                | CC                              | TT              | 1946822617               |
| SNP_P4_58546_37570104 | NC_021163.1    | Ca_kabuli_chr04 | 37570104                | GG                              | TT              | 1946822619               |
| SNP_P4_58547_37576334 | NC_021163.1    | Ca_kabuli_chr04 | 37576334                | AA                              | GG              | 1946822621               |

| SNPs IDs              | Chromosome IDs | Chromosomes     | Physical positions (bp) | CDC Frontier (Reference genome) | (ILWC46 & LPNB) | NCBI SNPdb Accession IDs |
|-----------------------|----------------|-----------------|-------------------------|---------------------------------|-----------------|--------------------------|
| SNP_P4_58548_37576336 | NC_021163.1    | Ca_kabuli_chr04 | 37576336                | TT                              | AA              | 1946822623               |
| SNP_P4_58549_37576678 | NC_021163.1    | Ca_kabuli_chr04 | 37576678                | GG                              | AA              | 1946822625               |
| SNP_P4_58550_37576730 | NC_021163.1    | Ca_kabuli_chr04 | 37576730                | CC                              | TT              | 1946822627               |
| SNP_P4_58551_37578072 | NC_021163.1    | Ca_kabuli_chr04 | 37578072                | AA                              | GG              | 1946822630               |
| SNP_P4_58552_37578196 | NC_021163.1    | Ca_kabuli_chr04 | 37578196                | TT                              | AA              | 1946822632               |
| SNP_P4_58553_37579859 | NC_021163.1    | Ca_kabuli_chr04 | 37579859                | TT                              | AA              | 1946822634               |
| SNP_P4_58554_37582355 | NC_021163.1    | Ca_kabuli_chr04 | 37582355                | CC                              | AA              | 1946822636               |
| SNP_P4_58555_37584852 | NC_021163.1    | Ca_kabuli_chr04 | 37584852                | CC                              | TT              | 1946822638               |
| SNP_P4_58556_37584982 | NC_021163.1    | Ca_kabuli_chr04 | 37584982                | TT                              | GG              | 1946822640               |
| SNP_P4_58557_37585088 | NC_021163.1    | Ca_kabuli_chr04 | 37585088                | GG                              | AA              | 1946822642               |
| SNP_P4_58558_37605362 | NC_021163.1    | Ca_kabuli_chr04 | 37605362                | GG                              | TT              | 1946822644               |
| SNP_P4_58559_37605391 | NC_021163.1    | Ca_kabuli_chr04 | 37605391                | TT                              | CC              | 1946822646               |
| SNP_P4_58560_37605556 | NC_021163.1    | Ca_kabuli_chr04 | 37605556                | AA                              | GG              | 1946822648               |
| SNP_P4_58561_37605565 | NC_021163.1    | Ca_kabuli_chr04 | 37605565                | TT                              | AA              | 1946822650               |
| SNP_P4_58562_37605652 | NC_021163.1    | Ca_kabuli_chr04 | 37605652                | GG                              | AA              | 1946822652               |
| SNP_P4_58563_37605674 | NC_021163.1    | Ca_kabuli_chr04 | 37605674                | CC                              | TT              | 1946822654               |
| SNP_P4_58564_37605726 | NC_021163.1    | Ca_kabuli_chr04 | 37605726                | TT                              | CC              | 1946822656               |
| SNP_P4_58566_37608323 | NC_021163.1    | Ca_kabuli_chr04 | 37608323                | GG                              | AA              | 1946822658               |
| SNP_P4_58567_37608982 | NC_021163.1    | Ca_kabuli_chr04 | 37608982                | TT                              | CC              | 1946822660               |
| SNP_P4_58568_37609051 | NC_021163.1    | Ca_kabuli_chr04 | 37609051                | GG                              | CC              | 1946822662               |
| SNP_P4_58569_37612426 | NC_021163.1    | Ca_kabuli_chr04 | 37612426                | GG                              | AA              | 1946822664               |
| SNP_P4_58570_37612889 | NC_021163.1    | Ca_kabuli_chr04 | 37612889                | AA                              | GG              | 1946822666               |
| SNP_P4_58571_37612903 | NC_021163.1    | Ca_kabuli_chr04 | 37612903                | AA                              | GG              | 1946822668               |
| SNP_P4_58572_37612974 | NC_021163.1    | Ca_kabuli_chr04 | 37612974                | TT                              | CC              | 1946822670               |
| SNP_P4_58573_37612975 | NC_021163.1    | Ca_kabuli_chr04 | 37612975                | CC                              | AA              | 1946822672               |
| SNP_P4_58574_37613088 | NC_021163.1    | Ca_kabuli_chr04 | 37613088                | AA                              | GG              | 1946822675               |
| SNP_P4_58575_37615051 | NC_021163.1    | Ca_kabuli_chr04 | 37615051                | AA                              | GG              | 1946822677               |
| SNP_P4_58576_37615133 | NC_021163.1    | Ca_kabuli_chr04 | 37615133                | GG                              | CC              | 1946822679               |
| SNP_P4_58578_37617523 | NC_021163.1    | Ca_kabuli_chr04 | 37617523                | CC                              | AA              | 1946822681               |
| SNP_P4_58579_37618015 | NC_021163.1    | Ca_kabuli_chr04 | 37618015                | CC                              | GG              | 1946822683               |
| SNP_P4_58580_37618022 | NC_021163.1    | Ca_kabuli_chr04 | 37618022                | GG                              | AA              | 1946822685               |
| SNP_P4_58581_37618311 | NC_021163.1    | Ca_kabuli_chr04 | 37618311                | TT                              | AA              | 1946822687               |
| SNP_P4_58583_37619597 | NC_021163.1    | Ca_kabuli_chr04 | 37619597                | CC                              | AA              | 1946822689               |
| SNP_P4_58584_37620063 | NC_021163.1    | Ca_kabuli_chr04 | 37620063                | AA                              | CC              | 1946822691               |
| SNP_P4_58585_37621698 | NC_021163.1    | Ca_kabuli_chr04 | 37621698                | TT                              | CC              | 1946822693               |
| SNP_P4_58586_37622100 | NC_021163.1    | Ca_kabuli_chr04 | 37622100                | AA                              | CC              | 1946822695               |
| SNP_P4_58587_37630840 | NC_021163.1    | Ca_kabuli_chr04 | 37630840                | AA                              | TT              | 1946822697               |
| SNP_P4_58588_37632260 | NC_021163.1    | Ca_kabuli_chr04 | 37632260                | AA                              | GG              | 1946822699               |
| SNP_P4_58589_37634286 | NC_021163.1    | Ca_kabuli_chr04 | 37634286                | TT                              | CC              | 1946822701               |
| SNP_P4_58590_37634347 | NC_021163.1    | Ca_kabuli_chr04 | 37634347                | TT                              | CC              | 1946822703               |
| SNP_P4_58591_37635534 | NC_021163.1    | Ca_kabuli_chr04 | 37635534                | CC                              | AA              | 1946822705               |
| SNP_P4_58592_37636163 | NC_021163.1    | Ca_kabuli_chr04 | 37636163                | CC                              | TT              | 1946822707               |

| SNPs IDs              | Chromosome IDs | Chromosomes     | Physical positions (bp) | CDC Frontier (Reference genome) | (ILWC46 & LPNB) | NCBI SNPdb Accession IDs |
|-----------------------|----------------|-----------------|-------------------------|---------------------------------|-----------------|--------------------------|
| SNP_P4_58593_37636185 | NC_021163.1    | Ca_kabuli_chr04 | 37636185                | GG                              | CC              | 1946822709               |
| SNP_P4_58594_37637650 | NC_021163.1    | Ca_kabuli_chr04 | 37637650                | GG                              | CC              | 1946822711               |
| SNP_P4_58595_37637696 | NC_021163.1    | Ca_kabuli_chr04 | 37637696                | CC                              | TT              | 1946822713               |
| SNP_P4_58596_37637701 | NC_021163.1    | Ca_kabuli_chr04 | 37637701                | CC                              | TT              | 1946822715               |
| SNP_P4_58597_37637734 | NC_021163.1    | Ca_kabuli_chr04 | 37637734                | TT                              | CC              | 1946822717               |
| SNP_P4_58598_37637737 | NC_021163.1    | Ca_kabuli_chr04 | 37637737                | TT                              | AA              | 1946822719               |
| SNP_P4_58599_37637919 | NC_021163.1    | Ca_kabuli_chr04 | 37637919                | GG                              | AA              | 1946822721               |
| SNP_P4_58600_37637922 | NC_021163.1    | Ca_kabuli_chr04 | 37637922                | AA                              | GG              | 1946822723               |
| SNP_P4_58601_37638723 | NC_021163.1    | Ca_kabuli_chr04 | 37638723                | GG                              | AA              | 1946822725               |
| SNP_P4_58602_37641565 | NC_021163.1    | Ca_kabuli_chr04 | 37641565                | AA                              | GG              | 1946822727               |
| SNP_P4_58603_37643300 | NC_021163.1    | Ca_kabuli_chr04 | 37643300                | GG                              | AA              | 1946822729               |
| SNP_P4_58604_37643957 | NC_021163.1    | Ca_kabuli_chr04 | 37643957                | GG                              | TT              | 1946822731               |
| SNP_P4_58605_37644199 | NC_021163.1    | Ca_kabuli_chr04 | 37644199                | TT                              | CC              | 1946822733               |
| SNP_P4_58606_37645153 | NC_021163.1    | Ca_kabuli_chr04 | 37645153                | TT                              | AA              | 1946822735               |
| SNP_P4_58607_37646394 | NC_021163.1    | Ca_kabuli_chr04 | 37646394                | GG                              | AA              | 1946822737               |
| SNP_P4_58609_37646853 | NC_021163.1    | Ca_kabuli_chr04 | 37646853                | CC                              | TT              | 1946822739               |
| SNP_P4_58610_37647867 | NC_021163.1    | Ca_kabuli_chr04 | 37647867                | AA                              | GG              | 1946822741               |
| SNP_P4_58612_37648145 | NC_021163.1    | Ca_kabuli_chr04 | 37648145                | CC                              | TT              | 1946822743               |
| SNP_P4_58613_37648354 | NC_021163.1    | Ca_kabuli_chr04 | 37648354                | TT                              | CC              | 1946822745               |
| SNP_P4_58614_37652227 | NC_021163.1    | Ca_kabuli_chr04 | 37652227                | CC                              | TT              | 1946822747               |
| SNP_P4_58615_37652616 | NC_021163.1    | Ca_kabuli_chr04 | 37652616                | TT                              | CC              | 1946822749               |
| SNP_P4_58616_37659819 | NC_021163.1    | Ca_kabuli_chr04 | 37659819                | AA                              | CC              | 1946822751               |
| SNP_P4_58617_37659824 | NC_021163.1    | Ca_kabuli_chr04 | 37659824                | GG                              | TT              | 1946822753               |
| SNP_P4_58618_37659922 | NC_021163.1    | Ca_kabuli_chr04 | 37659922                | AA                              | TT              | 1946822755               |
| SNP_P4_58619_37659923 | NC_021163.1    | Ca_kabuli_chr04 | 37659923                | CC                              | AA              | 1946822757               |
| SNP_P4_58620_37659924 | NC_021163.1    | Ca_kabuli_chr04 | 37659924                | TT                              | CC              | 1946822759               |
| SNP_P4_58621_37660217 | NC_021163.1    | Ca_kabuli_chr04 | 37660217                | TT                              | AA              | 1946822761               |
| SNP_P4_58622_37660247 | NC_021163.1    | Ca_kabuli_chr04 | 37660247                | GG                              | AA              | 1946822763               |
| SNP_P4_58623_37661616 | NC_021163.1    | Ca_kabuli_chr04 | 37661616                | TT                              | CC              | 1946822765               |
| SNP_P4_58624_37662640 | NC_021163.1    | Ca_kabuli_chr04 | 37662640                | AA                              | GG              | 1946822767               |
| SNP_P4_58625_37662685 | NC_021163.1    | Ca_kabuli_chr04 | 37662685                | GG                              | AA              | 1946822769               |
| SNP_P4_58627_37677228 | NC_021163.1    | Ca_kabuli_chr04 | 37677228                | TT                              | GG              | 1946822771               |
| SNP_P4_58628_37677579 | NC_021163.1    | Ca_kabuli_chr04 | 37677579                | AA                              | GG              | 1946822773               |
| SNP_P4_58629_37678552 | NC_021163.1    | Ca_kabuli_chr04 | 37678552                | AA                              | TT              | 1946822775               |
| SNP_P4_58630_37678580 | NC_021163.1    | Ca_kabuli_chr04 | 37678580                | GG                              | AA              | 1946822777               |
| SNP_P4_58631_37678581 | NC_021163.1    | Ca_kabuli_chr04 | 37678581                | AA                              | TT              | 1946822779               |
| SNP_P4_58632_37678590 | NC_021163.1    | Ca_kabuli_chr04 | 37678590                | TT                              | AA              | 1946822781               |
| SNP_P4_58633_37679156 | NC_021163.1    | Ca_kabuli_chr04 | 37679156                | CC                              | AA              | 1946822783               |
| SNP_P4_58634_37679437 | NC_021163.1    | Ca_kabuli_chr04 | 37679437                | CC                              | TT              | 1946822785               |
| SNP_P4_58635_37679463 | NC_021163.1    | Ca_kabuli_chr04 | 37679463                | CC                              | TT              | 1946822787               |
| SNP_P4_58636_37681116 | NC_021163.1    | Ca_kabuli_chr04 | 37681116                | GG                              | AA              | 1946822789               |
| SNP_P4_58637_37681118 | NC_021163.1    | Ca_kabuli_chr04 | 37681118                | TT                              | CC              | 1946822791               |



| SNPs IDs              | Chromosome IDs | Chromosomes     | Physical positions (bp) | CDC Frontier (Reference genome) | (ILWC46 & LPNB) | NCBI SNPdb Accession IDs |
|-----------------------|----------------|-----------------|-------------------------|---------------------------------|-----------------|--------------------------|
| SNP_P4_58638_37681124 | NC_021163.1    | Ca_kabuli_chr04 | 37681124                | AA                              | GG              | 1946822793               |
| SNP_P4_58639_37681140 | NC_021163.1    | Ca_kabuli_chr04 | 37681140                | CC                              | TT              | 1946822795               |
| SNP_P4_58640_37681297 | NC_021163.1    | Ca_kabuli_chr04 | 37681297                | CC                              | TT              | 1946822797               |
| SNP_P4_58641_37681347 | NC_021163.1    | Ca_kabuli_chr04 | 37681347                | CC                              | TT              | 1946822799               |
| SNP_P4_58642_37681463 | NC_021163.1    | Ca_kabuli_chr04 | 37681463                | CC                              | AA              | 1946822801               |
| SNP_P4_58643_37681893 | NC_021163.1    | Ca_kabuli_chr04 | 37681893                | CC                              | GG              | 1946822803               |
| SNP_P4_58644_37682095 | NC_021163.1    | Ca_kabuli_chr04 | 37682095                | AA                              | TT              | 1946822805               |
| SNP_P4_58645_37682114 | NC_021163.1    | Ca_kabuli_chr04 | 37682114                | GG                              | AA              | 1946822807               |
| SNP_P4_58646_37682145 | NC_021163.1    | Ca_kabuli_chr04 | 37682145                | TT                              | CC              | 1946822809               |
| SNP_P4_58647_37682146 | NC_021163.1    | Ca_kabuli_chr04 | 37682146                | TT                              | AA              | 1946822811               |
| SNP_P4_58648_37682194 | NC_021163.1    | Ca_kabuli_chr04 | 37682194                | CC                              | GG              | 1946822813               |
| SNP_P4_58649_37682371 | NC_021163.1    | Ca_kabuli_chr04 | 37682371                | CC                              | TT              | 1946822815               |
| SNP_P4_58650_37682376 | NC_021163.1    | Ca_kabuli_chr04 | 37682376                | TT                              | CC              | 1946822817               |
| SNP_P4_58651_37682998 | NC_021163.1    | Ca_kabuli_chr04 | 37682998                | AA                              | GG              | 1946822820               |
| SNP_P4_58652_37683602 | NC_021163.1    | Ca_kabuli_chr04 | 37683602                | TT                              | AA              | 1946822822               |
| SNP_P4_58653_37684740 | NC_021163.1    | Ca_kabuli_chr04 | 37684740                | TT                              | GG              | 1946822824               |
| SNP_P4_58654_37684755 | NC_021163.1    | Ca_kabuli_chr04 | 37684755                | CC                              | TT              | 1946822826               |
| SNP_P4_58655_37688361 | NC_021163.1    | Ca_kabuli_chr04 | 37688361                | GG                              | TT              | 1946822828               |
| SNP_P4_58657_37688651 | NC_021163.1    | Ca_kabuli_chr04 | 37688651                | AA                              | GG              | 1946822830               |
| SNP_P4_58658_37690767 | NC_021163.1    | Ca_kabuli_chr04 | 37690767                | CC                              | TT              | 1946822832               |
| SNP_P4_58659_37690961 | NC_021163.1    | Ca_kabuli_chr04 | 37690961                | TT                              | CC              | 1946822834               |
| SNP_P4_58660_37691096 | NC_021163.1    | Ca_kabuli_chr04 | 37691096                | TT                              | CC              | 1946822836               |
| SNP_P4_58662_37691131 | NC_021163.1    | Ca_kabuli_chr04 | 37691131                | GG                              | AA              | 1946822838               |
| SNP_P4_58663_37693463 | NC_021163.1    | Ca_kabuli_chr04 | 37693463                | TT                              | GG              | 1946822840               |
| SNP_P4_58665_37693502 | NC_021163.1    | Ca_kabuli_chr04 | 37693502                | GG                              | AA              | 1946822842               |
| SNP_P4_58666_37693829 | NC_021163.1    | Ca_kabuli_chr04 | 37693829                | CC                              | TT              | 1946822844               |
| SNP_P4_58667_37694694 | NC_021163.1    | Ca_kabuli_chr04 | 37694694                | CC                              | TT              | 1946822846               |
| SNP_P4_58668_37694701 | NC_021163.1    | Ca_kabuli_chr04 | 37694701                | CC                              | TT              | 1946822848               |
| SNP_P4_58670_37695906 | NC_021163.1    | Ca_kabuli_chr04 | 37695906                | AA                              | TT              | 1946822850               |
| SNP_P4_58671_37695924 | NC_021163.1    | Ca_kabuli_chr04 | 37695924                | GG                              | CC              | 1946822852               |
| SNP_P4_58672_37695925 | NC_021163.1    | Ca_kabuli_chr04 | 37695925                | CC                              | TT              | 1946822855               |
| SNP_P4_58673_37695969 | NC_021163.1    | Ca_kabuli_chr04 | 37695969                | TT                              | CC              | 1946822857               |
| SNP_P4_58674_37695976 | NC_021163.1    | Ca_kabuli_chr04 | 37695976                | CC                              | TT              | 1946822859               |
| SNP_P4_58677_37697682 | NC_021163.1    | Ca_kabuli_chr04 | 37697682                | GG                              | AA              | 1946822861               |
| SNP_P4_58679_37699176 | NC_021163.1    | Ca_kabuli_chr04 | 37699176                | AA                              | GG              | 1946822863               |
| SNP_P4_58680_37699782 | NC_021163.1    | Ca_kabuli_chr04 | 37699782                | GG                              | AA              | 1946822865               |
| SNP_P4_58681_37699894 | NC_021163.1    | Ca_kabuli_chr04 | 37699894                | CC                              | TT              | 1946822867               |
| SNP_P4_58682_37699981 | NC_021163.1    | Ca_kabuli_chr04 | 37699981                | GG                              | TT              | 1946822869               |
| SNP_P4_58683_37700066 | NC_021163.1    | Ca_kabuli_chr04 | 37700066                | AA                              | GG              | 1946822871               |
| SNP_P4_58685_37700345 | NC_021163.1    | Ca_kabuli_chr04 | 37700345                | AA                              | GG              | 1946822873               |
| SNP_P4_58687_37701414 | NC_021163.1    | Ca_kabuli_chr04 | 37701414                | CC                              | TT              | 1946822875               |
| SNP_P4_58688_37702101 | NC_021163.1    | Ca_kabuli_chr04 | 37702101                | TT                              | GG              | 1946822877               |

| SNPs IDs              | Chromosome IDs | Chromosomes     | Physical positions (bp) | CDC Frontier (Reference genome) | (ILWC46 & LPNB) | NCBI SNPdb Accession IDs |
|-----------------------|----------------|-----------------|-------------------------|---------------------------------|-----------------|--------------------------|
| SNP_P4_58689_37702373 | NC_021163.1    | Ca_kabuli_chr04 | 37702373                | CC                              | TT              | 1946822879               |
| SNP_P4_58690_37702424 | NC_021163.1    | Ca_kabuli_chr04 | 37702424                | AA                              | CC              | 1946822881               |
| SNP_P4_58691_37702443 | NC_021163.1    | Ca_kabuli_chr04 | 37702443                | TT                              | AA              | 1946822883               |
| SNP_P4_58692_37702446 | NC_021163.1    | Ca_kabuli_chr04 | 37702446                | GG                              | TT              | 1946822886               |
| SNP_P4_58693_37702456 | NC_021163.1    | Ca_kabuli_chr04 | 37702456                | TT                              | GG              | 1946822888               |
| SNP_P4_58694_37703751 | NC_021163.1    | Ca_kabuli_chr04 | 37703751                | TT                              | CC              | 1946822890               |
| SNP_P4_58695_37703863 | NC_021163.1    | Ca_kabuli_chr04 | 37703863                | AA                              | TT              | 1946822892               |
| SNP_P4_58696_37703941 | NC_021163.1    | Ca_kabuli_chr04 | 37703941                | AA                              | GG              | 1946822894               |
| SNP_P4_58699_37704106 | NC_021163.1    | Ca_kabuli_chr04 | 37704106                | CC                              | AA              | 1946822896               |
| SNP_P4_58700_37704109 | NC_021163.1    | Ca_kabuli_chr04 | 37704109                | AA                              | CC              | 1946822898               |
| SNP_P4_58702_37704272 | NC_021163.1    | Ca_kabuli_chr04 | 37704272                | TT                              | GG              | 1946822900               |
| SNP_P4_58704_37704345 | NC_021163.1    | Ca_kabuli_chr04 | 37704345                | AA                              | GG              | 1946822902               |
| SNP_P4_58705_37704705 | NC_021163.1    | Ca_kabuli_chr04 | 37704705                | TT                              | GG              | 1946822904               |
| SNP_P4_58706_37704755 | NC_021163.1    | Ca_kabuli_chr04 | 37704755                | AA                              | CC              | 1946822906               |
| SNP_P4_58707_37704782 | NC_021163.1    | Ca_kabuli_chr04 | 37704782                | CC                              | AA              | 1946822908               |
| SNP_P4_58708_37705061 | NC_021163.1    | Ca_kabuli_chr04 | 37705061                | TT                              | AA              | 1946822910               |
| SNP_P4_58709_37705224 | NC_021163.1    | Ca_kabuli_chr04 | 37705224                | GG                              | TT              | 1946822912               |
| SNP_P4_58710_37705317 | NC_021163.1    | Ca_kabuli_chr04 | 37705317                | AA                              | GG              | 1946822914               |
| SNP_P4_58711_37705335 | NC_021163.1    | Ca_kabuli_chr04 | 37705335                | TT                              | CC              | 1946822916               |
| SNP_P4_58712_37705349 | NC_021163.1    | Ca_kabuli_chr04 | 37705349                | CC                              | TT              | 1946822919               |
| SNP_P4_58713_37705350 | NC_021163.1    | Ca_kabuli_chr04 | 37705350                | GG                              | AA              | 1946822921               |
| SNP_P4_58715_37706061 | NC_021163.1    | Ca_kabuli_chr04 | 37706061                | AA                              | GG              | 1946822923               |
| SNP_P4_58719_37707088 | NC_021163.1    | Ca_kabuli_chr04 | 37707088                | CC                              | TT              | 1946822925               |
| SNP_P4_58720_37707106 | NC_021163.1    | Ca_kabuli_chr04 | 37707106                | GG                              | CC              | 1946822927               |
| SNP_P4_58722_37707192 | NC_021163.1    | Ca_kabuli_chr04 | 37707192                | AA                              | TT              | 1946822929               |
| SNP_P4_58723_37707198 | NC_021163.1    | Ca_kabuli_chr04 | 37707198                | TT                              | GG              | 1946822931               |
| SNP_P4_58724_37707346 | NC_021163.1    | Ca_kabuli_chr04 | 37707346                | CC                              | GG              | 1946822933               |
| SNP_P4_58726_37708911 | NC_021163.1    | Ca_kabuli_chr04 | 37708911                | GG                              | CC              | 1946822935               |
| SNP_P4_58727_37708964 | NC_021163.1    | Ca_kabuli_chr04 | 37708964                | GG                              | TT              | 1946822937               |
| SNP_P4_58728_37708976 | NC_021163.1    | Ca_kabuli_chr04 | 37708976                | TT                              | CC              | 1946822939               |
| SNP_P4_58729_37709043 | NC_021163.1    | Ca_kabuli_chr04 | 37709043                | GG                              | TT              | 1946822941               |
| SNP_P4_58730_37709111 | NC_021163.1    | Ca_kabuli_chr04 | 37709111                | CC                              | TT              | 1946822943               |
| SNP_P4_58731_37709144 | NC_021163.1    | Ca_kabuli_chr04 | 37709144                | TT                              | GG              | 1946822945               |
| SNP_P4_58732_37709221 | NC_021163.1    | Ca_kabuli_chr04 | 37709221                | TT                              | CC              | 1946822947               |
| SNP_P4_58733_37709251 | NC_021163.1    | Ca_kabuli_chr04 | 37709251                | TT                              | GG              | 1946822949               |
| SNP_P4_58734_37709255 | NC_021163.1    | Ca_kabuli_chr04 | 37709255                | AA                              | CC              | 1946822951               |
| SNP_P4_58735_37709257 | NC_021163.1    | Ca_kabuli_chr04 | 37709257                | AA                              | GG              | 1946822953               |
| SNP_P4_58736_37709723 | NC_021163.1    | Ca_kabuli_chr04 | 37709723                | AA                              | GG              | 1946822955               |
| SNP_P4_58737_37710133 | NC_021163.1    | Ca_kabuli_chr04 | 37710133                | TT                              | AA              | 1946822957               |
| SNP_P4_58738_37710234 | NC_021163.1    | Ca_kabuli_chr04 | 37710234                | AA                              | GG              | 1946822959               |
| SNP_P4_58739_37710252 | NC_021163.1    | Ca_kabuli_chr04 | 37710252                | TT                              | AA              | 1946822961               |
| SNP_P4_58740_37710420 | NC_021163.1    | Ca_kabuli_chr04 | 37710420                | AA                              | GG              | 1946822963               |

| SNPs IDs              | Chromosome IDs | Chromosomes     | Physical positions (bp) | CDC Frontier (Reference genome) | (ILWC46 & LPNB) | NCBI SNPdb Accession IDs |
|-----------------------|----------------|-----------------|-------------------------|---------------------------------|-----------------|--------------------------|
| SNP_P4_58742_37711372 | NC_021163.1    | Ca_kabuli_chr04 | 37711372                | AA                              | CC              | 1946822965               |
| SNP_P4_58743_37711484 | NC_021163.1    | Ca_kabuli_chr04 | 37711484                | CC                              | TT              | 1946822967               |
| SNP_P4_58744_37711492 | NC_021163.1    | Ca_kabuli_chr04 | 37711492                | AA                              | CC              | 1946822969               |
| SNP_P4_58746_37712458 | NC_021163.1    | Ca_kabuli_chr04 | 37712458                | AA                              | CC              | 1946822971               |
| SNP_P4_58747_37713209 | NC_021163.1    | Ca_kabuli_chr04 | 37713209                | AA                              | GG              | 1946822973               |
| SNP_P4_58748_37715050 | NC_021163.1    | Ca_kabuli_chr04 | 37715050                | CC                              | TT              | 1946822975               |
| SNP_P4_58749_37717354 | NC_021163.1    | Ca_kabuli_chr04 | 37717354                | AA                              | GG              | 1946822977               |
| SNP_P4_58750_37718446 | NC_021163.1    | Ca_kabuli_chr04 | 37718446                | AA                              | TT              | 1946822979               |
| SNP_P4_58751_37718479 | NC_021163.1    | Ca_kabuli_chr04 | 37718479                | TT                              | CC              | 1946822981               |
| SNP_P4_58752_37721468 | NC_021163.1    | Ca_kabuli_chr04 | 37721468                | CC                              | TT              | 1946822984               |
| SNP_P4_58753_37723859 | NC_021163.1    | Ca_kabuli_chr04 | 37723859                | CC                              | TT              | 1946822986               |
| SNP_P4_58754_37724158 | NC_021163.1    | Ca_kabuli_chr04 | 37724158                | AA                              | GG              | 1946822988               |
| SNP_P4_58755_37725558 | NC_021163.1    | Ca_kabuli_chr04 | 37725558                | AA                              | GG              | 1946822990               |
| SNP_P4_58756_37725965 | NC_021163.1    | Ca_kabuli_chr04 | 37725965                | TT                              | GG              | 1946822992               |
| SNP_P4_58757_37726662 | NC_021163.1    | Ca_kabuli_chr04 | 37726662                | AA                              | GG              | 1946822994               |
| SNP_P4_58758_37726910 | NC_021163.1    | Ca_kabuli_chr04 | 37726910                | AA                              | GG              | 1946822996               |
| SNP_P4_58760_37728325 | NC_021163.1    | Ca_kabuli_chr04 | 37728325                | AA                              | TT              | 1946822998               |
| SNP_P4_58761_37728326 | NC_021163.1    | Ca_kabuli_chr04 | 37728326                | GG                              | AA              | 1946823000               |
| SNP_P4_58762_37728381 | NC_021163.1    | Ca_kabuli_chr04 | 37728381                | AA                              | GG              | 1946823002               |
| SNP_P4_58763_37728385 | NC_021163.1    | Ca_kabuli_chr04 | 37728385                | CC                              | TT              | 1946823004               |
| SNP_P4_58764_37728429 | NC_021163.1    | Ca_kabuli_chr04 | 37728429                | AA                              | GG              | 1946823006               |
| SNP_P4_58765_37728550 | NC_021163.1    | Ca_kabuli_chr04 | 37728550                | GG                              | AA              | 1946823008               |
| SNP_P4_58766_37728620 | NC_021163.1    | Ca_kabuli_chr04 | 37728620                | TT                              | AA              | 1946823010               |
| SNP_P4_58767_37728622 | NC_021163.1    | Ca_kabuli_chr04 | 37728622                | TT                              | AA              | 1946823012               |
| SNP_P4_58768_37728632 | NC_021163.1    | Ca_kabuli_chr04 | 37728632                | TT                              | CC              | 1946823014               |
| SNP_P4_58769_37728646 | NC_021163.1    | Ca_kabuli_chr04 | 37728646                | TT                              | CC              | 1946823016               |
| SNP_P4_58770_37728651 | NC_021163.1    | Ca_kabuli_chr04 | 37728651                | TT                              | GG              | 1946823018               |
| SNP_P4_58771_37728666 | NC_021163.1    | Ca_kabuli_chr04 | 37728666                | CC                              | TT              | 1946823020               |
| SNP_P4_58772_37728801 | NC_021163.1    | Ca_kabuli_chr04 | 37728801                | AA                              | GG              | 1946823022               |
| SNP_P4_58773_37729285 | NC_021163.1    | Ca_kabuli_chr04 | 37729285                | AA                              | GG              | 1946823024               |
| SNP_P4_58774_37730145 | NC_021163.1    | Ca_kabuli_chr04 | 37730145                | GG                              | AA              | 1946823026               |
| SNP_P4_58775_37730215 | NC_021163.1    | Ca_kabuli_chr04 | 37730215                | CC                              | TT              | 1946823028               |
| SNP_P4_58776_37730666 | NC_021163.1    | Ca_kabuli_chr04 | 37730666                | TT                              | CC              | 1946823030               |
| SNP_P4_58777_37731044 | NC_021163.1    | Ca_kabuli_chr04 | 37731044                | CC                              | TT              | 1946823032               |
| SNP_P4_58778_37731102 | NC_021163.1    | Ca_kabuli_chr04 | 37731102                | CC                              | TT              | 1946823034               |
| SNP_P4_58779_37731477 | NC_021163.1    | Ca_kabuli_chr04 | 37731477                | GG                              | TT              | 1946823036               |
| SNP_P4_58780_37735417 | NC_021163.1    | Ca_kabuli_chr04 | 37735417                | GG                              | AA              | 1946823038               |
| SNP_P4_58781_37735450 | NC_021163.1    | Ca_kabuli_chr04 | 37735450                | AA                              | GG              | 1946823040               |
| SNP_P4_58782_37737511 | NC_021163.1    | Ca_kabuli_chr04 | 37737511                | CC                              | GG              | 1946823042               |
| SNP_P4_58783_37737524 | NC_021163.1    | Ca_kabuli_chr04 | 37737524                | TT                              | GG              | 1946823044               |
| SNP_P4_58784_37737533 | NC_021163.1    | Ca_kabuli_chr04 | 37737533                | GG                              | AA              | 1946823046               |
| SNP_P4_58785_37737547 | NC_021163.1    | Ca_kabuli_chr04 | 37737547                | TT                              | CC              | 1946823048               |

| SNPs IDs              | Chromosome IDs | Chromosomes     | Physical positions (bp) | CDC Frontier (Reference genome) | (ILWC46 & LPNB) | NCBI SNPdb Accession IDs |
|-----------------------|----------------|-----------------|-------------------------|---------------------------------|-----------------|--------------------------|
| SNP_P4_58786_37737560 | NC_021163.1    | Ca_kabuli_chr04 | 37737560                | GG                              | AA              | 1946823050               |
| SNP_P4_58787_37737804 | NC_021163.1    | Ca_kabuli_chr04 | 37737804                | AA                              | GG              | 1946823052               |
| SNP_P4_58788_37737859 | NC_021163.1    | Ca_kabuli_chr04 | 37737859                | AA                              | TT              | 1946823054               |
| SNP_P4_58789_37737946 | NC_021163.1    | Ca_kabuli_chr04 | 37737946                | CC                              | TT              | 1946823056               |
| SNP_P4_58790_37738267 | NC_021163.1    | Ca_kabuli_chr04 | 37738267                | TT                              | CC              | 1946823059               |
| SNP_P4_58791_37738279 | NC_021163.1    | Ca_kabuli_chr04 | 37738279                | AA                              | GG              | 1946823061               |
| SNP_P4_58792_37741329 | NC_021163.1    | Ca_kabuli_chr04 | 37741329                | TT                              | GG              | 1946823063               |
| SNP_P4_58793_37741666 | NC_021163.1    | Ca_kabuli_chr04 | 37741666                | GG                              | AA              | 1946823065               |
| SNP_P4_58794_37741835 | NC_021163.1    | Ca_kabuli_chr04 | 37741835                | GG                              | AA              | 1946823067               |
| SNP_P4_58795_37742888 | NC_021163.1    | Ca_kabuli_chr04 | 37742888                | AA                              | TT              | 1946823069               |
| SNP_P4_58796_37743028 | NC_021163.1    | Ca_kabuli_chr04 | 37743028                | AA                              | GG              | 1946823071               |
| SNP_P4_58797_37743149 | NC_021163.1    | Ca_kabuli_chr04 | 37743149                | GG                              | CC              | 1946823073               |
| SNP_P4_58798_37743151 | NC_021163.1    | Ca_kabuli_chr04 | 37743151                | AA                              | GG              | 1946823075               |
| SNP_P4_58799_37743155 | NC_021163.1    | Ca_kabuli_chr04 | 37743155                | AA                              | GG              | 1946823077               |
| SNP_P4_58800_37743285 | NC_021163.1    | Ca_kabuli_chr04 | 37743285                | TT                              | AA              | 1946823079               |
| SNP_P4_58801_37743300 | NC_021163.1    | Ca_kabuli_chr04 | 37743300                | CC                              | GG              | 1946823081               |
| SNP_P4_58802_37743943 | NC_021163.1    | Ca_kabuli_chr04 | 37743943                | GG                              | CC              | 1946823083               |
| SNP_P4_58804_37746074 | NC_021163.1    | Ca_kabuli_chr04 | 37746074                | TT                              | CC              | 1946823085               |
| SNP_P4_58806_37746453 | NC_021163.1    | Ca_kabuli_chr04 | 37746453                | GG                              | AA              | 1946823087               |
| SNP_P4_58807_37746458 | NC_021163.1    | Ca_kabuli_chr04 | 37746458                | TT                              | CC              | 1946823089               |
| SNP_P4_58808_37747548 | NC_021163.1    | Ca_kabuli_chr04 | 37747548                | TT                              | AA              | 1946823091               |
| SNP_P4_58809_37748156 | NC_021163.1    | Ca_kabuli_chr04 | 37748156                | TT                              | GG              | 1946823093               |
| SNP_P4_58810_37748277 | NC_021163.1    | Ca_kabuli_chr04 | 37748277                | CC                              | TT              | 1946823095               |
| SNP_P4_58811_37748375 | NC_021163.1    | Ca_kabuli_chr04 | 37748375                | GG                              | AA              | 1946823097               |
| SNP_P4_58812_37748377 | NC_021163.1    | Ca_kabuli_chr04 | 37748377                | CC                              | TT              | 1946823099               |
| SNP_P4_58813_37748418 | NC_021163.1    | Ca_kabuli_chr04 | 37748418                | GG                              | AA              | 1946823101               |
| SNP_P4_58814_37748469 | NC_021163.1    | Ca_kabuli_chr04 | 37748469                | TT                              | CC              | 1946823103               |
| SNP_P4_58815_37748615 | NC_021163.1    | Ca_kabuli_chr04 | 37748615                | TT                              | AA              | 1946823105               |
| SNP_P4_58816_37748657 | NC_021163.1    | Ca_kabuli_chr04 | 37748657                | GG                              | TT              | 1946823107               |
| SNP_P4_58817_37748675 | NC_021163.1    | Ca_kabuli_chr04 | 37748675                | TT                              | CC              | 1946823109               |
| SNP_P4_58818_37748677 | NC_021163.1    | Ca_kabuli_chr04 | 37748677                | CC                              | TT              | 1946823111               |
| SNP_P4_58819_37748678 | NC_021163.1    | Ca_kabuli_chr04 | 37748678                | AA                              | GG              | 1946823113               |
| SNP_P4_58820_37749831 | NC_021163.1    | Ca_kabuli_chr04 | 37749831                | CC                              | TT              | 1946823115               |
| SNP_P4_58821_37750109 | NC_021163.1    | Ca_kabuli_chr04 | 37750109                | GG                              | AA              | 1946823117               |
| SNP_P4_58822_37750245 | NC_021163.1    | Ca_kabuli_chr04 | 37750245                | GG                              | AA              | 1946823119               |
| SNP_P4_58823_37750490 | NC_021163.1    | Ca_kabuli_chr04 | 37750490                | AA                              | CC              | 1946823121               |
| SNP_P4_58824_37751147 | NC_021163.1    | Ca_kabuli_chr04 | 37751147                | CC                              | TT              | 1946823123               |
| SNP_P4_58825_37751166 | NC_021163.1    | Ca_kabuli_chr04 | 37751166                | AA                              | GG              | 1946823125               |
| SNP_P4_58826_37751199 | NC_021163.1    | Ca_kabuli_chr04 | 37751199                | TT                              | CC              | 1946823127               |
| SNP_P4_58827_37751371 | NC_021163.1    | Ca_kabuli_chr04 | 37751371                | CC                              | AA              | 1946823129               |
| SNP_P4_58828_37751406 | NC_021163.1    | Ca_kabuli_chr04 | 37751406                | GG                              | AA              | 1946823131               |
| SNP_P4_58831_37755608 | NC_021163.1    | Ca_kabuli_chr04 | 37755608                | CC                              | TT              | 1946823133               |

| SNPs IDs              | Chromosome IDs | Chromosomes     | Physical positions (bp) | CDC Frontier (Reference genome) | (ILWC46 & LPNB) | NCBI SNPdb Accession IDs |
|-----------------------|----------------|-----------------|-------------------------|---------------------------------|-----------------|--------------------------|
| SNP_P4_58832_37757133 | NC_021163.1    | Ca_kabuli_chr04 | 37757133                | CC                              | AA              | 1946823135               |
| SNP_P4_58833_37757204 | NC_021163.1    | Ca_kabuli_chr04 | 37757204                | TT                              | GG              | 1946823137               |
| SNP_P4_58834_37757205 | NC_021163.1    | Ca_kabuli_chr04 | 37757205                | GG                              | AA              | 1946823139               |
| SNP_P4_58835_37757395 | NC_021163.1    | Ca_kabuli_chr04 | 37757395                | CC                              | TT              | 1946823141               |
| SNP_P4_58836_37757401 | NC_021163.1    | Ca_kabuli_chr04 | 37757401                | AA                              | GG              | 1946823143               |
| SNP_P4_58837_37757435 | NC_021163.1    | Ca_kabuli_chr04 | 37757435                | TT                              | CC              | 1946823146               |
| SNP_P4_58838_37757437 | NC_021163.1    | Ca_kabuli_chr04 | 37757437                | AA                              | CC              | 1946823148               |
| SNP_P4_58839_37757472 | NC_021163.1    | Ca_kabuli_chr04 | 37757472                | GG                              | AA              | 1946823150               |
| SNP_P4_58840_37760147 | NC_021163.1    | Ca_kabuli_chr04 | 37760147                | CC                              | TT              | 1946823152               |
| SNP_P4_58842_37760692 | NC_021163.1    | Ca_kabuli_chr04 | 37760692                | CC                              | TT              | 1946823154               |
| SNP_P4_58843_37760936 | NC_021163.1    | Ca_kabuli_chr04 | 37760936                | GG                              | AA              | 1946823156               |
| SNP_P4_58844_37760950 | NC_021163.1    | Ca_kabuli_chr04 | 37760950                | GG                              | AA              | 1946823158               |
| SNP_P4_58845_37760980 | NC_021163.1    | Ca_kabuli_chr04 | 37760980                | AA                              | GG              | 1946823160               |
| SNP_P4_58846_37761162 | NC_021163.1    | Ca_kabuli_chr04 | 37761162                | AA                              | CC              | 1946823162               |
| SNP_P4_58847_37761761 | NC_021163.1    | Ca_kabuli_chr04 | 37761761                | TT                              | CC              | 1946823164               |
| SNP_P4_58848_37761779 | NC_021163.1    | Ca_kabuli_chr04 | 37761779                | CC                              | TT              | 1946823166               |
| SNP_P4_58849_37761846 | NC_021163.1    | Ca_kabuli_chr04 | 37761846                | TT                              | GG              | 1946823168               |
| SNP_P4_58850_37761879 | NC_021163.1    | Ca_kabuli_chr04 | 37761879                | AA                              | GG              | 1946823170               |
| SNP_P4_58851_37761981 | NC_021163.1    | Ca_kabuli_chr04 | 37761981                | GG                              | AA              | 1946823172               |
| SNP_P4_58852_37762279 | NC_021163.1    | Ca_kabuli_chr04 | 37762279                | TT                              | CC              | 1946823174               |
| SNP_P4_58853_37762358 | NC_021163.1    | Ca_kabuli_chr04 | 37762358                | GG                              | AA              | 1946823176               |
| SNP_P4_58854_37767712 | NC_021163.1    | Ca_kabuli_chr04 | 37767712                | GG                              | AA              | 1946823178               |
| SNP_P4_58855_37769877 | NC_021163.1    | Ca_kabuli_chr04 | 37769877                | GG                              | AA              | 1946823180               |
| SNP_P4_58856_37770390 | NC_021163.1    | Ca_kabuli_chr04 | 37770390                | AA                              | GG              | 1946823182               |
| SNP_P4_58857_37777378 | NC_021163.1    | Ca_kabuli_chr04 | 37777378                | TT                              | CC              | 1946823184               |
| SNP_P4_58858_37778100 | NC_021163.1    | Ca_kabuli_chr04 | 37778100                | CC                              | AA              | 1946823186               |
| SNP_P4_58859_37781034 | NC_021163.1    | Ca_kabuli_chr04 | 37781034                | AA                              | GG              | 1946823188               |
| SNP_P4_58860_37783916 | NC_021163.1    | Ca_kabuli_chr04 | 37783916                | GG                              | AA              | 1946823190               |
| SNP_P4_58861_37783959 | NC_021163.1    | Ca_kabuli_chr04 | 37783959                | GG                              | AA              | 1946823192               |
| SNP_P4_58862_37783967 | NC_021163.1    | Ca_kabuli_chr04 | 37783967                | TT                              | AA              | 1946823194               |
| SNP_P4_58863_37783984 | NC_021163.1    | Ca_kabuli_chr04 | 37783984                | TT                              | GG              | 1946823196               |
| SNP_P4_58864_37783999 | NC_021163.1    | Ca_kabuli_chr04 | 37783999                | TT                              | CC              | 1946823198               |
| SNP_P4_58865_37784003 | NC_021163.1    | Ca_kabuli_chr04 | 37784003                | GG                              | AA              | 1946823200               |
| SNP_P4_58866_37784014 | NC_021163.1    | Ca_kabuli_chr04 | 37784014                | CC                              | GG              | 1946823202               |
| SNP_P4_58867_37785626 | NC_021163.1    | Ca_kabuli_chr04 | 37785626                | AA                              | GG              | 1946823204               |
| SNP_P4_58868_37786953 | NC_021163.1    | Ca_kabuli_chr04 | 37786953                | TT                              | CC              | 1946823206               |
| SNP_P4_58869_37787440 | NC_021163.1    | Ca_kabuli_chr04 | 37787440                | TT                              | GG              | 1946823208               |
| SNP_P4_58870_37787624 | NC_021163.1    | Ca_kabuli_chr04 | 37787624                | TT                              | CC              | 1946823210               |
| SNP_P4_58871_37787746 | NC_021163.1    | Ca_kabuli_chr04 | 37787746                | TT                              | CC              | 1946823212               |
| SNP_P4_58873_37788485 | NC_021163.1    | Ca_kabuli_chr04 | 37788485                | TT                              | CC              | 1946823214               |
| SNP_P4_58874_37790288 | NC_021163.1    | Ca_kabuli_chr04 | 37790288                | CC                              | TT              | 1946823216               |
| SNP_P4_58875_37790295 | NC_021163.1    | Ca_kabuli_chr04 | 37790295                | TT                              | AA              | 1946823218               |

| SNPs IDs              | Chromosome IDs | Chromosomes     | Physical positions (bp) | CDC Frontier (Reference genome) | (ILWC46 & LPNB) | NCBI SNPdb Accession IDs |
|-----------------------|----------------|-----------------|-------------------------|---------------------------------|-----------------|--------------------------|
| SNP_P4_58876_37790589 | NC_021163.1    | Ca_kabuli_chr04 | 37790589                | CC                              | TT              | 1946823220               |
| SNP_P4_58877_37790619 | NC_021163.1    | Ca_kabuli_chr04 | 37790619                | TT                              | CC              | 1946823222               |
| SNP_P4_58878_37793574 | NC_021163.1    | Ca_kabuli_chr04 | 37793574                | TT                              | AA              | 1946823224               |
| SNP_P4_58879_37793749 | NC_021163.1    | Ca_kabuli_chr04 | 37793749                | GG                              | AA              | 1946823227               |
| SNP_P4_58880_37793757 | NC_021163.1    | Ca_kabuli_chr04 | 37793757                | AA                              | CC              | 1946823229               |
| SNP_P4_58881_37793766 | NC_021163.1    | Ca_kabuli_chr04 | 37793766                | GG                              | AA              | 1946823231               |
| SNP_P4_58882_37796140 | NC_021163.1    | Ca_kabuli_chr04 | 37796140                | CC                              | GG              | 1946823233               |
| SNP_P4_58883_37796357 | NC_021163.1    | Ca_kabuli_chr04 | 37796357                | AA                              | GG              | 1946823235               |
| SNP_P4_58884_37797651 | NC_021163.1    | Ca_kabuli_chr04 | 37797651                | GG                              | CC              | 1946823237               |
| SNP_P4_58885_37797676 | NC_021163.1    | Ca_kabuli_chr04 | 37797676                | CC                              | TT              | 1946823239               |
| SNP_P4_58886_37798792 | NC_021163.1    | Ca_kabuli_chr04 | 37798792                | CC                              | TT              | 1946823241               |
| SNP_P4_58887_37800495 | NC_021163.1    | Ca_kabuli_chr04 | 37800495                | GG                              | TT              | 1946823243               |
| SNP_P4_58888_37800578 | NC_021163.1    | Ca_kabuli_chr04 | 37800578                | CC                              | TT              | 1946823245               |
| SNP_P4_58889_37800581 | NC_021163.1    | Ca_kabuli_chr04 | 37800581                | CC                              | TT              | 1946823247               |
| SNP_P4_58890_37800582 | NC_021163.1    | Ca_kabuli_chr04 | 37800582                | AA                              | GG              | 1946823249               |
| SNP_P4_58891_37800606 | NC_021163.1    | Ca_kabuli_chr04 | 37800606                | AA                              | GG              | 1946823251               |
| SNP_P4_58892_37801631 | NC_021163.1    | Ca_kabuli_chr04 | 37801631                | CC                              | TT              | 1946823253               |
| SNP_P4_58893_37801636 | NC_021163.1    | Ca_kabuli_chr04 | 37801636                | CC                              | TT              | 1946823255               |
| SNP_P4_58894_37801867 | NC_021163.1    | Ca_kabuli_chr04 | 37801867                | TT                              | AA              | 1946823257               |
| SNP_P4_58895_37801878 | NC_021163.1    | Ca_kabuli_chr04 | 37801878                | CC                              | TT              | 1946823259               |
| SNP_P4_58896_37801892 | NC_021163.1    | Ca_kabuli_chr04 | 37801892                | TT                              | AA              | 1946823261               |
| SNP_P4_58897_37801909 | NC_021163.1    | Ca_kabuli_chr04 | 37801909                | TT                              | GG              | 1946823263               |
| SNP_P4_58898_37801947 | NC_021163.1    | Ca_kabuli_chr04 | 37801947                | TT                              | CC              | 1946823265               |
| SNP_P4_58899_37801993 | NC_021163.1    | Ca_kabuli_chr04 | 37801993                | TT                              | CC              | 1946823267               |
| SNP_P4_58900_37801999 | NC_021163.1    | Ca_kabuli_chr04 | 37801999                | AA                              | GG              | 1946823269               |
| SNP_P4_58901_37802182 | NC_021163.1    | Ca_kabuli_chr04 | 37802182                | GG                              | AA              | 1946823271               |
| SNP_P4_58902_37802193 | NC_021163.1    | Ca_kabuli_chr04 | 37802193                | TT                              | CC              | 1946823273               |
| SNP_P4_58903_37802194 | NC_021163.1    | Ca_kabuli_chr04 | 37802194                | AA                              | CC              | 1946823275               |
| SNP_P4_58904_37802210 | NC_021163.1    | Ca_kabuli_chr04 | 37802210                | TT                              | CC              | 1946823277               |
| SNP_P4_58905_37802212 | NC_021163.1    | Ca_kabuli_chr04 | 37802212                | AA                              | GG              | 1946823279               |
| SNP_P4_58906_37802217 | NC_021163.1    | Ca_kabuli_chr04 | 37802217                | CC                              | AA              | 1946823281               |
| SNP_P4_58907_37802245 | NC_021163.1    | Ca_kabuli_chr04 | 37802245                | TT                              | CC              | 1946823283               |
| SNP_P4_58908_37802650 | NC_021163.1    | Ca_kabuli_chr04 | 37802650                | TT                              | CC              | 1946823285               |
| SNP_P4_58909_37802676 | NC_021163.1    | Ca_kabuli_chr04 | 37802676                | GG                              | AA              | 1946823288               |
| SNP_P4_58910_37802721 | NC_021163.1    | Ca_kabuli_chr04 | 37802721                | CC                              | TT              | 1946823290               |
| SNP_P4_58911_37802723 | NC_021163.1    | Ca_kabuli_chr04 | 37802723                | TT                              | CC              | 1946823292               |
| SNP_P4_58912_37802730 | NC_021163.1    | Ca_kabuli_chr04 | 37802730                | CC                              | TT              | 1946823294               |
| SNP_P4_58913_37804912 | NC_021163.1    | Ca_kabuli_chr04 | 37804912                | AA                              | GG              | 1946823296               |
| SNP_P4_58914_37805568 | NC_021163.1    | Ca_kabuli_chr04 | 37805568                | GG                              | AA              | 1946823298               |
| SNP_P4_58915_37806745 | NC_021163.1    | Ca_kabuli_chr04 | 37806745                | AA                              | TT              | 1946823300               |
| SNP_P4_58916_37810673 | NC_021163.1    | Ca_kabuli_chr04 | 37810673                | AA                              | GG              | 1946823302               |
| SNP_P4_58917_37810681 | NC_021163.1    | Ca_kabuli_chr04 | 37810681                | GG                              | TT              | 1946823304               |

| SNPs IDs              | Chromosome IDs | Chromosomes     | Physical positions (bp) | CDC Frontier (Reference genome) | (ILWC46 & LPNB) | NCBI SNPdb Accession IDs |
|-----------------------|----------------|-----------------|-------------------------|---------------------------------|-----------------|--------------------------|
| SNP_P4_58918_37811163 | NC_021163.1    | Ca_kabuli_chr04 | 37811163                | AA                              | GG              | 1946823306               |
| SNP_P4_58919_37811241 | NC_021163.1    | Ca_kabuli_chr04 | 37811241                | AA                              | TT              | 1946823308               |
| SNP_P4_58920_37811294 | NC_021163.1    | Ca_kabuli_chr04 | 37811294                | AA                              | GG              | 1946823310               |
| SNP_P4_58921_37815310 | NC_021163.1    | Ca_kabuli_chr04 | 37815310                | AA                              | CC              | 1946823312               |
| SNP_P4_58922_37815356 | NC_021163.1    | Ca_kabuli_chr04 | 37815356                | AA                              | GG              | 1946823314               |
| SNP_P4_58924_37817646 | NC_021163.1    | Ca_kabuli_chr04 | 37817646                | GG                              | AA              | 1946823316               |
| SNP_P4_58925_37817685 | NC_021163.1    | Ca_kabuli_chr04 | 37817685                | AA                              | TT              | 1946823318               |
| SNP_P4_58926_37819100 | NC_021163.1    | Ca_kabuli_chr04 | 37819100                | AA                              | GG              | 1946823320               |
| SNP_P4_58927_37820317 | NC_021163.1    | Ca_kabuli_chr04 | 37820317                | CC                              | TT              | 1946823322               |
| SNP_P4_58928_37823122 | NC_021163.1    | Ca_kabuli_chr04 | 37823122                | GG                              | AA              | 1946823324               |
| SNP_P4_58929_37823352 | NC_021163.1    | Ca_kabuli_chr04 | 37823352                | TT                              | CC              | 1946823326               |
| SNP_P4_58931_37826846 | NC_021163.1    | Ca_kabuli_chr04 | 37826846                | GG                              | AA              | 1946823328               |
| SNP_P4_58932_37827383 | NC_021163.1    | Ca_kabuli_chr04 | 37827383                | GG                              | AA              | 1946823330               |
| SNP_P4_58933_37827386 | NC_021163.1    | Ca_kabuli_chr04 | 37827386                | AA                              | TT              | 1946823332               |
| SNP_P4_58934_37827405 | NC_021163.1    | Ca_kabuli_chr04 | 37827405                | GG                              | CC              | 1946823334               |
| SNP_P4_58935_37827640 | NC_021163.1    | Ca_kabuli_chr04 | 37827640                | AA                              | TT              | 1946823336               |
| SNP_P4_58936_37827664 | NC_021163.1    | Ca_kabuli_chr04 | 37827664                | AA                              | TT              | 1946823338               |
| SNP_P4_58937_37828355 | NC_021163.1    | Ca_kabuli_chr04 | 37828355                | TT                              | AA              | 1946823340               |
| SNP_P4_58938_37828379 | NC_021163.1    | Ca_kabuli_chr04 | 37828379                | TT                              | CC              | 1946823342               |
| SNP_P4_58939_37836932 | NC_021163.1    | Ca_kabuli_chr04 | 37836932                | CC                              | TT              | 1946823344               |
| SNP_P4_58940_37838782 | NC_021163.1    | Ca_kabuli_chr04 | 37838782                | CC                              | TT              | 1946823346               |
| SNP_P4_58941_37838804 | NC_021163.1    | Ca_kabuli_chr04 | 37838804                | GG                              | AA              | 1946823348               |
| SNP_P4_58942_37840497 | NC_021163.1    | Ca_kabuli_chr04 | 37840497                | CC                              | TT              | 1946823350               |
| SNP_P4_58943_37841854 | NC_021163.1    | Ca_kabuli_chr04 | 37841854                | CC                              | TT              | 1946823353               |
| SNP_P4_58944_37842151 | NC_021163.1    | Ca_kabuli_chr04 | 37842151                | CC                              | TT              | 1946823355               |
| SNP_P4_58945_37842186 | NC_021163.1    | Ca_kabuli_chr04 | 37842186                | GG                              | TT              | 1946823357               |
| SNP_P4_58946_37842204 | NC_021163.1    | Ca_kabuli_chr04 | 37842204                | CC                              | AA              | 1946823359               |
| SNP_P4_58947_37842425 | NC_021163.1    | Ca_kabuli_chr04 | 37842425                | CC                              | TT              | 1946823361               |
| SNP_P4_58948_37843297 | NC_021163.1    | Ca_kabuli_chr04 | 37843297                | AA                              | TT              | 1946823363               |
| SNP_P4_58949_37843331 | NC_021163.1    | Ca_kabuli_chr04 | 37843331                | TT                              | AA              | 1946823365               |
| SNP_P4_58950_37843349 | NC_021163.1    | Ca_kabuli_chr04 | 37843349                | TT                              | CC              | 1946823367               |
| SNP_P4_58951_37843360 | NC_021163.1    | Ca_kabuli_chr04 | 37843360                | CC                              | GG              | 1946823369               |
| SNP_P4_58952_37844204 | NC_021163.1    | Ca_kabuli_chr04 | 37844204                | TT                              | CC              | 1946823371               |
| SNP_P4_58953_37846166 | NC_021163.1    | Ca_kabuli_chr04 | 37846166                | AA                              | GG              | 1946823373               |
| SNP_P4_58954_37846197 | NC_021163.1    | Ca_kabuli_chr04 | 37846197                | AA                              | GG              | 1946823374               |
| SNP_P4_58955_37846227 | NC_021163.1    | Ca_kabuli_chr04 | 37846227                | AA                              | CC              | 1946823375               |
| SNP_P4_58956_37846242 | NC_021163.1    | Ca_kabuli_chr04 | 37846242                | CC                              | TT              | 1946823376               |
| SNP_P4_58957_37846256 | NC_021163.1    | Ca_kabuli_chr04 | 37846256                | TT                              | CC              | 1946823377               |
| SNP_P4_58958_37846260 | NC_021163.1    | Ca_kabuli_chr04 | 37846260                | CC                              | TT              | 1946823379               |
| SNP_P4_58959_37846261 | NC_021163.1    | Ca_kabuli_chr04 | 37846261                | TT                              | CC              | 1946823381               |
| SNP_P4_58960_37846264 | NC_021163.1    | Ca_kabuli_chr04 | 37846264                | CC                              | AA              | 1946823383               |
| SNP_P4_58961_37846279 | NC_021163.1    | Ca_kabuli_chr04 | 37846279                | CC                              | TT              | 1946823385               |

| SNPs IDs              | Chromosome IDs | Chromosomes     | Physical positions (bp) | CDC Frontier (Reference genome) | (ILWC46 & LPNB) | NCBI SNPdb Accession IDs |
|-----------------------|----------------|-----------------|-------------------------|---------------------------------|-----------------|--------------------------|
| SNP_P4_58962_37846383 | NC_021163.1    | Ca_kabuli_chr04 | 37846383                | CC                              | TT              | 1946823388               |
| SNP_P4_58963_37846598 | NC_021163.1    | Ca_kabuli_chr04 | 37846598                | CC                              | TT              | 1946823390               |
| SNP_P4_58964_37846691 | NC_021163.1    | Ca_kabuli_chr04 | 37846691                | AA                              | GG              | 1946823392               |
| SNP_P4_58965_37846697 | NC_021163.1    | Ca_kabuli_chr04 | 37846697                | GG                              | AA              | 1946823394               |
| SNP_P4_58966_37846715 | NC_021163.1    | Ca_kabuli_chr04 | 37846715                | AA                              | GG              | 1946823396               |
| SNP_P4_58967_37846742 | NC_021163.1    | Ca_kabuli_chr04 | 37846742                | TT                              | CC              | 1946823398               |
| SNP_P4_58968_37846748 | NC_021163.1    | Ca_kabuli_chr04 | 37846748                | GG                              | AA              | 1946823400               |
| SNP_P4_58969_37846941 | NC_021163.1    | Ca_kabuli_chr04 | 37846941                | GG                              | TT              | 1946823402               |
| SNP_P4_58970_37847869 | NC_021163.1    | Ca_kabuli_chr04 | 37847869                | CC                              | TT              | 1946823404               |
| SNP_P4_58971_37848204 | NC_021163.1    | Ca_kabuli_chr04 | 37848204                | TT                              | CC              | 1946823406               |
| SNP_P4_58972_37848213 | NC_021163.1    | Ca_kabuli_chr04 | 37848213                | TT                              | GG              | 1946823408               |
| SNP_P4_58973_37848477 | NC_021163.1    | Ca_kabuli_chr04 | 37848477                | CC                              | TT              | 1946823410               |
| SNP_P4_58974_37848496 | NC_021163.1    | Ca_kabuli_chr04 | 37848496                | CC                              | TT              | 1946823412               |
| SNP_P4_58975_37849164 | NC_021163.1    | Ca_kabuli_chr04 | 37849164                | CC                              | TT              | 1946823414               |
| SNP_P4_58976_37850392 | NC_021163.1    | Ca_kabuli_chr04 | 37850392                | CC                              | TT              | 1946823416               |
| SNP_P4_58977_37850408 | NC_021163.1    | Ca_kabuli_chr04 | 37850408                | GG                              | AA              | 1946823418               |
| SNP_P4_58978_37850521 | NC_021163.1    | Ca_kabuli_chr04 | 37850521                | TT                              | CC              | 1946823420               |
| SNP_P4_58980_37850644 | NC_021163.1    | Ca_kabuli_chr04 | 37850644                | TT                              | AA              | 1946823422               |
| SNP_P4_58981_37850819 | NC_021163.1    | Ca_kabuli_chr04 | 37850819                | GG                              | AA              | 1946823424               |
| SNP_P4_58982_37850873 | NC_021163.1    | Ca_kabuli_chr04 | 37850873                | CC                              | TT              | 1946823426               |
| SNP_P4_58983_37850888 | NC_021163.1    | Ca_kabuli_chr04 | 37850888                | GG                              | AA              | 1946823428               |
| SNP_P4_58984_37850919 | NC_021163.1    | Ca_kabuli_chr04 | 37850919                | AA                              | GG              | 1946823430               |
| SNP_P4_58985_37852110 | NC_021163.1    | Ca_kabuli_chr04 | 37852110                | GG                              | AA              | 1946823432               |
| SNP_P4_58986_37853550 | NC_021163.1    | Ca_kabuli_chr04 | 37853550                | AA                              | GG              | 1946823434               |
| SNP_P4_58987_37853559 | NC_021163.1    | Ca_kabuli_chr04 | 37853559                | TT                              | CC              | 1946823436               |
| SNP_P4_58988_37853572 | NC_021163.1    | Ca_kabuli_chr04 | 37853572                | TT                              | CC              | 1946823438               |
| SNP_P4_58989_37853610 | NC_021163.1    | Ca_kabuli_chr04 | 37853610                | GG                              | AA              | 1946823440               |
| SNP_P4_58990_37857921 | NC_021163.1    | Ca_kabuli_chr04 | 37857921                | GG                              | AA              | 1946823442               |
| SNP_P4_58991_37859795 | NC_021163.1    | Ca_kabuli_chr04 | 37859795                | CC                              | AA              | 1946823444               |
| SNP_P4_58994_37860911 | NC_021163.1    | Ca_kabuli_chr04 | 37860911                | TT                              | CC              | 1946823446               |
| SNP_P4_58995_37861846 | NC_021163.1    | Ca_kabuli_chr04 | 37861846                | TT                              | AA              | 1946823448               |
| SNP_P4_58996_37861890 | NC_021163.1    | Ca_kabuli_chr04 | 37861890                | AA                              | GG              | 1946823450               |
| SNP_P4_58997_37862981 | NC_021163.1    | Ca_kabuli_chr04 | 37862981                | TT                              | AA              | 1946823452               |
| SNP_P4_58998_37865722 | NC_021163.1    | Ca_kabuli_chr04 | 37865722                | AA                              | GG              | 1946823454               |
| SNP_P4_58999_37866221 | NC_021163.1    | Ca_kabuli_chr04 | 37866221                | TT                              | CC              | 1946823456               |
| SNP_P4_59000_37866224 | NC_021163.1    | Ca_kabuli_chr04 | 37866224                | GG                              | AA              | 1946823458               |
| SNP_P4_59001_37867341 | NC_021163.1    | Ca_kabuli_chr04 | 37867341                | GG                              | TT              | 1946823460               |
| SNP_P4_59002_37868612 | NC_021163.1    | Ca_kabuli_chr04 | 37868612                | GG                              | AA              | 1946823462               |
| SNP_P4_59003_37868644 | NC_021163.1    | Ca_kabuli_chr04 | 37868644                | GG                              | AA              | 1946823464               |
| SNP_P4_59004_37869061 | NC_021163.1    | Ca_kabuli_chr04 | 37869061                | TT                              | CC              | 1946823466               |
| SNP_P4_59006_37871915 | NC_021163.1    | Ca_kabuli_chr04 | 37871915                | CC                              | TT              | 1946823468               |
| SNP_P4_59007_37872448 | NC_021163.1    | Ca_kabuli_chr04 | 37872448                | TT                              | GG              | 1946823470               |



| SNPs IDs              | Chromosome IDs | Chromosomes     | Physical positions (bp) | CDC Frontier (Reference genome) | (ILWC46 & LPNB) | NCBI SNPdb Accession IDs |
|-----------------------|----------------|-----------------|-------------------------|---------------------------------|-----------------|--------------------------|
| SNP_P4_59009_37872710 | NC_021163.1    | Ca_kabuli_chr04 | 37872710                | TT                              | CC              | 1946823472               |
| SNP_P4_59010_37872776 | NC_021163.1    | Ca_kabuli_chr04 | 37872776                | TT                              | CC              | 1946823474               |
| SNP_P4_59011_37874767 | NC_021163.1    | Ca_kabuli_chr04 | 37874767                | AA                              | TT              | 1946823476               |
| SNP_P4_59012_37876083 | NC_021163.1    | Ca_kabuli_chr04 | 37876083                | TT                              | AA              | 1946823478               |
| SNP_P4_59013_37879621 | NC_021163.1    | Ca_kabuli_chr04 | 37879621                | TT                              | GG              | 1946823480               |
| SNP_P4_59014_37880199 | NC_021163.1    | Ca_kabuli_chr04 | 37880199                | CC                              | TT              | 1946823482               |
| SNP_P4_59015_37880218 | NC_021163.1    | Ca_kabuli_chr04 | 37880218                | GG                              | AA              | 1946823484               |
| SNP_P4_59016_37880958 | NC_021163.1    | Ca_kabuli_chr04 | 37880958                | AA                              | GG              | 1946823486               |
| SNP_P4_59018_37881264 | NC_021163.1    | Ca_kabuli_chr04 | 37881264                | GG                              | AA              | 1946823488               |
| SNP_P4_59019_37881461 | NC_021163.1    | Ca_kabuli_chr04 | 37881461                | GG                              | CC              | 1946823490               |
| SNP_P4_59020_37881651 | NC_021163.1    | Ca_kabuli_chr04 | 37881651                | TT                              | AA              | 1946823492               |
| SNP_P4_59021_37883168 | NC_021163.1    | Ca_kabuli_chr04 | 37883168                | TT                              | CC              | 1946823494               |
| SNP_P4_59022_37883181 | NC_021163.1    | Ca_kabuli_chr04 | 37883181                | AA                              | CC              | 1946823496               |
| SNP_P4_59023_37883469 | NC_021163.1    | Ca_kabuli_chr04 | 37883469                | CC                              | TT              | 1946823498               |
| SNP_P4_59024_37884220 | NC_021163.1    | Ca_kabuli_chr04 | 37884220                | CC                              | AA              | 1946823500               |
| SNP_P4_59025_37884256 | NC_021163.1    | Ca_kabuli_chr04 | 37884256                | AA                              | CC              | 1946823502               |
| SNP_P4_59026_37884283 | NC_021163.1    | Ca_kabuli_chr04 | 37884283                | GG                              | TT              | 1946823504               |
| SNP_P4_59027_37884464 | NC_021163.1    | Ca_kabuli_chr04 | 37884464                | GG                              | TT              | 1946823506               |
| SNP_P4_59028_37884712 | NC_021163.1    | Ca_kabuli_chr04 | 37884712                | GG                              | AA              | 1946823508               |
| SNP_P4_59029_37884732 | NC_021163.1    | Ca_kabuli_chr04 | 37884732                | TT                              | CC              | 1946823510               |
| SNP_P4_59030_37884739 | NC_021163.1    | Ca_kabuli_chr04 | 37884739                | GG                              | AA              | 1946823513               |
| SNP_P4_59031_37884744 | NC_021163.1    | Ca_kabuli_chr04 | 37884744                | TT                              | GG              | 1946823515               |
| SNP_P4_59032_37884810 | NC_021163.1    | Ca_kabuli_chr04 | 37884810                | CC                              | AA              | 1946823517               |
| SNP_P4_59033_37884828 | NC_021163.1    | Ca_kabuli_chr04 | 37884828                | GG                              | AA              | 1946823519               |
| SNP_P4_59034_37884921 | NC_021163.1    | Ca_kabuli_chr04 | 37884921                | CC                              | AA              | 1946823521               |
| SNP_P4_59035_37884982 | NC_021163.1    | Ca_kabuli_chr04 | 37884982                | AA                              | GG              | 1946823523               |
| SNP_P4_59036_37885015 | NC_021163.1    | Ca_kabuli_chr04 | 37885015                | GG                              | AA              | 1946823525               |
| SNP_P4_59037_37885154 | NC_021163.1    | Ca_kabuli_chr04 | 37885154                | GG                              | AA              | 1946823527               |
| SNP_P4_59038_37885245 | NC_021163.1    | Ca_kabuli_chr04 | 37885245                | CC                              | TT              | 1946823529               |
| SNP_P4_59039_37885293 | NC_021163.1    | Ca_kabuli_chr04 | 37885293                | AA                              | GG              | 1946823531               |
| SNP_P4_59040_37886280 | NC_021163.1    | Ca_kabuli_chr04 | 37886280                | AA                              | GG              | 1946823533               |
| SNP_P4_59041_37886315 | NC_021163.1    | Ca_kabuli_chr04 | 37886315                | CC                              | AA              | 1946823535               |
| SNP_P4_59042_37886672 | NC_021163.1    | Ca_kabuli_chr04 | 37886672                | AA                              | CC              | 1946823537               |
| SNP_P4_59043_37886825 | NC_021163.1    | Ca_kabuli_chr04 | 37886825                | GG                              | AA              | 1946823539               |
| SNP_P4_59044_37887022 | NC_021163.1    | Ca_kabuli_chr04 | 37887022                | CC                              | TT              | 1946823541               |
| SNP_P4_59045_37887045 | NC_021163.1    | Ca_kabuli_chr04 | 37887045                | TT                              | CC              | 1946823543               |
| SNP_P4_59046_37887049 | NC_021163.1    | Ca_kabuli_chr04 | 37887049                | TT                              | CC              | 1946823545               |
| SNP_P4_59047_37887055 | NC_021163.1    | Ca_kabuli_chr04 | 37887055                | TT                              | AA              | 1946823547               |
| SNP_P4_59048_37887062 | NC_021163.1    | Ca_kabuli_chr04 | 37887062                | GG                              | AA              | 1946823549               |
| SNP_P4_59049_37887674 | NC_021163.1    | Ca_kabuli_chr04 | 37887674                | CC                              | TT              | 1946823551               |
| SNP_P4_59050_37887901 | NC_021163.1    | Ca_kabuli_chr04 | 37887901                | AA                              | TT              | 1946823553               |
| SNP_P4_59051_37889393 | NC_021163.1    | Ca_kabuli_chr04 | 37889393                | TT                              | AA              | 1946823555               |

| SNPs IDs              | Chromosome IDs | Chromosomes     | Physical positions (bp) | CDC Frontier (Reference genome) | (ILWC46 & LPNB) | NCBI SNPdb Accession IDs |
|-----------------------|----------------|-----------------|-------------------------|---------------------------------|-----------------|--------------------------|
| SNP_P4_59052_37889420 | NC_021163.1    | Ca_kabuli_chr04 | 37889420                | AA                              | GG              | 1946823557               |
| SNP_P4_59053_37890199 | NC_021163.1    | Ca_kabuli_chr04 | 37890199                | TT                              | CC              | 1946823559               |
| SNP_P4_59054_37891023 | NC_021163.1    | Ca_kabuli_chr04 | 37891023                | TT                              | CC              | 1946823561               |
| SNP_P4_59055_37891402 | NC_021163.1    | Ca_kabuli_chr04 | 37891402                | GG                              | AA              | 1946823563               |
| SNP_P4_59057_37895220 | NC_021163.1    | Ca_kabuli_chr04 | 37895220                | TT                              | GG              | 1946823565               |
| SNP_P4_59058_37895540 | NC_021163.1    | Ca_kabuli_chr04 | 37895540                | GG                              | TT              | 1946823568               |
| SNP_P4_59059_37895601 | NC_021163.1    | Ca_kabuli_chr04 | 37895601                | GG                              | CC              | 1946823570               |
| SNP_P4_59061_37900930 | NC_021163.1    | Ca_kabuli_chr04 | 37900930                | GG                              | AA              | 1946823572               |
| SNP_P4_59062_37907161 | NC_021163.1    | Ca_kabuli_chr04 | 37907161                | GG                              | AA              | 1946823574               |
| SNP_P4_59063_37907165 | NC_021163.1    | Ca_kabuli_chr04 | 37907165                | CC                              | TT              | 1946823576               |
| SNP_P4_59064_37907738 | NC_021163.1    | Ca_kabuli_chr04 | 37907738                | CC                              | TT              | 1946823578               |
| SNP_P4_59065_37907769 | NC_021163.1    | Ca_kabuli_chr04 | 37907769                | TT                              | CC              | 1946823580               |
| SNP_P4_59066_37907793 | NC_021163.1    | Ca_kabuli_chr04 | 37907793                | AA                              | GG              | 1946823582               |
| SNP_P4_59067_37908490 | NC_021163.1    | Ca_kabuli_chr04 | 37908490                | TT                              | CC              | 1946823584               |
| SNP_P4_59068_37908501 | NC_021163.1    | Ca_kabuli_chr04 | 37908501                | AA                              | GG              | 1946823586               |
| SNP_P4_59069_37908511 | NC_021163.1    | Ca_kabuli_chr04 | 37908511                | AA                              | GG              | 1946823588               |
| SNP_P4_59071_37909209 | NC_021163.1    | Ca_kabuli_chr04 | 37909209                | CC                              | AA              | 1946823590               |
| SNP_P4_59072_37909210 | NC_021163.1    | Ca_kabuli_chr04 | 37909210                | AA                              | CC              | 1946823592               |
| SNP_P4_59073_37909712 | NC_021163.1    | Ca_kabuli_chr04 | 37909712                | CC                              | AA              | 1946823594               |
| SNP_P4_59074_37910552 | NC_021163.1    | Ca_kabuli_chr04 | 37910552                | CC                              | TT              | 1946823596               |
| SNP_P4_59075_37910570 | NC_021163.1    | Ca_kabuli_chr04 | 37910570                | GG                              | AA              | 1946823598               |
| SNP_P4_59076_37910605 | NC_021163.1    | Ca_kabuli_chr04 | 37910605                | TT                              | CC              | 1946823600               |
| SNP_P4_59077_37910609 | NC_021163.1    | Ca_kabuli_chr04 | 37910609                | TT                              | CC              | 1946823602               |
| SNP_P4_59078_37911545 | NC_021163.1    | Ca_kabuli_chr04 | 37911545                | AA                              | GG              | 1946823603               |
| SNP_P4_59079_37911558 | NC_021163.1    | Ca_kabuli_chr04 | 37911558                | CC                              | TT              | 1946823604               |
| SNP_P4_59080_37911566 | NC_021163.1    | Ca_kabuli_chr04 | 37911566                | CC                              | TT              | 1946823605               |
| SNP_P4_59081_37911568 | NC_021163.1    | Ca_kabuli_chr04 | 37911568                | AA                              | GG              | 1946823606               |
| SNP_P4_59082_37911707 | NC_021163.1    | Ca_kabuli_chr04 | 37911707                | CC                              | AA              | 1946823608               |
| SNP_P4_59083_37911727 | NC_021163.1    | Ca_kabuli_chr04 | 37911727                | TT                              | CC              | 1946823610               |
| SNP_P4_59084_37911761 | NC_021163.1    | Ca_kabuli_chr04 | 37911761                | TT                              | CC              | 1946823612               |
| SNP_P4_59085_37911771 | NC_021163.1    | Ca_kabuli_chr04 | 37911771                | GG                              | AA              | 1946823614               |
| SNP_P4_59086_37912007 | NC_021163.1    | Ca_kabuli_chr04 | 37912007                | CC                              | TT              | 1946823616               |
| SNP_P4_59087_37912018 | NC_021163.1    | Ca_kabuli_chr04 | 37912018                | AA                              | TT              | 1946823618               |
| SNP_P4_59088_37917057 | NC_021163.1    | Ca_kabuli_chr04 | 37917057                | TT                              | AA              | 1946823620               |
| SNP_P4_59089_37918859 | NC_021163.1    | Ca_kabuli_chr04 | 37918859                | CC                              | AA              | 1946823622               |
| SNP_P4_59090_37918958 | NC_021163.1    | Ca_kabuli_chr04 | 37918958                | CC                              | TT              | 1946823624               |
| SNP_P4_59091_37919671 | NC_021163.1    | Ca_kabuli_chr04 | 37919671                | CC                              | TT              | 1946823626               |
| SNP_P4_59092_37920004 | NC_021163.1    | Ca_kabuli_chr04 | 37920004                | CC                              | AA              | 1946823628               |
| SNP_P4_59093_37930908 | NC_021163.1    | Ca_kabuli_chr04 | 37930908                | TT                              | CC              | 1946823630               |
| SNP_P4_59094_37930932 | NC_021163.1    | Ca_kabuli_chr04 | 37930932                | GG                              | AA              | 1946823632               |
| SNP_P4_59095_37930949 | NC_021163.1    | Ca_kabuli_chr04 | 37930949                | TT                              | CC              | 1946823634               |
| SNP_P4_59096_37930972 | NC_021163.1    | Ca_kabuli_chr04 | 37930972                | AA                              | GG              | 1946823636               |

| SNPs IDs              | Chromosome IDs | Chromosomes     | Physical positions (bp) | CDC Frontier (Reference genome) | (ILWC46 & LPNB) | NCBI SNPdb Accession IDs |
|-----------------------|----------------|-----------------|-------------------------|---------------------------------|-----------------|--------------------------|
| SNP_P4_59097_37931039 | NC_021163.1    | Ca_kabuli_chr04 | 37931039                | TT                              | AA              | 1946823638               |
| SNP_P4_59098_37931139 | NC_021163.1    | Ca_kabuli_chr04 | 37931139                | CC                              | TT              | 1946823640               |
| SNP_P4_59099_37931141 | NC_021163.1    | Ca_kabuli_chr04 | 37931141                | TT                              | CC              | 1946823642               |
| SNP_P4_59100_37931143 | NC_021163.1    | Ca_kabuli_chr04 | 37931143                | GG                              | TT              | 1946823644               |
| SNP_P4_59101_37931165 | NC_021163.1    | Ca_kabuli_chr04 | 37931165                | TT                              | CC              | 1946823646               |
| SNP_P4_59102_37931216 | NC_021163.1    | Ca_kabuli_chr04 | 37931216                | CC                              | TT              | 1946823648               |
| SNP_P4_59103_37931219 | NC_021163.1    | Ca_kabuli_chr04 | 37931219                | GG                              | AA              | 1946823650               |
| SNP_P4_59104_37932385 | NC_021163.1    | Ca_kabuli_chr04 | 37932385                | GG                              | AA              | 1946823652               |
| SNP_P4_59105_37932950 | NC_021163.1    | Ca_kabuli_chr04 | 37932950                | TT                              | AA              | 1946823654               |
| SNP_P4_59106_37933355 | NC_021163.1    | Ca_kabuli_chr04 | 37933355                | TT                              | CC              | 1946823656               |
| SNP_P4_59107_37933662 | NC_021163.1    | Ca_kabuli_chr04 | 37933662                | CC                              | TT              | 1946823658               |
| SNP_P4_59108_37933716 | NC_021163.1    | Ca_kabuli_chr04 | 37933716                | AA                              | GG              | 1946823660               |
| SNP_P4_59109_37933733 | NC_021163.1    | Ca_kabuli_chr04 | 37933733                | AA                              | TT              | 1946823662               |
| SNP_P4_59110_37933781 | NC_021163.1    | Ca_kabuli_chr04 | 37933781                | TT                              | AA              | 1946823664               |
| SNP_P4_59111_37933833 | NC_021163.1    | Ca_kabuli_chr04 | 37933833                | TT                              | CC              | 1946823666               |
| SNP_P4_59112_37935651 | NC_021163.1    | Ca_kabuli_chr04 | 37935651                | CC                              | GG              | 1946823668               |
| SNP_P4_59113_37938078 | NC_021163.1    | Ca_kabuli_chr04 | 37938078                | CC                              | GG              | 1946823670               |
| SNP_P4_59114_37938081 | NC_021163.1    | Ca_kabuli_chr04 | 37938081                | AA                              | TT              | 1946823672               |
| SNP_P4_59115_37938095 | NC_021163.1    | Ca_kabuli_chr04 | 37938095                | AA                              | GG              | 1946823674               |
| SNP_P4_59116_37938336 | NC_021163.1    | Ca_kabuli_chr04 | 37938336                | CC                              | TT              | 1946823676               |
| SNP_P4_59117_37938350 | NC_021163.1    | Ca_kabuli_chr04 | 37938350                | AA                              | GG              | 1946823678               |
| SNP_P4_59119_37938640 | NC_021163.1    | Ca_kabuli_chr04 | 37938640                | GG                              | AA              | 1946823680               |
| SNP_P4_59120_37938678 | NC_021163.1    | Ca_kabuli_chr04 | 37938678                | AA                              | TT              | 1946823682               |
| SNP_P4_59121_37938702 | NC_021163.1    | Ca_kabuli_chr04 | 37938702                | AA                              | GG              | 1946823684               |
| SNP_P4_59122_37953343 | NC_021163.1    | Ca_kabuli_chr04 | 37953343                | TT                              | CC              | 1946823686               |
| SNP_P4_59123_37953837 | NC_021163.1    | Ca_kabuli_chr04 | 37953837                | CC                              | TT              | 1946823688               |
| SNP_P4_59124_37953839 | NC_021163.1    | Ca_kabuli_chr04 | 37953839                | AA                              | GG              | 1946823691               |
| SNP_P4_59125_37974422 | NC_021163.1    | Ca_kabuli_chr04 | 37974422                | TT                              | CC              | 1946823693               |
| SNP_P4_59126_37974779 | NC_021163.1    | Ca_kabuli_chr04 | 37974779                | AA                              | GG              | 1946823695               |
| SNP_P4_59127_37974800 | NC_021163.1    | Ca_kabuli_chr04 | 37974800                | TT                              | CC              | 1946823697               |
| SNP_P4_59128_37975462 | NC_021163.1    | Ca_kabuli_chr04 | 37975462                | TT                              | CC              | 1946823699               |
| SNP_P4_59129_37975600 | NC_021163.1    | Ca_kabuli_chr04 | 37975600                | CC                              | TT              | 1946823701               |
| SNP_P4_59130_37975786 | NC_021163.1    | Ca_kabuli_chr04 | 37975786                | GG                              | AA              | 1946823703               |
| SNP_P4_59131_37975949 | NC_021163.1    | Ca_kabuli_chr04 | 37975949                | AA                              | CC              | 1946823705               |
| SNP_P4_59132_37976042 | NC_021163.1    | Ca_kabuli_chr04 | 37976042                | TT                              | CC              | 1946823707               |
| SNP_P4_59133_37976233 | NC_021163.1    | Ca_kabuli_chr04 | 37976233                | CC                              | TT              | 1946823709               |
| SNP_P4_59134_37976247 | NC_021163.1    | Ca_kabuli_chr04 | 37976247                | AA                              | GG              | 1946823711               |
| SNP_P4_59135_37976598 | NC_021163.1    | Ca_kabuli_chr04 | 37976598                | GG                              | AA              | 1946823713               |
| SNP_P4_59136_37976962 | NC_021163.1    | Ca_kabuli_chr04 | 37976962                | CC                              | TT              | 1946823715               |
| SNP_P4_59137_37977073 | NC_021163.1    | Ca_kabuli_chr04 | 37977073                | GG                              | AA              | 1946823717               |
| SNP_P4_59138_37977286 | NC_021163.1    | Ca_kabuli_chr04 | 37977286                | CC                              | GG              | 1946823719               |
| SNP_P4_59140_37977780 | NC_021163.1    | Ca_kabuli_chr04 | 37977780                | TT                              | AA              | 1946823721               |

| SNPs IDs              | Chromosome IDs | Chromosomes     | Physical positions (bp) | CDC Frontier (Reference genome) | (ILWC46 & LPNB) | NCBI SNPdb Accession IDs |
|-----------------------|----------------|-----------------|-------------------------|---------------------------------|-----------------|--------------------------|
| SNP_P4_59141_37977804 | NC_021163.1    | Ca_kabuli_chr04 | 37977804                | CC                              | TT              | 1946823723               |
| SNP_P4_59143_37980137 | NC_021163.1    | Ca_kabuli_chr04 | 37980137                | CC                              | AA              | 1946823725               |
| SNP_P4_59144_37980185 | NC_021163.1    | Ca_kabuli_chr04 | 37980185                | TT                              | AA              | 1946823727               |
| SNP_P4_59145_37980547 | NC_021163.1    | Ca_kabuli_chr04 | 37980547                | CC                              | GG              | 1946823729               |
| SNP_P4_59147_37983196 | NC_021163.1    | Ca_kabuli_chr04 | 37983196                | AA                              | CC              | 1946823731               |
| SNP_P4_59148_37983214 | NC_021163.1    | Ca_kabuli_chr04 | 37983214                | CC                              | AA              | 1946823733               |
| SNP_P4_59149_37984789 | NC_021163.1    | Ca_kabuli_chr04 | 37984789                | TT                              | CC              | 1946823735               |
| SNP_P4_59150_37984791 | NC_021163.1    | Ca_kabuli_chr04 | 37984791                | TT                              | CC              | 1946823737               |
| SNP_P4_59151_37985179 | NC_021163.1    | Ca_kabuli_chr04 | 37985179                | AA                              | GG              | 1946823739               |
| SNP_P4_59152_37986881 | NC_021163.1    | Ca_kabuli_chr04 | 37986881                | AA                              | GG              | 1946823742               |
| SNP_P4_59153_37986899 | NC_021163.1    | Ca_kabuli_chr04 | 37986899                | CC                              | AA              | 1946823744               |
| SNP_P4_59154_37986971 | NC_021163.1    | Ca_kabuli_chr04 | 37986971                | TT                              | CC              | 1946823746               |
| SNP_P4_59155_37989239 | NC_021163.1    | Ca_kabuli_chr04 | 37989239                | CC                              | AA              | 1946823748               |
| SNP_P4_59156_37989265 | NC_021163.1    | Ca_kabuli_chr04 | 37989265                | TT                              | CC              | 1946823750               |
| SNP_P4_59157_37989270 | NC_021163.1    | Ca_kabuli_chr04 | 37989270                | CC                              | TT              | 1946823752               |
| SNP_P4_59158_37989616 | NC_021163.1    | Ca_kabuli_chr04 | 37989616                | CC                              | TT              | 1946823754               |
| SNP_P4_59159_37989633 | NC_021163.1    | Ca_kabuli_chr04 | 37989633                | CC                              | GG              | 1946823756               |
| SNP_P4_59160_37989693 | NC_021163.1    | Ca_kabuli_chr04 | 37989693                | CC                              | TT              | 1946823758               |
| SNP_P4_59161_37989817 | NC_021163.1    | Ca_kabuli_chr04 | 37989817                | AA                              | GG              | 1946823760               |
| SNP_P4_59162_37989838 | NC_021163.1    | Ca_kabuli_chr04 | 37989838                | AA                              | GG              | 1946823762               |
| SNP_P4_59164_37990022 | NC_021163.1    | Ca_kabuli_chr04 | 37990022                | AA                              | GG              | 1946823764               |
| SNP_P4_59165_37990110 | NC_021163.1    | Ca_kabuli_chr04 | 37990110                | GG                              | AA              | 1946823766               |
| SNP_P4_59166_37990248 | NC_021163.1    | Ca_kabuli_chr04 | 37990248                | TT                              | CC              | 1946823768               |
| SNP_P4_59167_37991071 | NC_021163.1    | Ca_kabuli_chr04 | 37991071                | CC                              | TT              | 1946823770               |
| SNP_P4_59168_37991079 | NC_021163.1    | Ca_kabuli_chr04 | 37991079                | GG                              | AA              | 1946823772               |
| SNP_P4_59169_37991794 | NC_021163.1    | Ca_kabuli_chr04 | 37991794                | GG                              | AA              | 1946823775               |
| SNP_P4_59170_37991962 | NC_021163.1    | Ca_kabuli_chr04 | 37991962                | AA                              | GG              | 1946823777               |
| SNP_P4_59173_37994354 | NC_021163.1    | Ca_kabuli_chr04 | 37994354                | CC                              | TT              | 1946823779               |
| SNP_P4_59174_37994498 | NC_021163.1    | Ca_kabuli_chr04 | 37994498                | GG                              | AA              | 1946823781               |
| SNP_P4_59175_37994503 | NC_021163.1    | Ca_kabuli_chr04 | 37994503                | TT                              | CC              | 1946823783               |
| SNP_P4_59176_37994527 | NC_021163.1    | Ca_kabuli_chr04 | 37994527                | CC                              | TT              | 1946823785               |
| SNP_P4_59177_38001230 | NC_021163.1    | Ca_kabuli_chr04 | 38001230                | GG                              | AA              | 1946823787               |
| SNP_P4_59178_38001285 | NC_021163.1    | Ca_kabuli_chr04 | 38001285                | CC                              | TT              | 1946823789               |
| SNP_P4_59179_38003811 | NC_021163.1    | Ca_kabuli_chr04 | 38003811                | GG                              | AA              | 1946823791               |
| SNP_P4_59180_38003987 | NC_021163.1    | Ca_kabuli_chr04 | 38003987                | AA                              | TT              | 1946823793               |
| SNP_P4_59181_38004023 | NC_021163.1    | Ca_kabuli_chr04 | 38004023                | CC                              | TT              | 1946823795               |
| SNP_P4_59182_38004302 | NC_021163.1    | Ca_kabuli_chr04 | 38004302                | TT                              | CC              | 1946823798               |
| SNP_P4_59184_38004332 | NC_021163.1    | Ca_kabuli_chr04 | 38004332                | CC                              | TT              | 1946823800               |
| SNP_P4_59185_38004705 | NC_021163.1    | Ca_kabuli_chr04 | 38004705                | CC                              | TT              | 1946823802               |
| SNP_P4_59186_38004749 | NC_021163.1    | Ca_kabuli_chr04 | 38004749                | TT                              | AA              | 1946823804               |
| SNP_P4_59187_38005103 | NC_021163.1    | Ca_kabuli_chr04 | 38005103                | AA                              | TT              | 1946823806               |
| SNP_P4_59188_38005486 | NC_021163.1    | Ca_kabuli_chr04 | 38005486                | CC                              | GG              | 1946823808               |

| SNPs IDs              | Chromosome IDs | Chromosomes     | Physical positions (bp) | CDC Frontier (Reference genome) | (ILWC46 & LPNB) | NCBI SNPdb Accession IDs |
|-----------------------|----------------|-----------------|-------------------------|---------------------------------|-----------------|--------------------------|
| SNP_P4_59189_38006509 | NC_021163.1    | Ca_kabuli_chr04 | 38006509                | TT                              | CC              | 1946823810               |
| SNP_P4_59190_38006582 | NC_021163.1    | Ca_kabuli_chr04 | 38006582                | AA                              | GG              | 1946823812               |
| SNP_P4_59191_38007416 | NC_021163.1    | Ca_kabuli_chr04 | 38007416                | TT                              | CC              | 1946823814               |
| SNP_P4_59192_38008205 | NC_021163.1    | Ca_kabuli_chr04 | 38008205                | GG                              | AA              | 1946823816               |
| SNP_P4_59193_38008227 | NC_021163.1    | Ca_kabuli_chr04 | 38008227                | GG                              | TT              | 1946823818               |
| SNP_P4_59194_38009451 | NC_021163.1    | Ca_kabuli_chr04 | 38009451                | TT                              | CC              | 1946823820               |
| SNP_P4_59195_38009845 | NC_021163.1    | Ca_kabuli_chr04 | 38009845                | GG                              | TT              | 1946823822               |
| SNP_P4_59196_38010070 | NC_021163.1    | Ca_kabuli_chr04 | 38010070                | CC                              | TT              | 1946823824               |
| SNP_P4_59197_38011067 | NC_021163.1    | Ca_kabuli_chr04 | 38011067                | GG                              | AA              | 1946823826               |
| SNP_P4_59198_38011602 | NC_021163.1    | Ca_kabuli_chr04 | 38011602                | CC                              | GG              | 1946823828               |
| SNP_P4_59199_38011693 | NC_021163.1    | Ca_kabuli_chr04 | 38011693                | AA                              | GG              | 1946823830               |
| SNP_P4_59200_38011702 | NC_021163.1    | Ca_kabuli_chr04 | 38011702                | TT                              | CC              | 1946823832               |
| SNP_P4_59202_38015202 | NC_021163.1    | Ca_kabuli_chr04 | 38015202                | TT                              | CC              | 1946823834               |
| SNP_P4_59203_38015213 | NC_021163.1    | Ca_kabuli_chr04 | 38015213                | CC                              | AA              | 1946823836               |
| SNP_P4_59205_38017491 | NC_021163.1    | Ca_kabuli_chr04 | 38017491                | AA                              | TT              | 1946823838               |
| SNP_P4_59206_38017727 | NC_021163.1    | Ca_kabuli_chr04 | 38017727                | CC                              | TT              | 1946823840               |
| SNP_P4_59207_38017737 | NC_021163.1    | Ca_kabuli_chr04 | 38017737                | GG                              | AA              | 1946823842               |
| SNP_P4_59208_38018629 | NC_021163.1    | Ca_kabuli_chr04 | 38018629                | AA                              | CC              | 1946823844               |
| SNP_P4_59209_38018670 | NC_021163.1    | Ca_kabuli_chr04 | 38018670                | TT                              | CC              | 1946823846               |
| SNP_P4_59210_38018866 | NC_021163.1    | Ca_kabuli_chr04 | 38018866                | CC                              | TT              | 1946823848               |
| SNP_P4_59211_38018940 | NC_021163.1    | Ca_kabuli_chr04 | 38018940                | TT                              | AA              | 1946823850               |
| SNP_P4_59212_38018961 | NC_021163.1    | Ca_kabuli_chr04 | 38018961                | GG                              | AA              | 1946823852               |
| SNP_P4_59213_38018980 | NC_021163.1    | Ca_kabuli_chr04 | 38018980                | AA                              | GG              | 1946823854               |
| SNP_P4_59215_38019173 | NC_021163.1    | Ca_kabuli_chr04 | 38019173                | AA                              | GG              | 1946823856               |
| SNP_P4_59217_38021870 | NC_021163.1    | Ca_kabuli_chr04 | 38021870                | AA                              | GG              | 1946823858               |
| SNP_P4_59218_38021904 | NC_021163.1    | Ca_kabuli_chr04 | 38021904                | CC                              | TT              | 1946823860               |
| SNP_P4_59219_38021916 | NC_021163.1    | Ca_kabuli_chr04 | 38021916                | AA                              | TT              | 1946823863               |
| SNP_P4_59220_38024361 | NC_021163.1    | Ca_kabuli_chr04 | 38024361                | AA                              | TT              | 1946823865               |
| SNP_P4_59221_38024403 | NC_021163.1    | Ca_kabuli_chr04 | 38024403                | TT                              | AA              | 1946823867               |
| SNP_P4_59222_38024526 | NC_021163.1    | Ca_kabuli_chr04 | 38024526                | AA                              | GG              | 1946823869               |
| SNP_P4_59223_38024534 | NC_021163.1    | Ca_kabuli_chr04 | 38024534                | TT                              | CC              | 1946823871               |
| SNP_P4_59225_38026081 | NC_021163.1    | Ca_kabuli_chr04 | 38026081                | TT                              | CC              | 1946823873               |
| SNP_P4_59226_38026083 | NC_021163.1    | Ca_kabuli_chr04 | 38026083                | AA                              | CC              | 1946823875               |
| SNP_P4_59227_38026233 | NC_021163.1    | Ca_kabuli_chr04 | 38026233                | TT                              | CC              | 1946823877               |
| SNP_P4_59229_38026283 | NC_021163.1    | Ca_kabuli_chr04 | 38026283                | GG                              | AA              | 1946823879               |
| SNP_P4_59230_38026296 | NC_021163.1    | Ca_kabuli_chr04 | 38026296                | TT                              | CC              | 1946823881               |
| SNP_P4_59231_38026612 | NC_021163.1    | Ca_kabuli_chr04 | 38026612                | TT                              | CC              | 1946823883               |
| SNP_P4_59232_38026850 | NC_021163.1    | Ca_kabuli_chr04 | 38026850                | AA                              | GG              | 1946823885               |
| SNP_P4_59233_38027055 | NC_021163.1    | Ca_kabuli_chr04 | 38027055                | GG                              | AA              | 1946823887               |
| SNP_P4_59234_38029380 | NC_021163.1    | Ca_kabuli_chr04 | 38029380                | AA                              | GG              | 1946823889               |
| SNP_P4_59235_38030673 | NC_021163.1    | Ca_kabuli_chr04 | 38030673                | TT                              | AA              | 1946823891               |
| SNP_P4_59236_38033979 | NC_021163.1    | Ca_kabuli_chr04 | 38033979                | TT                              | CC              | 1946823893               |

| SNPs IDs              | Chromosome IDs | Chromosomes     | Physical positions (bp) | CDC Frontier (Reference genome) | (ILWC46 & LPNB) | NCBI SNPdb Accession IDs |
|-----------------------|----------------|-----------------|-------------------------|---------------------------------|-----------------|--------------------------|
| SNP_P4_59237_38033985 | NC_021163.1    | Ca_kabuli_chr04 | 38033985                | TT                              | AA              | 1946823895               |
| SNP_P4_59238_38034061 | NC_021163.1    | Ca_kabuli_chr04 | 38034061                | GG                              | AA              | 1946823897               |
| SNP_P4_59239_38034325 | NC_021163.1    | Ca_kabuli_chr04 | 38034325                | AA                              | CC              | 1946823899               |
| SNP_P4_59240_38034339 | NC_021163.1    | Ca_kabuli_chr04 | 38034339                | AA                              | TT              | 1946823901               |
| SNP_P4_59241_38034362 | NC_021163.1    | Ca_kabuli_chr04 | 38034362                | TT                              | CC              | 1946823903               |
| SNP_P4_59242_38034577 | NC_021163.1    | Ca_kabuli_chr04 | 38034577                | GG                              | CC              | 1946823905               |
| SNP_P4_59243_38034579 | NC_021163.1    | Ca_kabuli_chr04 | 38034579                | TT                              | CC              | 1946823907               |
| SNP_P4_59244_38034785 | NC_021163.1    | Ca_kabuli_chr04 | 38034785                | GG                              | AA              | 1946823909               |
| SNP_P4_59245_38034793 | NC_021163.1    | Ca_kabuli_chr04 | 38034793                | TT                              | AA              | 1946823911               |
| SNP_P4_59246_38035359 | NC_021163.1    | Ca_kabuli_chr04 | 38035359                | AA                              | GG              | 1946823913               |
| SNP_P4_59247_38035361 | NC_021163.1    | Ca_kabuli_chr04 | 38035361                | AA                              | GG              | 1946823915               |
| SNP_P4_59248_38035414 | NC_021163.1    | Ca_kabuli_chr04 | 38035414                | TT                              | CC              | 1946823917               |
| SNP_P4_59250_38035652 | NC_021163.1    | Ca_kabuli_chr04 | 38035652                | TT                              | CC              | 1946823919               |
| SNP_P4_59251_38037025 | NC_021163.1    | Ca_kabuli_chr04 | 38037025                | CC                              | AA              | 1946823921               |
| SNP_P4_59252_38038865 | NC_021163.1    | Ca_kabuli_chr04 | 38038865                | CC                              | TT              | 1946823924               |
| SNP_P4_59255_38040436 | NC_021163.1    | Ca_kabuli_chr04 | 38040436                | GG                              | AA              | 1946823926               |
| SNP_P4_59256_38040573 | NC_021163.1    | Ca_kabuli_chr04 | 38040573                | TT                              | GG              | 1946823928               |
| SNP_P4_59258_38045054 | NC_021163.1    | Ca_kabuli_chr04 | 38045054                | CC                              | TT              | 1946823930               |
| SNP_P4_59259_38045110 | NC_021163.1    | Ca_kabuli_chr04 | 38045110                | AA                              | GG              | 1946823932               |
| SNP_P4_59260_38045114 | NC_021163.1    | Ca_kabuli_chr04 | 38045114                | CC                              | TT              | 1946823934               |
| SNP_P4_59261_38045397 | NC_021163.1    | Ca_kabuli_chr04 | 38045397                | TT                              | CC              | 1946823936               |
| SNP_P4_59262_38045398 | NC_021163.1    | Ca_kabuli_chr04 | 38045398                | CC                              | TT              | 1946823938               |
| SNP_P4_59263_38045412 | NC_021163.1    | Ca_kabuli_chr04 | 38045412                | GG                              | AA              | 1946823940               |
| SNP_P4_59264_38045438 | NC_021163.1    | Ca_kabuli_chr04 | 38045438                | TT                              | CC              | 1946823942               |
| SNP_P4_59265_38046004 | NC_021163.1    | Ca_kabuli_chr04 | 38046004                | GG                              | TT              | 1946823944               |
| SNP_P4_59266_38046305 | NC_021163.1    | Ca_kabuli_chr04 | 38046305                | TT                              | AA              | 1946823946               |
| SNP_P4_59267_38049466 | NC_021163.1    | Ca_kabuli_chr04 | 38049466                | AA                              | TT              | 1946823948               |
| SNP_P4_59268_38049533 | NC_021163.1    | Ca_kabuli_chr04 | 38049533                | CC                              | TT              | 1946823950               |
| SNP_P4_59269_38049556 | NC_021163.1    | Ca_kabuli_chr04 | 38049556                | AA                              | GG              | 1946823952               |
| SNP_P4_59270_38049587 | NC_021163.1    | Ca_kabuli_chr04 | 38049587                | TT                              | CC              | 1946823955               |
| SNP_P4_59273_38051404 | NC_021163.1    | Ca_kabuli_chr04 | 38051404                | TT                              | AA              | 1946823957               |
| SNP_P4_59274_38051408 | NC_021163.1    | Ca_kabuli_chr04 | 38051408                | CC                              | AA              | 1946823959               |
| SNP_P4_59275_38052094 | NC_021163.1    | Ca_kabuli_chr04 | 38052094                | GG                              | AA              | 1946823961               |
| SNP_P4_59276_38053611 | NC_021163.1    | Ca_kabuli_chr04 | 38053611                | TT                              | CC              | 1946823963               |
| SNP_P4_59277_38054383 | NC_021163.1    | Ca_kabuli_chr04 | 38054383                | CC                              | TT              | 1946823965               |
| SNP_P4_59278_38054404 | NC_021163.1    | Ca_kabuli_chr04 | 38054404                | GG                              | CC              | 1946823967               |
| SNP_P4_59279_38054412 | NC_021163.1    | Ca_kabuli_chr04 | 38054412                | TT                              | CC              | 1946823970               |
| SNP_P4_59280_38054416 | NC_021163.1    | Ca_kabuli_chr04 | 38054416                | AA                              | GG              | 1946823972               |
| SNP_P4_59281_38054417 | NC_021163.1    | Ca_kabuli_chr04 | 38054417                | TT                              | CC              | 1946823974               |
| SNP_P4_59283_38055158 | NC_021163.1    | Ca_kabuli_chr04 | 38055158                | TT                              | CC              | 1946823976               |
| SNP_P4_59284_38055885 | NC_021163.1    | Ca_kabuli_chr04 | 38055885                | GG                              | AA              | 1946823978               |
| SNP_P4_59285_38061422 | NC_021163.1    | Ca_kabuli_chr04 | 38061422                | TT                              | CC              | 1946823980               |

| SNPs IDs              | Chromosome IDs | Chromosomes     | Physical positions (bp) | CDC Frontier (Reference genome) | (ILWC46 & LPNB) | NCBI SNPdb Accession IDs |
|-----------------------|----------------|-----------------|-------------------------|---------------------------------|-----------------|--------------------------|
| SNP_P4_59286_38062173 | NC_021163.1    | Ca_kabuli_chr04 | 38062173                | CC                              | GG              | 1946823982               |
| SNP_P4_59287_38062200 | NC_021163.1    | Ca_kabuli_chr04 | 38062200                | CC                              | AA              | 1946823985               |
| SNP_P4_59288_38063807 | NC_021163.1    | Ca_kabuli_chr04 | 38063807                | AA                              | TT              | 1946823987               |
| SNP_P4_59289_38063958 | NC_021163.1    | Ca_kabuli_chr04 | 38063958                | TT                              | CC              | 1946823989               |
| SNP_P4_59290_38073315 | NC_021163.1    | Ca_kabuli_chr04 | 38073315                | TT                              | CC              | 1946823991               |
| SNP_P4_59292_38074538 | NC_021163.1    | Ca_kabuli_chr04 | 38074538                | TT                              | CC              | 1946823993               |
| SNP_P4_59293_38074559 | NC_021163.1    | Ca_kabuli_chr04 | 38074559                | TT                              | CC              | 1946823995               |
| SNP_P4_59294_38074583 | NC_021163.1    | Ca_kabuli_chr04 | 38074583                | CC                              | TT              | 1946823997               |
| SNP_P4_59295_38074816 | NC_021163.1    | Ca_kabuli_chr04 | 38074816                | GG                              | TT              | 1946823999               |
| SNP_P4_59296_38074844 | NC_021163.1    | Ca_kabuli_chr04 | 38074844                | AA                              | GG              | 1946824002               |
| SNP_P4_59297_38074860 | NC_021163.1    | Ca_kabuli_chr04 | 38074860                | CC                              | TT              | 1946824004               |
| SNP_P4_59298_38074861 | NC_021163.1    | Ca_kabuli_chr04 | 38074861                | GG                              | AA              | 1946824006               |
| SNP_P4_59299_38074871 | NC_021163.1    | Ca_kabuli_chr04 | 38074871                | CC                              | TT              | 1946824008               |
| SNP_P4_59300_38075212 | NC_021163.1    | Ca_kabuli_chr04 | 38075212                | AA                              | GG              | 1946824010               |
| SNP_P4_59301_38075514 | NC_021163.1    | Ca_kabuli_chr04 | 38075514                | TT                              | CC              | 1946824012               |
| SNP_P4_59302_38077107 | NC_021163.1    | Ca_kabuli_chr04 | 38077107                | CC                              | AA              | 1946824013               |
| SNP_P4_59303_38079573 | NC_021163.1    | Ca_kabuli_chr04 | 38079573                | TT                              | CC              | 1946824014               |
| SNP_P4_59304_38079576 | NC_021163.1    | Ca_kabuli_chr04 | 38079576                | CC                              | AA              | 1946824015               |
| SNP_P4_59305_38084745 | NC_021163.1    | Ca_kabuli_chr04 | 38084745                | CC                              | TT              | 1946824016               |
| SNP_P4_59306_38084746 | NC_021163.1    | Ca_kabuli_chr04 | 38084746                | GG                              | AA              | 1946824017               |
| SNP_P4_59307_38084769 | NC_021163.1    | Ca_kabuli_chr04 | 38084769                | TT                              | GG              | 1946824018               |
| SNP_P4_59308_38084773 | NC_021163.1    | Ca_kabuli_chr04 | 38084773                | AA                              | CC              | 1946824019               |
| SNP_P4_59309_38084807 | NC_021163.1    | Ca_kabuli_chr04 | 38084807                | AA                              | CC              | 1946824020               |
| SNP_P4_59310_38084825 | NC_021163.1    | Ca_kabuli_chr04 | 38084825                | AA                              | GG              | 1946824022               |
| SNP_P4_59311_38085197 | NC_021163.1    | Ca_kabuli_chr04 | 38085197                | TT                              | AA              | 1946824024               |
| SNP_P4_59313_38085872 | NC_021163.1    | Ca_kabuli_chr04 | 38085872                | GG                              | AA              | 1946824026               |
| SNP_P4_59314_38092063 | NC_021163.1    | Ca_kabuli_chr04 | 38092063                | GG                              | AA              | 1946824028               |
| SNP_P4_59315_38099083 | NC_021163.1    | Ca_kabuli_chr04 | 38099083                | AA                              | GG              | 1946824030               |
| SNP_P4_59316_38099108 | NC_021163.1    | Ca_kabuli_chr04 | 38099108                | CC                              | TT              | 1946824032               |
| SNP_P4_59317_38099114 | NC_021163.1    | Ca_kabuli_chr04 | 38099114                | AA                              | GG              | 1946824034               |
| SNP_P4_59318_38099369 | NC_021163.1    | Ca_kabuli_chr04 | 38099369                | AA                              | GG              | 1946824036               |
| SNP_P4_59319_38102384 | NC_021163.1    | Ca_kabuli_chr04 | 38102384                | GG                              | TT              | 1946824038               |
| SNP_P4_59320_38104381 | NC_021163.1    | Ca_kabuli_chr04 | 38104381                | AA                              | GG              | 1946824040               |
| SNP_P4_59321_38104425 | NC_021163.1    | Ca_kabuli_chr04 | 38104425                | CC                              | TT              | 1946824042               |
| SNP_P4_59322_38104641 | NC_021163.1    | Ca_kabuli_chr04 | 38104641                | CC                              | TT              | 1946824044               |
| SNP_P4_59323_38104655 | NC_021163.1    | Ca_kabuli_chr04 | 38104655                | CC                              | TT              | 1946824046               |
| SNP_P4_59324_38104670 | NC_021163.1    | Ca_kabuli_chr04 | 38104670                | TT                              | AA              | 1946824048               |
| SNP_P4_59325_38104694 | NC_021163.1    | Ca_kabuli_chr04 | 38104694                | CC                              | TT              | 1946824050               |
| SNP_P4_59326_38104699 | NC_021163.1    | Ca_kabuli_chr04 | 38104699                | GG                              | AA              | 1946824052               |
| SNP_P4_59327_38105293 | NC_021163.1    | Ca_kabuli_chr04 | 38105293                | CC                              | GG              | 1946824054               |
| SNP_P4_59328_38105465 | NC_021163.1    | Ca_kabuli_chr04 | 38105465                | TT                              | AA              | 1946824056               |
| SNP_P4_59329_38106658 | NC_021163.1    | Ca_kabuli_chr04 | 38106658                | AA                              | GG              | 1946824058               |

| SNPs IDs              | Chromosome IDs | Chromosomes     | Physical positions (bp) | CDC Frontier (Reference genome) | (ILWC46 & LPNB) | NCBI SNPdb Accession IDs |
|-----------------------|----------------|-----------------|-------------------------|---------------------------------|-----------------|--------------------------|
| SNP_P4_59330_38106664 | NC_021163.1    | Ca_kabuli_chr04 | 38106664                | GG                              | AA              | 1946824060               |
| SNP_P4_59331_38107767 | NC_021163.1    | Ca_kabuli_chr04 | 38107767                | AA                              | TT              | 1946824062               |
| SNP_P4_59332_38108033 | NC_021163.1    | Ca_kabuli_chr04 | 38108033                | GG                              | AA              | 1946824064               |
| SNP_P4_59333_38108042 | NC_021163.1    | Ca_kabuli_chr04 | 38108042                | AA                              | CC              | 1946824066               |
| SNP_P4_59334_38108107 | NC_021163.1    | Ca_kabuli_chr04 | 38108107                | GG                              | TT              | 1946824068               |
| SNP_P4_59337_38108644 | NC_021163.1    | Ca_kabuli_chr04 | 38108644                | GG                              | TT              | 1946824070               |
| SNP_P4_59338_38108853 | NC_021163.1    | Ca_kabuli_chr04 | 38108853                | GG                              | TT              | 1946824072               |
| SNP_P4_59339_38108877 | NC_021163.1    | Ca_kabuli_chr04 | 38108877                | GG                              | CC              | 1946824074               |
| SNP_P4_59340_38109144 | NC_021163.1    | Ca_kabuli_chr04 | 38109144                | CC                              | TT              | 1946824076               |
| SNP_P4_59341_38109308 | NC_021163.1    | Ca_kabuli_chr04 | 38109308                | CC                              | TT              | 1946824078               |
| SNP_P4_59342_38109813 | NC_021163.1    | Ca_kabuli_chr04 | 38109813                | AA                              | TT              | 1946824080               |
| SNP_P4_59343_38110072 | NC_021163.1    | Ca_kabuli_chr04 | 38110072                | TT                              | CC              | 1946824082               |
| SNP_P4_59344_38110201 | NC_021163.1    | Ca_kabuli_chr04 | 38110201                | CC                              | TT              | 1946824084               |
| SNP_P4_59345_38111612 | NC_021163.1    | Ca_kabuli_chr04 | 38111612                | GG                              | TT              | 1946824086               |
| SNP_P4_59346_38112468 | NC_021163.1    | Ca_kabuli_chr04 | 38112468                | CC                              | TT              | 1946824088               |
| SNP_P4_59347_38113328 | NC_021163.1    | Ca_kabuli_chr04 | 38113328                | GG                              | AA              | 1946824090               |
| SNP_P4_59348_38113369 | NC_021163.1    | Ca_kabuli_chr04 | 38113369                | TT                              | CC              | 1946824092               |
| SNP_P4_59349_38113375 | NC_021163.1    | Ca_kabuli_chr04 | 38113375                | GG                              | AA              | 1946824094               |
| SNP_P4_59350_38113622 | NC_021163.1    | Ca_kabuli_chr04 | 38113622                | TT                              | GG              | 1946824096               |
| SNP_P4_59351_38114333 | NC_021163.1    | Ca_kabuli_chr04 | 38114333                | AA                              | GG              | 1946824098               |
| SNP_P4_59352_38114734 | NC_021163.1    | Ca_kabuli_chr04 | 38114734                | TT                              | CC              | 1946824100               |
| SNP_P4_59353_38114787 | NC_021163.1    | Ca_kabuli_chr04 | 38114787                | GG                              | AA              | 1946824102               |
| SNP_P4_59354_38114793 | NC_021163.1    | Ca_kabuli_chr04 | 38114793                | GG                              | AA              | 1946824104               |
| SNP_P4_59355_38115586 | NC_021163.1    | Ca_kabuli_chr04 | 38115586                | AA                              | GG              | 1946824106               |
| SNP_P4_59356_38115592 | NC_021163.1    | Ca_kabuli_chr04 | 38115592                | GG                              | AA              | 1946824108               |
| SNP_P4_59357_38119128 | NC_021163.1    | Ca_kabuli_chr04 | 38119128                | CC                              | TT              | 1946824110               |
| SNP_P4_59358_38119129 | NC_021163.1    | Ca_kabuli_chr04 | 38119129                | CC                              | TT              | 1946824113               |
| SNP_P4_59359_38119141 | NC_021163.1    | Ca_kabuli_chr04 | 38119141                | TT                              | CC              | 1946824115               |
| SNP_P4_59360_38120945 | NC_021163.1    | Ca_kabuli_chr04 | 38120945                | AA                              | TT              | 1946824117               |
| SNP_P4_59361_38121305 | NC_021163.1    | Ca_kabuli_chr04 | 38121305                | TT                              | CC              | 1946824119               |
| SNP_P4_59362_38121508 | NC_021163.1    | Ca_kabuli_chr04 | 38121508                | GG                              | AA              | 1946824121               |
| SNP_P4_59363_38121708 | NC_021163.1    | Ca_kabuli_chr04 | 38121708                | TT                              | CC              | 1946824123               |
| SNP_P4_59364_38121777 | NC_021163.1    | Ca_kabuli_chr04 | 38121777                | GG                              | AA              | 1946824125               |
| SNP_P4_59365_38121784 | NC_021163.1    | Ca_kabuli_chr04 | 38121784                | GG                              | TT              | 1946824127               |
| SNP_P4_59366_38121827 | NC_021163.1    | Ca_kabuli_chr04 | 38121827                | TT                              | CC              | 1946824129               |
| SNP_P4_59367_38121852 | NC_021163.1    | Ca_kabuli_chr04 | 38121852                | GG                              | AA              | 1946824131               |
| SNP_P4_59369_38123774 | NC_021163.1    | Ca_kabuli_chr04 | 38123774                | TT                              | CC              | 1946824133               |
| SNP_P4_59371_38124895 | NC_021163.1    | Ca_kabuli_chr04 | 38124895                | GG                              | AA              | 1946824135               |
| SNP_P4_59372_38126047 | NC_021163.1    | Ca_kabuli_chr04 | 38126047                | TT                              | AA              | 1946824137               |
| SNP_P4_59373_38128427 | NC_021163.1    | Ca_kabuli_chr04 | 38128427                | CC                              | GG              | 1946824139               |
| SNP_P4_59374_38128750 | NC_021163.1    | Ca_kabuli_chr04 | 38128750                | GG                              | TT              | 1946824141               |
| SNP_P4_59375_38128755 | NC_021163.1    | Ca_kabuli_chr04 | 38128755                | AA                              | TT              | 1946824143               |



| SNPs IDs              | Chromosome IDs | Chromosomes     | Physical positions (bp) | CDC Frontier (Reference genome) | (ILWC46 & LPNB) | NCBI SNPdb Accession IDs |
|-----------------------|----------------|-----------------|-------------------------|---------------------------------|-----------------|--------------------------|
| SNP_P4_59376_38128759 | NC_021163.1    | Ca_kabuli_chr04 | 38128759                | TT                              | GG              | 1946824145               |
| SNP_P4_59377_38128766 | NC_021163.1    | Ca_kabuli_chr04 | 38128766                | TT                              | CC              | 1946824147               |
| SNP_P4_59378_38128786 | NC_021163.1    | Ca_kabuli_chr04 | 38128786                | TT                              | CC              | 1946824149               |
| SNP_P4_59379_38128787 | NC_021163.1    | Ca_kabuli_chr04 | 38128787                | TT                              | AA              | 1946824151               |
| SNP_P4_59380_38129566 | NC_021163.1    | Ca_kabuli_chr04 | 38129566                | CC                              | AA              | 1946824154               |
| SNP_P4_59381_38129641 | NC_021163.1    | Ca_kabuli_chr04 | 38129641                | GG                              | CC              | 1946824156               |
| SNP_P4_59382_38129642 | NC_021163.1    | Ca_kabuli_chr04 | 38129642                | TT                              | AA              | 1946824158               |
| SNP_P4_59383_38132009 | NC_021163.1    | Ca_kabuli_chr04 | 38132009                | GG                              | TT              | 1946824161               |
| SNP_P4_59384_38132474 | NC_021163.1    | Ca_kabuli_chr04 | 38132474                | GG                              | AA              | 1946824163               |
| SNP_P4_59385_38132491 | NC_021163.1    | Ca_kabuli_chr04 | 38132491                | TT                              | CC              | 1946824165               |
| SNP_P4_59386_38133367 | NC_021163.1    | Ca_kabuli_chr04 | 38133367                | CC                              | GG              | 1946824167               |
| SNP_P4_59387_38133400 | NC_021163.1    | Ca_kabuli_chr04 | 38133400                | GG                              | TT              | 1946824169               |
| SNP_P4_59388_38133450 | NC_021163.1    | Ca_kabuli_chr04 | 38133450                | CC                              | TT              | 1946824171               |
| SNP_P4_59389_38133887 | NC_021163.1    | Ca_kabuli_chr04 | 38133887                | TT                              | CC              | 1946824173               |
| SNP_P4_59392_38138009 | NC_021163.1    | Ca_kabuli_chr04 | 38138009                | GG                              | AA              | 1946824175               |
| SNP_P4_59393_38139043 | NC_021163.1    | Ca_kabuli_chr04 | 38139043                | CC                              | TT              | 1946824177               |
| SNP_P4_59395_38139465 | NC_021163.1    | Ca_kabuli_chr04 | 38139465                | TT                              | AA              | 1946824179               |
| SNP_P4_59396_38139473 | NC_021163.1    | Ca_kabuli_chr04 | 38139473                | AA                              | CC              | 1946824181               |
| SNP_P4_59397_38141013 | NC_021163.1    | Ca_kabuli_chr04 | 38141013                | TT                              | AA              | 1946824183               |
| SNP_P4_59398_38141501 | NC_021163.1    | Ca_kabuli_chr04 | 38141501                | TT                              | AA              | 1946824185               |
| SNP_P4_59399_38150128 | NC_021163.1    | Ca_kabuli_chr04 | 38150128                | GG                              | AA              | 1946824187               |
| SNP_P4_59400_38150155 | NC_021163.1    | Ca_kabuli_chr04 | 38150155                | CC                              | TT              | 1946824189               |
| SNP_P4_59401_38150450 | NC_021163.1    | Ca_kabuli_chr04 | 38150450                | AA                              | GG              | 1946824191               |
| SNP_P4_59402_38151767 | NC_021163.1    | Ca_kabuli_chr04 | 38151767                | GG                              | AA              | 1946824193               |
| SNP_P4_59403_38151829 | NC_021163.1    | Ca_kabuli_chr04 | 38151829                | CC                              | TT              | 1946824195               |
| SNP_P4_59404_38152826 | NC_021163.1    | Ca_kabuli_chr04 | 38152826                | AA                              | GG              | 1946824197               |
| SNP_P4_59405_38154481 | NC_021163.1    | Ca_kabuli_chr04 | 38154481                | GG                              | AA              | 1946824199               |
| SNP_P4_59406_38154495 | NC_021163.1    | Ca_kabuli_chr04 | 38154495                | GG                              | AA              | 1946824201               |
| SNP_P4_59407_38156108 | NC_021163.1    | Ca_kabuli_chr04 | 38156108                | AA                              | GG              | 1946824203               |
| SNP_P4_59408_38157551 | NC_021163.1    | Ca_kabuli_chr04 | 38157551                | AA                              | GG              | 1946824205               |
| SNP_P4_59409_38157956 | NC_021163.1    | Ca_kabuli_chr04 | 38157956                | TT                              | CC              | 1946824207               |
| SNP_P4_59410_38159348 | NC_021163.1    | Ca_kabuli_chr04 | 38159348                | CC                              | TT              | 1946824209               |
| SNP_P4_59411_38160299 | NC_021163.1    | Ca_kabuli_chr04 | 38160299                | TT                              | GG              | 1946824211               |
| SNP_P4_59412_38160326 | NC_021163.1    | Ca_kabuli_chr04 | 38160326                | AA                              | GG              | 1946824213               |
| SNP_P4_59413_38160337 | NC_021163.1    | Ca_kabuli_chr04 | 38160337                | TT                              | CC              | 1946824215               |
| SNP_P4_59414_38160375 | NC_021163.1    | Ca_kabuli_chr04 | 38160375                | GG                              | AA              | 1946824217               |
| SNP_P4_59415_38160522 | NC_021163.1    | Ca_kabuli_chr04 | 38160522                | GG                              | AA              | 1946824219               |
| SNP_P4_59416_38162097 | NC_021163.1    | Ca_kabuli_chr04 | 38162097                | TT                              | CC              | 1946824222               |
| SNP_P4_59417_38162098 | NC_021163.1    | Ca_kabuli_chr04 | 38162098                | TT                              | GG              | 1946824224               |
| SNP_P4_59418_38162122 | NC_021163.1    | Ca_kabuli_chr04 | 38162122                | CC                              | AA              | 1946824226               |
| SNP_P4_59419_38162159 | NC_021163.1    | Ca_kabuli_chr04 | 38162159                | AA                              | CC              | 1946824228               |
| SNP_P4_59420_38162163 | NC_021163.1    | Ca_kabuli_chr04 | 38162163                | CC                              | TT              | 1946824230               |

| SNPs IDs              | Chromosome IDs | Chromosomes     | Physical positions (bp) | CDC Frontier (Reference genome) | (ILWC46 & LPNB) | NCBI SNPdb Accession IDs |
|-----------------------|----------------|-----------------|-------------------------|---------------------------------|-----------------|--------------------------|
| SNP_P4_59421_38162508 | NC_021163.1    | Ca_kabuli_chr04 | 38162508                | AA                              | CC              | 1946824232               |
| SNP_P4_59422_38162718 | NC_021163.1    | Ca_kabuli_chr04 | 38162718                | CC                              | TT              | 1946824234               |
| SNP_P4_59423_38162745 | NC_021163.1    | Ca_kabuli_chr04 | 38162745                | GG                              | AA              | 1946824236               |
| SNP_P4_59424_38162797 | NC_021163.1    | Ca_kabuli_chr04 | 38162797                | AA                              | GG              | 1946824238               |
| SNP_P4_59425_38164318 | NC_021163.1    | Ca_kabuli_chr04 | 38164318                | CC                              | GG              | 1946824240               |
| SNP_P4_59426_38164380 | NC_021163.1    | Ca_kabuli_chr04 | 38164380                | GG                              | TT              | 1946824242               |
| SNP_P4_59427_38164387 | NC_021163.1    | Ca_kabuli_chr04 | 38164387                | CC                              | TT              | 1946824244               |
| SNP_P4_59428_38164545 | NC_021163.1    | Ca_kabuli_chr04 | 38164545                | AA                              | GG              | 1946824246               |
| SNP_P4_59429_38164548 | NC_021163.1    | Ca_kabuli_chr04 | 38164548                | TT                              | CC              | 1946824248               |
| SNP_P4_59430_38164565 | NC_021163.1    | Ca_kabuli_chr04 | 38164565                | CC                              | AA              | 1946824250               |
| SNP_P4_59431_38164575 | NC_021163.1    | Ca_kabuli_chr04 | 38164575                | TT                              | CC              | 1946824252               |
| SNP_P4_59432_38164761 | NC_021163.1    | Ca_kabuli_chr04 | 38164761                | CC                              | TT              | 1946824254               |
| SNP_P4_59433_38164840 | NC_021163.1    | Ca_kabuli_chr04 | 38164840                | AA                              | GG              | 1946824256               |
| SNP_P4_59434_38165555 | NC_021163.1    | Ca_kabuli_chr04 | 38165555                | AA                              | GG              | 1946824258               |
| SNP_P4_59435_38165584 | NC_021163.1    | Ca_kabuli_chr04 | 38165584                | GG                              | AA              | 1946824260               |
| SNP_P4_59436_38165587 | NC_021163.1    | Ca_kabuli_chr04 | 38165587                | AA                              | GG              | 1946824262               |
| SNP_P4_59437_38165774 | NC_021163.1    | Ca_kabuli_chr04 | 38165774                | TT                              | CC              | 1946824264               |
| SNP_P4_59438_38165836 | NC_021163.1    | Ca_kabuli_chr04 | 38165836                | GG                              | TT              | 1946824266               |
| SNP_P4_59439_38165851 | NC_021163.1    | Ca_kabuli_chr04 | 38165851                | AA                              | GG              | 1946824268               |
| SNP_P4_59440_38165907 | NC_021163.1    | Ca_kabuli_chr04 | 38165907                | AA                              | GG              | 1946824270               |
| SNP_P4_59441_38166472 | NC_021163.1    | Ca_kabuli_chr04 | 38166472                | AA                              | GG              | 1946824272               |
| SNP_P4_59442_38166485 | NC_021163.1    | Ca_kabuli_chr04 | 38166485                | TT                              | GG              | 1946824274               |
| SNP_P4_59443_38166487 | NC_021163.1    | Ca_kabuli_chr04 | 38166487                | AA                              | TT              | 1946824276               |
| SNP_P4_59444_38166490 | NC_021163.1    | Ca_kabuli_chr04 | 38166490                | TT                              | CC              | 1946824278               |
| SNP_P4_59445_38166494 | NC_021163.1    | Ca_kabuli_chr04 | 38166494                | GG                              | TT              | 1946824280               |
| SNP_P4_59446_38166500 | NC_021163.1    | Ca_kabuli_chr04 | 38166500                | GG                              | AA              | 1946824282               |
| SNP_P4_59447_38166917 | NC_021163.1    | Ca_kabuli_chr04 | 38166917                | TT                              | AA              | 1946824284               |
| SNP_P4_59448_38166945 | NC_021163.1    | Ca_kabuli_chr04 | 38166945                | CC                              | TT              | 1946824286               |
| SNP_P4_59449_38167132 | NC_021163.1    | Ca_kabuli_chr04 | 38167132                | TT                              | CC              | 1946824288               |
| SNP_P4_59450_38167198 | NC_021163.1    | Ca_kabuli_chr04 | 38167198                | CC                              | TT              | 1946824290               |
| SNP_P4_59451_38167269 | NC_021163.1    | Ca_kabuli_chr04 | 38167269                | TT                              | CC              | 1946824292               |
| SNP_P4_59452_38167287 | NC_021163.1    | Ca_kabuli_chr04 | 38167287                | GG                              | CC              | 1946824294               |
| SNP_P4_59453_38169187 | NC_021163.1    | Ca_kabuli_chr04 | 38169187                | AA                              | GG              | 1946824296               |
| SNP_P4_59454_38169199 | NC_021163.1    | Ca_kabuli_chr04 | 38169199                | GG                              | TT              | 1946824299               |
| SNP_P4_59455_38169378 | NC_021163.1    | Ca_kabuli_chr04 | 38169378                | AA                              | GG              | 1946824301               |
| SNP_P4_59456_38169517 | NC_021163.1    | Ca_kabuli_chr04 | 38169517                | AA                              | GG              | 1946824303               |
| SNP_P4_59458_38169646 | NC_021163.1    | Ca_kabuli_chr04 | 38169646                | TT                              | CC              | 1946824305               |
| SNP_P4_59459_38169662 | NC_021163.1    | Ca_kabuli_chr04 | 38169662                | TT                              | CC              | 1946824307               |
| SNP_P4_59460_38169866 | NC_021163.1    | Ca_kabuli_chr04 | 38169866                | GG                              | AA              | 1946824309               |
| SNP_P4_59461_38169879 | NC_021163.1    | Ca_kabuli_chr04 | 38169879                | TT                              | CC              | 1946824311               |
| SNP_P4_59462_38173999 | NC_021163.1    | Ca_kabuli_chr04 | 38173999                | TT                              | CC              | 1946824313               |
| SNP_P4_59463_38174195 | NC_021163.1    | Ca_kabuli_chr04 | 38174195                | AA                              | TT              | 1946824315               |

| SNPs IDs              | Chromosome IDs | Chromosomes     | Physical positions (bp) | CDC Frontier (Reference genome) | (ILWC46 & LPNB) | NCBI SNPdb Accession IDs |
|-----------------------|----------------|-----------------|-------------------------|---------------------------------|-----------------|--------------------------|
| SNP_P4_59464_38174243 | NC_021163.1    | Ca_kabuli_chr04 | 38174243                | CC                              | TT              | 1946824317               |
| SNP_P4_59465_38174260 | NC_021163.1    | Ca_kabuli_chr04 | 38174260                | GG                              | TT              | 1946824319               |
| SNP_P4_59466_38174275 | NC_021163.1    | Ca_kabuli_chr04 | 38174275                | GG                              | AA              | 1946824321               |
| SNP_P4_59467_38175002 | NC_021163.1    | Ca_kabuli_chr04 | 38175002                | GG                              | AA              | 1946824323               |
| SNP_P4_59469_38176052 | NC_021163.1    | Ca_kabuli_chr04 | 38176052                | CC                              | TT              | 1946824325               |
| SNP_P4_59470_38176055 | NC_021163.1    | Ca_kabuli_chr04 | 38176055                | TT                              | GG              | 1946824327               |
| SNP_P4_59471_38178368 | NC_021163.1    | Ca_kabuli_chr04 | 38178368                | GG                              | AA              | 1946824329               |
| SNP_P4_59472_38178433 | NC_021163.1    | Ca_kabuli_chr04 | 38178433                | CC                              | AA              | 1946824331               |
| SNP_P4_59473_38178447 | NC_021163.1    | Ca_kabuli_chr04 | 38178447                | GG                              | AA              | 1946824333               |
| SNP_P4_59474_38178455 | NC_021163.1    | Ca_kabuli_chr04 | 38178455                | CC                              | TT              | 1946824335               |
| SNP_P4_59475_38178729 | NC_021163.1    | Ca_kabuli_chr04 | 38178729                | CC                              | TT              | 1946824337               |
| SNP_P4_59476_38184628 | NC_021163.1    | Ca_kabuli_chr04 | 38184628                | TT                              | CC              | 1946824339               |
| SNP_P4_59477_38191986 | NC_021163.1    | Ca_kabuli_chr04 | 38191986                | GG                              | TT              | 1946824341               |
| SNP_P4_59478_38192135 | NC_021163.1    | Ca_kabuli_chr04 | 38192135                | GG                              | AA              | 1946824343               |
| SNP_P4_59479_38192161 | NC_021163.1    | Ca_kabuli_chr04 | 38192161                | CC                              | AA              | 1946824345               |
| SNP_P4_59480_38192170 | NC_021163.1    | Ca_kabuli_chr04 | 38192170                | GG                              | AA              | 1946824347               |
| SNP_P4_59481_38192184 | NC_021163.1    | Ca_kabuli_chr04 | 38192184                | TT                              | CC              | 1946824349               |
| SNP_P4_59482_38192306 | NC_021163.1    | Ca_kabuli_chr04 | 38192306                | AA                              | GG              | 1946824351               |
| SNP_P4_59483_38192313 | NC_021163.1    | Ca_kabuli_chr04 | 38192313                | AA                              | TT              | 1946824353               |
| SNP_P4_59484_38192339 | NC_021163.1    | Ca_kabuli_chr04 | 38192339                | AA                              | GG              | 1946824355               |
| SNP_P4_59485_38192345 | NC_021163.1    | Ca_kabuli_chr04 | 38192345                | GG                              | AA              | 1946824357               |
| SNP_P4_59486_38192367 | NC_021163.1    | Ca_kabuli_chr04 | 38192367                | TT                              | CC              | 1946824359               |
| SNP_P4_59487_38192573 | NC_021163.1    | Ca_kabuli_chr04 | 38192573                | TT                              | GG              | 1946824361               |
| SNP_P4_59488_38193070 | NC_021163.1    | Ca_kabuli_chr04 | 38193070                | TT                              | CC              | 1946824363               |
| SNP_P4_59489_38193709 | NC_021163.1    | Ca_kabuli_chr04 | 38193709                | TT                              | CC              | 1946824366               |
| SNP_P4_59490_38193720 | NC_021163.1    | Ca_kabuli_chr04 | 38193720                | AA                              | GG              | 1946824368               |
| SNP_P4_59491_38195044 | NC_021163.1    | Ca_kabuli_chr04 | 38195044                | CC                              | GG              | 1946824370               |
| SNP_P4_59492_38196077 | NC_021163.1    | Ca_kabuli_chr04 | 38196077                | GG                              | CC              | 1946824372               |
| SNP_P4_59493_38196078 | NC_021163.1    | Ca_kabuli_chr04 | 38196078                | AA                              | GG              | 1946824374               |
| SNP_P4_59495_38197293 | NC_021163.1    | Ca_kabuli_chr04 | 38197293                | AA                              | GG              | 1946824376               |
| SNP_P4_59496_38197792 | NC_021163.1    | Ca_kabuli_chr04 | 38197792                | TT                              | CC              | 1946824378               |
| SNP_P4_59497_38197983 | NC_021163.1    | Ca_kabuli_chr04 | 38197983                | AA                              | CC              | 1946824380               |
| SNP_P4_59498_38198971 | NC_021163.1    | Ca_kabuli_chr04 | 38198971                | AA                              | TT              | 1946824382               |
| SNP_P4_59499_38200872 | NC_021163.1    | Ca_kabuli_chr04 | 38200872                | TT                              | CC              | 1946824384               |
| SNP_P4_59500_38200917 | NC_021163.1    | Ca_kabuli_chr04 | 38200917                | GG                              | CC              | 1946824386               |
| SNP_P4_59501_38204259 | NC_021163.1    | Ca_kabuli_chr04 | 38204259                | CC                              | TT              | 1946824388               |
| SNP_P4_59502_38204491 | NC_021163.1    | Ca_kabuli_chr04 | 38204491                | TT                              | AA              | 1946824390               |
| SNP_P4_59503_38204504 | NC_021163.1    | Ca_kabuli_chr04 | 38204504                | GG                              | CC              | 1946824392               |
| SNP_P4_59505_38207039 | NC_021163.1    | Ca_kabuli_chr04 | 38207039                | GG                              | AA              | 1946824394               |
| SNP_P4_59506_38207055 | NC_021163.1    | Ca_kabuli_chr04 | 38207055                | AA                              | TT              | 1946824397               |
| SNP_P4_59508_38211257 | NC_021163.1    | Ca_kabuli_chr04 | 38211257                | AA                              | CC              | 1946824399               |
| SNP_P4_59509_38211332 | NC_021163.1    | Ca_kabuli_chr04 | 38211332                | GG                              | AA              | 1946824401               |

| SNPs IDs              | Chromosome IDs | Chromosomes     | Physical positions (bp) | CDC Frontier (Reference genome) | (ILWC46 & LPNB) | NCBI SNPdb Accession IDs |
|-----------------------|----------------|-----------------|-------------------------|---------------------------------|-----------------|--------------------------|
| SNP_P4_59510_38218979 | NC_021163.1    | Ca_kabuli_chr04 | 38218979                | GG                              | AA              | 1946824403               |
| SNP_P4_59511_38220765 | NC_021163.1    | Ca_kabuli_chr04 | 38220765                | GG                              | TT              | 1946824405               |
| SNP_P4_59512_38222263 | NC_021163.1    | Ca_kabuli_chr04 | 38222263                | TT                              | CC              | 1946824407               |
| SNP_P4_59513_38222944 | NC_021163.1    | Ca_kabuli_chr04 | 38222944                | TT                              | AA              | 1946824409               |
| SNP_P4_59514_38225558 | NC_021163.1    | Ca_kabuli_chr04 | 38225558                | GG                              | AA              | 1946824411               |
| SNP_P4_59515_38225572 | NC_021163.1    | Ca_kabuli_chr04 | 38225572                | GG                              | AA              | 1946824413               |
| SNP_P4_59516_38225585 | NC_021163.1    | Ca_kabuli_chr04 | 38225585                | AA                              | GG              | 1946824415               |
| SNP_P4_59517_38225599 | NC_021163.1    | Ca_kabuli_chr04 | 38225599                | GG                              | AA              | 1946824417               |
| SNP_P4_59519_38226029 | NC_021163.1    | Ca_kabuli_chr04 | 38226029                | GG                              | AA              | 1946824419               |
| SNP_P4_59520_38226207 | NC_021163.1    | Ca_kabuli_chr04 | 38226207                | GG                              | CC              | 1946824421               |
| SNP_P4_59521_38226487 | NC_021163.1    | Ca_kabuli_chr04 | 38226487                | GG                              | AA              | 1946824423               |
| SNP_P4_59522_38226563 | NC_021163.1    | Ca_kabuli_chr04 | 38226563                | GG                              | TT              | 1946824425               |
| SNP_P4_59523_38226569 | NC_021163.1    | Ca_kabuli_chr04 | 38226569                | CC                              | AA              | 1946824427               |
| SNP_P4_59524_38226583 | NC_021163.1    | Ca_kabuli_chr04 | 38226583                | TT                              | CC              | 1946824429               |
| SNP_P4_59526_38226862 | NC_021163.1    | Ca_kabuli_chr04 | 38226862                | GG                              | AA              | 1946824431               |
| SNP_P4_59527_38226903 | NC_021163.1    | Ca_kabuli_chr04 | 38226903                | AA                              | TT              | 1946824433               |
| SNP_P4_59528_38226958 | NC_021163.1    | Ca_kabuli_chr04 | 38226958                | GG                              | AA              | 1946824435               |
| SNP_P4_59529_38227004 | NC_021163.1    | Ca_kabuli_chr04 | 38227004                | GG                              | AA              | 1946824437               |
| SNP_P4_59530_38227387 | NC_021163.1    | Ca_kabuli_chr04 | 38227387                | TT                              | CC              | 1946824439               |
| SNP_P4_59531_38227401 | NC_021163.1    | Ca_kabuli_chr04 | 38227401                | CC                              | TT              | 1946824441               |
| SNP_P4_59532_38227449 | NC_021163.1    | Ca_kabuli_chr04 | 38227449                | CC                              | AA              | 1946824443               |
| SNP_P4_59533_38227639 | NC_021163.1    | Ca_kabuli_chr04 | 38227639                | GG                              | AA              | 1946824445               |
| SNP_P4_59534_38227645 | NC_021163.1    | Ca_kabuli_chr04 | 38227645                | TT                              | GG              | 1946824447               |
| SNP_P4_59535_38228224 | NC_021163.1    | Ca_kabuli_chr04 | 38228224                | TT                              | CC              | 1946824449               |
| SNP_P4_59536_38228429 | NC_021163.1    | Ca_kabuli_chr04 | 38228429                | CC                              | TT              | 1946824452               |
| SNP_P4_59537_38228465 | NC_021163.1    | Ca_kabuli_chr04 | 38228465                | GG                              | AA              | 1946824454               |
| SNP_P4_59538_38228534 | NC_021163.1    | Ca_kabuli_chr04 | 38228534                | GG                              | TT              | 1946824456               |
| SNP_P4_59539_38228557 | NC_021163.1    | Ca_kabuli_chr04 | 38228557                | CC                              | TT              | 1946824458               |
| SNP_P4_59540_38228636 | NC_021163.1    | Ca_kabuli_chr04 | 38228636                | AA                              | GG              | 1946824460               |
| SNP_P4_59541_38228792 | NC_021163.1    | Ca_kabuli_chr04 | 38228792                | AA                              | GG              | 1946824462               |
| SNP_P4_59542_38228865 | NC_021163.1    | Ca_kabuli_chr04 | 38228865                | AA                              | GG              | 1946824464               |
| SNP_P4_59543_38229006 | NC_021163.1    | Ca_kabuli_chr04 | 38229006                | CC                              | TT              | 1946824466               |
| SNP_P4_59544_38229691 | NC_021163.1    | Ca_kabuli_chr04 | 38229691                | TT                              | CC              | 1946824468               |
| SNP_P4_59545_38232052 | NC_021163.1    | Ca_kabuli_chr04 | 38232052                | AA                              | CC              | 1946824470               |
| SNP_P4_59546_38232340 | NC_021163.1    | Ca_kabuli_chr04 | 38232340                | GG                              | AA              | 1946824472               |
| SNP_P4_59547_38232357 | NC_021163.1    | Ca_kabuli_chr04 | 38232357                | GG                              | AA              | 1946824474               |
| SNP_P4_59548_38232380 | NC_021163.1    | Ca_kabuli_chr04 | 38232380                | GG                              | AA              | 1946824476               |
| SNP_P4_59549_38233658 | NC_021163.1    | Ca_kabuli_chr04 | 38233658                | GG                              | AA              | 1946824478               |
| SNP_P4_59550_38233663 | NC_021163.1    | Ca_kabuli_chr04 | 38233663                | GG                              | CC              | 1946824480               |
| SNP_P4_59551_38237520 | NC_021163.1    | Ca_kabuli_chr04 | 38237520                | CC                              | TT              | 1946824482               |
| SNP_P4_59552_38237532 | NC_021163.1    | Ca_kabuli_chr04 | 38237532                | GG                              | TT              | 1946824484               |
| SNP_P4_59553_38237535 | NC_021163.1    | Ca_kabuli_chr04 | 38237535                | TT                              | AA              | 1946824486               |

| SNPs IDs              | Chromosome IDs | Chromosomes     | Physical positions (bp) | CDC Frontier (Reference genome) | (ILWC46 & LPNB) | NCBI SNPdb Accession IDs |
|-----------------------|----------------|-----------------|-------------------------|---------------------------------|-----------------|--------------------------|
| SNP_P4_59554_38237705 | NC_021163.1    | Ca_kabuli_chr04 | 38237705                | TT                              | AA              | 1946824488               |
| SNP_P4_59555_38237706 | NC_021163.1    | Ca_kabuli_chr04 | 38237706                | TT                              | GG              | 1946824490               |
| SNP_P4_59557_38238764 | NC_021163.1    | Ca_kabuli_chr04 | 38238764                | TT                              | AA              | 1946824492               |
| SNP_P4_59558_38238863 | NC_021163.1    | Ca_kabuli_chr04 | 38238863                | AA                              | GG              | 1946824494               |
| SNP_P4_59559_38238891 | NC_021163.1    | Ca_kabuli_chr04 | 38238891                | GG                              | AA              | 1946824496               |
| SNP_P4_59560_38239079 | NC_021163.1    | Ca_kabuli_chr04 | 38239079                | AA                              | GG              | 1946824498               |
| SNP_P4_59561_38239315 | NC_021163.1    | Ca_kabuli_chr04 | 38239315                | CC                              | TT              | 1946824500               |
| SNP_P4_59562_38240368 | NC_021163.1    | Ca_kabuli_chr04 | 38240368                | TT                              | CC              | 1946824502               |
| SNP_P4_59563_38240538 | NC_021163.1    | Ca_kabuli_chr04 | 38240538                | TT                              | AA              | 1946824504               |
| SNP_P4_59564_38240542 | NC_021163.1    | Ca_kabuli_chr04 | 38240542                | AA                              | CC              | 1946824507               |
| SNP_P4_59565_38240613 | NC_021163.1    | Ca_kabuli_chr04 | 38240613                | GG                              | TT              | 1946824509               |
| SNP_P4_59566_38240791 | NC_021163.1    | Ca_kabuli_chr04 | 38240791                | CC                              | TT              | 1946824511               |
| SNP_P4_59568_38245695 | NC_021163.1    | Ca_kabuli_chr04 | 38245695                | TT                              | CC              | 1946824513               |
| SNP_P4_59569_38246391 | NC_021163.1    | Ca_kabuli_chr04 | 38246391                | GG                              | TT              | 1946824515               |
| SNP_P4_59570_38246931 | NC_021163.1    | Ca_kabuli_chr04 | 38246931                | TT                              | AA              | 1946824517               |
| SNP_P4_59571_38246977 | NC_021163.1    | Ca_kabuli_chr04 | 38246977                | GG                              | TT              | 1946824519               |
| SNP_P4_59572_38280256 | NC_021163.1    | Ca_kabuli_chr04 | 38280256                | AA                              | CC              | 1946824521               |
| SNP_P4_59573_38280271 | NC_021163.1    | Ca_kabuli_chr04 | 38280271                | CC                              | TT              | 1946824523               |
| SNP_P4_59574_38280281 | NC_021163.1    | Ca_kabuli_chr04 | 38280281                | CC                              | TT              | 1946824525               |
| SNP_P4_59575_38280297 | NC_021163.1    | Ca_kabuli_chr04 | 38280297                | GG                              | AA              | 1946824527               |
| SNP_P4_59576_38280946 | NC_021163.1    | Ca_kabuli_chr04 | 38280946                | GG                              | AA              | 1946824529               |
| SNP_P4_59577_38280948 | NC_021163.1    | Ca_kabuli_chr04 | 38280948                | CC                              | TT              | 1946824531               |
| SNP_P4_59578_38280991 | NC_021163.1    | Ca_kabuli_chr04 | 38280991                | GG                              | TT              | 1946824533               |
| SNP_P4_59579_38281036 | NC_021163.1    | Ca_kabuli_chr04 | 38281036                | GG                              | TT              | 1946824535               |
| SNP_P4_59580_38281362 | NC_021163.1    | Ca_kabuli_chr04 | 38281362                | AA                              | TT              | 1946824537               |
| SNP_P4_59581_38281380 | NC_021163.1    | Ca_kabuli_chr04 | 38281380                | AA                              | GG              | 1946824539               |
| SNP_P4_59582_38284139 | NC_021163.1    | Ca_kabuli_chr04 | 38284139                | GG                              | TT              | 1946824541               |
| SNP_P4_59584_38284375 | NC_021163.1    | Ca_kabuli_chr04 | 38284375                | AA                              | GG              | 1946824543               |
| SNP_P4_59585_38284400 | NC_021163.1    | Ca_kabuli_chr04 | 38284400                | GG                              | AA              | 1946824545               |
| SNP_P4_59586_38284434 | NC_021163.1    | Ca_kabuli_chr04 | 38284434                | AA                              | GG              | 1946824547               |
| SNP_P4_59587_38284675 | NC_021163.1    | Ca_kabuli_chr04 | 38284675                | AA                              | GG              | 1946824549               |
| SNP_P4_59588_38285853 | NC_021163.1    | Ca_kabuli_chr04 | 38285853                | TT                              | AA              | 1946824551               |
| SNP_P4_59589_38286393 | NC_021163.1    | Ca_kabuli_chr04 | 38286393                | AA                              | GG              | 1946824553               |
| SNP_P4_59590_38287375 | NC_021163.1    | Ca_kabuli_chr04 | 38287375                | CC                              | TT              | 1946824555               |
| SNP_P4_59591_38287532 | NC_021163.1    | Ca_kabuli_chr04 | 38287532                | GG                              | CC              | 1946824557               |
| SNP_P4_59592_38287829 | NC_021163.1    | Ca_kabuli_chr04 | 38287829                | TT                              | AA              | 1946824559               |
| SNP_P4_59593_38287883 | NC_021163.1    | Ca_kabuli_chr04 | 38287883                | CC                              | TT              | 1946824562               |
| SNP_P4_59594_38287889 | NC_021163.1    | Ca_kabuli_chr04 | 38287889                | TT                              | CC              | 1946824564               |
| SNP_P4_59595_38288076 | NC_021163.1    | Ca_kabuli_chr04 | 38288076                | GG                              | AA              | 1946824566               |
| SNP_P4_59596_38288205 | NC_021163.1    | Ca_kabuli_chr04 | 38288205                | GG                              | TT              | 1946824568               |
| SNP_P4_59597_38288220 | NC_021163.1    | Ca_kabuli_chr04 | 38288220                | AA                              | GG              | 1946824570               |
| SNP_P4_59598_38288235 | NC_021163.1    | Ca_kabuli_chr04 | 38288235                | AA                              | CC              | 1946824572               |

| SNPs IDs              | Chromosome IDs | Chromosomes     | Physical positions (bp) | CDC Frontier (Reference genome) | (ILWC46 & LPNB) | NCBI SNPdb Accession IDs |
|-----------------------|----------------|-----------------|-------------------------|---------------------------------|-----------------|--------------------------|
| SNP_P4_59599_38288245 | NC_021163.1    | Ca_kabuli_chr04 | 38288245                | GG                              | CC              | 1946824574               |
| SNP_P4_59600_38288300 | NC_021163.1    | Ca_kabuli_chr04 | 38288300                | CC                              | AA              | 1946824576               |
| SNP_P4_59601_38288357 | NC_021163.1    | Ca_kabuli_chr04 | 38288357                | TT                              | CC              | 1946824578               |
| SNP_P4_59602_38288376 | NC_021163.1    | Ca_kabuli_chr04 | 38288376                | TT                              | AA              | 1946824580               |
| SNP_P4_59603_38288823 | NC_021163.1    | Ca_kabuli_chr04 | 38288823                | TT                              | GG              | 1946824582               |
| SNP_P4_59604_38289566 | NC_021163.1    | Ca_kabuli_chr04 | 38289566                | CC                              | TT              | 1946824584               |
| SNP_P4_59605_38289585 | NC_021163.1    | Ca_kabuli_chr04 | 38289585                | GG                              | AA              | 1946824586               |
| SNP_P4_59606_38291168 | NC_021163.1    | Ca_kabuli_chr04 | 38291168                | GG                              | AA              | 1946824589               |
| SNP_P4_59607_38294067 | NC_021163.1    | Ca_kabuli_chr04 | 38294067                | TT                              | CC              | 1946824591               |
| SNP_P4_59608_38294082 | NC_021163.1    | Ca_kabuli_chr04 | 38294082                | CC                              | AA              | 1946824593               |
| SNP_P4_59609_38294326 | NC_021163.1    | Ca_kabuli_chr04 | 38294326                | CC                              | TT              | 1946824595               |
| SNP_P4_59610_38294364 | NC_021163.1    | Ca_kabuli_chr04 | 38294364                | TT                              | GG              | 1946824597               |
| SNP_P4_59611_38294395 | NC_021163.1    | Ca_kabuli_chr04 | 38294395                | AA                              | GG              | 1946824599               |
| SNP_P4_59612_38294397 | NC_021163.1    | Ca_kabuli_chr04 | 38294397                | AA                              | CC              | 1946824602               |
| SNP_P4_59613_38296299 | NC_021163.1    | Ca_kabuli_chr04 | 38296299                | TT                              | GG              | 1946824604               |
| SNP_P4_59614_38297079 | NC_021163.1    | Ca_kabuli_chr04 | 38297079                | TT                              | AA              | 1946824606               |
| SNP_P4_59615_38297086 | NC_021163.1    | Ca_kabuli_chr04 | 38297086                | CC                              | TT              | 1946824608               |
| SNP_P4_59617_38297146 | NC_021163.1    | Ca_kabuli_chr04 | 38297146                | TT                              | CC              | 1946824610               |
| SNP_P4_59618_38297155 | NC_021163.1    | Ca_kabuli_chr04 | 38297155                | GG                              | AA              | 1946824612               |
| SNP_P4_59619_38297418 | NC_021163.1    | Ca_kabuli_chr04 | 38297418                | AA                              | GG              | 1946824614               |
| SNP_P4_59620_38297474 | NC_021163.1    | Ca_kabuli_chr04 | 38297474                | CC                              | GG              | 1946824616               |
| SNP_P4_59621_38297631 | NC_021163.1    | Ca_kabuli_chr04 | 38297631                | TT                              | GG              | 1946824618               |
| SNP_P4_59623_38298595 | NC_021163.1    | Ca_kabuli_chr04 | 38298595                | GG                              | TT              | 1946824620               |
| SNP_P4_59624_38299697 | NC_021163.1    | Ca_kabuli_chr04 | 38299697                | CC                              | TT              | 1946824622               |
| SNP_P4_59625_38299731 | NC_021163.1    | Ca_kabuli_chr04 | 38299731                | CC                              | TT              | 1946824624               |
| SNP_P4_59626_38299922 | NC_021163.1    | Ca_kabuli_chr04 | 38299922                | TT                              | CC              | 1946824626               |
| SNP_P4_59627_38303627 | NC_021163.1    | Ca_kabuli_chr04 | 38303627                | TT                              | GG              | 1946824628               |
| SNP_P4_59628_38303716 | NC_021163.1    | Ca_kabuli_chr04 | 38303716                | AA                              | TT              | 1946824630               |
| SNP_P4_59629_38303727 | NC_021163.1    | Ca_kabuli_chr04 | 38303727                | AA                              | TT              | 1946824632               |
| SNP_P4_59630_38303754 | NC_021163.1    | Ca_kabuli_chr04 | 38303754                | AA                              | CC              | 1946824634               |
| SNP_P4_59631_38303911 | NC_021163.1    | Ca_kabuli_chr04 | 38303911                | GG                              | TT              | 1946824636               |
| SNP_P4_59632_38303918 | NC_021163.1    | Ca_kabuli_chr04 | 38303918                | GG                              | AA              | 1946824638               |
| SNP_P4_59633_38304104 | NC_021163.1    | Ca_kabuli_chr04 | 38304104                | CC                              | TT              | 1946824640               |
| SNP_P4_59634_38304146 | NC_021163.1    | Ca_kabuli_chr04 | 38304146                | AA                              | GG              | 1946824642               |
| SNP_P4_59635_38305720 | NC_021163.1    | Ca_kabuli_chr04 | 38305720                | GG                              | AA              | 1946824644               |
| SNP_P4_59636_38306032 | NC_021163.1    | Ca_kabuli_chr04 | 38306032                | CC                              | TT              | 1946824646               |
| SNP_P4_59637_38306374 | NC_021163.1    | Ca_kabuli_chr04 | 38306374                | TT                              | GG              | 1946824648               |
| SNP_P4_59638_38306386 | NC_021163.1    | Ca_kabuli_chr04 | 38306386                | TT                              | GG              | 1946824650               |
| SNP_P4_59639_38309669 | NC_021163.1    | Ca_kabuli_chr04 | 38309669                | TT                              | CC              | 1946824652               |
| SNP_P4_59640_38311627 | NC_021163.1    | Ca_kabuli_chr04 | 38311627                | GG                              | CC              | 1946824654               |
| SNP_P4_59642_38311815 | NC_021163.1    | Ca_kabuli_chr04 | 38311815                | GG                              | CC              | 1946824656               |
| SNP_P4_59643_38312151 | NC_021163.1    | Ca_kabuli_chr04 | 38312151                | TT                              | CC              | 1946824658               |

| SNPs IDs              | Chromosome IDs | Chromosomes     | Physical positions (bp) | CDC Frontier (Reference genome) | (ILWC46 & LPNB) | NCBI SNPdb Accession IDs |
|-----------------------|----------------|-----------------|-------------------------|---------------------------------|-----------------|--------------------------|
| SNP_P4_59644_38312156 | NC_021163.1    | Ca_kabuli_chr04 | 38312156                | AA                              | GG              | 1946824660               |
| SNP_P4_59645_38312497 | NC_021163.1    | Ca_kabuli_chr04 | 38312497                | TT                              | CC              | 1946824662               |
| SNP_P4_59646_38312503 | NC_021163.1    | Ca_kabuli_chr04 | 38312503                | CC                              | TT              | 1946824664               |
| SNP_P4_59647_38313821 | NC_021163.1    | Ca_kabuli_chr04 | 38313821                | AA                              | GG              | 1946824666               |
| SNP_P4_59648_38314872 | NC_021163.1    | Ca_kabuli_chr04 | 38314872                | TT                              | CC              | 1946824668               |
| SNP_P4_59649_38316064 | NC_021163.1    | Ca_kabuli_chr04 | 38316064                | CC                              | GG              | 1946824670               |
| SNP_P4_59650_38316065 | NC_021163.1    | Ca_kabuli_chr04 | 38316065                | AA                              | GG              | 1946824672               |
| SNP_P4_59652_38317296 | NC_021163.1    | Ca_kabuli_chr04 | 38317296                | AA                              | GG              | 1946824674               |
| SNP_P4_59653_38317325 | NC_021163.1    | Ca_kabuli_chr04 | 38317325                | CC                              | TT              | 1946824676               |
| SNP_P4_59654_38317358 | NC_021163.1    | Ca_kabuli_chr04 | 38317358                | TT                              | AA              | 1946824678               |
| SNP_P4_59655_38317434 | NC_021163.1    | Ca_kabuli_chr04 | 38317434                | TT                              | CC              | 1946824680               |
| SNP_P4_59656_38317508 | NC_021163.1    | Ca_kabuli_chr04 | 38317508                | CC                              | TT              | 1946824682               |
| SNP_P4_59658_38318594 | NC_021163.1    | Ca_kabuli_chr04 | 38318594                | GG                              | AA              | 1946824684               |
| SNP_P4_59659_38318734 | NC_021163.1    | Ca_kabuli_chr04 | 38318734                | CC                              | AA              | 1946824686               |
| SNP_P4_59660_38318924 | NC_021163.1    | Ca_kabuli_chr04 | 38318924                | GG                              | TT              | 1946824688               |
| SNP_P4_59661_38318931 | NC_021163.1    | Ca_kabuli_chr04 | 38318931                | GG                              | AA              | 1946824690               |
| SNP_P4_59662_38319139 | NC_021163.1    | Ca_kabuli_chr04 | 38319139                | GG                              | AA              | 1946824692               |
| SNP_P4_59663_38319208 | NC_021163.1    | Ca_kabuli_chr04 | 38319208                | TT                              | CC              | 1946824694               |
| SNP_P4_59664_38319279 | NC_021163.1    | Ca_kabuli_chr04 | 38319279                | TT                              | AA              | 1946824696               |
| SNP_P4_59665_38319697 | NC_021163.1    | Ca_kabuli_chr04 | 38319697                | TT                              | AA              | 1946824698               |
| SNP_P4_59666_38320463 | NC_021163.1    | Ca_kabuli_chr04 | 38320463                | CC                              | TT              | 1946824700               |
| SNP_P4_59667_38321161 | NC_021163.1    | Ca_kabuli_chr04 | 38321161                | AA                              | GG              | 1946824702               |
| SNP_P4_59668_38321359 | NC_021163.1    | Ca_kabuli_chr04 | 38321359                | TT                              | AA              | 1946824704               |
| SNP_P4_59669_38322709 | NC_021163.1    | Ca_kabuli_chr04 | 38322709                | CC                              | TT              | 1946824706               |
| SNP_P4_59670_38323037 | NC_021163.1    | Ca_kabuli_chr04 | 38323037                | TT                              | GG              | 1946824708               |
| SNP_P4_59671_38323056 | NC_021163.1    | Ca_kabuli_chr04 | 38323056                | TT                              | CC              | 1946824710               |
| SNP_P4_59672_38323139 | NC_021163.1    | Ca_kabuli_chr04 | 38323139                | GG                              | AA              | 1946824712               |
| SNP_P4_59673_38323164 | NC_021163.1    | Ca_kabuli_chr04 | 38323164                | GG                              | TT              | 1946824714               |
| SNP_P4_59674_38323321 | NC_021163.1    | Ca_kabuli_chr04 | 38323321                | GG                              | TT              | 1946824716               |
| SNP_P4_59675_38323345 | NC_021163.1    | Ca_kabuli_chr04 | 38323345                | AA                              | TT              | 1946824718               |
| SNP_P4_59676_38323426 | NC_021163.1    | Ca_kabuli_chr04 | 38323426                | AA                              | CC              | 1946824721               |
| SNP_P4_59677_38323433 | NC_021163.1    | Ca_kabuli_chr04 | 38323433                | GG                              | CC              | 1946824723               |
| SNP_P4_59678_38324752 | NC_021163.1    | Ca_kabuli_chr04 | 38324752                | GG                              | CC              | 1946824725               |
| SNP_P4_59679_38324758 | NC_021163.1    | Ca_kabuli_chr04 | 38324758                | AA                              | GG              | 1946824727               |
| SNP_P4_59680_38324764 | NC_021163.1    | Ca_kabuli_chr04 | 38324764                | TT                              | AA              | 1946824729               |
| SNP_P4_59681_38324802 | NC_021163.1    | Ca_kabuli_chr04 | 38324802                | GG                              | AA              | 1946824731               |
| SNP_P4_59682_38324805 | NC_021163.1    | Ca_kabuli_chr04 | 38324805                | GG                              | CC              | 1946824733               |
| SNP_P4_59683_38324814 | NC_021163.1    | Ca_kabuli_chr04 | 38324814                | CC                              | TT              | 1946824735               |
| SNP_P4_59684_38324906 | NC_021163.1    | Ca_kabuli_chr04 | 38324906                | CC                              | TT              | 1946824737               |
| SNP_P4_59685_38325575 | NC_021163.1    | Ca_kabuli_chr04 | 38325575                | TT                              | CC              | 1946824739               |
| SNP_P4_59686_38325742 | NC_021163.1    | Ca_kabuli_chr04 | 38325742                | GG                              | AA              | 1946824741               |
| SNP_P4_59687_38326123 | NC_021163.1    | Ca_kabuli_chr04 | 38326123                | GG                              | AA              | 1946824743               |

| SNPs IDs              | Chromosome IDs | Chromosomes     | Physical positions (bp) | CDC Frontier (Reference genome) | (ILWC46 & LPNB) | NCBI SNPdb Accession IDs |
|-----------------------|----------------|-----------------|-------------------------|---------------------------------|-----------------|--------------------------|
| SNP_P4_59688_38329926 | NC_021163.1    | Ca_kabuli_chr04 | 38329926                | AA                              | TT              | 1946824745               |
| SNP_P4_59689_38335653 | NC_021163.1    | Ca_kabuli_chr04 | 38335653                | TT                              | CC              | 1946824747               |
| SNP_P4_59690_38335773 | NC_021163.1    | Ca_kabuli_chr04 | 38335773                | AA                              | CC              | 1946824749               |
| SNP_P4_59691_38335819 | NC_021163.1    | Ca_kabuli_chr04 | 38335819                | GG                              | AA              | 1946824751               |
| SNP_P4_59692_38336050 | NC_021163.1    | Ca_kabuli_chr04 | 38336050                | GG                              | AA              | 1946824753               |
| SNP_P4_59693_38336251 | NC_021163.1    | Ca_kabuli_chr04 | 38336251                | TT                              | CC              | 1946824755               |
| SNP_P4_59694_38336291 | NC_021163.1    | Ca_kabuli_chr04 | 38336291                | CC                              | TT              | 1946824758               |
| SNP_P4_59695_38336312 | NC_021163.1    | Ca_kabuli_chr04 | 38336312                | TT                              | CC              | 1946824760               |
| SNP_P4_59696_38338566 | NC_021163.1    | Ca_kabuli_chr04 | 38338566                | AA                              | TT              | 1946824762               |
| SNP_P4_59697_38339479 | NC_021163.1    | Ca_kabuli_chr04 | 38339479                | GG                              | AA              | 1946824764               |
| SNP_P4_59698_38341723 | NC_021163.1    | Ca_kabuli_chr04 | 38341723                | TT                              | CC              | 1946824766               |
| SNP_P4_59699_38343474 | NC_021163.1    | Ca_kabuli_chr04 | 38343474                | AA                              | GG              | 1946824768               |
| SNP_P4_59700_38343477 | NC_021163.1    | Ca_kabuli_chr04 | 38343477                | CC                              | TT              | 1946824770               |
| SNP_P4_59701_38343505 | NC_021163.1    | Ca_kabuli_chr04 | 38343505                | GG                              | AA              | 1946824772               |
| SNP_P4_59702_38344891 | NC_021163.1    | Ca_kabuli_chr04 | 38344891                | GG                              | AA              | 1946824774               |
| SNP_P4_59703_38346128 | NC_021163.1    | Ca_kabuli_chr04 | 38346128                | TT                              | GG              | 1946824776               |
| SNP_P4_59704_38346207 | NC_021163.1    | Ca_kabuli_chr04 | 38346207                | CC                              | TT              | 1946824778               |
| SNP_P4_59705_38348609 | NC_021163.1    | Ca_kabuli_chr04 | 38348609                | CC                              | TT              | 1946824780               |
| SNP_P4_59706_38348617 | NC_021163.1    | Ca_kabuli_chr04 | 38348617                | CC                              | TT              | 1946824782               |
| SNP_P4_59707_38348619 | NC_021163.1    | Ca_kabuli_chr04 | 38348619                | AA                              | TT              | 1946824784               |
| SNP_P4_59708_38348682 | NC_021163.1    | Ca_kabuli_chr04 | 38348682                | TT                              | CC              | 1946824786               |
| SNP_P4_59709_38348692 | NC_021163.1    | Ca_kabuli_chr04 | 38348692                | GG                              | AA              | 1946824788               |
| SNP_P4_59710_38348700 | NC_021163.1    | Ca_kabuli_chr04 | 38348700                | TT                              | CC              | 1946824790               |
| SNP_P4_59711_38348703 | NC_021163.1    | Ca_kabuli_chr04 | 38348703                | CC                              | AA              | 1946824792               |
| SNP_P4_59712_38348772 | NC_021163.1    | Ca_kabuli_chr04 | 38348772                | TT                              | AA              | 1946824794               |
| SNP_P4_59713_38348779 | NC_021163.1    | Ca_kabuli_chr04 | 38348779                | AA                              | GG              | 1946824797               |
| SNP_P4_59714_38348946 | NC_021163.1    | Ca_kabuli_chr04 | 38348946                | CC                              | TT              | 1946824799               |
| SNP_P4_59715_38348951 | NC_021163.1    | Ca_kabuli_chr04 | 38348951                | GG                              | AA              | 1946824801               |
| SNP_P4_59716_38349178 | NC_021163.1    | Ca_kabuli_chr04 | 38349178                | CC                              | TT              | 1946824803               |
| SNP_P4_59717_38349231 | NC_021163.1    | Ca_kabuli_chr04 | 38349231                | GG                              | AA              | 1946824805               |
| SNP_P4_59718_38349233 | NC_021163.1    | Ca_kabuli_chr04 | 38349233                | GG                              | AA              | 1946824807               |
| SNP_P4_59719_38349250 | NC_021163.1    | Ca_kabuli_chr04 | 38349250                | CC                              | TT              | 1946824809               |
| SNP_P4_59720_38349290 | NC_021163.1    | Ca_kabuli_chr04 | 38349290                | TT                              | GG              | 1946824811               |
| SNP_P4_59721_38349294 | NC_021163.1    | Ca_kabuli_chr04 | 38349294                | AA                              | GG              | 1946824813               |
| SNP_P4_59722_38349493 | NC_021163.1    | Ca_kabuli_chr04 | 38349493                | AA                              | GG              | 1946824815               |
| SNP_P4_59723_38349510 | NC_021163.1    | Ca_kabuli_chr04 | 38349510                | AA                              | GG              | 1946824817               |
| SNP_P4_59724_38349516 | NC_021163.1    | Ca_kabuli_chr04 | 38349516                | AA                              | GG              | 1946824819               |
| SNP_P4_59725_38349565 | NC_021163.1    | Ca_kabuli_chr04 | 38349565                | TT                              | CC              | 1946824821               |
| SNP_P4_59726_38349584 | NC_021163.1    | Ca_kabuli_chr04 | 38349584                | AA                              | GG              | 1946824823               |
| SNP_P4_59727_38349598 | NC_021163.1    | Ca_kabuli_chr04 | 38349598                | TT                              | CC              | 1946824825               |
| SNP_P4_59728_38349972 | NC_021163.1    | Ca_kabuli_chr04 | 38349972                | AA                              | GG              | 1946824827               |
| SNP_P4_59729_38350692 | NC_021163.1    | Ca_kabuli_chr04 | 38350692                | GG                              | TT              | 1946824829               |



| SNPs IDs              | Chromosome IDs | Chromosomes     | Physical positions (bp) | CDC Frontier (Reference genome) | (ILWC46 & LPNB) | NCBI SNPdb Accession IDs |
|-----------------------|----------------|-----------------|-------------------------|---------------------------------|-----------------|--------------------------|
| SNP_P4_59730_38352547 | NC_021163.1    | Ca_kabuli_chr04 | 38352547                | TT                              | CC              | 1946824831               |
| SNP_P4_59731_38352794 | NC_021163.1    | Ca_kabuli_chr04 | 38352794                | AA                              | TT              | 1946824833               |
| SNP_P4_59732_38353632 | NC_021163.1    | Ca_kabuli_chr04 | 38353632                | GG                              | AA              | 1946824835               |
| SNP_P4_59733_38353653 | NC_021163.1    | Ca_kabuli_chr04 | 38353653                | AA                              | GG              | 1946824837               |
| SNP_P4_59734_38353656 | NC_021163.1    | Ca_kabuli_chr04 | 38353656                | CC                              | TT              | 1946824839               |
| SNP_P4_59735_38353888 | NC_021163.1    | Ca_kabuli_chr04 | 38353888                | AA                              | TT              | 1946824841               |
| SNP_P4_59736_38354267 | NC_021163.1    | Ca_kabuli_chr04 | 38354267                | AA                              | GG              | 1946824843               |
| SNP_P4_59737_38354328 | NC_021163.1    | Ca_kabuli_chr04 | 38354328                | AA                              | GG              | 1946824845               |
| SNP_P4_59739_38360723 | NC_021163.1    | Ca_kabuli_chr04 | 38360723                | CC                              | GG              | 1946824847               |
| SNP_P4_59740_38360838 | NC_021163.1    | Ca_kabuli_chr04 | 38360838                | TT                              | CC              | 1946824849               |
| SNP_P4_59741_38360936 | NC_021163.1    | Ca_kabuli_chr04 | 38360936                | CC                              | AA              | 1946824851               |
| SNP_P4_59742_38361736 | NC_021163.1    | Ca_kabuli_chr04 | 38361736                | GG                              | AA              | 1946824853               |
| SNP_P4_59744_38367581 | NC_021163.1    | Ca_kabuli_chr04 | 38367581                | AA                              | CC              | 1946824855               |
| SNP_P4_59745_38367582 | NC_021163.1    | Ca_kabuli_chr04 | 38367582                | TT                              | GG              | 1946824857               |
| SNP_P4_59746_38367953 | NC_021163.1    | Ca_kabuli_chr04 | 38367953                | AA                              | GG              | 1946824859               |
| SNP_P4_59747_38367967 | NC_021163.1    | Ca_kabuli_chr04 | 38367967                | AA                              | GG              | 1946824861               |
| SNP_P4_59748_38368265 | NC_021163.1    | Ca_kabuli_chr04 | 38368265                | CC                              | TT              | 1946824863               |
| SNP_P4_59749_38368626 | NC_021163.1    | Ca_kabuli_chr04 | 38368626                | CC                              | AA              | 1946824865               |
| SNP_P4_59751_38369330 | NC_021163.1    | Ca_kabuli_chr04 | 38369330                | CC                              | TT              | 1946824867               |
| SNP_P4_59752_38369336 | NC_021163.1    | Ca_kabuli_chr04 | 38369336                | TT                              | CC              | 1946824869               |
| SNP_P4_59753_38369617 | NC_021163.1    | Ca_kabuli_chr04 | 38369617                | GG                              | AA              | 1946824871               |
| SNP_P4_59754_38369647 | NC_021163.1    | Ca_kabuli_chr04 | 38369647                | TT                              | CC              | 1946824873               |
| SNP_P4_59755_38369889 | NC_021163.1    | Ca_kabuli_chr04 | 38369889                | TT                              | CC              | 1946824875               |
| SNP_P4_59756_38370506 | NC_021163.1    | Ca_kabuli_chr04 | 38370506                | TT                              | CC              | 1946824877               |
| SNP_P4_59757_38370941 | NC_021163.1    | Ca_kabuli_chr04 | 38370941                | AA                              | GG              | 1946824879               |
| SNP_P4_59758_38371060 | NC_021163.1    | Ca_kabuli_chr04 | 38371060                | TT                              | CC              | 1946824881               |
| SNP_P4_59759_38371144 | NC_021163.1    | Ca_kabuli_chr04 | 38371144                | AA                              | CC              | 1946824883               |
| SNP_P4_59760_38371146 | NC_021163.1    | Ca_kabuli_chr04 | 38371146                | GG                              | AA              | 1946824885               |
| SNP_P4_59761_38371328 | NC_021163.1    | Ca_kabuli_chr04 | 38371328                | GG                              | TT              | 1946824887               |
| SNP_P4_59762_38371367 | NC_021163.1    | Ca_kabuli_chr04 | 38371367                | TT                              | CC              | 1946824889               |
| SNP_P4_59763_38371370 | NC_021163.1    | Ca_kabuli_chr04 | 38371370                | TT                              | AA              | 1946824891               |
| SNP_P4_59764_38372471 | NC_021163.1    | Ca_kabuli_chr04 | 38372471                | TT                              | CC              | 1946824893               |
| SNP_P4_59765_38372945 | NC_021163.1    | Ca_kabuli_chr04 | 38372945                | GG                              | AA              | 1946824895               |
| SNP_P4_59766_38373975 | NC_021163.1    | Ca_kabuli_chr04 | 38373975                | TT                              | CC              | 1946824897               |
| SNP_P4_59767_38373998 | NC_021163.1    | Ca_kabuli_chr04 | 38373998                | GG                              | AA              | 1946824900               |
| SNP_P4_59768_38373999 | NC_021163.1    | Ca_kabuli_chr04 | 38373999                | AA                              | TT              | 1946824902               |
| SNP_P4_59770_38377006 | NC_021163.1    | Ca_kabuli_chr04 | 38377006                | AA                              | TT              | 1946824904               |
| SNP_P4_59771_38377075 | NC_021163.1    | Ca_kabuli_chr04 | 38377075                | GG                              | AA              | 1946824906               |
| SNP_P4_59773_38377707 | NC_021163.1    | Ca_kabuli_chr04 | 38377707                | AA                              | TT              | 1946824908               |
| SNP_P4_59775_38378315 | NC_021163.1    | Ca_kabuli_chr04 | 38378315                | AA                              | GG              | 1946824910               |
| SNP_P4_59776_38378499 | NC_021163.1    | Ca_kabuli_chr04 | 38378499                | CC                              | TT              | 1946824912               |
| SNP_P4_59777_38378688 | NC_021163.1    | Ca_kabuli_chr04 | 38378688                | TT                              | AA              | 1946824914               |

| SNPs IDs              | Chromosome IDs | Chromosomes     | Physical positions (bp) | CDC Frontier (Reference genome) | (ILWC46 & LPNB) | NCBI SNPdb Accession IDs |
|-----------------------|----------------|-----------------|-------------------------|---------------------------------|-----------------|--------------------------|
| SNP_P4_59779_38380013 | NC_021163.1    | Ca_kabuli_chr04 | 38380013                | GG                              | TT              | 1946824916               |
| SNP_P4_59780_38380044 | NC_021163.1    | Ca_kabuli_chr04 | 38380044                | GG                              | AA              | 1946824918               |
| SNP_P4_59781_38381695 | NC_021163.1    | Ca_kabuli_chr04 | 38381695                | AA                              | TT              | 1946824920               |
| SNP_P4_59782_38381834 | NC_021163.1    | Ca_kabuli_chr04 | 38381834                | TT                              | CC              | 1946824922               |
| SNP_P4_59783_38382229 | NC_021163.1    | Ca_kabuli_chr04 | 38382229                | CC                              | TT              | 1946824924               |
| SNP_P4_59784_38382298 | NC_021163.1    | Ca_kabuli_chr04 | 38382298                | TT                              | AA              | 1946824926               |
| SNP_P4_59785_38384564 | NC_021163.1    | Ca_kabuli_chr04 | 38384564                | CC                              | TT              | 1946824928               |
| SNP_P4_59786_38388830 | NC_021163.1    | Ca_kabuli_chr04 | 38388830                | TT                              | CC              | 1946824930               |
| SNP_P4_59787_38388948 | NC_021163.1    | Ca_kabuli_chr04 | 38388948                | AA                              | GG              | 1946824932               |
| SNP_P4_59788_38398486 | NC_021163.1    | Ca_kabuli_chr04 | 38398486                | TT                              | CC              | 1946824934               |
| SNP_P4_59789_38402453 | NC_021163.1    | Ca_kabuli_chr04 | 38402453                | TT                              | CC              | 1946824936               |
| SNP_P4_59790_38407304 | NC_021163.1    | Ca_kabuli_chr04 | 38407304                | TT                              | CC              | 1946824938               |
| SNP_P4_59791_38412789 | NC_021163.1    | Ca_kabuli_chr04 | 38412789                | CC                              | AA              | 1946824940               |
| SNP_P4_59792_38412812 | NC_021163.1    | Ca_kabuli_chr04 | 38412812                | CC                              | AA              | 1946824942               |
| SNP_P4_59793_38412869 | NC_021163.1    | Ca_kabuli_chr04 | 38412869                | GG                              | AA              | 1946824944               |
| SNP_P4_59794_38412954 | NC_021163.1    | Ca_kabuli_chr04 | 38412954                | AA                              | TT              | 1946824946               |
| SNP_P4_59795_38413025 | NC_021163.1    | Ca_kabuli_chr04 | 38413025                | GG                              | TT              | 1946824948               |
| SNP_P4_59796_38413273 | NC_021163.1    | Ca_kabuli_chr04 | 38413273                | CC                              | TT              | 1946824950               |
| SNP_P4_59797_38413279 | NC_021163.1    | Ca_kabuli_chr04 | 38413279                | AA                              | TT              | 1946824952               |
| SNP_P4_59798_38413358 | NC_021163.1    | Ca_kabuli_chr04 | 38413358                | CC                              | TT              | 1946824954               |
| SNP_P4_59800_38414871 | NC_021163.1    | Ca_kabuli_chr04 | 38414871                | TT                              | AA              | 1946824956               |
| SNP_P4_59801_38414913 | NC_021163.1    | Ca_kabuli_chr04 | 38414913                | GG                              | AA              | 1946824958               |
| SNP_P4_59802_38415992 | NC_021163.1    | Ca_kabuli_chr04 | 38415992                | GG                              | AA              | 1946824960               |
| SNP_P4_59803_38417359 | NC_021163.1    | Ca_kabuli_chr04 | 38417359                | CC                              | AA              | 1946824962               |
| SNP_P4_59804_38417799 | NC_021163.1    | Ca_kabuli_chr04 | 38417799                | GG                              | AA              | 1946824964               |
| SNP_P4_59805_38417825 | NC_021163.1    | Ca_kabuli_chr04 | 38417825                | AA                              | GG              | 1946824967               |
| SNP_P4_59806_38417871 | NC_021163.1    | Ca_kabuli_chr04 | 38417871                | GG                              | AA              | 1946824969               |
| SNP_P4_59807_38418574 | NC_021163.1    | Ca_kabuli_chr04 | 38418574                | CC                              | TT              | 1946824971               |
| SNP_P4_59808_38418615 | NC_021163.1    | Ca_kabuli_chr04 | 38418615                | CC                              | TT              | 1946824973               |
| SNP_P4_59809_38418668 | NC_021163.1    | Ca_kabuli_chr04 | 38418668                | TT                              | CC              | 1946824975               |
| SNP_P4_59810_38418684 | NC_021163.1    | Ca_kabuli_chr04 | 38418684                | AA                              | GG              | 1946824977               |
| SNP_P4_59811_38418734 | NC_021163.1    | Ca_kabuli_chr04 | 38418734                | TT                              | GG              | 1946824980               |
| SNP_P4_59812_38422578 | NC_021163.1    | Ca_kabuli_chr04 | 38422578                | TT                              | GG              | 1946824982               |
| SNP_P4_59813_38425675 | NC_021163.1    | Ca_kabuli_chr04 | 38425675                | AA                              | GG              | 1946824984               |
| SNP_P4_59814_38427912 | NC_021163.1    | Ca_kabuli_chr04 | 38427912                | CC                              | AA              | 1946824986               |
| SNP_P4_59815_38429102 | NC_021163.1    | Ca_kabuli_chr04 | 38429102                | GG                              | AA              | 1946824988               |
| SNP_P4_59816_38433090 | NC_021163.1    | Ca_kabuli_chr04 | 38433090                | CC                              | AA              | 1946824990               |
| SNP_P4_59817_38434327 | NC_021163.1    | Ca_kabuli_chr04 | 38434327                | GG                              | AA              | 1946824992               |
| SNP_P4_59818_38435671 | NC_021163.1    | Ca_kabuli_chr04 | 38435671                | GG                              | TT              | 1946824994               |
| SNP_P4_59819_38436253 | NC_021163.1    | Ca_kabuli_chr04 | 38436253                | CC                              | TT              | 1946824996               |
| SNP_P4_59820_38436876 | NC_021163.1    | Ca_kabuli_chr04 | 38436876                | GG                              | AA              | 1946824999               |
| SNP_P4_59821_38436879 | NC_021163.1    | Ca_kabuli_chr04 | 38436879                | CC                              | GG              | 1946825001               |

| SNPs IDs              | Chromosome IDs | Chromosomes     | Physical positions (bp) | CDC Frontier (Reference genome) | (ILWC46 & LPNB) | NCBI SNPdb Accession IDs |
|-----------------------|----------------|-----------------|-------------------------|---------------------------------|-----------------|--------------------------|
| SNP_P4_59822_38436928 | NC_021163.1    | Ca_kabuli_chr04 | 38436928                | TT                              | GG              | 1946825003               |
| SNP_P4_59823_38438220 | NC_021163.1    | Ca_kabuli_chr04 | 38438220                | GG                              | AA              | 1946825005               |
| SNP_P4_59824_38438222 | NC_021163.1    | Ca_kabuli_chr04 | 38438222                | AA                              | CC              | 1946825007               |
| SNP_P4_59825_38438248 | NC_021163.1    | Ca_kabuli_chr04 | 38438248                | AA                              | GG              | 1946825010               |
| SNP_P4_59826_38438867 | NC_021163.1    | Ca_kabuli_chr04 | 38438867                | AA                              | GG              | 1946825012               |
| SNP_P4_59827_38438870 | NC_021163.1    | Ca_kabuli_chr04 | 38438870                | TT                              | GG              | 1946825014               |
| SNP_P4_59828_38438874 | NC_021163.1    | Ca_kabuli_chr04 | 38438874                | CC                              | TT              | 1946825016               |
| SNP_P4_59829_38439997 | NC_021163.1    | Ca_kabuli_chr04 | 38439997                | GG                              | AA              | 1946825018               |
| SNP_P4_59830_38440264 | NC_021163.1    | Ca_kabuli_chr04 | 38440264                | GG                              | AA              | 1946825020               |
| SNP_P4_59831_38440270 | NC_021163.1    | Ca_kabuli_chr04 | 38440270                | TT                              | CC              | 1946825022               |
| SNP_P4_59832_38443133 | NC_021163.1    | Ca_kabuli_chr04 | 38443133                | CC                              | TT              | 1946825025               |
| SNP_P4_59833_38443135 | NC_021163.1    | Ca_kabuli_chr04 | 38443135                | AA                              | GG              | 1946825027               |
| SNP_P4_59834_38444129 | NC_021163.1    | Ca_kabuli_chr04 | 38444129                | TT                              | CC              | 1946825029               |
| SNP_P4_59835_38445242 | NC_021163.1    | Ca_kabuli_chr04 | 38445242                | AA                              | GG              | 1946825031               |
| SNP_P4_59836_38445245 | NC_021163.1    | Ca_kabuli_chr04 | 38445245                | GG                              | AA              | 1946825033               |
| SNP_P4_59837_38445632 | NC_021163.1    | Ca_kabuli_chr04 | 38445632                | AA                              | GG              | 1946825035               |
| SNP_P4_59838_38445766 | NC_021163.1    | Ca_kabuli_chr04 | 38445766                | GG                              | AA              | 1946825037               |
| SNP_P4_59839_38445795 | NC_021163.1    | Ca_kabuli_chr04 | 38445795                | CC                              | TT              | 1946825039               |
| SNP_P4_59840_38445942 | NC_021163.1    | Ca_kabuli_chr04 | 38445942                | AA                              | TT              | 1946825041               |
| SNP_P4_59842_38446357 | NC_021163.1    | Ca_kabuli_chr04 | 38446357                | GG                              | CC              | 1946825043               |
| SNP_P4_59844_38446722 | NC_021163.1    | Ca_kabuli_chr04 | 38446722                | CC                              | TT              | 1946825045               |
| SNP_P4_59845_38447052 | NC_021163.1    | Ca_kabuli_chr04 | 38447052                | AA                              | GG              | 1946825047               |
| SNP_P4_59846_38447082 | NC_021163.1    | Ca_kabuli_chr04 | 38447082                | AA                              | GG              | 1946825049               |
| SNP_P4_59847_38447121 | NC_021163.1    | Ca_kabuli_chr04 | 38447121                | GG                              | TT              | 1946825051               |
| SNP_P4_59848_38447128 | NC_021163.1    | Ca_kabuli_chr04 | 38447128                | AA                              | GG              | 1946825053               |
| SNP_P4_59849_38447130 | NC_021163.1    | Ca_kabuli_chr04 | 38447130                | GG                              | AA              | 1946825055               |
| SNP_P4_59850_38449821 | NC_021163.1    | Ca_kabuli_chr04 | 38449821                | TT                              | CC              | 1946825057               |
| SNP_P4_59851_38450228 | NC_021163.1    | Ca_kabuli_chr04 | 38450228                | TT                              | CC              | 1946825060               |
| SNP_P4_59852_38452319 | NC_021163.1    | Ca_kabuli_chr04 | 38452319                | GG                              | AA              | 1946825062               |
| SNP_P4_59853_38452370 | NC_021163.1    | Ca_kabuli_chr04 | 38452370                | CC                              | TT              | 1946825064               |
| SNP_P4_59854_38452647 | NC_021163.1    | Ca_kabuli_chr04 | 38452647                | TT                              | CC              | 1946825066               |
| SNP_P4_59855_38452905 | NC_021163.1    | Ca_kabuli_chr04 | 38452905                | CC                              | TT              | 1946825068               |
| SNP_P4_59856_38453400 | NC_021163.1    | Ca_kabuli_chr04 | 38453400                | TT                              | CC              | 1946825070               |
| SNP_P4_59857_38453569 | NC_021163.1    | Ca_kabuli_chr04 | 38453569                | TT                              | GG              | 1946825072               |
| SNP_P4_59858_38453610 | NC_021163.1    | Ca_kabuli_chr04 | 38453610                | GG                              | AA              | 1946825074               |
| SNP_P4_59859_38454786 | NC_021163.1    | Ca_kabuli_chr04 | 38454786                | CC                              | AA              | 1946825076               |
| SNP_P4_59860_38456486 | NC_021163.1    | Ca_kabuli_chr04 | 38456486                | GG                              | TT              | 1946825078               |
| SNP_P4_59861_38456670 | NC_021163.1    | Ca_kabuli_chr04 | 38456670                | GG                              | AA              | 1946825080               |
| SNP_P4_59862_38456769 | NC_021163.1    | Ca_kabuli_chr04 | 38456769                | TT                              | CC              | 1946825082               |
| SNP_P4_59863_38456809 | NC_021163.1    | Ca_kabuli_chr04 | 38456809                | AA                              | CC              | 1946825084               |
| SNP_P4_59865_38458273 | NC_021163.1    | Ca_kabuli_chr04 | 38458273                | GG                              | AA              | 1946825086               |
| SNP_P4_59866_38458307 | NC_021163.1    | Ca_kabuli_chr04 | 38458307                | CC                              | TT              | 1946825088               |

| SNPs IDs              | Chromosome IDs | Chromosomes     | Physical positions (bp) | CDC Frontier (Reference genome) | (ILWC46 & LPNB) | NCBI SNPdb Accession IDs |
|-----------------------|----------------|-----------------|-------------------------|---------------------------------|-----------------|--------------------------|
| SNP_P4_59867_38458866 | NC_021163.1    | Ca_kabuli_chr04 | 38458866                | CC                              | TT              | 1946825090               |
| SNP_P4_59868_38460127 | NC_021163.1    | Ca_kabuli_chr04 | 38460127                | CC                              | TT              | 1946825092               |
| SNP_P4_59869_38461703 | NC_021163.1    | Ca_kabuli_chr04 | 38461703                | CC                              | TT              | 1946825094               |
| SNP_P4_59870_38461990 | NC_021163.1    | Ca_kabuli_chr04 | 38461990                | TT                              | CC              | 1946825096               |
| SNP_P4_59871_38464343 | NC_021163.1    | Ca_kabuli_chr04 | 38464343                | AA                              | CC              | 1946825098               |
| SNP_P4_59872_38464597 | NC_021163.1    | Ca_kabuli_chr04 | 38464597                | AA                              | GG              | 1946825100               |
| SNP_P4_59873_38465322 | NC_021163.1    | Ca_kabuli_chr04 | 38465322                | AA                              | GG              | 1946825102               |
| SNP_P4_59874_38465355 | NC_021163.1    | Ca_kabuli_chr04 | 38465355                | TT                              | CC              | 1946825104               |
| SNP_P4_59875_38465720 | NC_021163.1    | Ca_kabuli_chr04 | 38465720                | TT                              | GG              | 1946825106               |
| SNP_P4_59876_38466497 | NC_021163.1    | Ca_kabuli_chr04 | 38466497                | CC                              | TT              | 1946825108               |
| SNP_P4_59877_38467849 | NC_021163.1    | Ca_kabuli_chr04 | 38467849                | AA                              | GG              | 1946825110               |
| SNP_P4_59878_38476948 | NC_021163.1    | Ca_kabuli_chr04 | 38476948                | GG                              | AA              | 1946825112               |
| SNP_P4_59879_38477846 | NC_021163.1    | Ca_kabuli_chr04 | 38477846                | GG                              | AA              | 1946825114               |
| SNP_P4_59880_38477868 | NC_021163.1    | Ca_kabuli_chr04 | 38477868                | AA                              | GG              | 1946825116               |
| SNP_P4_59881_38478095 | NC_021163.1    | Ca_kabuli_chr04 | 38478095                | GG                              | AA              | 1946825118               |
| SNP_P4_59882_38478443 | NC_021163.1    | Ca_kabuli_chr04 | 38478443                | GG                              | AA              | 1946825121               |
| SNP_P4_59883_38478457 | NC_021163.1    | Ca_kabuli_chr04 | 38478457                | CC                              | TT              | 1946825123               |
| SNP_P4_59884_38478923 | NC_021163.1    | Ca_kabuli_chr04 | 38478923                | GG                              | CC              | 1946825125               |
| SNP_P4_59885_38478925 | NC_021163.1    | Ca_kabuli_chr04 | 38478925                | CC                              | TT              | 1946825127               |
| SNP_P4_59886_38478928 | NC_021163.1    | Ca_kabuli_chr04 | 38478928                | AA                              | GG              | 1946825129               |
| SNP_P4_59887_38478939 | NC_021163.1    | Ca_kabuli_chr04 | 38478939                | GG                              | AA              | 1946825131               |
| SNP_P4_59890_38482663 | NC_021163.1    | Ca_kabuli_chr04 | 38482663                | TT                              | CC              | 1946825133               |
| SNP_P4_59891_38482665 | NC_021163.1    | Ca_kabuli_chr04 | 38482665                | TT                              | CC              | 1946825135               |
| SNP_P4_59892_38482686 | NC_021163.1    | Ca_kabuli_chr04 | 38482686                | TT                              | CC              | 1946825137               |
| SNP_P4_59895_38482994 | NC_021163.1    | Ca_kabuli_chr04 | 38482994                | TT                              | CC              | 1946825139               |
| SNP_P4_59896_38483164 | NC_021163.1    | Ca_kabuli_chr04 | 38483164                | CC                              | TT              | 1946825141               |
| SNP_P4_59897_38483166 | NC_021163.1    | Ca_kabuli_chr04 | 38483166                | AA                              | GG              | 1946825143               |
| SNP_P4_59898_38483202 | NC_021163.1    | Ca_kabuli_chr04 | 38483202                | TT                              | CC              | 1946825145               |
| SNP_P4_59902_38484145 | NC_021163.1    | Ca_kabuli_chr04 | 38484145                | GG                              | CC              | 1946825147               |
| SNP_P4_59905_38485158 | NC_021163.1    | Ca_kabuli_chr04 | 38485158                | CC                              | TT              | 1946825149               |
| SNP_P4_59908_38485250 | NC_021163.1    | Ca_kabuli_chr04 | 38485250                | TT                              | CC              | 1946825151               |
| SNP_P4_59909_38485298 | NC_021163.1    | Ca_kabuli_chr04 | 38485298                | TT                              | GG              | 1946825153               |
| SNP_P4_59910_38485346 | NC_021163.1    | Ca_kabuli_chr04 | 38485346                | GG                              | AA              | 1946825155               |
| SNP_P4_59911_38488880 | NC_021163.1    | Ca_kabuli_chr04 | 38488880                | TT                              | CC              | 1946825157               |
| SNP_P4_59912_38489026 | NC_021163.1    | Ca_kabuli_chr04 | 38489026                | CC                              | GG              | 1946825159               |
| SNP_P4_59913_38489559 | NC_021163.1    | Ca_kabuli_chr04 | 38489559                | CC                              | TT              | 1946825161               |
| SNP_P4_59914_38490100 | NC_021163.1    | Ca_kabuli_chr04 | 38490100                | AA                              | GG              | 1946825163               |
| SNP_P4_59915_38491574 | NC_021163.1    | Ca_kabuli_chr04 | 38491574                | TT                              | GG              | 1946825165               |
| SNP_P4_59916_38491577 | NC_021163.1    | Ca_kabuli_chr04 | 38491577                | GG                              | AA              | 1946825167               |
| SNP_P4_59917_38491638 | NC_021163.1    | Ca_kabuli_chr04 | 38491638                | CC                              | AA              | 1946825169               |
| SNP_P4_59918_38491685 | NC_021163.1    | Ca_kabuli_chr04 | 38491685                | CC                              | TT              | 1946825171               |
| SNP_P4_59919_38491817 | NC_021163.1    | Ca_kabuli_chr04 | 38491817                | AA                              | CC              | 1946825173               |

| SNPs IDs              | Chromosome IDs | Chromosomes     | Physical positions (bp) | CDC Frontier (Reference genome) | (ILWC46 & LPNB) | NCBI SNPdb Accession IDs |
|-----------------------|----------------|-----------------|-------------------------|---------------------------------|-----------------|--------------------------|
| SNP_P4_59920_38492590 | NC_021163.1    | Ca_kabuli_chr04 | 38492590                | GG                              | AA              | 1946825175               |
| SNP_P4_59921_38492639 | NC_021163.1    | Ca_kabuli_chr04 | 38492639                | CC                              | TT              | 1946825177               |
| SNP_P4_59922_38492706 | NC_021163.1    | Ca_kabuli_chr04 | 38492706                | TT                              | CC              | 1946825179               |
| SNP_P4_59923_38493381 | NC_021163.1    | Ca_kabuli_chr04 | 38493381                | CC                              | TT              | 1946825181               |
| SNP_P4_59924_38493397 | NC_021163.1    | Ca_kabuli_chr04 | 38493397                | AA                              | TT              | 1946825183               |
| SNP_P4_59925_38493761 | NC_021163.1    | Ca_kabuli_chr04 | 38493761                | TT                              | CC              | 1946825185               |
| SNP_P4_59926_38493798 | NC_021163.1    | Ca_kabuli_chr04 | 38493798                | AA                              | GG              | 1946825187               |
| SNP_P4_59927_38493812 | NC_021163.1    | Ca_kabuli_chr04 | 38493812                | GG                              | AA              | 1946825189               |
| SNP_P4_59928_38493838 | NC_021163.1    | Ca_kabuli_chr04 | 38493838                | GG                              | CC              | 1946825191               |
| SNP_P4_59929_38493871 | NC_021163.1    | Ca_kabuli_chr04 | 38493871                | GG                              | TT              | 1946825193               |
| SNP_P4_59930_38494917 | NC_021163.1    | Ca_kabuli_chr04 | 38494917                | AA                              | GG              | 1946825195               |
| SNP_P4_59931_38494927 | NC_021163.1    | Ca_kabuli_chr04 | 38494927                | GG                              | AA              | 1946825197               |
| SNP_P4_59932_38495451 | NC_021163.1    | Ca_kabuli_chr04 | 38495451                | TT                              | CC              | 1946825199               |
| SNP_P4_59933_38495452 | NC_021163.1    | Ca_kabuli_chr04 | 38495452                | GG                              | AA              | 1946825201               |
| SNP_P4_59934_38495666 | NC_021163.1    | Ca_kabuli_chr04 | 38495666                | TT                              | CC              | 1946825204               |
| SNP_P4_59935_38500147 | NC_021163.1    | Ca_kabuli_chr04 | 38500147                | GG                              | AA              | 1946825206               |
| SNP_P4_59936_38500469 | NC_021163.1    | Ca_kabuli_chr04 | 38500469                | AA                              | CC              | 1946825208               |
| SNP_P4_59937_38500514 | NC_021163.1    | Ca_kabuli_chr04 | 38500514                | GG                              | CC              | 1946825210               |
| SNP_P4_59938_38500820 | NC_021163.1    | Ca_kabuli_chr04 | 38500820                | CC                              | TT              | 1946825212               |
| SNP_P4_59939_38501002 | NC_021163.1    | Ca_kabuli_chr04 | 38501002                | GG                              | AA              | 1946825214               |
| SNP_P4_59940_38501765 | NC_021163.1    | Ca_kabuli_chr04 | 38501765                | AA                              | GG              | 1946825216               |
| SNP_P4_59941_38503430 | NC_021163.1    | Ca_kabuli_chr04 | 38503430                | GG                              | TT              | 1946825218               |
| SNP_P4_59942_38506691 | NC_021163.1    | Ca_kabuli_chr04 | 38506691                | TT                              | GG              | 1946825220               |
| SNP_P4_59943_38506711 | NC_021163.1    | Ca_kabuli_chr04 | 38506711                | AA                              | CC              | 1946825222               |
| SNP_P4_59944_38506732 | NC_021163.1    | Ca_kabuli_chr04 | 38506732                | TT                              | CC              | 1946825224               |
| SNP_P4_59945_38508396 | NC_021163.1    | Ca_kabuli_chr04 | 38508396                | CC                              | TT              | 1946825226               |
| SNP_P4_59948_38514831 | NC_021163.1    | Ca_kabuli_chr04 | 38514831                | TT                              | CC              | 1946825228               |
| SNP_P4_59949_38514836 | NC_021163.1    | Ca_kabuli_chr04 | 38514836                | GG                              | AA              | 1946825230               |
| SNP_P4_59950_38515061 | NC_021163.1    | Ca_kabuli_chr04 | 38515061                | TT                              | AA              | 1946825232               |
| SNP_P4_59951_38515080 | NC_021163.1    | Ca_kabuli_chr04 | 38515080                | GG                              | AA              | 1946825234               |
| SNP_P4_59953_38518954 | NC_021163.1    | Ca_kabuli_chr04 | 38518954                | AA                              | CC              | 1946825236               |
| SNP_P4_59954_38518981 | NC_021163.1    | Ca_kabuli_chr04 | 38518981                | TT                              | AA              | 1946825238               |
| SNP_P4_59955_38518995 | NC_021163.1    | Ca_kabuli_chr04 | 38518995                | AA                              | GG              | 1946825240               |
| SNP_P4_59956_38519243 | NC_021163.1    | Ca_kabuli_chr04 | 38519243                | GG                              | AA              | 1946825242               |
| SNP_P4_59957_38519378 | NC_021163.1    | Ca_kabuli_chr04 | 38519378                | AA                              | GG              | 1946825244               |
| SNP_P4_59958_38520897 | NC_021163.1    | Ca_kabuli_chr04 | 38520897                | AA                              | TT              | 1946825246               |
| SNP_P4_59959_38520935 | NC_021163.1    | Ca_kabuli_chr04 | 38520935                | TT                              | GG              | 1946825248               |
| SNP_P4_59960_38520941 | NC_021163.1    | Ca_kabuli_chr04 | 38520941                | TT                              | CC              | 1946825250               |
| SNP_P4_59961_38523148 | NC_021163.1    | Ca_kabuli_chr04 | 38523148                | TT                              | AA              | 1946825252               |
| SNP_P4_59962_38523302 | NC_021163.1    | Ca_kabuli_chr04 | 38523302                | GG                              | AA              | 1946825254               |
| SNP_P4_59963_38524710 | NC_021163.1    | Ca_kabuli_chr04 | 38524710                | GG                              | AA              | 1946825256               |
| SNP_P4_59964_38526506 | NC_021163.1    | Ca_kabuli_chr04 | 38526506                | TT                              | CC              | 1946825258               |

| SNPs IDs              | Chromosome IDs | Chromosomes     | Physical positions (bp) | CDC Frontier (Reference genome) | (ILWC46 & LPNB) | NCBI SNPdb Accession IDs |
|-----------------------|----------------|-----------------|-------------------------|---------------------------------|-----------------|--------------------------|
| SNP_P4_59965_38526827 | NC_021163.1    | Ca_kabuli_chr04 | 38526827                | AA                              | GG              | 1946825260               |
| SNP_P4_59966_38527353 | NC_021163.1    | Ca_kabuli_chr04 | 38527353                | CC                              | AA              | 1946825262               |
| SNP_P4_59967_38527624 | NC_021163.1    | Ca_kabuli_chr04 | 38527624                | CC                              | TT              | 1946825264               |
| SNP_P4_59969_38527721 | NC_021163.1    | Ca_kabuli_chr04 | 38527721                | TT                              | GG              | 1946825266               |
| SNP_P4_59970_38529863 | NC_021163.1    | Ca_kabuli_chr04 | 38529863                | TT                              | CC              | 1946825268               |
| SNP_P4_59971_38531853 | NC_021163.1    | Ca_kabuli_chr04 | 38531853                | CC                              | GG              | 1946825270               |
| SNP_P4_59972_38532177 | NC_021163.1    | Ca_kabuli_chr04 | 38532177                | GG                              | CC              | 1946825272               |
| SNP_P4_59973_38533664 | NC_021163.1    | Ca_kabuli_chr04 | 38533664                | CC                              | GG              | 1946825274               |
| SNP_P4_59974_38534446 | NC_021163.1    | Ca_kabuli_chr04 | 38534446                | AA                              | GG              | 1946825276               |
| SNP_P4_59975_38535520 | NC_021163.1    | Ca_kabuli_chr04 | 38535520                | CC                              | TT              | 1946825278               |
| SNP_P4_59976_38536709 | NC_021163.1    | Ca_kabuli_chr04 | 38536709                | TT                              | CC              | 1946825280               |
| SNP_P4_59979_38537369 | NC_021163.1    | Ca_kabuli_chr04 | 38537369                | TT                              | CC              | 1946825282               |
| SNP_P4_59980_38537538 | NC_021163.1    | Ca_kabuli_chr04 | 38537538                | TT                              | CC              | 1946825284               |
| SNP_P4_59982_38537882 | NC_021163.1    | Ca_kabuli_chr04 | 38537882                | GG                              | AA              | 1946825286               |
| SNP_P4_59983_38538017 | NC_021163.1    | Ca_kabuli_chr04 | 38538017                | TT                              | AA              | 1946825288               |
| SNP_P4_59984_38538056 | NC_021163.1    | Ca_kabuli_chr04 | 38538056                | AA                              | TT              | 1946825290               |
| SNP_P4_59985_38545454 | NC_021163.1    | Ca_kabuli_chr04 | 38545454                | GG                              | AA              | 1946825292               |
| SNP_P4_59986_38545471 | NC_021163.1    | Ca_kabuli_chr04 | 38545471                | GG                              | AA              | 1946825294               |
| SNP_P4_59987_38545508 | NC_021163.1    | Ca_kabuli_chr04 | 38545508                | GG                              | AA              | 1946825296               |
| SNP_P4_59988_38545642 | NC_021163.1    | Ca_kabuli_chr04 | 38545642                | TT                              | AA              | 1946825298               |
| SNP_P4_59989_38547308 | NC_021163.1    | Ca_kabuli_chr04 | 38547308                | TT                              | AA              | 1946825300               |
| SNP_P4_59990_38547634 | NC_021163.1    | Ca_kabuli_chr04 | 38547634                | AA                              | TT              | 1946825302               |
| SNP_P4_59991_38547820 | NC_021163.1    | Ca_kabuli_chr04 | 38547820                | AA                              | GG              | 1946825304               |
| SNP_P4_59992_38547824 | NC_021163.1    | Ca_kabuli_chr04 | 38547824                | GG                              | AA              | 1946825306               |
| SNP_P4_59994_38549058 | NC_021163.1    | Ca_kabuli_chr04 | 38549058                | TT                              | CC              | 1946825308               |
| SNP_P4_59995_38550600 | NC_021163.1    | Ca_kabuli_chr04 | 38550600                | GG                              | AA              | 1946825310               |
| SNP_P4_59996_38550938 | NC_021163.1    | Ca_kabuli_chr04 | 38550938                | AA                              | TT              | 1946825312               |
| SNP_P4_59997_38550983 | NC_021163.1    | Ca_kabuli_chr04 | 38550983                | AA                              | TT              | 1946825314               |
| SNP_P4_59998_38551370 | NC_021163.1    | Ca_kabuli_chr04 | 38551370                | CC                              | TT              | 1946825316               |
| SNP_P4_59999_38551394 | NC_021163.1    | Ca_kabuli_chr04 | 38551394                | TT                              | CC              | 1946825318               |
| SNP_P4_60000_38551537 | NC_021163.1    | Ca_kabuli_chr04 | 38551537                | TT                              | GG              | 1946825321               |
| SNP_P4_60001_38552010 | NC_021163.1    | Ca_kabuli_chr04 | 38552010                | AA                              | GG              | 1946825323               |
| SNP_P4_60002_38552032 | NC_021163.1    | Ca_kabuli_chr04 | 38552032                | GG                              | AA              | 1946825325               |
| SNP_P4_60003_38552089 | NC_021163.1    | Ca_kabuli_chr04 | 38552089                | AA                              | GG              | 1946825327               |
| SNP_P4_60004_38552104 | NC_021163.1    | Ca_kabuli_chr04 | 38552104                | AA                              | GG              | 1946825329               |
| SNP_P4_60005_38552626 | NC_021163.1    | Ca_kabuli_chr04 | 38552626                | GG                              | AA              | 1946825331               |
| SNP_P4_60006_38552798 | NC_021163.1    | Ca_kabuli_chr04 | 38552798                | GG                              | AA              | 1946825333               |
| SNP_P4_60007_38552882 | NC_021163.1    | Ca_kabuli_chr04 | 38552882                | GG                              | CC              | 1946825335               |
| SNP_P4_60008_38553069 | NC_021163.1    | Ca_kabuli_chr04 | 38553069                | AA                              | GG              | 1946825338               |
| SNP_P4_60009_38553070 | NC_021163.1    | Ca_kabuli_chr04 | 38553070                | AA                              | GG              | 1946825340               |
| SNP_P4_60010_38553151 | NC_021163.1    | Ca_kabuli_chr04 | 38553151                | GG                              | CC              | 1946825342               |
| SNP_P4_60011_38553163 | NC_021163.1    | Ca_kabuli_chr04 | 38553163                | TT                              | CC              | 1946825344               |

| SNPs IDs              | Chromosome IDs | Chromosomes     | Physical positions (bp) | CDC Frontier (Reference genome) | (ILWC46 & LPNB) | NCBI SNPdb Accession IDs |
|-----------------------|----------------|-----------------|-------------------------|---------------------------------|-----------------|--------------------------|
| SNP_P4_60012_38553735 | NC_021163.1    | Ca_kabuli_chr04 | 38553735                | TT                              | GG              | 1946825346               |
| SNP_P4_60013_38553902 | NC_021163.1    | Ca_kabuli_chr04 | 38553902                | GG                              | TT              | 1946825348               |
| SNP_P4_60014_38554361 | NC_021163.1    | Ca_kabuli_chr04 | 38554361                | AA                              | GG              | 1946825350               |
| SNP_P4_60015_38554471 | NC_021163.1    | Ca_kabuli_chr04 | 38554471                | TT                              | CC              | 1946825352               |
| SNP_P4_60016_38558913 | NC_021163.1    | Ca_kabuli_chr04 | 38558913                | CC                              | TT              | 1946825354               |
| SNP_P4_60017_38558945 | NC_021163.1    | Ca_kabuli_chr04 | 38558945                | TT                              | CC              | 1946825356               |
| SNP_P4_60018_38559017 | NC_021163.1    | Ca_kabuli_chr04 | 38559017                | AA                              | CC              | 1946825358               |
| SNP_P4_60019_38561714 | NC_021163.1    | Ca_kabuli_chr04 | 38561714                | GG                              | AA              | 1946825360               |
| SNP_P4_60020_38561746 | NC_021163.1    | Ca_kabuli_chr04 | 38561746                | TT                              | CC              | 1946825362               |
| SNP_P4_60021_38561757 | NC_021163.1    | Ca_kabuli_chr04 | 38561757                | CC                              | TT              | 1946825364               |
| SNP_P4_60022_38562266 | NC_021163.1    | Ca_kabuli_chr04 | 38562266                | TT                              | CC              | 1946825367               |
| SNP_P4_60023_38562284 | NC_021163.1    | Ca_kabuli_chr04 | 38562284                | AA                              | CC              | 1946825369               |
| SNP_P4_60024_38562494 | NC_021163.1    | Ca_kabuli_chr04 | 38562494                | TT                              | CC              | 1946825371               |
| SNP_P4_60025_38563421 | NC_021163.1    | Ca_kabuli_chr04 | 38563421                | AA                              | TT              | 1946825373               |
| SNP_P4_60026_38563834 | NC_021163.1    | Ca_kabuli_chr04 | 38563834                | GG                              | AA              | 1946825375               |
| SNP_P4_60027_38563923 | NC_021163.1    | Ca_kabuli_chr04 | 38563923                | GG                              | AA              | 1946825377               |
| SNP_P4_60028_38564132 | NC_021163.1    | Ca_kabuli_chr04 | 38564132                | AA                              | GG              | 1946825379               |
| SNP_P4_60029_38564181 | NC_021163.1    | Ca_kabuli_chr04 | 38564181                | CC                              | AA              | 1946825381               |
| SNP_P4_60030_38564931 | NC_021163.1    | Ca_kabuli_chr04 | 38564931                | CC                              | TT              | 1946825384               |
| SNP_P4_60031_38564960 | NC_021163.1    | Ca_kabuli_chr04 | 38564960                | AA                              | TT              | 1946825386               |
| SNP_P4_60032_38564964 | NC_021163.1    | Ca_kabuli_chr04 | 38564964                | AA                              | TT              | 1946825388               |
| SNP_P4_60033_38565029 | NC_021163.1    | Ca_kabuli_chr04 | 38565029                | AA                              | CC              | 1946825390               |
| SNP_P4_60034_38565250 | NC_021163.1    | Ca_kabuli_chr04 | 38565250                | GG                              | AA              | 1946825392               |
| SNP_P4_60035_38567088 | NC_021163.1    | Ca_kabuli_chr04 | 38567088                | AA                              | GG              | 1946825394               |
| SNP_P4_60036_38567191 | NC_021163.1    | Ca_kabuli_chr04 | 38567191                | GG                              | TT              | 1946825396               |
| SNP_P4_60037_38567217 | NC_021163.1    | Ca_kabuli_chr04 | 38567217                | AA                              | GG              | 1946825398               |
| SNP_P4_60039_38567256 | NC_021163.1    | Ca_kabuli_chr04 | 38567256                | CC                              | TT              | 1946825400               |
| SNP_P4_60040_38567418 | NC_021163.1    | Ca_kabuli_chr04 | 38567418                | GG                              | AA              | 1946825402               |
| SNP_P4_60041_38567464 | NC_021163.1    | Ca_kabuli_chr04 | 38567464                | AA                              | GG              | 1946825404               |
| SNP_P4_60042_38567824 | NC_021163.1    | Ca_kabuli_chr04 | 38567824                | TT                              | GG              | 1946825406               |
| SNP_P4_60043_38568123 | NC_021163.1    | Ca_kabuli_chr04 | 38568123                | AA                              | GG              | 1946825408               |
| SNP_P4_60044_38568343 | NC_021163.1    | Ca_kabuli_chr04 | 38568343                | AA                              | TT              | 1946825410               |
| SNP_P4_60045_38568350 | NC_021163.1    | Ca_kabuli_chr04 | 38568350                | AA                              | TT              | 1946825412               |
| SNP_P4_60048_38569321 | NC_021163.1    | Ca_kabuli_chr04 | 38569321                | TT                              | AA              | 1946825414               |
| SNP_P4_60049_38569545 | NC_021163.1    | Ca_kabuli_chr04 | 38569545                | TT                              | GG              | 1946825416               |
| SNP_P4_60050_38570263 | NC_021163.1    | Ca_kabuli_chr04 | 38570263                | AA                              | TT              | 1946825418               |
| SNP_P4_60051_38570362 | NC_021163.1    | Ca_kabuli_chr04 | 38570362                | CC                              | TT              | 1946825420               |
| SNP_P4_60052_38571181 | NC_021163.1    | Ca_kabuli_chr04 | 38571181                | GG                              | TT              | 1946825422               |
| SNP_P4_60053_38572152 | NC_021163.1    | Ca_kabuli_chr04 | 38572152                | TT                              | CC              | 1946825424               |
| SNP_P4_60054_38572613 | NC_021163.1    | Ca_kabuli_chr04 | 38572613                | CC                              | TT              | 1946825426               |
| SNP_P4_60056_38574210 | NC_021163.1    | Ca_kabuli_chr04 | 38574210                | TT                              | CC              | 1946825428               |
| SNP_P4_60057_38574218 | NC_021163.1    | Ca_kabuli_chr04 | 38574218                | CC                              | AA              | 1946825430               |

| SNPs IDs              | Chromosome IDs | Chromosomes     | Physical positions (bp) | CDC Frontier (Reference genome) | (ILWC46 & LPNB) | NCBI SNPdb Accession IDs |
|-----------------------|----------------|-----------------|-------------------------|---------------------------------|-----------------|--------------------------|
| SNP_P4_60058_38574256 | NC_021163.1    | Ca_kabuli_chr04 | 38574256                | TT                              | CC              | 1946825432               |
| SNP_P4_60059_38574507 | NC_021163.1    | Ca_kabuli_chr04 | 38574507                | GG                              | AA              | 1946825434               |
| SNP_P4_60060_38574514 | NC_021163.1    | Ca_kabuli_chr04 | 38574514                | TT                              | CC              | 1946825436               |
| SNP_P4_60061_38574547 | NC_021163.1    | Ca_kabuli_chr04 | 38574547                | TT                              | CC              | 1946825438               |
| SNP_P4_60062_38574911 | NC_021163.1    | Ca_kabuli_chr04 | 38574911                | TT                              | CC              | 1946825440               |
| SNP_P4_60063_38575252 | NC_021163.1    | Ca_kabuli_chr04 | 38575252                | GG                              | TT              | 1946825442               |
| SNP_P4_60064_38575635 | NC_021163.1    | Ca_kabuli_chr04 | 38575635                | GG                              | AA              | 1946825444               |
| SNP_P4_60065_38576259 | NC_021163.1    | Ca_kabuli_chr04 | 38576259                | GG                              | TT              | 1946825447               |
| SNP_P4_60066_38577551 | NC_021163.1    | Ca_kabuli_chr04 | 38577551                | AA                              | GG              | 1946825449               |
| SNP_P4_60067_38577553 | NC_021163.1    | Ca_kabuli_chr04 | 38577553                | TT                              | GG              | 1946825451               |
| SNP_P4_60068_38579631 | NC_021163.1    | Ca_kabuli_chr04 | 38579631                | CC                              | AA              | 1946825453               |
| SNP_P4_60069_38579676 | NC_021163.1    | Ca_kabuli_chr04 | 38579676                | TT                              | AA              | 1946825455               |
| SNP_P4_60070_38579677 | NC_021163.1    | Ca_kabuli_chr04 | 38579677                | AA                              | TT              | 1946825457               |
| SNP_P4_60071_38579778 | NC_021163.1    | Ca_kabuli_chr04 | 38579778                | TT                              | AA              | 1946825459               |
| SNP_P4_60072_38579808 | NC_021163.1    | Ca_kabuli_chr04 | 38579808                | TT                              | CC              | 1946825461               |
| SNP_P4_60073_38579888 | NC_021163.1    | Ca_kabuli_chr04 | 38579888                | CC                              | GG              | 1946825463               |
| SNP_P4_60074_38579912 | NC_021163.1    | Ca_kabuli_chr04 | 38579912                | CC                              | TT              | 1946825465               |
| SNP_P4_60075_38579913 | NC_021163.1    | Ca_kabuli_chr04 | 38579913                | CC                              | AA              | 1946825467               |
| SNP_P4_60076_38579925 | NC_021163.1    | Ca_kabuli_chr04 | 38579925                | CC                              | TT              | 1946825469               |
| SNP_P4_60077_38579928 | NC_021163.1    | Ca_kabuli_chr04 | 38579928                | AA                              | GG              | 1946825471               |
| SNP_P4_60078_38579935 | NC_021163.1    | Ca_kabuli_chr04 | 38579935                | CC                              | AA              | 1946825473               |
| SNP_P4_60079_38579978 | NC_021163.1    | Ca_kabuli_chr04 | 38579978                | CC                              | AA              | 1946825475               |
| SNP_P4_60080_38580148 | NC_021163.1    | Ca_kabuli_chr04 | 38580148                | TT                              | CC              | 1946825477               |
| SNP_P4_60081_38580962 | NC_021163.1    | Ca_kabuli_chr04 | 38580962                | GG                              | CC              | 1946825479               |
| SNP_P4_60082_38581016 | NC_021163.1    | Ca_kabuli_chr04 | 38581016                | GG                              | CC              | 1946825481               |
| SNP_P4_60083_38581034 | NC_021163.1    | Ca_kabuli_chr04 | 38581034                | AA                              | GG              | 1946825483               |
| SNP_P4_60084_38581071 | NC_021163.1    | Ca_kabuli_chr04 | 38581071                | TT                              | GG              | 1946825485               |
| SNP_P4_60085_38581333 | NC_021163.1    | Ca_kabuli_chr04 | 38581333                | GG                              | AA              | 1946825487               |
| SNP_P4_60086_38581543 | NC_021163.1    | Ca_kabuli_chr04 | 38581543                | AA                              | GG              | 1946825489               |
| SNP_P4_60087_38584722 | NC_021163.1    | Ca_kabuli_chr04 | 38584722                | GG                              | AA              | 1946825491               |
| SNP_P4_60088_38584975 | NC_021163.1    | Ca_kabuli_chr04 | 38584975                | AA                              | GG              | 1946825493               |
| SNP_P4_60091_38586531 | NC_021163.1    | Ca_kabuli_chr04 | 38586531                | TT                              | GG              | 1946825495               |
| SNP_P4_60092_38586546 | NC_021163.1    | Ca_kabuli_chr04 | 38586546                | AA                              | CC              | 1946825497               |
| SNP_P4_60093_38586806 | NC_021163.1    | Ca_kabuli_chr04 | 38586806                | AA                              | TT              | 1946825499               |
| SNP_P4_60094_38587071 | NC_021163.1    | Ca_kabuli_chr04 | 38587071                | CC                              | AA              | 1946825501               |
| SNP_P4_60095_38587090 | NC_021163.1    | Ca_kabuli_chr04 | 38587090                | TT                              | GG              | 1946825503               |
| SNP_P4_60096_38587152 | NC_021163.1    | Ca_kabuli_chr04 | 38587152                | TT                              | CC              | 1946825505               |
| SNP_P4_60097_38587202 | NC_021163.1    | Ca_kabuli_chr04 | 38587202                | GG                              | AA              | 1946825507               |
| SNP_P4_60098_38587388 | NC_021163.1    | Ca_kabuli_chr04 | 38587388                | AA                              | GG              | 1946825509               |
| SNP_P4_60099_38587393 | NC_021163.1    | Ca_kabuli_chr04 | 38587393                | CC                              | TT              | 1946825511               |
| SNP_P4_60100_38588227 | NC_021163.1    | Ca_kabuli_chr04 | 38588227                | TT                              | CC              | 1946825513               |
| SNP_P4_60101_38589541 | NC_021163.1    | Ca_kabuli_chr04 | 38589541                | TT                              | CC              | 1946825515               |



| SNPs IDs              | Chromosome IDs | Chromosomes     | Physical positions (bp) | CDC Frontier (Reference genome) | (ILWC46 & LPNB) | NCBI SNPdb Accession IDs |
|-----------------------|----------------|-----------------|-------------------------|---------------------------------|-----------------|--------------------------|
| SNP_P4_60102_38592444 | NC_021163.1    | Ca_kabuli_chr04 | 38592444                | CC                              | AA              | 1946825517               |
| SNP_P4_60103_38592709 | NC_021163.1    | Ca_kabuli_chr04 | 38592709                | CC                              | AA              | 1946825519               |
| SNP_P4_60104_38594463 | NC_021163.1    | Ca_kabuli_chr04 | 38594463                | GG                              | AA              | 1946825522               |
| SNP_P4_60105_38594849 | NC_021163.1    | Ca_kabuli_chr04 | 38594849                | AA                              | GG              | 1946825524               |
| SNP_P4_60106_38594867 | NC_021163.1    | Ca_kabuli_chr04 | 38594867                | AA                              | GG              | 1946825526               |
| SNP_P4_60107_38594949 | NC_021163.1    | Ca_kabuli_chr04 | 38594949                | TT                              | AA              | 1946825528               |
| SNP_P4_60108_38595214 | NC_021163.1    | Ca_kabuli_chr04 | 38595214                | AA                              | CC              | 1946825530               |
| SNP_P4_60109_38595216 | NC_021163.1    | Ca_kabuli_chr04 | 38595216                | CC                              | AA              | 1946825532               |
| SNP_P4_60110_38596431 | NC_021163.1    | Ca_kabuli_chr04 | 38596431                | TT                              | AA              | 1946825534               |
| SNP_P4_60111_38602282 | NC_021163.1    | Ca_kabuli_chr04 | 38602282                | GG                              | AA              | 1946825536               |
| SNP_P4_60112_38602314 | NC_021163.1    | Ca_kabuli_chr04 | 38602314                | TT                              | AA              | 1946825538               |
| SNP_P4_60113_38602583 | NC_021163.1    | Ca_kabuli_chr04 | 38602583                | AA                              | TT              | 1946825540               |
| SNP_P4_60114_38602970 | NC_021163.1    | Ca_kabuli_chr04 | 38602970                | GG                              | AA              | 1946825542               |
| SNP_P4_60115_38602994 | NC_021163.1    | Ca_kabuli_chr04 | 38602994                | GG                              | CC              | 1946825544               |
| SNP_P4_60116_38603005 | NC_021163.1    | Ca_kabuli_chr04 | 38603005                | GG                              | AA              | 1946825546               |
| SNP_P4_60117_38603811 | NC_021163.1    | Ca_kabuli_chr04 | 38603811                | GG                              | AA              | 1946825548               |
| SNP_P4_60118_38603845 | NC_021163.1    | Ca_kabuli_chr04 | 38603845                | AA                              | GG              | 1946825550               |
| SNP_P4_60120_38604373 | NC_021163.1    | Ca_kabuli_chr04 | 38604373                | AA                              | CC              | 1946825552               |
| SNP_P4_60121_38604590 | NC_021163.1    | Ca_kabuli_chr04 | 38604590                | CC                              | TT              | 1946825554               |
| SNP_P4_60122_38608522 | NC_021163.1    | Ca_kabuli_chr04 | 38608522                | TT                              | CC              | 1946825556               |
| SNP_P4_60123_38608577 | NC_021163.1    | Ca_kabuli_chr04 | 38608577                | AA                              | TT              | 1946825558               |
| SNP_P4_60124_38608679 | NC_021163.1    | Ca_kabuli_chr04 | 38608679                | AA                              | TT              | 1946825560               |
| SNP_P4_60125_38608943 | NC_021163.1    | Ca_kabuli_chr04 | 38608943                | CC                              | AA              | 1946825562               |
| SNP_P4_60126_38609649 | NC_021163.1    | Ca_kabuli_chr04 | 38609649                | TT                              | AA              | 1946825564               |
| SNP_P4_60127_38609651 | NC_021163.1    | Ca_kabuli_chr04 | 38609651                | AA                              | GG              | 1946825566               |
| SNP_P4_60128_38609659 | NC_021163.1    | Ca_kabuli_chr04 | 38609659                | GG                              | AA              | 1946825568               |
| SNP_P4_60129_38611852 | NC_021163.1    | Ca_kabuli_chr04 | 38611852                | TT                              | GG              | 1946825570               |
| SNP_P4_60130_38612783 | NC_021163.1    | Ca_kabuli_chr04 | 38612783                | AA                              | CC              | 1946825572               |
| SNP_P4_60131_38612870 | NC_021163.1    | Ca_kabuli_chr04 | 38612870                | CC                              | TT              | 1946825574               |
| SNP_P4_60133_38613835 | NC_021163.1    | Ca_kabuli_chr04 | 38613835                | GG                              | TT              | 1946825576               |
| SNP_P4_60134_38613858 | NC_021163.1    | Ca_kabuli_chr04 | 38613858                | GG                              | TT              | 1946825578               |
| SNP_P4_60135_38615833 | NC_021163.1    | Ca_kabuli_chr04 | 38615833                | CC                              | AA              | 1946825580               |
| SNP_P4_60137_38617150 | NC_021163.1    | Ca_kabuli_chr04 | 38617150                | TT                              | GG              | 1946825582               |
| SNP_P4_60138_38618610 | NC_021163.1    | Ca_kabuli_chr04 | 38618610                | AA                              | GG              | 1946825584               |
| SNP_P4_60141_38619552 | NC_021163.1    | Ca_kabuli_chr04 | 38619552                | AA                              | TT              | 1946825586               |
| SNP_P4_60142_38620042 | NC_021163.1    | Ca_kabuli_chr04 | 38620042                | CC                              | AA              | 1946825588               |
| SNP_P4_60143_38620068 | NC_021163.1    | Ca_kabuli_chr04 | 38620068                | TT                              | CC              | 1946825591               |
| SNP_P4_60145_38620413 | NC_021163.1    | Ca_kabuli_chr04 | 38620413                | AA                              | TT              | 1946825593               |
| SNP_P4_60146_38620422 | NC_021163.1    | Ca_kabuli_chr04 | 38620422                | GG                              | TT              | 1946825595               |
| SNP_P4_60147_38620435 | NC_021163.1    | Ca_kabuli_chr04 | 38620435                | CC                              | AA              | 1946825597               |
| SNP_P4_60149_38620845 | NC_021163.1    | Ca_kabuli_chr04 | 38620845                | TT                              | CC              | 1946825599               |
| SNP_P4_60150_38622161 | NC_021163.1    | Ca_kabuli_chr04 | 38622161                | TT                              | GG              | 1946825601               |

| SNPs IDs              | Chromosome IDs | Chromosomes     | Physical positions (bp) | CDC Frontier (Reference genome) | (ILWC46 & LPNB) | NCBI SNPdb Accession IDs |
|-----------------------|----------------|-----------------|-------------------------|---------------------------------|-----------------|--------------------------|
| SNP_P4_60151_38624501 | NC_021163.1    | Ca_kabuli_chr04 | 38624501                | CC                              | TT              | 1946825603               |
| SNP_P4_60152_38624705 | NC_021163.1    | Ca_kabuli_chr04 | 38624705                | GG                              | AA              | 1946825605               |
| SNP_P4_60153_38625691 | NC_021163.1    | Ca_kabuli_chr04 | 38625691                | TT                              | CC              | 1946825607               |
| SNP_P4_60154_38625868 | NC_021163.1    | Ca_kabuli_chr04 | 38625868                | CC                              | TT              | 1946825609               |
| SNP_P4_60155_38626038 | NC_021163.1    | Ca_kabuli_chr04 | 38626038                | TT                              | AA              | 1946825611               |
| SNP_P4_60157_38627708 | NC_021163.1    | Ca_kabuli_chr04 | 38627708                | GG                              | AA              | 1946825613               |
| SNP_P4_60158_38628066 | NC_021163.1    | Ca_kabuli_chr04 | 38628066                | GG                              | AA              | 1946825615               |
| SNP_P4_60159_38628069 | NC_021163.1    | Ca_kabuli_chr04 | 38628069                | AA                              | GG              | 1946825617               |
| SNP_P4_60160_38628731 | NC_021163.1    | Ca_kabuli_chr04 | 38628731                | AA                              | GG              | 1946825619               |
| SNP_P4_60161_38639094 | NC_021163.1    | Ca_kabuli_chr04 | 38639094                | TT                              | CC              | 1946825621               |
| SNP_P4_60162_38639549 | NC_021163.1    | Ca_kabuli_chr04 | 38639549                | TT                              | CC              | 1946825623               |
| SNP_P4_60163_38643959 | NC_021163.1    | Ca_kabuli_chr04 | 38643959                | CC                              | AA              | 1946825625               |
| SNP_P4_60164_38644142 | NC_021163.1    | Ca_kabuli_chr04 | 38644142                | CC                              | TT              | 1946825627               |
| SNP_P4_60165_38644333 | NC_021163.1    | Ca_kabuli_chr04 | 38644333                | AA                              | TT              | 1946825629               |
| SNP_P4_60166_38644339 | NC_021163.1    | Ca_kabuli_chr04 | 38644339                | TT                              | CC              | 1946825631               |
| SNP_P4_60168_38645732 | NC_021163.1    | Ca_kabuli_chr04 | 38645732                | CC                              | TT              | 1946825633               |
| SNP_P4_60169_38647103 | NC_021163.1    | Ca_kabuli_chr04 | 38647103                | AA                              | GG              | 1946825635               |
| SNP_P4_60170_38647108 | NC_021163.1    | Ca_kabuli_chr04 | 38647108                | AA                              | GG              | 1946825637               |
| SNP_P4_60171_38647137 | NC_021163.1    | Ca_kabuli_chr04 | 38647137                | AA                              | TT              | 1946825639               |
| SNP_P4_60172_38647149 | NC_021163.1    | Ca_kabuli_chr04 | 38647149                | AA                              | GG              | 1946825641               |
| SNP_P4_60173_38647914 | NC_021163.1    | Ca_kabuli_chr04 | 38647914                | GG                              | AA              | 1946825643               |
| SNP_P4_60174_38647915 | NC_021163.1    | Ca_kabuli_chr04 | 38647915                | GG                              | AA              | 1946825645               |
| SNP_P4_60175_38647926 | NC_021163.1    | Ca_kabuli_chr04 | 38647926                | GG                              | AA              | 1946825647               |
| SNP_P4_60176_38648249 | NC_021163.1    | Ca_kabuli_chr04 | 38648249                | CC                              | AA              | 1946825649               |
| SNP_P4_60179_38649421 | NC_021163.1    | Ca_kabuli_chr04 | 38649421                | AA                              | CC              | 1946825651               |
| SNP_P4_60180_38649484 | NC_021163.1    | Ca_kabuli_chr04 | 38649484                | TT                              | CC              | 1946825653               |
| SNP_P4_60181_38649639 | NC_021163.1    | Ca_kabuli_chr04 | 38649639                | TT                              | AA              | 1946825655               |
| SNP_P4_60182_38649648 | NC_021163.1    | Ca_kabuli_chr04 | 38649648                | TT                              | GG              | 1946825657               |
| SNP_P4_60183_38651914 | NC_021163.1    | Ca_kabuli_chr04 | 38651914                | TT                              | GG              | 1946825660               |
| SNP_P4_60184_38652011 | NC_021163.1    | Ca_kabuli_chr04 | 38652011                | CC                              | TT              | 1946825662               |
| SNP_P4_60186_38657103 | NC_021163.1    | Ca_kabuli_chr04 | 38657103                | GG                              | AA              | 1946825664               |
| SNP_P4_60187_38657294 | NC_021163.1    | Ca_kabuli_chr04 | 38657294                | CC                              | TT              | 1946825666               |
| SNP_P4_60188_38660739 | NC_021163.1    | Ca_kabuli_chr04 | 38660739                | TT                              | GG              | 1946825668               |
| SNP_P4_60189_38660773 | NC_021163.1    | Ca_kabuli_chr04 | 38660773                | AA                              | TT              | 1946825670               |
| SNP_P4_60190_38660928 | NC_021163.1    | Ca_kabuli_chr04 | 38660928                | AA                              | TT              | 1946825672               |
| SNP_P4_60191_38662122 | NC_021163.1    | Ca_kabuli_chr04 | 38662122                | CC                              | TT              | 1946825674               |
| SNP_P4_60192_38662464 | NC_021163.1    | Ca_kabuli_chr04 | 38662464                | GG                              | AA              | 1946825676               |
| SNP_P4_60193_38662544 | NC_021163.1    | Ca_kabuli_chr04 | 38662544                | AA                              | GG              | 1946825678               |
| SNP_P4_60194_38662546 | NC_021163.1    | Ca_kabuli_chr04 | 38662546                | TT                              | CC              | 1946825680               |
| SNP_P4_60195_38664255 | NC_021163.1    | Ca_kabuli_chr04 | 38664255                | AA                              | GG              | 1946825682               |
| SNP_P4_60197_38667442 | NC_021163.1    | Ca_kabuli_chr04 | 38667442                | AA                              | GG              | 1946825684               |
| SNP_P4_60198_38667469 | NC_021163.1    | Ca_kabuli_chr04 | 38667469                | TT                              | AA              | 1946825686               |

| SNPs IDs              | Chromosome IDs | Chromosomes     | Physical positions (bp) | CDC Frontier (Reference genome) | (ILWC46 & LPNB) | NCBI SNPdb Accession IDs |
|-----------------------|----------------|-----------------|-------------------------|---------------------------------|-----------------|--------------------------|
| SNP_P4_60199_38667798 | NC_021163.1    | Ca_kabuli_chr04 | 38667798                | AA                              | CC              | 1946825688               |
| SNP_P4_60200_38668275 | NC_021163.1    | Ca_kabuli_chr04 | 38668275                | AA                              | CC              | 1946825690               |
| SNP_P4_60202_38669498 | NC_021163.1    | Ca_kabuli_chr04 | 38669498                | CC                              | GG              | 1946825692               |
| SNP_P4_60203_38670294 | NC_021163.1    | Ca_kabuli_chr04 | 38670294                | AA                              | TT              | 1946825694               |
| SNP_P4_60204_38670299 | NC_021163.1    | Ca_kabuli_chr04 | 38670299                | CC                              | AA              | 1946825696               |
| SNP_P4_60205_38670310 | NC_021163.1    | Ca_kabuli_chr04 | 38670310                | AA                              | CC              | 1946825698               |
| SNP_P4_60206_38670993 | NC_021163.1    | Ca_kabuli_chr04 | 38670993                | GG                              | CC              | 1946825700               |
| SNP_P4_60207_38671364 | NC_021163.1    | Ca_kabuli_chr04 | 38671364                | TT                              | CC              | 1946825702               |
| SNP_P4_60208_38671372 | NC_021163.1    | Ca_kabuli_chr04 | 38671372                | CC                              | GG              | 1946825704               |
| SNP_P4_60209_38671580 | NC_021163.1    | Ca_kabuli_chr04 | 38671580                | AA                              | GG              | 1946825706               |
| SNP_P4_60210_38674152 | NC_021163.1    | Ca_kabuli_chr04 | 38674152                | CC                              | TT              | 1946825708               |
| SNP_P4_60211_38674185 | NC_021163.1    | Ca_kabuli_chr04 | 38674185                | TT                              | GG              | 1946825710               |
| SNP_P4_60212_38674213 | NC_021163.1    | Ca_kabuli_chr04 | 38674213                | CC                              | TT              | 1946825713               |
| SNP_P4_60213_38674527 | NC_021163.1    | Ca_kabuli_chr04 | 38674527                | TT                              | CC              | 1946825715               |
| SNP_P4_60214_38674822 | NC_021163.1    | Ca_kabuli_chr04 | 38674822                | TT                              | CC              | 1946825717               |
| SNP_P4_60215_38675725 | NC_021163.1    | Ca_kabuli_chr04 | 38675725                | TT                              | GG              | 1946825719               |
| SNP_P4_60216_38676098 | NC_021163.1    | Ca_kabuli_chr04 | 38676098                | TT                              | CC              | 1946825721               |
| SNP_P4_60217_38676106 | NC_021163.1    | Ca_kabuli_chr04 | 38676106                | TT                              | AA              | 1946825723               |
| SNP_P4_60218_38676114 | NC_021163.1    | Ca_kabuli_chr04 | 38676114                | AA                              | TT              | 1946825725               |
| SNP_P4_60219_38676349 | NC_021163.1    | Ca_kabuli_chr04 | 38676349                | CC                              | TT              | 1946825727               |
| SNP_P4_60220_38677102 | NC_021163.1    | Ca_kabuli_chr04 | 38677102                | TT                              | CC              | 1946825729               |
| SNP_P4_60222_38680483 | NC_021163.1    | Ca_kabuli_chr04 | 38680483                | GG                              | AA              | 1946825731               |
| SNP_P4_60223_38680546 | NC_021163.1    | Ca_kabuli_chr04 | 38680546                | AA                              | TT              | 1946825733               |
| SNP_P4_60224_38682048 | NC_021163.1    | Ca_kabuli_chr04 | 38682048                | AA                              | CC              | 1946825735               |
| SNP_P4_60225_38682505 | NC_021163.1    | Ca_kabuli_chr04 | 38682505                | AA                              | CC              | 1946825737               |
| SNP_P4_60226_38682546 | NC_021163.1    | Ca_kabuli_chr04 | 38682546                | CC                              | TT              | 1946825739               |
| SNP_P4_60228_38683156 | NC_021163.1    | Ca_kabuli_chr04 | 38683156                | AA                              | GG              | 1946825741               |
| SNP_P4_60229_38683881 | NC_021163.1    | Ca_kabuli_chr04 | 38683881                | TT                              | AA              | 1946825743               |
| SNP_P4_60230_38686376 | NC_021163.1    | Ca_kabuli_chr04 | 38686376                | AA                              | GG              | 1946825745               |
| SNP_P4_60231_38686393 | NC_021163.1    | Ca_kabuli_chr04 | 38686393                | GG                              | AA              | 1946825748               |
| SNP_P4_60233_38686982 | NC_021163.1    | Ca_kabuli_chr04 | 38686982                | GG                              | AA              | 1946825750               |
| SNP_P4_60234_38687197 | NC_021163.1    | Ca_kabuli_chr04 | 38687197                | GG                              | AA              | 1946825752               |
| SNP_P4_60235_38687402 | NC_021163.1    | Ca_kabuli_chr04 | 38687402                | TT                              | GG              | 1946825754               |
| SNP_P4_60236_38687934 | NC_021163.1    | Ca_kabuli_chr04 | 38687934                | TT                              | GG              | 1946825756               |
| SNP_P4_60237_38688027 | NC_021163.1    | Ca_kabuli_chr04 | 38688027                | AA                              | GG              | 1946825758               |
| SNP_P4_60238_38688240 | NC_021163.1    | Ca_kabuli_chr04 | 38688240                | TT                              | CC              | 1946825760               |
| SNP_P4_60239_38688855 | NC_021163.1    | Ca_kabuli_chr04 | 38688855                | CC                              | AA              | 1946825762               |
| SNP_P4_60240_38690558 | NC_021163.1    | Ca_kabuli_chr04 | 38690558                | AA                              | TT              | 1946825764               |
| SNP_P4_60241_38691127 | NC_021163.1    | Ca_kabuli_chr04 | 38691127                | GG                              | AA              | 1946825766               |
| SNP_P4_60242_38691154 | NC_021163.1    | Ca_kabuli_chr04 | 38691154                | GG                              | AA              | 1946825768               |
| SNP_P4_60243_38691188 | NC_021163.1    | Ca_kabuli_chr04 | 38691188                | AA                              | GG              | 1946825770               |
| SNP_P4_60245_38691618 | NC_021163.1    | Ca_kabuli_chr04 | 38691618                | TT                              | AA              | 1946825772               |

| SNPs IDs              | Chromosome IDs | Chromosomes     | Physical positions (bp) | CDC Frontier (Reference genome) | (ILWC46 & LPNB) | NCBI SNPdb Accession IDs |
|-----------------------|----------------|-----------------|-------------------------|---------------------------------|-----------------|--------------------------|
| SNP_P4_60246_38692352 | NC_021163.1    | Ca_kabuli_chr04 | 38692352                | TT                              | AA              | 1946825774               |
| SNP_P4_60247_38692359 | NC_021163.1    | Ca_kabuli_chr04 | 38692359                | TT                              | AA              | 1946825776               |
| SNP_P4_60248_38693096 | NC_021163.1    | Ca_kabuli_chr04 | 38693096                | GG                              | CC              | 1946825778               |
| SNP_P4_60249_38693186 | NC_021163.1    | Ca_kabuli_chr04 | 38693186                | AA                              | GG              | 1946825780               |
| SNP_P4_60250_38693691 | NC_021163.1    | Ca_kabuli_chr04 | 38693691                | TT                              | AA              | 1946825782               |
| SNP_P4_60251_38693723 | NC_021163.1    | Ca_kabuli_chr04 | 38693723                | CC                              | TT              | 1946825784               |
| SNP_P4_60252_38694007 | NC_021163.1    | Ca_kabuli_chr04 | 38694007                | TT                              | CC              | 1946825786               |
| SNP_P4_60253_38694075 | NC_021163.1    | Ca_kabuli_chr04 | 38694075                | AA                              | TT              | 1946825788               |
| SNP_P4_60254_38695281 | NC_021163.1    | Ca_kabuli_chr04 | 38695281                | GG                              | AA              | 1946825790               |
| SNP_P4_60255_38695292 | NC_021163.1    | Ca_kabuli_chr04 | 38695292                | CC                              | AA              | 1946825792               |
| SNP_P4_60256_38695520 | NC_021163.1    | Ca_kabuli_chr04 | 38695520                | TT                              | GG              | 1946825794               |
| SNP_P4_60257_38695559 | NC_021163.1    | Ca_kabuli_chr04 | 38695559                | GG                              | AA              | 1946825796               |
| SNP_P4_60258_38695801 | NC_021163.1    | Ca_kabuli_chr04 | 38695801                | GG                              | AA              | 1946825798               |
| SNP_P4_60259_38696017 | NC_021163.1    | Ca_kabuli_chr04 | 38696017                | AA                              | GG              | 1946825800               |
| SNP_P4_60260_38696031 | NC_021163.1    | Ca_kabuli_chr04 | 38696031                | CC                              | TT              | 1946825802               |
| SNP_P4_60261_38696059 | NC_021163.1    | Ca_kabuli_chr04 | 38696059                | AA                              | GG              | 1946825804               |
| SNP_P4_60262_38697151 | NC_021163.1    | Ca_kabuli_chr04 | 38697151                | GG                              | TT              | 1946825806               |
| SNP_P4_60263_38701641 | NC_021163.1    | Ca_kabuli_chr04 | 38701641                | GG                              | TT              | 1946825808               |
| SNP_P4_60264_38701642 | NC_021163.1    | Ca_kabuli_chr04 | 38701642                | TT                              | GG              | 1946825810               |
| SNP_P4_60265_38701646 | NC_021163.1    | Ca_kabuli_chr04 | 38701646                | CC                              | TT              | 1946825812               |
| SNP_P4_60266_38702875 | NC_021163.1    | Ca_kabuli_chr04 | 38702875                | CC                              | GG              | 1946825814               |
| SNP_P4_60267_38703735 | NC_021163.1    | Ca_kabuli_chr04 | 38703735                | GG                              | AA              | 1946825816               |
| SNP_P4_60268_38703926 | NC_021163.1    | Ca_kabuli_chr04 | 38703926                | AA                              | GG              | 1946825818               |
| SNP_P4_60269_38704495 | NC_021163.1    | Ca_kabuli_chr04 | 38704495                | GG                              | TT              | 1946825820               |
| SNP_P4_60270_38704496 | NC_021163.1    | Ca_kabuli_chr04 | 38704496                | CC                              | TT              | 1946825823               |
| SNP_P4_60271_38704555 | NC_021163.1    | Ca_kabuli_chr04 | 38704555                | AA                              | GG              | 1946825825               |
| SNP_P4_60272_38704683 | NC_021163.1    | Ca_kabuli_chr04 | 38704683                | TT                              | CC              | 1946825827               |
| SNP_P4_60273_38704717 | NC_021163.1    | Ca_kabuli_chr04 | 38704717                | CC                              | TT              | 1946825829               |
| SNP_P4_60274_38704749 | NC_021163.1    | Ca_kabuli_chr04 | 38704749                | AA                              | GG              | 1946825831               |
| SNP_P4_60275_38704827 | NC_021163.1    | Ca_kabuli_chr04 | 38704827                | TT                              | CC              | 1946825833               |
| SNP_P4_60276_38704837 | NC_021163.1    | Ca_kabuli_chr04 | 38704837                | AA                              | TT              | 1946825835               |
| SNP_P4_60277_38705150 | NC_021163.1    | Ca_kabuli_chr04 | 38705150                | TT                              | AA              | 1946825837               |
| SNP_P4_60278_38705163 | NC_021163.1    | Ca_kabuli_chr04 | 38705163                | CC                              | AA              | 1946825839               |
| SNP_P4_60280_38707464 | NC_021163.1    | Ca_kabuli_chr04 | 38707464                | TT                              | GG              | 1946825841               |
| SNP_P4_60281_38707479 | NC_021163.1    | Ca_kabuli_chr04 | 38707479                | CC                              | TT              | 1946825843               |
| SNP_P4_60282_38707489 | NC_021163.1    | Ca_kabuli_chr04 | 38707489                | AA                              | GG              | 1946825845               |
| SNP_P4_60283_38707490 | NC_021163.1    | Ca_kabuli_chr04 | 38707490                | AA                              | TT              | 1946825847               |
| SNP_P4_60284_38707503 | NC_021163.1    | Ca_kabuli_chr04 | 38707503                | TT                              | CC              | 1946825849               |
| SNP_P4_60285_38708484 | NC_021163.1    | Ca_kabuli_chr04 | 38708484                | TT                              | AA              | 1946825850               |
| SNP_P4_60286_38708489 | NC_021163.1    | Ca_kabuli_chr04 | 38708489                | AA                              | TT              | 1946825851               |
| SNP_P4_60287_38709125 | NC_021163.1    | Ca_kabuli_chr04 | 38709125                | TT                              | CC              | 1946825852               |
| SNP_P4_60288_38710759 | NC_021163.1    | Ca_kabuli_chr04 | 38710759                | CC                              | AA              | 1946825853               |

| SNPs IDs              | Chromosome IDs | Chromosomes     | Physical positions (bp) | CDC Frontier (Reference genome) | (ILWC46 & LPNB) | NCBI SNPdb Accession IDs |
|-----------------------|----------------|-----------------|-------------------------|---------------------------------|-----------------|--------------------------|
| SNP_P4_60290_38711477 | NC_021163.1    | Ca_kabuli_chr04 | 38711477                | CC                              | TT              | 1946825855               |
| SNP_P4_60291_38711543 | NC_021163.1    | Ca_kabuli_chr04 | 38711543                | CC                              | AA              | 1946825857               |
| SNP_P4_60292_38711784 | NC_021163.1    | Ca_kabuli_chr04 | 38711784                | TT                              | GG              | 1946825859               |
| SNP_P4_60293_38712875 | NC_021163.1    | Ca_kabuli_chr04 | 38712875                | TT                              | CC              | 1946825861               |
| SNP_P4_60294_38712886 | NC_021163.1    | Ca_kabuli_chr04 | 38712886                | CC                              | TT              | 1946825863               |
| SNP_P4_60295_38713212 | NC_021163.1    | Ca_kabuli_chr04 | 38713212                | GG                              | AA              | 1946825865               |
| SNP_P4_60296_38713223 | NC_021163.1    | Ca_kabuli_chr04 | 38713223                | TT                              | CC              | 1946825868               |
| SNP_P4_60297_38713242 | NC_021163.1    | Ca_kabuli_chr04 | 38713242                | TT                              | CC              | 1946825870               |
| SNP_P4_60298_38713292 | NC_021163.1    | Ca_kabuli_chr04 | 38713292                | TT                              | CC              | 1946825872               |
| SNP_P4_60299_38713310 | NC_021163.1    | Ca_kabuli_chr04 | 38713310                | CC                              | TT              | 1946825874               |
| SNP_P4_60300_38713673 | NC_021163.1    | Ca_kabuli_chr04 | 38713673                | TT                              | AA              | 1946825876               |
| SNP_P4_60301_38713991 | NC_021163.1    | Ca_kabuli_chr04 | 38713991                | CC                              | TT              | 1946825878               |
| SNP_P4_60302_38714031 | NC_021163.1    | Ca_kabuli_chr04 | 38714031                | CC                              | TT              | 1946825880               |
| SNP_P4_60303_38714032 | NC_021163.1    | Ca_kabuli_chr04 | 38714032                | TT                              | CC              | 1946825882               |
| SNP_P4_60304_38714108 | NC_021163.1    | Ca_kabuli_chr04 | 38714108                | AA                              | CC              | 1946825884               |
| SNP_P4_60305_38714148 | NC_021163.1    | Ca_kabuli_chr04 | 38714148                | TT                              | CC              | 1946825886               |
| SNP_P4_60306_38714154 | NC_021163.1    | Ca_kabuli_chr04 | 38714154                | TT                              | AA              | 1946825889               |
| SNP_P4_60307_38714182 | NC_021163.1    | Ca_kabuli_chr04 | 38714182                | TT                              | AA              | 1946825891               |
| SNP_P4_60308_38714195 | NC_021163.1    | Ca_kabuli_chr04 | 38714195                | GG                              | CC              | 1946825893               |
| SNP_P4_60309_38714371 | NC_021163.1    | Ca_kabuli_chr04 | 38714371                | CC                              | AA              | 1946825895               |
| SNP_P4_60311_38714520 | NC_021163.1    | Ca_kabuli_chr04 | 38714520                | GG                              | AA              | 1946825898               |
| SNP_P4_60312_38714652 | NC_021163.1    | Ca_kabuli_chr04 | 38714652                | CC                              | AA              | 1946825900               |
| SNP_P4_60313_38715459 | NC_021163.1    | Ca_kabuli_chr04 | 38715459                | AA                              | GG              | 1946825902               |
| SNP_P4_60314_38715478 | NC_021163.1    | Ca_kabuli_chr04 | 38715478                | AA                              | GG              | 1946825904               |
| SNP_P4_60315_38715583 | NC_021163.1    | Ca_kabuli_chr04 | 38715583                | GG                              | TT              | 1946825907               |
| SNP_P4_60316_38715603 | NC_021163.1    | Ca_kabuli_chr04 | 38715603                | AA                              | CC              | 1946825909               |
| SNP_P4_60317_38715655 | NC_021163.1    | Ca_kabuli_chr04 | 38715655                | CC                              | TT              | 1946825911               |
| SNP_P4_60318_38715660 | NC_021163.1    | Ca_kabuli_chr04 | 38715660                | AA                              | TT              | 1946825913               |
| SNP_P4_60319_38715681 | NC_021163.1    | Ca_kabuli_chr04 | 38715681                | CC                              | GG              | 1946825915               |
| SNP_P4_60320_38716075 | NC_021163.1    | Ca_kabuli_chr04 | 38716075                | CC                              | TT              | 1946825917               |
| SNP_P4_60321_38716078 | NC_021163.1    | Ca_kabuli_chr04 | 38716078                | CC                              | TT              | 1946825920               |
| SNP_P4_60322_38716087 | NC_021163.1    | Ca_kabuli_chr04 | 38716087                | CC                              | TT              | 1946825922               |
| SNP_P4_60323_38716279 | NC_021163.1    | Ca_kabuli_chr04 | 38716279                | AA                              | CC              | 1946825924               |
| SNP_P4_60324_38716284 | NC_021163.1    | Ca_kabuli_chr04 | 38716284                | CC                              | AA              | 1946825926               |
| SNP_P4_60325_38717932 | NC_021163.1    | Ca_kabuli_chr04 | 38717932                | AA                              | GG              | 1946825928               |
| SNP_P4_60326_38718167 | NC_021163.1    | Ca_kabuli_chr04 | 38718167                | AA                              | GG              | 1946825930               |
| SNP_P4_60327_38718268 | NC_021163.1    | Ca_kabuli_chr04 | 38718268                | CC                              | TT              | 1946825932               |
| SNP_P4_60328_38718280 | NC_021163.1    | Ca_kabuli_chr04 | 38718280                | TT                              | CC              | 1946825934               |
| SNP_P4_60329_38718466 | NC_021163.1    | Ca_kabuli_chr04 | 38718466                | GG                              | AA              | 1946825937               |
| SNP_P4_60330_38718657 | NC_021163.1    | Ca_kabuli_chr04 | 38718657                | GG                              | AA              | 1946825939               |
| SNP_P4_60331_38719414 | NC_021163.1    | Ca_kabuli_chr04 | 38719414                | GG                              | AA              | 1946825941               |
| SNP_P4_60332_38719451 | NC_021163.1    | Ca_kabuli_chr04 | 38719451                | CC                              | TT              | 1946825943               |

| SNPs IDs              | Chromosome IDs | Chromosomes     | Physical positions (bp) | CDC Frontier (Reference genome) | (ILWC46 & LPNB) | NCBI SNPdb Accession IDs |
|-----------------------|----------------|-----------------|-------------------------|---------------------------------|-----------------|--------------------------|
| SNP_P4_60333_38719479 | NC_021163.1    | Ca_kabuli_chr04 | 38719479                | TT                              | CC              | 1946825945               |
| SNP_P4_60334_38720828 | NC_021163.1    | Ca_kabuli_chr04 | 38720828                | GG                              | AA              | 1946825947               |
| SNP_P4_60335_38720868 | NC_021163.1    | Ca_kabuli_chr04 | 38720868                | AA                              | GG              | 1946825949               |
| SNP_P4_60336_38721502 | NC_021163.1    | Ca_kabuli_chr04 | 38721502                | CC                              | TT              | 1946825951               |
| SNP_P4_60337_38721792 | NC_021163.1    | Ca_kabuli_chr04 | 38721792                | TT                              | CC              | 1946825953               |
| SNP_P4_60338_38721836 | NC_021163.1    | Ca_kabuli_chr04 | 38721836                | GG                              | TT              | 1946825955               |
| SNP_P4_60339_38721839 | NC_021163.1    | Ca_kabuli_chr04 | 38721839                | TT                              | CC              | 1946825957               |
| SNP_P4_60340_38723976 | NC_021163.1    | Ca_kabuli_chr04 | 38723976                | CC                              | TT              | 1946825959               |
| SNP_P4_60341_38725412 | NC_021163.1    | Ca_kabuli_chr04 | 38725412                | TT                              | CC              | 1946825961               |
| SNP_P4_60342_38726462 | NC_021163.1    | Ca_kabuli_chr04 | 38726462                | GG                              | AA              | 1946825963               |
| SNP_P4_60343_38726504 | NC_021163.1    | Ca_kabuli_chr04 | 38726504                | GG                              | AA              | 1946825965               |
| SNP_P4_60345_38727739 | NC_021163.1    | Ca_kabuli_chr04 | 38727739                | CC                              | TT              | 1946825967               |
| SNP_P4_60346_38729073 | NC_021163.1    | Ca_kabuli_chr04 | 38729073                | TT                              | CC              | 1946825969               |
| SNP_P4_60347_38729103 | NC_021163.1    | Ca_kabuli_chr04 | 38729103                | AA                              | CC              | 1946825971               |
| SNP_P4_60348_38729131 | NC_021163.1    | Ca_kabuli_chr04 | 38729131                | CC                              | TT              | 1946825973               |
| SNP_P4_60349_38729714 | NC_021163.1    | Ca_kabuli_chr04 | 38729714                | CC                              | TT              | 1946825975               |
| SNP_P4_60350_38730269 | NC_021163.1    | Ca_kabuli_chr04 | 38730269                | CC                              | TT              | 1946825977               |
| SNP_P4_60351_38730918 | NC_021163.1    | Ca_kabuli_chr04 | 38730918                | TT                              | CC              | 1946825979               |
| SNP_P4_60352_38730977 | NC_021163.1    | Ca_kabuli_chr04 | 38730977                | TT                              | CC              | 1946825981               |
| SNP_P4_60353_38730980 | NC_021163.1    | Ca_kabuli_chr04 | 38730980                | TT                              | CC              | 1946825983               |
| SNP_P4_60354_38731002 | NC_021163.1    | Ca_kabuli_chr04 | 38731002                | CC                              | TT              | 1946825985               |
| SNP_P4_60355_38731135 | NC_021163.1    | Ca_kabuli_chr04 | 38731135                | CC                              | TT              | 1946825987               |
| SNP_P4_60356_38731406 | NC_021163.1    | Ca_kabuli_chr04 | 38731406                | TT                              | CC              | 1946825989               |
| SNP_P4_60357_38733343 | NC_021163.1    | Ca_kabuli_chr04 | 38733343                | AA                              | GG              | 1946825991               |
| SNP_P4_60358_38733351 | NC_021163.1    | Ca_kabuli_chr04 | 38733351                | CC                              | TT              | 1946825993               |
| SNP_P4_60359_38733402 | NC_021163.1    | Ca_kabuli_chr04 | 38733402                | TT                              | GG              | 1946825995               |
| SNP_P4_60361_38734181 | NC_021163.1    | Ca_kabuli_chr04 | 38734181                | AA                              | GG              | 1946825997               |
| SNP_P4_60363_38736691 | NC_021163.1    | Ca_kabuli_chr04 | 38736691                | TT                              | CC              | 1946825999               |
| SNP_P4_60364_38737798 | NC_021163.1    | Ca_kabuli_chr04 | 38737798                | CC                              | TT              | 1946826001               |
| SNP_P4_60365_38738327 | NC_021163.1    | Ca_kabuli_chr04 | 38738327                | CC                              | TT              | 1946826003               |
| SNP_P4_60366_38738331 | NC_021163.1    | Ca_kabuli_chr04 | 38738331                | AA                              | CC              | 1946826005               |
| SNP_P4_60367_38738586 | NC_021163.1    | Ca_kabuli_chr04 | 38738586                | TT                              | CC              | 1946826007               |
| SNP_P4_60368_38738631 | NC_021163.1    | Ca_kabuli_chr04 | 38738631                | TT                              | CC              | 1946826009               |
| SNP_P4_60369_38738906 | NC_021163.1    | Ca_kabuli_chr04 | 38738906                | TT                              | CC              | 1946826011               |
| SNP_P4_60371_38739362 | NC_021163.1    | Ca_kabuli_chr04 | 38739362                | CC                              | TT              | 1946826013               |
| SNP_P4_60372_38739390 | NC_021163.1    | Ca_kabuli_chr04 | 38739390                | TT                              | CC              | 1946826015               |
| SNP_P4_60373_38739430 | NC_021163.1    | Ca_kabuli_chr04 | 38739430                | TT                              | CC              | 1946826017               |
| SNP_P4_60374_38739626 | NC_021163.1    | Ca_kabuli_chr04 | 38739626                | CC                              | AA              | 1946826019               |
| SNP_P4_60376_38743579 | NC_021163.1    | Ca_kabuli_chr04 | 38743579                | GG                              | AA              | 1946826021               |
| SNP_P4_60377_38743771 | NC_021163.1    | Ca_kabuli_chr04 | 38743771                | GG                              | TT              | 1946826023               |
| SNP_P4_60379_38744181 | NC_021163.1    | Ca_kabuli_chr04 | 38744181                | AA                              | GG              | 1946826025               |
| SNP_P4_60380_38744442 | NC_021163.1    | Ca_kabuli_chr04 | 38744442                | AA                              | GG              | 1946826027               |

| SNPs IDs              | Chromosome IDs | Chromosomes     | Physical positions (bp) | CDC Frontier (Reference genome) | (ILWC46 & LPNB) | NCBI SNPdb Accession IDs |
|-----------------------|----------------|-----------------|-------------------------|---------------------------------|-----------------|--------------------------|
| SNP_P4_60382_38745551 | NC_021163.1    | Ca_kabuli_chr04 | 38745551                | CC                              | TT              | 1946826029               |
| SNP_P4_60383_38746314 | NC_021163.1    | Ca_kabuli_chr04 | 38746314                | CC                              | AA              | 1946826031               |
| SNP_P4_60384_38747497 | NC_021163.1    | Ca_kabuli_chr04 | 38747497                | TT                              | AA              | 1946826033               |
| SNP_P4_60385_38748876 | NC_021163.1    | Ca_kabuli_chr04 | 38748876                | GG                              | AA              | 1946826035               |
| SNP_P4_60386_38749055 | NC_021163.1    | Ca_kabuli_chr04 | 38749055                | CC                              | TT              | 1946826037               |
| SNP_P4_60387_38749125 | NC_021163.1    | Ca_kabuli_chr04 | 38749125                | TT                              | CC              | 1946826039               |
| SNP_P4_60388_38750062 | NC_021163.1    | Ca_kabuli_chr04 | 38750062                | AA                              | GG              | 1946826041               |
| SNP_P4_60390_38750378 | NC_021163.1    | Ca_kabuli_chr04 | 38750378                | TT                              | CC              | 1946826043               |
| SNP_P4_60391_38750383 | NC_021163.1    | Ca_kabuli_chr04 | 38750383                | CC                              | TT              | 1946826045               |
| SNP_P4_60392_38750423 | NC_021163.1    | Ca_kabuli_chr04 | 38750423                | AA                              | GG              | 1946826047               |
| SNP_P4_60393_38750575 | NC_021163.1    | Ca_kabuli_chr04 | 38750575                | TT                              | CC              | 1946826049               |
| SNP_P4_60394_38751376 | NC_021163.1    | Ca_kabuli_chr04 | 38751376                | TT                              | CC              | 1946826052               |
| SNP_P4_60395_38751383 | NC_021163.1    | Ca_kabuli_chr04 | 38751383                | TT                              | GG              | 1946826054               |
| SNP_P4_60396_38751653 | NC_021163.1    | Ca_kabuli_chr04 | 38751653                | GG                              | AA              | 1946826056               |
| SNP_P4_60397_38752144 | NC_021163.1    | Ca_kabuli_chr04 | 38752144                | GG                              | AA              | 1946826058               |
| SNP_P4_60398_38752160 | NC_021163.1    | Ca_kabuli_chr04 | 38752160                | GG                              | AA              | 1946826060               |
| SNP_P4_60399_38753259 | NC_021163.1    | Ca_kabuli_chr04 | 38753259                | AA                              | GG              | 1946826062               |
| SNP_P4_60400_38753472 | NC_021163.1    | Ca_kabuli_chr04 | 38753472                | TT                              | AA              | 1946826064               |
| SNP_P4_60401_38755675 | NC_021163.1    | Ca_kabuli_chr04 | 38755675                | CC                              | GG              | 1946826066               |
| SNP_P4_60402_38755964 | NC_021163.1    | Ca_kabuli_chr04 | 38755964                | GG                              | CC              | 1946826068               |
| SNP_P4_60403_38757439 | NC_021163.1    | Ca_kabuli_chr04 | 38757439                | CC                              | GG              | 1946826070               |
| SNP_P4_60404_38757441 | NC_021163.1    | Ca_kabuli_chr04 | 38757441                | GG                              | AA              | 1946826072               |
| SNP_P4_60406_38757478 | NC_021163.1    | Ca_kabuli_chr04 | 38757478                | AA                              | TT              | 1946826074               |
| SNP_P4_60407_38757701 | NC_021163.1    | Ca_kabuli_chr04 | 38757701                | AA                              | GG              | 1946826076               |
| SNP_P4_60409_38761337 | NC_021163.1    | Ca_kabuli_chr04 | 38761337                | TT                              | CC              | 1946826078               |
| SNP_P4_60410_38761392 | NC_021163.1    | Ca_kabuli_chr04 | 38761392                | GG                              | TT              | 1946826080               |
| SNP_P4_60411_38763925 | NC_021163.1    | Ca_kabuli_chr04 | 38763925                | GG                              | AA              | 1946826082               |
| SNP_P4_60412_38764022 | NC_021163.1    | Ca_kabuli_chr04 | 38764022                | AA                              | GG              | 1946826084               |
| SNP_P4_60413_38764044 | NC_021163.1    | Ca_kabuli_chr04 | 38764044                | GG                              | TT              | 1946826086               |
| SNP_P4_60414_38764256 | NC_021163.1    | Ca_kabuli_chr04 | 38764256                | GG                              | TT              | 1946826088               |
| SNP_P4_60415_38768828 | NC_021163.1    | Ca_kabuli_chr04 | 38768828                | AA                              | CC              | 1946826090               |
| SNP_P4_60416_38768833 | NC_021163.1    | Ca_kabuli_chr04 | 38768833                | GG                              | AA              | 1946826092               |
| SNP_P4_60417_38770288 | NC_021163.1    | Ca_kabuli_chr04 | 38770288                | AA                              | GG              | 1946826094               |
| SNP_P4_60418_38770582 | NC_021163.1    | Ca_kabuli_chr04 | 38770582                | AA                              | GG              | 1946826096               |
| SNP_P4_60422_38773829 | NC_021163.1    | Ca_kabuli_chr04 | 38773829                | TT                              | AA              | 1946826098               |
| SNP_P4_60423_38773984 | NC_021163.1    | Ca_kabuli_chr04 | 38773984                | AA                              | TT              | 1946826100               |
| SNP_P4_60424_38774562 | NC_021163.1    | Ca_kabuli_chr04 | 38774562                | TT                              | CC              | 1946826102               |
| SNP_P4_60425_38774597 | NC_021163.1    | Ca_kabuli_chr04 | 38774597                | GG                              | AA              | 1946826104               |
| SNP_P4_60426_38779291 | NC_021163.1    | Ca_kabuli_chr04 | 38779291                | CC                              | TT              | 1946826106               |
| SNP_P4_60427_38779595 | NC_021163.1    | Ca_kabuli_chr04 | 38779595                | TT                              | CC              | 1946826109               |
| SNP_P4_60428_38780791 | NC_021163.1    | Ca_kabuli_chr04 | 38780791                | AA                              | TT              | 1946826111               |
| SNP_P4_60429_38780850 | NC_021163.1    | Ca_kabuli_chr04 | 38780850                | CC                              | TT              | 1946826113               |

| SNPs IDs              | Chromosome IDs | Chromosomes     | Physical positions (bp) | CDC Frontier (Reference genome) | (ILWC46 & LPNB) | NCBI SNPdb Accession IDs |
|-----------------------|----------------|-----------------|-------------------------|---------------------------------|-----------------|--------------------------|
| SNP_P4_60430_38781242 | NC_021163.1    | Ca_kabuli_chr04 | 38781242                | TT                              | AA              | 1946826115               |
| SNP_P4_60431_38781809 | NC_021163.1    | Ca_kabuli_chr04 | 38781809                | GG                              | TT              | 1946826117               |
| SNP_P4_60432_38782329 | NC_021163.1    | Ca_kabuli_chr04 | 38782329                | TT                              | GG              | 1946826119               |
| SNP_P4_60433_38782486 | NC_021163.1    | Ca_kabuli_chr04 | 38782486                | CC                              | TT              | 1946826121               |
| SNP_P4_60434_38782894 | NC_021163.1    | Ca_kabuli_chr04 | 38782894                | AA                              | GG              | 1946826123               |
| SNP_P4_60435_38784045 | NC_021163.1    | Ca_kabuli_chr04 | 38784045                | GG                              | CC              | 1946826125               |
| SNP_P4_60436_38784500 | NC_021163.1    | Ca_kabuli_chr04 | 38784500                | GG                              | TT              | 1946826127               |
| SNP_P4_60437_38786540 | NC_021163.1    | Ca_kabuli_chr04 | 38786540                | AA                              | GG              | 1946826129               |
| SNP_P4_60438_38786701 | NC_021163.1    | Ca_kabuli_chr04 | 38786701                | CC                              | TT              | 1946826131               |
| SNP_P4_60439_38786819 | NC_021163.1    | Ca_kabuli_chr04 | 38786819                | AA                              | GG              | 1946826133               |
| SNP_P4_60440_38788573 | NC_021163.1    | Ca_kabuli_chr04 | 38788573                | CC                              | AA              | 1946826135               |
| SNP_P4_60441_38788743 | NC_021163.1    | Ca_kabuli_chr04 | 38788743                | CC                              | TT              | 1946826137               |
| SNP_P4_60442_38788812 | NC_021163.1    | Ca_kabuli_chr04 | 38788812                | CC                              | TT              | 1946826139               |
| SNP_P4_60443_38789006 | NC_021163.1    | Ca_kabuli_chr04 | 38789006                | CC                              | AA              | 1946826141               |
| SNP_P4_60444_38789019 | NC_021163.1    | Ca_kabuli_chr04 | 38789019                | TT                              | CC              | 1946826143               |
| SNP_P4_60445_38789051 | NC_021163.1    | Ca_kabuli_chr04 | 38789051                | TT                              | CC              | 1946826145               |
| SNP_P4_60446_38789074 | NC_021163.1    | Ca_kabuli_chr04 | 38789074                | TT                              | AA              | 1946826147               |
| SNP_P4_60447_38789512 | NC_021163.1    | Ca_kabuli_chr04 | 38789512                | CC                              | TT              | 1946826149               |
| SNP_P4_60448_38789518 | NC_021163.1    | Ca_kabuli_chr04 | 38789518                | AA                              | GG              | 1946826151               |
| SNP_P4_60449_38789537 | NC_021163.1    | Ca_kabuli_chr04 | 38789537                | GG                              | AA              | 1946826153               |
| SNP_P4_60450_38789836 | NC_021163.1    | Ca_kabuli_chr04 | 38789836                | TT                              | CC              | 1946826155               |
| SNP_P4_60451_38789838 | NC_021163.1    | Ca_kabuli_chr04 | 38789838                | AA                              | CC              | 1946826158               |
| SNP_P4_60452_38789901 | NC_021163.1    | Ca_kabuli_chr04 | 38789901                | GG                              | AA              | 1946826160               |
| SNP_P4_60453_38790192 | NC_021163.1    | Ca_kabuli_chr04 | 38790192                | GG                              | AA              | 1946826161               |
| SNP_P4_60454_38790220 | NC_021163.1    | Ca_kabuli_chr04 | 38790220                | CC                              | TT              | 1946826163               |
| SNP_P4_60455_38790231 | NC_021163.1    | Ca_kabuli_chr04 | 38790231                | GG                              | AA              | 1946826165               |
| SNP_P4_60456_38790257 | NC_021163.1    | Ca_kabuli_chr04 | 38790257                | TT                              | CC              | 1946826167               |
| SNP_P4_60457_38790991 | NC_021163.1    | Ca_kabuli_chr04 | 38790991                | AA                              | TT              | 1946826169               |
| SNP_P4_60458_38796637 | NC_021163.1    | Ca_kabuli_chr04 | 38796637                | CC                              | TT              | 1946826171               |
| SNP_P4_60459_38796640 | NC_021163.1    | Ca_kabuli_chr04 | 38796640                | TT                              | CC              | 1946826173               |
| SNP_P4_60460_38798731 | NC_021163.1    | Ca_kabuli_chr04 | 38798731                | AA                              | GG              | 1946826175               |
| SNP_P4_60461_38798741 | NC_021163.1    | Ca_kabuli_chr04 | 38798741                | AA                              | TT              | 1946826177               |
| SNP_P4_60462_38798743 | NC_021163.1    | Ca_kabuli_chr04 | 38798743                | AA                              | TT              | 1946826179               |
| SNP_P4_60463_38798759 | NC_021163.1    | Ca_kabuli_chr04 | 38798759                | AA                              | GG              | 1946826181               |
| SNP_P4_60464_38799021 | NC_021163.1    | Ca_kabuli_chr04 | 38799021                | AA                              | GG              | 1946826183               |
| SNP_P4_60465_38799035 | NC_021163.1    | Ca_kabuli_chr04 | 38799035                | GG                              | TT              | 1946826185               |
| SNP_P4_60466_38799037 | NC_021163.1    | Ca_kabuli_chr04 | 38799037                | TT                              | AA              | 1946826187               |
| SNP_P4_60467_38800162 | NC_021163.1    | Ca_kabuli_chr04 | 38800162                | AA                              | GG              | 1946826189               |
| SNP_P4_60468_38800492 | NC_021163.1    | Ca_kabuli_chr04 | 38800492                | GG                              | TT              | 1946826191               |
| SNP_P4_60469_38800499 | NC_021163.1    | Ca_kabuli_chr04 | 38800499                | TT                              | CC              | 1946826193               |
| SNP_P4_60470_38800513 | NC_021163.1    | Ca_kabuli_chr04 | 38800513                | AA                              | TT              | 1946826195               |
| SNP_P4_60472_38806152 | NC_021163.1    | Ca_kabuli_chr04 | 38806152                | CC                              | TT              | 1946826197               |



| SNPs IDs              | Chromosome IDs | Chromosomes     | Physical positions (bp) | CDC Frontier (Reference genome) | (ILWC46 & LPNB) | NCBI SNPdb Accession IDs |
|-----------------------|----------------|-----------------|-------------------------|---------------------------------|-----------------|--------------------------|
| SNP_P4_60473_38806155 | NC_021163.1    | Ca_kabuli_chr04 | 38806155                | TT                              | CC              | 1946826199               |
| SNP_P4_60474_38806174 | NC_021163.1    | Ca_kabuli_chr04 | 38806174                | CC                              | TT              | 1946826201               |
| SNP_P4_60476_38807238 | NC_021163.1    | Ca_kabuli_chr04 | 38807238                | TT                              | AA              | 1946826203               |
| SNP_P4_60477_38807246 | NC_021163.1    | Ca_kabuli_chr04 | 38807246                | AA                              | GG              | 1946826205               |
| SNP_P4_60478_38807849 | NC_021163.1    | Ca_kabuli_chr04 | 38807849                | CC                              | TT              | 1946826207               |
| SNP_P4_60479_38807862 | NC_021163.1    | Ca_kabuli_chr04 | 38807862                | AA                              | CC              | 1946826209               |
| SNP_P4_60480_38808418 | NC_021163.1    | Ca_kabuli_chr04 | 38808418                | AA                              | GG              | 1946826211               |
| SNP_P4_60481_38808627 | NC_021163.1    | Ca_kabuli_chr04 | 38808627                | GG                              | CC              | 1946826213               |
| SNP_P4_60482_38808632 | NC_021163.1    | Ca_kabuli_chr04 | 38808632                | TT                              | CC              | 1946826215               |
| SNP_P4_60483_38810369 | NC_021163.1    | Ca_kabuli_chr04 | 38810369                | AA                              | CC              | 1946826217               |
| SNP_P4_60484_38810376 | NC_021163.1    | Ca_kabuli_chr04 | 38810376                | GG                              | TT              | 1946826219               |
| SNP_P4_60485_38811896 | NC_021163.1    | Ca_kabuli_chr04 | 38811896                | CC                              | TT              | 1946826221               |
| SNP_P4_60486_38812141 | NC_021163.1    | Ca_kabuli_chr04 | 38812141                | CC                              | AA              | 1946826223               |
| SNP_P4_60487_38813145 | NC_021163.1    | Ca_kabuli_chr04 | 38813145                | CC                              | AA              | 1946826225               |
| SNP_P4_60488_38814293 | NC_021163.1    | Ca_kabuli_chr04 | 38814293                | CC                              | TT              | 1946826227               |
| SNP_P4_60489_38814470 | NC_021163.1    | Ca_kabuli_chr04 | 38814470                | GG                              | TT              | 1946826229               |
| SNP_P4_60490_38814475 | NC_021163.1    | Ca_kabuli_chr04 | 38814475                | TT                              | CC              | 1946826231               |
| SNP_P4_60491_38814476 | NC_021163.1    | Ca_kabuli_chr04 | 38814476                | AA                              | GG              | 1946826233               |
| SNP_P4_60492_38814551 | NC_021163.1    | Ca_kabuli_chr04 | 38814551                | CC                              | TT              | 1946826235               |
| SNP_P4_60493_38814574 | NC_021163.1    | Ca_kabuli_chr04 | 38814574                | TT                              | GG              | 1946826237               |
| SNP_P4_60494_38815211 | NC_021163.1    | Ca_kabuli_chr04 | 38815211                | TT                              | CC              | 1946826239               |
| SNP_P4_60495_38815373 | NC_021163.1    | Ca_kabuli_chr04 | 38815373                | TT                              | CC              | 1946826241               |
| SNP_P4_60496_38816562 | NC_021163.1    | Ca_kabuli_chr04 | 38816562                | TT                              | AA              | 1946826243               |
| SNP_P4_60498_38820457 | NC_021163.1    | Ca_kabuli_chr04 | 38820457                | TT                              | GG              | 1946826245               |
| SNP_P4_60500_38823234 | NC_021163.1    | Ca_kabuli_chr04 | 38823234                | CC                              | AA              | 1946826247               |
| SNP_P4_60501_38823463 | NC_021163.1    | Ca_kabuli_chr04 | 38823463                | GG                              | TT              | 1946826249               |
| SNP_P4_60502_38823511 | NC_021163.1    | Ca_kabuli_chr04 | 38823511                | GG                              | TT              | 1946826251               |
| SNP_P4_60503_38823515 | NC_021163.1    | Ca_kabuli_chr04 | 38823515                | TT                              | AA              | 1946826253               |
| SNP_P4_60504_38824103 | NC_021163.1    | Ca_kabuli_chr04 | 38824103                | TT                              | CC              | 1946826255               |
| SNP_P4_60505_38824126 | NC_021163.1    | Ca_kabuli_chr04 | 38824126                | CC                              | GG              | 1946826257               |
| SNP_P4_60506_38824403 | NC_021163.1    | Ca_kabuli_chr04 | 38824403                | TT                              | AA              | 1946826259               |
| SNP_P4_60507_38825240 | NC_021163.1    | Ca_kabuli_chr04 | 38825240                | GG                              | AA              | 1946826261               |
| SNP_P4_60508_38825292 | NC_021163.1    | Ca_kabuli_chr04 | 38825292                | GG                              | AA              | 1946826263               |
| SNP_P4_60509_38825358 | NC_021163.1    | Ca_kabuli_chr04 | 38825358                | GG                              | TT              | 1946826265               |
| SNP_P4_60510_38825606 | NC_021163.1    | Ca_kabuli_chr04 | 38825606                | AA                              | GG              | 1946826267               |
| SNP_P4_60511_38825847 | NC_021163.1    | Ca_kabuli_chr04 | 38825847                | AA                              | TT              | 1946826269               |
| SNP_P4_60512_38825951 | NC_021163.1    | Ca_kabuli_chr04 | 38825951                | CC                              | TT              | 1946826271               |
| SNP_P4_60513_38829455 | NC_021163.1    | Ca_kabuli_chr04 | 38829455                | AA                              | TT              | 1946826273               |
| SNP_P4_60514_38830289 | NC_021163.1    | Ca_kabuli_chr04 | 38830289                | TT                              | CC              | 1946826275               |
| SNP_P4_60515_38830300 | NC_021163.1    | Ca_kabuli_chr04 | 38830300                | AA                              | CC              | 1946826277               |
| SNP_P4_60516_38830473 | NC_021163.1    | Ca_kabuli_chr04 | 38830473                | CC                              | TT              | 1946826279               |
| SNP_P4_60518_38830558 | NC_021163.1    | Ca_kabuli_chr04 | 38830558                | TT                              | CC              | 1946826281               |

| SNPs IDs              | Chromosome IDs | Chromosomes     | Physical positions (bp) | CDC Frontier (Reference genome) | (ILWC46 & LPNB) | NCBI SNPdb Accession IDs |
|-----------------------|----------------|-----------------|-------------------------|---------------------------------|-----------------|--------------------------|
| SNP_P4_60519_38830732 | NC_021163.1    | Ca_kabuli_chr04 | 38830732                | AA                              | CC              | 1946826283               |
| SNP_P4_60520_38830784 | NC_021163.1    | Ca_kabuli_chr04 | 38830784                | GG                              | TT              | 1946826285               |
| SNP_P4_60521_38832740 | NC_021163.1    | Ca_kabuli_chr04 | 38832740                | AA                              | CC              | 1946826287               |
| SNP_P4_60523_38837670 | NC_021163.1    | Ca_kabuli_chr04 | 38837670                | GG                              | TT              | 1946826289               |
| SNP_P4_60524_38837672 | NC_021163.1    | Ca_kabuli_chr04 | 38837672                | TT                              | GG              | 1946826291               |
| SNP_P4_60525_38838052 | NC_021163.1    | Ca_kabuli_chr04 | 38838052                | AA                              | GG              | 1946826293               |
| SNP_P4_60526_38840151 | NC_021163.1    | Ca_kabuli_chr04 | 38840151                | TT                              | CC              | 1946826295               |
| SNP_P4_60527_38840564 | NC_021163.1    | Ca_kabuli_chr04 | 38840564                | CC                              | TT              | 1946826297               |
| SNP_P4_60528_38845573 | NC_021163.1    | Ca_kabuli_chr04 | 38845573                | CC                              | AA              | 1946826299               |
| SNP_P4_60529_38845925 | NC_021163.1    | Ca_kabuli_chr04 | 38845925                | TT                              | CC              | 1946826301               |
| SNP_P4_60530_38845933 | NC_021163.1    | Ca_kabuli_chr04 | 38845933                | CC                              | TT              | 1946826303               |
| SNP_P4_60531_38846005 | NC_021163.1    | Ca_kabuli_chr04 | 38846005                | AA                              | TT              | 1946826305               |
| SNP_P4_60532_38846227 | NC_021163.1    | Ca_kabuli_chr04 | 38846227                | GG                              | CC              | 1946826307               |
| SNP_P4_60533_38846920 | NC_021163.1    | Ca_kabuli_chr04 | 38846920                | CC                              | GG              | 1946826309               |
| SNP_P4_60534_38848009 | NC_021163.1    | Ca_kabuli_chr04 | 38848009                | CC                              | AA              | 1946826312               |
| SNP_P4_60535_38850376 | NC_021163.1    | Ca_kabuli_chr04 | 38850376                | GG                              | TT              | 1946826314               |
| SNP_P4_60536_38851691 | NC_021163.1    | Ca_kabuli_chr04 | 38851691                | AA                              | GG              | 1946826316               |
| SNP_P4_60537_38852066 | NC_021163.1    | Ca_kabuli_chr04 | 38852066                | GG                              | CC              | 1946826318               |
| SNP_P4_60538_38852101 | NC_021163.1    | Ca_kabuli_chr04 | 38852101                | AA                              | GG              | 1946826320               |
| SNP_P4_60539_38858905 | NC_021163.1    | Ca_kabuli_chr04 | 38858905                | AA                              | TT              | 1946826322               |
| SNP_P4_60540_38858930 | NC_021163.1    | Ca_kabuli_chr04 | 38858930                | GG                              | AA              | 1946826324               |
| SNP_P4_60541_38858945 | NC_021163.1    | Ca_kabuli_chr04 | 38858945                | AA                              | TT              | 1946826326               |
| SNP_P4_60543_38859855 | NC_021163.1    | Ca_kabuli_chr04 | 38859855                | TT                              | CC              | 1946826328               |
| SNP_P4_60544_38859914 | NC_021163.1    | Ca_kabuli_chr04 | 38859914                | CC                              | TT              | 1946826330               |
| SNP_P4_60545_38859922 | NC_021163.1    | Ca_kabuli_chr04 | 38859922                | GG                              | AA              | 1946826332               |
| SNP_P4_60546_38859923 | NC_021163.1    | Ca_kabuli_chr04 | 38859923                | TT                              | AA              | 1946826334               |
| SNP_P4_60547_38859963 | NC_021163.1    | Ca_kabuli_chr04 | 38859963                | CC                              | TT              | 1946826336               |
| SNP_P4_60548_38860294 | NC_021163.1    | Ca_kabuli_chr04 | 38860294                | CC                              | TT              | 1946826338               |
| SNP_P4_60549_38860311 | NC_021163.1    | Ca_kabuli_chr04 | 38860311                | TT                              | AA              | 1946826340               |
| SNP_P4_60550_38864899 | NC_021163.1    | Ca_kabuli_chr04 | 38864899                | CC                              | TT              | 1946826342               |
| SNP_P4_60551_38864970 | NC_021163.1    | Ca_kabuli_chr04 | 38864970                | CC                              | GG              | 1946826344               |
| SNP_P4_60552_38864979 | NC_021163.1    | Ca_kabuli_chr04 | 38864979                | AA                              | TT              | 1946826346               |
| SNP_P4_60553_38868384 | NC_021163.1    | Ca_kabuli_chr04 | 38868384                | TT                              | CC              | 1946826348               |
| SNP_P4_60554_38869370 | NC_021163.1    | Ca_kabuli_chr04 | 38869370                | CC                              | TT              | 1946826350               |
| SNP_P4_60555_38870938 | NC_021163.1    | Ca_kabuli_chr04 | 38870938                | GG                              | AA              | 1946826352               |
| SNP_P4_60556_38871867 | NC_021163.1    | Ca_kabuli_chr04 | 38871867                | TT                              | GG              | 1946826354               |
| SNP_P4_60557_38871900 | NC_021163.1    | Ca_kabuli_chr04 | 38871900                | GG                              | CC              | 1946826356               |
| SNP_P4_60558_38872231 | NC_021163.1    | Ca_kabuli_chr04 | 38872231                | AA                              | GG              | 1946826358               |
| SNP_P4_60559_38872232 | NC_021163.1    | Ca_kabuli_chr04 | 38872232                | CC                              | TT              | 1946826360               |
| SNP_P4_60560_38874486 | NC_021163.1    | Ca_kabuli_chr04 | 38874486                | AA                              | GG              | 1946826362               |
| SNP_P4_60561_38874491 | NC_021163.1    | Ca_kabuli_chr04 | 38874491                | GG                              | AA              | 1946826364               |
| SNP_P4_60562_38874542 | NC_021163.1    | Ca_kabuli_chr04 | 38874542                | AA                              | CC              | 1946826366               |

| SNPs IDs              | Chromosome IDs | Chromosomes     | Physical positions (bp) | CDC Frontier (Reference genome) | (ILWC46 & LPNB) | NCBI SNPdb Accession IDs |
|-----------------------|----------------|-----------------|-------------------------|---------------------------------|-----------------|--------------------------|
| SNP_P4_60564_38874615 | NC_021163.1    | Ca_kabuli_chr04 | 38874615                | CC                              | GG              | 1946826368               |
| SNP_P4_60565_38874646 | NC_021163.1    | Ca_kabuli_chr04 | 38874646                | GG                              | CC              | 1946826370               |
| SNP_P4_60566_38874790 | NC_021163.1    | Ca_kabuli_chr04 | 38874790                | AA                              | GG              | 1946826372               |
| SNP_P4_60567_38875209 | NC_021163.1    | Ca_kabuli_chr04 | 38875209                | AA                              | GG              | 1946826374               |
| SNP_P4_60568_38875237 | NC_021163.1    | Ca_kabuli_chr04 | 38875237                | GG                              | AA              | 1946826376               |
| SNP_P4_60569_38875265 | NC_021163.1    | Ca_kabuli_chr04 | 38875265                | GG                              | AA              | 1946826378               |
| SNP_P4_60570_38877152 | NC_021163.1    | Ca_kabuli_chr04 | 38877152                | GG                              | AA              | 1946826380               |
| SNP_P4_60571_38877296 | NC_021163.1    | Ca_kabuli_chr04 | 38877296                | CC                              | TT              | 1946826382               |
| SNP_P4_60572_38877304 | NC_021163.1    | Ca_kabuli_chr04 | 38877304                | TT                              | GG              | 1946826384               |
| SNP_P4_60573_38877934 | NC_021163.1    | Ca_kabuli_chr04 | 38877934                | GG                              | AA              | 1946826386               |
| SNP_P4_60574_38877936 | NC_021163.1    | Ca_kabuli_chr04 | 38877936                | CC                              | TT              | 1946826388               |
| SNP_P4_60575_38877953 | NC_021163.1    | Ca_kabuli_chr04 | 38877953                | AA                              | GG              | 1946826390               |
| SNP_P4_60576_38879121 | NC_021163.1    | Ca_kabuli_chr04 | 38879121                | CC                              | AA              | 1946826392               |
| SNP_P4_60577_38881200 | NC_021163.1    | Ca_kabuli_chr04 | 38881200                | TT                              | CC              | 1946826394               |
| SNP_P4_60578_38881452 | NC_021163.1    | Ca_kabuli_chr04 | 38881452                | AA                              | GG              | 1946826396               |
| SNP_P4_60579_38881476 | NC_021163.1    | Ca_kabuli_chr04 | 38881476                | AA                              | GG              | 1946826398               |
| SNP_P4_60580_38881523 | NC_021163.1    | Ca_kabuli_chr04 | 38881523                | GG                              | AA              | 1946826400               |
| SNP_P4_60581_38881568 | NC_021163.1    | Ca_kabuli_chr04 | 38881568                | AA                              | GG              | 1946826402               |
| SNP_P4_60582_38881602 | NC_021163.1    | Ca_kabuli_chr04 | 38881602                | TT                              | CC              | 1946826404               |
| SNP_P4_60583_38881607 | NC_021163.1    | Ca_kabuli_chr04 | 38881607                | CC                              | AA              | 1946826406               |
| SNP_P4_60584_38881633 | NC_021163.1    | Ca_kabuli_chr04 | 38881633                | GG                              | AA              | 1946826408               |
| SNP_P4_60585_38881863 | NC_021163.1    | Ca_kabuli_chr04 | 38881863                | CC                              | AA              | 1946826410               |
| SNP_P4_60586_38881869 | NC_021163.1    | Ca_kabuli_chr04 | 38881869                | GG                              | AA              | 1946826412               |
| SNP_P4_60587_38881907 | NC_021163.1    | Ca_kabuli_chr04 | 38881907                | AA                              | GG              | 1946826414               |
| SNP_P4_60588_38881911 | NC_021163.1    | Ca_kabuli_chr04 | 38881911                | GG                              | AA              | 1946826416               |
| SNP_P4_60589_38882170 | NC_021163.1    | Ca_kabuli_chr04 | 38882170                | AA                              | GG              | 1946826418               |
| SNP_P4_60590_38883127 | NC_021163.1    | Ca_kabuli_chr04 | 38883127                | GG                              | AA              | 1946826420               |
| SNP_P4_60591_38883131 | NC_021163.1    | Ca_kabuli_chr04 | 38883131                | AA                              | GG              | 1946826422               |
| SNP_P4_60592_38883929 | NC_021163.1    | Ca_kabuli_chr04 | 38883929                | GG                              | AA              | 1946826424               |
| SNP_P4_60593_38884866 | NC_021163.1    | Ca_kabuli_chr04 | 38884866                | AA                              | GG              | 1946826426               |
| SNP_P4_60594_38884887 | NC_021163.1    | Ca_kabuli_chr04 | 38884887                | GG                              | CC              | 1946826428               |
| SNP_P4_60595_38884903 | NC_021163.1    | Ca_kabuli_chr04 | 38884903                | AA                              | GG              | 1946826430               |
| SNP_P4_60597_38885497 | NC_021163.1    | Ca_kabuli_chr04 | 38885497                | AA                              | GG              | 1946826432               |
| SNP_P4_60598_38886100 | NC_021163.1    | Ca_kabuli_chr04 | 38886100                | GG                              | CC              | 1946826434               |
| SNP_P4_60601_38887116 | NC_021163.1    | Ca_kabuli_chr04 | 38887116                | TT                              | CC              | 1946826436               |
| SNP_P4_60602_38887154 | NC_021163.1    | Ca_kabuli_chr04 | 38887154                | TT                              | CC              | 1946826438               |
| SNP_P4_60605_38887619 | NC_021163.1    | Ca_kabuli_chr04 | 38887619                | TT                              | GG              | 1946826440               |
| SNP_P4_60606_38887646 | NC_021163.1    | Ca_kabuli_chr04 | 38887646                | CC                              | TT              | 1946826442               |
| SNP_P4_60607_38887877 | NC_021163.1    | Ca_kabuli_chr04 | 38887877                | AA                              | GG              | 1946826444               |
| SNP_P4_60608_38888144 | NC_021163.1    | Ca_kabuli_chr04 | 38888144                | TT                              | CC              | 1946826446               |
| SNP_P4_60609_38889481 | NC_021163.1    | Ca_kabuli_chr04 | 38889481                | CC                              | TT              | 1946826448               |
| SNP_P4_60610_38889527 | NC_021163.1    | Ca_kabuli_chr04 | 38889527                | TT                              | CC              | 1946826450               |

| SNPs IDs              | Chromosome IDs | Chromosomes     | Physical positions (bp) | CDC Frontier (Reference genome) | (ILWC46 & LPNB) | NCBI SNPdb Accession IDs |
|-----------------------|----------------|-----------------|-------------------------|---------------------------------|-----------------|--------------------------|
| SNP_P4_60612_38891841 | NC_021163.1    | Ca_kabuli_chr04 | 38891841                | TT                              | AA              | 1946826452               |
| SNP_P4_60613_38892107 | NC_021163.1    | Ca_kabuli_chr04 | 38892107                | TT                              | CC              | 1946826454               |
| SNP_P4_60614_38892200 | NC_021163.1    | Ca_kabuli_chr04 | 38892200                | TT                              | CC              | 1946826456               |
| SNP_P4_60615_38894848 | NC_021163.1    | Ca_kabuli_chr04 | 38894848                | TT                              | CC              | 1946826458               |
| SNP_P4_60618_38896224 | NC_021163.1    | Ca_kabuli_chr04 | 38896224                | TT                              | CC              | 1946826460               |
| SNP_P4_60619_38898943 | NC_021163.1    | Ca_kabuli_chr04 | 38898943                | CC                              | GG              | 1946826462               |
| SNP_P4_60620_38898962 | NC_021163.1    | Ca_kabuli_chr04 | 38898962                | TT                              | GG              | 1946826464               |
| SNP_P4_60621_38913898 | NC_021163.1    | Ca_kabuli_chr04 | 38913898                | TT                              | CC              | 1946826466               |
| SNP_P4_60622_38913950 | NC_021163.1    | Ca_kabuli_chr04 | 38913950                | AA                              | CC              | 1946826468               |
| SNP_P4_60623_38914440 | NC_021163.1    | Ca_kabuli_chr04 | 38914440                | TT                              | GG              | 1946826470               |
| SNP_P4_60625_38915084 | NC_021163.1    | Ca_kabuli_chr04 | 38915084                | AA                              | GG              | 1946826472               |
| SNP_P4_60626_38915380 | NC_021163.1    | Ca_kabuli_chr04 | 38915380                | AA                              | TT              | 1946826474               |
| SNP_P4_60627_38915405 | NC_021163.1    | Ca_kabuli_chr04 | 38915405                | GG                              | TT              | 1946826476               |
| SNP_P4_60628_38915631 | NC_021163.1    | Ca_kabuli_chr04 | 38915631                | AA                              | GG              | 1946826478               |
| SNP_P4_60629_38915632 | NC_021163.1    | Ca_kabuli_chr04 | 38915632                | AA                              | CC              | 1946826480               |
| SNP_P4_60630_38915656 | NC_021163.1    | Ca_kabuli_chr04 | 38915656                | CC                              | TT              | 1946826482               |
| SNP_P4_60631_38916826 | NC_021163.1    | Ca_kabuli_chr04 | 38916826                | TT                              | CC              | 1946826484               |
| SNP_P4_60632_38916830 | NC_021163.1    | Ca_kabuli_chr04 | 38916830                | AA                              | TT              | 1946826486               |
| SNP_P4_60633_38916844 | NC_021163.1    | Ca_kabuli_chr04 | 38916844                | TT                              | CC              | 1946826488               |
| SNP_P4_60634_38917174 | NC_021163.1    | Ca_kabuli_chr04 | 38917174                | CC                              | TT              | 1946826490               |
| SNP_P4_60635_38917176 | NC_021163.1    | Ca_kabuli_chr04 | 38917176                | AA                              | GG              | 1946826492               |
| SNP_P4_60636_38917351 | NC_021163.1    | Ca_kabuli_chr04 | 38917351                | CC                              | GG              | 1946826495               |
| SNP_P4_60637_38917354 | NC_021163.1    | Ca_kabuli_chr04 | 38917354                | CC                              | TT              | 1946826497               |
| SNP_P4_60638_38917712 | NC_021163.1    | Ca_kabuli_chr04 | 38917712                | TT                              | CC              | 1946826499               |
| SNP_P4_60639_38917990 | NC_021163.1    | Ca_kabuli_chr04 | 38917990                | TT                              | CC              | 1946826501               |
| SNP_P4_60640_38918904 | NC_021163.1    | Ca_kabuli_chr04 | 38918904                | GG                              | CC              | 1946826503               |
| SNP_P4_60641_38918916 | NC_021163.1    | Ca_kabuli_chr04 | 38918916                | CC                              | TT              | 1946826505               |
| SNP_P4_60642_38922377 | NC_021163.1    | Ca_kabuli_chr04 | 38922377                | CC                              | TT              | 1946826507               |
| SNP_P4_60643_38924463 | NC_021163.1    | Ca_kabuli_chr04 | 38924463                | TT                              | CC              | 1946826509               |
| SNP_P4_60644_38924493 | NC_021163.1    | Ca_kabuli_chr04 | 38924493                | CC                              | GG              | 1946826511               |
| SNP_P4_60645_38924515 | NC_021163.1    | Ca_kabuli_chr04 | 38924515                | TT                              | CC              | 1946826513               |
| SNP_P4_60646_38924540 | NC_021163.1    | Ca_kabuli_chr04 | 38924540                | TT                              | AA              | 1946826515               |
| SNP_P4_60647_38925203 | NC_021163.1    | Ca_kabuli_chr04 | 38925203                | TT                              | AA              | 1946826517               |
| SNP_P4_60648_38925241 | NC_021163.1    | Ca_kabuli_chr04 | 38925241                | TT                              | AA              | 1946826519               |
| SNP_P4_60649_38925262 | NC_021163.1    | Ca_kabuli_chr04 | 38925262                | AA                              | TT              | 1946826521               |
| SNP_P4_60650_38926165 | NC_021163.1    | Ca_kabuli_chr04 | 38926165                | GG                              | AA              | 1946826523               |
| SNP_P4_60651_38928030 | NC_021163.1    | Ca_kabuli_chr04 | 38928030                | TT                              | CC              | 1946826525               |
| SNP_P4_60652_38929400 | NC_021163.1    | Ca_kabuli_chr04 | 38929400                | CC                              | TT              | 1946826527               |
| SNP_P4_60653_38930225 | NC_021163.1    | Ca_kabuli_chr04 | 38930225                | GG                              | TT              | 1946826529               |
| SNP_P4_60654_38930909 | NC_021163.1    | Ca_kabuli_chr04 | 38930909                | TT                              | AA              | 1946826531               |
| SNP_P4_60655_38931497 | NC_021163.1    | Ca_kabuli_chr04 | 38931497                | TT                              | CC              | 1946826533               |
| SNP_P4_60656_38931709 | NC_021163.1    | Ca_kabuli_chr04 | 38931709                | GG                              | TT              | 1946826535               |

| SNPs IDs              | Chromosome IDs | Chromosomes     | Physical positions (bp) | CDC Frontier (Reference genome) | (ILWC46 & LPNB) | NCBI SNPdb Accession IDs |
|-----------------------|----------------|-----------------|-------------------------|---------------------------------|-----------------|--------------------------|
| SNP_P4_60657_38931862 | NC_021163.1    | Ca_kabuli_chr04 | 38931862                | GG                              | TT              | 1946826537               |
| SNP_P4_60658_38931882 | NC_021163.1    | Ca_kabuli_chr04 | 38931882                | AA                              | GG              | 1946826539               |
| SNP_P4_60659_38932495 | NC_021163.1    | Ca_kabuli_chr04 | 38932495                | TT                              | AA              | 1946826541               |
| SNP_P4_60660_38932555 | NC_021163.1    | Ca_kabuli_chr04 | 38932555                | GG                              | AA              | 1946826543               |
| SNP_P4_60661_38933120 | NC_021163.1    | Ca_kabuli_chr04 | 38933120                | AA                              | CC              | 1946826545               |
| SNP_P4_60662_38933124 | NC_021163.1    | Ca_kabuli_chr04 | 38933124                | AA                              | GG              | 1946826547               |
| SNP_P4_60663_38933455 | NC_021163.1    | Ca_kabuli_chr04 | 38933455                | GG                              | AA              | 1946826549               |
| SNP_P4_60664_38933456 | NC_021163.1    | Ca_kabuli_chr04 | 38933456                | CC                              | TT              | 1946826551               |
| SNP_P4_60665_38935870 | NC_021163.1    | Ca_kabuli_chr04 | 38935870                | GG                              | AA              | 1946826553               |
| SNP_P4_60666_38935871 | NC_021163.1    | Ca_kabuli_chr04 | 38935871                | CC                              | TT              | 1946826555               |
| SNP_P4_60668_38937847 | NC_021163.1    | Ca_kabuli_chr04 | 38937847                | AA                              | GG              | 1946826557               |
| SNP_P4_60669_38940385 | NC_021163.1    | Ca_kabuli_chr04 | 38940385                | TT                              | CC              | 1946826559               |
| SNP_P4_60670_38940417 | NC_021163.1    | Ca_kabuli_chr04 | 38940417                | TT                              | CC              | 1946826561               |
| SNP_P4_60671_38940710 | NC_021163.1    | Ca_kabuli_chr04 | 38940710                | TT                              | CC              | 1946826563               |
| SNP_P4_60672_38940716 | NC_021163.1    | Ca_kabuli_chr04 | 38940716                | AA                              | TT              | 1946826565               |
| SNP_P4_60673_38940723 | NC_021163.1    | Ca_kabuli_chr04 | 38940723                | CC                              | TT              | 1946826567               |
| SNP_P4_60674_38942781 | NC_021163.1    | Ca_kabuli_chr04 | 38942781                | GG                              | AA              | 1946826569               |
| SNP_P4_60675_38942789 | NC_021163.1    | Ca_kabuli_chr04 | 38942789                | AA                              | GG              | 1946826571               |
| SNP_P4_60676_38942810 | NC_021163.1    | Ca_kabuli_chr04 | 38942810                | CC                              | AA              | 1946826573               |
| SNP_P4_60677_38942875 | NC_021163.1    | Ca_kabuli_chr04 | 38942875                | TT                              | CC              | 1946826575               |
| SNP_P4_60678_38942897 | NC_021163.1    | Ca_kabuli_chr04 | 38942897                | AA                              | CC              | 1946826577               |
| SNP_P4_60679_38943054 | NC_021163.1    | Ca_kabuli_chr04 | 38943054                | AA                              | GG              | 1946826579               |
| SNP_P4_60680_38943067 | NC_021163.1    | Ca_kabuli_chr04 | 38943067                | AA                              | GG              | 1946826581               |
| SNP_P4_60682_38943087 | NC_021163.1    | Ca_kabuli_chr04 | 38943087                | CC                              | TT              | 1946826583               |
| SNP_P4_60683_38944147 | NC_021163.1    | Ca_kabuli_chr04 | 38944147                | TT                              | CC              | 1946826585               |
| SNP_P4_60684_38944171 | NC_021163.1    | Ca_kabuli_chr04 | 38944171                | TT                              | AA              | 1946826587               |
| SNP_P4_60685_38944186 | NC_021163.1    | Ca_kabuli_chr04 | 38944186                | CC                              | TT              | 1946826589               |
| SNP_P4_60687_38946387 | NC_021163.1    | Ca_kabuli_chr04 | 38946387                | TT                              | CC              | 1946826591               |
| SNP_P4_60688_38946394 | NC_021163.1    | Ca_kabuli_chr04 | 38946394                | TT                              | CC              | 1946826593               |
| SNP_P4_60689_38946395 | NC_021163.1    | Ca_kabuli_chr04 | 38946395                | CC                              | TT              | 1946826595               |
| SNP_P4_60690_38948736 | NC_021163.1    | Ca_kabuli_chr04 | 38948736                | CC                              | TT              | 1946826597               |
| SNP_P4_60691_38948788 | NC_021163.1    | Ca_kabuli_chr04 | 38948788                | AA                              | TT              | 1946826599               |
| SNP_P4_60694_38950243 | NC_021163.1    | Ca_kabuli_chr04 | 38950243                | CC                              | TT              | 1946826601               |
| SNP_P4_60696_38952143 | NC_021163.1    | Ca_kabuli_chr04 | 38952143                | AA                              | GG              | 1946826603               |
| SNP_P4_60697_38952145 | NC_021163.1    | Ca_kabuli_chr04 | 38952145                | GG                              | AA              | 1946826606               |
| SNP_P4_60698_38952147 | NC_021163.1    | Ca_kabuli_chr04 | 38952147                | AA                              | TT              | 1946826608               |
| SNP_P4_60699_38953177 | NC_021163.1    | Ca_kabuli_chr04 | 38953177                | TT                              | GG              | 1946826610               |
| SNP_P4_60700_38953193 | NC_021163.1    | Ca_kabuli_chr04 | 38953193                | CC                              | TT              | 1946826612               |
| SNP_P4_60701_38953206 | NC_021163.1    | Ca_kabuli_chr04 | 38953206                | TT                              | AA              | 1946826614               |
| SNP_P4_60702_38954751 | NC_021163.1    | Ca_kabuli_chr04 | 38954751                | TT                              | GG              | 1946826616               |
| SNP_P4_60703_38954766 | NC_021163.1    | Ca_kabuli_chr04 | 38954766                | CC                              | GG              | 1946826618               |
| SNP_P4_60704_38955067 | NC_021163.1    | Ca_kabuli_chr04 | 38955067                | CC                              | TT              | 1946826620               |

| SNPs IDs              | Chromosome IDs | Chromosomes     | Physical positions (bp) | CDC Frontier (Reference genome) | (ILWC46 & LPNB) | NCBI SNPdb Accession IDs |
|-----------------------|----------------|-----------------|-------------------------|---------------------------------|-----------------|--------------------------|
| SNP_P4_60706_38956008 | NC_021163.1    | Ca_kabuli_chr04 | 38956008                | CC                              | TT              | 1946826622               |
| SNP_P4_60707_38956031 | NC_021163.1    | Ca_kabuli_chr04 | 38956031                | GG                              | CC              | 1946826624               |
| SNP_P4_60708_38956038 | NC_021163.1    | Ca_kabuli_chr04 | 38956038                | TT                              | CC              | 1946826626               |
| SNP_P4_60709_38956172 | NC_021163.1    | Ca_kabuli_chr04 | 38956172                | GG                              | TT              | 1946826628               |
| SNP_P4_60710_38956195 | NC_021163.1    | Ca_kabuli_chr04 | 38956195                | TT                              | CC              | 1946826630               |
| SNP_P4_60711_38956226 | NC_021163.1    | Ca_kabuli_chr04 | 38956226                | GG                              | AA              | 1946826632               |
| SNP_P4_60712_38958985 | NC_021163.1    | Ca_kabuli_chr04 | 38958985                | CC                              | AA              | 1946826634               |
| SNP_P4_60713_38959001 | NC_021163.1    | Ca_kabuli_chr04 | 38959001                | AA                              | TT              | 1946826636               |
| SNP_P4_60714_38959173 | NC_021163.1    | Ca_kabuli_chr04 | 38959173                | AA                              | TT              | 1946826638               |
| SNP_P4_60715_38959189 | NC_021163.1    | Ca_kabuli_chr04 | 38959189                | GG                              | TT              | 1946826640               |
| SNP_P4_60717_38961604 | NC_021163.1    | Ca_kabuli_chr04 | 38961604                | TT                              | AA              | 1946826642               |
| SNP_P4_60718_38961803 | NC_021163.1    | Ca_kabuli_chr04 | 38961803                | GG                              | TT              | 1946826644               |
| SNP_P4_60719_38962654 | NC_021163.1    | Ca_kabuli_chr04 | 38962654                | GG                              | TT              | 1946826646               |
| SNP_P4_60722_38963666 | NC_021163.1    | Ca_kabuli_chr04 | 38963666                | TT                              | AA              | 1946826648               |
| SNP_P4_60723_38963922 | NC_021163.1    | Ca_kabuli_chr04 | 38963922                | TT                              | CC              | 1946826650               |
| SNP_P4_60724_38963999 | NC_021163.1    | Ca_kabuli_chr04 | 38963999                | TT                              | CC              | 1946826652               |
| SNP_P4_60726_38965172 | NC_021163.1    | Ca_kabuli_chr04 | 38965172                | AA                              | CC              | 1946826654               |
| SNP_P4_60727_38967597 | NC_021163.1    | Ca_kabuli_chr04 | 38967597                | CC                              | AA              | 1946826656               |
| SNP_P4_60728_38968468 | NC_021163.1    | Ca_kabuli_chr04 | 38968468                | CC                              | TT              | 1946826658               |
| SNP_P4_60729_38968487 | NC_021163.1    | Ca_kabuli_chr04 | 38968487                | AA                              | GG              | 1946826660               |
| SNP_P4_60730_38968529 | NC_021163.1    | Ca_kabuli_chr04 | 38968529                | GG                              | AA              | 1946826662               |
| SNP_P4_60731_38968539 | NC_021163.1    | Ca_kabuli_chr04 | 38968539                | GG                              | CC              | 1946826664               |
| SNP_P4_60732_38970032 | NC_021163.1    | Ca_kabuli_chr04 | 38970032                | GG                              | AA              | 1946826666               |
| SNP_P4_60733_38970043 | NC_021163.1    | Ca_kabuli_chr04 | 38970043                | AA                              | TT              | 1946826668               |
| SNP_P4_60734_38970047 | NC_021163.1    | Ca_kabuli_chr04 | 38970047                | GG                              | AA              | 1946826670               |
| SNP_P4_60736_38970767 | NC_021163.1    | Ca_kabuli_chr04 | 38970767                | AA                              | TT              | 1946826672               |
| SNP_P4_60737_38970768 | NC_021163.1    | Ca_kabuli_chr04 | 38970768                | CC                              | AA              | 1946826674               |
| SNP_P4_60738_38970800 | NC_021163.1    | Ca_kabuli_chr04 | 38970800                | TT                              | AA              | 1946826676               |
| SNP_P4_60739_38972230 | NC_021163.1    | Ca_kabuli_chr04 | 38972230                | AA                              | GG              | 1946826678               |
| SNP_P4_60740_38972246 | NC_021163.1    | Ca_kabuli_chr04 | 38972246                | TT                              | CC              | 1946826680               |
| SNP_P4_60741_38972258 | NC_021163.1    | Ca_kabuli_chr04 | 38972258                | AA                              | CC              | 1946826682               |
| SNP_P4_60742_38972579 | NC_021163.1    | Ca_kabuli_chr04 | 38972579                | CC                              | TT              | 1946826684               |
| SNP_P4_60743_38972585 | NC_021163.1    | Ca_kabuli_chr04 | 38972585                | GG                              | CC              | 1946826686               |
| SNP_P4_60744_38972590 | NC_021163.1    | Ca_kabuli_chr04 | 38972590                | TT                              | CC              | 1946826688               |
| SNP_P4_60745_38972594 | NC_021163.1    | Ca_kabuli_chr04 | 38972594                | AA                              | CC              | 1946826690               |
| SNP_P4_60746_38975178 | NC_021163.1    | Ca_kabuli_chr04 | 38975178                | CC                              | TT              | 1946826692               |
| SNP_P4_60747_38975184 | NC_021163.1    | Ca_kabuli_chr04 | 38975184                | GG                              | CC              | 1946826694               |
| SNP_P4_60748_38975386 | NC_021163.1    | Ca_kabuli_chr04 | 38975386                | TT                              | GG              | 1946826696               |
| SNP_P4_60749_38976865 | NC_021163.1    | Ca_kabuli_chr04 | 38976865                | CC                              | TT              | 1946826698               |
| SNP_P4_60750_38977622 | NC_021163.1    | Ca_kabuli_chr04 | 38977622                | TT                              | GG              | 1946826700               |
| SNP_P4_60751_38979313 | NC_021163.1    | Ca_kabuli_chr04 | 38979313                | AA                              | GG              | 1946826702               |
| SNP_P4_60752_38979626 | NC_021163.1    | Ca_kabuli_chr04 | 38979626                | CC                              | AA              | 1946826704               |

| SNPs IDs              | Chromosome IDs | Chromosomes     | Physical positions (bp) | CDC Frontier (Reference genome) | (ILWC46 & LPNB) | NCBI SNPdb Accession IDs |
|-----------------------|----------------|-----------------|-------------------------|---------------------------------|-----------------|--------------------------|
| SNP_P4_60753_38980626 | NC_021163.1    | Ca_kabuli_chr04 | 38980626                | TT                              | GG              | 1946826706               |
| SNP_P4_60754_38981179 | NC_021163.1    | Ca_kabuli_chr04 | 38981179                | AA                              | GG              | 1946826708               |
| SNP_P4_60755_38981188 | NC_021163.1    | Ca_kabuli_chr04 | 38981188                | AA                              | TT              | 1946826710               |
| SNP_P4_60756_38981588 | NC_021163.1    | Ca_kabuli_chr04 | 38981588                | GG                              | AA              | 1946826712               |
| SNP_P4_60757_38982833 | NC_021163.1    | Ca_kabuli_chr04 | 38982833                | TT                              | AA              | 1946826714               |
| SNP_P4_60759_38984176 | NC_021163.1    | Ca_kabuli_chr04 | 38984176                | TT                              | CC              | 1946826716               |
| SNP_P4_60760_38984316 | NC_021163.1    | Ca_kabuli_chr04 | 38984316                | TT                              | GG              | 1946826718               |
| SNP_P4_60761_38987062 | NC_021163.1    | Ca_kabuli_chr04 | 38987062                | CC                              | AA              | 1946826720               |
| SNP_P4_60763_38989162 | NC_021163.1    | Ca_kabuli_chr04 | 38989162                | GG                              | AA              | 1946826722               |
| SNP_P4_60764_38989835 | NC_021163.1    | Ca_kabuli_chr04 | 38989835                | AA                              | CC              | 1946826724               |
| SNP_P4_60765_38989836 | NC_021163.1    | Ca_kabuli_chr04 | 38989836                | CC                              | TT              | 1946826726               |
| SNP_P4_60766_38990458 | NC_021163.1    | Ca_kabuli_chr04 | 38990458                | CC                              | TT              | 1946826729               |
| SNP_P4_60767_38990468 | NC_021163.1    | Ca_kabuli_chr04 | 38990468                | AA                              | GG              | 1946826731               |
| SNP_P4_60768_38991212 | NC_021163.1    | Ca_kabuli_chr04 | 38991212                | CC                              | GG              | 1946826733               |
| SNP_P4_60769_38991218 | NC_021163.1    | Ca_kabuli_chr04 | 38991218                | GG                              | CC              | 1946826735               |
| SNP_P4_60770_38991824 | NC_021163.1    | Ca_kabuli_chr04 | 38991824                | CC                              | AA              | 1946826737               |
| SNP_P4_60771_38992553 | NC_021163.1    | Ca_kabuli_chr04 | 38992553                | AA                              | GG              | 1946826739               |
| SNP_P4_60772_38993829 | NC_021163.1    | Ca_kabuli_chr04 | 38993829                | AA                              | GG              | 1946826741               |
| SNP_P4_60774_38994594 | NC_021163.1    | Ca_kabuli_chr04 | 38994594                | AA                              | GG              | 1946826743               |
| SNP_P4_60776_38995474 | NC_021163.1    | Ca_kabuli_chr04 | 38995474                | AA                              | CC              | 1946826745               |
| SNP_P4_60777_38995476 | NC_021163.1    | Ca_kabuli_chr04 | 38995476                | GG                              | CC              | 1946826747               |
| SNP_P4_60778_38995504 | NC_021163.1    | Ca_kabuli_chr04 | 38995504                | TT                              | GG              | 1946826749               |
| SNP_P4_60779_38996465 | NC_021163.1    | Ca_kabuli_chr04 | 38996465                | TT                              | AA              | 1946826751               |
| SNP_P4_60780_38996469 | NC_021163.1    | Ca_kabuli_chr04 | 38996469                | GG                              | TT              | 1946826753               |
| SNP_P4_60781_38996478 | NC_021163.1    | Ca_kabuli_chr04 | 38996478                | TT                              | CC              | 1946826755               |
| SNP_P4_60782_38997309 | NC_021163.1    | Ca_kabuli_chr04 | 38997309                | AA                              | TT              | 1946826757               |
| SNP_P4_60784_38997902 | NC_021163.1    | Ca_kabuli_chr04 | 38997902                | GG                              | AA              | 1946826759               |
| SNP_P4_60785_38998096 | NC_021163.1    | Ca_kabuli_chr04 | 38998096                | GG                              | AA              | 1946826761               |
| SNP_P4_60786_38998189 | NC_021163.1    | Ca_kabuli_chr04 | 38998189                | GG                              | AA              | 1946826763               |
| SNP_P4_60787_39000675 | NC_021163.1    | Ca_kabuli_chr04 | 39000675                | AA                              | TT              | 1946826765               |
| SNP_P4_60788_39000846 | NC_021163.1    | Ca_kabuli_chr04 | 39000846                | TT                              | CC              | 1946826767               |
| SNP_P4_60789_39000899 | NC_021163.1    | Ca_kabuli_chr04 | 39000899                | CC                              | TT              | 1946826769               |
| SNP_P4_60790_39001755 | NC_021163.1    | Ca_kabuli_chr04 | 39001755                | AA                              | GG              | 1946826771               |
| SNP_P4_60792_39001862 | NC_021163.1    | Ca_kabuli_chr04 | 39001862                | CC                              | AA              | 1946826773               |
| SNP_P4_60794_39002834 | NC_021163.1    | Ca_kabuli_chr04 | 39002834                | TT                              | AA              | 1946826775               |
| SNP_P4_60795_39002840 | NC_021163.1    | Ca_kabuli_chr04 | 39002840                | AA                              | GG              | 1946826776               |
| SNP_P4_60796_39003052 | NC_021163.1    | Ca_kabuli_chr04 | 39003052                | AA                              | GG              | 1946826777               |
| SNP_P4_60797_39003112 | NC_021163.1    | Ca_kabuli_chr04 | 39003112                | GG                              | AA              | 1946826778               |
| SNP_P4_60798_39003140 | NC_021163.1    | Ca_kabuli_chr04 | 39003140                | TT                              | CC              | 1946826779               |
| SNP_P4_60799_39003183 | NC_021163.1    | Ca_kabuli_chr04 | 39003183                | AA                              | TT              | 1946826781               |
| SNP_P4_60800_39003199 | NC_021163.1    | Ca_kabuli_chr04 | 39003199                | AA                              | GG              | 1946826783               |
| SNP_P4_60801_39003219 | NC_021163.1    | Ca_kabuli_chr04 | 39003219                | GG                              | TT              | 1946826785               |

| SNPs IDs              | Chromosome IDs | Chromosomes     | Physical positions (bp) | CDC Frontier (Reference genome) | (ILWC46 & LPNB) | NCBI SNPdb Accession IDs |
|-----------------------|----------------|-----------------|-------------------------|---------------------------------|-----------------|--------------------------|
| SNP_P4_60802_39003649 | NC_021163.1    | Ca_kabuli_chr04 | 39003649                | AA                              | TT              | 1946826787               |
| SNP_P4_60803_39004430 | NC_021163.1    | Ca_kabuli_chr04 | 39004430                | AA                              | GG              | 1946826789               |
| SNP_P4_60804_39004519 | NC_021163.1    | Ca_kabuli_chr04 | 39004519                | CC                              | TT              | 1946826791               |
| SNP_P4_60805_39004534 | NC_021163.1    | Ca_kabuli_chr04 | 39004534                | CC                              | TT              | 1946826793               |
| SNP_P4_60806_39006695 | NC_021163.1    | Ca_kabuli_chr04 | 39006695                | TT                              | GG              | 1946826795               |
| SNP_P4_60807_39006790 | NC_021163.1    | Ca_kabuli_chr04 | 39006790                | AA                              | TT              | 1946826797               |
| SNP_P4_60808_39006817 | NC_021163.1    | Ca_kabuli_chr04 | 39006817                | GG                              | AA              | 1946826799               |
| SNP_P4_60809_39006822 | NC_021163.1    | Ca_kabuli_chr04 | 39006822                | TT                              | AA              | 1946826801               |
| SNP_P4_60810_39007083 | NC_021163.1    | Ca_kabuli_chr04 | 39007083                | AA                              | CC              | 1946826803               |
| SNP_P4_60811_39009644 | NC_021163.1    | Ca_kabuli_chr04 | 39009644                | AA                              | TT              | 1946826805               |
| SNP_P4_60812_39009690 | NC_021163.1    | Ca_kabuli_chr04 | 39009690                | CC                              | AA              | 1946826807               |
| SNP_P4_60813_39009905 | NC_021163.1    | Ca_kabuli_chr04 | 39009905                | CC                              | TT              | 1946826809               |
| SNP_P4_60814_39010677 | NC_021163.1    | Ca_kabuli_chr04 | 39010677                | TT                              | CC              | 1946826811               |
| SNP_P4_60815_39010897 | NC_021163.1    | Ca_kabuli_chr04 | 39010897                | CC                              | TT              | 1946826814               |
| SNP_P4_60816_39010923 | NC_021163.1    | Ca_kabuli_chr04 | 39010923                | TT                              | CC              | 1946826816               |
| SNP_P4_60817_39010928 | NC_021163.1    | Ca_kabuli_chr04 | 39010928                | AA                              | TT              | 1946826818               |
| SNP_P4_60818_39010937 | NC_021163.1    | Ca_kabuli_chr04 | 39010937                | GG                              | AA              | 1946826820               |
| SNP_P4_60819_39011016 | NC_021163.1    | Ca_kabuli_chr04 | 39011016                | CC                              | TT              | 1946826822               |
| SNP_P4_60820_39011225 | NC_021163.1    | Ca_kabuli_chr04 | 39011225                | AA                              | GG              | 1946826824               |
| SNP_P4_60821_39011230 | NC_021163.1    | Ca_kabuli_chr04 | 39011230                | AA                              | GG              | 1946826826               |
| SNP_P4_60822_39011245 | NC_021163.1    | Ca_kabuli_chr04 | 39011245                | AA                              | CC              | 1946826828               |
| SNP_P4_60823_39011331 | NC_021163.1    | Ca_kabuli_chr04 | 39011331                | TT                              | CC              | 1946826830               |
| SNP_P4_60824_39011386 | NC_021163.1    | Ca_kabuli_chr04 | 39011386                | TT                              | CC              | 1946826832               |
| SNP_P4_60825_39011615 | NC_021163.1    | Ca_kabuli_chr04 | 39011615                | AA                              | TT              | 1946826834               |
| SNP_P4_60826_39013190 | NC_021163.1    | Ca_kabuli_chr04 | 39013190                | TT                              | GG              | 1946826836               |
| SNP_P4_60827_39013251 | NC_021163.1    | Ca_kabuli_chr04 | 39013251                | CC                              | TT              | 1946826838               |
| SNP_P4_60829_39015004 | NC_021163.1    | Ca_kabuli_chr04 | 39015004                | AA                              | CC              | 1946826840               |
| SNP_P4_60830_39015577 | NC_021163.1    | Ca_kabuli_chr04 | 39015577                | AA                              | TT              | 1946826842               |
| SNP_P4_60831_39015810 | NC_021163.1    | Ca_kabuli_chr04 | 39015810                | TT                              | CC              | 1946826844               |
| SNP_P4_60832_39015849 | NC_021163.1    | Ca_kabuli_chr04 | 39015849                | AA                              | TT              | 1946826846               |
| SNP_P4_60833_39015853 | NC_021163.1    | Ca_kabuli_chr04 | 39015853                | TT                              | AA              | 1946826848               |
| SNP_P4_60834_39015859 | NC_021163.1    | Ca_kabuli_chr04 | 39015859                | GG                              | TT              | 1946826850               |
| SNP_P4_60835_39015865 | NC_021163.1    | Ca_kabuli_chr04 | 39015865                | TT                              | AA              | 1946826852               |
| SNP_P4_60836_39016616 | NC_021163.1    | Ca_kabuli_chr04 | 39016616                | AA                              | GG              | 1946826854               |
| SNP_P4_60837_39016780 | NC_021163.1    | Ca_kabuli_chr04 | 39016780                | TT                              | CC              | 1946826856               |
| SNP_P4_60839_39017168 | NC_021163.1    | Ca_kabuli_chr04 | 39017168                | AA                              | GG              | 1946826859               |
| SNP_P4_60840_39017774 | NC_021163.1    | Ca_kabuli_chr04 | 39017774                | TT                              | CC              | 1946826861               |
| SNP_P4_60841_39017777 | NC_021163.1    | Ca_kabuli_chr04 | 39017777                | CC                              | GG              | 1946826863               |
| SNP_P4_60842_39017958 | NC_021163.1    | Ca_kabuli_chr04 | 39017958                | CC                              | AA              | 1946826865               |
| SNP_P4_60843_39018610 | NC_021163.1    | Ca_kabuli_chr04 | 39018610                | AA                              | TT              | 1946826867               |
| SNP_P4_60844_39018620 | NC_021163.1    | Ca_kabuli_chr04 | 39018620                | CC                              | TT              | 1946826869               |
| SNP_P4_60845_39018797 | NC_021163.1    | Ca_kabuli_chr04 | 39018797                | GG                              | TT              | 1946826871               |



| SNPs IDs              | Chromosome IDs | Chromosomes     | Physical positions (bp) | CDC Frontier (Reference genome) | (ILWC46 & LPNB) | NCBI SNPdb Accession IDs |
|-----------------------|----------------|-----------------|-------------------------|---------------------------------|-----------------|--------------------------|
| SNP_P4_60846_39019409 | NC_021163.1    | Ca_kabuli_chr04 | 39019409                | TT                              | CC              | 1946826873               |
| SNP_P4_60847_39019432 | NC_021163.1    | Ca_kabuli_chr04 | 39019432                | AA                              | TT              | 1946826875               |
| SNP_P4_60850_39023630 | NC_021163.1    | Ca_kabuli_chr04 | 39023630                | AA                              | TT              | 1946826877               |
| SNP_P4_60851_39025173 | NC_021163.1    | Ca_kabuli_chr04 | 39025173                | AA                              | GG              | 1946826879               |
| SNP_P4_60852_39025209 | NC_021163.1    | Ca_kabuli_chr04 | 39025209                | AA                              | CC              | 1946826881               |
| SNP_P4_60853_39026088 | NC_021163.1    | Ca_kabuli_chr04 | 39026088                | CC                              | TT              | 1946826883               |
| SNP_P4_60854_39026569 | NC_021163.1    | Ca_kabuli_chr04 | 39026569                | AA                              | GG              | 1946826885               |
| SNP_P4_60855_39026855 | NC_021163.1    | Ca_kabuli_chr04 | 39026855                | TT                              | CC              | 1946826887               |
| SNP_P4_60856_39026956 | NC_021163.1    | Ca_kabuli_chr04 | 39026956                | CC                              | AA              | 1946826889               |
| SNP_P4_60858_39027962 | NC_021163.1    | Ca_kabuli_chr04 | 39027962                | TT                              | CC              | 1946826891               |
| SNP_P4_60859_39028164 | NC_021163.1    | Ca_kabuli_chr04 | 39028164                | AA                              | GG              | 1946826893               |
| SNP_P4_60860_39028190 | NC_021163.1    | Ca_kabuli_chr04 | 39028190                | TT                              | CC              | 1946826895               |
| SNP_P4_60861_39028198 | NC_021163.1    | Ca_kabuli_chr04 | 39028198                | CC                              | AA              | 1946826897               |
| SNP_P4_60862_39028225 | NC_021163.1    | Ca_kabuli_chr04 | 39028225                | GG                              | AA              | 1946826899               |
| SNP_P4_60863_39029231 | NC_021163.1    | Ca_kabuli_chr04 | 39029231                | AA                              | GG              | 1946826901               |
| SNP_P4_60864_39029307 | NC_021163.1    | Ca_kabuli_chr04 | 39029307                | CC                              | TT              | 1946826903               |
| SNP_P4_60865_39029451 | NC_021163.1    | Ca_kabuli_chr04 | 39029451                | TT                              | CC              | 1946826905               |
| SNP_P4_60866_39029533 | NC_021163.1    | Ca_kabuli_chr04 | 39029533                | GG                              | CC              | 1946826907               |
| SNP_P4_60867_39030097 | NC_021163.1    | Ca_kabuli_chr04 | 39030097                | AA                              | TT              | 1946826909               |
| SNP_P4_60868_39030409 | NC_021163.1    | Ca_kabuli_chr04 | 39030409                | GG                              | CC              | 1946826911               |
| SNP_P4_60869_39030485 | NC_021163.1    | Ca_kabuli_chr04 | 39030485                | GG                              | AA              | 1946826913               |
| SNP_P4_60870_39030749 | NC_021163.1    | Ca_kabuli_chr04 | 39030749                | TT                              | GG              | 1946826915               |
| SNP_P4_60871_39031208 | NC_021163.1    | Ca_kabuli_chr04 | 39031208                | TT                              | GG              | 1946826917               |
| SNP_P4_60872_39031823 | NC_021163.1    | Ca_kabuli_chr04 | 39031823                | AA                              | GG              | 1946826919               |
| SNP_P4_60874_39033435 | NC_021163.1    | Ca_kabuli_chr04 | 39033435                | TT                              | CC              | 1946826921               |
| SNP_P4_60875_39034789 | NC_021163.1    | Ca_kabuli_chr04 | 39034789                | GG                              | TT              | 1946826923               |
| SNP_P4_60877_39034960 | NC_021163.1    | Ca_kabuli_chr04 | 39034960                | CC                              | TT              | 1946826925               |
| SNP_P4_60878_39034983 | NC_021163.1    | Ca_kabuli_chr04 | 39034983                | TT                              | CC              | 1946826927               |
| SNP_P4_60879_39036213 | NC_021163.1    | Ca_kabuli_chr04 | 39036213                | TT                              | AA              | 1946826929               |
| SNP_P4_60880_39036835 | NC_021163.1    | Ca_kabuli_chr04 | 39036835                | CC                              | TT              | 1946826931               |
| SNP_P4_60882_39038708 | NC_021163.1    | Ca_kabuli_chr04 | 39038708                | AA                              | GG              | 1946826933               |
| SNP_P4_60883_39039615 | NC_021163.1    | Ca_kabuli_chr04 | 39039615                | TT                              | CC              | 1946826935               |
| SNP_P4_60884_39039796 | NC_021163.1    | Ca_kabuli_chr04 | 39039796                | GG                              | AA              | 1946826937               |
| SNP_P4_60885_39039800 | NC_021163.1    | Ca_kabuli_chr04 | 39039800                | TT                              | GG              | 1946826939               |
| SNP_P4_60886_39039804 | NC_021163.1    | Ca_kabuli_chr04 | 39039804                | TT                              | AA              | 1946826941               |
| SNP_P4_60887_39039884 | NC_021163.1    | Ca_kabuli_chr04 | 39039884                | CC                              | TT              | 1946826943               |
| SNP_P4_60888_39042938 | NC_021163.1    | Ca_kabuli_chr04 | 39042938                | GG                              | TT              | 1946826945               |
| SNP_P4_60889_39043179 | NC_021163.1    | Ca_kabuli_chr04 | 39043179                | TT                              | CC              | 1946826947               |
| SNP_P4_60890_39044457 | NC_021163.1    | Ca_kabuli_chr04 | 39044457                | TT                              | CC              | 1946826950               |
| SNP_P4_60891_39044478 | NC_021163.1    | Ca_kabuli_chr04 | 39044478                | GG                              | AA              | 1946826952               |
| SNP_P4_60892_39045263 | NC_021163.1    | Ca_kabuli_chr04 | 39045263                | AA                              | GG              | 1946826954               |
| SNP_P4_60893_39047906 | NC_021163.1    | Ca_kabuli_chr04 | 39047906                | CC                              | AA              | 1946826956               |

| SNPs IDs              | Chromosome IDs | Chromosomes     | Physical positions (bp) | CDC Frontier (Reference genome) | (ILWC46 & LPNB) | NCBI SNPdb Accession IDs |
|-----------------------|----------------|-----------------|-------------------------|---------------------------------|-----------------|--------------------------|
| SNP_P4_60894_39048183 | NC_021163.1    | Ca_kabuli_chr04 | 39048183                | TT                              | CC              | 1946826958               |
| SNP_P4_60895_39050889 | NC_021163.1    | Ca_kabuli_chr04 | 39050889                | TT                              | GG              | 1946826960               |
| SNP_P4_60897_39051171 | NC_021163.1    | Ca_kabuli_chr04 | 39051171                | GG                              | CC              | 1946826962               |
| SNP_P4_60898_39051203 | NC_021163.1    | Ca_kabuli_chr04 | 39051203                | AA                              | GG              | 1946826964               |
| SNP_P4_60899_39051218 | NC_021163.1    | Ca_kabuli_chr04 | 39051218                | GG                              | TT              | 1946826966               |
| SNP_P4_60900_39051226 | NC_021163.1    | Ca_kabuli_chr04 | 39051226                | TT                              | CC              | 1946826968               |
| SNP_P4_60901_39051245 | NC_021163.1    | Ca_kabuli_chr04 | 39051245                | TT                              | CC              | 1946826970               |
| SNP_P4_60902_39051416 | NC_021163.1    | Ca_kabuli_chr04 | 39051416                | AA                              | GG              | 1946826972               |
| SNP_P4_60904_39053582 | NC_021163.1    | Ca_kabuli_chr04 | 39053582                | AA                              | GG              | 1946826974               |
| SNP_P4_60905_39053728 | NC_021163.1    | Ca_kabuli_chr04 | 39053728                | AA                              | CC              | 1946826976               |
| SNP_P4_60906_39053982 | NC_021163.1    | Ca_kabuli_chr04 | 39053982                | CC                              | TT              | 1946826978               |
| SNP_P4_60907_39054045 | NC_021163.1    | Ca_kabuli_chr04 | 39054045                | CC                              | TT              | 1946826980               |
| SNP_P4_60908_39054201 | NC_021163.1    | Ca_kabuli_chr04 | 39054201                | TT                              | CC              | 1946826982               |
| SNP_P4_60909_39054380 | NC_021163.1    | Ca_kabuli_chr04 | 39054380                | AA                              | GG              | 1946826984               |
| SNP_P4_60912_39057473 | NC_021163.1    | Ca_kabuli_chr04 | 39057473                | AA                              | GG              | 1946826986               |
| SNP_P4_60913_39057861 | NC_021163.1    | Ca_kabuli_chr04 | 39057861                | AA                              | GG              | 1946826988               |
| SNP_P4_60914_39057918 | NC_021163.1    | Ca_kabuli_chr04 | 39057918                | GG                              | CC              | 1946826990               |
| SNP_P4_60915_39061689 | NC_021163.1    | Ca_kabuli_chr04 | 39061689                | GG                              | AA              | 1946826991               |
| SNP_P4_60916_39061692 | NC_021163.1    | Ca_kabuli_chr04 | 39061692                | AA                              | GG              | 1946826993               |
| SNP_P4_60917_39061746 | NC_021163.1    | Ca_kabuli_chr04 | 39061746                | GG                              | TT              | 1946826995               |
| SNP_P4_60918_39062288 | NC_021163.1    | Ca_kabuli_chr04 | 39062288                | TT                              | AA              | 1946826997               |
| SNP_P4_60919_39062435 | NC_021163.1    | Ca_kabuli_chr04 | 39062435                | TT                              | AA              | 1946826999               |
| SNP_P4_60921_39063055 | NC_021163.1    | Ca_kabuli_chr04 | 39063055                | TT                              | CC              | 1946827001               |
| SNP_P4_60922_39063059 | NC_021163.1    | Ca_kabuli_chr04 | 39063059                | TT                              | AA              | 1946827003               |
| SNP_P4_60923_39063137 | NC_021163.1    | Ca_kabuli_chr04 | 39063137                | TT                              | CC              | 1946827006               |
| SNP_P4_60924_39063266 | NC_021163.1    | Ca_kabuli_chr04 | 39063266                | CC                              | AA              | 1946827008               |
| SNP_P4_60925_39063369 | NC_021163.1    | Ca_kabuli_chr04 | 39063369                | TT                              | AA              | 1946827010               |
| SNP_P4_60926_39063651 | NC_021163.1    | Ca_kabuli_chr04 | 39063651                | AA                              | CC              | 1946827012               |
| SNP_P4_60927_39063696 | NC_021163.1    | Ca_kabuli_chr04 | 39063696                | CC                              | AA              | 1946827014               |
| SNP_P4_60928_39063710 | NC_021163.1    | Ca_kabuli_chr04 | 39063710                | GG                              | AA              | 1946827016               |
| SNP_P4_60929_39063769 | NC_021163.1    | Ca_kabuli_chr04 | 39063769                | AA                              | GG              | 1946827018               |
| SNP_P4_60930_39064677 | NC_021163.1    | Ca_kabuli_chr04 | 39064677                | GG                              | AA              | 1946827020               |
| SNP_P4_60931_39064682 | NC_021163.1    | Ca_kabuli_chr04 | 39064682                | CC                              | TT              | 1946827022               |
| SNP_P4_60932_39065479 | NC_021163.1    | Ca_kabuli_chr04 | 39065479                | TT                              | CC              | 1946827024               |
| SNP_P4_60933_39067347 | NC_021163.1    | Ca_kabuli_chr04 | 39067347                | TT                              | CC              | 1946827026               |
| SNP_P4_60934_39072793 | NC_021163.1    | Ca_kabuli_chr04 | 39072793                | CC                              | TT              | 1946827028               |
| SNP_P4_60935_39072949 | NC_021163.1    | Ca_kabuli_chr04 | 39072949                | TT                              | GG              | 1946827030               |
| SNP_P4_60936_39072954 | NC_021163.1    | Ca_kabuli_chr04 | 39072954                | GG                              | AA              | 1946827032               |
| SNP_P4_60937_39074502 | NC_021163.1    | Ca_kabuli_chr04 | 39074502                | CC                              | TT              | 1946827034               |
| SNP_P4_60938_39074559 | NC_021163.1    | Ca_kabuli_chr04 | 39074559                | GG                              | AA              | 1946827036               |
| SNP_P4_60940_39074949 | NC_021163.1    | Ca_kabuli_chr04 | 39074949                | GG                              | TT              | 1946827038               |
| SNP_P4_60941_39074993 | NC_021163.1    | Ca_kabuli_chr04 | 39074993                | GG                              | TT              | 1946827040               |

| SNPs IDs              | Chromosome IDs | Chromosomes     | Physical positions (bp) | CDC Frontier (Reference genome) | (ILWC46 & LPNB) | NCBI SNPdb Accession IDs |
|-----------------------|----------------|-----------------|-------------------------|---------------------------------|-----------------|--------------------------|
| SNP_P4_60942_39075382 | NC_021163.1    | Ca_kabuli_chr04 | 39075382                | AA                              | GG              | 1946827042               |
| SNP_P4_60943_39075436 | NC_021163.1    | Ca_kabuli_chr04 | 39075436                | CC                              | TT              | 1946827044               |
| SNP_P4_60944_39075461 | NC_021163.1    | Ca_kabuli_chr04 | 39075461                | AA                              | GG              | 1946827046               |
| SNP_P4_60945_39075549 | NC_021163.1    | Ca_kabuli_chr04 | 39075549                | GG                              | TT              | 1946827048               |
| SNP_P4_60946_39075620 | NC_021163.1    | Ca_kabuli_chr04 | 39075620                | GG                              | AA              | 1946827050               |
| SNP_P4_60947_39076190 | NC_021163.1    | Ca_kabuli_chr04 | 39076190                | GG                              | AA              | 1946827052               |
| SNP_P4_60948_39076215 | NC_021163.1    | Ca_kabuli_chr04 | 39076215                | TT                              | GG              | 1946827054               |
| SNP_P4_60949_39076729 | NC_021163.1    | Ca_kabuli_chr04 | 39076729                | AA                              | GG              | 1946827056               |
| SNP_P4_60950_39077179 | NC_021163.1    | Ca_kabuli_chr04 | 39077179                | GG                              | AA              | 1946827058               |
| SNP_P4_60951_39077189 | NC_021163.1    | Ca_kabuli_chr04 | 39077189                | TT                              | CC              | 1946827060               |
| SNP_P4_60952_39077193 | NC_021163.1    | Ca_kabuli_chr04 | 39077193                | CC                              | TT              | 1946827062               |
| SNP_P4_60953_39077688 | NC_021163.1    | Ca_kabuli_chr04 | 39077688                | AA                              | GG              | 1946827064               |
| SNP_P4_60954_39078090 | NC_021163.1    | Ca_kabuli_chr04 | 39078090                | AA                              | GG              | 1946827066               |
| SNP_P4_60956_39078174 | NC_021163.1    | Ca_kabuli_chr04 | 39078174                | AA                              | CC              | 1946827068               |
| SNP_P4_60957_39078467 | NC_021163.1    | Ca_kabuli_chr04 | 39078467                | GG                              | AA              | 1946827070               |
| SNP_P4_60958_39078469 | NC_021163.1    | Ca_kabuli_chr04 | 39078469                | CC                              | TT              | 1946827072               |
| SNP_P4_60960_39079003 | NC_021163.1    | Ca_kabuli_chr04 | 39079003                | AA                              | CC              | 1946827074               |
| SNP_P4_60962_39079834 | NC_021163.1    | Ca_kabuli_chr04 | 39079834                | GG                              | AA              | 1946827076               |
| SNP_P4_60963_39082828 | NC_021163.1    | Ca_kabuli_chr04 | 39082828                | AA                              | TT              | 1946827078               |
| SNP_P4_60964_39083123 | NC_021163.1    | Ca_kabuli_chr04 | 39083123                | TT                              | CC              | 1946827080               |
| SNP_P4_60965_39083824 | NC_021163.1    | Ca_kabuli_chr04 | 39083824                | AA                              | GG              | 1946827082               |
| SNP_P4_60966_39085821 | NC_021163.1    | Ca_kabuli_chr04 | 39085821                | CC                              | AA              | 1946827084               |
| SNP_P4_60967_39086017 | NC_021163.1    | Ca_kabuli_chr04 | 39086017                | TT                              | AA              | 1946827086               |
| SNP_P4_60968_39086345 | NC_021163.1    | Ca_kabuli_chr04 | 39086345                | CC                              | AA              | 1946827088               |
| SNP_P4_60969_39086700 | NC_021163.1    | Ca_kabuli_chr04 | 39086700                | GG                              | AA              | 1946827090               |
| SNP_P4_60970_39086712 | NC_021163.1    | Ca_kabuli_chr04 | 39086712                | AA                              | GG              | 1946827092               |
| SNP_P4_60971_39093096 | NC_021163.1    | Ca_kabuli_chr04 | 39093096                | AA                              | CC              | 1946827094               |
| SNP_P4_60972_39098835 | NC_021163.1    | Ca_kabuli_chr04 | 39098835                | CC                              | AA              | 1946827096               |
| SNP_P4_60973_39101164 | NC_021163.1    | Ca_kabuli_chr04 | 39101164                | AA                              | TT              | 1946827098               |
| SNP_P4_60974_39124789 | NC_021163.1    | Ca_kabuli_chr04 | 39124789                | AA                              | TT              | 1946827100               |
| SNP_P4_60975_39131022 | NC_021163.1    | Ca_kabuli_chr04 | 39131022                | TT                              | CC              | 1946827102               |
| SNP_P4_60976_39132695 | NC_021163.1    | Ca_kabuli_chr04 | 39132695                | GG                              | AA              | 1946827104               |
| SNP_P4_60977_39153741 | NC_021163.1    | Ca_kabuli_chr04 | 39153741                | TT                              | AA              | 1946827106               |
| SNP_P4_60980_39177690 | NC_021163.1    | Ca_kabuli_chr04 | 39177690                | GG                              | AA              | 1946827108               |
| SNP_P4_60981_39183749 | NC_021163.1    | Ca_kabuli_chr04 | 39183749                | GG                              | TT              | 1946827110               |
| SNP_P4_60983_39189724 | NC_021163.1    | Ca_kabuli_chr04 | 39189724                | TT                              | CC              | 1946827112               |
| SNP_P4_60984_39193971 | NC_021163.1    | Ca_kabuli_chr04 | 39193971                | CC                              | AA              | 1946827114               |
| SNP_P4_60985_39194796 | NC_021163.1    | Ca_kabuli_chr04 | 39194796                | CC                              | AA              | 1946827116               |
| SNP_P4_60986_39221372 | NC_021163.1    | Ca_kabuli_chr04 | 39221372                | CC                              | TT              | 1946827118               |
| SNP_P4_60989_39291392 | NC_021163.1    | Ca_kabuli_chr04 | 39291392                | GG                              | AA              | 1946827120               |
| SNP_P4_60990_39291434 | NC_021163.1    | Ca_kabuli_chr04 | 39291434                | GG                              | CC              | 1946827122               |
| SNP_P4_60991_39298454 | NC_021163.1    | Ca_kabuli_chr04 | 39298454                | CC                              | AA              | 1946827124               |

| SNPs IDs              | Chromosome IDs | Chromosomes     | Physical positions (bp) | CDC Frontier (Reference genome) | (ILWC46 & LPNB) | NCBI SNPdb Accession IDs |
|-----------------------|----------------|-----------------|-------------------------|---------------------------------|-----------------|--------------------------|
| SNP_P4_60992_39298455 | NC_021163.1    | Ca_kabuli_chr04 | 39298455                | TT                              | CC              | 1946827126               |
| SNP_P4_60993_39298599 | NC_021163.1    | Ca_kabuli_chr04 | 39298599                | AA                              | GG              | 1946827128               |
| SNP_P4_60994_39298732 | NC_021163.1    | Ca_kabuli_chr04 | 39298732                | AA                              | GG              | 1946827130               |
| SNP_P4_60995_39298762 | NC_021163.1    | Ca_kabuli_chr04 | 39298762                | AA                              | TT              | 1946827132               |
| SNP_P4_60996_39298786 | NC_021163.1    | Ca_kabuli_chr04 | 39298786                | AA                              | CC              | 1946827134               |
| SNP_P4_60997_39299025 | NC_021163.1    | Ca_kabuli_chr04 | 39299025                | GG                              | CC              | 1946827136               |
| SNP_P4_60999_39299050 | NC_021163.1    | Ca_kabuli_chr04 | 39299050                | AA                              | GG              | 1946827138               |
| SNP_P4_61000_39315056 | NC_021163.1    | Ca_kabuli_chr04 | 39315056                | AA                              | GG              | 1946827140               |
| SNP_P4_61001_39331079 | NC_021163.1    | Ca_kabuli_chr04 | 39331079                | TT                              | CC              | 1946827142               |
| SNP_P4_61002_39331811 | NC_021163.1    | Ca_kabuli_chr04 | 39331811                | AA                              | GG              | 1946827144               |
| SNP_P4_61004_39378568 | NC_021163.1    | Ca_kabuli_chr04 | 39378568                | AA                              | GG              | 1946827146               |
| SNP_P4_61005_39392913 | NC_021163.1    | Ca_kabuli_chr04 | 39392913                | GG                              | AA              | 1946827148               |
| SNP_P4_61007_39393308 | NC_021163.1    | Ca_kabuli_chr04 | 39393308                | TT                              | AA              | 1946827150               |
| SNP_P4_61008_39393329 | NC_021163.1    | Ca_kabuli_chr04 | 39393329                | AA                              | GG              | 1946827152               |
| SNP_P4_61009_39398492 | NC_021163.1    | Ca_kabuli_chr04 | 39398492                | GG                              | AA              | 1946827154               |
| SNP_P4_61010_39640454 | NC_021163.1    | Ca_kabuli_chr04 | 39640454                | TT                              | GG              | 1946827156               |
| SNP_P4_61011_39640483 | NC_021163.1    | Ca_kabuli_chr04 | 39640483                | CC                              | TT              | 1946827158               |
| SNP_P4_61012_39641833 | NC_021163.1    | Ca_kabuli_chr04 | 39641833                | AA                              | TT              | 1946827160               |
| SNP_P4_61013_39641881 | NC_021163.1    | Ca_kabuli_chr04 | 39641881                | GG                              | AA              | 1946827162               |
| SNP_P4_61017_39643114 | NC_021163.1    | Ca_kabuli_chr04 | 39643114                | CC                              | AA              | 1946827164               |
| SNP_P4_61018_39643318 | NC_021163.1    | Ca_kabuli_chr04 | 39643318                | AA                              | GG              | 1946827166               |
| SNP_P4_61019_39644394 | NC_021163.1    | Ca_kabuli_chr04 | 39644394                | GG                              | AA              | 1946827168               |
| SNP_P4_61020_39644471 | NC_021163.1    | Ca_kabuli_chr04 | 39644471                | TT                              | CC              | 1946827170               |
| SNP_P4_61021_39644482 | NC_021163.1    | Ca_kabuli_chr04 | 39644482                | AA                              | GG              | 1946827172               |
| SNP_P4_61022_39644484 | NC_021163.1    | Ca_kabuli_chr04 | 39644484                | AA                              | GG              | 1946827174               |
| SNP_P4_61023_39644511 | NC_021163.1    | Ca_kabuli_chr04 | 39644511                | AA                              | GG              | 1946827177               |
| SNP_P4_61025_39644551 | NC_021163.1    | Ca_kabuli_chr04 | 39644551                | CC                              | TT              | 1946827179               |
| SNP_P4_61026_39644845 | NC_021163.1    | Ca_kabuli_chr04 | 39644845                | AA                              | TT              | 1946827181               |
| SNP_P4_61027_39644867 | NC_021163.1    | Ca_kabuli_chr04 | 39644867                | TT                              | CC              | 1946827183               |
| SNP_P4_61028_39647285 | NC_021163.1    | Ca_kabuli_chr04 | 39647285                | CC                              | TT              | 1946827185               |
| SNP_P4_61029_39688910 | NC_021163.1    | Ca_kabuli_chr04 | 39688910                | AA                              | CC              | 1946827187               |
| SNP_P4_61030_39689095 | NC_021163.1    | Ca_kabuli_chr04 | 39689095                | CC                              | AA              | 1946827190               |
| SNP_P4_61032_39689210 | NC_021163.1    | Ca_kabuli_chr04 | 39689210                | GG                              | AA              | 1946827192               |
| SNP_P4_61033_39689278 | NC_021163.1    | Ca_kabuli_chr04 | 39689278                | AA                              | CC              | 1946827194               |
| SNP_P4_61034_39689287 | NC_021163.1    | Ca_kabuli_chr04 | 39689287                | TT                              | GG              | 1946827196               |
| SNP_P4_61035_39689301 | NC_021163.1    | Ca_kabuli_chr04 | 39689301                | AA                              | CC              | 1946827198               |
| SNP_P4_61036_39689308 | NC_021163.1    | Ca_kabuli_chr04 | 39689308                | AA                              | GG              | 1946827200               |
| SNP_P4_61037_39689320 | NC_021163.1    | Ca_kabuli_chr04 | 39689320                | TT                              | CC              | 1946827202               |
| SNP_P4_61038_39689349 | NC_021163.1    | Ca_kabuli_chr04 | 39689349                | GG                              | AA              | 1946827204               |
| SNP_P4_61039_39689386 | NC_021163.1    | Ca_kabuli_chr04 | 39689386                | TT                              | AA              | 1946827206               |
| SNP_P4_61040_39691197 | NC_021163.1    | Ca_kabuli_chr04 | 39691197                | TT                              | CC              | 1946827209               |
| SNP_P4_61041_39691217 | NC_021163.1    | Ca_kabuli_chr04 | 39691217                | TT                              | CC              | 1946827211               |

| SNPs IDs              | Chromosome IDs | Chromosomes     | Physical positions (bp) | CDC Frontier (Reference genome) | (ILWC46 & LPNB) | NCBI SNPdb Accession IDs |
|-----------------------|----------------|-----------------|-------------------------|---------------------------------|-----------------|--------------------------|
| SNP_P4_61042_39691529 | NC_021163.1    | Ca_kabuli_chr04 | 39691529                | TT                              | CC              | 1946827214               |
| SNP_P4_61043_39691539 | NC_021163.1    | Ca_kabuli_chr04 | 39691539                | TT                              | AA              | 1946827217               |
| SNP_P4_61044_39691540 | NC_021163.1    | Ca_kabuli_chr04 | 39691540                | AA                              | GG              | 1946827219               |
| SNP_P4_61045_39704740 | NC_021163.1    | Ca_kabuli_chr04 | 39704740                | AA                              | TT              | 1946827222               |
| SNP_P4_61046_39745870 | NC_021163.1    | Ca_kabuli_chr04 | 39745870                | GG                              | TT              | 1946827225               |
| SNP_P4_61047_39759069 | NC_021163.1    | Ca_kabuli_chr04 | 39759069                | TT                              | AA              | 1946827228               |
| SNP_P4_61048_39762732 | NC_021163.1    | Ca_kabuli_chr04 | 39762732                | GG                              | AA              | 1946827230               |
| SNP_P4_61049_39768886 | NC_021163.1    | Ca_kabuli_chr04 | 39768886                | TT                              | CC              | 1946827233               |
| SNP_P4_61051_39832250 | NC_021163.1    | Ca_kabuli_chr04 | 39832250                | TT                              | AA              | 1946827235               |
| SNP_P4_61052_39863278 | NC_021163.1    | Ca_kabuli_chr04 | 39863278                | CC                              | TT              | 1946827238               |
| SNP_P4_61053_39876640 | NC_021163.1    | Ca_kabuli_chr04 | 39876640                | AA                              | CC              | 1946827240               |
| SNP_P4_61054_39882838 | NC_021163.1    | Ca_kabuli_chr04 | 39882838                | GG                              | AA              | 1946827243               |
| SNP_P4_61055_39889358 | NC_021163.1    | Ca_kabuli_chr04 | 39889358                | GG                              | AA              | 1946827246               |
| SNP_P4_61056_39889359 | NC_021163.1    | Ca_kabuli_chr04 | 39889359                | AA                              | GG              | 1946827248               |
| SNP_P4_61057_39889371 | NC_021163.1    | Ca_kabuli_chr04 | 39889371                | TT                              | CC              | 1946827251               |
| SNP_P4_61058_39889383 | NC_021163.1    | Ca_kabuli_chr04 | 39889383                | TT                              | CC              | 1946827253               |
| SNP_P4_61059_39889399 | NC_021163.1    | Ca_kabuli_chr04 | 39889399                | AA                              | CC              | 1946827255               |
| SNP_P4_61060_39889413 | NC_021163.1    | Ca_kabuli_chr04 | 39889413                | AA                              | GG              | 1946827257               |
| SNP_P4_61061_39889447 | NC_021163.1    | Ca_kabuli_chr04 | 39889447                | GG                              | AA              | 1946827259               |
| SNP_P4_61062_39889473 | NC_021163.1    | Ca_kabuli_chr04 | 39889473                | GG                              | AA              | 1946827261               |
| SNP_P4_61063_39889515 | NC_021163.1    | Ca_kabuli_chr04 | 39889515                | AA                              | TT              | 1946827263               |
| SNP_P4_61064_39889534 | NC_021163.1    | Ca_kabuli_chr04 | 39889534                | GG                              | AA              | 1946827265               |
| SNP_P4_61065_39892228 | NC_021163.1    | Ca_kabuli_chr04 | 39892228                | AA                              | CC              | 1946827268               |
| SNP_P4_61066_39892577 | NC_021163.1    | Ca_kabuli_chr04 | 39892577                | TT                              | CC              | 1946827270               |
| SNP_P4_61067_39898498 | NC_021163.1    | Ca_kabuli_chr04 | 39898498                | AA                              | TT              | 1946827272               |
| SNP_P4_61068_39903408 | NC_021163.1    | Ca_kabuli_chr04 | 39903408                | AA                              | TT              | 1946827274               |
| SNP_P4_61069_39903434 | NC_021163.1    | Ca_kabuli_chr04 | 39903434                | CC                              | TT              | 1946827276               |
| SNP_P4_61070_39903772 | NC_021163.1    | Ca_kabuli_chr04 | 39903772                | TT                              | CC              | 1946827278               |
| SNP_P4_61071_39907464 | NC_021163.1    | Ca_kabuli_chr04 | 39907464                | AA                              | CC              | 1946827280               |
| SNP_P4_61072_39907474 | NC_021163.1    | Ca_kabuli_chr04 | 39907474                | AA                              | CC              | 1946827282               |
| SNP_P4_61073_39946111 | NC_021163.1    | Ca_kabuli_chr04 | 39946111                | TT                              | CC              | 1946827284               |
| SNP_P4_61074_39986657 | NC_021163.1    | Ca_kabuli_chr04 | 39986657                | AA                              | GG              | 1946827286               |
| SNP_P4_61075_39986658 | NC_021163.1    | Ca_kabuli_chr04 | 39986658                | GG                              | AA              | 1946827288               |
| SNP_P4_61076_39986690 | NC_021163.1    | Ca_kabuli_chr04 | 39986690                | AA                              | TT              | 1946827290               |
| SNP_P4_61077_39986693 | NC_021163.1    | Ca_kabuli_chr04 | 39986693                | GG                              | CC              | 1946827292               |
| SNP_P4_61078_39986740 | NC_021163.1    | Ca_kabuli_chr04 | 39986740                | AA                              | GG              | 1946827294               |
| SNP_P4_61079_39986757 | NC_021163.1    | Ca_kabuli_chr04 | 39986757                | CC                              | TT              | 1946827296               |
| SNP_P4_61080_39986759 | NC_021163.1    | Ca_kabuli_chr04 | 39986759                | GG                              | AA              | 1946827299               |
| SNP_P4_61081_39986779 | NC_021163.1    | Ca_kabuli_chr04 | 39986779                | AA                              | TT              | 1946827301               |
| SNP_P4_61082_39986965 | NC_021163.1    | Ca_kabuli_chr04 | 39986965                | TT                              | CC              | 1946827303               |
| SNP_P4_61083_39987165 | NC_021163.1    | Ca_kabuli_chr04 | 39987165                | TT                              | CC              | 1946827305               |
| SNP_P4_61084_39987259 | NC_021163.1    | Ca_kabuli_chr04 | 39987259                | AA                              | CC              | 1946827307               |

| SNPs IDs              | Chromosome IDs | Chromosomes     | Physical positions (bp) | CDC Frontier (Reference genome) | (ILWC46 & LPNB) | NCBI SNPdb Accession IDs |
|-----------------------|----------------|-----------------|-------------------------|---------------------------------|-----------------|--------------------------|
| SNP_P4_61086_39994027 | NC_021163.1    | Ca_kabuli_chr04 | 39994027                | TT                              | CC              | 1946827309               |
| SNP_P4_61087_39994029 | NC_021163.1    | Ca_kabuli_chr04 | 39994029                | GG                              | AA              | 1946827311               |
| SNP_P4_61088_40022359 | NC_021163.1    | Ca_kabuli_chr04 | 40022359                | TT                              | AA              | 1946827313               |
| SNP_P4_61090_40059090 | NC_021163.1    | Ca_kabuli_chr04 | 40059090                | AA                              | GG              | 1946827315               |
| SNP_P4_61091_40072050 | NC_021163.1    | Ca_kabuli_chr04 | 40072050                | AA                              | CC              | 1946827317               |
| SNP_P4_61092_40095848 | NC_021163.1    | Ca_kabuli_chr04 | 40095848                | TT                              | CC              | 1946827319               |
| SNP_P4_61093_40096117 | NC_021163.1    | Ca_kabuli_chr04 | 40096117                | TT                              | AA              | 1946827321               |
| SNP_P4_61095_40114557 | NC_021163.1    | Ca_kabuli_chr04 | 40114557                | TT                              | CC              | 1946827323               |
| SNP_P4_61096_40114572 | NC_021163.1    | Ca_kabuli_chr04 | 40114572                | AA                              | GG              | 1946827325               |
| SNP_P4_61097_40114613 | NC_021163.1    | Ca_kabuli_chr04 | 40114613                | AA                              | GG              | 1946827327               |
| SNP_P4_61098_40114919 | NC_021163.1    | Ca_kabuli_chr04 | 40114919                | GG                              | TT              | 1946827329               |
| SNP_P4_61099_40131350 | NC_021163.1    | Ca_kabuli_chr04 | 40131350                | TT                              | CC              | 1946827331               |
| SNP_P4_61100_40139389 | NC_021163.1    | Ca_kabuli_chr04 | 40139389                | AA                              | CC              | 1946827334               |
| SNP_P4_61101_40142892 | NC_021163.1    | Ca_kabuli_chr04 | 40142892                | AA                              | TT              | 1946827336               |
| SNP_P4_61103_40171953 | NC_021163.1    | Ca_kabuli_chr04 | 40171953                | GG                              | TT              | 1946827338               |
| SNP_P4_61104_40171978 | NC_021163.1    | Ca_kabuli_chr04 | 40171978                | TT                              | CC              | 1946827340               |
| SNP_P4_61105_40182331 | NC_021163.1    | Ca_kabuli_chr04 | 40182331                | AA                              | CC              | 1946827342               |
| SNP_P4_61106_40241065 | NC_021163.1    | Ca_kabuli_chr04 | 40241065                | GG                              | AA              | 1946827344               |
| SNP_P4_61108_40250486 | NC_021163.1    | Ca_kabuli_chr04 | 40250486                | AA                              | GG              | 1946827346               |
| SNP_P4_61111_40320780 | NC_021163.1    | Ca_kabuli_chr04 | 40320780                | TT                              | GG              | 1946827348               |
| SNP_P4_61112_40320783 | NC_021163.1    | Ca_kabuli_chr04 | 40320783                | TT                              | GG              | 1946827350               |
| SNP_P4_61113_40326984 | NC_021163.1    | Ca_kabuli_chr04 | 40326984                | CC                              | GG              | 1946827352               |
| SNP_P4_61114_40334836 | NC_021163.1    | Ca_kabuli_chr04 | 40334836                | GG                              | AA              | 1946827354               |
| SNP_P4_61115_40334857 | NC_021163.1    | Ca_kabuli_chr04 | 40334857                | GG                              | AA              | 1946827356               |
| SNP_P4_61116_40334872 | NC_021163.1    | Ca_kabuli_chr04 | 40334872                | AA                              | TT              | 1946827358               |
| SNP_P4_61117_40334906 | NC_021163.1    | Ca_kabuli_chr04 | 40334906                | AA                              | GG              | 1946827360               |
| SNP_P4_61118_40334922 | NC_021163.1    | Ca_kabuli_chr04 | 40334922                | TT                              | CC              | 1946827362               |
| SNP_P4_61119_40335048 | NC_021163.1    | Ca_kabuli_chr04 | 40335048                | AA                              | GG              | 1946827364               |
| SNP_P4_61120_40335095 | NC_021163.1    | Ca_kabuli_chr04 | 40335095                | AA                              | GG              | 1946827366               |
| SNP_P4_61121_40335178 | NC_021163.1    | Ca_kabuli_chr04 | 40335178                | TT                              | CC              | 1946827368               |
| SNP_P4_61122_40335291 | NC_021163.1    | Ca_kabuli_chr04 | 40335291                | TT                              | CC              | 1946827370               |
| SNP_P4_61123_40335297 | NC_021163.1    | Ca_kabuli_chr04 | 40335297                | AA                              | CC              | 1946827372               |
| SNP_P4_61124_40335317 | NC_021163.1    | Ca_kabuli_chr04 | 40335317                | CC                              | AA              | 1946827374               |
| SNP_P4_61125_40335340 | NC_021163.1    | Ca_kabuli_chr04 | 40335340                | AA                              | GG              | 1946827376               |
| SNP_P4_61126_40335348 | NC_021163.1    | Ca_kabuli_chr04 | 40335348                | TT                              | GG              | 1946827378               |
| SNP_P4_61127_40335430 | NC_021163.1    | Ca_kabuli_chr04 | 40335430                | AA                              | GG              | 1946827380               |
| SNP_P4_61128_40335438 | NC_021163.1    | Ca_kabuli_chr04 | 40335438                | TT                              | CC              | 1946827382               |
| SNP_P4_61129_40341846 | NC_021163.1    | Ca_kabuli_chr04 | 40341846                | AA                              | TT              | 1946827385               |
| SNP_P4_61130_40341864 | NC_021163.1    | Ca_kabuli_chr04 | 40341864                | GG                              | AA              | 1946827387               |
| SNP_P4_61131_40341905 | NC_021163.1    | Ca_kabuli_chr04 | 40341905                | AA                              | GG              | 1946827389               |
| SNP_P4_61132_40342350 | NC_021163.1    | Ca_kabuli_chr04 | 40342350                | TT                              | AA              | 1946827391               |
| SNP_P4_61133_40342351 | NC_021163.1    | Ca_kabuli_chr04 | 40342351                | TT                              | AA              | 1946827393               |

| SNPs IDs              | Chromosome IDs | Chromosomes     | Physical positions (bp) | CDC Frontier (Reference genome) | (ILWC46 & LPNB) | NCBI SNPdb Accession IDs |
|-----------------------|----------------|-----------------|-------------------------|---------------------------------|-----------------|--------------------------|
| SNP_P4_61134_40342352 | NC_021163.1    | Ca_kabuli_chr04 | 40342352                | GG                              | TT              | 1946827395               |
| SNP_P4_61137_40354286 | NC_021163.1    | Ca_kabuli_chr04 | 40354286                | AA                              | GG              | 1946827397               |
| SNP_P4_61139_40425120 | NC_021163.1    | Ca_kabuli_chr04 | 40425120                | CC                              | TT              | 1946827399               |
| SNP_P4_61141_40461508 | NC_021163.1    | Ca_kabuli_chr04 | 40461508                | AA                              | GG              | 1946827401               |
| SNP_P4_61142_40473259 | NC_021163.1    | Ca_kabuli_chr04 | 40473259                | CC                              | TT              | 1946827403               |
| SNP_P4_61143_40478942 | NC_021163.1    | Ca_kabuli_chr04 | 40478942                | TT                              | CC              | 1946827405               |
| SNP_P4_61144_40479237 | NC_021163.1    | Ca_kabuli_chr04 | 40479237                | TT                              | AA              | 1946827407               |
| SNP_P4_61146_40481903 | NC_021163.1    | Ca_kabuli_chr04 | 40481903                | CC                              | TT              | 1946827409               |
| SNP_P4_61147_40482288 | NC_021163.1    | Ca_kabuli_chr04 | 40482288                | TT                              | CC              | 1946827411               |
| SNP_P4_61148_40482307 | NC_021163.1    | Ca_kabuli_chr04 | 40482307                | TT                              | CC              | 1946827413               |
| SNP_P4_61150_40483825 | NC_021163.1    | Ca_kabuli_chr04 | 40483825                | AA                              | GG              | 1946827415               |
| SNP_P4_61151_40483864 | NC_021163.1    | Ca_kabuli_chr04 | 40483864                | AA                              | GG              | 1946827417               |
| SNP_P4_61152_40484690 | NC_021163.1    | Ca_kabuli_chr04 | 40484690                | GG                              | AA              | 1946827418               |
| SNP_P4_61153_40484694 | NC_021163.1    | Ca_kabuli_chr04 | 40484694                | AA                              | GG              | 1946827420               |
| SNP_P4_61154_40485326 | NC_021163.1    | Ca_kabuli_chr04 | 40485326                | GG                              | AA              | 1946827422               |
| SNP_P4_61155_40486963 | NC_021163.1    | Ca_kabuli_chr04 | 40486963                | TT                              | CC              | 1946827424               |
| SNP_P4_61157_40487955 | NC_021163.1    | Ca_kabuli_chr04 | 40487955                | GG                              | AA              | 1946827426               |
| SNP_P4_61158_40488210 | NC_021163.1    | Ca_kabuli_chr04 | 40488210                | TT                              | CC              | 1946827428               |
| SNP_P4_61159_40488258 | NC_021163.1    | Ca_kabuli_chr04 | 40488258                | AA                              | GG              | 1946827430               |
| SNP_P4_61160_40488266 | NC_021163.1    | Ca_kabuli_chr04 | 40488266                | AA                              | TT              | 1946827432               |
| SNP_P4_61161_40488626 | NC_021163.1    | Ca_kabuli_chr04 | 40488626                | GG                              | AA              | 1946827434               |
| SNP_P4_61162_40489626 | NC_021163.1    | Ca_kabuli_chr04 | 40489626                | AA                              | GG              | 1946827436               |
| SNP_P4_61163_40489878 | NC_021163.1    | Ca_kabuli_chr04 | 40489878                | GG                              | TT              | 1946827438               |
| SNP_P4_61164_40491074 | NC_021163.1    | Ca_kabuli_chr04 | 40491074                | GG                              | CC              | 1946827440               |
| SNP_P4_61166_40491505 | NC_021163.1    | Ca_kabuli_chr04 | 40491505                | AA                              | TT              | 1946827442               |
| SNP_P4_61167_40491507 | NC_021163.1    | Ca_kabuli_chr04 | 40491507                | GG                              | TT              | 1946827444               |
| SNP_P4_61168_40491544 | NC_021163.1    | Ca_kabuli_chr04 | 40491544                | AA                              | CC              | 1946827446               |
| SNP_P4_61169_40491772 | NC_021163.1    | Ca_kabuli_chr04 | 40491772                | GG                              | CC              | 1946827448               |
| SNP_P4_61170_40492382 | NC_021163.1    | Ca_kabuli_chr04 | 40492382                | TT                              | GG              | 1946827450               |
| SNP_P4_61171_40492416 | NC_021163.1    | Ca_kabuli_chr04 | 40492416                | CC                              | GG              | 1946827452               |
| SNP_P4_61172_40492432 | NC_021163.1    | Ca_kabuli_chr04 | 40492432                | AA                              | GG              | 1946827454               |
| SNP_P4_61173_40493710 | NC_021163.1    | Ca_kabuli_chr04 | 40493710                | AA                              | TT              | 1946827456               |
| SNP_P4_61174_40493718 | NC_021163.1    | Ca_kabuli_chr04 | 40493718                | TT                              | GG              | 1946827458               |
| SNP_P4_61175_40493822 | NC_021163.1    | Ca_kabuli_chr04 | 40493822                | TT                              | AA              | 1946827460               |
| SNP_P4_61176_40493878 | NC_021163.1    | Ca_kabuli_chr04 | 40493878                | GG                              | AA              | 1946827462               |
| SNP_P4_61177_40493990 | NC_021163.1    | Ca_kabuli_chr04 | 40493990                | CC                              | TT              | 1946827464               |
| SNP_P4_61178_40493991 | NC_021163.1    | Ca_kabuli_chr04 | 40493991                | TT                              | CC              | 1946827466               |
| SNP_P4_61179_40493993 | NC_021163.1    | Ca_kabuli_chr04 | 40493993                | AA                              | GG              | 1946827468               |
| SNP_P4_61180_40494059 | NC_021163.1    | Ca_kabuli_chr04 | 40494059                | GG                              | AA              | 1946827470               |
| SNP_P4_61181_40494079 | NC_021163.1    | Ca_kabuli_chr04 | 40494079                | AA                              | GG              | 1946827472               |
| SNP_P4_61182_40494086 | NC_021163.1    | Ca_kabuli_chr04 | 40494086                | TT                              | CC              | 1946827474               |
| SNP_P4_61183_40495199 | NC_021163.1    | Ca_kabuli_chr04 | 40495199                | CC                              | AA              | 1946827476               |

| SNPs IDs              | Chromosome IDs | Chromosomes     | Physical positions (bp) | CDC Frontier (Reference genome) | (ILWC46 & LPNB) | NCBI SNPdb Accession IDs |
|-----------------------|----------------|-----------------|-------------------------|---------------------------------|-----------------|--------------------------|
| SNP_P4_61184_40495452 | NC_021163.1    | Ca_kabuli_chr04 | 40495452                | GG                              | AA              | 1946827477               |
| SNP_P4_61185_40495769 | NC_021163.1    | Ca_kabuli_chr04 | 40495769                | CC                              | TT              | 1946827479               |
| SNP_P4_61186_40498901 | NC_021163.1    | Ca_kabuli_chr04 | 40498901                | GG                              | AA              | 1946827481               |
| SNP_P4_61188_40500748 | NC_021163.1    | Ca_kabuli_chr04 | 40500748                | GG                              | TT              | 1946827483               |
| SNP_P4_61189_40501012 | NC_021163.1    | Ca_kabuli_chr04 | 40501012                | TT                              | AA              | 1946827485               |
| SNP_P4_61190_40501014 | NC_021163.1    | Ca_kabuli_chr04 | 40501014                | AA                              | CC              | 1946827487               |
| SNP_P4_61191_40501854 | NC_021163.1    | Ca_kabuli_chr04 | 40501854                | AA                              | TT              | 1946827489               |
| SNP_P4_61192_40501894 | NC_021163.1    | Ca_kabuli_chr04 | 40501894                | CC                              | TT              | 1946827491               |
| SNP_P4_61193_40501920 | NC_021163.1    | Ca_kabuli_chr04 | 40501920                | TT                              | GG              | 1946827493               |
| SNP_P4_61194_40501921 | NC_021163.1    | Ca_kabuli_chr04 | 40501921                | AA                              | GG              | 1946827495               |
| SNP_P4_61195_40502132 | NC_021163.1    | Ca_kabuli_chr04 | 40502132                | CC                              | TT              | 1946827497               |
| SNP_P4_61196_40502141 | NC_021163.1    | Ca_kabuli_chr04 | 40502141                | GG                              | TT              | 1946827499               |
| SNP_P4_61197_40502155 | NC_021163.1    | Ca_kabuli_chr04 | 40502155                | CC                              | TT              | 1946827501               |
| SNP_P4_61198_40502168 | NC_021163.1    | Ca_kabuli_chr04 | 40502168                | CC                              | GG              | 1946827503               |
| SNP_P4_61200_40503765 | NC_021163.1    | Ca_kabuli_chr04 | 40503765                | TT                              | CC              | 1946827505               |
| SNP_P4_61201_40503817 | NC_021163.1    | Ca_kabuli_chr04 | 40503817                | AA                              | GG              | 1946827507               |
| SNP_P4_61202_40504128 | NC_021163.1    | Ca_kabuli_chr04 | 40504128                | TT                              | CC              | 1946827508               |
| SNP_P4_61203_40505113 | NC_021163.1    | Ca_kabuli_chr04 | 40505113                | AA                              | GG              | 1946827510               |
| SNP_P4_61204_40505461 | NC_021163.1    | Ca_kabuli_chr04 | 40505461                | GG                              | AA              | 1946827512               |
| SNP_P4_61205_40505473 | NC_021163.1    | Ca_kabuli_chr04 | 40505473                | TT                              | AA              | 1946827514               |
| SNP_P4_61206_40505609 | NC_021163.1    | Ca_kabuli_chr04 | 40505609                | GG                              | AA              | 1946827516               |
| SNP_P4_61207_40505851 | NC_021163.1    | Ca_kabuli_chr04 | 40505851                | TT                              | GG              | 1946827518               |
| SNP_P4_61208_40505900 | NC_021163.1    | Ca_kabuli_chr04 | 40505900                | AA                              | TT              | 1946827520               |
| SNP_P4_61210_40506570 | NC_021163.1    | Ca_kabuli_chr04 | 40506570                | AA                              | TT              | 1946827522               |
| SNP_P4_61211_40507219 | NC_021163.1    | Ca_kabuli_chr04 | 40507219                | CC                              | TT              | 1946827524               |
| SNP_P4_61212_40507523 | NC_021163.1    | Ca_kabuli_chr04 | 40507523                | CC                              | TT              | 1946827526               |
| SNP_P4_61213_40507537 | NC_021163.1    | Ca_kabuli_chr04 | 40507537                | CC                              | TT              | 1946827528               |
| SNP_P4_61214_40508078 | NC_021163.1    | Ca_kabuli_chr04 | 40508078                | AA                              | GG              | 1946827530               |
| SNP_P4_61215_40509437 | NC_021163.1    | Ca_kabuli_chr04 | 40509437                | TT                              | CC              | 1946827532               |
| SNP_P4_61216_40510763 | NC_021163.1    | Ca_kabuli_chr04 | 40510763                | TT                              | CC              | 1946827534               |
| SNP_P4_61217_40511837 | NC_021163.1    | Ca_kabuli_chr04 | 40511837                | TT                              | CC              | 1946827536               |
| SNP_P4_61218_40512122 | NC_021163.1    | Ca_kabuli_chr04 | 40512122                | CC                              | AA              | 1946827538               |
| SNP_P4_61219_40512456 | NC_021163.1    | Ca_kabuli_chr04 | 40512456                | TT                              | GG              | 1946827540               |
| SNP_P4_61220_40512646 | NC_021163.1    | Ca_kabuli_chr04 | 40512646                | GG                              | TT              | 1946827542               |
| SNP_P4_61221_40513733 | NC_021163.1    | Ca_kabuli_chr04 | 40513733                | TT                              | CC              | 1946827544               |
| SNP_P4_61222_40513928 | NC_021163.1    | Ca_kabuli_chr04 | 40513928                | GG                              | AA              | 1946827546               |
| SNP_P4_61223_40514077 | NC_021163.1    | Ca_kabuli_chr04 | 40514077                | GG                              | AA              | 1946827548               |
| SNP_P4_61226_40514922 | NC_021163.1    | Ca_kabuli_chr04 | 40514922                | CC                              | TT              | 1946827550               |
| SNP_P4_61227_40514924 | NC_021163.1    | Ca_kabuli_chr04 | 40514924                | CC                              | TT              | 1946827552               |
| SNP_P4_61229_40515866 | NC_021163.1    | Ca_kabuli_chr04 | 40515866                | AA                              | GG              | 1946827554               |
| SNP_P4_61230_40516511 | NC_021163.1    | Ca_kabuli_chr04 | 40516511                | AA                              | GG              | 1946827556               |
| SNP_P4_61231_40516526 | NC_021163.1    | Ca_kabuli_chr04 | 40516526                | AA                              | GG              | 1946827558               |



| SNPs IDs              | Chromosome IDs | Chromosomes     | Physical positions (bp) | CDC Frontier (Reference genome) | (ILWC46 & LPNB) | NCBI SNPdb Accession IDs |
|-----------------------|----------------|-----------------|-------------------------|---------------------------------|-----------------|--------------------------|
| SNP_P4_61232_40516563 | NC_021163.1    | Ca_kabuli_chr04 | 40516563                | TT                              | CC              | 1946827560               |
| SNP_P4_61233_40516667 | NC_021163.1    | Ca_kabuli_chr04 | 40516667                | AA                              | GG              | 1946827562               |
| SNP_P4_61234_40517007 | NC_021163.1    | Ca_kabuli_chr04 | 40517007                | TT                              | CC              | 1946827564               |
| SNP_P4_61235_40517010 | NC_021163.1    | Ca_kabuli_chr04 | 40517010                | AA                              | GG              | 1946827566               |
| SNP_P4_61236_40517015 | NC_021163.1    | Ca_kabuli_chr04 | 40517015                | AA                              | GG              | 1946827568               |
| SNP_P4_61237_40517534 | NC_021163.1    | Ca_kabuli_chr04 | 40517534                | TT                              | CC              | 1946827570               |
| SNP_P4_61238_40517694 | NC_021163.1    | Ca_kabuli_chr04 | 40517694                | CC                              | TT              | 1946827572               |
| SNP_P4_61239_40517726 | NC_021163.1    | Ca_kabuli_chr04 | 40517726                | GG                              | AA              | 1946827574               |
| SNP_P4_61240_40517729 | NC_021163.1    | Ca_kabuli_chr04 | 40517729                | TT                              | AA              | 1946827576               |
| SNP_P4_61241_40517757 | NC_021163.1    | Ca_kabuli_chr04 | 40517757                | TT                              | CC              | 1946827578               |
| SNP_P4_61242_40518714 | NC_021163.1    | Ca_kabuli_chr04 | 40518714                | CC                              | TT              | 1946827580               |
| SNP_P4_61243_40518723 | NC_021163.1    | Ca_kabuli_chr04 | 40518723                | CC                              | TT              | 1946827582               |
| SNP_P4_61244_40518741 | NC_021163.1    | Ca_kabuli_chr04 | 40518741                | GG                              | AA              | 1946827583               |
| SNP_P4_61245_40518744 | NC_021163.1    | Ca_kabuli_chr04 | 40518744                | GG                              | AA              | 1946827584               |
| SNP_P4_61246_40518762 | NC_021163.1    | Ca_kabuli_chr04 | 40518762                | GG                              | AA              | 1946827585               |
| SNP_P4_61247_40518763 | NC_021163.1    | Ca_kabuli_chr04 | 40518763                | TT                              | CC              | 1946827586               |
| SNP_P4_61248_40518769 | NC_021163.1    | Ca_kabuli_chr04 | 40518769                | GG                              | AA              | 1946827587               |
| SNP_P4_61249_40519111 | NC_021163.1    | Ca_kabuli_chr04 | 40519111                | GG                              | AA              | 1946827588               |
| SNP_P4_61250_40519190 | NC_021163.1    | Ca_kabuli_chr04 | 40519190                | CC                              | TT              | 1946827589               |
| SNP_P4_61251_40519236 | NC_021163.1    | Ca_kabuli_chr04 | 40519236                | CC                              | TT              | 1946827590               |
| SNP_P4_61252_40519323 | NC_021163.1    | Ca_kabuli_chr04 | 40519323                | TT                              | CC              | 1946827591               |
| SNP_P4_61253_40519431 | NC_021163.1    | Ca_kabuli_chr04 | 40519431                | CC                              | TT              | 1946827592               |
| SNP_P4_61254_40519446 | NC_021163.1    | Ca_kabuli_chr04 | 40519446                | AA                              | TT              | 1946827593               |
| SNP_P4_61255_40519502 | NC_021163.1    | Ca_kabuli_chr04 | 40519502                | CC                              | AA              | 1946827594               |
| SNP_P4_61256_40519660 | NC_021163.1    | Ca_kabuli_chr04 | 40519660                | GG                              | AA              | 1946827595               |
| SNP_P4_61257_40519708 | NC_021163.1    | Ca_kabuli_chr04 | 40519708                | GG                              | AA              | 1946827596               |
| SNP_P4_61258_40519756 | NC_021163.1    | Ca_kabuli_chr04 | 40519756                | AA                              | GG              | 1946827597               |
| SNP_P4_61259_40519805 | NC_021163.1    | Ca_kabuli_chr04 | 40519805                | TT                              | CC              | 1946827598               |
| SNP_P4_61260_40519806 | NC_021163.1    | Ca_kabuli_chr04 | 40519806                | GG                              | AA              | 1946827599               |
| SNP_P4_61261_40519863 | NC_021163.1    | Ca_kabuli_chr04 | 40519863                | GG                              | AA              | 1946827600               |
| SNP_P4_61262_40519882 | NC_021163.1    | Ca_kabuli_chr04 | 40519882                | TT                              | CC              | 1946827601               |
| SNP_P4_61263_40519884 | NC_021163.1    | Ca_kabuli_chr04 | 40519884                | TT                              | GG              | 1946827602               |
| SNP_P4_61264_40519913 | NC_021163.1    | Ca_kabuli_chr04 | 40519913                | GG                              | CC              | 1946827603               |
| SNP_P4_61265_40520030 | NC_021163.1    | Ca_kabuli_chr04 | 40520030                | GG                              | TT              | 1946827604               |
| SNP_P4_61266_40523252 | NC_021163.1    | Ca_kabuli_chr04 | 40523252                | CC                              | GG              | 1946827605               |
| SNP_P4_61267_40523293 | NC_021163.1    | Ca_kabuli_chr04 | 40523293                | GG                              | AA              | 1946827606               |
| SNP_P4_61268_40523864 | NC_021163.1    | Ca_kabuli_chr04 | 40523864                | TT                              | CC              | 1946827607               |
| SNP_P4_61269_40524314 | NC_021163.1    | Ca_kabuli_chr04 | 40524314                | AA                              | GG              | 1946827608               |
| SNP_P4_61270_40524490 | NC_021163.1    | Ca_kabuli_chr04 | 40524490                | GG                              | AA              | 1946827609               |
| SNP_P4_61271_40524909 | NC_021163.1    | Ca_kabuli_chr04 | 40524909                | AA                              | CC              | 1946827610               |
| SNP_P4_61272_40525272 | NC_021163.1    | Ca_kabuli_chr04 | 40525272                | AA                              | GG              | 1946827611               |
| SNP_P4_61274_40528471 | NC_021163.1    | Ca_kabuli_chr04 | 40528471                | AA                              | GG              | 1946827612               |

| SNPs IDs              | Chromosome IDs | Chromosomes     | Physical positions (bp) | CDC Frontier (Reference genome) | (ILWC46 & LPNB) | NCBI SNPdb Accession IDs |
|-----------------------|----------------|-----------------|-------------------------|---------------------------------|-----------------|--------------------------|
| SNP_P4_61275_40530040 | NC_021163.1    | Ca_kabuli_chr04 | 40530040                | AA                              | TT              | 1946827613               |
| SNP_P4_61276_40531736 | NC_021163.1    | Ca_kabuli_chr04 | 40531736                | CC                              | TT              | 1946827614               |
| SNP_P4_61277_40531764 | NC_021163.1    | Ca_kabuli_chr04 | 40531764                | AA                              | GG              | 1946827615               |
| SNP_P4_61278_40531786 | NC_021163.1    | Ca_kabuli_chr04 | 40531786                | GG                              | AA              | 1946827616               |
| SNP_P4_61279_40531908 | NC_021163.1    | Ca_kabuli_chr04 | 40531908                | AA                              | CC              | 1946827617               |
| SNP_P4_61281_40532660 | NC_021163.1    | Ca_kabuli_chr04 | 40532660                | AA                              | GG              | 1946827618               |
| SNP_P4_61282_40533165 | NC_021163.1    | Ca_kabuli_chr04 | 40533165                | GG                              | CC              | 1946827619               |
| SNP_P4_61283_40533234 | NC_021163.1    | Ca_kabuli_chr04 | 40533234                | TT                              | AA              | 1946827620               |
| SNP_P4_61284_40533244 | NC_021163.1    | Ca_kabuli_chr04 | 40533244                | CC                              | AA              | 1946827621               |
| SNP_P4_61285_40533278 | NC_021163.1    | Ca_kabuli_chr04 | 40533278                | AA                              | CC              | 1946827622               |
| SNP_P4_61286_40533821 | NC_021163.1    | Ca_kabuli_chr04 | 40533821                | CC                              | GG              | 1946827623               |
| SNP_P4_61287_40533858 | NC_021163.1    | Ca_kabuli_chr04 | 40533858                | AA                              | GG              | 1946827624               |
| SNP_P4_61289_40534906 | NC_021163.1    | Ca_kabuli_chr04 | 40534906                | GG                              | AA              | 1946827625               |
| SNP_P4_61290_40538051 | NC_021163.1    | Ca_kabuli_chr04 | 40538051                | TT                              | AA              | 1946827626               |
| SNP_P4_61291_40539576 | NC_021163.1    | Ca_kabuli_chr04 | 40539576                | CC                              | TT              | 1946827627               |
| SNP_P4_61292_40539583 | NC_021163.1    | Ca_kabuli_chr04 | 40539583                | TT                              | CC              | 1946827628               |
| SNP_P4_61293_40540890 | NC_021163.1    | Ca_kabuli_chr04 | 40540890                | GG                              | TT              | 1946827629               |
| SNP_P4_61294_40540921 | NC_021163.1    | Ca_kabuli_chr04 | 40540921                | AA                              | GG              | 1946827630               |
| SNP_P4_61295_40541644 | NC_021163.1    | Ca_kabuli_chr04 | 40541644                | GG                              | CC              | 1946827631               |
| SNP_P4_61296_40542351 | NC_021163.1    | Ca_kabuli_chr04 | 40542351                | GG                              | AA              | 1946827632               |
| SNP_P4_61297_40546323 | NC_021163.1    | Ca_kabuli_chr04 | 40546323                | TT                              | AA              | 1946827633               |
| SNP_P4_61298_40546881 | NC_021163.1    | Ca_kabuli_chr04 | 40546881                | AA                              | GG              | 1946827634               |
| SNP_P4_61299_40546891 | NC_021163.1    | Ca_kabuli_chr04 | 40546891                | TT                              | GG              | 1946827635               |
| SNP_P4_61300_40547057 | NC_021163.1    | Ca_kabuli_chr04 | 40547057                | CC                              | TT              | 1946827636               |
| SNP_P4_61301_40547090 | NC_021163.1    | Ca_kabuli_chr04 | 40547090                | AA                              | GG              | 1946827637               |
| SNP_P4_61302_40547399 | NC_021163.1    | Ca_kabuli_chr04 | 40547399                | TT                              | GG              | 1946827638               |
| SNP_P4_61303_40547557 | NC_021163.1    | Ca_kabuli_chr04 | 40547557                | AA                              | TT              | 1946827639               |
| SNP_P4_61304_40549820 | NC_021163.1    | Ca_kabuli_chr04 | 40549820                | GG                              | AA              | 1946827640               |
| SNP_P4_61305_40550103 | NC_021163.1    | Ca_kabuli_chr04 | 40550103                | GG                              | AA              | 1946827641               |
| SNP_P4_61306_40551386 | NC_021163.1    | Ca_kabuli_chr04 | 40551386                | CC                              | AA              | 1946827642               |
| SNP_P4_61308_40552636 | NC_021163.1    | Ca_kabuli_chr04 | 40552636                | TT                              | GG              | 1946827643               |
| SNP_P4_61309_40552724 | NC_021163.1    | Ca_kabuli_chr04 | 40552724                | CC                              | AA              | 1946827644               |
| SNP_P4_61310_40552770 | NC_021163.1    | Ca_kabuli_chr04 | 40552770                | TT                              | GG              | 1946827645               |
| SNP_P4_61311_40553223 | NC_021163.1    | Ca_kabuli_chr04 | 40553223                | TT                              | GG              | 1946827646               |
| SNP_P4_61312_40553444 | NC_021163.1    | Ca_kabuli_chr04 | 40553444                | TT                              | GG              | 1946827647               |
| SNP_P4_61313_40553634 | NC_021163.1    | Ca_kabuli_chr04 | 40553634                | AA                              | GG              | 1946827648               |
| SNP_P4_61314_40553886 | NC_021163.1    | Ca_kabuli_chr04 | 40553886                | GG                              | CC              | 1946827649               |
| SNP_P4_61315_40553911 | NC_021163.1    | Ca_kabuli_chr04 | 40553911                | CC                              | TT              | 1946827650               |
| SNP_P4_61316_40553964 | NC_021163.1    | Ca_kabuli_chr04 | 40553964                | GG                              | TT              | 1946827651               |
| SNP_P4_61317_40553971 | NC_021163.1    | Ca_kabuli_chr04 | 40553971                | GG                              | CC              | 1946827652               |
| SNP_P4_61318_40555030 | NC_021163.1    | Ca_kabuli_chr04 | 40555030                | CC                              | TT              | 1946827653               |
| SNP_P4_61319_40555374 | NC_021163.1    | Ca_kabuli_chr04 | 40555374                | AA                              | TT              | 1946827654               |

| SNPs IDs              | Chromosome IDs | Chromosomes     | Physical positions (bp) | CDC Frontier (Reference genome) | (ILWC46 & LPNB) | NCBI SNPdb Accession IDs |
|-----------------------|----------------|-----------------|-------------------------|---------------------------------|-----------------|--------------------------|
| SNP_P4_61320_40555404 | NC_021163.1    | Ca_kabuli_chr04 | 40555404                | AA                              | GG              | 1946827655               |
| SNP_P4_61321_40555475 | NC_021163.1    | Ca_kabuli_chr04 | 40555475                | TT                              | CC              | 1946827656               |
| SNP_P4_61322_40555546 | NC_021163.1    | Ca_kabuli_chr04 | 40555546                | TT                              | GG              | 1946827657               |
| SNP_P4_61323_40556000 | NC_021163.1    | Ca_kabuli_chr04 | 40556000                | CC                              | TT              | 1946827658               |
| SNP_P4_61324_40556045 | NC_021163.1    | Ca_kabuli_chr04 | 40556045                | TT                              | AA              | 1946827659               |
| SNP_P4_61325_40557716 | NC_021163.1    | Ca_kabuli_chr04 | 40557716                | CC                              | TT              | 1946827660               |
| SNP_P4_61326_40558595 | NC_021163.1    | Ca_kabuli_chr04 | 40558595                | TT                              | CC              | 1946827661               |
| SNP_P4_61327_40559104 | NC_021163.1    | Ca_kabuli_chr04 | 40559104                | AA                              | CC              | 1946827662               |
| SNP_P4_61328_40559197 | NC_021163.1    | Ca_kabuli_chr04 | 40559197                | TT                              | CC              | 1946827663               |
| SNP_P4_61330_40559484 | NC_021163.1    | Ca_kabuli_chr04 | 40559484                | GG                              | AA              | 1946827664               |
| SNP_P4_61331_40559489 | NC_021163.1    | Ca_kabuli_chr04 | 40559489                | CC                              | TT              | 1946827665               |
| SNP_P4_61332_40559513 | NC_021163.1    | Ca_kabuli_chr04 | 40559513                | TT                              | CC              | 1946827666               |
| SNP_P4_61333_40559534 | NC_021163.1    | Ca_kabuli_chr04 | 40559534                | CC                              | TT              | 1946827667               |
| SNP_P4_61334_40559575 | NC_021163.1    | Ca_kabuli_chr04 | 40559575                | AA                              | GG              | 1946827668               |
| SNP_P4_61335_40559957 | NC_021163.1    | Ca_kabuli_chr04 | 40559957                | CC                              | TT              | 1946827669               |
| SNP_P4_61336_40560292 | NC_021163.1    | Ca_kabuli_chr04 | 40560292                | AA                              | GG              | 1946827670               |
| SNP_P4_61337_40560543 | NC_021163.1    | Ca_kabuli_chr04 | 40560543                | GG                              | AA              | 1946827671               |
| SNP_P4_61339_40560600 | NC_021163.1    | Ca_kabuli_chr04 | 40560600                | TT                              | CC              | 1946827672               |
| SNP_P4_61340_40560603 | NC_021163.1    | Ca_kabuli_chr04 | 40560603                | GG                              | TT              | 1946827673               |
| SNP_P4_61341_40560760 | NC_021163.1    | Ca_kabuli_chr04 | 40560760                | GG                              | AA              | 1946827674               |
| SNP_P4_61342_40560801 | NC_021163.1    | Ca_kabuli_chr04 | 40560801                | TT                              | GG              | 1946827675               |
| SNP_P4_61343_40560839 | NC_021163.1    | Ca_kabuli_chr04 | 40560839                | TT                              | CC              | 1946827676               |
| SNP_P4_61344_40560866 | NC_021163.1    | Ca_kabuli_chr04 | 40560866                | TT                              | AA              | 1946827677               |
| SNP_P4_61345_40560879 | NC_021163.1    | Ca_kabuli_chr04 | 40560879                | GG                              | AA              | 1946827678               |
| SNP_P4_61346_40560880 | NC_021163.1    | Ca_kabuli_chr04 | 40560880                | TT                              | CC              | 1946827679               |
| SNP_P4_61347_40560898 | NC_021163.1    | Ca_kabuli_chr04 | 40560898                | GG                              | AA              | 1946827680               |
| SNP_P4_61348_40560982 | NC_021163.1    | Ca_kabuli_chr04 | 40560982                | AA                              | GG              | 1946827681               |
| SNP_P4_61349_40560995 | NC_021163.1    | Ca_kabuli_chr04 | 40560995                | TT                              | CC              | 1946827682               |
| SNP_P4_61350_40560996 | NC_021163.1    | Ca_kabuli_chr04 | 40560996                | GG                              | AA              | 1946827683               |
| SNP_P4_61351_40561060 | NC_021163.1    | Ca_kabuli_chr04 | 40561060                | AA                              | TT              | 1946827684               |
| SNP_P4_61352_40561337 | NC_021163.1    | Ca_kabuli_chr04 | 40561337                | GG                              | TT              | 1946827685               |
| SNP_P4_61353_40567206 | NC_021163.1    | Ca_kabuli_chr04 | 40567206                | GG                              | AA              | 1946827686               |
| SNP_P4_61354_40567210 | NC_021163.1    | Ca_kabuli_chr04 | 40567210                | AA                              | TT              | 1946827687               |
| SNP_P4_61355_40567237 | NC_021163.1    | Ca_kabuli_chr04 | 40567237                | TT                              | CC              | 1946827688               |
| SNP_P4_61356_40567455 | NC_021163.1    | Ca_kabuli_chr04 | 40567455                | CC                              | TT              | 1946827689               |
| SNP_P4_61357_40569716 | NC_021163.1    | Ca_kabuli_chr04 | 40569716                | GG                              | AA              | 1946827690               |
| SNP_P4_61358_40571040 | NC_021163.1    | Ca_kabuli_chr04 | 40571040                | TT                              | CC              | 1946827691               |
| SNP_P4_61359_40571081 | NC_021163.1    | Ca_kabuli_chr04 | 40571081                | AA                              | GG              | 1946827692               |
| SNP_P4_61360_40571099 | NC_021163.1    | Ca_kabuli_chr04 | 40571099                | AA                              | TT              | 1946827693               |
| SNP_P4_61361_40571699 | NC_021163.1    | Ca_kabuli_chr04 | 40571699                | GG                              | AA              | 1946827694               |
| SNP_P4_61362_40571706 | NC_021163.1    | Ca_kabuli_chr04 | 40571706                | AA                              | GG              | 1946827695               |
| SNP_P4_61363_40571708 | NC_021163.1    | Ca_kabuli_chr04 | 40571708                | AA                              | TT              | 1946827696               |

| SNPs IDs              | Chromosome IDs | Chromosomes     | Physical positions (bp) | CDC Frontier (Reference genome) | (ILWC46 & LPNB) | NCBI SNPdb Accession IDs |
|-----------------------|----------------|-----------------|-------------------------|---------------------------------|-----------------|--------------------------|
| SNP_P4_61365_40571814 | NC_021163.1    | Ca_kabuli_chr04 | 40571814                | CC                              | TT              | 1946827697               |
| SNP_P4_61366_40572002 | NC_021163.1    | Ca_kabuli_chr04 | 40572002                | AA                              | CC              | 1946827698               |
| SNP_P4_61367_40572152 | NC_021163.1    | Ca_kabuli_chr04 | 40572152                | AA                              | GG              | 1946827699               |
| SNP_P4_61368_40572157 | NC_021163.1    | Ca_kabuli_chr04 | 40572157                | TT                              | CC              | 1946827700               |
| SNP_P4_61369_40572159 | NC_021163.1    | Ca_kabuli_chr04 | 40572159                | AA                              | GG              | 1946827701               |
| SNP_P4_61370_40572167 | NC_021163.1    | Ca_kabuli_chr04 | 40572167                | CC                              | AA              | 1946827702               |
| SNP_P4_61371_40572207 | NC_021163.1    | Ca_kabuli_chr04 | 40572207                | GG                              | CC              | 1946827703               |
| SNP_P4_61372_40572208 | NC_021163.1    | Ca_kabuli_chr04 | 40572208                | AA                              | TT              | 1946827704               |
| SNP_P4_61373_40572239 | NC_021163.1    | Ca_kabuli_chr04 | 40572239                | AA                              | GG              | 1946827705               |
| SNP_P4_61374_40572477 | NC_021163.1    | Ca_kabuli_chr04 | 40572477                | AA                              | GG              | 1946827706               |
| SNP_P4_61375_40573267 | NC_021163.1    | Ca_kabuli_chr04 | 40573267                | AA                              | GG              | 1946827707               |
| SNP_P4_61376_40573329 | NC_021163.1    | Ca_kabuli_chr04 | 40573329                | CC                              | TT              | 1946827708               |
| SNP_P4_61377_40573367 | NC_021163.1    | Ca_kabuli_chr04 | 40573367                | GG                              | AA              | 1946827709               |
| SNP_P4_61378_40573447 | NC_021163.1    | Ca_kabuli_chr04 | 40573447                | CC                              | TT              | 1946827710               |
| SNP_P4_61379_40573486 | NC_021163.1    | Ca_kabuli_chr04 | 40573486                | CC                              | GG              | 1946827711               |
| SNP_P4_61381_40573659 | NC_021163.1    | Ca_kabuli_chr04 | 40573659                | AA                              | TT              | 1946827712               |
| SNP_P4_61382_40574263 | NC_021163.1    | Ca_kabuli_chr04 | 40574263                | AA                              | GG              | 1946827713               |
| SNP_P4_61383_40574269 | NC_021163.1    | Ca_kabuli_chr04 | 40574269                | TT                              | GG              | 1946827714               |
| SNP_P4_61384_40574277 | NC_021163.1    | Ca_kabuli_chr04 | 40574277                | AA                              | GG              | 1946827715               |
| SNP_P4_61386_40574683 | NC_021163.1    | Ca_kabuli_chr04 | 40574683                | CC                              | TT              | 1946827716               |
| SNP_P4_61387_40574725 | NC_021163.1    | Ca_kabuli_chr04 | 40574725                | CC                              | TT              | 1946827717               |
| SNP_P4_61388_40574737 | NC_021163.1    | Ca_kabuli_chr04 | 40574737                | AA                              | GG              | 1946827718               |
| SNP_P4_61389_40574758 | NC_021163.1    | Ca_kabuli_chr04 | 40574758                | AA                              | GG              | 1946827719               |
| SNP_P4_61390_40575070 | NC_021163.1    | Ca_kabuli_chr04 | 40575070                | AA                              | GG              | 1946827720               |
| SNP_P4_61391_40575102 | NC_021163.1    | Ca_kabuli_chr04 | 40575102                | CC                              | TT              | 1946827721               |
| SNP_P4_61392_40575261 | NC_021163.1    | Ca_kabuli_chr04 | 40575261                | GG                              | TT              | 1946827722               |
| SNP_P4_61393_40575273 | NC_021163.1    | Ca_kabuli_chr04 | 40575273                | GG                              | AA              | 1946827723               |
| SNP_P4_61395_40576877 | NC_021163.1    | Ca_kabuli_chr04 | 40576877                | GG                              | AA              | 1946827724               |
| SNP_P4_61396_40577088 | NC_021163.1    | Ca_kabuli_chr04 | 40577088                | TT                              | CC              | 1946827725               |
| SNP_P4_61397_40577089 | NC_021163.1    | Ca_kabuli_chr04 | 40577089                | CC                              | TT              | 1946827726               |
| SNP_P4_61398_40577221 | NC_021163.1    | Ca_kabuli_chr04 | 40577221                | AA                              | CC              | 1946827727               |
| SNP_P4_61400_40580037 | NC_021163.1    | Ca_kabuli_chr04 | 40580037                | AA                              | GG              | 1946827728               |
| SNP_P4_61402_40587185 | NC_021163.1    | Ca_kabuli_chr04 | 40587185                | GG                              | AA              | 1946827729               |
| SNP_P4_61403_40587478 | NC_021163.1    | Ca_kabuli_chr04 | 40587478                | TT                              | AA              | 1946827730               |
| SNP_P4_61406_40591120 | NC_021163.1    | Ca_kabuli_chr04 | 40591120                | CC                              | TT              | 1946827731               |
| SNP_P4_61407_40591471 | NC_021163.1    | Ca_kabuli_chr04 | 40591471                | AA                              | CC              | 1946827732               |
| SNP_P4_61408_40591707 | NC_021163.1    | Ca_kabuli_chr04 | 40591707                | GG                              | AA              | 1946827733               |
| SNP_P4_61409_40592621 | NC_021163.1    | Ca_kabuli_chr04 | 40592621                | TT                              | AA              | 1946827734               |
| SNP_P4_61410_40592806 | NC_021163.1    | Ca_kabuli_chr04 | 40592806                | TT                              | AA              | 1946827735               |
| SNP_P4_61411_40593014 | NC_021163.1    | Ca_kabuli_chr04 | 40593014                | TT                              | CC              | 1946827736               |
| SNP_P4_61413_40593301 | NC_021163.1    | Ca_kabuli_chr04 | 40593301                | TT                              | CC              | 1946827737               |
| SNP_P4_61414_40593316 | NC_021163.1    | Ca_kabuli_chr04 | 40593316                | GG                              | AA              | 1946827738               |

| SNPs IDs              | Chromosome IDs | Chromosomes     | Physical positions (bp) | CDC Frontier (Reference genome) | (ILWC46 & LPNB) | NCBI SNPdb Accession IDs |
|-----------------------|----------------|-----------------|-------------------------|---------------------------------|-----------------|--------------------------|
| SNP_P4_61415_40597948 | NC_021163.1    | Ca_kabuli_chr04 | 40597948                | AA                              | GG              | 1946827739               |
| SNP_P4_61416_40598109 | NC_021163.1    | Ca_kabuli_chr04 | 40598109                | CC                              | AA              | 1946827741               |
| SNP_P4_61418_40598631 | NC_021163.1    | Ca_kabuli_chr04 | 40598631                | CC                              | GG              | 1946827742               |
| SNP_P4_61419_40599444 | NC_021163.1    | Ca_kabuli_chr04 | 40599444                | GG                              | AA              | 1946827744               |
| SNP_P4_61420_40600350 | NC_021163.1    | Ca_kabuli_chr04 | 40600350                | GG                              | AA              | 1946827746               |
| SNP_P4_61421_40600354 | NC_021163.1    | Ca_kabuli_chr04 | 40600354                | TT                              | GG              | 1946827748               |
| SNP_P4_61422_40601388 | NC_021163.1    | Ca_kabuli_chr04 | 40601388                | GG                              | TT              | 1946827750               |
| SNP_P4_61426_40604060 | NC_021163.1    | Ca_kabuli_chr04 | 40604060                | CC                              | TT              | 1946827752               |
| SNP_P4_61427_40604067 | NC_021163.1    | Ca_kabuli_chr04 | 40604067                | GG                              | AA              | 1946827754               |
| SNP_P4_61429_40611261 | NC_021163.1    | Ca_kabuli_chr04 | 40611261                | GG                              | AA              | 1946827756               |
| SNP_P4_61430_40611333 | NC_021163.1    | Ca_kabuli_chr04 | 40611333                | TT                              | AA              | 1946827758               |
| SNP_P4_61431_40613328 | NC_021163.1    | Ca_kabuli_chr04 | 40613328                | AA                              | GG              | 1946827760               |
| SNP_P4_61433_40615140 | NC_021163.1    | Ca_kabuli_chr04 | 40615140                | CC                              | AA              | 1946827762               |
| SNP_P4_61434_40615637 | NC_021163.1    | Ca_kabuli_chr04 | 40615637                | TT                              | GG              | 1946827764               |
| SNP_P4_61435_40618403 | NC_021163.1    | Ca_kabuli_chr04 | 40618403                | TT                              | CC              | 1946827766               |
| SNP_P4_61436_40620824 | NC_021163.1    | Ca_kabuli_chr04 | 40620824                | AA                              | TT              | 1946827768               |
| SNP_P4_61437_40620840 | NC_021163.1    | Ca_kabuli_chr04 | 40620840                | CC                              | TT              | 1946827770               |
| SNP_P4_61439_40621859 | NC_021163.1    | Ca_kabuli_chr04 | 40621859                | GG                              | AA              | 1946827772               |
| SNP_P4_61440_40622109 | NC_021163.1    | Ca_kabuli_chr04 | 40622109                | TT                              | GG              | 1946827774               |
| SNP_P4_61442_40625207 | NC_021163.1    | Ca_kabuli_chr04 | 40625207                | GG                              | AA              | 1946827776               |
| SNP_P4_61443_40625425 | NC_021163.1    | Ca_kabuli_chr04 | 40625425                | CC                              | TT              | 1946827778               |
| SNP_P4_61444_40629607 | NC_021163.1    | Ca_kabuli_chr04 | 40629607                | TT                              | CC              | 1946827780               |
| SNP_P4_61445_40630366 | NC_021163.1    | Ca_kabuli_chr04 | 40630366                | TT                              | CC              | 1946827782               |
| SNP_P4_61446_40630367 | NC_021163.1    | Ca_kabuli_chr04 | 40630367                | AA                              | CC              | 1946827784               |
| SNP_P4_61447_40630368 | NC_021163.1    | Ca_kabuli_chr04 | 40630368                | GG                              | AA              | 1946827786               |
| SNP_P4_61448_40630369 | NC_021163.1    | Ca_kabuli_chr04 | 40630369                | TT                              | AA              | 1946827788               |
| SNP_P4_61449_40630370 | NC_021163.1    | Ca_kabuli_chr04 | 40630370                | TT                              | CC              | 1946827790               |
| SNP_P4_61450_40630411 | NC_021163.1    | Ca_kabuli_chr04 | 40630411                | GG                              | AA              | 1946827792               |
| SNP_P4_61451_40630664 | NC_021163.1    | Ca_kabuli_chr04 | 40630664                | CC                              | TT              | 1946827794               |
| SNP_P4_61452_40632226 | NC_021163.1    | Ca_kabuli_chr04 | 40632226                | TT                              | AA              | 1946827796               |
| SNP_P4_61454_40633850 | NC_021163.1    | Ca_kabuli_chr04 | 40633850                | TT                              | CC              | 1946827798               |
| SNP_P4_61455_40633889 | NC_021163.1    | Ca_kabuli_chr04 | 40633889                | TT                              | CC              | 1946827800               |
| SNP_P4_61456_40634006 | NC_021163.1    | Ca_kabuli_chr04 | 40634006                | CC                              | TT              | 1946827802               |
| SNP_P4_61457_40634624 | NC_021163.1    | Ca_kabuli_chr04 | 40634624                | TT                              | AA              | 1946827804               |
| SNP_P4_61458_40635062 | NC_021163.1    | Ca_kabuli_chr04 | 40635062                | GG                              | TT              | 1946827806               |
| SNP_P4_61459_40635475 | NC_021163.1    | Ca_kabuli_chr04 | 40635475                | AA                              | GG              | 1946827808               |
| SNP_P4_61460_40637789 | NC_021163.1    | Ca_kabuli_chr04 | 40637789                | TT                              | CC              | 1946827810               |
| SNP_P4_61461_40637790 | NC_021163.1    | Ca_kabuli_chr04 | 40637790                | CC                              | AA              | 1946827812               |
| SNP_P4_61462_40638071 | NC_021163.1    | Ca_kabuli_chr04 | 40638071                | CC                              | TT              | 1946827814               |
| SNP_P4_61463_40638686 | NC_021163.1    | Ca_kabuli_chr04 | 40638686                | CC                              | TT              | 1946827816               |
| SNP_P4_61464_40638713 | NC_021163.1    | Ca_kabuli_chr04 | 40638713                | TT                              | CC              | 1946827818               |
| SNP_P4_61466_40638745 | NC_021163.1    | Ca_kabuli_chr04 | 40638745                | TT                              | CC              | 1946827820               |

| SNPs IDs              | Chromosome IDs | Chromosomes     | Physical positions (bp) | CDC Frontier (Reference genome) | (ILWC46 & LPNB) | NCBI SNPdb Accession IDs |
|-----------------------|----------------|-----------------|-------------------------|---------------------------------|-----------------|--------------------------|
| SNP_P4_61467_40638748 | NC_021163.1    | Ca_kabuli_chr04 | 40638748                | TT                              | CC              | 1946827822               |
| SNP_P4_61469_40639403 | NC_021163.1    | Ca_kabuli_chr04 | 40639403                | TT                              | AA              | 1946827824               |
| SNP_P4_61470_40639635 | NC_021163.1    | Ca_kabuli_chr04 | 40639635                | AA                              | GG              | 1946827826               |
| SNP_P4_61471_40639640 | NC_021163.1    | Ca_kabuli_chr04 | 40639640                | AA                              | GG              | 1946827828               |
| SNP_P4_61472_40639653 | NC_021163.1    | Ca_kabuli_chr04 | 40639653                | TT                              | CC              | 1946827830               |
| SNP_P4_61474_40640164 | NC_021163.1    | Ca_kabuli_chr04 | 40640164                | AA                              | CC              | 1946827832               |
| SNP_P4_61475_40640413 | NC_021163.1    | Ca_kabuli_chr04 | 40640413                | CC                              | TT              | 1946827834               |
| SNP_P4_61476_40640442 | NC_021163.1    | Ca_kabuli_chr04 | 40640442                | CC                              | TT              | 1946827836               |
| SNP_P4_61477_40640445 | NC_021163.1    | Ca_kabuli_chr04 | 40640445                | GG                              | AA              | 1946827838               |
| SNP_P4_61478_40640456 | NC_021163.1    | Ca_kabuli_chr04 | 40640456                | CC                              | TT              | 1946827840               |
| SNP_P4_61479_40640461 | NC_021163.1    | Ca_kabuli_chr04 | 40640461                | AA                              | TT              | 1946827842               |
| SNP_P4_61480_40640469 | NC_021163.1    | Ca_kabuli_chr04 | 40640469                | TT                              | CC              | 1946827845               |
| SNP_P4_61481_40640491 | NC_021163.1    | Ca_kabuli_chr04 | 40640491                | AA                              | GG              | 1946827847               |
| SNP_P4_61483_40642301 | NC_021163.1    | Ca_kabuli_chr04 | 40642301                | TT                              | CC              | 1946827849               |
| SNP_P4_61484_40643967 | NC_021163.1    | Ca_kabuli_chr04 | 40643967                | CC                              | TT              | 1946827851               |
| SNP_P4_61485_40644004 | NC_021163.1    | Ca_kabuli_chr04 | 40644004                | GG                              | AA              | 1946827853               |
| SNP_P4_61486_40644027 | NC_021163.1    | Ca_kabuli_chr04 | 40644027                | TT                              | CC              | 1946827855               |
| SNP_P4_61487_40645336 | NC_021163.1    | Ca_kabuli_chr04 | 40645336                | TT                              | CC              | 1946827857               |
| SNP_P4_61488_40645382 | NC_021163.1    | Ca_kabuli_chr04 | 40645382                | GG                              | CC              | 1946827859               |
| SNP_P4_61490_40647474 | NC_021163.1    | Ca_kabuli_chr04 | 40647474                | TT                              | AA              | 1946827861               |
| SNP_P4_61491_40647596 | NC_021163.1    | Ca_kabuli_chr04 | 40647596                | TT                              | CC              | 1946827863               |
| SNP_P4_61492_40647605 | NC_021163.1    | Ca_kabuli_chr04 | 40647605                | CC                              | TT              | 1946827865               |
| SNP_P4_61493_40647938 | NC_021163.1    | Ca_kabuli_chr04 | 40647938                | AA                              | CC              | 1946827867               |
| SNP_P4_61494_40648050 | NC_021163.1    | Ca_kabuli_chr04 | 40648050                | AA                              | CC              | 1946827869               |
| SNP_P4_61495_40648072 | NC_021163.1    | Ca_kabuli_chr04 | 40648072                | TT                              | AA              | 1946827871               |
| SNP_P4_61496_40648128 | NC_021163.1    | Ca_kabuli_chr04 | 40648128                | TT                              | GG              | 1946827873               |
| SNP_P4_61497_40648207 | NC_021163.1    | Ca_kabuli_chr04 | 40648207                | CC                              | TT              | 1946827875               |
| SNP_P4_61498_40648290 | NC_021163.1    | Ca_kabuli_chr04 | 40648290                | TT                              | CC              | 1946827878               |
| SNP_P4_61499_40648326 | NC_021163.1    | Ca_kabuli_chr04 | 40648326                | CC                              | TT              | 1946827880               |
| SNP_P4_61500_40648339 | NC_021163.1    | Ca_kabuli_chr04 | 40648339                | GG                              | AA              | 1946827882               |
| SNP_P4_61501_40648359 | NC_021163.1    | Ca_kabuli_chr04 | 40648359                | TT                              | CC              | 1946827884               |
| SNP_P4_61502_40648618 | NC_021163.1    | Ca_kabuli_chr04 | 40648618                | CC                              | TT              | 1946827886               |
| SNP_P4_61503_40648743 | NC_021163.1    | Ca_kabuli_chr04 | 40648743                | CC                              | TT              | 1946827888               |
| SNP_P4_61504_40648869 | NC_021163.1    | Ca_kabuli_chr04 | 40648869                | TT                              | GG              | 1946827890               |
| SNP_P4_61505_40648877 | NC_021163.1    | Ca_kabuli_chr04 | 40648877                | CC                              | AA              | 1946827892               |
| SNP_P4_61506_40648899 | NC_021163.1    | Ca_kabuli_chr04 | 40648899                | GG                              | AA              | 1946827894               |
| SNP_P4_61507_40648933 | NC_021163.1    | Ca_kabuli_chr04 | 40648933                | CC                              | TT              | 1946827896               |
| SNP_P4_61509_40649069 | NC_021163.1    | Ca_kabuli_chr04 | 40649069                | GG                              | CC              | 1946827898               |
| SNP_P4_61510_40649078 | NC_021163.1    | Ca_kabuli_chr04 | 40649078                | GG                              | AA              | 1946827900               |
| SNP_P4_61511_40649120 | NC_021163.1    | Ca_kabuli_chr04 | 40649120                | TT                              | AA              | 1946827902               |
| SNP_P4_61512_40651378 | NC_021163.1    | Ca_kabuli_chr04 | 40651378                | CC                              | AA              | 1946827904               |
| SNP_P4_61513_40651379 | NC_021163.1    | Ca_kabuli_chr04 | 40651379                | TT                              | CC              | 1946827906               |

| SNPs IDs              | Chromosome IDs | Chromosomes     | Physical positions (bp) | CDC Frontier (Reference genome) | (ILWC46 & LPNB) | NCBI SNPdb Accession IDs |
|-----------------------|----------------|-----------------|-------------------------|---------------------------------|-----------------|--------------------------|
| SNP_P4_61514_40651380 | NC_021163.1    | Ca_kabuli_chr04 | 40651380                | CC                              | GG              | 1946827908               |
| SNP_P4_61515_40651518 | NC_021163.1    | Ca_kabuli_chr04 | 40651518                | GG                              | AA              | 1946827910               |
| SNP_P4_61516_40651569 | NC_021163.1    | Ca_kabuli_chr04 | 40651569                | GG                              | AA              | 1946827913               |
| SNP_P4_61517_40651807 | NC_021163.1    | Ca_kabuli_chr04 | 40651807                | CC                              | TT              | 1946827915               |
| SNP_P4_61518_40651848 | NC_021163.1    | Ca_kabuli_chr04 | 40651848                | AA                              | TT              | 1946827916               |
| SNP_P4_61519_40652279 | NC_021163.1    | Ca_kabuli_chr04 | 40652279                | AA                              | GG              | 1946827918               |
| SNP_P4_61520_40653040 | NC_021163.1    | Ca_kabuli_chr04 | 40653040                | TT                              | AA              | 1946827921               |
| SNP_P4_61521_40653093 | NC_021163.1    | Ca_kabuli_chr04 | 40653093                | GG                              | TT              | 1946827923               |
| SNP_P4_61522_40653116 | NC_021163.1    | Ca_kabuli_chr04 | 40653116                | CC                              | AA              | 1946827924               |
| SNP_P4_61524_40700993 | NC_021163.1    | Ca_kabuli_chr04 | 40700993                | AA                              | GG              | 1946827926               |
| SNP_P4_61525_40701279 | NC_021163.1    | Ca_kabuli_chr04 | 40701279                | AA                              | TT              | 1946827928               |
| SNP_P4_61526_40702056 | NC_021163.1    | Ca_kabuli_chr04 | 40702056                | CC                              | TT              | 1946827930               |
| SNP_P4_61527_40702074 | NC_021163.1    | Ca_kabuli_chr04 | 40702074                | TT                              | CC              | 1946827932               |
| SNP_P4_61528_40702215 | NC_021163.1    | Ca_kabuli_chr04 | 40702215                | TT                              | CC              | 1946827934               |
| SNP_P4_61529_40702232 | NC_021163.1    | Ca_kabuli_chr04 | 40702232                | CC                              | TT              | 1946827936               |
| SNP_P4_61530_40702587 | NC_021163.1    | Ca_kabuli_chr04 | 40702587                | CC                              | GG              | 1946827938               |
| SNP_P4_61531_40702637 | NC_021163.1    | Ca_kabuli_chr04 | 40702637                | AA                              | GG              | 1946827940               |
| SNP_P4_61532_40702649 | NC_021163.1    | Ca_kabuli_chr04 | 40702649                | AA                              | CC              | 1946827942               |
| SNP_P4_61533_40702673 | NC_021163.1    | Ca_kabuli_chr04 | 40702673                | AA                              | GG              | 1946827944               |
| SNP_P4_61535_40702781 | NC_021163.1    | Ca_kabuli_chr04 | 40702781                | CC                              | TT              | 1946827946               |
| SNP_P4_61536_40703141 | NC_021163.1    | Ca_kabuli_chr04 | 40703141                | TT                              | CC              | 1946827948               |
| SNP_P4_61537_40703270 | NC_021163.1    | Ca_kabuli_chr04 | 40703270                | CC                              | AA              | 1946827950               |
| SNP_P4_61538_40703398 | NC_021163.1    | Ca_kabuli_chr04 | 40703398                | GG                              | AA              | 1946827952               |
| SNP_P4_61539_40704137 | NC_021163.1    | Ca_kabuli_chr04 | 40704137                | TT                              | CC              | 1946827954               |
| SNP_P4_61541_40704881 | NC_021163.1    | Ca_kabuli_chr04 | 40704881                | TT                              | AA              | 1946827956               |
| SNP_P4_61543_40707256 | NC_021163.1    | Ca_kabuli_chr04 | 40707256                | GG                              | AA              | 1946827958               |
| SNP_P4_61544_40708045 | NC_021163.1    | Ca_kabuli_chr04 | 40708045                | GG                              | AA              | 1946827960               |
| SNP_P4_61545_40714458 | NC_021163.1    | Ca_kabuli_chr04 | 40714458                | TT                              | AA              | 1946827962               |
| SNP_P4_61546_40717742 | NC_021163.1    | Ca_kabuli_chr04 | 40717742                | GG                              | AA              | 1946827964               |
| SNP_P4_61547_40718340 | NC_021163.1    | Ca_kabuli_chr04 | 40718340                | GG                              | AA              | 1946827966               |
| SNP_P4_61548_40720663 | NC_021163.1    | Ca_kabuli_chr04 | 40720663                | TT                              | CC              | 1946827968               |
| SNP_P4_61550_40722666 | NC_021163.1    | Ca_kabuli_chr04 | 40722666                | CC                              | TT              | 1946827970               |
| SNP_P4_61552_40728475 | NC_021163.1    | Ca_kabuli_chr04 | 40728475                | TT                              | GG              | 1946827972               |
| SNP_P4_61553_40728509 | NC_021163.1    | Ca_kabuli_chr04 | 40728509                | CC                              | TT              | 1946827974               |
| SNP_P4_61554_40729241 | NC_021163.1    | Ca_kabuli_chr04 | 40729241                | TT                              | CC              | 1946827976               |
| SNP_P4_61555_40729362 | NC_021163.1    | Ca_kabuli_chr04 | 40729362                | AA                              | GG              | 1946827978               |
| SNP_P4_61556_40729369 | NC_021163.1    | Ca_kabuli_chr04 | 40729369                | AA                              | GG              | 1946827979               |
| SNP_P4_61558_40729412 | NC_021163.1    | Ca_kabuli_chr04 | 40729412                | CC                              | AA              | 1946827982               |
| SNP_P4_61559_40729433 | NC_021163.1    | Ca_kabuli_chr04 | 40729433                | TT                              | GG              | 1946827984               |
| SNP_P4_61560_40729690 | NC_021163.1    | Ca_kabuli_chr04 | 40729690                | CC                              | GG              | 1946827986               |
| SNP_P4_61561_40729744 | NC_021163.1    | Ca_kabuli_chr04 | 40729744                | GG                              | AA              | 1946827988               |
| SNP_P4_61562_40729915 | NC_021163.1    | Ca_kabuli_chr04 | 40729915                | GG                              | AA              | 1946827990               |

| SNPs IDs              | Chromosome IDs | Chromosomes     | Physical positions (bp) | CDC Frontier (Reference genome) | (ILWC46 & LPNB) | NCBI SNPdb Accession IDs |
|-----------------------|----------------|-----------------|-------------------------|---------------------------------|-----------------|--------------------------|
| SNP_P4_61563_40729918 | NC_021163.1    | Ca_kabuli_chr04 | 40729918                | GG                              | TT              | 1946827992               |
| SNP_P4_61564_40730105 | NC_021163.1    | Ca_kabuli_chr04 | 40730105                | GG                              | AA              | 1946827994               |
| SNP_P4_61565_40730107 | NC_021163.1    | Ca_kabuli_chr04 | 40730107                | TT                              | AA              | 1946827996               |
| SNP_P4_61566_40730150 | NC_021163.1    | Ca_kabuli_chr04 | 40730150                | GG                              | TT              | 1946827998               |
| SNP_P4_61567_40730213 | NC_021163.1    | Ca_kabuli_chr04 | 40730213                | GG                              | AA              | 1946828000               |
| SNP_P4_61568_40730225 | NC_021163.1    | Ca_kabuli_chr04 | 40730225                | AA                              | GG              | 1946828002               |
| SNP_P4_61569_40730260 | NC_021163.1    | Ca_kabuli_chr04 | 40730260                | CC                              | TT              | 1946828004               |
| SNP_P4_61570_40730549 | NC_021163.1    | Ca_kabuli_chr04 | 40730549                | CC                              | TT              | 1946828005               |
| SNP_P4_61571_40730830 | NC_021163.1    | Ca_kabuli_chr04 | 40730830                | AA                              | GG              | 1946828007               |
| SNP_P4_61572_40731013 | NC_021163.1    | Ca_kabuli_chr04 | 40731013                | AA                              | TT              | 1946828009               |
| SNP_P4_61573_40731133 | NC_021163.1    | Ca_kabuli_chr04 | 40731133                | AA                              | GG              | 1946828011               |
| SNP_P4_61575_40731159 | NC_021163.1    | Ca_kabuli_chr04 | 40731159                | CC                              | AA              | 1946828013               |
| SNP_P4_61576_40731810 | NC_021163.1    | Ca_kabuli_chr04 | 40731810                | AA                              | GG              | 1946828015               |
| SNP_P4_61577_40732168 | NC_021163.1    | Ca_kabuli_chr04 | 40732168                | TT                              | CC              | 1946828017               |
| SNP_P4_61578_40732188 | NC_021163.1    | Ca_kabuli_chr04 | 40732188                | CC                              | TT              | 1946828019               |
| SNP_P4_61579_40732224 | NC_021163.1    | Ca_kabuli_chr04 | 40732224                | AA                              | CC              | 1946828021               |
| SNP_P4_61580_40733575 | NC_021163.1    | Ca_kabuli_chr04 | 40733575                | AA                              | TT              | 1946828023               |
| SNP_P4_61581_40734572 | NC_021163.1    | Ca_kabuli_chr04 | 40734572                | GG                              | TT              | 1946828025               |
| SNP_P4_61582_40735525 | NC_021163.1    | Ca_kabuli_chr04 | 40735525                | TT                              | CC              | 1946828027               |
| SNP_P4_61583_40736396 | NC_021163.1    | Ca_kabuli_chr04 | 40736396                | CC                              | TT              | 1946828029               |
| SNP_P4_61584_40736402 | NC_021163.1    | Ca_kabuli_chr04 | 40736402                | GG                              | AA              | 1946828031               |
| SNP_P4_61585_40736442 | NC_021163.1    | Ca_kabuli_chr04 | 40736442                | GG                              | AA              | 1946828033               |
| SNP_P4_61586_40736712 | NC_021163.1    | Ca_kabuli_chr04 | 40736712                | AA                              | GG              | 1946828035               |
| SNP_P4_61587_40736721 | NC_021163.1    | Ca_kabuli_chr04 | 40736721                | AA                              | GG              | 1946828037               |
| SNP_P4_61588_40737462 | NC_021163.1    | Ca_kabuli_chr04 | 40737462                | AA                              | TT              | 1946828039               |
| SNP_P4_61589_40737474 | NC_021163.1    | Ca_kabuli_chr04 | 40737474                | AA                              | GG              | 1946828041               |
| SNP_P4_61590_40737523 | NC_021163.1    | Ca_kabuli_chr04 | 40737523                | GG                              | AA              | 1946828043               |
| SNP_P4_61591_40737530 | NC_021163.1    | Ca_kabuli_chr04 | 40737530                | TT                              | CC              | 1946828045               |
| SNP_P4_61593_40738402 | NC_021163.1    | Ca_kabuli_chr04 | 40738402                | TT                              | AA              | 1946828047               |
| SNP_P4_61594_40738475 | NC_021163.1    | Ca_kabuli_chr04 | 40738475                | AA                              | TT              | 1946828049               |
| SNP_P4_61595_40738515 | NC_021163.1    | Ca_kabuli_chr04 | 40738515                | CC                              | AA              | 1946828051               |
| SNP_P4_61596_40742532 | NC_021163.1    | Ca_kabuli_chr04 | 40742532                | TT                              | CC              | 1946828053               |
| SNP_P4_61597_40742568 | NC_021163.1    | Ca_kabuli_chr04 | 40742568                | CC                              | TT              | 1946828055               |
| SNP_P4_61598_40743273 | NC_021163.1    | Ca_kabuli_chr04 | 40743273                | AA                              | GG              | 1946828057               |
| SNP_P4_61599_40743317 | NC_021163.1    | Ca_kabuli_chr04 | 40743317                | GG                              | AA              | 1946828060               |
| SNP_P4_61601_40743630 | NC_021163.1    | Ca_kabuli_chr04 | 40743630                | AA                              | CC              | 1946828062               |
| SNP_P4_61602_40744600 | NC_021163.1    | Ca_kabuli_chr04 | 40744600                | AA                              | GG              | 1946828064               |
| SNP_P4_61603_40744605 | NC_021163.1    | Ca_kabuli_chr04 | 40744605                | GG                              | TT              | 1946828066               |
| SNP_P4_61604_40746510 | NC_021163.1    | Ca_kabuli_chr04 | 40746510                | TT                              | CC              | 1946828068               |
| SNP_P4_61605_40746514 | NC_021163.1    | Ca_kabuli_chr04 | 40746514                | GG                              | AA              | 1946828070               |
| SNP_P4_61606_40746532 | NC_021163.1    | Ca_kabuli_chr04 | 40746532                | CC                              | GG              | 1946828072               |
| SNP_P4_61607_40746765 | NC_021163.1    | Ca_kabuli_chr04 | 40746765                | GG                              | AA              | 1946828074               |



| SNPs IDs              | Chromosome IDs | Chromosomes     | Physical positions (bp) | CDC Frontier (Reference genome) | (ILWC46 & LPNB) | NCBI SNPdb Accession IDs |
|-----------------------|----------------|-----------------|-------------------------|---------------------------------|-----------------|--------------------------|
| SNP_P4_61608_40746793 | NC_021163.1    | Ca_kabuli_chr04 | 40746793                | TT                              | CC              | 1946828076               |
| SNP_P4_61609_40748647 | NC_021163.1    | Ca_kabuli_chr04 | 40748647                | CC                              | TT              | 1946828078               |
| SNP_P4_61610_40748671 | NC_021163.1    | Ca_kabuli_chr04 | 40748671                | TT                              | CC              | 1946828080               |
| SNP_P4_61611_40748712 | NC_021163.1    | Ca_kabuli_chr04 | 40748712                | CC                              | TT              | 1946828082               |
| SNP_P4_61612_40749375 | NC_021163.1    | Ca_kabuli_chr04 | 40749375                | TT                              | CC              | 1946828084               |
| SNP_P4_61613_40749378 | NC_021163.1    | Ca_kabuli_chr04 | 40749378                | AA                              | GG              | 1946828086               |
| SNP_P4_61614_40749658 | NC_021163.1    | Ca_kabuli_chr04 | 40749658                | GG                              | AA              | 1946828088               |
| SNP_P4_61615_40749662 | NC_021163.1    | Ca_kabuli_chr04 | 40749662                | TT                              | CC              | 1946828090               |
| SNP_P4_61616_40749675 | NC_021163.1    | Ca_kabuli_chr04 | 40749675                | CC                              | TT              | 1946828092               |
| SNP_P4_61617_40749676 | NC_021163.1    | Ca_kabuli_chr04 | 40749676                | TT                              | CC              | 1946828094               |
| SNP_P4_61618_40749733 | NC_021163.1    | Ca_kabuli_chr04 | 40749733                | AA                              | GG              | 1946828096               |
| SNP_P4_61619_40749740 | NC_021163.1    | Ca_kabuli_chr04 | 40749740                | TT                              | AA              | 1946828098               |
| SNP_P4_61620_40750555 | NC_021163.1    | Ca_kabuli_chr04 | 40750555                | AA                              | GG              | 1946828100               |
| SNP_P4_61621_40751000 | NC_021163.1    | Ca_kabuli_chr04 | 40751000                | TT                              | CC              | 1946828102               |
| SNP_P4_61622_40751087 | NC_021163.1    | Ca_kabuli_chr04 | 40751087                | GG                              | CC              | 1946828104               |
| SNP_P4_61623_40754010 | NC_021163.1    | Ca_kabuli_chr04 | 40754010                | TT                              | CC              | 1946828106               |
| SNP_P4_61624_40754971 | NC_021163.1    | Ca_kabuli_chr04 | 40754971                | TT                              | CC              | 1946828108               |
| SNP_P4_61625_40755565 | NC_021163.1    | Ca_kabuli_chr04 | 40755565                | AA                              | GG              | 1946828110               |
| SNP_P4_61626_40755721 | NC_021163.1    | Ca_kabuli_chr04 | 40755721                | GG                              | AA              | 1946828112               |
| SNP_P4_61627_40755879 | NC_021163.1    | Ca_kabuli_chr04 | 40755879                | TT                              | CC              | 1946828114               |
| SNP_P4_61628_40755996 | NC_021163.1    | Ca_kabuli_chr04 | 40755996                | CC                              | AA              | 1946828116               |
| SNP_P4_61629_40756104 | NC_021163.1    | Ca_kabuli_chr04 | 40756104                | CC                              | TT              | 1946828118               |
| SNP_P4_61631_40757508 | NC_021163.1    | Ca_kabuli_chr04 | 40757508                | CC                              | TT              | 1946828120               |
| SNP_P4_61632_40757515 | NC_021163.1    | Ca_kabuli_chr04 | 40757515                | CC                              | AA              | 1946828122               |
| SNP_P4_61633_40757534 | NC_021163.1    | Ca_kabuli_chr04 | 40757534                | GG                              | AA              | 1946828123               |
| SNP_P4_61634_40760435 | NC_021163.1    | Ca_kabuli_chr04 | 40760435                | TT                              | CC              | 1946828124               |
| SNP_P4_61635_40760440 | NC_021163.1    | Ca_kabuli_chr04 | 40760440                | AA                              | TT              | 1946828125               |
| SNP_P4_61636_40761315 | NC_021163.1    | Ca_kabuli_chr04 | 40761315                | AA                              | TT              | 1946828127               |
| SNP_P4_61637_40761320 | NC_021163.1    | Ca_kabuli_chr04 | 40761320                | AA                              | CC              | 1946828128               |
| SNP_P4_61638_40761323 | NC_021163.1    | Ca_kabuli_chr04 | 40761323                | AA                              | TT              | 1946828130               |
| SNP_P4_61639_40761775 | NC_021163.1    | Ca_kabuli_chr04 | 40761775                | TT                              | AA              | 1946828132               |
| SNP_P4_61640_40762003 | NC_021163.1    | Ca_kabuli_chr04 | 40762003                | GG                              | CC              | 1946828134               |
| SNP_P4_61641_40762031 | NC_021163.1    | Ca_kabuli_chr04 | 40762031                | CC                              | TT              | 1946828136               |
| SNP_P4_61643_40762210 | NC_021163.1    | Ca_kabuli_chr04 | 40762210                | TT                              | CC              | 1946828138               |
| SNP_P4_61644_40762216 | NC_021163.1    | Ca_kabuli_chr04 | 40762216                | CC                              | TT              | 1946828140               |
| SNP_P4_61645_40762221 | NC_021163.1    | Ca_kabuli_chr04 | 40762221                | CC                              | TT              | 1946828142               |
| SNP_P4_61646_40762231 | NC_021163.1    | Ca_kabuli_chr04 | 40762231                | CC                              | TT              | 1946828144               |
| SNP_P4_61647_40762267 | NC_021163.1    | Ca_kabuli_chr04 | 40762267                | TT                              | CC              | 1946828146               |
| SNP_P4_61648_40762286 | NC_021163.1    | Ca_kabuli_chr04 | 40762286                | CC                              | TT              | 1946828148               |
| SNP_P4_61649_40762297 | NC_021163.1    | Ca_kabuli_chr04 | 40762297                | AA                              | GG              | 1946828150               |
| SNP_P4_61650_40762300 | NC_021163.1    | Ca_kabuli_chr04 | 40762300                | CC                              | TT              | 1946828152               |
| SNP_P4_61651_40763003 | NC_021163.1    | Ca_kabuli_chr04 | 40763003                | TT                              | AA              | 1946828154               |

| SNPs IDs              | Chromosome IDs | Chromosomes     | Physical positions (bp) | CDC Frontier (Reference genome) | (ILWC46 & LPNB) | NCBI SNPdb Accession IDs |
|-----------------------|----------------|-----------------|-------------------------|---------------------------------|-----------------|--------------------------|
| SNP_P4_61652_40763043 | NC_021163.1    | Ca_kabuli_chr04 | 40763043                | TT                              | CC              | 1946828156               |
| SNP_P4_61653_40763078 | NC_021163.1    | Ca_kabuli_chr04 | 40763078                | AA                              | TT              | 1946828158               |
| SNP_P4_61654_40763081 | NC_021163.1    | Ca_kabuli_chr04 | 40763081                | AA                              | TT              | 1946828160               |
| SNP_P4_61656_40763676 | NC_021163.1    | Ca_kabuli_chr04 | 40763676                | TT                              | CC              | 1946828162               |
| SNP_P4_61658_40763743 | NC_021163.1    | Ca_kabuli_chr04 | 40763743                | AA                              | GG              | 1946828164               |
| SNP_P4_61659_40763766 | NC_021163.1    | Ca_kabuli_chr04 | 40763766                | TT                              | CC              | 1946828166               |
| SNP_P4_61660_40763912 | NC_021163.1    | Ca_kabuli_chr04 | 40763912                | GG                              | TT              | 1946828168               |
| SNP_P4_61661_40764000 | NC_021163.1    | Ca_kabuli_chr04 | 40764000                | TT                              | GG              | 1946828170               |
| SNP_P4_61662_40764005 | NC_021163.1    | Ca_kabuli_chr04 | 40764005                | AA                              | GG              | 1946828172               |
| SNP_P4_61663_40764008 | NC_021163.1    | Ca_kabuli_chr04 | 40764008                | AA                              | GG              | 1946828175               |
| SNP_P4_61664_40764012 | NC_021163.1    | Ca_kabuli_chr04 | 40764012                | AA                              | GG              | 1946828177               |
| SNP_P4_61665_40764211 | NC_021163.1    | Ca_kabuli_chr04 | 40764211                | GG                              | AA              | 1946828179               |
| SNP_P4_61666_40765069 | NC_021163.1    | Ca_kabuli_chr04 | 40765069                | AA                              | GG              | 1946828181               |
| SNP_P4_61667_40765401 | NC_021163.1    | Ca_kabuli_chr04 | 40765401                | GG                              | AA              | 1946828183               |
| SNP_P4_61668_40765412 | NC_021163.1    | Ca_kabuli_chr04 | 40765412                | AA                              | GG              | 1946828185               |
| SNP_P4_61669_40765858 | NC_021163.1    | Ca_kabuli_chr04 | 40765858                | CC                              | TT              | 1946828187               |
| SNP_P4_61670_40766101 | NC_021163.1    | Ca_kabuli_chr04 | 40766101                | CC                              | TT              | 1946828189               |
| SNP_P4_61671_40766168 | NC_021163.1    | Ca_kabuli_chr04 | 40766168                | TT                              | AA              | 1946828191               |
| SNP_P4_61672_40766172 | NC_021163.1    | Ca_kabuli_chr04 | 40766172                | GG                              | AA              | 1946828193               |
| SNP_P4_61673_40766406 | NC_021163.1    | Ca_kabuli_chr04 | 40766406                | TT                              | CC              | 1946828195               |
| SNP_P4_61674_40766692 | NC_021163.1    | Ca_kabuli_chr04 | 40766692                | TT                              | CC              | 1946828197               |
| SNP_P4_61675_40767261 | NC_021163.1    | Ca_kabuli_chr04 | 40767261                | AA                              | TT              | 1946828199               |
| SNP_P4_61676_40767283 | NC_021163.1    | Ca_kabuli_chr04 | 40767283                | CC                              | GG              | 1946828201               |
| SNP_P4_61677_40767764 | NC_021163.1    | Ca_kabuli_chr04 | 40767764                | TT                              | AA              | 1946828203               |
| SNP_P4_61679_40768047 | NC_021163.1    | Ca_kabuli_chr04 | 40768047                | AA                              | TT              | 1946828205               |
| SNP_P4_61680_40768072 | NC_021163.1    | Ca_kabuli_chr04 | 40768072                | CC                              | TT              | 1946828207               |
| SNP_P4_61681_40768110 | NC_021163.1    | Ca_kabuli_chr04 | 40768110                | TT                              | GG              | 1946828209               |
| SNP_P4_61682_40768114 | NC_021163.1    | Ca_kabuli_chr04 | 40768114                | AA                              | CC              | 1946828211               |
| SNP_P4_61683_40768128 | NC_021163.1    | Ca_kabuli_chr04 | 40768128                | TT                              | CC              | 1946828213               |
| SNP_P4_61684_40768134 | NC_021163.1    | Ca_kabuli_chr04 | 40768134                | GG                              | AA              | 1946828215               |
| SNP_P4_61685_40769101 | NC_021163.1    | Ca_kabuli_chr04 | 40769101                | TT                              | AA              | 1946828217               |
| SNP_P4_61686_40769103 | NC_021163.1    | Ca_kabuli_chr04 | 40769103                | GG                              | TT              | 1946828218               |
| SNP_P4_61689_40771285 | NC_021163.1    | Ca_kabuli_chr04 | 40771285                | GG                              | AA              | 1946828219               |
| SNP_P4_61690_40771356 | NC_021163.1    | Ca_kabuli_chr04 | 40771356                | CC                              | TT              | 1946828220               |
| SNP_P4_61691_40771388 | NC_021163.1    | Ca_kabuli_chr04 | 40771388                | CC                              | GG              | 1946828221               |
| SNP_P4_61692_40771433 | NC_021163.1    | Ca_kabuli_chr04 | 40771433                | AA                              | GG              | 1946828222               |
| SNP_P4_61693_40771550 | NC_021163.1    | Ca_kabuli_chr04 | 40771550                | TT                              | CC              | 1946828223               |
| SNP_P4_61694_40771763 | NC_021163.1    | Ca_kabuli_chr04 | 40771763                | TT                              | GG              | 1946828224               |
| SNP_P4_61695_40772598 | NC_021163.1    | Ca_kabuli_chr04 | 40772598                | AA                              | GG              | 1946828226               |
| SNP_P4_61696_40772615 | NC_021163.1    | Ca_kabuli_chr04 | 40772615                | AA                              | GG              | 1946828228               |
| SNP_P4_61697_40772617 | NC_021163.1    | Ca_kabuli_chr04 | 40772617                | TT                              | CC              | 1946828230               |
| SNP_P4_61698_40772656 | NC_021163.1    | Ca_kabuli_chr04 | 40772656                | GG                              | AA              | 1946828232               |

| SNPs IDs              | Chromosome IDs | Chromosomes     | Physical positions (bp) | CDC Frontier (Reference genome) | (ILWC46 & LPNB) | NCBI SNPdb Accession IDs |
|-----------------------|----------------|-----------------|-------------------------|---------------------------------|-----------------|--------------------------|
| SNP_P4_61699_40772667 | NC_021163.1    | Ca_kabuli_chr04 | 40772667                | GG                              | TT              | 1946828234               |
| SNP_P4_61700_40772890 | NC_021163.1    | Ca_kabuli_chr04 | 40772890                | CC                              | TT              | 1946828236               |
| SNP_P4_61701_40772952 | NC_021163.1    | Ca_kabuli_chr04 | 40772952                | AA                              | GG              | 1946828238               |
| SNP_P4_61702_40772988 | NC_021163.1    | Ca_kabuli_chr04 | 40772988                | CC                              | GG              | 1946828240               |
| SNP_P4_61703_40772993 | NC_021163.1    | Ca_kabuli_chr04 | 40772993                | GG                              | AA              | 1946828242               |
| SNP_P4_61704_40773239 | NC_021163.1    | Ca_kabuli_chr04 | 40773239                | CC                              | TT              | 1946828244               |
| SNP_P4_61705_40773254 | NC_021163.1    | Ca_kabuli_chr04 | 40773254                | GG                              | AA              | 1946828246               |
| SNP_P4_61706_40773259 | NC_021163.1    | Ca_kabuli_chr04 | 40773259                | GG                              | TT              | 1946828248               |
| SNP_P4_61707_40773273 | NC_021163.1    | Ca_kabuli_chr04 | 40773273                | AA                              | GG              | 1946828250               |
| SNP_P4_61708_40773294 | NC_021163.1    | Ca_kabuli_chr04 | 40773294                | GG                              | AA              | 1946828252               |
| SNP_P4_61709_40773919 | NC_021163.1    | Ca_kabuli_chr04 | 40773919                | GG                              | AA              | 1946828254               |
| SNP_P4_61710_40776363 | NC_021163.1    | Ca_kabuli_chr04 | 40776363                | CC                              | TT              | 1946828256               |
| SNP_P4_61711_40776379 | NC_021163.1    | Ca_kabuli_chr04 | 40776379                | AA                              | GG              | 1946828258               |
| SNP_P4_61712_40776380 | NC_021163.1    | Ca_kabuli_chr04 | 40776380                | AA                              | GG              | 1946828260               |
| SNP_P4_61713_40777538 | NC_021163.1    | Ca_kabuli_chr04 | 40777538                | GG                              | TT              | 1946828262               |
| SNP_P4_61714_40777585 | NC_021163.1    | Ca_kabuli_chr04 | 40777585                | AA                              | CC              | 1946828264               |
| SNP_P4_61715_40777655 | NC_021163.1    | Ca_kabuli_chr04 | 40777655                | TT                              | AA              | 1946828266               |
| SNP_P4_61716_40777681 | NC_021163.1    | Ca_kabuli_chr04 | 40777681                | GG                              | AA              | 1946828268               |
| SNP_P4_61717_40777877 | NC_021163.1    | Ca_kabuli_chr04 | 40777877                | AA                              | GG              | 1946828270               |
| SNP_P4_61718_40777918 | NC_021163.1    | Ca_kabuli_chr04 | 40777918                | CC                              | TT              | 1946828272               |
| SNP_P4_61719_40777956 | NC_021163.1    | Ca_kabuli_chr04 | 40777956                | AA                              | CC              | 1946828274               |
| SNP_P4_61720_40778021 | NC_021163.1    | Ca_kabuli_chr04 | 40778021                | GG                              | AA              | 1946828276               |
| SNP_P4_61721_40778024 | NC_021163.1    | Ca_kabuli_chr04 | 40778024                | CC                              | TT              | 1946828278               |
| SNP_P4_61722_40778095 | NC_021163.1    | Ca_kabuli_chr04 | 40778095                | TT                              | CC              | 1946828280               |
| SNP_P4_61723_40778134 | NC_021163.1    | Ca_kabuli_chr04 | 40778134                | CC                              | GG              | 1946828282               |
| SNP_P4_61724_40778234 | NC_021163.1    | Ca_kabuli_chr04 | 40778234                | CC                              | TT              | 1946828284               |
| SNP_P4_61725_40778251 | NC_021163.1    | Ca_kabuli_chr04 | 40778251                | TT                              | GG              | 1946828286               |
| SNP_P4_61726_40778365 | NC_021163.1    | Ca_kabuli_chr04 | 40778365                | CC                              | TT              | 1946828288               |
| SNP_P4_61727_40778609 | NC_021163.1    | Ca_kabuli_chr04 | 40778609                | AA                              | GG              | 1946828290               |
| SNP_P4_61728_40778610 | NC_021163.1    | Ca_kabuli_chr04 | 40778610                | GG                              | AA              | 1946828292               |
| SNP_P4_61730_40778783 | NC_021163.1    | Ca_kabuli_chr04 | 40778783                | TT                              | GG              | 1946828294               |
| SNP_P4_61731_40778884 | NC_021163.1    | Ca_kabuli_chr04 | 40778884                | GG                              | AA              | 1946828296               |
| SNP_P4_61732_40779754 | NC_021163.1    | Ca_kabuli_chr04 | 40779754                | GG                              | AA              | 1946828298               |
| SNP_P4_61733_40781593 | NC_021163.1    | Ca_kabuli_chr04 | 40781593                | CC                              | TT              | 1946828300               |
| SNP_P4_61734_40781831 | NC_021163.1    | Ca_kabuli_chr04 | 40781831                | AA                              | GG              | 1946828302               |
| SNP_P4_61735_40781881 | NC_021163.1    | Ca_kabuli_chr04 | 40781881                | GG                              | TT              | 1946828304               |
| SNP_P4_61736_40781891 | NC_021163.1    | Ca_kabuli_chr04 | 40781891                | GG                              | AA              | 1946828306               |
| SNP_P4_61737_40781928 | NC_021163.1    | Ca_kabuli_chr04 | 40781928                | AA                              | CC              | 1946828308               |
| SNP_P4_61738_40782219 | NC_021163.1    | Ca_kabuli_chr04 | 40782219                | AA                              | GG              | 1946828310               |
| SNP_P4_61739_40782220 | NC_021163.1    | Ca_kabuli_chr04 | 40782220                | CC                              | TT              | 1946828312               |
| SNP_P4_61740_40783269 | NC_021163.1    | Ca_kabuli_chr04 | 40783269                | CC                              | TT              | 1946828314               |
| SNP_P4_61741_40783296 | NC_021163.1    | Ca_kabuli_chr04 | 40783296                | AA                              | GG              | 1946828316               |

| SNPs IDs              | Chromosome IDs | Chromosomes     | Physical positions (bp) | CDC Frontier (Reference genome) | (ILWC46 & LPNB) | NCBI SNPdb Accession IDs |
|-----------------------|----------------|-----------------|-------------------------|---------------------------------|-----------------|--------------------------|
| SNP_P4_61742_40783553 | NC_021163.1    | Ca_kabuli_chr04 | 40783553                | AA                              | GG              | 1946828318               |
| SNP_P4_61744_40785145 | NC_021163.1    | Ca_kabuli_chr04 | 40785145                | AA                              | GG              | 1946828320               |
| SNP_P4_61745_40785351 | NC_021163.1    | Ca_kabuli_chr04 | 40785351                | CC                              | TT              | 1946828322               |
| SNP_P4_61747_40786760 | NC_021163.1    | Ca_kabuli_chr04 | 40786760                | TT                              | CC              | 1946828324               |
| SNP_P4_61748_40787980 | NC_021163.1    | Ca_kabuli_chr04 | 40787980                | GG                              | AA              | 1946828326               |
| SNP_P4_61749_40789753 | NC_021163.1    | Ca_kabuli_chr04 | 40789753                | CC                              | AA              | 1946828328               |
| SNP_P4_61750_40789969 | NC_021163.1    | Ca_kabuli_chr04 | 40789969                | GG                              | TT              | 1946828330               |
| SNP_P4_61751_40790011 | NC_021163.1    | Ca_kabuli_chr04 | 40790011                | CC                              | GG              | 1946828332               |
| SNP_P4_61753_40790489 | NC_021163.1    | Ca_kabuli_chr04 | 40790489                | AA                              | TT              | 1946828334               |
| SNP_P4_61754_40790490 | NC_021163.1    | Ca_kabuli_chr04 | 40790490                | TT                              | GG              | 1946828336               |
| SNP_P4_61755_40793380 | NC_021163.1    | Ca_kabuli_chr04 | 40793380                | AA                              | GG              | 1946828338               |
| SNP_P4_61756_40793681 | NC_021163.1    | Ca_kabuli_chr04 | 40793681                | AA                              | GG              | 1946828340               |
| SNP_P4_61758_40794676 | NC_021163.1    | Ca_kabuli_chr04 | 40794676                | TT                              | AA              | 1946828342               |
| SNP_P4_61759_40795306 | NC_021163.1    | Ca_kabuli_chr04 | 40795306                | CC                              | GG              | 1946828344               |
| SNP_P4_61760_40795319 | NC_021163.1    | Ca_kabuli_chr04 | 40795319                | TT                              | CC              | 1946828346               |
| SNP_P4_61761_40795384 | NC_021163.1    | Ca_kabuli_chr04 | 40795384                | CC                              | TT              | 1946828348               |
| SNP_P4_61762_40795668 | NC_021163.1    | Ca_kabuli_chr04 | 40795668                | AA                              | GG              | 1946828350               |
| SNP_P4_61763_40795670 | NC_021163.1    | Ca_kabuli_chr04 | 40795670                | CC                              | GG              | 1946828352               |
| SNP_P4_61764_40795672 | NC_021163.1    | Ca_kabuli_chr04 | 40795672                | AA                              | GG              | 1946828354               |
| SNP_P4_61765_40795699 | NC_021163.1    | Ca_kabuli_chr04 | 40795699                | AA                              | GG              | 1946828356               |
| SNP_P4_61766_40797201 | NC_021163.1    | Ca_kabuli_chr04 | 40797201                | TT                              | CC              | 1946828358               |
| SNP_P4_61767_40797216 | NC_021163.1    | Ca_kabuli_chr04 | 40797216                | GG                              | TT              | 1946828360               |
| SNP_P4_61768_40797225 | NC_021163.1    | Ca_kabuli_chr04 | 40797225                | AA                              | GG              | 1946828362               |
| SNP_P4_61769_40797583 | NC_021163.1    | Ca_kabuli_chr04 | 40797583                | CC                              | TT              | 1946828364               |
| SNP_P4_61770_40797846 | NC_021163.1    | Ca_kabuli_chr04 | 40797846                | AA                              | GG              | 1946828366               |
| SNP_P4_61771_40798847 | NC_021163.1    | Ca_kabuli_chr04 | 40798847                | CC                              | TT              | 1946828368               |
| SNP_P4_61772_40798849 | NC_021163.1    | Ca_kabuli_chr04 | 40798849                | AA                              | GG              | 1946828370               |
| SNP_P4_61773_40799039 | NC_021163.1    | Ca_kabuli_chr04 | 40799039                | AA                              | TT              | 1946828372               |
| SNP_P4_61774_40799069 | NC_021163.1    | Ca_kabuli_chr04 | 40799069                | AA                              | GG              | 1946828374               |
| SNP_P4_61775_40799325 | NC_021163.1    | Ca_kabuli_chr04 | 40799325                | AA                              | CC              | 1946828376               |
| SNP_P4_61776_40799656 | NC_021163.1    | Ca_kabuli_chr04 | 40799656                | TT                              | CC              | 1946828378               |
| SNP_P4_61779_40801999 | NC_021163.1    | Ca_kabuli_chr04 | 40801999                | AA                              | GG              | 1946828380               |
| SNP_P4_61780_40802335 | NC_021163.1    | Ca_kabuli_chr04 | 40802335                | TT                              | AA              | 1946828382               |
| SNP_P4_61782_40803608 | NC_021163.1    | Ca_kabuli_chr04 | 40803608                | TT                              | AA              | 1946828384               |
| SNP_P4_61783_40803611 | NC_021163.1    | Ca_kabuli_chr04 | 40803611                | CC                              | TT              | 1946828386               |
| SNP_P4_61784_40803646 | NC_021163.1    | Ca_kabuli_chr04 | 40803646                | TT                              | GG              | 1946828388               |
| SNP_P4_61785_40803799 | NC_021163.1    | Ca_kabuli_chr04 | 40803799                | GG                              | TT              | 1946828390               |
| SNP_P4_61786_40804138 | NC_021163.1    | Ca_kabuli_chr04 | 40804138                | TT                              | GG              | 1946828392               |
| SNP_P4_61787_40804861 | NC_021163.1    | Ca_kabuli_chr04 | 40804861                | TT                              | CC              | 1946828394               |
| SNP_P4_61788_40804893 | NC_021163.1    | Ca_kabuli_chr04 | 40804893                | TT                              | CC              | 1946828396               |
| SNP_P4_61789_40805835 | NC_021163.1    | Ca_kabuli_chr04 | 40805835                | AA                              | CC              | 1946828398               |
| SNP_P4_61790_40805839 | NC_021163.1    | Ca_kabuli_chr04 | 40805839                | CC                              | TT              | 1946828400               |

| SNPs IDs              | Chromosome IDs | Chromosomes     | Physical positions (bp) | CDC Frontier (Reference genome) | (ILWC46 & LPNB) | NCBI SNPdb Accession IDs |
|-----------------------|----------------|-----------------|-------------------------|---------------------------------|-----------------|--------------------------|
| SNP_P4_61791_40805863 | NC_021163.1    | Ca_kabuli_chr04 | 40805863                | AA                              | CC              | 1946828402               |
| SNP_P4_61792_40806274 | NC_021163.1    | Ca_kabuli_chr04 | 40806274                | AA                              | GG              | 1946828404               |
| SNP_P4_61793_40807053 | NC_021163.1    | Ca_kabuli_chr04 | 40807053                | TT                              | GG              | 1946828406               |
| SNP_P4_61794_40807183 | NC_021163.1    | Ca_kabuli_chr04 | 40807183                | CC                              | TT              | 1946828408               |
| SNP_P4_61795_40808210 | NC_021163.1    | Ca_kabuli_chr04 | 40808210                | CC                              | AA              | 1946828410               |
| SNP_P4_61796_40808235 | NC_021163.1    | Ca_kabuli_chr04 | 40808235                | AA                              | GG              | 1946828412               |
| SNP_P4_61797_40808405 | NC_021163.1    | Ca_kabuli_chr04 | 40808405                | CC                              | GG              | 1946828414               |
| SNP_P4_61798_40808411 | NC_021163.1    | Ca_kabuli_chr04 | 40808411                | TT                              | GG              | 1946828416               |
| SNP_P4_61799_40808449 | NC_021163.1    | Ca_kabuli_chr04 | 40808449                | TT                              | AA              | 1946828418               |
| SNP_P4_61800_40808617 | NC_021163.1    | Ca_kabuli_chr04 | 40808617                | CC                              | TT              | 1946828420               |
| SNP_P4_61801_40808637 | NC_021163.1    | Ca_kabuli_chr04 | 40808637                | GG                              | AA              | 1946828422               |
| SNP_P4_61802_40808664 | NC_021163.1    | Ca_kabuli_chr04 | 40808664                | TT                              | CC              | 1946828424               |
| SNP_P4_61803_40808666 | NC_021163.1    | Ca_kabuli_chr04 | 40808666                | TT                              | AA              | 1946828426               |
| SNP_P4_61804_40808864 | NC_021163.1    | Ca_kabuli_chr04 | 40808864                | CC                              | GG              | 1946828428               |
| SNP_P4_61805_40808873 | NC_021163.1    | Ca_kabuli_chr04 | 40808873                | GG                              | AA              | 1946828430               |
| SNP_P4_61806_40809006 | NC_021163.1    | Ca_kabuli_chr04 | 40809006                | AA                              | GG              | 1946828432               |
| SNP_P4_61807_40809304 | NC_021163.1    | Ca_kabuli_chr04 | 40809304                | AA                              | GG              | 1946828434               |
| SNP_P4_61808_40811304 | NC_021163.1    | Ca_kabuli_chr04 | 40811304                | GG                              | CC              | 1946828436               |
| SNP_P4_61809_40811598 | NC_021163.1    | Ca_kabuli_chr04 | 40811598                | TT                              | CC              | 1946828438               |
| SNP_P4_61811_40811689 | NC_021163.1    | Ca_kabuli_chr04 | 40811689                | GG                              | TT              | 1946828440               |
| SNP_P4_61812_40811698 | NC_021163.1    | Ca_kabuli_chr04 | 40811698                | AA                              | GG              | 1946828442               |
| SNP_P4_61813_40811701 | NC_021163.1    | Ca_kabuli_chr04 | 40811701                | CC                              | AA              | 1946828444               |
| SNP_P4_61814_40811720 | NC_021163.1    | Ca_kabuli_chr04 | 40811720                | AA                              | GG              | 1946828446               |
| SNP_P4_61815_40811759 | NC_021163.1    | Ca_kabuli_chr04 | 40811759                | AA                              | GG              | 1946828448               |
| SNP_P4_61816_40811823 | NC_021163.1    | Ca_kabuli_chr04 | 40811823                | TT                              | CC              | 1946828450               |
| SNP_P4_61817_40811850 | NC_021163.1    | Ca_kabuli_chr04 | 40811850                | GG                              | AA              | 1946828452               |
| SNP_P4_61818_40811851 | NC_021163.1    | Ca_kabuli_chr04 | 40811851                | CC                              | TT              | 1946828454               |
| SNP_P4_61819_40811956 | NC_021163.1    | Ca_kabuli_chr04 | 40811956                | GG                              | AA              | 1946828455               |
| SNP_P4_61820_40812029 | NC_021163.1    | Ca_kabuli_chr04 | 40812029                | TT                              | GG              | 1946828457               |
| SNP_P4_61821_40812086 | NC_021163.1    | Ca_kabuli_chr04 | 40812086                | CC                              | TT              | 1946828459               |
| SNP_P4_61822_40812123 | NC_021163.1    | Ca_kabuli_chr04 | 40812123                | GG                              | CC              | 1946828461               |
| SNP_P4_61823_40817132 | NC_021163.1    | Ca_kabuli_chr04 | 40817132                | CC                              | TT              | 1946828463               |
| SNP_P4_61824_40817441 | NC_021163.1    | Ca_kabuli_chr04 | 40817441                | AA                              | CC              | 1946828465               |
| SNP_P4_61825_40817510 | NC_021163.1    | Ca_kabuli_chr04 | 40817510                | TT                              | CC              | 1946828467               |
| SNP_P4_61826_40817911 | NC_021163.1    | Ca_kabuli_chr04 | 40817911                | AA                              | GG              | 1946828469               |
| SNP_P4_61827_40817933 | NC_021163.1    | Ca_kabuli_chr04 | 40817933                | AA                              | GG              | 1946828471               |
| SNP_P4_61828_40817985 | NC_021163.1    | Ca_kabuli_chr04 | 40817985                | GG                              | AA              | 1946828473               |
| SNP_P4_61829_40818184 | NC_021163.1    | Ca_kabuli_chr04 | 40818184                | AA                              | GG              | 1946828475               |
| SNP_P4_61832_40821076 | NC_021163.1    | Ca_kabuli_chr04 | 40821076                | AA                              | GG              | 1946828477               |
| SNP_P4_61833_40821276 | NC_021163.1    | Ca_kabuli_chr04 | 40821276                | GG                              | AA              | 1946828479               |
| SNP_P4_61834_40822141 | NC_021163.1    | Ca_kabuli_chr04 | 40822141                | TT                              | GG              | 1946828481               |
| SNP_P4_61835_40822439 | NC_021163.1    | Ca_kabuli_chr04 | 40822439                | TT                              | CC              | 1946828483               |

| SNPs IDs              | Chromosome IDs | Chromosomes     | Physical positions (bp) | CDC Frontier (Reference genome) | (ILWC46 & LPNB) | NCBI SNPdb Accession IDs |
|-----------------------|----------------|-----------------|-------------------------|---------------------------------|-----------------|--------------------------|
| SNP_P4_61836_40827520 | NC_021163.1    | Ca_kabuli_chr04 | 40827520                | AA                              | GG              | 1946828485               |
| SNP_P4_61837_40828629 | NC_021163.1    | Ca_kabuli_chr04 | 40828629                | CC                              | TT              | 1946828487               |
| SNP_P4_61838_40829302 | NC_021163.1    | Ca_kabuli_chr04 | 40829302                | GG                              | AA              | 1946828489               |
| SNP_P4_61839_40829652 | NC_021163.1    | Ca_kabuli_chr04 | 40829652                | TT                              | CC              | 1946828491               |
| SNP_P4_61840_40829771 | NC_021163.1    | Ca_kabuli_chr04 | 40829771                | TT                              | CC              | 1946828493               |
| SNP_P4_61841_40832447 | NC_021163.1    | Ca_kabuli_chr04 | 40832447                | GG                              | TT              | 1946828495               |
| SNP_P4_61843_40833489 | NC_021163.1    | Ca_kabuli_chr04 | 40833489                | GG                              | AA              | 1946828497               |
| SNP_P4_61844_40834901 | NC_021163.1    | Ca_kabuli_chr04 | 40834901                | CC                              | TT              | 1946828499               |
| SNP_P4_61845_40835680 | NC_021163.1    | Ca_kabuli_chr04 | 40835680                | TT                              | CC              | 1946828501               |
| SNP_P4_61846_40837373 | NC_021163.1    | Ca_kabuli_chr04 | 40837373                | AA                              | TT              | 1946828503               |
| SNP_P4_61847_40837626 | NC_021163.1    | Ca_kabuli_chr04 | 40837626                | AA                              | TT              | 1946828505               |
| SNP_P4_61848_40837934 | NC_021163.1    | Ca_kabuli_chr04 | 40837934                | AA                              | GG              | 1946828507               |
| SNP_P4_61849_40838150 | NC_021163.1    | Ca_kabuli_chr04 | 40838150                | GG                              | TT              | 1946828509               |
| SNP_P4_61850_40838170 | NC_021163.1    | Ca_kabuli_chr04 | 40838170                | GG                              | CC              | 1946828511               |
| SNP_P4_61851_40838204 | NC_021163.1    | Ca_kabuli_chr04 | 40838204                | TT                              | AA              | 1946828513               |
| SNP_P4_61852_40838339 | NC_021163.1    | Ca_kabuli_chr04 | 40838339                | AA                              | GG              | 1946828515               |
| SNP_P4_61854_40838999 | NC_021163.1    | Ca_kabuli_chr04 | 40838999                | TT                              | GG              | 1946828517               |
| SNP_P4_61855_40839005 | NC_021163.1    | Ca_kabuli_chr04 | 40839005                | AA                              | CC              | 1946828519               |
| SNP_P4_61856_40839623 | NC_021163.1    | Ca_kabuli_chr04 | 40839623                | AA                              | TT              | 1946828521               |
| SNP_P4_61857_40841182 | NC_021163.1    | Ca_kabuli_chr04 | 40841182                | AA                              | GG              | 1946828523               |
| SNP_P4_61858_40841360 | NC_021163.1    | Ca_kabuli_chr04 | 40841360                | CC                              | TT              | 1946828525               |
| SNP_P4_61859_40841449 | NC_021163.1    | Ca_kabuli_chr04 | 40841449                | TT                              | CC              | 1946828527               |
| SNP_P4_61860_40841477 | NC_021163.1    | Ca_kabuli_chr04 | 40841477                | TT                              | AA              | 1946828529               |
| SNP_P4_61861_40841567 | NC_021163.1    | Ca_kabuli_chr04 | 40841567                | CC                              | GG              | 1946828531               |
| SNP_P4_61864_40843882 | NC_021163.1    | Ca_kabuli_chr04 | 40843882                | TT                              | AA              | 1946828533               |
| SNP_P4_61866_40843965 | NC_021163.1    | Ca_kabuli_chr04 | 40843965                | GG                              | TT              | 1946828535               |
| SNP_P4_61867_40843999 | NC_021163.1    | Ca_kabuli_chr04 | 40843999                | CC                              | TT              | 1946828537               |
| SNP_P4_61868_40844259 | NC_021163.1    | Ca_kabuli_chr04 | 40844259                | GG                              | AA              | 1946828539               |
| SNP_P4_61869_40844264 | NC_021163.1    | Ca_kabuli_chr04 | 40844264                | GG                              | AA              | 1946828541               |
| SNP_P4_61870_40844701 | NC_021163.1    | Ca_kabuli_chr04 | 40844701                | TT                              | CC              | 1946828543               |
| SNP_P4_61871_40844706 | NC_021163.1    | Ca_kabuli_chr04 | 40844706                | CC                              | GG              | 1946828545               |
| SNP_P4_61872_40844708 | NC_021163.1    | Ca_kabuli_chr04 | 40844708                | CC                              | AA              | 1946828547               |
| SNP_P4_61874_40845350 | NC_021163.1    | Ca_kabuli_chr04 | 40845350                | TT                              | AA              | 1946828549               |
| SNP_P4_61875_40845641 | NC_021163.1    | Ca_kabuli_chr04 | 40845641                | CC                              | AA              | 1946828551               |
| SNP_P4_61876_40845794 | NC_021163.1    | Ca_kabuli_chr04 | 40845794                | GG                              | AA              | 1946828553               |
| SNP_P4_61878_40847836 | NC_021163.1    | Ca_kabuli_chr04 | 40847836                | TT                              | CC              | 1946828555               |
| SNP_P4_61879_40848091 | NC_021163.1    | Ca_kabuli_chr04 | 40848091                | AA                              | GG              | 1946828557               |
| SNP_P4_61880_40848207 | NC_021163.1    | Ca_kabuli_chr04 | 40848207                | AA                              | GG              | 1946828559               |
| SNP_P4_61881_40848615 | NC_021163.1    | Ca_kabuli_chr04 | 40848615                | CC                              | TT              | 1946828561               |
| SNP_P4_61882_40848951 | NC_021163.1    | Ca_kabuli_chr04 | 40848951                | CC                              | TT              | 1946828563               |
| SNP_P4_61883_40852144 | NC_021163.1    | Ca_kabuli_chr04 | 40852144                | TT                              | CC              | 1946828565               |
| SNP_P4_61884_40852149 | NC_021163.1    | Ca_kabuli_chr04 | 40852149                | AA                              | GG              | 1946828567               |

| SNPs IDs              | Chromosome IDs | Chromosomes     | Physical positions (bp) | CDC Frontier (Reference genome) | (ILWC46 & LPNB) | NCBI SNPdb Accession IDs |
|-----------------------|----------------|-----------------|-------------------------|---------------------------------|-----------------|--------------------------|
| SNP_P4_61885_40853638 | NC_021163.1    | Ca_kabuli_chr04 | 40853638                | TT                              | CC              | 1946828569               |
| SNP_P4_61886_40853644 | NC_021163.1    | Ca_kabuli_chr04 | 40853644                | AA                              | TT              | 1946828571               |
| SNP_P4_61887_40853653 | NC_021163.1    | Ca_kabuli_chr04 | 40853653                | GG                              | CC              | 1946828573               |
| SNP_P4_61890_40880003 | NC_021163.1    | Ca_kabuli_chr04 | 40880003                | AA                              | GG              | 1946828575               |
| SNP_P4_61891_40880048 | NC_021163.1    | Ca_kabuli_chr04 | 40880048                | CC                              | AA              | 1946828577               |
| SNP_P4_61892_40880256 | NC_021163.1    | Ca_kabuli_chr04 | 40880256                | CC                              | AA              | 1946828579               |
| SNP_P4_61894_40880313 | NC_021163.1    | Ca_kabuli_chr04 | 40880313                | CC                              | TT              | 1946828581               |
| SNP_P4_61895_40880333 | NC_021163.1    | Ca_kabuli_chr04 | 40880333                | CC                              | GG              | 1946828583               |
| SNP_P4_61896_40881402 | NC_021163.1    | Ca_kabuli_chr04 | 40881402                | AA                              | TT              | 1946828585               |
| SNP_P4_61898_40883688 | NC_021163.1    | Ca_kabuli_chr04 | 40883688                | TT                              | CC              | 1946828587               |
| SNP_P4_61899_40885199 | NC_021163.1    | Ca_kabuli_chr04 | 40885199                | GG                              | AA              | 1946828589               |
| SNP_P4_61900_40885216 | NC_021163.1    | Ca_kabuli_chr04 | 40885216                | CC                              | TT              | 1946828591               |
| SNP_P4_61901_40885225 | NC_021163.1    | Ca_kabuli_chr04 | 40885225                | TT                              | CC              | 1946828593               |
| SNP_P4_61902_40886552 | NC_021163.1    | Ca_kabuli_chr04 | 40886552                | AA                              | GG              | 1946828595               |
| SNP_P4_61903_40887191 | NC_021163.1    | Ca_kabuli_chr04 | 40887191                | AA                              | TT              | 1946828597               |
| SNP_P4_61904_40887274 | NC_021163.1    | Ca_kabuli_chr04 | 40887274                | CC                              | TT              | 1946828599               |
| SNP_P4_61905_40890654 | NC_021163.1    | Ca_kabuli_chr04 | 40890654                | CC                              | GG              | 1946828601               |
| SNP_P4_61906_40890713 | NC_021163.1    | Ca_kabuli_chr04 | 40890713                | AA                              | CC              | 1946828603               |
| SNP_P4_61907_40891118 | NC_021163.1    | Ca_kabuli_chr04 | 40891118                | AA                              | GG              | 1946828605               |
| SNP_P4_61908_40891375 | NC_021163.1    | Ca_kabuli_chr04 | 40891375                | AA                              | TT              | 1946828607               |
| SNP_P4_61909_40891595 | NC_021163.1    | Ca_kabuli_chr04 | 40891595                | TT                              | CC              | 1946828609               |
| SNP_P4_61912_40892356 | NC_021163.1    | Ca_kabuli_chr04 | 40892356                | GG                              | TT              | 1946828611               |
| SNP_P4_61913_40892398 | NC_021163.1    | Ca_kabuli_chr04 | 40892398                | AA                              | GG              | 1946828613               |
| SNP_P4_61914_40892578 | NC_021163.1    | Ca_kabuli_chr04 | 40892578                | CC                              | TT              | 1946828615               |
| SNP_P4_61915_40892582 | NC_021163.1    | Ca_kabuli_chr04 | 40892582                | TT                              | AA              | 1946828617               |
| SNP_P4_61916_40893185 | NC_021163.1    | Ca_kabuli_chr04 | 40893185                | AA                              | TT              | 1946828619               |
| SNP_P4_61917_40893467 | NC_021163.1    | Ca_kabuli_chr04 | 40893467                | CC                              | AA              | 1946828621               |
| SNP_P4_61918_40893469 | NC_021163.1    | Ca_kabuli_chr04 | 40893469                | AA                              | CC              | 1946828623               |
| SNP_P4_61920_40893646 | NC_021163.1    | Ca_kabuli_chr04 | 40893646                | TT                              | CC              | 1946828625               |
| SNP_P4_61921_40893665 | NC_021163.1    | Ca_kabuli_chr04 | 40893665                | TT                              | AA              | 1946828627               |
| SNP_P4_61922_40893700 | NC_021163.1    | Ca_kabuli_chr04 | 40893700                | TT                              | CC              | 1946828629               |
| SNP_P4_61923_40895080 | NC_021163.1    | Ca_kabuli_chr04 | 40895080                | GG                              | AA              | 1946828631               |
| SNP_P4_61924_40895084 | NC_021163.1    | Ca_kabuli_chr04 | 40895084                | GG                              | CC              | 1946828633               |
| SNP_P4_61925_40895265 | NC_021163.1    | Ca_kabuli_chr04 | 40895265                | AA                              | GG              | 1946828635               |
| SNP_P4_61926_40895283 | NC_021163.1    | Ca_kabuli_chr04 | 40895283                | CC                              | TT              | 1946828637               |
| SNP_P4_61927_40895330 | NC_021163.1    | Ca_kabuli_chr04 | 40895330                | AA                              | GG              | 1946828639               |
| SNP_P4_61929_40895441 | NC_021163.1    | Ca_kabuli_chr04 | 40895441                | AA                              | GG              | 1946828641               |
| SNP_P4_61930_40895490 | NC_021163.1    | Ca_kabuli_chr04 | 40895490                | CC                              | TT              | 1946828643               |
| SNP_P4_61931_40895755 | NC_021163.1    | Ca_kabuli_chr04 | 40895755                | GG                              | AA              | 1946828645               |
| SNP_P4_61933_40896563 | NC_021163.1    | Ca_kabuli_chr04 | 40896563                | CC                              | TT              | 1946828647               |
| SNP_P4_61934_40896605 | NC_021163.1    | Ca_kabuli_chr04 | 40896605                | AA                              | GG              | 1946828649               |
| SNP_P4_61935_40897429 | NC_021163.1    | Ca_kabuli_chr04 | 40897429                | CC                              | TT              | 1946828651               |

| SNPs IDs              | Chromosome IDs | Chromosomes     | Physical positions (bp) | CDC Frontier (Reference genome) | (ILWC46 & LPNB) | NCBI SNPdb Accession IDs |
|-----------------------|----------------|-----------------|-------------------------|---------------------------------|-----------------|--------------------------|
| SNP_P4_61936_40900608 | NC_021163.1    | Ca_kabuli_chr04 | 40900608                | AA                              | TT              | 1946828653               |
| SNP_P4_61937_40900768 | NC_021163.1    | Ca_kabuli_chr04 | 40900768                | TT                              | AA              | 1946828655               |
| SNP_P4_61938_40900792 | NC_021163.1    | Ca_kabuli_chr04 | 40900792                | TT                              | GG              | 1946828657               |
| SNP_P4_61939_40900844 | NC_021163.1    | Ca_kabuli_chr04 | 40900844                | CC                              | TT              | 1946828659               |
| SNP_P4_61940_40901327 | NC_021163.1    | Ca_kabuli_chr04 | 40901327                | CC                              | TT              | 1946828661               |
| SNP_P4_61941_40901330 | NC_021163.1    | Ca_kabuli_chr04 | 40901330                | CC                              | TT              | 1946828663               |
| SNP_P4_61942_40901952 | NC_021163.1    | Ca_kabuli_chr04 | 40901952                | GG                              | TT              | 1946828666               |
| SNP_P4_61943_40906914 | NC_021163.1    | Ca_kabuli_chr04 | 40906914                | AA                              | GG              | 1946828668               |
| SNP_P4_61944_40907733 | NC_021163.1    | Ca_kabuli_chr04 | 40907733                | GG                              | AA              | 1946828670               |
| SNP_P4_61945_40907743 | NC_021163.1    | Ca_kabuli_chr04 | 40907743                | CC                              | TT              | 1946828672               |
| SNP_P4_61946_40907751 | NC_021163.1    | Ca_kabuli_chr04 | 40907751                | AA                              | GG              | 1946828674               |
| SNP_P4_61947_40907831 | NC_021163.1    | Ca_kabuli_chr04 | 40907831                | TT                              | AA              | 1946828676               |
| SNP_P4_61948_40908249 | NC_021163.1    | Ca_kabuli_chr04 | 40908249                | TT                              | AA              | 1946828678               |
| SNP_P4_61949_40909046 | NC_021163.1    | Ca_kabuli_chr04 | 40909046                | GG                              | CC              | 1946828680               |
| SNP_P4_61950_40909585 | NC_021163.1    | Ca_kabuli_chr04 | 40909585                | TT                              | CC              | 1946828681               |
| SNP_P4_61951_40911100 | NC_021163.1    | Ca_kabuli_chr04 | 40911100                | GG                              | TT              | 1946828684               |
| SNP_P4_61952_40911179 | NC_021163.1    | Ca_kabuli_chr04 | 40911179                | TT                              | CC              | 1946828686               |
| SNP_P4_61953_40911192 | NC_021163.1    | Ca_kabuli_chr04 | 40911192                | GG                              | AA              | 1946828688               |
| SNP_P4_61954_40911207 | NC_021163.1    | Ca_kabuli_chr04 | 40911207                | GG                              | TT              | 1946828690               |
| SNP_P4_61955_40911249 | NC_021163.1    | Ca_kabuli_chr04 | 40911249                | TT                              | CC              | 1946828692               |
| SNP_P4_61956_40912089 | NC_021163.1    | Ca_kabuli_chr04 | 40912089                | AA                              | CC              | 1946828694               |
| SNP_P4_61957_40913200 | NC_021163.1    | Ca_kabuli_chr04 | 40913200                | GG                              | CC              | 1946828696               |
| SNP_P4_61958_40914583 | NC_021163.1    | Ca_kabuli_chr04 | 40914583                | TT                              | CC              | 1946828698               |
| SNP_P4_61959_40914691 | NC_021163.1    | Ca_kabuli_chr04 | 40914691                | CC                              | GG              | 1946828701               |
| SNP_P4_61960_40916282 | NC_021163.1    | Ca_kabuli_chr04 | 40916282                | AA                              | TT              | 1946828703               |
| SNP_P4_61961_40917071 | NC_021163.1    | Ca_kabuli_chr04 | 40917071                | AA                              | GG              | 1946828705               |
| SNP_P4_61962_40919728 | NC_021163.1    | Ca_kabuli_chr04 | 40919728                | AA                              | TT              | 1946828708               |
| SNP_P4_61963_40920837 | NC_021163.1    | Ca_kabuli_chr04 | 40920837                | CC                              | AA              | 1946828710               |
| SNP_P4_61964_40920868 | NC_021163.1    | Ca_kabuli_chr04 | 40920868                | GG                              | AA              | 1946828712               |
| SNP_P4_61965_40920871 | NC_021163.1    | Ca_kabuli_chr04 | 40920871                | AA                              | TT              | 1946828714               |
| SNP_P4_61966_40920893 | NC_021163.1    | Ca_kabuli_chr04 | 40920893                | TT                              | CC              | 1946828716               |
| SNP_P4_61967_40920895 | NC_021163.1    | Ca_kabuli_chr04 | 40920895                | TT                              | GG              | 1946828718               |
| SNP_P4_61968_40921172 | NC_021163.1    | Ca_kabuli_chr04 | 40921172                | TT                              | CC              | 1946828721               |
| SNP_P4_61969_40921218 | NC_021163.1    | Ca_kabuli_chr04 | 40921218                | GG                              | TT              | 1946828723               |
| SNP_P4_61970_40921239 | NC_021163.1    | Ca_kabuli_chr04 | 40921239                | GG                              | TT              | 1946828725               |
| SNP_P4_61971_40921610 | NC_021163.1    | Ca_kabuli_chr04 | 40921610                | CC                              | TT              | 1946828727               |
| SNP_P4_61972_40921923 | NC_021163.1    | Ca_kabuli_chr04 | 40921923                | AA                              | TT              | 1946828729               |
| SNP_P4_61973_40922213 | NC_021163.1    | Ca_kabuli_chr04 | 40922213                | AA                              | TT              | 1946828731               |
| SNP_P4_61975_40924297 | NC_021163.1    | Ca_kabuli_chr04 | 40924297                | GG                              | AA              | 1946828733               |
| SNP_P4_61976_40924673 | NC_021163.1    | Ca_kabuli_chr04 | 40924673                | GG                              | AA              | 1946828735               |
| SNP_P4_61977_40926669 | NC_021163.1    | Ca_kabuli_chr04 | 40926669                | GG                              | AA              | 1946828737               |
| SNP_P4_61978_40927093 | NC_021163.1    | Ca_kabuli_chr04 | 40927093                | GG                              | AA              | 1946828739               |



| SNPs IDs              | Chromosome IDs | Chromosomes     | Physical positions (bp) | CDC Frontier (Reference genome) | (ILWC46 & LPNB) | NCBI SNPdb Accession IDs |
|-----------------------|----------------|-----------------|-------------------------|---------------------------------|-----------------|--------------------------|
| SNP_P4_61979_40927385 | NC_021163.1    | Ca_kabuli_chr04 | 40927385                | GG                              | AA              | 1946828741               |
| SNP_P4_61980_40927622 | NC_021163.1    | Ca_kabuli_chr04 | 40927622                | AA                              | GG              | 1946828743               |
| SNP_P4_61981_40927717 | NC_021163.1    | Ca_kabuli_chr04 | 40927717                | TT                              | CC              | 1946828745               |
| SNP_P4_61982_40929043 | NC_021163.1    | Ca_kabuli_chr04 | 40929043                | AA                              | GG              | 1946828747               |
| SNP_P4_61985_40929446 | NC_021163.1    | Ca_kabuli_chr04 | 40929446                | GG                              | AA              | 1946828749               |
| SNP_P4_61986_40929655 | NC_021163.1    | Ca_kabuli_chr04 | 40929655                | CC                              | AA              | 1946828751               |
| SNP_P4_61987_40929674 | NC_021163.1    | Ca_kabuli_chr04 | 40929674                | AA                              | GG              | 1946828753               |
| SNP_P4_61988_40930911 | NC_021163.1    | Ca_kabuli_chr04 | 40930911                | GG                              | TT              | 1946828755               |
| SNP_P4_61989_40931385 | NC_021163.1    | Ca_kabuli_chr04 | 40931385                | TT                              | CC              | 1946828757               |
| SNP_P4_61990_40931418 | NC_021163.1    | Ca_kabuli_chr04 | 40931418                | CC                              | AA              | 1946828759               |
| SNP_P4_61991_40931433 | NC_021163.1    | Ca_kabuli_chr04 | 40931433                | AA                              | CC              | 1946828762               |
| SNP_P4_61992_40931961 | NC_021163.1    | Ca_kabuli_chr04 | 40931961                | AA                              | TT              | 1946828764               |
| SNP_P4_61993_40933534 | NC_021163.1    | Ca_kabuli_chr04 | 40933534                | CC                              | AA              | 1946828766               |
| SNP_P4_61994_40933554 | NC_021163.1    | Ca_kabuli_chr04 | 40933554                | AA                              | TT              | 1946828768               |
| SNP_P4_61995_40933873 | NC_021163.1    | Ca_kabuli_chr04 | 40933873                | AA                              | GG              | 1946828770               |
| SNP_P4_61996_40933879 | NC_021163.1    | Ca_kabuli_chr04 | 40933879                | CC                              | TT              | 1946828772               |
| SNP_P4_61998_40934492 | NC_021163.1    | Ca_kabuli_chr04 | 40934492                | TT                              | CC              | 1946828774               |
| SNP_P4_61999_40934525 | NC_021163.1    | Ca_kabuli_chr04 | 40934525                | AA                              | GG              | 1946828776               |
| SNP_P4_62000_40934576 | NC_021163.1    | Ca_kabuli_chr04 | 40934576                | CC                              | TT              | 1946828778               |
| SNP_P4_62001_40935877 | NC_021163.1    | Ca_kabuli_chr04 | 40935877                | CC                              | TT              | 1946828780               |
| SNP_P4_62003_40937520 | NC_021163.1    | Ca_kabuli_chr04 | 40937520                | TT                              | AA              | 1946828782               |
| SNP_P4_62004_40937526 | NC_021163.1    | Ca_kabuli_chr04 | 40937526                | CC                              | TT              | 1946828784               |
| SNP_P4_62005_40937527 | NC_021163.1    | Ca_kabuli_chr04 | 40937527                | GG                              | AA              | 1946828786               |
| SNP_P4_62006_40937591 | NC_021163.1    | Ca_kabuli_chr04 | 40937591                | AA                              | TT              | 1946828788               |
| SNP_P4_62007_40937597 | NC_021163.1    | Ca_kabuli_chr04 | 40937597                | TT                              | CC              | 1946828790               |
| SNP_P4_62008_40937605 | NC_021163.1    | Ca_kabuli_chr04 | 40937605                | CC                              | TT              | 1946828793               |
| SNP_P4_62009_40937614 | NC_021163.1    | Ca_kabuli_chr04 | 40937614                | GG                              | AA              | 1946828795               |
| SNP_P4_62010_40937628 | NC_021163.1    | Ca_kabuli_chr04 | 40937628                | AA                              | GG              | 1946828797               |
| SNP_P4_62011_40937730 | NC_021163.1    | Ca_kabuli_chr04 | 40937730                | GG                              | AA              | 1946828799               |
| SNP_P4_62012_40937761 | NC_021163.1    | Ca_kabuli_chr04 | 40937761                | CC                              | AA              | 1946828801               |
| SNP_P4_62013_40937762 | NC_021163.1    | Ca_kabuli_chr04 | 40937762                | GG                              | AA              | 1946828803               |
| SNP_P4_62014_40939087 | NC_021163.1    | Ca_kabuli_chr04 | 40939087                | CC                              | TT              | 1946828805               |
| SNP_P4_62015_40939995 | NC_021163.1    | Ca_kabuli_chr04 | 40939995                | GG                              | AA              | 1946828807               |
| SNP_P4_62016_40940040 | NC_021163.1    | Ca_kabuli_chr04 | 40940040                | AA                              | CC              | 1946828809               |
| SNP_P4_62017_40940108 | NC_021163.1    | Ca_kabuli_chr04 | 40940108                | TT                              | AA              | 1946828811               |
| SNP_P4_62019_40940259 | NC_021163.1    | Ca_kabuli_chr04 | 40940259                | GG                              | AA              | 1946828813               |
| SNP_P4_62020_40941094 | NC_021163.1    | Ca_kabuli_chr04 | 40941094                | AA                              | TT              | 1946828815               |
| SNP_P4_62021_40941283 | NC_021163.1    | Ca_kabuli_chr04 | 40941283                | GG                              | AA              | 1946828817               |
| SNP_P4_62022_40945496 | NC_021163.1    | Ca_kabuli_chr04 | 40945496                | GG                              | AA              | 1946828819               |
| SNP_P4_62023_40947303 | NC_021163.1    | Ca_kabuli_chr04 | 40947303                | AA                              | GG              | 1946828821               |
| SNP_P4_62024_40947331 | NC_021163.1    | Ca_kabuli_chr04 | 40947331                | GG                              | AA              | 1946828823               |
| SNP_P4_62025_40947332 | NC_021163.1    | Ca_kabuli_chr04 | 40947332                | GG                              | TT              | 1946828825               |

| SNPs IDs              | Chromosome IDs | Chromosomes     | Physical positions (bp) | CDC Frontier (Reference genome) | (ILWC46 & LPNB) | NCBI SNPdb Accession IDs |
|-----------------------|----------------|-----------------|-------------------------|---------------------------------|-----------------|--------------------------|
| SNP_P4_62026_40947341 | NC_021163.1    | Ca_kabuli_chr04 | 40947341                | GG                              | AA              | 1946828827               |
| SNP_P4_62027_40947377 | NC_021163.1    | Ca_kabuli_chr04 | 40947377                | GG                              | TT              | 1946828829               |
| SNP_P4_62028_40947697 | NC_021163.1    | Ca_kabuli_chr04 | 40947697                | CC                              | TT              | 1946828831               |
| SNP_P4_62029_40948368 | NC_021163.1    | Ca_kabuli_chr04 | 40948368                | GG                              | CC              | 1946828833               |
| SNP_P4_62030_40948386 | NC_021163.1    | Ca_kabuli_chr04 | 40948386                | GG                              | AA              | 1946828835               |
| SNP_P4_62032_40949619 | NC_021163.1    | Ca_kabuli_chr04 | 40949619                | CC                              | TT              | 1946828837               |
| SNP_P4_62033_40949946 | NC_021163.1    | Ca_kabuli_chr04 | 40949946                | GG                              | CC              | 1946828839               |
| SNP_P4_62034_40949948 | NC_021163.1    | Ca_kabuli_chr04 | 40949948                | GG                              | TT              | 1946828841               |
| SNP_P4_62035_40949965 | NC_021163.1    | Ca_kabuli_chr04 | 40949965                | TT                              | AA              | 1946828843               |
| SNP_P4_62036_40949986 | NC_021163.1    | Ca_kabuli_chr04 | 40949986                | CC                              | TT              | 1946828845               |
| SNP_P4_62037_40950190 | NC_021163.1    | Ca_kabuli_chr04 | 40950190                | CC                              | TT              | 1946828847               |
| SNP_P4_62038_40953765 | NC_021163.1    | Ca_kabuli_chr04 | 40953765                | GG                              | AA              | 1946828849               |
| SNP_P4_62039_40953773 | NC_021163.1    | Ca_kabuli_chr04 | 40953773                | CC                              | TT              | 1946828851               |
| SNP_P4_62040_40955460 | NC_021163.1    | Ca_kabuli_chr04 | 40955460                | AA                              | CC              | 1946828853               |
| SNP_P4_62042_40955494 | NC_021163.1    | Ca_kabuli_chr04 | 40955494                | AA                              | GG              | 1946828855               |
| SNP_P4_62043_40955730 | NC_021163.1    | Ca_kabuli_chr04 | 40955730                | CC                              | TT              | 1946828857               |
| SNP_P4_62044_40955742 | NC_021163.1    | Ca_kabuli_chr04 | 40955742                | GG                              | AA              | 1946828859               |
| SNP_P4_62045_40955748 | NC_021163.1    | Ca_kabuli_chr04 | 40955748                | AA                              | TT              | 1946828862               |
| SNP_P4_62046_40955758 | NC_021163.1    | Ca_kabuli_chr04 | 40955758                | AA                              | GG              | 1946828864               |
| SNP_P4_62047_40955767 | NC_021163.1    | Ca_kabuli_chr04 | 40955767                | AA                              | GG              | 1946828866               |
| SNP_P4_62048_40955814 | NC_021163.1    | Ca_kabuli_chr04 | 40955814                | AA                              | GG              | 1946828868               |
| SNP_P4_62049_40955823 | NC_021163.1    | Ca_kabuli_chr04 | 40955823                | TT                              | CC              | 1946828870               |
| SNP_P4_62050_40955834 | NC_021163.1    | Ca_kabuli_chr04 | 40955834                | CC                              | TT              | 1946828872               |
| SNP_P4_62051_40956033 | NC_021163.1    | Ca_kabuli_chr04 | 40956033                | AA                              | GG              | 1946828874               |
| SNP_P4_62052_40956100 | NC_021163.1    | Ca_kabuli_chr04 | 40956100                | AA                              | GG              | 1946828876               |
| SNP_P4_62053_40956105 | NC_021163.1    | Ca_kabuli_chr04 | 40956105                | TT                              | CC              | 1946828878               |
| SNP_P4_62054_40957349 | NC_021163.1    | Ca_kabuli_chr04 | 40957349                | GG                              | TT              | 1946828880               |
| SNP_P4_62055_40959464 | NC_021163.1    | Ca_kabuli_chr04 | 40959464                | AA                              | GG              | 1946828882               |
| SNP_P4_62056_40959470 | NC_021163.1    | Ca_kabuli_chr04 | 40959470                | TT                              | CC              | 1946828884               |
| SNP_P4_62057_40959845 | NC_021163.1    | Ca_kabuli_chr04 | 40959845                | AA                              | GG              | 1946828886               |
| SNP_P4_62058_40960858 | NC_021163.1    | Ca_kabuli_chr04 | 40960858                | TT                              | CC              | 1946828888               |
| SNP_P4_62059_40960915 | NC_021163.1    | Ca_kabuli_chr04 | 40960915                | CC                              | AA              | 1946828890               |
| SNP_P4_62060_40961614 | NC_021163.1    | Ca_kabuli_chr04 | 40961614                | AA                              | CC              | 1946828892               |
| SNP_P4_62061_40961617 | NC_021163.1    | Ca_kabuli_chr04 | 40961617                | AA                              | TT              | 1946828894               |
| SNP_P4_62062_40961676 | NC_021163.1    | Ca_kabuli_chr04 | 40961676                | GG                              | AA              | 1946828896               |
| SNP_P4_62063_40961684 | NC_021163.1    | Ca_kabuli_chr04 | 40961684                | AA                              | GG              | 1946828898               |
| SNP_P4_62064_40961709 | NC_021163.1    | Ca_kabuli_chr04 | 40961709                | AA                              | GG              | 1946828900               |
| SNP_P4_62065_40961793 | NC_021163.1    | Ca_kabuli_chr04 | 40961793                | AA                              | GG              | 1946828902               |
| SNP_P4_62066_40961903 | NC_021163.1    | Ca_kabuli_chr04 | 40961903                | CC                              | AA              | 1946828905               |
| SNP_P4_62067_40961963 | NC_021163.1    | Ca_kabuli_chr04 | 40961963                | AA                              | TT              | 1946828907               |
| SNP_P4_62068_40962565 | NC_021163.1    | Ca_kabuli_chr04 | 40962565                | CC                              | AA              | 1946828909               |
| SNP_P4_62069_40962727 | NC_021163.1    | Ca_kabuli_chr04 | 40962727                | TT                              | CC              | 1946828911               |

| SNPs IDs              | Chromosome IDs | Chromosomes     | Physical positions (bp) | CDC Frontier (Reference genome) | (ILWC46 & LPNB) | NCBI SNPdb Accession IDs |
|-----------------------|----------------|-----------------|-------------------------|---------------------------------|-----------------|--------------------------|
| SNP_P4_62070_40963185 | NC_021163.1    | Ca_kabuli_chr04 | 40963185                | AA                              | GG              | 1946828913               |
| SNP_P4_62071_40963211 | NC_021163.1    | Ca_kabuli_chr04 | 40963211                | GG                              | TT              | 1946828915               |
| SNP_P4_62072_40963921 | NC_021163.1    | Ca_kabuli_chr04 | 40963921                | CC                              | TT              | 1946828917               |
| SNP_P4_62073_40963992 | NC_021163.1    | Ca_kabuli_chr04 | 40963992                | GG                              | AA              | 1946828919               |
| SNP_P4_62075_40964278 | NC_021163.1    | Ca_kabuli_chr04 | 40964278                | AA                              | GG              | 1946828921               |
| SNP_P4_62076_40964373 | NC_021163.1    | Ca_kabuli_chr04 | 40964373                | CC                              | AA              | 1946828923               |
| SNP_P4_62077_40964714 | NC_021163.1    | Ca_kabuli_chr04 | 40964714                | AA                              | GG              | 1946828925               |
| SNP_P4_62078_40965455 | NC_021163.1    | Ca_kabuli_chr04 | 40965455                | TT                              | AA              | 1946828927               |
| SNP_P4_62080_40967393 | NC_021163.1    | Ca_kabuli_chr04 | 40967393                | CC                              | AA              | 1946828929               |
| SNP_P4_62081_40967863 | NC_021163.1    | Ca_kabuli_chr04 | 40967863                | AA                              | GG              | 1946828931               |
| SNP_P4_62082_40968003 | NC_021163.1    | Ca_kabuli_chr04 | 40968003                | AA                              | GG              | 1946828933               |
| SNP_P4_62083_40968230 | NC_021163.1    | Ca_kabuli_chr04 | 40968230                | CC                              | TT              | 1946828935               |
| SNP_P4_62084_40968600 | NC_021163.1    | Ca_kabuli_chr04 | 40968600                | CC                              | TT              | 1946828937               |
| SNP_P4_62085_40968641 | NC_021163.1    | Ca_kabuli_chr04 | 40968641                | GG                              | AA              | 1946828939               |
| SNP_P4_62086_40968705 | NC_021163.1    | Ca_kabuli_chr04 | 40968705                | GG                              | AA              | 1946828941               |
| SNP_P4_62087_40968766 | NC_021163.1    | Ca_kabuli_chr04 | 40968766                | CC                              | GG              | 1946828943               |
| SNP_P4_62089_40969273 | NC_021163.1    | Ca_kabuli_chr04 | 40969273                | TT                              | CC              | 1946828946               |
| SNP_P4_62090_40969303 | NC_021163.1    | Ca_kabuli_chr04 | 40969303                | AA                              | GG              | 1946828948               |
| SNP_P4_62091_40969350 | NC_021163.1    | Ca_kabuli_chr04 | 40969350                | TT                              | GG              | 1946828950               |
| SNP_P4_62092_40969383 | NC_021163.1    | Ca_kabuli_chr04 | 40969383                | AA                              | CC              | 1946828952               |
| SNP_P4_62093_40969618 | NC_021163.1    | Ca_kabuli_chr04 | 40969618                | GG                              | AA              | 1946828954               |
| SNP_P4_62094_40969626 | NC_021163.1    | Ca_kabuli_chr04 | 40969626                | CC                              | TT              | 1946828956               |
| SNP_P4_62095_40970884 | NC_021163.1    | Ca_kabuli_chr04 | 40970884                | AA                              | TT              | 1946828958               |
| SNP_P4_62096_40972028 | NC_021163.1    | Ca_kabuli_chr04 | 40972028                | CC                              | TT              | 1946828960               |
| SNP_P4_62097_40972077 | NC_021163.1    | Ca_kabuli_chr04 | 40972077                | AA                              | GG              | 1946828962               |
| SNP_P4_62098_40972093 | NC_021163.1    | Ca_kabuli_chr04 | 40972093                | AA                              | CC              | 1946828964               |
| SNP_P4_62099_40972094 | NC_021163.1    | Ca_kabuli_chr04 | 40972094                | TT                              | CC              | 1946828966               |
| SNP_P4_62100_40972106 | NC_021163.1    | Ca_kabuli_chr04 | 40972106                | AA                              | GG              | 1946828968               |
| SNP_P4_62101_40972115 | NC_021163.1    | Ca_kabuli_chr04 | 40972115                | TT                              | CC              | 1946828970               |
| SNP_P4_62102_40972157 | NC_021163.1    | Ca_kabuli_chr04 | 40972157                | AA                              | GG              | 1946828973               |
| SNP_P4_62103_40972172 | NC_021163.1    | Ca_kabuli_chr04 | 40972172                | TT                              | CC              | 1946828975               |
| SNP_P4_62104_40972305 | NC_021163.1    | Ca_kabuli_chr04 | 40972305                | AA                              | GG              | 1946828977               |
| SNP_P4_62105_40972359 | NC_021163.1    | Ca_kabuli_chr04 | 40972359                | TT                              | CC              | 1946828979               |
| SNP_P4_62106_40974025 | NC_021163.1    | Ca_kabuli_chr04 | 40974025                | GG                              | AA              | 1946828981               |
| SNP_P4_62107_40975358 | NC_021163.1    | Ca_kabuli_chr04 | 40975358                | AA                              | TT              | 1946828983               |
| SNP_P4_62108_40975925 | NC_021163.1    | Ca_kabuli_chr04 | 40975925                | CC                              | TT              | 1946828985               |
| SNP_P4_62109_40977052 | NC_021163.1    | Ca_kabuli_chr04 | 40977052                | TT                              | AA              | 1946828987               |
| SNP_P4_62110_40977295 | NC_021163.1    | Ca_kabuli_chr04 | 40977295                | CC                              | TT              | 1946828989               |
| SNP_P4_62111_40977463 | NC_021163.1    | Ca_kabuli_chr04 | 40977463                | TT                              | CC              | 1946828991               |
| SNP_P4_62112_40981983 | NC_021163.1    | Ca_kabuli_chr04 | 40981983                | AA                              | GG              | 1946828993               |
| SNP_P4_62113_40982049 | NC_021163.1    | Ca_kabuli_chr04 | 40982049                | GG                              | TT              | 1946828995               |
| SNP_P4_62114_40982388 | NC_021163.1    | Ca_kabuli_chr04 | 40982388                | TT                              | GG              | 1946828997               |

| SNPs IDs              | Chromosome IDs | Chromosomes     | Physical positions (bp) | CDC Frontier (Reference genome) | (ILWC46 & LPNB) | NCBI SNPdb Accession IDs |
|-----------------------|----------------|-----------------|-------------------------|---------------------------------|-----------------|--------------------------|
| SNP_P4_62115_40982419 | NC_021163.1    | Ca_kabuli_chr04 | 40982419                | TT                              | AA              | 1946828999               |
| SNP_P4_62116_40982420 | NC_021163.1    | Ca_kabuli_chr04 | 40982420                | TT                              | CC              | 1946829001               |
| SNP_P4_62117_40982478 | NC_021163.1    | Ca_kabuli_chr04 | 40982478                | CC                              | TT              | 1946829003               |
| SNP_P4_62118_40988142 | NC_021163.1    | Ca_kabuli_chr04 | 40988142                | GG                              | AA              | 1946829005               |
| SNP_P4_62119_40988184 | NC_021163.1    | Ca_kabuli_chr04 | 40988184                | TT                              | CC              | 1946829007               |
| SNP_P4_62120_40988747 | NC_021163.1    | Ca_kabuli_chr04 | 40988747                | TT                              | GG              | 1946829009               |
| SNP_P4_62121_40989412 | NC_021163.1    | Ca_kabuli_chr04 | 40989412                | AA                              | TT              | 1946829011               |
| SNP_P4_62122_40990191 | NC_021163.1    | Ca_kabuli_chr04 | 40990191                | CC                              | TT              | 1946829013               |
| SNP_P4_62123_40991499 | NC_021163.1    | Ca_kabuli_chr04 | 40991499                | TT                              | GG              | 1946829015               |
| SNP_P4_62124_40994027 | NC_021163.1    | Ca_kabuli_chr04 | 40994027                | AA                              | GG              | 1946829017               |
| SNP_P4_62125_40995115 | NC_021163.1    | Ca_kabuli_chr04 | 40995115                | TT                              | CC              | 1946829019               |
| SNP_P4_62126_40995343 | NC_021163.1    | Ca_kabuli_chr04 | 40995343                | AA                              | GG              | 1946829021               |
| SNP_P4_62127_40995389 | NC_021163.1    | Ca_kabuli_chr04 | 40995389                | AA                              | GG              | 1946829023               |
| SNP_P4_62128_40995391 | NC_021163.1    | Ca_kabuli_chr04 | 40995391                | GG                              | AA              | 1946829025               |
| SNP_P4_62130_40996788 | NC_021163.1    | Ca_kabuli_chr04 | 40996788                | GG                              | AA              | 1946829027               |
| SNP_P4_62131_40997480 | NC_021163.1    | Ca_kabuli_chr04 | 40997480                | CC                              | GG              | 1946829028               |
| SNP_P4_62132_40997852 | NC_021163.1    | Ca_kabuli_chr04 | 40997852                | CC                              | TT              | 1946829030               |
| SNP_P4_62133_40997854 | NC_021163.1    | Ca_kabuli_chr04 | 40997854                | TT                              | CC              | 1946829032               |
| SNP_P4_62134_40997856 | NC_021163.1    | Ca_kabuli_chr04 | 40997856                | TT                              | CC              | 1946829034               |
| SNP_P4_62136_40997923 | NC_021163.1    | Ca_kabuli_chr04 | 40997923                | AA                              | GG              | 1946829036               |
| SNP_P4_62137_40998360 | NC_021163.1    | Ca_kabuli_chr04 | 40998360                | CC                              | TT              | 1946829039               |
| SNP_P4_62138_40998375 | NC_021163.1    | Ca_kabuli_chr04 | 40998375                | AA                              | TT              | 1946829041               |
| SNP_P4_62139_40998920 | NC_021163.1    | Ca_kabuli_chr04 | 40998920                | TT                              | CC              | 1946829042               |
| SNP_P4_62140_40998946 | NC_021163.1    | Ca_kabuli_chr04 | 40998946                | TT                              | CC              | 1946829045               |
| SNP_P4_62141_41000051 | NC_021163.1    | Ca_kabuli_chr04 | 41000051                | GG                              | TT              | 1946829047               |
| SNP_P4_62142_41000053 | NC_021163.1    | Ca_kabuli_chr04 | 41000053                | TT                              | CC              | 1946829049               |
| SNP_P4_62143_41000062 | NC_021163.1    | Ca_kabuli_chr04 | 41000062                | TT                              | CC              | 1946829051               |
| SNP_P4_62144_41000114 | NC_021163.1    | Ca_kabuli_chr04 | 41000114                | GG                              | TT              | 1946829053               |
| SNP_P4_62145_41000374 | NC_021163.1    | Ca_kabuli_chr04 | 41000374                | GG                              | AA              | 1946829056               |
| SNP_P4_62146_41000546 | NC_021163.1    | Ca_kabuli_chr04 | 41000546                | AA                              | GG              | 1946829058               |
| SNP_P4_62147_41003940 | NC_021163.1    | Ca_kabuli_chr04 | 41003940                | GG                              | AA              | 1946829059               |
| SNP_P4_62148_41003950 | NC_021163.1    | Ca_kabuli_chr04 | 41003950                | GG                              | AA              | 1946829061               |
| SNP_P4_62149_41006613 | NC_021163.1    | Ca_kabuli_chr04 | 41006613                | GG                              | AA              | 1946829064               |
| SNP_P4_62150_41006622 | NC_021163.1    | Ca_kabuli_chr04 | 41006622                | TT                              | CC              | 1946829066               |
| SNP_P4_62151_41006664 | NC_021163.1    | Ca_kabuli_chr04 | 41006664                | CC                              | TT              | 1946829068               |
| SNP_P4_62152_41006909 | NC_021163.1    | Ca_kabuli_chr04 | 41006909                | AA                              | TT              | 1946829070               |
| SNP_P4_62153_41006919 | NC_021163.1    | Ca_kabuli_chr04 | 41006919                | GG                              | TT              | 1946829072               |
| SNP_P4_62154_41006932 | NC_021163.1    | Ca_kabuli_chr04 | 41006932                | GG                              | TT              | 1946829074               |
| SNP_P4_62155_41006965 | NC_021163.1    | Ca_kabuli_chr04 | 41006965                | TT                              | CC              | 1946829076               |
| SNP_P4_62156_41006966 | NC_021163.1    | Ca_kabuli_chr04 | 41006966                | AA                              | GG              | 1946829078               |
| SNP_P4_62157_41007026 | NC_021163.1    | Ca_kabuli_chr04 | 41007026                | AA                              | GG              | 1946829080               |
| SNP_P4_62158_41007040 | NC_021163.1    | Ca_kabuli_chr04 | 41007040                | AA                              | GG              | 1946829082               |

| SNPs IDs              | Chromosome IDs | Chromosomes     | Physical positions (bp) | CDC Frontier (Reference genome) | (ILWC46 & LPNB) | NCBI SNPdb Accession IDs |
|-----------------------|----------------|-----------------|-------------------------|---------------------------------|-----------------|--------------------------|
| SNP_P4_62159_41007042 | NC_021163.1    | Ca_kabuli_chr04 | 41007042                | AA                              | GG              | 1946829084               |
| SNP_P4_62160_41007052 | NC_021163.1    | Ca_kabuli_chr04 | 41007052                | TT                              | GG              | 1946829086               |
| SNP_P4_62161_41007074 | NC_021163.1    | Ca_kabuli_chr04 | 41007074                | GG                              | AA              | 1946829088               |
| SNP_P4_62162_41007080 | NC_021163.1    | Ca_kabuli_chr04 | 41007080                | GG                              | CC              | 1946829090               |
| SNP_P4_62163_41007085 | NC_021163.1    | Ca_kabuli_chr04 | 41007085                | CC                              | TT              | 1946829092               |
| SNP_P4_62164_41007146 | NC_021163.1    | Ca_kabuli_chr04 | 41007146                | CC                              | AA              | 1946829094               |
| SNP_P4_62165_41010100 | NC_021163.1    | Ca_kabuli_chr04 | 41010100                | TT                              | AA              | 1946829096               |
| SNP_P4_62166_41010140 | NC_021163.1    | Ca_kabuli_chr04 | 41010140                | AA                              | GG              | 1946829099               |
| SNP_P4_62167_41010154 | NC_021163.1    | Ca_kabuli_chr04 | 41010154                | AA                              | TT              | 1946829100               |
| SNP_P4_62168_41010209 | NC_021163.1    | Ca_kabuli_chr04 | 41010209                | GG                              | AA              | 1946829102               |
| SNP_P4_62171_41011115 | NC_021163.1    | Ca_kabuli_chr04 | 41011115                | CC                              | TT              | 1946829105               |
| SNP_P4_62172_41011117 | NC_021163.1    | Ca_kabuli_chr04 | 41011117                | AA                              | GG              | 1946829107               |
| SNP_P4_62173_41011122 | NC_021163.1    | Ca_kabuli_chr04 | 41011122                | AA                              | GG              | 1946829109               |
| SNP_P4_62174_41011127 | NC_021163.1    | Ca_kabuli_chr04 | 41011127                | GG                              | AA              | 1946829111               |
| SNP_P4_62176_41012530 | NC_021163.1    | Ca_kabuli_chr04 | 41012530                | CC                              | AA              | 1946829113               |
| SNP_P4_62177_41012747 | NC_021163.1    | Ca_kabuli_chr04 | 41012747                | CC                              | TT              | 1946829115               |
| SNP_P4_62178_41012751 | NC_021163.1    | Ca_kabuli_chr04 | 41012751                | AA                              | GG              | 1946829117               |
| SNP_P4_62180_41013079 | NC_021163.1    | Ca_kabuli_chr04 | 41013079                | CC                              | TT              | 1946829119               |
| SNP_P4_62181_41013428 | NC_021163.1    | Ca_kabuli_chr04 | 41013428                | CC                              | TT              | 1946829121               |
| SNP_P4_62182_41013732 | NC_021163.1    | Ca_kabuli_chr04 | 41013732                | TT                              | GG              | 1946829123               |
| SNP_P4_62185_41015747 | NC_021163.1    | Ca_kabuli_chr04 | 41015747                | AA                              | GG              | 1946829125               |
| SNP_P4_62186_41015776 | NC_021163.1    | Ca_kabuli_chr04 | 41015776                | CC                              | TT              | 1946829127               |
| SNP_P4_62187_41016071 | NC_021163.1    | Ca_kabuli_chr04 | 41016071                | TT                              | CC              | 1946829129               |
| SNP_P4_62188_41016099 | NC_021163.1    | Ca_kabuli_chr04 | 41016099                | TT                              | AA              | 1946829131               |
| SNP_P4_62189_41016114 | NC_021163.1    | Ca_kabuli_chr04 | 41016114                | TT                              | CC              | 1946829133               |
| SNP_P4_62190_41016412 | NC_021163.1    | Ca_kabuli_chr04 | 41016412                | GG                              | CC              | 1946829135               |
| SNP_P4_62191_41017115 | NC_021163.1    | Ca_kabuli_chr04 | 41017115                | TT                              | AA              | 1946829137               |
| SNP_P4_62192_41018087 | NC_021163.1    | Ca_kabuli_chr04 | 41018087                | AA                              | TT              | 1946829139               |
| SNP_P4_62193_41018089 | NC_021163.1    | Ca_kabuli_chr04 | 41018089                | GG                              | AA              | 1946829141               |
| SNP_P4_62194_41027534 | NC_021163.1    | Ca_kabuli_chr04 | 41027534                | TT                              | CC              | 1946829143               |
| SNP_P4_62196_41038739 | NC_021163.1    | Ca_kabuli_chr04 | 41038739                | CC                              | GG              | 1946829145               |
| SNP_P4_62197_41060963 | NC_021163.1    | Ca_kabuli_chr04 | 41060963                | GG                              | CC              | 1946829147               |
| SNP_P4_62198_41126152 | NC_021163.1    | Ca_kabuli_chr04 | 41126152                | AA                              | TT              | 1946829149               |
| SNP_P4_62199_41126153 | NC_021163.1    | Ca_kabuli_chr04 | 41126153                | AA                              | TT              | 1946829151               |
| SNP_P4_62200_41126156 | NC_021163.1    | Ca_kabuli_chr04 | 41126156                | GG                              | TT              | 1946829153               |
| SNP_P4_62201_41158412 | NC_021163.1    | Ca_kabuli_chr04 | 41158412                | AA                              | GG              | 1946829155               |
| SNP_P4_62203_41172737 | NC_021163.1    | Ca_kabuli_chr04 | 41172737                | AA                              | GG              | 1946829157               |
| SNP_P4_62204_41172744 | NC_021163.1    | Ca_kabuli_chr04 | 41172744                | AA                              | GG              | 1946829159               |
| SNP_P4_62205_41179214 | NC_021163.1    | Ca_kabuli_chr04 | 41179214                | AA                              | TT              | 1946829161               |
| SNP_P4_62206_41179224 | NC_021163.1    | Ca_kabuli_chr04 | 41179224                | AA                              | CC              | 1946829163               |
| SNP_P4_62207_41179227 | NC_021163.1    | Ca_kabuli_chr04 | 41179227                | AA                              | GG              | 1946829165               |
| SNP_P4_62209_41245162 | NC_021163.1    | Ca_kabuli_chr04 | 41245162                | AA                              | GG              | 1946829167               |

| SNPs IDs              | Chromosome IDs | Chromosomes     | Physical positions (bp) | CDC Frontier (Reference genome) | (ILWC46 & LPNB) | NCBI SNPdb Accession IDs |
|-----------------------|----------------|-----------------|-------------------------|---------------------------------|-----------------|--------------------------|
| SNP_P4_62212_41273218 | NC_021163.1    | Ca_kabuli_chr04 | 41273218                | TT                              | CC              | 1946829169               |
| SNP_P4_62213_41301894 | NC_021163.1    | Ca_kabuli_chr04 | 41301894                | AA                              | CC              | 1946829171               |
| SNP_P4_62214_41306037 | NC_021163.1    | Ca_kabuli_chr04 | 41306037                | GG                              | AA              | 1946829173               |
| SNP_P4_62216_41323258 | NC_021163.1    | Ca_kabuli_chr04 | 41323258                | GG                              | AA              | 1946829175               |
| SNP_P4_62217_41327864 | NC_021163.1    | Ca_kabuli_chr04 | 41327864                | TT                              | CC              | 1946829177               |
| SNP_P4_62218_41371930 | NC_021163.1    | Ca_kabuli_chr04 | 41371930                | TT                              | AA              | 1946829179               |
| SNP_P4_62219_41379386 | NC_021163.1    | Ca_kabuli_chr04 | 41379386                | AA                              | GG              | 1946829181               |
| SNP_P4_62220_41410538 | NC_021163.1    | Ca_kabuli_chr04 | 41410538                | TT                              | CC              | 1946829183               |
| SNP_P4_62221_41435270 | NC_021163.1    | Ca_kabuli_chr04 | 41435270                | TT                              | AA              | 1946829185               |
| SNP_P4_62223_41435766 | NC_021163.1    | Ca_kabuli_chr04 | 41435766                | CC                              | TT              | 1946829187               |
| SNP_P4_62225_41442214 | NC_021163.1    | Ca_kabuli_chr04 | 41442214                | GG                              | CC              | 1946829189               |
| SNP_P4_62226_41452045 | NC_021163.1    | Ca_kabuli_chr04 | 41452045                | AA                              | CC              | 1946829191               |
| SNP_P4_62227_41473315 | NC_021163.1    | Ca_kabuli_chr04 | 41473315                | GG                              | AA              | 1946829193               |
| SNP_P4_62228_41478524 | NC_021163.1    | Ca_kabuli_chr04 | 41478524                | AA                              | CC              | 1946829195               |
| SNP_P4_62229_41497468 | NC_021163.1    | Ca_kabuli_chr04 | 41497468                | TT                              | CC              | 1946829197               |
| SNP_P4_62230_41510128 | NC_021163.1    | Ca_kabuli_chr04 | 41510128                | GG                              | AA              | 1946829199               |
| SNP_P4_62231_41523723 | NC_021163.1    | Ca_kabuli_chr04 | 41523723                | TT                              | CC              | 1946829201               |
| SNP_P4_62234_41624975 | NC_021163.1    | Ca_kabuli_chr04 | 41624975                | GG                              | AA              | 1946829203               |
| SNP_P4_62237_41641072 | NC_021163.1    | Ca_kabuli_chr04 | 41641072                | TT                              | CC              | 1946829205               |
| SNP_P4_62239_41666917 | NC_021163.1    | Ca_kabuli_chr04 | 41666917                | AA                              | GG              | 1946829207               |
| SNP_P4_62240_41696034 | NC_021163.1    | Ca_kabuli_chr04 | 41696034                | AA                              | GG              | 1946829209               |
| SNP_P4_62241_41781987 | NC_021163.1    | Ca_kabuli_chr04 | 41781987                | AA                              | GG              | 1946829211               |
| SNP_P4_62242_41786255 | NC_021163.1    | Ca_kabuli_chr04 | 41786255                | AA                              | GG              | 1946829213               |
| SNP_P4_62243_41786256 | NC_021163.1    | Ca_kabuli_chr04 | 41786256                | TT                              | CC              | 1946829215               |
| SNP_P4_62246_41806133 | NC_021163.1    | Ca_kabuli_chr04 | 41806133                | AA                              | TT              | 1946829216               |
| SNP_P4_62250_41806637 | NC_021163.1    | Ca_kabuli_chr04 | 41806637                | TT                              | AA              | 1946829218               |
| SNP_P4_62251_41806645 | NC_021163.1    | Ca_kabuli_chr04 | 41806645                | CC                              | TT              | 1946829220               |
| SNP_P4_62252_41806670 | NC_021163.1    | Ca_kabuli_chr04 | 41806670                | CC                              | TT              | 1946829222               |
| SNP_P4_62253_41806888 | NC_021163.1    | Ca_kabuli_chr04 | 41806888                | CC                              | GG              | 1946829224               |
| SNP_P4_62254_41807602 | NC_021163.1    | Ca_kabuli_chr04 | 41807602                | TT                              | CC              | 1946829226               |
| SNP_P4_62255_41807605 | NC_021163.1    | Ca_kabuli_chr04 | 41807605                | GG                              | AA              | 1946829228               |
| SNP_P4_62256_41807606 | NC_021163.1    | Ca_kabuli_chr04 | 41807606                | TT                              | AA              | 1946829230               |
| SNP_P4_62257_41807607 | NC_021163.1    | Ca_kabuli_chr04 | 41807607                | AA                              | TT              | 1946829232               |
| SNP_P4_62258_41807622 | NC_021163.1    | Ca_kabuli_chr04 | 41807622                | TT                              | CC              | 1946829234               |
| SNP_P4_62259_41807632 | NC_021163.1    | Ca_kabuli_chr04 | 41807632                | TT                              | CC              | 1946829236               |
| SNP_P4_62260_41807642 | NC_021163.1    | Ca_kabuli_chr04 | 41807642                | TT                              | CC              | 1946829238               |
| SNP_P4_62262_41808444 | NC_021163.1    | Ca_kabuli_chr04 | 41808444                | AA                              | GG              | 1946829240               |
| SNP_P4_62263_41808456 | NC_021163.1    | Ca_kabuli_chr04 | 41808456                | TT                              | AA              | 1946829242               |
| SNP_P4_62264_41808463 | NC_021163.1    | Ca_kabuli_chr04 | 41808463                | CC                              | TT              | 1946829244               |
| SNP_P4_62265_41808507 | NC_021163.1    | Ca_kabuli_chr04 | 41808507                | CC                              | GG              | 1946829246               |
| SNP_P4_62267_41808917 | NC_021163.1    | Ca_kabuli_chr04 | 41808917                | AA                              | TT              | 1946829248               |
| SNP_P4_62268_41810267 | NC_021163.1    | Ca_kabuli_chr04 | 41810267                | GG                              | AA              | 1946829250               |

| SNPs IDs              | Chromosome IDs | Chromosomes     | Physical positions (bp) | CDC Frontier (Reference genome) | (ILWC46 & LPNB) | NCBI SNPdb Accession IDs |
|-----------------------|----------------|-----------------|-------------------------|---------------------------------|-----------------|--------------------------|
| SNP_P4_62269_41810859 | NC_021163.1    | Ca_kabuli_chr04 | 41810859                | TT                              | AA              | 1946829252               |
| SNP_P4_62271_41814560 | NC_021163.1    | Ca_kabuli_chr04 | 41814560                | GG                              | AA              | 1946829254               |
| SNP_P4_62272_41814578 | NC_021163.1    | Ca_kabuli_chr04 | 41814578                | GG                              | AA              | 1946829256               |
| SNP_P4_62273_41814644 | NC_021163.1    | Ca_kabuli_chr04 | 41814644                | GG                              | AA              | 1946829258               |
| SNP_P4_62274_41814651 | NC_021163.1    | Ca_kabuli_chr04 | 41814651                | CC                              | TT              | 1946829260               |
| SNP_P4_62275_41814654 | NC_021163.1    | Ca_kabuli_chr04 | 41814654                | AA                              | GG              | 1946829262               |
| SNP_P4_62276_41819737 | NC_021163.1    | Ca_kabuli_chr04 | 41819737                | CC                              | TT              | 1946829264               |
| SNP_P4_62277_41823453 | NC_021163.1    | Ca_kabuli_chr04 | 41823453                | CC                              | TT              | 1946829266               |
| SNP_P4_62279_41824003 | NC_021163.1    | Ca_kabuli_chr04 | 41824003                | TT                              | CC              | 1946829268               |
| SNP_P4_62280_41824308 | NC_021163.1    | Ca_kabuli_chr04 | 41824308                | TT                              | CC              | 1946829270               |
| SNP_P4_62281_41824328 | NC_021163.1    | Ca_kabuli_chr04 | 41824328                | GG                              | CC              | 1946829272               |
| SNP_P4_62282_41824333 | NC_021163.1    | Ca_kabuli_chr04 | 41824333                | CC                              | TT              | 1946829274               |
| SNP_P4_62283_41824530 | NC_021163.1    | Ca_kabuli_chr04 | 41824530                | AA                              | TT              | 1946829276               |
| SNP_P4_62284_41824541 | NC_021163.1    | Ca_kabuli_chr04 | 41824541                | AA                              | GG              | 1946829278               |
| SNP_P4_62285_41824562 | NC_021163.1    | Ca_kabuli_chr04 | 41824562                | GG                              | AA              | 1946829280               |
| SNP_P4_62286_41824566 | NC_021163.1    | Ca_kabuli_chr04 | 41824566                | TT                              | CC              | 1946829282               |
| SNP_P4_62287_41824672 | NC_021163.1    | Ca_kabuli_chr04 | 41824672                | TT                              | CC              | 1946829284               |
| SNP_P4_62288_41825801 | NC_021163.1    | Ca_kabuli_chr04 | 41825801                | GG                              | AA              | 1946829286               |
| SNP_P4_62289_41828822 | NC_021163.1    | Ca_kabuli_chr04 | 41828822                | GG                              | AA              | 1946829288               |
| SNP_P4_62290_41829659 | NC_021163.1    | Ca_kabuli_chr04 | 41829659                | TT                              | CC              | 1946829290               |
| SNP_P4_62291_41829938 | NC_021163.1    | Ca_kabuli_chr04 | 41829938                | TT                              | CC              | 1946829292               |
| SNP_P4_62292_41830005 | NC_021163.1    | Ca_kabuli_chr04 | 41830005                | CC                              | TT              | 1946829294               |
| SNP_P4_62293_41830202 | NC_021163.1    | Ca_kabuli_chr04 | 41830202                | TT                              | CC              | 1946829296               |
| SNP_P4_62294_41830207 | NC_021163.1    | Ca_kabuli_chr04 | 41830207                | CC                              | GG              | 1946829298               |
| SNP_P4_62295_41831808 | NC_021163.1    | Ca_kabuli_chr04 | 41831808                | AA                              | GG              | 1946829300               |
| SNP_P4_62296_41832309 | NC_021163.1    | Ca_kabuli_chr04 | 41832309                | GG                              | AA              | 1946829302               |
| SNP_P4_62297_41832787 | NC_021163.1    | Ca_kabuli_chr04 | 41832787                | AA                              | GG              | 1946829304               |
| SNP_P4_62299_41838436 | NC_021163.1    | Ca_kabuli_chr04 | 41838436                | CC                              | AA              | 1946829306               |
| SNP_P4_62301_41859766 | NC_021163.1    | Ca_kabuli_chr04 | 41859766                | CC                              | TT              | 1946829309               |
| SNP_P4_62302_41873364 | NC_021163.1    | Ca_kabuli_chr04 | 41873364                | TT                              | CC              | 1946829311               |
| SNP_P4_62303_41895604 | NC_021163.1    | Ca_kabuli_chr04 | 41895604                | CC                              | TT              | 1946829312               |
| SNP_P4_62304_41895638 | NC_021163.1    | Ca_kabuli_chr04 | 41895638                | AA                              | GG              | 1946829315               |
| SNP_P4_62305_41897047 | NC_021163.1    | Ca_kabuli_chr04 | 41897047                | AA                              | TT              | 1946829316               |
| SNP_P4_62306_41905035 | NC_021163.1    | Ca_kabuli_chr04 | 41905035                | TT                              | CC              | 1946829319               |
| SNP_P4_62307_41905041 | NC_021163.1    | Ca_kabuli_chr04 | 41905041                | GG                              | CC              | 1946829321               |
| SNP_P4_62308_41905054 | NC_021163.1    | Ca_kabuli_chr04 | 41905054                | CC                              | AA              | 1946829323               |
| SNP_P4_62309_41905095 | NC_021163.1    | Ca_kabuli_chr04 | 41905095                | GG                              | TT              | 1946829325               |
| SNP_P4_62310_41905098 | NC_021163.1    | Ca_kabuli_chr04 | 41905098                | TT                              | GG              | 1946829326               |
| SNP_P4_62311_41905429 | NC_021163.1    | Ca_kabuli_chr04 | 41905429                | CC                              | TT              | 1946829329               |
| SNP_P4_62312_41912472 | NC_021163.1    | Ca_kabuli_chr04 | 41912472                | AA                              | GG              | 1946829331               |
| SNP_P4_62313_41925475 | NC_021163.1    | Ca_kabuli_chr04 | 41925475                | CC                              | TT              | 1946829332               |
| SNP_P4_62314_41935139 | NC_021163.1    | Ca_kabuli_chr04 | 41935139                | CC                              | GG              | 1946829334               |

| SNPs IDs              | Chromosome IDs | Chromosomes     | Physical positions (bp) | CDC Frontier (Reference genome) | (ILWC46 & LPNB) | NCBI SNPdb Accession IDs |
|-----------------------|----------------|-----------------|-------------------------|---------------------------------|-----------------|--------------------------|
| SNP_P4_62315_41953709 | NC_021163.1    | Ca_kabuli_chr04 | 41953709                | CC                              | AA              | 1946829336               |
| SNP_P4_62316_41967322 | NC_021163.1    | Ca_kabuli_chr04 | 41967322                | CC                              | AA              | 1946829338               |
| SNP_P4_62318_41985657 | NC_021163.1    | Ca_kabuli_chr04 | 41985657                | AA                              | GG              | 1946829340               |
| SNP_P4_62319_42013044 | NC_021163.1    | Ca_kabuli_chr04 | 42013044                | CC                              | GG              | 1946829343               |
| SNP_P4_62320_42013050 | NC_021163.1    | Ca_kabuli_chr04 | 42013050                | AA                              | TT              | 1946829345               |
| SNP_P4_62321_42016625 | NC_021163.1    | Ca_kabuli_chr04 | 42016625                | GG                              | TT              | 1946829347               |
| SNP_P4_62322_42017322 | NC_021163.1    | Ca_kabuli_chr04 | 42017322                | CC                              | TT              | 1946829349               |
| SNP_P4_62324_42034865 | NC_021163.1    | Ca_kabuli_chr04 | 42034865                | TT                              | AA              | 1946829351               |
| SNP_P4_62325_42034874 | NC_021163.1    | Ca_kabuli_chr04 | 42034874                | TT                              | AA              | 1946829353               |
| SNP_P4_62326_42034875 | NC_021163.1    | Ca_kabuli_chr04 | 42034875                | AA                              | TT              | 1946829355               |
| SNP_P4_62327_42034876 | NC_021163.1    | Ca_kabuli_chr04 | 42034876                | TT                              | AA              | 1946829357               |
| SNP_P4_62328_42035918 | NC_021163.1    | Ca_kabuli_chr04 | 42035918                | AA                              | GG              | 1946829359               |
| SNP_P4_62329_42041924 | NC_021163.1    | Ca_kabuli_chr04 | 42041924                | GG                              | CC              | 1946829360               |
| SNP_P4_62330_42041928 | NC_021163.1    | Ca_kabuli_chr04 | 42041928                | TT                              | CC              | 1946829362               |
| SNP_P4_62331_42073261 | NC_021163.1    | Ca_kabuli_chr04 | 42073261                | AA                              | TT              | 1946829364               |
| SNP_P4_62332_42076709 | NC_021163.1    | Ca_kabuli_chr04 | 42076709                | GG                              | AA              | 1946829366               |
| SNP_P4_62333_42078518 | NC_021163.1    | Ca_kabuli_chr04 | 42078518                | GG                              | AA              | 1946829368               |
| SNP_P4_62334_42078713 | NC_021163.1    | Ca_kabuli_chr04 | 42078713                | TT                              | AA              | 1946829370               |
| SNP_P4_62335_42078837 | NC_021163.1    | Ca_kabuli_chr04 | 42078837                | TT                              | CC              | 1946829372               |
| SNP_P4_62336_42078964 | NC_021163.1    | Ca_kabuli_chr04 | 42078964                | AA                              | GG              | 1946829374               |
| SNP_P4_62337_42081334 | NC_021163.1    | Ca_kabuli_chr04 | 42081334                | GG                              | AA              | 1946829376               |
| SNP_P4_62338_42081699 | NC_021163.1    | Ca_kabuli_chr04 | 42081699                | TT                              | GG              | 1946829378               |
| SNP_P4_62339_42083393 | NC_021163.1    | Ca_kabuli_chr04 | 42083393                | AA                              | TT              | 1946829380               |
| SNP_P4_62340_42083506 | NC_021163.1    | Ca_kabuli_chr04 | 42083506                | AA                              | GG              | 1946829382               |
| SNP_P4_62341_42083557 | NC_021163.1    | Ca_kabuli_chr04 | 42083557                | CC                              | GG              | 1946829384               |
| SNP_P4_62342_42083558 | NC_021163.1    | Ca_kabuli_chr04 | 42083558                | GG                              | AA              | 1946829386               |
| SNP_P4_62343_42083560 | NC_021163.1    | Ca_kabuli_chr04 | 42083560                | CC                              | AA              | 1946829388               |
| SNP_P4_62344_42083697 | NC_021163.1    | Ca_kabuli_chr04 | 42083697                | CC                              | AA              | 1946829390               |
| SNP_P4_62345_42083699 | NC_021163.1    | Ca_kabuli_chr04 | 42083699                | TT                              | GG              | 1946829392               |
| SNP_P4_62346_42083743 | NC_021163.1    | Ca_kabuli_chr04 | 42083743                | AA                              | GG              | 1946829394               |
| SNP_P4_62347_42083770 | NC_021163.1    | Ca_kabuli_chr04 | 42083770                | TT                              | CC              | 1946829396               |
| SNP_P4_62348_42083840 | NC_021163.1    | Ca_kabuli_chr04 | 42083840                | GG                              | AA              | 1946829398               |
| SNP_P4_62349_42095853 | NC_021163.1    | Ca_kabuli_chr04 | 42095853                | TT                              | CC              | 1946829400               |
| SNP_P4_62351_42117783 | NC_021163.1    | Ca_kabuli_chr04 | 42117783                | CC                              | AA              | 1946829402               |
| SNP_P4_62353_42119016 | NC_021163.1    | Ca_kabuli_chr04 | 42119016                | AA                              | CC              | 1946829404               |
| SNP_P4_62354_42119020 | NC_021163.1    | Ca_kabuli_chr04 | 42119020                | TT                              | AA              | 1946829406               |
| SNP_P4_62355_42119024 | NC_021163.1    | Ca_kabuli_chr04 | 42119024                | CC                              | TT              | 1946829408               |
| SNP_P4_62356_42119025 | NC_021163.1    | Ca_kabuli_chr04 | 42119025                | CC                              | TT              | 1946829410               |
| SNP_P4_62357_42119027 | NC_021163.1    | Ca_kabuli_chr04 | 42119027                | CC                              | GG              | 1946829412               |
| SNP_P4_62358_42119062 | NC_021163.1    | Ca_kabuli_chr04 | 42119062                | AA                              | GG              | 1946829414               |
| SNP_P4_62359_42119194 | NC_021163.1    | Ca_kabuli_chr04 | 42119194                | TT                              | CC              | 1946829416               |
| SNP_P4_62360_42119269 | NC_021163.1    | Ca_kabuli_chr04 | 42119269                | CC                              | TT              | 1946829418               |



| SNPs IDs              | Chromosome IDs | Chromosomes     | Physical positions (bp) | CDC Frontier (Reference genome) | (ILWC46 & LPNB) | NCBI SNPdb Accession IDs |
|-----------------------|----------------|-----------------|-------------------------|---------------------------------|-----------------|--------------------------|
| SNP_P4_62361_42119401 | NC_021163.1    | Ca_kabuli_chr04 | 42119401                | CC                              | GG              | 1946829420               |
| SNP_P4_62362_42119422 | NC_021163.1    | Ca_kabuli_chr04 | 42119422                | GG                              | TT              | 1946829422               |
| SNP_P4_62363_42119423 | NC_021163.1    | Ca_kabuli_chr04 | 42119423                | GG                              | AA              | 1946829424               |
| SNP_P4_62364_42119513 | NC_021163.1    | Ca_kabuli_chr04 | 42119513                | TT                              | GG              | 1946829426               |
| SNP_P4_62365_42119554 | NC_021163.1    | Ca_kabuli_chr04 | 42119554                | GG                              | TT              | 1946829428               |
| SNP_P4_62366_42119704 | NC_021163.1    | Ca_kabuli_chr04 | 42119704                | TT                              | AA              | 1946829430               |
| SNP_P4_62367_42119716 | NC_021163.1    | Ca_kabuli_chr04 | 42119716                | GG                              | AA              | 1946829432               |
| SNP_P4_62368_42119757 | NC_021163.1    | Ca_kabuli_chr04 | 42119757                | GG                              | AA              | 1946829435               |
| SNP_P4_62369_42119889 | NC_021163.1    | Ca_kabuli_chr04 | 42119889                | AA                              | CC              | 1946829437               |
| SNP_P4_62370_42119936 | NC_021163.1    | Ca_kabuli_chr04 | 42119936                | GG                              | CC              | 1946829439               |
| SNP_P4_62371_42119945 | NC_021163.1    | Ca_kabuli_chr04 | 42119945                | TT                              | AA              | 1946829441               |
| SNP_P4_62372_42120012 | NC_021163.1    | Ca_kabuli_chr04 | 42120012                | CC                              | GG              | 1946829443               |
| SNP_P4_62373_42120055 | NC_021163.1    | Ca_kabuli_chr04 | 42120055                | AA                              | GG              | 1946829445               |
| SNP_P4_62374_42120201 | NC_021163.1    | Ca_kabuli_chr04 | 42120201                | GG                              | CC              | 1946829447               |
| SNP_P4_62375_42120202 | NC_021163.1    | Ca_kabuli_chr04 | 42120202                | GG                              | TT              | 1946829449               |
| SNP_P4_62376_42120203 | NC_021163.1    | Ca_kabuli_chr04 | 42120203                | AA                              | GG              | 1946829451               |
| SNP_P4_62377_42120236 | NC_021163.1    | Ca_kabuli_chr04 | 42120236                | TT                              | CC              | 1946829453               |
| SNP_P4_62378_42120295 | NC_021163.1    | Ca_kabuli_chr04 | 42120295                | AA                              | GG              | 1946829455               |
| SNP_P4_62379_42120323 | NC_021163.1    | Ca_kabuli_chr04 | 42120323                | AA                              | GG              | 1946829457               |
| SNP_P4_62380_42120377 | NC_021163.1    | Ca_kabuli_chr04 | 42120377                | GG                              | AA              | 1946829458               |
| SNP_P4_62381_42120426 | NC_021163.1    | Ca_kabuli_chr04 | 42120426                | AA                              | GG              | 1946829459               |
| SNP_P4_62383_42120452 | NC_021163.1    | Ca_kabuli_chr04 | 42120452                | TT                              | CC              | 1946829460               |
| SNP_P4_62384_42120505 | NC_021163.1    | Ca_kabuli_chr04 | 42120505                | GG                              | AA              | 1946829461               |
| SNP_P4_62387_42120649 | NC_021163.1    | Ca_kabuli_chr04 | 42120649                | CC                              | AA              | 1946829462               |
| SNP_P4_62388_42120655 | NC_021163.1    | Ca_kabuli_chr04 | 42120655                | GG                              | TT              | 1946829463               |
| SNP_P4_62389_42120817 | NC_021163.1    | Ca_kabuli_chr04 | 42120817                | AA                              | GG              | 1946829465               |
| SNP_P4_62390_42120824 | NC_021163.1    | Ca_kabuli_chr04 | 42120824                | CC                              | AA              | 1946829467               |
| SNP_P4_62392_42147955 | NC_021163.1    | Ca_kabuli_chr04 | 42147955                | TT                              | AA              | 1946829469               |
| SNP_P4_62393_42147961 | NC_021163.1    | Ca_kabuli_chr04 | 42147961                | TT                              | CC              | 1946829471               |
| SNP_P4_62394_42148089 | NC_021163.1    | Ca_kabuli_chr04 | 42148089                | AA                              | TT              | 1946829473               |
| SNP_P4_62395_42148102 | NC_021163.1    | Ca_kabuli_chr04 | 42148102                | AA                              | GG              | 1946829475               |
| SNP_P4_62396_42148118 | NC_021163.1    | Ca_kabuli_chr04 | 42148118                | AA                              | GG              | 1946829477               |
| SNP_P4_62397_42148119 | NC_021163.1    | Ca_kabuli_chr04 | 42148119                | TT                              | CC              | 1946829479               |
| SNP_P4_62398_42148121 | NC_021163.1    | Ca_kabuli_chr04 | 42148121                | TT                              | GG              | 1946829481               |
| SNP_P4_62399_42148122 | NC_021163.1    | Ca_kabuli_chr04 | 42148122                | TT                              | AA              | 1946829483               |
| SNP_P4_62400_42148229 | NC_021163.1    | Ca_kabuli_chr04 | 42148229                | TT                              | CC              | 1946829485               |
| SNP_P4_62401_42148243 | NC_021163.1    | Ca_kabuli_chr04 | 42148243                | AA                              | GG              | 1946829487               |
| SNP_P4_62403_42171863 | NC_021163.1    | Ca_kabuli_chr04 | 42171863                | TT                              | AA              | 1946829489               |
| SNP_P4_62404_42230408 | NC_021163.1    | Ca_kabuli_chr04 | 42230408                | AA                              | GG              | 1946829491               |
| SNP_P4_62405_42259643 | NC_021163.1    | Ca_kabuli_chr04 | 42259643                | CC                              | TT              | 1946829493               |
| SNP_P4_62406_42259644 | NC_021163.1    | Ca_kabuli_chr04 | 42259644                | AA                              | GG              | 1946829495               |
| SNP_P4_62407_42259780 | NC_021163.1    | Ca_kabuli_chr04 | 42259780                | TT                              | GG              | 1946829497               |

| SNPs IDs              | Chromosome IDs | Chromosomes     | Physical positions (bp) | CDC Frontier (Reference genome) | (ILWC46 & LPNB) | NCBI SNPdb Accession IDs |
|-----------------------|----------------|-----------------|-------------------------|---------------------------------|-----------------|--------------------------|
| SNP_P4_62408_42259788 | NC_021163.1    | Ca_kabuli_chr04 | 42259788                | AA                              | GG              | 1946829499               |
| SNP_P4_62409_42259802 | NC_021163.1    | Ca_kabuli_chr04 | 42259802                | TT                              | GG              | 1946829501               |
| SNP_P4_62410_42285197 | NC_021163.1    | Ca_kabuli_chr04 | 42285197                | TT                              | AA              | 1946829503               |
| SNP_P4_62411_42285202 | NC_021163.1    | Ca_kabuli_chr04 | 42285202                | TT                              | CC              | 1946829505               |
| SNP_P4_62412_42285207 | NC_021163.1    | Ca_kabuli_chr04 | 42285207                | AA                              | TT              | 1946829508               |
| SNP_P4_62413_42285380 | NC_021163.1    | Ca_kabuli_chr04 | 42285380                | TT                              | AA              | 1946829510               |
| SNP_P4_62414_42286597 | NC_021163.1    | Ca_kabuli_chr04 | 42286597                | GG                              | CC              | 1946829512               |
| SNP_P4_62415_42299403 | NC_021163.1    | Ca_kabuli_chr04 | 42299403                | CC                              | AA              | 1946829514               |
| SNP_P4_62416_42305857 | NC_021163.1    | Ca_kabuli_chr04 | 42305857                | TT                              | AA              | 1946829516               |
| SNP_P4_62417_42305866 | NC_021163.1    | Ca_kabuli_chr04 | 42305866                | AA                              | GG              | 1946829518               |
| SNP_P4_62418_42305917 | NC_021163.1    | Ca_kabuli_chr04 | 42305917                | GG                              | AA              | 1946829521               |
| SNP_P4_62419_42306150 | NC_021163.1    | Ca_kabuli_chr04 | 42306150                | GG                              | AA              | 1946829523               |
| SNP_P4_62420_42306221 | NC_021163.1    | Ca_kabuli_chr04 | 42306221                | AA                              | GG              | 1946829525               |
| SNP_P4_62421_42308266 | NC_021163.1    | Ca_kabuli_chr04 | 42308266                | GG                              | AA              | 1946829527               |
| SNP_P4_62423_42355726 | NC_021163.1    | Ca_kabuli_chr04 | 42355726                | GG                              | TT              | 1946829529               |
| SNP_P4_62424_42355728 | NC_021163.1    | Ca_kabuli_chr04 | 42355728                | TT                              | CC              | 1946829531               |
| SNP_P4_62425_42407140 | NC_021163.1    | Ca_kabuli_chr04 | 42407140                | AA                              | GG              | 1946829533               |
| SNP_P4_62426_42407151 | NC_021163.1    | Ca_kabuli_chr04 | 42407151                | TT                              | CC              | 1946829535               |
| SNP_P4_62427_42407455 | NC_021163.1    | Ca_kabuli_chr04 | 42407455                | CC                              | GG              | 1946829537               |
| SNP_P4_62428_42408865 | NC_021163.1    | Ca_kabuli_chr04 | 42408865                | AA                              | GG              | 1946829539               |
| SNP_P4_62430_42438471 | NC_021163.1    | Ca_kabuli_chr04 | 42438471                | CC                              | TT              | 1946829541               |
| SNP_P4_62431_42438660 | NC_021163.1    | Ca_kabuli_chr04 | 42438660                | GG                              | AA              | 1946829543               |
| SNP_P4_62432_42439297 | NC_021163.1    | Ca_kabuli_chr04 | 42439297                | AA                              | CC              | 1946829545               |
| SNP_P4_62433_42439797 | NC_021163.1    | Ca_kabuli_chr04 | 42439797                | GG                              | AA              | 1946829547               |
| SNP_P4_62434_42481520 | NC_021163.1    | Ca_kabuli_chr04 | 42481520                | TT                              | CC              | 1946829549               |
| SNP_P4_62435_42508514 | NC_021163.1    | Ca_kabuli_chr04 | 42508514                | TT                              | CC              | 1946829551               |
| SNP_P4_62436_42514032 | NC_021163.1    | Ca_kabuli_chr04 | 42514032                | TT                              | AA              | 1946829553               |
| SNP_P4_62437_42516755 | NC_021163.1    | Ca_kabuli_chr04 | 42516755                | TT                              | CC              | 1946829555               |
| SNP_P4_62438_42516759 | NC_021163.1    | Ca_kabuli_chr04 | 42516759                | AA                              | GG              | 1946829557               |
| SNP_P4_62439_42517079 | NC_021163.1    | Ca_kabuli_chr04 | 42517079                | AA                              | GG              | 1946829559               |
| SNP_P4_62440_42517101 | NC_021163.1    | Ca_kabuli_chr04 | 42517101                | CC                              | AA              | 1946829561               |
| SNP_P4_62443_42546825 | NC_021163.1    | Ca_kabuli_chr04 | 42546825                | AA                              | CC              | 1946829563               |
| SNP_P4_62444_42546842 | NC_021163.1    | Ca_kabuli_chr04 | 42546842                | TT                              | GG              | 1946829565               |
| SNP_P4_62446_42561382 | NC_021163.1    | Ca_kabuli_chr04 | 42561382                | AA                              | TT              | 1946829567               |
| SNP_P4_62448_42579481 | NC_021163.1    | Ca_kabuli_chr04 | 42579481                | GG                              | AA              | 1946829569               |
| SNP_P4_62449_42580703 | NC_021163.1    | Ca_kabuli_chr04 | 42580703                | AA                              | CC              | 1946829571               |
| SNP_P4_62450_42580753 | NC_021163.1    | Ca_kabuli_chr04 | 42580753                | CC                              | TT              | 1946829573               |
| SNP_P4_62451_42588557 | NC_021163.1    | Ca_kabuli_chr04 | 42588557                | TT                              | CC              | 1946829575               |
| SNP_P4_62452_42588597 | NC_021163.1    | Ca_kabuli_chr04 | 42588597                | TT                              | AA              | 1946829578               |
| SNP_P4_62453_42588891 | NC_021163.1    | Ca_kabuli_chr04 | 42588891                | GG                              | AA              | 1946829579               |
| SNP_P4_62454_42588903 | NC_021163.1    | Ca_kabuli_chr04 | 42588903                | AA                              | GG              | 1946829581               |
| SNP_P4_62455_42588937 | NC_021163.1    | Ca_kabuli_chr04 | 42588937                | CC                              | TT              | 1946829583               |

| SNPs IDs              | Chromosome IDs | Chromosomes     | Physical positions (bp) | CDC Frontier (Reference genome) | (ILWC46 & LPNB) | NCBI SNPdb Accession IDs |
|-----------------------|----------------|-----------------|-------------------------|---------------------------------|-----------------|--------------------------|
| SNP_P4_62456_42589072 | NC_021163.1    | Ca_kabuli_chr04 | 42589072                | GG                              | AA              | 1946829585               |
| SNP_P4_62457_42589453 | NC_021163.1    | Ca_kabuli_chr04 | 42589453                | GG                              | AA              | 1946829587               |
| SNP_P4_62458_42589488 | NC_021163.1    | Ca_kabuli_chr04 | 42589488                | CC                              | TT              | 1946829589               |
| SNP_P4_62459_42589491 | NC_021163.1    | Ca_kabuli_chr04 | 42589491                | AA                              | GG              | 1946829591               |
| SNP_P4_62460_42589492 | NC_021163.1    | Ca_kabuli_chr04 | 42589492                | CC                              | AA              | 1946829593               |
| SNP_P4_62461_42589518 | NC_021163.1    | Ca_kabuli_chr04 | 42589518                | TT                              | AA              | 1946829595               |
| SNP_P4_62462_42592247 | NC_021163.1    | Ca_kabuli_chr04 | 42592247                | GG                              | CC              | 1946829597               |
| SNP_P4_62463_42592785 | NC_021163.1    | Ca_kabuli_chr04 | 42592785                | AA                              | GG              | 1946829599               |
| SNP_P4_62464_42609857 | NC_021163.1    | Ca_kabuli_chr04 | 42609857                | AA                              | GG              | 1946829601               |
| SNP_P4_62465_42610204 | NC_021163.1    | Ca_kabuli_chr04 | 42610204                | TT                              | AA              | 1946829603               |
| SNP_P4_62467_42663707 | NC_021163.1    | Ca_kabuli_chr04 | 42663707                | GG                              | AA              | 1946829605               |
| SNP_P4_62469_42704777 | NC_021163.1    | Ca_kabuli_chr04 | 42704777                | GG                              | AA              | 1946829607               |
| SNP_P4_62470_42755287 | NC_021163.1    | Ca_kabuli_chr04 | 42755287                | GG                              | AA              | 1946829609               |
| SNP_P4_62471_42755289 | NC_021163.1    | Ca_kabuli_chr04 | 42755289                | GG                              | AA              | 1946829611               |
| SNP_P4_62472_42755291 | NC_021163.1    | Ca_kabuli_chr04 | 42755291                | TT                              | GG              | 1946829613               |
| SNP_P4_62474_42807957 | NC_021163.1    | Ca_kabuli_chr04 | 42807957                | AA                              | GG              | 1946829615               |
| SNP_P4_62475_42817819 | NC_021163.1    | Ca_kabuli_chr04 | 42817819                | CC                              | TT              | 1946829617               |
| SNP_P4_62476_42820770 | NC_021163.1    | Ca_kabuli_chr04 | 42820770                | AA                              | GG              | 1946829619               |
| SNP_P4_62477_42820788 | NC_021163.1    | Ca_kabuli_chr04 | 42820788                | GG                              | AA              | 1946829621               |
| SNP_P4_62478_42820848 | NC_021163.1    | Ca_kabuli_chr04 | 42820848                | TT                              | GG              | 1946829623               |
| SNP_P4_62479_42820893 | NC_021163.1    | Ca_kabuli_chr04 | 42820893                | TT                              | CC              | 1946829625               |
| SNP_P4_62480_42820896 | NC_021163.1    | Ca_kabuli_chr04 | 42820896                | CC                              | TT              | 1946829627               |
| SNP_P4_62481_42820898 | NC_021163.1    | Ca_kabuli_chr04 | 42820898                | TT                              | GG              | 1946829629               |
| SNP_P4_62482_42820901 | NC_021163.1    | Ca_kabuli_chr04 | 42820901                | GG                              | AA              | 1946829631               |
| SNP_P4_62483_42821098 | NC_021163.1    | Ca_kabuli_chr04 | 42821098                | CC                              | AA              | 1946829633               |
| SNP_P4_62484_42821104 | NC_021163.1    | Ca_kabuli_chr04 | 42821104                | AA                              | TT              | 1946829635               |
| SNP_P4_62485_42821106 | NC_021163.1    | Ca_kabuli_chr04 | 42821106                | GG                              | AA              | 1946829637               |
| SNP_P4_62486_42821130 | NC_021163.1    | Ca_kabuli_chr04 | 42821130                | AA                              | CC              | 1946829639               |
| SNP_P4_62487_42821250 | NC_021163.1    | Ca_kabuli_chr04 | 42821250                | CC                              | TT              | 1946829641               |
| SNP_P4_62488_42829258 | NC_021163.1    | Ca_kabuli_chr04 | 42829258                | TT                              | CC              | 1946829643               |
| SNP_P4_62489_42829263 | NC_021163.1    | Ca_kabuli_chr04 | 42829263                | CC                              | TT              | 1946829645               |
| SNP_P4_62490_42829265 | NC_021163.1    | Ca_kabuli_chr04 | 42829265                | AA                              | GG              | 1946829647               |
| SNP_P4_62491_42829346 | NC_021163.1    | Ca_kabuli_chr04 | 42829346                | TT                              | CC              | 1946829649               |
| SNP_P4_62492_42829370 | NC_021163.1    | Ca_kabuli_chr04 | 42829370                | AA                              | TT              | 1946829651               |
| SNP_P4_62493_42829408 | NC_021163.1    | Ca_kabuli_chr04 | 42829408                | GG                              | TT              | 1946829653               |
| SNP_P4_62494_42829662 | NC_021163.1    | Ca_kabuli_chr04 | 42829662                | CC                              | TT              | 1946829656               |
| SNP_P4_62495_42829710 | NC_021163.1    | Ca_kabuli_chr04 | 42829710                | TT                              | CC              | 1946829658               |
| SNP_P4_62496_42829720 | NC_021163.1    | Ca_kabuli_chr04 | 42829720                | TT                              | CC              | 1946829660               |
| SNP_P4_62497_42829743 | NC_021163.1    | Ca_kabuli_chr04 | 42829743                | TT                              | CC              | 1946829662               |
| SNP_P4_62498_42840834 | NC_021163.1    | Ca_kabuli_chr04 | 42840834                | AA                              | CC              | 1946829664               |
| SNP_P4_62499_42844531 | NC_021163.1    | Ca_kabuli_chr04 | 42844531                | AA                              | TT              | 1946829666               |
| SNP_P4_62500_42845107 | NC_021163.1    | Ca_kabuli_chr04 | 42845107                | TT                              | GG              | 1946829668               |

| SNPs IDs              | Chromosome IDs | Chromosomes     | Physical positions (bp) | CDC Frontier (Reference genome) | (ILWC46 & LPNB) | NCBI SNPdb Accession IDs |
|-----------------------|----------------|-----------------|-------------------------|---------------------------------|-----------------|--------------------------|
| SNP_P4_62501_42845144 | NC_021163.1    | Ca_kabuli_chr04 | 42845144                | CC                              | GG              | 1946829670               |
| SNP_P4_62502_42845599 | NC_021163.1    | Ca_kabuli_chr04 | 42845599                | AA                              | GG              | 1946829672               |
| SNP_P4_62503_42864703 | NC_021163.1    | Ca_kabuli_chr04 | 42864703                | AA                              | GG              | 1946829674               |
| SNP_P4_62504_42883402 | NC_021163.1    | Ca_kabuli_chr04 | 42883402                | TT                              | AA              | 1946829676               |
| SNP_P4_62505_42889013 | NC_021163.1    | Ca_kabuli_chr04 | 42889013                | CC                              | AA              | 1946829678               |
| SNP_P4_62506_42889022 | NC_021163.1    | Ca_kabuli_chr04 | 42889022                | TT                              | AA              | 1946829680               |
| SNP_P4_62507_42889032 | NC_021163.1    | Ca_kabuli_chr04 | 42889032                | CC                              | AA              | 1946829682               |
| SNP_P4_62508_42892422 | NC_021163.1    | Ca_kabuli_chr04 | 42892422                | TT                              | CC              | 1946829684               |
| SNP_P4_62509_42892518 | NC_021163.1    | Ca_kabuli_chr04 | 42892518                | CC                              | TT              | 1946829686               |
| SNP_P4_62510_42892581 | NC_021163.1    | Ca_kabuli_chr04 | 42892581                | TT                              | AA              | 1946829688               |
| SNP_P4_62511_42892620 | NC_021163.1    | Ca_kabuli_chr04 | 42892620                | TT                              | AA              | 1946829690               |
| SNP_P4_62512_42892839 | NC_021163.1    | Ca_kabuli_chr04 | 42892839                | CC                              | AA              | 1946829692               |
| SNP_P4_62513_42892850 | NC_021163.1    | Ca_kabuli_chr04 | 42892850                | CC                              | TT              | 1946829694               |
| SNP_P4_62514_42892953 | NC_021163.1    | Ca_kabuli_chr04 | 42892953                | AA                              | GG              | 1946829696               |
| SNP_P4_62515_42893016 | NC_021163.1    | Ca_kabuli_chr04 | 42893016                | AA                              | CC              | 1946829698               |
| SNP_P4_62516_42893382 | NC_021163.1    | Ca_kabuli_chr04 | 42893382                | TT                              | AA              | 1946829700               |
| SNP_P4_62517_42893394 | NC_021163.1    | Ca_kabuli_chr04 | 42893394                | CC                              | TT              | 1946829702               |
| SNP_P4_62518_42893400 | NC_021163.1    | Ca_kabuli_chr04 | 42893400                | GG                              | AA              | 1946829704               |
| SNP_P4_62519_42904493 | NC_021163.1    | Ca_kabuli_chr04 | 42904493                | TT                              | AA              | 1946829706               |
| SNP_P4_62520_42915842 | NC_021163.1    | Ca_kabuli_chr04 | 42915842                | CC                              | TT              | 1946829708               |
| SNP_P4_62521_42916168 | NC_021163.1    | Ca_kabuli_chr04 | 42916168                | AA                              | GG              | 1946829710               |
| SNP_P4_62522_42947345 | NC_021163.1    | Ca_kabuli_chr04 | 42947345                | CC                              | TT              | 1946829712               |
| SNP_P4_62523_42947372 | NC_021163.1    | Ca_kabuli_chr04 | 42947372                | AA                              | CC              | 1946829714               |
| SNP_P4_62524_42947736 | NC_021163.1    | Ca_kabuli_chr04 | 42947736                | CC                              | TT              | 1946829716               |
| SNP_P4_62525_42961506 | NC_021163.1    | Ca_kabuli_chr04 | 42961506                | CC                              | GG              | 1946829718               |
| SNP_P4_62527_42968168 | NC_021163.1    | Ca_kabuli_chr04 | 42968168                | CC                              | TT              | 1946829720               |
| SNP_P4_62528_42973891 | NC_021163.1    | Ca_kabuli_chr04 | 42973891                | GG                              | AA              | 1946829722               |
| SNP_P4_62529_42973919 | NC_021163.1    | Ca_kabuli_chr04 | 42973919                | CC                              | TT              | 1946829723               |
| SNP_P4_62530_42973930 | NC_021163.1    | Ca_kabuli_chr04 | 42973930                | AA                              | GG              | 1946829725               |
| SNP_P4_62531_42992337 | NC_021163.1    | Ca_kabuli_chr04 | 42992337                | AA                              | GG              | 1946829727               |
| SNP_P4_62532_42996102 | NC_021163.1    | Ca_kabuli_chr04 | 42996102                | TT                              | AA              | 1946829730               |
| SNP_P4_62533_43001887 | NC_021163.1    | Ca_kabuli_chr04 | 43001887                | TT                              | GG              | 1946829732               |
| SNP_P4_62534_43001898 | NC_021163.1    | Ca_kabuli_chr04 | 43001898                | TT                              | AA              | 1946829734               |
| SNP_P4_62535_43001969 | NC_021163.1    | Ca_kabuli_chr04 | 43001969                | CC                              | AA              | 1946829736               |
| SNP_P4_62536_43002145 | NC_021163.1    | Ca_kabuli_chr04 | 43002145                | CC                              | TT              | 1946829738               |
| SNP_P4_62537_43002146 | NC_021163.1    | Ca_kabuli_chr04 | 43002146                | AA                              | GG              | 1946829740               |
| SNP_P4_62538_43002162 | NC_021163.1    | Ca_kabuli_chr04 | 43002162                | CC                              | TT              | 1946829742               |
| SNP_P4_62539_43002184 | NC_021163.1    | Ca_kabuli_chr04 | 43002184                | AA                              | GG              | 1946829744               |
| SNP_P4_62540_43002200 | NC_021163.1    | Ca_kabuli_chr04 | 43002200                | CC                              | TT              | 1946829746               |
| SNP_P4_62541_43002309 | NC_021163.1    | Ca_kabuli_chr04 | 43002309                | AA                              | TT              | 1946829748               |
| SNP_P4_62542_43002331 | NC_021163.1    | Ca_kabuli_chr04 | 43002331                | AA                              | TT              | 1946829750               |
| SNP_P4_62543_43002341 | NC_021163.1    | Ca_kabuli_chr04 | 43002341                | TT                              | AA              | 1946829752               |

| SNPs IDs              | Chromosome IDs | Chromosomes     | Physical positions (bp) | CDC Frontier (Reference genome) | (ILWC46 & LPNB) | NCBI SNPdb Accession IDs |
|-----------------------|----------------|-----------------|-------------------------|---------------------------------|-----------------|--------------------------|
| SNP_P4_62544_43002347 | NC_021163.1    | Ca_kabuli_chr04 | 43002347                | TT                              | AA              | 1946829753               |
| SNP_P4_62545_43002348 | NC_021163.1    | Ca_kabuli_chr04 | 43002348                | TT                              | AA              | 1946829755               |
| SNP_P4_62546_43002349 | NC_021163.1    | Ca_kabuli_chr04 | 43002349                | AA                              | TT              | 1946829757               |
| SNP_P4_62547_43002405 | NC_021163.1    | Ca_kabuli_chr04 | 43002405                | TT                              | CC              | 1946829760               |
| SNP_P4_62548_43002422 | NC_021163.1    | Ca_kabuli_chr04 | 43002422                | AA                              | TT              | 1946829762               |
| SNP_P4_62549_43002611 | NC_021163.1    | Ca_kabuli_chr04 | 43002611                | TT                              | CC              | 1946829764               |
| SNP_P4_62550_43005274 | NC_021163.1    | Ca_kabuli_chr04 | 43005274                | GG                              | AA              | 1946829766               |
| SNP_P4_62551_43006059 | NC_021163.1    | Ca_kabuli_chr04 | 43006059                | GG                              | TT              | 1946829768               |
| SNP_P4_62552_43006101 | NC_021163.1    | Ca_kabuli_chr04 | 43006101                | GG                              | AA              | 1946829770               |
| SNP_P4_62553_43006123 | NC_021163.1    | Ca_kabuli_chr04 | 43006123                | CC                              | TT              | 1946829771               |
| SNP_P4_62554_43006177 | NC_021163.1    | Ca_kabuli_chr04 | 43006177                | AA                              | TT              | 1946829773               |
| SNP_P4_62555_43006195 | NC_021163.1    | Ca_kabuli_chr04 | 43006195                | TT                              | AA              | 1946829775               |
| SNP_P4_62556_43006199 | NC_021163.1    | Ca_kabuli_chr04 | 43006199                | TT                              | AA              | 1946829777               |
| SNP_P4_62557_43006203 | NC_021163.1    | Ca_kabuli_chr04 | 43006203                | AA                              | GG              | 1946829780               |
| SNP_P4_62558_43006205 | NC_021163.1    | Ca_kabuli_chr04 | 43006205                | GG                              | TT              | 1946829782               |
| SNP_P4_62559_43006207 | NC_021163.1    | Ca_kabuli_chr04 | 43006207                | AA                              | TT              | 1946829784               |
| SNP_P4_62560_43009986 | NC_021163.1    | Ca_kabuli_chr04 | 43009986                | GG                              | TT              | 1946829786               |
| SNP_P4_62561_43010349 | NC_021163.1    | Ca_kabuli_chr04 | 43010349                | TT                              | CC              | 1946829788               |
| SNP_P4_62562_43010356 | NC_021163.1    | Ca_kabuli_chr04 | 43010356                | GG                              | AA              | 1946829790               |
| SNP_P4_62563_43010371 | NC_021163.1    | Ca_kabuli_chr04 | 43010371                | GG                              | AA              | 1946829792               |
| SNP_P4_62564_43010396 | NC_021163.1    | Ca_kabuli_chr04 | 43010396                | GG                              | AA              | 1946829794               |
| SNP_P4_62565_43010409 | NC_021163.1    | Ca_kabuli_chr04 | 43010409                | TT                              | GG              | 1946829796               |
| SNP_P4_62566_43015191 | NC_021163.1    | Ca_kabuli_chr04 | 43015191                | CC                              | TT              | 1946829798               |
| SNP_P4_62567_43022007 | NC_021163.1    | Ca_kabuli_chr04 | 43022007                | TT                              | CC              | 1946829800               |
| SNP_P4_62568_43024108 | NC_021163.1    | Ca_kabuli_chr04 | 43024108                | TT                              | AA              | 1946829802               |
| SNP_P4_62569_43024123 | NC_021163.1    | Ca_kabuli_chr04 | 43024123                | TT                              | AA              | 1946829804               |
| SNP_P4_62570_43024134 | NC_021163.1    | Ca_kabuli_chr04 | 43024134                | TT                              | CC              | 1946829806               |
| SNP_P4_62571_43024147 | NC_021163.1    | Ca_kabuli_chr04 | 43024147                | TT                              | CC              | 1946829808               |
| SNP_P4_62572_43028337 | NC_021163.1    | Ca_kabuli_chr04 | 43028337                | GG                              | CC              | 1946829810               |
| SNP_P4_62573_43028638 | NC_021163.1    | Ca_kabuli_chr04 | 43028638                | AA                              | GG              | 1946829812               |
| SNP_P4_62574_43028684 | NC_021163.1    | Ca_kabuli_chr04 | 43028684                | TT                              | CC              | 1946829814               |
| SNP_P4_62575_43030798 | NC_021163.1    | Ca_kabuli_chr04 | 43030798                | GG                              | AA              | 1946829816               |
| SNP_P4_62576_43031348 | NC_021163.1    | Ca_kabuli_chr04 | 43031348                | TT                              | CC              | 1946829819               |
| SNP_P4_62577_43036135 | NC_021163.1    | Ca_kabuli_chr04 | 43036135                | CC                              | TT              | 1946829821               |
| SNP_P4_62578_43047550 | NC_021163.1    | Ca_kabuli_chr04 | 43047550                | CC                              | GG              | 1946829823               |
| SNP_P4_62579_43049661 | NC_021163.1    | Ca_kabuli_chr04 | 43049661                | GG                              | AA              | 1946829825               |
| SNP_P4_62580_43049680 | NC_021163.1    | Ca_kabuli_chr04 | 43049680                | AA                              | TT              | 1946829827               |
| SNP_P4_62582_43053884 | NC_021163.1    | Ca_kabuli_chr04 | 43053884                | GG                              | AA              | 1946829829               |
| SNP_P4_62583_43055789 | NC_021163.1    | Ca_kabuli_chr04 | 43055789                | CC                              | AA              | 1946829831               |
| SNP_P4_62584_43055803 | NC_021163.1    | Ca_kabuli_chr04 | 43055803                | CC                              | TT              | 1946829833               |
| SNP_P4_62585_43055820 | NC_021163.1    | Ca_kabuli_chr04 | 43055820                | GG                              | AA              | 1946829835               |
| SNP_P4_62586_43055847 | NC_021163.1    | Ca_kabuli_chr04 | 43055847                | TT                              | CC              | 1946829837               |

| SNPs IDs              | Chromosome IDs | Chromosomes     | Physical positions (bp) | CDC Frontier (Reference genome) | (ILWC46 & LPNB) | NCBI SNPdb Accession IDs |
|-----------------------|----------------|-----------------|-------------------------|---------------------------------|-----------------|--------------------------|
| SNP_P4_62587_43056171 | NC_021163.1    | Ca_kabuli_chr04 | 43056171                | AA                              | CC              | 1946829839               |
| SNP_P4_62588_43056191 | NC_021163.1    | Ca_kabuli_chr04 | 43056191                | AA                              | GG              | 1946829841               |
| SNP_P4_62589_43061698 | NC_021163.1    | Ca_kabuli_chr04 | 43061698                | AA                              | GG              | 1946829843               |
| SNP_P4_62590_43061818 | NC_021163.1    | Ca_kabuli_chr04 | 43061818                | CC                              | GG              | 1946829845               |
| SNP_P4_62591_43061853 | NC_021163.1    | Ca_kabuli_chr04 | 43061853                | AA                              | CC              | 1946829847               |
| SNP_P4_62592_43062230 | NC_021163.1    | Ca_kabuli_chr04 | 43062230                | GG                              | TT              | 1946829849               |
| SNP_P4_62593_43062247 | NC_021163.1    | Ca_kabuli_chr04 | 43062247                | AA                              | GG              | 1946829851               |
| SNP_P4_62594_43062694 | NC_021163.1    | Ca_kabuli_chr04 | 43062694                | TT                              | CC              | 1946829853               |
| SNP_P4_62595_43062714 | NC_021163.1    | Ca_kabuli_chr04 | 43062714                | GG                              | AA              | 1946829855               |
| SNP_P4_62596_43065440 | NC_021163.1    | Ca_kabuli_chr04 | 43065440                | AA                              | CC              | 1946829857               |
| SNP_P4_62597_43065449 | NC_021163.1    | Ca_kabuli_chr04 | 43065449                | GG                              | AA              | 1946829859               |
| SNP_P4_62598_43073557 | NC_021163.1    | Ca_kabuli_chr04 | 43073557                | TT                              | AA              | 1946829861               |
| SNP_P4_62599_43073720 | NC_021163.1    | Ca_kabuli_chr04 | 43073720                | GG                              | AA              | 1946829863               |
| SNP_P4_62600_43073953 | NC_021163.1    | Ca_kabuli_chr04 | 43073953                | GG                              | CC              | 1946829865               |
| SNP_P4_62601_43083212 | NC_021163.1    | Ca_kabuli_chr04 | 43083212                | AA                              | TT              | 1946829867               |
| SNP_P4_62602_43083219 | NC_021163.1    | Ca_kabuli_chr04 | 43083219                | AA                              | TT              | 1946829869               |
| SNP_P4_62603_43083696 | NC_021163.1    | Ca_kabuli_chr04 | 43083696                | CC                              | AA              | 1946829871               |
| SNP_P4_62604_43093279 | NC_021163.1    | Ca_kabuli_chr04 | 43093279                | TT                              | CC              | 1946829873               |
| SNP_P4_62605_43093862 | NC_021163.1    | Ca_kabuli_chr04 | 43093862                | AA                              | TT              | 1946829875               |
| SNP_P4_62606_43098172 | NC_021163.1    | Ca_kabuli_chr04 | 43098172                | GG                              | AA              | 1946829877               |
| SNP_P4_62607_43105268 | NC_021163.1    | Ca_kabuli_chr04 | 43105268                | CC                              | AA              | 1946829879               |
| SNP_P4_62608_43111680 | NC_021163.1    | Ca_kabuli_chr04 | 43111680                | AA                              | TT              | 1946829881               |
| SNP_P4_62609_43111702 | NC_021163.1    | Ca_kabuli_chr04 | 43111702                | TT                              | CC              | 1946829883               |
| SNP_P4_62610_43111734 | NC_021163.1    | Ca_kabuli_chr04 | 43111734                | GG                              | AA              | 1946829885               |
| SNP_P4_62611_43112042 | NC_021163.1    | Ca_kabuli_chr04 | 43112042                | CC                              | TT              | 1946829887               |
| SNP_P4_62612_43115388 | NC_021163.1    | Ca_kabuli_chr04 | 43115388                | GG                              | AA              | 1946829889               |
| SNP_P4_62613_43115809 | NC_021163.1    | Ca_kabuli_chr04 | 43115809                | GG                              | TT              | 1946829891               |
| SNP_P4_62614_43115831 | NC_021163.1    | Ca_kabuli_chr04 | 43115831                | TT                              | CC              | 1946829893               |
| SNP_P4_62615_43116199 | NC_021163.1    | Ca_kabuli_chr04 | 43116199                | AA                              | GG              | 1946829895               |
| SNP_P4_62616_43116202 | NC_021163.1    | Ca_kabuli_chr04 | 43116202                | TT                              | CC              | 1946829897               |
| SNP_P4_62617_43116273 | NC_021163.1    | Ca_kabuli_chr04 | 43116273                | AA                              | CC              | 1946829899               |
| SNP_P4_62618_43120029 | NC_021163.1    | Ca_kabuli_chr04 | 43120029                | CC                              | AA              | 1946829901               |
| SNP_P4_62619_43120030 | NC_021163.1    | Ca_kabuli_chr04 | 43120030                | TT                              | CC              | 1946829903               |
| SNP_P4_62620_43120960 | NC_021163.1    | Ca_kabuli_chr04 | 43120960                | GG                              | AA              | 1946829905               |
| SNP_P4_62621_43120994 | NC_021163.1    | Ca_kabuli_chr04 | 43120994                | TT                              | AA              | 1946829907               |
| SNP_P4_62622_43121003 | NC_021163.1    | Ca_kabuli_chr04 | 43121003                | TT                              | CC              | 1946829909               |
| SNP_P4_62623_43121747 | NC_021163.1    | Ca_kabuli_chr04 | 43121747                | AA                              | GG              | 1946829911               |
| SNP_P4_62624_43123849 | NC_021163.1    | Ca_kabuli_chr04 | 43123849                | CC                              | GG              | 1946829913               |
| SNP_P4_62625_43127969 | NC_021163.1    | Ca_kabuli_chr04 | 43127969                | GG                              | AA              | 1946829915               |
| SNP_P4_62626_43128042 | NC_021163.1    | Ca_kabuli_chr04 | 43128042                | CC                              | AA              | 1946829917               |
| SNP_P4_62627_43128046 | NC_021163.1    | Ca_kabuli_chr04 | 43128046                | TT                              | GG              | 1946829919               |
| SNP_P4_62628_43143376 | NC_021163.1    | Ca_kabuli_chr04 | 43143376                | CC                              | TT              | 1946829921               |

| SNPs IDs              | Chromosome IDs | Chromosomes     | Physical positions (bp) | CDC Frontier (Reference genome) | (ILWC46 & LPNB) | NCBI SNPdb Accession IDs |
|-----------------------|----------------|-----------------|-------------------------|---------------------------------|-----------------|--------------------------|
| SNP_P4_62629_43146786 | NC_021163.1    | Ca_kabuli_chr04 | 43146786                | AA                              | TT              | 1946829923               |
| SNP_P4_62630_43146812 | NC_021163.1    | Ca_kabuli_chr04 | 43146812                | TT                              | CC              | 1946829925               |
| SNP_P4_62631_43146862 | NC_021163.1    | Ca_kabuli_chr04 | 43146862                | GG                              | TT              | 1946829928               |
| SNP_P4_62632_43146878 | NC_021163.1    | Ca_kabuli_chr04 | 43146878                | CC                              | GG              | 1946829931               |
| SNP_P4_62633_43146893 | NC_021163.1    | Ca_kabuli_chr04 | 43146893                | GG                              | AA              | 1946829933               |
| SNP_P4_62634_43146954 | NC_021163.1    | Ca_kabuli_chr04 | 43146954                | CC                              | TT              | 1946829935               |
| SNP_P4_62635_43146975 | NC_021163.1    | Ca_kabuli_chr04 | 43146975                | CC                              | TT              | 1946829937               |
| SNP_P4_62636_43146983 | NC_021163.1    | Ca_kabuli_chr04 | 43146983                | CC                              | TT              | 1946829939               |
| SNP_P4_62637_43146991 | NC_021163.1    | Ca_kabuli_chr04 | 43146991                | CC                              | TT              | 1946829941               |
| SNP_P4_62638_43146996 | NC_021163.1    | Ca_kabuli_chr04 | 43146996                | CC                              | TT              | 1946829943               |
| SNP_P4_62639_43147715 | NC_021163.1    | Ca_kabuli_chr04 | 43147715                | AA                              | GG              | 1946829945               |
| SNP_P4_62640_43149403 | NC_021163.1    | Ca_kabuli_chr04 | 43149403                | CC                              | TT              | 1946829947               |
| SNP_P4_62641_43154626 | NC_021163.1    | Ca_kabuli_chr04 | 43154626                | TT                              | AA              | 1946829949               |
| SNP_P4_62642_43163859 | NC_021163.1    | Ca_kabuli_chr04 | 43163859                | AA                              | CC              | 1946829951               |
| SNP_P4_62643_43164142 | NC_021163.1    | Ca_kabuli_chr04 | 43164142                | TT                              | CC              | 1946829953               |
| SNP_P4_62644_43191698 | NC_021163.1    | Ca_kabuli_chr04 | 43191698                | GG                              | AA              | 1946829955               |
| SNP_P4_62645_43192036 | NC_021163.1    | Ca_kabuli_chr04 | 43192036                | GG                              | AA              | 1946829957               |
| SNP_P4_62646_43192456 | NC_021163.1    | Ca_kabuli_chr04 | 43192456                | AA                              | GG              | 1946829959               |
| SNP_P4_62647_43192523 | NC_021163.1    | Ca_kabuli_chr04 | 43192523                | TT                              | CC              | 1946829961               |
| SNP_P4_62648_43193191 | NC_021163.1    | Ca_kabuli_chr04 | 43193191                | GG                              | AA              | 1946829963               |
| SNP_P4_62649_43193309 | NC_021163.1    | Ca_kabuli_chr04 | 43193309                | AA                              | GG              | 1946829965               |
| SNP_P4_62651_43200277 | NC_021163.1    | Ca_kabuli_chr04 | 43200277                | AA                              | CC              | 1946829967               |
| SNP_P4_62652_43205061 | NC_021163.1    | Ca_kabuli_chr04 | 43205061                | CC                              | TT              | 1946829969               |
| SNP_P4_62653_43205071 | NC_021163.1    | Ca_kabuli_chr04 | 43205071                | CC                              | TT              | 1946829971               |
| SNP_P4_62654_43205245 | NC_021163.1    | Ca_kabuli_chr04 | 43205245                | CC                              | TT              | 1946829974               |
| SNP_P4_62655_43205434 | NC_021163.1    | Ca_kabuli_chr04 | 43205434                | AA                              | GG              | 1946829976               |
| SNP_P4_62656_43207195 | NC_021163.1    | Ca_kabuli_chr04 | 43207195                | CC                              | GG              | 1946829978               |
| SNP_P4_62657_43207196 | NC_021163.1    | Ca_kabuli_chr04 | 43207196                | CC                              | TT              | 1946829980               |
| SNP_P4_62658_43209294 | NC_021163.1    | Ca_kabuli_chr04 | 43209294                | CC                              | TT              | 1946829982               |
| SNP_P4_62659_43212036 | NC_021163.1    | Ca_kabuli_chr04 | 43212036                | TT                              | AA              | 1946829984               |
| SNP_P4_62660_43213237 | NC_021163.1    | Ca_kabuli_chr04 | 43213237                | AA                              | GG              | 1946829986               |
| SNP_P4_62661_43213442 | NC_021163.1    | Ca_kabuli_chr04 | 43213442                | AA                              | GG              | 1946829987               |
| SNP_P4_62662_43215184 | NC_021163.1    | Ca_kabuli_chr04 | 43215184                | CC                              | AA              | 1946829989               |
| SNP_P4_62663_43217463 | NC_021163.1    | Ca_kabuli_chr04 | 43217463                | GG                              | AA              | 1946829991               |
| SNP_P4_62666_43226627 | NC_021163.1    | Ca_kabuli_chr04 | 43226627                | GG                              | AA              | 1946829993               |
| SNP_P4_62667_43226725 | NC_021163.1    | Ca_kabuli_chr04 | 43226725                | AA                              | GG              | 1946829995               |
| SNP_P4_62668_43226733 | NC_021163.1    | Ca_kabuli_chr04 | 43226733                | CC                              | GG              | 1946829997               |
| SNP_P4_62669_43227552 | NC_021163.1    | Ca_kabuli_chr04 | 43227552                | AA                              | CC              | 1946829999               |
| SNP_P4_62670_43227809 | NC_021163.1    | Ca_kabuli_chr04 | 43227809                | GG                              | TT              | 1946830001               |
| SNP_P4_62671_43240566 | NC_021163.1    | Ca_kabuli_chr04 | 43240566                | AA                              | GG              | 1946830003               |
| SNP_P4_62672_43240667 | NC_021163.1    | Ca_kabuli_chr04 | 43240667                | AA                              | CC              | 1946830005               |
| SNP_P4_62673_43241011 | NC_021163.1    | Ca_kabuli_chr04 | 43241011                | AA                              | GG              | 1946830006               |

| SNPs IDs              | Chromosome IDs | Chromosomes     | Physical positions (bp) | CDC Frontier (Reference genome) | (ILWC46 & LPNB) | NCBI SNPdb Accession IDs |
|-----------------------|----------------|-----------------|-------------------------|---------------------------------|-----------------|--------------------------|
| SNP_P4_62674_43243584 | NC_021163.1    | Ca_kabuli_chr04 | 43243584                | TT                              | CC              | 1946830008               |
| SNP_P4_62675_43243585 | NC_021163.1    | Ca_kabuli_chr04 | 43243585                | CC                              | TT              | 1946830010               |
| SNP_P4_62676_43243592 | NC_021163.1    | Ca_kabuli_chr04 | 43243592                | TT                              | CC              | 1946830012               |
| SNP_P4_62677_43243610 | NC_021163.1    | Ca_kabuli_chr04 | 43243610                | GG                              | AA              | 1946830014               |
| SNP_P4_62678_43243646 | NC_021163.1    | Ca_kabuli_chr04 | 43243646                | AA                              | GG              | 1946830016               |
| SNP_P4_62679_43243663 | NC_021163.1    | Ca_kabuli_chr04 | 43243663                | AA                              | GG              | 1946830018               |
| SNP_P4_62680_43243667 | NC_021163.1    | Ca_kabuli_chr04 | 43243667                | AA                              | GG              | 1946830020               |
| SNP_P4_62681_43243713 | NC_021163.1    | Ca_kabuli_chr04 | 43243713                | TT                              | GG              | 1946830022               |
| SNP_P4_62682_43243727 | NC_021163.1    | Ca_kabuli_chr04 | 43243727                | TT                              | AA              | 1946830024               |
| SNP_P4_62684_43243945 | NC_021163.1    | Ca_kabuli_chr04 | 43243945                | GG                              | AA              | 1946830026               |
| SNP_P4_62685_43243984 | NC_021163.1    | Ca_kabuli_chr04 | 43243984                | CC                              | TT              | 1946830028               |
| SNP_P4_62686_43243990 | NC_021163.1    | Ca_kabuli_chr04 | 43243990                | AA                              | TT              | 1946830030               |
| SNP_P4_62687_43244008 | NC_021163.1    | Ca_kabuli_chr04 | 43244008                | TT                              | AA              | 1946830031               |
| SNP_P4_62688_43244017 | NC_021163.1    | Ca_kabuli_chr04 | 43244017                | GG                              | AA              | 1946830033               |
| SNP_P4_62689_43244018 | NC_021163.1    | Ca_kabuli_chr04 | 43244018                | AA                              | GG              | 1946830035               |
| SNP_P4_62690_43244528 | NC_021163.1    | Ca_kabuli_chr04 | 43244528                | TT                              | GG              | 1946830037               |
| SNP_P4_62691_43268401 | NC_021163.1    | Ca_kabuli_chr04 | 43268401                | TT                              | CC              | 1946830039               |
| SNP_P4_62692_43268543 | NC_021163.1    | Ca_kabuli_chr04 | 43268543                | AA                              | CC              | 1946830041               |
| SNP_P4_62693_43273847 | NC_021163.1    | Ca_kabuli_chr04 | 43273847                | TT                              | CC              | 1946830043               |
| SNP_P4_62694_43274576 | NC_021163.1    | Ca_kabuli_chr04 | 43274576                | CC                              | TT              | 1946830045               |
| SNP_P4_62695_43274779 | NC_021163.1    | Ca_kabuli_chr04 | 43274779                | CC                              | AA              | 1946830047               |
| SNP_P4_62696_43274785 | NC_021163.1    | Ca_kabuli_chr04 | 43274785                | TT                              | CC              | 1946830049               |
| SNP_P4_62697_43274786 | NC_021163.1    | Ca_kabuli_chr04 | 43274786                | CC                              | AA              | 1946830051               |
| SNP_P4_62698_43274792 | NC_021163.1    | Ca_kabuli_chr04 | 43274792                | CC                              | TT              | 1946830053               |
| SNP_P4_62699_43274798 | NC_021163.1    | Ca_kabuli_chr04 | 43274798                | GG                              | AA              | 1946830055               |
| SNP_P4_62700_43274816 | NC_021163.1    | Ca_kabuli_chr04 | 43274816                | GG                              | AA              | 1946830057               |
| SNP_P4_62701_43274849 | NC_021163.1    | Ca_kabuli_chr04 | 43274849                | GG                              | AA              | 1946830059               |
| SNP_P4_62702_43274864 | NC_021163.1    | Ca_kabuli_chr04 | 43274864                | TT                              | CC              | 1946830060               |
| SNP_P4_62703_43274894 | NC_021163.1    | Ca_kabuli_chr04 | 43274894                | CC                              | TT              | 1946830062               |
| SNP_P4_62704_43274909 | NC_021163.1    | Ca_kabuli_chr04 | 43274909                | TT                              | GG              | 1946830064               |
| SNP_P4_62705_43274911 | NC_021163.1    | Ca_kabuli_chr04 | 43274911                | TT                              | CC              | 1946830066               |
| SNP_P4_62706_43274912 | NC_021163.1    | Ca_kabuli_chr04 | 43274912                | CC                              | TT              | 1946830068               |
| SNP_P4_62707_43274919 | NC_021163.1    | Ca_kabuli_chr04 | 43274919                | AA                              | CC              | 1946830070               |
| SNP_P4_62708_43274924 | NC_021163.1    | Ca_kabuli_chr04 | 43274924                | AA                              | CC              | 1946830072               |
| SNP_P4_62709_43274932 | NC_021163.1    | Ca_kabuli_chr04 | 43274932                | TT                              | CC              | 1946830074               |
| SNP_P4_62710_43275190 | NC_021163.1    | Ca_kabuli_chr04 | 43275190                | AA                              | GG              | 1946830076               |
| SNP_P4_62711_43275206 | NC_021163.1    | Ca_kabuli_chr04 | 43275206                | CC                              | TT              | 1946830078               |
| SNP_P4_62712_43275239 | NC_021163.1    | Ca_kabuli_chr04 | 43275239                | TT                              | CC              | 1946830080               |
| SNP_P4_62713_43275244 | NC_021163.1    | Ca_kabuli_chr04 | 43275244                | CC                              | TT              | 1946830082               |
| SNP_P4_62714_43275251 | NC_021163.1    | Ca_kabuli_chr04 | 43275251                | AA                              | GG              | 1946830084               |
| SNP_P4_62715_43277404 | NC_021163.1    | Ca_kabuli_chr04 | 43277404                | AA                              | CC              | 1946830086               |
| SNP_P4_62716_43277473 | NC_021163.1    | Ca_kabuli_chr04 | 43277473                | TT                              | CC              | 1946830087               |



| SNPs IDs              | Chromosome IDs | Chromosomes     | Physical positions (bp) | CDC Frontier (Reference genome) | (ILWC46 & LPNB) | NCBI SNPdb Accession IDs |
|-----------------------|----------------|-----------------|-------------------------|---------------------------------|-----------------|--------------------------|
| SNP_P4_62717_43278085 | NC_021163.1    | Ca_kabuli_chr04 | 43278085                | GG                              | AA              | 1946830089               |
| SNP_P4_62718_43281944 | NC_021163.1    | Ca_kabuli_chr04 | 43281944                | TT                              | CC              | 1946830091               |
| SNP_P4_62719_43289403 | NC_021163.1    | Ca_kabuli_chr04 | 43289403                | AA                              | TT              | 1946830093               |
| SNP_P4_62720_43290006 | NC_021163.1    | Ca_kabuli_chr04 | 43290006                | TT                              | AA              | 1946830095               |
| SNP_P4_62721_43291265 | NC_021163.1    | Ca_kabuli_chr04 | 43291265                | AA                              | CC              | 1946830097               |
| SNP_P4_62723_43294938 | NC_021163.1    | Ca_kabuli_chr04 | 43294938                | TT                              | CC              | 1946830099               |
| SNP_P4_62725_43298432 | NC_021163.1    | Ca_kabuli_chr04 | 43298432                | AA                              | GG              | 1946830101               |
| SNP_P4_62726_43299191 | NC_021163.1    | Ca_kabuli_chr04 | 43299191                | AA                              | TT              | 1946830103               |
| SNP_P4_62727_43299760 | NC_021163.1    | Ca_kabuli_chr04 | 43299760                | AA                              | GG              | 1946830105               |
| SNP_P4_62728_43301079 | NC_021163.1    | Ca_kabuli_chr04 | 43301079                | GG                              | AA              | 1946830106               |
| SNP_P4_62730_43301251 | NC_021163.1    | Ca_kabuli_chr04 | 43301251                | CC                              | TT              | 1946830108               |
| SNP_P4_62731_43301586 | NC_021163.1    | Ca_kabuli_chr04 | 43301586                | AA                              | CC              | 1946830110               |
| SNP_P4_62732_43303587 | NC_021163.1    | Ca_kabuli_chr04 | 43303587                | GG                              | CC              | 1946830112               |
| SNP_P4_62733_43305940 | NC_021163.1    | Ca_kabuli_chr04 | 43305940                | AA                              | GG              | 1946830114               |
| SNP_P4_62734_43306800 | NC_021163.1    | Ca_kabuli_chr04 | 43306800                | CC                              | TT              | 1946830116               |
| SNP_P4_62735_43306830 | NC_021163.1    | Ca_kabuli_chr04 | 43306830                | TT                              | CC              | 1946830118               |
| SNP_P4_62736_43308349 | NC_021163.1    | Ca_kabuli_chr04 | 43308349                | AA                              | TT              | 1946830120               |
| SNP_P4_62737_43308358 | NC_021163.1    | Ca_kabuli_chr04 | 43308358                | CC                              | AA              | 1946830122               |
| SNP_P4_62738_43310446 | NC_021163.1    | Ca_kabuli_chr04 | 43310446                | AA                              | TT              | 1946830124               |
| SNP_P4_62739_43310639 | NC_021163.1    | Ca_kabuli_chr04 | 43310639                | AA                              | TT              | 1946830126               |
| SNP_P4_62740_43310640 | NC_021163.1    | Ca_kabuli_chr04 | 43310640                | AA                              | TT              | 1946830128               |
| SNP_P4_62742_43312953 | NC_021163.1    | Ca_kabuli_chr04 | 43312953                | AA                              | TT              | 1946830129               |
| SNP_P4_62743_43316125 | NC_021163.1    | Ca_kabuli_chr04 | 43316125                | GG                              | AA              | 1946830131               |
| SNP_P4_62744_43317151 | NC_021163.1    | Ca_kabuli_chr04 | 43317151                | TT                              | CC              | 1946830133               |
| SNP_P4_62745_43317173 | NC_021163.1    | Ca_kabuli_chr04 | 43317173                | AA                              | GG              | 1946830135               |
| SNP_P4_62746_43317276 | NC_021163.1    | Ca_kabuli_chr04 | 43317276                | CC                              | TT              | 1946830137               |
| SNP_P4_62747_43317320 | NC_021163.1    | Ca_kabuli_chr04 | 43317320                | TT                              | AA              | 1946830139               |
| SNP_P4_62748_43318076 | NC_021163.1    | Ca_kabuli_chr04 | 43318076                | AA                              | GG              | 1946830141               |
| SNP_P4_62749_43319040 | NC_021163.1    | Ca_kabuli_chr04 | 43319040                | GG                              | AA              | 1946830143               |
| SNP_P4_62750_43319057 | NC_021163.1    | Ca_kabuli_chr04 | 43319057                | TT                              | AA              | 1946830145               |
| SNP_P4_62751_43319098 | NC_021163.1    | Ca_kabuli_chr04 | 43319098                | CC                              | TT              | 1946830147               |
| SNP_P4_62753_43319180 | NC_021163.1    | Ca_kabuli_chr04 | 43319180                | AA                              | CC              | 1946830149               |
| SNP_P4_62754_43319207 | NC_021163.1    | Ca_kabuli_chr04 | 43319207                | GG                              | TT              | 1946830151               |
| SNP_P4_62755_43319208 | NC_021163.1    | Ca_kabuli_chr04 | 43319208                | TT                              | GG              | 1946830153               |
| SNP_P4_62756_43319251 | NC_021163.1    | Ca_kabuli_chr04 | 43319251                | GG                              | CC              | 1946830155               |
| SNP_P4_62757_43319360 | NC_021163.1    | Ca_kabuli_chr04 | 43319360                | TT                              | CC              | 1946830157               |
| SNP_P4_62758_43319378 | NC_021163.1    | Ca_kabuli_chr04 | 43319378                | TT                              | GG              | 1946830159               |
| SNP_P4_62759_43319709 | NC_021163.1    | Ca_kabuli_chr04 | 43319709                | TT                              | CC              | 1946830161               |
| SNP_P4_62761_43320142 | NC_021163.1    | Ca_kabuli_chr04 | 43320142                | AA                              | GG              | 1946830163               |
| SNP_P4_62762_43320591 | NC_021163.1    | Ca_kabuli_chr04 | 43320591                | TT                              | CC              | 1946830165               |
| SNP_P4_62763_43320666 | NC_021163.1    | Ca_kabuli_chr04 | 43320666                | AA                              | GG              | 1946830167               |
| SNP_P4_62764_43320692 | NC_021163.1    | Ca_kabuli_chr04 | 43320692                | AA                              | TT              | 1946830169               |

| SNPs IDs              | Chromosome IDs | Chromosomes     | Physical positions (bp) | CDC Frontier (Reference genome) | (ILWC46 & LPNB) | NCBI SNPdb Accession IDs |
|-----------------------|----------------|-----------------|-------------------------|---------------------------------|-----------------|--------------------------|
| SNP_P4_62765_43320717 | NC_021163.1    | Ca_kabuli_chr04 | 43320717                | CC                              | TT              | 1946830171               |
| SNP_P4_62767_43323470 | NC_021163.1    | Ca_kabuli_chr04 | 43323470                | CC                              | TT              | 1946830174               |
| SNP_P4_62768_43323614 | NC_021163.1    | Ca_kabuli_chr04 | 43323614                | TT                              | AA              | 1946830176               |
| SNP_P4_62769_43323626 | NC_021163.1    | Ca_kabuli_chr04 | 43323626                | GG                              | CC              | 1946830178               |
| SNP_P4_62771_43325483 | NC_021163.1    | Ca_kabuli_chr04 | 43325483                | TT                              | CC              | 1946830180               |
| SNP_P4_62772_43326620 | NC_021163.1    | Ca_kabuli_chr04 | 43326620                | CC                              | TT              | 1946830182               |
| SNP_P4_62773_43327729 | NC_021163.1    | Ca_kabuli_chr04 | 43327729                | TT                              | AA              | 1946830184               |
| SNP_P4_62775_43328421 | NC_021163.1    | Ca_kabuli_chr04 | 43328421                | CC                              | TT              | 1946830186               |
| SNP_P4_62776_43332335 | NC_021163.1    | Ca_kabuli_chr04 | 43332335                | GG                              | TT              | 1946830188               |
| SNP_P4_62777_43332496 | NC_021163.1    | Ca_kabuli_chr04 | 43332496                | GG                              | CC              | 1946830190               |
| SNP_P4_62778_43332625 | NC_021163.1    | Ca_kabuli_chr04 | 43332625                | GG                              | AA              | 1946830192               |
| SNP_P4_62779_43333003 | NC_021163.1    | Ca_kabuli_chr04 | 43333003                | AA                              | GG              | 1946830194               |
| SNP_P4_62780_43333288 | NC_021163.1    | Ca_kabuli_chr04 | 43333288                | AA                              | GG              | 1946830196               |
| SNP_P4_62782_43334655 | NC_021163.1    | Ca_kabuli_chr04 | 43334655                | GG                              | AA              | 1946830198               |
| SNP_P4_62783_43334664 | NC_021163.1    | Ca_kabuli_chr04 | 43334664                | GG                              | AA              | 1946830200               |
| SNP_P4_62784_43334671 | NC_021163.1    | Ca_kabuli_chr04 | 43334671                | AA                              | GG              | 1946830201               |
| SNP_P4_62785_43334699 | NC_021163.1    | Ca_kabuli_chr04 | 43334699                | CC                              | TT              | 1946830203               |
| SNP_P4_62786_43334709 | NC_021163.1    | Ca_kabuli_chr04 | 43334709                | AA                              | GG              | 1946830205               |
| SNP_P4_62787_43339780 | NC_021163.1    | Ca_kabuli_chr04 | 43339780                | GG                              | CC              | 1946830207               |
| SNP_P4_62788_43339811 | NC_021163.1    | Ca_kabuli_chr04 | 43339811                | AA                              | TT              | 1946830209               |
| SNP_P4_62790_43340441 | NC_021163.1    | Ca_kabuli_chr04 | 43340441                | AA                              | GG              | 1946830211               |
| SNP_P4_62792_43346374 | NC_021163.1    | Ca_kabuli_chr04 | 43346374                | CC                              | AA              | 1946830213               |
| SNP_P4_62793_43346382 | NC_021163.1    | Ca_kabuli_chr04 | 43346382                | GG                              | AA              | 1946830215               |
| SNP_P4_62794_43346450 | NC_021163.1    | Ca_kabuli_chr04 | 43346450                | CC                              | TT              | 1946830217               |
| SNP_P4_62796_43346631 | NC_021163.1    | Ca_kabuli_chr04 | 43346631                | GG                              | CC              | 1946830219               |
| SNP_P4_62797_43346768 | NC_021163.1    | Ca_kabuli_chr04 | 43346768                | AA                              | CC              | 1946830221               |
| SNP_P4_62798_43350170 | NC_021163.1    | Ca_kabuli_chr04 | 43350170                | TT                              | CC              | 1946830223               |
| SNP_P4_62799_43350231 | NC_021163.1    | Ca_kabuli_chr04 | 43350231                | TT                              | GG              | 1946830225               |
| SNP_P4_62800_43350249 | NC_021163.1    | Ca_kabuli_chr04 | 43350249                | AA                              | GG              | 1946830227               |
| SNP_P4_62801_43350325 | NC_021163.1    | Ca_kabuli_chr04 | 43350325                | TT                              | CC              | 1946830229               |
| SNP_P4_62803_43350434 | NC_021163.1    | Ca_kabuli_chr04 | 43350434                | TT                              | CC              | 1946830231               |
| SNP_P4_62804_43350556 | NC_021163.1    | Ca_kabuli_chr04 | 43350556                | CC                              | GG              | 1946830233               |
| SNP_P4_62805_43350732 | NC_021163.1    | Ca_kabuli_chr04 | 43350732                | TT                              | AA              | 1946830235               |
| SNP_P4_62806_43351489 | NC_021163.1    | Ca_kabuli_chr04 | 43351489                | AA                              | GG              | 1946830237               |
| SNP_P4_62807_43351532 | NC_021163.1    | Ca_kabuli_chr04 | 43351532                | CC                              | TT              | 1946830239               |
| SNP_P4_62808_43351534 | NC_021163.1    | Ca_kabuli_chr04 | 43351534                | TT                              | CC              | 1946830241               |
| SNP_P4_62809_43351911 | NC_021163.1    | Ca_kabuli_chr04 | 43351911                | TT                              | CC              | 1946830243               |
| SNP_P4_62810_43351960 | NC_021163.1    | Ca_kabuli_chr04 | 43351960                | GG                              | AA              | 1946830244               |
| SNP_P4_62811_43351967 | NC_021163.1    | Ca_kabuli_chr04 | 43351967                | GG                              | AA              | 1946830246               |
| SNP_P4_62812_43352422 | NC_021163.1    | Ca_kabuli_chr04 | 43352422                | CC                              | TT              | 1946830248               |
| SNP_P4_62813_43352428 | NC_021163.1    | Ca_kabuli_chr04 | 43352428                | GG                              | TT              | 1946830250               |
| SNP_P4_62814_43352449 | NC_021163.1    | Ca_kabuli_chr04 | 43352449                | GG                              | AA              | 1946830252               |

| SNPs IDs              | Chromosome IDs | Chromosomes     | Physical positions (bp) | CDC Frontier (Reference genome) | (ILWC46 & LPNB) | NCBI SNPdb Accession IDs |
|-----------------------|----------------|-----------------|-------------------------|---------------------------------|-----------------|--------------------------|
| SNP_P4_62815_43357423 | NC_021163.1    | Ca_kabuli_chr04 | 43357423                | AA                              | CC              | 1946830254               |
| SNP_P4_62816_43359074 | NC_021163.1    | Ca_kabuli_chr04 | 43359074                | AA                              | CC              | 1946830256               |
| SNP_P4_62817_43359386 | NC_021163.1    | Ca_kabuli_chr04 | 43359386                | AA                              | GG              | 1946830258               |
| SNP_P4_62818_43359573 | NC_021163.1    | Ca_kabuli_chr04 | 43359573                | GG                              | AA              | 1946830260               |
| SNP_P4_62819_43363959 | NC_021163.1    | Ca_kabuli_chr04 | 43363959                | CC                              | AA              | 1946830262               |
| SNP_P4_62820_43369448 | NC_021163.1    | Ca_kabuli_chr04 | 43369448                | TT                              | CC              | 1946830264               |
| SNP_P4_62821_43369475 | NC_021163.1    | Ca_kabuli_chr04 | 43369475                | GG                              | TT              | 1946830265               |
| SNP_P4_62822_43370679 | NC_021163.1    | Ca_kabuli_chr04 | 43370679                | TT                              | AA              | 1946830267               |
| SNP_P4_62823_43372392 | NC_021163.1    | Ca_kabuli_chr04 | 43372392                | TT                              | CC              | 1946830269               |
| SNP_P4_62824_43372788 | NC_021163.1    | Ca_kabuli_chr04 | 43372788                | AA                              | GG              | 1946830271               |
| SNP_P4_62825_43373025 | NC_021163.1    | Ca_kabuli_chr04 | 43373025                | CC                              | TT              | 1946830273               |
| SNP_P4_62826_43380165 | NC_021163.1    | Ca_kabuli_chr04 | 43380165                | AA                              | CC              | 1946830275               |
| SNP_P4_62827_43380169 | NC_021163.1    | Ca_kabuli_chr04 | 43380169                | AA                              | GG              | 1946830277               |
| SNP_P4_62829_43383628 | NC_021163.1    | Ca_kabuli_chr04 | 43383628                | CC                              | TT              | 1946830279               |
| SNP_P4_62830_43384691 | NC_021163.1    | Ca_kabuli_chr04 | 43384691                | AA                              | GG              | 1946830281               |
| SNP_P4_62831_43385074 | NC_021163.1    | Ca_kabuli_chr04 | 43385074                | GG                              | CC              | 1946830283               |
| SNP_P4_62832_43386887 | NC_021163.1    | Ca_kabuli_chr04 | 43386887                | CC                              | TT              | 1946830285               |
| SNP_P4_62833_43386901 | NC_021163.1    | Ca_kabuli_chr04 | 43386901                | GG                              | AA              | 1946830287               |
| SNP_P4_62834_43386970 | NC_021163.1    | Ca_kabuli_chr04 | 43386970                | CC                              | AA              | 1946830289               |
| SNP_P4_62835_43387398 | NC_021163.1    | Ca_kabuli_chr04 | 43387398                | CC                              | TT              | 1946830291               |
| SNP_P4_62836_43388808 | NC_021163.1    | Ca_kabuli_chr04 | 43388808                | CC                              | TT              | 1946830293               |
| SNP_P4_62837_43391026 | NC_021163.1    | Ca_kabuli_chr04 | 43391026                | TT                              | CC              | 1946830295               |
| SNP_P4_62838_43391027 | NC_021163.1    | Ca_kabuli_chr04 | 43391027                | CC                              | TT              | 1946830297               |
| SNP_P4_62839_43399920 | NC_021163.1    | Ca_kabuli_chr04 | 43399920                | GG                              | AA              | 1946830299               |
| SNP_P4_62840_43399932 | NC_021163.1    | Ca_kabuli_chr04 | 43399932                | TT                              | CC              | 1946830301               |
| SNP_P4_62842_43403038 | NC_021163.1    | Ca_kabuli_chr04 | 43403038                | GG                              | TT              | 1946830303               |
| SNP_P4_62843_43405175 | NC_021163.1    | Ca_kabuli_chr04 | 43405175                | TT                              | GG              | 1946830305               |
| SNP_P4_62844_43405958 | NC_021163.1    | Ca_kabuli_chr04 | 43405958                | TT                              | AA              | 1946830307               |
| SNP_P4_62845_43406032 | NC_021163.1    | Ca_kabuli_chr04 | 43406032                | GG                              | AA              | 1946830309               |
| SNP_P4_62846_43406055 | NC_021163.1    | Ca_kabuli_chr04 | 43406055                | CC                              | AA              | 1946830311               |
| SNP_P4_62847_43409325 | NC_021163.1    | Ca_kabuli_chr04 | 43409325                | TT                              | CC              | 1946830313               |
| SNP_P4_62848_43409332 | NC_021163.1    | Ca_kabuli_chr04 | 43409332                | TT                              | CC              | 1946830315               |
| SNP_P4_62849_43409477 | NC_021163.1    | Ca_kabuli_chr04 | 43409477                | AA                              | GG              | 1946830317               |
| SNP_P4_62850_43409569 | NC_021163.1    | Ca_kabuli_chr04 | 43409569                | TT                              | AA              | 1946830319               |
| SNP_P4_62851_43412225 | NC_021163.1    | Ca_kabuli_chr04 | 43412225                | TT                              | GG              | 1946830321               |
| SNP_P4_62852_43412310 | NC_021163.1    | Ca_kabuli_chr04 | 43412310                | CC                              | TT              | 1946830323               |
| SNP_P4_62853_43412800 | NC_021163.1    | Ca_kabuli_chr04 | 43412800                | CC                              | TT              | 1946830325               |
| SNP_P4_62854_43412804 | NC_021163.1    | Ca_kabuli_chr04 | 43412804                | CC                              | TT              | 1946830327               |
| SNP_P4_62855_43413050 | NC_021163.1    | Ca_kabuli_chr04 | 43413050                | AA                              | CC              | 1946830329               |
| SNP_P4_62856_43413058 | NC_021163.1    | Ca_kabuli_chr04 | 43413058                | TT                              | CC              | 1946830331               |
| SNP_P4_62857_43413080 | NC_021163.1    | Ca_kabuli_chr04 | 43413080                | TT                              | AA              | 1946830333               |
| SNP_P4_62858_43413100 | NC_021163.1    | Ca_kabuli_chr04 | 43413100                | CC                              | TT              | 1946830335               |

| SNPs IDs              | Chromosome IDs | Chromosomes     | Physical positions (bp) | CDC Frontier (Reference genome) | (ILWC46 & LPNB) | NCBI SNPdb Accession IDs |
|-----------------------|----------------|-----------------|-------------------------|---------------------------------|-----------------|--------------------------|
| SNP_P4_62859_43413108 | NC_021163.1    | Ca_kabuli_chr04 | 43413108                | GG                              | AA              | 1946830337               |
| SNP_P4_62860_43413214 | NC_021163.1    | Ca_kabuli_chr04 | 43413214                | CC                              | AA              | 1946830339               |
| SNP_P4_62861_43415549 | NC_021163.1    | Ca_kabuli_chr04 | 43415549                | TT                              | CC              | 1946830341               |
| SNP_P4_62862_43415557 | NC_021163.1    | Ca_kabuli_chr04 | 43415557                | CC                              | TT              | 1946830343               |
| SNP_P4_62863_43415681 | NC_021163.1    | Ca_kabuli_chr04 | 43415681                | CC                              | TT              | 1946830345               |
| SNP_P4_62864_43415705 | NC_021163.1    | Ca_kabuli_chr04 | 43415705                | GG                              | TT              | 1946830347               |
| SNP_P4_62865_43415732 | NC_021163.1    | Ca_kabuli_chr04 | 43415732                | AA                              | GG              | 1946830349               |
| SNP_P4_62866_43415764 | NC_021163.1    | Ca_kabuli_chr04 | 43415764                | GG                              | AA              | 1946830351               |
| SNP_P4_62867_43416166 | NC_021163.1    | Ca_kabuli_chr04 | 43416166                | TT                              | CC              | 1946830353               |
| SNP_P4_62868_43416229 | NC_021163.1    | Ca_kabuli_chr04 | 43416229                | GG                              | AA              | 1946830355               |
| SNP_P4_62870_43423071 | NC_021163.1    | Ca_kabuli_chr04 | 43423071                | AA                              | GG              | 1946830357               |
| SNP_P4_62871_43423369 | NC_021163.1    | Ca_kabuli_chr04 | 43423369                | TT                              | CC              | 1946830359               |
| SNP_P4_62872_43423393 | NC_021163.1    | Ca_kabuli_chr04 | 43423393                | AA                              | TT              | 1946830361               |
| SNP_P4_62874_43428002 | NC_021163.1    | Ca_kabuli_chr04 | 43428002                | TT                              | AA              | 1946830363               |
| SNP_P4_62875_43428696 | NC_021163.1    | Ca_kabuli_chr04 | 43428696                | AA                              | TT              | 1946830365               |
| SNP_P4_62876_43428923 | NC_021163.1    | Ca_kabuli_chr04 | 43428923                | AA                              | CC              | 1946830366               |
| SNP_P4_62877_43428963 | NC_021163.1    | Ca_kabuli_chr04 | 43428963                | CC                              | TT              | 1946830368               |
| SNP_P4_62878_43429069 | NC_021163.1    | Ca_kabuli_chr04 | 43429069                | GG                              | AA              | 1946830370               |
| SNP_P4_62879_43429417 | NC_021163.1    | Ca_kabuli_chr04 | 43429417                | CC                              | TT              | 1946830372               |
| SNP_P4_62880_43429460 | NC_021163.1    | Ca_kabuli_chr04 | 43429460                | TT                              | GG              | 1946830374               |
| SNP_P4_62881_43429461 | NC_021163.1    | Ca_kabuli_chr04 | 43429461                | CC                              | GG              | 1946830376               |
| SNP_P4_62882_43430742 | NC_021163.1    | Ca_kabuli_chr04 | 43430742                | AA                              | CC              | 1946830378               |
| SNP_P4_62883_43431031 | NC_021163.1    | Ca_kabuli_chr04 | 43431031                | AA                              | GG              | 1946830380               |
| SNP_P4_62884_43431241 | NC_021163.1    | Ca_kabuli_chr04 | 43431241                | AA                              | CC              | 1946830382               |
| SNP_P4_62885_43431815 | NC_021163.1    | Ca_kabuli_chr04 | 43431815                | GG                              | TT              | 1946830384               |
| SNP_P4_62886_43432206 | NC_021163.1    | Ca_kabuli_chr04 | 43432206                | GG                              | AA              | 1946830386               |
| SNP_P4_62887_43433748 | NC_021163.1    | Ca_kabuli_chr04 | 43433748                | GG                              | AA              | 1946830388               |
| SNP_P4_62888_43435887 | NC_021163.1    | Ca_kabuli_chr04 | 43435887                | CC                              | AA              | 1946830390               |
| SNP_P4_62889_43437272 | NC_021163.1    | Ca_kabuli_chr04 | 43437272                | CC                              | TT              | 1946830392               |
| SNP_P4_62890_43439412 | NC_021163.1    | Ca_kabuli_chr04 | 43439412                | GG                              | TT              | 1946830394               |
| SNP_P4_62891_43440079 | NC_021163.1    | Ca_kabuli_chr04 | 43440079                | TT                              | CC              | 1946830396               |
| SNP_P4_62892_43440356 | NC_021163.1    | Ca_kabuli_chr04 | 43440356                | GG                              | TT              | 1946830398               |
| SNP_P4_62893_43440655 | NC_021163.1    | Ca_kabuli_chr04 | 43440655                | TT                              | CC              | 1946830399               |
| SNP_P4_62894_43443922 | NC_021163.1    | Ca_kabuli_chr04 | 43443922                | TT                              | GG              | 1946830401               |
| SNP_P4_62895_43445271 | NC_021163.1    | Ca_kabuli_chr04 | 43445271                | GG                              | AA              | 1946830403               |
| SNP_P4_62896_43445551 | NC_021163.1    | Ca_kabuli_chr04 | 43445551                | TT                              | GG              | 1946830405               |
| SNP_P4_62897_43446017 | NC_021163.1    | Ca_kabuli_chr04 | 43446017                | TT                              | CC              | 1946830407               |
| SNP_P4_62898_43446203 | NC_021163.1    | Ca_kabuli_chr04 | 43446203                | AA                              | TT              | 1946830409               |
| SNP_P4_62900_43451306 | NC_021163.1    | Ca_kabuli_chr04 | 43451306                | AA                              | GG              | 1946830411               |
| SNP_P4_62901_43452951 | NC_021163.1    | Ca_kabuli_chr04 | 43452951                | CC                              | TT              | 1946830413               |
| SNP_P4_62902_43452952 | NC_021163.1    | Ca_kabuli_chr04 | 43452952                | TT                              | CC              | 1946830415               |
| SNP_P4_62903_43453318 | NC_021163.1    | Ca_kabuli_chr04 | 43453318                | GG                              | TT              | 1946830417               |

| SNPs IDs              | Chromosome IDs | Chromosomes     | Physical positions (bp) | CDC Frontier (Reference genome) | (ILWC46 & LPNB) | NCBI SNPdb Accession IDs |
|-----------------------|----------------|-----------------|-------------------------|---------------------------------|-----------------|--------------------------|
| SNP_P4_62904_43453886 | NC_021163.1    | Ca_kabuli_chr04 | 43453886                | CC                              | TT              | 1946830419               |
| SNP_P4_62905_43453931 | NC_021163.1    | Ca_kabuli_chr04 | 43453931                | CC                              | TT              | 1946830421               |
| SNP_P4_62906_43454155 | NC_021163.1    | Ca_kabuli_chr04 | 43454155                | TT                              | CC              | 1946830423               |
| SNP_P4_62907_43454198 | NC_021163.1    | Ca_kabuli_chr04 | 43454198                | CC                              | TT              | 1946830425               |
| SNP_P4_62908_43454208 | NC_021163.1    | Ca_kabuli_chr04 | 43454208                | GG                              | TT              | 1946830427               |
| SNP_P4_62909_43454785 | NC_021163.1    | Ca_kabuli_chr04 | 43454785                | TT                              | CC              | 1946830429               |
| SNP_P4_62910_43455205 | NC_021163.1    | Ca_kabuli_chr04 | 43455205                | AA                              | CC              | 1946830430               |
| SNP_P4_62911_43455898 | NC_021163.1    | Ca_kabuli_chr04 | 43455898                | GG                              | AA              | 1946830432               |
| SNP_P4_62912_43456133 | NC_021163.1    | Ca_kabuli_chr04 | 43456133                | TT                              | CC              | 1946830434               |
| SNP_P4_62913_43456159 | NC_021163.1    | Ca_kabuli_chr04 | 43456159                | AA                              | GG              | 1946830436               |
| SNP_P4_62914_43458698 | NC_021163.1    | Ca_kabuli_chr04 | 43458698                | GG                              | CC              | 1946830438               |
| SNP_P4_62916_43459016 | NC_021163.1    | Ca_kabuli_chr04 | 43459016                | TT                              | GG              | 1946830440               |
| SNP_P4_62917_43459021 | NC_021163.1    | Ca_kabuli_chr04 | 43459021                | AA                              | GG              | 1946830442               |
| SNP_P4_62918_43459249 | NC_021163.1    | Ca_kabuli_chr04 | 43459249                | TT                              | AA              | 1946830444               |
| SNP_P4_62919_43459252 | NC_021163.1    | Ca_kabuli_chr04 | 43459252                | AA                              | CC              | 1946830446               |
| SNP_P4_62920_43459284 | NC_021163.1    | Ca_kabuli_chr04 | 43459284                | CC                              | AA              | 1946830447               |
| SNP_P4_62921_43459294 | NC_021163.1    | Ca_kabuli_chr04 | 43459294                | CC                              | TT              | 1946830450               |
| SNP_P4_62922_43459465 | NC_021163.1    | Ca_kabuli_chr04 | 43459465                | CC                              | TT              | 1946830452               |
| SNP_P4_62923_43459466 | NC_021163.1    | Ca_kabuli_chr04 | 43459466                | TT                              | CC              | 1946830454               |
| SNP_P4_62924_43459475 | NC_021163.1    | Ca_kabuli_chr04 | 43459475                | TT                              | CC              | 1946830456               |
| SNP_P4_62926_43459710 | NC_021163.1    | Ca_kabuli_chr04 | 43459710                | TT                              | CC              | 1946830457               |
| SNP_P4_62927_43459742 | NC_021163.1    | Ca_kabuli_chr04 | 43459742                | CC                              | TT              | 1946830459               |
| SNP_P4_62928_43459793 | NC_021163.1    | Ca_kabuli_chr04 | 43459793                | TT                              | CC              | 1946830461               |
| SNP_P4_62929_43460170 | NC_021163.1    | Ca_kabuli_chr04 | 43460170                | AA                              | GG              | 1946830463               |
| SNP_P4_62931_43468666 | NC_021163.1    | Ca_kabuli_chr04 | 43468666                | AA                              | CC              | 1946830465               |
| SNP_P4_62932_43468726 | NC_021163.1    | Ca_kabuli_chr04 | 43468726                | AA                              | GG              | 1946830467               |
| SNP_P4_62933_43472852 | NC_021163.1    | Ca_kabuli_chr04 | 43472852                | CC                              | TT              | 1946830469               |
| SNP_P4_62934_43475040 | NC_021163.1    | Ca_kabuli_chr04 | 43475040                | TT                              | CC              | 1946830471               |
| SNP_P4_62935_43475093 | NC_021163.1    | Ca_kabuli_chr04 | 43475093                | GG                              | TT              | 1946830473               |
| SNP_P4_62936_43475150 | NC_021163.1    | Ca_kabuli_chr04 | 43475150                | GG                              | TT              | 1946830475               |
| SNP_P4_62938_43475535 | NC_021163.1    | Ca_kabuli_chr04 | 43475535                | AA                              | GG              | 1946830477               |
| SNP_P4_62939_43475547 | NC_021163.1    | Ca_kabuli_chr04 | 43475547                | CC                              | TT              | 1946830479               |
| SNP_P4_62940_43475563 | NC_021163.1    | Ca_kabuli_chr04 | 43475563                | CC                              | AA              | 1946830481               |
| SNP_P4_62941_43477625 | NC_021163.1    | Ca_kabuli_chr04 | 43477625                | AA                              | GG              | 1946830483               |
| SNP_P4_62942_43477629 | NC_021163.1    | Ca_kabuli_chr04 | 43477629                | GG                              | AA              | 1946830485               |
| SNP_P4_62943_43485327 | NC_021163.1    | Ca_kabuli_chr04 | 43485327                | TT                              | CC              | 1946830487               |
| SNP_P4_62945_43490887 | NC_021163.1    | Ca_kabuli_chr04 | 43490887                | GG                              | AA              | 1946830489               |
| SNP_P4_62947_43497657 | NC_021163.1    | Ca_kabuli_chr04 | 43497657                | AA                              | GG              | 1946830491               |
| SNP_P4_62948_43510547 | NC_021163.1    | Ca_kabuli_chr04 | 43510547                | AA                              | GG              | 1946830493               |
| SNP_P4_62949_43510707 | NC_021163.1    | Ca_kabuli_chr04 | 43510707                | TT                              | CC              | 1946830495               |
| SNP_P4_62950_43510740 | NC_021163.1    | Ca_kabuli_chr04 | 43510740                | TT                              | CC              | 1946830498               |
| SNP_P4_62951_43510916 | NC_021163.1    | Ca_kabuli_chr04 | 43510916                | CC                              | TT              | 1946830500               |

| SNPs IDs              | Chromosome IDs | Chromosomes     | Physical positions (bp) | CDC Frontier (Reference genome) | (ILWC46 & LPNB) | NCBI SNPdb Accession IDs |
|-----------------------|----------------|-----------------|-------------------------|---------------------------------|-----------------|--------------------------|
| SNP_P4_62952_43511091 | NC_021163.1    | Ca_kabuli_chr04 | 43511091                | TT                              | CC              | 1946830502               |
| SNP_P4_62953_43511138 | NC_021163.1    | Ca_kabuli_chr04 | 43511138                | GG                              | AA              | 1946830505               |
| SNP_P4_62954_43517839 | NC_021163.1    | Ca_kabuli_chr04 | 43517839                | TT                              | GG              | 1946830507               |
| SNP_P4_62955_43517860 | NC_021163.1    | Ca_kabuli_chr04 | 43517860                | TT                              | CC              | 1946830509               |
| SNP_P4_62957_43518569 | NC_021163.1    | Ca_kabuli_chr04 | 43518569                | TT                              | CC              | 1946830511               |
| SNP_P4_62960_43524377 | NC_021163.1    | Ca_kabuli_chr04 | 43524377                | GG                              | CC              | 1946830513               |
| SNP_P4_62961_43525473 | NC_021163.1    | Ca_kabuli_chr04 | 43525473                | AA                              | TT              | 1946830515               |
| SNP_P4_62962_43525676 | NC_021163.1    | Ca_kabuli_chr04 | 43525676                | GG                              | AA              | 1946830517               |
| SNP_P4_62963_43532712 | NC_021163.1    | Ca_kabuli_chr04 | 43532712                | AA                              | GG              | 1946830519               |
| SNP_P4_62964_43532750 | NC_021163.1    | Ca_kabuli_chr04 | 43532750                | GG                              | TT              | 1946830520               |
| SNP_P4_62965_43533107 | NC_021163.1    | Ca_kabuli_chr04 | 43533107                | AA                              | GG              | 1946830521               |
| SNP_P4_62966_43533141 | NC_021163.1    | Ca_kabuli_chr04 | 43533141                | GG                              | AA              | 1946830522               |
| SNP_P4_62967_43533161 | NC_021163.1    | Ca_kabuli_chr04 | 43533161                | CC                              | AA              | 1946830524               |
| SNP_P4_62968_43533278 | NC_021163.1    | Ca_kabuli_chr04 | 43533278                | TT                              | AA              | 1946830526               |
| SNP_P4_62969_43533662 | NC_021163.1    | Ca_kabuli_chr04 | 43533662                | GG                              | TT              | 1946830528               |
| SNP_P4_62970_43534467 | NC_021163.1    | Ca_kabuli_chr04 | 43534467                | TT                              | AA              | 1946830530               |
| SNP_P4_62971_43535093 | NC_021163.1    | Ca_kabuli_chr04 | 43535093                | CC                              | TT              | 1946830532               |
| SNP_P4_62972_43535113 | NC_021163.1    | Ca_kabuli_chr04 | 43535113                | GG                              | AA              | 1946830534               |
| SNP_P4_62973_43535205 | NC_021163.1    | Ca_kabuli_chr04 | 43535205                | CC                              | GG              | 1946830536               |
| SNP_P4_62974_43536329 | NC_021163.1    | Ca_kabuli_chr04 | 43536329                | CC                              | TT              | 1946830538               |
| SNP_P4_62975_43536529 | NC_021163.1    | Ca_kabuli_chr04 | 43536529                | AA                              | TT              | 1946830540               |
| SNP_P4_62977_43544323 | NC_021163.1    | Ca_kabuli_chr04 | 43544323                | CC                              | TT              | 1946830542               |
| SNP_P4_62979_43544465 | NC_021163.1    | Ca_kabuli_chr04 | 43544465                | CC                              | TT              | 1946830544               |
| SNP_P4_62980_43545048 | NC_021163.1    | Ca_kabuli_chr04 | 43545048                | TT                              | CC              | 1946830546               |
| SNP_P4_62981_43545730 | NC_021163.1    | Ca_kabuli_chr04 | 43545730                | CC                              | TT              | 1946830548               |
| SNP_P4_62982_43545777 | NC_021163.1    | Ca_kabuli_chr04 | 43545777                | CC                              | AA              | 1946830550               |
| SNP_P4_62983_43546882 | NC_021163.1    | Ca_kabuli_chr04 | 43546882                | GG                              | CC              | 1946830552               |
| SNP_P4_62984_43548204 | NC_021163.1    | Ca_kabuli_chr04 | 43548204                | GG                              | TT              | 1946830554               |
| SNP_P4_62985_43548958 | NC_021163.1    | Ca_kabuli_chr04 | 43548958                | CC                              | TT              | 1946830556               |
| SNP_P4_62987_43549657 | NC_021163.1    | Ca_kabuli_chr04 | 43549657                | TT                              | CC              | 1946830558               |
| SNP_P4_62988_43549766 | NC_021163.1    | Ca_kabuli_chr04 | 43549766                | AA                              | TT              | 1946830560               |
| SNP_P4_62990_43549834 | NC_021163.1    | Ca_kabuli_chr04 | 43549834                | TT                              | AA              | 1946830562               |
| SNP_P4_62991_43550014 | NC_021163.1    | Ca_kabuli_chr04 | 43550014                | GG                              | AA              | 1946830564               |
| SNP_P4_62992_43553391 | NC_021163.1    | Ca_kabuli_chr04 | 43553391                | AA                              | GG              | 1946830566               |
| SNP_P4_62994_43553696 | NC_021163.1    | Ca_kabuli_chr04 | 43553696                | AA                              | GG              | 1946830568               |
| SNP_P4_62995_43553701 | NC_021163.1    | Ca_kabuli_chr04 | 43553701                | TT                              | AA              | 1946830570               |
| SNP_P4_62996_43554609 | NC_021163.1    | Ca_kabuli_chr04 | 43554609                | GG                              | AA              | 1946830572               |
| SNP_P4_62997_43556330 | NC_021163.1    | Ca_kabuli_chr04 | 43556330                | CC                              | GG              | 1946830574               |
| SNP_P4_62998_43556630 | NC_021163.1    | Ca_kabuli_chr04 | 43556630                | CC                              | TT              | 1946830576               |
| SNP_P4_62999_43557305 | NC_021163.1    | Ca_kabuli_chr04 | 43557305                | TT                              | GG              | 1946830578               |
| SNP_P4_63000_43559153 | NC_021163.1    | Ca_kabuli_chr04 | 43559153                | TT                              | CC              | 1946830580               |
| SNP_P4_63001_43560074 | NC_021163.1    | Ca_kabuli_chr04 | 43560074                | CC                              | TT              | 1946830582               |

| SNPs IDs              | Chromosome IDs | Chromosomes     | Physical positions (bp) | CDC Frontier (Reference genome) | (ILWC46 & LPNB) | NCBI SNPdb Accession IDs |
|-----------------------|----------------|-----------------|-------------------------|---------------------------------|-----------------|--------------------------|
| SNP_P4_63002_43560174 | NC_021163.1    | Ca_kabuli_chr04 | 43560174                | GG                              | TT              | 1946830584               |
| SNP_P4_63003_43560773 | NC_021163.1    | Ca_kabuli_chr04 | 43560773                | AA                              | GG              | 1946830586               |
| SNP_P4_63004_43560953 | NC_021163.1    | Ca_kabuli_chr04 | 43560953                | AA                              | GG              | 1946830588               |
| SNP_P4_63005_43561094 | NC_021163.1    | Ca_kabuli_chr04 | 43561094                | AA                              | GG              | 1946830591               |
| SNP_P4_63006_43561230 | NC_021163.1    | Ca_kabuli_chr04 | 43561230                | GG                              | AA              | 1946830593               |
| SNP_P4_63007_43561433 | NC_021163.1    | Ca_kabuli_chr04 | 43561433                | CC                              | TT              | 1946830595               |
| SNP_P4_63008_43562549 | NC_021163.1    | Ca_kabuli_chr04 | 43562549                | TT                              | AA              | 1946830597               |
| SNP_P4_63010_43565657 | NC_021163.1    | Ca_kabuli_chr04 | 43565657                | GG                              | TT              | 1946830599               |
| SNP_P4_63011_43565669 | NC_021163.1    | Ca_kabuli_chr04 | 43565669                | AA                              | GG              | 1946830601               |
| SNP_P4_63012_43566091 | NC_021163.1    | Ca_kabuli_chr04 | 43566091                | TT                              | GG              | 1946830603               |
| SNP_P4_63014_43566444 | NC_021163.1    | Ca_kabuli_chr04 | 43566444                | CC                              | TT              | 1946830605               |
| SNP_P4_63015_43566451 | NC_021163.1    | Ca_kabuli_chr04 | 43566451                | CC                              | GG              | 1946830607               |
| SNP_P4_63016_43566918 | NC_021163.1    | Ca_kabuli_chr04 | 43566918                | TT                              | CC              | 1946830609               |
| SNP_P4_63017_43568798 | NC_021163.1    | Ca_kabuli_chr04 | 43568798                | GG                              | AA              | 1946830611               |
| SNP_P4_63018_43569305 | NC_021163.1    | Ca_kabuli_chr04 | 43569305                | AA                              | GG              | 1946830613               |
| SNP_P4_63020_43570372 | NC_021163.1    | Ca_kabuli_chr04 | 43570372                | TT                              | GG              | 1946830615               |
| SNP_P4_63021_43573252 | NC_021163.1    | Ca_kabuli_chr04 | 43573252                | GG                              | AA              | 1946830617               |
| SNP_P4_63022_43579433 | NC_021163.1    | Ca_kabuli_chr04 | 43579433                | TT                              | AA              | 1946830619               |
| SNP_P4_63023_43579481 | NC_021163.1    | Ca_kabuli_chr04 | 43579481                | AA                              | TT              | 1946830621               |
| SNP_P4_63024_43579547 | NC_021163.1    | Ca_kabuli_chr04 | 43579547                | CC                              | TT              | 1946830623               |
| SNP_P4_63025_43605201 | NC_021163.1    | Ca_kabuli_chr04 | 43605201                | TT                              | CC              | 1946830625               |
| SNP_P4_63026_43606280 | NC_021163.1    | Ca_kabuli_chr04 | 43606280                | GG                              | AA              | 1946830627               |
| SNP_P4_63027_43620208 | NC_021163.1    | Ca_kabuli_chr04 | 43620208                | AA                              | GG              | 1946830629               |
| SNP_P4_63028_43636143 | NC_021163.1    | Ca_kabuli_chr04 | 43636143                | CC                              | TT              | 1946830631               |
| SNP_P4_63030_43664752 | NC_021163.1    | Ca_kabuli_chr04 | 43664752                | GG                              | TT              | 1946830633               |
| SNP_P4_63031_43664763 | NC_021163.1    | Ca_kabuli_chr04 | 43664763                | CC                              | TT              | 1946830635               |
| SNP_P4_63032_43665084 | NC_021163.1    | Ca_kabuli_chr04 | 43665084                | TT                              | AA              | 1946830637               |
| SNP_P4_63033_43734593 | NC_021163.1    | Ca_kabuli_chr04 | 43734593                | AA                              | CC              | 1946830639               |
| SNP_P4_63034_43757371 | NC_021163.1    | Ca_kabuli_chr04 | 43757371                | CC                              | GG              | 1946830641               |
| SNP_P4_63035_43757413 | NC_021163.1    | Ca_kabuli_chr04 | 43757413                | AA                              | GG              | 1946830643               |
| SNP_P4_63036_43757476 | NC_021163.1    | Ca_kabuli_chr04 | 43757476                | TT                              | CC              | 1946830645               |
| SNP_P4_63037_43757505 | NC_021163.1    | Ca_kabuli_chr04 | 43757505                | AA                              | GG              | 1946830647               |
| SNP_P4_63038_43774619 | NC_021163.1    | Ca_kabuli_chr04 | 43774619                | AA                              | TT              | 1946830649               |
| SNP_P4_63039_43789693 | NC_021163.1    | Ca_kabuli_chr04 | 43789693                | TT                              | GG              | 1946830651               |
| SNP_P4_63040_43789713 | NC_021163.1    | Ca_kabuli_chr04 | 43789713                | GG                              | CC              | 1946830653               |
| SNP_P4_63041_43819386 | NC_021163.1    | Ca_kabuli_chr04 | 43819386                | AA                              | GG              | 1946830655               |
| SNP_P4_63042_43849763 | NC_021163.1    | Ca_kabuli_chr04 | 43849763                | CC                              | TT              | 1946830657               |
| SNP_P4_63043_43871457 | NC_021163.1    | Ca_kabuli_chr04 | 43871457                | AA                              | CC              | 1946830659               |
| SNP_P4_63044_43879745 | NC_021163.1    | Ca_kabuli_chr04 | 43879745                | GG                              | AA              | 1946830661               |
| SNP_P4_63045_43887084 | NC_021163.1    | Ca_kabuli_chr04 | 43887084                | CC                              | AA              | 1946830663               |
| SNP_P4_63048_43916021 | NC_021163.1    | Ca_kabuli_chr04 | 43916021                | AA                              | GG              | 1946830665               |
| SNP_P4_63049_43971987 | NC_021163.1    | Ca_kabuli_chr04 | 43971987                | TT                              | AA              | 1946830667               |

| SNPs IDs              | Chromosome IDs | Chromosomes     | Physical positions (bp) | CDC Frontier (Reference genome) | (ILWC46 & LPNB) | NCBI SNPdb Accession IDs |
|-----------------------|----------------|-----------------|-------------------------|---------------------------------|-----------------|--------------------------|
| SNP_P4_63051_43998642 | NC_021163.1    | Ca_kabuli_chr04 | 43998642                | CC                              | TT              | 1946830669               |
| SNP_P4_63053_44000923 | NC_021163.1    | Ca_kabuli_chr04 | 44000923                | TT                              | CC              | 1946830671               |
| SNP_P4_63054_44039297 | NC_021163.1    | Ca_kabuli_chr04 | 44039297                | TT                              | CC              | 1946830673               |
| SNP_P4_63055_44041572 | NC_021163.1    | Ca_kabuli_chr04 | 44041572                | CC                              | GG              | 1946830675               |
| SNP_P4_63056_44096498 | NC_021163.1    | Ca_kabuli_chr04 | 44096498                | AA                              | GG              | 1946830677               |
| SNP_P4_63057_44134103 | NC_021163.1    | Ca_kabuli_chr04 | 44134103                | CC                              | TT              | 1946830679               |
| SNP_P4_63058_44134618 | NC_021163.1    | Ca_kabuli_chr04 | 44134618                | CC                              | TT              | 1946830681               |
| SNP_P4_63059_44134635 | NC_021163.1    | Ca_kabuli_chr04 | 44134635                | AA                              | GG              | 1946830683               |
| SNP_P4_63060_44134674 | NC_021163.1    | Ca_kabuli_chr04 | 44134674                | CC                              | TT              | 1946830685               |
| SNP_P4_63061_44134774 | NC_021163.1    | Ca_kabuli_chr04 | 44134774                | AA                              | GG              | 1946830687               |
| SNP_P4_63062_44134836 | NC_021163.1    | Ca_kabuli_chr04 | 44134836                | CC                              | TT              | 1946830689               |
| SNP_P4_63063_44134954 | NC_021163.1    | Ca_kabuli_chr04 | 44134954                | AA                              | GG              | 1946830691               |
| SNP_P4_63064_44135047 | NC_021163.1    | Ca_kabuli_chr04 | 44135047                | TT                              | CC              | 1946830694               |
| SNP_P4_63065_44135050 | NC_021163.1    | Ca_kabuli_chr04 | 44135050                | CC                              | TT              | 1946830696               |
| SNP_P4_63066_44135175 | NC_021163.1    | Ca_kabuli_chr04 | 44135175                | TT                              | CC              | 1946830698               |
| SNP_P4_63067_44135203 | NC_021163.1    | Ca_kabuli_chr04 | 44135203                | TT                              | AA              | 1946830700               |
| SNP_P4_63068_44135205 | NC_021163.1    | Ca_kabuli_chr04 | 44135205                | TT                              | CC              | 1946830702               |
| SNP_P4_63069_44135241 | NC_021163.1    | Ca_kabuli_chr04 | 44135241                | AA                              | GG              | 1946830704               |
| SNP_P4_63070_44135380 | NC_021163.1    | Ca_kabuli_chr04 | 44135380                | AA                              | CC              | 1946830706               |
| SNP_P4_63071_44163792 | NC_021163.1    | Ca_kabuli_chr04 | 44163792                | AA                              | TT              | 1946830708               |
| SNP_P4_63072_44163793 | NC_021163.1    | Ca_kabuli_chr04 | 44163793                | CC                              | AA              | 1946830710               |
| SNP_P4_63073_44191103 | NC_021163.1    | Ca_kabuli_chr04 | 44191103                | GG                              | CC              | 1946830713               |
| SNP_P4_63074_44198065 | NC_021163.1    | Ca_kabuli_chr04 | 44198065                | GG                              | CC              | 1946830715               |
| SNP_P4_63075_44198072 | NC_021163.1    | Ca_kabuli_chr04 | 44198072                | CC                              | TT              | 1946830718               |
| SNP_P4_63076_44198550 | NC_021163.1    | Ca_kabuli_chr04 | 44198550                | AA                              | GG              | 1946830721               |
| SNP_P4_63077_44198555 | NC_021163.1    | Ca_kabuli_chr04 | 44198555                | AA                              | GG              | 1946830723               |
| SNP_P4_63078_44213361 | NC_021163.1    | Ca_kabuli_chr04 | 44213361                | CC                              | TT              | 1946830725               |
| SNP_P4_63079_44214537 | NC_021163.1    | Ca_kabuli_chr04 | 44214537                | GG                              | AA              | 1946830727               |
| SNP_P4_63080_44214538 | NC_021163.1    | Ca_kabuli_chr04 | 44214538                | AA                              | CC              | 1946830729               |
| SNP_P4_63081_44214566 | NC_021163.1    | Ca_kabuli_chr04 | 44214566                | TT                              | AA              | 1946830731               |
| SNP_P4_63082_44215626 | NC_021163.1    | Ca_kabuli_chr04 | 44215626                | CC                              | AA              | 1946830733               |
| SNP_P4_63083_44215639 | NC_021163.1    | Ca_kabuli_chr04 | 44215639                | CC                              | TT              | 1946830735               |
| SNP_P4_63084_44219092 | NC_021163.1    | Ca_kabuli_chr04 | 44219092                | CC                              | TT              | 1946830737               |
| SNP_P4_63085_44227647 | NC_021163.1    | Ca_kabuli_chr04 | 44227647                | GG                              | AA              | 1946830739               |
| SNP_P4_63086_44227720 | NC_021163.1    | Ca_kabuli_chr04 | 44227720                | CC                              | TT              | 1946830741               |
| SNP_P4_63087_44235280 | NC_021163.1    | Ca_kabuli_chr04 | 44235280                | AA                              | GG              | 1946830743               |
| SNP_P4_63088_44240915 | NC_021163.1    | Ca_kabuli_chr04 | 44240915                | GG                              | TT              | 1946830745               |
| SNP_P4_63089_44240989 | NC_021163.1    | Ca_kabuli_chr04 | 44240989                | TT                              | GG              | 1946830747               |
| SNP_P4_63090_44247689 | NC_021163.1    | Ca_kabuli_chr04 | 44247689                | GG                              | AA              | 1946830749               |
| SNP_P4_63091_44250828 | NC_021163.1    | Ca_kabuli_chr04 | 44250828                | GG                              | AA              | 1946830751               |
| SNP_P4_63092_44256389 | NC_021163.1    | Ca_kabuli_chr04 | 44256389                | CC                              | AA              | 1946830753               |
| SNP_P4_63093_44267500 | NC_021163.1    | Ca_kabuli_chr04 | 44267500                | GG                              | AA              | 1946830755               |



| SNPs IDs              | Chromosome IDs | Chromosomes     | Physical positions (bp) | CDC Frontier (Reference genome) | (ILWC46 & LPNB) | NCBI SNPdb Accession IDs |
|-----------------------|----------------|-----------------|-------------------------|---------------------------------|-----------------|--------------------------|
| SNP_P4_63094_44272211 | NC_021163.1    | Ca_kabuli_chr04 | 44272211                | AA                              | GG              | 1946830757               |
| SNP_P4_63095_44281587 | NC_021163.1    | Ca_kabuli_chr04 | 44281587                | CC                              | TT              | 1946830759               |
| SNP_P4_63096_44287684 | NC_021163.1    | Ca_kabuli_chr04 | 44287684                | CC                              | TT              | 1946830761               |
| SNP_P4_63097_44293924 | NC_021163.1    | Ca_kabuli_chr04 | 44293924                | CC                              | AA              | 1946830763               |
| SNP_P4_63098_44294024 | NC_021163.1    | Ca_kabuli_chr04 | 44294024                | CC                              | TT              | 1946830765               |
| SNP_P4_63099_44294073 | NC_021163.1    | Ca_kabuli_chr04 | 44294073                | AA                              | GG              | 1946830767               |
| SNP_P4_63100_44294102 | NC_021163.1    | Ca_kabuli_chr04 | 44294102                | AA                              | TT              | 1946830769               |
| SNP_P4_63101_44294103 | NC_021163.1    | Ca_kabuli_chr04 | 44294103                | CC                              | GG              | 1946830771               |
| SNP_P4_63102_44294308 | NC_021163.1    | Ca_kabuli_chr04 | 44294308                | GG                              | TT              | 1946830773               |
| SNP_P4_63103_44294440 | NC_021163.1    | Ca_kabuli_chr04 | 44294440                | TT                              | GG              | 1946830775               |
| SNP_P4_63104_44294514 | NC_021163.1    | Ca_kabuli_chr04 | 44294514                | TT                              | CC              | 1946830777               |
| SNP_P4_63105_44294595 | NC_021163.1    | Ca_kabuli_chr04 | 44294595                | TT                              | CC              | 1946830779               |
| SNP_P4_63106_44294621 | NC_021163.1    | Ca_kabuli_chr04 | 44294621                | AA                              | GG              | 1946830781               |
| SNP_P4_63107_44294737 | NC_021163.1    | Ca_kabuli_chr04 | 44294737                | TT                              | CC              | 1946830783               |
| SNP_P4_63108_44294965 | NC_021163.1    | Ca_kabuli_chr04 | 44294965                | AA                              | TT              | 1946830785               |
| SNP_P4_63109_44294987 | NC_021163.1    | Ca_kabuli_chr04 | 44294987                | CC                              | TT              | 1946830787               |
| SNP_P4_63110_44295073 | NC_021163.1    | Ca_kabuli_chr04 | 44295073                | AA                              | GG              | 1946830789               |
| SNP_P4_63111_44295162 | NC_021163.1    | Ca_kabuli_chr04 | 44295162                | AA                              | GG              | 1946830791               |
| SNP_P4_63112_44295260 | NC_021163.1    | Ca_kabuli_chr04 | 44295260                | CC                              | TT              | 1946830793               |
| SNP_P4_63113_44295280 | NC_021163.1    | Ca_kabuli_chr04 | 44295280                | AA                              | CC              | 1946830795               |
| SNP_P4_63114_44295325 | NC_021163.1    | Ca_kabuli_chr04 | 44295325                | TT                              | CC              | 1946830798               |
| SNP_P4_63116_44342714 | NC_021163.1    | Ca_kabuli_chr04 | 44342714                | CC                              | TT              | 1946830800               |
| SNP_P4_63118_44346629 | NC_021163.1    | Ca_kabuli_chr04 | 44346629                | CC                              | TT              | 1946830802               |
| SNP_P4_63119_44376515 | NC_021163.1    | Ca_kabuli_chr04 | 44376515                | TT                              | CC              | 1946830804               |
| SNP_P4_63120_44383617 | NC_021163.1    | Ca_kabuli_chr04 | 44383617                | GG                              | AA              | 1946830806               |
| SNP_P4_63121_44417167 | NC_021163.1    | Ca_kabuli_chr04 | 44417167                | TT                              | AA              | 1946830808               |
| SNP_P4_63123_44444484 | NC_021163.1    | Ca_kabuli_chr04 | 44444484                | AA                              | CC              | 1946830810               |
| SNP_P4_63124_44470789 | NC_021163.1    | Ca_kabuli_chr04 | 44470789                | CC                              | TT              | 1946830812               |
| SNP_P4_63125_44486683 | NC_021163.1    | Ca_kabuli_chr04 | 44486683                | CC                              | GG              | 1946830814               |
| SNP_P4_63126_44486701 | NC_021163.1    | Ca_kabuli_chr04 | 44486701                | AA                              | GG              | 1946830816               |
| SNP_P4_63127_44486751 | NC_021163.1    | Ca_kabuli_chr04 | 44486751                | AA                              | TT              | 1946830818               |
| SNP_P4_63129_44486880 | NC_021163.1    | Ca_kabuli_chr04 | 44486880                | AA                              | GG              | 1946830820               |
| SNP_P4_63130_44486897 | NC_021163.1    | Ca_kabuli_chr04 | 44486897                | TT                              | CC              | 1946830822               |
| SNP_P4_63131_44488004 | NC_021163.1    | Ca_kabuli_chr04 | 44488004                | CC                              | TT              | 1946830824               |
| SNP_P4_63132_44488011 | NC_021163.1    | Ca_kabuli_chr04 | 44488011                | TT                              | CC              | 1946830826               |
| SNP_P4_63134_44488499 | NC_021163.1    | Ca_kabuli_chr04 | 44488499                | GG                              | CC              | 1946830828               |
| SNP_P4_63135_44489285 | NC_021163.1    | Ca_kabuli_chr04 | 44489285                | AA                              | GG              | 1946830830               |
| SNP_P4_63136_44489336 | NC_021163.1    | Ca_kabuli_chr04 | 44489336                | GG                              | AA              | 1946830832               |
| SNP_P4_63137_44489347 | NC_021163.1    | Ca_kabuli_chr04 | 44489347                | TT                              | AA              | 1946830834               |
| SNP_P4_63139_44489409 | NC_021163.1    | Ca_kabuli_chr04 | 44489409                | TT                              | CC              | 1946830836               |
| SNP_P4_63140_44489494 | NC_021163.1    | Ca_kabuli_chr04 | 44489494                | AA                              | GG              | 1946830838               |
| SNP_P4_63142_44489916 | NC_021163.1    | Ca_kabuli_chr04 | 44489916                | AA                              | TT              | 1946830840               |

| SNPs IDs              | Chromosome IDs | Chromosomes     | Physical positions (bp) | CDC Frontier (Reference genome) | (ILWC46 & LPNB) | NCBI SNPdb Accession IDs |
|-----------------------|----------------|-----------------|-------------------------|---------------------------------|-----------------|--------------------------|
| SNP_P4_63143_44489964 | NC_021163.1    | Ca_kabuli_chr04 | 44489964                | CC                              | TT              | 1946830842               |
| SNP_P4_63145_44490616 | NC_021163.1    | Ca_kabuli_chr04 | 44490616                | CC                              | AA              | 1946830844               |
| SNP_P4_63146_44490626 | NC_021163.1    | Ca_kabuli_chr04 | 44490626                | AA                              | GG              | 1946830846               |
| SNP_P4_63147_44490629 | NC_021163.1    | Ca_kabuli_chr04 | 44490629                | TT                              | GG              | 1946830848               |
| SNP_P4_63148_44490641 | NC_021163.1    | Ca_kabuli_chr04 | 44490641                | TT                              | CC              | 1946830850               |
| SNP_P4_63149_44490932 | NC_021163.1    | Ca_kabuli_chr04 | 44490932                | TT                              | CC              | 1946830852               |
| SNP_P4_63150_44490951 | NC_021163.1    | Ca_kabuli_chr04 | 44490951                | CC                              | TT              | 1946830854               |
| SNP_P4_63151_44490979 | NC_021163.1    | Ca_kabuli_chr04 | 44490979                | AA                              | GG              | 1946830856               |
| SNP_P4_63152_44491409 | NC_021163.1    | Ca_kabuli_chr04 | 44491409                | TT                              | AA              | 1946830858               |
| SNP_P4_63153_44491424 | NC_021163.1    | Ca_kabuli_chr04 | 44491424                | TT                              | GG              | 1946830860               |
| SNP_P4_63154_44493109 | NC_021163.1    | Ca_kabuli_chr04 | 44493109                | TT                              | CC              | 1946830862               |
| SNP_P4_63156_44493154 | NC_021163.1    | Ca_kabuli_chr04 | 44493154                | GG                              | CC              | 1946830864               |
| SNP_P4_63157_44493176 | NC_021163.1    | Ca_kabuli_chr04 | 44493176                | TT                              | GG              | 1946830866               |
| SNP_P4_63159_44496711 | NC_021163.1    | Ca_kabuli_chr04 | 44496711                | CC                              | TT              | 1946830867               |
| SNP_P4_63160_44496827 | NC_021163.1    | Ca_kabuli_chr04 | 44496827                | AA                              | GG              | 1946830869               |
| SNP_P4_63161_44499501 | NC_021163.1    | Ca_kabuli_chr04 | 44499501                | CC                              | TT              | 1946830871               |
| SNP_P4_63162_44499513 | NC_021163.1    | Ca_kabuli_chr04 | 44499513                | CC                              | TT              | 1946830873               |
| SNP_P4_63163_44499810 | NC_021163.1    | Ca_kabuli_chr04 | 44499810                | AA                              | CC              | 1946830875               |
| SNP_P4_63164_44499848 | NC_021163.1    | Ca_kabuli_chr04 | 44499848                | GG                              | AA              | 1946830877               |
| SNP_P4_63165_44499860 | NC_021163.1    | Ca_kabuli_chr04 | 44499860                | TT                              | GG              | 1946830879               |
| SNP_P4_63166_44499914 | NC_021163.1    | Ca_kabuli_chr04 | 44499914                | TT                              | AA              | 1946830881               |
| SNP_P4_63167_44500104 | NC_021163.1    | Ca_kabuli_chr04 | 44500104                | TT                              | CC              | 1946830883               |
| SNP_P4_63168_44501366 | NC_021163.1    | Ca_kabuli_chr04 | 44501366                | TT                              | CC              | 1946830885               |
| SNP_P4_63169_44501401 | NC_021163.1    | Ca_kabuli_chr04 | 44501401                | AA                              | TT              | 1946830887               |
| SNP_P4_63170_44501445 | NC_021163.1    | Ca_kabuli_chr04 | 44501445                | TT                              | CC              | 1946830889               |
| SNP_P4_63171_44501589 | NC_021163.1    | Ca_kabuli_chr04 | 44501589                | CC                              | TT              | 1946830891               |
| SNP_P4_63172_44501700 | NC_021163.1    | Ca_kabuli_chr04 | 44501700                | TT                              | CC              | 1946830893               |
| SNP_P4_63173_44501936 | NC_021163.1    | Ca_kabuli_chr04 | 44501936                | CC                              | TT              | 1946830895               |
| SNP_P4_63174_44502032 | NC_021163.1    | Ca_kabuli_chr04 | 44502032                | GG                              | TT              | 1946830897               |
| SNP_P4_63175_44502076 | NC_021163.1    | Ca_kabuli_chr04 | 44502076                | GG                              | AA              | 1946830899               |
| SNP_P4_63176_44502558 | NC_021163.1    | Ca_kabuli_chr04 | 44502558                | GG                              | TT              | 1946830901               |
| SNP_P4_63177_44502562 | NC_021163.1    | Ca_kabuli_chr04 | 44502562                | AA                              | TT              | 1946830903               |
| SNP_P4_63178_44505118 | NC_021163.1    | Ca_kabuli_chr04 | 44505118                | AA                              | CC              | 1946830905               |
| SNP_P4_63179_44505153 | NC_021163.1    | Ca_kabuli_chr04 | 44505153                | CC                              | TT              | 1946830907               |
| SNP_P4_63180_44505420 | NC_021163.1    | Ca_kabuli_chr04 | 44505420                | AA                              | TT              | 1946830909               |
| SNP_P4_63181_44505436 | NC_021163.1    | Ca_kabuli_chr04 | 44505436                | AA                              | GG              | 1946830911               |
| SNP_P4_63182_44505442 | NC_021163.1    | Ca_kabuli_chr04 | 44505442                | CC                              | TT              | 1946830913               |
| SNP_P4_63183_44505470 | NC_021163.1    | Ca_kabuli_chr04 | 44505470                | CC                              | AA              | 1946830915               |
| SNP_P4_63184_44505672 | NC_021163.1    | Ca_kabuli_chr04 | 44505672                | GG                              | AA              | 1946830917               |
| SNP_P4_63185_44506105 | NC_021163.1    | Ca_kabuli_chr04 | 44506105                | CC                              | AA              | 1946830919               |
| SNP_P4_63186_44507256 | NC_021163.1    | Ca_kabuli_chr04 | 44507256                | AA                              | GG              | 1946830921               |
| SNP_P4_63187_44507258 | NC_021163.1    | Ca_kabuli_chr04 | 44507258                | GG                              | CC              | 1946830923               |

| SNPs IDs              | Chromosome IDs | Chromosomes     | Physical positions (bp) | CDC Frontier (Reference genome) | (ILWC46 & LPNB) | NCBI SNPdb Accession IDs |
|-----------------------|----------------|-----------------|-------------------------|---------------------------------|-----------------|--------------------------|
| SNP_P4_63188_44507868 | NC_021163.1    | Ca_kabuli_chr04 | 44507868                | AA                              | GG              | 1946830925               |
| SNP_P4_63189_44507910 | NC_021163.1    | Ca_kabuli_chr04 | 44507910                | TT                              | AA              | 1946830927               |
| SNP_P4_63190_44507915 | NC_021163.1    | Ca_kabuli_chr04 | 44507915                | AA                              | GG              | 1946830929               |
| SNP_P4_63192_44507952 | NC_021163.1    | Ca_kabuli_chr04 | 44507952                | AA                              | TT              | 1946830931               |
| SNP_P4_63193_44508550 | NC_021163.1    | Ca_kabuli_chr04 | 44508550                | CC                              | AA              | 1946830933               |
| SNP_P4_63194_44508912 | NC_021163.1    | Ca_kabuli_chr04 | 44508912                | AA                              | TT              | 1946830935               |
| SNP_P4_63195_44508914 | NC_021163.1    | Ca_kabuli_chr04 | 44508914                | AA                              | CC              | 1946830937               |
| SNP_P4_63196_44508924 | NC_021163.1    | Ca_kabuli_chr04 | 44508924                | AA                              | CC              | 1946830939               |
| SNP_P4_63197_44509221 | NC_021163.1    | Ca_kabuli_chr04 | 44509221                | CC                              | AA              | 1946830941               |
| SNP_P4_63198_44509547 | NC_021163.1    | Ca_kabuli_chr04 | 44509547                | AA                              | GG              | 1946830943               |
| SNP_P4_63199_44509584 | NC_021163.1    | Ca_kabuli_chr04 | 44509584                | CC                              | AA              | 1946830945               |
| SNP_P4_63200_44509589 | NC_021163.1    | Ca_kabuli_chr04 | 44509589                | TT                              | CC              | 1946830947               |
| SNP_P4_63201_44509702 | NC_021163.1    | Ca_kabuli_chr04 | 44509702                | TT                              | GG              | 1946830949               |
| SNP_P4_63202_44509879 | NC_021163.1    | Ca_kabuli_chr04 | 44509879                | GG                              | CC              | 1946830951               |
| SNP_P4_63203_44510093 | NC_021163.1    | Ca_kabuli_chr04 | 44510093                | AA                              | GG              | 1946830953               |
| SNP_P4_63204_44510134 | NC_021163.1    | Ca_kabuli_chr04 | 44510134                | AA                              | GG              | 1946830955               |
| SNP_P4_63205_44510297 | NC_021163.1    | Ca_kabuli_chr04 | 44510297                | CC                              | TT              | 1946830957               |
| SNP_P4_63206_44510311 | NC_021163.1    | Ca_kabuli_chr04 | 44510311                | CC                              | TT              | 1946830960               |
| SNP_P4_63207_44510505 | NC_021163.1    | Ca_kabuli_chr04 | 44510505                | TT                              | CC              | 1946830962               |
| SNP_P4_63208_44510554 | NC_021163.1    | Ca_kabuli_chr04 | 44510554                | AA                              | GG              | 1946830964               |
| SNP_P4_63209_44510842 | NC_021163.1    | Ca_kabuli_chr04 | 44510842                | TT                              | CC              | 1946830966               |
| SNP_P4_63210_44510850 | NC_021163.1    | Ca_kabuli_chr04 | 44510850                | CC                              | AA              | 1946830968               |
| SNP_P4_63212_44511512 | NC_021163.1    | Ca_kabuli_chr04 | 44511512                | CC                              | AA              | 1946830970               |
| SNP_P4_63213_44512150 | NC_021163.1    | Ca_kabuli_chr04 | 44512150                | CC                              | AA              | 1946830972               |
| SNP_P4_63214_44512391 | NC_021163.1    | Ca_kabuli_chr04 | 44512391                | AA                              | GG              | 1946830974               |
| SNP_P4_63215_44512442 | NC_021163.1    | Ca_kabuli_chr04 | 44512442                | GG                              | AA              | 1946830976               |
| SNP_P4_63216_44512690 | NC_021163.1    | Ca_kabuli_chr04 | 44512690                | CC                              | TT              | 1946830978               |
| SNP_P4_63217_44513092 | NC_021163.1    | Ca_kabuli_chr04 | 44513092                | GG                              | CC              | 1946830980               |
| SNP_P4_63218_44513423 | NC_021163.1    | Ca_kabuli_chr04 | 44513423                | CC                              | TT              | 1946830983               |
| SNP_P4_63219_44513699 | NC_021163.1    | Ca_kabuli_chr04 | 44513699                | TT                              | CC              | 1946830985               |
| SNP_P4_63220_44513942 | NC_021163.1    | Ca_kabuli_chr04 | 44513942                | GG                              | AA              | 1946830987               |
| SNP_P4_63221_44513956 | NC_021163.1    | Ca_kabuli_chr04 | 44513956                | GG                              | AA              | 1946830989               |
| SNP_P4_63222_44514311 | NC_021163.1    | Ca_kabuli_chr04 | 44514311                | CC                              | TT              | 1946830991               |
| SNP_P4_63223_44514344 | NC_021163.1    | Ca_kabuli_chr04 | 44514344                | TT                              | AA              | 1946830993               |
| SNP_P4_63224_44515060 | NC_021163.1    | Ca_kabuli_chr04 | 44515060                | TT                              | GG              | 1946830995               |
| SNP_P4_63225_44515063 | NC_021163.1    | Ca_kabuli_chr04 | 44515063                | TT                              | CC              | 1946830997               |
| SNP_P4_63226_44515240 | NC_021163.1    | Ca_kabuli_chr04 | 44515240                | TT                              | GG              | 1946830999               |
| SNP_P4_63227_44515474 | NC_021163.1    | Ca_kabuli_chr04 | 44515474                | TT                              | CC              | 1946831000               |
| SNP_P4_63228_44515495 | NC_021163.1    | Ca_kabuli_chr04 | 44515495                | CC                              | AA              | 1946831002               |
| SNP_P4_63229_44518779 | NC_021163.1    | Ca_kabuli_chr04 | 44518779                | AA                              | GG              | 1946831004               |
| SNP_P4_63230_44519129 | NC_021163.1    | Ca_kabuli_chr04 | 44519129                | AA                              | CC              | 1946831006               |
| SNP_P4_63231_44519131 | NC_021163.1    | Ca_kabuli_chr04 | 44519131                | CC                              | AA              | 1946831008               |

| SNPs IDs              | Chromosome IDs | Chromosomes     | Physical positions (bp) | CDC Frontier (Reference genome) | (ILWC46 & LPNB) | NCBI SNPdb Accession IDs |
|-----------------------|----------------|-----------------|-------------------------|---------------------------------|-----------------|--------------------------|
| SNP_P4_63232_44519940 | NC_021163.1    | Ca_kabuli_chr04 | 44519940                | TT                              | AA              | 1946831011               |
| SNP_P4_63233_44520962 | NC_021163.1    | Ca_kabuli_chr04 | 44520962                | TT                              | GG              | 1946831013               |
| SNP_P4_63236_44523249 | NC_021163.1    | Ca_kabuli_chr04 | 44523249                | TT                              | CC              | 1946831015               |
| SNP_P4_63237_44523295 | NC_021163.1    | Ca_kabuli_chr04 | 44523295                | TT                              | CC              | 1946831017               |
| SNP_P4_63238_44523560 | NC_021163.1    | Ca_kabuli_chr04 | 44523560                | TT                              | AA              | 1946831019               |
| SNP_P4_63240_44524461 | NC_021163.1    | Ca_kabuli_chr04 | 44524461                | GG                              | AA              | 1946831021               |
| SNP_P4_63241_44524708 | NC_021163.1    | Ca_kabuli_chr04 | 44524708                | AA                              | TT              | 1946831023               |
| SNP_P4_63242_44524752 | NC_021163.1    | Ca_kabuli_chr04 | 44524752                | TT                              | AA              | 1946831025               |
| SNP_P4_63243_44524884 | NC_021163.1    | Ca_kabuli_chr04 | 44524884                | CC                              | TT              | 1946831027               |
| SNP_P4_63248_44529321 | NC_021163.1    | Ca_kabuli_chr04 | 44529321                | TT                              | GG              | 1946831029               |
| SNP_P4_63249_44529420 | NC_021163.1    | Ca_kabuli_chr04 | 44529420                | TT                              | AA              | 1946831031               |
| SNP_P4_63250_44529441 | NC_021163.1    | Ca_kabuli_chr04 | 44529441                | CC                              | TT              | 1946831034               |
| SNP_P4_63251_44530549 | NC_021163.1    | Ca_kabuli_chr04 | 44530549                | TT                              | AA              | 1946831036               |
| SNP_P4_63252_44532061 | NC_021163.1    | Ca_kabuli_chr04 | 44532061                | AA                              | CC              | 1946831038               |
| SNP_P4_63253_44532293 | NC_021163.1    | Ca_kabuli_chr04 | 44532293                | CC                              | TT              | 1946831040               |
| SNP_P4_63255_44540221 | NC_021163.1    | Ca_kabuli_chr04 | 44540221                | CC                              | GG              | 1946831042               |
| SNP_P4_63256_44540573 | NC_021163.1    | Ca_kabuli_chr04 | 44540573                | GG                              | TT              | 1946831044               |
| SNP_P4_63257_44540593 | NC_021163.1    | Ca_kabuli_chr04 | 44540593                | CC                              | TT              | 1946831046               |
| SNP_P4_63260_44540838 | NC_021163.1    | Ca_kabuli_chr04 | 44540838                | TT                              | CC              | 1946831048               |
| SNP_P4_63261_44541586 | NC_021163.1    | Ca_kabuli_chr04 | 44541586                | CC                              | TT              | 1946831050               |
| SNP_P4_63262_44542339 | NC_021163.1    | Ca_kabuli_chr04 | 44542339                | GG                              | AA              | 1946831052               |
| SNP_P4_63263_44543486 | NC_021163.1    | Ca_kabuli_chr04 | 44543486                | TT                              | CC              | 1946831054               |
| SNP_P4_63264_44543487 | NC_021163.1    | Ca_kabuli_chr04 | 44543487                | GG                              | CC              | 1946831056               |
| SNP_P4_63265_44543510 | NC_021163.1    | Ca_kabuli_chr04 | 44543510                | AA                              | GG              | 1946831059               |
| SNP_P4_63266_44543548 | NC_021163.1    | Ca_kabuli_chr04 | 44543548                | CC                              | TT              | 1946831061               |
| SNP_P4_63267_44543555 | NC_021163.1    | Ca_kabuli_chr04 | 44543555                | GG                              | TT              | 1946831063               |
| SNP_P4_63268_44543595 | NC_021163.1    | Ca_kabuli_chr04 | 44543595                | TT                              | AA              | 1946831065               |
| SNP_P4_63269_44543658 | NC_021163.1    | Ca_kabuli_chr04 | 44543658                | CC                              | TT              | 1946831067               |
| SNP_P4_63270_44543721 | NC_021163.1    | Ca_kabuli_chr04 | 44543721                | GG                              | AA              | 1946831069               |
| SNP_P4_63271_44543761 | NC_021163.1    | Ca_kabuli_chr04 | 44543761                | TT                              | AA              | 1946831072               |
| SNP_P4_63272_44543821 | NC_021163.1    | Ca_kabuli_chr04 | 44543821                | CC                              | TT              | 1946831074               |
| SNP_P4_63273_44543828 | NC_021163.1    | Ca_kabuli_chr04 | 44543828                | CC                              | TT              | 1946831076               |
| SNP_P4_63274_44543851 | NC_021163.1    | Ca_kabuli_chr04 | 44543851                | CC                              | AA              | 1946831078               |
| SNP_P4_63275_44543889 | NC_021163.1    | Ca_kabuli_chr04 | 44543889                | TT                              | CC              | 1946831079               |
| SNP_P4_63276_44543890 | NC_021163.1    | Ca_kabuli_chr04 | 44543890                | AA                              | GG              | 1946831081               |
| SNP_P4_63277_44543916 | NC_021163.1    | Ca_kabuli_chr04 | 44543916                | AA                              | CC              | 1946831083               |
| SNP_P4_63278_44543924 | NC_021163.1    | Ca_kabuli_chr04 | 44543924                | GG                              | AA              | 1946831085               |
| SNP_P4_63279_44543962 | NC_021163.1    | Ca_kabuli_chr04 | 44543962                | AA                              | GG              | 1946831087               |
| SNP_P4_63280_44543998 | NC_021163.1    | Ca_kabuli_chr04 | 44543998                | GG                              | AA              | 1946831089               |
| SNP_P4_63281_44544651 | NC_021163.1    | Ca_kabuli_chr04 | 44544651                | AA                              | TT              | 1946831091               |
| SNP_P4_63282_44544652 | NC_021163.1    | Ca_kabuli_chr04 | 44544652                | AA                              | TT              | 1946831093               |
| SNP_P4_63283_44544653 | NC_021163.1    | Ca_kabuli_chr04 | 44544653                | AA                              | TT              | 1946831095               |

| SNPs IDs              | Chromosome IDs | Chromosomes     | Physical positions (bp) | CDC Frontier (Reference genome) | (ILWC46 & LPNB) | NCBI SNPdb Accession IDs |
|-----------------------|----------------|-----------------|-------------------------|---------------------------------|-----------------|--------------------------|
| SNP_P4_63284_44545065 | NC_021163.1    | Ca_kabuli_chr04 | 44545065                | TT                              | AA              | 1946831097               |
| SNP_P4_63285_44545089 | NC_021163.1    | Ca_kabuli_chr04 | 44545089                | TT                              | CC              | 1946831099               |
| SNP_P4_63286_44545133 | NC_021163.1    | Ca_kabuli_chr04 | 44545133                | GG                              | AA              | 1946831101               |
| SNP_P4_63288_44545268 | NC_021163.1    | Ca_kabuli_chr04 | 44545268                | TT                              | GG              | 1946831103               |
| SNP_P4_63289_44545287 | NC_021163.1    | Ca_kabuli_chr04 | 44545287                | TT                              | CC              | 1946831105               |
| SNP_P4_63290_44546482 | NC_021163.1    | Ca_kabuli_chr04 | 44546482                | GG                              | AA              | 1946831107               |
| SNP_P4_63291_44548226 | NC_021163.1    | Ca_kabuli_chr04 | 44548226                | GG                              | AA              | 1946831109               |
| SNP_P4_63292_44549460 | NC_021163.1    | Ca_kabuli_chr04 | 44549460                | TT                              | GG              | 1946831111               |
| SNP_P4_63293_44549504 | NC_021163.1    | Ca_kabuli_chr04 | 44549504                | TT                              | AA              | 1946831113               |
| SNP_P4_63294_44549647 | NC_021163.1    | Ca_kabuli_chr04 | 44549647                | GG                              | AA              | 1946831114               |
| SNP_P4_63295_44549747 | NC_021163.1    | Ca_kabuli_chr04 | 44549747                | CC                              | TT              | 1946831116               |
| SNP_P4_63296_44549751 | NC_021163.1    | Ca_kabuli_chr04 | 44549751                | AA                              | GG              | 1946831119               |
| SNP_P4_63297_44549857 | NC_021163.1    | Ca_kabuli_chr04 | 44549857                | AA                              | TT              | 1946831120               |
| SNP_P4_63298_44549873 | NC_021163.1    | Ca_kabuli_chr04 | 44549873                | GG                              | TT              | 1946831122               |
| SNP_P4_63299_44549889 | NC_021163.1    | Ca_kabuli_chr04 | 44549889                | AA                              | CC              | 1946831125               |
| SNP_P4_63300_44549921 | NC_021163.1    | Ca_kabuli_chr04 | 44549921                | TT                              | AA              | 1946831126               |
| SNP_P4_63301_44550135 | NC_021163.1    | Ca_kabuli_chr04 | 44550135                | TT                              | CC              | 1946831128               |
| SNP_P4_63302_44550168 | NC_021163.1    | Ca_kabuli_chr04 | 44550168                | CC                              | AA              | 1946831130               |
| SNP_P4_63303_44550238 | NC_021163.1    | Ca_kabuli_chr04 | 44550238                | CC                              | TT              | 1946831132               |
| SNP_P4_63304_44550242 | NC_021163.1    | Ca_kabuli_chr04 | 44550242                | TT                              | CC              | 1946831134               |
| SNP_P4_63305_44550720 | NC_021163.1    | Ca_kabuli_chr04 | 44550720                | AA                              | GG              | 1946831136               |
| SNP_P4_63306_44550920 | NC_021163.1    | Ca_kabuli_chr04 | 44550920                | GG                              | TT              | 1946831138               |
| SNP_P4_63307_44550985 | NC_021163.1    | Ca_kabuli_chr04 | 44550985                | GG                              | TT              | 1946831140               |
| SNP_P4_63308_44551042 | NC_021163.1    | Ca_kabuli_chr04 | 44551042                | CC                              | AA              | 1946831142               |
| SNP_P4_63309_44551046 | NC_021163.1    | Ca_kabuli_chr04 | 44551046                | TT                              | AA              | 1946831144               |
| SNP_P4_63310_44551063 | NC_021163.1    | Ca_kabuli_chr04 | 44551063                | AA                              | GG              | 1946831146               |
| SNP_P4_63311_44551998 | NC_021163.1    | Ca_kabuli_chr04 | 44551998                | TT                              | CC              | 1946831148               |
| SNP_P4_63312_44552027 | NC_021163.1    | Ca_kabuli_chr04 | 44552027                | CC                              | TT              | 1946831150               |
| SNP_P4_63313_44554175 | NC_021163.1    | Ca_kabuli_chr04 | 44554175                | CC                              | GG              | 1946831152               |
| SNP_P4_63314_44554215 | NC_021163.1    | Ca_kabuli_chr04 | 44554215                | TT                              | CC              | 1946831154               |
| SNP_P4_63315_44554268 | NC_021163.1    | Ca_kabuli_chr04 | 44554268                | CC                              | TT              | 1946831156               |
| SNP_P4_63316_44554270 | NC_021163.1    | Ca_kabuli_chr04 | 44554270                | TT                              | GG              | 1946831158               |
| SNP_P4_63317_44554271 | NC_021163.1    | Ca_kabuli_chr04 | 44554271                | AA                              | GG              | 1946831160               |
| SNP_P4_63319_44555472 | NC_021163.1    | Ca_kabuli_chr04 | 44555472                | TT                              | CC              | 1946831162               |
| SNP_P4_63320_44555604 | NC_021163.1    | Ca_kabuli_chr04 | 44555604                | AA                              | TT              | 1946831164               |
| SNP_P4_63322_44556590 | NC_021163.1    | Ca_kabuli_chr04 | 44556590                | AA                              | TT              | 1946831165               |
| SNP_P4_63323_44557967 | NC_021163.1    | Ca_kabuli_chr04 | 44557967                | CC                              | AA              | 1946831167               |
| SNP_P4_63324_44558756 | NC_021163.1    | Ca_kabuli_chr04 | 44558756                | GG                              | AA              | 1946831169               |
| SNP_P4_63325_44559025 | NC_021163.1    | Ca_kabuli_chr04 | 44559025                | TT                              | CC              | 1946831171               |
| SNP_P4_63326_44559695 | NC_021163.1    | Ca_kabuli_chr04 | 44559695                | TT                              | GG              | 1946831173               |
| SNP_P4_63327_44559697 | NC_021163.1    | Ca_kabuli_chr04 | 44559697                | CC                              | TT              | 1946831175               |
| SNP_P4_63328_44560410 | NC_021163.1    | Ca_kabuli_chr04 | 44560410                | CC                              | TT              | 1946831177               |

| SNPs IDs              | Chromosome IDs | Chromosomes     | Physical positions (bp) | CDC Frontier (Reference genome) | (ILWC46 & LPNB) | NCBI SNPdb Accession IDs |
|-----------------------|----------------|-----------------|-------------------------|---------------------------------|-----------------|--------------------------|
| SNP_P4_63329_44560620 | NC_021163.1    | Ca_kabuli_chr04 | 44560620                | CC                              | TT              | 1946831179               |
| SNP_P4_63330_44560742 | NC_021163.1    | Ca_kabuli_chr04 | 44560742                | GG                              | AA              | 1946831181               |
| SNP_P4_63331_44560829 | NC_021163.1    | Ca_kabuli_chr04 | 44560829                | AA                              | TT              | 1946831184               |
| SNP_P4_63332_44561247 | NC_021163.1    | Ca_kabuli_chr04 | 44561247                | GG                              | CC              | 1946831186               |
| SNP_P4_63334_44561295 | NC_021163.1    | Ca_kabuli_chr04 | 44561295                | AA                              | GG              | 1946831188               |
| SNP_P4_63335_44561296 | NC_021163.1    | Ca_kabuli_chr04 | 44561296                | TT                              | AA              | 1946831190               |
| SNP_P4_63336_44561347 | NC_021163.1    | Ca_kabuli_chr04 | 44561347                | TT                              | AA              | 1946831192               |
| SNP_P4_63337_44561676 | NC_021163.1    | Ca_kabuli_chr04 | 44561676                | CC                              | TT              | 1946831194               |
| SNP_P4_63338_44561678 | NC_021163.1    | Ca_kabuli_chr04 | 44561678                | TT                              | CC              | 1946831196               |
| SNP_P4_63339_44561959 | NC_021163.1    | Ca_kabuli_chr04 | 44561959                | TT                              | CC              | 1946831198               |
| SNP_P4_63340_44562213 | NC_021163.1    | Ca_kabuli_chr04 | 44562213                | TT                              | CC              | 1946831200               |
| SNP_P4_63341_44563193 | NC_021163.1    | Ca_kabuli_chr04 | 44563193                | TT                              | CC              | 1946831202               |
| SNP_P4_63342_44563477 | NC_021163.1    | Ca_kabuli_chr04 | 44563477                | GG                              | AA              | 1946831204               |
| SNP_P4_63343_44563479 | NC_021163.1    | Ca_kabuli_chr04 | 44563479                | CC                              | AA              | 1946831206               |
| SNP_P4_63345_44563558 | NC_021163.1    | Ca_kabuli_chr04 | 44563558                | TT                              | GG              | 1946831208               |
| SNP_P4_63346_44563681 | NC_021163.1    | Ca_kabuli_chr04 | 44563681                | TT                              | GG              | 1946831210               |
| SNP_P4_63347_44563818 | NC_021163.1    | Ca_kabuli_chr04 | 44563818                | GG                              | AA              | 1946831212               |
| SNP_P4_63348_44565469 | NC_021163.1    | Ca_kabuli_chr04 | 44565469                | TT                              | CC              | 1946831215               |
| SNP_P4_63349_44565488 | NC_021163.1    | Ca_kabuli_chr04 | 44565488                | AA                              | TT              | 1946831217               |
| SNP_P4_63350_44565491 | NC_021163.1    | Ca_kabuli_chr04 | 44565491                | AA                              | GG              | 1946831219               |
| SNP_P4_63351_44566173 | NC_021163.1    | Ca_kabuli_chr04 | 44566173                | GG                              | AA              | 1946831221               |
| SNP_P4_63352_44566415 | NC_021163.1    | Ca_kabuli_chr04 | 44566415                | TT                              | AA              | 1946831223               |
| SNP_P4_63353_44566642 | NC_021163.1    | Ca_kabuli_chr04 | 44566642                | CC                              | TT              | 1946831225               |
| SNP_P4_63354_44566976 | NC_021163.1    | Ca_kabuli_chr04 | 44566976                | AA                              | TT              | 1946831227               |
| SNP_P4_63355_44566987 | NC_021163.1    | Ca_kabuli_chr04 | 44566987                | AA                              | GG              | 1946831229               |
| SNP_P4_63356_44567129 | NC_021163.1    | Ca_kabuli_chr04 | 44567129                | TT                              | AA              | 1946831231               |
| SNP_P4_63357_44567178 | NC_021163.1    | Ca_kabuli_chr04 | 44567178                | CC                              | TT              | 1946831233               |
| SNP_P4_63358_44567229 | NC_021163.1    | Ca_kabuli_chr04 | 44567229                | TT                              | AA              | 1946831235               |
| SNP_P4_63359_44567232 | NC_021163.1    | Ca_kabuli_chr04 | 44567232                | TT                              | CC              | 1946831237               |
| SNP_P4_63360_44567465 | NC_021163.1    | Ca_kabuli_chr04 | 44567465                | TT                              | AA              | 1946831239               |
| SNP_P4_63361_44567753 | NC_021163.1    | Ca_kabuli_chr04 | 44567753                | CC                              | TT              | 1946831241               |
| SNP_P4_63362_44567804 | NC_021163.1    | Ca_kabuli_chr04 | 44567804                | AA                              | GG              | 1946831243               |
| SNP_P4_63364_44569586 | NC_021163.1    | Ca_kabuli_chr04 | 44569586                | TT                              | AA              | 1946831245               |
| SNP_P4_63365_44570054 | NC_021163.1    | Ca_kabuli_chr04 | 44570054                | TT                              | AA              | 1946831247               |
| SNP_P4_63366_44570901 | NC_021163.1    | Ca_kabuli_chr04 | 44570901                | TT                              | AA              | 1946831249               |
| SNP_P4_63367_44570902 | NC_021163.1    | Ca_kabuli_chr04 | 44570902                | GG                              | TT              | 1946831251               |
| SNP_P4_63368_44570969 | NC_021163.1    | Ca_kabuli_chr04 | 44570969                | CC                              | TT              | 1946831253               |
| SNP_P4_63369_44571061 | NC_021163.1    | Ca_kabuli_chr04 | 44571061                | GG                              | TT              | 1946831255               |
| SNP_P4_63370_44572458 | NC_021163.1    | Ca_kabuli_chr04 | 44572458                | AA                              | CC              | 1946831257               |
| SNP_P4_63371_44577913 | NC_021163.1    | Ca_kabuli_chr04 | 44577913                | AA                              | GG              | 1946831259               |
| SNP_P4_63372_44578259 | NC_021163.1    | Ca_kabuli_chr04 | 44578259                | TT                              | CC              | 1946831261               |
| SNP_P4_63373_44578275 | NC_021163.1    | Ca_kabuli_chr04 | 44578275                | TT                              | CC              | 1946831263               |

| SNPs IDs              | Chromosome IDs | Chromosomes     | Physical positions (bp) | CDC Frontier (Reference genome) | (ILWC46 & LPNB) | NCBI SNPdb Accession IDs |
|-----------------------|----------------|-----------------|-------------------------|---------------------------------|-----------------|--------------------------|
| SNP_P4_63375_44578774 | NC_021163.1    | Ca_kabuli_chr04 | 44578774                | GG                              | AA              | 1946831265               |
| SNP_P4_63376_44578778 | NC_021163.1    | Ca_kabuli_chr04 | 44578778                | AA                              | TT              | 1946831267               |
| SNP_P4_63377_44579150 | NC_021163.1    | Ca_kabuli_chr04 | 44579150                | CC                              | AA              | 1946831269               |
| SNP_P4_63378_44579429 | NC_021163.1    | Ca_kabuli_chr04 | 44579429                | AA                              | GG              | 1946831271               |
| SNP_P4_63380_44581081 | NC_021163.1    | Ca_kabuli_chr04 | 44581081                | CC                              | GG              | 1946831273               |
| SNP_P4_63381_44581087 | NC_021163.1    | Ca_kabuli_chr04 | 44581087                | AA                              | GG              | 1946831275               |
| SNP_P4_63382_44581146 | NC_021163.1    | Ca_kabuli_chr04 | 44581146                | GG                              | AA              | 1946831277               |
| SNP_P4_63383_44581541 | NC_021163.1    | Ca_kabuli_chr04 | 44581541                | TT                              | AA              | 1946831279               |
| SNP_P4_63384_44581845 | NC_021163.1    | Ca_kabuli_chr04 | 44581845                | TT                              | CC              | 1946831281               |
| SNP_P4_63385_44582088 | NC_021163.1    | Ca_kabuli_chr04 | 44582088                | AA                              | GG              | 1946831283               |
| SNP_P4_63386_44582471 | NC_021163.1    | Ca_kabuli_chr04 | 44582471                | CC                              | AA              | 1946831285               |
| SNP_P4_63388_44583733 | NC_021163.1    | Ca_kabuli_chr04 | 44583733                | CC                              | TT              | 1946831287               |
| SNP_P4_63389_44583741 | NC_021163.1    | Ca_kabuli_chr04 | 44583741                | GG                              | AA              | 1946831289               |
| SNP_P4_63390_44583743 | NC_021163.1    | Ca_kabuli_chr04 | 44583743                | GG                              | TT              | 1946831291               |
| SNP_P4_63391_44583803 | NC_021163.1    | Ca_kabuli_chr04 | 44583803                | CC                              | TT              | 1946831293               |
| SNP_P4_63392_44583811 | NC_021163.1    | Ca_kabuli_chr04 | 44583811                | GG                              | AA              | 1946831295               |
| SNP_P4_63393_44584465 | NC_021163.1    | Ca_kabuli_chr04 | 44584465                | GG                              | AA              | 1946831297               |
| SNP_P4_63394_44584484 | NC_021163.1    | Ca_kabuli_chr04 | 44584484                | CC                              | TT              | 1946831299               |
| SNP_P4_63395_44585314 | NC_021163.1    | Ca_kabuli_chr04 | 44585314                | AA                              | GG              | 1946831301               |
| SNP_P4_63396_44585319 | NC_021163.1    | Ca_kabuli_chr04 | 44585319                | CC                              | AA              | 1946831303               |
| SNP_P4_63397_44585327 | NC_021163.1    | Ca_kabuli_chr04 | 44585327                | CC                              | TT              | 1946831305               |
| SNP_P4_63398_44585595 | NC_021163.1    | Ca_kabuli_chr04 | 44585595                | CC                              | TT              | 1946831307               |
| SNP_P4_63400_44585922 | NC_021163.1    | Ca_kabuli_chr04 | 44585922                | AA                              | GG              | 1946831309               |
| SNP_P4_63401_44585951 | NC_021163.1    | Ca_kabuli_chr04 | 44585951                | CC                              | TT              | 1946831311               |
| SNP_P4_63402_44586363 | NC_021163.1    | Ca_kabuli_chr04 | 44586363                | CC                              | TT              | 1946831313               |
| SNP_P4_63403_44587929 | NC_021163.1    | Ca_kabuli_chr04 | 44587929                | TT                              | AA              | 1946831315               |
| SNP_P4_63404_44592359 | NC_021163.1    | Ca_kabuli_chr04 | 44592359                | AA                              | TT              | 1946831318               |
| SNP_P4_63405_44592360 | NC_021163.1    | Ca_kabuli_chr04 | 44592360                | AA                              | TT              | 1946831320               |
| SNP_P4_63407_44594739 | NC_021163.1    | Ca_kabuli_chr04 | 44594739                | AA                              | GG              | 1946831322               |
| SNP_P4_63408_44594819 | NC_021163.1    | Ca_kabuli_chr04 | 44594819                | GG                              | AA              | 1946831324               |
| SNP_P4_63409_44594853 | NC_021163.1    | Ca_kabuli_chr04 | 44594853                | GG                              | AA              | 1946831326               |
| SNP_P4_63410_44594867 | NC_021163.1    | Ca_kabuli_chr04 | 44594867                | AA                              | GG              | 1946831328               |
| SNP_P4_63411_44594876 | NC_021163.1    | Ca_kabuli_chr04 | 44594876                | AA                              | GG              | 1946831330               |
| SNP_P4_63412_44594893 | NC_021163.1    | Ca_kabuli_chr04 | 44594893                | TT                              | CC              | 1946831332               |
| SNP_P4_63413_44594914 | NC_021163.1    | Ca_kabuli_chr04 | 44594914                | GG                              | AA              | 1946831334               |
| SNP_P4_63414_44594931 | NC_021163.1    | Ca_kabuli_chr04 | 44594931                | TT                              | CC              | 1946831336               |
| SNP_P4_63415_44594968 | NC_021163.1    | Ca_kabuli_chr04 | 44594968                | GG                              | AA              | 1946831338               |
| SNP_P4_63416_44594976 | NC_021163.1    | Ca_kabuli_chr04 | 44594976                | TT                              | CC              | 1946831340               |
| SNP_P4_63417_44595210 | NC_021163.1    | Ca_kabuli_chr04 | 44595210                | TT                              | CC              | 1946831342               |
| SNP_P4_63418_44595420 | NC_021163.1    | Ca_kabuli_chr04 | 44595420                | AA                              | TT              | 1946831344               |
| SNP_P4_63419_44598809 | NC_021163.1    | Ca_kabuli_chr04 | 44598809                | AA                              | GG              | 1946831346               |
| SNP_P4_63420_44598882 | NC_021163.1    | Ca_kabuli_chr04 | 44598882                | TT                              | GG              | 1946831348               |

| SNPs IDs              | Chromosome IDs | Chromosomes     | Physical positions (bp) | CDC Frontier (Reference genome) | (ILWC46 & LPNB) | NCBI SNPdb Accession IDs |
|-----------------------|----------------|-----------------|-------------------------|---------------------------------|-----------------|--------------------------|
| SNP_P4_63421_44599505 | NC_021163.1    | Ca_kabuli_chr04 | 44599505                | AA                              | CC              | 1946831350               |
| SNP_P4_63422_44599511 | NC_021163.1    | Ca_kabuli_chr04 | 44599511                | CC                              | TT              | 1946831352               |
| SNP_P4_63423_44599529 | NC_021163.1    | Ca_kabuli_chr04 | 44599529                | TT                              | AA              | 1946831354               |
| SNP_P4_63424_44600218 | NC_021163.1    | Ca_kabuli_chr04 | 44600218                | TT                              | AA              | 1946831356               |
| SNP_P4_63425_44600244 | NC_021163.1    | Ca_kabuli_chr04 | 44600244                | GG                              | AA              | 1946831358               |
| SNP_P4_63426_44600567 | NC_021163.1    | Ca_kabuli_chr04 | 44600567                | TT                              | CC              | 1946831360               |
| SNP_P4_63427_44601334 | NC_021163.1    | Ca_kabuli_chr04 | 44601334                | TT                              | CC              | 1946831362               |
| SNP_P4_63428_44601481 | NC_021163.1    | Ca_kabuli_chr04 | 44601481                | GG                              | AA              | 1946831364               |
| SNP_P4_63429_44601531 | NC_021163.1    | Ca_kabuli_chr04 | 44601531                | TT                              | GG              | 1946831367               |
| SNP_P4_63430_44601544 | NC_021163.1    | Ca_kabuli_chr04 | 44601544                | CC                              | TT              | 1946831369               |
| SNP_P4_63431_44601559 | NC_021163.1    | Ca_kabuli_chr04 | 44601559                | CC                              | TT              | 1946831371               |
| SNP_P4_63433_44601747 | NC_021163.1    | Ca_kabuli_chr04 | 44601747                | AA                              | CC              | 1946831374               |
| SNP_P4_63434_44601793 | NC_021163.1    | Ca_kabuli_chr04 | 44601793                | TT                              | AA              | 1946831376               |
| SNP_P4_63435_44602137 | NC_021163.1    | Ca_kabuli_chr04 | 44602137                | GG                              | AA              | 1946831378               |
| SNP_P4_63436_44602460 | NC_021163.1    | Ca_kabuli_chr04 | 44602460                | GG                              | AA              | 1946831380               |
| SNP_P4_63438_44603335 | NC_021163.1    | Ca_kabuli_chr04 | 44603335                | TT                              | CC              | 1946831382               |
| SNP_P4_63439_44603479 | NC_021163.1    | Ca_kabuli_chr04 | 44603479                | GG                              | TT              | 1946831384               |
| SNP_P4_63440_44603525 | NC_021163.1    | Ca_kabuli_chr04 | 44603525                | GG                              | TT              | 1946831387               |
| SNP_P4_63441_44603527 | NC_021163.1    | Ca_kabuli_chr04 | 44603527                | CC                              | TT              | 1946831389               |
| SNP_P4_63442_44603538 | NC_021163.1    | Ca_kabuli_chr04 | 44603538                | AA                              | GG              | 1946831391               |
| SNP_P4_63443_44603554 | NC_021163.1    | Ca_kabuli_chr04 | 44603554                | AA                              | GG              | 1946831393               |
| SNP_P4_63444_44603559 | NC_021163.1    | Ca_kabuli_chr04 | 44603559                | GG                              | AA              | 1946831395               |
| SNP_P4_63445_44603564 | NC_021163.1    | Ca_kabuli_chr04 | 44603564                | GG                              | TT              | 1946831397               |
| SNP_P4_63446_44606993 | NC_021163.1    | Ca_kabuli_chr04 | 44606993                | TT                              | CC              | 1946831399               |
| SNP_P4_63448_44607024 | NC_021163.1    | Ca_kabuli_chr04 | 44607024                | AA                              | GG              | 1946831401               |
| SNP_P4_63450_44607308 | NC_021163.1    | Ca_kabuli_chr04 | 44607308                | AA                              | GG              | 1946831403               |
| SNP_P4_63451_44607445 | NC_021163.1    | Ca_kabuli_chr04 | 44607445                | GG                              | AA              | 1946831405               |
| SNP_P4_63452_44607529 | NC_021163.1    | Ca_kabuli_chr04 | 44607529                | TT                              | CC              | 1946831407               |
| SNP_P4_63453_44607559 | NC_021163.1    | Ca_kabuli_chr04 | 44607559                | GG                              | CC              | 1946831409               |
| SNP_P4_63454_44607877 | NC_021163.1    | Ca_kabuli_chr04 | 44607877                | TT                              | CC              | 1946831411               |
| SNP_P4_63455_44607891 | NC_021163.1    | Ca_kabuli_chr04 | 44607891                | GG                              | AA              | 1946831412               |
| SNP_P4_63456_44608847 | NC_021163.1    | Ca_kabuli_chr04 | 44608847                | TT                              | CC              | 1946831413               |
| SNP_P4_63457_44608888 | NC_021163.1    | Ca_kabuli_chr04 | 44608888                | AA                              | GG              | 1946831414               |
| SNP_P4_63458_44608892 | NC_021163.1    | Ca_kabuli_chr04 | 44608892                | AA                              | TT              | 1946831416               |
| SNP_P4_63459_44608895 | NC_021163.1    | Ca_kabuli_chr04 | 44608895                | TT                              | CC              | 1946831418               |
| SNP_P4_63460_44609998 | NC_021163.1    | Ca_kabuli_chr04 | 44609998                | CC                              | TT              | 1946831420               |
| SNP_P4_63461_44610000 | NC_021163.1    | Ca_kabuli_chr04 | 44610000                | CC                              | AA              | 1946831422               |
| SNP_P4_63462_44610002 | NC_021163.1    | Ca_kabuli_chr04 | 44610002                | AA                              | GG              | 1946831424               |
| SNP_P4_63463_44610149 | NC_021163.1    | Ca_kabuli_chr04 | 44610149                | AA                              | CC              | 1946831426               |
| SNP_P4_63464_44610176 | NC_021163.1    | Ca_kabuli_chr04 | 44610176                | GG                              | AA              | 1946831428               |
| SNP_P4_63465_44611490 | NC_021163.1    | Ca_kabuli_chr04 | 44611490                | GG                              | AA              | 1946831430               |
| SNP_P4_63467_44611734 | NC_021163.1    | Ca_kabuli_chr04 | 44611734                | AA                              | GG              | 1946831432               |



| SNPs IDs              | Chromosome IDs | Chromosomes     | Physical positions (bp) | CDC Frontier (Reference genome) | (ILWC46 & LPNB) | NCBI SNPdb Accession IDs |
|-----------------------|----------------|-----------------|-------------------------|---------------------------------|-----------------|--------------------------|
| SNP_P4_63468_44611769 | NC_021163.1    | Ca_kabuli_chr04 | 44611769                | TT                              | CC              | 1946831434               |
| SNP_P4_63469_44611774 | NC_021163.1    | Ca_kabuli_chr04 | 44611774                | CC                              | AA              | 1946831436               |
| SNP_P4_63470_44612036 | NC_021163.1    | Ca_kabuli_chr04 | 44612036                | CC                              | TT              | 1946831438               |
| SNP_P4_63471_44612042 | NC_021163.1    | Ca_kabuli_chr04 | 44612042                | TT                              | CC              | 1946831440               |
| SNP_P4_63472_44612048 | NC_021163.1    | Ca_kabuli_chr04 | 44612048                | TT                              | CC              | 1946831442               |
| SNP_P4_63473_44612818 | NC_021163.1    | Ca_kabuli_chr04 | 44612818                | CC                              | TT              | 1946831444               |
| SNP_P4_63474_44612850 | NC_021163.1    | Ca_kabuli_chr04 | 44612850                | TT                              | CC              | 1946831446               |
| SNP_P4_63475_44612969 | NC_021163.1    | Ca_kabuli_chr04 | 44612969                | TT                              | AA              | 1946831448               |
| SNP_P4_63476_44613041 | NC_021163.1    | Ca_kabuli_chr04 | 44613041                | AA                              | TT              | 1946831450               |
| SNP_P4_63477_44613047 | NC_021163.1    | Ca_kabuli_chr04 | 44613047                | AA                              | GG              | 1946831452               |
| SNP_P4_63479_44613538 | NC_021163.1    | Ca_kabuli_chr04 | 44613538                | AA                              | CC              | 1946831454               |
| SNP_P4_63480_44613638 | NC_021163.1    | Ca_kabuli_chr04 | 44613638                | CC                              | TT              | 1946831456               |
| SNP_P4_63482_44614112 | NC_021163.1    | Ca_kabuli_chr04 | 44614112                | AA                              | CC              | 1946831458               |
| SNP_P4_63483_44617540 | NC_021163.1    | Ca_kabuli_chr04 | 44617540                | CC                              | TT              | 1946831460               |
| SNP_P4_63484_44617800 | NC_021163.1    | Ca_kabuli_chr04 | 44617800                | AA                              | GG              | 1946831462               |
| SNP_P4_63485_44621446 | NC_021163.1    | Ca_kabuli_chr04 | 44621446                | AA                              | GG              | 1946831464               |
| SNP_P4_63486_44621455 | NC_021163.1    | Ca_kabuli_chr04 | 44621455                | CC                              | TT              | 1946831466               |
| SNP_P4_63487_44622369 | NC_021163.1    | Ca_kabuli_chr04 | 44622369                | AA                              | TT              | 1946831468               |
| SNP_P4_63489_44622659 | NC_021163.1    | Ca_kabuli_chr04 | 44622659                | TT                              | AA              | 1946831470               |
| SNP_P4_63490_44624585 | NC_021163.1    | Ca_kabuli_chr04 | 44624585                | CC                              | TT              | 1946831472               |
| SNP_P4_63491_44625355 | NC_021163.1    | Ca_kabuli_chr04 | 44625355                | GG                              | AA              | 1946831474               |
| SNP_P4_63493_44625711 | NC_021163.1    | Ca_kabuli_chr04 | 44625711                | TT                              | CC              | 1946831476               |
| SNP_P4_63494_44626034 | NC_021163.1    | Ca_kabuli_chr04 | 44626034                | TT                              | GG              | 1946831478               |
| SNP_P4_63495_44626645 | NC_021163.1    | Ca_kabuli_chr04 | 44626645                | CC                              | AA              | 1946831480               |
| SNP_P4_63496_44626753 | NC_021163.1    | Ca_kabuli_chr04 | 44626753                | TT                              | CC              | 1946831481               |
| SNP_P4_63497_44626770 | NC_021163.1    | Ca_kabuli_chr04 | 44626770                | TT                              | GG              | 1946831483               |
| SNP_P4_63498_44628790 | NC_021163.1    | Ca_kabuli_chr04 | 44628790                | AA                              | CC              | 1946831485               |
| SNP_P4_63499_44629671 | NC_021163.1    | Ca_kabuli_chr04 | 44629671                | TT                              | AA              | 1946831487               |
| SNP_P4_63500_44629735 | NC_021163.1    | Ca_kabuli_chr04 | 44629735                | TT                              | CC              | 1946831489               |
| SNP_P4_63501_44629859 | NC_021163.1    | Ca_kabuli_chr04 | 44629859                | CC                              | TT              | 1946831492               |
| SNP_P4_63503_44629938 | NC_021163.1    | Ca_kabuli_chr04 | 44629938                | CC                              | AA              | 1946831494               |
| SNP_P4_63504_44630021 | NC_021163.1    | Ca_kabuli_chr04 | 44630021                | TT                              | CC              | 1946831496               |
| SNP_P4_63505_44630819 | NC_021163.1    | Ca_kabuli_chr04 | 44630819                | CC                              | TT              | 1946831498               |
| SNP_P4_63506_44631098 | NC_021163.1    | Ca_kabuli_chr04 | 44631098                | TT                              | AA              | 1946831500               |
| SNP_P4_63507_44631119 | NC_021163.1    | Ca_kabuli_chr04 | 44631119                | GG                              | CC              | 1946831502               |
| SNP_P4_63508_44631142 | NC_021163.1    | Ca_kabuli_chr04 | 44631142                | TT                              | CC              | 1946831504               |
| SNP_P4_63510_44631207 | NC_021163.1    | Ca_kabuli_chr04 | 44631207                | CC                              | AA              | 1946831506               |
| SNP_P4_63511_44631474 | NC_021163.1    | Ca_kabuli_chr04 | 44631474                | TT                              | CC              | 1946831508               |
| SNP_P4_63514_44632477 | NC_021163.1    | Ca_kabuli_chr04 | 44632477                | GG                              | AA              | 1946831510               |
| SNP_P4_63515_44632513 | NC_021163.1    | Ca_kabuli_chr04 | 44632513                | AA                              | GG              | 1946831512               |
| SNP_P4_63516_44632525 | NC_021163.1    | Ca_kabuli_chr04 | 44632525                | AA                              | CC              | 1946831514               |
| SNP_P4_63517_44632574 | NC_021163.1    | Ca_kabuli_chr04 | 44632574                | TT                              | CC              | 1946831516               |

| SNPs IDs              | Chromosome IDs | Chromosomes     | Physical positions (bp) | CDC Frontier (Reference genome) | (ILWC46 & LPNB) | NCBI SNPdb Accession IDs |
|-----------------------|----------------|-----------------|-------------------------|---------------------------------|-----------------|--------------------------|
| SNP_P4_63518_44632663 | NC_021163.1    | Ca_kabuli_chr04 | 44632663                | GG                              | CC              | 1946831518               |
| SNP_P4_63520_44632847 | NC_021163.1    | Ca_kabuli_chr04 | 44632847                | AA                              | CC              | 1946831520               |
| SNP_P4_63521_44632900 | NC_021163.1    | Ca_kabuli_chr04 | 44632900                | CC                              | AA              | 1946831522               |
| SNP_P4_63522_44632917 | NC_021163.1    | Ca_kabuli_chr04 | 44632917                | TT                              | CC              | 1946831524               |
| SNP_P4_63523_44632928 | NC_021163.1    | Ca_kabuli_chr04 | 44632928                | GG                              | AA              | 1946831526               |
| SNP_P4_63524_44632930 | NC_021163.1    | Ca_kabuli_chr04 | 44632930                | CC                              | AA              | 1946831528               |
| SNP_P4_63525_44632934 | NC_021163.1    | Ca_kabuli_chr04 | 44632934                | GG                              | AA              | 1946831530               |
| SNP_P4_63526_44633091 | NC_021163.1    | Ca_kabuli_chr04 | 44633091                | AA                              | GG              | 1946831532               |
| SNP_P4_63527_44633115 | NC_021163.1    | Ca_kabuli_chr04 | 44633115                | GG                              | AA              | 1946831534               |
| SNP_P4_63528_44633128 | NC_021163.1    | Ca_kabuli_chr04 | 44633128                | GG                              | AA              | 1946831536               |
| SNP_P4_63529_44633551 | NC_021163.1    | Ca_kabuli_chr04 | 44633551                | GG                              | AA              | 1946831538               |
| SNP_P4_63530_44633583 | NC_021163.1    | Ca_kabuli_chr04 | 44633583                | GG                              | TT              | 1946831540               |
| SNP_P4_63532_44634148 | NC_021163.1    | Ca_kabuli_chr04 | 44634148                | GG                              | AA              | 1946831542               |
| SNP_P4_63533_44634170 | NC_021163.1    | Ca_kabuli_chr04 | 44634170                | AA                              | CC              | 1946831544               |
| SNP_P4_63534_44634454 | NC_021163.1    | Ca_kabuli_chr04 | 44634454                | TT                              | CC              | 1946831546               |
| SNP_P4_63535_44634517 | NC_021163.1    | Ca_kabuli_chr04 | 44634517                | AA                              | GG              | 1946831548               |
| SNP_P4_63536_44634703 | NC_021163.1    | Ca_kabuli_chr04 | 44634703                | GG                              | AA              | 1946831550               |
| SNP_P4_63537_44636817 | NC_021163.1    | Ca_kabuli_chr04 | 44636817                | AA                              | GG              | 1946831552               |
| SNP_P4_63538_44637064 | NC_021163.1    | Ca_kabuli_chr04 | 44637064                | AA                              | CC              | 1946831554               |
| SNP_P4_63539_44637079 | NC_021163.1    | Ca_kabuli_chr04 | 44637079                | CC                              | AA              | 1946831556               |
| SNP_P4_63540_44637472 | NC_021163.1    | Ca_kabuli_chr04 | 44637472                | TT                              | AA              | 1946831558               |
| SNP_P4_63541_44637743 | NC_021163.1    | Ca_kabuli_chr04 | 44637743                | TT                              | CC              | 1946831560               |
| SNP_P4_63543_44638490 | NC_021163.1    | Ca_kabuli_chr04 | 44638490                | CC                              | GG              | 1946831562               |
| SNP_P4_63544_44640128 | NC_021163.1    | Ca_kabuli_chr04 | 44640128                | CC                              | TT              | 1946831564               |
| SNP_P4_63545_44640145 | NC_021163.1    | Ca_kabuli_chr04 | 44640145                | CC                              | TT              | 1946831567               |
| SNP_P4_63546_44640148 | NC_021163.1    | Ca_kabuli_chr04 | 44640148                | CC                              | TT              | 1946831569               |
| SNP_P4_63547_44640208 | NC_021163.1    | Ca_kabuli_chr04 | 44640208                | TT                              | CC              | 1946831572               |
| SNP_P4_63548_44640224 | NC_021163.1    | Ca_kabuli_chr04 | 44640224                | AA                              | GG              | 1946831574               |
| SNP_P4_63549_44640353 | NC_021163.1    | Ca_kabuli_chr04 | 44640353                | GG                              | CC              | 1946831576               |
| SNP_P4_63550_44640493 | NC_021163.1    | Ca_kabuli_chr04 | 44640493                | TT                              | CC              | 1946831578               |
| SNP_P4_63551_44640526 | NC_021163.1    | Ca_kabuli_chr04 | 44640526                | GG                              | CC              | 1946831580               |
| SNP_P4_63552_44642882 | NC_021163.1    | Ca_kabuli_chr04 | 44642882                | AA                              | GG              | 1946831582               |
| SNP_P4_63553_44642968 | NC_021163.1    | Ca_kabuli_chr04 | 44642968                | AA                              | GG              | 1946831584               |
| SNP_P4_63554_44643284 | NC_021163.1    | Ca_kabuli_chr04 | 44643284                | CC                              | TT              | 1946831586               |
| SNP_P4_63555_44643312 | NC_021163.1    | Ca_kabuli_chr04 | 44643312                | CC                              | AA              | 1946831588               |
| SNP_P4_63556_44646567 | NC_021163.1    | Ca_kabuli_chr04 | 44646567                | CC                              | GG              | 1946831590               |
| SNP_P4_63559_44657709 | NC_021163.1    | Ca_kabuli_chr04 | 44657709                | AA                              | GG              | 1946831592               |
| SNP_P4_63560_44658408 | NC_021163.1    | Ca_kabuli_chr04 | 44658408                | TT                              | GG              | 1946831594               |
| SNP_P4_63561_44658456 | NC_021163.1    | Ca_kabuli_chr04 | 44658456                | CC                              | TT              | 1946831596               |
| SNP_P4_63562_44658474 | NC_021163.1    | Ca_kabuli_chr04 | 44658474                | CC                              | TT              | 1946831599               |
| SNP_P4_63564_44660953 | NC_021163.1    | Ca_kabuli_chr04 | 44660953                | AA                              | TT              | 1946831601               |
| SNP_P4_63566_44661044 | NC_021163.1    | Ca_kabuli_chr04 | 44661044                | CC                              | TT              | 1946831603               |

| SNPs IDs              | Chromosome IDs | Chromosomes     | Physical positions (bp) | CDC Frontier (Reference genome) | (ILWC46 & LPNB) | NCBI SNPdb Accession IDs |
|-----------------------|----------------|-----------------|-------------------------|---------------------------------|-----------------|--------------------------|
| SNP_P4_63567_44661314 | NC_021163.1    | Ca_kabuli_chr04 | 44661314                | AA                              | GG              | 1946831605               |
| SNP_P4_63568_44661589 | NC_021163.1    | Ca_kabuli_chr04 | 44661589                | AA                              | GG              | 1946831607               |
| SNP_P4_63570_44661797 | NC_021163.1    | Ca_kabuli_chr04 | 44661797                | AA                              | GG              | 1946831609               |
| SNP_P4_63571_44661811 | NC_021163.1    | Ca_kabuli_chr04 | 44661811                | TT                              | CC              | 1946831611               |
| SNP_P4_63572_44662108 | NC_021163.1    | Ca_kabuli_chr04 | 44662108                | TT                              | CC              | 1946831613               |
| SNP_P4_63573_44662424 | NC_021163.1    | Ca_kabuli_chr04 | 44662424                | CC                              | TT              | 1946831615               |
| SNP_P4_63576_44663135 | NC_021163.1    | Ca_kabuli_chr04 | 44663135                | TT                              | GG              | 1946831617               |
| SNP_P4_63577_44663203 | NC_021163.1    | Ca_kabuli_chr04 | 44663203                | CC                              | GG              | 1946831619               |
| SNP_P4_63578_44663209 | NC_021163.1    | Ca_kabuli_chr04 | 44663209                | AA                              | CC              | 1946831621               |
| SNP_P4_63579_44663214 | NC_021163.1    | Ca_kabuli_chr04 | 44663214                | TT                              | CC              | 1946831623               |
| SNP_P4_63580_44663229 | NC_021163.1    | Ca_kabuli_chr04 | 44663229                | AA                              | GG              | 1946831625               |
| SNP_P4_63582_44665762 | NC_021163.1    | Ca_kabuli_chr04 | 44665762                | CC                              | GG              | 1946831627               |
| SNP_P4_63583_44665811 | NC_021163.1    | Ca_kabuli_chr04 | 44665811                | GG                              | AA              | 1946831629               |
| SNP_P4_63584_44666849 | NC_021163.1    | Ca_kabuli_chr04 | 44666849                | AA                              | GG              | 1946831631               |
| SNP_P4_63585_44666868 | NC_021163.1    | Ca_kabuli_chr04 | 44666868                | AA                              | GG              | 1946831633               |
| SNP_P4_63586_44666871 | NC_021163.1    | Ca_kabuli_chr04 | 44666871                | AA                              | GG              | 1946831635               |
| SNP_P4_63587_44666952 | NC_021163.1    | Ca_kabuli_chr04 | 44666952                | AA                              | GG              | 1946831637               |
| SNP_P4_63588_44666967 | NC_021163.1    | Ca_kabuli_chr04 | 44666967                | CC                              | TT              | 1946831639               |
| SNP_P4_63589_44667584 | NC_021163.1    | Ca_kabuli_chr04 | 44667584                | AA                              | TT              | 1946831641               |
| SNP_P4_63590_44668030 | NC_021163.1    | Ca_kabuli_chr04 | 44668030                | GG                              | AA              | 1946831643               |
| SNP_P4_63591_44668052 | NC_021163.1    | Ca_kabuli_chr04 | 44668052                | TT                              | CC              | 1946831645               |
| SNP_P4_63592_44668098 | NC_021163.1    | Ca_kabuli_chr04 | 44668098                | CC                              | AA              | 1946831647               |
| SNP_P4_63593_44668722 | NC_021163.1    | Ca_kabuli_chr04 | 44668722                | AA                              | TT              | 1946831649               |
| SNP_P4_63594_44668800 | NC_021163.1    | Ca_kabuli_chr04 | 44668800                | GG                              | CC              | 1946831651               |
| SNP_P4_63597_44670088 | NC_021163.1    | Ca_kabuli_chr04 | 44670088                | GG                              | AA              | 1946831653               |
| SNP_P4_63598_44670976 | NC_021163.1    | Ca_kabuli_chr04 | 44670976                | GG                              | TT              | 1946831655               |
| SNP_P4_63599_44671177 | NC_021163.1    | Ca_kabuli_chr04 | 44671177                | AA                              | GG              | 1946831657               |
| SNP_P4_63600_44671215 | NC_021163.1    | Ca_kabuli_chr04 | 44671215                | GG                              | CC              | 1946831659               |
| SNP_P4_63601_44672809 | NC_021163.1    | Ca_kabuli_chr04 | 44672809                | GG                              | TT              | 1946831661               |
| SNP_P4_63602_44672812 | NC_021163.1    | Ca_kabuli_chr04 | 44672812                | GG                              | TT              | 1946831663               |
| SNP_P4_63603_44672817 | NC_021163.1    | Ca_kabuli_chr04 | 44672817                | GG                              | AA              | 1946831665               |
| SNP_P4_63604_44672922 | NC_021163.1    | Ca_kabuli_chr04 | 44672922                | AA                              | GG              | 1946831667               |
| SNP_P4_63605_44673159 | NC_021163.1    | Ca_kabuli_chr04 | 44673159                | GG                              | AA              | 1946831669               |
| SNP_P4_63606_44673680 | NC_021163.1    | Ca_kabuli_chr04 | 44673680                | CC                              | TT              | 1946831671               |
| SNP_P4_63607_44673711 | NC_021163.1    | Ca_kabuli_chr04 | 44673711                | AA                              | GG              | 1946831673               |
| SNP_P4_63608_44673712 | NC_021163.1    | Ca_kabuli_chr04 | 44673712                | AA                              | TT              | 1946831675               |
| SNP_P4_63609_44673719 | NC_021163.1    | Ca_kabuli_chr04 | 44673719                | GG                              | AA              | 1946831677               |
| SNP_P4_63610_44673746 | NC_021163.1    | Ca_kabuli_chr04 | 44673746                | GG                              | TT              | 1946831679               |
| SNP_P4_63611_44673780 | NC_021163.1    | Ca_kabuli_chr04 | 44673780                | AA                              | GG              | 1946831681               |
| SNP_P4_63612_44673949 | NC_021163.1    | Ca_kabuli_chr04 | 44673949                | GG                              | AA              | 1946831683               |
| SNP_P4_63613_44674043 | NC_021163.1    | Ca_kabuli_chr04 | 44674043                | GG                              | TT              | 1946831685               |
| SNP_P4_63615_44675447 | NC_021163.1    | Ca_kabuli_chr04 | 44675447                | GG                              | AA              | 1946831688               |

| SNPs IDs              | Chromosome IDs | Chromosomes     | Physical positions (bp) | CDC Frontier (Reference genome) | (ILWC46 & LPNB) | NCBI SNPdb Accession IDs |
|-----------------------|----------------|-----------------|-------------------------|---------------------------------|-----------------|--------------------------|
| SNP_P4_63616_44676788 | NC_021163.1    | Ca_kabuli_chr04 | 44676788                | CC                              | AA              | 1946831690               |
| SNP_P4_63617_44677631 | NC_021163.1    | Ca_kabuli_chr04 | 44677631                | GG                              | AA              | 1946831691               |
| SNP_P4_63618_44677660 | NC_021163.1    | Ca_kabuli_chr04 | 44677660                | TT                              | CC              | 1946831694               |
| SNP_P4_63619_44677968 | NC_021163.1    | Ca_kabuli_chr04 | 44677968                | GG                              | AA              | 1946831696               |
| SNP_P4_63620_44678033 | NC_021163.1    | Ca_kabuli_chr04 | 44678033                | AA                              | GG              | 1946831698               |
| SNP_P4_63621_44678205 | NC_021163.1    | Ca_kabuli_chr04 | 44678205                | TT                              | CC              | 1946831700               |
| SNP_P4_63622_44678213 | NC_021163.1    | Ca_kabuli_chr04 | 44678213                | TT                              | CC              | 1946831702               |
| SNP_P4_63623_44678224 | NC_021163.1    | Ca_kabuli_chr04 | 44678224                | GG                              | AA              | 1946831704               |
| SNP_P4_63624_44678362 | NC_021163.1    | Ca_kabuli_chr04 | 44678362                | AA                              | GG              | 1946831706               |
| SNP_P4_63626_44678388 | NC_021163.1    | Ca_kabuli_chr04 | 44678388                | TT                              | GG              | 1946831708               |
| SNP_P4_63627_44678451 | NC_021163.1    | Ca_kabuli_chr04 | 44678451                | AA                              | GG              | 1946831710               |
| SNP_P4_63628_44678462 | NC_021163.1    | Ca_kabuli_chr04 | 44678462                | AA                              | GG              | 1946831712               |
| SNP_P4_63629_44678471 | NC_021163.1    | Ca_kabuli_chr04 | 44678471                | GG                              | AA              | 1946831714               |
| SNP_P4_63630_44679044 | NC_021163.1    | Ca_kabuli_chr04 | 44679044                | AA                              | TT              | 1946831716               |
| SNP_P4_63631_44679210 | NC_021163.1    | Ca_kabuli_chr04 | 44679210                | TT                              | AA              | 1946831718               |
| SNP_P4_63632_44679287 | NC_021163.1    | Ca_kabuli_chr04 | 44679287                | TT                              | AA              | 1946831720               |
| SNP_P4_63633_44679328 | NC_021163.1    | Ca_kabuli_chr04 | 44679328                | GG                              | CC              | 1946831722               |
| SNP_P4_63636_44679493 | NC_021163.1    | Ca_kabuli_chr04 | 44679493                | AA                              | TT              | 1946831724               |
| SNP_P4_63637_44679505 | NC_021163.1    | Ca_kabuli_chr04 | 44679505                | TT                              | AA              | 1946831726               |
| SNP_P4_63638_44679514 | NC_021163.1    | Ca_kabuli_chr04 | 44679514                | TT                              | GG              | 1946831728               |
| SNP_P4_63639_44679651 | NC_021163.1    | Ca_kabuli_chr04 | 44679651                | AA                              | GG              | 1946831730               |
| SNP_P4_63640_44679670 | NC_021163.1    | Ca_kabuli_chr04 | 44679670                | GG                              | AA              | 1946831732               |
| SNP_P4_63641_44679743 | NC_021163.1    | Ca_kabuli_chr04 | 44679743                | AA                              | GG              | 1946831735               |
| SNP_P4_63643_44680847 | NC_021163.1    | Ca_kabuli_chr04 | 44680847                | TT                              | CC              | 1946831736               |
| SNP_P4_63644_44680873 | NC_021163.1    | Ca_kabuli_chr04 | 44680873                | TT                              | CC              | 1946831739               |
| SNP_P4_63645_44680878 | NC_021163.1    | Ca_kabuli_chr04 | 44680878                | TT                              | CC              | 1946831741               |
| SNP_P4_63646_44680997 | NC_021163.1    | Ca_kabuli_chr04 | 44680997                | AA                              | GG              | 1946831743               |
| SNP_P4_63648_44681318 | NC_021163.1    | Ca_kabuli_chr04 | 44681318                | CC                              | TT              | 1946831745               |
| SNP_P4_63652_44683023 | NC_021163.1    | Ca_kabuli_chr04 | 44683023                | AA                              | TT              | 1946831747               |
| SNP_P4_63653_44683468 | NC_021163.1    | Ca_kabuli_chr04 | 44683468                | TT                              | CC              | 1946831749               |
| SNP_P4_63654_44685589 | NC_021163.1    | Ca_kabuli_chr04 | 44685589                | TT                              | GG              | 1946831751               |
| SNP_P4_63655_44685613 | NC_021163.1    | Ca_kabuli_chr04 | 44685613                | TT                              | CC              | 1946831753               |
| SNP_P4_63657_44685691 | NC_021163.1    | Ca_kabuli_chr04 | 44685691                | GG                              | AA              | 1946831755               |
| SNP_P4_63658_44685695 | NC_021163.1    | Ca_kabuli_chr04 | 44685695                | TT                              | CC              | 1946831757               |
| SNP_P4_63660_44685893 | NC_021163.1    | Ca_kabuli_chr04 | 44685893                | GG                              | AA              | 1946831759               |
| SNP_P4_63661_44686411 | NC_021163.1    | Ca_kabuli_chr04 | 44686411                | GG                              | TT              | 1946831761               |
| SNP_P4_63662_44686655 | NC_021163.1    | Ca_kabuli_chr04 | 44686655                | AA                              | TT              | 1946831763               |
| SNP_P4_63663_44687597 | NC_021163.1    | Ca_kabuli_chr04 | 44687597                | CC                              | TT              | 1946831765               |
| SNP_P4_63664_44687600 | NC_021163.1    | Ca_kabuli_chr04 | 44687600                | AA                              | GG              | 1946831767               |
| SNP_P4_63665_44687603 | NC_021163.1    | Ca_kabuli_chr04 | 44687603                | TT                              | CC              | 1946831769               |
| SNP_P4_63666_44687639 | NC_021163.1    | Ca_kabuli_chr04 | 44687639                | TT                              | CC              | 1946831771               |
| SNP_P4_63668_44688807 | NC_021163.1    | Ca_kabuli_chr04 | 44688807                | GG                              | AA              | 1946831773               |

| SNPs IDs              | Chromosome IDs | Chromosomes     | Physical positions (bp) | CDC Frontier (Reference genome) | (ILWC46 & LPNB) | NCBI SNPdb Accession IDs |
|-----------------------|----------------|-----------------|-------------------------|---------------------------------|-----------------|--------------------------|
| SNP_P4_63669_44688847 | NC_021163.1    | Ca_kabuli_chr04 | 44688847                | TT                              | AA              | 1946831776               |
| SNP_P4_63670_44692304 | NC_021163.1    | Ca_kabuli_chr04 | 44692304                | CC                              | TT              | 1946831778               |
| SNP_P4_63671_44693810 | NC_021163.1    | Ca_kabuli_chr04 | 44693810                | TT                              | AA              | 1946831780               |
| SNP_P4_63672_44693840 | NC_021163.1    | Ca_kabuli_chr04 | 44693840                | CC                              | GG              | 1946831781               |
| SNP_P4_63674_44694130 | NC_021163.1    | Ca_kabuli_chr04 | 44694130                | TT                              | CC              | 1946831783               |
| SNP_P4_63675_44694154 | NC_021163.1    | Ca_kabuli_chr04 | 44694154                | AA                              | CC              | 1946831785               |
| SNP_P4_63676_44694166 | NC_021163.1    | Ca_kabuli_chr04 | 44694166                | TT                              | AA              | 1946831787               |
| SNP_P4_63677_44694436 | NC_021163.1    | Ca_kabuli_chr04 | 44694436                | CC                              | TT              | 1946831789               |
| SNP_P4_63678_44694493 | NC_021163.1    | Ca_kabuli_chr04 | 44694493                | AA                              | TT              | 1946831791               |
| SNP_P4_63679_44694498 | NC_021163.1    | Ca_kabuli_chr04 | 44694498                | TT                              | AA              | 1946831794               |
| SNP_P4_63680_44694508 | NC_021163.1    | Ca_kabuli_chr04 | 44694508                | TT                              | AA              | 1946831796               |
| SNP_P4_63681_44694555 | NC_021163.1    | Ca_kabuli_chr04 | 44694555                | TT                              | AA              | 1946831798               |
| SNP_P4_63682_44694586 | NC_021163.1    | Ca_kabuli_chr04 | 44694586                | TT                              | GG              | 1946831800               |
| SNP_P4_63683_44694600 | NC_021163.1    | Ca_kabuli_chr04 | 44694600                | AA                              | TT              | 1946831802               |
| SNP_P4_63684_44694601 | NC_021163.1    | Ca_kabuli_chr04 | 44694601                | AA                              | GG              | 1946831804               |
| SNP_P4_63687_44694695 | NC_021163.1    | Ca_kabuli_chr04 | 44694695                | TT                              | GG              | 1946831806               |
| SNP_P4_63688_44694745 | NC_021163.1    | Ca_kabuli_chr04 | 44694745                | AA                              | TT              | 1946831808               |
| SNP_P4_63689_44694750 | NC_021163.1    | Ca_kabuli_chr04 | 44694750                | CC                              | AA              | 1946831810               |
| SNP_P4_63690_44694751 | NC_021163.1    | Ca_kabuli_chr04 | 44694751                | AA                              | TT              | 1946831812               |
| SNP_P4_63691_44694795 | NC_021163.1    | Ca_kabuli_chr04 | 44694795                | TT                              | GG              | 1946831814               |
| SNP_P4_63692_44697986 | NC_021163.1    | Ca_kabuli_chr04 | 44697986                | AA                              | GG              | 1946831816               |
| SNP_P4_63693_44698217 | NC_021163.1    | Ca_kabuli_chr04 | 44698217                | TT                              | GG              | 1946831818               |
| SNP_P4_63694_44703763 | NC_021163.1    | Ca_kabuli_chr04 | 44703763                | TT                              | CC              | 1946831820               |
| SNP_P4_63695_44704117 | NC_021163.1    | Ca_kabuli_chr04 | 44704117                | GG                              | AA              | 1946831822               |
| SNP_P4_63696_44704154 | NC_021163.1    | Ca_kabuli_chr04 | 44704154                | TT                              | AA              | 1946831824               |
| SNP_P4_63697_44704366 | NC_021163.1    | Ca_kabuli_chr04 | 44704366                | TT                              | CC              | 1946831826               |
| SNP_P4_63698_44704524 | NC_021163.1    | Ca_kabuli_chr04 | 44704524                | TT                              | GG              | 1946831828               |
| SNP_P4_63700_44704754 | NC_021163.1    | Ca_kabuli_chr04 | 44704754                | GG                              | CC              | 1946831830               |
| SNP_P4_63701_44705096 | NC_021163.1    | Ca_kabuli_chr04 | 44705096                | AA                              | CC              | 1946831832               |
| SNP_P4_63703_44705170 | NC_021163.1    | Ca_kabuli_chr04 | 44705170                | CC                              | TT              | 1946831833               |
| SNP_P4_63704_44706422 | NC_021163.1    | Ca_kabuli_chr04 | 44706422                | GG                              | AA              | 1946831834               |
| SNP_P4_63706_44706645 | NC_021163.1    | Ca_kabuli_chr04 | 44706645                | TT                              | AA              | 1946831835               |
| SNP_P4_63708_44707080 | NC_021163.1    | Ca_kabuli_chr04 | 44707080                | CC                              | AA              | 1946831836               |
| SNP_P4_63709_44707119 | NC_021163.1    | Ca_kabuli_chr04 | 44707119                | GG                              | AA              | 1946831837               |
| SNP_P4_63710_44707328 | NC_021163.1    | Ca_kabuli_chr04 | 44707328                | GG                              | TT              | 1946831838               |
| SNP_P4_63712_44707499 | NC_021163.1    | Ca_kabuli_chr04 | 44707499                | GG                              | TT              | 1946831841               |
| SNP_P4_63713_44708222 | NC_021163.1    | Ca_kabuli_chr04 | 44708222                | AA                              | TT              | 1946831843               |
| SNP_P4_63715_44710215 | NC_021163.1    | Ca_kabuli_chr04 | 44710215                | TT                              | CC              | 1946831845               |
| SNP_P4_63716_44710227 | NC_021163.1    | Ca_kabuli_chr04 | 44710227                | GG                              | AA              | 1946831847               |
| SNP_P4_63718_44710346 | NC_021163.1    | Ca_kabuli_chr04 | 44710346                | CC                              | TT              | 1946831849               |
| SNP_P4_63719_44710420 | NC_021163.1    | Ca_kabuli_chr04 | 44710420                | AA                              | CC              | 1946831851               |
| SNP_P4_63721_44710537 | NC_021163.1    | Ca_kabuli_chr04 | 44710537                | AA                              | GG              | 1946831853               |

| SNPs IDs              | Chromosome IDs | Chromosomes     | Physical positions (bp) | CDC Frontier (Reference genome) | (ILWC46 & LPNB) | NCBI SNPdb Accession IDs |
|-----------------------|----------------|-----------------|-------------------------|---------------------------------|-----------------|--------------------------|
| SNP_P4_63723_44710585 | NC_021163.1    | Ca_kabuli_chr04 | 44710585                | TT                              | GG              | 1946831855               |
| SNP_P4_63724_44710685 | NC_021163.1    | Ca_kabuli_chr04 | 44710685                | CC                              | GG              | 1946831857               |
| SNP_P4_63725_44711186 | NC_021163.1    | Ca_kabuli_chr04 | 44711186                | CC                              | TT              | 1946831859               |
| SNP_P4_63727_44711254 | NC_021163.1    | Ca_kabuli_chr04 | 44711254                | CC                              | TT              | 1946831861               |
| SNP_P4_63728_44712225 | NC_021163.1    | Ca_kabuli_chr04 | 44712225                | GG                              | CC              | 1946831863               |
| SNP_P4_63729_44712530 | NC_021163.1    | Ca_kabuli_chr04 | 44712530                | TT                              | AA              | 1946831865               |
| SNP_P4_63730_44713192 | NC_021163.1    | Ca_kabuli_chr04 | 44713192                | CC                              | TT              | 1946831867               |
| SNP_P4_63731_44713203 | NC_021163.1    | Ca_kabuli_chr04 | 44713203                | TT                              | CC              | 1946831869               |
| SNP_P4_63732_44713435 | NC_021163.1    | Ca_kabuli_chr04 | 44713435                | CC                              | TT              | 1946831872               |
| SNP_P4_63733_44713474 | NC_021163.1    | Ca_kabuli_chr04 | 44713474                | TT                              | CC              | 1946831874               |
| SNP_P4_63734_44713587 | NC_021163.1    | Ca_kabuli_chr04 | 44713587                | CC                              | TT              | 1946831876               |
| SNP_P4_63735_44713666 | NC_021163.1    | Ca_kabuli_chr04 | 44713666                | CC                              | TT              | 1946831878               |
| SNP_P4_63736_44714351 | NC_021163.1    | Ca_kabuli_chr04 | 44714351                | AA                              | GG              | 1946831880               |
| SNP_P4_63737_44714488 | NC_021163.1    | Ca_kabuli_chr04 | 44714488                | AA                              | TT              | 1946831882               |
| SNP_P4_63738_44714510 | NC_021163.1    | Ca_kabuli_chr04 | 44714510                | TT                              | AA              | 1946831884               |
| SNP_P4_63739_44714541 | NC_021163.1    | Ca_kabuli_chr04 | 44714541                | GG                              | AA              | 1946831886               |
| SNP_P4_63740_44714571 | NC_021163.1    | Ca_kabuli_chr04 | 44714571                | AA                              | GG              | 1946831888               |
| SNP_P4_63741_44714587 | NC_021163.1    | Ca_kabuli_chr04 | 44714587                | AA                              | GG              | 1946831890               |
| SNP_P4_63742_44714648 | NC_021163.1    | Ca_kabuli_chr04 | 44714648                | AA                              | TT              | 1946831892               |
| SNP_P4_63743_44714662 | NC_021163.1    | Ca_kabuli_chr04 | 44714662                | TT                              | AA              | 1946831895               |
| SNP_P4_63744_44714690 | NC_021163.1    | Ca_kabuli_chr04 | 44714690                | AA                              | TT              | 1946831897               |
| SNP_P4_63745_44717560 | NC_021163.1    | Ca_kabuli_chr04 | 44717560                | AA                              | GG              | 1946831899               |
| SNP_P4_63746_44717593 | NC_021163.1    | Ca_kabuli_chr04 | 44717593                | TT                              | CC              | 1946831901               |
| SNP_P4_63747_44717607 | NC_021163.1    | Ca_kabuli_chr04 | 44717607                | GG                              | AA              | 1946831903               |
| SNP_P4_63748_44717776 | NC_021163.1    | Ca_kabuli_chr04 | 44717776                | TT                              | GG              | 1946831905               |
| SNP_P4_63749_44717958 | NC_021163.1    | Ca_kabuli_chr04 | 44717958                | CC                              | AA              | 1946831907               |
| SNP_P4_63750_44717967 | NC_021163.1    | Ca_kabuli_chr04 | 44717967                | AA                              | TT              | 1946831909               |
| SNP_P4_63751_44718145 | NC_021163.1    | Ca_kabuli_chr04 | 44718145                | TT                              | CC              | 1946831912               |
| SNP_P4_63752_44718186 | NC_021163.1    | Ca_kabuli_chr04 | 44718186                | GG                              | CC              | 1946831914               |
| SNP_P4_63753_44718216 | NC_021163.1    | Ca_kabuli_chr04 | 44718216                | GG                              | AA              | 1946831916               |
| SNP_P4_63754_44718501 | NC_021163.1    | Ca_kabuli_chr04 | 44718501                | TT                              | AA              | 1946831918               |
| SNP_P4_63755_44718554 | NC_021163.1    | Ca_kabuli_chr04 | 44718554                | CC                              | TT              | 1946831920               |
| SNP_P4_63756_44718578 | NC_021163.1    | Ca_kabuli_chr04 | 44718578                | GG                              | CC              | 1946831923               |
| SNP_P4_63758_44718619 | NC_021163.1    | Ca_kabuli_chr04 | 44718619                | TT                              | GG              | 1946831925               |
| SNP_P4_63759_44718713 | NC_021163.1    | Ca_kabuli_chr04 | 44718713                | GG                              | AA              | 1946831927               |
| SNP_P4_63760_44718714 | NC_021163.1    | Ca_kabuli_chr04 | 44718714                | CC                              | TT              | 1946831929               |
| SNP_P4_63761_44718739 | NC_021163.1    | Ca_kabuli_chr04 | 44718739                | TT                              | CC              | 1946831931               |
| SNP_P4_63762_44718749 | NC_021163.1    | Ca_kabuli_chr04 | 44718749                | GG                              | TT              | 1946831933               |
| SNP_P4_63763_44718760 | NC_021163.1    | Ca_kabuli_chr04 | 44718760                | AA                              | TT              | 1946831935               |
| SNP_P4_63764_44718802 | NC_021163.1    | Ca_kabuli_chr04 | 44718802                | GG                              | CC              | 1946831937               |
| SNP_P4_63765_44718857 | NC_021163.1    | Ca_kabuli_chr04 | 44718857                | GG                              | TT              | 1946831939               |
| SNP_P4_63766_44718858 | NC_021163.1    | Ca_kabuli_chr04 | 44718858                | TT                              | CC              | 1946831941               |

| SNPs IDs              | Chromosome IDs | Chromosomes     | Physical positions (bp) | CDC Frontier (Reference genome) | (ILWC46 & LPNB) | NCBI SNPdb Accession IDs |
|-----------------------|----------------|-----------------|-------------------------|---------------------------------|-----------------|--------------------------|
| SNP_P4_63767_44719466 | NC_021163.1    | Ca_kabuli_chr04 | 44719466                | CC                              | AA              | 1946831943               |
| SNP_P4_63768_44719713 | NC_021163.1    | Ca_kabuli_chr04 | 44719713                | TT                              | CC              | 1946831945               |
| SNP_P4_63769_44720979 | NC_021163.1    | Ca_kabuli_chr04 | 44720979                | AA                              | CC              | 1946831947               |
| SNP_P4_63770_44721037 | NC_021163.1    | Ca_kabuli_chr04 | 44721037                | TT                              | CC              | 1946831949               |
| SNP_P4_63771_44721393 | NC_021163.1    | Ca_kabuli_chr04 | 44721393                | AA                              | GG              | 1946831951               |
| SNP_P4_63772_44721695 | NC_021163.1    | Ca_kabuli_chr04 | 44721695                | GG                              | AA              | 1946831953               |
| SNP_P4_63773_44724562 | NC_021163.1    | Ca_kabuli_chr04 | 44724562                | AA                              | GG              | 1946831955               |
| SNP_P4_63774_44724606 | NC_021163.1    | Ca_kabuli_chr04 | 44724606                | CC                              | TT              | 1946831957               |
| SNP_P4_63775_44724616 | NC_021163.1    | Ca_kabuli_chr04 | 44724616                | AA                              | TT              | 1946831959               |
| SNP_P4_63776_44724810 | NC_021163.1    | Ca_kabuli_chr04 | 44724810                | AA                              | GG              | 1946831961               |
| SNP_P4_63777_44724870 | NC_021163.1    | Ca_kabuli_chr04 | 44724870                | CC                              | TT              | 1946831963               |
| SNP_P4_63778_44724975 | NC_021163.1    | Ca_kabuli_chr04 | 44724975                | CC                              | TT              | 1946831965               |
| SNP_P4_63779_44725139 | NC_021163.1    | Ca_kabuli_chr04 | 44725139                | GG                              | AA              | 1946831967               |
| SNP_P4_63780_44725148 | NC_021163.1    | Ca_kabuli_chr04 | 44725148                | CC                              | TT              | 1946831969               |
| SNP_P4_63781_44725151 | NC_021163.1    | Ca_kabuli_chr04 | 44725151                | GG                              | AA              | 1946831971               |
| SNP_P4_63782_44725166 | NC_021163.1    | Ca_kabuli_chr04 | 44725166                | GG                              | AA              | 1946831973               |
| SNP_P4_63783_44725172 | NC_021163.1    | Ca_kabuli_chr04 | 44725172                | AA                              | GG              | 1946831975               |
| SNP_P4_63784_44725198 | NC_021163.1    | Ca_kabuli_chr04 | 44725198                | TT                              | CC              | 1946831978               |
| SNP_P4_63785_44725551 | NC_021163.1    | Ca_kabuli_chr04 | 44725551                | TT                              | AA              | 1946831980               |
| SNP_P4_63787_44727362 | NC_021163.1    | Ca_kabuli_chr04 | 44727362                | AA                              | GG              | 1946831982               |
| SNP_P4_63788_44727415 | NC_021163.1    | Ca_kabuli_chr04 | 44727415                | AA                              | GG              | 1946831984               |
| SNP_P4_63789_44727430 | NC_021163.1    | Ca_kabuli_chr04 | 44727430                | AA                              | GG              | 1946831986               |
| SNP_P4_63790_44727431 | NC_021163.1    | Ca_kabuli_chr04 | 44727431                | TT                              | AA              | 1946831988               |
| SNP_P4_63791_44727477 | NC_021163.1    | Ca_kabuli_chr04 | 44727477                | CC                              | TT              | 1946831990               |
| SNP_P4_63792_44727478 | NC_021163.1    | Ca_kabuli_chr04 | 44727478                | TT                              | CC              | 1946831992               |
| SNP_P4_63793_44727509 | NC_021163.1    | Ca_kabuli_chr04 | 44727509                | TT                              | AA              | 1946831994               |
| SNP_P4_63794_44727679 | NC_021163.1    | Ca_kabuli_chr04 | 44727679                | CC                              | GG              | 1946831996               |
| SNP_P4_63795_44727828 | NC_021163.1    | Ca_kabuli_chr04 | 44727828                | AA                              | CC              | 1946831998               |
| SNP_P4_63796_44727876 | NC_021163.1    | Ca_kabuli_chr04 | 44727876                | GG                              | TT              | 1946832000               |
| SNP_P4_63797_44728613 | NC_021163.1    | Ca_kabuli_chr04 | 44728613                | CC                              | TT              | 1946832002               |
| SNP_P4_63799_44729645 | NC_021163.1    | Ca_kabuli_chr04 | 44729645                | CC                              | TT              | 1946832004               |
| SNP_P4_63800_44729728 | NC_021163.1    | Ca_kabuli_chr04 | 44729728                | AA                              | TT              | 1946832006               |
| SNP_P4_63801_44729869 | NC_021163.1    | Ca_kabuli_chr04 | 44729869                | GG                              | TT              | 1946832008               |
| SNP_P4_63802_44729897 | NC_021163.1    | Ca_kabuli_chr04 | 44729897                | AA                              | GG              | 1946832010               |
| SNP_P4_63803_44729903 | NC_021163.1    | Ca_kabuli_chr04 | 44729903                | TT                              | AA              | 1946832012               |
| SNP_P4_63804_44729915 | NC_021163.1    | Ca_kabuli_chr04 | 44729915                | AA                              | GG              | 1946832014               |
| SNP_P4_63805_44729958 | NC_021163.1    | Ca_kabuli_chr04 | 44729958                | TT                              | CC              | 1946832016               |
| SNP_P4_63806_44729965 | NC_021163.1    | Ca_kabuli_chr04 | 44729965                | CC                              | TT              | 1946832018               |
| SNP_P4_63807_44729972 | NC_021163.1    | Ca_kabuli_chr04 | 44729972                | CC                              | TT              | 1946832021               |
| SNP_P4_63808_44732128 | NC_021163.1    | Ca_kabuli_chr04 | 44732128                | TT                              | AA              | 1946832023               |
| SNP_P4_63809_44732129 | NC_021163.1    | Ca_kabuli_chr04 | 44732129                | AA                              | TT              | 1946832025               |
| SNP_P4_63810_44733067 | NC_021163.1    | Ca_kabuli_chr04 | 44733067                | AA                              | TT              | 1946832027               |

| SNPs IDs              | Chromosome IDs | Chromosomes     | Physical positions (bp) | CDC Frontier (Reference genome) | (ILWC46 & LPNB) | NCBI SNPdb Accession IDs |
|-----------------------|----------------|-----------------|-------------------------|---------------------------------|-----------------|--------------------------|
| SNP_P4_63812_44738011 | NC_021163.1    | Ca_kabuli_chr04 | 44738011                | AA                              | TT              | 1946832029               |
| SNP_P4_63813_44738532 | NC_021163.1    | Ca_kabuli_chr04 | 44738532                | TT                              | CC              | 1946832031               |
| SNP_P4_63816_44738826 | NC_021163.1    | Ca_kabuli_chr04 | 44738826                | AA                              | CC              | 1946832033               |
| SNP_P4_63817_44739658 | NC_021163.1    | Ca_kabuli_chr04 | 44739658                | CC                              | GG              | 1946832035               |
| SNP_P4_63818_44739670 | NC_021163.1    | Ca_kabuli_chr04 | 44739670                | AA                              | TT              | 1946832037               |
| SNP_P4_63819_44739709 | NC_021163.1    | Ca_kabuli_chr04 | 44739709                | TT                              | CC              | 1946832039               |
| SNP_P4_63821_44740359 | NC_021163.1    | Ca_kabuli_chr04 | 44740359                | CC                              | TT              | 1946832041               |
| SNP_P4_63822_44740620 | NC_021163.1    | Ca_kabuli_chr04 | 44740620                | AA                              | GG              | 1946832043               |
| SNP_P4_63823_44740621 | NC_021163.1    | Ca_kabuli_chr04 | 44740621                | TT                              | AA              | 1946832045               |
| SNP_P4_63824_44740933 | NC_021163.1    | Ca_kabuli_chr04 | 44740933                | CC                              | GG              | 1946832047               |
| SNP_P4_63825_44740949 | NC_021163.1    | Ca_kabuli_chr04 | 44740949                | TT                              | CC              | 1946832049               |
| SNP_P4_63826_44741058 | NC_021163.1    | Ca_kabuli_chr04 | 44741058                | AA                              | TT              | 1946832051               |
| SNP_P4_63827_44741138 | NC_021163.1    | Ca_kabuli_chr04 | 44741138                | CC                              | TT              | 1946832053               |
| SNP_P4_63828_44741888 | NC_021163.1    | Ca_kabuli_chr04 | 44741888                | CC                              | TT              | 1946832055               |
| SNP_P4_63829_44742102 | NC_021163.1    | Ca_kabuli_chr04 | 44742102                | GG                              | AA              | 1946832057               |
| SNP_P4_63830_44742149 | NC_021163.1    | Ca_kabuli_chr04 | 44742149                | AA                              | TT              | 1946832059               |
| SNP_P4_63831_44742175 | NC_021163.1    | Ca_kabuli_chr04 | 44742175                | TT                              | CC              | 1946832061               |
| SNP_P4_63832_44742277 | NC_021163.1    | Ca_kabuli_chr04 | 44742277                | GG                              | AA              | 1946832063               |
| SNP_P4_63834_44742852 | NC_021163.1    | Ca_kabuli_chr04 | 44742852                | AA                              | GG              | 1946832065               |
| SNP_P4_63835_44743289 | NC_021163.1    | Ca_kabuli_chr04 | 44743289                | AA                              | CC              | 1946832067               |
| SNP_P4_63836_44743324 | NC_021163.1    | Ca_kabuli_chr04 | 44743324                | GG                              | AA              | 1946832069               |
| SNP_P4_63837_44744746 | NC_021163.1    | Ca_kabuli_chr04 | 44744746                | TT                              | GG              | 1946832071               |
| SNP_P4_63838_44744780 | NC_021163.1    | Ca_kabuli_chr04 | 44744780                | CC                              | GG              | 1946832074               |
| SNP_P4_63840_44746529 | NC_021163.1    | Ca_kabuli_chr04 | 44746529                | AA                              | CC              | 1946832076               |
| SNP_P4_63841_44746593 | NC_021163.1    | Ca_kabuli_chr04 | 44746593                | GG                              | AA              | 1946832078               |
| SNP_P4_63842_44747457 | NC_021163.1    | Ca_kabuli_chr04 | 44747457                | AA                              | GG              | 1946832080               |
| SNP_P4_63843_44747818 | NC_021163.1    | Ca_kabuli_chr04 | 44747818                | CC                              | TT              | 1946832082               |
| SNP_P4_63845_44748098 | NC_021163.1    | Ca_kabuli_chr04 | 44748098                | CC                              | GG              | 1946832084               |
| SNP_P4_63846_44748110 | NC_021163.1    | Ca_kabuli_chr04 | 44748110                | GG                              | CC              | 1946832087               |
| SNP_P4_63847_44748113 | NC_021163.1    | Ca_kabuli_chr04 | 44748113                | AA                              | GG              | 1946832089               |
| SNP_P4_63848_44748115 | NC_021163.1    | Ca_kabuli_chr04 | 44748115                | CC                              | GG              | 1946832091               |
| SNP_P4_63849_44748418 | NC_021163.1    | Ca_kabuli_chr04 | 44748418                | AA                              | GG              | 1946832093               |
| SNP_P4_63850_44748895 | NC_021163.1    | Ca_kabuli_chr04 | 44748895                | AA                              | TT              | 1946832095               |
| SNP_P4_63851_44748904 | NC_021163.1    | Ca_kabuli_chr04 | 44748904                | CC                              | TT              | 1946832096               |
| SNP_P4_63852_44748916 | NC_021163.1    | Ca_kabuli_chr04 | 44748916                | TT                              | CC              | 1946832098               |
| SNP_P4_63853_44748928 | NC_021163.1    | Ca_kabuli_chr04 | 44748928                | GG                              | AA              | 1946832101               |
| SNP_P4_63854_44748953 | NC_021163.1    | Ca_kabuli_chr04 | 44748953                | AA                              | GG              | 1946832102               |
| SNP_P4_63855_44748973 | NC_021163.1    | Ca_kabuli_chr04 | 44748973                | GG                              | AA              | 1946832104               |
| SNP_P4_63856_44749262 | NC_021163.1    | Ca_kabuli_chr04 | 44749262                | TT                              | CC              | 1946832106               |
| SNP_P4_63857_44749467 | NC_021163.1    | Ca_kabuli_chr04 | 44749467                | TT                              | AA              | 1946832108               |
| SNP_P4_63858_44749490 | NC_021163.1    | Ca_kabuli_chr04 | 44749490                | GG                              | TT              | 1946832110               |
| SNP_P4_63859_44749802 | NC_021163.1    | Ca_kabuli_chr04 | 44749802                | GG                              | AA              | 1946832112               |



| SNPs IDs              | Chromosome IDs | Chromosomes     | Physical positions (bp) | CDC Frontier (Reference genome) | (ILWC46 & LPNB) | NCBI SNPdb Accession IDs |
|-----------------------|----------------|-----------------|-------------------------|---------------------------------|-----------------|--------------------------|
| SNP_P4_63860_44749809 | NC_021163.1    | Ca_kabuli_chr04 | 44749809                | AA                              | TT              | 1946832114               |
| SNP_P4_63861_44750159 | NC_021163.1    | Ca_kabuli_chr04 | 44750159                | AA                              | CC              | 1946832116               |
| SNP_P4_63862_44750277 | NC_021163.1    | Ca_kabuli_chr04 | 44750277                | TT                              | CC              | 1946832118               |
| SNP_P4_63863_44750289 | NC_021163.1    | Ca_kabuli_chr04 | 44750289                | AA                              | GG              | 1946832120               |
| SNP_P4_63865_44750613 | NC_021163.1    | Ca_kabuli_chr04 | 44750613                | GG                              | AA              | 1946832122               |
| SNP_P4_63867_44751008 | NC_021163.1    | Ca_kabuli_chr04 | 44751008                | CC                              | TT              | 1946832124               |
| SNP_P4_63868_44751089 | NC_021163.1    | Ca_kabuli_chr04 | 44751089                | TT                              | AA              | 1946832126               |
| SNP_P4_63869_44751118 | NC_021163.1    | Ca_kabuli_chr04 | 44751118                | CC                              | GG              | 1946832128               |
| SNP_P4_63870_44751123 | NC_021163.1    | Ca_kabuli_chr04 | 44751123                | TT                              | GG              | 1946832130               |
| SNP_P4_63871_44751151 | NC_021163.1    | Ca_kabuli_chr04 | 44751151                | CC                              | TT              | 1946832132               |
| SNP_P4_63872_44751355 | NC_021163.1    | Ca_kabuli_chr04 | 44751355                | GG                              | AA              | 1946832134               |
| SNP_P4_63873_44751370 | NC_021163.1    | Ca_kabuli_chr04 | 44751370                | GG                              | TT              | 1946832136               |
| SNP_P4_63874_44751389 | NC_021163.1    | Ca_kabuli_chr04 | 44751389                | AA                              | GG              | 1946832138               |
| SNP_P4_63875_44751467 | NC_021163.1    | Ca_kabuli_chr04 | 44751467                | AA                              | TT              | 1946832140               |
| SNP_P4_63876_44753391 | NC_021163.1    | Ca_kabuli_chr04 | 44753391                | GG                              | TT              | 1946832142               |
| SNP_P4_63877_44755475 | NC_021163.1    | Ca_kabuli_chr04 | 44755475                | GG                              | TT              | 1946832144               |
| SNP_P4_63878_44758317 | NC_021163.1    | Ca_kabuli_chr04 | 44758317                | GG                              | CC              | 1946832146               |
| SNP_P4_63879_44758330 | NC_021163.1    | Ca_kabuli_chr04 | 44758330                | AA                              | GG              | 1946832148               |
| SNP_P4_63880_44760169 | NC_021163.1    | Ca_kabuli_chr04 | 44760169                | GG                              | AA              | 1946832150               |
| SNP_P4_63881_44760171 | NC_021163.1    | Ca_kabuli_chr04 | 44760171                | CC                              | TT              | 1946832152               |
| SNP_P4_63882_44760402 | NC_021163.1    | Ca_kabuli_chr04 | 44760402                | CC                              | GG              | 1946832154               |
| SNP_P4_63883_44762074 | NC_021163.1    | Ca_kabuli_chr04 | 44762074                | TT                              | CC              | 1946832156               |
| SNP_P4_63884_44762090 | NC_021163.1    | Ca_kabuli_chr04 | 44762090                | CC                              | TT              | 1946832158               |
| SNP_P4_63885_44762140 | NC_021163.1    | Ca_kabuli_chr04 | 44762140                | AA                              | GG              | 1946832160               |
| SNP_P4_63886_44762965 | NC_021163.1    | Ca_kabuli_chr04 | 44762965                | CC                              | AA              | 1946832162               |
| SNP_P4_63887_44763640 | NC_021163.1    | Ca_kabuli_chr04 | 44763640                | GG                              | AA              | 1946832164               |
| SNP_P4_63888_44763665 | NC_021163.1    | Ca_kabuli_chr04 | 44763665                | TT                              | AA              | 1946832166               |
| SNP_P4_63889_44763951 | NC_021163.1    | Ca_kabuli_chr04 | 44763951                | AA                              | GG              | 1946832167               |
| SNP_P4_63890_44764272 | NC_021163.1    | Ca_kabuli_chr04 | 44764272                | GG                              | AA              | 1946832169               |
| SNP_P4_63892_44764298 | NC_021163.1    | Ca_kabuli_chr04 | 44764298                | AA                              | GG              | 1946832171               |
| SNP_P4_63893_44764335 | NC_021163.1    | Ca_kabuli_chr04 | 44764335                | GG                              | TT              | 1946832173               |
| SNP_P4_63894_44764364 | NC_021163.1    | Ca_kabuli_chr04 | 44764364                | AA                              | GG              | 1946832175               |
| SNP_P4_63895_44764533 | NC_021163.1    | Ca_kabuli_chr04 | 44764533                | TT                              | AA              | 1946832177               |
| SNP_P4_63896_44764543 | NC_021163.1    | Ca_kabuli_chr04 | 44764543                | AA                              | TT              | 1946832179               |
| SNP_P4_63898_44764816 | NC_021163.1    | Ca_kabuli_chr04 | 44764816                | AA                              | TT              | 1946832181               |
| SNP_P4_63899_44764817 | NC_021163.1    | Ca_kabuli_chr04 | 44764817                | TT                              | AA              | 1946832183               |
| SNP_P4_63900_44765535 | NC_021163.1    | Ca_kabuli_chr04 | 44765535                | TT                              | CC              | 1946832185               |
| SNP_P4_63901_44766416 | NC_021163.1    | Ca_kabuli_chr04 | 44766416                | CC                              | TT              | 1946832187               |
| SNP_P4_63902_44766887 | NC_021163.1    | Ca_kabuli_chr04 | 44766887                | TT                              | CC              | 1946832189               |
| SNP_P4_63903_44767161 | NC_021163.1    | Ca_kabuli_chr04 | 44767161                | GG                              | TT              | 1946832191               |
| SNP_P4_63904_44767166 | NC_021163.1    | Ca_kabuli_chr04 | 44767166                | TT                              | CC              | 1946832193               |
| SNP_P4_63905_44767169 | NC_021163.1    | Ca_kabuli_chr04 | 44767169                | CC                              | TT              | 1946832195               |

| SNPs IDs              | Chromosome IDs | Chromosomes     | Physical positions (bp) | CDC Frontier (Reference genome) | (ILWC46 & LPNB) | NCBI SNPdb Accession IDs |
|-----------------------|----------------|-----------------|-------------------------|---------------------------------|-----------------|--------------------------|
| SNP_P4_63906_44767230 | NC_021163.1    | Ca_kabuli_chr04 | 44767230                | AA                              | GG              | 1946832198               |
| SNP_P4_63908_44769640 | NC_021163.1    | Ca_kabuli_chr04 | 44769640                | AA                              | GG              | 1946832200               |
| SNP_P4_63909_44769677 | NC_021163.1    | Ca_kabuli_chr04 | 44769677                | CC                              | TT              | 1946832202               |
| SNP_P4_63910_44769695 | NC_021163.1    | Ca_kabuli_chr04 | 44769695                | GG                              | CC              | 1946832204               |
| SNP_P4_63911_44769713 | NC_021163.1    | Ca_kabuli_chr04 | 44769713                | AA                              | TT              | 1946832206               |
| SNP_P4_63912_44769875 | NC_021163.1    | Ca_kabuli_chr04 | 44769875                | TT                              | CC              | 1946832207               |
| SNP_P4_63913_44770018 | NC_021163.1    | Ca_kabuli_chr04 | 44770018                | GG                              | AA              | 1946832209               |
| SNP_P4_63914_44770053 | NC_021163.1    | Ca_kabuli_chr04 | 44770053                | GG                              | AA              | 1946832211               |
| SNP_P4_63915_44770093 | NC_021163.1    | Ca_kabuli_chr04 | 44770093                | AA                              | GG              | 1946832213               |
| SNP_P4_63916_44770098 | NC_021163.1    | Ca_kabuli_chr04 | 44770098                | AA                              | GG              | 1946832215               |
| SNP_P4_63917_44770452 | NC_021163.1    | Ca_kabuli_chr04 | 44770452                | GG                              | AA              | 1946832217               |
| SNP_P4_63918_44770915 | NC_021163.1    | Ca_kabuli_chr04 | 44770915                | GG                              | TT              | 1946832219               |
| SNP_P4_63919_44771276 | NC_021163.1    | Ca_kabuli_chr04 | 44771276                | TT                              | GG              | 1946832222               |
| SNP_P4_63921_44771297 | NC_021163.1    | Ca_kabuli_chr04 | 44771297                | CC                              | TT              | 1946832224               |
| SNP_P4_63922_44771336 | NC_021163.1    | Ca_kabuli_chr04 | 44771336                | TT                              | CC              | 1946832226               |
| SNP_P4_63923_44771644 | NC_021163.1    | Ca_kabuli_chr04 | 44771644                | AA                              | CC              | 1946832228               |
| SNP_P4_63924_44772416 | NC_021163.1    | Ca_kabuli_chr04 | 44772416                | TT                              | CC              | 1946832230               |
| SNP_P4_63926_44773069 | NC_021163.1    | Ca_kabuli_chr04 | 44773069                | AA                              | TT              | 1946832232               |
| SNP_P4_63928_44773165 | NC_021163.1    | Ca_kabuli_chr04 | 44773165                | AA                              | GG              | 1946832234               |
| SNP_P4_63929_44773327 | NC_021163.1    | Ca_kabuli_chr04 | 44773327                | TT                              | CC              | 1946832236               |
| SNP_P4_63930_44773328 | NC_021163.1    | Ca_kabuli_chr04 | 44773328                | GG                              | AA              | 1946832238               |
| SNP_P4_63931_44773387 | NC_021163.1    | Ca_kabuli_chr04 | 44773387                | CC                              | TT              | 1946832241               |
| SNP_P4_63932_44773392 | NC_021163.1    | Ca_kabuli_chr04 | 44773392                | CC                              | TT              | 1946832243               |
| SNP_P4_63933_44773407 | NC_021163.1    | Ca_kabuli_chr04 | 44773407                | GG                              | AA              | 1946832245               |
| SNP_P4_63936_44773799 | NC_021163.1    | Ca_kabuli_chr04 | 44773799                | TT                              | CC              | 1946832247               |
| SNP_P4_63937_44773868 | NC_021163.1    | Ca_kabuli_chr04 | 44773868                | TT                              | GG              | 1946832249               |
| SNP_P4_63939_44774086 | NC_021163.1    | Ca_kabuli_chr04 | 44774086                | AA                              | CC              | 1946832251               |
| SNP_P4_63940_44776540 | NC_021163.1    | Ca_kabuli_chr04 | 44776540                | CC                              | AA              | 1946832253               |
| SNP_P4_63941_44776672 | NC_021163.1    | Ca_kabuli_chr04 | 44776672                | GG                              | AA              | 1946832255               |
| SNP_P4_63942_44776682 | NC_021163.1    | Ca_kabuli_chr04 | 44776682                | AA                              | GG              | 1946832257               |
| SNP_P4_63943_44776683 | NC_021163.1    | Ca_kabuli_chr04 | 44776683                | AA                              | CC              | 1946832259               |
| SNP_P4_63944_44776698 | NC_021163.1    | Ca_kabuli_chr04 | 44776698                | TT                              | CC              | 1946832261               |
| SNP_P4_63945_44776701 | NC_021163.1    | Ca_kabuli_chr04 | 44776701                | CC                              | TT              | 1946832263               |
| SNP_P4_63946_44776750 | NC_021163.1    | Ca_kabuli_chr04 | 44776750                | TT                              | CC              | 1946832265               |
| SNP_P4_63947_44776765 | NC_021163.1    | Ca_kabuli_chr04 | 44776765                | GG                              | AA              | 1946832267               |
| SNP_P4_63948_44776934 | NC_021163.1    | Ca_kabuli_chr04 | 44776934                | CC                              | TT              | 1946832269               |
| SNP_P4_63949_44776953 | NC_021163.1    | Ca_kabuli_chr04 | 44776953                | TT                              | CC              | 1946832271               |
| SNP_P4_63950_44776970 | NC_021163.1    | Ca_kabuli_chr04 | 44776970                | CC                              | TT              | 1946832273               |
| SNP_P4_63951_44776982 | NC_021163.1    | Ca_kabuli_chr04 | 44776982                | CC                              | TT              | 1946832275               |
| SNP_P4_63952_44777033 | NC_021163.1    | Ca_kabuli_chr04 | 44777033                | TT                              | CC              | 1946832278               |
| SNP_P4_63953_44777038 | NC_021163.1    | Ca_kabuli_chr04 | 44777038                | AA                              | GG              | 1946832280               |
| SNP_P4_63954_44777076 | NC_021163.1    | Ca_kabuli_chr04 | 44777076                | CC                              | TT              | 1946832282               |

| SNPs IDs              | Chromosome IDs | Chromosomes     | Physical positions (bp) | CDC Frontier (Reference genome) | (ILWC46 & LPNB) | NCBI SNPdb Accession IDs |
|-----------------------|----------------|-----------------|-------------------------|---------------------------------|-----------------|--------------------------|
| SNP_P4_63955_44777109 | NC_021163.1    | Ca_kabuli_chr04 | 44777109                | TT                              | CC              | 1946832284               |
| SNP_P4_63956_44777310 | NC_021163.1    | Ca_kabuli_chr04 | 44777310                | CC                              | TT              | 1946832286               |
| SNP_P4_63957_44777358 | NC_021163.1    | Ca_kabuli_chr04 | 44777358                | GG                              | TT              | 1946832288               |
| SNP_P4_63958_44777369 | NC_021163.1    | Ca_kabuli_chr04 | 44777369                | TT                              | GG              | 1946832290               |
| SNP_P4_63959_44777645 | NC_021163.1    | Ca_kabuli_chr04 | 44777645                | AA                              | CC              | 1946832292               |
| SNP_P4_63960_44777657 | NC_021163.1    | Ca_kabuli_chr04 | 44777657                | CC                              | TT              | 1946832294               |
| SNP_P4_63961_44777706 | NC_021163.1    | Ca_kabuli_chr04 | 44777706                | GG                              | AA              | 1946832296               |
| SNP_P4_63963_44777831 | NC_021163.1    | Ca_kabuli_chr04 | 44777831                | AA                              | GG              | 1946832298               |
| SNP_P4_63964_44778021 | NC_021163.1    | Ca_kabuli_chr04 | 44778021                | CC                              | TT              | 1946832300               |
| SNP_P4_63965_44778029 | NC_021163.1    | Ca_kabuli_chr04 | 44778029                | CC                              | TT              | 1946832302               |
| SNP_P4_63966_44778047 | NC_021163.1    | Ca_kabuli_chr04 | 44778047                | GG                              | AA              | 1946832304               |
| SNP_P4_63967_44778065 | NC_021163.1    | Ca_kabuli_chr04 | 44778065                | AA                              | GG              | 1946832306               |
| SNP_P4_63968_44779296 | NC_021163.1    | Ca_kabuli_chr04 | 44779296                | TT                              | AA              | 1946832308               |
| SNP_P4_63969_44779408 | NC_021163.1    | Ca_kabuli_chr04 | 44779408                | CC                              | TT              | 1946832310               |
| SNP_P4_63970_44779517 | NC_021163.1    | Ca_kabuli_chr04 | 44779517                | TT                              | CC              | 1946832312               |
| SNP_P4_63971_44779633 | NC_021163.1    | Ca_kabuli_chr04 | 44779633                | AA                              | GG              | 1946832314               |
| SNP_P4_63972_44779673 | NC_021163.1    | Ca_kabuli_chr04 | 44779673                | TT                              | CC              | 1946832316               |
| SNP_P4_63973_44780281 | NC_021163.1    | Ca_kabuli_chr04 | 44780281                | TT                              | CC              | 1946832318               |
| SNP_P4_63974_44780357 | NC_021163.1    | Ca_kabuli_chr04 | 44780357                | CC                              | TT              | 1946832320               |
| SNP_P4_63976_44781275 | NC_021163.1    | Ca_kabuli_chr04 | 44781275                | GG                              | AA              | 1946832322               |
| SNP_P4_63978_44782290 | NC_021163.1    | Ca_kabuli_chr04 | 44782290                | AA                              | GG              | 1946832324               |
| SNP_P4_63980_44783831 | NC_021163.1    | Ca_kabuli_chr04 | 44783831                | AA                              | GG              | 1946832326               |
| SNP_P4_63981_44784480 | NC_021163.1    | Ca_kabuli_chr04 | 44784480                | GG                              | TT              | 1946832328               |
| SNP_P4_63982_44784873 | NC_021163.1    | Ca_kabuli_chr04 | 44784873                | GG                              | AA              | 1946832331               |
| SNP_P4_63983_44784911 | NC_021163.1    | Ca_kabuli_chr04 | 44784911                | TT                              | CC              | 1946832333               |
| SNP_P4_63984_44785331 | NC_021163.1    | Ca_kabuli_chr04 | 44785331                | GG                              | AA              | 1946832335               |
| SNP_P4_63985_44785477 | NC_021163.1    | Ca_kabuli_chr04 | 44785477                | TT                              | AA              | 1946832337               |
| SNP_P4_63986_44785692 | NC_021163.1    | Ca_kabuli_chr04 | 44785692                | AA                              | GG              | 1946832339               |
| SNP_P4_63987_44785846 | NC_021163.1    | Ca_kabuli_chr04 | 44785846                | CC                              | AA              | 1946832341               |
| SNP_P4_63990_44786715 | NC_021163.1    | Ca_kabuli_chr04 | 44786715                | AA                              | GG              | 1946832343               |
| SNP_P4_63991_44786724 | NC_021163.1    | Ca_kabuli_chr04 | 44786724                | TT                              | CC              | 1946832345               |
| SNP_P4_63992_44786727 | NC_021163.1    | Ca_kabuli_chr04 | 44786727                | GG                              | TT              | 1946832347               |
| SNP_P4_63993_44786742 | NC_021163.1    | Ca_kabuli_chr04 | 44786742                | TT                              | AA              | 1946832349               |
| SNP_P4_63995_44787133 | NC_021163.1    | Ca_kabuli_chr04 | 44787133                | AA                              | GG              | 1946832351               |
| SNP_P4_63997_44792093 | NC_021163.1    | Ca_kabuli_chr04 | 44792093                | AA                              | GG              | 1946832353               |
| SNP_P4_63998_44792300 | NC_021163.1    | Ca_kabuli_chr04 | 44792300                | AA                              | CC              | 1946832355               |
| SNP_P4_63999_44793404 | NC_021163.1    | Ca_kabuli_chr04 | 44793404                | AA                              | TT              | 1946832357               |
| SNP_P4_64000_44793407 | NC_021163.1    | Ca_kabuli_chr04 | 44793407                | AA                              | GG              | 1946832359               |
| SNP_P4_64001_44793415 | NC_021163.1    | Ca_kabuli_chr04 | 44793415                | GG                              | AA              | 1946832361               |
| SNP_P4_64002_44793419 | NC_021163.1    | Ca_kabuli_chr04 | 44793419                | CC                              | GG              | 1946832363               |
| SNP_P4_64003_44794226 | NC_021163.1    | Ca_kabuli_chr04 | 44794226                | GG                              | TT              | 1946832365               |
| SNP_P4_64004_44794268 | NC_021163.1    | Ca_kabuli_chr04 | 44794268                | CC                              | TT              | 1946832367               |

| SNPs IDs              | Chromosome IDs | Chromosomes     | Physical positions (bp) | CDC Frontier (Reference genome) | (ILWC46 & LPNB) | NCBI SNPdb Accession IDs |
|-----------------------|----------------|-----------------|-------------------------|---------------------------------|-----------------|--------------------------|
| SNP_P4_64005_44794309 | NC_021163.1    | Ca_kabuli_chr04 | 44794309                | TT                              | CC              | 1946832370               |
| SNP_P4_64006_44794710 | NC_021163.1    | Ca_kabuli_chr04 | 44794710                | AA                              | TT              | 1946832372               |
| SNP_P4_64007_44794842 | NC_021163.1    | Ca_kabuli_chr04 | 44794842                | TT                              | CC              | 1946832375               |
| SNP_P4_64008_44795835 | NC_021163.1    | Ca_kabuli_chr04 | 44795835                | TT                              | CC              | 1946832377               |
| SNP_P4_64009_44797973 | NC_021163.1    | Ca_kabuli_chr04 | 44797973                | AA                              | GG              | 1946832379               |
| SNP_P4_64010_44798592 | NC_021163.1    | Ca_kabuli_chr04 | 44798592                | TT                              | CC              | 1946832381               |
| SNP_P4_64011_44798862 | NC_021163.1    | Ca_kabuli_chr04 | 44798862                | GG                              | CC              | 1946832383               |
| SNP_P4_64013_44803694 | NC_021163.1    | Ca_kabuli_chr04 | 44803694                | TT                              | AA              | 1946832385               |
| SNP_P4_64014_44813879 | NC_021163.1    | Ca_kabuli_chr04 | 44813879                | AA                              | GG              | 1946832387               |
| SNP_P4_64015_44816284 | NC_021163.1    | Ca_kabuli_chr04 | 44816284                | CC                              | TT              | 1946832389               |
| SNP_P4_64016_44819653 | NC_021163.1    | Ca_kabuli_chr04 | 44819653                | AA                              | GG              | 1946832391               |
| SNP_P4_64017_44819671 | NC_021163.1    | Ca_kabuli_chr04 | 44819671                | CC                              | TT              | 1946832393               |
| SNP_P4_64018_44819854 | NC_021163.1    | Ca_kabuli_chr04 | 44819854                | AA                              | GG              | 1946832395               |
| SNP_P4_64019_44819870 | NC_021163.1    | Ca_kabuli_chr04 | 44819870                | AA                              | GG              | 1946832397               |
| SNP_P4_64020_44819941 | NC_021163.1    | Ca_kabuli_chr04 | 44819941                | TT                              | CC              | 1946832399               |
| SNP_P4_64021_44820024 | NC_021163.1    | Ca_kabuli_chr04 | 44820024                | GG                              | TT              | 1946832401               |
| SNP_P4_64022_44820050 | NC_021163.1    | Ca_kabuli_chr04 | 44820050                | TT                              | CC              | 1946832403               |
| SNP_P4_64023_44820094 | NC_021163.1    | Ca_kabuli_chr04 | 44820094                | CC                              | TT              | 1946832405               |
| SNP_P4_64024_44820201 | NC_021163.1    | Ca_kabuli_chr04 | 44820201                | AA                              | CC              | 1946832407               |
| SNP_P4_64025_44820470 | NC_021163.1    | Ca_kabuli_chr04 | 44820470                | TT                              | AA              | 1946832409               |
| SNP_P4_64026_44821255 | NC_021163.1    | Ca_kabuli_chr04 | 44821255                | CC                              | TT              | 1946832412               |
| SNP_P4_64027_44822509 | NC_021163.1    | Ca_kabuli_chr04 | 44822509                | CC                              | AA              | 1946832414               |
| SNP_P4_64029_44831009 | NC_021163.1    | Ca_kabuli_chr04 | 44831009                | TT                              | GG              | 1946832416               |
| SNP_P4_64030_44832795 | NC_021163.1    | Ca_kabuli_chr04 | 44832795                | AA                              | CC              | 1946832418               |
| SNP_P4_64031_44832839 | NC_021163.1    | Ca_kabuli_chr04 | 44832839                | AA                              | GG              | 1946832420               |
| SNP_P4_64032_44832862 | NC_021163.1    | Ca_kabuli_chr04 | 44832862                | AA                              | GG              | 1946832422               |
| SNP_P4_64033_44832891 | NC_021163.1    | Ca_kabuli_chr04 | 44832891                | TT                              | CC              | 1946832425               |
| SNP_P4_64034_44833070 | NC_021163.1    | Ca_kabuli_chr04 | 44833070                | TT                              | GG              | 1946832427               |
| SNP_P4_64035_44833347 | NC_021163.1    | Ca_kabuli_chr04 | 44833347                | CC                              | AA              | 1946832429               |
| SNP_P4_64036_44833365 | NC_021163.1    | Ca_kabuli_chr04 | 44833365                | AA                              | GG              | 1946832431               |
| SNP_P4_64037_44833556 | NC_021163.1    | Ca_kabuli_chr04 | 44833556                | TT                              | AA              | 1946832433               |
| SNP_P4_64038_44833560 | NC_021163.1    | Ca_kabuli_chr04 | 44833560                | TT                              | AA              | 1946832435               |
| SNP_P4_64039_44833564 | NC_021163.1    | Ca_kabuli_chr04 | 44833564                | AA                              | TT              | 1946832437               |
| SNP_P4_64040_44836454 | NC_021163.1    | Ca_kabuli_chr04 | 44836454                | GG                              | TT              | 1946832439               |
| SNP_P4_64041_44836544 | NC_021163.1    | Ca_kabuli_chr04 | 44836544                | GG                              | TT              | 1946832441               |
| SNP_P4_64042_44836598 | NC_021163.1    | Ca_kabuli_chr04 | 44836598                | CC                              | TT              | 1946832443               |
| SNP_P4_64044_44836845 | NC_021163.1    | Ca_kabuli_chr04 | 44836845                | TT                              | AA              | 1946832445               |
| SNP_P4_64045_44837120 | NC_021163.1    | Ca_kabuli_chr04 | 44837120                | AA                              | CC              | 1946832447               |
| SNP_P4_64047_44837685 | NC_021163.1    | Ca_kabuli_chr04 | 44837685                | CC                              | TT              | 1946832449               |
| SNP_P4_64048_44837756 | NC_021163.1    | Ca_kabuli_chr04 | 44837756                | TT                              | GG              | 1946832451               |
| SNP_P4_64051_44838075 | NC_021163.1    | Ca_kabuli_chr04 | 44838075                | TT                              | AA              | 1946832453               |
| SNP_P4_64052_44838215 | NC_021163.1    | Ca_kabuli_chr04 | 44838215                | CC                              | TT              | 1946832455               |

| SNPs IDs              | Chromosome IDs | Chromosomes     | Physical positions (bp) | CDC Frontier (Reference genome) | (ILWC46 & LPNB) | NCBI SNPdb Accession IDs |
|-----------------------|----------------|-----------------|-------------------------|---------------------------------|-----------------|--------------------------|
| SNP_P4_64053_44838264 | NC_021163.1    | Ca_kabuli_chr04 | 44838264                | GG                              | AA              | 1946832457               |
| SNP_P4_64054_44838294 | NC_021163.1    | Ca_kabuli_chr04 | 44838294                | AA                              | TT              | 1946832459               |
| SNP_P4_64055_44838315 | NC_021163.1    | Ca_kabuli_chr04 | 44838315                | AA                              | CC              | 1946832461               |
| SNP_P4_64056_44838322 | NC_021163.1    | Ca_kabuli_chr04 | 44838322                | AA                              | TT              | 1946832463               |
| SNP_P4_64058_44838554 | NC_021163.1    | Ca_kabuli_chr04 | 44838554                | CC                              | TT              | 1946832465               |
| SNP_P4_64059_44838625 | NC_021163.1    | Ca_kabuli_chr04 | 44838625                | AA                              | CC              | 1946832467               |
| SNP_P4_64060_44838677 | NC_021163.1    | Ca_kabuli_chr04 | 44838677                | GG                              | AA              | 1946832469               |
| SNP_P4_64061_44838857 | NC_021163.1    | Ca_kabuli_chr04 | 44838857                | TT                              | AA              | 1946832471               |
| SNP_P4_64062_44838938 | NC_021163.1    | Ca_kabuli_chr04 | 44838938                | CC                              | TT              | 1946832473               |
| SNP_P4_64063_44839105 | NC_021163.1    | Ca_kabuli_chr04 | 44839105                | CC                              | TT              | 1946832475               |
| SNP_P4_64064_44841941 | NC_021163.1    | Ca_kabuli_chr04 | 44841941                | GG                              | AA              | 1946832477               |
| SNP_P4_64065_44842867 | NC_021163.1    | Ca_kabuli_chr04 | 44842867                | TT                              | CC              | 1946832480               |
| SNP_P4_64066_44842882 | NC_021163.1    | Ca_kabuli_chr04 | 44842882                | TT                              | CC              | 1946832482               |
| SNP_P4_64067_44842884 | NC_021163.1    | Ca_kabuli_chr04 | 44842884                | AA                              | GG              | 1946832484               |
| SNP_P4_64069_44843129 | NC_021163.1    | Ca_kabuli_chr04 | 44843129                | CC                              | TT              | 1946832486               |
| SNP_P4_64070_44843151 | NC_021163.1    | Ca_kabuli_chr04 | 44843151                | AA                              | CC              | 1946832488               |
| SNP_P4_64071_44843165 | NC_021163.1    | Ca_kabuli_chr04 | 44843165                | TT                              | AA              | 1946832491               |
| SNP_P4_64072_44843491 | NC_021163.1    | Ca_kabuli_chr04 | 44843491                | AA                              | TT              | 1946832493               |
| SNP_P4_64073_44845268 | NC_021163.1    | Ca_kabuli_chr04 | 44845268                | TT                              | CC              | 1946832495               |
| SNP_P4_64074_44845272 | NC_021163.1    | Ca_kabuli_chr04 | 44845272                | GG                              | AA              | 1946832496               |
| SNP_P4_64075_44845549 | NC_021163.1    | Ca_kabuli_chr04 | 44845549                | TT                              | AA              | 1946832498               |
| SNP_P4_64076_44845553 | NC_021163.1    | Ca_kabuli_chr04 | 44845553                | AA                              | GG              | 1946832500               |
| SNP_P4_64077_44847519 | NC_021163.1    | Ca_kabuli_chr04 | 44847519                | AA                              | GG              | 1946832502               |
| SNP_P4_64079_44848410 | NC_021163.1    | Ca_kabuli_chr04 | 44848410                | AA                              | CC              | 1946832504               |
| SNP_P4_64081_44853181 | NC_021163.1    | Ca_kabuli_chr04 | 44853181                | GG                              | CC              | 1946832506               |
| SNP_P4_64082_44854058 | NC_021163.1    | Ca_kabuli_chr04 | 44854058                | AA                              | TT              | 1946832509               |
| SNP_P4_64083_44854070 | NC_021163.1    | Ca_kabuli_chr04 | 44854070                | CC                              | TT              | 1946832511               |
| SNP_P4_64084_44854113 | NC_021163.1    | Ca_kabuli_chr04 | 44854113                | TT                              | CC              | 1946832513               |
| SNP_P4_64085_44854141 | NC_021163.1    | Ca_kabuli_chr04 | 44854141                | AA                              | GG              | 1946832515               |
| SNP_P4_64087_44854409 | NC_021163.1    | Ca_kabuli_chr04 | 44854409                | AA                              | TT              | 1946832517               |
| SNP_P4_64089_44854674 | NC_021163.1    | Ca_kabuli_chr04 | 44854674                | AA                              | CC              | 1946832519               |
| SNP_P4_64091_44854958 | NC_021163.1    | Ca_kabuli_chr04 | 44854958                | CC                              | TT              | 1946832521               |
| SNP_P4_64092_44854963 | NC_021163.1    | Ca_kabuli_chr04 | 44854963                | GG                              | AA              | 1946832523               |
| SNP_P4_64093_44855124 | NC_021163.1    | Ca_kabuli_chr04 | 44855124                | GG                              | TT              | 1946832525               |
| SNP_P4_64094_44855148 | NC_021163.1    | Ca_kabuli_chr04 | 44855148                | AA                              | CC              | 1946832527               |
| SNP_P4_64097_44856798 | NC_021163.1    | Ca_kabuli_chr04 | 44856798                | GG                              | AA              | 1946832529               |
| SNP_P4_64099_44856914 | NC_021163.1    | Ca_kabuli_chr04 | 44856914                | AA                              | CC              | 1946832531               |
| SNP_P4_64100_44860954 | NC_021163.1    | Ca_kabuli_chr04 | 44860954                | GG                              | TT              | 1946832534               |
| SNP_P4_64101_44861486 | NC_021163.1    | Ca_kabuli_chr04 | 44861486                | CC                              | GG              | 1946832536               |
| SNP_P4_64102_44862195 | NC_021163.1    | Ca_kabuli_chr04 | 44862195                | TT                              | CC              | 1946832538               |
| SNP_P4_64104_44863365 | NC_021163.1    | Ca_kabuli_chr04 | 44863365                | GG                              | CC              | 1946832540               |
| SNP_P4_64105_44863384 | NC_021163.1    | Ca_kabuli_chr04 | 44863384                | AA                              | TT              | 1946832542               |

| SNPs IDs              | Chromosome IDs | Chromosomes     | Physical positions (bp) | CDC Frontier (Reference genome) | (ILWC46 & LPNB) | NCBI SNPdb Accession IDs |
|-----------------------|----------------|-----------------|-------------------------|---------------------------------|-----------------|--------------------------|
| SNP_P4_64106_44864223 | NC_021163.1    | Ca_kabuli_chr04 | 44864223                | GG                              | AA              | 1946832544               |
| SNP_P4_64107_44864267 | NC_021163.1    | Ca_kabuli_chr04 | 44864267                | GG                              | AA              | 1946832546               |
| SNP_P4_64108_44864468 | NC_021163.1    | Ca_kabuli_chr04 | 44864468                | AA                              | TT              | 1946832548               |
| SNP_P4_64109_44865317 | NC_021163.1    | Ca_kabuli_chr04 | 44865317                | AA                              | TT              | 1946832550               |
| SNP_P4_64110_44865472 | NC_021163.1    | Ca_kabuli_chr04 | 44865472                | TT                              | CC              | 1946832558               |
| SNP_P4_64112_44865527 | NC_021163.1    | Ca_kabuli_chr04 | 44865527                | TT                              | CC              | 1946832560               |
| SNP_P4_64113_44865731 | NC_021163.1    | Ca_kabuli_chr04 | 44865731                | GG                              | AA              | 1946832562               |
| SNP_P4_64114_44866190 | NC_021163.1    | Ca_kabuli_chr04 | 44866190                | TT                              | CC              | 1946832564               |
| SNP_P4_64115_44868179 | NC_021163.1    | Ca_kabuli_chr04 | 44868179                | TT                              | GG              | 1946832566               |
| SNP_P4_64116_44868597 | NC_021163.1    | Ca_kabuli_chr04 | 44868597                | GG                              | CC              | 1946832568               |
| SNP_P4_64117_44869660 | NC_021163.1    | Ca_kabuli_chr04 | 44869660                | AA                              | CC              | 1946832570               |
| SNP_P4_64118_44870337 | NC_021163.1    | Ca_kabuli_chr04 | 44870337                | CC                              | GG              | 1946832572               |
| SNP_P4_64119_44870338 | NC_021163.1    | Ca_kabuli_chr04 | 44870338                | AA                              | GG              | 1946832574               |
| SNP_P4_64120_44870519 | NC_021163.1    | Ca_kabuli_chr04 | 44870519                | GG                              | AA              | 1946832576               |
| SNP_P4_64121_44871398 | NC_021163.1    | Ca_kabuli_chr04 | 44871398                | GG                              | AA              | 1946832579               |
| SNP_P4_64122_44871469 | NC_021163.1    | Ca_kabuli_chr04 | 44871469                | AA                              | GG              | 1946832581               |
| SNP_P4_64123_44871509 | NC_021163.1    | Ca_kabuli_chr04 | 44871509                | AA                              | GG              | 1946832583               |
| SNP_P4_64124_44871676 | NC_021163.1    | Ca_kabuli_chr04 | 44871676                | TT                              | CC              | 1946832585               |
| SNP_P4_64125_44872157 | NC_021163.1    | Ca_kabuli_chr04 | 44872157                | AA                              | GG              | 1946832587               |
| SNP_P4_64126_44872500 | NC_021163.1    | Ca_kabuli_chr04 | 44872500                | GG                              | TT              | 1946832589               |
| SNP_P4_64127_44872676 | NC_021163.1    | Ca_kabuli_chr04 | 44872676                | GG                              | AA              | 1946832591               |
| SNP_P4_64128_44872759 | NC_021163.1    | Ca_kabuli_chr04 | 44872759                | GG                              | TT              | 1946832593               |
| SNP_P4_64129_44872966 | NC_021163.1    | Ca_kabuli_chr04 | 44872966                | CC                              | TT              | 1946832595               |
| SNP_P4_64130_44873942 | NC_021163.1    | Ca_kabuli_chr04 | 44873942                | GG                              | TT              | 1946832597               |
| SNP_P4_64131_44874204 | NC_021163.1    | Ca_kabuli_chr04 | 44874204                | CC                              | GG              | 1946832600               |
| SNP_P4_64132_44874721 | NC_021163.1    | Ca_kabuli_chr04 | 44874721                | AA                              | GG              | 1946832602               |
| SNP_P4_64133_44875906 | NC_021163.1    | Ca_kabuli_chr04 | 44875906                | TT                              | AA              | 1946832604               |
| SNP_P4_64134_44875908 | NC_021163.1    | Ca_kabuli_chr04 | 44875908                | TT                              | AA              | 1946832606               |
| SNP_P4_64135_44876552 | NC_021163.1    | Ca_kabuli_chr04 | 44876552                | CC                              | TT              | 1946832608               |
| SNP_P4_64136_44876586 | NC_021163.1    | Ca_kabuli_chr04 | 44876586                | AA                              | GG              | 1946832610               |
| SNP_P4_64137_44876614 | NC_021163.1    | Ca_kabuli_chr04 | 44876614                | TT                              | CC              | 1946832612               |
| SNP_P4_64138_44877916 | NC_021163.1    | Ca_kabuli_chr04 | 44877916                | GG                              | AA              | 1946832614               |
| SNP_P4_64140_44878490 | NC_021163.1    | Ca_kabuli_chr04 | 44878490                | CC                              | GG              | 1946832616               |
| SNP_P4_64141_44878538 | NC_021163.1    | Ca_kabuli_chr04 | 44878538                | CC                              | GG              | 1946832618               |
| SNP_P4_64142_44881440 | NC_021163.1    | Ca_kabuli_chr04 | 44881440                | AA                              | GG              | 1946832620               |
| SNP_P4_64143_44881805 | NC_021163.1    | Ca_kabuli_chr04 | 44881805                | TT                              | GG              | 1946832622               |
| SNP_P4_64144_44881850 | NC_021163.1    | Ca_kabuli_chr04 | 44881850                | TT                              | CC              | 1946832624               |
| SNP_P4_64145_44881885 | NC_021163.1    | Ca_kabuli_chr04 | 44881885                | AA                              | CC              | 1946832627               |
| SNP_P4_64146_44882062 | NC_021163.1    | Ca_kabuli_chr04 | 44882062                | GG                              | AA              | 1946832629               |
| SNP_P4_64147_44883335 | NC_021163.1    | Ca_kabuli_chr04 | 44883335                | TT                              | GG              | 1946832631               |
| SNP_P4_64148_44883348 | NC_021163.1    | Ca_kabuli_chr04 | 44883348                | TT                              | GG              | 1946832633               |
| SNP_P4_64149_44883425 | NC_021163.1    | Ca_kabuli_chr04 | 44883425                | CC                              | TT              | 1946832635               |

| SNPs IDs              | Chromosome IDs | Chromosomes     | Physical positions (bp) | CDC Frontier (Reference genome) | (ILWC46 & LPNB) | NCBI SNPdb Accession IDs |
|-----------------------|----------------|-----------------|-------------------------|---------------------------------|-----------------|--------------------------|
| SNP_P4_64150_44883595 | NC_021163.1    | Ca_kabuli_chr04 | 44883595                | GG                              | TT              | 1946832637               |
| SNP_P4_64151_44883636 | NC_021163.1    | Ca_kabuli_chr04 | 44883636                | CC                              | AA              | 1946832639               |
| SNP_P4_64152_44884440 | NC_021163.1    | Ca_kabuli_chr04 | 44884440                | TT                              | AA              | 1946832641               |
| SNP_P4_64153_44884782 | NC_021163.1    | Ca_kabuli_chr04 | 44884782                | CC                              | AA              | 1946832643               |
| SNP_P4_64154_44884784 | NC_021163.1    | Ca_kabuli_chr04 | 44884784                | AA                              | CC              | 1946832645               |
| SNP_P4_64155_44884811 | NC_021163.1    | Ca_kabuli_chr04 | 44884811                | TT                              | AA              | 1946832647               |
| SNP_P4_64156_44884820 | NC_021163.1    | Ca_kabuli_chr04 | 44884820                | AA                              | GG              | 1946832649               |
| SNP_P4_64157_44884903 | NC_021163.1    | Ca_kabuli_chr04 | 44884903                | GG                              | CC              | 1946832651               |
| SNP_P4_64158_44884944 | NC_021163.1    | Ca_kabuli_chr04 | 44884944                | AA                              | CC              | 1946832653               |
| SNP_P4_64159_44885149 | NC_021163.1    | Ca_kabuli_chr04 | 44885149                | TT                              | CC              | 1946832656               |
| SNP_P4_64160_44885179 | NC_021163.1    | Ca_kabuli_chr04 | 44885179                | TT                              | CC              | 1946832658               |
| SNP_P4_64161_44886023 | NC_021163.1    | Ca_kabuli_chr04 | 44886023                | AA                              | TT              | 1946832660               |
| SNP_P4_64162_44886049 | NC_021163.1    | Ca_kabuli_chr04 | 44886049                | GG                              | AA              | 1946832662               |
| SNP_P4_64163_44886066 | NC_021163.1    | Ca_kabuli_chr04 | 44886066                | CC                              | TT              | 1946832664               |
| SNP_P4_64164_44886259 | NC_021163.1    | Ca_kabuli_chr04 | 44886259                | GG                              | AA              | 1946832666               |
| SNP_P4_64165_44886284 | NC_021163.1    | Ca_kabuli_chr04 | 44886284                | GG                              | AA              | 1946832668               |
| SNP_P4_64166_44886307 | NC_021163.1    | Ca_kabuli_chr04 | 44886307                | GG                              | TT              | 1946832670               |
| SNP_P4_64167_44886364 | NC_021163.1    | Ca_kabuli_chr04 | 44886364                | AA                              | GG              | 1946832672               |
| SNP_P4_64168_44886373 | NC_021163.1    | Ca_kabuli_chr04 | 44886373                | TT                              | CC              | 1946832674               |
| SNP_P4_64169_44886377 | NC_021163.1    | Ca_kabuli_chr04 | 44886377                | TT                              | CC              | 1946832677               |
| SNP_P4_64170_44886392 | NC_021163.1    | Ca_kabuli_chr04 | 44886392                | AA                              | GG              | 1946832679               |
| SNP_P4_64172_44886584 | NC_021163.1    | Ca_kabuli_chr04 | 44886584                | TT                              | AA              | 1946832681               |
| SNP_P4_64173_44886741 | NC_021163.1    | Ca_kabuli_chr04 | 44886741                | TT                              | GG              | 1946832683               |
| SNP_P4_64174_44888917 | NC_021163.1    | Ca_kabuli_chr04 | 44888917                | GG                              | CC              | 1946832685               |
| SNP_P4_64175_44889413 | NC_021163.1    | Ca_kabuli_chr04 | 44889413                | CC                              | TT              | 1946832687               |
| SNP_P4_64176_44889415 | NC_021163.1    | Ca_kabuli_chr04 | 44889415                | GG                              | TT              | 1946832689               |
| SNP_P4_64177_44889438 | NC_021163.1    | Ca_kabuli_chr04 | 44889438                | TT                              | CC              | 1946832692               |
| SNP_P4_64180_44889549 | NC_021163.1    | Ca_kabuli_chr04 | 44889549                | TT                              | GG              | 1946832694               |
| SNP_P4_64181_44889773 | NC_021163.1    | Ca_kabuli_chr04 | 44889773                | TT                              | AA              | 1946832697               |
| SNP_P4_64182_44889846 | NC_021163.1    | Ca_kabuli_chr04 | 44889846                | TT                              | GG              | 1946832699               |
| SNP_P4_64183_44897354 | NC_021163.1    | Ca_kabuli_chr04 | 44897354                | GG                              | TT              | 1946832701               |
| SNP_P4_64185_44899413 | NC_021163.1    | Ca_kabuli_chr04 | 44899413                | GG                              | AA              | 1946832703               |
| SNP_P4_64186_44900047 | NC_021163.1    | Ca_kabuli_chr04 | 44900047                | AA                              | GG              | 1946832704               |
| SNP_P4_64187_44900068 | NC_021163.1    | Ca_kabuli_chr04 | 44900068                | AA                              | GG              | 1946832706               |
| SNP_P4_64189_44900124 | NC_021163.1    | Ca_kabuli_chr04 | 44900124                | AA                              | GG              | 1946832708               |
| SNP_P4_64190_44900335 | NC_021163.1    | Ca_kabuli_chr04 | 44900335                | AA                              | TT              | 1946832710               |
| SNP_P4_64192_44901199 | NC_021163.1    | Ca_kabuli_chr04 | 44901199                | AA                              | GG              | 1946832712               |
| SNP_P4_64193_44901201 | NC_021163.1    | Ca_kabuli_chr04 | 44901201                | GG                              | CC              | 1946832714               |
| SNP_P4_64194_44901383 | NC_021163.1    | Ca_kabuli_chr04 | 44901383                | TT                              | CC              | 1946832717               |
| SNP_P4_64195_44902192 | NC_021163.1    | Ca_kabuli_chr04 | 44902192                | CC                              | TT              | 1946832719               |
| SNP_P4_64197_44902393 | NC_021163.1    | Ca_kabuli_chr04 | 44902393                | TT                              | CC              | 1946832721               |
| SNP_P4_64198_44902417 | NC_021163.1    | Ca_kabuli_chr04 | 44902417                | TT                              | AA              | 1946832723               |

| SNPs IDs              | Chromosome IDs | Chromosomes     | Physical positions (bp) | CDC Frontier (Reference genome) | (ILWC46 & LPNB) | NCBI SNPdb Accession IDs |
|-----------------------|----------------|-----------------|-------------------------|---------------------------------|-----------------|--------------------------|
| SNP_P4_64199_44902492 | NC_021163.1    | Ca_kabuli_chr04 | 44902492                | GG                              | AA              | 1946832725               |
| SNP_P4_64200_44902526 | NC_021163.1    | Ca_kabuli_chr04 | 44902526                | AA                              | TT              | 1946832727               |
| SNP_P4_64201_44903363 | NC_021163.1    | Ca_kabuli_chr04 | 44903363                | GG                              | AA              | 1946832729               |
| SNP_P4_64202_44903371 | NC_021163.1    | Ca_kabuli_chr04 | 44903371                | CC                              | AA              | 1946832731               |
| SNP_P4_64204_44905273 | NC_021163.1    | Ca_kabuli_chr04 | 44905273                | GG                              | CC              | 1946832733               |
| SNP_P4_64205_44905290 | NC_021163.1    | Ca_kabuli_chr04 | 44905290                | GG                              | AA              | 1946832736               |
| SNP_P4_64206_44905317 | NC_021163.1    | Ca_kabuli_chr04 | 44905317                | AA                              | TT              | 1946832738               |
| SNP_P4_64207_44905385 | NC_021163.1    | Ca_kabuli_chr04 | 44905385                | AA                              | GG              | 1946832740               |
| SNP_P4_64208_44905447 | NC_021163.1    | Ca_kabuli_chr04 | 44905447                | GG                              | AA              | 1946832742               |
| SNP_P4_64209_44905811 | NC_021163.1    | Ca_kabuli_chr04 | 44905811                | GG                              | CC              | 1946832745               |
| SNP_P4_64210_44905814 | NC_021163.1    | Ca_kabuli_chr04 | 44905814                | TT                              | CC              | 1946832746               |
| SNP_P4_64211_44905818 | NC_021163.1    | Ca_kabuli_chr04 | 44905818                | GG                              | AA              | 1946832749               |
| SNP_P4_64212_44905844 | NC_021163.1    | Ca_kabuli_chr04 | 44905844                | GG                              | AA              | 1946832750               |
| SNP_P4_64213_44906153 | NC_021163.1    | Ca_kabuli_chr04 | 44906153                | GG                              | TT              | 1946832751               |
| SNP_P4_64214_44906820 | NC_021163.1    | Ca_kabuli_chr04 | 44906820                | AA                              | GG              | 1946832752               |
| SNP_P4_64215_44907077 | NC_021163.1    | Ca_kabuli_chr04 | 44907077                | TT                              | AA              | 1946832754               |
| SNP_P4_64216_44907108 | NC_021163.1    | Ca_kabuli_chr04 | 44907108                | CC                              | TT              | 1946832755               |
| SNP_P4_64217_44907530 | NC_021163.1    | Ca_kabuli_chr04 | 44907530                | CC                              | TT              | 1946832757               |
| SNP_P4_64218_44907549 | NC_021163.1    | Ca_kabuli_chr04 | 44907549                | GG                              | AA              | 1946832760               |
| SNP_P4_64219_44907566 | NC_021163.1    | Ca_kabuli_chr04 | 44907566                | GG                              | AA              | 1946832762               |
| SNP_P4_64220_44907913 | NC_021163.1    | Ca_kabuli_chr04 | 44907913                | CC                              | TT              | 1946832764               |
| SNP_P4_64221_44908105 | NC_021163.1    | Ca_kabuli_chr04 | 44908105                | GG                              | TT              | 1946832766               |
| SNP_P4_64222_44908387 | NC_021163.1    | Ca_kabuli_chr04 | 44908387                | AA                              | TT              | 1946832768               |
| SNP_P4_64223_44909712 | NC_021163.1    | Ca_kabuli_chr04 | 44909712                | AA                              | TT              | 1946832770               |
| SNP_P4_64225_44909762 | NC_021163.1    | Ca_kabuli_chr04 | 44909762                | CC                              | TT              | 1946832772               |
| SNP_P4_64226_44913246 | NC_021163.1    | Ca_kabuli_chr04 | 44913246                | AA                              | TT              | 1946832774               |
| SNP_P4_64227_44913269 | NC_021163.1    | Ca_kabuli_chr04 | 44913269                | CC                              | TT              | 1946832776               |
| SNP_P4_64228_44913595 | NC_021163.1    | Ca_kabuli_chr04 | 44913595                | CC                              | TT              | 1946832778               |
| SNP_P4_64229_44913724 | NC_021163.1    | Ca_kabuli_chr04 | 44913724                | CC                              | AA              | 1946832780               |
| SNP_P4_64230_44913762 | NC_021163.1    | Ca_kabuli_chr04 | 44913762                | AA                              | GG              | 1946832782               |
| SNP_P4_64231_44914001 | NC_021163.1    | Ca_kabuli_chr04 | 44914001                | GG                              | AA              | 1946832784               |
| SNP_P4_64232_44914008 | NC_021163.1    | Ca_kabuli_chr04 | 44914008                | GG                              | AA              | 1946832786               |
| SNP_P4_64233_44914282 | NC_021163.1    | Ca_kabuli_chr04 | 44914282                | AA                              | GG              | 1946832788               |
| SNP_P4_64234_44916088 | NC_021163.1    | Ca_kabuli_chr04 | 44916088                | AA                              | GG              | 1946832790               |
| SNP_P4_64235_44916101 | NC_021163.1    | Ca_kabuli_chr04 | 44916101                | GG                              | AA              | 1946832792               |
| SNP_P4_64236_44916107 | NC_021163.1    | Ca_kabuli_chr04 | 44916107                | GG                              | AA              | 1946832794               |
| SNP_P4_64237_44917070 | NC_021163.1    | Ca_kabuli_chr04 | 44917070                | TT                              | GG              | 1946832796               |
| SNP_P4_64238_44917094 | NC_021163.1    | Ca_kabuli_chr04 | 44917094                | AA                              | GG              | 1946832798               |
| SNP_P4_64241_44917559 | NC_021163.1    | Ca_kabuli_chr04 | 44917559                | CC                              | GG              | 1946832800               |
| SNP_P4_64242_44917890 | NC_021163.1    | Ca_kabuli_chr04 | 44917890                | AA                              | GG              | 1946832802               |
| SNP_P4_64243_44918666 | NC_021163.1    | Ca_kabuli_chr04 | 44918666                | TT                              | CC              | 1946832804               |
| SNP_P4_64244_44918675 | NC_021163.1    | Ca_kabuli_chr04 | 44918675                | TT                              | AA              | 1946832807               |



| SNPs IDs              | Chromosome IDs | Chromosomes     | Physical positions (bp) | CDC Frontier (Reference genome) | (ILWC46 & LPNB) | NCBI SNPdb Accession IDs |
|-----------------------|----------------|-----------------|-------------------------|---------------------------------|-----------------|--------------------------|
| SNP_P4_64245_44918681 | NC_021163.1    | Ca_kabuli_chr04 | 44918681                | AA                              | TT              | 1946832809               |
| SNP_P4_64246_44918682 | NC_021163.1    | Ca_kabuli_chr04 | 44918682                | AA                              | TT              | 1946832811               |
| SNP_P4_64247_44918699 | NC_021163.1    | Ca_kabuli_chr04 | 44918699                | AA                              | CC              | 1946832813               |
| SNP_P4_64248_44918708 | NC_021163.1    | Ca_kabuli_chr04 | 44918708                | TT                              | CC              | 1946832815               |
| SNP_P4_64249_44918751 | NC_021163.1    | Ca_kabuli_chr04 | 44918751                | AA                              | GG              | 1946832817               |
| SNP_P4_64250_44919017 | NC_021163.1    | Ca_kabuli_chr04 | 44919017                | TT                              | CC              | 1946832819               |
| SNP_P4_64251_44920028 | NC_021163.1    | Ca_kabuli_chr04 | 44920028                | GG                              | AA              | 1946832821               |
| SNP_P4_64252_44920034 | NC_021163.1    | Ca_kabuli_chr04 | 44920034                | TT                              | CC              | 1946832823               |
| SNP_P4_64253_44920036 | NC_021163.1    | Ca_kabuli_chr04 | 44920036                | GG                              | AA              | 1946832825               |
| SNP_P4_64254_44920053 | NC_021163.1    | Ca_kabuli_chr04 | 44920053                | TT                              | CC              | 1946832826               |
| SNP_P4_64255_44920061 | NC_021163.1    | Ca_kabuli_chr04 | 44920061                | TT                              | CC              | 1946832828               |
| SNP_P4_64256_44920081 | NC_021163.1    | Ca_kabuli_chr04 | 44920081                | GG                              | AA              | 1946832830               |
| SNP_P4_64257_44920085 | NC_021163.1    | Ca_kabuli_chr04 | 44920085                | AA                              | GG              | 1946832833               |
| SNP_P4_64258_44920630 | NC_021163.1    | Ca_kabuli_chr04 | 44920630                | CC                              | AA              | 1946832835               |
| SNP_P4_64259_44920764 | NC_021163.1    | Ca_kabuli_chr04 | 44920764                | TT                              | CC              | 1946832837               |
| SNP_P4_64260_44920772 | NC_021163.1    | Ca_kabuli_chr04 | 44920772                | GG                              | AA              | 1946832839               |
| SNP_P4_64261_44920785 | NC_021163.1    | Ca_kabuli_chr04 | 44920785                | GG                              | AA              | 1946832841               |
| SNP_P4_64262_44922212 | NC_021163.1    | Ca_kabuli_chr04 | 44922212                | GG                              | AA              | 1946832843               |
| SNP_P4_64264_44922339 | NC_021163.1    | Ca_kabuli_chr04 | 44922339                | TT                              | CC              | 1946832845               |
| SNP_P4_64266_44923592 | NC_021163.1    | Ca_kabuli_chr04 | 44923592                | CC                              | TT              | 1946832847               |
| SNP_P4_64267_44923793 | NC_021163.1    | Ca_kabuli_chr04 | 44923793                | GG                              | AA              | 1946832849               |
| SNP_P4_64268_44923869 | NC_021163.1    | Ca_kabuli_chr04 | 44923869                | AA                              | GG              | 1946832851               |
| SNP_P4_64269_44924031 | NC_021163.1    | Ca_kabuli_chr04 | 44924031                | AA                              | TT              | 1946832853               |
| SNP_P4_64270_44924038 | NC_021163.1    | Ca_kabuli_chr04 | 44924038                | TT                              | CC              | 1946832855               |
| SNP_P4_64271_44924235 | NC_021163.1    | Ca_kabuli_chr04 | 44924235                | TT                              | CC              | 1946832857               |
| SNP_P4_64272_44924398 | NC_021163.1    | Ca_kabuli_chr04 | 44924398                | GG                              | AA              | 1946832859               |
| SNP_P4_64273_44924405 | NC_021163.1    | Ca_kabuli_chr04 | 44924405                | GG                              | AA              | 1946832861               |
| SNP_P4_64274_44924424 | NC_021163.1    | Ca_kabuli_chr04 | 44924424                | AA                              | TT              | 1946832863               |
| SNP_P4_64275_44924431 | NC_021163.1    | Ca_kabuli_chr04 | 44924431                | AA                              | CC              | 1946832865               |
| SNP_P4_64276_44924592 | NC_021163.1    | Ca_kabuli_chr04 | 44924592                | GG                              | AA              | 1946832867               |
| SNP_P4_64277_44924627 | NC_021163.1    | Ca_kabuli_chr04 | 44924627                | TT                              | AA              | 1946832869               |
| SNP_P4_64278_44926132 | NC_021163.1    | Ca_kabuli_chr04 | 44926132                | CC                              | GG              | 1946832871               |
| SNP_P4_64279_44926168 | NC_021163.1    | Ca_kabuli_chr04 | 44926168                | GG                              | AA              | 1946832873               |
| SNP_P4_64281_44927591 | NC_021163.1    | Ca_kabuli_chr04 | 44927591                | CC                              | TT              | 1946832875               |
| SNP_P4_64282_44927625 | NC_021163.1    | Ca_kabuli_chr04 | 44927625                | TT                              | CC              | 1946832877               |
| SNP_P4_64283_44927676 | NC_021163.1    | Ca_kabuli_chr04 | 44927676                | TT                              | CC              | 1946832879               |
| SNP_P4_64284_44928136 | NC_021163.1    | Ca_kabuli_chr04 | 44928136                | CC                              | TT              | 1946832881               |
| SNP_P4_64285_44928156 | NC_021163.1    | Ca_kabuli_chr04 | 44928156                | GG                              | AA              | 1946832883               |
| SNP_P4_64286_44928231 | NC_021163.1    | Ca_kabuli_chr04 | 44928231                | TT                              | GG              | 1946832885               |
| SNP_P4_64287_44928275 | NC_021163.1    | Ca_kabuli_chr04 | 44928275                | AA                              | CC              | 1946832887               |
| SNP_P4_64288_44930661 | NC_021163.1    | Ca_kabuli_chr04 | 44930661                | TT                              | CC              | 1946832889               |
| SNP_P4_64289_44932136 | NC_021163.1    | Ca_kabuli_chr04 | 44932136                | CC                              | TT              | 1946832891               |

| SNPs IDs              | Chromosome IDs | Chromosomes     | Physical positions (bp) | CDC Frontier (Reference genome) | (ILWC46 & LPNB) | NCBI SNPdb Accession IDs |
|-----------------------|----------------|-----------------|-------------------------|---------------------------------|-----------------|--------------------------|
| SNP_P4_64290_44932485 | NC_021163.1    | Ca_kabuli_chr04 | 44932485                | AA                              | GG              | 1946832893               |
| SNP_P4_64291_44932486 | NC_021163.1    | Ca_kabuli_chr04 | 44932486                | GG                              | AA              | 1946832895               |
| SNP_P4_64292_44932536 | NC_021163.1    | Ca_kabuli_chr04 | 44932536                | CC                              | TT              | 1946832897               |
| SNP_P4_64293_44932555 | NC_021163.1    | Ca_kabuli_chr04 | 44932555                | AA                              | GG              | 1946832899               |
| SNP_P4_64294_44932813 | NC_021163.1    | Ca_kabuli_chr04 | 44932813                | GG                              | AA              | 1946832901               |
| SNP_P4_64295_44932822 | NC_021163.1    | Ca_kabuli_chr04 | 44932822                | AA                              | TT              | 1946832903               |
| SNP_P4_64296_44932854 | NC_021163.1    | Ca_kabuli_chr04 | 44932854                | TT                              | CC              | 1946832905               |
| SNP_P4_64297_44932871 | NC_021163.1    | Ca_kabuli_chr04 | 44932871                | TT                              | GG              | 1946832907               |
| SNP_P4_64298_44932881 | NC_021163.1    | Ca_kabuli_chr04 | 44932881                | GG                              | AA              | 1946832909               |
| SNP_P4_64299_44932889 | NC_021163.1    | Ca_kabuli_chr04 | 44932889                | CC                              | TT              | 1946832911               |
| SNP_P4_64300_44933083 | NC_021163.1    | Ca_kabuli_chr04 | 44933083                | AA                              | CC              | 1946832913               |
| SNP_P4_64302_44934355 | NC_021163.1    | Ca_kabuli_chr04 | 44934355                | GG                              | AA              | 1946832915               |
| SNP_P4_64303_44934367 | NC_021163.1    | Ca_kabuli_chr04 | 44934367                | TT                              | CC              | 1946832917               |
| SNP_P4_64304_44934376 | NC_021163.1    | Ca_kabuli_chr04 | 44934376                | CC                              | TT              | 1946832919               |
| SNP_P4_64305_44934459 | NC_021163.1    | Ca_kabuli_chr04 | 44934459                | CC                              | GG              | 1946832921               |
| SNP_P4_64306_44934750 | NC_021163.1    | Ca_kabuli_chr04 | 44934750                | CC                              | AA              | 1946832923               |
| SNP_P4_64307_44935023 | NC_021163.1    | Ca_kabuli_chr04 | 44935023                | GG                              | CC              | 1946832926               |
| SNP_P4_64308_44935794 | NC_021163.1    | Ca_kabuli_chr04 | 44935794                | AA                              | GG              | 1946832927               |
| SNP_P4_64309_44936710 | NC_021163.1    | Ca_kabuli_chr04 | 44936710                | TT                              | GG              | 1946832929               |
| SNP_P4_64310_44936793 | NC_021163.1    | Ca_kabuli_chr04 | 44936793                | AA                              | GG              | 1946832931               |
| SNP_P4_64311_44936854 | NC_021163.1    | Ca_kabuli_chr04 | 44936854                | AA                              | GG              | 1946832933               |
| SNP_P4_64312_44936918 | NC_021163.1    | Ca_kabuli_chr04 | 44936918                | CC                              | TT              | 1946832935               |
| SNP_P4_64314_44937058 | NC_021163.1    | Ca_kabuli_chr04 | 44937058                | CC                              | TT              | 1946832937               |
| SNP_P4_64315_44937096 | NC_021163.1    | Ca_kabuli_chr04 | 44937096                | TT                              | CC              | 1946832939               |
| SNP_P4_64316_44937151 | NC_021163.1    | Ca_kabuli_chr04 | 44937151                | AA                              | TT              | 1946832941               |
| SNP_P4_64318_44938390 | NC_021163.1    | Ca_kabuli_chr04 | 44938390                | AA                              | GG              | 1946832943               |
| SNP_P4_64319_44938809 | NC_021163.1    | Ca_kabuli_chr04 | 44938809                | TT                              | CC              | 1946832945               |
| SNP_P4_64320_44939343 | NC_021163.1    | Ca_kabuli_chr04 | 44939343                | CC                              | TT              | 1946832947               |
| SNP_P4_64321_44939366 | NC_021163.1    | Ca_kabuli_chr04 | 44939366                | AA                              | GG              | 1946832949               |
| SNP_P4_64322_44939374 | NC_021163.1    | Ca_kabuli_chr04 | 44939374                | CC                              | TT              | 1946832951               |
| SNP_P4_64323_44939577 | NC_021163.1    | Ca_kabuli_chr04 | 44939577                | AA                              | GG              | 1946832953               |
| SNP_P4_64324_44939579 | NC_021163.1    | Ca_kabuli_chr04 | 44939579                | AA                              | GG              | 1946832955               |
| SNP_P4_64325_44939587 | NC_021163.1    | Ca_kabuli_chr04 | 44939587                | TT                              | CC              | 1946832957               |
| SNP_P4_64326_44939615 | NC_021163.1    | Ca_kabuli_chr04 | 44939615                | TT                              | AA              | 1946832959               |
| SNP_P4_64328_44939729 | NC_021163.1    | Ca_kabuli_chr04 | 44939729                | AA                              | GG              | 1946832961               |
| SNP_P4_64329_44939741 | NC_021163.1    | Ca_kabuli_chr04 | 44939741                | AA                              | GG              | 1946832962               |
| SNP_P4_64330_44939745 | NC_021163.1    | Ca_kabuli_chr04 | 44939745                | TT                              | GG              | 1946832964               |
| SNP_P4_64331_44939943 | NC_021163.1    | Ca_kabuli_chr04 | 44939943                | TT                              | CC              | 1946832966               |
| SNP_P4_64332_44939946 | NC_021163.1    | Ca_kabuli_chr04 | 44939946                | CC                              | TT              | 1946832968               |
| SNP_P4_64333_44939965 | NC_021163.1    | Ca_kabuli_chr04 | 44939965                | GG                              | TT              | 1946832970               |
| SNP_P4_64334_44939993 | NC_021163.1    | Ca_kabuli_chr04 | 44939993                | GG                              | AA              | 1946832972               |
| SNP_P4_64335_44940015 | NC_021163.1    | Ca_kabuli_chr04 | 44940015                | GG                              | TT              | 1946832974               |

| SNPs IDs              | Chromosome IDs | Chromosomes     | Physical positions (bp) | CDC Frontier (Reference genome) | (ILWC46 & LPNB) | NCBI SNPdb Accession IDs |
|-----------------------|----------------|-----------------|-------------------------|---------------------------------|-----------------|--------------------------|
| SNP_P4_64336_44942866 | NC_021163.1    | Ca_kabuli_chr04 | 44942866                | GG                              | AA              | 1946832976               |
| SNP_P4_64337_44942868 | NC_021163.1    | Ca_kabuli_chr04 | 44942868                | TT                              | AA              | 1946832978               |
| SNP_P4_64338_44942880 | NC_021163.1    | Ca_kabuli_chr04 | 44942880                | TT                              | CC              | 1946832980               |
| SNP_P4_64339_44942895 | NC_021163.1    | Ca_kabuli_chr04 | 44942895                | TT                              | GG              | 1946832982               |
| SNP_P4_64341_44944490 | NC_021163.1    | Ca_kabuli_chr04 | 44944490                | AA                              | CC              | 1946832984               |
| SNP_P4_64342_44944584 | NC_021163.1    | Ca_kabuli_chr04 | 44944584                | AA                              | TT              | 1946832986               |
| SNP_P4_64343_44944586 | NC_021163.1    | Ca_kabuli_chr04 | 44944586                | GG                              | CC              | 1946832988               |
| SNP_P4_64344_44944590 | NC_021163.1    | Ca_kabuli_chr04 | 44944590                | AA                              | GG              | 1946832990               |
| SNP_P4_64346_44945037 | NC_021163.1    | Ca_kabuli_chr04 | 44945037                | AA                              | TT              | 1946832992               |
| SNP_P4_64347_44945702 | NC_021163.1    | Ca_kabuli_chr04 | 44945702                | TT                              | CC              | 1946832994               |
| SNP_P4_64348_44945713 | NC_021163.1    | Ca_kabuli_chr04 | 44945713                | CC                              | TT              | 1946832996               |
| SNP_P4_64349_44945932 | NC_021163.1    | Ca_kabuli_chr04 | 44945932                | AA                              | GG              | 1946832998               |
| SNP_P4_64350_44945972 | NC_021163.1    | Ca_kabuli_chr04 | 44945972                | TT                              | CC              | 1946833000               |
| SNP_P4_64352_44947093 | NC_021163.1    | Ca_kabuli_chr04 | 44947093                | GG                              | CC              | 1946833002               |
| SNP_P4_64353_44947939 | NC_021163.1    | Ca_kabuli_chr04 | 44947939                | CC                              | TT              | 1946833004               |
| SNP_P4_64354_44947940 | NC_021163.1    | Ca_kabuli_chr04 | 44947940                | GG                              | AA              | 1946833006               |
| SNP_P4_64355_44947941 | NC_021163.1    | Ca_kabuli_chr04 | 44947941                | AA                              | GG              | 1946833008               |
| SNP_P4_64356_44947952 | NC_021163.1    | Ca_kabuli_chr04 | 44947952                | CC                              | TT              | 1946833010               |
| SNP_P4_64357_44948051 | NC_021163.1    | Ca_kabuli_chr04 | 44948051                | TT                              | CC              | 1946833012               |
| SNP_P4_64358_44948861 | NC_021163.1    | Ca_kabuli_chr04 | 44948861                | AA                              | GG              | 1946833015               |
| SNP_P4_64359_44949045 | NC_021163.1    | Ca_kabuli_chr04 | 44949045                | CC                              | TT              | 1946833017               |
| SNP_P4_64360_44949061 | NC_021163.1    | Ca_kabuli_chr04 | 44949061                | TT                              | AA              | 1946833019               |
| SNP_P4_64361_44949079 | NC_021163.1    | Ca_kabuli_chr04 | 44949079                | CC                              | GG              | 1946833021               |
| SNP_P4_64362_44949081 | NC_021163.1    | Ca_kabuli_chr04 | 44949081                | CC                              | AA              | 1946833023               |
| SNP_P4_64363_44949082 | NC_021163.1    | Ca_kabuli_chr04 | 44949082                | GG                              | TT              | 1946833025               |
| SNP_P4_64364_44949106 | NC_021163.1    | Ca_kabuli_chr04 | 44949106                | CC                              | TT              | 1946833027               |
| SNP_P4_64366_44949277 | NC_021163.1    | Ca_kabuli_chr04 | 44949277                | AA                              | TT              | 1946833029               |
| SNP_P4_64367_44949619 | NC_021163.1    | Ca_kabuli_chr04 | 44949619                | TT                              | CC              | 1946833031               |
| SNP_P4_64368_44949620 | NC_021163.1    | Ca_kabuli_chr04 | 44949620                | CC                              | AA              | 1946833033               |
| SNP_P4_64369_44950094 | NC_021163.1    | Ca_kabuli_chr04 | 44950094                | AA                              | GG              | 1946833035               |
| SNP_P4_64370_44950138 | NC_021163.1    | Ca_kabuli_chr04 | 44950138                | GG                              | AA              | 1946833037               |
| SNP_P4_64371_44950413 | NC_021163.1    | Ca_kabuli_chr04 | 44950413                | CC                              | AA              | 1946833039               |
| SNP_P4_64372_44950454 | NC_021163.1    | Ca_kabuli_chr04 | 44950454                | CC                              | AA              | 1946833042               |
| SNP_P4_64373_44960338 | NC_021163.1    | Ca_kabuli_chr04 | 44960338                | AA                              | GG              | 1946833044               |
| SNP_P4_64374_44963902 | NC_021163.1    | Ca_kabuli_chr04 | 44963902                | GG                              | AA              | 1946833046               |
| SNP_P4_64377_44973703 | NC_021163.1    | Ca_kabuli_chr04 | 44973703                | TT                              | GG              | 1946833048               |
| SNP_P4_64378_44988424 | NC_021163.1    | Ca_kabuli_chr04 | 44988424                | GG                              | AA              | 1946833050               |
| SNP_P4_64379_45000653 | NC_021163.1    | Ca_kabuli_chr04 | 45000653                | GG                              | TT              | 1946833052               |
| SNP_P4_64380_45007587 | NC_021163.1    | Ca_kabuli_chr04 | 45007587                | TT                              | CC              | 1946833054               |
| SNP_P4_64381_45010189 | NC_021163.1    | Ca_kabuli_chr04 | 45010189                | AA                              | TT              | 1946833056               |
| SNP_P4_64382_45012236 | NC_021163.1    | Ca_kabuli_chr04 | 45012236                | AA                              | GG              | 1946833058               |
| SNP_P4_64383_45022634 | NC_021163.1    | Ca_kabuli_chr04 | 45022634                | GG                              | CC              | 1946833060               |

| SNPs IDs              | Chromosome IDs | Chromosomes     | Physical positions (bp) | CDC Frontier (Reference genome) | (ILWC46 & LPNB) | NCBI SNPdb Accession IDs |
|-----------------------|----------------|-----------------|-------------------------|---------------------------------|-----------------|--------------------------|
| SNP_P4_64385_45031370 | NC_021163.1    | Ca_kabuli_chr04 | 45031370                | CC                              | AA              | 1946833062               |
| SNP_P4_64386_45048344 | NC_021163.1    | Ca_kabuli_chr04 | 45048344                | AA                              | TT              | 1946833064               |
| SNP_P4_64388_45053008 | NC_021163.1    | Ca_kabuli_chr04 | 45053008                | TT                              | CC              | 1946833066               |
| SNP_P4_64391_45054227 | NC_021163.1    | Ca_kabuli_chr04 | 45054227                | AA                              | GG              | 1946833068               |
| SNP_P4_64392_45054970 | NC_021163.1    | Ca_kabuli_chr04 | 45054970                | AA                              | GG              | 1946833070               |
| SNP_P4_64393_45057704 | NC_021163.1    | Ca_kabuli_chr04 | 45057704                | GG                              | AA              | 1946833072               |
| SNP_P4_64394_45057834 | NC_021163.1    | Ca_kabuli_chr04 | 45057834                | GG                              | AA              | 1946833074               |
| SNP_P4_64395_45057838 | NC_021163.1    | Ca_kabuli_chr04 | 45057838                | AA                              | GG              | 1946833076               |
| SNP_P4_64396_45057853 | NC_021163.1    | Ca_kabuli_chr04 | 45057853                | CC                              | TT              | 1946833078               |
| SNP_P4_64397_45057874 | NC_021163.1    | Ca_kabuli_chr04 | 45057874                | AA                              | GG              | 1946833080               |
| SNP_P4_64398_45057879 | NC_021163.1    | Ca_kabuli_chr04 | 45057879                | CC                              | TT              | 1946833082               |
| SNP_P4_64400_45058025 | NC_021163.1    | Ca_kabuli_chr04 | 45058025                | CC                              | TT              | 1946833084               |
| SNP_P4_64401_45058026 | NC_021163.1    | Ca_kabuli_chr04 | 45058026                | AA                              | TT              | 1946833087               |
| SNP_P4_64402_45058261 | NC_021163.1    | Ca_kabuli_chr04 | 45058261                | AA                              | GG              | 1946833089               |
| SNP_P4_64403_45058286 | NC_021163.1    | Ca_kabuli_chr04 | 45058286                | GG                              | AA              | 1946833091               |
| SNP_P4_64404_45058301 | NC_021163.1    | Ca_kabuli_chr04 | 45058301                | AA                              | GG              | 1946833093               |
| SNP_P4_64406_45060127 | NC_021163.1    | Ca_kabuli_chr04 | 45060127                | AA                              | CC              | 1946833095               |
| SNP_P4_64407_45060187 | NC_021163.1    | Ca_kabuli_chr04 | 45060187                | TT                              | CC              | 1946833097               |
| SNP_P4_64408_45060194 | NC_021163.1    | Ca_kabuli_chr04 | 45060194                | AA                              | TT              | 1946833099               |
| SNP_P4_64409_45060224 | NC_021163.1    | Ca_kabuli_chr04 | 45060224                | CC                              | AA              | 1946833101               |
| SNP_P4_64410_45060493 | NC_021163.1    | Ca_kabuli_chr04 | 45060493                | AA                              | GG              | 1946833103               |
| SNP_P4_64411_45061305 | NC_021163.1    | Ca_kabuli_chr04 | 45061305                | TT                              | GG              | 1946833105               |
| SNP_P4_64412_45061348 | NC_021163.1    | Ca_kabuli_chr04 | 45061348                | GG                              | AA              | 1946833107               |
| SNP_P4_64413_45061971 | NC_021163.1    | Ca_kabuli_chr04 | 45061971                | CC                              | TT              | 1946833109               |
| SNP_P4_64414_45062089 | NC_021163.1    | Ca_kabuli_chr04 | 45062089                | AA                              | CC              | 1946833111               |
| SNP_P4_64415_45062159 | NC_021163.1    | Ca_kabuli_chr04 | 45062159                | CC                              | AA              | 1946833113               |
| SNP_P4_64417_45062234 | NC_021163.1    | Ca_kabuli_chr04 | 45062234                | CC                              | AA              | 1946833115               |
| SNP_P4_64418_45062394 | NC_021163.1    | Ca_kabuli_chr04 | 45062394                | AA                              | GG              | 1946833117               |
| SNP_P4_64419_45062404 | NC_021163.1    | Ca_kabuli_chr04 | 45062404                | TT                              | CC              | 1946833119               |
| SNP_P4_64420_45063572 | NC_021163.1    | Ca_kabuli_chr04 | 45063572                | GG                              | AA              | 1946833121               |
| SNP_P4_64422_45065318 | NC_021163.1    | Ca_kabuli_chr04 | 45065318                | CC                              | TT              | 1946833123               |
| SNP_P4_64423_45065335 | NC_021163.1    | Ca_kabuli_chr04 | 45065335                | CC                              | TT              | 1946833125               |
| SNP_P4_64424_45065365 | NC_021163.1    | Ca_kabuli_chr04 | 45065365                | AA                              | TT              | 1946833127               |
| SNP_P4_64425_45065408 | NC_021163.1    | Ca_kabuli_chr04 | 45065408                | CC                              | TT              | 1946833129               |
| SNP_P4_64426_45065488 | NC_021163.1    | Ca_kabuli_chr04 | 45065488                | GG                              | TT              | 1946833131               |
| SNP_P4_64427_45065563 | NC_021163.1    | Ca_kabuli_chr04 | 45065563                | TT                              | CC              | 1946833133               |
| SNP_P4_64429_45065658 | NC_021163.1    | Ca_kabuli_chr04 | 45065658                | CC                              | TT              | 1946833135               |
| SNP_P4_64431_45065795 | NC_021163.1    | Ca_kabuli_chr04 | 45065795                | GG                              | AA              | 1946833137               |
| SNP_P4_64432_45067638 | NC_021163.1    | Ca_kabuli_chr04 | 45067638                | AA                              | GG              | 1946833139               |
| SNP_P4_64433_45067910 | NC_021163.1    | Ca_kabuli_chr04 | 45067910                | TT                              | GG              | 1946833141               |
| SNP_P4_64434_45068236 | NC_021163.1    | Ca_kabuli_chr04 | 45068236                | CC                              | TT              | 1946833143               |
| SNP_P4_64435_45068331 | NC_021163.1    | Ca_kabuli_chr04 | 45068331                | CC                              | TT              | 1946833145               |

| SNPs IDs              | Chromosome IDs | Chromosomes     | Physical positions (bp) | CDC Frontier (Reference genome) | (ILWC46 & LPNB) | NCBI SNPdb Accession IDs |
|-----------------------|----------------|-----------------|-------------------------|---------------------------------|-----------------|--------------------------|
| SNP_P4_64436_45069663 | NC_021163.1    | Ca_kabuli_chr04 | 45069663                | GG                              | TT              | 1946833147               |
| SNP_P4_64437_45072519 | NC_021163.1    | Ca_kabuli_chr04 | 45072519                | CC                              | TT              | 1946833149               |
| SNP_P4_64438_45073966 | NC_021163.1    | Ca_kabuli_chr04 | 45073966                | TT                              | CC              | 1946833151               |
| SNP_P4_64439_45073985 | NC_021163.1    | Ca_kabuli_chr04 | 45073985                | GG                              | CC              | 1946833153               |
| SNP_P4_64440_45075226 | NC_021163.1    | Ca_kabuli_chr04 | 45075226                | GG                              | AA              | 1946833155               |
| SNP_P4_64441_45075548 | NC_021163.1    | Ca_kabuli_chr04 | 45075548                | AA                              | TT              | 1946833157               |
| SNP_P4_64442_45075565 | NC_021163.1    | Ca_kabuli_chr04 | 45075565                | CC                              | TT              | 1946833159               |
| SNP_P4_64443_45075576 | NC_021163.1    | Ca_kabuli_chr04 | 45075576                | GG                              | AA              | 1946833161               |
| SNP_P4_64444_45075584 | NC_021163.1    | Ca_kabuli_chr04 | 45075584                | AA                              | GG              | 1946833163               |
| SNP_P4_64445_45075837 | NC_021163.1    | Ca_kabuli_chr04 | 45075837                | GG                              | AA              | 1946833165               |
| SNP_P4_64446_45075860 | NC_021163.1    | Ca_kabuli_chr04 | 45075860                | AA                              | CC              | 1946833167               |
| SNP_P4_64447_45076186 | NC_021163.1    | Ca_kabuli_chr04 | 45076186                | TT                              | CC              | 1946833169               |
| SNP_P4_64448_45076219 | NC_021163.1    | Ca_kabuli_chr04 | 45076219                | CC                              | TT              | 1946833172               |
| SNP_P4_64449_45076232 | NC_021163.1    | Ca_kabuli_chr04 | 45076232                | CC                              | GG              | 1946833174               |
| SNP_P4_64450_45076242 | NC_021163.1    | Ca_kabuli_chr04 | 45076242                | TT                              | CC              | 1946833176               |
| SNP_P4_64451_45076246 | NC_021163.1    | Ca_kabuli_chr04 | 45076246                | AA                              | CC              | 1946833178               |
| SNP_P4_64454_45076917 | NC_021163.1    | Ca_kabuli_chr04 | 45076917                | AA                              | CC              | 1946833180               |
| SNP_P4_64455_45077121 | NC_021163.1    | Ca_kabuli_chr04 | 45077121                | AA                              | GG              | 1946833182               |
| SNP_P4_64456_45077421 | NC_021163.1    | Ca_kabuli_chr04 | 45077421                | GG                              | CC              | 1946833184               |
| SNP_P4_64457_45077423 | NC_021163.1    | Ca_kabuli_chr04 | 45077423                | CC                              | TT              | 1946833186               |
| SNP_P4_64458_45077443 | NC_021163.1    | Ca_kabuli_chr04 | 45077443                | CC                              | GG              | 1946833188               |
| SNP_P4_64459_45078520 | NC_021163.1    | Ca_kabuli_chr04 | 45078520                | TT                              | CC              | 1946833190               |
| SNP_P4_64460_45078689 | NC_021163.1    | Ca_kabuli_chr04 | 45078689                | AA                              | CC              | 1946833192               |
| SNP_P4_64461_45078709 | NC_021163.1    | Ca_kabuli_chr04 | 45078709                | TT                              | AA              | 1946833195               |
| SNP_P4_64462_45078747 | NC_021163.1    | Ca_kabuli_chr04 | 45078747                | TT                              | CC              | 1946833197               |
| SNP_P4_64463_45078764 | NC_021163.1    | Ca_kabuli_chr04 | 45078764                | GG                              | CC              | 1946833198               |
| SNP_P4_64464_45078773 | NC_021163.1    | Ca_kabuli_chr04 | 45078773                | CC                              | TT              | 1946833200               |
| SNP_P4_64465_45078775 | NC_021163.1    | Ca_kabuli_chr04 | 45078775                | AA                              | GG              | 1946833202               |
| SNP_P4_64466_45078807 | NC_021163.1    | Ca_kabuli_chr04 | 45078807                | TT                              | GG              | 1946833204               |
| SNP_P4_64467_45078843 | NC_021163.1    | Ca_kabuli_chr04 | 45078843                | AA                              | GG              | 1946833206               |
| SNP_P4_64468_45078844 | NC_021163.1    | Ca_kabuli_chr04 | 45078844                | AA                              | GG              | 1946833208               |
| SNP_P4_64469_45078877 | NC_021163.1    | Ca_kabuli_chr04 | 45078877                | AA                              | GG              | 1946833210               |
| SNP_P4_64470_45078890 | NC_021163.1    | Ca_kabuli_chr04 | 45078890                | AA                              | GG              | 1946833213               |
| SNP_P4_64471_45079043 | NC_021163.1    | Ca_kabuli_chr04 | 45079043                | GG                              | AA              | 1946833214               |
| SNP_P4_64472_45080306 | NC_021163.1    | Ca_kabuli_chr04 | 45080306                | TT                              | CC              | 1946833216               |
| SNP_P4_64473_45080327 | NC_021163.1    | Ca_kabuli_chr04 | 45080327                | TT                              | CC              | 1946833218               |
| SNP_P4_64474_45081275 | NC_021163.1    | Ca_kabuli_chr04 | 45081275                | GG                              | AA              | 1946833220               |
| SNP_P4_64476_45084828 | NC_021163.1    | Ca_kabuli_chr04 | 45084828                | GG                              | CC              | 1946833223               |
| SNP_P4_64477_45089502 | NC_021163.1    | Ca_kabuli_chr04 | 45089502                | GG                              | TT              | 1946833224               |
| SNP_P4_64478_45089570 | NC_021163.1    | Ca_kabuli_chr04 | 45089570                | TT                              | CC              | 1946833226               |
| SNP_P4_64479_45092098 | NC_021163.1    | Ca_kabuli_chr04 | 45092098                | GG                              | AA              | 1946833228               |
| SNP_P4_64480_45092113 | NC_021163.1    | Ca_kabuli_chr04 | 45092113                | TT                              | GG              | 1946833230               |

| SNPs IDs              | Chromosome IDs | Chromosomes     | Physical positions (bp) | CDC Frontier (Reference genome) | (ILWC46 & LPNB) | NCBI SNPdb Accession IDs |
|-----------------------|----------------|-----------------|-------------------------|---------------------------------|-----------------|--------------------------|
| SNP_P4_64481_45092134 | NC_021163.1    | Ca_kabuli_chr04 | 45092134                | TT                              | GG              | 1946833232               |
| SNP_P4_64482_45092244 | NC_021163.1    | Ca_kabuli_chr04 | 45092244                | CC                              | AA              | 1946833234               |
| SNP_P4_64483_45092265 | NC_021163.1    | Ca_kabuli_chr04 | 45092265                | GG                              | AA              | 1946833236               |
| SNP_P4_64484_45092725 | NC_021163.1    | Ca_kabuli_chr04 | 45092725                | TT                              | AA              | 1946833238               |
| SNP_P4_64485_45092726 | NC_021163.1    | Ca_kabuli_chr04 | 45092726                | TT                              | AA              | 1946833240               |
| SNP_P4_64487_45094365 | NC_021163.1    | Ca_kabuli_chr04 | 45094365                | AA                              | GG              | 1946833242               |
| SNP_P4_64488_45095000 | NC_021163.1    | Ca_kabuli_chr04 | 45095000                | TT                              | AA              | 1946833244               |
| SNP_P4_64489_45096152 | NC_021163.1    | Ca_kabuli_chr04 | 45096152                | TT                              | AA              | 1946833246               |
| SNP_P4_64490_45096315 | NC_021163.1    | Ca_kabuli_chr04 | 45096315                | GG                              | AA              | 1946833248               |
| SNP_P4_64491_45098074 | NC_021163.1    | Ca_kabuli_chr04 | 45098074                | GG                              | CC              | 1946833250               |
| SNP_P4_64492_45098250 | NC_021163.1    | Ca_kabuli_chr04 | 45098250                | CC                              | TT              | 1946833252               |
| SNP_P4_64493_45098264 | NC_021163.1    | Ca_kabuli_chr04 | 45098264                | GG                              | AA              | 1946833254               |
| SNP_P4_64495_45098641 | NC_021163.1    | Ca_kabuli_chr04 | 45098641                | CC                              | TT              | 1946833256               |
| SNP_P4_64496_45099373 | NC_021163.1    | Ca_kabuli_chr04 | 45099373                | CC                              | TT              | 1946833258               |
| SNP_P4_64498_45101416 | NC_021163.1    | Ca_kabuli_chr04 | 45101416                | GG                              | AA              | 1946833260               |
| SNP_P4_64499_45101426 | NC_021163.1    | Ca_kabuli_chr04 | 45101426                | GG                              | AA              | 1946833262               |
| SNP_P4_64500_45101999 | NC_021163.1    | Ca_kabuli_chr04 | 45101999                | GG                              | CC              | 1946833264               |
| SNP_P4_64501_45102220 | NC_021163.1    | Ca_kabuli_chr04 | 45102220                | GG                              | AA              | 1946833266               |
| SNP_P4_64502_45102279 | NC_021163.1    | Ca_kabuli_chr04 | 45102279                | AA                              | GG              | 1946833268               |
| SNP_P4_64503_45102302 | NC_021163.1    | Ca_kabuli_chr04 | 45102302                | CC                              | TT              | 1946833270               |
| SNP_P4_64504_45102323 | NC_021163.1    | Ca_kabuli_chr04 | 45102323                | CC                              | TT              | 1946833273               |
| SNP_P4_64505_45102369 | NC_021163.1    | Ca_kabuli_chr04 | 45102369                | AA                              | GG              | 1946833275               |
| SNP_P4_64506_45102437 | NC_021163.1    | Ca_kabuli_chr04 | 45102437                | AA                              | CC              | 1946833277               |
| SNP_P4_64507_45103029 | NC_021163.1    | Ca_kabuli_chr04 | 45103029                | TT                              | CC              | 1946833279               |
| SNP_P4_64508_45105428 | NC_021163.1    | Ca_kabuli_chr04 | 45105428                | TT                              | AA              | 1946833281               |
| SNP_P4_64509_45106127 | NC_021163.1    | Ca_kabuli_chr04 | 45106127                | GG                              | AA              | 1946833283               |
| SNP_P4_64510_45107822 | NC_021163.1    | Ca_kabuli_chr04 | 45107822                | AA                              | GG              | 1946833285               |
| SNP_P4_64512_45108476 | NC_021163.1    | Ca_kabuli_chr04 | 45108476                | TT                              | CC              | 1946833287               |
| SNP_P4_64513_45108493 | NC_021163.1    | Ca_kabuli_chr04 | 45108493                | TT                              | CC              | 1946833289               |
| SNP_P4_64514_45108868 | NC_021163.1    | Ca_kabuli_chr04 | 45108868                | TT                              | AA              | 1946833290               |
| SNP_P4_64516_45108915 | NC_021163.1    | Ca_kabuli_chr04 | 45108915                | CC                              | TT              | 1946833293               |
| SNP_P4_64518_45112423 | NC_021163.1    | Ca_kabuli_chr04 | 45112423                | CC                              | TT              | 1946833294               |
| SNP_P4_64519_45112437 | NC_021163.1    | Ca_kabuli_chr04 | 45112437                | AA                              | TT              | 1946833296               |
| SNP_P4_64520_45112451 | NC_021163.1    | Ca_kabuli_chr04 | 45112451                | GG                              | AA              | 1946833298               |
| SNP_P4_64521_45112834 | NC_021163.1    | Ca_kabuli_chr04 | 45112834                | TT                              | CC              | 1946833300               |
| SNP_P4_64522_45113178 | NC_021163.1    | Ca_kabuli_chr04 | 45113178                | GG                              | AA              | 1946833302               |
| SNP_P4_64523_45113847 | NC_021163.1    | Ca_kabuli_chr04 | 45113847                | CC                              | GG              | 1946833304               |
| SNP_P4_64525_45114638 | NC_021163.1    | Ca_kabuli_chr04 | 45114638                | CC                              | TT              | 1946833306               |
| SNP_P4_64526_45114655 | NC_021163.1    | Ca_kabuli_chr04 | 45114655                | GG                              | TT              | 1946833308               |
| SNP_P4_64527_45114662 | NC_021163.1    | Ca_kabuli_chr04 | 45114662                | GG                              | CC              | 1946833310               |
| SNP_P4_64528_45114828 | NC_021163.1    | Ca_kabuli_chr04 | 45114828                | AA                              | GG              | 1946833312               |
| SNP_P4_64529_45114914 | NC_021163.1    | Ca_kabuli_chr04 | 45114914                | AA                              | GG              | 1946833314               |

| SNPs IDs              | Chromosome IDs | Chromosomes     | Physical positions (bp) | CDC Frontier (Reference genome) | (ILWC46 & LPNB) | NCBI SNPdb Accession IDs |
|-----------------------|----------------|-----------------|-------------------------|---------------------------------|-----------------|--------------------------|
| SNP_P4_64530_45114931 | NC_021163.1    | Ca_kabuli_chr04 | 45114931                | TT                              | GG              | 1946833316               |
| SNP_P4_64531_45114932 | NC_021163.1    | Ca_kabuli_chr04 | 45114932                | GG                              | AA              | 1946833318               |
| SNP_P4_64532_45114996 | NC_021163.1    | Ca_kabuli_chr04 | 45114996                | TT                              | CC              | 1946833321               |
| SNP_P4_64533_45115268 | NC_021163.1    | Ca_kabuli_chr04 | 45115268                | AA                              | GG              | 1946833323               |
| SNP_P4_64535_45116039 | NC_021163.1    | Ca_kabuli_chr04 | 45116039                | GG                              | TT              | 1946833325               |
| SNP_P4_64536_45116074 | NC_021163.1    | Ca_kabuli_chr04 | 45116074                | GG                              | AA              | 1946833327               |
| SNP_P4_64537_45116400 | NC_021163.1    | Ca_kabuli_chr04 | 45116400                | TT                              | AA              | 1946833329               |
| SNP_P4_64538_45116902 | NC_021163.1    | Ca_kabuli_chr04 | 45116902                | CC                              | TT              | 1946833331               |
| SNP_P4_64539_45118276 | NC_021163.1    | Ca_kabuli_chr04 | 45118276                | TT                              | CC              | 1946833333               |
| SNP_P4_64540_45118832 | NC_021163.1    | Ca_kabuli_chr04 | 45118832                | CC                              | TT              | 1946833335               |
| SNP_P4_64542_45118904 | NC_021163.1    | Ca_kabuli_chr04 | 45118904                | TT                              | AA              | 1946833338               |
| SNP_P4_64543_45119794 | NC_021163.1    | Ca_kabuli_chr04 | 45119794                | TT                              | CC              | 1946833340               |
| SNP_P4_64544_45119861 | NC_021163.1    | Ca_kabuli_chr04 | 45119861                | CC                              | GG              | 1946833342               |
| SNP_P4_64545_45119912 | NC_021163.1    | Ca_kabuli_chr04 | 45119912                | CC                              | TT              | 1946833344               |
| SNP_P4_64546_45120560 | NC_021163.1    | Ca_kabuli_chr04 | 45120560                | CC                              | TT              | 1946833347               |
| SNP_P4_64549_45122875 | NC_021163.1    | Ca_kabuli_chr04 | 45122875                | CC                              | TT              | 1946833349               |
| SNP_P4_64550_45124613 | NC_021163.1    | Ca_kabuli_chr04 | 45124613                | TT                              | GG              | 1946833351               |
| SNP_P4_64551_45124616 | NC_021163.1    | Ca_kabuli_chr04 | 45124616                | AA                              | GG              | 1946833353               |
| SNP_P4_64552_45124625 | NC_021163.1    | Ca_kabuli_chr04 | 45124625                | TT                              | CC              | 1946833355               |
| SNP_P4_64553_45125052 | NC_021163.1    | Ca_kabuli_chr04 | 45125052                | CC                              | TT              | 1946833357               |
| SNP_P4_64554_45126334 | NC_021163.1    | Ca_kabuli_chr04 | 45126334                | CC                              | TT              | 1946833360               |
| SNP_P4_64556_45127987 | NC_021163.1    | Ca_kabuli_chr04 | 45127987                | AA                              | TT              | 1946833362               |
| SNP_P4_64557_45128594 | NC_021163.1    | Ca_kabuli_chr04 | 45128594                | TT                              | CC              | 1946833364               |
| SNP_P4_64558_45128842 | NC_021163.1    | Ca_kabuli_chr04 | 45128842                | AA                              | GG              | 1946833366               |
| SNP_P4_64559_45128855 | NC_021163.1    | Ca_kabuli_chr04 | 45128855                | GG                              | CC              | 1946833368               |
| SNP_P4_64560_45128879 | NC_021163.1    | Ca_kabuli_chr04 | 45128879                | CC                              | TT              | 1946833370               |
| SNP_P4_64561_45128884 | NC_021163.1    | Ca_kabuli_chr04 | 45128884                | AA                              | TT              | 1946833373               |
| SNP_P4_64562_45129095 | NC_021163.1    | Ca_kabuli_chr04 | 45129095                | TT                              | GG              | 1946833375               |
| SNP_P4_64563_45130800 | NC_021163.1    | Ca_kabuli_chr04 | 45130800                | AA                              | TT              | 1946833377               |
| SNP_P4_64564_45130982 | NC_021163.1    | Ca_kabuli_chr04 | 45130982                | TT                              | GG              | 1946833379               |
| SNP_P4_64565_45131359 | NC_021163.1    | Ca_kabuli_chr04 | 45131359                | GG                              | AA              | 1946833381               |
| SNP_P4_64566_45131372 | NC_021163.1    | Ca_kabuli_chr04 | 45131372                | AA                              | TT              | 1946833383               |
| SNP_P4_64567_45131430 | NC_021163.1    | Ca_kabuli_chr04 | 45131430                | CC                              | AA              | 1946833385               |
| SNP_P4_64568_45131738 | NC_021163.1    | Ca_kabuli_chr04 | 45131738                | AA                              | TT              | 1946833388               |
| SNP_P4_64569_45131784 | NC_021163.1    | Ca_kabuli_chr04 | 45131784                | GG                              | TT              | 1946833390               |
| SNP_P4_64570_45131994 | NC_021163.1    | Ca_kabuli_chr04 | 45131994                | TT                              | CC              | 1946833392               |
| SNP_P4_64571_45132019 | NC_021163.1    | Ca_kabuli_chr04 | 45132019                | GG                              | AA              | 1946833394               |
| SNP_P4_64572_45132025 | NC_021163.1    | Ca_kabuli_chr04 | 45132025                | AA                              | TT              | 1946833396               |
| SNP_P4_64573_45132442 | NC_021163.1    | Ca_kabuli_chr04 | 45132442                | AA                              | GG              | 1946833398               |
| SNP_P4_64574_45132737 | NC_021163.1    | Ca_kabuli_chr04 | 45132737                | AA                              | GG              | 1946833400               |
| SNP_P4_64575_45132742 | NC_021163.1    | Ca_kabuli_chr04 | 45132742                | AA                              | CC              | 1946833403               |
| SNP_P4_64576_45132819 | NC_021163.1    | Ca_kabuli_chr04 | 45132819                | TT                              | GG              | 1946833405               |

| SNPs IDs              | Chromosome IDs | Chromosomes     | Physical positions (bp) | CDC Frontier (Reference genome) | (ILWC46 & LPNB) | NCBI SNPdb Accession IDs |
|-----------------------|----------------|-----------------|-------------------------|---------------------------------|-----------------|--------------------------|
| SNP_P4_64577_45132820 | NC_021163.1    | Ca_kabuli_chr04 | 45132820                | AA                              | GG              | 1946833407               |
| SNP_P4_64578_45132969 | NC_021163.1    | Ca_kabuli_chr04 | 45132969                | CC                              | TT              | 1946833409               |
| SNP_P4_64579_45133239 | NC_021163.1    | Ca_kabuli_chr04 | 45133239                | GG                              | TT              | 1946833411               |
| SNP_P4_64580_45133454 | NC_021163.1    | Ca_kabuli_chr04 | 45133454                | TT                              | GG              | 1946833413               |
| SNP_P4_64581_45134324 | NC_021163.1    | Ca_kabuli_chr04 | 45134324                | AA                              | TT              | 1946833415               |
| SNP_P4_64582_45135161 | NC_021163.1    | Ca_kabuli_chr04 | 45135161                | AA                              | TT              | 1946833417               |
| SNP_P4_64584_45135509 | NC_021163.1    | Ca_kabuli_chr04 | 45135509                | CC                              | TT              | 1946833420               |
| SNP_P4_64585_45135513 | NC_021163.1    | Ca_kabuli_chr04 | 45135513                | AA                              | TT              | 1946833422               |
| SNP_P4_64586_45135529 | NC_021163.1    | Ca_kabuli_chr04 | 45135529                | AA                              | CC              | 1946833424               |
| SNP_P4_64587_45137102 | NC_021163.1    | Ca_kabuli_chr04 | 45137102                | AA                              | CC              | 1946833426               |
| SNP_P4_64588_45137107 | NC_021163.1    | Ca_kabuli_chr04 | 45137107                | GG                              | TT              | 1946833428               |
| SNP_P4_64589_45137138 | NC_021163.1    | Ca_kabuli_chr04 | 45137138                | GG                              | TT              | 1946833430               |
| SNP_P4_64590_45137403 | NC_021163.1    | Ca_kabuli_chr04 | 45137403                | AA                              | GG              | 1946833432               |
| SNP_P4_64591_45137666 | NC_021163.1    | Ca_kabuli_chr04 | 45137666                | CC                              | TT              | 1946833434               |
| SNP_P4_64592_45137709 | NC_021163.1    | Ca_kabuli_chr04 | 45137709                | AA                              | GG              | 1946833436               |
| SNP_P4_64593_45137798 | NC_021163.1    | Ca_kabuli_chr04 | 45137798                | GG                              | CC              | 1946833438               |
| SNP_P4_64594_45137926 | NC_021163.1    | Ca_kabuli_chr04 | 45137926                | AA                              | GG              | 1946833440               |
| SNP_P4_64596_45138321 | NC_021163.1    | Ca_kabuli_chr04 | 45138321                | TT                              | AA              | 1946833442               |
| SNP_P4_64597_45138348 | NC_021163.1    | Ca_kabuli_chr04 | 45138348                | GG                              | AA              | 1946833444               |
| SNP_P4_64598_45138640 | NC_021163.1    | Ca_kabuli_chr04 | 45138640                | AA                              | TT              | 1946833446               |
| SNP_P4_64599_45138662 | NC_021163.1    | Ca_kabuli_chr04 | 45138662                | CC                              | TT              | 1946833448               |
| SNP_P4_64600_45138695 | NC_021163.1    | Ca_kabuli_chr04 | 45138695                | TT                              | CC              | 1946833450               |
| SNP_P4_64601_45138883 | NC_021163.1    | Ca_kabuli_chr04 | 45138883                | GG                              | AA              | 1946833452               |
| SNP_P4_64602_45138886 | NC_021163.1    | Ca_kabuli_chr04 | 45138886                | TT                              | CC              | 1946833454               |
| SNP_P4_64603_45139329 | NC_021163.1    | Ca_kabuli_chr04 | 45139329                | GG                              | CC              | 1946833456               |
| SNP_P4_64604_45140826 | NC_021163.1    | Ca_kabuli_chr04 | 45140826                | CC                              | TT              | 1946833458               |
| SNP_P4_64605_45140837 | NC_021163.1    | Ca_kabuli_chr04 | 45140837                | TT                              | AA              | 1946833460               |
| SNP_P4_64606_45141410 | NC_021163.1    | Ca_kabuli_chr04 | 45141410                | GG                              | CC              | 1946833462               |
| SNP_P4_64607_45141539 | NC_021163.1    | Ca_kabuli_chr04 | 45141539                | AA                              | TT              | 1946833464               |
| SNP_P4_64608_45141572 | NC_021163.1    | Ca_kabuli_chr04 | 45141572                | CC                              | TT              | 1946833466               |
| SNP_P4_64609_45141609 | NC_021163.1    | Ca_kabuli_chr04 | 45141609                | GG                              | AA              | 1946833468               |
| SNP_P4_64610_45142020 | NC_021163.1    | Ca_kabuli_chr04 | 45142020                | TT                              | CC              | 1946833470               |
| SNP_P4_64611_45142021 | NC_021163.1    | Ca_kabuli_chr04 | 45142021                | CC                              | TT              | 1946833472               |
| SNP_P4_64612_45143016 | NC_021163.1    | Ca_kabuli_chr04 | 45143016                | TT                              | CC              | 1946833474               |
| SNP_P4_64613_45143030 | NC_021163.1    | Ca_kabuli_chr04 | 45143030                | TT                              | CC              | 1946833476               |
| SNP_P4_64614_45143038 | NC_021163.1    | Ca_kabuli_chr04 | 45143038                | CC                              | TT              | 1946833478               |
| SNP_P4_64615_45143044 | NC_021163.1    | Ca_kabuli_chr04 | 45143044                | CC                              | GG              | 1946833480               |
| SNP_P4_64616_45143166 | NC_021163.1    | Ca_kabuli_chr04 | 45143166                | TT                              | CC              | 1946833482               |
| SNP_P4_64618_45143920 | NC_021163.1    | Ca_kabuli_chr04 | 45143920                | CC                              | TT              | 1946833484               |
| SNP_P4_64619_45144359 | NC_021163.1    | Ca_kabuli_chr04 | 45144359                | TT                              | GG              | 1946833486               |
| SNP_P4_64620_45145623 | NC_021163.1    | Ca_kabuli_chr04 | 45145623                | AA                              | GG              | 1946833488               |
| SNP_P4_64621_45145646 | NC_021163.1    | Ca_kabuli_chr04 | 45145646                | GG                              | AA              | 1946833490               |



| SNPs IDs              | Chromosome IDs | Chromosomes     | Physical positions (bp) | CDC Frontier (Reference genome) | (ILWC46 & LPNB) | NCBI SNPdb Accession IDs |
|-----------------------|----------------|-----------------|-------------------------|---------------------------------|-----------------|--------------------------|
| SNP_P4_64622_45145829 | NC_021163.1    | Ca_kabuli_chr04 | 45145829                | CC                              | TT              | 1946833492               |
| SNP_P4_64623_45145856 | NC_021163.1    | Ca_kabuli_chr04 | 45145856                | TT                              | CC              | 1946833494               |
| SNP_P4_64624_45146271 | NC_021163.1    | Ca_kabuli_chr04 | 45146271                | AA                              | CC              | 1946833496               |
| SNP_P4_64625_45147630 | NC_021163.1    | Ca_kabuli_chr04 | 45147630                | AA                              | GG              | 1946833499               |
| SNP_P4_64626_45148325 | NC_021163.1    | Ca_kabuli_chr04 | 45148325                | GG                              | TT              | 1946833501               |
| SNP_P4_64628_45148571 | NC_021163.1    | Ca_kabuli_chr04 | 45148571                | TT                              | GG              | 1946833503               |
| SNP_P4_64629_45148595 | NC_021163.1    | Ca_kabuli_chr04 | 45148595                | CC                              | GG              | 1946833505               |
| SNP_P4_64630_45149269 | NC_021163.1    | Ca_kabuli_chr04 | 45149269                | GG                              | AA              | 1946833507               |
| SNP_P4_64631_45149758 | NC_021163.1    | Ca_kabuli_chr04 | 45149758                | TT                              | AA              | 1946833509               |
| SNP_P4_64632_45150184 | NC_021163.1    | Ca_kabuli_chr04 | 45150184                | CC                              | TT              | 1946833511               |
| SNP_P4_64633_45150199 | NC_021163.1    | Ca_kabuli_chr04 | 45150199                | CC                              | TT              | 1946833513               |
| SNP_P4_64635_45150270 | NC_021163.1    | Ca_kabuli_chr04 | 45150270                | TT                              | GG              | 1946833515               |
| SNP_P4_64636_45150280 | NC_021163.1    | Ca_kabuli_chr04 | 45150280                | TT                              | CC              | 1946833517               |
| SNP_P4_64637_45150292 | NC_021163.1    | Ca_kabuli_chr04 | 45150292                | CC                              | TT              | 1946833519               |
| SNP_P4_64638_45151430 | NC_021163.1    | Ca_kabuli_chr04 | 45151430                | TT                              | AA              | 1946833521               |
| SNP_P4_64640_45152192 | NC_021163.1    | Ca_kabuli_chr04 | 45152192                | AA                              | CC              | 1946833523               |
| SNP_P4_64642_45153948 | NC_021163.1    | Ca_kabuli_chr04 | 45153948                | AA                              | TT              | 1946833525               |
| SNP_P4_64643_45154452 | NC_021163.1    | Ca_kabuli_chr04 | 45154452                | CC                              | TT              | 1946833527               |
| SNP_P4_64644_45154485 | NC_021163.1    | Ca_kabuli_chr04 | 45154485                | AA                              | TT              | 1946833529               |
| SNP_P4_64645_45155065 | NC_021163.1    | Ca_kabuli_chr04 | 45155065                | GG                              | TT              | 1946833531               |
| SNP_P4_64646_45157000 | NC_021163.1    | Ca_kabuli_chr04 | 45157000                | GG                              | AA              | 1946833532               |
| SNP_P4_64648_45161367 | NC_021163.1    | Ca_kabuli_chr04 | 45161367                | CC                              | TT              | 1946833534               |
| SNP_P4_64650_45163408 | NC_021163.1    | Ca_kabuli_chr04 | 45163408                | TT                              | GG              | 1946833536               |
| SNP_P4_64651_45163436 | NC_021163.1    | Ca_kabuli_chr04 | 45163436                | TT                              | CC              | 1946833538               |
| SNP_P4_64652_45164077 | NC_021163.1    | Ca_kabuli_chr04 | 45164077                | GG                              | AA              | 1946833540               |
| SNP_P4_64653_45164118 | NC_021163.1    | Ca_kabuli_chr04 | 45164118                | CC                              | TT              | 1946833543               |
| SNP_P4_64654_45164144 | NC_021163.1    | Ca_kabuli_chr04 | 45164144                | AA                              | GG              | 1946833545               |
| SNP_P4_64655_45164307 | NC_021163.1    | Ca_kabuli_chr04 | 45164307                | TT                              | CC              | 1946833547               |
| SNP_P4_64656_45164518 | NC_021163.1    | Ca_kabuli_chr04 | 45164518                | TT                              | GG              | 1946833549               |
| SNP_P4_64657_45164742 | NC_021163.1    | Ca_kabuli_chr04 | 45164742                | AA                              | GG              | 1946833551               |
| SNP_P4_64658_45164945 | NC_021163.1    | Ca_kabuli_chr04 | 45164945                | GG                              | AA              | 1946833553               |
| SNP_P4_64660_45165327 | NC_021163.1    | Ca_kabuli_chr04 | 45165327                | TT                              | CC              | 1946833555               |
| SNP_P4_64661_45165368 | NC_021163.1    | Ca_kabuli_chr04 | 45165368                | CC                              | TT              | 1946833557               |
| SNP_P4_64662_45165653 | NC_021163.1    | Ca_kabuli_chr04 | 45165653                | CC                              | TT              | 1946833559               |
| SNP_P4_64663_45166003 | NC_021163.1    | Ca_kabuli_chr04 | 45166003                | CC                              | AA              | 1946833561               |
| SNP_P4_64664_45166023 | NC_021163.1    | Ca_kabuli_chr04 | 45166023                | AA                              | GG              | 1946833563               |
| SNP_P4_64665_45166298 | NC_021163.1    | Ca_kabuli_chr04 | 45166298                | TT                              | CC              | 1946833565               |
| SNP_P4_64666_45166302 | NC_021163.1    | Ca_kabuli_chr04 | 45166302                | GG                              | AA              | 1946833567               |
| SNP_P4_64667_45167158 | NC_021163.1    | Ca_kabuli_chr04 | 45167158                | AA                              | TT              | 1946833569               |
| SNP_P4_64668_45167168 | NC_021163.1    | Ca_kabuli_chr04 | 45167168                | AA                              | TT              | 1946833571               |
| SNP_P4_64669_45167988 | NC_021163.1    | Ca_kabuli_chr04 | 45167988                | GG                              | AA              | 1946833574               |
| SNP_P4_64671_45169089 | NC_021163.1    | Ca_kabuli_chr04 | 45169089                | TT                              | CC              | 1946833576               |

| SNPs IDs              | Chromosome IDs | Chromosomes     | Physical positions (bp) | CDC Frontier (Reference genome) | (ILWC46 & LPNB) | NCBI SNPdb Accession IDs |
|-----------------------|----------------|-----------------|-------------------------|---------------------------------|-----------------|--------------------------|
| SNP_P4_64673_45169211 | NC_021163.1    | Ca_kabuli_chr04 | 45169211                | AA                              | GG              | 1946833578               |
| SNP_P4_64674_45169667 | NC_021163.1    | Ca_kabuli_chr04 | 45169667                | AA                              | GG              | 1946833580               |
| SNP_P4_64675_45171354 | NC_021163.1    | Ca_kabuli_chr04 | 45171354                | GG                              | TT              | 1946833582               |
| SNP_P4_64676_45171664 | NC_021163.1    | Ca_kabuli_chr04 | 45171664                | AA                              | TT              | 1946833584               |
| SNP_P4_64677_45174336 | NC_021163.1    | Ca_kabuli_chr04 | 45174336                | CC                              | TT              | 1946833586               |
| SNP_P4_64678_45174359 | NC_021163.1    | Ca_kabuli_chr04 | 45174359                | CC                              | AA              | 1946833588               |
| SNP_P4_64680_45174622 | NC_021163.1    | Ca_kabuli_chr04 | 45174622                | AA                              | GG              | 1946833590               |
| SNP_P4_64682_45174790 | NC_021163.1    | Ca_kabuli_chr04 | 45174790                | AA                              | CC              | 1946833592               |
| SNP_P4_64683_45175735 | NC_021163.1    | Ca_kabuli_chr04 | 45175735                | AA                              | CC              | 1946833594               |
| SNP_P4_64684_45176012 | NC_021163.1    | Ca_kabuli_chr04 | 45176012                | AA                              | GG              | 1946833596               |
| SNP_P4_64685_45176053 | NC_021163.1    | Ca_kabuli_chr04 | 45176053                | TT                              | CC              | 1946833598               |
| SNP_P4_64686_45176061 | NC_021163.1    | Ca_kabuli_chr04 | 45176061                | CC                              | TT              | 1946833600               |
| SNP_P4_64687_45176077 | NC_021163.1    | Ca_kabuli_chr04 | 45176077                | CC                              | TT              | 1946833602               |
| SNP_P4_64688_45176103 | NC_021163.1    | Ca_kabuli_chr04 | 45176103                | CC                              | TT              | 1946833604               |
| SNP_P4_64689_45176198 | NC_021163.1    | Ca_kabuli_chr04 | 45176198                | CC                              | TT              | 1946833606               |
| SNP_P4_64690_45176355 | NC_021163.1    | Ca_kabuli_chr04 | 45176355                | AA                              | CC              | 1946833608               |
| SNP_P4_64691_45176391 | NC_021163.1    | Ca_kabuli_chr04 | 45176391                | CC                              | TT              | 1946833610               |
| SNP_P4_64692_45177035 | NC_021163.1    | Ca_kabuli_chr04 | 45177035                | TT                              | CC              | 1946833613               |
| SNP_P4_64694_45177060 | NC_021163.1    | Ca_kabuli_chr04 | 45177060                | CC                              | TT              | 1946833615               |
| SNP_P4_64696_45177841 | NC_021163.1    | Ca_kabuli_chr04 | 45177841                | TT                              | GG              | 1946833617               |
| SNP_P4_64698_45178038 | NC_021163.1    | Ca_kabuli_chr04 | 45178038                | AA                              | GG              | 1946833619               |
| SNP_P4_64699_45178070 | NC_021163.1    | Ca_kabuli_chr04 | 45178070                | TT                              | CC              | 1946833621               |
| SNP_P4_64700_45179662 | NC_021163.1    | Ca_kabuli_chr04 | 45179662                | AA                              | GG              | 1946833623               |
| SNP_P4_64701_45179694 | NC_021163.1    | Ca_kabuli_chr04 | 45179694                | TT                              | AA              | 1946833625               |
| SNP_P4_64702_45179696 | NC_021163.1    | Ca_kabuli_chr04 | 45179696                | GG                              | TT              | 1946833627               |
| SNP_P4_64703_45179722 | NC_021163.1    | Ca_kabuli_chr04 | 45179722                | CC                              | TT              | 1946833629               |
| SNP_P4_64704_45179729 | NC_021163.1    | Ca_kabuli_chr04 | 45179729                | AA                              | GG              | 1946833631               |
| SNP_P4_64705_45179935 | NC_021163.1    | Ca_kabuli_chr04 | 45179935                | TT                              | CC              | 1946833633               |
| SNP_P4_64706_45179990 | NC_021163.1    | Ca_kabuli_chr04 | 45179990                | GG                              | AA              | 1946833635               |
| SNP_P4_64707_45180000 | NC_021163.1    | Ca_kabuli_chr04 | 45180000                | CC                              | AA              | 1946833636               |
| SNP_P4_64708_45180214 | NC_021163.1    | Ca_kabuli_chr04 | 45180214                | CC                              | AA              | 1946833639               |
| SNP_P4_64709_45180517 | NC_021163.1    | Ca_kabuli_chr04 | 45180517                | AA                              | GG              | 1946833641               |
| SNP_P4_64710_45180609 | NC_021163.1    | Ca_kabuli_chr04 | 45180609                | TT                              | CC              | 1946833643               |
| SNP_P4_64711_45180900 | NC_021163.1    | Ca_kabuli_chr04 | 45180900                | CC                              | TT              | 1946833645               |
| SNP_P4_64712_45180975 | NC_021163.1    | Ca_kabuli_chr04 | 45180975                | CC                              | TT              | 1946833647               |
| SNP_P4_64713_45181124 | NC_021163.1    | Ca_kabuli_chr04 | 45181124                | CC                              | TT              | 1946833649               |
| SNP_P4_64714_45181728 | NC_021163.1    | Ca_kabuli_chr04 | 45181728                | GG                              | AA              | 1946833651               |
| SNP_P4_64715_45181774 | NC_021163.1    | Ca_kabuli_chr04 | 45181774                | AA                              | TT              | 1946833653               |
| SNP_P4_64716_45181785 | NC_021163.1    | Ca_kabuli_chr04 | 45181785                | CC                              | TT              | 1946833654               |
| SNP_P4_64717_45182322 | NC_021163.1    | Ca_kabuli_chr04 | 45182322                | CC                              | GG              | 1946833656               |
| SNP_P4_64719_45182560 | NC_021163.1    | Ca_kabuli_chr04 | 45182560                | TT                              | AA              | 1946833658               |
| SNP_P4_64720_45182566 | NC_021163.1    | Ca_kabuli_chr04 | 45182566                | TT                              | GG              | 1946833660               |

| SNPs IDs              | Chromosome IDs | Chromosomes     | Physical positions (bp) | CDC Frontier (Reference genome) | (ILWC46 & LPNB) | NCBI SNPdb Accession IDs |
|-----------------------|----------------|-----------------|-------------------------|---------------------------------|-----------------|--------------------------|
| SNP_P4_64721_45182568 | NC_021163.1    | Ca_kabuli_chr04 | 45182568                | CC                              | TT              | 1946833662               |
| SNP_P4_64722_45182614 | NC_021163.1    | Ca_kabuli_chr04 | 45182614                | TT                              | CC              | 1946833664               |
| SNP_P4_64723_45182662 | NC_021163.1    | Ca_kabuli_chr04 | 45182662                | AA                              | CC              | 1946833667               |
| SNP_P4_64724_45182665 | NC_021163.1    | Ca_kabuli_chr04 | 45182665                | AA                              | TT              | 1946833669               |
| SNP_P4_64725_45182685 | NC_021163.1    | Ca_kabuli_chr04 | 45182685                | TT                              | CC              | 1946833671               |
| SNP_P4_64729_45184391 | NC_021163.1    | Ca_kabuli_chr04 | 45184391                | GG                              | AA              | 1946833673               |
| SNP_P4_64730_45184401 | NC_021163.1    | Ca_kabuli_chr04 | 45184401                | CC                              | AA              | 1946833675               |
| SNP_P4_64731_45184410 | NC_021163.1    | Ca_kabuli_chr04 | 45184410                | TT                              | CC              | 1946833677               |
| SNP_P4_64732_45184428 | NC_021163.1    | Ca_kabuli_chr04 | 45184428                | CC                              | GG              | 1946833679               |
| SNP_P4_64733_45184488 | NC_021163.1    | Ca_kabuli_chr04 | 45184488                | GG                              | AA              | 1946833681               |
| SNP_P4_64734_45184504 | NC_021163.1    | Ca_kabuli_chr04 | 45184504                | AA                              | GG              | 1946833683               |
| SNP_P4_64735_45185355 | NC_021163.1    | Ca_kabuli_chr04 | 45185355                | CC                              | TT              | 1946833685               |
| SNP_P4_64737_45185867 | NC_021163.1    | Ca_kabuli_chr04 | 45185867                | CC                              | AA              | 1946833687               |
| SNP_P4_64738_45186475 | NC_021163.1    | Ca_kabuli_chr04 | 45186475                | GG                              | CC              | 1946833689               |
| SNP_P4_64739_45186495 | NC_021163.1    | Ca_kabuli_chr04 | 45186495                | TT                              | AA              | 1946833691               |
| SNP_P4_64740_45187531 | NC_021163.1    | Ca_kabuli_chr04 | 45187531                | CC                              | TT              | 1946833693               |
| SNP_P4_64741_45189961 | NC_021163.1    | Ca_kabuli_chr04 | 45189961                | AA                              | GG              | 1946833695               |
| SNP_P4_64742_45190336 | NC_021163.1    | Ca_kabuli_chr04 | 45190336                | CC                              | TT              | 1946833697               |
| SNP_P4_64744_45194314 | NC_021163.1    | Ca_kabuli_chr04 | 45194314                | AA                              | GG              | 1946833699               |
| SNP_P4_64745_45194320 | NC_021163.1    | Ca_kabuli_chr04 | 45194320                | AA                              | GG              | 1946833701               |
| SNP_P4_64746_45194697 | NC_021163.1    | Ca_kabuli_chr04 | 45194697                | CC                              | TT              | 1946833703               |
| SNP_P4_64747_45194704 | NC_021163.1    | Ca_kabuli_chr04 | 45194704                | CC                              | TT              | 1946833705               |
| SNP_P4_64748_45194752 | NC_021163.1    | Ca_kabuli_chr04 | 45194752                | AA                              | TT              | 1946833707               |
| SNP_P4_64749_45194824 | NC_021163.1    | Ca_kabuli_chr04 | 45194824                | TT                              | CC              | 1946833709               |
| SNP_P4_64750_45194829 | NC_021163.1    | Ca_kabuli_chr04 | 45194829                | TT                              | CC              | 1946833711               |
| SNP_P4_64751_45194890 | NC_021163.1    | Ca_kabuli_chr04 | 45194890                | CC                              | TT              | 1946833713               |
| SNP_P4_64752_45194947 | NC_021163.1    | Ca_kabuli_chr04 | 45194947                | TT                              | CC              | 1946833715               |
| SNP_P4_64753_45194976 | NC_021163.1    | Ca_kabuli_chr04 | 45194976                | GG                              | TT              | 1946833717               |
| SNP_P4_64754_45195872 | NC_021163.1    | Ca_kabuli_chr04 | 45195872                | GG                              | AA              | 1946833719               |
| SNP_P4_64755_45195874 | NC_021163.1    | Ca_kabuli_chr04 | 45195874                | GG                              | TT              | 1946833721               |
| SNP_P4_64756_45196108 | NC_021163.1    | Ca_kabuli_chr04 | 45196108                | GG                              | AA              | 1946833723               |
| SNP_P4_64757_45196303 | NC_021163.1    | Ca_kabuli_chr04 | 45196303                | AA                              | TT              | 1946833725               |
| SNP_P4_64758_45196310 | NC_021163.1    | Ca_kabuli_chr04 | 45196310                | TT                              | CC              | 1946833727               |
| SNP_P4_64759_45196554 | NC_021163.1    | Ca_kabuli_chr04 | 45196554                | AA                              | GG              | 1946833729               |
| SNP_P4_64760_45196564 | NC_021163.1    | Ca_kabuli_chr04 | 45196564                | TT                              | CC              | 1946833731               |
| SNP_P4_64761_45196580 | NC_021163.1    | Ca_kabuli_chr04 | 45196580                | GG                              | CC              | 1946833733               |
| SNP_P4_64762_45196601 | NC_021163.1    | Ca_kabuli_chr04 | 45196601                | AA                              | TT              | 1946833735               |
| SNP_P4_64764_45196998 | NC_021163.1    | Ca_kabuli_chr04 | 45196998                | GG                              | CC              | 1946833737               |
| SNP_P4_64765_45197913 | NC_021163.1    | Ca_kabuli_chr04 | 45197913                | TT                              | GG              | 1946833739               |
| SNP_P4_64766_45197944 | NC_021163.1    | Ca_kabuli_chr04 | 45197944                | CC                              | TT              | 1946833741               |
| SNP_P4_64767_45198597 | NC_021163.1    | Ca_kabuli_chr04 | 45198597                | AA                              | GG              | 1946833744               |
| SNP_P4_64768_45199408 | NC_021163.1    | Ca_kabuli_chr04 | 45199408                | TT                              | CC              | 1946833746               |

| SNPs IDs              | Chromosome IDs | Chromosomes     | Physical positions (bp) | CDC Frontier (Reference genome) | (ILWC46 & LPNB) | NCBI SNPdb Accession IDs |
|-----------------------|----------------|-----------------|-------------------------|---------------------------------|-----------------|--------------------------|
| SNP_P4_64769_45199421 | NC_021163.1    | Ca_kabuli_chr04 | 45199421                | TT                              | AA              | 1946833748               |
| SNP_P4_64770_45199574 | NC_021163.1    | Ca_kabuli_chr04 | 45199574                | AA                              | GG              | 1946833750               |
| SNP_P4_64771_45199745 | NC_021163.1    | Ca_kabuli_chr04 | 45199745                | TT                              | GG              | 1946833752               |
| SNP_P4_64772_45199775 | NC_021163.1    | Ca_kabuli_chr04 | 45199775                | AA                              | GG              | 1946833754               |
| SNP_P4_64773_45199947 | NC_021163.1    | Ca_kabuli_chr04 | 45199947                | CC                              | GG              | 1946833756               |
| SNP_P4_64775_45200015 | NC_021163.1    | Ca_kabuli_chr04 | 45200015                | GG                              | AA              | 1946833758               |
| SNP_P4_64776_45200507 | NC_021163.1    | Ca_kabuli_chr04 | 45200507                | TT                              | AA              | 1946833760               |
| SNP_P4_64777_45202299 | NC_021163.1    | Ca_kabuli_chr04 | 45202299                | GG                              | AA              | 1946833762               |
| SNP_P4_64779_45203504 | NC_021163.1    | Ca_kabuli_chr04 | 45203504                | GG                              | AA              | 1946833765               |
| SNP_P4_64780_45203512 | NC_021163.1    | Ca_kabuli_chr04 | 45203512                | TT                              | GG              | 1946833767               |
| SNP_P4_64781_45205023 | NC_021163.1    | Ca_kabuli_chr04 | 45205023                | GG                              | AA              | 1946833769               |
| SNP_P4_64782_45205027 | NC_021163.1    | Ca_kabuli_chr04 | 45205027                | CC                              | TT              | 1946833771               |
| SNP_P4_64785_45205355 | NC_021163.1    | Ca_kabuli_chr04 | 45205355                | AA                              | TT              | 1946833773               |
| SNP_P4_64786_45205364 | NC_021163.1    | Ca_kabuli_chr04 | 45205364                | AA                              | GG              | 1946833775               |
| SNP_P4_64787_45205365 | NC_021163.1    | Ca_kabuli_chr04 | 45205365                | CC                              | TT              | 1946833777               |
| SNP_P4_64788_45205487 | NC_021163.1    | Ca_kabuli_chr04 | 45205487                | CC                              | TT              | 1946833779               |
| SNP_P4_64789_45205607 | NC_021163.1    | Ca_kabuli_chr04 | 45205607                | GG                              | CC              | 1946833781               |
| SNP_P4_64790_45205660 | NC_021163.1    | Ca_kabuli_chr04 | 45205660                | GG                              | AA              | 1946833783               |
| SNP_P4_64791_45205664 | NC_021163.1    | Ca_kabuli_chr04 | 45205664                | GG                              | CC              | 1946833785               |
| SNP_P4_64793_45206032 | NC_021163.1    | Ca_kabuli_chr04 | 45206032                | GG                              | TT              | 1946833787               |
| SNP_P4_64794_45206035 | NC_021163.1    | Ca_kabuli_chr04 | 45206035                | TT                              | AA              | 1946833789               |
| SNP_P4_64795_45206383 | NC_021163.1    | Ca_kabuli_chr04 | 45206383                | AA                              | CC              | 1946833791               |
| SNP_P4_64796_45206887 | NC_021163.1    | Ca_kabuli_chr04 | 45206887                | TT                              | GG              | 1946833793               |
| SNP_P4_64797_45206892 | NC_021163.1    | Ca_kabuli_chr04 | 45206892                | TT                              | CC              | 1946833795               |
| SNP_P4_64798_45206907 | NC_021163.1    | Ca_kabuli_chr04 | 45206907                | AA                              | GG              | 1946833797               |
| SNP_P4_64799_45206920 | NC_021163.1    | Ca_kabuli_chr04 | 45206920                | AA                              | GG              | 1946833799               |
| SNP_P4_64800_45207110 | NC_021163.1    | Ca_kabuli_chr04 | 45207110                | GG                              | TT              | 1946833801               |
| SNP_P4_64801_45208566 | NC_021163.1    | Ca_kabuli_chr04 | 45208566                | CC                              | TT              | 1946833803               |
| SNP_P4_64802_45208597 | NC_021163.1    | Ca_kabuli_chr04 | 45208597                | AA                              | TT              | 1946833805               |
| SNP_P4_64803_45210511 | NC_021163.1    | Ca_kabuli_chr04 | 45210511                | TT                              | CC              | 1946833807               |
| SNP_P4_64804_45210612 | NC_021163.1    | Ca_kabuli_chr04 | 45210612                | CC                              | TT              | 1946833809               |
| SNP_P4_64805_45210778 | NC_021163.1    | Ca_kabuli_chr04 | 45210778                | AA                              | CC              | 1946833811               |
| SNP_P4_64809_45215501 | NC_021163.1    | Ca_kabuli_chr04 | 45215501                | CC                              | TT              | 1946833813               |
| SNP_P4_64810_45216031 | NC_021163.1    | Ca_kabuli_chr04 | 45216031                | TT                              | CC              | 1946833815               |
| SNP_P4_64811_45216134 | NC_021163.1    | Ca_kabuli_chr04 | 45216134                | TT                              | GG              | 1946833817               |
| SNP_P4_64812_45218129 | NC_021163.1    | Ca_kabuli_chr04 | 45218129                | CC                              | AA              | 1946833819               |
| SNP_P4_64813_45218873 | NC_021163.1    | Ca_kabuli_chr04 | 45218873                | AA                              | TT              | 1946833821               |
| SNP_P4_64814_45219587 | NC_021163.1    | Ca_kabuli_chr04 | 45219587                | AA                              | GG              | 1946833823               |
| SNP_P4_64815_45220084 | NC_021163.1    | Ca_kabuli_chr04 | 45220084                | GG                              | TT              | 1946833825               |
| SNP_P4_64818_45222138 | NC_021163.1    | Ca_kabuli_chr04 | 45222138                | GG                              | TT              | 1946833827               |
| SNP_P4_64819_45222152 | NC_021163.1    | Ca_kabuli_chr04 | 45222152                | CC                              | GG              | 1946833829               |
| SNP_P4_64820_45222334 | NC_021163.1    | Ca_kabuli_chr04 | 45222334                | TT                              | CC              | 1946833831               |

| SNPs IDs              | Chromosome IDs | Chromosomes     | Physical positions (bp) | CDC Frontier (Reference genome) | (ILWC46 & LPNB) | NCBI SNPdb Accession IDs |
|-----------------------|----------------|-----------------|-------------------------|---------------------------------|-----------------|--------------------------|
| SNP_P4_64821_45223001 | NC_021163.1    | Ca_kabuli_chr04 | 45223001                | GG                              | AA              | 1946833833               |
| SNP_P4_64822_45223210 | NC_021163.1    | Ca_kabuli_chr04 | 45223210                | GG                              | AA              | 1946833835               |
| SNP_P4_64824_45223548 | NC_021163.1    | Ca_kabuli_chr04 | 45223548                | AA                              | TT              | 1946833837               |
| SNP_P4_64825_45224596 | NC_021163.1    | Ca_kabuli_chr04 | 45224596                | CC                              | GG              | 1946833839               |
| SNP_P4_64826_45224907 | NC_021163.1    | Ca_kabuli_chr04 | 45224907                | CC                              | AA              | 1946833841               |
| SNP_P4_64828_45225941 | NC_021163.1    | Ca_kabuli_chr04 | 45225941                | CC                              | TT              | 1946833843               |
| SNP_P4_64829_45226830 | NC_021163.1    | Ca_kabuli_chr04 | 45226830                | TT                              | CC              | 1946833845               |
| SNP_P4_64830_45226837 | NC_021163.1    | Ca_kabuli_chr04 | 45226837                | TT                              | CC              | 1946833847               |
| SNP_P4_64831_45226869 | NC_021163.1    | Ca_kabuli_chr04 | 45226869                | AA                              | GG              | 1946833849               |
| SNP_P4_64832_45226878 | NC_021163.1    | Ca_kabuli_chr04 | 45226878                | TT                              | CC              | 1946833851               |
| SNP_P4_64833_45226882 | NC_021163.1    | Ca_kabuli_chr04 | 45226882                | AA                              | CC              | 1946833853               |
| SNP_P4_64835_45227076 | NC_021163.1    | Ca_kabuli_chr04 | 45227076                | TT                              | GG              | 1946833855               |
| SNP_P4_64836_45227095 | NC_021163.1    | Ca_kabuli_chr04 | 45227095                | GG                              | AA              | 1946833857               |
| SNP_P4_64837_45227112 | NC_021163.1    | Ca_kabuli_chr04 | 45227112                | TT                              | GG              | 1946833859               |
| SNP_P4_64838_45227155 | NC_021163.1    | Ca_kabuli_chr04 | 45227155                | CC                              | TT              | 1946833861               |
| SNP_P4_64839_45227157 | NC_021163.1    | Ca_kabuli_chr04 | 45227157                | AA                              | CC              | 1946833863               |
| SNP_P4_64840_45227161 | NC_021163.1    | Ca_kabuli_chr04 | 45227161                | GG                              | AA              | 1946833865               |
| SNP_P4_64841_45227182 | NC_021163.1    | Ca_kabuli_chr04 | 45227182                | AA                              | GG              | 1946833867               |
| SNP_P4_64842_45227221 | NC_021163.1    | Ca_kabuli_chr04 | 45227221                | AA                              | GG              | 1946833869               |
| SNP_P4_64843_45227222 | NC_021163.1    | Ca_kabuli_chr04 | 45227222                | AA                              | GG              | 1946833871               |
| SNP_P4_64844_45227328 | NC_021163.1    | Ca_kabuli_chr04 | 45227328                | GG                              | AA              | 1946833873               |
| SNP_P4_64845_45227333 | NC_021163.1    | Ca_kabuli_chr04 | 45227333                | CC                              | TT              | 1946833875               |
| SNP_P4_64846_45228740 | NC_021163.1    | Ca_kabuli_chr04 | 45228740                | AA                              | GG              | 1946833877               |
| SNP_P4_64847_45228905 | NC_021163.1    | Ca_kabuli_chr04 | 45228905                | GG                              | CC              | 1946833878               |
| SNP_P4_64848_45231209 | NC_021163.1    | Ca_kabuli_chr04 | 45231209                | GG                              | TT              | 1946833880               |
| SNP_P4_64849_45232095 | NC_021163.1    | Ca_kabuli_chr04 | 45232095                | TT                              | CC              | 1946833882               |
| SNP_P4_64850_45232627 | NC_021163.1    | Ca_kabuli_chr04 | 45232627                | AA                              | GG              | 1946833884               |
| SNP_P4_64851_45233677 | NC_021163.1    | Ca_kabuli_chr04 | 45233677                | GG                              | AA              | 1946833886               |
| SNP_P4_64852_45233925 | NC_021163.1    | Ca_kabuli_chr04 | 45233925                | AA                              | CC              | 1946833887               |
| SNP_P4_64853_45235615 | NC_021163.1    | Ca_kabuli_chr04 | 45235615                | CC                              | TT              | 1946833890               |
| SNP_P4_64854_45235747 | NC_021163.1    | Ca_kabuli_chr04 | 45235747                | CC                              | TT              | 1946833892               |
| SNP_P4_64856_45236451 | NC_021163.1    | Ca_kabuli_chr04 | 45236451                | GG                              | CC              | 1946833894               |
| SNP_P4_64857_45236666 | NC_021163.1    | Ca_kabuli_chr04 | 45236666                | CC                              | TT              | 1946833896               |
| SNP_P4_64858_45236678 | NC_021163.1    | Ca_kabuli_chr04 | 45236678                | GG                              | AA              | 1946833898               |
| SNP_P4_64859_45236693 | NC_021163.1    | Ca_kabuli_chr04 | 45236693                | CC                              | TT              | 1946833900               |
| SNP_P4_64860_45244714 | NC_021163.1    | Ca_kabuli_chr04 | 45244714                | CC                              | TT              | 1946833902               |
| SNP_P4_64861_45244737 | NC_021163.1    | Ca_kabuli_chr04 | 45244737                | AA                              | GG              | 1946833904               |
| SNP_P4_64862_45244778 | NC_021163.1    | Ca_kabuli_chr04 | 45244778                | GG                              | AA              | 1946833906               |
| SNP_P4_64863_45244779 | NC_021163.1    | Ca_kabuli_chr04 | 45244779                | TT                              | CC              | 1946833908               |
| SNP_P4_64866_45245711 | NC_021163.1    | Ca_kabuli_chr04 | 45245711                | GG                              | AA              | 1946833910               |
| SNP_P4_64867_45245802 | NC_021163.1    | Ca_kabuli_chr04 | 45245802                | AA                              | CC              | 1946833912               |
| SNP_P4_64868_45245906 | NC_021163.1    | Ca_kabuli_chr04 | 45245906                | AA                              | TT              | 1946833914               |

| SNPs IDs              | Chromosome IDs | Chromosomes     | Physical positions (bp) | CDC Frontier (Reference genome) | (ILWC46 & LPNB) | NCBI SNPdb Accession IDs |
|-----------------------|----------------|-----------------|-------------------------|---------------------------------|-----------------|--------------------------|
| SNP_P4_64869_45246110 | NC_021163.1    | Ca_kabuli_chr04 | 45246110                | TT                              | CC              | 1946833916               |
| SNP_P4_64870_45247445 | NC_021163.1    | Ca_kabuli_chr04 | 45247445                | CC                              | TT              | 1946833918               |
| SNP_P4_64872_45247569 | NC_021163.1    | Ca_kabuli_chr04 | 45247569                | TT                              | AA              | 1946833920               |
| SNP_P4_64873_45247570 | NC_021163.1    | Ca_kabuli_chr04 | 45247570                | TT                              | AA              | 1946833922               |
| SNP_P4_64874_45247571 | NC_021163.1    | Ca_kabuli_chr04 | 45247571                | TT                              | AA              | 1946833924               |
| SNP_P4_64877_45248307 | NC_021163.1    | Ca_kabuli_chr04 | 45248307                | AA                              | TT              | 1946833926               |
| SNP_P4_64878_45249477 | NC_021163.1    | Ca_kabuli_chr04 | 45249477                | CC                              | GG              | 1946833928               |
| SNP_P4_64879_45249518 | NC_021163.1    | Ca_kabuli_chr04 | 45249518                | CC                              | GG              | 1946833930               |
| SNP_P4_64880_45249558 | NC_021163.1    | Ca_kabuli_chr04 | 45249558                | CC                              | GG              | 1946833932               |
| SNP_P4_64881_45249873 | NC_021163.1    | Ca_kabuli_chr04 | 45249873                | AA                              | GG              | 1946833934               |
| SNP_P4_64883_45250099 | NC_021163.1    | Ca_kabuli_chr04 | 45250099                | TT                              | CC              | 1946833936               |
| SNP_P4_64884_45250110 | NC_021163.1    | Ca_kabuli_chr04 | 45250110                | GG                              | AA              | 1946833938               |
| SNP_P4_64885_45250124 | NC_021163.1    | Ca_kabuli_chr04 | 45250124                | GG                              | CC              | 1946833941               |
| SNP_P4_64887_45251027 | NC_021163.1    | Ca_kabuli_chr04 | 45251027                | AA                              | GG              | 1946833943               |
| SNP_P4_64888_45251201 | NC_021163.1    | Ca_kabuli_chr04 | 45251201                | CC                              | TT              | 1946833945               |
| SNP_P4_64889_45255910 | NC_021163.1    | Ca_kabuli_chr04 | 45255910                | AA                              | TT              | 1946833947               |
| SNP_P4_64890_45255940 | NC_021163.1    | Ca_kabuli_chr04 | 45255940                | AA                              | GG              | 1946833949               |
| SNP_P4_64891_45255948 | NC_021163.1    | Ca_kabuli_chr04 | 45255948                | TT                              | AA              | 1946833951               |
| SNP_P4_64892_45255977 | NC_021163.1    | Ca_kabuli_chr04 | 45255977                | AA                              | TT              | 1946833953               |
| SNP_P4_64893_45256409 | NC_021163.1    | Ca_kabuli_chr04 | 45256409                | GG                              | AA              | 1946833955               |
| SNP_P4_64894_45256846 | NC_021163.1    | Ca_kabuli_chr04 | 45256846                | TT                              | CC              | 1946833957               |
| SNP_P4_64895_45256885 | NC_021163.1    | Ca_kabuli_chr04 | 45256885                | TT                              | CC              | 1946833959               |
| SNP_P4_64896_45256904 | NC_021163.1    | Ca_kabuli_chr04 | 45256904                | GG                              | AA              | 1946833961               |
| SNP_P4_64897_45256908 | NC_021163.1    | Ca_kabuli_chr04 | 45256908                | GG                              | AA              | 1946833963               |
| SNP_P4_64898_45257235 | NC_021163.1    | Ca_kabuli_chr04 | 45257235                | AA                              | GG              | 1946833965               |
| SNP_P4_64899_45258288 | NC_021163.1    | Ca_kabuli_chr04 | 45258288                | TT                              | GG              | 1946833967               |
| SNP_P4_64900_45258373 | NC_021163.1    | Ca_kabuli_chr04 | 45258373                | TT                              | CC              | 1946833970               |
| SNP_P4_64901_45258395 | NC_021163.1    | Ca_kabuli_chr04 | 45258395                | TT                              | CC              | 1946833972               |
| SNP_P4_64902_45258932 | NC_021163.1    | Ca_kabuli_chr04 | 45258932                | TT                              | GG              | 1946833974               |
| SNP_P4_64903_45258959 | NC_021163.1    | Ca_kabuli_chr04 | 45258959                | GG                              | AA              | 1946833976               |
| SNP_P4_64904_45258972 | NC_021163.1    | Ca_kabuli_chr04 | 45258972                | AA                              | CC              | 1946833978               |
| SNP_P4_64905_45259216 | NC_021163.1    | Ca_kabuli_chr04 | 45259216                | TT                              | CC              | 1946833980               |
| SNP_P4_64906_45259280 | NC_021163.1    | Ca_kabuli_chr04 | 45259280                | TT                              | CC              | 1946833982               |
| SNP_P4_64908_45261805 | NC_021163.1    | Ca_kabuli_chr04 | 45261805                | GG                              | AA              | 1946833984               |
| SNP_P4_64909_45261829 | NC_021163.1    | Ca_kabuli_chr04 | 45261829                | TT                              | CC              | 1946833986               |
| SNP_P4_64910_45261830 | NC_021163.1    | Ca_kabuli_chr04 | 45261830                | AA                              | GG              | 1946833988               |
| SNP_P4_64911_45261876 | NC_021163.1    | Ca_kabuli_chr04 | 45261876                | TT                              | AA              | 1946833989               |
| SNP_P4_64913_45266152 | NC_021163.1    | Ca_kabuli_chr04 | 45266152                | GG                              | AA              | 1946833991               |
| SNP_P4_64915_45268350 | NC_021163.1    | Ca_kabuli_chr04 | 45268350                | CC                              | TT              | 1946833993               |
| SNP_P4_64916_45268374 | NC_021163.1    | Ca_kabuli_chr04 | 45268374                | GG                              | TT              | 1946833995               |
| SNP_P4_64917_45268375 | NC_021163.1    | Ca_kabuli_chr04 | 45268375                | TT                              | AA              | 1946833998               |
| SNP_P4_64919_45268974 | NC_021163.1    | Ca_kabuli_chr04 | 45268974                | CC                              | AA              | 1946834000               |

| SNPs IDs              | Chromosome IDs | Chromosomes     | Physical positions (bp) | CDC Frontier (Reference genome) | (ILWC46 & LPNB) | NCBI SNPdb Accession IDs |
|-----------------------|----------------|-----------------|-------------------------|---------------------------------|-----------------|--------------------------|
| SNP_P4_64920_45269300 | NC_021163.1    | Ca_kabuli_chr04 | 45269300                | TT                              | AA              | 1946834002               |
| SNP_P4_64921_45269649 | NC_021163.1    | Ca_kabuli_chr04 | 45269649                | CC                              | GG              | 1946834004               |
| SNP_P4_64922_45270083 | NC_021163.1    | Ca_kabuli_chr04 | 45270083                | AA                              | GG              | 1946834006               |
| SNP_P4_64923_45270587 | NC_021163.1    | Ca_kabuli_chr04 | 45270587                | AA                              | GG              | 1946834008               |
| SNP_P4_64926_45271757 | NC_021163.1    | Ca_kabuli_chr04 | 45271757                | AA                              | GG              | 1946834010               |
| SNP_P4_64927_45273283 | NC_021163.1    | Ca_kabuli_chr04 | 45273283                | AA                              | CC              | 1946834012               |
| SNP_P4_64928_45273629 | NC_021163.1    | Ca_kabuli_chr04 | 45273629                | CC                              | TT              | 1946834014               |
| SNP_P4_64929_45273857 | NC_021163.1    | Ca_kabuli_chr04 | 45273857                | CC                              | TT              | 1946834016               |
| SNP_P4_64933_45274847 | NC_021163.1    | Ca_kabuli_chr04 | 45274847                | TT                              | GG              | 1946834018               |
| SNP_P4_64935_45275401 | NC_021163.1    | Ca_kabuli_chr04 | 45275401                | GG                              | AA              | 1946834020               |
| SNP_P4_64936_45275696 | NC_021163.1    | Ca_kabuli_chr04 | 45275696                | AA                              | TT              | 1946834022               |
| SNP_P4_64937_45275735 | NC_021163.1    | Ca_kabuli_chr04 | 45275735                | TT                              | CC              | 1946834024               |
| SNP_P4_64938_45275748 | NC_021163.1    | Ca_kabuli_chr04 | 45275748                | AA                              | CC              | 1946834026               |
| SNP_P4_64939_45275772 | NC_021163.1    | Ca_kabuli_chr04 | 45275772                | GG                              | CC              | 1946834028               |
| SNP_P4_64940_45289803 | NC_021163.1    | Ca_kabuli_chr04 | 45289803                | GG                              | AA              | 1946834030               |
| SNP_P4_64942_45289977 | NC_021163.1    | Ca_kabuli_chr04 | 45289977                | AA                              | GG              | 1946834032               |
| SNP_P4_64943_45290157 | NC_021163.1    | Ca_kabuli_chr04 | 45290157                | AA                              | GG              | 1946834034               |
| SNP_P4_64944_45290250 | NC_021163.1    | Ca_kabuli_chr04 | 45290250                | AA                              | GG              | 1946834036               |
| SNP_P4_64945_45290285 | NC_021163.1    | Ca_kabuli_chr04 | 45290285                | CC                              | TT              | 1946834038               |
| SNP_P4_64946_45290369 | NC_021163.1    | Ca_kabuli_chr04 | 45290369                | CC                              | AA              | 1946834040               |
| SNP_P4_64947_45290411 | NC_021163.1    | Ca_kabuli_chr04 | 45290411                | AA                              | TT              | 1946834042               |
| SNP_P4_64949_45290606 | NC_021163.1    | Ca_kabuli_chr04 | 45290606                | CC                              | TT              | 1946834044               |
| SNP_P4_64950_45290660 | NC_021163.1    | Ca_kabuli_chr04 | 45290660                | CC                              | TT              | 1946834046               |
| SNP_P4_64951_45290847 | NC_021163.1    | Ca_kabuli_chr04 | 45290847                | AA                              | GG              | 1946834048               |
| SNP_P4_64952_45290891 | NC_021163.1    | Ca_kabuli_chr04 | 45290891                | TT                              | CC              | 1946834050               |
| SNP_P4_64953_45295007 | NC_021163.1    | Ca_kabuli_chr04 | 45295007                | TT                              | CC              | 1946834052               |
| SNP_P4_64954_45295033 | NC_021163.1    | Ca_kabuli_chr04 | 45295033                | TT                              | CC              | 1946834054               |
| SNP_P4_64955_45295262 | NC_021163.1    | Ca_kabuli_chr04 | 45295262                | AA                              | GG              | 1946834056               |
| SNP_P4_64956_45295287 | NC_021163.1    | Ca_kabuli_chr04 | 45295287                | GG                              | AA              | 1946834059               |
| SNP_P4_64958_45295411 | NC_021163.1    | Ca_kabuli_chr04 | 45295411                | TT                              | AA              | 1946834061               |
| SNP_P4_64959_45296255 | NC_021163.1    | Ca_kabuli_chr04 | 45296255                | TT                              | AA              | 1946834063               |
| SNP_P4_64960_45296262 | NC_021163.1    | Ca_kabuli_chr04 | 45296262                | AA                              | GG              | 1946834065               |
| SNP_P4_64961_45296379 | NC_021163.1    | Ca_kabuli_chr04 | 45296379                | AA                              | GG              | 1946834067               |
| SNP_P4_64963_45296414 | NC_021163.1    | Ca_kabuli_chr04 | 45296414                | CC                              | TT              | 1946834069               |
| SNP_P4_64964_45296445 | NC_021163.1    | Ca_kabuli_chr04 | 45296445                | TT                              | CC              | 1946834071               |
| SNP_P4_64965_45296456 | NC_021163.1    | Ca_kabuli_chr04 | 45296456                | AA                              | GG              | 1946834073               |
| SNP_P4_64966_45296457 | NC_021163.1    | Ca_kabuli_chr04 | 45296457                | CC                              | TT              | 1946834075               |
| SNP_P4_64967_45296499 | NC_021163.1    | Ca_kabuli_chr04 | 45296499                | CC                              | TT              | 1946834077               |
| SNP_P4_64968_45296505 | NC_021163.1    | Ca_kabuli_chr04 | 45296505                | AA                              | GG              | 1946834079               |
| SNP_P4_64969_45296506 | NC_021163.1    | Ca_kabuli_chr04 | 45296506                | GG                              | AA              | 1946834081               |
| SNP_P4_64970_45296509 | NC_021163.1    | Ca_kabuli_chr04 | 45296509                | GG                              | AA              | 1946834083               |
| SNP_P4_64971_45296513 | NC_021163.1    | Ca_kabuli_chr04 | 45296513                | AA                              | TT              | 1946834085               |

| SNPs IDs              | Chromosome IDs | Chromosomes     | Physical positions (bp) | CDC Frontier (Reference genome) | (ILWC46 & LPNB) | NCBI SNPdb Accession IDs |
|-----------------------|----------------|-----------------|-------------------------|---------------------------------|-----------------|--------------------------|
| SNP_P4_64972_45296548 | NC_021163.1    | Ca_kabuli_chr04 | 45296548                | TT                              | CC              | 1946834087               |
| SNP_P4_64973_45296553 | NC_021163.1    | Ca_kabuli_chr04 | 45296553                | TT                              | AA              | 1946834089               |
| SNP_P4_64974_45296623 | NC_021163.1    | Ca_kabuli_chr04 | 45296623                | GG                              | AA              | 1946834092               |
| SNP_P4_64975_45296716 | NC_021163.1    | Ca_kabuli_chr04 | 45296716                | GG                              | CC              | 1946834094               |
| SNP_P4_64976_45296756 | NC_021163.1    | Ca_kabuli_chr04 | 45296756                | CC                              | TT              | 1946834096               |
| SNP_P4_64977_45296765 | NC_021163.1    | Ca_kabuli_chr04 | 45296765                | AA                              | CC              | 1946834098               |
| SNP_P4_64978_45296825 | NC_021163.1    | Ca_kabuli_chr04 | 45296825                | GG                              | TT              | 1946834100               |
| SNP_P4_64979_45296982 | NC_021163.1    | Ca_kabuli_chr04 | 45296982                | CC                              | TT              | 1946834102               |
| SNP_P4_64980_45297014 | NC_021163.1    | Ca_kabuli_chr04 | 45297014                | AA                              | GG              | 1946834104               |
| SNP_P4_64981_45297221 | NC_021163.1    | Ca_kabuli_chr04 | 45297221                | AA                              | GG              | 1946834106               |
| SNP_P4_64982_45297262 | NC_021163.1    | Ca_kabuli_chr04 | 45297262                | AA                              | GG              | 1946834108               |
| SNP_P4_64986_45297841 | NC_021163.1    | Ca_kabuli_chr04 | 45297841                | AA                              | GG              | 1946834110               |
| SNP_P4_64987_45297847 | NC_021163.1    | Ca_kabuli_chr04 | 45297847                | GG                              | CC              | 1946834112               |
| SNP_P4_64988_45297896 | NC_021163.1    | Ca_kabuli_chr04 | 45297896                | CC                              | AA              | 1946834114               |
| SNP_P4_64989_45297950 | NC_021163.1    | Ca_kabuli_chr04 | 45297950                | CC                              | TT              | 1946834116               |
| SNP_P4_64991_45298000 | NC_021163.1    | Ca_kabuli_chr04 | 45298000                | GG                              | TT              | 1946834118               |
| SNP_P4_64992_45298113 | NC_021163.1    | Ca_kabuli_chr04 | 45298113                | AA                              | CC              | 1946834120               |
| SNP_P4_64993_45298140 | NC_021163.1    | Ca_kabuli_chr04 | 45298140                | CC                              | TT              | 1946834122               |
| SNP_P4_64994_45298151 | NC_021163.1    | Ca_kabuli_chr04 | 45298151                | AA                              | TT              | 1946834124               |
| SNP_P4_64995_45298159 | NC_021163.1    | Ca_kabuli_chr04 | 45298159                | GG                              | AA              | 1946834126               |
| SNP_P4_64996_45298213 | NC_021163.1    | Ca_kabuli_chr04 | 45298213                | CC                              | TT              | 1946834128               |
| SNP_P4_64997_45298222 | NC_021163.1    | Ca_kabuli_chr04 | 45298222                | TT                              | CC              | 1946834130               |
| SNP_P4_64998_45298239 | NC_021163.1    | Ca_kabuli_chr04 | 45298239                | AA                              | TT              | 1946834132               |
| SNP_P4_64999_45298242 | NC_021163.1    | Ca_kabuli_chr04 | 45298242                | AA                              | GG              | 1946834134               |
| SNP_P4_65000_45298638 | NC_021163.1    | Ca_kabuli_chr04 | 45298638                | GG                              | AA              | 1946834136               |
| SNP_P4_65001_45298669 | NC_021163.1    | Ca_kabuli_chr04 | 45298669                | CC                              | AA              | 1946834138               |
| SNP_P4_65002_45300508 | NC_021163.1    | Ca_kabuli_chr04 | 45300508                | GG                              | AA              | 1946834140               |
| SNP_P4_65003_45302876 | NC_021163.1    | Ca_kabuli_chr04 | 45302876                | GG                              | AA              | 1946834142               |
| SNP_P4_65004_45303306 | NC_021163.1    | Ca_kabuli_chr04 | 45303306                | AA                              | CC              | 1946834144               |
| SNP_P4_65005_45317990 | NC_021163.1    | Ca_kabuli_chr04 | 45317990                | TT                              | CC              | 1946834146               |
| SNP_P4_65006_45317997 | NC_021163.1    | Ca_kabuli_chr04 | 45317997                | CC                              | TT              | 1946834148               |
| SNP_P4_65007_45318020 | NC_021163.1    | Ca_kabuli_chr04 | 45318020                | CC                              | AA              | 1946834150               |
| SNP_P4_65009_45318175 | NC_021163.1    | Ca_kabuli_chr04 | 45318175                | GG                              | AA              | 1946834152               |
| SNP_P4_65010_45318769 | NC_021163.1    | Ca_kabuli_chr04 | 45318769                | GG                              | AA              | 1946834154               |
| SNP_P4_65011_45318822 | NC_021163.1    | Ca_kabuli_chr04 | 45318822                | TT                              | CC              | 1946834157               |
| SNP_P4_65012_45319004 | NC_021163.1    | Ca_kabuli_chr04 | 45319004                | CC                              | TT              | 1946834159               |
| SNP_P4_65013_45319010 | NC_021163.1    | Ca_kabuli_chr04 | 45319010                | TT                              | AA              | 1946834162               |
| SNP_P4_65014_45319027 | NC_021163.1    | Ca_kabuli_chr04 | 45319027                | AA                              | TT              | 1946834164               |
| SNP_P4_65015_45319171 | NC_021163.1    | Ca_kabuli_chr04 | 45319171                | TT                              | CC              | 1946834166               |
| SNP_P4_65017_45320414 | NC_021163.1    | Ca_kabuli_chr04 | 45320414                | TT                              | CC              | 1946834168               |
| SNP_P4_65018_45320447 | NC_021163.1    | Ca_kabuli_chr04 | 45320447                | AA                              | TT              | 1946834170               |
| SNP_P4_65019_45320449 | NC_021163.1    | Ca_kabuli_chr04 | 45320449                | CC                              | GG              | 1946834172               |



| SNPs IDs              | Chromosome IDs | Chromosomes     | Physical positions (bp) | CDC Frontier (Reference genome) | (ILWC46 & LPNB) | NCBI SNPdb Accession IDs |
|-----------------------|----------------|-----------------|-------------------------|---------------------------------|-----------------|--------------------------|
| SNP_P4_65020_45320481 | NC_021163.1    | Ca_kabuli_chr04 | 45320481                | GG                              | AA              | 1946834174               |
| SNP_P4_65021_45320503 | NC_021163.1    | Ca_kabuli_chr04 | 45320503                | CC                              | AA              | 1946834176               |
| SNP_P4_65022_45321508 | NC_021163.1    | Ca_kabuli_chr04 | 45321508                | CC                              | GG              | 1946834178               |
| SNP_P4_65023_45321544 | NC_021163.1    | Ca_kabuli_chr04 | 45321544                | AA                              | CC              | 1946834181               |
| SNP_P4_65024_45321938 | NC_021163.1    | Ca_kabuli_chr04 | 45321938                | TT                              | CC              | 1946834183               |
| SNP_P4_65025_45321952 | NC_021163.1    | Ca_kabuli_chr04 | 45321952                | AA                              | GG              | 1946834184               |
| SNP_P4_65026_45321953 | NC_021163.1    | Ca_kabuli_chr04 | 45321953                | TT                              | AA              | 1946834187               |
| SNP_P4_65027_45322160 | NC_021163.1    | Ca_kabuli_chr04 | 45322160                | AA                              | GG              | 1946834189               |
| SNP_P4_65029_45322252 | NC_021163.1    | Ca_kabuli_chr04 | 45322252                | GG                              | AA              | 1946834191               |
| SNP_P4_65030_45322458 | NC_021163.1    | Ca_kabuli_chr04 | 45322458                | CC                              | TT              | 1946834193               |
| SNP_P4_65032_45322752 | NC_021163.1    | Ca_kabuli_chr04 | 45322752                | GG                              | AA              | 1946834195               |
| SNP_P4_65033_45322762 | NC_021163.1    | Ca_kabuli_chr04 | 45322762                | AA                              | GG              | 1946834196               |
| SNP_P4_65034_45322779 | NC_021163.1    | Ca_kabuli_chr04 | 45322779                | AA                              | GG              | 1946834198               |
| SNP_P4_65035_45322830 | NC_021163.1    | Ca_kabuli_chr04 | 45322830                | CC                              | GG              | 1946834200               |
| SNP_P4_65036_45324620 | NC_021163.1    | Ca_kabuli_chr04 | 45324620                | GG                              | CC              | 1946834202               |
| SNP_P4_65037_45327535 | NC_021163.1    | Ca_kabuli_chr04 | 45327535                | CC                              | GG              | 1946834204               |
| SNP_P4_65038_45327728 | NC_021163.1    | Ca_kabuli_chr04 | 45327728                | AA                              | GG              | 1946834206               |
| SNP_P4_65039_45329105 | NC_021163.1    | Ca_kabuli_chr04 | 45329105                | TT                              | AA              | 1946834208               |
| SNP_P4_65040_45330627 | NC_021163.1    | Ca_kabuli_chr04 | 45330627                | GG                              | AA              | 1946834210               |
| SNP_P4_65041_45330918 | NC_021163.1    | Ca_kabuli_chr04 | 45330918                | CC                              | TT              | 1946834212               |
| SNP_P4_65042_45331394 | NC_021163.1    | Ca_kabuli_chr04 | 45331394                | AA                              | GG              | 1946834214               |
| SNP_P4_65043_45331602 | NC_021163.1    | Ca_kabuli_chr04 | 45331602                | AA                              | CC              | 1946834216               |
| SNP_P4_65044_45331622 | NC_021163.1    | Ca_kabuli_chr04 | 45331622                | GG                              | TT              | 1946834218               |
| SNP_P4_65045_45331646 | NC_021163.1    | Ca_kabuli_chr04 | 45331646                | AA                              | GG              | 1946834220               |
| SNP_P4_65046_45331890 | NC_021163.1    | Ca_kabuli_chr04 | 45331890                | AA                              | GG              | 1946834222               |
| SNP_P4_65047_45331916 | NC_021163.1    | Ca_kabuli_chr04 | 45331916                | TT                              | GG              | 1946834224               |
| SNP_P4_65048_45332058 | NC_021163.1    | Ca_kabuli_chr04 | 45332058                | AA                              | CC              | 1946834226               |
| SNP_P4_65049_45332279 | NC_021163.1    | Ca_kabuli_chr04 | 45332279                | GG                              | TT              | 1946834228               |
| SNP_P4_65050_45332363 | NC_021163.1    | Ca_kabuli_chr04 | 45332363                | CC                              | TT              | 1946834230               |
| SNP_P4_65051_45332374 | NC_021163.1    | Ca_kabuli_chr04 | 45332374                | AA                              | GG              | 1946834231               |
| SNP_P4_65052_45332376 | NC_021163.1    | Ca_kabuli_chr04 | 45332376                | CC                              | TT              | 1946834232               |
| SNP_P4_65053_45332379 | NC_021163.1    | Ca_kabuli_chr04 | 45332379                | GG                              | AA              | 1946834233               |
| SNP_P4_65054_45332382 | NC_021163.1    | Ca_kabuli_chr04 | 45332382                | CC                              | TT              | 1946834234               |
| SNP_P4_65055_45332562 | NC_021163.1    | Ca_kabuli_chr04 | 45332562                | TT                              | CC              | 1946834235               |
| SNP_P4_65056_45332567 | NC_021163.1    | Ca_kabuli_chr04 | 45332567                | GG                              | AA              | 1946834236               |
| SNP_P4_65057_45332599 | NC_021163.1    | Ca_kabuli_chr04 | 45332599                | CC                              | AA              | 1946834237               |
| SNP_P4_65058_45332602 | NC_021163.1    | Ca_kabuli_chr04 | 45332602                | AA                              | GG              | 1946834238               |
| SNP_P4_65059_45332657 | NC_021163.1    | Ca_kabuli_chr04 | 45332657                | AA                              | GG              | 1946834239               |
| SNP_P4_65060_45332685 | NC_021163.1    | Ca_kabuli_chr04 | 45332685                | TT                              | CC              | 1946834240               |
| SNP_P4_65061_45333421 | NC_021163.1    | Ca_kabuli_chr04 | 45333421                | AA                              | GG              | 1946834243               |
| SNP_P4_65062_45333426 | NC_021163.1    | Ca_kabuli_chr04 | 45333426                | GG                              | CC              | 1946834244               |
| SNP_P4_65063_45333453 | NC_021163.1    | Ca_kabuli_chr04 | 45333453                | AA                              | GG              | 1946834246               |

| SNPs IDs              | Chromosome IDs | Chromosomes     | Physical positions (bp) | CDC Frontier (Reference genome) | (ILWC46 & LPNB) | NCBI SNPdb Accession IDs |
|-----------------------|----------------|-----------------|-------------------------|---------------------------------|-----------------|--------------------------|
| SNP_P4_65064_45333473 | NC_021163.1    | Ca_kabuli_chr04 | 45333473                | AA                              | CC              | 1946834248               |
| SNP_P4_65065_45333505 | NC_021163.1    | Ca_kabuli_chr04 | 45333505                | TT                              | CC              | 1946834250               |
| SNP_P4_65066_45333731 | NC_021163.1    | Ca_kabuli_chr04 | 45333731                | GG                              | AA              | 1946834252               |
| SNP_P4_65067_45333735 | NC_021163.1    | Ca_kabuli_chr04 | 45333735                | AA                              | GG              | 1946834254               |
| SNP_P4_65068_45333753 | NC_021163.1    | Ca_kabuli_chr04 | 45333753                | GG                              | AA              | 1946834256               |
| SNP_P4_65069_45333773 | NC_021163.1    | Ca_kabuli_chr04 | 45333773                | GG                              | AA              | 1946834258               |
| SNP_P4_65070_45333777 | NC_021163.1    | Ca_kabuli_chr04 | 45333777                | AA                              | GG              | 1946834260               |
| SNP_P4_65071_45333779 | NC_021163.1    | Ca_kabuli_chr04 | 45333779                | GG                              | AA              | 1946834262               |
| SNP_P4_65072_45333866 | NC_021163.1    | Ca_kabuli_chr04 | 45333866                | CC                              | AA              | 1946834264               |
| SNP_P4_65073_45334048 | NC_021163.1    | Ca_kabuli_chr04 | 45334048                | GG                              | AA              | 1946834266               |
| SNP_P4_65074_45334067 | NC_021163.1    | Ca_kabuli_chr04 | 45334067                | AA                              | TT              | 1946834268               |
| SNP_P4_65075_45334091 | NC_021163.1    | Ca_kabuli_chr04 | 45334091                | TT                              | CC              | 1946834270               |
| SNP_P4_65076_45334097 | NC_021163.1    | Ca_kabuli_chr04 | 45334097                | GG                              | AA              | 1946834272               |
| SNP_P4_65077_45334270 | NC_021163.1    | Ca_kabuli_chr04 | 45334270                | TT                              | GG              | 1946834274               |
| SNP_P4_65078_45334402 | NC_021163.1    | Ca_kabuli_chr04 | 45334402                | TT                              | CC              | 1946834276               |
| SNP_P4_65080_45334501 | NC_021163.1    | Ca_kabuli_chr04 | 45334501                | TT                              | AA              | 1946834279               |
| SNP_P4_65081_45334601 | NC_021163.1    | Ca_kabuli_chr04 | 45334601                | AA                              | CC              | 1946834281               |
| SNP_P4_65082_45334618 | NC_021163.1    | Ca_kabuli_chr04 | 45334618                | AA                              | GG              | 1946834283               |
| SNP_P4_65083_45334638 | NC_021163.1    | Ca_kabuli_chr04 | 45334638                | GG                              | CC              | 1946834284               |
| SNP_P4_65085_45334730 | NC_021163.1    | Ca_kabuli_chr04 | 45334730                | AA                              | GG              | 1946834286               |
| SNP_P4_65086_45334776 | NC_021163.1    | Ca_kabuli_chr04 | 45334776                | CC                              | TT              | 1946834288               |
| SNP_P4_65087_45334819 | NC_021163.1    | Ca_kabuli_chr04 | 45334819                | GG                              | AA              | 1946834290               |
| SNP_P4_65089_45334896 | NC_021163.1    | Ca_kabuli_chr04 | 45334896                | GG                              | AA              | 1946834292               |
| SNP_P4_65090_45334922 | NC_021163.1    | Ca_kabuli_chr04 | 45334922                | CC                              | TT              | 1946834294               |
| SNP_P4_65092_45335033 | NC_021163.1    | Ca_kabuli_chr04 | 45335033                | AA                              | GG              | 1946834296               |
| SNP_P4_65093_45335054 | NC_021163.1    | Ca_kabuli_chr04 | 45335054                | TT                              | GG              | 1946834298               |
| SNP_P4_65094_45335433 | NC_021163.1    | Ca_kabuli_chr04 | 45335433                | AA                              | CC              | 1946834300               |
| SNP_P4_65097_45339326 | NC_021163.1    | Ca_kabuli_chr04 | 45339326                | AA                              | GG              | 1946834302               |
| SNP_P4_65098_45339980 | NC_021163.1    | Ca_kabuli_chr04 | 45339980                | CC                              | GG              | 1946834304               |
| SNP_P4_65099_45341247 | NC_021163.1    | Ca_kabuli_chr04 | 45341247                | AA                              | GG              | 1946834306               |
| SNP_P4_65101_45341521 | NC_021163.1    | Ca_kabuli_chr04 | 45341521                | CC                              | TT              | 1946834308               |
| SNP_P4_65103_45341657 | NC_021163.1    | Ca_kabuli_chr04 | 45341657                | CC                              | GG              | 1946834310               |
| SNP_P4_65104_45342282 | NC_021163.1    | Ca_kabuli_chr04 | 45342282                | GG                              | AA              | 1946834312               |
| SNP_P4_65105_45347464 | NC_021163.1    | Ca_kabuli_chr04 | 45347464                | AA                              | GG              | 1946834314               |
| SNP_P4_65106_45347724 | NC_021163.1    | Ca_kabuli_chr04 | 45347724                | AA                              | GG              | 1946834316               |
| SNP_P4_65107_45349655 | NC_021163.1    | Ca_kabuli_chr04 | 45349655                | TT                              | CC              | 1946834318               |
| SNP_P4_65108_45349784 | NC_021163.1    | Ca_kabuli_chr04 | 45349784                | GG                              | AA              | 1946834320               |
| SNP_P4_65109_45349966 | NC_021163.1    | Ca_kabuli_chr04 | 45349966                | AA                              | GG              | 1946834322               |
| SNP_P4_65110_45350842 | NC_021163.1    | Ca_kabuli_chr04 | 45350842                | TT                              | GG              | 1946834324               |
| SNP_P4_65111_45351140 | NC_021163.1    | Ca_kabuli_chr04 | 45351140                | CC                              | TT              | 1946834326               |
| SNP_P4_65112_45351146 | NC_021163.1    | Ca_kabuli_chr04 | 45351146                | GG                              | AA              | 1946834329               |
| SNP_P4_65113_45351152 | NC_021163.1    | Ca_kabuli_chr04 | 45351152                | AA                              | GG              | 1946834331               |

| SNPs IDs              | Chromosome IDs | Chromosomes     | Physical positions (bp) | CDC Frontier (Reference genome) | (ILWC46 & LPNB) | NCBI SNPdb Accession IDs |
|-----------------------|----------------|-----------------|-------------------------|---------------------------------|-----------------|--------------------------|
| SNP_P4_65114_45351163 | NC_021163.1    | Ca_kabuli_chr04 | 45351163                | GG                              | AA              | 1946834333               |
| SNP_P4_65115_45352564 | NC_021163.1    | Ca_kabuli_chr04 | 45352564                | GG                              | AA              | 1946834335               |
| SNP_P4_65116_45353483 | NC_021163.1    | Ca_kabuli_chr04 | 45353483                | CC                              | AA              | 1946834337               |
| SNP_P4_65119_45365383 | NC_021163.1    | Ca_kabuli_chr04 | 45365383                | GG                              | AA              | 1946834339               |
| SNP_P4_65120_45366891 | NC_021163.1    | Ca_kabuli_chr04 | 45366891                | AA                              | TT              | 1946834341               |
| SNP_P4_65121_45366894 | NC_021163.1    | Ca_kabuli_chr04 | 45366894                | CC                              | TT              | 1946834344               |
| SNP_P4_65122_45366895 | NC_021163.1    | Ca_kabuli_chr04 | 45366895                | CC                              | TT              | 1946834346               |
| SNP_P4_65123_45366910 | NC_021163.1    | Ca_kabuli_chr04 | 45366910                | AA                              | GG              | 1946834348               |
| SNP_P4_65125_45368836 | NC_021163.1    | Ca_kabuli_chr04 | 45368836                | GG                              | CC              | 1946834351               |
| SNP_P4_65127_45369208 | NC_021163.1    | Ca_kabuli_chr04 | 45369208                | GG                              | AA              | 1946834353               |
| SNP_P4_65128_45369315 | NC_021163.1    | Ca_kabuli_chr04 | 45369315                | AA                              | GG              | 1946834355               |
| SNP_P4_65129_45369989 | NC_021163.1    | Ca_kabuli_chr04 | 45369989                | CC                              | TT              | 1946834357               |
| SNP_P4_65130_45369992 | NC_021163.1    | Ca_kabuli_chr04 | 45369992                | GG                              | AA              | 1946834359               |
| SNP_P4_65131_45370365 | NC_021163.1    | Ca_kabuli_chr04 | 45370365                | TT                              | CC              | 1946834361               |
| SNP_P4_65132_45370387 | NC_021163.1    | Ca_kabuli_chr04 | 45370387                | TT                              | AA              | 1946834363               |
| SNP_P4_65133_45371478 | NC_021163.1    | Ca_kabuli_chr04 | 45371478                | TT                              | CC              | 1946834365               |
| SNP_P4_65134_45371839 | NC_021163.1    | Ca_kabuli_chr04 | 45371839                | GG                              | AA              | 1946834367               |
| SNP_P4_65135_45372773 | NC_021163.1    | Ca_kabuli_chr04 | 45372773                | TT                              | GG              | 1946834369               |
| SNP_P4_65136_45372844 | NC_021163.1    | Ca_kabuli_chr04 | 45372844                | TT                              | CC              | 1946834372               |
| SNP_P4_65137_45372847 | NC_021163.1    | Ca_kabuli_chr04 | 45372847                | AA                              | CC              | 1946834374               |
| SNP_P4_65138_45372851 | NC_021163.1    | Ca_kabuli_chr04 | 45372851                | TT                              | GG              | 1946834376               |
| SNP_P4_65139_45372880 | NC_021163.1    | Ca_kabuli_chr04 | 45372880                | CC                              | TT              | 1946834378               |
| SNP_P4_65140_45372894 | NC_021163.1    | Ca_kabuli_chr04 | 45372894                | CC                              | TT              | 1946834380               |
| SNP_P4_65141_45374055 | NC_021163.1    | Ca_kabuli_chr04 | 45374055                | TT                              | CC              | 1946834382               |
| SNP_P4_65142_45375024 | NC_021163.1    | Ca_kabuli_chr04 | 45375024                | CC                              | TT              | 1946834384               |
| SNP_P4_65143_45375212 | NC_021163.1    | Ca_kabuli_chr04 | 45375212                | GG                              | AA              | 1946834386               |
| SNP_P4_65144_45375234 | NC_021163.1    | Ca_kabuli_chr04 | 45375234                | CC                              | TT              | 1946834389               |
| SNP_P4_65145_45375414 | NC_021163.1    | Ca_kabuli_chr04 | 45375414                | CC                              | TT              | 1946834391               |
| SNP_P4_65147_45376940 | NC_021163.1    | Ca_kabuli_chr04 | 45376940                | GG                              | AA              | 1946834393               |
| SNP_P4_65148_45377555 | NC_021163.1    | Ca_kabuli_chr04 | 45377555                | AA                              | CC              | 1946834395               |
| SNP_P4_65151_45377863 | NC_021163.1    | Ca_kabuli_chr04 | 45377863                | GG                              | AA              | 1946834397               |
| SNP_P4_65152_45379258 | NC_021163.1    | Ca_kabuli_chr04 | 45379258                | CC                              | TT              | 1946834399               |
| SNP_P4_65153_45383604 | NC_021163.1    | Ca_kabuli_chr04 | 45383604                | TT                              | CC              | 1946834401               |
| SNP_P4_65154_45383608 | NC_021163.1    | Ca_kabuli_chr04 | 45383608                | CC                              | TT              | 1946834403               |
| SNP_P4_65155_45384032 | NC_021163.1    | Ca_kabuli_chr04 | 45384032                | CC                              | TT              | 1946834405               |
| SNP_P4_65156_45384129 | NC_021163.1    | Ca_kabuli_chr04 | 45384129                | TT                              | GG              | 1946834407               |
| SNP_P4_65157_45384152 | NC_021163.1    | Ca_kabuli_chr04 | 45384152                | AA                              | GG              | 1946834409               |
| SNP_P4_65158_45384157 | NC_021163.1    | Ca_kabuli_chr04 | 45384157                | CC                              | TT              | 1946834412               |
| SNP_P4_65159_45384163 | NC_021163.1    | Ca_kabuli_chr04 | 45384163                | GG                              | TT              | 1946834414               |
| SNP_P4_65160_45384181 | NC_021163.1    | Ca_kabuli_chr04 | 45384181                | TT                              | CC              | 1946834416               |
| SNP_P4_65161_45384183 | NC_021163.1    | Ca_kabuli_chr04 | 45384183                | CC                              | TT              | 1946834418               |
| SNP_P4_65163_45384442 | NC_021163.1    | Ca_kabuli_chr04 | 45384442                | AA                              | TT              | 1946834420               |

| SNPs IDs              | Chromosome IDs | Chromosomes     | Physical positions (bp) | CDC Frontier (Reference genome) | (ILWC46 & LPNB) | NCBI SNPdb Accession IDs |
|-----------------------|----------------|-----------------|-------------------------|---------------------------------|-----------------|--------------------------|
| SNP_P4_65164_45384448 | NC_021163.1    | Ca_kabuli_chr04 | 45384448                | TT                              | AA              | 1946834422               |
| SNP_P4_65165_45384609 | NC_021163.1    | Ca_kabuli_chr04 | 45384609                | CC                              | AA              | 1946834424               |
| SNP_P4_65166_45384684 | NC_021163.1    | Ca_kabuli_chr04 | 45384684                | AA                              | CC              | 1946834426               |
| SNP_P4_65167_45384714 | NC_021163.1    | Ca_kabuli_chr04 | 45384714                | CC                              | TT              | 1946834427               |
| SNP_P4_65168_45384874 | NC_021163.1    | Ca_kabuli_chr04 | 45384874                | GG                              | TT              | 1946834429               |
| SNP_P4_65169_45384914 | NC_021163.1    | Ca_kabuli_chr04 | 45384914                | GG                              | AA              | 1946834431               |
| SNP_P4_65173_45386384 | NC_021163.1    | Ca_kabuli_chr04 | 45386384                | TT                              | CC              | 1946834433               |
| SNP_P4_65174_45387728 | NC_021163.1    | Ca_kabuli_chr04 | 45387728                | GG                              | TT              | 1946834435               |
| SNP_P4_65175_45387737 | NC_021163.1    | Ca_kabuli_chr04 | 45387737                | CC                              | TT              | 1946834437               |
| SNP_P4_65176_45387833 | NC_021163.1    | Ca_kabuli_chr04 | 45387833                | CC                              | AA              | 1946834439               |
| SNP_P4_65178_45387936 | NC_021163.1    | Ca_kabuli_chr04 | 45387936                | TT                              | CC              | 1946834441               |
| SNP_P4_65179_45389918 | NC_021163.1    | Ca_kabuli_chr04 | 45389918                | CC                              | TT              | 1946834443               |
| SNP_P4_65181_45389942 | NC_021163.1    | Ca_kabuli_chr04 | 45389942                | CC                              | TT              | 1946834445               |
| SNP_P4_65182_45389957 | NC_021163.1    | Ca_kabuli_chr04 | 45389957                | GG                              | AA              | 1946834448               |
| SNP_P4_65183_45390324 | NC_021163.1    | Ca_kabuli_chr04 | 45390324                | GG                              | TT              | 1946834450               |
| SNP_P4_65184_45390374 | NC_021163.1    | Ca_kabuli_chr04 | 45390374                | CC                              | AA              | 1946834452               |
| SNP_P4_65185_45390400 | NC_021163.1    | Ca_kabuli_chr04 | 45390400                | AA                              | GG              | 1946834454               |
| SNP_P4_65186_45390413 | NC_021163.1    | Ca_kabuli_chr04 | 45390413                | TT                              | CC              | 1946834456               |
| SNP_P4_65188_45390706 | NC_021163.1    | Ca_kabuli_chr04 | 45390706                | CC                              | TT              | 1946834458               |
| SNP_P4_65189_45390715 | NC_021163.1    | Ca_kabuli_chr04 | 45390715                | CC                              | AA              | 1946834460               |
| SNP_P4_65190_45390736 | NC_021163.1    | Ca_kabuli_chr04 | 45390736                | GG                              | TT              | 1946834461               |
| SNP_P4_65191_45390799 | NC_021163.1    | Ca_kabuli_chr04 | 45390799                | GG                              | TT              | 1946834463               |
| SNP_P4_65192_45391056 | NC_021163.1    | Ca_kabuli_chr04 | 45391056                | CC                              | AA              | 1946834465               |
| SNP_P4_65193_45391058 | NC_021163.1    | Ca_kabuli_chr04 | 45391058                | CC                              | TT              | 1946834467               |
| SNP_P4_65195_45391088 | NC_021163.1    | Ca_kabuli_chr04 | 45391088                | AA                              | TT              | 1946834469               |
| SNP_P4_65196_45391091 | NC_021163.1    | Ca_kabuli_chr04 | 45391091                | AA                              | TT              | 1946834471               |
| SNP_P4_65197_45391224 | NC_021163.1    | Ca_kabuli_chr04 | 45391224                | CC                              | TT              | 1946834473               |
| SNP_P4_65198_45391351 | NC_021163.1    | Ca_kabuli_chr04 | 45391351                | AA                              | TT              | 1946834475               |
| SNP_P4_65199_45391361 | NC_021163.1    | Ca_kabuli_chr04 | 45391361                | AA                              | GG              | 1946834477               |
| SNP_P4_65200_45391368 | NC_021163.1    | Ca_kabuli_chr04 | 45391368                | AA                              | GG              | 1946834479               |
| SNP_P4_65201_45391395 | NC_021163.1    | Ca_kabuli_chr04 | 45391395                | AA                              | GG              | 1946834481               |
| SNP_P4_65202_45391467 | NC_021163.1    | Ca_kabuli_chr04 | 45391467                | GG                              | AA              | 1946834483               |
| SNP_P4_65203_45391540 | NC_021163.1    | Ca_kabuli_chr04 | 45391540                | AA                              | GG              | 1946834485               |
| SNP_P4_65205_45391934 | NC_021163.1    | Ca_kabuli_chr04 | 45391934                | CC                              | AA              | 1946834487               |
| SNP_P4_65206_45392020 | NC_021163.1    | Ca_kabuli_chr04 | 45392020                | TT                              | CC              | 1946834489               |
| SNP_P4_65207_45395105 | NC_021163.1    | Ca_kabuli_chr04 | 45395105                | AA                              | GG              | 1946834491               |
| SNP_P4_65208_45395118 | NC_021163.1    | Ca_kabuli_chr04 | 45395118                | AA                              | TT              | 1946834493               |
| SNP_P4_65209_45395163 | NC_021163.1    | Ca_kabuli_chr04 | 45395163                | TT                              | AA              | 1946834495               |
| SNP_P4_65210_45395596 | NC_021163.1    | Ca_kabuli_chr04 | 45395596                | TT                              | AA              | 1946834497               |
| SNP_P4_65211_45395610 | NC_021163.1    | Ca_kabuli_chr04 | 45395610                | GG                              | AA              | 1946834499               |
| SNP_P4_65212_45396434 | NC_021163.1    | Ca_kabuli_chr04 | 45396434                | TT                              | AA              | 1946834501               |
| SNP_P4_65213_45396452 | NC_021163.1    | Ca_kabuli_chr04 | 45396452                | AA                              | TT              | 1946834503               |

| SNPs IDs              | Chromosome IDs | Chromosomes     | Physical positions (bp) | CDC Frontier (Reference genome) | (ILWC46 & LPNB) | NCBI SNPdb Accession IDs |
|-----------------------|----------------|-----------------|-------------------------|---------------------------------|-----------------|--------------------------|
| SNP_P4_65214_45396694 | NC_021163.1    | Ca_kabuli_chr04 | 45396694                | GG                              | CC              | 1946834505               |
| SNP_P4_65215_45396704 | NC_021163.1    | Ca_kabuli_chr04 | 45396704                | CC                              | TT              | 1946834507               |
| SNP_P4_65217_45396739 | NC_021163.1    | Ca_kabuli_chr04 | 45396739                | AA                              | TT              | 1946834509               |
| SNP_P4_65218_45396769 | NC_021163.1    | Ca_kabuli_chr04 | 45396769                | AA                              | TT              | 1946834511               |
| SNP_P4_65219_45396793 | NC_021163.1    | Ca_kabuli_chr04 | 45396793                | TT                              | CC              | 1946834513               |
| SNP_P4_65220_45396920 | NC_021163.1    | Ca_kabuli_chr04 | 45396920                | GG                              | AA              | 1946834515               |
| SNP_P4_65222_45397440 | NC_021163.1    | Ca_kabuli_chr04 | 45397440                | TT                              | AA              | 1946834517               |
| SNP_P4_65223_45397446 | NC_021163.1    | Ca_kabuli_chr04 | 45397446                | AA                              | CC              | 1946834519               |
| SNP_P4_65224_45397501 | NC_021163.1    | Ca_kabuli_chr04 | 45397501                | TT                              | AA              | 1946834520               |
| SNP_P4_65225_45399295 | NC_021163.1    | Ca_kabuli_chr04 | 45399295                | AA                              | TT              | 1946834522               |
| SNP_P4_65226_45399316 | NC_021163.1    | Ca_kabuli_chr04 | 45399316                | TT                              | CC              | 1946834524               |
| SNP_P4_65228_45399356 | NC_021163.1    | Ca_kabuli_chr04 | 45399356                | TT                              | GG              | 1946834526               |
| SNP_P4_65229_45400098 | NC_021163.1    | Ca_kabuli_chr04 | 45400098                | CC                              | TT              | 1946834528               |
| SNP_P4_65230_45400126 | NC_021163.1    | Ca_kabuli_chr04 | 45400126                | GG                              | TT              | 1946834530               |
| SNP_P4_65231_45400280 | NC_021163.1    | Ca_kabuli_chr04 | 45400280                | CC                              | TT              | 1946834532               |
| SNP_P4_65232_45400284 | NC_021163.1    | Ca_kabuli_chr04 | 45400284                | CC                              | TT              | 1946834534               |
| SNP_P4_65233_45400322 | NC_021163.1    | Ca_kabuli_chr04 | 45400322                | AA                              | CC              | 1946834536               |
| SNP_P4_65234_45400327 | NC_021163.1    | Ca_kabuli_chr04 | 45400327                | CC                              | TT              | 1946834538               |
| SNP_P4_65235_45400333 | NC_021163.1    | Ca_kabuli_chr04 | 45400333                | TT                              | CC              | 1946834540               |
| SNP_P4_65236_45400334 | NC_021163.1    | Ca_kabuli_chr04 | 45400334                | TT                              | CC              | 1946834542               |
| SNP_P4_65237_45400341 | NC_021163.1    | Ca_kabuli_chr04 | 45400341                | CC                              | TT              | 1946834544               |
| SNP_P4_65238_45400349 | NC_021163.1    | Ca_kabuli_chr04 | 45400349                | GG                              | AA              | 1946834547               |
| SNP_P4_65239_45400363 | NC_021163.1    | Ca_kabuli_chr04 | 45400363                | AA                              | GG              | 1946834549               |
| SNP_P4_65240_45400387 | NC_021163.1    | Ca_kabuli_chr04 | 45400387                | AA                              | GG              | 1946834551               |
| SNP_P4_65241_45400390 | NC_021163.1    | Ca_kabuli_chr04 | 45400390                | CC                              | GG              | 1946834553               |
| SNP_P4_65242_45400393 | NC_021163.1    | Ca_kabuli_chr04 | 45400393                | AA                              | GG              | 1946834555               |
| SNP_P4_65243_45400646 | NC_021163.1    | Ca_kabuli_chr04 | 45400646                | GG                              | AA              | 1946834557               |
| SNP_P4_65244_45400685 | NC_021163.1    | Ca_kabuli_chr04 | 45400685                | GG                              | AA              | 1946834559               |
| SNP_P4_65245_45401025 | NC_021163.1    | Ca_kabuli_chr04 | 45401025                | TT                              | AA              | 1946834561               |
| SNP_P4_65246_45401914 | NC_021163.1    | Ca_kabuli_chr04 | 45401914                | TT                              | CC              | 1946834563               |
| SNP_P4_65247_45401950 | NC_021163.1    | Ca_kabuli_chr04 | 45401950                | AA                              | TT              | 1946834565               |
| SNP_P4_65249_45404695 | NC_021163.1    | Ca_kabuli_chr04 | 45404695                | AA                              | GG              | 1946834567               |
| SNP_P4_65250_45405895 | NC_021163.1    | Ca_kabuli_chr04 | 45405895                | AA                              | TT              | 1946834569               |
| SNP_P4_65251_45406042 | NC_021163.1    | Ca_kabuli_chr04 | 45406042                | GG                              | TT              | 1946834571               |
| SNP_P4_65252_45406046 | NC_021163.1    | Ca_kabuli_chr04 | 45406046                | CC                              | TT              | 1946834573               |
| SNP_P4_65253_45407010 | NC_021163.1    | Ca_kabuli_chr04 | 45407010                | CC                              | TT              | 1946834575               |
| SNP_P4_65254_45407033 | NC_021163.1    | Ca_kabuli_chr04 | 45407033                | GG                              | AA              | 1946834577               |
| SNP_P4_65255_45407040 | NC_021163.1    | Ca_kabuli_chr04 | 45407040                | AA                              | GG              | 1946834579               |
| SNP_P4_65256_45407291 | NC_021163.1    | Ca_kabuli_chr04 | 45407291                | TT                              | CC              | 1946834580               |
| SNP_P4_65257_45407654 | NC_021163.1    | Ca_kabuli_chr04 | 45407654                | GG                              | TT              | 1946834582               |
| SNP_P4_65258_45408478 | NC_021163.1    | Ca_kabuli_chr04 | 45408478                | GG                              | AA              | 1946834584               |
| SNP_P4_65259_45411412 | NC_021163.1    | Ca_kabuli_chr04 | 45411412                | TT                              | CC              | 1946834586               |

| SNPs IDs              | Chromosome IDs | Chromosomes     | Physical positions (bp) | CDC Frontier (Reference genome) | (ILWC46 & LPNB) | NCBI SNPdb Accession IDs |
|-----------------------|----------------|-----------------|-------------------------|---------------------------------|-----------------|--------------------------|
| SNP_P4_65260_45411634 | NC_021163.1    | Ca_kabuli_chr04 | 45411634                | TT                              | CC              | 1946834588               |
| SNP_P4_65261_45413540 | NC_021163.1    | Ca_kabuli_chr04 | 45413540                | AA                              | GG              | 1946834590               |
| SNP_P4_65262_45413556 | NC_021163.1    | Ca_kabuli_chr04 | 45413556                | AA                              | GG              | 1946834592               |
| SNP_P4_65263_45413568 | NC_021163.1    | Ca_kabuli_chr04 | 45413568                | AA                              | GG              | 1946834594               |
| SNP_P4_65264_45414005 | NC_021163.1    | Ca_kabuli_chr04 | 45414005                | AA                              | GG              | 1946834596               |
| SNP_P4_65265_45414041 | NC_021163.1    | Ca_kabuli_chr04 | 45414041                | GG                              | AA              | 1946834598               |
| SNP_P4_65266_45414044 | NC_021163.1    | Ca_kabuli_chr04 | 45414044                | TT                              | CC              | 1946834600               |
| SNP_P4_65267_45414323 | NC_021163.1    | Ca_kabuli_chr04 | 45414323                | AA                              | TT              | 1946834602               |
| SNP_P4_65268_45414357 | NC_021163.1    | Ca_kabuli_chr04 | 45414357                | CC                              | AA              | 1946834604               |
| SNP_P4_65269_45414371 | NC_021163.1    | Ca_kabuli_chr04 | 45414371                | TT                              | AA              | 1946834606               |
| SNP_P4_65270_45414580 | NC_021163.1    | Ca_kabuli_chr04 | 45414580                | AA                              | TT              | 1946834608               |
| SNP_P4_65272_45415118 | NC_021163.1    | Ca_kabuli_chr04 | 45415118                | AA                              | GG              | 1946834610               |
| SNP_P4_65274_45415791 | NC_021163.1    | Ca_kabuli_chr04 | 45415791                | TT                              | AA              | 1946834612               |
| SNP_P4_65275_45416481 | NC_021163.1    | Ca_kabuli_chr04 | 45416481                | AA                              | GG              | 1946834614               |
| SNP_P4_65276_45416833 | NC_021163.1    | Ca_kabuli_chr04 | 45416833                | AA                              | CC              | 1946834616               |
| SNP_P4_65277_45416845 | NC_021163.1    | Ca_kabuli_chr04 | 45416845                | AA                              | TT              | 1946834618               |
| SNP_P4_65278_45416858 | NC_021163.1    | Ca_kabuli_chr04 | 45416858                | TT                              | AA              | 1946834620               |
| SNP_P4_65279_45416874 | NC_021163.1    | Ca_kabuli_chr04 | 45416874                | CC                              | TT              | 1946834622               |
| SNP_P4_65280_45416879 | NC_021163.1    | Ca_kabuli_chr04 | 45416879                | TT                              | AA              | 1946834624               |
| SNP_P4_65283_45417444 | NC_021163.1    | Ca_kabuli_chr04 | 45417444                | GG                              | AA              | 1946834626               |
| SNP_P4_65284_45417741 | NC_021163.1    | Ca_kabuli_chr04 | 45417741                | TT                              | AA              | 1946834628               |
| SNP_P4_65285_45418058 | NC_021163.1    | Ca_kabuli_chr04 | 45418058                | GG                              | AA              | 1946834630               |
| SNP_P4_65286_45418059 | NC_021163.1    | Ca_kabuli_chr04 | 45418059                | GG                              | AA              | 1946834632               |
| SNP_P4_65287_45418060 | NC_021163.1    | Ca_kabuli_chr04 | 45418060                | CC                              | AA              | 1946834634               |
| SNP_P4_65288_45418064 | NC_021163.1    | Ca_kabuli_chr04 | 45418064                | GG                              | AA              | 1946834636               |
| SNP_P4_65289_45418257 | NC_021163.1    | Ca_kabuli_chr04 | 45418257                | TT                              | AA              | 1946834638               |
| SNP_P4_65290_45418275 | NC_021163.1    | Ca_kabuli_chr04 | 45418275                | CC                              | TT              | 1946834640               |
| SNP_P4_65291_45418312 | NC_021163.1    | Ca_kabuli_chr04 | 45418312                | CC                              | TT              | 1946834642               |
| SNP_P4_65292_45418323 | NC_021163.1    | Ca_kabuli_chr04 | 45418323                | CC                              | AA              | 1946834644               |
| SNP_P4_65293_45420193 | NC_021163.1    | Ca_kabuli_chr04 | 45420193                | CC                              | TT              | 1946834646               |
| SNP_P4_65294_45420949 | NC_021163.1    | Ca_kabuli_chr04 | 45420949                | CC                              | TT              | 1946834648               |
| SNP_P4_65295_45420966 | NC_021163.1    | Ca_kabuli_chr04 | 45420966                | CC                              | GG              | 1946834650               |
| SNP_P4_65296_45421482 | NC_021163.1    | Ca_kabuli_chr04 | 45421482                | TT                              | AA              | 1946834652               |
| SNP_P4_65297_45422280 | NC_021163.1    | Ca_kabuli_chr04 | 45422280                | CC                              | TT              | 1946834654               |
| SNP_P4_65298_45422326 | NC_021163.1    | Ca_kabuli_chr04 | 45422326                | AA                              | CC              | 1946834656               |
| SNP_P4_65299_45422329 | NC_021163.1    | Ca_kabuli_chr04 | 45422329                | TT                              | CC              | 1946834658               |
| SNP_P4_65300_45422352 | NC_021163.1    | Ca_kabuli_chr04 | 45422352                | CC                              | TT              | 1946834660               |
| SNP_P4_65301_45422617 | NC_021163.1    | Ca_kabuli_chr04 | 45422617                | TT                              | CC              | 1946834662               |
| SNP_P4_65302_45422625 | NC_021163.1    | Ca_kabuli_chr04 | 45422625                | GG                              | TT              | 1946834664               |
| SNP_P4_65303_45422635 | NC_021163.1    | Ca_kabuli_chr04 | 45422635                | AA                              | GG              | 1946834666               |
| SNP_P4_65304_45422746 | NC_021163.1    | Ca_kabuli_chr04 | 45422746                | TT                              | CC              | 1946834669               |
| SNP_P4_65305_45422755 | NC_021163.1    | Ca_kabuli_chr04 | 45422755                | CC                              | TT              | 1946834671               |

| SNPs IDs              | Chromosome IDs | Chromosomes     | Physical positions (bp) | CDC Frontier (Reference genome) | (ILWC46 & LPNB) | NCBI SNPdb Accession IDs |
|-----------------------|----------------|-----------------|-------------------------|---------------------------------|-----------------|--------------------------|
| SNP_P4_65306_45422909 | NC_021163.1    | Ca_kabuli_chr04 | 45422909                | AA                              | GG              | 1946834673               |
| SNP_P4_65307_45422980 | NC_021163.1    | Ca_kabuli_chr04 | 45422980                | GG                              | AA              | 1946834675               |
| SNP_P4_65308_45423019 | NC_021163.1    | Ca_kabuli_chr04 | 45423019                | AA                              | TT              | 1946834677               |
| SNP_P4_65309_45423025 | NC_021163.1    | Ca_kabuli_chr04 | 45423025                | CC                              | TT              | 1946834679               |
| SNP_P4_65310_45423029 | NC_021163.1    | Ca_kabuli_chr04 | 45423029                | AA                              | GG              | 1946834681               |
| SNP_P4_65311_45429205 | NC_021163.1    | Ca_kabuli_chr04 | 45429205                | GG                              | TT              | 1946834683               |
| SNP_P4_65312_45429371 | NC_021163.1    | Ca_kabuli_chr04 | 45429371                | CC                              | TT              | 1946834685               |
| SNP_P4_65313_45429401 | NC_021163.1    | Ca_kabuli_chr04 | 45429401                | AA                              | GG              | 1946834687               |
| SNP_P4_65314_45429420 | NC_021163.1    | Ca_kabuli_chr04 | 45429420                | AA                              | GG              | 1946834689               |
| SNP_P4_65315_45429427 | NC_021163.1    | Ca_kabuli_chr04 | 45429427                | GG                              | CC              | 1946834691               |
| SNP_P4_65316_45430558 | NC_021163.1    | Ca_kabuli_chr04 | 45430558                | CC                              | TT              | 1946834693               |
| SNP_P4_65317_45430562 | NC_021163.1    | Ca_kabuli_chr04 | 45430562                | AA                              | GG              | 1946834695               |
| SNP_P4_65318_45430576 | NC_021163.1    | Ca_kabuli_chr04 | 45430576                | TT                              | GG              | 1946834697               |
| SNP_P4_65319_45430682 | NC_021163.1    | Ca_kabuli_chr04 | 45430682                | GG                              | TT              | 1946834698               |
| SNP_P4_65320_45430683 | NC_021163.1    | Ca_kabuli_chr04 | 45430683                | GG                              | TT              | 1946834700               |
| SNP_P4_65321_45431002 | NC_021163.1    | Ca_kabuli_chr04 | 45431002                | AA                              | CC              | 1946834702               |
| SNP_P4_65322_45431097 | NC_021163.1    | Ca_kabuli_chr04 | 45431097                | CC                              | AA              | 1946834704               |
| SNP_P4_65325_45431384 | NC_021163.1    | Ca_kabuli_chr04 | 45431384                | CC                              | TT              | 1946834706               |
| SNP_P4_65327_45432288 | NC_021163.1    | Ca_kabuli_chr04 | 45432288                | CC                              | AA              | 1946834708               |
| SNP_P4_65328_45432356 | NC_021163.1    | Ca_kabuli_chr04 | 45432356                | GG                              | AA              | 1946834710               |
| SNP_P4_65329_45432428 | NC_021163.1    | Ca_kabuli_chr04 | 45432428                | GG                              | AA              | 1946834712               |
| SNP_P4_65330_45433454 | NC_021163.1    | Ca_kabuli_chr04 | 45433454                | CC                              | TT              | 1946834714               |
| SNP_P4_65331_45433940 | NC_021163.1    | Ca_kabuli_chr04 | 45433940                | CC                              | AA              | 1946834716               |
| SNP_P4_65332_45433957 | NC_021163.1    | Ca_kabuli_chr04 | 45433957                | GG                              | AA              | 1946834718               |
| SNP_P4_65334_45434604 | NC_021163.1    | Ca_kabuli_chr04 | 45434604                | CC                              | TT              | 1946834720               |
| SNP_P4_65335_45434731 | NC_021163.1    | Ca_kabuli_chr04 | 45434731                | GG                              | AA              | 1946834722               |
| SNP_P4_65337_45435256 | NC_021163.1    | Ca_kabuli_chr04 | 45435256                | AA                              | TT              | 1946834724               |
| SNP_P4_65339_45436269 | NC_021163.1    | Ca_kabuli_chr04 | 45436269                | TT                              | AA              | 1946834726               |
| SNP_P4_65342_45437602 | NC_021163.1    | Ca_kabuli_chr04 | 45437602                | GG                              | AA              | 1946834728               |
| SNP_P4_65343_45437802 | NC_021163.1    | Ca_kabuli_chr04 | 45437802                | GG                              | CC              | 1946834730               |
| SNP_P4_65345_45438344 | NC_021163.1    | Ca_kabuli_chr04 | 45438344                | GG                              | TT              | 1946834732               |
| SNP_P4_65346_45438358 | NC_021163.1    | Ca_kabuli_chr04 | 45438358                | AA                              | CC              | 1946834734               |
| SNP_P4_65347_45438519 | NC_021163.1    | Ca_kabuli_chr04 | 45438519                | GG                              | AA              | 1946834736               |
| SNP_P4_65348_45438526 | NC_021163.1    | Ca_kabuli_chr04 | 45438526                | TT                              | CC              | 1946834738               |
| SNP_P4_65349_45438535 | NC_021163.1    | Ca_kabuli_chr04 | 45438535                | AA                              | CC              | 1946834740               |
| SNP_P4_65350_45438540 | NC_021163.1    | Ca_kabuli_chr04 | 45438540                | TT                              | CC              | 1946834742               |
| SNP_P4_65351_45438670 | NC_021163.1    | Ca_kabuli_chr04 | 45438670                | CC                              | TT              | 1946834744               |
| SNP_P4_65352_45438684 | NC_021163.1    | Ca_kabuli_chr04 | 45438684                | GG                              | AA              | 1946834746               |
| SNP_P4_65353_45438716 | NC_021163.1    | Ca_kabuli_chr04 | 45438716                | TT                              | CC              | 1946834748               |
| SNP_P4_65355_45439659 | NC_021163.1    | Ca_kabuli_chr04 | 45439659                | AA                              | CC              | 1946834750               |
| SNP_P4_65356_45439677 | NC_021163.1    | Ca_kabuli_chr04 | 45439677                | TT                              | CC              | 1946834752               |
| SNP_P4_65357_45439701 | NC_021163.1    | Ca_kabuli_chr04 | 45439701                | GG                              | AA              | 1946834754               |

| SNPs IDs              | Chromosome IDs | Chromosomes     | Physical positions (bp) | CDC Frontier (Reference genome) | (ILWC46 & LPNB) | NCBI SNPdb Accession IDs |
|-----------------------|----------------|-----------------|-------------------------|---------------------------------|-----------------|--------------------------|
| SNP_P4_65358_45439709 | NC_021163.1    | Ca_kabuli_chr04 | 45439709                | TT                              | GG              | 1946834756               |
| SNP_P4_65359_45439971 | NC_021163.1    | Ca_kabuli_chr04 | 45439971                | GG                              | AA              | 1946834758               |
| SNP_P4_65360_45439973 | NC_021163.1    | Ca_kabuli_chr04 | 45439973                | GG                              | AA              | 1946834761               |
| SNP_P4_65361_45440342 | NC_021163.1    | Ca_kabuli_chr04 | 45440342                | TT                              | GG              | 1946834762               |
| SNP_P4_65362_45440353 | NC_021163.1    | Ca_kabuli_chr04 | 45440353                | CC                              | TT              | 1946834764               |
| SNP_P4_65364_45441214 | NC_021163.1    | Ca_kabuli_chr04 | 45441214                | CC                              | TT              | 1946834767               |
| SNP_P4_65366_45441520 | NC_021163.1    | Ca_kabuli_chr04 | 45441520                | CC                              | TT              | 1946834769               |
| SNP_P4_65367_45441545 | NC_021163.1    | Ca_kabuli_chr04 | 45441545                | CC                              | TT              | 1946834771               |
| SNP_P4_65368_45441583 | NC_021163.1    | Ca_kabuli_chr04 | 45441583                | GG                              | CC              | 1946834772               |
| SNP_P4_65370_45453628 | NC_021163.1    | Ca_kabuli_chr04 | 45453628                | AA                              | TT              | 1946834774               |
| SNP_P4_65371_45470106 | NC_021163.1    | Ca_kabuli_chr04 | 45470106                | GG                              | TT              | 1946834776               |
| SNP_P4_65372_45472043 | NC_021163.1    | Ca_kabuli_chr04 | 45472043                | GG                              | TT              | 1946834778               |
| SNP_P4_65373_45472250 | NC_021163.1    | Ca_kabuli_chr04 | 45472250                | GG                              | AA              | 1946834780               |
| SNP_P4_65375_45501118 | NC_021163.1    | Ca_kabuli_chr04 | 45501118                | AA                              | TT              | 1946834782               |
| SNP_P4_65376_45502741 | NC_021163.1    | Ca_kabuli_chr04 | 45502741                | AA                              | CC              | 1946834784               |
| SNP_P4_65377_45507934 | NC_021163.1    | Ca_kabuli_chr04 | 45507934                | CC                              | GG              | 1946834786               |
| SNP_P4_65379_45551595 | NC_021163.1    | Ca_kabuli_chr04 | 45551595                | CC                              | TT              | 1946834788               |
| SNP_P4_65382_45575040 | NC_021163.1    | Ca_kabuli_chr04 | 45575040                | AA                              | GG              | 1946834790               |
| SNP_P4_65384_45589759 | NC_021163.1    | Ca_kabuli_chr04 | 45589759                | GG                              | AA              | 1946834792               |
| SNP_P4_65385_45589880 | NC_021163.1    | Ca_kabuli_chr04 | 45589880                | TT                              | CC              | 1946834794               |
| SNP_P4_65386_45590166 | NC_021163.1    | Ca_kabuli_chr04 | 45590166                | GG                              | AA              | 1946834797               |
| SNP_P4_65389_45599372 | NC_021163.1    | Ca_kabuli_chr04 | 45599372                | TT                              | CC              | 1946834799               |
| SNP_P4_65390_45645573 | NC_021163.1    | Ca_kabuli_chr04 | 45645573                | AA                              | GG              | 1946834801               |
| SNP_P4_65391_45645663 | NC_021163.1    | Ca_kabuli_chr04 | 45645663                | GG                              | AA              | 1946834803               |
| SNP_P4_65392_45645926 | NC_021163.1    | Ca_kabuli_chr04 | 45645926                | AA                              | CC              | 1946834805               |
| SNP_P4_65394_45646086 | NC_021163.1    | Ca_kabuli_chr04 | 45646086                | TT                              | AA              | 1946834807               |
| SNP_P4_65395_45646089 | NC_021163.1    | Ca_kabuli_chr04 | 45646089                | CC                              | AA              | 1946834809               |
| SNP_P4_65396_45668626 | NC_021163.1    | Ca_kabuli_chr04 | 45668626                | CC                              | GG              | 1946834811               |
| SNP_P4_65398_45709391 | NC_021163.1    | Ca_kabuli_chr04 | 45709391                | TT                              | AA              | 1946834813               |
| SNP_P4_65399_45709392 | NC_021163.1    | Ca_kabuli_chr04 | 45709392                | AA                              | CC              | 1946834815               |
| SNP_P4_65400_45714154 | NC_021163.1    | Ca_kabuli_chr04 | 45714154                | TT                              | AA              | 1946834817               |
| SNP_P4_65401_45730193 | NC_021163.1    | Ca_kabuli_chr04 | 45730193                | AA                              | CC              | 1946834819               |
| SNP_P4_65402_45735828 | NC_021163.1    | Ca_kabuli_chr04 | 45735828                | CC                              | TT              | 1946834821               |
| SNP_P4_65403_45736176 | NC_021163.1    | Ca_kabuli_chr04 | 45736176                | GG                              | CC              | 1946834823               |
| SNP_P4_65405_45752662 | NC_021163.1    | Ca_kabuli_chr04 | 45752662                | CC                              | TT              | 1946834825               |
| SNP_P4_65406_45752663 | NC_021163.1    | Ca_kabuli_chr04 | 45752663                | AA                              | GG              | 1946834827               |
| SNP_P4_65407_45752707 | NC_021163.1    | Ca_kabuli_chr04 | 45752707                | CC                              | TT              | 1946834829               |
| SNP_P4_65408_45752981 | NC_021163.1    | Ca_kabuli_chr04 | 45752981                | GG                              | TT              | 1946834831               |
| SNP_P4_65409_45756241 | NC_021163.1    | Ca_kabuli_chr04 | 45756241                | AA                              | GG              | 1946834833               |
| SNP_P4_65410_45756317 | NC_021163.1    | Ca_kabuli_chr04 | 45756317                | TT                              | CC              | 1946834835               |
| SNP_P4_65411_45756408 | NC_021163.1    | Ca_kabuli_chr04 | 45756408                | GG                              | TT              | 1946834837               |
| SNP_P4_65412_45756574 | NC_021163.1    | Ca_kabuli_chr04 | 45756574                | AA                              | TT              | 1946834839               |



| SNPs IDs              | Chromosome IDs | Chromosomes     | Physical positions (bp) | CDC Frontier (Reference genome) | (ILWC46 & LPNB) | NCBI SNPdb Accession IDs |
|-----------------------|----------------|-----------------|-------------------------|---------------------------------|-----------------|--------------------------|
| SNP_P4_65413_45756582 | NC_021163.1    | Ca_kabuli_chr04 | 45756582                | TT                              | AA              | 1946834841               |
| SNP_P4_65414_45756592 | NC_021163.1    | Ca_kabuli_chr04 | 45756592                | GG                              | TT              | 1946834843               |
| SNP_P4_65415_45756594 | NC_021163.1    | Ca_kabuli_chr04 | 45756594                | GG                              | AA              | 1946834845               |
| SNP_P4_65416_45756597 | NC_021163.1    | Ca_kabuli_chr04 | 45756597                | TT                              | AA              | 1946834847               |
| SNP_P4_65417_45756714 | NC_021163.1    | Ca_kabuli_chr04 | 45756714                | GG                              | CC              | 1946834849               |
| SNP_P4_65419_45767751 | NC_021163.1    | Ca_kabuli_chr04 | 45767751                | CC                              | TT              | 1946834851               |
| SNP_P4_65420_45767760 | NC_021163.1    | Ca_kabuli_chr04 | 45767760                | AA                              | GG              | 1946834853               |
| SNP_P4_65421_45767795 | NC_021163.1    | Ca_kabuli_chr04 | 45767795                | AA                              | GG              | 1946834855               |
| SNP_P4_65422_45771282 | NC_021163.1    | Ca_kabuli_chr04 | 45771282                | CC                              | AA              | 1946834857               |
| SNP_P4_65423_45793338 | NC_021163.1    | Ca_kabuli_chr04 | 45793338                | TT                              | CC              | 1946834859               |
| SNP_P4_65424_45825733 | NC_021163.1    | Ca_kabuli_chr04 | 45825733                | GG                              | AA              | 1946834861               |
| SNP_P4_65425_45826278 | NC_021163.1    | Ca_kabuli_chr04 | 45826278                | TT                              | CC              | 1946834863               |
| SNP_P4_65426_45828352 | NC_021163.1    | Ca_kabuli_chr04 | 45828352                | GG                              | AA              | 1946834865               |
| SNP_P4_65428_45849174 | NC_021163.1    | Ca_kabuli_chr04 | 45849174                | TT                              | AA              | 1946834867               |
| SNP_P4_65429_45849201 | NC_021163.1    | Ca_kabuli_chr04 | 45849201                | TT                              | CC              | 1946834869               |
| SNP_P4_65430_45849418 | NC_021163.1    | Ca_kabuli_chr04 | 45849418                | TT                              | GG              | 1946834870               |
| SNP_P4_65432_45888339 | NC_021163.1    | Ca_kabuli_chr04 | 45888339                | CC                              | TT              | 1946834872               |
| SNP_P4_65433_45892267 | NC_021163.1    | Ca_kabuli_chr04 | 45892267                | CC                              | TT              | 1946834874               |
| SNP_P4_65434_45903330 | NC_021163.1    | Ca_kabuli_chr04 | 45903330                | TT                              | CC              | 1946834876               |
| SNP_P4_65435_45915877 | NC_021163.1    | Ca_kabuli_chr04 | 45915877                | CC                              | TT              | 1946834878               |
| SNP_P4_65437_45934006 | NC_021163.1    | Ca_kabuli_chr04 | 45934006                | GG                              | AA              | 1946834880               |
| SNP_P4_65438_45941971 | NC_021163.1    | Ca_kabuli_chr04 | 45941971                | CC                              | TT              | 1946834882               |
| SNP_P4_65439_45948691 | NC_021163.1    | Ca_kabuli_chr04 | 45948691                | AA                              | GG              | 1946834884               |
| SNP_P4_65441_45949984 | NC_021163.1    | Ca_kabuli_chr04 | 45949984                | GG                              | TT              | 1946834886               |
| SNP_P4_65442_45953953 | NC_021163.1    | Ca_kabuli_chr04 | 45953953                | TT                              | CC              | 1946834888               |
| SNP_P4_65444_45974911 | NC_021163.1    | Ca_kabuli_chr04 | 45974911                | GG                              | TT              | 1946834890               |
| SNP_P4_65447_46005900 | NC_021163.1    | Ca_kabuli_chr04 | 46005900                | GG                              | AA              | 1946834892               |
| SNP_P4_65448_46005907 | NC_021163.1    | Ca_kabuli_chr04 | 46005907                | AA                              | GG              | 1946834894               |
| SNP_P4_65449_46005925 | NC_021163.1    | Ca_kabuli_chr04 | 46005925                | GG                              | AA              | 1946834896               |
| SNP_P4_65450_46005941 | NC_021163.1    | Ca_kabuli_chr04 | 46005941                | CC                              | TT              | 1946834898               |
| SNP_P4_65451_46005949 | NC_021163.1    | Ca_kabuli_chr04 | 46005949                | AA                              | GG              | 1946834900               |
| SNP_P4_65452_46005950 | NC_021163.1    | Ca_kabuli_chr04 | 46005950                | GG                              | AA              | 1946834902               |
| SNP_P4_65453_46005956 | NC_021163.1    | Ca_kabuli_chr04 | 46005956                | CC                              | TT              | 1946834904               |
| SNP_P4_65455_46026852 | NC_021163.1    | Ca_kabuli_chr04 | 46026852                | AA                              | GG              | 1946834906               |
| SNP_P4_65456_46026867 | NC_021163.1    | Ca_kabuli_chr04 | 46026867                | GG                              | AA              | 1946834908               |
| SNP_P4_65457_46027076 | NC_021163.1    | Ca_kabuli_chr04 | 46027076                | TT                              | AA              | 1946834910               |
| SNP_P4_65458_46027446 | NC_021163.1    | Ca_kabuli_chr04 | 46027446                | GG                              | CC              | 1946834912               |
| SNP_P4_65459_46031841 | NC_021163.1    | Ca_kabuli_chr04 | 46031841                | CC                              | TT              | 1946834914               |
| SNP_P4_65460_46031891 | NC_021163.1    | Ca_kabuli_chr04 | 46031891                | CC                              | TT              | 1946834916               |
| SNP_P4_65462_46035639 | NC_021163.1    | Ca_kabuli_chr04 | 46035639                | TT                              | CC              | 1946834918               |
| SNP_P4_65463_46040213 | NC_021163.1    | Ca_kabuli_chr04 | 46040213                | TT                              | AA              | 1946834920               |
| SNP_P4_65464_46040214 | NC_021163.1    | Ca_kabuli_chr04 | 46040214                | CC                              | TT              | 1946834922               |

| SNPs IDs              | Chromosome IDs | Chromosomes     | Physical positions (bp) | CDC Frontier (Reference genome) | (ILWC46 & LPNB) | NCBI SNPdb Accession IDs |
|-----------------------|----------------|-----------------|-------------------------|---------------------------------|-----------------|--------------------------|
| SNP_P4_65466_46043869 | NC_021163.1    | Ca_kabuli_chr04 | 46043869                | GG                              | TT              | 1946834924               |
| SNP_P4_65467_46057362 | NC_021163.1    | Ca_kabuli_chr04 | 46057362                | GG                              | AA              | 1946834926               |
| SNP_P4_65470_46060502 | NC_021163.1    | Ca_kabuli_chr04 | 46060502                | AA                              | GG              | 1946834928               |
| SNP_P4_65471_46060549 | NC_021163.1    | Ca_kabuli_chr04 | 46060549                | AA                              | GG              | 1946834930               |
| SNP_P4_65472_46081408 | NC_021163.1    | Ca_kabuli_chr04 | 46081408                | AA                              | GG              | 1946834932               |
| SNP_P4_65473_46106806 | NC_021163.1    | Ca_kabuli_chr04 | 46106806                | AA                              | TT              | 1946834935               |
| SNP_P4_65474_46113290 | NC_021163.1    | Ca_kabuli_chr04 | 46113290                | GG                              | AA              | 1946834937               |
| SNP_P4_65475_46113467 | NC_021163.1    | Ca_kabuli_chr04 | 46113467                | GG                              | AA              | 1946834939               |
| SNP_P4_65476_46127896 | NC_021163.1    | Ca_kabuli_chr04 | 46127896                | AA                              | TT              | 1946834941               |
| SNP_P4_65477_46128767 | NC_021163.1    | Ca_kabuli_chr04 | 46128767                | AA                              | CC              | 1946834943               |
| SNP_P4_65478_46130824 | NC_021163.1    | Ca_kabuli_chr04 | 46130824                | AA                              | GG              | 1946834945               |
| SNP_P4_65480_46141275 | NC_021163.1    | Ca_kabuli_chr04 | 46141275                | AA                              | TT              | 1946834947               |
| SNP_P4_65483_46191224 | NC_021163.1    | Ca_kabuli_chr04 | 46191224                | AA                              | TT              | 1946834949               |
| SNP_P4_65484_46228218 | NC_021163.1    | Ca_kabuli_chr04 | 46228218                | TT                              | CC              | 1946834951               |
| SNP_P4_65485_46239828 | NC_021163.1    | Ca_kabuli_chr04 | 46239828                | CC                              | GG              | 1946834953               |
| SNP_P4_65486_46243078 | NC_021163.1    | Ca_kabuli_chr04 | 46243078                | TT                              | CC              | 1946834955               |
| SNP_P4_65487_46282668 | NC_021163.1    | Ca_kabuli_chr04 | 46282668                | CC                              | GG              | 1946834957               |
| SNP_P4_65488_46321989 | NC_021163.1    | Ca_kabuli_chr04 | 46321989                | AA                              | GG              | 1946834959               |
| SNP_P4_65489_46322024 | NC_021163.1    | Ca_kabuli_chr04 | 46322024                | AA                              | GG              | 1946834961               |
| SNP_P4_65490_46322268 | NC_021163.1    | Ca_kabuli_chr04 | 46322268                | AA                              | GG              | 1946834963               |
| SNP_P4_65491_46322341 | NC_021163.1    | Ca_kabuli_chr04 | 46322341                | GG                              | AA              | 1946834965               |
| SNP_P4_65492_46322521 | NC_021163.1    | Ca_kabuli_chr04 | 46322521                | GG                              | AA              | 1946834967               |
| SNP_P4_65493_46322553 | NC_021163.1    | Ca_kabuli_chr04 | 46322553                | GG                              | TT              | 1946834969               |
| SNP_P4_65494_46322560 | NC_021163.1    | Ca_kabuli_chr04 | 46322560                | AA                              | GG              | 1946834971               |
| SNP_P4_65495_46322812 | NC_021163.1    | Ca_kabuli_chr04 | 46322812                | TT                              | CC              | 1946834973               |
| SNP_P4_65496_46322831 | NC_021163.1    | Ca_kabuli_chr04 | 46322831                | TT                              | GG              | 1946834975               |
| SNP_P4_65497_46322866 | NC_021163.1    | Ca_kabuli_chr04 | 46322866                | TT                              | CC              | 1946834977               |
| SNP_P4_65498_46322869 | NC_021163.1    | Ca_kabuli_chr04 | 46322869                | TT                              | CC              | 1946834979               |
| SNP_P4_65499_46322879 | NC_021163.1    | Ca_kabuli_chr04 | 46322879                | GG                              | AA              | 1946834981               |
| SNP_P4_65500_46377539 | NC_021163.1    | Ca_kabuli_chr04 | 46377539                | AA                              | TT              | 1946834983               |
| SNP_P4_65503_46385863 | NC_021163.1    | Ca_kabuli_chr04 | 46385863                | AA                              | GG              | 1946834985               |
| SNP_P4_65504_46385956 | NC_021163.1    | Ca_kabuli_chr04 | 46385956                | CC                              | AA              | 1946834987               |
| SNP_P4_65505_46388109 | NC_021163.1    | Ca_kabuli_chr04 | 46388109                | AA                              | GG              | 1946834989               |
| SNP_P4_65506_46388170 | NC_021163.1    | Ca_kabuli_chr04 | 46388170                | GG                              | TT              | 1946834991               |
| SNP_P4_65507_46388342 | NC_021163.1    | Ca_kabuli_chr04 | 46388342                | CC                              | AA              | 1946834993               |
| SNP_P4_65509_46426419 | NC_021163.1    | Ca_kabuli_chr04 | 46426419                | GG                              | AA              | 1946834995               |
| SNP_P4_65510_46471787 | NC_021163.1    | Ca_kabuli_chr04 | 46471787                | AA                              | GG              | 1946834997               |
| SNP_P4_65511_46472367 | NC_021163.1    | Ca_kabuli_chr04 | 46472367                | AA                              | TT              | 1946834999               |
| SNP_P4_65512_46473881 | NC_021163.1    | Ca_kabuli_chr04 | 46473881                | AA                              | TT              | 1946835001               |
| SNP_P4_65513_46473904 | NC_021163.1    | Ca_kabuli_chr04 | 46473904                | AA                              | GG              | 1946835003               |
| SNP_P4_65514_46473923 | NC_021163.1    | Ca_kabuli_chr04 | 46473923                | CC                              | AA              | 1946835005               |
| SNP_P4_65515_46492908 | NC_021163.1    | Ca_kabuli_chr04 | 46492908                | TT                              | CC              | 1946835007               |

| SNPs IDs              | Chromosome IDs | Chromosomes     | Physical positions (bp) | CDC Frontier (Reference genome) | (ILWC46 & LPNB) | NCBI SNPdb Accession IDs |
|-----------------------|----------------|-----------------|-------------------------|---------------------------------|-----------------|--------------------------|
| SNP_P4_65516_46492967 | NC_021163.1    | Ca_kabuli_chr04 | 46492967                | GG                              | TT              | 1946835009               |
| SNP_P4_65517_46492982 | NC_021163.1    | Ca_kabuli_chr04 | 46492982                | TT                              | CC              | 1946835011               |
| SNP_P4_65518_46492994 | NC_021163.1    | Ca_kabuli_chr04 | 46492994                | GG                              | AA              | 1946835013               |
| SNP_P4_65521_46494958 | NC_021163.1    | Ca_kabuli_chr04 | 46494958                | AA                              | GG              | 1946835015               |
| SNP_P4_65522_46494983 | NC_021163.1    | Ca_kabuli_chr04 | 46494983                | TT                              | AA              | 1946835017               |
| SNP_P4_65524_46495131 | NC_021163.1    | Ca_kabuli_chr04 | 46495131                | AA                              | CC              | 1946835019               |
| SNP_P4_65525_46495162 | NC_021163.1    | Ca_kabuli_chr04 | 46495162                | TT                              | AA              | 1946835022               |
| SNP_P4_65526_46495311 | NC_021163.1    | Ca_kabuli_chr04 | 46495311                | TT                              | AA              | 1946835024               |
| SNP_P4_65527_46495398 | NC_021163.1    | Ca_kabuli_chr04 | 46495398                | AA                              | GG              | 1946835026               |
| SNP_P4_65528_46495580 | NC_021163.1    | Ca_kabuli_chr04 | 46495580                | AA                              | GG              | 1946835028               |
| SNP_P4_65529_46495585 | NC_021163.1    | Ca_kabuli_chr04 | 46495585                | GG                              | AA              | 1946835030               |
| SNP_P4_65532_46514924 | NC_021163.1    | Ca_kabuli_chr04 | 46514924                | CC                              | AA              | 1946835033               |
| SNP_P4_65533_46539348 | NC_021163.1    | Ca_kabuli_chr04 | 46539348                | GG                              | CC              | 1946835035               |
| SNP_P4_65534_46539586 | NC_021163.1    | Ca_kabuli_chr04 | 46539586                | AA                              | GG              | 1946835037               |
| SNP_P4_65535_46546977 | NC_021163.1    | Ca_kabuli_chr04 | 46546977                | CC                              | TT              | 1946835039               |
| SNP_P4_65537_46561484 | NC_021163.1    | Ca_kabuli_chr04 | 46561484                | TT                              | AA              | 1946835041               |
| SNP_P4_65538_46581281 | NC_021163.1    | Ca_kabuli_chr04 | 46581281                | GG                              | AA              | 1946835043               |
| SNP_P4_65540_46583353 | NC_021163.1    | Ca_kabuli_chr04 | 46583353                | GG                              | AA              | 1946835045               |
| SNP_P4_65541_46594700 | NC_021163.1    | Ca_kabuli_chr04 | 46594700                | AA                              | TT              | 1946835047               |
| SNP_P4_65542_46597677 | NC_021163.1    | Ca_kabuli_chr04 | 46597677                | TT                              | GG              | 1946835049               |
| SNP_P4_65543_46606380 | NC_021163.1    | Ca_kabuli_chr04 | 46606380                | GG                              | TT              | 1946835051               |
| SNP_P4_65544_46615573 | NC_021163.1    | Ca_kabuli_chr04 | 46615573                | AA                              | GG              | 1946835053               |
| SNP_P4_65545_46621877 | NC_021163.1    | Ca_kabuli_chr04 | 46621877                | AA                              | GG              | 1946835055               |
| SNP_P4_65546_46636542 | NC_021163.1    | Ca_kabuli_chr04 | 46636542                | CC                              | GG              | 1946835057               |
| SNP_P4_65547_46641461 | NC_021163.1    | Ca_kabuli_chr04 | 46641461                | TT                              | CC              | 1946835059               |
| SNP_P4_65548_46647091 | NC_021163.1    | Ca_kabuli_chr04 | 46647091                | AA                              | GG              | 1946835061               |
| SNP_P4_65549_46647092 | NC_021163.1    | Ca_kabuli_chr04 | 46647092                | AA                              | CC              | 1946835063               |
| SNP_P4_65550_46657858 | NC_021163.1    | Ca_kabuli_chr04 | 46657858                | TT                              | AA              | 1946835065               |
| SNP_P4_65552_46675101 | NC_021163.1    | Ca_kabuli_chr04 | 46675101                | TT                              | CC              | 1946835067               |
| SNP_P4_65554_46688797 | NC_021163.1    | Ca_kabuli_chr04 | 46688797                | TT                              | AA              | 1946835069               |
| SNP_P4_65555_46705812 | NC_021163.1    | Ca_kabuli_chr04 | 46705812                | CC                              | GG              | 1946835072               |
| SNP_P4_65556_46705819 | NC_021163.1    | Ca_kabuli_chr04 | 46705819                | CC                              | TT              | 1946835074               |
| SNP_P4_65557_46705824 | NC_021163.1    | Ca_kabuli_chr04 | 46705824                | CC                              | AA              | 1946835076               |
| SNP_P4_65558_46705835 | NC_021163.1    | Ca_kabuli_chr04 | 46705835                | CC                              | TT              | 1946835078               |
| SNP_P4_65559_46705858 | NC_021163.1    | Ca_kabuli_chr04 | 46705858                | TT                              | AA              | 1946835080               |
| SNP_P4_65560_46706563 | NC_021163.1    | Ca_kabuli_chr04 | 46706563                | CC                              | TT              | 1946835082               |
| SNP_P4_65561_46708301 | NC_021163.1    | Ca_kabuli_chr04 | 46708301                | GG                              | AA              | 1946835084               |
| SNP_P4_65563_46708470 | NC_021163.1    | Ca_kabuli_chr04 | 46708470                | AA                              | CC              | 1946835086               |
| SNP_P4_65564_46708837 | NC_021163.1    | Ca_kabuli_chr04 | 46708837                | GG                              | CC              | 1946835088               |
| SNP_P4_65565_46708863 | NC_021163.1    | Ca_kabuli_chr04 | 46708863                | TT                              | AA              | 1946835090               |
| SNP_P4_65566_46708872 | NC_021163.1    | Ca_kabuli_chr04 | 46708872                | GG                              | AA              | 1946835092               |
| SNP_P4_65567_46709769 | NC_021163.1    | Ca_kabuli_chr04 | 46709769                | GG                              | AA              | 1946835094               |

| SNPs IDs              | Chromosome IDs | Chromosomes     | Physical positions (bp) | CDC Frontier (Reference genome) | (ILWC46 & LPNB) | NCBI SNPdb Accession IDs |
|-----------------------|----------------|-----------------|-------------------------|---------------------------------|-----------------|--------------------------|
| SNP_P4_65568_46709778 | NC_021163.1    | Ca_kabuli_chr04 | 46709778                | TT                              | CC              | 1946835096               |
| SNP_P4_65569_46709782 | NC_021163.1    | Ca_kabuli_chr04 | 46709782                | TT                              | AA              | 1946835098               |
| SNP_P4_65570_46709793 | NC_021163.1    | Ca_kabuli_chr04 | 46709793                | TT                              | CC              | 1946835100               |
| SNP_P4_65571_46709911 | NC_021163.1    | Ca_kabuli_chr04 | 46709911                | CC                              | TT              | 1946835102               |
| SNP_P4_65572_46710092 | NC_021163.1    | Ca_kabuli_chr04 | 46710092                | GG                              | AA              | 1946835104               |
| SNP_P4_65573_46710101 | NC_021163.1    | Ca_kabuli_chr04 | 46710101                | AA                              | TT              | 1946835106               |
| SNP_P4_65574_46710144 | NC_021163.1    | Ca_kabuli_chr04 | 46710144                | CC                              | TT              | 1946835108               |
| SNP_P4_65575_46710292 | NC_021163.1    | Ca_kabuli_chr04 | 46710292                | CC                              | TT              | 1946835110               |
| SNP_P4_65576_46710315 | NC_021163.1    | Ca_kabuli_chr04 | 46710315                | TT                              | CC              | 1946835112               |
| SNP_P4_65577_46710413 | NC_021163.1    | Ca_kabuli_chr04 | 46710413                | AA                              | GG              | 1946835114               |
| SNP_P4_65578_46710467 | NC_021163.1    | Ca_kabuli_chr04 | 46710467                | CC                              | TT              | 1946835116               |
| SNP_P4_65579_46710504 | NC_021163.1    | Ca_kabuli_chr04 | 46710504                | GG                              | TT              | 1946835118               |
| SNP_P4_65580_46710534 | NC_021163.1    | Ca_kabuli_chr04 | 46710534                | CC                              | AA              | 1946835120               |
| SNP_P4_65581_46710755 | NC_021163.1    | Ca_kabuli_chr04 | 46710755                | CC                              | AA              | 1946835122               |
| SNP_P4_65582_46711452 | NC_021163.1    | Ca_kabuli_chr04 | 46711452                | AA                              | TT              | 1946835124               |
| SNP_P4_65584_46712394 | NC_021163.1    | Ca_kabuli_chr04 | 46712394                | TT                              | GG              | 1946835126               |
| SNP_P4_65585_46713145 | NC_021163.1    | Ca_kabuli_chr04 | 46713145                | CC                              | TT              | 1946835128               |
| SNP_P4_65587_46717200 | NC_021163.1    | Ca_kabuli_chr04 | 46717200                | CC                              | TT              | 1946835130               |
| SNP_P4_65588_46717337 | NC_021163.1    | Ca_kabuli_chr04 | 46717337                | TT                              | CC              | 1946835132               |
| SNP_P4_65589_46717537 | NC_021163.1    | Ca_kabuli_chr04 | 46717537                | AA                              | GG              | 1946835134               |
| SNP_P4_65590_46723483 | NC_021163.1    | Ca_kabuli_chr04 | 46723483                | AA                              | TT              | 1946835136               |
| SNP_P4_65591_46725985 | NC_021163.1    | Ca_kabuli_chr04 | 46725985                | AA                              | CC              | 1946835138               |
| SNP_P4_65592_46726169 | NC_021163.1    | Ca_kabuli_chr04 | 46726169                | GG                              | AA              | 1946835140               |
| SNP_P4_65593_46726178 | NC_021163.1    | Ca_kabuli_chr04 | 46726178                | GG                              | AA              | 1946835142               |
| SNP_P4_65594_46726341 | NC_021163.1    | Ca_kabuli_chr04 | 46726341                | TT                              | CC              | 1946835144               |
| SNP_P4_65595_46727629 | NC_021163.1    | Ca_kabuli_chr04 | 46727629                | GG                              | AA              | 1946835146               |
| SNP_P4_65596_46727698 | NC_021163.1    | Ca_kabuli_chr04 | 46727698                | AA                              | GG              | 1946835148               |
| SNP_P4_65597_46727781 | NC_021163.1    | Ca_kabuli_chr04 | 46727781                | TT                              | AA              | 1946835150               |
| SNP_P4_65598_46728872 | NC_021163.1    | Ca_kabuli_chr04 | 46728872                | AA                              | GG              | 1946835152               |
| SNP_P4_65601_46730423 | NC_021163.1    | Ca_kabuli_chr04 | 46730423                | TT                              | AA              | 1946835154               |
| SNP_P4_65602_46730428 | NC_021163.1    | Ca_kabuli_chr04 | 46730428                | TT                              | CC              | 1946835156               |
| SNP_P4_65604_46730677 | NC_021163.1    | Ca_kabuli_chr04 | 46730677                | GG                              | TT              | 1946835158               |
| SNP_P4_65605_46730679 | NC_021163.1    | Ca_kabuli_chr04 | 46730679                | CC                              | TT              | 1946835160               |
| SNP_P4_65606_46730696 | NC_021163.1    | Ca_kabuli_chr04 | 46730696                | TT                              | CC              | 1946835162               |
| SNP_P4_65607_46730702 | NC_021163.1    | Ca_kabuli_chr04 | 46730702                | AA                              | GG              | 1946835164               |
| SNP_P4_65608_46730768 | NC_021163.1    | Ca_kabuli_chr04 | 46730768                | CC                              | TT              | 1946835166               |
| SNP_P4_65609_46730872 | NC_021163.1    | Ca_kabuli_chr04 | 46730872                | TT                              | CC              | 1946835168               |
| SNP_P4_65610_46730877 | NC_021163.1    | Ca_kabuli_chr04 | 46730877                | TT                              | AA              | 1946835170               |
| SNP_P4_65611_46730880 | NC_021163.1    | Ca_kabuli_chr04 | 46730880                | GG                              | TT              | 1946835172               |
| SNP_P4_65613_46730957 | NC_021163.1    | Ca_kabuli_chr04 | 46730957                | TT                              | CC              | 1946835174               |
| SNP_P4_65614_46730969 | NC_021163.1    | Ca_kabuli_chr04 | 46730969                | TT                              | CC              | 1946835176               |
| SNP_P4_65615_46731155 | NC_021163.1    | Ca_kabuli_chr04 | 46731155                | GG                              | CC              | 1946835179               |

| SNPs IDs              | Chromosome IDs | Chromosomes     | Physical positions (bp) | CDC Frontier (Reference genome) | (ILWC46 & LPNB) | NCBI SNPdb Accession IDs |
|-----------------------|----------------|-----------------|-------------------------|---------------------------------|-----------------|--------------------------|
| SNP_P4_65616_46731324 | NC_021163.1    | Ca_kabuli_chr04 | 46731324                | AA                              | TT              | 1946835181               |
| SNP_P4_65617_46732476 | NC_021163.1    | Ca_kabuli_chr04 | 46732476                | CC                              | GG              | 1946835183               |
| SNP_P4_65619_46732531 | NC_021163.1    | Ca_kabuli_chr04 | 46732531                | TT                              | AA              | 1946835185               |
| SNP_P4_65620_46733965 | NC_021163.1    | Ca_kabuli_chr04 | 46733965                | AA                              | GG              | 1946835188               |
| SNP_P4_65621_46734047 | NC_021163.1    | Ca_kabuli_chr04 | 46734047                | GG                              | AA              | 1946835190               |
| SNP_P4_65622_46734469 | NC_021163.1    | Ca_kabuli_chr04 | 46734469                | CC                              | TT              | 1946835192               |
| SNP_P4_65623_46734522 | NC_021163.1    | Ca_kabuli_chr04 | 46734522                | GG                              | AA              | 1946835194               |
| SNP_P4_65624_46734525 | NC_021163.1    | Ca_kabuli_chr04 | 46734525                | TT                              | CC              | 1946835196               |
| SNP_P4_65625_46734651 | NC_021163.1    | Ca_kabuli_chr04 | 46734651                | GG                              | AA              | 1946835198               |
| SNP_P4_65626_46734701 | NC_021163.1    | Ca_kabuli_chr04 | 46734701                | AA                              | TT              | 1946835200               |
| SNP_P4_65627_46734705 | NC_021163.1    | Ca_kabuli_chr04 | 46734705                | CC                              | TT              | 1946835202               |
| SNP_P4_65628_46734724 | NC_021163.1    | Ca_kabuli_chr04 | 46734724                | GG                              | TT              | 1946835204               |
| SNP_P4_65629_46735746 | NC_021163.1    | Ca_kabuli_chr04 | 46735746                | TT                              | CC              | 1946835206               |
| SNP_P4_65630_46735784 | NC_021163.1    | Ca_kabuli_chr04 | 46735784                | GG                              | TT              | 1946835208               |
| SNP_P4_65631_46735833 | NC_021163.1    | Ca_kabuli_chr04 | 46735833                | AA                              | GG              | 1946835210               |
| SNP_P4_65633_46735954 | NC_021163.1    | Ca_kabuli_chr04 | 46735954                | TT                              | AA              | 1946835211               |
| SNP_P4_65634_46736007 | NC_021163.1    | Ca_kabuli_chr04 | 46736007                | TT                              | CC              | 1946835212               |
| SNP_P4_65635_46736124 | NC_021163.1    | Ca_kabuli_chr04 | 46736124                | AA                              | CC              | 1946835213               |
| SNP_P4_65636_46736179 | NC_021163.1    | Ca_kabuli_chr04 | 46736179                | GG                              | AA              | 1946835214               |
| SNP_P4_65637_46736306 | NC_021163.1    | Ca_kabuli_chr04 | 46736306                | GG                              | CC              | 1946835215               |
| SNP_P4_65639_46736389 | NC_021163.1    | Ca_kabuli_chr04 | 46736389                | GG                              | AA              | 1946835218               |
| SNP_P4_65640_46736785 | NC_021163.1    | Ca_kabuli_chr04 | 46736785                | CC                              | TT              | 1946835220               |
| SNP_P4_65641_46736847 | NC_021163.1    | Ca_kabuli_chr04 | 46736847                | TT                              | CC              | 1946835222               |
| SNP_P4_65642_46736862 | NC_021163.1    | Ca_kabuli_chr04 | 46736862                | TT                              | CC              | 1946835224               |
| SNP_P4_65643_46736929 | NC_021163.1    | Ca_kabuli_chr04 | 46736929                | AA                              | GG              | 1946835226               |
| SNP_P4_65644_46737167 | NC_021163.1    | Ca_kabuli_chr04 | 46737167                | GG                              | AA              | 1946835228               |
| SNP_P4_65645_46737179 | NC_021163.1    | Ca_kabuli_chr04 | 46737179                | CC                              | TT              | 1946835230               |
| SNP_P4_65646_46737529 | NC_021163.1    | Ca_kabuli_chr04 | 46737529                | TT                              | CC              | 1946835232               |
| SNP_P4_65647_46737570 | NC_021163.1    | Ca_kabuli_chr04 | 46737570                | GG                              | CC              | 1946835234               |
| SNP_P4_65648_46737580 | NC_021163.1    | Ca_kabuli_chr04 | 46737580                | GG                              | TT              | 1946835236               |
| SNP_P4_65649_46737747 | NC_021163.1    | Ca_kabuli_chr04 | 46737747                | CC                              | TT              | 1946835238               |
| SNP_P4_65650_46737765 | NC_021163.1    | Ca_kabuli_chr04 | 46737765                | GG                              | AA              | 1946835240               |
| SNP_P4_65651_46737805 | NC_021163.1    | Ca_kabuli_chr04 | 46737805                | AA                              | GG              | 1946835242               |
| SNP_P4_65652_46737892 | NC_021163.1    | Ca_kabuli_chr04 | 46737892                | TT                              | AA              | 1946835244               |
| SNP_P4_65653_46737947 | NC_021163.1    | Ca_kabuli_chr04 | 46737947                | CC                              | TT              | 1946835246               |
| SNP_P4_65654_46737949 | NC_021163.1    | Ca_kabuli_chr04 | 46737949                | GG                              | AA              | 1946835249               |
| SNP_P4_65655_46738196 | NC_021163.1    | Ca_kabuli_chr04 | 46738196                | AA                              | GG              | 1946835251               |
| SNP_P4_65656_46738276 | NC_021163.1    | Ca_kabuli_chr04 | 46738276                | TT                              | CC              | 1946835253               |
| SNP_P4_65657_46738400 | NC_021163.1    | Ca_kabuli_chr04 | 46738400                | TT                              | CC              | 1946835255               |
| SNP_P4_65659_46738800 | NC_021163.1    | Ca_kabuli_chr04 | 46738800                | AA                              | TT              | 1946835257               |
| SNP_P4_65660_46739039 | NC_021163.1    | Ca_kabuli_chr04 | 46739039                | TT                              | AA              | 1946835259               |
| SNP_P4_65661_46741333 | NC_021163.1    | Ca_kabuli_chr04 | 46741333                | TT                              | AA              | 1946835261               |

| SNPs IDs              | Chromosome IDs | Chromosomes     | Physical positions (bp) | CDC Frontier (Reference genome) | (ILWC46 & LPNB) | NCBI SNPdb Accession IDs |
|-----------------------|----------------|-----------------|-------------------------|---------------------------------|-----------------|--------------------------|
| SNP_P4_65662_46741436 | NC_021163.1    | Ca_kabuli_chr04 | 46741436                | AA                              | CC              | 1946835263               |
| SNP_P4_65663_46742183 | NC_021163.1    | Ca_kabuli_chr04 | 46742183                | GG                              | AA              | 1946835265               |
| SNP_P4_65664_46744337 | NC_021163.1    | Ca_kabuli_chr04 | 46744337                | TT                              | CC              | 1946835267               |
| SNP_P4_65665_46744364 | NC_021163.1    | Ca_kabuli_chr04 | 46744364                | TT                              | CC              | 1946835269               |
| SNP_P4_65669_46748650 | NC_021163.1    | Ca_kabuli_chr04 | 46748650                | GG                              | AA              | 1946835271               |
| SNP_P4_65670_46748719 | NC_021163.1    | Ca_kabuli_chr04 | 46748719                | CC                              | GG              | 1946835273               |
| SNP_P4_65671_46748862 | NC_021163.1    | Ca_kabuli_chr04 | 46748862                | AA                              | GG              | 1946835275               |
| SNP_P4_65672_46749002 | NC_021163.1    | Ca_kabuli_chr04 | 46749002                | CC                              | GG              | 1946835277               |
| SNP_P4_65673_46749016 | NC_021163.1    | Ca_kabuli_chr04 | 46749016                | CC                              | TT              | 1946835279               |
| SNP_P4_65674_46749827 | NC_021163.1    | Ca_kabuli_chr04 | 46749827                | TT                              | AA              | 1946835282               |
| SNP_P4_65675_46749836 | NC_021163.1    | Ca_kabuli_chr04 | 46749836                | CC                              | TT              | 1946835284               |
| SNP_P4_65676_46753030 | NC_021163.1    | Ca_kabuli_chr04 | 46753030                | GG                              | AA              | 1946835286               |
| SNP_P4_65677_46753074 | NC_021163.1    | Ca_kabuli_chr04 | 46753074                | CC                              | TT              | 1946835288               |
| SNP_P4_65679_46753103 | NC_021163.1    | Ca_kabuli_chr04 | 46753103                | CC                              | TT              | 1946835290               |
| SNP_P4_65680_46753162 | NC_021163.1    | Ca_kabuli_chr04 | 46753162                | TT                              | CC              | 1946835292               |
| SNP_P4_65681_46753172 | NC_021163.1    | Ca_kabuli_chr04 | 46753172                | TT                              | CC              | 1946835294               |
| SNP_P4_65682_46753203 | NC_021163.1    | Ca_kabuli_chr04 | 46753203                | TT                              | CC              | 1946835296               |
| SNP_P4_65683_46753220 | NC_021163.1    | Ca_kabuli_chr04 | 46753220                | AA                              | TT              | 1946835298               |
| SNP_P4_65684_46753267 | NC_021163.1    | Ca_kabuli_chr04 | 46753267                | AA                              | CC              | 1946835300               |
| SNP_P4_65685_46753273 | NC_021163.1    | Ca_kabuli_chr04 | 46753273                | CC                              | TT              | 1946835302               |
| SNP_P4_65686_46753393 | NC_021163.1    | Ca_kabuli_chr04 | 46753393                | GG                              | TT              | 1946835304               |
| SNP_P4_65687_46753473 | NC_021163.1    | Ca_kabuli_chr04 | 46753473                | GG                              | AA              | 1946835306               |
| SNP_P4_65688_46753488 | NC_021163.1    | Ca_kabuli_chr04 | 46753488                | TT                              | AA              | 1946835308               |
| SNP_P4_65689_46753497 | NC_021163.1    | Ca_kabuli_chr04 | 46753497                | CC                              | TT              | 1946835309               |
| SNP_P4_65690_46754434 | NC_021163.1    | Ca_kabuli_chr04 | 46754434                | GG                              | AA              | 1946835311               |
| SNP_P4_65691_46754712 | NC_021163.1    | Ca_kabuli_chr04 | 46754712                | AA                              | GG              | 1946835313               |
| SNP_P4_65692_46754801 | NC_021163.1    | Ca_kabuli_chr04 | 46754801                | GG                              | TT              | 1946835315               |
| SNP_P4_65693_46754804 | NC_021163.1    | Ca_kabuli_chr04 | 46754804                | GG                              | TT              | 1946835318               |
| SNP_P4_65694_46754806 | NC_021163.1    | Ca_kabuli_chr04 | 46754806                | TT                              | GG              | 1946835320               |
| SNP_P4_65695_46754885 | NC_021163.1    | Ca_kabuli_chr04 | 46754885                | GG                              | TT              | 1946835322               |
| SNP_P4_65696_46755053 | NC_021163.1    | Ca_kabuli_chr04 | 46755053                | CC                              | TT              | 1946835324               |
| SNP_P4_65697_46755747 | NC_021163.1    | Ca_kabuli_chr04 | 46755747                | CC                              | TT              | 1946835326               |
| SNP_P4_65698_46755759 | NC_021163.1    | Ca_kabuli_chr04 | 46755759                | TT                              | GG              | 1946835328               |
| SNP_P4_65699_46756067 | NC_021163.1    | Ca_kabuli_chr04 | 46756067                | AA                              | GG              | 1946835330               |
| SNP_P4_65700_46756165 | NC_021163.1    | Ca_kabuli_chr04 | 46756165                | TT                              | CC              | 1946835332               |
| SNP_P4_65701_46756168 | NC_021163.1    | Ca_kabuli_chr04 | 46756168                | AA                              | GG              | 1946835334               |
| SNP_P4_65703_46757859 | NC_021163.1    | Ca_kabuli_chr04 | 46757859                | TT                              | GG              | 1946835336               |
| SNP_P4_65704_46757954 | NC_021163.1    | Ca_kabuli_chr04 | 46757954                | TT                              | AA              | 1946835338               |
| SNP_P4_65705_46757969 | NC_021163.1    | Ca_kabuli_chr04 | 46757969                | CC                              | TT              | 1946835339               |
| SNP_P4_65706_46758173 | NC_021163.1    | Ca_kabuli_chr04 | 46758173                | TT                              | AA              | 1946835341               |
| SNP_P4_65707_46758257 | NC_021163.1    | Ca_kabuli_chr04 | 46758257                | GG                              | AA              | 1946835343               |
| SNP_P4_65708_46759449 | NC_021163.1    | Ca_kabuli_chr04 | 46759449                | CC                              | TT              | 1946835345               |

| SNPs IDs              | Chromosome IDs | Chromosomes     | Physical positions (bp) | CDC Frontier (Reference genome) | (ILWC46 & LPNB) | NCBI SNPdb Accession IDs |
|-----------------------|----------------|-----------------|-------------------------|---------------------------------|-----------------|--------------------------|
| SNP_P4_65710_46760066 | NC_021163.1    | Ca_kabuli_chr04 | 46760066                | GG                              | TT              | 1946835347               |
| SNP_P4_65711_46760077 | NC_021163.1    | Ca_kabuli_chr04 | 46760077                | TT                              | AA              | 1946835349               |
| SNP_P4_65712_46760078 | NC_021163.1    | Ca_kabuli_chr04 | 46760078                | TT                              | CC              | 1946835351               |
| SNP_P4_65714_46760715 | NC_021163.1    | Ca_kabuli_chr04 | 46760715                | AA                              | CC              | 1946835353               |
| SNP_P4_65715_46760728 | NC_021163.1    | Ca_kabuli_chr04 | 46760728                | TT                              | AA              | 1946835355               |
| SNP_P4_65716_46760756 | NC_021163.1    | Ca_kabuli_chr04 | 46760756                | CC                              | AA              | 1946835357               |
| SNP_P4_65718_46761101 | NC_021163.1    | Ca_kabuli_chr04 | 46761101                | AA                              | TT              | 1946835359               |
| SNP_P4_65721_46762281 | NC_021163.1    | Ca_kabuli_chr04 | 46762281                | GG                              | TT              | 1946835361               |
| SNP_P4_65722_46762709 | NC_021163.1    | Ca_kabuli_chr04 | 46762709                | TT                              | AA              | 1946835363               |
| SNP_P4_65723_46764897 | NC_021163.1    | Ca_kabuli_chr04 | 46764897                | CC                              | AA              | 1946835365               |
| SNP_P4_65724_46764921 | NC_021163.1    | Ca_kabuli_chr04 | 46764921                | AA                              | CC              | 1946835367               |
| SNP_P4_65725_46764929 | NC_021163.1    | Ca_kabuli_chr04 | 46764929                | CC                              | TT              | 1946835369               |
| SNP_P4_65726_46764968 | NC_021163.1    | Ca_kabuli_chr04 | 46764968                | CC                              | TT              | 1946835371               |
| SNP_P4_65727_46765003 | NC_021163.1    | Ca_kabuli_chr04 | 46765003                | GG                              | AA              | 1946835373               |
| SNP_P4_65728_46766199 | NC_021163.1    | Ca_kabuli_chr04 | 46766199                | TT                              | GG              | 1946835375               |
| SNP_P4_65729_46766219 | NC_021163.1    | Ca_kabuli_chr04 | 46766219                | TT                              | AA              | 1946835377               |
| SNP_P4_65730_46766237 | NC_021163.1    | Ca_kabuli_chr04 | 46766237                | CC                              | GG              | 1946835379               |
| SNP_P4_65731_46766267 | NC_021163.1    | Ca_kabuli_chr04 | 46766267                | GG                              | TT              | 1946835381               |
| SNP_P4_65732_46766851 | NC_021163.1    | Ca_kabuli_chr04 | 46766851                | CC                              | TT              | 1946835382               |
| SNP_P4_65733_46766856 | NC_021163.1    | Ca_kabuli_chr04 | 46766856                | CC                              | TT              | 1946835384               |
| SNP_P4_65734_46767110 | NC_021163.1    | Ca_kabuli_chr04 | 46767110                | CC                              | AA              | 1946835387               |
| SNP_P4_65735_46767122 | NC_021163.1    | Ca_kabuli_chr04 | 46767122                | CC                              | TT              | 1946835389               |
| SNP_P4_65736_46767127 | NC_021163.1    | Ca_kabuli_chr04 | 46767127                | CC                              | AA              | 1946835391               |
| SNP_P4_65737_46767134 | NC_021163.1    | Ca_kabuli_chr04 | 46767134                | TT                              | CC              | 1946835393               |
| SNP_P4_65738_46767200 | NC_021163.1    | Ca_kabuli_chr04 | 46767200                | TT                              | AA              | 1946835395               |
| SNP_P4_65741_46769073 | NC_021163.1    | Ca_kabuli_chr04 | 46769073                | AA                              | GG              | 1946835397               |
| SNP_P4_65742_46769077 | NC_021163.1    | Ca_kabuli_chr04 | 46769077                | CC                              | AA              | 1946835399               |
| SNP_P4_65743_46769183 | NC_021163.1    | Ca_kabuli_chr04 | 46769183                | AA                              | TT              | 1946835401               |
| SNP_P4_65744_46769197 | NC_021163.1    | Ca_kabuli_chr04 | 46769197                | AA                              | GG              | 1946835403               |
| SNP_P4_65746_46769347 | NC_021163.1    | Ca_kabuli_chr04 | 46769347                | TT                              | AA              | 1946835405               |
| SNP_P4_65747_46769634 | NC_021163.1    | Ca_kabuli_chr04 | 46769634                | CC                              | TT              | 1946835407               |
| SNP_P4_65748_46769753 | NC_021163.1    | Ca_kabuli_chr04 | 46769753                | GG                              | AA              | 1946835409               |
| SNP_P4_65749_46769784 | NC_021163.1    | Ca_kabuli_chr04 | 46769784                | AA                              | TT              | 1946835411               |
| SNP_P4_65750_46770009 | NC_021163.1    | Ca_kabuli_chr04 | 46770009                | TT                              | CC              | 1946835413               |
| SNP_P4_65751_46770364 | NC_021163.1    | Ca_kabuli_chr04 | 46770364                | CC                              | TT              | 1946835415               |
| SNP_P4_65752_46770367 | NC_021163.1    | Ca_kabuli_chr04 | 46770367                | GG                              | AA              | 1946835417               |
| SNP_P4_65753_46770375 | NC_021163.1    | Ca_kabuli_chr04 | 46770375                | GG                              | AA              | 1946835419               |
| SNP_P4_65754_46770376 | NC_021163.1    | Ca_kabuli_chr04 | 46770376                | GG                              | AA              | 1946835421               |
| SNP_P4_65755_46770389 | NC_021163.1    | Ca_kabuli_chr04 | 46770389                | TT                              | CC              | 1946835423               |
| SNP_P4_65756_46770406 | NC_021163.1    | Ca_kabuli_chr04 | 46770406                | GG                              | TT              | 1946835425               |
| SNP_P4_65757_46770509 | NC_021163.1    | Ca_kabuli_chr04 | 46770509                | TT                              | AA              | 1946835427               |
| SNP_P4_65758_47183182 | NC_021163.1    | Ca_kabuli_chr04 | 47183182                | TT                              | AA              | 1946835429               |

| SNPs IDs              | Chromosome IDs | Chromosomes     | Physical positions (bp) | CDC Frontier (Reference genome) | (ILWC46 & LPNB) | NCBI SNPdb Accession IDs |
|-----------------------|----------------|-----------------|-------------------------|---------------------------------|-----------------|--------------------------|
| SNP_P4_65759_47185064 | NC_021163.1    | Ca_kabuli_chr04 | 47185064                | TT                              | GG              | 1946835431               |
| SNP_P4_65760_47185775 | NC_021163.1    | Ca_kabuli_chr04 | 47185775                | AA                              | GG              | 1946835433               |
| SNP_P4_65762_47186181 | NC_021163.1    | Ca_kabuli_chr04 | 47186181                | CC                              | TT              | 1946835435               |
| SNP_P4_65763_47187215 | NC_021163.1    | Ca_kabuli_chr04 | 47187215                | AA                              | GG              | 1946835436               |
| SNP_P4_65764_47189415 | NC_021163.1    | Ca_kabuli_chr04 | 47189415                | CC                              | TT              | 1946835438               |
| SNP_P4_65765_47189855 | NC_021163.1    | Ca_kabuli_chr04 | 47189855                | CC                              | TT              | 1946835440               |
| SNP_P4_65766_47189880 | NC_021163.1    | Ca_kabuli_chr04 | 47189880                | AA                              | GG              | 1946835442               |
| SNP_P4_65767_47189886 | NC_021163.1    | Ca_kabuli_chr04 | 47189886                | AA                              | GG              | 1946835444               |
| SNP_P4_65768_47189892 | NC_021163.1    | Ca_kabuli_chr04 | 47189892                | GG                              | AA              | 1946835446               |
| SNP_P4_65769_47190428 | NC_021163.1    | Ca_kabuli_chr04 | 47190428                | GG                              | TT              | 1946835448               |
| SNP_P4_65771_47193179 | NC_021163.1    | Ca_kabuli_chr04 | 47193179                | AA                              | GG              | 1946835450               |
| SNP_P4_65772_47194407 | NC_021163.1    | Ca_kabuli_chr04 | 47194407                | AA                              | GG              | 1946835452               |
| SNP_P4_65773_47195659 | NC_021163.1    | Ca_kabuli_chr04 | 47195659                | AA                              | GG              | 1946835454               |
| SNP_P4_65775_47196023 | NC_021163.1    | Ca_kabuli_chr04 | 47196023                | CC                              | TT              | 1946835456               |
| SNP_P4_65776_47196051 | NC_021163.1    | Ca_kabuli_chr04 | 47196051                | GG                              | TT              | 1946835458               |
| SNP_P4_65777_47196297 | NC_021163.1    | Ca_kabuli_chr04 | 47196297                | CC                              | AA              | 1946835460               |
| SNP_P4_65778_47198243 | NC_021163.1    | Ca_kabuli_chr04 | 47198243                | AA                              | TT              | 1946835462               |
| SNP_P4_65779_47199025 | NC_021163.1    | Ca_kabuli_chr04 | 47199025                | CC                              | TT              | 1946835463               |
| SNP_P4_65780_47199026 | NC_021163.1    | Ca_kabuli_chr04 | 47199026                | AA                              | CC              | 1946835465               |
| SNP_P4_65781_47199028 | NC_021163.1    | Ca_kabuli_chr04 | 47199028                | TT                              | AA              | 1946835467               |
| SNP_P4_65782_47204773 | NC_021163.1    | Ca_kabuli_chr04 | 47204773                | AA                              | GG              | 1946835469               |
| SNP_P4_65783_47205706 | NC_021163.1    | Ca_kabuli_chr04 | 47205706                | CC                              | AA              | 1946835471               |
| SNP_P4_65785_47206112 | NC_021163.1    | Ca_kabuli_chr04 | 47206112                | GG                              | AA              | 1946835473               |
| SNP_P4_65787_47206313 | NC_021163.1    | Ca_kabuli_chr04 | 47206313                | GG                              | AA              | 1946835475               |
| SNP_P4_65788_47206688 | NC_021163.1    | Ca_kabuli_chr04 | 47206688                | TT                              | AA              | 1946835476               |
| SNP_P4_65789_47206730 | NC_021163.1    | Ca_kabuli_chr04 | 47206730                | TT                              | CC              | 1946835477               |
| SNP_P4_65791_47207169 | NC_021163.1    | Ca_kabuli_chr04 | 47207169                | AA                              | CC              | 1946835478               |
| SNP_P4_65792_47207879 | NC_021163.1    | Ca_kabuli_chr04 | 47207879                | TT                              | CC              | 1946835479               |
| SNP_P4_65793_47207951 | NC_021163.1    | Ca_kabuli_chr04 | 47207951                | GG                              | AA              | 1946835480               |
| SNP_P4_65794_47208252 | NC_021163.1    | Ca_kabuli_chr04 | 47208252                | CC                              | TT              | 1946835481               |
| SNP_P4_65795_47208262 | NC_021163.1    | Ca_kabuli_chr04 | 47208262                | TT                              | CC              | 1946835482               |
| SNP_P4_65796_47209154 | NC_021163.1    | Ca_kabuli_chr04 | 47209154                | GG                              | AA              | 1946835483               |
| SNP_P4_65797_47210009 | NC_021163.1    | Ca_kabuli_chr04 | 47210009                | CC                              | TT              | 1946835484               |
| SNP_P4_65798_47210114 | NC_021163.1    | Ca_kabuli_chr04 | 47210114                | GG                              | AA              | 1946835485               |
| SNP_P4_65799_47211088 | NC_021163.1    | Ca_kabuli_chr04 | 47211088                | GG                              | TT              | 1946835486               |
| SNP_P4_65800_47211119 | NC_021163.1    | Ca_kabuli_chr04 | 47211119                | AA                              | GG              | 1946835487               |
| SNP_P4_65801_47211413 | NC_021163.1    | Ca_kabuli_chr04 | 47211413                | GG                              | CC              | 1946835488               |
| SNP_P4_65803_47212281 | NC_021163.1    | Ca_kabuli_chr04 | 47212281                | GG                              | AA              | 1946835489               |
| SNP_P4_65804_47214247 | NC_021163.1    | Ca_kabuli_chr04 | 47214247                | GG                              | AA              | 1946835490               |
| SNP_P4_65805_47215300 | NC_021163.1    | Ca_kabuli_chr04 | 47215300                | AA                              | GG              | 1946835491               |
| SNP_P4_65806_47215305 | NC_021163.1    | Ca_kabuli_chr04 | 47215305                | TT                              | GG              | 1946835492               |
| SNP_P4_65807_47215340 | NC_021163.1    | Ca_kabuli_chr04 | 47215340                | AA                              | TT              | 1946835493               |



| SNPs IDs              | Chromosome IDs | Chromosomes     | Physical positions (bp) | CDC Frontier (Reference genome) | (ILWC46 & LPNB) | NCBI SNPdb Accession IDs |
|-----------------------|----------------|-----------------|-------------------------|---------------------------------|-----------------|--------------------------|
| SNP_P4_65808_47215846 | NC_021163.1    | Ca_kabuli_chr04 | 47215846                | TT                              | AA              | 1946835494               |
| SNP_P4_65809_47215867 | NC_021163.1    | Ca_kabuli_chr04 | 47215867                | CC                              | TT              | 1946835495               |
| SNP_P4_65810_47216149 | NC_021163.1    | Ca_kabuli_chr04 | 47216149                | GG                              | AA              | 1946835496               |
| SNP_P4_65811_47216384 | NC_021163.1    | Ca_kabuli_chr04 | 47216384                | TT                              | CC              | 1946835497               |
| SNP_P4_65812_47216475 | NC_021163.1    | Ca_kabuli_chr04 | 47216475                | AA                              | TT              | 1946835498               |
| SNP_P4_65813_47216497 | NC_021163.1    | Ca_kabuli_chr04 | 47216497                | TT                              | GG              | 1946835499               |
| SNP_P4_65814_47218047 | NC_021163.1    | Ca_kabuli_chr04 | 47218047                | TT                              | GG              | 1946835500               |
| SNP_P4_65815_47218609 | NC_021163.1    | Ca_kabuli_chr04 | 47218609                | AA                              | TT              | 1946835501               |
| SNP_P4_65816_47218908 | NC_021163.1    | Ca_kabuli_chr04 | 47218908                | AA                              | GG              | 1946835502               |
| SNP_P4_65817_47219169 | NC_021163.1    | Ca_kabuli_chr04 | 47219169                | TT                              | CC              | 1946835503               |
| SNP_P4_65818_47219561 | NC_021163.1    | Ca_kabuli_chr04 | 47219561                | GG                              | AA              | 1946835504               |
| SNP_P4_65820_47220222 | NC_021163.1    | Ca_kabuli_chr04 | 47220222                | CC                              | TT              | 1946835505               |
| SNP_P4_65821_47220308 | NC_021163.1    | Ca_kabuli_chr04 | 47220308                | AA                              | GG              | 1946835506               |
| SNP_P4_65822_47220670 | NC_021163.1    | Ca_kabuli_chr04 | 47220670                | CC                              | TT              | 1946835507               |
| SNP_P4_65823_47220672 | NC_021163.1    | Ca_kabuli_chr04 | 47220672                | CC                              | TT              | 1946835508               |
| SNP_P4_65824_47220789 | NC_021163.1    | Ca_kabuli_chr04 | 47220789                | TT                              | CC              | 1946835509               |
| SNP_P4_65825_47220795 | NC_021163.1    | Ca_kabuli_chr04 | 47220795                | GG                              | AA              | 1946835510               |
| SNP_P4_65826_47220796 | NC_021163.1    | Ca_kabuli_chr04 | 47220796                | TT                              | AA              | 1946835511               |
| SNP_P4_65827_47220801 | NC_021163.1    | Ca_kabuli_chr04 | 47220801                | CC                              | TT              | 1946835512               |
| SNP_P4_65828_47220819 | NC_021163.1    | Ca_kabuli_chr04 | 47220819                | TT                              | CC              | 1946835513               |
| SNP_P4_65829_47220822 | NC_021163.1    | Ca_kabuli_chr04 | 47220822                | AA                              | TT              | 1946835514               |
| SNP_P4_65830_47221098 | NC_021163.1    | Ca_kabuli_chr04 | 47221098                | TT                              | GG              | 1946835515               |
| SNP_P4_65831_47221209 | NC_021163.1    | Ca_kabuli_chr04 | 47221209                | AA                              | TT              | 1946835516               |
| SNP_P4_65832_47221211 | NC_021163.1    | Ca_kabuli_chr04 | 47221211                | AA                              | GG              | 1946835517               |
| SNP_P4_65833_47221809 | NC_021163.1    | Ca_kabuli_chr04 | 47221809                | AA                              | CC              | 1946835518               |
| SNP_P4_65834_47221965 | NC_021163.1    | Ca_kabuli_chr04 | 47221965                | GG                              | AA              | 1946835519               |
| SNP_P4_65835_47222693 | NC_021163.1    | Ca_kabuli_chr04 | 47222693                | TT                              | CC              | 1946835520               |
| SNP_P4_65836_47222694 | NC_021163.1    | Ca_kabuli_chr04 | 47222694                | GG                              | AA              | 1946835521               |
| SNP_P4_65837_47222701 | NC_021163.1    | Ca_kabuli_chr04 | 47222701                | GG                              | CC              | 1946835523               |
| SNP_P4_65838_47223047 | NC_021163.1    | Ca_kabuli_chr04 | 47223047                | AA                              | GG              | 1946835525               |
| SNP_P4_65839_47224713 | NC_021163.1    | Ca_kabuli_chr04 | 47224713                | CC                              | TT              | 1946835527               |
| SNP_P4_65840_47224754 | NC_021163.1    | Ca_kabuli_chr04 | 47224754                | CC                              | TT              | 1946835530               |
| SNP_P4_65841_47224784 | NC_021163.1    | Ca_kabuli_chr04 | 47224784                | AA                              | GG              | 1946835532               |
| SNP_P4_65842_47229001 | NC_021163.1    | Ca_kabuli_chr04 | 47229001                | GG                              | AA              | 1946835534               |
| SNP_P4_65843_47229006 | NC_021163.1    | Ca_kabuli_chr04 | 47229006                | GG                              | AA              | 1946835536               |
| SNP_P4_65844_47230063 | NC_021163.1    | Ca_kabuli_chr04 | 47230063                | AA                              | TT              | 1946835538               |
| SNP_P4_65845_47230081 | NC_021163.1    | Ca_kabuli_chr04 | 47230081                | GG                              | AA              | 1946835539               |
| SNP_P4_65846_47230123 | NC_021163.1    | Ca_kabuli_chr04 | 47230123                | AA                              | TT              | 1946835541               |
| SNP_P4_65848_47230338 | NC_021163.1    | Ca_kabuli_chr04 | 47230338                | GG                              | AA              | 1946835543               |
| SNP_P4_65849_47230502 | NC_021163.1    | Ca_kabuli_chr04 | 47230502                | TT                              | GG              | 1946835545               |
| SNP_P4_65850_47230534 | NC_021163.1    | Ca_kabuli_chr04 | 47230534                | GG                              | AA              | 1946835547               |
| SNP_P4_65851_47230549 | NC_021163.1    | Ca_kabuli_chr04 | 47230549                | GG                              | AA              | 1946835549               |

| SNPs IDs              | Chromosome IDs | Chromosomes     | Physical positions (bp) | CDC Frontier (Reference genome) | (ILWC46 & LPNB) | NCBI SNPdb Accession IDs |
|-----------------------|----------------|-----------------|-------------------------|---------------------------------|-----------------|--------------------------|
| SNP_P4_65852_47230581 | NC_021163.1    | Ca_kabuli_chr04 | 47230581                | GG                              | AA              | 1946835551               |
| SNP_P4_65853_47230823 | NC_021163.1    | Ca_kabuli_chr04 | 47230823                | GG                              | AA              | 1946835553               |
| SNP_P4_65854_47231611 | NC_021163.1    | Ca_kabuli_chr04 | 47231611                | AA                              | GG              | 1946835555               |
| SNP_P4_65855_47231696 | NC_021163.1    | Ca_kabuli_chr04 | 47231696                | GG                              | CC              | 1946835557               |
| SNP_P4_65856_47232602 | NC_021163.1    | Ca_kabuli_chr04 | 47232602                | CC                              | TT              | 1946835559               |
| SNP_P4_65857_47232613 | NC_021163.1    | Ca_kabuli_chr04 | 47232613                | CC                              | AA              | 1946835561               |
| SNP_P4_65858_47232927 | NC_021163.1    | Ca_kabuli_chr04 | 47232927                | TT                              | CC              | 1946835563               |
| SNP_P4_65860_47233546 | NC_021163.1    | Ca_kabuli_chr04 | 47233546                | CC                              | TT              | 1946835565               |
| SNP_P4_65861_47233561 | NC_021163.1    | Ca_kabuli_chr04 | 47233561                | GG                              | AA              | 1946835567               |
| SNP_P4_65863_47234671 | NC_021163.1    | Ca_kabuli_chr04 | 47234671                | CC                              | TT              | 1946835569               |
| SNP_P4_65864_47234977 | NC_021163.1    | Ca_kabuli_chr04 | 47234977                | CC                              | TT              | 1946835571               |
| SNP_P4_65865_47235007 | NC_021163.1    | Ca_kabuli_chr04 | 47235007                | TT                              | CC              | 1946835573               |
| SNP_P4_65866_47238655 | NC_021163.1    | Ca_kabuli_chr04 | 47238655                | GG                              | TT              | 1946835575               |
| SNP_P4_65869_47238945 | NC_021163.1    | Ca_kabuli_chr04 | 47238945                | GG                              | AA              | 1946835577               |
| SNP_P4_65870_47239067 | NC_021163.1    | Ca_kabuli_chr04 | 47239067                | CC                              | TT              | 1946835579               |
| SNP_P4_65871_47239068 | NC_021163.1    | Ca_kabuli_chr04 | 47239068                | CC                              | TT              | 1946835581               |
| SNP_P4_65872_47240043 | NC_021163.1    | Ca_kabuli_chr04 | 47240043                | AA                              | GG              | 1946835583               |
| SNP_P4_65873_47240106 | NC_021163.1    | Ca_kabuli_chr04 | 47240106                | AA                              | GG              | 1946835585               |
| SNP_P4_65875_47241329 | NC_021163.1    | Ca_kabuli_chr04 | 47241329                | TT                              | CC              | 1946835587               |
| SNP_P4_65876_47241330 | NC_021163.1    | Ca_kabuli_chr04 | 47241330                | GG                              | AA              | 1946835589               |
| SNP_P4_65877_47241896 | NC_021163.1    | Ca_kabuli_chr04 | 47241896                | CC                              | TT              | 1946835591               |
| SNP_P4_65878_47241914 | NC_021163.1    | Ca_kabuli_chr04 | 47241914                | TT                              | GG              | 1946835593               |
| SNP_P4_65880_47242309 | NC_021163.1    | Ca_kabuli_chr04 | 47242309                | CC                              | TT              | 1946835595               |
| SNP_P4_65881_47246683 | NC_021163.1    | Ca_kabuli_chr04 | 47246683                | CC                              | TT              | 1946835597               |
| SNP_P4_65883_47247408 | NC_021163.1    | Ca_kabuli_chr04 | 47247408                | TT                              | GG              | 1946835599               |
| SNP_P4_65884_47247638 | NC_021163.1    | Ca_kabuli_chr04 | 47247638                | GG                              | AA              | 1946835601               |
| SNP_P4_65885_47249943 | NC_021163.1    | Ca_kabuli_chr04 | 47249943                | CC                              | TT              | 1946835603               |
| SNP_P4_65886_47249952 | NC_021163.1    | Ca_kabuli_chr04 | 47249952                | TT                              | CC              | 1946835605               |
| SNP_P4_65887_47249987 | NC_021163.1    | Ca_kabuli_chr04 | 47249987                | CC                              | TT              | 1946835607               |
| SNP_P4_65888_47254507 | NC_021163.1    | Ca_kabuli_chr04 | 47254507                | TT                              | AA              | 1946835609               |
| SNP_P4_65889_47254943 | NC_021163.1    | Ca_kabuli_chr04 | 47254943                | TT                              | CC              | 1946835611               |
| SNP_P4_65890_47255710 | NC_021163.1    | Ca_kabuli_chr04 | 47255710                | AA                              | GG              | 1946835613               |
| SNP_P4_65891_47255720 | NC_021163.1    | Ca_kabuli_chr04 | 47255720                | TT                              | CC              | 1946835615               |
| SNP_P4_65892_47256399 | NC_021163.1    | Ca_kabuli_chr04 | 47256399                | GG                              | AA              | 1946835617               |
| SNP_P4_65893_47256588 | NC_021163.1    | Ca_kabuli_chr04 | 47256588                | AA                              | GG              | 1946835619               |
| SNP_P4_65894_47257014 | NC_021163.1    | Ca_kabuli_chr04 | 47257014                | TT                              | GG              | 1946835621               |
| SNP_P4_65895_47257039 | NC_021163.1    | Ca_kabuli_chr04 | 47257039                | TT                              | CC              | 1946835623               |
| SNP_P4_65896_47257048 | NC_021163.1    | Ca_kabuli_chr04 | 47257048                | GG                              | AA              | 1946835625               |
| SNP_P4_65898_47257205 | NC_021163.1    | Ca_kabuli_chr04 | 47257205                | AA                              | TT              | 1946835627               |
| SNP_P4_65899_47262892 | NC_021163.1    | Ca_kabuli_chr04 | 47262892                | AA                              | CC              | 1946835629               |
| SNP_P4_65900_47264158 | NC_021163.1    | Ca_kabuli_chr04 | 47264158                | TT                              | CC              | 1946835631               |
| SNP_P4_65903_47305460 | NC_021163.1    | Ca_kabuli_chr04 | 47305460                | AA                              | GG              | 1946835633               |

| SNPs IDs              | Chromosome IDs | Chromosomes     | Physical positions (bp) | CDC Frontier (Reference genome) | (ILWC46 & LPNB) | NCBI SNPdb Accession IDs |
|-----------------------|----------------|-----------------|-------------------------|---------------------------------|-----------------|--------------------------|
| SNP_P4_65904_47305468 | NC_021163.1    | Ca_kabuli_chr04 | 47305468                | AA                              | GG              | 1946835635               |
| SNP_P4_65905_47315974 | NC_021163.1    | Ca_kabuli_chr04 | 47315974                | GG                              | AA              | 1946835637               |
| SNP_P4_65906_47316398 | NC_021163.1    | Ca_kabuli_chr04 | 47316398                | CC                              | AA              | 1946835639               |
| SNP_P4_65907_47332462 | NC_021163.1    | Ca_kabuli_chr04 | 47332462                | AA                              | GG              | 1946835641               |
| SNP_P4_65908_47333767 | NC_021163.1    | Ca_kabuli_chr04 | 47333767                | AA                              | GG              | 1946835643               |
| SNP_P4_65910_47363089 | NC_021163.1    | Ca_kabuli_chr04 | 47363089                | AA                              | GG              | 1946835645               |
| SNP_P4_65911_47372944 | NC_021163.1    | Ca_kabuli_chr04 | 47372944                | TT                              | CC              | 1946835647               |
| SNP_P4_65912_47376492 | NC_021163.1    | Ca_kabuli_chr04 | 47376492                | GG                              | AA              | 1946835649               |
| SNP_P4_65913_47377931 | NC_021163.1    | Ca_kabuli_chr04 | 47377931                | AA                              | GG              | 1946835651               |
| SNP_P4_65914_47398069 | NC_021163.1    | Ca_kabuli_chr04 | 47398069                | TT                              | CC              | 1946835652               |
| SNP_P4_65916_47404992 | NC_021163.1    | Ca_kabuli_chr04 | 47404992                | TT                              | CC              | 1946835654               |
| SNP_P4_65917_47405000 | NC_021163.1    | Ca_kabuli_chr04 | 47405000                | TT                              | CC              | 1946835656               |
| SNP_P4_65918_47420422 | NC_021163.1    | Ca_kabuli_chr04 | 47420422                | AA                              | CC              | 1946835658               |
| SNP_P4_65919_47420426 | NC_021163.1    | Ca_kabuli_chr04 | 47420426                | TT                              | GG              | 1946835660               |
| SNP_P4_65920_47420810 | NC_021163.1    | Ca_kabuli_chr04 | 47420810                | TT                              | CC              | 1946835662               |
| SNP_P4_65921_47423125 | NC_021163.1    | Ca_kabuli_chr04 | 47423125                | AA                              | TT              | 1946835664               |
| SNP_P4_65924_47437581 | NC_021163.1    | Ca_kabuli_chr04 | 47437581                | GG                              | CC              | 1946835666               |
| SNP_P4_65925_47453954 | NC_021163.1    | Ca_kabuli_chr04 | 47453954                | AA                              | GG              | 1946835668               |
| SNP_P4_65926_47454488 | NC_021163.1    | Ca_kabuli_chr04 | 47454488                | CC                              | TT              | 1946835670               |
| SNP_P4_65927_47456370 | NC_021163.1    | Ca_kabuli_chr04 | 47456370                | GG                              | AA              | 1946835672               |
| SNP_P4_65929_47485458 | NC_021163.1    | Ca_kabuli_chr04 | 47485458                | GG                              | AA              | 1946835674               |
| SNP_P4_65930_47522529 | NC_021163.1    | Ca_kabuli_chr04 | 47522529                | TT                              | AA              | 1946835676               |
| SNP_P4_65931_47547190 | NC_021163.1    | Ca_kabuli_chr04 | 47547190                | GG                              | AA              | 1946835678               |
| SNP_P4_65932_47552320 | NC_021163.1    | Ca_kabuli_chr04 | 47552320                | TT                              | CC              | 1946835680               |
| SNP_P4_65933_47552332 | NC_021163.1    | Ca_kabuli_chr04 | 47552332                | GG                              | TT              | 1946835682               |
| SNP_P4_65935_47573766 | NC_021163.1    | Ca_kabuli_chr04 | 47573766                | AA                              | TT              | 1946835684               |
| SNP_P4_65936_47586883 | NC_021163.1    | Ca_kabuli_chr04 | 47586883                | CC                              | TT              | 1946835686               |
| SNP_P4_65938_47604531 | NC_021163.1    | Ca_kabuli_chr04 | 47604531                | AA                              | GG              | 1946835688               |
| SNP_P4_65939_47604533 | NC_021163.1    | Ca_kabuli_chr04 | 47604533                | TT                              | CC              | 1946835690               |
| SNP_P4_65940_47625138 | NC_021163.1    | Ca_kabuli_chr04 | 47625138                | TT                              | AA              | 1946835692               |
| SNP_P4_65941_47633373 | NC_021163.1    | Ca_kabuli_chr04 | 47633373                | TT                              | CC              | 1946835695               |
| SNP_P4_65942_47664104 | NC_021163.1    | Ca_kabuli_chr04 | 47664104                | TT                              | CC              | 1946835697               |
| SNP_P4_65943_47669489 | NC_021163.1    | Ca_kabuli_chr04 | 47669489                | CC                              | TT              | 1946835699               |
| SNP_P4_65944_47674057 | NC_021163.1    | Ca_kabuli_chr04 | 47674057                | TT                              | CC              | 1946835701               |
| SNP_P4_65945_47674400 | NC_021163.1    | Ca_kabuli_chr04 | 47674400                | CC                              | TT              | 1946835703               |
| SNP_P4_65946_47674690 | NC_021163.1    | Ca_kabuli_chr04 | 47674690                | TT                              | CC              | 1946835705               |
| SNP_P4_65948_47685837 | NC_021163.1    | Ca_kabuli_chr04 | 47685837                | GG                              | TT              | 1946835707               |
| SNP_P4_65950_47685967 | NC_021163.1    | Ca_kabuli_chr04 | 47685967                | TT                              | AA              | 1946835710               |
| SNP_P4_65951_47685968 | NC_021163.1    | Ca_kabuli_chr04 | 47685968                | GG                              | TT              | 1946835712               |
| SNP_P4_65952_47686118 | NC_021163.1    | Ca_kabuli_chr04 | 47686118                | AA                              | GG              | 1946835714               |
| SNP_P4_65953_47686129 | NC_021163.1    | Ca_kabuli_chr04 | 47686129                | CC                              | TT              | 1946835716               |
| SNP_P4_65954_47686187 | NC_021163.1    | Ca_kabuli_chr04 | 47686187                | AA                              | CC              | 1946835718               |

| SNPs IDs              | Chromosome IDs | Chromosomes     | Physical positions (bp) | CDC Frontier (Reference genome) | (ILWC46 & LPNB) | NCBI SNPdb Accession IDs |
|-----------------------|----------------|-----------------|-------------------------|---------------------------------|-----------------|--------------------------|
| SNP_P4_65955_47688292 | NC_021163.1    | Ca_kabuli_chr04 | 47688292                | TT                              | CC              | 1946835720               |
| SNP_P4_65956_47702115 | NC_021163.1    | Ca_kabuli_chr04 | 47702115                | AA                              | GG              | 1946835722               |
| SNP_P4_65957_47732651 | NC_021163.1    | Ca_kabuli_chr04 | 47732651                | CC                              | GG              | 1946835724               |
| SNP_P4_65958_47743970 | NC_021163.1    | Ca_kabuli_chr04 | 47743970                | TT                              | CC              | 1946835726               |
| SNP_P4_65960_47744356 | NC_021163.1    | Ca_kabuli_chr04 | 47744356                | TT                              | CC              | 1946835728               |
| SNP_P4_65961_47756775 | NC_021163.1    | Ca_kabuli_chr04 | 47756775                | CC                              | AA              | 1946835730               |
| SNP_P4_65962_47757559 | NC_021163.1    | Ca_kabuli_chr04 | 47757559                | CC                              | TT              | 1946835732               |
| SNP_P4_65963_47770014 | NC_021163.1    | Ca_kabuli_chr04 | 47770014                | CC                              | AA              | 1946835734               |
| SNP_P4_65964_47782034 | NC_021163.1    | Ca_kabuli_chr04 | 47782034                | GG                              | AA              | 1946835736               |
| SNP_P4_65965_47782297 | NC_021163.1    | Ca_kabuli_chr04 | 47782297                | AA                              | GG              | 1946835738               |
| SNP_P4_65966_47803581 | NC_021163.1    | Ca_kabuli_chr04 | 47803581                | AA                              | GG              | 1946835740               |
| SNP_P4_65967_47838699 | NC_021163.1    | Ca_kabuli_chr04 | 47838699                | AA                              | GG              | 1946835742               |
| SNP_P4_65969_47851126 | NC_021163.1    | Ca_kabuli_chr04 | 47851126                | TT                              | CC              | 1946835744               |
| SNP_P4_65971_47875036 | NC_021163.1    | Ca_kabuli_chr04 | 47875036                | AA                              | CC              | 1946835746               |
| SNP_P4_65972_47875038 | NC_021163.1    | Ca_kabuli_chr04 | 47875038                | GG                              | AA              | 1946835748               |
| SNP_P4_65973_47893748 | NC_021163.1    | Ca_kabuli_chr04 | 47893748                | CC                              | TT              | 1946835750               |
| SNP_P4_65974_47909452 | NC_021163.1    | Ca_kabuli_chr04 | 47909452                | GG                              | AA              | 1946835752               |
| SNP_P4_65975_47916217 | NC_021163.1    | Ca_kabuli_chr04 | 47916217                | GG                              | AA              | 1946835754               |
| SNP_P4_65976_47916249 | NC_021163.1    | Ca_kabuli_chr04 | 47916249                | AA                              | CC              | 1946835756               |
| SNP_P4_65977_47916419 | NC_021163.1    | Ca_kabuli_chr04 | 47916419                | GG                              | AA              | 1946835758               |
| SNP_P4_65978_47935139 | NC_021163.1    | Ca_kabuli_chr04 | 47935139                | AA                              | GG              | 1946835760               |
| SNP_P4_65979_47939870 | NC_021163.1    | Ca_kabuli_chr04 | 47939870                | TT                              | CC              | 1946835762               |
| SNP_P4_65980_47939930 | NC_021163.1    | Ca_kabuli_chr04 | 47939930                | AA                              | GG              | 1946835764               |
| SNP_P4_65981_47955266 | NC_021163.1    | Ca_kabuli_chr04 | 47955266                | AA                              | GG              | 1946835766               |
| SNP_P4_65982_47955433 | NC_021163.1    | Ca_kabuli_chr04 | 47955433                | TT                              | CC              | 1946835768               |
| SNP_P4_65983_47955884 | NC_021163.1    | Ca_kabuli_chr04 | 47955884                | CC                              | GG              | 1946835770               |
| SNP_P4_65984_47955965 | NC_021163.1    | Ca_kabuli_chr04 | 47955965                | GG                              | AA              | 1946835772               |
| SNP_P4_65985_47956147 | NC_021163.1    | Ca_kabuli_chr04 | 47956147                | GG                              | TT              | 1946835774               |
| SNP_P4_65986_47958880 | NC_021163.1    | Ca_kabuli_chr04 | 47958880                | TT                              | GG              | 1946835776               |
| SNP_P4_65987_47959113 | NC_021163.1    | Ca_kabuli_chr04 | 47959113                | TT                              | CC              | 1946835778               |
| SNP_P4_65988_47959199 | NC_021163.1    | Ca_kabuli_chr04 | 47959199                | GG                              | TT              | 1946835780               |
| SNP_P4_65989_47960972 | NC_021163.1    | Ca_kabuli_chr04 | 47960972                | TT                              | CC              | 1946835782               |
| SNP_P4_65990_47960991 | NC_021163.1    | Ca_kabuli_chr04 | 47960991                | CC                              | TT              | 1946835784               |
| SNP_P4_65991_47961159 | NC_021163.1    | Ca_kabuli_chr04 | 47961159                | CC                              | TT              | 1946835786               |
| SNP_P4_65992_47961212 | NC_021163.1    | Ca_kabuli_chr04 | 47961212                | AA                              | TT              | 1946835788               |
| SNP_P4_65993_47961358 | NC_021163.1    | Ca_kabuli_chr04 | 47961358                | GG                              | TT              | 1946835790               |
| SNP_P4_65994_47961640 | NC_021163.1    | Ca_kabuli_chr04 | 47961640                | GG                              | AA              | 1946835792               |
| SNP_P4_65995_47961647 | NC_021163.1    | Ca_kabuli_chr04 | 47961647                | AA                              | TT              | 1946835794               |
| SNP_P4_65996_47961649 | NC_021163.1    | Ca_kabuli_chr04 | 47961649                | CC                              | TT              | 1946835796               |
| SNP_P4_65997_47961664 | NC_021163.1    | Ca_kabuli_chr04 | 47961664                | CC                              | TT              | 1946835798               |
| SNP_P4_65998_47961758 | NC_021163.1    | Ca_kabuli_chr04 | 47961758                | CC                              | AA              | 1946835800               |
| SNP_P4_65999_47962076 | NC_021163.1    | Ca_kabuli_chr04 | 47962076                | TT                              | CC              | 1946835802               |

| SNPs IDs              | Chromosome IDs | Chromosomes     | Physical positions (bp) | CDC Frontier (Reference genome) | (ILWC46 & LPNB) | NCBI SNPdb Accession IDs |
|-----------------------|----------------|-----------------|-------------------------|---------------------------------|-----------------|--------------------------|
| SNP_P4_66000_47962778 | NC_021163.1    | Ca_kabuli_chr04 | 47962778                | GG                              | AA              | 1946835804               |
| SNP_P4_66001_47962800 | NC_021163.1    | Ca_kabuli_chr04 | 47962800                | GG                              | AA              | 1946835806               |
| SNP_P4_66002_47962816 | NC_021163.1    | Ca_kabuli_chr04 | 47962816                | GG                              | AA              | 1946835808               |
| SNP_P4_66003_47962978 | NC_021163.1    | Ca_kabuli_chr04 | 47962978                | CC                              | GG              | 1946835810               |
| SNP_P4_66004_47962981 | NC_021163.1    | Ca_kabuli_chr04 | 47962981                | CC                              | TT              | 1946835812               |
| SNP_P4_66005_47963095 | NC_021163.1    | Ca_kabuli_chr04 | 47963095                | GG                              | TT              | 1946835814               |
| SNP_P4_66006_47966308 | NC_021163.1    | Ca_kabuli_chr04 | 47966308                | TT                              | AA              | 1946835816               |
| SNP_P4_66007_47966373 | NC_021163.1    | Ca_kabuli_chr04 | 47966373                | CC                              | TT              | 1946835818               |
| SNP_P4_66009_47966476 | NC_021163.1    | Ca_kabuli_chr04 | 47966476                | AA                              | GG              | 1946835821               |
| SNP_P4_66010_47966500 | NC_021163.1    | Ca_kabuli_chr04 | 47966500                | GG                              | AA              | 1946835823               |
| SNP_P4_66011_47966508 | NC_021163.1    | Ca_kabuli_chr04 | 47966508                | CC                              | GG              | 1946835825               |
| SNP_P4_66012_47967931 | NC_021163.1    | Ca_kabuli_chr04 | 47967931                | TT                              | AA              | 1946835827               |
| SNP_P4_66013_47981465 | NC_021163.1    | Ca_kabuli_chr04 | 47981465                | CC                              | TT              | 1946835829               |
| SNP_P4_66014_47982180 | NC_021163.1    | Ca_kabuli_chr04 | 47982180                | CC                              | GG              | 1946835831               |
| SNP_P4_66015_47982273 | NC_021163.1    | Ca_kabuli_chr04 | 47982273                | CC                              | TT              | 1946835833               |
| SNP_P4_66016_47982342 | NC_021163.1    | Ca_kabuli_chr04 | 47982342                | TT                              | GG              | 1946835835               |
| SNP_P4_66017_47982400 | NC_021163.1    | Ca_kabuli_chr04 | 47982400                | CC                              | AA              | 1946835837               |
| SNP_P4_66018_47982429 | NC_021163.1    | Ca_kabuli_chr04 | 47982429                | TT                              | AA              | 1946835839               |
| SNP_P4_66019_47982458 | NC_021163.1    | Ca_kabuli_chr04 | 47982458                | CC                              | TT              | 1946835841               |
| SNP_P4_66020_47982487 | NC_021163.1    | Ca_kabuli_chr04 | 47982487                | GG                              | TT              | 1946835843               |
| SNP_P4_66021_47982567 | NC_021163.1    | Ca_kabuli_chr04 | 47982567                | AA                              | GG              | 1946835845               |
| SNP_P4_66022_47982587 | NC_021163.1    | Ca_kabuli_chr04 | 47982587                | TT                              | AA              | 1946835847               |
| SNP_P4_66025_47982687 | NC_021163.1    | Ca_kabuli_chr04 | 47982687                | AA                              | GG              | 1946835849               |
| SNP_P4_66026_47982839 | NC_021163.1    | Ca_kabuli_chr04 | 47982839                | CC                              | TT              | 1946835851               |
| SNP_P4_66027_47990957 | NC_021163.1    | Ca_kabuli_chr04 | 47990957                | AA                              | CC              | 1946835853               |
| SNP_P4_66028_47990971 | NC_021163.1    | Ca_kabuli_chr04 | 47990971                | TT                              | CC              | 1946835855               |
| SNP_P4_66029_47990981 | NC_021163.1    | Ca_kabuli_chr04 | 47990981                | AA                              | GG              | 1946835857               |
| SNP_P4_66030_47991035 | NC_021163.1    | Ca_kabuli_chr04 | 47991035                | GG                              | CC              | 1946835859               |
| SNP_P4_66033_47991321 | NC_021163.1    | Ca_kabuli_chr04 | 47991321                | CC                              | TT              | 1946835861               |
| SNP_P4_66034_47991348 | NC_021163.1    | Ca_kabuli_chr04 | 47991348                | AA                              | GG              | 1946835863               |
| SNP_P4_66035_47991452 | NC_021163.1    | Ca_kabuli_chr04 | 47991452                | AA                              | GG              | 1946835865               |
| SNP_P4_66036_47997241 | NC_021163.1    | Ca_kabuli_chr04 | 47997241                | CC                              | AA              | 1946835867               |
| SNP_P4_66037_47997500 | NC_021163.1    | Ca_kabuli_chr04 | 47997500                | TT                              | CC              | 1946835869               |
| SNP_P4_66038_47999511 | NC_021163.1    | Ca_kabuli_chr04 | 47999511                | CC                              | TT              | 1946835871               |
| SNP_P4_66039_48005621 | NC_021163.1    | Ca_kabuli_chr04 | 48005621                | AA                              | GG              | 1946835873               |
| SNP_P4_66040_48027876 | NC_021163.1    | Ca_kabuli_chr04 | 48027876                | AA                              | GG              | 1946835875               |
| SNP_P4_66041_48037366 | NC_021163.1    | Ca_kabuli_chr04 | 48037366                | GG                              | AA              | 1946835877               |
| SNP_P4_66043_48047640 | NC_021163.1    | Ca_kabuli_chr04 | 48047640                | AA                              | GG              | 1946835879               |
| SNP_P4_66045_48052503 | NC_021163.1    | Ca_kabuli_chr04 | 48052503                | AA                              | CC              | 1946835881               |
| SNP_P4_66047_48066874 | NC_021163.1    | Ca_kabuli_chr04 | 48066874                | TT                              | GG              | 1946835883               |
| SNP_P4_66048_48067818 | NC_021163.1    | Ca_kabuli_chr04 | 48067818                | TT                              | AA              | 1946835885               |
| SNP_P4_66050_48078472 | NC_021163.1    | Ca_kabuli_chr04 | 48078472                | GG                              | CC              | 1946835887               |

| SNPs IDs              | Chromosome IDs | Chromosomes     | Physical positions (bp) | CDC Frontier (Reference genome) | (ILWC46 & LPNB) | NCBI SNPdb Accession IDs |
|-----------------------|----------------|-----------------|-------------------------|---------------------------------|-----------------|--------------------------|
| SNP_P4_66052_48078783 | NC_021163.1    | Ca_kabuli_chr04 | 48078783                | CC                              | TT              | 1946835889               |
| SNP_P4_66053_48089680 | NC_021163.1    | Ca_kabuli_chr04 | 48089680                | AA                              | GG              | 1946835891               |
| SNP_P4_66054_48104229 | NC_021163.1    | Ca_kabuli_chr04 | 48104229                | AA                              | GG              | 1946835893               |
| SNP_P4_66056_48161689 | NC_021163.1    | Ca_kabuli_chr04 | 48161689                | AA                              | TT              | 1946835895               |
| SNP_P4_66057_48161718 | NC_021163.1    | Ca_kabuli_chr04 | 48161718                | AA                              | TT              | 1946835897               |
| SNP_P4_66058_48182857 | NC_021163.1    | Ca_kabuli_chr04 | 48182857                | AA                              | GG              | 1946835899               |
| SNP_P4_66059_48189097 | NC_021163.1    | Ca_kabuli_chr04 | 48189097                | CC                              | TT              | 1946835901               |
| SNP_P4_66061_48202928 | NC_021163.1    | Ca_kabuli_chr04 | 48202928                | GG                              | TT              | 1946835903               |
| SNP_P4_66062_48203009 | NC_021163.1    | Ca_kabuli_chr04 | 48203009                | GG                              | AA              | 1946835905               |
| SNP_P4_66063_48203339 | NC_021163.1    | Ca_kabuli_chr04 | 48203339                | CC                              | TT              | 1946835907               |
| SNP_P4_66064_48203478 | NC_021163.1    | Ca_kabuli_chr04 | 48203478                | AA                              | GG              | 1946835909               |
| SNP_P4_66065_48203594 | NC_021163.1    | Ca_kabuli_chr04 | 48203594                | GG                              | CC              | 1946835911               |
| SNP_P4_66066_48203596 | NC_021163.1    | Ca_kabuli_chr04 | 48203596                | TT                              | CC              | 1946835913               |
| SNP_P4_66067_48203730 | NC_021163.1    | Ca_kabuli_chr04 | 48203730                | TT                              | CC              | 1946835915               |
| SNP_P4_66068_48203751 | NC_021163.1    | Ca_kabuli_chr04 | 48203751                | TT                              | CC              | 1946835917               |
| SNP_P4_66069_48203754 | NC_021163.1    | Ca_kabuli_chr04 | 48203754                | CC                              | TT              | 1946835919               |
| SNP_P4_66070_48203995 | NC_021163.1    | Ca_kabuli_chr04 | 48203995                | GG                              | TT              | 1946835921               |
| SNP_P4_66071_48204007 | NC_021163.1    | Ca_kabuli_chr04 | 48204007                | CC                              | GG              | 1946835923               |
| SNP_P4_66072_48204157 | NC_021163.1    | Ca_kabuli_chr04 | 48204157                | TT                              | GG              | 1946835925               |
| SNP_P4_66073_48204231 | NC_021163.1    | Ca_kabuli_chr04 | 48204231                | TT                              | AA              | 1946835927               |
| SNP_P4_66074_48204310 | NC_021163.1    | Ca_kabuli_chr04 | 48204310                | AA                              | TT              | 1946835929               |
| SNP_P4_66076_48204519 | NC_021163.1    | Ca_kabuli_chr04 | 48204519                | TT                              | AA              | 1946835931               |
| SNP_P4_66077_48204526 | NC_021163.1    | Ca_kabuli_chr04 | 48204526                | AA                              | TT              | 1946835933               |
| SNP_P4_66078_48204799 | NC_021163.1    | Ca_kabuli_chr04 | 48204799                | CC                              | TT              | 1946835935               |
| SNP_P4_66079_48205427 | NC_021163.1    | Ca_kabuli_chr04 | 48205427                | TT                              | CC              | 1946835937               |
| SNP_P4_66080_48205454 | NC_021163.1    | Ca_kabuli_chr04 | 48205454                | TT                              | AA              | 1946835939               |
| SNP_P4_66081_48205478 | NC_021163.1    | Ca_kabuli_chr04 | 48205478                | CC                              | GG              | 1946835941               |
| SNP_P4_66082_48205784 | NC_021163.1    | Ca_kabuli_chr04 | 48205784                | GG                              | CC              | 1946835943               |
| SNP_P4_66083_48205877 | NC_021163.1    | Ca_kabuli_chr04 | 48205877                | TT                              | AA              | 1946835945               |
| SNP_P4_66084_48205892 | NC_021163.1    | Ca_kabuli_chr04 | 48205892                | GG                              | AA              | 1946835947               |
| SNP_P4_66085_48205923 | NC_021163.1    | Ca_kabuli_chr04 | 48205923                | CC                              | TT              | 1946835949               |
| SNP_P4_66086_48205966 | NC_021163.1    | Ca_kabuli_chr04 | 48205966                | TT                              | GG              | 1946835951               |
| SNP_P4_66087_48205968 | NC_021163.1    | Ca_kabuli_chr04 | 48205968                | AA                              | GG              | 1946835954               |
| SNP_P4_66088_48206062 | NC_021163.1    | Ca_kabuli_chr04 | 48206062                | CC                              | TT              | 1946835956               |
| SNP_P4_66089_48206071 | NC_021163.1    | Ca_kabuli_chr04 | 48206071                | GG                              | TT              | 1946835958               |
| SNP_P4_66090_48206095 | NC_021163.1    | Ca_kabuli_chr04 | 48206095                | GG                              | CC              | 1946835960               |
| SNP_P4_66091_48206111 | NC_021163.1    | Ca_kabuli_chr04 | 48206111                | GG                              | AA              | 1946835962               |
| SNP_P4_66092_48206150 | NC_021163.1    | Ca_kabuli_chr04 | 48206150                | CC                              | TT              | 1946835964               |
| SNP_P4_66093_48206205 | NC_021163.1    | Ca_kabuli_chr04 | 48206205                | CC                              | TT              | 1946835966               |
| SNP_P4_66094_48206270 | NC_021163.1    | Ca_kabuli_chr04 | 48206270                | GG                              | AA              | 1946835968               |
| SNP_P4_66095_48206278 | NC_021163.1    | Ca_kabuli_chr04 | 48206278                | AA                              | GG              | 1946835970               |
| SNP_P4_66096_48206290 | NC_021163.1    | Ca_kabuli_chr04 | 48206290                | CC                              | TT              | 1946835972               |

| SNPs IDs              | Chromosome IDs | Chromosomes     | Physical positions (bp) | CDC Frontier (Reference genome) | (ILWC46 & LPNB) | NCBI SNPdb Accession IDs |
|-----------------------|----------------|-----------------|-------------------------|---------------------------------|-----------------|--------------------------|
| SNP_P4_66097_48206328 | NC_021163.1    | Ca_kabuli_chr04 | 48206328                | GG                              | AA              | 1946835974               |
| SNP_P4_66098_48206376 | NC_021163.1    | Ca_kabuli_chr04 | 48206376                | AA                              | CC              | 1946835976               |
| SNP_P4_66099_48206379 | NC_021163.1    | Ca_kabuli_chr04 | 48206379                | GG                              | AA              | 1946835978               |
| SNP_P4_66100_48206556 | NC_021163.1    | Ca_kabuli_chr04 | 48206556                | CC                              | GG              | 1946835980               |
| SNP_P4_66101_48206565 | NC_021163.1    | Ca_kabuli_chr04 | 48206565                | GG                              | CC              | 1946835982               |
| SNP_P4_66102_48206618 | NC_021163.1    | Ca_kabuli_chr04 | 48206618                | CC                              | AA              | 1946835984               |
| SNP_P4_66103_48206722 | NC_021163.1    | Ca_kabuli_chr04 | 48206722                | GG                              | AA              | 1946835986               |
| SNP_P4_66104_48206746 | NC_021163.1    | Ca_kabuli_chr04 | 48206746                | TT                              | CC              | 1946835988               |
| SNP_P4_66106_48206808 | NC_021163.1    | Ca_kabuli_chr04 | 48206808                | AA                              | GG              | 1946835990               |
| SNP_P4_66108_48207413 | NC_021163.1    | Ca_kabuli_chr04 | 48207413                | CC                              | TT              | 1946835992               |
| SNP_P4_66109_48207547 | NC_021163.1    | Ca_kabuli_chr04 | 48207547                | GG                              | CC              | 1946835994               |
| SNP_P4_66110_48207597 | NC_021163.1    | Ca_kabuli_chr04 | 48207597                | CC                              | TT              | 1946835996               |
| SNP_P4_66111_48207955 | NC_021163.1    | Ca_kabuli_chr04 | 48207955                | TT                              | CC              | 1946835998               |
| SNP_P4_66112_48208611 | NC_021163.1    | Ca_kabuli_chr04 | 48208611                | TT                              | CC              | 1946836000               |
| SNP_P4_66114_48208626 | NC_021163.1    | Ca_kabuli_chr04 | 48208626                | AA                              | GG              | 1946836002               |
| SNP_P4_66116_48209869 | NC_021163.1    | Ca_kabuli_chr04 | 48209869                | CC                              | GG              | 1946836004               |
| SNP_P4_66117_48209883 | NC_021163.1    | Ca_kabuli_chr04 | 48209883                | AA                              | GG              | 1946836006               |
| SNP_P4_66118_48209891 | NC_021163.1    | Ca_kabuli_chr04 | 48209891                | AA                              | GG              | 1946836008               |
| SNP_P4_66120_48210113 | NC_021163.1    | Ca_kabuli_chr04 | 48210113                | CC                              | TT              | 1946836010               |
| SNP_P4_66121_48210127 | NC_021163.1    | Ca_kabuli_chr04 | 48210127                | GG                              | TT              | 1946836012               |
| SNP_P4_66123_48210323 | NC_021163.1    | Ca_kabuli_chr04 | 48210323                | TT                              | CC              | 1946836014               |
| SNP_P4_66124_48210334 | NC_021163.1    | Ca_kabuli_chr04 | 48210334                | AA                              | GG              | 1946836016               |
| SNP_P4_66125_48210340 | NC_021163.1    | Ca_kabuli_chr04 | 48210340                | CC                              | TT              | 1946836018               |
| SNP_P4_66126_48210405 | NC_021163.1    | Ca_kabuli_chr04 | 48210405                | AA                              | GG              | 1946836020               |
| SNP_P4_66128_48211961 | NC_021163.1    | Ca_kabuli_chr04 | 48211961                | GG                              | AA              | 1946836022               |
| SNP_P4_66130_48212310 | NC_021163.1    | Ca_kabuli_chr04 | 48212310                | AA                              | GG              | 1946836024               |
| SNP_P4_66131_48212622 | NC_021163.1    | Ca_kabuli_chr04 | 48212622                | GG                              | TT              | 1946836026               |
| SNP_P4_66132_48213957 | NC_021163.1    | Ca_kabuli_chr04 | 48213957                | TT                              | AA              | 1946836028               |
| SNP_P4_66133_48214200 | NC_021163.1    | Ca_kabuli_chr04 | 48214200                | TT                              | CC              | 1946836030               |
| SNP_P4_66134_48214219 | NC_021163.1    | Ca_kabuli_chr04 | 48214219                | GG                              | AA              | 1946836032               |
| SNP_P4_66135_48214256 | NC_021163.1    | Ca_kabuli_chr04 | 48214256                | GG                              | TT              | 1946836035               |
| SNP_P4_66136_48214618 | NC_021163.1    | Ca_kabuli_chr04 | 48214618                | TT                              | CC              | 1946836037               |
| SNP_P4_66137_48214646 | NC_021163.1    | Ca_kabuli_chr04 | 48214646                | AA                              | GG              | 1946836039               |
| SNP_P4_66138_48214666 | NC_021163.1    | Ca_kabuli_chr04 | 48214666                | CC                              | TT              | 1946836041               |
| SNP_P4_66140_48214709 | NC_021163.1    | Ca_kabuli_chr04 | 48214709                | TT                              | CC              | 1946836043               |
| SNP_P4_66141_48214750 | NC_021163.1    | Ca_kabuli_chr04 | 48214750                | AA                              | TT              | 1946836045               |
| SNP_P4_66142_48214761 | NC_021163.1    | Ca_kabuli_chr04 | 48214761                | GG                              | AA              | 1946836047               |
| SNP_P4_66143_48214778 | NC_021163.1    | Ca_kabuli_chr04 | 48214778                | CC                              | AA              | 1946836049               |
| SNP_P4_66144_48214935 | NC_021163.1    | Ca_kabuli_chr04 | 48214935                | TT                              | CC              | 1946836051               |
| SNP_P4_66146_48215270 | NC_021163.1    | Ca_kabuli_chr04 | 48215270                | GG                              | AA              | 1946836053               |
| SNP_P4_66147_48215522 | NC_021163.1    | Ca_kabuli_chr04 | 48215522                | TT                              | CC              | 1946836056               |
| SNP_P4_66148_48215547 | NC_021163.1    | Ca_kabuli_chr04 | 48215547                | TT                              | AA              | 1946836058               |

| SNPs IDs              | Chromosome IDs | Chromosomes     | Physical positions (bp) | CDC Frontier (Reference genome) | (ILWC46 & LPNB) | NCBI SNPdb Accession IDs |
|-----------------------|----------------|-----------------|-------------------------|---------------------------------|-----------------|--------------------------|
| SNP_P4_66150_48216591 | NC_021163.1    | Ca_kabuli_chr04 | 48216591                | CC                              | TT              | 1946836060               |
| SNP_P4_66151_48216646 | NC_021163.1    | Ca_kabuli_chr04 | 48216646                | AA                              | GG              | 1946836062               |
| SNP_P4_66152_48216650 | NC_021163.1    | Ca_kabuli_chr04 | 48216650                | AA                              | TT              | 1946836064               |
| SNP_P4_66153_48217541 | NC_021163.1    | Ca_kabuli_chr04 | 48217541                | CC                              | AA              | 1946836066               |
| SNP_P4_66154_48217893 | NC_021163.1    | Ca_kabuli_chr04 | 48217893                | AA                              | GG              | 1946836068               |
| SNP_P4_66155_48217916 | NC_021163.1    | Ca_kabuli_chr04 | 48217916                | GG                              | AA              | 1946836070               |
| SNP_P4_66156_48217918 | NC_021163.1    | Ca_kabuli_chr04 | 48217918                | TT                              | CC              | 1946836072               |
| SNP_P4_66157_48217922 | NC_021163.1    | Ca_kabuli_chr04 | 48217922                | CC                              | TT              | 1946836074               |
| SNP_P4_66160_48218682 | NC_021163.1    | Ca_kabuli_chr04 | 48218682                | CC                              | GG              | 1946836076               |
| SNP_P4_66161_48218707 | NC_021163.1    | Ca_kabuli_chr04 | 48218707                | AA                              | GG              | 1946836078               |
| SNP_P4_66162_48218765 | NC_021163.1    | Ca_kabuli_chr04 | 48218765                | CC                              | AA              | 1946836081               |
| SNP_P4_66163_48218785 | NC_021163.1    | Ca_kabuli_chr04 | 48218785                | AA                              | CC              | 1946836083               |
| SNP_P4_66164_48218786 | NC_021163.1    | Ca_kabuli_chr04 | 48218786                | TT                              | CC              | 1946836085               |
| SNP_P4_66165_48223378 | NC_021163.1    | Ca_kabuli_chr04 | 48223378                | CC                              | TT              | 1946836087               |
| SNP_P4_66166_48223382 | NC_021163.1    | Ca_kabuli_chr04 | 48223382                | GG                              | AA              | 1946836089               |
| SNP_P4_66167_48223383 | NC_021163.1    | Ca_kabuli_chr04 | 48223383                | GG                              | CC              | 1946836091               |
| SNP_P4_66168_48223407 | NC_021163.1    | Ca_kabuli_chr04 | 48223407                | GG                              | CC              | 1946836093               |
| SNP_P4_66170_48224361 | NC_021163.1    | Ca_kabuli_chr04 | 48224361                | TT                              | AA              | 1946836212               |
| SNP_P4_66171_48225117 | NC_021163.1    | Ca_kabuli_chr04 | 48225117                | GG                              | AA              | 1946836214               |
| SNP_P4_66172_48226116 | NC_021163.1    | Ca_kabuli_chr04 | 48226116                | GG                              | CC              | 1946836216               |
| SNP_P4_66174_48226437 | NC_021163.1    | Ca_kabuli_chr04 | 48226437                | CC                              | TT              | 1946836218               |
| SNP_P4_66175_48226528 | NC_021163.1    | Ca_kabuli_chr04 | 48226528                | TT                              | CC              | 1946836220               |
| SNP_P4_66176_48228888 | NC_021163.1    | Ca_kabuli_chr04 | 48228888                | AA                              | GG              | 1946836223               |
| SNP_P4_66177_48229101 | NC_021163.1    | Ca_kabuli_chr04 | 48229101                | CC                              | TT              | 1946836225               |
| SNP_P4_66178_48229206 | NC_021163.1    | Ca_kabuli_chr04 | 48229206                | AA                              | GG              | 1946836227               |
| SNP_P4_66180_48231105 | NC_021163.1    | Ca_kabuli_chr04 | 48231105                | CC                              | TT              | 1946836229               |
| SNP_P4_66181_48231167 | NC_021163.1    | Ca_kabuli_chr04 | 48231167                | TT                              | GG              | 1946836231               |
| SNP_P4_66182_48232305 | NC_021163.1    | Ca_kabuli_chr04 | 48232305                | TT                              | CC              | 1946836233               |
| SNP_P4_66183_48232731 | NC_021163.1    | Ca_kabuli_chr04 | 48232731                | GG                              | TT              | 1946836235               |
| SNP_P4_66184_48234779 | NC_021163.1    | Ca_kabuli_chr04 | 48234779                | GG                              | CC              | 1946836236               |
| SNP_P4_66185_48235267 | NC_021163.1    | Ca_kabuli_chr04 | 48235267                | TT                              | CC              | 1946836238               |
| SNP_P4_66186_48237028 | NC_021163.1    | Ca_kabuli_chr04 | 48237028                | AA                              | GG              | 1946836240               |
| SNP_P4_66187_48239201 | NC_021163.1    | Ca_kabuli_chr04 | 48239201                | AA                              | GG              | 1946836242               |
| SNP_P4_66188_48240735 | NC_021163.1    | Ca_kabuli_chr04 | 48240735                | AA                              | TT              | 1946836244               |
| SNP_P4_66189_48240743 | NC_021163.1    | Ca_kabuli_chr04 | 48240743                | TT                              | AA              | 1946836246               |
| SNP_P4_66190_48241708 | NC_021163.1    | Ca_kabuli_chr04 | 48241708                | CC                              | TT              | 1946836248               |
| SNP_P4_66191_48241716 | NC_021163.1    | Ca_kabuli_chr04 | 48241716                | TT                              | CC              | 1946836250               |
| SNP_P4_66192_48243658 | NC_021163.1    | Ca_kabuli_chr04 | 48243658                | GG                              | AA              | 1946836252               |
| SNP_P4_66193_48243988 | NC_021163.1    | Ca_kabuli_chr04 | 48243988                | GG                              | AA              | 1946836254               |
| SNP_P4_66194_48244068 | NC_021163.1    | Ca_kabuli_chr04 | 48244068                | CC                              | TT              | 1946836256               |
| SNP_P4_66195_48244091 | NC_021163.1    | Ca_kabuli_chr04 | 48244091                | CC                              | TT              | 1946836258               |
| SNP_P4_66196_48244186 | NC_021163.1    | Ca_kabuli_chr04 | 48244186                | TT                              | CC              | 1946836260               |



| SNPs IDs              | Chromosome IDs | Chromosomes     | Physical positions (bp) | CDC Frontier (Reference genome) | (ILWC46 & LPNB) | NCBI SNPdb Accession IDs |
|-----------------------|----------------|-----------------|-------------------------|---------------------------------|-----------------|--------------------------|
| SNP_P4_66197_48244212 | NC_021163.1    | Ca_kabuli_chr04 | 48244212                | GG                              | AA              | 1946836262               |
| SNP_P4_66198_48244213 | NC_021163.1    | Ca_kabuli_chr04 | 48244213                | TT                              | CC              | 1946836264               |
| SNP_P4_66199_48244234 | NC_021163.1    | Ca_kabuli_chr04 | 48244234                | AA                              | GG              | 1946836266               |
| SNP_P4_66200_48244305 | NC_021163.1    | Ca_kabuli_chr04 | 48244305                | GG                              | AA              | 1946836268               |
| SNP_P4_66201_48244495 | NC_021163.1    | Ca_kabuli_chr04 | 48244495                | GG                              | CC              | 1946836270               |
| SNP_P4_66202_48244571 | NC_021163.1    | Ca_kabuli_chr04 | 48244571                | CC                              | TT              | 1946836272               |
| SNP_P4_66203_48244582 | NC_021163.1    | Ca_kabuli_chr04 | 48244582                | AA                              | CC              | 1946836274               |
| SNP_P4_66204_48244594 | NC_021163.1    | Ca_kabuli_chr04 | 48244594                | AA                              | GG              | 1946836276               |
| SNP_P4_66205_48244610 | NC_021163.1    | Ca_kabuli_chr04 | 48244610                | CC                              | TT              | 1946836278               |
| SNP_P4_66206_48247218 | NC_021163.1    | Ca_kabuli_chr04 | 48247218                | TT                              | CC              | 1946836281               |
| SNP_P4_66207_48247369 | NC_021163.1    | Ca_kabuli_chr04 | 48247369                | CC                              | TT              | 1946836283               |
| SNP_P4_66208_48247705 | NC_021163.1    | Ca_kabuli_chr04 | 48247705                | TT                              | AA              | 1946836285               |
| SNP_P4_66210_48248170 | NC_021163.1    | Ca_kabuli_chr04 | 48248170                | AA                              | GG              | 1946836287               |
| SNP_P4_66211_48255076 | NC_021163.1    | Ca_kabuli_chr04 | 48255076                | CC                              | TT              | 1946836289               |
| SNP_P4_66212_48255101 | NC_021163.1    | Ca_kabuli_chr04 | 48255101                | CC                              | TT              | 1946836291               |
| SNP_P4_66213_48255115 | NC_021163.1    | Ca_kabuli_chr04 | 48255115                | GG                              | TT              | 1946836293               |
| SNP_P4_66214_48255138 | NC_021163.1    | Ca_kabuli_chr04 | 48255138                | CC                              | TT              | 1946836295               |
| SNP_P4_66215_48255174 | NC_021163.1    | Ca_kabuli_chr04 | 48255174                | TT                              | AA              | 1946836297               |
| SNP_P4_66216_48256377 | NC_021163.1    | Ca_kabuli_chr04 | 48256377                | AA                              | CC              | 1946836299               |
| SNP_P4_66217_48256428 | NC_021163.1    | Ca_kabuli_chr04 | 48256428                | GG                              | CC              | 1946836301               |
| SNP_P4_66218_48256475 | NC_021163.1    | Ca_kabuli_chr04 | 48256475                | AA                              | CC              | 1946836303               |
| SNP_P4_66219_48256566 | NC_021163.1    | Ca_kabuli_chr04 | 48256566                | AA                              | GG              | 1946836305               |
| SNP_P4_66220_48256600 | NC_021163.1    | Ca_kabuli_chr04 | 48256600                | CC                              | TT              | 1946836307               |
| SNP_P4_66221_48259494 | NC_021163.1    | Ca_kabuli_chr04 | 48259494                | AA                              | GG              | 1946836309               |
| SNP_P4_66222_48259835 | NC_021163.1    | Ca_kabuli_chr04 | 48259835                | CC                              | TT              | 1946836311               |
| SNP_P4_66224_48262947 | NC_021163.1    | Ca_kabuli_chr04 | 48262947                | TT                              | CC              | 1946836313               |
| SNP_P4_66226_48263292 | NC_021163.1    | Ca_kabuli_chr04 | 48263292                | CC                              | TT              | 1946836315               |
| SNP_P4_66227_48263603 | NC_021163.1    | Ca_kabuli_chr04 | 48263603                | AA                              | GG              | 1946836317               |
| SNP_P4_66228_48265078 | NC_021163.1    | Ca_kabuli_chr04 | 48265078                | AA                              | GG              | 1946836319               |
| SNP_P4_66229_48265350 | NC_021163.1    | Ca_kabuli_chr04 | 48265350                | CC                              | TT              | 1946836321               |
| SNP_P4_66231_48266024 | NC_021163.1    | Ca_kabuli_chr04 | 48266024                | GG                              | AA              | 1946836323               |
| SNP_P4_66232_48266889 | NC_021163.1    | Ca_kabuli_chr04 | 48266889                | TT                              | CC              | 1946836325               |
| SNP_P4_66233_48268868 | NC_021163.1    | Ca_kabuli_chr04 | 48268868                | TT                              | AA              | 1946836327               |
| SNP_P4_66234_48270212 | NC_021163.1    | Ca_kabuli_chr04 | 48270212                | CC                              | AA              | 1946836329               |
| SNP_P4_66235_48272422 | NC_021163.1    | Ca_kabuli_chr04 | 48272422                | GG                              | AA              | 1946836331               |
| SNP_P4_66236_48272480 | NC_021163.1    | Ca_kabuli_chr04 | 48272480                | TT                              | AA              | 1946836333               |
| SNP_P4_66237_48272837 | NC_021163.1    | Ca_kabuli_chr04 | 48272837                | CC                              | AA              | 1946836335               |
| SNP_P4_66238_48274429 | NC_021163.1    | Ca_kabuli_chr04 | 48274429                | AA                              | TT              | 1946836337               |
| SNP_P4_66239_48275728 | NC_021163.1    | Ca_kabuli_chr04 | 48275728                | GG                              | AA              | 1946836339               |
| SNP_P4_66240_48275740 | NC_021163.1    | Ca_kabuli_chr04 | 48275740                | AA                              | TT              | 1946836341               |
| SNP_P4_66241_48276584 | NC_021163.1    | Ca_kabuli_chr04 | 48276584                | GG                              | TT              | 1946836343               |
| SNP_P4_66242_48277248 | NC_021163.1    | Ca_kabuli_chr04 | 48277248                | AA                              | TT              | 1946836346               |

| SNPs IDs              | Chromosome IDs | Chromosomes     | Physical positions (bp) | CDC Frontier (Reference genome) | (ILWC46 & LPNB) | NCBI SNPdb Accession IDs |
|-----------------------|----------------|-----------------|-------------------------|---------------------------------|-----------------|--------------------------|
| SNP_P4_66243_48277582 | NC_021163.1    | Ca_kabuli_chr04 | 48277582                | GG                              | AA              | 1946836348               |
| SNP_P4_66244_48277616 | NC_021163.1    | Ca_kabuli_chr04 | 48277616                | AA                              | GG              | 1946836350               |
| SNP_P4_66245_48277646 | NC_021163.1    | Ca_kabuli_chr04 | 48277646                | TT                              | AA              | 1946836352               |
| SNP_P4_66246_48277932 | NC_021163.1    | Ca_kabuli_chr04 | 48277932                | TT                              | CC              | 1946836354               |
| SNP_P4_66247_48278576 | NC_021163.1    | Ca_kabuli_chr04 | 48278576                | GG                              | AA              | 1946836356               |
| SNP_P4_66248_48278587 | NC_021163.1    | Ca_kabuli_chr04 | 48278587                | TT                              | GG              | 1946836358               |
| SNP_P4_66249_48278646 | NC_021163.1    | Ca_kabuli_chr04 | 48278646                | GG                              | AA              | 1946836360               |
| SNP_P4_66250_48278651 | NC_021163.1    | Ca_kabuli_chr04 | 48278651                | AA                              | GG              | 1946836362               |
| SNP_P4_66252_48278693 | NC_021163.1    | Ca_kabuli_chr04 | 48278693                | GG                              | AA              | 1946836364               |
| SNP_P4_66253_48278917 | NC_021163.1    | Ca_kabuli_chr04 | 48278917                | TT                              | CC              | 1946836366               |
| SNP_P4_66254_48278919 | NC_021163.1    | Ca_kabuli_chr04 | 48278919                | CC                              | GG              | 1946836368               |
| SNP_P4_66255_48278973 | NC_021163.1    | Ca_kabuli_chr04 | 48278973                | CC                              | TT              | 1946836370               |
| SNP_P4_66257_48279338 | NC_021163.1    | Ca_kabuli_chr04 | 48279338                | AA                              | GG              | 1946836372               |
| SNP_P4_66258_48279350 | NC_021163.1    | Ca_kabuli_chr04 | 48279350                | TT                              | AA              | 1946836374               |
| SNP_P4_66260_48291855 | NC_021163.1    | Ca_kabuli_chr04 | 48291855                | GG                              | AA              | 1946836376               |
| SNP_P4_66261_48291923 | NC_021163.1    | Ca_kabuli_chr04 | 48291923                | CC                              | AA              | 1946836378               |
| SNP_P4_66262_48291926 | NC_021163.1    | Ca_kabuli_chr04 | 48291926                | TT                              | CC              | 1946836380               |
| SNP_P4_66263_48291927 | NC_021163.1    | Ca_kabuli_chr04 | 48291927                | CC                              | AA              | 1946836382               |
| SNP_P4_66264_48292370 | NC_021163.1    | Ca_kabuli_chr04 | 48292370                | AA                              | TT              | 1946836384               |
| SNP_P4_66265_48292385 | NC_021163.1    | Ca_kabuli_chr04 | 48292385                | GG                              | CC              | 1946836386               |
| SNP_P4_66266_48293942 | NC_021163.1    | Ca_kabuli_chr04 | 48293942                | CC                              | TT              | 1946836388               |
| SNP_P4_66268_48295365 | NC_021163.1    | Ca_kabuli_chr04 | 48295365                | CC                              | TT              | 1946836390               |
| SNP_P4_66269_48296294 | NC_021163.1    | Ca_kabuli_chr04 | 48296294                | AA                              | TT              | 1946836392               |
| SNP_P4_66271_48297989 | NC_021163.1    | Ca_kabuli_chr04 | 48297989                | CC                              | TT              | 1946836394               |
| SNP_P4_66272_48298511 | NC_021163.1    | Ca_kabuli_chr04 | 48298511                | AA                              | TT              | 1946836396               |
| SNP_P4_66273_48298549 | NC_021163.1    | Ca_kabuli_chr04 | 48298549                | AA                              | GG              | 1946836399               |
| SNP_P4_66275_48299804 | NC_021163.1    | Ca_kabuli_chr04 | 48299804                | TT                              | CC              | 1946836401               |
| SNP_P4_66276_48299808 | NC_021163.1    | Ca_kabuli_chr04 | 48299808                | GG                              | AA              | 1946836403               |
| SNP_P4_66277_48299839 | NC_021163.1    | Ca_kabuli_chr04 | 48299839                | TT                              | CC              | 1946836405               |
| SNP_P4_66278_48299940 | NC_021163.1    | Ca_kabuli_chr04 | 48299940                | GG                              | AA              | 1946836407               |
| SNP_P4_66279_48299955 | NC_021163.1    | Ca_kabuli_chr04 | 48299955                | TT                              | CC              | 1946836409               |
| SNP_P4_66280_48300164 | NC_021163.1    | Ca_kabuli_chr04 | 48300164                | CC                              | TT              | 1946836411               |
| SNP_P4_66281_48300206 | NC_021163.1    | Ca_kabuli_chr04 | 48300206                | AA                              | CC              | 1946836413               |
| SNP_P4_66286_48304831 | NC_021163.1    | Ca_kabuli_chr04 | 48304831                | CC                              | AA              | 1946836415               |
| SNP_P4_66287_48304852 | NC_021163.1    | Ca_kabuli_chr04 | 48304852                | TT                              | AA              | 1946836418               |
| SNP_P4_66288_48304857 | NC_021163.1    | Ca_kabuli_chr04 | 48304857                | TT                              | CC              | 1946836420               |
| SNP_P4_66289_48304914 | NC_021163.1    | Ca_kabuli_chr04 | 48304914                | AA                              | GG              | 1946836422               |
| SNP_P4_66290_48305839 | NC_021163.1    | Ca_kabuli_chr04 | 48305839                | AA                              | TT              | 1946836424               |
| SNP_P4_66291_48306460 | NC_021163.1    | Ca_kabuli_chr04 | 48306460                | TT                              | AA              | 1946836426               |
| SNP_P4_66292_48306488 | NC_021163.1    | Ca_kabuli_chr04 | 48306488                | CC                              | TT              | 1946836428               |
| SNP_P4_66294_48306523 | NC_021163.1    | Ca_kabuli_chr04 | 48306523                | GG                              | TT              | 1946836431               |
| SNP_P4_66295_48307816 | NC_021163.1    | Ca_kabuli_chr04 | 48307816                | GG                              | AA              | 1946836433               |

| SNPs IDs              | Chromosome IDs | Chromosomes     | Physical positions (bp) | CDC Frontier (Reference genome) | (ILWC46 & LPNB) | NCBI SNPdb Accession IDs |
|-----------------------|----------------|-----------------|-------------------------|---------------------------------|-----------------|--------------------------|
| SNP_P4_66296_48307822 | NC_021163.1    | Ca_kabuli_chr04 | 48307822                | CC                              | TT              | 1946836435               |
| SNP_P4_66298_48307999 | NC_021163.1    | Ca_kabuli_chr04 | 48307999                | CC                              | AA              | 1946836437               |
| SNP_P4_66299_48308971 | NC_021163.1    | Ca_kabuli_chr04 | 48308971                | TT                              | CC              | 1946836439               |
| SNP_P4_66300_48308998 | NC_021163.1    | Ca_kabuli_chr04 | 48308998                | AA                              | GG              | 1946836441               |
| SNP_P4_66301_48309006 | NC_021163.1    | Ca_kabuli_chr04 | 48309006                | TT                              | AA              | 1946836443               |
| SNP_P4_66302_48309029 | NC_021163.1    | Ca_kabuli_chr04 | 48309029                | AA                              | GG              | 1946836446               |
| SNP_P4_66303_48309032 | NC_021163.1    | Ca_kabuli_chr04 | 48309032                | GG                              | AA              | 1946836448               |
| SNP_P4_66304_48309033 | NC_021163.1    | Ca_kabuli_chr04 | 48309033                | CC                              | TT              | 1946836450               |
| SNP_P4_66305_48309199 | NC_021163.1    | Ca_kabuli_chr04 | 48309199                | GG                              | AA              | 1946836452               |
| SNP_P4_66306_48309237 | NC_021163.1    | Ca_kabuli_chr04 | 48309237                | GG                              | TT              | 1946836454               |
| SNP_P4_66308_48309723 | NC_021163.1    | Ca_kabuli_chr04 | 48309723                | AA                              | TT              | 1946836456               |
| SNP_P4_66310_48310843 | NC_021163.1    | Ca_kabuli_chr04 | 48310843                | AA                              | TT              | 1946836458               |
| SNP_P4_66311_48314503 | NC_021163.1    | Ca_kabuli_chr04 | 48314503                | AA                              | CC              | 1946836460               |
| SNP_P4_66313_48314847 | NC_021163.1    | Ca_kabuli_chr04 | 48314847                | TT                              | AA              | 1946836462               |
| SNP_P4_66314_48314865 | NC_021163.1    | Ca_kabuli_chr04 | 48314865                | TT                              | CC              | 1946836464               |
| SNP_P4_66316_48315224 | NC_021163.1    | Ca_kabuli_chr04 | 48315224                | AA                              | CC              | 1946836466               |
| SNP_P4_66317_48315535 | NC_021163.1    | Ca_kabuli_chr04 | 48315535                | TT                              | AA              | 1946836469               |
| SNP_P4_66318_48315568 | NC_021163.1    | Ca_kabuli_chr04 | 48315568                | TT                              | CC              | 1946836471               |
| SNP_P4_66319_48315862 | NC_021163.1    | Ca_kabuli_chr04 | 48315862                | AA                              | CC              | 1946836473               |
| SNP_P4_66320_48316180 | NC_021163.1    | Ca_kabuli_chr04 | 48316180                | AA                              | TT              | 1946836475               |
| SNP_P4_66322_48316479 | NC_021163.1    | Ca_kabuli_chr04 | 48316479                | GG                              | AA              | 1946836477               |
| SNP_P4_66323_48316971 | NC_021163.1    | Ca_kabuli_chr04 | 48316971                | AA                              | GG              | 1946836479               |
| SNP_P4_66324_48316981 | NC_021163.1    | Ca_kabuli_chr04 | 48316981                | GG                              | AA              | 1946836481               |
| SNP_P4_66325_48317494 | NC_021163.1    | Ca_kabuli_chr04 | 48317494                | AA                              | GG              | 1946836483               |
| SNP_P4_66326_48317629 | NC_021163.1    | Ca_kabuli_chr04 | 48317629                | GG                              | AA              | 1946836485               |
| SNP_P4_66327_48317634 | NC_021163.1    | Ca_kabuli_chr04 | 48317634                | TT                              | CC              | 1946836488               |
| SNP_P4_66328_48317641 | NC_021163.1    | Ca_kabuli_chr04 | 48317641                | TT                              | GG              | 1946836490               |
| SNP_P4_66330_48323465 | NC_021163.1    | Ca_kabuli_chr04 | 48323465                | TT                              | GG              | 1946836492               |
| SNP_P4_66331_48323504 | NC_021163.1    | Ca_kabuli_chr04 | 48323504                | CC                              | TT              | 1946836494               |
| SNP_P4_66332_48323514 | NC_021163.1    | Ca_kabuli_chr04 | 48323514                | GG                              | TT              | 1946836496               |
| SNP_P4_66333_48324061 | NC_021163.1    | Ca_kabuli_chr04 | 48324061                | GG                              | TT              | 1946836498               |
| SNP_P4_66334_48324193 | NC_021163.1    | Ca_kabuli_chr04 | 48324193                | AA                              | TT              | 1946836500               |
| SNP_P4_66335_48324454 | NC_021163.1    | Ca_kabuli_chr04 | 48324454                | TT                              | AA              | 1946836502               |
| SNP_P4_66336_48325103 | NC_021163.1    | Ca_kabuli_chr04 | 48325103                | TT                              | CC              | 1946836504               |
| SNP_P4_66337_48325611 | NC_021163.1    | Ca_kabuli_chr04 | 48325611                | GG                              | AA              | 1946836506               |
| SNP_P4_66338_48326201 | NC_021163.1    | Ca_kabuli_chr04 | 48326201                | CC                              | TT              | 1946836508               |
| SNP_P4_66339_48326893 | NC_021163.1    | Ca_kabuli_chr04 | 48326893                | TT                              | AA              | 1946836510               |
| SNP_P4_66340_48326898 | NC_021163.1    | Ca_kabuli_chr04 | 48326898                | AA                              | TT              | 1946836512               |
| SNP_P4_66341_48326952 | NC_021163.1    | Ca_kabuli_chr04 | 48326952                | CC                              | TT              | 1946836514               |
| SNP_P4_66342_48326976 | NC_021163.1    | Ca_kabuli_chr04 | 48326976                | TT                              | AA              | 1946836516               |
| SNP_P4_66343_48327014 | NC_021163.1    | Ca_kabuli_chr04 | 48327014                | AA                              | TT              | 1946836518               |
| SNP_P4_66346_48331990 | NC_021163.1    | Ca_kabuli_chr04 | 48331990                | CC                              | AA              | 1946836520               |

| SNPs IDs              | Chromosome IDs | Chromosomes     | Physical positions (bp) | CDC Frontier (Reference genome) | (ILWC46 & LPNB) | NCBI SNPdb Accession IDs |
|-----------------------|----------------|-----------------|-------------------------|---------------------------------|-----------------|--------------------------|
| SNP_P4_66347_48332798 | NC_021163.1    | Ca_kabuli_chr04 | 48332798                | CC                              | AA              | 1946836522               |
| SNP_P4_66348_48332847 | NC_021163.1    | Ca_kabuli_chr04 | 48332847                | CC                              | TT              | 1946836524               |
| SNP_P4_66350_48333183 | NC_021163.1    | Ca_kabuli_chr04 | 48333183                | CC                              | TT              | 1946836526               |
| SNP_P4_66351_48335890 | NC_021163.1    | Ca_kabuli_chr04 | 48335890                | AA                              | TT              | 1946836528               |
| SNP_P4_66353_48338164 | NC_021163.1    | Ca_kabuli_chr04 | 48338164                | GG                              | TT              | 1946836530               |
| SNP_P4_66354_48338189 | NC_021163.1    | Ca_kabuli_chr04 | 48338189                | AA                              | GG              | 1946836532               |
| SNP_P4_66355_48338208 | NC_021163.1    | Ca_kabuli_chr04 | 48338208                | GG                              | AA              | 1946836534               |
| SNP_P4_66356_48338240 | NC_021163.1    | Ca_kabuli_chr04 | 48338240                | TT                              | CC              | 1946836536               |
| SNP_P4_66357_48338269 | NC_021163.1    | Ca_kabuli_chr04 | 48338269                | TT                              | CC              | 1946836538               |
| SNP_P4_66358_48338873 | NC_021163.1    | Ca_kabuli_chr04 | 48338873                | GG                              | AA              | 1946836540               |
| SNP_P4_66359_48338878 | NC_021163.1    | Ca_kabuli_chr04 | 48338878                | AA                              | CC              | 1946836542               |
| SNP_P4_66362_48340654 | NC_021163.1    | Ca_kabuli_chr04 | 48340654                | CC                              | TT              | 1946836544               |
| SNP_P4_66363_48340669 | NC_021163.1    | Ca_kabuli_chr04 | 48340669                | GG                              | AA              | 1946836546               |
| SNP_P4_66364_48340934 | NC_021163.1    | Ca_kabuli_chr04 | 48340934                | CC                              | TT              | 1946836548               |
| SNP_P4_66365_48341053 | NC_021163.1    | Ca_kabuli_chr04 | 48341053                | CC                              | TT              | 1946836550               |
| SNP_P4_66366_48341241 | NC_021163.1    | Ca_kabuli_chr04 | 48341241                | TT                              | CC              | 1946836552               |
| SNP_P4_66367_48341390 | NC_021163.1    | Ca_kabuli_chr04 | 48341390                | GG                              | AA              | 1946836554               |
| SNP_P4_66368_48341406 | NC_021163.1    | Ca_kabuli_chr04 | 48341406                | GG                              | AA              | 1946836556               |
| SNP_P4_66369_48341407 | NC_021163.1    | Ca_kabuli_chr04 | 48341407                | TT                              | AA              | 1946836558               |
| SNP_P4_66370_48341440 | NC_021163.1    | Ca_kabuli_chr04 | 48341440                | AA                              | GG              | 1946836560               |
| SNP_P4_66371_48341480 | NC_021163.1    | Ca_kabuli_chr04 | 48341480                | GG                              | TT              | 1946836562               |
| SNP_P4_66372_48341503 | NC_021163.1    | Ca_kabuli_chr04 | 48341503                | CC                              | GG              | 1946836564               |
| SNP_P4_66373_48341542 | NC_021163.1    | Ca_kabuli_chr04 | 48341542                | AA                              | GG              | 1946836566               |
| SNP_P4_66374_48341822 | NC_021163.1    | Ca_kabuli_chr04 | 48341822                | GG                              | AA              | 1946836568               |
| SNP_P4_66375_48341826 | NC_021163.1    | Ca_kabuli_chr04 | 48341826                | AA                              | CC              | 1946836570               |
| SNP_P4_66376_48341962 | NC_021163.1    | Ca_kabuli_chr04 | 48341962                | CC                              | TT              | 1946836572               |
| SNP_P4_66378_48342004 | NC_021163.1    | Ca_kabuli_chr04 | 48342004                | TT                              | AA              | 1946836574               |
| SNP_P4_66379_48342021 | NC_021163.1    | Ca_kabuli_chr04 | 48342021                | CC                              | TT              | 1946836577               |
| SNP_P4_66380_48342064 | NC_021163.1    | Ca_kabuli_chr04 | 48342064                | CC                              | TT              | 1946836580               |
| SNP_P4_66381_48342076 | NC_021163.1    | Ca_kabuli_chr04 | 48342076                | GG                              | AA              | 1946836582               |
| SNP_P4_66383_48342753 | NC_021163.1    | Ca_kabuli_chr04 | 48342753                | AA                              | TT              | 1946836584               |
| SNP_P4_66384_48342814 | NC_021163.1    | Ca_kabuli_chr04 | 48342814                | TT                              | GG              | 1946836586               |
| SNP_P4_66385_48343363 | NC_021163.1    | Ca_kabuli_chr04 | 48343363                | TT                              | CC              | 1946836588               |
| SNP_P4_66387_48344797 | NC_021163.1    | Ca_kabuli_chr04 | 48344797                | CC                              | GG              | 1946836590               |
| SNP_P4_66388_48344984 | NC_021163.1    | Ca_kabuli_chr04 | 48344984                | GG                              | AA              | 1946836592               |
| SNP_P4_66389_48345093 | NC_021163.1    | Ca_kabuli_chr04 | 48345093                | TT                              | AA              | 1946836594               |
| SNP_P4_66390_48345202 | NC_021163.1    | Ca_kabuli_chr04 | 48345202                | AA                              | GG              | 1946836596               |
| SNP_P4_66391_48345399 | NC_021163.1    | Ca_kabuli_chr04 | 48345399                | TT                              | CC              | 1946836598               |
| SNP_P4_66392_48347400 | NC_021163.1    | Ca_kabuli_chr04 | 48347400                | AA                              | TT              | 1946836600               |
| SNP_P4_66393_48348447 | NC_021163.1    | Ca_kabuli_chr04 | 48348447                | AA                              | CC              | 1946836602               |
| SNP_P4_66394_48350095 | NC_021163.1    | Ca_kabuli_chr04 | 48350095                | AA                              | CC              | 1946836604               |
| SNP_P4_66395_48350140 | NC_021163.1    | Ca_kabuli_chr04 | 48350140                | AA                              | GG              | 1946836606               |

| SNPs IDs              | Chromosome IDs | Chromosomes     | Physical positions (bp) | CDC Frontier (Reference genome) | (ILWC46 & LPNB) | NCBI SNPdb Accession IDs |
|-----------------------|----------------|-----------------|-------------------------|---------------------------------|-----------------|--------------------------|
| SNP_P4_66397_48351840 | NC_021163.1    | Ca_kabuli_chr04 | 48351840                | CC                              | TT              | 1946836608               |
| SNP_P4_66398_48351855 | NC_021163.1    | Ca_kabuli_chr04 | 48351855                | TT                              | GG              | 1946836610               |
| SNP_P4_66399_48351873 | NC_021163.1    | Ca_kabuli_chr04 | 48351873                | AA                              | GG              | 1946836612               |
| SNP_P4_66400_48351919 | NC_021163.1    | Ca_kabuli_chr04 | 48351919                | AA                              | CC              | 1946836614               |
| SNP_P4_66401_48351948 | NC_021163.1    | Ca_kabuli_chr04 | 48351948                | AA                              | GG              | 1946836616               |
| SNP_P4_66402_48352940 | NC_021163.1    | Ca_kabuli_chr04 | 48352940                | CC                              | AA              | 1946836618               |
| SNP_P4_66403_48353116 | NC_021163.1    | Ca_kabuli_chr04 | 48353116                | CC                              | TT              | 1946836620               |
| SNP_P4_66404_48354750 | NC_021163.1    | Ca_kabuli_chr04 | 48354750                | CC                              | TT              | 1946836622               |
| SNP_P4_66405_48359900 | NC_021163.1    | Ca_kabuli_chr04 | 48359900                | GG                              | TT              | 1946836624               |
| SNP_P4_66406_48361612 | NC_021163.1    | Ca_kabuli_chr04 | 48361612                | GG                              | TT              | 1946836626               |
| SNP_P4_66407_48363940 | NC_021163.1    | Ca_kabuli_chr04 | 48363940                | GG                              | AA              | 1946836628               |
| SNP_P4_66408_48363945 | NC_021163.1    | Ca_kabuli_chr04 | 48363945                | GG                              | TT              | 1946836630               |
| SNP_P4_66409_48363972 | NC_021163.1    | Ca_kabuli_chr04 | 48363972                | AA                              | TT              | 1946836632               |
| SNP_P4_66410_48364170 | NC_021163.1    | Ca_kabuli_chr04 | 48364170                | AA                              | GG              | 1946836634               |
| SNP_P4_66412_48366445 | NC_021163.1    | Ca_kabuli_chr04 | 48366445                | AA                              | GG              | 1946836636               |
| SNP_P4_66414_48368676 | NC_021163.1    | Ca_kabuli_chr04 | 48368676                | GG                              | CC              | 1946836638               |
| SNP_P4_66415_48369088 | NC_021163.1    | Ca_kabuli_chr04 | 48369088                | CC                              | TT              | 1946836640               |
| SNP_P4_66416_48370172 | NC_021163.1    | Ca_kabuli_chr04 | 48370172                | AA                              | CC              | 1946836642               |
| SNP_P4_66417_48380839 | NC_021163.1    | Ca_kabuli_chr04 | 48380839                | CC                              | TT              | 1946836644               |
| SNP_P4_66418_48380841 | NC_021163.1    | Ca_kabuli_chr04 | 48380841                | TT                              | CC              | 1946836646               |
| SNP_P4_66419_48382145 | NC_021163.1    | Ca_kabuli_chr04 | 48382145                | CC                              | TT              | 1946836648               |
| SNP_P4_66420_48382262 | NC_021163.1    | Ca_kabuli_chr04 | 48382262                | GG                              | AA              | 1946836650               |
| SNP_P4_66421_48382274 | NC_021163.1    | Ca_kabuli_chr04 | 48382274                | TT                              | CC              | 1946836652               |
| SNP_P4_66422_48382666 | NC_021163.1    | Ca_kabuli_chr04 | 48382666                | CC                              | GG              | 1946836654               |
| SNP_P4_66423_48383114 | NC_021163.1    | Ca_kabuli_chr04 | 48383114                | GG                              | CC              | 1946836656               |
| SNP_P4_66424_48383447 | NC_021163.1    | Ca_kabuli_chr04 | 48383447                | CC                              | TT              | 1946836658               |
| SNP_P4_66425_48385339 | NC_021163.1    | Ca_kabuli_chr04 | 48385339                | GG                              | AA              | 1946836660               |
| SNP_P4_66427_48386950 | NC_021163.1    | Ca_kabuli_chr04 | 48386950                | GG                              | AA              | 1946836662               |
| SNP_P4_66428_48389100 | NC_021163.1    | Ca_kabuli_chr04 | 48389100                | TT                              | CC              | 1946836664               |
| SNP_P4_66429_48389107 | NC_021163.1    | Ca_kabuli_chr04 | 48389107                | AA                              | TT              | 1946836666               |
| SNP_P4_66430_48389161 | NC_021163.1    | Ca_kabuli_chr04 | 48389161                | AA                              | GG              | 1946836668               |
| SNP_P4_66431_48389820 | NC_021163.1    | Ca_kabuli_chr04 | 48389820                | TT                              | GG              | 1946836670               |
| SNP_P4_66433_48389878 | NC_021163.1    | Ca_kabuli_chr04 | 48389878                | GG                              | TT              | 1946836672               |
| SNP_P4_66434_48389926 | NC_021163.1    | Ca_kabuli_chr04 | 48389926                | TT                              | GG              | 1946836674               |
| SNP_P4_66435_48392422 | NC_021163.1    | Ca_kabuli_chr04 | 48392422                | CC                              | TT              | 1946836676               |
| SNP_P4_66436_48394263 | NC_021163.1    | Ca_kabuli_chr04 | 48394263                | AA                              | GG              | 1946836678               |
| SNP_P4_66437_48394288 | NC_021163.1    | Ca_kabuli_chr04 | 48394288                | TT                              | CC              | 1946836681               |
| SNP_P4_66438_48395329 | NC_021163.1    | Ca_kabuli_chr04 | 48395329                | AA                              | GG              | 1946836683               |
| SNP_P4_66439_48395373 | NC_021163.1    | Ca_kabuli_chr04 | 48395373                | AA                              | GG              | 1946836685               |
| SNP_P4_66440_48396395 | NC_021163.1    | Ca_kabuli_chr04 | 48396395                | TT                              | GG              | 1946836687               |
| SNP_P4_66441_48398914 | NC_021163.1    | Ca_kabuli_chr04 | 48398914                | CC                              | GG              | 1946836689               |
| SNP_P4_66442_48401112 | NC_021163.1    | Ca_kabuli_chr04 | 48401112                | AA                              | GG              | 1946836691               |

| SNPs IDs              | Chromosome IDs | Chromosomes     | Physical positions (bp) | CDC Frontier (Reference genome) | (ILWC46 & LPNB) | NCBI SNPdb Accession IDs |
|-----------------------|----------------|-----------------|-------------------------|---------------------------------|-----------------|--------------------------|
| SNP_P4_66443_48401321 | NC_021163.1    | Ca_kabuli_chr04 | 48401321                | GG                              | TT              | 1946836693               |
| SNP_P4_66444_48401374 | NC_021163.1    | Ca_kabuli_chr04 | 48401374                | CC                              | TT              | 1946836695               |
| SNP_P4_66445_48401385 | NC_021163.1    | Ca_kabuli_chr04 | 48401385                | GG                              | AA              | 1946836697               |
| SNP_P4_66447_48403777 | NC_021163.1    | Ca_kabuli_chr04 | 48403777                | TT                              | CC              | 1946836699               |
| SNP_P4_66448_48403948 | NC_021163.1    | Ca_kabuli_chr04 | 48403948                | GG                              | AA              | 1946836701               |
| SNP_P4_66449_48403955 | NC_021163.1    | Ca_kabuli_chr04 | 48403955                | AA                              | CC              | 1946836703               |
| SNP_P4_66450_48404005 | NC_021163.1    | Ca_kabuli_chr04 | 48404005                | CC                              | TT              | 1946836705               |
| SNP_P4_66452_48404158 | NC_021163.1    | Ca_kabuli_chr04 | 48404158                | CC                              | GG              | 1946836707               |
| SNP_P4_66453_48404165 | NC_021163.1    | Ca_kabuli_chr04 | 48404165                | GG                              | AA              | 1946836709               |
| SNP_P4_66454_48404396 | NC_021163.1    | Ca_kabuli_chr04 | 48404396                | AA                              | TT              | 1946836712               |
| SNP_P4_66455_48404400 | NC_021163.1    | Ca_kabuli_chr04 | 48404400                | AA                              | GG              | 1946836715               |
| SNP_P4_66456_48404540 | NC_021163.1    | Ca_kabuli_chr04 | 48404540                | AA                              | GG              | 1946836717               |
| SNP_P4_66457_48404613 | NC_021163.1    | Ca_kabuli_chr04 | 48404613                | GG                              | TT              | 1946836720               |
| SNP_P4_66459_48404846 | NC_021163.1    | Ca_kabuli_chr04 | 48404846                | TT                              | AA              | 1946836722               |
| SNP_P4_66463_48405379 | NC_021163.1    | Ca_kabuli_chr04 | 48405379                | CC                              | AA              | 1946836724               |
| SNP_P4_66464_48406708 | NC_021163.1    | Ca_kabuli_chr04 | 48406708                | CC                              | TT              | 1946836726               |
| SNP_P4_66465_48406972 | NC_021163.1    | Ca_kabuli_chr04 | 48406972                | AA                              | GG              | 1946836728               |
| SNP_P4_66466_48406973 | NC_021163.1    | Ca_kabuli_chr04 | 48406973                | AA                              | TT              | 1946836730               |
| SNP_P4_66467_48407035 | NC_021163.1    | Ca_kabuli_chr04 | 48407035                | CC                              | TT              | 1946836732               |
| SNP_P4_66468_48409678 | NC_021163.1    | Ca_kabuli_chr04 | 48409678                | TT                              | AA              | 1946836734               |
| SNP_P4_66469_48409679 | NC_021163.1    | Ca_kabuli_chr04 | 48409679                | TT                              | CC              | 1946836736               |
| SNP_P4_66470_48409714 | NC_021163.1    | Ca_kabuli_chr04 | 48409714                | AA                              | CC              | 1946836738               |
| SNP_P4_66471_48409726 | NC_021163.1    | Ca_kabuli_chr04 | 48409726                | CC                              | AA              | 1946836740               |
| SNP_P4_66472_48410025 | NC_021163.1    | Ca_kabuli_chr04 | 48410025                | TT                              | CC              | 1946836742               |
| SNP_P4_66476_48412087 | NC_021163.1    | Ca_kabuli_chr04 | 48412087                | AA                              | GG              | 1946836744               |
| SNP_P4_66477_48412110 | NC_021163.1    | Ca_kabuli_chr04 | 48412110                | AA                              | TT              | 1946836746               |
| SNP_P4_66478_48412118 | NC_021163.1    | Ca_kabuli_chr04 | 48412118                | TT                              | AA              | 1946836748               |
| SNP_P4_66479_48413233 | NC_021163.1    | Ca_kabuli_chr04 | 48413233                | GG                              | AA              | 1946836750               |
| SNP_P4_66480_48413317 | NC_021163.1    | Ca_kabuli_chr04 | 48413317                | CC                              | TT              | 1946836752               |
| SNP_P4_66482_48427993 | NC_021163.1    | Ca_kabuli_chr04 | 48427993                | GG                              | AA              | 1946836754               |
| SNP_P4_66483_48428027 | NC_021163.1    | Ca_kabuli_chr04 | 48428027                | TT                              | CC              | 1946836756               |
| SNP_P4_66484_48428037 | NC_021163.1    | Ca_kabuli_chr04 | 48428037                | AA                              | GG              | 1946836758               |
| SNP_P4_66485_48428040 | NC_021163.1    | Ca_kabuli_chr04 | 48428040                | GG                              | AA              | 1946836760               |
| SNP_P4_66486_48428046 | NC_021163.1    | Ca_kabuli_chr04 | 48428046                | TT                              | AA              | 1946836762               |
| SNP_P4_66487_48428864 | NC_021163.1    | Ca_kabuli_chr04 | 48428864                | CC                              | AA              | 1946836764               |
| SNP_P4_66489_48431353 | NC_021163.1    | Ca_kabuli_chr04 | 48431353                | TT                              | AA              | 1946836766               |
| SNP_P4_66490_48431923 | NC_021163.1    | Ca_kabuli_chr04 | 48431923                | TT                              | CC              | 1946836768               |
| SNP_P4_66491_48432057 | NC_021163.1    | Ca_kabuli_chr04 | 48432057                | AA                              | GG              | 1946836770               |
| SNP_P4_66492_48432248 | NC_021163.1    | Ca_kabuli_chr04 | 48432248                | GG                              | TT              | 1946836772               |
| SNP_P4_66493_48432295 | NC_021163.1    | Ca_kabuli_chr04 | 48432295                | TT                              | GG              | 1946836774               |
| SNP_P4_66494_48432329 | NC_021163.1    | Ca_kabuli_chr04 | 48432329                | GG                              | AA              | 1946836776               |
| SNP_P4_66495_48432397 | NC_021163.1    | Ca_kabuli_chr04 | 48432397                | AA                              | GG              | 1946836778               |

| SNPs IDs              | Chromosome IDs | Chromosomes     | Physical positions (bp) | CDC Frontier (Reference genome) | (ILWC46 & LPNB) | NCBI SNPdb Accession IDs |
|-----------------------|----------------|-----------------|-------------------------|---------------------------------|-----------------|--------------------------|
| SNP_P4_66496_48432438 | NC_021163.1    | Ca_kabuli_chr04 | 48432438                | TT                              | CC              | 1946836780               |
| SNP_P4_66497_48432608 | NC_021163.1    | Ca_kabuli_chr04 | 48432608                | GG                              | AA              | 1946836782               |
| SNP_P4_66498_48433537 | NC_021163.1    | Ca_kabuli_chr04 | 48433537                | AA                              | GG              | 1946836784               |
| SNP_P4_66499_48434211 | NC_021163.1    | Ca_kabuli_chr04 | 48434211                | GG                              | AA              | 1946836787               |
| SNP_P4_66500_48434580 | NC_021163.1    | Ca_kabuli_chr04 | 48434580                | AA                              | GG              | 1946836789               |
| SNP_P4_66501_48434622 | NC_021163.1    | Ca_kabuli_chr04 | 48434622                | GG                              | AA              | 1946836791               |
| SNP_P4_66502_48434640 | NC_021163.1    | Ca_kabuli_chr04 | 48434640                | TT                              | CC              | 1946836793               |
| SNP_P4_66503_48434699 | NC_021163.1    | Ca_kabuli_chr04 | 48434699                | AA                              | GG              | 1946836795               |
| SNP_P4_66505_48434803 | NC_021163.1    | Ca_kabuli_chr04 | 48434803                | TT                              | AA              | 1946836797               |
| SNP_P4_66506_48434827 | NC_021163.1    | Ca_kabuli_chr04 | 48434827                | GG                              | AA              | 1946836799               |
| SNP_P4_66507_48434828 | NC_021163.1    | Ca_kabuli_chr04 | 48434828                | AA                              | TT              | 1946836801               |
| SNP_P4_66508_48435124 | NC_021163.1    | Ca_kabuli_chr04 | 48435124                | GG                              | AA              | 1946836803               |
| SNP_P4_66509_48435704 | NC_021163.1    | Ca_kabuli_chr04 | 48435704                | TT                              | CC              | 1946836805               |
| SNP_P4_66510_48435743 | NC_021163.1    | Ca_kabuli_chr04 | 48435743                | GG                              | CC              | 1946836807               |
| SNP_P4_66511_48436167 | NC_021163.1    | Ca_kabuli_chr04 | 48436167                | CC                              | GG              | 1946836809               |
| SNP_P4_66513_48436642 | NC_021163.1    | Ca_kabuli_chr04 | 48436642                | AA                              | GG              | 1946836811               |
| SNP_P4_66514_48436919 | NC_021163.1    | Ca_kabuli_chr04 | 48436919                | GG                              | TT              | 1946836813               |
| SNP_P4_66515_48436944 | NC_021163.1    | Ca_kabuli_chr04 | 48436944                | CC                              | TT              | 1946836815               |
| SNP_P4_66516_48436956 | NC_021163.1    | Ca_kabuli_chr04 | 48436956                | GG                              | AA              | 1946836817               |
| SNP_P4_66517_48437365 | NC_021163.1    | Ca_kabuli_chr04 | 48437365                | AA                              | GG              | 1946836819               |
| SNP_P4_66518_48437386 | NC_021163.1    | Ca_kabuli_chr04 | 48437386                | CC                              | AA              | 1946836821               |
| SNP_P4_66519_48440235 | NC_021163.1    | Ca_kabuli_chr04 | 48440235                | GG                              | AA              | 1946836823               |
| SNP_P4_66520_48440250 | NC_021163.1    | Ca_kabuli_chr04 | 48440250                | TT                              | GG              | 1946836825               |
| SNP_P4_66522_48440628 | NC_021163.1    | Ca_kabuli_chr04 | 48440628                | GG                              | AA              | 1946836827               |
| SNP_P4_66523_48440732 | NC_021163.1    | Ca_kabuli_chr04 | 48440732                | TT                              | CC              | 1946836829               |
| SNP_P4_66524_48441603 | NC_021163.1    | Ca_kabuli_chr04 | 48441603                | GG                              | AA              | 1946836831               |
| SNP_P4_66525_48442513 | NC_021163.1    | Ca_kabuli_chr04 | 48442513                | TT                              | CC              | 1946836833               |
| SNP_P4_66526_48443314 | NC_021163.1    | Ca_kabuli_chr04 | 48443314                | CC                              | TT              | 1946836835               |
| SNP_P4_66527_48443345 | NC_021163.1    | Ca_kabuli_chr04 | 48443345                | CC                              | TT              | 1946836837               |
| SNP_P4_66529_48443507 | NC_021163.1    | Ca_kabuli_chr04 | 48443507                | CC                              | TT              | 1946836838               |
| SNP_P4_66530_48443773 | NC_021163.1    | Ca_kabuli_chr04 | 48443773                | TT                              | GG              | 1946836840               |
| SNP_P4_66531_48443797 | NC_021163.1    | Ca_kabuli_chr04 | 48443797                | AA                              | TT              | 1946836843               |
| SNP_P4_66532_48444140 | NC_021163.1    | Ca_kabuli_chr04 | 48444140                | GG                              | TT              | 1946836845               |
| SNP_P4_66533_48444549 | NC_021163.1    | Ca_kabuli_chr04 | 48444549                | TT                              | AA              | 1946836847               |
| SNP_P4_66534_48444579 | NC_021163.1    | Ca_kabuli_chr04 | 48444579                | GG                              | TT              | 1946836849               |
| SNP_P4_66535_48444590 | NC_021163.1    | Ca_kabuli_chr04 | 48444590                | TT                              | CC              | 1946836851               |
| SNP_P4_66536_48444591 | NC_021163.1    | Ca_kabuli_chr04 | 48444591                | GG                              | AA              | 1946836853               |
| SNP_P4_66537_48444593 | NC_021163.1    | Ca_kabuli_chr04 | 48444593                | AA                              | TT              | 1946836855               |
| SNP_P4_66538_48444607 | NC_021163.1    | Ca_kabuli_chr04 | 48444607                | AA                              | GG              | 1946836857               |
| SNP_P4_66539_48444629 | NC_021163.1    | Ca_kabuli_chr04 | 48444629                | TT                              | AA              | 1946836859               |
| SNP_P4_66540_48444630 | NC_021163.1    | Ca_kabuli_chr04 | 48444630                | GG                              | TT              | 1946836861               |
| SNP_P4_66541_48444633 | NC_021163.1    | Ca_kabuli_chr04 | 48444633                | CC                              | TT              | 1946836863               |

| SNPs IDs              | Chromosome IDs | Chromosomes     | Physical positions (bp) | CDC Frontier (Reference genome) | (ILWC46 & LPNB) | NCBI SNPdb Accession IDs |
|-----------------------|----------------|-----------------|-------------------------|---------------------------------|-----------------|--------------------------|
| SNP_P4_66542_48444715 | NC_021163.1    | Ca_kabuli_chr04 | 48444715                | CC                              | TT              | 1946836865               |
| SNP_P4_66543_48444766 | NC_021163.1    | Ca_kabuli_chr04 | 48444766                | CC                              | TT              | 1946836867               |
| SNP_P4_66544_48444790 | NC_021163.1    | Ca_kabuli_chr04 | 48444790                | GG                              | AA              | 1946836869               |
| SNP_P4_66545_48444840 | NC_021163.1    | Ca_kabuli_chr04 | 48444840                | GG                              | AA              | 1946836871               |
| SNP_P4_66546_48444866 | NC_021163.1    | Ca_kabuli_chr04 | 48444866                | AA                              | GG              | 1946836873               |
| SNP_P4_66547_48444947 | NC_021163.1    | Ca_kabuli_chr04 | 48444947                | TT                              | GG              | 1946836875               |
| SNP_P4_66548_48444951 | NC_021163.1    | Ca_kabuli_chr04 | 48444951                | CC                              | TT              | 1946836877               |
| SNP_P4_66549_48444994 | NC_021163.1    | Ca_kabuli_chr04 | 48444994                | TT                              | CC              | 1946836879               |
| SNP_P4_66550_48445004 | NC_021163.1    | Ca_kabuli_chr04 | 48445004                | GG                              | AA              | 1946836881               |
| SNP_P4_66551_48445008 | NC_021163.1    | Ca_kabuli_chr04 | 48445008                | CC                              | TT              | 1946836883               |
| SNP_P4_66552_48445058 | NC_021163.1    | Ca_kabuli_chr04 | 48445058                | GG                              | AA              | 1946836885               |
| SNP_P4_66553_48445059 | NC_021163.1    | Ca_kabuli_chr04 | 48445059                | GG                              | AA              | 1946836887               |
| SNP_P4_66554_48445064 | NC_021163.1    | Ca_kabuli_chr04 | 48445064                | TT                              | AA              | 1946836889               |
| SNP_P4_66555_48445117 | NC_021163.1    | Ca_kabuli_chr04 | 48445117                | GG                              | AA              | 1946836891               |
| SNP_P4_66556_48445148 | NC_021163.1    | Ca_kabuli_chr04 | 48445148                | AA                              | CC              | 1946836894               |
| SNP_P4_66557_48445192 | NC_021163.1    | Ca_kabuli_chr04 | 48445192                | CC                              | TT              | 1946836896               |
| SNP_P4_66559_48445238 | NC_021163.1    | Ca_kabuli_chr04 | 48445238                | CC                              | AA              | 1946836898               |
| SNP_P4_66560_48445275 | NC_021163.1    | Ca_kabuli_chr04 | 48445275                | CC                              | TT              | 1946836900               |
| SNP_P4_66561_48445744 | NC_021163.1    | Ca_kabuli_chr04 | 48445744                | GG                              | CC              | 1946836902               |
| SNP_P4_66563_48445822 | NC_021163.1    | Ca_kabuli_chr04 | 48445822                | CC                              | TT              | 1946836904               |
| SNP_P4_66564_48445883 | NC_021163.1    | Ca_kabuli_chr04 | 48445883                | TT                              | GG              | 1946836906               |
| SNP_P4_66565_48445884 | NC_021163.1    | Ca_kabuli_chr04 | 48445884                | GG                              | TT              | 1946836908               |
| SNP_P4_66566_48445889 | NC_021163.1    | Ca_kabuli_chr04 | 48445889                | TT                              | CC              | 1946836910               |
| SNP_P4_66567_48446045 | NC_021163.1    | Ca_kabuli_chr04 | 48446045                | GG                              | AA              | 1946836912               |
| SNP_P4_66569_48446124 | NC_021163.1    | Ca_kabuli_chr04 | 48446124                | AA                              | GG              | 1946836914               |
| SNP_P4_66570_48446177 | NC_021163.1    | Ca_kabuli_chr04 | 48446177                | CC                              | TT              | 1946836916               |
| SNP_P4_66571_48446181 | NC_021163.1    | Ca_kabuli_chr04 | 48446181                | CC                              | TT              | 1946836918               |
| SNP_P4_66572_48446371 | NC_021163.1    | Ca_kabuli_chr04 | 48446371                | GG                              | AA              | 1946836920               |
| SNP_P4_66574_48446864 | NC_021163.1    | Ca_kabuli_chr04 | 48446864                | GG                              | AA              | 1946836922               |
| SNP_P4_66575_48446870 | NC_021163.1    | Ca_kabuli_chr04 | 48446870                | CC                              | TT              | 1946836924               |
| SNP_P4_66576_48447100 | NC_021163.1    | Ca_kabuli_chr04 | 48447100                | TT                              | CC              | 1946836926               |
| SNP_P4_66577_48447119 | NC_021163.1    | Ca_kabuli_chr04 | 48447119                | TT                              | GG              | 1946836928               |
| SNP_P4_66579_48447394 | NC_021163.1    | Ca_kabuli_chr04 | 48447394                | TT                              | CC              | 1946836930               |
| SNP_P4_66580_48448889 | NC_021163.1    | Ca_kabuli_chr04 | 48448889                | CC                              | TT              | 1946836932               |
| SNP_P4_66581_48448892 | NC_021163.1    | Ca_kabuli_chr04 | 48448892                | CC                              | TT              | 1946836934               |
| SNP_P4_66582_48449337 | NC_021163.1    | Ca_kabuli_chr04 | 48449337                | AA                              | GG              | 1946836936               |
| SNP_P4_66583_48449364 | NC_021163.1    | Ca_kabuli_chr04 | 48449364                | TT                              | CC              | 1946836938               |
| SNP_P4_66584_48450167 | NC_021163.1    | Ca_kabuli_chr04 | 48450167                | AA                              | GG              | 1946836940               |
| SNP_P4_66585_48450181 | NC_021163.1    | Ca_kabuli_chr04 | 48450181                | AA                              | TT              | 1946836941               |
| SNP_P4_66586_48450367 | NC_021163.1    | Ca_kabuli_chr04 | 48450367                | GG                              | AA              | 1946836943               |
| SNP_P4_66587_48450454 | NC_021163.1    | Ca_kabuli_chr04 | 48450454                | AA                              | TT              | 1946836945               |
| SNP_P4_66588_48450769 | NC_021163.1    | Ca_kabuli_chr04 | 48450769                | CC                              | TT              | 1946836947               |



| SNPs IDs              | Chromosome IDs | Chromosomes     | Physical positions (bp) | CDC Frontier (Reference genome) | (ILWC46 & LPNB) | NCBI SNPdb Accession IDs |
|-----------------------|----------------|-----------------|-------------------------|---------------------------------|-----------------|--------------------------|
| SNP_P4_66589_48451078 | NC_021163.1    | Ca_kabuli_chr04 | 48451078                | GG                              | AA              | 1946836949               |
| SNP_P4_66590_48451176 | NC_021163.1    | Ca_kabuli_chr04 | 48451176                | AA                              | GG              | 1946836951               |
| SNP_P4_66591_48451181 | NC_021163.1    | Ca_kabuli_chr04 | 48451181                | TT                              | CC              | 1946836953               |
| SNP_P4_66592_48451227 | NC_021163.1    | Ca_kabuli_chr04 | 48451227                | TT                              | CC              | 1946836955               |
| SNP_P4_66593_48451232 | NC_021163.1    | Ca_kabuli_chr04 | 48451232                | AA                              | GG              | 1946836957               |
| SNP_P4_66595_48451321 | NC_021163.1    | Ca_kabuli_chr04 | 48451321                | TT                              | CC              | 1946836959               |
| SNP_P4_66596_48452059 | NC_021163.1    | Ca_kabuli_chr04 | 48452059                | AA                              | GG              | 1946836961               |
| SNP_P4_66597_48452060 | NC_021163.1    | Ca_kabuli_chr04 | 48452060                | CC                              | TT              | 1946836963               |
| SNP_P4_66600_48455054 | NC_021163.1    | Ca_kabuli_chr04 | 48455054                | TT                              | AA              | 1946836965               |
| SNP_P4_66601_48455326 | NC_021163.1    | Ca_kabuli_chr04 | 48455326                | TT                              | CC              | 1946836967               |
| SNP_P4_66602_48457943 | NC_021163.1    | Ca_kabuli_chr04 | 48457943                | TT                              | CC              | 1946836968               |
| SNP_P4_66603_48459175 | NC_021163.1    | Ca_kabuli_chr04 | 48459175                | CC                              | TT              | 1946836970               |
| SNP_P4_66604_48459274 | NC_021163.1    | Ca_kabuli_chr04 | 48459274                | GG                              | AA              | 1946836972               |
| SNP_P4_66606_48459523 | NC_021163.1    | Ca_kabuli_chr04 | 48459523                | AA                              | TT              | 1946836974               |
| SNP_P4_66608_48460117 | NC_021163.1    | Ca_kabuli_chr04 | 48460117                | AA                              | GG              | 1946836976               |
| SNP_P4_66609_48460501 | NC_021163.1    | Ca_kabuli_chr04 | 48460501                | TT                              | CC              | 1946836978               |
| SNP_P4_66610_48460504 | NC_021163.1    | Ca_kabuli_chr04 | 48460504                | TT                              | CC              | 1946836980               |
| SNP_P4_66611_48460506 | NC_021163.1    | Ca_kabuli_chr04 | 48460506                | AA                              | GG              | 1946836982               |
| SNP_P4_66612_48460519 | NC_021163.1    | Ca_kabuli_chr04 | 48460519                | TT                              | CC              | 1946836984               |
| SNP_P4_66613_48461884 | NC_021163.1    | Ca_kabuli_chr04 | 48461884                | TT                              | CC              | 1946836986               |
| SNP_P4_66614_48461903 | NC_021163.1    | Ca_kabuli_chr04 | 48461903                | GG                              | TT              | 1946836988               |
| SNP_P4_66615_48461976 | NC_021163.1    | Ca_kabuli_chr04 | 48461976                | CC                              | TT              | 1946836990               |
| SNP_P4_66616_48465416 | NC_021163.1    | Ca_kabuli_chr04 | 48465416                | TT                              | CC              | 1946836992               |
| SNP_P4_66617_48466535 | NC_021163.1    | Ca_kabuli_chr04 | 48466535                | TT                              | AA              | 1946836994               |
| SNP_P4_66618_48466599 | NC_021163.1    | Ca_kabuli_chr04 | 48466599                | AA                              | GG              | 1946836996               |
| SNP_P4_66619_48471127 | NC_021163.1    | Ca_kabuli_chr04 | 48471127                | AA                              | GG              | 1946836998               |
| SNP_P4_66620_48471145 | NC_021163.1    | Ca_kabuli_chr04 | 48471145                | TT                              | CC              | 1946837000               |
| SNP_P4_66621_48471413 | NC_021163.1    | Ca_kabuli_chr04 | 48471413                | TT                              | CC              | 1946837002               |
| SNP_P4_66622_48472766 | NC_021163.1    | Ca_kabuli_chr04 | 48472766                | GG                              | CC              | 1946837004               |
| SNP_P4_66623_48472897 | NC_021163.1    | Ca_kabuli_chr04 | 48472897                | CC                              | TT              | 1946837006               |
| SNP_P4_66624_48472943 | NC_021163.1    | Ca_kabuli_chr04 | 48472943                | CC                              | AA              | 1946837008               |
| SNP_P4_66625_48477661 | NC_021163.1    | Ca_kabuli_chr04 | 48477661                | AA                              | GG              | 1946837010               |
| SNP_P4_66626_48477664 | NC_021163.1    | Ca_kabuli_chr04 | 48477664                | TT                              | CC              | 1946837011               |
| SNP_P4_66627_48478817 | NC_021163.1    | Ca_kabuli_chr04 | 48478817                | TT                              | CC              | 1946837013               |
| SNP_P4_66628_48479881 | NC_021163.1    | Ca_kabuli_chr04 | 48479881                | AA                              | CC              | 1946837015               |
| SNP_P4_66629_48479906 | NC_021163.1    | Ca_kabuli_chr04 | 48479906                | GG                              | AA              | 1946837017               |
| SNP_P4_66630_48479920 | NC_021163.1    | Ca_kabuli_chr04 | 48479920                | AA                              | GG              | 1946837019               |
| SNP_P4_66631_48481113 | NC_021163.1    | Ca_kabuli_chr04 | 48481113                | TT                              | AA              | 1946837021               |
| SNP_P4_66632_48481391 | NC_021163.1    | Ca_kabuli_chr04 | 48481391                | CC                              | TT              | 1946837023               |
| SNP_P4_66633_48481425 | NC_021163.1    | Ca_kabuli_chr04 | 48481425                | GG                              | AA              | 1946837025               |
| SNP_P4_66634_48481427 | NC_021163.1    | Ca_kabuli_chr04 | 48481427                | CC                              | TT              | 1946837027               |
| SNP_P4_66635_48481577 | NC_021163.1    | Ca_kabuli_chr04 | 48481577                | TT                              | GG              | 1946837029               |

| SNPs IDs              | Chromosome IDs | Chromosomes     | Physical positions (bp) | CDC Frontier (Reference genome) | (ILWC46 & LPNB) | NCBI SNPdb Accession IDs |
|-----------------------|----------------|-----------------|-------------------------|---------------------------------|-----------------|--------------------------|
| SNP_P4_66637_48487324 | NC_021163.1    | Ca_kabuli_chr04 | 48487324                | GG                              | AA              | 1946837031               |
| SNP_P4_66638_48487583 | NC_021163.1    | Ca_kabuli_chr04 | 48487583                | AA                              | GG              | 1946837033               |
| SNP_P4_66639_48487622 | NC_021163.1    | Ca_kabuli_chr04 | 48487622                | GG                              | TT              | 1946837035               |
| SNP_P4_66640_48487689 | NC_021163.1    | Ca_kabuli_chr04 | 48487689                | GG                              | AA              | 1946837037               |
| SNP_P4_66641_48488096 | NC_021163.1    | Ca_kabuli_chr04 | 48488096                | AA                              | TT              | 1946837039               |
| SNP_P4_66642_48488115 | NC_021163.1    | Ca_kabuli_chr04 | 48488115                | TT                              | GG              | 1946837041               |
| SNP_P4_66643_48488188 | NC_021163.1    | Ca_kabuli_chr04 | 48488188                | TT                              | AA              | 1946837043               |
| SNP_P4_66644_48493609 | NC_021163.1    | Ca_kabuli_chr04 | 48493609                | CC                              | TT              | 1946837045               |
| SNP_P4_66645_48493645 | NC_021163.1    | Ca_kabuli_chr04 | 48493645                | CC                              | TT              | 1946837047               |
| SNP_P4_66646_48493684 | NC_021163.1    | Ca_kabuli_chr04 | 48493684                | GG                              | CC              | 1946837049               |
| SNP_P4_66647_48494374 | NC_021163.1    | Ca_kabuli_chr04 | 48494374                | TT                              | CC              | 1946837051               |
| SNP_P4_66648_48494417 | NC_021163.1    | Ca_kabuli_chr04 | 48494417                | TT                              | CC              | 1946837053               |
| SNP_P4_66649_48494426 | NC_021163.1    | Ca_kabuli_chr04 | 48494426                | GG                              | AA              | 1946837055               |
| SNP_P4_66650_48494434 | NC_021163.1    | Ca_kabuli_chr04 | 48494434                | CC                              | AA              | 1946837057               |
| SNP_P4_66652_48494545 | NC_021163.1    | Ca_kabuli_chr04 | 48494545                | TT                              | GG              | 1946837059               |
| SNP_P4_66654_48494614 | NC_021163.1    | Ca_kabuli_chr04 | 48494614                | CC                              | TT              | 1946837061               |
| SNP_P4_66655_48494914 | NC_021163.1    | Ca_kabuli_chr04 | 48494914                | AA                              | GG              | 1946837063               |
| SNP_P4_66656_48495002 | NC_021163.1    | Ca_kabuli_chr04 | 48495002                | AA                              | TT              | 1946837065               |
| SNP_P4_66657_48496721 | NC_021163.1    | Ca_kabuli_chr04 | 48496721                | CC                              | TT              | 1946837067               |
| SNP_P4_66658_48498331 | NC_021163.1    | Ca_kabuli_chr04 | 48498331                | AA                              | TT              | 1946837069               |
| SNP_P4_66659_48498334 | NC_021163.1    | Ca_kabuli_chr04 | 48498334                | GG                              | TT              | 1946837070               |
| SNP_P4_66660_48498368 | NC_021163.1    | Ca_kabuli_chr04 | 48498368                | TT                              | CC              | 1946837072               |
| SNP_P4_66661_48498612 | NC_021163.1    | Ca_kabuli_chr04 | 48498612                | AA                              | GG              | 1946837074               |
| SNP_P4_66662_48498750 | NC_021163.1    | Ca_kabuli_chr04 | 48498750                | TT                              | AA              | 1946837076               |
| SNP_P4_66663_48499065 | NC_021163.1    | Ca_kabuli_chr04 | 48499065                | CC                              | AA              | 1946837078               |
| SNP_P4_66664_48499469 | NC_021163.1    | Ca_kabuli_chr04 | 48499469                | GG                              | TT              | 1946837080               |
| SNP_P4_66665_48499477 | NC_021163.1    | Ca_kabuli_chr04 | 48499477                | TT                              | GG              | 1946837082               |
| SNP_P4_66666_48499784 | NC_021163.1    | Ca_kabuli_chr04 | 48499784                | GG                              | AA              | 1946837084               |
| SNP_P4_66667_48499856 | NC_021163.1    | Ca_kabuli_chr04 | 48499856                | CC                              | AA              | 1946837086               |
| SNP_P4_66668_48500117 | NC_021163.1    | Ca_kabuli_chr04 | 48500117                | GG                              | TT              | 1946837088               |
| SNP_P4_66670_48500699 | NC_021163.1    | Ca_kabuli_chr04 | 48500699                | CC                              | TT              | 1946837090               |
| SNP_P4_66671_48501170 | NC_021163.1    | Ca_kabuli_chr04 | 48501170                | TT                              | CC              | 1946837092               |
| SNP_P4_66672_48503257 | NC_021163.1    | Ca_kabuli_chr04 | 48503257                | TT                              | AA              | 1946837094               |
| SNP_P4_66673_48503280 | NC_021163.1    | Ca_kabuli_chr04 | 48503280                | TT                              | CC              | 1946837096               |
| SNP_P4_66675_48503636 | NC_021163.1    | Ca_kabuli_chr04 | 48503636                | GG                              | AA              | 1946837098               |
| SNP_P4_66676_48503653 | NC_021163.1    | Ca_kabuli_chr04 | 48503653                | AA                              | TT              | 1946837100               |
| SNP_P4_66677_48503656 | NC_021163.1    | Ca_kabuli_chr04 | 48503656                | GG                              | AA              | 1946837102               |
| SNP_P4_66678_48503841 | NC_021163.1    | Ca_kabuli_chr04 | 48503841                | CC                              | AA              | 1946837104               |
| SNP_P4_66679_48503935 | NC_021163.1    | Ca_kabuli_chr04 | 48503935                | GG                              | AA              | 1946837106               |
| SNP_P4_66680_48504073 | NC_021163.1    | Ca_kabuli_chr04 | 48504073                | TT                              | CC              | 1946837108               |
| SNP_P4_66681_48504101 | NC_021163.1    | Ca_kabuli_chr04 | 48504101                | AA                              | TT              | 1946837110               |
| SNP_P4_66682_48504330 | NC_021163.1    | Ca_kabuli_chr04 | 48504330                | CC                              | GG              | 1946837112               |

| SNPs IDs              | Chromosome IDs | Chromosomes     | Physical positions (bp) | CDC Frontier (Reference genome) | (ILWC46 & LPNB) | NCBI SNPdb Accession IDs |
|-----------------------|----------------|-----------------|-------------------------|---------------------------------|-----------------|--------------------------|
| SNP_P4_66683_48504406 | NC_021163.1    | Ca_kabuli_chr04 | 48504406                | TT                              | GG              | 1946837114               |
| SNP_P4_66684_48504617 | NC_021163.1    | Ca_kabuli_chr04 | 48504617                | CC                              | GG              | 1946837115               |
| SNP_P4_66685_48504685 | NC_021163.1    | Ca_kabuli_chr04 | 48504685                | GG                              | CC              | 1946837116               |
| SNP_P4_66686_48504686 | NC_021163.1    | Ca_kabuli_chr04 | 48504686                | TT                              | AA              | 1946837117               |
| SNP_P4_66688_48505584 | NC_021163.1    | Ca_kabuli_chr04 | 48505584                | CC                              | AA              | 1946837118               |
| SNP_P4_66690_48505819 | NC_021163.1    | Ca_kabuli_chr04 | 48505819                | TT                              | CC              | 1946837119               |
| SNP_P4_66691_48505820 | NC_021163.1    | Ca_kabuli_chr04 | 48505820                | TT                              | AA              | 1946837121               |
| SNP_P4_66692_48508487 | NC_021163.1    | Ca_kabuli_chr04 | 48508487                | AA                              | TT              | 1946837123               |
| SNP_P4_66693_48509311 | NC_021163.1    | Ca_kabuli_chr04 | 48509311                | CC                              | TT              | 1946837125               |
| SNP_P4_66694_48509356 | NC_021163.1    | Ca_kabuli_chr04 | 48509356                | CC                              | GG              | 1946837127               |
| SNP_P4_66696_48509707 | NC_021163.1    | Ca_kabuli_chr04 | 48509707                | AA                              | TT              | 1946837129               |
| SNP_P4_66697_48511628 | NC_021163.1    | Ca_kabuli_chr04 | 48511628                | TT                              | AA              | 1946837131               |
| SNP_P4_66698_48511807 | NC_021163.1    | Ca_kabuli_chr04 | 48511807                | CC                              | TT              | 1946837133               |
| SNP_P4_66699_48511814 | NC_021163.1    | Ca_kabuli_chr04 | 48511814                | AA                              | TT              | 1946837135               |
| SNP_P4_66700_48511817 | NC_021163.1    | Ca_kabuli_chr04 | 48511817                | TT                              | CC              | 1946837137               |
| SNP_P4_66701_48511874 | NC_021163.1    | Ca_kabuli_chr04 | 48511874                | AA                              | GG              | 1946837139               |
| SNP_P4_66702_48511876 | NC_021163.1    | Ca_kabuli_chr04 | 48511876                | TT                              | CC              | 1946837141               |
| SNP_P4_66704_48513349 | NC_021163.1    | Ca_kabuli_chr04 | 48513349                | AA                              | TT              | 1946837143               |
| SNP_P4_66705_48513352 | NC_021163.1    | Ca_kabuli_chr04 | 48513352                | CC                              | TT              | 1946837145               |
| SNP_P4_66706_48513365 | NC_021163.1    | Ca_kabuli_chr04 | 48513365                | AA                              | GG              | 1946837147               |
| SNP_P4_66707_48513375 | NC_021163.1    | Ca_kabuli_chr04 | 48513375                | TT                              | GG              | 1946837149               |
| SNP_P4_66708_48514465 | NC_021163.1    | Ca_kabuli_chr04 | 48514465                | CC                              | AA              | 1946837151               |
| SNP_P4_66709_48515157 | NC_021163.1    | Ca_kabuli_chr04 | 48515157                | GG                              | AA              | 1946837153               |
| SNP_P4_66710_48515774 | NC_021163.1    | Ca_kabuli_chr04 | 48515774                | CC                              | TT              | 1946837155               |
| SNP_P4_66711_48516139 | NC_021163.1    | Ca_kabuli_chr04 | 48516139                | AA                              | TT              | 1946837157               |
| SNP_P4_66712_48516540 | NC_021163.1    | Ca_kabuli_chr04 | 48516540                | TT                              | CC              | 1946837159               |
| SNP_P4_66713_48516573 | NC_021163.1    | Ca_kabuli_chr04 | 48516573                | CC                              | AA              | 1946837161               |
| SNP_P4_66714_48517684 | NC_021163.1    | Ca_kabuli_chr04 | 48517684                | GG                              | AA              | 1946837163               |
| SNP_P4_66717_48520857 | NC_021163.1    | Ca_kabuli_chr04 | 48520857                | CC                              | AA              | 1946837165               |
| SNP_P4_66718_48521692 | NC_021163.1    | Ca_kabuli_chr04 | 48521692                | TT                              | CC              | 1946837168               |
| SNP_P4_66719_48521707 | NC_021163.1    | Ca_kabuli_chr04 | 48521707                | AA                              | TT              | 1946837170               |
| SNP_P4_66720_48521743 | NC_021163.1    | Ca_kabuli_chr04 | 48521743                | AA                              | GG              | 1946837172               |
| SNP_P4_66722_48530418 | NC_021163.1    | Ca_kabuli_chr04 | 48530418                | AA                              | GG              | 1946837174               |
| SNP_P4_66723_48541105 | NC_021163.1    | Ca_kabuli_chr04 | 48541105                | GG                              | TT              | 1946837176               |
| SNP_P4_66725_48574481 | NC_021163.1    | Ca_kabuli_chr04 | 48574481                | GG                              | AA              | 1946837178               |
| SNP_P4_66726_48574530 | NC_021163.1    | Ca_kabuli_chr04 | 48574530                | CC                              | TT              | 1946837180               |
| SNP_P4_66727_48574926 | NC_021163.1    | Ca_kabuli_chr04 | 48574926                | AA                              | TT              | 1946837182               |
| SNP_P4_66728_48575242 | NC_021163.1    | Ca_kabuli_chr04 | 48575242                | GG                              | TT              | 1946837184               |
| SNP_P4_66729_48575833 | NC_021163.1    | Ca_kabuli_chr04 | 48575833                | TT                              | AA              | 1946837187               |
| SNP_P4_66733_48580382 | NC_021163.1    | Ca_kabuli_chr04 | 48580382                | GG                              | AA              | 1946837189               |
| SNP_P4_66734_48592399 | NC_021163.1    | Ca_kabuli_chr04 | 48592399                | GG                              | AA              | 1946837191               |
| SNP_P4_66735_48620682 | NC_021163.1    | Ca_kabuli_chr04 | 48620682                | AA                              | GG              | 1946837193               |

| SNPs IDs              | Chromosome IDs | Chromosomes     | Physical positions (bp) | CDC Frontier (Reference genome) | (ILWC46 & LPNB) | NCBI SNPdb Accession IDs |
|-----------------------|----------------|-----------------|-------------------------|---------------------------------|-----------------|--------------------------|
| SNP_P4_66736_48626682 | NC_021163.1    | Ca_kabuli_chr04 | 48626682                | TT                              | CC              | 1946837195               |
| SNP_P4_66737_48627122 | NC_021163.1    | Ca_kabuli_chr04 | 48627122                | CC                              | TT              | 1946837197               |
| SNP_P4_66738_48630807 | NC_021163.1    | Ca_kabuli_chr04 | 48630807                | CC                              | TT              | 1946837199               |
| SNP_P4_66739_48645314 | NC_021163.1    | Ca_kabuli_chr04 | 48645314                | AA                              | GG              | 1946837201               |
| SNP_P4_66740_48646239 | NC_021163.1    | Ca_kabuli_chr04 | 48646239                | TT                              | CC              | 1946837203               |
| SNP_P4_66741_48650739 | NC_021163.1    | Ca_kabuli_chr04 | 48650739                | CC                              | TT              | 1946837205               |
| SNP_P4_66742_48657505 | NC_021163.1    | Ca_kabuli_chr04 | 48657505                | GG                              | TT              | 1946837207               |
| SNP_P4_66743_48659908 | NC_021163.1    | Ca_kabuli_chr04 | 48659908                | TT                              | CC              | 1946837209               |
| SNP_P4_66744_48661907 | NC_021163.1    | Ca_kabuli_chr04 | 48661907                | TT                              | CC              | 1946837211               |
| SNP_P4_66745_48661942 | NC_021163.1    | Ca_kabuli_chr04 | 48661942                | CC                              | TT              | 1946837213               |
| SNP_P4_66746_48662062 | NC_021163.1    | Ca_kabuli_chr04 | 48662062                | GG                              | CC              | 1946837215               |
| SNP_P4_66747_48662147 | NC_021163.1    | Ca_kabuli_chr04 | 48662147                | GG                              | AA              | 1946837217               |
| SNP_P4_66748_48662178 | NC_021163.1    | Ca_kabuli_chr04 | 48662178                | AA                              | TT              | 1946837219               |
| SNP_P4_66749_48662367 | NC_021163.1    | Ca_kabuli_chr04 | 48662367                | AA                              | GG              | 1946837222               |
| SNP_P4_66750_48662828 | NC_021163.1    | Ca_kabuli_chr04 | 48662828                | GG                              | AA              | 1946837224               |
| SNP_P4_66753_48663212 | NC_021163.1    | Ca_kabuli_chr04 | 48663212                | CC                              | AA              | 1946837226               |
| SNP_P4_66754_48663219 | NC_021163.1    | Ca_kabuli_chr04 | 48663219                | AA                              | CC              | 1946837228               |
| SNP_P4_66756_48663817 | NC_021163.1    | Ca_kabuli_chr04 | 48663817                | CC                              | GG              | 1946837230               |
| SNP_P4_66757_48663858 | NC_021163.1    | Ca_kabuli_chr04 | 48663858                | AA                              | TT              | 1946837232               |
| SNP_P4_66758_48664003 | NC_021163.1    | Ca_kabuli_chr04 | 48664003                | TT                              | CC              | 1946837234               |
| SNP_P4_66759_48664049 | NC_021163.1    | Ca_kabuli_chr04 | 48664049                | CC                              | TT              | 1946837236               |
| SNP_P4_66760_48664186 | NC_021163.1    | Ca_kabuli_chr04 | 48664186                | GG                              | AA              | 1946837238               |
| SNP_P4_66761_48664251 | NC_021163.1    | Ca_kabuli_chr04 | 48664251                | TT                              | AA              | 1946837240               |
| SNP_P4_66762_48664252 | NC_021163.1    | Ca_kabuli_chr04 | 48664252                | TT                              | AA              | 1946837242               |
| SNP_P4_66763_48664281 | NC_021163.1    | Ca_kabuli_chr04 | 48664281                | AA                              | TT              | 1946837244               |
| SNP_P4_66764_48664600 | NC_021163.1    | Ca_kabuli_chr04 | 48664600                | GG                              | CC              | 1946837246               |
| SNP_P4_66765_48665225 | NC_021163.1    | Ca_kabuli_chr04 | 48665225                | TT                              | CC              | 1946837248               |
| SNP_P4_66766_48665517 | NC_021163.1    | Ca_kabuli_chr04 | 48665517                | AA                              | GG              | 1946837250               |
| SNP_P4_66768_48666819 | NC_021163.1    | Ca_kabuli_chr04 | 48666819                | TT                              | CC              | 1946837252               |
| SNP_P4_66769_48667177 | NC_021163.1    | Ca_kabuli_chr04 | 48667177                | TT                              | CC              | 1946837254               |
| SNP_P4_66770_48667231 | NC_021163.1    | Ca_kabuli_chr04 | 48667231                | GG                              | AA              | 1946837256               |
| SNP_P4_66771_48667659 | NC_021163.1    | Ca_kabuli_chr04 | 48667659                | GG                              | AA              | 1946837258               |
| SNP_P4_66772_48668504 | NC_021163.1    | Ca_kabuli_chr04 | 48668504                | GG                              | AA              | 1946837260               |
| SNP_P4_66773_48670066 | NC_021163.1    | Ca_kabuli_chr04 | 48670066                | TT                              | GG              | 1946837262               |
| SNP_P4_66774_48670089 | NC_021163.1    | Ca_kabuli_chr04 | 48670089                | CC                              | TT              | 1946837264               |
| SNP_P4_66776_48670367 | NC_021163.1    | Ca_kabuli_chr04 | 48670367                | CC                              | TT              | 1946837266               |
| SNP_P4_66777_48670394 | NC_021163.1    | Ca_kabuli_chr04 | 48670394                | CC                              | TT              | 1946837268               |
| SNP_P4_66779_48670628 | NC_021163.1    | Ca_kabuli_chr04 | 48670628                | CC                              | AA              | 1946837270               |
| SNP_P4_66780_48670878 | NC_021163.1    | Ca_kabuli_chr04 | 48670878                | CC                              | TT              | 1946837272               |
| SNP_P4_66781_48670958 | NC_021163.1    | Ca_kabuli_chr04 | 48670958                | TT                              | GG              | 1946837274               |
| SNP_P4_66783_48671136 | NC_021163.1    | Ca_kabuli_chr04 | 48671136                | TT                              | CC              | 1946837276               |
| SNP_P4_66784_48671161 | NC_021163.1    | Ca_kabuli_chr04 | 48671161                | AA                              | GG              | 1946837278               |

| SNPs IDs              | Chromosome IDs | Chromosomes     | Physical positions (bp) | CDC Frontier (Reference genome) | (ILWC46 & LPNB) | NCBI SNPdb Accession IDs |
|-----------------------|----------------|-----------------|-------------------------|---------------------------------|-----------------|--------------------------|
| SNP_P4_66785_48671167 | NC_021163.1    | Ca_kabuli_chr04 | 48671167                | TT                              | CC              | 1946837280               |
| SNP_P4_66786_48671311 | NC_021163.1    | Ca_kabuli_chr04 | 48671311                | TT                              | AA              | 1946837282               |
| SNP_P4_66787_48671625 | NC_021163.1    | Ca_kabuli_chr04 | 48671625                | GG                              | TT              | 1946837284               |
| SNP_P4_66788_48671863 | NC_021163.1    | Ca_kabuli_chr04 | 48671863                | TT                              | CC              | 1946837286               |
| SNP_P4_66791_48673777 | NC_021163.1    | Ca_kabuli_chr04 | 48673777                | CC                              | TT              | 1946837288               |
| SNP_P4_66792_48673781 | NC_021163.1    | Ca_kabuli_chr04 | 48673781                | TT                              | AA              | 1946837290               |
| SNP_P4_66794_48674176 | NC_021163.1    | Ca_kabuli_chr04 | 48674176                | CC                              | TT              | 1946837292               |
| SNP_P4_66795_48679708 | NC_021163.1    | Ca_kabuli_chr04 | 48679708                | AA                              | GG              | 1946837294               |
| SNP_P4_66796_48680998 | NC_021163.1    | Ca_kabuli_chr04 | 48680998                | TT                              | CC              | 1946837296               |
| SNP_P4_66797_48681151 | NC_021163.1    | Ca_kabuli_chr04 | 48681151                | TT                              | CC              | 1946837298               |
| SNP_P4_66798_48681589 | NC_021163.1    | Ca_kabuli_chr04 | 48681589                | TT                              | AA              | 1946837300               |
| SNP_P4_66799_48681625 | NC_021163.1    | Ca_kabuli_chr04 | 48681625                | AA                              | GG              | 1946837302               |
| SNP_P4_66800_48683689 | NC_021163.1    | Ca_kabuli_chr04 | 48683689                | GG                              | AA              | 1946837304               |
| SNP_P4_66801_48684321 | NC_021163.1    | Ca_kabuli_chr04 | 48684321                | AA                              | CC              | 1946837306               |
| SNP_P4_66802_48684520 | NC_021163.1    | Ca_kabuli_chr04 | 48684520                | TT                              | AA              | 1946837308               |
| SNP_P4_66803_48684567 | NC_021163.1    | Ca_kabuli_chr04 | 48684567                | GG                              | AA              | 1946837310               |
| SNP_P4_66804_48685801 | NC_021163.1    | Ca_kabuli_chr04 | 48685801                | CC                              | TT              | 1946837312               |
| SNP_P4_66805_48685839 | NC_021163.1    | Ca_kabuli_chr04 | 48685839                | CC                              | AA              | 1946837314               |
| SNP_P4_66806_48685996 | NC_021163.1    | Ca_kabuli_chr04 | 48685996                | TT                              | CC              | 1946837316               |
| SNP_P4_66807_48686011 | NC_021163.1    | Ca_kabuli_chr04 | 48686011                | TT                              | CC              | 1946837318               |
| SNP_P4_66808_48686911 | NC_021163.1    | Ca_kabuli_chr04 | 48686911                | GG                              | TT              | 1946837320               |
| SNP_P4_66809_48686915 | NC_021163.1    | Ca_kabuli_chr04 | 48686915                | TT                              | GG              | 1946837322               |
| SNP_P4_66810_48687061 | NC_021163.1    | Ca_kabuli_chr04 | 48687061                | CC                              | TT              | 1946837324               |
| SNP_P4_66811_48687080 | NC_021163.1    | Ca_kabuli_chr04 | 48687080                | CC                              | AA              | 1946837326               |
| SNP_P4_66812_48687096 | NC_021163.1    | Ca_kabuli_chr04 | 48687096                | AA                              | GG              | 1946837328               |
| SNP_P4_66813_48687110 | NC_021163.1    | Ca_kabuli_chr04 | 48687110                | AA                              | GG              | 1946837330               |
| SNP_P4_66814_48687126 | NC_021163.1    | Ca_kabuli_chr04 | 48687126                | CC                              | TT              | 1946837332               |
| SNP_P4_66815_48687336 | NC_021163.1    | Ca_kabuli_chr04 | 48687336                | GG                              | TT              | 1946837334               |
| SNP_P4_66816_48687769 | NC_021163.1    | Ca_kabuli_chr04 | 48687769                | AA                              | TT              | 1946837336               |
| SNP_P4_66817_48688830 | NC_021163.1    | Ca_kabuli_chr04 | 48688830                | AA                              | TT              | 1946837338               |
| SNP_P4_66821_48691096 | NC_021163.1    | Ca_kabuli_chr04 | 48691096                | CC                              | TT              | 1946837340               |
| SNP_P4_66822_48691122 | NC_021163.1    | Ca_kabuli_chr04 | 48691122                | TT                              | AA              | 1946837342               |
| SNP_P4_66823_48691146 | NC_021163.1    | Ca_kabuli_chr04 | 48691146                | CC                              | GG              | 1946837344               |
| SNP_P4_66824_48691173 | NC_021163.1    | Ca_kabuli_chr04 | 48691173                | GG                              | TT              | 1946837347               |
| SNP_P4_66825_48691193 | NC_021163.1    | Ca_kabuli_chr04 | 48691193                | TT                              | AA              | 1946837349               |
| SNP_P4_66826_48691207 | NC_021163.1    | Ca_kabuli_chr04 | 48691207                | TT                              | GG              | 1946837351               |
| SNP_P4_66827_48691466 | NC_021163.1    | Ca_kabuli_chr04 | 48691466                | AA                              | GG              | 1946837353               |
| SNP_P4_66828_48691467 | NC_021163.1    | Ca_kabuli_chr04 | 48691467                | AA                              | GG              | 1946837355               |
| SNP_P4_66829_48691889 | NC_021163.1    | Ca_kabuli_chr04 | 48691889                | GG                              | TT              | 1946837357               |
| SNP_P4_66830_48692146 | NC_021163.1    | Ca_kabuli_chr04 | 48692146                | AA                              | GG              | 1946837359               |
| SNP_P4_66831_48692157 | NC_021163.1    | Ca_kabuli_chr04 | 48692157                | AA                              | CC              | 1946837361               |
| SNP_P4_66832_48692164 | NC_021163.1    | Ca_kabuli_chr04 | 48692164                | TT                              | CC              | 1946837363               |

| SNPs IDs              | Chromosome IDs | Chromosomes     | Physical positions (bp) | CDC Frontier (Reference genome) | (ILWC46 & LPNB) | NCBI SNPdb Accession IDs |
|-----------------------|----------------|-----------------|-------------------------|---------------------------------|-----------------|--------------------------|
| SNP_P4_66833_48692181 | NC_021163.1    | Ca_kabuli_chr04 | 48692181                | TT                              | CC              | 1946837365               |
| SNP_P4_66834_48692903 | NC_021163.1    | Ca_kabuli_chr04 | 48692903                | CC                              | TT              | 1946837367               |
| SNP_P4_66835_48693101 | NC_021163.1    | Ca_kabuli_chr04 | 48693101                | AA                              | GG              | 1946837369               |
| SNP_P4_66836_48693125 | NC_021163.1    | Ca_kabuli_chr04 | 48693125                | AA                              | GG              | 1946837371               |
| SNP_P4_66837_48693202 | NC_021163.1    | Ca_kabuli_chr04 | 48693202                | GG                              | AA              | 1946837373               |
| SNP_P4_66838_48693235 | NC_021163.1    | Ca_kabuli_chr04 | 48693235                | CC                              | TT              | 1946837375               |
| SNP_P4_66839_48693269 | NC_021163.1    | Ca_kabuli_chr04 | 48693269                | CC                              | TT              | 1946837377               |
| SNP_P4_66840_48693280 | NC_021163.1    | Ca_kabuli_chr04 | 48693280                | CC                              | TT              | 1946837380               |
| SNP_P4_66841_48693303 | NC_021163.1    | Ca_kabuli_chr04 | 48693303                | AA                              | GG              | 1946837382               |
| SNP_P4_66842_48693306 | NC_021163.1    | Ca_kabuli_chr04 | 48693306                | AA                              | GG              | 1946837384               |
| SNP_P4_66843_48693320 | NC_021163.1    | Ca_kabuli_chr04 | 48693320                | AA                              | CC              | 1946837386               |
| SNP_P4_66844_48693601 | NC_021163.1    | Ca_kabuli_chr04 | 48693601                | CC                              | AA              | 1946837387               |
| SNP_P4_66845_48693668 | NC_021163.1    | Ca_kabuli_chr04 | 48693668                | TT                              | GG              | 1946837389               |
| SNP_P4_66846_48693671 | NC_021163.1    | Ca_kabuli_chr04 | 48693671                | GG                              | TT              | 1946837391               |
| SNP_P4_66848_48695362 | NC_021163.1    | Ca_kabuli_chr04 | 48695362                | AA                              | GG              | 1946837393               |
| SNP_P4_66849_48695780 | NC_021163.1    | Ca_kabuli_chr04 | 48695780                | GG                              | AA              | 1946837395               |
| SNP_P4_66850_48697672 | NC_021163.1    | Ca_kabuli_chr04 | 48697672                | TT                              | CC              | 1946837397               |
| SNP_P4_66851_48697689 | NC_021163.1    | Ca_kabuli_chr04 | 48697689                | TT                              | GG              | 1946837399               |
| SNP_P4_66852_48697710 | NC_021163.1    | Ca_kabuli_chr04 | 48697710                | AA                              | GG              | 1946837401               |
| SNP_P4_66853_48697745 | NC_021163.1    | Ca_kabuli_chr04 | 48697745                | AA                              | GG              | 1946837402               |
| SNP_P4_66854_48697751 | NC_021163.1    | Ca_kabuli_chr04 | 48697751                | TT                              | CC              | 1946837404               |
| SNP_P4_66855_48697805 | NC_021163.1    | Ca_kabuli_chr04 | 48697805                | AA                              | CC              | 1946837406               |
| SNP_P4_66856_48697811 | NC_021163.1    | Ca_kabuli_chr04 | 48697811                | AA                              | GG              | 1946837408               |
| SNP_P4_66857_48697970 | NC_021163.1    | Ca_kabuli_chr04 | 48697970                | TT                              | CC              | 1946837410               |
| SNP_P4_66858_48698005 | NC_021163.1    | Ca_kabuli_chr04 | 48698005                | AA                              | GG              | 1946837412               |
| SNP_P4_66859_48698006 | NC_021163.1    | Ca_kabuli_chr04 | 48698006                | AA                              | GG              | 1946837414               |
| SNP_P4_66860_48706437 | NC_021163.1    | Ca_kabuli_chr04 | 48706437                | GG                              | AA              | 1946837416               |
| SNP_P4_66862_48708364 | NC_021163.1    | Ca_kabuli_chr04 | 48708364                | GG                              | AA              | 1946837418               |
| SNP_P4_66864_48711031 | NC_021163.1    | Ca_kabuli_chr04 | 48711031                | GG                              | TT              | 1946837419               |
| SNP_P4_66866_48711496 | NC_021163.1    | Ca_kabuli_chr04 | 48711496                | GG                              | AA              | 1946837421               |
| SNP_P4_66867_48711790 | NC_021163.1    | Ca_kabuli_chr04 | 48711790                | TT                              | CC              | 1946837423               |
| SNP_P4_66869_48713023 | NC_021163.1    | Ca_kabuli_chr04 | 48713023                | AA                              | GG              | 1946837425               |
| SNP_P4_66870_48713101 | NC_021163.1    | Ca_kabuli_chr04 | 48713101                | TT                              | GG              | 1946837427               |
| SNP_P4_66871_48714668 | NC_021163.1    | Ca_kabuli_chr04 | 48714668                | GG                              | AA              | 1946837429               |
| SNP_P4_66872_48714724 | NC_021163.1    | Ca_kabuli_chr04 | 48714724                | CC                              | TT              | 1946837431               |
| SNP_P4_66873_48715843 | NC_021163.1    | Ca_kabuli_chr04 | 48715843                | TT                              | GG              | 1946837433               |
| SNP_P4_66874_48715917 | NC_021163.1    | Ca_kabuli_chr04 | 48715917                | AA                              | GG              | 1946837435               |
| SNP_P4_66876_48717120 | NC_021163.1    | Ca_kabuli_chr04 | 48717120                | CC                              | TT              | 1946837437               |
| SNP_P4_66877_48718314 | NC_021163.1    | Ca_kabuli_chr04 | 48718314                | GG                              | CC              | 1946837440               |
| SNP_P4_66879_48718941 | NC_021163.1    | Ca_kabuli_chr04 | 48718941                | TT                              | AA              | 1946837442               |
| SNP_P4_66880_48719182 | NC_021163.1    | Ca_kabuli_chr04 | 48719182                | TT                              | AA              | 1946837444               |
| SNP_P4_66881_48719184 | NC_021163.1    | Ca_kabuli_chr04 | 48719184                | GG                              | AA              | 1946837446               |

| SNPs IDs              | Chromosome IDs | Chromosomes     | Physical positions (bp) | CDC Frontier (Reference genome) | (ILWC46 & LPNB) | NCBI SNPdb Accession IDs |
|-----------------------|----------------|-----------------|-------------------------|---------------------------------|-----------------|--------------------------|
| SNP_P4_66882_48719194 | NC_021163.1    | Ca_kabuli_chr04 | 48719194                | CC                              | TT              | 1946837448               |
| SNP_P4_66883_48719216 | NC_021163.1    | Ca_kabuli_chr04 | 48719216                | GG                              | AA              | 1946837450               |
| SNP_P4_66884_48719237 | NC_021163.1    | Ca_kabuli_chr04 | 48719237                | GG                              | CC              | 1946837452               |
| SNP_P4_66885_48719238 | NC_021163.1    | Ca_kabuli_chr04 | 48719238                | CC                              | TT              | 1946837454               |
| SNP_P4_66886_48720665 | NC_021163.1    | Ca_kabuli_chr04 | 48720665                | GG                              | CC              | 1946837456               |
| SNP_P4_66888_48721968 | NC_021163.1    | Ca_kabuli_chr04 | 48721968                | AA                              | CC              | 1946837458               |
| SNP_P4_66889_48721989 | NC_021163.1    | Ca_kabuli_chr04 | 48721989                | GG                              | CC              | 1946837460               |
| SNP_P4_66890_48721993 | NC_021163.1    | Ca_kabuli_chr04 | 48721993                | AA                              | TT              | 1946837462               |
| SNP_P4_66891_48722294 | NC_021163.1    | Ca_kabuli_chr04 | 48722294                | AA                              | TT              | 1946837464               |
| SNP_P4_66892_48722326 | NC_021163.1    | Ca_kabuli_chr04 | 48722326                | TT                              | CC              | 1946837466               |
| SNP_P4_66893_48722347 | NC_021163.1    | Ca_kabuli_chr04 | 48722347                | AA                              | CC              | 1946837468               |
| SNP_P4_66894_48722354 | NC_021163.1    | Ca_kabuli_chr04 | 48722354                | AA                              | GG              | 1946837470               |
| SNP_P4_66895_48722355 | NC_021163.1    | Ca_kabuli_chr04 | 48722355                | AA                              | GG              | 1946837472               |
| SNP_P4_66896_48723111 | NC_021163.1    | Ca_kabuli_chr04 | 48723111                | AA                              | CC              | 1946837474               |
| SNP_P4_66898_48723421 | NC_021163.1    | Ca_kabuli_chr04 | 48723421                | CC                              | TT              | 1946837476               |
| SNP_P4_66899_48723454 | NC_021163.1    | Ca_kabuli_chr04 | 48723454                | TT                              | CC              | 1946837478               |
| SNP_P4_66900_48723466 | NC_021163.1    | Ca_kabuli_chr04 | 48723466                | TT                              | CC              | 1946837480               |
| SNP_P4_66901_48723468 | NC_021163.1    | Ca_kabuli_chr04 | 48723468                | GG                              | AA              | 1946837482               |
| SNP_P4_66902_48723473 | NC_021163.1    | Ca_kabuli_chr04 | 48723473                | AA                              | TT              | 1946837484               |
| SNP_P4_66904_48723727 | NC_021163.1    | Ca_kabuli_chr04 | 48723727                | AA                              | TT              | 1946837486               |
| SNP_P4_66905_48723745 | NC_021163.1    | Ca_kabuli_chr04 | 48723745                | GG                              | AA              | 1946837487               |
| SNP_P4_66906_48725331 | NC_021163.1    | Ca_kabuli_chr04 | 48725331                | CC                              | GG              | 1946837489               |
| SNP_P4_66907_48725382 | NC_021163.1    | Ca_kabuli_chr04 | 48725382                | CC                              | TT              | 1946837491               |
| SNP_P4_66908_48725407 | NC_021163.1    | Ca_kabuli_chr04 | 48725407                | TT                              | AA              | 1946837494               |
| SNP_P4_66909_48725723 | NC_021163.1    | Ca_kabuli_chr04 | 48725723                | TT                              | GG              | 1946837496               |
| SNP_P4_66910_48725725 | NC_021163.1    | Ca_kabuli_chr04 | 48725725                | CC                              | AA              | 1946837498               |
| SNP_P4_66911_48725731 | NC_021163.1    | Ca_kabuli_chr04 | 48725731                | GG                              | TT              | 1946837500               |
| SNP_P4_66912_48725743 | NC_021163.1    | Ca_kabuli_chr04 | 48725743                | AA                              | GG              | 1946837502               |
| SNP_P4_66913_48726038 | NC_021163.1    | Ca_kabuli_chr04 | 48726038                | CC                              | TT              | 1946837504               |
| SNP_P4_66914_48726098 | NC_021163.1    | Ca_kabuli_chr04 | 48726098                | AA                              | GG              | 1946837506               |
| SNP_P4_66915_48726168 | NC_021163.1    | Ca_kabuli_chr04 | 48726168                | AA                              | GG              | 1946837508               |
| SNP_P4_66917_48726278 | NC_021163.1    | Ca_kabuli_chr04 | 48726278                | CC                              | TT              | 1946837510               |
| SNP_P4_66918_48726403 | NC_021163.1    | Ca_kabuli_chr04 | 48726403                | AA                              | GG              | 1946837512               |
| SNP_P4_66919_48726410 | NC_021163.1    | Ca_kabuli_chr04 | 48726410                | CC                              | TT              | 1946837514               |
| SNP_P4_66920_48726413 | NC_021163.1    | Ca_kabuli_chr04 | 48726413                | CC                              | TT              | 1946837516               |
| SNP_P4_66921_48726414 | NC_021163.1    | Ca_kabuli_chr04 | 48726414                | AA                              | CC              | 1946837518               |
| SNP_P4_66922_48726444 | NC_021163.1    | Ca_kabuli_chr04 | 48726444                | CC                              | TT              | 1946837520               |
| SNP_P4_66923_48729928 | NC_021163.1    | Ca_kabuli_chr04 | 48729928                | AA                              | GG              | 1946837522               |
| SNP_P4_66924_48730272 | NC_021163.1    | Ca_kabuli_chr04 | 48730272                | CC                              | AA              | 1946837524               |
| SNP_P4_66925_48730280 | NC_021163.1    | Ca_kabuli_chr04 | 48730280                | GG                              | TT              | 1946837526               |
| SNP_P4_66926_48733506 | NC_021163.1    | Ca_kabuli_chr04 | 48733506                | AA                              | GG              | 1946837528               |
| SNP_P4_66927_48739519 | NC_021163.1    | Ca_kabuli_chr04 | 48739519                | AA                              | TT              | 1946837530               |

| SNPs IDs              | Chromosome IDs | Chromosomes     | Physical positions (bp) | CDC Frontier (Reference genome) | (ILWC46 & LPNB) | NCBI SNPdb Accession IDs |
|-----------------------|----------------|-----------------|-------------------------|---------------------------------|-----------------|--------------------------|
| SNP_P4_66928_48739525 | NC_021163.1    | Ca_kabuli_chr04 | 48739525                | CC                              | TT              | 1946837532               |
| SNP_P4_66929_48739561 | NC_021163.1    | Ca_kabuli_chr04 | 48739561                | CC                              | TT              | 1946837533               |
| SNP_P4_66930_48739597 | NC_021163.1    | Ca_kabuli_chr04 | 48739597                | AA                              | GG              | 1946837534               |
| SNP_P4_66931_48739619 | NC_021163.1    | Ca_kabuli_chr04 | 48739619                | GG                              | AA              | 1946837535               |
| SNP_P4_66932_48739684 | NC_021163.1    | Ca_kabuli_chr04 | 48739684                | CC                              | GG              | 1946837536               |
| SNP_P4_66934_48739717 | NC_021163.1    | Ca_kabuli_chr04 | 48739717                | GG                              | TT              | 1946837537               |
| SNP_P4_66935_48739726 | NC_021163.1    | Ca_kabuli_chr04 | 48739726                | AA                              | GG              | 1946837539               |
| SNP_P4_66936_48739738 | NC_021163.1    | Ca_kabuli_chr04 | 48739738                | GG                              | CC              | 1946837541               |
| SNP_P4_66937_48739751 | NC_021163.1    | Ca_kabuli_chr04 | 48739751                | AA                              | TT              | 1946837543               |
| SNP_P4_66938_48740225 | NC_021163.1    | Ca_kabuli_chr04 | 48740225                | AA                              | TT              | 1946837545               |
| SNP_P4_66939_48740457 | NC_021163.1    | Ca_kabuli_chr04 | 48740457                | CC                              | TT              | 1946837547               |
| SNP_P4_66940_48740475 | NC_021163.1    | Ca_kabuli_chr04 | 48740475                | AA                              | GG              | 1946837549               |
| SNP_P4_66941_48740476 | NC_021163.1    | Ca_kabuli_chr04 | 48740476                | GG                              | AA              | 1946837551               |
| SNP_P4_66942_48740498 | NC_021163.1    | Ca_kabuli_chr04 | 48740498                | TT                              | CC              | 1946837553               |
| SNP_P4_66943_48740557 | NC_021163.1    | Ca_kabuli_chr04 | 48740557                | AA                              | GG              | 1946837555               |
| SNP_P4_66944_48740558 | NC_021163.1    | Ca_kabuli_chr04 | 48740558                | GG                              | CC              | 1946837557               |
| SNP_P4_66945_48740572 | NC_021163.1    | Ca_kabuli_chr04 | 48740572                | AA                              | GG              | 1946837559               |
| SNP_P4_66946_48740578 | NC_021163.1    | Ca_kabuli_chr04 | 48740578                | AA                              | GG              | 1946837561               |
| SNP_P4_66947_48740604 | NC_021163.1    | Ca_kabuli_chr04 | 48740604                | TT                              | AA              | 1946837563               |
| SNP_P4_66948_48740620 | NC_021163.1    | Ca_kabuli_chr04 | 48740620                | CC                              | TT              | 1946837565               |
| SNP_P4_66951_48741900 | NC_021163.1    | Ca_kabuli_chr04 | 48741900                | AA                              | CC              | 1946837567               |
| SNP_P4_66952_48742083 | NC_021163.1    | Ca_kabuli_chr04 | 48742083                | CC                              | TT              | 1946837569               |
| SNP_P4_66953_48742111 | NC_021163.1    | Ca_kabuli_chr04 | 48742111                | AA                              | GG              | 1946837571               |
| SNP_P4_66954_48742247 | NC_021163.1    | Ca_kabuli_chr04 | 48742247                | GG                              | AA              | 1946837573               |
| SNP_P4_66955_48742267 | NC_021163.1    | Ca_kabuli_chr04 | 48742267                | AA                              | GG              | 1946837575               |
| SNP_P4_66956_48742291 | NC_021163.1    | Ca_kabuli_chr04 | 48742291                | CC                              | AA              | 1946837577               |
| SNP_P4_66957_48742320 | NC_021163.1    | Ca_kabuli_chr04 | 48742320                | CC                              | TT              | 1946837579               |
| SNP_P4_66958_48742327 | NC_021163.1    | Ca_kabuli_chr04 | 48742327                | GG                              | AA              | 1946837581               |
| SNP_P4_66959_48742386 | NC_021163.1    | Ca_kabuli_chr04 | 48742386                | TT                              | AA              | 1946837583               |
| SNP_P4_66960_48742396 | NC_021163.1    | Ca_kabuli_chr04 | 48742396                | GG                              | AA              | 1946837585               |
| SNP_P4_66961_48742455 | NC_021163.1    | Ca_kabuli_chr04 | 48742455                | TT                              | CC              | 1946837586               |
| SNP_P4_66962_48742465 | NC_021163.1    | Ca_kabuli_chr04 | 48742465                | GG                              | CC              | 1946837588               |
| SNP_P4_66963_48742500 | NC_021163.1    | Ca_kabuli_chr04 | 48742500                | GG                              | CC              | 1946837590               |
| SNP_P4_66964_48742738 | NC_021163.1    | Ca_kabuli_chr04 | 48742738                | AA                              | CC              | 1946837592               |
| SNP_P4_66965_48752800 | NC_021163.1    | Ca_kabuli_chr04 | 48752800                | GG                              | AA              | 1946837594               |
| SNP_P4_66966_48752801 | NC_021163.1    | Ca_kabuli_chr04 | 48752801                | TT                              | CC              | 1946837596               |
| SNP_P4_66967_48752995 | NC_021163.1    | Ca_kabuli_chr04 | 48752995                | TT                              | GG              | 1946837598               |
| SNP_P4_66968_48755108 | NC_021163.1    | Ca_kabuli_chr04 | 48755108                | AA                              | GG              | 1946837600               |
| SNP_P4_66969_48755112 | NC_021163.1    | Ca_kabuli_chr04 | 48755112                | CC                              | TT              | 1946837602               |
| SNP_P4_66970_48755113 | NC_021163.1    | Ca_kabuli_chr04 | 48755113                | CC                              | TT              | 1946837604               |
| SNP_P4_66971_48755155 | NC_021163.1    | Ca_kabuli_chr04 | 48755155                | CC                              | TT              | 1946837606               |
| SNP_P4_66972_48756250 | NC_021163.1    | Ca_kabuli_chr04 | 48756250                | TT                              | CC              | 1946837608               |



| SNPs IDs              | Chromosome IDs | Chromosomes     | Physical positions (bp) | CDC Frontier (Reference genome) | (ILWC46 & LPNB) | NCBI SNPdb Accession IDs |
|-----------------------|----------------|-----------------|-------------------------|---------------------------------|-----------------|--------------------------|
| SNP_P4_66973_48758463 | NC_021163.1    | Ca_kabuli_chr04 | 48758463                | TT                              | AA              | 1946837610               |
| SNP_P4_66974_48758501 | NC_021163.1    | Ca_kabuli_chr04 | 48758501                | GG                              | AA              | 1946837611               |
| SNP_P4_66975_48758516 | NC_021163.1    | Ca_kabuli_chr04 | 48758516                | GG                              | TT              | 1946837613               |
| SNP_P4_66977_48759050 | NC_021163.1    | Ca_kabuli_chr04 | 48759050                | TT                              | AA              | 1946837615               |
| SNP_P4_66978_48759103 | NC_021163.1    | Ca_kabuli_chr04 | 48759103                | AA                              | GG              | 1946837617               |
| SNP_P4_66980_48760230 | NC_021163.1    | Ca_kabuli_chr04 | 48760230                | CC                              | AA              | 1946837619               |
| SNP_P4_66981_48760624 | NC_021163.1    | Ca_kabuli_chr04 | 48760624                | CC                              | AA              | 1946837621               |
| SNP_P4_66982_48760880 | NC_021163.1    | Ca_kabuli_chr04 | 48760880                | CC                              | AA              | 1946837623               |
| SNP_P4_66983_48760900 | NC_021163.1    | Ca_kabuli_chr04 | 48760900                | GG                              | AA              | 1946837625               |
| SNP_P4_66984_48760983 | NC_021163.1    | Ca_kabuli_chr04 | 48760983                | AA                              | GG              | 1946837627               |
| SNP_P4_66985_48766853 | NC_021163.1    | Ca_kabuli_chr04 | 48766853                | GG                              | TT              | 1946837629               |
| SNP_P4_66986_48766872 | NC_021163.1    | Ca_kabuli_chr04 | 48766872                | CC                              | TT              | 1946837630               |
| SNP_P4_66987_48768360 | NC_021163.1    | Ca_kabuli_chr04 | 48768360                | AA                              | GG              | 1946837632               |
| SNP_P4_66988_48768367 | NC_021163.1    | Ca_kabuli_chr04 | 48768367                | CC                              | TT              | 1946837634               |
| SNP_P4_66989_48768444 | NC_021163.1    | Ca_kabuli_chr04 | 48768444                | GG                              | AA              | 1946837636               |
| SNP_P4_66990_48768524 | NC_021163.1    | Ca_kabuli_chr04 | 48768524                | CC                              | TT              | 1946837638               |
| SNP_P4_66991_48768536 | NC_021163.1    | Ca_kabuli_chr04 | 48768536                | CC                              | AA              | 1946837640               |
| SNP_P4_66992_48768538 | NC_021163.1    | Ca_kabuli_chr04 | 48768538                | CC                              | TT              | 1946837642               |
| SNP_P4_66993_48768539 | NC_021163.1    | Ca_kabuli_chr04 | 48768539                | TT                              | CC              | 1946837644               |
| SNP_P4_66994_48768635 | NC_021163.1    | Ca_kabuli_chr04 | 48768635                | AA                              | GG              | 1946837646               |
| SNP_P4_66995_48768655 | NC_021163.1    | Ca_kabuli_chr04 | 48768655                | GG                              | TT              | 1946837648               |
| SNP_P4_66996_48768758 | NC_021163.1    | Ca_kabuli_chr04 | 48768758                | GG                              | AA              | 1946837650               |
| SNP_P4_66998_48770243 | NC_021163.1    | Ca_kabuli_chr04 | 48770243                | GG                              | CC              | 1946837651               |
| SNP_P4_66999_48770271 | NC_021163.1    | Ca_kabuli_chr04 | 48770271                | AA                              | GG              | 1946837653               |
| SNP_P4_67000_48770277 | NC_021163.1    | Ca_kabuli_chr04 | 48770277                | GG                              | CC              | 1946837655               |
| SNP_P4_67002_48772352 | NC_021163.1    | Ca_kabuli_chr04 | 48772352                | CC                              | GG              | 1946837657               |
| SNP_P4_67003_48772357 | NC_021163.1    | Ca_kabuli_chr04 | 48772357                | AA                              | GG              | 1946837659               |
| SNP_P4_67004_48772359 | NC_021163.1    | Ca_kabuli_chr04 | 48772359                | TT                              | AA              | 1946837661               |
| SNP_P4_67005_48772362 | NC_021163.1    | Ca_kabuli_chr04 | 48772362                | AA                              | TT              | 1946837663               |
| SNP_P4_67006_48772398 | NC_021163.1    | Ca_kabuli_chr04 | 48772398                | AA                              | GG              | 1946837665               |
| SNP_P4_67007_48774280 | NC_021163.1    | Ca_kabuli_chr04 | 48774280                | TT                              | CC              | 1946837667               |
| SNP_P4_67008_48774299 | NC_021163.1    | Ca_kabuli_chr04 | 48774299                | AA                              | GG              | 1946837669               |
| SNP_P4_67009_48774318 | NC_021163.1    | Ca_kabuli_chr04 | 48774318                | AA                              | GG              | 1946837671               |
| SNP_P4_67010_48774320 | NC_021163.1    | Ca_kabuli_chr04 | 48774320                | AA                              | GG              | 1946837673               |
| SNP_P4_67011_48774435 | NC_021163.1    | Ca_kabuli_chr04 | 48774435                | CC                              | TT              | 1946837675               |
| SNP_P4_67012_48774457 | NC_021163.1    | Ca_kabuli_chr04 | 48774457                | GG                              | AA              | 1946837677               |
| SNP_P4_67013_48774459 | NC_021163.1    | Ca_kabuli_chr04 | 48774459                | GG                              | AA              | 1946837679               |
| SNP_P4_67014_48774468 | NC_021163.1    | Ca_kabuli_chr04 | 48774468                | TT                              | CC              | 1946837680               |
| SNP_P4_67015_48774507 | NC_021163.1    | Ca_kabuli_chr04 | 48774507                | AA                              | GG              | 1946837682               |
| SNP_P4_67016_48774665 | NC_021163.1    | Ca_kabuli_chr04 | 48774665                | AA                              | GG              | 1946837684               |
| SNP_P4_67017_48774666 | NC_021163.1    | Ca_kabuli_chr04 | 48774666                | GG                              | AA              | 1946837686               |
| SNP_P4_67018_48781263 | NC_021163.1    | Ca_kabuli_chr04 | 48781263                | AA                              | GG              | 1946837688               |

| SNPs IDs              | Chromosome IDs | Chromosomes     | Physical positions (bp) | CDC Frontier (Reference genome) | (ILWC46 & LPNB) | NCBI SNPdb Accession IDs |
|-----------------------|----------------|-----------------|-------------------------|---------------------------------|-----------------|--------------------------|
| SNP_P4_67019_48781307 | NC_021163.1    | Ca_kabuli_chr04 | 48781307                | GG                              | AA              | 1946837690               |
| SNP_P4_67020_48782889 | NC_021163.1    | Ca_kabuli_chr04 | 48782889                | TT                              | CC              | 1946837692               |
| SNP_P4_67021_48782891 | NC_021163.1    | Ca_kabuli_chr04 | 48782891                | TT                              | CC              | 1946837694               |
| SNP_P4_67022_48784053 | NC_021163.1    | Ca_kabuli_chr04 | 48784053                | TT                              | CC              | 1946837696               |
| SNP_P4_67023_48784074 | NC_021163.1    | Ca_kabuli_chr04 | 48784074                | TT                              | GG              | 1946837698               |
| SNP_P4_67024_48784112 | NC_021163.1    | Ca_kabuli_chr04 | 48784112                | GG                              | AA              | 1946837700               |
| SNP_P4_67025_48784113 | NC_021163.1    | Ca_kabuli_chr04 | 48784113                | AA                              | TT              | 1946837702               |
| SNP_P4_67026_48784151 | NC_021163.1    | Ca_kabuli_chr04 | 48784151                | TT                              | GG              | 1946837703               |
| SNP_P4_67027_48784481 | NC_021163.1    | Ca_kabuli_chr04 | 48784481                | CC                              | GG              | 1946837705               |
| SNP_P4_67028_48784504 | NC_021163.1    | Ca_kabuli_chr04 | 48784504                | AA                              | GG              | 1946837707               |
| SNP_P4_67029_48784505 | NC_021163.1    | Ca_kabuli_chr04 | 48784505                | TT                              | AA              | 1946837709               |
| SNP_P4_67030_48786258 | NC_021163.1    | Ca_kabuli_chr04 | 48786258                | TT                              | GG              | 1946837711               |
| SNP_P4_67031_48786406 | NC_021163.1    | Ca_kabuli_chr04 | 48786406                | AA                              | TT              | 1946837713               |
| SNP_P4_67032_48786553 | NC_021163.1    | Ca_kabuli_chr04 | 48786553                | AA                              | GG              | 1946837715               |
| SNP_P4_67033_48786631 | NC_021163.1    | Ca_kabuli_chr04 | 48786631                | TT                              | CC              | 1946837717               |
| SNP_P4_67034_48786633 | NC_021163.1    | Ca_kabuli_chr04 | 48786633                | GG                              | TT              | 1946837719               |
| SNP_P4_67036_48786655 | NC_021163.1    | Ca_kabuli_chr04 | 48786655                | CC                              | TT              | 1946837721               |
| SNP_P4_67037_48786689 | NC_021163.1    | Ca_kabuli_chr04 | 48786689                | AA                              | TT              | 1946837723               |
| SNP_P4_67038_48786749 | NC_021163.1    | Ca_kabuli_chr04 | 48786749                | TT                              | CC              | 1946837725               |
| SNP_P4_67039_48786781 | NC_021163.1    | Ca_kabuli_chr04 | 48786781                | GG                              | TT              | 1946837726               |
| SNP_P4_67040_48786835 | NC_021163.1    | Ca_kabuli_chr04 | 48786835                | CC                              | TT              | 1946837728               |
| SNP_P4_67041_48786884 | NC_021163.1    | Ca_kabuli_chr04 | 48786884                | AA                              | TT              | 1946837730               |
| SNP_P4_67042_48786886 | NC_021163.1    | Ca_kabuli_chr04 | 48786886                | TT                              | CC              | 1946837732               |
| SNP_P4_67043_48787511 | NC_021163.1    | Ca_kabuli_chr04 | 48787511                | CC                              | GG              | 1946837734               |
| SNP_P4_67044_48792049 | NC_021163.1    | Ca_kabuli_chr04 | 48792049                | AA                              | CC              | 1946837736               |
| SNP_P4_67047_48793630 | NC_021163.1    | Ca_kabuli_chr04 | 48793630                | CC                              | TT              | 1946837738               |
| SNP_P4_67048_48793850 | NC_021163.1    | Ca_kabuli_chr04 | 48793850                | CC                              | AA              | 1946837740               |
| SNP_P4_67050_48794144 | NC_021163.1    | Ca_kabuli_chr04 | 48794144                | TT                              | GG              | 1946837742               |
| SNP_P4_67051_48794875 | NC_021163.1    | Ca_kabuli_chr04 | 48794875                | AA                              | GG              | 1946837744               |
| SNP_P4_67052_48795158 | NC_021163.1    | Ca_kabuli_chr04 | 48795158                | GG                              | TT              | 1946837746               |
| SNP_P4_67053_48795812 | NC_021163.1    | Ca_kabuli_chr04 | 48795812                | CC                              | GG              | 1946837748               |
| SNP_P4_67054_48795847 | NC_021163.1    | Ca_kabuli_chr04 | 48795847                | CC                              | GG              | 1946837750               |
| SNP_P4_67055_48795850 | NC_021163.1    | Ca_kabuli_chr04 | 48795850                | AA                              | CC              | 1946837752               |
| SNP_P4_67056_48796167 | NC_021163.1    | Ca_kabuli_chr04 | 48796167                | TT                              | CC              | 1946837754               |
| SNP_P4_67057_48797121 | NC_021163.1    | Ca_kabuli_chr04 | 48797121                | AA                              | GG              | 1946837756               |
| SNP_P4_67058_48797137 | NC_021163.1    | Ca_kabuli_chr04 | 48797137                | TT                              | AA              | 1946837758               |
| SNP_P4_67059_48798125 | NC_021163.1    | Ca_kabuli_chr04 | 48798125                | TT                              | AA              | 1946837760               |
| SNP_P4_67060_48798668 | NC_021163.1    | Ca_kabuli_chr04 | 48798668                | GG                              | AA              | 1946837762               |
| SNP_P4_67061_48799708 | NC_021163.1    | Ca_kabuli_chr04 | 48799708                | AA                              | CC              | 1946837764               |
| SNP_P4_67062_48800653 | NC_021163.1    | Ca_kabuli_chr04 | 48800653                | CC                              | AA              | 1946837766               |
| SNP_P4_67063_48801618 | NC_021163.1    | Ca_kabuli_chr04 | 48801618                | CC                              | TT              | 1946837768               |
| SNP_P4_67064_48801649 | NC_021163.1    | Ca_kabuli_chr04 | 48801649                | GG                              | TT              | 1946837770               |

| SNPs IDs              | Chromosome IDs | Chromosomes     | Physical positions (bp) | CDC Frontier (Reference genome) | (ILWC46 & LPNB) | NCBI SNPdb Accession IDs |
|-----------------------|----------------|-----------------|-------------------------|---------------------------------|-----------------|--------------------------|
| SNP_P4_67065_48802086 | NC_021163.1    | Ca_kabuli_chr04 | 48802086                | TT                              | CC              | 1946837772               |
| SNP_P4_67066_48802102 | NC_021163.1    | Ca_kabuli_chr04 | 48802102                | AA                              | CC              | 1946837774               |
| SNP_P4_67067_48802345 | NC_021163.1    | Ca_kabuli_chr04 | 48802345                | TT                              | CC              | 1946837776               |
| SNP_P4_67068_48809005 | NC_021163.1    | Ca_kabuli_chr04 | 48809005                | TT                              | AA              | 1946837778               |
| SNP_P4_67069_48809340 | NC_021163.1    | Ca_kabuli_chr04 | 48809340                | CC                              | TT              | 1946837780               |
| SNP_P4_67070_48810139 | NC_021163.1    | Ca_kabuli_chr04 | 48810139                | AA                              | GG              | 1946837782               |
| SNP_P4_67071_48810707 | NC_021163.1    | Ca_kabuli_chr04 | 48810707                | AA                              | CC              | 1946837784               |
| SNP_P4_67072_48811114 | NC_021163.1    | Ca_kabuli_chr04 | 48811114                | GG                              | TT              | 1946837786               |
| SNP_P4_67073_48811223 | NC_021163.1    | Ca_kabuli_chr04 | 48811223                | AA                              | GG              | 1946837788               |
| SNP_P4_67074_48811224 | NC_021163.1    | Ca_kabuli_chr04 | 48811224                | TT                              | CC              | 1946837790               |
| SNP_P4_67075_48811252 | NC_021163.1    | Ca_kabuli_chr04 | 48811252                | GG                              | AA              | 1946837792               |
| SNP_P4_67076_48812575 | NC_021163.1    | Ca_kabuli_chr04 | 48812575                | CC                              | TT              | 1946837794               |
| SNP_P4_67077_48812765 | NC_021163.1    | Ca_kabuli_chr04 | 48812765                | CC                              | TT              | 1946837796               |
| SNP_P4_67078_48812766 | NC_021163.1    | Ca_kabuli_chr04 | 48812766                | AA                              | GG              | 1946837798               |
| SNP_P4_67079_48813596 | NC_021163.1    | Ca_kabuli_chr04 | 48813596                | TT                              | CC              | 1946837800               |
| SNP_P4_67080_48813762 | NC_021163.1    | Ca_kabuli_chr04 | 48813762                | GG                              | CC              | 1946837802               |
| SNP_P4_67081_48813901 | NC_021163.1    | Ca_kabuli_chr04 | 48813901                | TT                              | CC              | 1946837804               |
| SNP_P4_67082_48814146 | NC_021163.1    | Ca_kabuli_chr04 | 48814146                | CC                              | TT              | 1946837806               |
| SNP_P4_67083_48814166 | NC_021163.1    | Ca_kabuli_chr04 | 48814166                | TT                              | CC              | 1946837808               |
| SNP_P4_67084_48815765 | NC_021163.1    | Ca_kabuli_chr04 | 48815765                | CC                              | AA              | 1946837810               |
| SNP_P4_67085_48816968 | NC_021163.1    | Ca_kabuli_chr04 | 48816968                | AA                              | CC              | 1946837812               |
| SNP_P4_67086_48817016 | NC_021163.1    | Ca_kabuli_chr04 | 48817016                | CC                              | TT              | 1946837814               |
| SNP_P4_67087_48817466 | NC_021163.1    | Ca_kabuli_chr04 | 48817466                | AA                              | CC              | 1946837816               |
| SNP_P4_67088_48818082 | NC_021163.1    | Ca_kabuli_chr04 | 48818082                | GG                              | CC              | 1946837818               |
| SNP_P4_67089_48818375 | NC_021163.1    | Ca_kabuli_chr04 | 48818375                | TT                              | CC              | 1946837820               |
| SNP_P4_67090_48818471 | NC_021163.1    | Ca_kabuli_chr04 | 48818471                | GG                              | AA              | 1946837822               |
| SNP_P4_67091_48818538 | NC_021163.1    | Ca_kabuli_chr04 | 48818538                | TT                              | CC              | 1946837824               |
| SNP_P4_67092_48818545 | NC_021163.1    | Ca_kabuli_chr04 | 48818545                | CC                              | GG              | 1946837826               |
| SNP_P4_67093_48818616 | NC_021163.1    | Ca_kabuli_chr04 | 48818616                | AA                              | TT              | 1946837828               |
| SNP_P4_67094_48818624 | NC_021163.1    | Ca_kabuli_chr04 | 48818624                | AA                              | GG              | 1946837829               |
| SNP_P4_67095_48818655 | NC_021163.1    | Ca_kabuli_chr04 | 48818655                | AA                              | GG              | 1946837830               |
| SNP_P4_67096_48818758 | NC_021163.1    | Ca_kabuli_chr04 | 48818758                | GG                              | AA              | 1946837831               |
| SNP_P4_67097_48819583 | NC_021163.1    | Ca_kabuli_chr04 | 48819583                | GG                              | AA              | 1946837832               |
| SNP_P4_67098_48820086 | NC_021163.1    | Ca_kabuli_chr04 | 48820086                | TT                              | CC              | 1946837833               |
| SNP_P4_67099_48820089 | NC_021163.1    | Ca_kabuli_chr04 | 48820089                | AA                              | GG              | 1946837834               |
| SNP_P4_67100_48820386 | NC_021163.1    | Ca_kabuli_chr04 | 48820386                | AA                              | CC              | 1946837962               |
| SNP_P4_67101_48821548 | NC_021163.1    | Ca_kabuli_chr04 | 48821548                | GG                              | AA              | 1946837964               |
| SNP_P4_67102_48822792 | NC_021163.1    | Ca_kabuli_chr04 | 48822792                | CC                              | AA              | 1946837967               |
| SNP_P4_67103_48824003 | NC_021163.1    | Ca_kabuli_chr04 | 48824003                | AA                              | GG              | 1946837969               |
| SNP_P4_67104_48824581 | NC_021163.1    | Ca_kabuli_chr04 | 48824581                | GG                              | AA              | 1946837971               |
| SNP_P4_67105_48824585 | NC_021163.1    | Ca_kabuli_chr04 | 48824585                | TT                              | CC              | 1946837973               |
| SNP_P4_67107_48824695 | NC_021163.1    | Ca_kabuli_chr04 | 48824695                | GG                              | AA              | 1946837975               |

| SNPs IDs              | Chromosome IDs | Chromosomes     | Physical positions (bp) | CDC Frontier (Reference genome) | (ILWC46 & LPNB) | NCBI SNPdb Accession IDs |
|-----------------------|----------------|-----------------|-------------------------|---------------------------------|-----------------|--------------------------|
| SNP_P4_67108_48825016 | NC_021163.1    | Ca_kabuli_chr04 | 48825016                | AA                              | GG              | 1946837977               |
| SNP_P4_67110_48827158 | NC_021163.1    | Ca_kabuli_chr04 | 48827158                | TT                              | CC              | 1946837979               |
| SNP_P4_67111_48827160 | NC_021163.1    | Ca_kabuli_chr04 | 48827160                | TT                              | CC              | 1946837981               |
| SNP_P4_67112_48827824 | NC_021163.1    | Ca_kabuli_chr04 | 48827824                | GG                              | AA              | 1946837983               |
| SNP_P4_67113_48827888 | NC_021163.1    | Ca_kabuli_chr04 | 48827888                | AA                              | TT              | 1946837985               |
| SNP_P4_67115_48831919 | NC_021163.1    | Ca_kabuli_chr04 | 48831919                | GG                              | TT              | 1946837988               |
| SNP_P4_67116_48832104 | NC_021163.1    | Ca_kabuli_chr04 | 48832104                | TT                              | AA              | 1946837990               |
| SNP_P4_67119_48837398 | NC_021163.1    | Ca_kabuli_chr04 | 48837398                | GG                              | TT              | 1946837992               |
| SNP_P4_67120_48837426 | NC_021163.1    | Ca_kabuli_chr04 | 48837426                | GG                              | AA              | 1946837994               |
| SNP_P4_67122_48845353 | NC_021163.1    | Ca_kabuli_chr04 | 48845353                | TT                              | AA              | 1946837996               |
| SNP_P4_67123_48845859 | NC_021163.1    | Ca_kabuli_chr04 | 48845859                | AA                              | GG              | 1946837998               |
| SNP_P4_67124_48847261 | NC_021163.1    | Ca_kabuli_chr04 | 48847261                | TT                              | AA              | 1946838000               |
| SNP_P4_67128_48849226 | NC_021163.1    | Ca_kabuli_chr04 | 48849226                | GG                              | AA              | 1946838002               |
| SNP_P4_67129_48849704 | NC_021163.1    | Ca_kabuli_chr04 | 48849704                | TT                              | CC              | 1946838004               |
| SNP_P4_67130_48849718 | NC_021163.1    | Ca_kabuli_chr04 | 48849718                | AA                              | GG              | 1946838007               |
| SNP_P4_67131_48849767 | NC_021163.1    | Ca_kabuli_chr04 | 48849767                | AA                              | GG              | 1946838009               |
| SNP_P4_67132_48849959 | NC_021163.1    | Ca_kabuli_chr04 | 48849959                | AA                              | CC              | 1946838011               |
| SNP_P4_67133_48850001 | NC_021163.1    | Ca_kabuli_chr04 | 48850001                | TT                              | AA              | 1946838013               |
| SNP_P4_67134_48850011 | NC_021163.1    | Ca_kabuli_chr04 | 48850011                | CC                              | TT              | 1946838015               |
| SNP_P4_67135_48851329 | NC_021163.1    | Ca_kabuli_chr04 | 48851329                | CC                              | TT              | 1946838017               |
| SNP_P4_67137_48851626 | NC_021163.1    | Ca_kabuli_chr04 | 48851626                | CC                              | AA              | 1946838019               |
| SNP_P4_67138_48851627 | NC_021163.1    | Ca_kabuli_chr04 | 48851627                | AA                              | GG              | 1946838021               |
| SNP_P4_67139_48851880 | NC_021163.1    | Ca_kabuli_chr04 | 48851880                | TT                              | GG              | 1946838023               |
| SNP_P4_67140_48853416 | NC_021163.1    | Ca_kabuli_chr04 | 48853416                | AA                              | TT              | 1946838025               |
| SNP_P4_67141_48853652 | NC_021163.1    | Ca_kabuli_chr04 | 48853652                | CC                              | TT              | 1946838027               |
| SNP_P4_67142_48864515 | NC_021163.1    | Ca_kabuli_chr04 | 48864515                | GG                              | TT              | 1946838029               |
| SNP_P4_67143_48873354 | NC_021163.1    | Ca_kabuli_chr04 | 48873354                | GG                              | TT              | 1946838031               |
| SNP_P4_67144_48878101 | NC_021163.1    | Ca_kabuli_chr04 | 48878101                | GG                              | TT              | 1946838033               |
| SNP_P4_67145_48879601 | NC_021163.1    | Ca_kabuli_chr04 | 48879601                | AA                              | GG              | 1946838035               |
| SNP_P4_67146_48879619 | NC_021163.1    | Ca_kabuli_chr04 | 48879619                | TT                              | CC              | 1946838037               |
| SNP_P4_67147_48879970 | NC_021163.1    | Ca_kabuli_chr04 | 48879970                | AA                              | GG              | 1946838039               |
| SNP_P4_67148_48880089 | NC_021163.1    | Ca_kabuli_chr04 | 48880089                | AA                              | GG              | 1946838041               |
| SNP_P4_67149_48880447 | NC_021163.1    | Ca_kabuli_chr04 | 48880447                | AA                              | GG              | 1946838043               |
| SNP_P4_67150_48881798 | NC_021163.1    | Ca_kabuli_chr04 | 48881798                | GG                              | TT              | 1946838045               |
| SNP_P4_67151_48881801 | NC_021163.1    | Ca_kabuli_chr04 | 48881801                | AA                              | TT              | 1946838047               |
| SNP_P4_67152_48884633 | NC_021163.1    | Ca_kabuli_chr04 | 48884633                | TT                              | AA              | 1946838049               |
| SNP_P4_67153_48884748 | NC_021163.1    | Ca_kabuli_chr04 | 48884748                | TT                              | CC              | 1946838051               |
| SNP_P4_67154_48885097 | NC_021163.1    | Ca_kabuli_chr04 | 48885097                | AA                              | GG              | 1946838053               |
| SNP_P4_67155_48885103 | NC_021163.1    | Ca_kabuli_chr04 | 48885103                | AA                              | GG              | 1946838056               |
| SNP_P4_67156_48902978 | NC_021163.1    | Ca_kabuli_chr04 | 48902978                | TT                              | CC              | 1946838058               |
| SNP_P4_67157_48906398 | NC_021163.1    | Ca_kabuli_chr04 | 48906398                | GG                              | CC              | 1946838060               |
| SNP_P4_67158_48910068 | NC_021163.1    | Ca_kabuli_chr04 | 48910068                | TT                              | CC              | 1946838062               |

| SNPs IDs              | Chromosome IDs | Chromosomes     | Physical positions (bp) | CDC Frontier (Reference genome) | (ILWC46 & LPNB) | NCBI SNPdb Accession IDs |
|-----------------------|----------------|-----------------|-------------------------|---------------------------------|-----------------|--------------------------|
| SNP_P4_67159_48925689 | NC_021163.1    | Ca_kabuli_chr04 | 48925689                | AA                              | GG              | 1946838064               |
| SNP_P4_67161_48975084 | NC_021163.1    | Ca_kabuli_chr04 | 48975084                | GG                              | AA              | 1946838066               |
| SNP_P4_67162_48975423 | NC_021163.1    | Ca_kabuli_chr04 | 48975423                | TT                              | GG              | 1946838068               |
| SNP_P4_67163_48975435 | NC_021163.1    | Ca_kabuli_chr04 | 48975435                | AA                              | GG              | 1946838070               |
| SNP_P4_67164_48999915 | NC_021163.1    | Ca_kabuli_chr04 | 48999915                | TT                              | CC              | 1946838072               |
| SNP_P4_67165_49020909 | NC_021163.1    | Ca_kabuli_chr04 | 49020909                | AA                              | GG              | 1946838074               |
| SNP_P4_67166_49036545 | NC_021163.1    | Ca_kabuli_chr04 | 49036545                | AA                              | GG              | 1946838076               |
| SNP_P4_67167_49037905 | NC_021163.1    | Ca_kabuli_chr04 | 49037905                | GG                              | AA              | 1946838078               |
| SNP_P4_67168_49049614 | NC_021163.1    | Ca_kabuli_chr04 | 49049614                | AA                              | GG              | 1946838080               |
| SNP_P4_67169_49066955 | NC_021163.1    | Ca_kabuli_chr04 | 49066955                | TT                              | CC              | 1946838082               |
| SNP_P4_67170_49074675 | NC_021163.1    | Ca_kabuli_chr04 | 49074675                | TT                              | AA              | 1946838084               |
| SNP_P4_67175_49107112 | NC_021163.1    | Ca_kabuli_chr04 | 49107112                | CC                              | AA              | 1946838086               |
| SNP_P4_67176_49115446 | NC_021163.1    | Ca_kabuli_chr04 | 49115446                | TT                              | AA              | 1946838088               |
| SNP_P4_67180_49159025 | NC_021163.1    | Ca_kabuli_chr04 | 49159025                | CC                              | TT              | 1946838090               |
| SNP_P4_67181_49159418 | NC_021163.1    | Ca_kabuli_chr04 | 49159418                | GG                              | AA              | 1946838092               |
| SNP_P4_67182_49163046 | NC_021163.1    | Ca_kabuli_chr04 | 49163046                | AA                              | GG              | 1946838094               |
| SNP_P4_67183_49168464 | NC_021163.1    | Ca_kabuli_chr04 | 49168464                | CC                              | TT              | 1946838096               |
| SNP_P4_67184_49168775 | NC_021163.1    | Ca_kabuli_chr04 | 49168775                | GG                              | TT              | 1946838098               |
| SNP_P4_67185_49170463 | NC_021163.1    | Ca_kabuli_chr04 | 49170463                | GG                              | AA              | 1946838100               |
| SNP_P4_67186_49170465 | NC_021163.1    | Ca_kabuli_chr04 | 49170465                | CC                              | AA              | 1946838102               |
| SNP_P4_67187_49177737 | NC_021163.1    | Ca_kabuli_chr04 | 49177737                | TT                              | CC              | 1946838104               |
| SNP_P4_67188_49178861 | NC_021163.1    | Ca_kabuli_chr04 | 49178861                | GG                              | AA              | 1946838106               |
| SNP_P4_67189_49179453 | NC_021163.1    | Ca_kabuli_chr04 | 49179453                | GG                              | AA              | 1946838108               |
| SNP_P4_67190_49179475 | NC_021163.1    | Ca_kabuli_chr04 | 49179475                | CC                              | TT              | 1946838110               |
| SNP_P4_67191_49179516 | NC_021163.1    | Ca_kabuli_chr04 | 49179516                | GG                              | TT              | 1946838112               |
| SNP_P4_67192_49189576 | NC_021163.1    | Ca_kabuli_chr04 | 49189576                | AA                              | TT              | 1946838114               |
| SNP_P4_67193_49191424 | NC_021163.1    | Ca_kabuli_chr04 | 49191424                | AA                              | GG              | 1946838116               |
| SNP_P4_67194_49191426 | NC_021163.1    | Ca_kabuli_chr04 | 49191426                | TT                              | CC              | 1946838118               |
| SNP_P4_67195_49191433 | NC_021163.1    | Ca_kabuli_chr04 | 49191433                | AA                              | CC              | 1946838120               |
| SNP_P4_67196_49191450 | NC_021163.1    | Ca_kabuli_chr04 | 49191450                | TT                              | CC              | 1946838122               |
| SNP_P4_67197_27938    | NC_021164.1    | Ca_kabuli_chr05 | 27938                   | AA                              | GG              | 1946838124               |
| SNP_P4_67199_32585    | NC_021164.1    | Ca_kabuli_chr05 | 32585                   | GG                              | CC              | 1946838126               |
| SNP_P4_67200_33000    | NC_021164.1    | Ca_kabuli_chr05 | 33000                   | CC                              | AA              | 1946838128               |
| SNP_P4_67201_44428    | NC_021164.1    | Ca_kabuli_chr05 | 44428                   | GG                              | TT              | 1946838130               |
| SNP_P4_67202_44628    | NC_021164.1    | Ca_kabuli_chr05 | 44628                   | TT                              | AA              | 1946838132               |
| SNP_P4_67203_44701    | NC_021164.1    | Ca_kabuli_chr05 | 44701                   | TT                              | CC              | 1946838134               |
| SNP_P4_67204_44722    | NC_021164.1    | Ca_kabuli_chr05 | 44722                   | AA                              | CC              | 1946838136               |
| SNP_P4_67205_44864    | NC_021164.1    | Ca_kabuli_chr05 | 44864                   | GG                              | CC              | 1946838138               |
| SNP_P4_67206_44889    | NC_021164.1    | Ca_kabuli_chr05 | 44889                   | TT                              | CC              | 1946838140               |
| SNP_P4_67207_45198    | NC_021164.1    | Ca_kabuli_chr05 | 45198                   | CC                              | AA              | 1946838142               |
| SNP_P4_67208_50507    | NC_021164.1    | Ca_kabuli_chr05 | 50507                   | TT                              | AA              | 1946838144               |
| SNP_P4_67209_50809    | NC_021164.1    | Ca_kabuli_chr05 | 50809                   | CC                              | TT              | 1946838146               |

| SNPs IDs            | Chromosome IDs | Chromosomes     | Physical positions (bp) | CDC Frontier (Reference genome) | (ILWC46 & LPNB) | NCBI SNPdb Accession IDs |
|---------------------|----------------|-----------------|-------------------------|---------------------------------|-----------------|--------------------------|
| SNP_P4_67210_55383  | NC_021164.1    | Ca_kabuli_chr05 | 55383                   | AA                              | GG              | 1946838148               |
| SNP_P4_67211_57602  | NC_021164.1    | Ca_kabuli_chr05 | 57602                   | CC                              | TT              | 1946838150               |
| SNP_P4_67214_76223  | NC_021164.1    | Ca_kabuli_chr05 | 76223                   | TT                              | CC              | 1946838152               |
| SNP_P4_67215_77807  | NC_021164.1    | Ca_kabuli_chr05 | 77807                   | CC                              | TT              | 1946838154               |
| SNP_P4_67216_96455  | NC_021164.1    | Ca_kabuli_chr05 | 96455                   | GG                              | AA              | 1946838156               |
| SNP_P4_67217_100888 | NC_021164.1    | Ca_kabuli_chr05 | 100888                  | TT                              | CC              | 1946838158               |
| SNP_P4_67218_100890 | NC_021164.1    | Ca_kabuli_chr05 | 100890                  | GG                              | AA              | 1946838160               |
| SNP_P4_67219_101170 | NC_021164.1    | Ca_kabuli_chr05 | 101170                  | AA                              | GG              | 1946838162               |
| SNP_P4_67220_101224 | NC_021164.1    | Ca_kabuli_chr05 | 101224                  | AA                              | TT              | 1946838164               |
| SNP_P4_67221_101303 | NC_021164.1    | Ca_kabuli_chr05 | 101303                  | TT                              | AA              | 1946838166               |
| SNP_P4_67223_105710 | NC_021164.1    | Ca_kabuli_chr05 | 105710                  | CC                              | TT              | 1946838168               |
| SNP_P4_67226_130741 | NC_021164.1    | Ca_kabuli_chr05 | 130741                  | TT                              | CC              | 1946838170               |
| SNP_P4_67227_131397 | NC_021164.1    | Ca_kabuli_chr05 | 131397                  | AA                              | TT              | 1946838172               |
| SNP_P4_67228_131707 | NC_021164.1    | Ca_kabuli_chr05 | 131707                  | TT                              | CC              | 1946838174               |
| SNP_P4_67233_133179 | NC_021164.1    | Ca_kabuli_chr05 | 133179                  | TT                              | AA              | 1946838176               |
| SNP_P4_67236_133441 | NC_021164.1    | Ca_kabuli_chr05 | 133441                  | TT                              | CC              | 1946838178               |
| SNP_P4_67238_133830 | NC_021164.1    | Ca_kabuli_chr05 | 133830                  | CC                              | TT              | 1946838180               |
| SNP_P4_67240_134226 | NC_021164.1    | Ca_kabuli_chr05 | 134226                  | CC                              | TT              | 1946838182               |
| SNP_P4_67241_134244 | NC_021164.1    | Ca_kabuli_chr05 | 134244                  | TT                              | AA              | 1946838184               |
| SNP_P4_67242_134320 | NC_021164.1    | Ca_kabuli_chr05 | 134320                  | TT                              | CC              | 1946838186               |
| SNP_P4_67243_134367 | NC_021164.1    | Ca_kabuli_chr05 | 134367                  | GG                              | AA              | 1946838188               |
| SNP_P4_67244_134384 | NC_021164.1    | Ca_kabuli_chr05 | 134384                  | TT                              | AA              | 1946838190               |
| SNP_P4_67245_134392 | NC_021164.1    | Ca_kabuli_chr05 | 134392                  | GG                              | AA              | 1946838192               |
| SNP_P4_67246_134435 | NC_021164.1    | Ca_kabuli_chr05 | 134435                  | CC                              | TT              | 1946838194               |
| SNP_P4_67247_134466 | NC_021164.1    | Ca_kabuli_chr05 | 134466                  | GG                              | AA              | 1946838196               |
| SNP_P4_67248_134487 | NC_021164.1    | Ca_kabuli_chr05 | 134487                  | CC                              | AA              | 1946838198               |
| SNP_P4_67249_134514 | NC_021164.1    | Ca_kabuli_chr05 | 134514                  | TT                              | CC              | 1946838200               |
| SNP_P4_67250_134710 | NC_021164.1    | Ca_kabuli_chr05 | 134710                  | TT                              | AA              | 1946838202               |
| SNP_P4_67251_134778 | NC_021164.1    | Ca_kabuli_chr05 | 134778                  | AA                              | GG              | 1946838204               |
| SNP_P4_67252_134858 | NC_021164.1    | Ca_kabuli_chr05 | 134858                  | CC                              | AA              | 1946838206               |
| SNP_P4_67253_134871 | NC_021164.1    | Ca_kabuli_chr05 | 134871                  | CC                              | TT              | 1946838208               |
| SNP_P4_67254_134888 | NC_021164.1    | Ca_kabuli_chr05 | 134888                  | CC                              | TT              | 1946838210               |
| SNP_P4_67255_134892 | NC_021164.1    | Ca_kabuli_chr05 | 134892                  | AA                              | GG              | 1946838212               |
| SNP_P4_67256_134913 | NC_021164.1    | Ca_kabuli_chr05 | 134913                  | GG                              | AA              | 1946838214               |
| SNP_P4_67257_134948 | NC_021164.1    | Ca_kabuli_chr05 | 134948                  | AA                              | GG              | 1946838216               |
| SNP_P4_67258_134976 | NC_021164.1    | Ca_kabuli_chr05 | 134976                  | AA                              | GG              | 1946838218               |
| SNP_P4_67259_134992 | NC_021164.1    | Ca_kabuli_chr05 | 134992                  | TT                              | GG              | 1946838220               |
| SNP_P4_67260_134996 | NC_021164.1    | Ca_kabuli_chr05 | 134996                  | AA                              | GG              | 1946838222               |
| SNP_P4_67261_135002 | NC_021164.1    | Ca_kabuli_chr05 | 135002                  | GG                              | AA              | 1946838224               |
| SNP_P4_67262_135033 | NC_021164.1    | Ca_kabuli_chr05 | 135033                  | AA                              | GG              | 1946838226               |
| SNP_P4_67264_135685 | NC_021164.1    | Ca_kabuli_chr05 | 135685                  | GG                              | AA              | 1946838228               |
| SNP_P4_67265_135931 | NC_021164.1    | Ca_kabuli_chr05 | 135931                  | CC                              | TT              | 1946838230               |

| SNPs IDs            | Chromosome IDs | Chromosomes     | Physical positions (bp) | CDC Frontier (Reference genome) | (ILWC46 & LPNB) | NCBI SNPdb Accession IDs |
|---------------------|----------------|-----------------|-------------------------|---------------------------------|-----------------|--------------------------|
| SNP_P4_67266_136021 | NC_021164.1    | Ca_kabuli_chr05 | 136021                  | TT                              | AA              | 1946838232               |
| SNP_P4_67268_140321 | NC_021164.1    | Ca_kabuli_chr05 | 140321                  | CC                              | AA              | 1946838234               |
| SNP_P4_67270_140543 | NC_021164.1    | Ca_kabuli_chr05 | 140543                  | AA                              | CC              | 1946838236               |
| SNP_P4_67271_140923 | NC_021164.1    | Ca_kabuli_chr05 | 140923                  | CC                              | TT              | 1946838238               |
| SNP_P4_67273_146875 | NC_021164.1    | Ca_kabuli_chr05 | 146875                  | TT                              | AA              | 1946838240               |
| SNP_P4_67274_146876 | NC_021164.1    | Ca_kabuli_chr05 | 146876                  | TT                              | AA              | 1946838242               |
| SNP_P4_67275_146881 | NC_021164.1    | Ca_kabuli_chr05 | 146881                  | CC                              | TT              | 1946838244               |
| SNP_P4_67276_146908 | NC_021164.1    | Ca_kabuli_chr05 | 146908                  | TT                              | CC              | 1946838246               |
| SNP_P4_67277_146979 | NC_021164.1    | Ca_kabuli_chr05 | 146979                  | TT                              | AA              | 1946838248               |
| SNP_P4_67278_148420 | NC_021164.1    | Ca_kabuli_chr05 | 148420                  | AA                              | GG              | 1946838250               |
| SNP_P4_67279_150761 | NC_021164.1    | Ca_kabuli_chr05 | 150761                  | TT                              | GG              | 1946838252               |
| SNP_P4_67280_150770 | NC_021164.1    | Ca_kabuli_chr05 | 150770                  | AA                              | TT              | 1946838254               |
| SNP_P4_67281_151393 | NC_021164.1    | Ca_kabuli_chr05 | 151393                  | GG                              | TT              | 1946838256               |
| SNP_P4_67282_152196 | NC_021164.1    | Ca_kabuli_chr05 | 152196                  | TT                              | CC              | 1946838258               |
| SNP_P4_67284_152630 | NC_021164.1    | Ca_kabuli_chr05 | 152630                  | GG                              | AA              | 1946838260               |
| SNP_P4_67285_152632 | NC_021164.1    | Ca_kabuli_chr05 | 152632                  | AA                              | CC              | 1946838262               |
| SNP_P4_67286_152648 | NC_021164.1    | Ca_kabuli_chr05 | 152648                  | TT                              | AA              | 1946838264               |
| SNP_P4_67287_153448 | NC_021164.1    | Ca_kabuli_chr05 | 153448                  | TT                              | AA              | 1946838266               |
| SNP_P4_67288_153449 | NC_021164.1    | Ca_kabuli_chr05 | 153449                  | AA                              | TT              | 1946838268               |
| SNP_P4_67290_154013 | NC_021164.1    | Ca_kabuli_chr05 | 154013                  | GG                              | TT              | 1946838270               |
| SNP_P4_67292_156794 | NC_021164.1    | Ca_kabuli_chr05 | 156794                  | AA                              | GG              | 1946838272               |
| SNP_P4_67293_157839 | NC_021164.1    | Ca_kabuli_chr05 | 157839                  | AA                              | TT              | 1946838274               |
| SNP_P4_67294_157840 | NC_021164.1    | Ca_kabuli_chr05 | 157840                  | GG                              | TT              | 1946838276               |
| SNP_P4_67295_157890 | NC_021164.1    | Ca_kabuli_chr05 | 157890                  | AA                              | TT              | 1946838278               |
| SNP_P4_67297_158539 | NC_021164.1    | Ca_kabuli_chr05 | 158539                  | AA                              | TT              | 1946838280               |
| SNP_P4_67298_158755 | NC_021164.1    | Ca_kabuli_chr05 | 158755                  | GG                              | AA              | 1946838282               |
| SNP_P4_67300_158835 | NC_021164.1    | Ca_kabuli_chr05 | 158835                  | TT                              | AA              | 1946838284               |
| SNP_P4_67301_159072 | NC_021164.1    | Ca_kabuli_chr05 | 159072                  | GG                              | AA              | 1946838286               |
| SNP_P4_67302_159135 | NC_021164.1    | Ca_kabuli_chr05 | 159135                  | TT                              | GG              | 1946838288               |
| SNP_P4_67304_159990 | NC_021164.1    | Ca_kabuli_chr05 | 159990                  | TT                              | CC              | 1946838290               |
| SNP_P4_67305_160014 | NC_021164.1    | Ca_kabuli_chr05 | 160014                  | CC                              | GG              | 1946838292               |
| SNP_P4_67306_160019 | NC_021164.1    | Ca_kabuli_chr05 | 160019                  | GG                              | AA              | 1946838294               |
| SNP_P4_67307_160339 | NC_021164.1    | Ca_kabuli_chr05 | 160339                  | AA                              | GG              | 1946838296               |
| SNP_P4_67308_160378 | NC_021164.1    | Ca_kabuli_chr05 | 160378                  | TT                              | CC              | 1946838298               |
| SNP_P4_67309_160529 | NC_021164.1    | Ca_kabuli_chr05 | 160529                  | GG                              | AA              | 1946838300               |
| SNP_P4_67311_160863 | NC_021164.1    | Ca_kabuli_chr05 | 160863                  | GG                              | AA              | 1946838302               |
| SNP_P4_67313_161179 | NC_021164.1    | Ca_kabuli_chr05 | 161179                  | CC                              | TT              | 1946838304               |
| SNP_P4_67315_161513 | NC_021164.1    | Ca_kabuli_chr05 | 161513                  | AA                              | CC              | 1946838306               |
| SNP_P4_67316_162383 | NC_021164.1    | Ca_kabuli_chr05 | 162383                  | TT                              | CC              | 1946838308               |
| SNP_P4_67317_162843 | NC_021164.1    | Ca_kabuli_chr05 | 162843                  | TT                              | AA              | 1946838310               |
| SNP_P4_67318_162845 | NC_021164.1    | Ca_kabuli_chr05 | 162845                  | TT                              | CC              | 1946838312               |
| SNP_P4_67319_162853 | NC_021164.1    | Ca_kabuli_chr05 | 162853                  | TT                              | AA              | 1946838314               |

| SNPs IDs            | Chromosome IDs | Chromosomes     | Physical positions (bp) | CDC Frontier (Reference genome) | (ILWC46 & LPNB) | NCBI SNPdb Accession IDs |
|---------------------|----------------|-----------------|-------------------------|---------------------------------|-----------------|--------------------------|
| SNP_P4_67321_164185 | NC_021164.1    | Ca_kabuli_chr05 | 164185                  | TT                              | GG              | 1946838316               |
| SNP_P4_67322_164457 | NC_021164.1    | Ca_kabuli_chr05 | 164457                  | TT                              | AA              | 1946838318               |
| SNP_P4_67323_167037 | NC_021164.1    | Ca_kabuli_chr05 | 167037                  | CC                              | TT              | 1946838320               |
| SNP_P4_67324_167930 | NC_021164.1    | Ca_kabuli_chr05 | 167930                  | TT                              | CC              | 1946838322               |
| SNP_P4_67325_168218 | NC_021164.1    | Ca_kabuli_chr05 | 168218                  | CC                              | TT              | 1946838323               |
| SNP_P4_67327_168403 | NC_021164.1    | Ca_kabuli_chr05 | 168403                  | TT                              | CC              | 1946838325               |
| SNP_P4_67328_168529 | NC_021164.1    | Ca_kabuli_chr05 | 168529                  | GG                              | AA              | 1946838327               |
| SNP_P4_67329_168573 | NC_021164.1    | Ca_kabuli_chr05 | 168573                  | AA                              | TT              | 1946838329               |
| SNP_P4_67330_168629 | NC_021164.1    | Ca_kabuli_chr05 | 168629                  | TT                              | CC              | 1946838331               |
| SNP_P4_67331_169888 | NC_021164.1    | Ca_kabuli_chr05 | 169888                  | CC                              | TT              | 1946838333               |
| SNP_P4_67332_170992 | NC_021164.1    | Ca_kabuli_chr05 | 170992                  | GG                              | AA              | 1946838335               |
| SNP_P4_67333_171257 | NC_021164.1    | Ca_kabuli_chr05 | 171257                  | CC                              | AA              | 1946838337               |
| SNP_P4_67334_171793 | NC_021164.1    | Ca_kabuli_chr05 | 171793                  | GG                              | CC              | 1946838339               |
| SNP_P4_67335_172212 | NC_021164.1    | Ca_kabuli_chr05 | 172212                  | TT                              | CC              | 1946838341               |
| SNP_P4_67336_172239 | NC_021164.1    | Ca_kabuli_chr05 | 172239                  | GG                              | AA              | 1946838343               |
| SNP_P4_67337_172713 | NC_021164.1    | Ca_kabuli_chr05 | 172713                  | TT                              | CC              | 1946838345               |
| SNP_P4_67338_172962 | NC_021164.1    | Ca_kabuli_chr05 | 172962                  | CC                              | TT              | 1946838347               |
| SNP_P4_67341_174101 | NC_021164.1    | Ca_kabuli_chr05 | 174101                  | CC                              | TT              | 1946838348               |
| SNP_P4_67342_178534 | NC_021164.1    | Ca_kabuli_chr05 | 178534                  | GG                              | AA              | 1946838350               |
| SNP_P4_67343_178549 | NC_021164.1    | Ca_kabuli_chr05 | 178549                  | TT                              | GG              | 1946838352               |
| SNP_P4_67344_178588 | NC_021164.1    | Ca_kabuli_chr05 | 178588                  | GG                              | AA              | 1946838354               |
| SNP_P4_67345_178808 | NC_021164.1    | Ca_kabuli_chr05 | 178808                  | AA                              | CC              | 1946838356               |
| SNP_P4_67346_178848 | NC_021164.1    | Ca_kabuli_chr05 | 178848                  | AA                              | CC              | 1946838358               |
| SNP_P4_67347_180041 | NC_021164.1    | Ca_kabuli_chr05 | 180041                  | GG                              | CC              | 1946838360               |
| SNP_P4_67348_180525 | NC_021164.1    | Ca_kabuli_chr05 | 180525                  | AA                              | GG              | 1946838362               |
| SNP_P4_67349_180707 | NC_021164.1    | Ca_kabuli_chr05 | 180707                  | TT                              | AA              | 1946838364               |
| SNP_P4_67350_180748 | NC_021164.1    | Ca_kabuli_chr05 | 180748                  | AA                              | TT              | 1946838366               |
| SNP_P4_67351_180986 | NC_021164.1    | Ca_kabuli_chr05 | 180986                  | TT                              | CC              | 1946838368               |
| SNP_P4_67352_184274 | NC_021164.1    | Ca_kabuli_chr05 | 184274                  | CC                              | TT              | 1946838370               |
| SNP_P4_67353_184483 | NC_021164.1    | Ca_kabuli_chr05 | 184483                  | AA                              | TT              | 1946838371               |
| SNP_P4_67354_184851 | NC_021164.1    | Ca_kabuli_chr05 | 184851                  | AA                              | GG              | 1946838373               |
| SNP_P4_67355_185682 | NC_021164.1    | Ca_kabuli_chr05 | 185682                  | CC                              | TT              | 1946838375               |
| SNP_P4_67359_193986 | NC_021164.1    | Ca_kabuli_chr05 | 193986                  | TT                              | AA              | 1946838377               |
| SNP_P4_67360_193993 | NC_021164.1    | Ca_kabuli_chr05 | 193993                  | TT                              | CC              | 1946838379               |
| SNP_P4_67361_194061 | NC_021164.1    | Ca_kabuli_chr05 | 194061                  | GG                              | AA              | 1946838381               |
| SNP_P4_67362_194266 | NC_021164.1    | Ca_kabuli_chr05 | 194266                  | CC                              | AA              | 1946838383               |
| SNP_P4_67363_194291 | NC_021164.1    | Ca_kabuli_chr05 | 194291                  | TT                              | GG              | 1946838385               |
| SNP_P4_67364_194755 | NC_021164.1    | Ca_kabuli_chr05 | 194755                  | AA                              | TT              | 1946838387               |
| SNP_P4_67365_194995 | NC_021164.1    | Ca_kabuli_chr05 | 194995                  | AA                              | GG              | 1946838389               |
| SNP_P4_67366_195331 | NC_021164.1    | Ca_kabuli_chr05 | 195331                  | CC                              | AA              | 1946838391               |
| SNP_P4_67367_195339 | NC_021164.1    | Ca_kabuli_chr05 | 195339                  | CC                              | TT              | 1946838392               |
| SNP_P4_67368_195476 | NC_021164.1    | Ca_kabuli_chr05 | 195476                  | GG                              | AA              | 1946838394               |



| SNPs IDs            | Chromosome IDs | Chromosomes     | Physical positions (bp) | CDC Frontier (Reference genome) | (ILWC46 & LPNB) | NCBI SNPdb Accession IDs |
|---------------------|----------------|-----------------|-------------------------|---------------------------------|-----------------|--------------------------|
| SNP_P4_67369_195520 | NC_021164.1    | Ca_kabuli_chr05 | 195520                  | TT                              | CC              | 1946838396               |
| SNP_P4_67370_195644 | NC_021164.1    | Ca_kabuli_chr05 | 195644                  | AA                              | GG              | 1946838398               |
| SNP_P4_67371_195669 | NC_021164.1    | Ca_kabuli_chr05 | 195669                  | CC                              | GG              | 1946838400               |
| SNP_P4_67372_195671 | NC_021164.1    | Ca_kabuli_chr05 | 195671                  | AA                              | TT              | 1946838402               |
| SNP_P4_67373_195675 | NC_021164.1    | Ca_kabuli_chr05 | 195675                  | AA                              | TT              | 1946838404               |
| SNP_P4_67374_195709 | NC_021164.1    | Ca_kabuli_chr05 | 195709                  | GG                              | AA              | 1946838406               |
| SNP_P4_67377_197700 | NC_021164.1    | Ca_kabuli_chr05 | 197700                  | AA                              | TT              | 1946838408               |
| SNP_P4_67378_197722 | NC_021164.1    | Ca_kabuli_chr05 | 197722                  | GG                              | TT              | 1946838410               |
| SNP_P4_67380_201293 | NC_021164.1    | Ca_kabuli_chr05 | 201293                  | CC                              | TT              | 1946838412               |
| SNP_P4_67381_202119 | NC_021164.1    | Ca_kabuli_chr05 | 202119                  | TT                              | GG              | 1946838414               |
| SNP_P4_67383_203100 | NC_021164.1    | Ca_kabuli_chr05 | 203100                  | AA                              | CC              | 1946838416               |
| SNP_P4_67384_204437 | NC_021164.1    | Ca_kabuli_chr05 | 204437                  | CC                              | TT              | 1946838418               |
| SNP_P4_67385_205115 | NC_021164.1    | Ca_kabuli_chr05 | 205115                  | CC                              | GG              | 1946838420               |
| SNP_P4_67386_205701 | NC_021164.1    | Ca_kabuli_chr05 | 205701                  | CC                              | TT              | 1946838422               |
| SNP_P4_67387_205923 | NC_021164.1    | Ca_kabuli_chr05 | 205923                  | TT                              | CC              | 1946838424               |
| SNP_P4_67388_206388 | NC_021164.1    | Ca_kabuli_chr05 | 206388                  | GG                              | AA              | 1946838426               |
| SNP_P4_67389_206482 | NC_021164.1    | Ca_kabuli_chr05 | 206482                  | AA                              | GG              | 1946838428               |
| SNP_P4_67390_206497 | NC_021164.1    | Ca_kabuli_chr05 | 206497                  | GG                              | TT              | 1946838430               |
| SNP_P4_67392_206576 | NC_021164.1    | Ca_kabuli_chr05 | 206576                  | GG                              | AA              | 1946838432               |
| SNP_P4_67393_206715 | NC_021164.1    | Ca_kabuli_chr05 | 206715                  | TT                              | GG              | 1946838434               |
| SNP_P4_67395_206823 | NC_021164.1    | Ca_kabuli_chr05 | 206823                  | AA                              | GG              | 1946838436               |
| SNP_P4_67396_206955 | NC_021164.1    | Ca_kabuli_chr05 | 206955                  | CC                              | GG              | 1946838438               |
| SNP_P4_67397_207384 | NC_021164.1    | Ca_kabuli_chr05 | 207384                  | TT                              | AA              | 1946838440               |
| SNP_P4_67398_207385 | NC_021164.1    | Ca_kabuli_chr05 | 207385                  | GG                              | TT              | 1946838442               |
| SNP_P4_67399_207765 | NC_021164.1    | Ca_kabuli_chr05 | 207765                  | TT                              | CC              | 1946838444               |
| SNP_P4_67400_207884 | NC_021164.1    | Ca_kabuli_chr05 | 207884                  | CC                              | TT              | 1946838446               |
| SNP_P4_67402_208156 | NC_021164.1    | Ca_kabuli_chr05 | 208156                  | GG                              | CC              | 1946838448               |
| SNP_P4_67404_209388 | NC_021164.1    | Ca_kabuli_chr05 | 209388                  | TT                              | CC              | 1946838450               |
| SNP_P4_67409_210125 | NC_021164.1    | Ca_kabuli_chr05 | 210125                  | AA                              | TT              | 1946838452               |
| SNP_P4_67411_210232 | NC_021164.1    | Ca_kabuli_chr05 | 210232                  | CC                              | GG              | 1946838454               |
| SNP_P4_67414_210818 | NC_021164.1    | Ca_kabuli_chr05 | 210818                  | GG                              | CC              | 1946838456               |
| SNP_P4_67415_212161 | NC_021164.1    | Ca_kabuli_chr05 | 212161                  | GG                              | TT              | 1946838458               |
| SNP_P4_67416_212211 | NC_021164.1    | Ca_kabuli_chr05 | 212211                  | TT                              | GG              | 1946838460               |
| SNP_P4_67417_212339 | NC_021164.1    | Ca_kabuli_chr05 | 212339                  | AA                              | TT              | 1946838462               |
| SNP_P4_67419_212697 | NC_021164.1    | Ca_kabuli_chr05 | 212697                  | TT                              | AA              | 1946838464               |
| SNP_P4_67420_212742 | NC_021164.1    | Ca_kabuli_chr05 | 212742                  | CC                              | GG              | 1946838466               |
| SNP_P4_67421_212752 | NC_021164.1    | Ca_kabuli_chr05 | 212752                  | CC                              | AA              | 1946838468               |
| SNP_P4_67422_212757 | NC_021164.1    | Ca_kabuli_chr05 | 212757                  | AA                              | CC              | 1946838470               |
| SNP_P4_67423_212767 | NC_021164.1    | Ca_kabuli_chr05 | 212767                  | TT                              | CC              | 1946838471               |
| SNP_P4_67424_212808 | NC_021164.1    | Ca_kabuli_chr05 | 212808                  | AA                              | CC              | 1946838473               |
| SNP_P4_67425_213538 | NC_021164.1    | Ca_kabuli_chr05 | 213538                  | CC                              | TT              | 1946838475               |
| SNP_P4_67426_214896 | NC_021164.1    | Ca_kabuli_chr05 | 214896                  | AA                              | GG              | 1946838477               |

| SNPs IDs            | Chromosome IDs | Chromosomes     | Physical positions (bp) | CDC Frontier (Reference genome) | (ILWC46 & LPNB) | NCBI SNPdb Accession IDs |
|---------------------|----------------|-----------------|-------------------------|---------------------------------|-----------------|--------------------------|
| SNP_P4_67427_217768 | NC_021164.1    | Ca_kabuli_chr05 | 217768                  | AA                              | CC              | 1946838479               |
| SNP_P4_67428_217805 | NC_021164.1    | Ca_kabuli_chr05 | 217805                  | CC                              | TT              | 1946838481               |
| SNP_P4_67429_217859 | NC_021164.1    | Ca_kabuli_chr05 | 217859                  | CC                              | GG              | 1946838483               |
| SNP_P4_67430_218395 | NC_021164.1    | Ca_kabuli_chr05 | 218395                  | GG                              | TT              | 1946838485               |
| SNP_P4_67431_218418 | NC_021164.1    | Ca_kabuli_chr05 | 218418                  | GG                              | CC              | 1946838487               |
| SNP_P4_67433_218520 | NC_021164.1    | Ca_kabuli_chr05 | 218520                  | TT                              | AA              | 1946838489               |
| SNP_P4_67435_218718 | NC_021164.1    | Ca_kabuli_chr05 | 218718                  | CC                              | GG              | 1946838491               |
| SNP_P4_67436_219678 | NC_021164.1    | Ca_kabuli_chr05 | 219678                  | TT                              | AA              | 1946838493               |
| SNP_P4_67437_220965 | NC_021164.1    | Ca_kabuli_chr05 | 220965                  | GG                              | TT              | 1946838495               |
| SNP_P4_67439_222391 | NC_021164.1    | Ca_kabuli_chr05 | 222391                  | AA                              | GG              | 1946838497               |
| SNP_P4_67440_225229 | NC_021164.1    | Ca_kabuli_chr05 | 225229                  | AA                              | CC              | 1946838498               |
| SNP_P4_67441_225380 | NC_021164.1    | Ca_kabuli_chr05 | 225380                  | GG                              | TT              | 1946838500               |
| SNP_P4_67443_225484 | NC_021164.1    | Ca_kabuli_chr05 | 225484                  | AA                              | GG              | 1946838502               |
| SNP_P4_67445_225574 | NC_021164.1    | Ca_kabuli_chr05 | 225574                  | TT                              | CC              | 1946838504               |
| SNP_P4_67446_225597 | NC_021164.1    | Ca_kabuli_chr05 | 225597                  | CC                              | TT              | 1946838506               |
| SNP_P4_67447_225610 | NC_021164.1    | Ca_kabuli_chr05 | 225610                  | GG                              | AA              | 1946838508               |
| SNP_P4_67448_225650 | NC_021164.1    | Ca_kabuli_chr05 | 225650                  | TT                              | AA              | 1946838510               |
| SNP_P4_67449_225652 | NC_021164.1    | Ca_kabuli_chr05 | 225652                  | TT                              | CC              | 1946838512               |
| SNP_P4_67450_225682 | NC_021164.1    | Ca_kabuli_chr05 | 225682                  | AA                              | GG              | 1946838514               |
| SNP_P4_67451_225823 | NC_021164.1    | Ca_kabuli_chr05 | 225823                  | CC                              | AA              | 1946838516               |
| SNP_P4_67453_230526 | NC_021164.1    | Ca_kabuli_chr05 | 230526                  | TT                              | CC              | 1946838518               |
| SNP_P4_67454_230575 | NC_021164.1    | Ca_kabuli_chr05 | 230575                  | CC                              | TT              | 1946838520               |
| SNP_P4_67455_230621 | NC_021164.1    | Ca_kabuli_chr05 | 230621                  | GG                              | TT              | 1946838522               |
| SNP_P4_67456_231058 | NC_021164.1    | Ca_kabuli_chr05 | 231058                  | GG                              | AA              | 1946838524               |
| SNP_P4_67457_232454 | NC_021164.1    | Ca_kabuli_chr05 | 232454                  | AA                              | GG              | 1946838525               |
| SNP_P4_67462_237083 | NC_021164.1    | Ca_kabuli_chr05 | 237083                  | TT                              | CC              | 1946838527               |
| SNP_P4_67463_237119 | NC_021164.1    | Ca_kabuli_chr05 | 237119                  | GG                              | AA              | 1946838529               |
| SNP_P4_67464_237157 | NC_021164.1    | Ca_kabuli_chr05 | 237157                  | GG                              | AA              | 1946838531               |
| SNP_P4_67466_237288 | NC_021164.1    | Ca_kabuli_chr05 | 237288                  | TT                              | CC              | 1946838533               |
| SNP_P4_67468_237612 | NC_021164.1    | Ca_kabuli_chr05 | 237612                  | TT                              | CC              | 1946838535               |
| SNP_P4_67469_237713 | NC_021164.1    | Ca_kabuli_chr05 | 237713                  | TT                              | AA              | 1946838537               |
| SNP_P4_67471_238089 | NC_021164.1    | Ca_kabuli_chr05 | 238089                  | GG                              | CC              | 1946838539               |
| SNP_P4_67472_238923 | NC_021164.1    | Ca_kabuli_chr05 | 238923                  | TT                              | AA              | 1946838541               |
| SNP_P4_67473_238935 | NC_021164.1    | Ca_kabuli_chr05 | 238935                  | AA                              | TT              | 1946838543               |
| SNP_P4_67475_239555 | NC_021164.1    | Ca_kabuli_chr05 | 239555                  | TT                              | CC              | 1946838545               |
| SNP_P4_67476_239605 | NC_021164.1    | Ca_kabuli_chr05 | 239605                  | TT                              | GG              | 1946838547               |
| SNP_P4_67478_240335 | NC_021164.1    | Ca_kabuli_chr05 | 240335                  | AA                              | TT              | 1946838549               |
| SNP_P4_67479_240337 | NC_021164.1    | Ca_kabuli_chr05 | 240337                  | CC                              | TT              | 1946838551               |
| SNP_P4_67480_240344 | NC_021164.1    | Ca_kabuli_chr05 | 240344                  | TT                              | CC              | 1946838553               |
| SNP_P4_67481_240380 | NC_021164.1    | Ca_kabuli_chr05 | 240380                  | GG                              | AA              | 1946838555               |
| SNP_P4_67482_240384 | NC_021164.1    | Ca_kabuli_chr05 | 240384                  | GG                              | CC              | 1946838557               |
| SNP_P4_67483_240391 | NC_021164.1    | Ca_kabuli_chr05 | 240391                  | AA                              | GG              | 1946838559               |

| SNPs IDs            | Chromosome IDs | Chromosomes     | Physical positions (bp) | CDC Frontier (Reference genome) | (ILWC46 & LPNB) | NCBI SNPdb Accession IDs |
|---------------------|----------------|-----------------|-------------------------|---------------------------------|-----------------|--------------------------|
| SNP_P4_67484_240487 | NC_021164.1    | Ca_kabuli_chr05 | 240487                  | AA                              | GG              | 1946838561               |
| SNP_P4_67485_240496 | NC_021164.1    | Ca_kabuli_chr05 | 240496                  | AA                              | GG              | 1946838563               |
| SNP_P4_67486_240505 | NC_021164.1    | Ca_kabuli_chr05 | 240505                  | AA                              | CC              | 1946838565               |
| SNP_P4_67487_240510 | NC_021164.1    | Ca_kabuli_chr05 | 240510                  | AA                              | CC              | 1946838567               |
| SNP_P4_67488_240562 | NC_021164.1    | Ca_kabuli_chr05 | 240562                  | CC                              | GG              | 1946838569               |
| SNP_P4_67489_240593 | NC_021164.1    | Ca_kabuli_chr05 | 240593                  | GG                              | AA              | 1946838571               |
| SNP_P4_67490_240596 | NC_021164.1    | Ca_kabuli_chr05 | 240596                  | GG                              | AA              | 1946838573               |
| SNP_P4_67491_240632 | NC_021164.1    | Ca_kabuli_chr05 | 240632                  | CC                              | GG              | 1946838575               |
| SNP_P4_67492_240637 | NC_021164.1    | Ca_kabuli_chr05 | 240637                  | GG                              | AA              | 1946838577               |
| SNP_P4_67494_240781 | NC_021164.1    | Ca_kabuli_chr05 | 240781                  | AA                              | CC              | 1946838579               |
| SNP_P4_67495_241154 | NC_021164.1    | Ca_kabuli_chr05 | 241154                  | CC                              | AA              | 1946838581               |
| SNP_P4_67496_241159 | NC_021164.1    | Ca_kabuli_chr05 | 241159                  | TT                              | AA              | 1946838583               |
| SNP_P4_67498_241209 | NC_021164.1    | Ca_kabuli_chr05 | 241209                  | GG                              | TT              | 1946838585               |
| SNP_P4_67499_241343 | NC_021164.1    | Ca_kabuli_chr05 | 241343                  | AA                              | CC              | 1946838587               |
| SNP_P4_67500_241375 | NC_021164.1    | Ca_kabuli_chr05 | 241375                  | TT                              | CC              | 1946838589               |
| SNP_P4_67502_243201 | NC_021164.1    | Ca_kabuli_chr05 | 243201                  | CC                              | TT              | 1946838591               |
| SNP_P4_67503_243397 | NC_021164.1    | Ca_kabuli_chr05 | 243397                  | CC                              | GG              | 1946838593               |
| SNP_P4_67504_243543 | NC_021164.1    | Ca_kabuli_chr05 | 243543                  | AA                              | GG              | 1946838595               |
| SNP_P4_67505_243786 | NC_021164.1    | Ca_kabuli_chr05 | 243786                  | GG                              | TT              | 1946838597               |
| SNP_P4_67506_243820 | NC_021164.1    | Ca_kabuli_chr05 | 243820                  | AA                              | GG              | 1946838599               |
| SNP_P4_67507_243878 | NC_021164.1    | Ca_kabuli_chr05 | 243878                  | TT                              | CC              | 1946838601               |
| SNP_P4_67508_243887 | NC_021164.1    | Ca_kabuli_chr05 | 243887                  | TT                              | CC              | 1946838603               |
| SNP_P4_67509_243929 | NC_021164.1    | Ca_kabuli_chr05 | 243929                  | CC                              | TT              | 1946838605               |
| SNP_P4_67510_243945 | NC_021164.1    | Ca_kabuli_chr05 | 243945                  | TT                              | CC              | 1946838607               |
| SNP_P4_67511_244004 | NC_021164.1    | Ca_kabuli_chr05 | 244004                  | AA                              | GG              | 1946838609               |
| SNP_P4_67512_244034 | NC_021164.1    | Ca_kabuli_chr05 | 244034                  | TT                              | CC              | 1946838611               |
| SNP_P4_67513_244076 | NC_021164.1    | Ca_kabuli_chr05 | 244076                  | AA                              | CC              | 1946838613               |
| SNP_P4_67515_244169 | NC_021164.1    | Ca_kabuli_chr05 | 244169                  | CC                              | TT              | 1946838615               |
| SNP_P4_67516_244215 | NC_021164.1    | Ca_kabuli_chr05 | 244215                  | CC                              | AA              | 1946838617               |
| SNP_P4_67518_244276 | NC_021164.1    | Ca_kabuli_chr05 | 244276                  | CC                              | AA              | 1946838619               |
| SNP_P4_67519_244299 | NC_021164.1    | Ca_kabuli_chr05 | 244299                  | AA                              | GG              | 1946838621               |
| SNP_P4_67521_244370 | NC_021164.1    | Ca_kabuli_chr05 | 244370                  | GG                              | AA              | 1946838623               |
| SNP_P4_67522_244419 | NC_021164.1    | Ca_kabuli_chr05 | 244419                  | CC                              | TT              | 1946838625               |
| SNP_P4_67523_244422 | NC_021164.1    | Ca_kabuli_chr05 | 244422                  | CC                              | AA              | 1946838627               |
| SNP_P4_67524_244424 | NC_021164.1    | Ca_kabuli_chr05 | 244424                  | TT                              | AA              | 1946838629               |
| SNP_P4_67525_244450 | NC_021164.1    | Ca_kabuli_chr05 | 244450                  | AA                              | GG              | 1946838631               |
| SNP_P4_67526_244457 | NC_021164.1    | Ca_kabuli_chr05 | 244457                  | AA                              | GG              | 1946838633               |
| SNP_P4_67527_244594 | NC_021164.1    | Ca_kabuli_chr05 | 244594                  | CC                              | TT              | 1946838635               |
| SNP_P4_67530_246466 | NC_021164.1    | Ca_kabuli_chr05 | 246466                  | TT                              | AA              | 1946838637               |
| SNP_P4_67531_252396 | NC_021164.1    | Ca_kabuli_chr05 | 252396                  | TT                              | CC              | 1946838639               |
| SNP_P4_67532_252649 | NC_021164.1    | Ca_kabuli_chr05 | 252649                  | TT                              | CC              | 1946838641               |
| SNP_P4_67533_259475 | NC_021164.1    | Ca_kabuli_chr05 | 259475                  | TT                              | CC              | 1946838643               |

| SNPs IDs            | Chromosome IDs | Chromosomes     | Physical positions (bp) | CDC Frontier (Reference genome) | (ILWC46 & LPNB) | NCBI SNPdb Accession IDs |
|---------------------|----------------|-----------------|-------------------------|---------------------------------|-----------------|--------------------------|
| SNP_P4_67534_260915 | NC_021164.1    | Ca_kabuli_chr05 | 260915                  | AA                              | CC              | 1946838645               |
| SNP_P4_67536_260966 | NC_021164.1    | Ca_kabuli_chr05 | 260966                  | AA                              | GG              | 1946838647               |
| SNP_P4_67537_261261 | NC_021164.1    | Ca_kabuli_chr05 | 261261                  | GG                              | TT              | 1946838649               |
| SNP_P4_67539_267342 | NC_021164.1    | Ca_kabuli_chr05 | 267342                  | CC                              | TT              | 1946838651               |
| SNP_P4_67540_271551 | NC_021164.1    | Ca_kabuli_chr05 | 271551                  | GG                              | CC              | 1946838653               |
| SNP_P4_67541_271887 | NC_021164.1    | Ca_kabuli_chr05 | 271887                  | TT                              | AA              | 1946838655               |
| SNP_P4_67542_272972 | NC_021164.1    | Ca_kabuli_chr05 | 272972                  | AA                              | TT              | 1946838656               |
| SNP_P4_67544_278551 | NC_021164.1    | Ca_kabuli_chr05 | 278551                  | AA                              | GG              | 1946838658               |
| SNP_P4_67547_286669 | NC_021164.1    | Ca_kabuli_chr05 | 286669                  | AA                              | GG              | 1946838660               |
| SNP_P4_67548_287671 | NC_021164.1    | Ca_kabuli_chr05 | 287671                  | AA                              | GG              | 1946838662               |
| SNP_P4_67552_289683 | NC_021164.1    | Ca_kabuli_chr05 | 289683                  | AA                              | GG              | 1946838664               |
| SNP_P4_67553_289781 | NC_021164.1    | Ca_kabuli_chr05 | 289781                  | TT                              | AA              | 1946838666               |
| SNP_P4_67554_289794 | NC_021164.1    | Ca_kabuli_chr05 | 289794                  | GG                              | AA              | 1946838668               |
| SNP_P4_67556_290880 | NC_021164.1    | Ca_kabuli_chr05 | 290880                  | GG                              | TT              | 1946838670               |
| SNP_P4_67557_290885 | NC_021164.1    | Ca_kabuli_chr05 | 290885                  | AA                              | TT              | 1946838672               |
| SNP_P4_67558_291039 | NC_021164.1    | Ca_kabuli_chr05 | 291039                  | AA                              | TT              | 1946838674               |
| SNP_P4_67559_291040 | NC_021164.1    | Ca_kabuli_chr05 | 291040                  | GG                              | CC              | 1946838676               |
| SNP_P4_67561_291116 | NC_021164.1    | Ca_kabuli_chr05 | 291116                  | TT                              | CC              | 1946838678               |
| SNP_P4_67562_291177 | NC_021164.1    | Ca_kabuli_chr05 | 291177                  | CC                              | TT              | 1946838680               |
| SNP_P4_67563_291228 | NC_021164.1    | Ca_kabuli_chr05 | 291228                  | GG                              | AA              | 1946838682               |
| SNP_P4_67564_291250 | NC_021164.1    | Ca_kabuli_chr05 | 291250                  | GG                              | AA              | 1946838684               |
| SNP_P4_67565_291296 | NC_021164.1    | Ca_kabuli_chr05 | 291296                  | GG                              | AA              | 1946838686               |
| SNP_P4_67566_291301 | NC_021164.1    | Ca_kabuli_chr05 | 291301                  | AA                              | TT              | 1946838688               |
| SNP_P4_67567_291315 | NC_021164.1    | Ca_kabuli_chr05 | 291315                  | GG                              | AA              | 1946838691               |
| SNP_P4_67568_291347 | NC_021164.1    | Ca_kabuli_chr05 | 291347                  | AA                              | GG              | 1946838693               |
| SNP_P4_67570_291421 | NC_021164.1    | Ca_kabuli_chr05 | 291421                  | GG                              | AA              | 1946838695               |
| SNP_P4_67571_291439 | NC_021164.1    | Ca_kabuli_chr05 | 291439                  | GG                              | AA              | 1946838697               |
| SNP_P4_67572_291545 | NC_021164.1    | Ca_kabuli_chr05 | 291545                  | CC                              | GG              | 1946838698               |
| SNP_P4_67573_291546 | NC_021164.1    | Ca_kabuli_chr05 | 291546                  | AA                              | TT              | 1946838700               |
| SNP_P4_67576_291981 | NC_021164.1    | Ca_kabuli_chr05 | 291981                  | AA                              | CC              | 1946838702               |
| SNP_P4_67577_291986 | NC_021164.1    | Ca_kabuli_chr05 | 291986                  | GG                              | AA              | 1946838704               |
| SNP_P4_67578_292029 | NC_021164.1    | Ca_kabuli_chr05 | 292029                  | TT                              | AA              | 1946838706               |
| SNP_P4_67580_292231 | NC_021164.1    | Ca_kabuli_chr05 | 292231                  | CC                              | AA              | 1946838708               |
| SNP_P4_67581_292255 | NC_021164.1    | Ca_kabuli_chr05 | 292255                  | CC                              | TT              | 1946838710               |
| SNP_P4_67582_292286 | NC_021164.1    | Ca_kabuli_chr05 | 292286                  | AA                              | GG              | 1946838712               |
| SNP_P4_67583_292296 | NC_021164.1    | Ca_kabuli_chr05 | 292296                  | TT                              | AA              | 1946838714               |
| SNP_P4_67584_292423 | NC_021164.1    | Ca_kabuli_chr05 | 292423                  | TT                              | CC              | 1946838716               |
| SNP_P4_67585_292460 | NC_021164.1    | Ca_kabuli_chr05 | 292460                  | AA                              | CC              | 1946838718               |
| SNP_P4_67586_292517 | NC_021164.1    | Ca_kabuli_chr05 | 292517                  | CC                              | AA              | 1946838720               |
| SNP_P4_67587_292525 | NC_021164.1    | Ca_kabuli_chr05 | 292525                  | GG                              | TT              | 1946838722               |
| SNP_P4_67588_292546 | NC_021164.1    | Ca_kabuli_chr05 | 292546                  | TT                              | CC              | 1946838724               |
| SNP_P4_67589_292675 | NC_021164.1    | Ca_kabuli_chr05 | 292675                  | TT                              | GG              | 1946838726               |

| SNPs IDs            | Chromosome IDs | Chromosomes     | Physical positions (bp) | CDC Frontier (Reference genome) | (ILWC46 & LPNB) | NCBI SNPdb Accession IDs |
|---------------------|----------------|-----------------|-------------------------|---------------------------------|-----------------|--------------------------|
| SNP_P4_67590_293168 | NC_021164.1    | Ca_kabuli_chr05 | 293168                  | CC                              | GG              | 1946838728               |
| SNP_P4_67591_293681 | NC_021164.1    | Ca_kabuli_chr05 | 293681                  | CC                              | AA              | 1946838730               |
| SNP_P4_67592_293793 | NC_021164.1    | Ca_kabuli_chr05 | 293793                  | GG                              | AA              | 1946838732               |
| SNP_P4_67593_294098 | NC_021164.1    | Ca_kabuli_chr05 | 294098                  | GG                              | AA              | 1946838734               |
| SNP_P4_67594_297032 | NC_021164.1    | Ca_kabuli_chr05 | 297032                  | TT                              | CC              | 1946838736               |
| SNP_P4_67595_297102 | NC_021164.1    | Ca_kabuli_chr05 | 297102                  | CC                              | TT              | 1946838738               |
| SNP_P4_67596_298190 | NC_021164.1    | Ca_kabuli_chr05 | 298190                  | CC                              | TT              | 1946838739               |
| SNP_P4_67597_298554 | NC_021164.1    | Ca_kabuli_chr05 | 298554                  | GG                              | AA              | 1946838741               |
| SNP_P4_67598_301620 | NC_021164.1    | Ca_kabuli_chr05 | 301620                  | CC                              | TT              | 1946838743               |
| SNP_P4_67599_301933 | NC_021164.1    | Ca_kabuli_chr05 | 301933                  | AA                              | GG              | 1946838745               |
| SNP_P4_67600_301992 | NC_021164.1    | Ca_kabuli_chr05 | 301992                  | AA                              | GG              | 1946838747               |
| SNP_P4_67601_302015 | NC_021164.1    | Ca_kabuli_chr05 | 302015                  | TT                              | CC              | 1946838749               |
| SNP_P4_67602_302099 | NC_021164.1    | Ca_kabuli_chr05 | 302099                  | AA                              | TT              | 1946838751               |
| SNP_P4_67603_316698 | NC_021164.1    | Ca_kabuli_chr05 | 316698                  | TT                              | AA              | 1946838753               |
| SNP_P4_67605_317821 | NC_021164.1    | Ca_kabuli_chr05 | 317821                  | GG                              | TT              | 1946838755               |
| SNP_P4_67606_319114 | NC_021164.1    | Ca_kabuli_chr05 | 319114                  | AA                              | GG              | 1946838757               |
| SNP_P4_67607_319144 | NC_021164.1    | Ca_kabuli_chr05 | 319144                  | CC                              | AA              | 1946838759               |
| SNP_P4_67608_319335 | NC_021164.1    | Ca_kabuli_chr05 | 319335                  | GG                              | AA              | 1946838761               |
| SNP_P4_67609_322908 | NC_021164.1    | Ca_kabuli_chr05 | 322908                  | AA                              | GG              | 1946838763               |
| SNP_P4_67611_323263 | NC_021164.1    | Ca_kabuli_chr05 | 323263                  | CC                              | TT              | 1946838765               |
| SNP_P4_67613_335325 | NC_021164.1    | Ca_kabuli_chr05 | 335325                  | GG                              | AA              | 1946838767               |
| SNP_P4_67614_336324 | NC_021164.1    | Ca_kabuli_chr05 | 336324                  | CC                              | AA              | 1946838769               |
| SNP_P4_67617_337856 | NC_021164.1    | Ca_kabuli_chr05 | 337856                  | TT                              | AA              | 1946838771               |
| SNP_P4_67618_340362 | NC_021164.1    | Ca_kabuli_chr05 | 340362                  | GG                              | AA              | 1946838773               |
| SNP_P4_67619_340669 | NC_021164.1    | Ca_kabuli_chr05 | 340669                  | CC                              | TT              | 1946838775               |
| SNP_P4_67620_347596 | NC_021164.1    | Ca_kabuli_chr05 | 347596                  | AA                              | CC              | 1946838777               |
| SNP_P4_67621_347634 | NC_021164.1    | Ca_kabuli_chr05 | 347634                  | AA                              | TT              | 1946838779               |
| SNP_P4_67622_347656 | NC_021164.1    | Ca_kabuli_chr05 | 347656                  | GG                              | AA              | 1946838781               |
| SNP_P4_67623_347675 | NC_021164.1    | Ca_kabuli_chr05 | 347675                  | GG                              | AA              | 1946838783               |
| SNP_P4_67624_348034 | NC_021164.1    | Ca_kabuli_chr05 | 348034                  | GG                              | AA              | 1946838785               |
| SNP_P4_67625_357266 | NC_021164.1    | Ca_kabuli_chr05 | 357266                  | TT                              | CC              | 1946838787               |
| SNP_P4_67627_362389 | NC_021164.1    | Ca_kabuli_chr05 | 362389                  | AA                              | GG              | 1946838789               |
| SNP_P4_67628_362831 | NC_021164.1    | Ca_kabuli_chr05 | 362831                  | TT                              | AA              | 1946838791               |
| SNP_P4_67629_362851 | NC_021164.1    | Ca_kabuli_chr05 | 362851                  | AA                              | CC              | 1946838793               |
| SNP_P4_67630_362971 | NC_021164.1    | Ca_kabuli_chr05 | 362971                  | AA                              | GG              | 1946838795               |
| SNP_P4_67631_362981 | NC_021164.1    | Ca_kabuli_chr05 | 362981                  | TT                              | CC              | 1946838797               |
| SNP_P4_67632_371371 | NC_021164.1    | Ca_kabuli_chr05 | 371371                  | TT                              | CC              | 1946838799               |
| SNP_P4_67633_373587 | NC_021164.1    | Ca_kabuli_chr05 | 373587                  | AA                              | GG              | 1946838801               |
| SNP_P4_67634_375127 | NC_021164.1    | Ca_kabuli_chr05 | 375127                  | TT                              | AA              | 1946838803               |
| SNP_P4_67635_384515 | NC_021164.1    | Ca_kabuli_chr05 | 384515                  | GG                              | TT              | 1946838805               |
| SNP_P4_67636_388423 | NC_021164.1    | Ca_kabuli_chr05 | 388423                  | CC                              | GG              | 1946838807               |
| SNP_P4_67637_394768 | NC_021164.1    | Ca_kabuli_chr05 | 394768                  | AA                              | TT              | 1946838809               |

| SNPs IDs            | Chromosome IDs | Chromosomes     | Physical positions (bp) | CDC Frontier (Reference genome) | (ILWC46 & LPNB) | NCBI SNPdb Accession IDs |
|---------------------|----------------|-----------------|-------------------------|---------------------------------|-----------------|--------------------------|
| SNP_P4_67638_395704 | NC_021164.1    | Ca_kabuli_chr05 | 395704                  | AA                              | TT              | 1946838811               |
| SNP_P4_67640_395994 | NC_021164.1    | Ca_kabuli_chr05 | 395994                  | CC                              | TT              | 1946838813               |
| SNP_P4_67641_396969 | NC_021164.1    | Ca_kabuli_chr05 | 396969                  | CC                              | TT              | 1946838815               |
| SNP_P4_67642_406752 | NC_021164.1    | Ca_kabuli_chr05 | 406752                  | CC                              | TT              | 1946838817               |
| SNP_P4_67643_411600 | NC_021164.1    | Ca_kabuli_chr05 | 411600                  | TT                              | CC              | 1946838819               |
| SNP_P4_67644_412472 | NC_021164.1    | Ca_kabuli_chr05 | 412472                  | GG                              | AA              | 1946838821               |
| SNP_P4_67646_422768 | NC_021164.1    | Ca_kabuli_chr05 | 422768                  | TT                              | CC              | 1946838823               |
| SNP_P4_67648_425659 | NC_021164.1    | Ca_kabuli_chr05 | 425659                  | AA                              | GG              | 1946838825               |
| SNP_P4_67649_437847 | NC_021164.1    | Ca_kabuli_chr05 | 437847                  | TT                              | CC              | 1946838827               |
| SNP_P4_67650_440628 | NC_021164.1    | Ca_kabuli_chr05 | 440628                  | TT                              | CC              | 1946838829               |
| SNP_P4_67651_440817 | NC_021164.1    | Ca_kabuli_chr05 | 440817                  | CC                              | TT              | 1946838831               |
| SNP_P4_67652_440938 | NC_021164.1    | Ca_kabuli_chr05 | 440938                  | TT                              | CC              | 1946838833               |
| SNP_P4_67653_441136 | NC_021164.1    | Ca_kabuli_chr05 | 441136                  | AA                              | GG              | 1946838835               |
| SNP_P4_67654_441250 | NC_021164.1    | Ca_kabuli_chr05 | 441250                  | GG                              | AA              | 1946838838               |
| SNP_P4_67655_441330 | NC_021164.1    | Ca_kabuli_chr05 | 441330                  | TT                              | CC              | 1946838840               |
| SNP_P4_67656_441998 | NC_021164.1    | Ca_kabuli_chr05 | 441998                  | GG                              | AA              | 1946838842               |
| SNP_P4_67658_446261 | NC_021164.1    | Ca_kabuli_chr05 | 446261                  | CC                              | AA              | 1946838844               |
| SNP_P4_67659_449941 | NC_021164.1    | Ca_kabuli_chr05 | 449941                  | AA                              | GG              | 1946838846               |
| SNP_P4_67660_450718 | NC_021164.1    | Ca_kabuli_chr05 | 450718                  | TT                              | AA              | 1946838848               |
| SNP_P4_67661_453070 | NC_021164.1    | Ca_kabuli_chr05 | 453070                  | CC                              | TT              | 1946838850               |
| SNP_P4_67662_456129 | NC_021164.1    | Ca_kabuli_chr05 | 456129                  | TT                              | GG              | 1946838852               |
| SNP_P4_67664_456534 | NC_021164.1    | Ca_kabuli_chr05 | 456534                  | CC                              | TT              | 1946838854               |
| SNP_P4_67666_457025 | NC_021164.1    | Ca_kabuli_chr05 | 457025                  | GG                              | AA              | 1946838856               |
| SNP_P4_67669_461695 | NC_021164.1    | Ca_kabuli_chr05 | 461695                  | GG                              | AA              | 1946838858               |
| SNP_P4_67670_463981 | NC_021164.1    | Ca_kabuli_chr05 | 463981                  | AA                              | GG              | 1946838860               |
| SNP_P4_67672_464291 | NC_021164.1    | Ca_kabuli_chr05 | 464291                  | TT                              | CC              | 1946838862               |
| SNP_P4_67674_464328 | NC_021164.1    | Ca_kabuli_chr05 | 464328                  | GG                              | AA              | 1946838864               |
| SNP_P4_67675_470485 | NC_021164.1    | Ca_kabuli_chr05 | 470485                  | TT                              | GG              | 1946838866               |
| SNP_P4_67677_474156 | NC_021164.1    | Ca_kabuli_chr05 | 474156                  | TT                              | CC              | 1946838868               |
| SNP_P4_67678_475450 | NC_021164.1    | Ca_kabuli_chr05 | 475450                  | TT                              | AA              | 1946838870               |
| SNP_P4_67681_479501 | NC_021164.1    | Ca_kabuli_chr05 | 479501                  | CC                              | TT              | 1946838872               |
| SNP_P4_67682_479787 | NC_021164.1    | Ca_kabuli_chr05 | 479787                  | GG                              | AA              | 1946838874               |
| SNP_P4_67683_479996 | NC_021164.1    | Ca_kabuli_chr05 | 479996                  | TT                              | CC              | 1946838876               |
| SNP_P4_67684_480163 | NC_021164.1    | Ca_kabuli_chr05 | 480163                  | AA                              | GG              | 1946838878               |
| SNP_P4_67685_480245 | NC_021164.1    | Ca_kabuli_chr05 | 480245                  | AA                              | CC              | 1946838880               |
| SNP_P4_67687_480948 | NC_021164.1    | Ca_kabuli_chr05 | 480948                  | GG                              | AA              | 1946838882               |
| SNP_P4_67688_481727 | NC_021164.1    | Ca_kabuli_chr05 | 481727                  | CC                              | AA              | 1946838884               |
| SNP_P4_67689_481731 | NC_021164.1    | Ca_kabuli_chr05 | 481731                  | CC                              | TT              | 1946838886               |
| SNP_P4_67690_481743 | NC_021164.1    | Ca_kabuli_chr05 | 481743                  | TT                              | CC              | 1946838889               |
| SNP_P4_67691_481770 | NC_021164.1    | Ca_kabuli_chr05 | 481770                  | CC                              | TT              | 1946838891               |
| SNP_P4_67692_481778 | NC_021164.1    | Ca_kabuli_chr05 | 481778                  | GG                              | AA              | 1946838893               |
| SNP_P4_67694_483187 | NC_021164.1    | Ca_kabuli_chr05 | 483187                  | AA                              | GG              | 1946838895               |

| SNPs IDs            | Chromosome IDs | Chromosomes     | Physical positions (bp) | CDC Frontier (Reference genome) | (ILWC46 & LPNB) | NCBI SNPdb Accession IDs |
|---------------------|----------------|-----------------|-------------------------|---------------------------------|-----------------|--------------------------|
| SNP_P4_67695_485056 | NC_021164.1    | Ca_kabuli_chr05 | 485056                  | TT                              | CC              | 1946838897               |
| SNP_P4_67696_485111 | NC_021164.1    | Ca_kabuli_chr05 | 485111                  | AA                              | GG              | 1946838899               |
| SNP_P4_67697_485226 | NC_021164.1    | Ca_kabuli_chr05 | 485226                  | TT                              | AA              | 1946838901               |
| SNP_P4_67698_485628 | NC_021164.1    | Ca_kabuli_chr05 | 485628                  | AA                              | GG              | 1946838903               |
| SNP_P4_67699_487304 | NC_021164.1    | Ca_kabuli_chr05 | 487304                  | CC                              | TT              | 1946838905               |
| SNP_P4_67700_488291 | NC_021164.1    | Ca_kabuli_chr05 | 488291                  | GG                              | TT              | 1946838907               |
| SNP_P4_67701_489922 | NC_021164.1    | Ca_kabuli_chr05 | 489922                  | TT                              | CC              | 1946838909               |
| SNP_P4_67702_489923 | NC_021164.1    | Ca_kabuli_chr05 | 489923                  | GG                              | TT              | 1946838911               |
| SNP_P4_67703_490231 | NC_021164.1    | Ca_kabuli_chr05 | 490231                  | CC                              | GG              | 1946838914               |
| SNP_P4_67704_490239 | NC_021164.1    | Ca_kabuli_chr05 | 490239                  | AA                              | GG              | 1946838916               |
| SNP_P4_67705_490258 | NC_021164.1    | Ca_kabuli_chr05 | 490258                  | GG                              | AA              | 1946838918               |
| SNP_P4_67706_490263 | NC_021164.1    | Ca_kabuli_chr05 | 490263                  | AA                              | GG              | 1946838920               |
| SNP_P4_67707_490278 | NC_021164.1    | Ca_kabuli_chr05 | 490278                  | AA                              | GG              | 1946838922               |
| SNP_P4_67708_492007 | NC_021164.1    | Ca_kabuli_chr05 | 492007                  | TT                              | CC              | 1946838924               |
| SNP_P4_67709_492064 | NC_021164.1    | Ca_kabuli_chr05 | 492064                  | AA                              | TT              | 1946838926               |
| SNP_P4_67710_492086 | NC_021164.1    | Ca_kabuli_chr05 | 492086                  | TT                              | GG              | 1946838928               |
| SNP_P4_67711_492090 | NC_021164.1    | Ca_kabuli_chr05 | 492090                  | TT                              | CC              | 1946838930               |
| SNP_P4_67712_492130 | NC_021164.1    | Ca_kabuli_chr05 | 492130                  | GG                              | TT              | 1946838932               |
| SNP_P4_67713_492145 | NC_021164.1    | Ca_kabuli_chr05 | 492145                  | AA                              | TT              | 1946838934               |
| SNP_P4_67714_492148 | NC_021164.1    | Ca_kabuli_chr05 | 492148                  | CC                              | TT              | 1946838937               |
| SNP_P4_67715_492196 | NC_021164.1    | Ca_kabuli_chr05 | 492196                  | TT                              | AA              | 1946838939               |
| SNP_P4_67716_492197 | NC_021164.1    | Ca_kabuli_chr05 | 492197                  | TT                              | CC              | 1946838941               |
| SNP_P4_67717_492198 | NC_021164.1    | Ca_kabuli_chr05 | 492198                  | TT                              | CC              | 1946838943               |
| SNP_P4_67718_492203 | NC_021164.1    | Ca_kabuli_chr05 | 492203                  | AA                              | GG              | 1946838945               |
| SNP_P4_67719_492251 | NC_021164.1    | Ca_kabuli_chr05 | 492251                  | CC                              | AA              | 1946838947               |
| SNP_P4_67720_492252 | NC_021164.1    | Ca_kabuli_chr05 | 492252                  | AA                              | TT              | 1946838949               |
| SNP_P4_67721_492292 | NC_021164.1    | Ca_kabuli_chr05 | 492292                  | CC                              | GG              | 1946838951               |
| SNP_P4_67722_492447 | NC_021164.1    | Ca_kabuli_chr05 | 492447                  | AA                              | GG              | 1946838953               |
| SNP_P4_67723_492471 | NC_021164.1    | Ca_kabuli_chr05 | 492471                  | CC                              | TT              | 1946838955               |
| SNP_P4_67724_492511 | NC_021164.1    | Ca_kabuli_chr05 | 492511                  | AA                              | GG              | 1946838957               |
| SNP_P4_67725_492516 | NC_021164.1    | Ca_kabuli_chr05 | 492516                  | GG                              | TT              | 1946838959               |
| SNP_P4_67726_492583 | NC_021164.1    | Ca_kabuli_chr05 | 492583                  | AA                              | TT              | 1946838961               |
| SNP_P4_67727_492585 | NC_021164.1    | Ca_kabuli_chr05 | 492585                  | TT                              | AA              | 1946838963               |
| SNP_P4_67729_492675 | NC_021164.1    | Ca_kabuli_chr05 | 492675                  | TT                              | GG              | 1946838965               |
| SNP_P4_67730_492679 | NC_021164.1    | Ca_kabuli_chr05 | 492679                  | TT                              | CC              | 1946838967               |
| SNP_P4_67731_492735 | NC_021164.1    | Ca_kabuli_chr05 | 492735                  | GG                              | TT              | 1946838970               |
| SNP_P4_67732_492868 | NC_021164.1    | Ca_kabuli_chr05 | 492868                  | AA                              | GG              | 1946838972               |
| SNP_P4_67733_492892 | NC_021164.1    | Ca_kabuli_chr05 | 492892                  | TT                              | AA              | 1946838974               |
| SNP_P4_67734_493025 | NC_021164.1    | Ca_kabuli_chr05 | 493025                  | GG                              | TT              | 1946838976               |
| SNP_P4_67735_493082 | NC_021164.1    | Ca_kabuli_chr05 | 493082                  | GG                              | AA              | 1946838978               |
| SNP_P4_67736_496238 | NC_021164.1    | Ca_kabuli_chr05 | 496238                  | AA                              | GG              | 1946838980               |
| SNP_P4_67737_496275 | NC_021164.1    | Ca_kabuli_chr05 | 496275                  | CC                              | TT              | 1946838982               |

| SNPs IDs            | Chromosome IDs | Chromosomes     | Physical positions (bp) | CDC Frontier (Reference genome) | (ILWC46 & LPNB) | NCBI SNPdb Accession IDs |
|---------------------|----------------|-----------------|-------------------------|---------------------------------|-----------------|--------------------------|
| SNP_P4_67738_496734 | NC_021164.1    | Ca_kabuli_chr05 | 496734                  | CC                              | TT              | 1946838984               |
| SNP_P4_67739_497005 | NC_021164.1    | Ca_kabuli_chr05 | 497005                  | AA                              | CC              | 1946838986               |
| SNP_P4_67741_497152 | NC_021164.1    | Ca_kabuli_chr05 | 497152                  | GG                              | TT              | 1946838988               |
| SNP_P4_67742_497175 | NC_021164.1    | Ca_kabuli_chr05 | 497175                  | TT                              | GG              | 1946838990               |
| SNP_P4_67743_497203 | NC_021164.1    | Ca_kabuli_chr05 | 497203                  | TT                              | CC              | 1946838992               |
| SNP_P4_67744_497462 | NC_021164.1    | Ca_kabuli_chr05 | 497462                  | CC                              | TT              | 1946838994               |
| SNP_P4_67745_497512 | NC_021164.1    | Ca_kabuli_chr05 | 497512                  | AA                              | GG              | 1946838996               |
| SNP_P4_67746_497519 | NC_021164.1    | Ca_kabuli_chr05 | 497519                  | AA                              | CC              | 1946838998               |
| SNP_P4_67747_512911 | NC_021164.1    | Ca_kabuli_chr05 | 512911                  | TT                              | CC              | 1946839000               |
| SNP_P4_67748_514540 | NC_021164.1    | Ca_kabuli_chr05 | 514540                  | TT                              | CC              | 1946839002               |
| SNP_P4_67749_529250 | NC_021164.1    | Ca_kabuli_chr05 | 529250                  | CC                              | AA              | 1946839004               |
| SNP_P4_67750_548556 | NC_021164.1    | Ca_kabuli_chr05 | 548556                  | TT                              | CC              | 1946839006               |
| SNP_P4_67751_573341 | NC_021164.1    | Ca_kabuli_chr05 | 573341                  | GG                              | AA              | 1946839008               |
| SNP_P4_67752_573574 | NC_021164.1    | Ca_kabuli_chr05 | 573574                  | GG                              | TT              | 1946839010               |
| SNP_P4_67753_584020 | NC_021164.1    | Ca_kabuli_chr05 | 584020                  | CC                              | TT              | 1946839012               |
| SNP_P4_67754_597770 | NC_021164.1    | Ca_kabuli_chr05 | 597770                  | GG                              | AA              | 1946839015               |
| SNP_P4_67755_599383 | NC_021164.1    | Ca_kabuli_chr05 | 599383                  | TT                              | GG              | 1946839017               |
| SNP_P4_67756_599387 | NC_021164.1    | Ca_kabuli_chr05 | 599387                  | TT                              | AA              | 1946839019               |
| SNP_P4_67757_617275 | NC_021164.1    | Ca_kabuli_chr05 | 617275                  | TT                              | CC              | 1946839021               |
| SNP_P4_67758_617747 | NC_021164.1    | Ca_kabuli_chr05 | 617747                  | CC                              | TT              | 1946839023               |
| SNP_P4_67759_622549 | NC_021164.1    | Ca_kabuli_chr05 | 622549                  | TT                              | CC              | 1946839025               |
| SNP_P4_67760_622725 | NC_021164.1    | Ca_kabuli_chr05 | 622725                  | AA                              | GG              | 1946839027               |
| SNP_P4_67761_622729 | NC_021164.1    | Ca_kabuli_chr05 | 622729                  | GG                              | AA              | 1946839030               |
| SNP_P4_67762_622737 | NC_021164.1    | Ca_kabuli_chr05 | 622737                  | GG                              | AA              | 1946839032               |
| SNP_P4_67763_622774 | NC_021164.1    | Ca_kabuli_chr05 | 622774                  | GG                              | TT              | 1946839034               |
| SNP_P4_67764_622782 | NC_021164.1    | Ca_kabuli_chr05 | 622782                  | TT                              | CC              | 1946839036               |
| SNP_P4_67765_622828 | NC_021164.1    | Ca_kabuli_chr05 | 622828                  | AA                              | GG              | 1946839038               |
| SNP_P4_67766_622834 | NC_021164.1    | Ca_kabuli_chr05 | 622834                  | AA                              | CC              | 1946839040               |
| SNP_P4_67767_622837 | NC_021164.1    | Ca_kabuli_chr05 | 622837                  | CC                              | GG              | 1946839042               |
| SNP_P4_67769_622915 | NC_021164.1    | Ca_kabuli_chr05 | 622915                  | AA                              | GG              | 1946839043               |
| SNP_P4_67770_625529 | NC_021164.1    | Ca_kabuli_chr05 | 625529                  | CC                              | AA              | 1946839044               |
| SNP_P4_67771_627588 | NC_021164.1    | Ca_kabuli_chr05 | 627588                  | AA                              | TT              | 1946839045               |
| SNP_P4_67772_627589 | NC_021164.1    | Ca_kabuli_chr05 | 627589                  | AA                              | GG              | 1946839046               |
| SNP_P4_67773_629744 | NC_021164.1    | Ca_kabuli_chr05 | 629744                  | GG                              | AA              | 1946839047               |
| SNP_P4_67774_629964 | NC_021164.1    | Ca_kabuli_chr05 | 629964                  | GG                              | AA              | 1946839048               |
| SNP_P4_67775_629999 | NC_021164.1    | Ca_kabuli_chr05 | 629999                  | AA                              | GG              | 1946839049               |
| SNP_P4_67776_636063 | NC_021164.1    | Ca_kabuli_chr05 | 636063                  | AA                              | TT              | 1946839050               |
| SNP_P4_67777_636074 | NC_021164.1    | Ca_kabuli_chr05 | 636074                  | AA                              | CC              | 1946839051               |
| SNP_P4_67778_636076 | NC_021164.1    | Ca_kabuli_chr05 | 636076                  | TT                              | AA              | 1946839052               |
| SNP_P4_67779_638378 | NC_021164.1    | Ca_kabuli_chr05 | 638378                  | AA                              | TT              | 1946839053               |
| SNP_P4_67780_638402 | NC_021164.1    | Ca_kabuli_chr05 | 638402                  | TT                              | GG              | 1946839054               |
| SNP_P4_67781_642123 | NC_021164.1    | Ca_kabuli_chr05 | 642123                  | TT                              | AA              | 1946839055               |



| SNPs IDs            | Chromosome IDs | Chromosomes     | Physical positions (bp) | CDC Frontier (Reference genome) | (ILWC46 & LPNB) | NCBI SNPdb Accession IDs |
|---------------------|----------------|-----------------|-------------------------|---------------------------------|-----------------|--------------------------|
| SNP_P4_67782_642126 | NC_021164.1    | Ca_kabuli_chr05 | 642126                  | CC                              | AA              | 1946839056               |
| SNP_P4_67783_642133 | NC_021164.1    | Ca_kabuli_chr05 | 642133                  | GG                              | AA              | 1946839057               |
| SNP_P4_67784_643166 | NC_021164.1    | Ca_kabuli_chr05 | 643166                  | GG                              | AA              | 1946839058               |
| SNP_P4_67785_643195 | NC_021164.1    | Ca_kabuli_chr05 | 643195                  | GG                              | TT              | 1946839059               |
| SNP_P4_67786_643373 | NC_021164.1    | Ca_kabuli_chr05 | 643373                  | GG                              | AA              | 1946839060               |
| SNP_P4_67787_643678 | NC_021164.1    | Ca_kabuli_chr05 | 643678                  | TT                              | AA              | 1946839061               |
| SNP_P4_67788_643684 | NC_021164.1    | Ca_kabuli_chr05 | 643684                  | CC                              | TT              | 1946839062               |
| SNP_P4_67789_643701 | NC_021164.1    | Ca_kabuli_chr05 | 643701                  | TT                              | CC              | 1946839063               |
| SNP_P4_67790_644922 | NC_021164.1    | Ca_kabuli_chr05 | 644922                  | GG                              | TT              | 1946839064               |
| SNP_P4_67791_655547 | NC_021164.1    | Ca_kabuli_chr05 | 655547                  | CC                              | GG              | 1946839065               |
| SNP_P4_67792_655632 | NC_021164.1    | Ca_kabuli_chr05 | 655632                  | TT                              | CC              | 1946839066               |
| SNP_P4_67793_655659 | NC_021164.1    | Ca_kabuli_chr05 | 655659                  | GG                              | CC              | 1946839067               |
| SNP_P4_67794_655668 | NC_021164.1    | Ca_kabuli_chr05 | 655668                  | TT                              | AA              | 1946839068               |
| SNP_P4_67795_655675 | NC_021164.1    | Ca_kabuli_chr05 | 655675                  | CC                              | TT              | 1946839069               |
| SNP_P4_67797_657118 | NC_021164.1    | Ca_kabuli_chr05 | 657118                  | AA                              | GG              | 1946839070               |
| SNP_P4_67798_659717 | NC_021164.1    | Ca_kabuli_chr05 | 659717                  | CC                              | TT              | 1946839071               |
| SNP_P4_67799_659724 | NC_021164.1    | Ca_kabuli_chr05 | 659724                  | AA                              | GG              | 1946839072               |
| SNP_P4_67800_659733 | NC_021164.1    | Ca_kabuli_chr05 | 659733                  | AA                              | TT              | 1946839073               |
| SNP_P4_67801_664351 | NC_021164.1    | Ca_kabuli_chr05 | 664351                  | GG                              | AA              | 1946839074               |
| SNP_P4_67802_664544 | NC_021164.1    | Ca_kabuli_chr05 | 664544                  | TT                              | AA              | 1946839075               |
| SNP_P4_67803_664702 | NC_021164.1    | Ca_kabuli_chr05 | 664702                  | TT                              | CC              | 1946839076               |
| SNP_P4_67804_664870 | NC_021164.1    | Ca_kabuli_chr05 | 664870                  | AA                              | CC              | 1946839077               |
| SNP_P4_67805_664946 | NC_021164.1    | Ca_kabuli_chr05 | 664946                  | TT                              | CC              | 1946839078               |
| SNP_P4_67806_666157 | NC_021164.1    | Ca_kabuli_chr05 | 666157                  | AA                              | GG              | 1946839079               |
| SNP_P4_67808_666502 | NC_021164.1    | Ca_kabuli_chr05 | 666502                  | GG                              | TT              | 1946839080               |
| SNP_P4_67809_666524 | NC_021164.1    | Ca_kabuli_chr05 | 666524                  | TT                              | CC              | 1946839081               |
| SNP_P4_67810_666539 | NC_021164.1    | Ca_kabuli_chr05 | 666539                  | AA                              | CC              | 1946839082               |
| SNP_P4_67811_666879 | NC_021164.1    | Ca_kabuli_chr05 | 666879                  | GG                              | TT              | 1946839083               |
| SNP_P4_67812_667266 | NC_021164.1    | Ca_kabuli_chr05 | 667266                  | TT                              | CC              | 1946839084               |
| SNP_P4_67813_667292 | NC_021164.1    | Ca_kabuli_chr05 | 667292                  | AA                              | GG              | 1946839085               |
| SNP_P4_67814_667304 | NC_021164.1    | Ca_kabuli_chr05 | 667304                  | GG                              | AA              | 1946839086               |
| SNP_P4_67815_667307 | NC_021164.1    | Ca_kabuli_chr05 | 667307                  | AA                              | GG              | 1946839088               |
| SNP_P4_67817_668041 | NC_021164.1    | Ca_kabuli_chr05 | 668041                  | GG                              | TT              | 1946839090               |
| SNP_P4_67818_668044 | NC_021164.1    | Ca_kabuli_chr05 | 668044                  | TT                              | AA              | 1946839092               |
| SNP_P4_67819_668059 | NC_021164.1    | Ca_kabuli_chr05 | 668059                  | CC                              | TT              | 1946839094               |
| SNP_P4_67821_668157 | NC_021164.1    | Ca_kabuli_chr05 | 668157                  | AA                              | CC              | 1946839096               |
| SNP_P4_67822_668279 | NC_021164.1    | Ca_kabuli_chr05 | 668279                  | CC                              | AA              | 1946839098               |
| SNP_P4_67823_671406 | NC_021164.1    | Ca_kabuli_chr05 | 671406                  | CC                              | TT              | 1946839100               |
| SNP_P4_67824_671408 | NC_021164.1    | Ca_kabuli_chr05 | 671408                  | AA                              | GG              | 1946839102               |
| SNP_P4_67825_672174 | NC_021164.1    | Ca_kabuli_chr05 | 672174                  | CC                              | TT              | 1946839104               |
| SNP_P4_67826_676203 | NC_021164.1    | Ca_kabuli_chr05 | 676203                  | GG                              | CC              | 1946839106               |
| SNP_P4_67827_676226 | NC_021164.1    | Ca_kabuli_chr05 | 676226                  | GG                              | CC              | 1946839109               |

| SNPs IDs            | Chromosome IDs | Chromosomes     | Physical positions (bp) | CDC Frontier (Reference genome) | (ILWC46 & LPNB) | NCBI SNPdb Accession IDs |
|---------------------|----------------|-----------------|-------------------------|---------------------------------|-----------------|--------------------------|
| SNP_P4_67828_676853 | NC_021164.1    | Ca_kabuli_chr05 | 676853                  | AA                              | TT              | 1946839111               |
| SNP_P4_67829_677995 | NC_021164.1    | Ca_kabuli_chr05 | 677995                  | AA                              | GG              | 1946839113               |
| SNP_P4_67830_681200 | NC_021164.1    | Ca_kabuli_chr05 | 681200                  | GG                              | TT              | 1946839114               |
| SNP_P4_67831_681210 | NC_021164.1    | Ca_kabuli_chr05 | 681210                  | GG                              | CC              | 1946839116               |
| SNP_P4_67832_681213 | NC_021164.1    | Ca_kabuli_chr05 | 681213                  | GG                              | TT              | 1946839118               |
| SNP_P4_67833_681214 | NC_021164.1    | Ca_kabuli_chr05 | 681214                  | TT                              | CC              | 1946839120               |
| SNP_P4_67834_681215 | NC_021164.1    | Ca_kabuli_chr05 | 681215                  | GG                              | AA              | 1946839122               |
| SNP_P4_67835_681220 | NC_021164.1    | Ca_kabuli_chr05 | 681220                  | TT                              | GG              | 1946839124               |
| SNP_P4_67836_681221 | NC_021164.1    | Ca_kabuli_chr05 | 681221                  | GG                              | TT              | 1946839126               |
| SNP_P4_67837_681330 | NC_021164.1    | Ca_kabuli_chr05 | 681330                  | AA                              | TT              | 1946839128               |
| SNP_P4_67838_681348 | NC_021164.1    | Ca_kabuli_chr05 | 681348                  | TT                              | CC              | 1946839130               |
| SNP_P4_67839_681349 | NC_021164.1    | Ca_kabuli_chr05 | 681349                  | CC                              | TT              | 1946839132               |
| SNP_P4_67840_681352 | NC_021164.1    | Ca_kabuli_chr05 | 681352                  | CC                              | TT              | 1946839134               |
| SNP_P4_67841_681362 | NC_021164.1    | Ca_kabuli_chr05 | 681362                  | AA                              | CC              | 1946839136               |
| SNP_P4_67842_681363 | NC_021164.1    | Ca_kabuli_chr05 | 681363                  | AA                              | TT              | 1946839138               |
| SNP_P4_67843_681977 | NC_021164.1    | Ca_kabuli_chr05 | 681977                  | GG                              | CC              | 1946839140               |
| SNP_P4_67844_681983 | NC_021164.1    | Ca_kabuli_chr05 | 681983                  | GG                              | AA              | 1946839142               |
| SNP_P4_67845_681994 | NC_021164.1    | Ca_kabuli_chr05 | 681994                  | CC                              | TT              | 1946839144               |
| SNP_P4_67846_682020 | NC_021164.1    | Ca_kabuli_chr05 | 682020                  | CC                              | TT              | 1946839146               |
| SNP_P4_67847_682055 | NC_021164.1    | Ca_kabuli_chr05 | 682055                  | TT                              | CC              | 1946839147               |
| SNP_P4_67848_697825 | NC_021164.1    | Ca_kabuli_chr05 | 697825                  | CC                              | TT              | 1946839149               |
| SNP_P4_67849_715244 | NC_021164.1    | Ca_kabuli_chr05 | 715244                  | GG                              | TT              | 1946839151               |
| SNP_P4_67850_715246 | NC_021164.1    | Ca_kabuli_chr05 | 715246                  | AA                              | CC              | 1946839153               |
| SNP_P4_67851_715272 | NC_021164.1    | Ca_kabuli_chr05 | 715272                  | CC                              | AA              | 1946839155               |
| SNP_P4_67852_715277 | NC_021164.1    | Ca_kabuli_chr05 | 715277                  | TT                              | CC              | 1946839157               |
| SNP_P4_67853_715522 | NC_021164.1    | Ca_kabuli_chr05 | 715522                  | CC                              | TT              | 1946839159               |
| SNP_P4_67854_715530 | NC_021164.1    | Ca_kabuli_chr05 | 715530                  | GG                              | TT              | 1946839161               |
| SNP_P4_67855_715537 | NC_021164.1    | Ca_kabuli_chr05 | 715537                  | TT                              | CC              | 1946839163               |
| SNP_P4_67856_715582 | NC_021164.1    | Ca_kabuli_chr05 | 715582                  | CC                              | TT              | 1946839165               |
| SNP_P4_67857_715619 | NC_021164.1    | Ca_kabuli_chr05 | 715619                  | CC                              | GG              | 1946839167               |
| SNP_P4_67858_719373 | NC_021164.1    | Ca_kabuli_chr05 | 719373                  | CC                              | TT              | 1946839169               |
| SNP_P4_67859_723388 | NC_021164.1    | Ca_kabuli_chr05 | 723388                  | TT                              | CC              | 1946839171               |
| SNP_P4_67860_738239 | NC_021164.1    | Ca_kabuli_chr05 | 738239                  | TT                              | AA              | 1946839173               |
| SNP_P4_67861_738240 | NC_021164.1    | Ca_kabuli_chr05 | 738240                  | GG                              | TT              | 1946839175               |
| SNP_P4_67862_738249 | NC_021164.1    | Ca_kabuli_chr05 | 738249                  | GG                              | CC              | 1946839176               |
| SNP_P4_67863_738250 | NC_021164.1    | Ca_kabuli_chr05 | 738250                  | GG                              | TT              | 1946839178               |
| SNP_P4_67864_755303 | NC_021164.1    | Ca_kabuli_chr05 | 755303                  | CC                              | TT              | 1946839180               |
| SNP_P4_67865_755980 | NC_021164.1    | Ca_kabuli_chr05 | 755980                  | GG                              | TT              | 1946839182               |
| SNP_P4_67866_789787 | NC_021164.1    | Ca_kabuli_chr05 | 789787                  | AA                              | GG              | 1946839184               |
| SNP_P4_67867_795136 | NC_021164.1    | Ca_kabuli_chr05 | 795136                  | TT                              | GG              | 1946839186               |
| SNP_P4_67868_795138 | NC_021164.1    | Ca_kabuli_chr05 | 795138                  | AA                              | CC              | 1946839188               |
| SNP_P4_67869_805859 | NC_021164.1    | Ca_kabuli_chr05 | 805859                  | CC                              | TT              | 1946839190               |

| SNPs IDs             | Chromosome IDs | Chromosomes     | Physical positions (bp) | CDC Frontier (Reference genome) | (ILWC46 & LPNB) | NCBI SNPdb Accession IDs |
|----------------------|----------------|-----------------|-------------------------|---------------------------------|-----------------|--------------------------|
| SNP_P4_67870_805984  | NC_021164.1    | Ca_kabuli_chr05 | 805984                  | TT                              | AA              | 1946839192               |
| SNP_P4_67872_814481  | NC_021164.1    | Ca_kabuli_chr05 | 814481                  | CC                              | TT              | 1946839194               |
| SNP_P4_67873_814580  | NC_021164.1    | Ca_kabuli_chr05 | 814580                  | CC                              | TT              | 1946839196               |
| SNP_P4_67874_834278  | NC_021164.1    | Ca_kabuli_chr05 | 834278                  | AA                              | GG              | 1946839198               |
| SNP_P4_67875_834609  | NC_021164.1    | Ca_kabuli_chr05 | 834609                  | GG                              | TT              | 1946839200               |
| SNP_P4_67876_842317  | NC_021164.1    | Ca_kabuli_chr05 | 842317                  | GG                              | AA              | 1946839202               |
| SNP_P4_67877_853328  | NC_021164.1    | Ca_kabuli_chr05 | 853328                  | CC                              | TT              | 1946839204               |
| SNP_P4_67878_853390  | NC_021164.1    | Ca_kabuli_chr05 | 853390                  | AA                              | GG              | 1946839206               |
| SNP_P4_67879_853530  | NC_021164.1    | Ca_kabuli_chr05 | 853530                  | TT                              | CC              | 1946839208               |
| SNP_P4_67880_853707  | NC_021164.1    | Ca_kabuli_chr05 | 853707                  | AA                              | GG              | 1946839210               |
| SNP_P4_67881_877125  | NC_021164.1    | Ca_kabuli_chr05 | 877125                  | AA                              | TT              | 1946839212               |
| SNP_P4_67882_877433  | NC_021164.1    | Ca_kabuli_chr05 | 877433                  | AA                              | TT              | 1946839214               |
| SNP_P4_67883_877485  | NC_021164.1    | Ca_kabuli_chr05 | 877485                  | AA                              | GG              | 1946839216               |
| SNP_P4_67884_884448  | NC_021164.1    | Ca_kabuli_chr05 | 884448                  | TT                              | CC              | 1946839218               |
| SNP_P4_67885_884522  | NC_021164.1    | Ca_kabuli_chr05 | 884522                  | TT                              | CC              | 1946839220               |
| SNP_P4_67887_885251  | NC_021164.1    | Ca_kabuli_chr05 | 885251                  | AA                              | CC              | 1946839222               |
| SNP_P4_67888_897033  | NC_021164.1    | Ca_kabuli_chr05 | 897033                  | TT                              | CC              | 1946839224               |
| SNP_P4_67889_897054  | NC_021164.1    | Ca_kabuli_chr05 | 897054                  | CC                              | TT              | 1946839226               |
| SNP_P4_67890_897287  | NC_021164.1    | Ca_kabuli_chr05 | 897287                  | GG                              | TT              | 1946839228               |
| SNP_P4_67891_897346  | NC_021164.1    | Ca_kabuli_chr05 | 897346                  | AA                              | TT              | 1946839230               |
| SNP_P4_67892_904708  | NC_021164.1    | Ca_kabuli_chr05 | 904708                  | CC                              | TT              | 1946839232               |
| SNP_P4_67893_907809  | NC_021164.1    | Ca_kabuli_chr05 | 907809                  | CC                              | TT              | 1946839234               |
| SNP_P4_67894_917727  | NC_021164.1    | Ca_kabuli_chr05 | 917727                  | GG                              | AA              | 1946839236               |
| SNP_P4_67897_927701  | NC_021164.1    | Ca_kabuli_chr05 | 927701                  | AA                              | GG              | 1946839238               |
| SNP_P4_67898_927931  | NC_021164.1    | Ca_kabuli_chr05 | 927931                  | TT                              | CC              | 1946839240               |
| SNP_P4_67899_930756  | NC_021164.1    | Ca_kabuli_chr05 | 930756                  | AA                              | TT              | 1946839242               |
| SNP_P4_67900_930809  | NC_021164.1    | Ca_kabuli_chr05 | 930809                  | AA                              | GG              | 1946839244               |
| SNP_P4_67901_931154  | NC_021164.1    | Ca_kabuli_chr05 | 931154                  | CC                              | TT              | 1946839246               |
| SNP_P4_67902_940525  | NC_021164.1    | Ca_kabuli_chr05 | 940525                  | TT                              | GG              | 1946839248               |
| SNP_P4_67903_944744  | NC_021164.1    | Ca_kabuli_chr05 | 944744                  | GG                              | AA              | 1946839250               |
| SNP_P4_67904_944816  | NC_021164.1    | Ca_kabuli_chr05 | 944816                  | GG                              | TT              | 1946839252               |
| SNP_P4_67905_951708  | NC_021164.1    | Ca_kabuli_chr05 | 951708                  | AA                              | GG              | 1946839254               |
| SNP_P4_67907_984608  | NC_021164.1    | Ca_kabuli_chr05 | 984608                  | CC                              | TT              | 1946839256               |
| SNP_P4_67908_984610  | NC_021164.1    | Ca_kabuli_chr05 | 984610                  | TT                              | CC              | 1946839258               |
| SNP_P4_67909_988742  | NC_021164.1    | Ca_kabuli_chr05 | 988742                  | TT                              | CC              | 1946839260               |
| SNP_P4_67911_1001792 | NC_021164.1    | Ca_kabuli_chr05 | 1001792                 | AA                              | GG              | 1946839262               |
| SNP_P4_67912_1001803 | NC_021164.1    | Ca_kabuli_chr05 | 1001803                 | GG                              | AA              | 1946839264               |
| SNP_P4_67913_1001814 | NC_021164.1    | Ca_kabuli_chr05 | 1001814                 | TT                              | CC              | 1946839266               |
| SNP_P4_67914_1001817 | NC_021164.1    | Ca_kabuli_chr05 | 1001817                 | GG                              | AA              | 1946839268               |
| SNP_P4_67915_1001823 | NC_021164.1    | Ca_kabuli_chr05 | 1001823                 | AA                              | TT              | 1946839270               |
| SNP_P4_67916_1001839 | NC_021164.1    | Ca_kabuli_chr05 | 1001839                 | TT                              | CC              | 1946839272               |
| SNP_P4_67917_1001840 | NC_021164.1    | Ca_kabuli_chr05 | 1001840                 | TT                              | CC              | 1946839274               |

| SNPs IDs             | Chromosome IDs | Chromosomes     | Physical positions (bp) | CDC Frontier (Reference genome) | (ILWC46 & LPNB) | NCBI SNPdb Accession IDs |
|----------------------|----------------|-----------------|-------------------------|---------------------------------|-----------------|--------------------------|
| SNP_P4_67918_1001844 | NC_021164.1    | Ca_kabuli_chr05 | 1001844                 | CC                              | AA              | 1946839276               |
| SNP_P4_67919_1001848 | NC_021164.1    | Ca_kabuli_chr05 | 1001848                 | AA                              | TT              | 1946839278               |
| SNP_P4_67920_1001851 | NC_021164.1    | Ca_kabuli_chr05 | 1001851                 | AA                              | CC              | 1946839280               |
| SNP_P4_67921_1001852 | NC_021164.1    | Ca_kabuli_chr05 | 1001852                 | AA                              | GG              | 1946839281               |
| SNP_P4_67922_1001853 | NC_021164.1    | Ca_kabuli_chr05 | 1001853                 | GG                              | AA              | 1946839283               |
| SNP_P4_67923_1009705 | NC_021164.1    | Ca_kabuli_chr05 | 1009705                 | AA                              | CC              | 1946839285               |
| SNP_P4_67924_1009715 | NC_021164.1    | Ca_kabuli_chr05 | 1009715                 | TT                              | CC              | 1946839287               |
| SNP_P4_67925_1009787 | NC_021164.1    | Ca_kabuli_chr05 | 1009787                 | GG                              | AA              | 1946839289               |
| SNP_P4_67926_1010416 | NC_021164.1    | Ca_kabuli_chr05 | 1010416                 | GG                              | TT              | 1946839291               |
| SNP_P4_67927_1011998 | NC_021164.1    | Ca_kabuli_chr05 | 1011998                 | GG                              | AA              | 1946839293               |
| SNP_P4_67928_1012077 | NC_021164.1    | Ca_kabuli_chr05 | 1012077                 | TT                              | CC              | 1946839295               |
| SNP_P4_67929_1012080 | NC_021164.1    | Ca_kabuli_chr05 | 1012080                 | AA                              | GG              | 1946839297               |
| SNP_P4_67930_1012193 | NC_021164.1    | Ca_kabuli_chr05 | 1012193                 | CC                              | TT              | 1946839299               |
| SNP_P4_67931_1012338 | NC_021164.1    | Ca_kabuli_chr05 | 1012338                 | CC                              | TT              | 1946839301               |
| SNP_P4_67932_1012410 | NC_021164.1    | Ca_kabuli_chr05 | 1012410                 | GG                              | AA              | 1946839303               |
| SNP_P4_67933_1012428 | NC_021164.1    | Ca_kabuli_chr05 | 1012428                 | TT                              | CC              | 1946839305               |
| SNP_P4_67934_1018509 | NC_021164.1    | Ca_kabuli_chr05 | 1018509                 | GG                              | AA              | 1946839307               |
| SNP_P4_67936_1024293 | NC_021164.1    | Ca_kabuli_chr05 | 1024293                 | GG                              | AA              | 1946839308               |
| SNP_P4_67937_1024317 | NC_021164.1    | Ca_kabuli_chr05 | 1024317                 | TT                              | CC              | 1946839310               |
| SNP_P4_67938_1027481 | NC_021164.1    | Ca_kabuli_chr05 | 1027481                 | CC                              | AA              | 1946839312               |
| SNP_P4_67939_1027782 | NC_021164.1    | Ca_kabuli_chr05 | 1027782                 | TT                              | CC              | 1946839314               |
| SNP_P4_67941_1030091 | NC_021164.1    | Ca_kabuli_chr05 | 1030091                 | AA                              | GG              | 1946839316               |
| SNP_P4_67942_1030120 | NC_021164.1    | Ca_kabuli_chr05 | 1030120                 | GG                              | AA              | 1946839318               |
| SNP_P4_67943_1030189 | NC_021164.1    | Ca_kabuli_chr05 | 1030189                 | TT                              | CC              | 1946839320               |
| SNP_P4_67944_1033120 | NC_021164.1    | Ca_kabuli_chr05 | 1033120                 | CC                              | TT              | 1946839322               |
| SNP_P4_67945_1033524 | NC_021164.1    | Ca_kabuli_chr05 | 1033524                 | TT                              | CC              | 1946839324               |
| SNP_P4_67946_1033570 | NC_021164.1    | Ca_kabuli_chr05 | 1033570                 | CC                              | TT              | 1946839326               |
| SNP_P4_67947_1037037 | NC_021164.1    | Ca_kabuli_chr05 | 1037037                 | CC                              | TT              | 1946839329               |
| SNP_P4_67948_1038624 | NC_021164.1    | Ca_kabuli_chr05 | 1038624                 | TT                              | CC              | 1946839331               |
| SNP_P4_67949_1038839 | NC_021164.1    | Ca_kabuli_chr05 | 1038839                 | TT                              | CC              | 1946839333               |
| SNP_P4_67950_1038849 | NC_021164.1    | Ca_kabuli_chr05 | 1038849                 | CC                              | TT              | 1946839335               |
| SNP_P4_67951_1038953 | NC_021164.1    | Ca_kabuli_chr05 | 1038953                 | GG                              | AA              | 1946839337               |
| SNP_P4_67952_1039005 | NC_021164.1    | Ca_kabuli_chr05 | 1039005                 | TT                              | GG              | 1946839339               |
| SNP_P4_67953_1065240 | NC_021164.1    | Ca_kabuli_chr05 | 1065240                 | GG                              | AA              | 1946839341               |
| SNP_P4_67954_1065457 | NC_021164.1    | Ca_kabuli_chr05 | 1065457                 | TT                              | CC              | 1946839343               |
| SNP_P4_67955_1065458 | NC_021164.1    | Ca_kabuli_chr05 | 1065458                 | CC                              | TT              | 1946839345               |
| SNP_P4_67956_1065481 | NC_021164.1    | Ca_kabuli_chr05 | 1065481                 | TT                              | CC              | 1946839347               |
| SNP_P4_67957_1065523 | NC_021164.1    | Ca_kabuli_chr05 | 1065523                 | TT                              | CC              | 1946839349               |
| SNP_P4_67958_1065536 | NC_021164.1    | Ca_kabuli_chr05 | 1065536                 | CC                              | TT              | 1946839351               |
| SNP_P4_67960_1126429 | NC_021164.1    | Ca_kabuli_chr05 | 1126429                 | GG                              | AA              | 1946839353               |
| SNP_P4_67961_1126452 | NC_021164.1    | Ca_kabuli_chr05 | 1126452                 | TT                              | AA              | 1946839355               |
| SNP_P4_67963_1136826 | NC_021164.1    | Ca_kabuli_chr05 | 1136826                 | CC                              | AA              | 1946839357               |

| SNPs IDs             | Chromosome IDs | Chromosomes     | Physical positions (bp) | CDC Frontier (Reference genome) | (ILWC46 & LPNB) | NCBI SNPdb Accession IDs |
|----------------------|----------------|-----------------|-------------------------|---------------------------------|-----------------|--------------------------|
| SNP_P4_67964_1139110 | NC_021164.1    | Ca_kabuli_chr05 | 1139110                 | GG                              | AA              | 1946839359               |
| SNP_P4_67965_1139172 | NC_021164.1    | Ca_kabuli_chr05 | 1139172                 | CC                              | TT              | 1946839361               |
| SNP_P4_67966_1139464 | NC_021164.1    | Ca_kabuli_chr05 | 1139464                 | GG                              | AA              | 1946839363               |
| SNP_P4_67967_1143538 | NC_021164.1    | Ca_kabuli_chr05 | 1143538                 | AA                              | GG              | 1946839365               |
| SNP_P4_67968_1151011 | NC_021164.1    | Ca_kabuli_chr05 | 1151011                 | AA                              | GG              | 1946839367               |
| SNP_P4_67969_1151024 | NC_021164.1    | Ca_kabuli_chr05 | 1151024                 | AA                              | GG              | 1946839369               |
| SNP_P4_67970_1151028 | NC_021164.1    | Ca_kabuli_chr05 | 1151028                 | TT                              | CC              | 1946839371               |
| SNP_P4_67971_1159999 | NC_021164.1    | Ca_kabuli_chr05 | 1159999                 | CC                              | TT              | 1946839373               |
| SNP_P4_67972_1160002 | NC_021164.1    | Ca_kabuli_chr05 | 1160002                 | CC                              | TT              | 1946839375               |
| SNP_P4_67973_1160008 | NC_021164.1    | Ca_kabuli_chr05 | 1160008                 | CC                              | TT              | 1946839377               |
| SNP_P4_67974_1162997 | NC_021164.1    | Ca_kabuli_chr05 | 1162997                 | GG                              | AA              | 1946839379               |
| SNP_P4_67975_1162998 | NC_021164.1    | Ca_kabuli_chr05 | 1162998                 | TT                              | AA              | 1946839381               |
| SNP_P4_67976_1171919 | NC_021164.1    | Ca_kabuli_chr05 | 1171919                 | CC                              | AA              | 1946839383               |
| SNP_P4_67977_1172000 | NC_021164.1    | Ca_kabuli_chr05 | 1172000                 | CC                              | AA              | 1946839385               |
| SNP_P4_67978_1172023 | NC_021164.1    | Ca_kabuli_chr05 | 1172023                 | CC                              | TT              | 1946839388               |
| SNP_P4_67979_1172038 | NC_021164.1    | Ca_kabuli_chr05 | 1172038                 | TT                              | CC              | 1946839390               |
| SNP_P4_67980_1174416 | NC_021164.1    | Ca_kabuli_chr05 | 1174416                 | CC                              | TT              | 1946839392               |
| SNP_P4_67981_1174566 | NC_021164.1    | Ca_kabuli_chr05 | 1174566                 | TT                              | GG              | 1946839394               |
| SNP_P4_67982_1174583 | NC_021164.1    | Ca_kabuli_chr05 | 1174583                 | GG                              | AA              | 1946839396               |
| SNP_P4_67983_1176384 | NC_021164.1    | Ca_kabuli_chr05 | 1176384                 | CC                              | AA              | 1946839398               |
| SNP_P4_67984_1176399 | NC_021164.1    | Ca_kabuli_chr05 | 1176399                 | AA                              | GG              | 1946839400               |
| SNP_P4_67985_1189808 | NC_021164.1    | Ca_kabuli_chr05 | 1189808                 | TT                              | AA              | 1946839402               |
| SNP_P4_67986_1230208 | NC_021164.1    | Ca_kabuli_chr05 | 1230208                 | AA                              | TT              | 1946839404               |
| SNP_P4_67987_1230217 | NC_021164.1    | Ca_kabuli_chr05 | 1230217                 | AA                              | CC              | 1946839406               |
| SNP_P4_67988_1230375 | NC_021164.1    | Ca_kabuli_chr05 | 1230375                 | TT                              | CC              | 1946839408               |
| SNP_P4_67989_1230531 | NC_021164.1    | Ca_kabuli_chr05 | 1230531                 | TT                              | GG              | 1946839410               |
| SNP_P4_67992_1247250 | NC_021164.1    | Ca_kabuli_chr05 | 1247250                 | AA                              | TT              | 1946839412               |
| SNP_P4_67993_1247253 | NC_021164.1    | Ca_kabuli_chr05 | 1247253                 | AA                              | GG              | 1946839414               |
| SNP_P4_67994_1260682 | NC_021164.1    | Ca_kabuli_chr05 | 1260682                 | CC                              | AA              | 1946839416               |
| SNP_P4_67995_1263552 | NC_021164.1    | Ca_kabuli_chr05 | 1263552                 | GG                              | AA              | 1946839418               |
| SNP_P4_67997_1275420 | NC_021164.1    | Ca_kabuli_chr05 | 1275420                 | GG                              | AA              | 1946839420               |
| SNP_P4_67998_1288248 | NC_021164.1    | Ca_kabuli_chr05 | 1288248                 | AA                              | GG              | 1946839422               |
| SNP_P4_67999_1330128 | NC_021164.1    | Ca_kabuli_chr05 | 1330128                 | TT                              | AA              | 1946839423               |
| SNP_P4_68000_1330174 | NC_021164.1    | Ca_kabuli_chr05 | 1330174                 | TT                              | CC              | 1946839425               |
| SNP_P4_68001_1330201 | NC_021164.1    | Ca_kabuli_chr05 | 1330201                 | TT                              | CC              | 1946839427               |
| SNP_P4_68002_1330497 | NC_021164.1    | Ca_kabuli_chr05 | 1330497                 | GG                              | CC              | 1946839429               |
| SNP_P4_68003_1330499 | NC_021164.1    | Ca_kabuli_chr05 | 1330499                 | TT                              | GG              | 1946839431               |
| SNP_P4_68004_1330524 | NC_021164.1    | Ca_kabuli_chr05 | 1330524                 | CC                              | TT              | 1946839433               |
| SNP_P4_68005_1330752 | NC_021164.1    | Ca_kabuli_chr05 | 1330752                 | TT                              | CC              | 1946839435               |
| SNP_P4_68006_1330754 | NC_021164.1    | Ca_kabuli_chr05 | 1330754                 | GG                              | AA              | 1946839437               |
| SNP_P4_68007_1334409 | NC_021164.1    | Ca_kabuli_chr05 | 1334409                 | AA                              | TT              | 1946839439               |
| SNP_P4_68008_1336047 | NC_021164.1    | Ca_kabuli_chr05 | 1336047                 | TT                              | CC              | 1946839441               |

| SNPs IDs             | Chromosome IDs | Chromosomes     | Physical positions (bp) | CDC Frontier (Reference genome) | (ILWC46 & LPNB) | NCBI SNPdb Accession IDs |
|----------------------|----------------|-----------------|-------------------------|---------------------------------|-----------------|--------------------------|
| SNP_P4_68009_1366032 | NC_021164.1    | Ca_kabuli_chr05 | 1366032                 | AA                              | CC              | 1946839443               |
| SNP_P4_68010_1369615 | NC_021164.1    | Ca_kabuli_chr05 | 1369615                 | TT                              | CC              | 1946839445               |
| SNP_P4_68011_1369626 | NC_021164.1    | Ca_kabuli_chr05 | 1369626                 | AA                              | GG              | 1946839447               |
| SNP_P4_68012_1369629 | NC_021164.1    | Ca_kabuli_chr05 | 1369629                 | AA                              | CC              | 1946839449               |
| SNP_P4_68013_1372095 | NC_021164.1    | Ca_kabuli_chr05 | 1372095                 | GG                              | AA              | 1946839451               |
| SNP_P4_68014_1377754 | NC_021164.1    | Ca_kabuli_chr05 | 1377754                 | CC                              | AA              | 1946839452               |
| SNP_P4_68015_1377765 | NC_021164.1    | Ca_kabuli_chr05 | 1377765                 | AA                              | GG              | 1946839454               |
| SNP_P4_68017_1377951 | NC_021164.1    | Ca_kabuli_chr05 | 1377951                 | TT                              | CC              | 1946839456               |
| SNP_P4_68018_1378008 | NC_021164.1    | Ca_kabuli_chr05 | 1378008                 | CC                              | TT              | 1946839458               |
| SNP_P4_68019_1378191 | NC_021164.1    | Ca_kabuli_chr05 | 1378191                 | GG                              | AA              | 1946839460               |
| SNP_P4_68020_1378261 | NC_021164.1    | Ca_kabuli_chr05 | 1378261                 | GG                              | TT              | 1946839462               |
| SNP_P4_68021_1378289 | NC_021164.1    | Ca_kabuli_chr05 | 1378289                 | TT                              | GG              | 1946839464               |
| SNP_P4_68022_1378309 | NC_021164.1    | Ca_kabuli_chr05 | 1378309                 | GG                              | AA              | 1946839466               |
| SNP_P4_68023_1378313 | NC_021164.1    | Ca_kabuli_chr05 | 1378313                 | CC                              | TT              | 1946839468               |
| SNP_P4_68024_1378363 | NC_021164.1    | Ca_kabuli_chr05 | 1378363                 | TT                              | CC              | 1946839470               |
| SNP_P4_68025_1378381 | NC_021164.1    | Ca_kabuli_chr05 | 1378381                 | CC                              | TT              | 1946839472               |
| SNP_P4_68026_1378384 | NC_021164.1    | Ca_kabuli_chr05 | 1378384                 | AA                              | GG              | 1946839474               |
| SNP_P4_68027_1380488 | NC_021164.1    | Ca_kabuli_chr05 | 1380488                 | GG                              | AA              | 1946839476               |
| SNP_P4_68028_1381091 | NC_021164.1    | Ca_kabuli_chr05 | 1381091                 | AA                              | GG              | 1946839478               |
| SNP_P4_68029_1381130 | NC_021164.1    | Ca_kabuli_chr05 | 1381130                 | AA                              | GG              | 1946839480               |
| SNP_P4_68030_1381184 | NC_021164.1    | Ca_kabuli_chr05 | 1381184                 | AA                              | GG              | 1946839482               |
| SNP_P4_68031_1381542 | NC_021164.1    | Ca_kabuli_chr05 | 1381542                 | GG                              | AA              | 1946839484               |
| SNP_P4_68032_1388469 | NC_021164.1    | Ca_kabuli_chr05 | 1388469                 | AA                              | GG              | 1946839486               |
| SNP_P4_68034_1391113 | NC_021164.1    | Ca_kabuli_chr05 | 1391113                 | CC                              | GG              | 1946839488               |
| SNP_P4_68035_1421670 | NC_021164.1    | Ca_kabuli_chr05 | 1421670                 | CC                              | TT              | 1946839490               |
| SNP_P4_68036_1421695 | NC_021164.1    | Ca_kabuli_chr05 | 1421695                 | GG                              | CC              | 1946839492               |
| SNP_P4_68037_1424820 | NC_021164.1    | Ca_kabuli_chr05 | 1424820                 | AA                              | GG              | 1946839494               |
| SNP_P4_68038_1441609 | NC_021164.1    | Ca_kabuli_chr05 | 1441609                 | AA                              | TT              | 1946839496               |
| SNP_P4_68039_1441667 | NC_021164.1    | Ca_kabuli_chr05 | 1441667                 | GG                              | AA              | 1946839498               |
| SNP_P4_68040_1444270 | NC_021164.1    | Ca_kabuli_chr05 | 1444270                 | TT                              | CC              | 1946839500               |
| SNP_P4_68041_1444273 | NC_021164.1    | Ca_kabuli_chr05 | 1444273                 | TT                              | AA              | 1946839502               |
| SNP_P4_68042_1447621 | NC_021164.1    | Ca_kabuli_chr05 | 1447621                 | AA                              | TT              | 1946839504               |
| SNP_P4_68044_1454083 | NC_021164.1    | Ca_kabuli_chr05 | 1454083                 | TT                              | CC              | 1946839505               |
| SNP_P4_68045_1457040 | NC_021164.1    | Ca_kabuli_chr05 | 1457040                 | AA                              | GG              | 1946839507               |
| SNP_P4_68046_1457054 | NC_021164.1    | Ca_kabuli_chr05 | 1457054                 | CC                              | AA              | 1946839509               |
| SNP_P4_68047_1457222 | NC_021164.1    | Ca_kabuli_chr05 | 1457222                 | AA                              | GG              | 1946839511               |
| SNP_P4_68048_1457257 | NC_021164.1    | Ca_kabuli_chr05 | 1457257                 | CC                              | TT              | 1946839513               |
| SNP_P4_68049_1457460 | NC_021164.1    | Ca_kabuli_chr05 | 1457460                 | CC                              | TT              | 1946839515               |
| SNP_P4_68050_1457500 | NC_021164.1    | Ca_kabuli_chr05 | 1457500                 | AA                              | CC              | 1946839517               |
| SNP_P4_68051_1457506 | NC_021164.1    | Ca_kabuli_chr05 | 1457506                 | CC                              | TT              | 1946839519               |
| SNP_P4_68052_1457528 | NC_021164.1    | Ca_kabuli_chr05 | 1457528                 | TT                              | CC              | 1946839521               |
| SNP_P4_68053_1488719 | NC_021164.1    | Ca_kabuli_chr05 | 1488719                 | GG                              | AA              | 1946839523               |

| SNPs IDs             | Chromosome IDs | Chromosomes     | Physical positions (bp) | CDC Frontier (Reference genome) | (ILWC46 & LPNB) | NCBI SNPdb Accession IDs |
|----------------------|----------------|-----------------|-------------------------|---------------------------------|-----------------|--------------------------|
| SNP_P4_68054_1497213 | NC_021164.1    | Ca_kabuli_chr05 | 1497213                 | AA                              | GG              | 1946839525               |
| SNP_P4_68055_1497217 | NC_021164.1    | Ca_kabuli_chr05 | 1497217                 | TT                              | CC              | 1946839527               |
| SNP_P4_68056_1501308 | NC_021164.1    | Ca_kabuli_chr05 | 1501308                 | TT                              | CC              | 1946839529               |
| SNP_P4_68057_1501309 | NC_021164.1    | Ca_kabuli_chr05 | 1501309                 | AA                              | TT              | 1946839531               |
| SNP_P4_68058_1501381 | NC_021164.1    | Ca_kabuli_chr05 | 1501381                 | TT                              | CC              | 1946839533               |
| SNP_P4_68059_1501641 | NC_021164.1    | Ca_kabuli_chr05 | 1501641                 | TT                              | CC              | 1946839535               |
| SNP_P4_68060_1509637 | NC_021164.1    | Ca_kabuli_chr05 | 1509637                 | GG                              | AA              | 1946839537               |
| SNP_P4_68062_1510764 | NC_021164.1    | Ca_kabuli_chr05 | 1510764                 | TT                              | CC              | 1946839539               |
| SNP_P4_68063_1510776 | NC_021164.1    | Ca_kabuli_chr05 | 1510776                 | GG                              | AA              | 1946839541               |
| SNP_P4_68064_1510784 | NC_021164.1    | Ca_kabuli_chr05 | 1510784                 | CC                              | TT              | 1946839543               |
| SNP_P4_68065_1510842 | NC_021164.1    | Ca_kabuli_chr05 | 1510842                 | CC                              | TT              | 1946839545               |
| SNP_P4_68066_1511058 | NC_021164.1    | Ca_kabuli_chr05 | 1511058                 | AA                              | GG              | 1946839547               |
| SNP_P4_68067_1511105 | NC_021164.1    | Ca_kabuli_chr05 | 1511105                 | GG                              | TT              | 1946839549               |
| SNP_P4_68068_1511107 | NC_021164.1    | Ca_kabuli_chr05 | 1511107                 | GG                              | AA              | 1946839551               |
| SNP_P4_68069_1511132 | NC_021164.1    | Ca_kabuli_chr05 | 1511132                 | CC                              | TT              | 1946839553               |
| SNP_P4_68070_1511146 | NC_021164.1    | Ca_kabuli_chr05 | 1511146                 | AA                              | CC              | 1946839555               |
| SNP_P4_68071_1511182 | NC_021164.1    | Ca_kabuli_chr05 | 1511182                 | AA                              | GG              | 1946839557               |
| SNP_P4_68072_1511186 | NC_021164.1    | Ca_kabuli_chr05 | 1511186                 | GG                              | AA              | 1946839559               |
| SNP_P4_68073_1511213 | NC_021164.1    | Ca_kabuli_chr05 | 1511213                 | TT                              | AA              | 1946839561               |
| SNP_P4_68074_1520951 | NC_021164.1    | Ca_kabuli_chr05 | 1520951                 | AA                              | GG              | 1946839563               |
| SNP_P4_68075_1520970 | NC_021164.1    | Ca_kabuli_chr05 | 1520970                 | GG                              | TT              | 1946839565               |
| SNP_P4_68077_1521431 | NC_021164.1    | Ca_kabuli_chr05 | 1521431                 | GG                              | AA              | 1946839567               |
| SNP_P4_68078_1521550 | NC_021164.1    | Ca_kabuli_chr05 | 1521550                 | TT                              | CC              | 1946839569               |
| SNP_P4_68079_1521708 | NC_021164.1    | Ca_kabuli_chr05 | 1521708                 | AA                              | GG              | 1946839571               |
| SNP_P4_68080_1526713 | NC_021164.1    | Ca_kabuli_chr05 | 1526713                 | CC                              | TT              | 1946839574               |
| SNP_P4_68081_1526729 | NC_021164.1    | Ca_kabuli_chr05 | 1526729                 | AA                              | TT              | 1946839575               |
| SNP_P4_68083_1526747 | NC_021164.1    | Ca_kabuli_chr05 | 1526747                 | GG                              | TT              | 1946839577               |
| SNP_P4_68084_1526756 | NC_021164.1    | Ca_kabuli_chr05 | 1526756                 | CC                              | TT              | 1946839579               |
| SNP_P4_68085_1526793 | NC_021164.1    | Ca_kabuli_chr05 | 1526793                 | AA                              | GG              | 1946839582               |
| SNP_P4_68086_1528101 | NC_021164.1    | Ca_kabuli_chr05 | 1528101                 | AA                              | GG              | 1946839584               |
| SNP_P4_68087_1528413 | NC_021164.1    | Ca_kabuli_chr05 | 1528413                 | CC                              | TT              | 1946839586               |
| SNP_P4_68088_1528667 | NC_021164.1    | Ca_kabuli_chr05 | 1528667                 | CC                              | TT              | 1946839588               |
| SNP_P4_68089_1528673 | NC_021164.1    | Ca_kabuli_chr05 | 1528673                 | TT                              | GG              | 1946839589               |
| SNP_P4_68090_1528702 | NC_021164.1    | Ca_kabuli_chr05 | 1528702                 | CC                              | TT              | 1946839591               |
| SNP_P4_68091_1535157 | NC_021164.1    | Ca_kabuli_chr05 | 1535157                 | TT                              | CC              | 1946839593               |
| SNP_P4_68092_1535169 | NC_021164.1    | Ca_kabuli_chr05 | 1535169                 | CC                              | AA              | 1946839595               |
| SNP_P4_68093_1535311 | NC_021164.1    | Ca_kabuli_chr05 | 1535311                 | AA                              | CC              | 1946839597               |
| SNP_P4_68094_1535360 | NC_021164.1    | Ca_kabuli_chr05 | 1535360                 | TT                              | AA              | 1946839599               |
| SNP_P4_68095_1535373 | NC_021164.1    | Ca_kabuli_chr05 | 1535373                 | AA                              | GG              | 1946839601               |
| SNP_P4_68098_1591247 | NC_021164.1    | Ca_kabuli_chr05 | 1591247                 | AA                              | CC              | 1946839603               |
| SNP_P4_68099_1601073 | NC_021164.1    | Ca_kabuli_chr05 | 1601073                 | GG                              | TT              | 1946839605               |
| SNP_P4_68100_1606354 | NC_021164.1    | Ca_kabuli_chr05 | 1606354                 | AA                              | TT              | 1946839607               |

| SNPs IDs             | Chromosome IDs | Chromosomes     | Physical positions (bp) | CDC Frontier (Reference genome) | (ILWC46 & LPNB) | NCBI SNPdb Accession IDs |
|----------------------|----------------|-----------------|-------------------------|---------------------------------|-----------------|--------------------------|
| SNP_P4_68101_1629526 | NC_021164.1    | Ca_kabuli_chr05 | 1629526                 | TT                              | AA              | 1946839609               |
| SNP_P4_68102_1633688 | NC_021164.1    | Ca_kabuli_chr05 | 1633688                 | GG                              | AA              | 1946839611               |
| SNP_P4_68104_1679521 | NC_021164.1    | Ca_kabuli_chr05 | 1679521                 | CC                              | TT              | 1946839613               |
| SNP_P4_68105_1679540 | NC_021164.1    | Ca_kabuli_chr05 | 1679540                 | GG                              | CC              | 1946839615               |
| SNP_P4_68106_1679644 | NC_021164.1    | Ca_kabuli_chr05 | 1679644                 | GG                              | AA              | 1946839617               |
| SNP_P4_68107_1679645 | NC_021164.1    | Ca_kabuli_chr05 | 1679645                 | GG                              | TT              | 1946839619               |
| SNP_P4_68108_1679652 | NC_021164.1    | Ca_kabuli_chr05 | 1679652                 | CC                              | TT              | 1946839621               |
| SNP_P4_68109_1679665 | NC_021164.1    | Ca_kabuli_chr05 | 1679665                 | AA                              | TT              | 1946839622               |
| SNP_P4_68110_1679817 | NC_021164.1    | Ca_kabuli_chr05 | 1679817                 | GG                              | TT              | 1946839624               |
| SNP_P4_68111_1679832 | NC_021164.1    | Ca_kabuli_chr05 | 1679832                 | GG                              | TT              | 1946839626               |
| SNP_P4_68112_1679881 | NC_021164.1    | Ca_kabuli_chr05 | 1679881                 | AA                              | TT              | 1946839628               |
| SNP_P4_68113_1679966 | NC_021164.1    | Ca_kabuli_chr05 | 1679966                 | AA                              | CC              | 1946839630               |
| SNP_P4_68114_1681163 | NC_021164.1    | Ca_kabuli_chr05 | 1681163                 | TT                              | CC              | 1946839632               |
| SNP_P4_68115_1681529 | NC_021164.1    | Ca_kabuli_chr05 | 1681529                 | GG                              | AA              | 1946839635               |
| SNP_P4_68116_1681558 | NC_021164.1    | Ca_kabuli_chr05 | 1681558                 | AA                              | CC              | 1946839637               |
| SNP_P4_68117_1681585 | NC_021164.1    | Ca_kabuli_chr05 | 1681585                 | TT                              | CC              | 1946839639               |
| SNP_P4_68118_1687804 | NC_021164.1    | Ca_kabuli_chr05 | 1687804                 | GG                              | AA              | 1946839641               |
| SNP_P4_68119_1706471 | NC_021164.1    | Ca_kabuli_chr05 | 1706471                 | TT                              | GG              | 1946839642               |
| SNP_P4_68120_1713353 | NC_021164.1    | Ca_kabuli_chr05 | 1713353                 | CC                              | AA              | 1946839643               |
| SNP_P4_68121_1713439 | NC_021164.1    | Ca_kabuli_chr05 | 1713439                 | AA                              | GG              | 1946839644               |
| SNP_P4_68122_1719503 | NC_021164.1    | Ca_kabuli_chr05 | 1719503                 | GG                              | AA              | 1946839645               |
| SNP_P4_68123_1719527 | NC_021164.1    | Ca_kabuli_chr05 | 1719527                 | TT                              | CC              | 1946839646               |
| SNP_P4_68124_1719528 | NC_021164.1    | Ca_kabuli_chr05 | 1719528                 | TT                              | AA              | 1946839647               |
| SNP_P4_68125_1763507 | NC_021164.1    | Ca_kabuli_chr05 | 1763507                 | AA                              | TT              | 1946839649               |
| SNP_P4_68126_1770168 | NC_021164.1    | Ca_kabuli_chr05 | 1770168                 | TT                              | CC              | 1946839651               |
| SNP_P4_68127_1770300 | NC_021164.1    | Ca_kabuli_chr05 | 1770300                 | TT                              | CC              | 1946839653               |
| SNP_P4_68128_1770556 | NC_021164.1    | Ca_kabuli_chr05 | 1770556                 | TT                              | AA              | 1946839655               |
| SNP_P4_68130_1780075 | NC_021164.1    | Ca_kabuli_chr05 | 1780075                 | CC                              | TT              | 1946839657               |
| SNP_P4_68131_1780096 | NC_021164.1    | Ca_kabuli_chr05 | 1780096                 | AA                              | GG              | 1946839659               |
| SNP_P4_68132_1781411 | NC_021164.1    | Ca_kabuli_chr05 | 1781411                 | GG                              | AA              | 1946839661               |
| SNP_P4_68133_1781413 | NC_021164.1    | Ca_kabuli_chr05 | 1781413                 | CC                              | TT              | 1946839663               |
| SNP_P4_68135_1808860 | NC_021164.1    | Ca_kabuli_chr05 | 1808860                 | TT                              | CC              | 1946839666               |
| SNP_P4_68136_1809399 | NC_021164.1    | Ca_kabuli_chr05 | 1809399                 | AA                              | GG              | 1946839668               |
| SNP_P4_68137_1812571 | NC_021164.1    | Ca_kabuli_chr05 | 1812571                 | AA                              | CC              | 1946839670               |
| SNP_P4_68138_1813406 | NC_021164.1    | Ca_kabuli_chr05 | 1813406                 | TT                              | GG              | 1946839672               |
| SNP_P4_68139_1814489 | NC_021164.1    | Ca_kabuli_chr05 | 1814489                 | GG                              | AA              | 1946839674               |
| SNP_P4_68140_1814836 | NC_021164.1    | Ca_kabuli_chr05 | 1814836                 | TT                              | GG              | 1946839676               |
| SNP_P4_68141_1818299 | NC_021164.1    | Ca_kabuli_chr05 | 1818299                 | AA                              | GG              | 1946839678               |
| SNP_P4_68142_1819162 | NC_021164.1    | Ca_kabuli_chr05 | 1819162                 | GG                              | CC              | 1946839680               |
| SNP_P4_68143_1819163 | NC_021164.1    | Ca_kabuli_chr05 | 1819163                 | TT                              | AA              | 1946839682               |
| SNP_P4_68144_1819315 | NC_021164.1    | Ca_kabuli_chr05 | 1819315                 | TT                              | CC              | 1946839684               |
| SNP_P4_68145_1819410 | NC_021164.1    | Ca_kabuli_chr05 | 1819410                 | AA                              | TT              | 1946839686               |



| SNPs IDs             | Chromosome IDs | Chromosomes     | Physical positions (bp) | CDC Frontier (Reference genome) | (ILWC46 & LPNB) | NCBI SNPdb Accession IDs |
|----------------------|----------------|-----------------|-------------------------|---------------------------------|-----------------|--------------------------|
| SNP_P4_68146_1819444 | NC_021164.1    | Ca_kabuli_chr05 | 1819444                 | CC                              | TT              | 1946839688               |
| SNP_P4_68147_1819471 | NC_021164.1    | Ca_kabuli_chr05 | 1819471                 | TT                              | AA              | 1946839690               |
| SNP_P4_68148_1819778 | NC_021164.1    | Ca_kabuli_chr05 | 1819778                 | CC                              | TT              | 1946839692               |
| SNP_P4_68149_1819781 | NC_021164.1    | Ca_kabuli_chr05 | 1819781                 | GG                              | TT              | 1946839694               |
| SNP_P4_68150_1819824 | NC_021164.1    | Ca_kabuli_chr05 | 1819824                 | CC                              | GG              | 1946839696               |
| SNP_P4_68151_1819829 | NC_021164.1    | Ca_kabuli_chr05 | 1819829                 | AA                              | CC              | 1946839698               |
| SNP_P4_68152_1819846 | NC_021164.1    | Ca_kabuli_chr05 | 1819846                 | TT                              | AA              | 1946839700               |
| SNP_P4_68153_1825425 | NC_021164.1    | Ca_kabuli_chr05 | 1825425                 | CC                              | GG              | 1946839702               |
| SNP_P4_68154_1825439 | NC_021164.1    | Ca_kabuli_chr05 | 1825439                 | TT                              | CC              | 1946839704               |
| SNP_P4_68155_1825706 | NC_021164.1    | Ca_kabuli_chr05 | 1825706                 | AA                              | GG              | 1946839706               |
| SNP_P4_68156_1827517 | NC_021164.1    | Ca_kabuli_chr05 | 1827517                 | GG                              | CC              | 1946839708               |
| SNP_P4_68157_1828535 | NC_021164.1    | Ca_kabuli_chr05 | 1828535                 | AA                              | GG              | 1946839710               |
| SNP_P4_68158_1828588 | NC_021164.1    | Ca_kabuli_chr05 | 1828588                 | AA                              | CC              | 1946839712               |
| SNP_P4_68159_1829280 | NC_021164.1    | Ca_kabuli_chr05 | 1829280                 | CC                              | GG              | 1946839714               |
| SNP_P4_68160_1829568 | NC_021164.1    | Ca_kabuli_chr05 | 1829568                 | GG                              | AA              | 1946839716               |
| SNP_P4_68161_1829577 | NC_021164.1    | Ca_kabuli_chr05 | 1829577                 | AA                              | TT              | 1946839718               |
| SNP_P4_68162_1829595 | NC_021164.1    | Ca_kabuli_chr05 | 1829595                 | TT                              | AA              | 1946839720               |
| SNP_P4_68163_1829597 | NC_021164.1    | Ca_kabuli_chr05 | 1829597                 | TT                              | CC              | 1946839722               |
| SNP_P4_68164_1829609 | NC_021164.1    | Ca_kabuli_chr05 | 1829609                 | AA                              | GG              | 1946839724               |
| SNP_P4_68165_1829610 | NC_021164.1    | Ca_kabuli_chr05 | 1829610                 | TT                              | GG              | 1946839726               |
| SNP_P4_68166_1829616 | NC_021164.1    | Ca_kabuli_chr05 | 1829616                 | GG                              | AA              | 1946839728               |
| SNP_P4_68167_1829674 | NC_021164.1    | Ca_kabuli_chr05 | 1829674                 | TT                              | GG              | 1946839730               |
| SNP_P4_68168_1829682 | NC_021164.1    | Ca_kabuli_chr05 | 1829682                 | TT                              | GG              | 1946839732               |
| SNP_P4_68169_1829712 | NC_021164.1    | Ca_kabuli_chr05 | 1829712                 | AA                              | TT              | 1946839734               |
| SNP_P4_68170_1829716 | NC_021164.1    | Ca_kabuli_chr05 | 1829716                 | CC                              | TT              | 1946839737               |
| SNP_P4_68171_1830816 | NC_021164.1    | Ca_kabuli_chr05 | 1830816                 | TT                              | CC              | 1946839739               |
| SNP_P4_68172_1832827 | NC_021164.1    | Ca_kabuli_chr05 | 1832827                 | AA                              | CC              | 1946839741               |
| SNP_P4_68173_1833191 | NC_021164.1    | Ca_kabuli_chr05 | 1833191                 | AA                              | CC              | 1946839743               |
| SNP_P4_68174_1836026 | NC_021164.1    | Ca_kabuli_chr05 | 1836026                 | CC                              | TT              | 1946839745               |
| SNP_P4_68175_1837567 | NC_021164.1    | Ca_kabuli_chr05 | 1837567                 | CC                              | TT              | 1946839747               |
| SNP_P4_68176_1839363 | NC_021164.1    | Ca_kabuli_chr05 | 1839363                 | CC                              | AA              | 1946839750               |
| SNP_P4_68177_1839395 | NC_021164.1    | Ca_kabuli_chr05 | 1839395                 | GG                              | AA              | 1946839752               |
| SNP_P4_68178_1839403 | NC_021164.1    | Ca_kabuli_chr05 | 1839403                 | TT                              | AA              | 1946839754               |
| SNP_P4_68179_1839431 | NC_021164.1    | Ca_kabuli_chr05 | 1839431                 | GG                              | CC              | 1946839756               |
| SNP_P4_68180_1839437 | NC_021164.1    | Ca_kabuli_chr05 | 1839437                 | AA                              | TT              | 1946839758               |
| SNP_P4_68181_1839441 | NC_021164.1    | Ca_kabuli_chr05 | 1839441                 | TT                              | AA              | 1946839760               |
| SNP_P4_68182_1839483 | NC_021164.1    | Ca_kabuli_chr05 | 1839483                 | CC                              | TT              | 1946839762               |
| SNP_P4_68183_1863770 | NC_021164.1    | Ca_kabuli_chr05 | 1863770                 | AA                              | TT              | 1946839764               |
| SNP_P4_68184_1863775 | NC_021164.1    | Ca_kabuli_chr05 | 1863775                 | CC                              | AA              | 1946839766               |
| SNP_P4_68185_1863804 | NC_021164.1    | Ca_kabuli_chr05 | 1863804                 | AA                              | TT              | 1946839769               |
| SNP_P4_68186_1864412 | NC_021164.1    | Ca_kabuli_chr05 | 1864412                 | CC                              | TT              | 1946839771               |
| SNP_P4_68187_1875027 | NC_021164.1    | Ca_kabuli_chr05 | 1875027                 | GG                              | AA              | 1946839773               |

| SNPs IDs             | Chromosome IDs | Chromosomes     | Physical positions (bp) | CDC Frontier (Reference genome) | (ILWC46 & LPNB) | NCBI SNPdb Accession IDs |
|----------------------|----------------|-----------------|-------------------------|---------------------------------|-----------------|--------------------------|
| SNP_P4_68188_1875913 | NC_021164.1    | Ca_kabuli_chr05 | 1875913                 | AA                              | GG              | 1946839775               |
| SNP_P4_68189_1875921 | NC_021164.1    | Ca_kabuli_chr05 | 1875921                 | TT                              | CC              | 1946839777               |
| SNP_P4_68190_1876003 | NC_021164.1    | Ca_kabuli_chr05 | 1876003                 | AA                              | GG              | 1946839779               |
| SNP_P4_68191_1876006 | NC_021164.1    | Ca_kabuli_chr05 | 1876006                 | AA                              | GG              | 1946839781               |
| SNP_P4_68192_1876046 | NC_021164.1    | Ca_kabuli_chr05 | 1876046                 | GG                              | TT              | 1946839783               |
| SNP_P4_68193_1876054 | NC_021164.1    | Ca_kabuli_chr05 | 1876054                 | GG                              | AA              | 1946839785               |
| SNP_P4_68194_1876075 | NC_021164.1    | Ca_kabuli_chr05 | 1876075                 | GG                              | AA              | 1946839787               |
| SNP_P4_68195_1876080 | NC_021164.1    | Ca_kabuli_chr05 | 1876080                 | AA                              | GG              | 1946839789               |
| SNP_P4_68196_1876108 | NC_021164.1    | Ca_kabuli_chr05 | 1876108                 | CC                              | TT              | 1946839791               |
| SNP_P4_68197_1876231 | NC_021164.1    | Ca_kabuli_chr05 | 1876231                 | GG                              | AA              | 1946839793               |
| SNP_P4_68198_1876261 | NC_021164.1    | Ca_kabuli_chr05 | 1876261                 | GG                              | CC              | 1946839795               |
| SNP_P4_68199_1876286 | NC_021164.1    | Ca_kabuli_chr05 | 1876286                 | GG                              | AA              | 1946839797               |
| SNP_P4_68200_1876475 | NC_021164.1    | Ca_kabuli_chr05 | 1876475                 | AA                              | GG              | 1946839799               |
| SNP_P4_68201_1878876 | NC_021164.1    | Ca_kabuli_chr05 | 1878876                 | GG                              | CC              | 1946839802               |
| SNP_P4_68202_1879422 | NC_021164.1    | Ca_kabuli_chr05 | 1879422                 | GG                              | AA              | 1946839804               |
| SNP_P4_68203_1879452 | NC_021164.1    | Ca_kabuli_chr05 | 1879452                 | GG                              | CC              | 1946839806               |
| SNP_P4_68204_1879820 | NC_021164.1    | Ca_kabuli_chr05 | 1879820                 | AA                              | GG              | 1946839808               |
| SNP_P4_68205_1881703 | NC_021164.1    | Ca_kabuli_chr05 | 1881703                 | AA                              | GG              | 1946839810               |
| SNP_P4_68206_1881716 | NC_021164.1    | Ca_kabuli_chr05 | 1881716                 | GG                              | CC              | 1946839813               |
| SNP_P4_68207_1881974 | NC_021164.1    | Ca_kabuli_chr05 | 1881974                 | AA                              | GG              | 1946839815               |
| SNP_P4_68208_1887479 | NC_021164.1    | Ca_kabuli_chr05 | 1887479                 | TT                              | AA              | 1946839817               |
| SNP_P4_68209_1887646 | NC_021164.1    | Ca_kabuli_chr05 | 1887646                 | GG                              | AA              | 1946839819               |
| SNP_P4_68210_1887780 | NC_021164.1    | Ca_kabuli_chr05 | 1887780                 | CC                              | TT              | 1946839821               |
| SNP_P4_68211_1887808 | NC_021164.1    | Ca_kabuli_chr05 | 1887808                 | TT                              | GG              | 1946839823               |
| SNP_P4_68212_1887875 | NC_021164.1    | Ca_kabuli_chr05 | 1887875                 | AA                              | TT              | 1946839825               |
| SNP_P4_68213_1887879 | NC_021164.1    | Ca_kabuli_chr05 | 1887879                 | CC                              | TT              | 1946839827               |
| SNP_P4_68214_1887880 | NC_021164.1    | Ca_kabuli_chr05 | 1887880                 | AA                              | TT              | 1946839830               |
| SNP_P4_68215_1887889 | NC_021164.1    | Ca_kabuli_chr05 | 1887889                 | TT                              | AA              | 1946839832               |
| SNP_P4_68216_1887890 | NC_021164.1    | Ca_kabuli_chr05 | 1887890                 | GG                              | CC              | 1946839834               |
| SNP_P4_68217_1887898 | NC_021164.1    | Ca_kabuli_chr05 | 1887898                 | TT                              | AA              | 1946839836               |
| SNP_P4_68218_1887971 | NC_021164.1    | Ca_kabuli_chr05 | 1887971                 | CC                              | TT              | 1946839838               |
| SNP_P4_68219_1888027 | NC_021164.1    | Ca_kabuli_chr05 | 1888027                 | GG                              | CC              | 1946839840               |
| SNP_P4_68220_1888049 | NC_021164.1    | Ca_kabuli_chr05 | 1888049                 | CC                              | AA              | 1946839842               |
| SNP_P4_68221_1888368 | NC_021164.1    | Ca_kabuli_chr05 | 1888368                 | CC                              | TT              | 1946839844               |
| SNP_P4_68222_1899037 | NC_021164.1    | Ca_kabuli_chr05 | 1899037                 | TT                              | CC              | 1946839846               |
| SNP_P4_68223_1899050 | NC_021164.1    | Ca_kabuli_chr05 | 1899050                 | CC                              | TT              | 1946839848               |
| SNP_P4_68224_1899051 | NC_021164.1    | Ca_kabuli_chr05 | 1899051                 | TT                              | CC              | 1946839850               |
| SNP_P4_68225_1899081 | NC_021164.1    | Ca_kabuli_chr05 | 1899081                 | GG                              | AA              | 1946839852               |
| SNP_P4_68226_1899105 | NC_021164.1    | Ca_kabuli_chr05 | 1899105                 | TT                              | AA              | 1946839854               |
| SNP_P4_68227_1899471 | NC_021164.1    | Ca_kabuli_chr05 | 1899471                 | AA                              | TT              | 1946839856               |
| SNP_P4_68228_1899530 | NC_021164.1    | Ca_kabuli_chr05 | 1899530                 | TT                              | CC              | 1946839858               |
| SNP_P4_68229_1902831 | NC_021164.1    | Ca_kabuli_chr05 | 1902831                 | CC                              | TT              | 1946839860               |

| SNPs IDs             | Chromosome IDs | Chromosomes     | Physical positions (bp) | CDC Frontier (Reference genome) | (ILWC46 & LPNB) | NCBI SNPdb Accession IDs |
|----------------------|----------------|-----------------|-------------------------|---------------------------------|-----------------|--------------------------|
| SNP_P4_68231_1905744 | NC_021164.1    | Ca_kabuli_chr05 | 1905744                 | CC                              | AA              | 1946839862               |
| SNP_P4_68232_1907896 | NC_021164.1    | Ca_kabuli_chr05 | 1907896                 | AA                              | TT              | 1946839864               |
| SNP_P4_68233_1907946 | NC_021164.1    | Ca_kabuli_chr05 | 1907946                 | GG                              | CC              | 1946839866               |
| SNP_P4_68234_1907967 | NC_021164.1    | Ca_kabuli_chr05 | 1907967                 | TT                              | AA              | 1946839868               |
| SNP_P4_68235_1908012 | NC_021164.1    | Ca_kabuli_chr05 | 1908012                 | AA                              | GG              | 1946839870               |
| SNP_P4_68236_1908242 | NC_021164.1    | Ca_kabuli_chr05 | 1908242                 | GG                              | AA              | 1946839872               |
| SNP_P4_68237_1908273 | NC_021164.1    | Ca_kabuli_chr05 | 1908273                 | TT                              | CC              | 1946839874               |
| SNP_P4_68238_1909959 | NC_021164.1    | Ca_kabuli_chr05 | 1909959                 | TT                              | CC              | 1946839876               |
| SNP_P4_68239_1911394 | NC_021164.1    | Ca_kabuli_chr05 | 1911394                 | GG                              | CC              | 1946839878               |
| SNP_P4_68240_1925675 | NC_021164.1    | Ca_kabuli_chr05 | 1925675                 | CC                              | TT              | 1946839880               |
| SNP_P4_68241_1925719 | NC_021164.1    | Ca_kabuli_chr05 | 1925719                 | GG                              | AA              | 1946839882               |
| SNP_P4_68242_1925741 | NC_021164.1    | Ca_kabuli_chr05 | 1925741                 | AA                              | CC              | 1946839884               |
| SNP_P4_68243_1925863 | NC_021164.1    | Ca_kabuli_chr05 | 1925863                 | AA                              | GG              | 1946839886               |
| SNP_P4_68244_1925976 | NC_021164.1    | Ca_kabuli_chr05 | 1925976                 | GG                              | CC              | 1946839888               |
| SNP_P4_68245_1926016 | NC_021164.1    | Ca_kabuli_chr05 | 1926016                 | AA                              | CC              | 1946839890               |
| SNP_P4_68246_1926041 | NC_021164.1    | Ca_kabuli_chr05 | 1926041                 | AA                              | GG              | 1946839892               |
| SNP_P4_68247_1930902 | NC_021164.1    | Ca_kabuli_chr05 | 1930902                 | CC                              | TT              | 1946839894               |
| SNP_P4_68248_1941298 | NC_021164.1    | Ca_kabuli_chr05 | 1941298                 | GG                              | AA              | 1946839896               |
| SNP_P4_68249_1942387 | NC_021164.1    | Ca_kabuli_chr05 | 1942387                 | TT                              | CC              | 1946839898               |
| SNP_P4_68250_1945468 | NC_021164.1    | Ca_kabuli_chr05 | 1945468                 | TT                              | CC              | 1946839900               |
| SNP_P4_68251_1948472 | NC_021164.1    | Ca_kabuli_chr05 | 1948472                 | CC                              | TT              | 1946839902               |
| SNP_P4_68252_1951010 | NC_021164.1    | Ca_kabuli_chr05 | 1951010                 | TT                              | CC              | 1946839904               |
| SNP_P4_68253_1957957 | NC_021164.1    | Ca_kabuli_chr05 | 1957957                 | TT                              | CC              | 1946839906               |
| SNP_P4_68254_1960624 | NC_021164.1    | Ca_kabuli_chr05 | 1960624                 | AA                              | GG              | 1946839908               |
| SNP_P4_68255_1964862 | NC_021164.1    | Ca_kabuli_chr05 | 1964862                 | TT                              | CC              | 1946839910               |
| SNP_P4_68256_1980117 | NC_021164.1    | Ca_kabuli_chr05 | 1980117                 | GG                              | TT              | 1946839912               |
| SNP_P4_68257_1980329 | NC_021164.1    | Ca_kabuli_chr05 | 1980329                 | AA                              | GG              | 1946839914               |
| SNP_P4_68258_1980943 | NC_021164.1    | Ca_kabuli_chr05 | 1980943                 | GG                              | CC              | 1946839916               |
| SNP_P4_68259_1983501 | NC_021164.1    | Ca_kabuli_chr05 | 1983501                 | AA                              | CC              | 1946839918               |
| SNP_P4_68260_1984841 | NC_021164.1    | Ca_kabuli_chr05 | 1984841                 | CC                              | TT              | 1946839920               |
| SNP_P4_68261_1994562 | NC_021164.1    | Ca_kabuli_chr05 | 1994562                 | TT                              | CC              | 1946839922               |
| SNP_P4_68262_1994663 | NC_021164.1    | Ca_kabuli_chr05 | 1994663                 | CC                              | TT              | 1946839924               |
| SNP_P4_68263_1994738 | NC_021164.1    | Ca_kabuli_chr05 | 1994738                 | CC                              | GG              | 1946839926               |
| SNP_P4_68264_1995023 | NC_021164.1    | Ca_kabuli_chr05 | 1995023                 | AA                              | TT              | 1946839928               |
| SNP_P4_68265_1995129 | NC_021164.1    | Ca_kabuli_chr05 | 1995129                 | AA                              | TT              | 1946839930               |
| SNP_P4_68266_1995157 | NC_021164.1    | Ca_kabuli_chr05 | 1995157                 | CC                              | GG              | 1946839932               |
| SNP_P4_68267_1995279 | NC_021164.1    | Ca_kabuli_chr05 | 1995279                 | TT                              | AA              | 1946839934               |
| SNP_P4_68268_1995414 | NC_021164.1    | Ca_kabuli_chr05 | 1995414                 | CC                              | TT              | 1946839936               |
| SNP_P4_68270_2000474 | NC_021164.1    | Ca_kabuli_chr05 | 2000474                 | AA                              | GG              | 1946839938               |
| SNP_P4_68271_2000494 | NC_021164.1    | Ca_kabuli_chr05 | 2000494                 | AA                              | GG              | 1946839940               |
| SNP_P4_68272_2000569 | NC_021164.1    | Ca_kabuli_chr05 | 2000569                 | AA                              | TT              | 1946839942               |
| SNP_P4_68273_2000590 | NC_021164.1    | Ca_kabuli_chr05 | 2000590                 | TT                              | CC              | 1946839944               |

| SNPs IDs             | Chromosome IDs | Chromosomes     | Physical positions (bp) | CDC Frontier (Reference genome) | (ILWC46 & LPNB) | NCBI SNPdb Accession IDs |
|----------------------|----------------|-----------------|-------------------------|---------------------------------|-----------------|--------------------------|
| SNP_P4_68274_2000618 | NC_021164.1    | Ca_kabuli_chr05 | 2000618                 | AA                              | GG              | 1946839946               |
| SNP_P4_68275_2000669 | NC_021164.1    | Ca_kabuli_chr05 | 2000669                 | CC                              | TT              | 1946839948               |
| SNP_P4_68276_2000695 | NC_021164.1    | Ca_kabuli_chr05 | 2000695                 | AA                              | TT              | 1946839950               |
| SNP_P4_68278_2002314 | NC_021164.1    | Ca_kabuli_chr05 | 2002314                 | TT                              | CC              | 1946839952               |
| SNP_P4_68279_2002326 | NC_021164.1    | Ca_kabuli_chr05 | 2002326                 | TT                              | CC              | 1946839954               |
| SNP_P4_68280_2002469 | NC_021164.1    | Ca_kabuli_chr05 | 2002469                 | GG                              | CC              | 1946839956               |
| SNP_P4_68281_2002471 | NC_021164.1    | Ca_kabuli_chr05 | 2002471                 | TT                              | CC              | 1946839958               |
| SNP_P4_68282_2006878 | NC_021164.1    | Ca_kabuli_chr05 | 2006878                 | AA                              | TT              | 1946839960               |
| SNP_P4_68283_2007937 | NC_021164.1    | Ca_kabuli_chr05 | 2007937                 | TT                              | CC              | 1946839962               |
| SNP_P4_68284_2008014 | NC_021164.1    | Ca_kabuli_chr05 | 2008014                 | GG                              | TT              | 1946839964               |
| SNP_P4_68286_2008433 | NC_021164.1    | Ca_kabuli_chr05 | 2008433                 | TT                              | CC              | 1946839966               |
| SNP_P4_68287_2008444 | NC_021164.1    | Ca_kabuli_chr05 | 2008444                 | AA                              | GG              | 1946839968               |
| SNP_P4_68288_2008447 | NC_021164.1    | Ca_kabuli_chr05 | 2008447                 | TT                              | GG              | 1946839970               |
| SNP_P4_68289_2008542 | NC_021164.1    | Ca_kabuli_chr05 | 2008542                 | TT                              | AA              | 1946839972               |
| SNP_P4_68290_2008849 | NC_021164.1    | Ca_kabuli_chr05 | 2008849                 | TT                              | CC              | 1946839974               |
| SNP_P4_68291_2008870 | NC_021164.1    | Ca_kabuli_chr05 | 2008870                 | AA                              | CC              | 1946839976               |
| SNP_P4_68292_2008885 | NC_021164.1    | Ca_kabuli_chr05 | 2008885                 | TT                              | CC              | 1946839978               |
| SNP_P4_68293_2008903 | NC_021164.1    | Ca_kabuli_chr05 | 2008903                 | CC                              | TT              | 1946839980               |
| SNP_P4_68294_2009005 | NC_021164.1    | Ca_kabuli_chr05 | 2009005                 | TT                              | AA              | 1946839982               |
| SNP_P4_68295_2009019 | NC_021164.1    | Ca_kabuli_chr05 | 2009019                 | GG                              | AA              | 1946839984               |
| SNP_P4_68296_2017091 | NC_021164.1    | Ca_kabuli_chr05 | 2017091                 | AA                              | GG              | 1946839986               |
| SNP_P4_68297_2017154 | NC_021164.1    | Ca_kabuli_chr05 | 2017154                 | CC                              | AA              | 1946839988               |
| SNP_P4_68298_2018530 | NC_021164.1    | Ca_kabuli_chr05 | 2018530                 | AA                              | GG              | 1946839990               |
| SNP_P4_68299_2018925 | NC_021164.1    | Ca_kabuli_chr05 | 2018925                 | TT                              | CC              | 1946839992               |
| SNP_P4_68300_2019065 | NC_021164.1    | Ca_kabuli_chr05 | 2019065                 | AA                              | TT              | 1946839994               |
| SNP_P4_68301_2019095 | NC_021164.1    | Ca_kabuli_chr05 | 2019095                 | GG                              | AA              | 1946839996               |
| SNP_P4_68302_2019380 | NC_021164.1    | Ca_kabuli_chr05 | 2019380                 | GG                              | TT              | 1946839998               |
| SNP_P4_68303_2031738 | NC_021164.1    | Ca_kabuli_chr05 | 2031738                 | CC                              | AA              | 1946839999               |
| SNP_P4_68304_2034522 | NC_021164.1    | Ca_kabuli_chr05 | 2034522                 | GG                              | CC              | 1946840001               |
| SNP_P4_68305_2034538 | NC_021164.1    | Ca_kabuli_chr05 | 2034538                 | AA                              | GG              | 1946840003               |
| SNP_P4_68306_2043286 | NC_021164.1    | Ca_kabuli_chr05 | 2043286                 | GG                              | AA              | 1946840005               |
| SNP_P4_68307_2043314 | NC_021164.1    | Ca_kabuli_chr05 | 2043314                 | AA                              | CC              | 1946840007               |
| SNP_P4_68308_2043494 | NC_021164.1    | Ca_kabuli_chr05 | 2043494                 | CC                              | TT              | 1946840009               |
| SNP_P4_68309_2084413 | NC_021164.1    | Ca_kabuli_chr05 | 2084413                 | GG                              | TT              | 1946840011               |
| SNP_P4_68310_2096863 | NC_021164.1    | Ca_kabuli_chr05 | 2096863                 | AA                              | GG              | 1946840013               |
| SNP_P4_68311_2097072 | NC_021164.1    | Ca_kabuli_chr05 | 2097072                 | AA                              | TT              | 1946840015               |
| SNP_P4_68312_2097145 | NC_021164.1    | Ca_kabuli_chr05 | 2097145                 | AA                              | TT              | 1946840017               |
| SNP_P4_68313_2097357 | NC_021164.1    | Ca_kabuli_chr05 | 2097357                 | AA                              | CC              | 1946840019               |
| SNP_P4_68314_2098889 | NC_021164.1    | Ca_kabuli_chr05 | 2098889                 | TT                              | CC              | 1946840021               |
| SNP_P4_68315_2100307 | NC_021164.1    | Ca_kabuli_chr05 | 2100307                 | GG                              | AA              | 1946840023               |
| SNP_P4_68317_2100931 | NC_021164.1    | Ca_kabuli_chr05 | 2100931                 | GG                              | TT              | 1946840025               |
| SNP_P4_68318_2100942 | NC_021164.1    | Ca_kabuli_chr05 | 2100942                 | CC                              | TT              | 1946840027               |

| SNPs IDs             | Chromosome IDs | Chromosomes     | Physical positions (bp) | CDC Frontier (Reference genome) | (ILWC46 & LPNB) | NCBI SNPdb Accession IDs |
|----------------------|----------------|-----------------|-------------------------|---------------------------------|-----------------|--------------------------|
| SNP_P4_68319_2131587 | NC_021164.1    | Ca_kabuli_chr05 | 2131587                 | CC                              | TT              | 1946840029               |
| SNP_P4_68321_2192099 | NC_021164.1    | Ca_kabuli_chr05 | 2192099                 | GG                              | AA              | 1946840031               |
| SNP_P4_68322_2208025 | NC_021164.1    | Ca_kabuli_chr05 | 2208025                 | AA                              | TT              | 1946840033               |
| SNP_P4_68323_2274697 | NC_021164.1    | Ca_kabuli_chr05 | 2274697                 | CC                              | TT              | 1946840035               |
| SNP_P4_68325_2277811 | NC_021164.1    | Ca_kabuli_chr05 | 2277811                 | AA                              | GG              | 1946840037               |
| SNP_P4_68326_2291160 | NC_021164.1    | Ca_kabuli_chr05 | 2291160                 | CC                              | TT              | 1946840039               |
| SNP_P4_68327_2291272 | NC_021164.1    | Ca_kabuli_chr05 | 2291272                 | GG                              | AA              | 1946840041               |
| SNP_P4_68328_2293085 | NC_021164.1    | Ca_kabuli_chr05 | 2293085                 | TT                              | CC              | 1946840043               |
| SNP_P4_68329_2293943 | NC_021164.1    | Ca_kabuli_chr05 | 2293943                 | CC                              | GG              | 1946840045               |
| SNP_P4_68330_2295090 | NC_021164.1    | Ca_kabuli_chr05 | 2295090                 | TT                              | CC              | 1946840047               |
| SNP_P4_68331_2296517 | NC_021164.1    | Ca_kabuli_chr05 | 2296517                 | GG                              | AA              | 1946840049               |
| SNP_P4_68332_2297474 | NC_021164.1    | Ca_kabuli_chr05 | 2297474                 | TT                              | GG              | 1946840051               |
| SNP_P4_68333_2299167 | NC_021164.1    | Ca_kabuli_chr05 | 2299167                 | CC                              | TT              | 1946840053               |
| SNP_P4_68334_2302945 | NC_021164.1    | Ca_kabuli_chr05 | 2302945                 | AA                              | GG              | 1946840055               |
| SNP_P4_68335_2304566 | NC_021164.1    | Ca_kabuli_chr05 | 2304566                 | TT                              | CC              | 1946840057               |
| SNP_P4_68336_2305207 | NC_021164.1    | Ca_kabuli_chr05 | 2305207                 | CC                              | AA              | 1946840059               |
| SNP_P4_68337_2305434 | NC_021164.1    | Ca_kabuli_chr05 | 2305434                 | TT                              | CC              | 1946840061               |
| SNP_P4_68338_2305619 | NC_021164.1    | Ca_kabuli_chr05 | 2305619                 | TT                              | CC              | 1946840063               |
| SNP_P4_68339_2323228 | NC_021164.1    | Ca_kabuli_chr05 | 2323228                 | CC                              | TT              | 1946840065               |
| SNP_P4_68340_2323425 | NC_021164.1    | Ca_kabuli_chr05 | 2323425                 | CC                              | TT              | 1946840067               |
| SNP_P4_68342_2323476 | NC_021164.1    | Ca_kabuli_chr05 | 2323476                 | TT                              | GG              | 1946840069               |
| SNP_P4_68343_2323564 | NC_021164.1    | Ca_kabuli_chr05 | 2323564                 | GG                              | AA              | 1946840071               |
| SNP_P4_68344_2323590 | NC_021164.1    | Ca_kabuli_chr05 | 2323590                 | AA                              | GG              | 1946840073               |
| SNP_P4_68345_2323599 | NC_021164.1    | Ca_kabuli_chr05 | 2323599                 | AA                              | CC              | 1946840075               |
| SNP_P4_68346_2323727 | NC_021164.1    | Ca_kabuli_chr05 | 2323727                 | TT                              | CC              | 1946840076               |
| SNP_P4_68348_2323868 | NC_021164.1    | Ca_kabuli_chr05 | 2323868                 | CC                              | TT              | 1946840078               |
| SNP_P4_68349_2323904 | NC_021164.1    | Ca_kabuli_chr05 | 2323904                 | TT                              | CC              | 1946840080               |
| SNP_P4_68350_2323935 | NC_021164.1    | Ca_kabuli_chr05 | 2323935                 | TT                              | AA              | 1946840082               |
| SNP_P4_68351_2324109 | NC_021164.1    | Ca_kabuli_chr05 | 2324109                 | TT                              | CC              | 1946840084               |
| SNP_P4_68352_2324295 | NC_021164.1    | Ca_kabuli_chr05 | 2324295                 | TT                              | CC              | 1946840086               |
| SNP_P4_68353_2324315 | NC_021164.1    | Ca_kabuli_chr05 | 2324315                 | CC                              | AA              | 1946840088               |
| SNP_P4_68354_2324326 | NC_021164.1    | Ca_kabuli_chr05 | 2324326                 | AA                              | CC              | 1946840090               |
| SNP_P4_68355_2324346 | NC_021164.1    | Ca_kabuli_chr05 | 2324346                 | CC                              | TT              | 1946840092               |
| SNP_P4_68356_2324438 | NC_021164.1    | Ca_kabuli_chr05 | 2324438                 | CC                              | TT              | 1946840094               |
| SNP_P4_68357_2324452 | NC_021164.1    | Ca_kabuli_chr05 | 2324452                 | TT                              | AA              | 1946840096               |
| SNP_P4_68358_2324454 | NC_021164.1    | Ca_kabuli_chr05 | 2324454                 | AA                              | TT              | 1946840098               |
| SNP_P4_68359_2324535 | NC_021164.1    | Ca_kabuli_chr05 | 2324535                 | TT                              | GG              | 1946840100               |
| SNP_P4_68360_2324573 | NC_021164.1    | Ca_kabuli_chr05 | 2324573                 | TT                              | GG              | 1946840102               |
| SNP_P4_68361_2324630 | NC_021164.1    | Ca_kabuli_chr05 | 2324630                 | GG                              | AA              | 1946840104               |
| SNP_P4_68362_2324641 | NC_021164.1    | Ca_kabuli_chr05 | 2324641                 | CC                              | AA              | 1946840106               |
| SNP_P4_68363_2324665 | NC_021164.1    | Ca_kabuli_chr05 | 2324665                 | AA                              | GG              | 1946840108               |
| SNP_P4_68364_2324815 | NC_021164.1    | Ca_kabuli_chr05 | 2324815                 | GG                              | CC              | 1946840110               |

| SNPs IDs             | Chromosome IDs | Chromosomes     | Physical positions (bp) | CDC Frontier (Reference genome) | (ILWC46 & LPNB) | NCBI SNPdb Accession IDs |
|----------------------|----------------|-----------------|-------------------------|---------------------------------|-----------------|--------------------------|
| SNP_P4_68365_2324845 | NC_021164.1    | Ca_kabuli_chr05 | 2324845                 | TT                              | AA              | 1946840113               |
| SNP_P4_68366_2324934 | NC_021164.1    | Ca_kabuli_chr05 | 2324934                 | TT                              | CC              | 1946840115               |
| SNP_P4_68367_2325042 | NC_021164.1    | Ca_kabuli_chr05 | 2325042                 | TT                              | CC              | 1946840117               |
| SNP_P4_68368_2325059 | NC_021164.1    | Ca_kabuli_chr05 | 2325059                 | AA                              | CC              | 1946840119               |
| SNP_P4_68369_2325063 | NC_021164.1    | Ca_kabuli_chr05 | 2325063                 | TT                              | AA              | 1946840121               |
| SNP_P4_68370_2325064 | NC_021164.1    | Ca_kabuli_chr05 | 2325064                 | AA                              | GG              | 1946840123               |
| SNP_P4_68371_2325120 | NC_021164.1    | Ca_kabuli_chr05 | 2325120                 | AA                              | GG              | 1946840125               |
| SNP_P4_68372_2325154 | NC_021164.1    | Ca_kabuli_chr05 | 2325154                 | TT                              | AA              | 1946840127               |
| SNP_P4_68373_2325270 | NC_021164.1    | Ca_kabuli_chr05 | 2325270                 | AA                              | TT              | 1946840129               |
| SNP_P4_68374_2325298 | NC_021164.1    | Ca_kabuli_chr05 | 2325298                 | CC                              | GG              | 1946840131               |
| SNP_P4_68375_2325624 | NC_021164.1    | Ca_kabuli_chr05 | 2325624                 | GG                              | TT              | 1946840133               |
| SNP_P4_68376_2325629 | NC_021164.1    | Ca_kabuli_chr05 | 2325629                 | TT                              | CC              | 1946840135               |
| SNP_P4_68377_2325635 | NC_021164.1    | Ca_kabuli_chr05 | 2325635                 | TT                              | GG              | 1946840137               |
| SNP_P4_68378_2325696 | NC_021164.1    | Ca_kabuli_chr05 | 2325696                 | AA                              | GG              | 1946840139               |
| SNP_P4_68379_2325881 | NC_021164.1    | Ca_kabuli_chr05 | 2325881                 | GG                              | TT              | 1946840141               |
| SNP_P4_68380_2325928 | NC_021164.1    | Ca_kabuli_chr05 | 2325928                 | TT                              | CC              | 1946840143               |
| SNP_P4_68381_2326349 | NC_021164.1    | Ca_kabuli_chr05 | 2326349                 | TT                              | AA              | 1946840145               |
| SNP_P4_68382_2326540 | NC_021164.1    | Ca_kabuli_chr05 | 2326540                 | TT                              | CC              | 1946840147               |
| SNP_P4_68383_2326682 | NC_021164.1    | Ca_kabuli_chr05 | 2326682                 | AA                              | CC              | 1946840149               |
| SNP_P4_68384_2326793 | NC_021164.1    | Ca_kabuli_chr05 | 2326793                 | AA                              | CC              | 1946840151               |
| SNP_P4_68385_2326873 | NC_021164.1    | Ca_kabuli_chr05 | 2326873                 | CC                              | TT              | 1946840153               |
| SNP_P4_68386_2326890 | NC_021164.1    | Ca_kabuli_chr05 | 2326890                 | AA                              | GG              | 1946840155               |
| SNP_P4_68387_2326917 | NC_021164.1    | Ca_kabuli_chr05 | 2326917                 | GG                              | CC              | 1946840157               |
| SNP_P4_68388_2326919 | NC_021164.1    | Ca_kabuli_chr05 | 2326919                 | AA                              | TT              | 1946840159               |
| SNP_P4_68389_2326968 | NC_021164.1    | Ca_kabuli_chr05 | 2326968                 | AA                              | GG              | 1946840160               |
| SNP_P4_68390_2327069 | NC_021164.1    | Ca_kabuli_chr05 | 2327069                 | CC                              | AA              | 1946840162               |
| SNP_P4_68391_2327108 | NC_021164.1    | Ca_kabuli_chr05 | 2327108                 | AA                              | CC              | 1946840164               |
| SNP_P4_68392_2327170 | NC_021164.1    | Ca_kabuli_chr05 | 2327170                 | CC                              | AA              | 1946840166               |
| SNP_P4_68393_2327178 | NC_021164.1    | Ca_kabuli_chr05 | 2327178                 | AA                              | TT              | 1946840168               |
| SNP_P4_68394_2327210 | NC_021164.1    | Ca_kabuli_chr05 | 2327210                 | TT                              | GG              | 1946840170               |
| SNP_P4_68396_2327313 | NC_021164.1    | Ca_kabuli_chr05 | 2327313                 | AA                              | GG              | 1946840172               |
| SNP_P4_68397_2327323 | NC_021164.1    | Ca_kabuli_chr05 | 2327323                 | AA                              | GG              | 1946840174               |
| SNP_P4_68398_2327360 | NC_021164.1    | Ca_kabuli_chr05 | 2327360                 | AA                              | GG              | 1946840176               |
| SNP_P4_68399_2327361 | NC_021164.1    | Ca_kabuli_chr05 | 2327361                 | CC                              | TT              | 1946840178               |
| SNP_P4_68400_2327383 | NC_021164.1    | Ca_kabuli_chr05 | 2327383                 | TT                              | CC              | 1946840180               |
| SNP_P4_68401_2327390 | NC_021164.1    | Ca_kabuli_chr05 | 2327390                 | GG                              | TT              | 1946840183               |
| SNP_P4_68402_2327396 | NC_021164.1    | Ca_kabuli_chr05 | 2327396                 | GG                              | AA              | 1946840185               |
| SNP_P4_68403_2327440 | NC_021164.1    | Ca_kabuli_chr05 | 2327440                 | AA                              | CC              | 1946840187               |
| SNP_P4_68404_2327472 | NC_021164.1    | Ca_kabuli_chr05 | 2327472                 | AA                              | GG              | 1946840189               |
| SNP_P4_68405_2327524 | NC_021164.1    | Ca_kabuli_chr05 | 2327524                 | TT                              | CC              | 1946840191               |
| SNP_P4_68406_2327588 | NC_021164.1    | Ca_kabuli_chr05 | 2327588                 | CC                              | TT              | 1946840193               |
| SNP_P4_68407_2327591 | NC_021164.1    | Ca_kabuli_chr05 | 2327591                 | TT                              | CC              | 1946840195               |

| SNPs IDs             | Chromosome IDs | Chromosomes     | Physical positions (bp) | CDC Frontier (Reference genome) | (ILWC46 & LPNB) | NCBI SNPdb Accession IDs |
|----------------------|----------------|-----------------|-------------------------|---------------------------------|-----------------|--------------------------|
| SNP_P4_68408_2327653 | NC_021164.1    | Ca_kabuli_chr05 | 2327653                 | CC                              | GG              | 1946840197               |
| SNP_P4_68409_2327687 | NC_021164.1    | Ca_kabuli_chr05 | 2327687                 | TT                              | CC              | 1946840199               |
| SNP_P4_68410_2327832 | NC_021164.1    | Ca_kabuli_chr05 | 2327832                 | AA                              | GG              | 1946840201               |
| SNP_P4_68411_2327912 | NC_021164.1    | Ca_kabuli_chr05 | 2327912                 | TT                              | AA              | 1946840203               |
| SNP_P4_68412_2327929 | NC_021164.1    | Ca_kabuli_chr05 | 2327929                 | TT                              | AA              | 1946840205               |
| SNP_P4_68413_2327930 | NC_021164.1    | Ca_kabuli_chr05 | 2327930                 | GG                              | AA              | 1946840207               |
| SNP_P4_68414_2327955 | NC_021164.1    | Ca_kabuli_chr05 | 2327955                 | CC                              | TT              | 1946840209               |
| SNP_P4_68415_2327980 | NC_021164.1    | Ca_kabuli_chr05 | 2327980                 | CC                              | TT              | 1946840211               |
| SNP_P4_68416_2328090 | NC_021164.1    | Ca_kabuli_chr05 | 2328090                 | TT                              | AA              | 1946840213               |
| SNP_P4_68417_2328128 | NC_021164.1    | Ca_kabuli_chr05 | 2328128                 | TT                              | CC              | 1946840215               |
| SNP_P4_68418_2328450 | NC_021164.1    | Ca_kabuli_chr05 | 2328450                 | GG                              | AA              | 1946840217               |
| SNP_P4_68419_2328451 | NC_021164.1    | Ca_kabuli_chr05 | 2328451                 | GG                              | AA              | 1946840219               |
| SNP_P4_68420_2328485 | NC_021164.1    | Ca_kabuli_chr05 | 2328485                 | AA                              | GG              | 1946840221               |
| SNP_P4_68421_2339970 | NC_021164.1    | Ca_kabuli_chr05 | 2339970                 | AA                              | TT              | 1946840223               |
| SNP_P4_68422_2355651 | NC_021164.1    | Ca_kabuli_chr05 | 2355651                 | GG                              | AA              | 1946840225               |
| SNP_P4_68423_2355661 | NC_021164.1    | Ca_kabuli_chr05 | 2355661                 | GG                              | TT              | 1946840227               |
| SNP_P4_68424_2355776 | NC_021164.1    | Ca_kabuli_chr05 | 2355776                 | AA                              | CC              | 1946840229               |
| SNP_P4_68426_2375490 | NC_021164.1    | Ca_kabuli_chr05 | 2375490                 | TT                              | GG              | 1946840231               |
| SNP_P4_68427_2379860 | NC_021164.1    | Ca_kabuli_chr05 | 2379860                 | CC                              | GG              | 1946840233               |
| SNP_P4_68428_2380011 | NC_021164.1    | Ca_kabuli_chr05 | 2380011                 | CC                              | AA              | 1946840235               |
| SNP_P4_68429_2402307 | NC_021164.1    | Ca_kabuli_chr05 | 2402307                 | TT                              | CC              | 1946840237               |
| SNP_P4_68431_2402660 | NC_021164.1    | Ca_kabuli_chr05 | 2402660                 | AA                              | CC              | 1946840239               |
| SNP_P4_68432_2404441 | NC_021164.1    | Ca_kabuli_chr05 | 2404441                 | CC                              | TT              | 1946840241               |
| SNP_P4_68434_2420874 | NC_021164.1    | Ca_kabuli_chr05 | 2420874                 | TT                              | CC              | 1946840243               |
| SNP_P4_68435_2421141 | NC_021164.1    | Ca_kabuli_chr05 | 2421141                 | TT                              | CC              | 1946840245               |
| SNP_P4_68436_2421829 | NC_021164.1    | Ca_kabuli_chr05 | 2421829                 | AA                              | TT              | 1946840247               |
| SNP_P4_68437_2421832 | NC_021164.1    | Ca_kabuli_chr05 | 2421832                 | AA                              | TT              | 1946840249               |
| SNP_P4_68439_2454809 | NC_021164.1    | Ca_kabuli_chr05 | 2454809                 | AA                              | CC              | 1946840251               |
| SNP_P4_68440_2476755 | NC_021164.1    | Ca_kabuli_chr05 | 2476755                 | TT                              | CC              | 1946840253               |
| SNP_P4_68441_2495578 | NC_021164.1    | Ca_kabuli_chr05 | 2495578                 | GG                              | TT              | 1946840255               |
| SNP_P4_68442_2504088 | NC_021164.1    | Ca_kabuli_chr05 | 2504088                 | TT                              | AA              | 1946840257               |
| SNP_P4_68443_2504098 | NC_021164.1    | Ca_kabuli_chr05 | 2504098                 | TT                              | AA              | 1946840259               |
| SNP_P4_68444_2508771 | NC_021164.1    | Ca_kabuli_chr05 | 2508771                 | TT                              | CC              | 1946840261               |
| SNP_P4_68445_2519150 | NC_021164.1    | Ca_kabuli_chr05 | 2519150                 | CC                              | AA              | 1946840263               |
| SNP_P4_68446_2519218 | NC_021164.1    | Ca_kabuli_chr05 | 2519218                 | CC                              | TT              | 1946840265               |
| SNP_P4_68447_2519728 | NC_021164.1    | Ca_kabuli_chr05 | 2519728                 | CC                              | TT              | 1946840267               |
| SNP_P4_68448_2539536 | NC_021164.1    | Ca_kabuli_chr05 | 2539536                 | TT                              | CC              | 1946840269               |
| SNP_P4_68449_2539760 | NC_021164.1    | Ca_kabuli_chr05 | 2539760                 | CC                              | TT              | 1946840271               |
| SNP_P4_68450_2540094 | NC_021164.1    | Ca_kabuli_chr05 | 2540094                 | TT                              | GG              | 1946840273               |
| SNP_P4_68451_2540108 | NC_021164.1    | Ca_kabuli_chr05 | 2540108                 | TT                              | GG              | 1946840275               |
| SNP_P4_68452_2540174 | NC_021164.1    | Ca_kabuli_chr05 | 2540174                 | GG                              | TT              | 1946840277               |
| SNP_P4_68453_2546738 | NC_021164.1    | Ca_kabuli_chr05 | 2546738                 | TT                              | CC              | 1946840279               |

| SNPs IDs             | Chromosome IDs | Chromosomes     | Physical positions (bp) | CDC Frontier (Reference genome) | (ILWC46 & LPNB) | NCBI SNPdb Accession IDs |
|----------------------|----------------|-----------------|-------------------------|---------------------------------|-----------------|--------------------------|
| SNP_P4_68454_2547461 | NC_021164.1    | Ca_kabuli_chr05 | 2547461                 | CC                              | AA              | 1946840281               |
| SNP_P4_68455_2548038 | NC_021164.1    | Ca_kabuli_chr05 | 2548038                 | AA                              | GG              | 1946840283               |
| SNP_P4_68457_2548050 | NC_021164.1    | Ca_kabuli_chr05 | 2548050                 | GG                              | AA              | 1946840285               |
| SNP_P4_68458_2548061 | NC_021164.1    | Ca_kabuli_chr05 | 2548061                 | GG                              | AA              | 1946840287               |
| SNP_P4_68459_2550825 | NC_021164.1    | Ca_kabuli_chr05 | 2550825                 | CC                              | AA              | 1946840289               |
| SNP_P4_68461_2559087 | NC_021164.1    | Ca_kabuli_chr05 | 2559087                 | TT                              | CC              | 1946840291               |
| SNP_P4_68462_2600805 | NC_021164.1    | Ca_kabuli_chr05 | 2600805                 | TT                              | GG              | 1946840293               |
| SNP_P4_68463_2626781 | NC_021164.1    | Ca_kabuli_chr05 | 2626781                 | AA                              | TT              | 1946840295               |
| SNP_P4_68464_2628357 | NC_021164.1    | Ca_kabuli_chr05 | 2628357                 | AA                              | TT              | 1946840297               |
| SNP_P4_68465_2628499 | NC_021164.1    | Ca_kabuli_chr05 | 2628499                 | AA                              | TT              | 1946840299               |
| SNP_P4_68466_2628508 | NC_021164.1    | Ca_kabuli_chr05 | 2628508                 | TT                              | CC              | 1946840301               |
| SNP_P4_68467_2628538 | NC_021164.1    | Ca_kabuli_chr05 | 2628538                 | CC                              | TT              | 1946840303               |
| SNP_P4_68469_2628594 | NC_021164.1    | Ca_kabuli_chr05 | 2628594                 | GG                              | AA              | 1946840305               |
| SNP_P4_68470_2628682 | NC_021164.1    | Ca_kabuli_chr05 | 2628682                 | CC                              | AA              | 1946840307               |
| SNP_P4_68471_2628719 | NC_021164.1    | Ca_kabuli_chr05 | 2628719                 | GG                              | AA              | 1946840309               |
| SNP_P4_68472_2629012 | NC_021164.1    | Ca_kabuli_chr05 | 2629012                 | CC                              | TT              | 1946840310               |
| SNP_P4_68473_2641145 | NC_021164.1    | Ca_kabuli_chr05 | 2641145                 | CC                              | AA              | 1946840312               |
| SNP_P4_68474_2659156 | NC_021164.1    | Ca_kabuli_chr05 | 2659156                 | TT                              | CC              | 1946840314               |
| SNP_P4_68475_2663865 | NC_021164.1    | Ca_kabuli_chr05 | 2663865                 | AA                              | GG              | 1946840316               |
| SNP_P4_68476_2664041 | NC_021164.1    | Ca_kabuli_chr05 | 2664041                 | GG                              | AA              | 1946840318               |
| SNP_P4_68477_2664226 | NC_021164.1    | Ca_kabuli_chr05 | 2664226                 | AA                              | TT              | 1946840320               |
| SNP_P4_68478_2669306 | NC_021164.1    | Ca_kabuli_chr05 | 2669306                 | CC                              | TT              | 1946840322               |
| SNP_P4_68479_2669324 | NC_021164.1    | Ca_kabuli_chr05 | 2669324                 | GG                              | AA              | 1946840324               |
| SNP_P4_68480_2669921 | NC_021164.1    | Ca_kabuli_chr05 | 2669921                 | GG                              | TT              | 1946840326               |
| SNP_P4_68481_2670102 | NC_021164.1    | Ca_kabuli_chr05 | 2670102                 | GG                              | AA              | 1946840328               |
| SNP_P4_68482_2698882 | NC_021164.1    | Ca_kabuli_chr05 | 2698882                 | TT                              | AA              | 1946840330               |
| SNP_P4_68483_2698923 | NC_021164.1    | Ca_kabuli_chr05 | 2698923                 | CC                              | TT              | 1946840332               |
| SNP_P4_68484_2699053 | NC_021164.1    | Ca_kabuli_chr05 | 2699053                 | GG                              | AA              | 1946840334               |
| SNP_P4_68485_2699058 | NC_021164.1    | Ca_kabuli_chr05 | 2699058                 | CC                              | TT              | 1946840337               |
| SNP_P4_68486_2699060 | NC_021164.1    | Ca_kabuli_chr05 | 2699060                 | CC                              | AA              | 1946840339               |
| SNP_P4_68487_2699067 | NC_021164.1    | Ca_kabuli_chr05 | 2699067                 | GG                              | TT              | 1946840341               |
| SNP_P4_68488_2699071 | NC_021164.1    | Ca_kabuli_chr05 | 2699071                 | AA                              | GG              | 1946840343               |
| SNP_P4_68489_2699076 | NC_021164.1    | Ca_kabuli_chr05 | 2699076                 | CC                              | TT              | 1946840345               |
| SNP_P4_68490_2699080 | NC_021164.1    | Ca_kabuli_chr05 | 2699080                 | AA                              | GG              | 1946840347               |
| SNP_P4_68492_2719098 | NC_021164.1    | Ca_kabuli_chr05 | 2719098                 | TT                              | GG              | 1946840349               |
| SNP_P4_68493_2739328 | NC_021164.1    | Ca_kabuli_chr05 | 2739328                 | AA                              | CC              | 1946840351               |
| SNP_P4_68494_2739935 | NC_021164.1    | Ca_kabuli_chr05 | 2739935                 | GG                              | AA              | 1946840353               |
| SNP_P4_68495_2740021 | NC_021164.1    | Ca_kabuli_chr05 | 2740021                 | AA                              | GG              | 1946840355               |
| SNP_P4_68496_2744336 | NC_021164.1    | Ca_kabuli_chr05 | 2744336                 | GG                              | AA              | 1946840357               |
| SNP_P4_68497_2744583 | NC_021164.1    | Ca_kabuli_chr05 | 2744583                 | CC                              | AA              | 1946840359               |
| SNP_P4_68498_2744585 | NC_021164.1    | Ca_kabuli_chr05 | 2744585                 | CC                              | AA              | 1946840361               |
| SNP_P4_68499_2744588 | NC_021164.1    | Ca_kabuli_chr05 | 2744588                 | CC                              | TT              | 1946840363               |



| SNPs IDs             | Chromosome IDs | Chromosomes     | Physical positions (bp) | CDC Frontier (Reference genome) | (ILWC46 & LPNB) | NCBI SNPdb Accession IDs |
|----------------------|----------------|-----------------|-------------------------|---------------------------------|-----------------|--------------------------|
| SNP_P4_68500_2744639 | NC_021164.1    | Ca_kabuli_chr05 | 2744639                 | AA                              | GG              | 1946840365               |
| SNP_P4_68501_2744686 | NC_021164.1    | Ca_kabuli_chr05 | 2744686                 | TT                              | CC              | 1946840367               |
| SNP_P4_68502_2753644 | NC_021164.1    | Ca_kabuli_chr05 | 2753644                 | AA                              | GG              | 1946840369               |
| SNP_P4_68503_2828783 | NC_021164.1    | Ca_kabuli_chr05 | 2828783                 | AA                              | CC              | 1946840371               |
| SNP_P4_68504_2830289 | NC_021164.1    | Ca_kabuli_chr05 | 2830289                 | AA                              | GG              | 1946840373               |
| SNP_P4_68505_2830655 | NC_021164.1    | Ca_kabuli_chr05 | 2830655                 | AA                              | GG              | 1946840375               |
| SNP_P4_68506_2830698 | NC_021164.1    | Ca_kabuli_chr05 | 2830698                 | AA                              | GG              | 1946840377               |
| SNP_P4_68507_2831020 | NC_021164.1    | Ca_kabuli_chr05 | 2831020                 | GG                              | AA              | 1946840379               |
| SNP_P4_68508_2831185 | NC_021164.1    | Ca_kabuli_chr05 | 2831185                 | AA                              | GG              | 1946840380               |
| SNP_P4_68509_2840443 | NC_021164.1    | Ca_kabuli_chr05 | 2840443                 | AA                              | GG              | 1946840382               |
| SNP_P4_68510_2851116 | NC_021164.1    | Ca_kabuli_chr05 | 2851116                 | GG                              | AA              | 1946840384               |
| SNP_P4_68511_2912543 | NC_021164.1    | Ca_kabuli_chr05 | 2912543                 | AA                              | GG              | 1946840386               |
| SNP_P4_68512_2920680 | NC_021164.1    | Ca_kabuli_chr05 | 2920680                 | AA                              | GG              | 1946840388               |
| SNP_P4_68513_2947219 | NC_021164.1    | Ca_kabuli_chr05 | 2947219                 | AA                              | GG              | 1946840391               |
| SNP_P4_68514_2948530 | NC_021164.1    | Ca_kabuli_chr05 | 2948530                 | GG                              | TT              | 1946840393               |
| SNP_P4_68515_2948531 | NC_021164.1    | Ca_kabuli_chr05 | 2948531                 | TT                              | CC              | 1946840395               |
| SNP_P4_68516_2978840 | NC_021164.1    | Ca_kabuli_chr05 | 2978840                 | CC                              | TT              | 1946840397               |
| SNP_P4_68517_2992969 | NC_021164.1    | Ca_kabuli_chr05 | 2992969                 | CC                              | TT              | 1946840399               |
| SNP_P4_68518_2997091 | NC_021164.1    | Ca_kabuli_chr05 | 2997091                 | GG                              | AA              | 1946840401               |
| SNP_P4_68520_3066729 | NC_021164.1    | Ca_kabuli_chr05 | 3066729                 | AA                              | GG              | 1946840403               |
| SNP_P4_68521_3067090 | NC_021164.1    | Ca_kabuli_chr05 | 3067090                 | GG                              | AA              | 1946840405               |
| SNP_P4_68522_3067114 | NC_021164.1    | Ca_kabuli_chr05 | 3067114                 | CC                              | TT              | 1946840407               |
| SNP_P4_68523_3067124 | NC_021164.1    | Ca_kabuli_chr05 | 3067124                 | GG                              | AA              | 1946840409               |
| SNP_P4_68524_3067141 | NC_021164.1    | Ca_kabuli_chr05 | 3067141                 | AA                              | GG              | 1946840411               |
| SNP_P4_68525_3067204 | NC_021164.1    | Ca_kabuli_chr05 | 3067204                 | CC                              | TT              | 1946840413               |
| SNP_P4_68526_3070154 | NC_021164.1    | Ca_kabuli_chr05 | 3070154                 | CC                              | TT              | 1946840415               |
| SNP_P4_68527_3070196 | NC_021164.1    | Ca_kabuli_chr05 | 3070196                 | GG                              | AA              | 1946840417               |
| SNP_P4_68528_3070557 | NC_021164.1    | Ca_kabuli_chr05 | 3070557                 | GG                              | AA              | 1946840419               |
| SNP_P4_68529_3091775 | NC_021164.1    | Ca_kabuli_chr05 | 3091775                 | TT                              | AA              | 1946840421               |
| SNP_P4_68532_3117498 | NC_021164.1    | Ca_kabuli_chr05 | 3117498                 | AA                              | CC              | 1946840423               |
| SNP_P4_68534_3117523 | NC_021164.1    | Ca_kabuli_chr05 | 3117523                 | TT                              | CC              | 1946840425               |
| SNP_P4_68535_3117605 | NC_021164.1    | Ca_kabuli_chr05 | 3117605                 | AA                              | GG              | 1946840427               |
| SNP_P4_68536_3117639 | NC_021164.1    | Ca_kabuli_chr05 | 3117639                 | TT                              | CC              | 1946840429               |
| SNP_P4_68537_3117975 | NC_021164.1    | Ca_kabuli_chr05 | 3117975                 | TT                              | GG              | 1946840431               |
| SNP_P4_68538_3118035 | NC_021164.1    | Ca_kabuli_chr05 | 3118035                 | CC                              | TT              | 1946840433               |
| SNP_P4_68539_3170635 | NC_021164.1    | Ca_kabuli_chr05 | 3170635                 | TT                              | CC              | 1946840435               |
| SNP_P4_68540_3199660 | NC_021164.1    | Ca_kabuli_chr05 | 3199660                 | TT                              | GG              | 1946840437               |
| SNP_P4_68541_3199685 | NC_021164.1    | Ca_kabuli_chr05 | 3199685                 | GG                              | TT              | 1946840439               |
| SNP_P4_68542_3199718 | NC_021164.1    | Ca_kabuli_chr05 | 3199718                 | AA                              | GG              | 1946840441               |
| SNP_P4_68543_3199728 | NC_021164.1    | Ca_kabuli_chr05 | 3199728                 | CC                              | TT              | 1946840443               |
| SNP_P4_68544_3243551 | NC_021164.1    | Ca_kabuli_chr05 | 3243551                 | GG                              | TT              | 1946840445               |
| SNP_P4_68545_3279744 | NC_021164.1    | Ca_kabuli_chr05 | 3279744                 | TT                              | CC              | 1946840447               |

| SNPs IDs             | Chromosome IDs | Chromosomes     | Physical positions (bp) | CDC Frontier (Reference genome) | (ILWC46 & LPNB) | NCBI SNPdb Accession IDs |
|----------------------|----------------|-----------------|-------------------------|---------------------------------|-----------------|--------------------------|
| SNP_P4_68546_3297859 | NC_021164.1    | Ca_kabuli_chr05 | 3297859                 | GG                              | AA              | 1946840449               |
| SNP_P4_68548_3343935 | NC_021164.1    | Ca_kabuli_chr05 | 3343935                 | TT                              | CC              | 1946840451               |
| SNP_P4_68549_3344126 | NC_021164.1    | Ca_kabuli_chr05 | 3344126                 | AA                              | GG              | 1946840453               |
| SNP_P4_68550_3345314 | NC_021164.1    | Ca_kabuli_chr05 | 3345314                 | TT                              | CC              | 1946840455               |
| SNP_P4_68551_3345518 | NC_021164.1    | Ca_kabuli_chr05 | 3345518                 | AA                              | TT              | 1946840457               |
| SNP_P4_68552_3348181 | NC_021164.1    | Ca_kabuli_chr05 | 3348181                 | GG                              | AA              | 1946840459               |
| SNP_P4_68553_3352863 | NC_021164.1    | Ca_kabuli_chr05 | 3352863                 | GG                              | AA              | 1946840461               |
| SNP_P4_68554_3353375 | NC_021164.1    | Ca_kabuli_chr05 | 3353375                 | AA                              | GG              | 1946840463               |
| SNP_P4_68555_3389002 | NC_021164.1    | Ca_kabuli_chr05 | 3389002                 | TT                              | CC              | 1946840465               |
| SNP_P4_68557_3406623 | NC_021164.1    | Ca_kabuli_chr05 | 3406623                 | GG                              | CC              | 1946840467               |
| SNP_P4_68558_3411158 | NC_021164.1    | Ca_kabuli_chr05 | 3411158                 | TT                              | GG              | 1946840469               |
| SNP_P4_68559_3413170 | NC_021164.1    | Ca_kabuli_chr05 | 3413170                 | AA                              | CC              | 1946840471               |
| SNP_P4_68560_3415080 | NC_021164.1    | Ca_kabuli_chr05 | 3415080                 | GG                              | AA              | 1946840473               |
| SNP_P4_68561_3415475 | NC_021164.1    | Ca_kabuli_chr05 | 3415475                 | GG                              | AA              | 1946840475               |
| SNP_P4_68562_3419948 | NC_021164.1    | Ca_kabuli_chr05 | 3419948                 | GG                              | AA              | 1946840477               |
| SNP_P4_68563_3433327 | NC_021164.1    | Ca_kabuli_chr05 | 3433327                 | AA                              | TT              | 1946840479               |
| SNP_P4_68564_3454470 | NC_021164.1    | Ca_kabuli_chr05 | 3454470                 | TT                              | GG              | 1946840481               |
| SNP_P4_68565_3457108 | NC_021164.1    | Ca_kabuli_chr05 | 3457108                 | TT                              | AA              | 1946840483               |
| SNP_P4_68566_3464705 | NC_021164.1    | Ca_kabuli_chr05 | 3464705                 | GG                              | AA              | 1946840486               |
| SNP_P4_68567_3466703 | NC_021164.1    | Ca_kabuli_chr05 | 3466703                 | TT                              | AA              | 1946840488               |
| SNP_P4_68568_3466704 | NC_021164.1    | Ca_kabuli_chr05 | 3466704                 | GG                              | TT              | 1946840490               |
| SNP_P4_68569_3466711 | NC_021164.1    | Ca_kabuli_chr05 | 3466711                 | CC                              | TT              | 1946840492               |
| SNP_P4_68570_3466714 | NC_021164.1    | Ca_kabuli_chr05 | 3466714                 | TT                              | CC              | 1946840494               |
| SNP_P4_68571_3466719 | NC_021164.1    | Ca_kabuli_chr05 | 3466719                 | GG                              | TT              | 1946840496               |
| SNP_P4_68572_3476691 | NC_021164.1    | Ca_kabuli_chr05 | 3476691                 | GG                              | AA              | 1946840498               |
| SNP_P4_68573_3476727 | NC_021164.1    | Ca_kabuli_chr05 | 3476727                 | GG                              | TT              | 1946840500               |
| SNP_P4_68574_3481226 | NC_021164.1    | Ca_kabuli_chr05 | 3481226                 | CC                              | GG              | 1946840503               |
| SNP_P4_68575_3483199 | NC_021164.1    | Ca_kabuli_chr05 | 3483199                 | GG                              | AA              | 1946840505               |
| SNP_P4_68577_3527006 | NC_021164.1    | Ca_kabuli_chr05 | 3527006                 | GG                              | TT              | 1946840507               |
| SNP_P4_68578_3527009 | NC_021164.1    | Ca_kabuli_chr05 | 3527009                 | CC                              | TT              | 1946840509               |
| SNP_P4_68580_3568422 | NC_021164.1    | Ca_kabuli_chr05 | 3568422                 | AA                              | CC              | 1946840511               |
| SNP_P4_68581_3570468 | NC_021164.1    | Ca_kabuli_chr05 | 3570468                 | AA                              | GG              | 1946840513               |
| SNP_P4_68582_3570504 | NC_021164.1    | Ca_kabuli_chr05 | 3570504                 | AA                              | GG              | 1946840515               |
| SNP_P4_68583_3570602 | NC_021164.1    | Ca_kabuli_chr05 | 3570602                 | GG                              | AA              | 1946840517               |
| SNP_P4_68584_3570619 | NC_021164.1    | Ca_kabuli_chr05 | 3570619                 | CC                              | TT              | 1946840519               |
| SNP_P4_68585_3570634 | NC_021164.1    | Ca_kabuli_chr05 | 3570634                 | GG                              | AA              | 1946840521               |
| SNP_P4_68586_3570654 | NC_021164.1    | Ca_kabuli_chr05 | 3570654                 | TT                              | AA              | 1946840523               |
| SNP_P4_68587_3570659 | NC_021164.1    | Ca_kabuli_chr05 | 3570659                 | GG                              | AA              | 1946840525               |
| SNP_P4_68588_3570676 | NC_021164.1    | Ca_kabuli_chr05 | 3570676                 | TT                              | GG              | 1946840527               |
| SNP_P4_68589_3570746 | NC_021164.1    | Ca_kabuli_chr05 | 3570746                 | GG                              | AA              | 1946840529               |
| SNP_P4_68590_3570788 | NC_021164.1    | Ca_kabuli_chr05 | 3570788                 | AA                              | TT              | 1946840531               |
| SNP_P4_68591_3570796 | NC_021164.1    | Ca_kabuli_chr05 | 3570796                 | AA                              | TT              | 1946840533               |

| SNPs IDs             | Chromosome IDs | Chromosomes     | Physical positions (bp) | CDC Frontier (Reference genome) | (ILWC46 & LPNB) | NCBI SNPdb Accession IDs |
|----------------------|----------------|-----------------|-------------------------|---------------------------------|-----------------|--------------------------|
| SNP_P4_68592_3570834 | NC_021164.1    | Ca_kabuli_chr05 | 3570834                 | CC                              | AA              | 1946840535               |
| SNP_P4_68593_3571363 | NC_021164.1    | Ca_kabuli_chr05 | 3571363                 | AA                              | GG              | 1946840537               |
| SNP_P4_68594_3575426 | NC_021164.1    | Ca_kabuli_chr05 | 3575426                 | AA                              | GG              | 1946840539               |
| SNP_P4_68596_3577752 | NC_021164.1    | Ca_kabuli_chr05 | 3577752                 | AA                              | GG              | 1946840541               |
| SNP_P4_68597_3577759 | NC_021164.1    | Ca_kabuli_chr05 | 3577759                 | TT                              | CC              | 1946840543               |
| SNP_P4_68598_3577762 | NC_021164.1    | Ca_kabuli_chr05 | 3577762                 | AA                              | GG              | 1946840545               |
| SNP_P4_68599_3577793 | NC_021164.1    | Ca_kabuli_chr05 | 3577793                 | GG                              | TT              | 1946840547               |
| SNP_P4_68600_3577794 | NC_021164.1    | Ca_kabuli_chr05 | 3577794                 | AA                              | GG              | 1946840549               |
| SNP_P4_68601_3577837 | NC_021164.1    | Ca_kabuli_chr05 | 3577837                 | AA                              | CC              | 1946840551               |
| SNP_P4_68602_3578127 | NC_021164.1    | Ca_kabuli_chr05 | 3578127                 | CC                              | TT              | 1946840553               |
| SNP_P4_68603_3578205 | NC_021164.1    | Ca_kabuli_chr05 | 3578205                 | AA                              | CC              | 1946840555               |
| SNP_P4_68604_3578208 | NC_021164.1    | Ca_kabuli_chr05 | 3578208                 | CC                              | AA              | 1946840557               |
| SNP_P4_68605_3578730 | NC_021164.1    | Ca_kabuli_chr05 | 3578730                 | CC                              | TT              | 1946840559               |
| SNP_P4_68606_3579237 | NC_021164.1    | Ca_kabuli_chr05 | 3579237                 | TT                              | CC              | 1946840561               |
| SNP_P4_68607_3579254 | NC_021164.1    | Ca_kabuli_chr05 | 3579254                 | AA                              | GG              | 1946840563               |
| SNP_P4_68608_3579258 | NC_021164.1    | Ca_kabuli_chr05 | 3579258                 | TT                              | GG              | 1946840565               |
| SNP_P4_68609_3589828 | NC_021164.1    | Ca_kabuli_chr05 | 3589828                 | CC                              | TT              | 1946840567               |
| SNP_P4_68610_3589834 | NC_021164.1    | Ca_kabuli_chr05 | 3589834                 | TT                              | CC              | 1946840569               |
| SNP_P4_68611_3589867 | NC_021164.1    | Ca_kabuli_chr05 | 3589867                 | TT                              | AA              | 1946840571               |
| SNP_P4_68612_3589969 | NC_021164.1    | Ca_kabuli_chr05 | 3589969                 | TT                              | AA              | 1946840573               |
| SNP_P4_68613_3590337 | NC_021164.1    | Ca_kabuli_chr05 | 3590337                 | AA                              | GG              | 1946840575               |
| SNP_P4_68614_3590791 | NC_021164.1    | Ca_kabuli_chr05 | 3590791                 | GG                              | AA              | 1946840576               |
| SNP_P4_68615_3591195 | NC_021164.1    | Ca_kabuli_chr05 | 3591195                 | GG                              | CC              | 1946840578               |
| SNP_P4_68616_3591198 | NC_021164.1    | Ca_kabuli_chr05 | 3591198                 | CC                              | AA              | 1946840580               |
| SNP_P4_68617_3591200 | NC_021164.1    | Ca_kabuli_chr05 | 3591200                 | CC                              | GG              | 1946840582               |
| SNP_P4_68618_3591399 | NC_021164.1    | Ca_kabuli_chr05 | 3591399                 | CC                              | AA              | 1946840584               |
| SNP_P4_68619_3592446 | NC_021164.1    | Ca_kabuli_chr05 | 3592446                 | AA                              | TT              | 1946840586               |
| SNP_P4_68620_3592452 | NC_021164.1    | Ca_kabuli_chr05 | 3592452                 | CC                              | AA              | 1946840588               |
| SNP_P4_68621_3592773 | NC_021164.1    | Ca_kabuli_chr05 | 3592773                 | AA                              | TT              | 1946840590               |
| SNP_P4_68622_3596554 | NC_021164.1    | Ca_kabuli_chr05 | 3596554                 | TT                              | AA              | 1946840592               |
| SNP_P4_68623_3598098 | NC_021164.1    | Ca_kabuli_chr05 | 3598098                 | GG                              | AA              | 1946840594               |
| SNP_P4_68624_3639215 | NC_021164.1    | Ca_kabuli_chr05 | 3639215                 | GG                              | AA              | 1946840595               |
| SNP_P4_68625_3639262 | NC_021164.1    | Ca_kabuli_chr05 | 3639262                 | TT                              | CC              | 1946840597               |
| SNP_P4_68626_3639552 | NC_021164.1    | Ca_kabuli_chr05 | 3639552                 | GG                              | AA              | 1946840599               |
| SNP_P4_68627_3639553 | NC_021164.1    | Ca_kabuli_chr05 | 3639553                 | TT                              | CC              | 1946840601               |
| SNP_P4_68628_3639573 | NC_021164.1    | Ca_kabuli_chr05 | 3639573                 | AA                              | GG              | 1946840603               |
| SNP_P4_68629_3639654 | NC_021164.1    | Ca_kabuli_chr05 | 3639654                 | TT                              | AA              | 1946840605               |
| SNP_P4_68630_3639720 | NC_021164.1    | Ca_kabuli_chr05 | 3639720                 | AA                              | TT              | 1946840607               |
| SNP_P4_68631_3640677 | NC_021164.1    | Ca_kabuli_chr05 | 3640677                 | AA                              | CC              | 1946840609               |
| SNP_P4_68632_3645647 | NC_021164.1    | Ca_kabuli_chr05 | 3645647                 | GG                              | AA              | 1946840611               |
| SNP_P4_68633_3645903 | NC_021164.1    | Ca_kabuli_chr05 | 3645903                 | GG                              | TT              | 1946840613               |
| SNP_P4_68634_3645921 | NC_021164.1    | Ca_kabuli_chr05 | 3645921                 | CC                              | TT              | 1946840615               |

| SNPs IDs             | Chromosome IDs | Chromosomes     | Physical positions (bp) | CDC Frontier (Reference genome) | (ILWC46 & LPNB) | NCBI SNPdb Accession IDs |
|----------------------|----------------|-----------------|-------------------------|---------------------------------|-----------------|--------------------------|
| SNP_P4_68635_3662034 | NC_021164.1    | Ca_kabuli_chr05 | 3662034                 | AA                              | GG              | 1946840617               |
| SNP_P4_68636_3662037 | NC_021164.1    | Ca_kabuli_chr05 | 3662037                 | TT                              | GG              | 1946840619               |
| SNP_P4_68637_3691097 | NC_021164.1    | Ca_kabuli_chr05 | 3691097                 | AA                              | GG              | 1946840621               |
| SNP_P4_68638_3691099 | NC_021164.1    | Ca_kabuli_chr05 | 3691099                 | CC                              | TT              | 1946840623               |
| SNP_P4_68639_3717237 | NC_021164.1    | Ca_kabuli_chr05 | 3717237                 | CC                              | TT              | 1946840625               |
| SNP_P4_68641_3742124 | NC_021164.1    | Ca_kabuli_chr05 | 3742124                 | GG                              | AA              | 1946840627               |
| SNP_P4_68642_3742461 | NC_021164.1    | Ca_kabuli_chr05 | 3742461                 | TT                              | CC              | 1946840629               |
| SNP_P4_68643_3742570 | NC_021164.1    | Ca_kabuli_chr05 | 3742570                 | TT                              | AA              | 1946840631               |
| SNP_P4_68644_3742626 | NC_021164.1    | Ca_kabuli_chr05 | 3742626                 | AA                              | GG              | 1946840633               |
| SNP_P4_68645_3742702 | NC_021164.1    | Ca_kabuli_chr05 | 3742702                 | TT                              | AA              | 1946840635               |
| SNP_P4_68646_3742766 | NC_021164.1    | Ca_kabuli_chr05 | 3742766                 | AA                              | GG              | 1946840637               |
| SNP_P4_68647_3742807 | NC_021164.1    | Ca_kabuli_chr05 | 3742807                 | CC                              | TT              | 1946840639               |
| SNP_P4_68648_3742940 | NC_021164.1    | Ca_kabuli_chr05 | 3742940                 | CC                              | TT              | 1946840641               |
| SNP_P4_68649_3749569 | NC_021164.1    | Ca_kabuli_chr05 | 3749569                 | TT                              | AA              | 1946840643               |
| SNP_P4_68650_3782556 | NC_021164.1    | Ca_kabuli_chr05 | 3782556                 | GG                              | AA              | 1946840645               |
| SNP_P4_68651_3783020 | NC_021164.1    | Ca_kabuli_chr05 | 3783020                 | AA                              | TT              | 1946840647               |
| SNP_P4_68652_3783045 | NC_021164.1    | Ca_kabuli_chr05 | 3783045                 | AA                              | GG              | 1946840649               |
| SNP_P4_68653_3783720 | NC_021164.1    | Ca_kabuli_chr05 | 3783720                 | AA                              | TT              | 1946840651               |
| SNP_P4_68654_3791548 | NC_021164.1    | Ca_kabuli_chr05 | 3791548                 | AA                              | CC              | 1946840653               |
| SNP_P4_68655_3791587 | NC_021164.1    | Ca_kabuli_chr05 | 3791587                 | TT                              | GG              | 1946840655               |
| SNP_P4_68656_3793220 | NC_021164.1    | Ca_kabuli_chr05 | 3793220                 | TT                              | AA              | 1946840657               |
| SNP_P4_68657_3795973 | NC_021164.1    | Ca_kabuli_chr05 | 3795973                 | CC                              | TT              | 1946840658               |
| SNP_P4_68658_3797799 | NC_021164.1    | Ca_kabuli_chr05 | 3797799                 | GG                              | TT              | 1946840660               |
| SNP_P4_68659_3798574 | NC_021164.1    | Ca_kabuli_chr05 | 3798574                 | AA                              | GG              | 1946840662               |
| SNP_P4_68660_3798618 | NC_021164.1    | Ca_kabuli_chr05 | 3798618                 | AA                              | GG              | 1946840664               |
| SNP_P4_68661_3798662 | NC_021164.1    | Ca_kabuli_chr05 | 3798662                 | CC                              | AA              | 1946840666               |
| SNP_P4_68662_3798931 | NC_021164.1    | Ca_kabuli_chr05 | 3798931                 | AA                              | CC              | 1946840668               |
| SNP_P4_68663_3798982 | NC_021164.1    | Ca_kabuli_chr05 | 3798982                 | TT                              | AA              | 1946840670               |
| SNP_P4_68664_3798988 | NC_021164.1    | Ca_kabuli_chr05 | 3798988                 | AA                              | CC              | 1946840672               |
| SNP_P4_68665_3799007 | NC_021164.1    | Ca_kabuli_chr05 | 3799007                 | GG                              | AA              | 1946840675               |
| SNP_P4_68666_3799036 | NC_021164.1    | Ca_kabuli_chr05 | 3799036                 | TT                              | CC              | 1946840677               |
| SNP_P4_68667_3799066 | NC_021164.1    | Ca_kabuli_chr05 | 3799066                 | TT                              | AA              | 1946840679               |
| SNP_P4_68668_3801240 | NC_021164.1    | Ca_kabuli_chr05 | 3801240                 | AA                              | CC              | 1946840682               |
| SNP_P4_68669_3806155 | NC_021164.1    | Ca_kabuli_chr05 | 3806155                 | TT                              | CC              | 1946840684               |
| SNP_P4_68670_3806274 | NC_021164.1    | Ca_kabuli_chr05 | 3806274                 | CC                              | TT              | 1946840686               |
| SNP_P4_68671_3808700 | NC_021164.1    | Ca_kabuli_chr05 | 3808700                 | AA                              | GG              | 1946840688               |
| SNP_P4_68672_3808798 | NC_021164.1    | Ca_kabuli_chr05 | 3808798                 | TT                              | CC              | 1946840690               |
| SNP_P4_68673_3808837 | NC_021164.1    | Ca_kabuli_chr05 | 3808837                 | CC                              | TT              | 1946840692               |
| SNP_P4_68674_3808849 | NC_021164.1    | Ca_kabuli_chr05 | 3808849                 | AA                              | TT              | 1946840694               |
| SNP_P4_68675_3808882 | NC_021164.1    | Ca_kabuli_chr05 | 3808882                 | TT                              | CC              | 1946840696               |
| SNP_P4_68676_3809087 | NC_021164.1    | Ca_kabuli_chr05 | 3809087                 | AA                              | GG              | 1946840698               |
| SNP_P4_68677_3809118 | NC_021164.1    | Ca_kabuli_chr05 | 3809118                 | AA                              | GG              | 1946840700               |

| SNPs IDs             | Chromosome IDs | Chromosomes     | Physical positions (bp) | CDC Frontier (Reference genome) | (ILWC46 & LPNB) | NCBI SNPdb Accession IDs |
|----------------------|----------------|-----------------|-------------------------|---------------------------------|-----------------|--------------------------|
| SNP_P4_68678_3809263 | NC_021164.1    | Ca_kabuli_chr05 | 3809263                 | TT                              | CC              | 1946840702               |
| SNP_P4_68679_3830506 | NC_021164.1    | Ca_kabuli_chr05 | 3830506                 | GG                              | CC              | 1946840704               |
| SNP_P4_68680_3838231 | NC_021164.1    | Ca_kabuli_chr05 | 3838231                 | TT                              | CC              | 1946840706               |
| SNP_P4_68681_3843442 | NC_021164.1    | Ca_kabuli_chr05 | 3843442                 | TT                              | CC              | 1946840708               |
| SNP_P4_68682_3843711 | NC_021164.1    | Ca_kabuli_chr05 | 3843711                 | TT                              | GG              | 1946840710               |
| SNP_P4_68683_3843842 | NC_021164.1    | Ca_kabuli_chr05 | 3843842                 | AA                              | GG              | 1946840712               |
| SNP_P4_68684_3843848 | NC_021164.1    | Ca_kabuli_chr05 | 3843848                 | GG                              | TT              | 1946840714               |
| SNP_P4_68685_3847922 | NC_021164.1    | Ca_kabuli_chr05 | 3847922                 | CC                              | TT              | 1946840716               |
| SNP_P4_68686_3847949 | NC_021164.1    | Ca_kabuli_chr05 | 3847949                 | AA                              | GG              | 1946840718               |
| SNP_P4_68687_3847962 | NC_021164.1    | Ca_kabuli_chr05 | 3847962                 | TT                              | CC              | 1946840720               |
| SNP_P4_68688_3847965 | NC_021164.1    | Ca_kabuli_chr05 | 3847965                 | AA                              | CC              | 1946840722               |
| SNP_P4_68689_3847978 | NC_021164.1    | Ca_kabuli_chr05 | 3847978                 | TT                              | CC              | 1946840724               |
| SNP_P4_68690_3848325 | NC_021164.1    | Ca_kabuli_chr05 | 3848325                 | GG                              | AA              | 1946840726               |
| SNP_P4_68691_3852600 | NC_021164.1    | Ca_kabuli_chr05 | 3852600                 | GG                              | TT              | 1946840728               |
| SNP_P4_68692_3852613 | NC_021164.1    | Ca_kabuli_chr05 | 3852613                 | AA                              | CC              | 1946840730               |
| SNP_P4_68693_3852618 | NC_021164.1    | Ca_kabuli_chr05 | 3852618                 | AA                              | CC              | 1946840732               |
| SNP_P4_68694_3852983 | NC_021164.1    | Ca_kabuli_chr05 | 3852983                 | CC                              | GG              | 1946840734               |
| SNP_P4_68696_3864961 | NC_021164.1    | Ca_kabuli_chr05 | 3864961                 | TT                              | AA              | 1946840736               |
| SNP_P4_68697_3865035 | NC_021164.1    | Ca_kabuli_chr05 | 3865035                 | AA                              | TT              | 1946840738               |
| SNP_P4_68698_3865098 | NC_021164.1    | Ca_kabuli_chr05 | 3865098                 | TT                              | AA              | 1946840741               |
| SNP_P4_68699_3865353 | NC_021164.1    | Ca_kabuli_chr05 | 3865353                 | AA                              | TT              | 1946840743               |
| SNP_P4_68700_3865363 | NC_021164.1    | Ca_kabuli_chr05 | 3865363                 | AA                              | TT              | 1946840745               |
| SNP_P4_68701_3865364 | NC_021164.1    | Ca_kabuli_chr05 | 3865364                 | GG                              | AA              | 1946840747               |
| SNP_P4_68702_3865497 | NC_021164.1    | Ca_kabuli_chr05 | 3865497                 | CC                              | TT              | 1946840749               |
| SNP_P4_68703_3865616 | NC_021164.1    | Ca_kabuli_chr05 | 3865616                 | AA                              | TT              | 1946840751               |
| SNP_P4_68704_3865709 | NC_021164.1    | Ca_kabuli_chr05 | 3865709                 | AA                              | TT              | 1946840753               |
| SNP_P4_68705_3865747 | NC_021164.1    | Ca_kabuli_chr05 | 3865747                 | GG                              | AA              | 1946840755               |
| SNP_P4_68706_3865756 | NC_021164.1    | Ca_kabuli_chr05 | 3865756                 | CC                              | AA              | 1946840757               |
| SNP_P4_68708_3865925 | NC_021164.1    | Ca_kabuli_chr05 | 3865925                 | GG                              | TT              | 1946840759               |
| SNP_P4_68709_3866219 | NC_021164.1    | Ca_kabuli_chr05 | 3866219                 | GG                              | AA              | 1946840761               |
| SNP_P4_68710_3866266 | NC_021164.1    | Ca_kabuli_chr05 | 3866266                 | GG                              | AA              | 1946840763               |
| SNP_P4_68711_3866426 | NC_021164.1    | Ca_kabuli_chr05 | 3866426                 | GG                              | AA              | 1946840765               |
| SNP_P4_68712_3866551 | NC_021164.1    | Ca_kabuli_chr05 | 3866551                 | AA                              | TT              | 1946840767               |
| SNP_P4_68713_3866553 | NC_021164.1    | Ca_kabuli_chr05 | 3866553                 | CC                              | TT              | 1946840769               |
| SNP_P4_68714_3869349 | NC_021164.1    | Ca_kabuli_chr05 | 3869349                 | TT                              | AA              | 1946840771               |
| SNP_P4_68715_3869459 | NC_021164.1    | Ca_kabuli_chr05 | 3869459                 | AA                              | GG              | 1946840773               |
| SNP_P4_68718_3874624 | NC_021164.1    | Ca_kabuli_chr05 | 3874624                 | GG                              | AA              | 1946840775               |
| SNP_P4_68719_3874676 | NC_021164.1    | Ca_kabuli_chr05 | 3874676                 | TT                              | CC              | 1946840777               |
| SNP_P4_68720_3880275 | NC_021164.1    | Ca_kabuli_chr05 | 3880275                 | TT                              | CC              | 1946840779               |
| SNP_P4_68722_3991968 | NC_021164.1    | Ca_kabuli_chr05 | 3991968                 | TT                              | CC              | 1946840781               |
| SNP_P4_68724_3993169 | NC_021164.1    | Ca_kabuli_chr05 | 3993169                 | TT                              | AA              | 1946840783               |
| SNP_P4_68725_3993202 | NC_021164.1    | Ca_kabuli_chr05 | 3993202                 | GG                              | TT              | 1946840785               |

| SNPs IDs             | Chromosome IDs | Chromosomes     | Physical positions (bp) | CDC Frontier (Reference genome) | (ILWC46 & LPNB) | NCBI SNPdb Accession IDs |
|----------------------|----------------|-----------------|-------------------------|---------------------------------|-----------------|--------------------------|
| SNP_P4_68726_3993219 | NC_021164.1    | Ca_kabuli_chr05 | 3993219                 | CC                              | AA              | 1946840787               |
| SNP_P4_68727_3993248 | NC_021164.1    | Ca_kabuli_chr05 | 3993248                 | AA                              | CC              | 1946840789               |
| SNP_P4_68728_3993255 | NC_021164.1    | Ca_kabuli_chr05 | 3993255                 | GG                              | TT              | 1946840791               |
| SNP_P4_68729_3993444 | NC_021164.1    | Ca_kabuli_chr05 | 3993444                 | GG                              | TT              | 1946840793               |
| SNP_P4_68730_3993615 | NC_021164.1    | Ca_kabuli_chr05 | 3993615                 | GG                              | TT              | 1946840795               |
| SNP_P4_68731_3993683 | NC_021164.1    | Ca_kabuli_chr05 | 3993683                 | GG                              | TT              | 1946840797               |
| SNP_P4_68732_4007744 | NC_021164.1    | Ca_kabuli_chr05 | 4007744                 | AA                              | GG              | 1946840799               |
| SNP_P4_68733_4030146 | NC_021164.1    | Ca_kabuli_chr05 | 4030146                 | CC                              | TT              | 1946840801               |
| SNP_P4_68734_4058552 | NC_021164.1    | Ca_kabuli_chr05 | 4058552                 | AA                              | CC              | 1946840803               |
| SNP_P4_68735_4059599 | NC_021164.1    | Ca_kabuli_chr05 | 4059599                 | TT                              | GG              | 1946840805               |
| SNP_P4_68737_4064778 | NC_021164.1    | Ca_kabuli_chr05 | 4064778                 | GG                              | AA              | 1946840807               |
| SNP_P4_68738_4071473 | NC_021164.1    | Ca_kabuli_chr05 | 4071473                 | AA                              | GG              | 1946840809               |
| SNP_P4_68739_4085325 | NC_021164.1    | Ca_kabuli_chr05 | 4085325                 | GG                              | CC              | 1946840811               |
| SNP_P4_68740_4124063 | NC_021164.1    | Ca_kabuli_chr05 | 4124063                 | AA                              | GG              | 1946840813               |
| SNP_P4_68741_4124064 | NC_021164.1    | Ca_kabuli_chr05 | 4124064                 | TT                              | CC              | 1946840815               |
| SNP_P4_68742_4124088 | NC_021164.1    | Ca_kabuli_chr05 | 4124088                 | TT                              | CC              | 1946840817               |
| SNP_P4_68743_4124099 | NC_021164.1    | Ca_kabuli_chr05 | 4124099                 | GG                              | TT              | 1946840819               |
| SNP_P4_68744_4124113 | NC_021164.1    | Ca_kabuli_chr05 | 4124113                 | CC                              | GG              | 1946840821               |
| SNP_P4_68745_4141138 | NC_021164.1    | Ca_kabuli_chr05 | 4141138                 | AA                              | GG              | 1946840823               |
| SNP_P4_68746_4141170 | NC_021164.1    | Ca_kabuli_chr05 | 4141170                 | CC                              | AA              | 1946840825               |
| SNP_P4_68747_4141199 | NC_021164.1    | Ca_kabuli_chr05 | 4141199                 | CC                              | TT              | 1946840827               |
| SNP_P4_68748_4141447 | NC_021164.1    | Ca_kabuli_chr05 | 4141447                 | CC                              | TT              | 1946840829               |
| SNP_P4_68749_4141551 | NC_021164.1    | Ca_kabuli_chr05 | 4141551                 | GG                              | CC              | 1946840831               |
| SNP_P4_68750_4141582 | NC_021164.1    | Ca_kabuli_chr05 | 4141582                 | TT                              | AA              | 1946840833               |
| SNP_P4_68751_4141623 | NC_021164.1    | Ca_kabuli_chr05 | 4141623                 | AA                              | GG              | 1946840835               |
| SNP_P4_68752_4141656 | NC_021164.1    | Ca_kabuli_chr05 | 4141656                 | AA                              | GG              | 1946840837               |
| SNP_P4_68753_4141765 | NC_021164.1    | Ca_kabuli_chr05 | 4141765                 | CC                              | TT              | 1946840839               |
| SNP_P4_68754_4141806 | NC_021164.1    | Ca_kabuli_chr05 | 4141806                 | AA                              | GG              | 1946840841               |
| SNP_P4_68755_4141811 | NC_021164.1    | Ca_kabuli_chr05 | 4141811                 | GG                              | AA              | 1946840843               |
| SNP_P4_68756_4146307 | NC_021164.1    | Ca_kabuli_chr05 | 4146307                 | TT                              | CC              | 1946840845               |
| SNP_P4_68757_4152784 | NC_021164.1    | Ca_kabuli_chr05 | 4152784                 | AA                              | GG              | 1946840847               |
| SNP_P4_68758_4154318 | NC_021164.1    | Ca_kabuli_chr05 | 4154318                 | AA                              | GG              | 1946840849               |
| SNP_P4_68759_4155052 | NC_021164.1    | Ca_kabuli_chr05 | 4155052                 | TT                              | CC              | 1946840852               |
| SNP_P4_68760_4155070 | NC_021164.1    | Ca_kabuli_chr05 | 4155070                 | GG                              | AA              | 1946840854               |
| SNP_P4_68761_4155758 | NC_021164.1    | Ca_kabuli_chr05 | 4155758                 | CC                              | TT              | 1946840856               |
| SNP_P4_68762_4156295 | NC_021164.1    | Ca_kabuli_chr05 | 4156295                 | AA                              | GG              | 1946840858               |
| SNP_P4_68763_4157200 | NC_021164.1    | Ca_kabuli_chr05 | 4157200                 | GG                              | AA              | 1946840860               |
| SNP_P4_68764_4157310 | NC_021164.1    | Ca_kabuli_chr05 | 4157310                 | AA                              | GG              | 1946840862               |
| SNP_P4_68765_4157670 | NC_021164.1    | Ca_kabuli_chr05 | 4157670                 | AA                              | TT              | 1946840864               |
| SNP_P4_68766_4157877 | NC_021164.1    | Ca_kabuli_chr05 | 4157877                 | TT                              | AA              | 1946840867               |
| SNP_P4_68767_4157888 | NC_021164.1    | Ca_kabuli_chr05 | 4157888                 | AA                              | GG              | 1946840869               |
| SNP_P4_68768_4157901 | NC_021164.1    | Ca_kabuli_chr05 | 4157901                 | TT                              | CC              | 1946840871               |

| SNPs IDs             | Chromosome IDs | Chromosomes     | Physical positions (bp) | CDC Frontier (Reference genome) | (ILWC46 & LPNB) | NCBI SNPdb Accession IDs |
|----------------------|----------------|-----------------|-------------------------|---------------------------------|-----------------|--------------------------|
| SNP_P4_68769_4158095 | NC_021164.1    | Ca_kabuli_chr05 | 4158095                 | GG                              | CC              | 1946840873               |
| SNP_P4_68770_4158810 | NC_021164.1    | Ca_kabuli_chr05 | 4158810                 | TT                              | GG              | 1946840875               |
| SNP_P4_68771_4158877 | NC_021164.1    | Ca_kabuli_chr05 | 4158877                 | AA                              | CC              | 1946840877               |
| SNP_P4_68772_4158889 | NC_021164.1    | Ca_kabuli_chr05 | 4158889                 | TT                              | GG              | 1946840879               |
| SNP_P4_68773_4159018 | NC_021164.1    | Ca_kabuli_chr05 | 4159018                 | GG                              | AA              | 1946840881               |
| SNP_P4_68774_4159023 | NC_021164.1    | Ca_kabuli_chr05 | 4159023                 | AA                              | TT              | 1946840883               |
| SNP_P4_68775_4159032 | NC_021164.1    | Ca_kabuli_chr05 | 4159032                 | AA                              | GG              | 1946840885               |
| SNP_P4_68776_4159104 | NC_021164.1    | Ca_kabuli_chr05 | 4159104                 | AA                              | TT              | 1946840887               |
| SNP_P4_68777_4159260 | NC_021164.1    | Ca_kabuli_chr05 | 4159260                 | AA                              | GG              | 1946840889               |
| SNP_P4_68778_4172730 | NC_021164.1    | Ca_kabuli_chr05 | 4172730                 | TT                              | AA              | 1946840891               |
| SNP_P4_68779_4172776 | NC_021164.1    | Ca_kabuli_chr05 | 4172776                 | AA                              | GG              | 1946840893               |
| SNP_P4_68780_4172823 | NC_021164.1    | Ca_kabuli_chr05 | 4172823                 | AA                              | GG              | 1946840895               |
| SNP_P4_68781_4176329 | NC_021164.1    | Ca_kabuli_chr05 | 4176329                 | AA                              | TT              | 1946840897               |
| SNP_P4_68782_4176341 | NC_021164.1    | Ca_kabuli_chr05 | 4176341                 | CC                              | GG              | 1946840899               |
| SNP_P4_68783_4176346 | NC_021164.1    | Ca_kabuli_chr05 | 4176346                 | AA                              | GG              | 1946840901               |
| SNP_P4_68784_4178539 | NC_021164.1    | Ca_kabuli_chr05 | 4178539                 | TT                              | GG              | 1946840903               |
| SNP_P4_68785_4179112 | NC_021164.1    | Ca_kabuli_chr05 | 4179112                 | TT                              | GG              | 1946840905               |
| SNP_P4_68786_4179186 | NC_021164.1    | Ca_kabuli_chr05 | 4179186                 | GG                              | AA              | 1946840907               |
| SNP_P4_68787_4179222 | NC_021164.1    | Ca_kabuli_chr05 | 4179222                 | GG                              | CC              | 1946840909               |
| SNP_P4_68790_4182339 | NC_021164.1    | Ca_kabuli_chr05 | 4182339                 | AA                              | TT              | 1946840911               |
| SNP_P4_68791_4182340 | NC_021164.1    | Ca_kabuli_chr05 | 4182340                 | GG                              | AA              | 1946840913               |
| SNP_P4_68792_4185719 | NC_021164.1    | Ca_kabuli_chr05 | 4185719                 | CC                              | TT              | 1946840915               |
| SNP_P4_68793_4192401 | NC_021164.1    | Ca_kabuli_chr05 | 4192401                 | GG                              | CC              | 1946840917               |
| SNP_P4_68794_4192403 | NC_021164.1    | Ca_kabuli_chr05 | 4192403                 | AA                              | GG              | 1946840919               |
| SNP_P4_68795_4192414 | NC_021164.1    | Ca_kabuli_chr05 | 4192414                 | TT                              | CC              | 1946840921               |
| SNP_P4_68796_4192434 | NC_021164.1    | Ca_kabuli_chr05 | 4192434                 | AA                              | CC              | 1946840923               |
| SNP_P4_68797_4194084 | NC_021164.1    | Ca_kabuli_chr05 | 4194084                 | AA                              | GG              | 1946840925               |
| SNP_P4_68798_4194086 | NC_021164.1    | Ca_kabuli_chr05 | 4194086                 | AA                              | TT              | 1946840927               |
| SNP_P4_68799_4194091 | NC_021164.1    | Ca_kabuli_chr05 | 4194091                 | TT                              | GG              | 1946840929               |
| SNP_P4_68800_4194116 | NC_021164.1    | Ca_kabuli_chr05 | 4194116                 | AA                              | CC              | 1946840931               |
| SNP_P4_68801_4194117 | NC_021164.1    | Ca_kabuli_chr05 | 4194117                 | GG                              | AA              | 1946840933               |
| SNP_P4_68802_4194130 | NC_021164.1    | Ca_kabuli_chr05 | 4194130                 | AA                              | CC              | 1946840935               |
| SNP_P4_68803_4194131 | NC_021164.1    | Ca_kabuli_chr05 | 4194131                 | GG                              | AA              | 1946840937               |
| SNP_P4_68804_4194133 | NC_021164.1    | Ca_kabuli_chr05 | 4194133                 | CC                              | GG              | 1946840939               |
| SNP_P4_68805_4198567 | NC_021164.1    | Ca_kabuli_chr05 | 4198567                 | AA                              | GG              | 1946840941               |
| SNP_P4_68806_4198593 | NC_021164.1    | Ca_kabuli_chr05 | 4198593                 | GG                              | AA              | 1946840943               |
| SNP_P4_68807_4198598 | NC_021164.1    | Ca_kabuli_chr05 | 4198598                 | TT                              | CC              | 1946840945               |
| SNP_P4_68808_4211447 | NC_021164.1    | Ca_kabuli_chr05 | 4211447                 | AA                              | GG              | 1946840947               |
| SNP_P4_68809_4212401 | NC_021164.1    | Ca_kabuli_chr05 | 4212401                 | GG                              | AA              | 1946840949               |
| SNP_P4_68810_4212626 | NC_021164.1    | Ca_kabuli_chr05 | 4212626                 | GG                              | AA              | 1946840951               |
| SNP_P4_68811_4212663 | NC_021164.1    | Ca_kabuli_chr05 | 4212663                 | TT                              | CC              | 1946840953               |
| SNP_P4_68812_4212757 | NC_021164.1    | Ca_kabuli_chr05 | 4212757                 | TT                              | GG              | 1946840955               |

| SNPs IDs             | Chromosome IDs | Chromosomes     | Physical positions (bp) | CDC Frontier (Reference genome) | (ILWC46 & LPNB) | NCBI SNPdb Accession IDs |
|----------------------|----------------|-----------------|-------------------------|---------------------------------|-----------------|--------------------------|
| SNP_P4_68813_4213199 | NC_021164.1    | Ca_kabuli_chr05 | 4213199                 | AA                              | GG              | 1946840957               |
| SNP_P4_68814_4213205 | NC_021164.1    | Ca_kabuli_chr05 | 4213205                 | AA                              | GG              | 1946840959               |
| SNP_P4_68815_4219744 | NC_021164.1    | Ca_kabuli_chr05 | 4219744                 | AA                              | GG              | 1946840961               |
| SNP_P4_68816_4219809 | NC_021164.1    | Ca_kabuli_chr05 | 4219809                 | CC                              | AA              | 1946840963               |
| SNP_P4_68817_4219843 | NC_021164.1    | Ca_kabuli_chr05 | 4219843                 | GG                              | AA              | 1946840965               |
| SNP_P4_68818_4219858 | NC_021164.1    | Ca_kabuli_chr05 | 4219858                 | GG                              | TT              | 1946840967               |
| SNP_P4_68819_4219867 | NC_021164.1    | Ca_kabuli_chr05 | 4219867                 | AA                              | CC              | 1946840969               |
| SNP_P4_68820_4219913 | NC_021164.1    | Ca_kabuli_chr05 | 4219913                 | AA                              | CC              | 1946840971               |
| SNP_P4_68821_4219927 | NC_021164.1    | Ca_kabuli_chr05 | 4219927                 | CC                              | GG              | 1946840973               |
| SNP_P4_68822_4220036 | NC_021164.1    | Ca_kabuli_chr05 | 4220036                 | TT                              | CC              | 1946840975               |
| SNP_P4_68823_4220114 | NC_021164.1    | Ca_kabuli_chr05 | 4220114                 | AA                              | GG              | 1946840977               |
| SNP_P4_68824_4220212 | NC_021164.1    | Ca_kabuli_chr05 | 4220212                 | CC                              | TT              | 1946840979               |
| SNP_P4_68825_4220245 | NC_021164.1    | Ca_kabuli_chr05 | 4220245                 | GG                              | AA              | 1946840981               |
| SNP_P4_68826_4221019 | NC_021164.1    | Ca_kabuli_chr05 | 4221019                 | AA                              | GG              | 1946840983               |
| SNP_P4_68827_4221096 | NC_021164.1    | Ca_kabuli_chr05 | 4221096                 | AA                              | GG              | 1946840985               |
| SNP_P4_68828_4222592 | NC_021164.1    | Ca_kabuli_chr05 | 4222592                 | TT                              | CC              | 1946840987               |
| SNP_P4_68829_4222638 | NC_021164.1    | Ca_kabuli_chr05 | 4222638                 | TT                              | CC              | 1946840989               |
| SNP_P4_68830_4222649 | NC_021164.1    | Ca_kabuli_chr05 | 4222649                 | AA                              | GG              | 1946840991               |
| SNP_P4_68831_4222661 | NC_021164.1    | Ca_kabuli_chr05 | 4222661                 | AA                              | CC              | 1946840993               |
| SNP_P4_68832_4222754 | NC_021164.1    | Ca_kabuli_chr05 | 4222754                 | GG                              | AA              | 1946840995               |
| SNP_P4_68833_4222770 | NC_021164.1    | Ca_kabuli_chr05 | 4222770                 | AA                              | GG              | 1946840997               |
| SNP_P4_68834_4222836 | NC_021164.1    | Ca_kabuli_chr05 | 4222836                 | CC                              | TT              | 1946840998               |
| SNP_P4_68835_4222899 | NC_021164.1    | Ca_kabuli_chr05 | 4222899                 | AA                              | GG              | 1946841000               |
| SNP_P4_68836_4223052 | NC_021164.1    | Ca_kabuli_chr05 | 4223052                 | AA                              | GG              | 1946841002               |
| SNP_P4_68837_4223064 | NC_021164.1    | Ca_kabuli_chr05 | 4223064                 | GG                              | AA              | 1946841004               |
| SNP_P4_68838_4223273 | NC_021164.1    | Ca_kabuli_chr05 | 4223273                 | CC                              | AA              | 1946841006               |
| SNP_P4_68839_4223285 | NC_021164.1    | Ca_kabuli_chr05 | 4223285                 | AA                              | GG              | 1946841008               |
| SNP_P4_68840_4225313 | NC_021164.1    | Ca_kabuli_chr05 | 4225313                 | TT                              | GG              | 1946841010               |
| SNP_P4_68841_4231668 | NC_021164.1    | Ca_kabuli_chr05 | 4231668                 | AA                              | GG              | 1946841012               |
| SNP_P4_68842_4231739 | NC_021164.1    | Ca_kabuli_chr05 | 4231739                 | GG                              | AA              | 1946841014               |
| SNP_P4_68843_4231870 | NC_021164.1    | Ca_kabuli_chr05 | 4231870                 | GG                              | CC              | 1946841016               |
| SNP_P4_68844_4231900 | NC_021164.1    | Ca_kabuli_chr05 | 4231900                 | TT                              | CC              | 1946841018               |
| SNP_P4_68845_4231918 | NC_021164.1    | Ca_kabuli_chr05 | 4231918                 | AA                              | GG              | 1946841020               |
| SNP_P4_68846_4233971 | NC_021164.1    | Ca_kabuli_chr05 | 4233971                 | GG                              | CC              | 1946841022               |
| SNP_P4_68847_4234456 | NC_021164.1    | Ca_kabuli_chr05 | 4234456                 | CC                              | TT              | 1946841024               |
| SNP_P4_68848_4237407 | NC_021164.1    | Ca_kabuli_chr05 | 4237407                 | TT                              | AA              | 1946841026               |
| SNP_P4_68849_4238224 | NC_021164.1    | Ca_kabuli_chr05 | 4238224                 | AA                              | GG              | 1946841028               |
| SNP_P4_68850_4238251 | NC_021164.1    | Ca_kabuli_chr05 | 4238251                 | GG                              | AA              | 1946841030               |
| SNP_P4_68851_4238252 | NC_021164.1    | Ca_kabuli_chr05 | 4238252                 | AA                              | GG              | 1946841032               |
| SNP_P4_68852_4238678 | NC_021164.1    | Ca_kabuli_chr05 | 4238678                 | TT                              | CC              | 1946841034               |
| SNP_P4_68853_4238681 | NC_021164.1    | Ca_kabuli_chr05 | 4238681                 | TT                              | CC              | 1946841036               |
| SNP_P4_68854_4242013 | NC_021164.1    | Ca_kabuli_chr05 | 4242013                 | GG                              | AA              | 1946841038               |



| SNPs IDs             | Chromosome IDs | Chromosomes     | Physical positions (bp) | CDC Frontier (Reference genome) | (ILWC46 & LPNB) | NCBI SNPdb Accession IDs |
|----------------------|----------------|-----------------|-------------------------|---------------------------------|-----------------|--------------------------|
| SNP_P4_68855_4242016 | NC_021164.1    | Ca_kabuli_chr05 | 4242016                 | CC                              | TT              | 1946841040               |
| SNP_P4_68856_4242096 | NC_021164.1    | Ca_kabuli_chr05 | 4242096                 | TT                              | GG              | 1946841043               |
| SNP_P4_68857_4242265 | NC_021164.1    | Ca_kabuli_chr05 | 4242265                 | GG                              | AA              | 1946841045               |
| SNP_P4_68858_4242318 | NC_021164.1    | Ca_kabuli_chr05 | 4242318                 | CC                              | TT              | 1946841047               |
| SNP_P4_68859_4242339 | NC_021164.1    | Ca_kabuli_chr05 | 4242339                 | TT                              | AA              | 1946841049               |
| SNP_P4_68860_4247753 | NC_021164.1    | Ca_kabuli_chr05 | 4247753                 | GG                              | TT              | 1946841051               |
| SNP_P4_68861_4250201 | NC_021164.1    | Ca_kabuli_chr05 | 4250201                 | GG                              | AA              | 1946841052               |
| SNP_P4_68862_4257261 | NC_021164.1    | Ca_kabuli_chr05 | 4257261                 | GG                              | AA              | 1946841054               |
| SNP_P4_68863_4257285 | NC_021164.1    | Ca_kabuli_chr05 | 4257285                 | TT                              | CC              | 1946841056               |
| SNP_P4_68864_4257286 | NC_021164.1    | Ca_kabuli_chr05 | 4257286                 | GG                              | AA              | 1946841058               |
| SNP_P4_68865_4257562 | NC_021164.1    | Ca_kabuli_chr05 | 4257562                 | CC                              | TT              | 1946841060               |
| SNP_P4_68866_4257575 | NC_021164.1    | Ca_kabuli_chr05 | 4257575                 | GG                              | CC              | 1946841062               |
| SNP_P4_68867_4257597 | NC_021164.1    | Ca_kabuli_chr05 | 4257597                 | TT                              | GG              | 1946841064               |
| SNP_P4_68868_4257610 | NC_021164.1    | Ca_kabuli_chr05 | 4257610                 | AA                              | GG              | 1946841066               |
| SNP_P4_68869_4264060 | NC_021164.1    | Ca_kabuli_chr05 | 4264060                 | TT                              | CC              | 1946841068               |
| SNP_P4_68870_4264080 | NC_021164.1    | Ca_kabuli_chr05 | 4264080                 | AA                              | CC              | 1946841070               |
| SNP_P4_68871_4264292 | NC_021164.1    | Ca_kabuli_chr05 | 4264292                 | TT                              | AA              | 1946841072               |
| SNP_P4_68872_4264301 | NC_021164.1    | Ca_kabuli_chr05 | 4264301                 | CC                              | AA              | 1946841074               |
| SNP_P4_68873_4264323 | NC_021164.1    | Ca_kabuli_chr05 | 4264323                 | TT                              | AA              | 1946841076               |
| SNP_P4_68874_4270193 | NC_021164.1    | Ca_kabuli_chr05 | 4270193                 | CC                              | TT              | 1946841078               |
| SNP_P4_68875_4273010 | NC_021164.1    | Ca_kabuli_chr05 | 4273010                 | CC                              | AA              | 1946841080               |
| SNP_P4_68876_4273019 | NC_021164.1    | Ca_kabuli_chr05 | 4273019                 | TT                              | CC              | 1946841082               |
| SNP_P4_68877_4273459 | NC_021164.1    | Ca_kabuli_chr05 | 4273459                 | GG                              | AA              | 1946841084               |
| SNP_P4_68880_4280725 | NC_021164.1    | Ca_kabuli_chr05 | 4280725                 | CC                              | AA              | 1946841086               |
| SNP_P4_68881_4281095 | NC_021164.1    | Ca_kabuli_chr05 | 4281095                 | CC                              | GG              | 1946841088               |
| SNP_P4_68882_4281096 | NC_021164.1    | Ca_kabuli_chr05 | 4281096                 | TT                              | CC              | 1946841090               |
| SNP_P4_68883_4282906 | NC_021164.1    | Ca_kabuli_chr05 | 4282906                 | GG                              | TT              | 1946841092               |
| SNP_P4_68884_4297732 | NC_021164.1    | Ca_kabuli_chr05 | 4297732                 | AA                              | CC              | 1946841094               |
| SNP_P4_68885_4297737 | NC_021164.1    | Ca_kabuli_chr05 | 4297737                 | CC                              | TT              | 1946841096               |
| SNP_P4_68886_4297824 | NC_021164.1    | Ca_kabuli_chr05 | 4297824                 | AA                              | GG              | 1946841098               |
| SNP_P4_68887_4297870 | NC_021164.1    | Ca_kabuli_chr05 | 4297870                 | CC                              | TT              | 1946841100               |
| SNP_P4_68888_4297914 | NC_021164.1    | Ca_kabuli_chr05 | 4297914                 | CC                              | TT              | 1946841102               |
| SNP_P4_68889_4297967 | NC_021164.1    | Ca_kabuli_chr05 | 4297967                 | AA                              | GG              | 1946841104               |
| SNP_P4_68890_4298054 | NC_021164.1    | Ca_kabuli_chr05 | 4298054                 | AA                              | GG              | 1946841106               |
| SNP_P4_68891_4298070 | NC_021164.1    | Ca_kabuli_chr05 | 4298070                 | TT                              | CC              | 1946841108               |
| SNP_P4_68892_4301703 | NC_021164.1    | Ca_kabuli_chr05 | 4301703                 | GG                              | AA              | 1946841110               |
| SNP_P4_68893_4313525 | NC_021164.1    | Ca_kabuli_chr05 | 4313525                 | CC                              | TT              | 1946841112               |
| SNP_P4_68894_4313563 | NC_021164.1    | Ca_kabuli_chr05 | 4313563                 | TT                              | CC              | 1946841114               |
| SNP_P4_68895_4314623 | NC_021164.1    | Ca_kabuli_chr05 | 4314623                 | GG                              | AA              | 1946841116               |
| SNP_P4_68896_4314908 | NC_021164.1    | Ca_kabuli_chr05 | 4314908                 | GG                              | TT              | 1946841118               |
| SNP_P4_68897_4314909 | NC_021164.1    | Ca_kabuli_chr05 | 4314909                 | TT                              | AA              | 1946841120               |
| SNP_P4_68898_4315393 | NC_021164.1    | Ca_kabuli_chr05 | 4315393                 | AA                              | GG              | 1946841122               |

| SNPs IDs             | Chromosome IDs | Chromosomes     | Physical positions (bp) | CDC Frontier (Reference genome) | (ILWC46 & LPNB) | NCBI SNPdb Accession IDs |
|----------------------|----------------|-----------------|-------------------------|---------------------------------|-----------------|--------------------------|
| SNP_P4_68899_4315683 | NC_021164.1    | Ca_kabuli_chr05 | 4315683                 | CC                              | GG              | 1946841124               |
| SNP_P4_68900_4317061 | NC_021164.1    | Ca_kabuli_chr05 | 4317061                 | GG                              | AA              | 1946841125               |
| SNP_P4_68901_4317068 | NC_021164.1    | Ca_kabuli_chr05 | 4317068                 | AA                              | GG              | 1946841127               |
| SNP_P4_68902_4324037 | NC_021164.1    | Ca_kabuli_chr05 | 4324037                 | AA                              | GG              | 1946841129               |
| SNP_P4_68903_4357204 | NC_021164.1    | Ca_kabuli_chr05 | 4357204                 | GG                              | TT              | 1946841131               |
| SNP_P4_68904_4375937 | NC_021164.1    | Ca_kabuli_chr05 | 4375937                 | GG                              | AA              | 1946841133               |
| SNP_P4_68905_4377432 | NC_021164.1    | Ca_kabuli_chr05 | 4377432                 | CC                              | TT              | 1946841135               |
| SNP_P4_68906_4377456 | NC_021164.1    | Ca_kabuli_chr05 | 4377456                 | AA                              | GG              | 1946841137               |
| SNP_P4_68907_4377509 | NC_021164.1    | Ca_kabuli_chr05 | 4377509                 | CC                              | TT              | 1946841138               |
| SNP_P4_68908_4378807 | NC_021164.1    | Ca_kabuli_chr05 | 4378807                 | GG                              | AA              | 1946841140               |
| SNP_P4_68909_4379449 | NC_021164.1    | Ca_kabuli_chr05 | 4379449                 | CC                              | TT              | 1946841142               |
| SNP_P4_68910_4379477 | NC_021164.1    | Ca_kabuli_chr05 | 4379477                 | CC                              | AA              | 1946841144               |
| SNP_P4_68911_4379984 | NC_021164.1    | Ca_kabuli_chr05 | 4379984                 | AA                              | GG              | 1946841146               |
| SNP_P4_68914_4398803 | NC_021164.1    | Ca_kabuli_chr05 | 4398803                 | GG                              | AA              | 1946841148               |
| SNP_P4_68915_4417470 | NC_021164.1    | Ca_kabuli_chr05 | 4417470                 | TT                              | AA              | 1946841150               |
| SNP_P4_68916_4430777 | NC_021164.1    | Ca_kabuli_chr05 | 4430777                 | CC                              | TT              | 1946841152               |
| SNP_P4_68917_4433503 | NC_021164.1    | Ca_kabuli_chr05 | 4433503                 | CC                              | AA              | 1946841154               |
| SNP_P4_68918_4433506 | NC_021164.1    | Ca_kabuli_chr05 | 4433506                 | TT                              | CC              | 1946841156               |
| SNP_P4_68919_4433515 | NC_021164.1    | Ca_kabuli_chr05 | 4433515                 | AA                              | TT              | 1946841158               |
| SNP_P4_68920_4433759 | NC_021164.1    | Ca_kabuli_chr05 | 4433759                 | TT                              | CC              | 1946841160               |
| SNP_P4_68921_4433783 | NC_021164.1    | Ca_kabuli_chr05 | 4433783                 | TT                              | AA              | 1946841162               |
| SNP_P4_68922_4433829 | NC_021164.1    | Ca_kabuli_chr05 | 4433829                 | GG                              | AA              | 1946841164               |
| SNP_P4_68923_4434019 | NC_021164.1    | Ca_kabuli_chr05 | 4434019                 | TT                              | GG              | 1946841166               |
| SNP_P4_68924_4437038 | NC_021164.1    | Ca_kabuli_chr05 | 4437038                 | GG                              | CC              | 1946841168               |
| SNP_P4_68925_4483791 | NC_021164.1    | Ca_kabuli_chr05 | 4483791                 | CC                              | AA              | 1946841171               |
| SNP_P4_68926_4485787 | NC_021164.1    | Ca_kabuli_chr05 | 4485787                 | AA                              | CC              | 1946841173               |
| SNP_P4_68927_4487227 | NC_021164.1    | Ca_kabuli_chr05 | 4487227                 | AA                              | GG              | 1946841175               |
| SNP_P4_68928_4507718 | NC_021164.1    | Ca_kabuli_chr05 | 4507718                 | CC                              | AA              | 1946841177               |
| SNP_P4_68929_4507719 | NC_021164.1    | Ca_kabuli_chr05 | 4507719                 | TT                              | AA              | 1946841179               |
| SNP_P4_68930_4521983 | NC_021164.1    | Ca_kabuli_chr05 | 4521983                 | GG                              | AA              | 1946841181               |
| SNP_P4_68931_4536055 | NC_021164.1    | Ca_kabuli_chr05 | 4536055                 | AA                              | GG              | 1946841183               |
| SNP_P4_68932_4536846 | NC_021164.1    | Ca_kabuli_chr05 | 4536846                 | AA                              | TT              | 1946841185               |
| SNP_P4_68933_4541683 | NC_021164.1    | Ca_kabuli_chr05 | 4541683                 | AA                              | GG              | 1946841187               |
| SNP_P4_68934_4542018 | NC_021164.1    | Ca_kabuli_chr05 | 4542018                 | TT                              | GG              | 1946841189               |
| SNP_P4_68935_4542076 | NC_021164.1    | Ca_kabuli_chr05 | 4542076                 | GG                              | AA              | 1946841191               |
| SNP_P4_68936_4542198 | NC_021164.1    | Ca_kabuli_chr05 | 4542198                 | CC                              | GG              | 1946841193               |
| SNP_P4_68937_4542224 | NC_021164.1    | Ca_kabuli_chr05 | 4542224                 | TT                              | CC              | 1946841195               |
| SNP_P4_68938_4542230 | NC_021164.1    | Ca_kabuli_chr05 | 4542230                 | GG                              | TT              | 1946841197               |
| SNP_P4_68939_4543735 | NC_021164.1    | Ca_kabuli_chr05 | 4543735                 | CC                              | AA              | 1946841199               |
| SNP_P4_68940_4543859 | NC_021164.1    | Ca_kabuli_chr05 | 4543859                 | AA                              | CC              | 1946841201               |
| SNP_P4_68941_4545796 | NC_021164.1    | Ca_kabuli_chr05 | 4545796                 | GG                              | AA              | 1946841203               |
| SNP_P4_68943_4552588 | NC_021164.1    | Ca_kabuli_chr05 | 4552588                 | GG                              | AA              | 1946841206               |

| SNPs IDs             | Chromosome IDs | Chromosomes     | Physical positions (bp) | CDC Frontier (Reference genome) | (ILWC46 & LPNB) | NCBI SNPdb Accession IDs |
|----------------------|----------------|-----------------|-------------------------|---------------------------------|-----------------|--------------------------|
| SNP_P4_68945_4552771 | NC_021164.1    | Ca_kabuli_chr05 | 4552771                 | GG                              | AA              | 1946841208               |
| SNP_P4_68946_4616014 | NC_021164.1    | Ca_kabuli_chr05 | 4616014                 | TT                              | CC              | 1946841210               |
| SNP_P4_68947_4616269 | NC_021164.1    | Ca_kabuli_chr05 | 4616269                 | AA                              | CC              | 1946841212               |
| SNP_P4_68948_4616270 | NC_021164.1    | Ca_kabuli_chr05 | 4616270                 | AA                              | GG              | 1946841214               |
| SNP_P4_68949_4616298 | NC_021164.1    | Ca_kabuli_chr05 | 4616298                 | AA                              | CC              | 1946841216               |
| SNP_P4_68950_4616303 | NC_021164.1    | Ca_kabuli_chr05 | 4616303                 | AA                              | TT              | 1946841218               |
| SNP_P4_68951_4616334 | NC_021164.1    | Ca_kabuli_chr05 | 4616334                 | AA                              | GG              | 1946841220               |
| SNP_P4_68952_4616451 | NC_021164.1    | Ca_kabuli_chr05 | 4616451                 | TT                              | CC              | 1946841222               |
| SNP_P4_68953_4616456 | NC_021164.1    | Ca_kabuli_chr05 | 4616456                 | AA                              | GG              | 1946841224               |
| SNP_P4_68954_4620723 | NC_021164.1    | Ca_kabuli_chr05 | 4620723                 | GG                              | AA              | 1946841226               |
| SNP_P4_68955_4620782 | NC_021164.1    | Ca_kabuli_chr05 | 4620782                 | TT                              | CC              | 1946841228               |
| SNP_P4_68956_4670636 | NC_021164.1    | Ca_kabuli_chr05 | 4670636                 | CC                              | TT              | 1946841229               |
| SNP_P4_68957_4673199 | NC_021164.1    | Ca_kabuli_chr05 | 4673199                 | TT                              | CC              | 1946841231               |
| SNP_P4_68958_4673215 | NC_021164.1    | Ca_kabuli_chr05 | 4673215                 | GG                              | AA              | 1946841233               |
| SNP_P4_68959_4673220 | NC_021164.1    | Ca_kabuli_chr05 | 4673220                 | AA                              | GG              | 1946841235               |
| SNP_P4_68960_4673246 | NC_021164.1    | Ca_kabuli_chr05 | 4673246                 | CC                              | TT              | 1946841237               |
| SNP_P4_68961_4673279 | NC_021164.1    | Ca_kabuli_chr05 | 4673279                 | AA                              | TT              | 1946841239               |
| SNP_P4_68962_4673285 | NC_021164.1    | Ca_kabuli_chr05 | 4673285                 | TT                              | AA              | 1946841241               |
| SNP_P4_68963_4678114 | NC_021164.1    | Ca_kabuli_chr05 | 4678114                 | TT                              | GG              | 1946841243               |
| SNP_P4_68964_4678267 | NC_021164.1    | Ca_kabuli_chr05 | 4678267                 | GG                              | AA              | 1946841245               |
| SNP_P4_68965_4678281 | NC_021164.1    | Ca_kabuli_chr05 | 4678281                 | CC                              | GG              | 1946841247               |
| SNP_P4_68966_4678318 | NC_021164.1    | Ca_kabuli_chr05 | 4678318                 | TT                              | AA              | 1946841249               |
| SNP_P4_68967_4678539 | NC_021164.1    | Ca_kabuli_chr05 | 4678539                 | TT                              | GG              | 1946841251               |
| SNP_P4_68968_4681520 | NC_021164.1    | Ca_kabuli_chr05 | 4681520                 | GG                              | CC              | 1946841253               |
| SNP_P4_68969_4689247 | NC_021164.1    | Ca_kabuli_chr05 | 4689247                 | AA                              | CC              | 1946841255               |
| SNP_P4_68970_4689578 | NC_021164.1    | Ca_kabuli_chr05 | 4689578                 | TT                              | GG              | 1946841256               |
| SNP_P4_68971_4690461 | NC_021164.1    | Ca_kabuli_chr05 | 4690461                 | AA                              | TT              | 1946841258               |
| SNP_P4_68972_4711673 | NC_021164.1    | Ca_kabuli_chr05 | 4711673                 | GG                              | AA              | 1946841260               |
| SNP_P4_68973_4713421 | NC_021164.1    | Ca_kabuli_chr05 | 4713421                 | CC                              | TT              | 1946841262               |
| SNP_P4_68974_4713707 | NC_021164.1    | Ca_kabuli_chr05 | 4713707                 | TT                              | GG              | 1946841264               |
| SNP_P4_68975_4727024 | NC_021164.1    | Ca_kabuli_chr05 | 4727024                 | CC                              | TT              | 1946841266               |
| SNP_P4_68976_4727076 | NC_021164.1    | Ca_kabuli_chr05 | 4727076                 | GG                              | CC              | 1946841268               |
| SNP_P4_68977_4730857 | NC_021164.1    | Ca_kabuli_chr05 | 4730857                 | CC                              | TT              | 1946841270               |
| SNP_P4_68978_4730928 | NC_021164.1    | Ca_kabuli_chr05 | 4730928                 | TT                              | CC              | 1946841272               |
| SNP_P4_68979_4731052 | NC_021164.1    | Ca_kabuli_chr05 | 4731052                 | GG                              | AA              | 1946841274               |
| SNP_P4_68980_4731379 | NC_021164.1    | Ca_kabuli_chr05 | 4731379                 | TT                              | CC              | 1946841276               |
| SNP_P4_68981_4731531 | NC_021164.1    | Ca_kabuli_chr05 | 4731531                 | TT                              | CC              | 1946841278               |
| SNP_P4_68982_4731615 | NC_021164.1    | Ca_kabuli_chr05 | 4731615                 | AA                              | GG              | 1946841280               |
| SNP_P4_68983_4731679 | NC_021164.1    | Ca_kabuli_chr05 | 4731679                 | AA                              | CC              | 1946841282               |
| SNP_P4_68984_4737099 | NC_021164.1    | Ca_kabuli_chr05 | 4737099                 | GG                              | AA              | 1946841284               |
| SNP_P4_68985_4737110 | NC_021164.1    | Ca_kabuli_chr05 | 4737110                 | AA                              | CC              | 1946841286               |
| SNP_P4_68986_4737129 | NC_021164.1    | Ca_kabuli_chr05 | 4737129                 | GG                              | AA              | 1946841288               |

| SNPs IDs             | Chromosome IDs | Chromosomes     | Physical positions (bp) | CDC Frontier (Reference genome) | (ILWC46 & LPNB) | NCBI SNPdb Accession IDs |
|----------------------|----------------|-----------------|-------------------------|---------------------------------|-----------------|--------------------------|
| SNP_P4_68987_4737497 | NC_021164.1    | Ca_kabuli_chr05 | 4737497                 | GG                              | AA              | 1946841290               |
| SNP_P4_68988_4747911 | NC_021164.1    | Ca_kabuli_chr05 | 4747911                 | TT                              | CC              | 1946841292               |
| SNP_P4_68989_4747981 | NC_021164.1    | Ca_kabuli_chr05 | 4747981                 | AA                              | TT              | 1946841294               |
| SNP_P4_68990_4748102 | NC_021164.1    | Ca_kabuli_chr05 | 4748102                 | TT                              | CC              | 1946841296               |
| SNP_P4_68991_4748760 | NC_021164.1    | Ca_kabuli_chr05 | 4748760                 | TT                              | AA              | 1946841298               |
| SNP_P4_68992_4750975 | NC_021164.1    | Ca_kabuli_chr05 | 4750975                 | TT                              | CC              | 1946841300               |
| SNP_P4_68993_4750995 | NC_021164.1    | Ca_kabuli_chr05 | 4750995                 | AA                              | GG              | 1946841302               |
| SNP_P4_68994_4751874 | NC_021164.1    | Ca_kabuli_chr05 | 4751874                 | TT                              | GG              | 1946841304               |
| SNP_P4_68995_4762755 | NC_021164.1    | Ca_kabuli_chr05 | 4762755                 | AA                              | GG              | 1946841306               |
| SNP_P4_68996_4763105 | NC_021164.1    | Ca_kabuli_chr05 | 4763105                 | GG                              | AA              | 1946841308               |
| SNP_P4_68997_4763141 | NC_021164.1    | Ca_kabuli_chr05 | 4763141                 | CC                              | GG              | 1946841310               |
| SNP_P4_68998_4763146 | NC_021164.1    | Ca_kabuli_chr05 | 4763146                 | GG                              | AA              | 1946841312               |
| SNP_P4_68999_4763170 | NC_021164.1    | Ca_kabuli_chr05 | 4763170                 | CC                              | TT              | 1946841314               |
| SNP_P4_69000_4767646 | NC_021164.1    | Ca_kabuli_chr05 | 4767646                 | AA                              | GG              | 1946841316               |
| SNP_P4_69001_4767713 | NC_021164.1    | Ca_kabuli_chr05 | 4767713                 | TT                              | CC              | 1946841318               |
| SNP_P4_69002_4768004 | NC_021164.1    | Ca_kabuli_chr05 | 4768004                 | AA                              | TT              | 1946841320               |
| SNP_P4_69003_4768020 | NC_021164.1    | Ca_kabuli_chr05 | 4768020                 | GG                              | TT              | 1946841322               |
| SNP_P4_69004_4768040 | NC_021164.1    | Ca_kabuli_chr05 | 4768040                 | AA                              | GG              | 1946841324               |
| SNP_P4_69005_4768427 | NC_021164.1    | Ca_kabuli_chr05 | 4768427                 | TT                              | CC              | 1946841326               |
| SNP_P4_69006_4768442 | NC_021164.1    | Ca_kabuli_chr05 | 4768442                 | TT                              | CC              | 1946841328               |
| SNP_P4_69007_4768622 | NC_021164.1    | Ca_kabuli_chr05 | 4768622                 | AA                              | GG              | 1946841330               |
| SNP_P4_69008_4768638 | NC_021164.1    | Ca_kabuli_chr05 | 4768638                 | GG                              | TT              | 1946841332               |
| SNP_P4_69009_4768667 | NC_021164.1    | Ca_kabuli_chr05 | 4768667                 | TT                              | CC              | 1946841334               |
| SNP_P4_69010_4768668 | NC_021164.1    | Ca_kabuli_chr05 | 4768668                 | AA                              | TT              | 1946841336               |
| SNP_P4_69011_4768703 | NC_021164.1    | Ca_kabuli_chr05 | 4768703                 | GG                              | AA              | 1946841338               |
| SNP_P4_69012_4768706 | NC_021164.1    | Ca_kabuli_chr05 | 4768706                 | CC                              | TT              | 1946841340               |
| SNP_P4_69013_4768709 | NC_021164.1    | Ca_kabuli_chr05 | 4768709                 | TT                              | CC              | 1946841342               |
| SNP_P4_69014_4768712 | NC_021164.1    | Ca_kabuli_chr05 | 4768712                 | GG                              | CC              | 1946841344               |
| SNP_P4_69015_4768723 | NC_021164.1    | Ca_kabuli_chr05 | 4768723                 | GG                              | AA              | 1946841346               |
| SNP_P4_69016_4768730 | NC_021164.1    | Ca_kabuli_chr05 | 4768730                 | CC                              | TT              | 1946841348               |
| SNP_P4_69017_4768757 | NC_021164.1    | Ca_kabuli_chr05 | 4768757                 | AA                              | GG              | 1946841350               |
| SNP_P4_69018_4768802 | NC_021164.1    | Ca_kabuli_chr05 | 4768802                 | TT                              | CC              | 1946841352               |
| SNP_P4_69019_4786669 | NC_021164.1    | Ca_kabuli_chr05 | 4786669                 | TT                              | CC              | 1946841354               |
| SNP_P4_69020_4793965 | NC_021164.1    | Ca_kabuli_chr05 | 4793965                 | CC                              | TT              | 1946841356               |
| SNP_P4_69021_4794649 | NC_021164.1    | Ca_kabuli_chr05 | 4794649                 | CC                              | TT              | 1946841358               |
| SNP_P4_69022_4794650 | NC_021164.1    | Ca_kabuli_chr05 | 4794650                 | AA                              | GG              | 1946841360               |
| SNP_P4_69023_4794656 | NC_021164.1    | Ca_kabuli_chr05 | 4794656                 | TT                              | CC              | 1946841362               |
| SNP_P4_69024_4794657 | NC_021164.1    | Ca_kabuli_chr05 | 4794657                 | GG                              | TT              | 1946841364               |
| SNP_P4_69025_4794743 | NC_021164.1    | Ca_kabuli_chr05 | 4794743                 | GG                              | AA              | 1946841366               |
| SNP_P4_69026_4808596 | NC_021164.1    | Ca_kabuli_chr05 | 4808596                 | CC                              | AA              | 1946841368               |
| SNP_P4_69028_4830568 | NC_021164.1    | Ca_kabuli_chr05 | 4830568                 | TT                              | CC              | 1946841370               |
| SNP_P4_69029_4832418 | NC_021164.1    | Ca_kabuli_chr05 | 4832418                 | TT                              | CC              | 1946841372               |

| SNPs IDs             | Chromosome IDs | Chromosomes     | Physical positions (bp) | CDC Frontier (Reference genome) | (ILWC46 & LPNB) | NCBI SNPdb Accession IDs |
|----------------------|----------------|-----------------|-------------------------|---------------------------------|-----------------|--------------------------|
| SNP_P4_69030_4832610 | NC_021164.1    | Ca_kabuli_chr05 | 4832610                 | CC                              | TT              | 1946841374               |
| SNP_P4_69031_4833910 | NC_021164.1    | Ca_kabuli_chr05 | 4833910                 | AA                              | GG              | 1946841376               |
| SNP_P4_69032_4833957 | NC_021164.1    | Ca_kabuli_chr05 | 4833957                 | AA                              | GG              | 1946841378               |
| SNP_P4_69033_4833982 | NC_021164.1    | Ca_kabuli_chr05 | 4833982                 | TT                              | AA              | 1946841380               |
| SNP_P4_69034_4856044 | NC_021164.1    | Ca_kabuli_chr05 | 4856044                 | GG                              | AA              | 1946841382               |
| SNP_P4_69035_4856183 | NC_021164.1    | Ca_kabuli_chr05 | 4856183                 | TT                              | CC              | 1946841384               |
| SNP_P4_69036_4856227 | NC_021164.1    | Ca_kabuli_chr05 | 4856227                 | AA                              | GG              | 1946841386               |
| SNP_P4_69037_4856228 | NC_021164.1    | Ca_kabuli_chr05 | 4856228                 | GG                              | TT              | 1946841388               |
| SNP_P4_69038_4856253 | NC_021164.1    | Ca_kabuli_chr05 | 4856253                 | GG                              | AA              | 1946841390               |
| SNP_P4_69039_4856291 | NC_021164.1    | Ca_kabuli_chr05 | 4856291                 | CC                              | TT              | 1946841392               |
| SNP_P4_69040_4856543 | NC_021164.1    | Ca_kabuli_chr05 | 4856543                 | AA                              | CC              | 1946841394               |
| SNP_P4_69041_4856977 | NC_021164.1    | Ca_kabuli_chr05 | 4856977                 | AA                              | GG              | 1946841396               |
| SNP_P4_69043_4857288 | NC_021164.1    | Ca_kabuli_chr05 | 4857288                 | AA                              | CC              | 1946841398               |
| SNP_P4_69044_4869275 | NC_021164.1    | Ca_kabuli_chr05 | 4869275                 | AA                              | GG              | 1946841401               |
| SNP_P4_69045_4869298 | NC_021164.1    | Ca_kabuli_chr05 | 4869298                 | TT                              | CC              | 1946841403               |
| SNP_P4_69046_4869935 | NC_021164.1    | Ca_kabuli_chr05 | 4869935                 | CC                              | TT              | 1946841405               |
| SNP_P4_69047_4870151 | NC_021164.1    | Ca_kabuli_chr05 | 4870151                 | TT                              | CC              | 1946841407               |
| SNP_P4_69048_4870185 | NC_021164.1    | Ca_kabuli_chr05 | 4870185                 | GG                              | AA              | 1946841409               |
| SNP_P4_69049_4870492 | NC_021164.1    | Ca_kabuli_chr05 | 4870492                 | CC                              | TT              | 1946841411               |
| SNP_P4_69050_4870528 | NC_021164.1    | Ca_kabuli_chr05 | 4870528                 | GG                              | AA              | 1946841413               |
| SNP_P4_69051_4870537 | NC_021164.1    | Ca_kabuli_chr05 | 4870537                 | GG                              | AA              | 1946841415               |
| SNP_P4_69052_4870563 | NC_021164.1    | Ca_kabuli_chr05 | 4870563                 | AA                              | TT              | 1946841417               |
| SNP_P4_69054_4882901 | NC_021164.1    | Ca_kabuli_chr05 | 4882901                 | CC                              | TT              | 1946841419               |
| SNP_P4_69055_4884844 | NC_021164.1    | Ca_kabuli_chr05 | 4884844                 | TT                              | GG              | 1946841421               |
| SNP_P4_69056_4885274 | NC_021164.1    | Ca_kabuli_chr05 | 4885274                 | GG                              | TT              | 1946841423               |
| SNP_P4_69057_4907892 | NC_021164.1    | Ca_kabuli_chr05 | 4907892                 | GG                              | AA              | 1946841425               |
| SNP_P4_69058_4908598 | NC_021164.1    | Ca_kabuli_chr05 | 4908598                 | GG                              | TT              | 1946841427               |
| SNP_P4_69059_4909195 | NC_021164.1    | Ca_kabuli_chr05 | 4909195                 | TT                              | CC              | 1946841429               |
| SNP_P4_69060_4955590 | NC_021164.1    | Ca_kabuli_chr05 | 4955590                 | CC                              | AA              | 1946841431               |
| SNP_P4_69061_4955609 | NC_021164.1    | Ca_kabuli_chr05 | 4955609                 | TT                              | CC              | 1946841433               |
| SNP_P4_69062_4957941 | NC_021164.1    | Ca_kabuli_chr05 | 4957941                 | CC                              | TT              | 1946841435               |
| SNP_P4_69063_4959519 | NC_021164.1    | Ca_kabuli_chr05 | 4959519                 | AA                              | CC              | 1946841437               |
| SNP_P4_69064_4959559 | NC_021164.1    | Ca_kabuli_chr05 | 4959559                 | CC                              | TT              | 1946841439               |
| SNP_P4_69065_4961707 | NC_021164.1    | Ca_kabuli_chr05 | 4961707                 | GG                              | AA              | 1946841441               |
| SNP_P4_69066_4962394 | NC_021164.1    | Ca_kabuli_chr05 | 4962394                 | CC                              | AA              | 1946841443               |
| SNP_P4_69067_4969348 | NC_021164.1    | Ca_kabuli_chr05 | 4969348                 | TT                              | CC              | 1946841445               |
| SNP_P4_69068_4969350 | NC_021164.1    | Ca_kabuli_chr05 | 4969350                 | TT                              | CC              | 1946841447               |
| SNP_P4_69069_4969579 | NC_021164.1    | Ca_kabuli_chr05 | 4969579                 | CC                              | TT              | 1946841449               |
| SNP_P4_69070_4969655 | NC_021164.1    | Ca_kabuli_chr05 | 4969655                 | AA                              | GG              | 1946841451               |
| SNP_P4_69071_4969686 | NC_021164.1    | Ca_kabuli_chr05 | 4969686                 | AA                              | TT              | 1946841453               |
| SNP_P4_69072_4969758 | NC_021164.1    | Ca_kabuli_chr05 | 4969758                 | AA                              | GG              | 1946841455               |
| SNP_P4_69073_4969792 | NC_021164.1    | Ca_kabuli_chr05 | 4969792                 | AA                              | GG              | 1946841457               |

| SNPs IDs             | Chromosome IDs | Chromosomes     | Physical positions (bp) | CDC Frontier (Reference genome) | (ILWC46 & LPNB) | NCBI SNPdb Accession IDs |
|----------------------|----------------|-----------------|-------------------------|---------------------------------|-----------------|--------------------------|
| SNP_P4_69075_4970495 | NC_021164.1    | Ca_kabuli_chr05 | 4970495                 | CC                              | TT              | 1946841459               |
| SNP_P4_69079_5052229 | NC_021164.1    | Ca_kabuli_chr05 | 5052229                 | TT                              | GG              | 1946841461               |
| SNP_P4_69080_5054177 | NC_021164.1    | Ca_kabuli_chr05 | 5054177                 | TT                              | CC              | 1946841463               |
| SNP_P4_69081_5077249 | NC_021164.1    | Ca_kabuli_chr05 | 5077249                 | CC                              | GG              | 1946841465               |
| SNP_P4_69082_5083388 | NC_021164.1    | Ca_kabuli_chr05 | 5083388                 | GG                              | AA              | 1946841467               |
| SNP_P4_69083_5122433 | NC_021164.1    | Ca_kabuli_chr05 | 5122433                 | CC                              | TT              | 1946841469               |
| SNP_P4_69084_5133905 | NC_021164.1    | Ca_kabuli_chr05 | 5133905                 | GG                              | AA              | 1946841471               |
| SNP_P4_69085_5147401 | NC_021164.1    | Ca_kabuli_chr05 | 5147401                 | TT                              | CC              | 1946841473               |
| SNP_P4_69086_5157166 | NC_021164.1    | Ca_kabuli_chr05 | 5157166                 | GG                              | AA              | 1946841475               |
| SNP_P4_69088_5193962 | NC_021164.1    | Ca_kabuli_chr05 | 5193962                 | CC                              | TT              | 1946841477               |
| SNP_P4_69089_5194011 | NC_021164.1    | Ca_kabuli_chr05 | 5194011                 | AA                              | GG              | 1946841479               |
| SNP_P4_69090_5194030 | NC_021164.1    | Ca_kabuli_chr05 | 5194030                 | GG                              | TT              | 1946841481               |
| SNP_P4_69091_5194031 | NC_021164.1    | Ca_kabuli_chr05 | 5194031                 | AA                              | GG              | 1946841483               |
| SNP_P4_69092_5194049 | NC_021164.1    | Ca_kabuli_chr05 | 5194049                 | AA                              | GG              | 1946841485               |
| SNP_P4_69093_5194096 | NC_021164.1    | Ca_kabuli_chr05 | 5194096                 | TT                              | CC              | 1946841487               |
| SNP_P4_69094_5194103 | NC_021164.1    | Ca_kabuli_chr05 | 5194103                 | TT                              | CC              | 1946841489               |
| SNP_P4_69095_5194128 | NC_021164.1    | Ca_kabuli_chr05 | 5194128                 | TT                              | CC              | 1946841491               |
| SNP_P4_69096_5194140 | NC_021164.1    | Ca_kabuli_chr05 | 5194140                 | TT                              | GG              | 1946841493               |
| SNP_P4_69097_5194142 | NC_021164.1    | Ca_kabuli_chr05 | 5194142                 | TT                              | AA              | 1946841495               |
| SNP_P4_69098_5194168 | NC_021164.1    | Ca_kabuli_chr05 | 5194168                 | TT                              | CC              | 1946841497               |
| SNP_P4_69099_5194177 | NC_021164.1    | Ca_kabuli_chr05 | 5194177                 | AA                              | GG              | 1946841499               |
| SNP_P4_69101_5269099 | NC_021164.1    | Ca_kabuli_chr05 | 5269099                 | AA                              | CC              | 1946841501               |
| SNP_P4_69102_5269122 | NC_021164.1    | Ca_kabuli_chr05 | 5269122                 | TT                              | CC              | 1946841503               |
| SNP_P4_69103_5269137 | NC_021164.1    | Ca_kabuli_chr05 | 5269137                 | AA                              | GG              | 1946841504               |
| SNP_P4_69104_5269149 | NC_021164.1    | Ca_kabuli_chr05 | 5269149                 | GG                              | TT              | 1946841505               |
| SNP_P4_69105_5269155 | NC_021164.1    | Ca_kabuli_chr05 | 5269155                 | AA                              | TT              | 1946841506               |
| SNP_P4_69106_5269158 | NC_021164.1    | Ca_kabuli_chr05 | 5269158                 | GG                              | AA              | 1946841507               |
| SNP_P4_69107_5269228 | NC_021164.1    | Ca_kabuli_chr05 | 5269228                 | TT                              | AA              | 1946841508               |
| SNP_P4_69108_5269291 | NC_021164.1    | Ca_kabuli_chr05 | 5269291                 | AA                              | GG              | 1946841509               |
| SNP_P4_69109_5284779 | NC_021164.1    | Ca_kabuli_chr05 | 5284779                 | CC                              | TT              | 1946841510               |
| SNP_P4_69112_5297193 | NC_021164.1    | Ca_kabuli_chr05 | 5297193                 | CC                              | GG              | 1946841511               |
| SNP_P4_69113_5298648 | NC_021164.1    | Ca_kabuli_chr05 | 5298648                 | TT                              | CC              | 1946841513               |
| SNP_P4_69114_5299414 | NC_021164.1    | Ca_kabuli_chr05 | 5299414                 | CC                              | GG              | 1946841515               |
| SNP_P4_69115_5299448 | NC_021164.1    | Ca_kabuli_chr05 | 5299448                 | CC                              | TT              | 1946841516               |
| SNP_P4_69116_5299472 | NC_021164.1    | Ca_kabuli_chr05 | 5299472                 | CC                              | TT              | 1946841518               |
| SNP_P4_69117_5299505 | NC_021164.1    | Ca_kabuli_chr05 | 5299505                 | CC                              | TT              | 1946841520               |
| SNP_P4_69118_5299520 | NC_021164.1    | Ca_kabuli_chr05 | 5299520                 | TT                              | CC              | 1946841523               |
| SNP_P4_69119_5299687 | NC_021164.1    | Ca_kabuli_chr05 | 5299687                 | AA                              | GG              | 1946841525               |
| SNP_P4_69120_5299767 | NC_021164.1    | Ca_kabuli_chr05 | 5299767                 | TT                              | CC              | 1946841527               |
| SNP_P4_69121_5299771 | NC_021164.1    | Ca_kabuli_chr05 | 5299771                 | TT                              | CC              | 1946841529               |
| SNP_P4_69122_5299830 | NC_021164.1    | Ca_kabuli_chr05 | 5299830                 | AA                              | GG              | 1946841531               |
| SNP_P4_69123_5299870 | NC_021164.1    | Ca_kabuli_chr05 | 5299870                 | AA                              | CC              | 1946841533               |

| SNPs IDs             | Chromosome IDs | Chromosomes     | Physical positions (bp) | CDC Frontier (Reference genome) | (ILWC46 & LPNB) | NCBI SNPdb Accession IDs |
|----------------------|----------------|-----------------|-------------------------|---------------------------------|-----------------|--------------------------|
| SNP_P4_69124_5299871 | NC_021164.1    | Ca_kabuli_chr05 | 5299871                 | TT                              | AA              | 1946841535               |
| SNP_P4_69125_5299883 | NC_021164.1    | Ca_kabuli_chr05 | 5299883                 | TT                              | CC              | 1946841537               |
| SNP_P4_69126_5299898 | NC_021164.1    | Ca_kabuli_chr05 | 5299898                 | TT                              | CC              | 1946841539               |
| SNP_P4_69127_5299936 | NC_021164.1    | Ca_kabuli_chr05 | 5299936                 | AA                              | GG              | 1946841541               |
| SNP_P4_69128_5300036 | NC_021164.1    | Ca_kabuli_chr05 | 5300036                 | TT                              | CC              | 1946841543               |
| SNP_P4_69129_5300041 | NC_021164.1    | Ca_kabuli_chr05 | 5300041                 | GG                              | TT              | 1946841545               |
| SNP_P4_69131_5318972 | NC_021164.1    | Ca_kabuli_chr05 | 5318972                 | CC                              | GG              | 1946841547               |
| SNP_P4_69132_5350609 | NC_021164.1    | Ca_kabuli_chr05 | 5350609                 | CC                              | AA              | 1946841549               |
| SNP_P4_69133_5352379 | NC_021164.1    | Ca_kabuli_chr05 | 5352379                 | CC                              | TT              | 1946841551               |
| SNP_P4_69134_5352903 | NC_021164.1    | Ca_kabuli_chr05 | 5352903                 | TT                              | CC              | 1946841553               |
| SNP_P4_69135_5352983 | NC_021164.1    | Ca_kabuli_chr05 | 5352983                 | TT                              | AA              | 1946841555               |
| SNP_P4_69136_5353002 | NC_021164.1    | Ca_kabuli_chr05 | 5353002                 | CC                              | TT              | 1946841557               |
| SNP_P4_69137_5363215 | NC_021164.1    | Ca_kabuli_chr05 | 5363215                 | TT                              | GG              | 1946841559               |
| SNP_P4_69138_5363260 | NC_021164.1    | Ca_kabuli_chr05 | 5363260                 | TT                              | GG              | 1946841561               |
| SNP_P4_69139_5363282 | NC_021164.1    | Ca_kabuli_chr05 | 5363282                 | TT                              | CC              | 1946841563               |
| SNP_P4_69140_5363286 | NC_021164.1    | Ca_kabuli_chr05 | 5363286                 | CC                              | GG              | 1946841565               |
| SNP_P4_69141_5363375 | NC_021164.1    | Ca_kabuli_chr05 | 5363375                 | AA                              | CC              | 1946841567               |
| SNP_P4_69142_5363419 | NC_021164.1    | Ca_kabuli_chr05 | 5363419                 | TT                              | CC              | 1946841569               |
| SNP_P4_69143_5363524 | NC_021164.1    | Ca_kabuli_chr05 | 5363524                 | TT                              | GG              | 1946841571               |
| SNP_P4_69144_5363545 | NC_021164.1    | Ca_kabuli_chr05 | 5363545                 | AA                              | CC              | 1946841573               |
| SNP_P4_69145_5363665 | NC_021164.1    | Ca_kabuli_chr05 | 5363665                 | GG                              | AA              | 1946841576               |
| SNP_P4_69146_5364897 | NC_021164.1    | Ca_kabuli_chr05 | 5364897                 | GG                              | AA              | 1946841578               |
| SNP_P4_69147_5364909 | NC_021164.1    | Ca_kabuli_chr05 | 5364909                 | TT                              | CC              | 1946841580               |
| SNP_P4_69148_5366159 | NC_021164.1    | Ca_kabuli_chr05 | 5366159                 | CC                              | TT              | 1946841582               |
| SNP_P4_69149_5366545 | NC_021164.1    | Ca_kabuli_chr05 | 5366545                 | AA                              | GG              | 1946841584               |
| SNP_P4_69150_5371447 | NC_021164.1    | Ca_kabuli_chr05 | 5371447                 | GG                              | AA              | 1946841586               |
| SNP_P4_69151_5372397 | NC_021164.1    | Ca_kabuli_chr05 | 5372397                 | GG                              | AA              | 1946841588               |
| SNP_P4_69154_5422053 | NC_021164.1    | Ca_kabuli_chr05 | 5422053                 | CC                              | TT              | 1946841590               |
| SNP_P4_69155_5425215 | NC_021164.1    | Ca_kabuli_chr05 | 5425215                 | GG                              | TT              | 1946841592               |
| SNP_P4_69156_5425216 | NC_021164.1    | Ca_kabuli_chr05 | 5425216                 | AA                              | GG              | 1946841594               |
| SNP_P4_69157_5425252 | NC_021164.1    | Ca_kabuli_chr05 | 5425252                 | GG                              | TT              | 1946841596               |
| SNP_P4_69158_5425455 | NC_021164.1    | Ca_kabuli_chr05 | 5425455                 | GG                              | AA              | 1946841598               |
| SNP_P4_69159_5425483 | NC_021164.1    | Ca_kabuli_chr05 | 5425483                 | GG                              | AA              | 1946841599               |
| SNP_P4_69160_5425485 | NC_021164.1    | Ca_kabuli_chr05 | 5425485                 | TT                              | CC              | 1946841601               |
| SNP_P4_69161_5436551 | NC_021164.1    | Ca_kabuli_chr05 | 5436551                 | AA                              | GG              | 1946841603               |
| SNP_P4_69162_5458039 | NC_021164.1    | Ca_kabuli_chr05 | 5458039                 | GG                              | AA              | 1946841605               |
| SNP_P4_69163_5465686 | NC_021164.1    | Ca_kabuli_chr05 | 5465686                 | AA                              | TT              | 1946841607               |
| SNP_P4_69164_5474756 | NC_021164.1    | Ca_kabuli_chr05 | 5474756                 | GG                              | TT              | 1946841609               |
| SNP_P4_69166_5499149 | NC_021164.1    | Ca_kabuli_chr05 | 5499149                 | CC                              | TT              | 1946841611               |
| SNP_P4_69167_5502688 | NC_021164.1    | Ca_kabuli_chr05 | 5502688                 | GG                              | CC              | 1946841613               |
| SNP_P4_69168_5503920 | NC_021164.1    | Ca_kabuli_chr05 | 5503920                 | CC                              | TT              | 1946841615               |
| SNP_P4_69169_5504068 | NC_021164.1    | Ca_kabuli_chr05 | 5504068                 | TT                              | CC              | 1946841617               |

| SNPs IDs             | Chromosome IDs | Chromosomes     | Physical positions (bp) | CDC Frontier (Reference genome) | (ILWC46 & LPNB) | NCBI SNPdb Accession IDs |
|----------------------|----------------|-----------------|-------------------------|---------------------------------|-----------------|--------------------------|
| SNP_P4_69170_5534153 | NC_021164.1    | Ca_kabuli_chr05 | 5534153                 | AA                              | GG              | 1946841619               |
| SNP_P4_69171_5534354 | NC_021164.1    | Ca_kabuli_chr05 | 5534354                 | TT                              | GG              | 1946841621               |
| SNP_P4_69172_5534367 | NC_021164.1    | Ca_kabuli_chr05 | 5534367                 | CC                              | TT              | 1946841623               |
| SNP_P4_69173_5570051 | NC_021164.1    | Ca_kabuli_chr05 | 5570051                 | TT                              | CC              | 1946841625               |
| SNP_P4_69174_5580660 | NC_021164.1    | Ca_kabuli_chr05 | 5580660                 | AA                              | GG              | 1946841627               |
| SNP_P4_69175_5585095 | NC_021164.1    | Ca_kabuli_chr05 | 5585095                 | CC                              | TT              | 1946841629               |
| SNP_P4_69176_5586003 | NC_021164.1    | Ca_kabuli_chr05 | 5586003                 | TT                              | CC              | 1946841631               |
| SNP_P4_69177_5586104 | NC_021164.1    | Ca_kabuli_chr05 | 5586104                 | AA                              | GG              | 1946841633               |
| SNP_P4_69178_5586111 | NC_021164.1    | Ca_kabuli_chr05 | 5586111                 | CC                              | GG              | 1946841635               |
| SNP_P4_69179_5586245 | NC_021164.1    | Ca_kabuli_chr05 | 5586245                 | GG                              | TT              | 1946841637               |
| SNP_P4_69180_5586247 | NC_021164.1    | Ca_kabuli_chr05 | 5586247                 | TT                              | CC              | 1946841639               |
| SNP_P4_69181_5586251 | NC_021164.1    | Ca_kabuli_chr05 | 5586251                 | CC                              | TT              | 1946841641               |
| SNP_P4_69182_5586412 | NC_021164.1    | Ca_kabuli_chr05 | 5586412                 | CC                              | TT              | 1946841643               |
| SNP_P4_69183_5586416 | NC_021164.1    | Ca_kabuli_chr05 | 5586416                 | GG                              | TT              | 1946841645               |
| SNP_P4_69184_5590660 | NC_021164.1    | Ca_kabuli_chr05 | 5590660                 | AA                              | GG              | 1946841647               |
| SNP_P4_69185_5590827 | NC_021164.1    | Ca_kabuli_chr05 | 5590827                 | TT                              | GG              | 1946841649               |
| SNP_P4_69186_5590860 | NC_021164.1    | Ca_kabuli_chr05 | 5590860                 | AA                              | GG              | 1946841651               |
| SNP_P4_69187_5591035 | NC_021164.1    | Ca_kabuli_chr05 | 5591035                 | TT                              | GG              | 1946841653               |
| SNP_P4_69188_5591062 | NC_021164.1    | Ca_kabuli_chr05 | 5591062                 | TT                              | CC              | 1946841655               |
| SNP_P4_69189_5602925 | NC_021164.1    | Ca_kabuli_chr05 | 5602925                 | AA                              | TT              | 1946841657               |
| SNP_P4_69190_5608251 | NC_021164.1    | Ca_kabuli_chr05 | 5608251                 | CC                              | TT              | 1946841659               |
| SNP_P4_69191_5609465 | NC_021164.1    | Ca_kabuli_chr05 | 5609465                 | TT                              | GG              | 1946841660               |
| SNP_P4_69192_5609480 | NC_021164.1    | Ca_kabuli_chr05 | 5609480                 | TT                              | CC              | 1946841662               |
| SNP_P4_69194_5631208 | NC_021164.1    | Ca_kabuli_chr05 | 5631208                 | AA                              | GG              | 1946841664               |
| SNP_P4_69195_5702989 | NC_021164.1    | Ca_kabuli_chr05 | 5702989                 | AA                              | GG              | 1946841666               |
| SNP_P4_69196_5703050 | NC_021164.1    | Ca_kabuli_chr05 | 5703050                 | TT                              | GG              | 1946841668               |
| SNP_P4_69197_5703445 | NC_021164.1    | Ca_kabuli_chr05 | 5703445                 | AA                              | TT              | 1946841670               |
| SNP_P4_69199_5735419 | NC_021164.1    | Ca_kabuli_chr05 | 5735419                 | AA                              | TT              | 1946841672               |
| SNP_P4_69200_5735426 | NC_021164.1    | Ca_kabuli_chr05 | 5735426                 | TT                              | CC              | 1946841674               |
| SNP_P4_69201_5735616 | NC_021164.1    | Ca_kabuli_chr05 | 5735616                 | GG                              | AA              | 1946841676               |
| SNP_P4_69202_5769482 | NC_021164.1    | Ca_kabuli_chr05 | 5769482                 | TT                              | CC              | 1946841678               |
| SNP_P4_69203_5769866 | NC_021164.1    | Ca_kabuli_chr05 | 5769866                 | TT                              | GG              | 1946841680               |
| SNP_P4_69204_5786947 | NC_021164.1    | Ca_kabuli_chr05 | 5786947                 | AA                              | GG              | 1946841682               |
| SNP_P4_69205_5787031 | NC_021164.1    | Ca_kabuli_chr05 | 5787031                 | CC                              | TT              | 1946841684               |
| SNP_P4_69206_5787156 | NC_021164.1    | Ca_kabuli_chr05 | 5787156                 | TT                              | GG              | 1946841686               |
| SNP_P4_69207_5788971 | NC_021164.1    | Ca_kabuli_chr05 | 5788971                 | GG                              | TT              | 1946841688               |
| SNP_P4_69209_5823553 | NC_021164.1    | Ca_kabuli_chr05 | 5823553                 | AA                              | TT              | 1946841690               |
| SNP_P4_69210_5823971 | NC_021164.1    | Ca_kabuli_chr05 | 5823971                 | AA                              | TT              | 1946841692               |
| SNP_P4_69211_5824708 | NC_021164.1    | Ca_kabuli_chr05 | 5824708                 | TT                              | CC              | 1946841694               |
| SNP_P4_69212_5825113 | NC_021164.1    | Ca_kabuli_chr05 | 5825113                 | GG                              | AA              | 1946841696               |
| SNP_P4_69213_5825142 | NC_021164.1    | Ca_kabuli_chr05 | 5825142                 | TT                              | GG              | 1946841698               |
| SNP_P4_69214_5825443 | NC_021164.1    | Ca_kabuli_chr05 | 5825443                 | AA                              | GG              | 1946841700               |



| SNPs IDs             | Chromosome IDs | Chromosomes     | Physical positions (bp) | CDC Frontier (Reference genome) | (ILWC46 & LPNB) | NCBI SNPdb Accession IDs |
|----------------------|----------------|-----------------|-------------------------|---------------------------------|-----------------|--------------------------|
| SNP_P4_69215_5825469 | NC_021164.1    | Ca_kabuli_chr05 | 5825469                 | TT                              | GG              | 1946841702               |
| SNP_P4_69216_5825577 | NC_021164.1    | Ca_kabuli_chr05 | 5825577                 | GG                              | AA              | 1946841704               |
| SNP_P4_69217_5825774 | NC_021164.1    | Ca_kabuli_chr05 | 5825774                 | GG                              | TT              | 1946841706               |
| SNP_P4_69218_5825819 | NC_021164.1    | Ca_kabuli_chr05 | 5825819                 | AA                              | CC              | 1946841708               |
| SNP_P4_69219_5825906 | NC_021164.1    | Ca_kabuli_chr05 | 5825906                 | GG                              | AA              | 1946841710               |
| SNP_P4_69220_5825910 | NC_021164.1    | Ca_kabuli_chr05 | 5825910                 | AA                              | CC              | 1946841712               |
| SNP_P4_69221_5825997 | NC_021164.1    | Ca_kabuli_chr05 | 5825997                 | TT                              | AA              | 1946841714               |
| SNP_P4_69222_5826207 | NC_021164.1    | Ca_kabuli_chr05 | 5826207                 | AA                              | CC              | 1946841716               |
| SNP_P4_69223_5827337 | NC_021164.1    | Ca_kabuli_chr05 | 5827337                 | CC                              | TT              | 1946841718               |
| SNP_P4_69224_5827357 | NC_021164.1    | Ca_kabuli_chr05 | 5827357                 | TT                              | CC              | 1946841720               |
| SNP_P4_69225_5827402 | NC_021164.1    | Ca_kabuli_chr05 | 5827402                 | AA                              | TT              | 1946841722               |
| SNP_P4_69226_5827445 | NC_021164.1    | Ca_kabuli_chr05 | 5827445                 | AA                              | CC              | 1946841724               |
| SNP_P4_69227_5827458 | NC_021164.1    | Ca_kabuli_chr05 | 5827458                 | TT                              | GG              | 1946841726               |
| SNP_P4_69228_5827525 | NC_021164.1    | Ca_kabuli_chr05 | 5827525                 | CC                              | TT              | 1946841728               |
| SNP_P4_69229_5827550 | NC_021164.1    | Ca_kabuli_chr05 | 5827550                 | AA                              | CC              | 1946841730               |
| SNP_P4_69230_5827556 | NC_021164.1    | Ca_kabuli_chr05 | 5827556                 | AA                              | GG              | 1946841732               |
| SNP_P4_69231_5827585 | NC_021164.1    | Ca_kabuli_chr05 | 5827585                 | TT                              | GG              | 1946841734               |
| SNP_P4_69232_5827634 | NC_021164.1    | Ca_kabuli_chr05 | 5827634                 | CC                              | TT              | 1946841736               |
| SNP_P4_69233_5827823 | NC_021164.1    | Ca_kabuli_chr05 | 5827823                 | CC                              | TT              | 1946841738               |
| SNP_P4_69234_5827833 | NC_021164.1    | Ca_kabuli_chr05 | 5827833                 | GG                              | AA              | 1946841740               |
| SNP_P4_69235_5827835 | NC_021164.1    | Ca_kabuli_chr05 | 5827835                 | CC                              | TT              | 1946841742               |
| SNP_P4_69236_5827837 | NC_021164.1    | Ca_kabuli_chr05 | 5827837                 | AA                              | GG              | 1946841744               |
| SNP_P4_69237_5828130 | NC_021164.1    | Ca_kabuli_chr05 | 5828130                 | CC                              | GG              | 1946841746               |
| SNP_P4_69238_5828170 | NC_021164.1    | Ca_kabuli_chr05 | 5828170                 | AA                              | GG              | 1946841748               |
| SNP_P4_69239_5828199 | NC_021164.1    | Ca_kabuli_chr05 | 5828199                 | TT                              | AA              | 1946841750               |
| SNP_P4_69240_5831378 | NC_021164.1    | Ca_kabuli_chr05 | 5831378                 | TT                              | GG              | 1946841752               |
| SNP_P4_69241_5831442 | NC_021164.1    | Ca_kabuli_chr05 | 5831442                 | CC                              | GG              | 1946841754               |
| SNP_P4_69242_5831649 | NC_021164.1    | Ca_kabuli_chr05 | 5831649                 | TT                              | CC              | 1946841756               |
| SNP_P4_69243_5833063 | NC_021164.1    | Ca_kabuli_chr05 | 5833063                 | GG                              | TT              | 1946841758               |
| SNP_P4_69244_5833064 | NC_021164.1    | Ca_kabuli_chr05 | 5833064                 | GG                              | AA              | 1946841760               |
| SNP_P4_69245_5835250 | NC_021164.1    | Ca_kabuli_chr05 | 5835250                 | AA                              | CC              | 1946841762               |
| SNP_P4_69246_5835354 | NC_021164.1    | Ca_kabuli_chr05 | 5835354                 | AA                              | TT              | 1946841764               |
| SNP_P4_69247_5835422 | NC_021164.1    | Ca_kabuli_chr05 | 5835422                 | TT                              | AA              | 1946841766               |
| SNP_P4_69248_5835428 | NC_021164.1    | Ca_kabuli_chr05 | 5835428                 | TT                              | AA              | 1946841768               |
| SNP_P4_69249_5835517 | NC_021164.1    | Ca_kabuli_chr05 | 5835517                 | AA                              | GG              | 1946841770               |
| SNP_P4_69250_5835712 | NC_021164.1    | Ca_kabuli_chr05 | 5835712                 | TT                              | CC              | 1946841772               |
| SNP_P4_69251_5835725 | NC_021164.1    | Ca_kabuli_chr05 | 5835725                 | GG                              | TT              | 1946841774               |
| SNP_P4_69252_5836280 | NC_021164.1    | Ca_kabuli_chr05 | 5836280                 | TT                              | CC              | 1946841776               |
| SNP_P4_69253_5836284 | NC_021164.1    | Ca_kabuli_chr05 | 5836284                 | CC                              | AA              | 1946841778               |
| SNP_P4_69254_5836316 | NC_021164.1    | Ca_kabuli_chr05 | 5836316                 | AA                              | GG              | 1946841780               |
| SNP_P4_69255_5836322 | NC_021164.1    | Ca_kabuli_chr05 | 5836322                 | CC                              | AA              | 1946841782               |
| SNP_P4_69256_5836376 | NC_021164.1    | Ca_kabuli_chr05 | 5836376                 | CC                              | TT              | 1946841784               |

| SNPs IDs             | Chromosome IDs | Chromosomes     | Physical positions (bp) | CDC Frontier (Reference genome) | (ILWC46 & LPNB) | NCBI SNPdb Accession IDs |
|----------------------|----------------|-----------------|-------------------------|---------------------------------|-----------------|--------------------------|
| SNP_P4_69257_5836473 | NC_021164.1    | Ca_kabuli_chr05 | 5836473                 | CC                              | TT              | 1946841786               |
| SNP_P4_69258_5836479 | NC_021164.1    | Ca_kabuli_chr05 | 5836479                 | CC                              | AA              | 1946841788               |
| SNP_P4_69259_5836528 | NC_021164.1    | Ca_kabuli_chr05 | 5836528                 | AA                              | CC              | 1946841790               |
| SNP_P4_69260_5836709 | NC_021164.1    | Ca_kabuli_chr05 | 5836709                 | CC                              | AA              | 1946841792               |
| SNP_P4_69261_5836718 | NC_021164.1    | Ca_kabuli_chr05 | 5836718                 | GG                              | AA              | 1946841794               |
| SNP_P4_69262_5836721 | NC_021164.1    | Ca_kabuli_chr05 | 5836721                 | GG                              | AA              | 1946841796               |
| SNP_P4_69264_5836913 | NC_021164.1    | Ca_kabuli_chr05 | 5836913                 | CC                              | GG              | 1946841797               |
| SNP_P4_69265_5836920 | NC_021164.1    | Ca_kabuli_chr05 | 5836920                 | TT                              | GG              | 1946841799               |
| SNP_P4_69266_5836955 | NC_021164.1    | Ca_kabuli_chr05 | 5836955                 | TT                              | GG              | 1946841801               |
| SNP_P4_69267_5836999 | NC_021164.1    | Ca_kabuli_chr05 | 5836999                 | TT                              | AA              | 1946841803               |
| SNP_P4_69268_5837024 | NC_021164.1    | Ca_kabuli_chr05 | 5837024                 | GG                              | AA              | 1946841805               |
| SNP_P4_69270_5837099 | NC_021164.1    | Ca_kabuli_chr05 | 5837099                 | TT                              | AA              | 1946841807               |
| SNP_P4_69271_5837131 | NC_021164.1    | Ca_kabuli_chr05 | 5837131                 | TT                              | CC              | 1946841809               |
| SNP_P4_69272_5837271 | NC_021164.1    | Ca_kabuli_chr05 | 5837271                 | TT                              | CC              | 1946841811               |
| SNP_P4_69273_5837283 | NC_021164.1    | Ca_kabuli_chr05 | 5837283                 | AA                              | GG              | 1946841813               |
| SNP_P4_69274_5837327 | NC_021164.1    | Ca_kabuli_chr05 | 5837327                 | TT                              | AA              | 1946841815               |
| SNP_P4_69275_5837444 | NC_021164.1    | Ca_kabuli_chr05 | 5837444                 | CC                              | AA              | 1946841817               |
| SNP_P4_69276_5855011 | NC_021164.1    | Ca_kabuli_chr05 | 5855011                 | TT                              | GG              | 1946841819               |
| SNP_P4_69277_5855039 | NC_021164.1    | Ca_kabuli_chr05 | 5855039                 | AA                              | GG              | 1946841821               |
| SNP_P4_69278_5855099 | NC_021164.1    | Ca_kabuli_chr05 | 5855099                 | TT                              | AA              | 1946841823               |
| SNP_P4_69279_5855528 | NC_021164.1    | Ca_kabuli_chr05 | 5855528                 | CC                              | AA              | 1946841825               |
| SNP_P4_69280_5855829 | NC_021164.1    | Ca_kabuli_chr05 | 5855829                 | CC                              | AA              | 1946841827               |
| SNP_P4_69281_5855840 | NC_021164.1    | Ca_kabuli_chr05 | 5855840                 | GG                              | AA              | 1946841829               |
| SNP_P4_69282_5857839 | NC_021164.1    | Ca_kabuli_chr05 | 5857839                 | TT                              | CC              | 1946841831               |
| SNP_P4_69283_5869851 | NC_021164.1    | Ca_kabuli_chr05 | 5869851                 | AA                              | GG              | 1946841833               |
| SNP_P4_69284_5870139 | NC_021164.1    | Ca_kabuli_chr05 | 5870139                 | AA                              | GG              | 1946841835               |
| SNP_P4_69285_5870150 | NC_021164.1    | Ca_kabuli_chr05 | 5870150                 | AA                              | CC              | 1946841837               |
| SNP_P4_69286_5870240 | NC_021164.1    | Ca_kabuli_chr05 | 5870240                 | GG                              | TT              | 1946841839               |
| SNP_P4_69287_5870259 | NC_021164.1    | Ca_kabuli_chr05 | 5870259                 | AA                              | GG              | 1946841841               |
| SNP_P4_69288_5870288 | NC_021164.1    | Ca_kabuli_chr05 | 5870288                 | GG                              | TT              | 1946841843               |
| SNP_P4_69289_5870303 | NC_021164.1    | Ca_kabuli_chr05 | 5870303                 | CC                              | AA              | 1946841845               |
| SNP_P4_69290_5873106 | NC_021164.1    | Ca_kabuli_chr05 | 5873106                 | TT                              | CC              | 1946841847               |
| SNP_P4_69291_5883554 | NC_021164.1    | Ca_kabuli_chr05 | 5883554                 | CC                              | TT              | 1946841849               |
| SNP_P4_69294_5906760 | NC_021164.1    | Ca_kabuli_chr05 | 5906760                 | TT                              | AA              | 1946841851               |
| SNP_P4_69295_5906773 | NC_021164.1    | Ca_kabuli_chr05 | 5906773                 | TT                              | GG              | 1946841853               |
| SNP_P4_69296_5906798 | NC_021164.1    | Ca_kabuli_chr05 | 5906798                 | CC                              | TT              | 1946841855               |
| SNP_P4_69298_5919367 | NC_021164.1    | Ca_kabuli_chr05 | 5919367                 | AA                              | CC              | 1946841857               |
| SNP_P4_69299_5957172 | NC_021164.1    | Ca_kabuli_chr05 | 5957172                 | AA                              | CC              | 1946841859               |
| SNP_P4_69300_5969684 | NC_021164.1    | Ca_kabuli_chr05 | 5969684                 | AA                              | GG              | 1946841861               |
| SNP_P4_69301_5969685 | NC_021164.1    | Ca_kabuli_chr05 | 5969685                 | TT                              | AA              | 1946841864               |
| SNP_P4_69302_5969722 | NC_021164.1    | Ca_kabuli_chr05 | 5969722                 | GG                              | CC              | 1946841866               |
| SNP_P4_69303_5969749 | NC_021164.1    | Ca_kabuli_chr05 | 5969749                 | TT                              | AA              | 1946841868               |

| SNPs IDs             | Chromosome IDs | Chromosomes     | Physical positions (bp) | CDC Frontier (Reference genome) | (ILWC46 & LPNB) | NCBI SNPdb Accession IDs |
|----------------------|----------------|-----------------|-------------------------|---------------------------------|-----------------|--------------------------|
| SNP_P4_69304_5969770 | NC_021164.1    | Ca_kabuli_chr05 | 5969770                 | AA                              | TT              | 1946841870               |
| SNP_P4_69305_5969798 | NC_021164.1    | Ca_kabuli_chr05 | 5969798                 | TT                              | CC              | 1946841872               |
| SNP_P4_69306_5969870 | NC_021164.1    | Ca_kabuli_chr05 | 5969870                 | AA                              | CC              | 1946841874               |
| SNP_P4_69307_5969893 | NC_021164.1    | Ca_kabuli_chr05 | 5969893                 | AA                              | TT              | 1946841876               |
| SNP_P4_69308_5969897 | NC_021164.1    | Ca_kabuli_chr05 | 5969897                 | AA                              | CC              | 1946841878               |
| SNP_P4_69309_5969919 | NC_021164.1    | Ca_kabuli_chr05 | 5969919                 | CC                              | AA              | 1946841880               |
| SNP_P4_69311_5969953 | NC_021164.1    | Ca_kabuli_chr05 | 5969953                 | AA                              | CC              | 1946841882               |
| SNP_P4_69312_5969957 | NC_021164.1    | Ca_kabuli_chr05 | 5969957                 | AA                              | CC              | 1946841884               |
| SNP_P4_69313_5969974 | NC_021164.1    | Ca_kabuli_chr05 | 5969974                 | GG                              | TT              | 1946841886               |
| SNP_P4_69314_5969978 | NC_021164.1    | Ca_kabuli_chr05 | 5969978                 | GG                              | TT              | 1946841888               |
| SNP_P4_69315_5970030 | NC_021164.1    | Ca_kabuli_chr05 | 5970030                 | AA                              | GG              | 1946841890               |
| SNP_P4_69316_5970043 | NC_021164.1    | Ca_kabuli_chr05 | 5970043                 | AA                              | CC              | 1946841892               |
| SNP_P4_69317_5970132 | NC_021164.1    | Ca_kabuli_chr05 | 5970132                 | TT                              | CC              | 1946841894               |
| SNP_P4_69318_5970184 | NC_021164.1    | Ca_kabuli_chr05 | 5970184                 | CC                              | GG              | 1946841897               |
| SNP_P4_69319_5970238 | NC_021164.1    | Ca_kabuli_chr05 | 5970238                 | GG                              | AA              | 1946841899               |
| SNP_P4_69320_5970262 | NC_021164.1    | Ca_kabuli_chr05 | 5970262                 | CC                              | TT              | 1946841901               |
| SNP_P4_69321_5970267 | NC_021164.1    | Ca_kabuli_chr05 | 5970267                 | CC                              | AA              | 1946841903               |
| SNP_P4_69322_5970295 | NC_021164.1    | Ca_kabuli_chr05 | 5970295                 | TT                              | CC              | 1946841905               |
| SNP_P4_69323_5970396 | NC_021164.1    | Ca_kabuli_chr05 | 5970396                 | AA                              | CC              | 1946841907               |
| SNP_P4_69324_5970402 | NC_021164.1    | Ca_kabuli_chr05 | 5970402                 | AA                              | GG              | 1946841909               |
| SNP_P4_69325_5970526 | NC_021164.1    | Ca_kabuli_chr05 | 5970526                 | TT                              | CC              | 1946841911               |
| SNP_P4_69326_5975265 | NC_021164.1    | Ca_kabuli_chr05 | 5975265                 | AA                              | TT              | 1946841912               |
| SNP_P4_69327_5975554 | NC_021164.1    | Ca_kabuli_chr05 | 5975554                 | TT                              | CC              | 1946841915               |
| SNP_P4_69328_5990992 | NC_021164.1    | Ca_kabuli_chr05 | 5990992                 | TT                              | GG              | 1946841917               |
| SNP_P4_69329_5990994 | NC_021164.1    | Ca_kabuli_chr05 | 5990994                 | GG                              | TT              | 1946841919               |
| SNP_P4_69330_5991485 | NC_021164.1    | Ca_kabuli_chr05 | 5991485                 | GG                              | AA              | 1946841921               |
| SNP_P4_69331_5991840 | NC_021164.1    | Ca_kabuli_chr05 | 5991840                 | CC                              | TT              | 1946841923               |
| SNP_P4_69332_5991978 | NC_021164.1    | Ca_kabuli_chr05 | 5991978                 | GG                              | AA              | 1946841925               |
| SNP_P4_69333_5993886 | NC_021164.1    | Ca_kabuli_chr05 | 5993886                 | AA                              | GG              | 1946841927               |
| SNP_P4_69334_5993887 | NC_021164.1    | Ca_kabuli_chr05 | 5993887                 | AA                              | TT              | 1946841929               |
| SNP_P4_69335_5994351 | NC_021164.1    | Ca_kabuli_chr05 | 5994351                 | CC                              | TT              | 1946841931               |
| SNP_P4_69336_5994806 | NC_021164.1    | Ca_kabuli_chr05 | 5994806                 | TT                              | AA              | 1946841933               |
| SNP_P4_69337_5994915 | NC_021164.1    | Ca_kabuli_chr05 | 5994915                 | CC                              | TT              | 1946841935               |
| SNP_P4_69338_5994944 | NC_021164.1    | Ca_kabuli_chr05 | 5994944                 | AA                              | CC              | 1946841937               |
| SNP_P4_69339_6001404 | NC_021164.1    | Ca_kabuli_chr05 | 6001404                 | CC                              | GG              | 1946841939               |
| SNP_P4_69340_6033288 | NC_021164.1    | Ca_kabuli_chr05 | 6033288                 | TT                              | CC              | 1946841941               |
| SNP_P4_69341_6036006 | NC_021164.1    | Ca_kabuli_chr05 | 6036006                 | GG                              | CC              | 1946841943               |
| SNP_P4_69342_6044831 | NC_021164.1    | Ca_kabuli_chr05 | 6044831                 | CC                              | TT              | 1946841945               |
| SNP_P4_69343_6045066 | NC_021164.1    | Ca_kabuli_chr05 | 6045066                 | TT                              | GG              | 1946841947               |
| SNP_P4_69344_6045227 | NC_021164.1    | Ca_kabuli_chr05 | 6045227                 | TT                              | CC              | 1946841949               |
| SNP_P4_69345_6045846 | NC_021164.1    | Ca_kabuli_chr05 | 6045846                 | GG                              | TT              | 1946841952               |
| SNP_P4_69346_6045848 | NC_021164.1    | Ca_kabuli_chr05 | 6045848                 | TT                              | CC              | 1946841954               |

| SNPs IDs             | Chromosome IDs | Chromosomes     | Physical positions (bp) | CDC Frontier (Reference genome) | (ILWC46 & LPNB) | NCBI SNPdb Accession IDs |
|----------------------|----------------|-----------------|-------------------------|---------------------------------|-----------------|--------------------------|
| SNP_P4_69347_6045852 | NC_021164.1    | Ca_kabuli_chr05 | 6045852                 | AA                              | GG              | 1946841956               |
| SNP_P4_69348_6045875 | NC_021164.1    | Ca_kabuli_chr05 | 6045875                 | AA                              | GG              | 1946841958               |
| SNP_P4_69349_6045913 | NC_021164.1    | Ca_kabuli_chr05 | 6045913                 | AA                              | CC              | 1946841960               |
| SNP_P4_69350_6045918 | NC_021164.1    | Ca_kabuli_chr05 | 6045918                 | CC                              | AA              | 1946841962               |
| SNP_P4_69351_6045923 | NC_021164.1    | Ca_kabuli_chr05 | 6045923                 | TT                              | CC              | 1946841964               |
| SNP_P4_69352_6045944 | NC_021164.1    | Ca_kabuli_chr05 | 6045944                 | AA                              | GG              | 1946841966               |
| SNP_P4_69353_6052829 | NC_021164.1    | Ca_kabuli_chr05 | 6052829                 | TT                              | CC              | 1946841968               |
| SNP_P4_69354_6067694 | NC_021164.1    | Ca_kabuli_chr05 | 6067694                 | GG                              | AA              | 1946841971               |
| SNP_P4_69355_6067736 | NC_021164.1    | Ca_kabuli_chr05 | 6067736                 | TT                              | AA              | 1946841973               |
| SNP_P4_69356_6067737 | NC_021164.1    | Ca_kabuli_chr05 | 6067737                 | TT                              | AA              | 1946841976               |
| SNP_P4_69358_6077541 | NC_021164.1    | Ca_kabuli_chr05 | 6077541                 | CC                              | TT              | 1946841978               |
| SNP_P4_69359_6094465 | NC_021164.1    | Ca_kabuli_chr05 | 6094465                 | AA                              | GG              | 1946841980               |
| SNP_P4_69360_6124817 | NC_021164.1    | Ca_kabuli_chr05 | 6124817                 | TT                              | CC              | 1946841982               |
| SNP_P4_69361_6155045 | NC_021164.1    | Ca_kabuli_chr05 | 6155045                 | CC                              | TT              | 1946841984               |
| SNP_P4_69362_6198275 | NC_021164.1    | Ca_kabuli_chr05 | 6198275                 | GG                              | AA              | 1946841986               |
| SNP_P4_69364_6199892 | NC_021164.1    | Ca_kabuli_chr05 | 6199892                 | AA                              | TT              | 1946841988               |
| SNP_P4_69365_6199901 | NC_021164.1    | Ca_kabuli_chr05 | 6199901                 | TT                              | CC              | 1946841991               |
| SNP_P4_69366_6199908 | NC_021164.1    | Ca_kabuli_chr05 | 6199908                 | TT                              | CC              | 1946841993               |
| SNP_P4_69367_6199936 | NC_021164.1    | Ca_kabuli_chr05 | 6199936                 | GG                              | AA              | 1946841995               |
| SNP_P4_69368_6199938 | NC_021164.1    | Ca_kabuli_chr05 | 6199938                 | TT                              | CC              | 1946841997               |
| SNP_P4_69370_6200128 | NC_021164.1    | Ca_kabuli_chr05 | 6200128                 | CC                              | TT              | 1946841999               |
| SNP_P4_69371_6200225 | NC_021164.1    | Ca_kabuli_chr05 | 6200225                 | CC                              | TT              | 1946842001               |
| SNP_P4_69372_6200270 | NC_021164.1    | Ca_kabuli_chr05 | 6200270                 | AA                              | GG              | 1946842003               |
| SNP_P4_69373_6200347 | NC_021164.1    | Ca_kabuli_chr05 | 6200347                 | GG                              | TT              | 1946842005               |
| SNP_P4_69374_6200375 | NC_021164.1    | Ca_kabuli_chr05 | 6200375                 | TT                              | GG              | 1946842007               |
| SNP_P4_69375_6200468 | NC_021164.1    | Ca_kabuli_chr05 | 6200468                 | AA                              | GG              | 1946842009               |
| SNP_P4_69376_6200526 | NC_021164.1    | Ca_kabuli_chr05 | 6200526                 | TT                              | AA              | 1946842011               |
| SNP_P4_69378_6219689 | NC_021164.1    | Ca_kabuli_chr05 | 6219689                 | CC                              | GG              | 1946842013               |
| SNP_P4_69379_6227141 | NC_021164.1    | Ca_kabuli_chr05 | 6227141                 | TT                              | AA              | 1946842015               |
| SNP_P4_69381_6227257 | NC_021164.1    | Ca_kabuli_chr05 | 6227257                 | TT                              | CC              | 1946842017               |
| SNP_P4_69382_6239208 | NC_021164.1    | Ca_kabuli_chr05 | 6239208                 | CC                              | TT              | 1946842019               |
| SNP_P4_69383_6239421 | NC_021164.1    | Ca_kabuli_chr05 | 6239421                 | GG                              | TT              | 1946842021               |
| SNP_P4_69384_6247101 | NC_021164.1    | Ca_kabuli_chr05 | 6247101                 | TT                              | CC              | 1946842023               |
| SNP_P4_69385_6263252 | NC_021164.1    | Ca_kabuli_chr05 | 6263252                 | AA                              | GG              | 1946842025               |
| SNP_P4_69386_6263471 | NC_021164.1    | Ca_kabuli_chr05 | 6263471                 | TT                              | CC              | 1946842027               |
| SNP_P4_69387_6263785 | NC_021164.1    | Ca_kabuli_chr05 | 6263785                 | GG                              | AA              | 1946842029               |
| SNP_P4_69388_6263851 | NC_021164.1    | Ca_kabuli_chr05 | 6263851                 | TT                              | AA              | 1946842031               |
| SNP_P4_69389_6263884 | NC_021164.1    | Ca_kabuli_chr05 | 6263884                 | AA                              | GG              | 1946842033               |
| SNP_P4_69390_6264775 | NC_021164.1    | Ca_kabuli_chr05 | 6264775                 | TT                              | AA              | 1946842035               |
| SNP_P4_69391_6264795 | NC_021164.1    | Ca_kabuli_chr05 | 6264795                 | GG                              | AA              | 1946842037               |
| SNP_P4_69392_6264798 | NC_021164.1    | Ca_kabuli_chr05 | 6264798                 | GG                              | TT              | 1946842039               |
| SNP_P4_69393_6289673 | NC_021164.1    | Ca_kabuli_chr05 | 6289673                 | CC                              | TT              | 1946842041               |

| SNPs IDs             | Chromosome IDs | Chromosomes     | Physical positions (bp) | CDC Frontier (Reference genome) | (ILWC46 & LPNB) | NCBI SNPdb Accession IDs |
|----------------------|----------------|-----------------|-------------------------|---------------------------------|-----------------|--------------------------|
| SNP_P4_69394_6290705 | NC_021164.1    | Ca_kabuli_chr05 | 6290705                 | CC                              | TT              | 1946842043               |
| SNP_P4_69395_6291064 | NC_021164.1    | Ca_kabuli_chr05 | 6291064                 | TT                              | CC              | 1946842045               |
| SNP_P4_69396_6297622 | NC_021164.1    | Ca_kabuli_chr05 | 6297622                 | CC                              | TT              | 1946842047               |
| SNP_P4_69397_6310463 | NC_021164.1    | Ca_kabuli_chr05 | 6310463                 | TT                              | GG              | 1946842049               |
| SNP_P4_69398_6310483 | NC_021164.1    | Ca_kabuli_chr05 | 6310483                 | GG                              | CC              | 1946842051               |
| SNP_P4_69399_6310498 | NC_021164.1    | Ca_kabuli_chr05 | 6310498                 | AA                              | GG              | 1946842053               |
| SNP_P4_69400_6310538 | NC_021164.1    | Ca_kabuli_chr05 | 6310538                 | AA                              | GG              | 1946842055               |
| SNP_P4_69401_6310740 | NC_021164.1    | Ca_kabuli_chr05 | 6310740                 | AA                              | CC              | 1946842057               |
| SNP_P4_69402_6310934 | NC_021164.1    | Ca_kabuli_chr05 | 6310934                 | GG                              | AA              | 1946842059               |
| SNP_P4_69403_6311053 | NC_021164.1    | Ca_kabuli_chr05 | 6311053                 | GG                              | AA              | 1946842061               |
| SNP_P4_69404_6369003 | NC_021164.1    | Ca_kabuli_chr05 | 6369003                 | GG                              | TT              | 1946842063               |
| SNP_P4_69405_6369197 | NC_021164.1    | Ca_kabuli_chr05 | 6369197                 | TT                              | AA              | 1946842065               |
| SNP_P4_69406_6369404 | NC_021164.1    | Ca_kabuli_chr05 | 6369404                 | GG                              | AA              | 1946842067               |
| SNP_P4_69407_6369424 | NC_021164.1    | Ca_kabuli_chr05 | 6369424                 | TT                              | GG              | 1946842069               |
| SNP_P4_69408_6369431 | NC_021164.1    | Ca_kabuli_chr05 | 6369431                 | TT                              | CC              | 1946842071               |
| SNP_P4_69409_6369432 | NC_021164.1    | Ca_kabuli_chr05 | 6369432                 | GG                              | AA              | 1946842073               |
| SNP_P4_69410_6369442 | NC_021164.1    | Ca_kabuli_chr05 | 6369442                 | AA                              | CC              | 1946842075               |
| SNP_P4_69411_6369470 | NC_021164.1    | Ca_kabuli_chr05 | 6369470                 | AA                              | TT              | 1946842077               |
| SNP_P4_69412_6369543 | NC_021164.1    | Ca_kabuli_chr05 | 6369543                 | AA                              | CC              | 1946842079               |
| SNP_P4_69414_6369679 | NC_021164.1    | Ca_kabuli_chr05 | 6369679                 | CC                              | TT              | 1946842081               |
| SNP_P4_69415_6369731 | NC_021164.1    | Ca_kabuli_chr05 | 6369731                 | GG                              | AA              | 1946842083               |
| SNP_P4_69416_6369736 | NC_021164.1    | Ca_kabuli_chr05 | 6369736                 | CC                              | TT              | 1946842085               |
| SNP_P4_69417_6369742 | NC_021164.1    | Ca_kabuli_chr05 | 6369742                 | GG                              | TT              | 1946842087               |
| SNP_P4_69418_6369769 | NC_021164.1    | Ca_kabuli_chr05 | 6369769                 | GG                              | AA              | 1946842089               |
| SNP_P4_69419_6369807 | NC_021164.1    | Ca_kabuli_chr05 | 6369807                 | CC                              | AA              | 1946842091               |
| SNP_P4_69420_6369878 | NC_021164.1    | Ca_kabuli_chr05 | 6369878                 | CC                              | AA              | 1946842093               |
| SNP_P4_69421_6397470 | NC_021164.1    | Ca_kabuli_chr05 | 6397470                 | AA                              | GG              | 1946842095               |
| SNP_P4_69422_6409853 | NC_021164.1    | Ca_kabuli_chr05 | 6409853                 | TT                              | CC              | 1946842097               |
| SNP_P4_69423_6416355 | NC_021164.1    | Ca_kabuli_chr05 | 6416355                 | AA                              | CC              | 1946842099               |
| SNP_P4_69424_6416673 | NC_021164.1    | Ca_kabuli_chr05 | 6416673                 | AA                              | GG              | 1946842101               |
| SNP_P4_69425_6416698 | NC_021164.1    | Ca_kabuli_chr05 | 6416698                 | TT                              | CC              | 1946842103               |
| SNP_P4_69426_6420643 | NC_021164.1    | Ca_kabuli_chr05 | 6420643                 | CC                              | TT              | 1946842105               |
| SNP_P4_69427_6420648 | NC_021164.1    | Ca_kabuli_chr05 | 6420648                 | TT                              | AA              | 1946842107               |
| SNP_P4_69428_6420666 | NC_021164.1    | Ca_kabuli_chr05 | 6420666                 | CC                              | AA              | 1946842109               |
| SNP_P4_69429_6420673 | NC_021164.1    | Ca_kabuli_chr05 | 6420673                 | CC                              | TT              | 1946842111               |
| SNP_P4_69430_6420674 | NC_021164.1    | Ca_kabuli_chr05 | 6420674                 | CC                              | TT              | 1946842113               |
| SNP_P4_69431_6421051 | NC_021164.1    | Ca_kabuli_chr05 | 6421051                 | TT                              | CC              | 1946842115               |
| SNP_P4_69432_6421484 | NC_021164.1    | Ca_kabuli_chr05 | 6421484                 | AA                              | CC              | 1946842117               |
| SNP_P4_69433_6421534 | NC_021164.1    | Ca_kabuli_chr05 | 6421534                 | TT                              | CC              | 1946842119               |
| SNP_P4_69434_6421573 | NC_021164.1    | Ca_kabuli_chr05 | 6421573                 | GG                              | AA              | 1946842121               |
| SNP_P4_69435_6421867 | NC_021164.1    | Ca_kabuli_chr05 | 6421867                 | TT                              | GG              | 1946842123               |
| SNP_P4_69436_6428479 | NC_021164.1    | Ca_kabuli_chr05 | 6428479                 | GG                              | AA              | 1946842125               |

| SNPs IDs             | Chromosome IDs | Chromosomes     | Physical positions (bp) | CDC Frontier (Reference genome) | (ILWC46 & LPNB) | NCBI SNPdb Accession IDs |
|----------------------|----------------|-----------------|-------------------------|---------------------------------|-----------------|--------------------------|
| SNP_P4_69437_6441603 | NC_021164.1    | Ca_kabuli_chr05 | 6441603                 | TT                              | CC              | 1946842127               |
| SNP_P4_69438_6441823 | NC_021164.1    | Ca_kabuli_chr05 | 6441823                 | GG                              | TT              | 1946842129               |
| SNP_P4_69439_6441826 | NC_021164.1    | Ca_kabuli_chr05 | 6441826                 | CC                              | TT              | 1946842131               |
| SNP_P4_69440_6442015 | NC_021164.1    | Ca_kabuli_chr05 | 6442015                 | TT                              | AA              | 1946842133               |
| SNP_P4_69441_6454787 | NC_021164.1    | Ca_kabuli_chr05 | 6454787                 | AA                              | TT              | 1946842135               |
| SNP_P4_69442_6460715 | NC_021164.1    | Ca_kabuli_chr05 | 6460715                 | TT                              | AA              | 1946842137               |
| SNP_P4_69443_6461065 | NC_021164.1    | Ca_kabuli_chr05 | 6461065                 | TT                              | CC              | 1946842139               |
| SNP_P4_69444_6461080 | NC_021164.1    | Ca_kabuli_chr05 | 6461080                 | CC                              | TT              | 1946842141               |
| SNP_P4_69445_6467879 | NC_021164.1    | Ca_kabuli_chr05 | 6467879                 | AA                              | GG              | 1946842143               |
| SNP_P4_69446_6474806 | NC_021164.1    | Ca_kabuli_chr05 | 6474806                 | TT                              | GG              | 1946842145               |
| SNP_P4_69447_6474808 | NC_021164.1    | Ca_kabuli_chr05 | 6474808                 | TT                              | CC              | 1946842147               |
| SNP_P4_69448_6477705 | NC_021164.1    | Ca_kabuli_chr05 | 6477705                 | CC                              | TT              | 1946842149               |
| SNP_P4_69449_6478082 | NC_021164.1    | Ca_kabuli_chr05 | 6478082                 | TT                              | AA              | 1946842151               |
| SNP_P4_69450_6478085 | NC_021164.1    | Ca_kabuli_chr05 | 6478085                 | AA                              | CC              | 1946842153               |
| SNP_P4_69451_6478128 | NC_021164.1    | Ca_kabuli_chr05 | 6478128                 | TT                              | GG              | 1946842155               |
| SNP_P4_69452_6478179 | NC_021164.1    | Ca_kabuli_chr05 | 6478179                 | AA                              | GG              | 1946842157               |
| SNP_P4_69454_6494037 | NC_021164.1    | Ca_kabuli_chr05 | 6494037                 | TT                              | CC              | 1946842159               |
| SNP_P4_69455_6494040 | NC_021164.1    | Ca_kabuli_chr05 | 6494040                 | GG                              | TT              | 1946842161               |
| SNP_P4_69456_6494063 | NC_021164.1    | Ca_kabuli_chr05 | 6494063                 | AA                              | GG              | 1946842163               |
| SNP_P4_69457_6494099 | NC_021164.1    | Ca_kabuli_chr05 | 6494099                 | GG                              | AA              | 1946842165               |
| SNP_P4_69458_6494111 | NC_021164.1    | Ca_kabuli_chr05 | 6494111                 | TT                              | CC              | 1946842167               |
| SNP_P4_69459_6494123 | NC_021164.1    | Ca_kabuli_chr05 | 6494123                 | AA                              | GG              | 1946842169               |
| SNP_P4_69460_6494150 | NC_021164.1    | Ca_kabuli_chr05 | 6494150                 | CC                              | TT              | 1946842171               |
| SNP_P4_69461_6494152 | NC_021164.1    | Ca_kabuli_chr05 | 6494152                 | TT                              | CC              | 1946842173               |
| SNP_P4_69462_6494156 | NC_021164.1    | Ca_kabuli_chr05 | 6494156                 | TT                              | GG              | 1946842175               |
| SNP_P4_69463_6494159 | NC_021164.1    | Ca_kabuli_chr05 | 6494159                 | TT                              | CC              | 1946842177               |
| SNP_P4_69464_6494162 | NC_021164.1    | Ca_kabuli_chr05 | 6494162                 | TT                              | CC              | 1946842179               |
| SNP_P4_69465_6494189 | NC_021164.1    | Ca_kabuli_chr05 | 6494189                 | TT                              | CC              | 1946842181               |
| SNP_P4_69466_6494207 | NC_021164.1    | Ca_kabuli_chr05 | 6494207                 | TT                              | CC              | 1946842183               |
| SNP_P4_69467_6494257 | NC_021164.1    | Ca_kabuli_chr05 | 6494257                 | GG                              | AA              | 1946842185               |
| SNP_P4_69468_6494494 | NC_021164.1    | Ca_kabuli_chr05 | 6494494                 | TT                              | CC              | 1946842187               |
| SNP_P4_69469_6494548 | NC_021164.1    | Ca_kabuli_chr05 | 6494548                 | TT                              | GG              | 1946842189               |
| SNP_P4_69470_6494566 | NC_021164.1    | Ca_kabuli_chr05 | 6494566                 | GG                              | AA              | 1946842191               |
| SNP_P4_69471_6494572 | NC_021164.1    | Ca_kabuli_chr05 | 6494572                 | AA                              | TT              | 1946842193               |
| SNP_P4_69472_6494575 | NC_021164.1    | Ca_kabuli_chr05 | 6494575                 | GG                              | AA              | 1946842195               |
| SNP_P4_69473_6497062 | NC_021164.1    | Ca_kabuli_chr05 | 6497062                 | GG                              | AA              | 1946842197               |
| SNP_P4_69474_6497078 | NC_021164.1    | Ca_kabuli_chr05 | 6497078                 | CC                              | AA              | 1946842199               |
| SNP_P4_69476_6512942 | NC_021164.1    | Ca_kabuli_chr05 | 6512942                 | GG                              | AA              | 1946842201               |
| SNP_P4_69477_6527698 | NC_021164.1    | Ca_kabuli_chr05 | 6527698                 | GG                              | AA              | 1946842203               |
| SNP_P4_69478_6530924 | NC_021164.1    | Ca_kabuli_chr05 | 6530924                 | TT                              | AA              | 1946842205               |
| SNP_P4_69479_6532183 | NC_021164.1    | Ca_kabuli_chr05 | 6532183                 | GG                              | AA              | 1946842207               |
| SNP_P4_69481_6532709 | NC_021164.1    | Ca_kabuli_chr05 | 6532709                 | AA                              | TT              | 1946842209               |

| SNPs IDs             | Chromosome IDs | Chromosomes     | Physical positions (bp) | CDC Frontier (Reference genome) | (ILWC46 & LPNB) | NCBI SNPdb Accession IDs |
|----------------------|----------------|-----------------|-------------------------|---------------------------------|-----------------|--------------------------|
| SNP_P4_69482_6535218 | NC_021164.1    | Ca_kabuli_chr05 | 6535218                 | TT                              | CC              | 1946842211               |
| SNP_P4_69483_6535226 | NC_021164.1    | Ca_kabuli_chr05 | 6535226                 | CC                              | TT              | 1946842213               |
| SNP_P4_69484_6535261 | NC_021164.1    | Ca_kabuli_chr05 | 6535261                 | TT                              | CC              | 1946842215               |
| SNP_P4_69486_6535322 | NC_021164.1    | Ca_kabuli_chr05 | 6535322                 | AA                              | GG              | 1946842217               |
| SNP_P4_69487_6535340 | NC_021164.1    | Ca_kabuli_chr05 | 6535340                 | AA                              | TT              | 1946842219               |
| SNP_P4_69488_6535346 | NC_021164.1    | Ca_kabuli_chr05 | 6535346                 | CC                              | TT              | 1946842221               |
| SNP_P4_69489_6535353 | NC_021164.1    | Ca_kabuli_chr05 | 6535353                 | AA                              | GG              | 1946842223               |
| SNP_P4_69490_6535363 | NC_021164.1    | Ca_kabuli_chr05 | 6535363                 | TT                              | AA              | 1946842225               |
| SNP_P4_69491_6535385 | NC_021164.1    | Ca_kabuli_chr05 | 6535385                 | AA                              | CC              | 1946842227               |
| SNP_P4_69492_6535391 | NC_021164.1    | Ca_kabuli_chr05 | 6535391                 | AA                              | GG              | 1946842229               |
| SNP_P4_69493_6535439 | NC_021164.1    | Ca_kabuli_chr05 | 6535439                 | CC                              | TT              | 1946842231               |
| SNP_P4_69494_6535535 | NC_021164.1    | Ca_kabuli_chr05 | 6535535                 | AA                              | GG              | 1946842233               |
| SNP_P4_69495_6535594 | NC_021164.1    | Ca_kabuli_chr05 | 6535594                 | TT                              | CC              | 1946842235               |
| SNP_P4_69496_6535747 | NC_021164.1    | Ca_kabuli_chr05 | 6535747                 | AA                              | CC              | 1946842237               |
| SNP_P4_69497_6535765 | NC_021164.1    | Ca_kabuli_chr05 | 6535765                 | AA                              | TT              | 1946842239               |
| SNP_P4_69498_6535780 | NC_021164.1    | Ca_kabuli_chr05 | 6535780                 | TT                              | AA              | 1946842241               |
| SNP_P4_69499_6535801 | NC_021164.1    | Ca_kabuli_chr05 | 6535801                 | AA                              | TT              | 1946842243               |
| SNP_P4_69500_6535835 | NC_021164.1    | Ca_kabuli_chr05 | 6535835                 | TT                              | CC              | 1946842245               |
| SNP_P4_69501_6535837 | NC_021164.1    | Ca_kabuli_chr05 | 6535837                 | AA                              | GG              | 1946842247               |
| SNP_P4_69502_6535843 | NC_021164.1    | Ca_kabuli_chr05 | 6535843                 | AA                              | GG              | 1946842249               |
| SNP_P4_69503_6535868 | NC_021164.1    | Ca_kabuli_chr05 | 6535868                 | CC                              | AA              | 1946842251               |
| SNP_P4_69504_6535888 | NC_021164.1    | Ca_kabuli_chr05 | 6535888                 | TT                              | CC              | 1946842253               |
| SNP_P4_69505_6535919 | NC_021164.1    | Ca_kabuli_chr05 | 6535919                 | AA                              | GG              | 1946842255               |
| SNP_P4_69506_6535932 | NC_021164.1    | Ca_kabuli_chr05 | 6535932                 | AA                              | GG              | 1946842257               |
| SNP_P4_69507_6535935 | NC_021164.1    | Ca_kabuli_chr05 | 6535935                 | TT                              | CC              | 1946842259               |
| SNP_P4_69508_6535960 | NC_021164.1    | Ca_kabuli_chr05 | 6535960                 | GG                              | AA              | 1946842261               |
| SNP_P4_69509_6536020 | NC_021164.1    | Ca_kabuli_chr05 | 6536020                 | TT                              | CC              | 1946842263               |
| SNP_P4_69510_6536202 | NC_021164.1    | Ca_kabuli_chr05 | 6536202                 | CC                              | GG              | 1946842265               |
| SNP_P4_69511_6536207 | NC_021164.1    | Ca_kabuli_chr05 | 6536207                 | AA                              | CC              | 1946842267               |
| SNP_P4_69512_6536258 | NC_021164.1    | Ca_kabuli_chr05 | 6536258                 | CC                              | AA              | 1946842269               |
| SNP_P4_69513_6536265 | NC_021164.1    | Ca_kabuli_chr05 | 6536265                 | AA                              | GG              | 1946842271               |
| SNP_P4_69514_6536303 | NC_021164.1    | Ca_kabuli_chr05 | 6536303                 | AA                              | CC              | 1946842273               |
| SNP_P4_69515_6536372 | NC_021164.1    | Ca_kabuli_chr05 | 6536372                 | GG                              | AA              | 1946842275               |
| SNP_P4_69516_6536586 | NC_021164.1    | Ca_kabuli_chr05 | 6536586                 | AA                              | GG              | 1946842277               |
| SNP_P4_69517_6536595 | NC_021164.1    | Ca_kabuli_chr05 | 6536595                 | AA                              | TT              | 1946842279               |
| SNP_P4_69518_6536597 | NC_021164.1    | Ca_kabuli_chr05 | 6536597                 | CC                              | TT              | 1946842281               |
| SNP_P4_69519_6536693 | NC_021164.1    | Ca_kabuli_chr05 | 6536693                 | CC                              | TT              | 1946842283               |
| SNP_P4_69520_6536750 | NC_021164.1    | Ca_kabuli_chr05 | 6536750                 | GG                              | AA              | 1946842285               |
| SNP_P4_69521_6536761 | NC_021164.1    | Ca_kabuli_chr05 | 6536761                 | CC                              | AA              | 1946842287               |
| SNP_P4_69522_6536819 | NC_021164.1    | Ca_kabuli_chr05 | 6536819                 | TT                              | GG              | 1946842289               |
| SNP_P4_69523_6542599 | NC_021164.1    | Ca_kabuli_chr05 | 6542599                 | CC                              | TT              | 1946842291               |
| SNP_P4_69524_6589954 | NC_021164.1    | Ca_kabuli_chr05 | 6589954                 | GG                              | AA              | 1946842293               |

| SNPs IDs             | Chromosome IDs | Chromosomes     | Physical positions (bp) | CDC Frontier (Reference genome) | (ILWC46 & LPNB) | NCBI SNPdb Accession IDs |
|----------------------|----------------|-----------------|-------------------------|---------------------------------|-----------------|--------------------------|
| SNP_P4_69525_6590144 | NC_021164.1    | Ca_kabuli_chr05 | 6590144                 | CC                              | AA              | 1946842295               |
| SNP_P4_69526_6590167 | NC_021164.1    | Ca_kabuli_chr05 | 6590167                 | GG                              | AA              | 1946842297               |
| SNP_P4_69527_6590220 | NC_021164.1    | Ca_kabuli_chr05 | 6590220                 | AA                              | GG              | 1946842299               |
| SNP_P4_69528_6590284 | NC_021164.1    | Ca_kabuli_chr05 | 6590284                 | GG                              | CC              | 1946842301               |
| SNP_P4_69529_6590329 | NC_021164.1    | Ca_kabuli_chr05 | 6590329                 | CC                              | AA              | 1946842302               |
| SNP_P4_69530_6590415 | NC_021164.1    | Ca_kabuli_chr05 | 6590415                 | CC                              | AA              | 1946842304               |
| SNP_P4_69531_6590548 | NC_021164.1    | Ca_kabuli_chr05 | 6590548                 | GG                              | CC              | 1946842306               |
| SNP_P4_69532_6590755 | NC_021164.1    | Ca_kabuli_chr05 | 6590755                 | TT                              | AA              | 1946842308               |
| SNP_P4_69533_6591493 | NC_021164.1    | Ca_kabuli_chr05 | 6591493                 | TT                              | CC              | 1946842310               |
| SNP_P4_69534_6591590 | NC_021164.1    | Ca_kabuli_chr05 | 6591590                 | TT                              | GG              | 1946842312               |
| SNP_P4_69535_6607971 | NC_021164.1    | Ca_kabuli_chr05 | 6607971                 | AA                              | CC              | 1946842314               |
| SNP_P4_69536_6609609 | NC_021164.1    | Ca_kabuli_chr05 | 6609609                 | CC                              | TT              | 1946842316               |
| SNP_P4_69537_6609715 | NC_021164.1    | Ca_kabuli_chr05 | 6609715                 | CC                              | GG              | 1946842318               |
| SNP_P4_69538_6609993 | NC_021164.1    | Ca_kabuli_chr05 | 6609993                 | TT                              | CC              | 1946842320               |
| SNP_P4_69539_6610002 | NC_021164.1    | Ca_kabuli_chr05 | 6610002                 | GG                              | AA              | 1946842322               |
| SNP_P4_69540_6610064 | NC_021164.1    | Ca_kabuli_chr05 | 6610064                 | AA                              | TT              | 1946842324               |
| SNP_P4_69541_6610066 | NC_021164.1    | Ca_kabuli_chr05 | 6610066                 | TT                              | CC              | 1946842325               |
| SNP_P4_69542_6610093 | NC_021164.1    | Ca_kabuli_chr05 | 6610093                 | AA                              | GG              | 1946842327               |
| SNP_P4_69543_6622830 | NC_021164.1    | Ca_kabuli_chr05 | 6622830                 | CC                              | GG              | 1946842329               |
| SNP_P4_69544_6622833 | NC_021164.1    | Ca_kabuli_chr05 | 6622833                 | AA                              | CC              | 1946842331               |
| SNP_P4_69545_6628037 | NC_021164.1    | Ca_kabuli_chr05 | 6628037                 | AA                              | CC              | 1946842333               |
| SNP_P4_69546_6632480 | NC_021164.1    | Ca_kabuli_chr05 | 6632480                 | TT                              | CC              | 1946842335               |
| SNP_P4_69547_6646569 | NC_021164.1    | Ca_kabuli_chr05 | 6646569                 | CC                              | GG              | 1946842337               |
| SNP_P4_69548_6646803 | NC_021164.1    | Ca_kabuli_chr05 | 6646803                 | AA                              | GG              | 1946842339               |
| SNP_P4_69549_6646910 | NC_021164.1    | Ca_kabuli_chr05 | 6646910                 | AA                              | TT              | 1946842341               |
| SNP_P4_69550_6646921 | NC_021164.1    | Ca_kabuli_chr05 | 6646921                 | GG                              | TT              | 1946842343               |
| SNP_P4_69551_6647311 | NC_021164.1    | Ca_kabuli_chr05 | 6647311                 | TT                              | GG              | 1946842345               |
| SNP_P4_69552_6647492 | NC_021164.1    | Ca_kabuli_chr05 | 6647492                 | CC                              | GG              | 1946842347               |
| SNP_P4_69553_6647799 | NC_021164.1    | Ca_kabuli_chr05 | 6647799                 | AA                              | CC              | 1946842348               |
| SNP_P4_69554_6647844 | NC_021164.1    | Ca_kabuli_chr05 | 6647844                 | CC                              | TT              | 1946842350               |
| SNP_P4_69555_6647860 | NC_021164.1    | Ca_kabuli_chr05 | 6647860                 | AA                              | TT              | 1946842352               |
| SNP_P4_69556_6647861 | NC_021164.1    | Ca_kabuli_chr05 | 6647861                 | CC                              | TT              | 1946842354               |
| SNP_P4_69557_6648048 | NC_021164.1    | Ca_kabuli_chr05 | 6648048                 | TT                              | CC              | 1946842356               |
| SNP_P4_69558_6648100 | NC_021164.1    | Ca_kabuli_chr05 | 6648100                 | AA                              | GG              | 1946842358               |
| SNP_P4_69559_6648129 | NC_021164.1    | Ca_kabuli_chr05 | 6648129                 | TT                              | AA              | 1946842360               |
| SNP_P4_69560_6648130 | NC_021164.1    | Ca_kabuli_chr05 | 6648130                 | CC                              | AA              | 1946842362               |
| SNP_P4_69561_6648177 | NC_021164.1    | Ca_kabuli_chr05 | 6648177                 | TT                              | CC              | 1946842364               |
| SNP_P4_69563_6668087 | NC_021164.1    | Ca_kabuli_chr05 | 6668087                 | AA                              | GG              | 1946842366               |
| SNP_P4_69564_6674818 | NC_021164.1    | Ca_kabuli_chr05 | 6674818                 | GG                              | TT              | 1946842368               |
| SNP_P4_69565_6674895 | NC_021164.1    | Ca_kabuli_chr05 | 6674895                 | GG                              | AA              | 1946842370               |
| SNP_P4_69566_6675073 | NC_021164.1    | Ca_kabuli_chr05 | 6675073                 | AA                              | TT              | 1946842372               |
| SNP_P4_69567_6675300 | NC_021164.1    | Ca_kabuli_chr05 | 6675300                 | CC                              | GG              | 1946842373               |



| SNPs IDs             | Chromosome IDs | Chromosomes     | Physical positions (bp) | CDC Frontier (Reference genome) | (ILWC46 & LPNB) | NCBI SNPdb Accession IDs |
|----------------------|----------------|-----------------|-------------------------|---------------------------------|-----------------|--------------------------|
| SNP_P4_69568_6713972 | NC_021164.1    | Ca_kabuli_chr05 | 6713972                 | GG                              | AA              | 1946842375               |
| SNP_P4_69569_6715029 | NC_021164.1    | Ca_kabuli_chr05 | 6715029                 | TT                              | AA              | 1946842377               |
| SNP_P4_69570_6715042 | NC_021164.1    | Ca_kabuli_chr05 | 6715042                 | AA                              | CC              | 1946842379               |
| SNP_P4_69571_6723684 | NC_021164.1    | Ca_kabuli_chr05 | 6723684                 | CC                              | AA              | 1946842381               |
| SNP_P4_69572_6723686 | NC_021164.1    | Ca_kabuli_chr05 | 6723686                 | TT                              | AA              | 1946842383               |
| SNP_P4_69573_6723692 | NC_021164.1    | Ca_kabuli_chr05 | 6723692                 | CC                              | AA              | 1946842385               |
| SNP_P4_69574_6723693 | NC_021164.1    | Ca_kabuli_chr05 | 6723693                 | TT                              | AA              | 1946842387               |
| SNP_P4_69575_6723702 | NC_021164.1    | Ca_kabuli_chr05 | 6723702                 | GG                              | TT              | 1946842389               |
| SNP_P4_69576_6723706 | NC_021164.1    | Ca_kabuli_chr05 | 6723706                 | TT                              | CC              | 1946842391               |
| SNP_P4_69577_6723707 | NC_021164.1    | Ca_kabuli_chr05 | 6723707                 | TT                              | AA              | 1946842393               |
| SNP_P4_69578_6723718 | NC_021164.1    | Ca_kabuli_chr05 | 6723718                 | AA                              | TT              | 1946842395               |
| SNP_P4_69579_6739607 | NC_021164.1    | Ca_kabuli_chr05 | 6739607                 | GG                              | AA              | 1946842397               |
| SNP_P4_69580_6739681 | NC_021164.1    | Ca_kabuli_chr05 | 6739681                 | TT                              | CC              | 1946842398               |
| SNP_P4_69581_6739719 | NC_021164.1    | Ca_kabuli_chr05 | 6739719                 | CC                              | TT              | 1946842400               |
| SNP_P4_69582_6739736 | NC_021164.1    | Ca_kabuli_chr05 | 6739736                 | CC                              | TT              | 1946842402               |
| SNP_P4_69583_6739788 | NC_021164.1    | Ca_kabuli_chr05 | 6739788                 | TT                              | AA              | 1946842404               |
| SNP_P4_69584_6739808 | NC_021164.1    | Ca_kabuli_chr05 | 6739808                 | TT                              | GG              | 1946842406               |
| SNP_P4_69585_6739921 | NC_021164.1    | Ca_kabuli_chr05 | 6739921                 | TT                              | CC              | 1946842408               |
| SNP_P4_69586_6740034 | NC_021164.1    | Ca_kabuli_chr05 | 6740034                 | AA                              | GG              | 1946842410               |
| SNP_P4_69587_6740080 | NC_021164.1    | Ca_kabuli_chr05 | 6740080                 | CC                              | TT              | 1946842412               |
| SNP_P4_69588_6740120 | NC_021164.1    | Ca_kabuli_chr05 | 6740120                 | GG                              | AA              | 1946842414               |
| SNP_P4_69589_6740122 | NC_021164.1    | Ca_kabuli_chr05 | 6740122                 | TT                              | GG              | 1946842415               |
| SNP_P4_69590_6753920 | NC_021164.1    | Ca_kabuli_chr05 | 6753920                 | TT                              | CC              | 1946842417               |
| SNP_P4_69591_6753953 | NC_021164.1    | Ca_kabuli_chr05 | 6753953                 | CC                              | GG              | 1946842419               |
| SNP_P4_69592_6753973 | NC_021164.1    | Ca_kabuli_chr05 | 6753973                 | CC                              | TT              | 1946842421               |
| SNP_P4_69593_6754055 | NC_021164.1    | Ca_kabuli_chr05 | 6754055                 | TT                              | CC              | 1946842423               |
| SNP_P4_69595_6754130 | NC_021164.1    | Ca_kabuli_chr05 | 6754130                 | CC                              | TT              | 1946842425               |
| SNP_P4_69596_6754210 | NC_021164.1    | Ca_kabuli_chr05 | 6754210                 | AA                              | GG              | 1946842427               |
| SNP_P4_69597_6761059 | NC_021164.1    | Ca_kabuli_chr05 | 6761059                 | CC                              | AA              | 1946842429               |
| SNP_P4_69598_6761099 | NC_021164.1    | Ca_kabuli_chr05 | 6761099                 | TT                              | CC              | 1946842431               |
| SNP_P4_69600_6763453 | NC_021164.1    | Ca_kabuli_chr05 | 6763453                 | TT                              | AA              | 1946842433               |
| SNP_P4_69601_6763454 | NC_021164.1    | Ca_kabuli_chr05 | 6763454                 | CC                              | TT              | 1946842435               |
| SNP_P4_69603_6764239 | NC_021164.1    | Ca_kabuli_chr05 | 6764239                 | CC                              | TT              | 1946842437               |
| SNP_P4_69604_6764258 | NC_021164.1    | Ca_kabuli_chr05 | 6764258                 | TT                              | AA              | 1946842439               |
| SNP_P4_69606_6765962 | NC_021164.1    | Ca_kabuli_chr05 | 6765962                 | TT                              | CC              | 1946842441               |
| SNP_P4_69607_6769194 | NC_021164.1    | Ca_kabuli_chr05 | 6769194                 | TT                              | CC              | 1946842443               |
| SNP_P4_69608_6771855 | NC_021164.1    | Ca_kabuli_chr05 | 6771855                 | CC                              | TT              | 1946842445               |
| SNP_P4_69609_6771981 | NC_021164.1    | Ca_kabuli_chr05 | 6771981                 | TT                              | CC              | 1946842447               |
| SNP_P4_69610_6772186 | NC_021164.1    | Ca_kabuli_chr05 | 6772186                 | AA                              | TT              | 1946842449               |
| SNP_P4_69611_6772228 | NC_021164.1    | Ca_kabuli_chr05 | 6772228                 | TT                              | GG              | 1946842451               |
| SNP_P4_69612_6772253 | NC_021164.1    | Ca_kabuli_chr05 | 6772253                 | AA                              | TT              | 1946842453               |
| SNP_P4_69614_6772313 | NC_021164.1    | Ca_kabuli_chr05 | 6772313                 | TT                              | CC              | 1946842455               |

| SNPs IDs             | Chromosome IDs | Chromosomes     | Physical positions (bp) | CDC Frontier (Reference genome) | (ILWC46 & LPNB) | NCBI SNPdb Accession IDs |
|----------------------|----------------|-----------------|-------------------------|---------------------------------|-----------------|--------------------------|
| SNP_P4_69615_6772366 | NC_021164.1    | Ca_kabuli_chr05 | 6772366                 | CC                              | TT              | 1946842457               |
| SNP_P4_69616_6772374 | NC_021164.1    | Ca_kabuli_chr05 | 6772374                 | TT                              | CC              | 1946842459               |
| SNP_P4_69618_6772502 | NC_021164.1    | Ca_kabuli_chr05 | 6772502                 | AA                              | CC              | 1946842461               |
| SNP_P4_69619_6772506 | NC_021164.1    | Ca_kabuli_chr05 | 6772506                 | CC                              | GG              | 1946842463               |
| SNP_P4_69620_6772577 | NC_021164.1    | Ca_kabuli_chr05 | 6772577                 | CC                              | GG              | 1946842465               |
| SNP_P4_69621_6772781 | NC_021164.1    | Ca_kabuli_chr05 | 6772781                 | TT                              | CC              | 1946842467               |
| SNP_P4_69622_6772856 | NC_021164.1    | Ca_kabuli_chr05 | 6772856                 | GG                              | AA              | 1946842469               |
| SNP_P4_69623_6772898 | NC_021164.1    | Ca_kabuli_chr05 | 6772898                 | CC                              | TT              | 1946842470               |
| SNP_P4_69624_6772974 | NC_021164.1    | Ca_kabuli_chr05 | 6772974                 | GG                              | AA              | 1946842472               |
| SNP_P4_69625_6772983 | NC_021164.1    | Ca_kabuli_chr05 | 6772983                 | TT                              | CC              | 1946842474               |
| SNP_P4_69626_6773134 | NC_021164.1    | Ca_kabuli_chr05 | 6773134                 | AA                              | GG              | 1946842476               |
| SNP_P4_69627_6773245 | NC_021164.1    | Ca_kabuli_chr05 | 6773245                 | GG                              | TT              | 1946842478               |
| SNP_P4_69628_6773348 | NC_021164.1    | Ca_kabuli_chr05 | 6773348                 | TT                              | AA              | 1946842480               |
| SNP_P4_69629_6773487 | NC_021164.1    | Ca_kabuli_chr05 | 6773487                 | AA                              | GG              | 1946842482               |
| SNP_P4_69630_6773602 | NC_021164.1    | Ca_kabuli_chr05 | 6773602                 | AA                              | GG              | 1946842484               |
| SNP_P4_69631_6773783 | NC_021164.1    | Ca_kabuli_chr05 | 6773783                 | TT                              | GG              | 1946842486               |
| SNP_P4_69632_6791986 | NC_021164.1    | Ca_kabuli_chr05 | 6791986                 | AA                              | CC              | 1946842487               |
| SNP_P4_69633_6791995 | NC_021164.1    | Ca_kabuli_chr05 | 6791995                 | TT                              | AA              | 1946842489               |
| SNP_P4_69634_6791996 | NC_021164.1    | Ca_kabuli_chr05 | 6791996                 | TT                              | GG              | 1946842491               |
| SNP_P4_69635_6821835 | NC_021164.1    | Ca_kabuli_chr05 | 6821835                 | TT                              | CC              | 1946842493               |
| SNP_P4_69636_6821852 | NC_021164.1    | Ca_kabuli_chr05 | 6821852                 | AA                              | CC              | 1946842495               |
| SNP_P4_69637_6830206 | NC_021164.1    | Ca_kabuli_chr05 | 6830206                 | CC                              | GG              | 1946842497               |
| SNP_P4_69638_6830293 | NC_021164.1    | Ca_kabuli_chr05 | 6830293                 | TT                              | GG              | 1946842499               |
| SNP_P4_69639_6830429 | NC_021164.1    | Ca_kabuli_chr05 | 6830429                 | TT                              | GG              | 1946842501               |
| SNP_P4_69640_6830446 | NC_021164.1    | Ca_kabuli_chr05 | 6830446                 | CC                              | TT              | 1946842503               |
| SNP_P4_69641_6830539 | NC_021164.1    | Ca_kabuli_chr05 | 6830539                 | GG                              | AA              | 1946842505               |
| SNP_P4_69642_6830578 | NC_021164.1    | Ca_kabuli_chr05 | 6830578                 | CC                              | TT              | 1946842507               |
| SNP_P4_69643_6830589 | NC_021164.1    | Ca_kabuli_chr05 | 6830589                 | CC                              | TT              | 1946842509               |
| SNP_P4_69644_6830797 | NC_021164.1    | Ca_kabuli_chr05 | 6830797                 | AA                              | GG              | 1946842511               |
| SNP_P4_69645_6830875 | NC_021164.1    | Ca_kabuli_chr05 | 6830875                 | TT                              | GG              | 1946842513               |
| SNP_P4_69646_6830893 | NC_021164.1    | Ca_kabuli_chr05 | 6830893                 | AA                              | GG              | 1946842515               |
| SNP_P4_69647_6830920 | NC_021164.1    | Ca_kabuli_chr05 | 6830920                 | AA                              | GG              | 1946842517               |
| SNP_P4_69648_6830930 | NC_021164.1    | Ca_kabuli_chr05 | 6830930                 | CC                              | AA              | 1946842519               |
| SNP_P4_69649_6830933 | NC_021164.1    | Ca_kabuli_chr05 | 6830933                 | CC                              | TT              | 1946842521               |
| SNP_P4_69650_6830948 | NC_021164.1    | Ca_kabuli_chr05 | 6830948                 | AA                              | GG              | 1946842523               |
| SNP_P4_69651_6831383 | NC_021164.1    | Ca_kabuli_chr05 | 6831383                 | AA                              | GG              | 1946842525               |
| SNP_P4_69652_6831456 | NC_021164.1    | Ca_kabuli_chr05 | 6831456                 | AA                              | GG              | 1946842527               |
| SNP_P4_69653_6831507 | NC_021164.1    | Ca_kabuli_chr05 | 6831507                 | GG                              | AA              | 1946842529               |
| SNP_P4_69654_6831563 | NC_021164.1    | Ca_kabuli_chr05 | 6831563                 | TT                              | CC              | 1946842531               |
| SNP_P4_69655_6831715 | NC_021164.1    | Ca_kabuli_chr05 | 6831715                 | AA                              | GG              | 1946842533               |
| SNP_P4_69657_6832854 | NC_021164.1    | Ca_kabuli_chr05 | 6832854                 | TT                              | CC              | 1946842534               |
| SNP_P4_69658_6832855 | NC_021164.1    | Ca_kabuli_chr05 | 6832855                 | CC                              | TT              | 1946842536               |

| SNPs IDs             | Chromosome IDs | Chromosomes     | Physical positions (bp) | CDC Frontier (Reference genome) | (ILWC46 & LPNB) | NCBI SNPdb Accession IDs |
|----------------------|----------------|-----------------|-------------------------|---------------------------------|-----------------|--------------------------|
| SNP_P4_69659_6832958 | NC_021164.1    | Ca_kabuli_chr05 | 6832958                 | GG                              | AA              | 1946842539               |
| SNP_P4_69660_6832968 | NC_021164.1    | Ca_kabuli_chr05 | 6832968                 | TT                              | AA              | 1946842541               |
| SNP_P4_69662_6833658 | NC_021164.1    | Ca_kabuli_chr05 | 6833658                 | TT                              | AA              | 1946842543               |
| SNP_P4_69664_6833713 | NC_021164.1    | Ca_kabuli_chr05 | 6833713                 | GG                              | CC              | 1946842545               |
| SNP_P4_69665_6833769 | NC_021164.1    | Ca_kabuli_chr05 | 6833769                 | CC                              | TT              | 1946842547               |
| SNP_P4_69667_6833877 | NC_021164.1    | Ca_kabuli_chr05 | 6833877                 | GG                              | AA              | 1946842549               |
| SNP_P4_69669_6834075 | NC_021164.1    | Ca_kabuli_chr05 | 6834075                 | AA                              | TT              | 1946842551               |
| SNP_P4_69670_6834233 | NC_021164.1    | Ca_kabuli_chr05 | 6834233                 | TT                              | CC              | 1946842553               |
| SNP_P4_69672_6834319 | NC_021164.1    | Ca_kabuli_chr05 | 6834319                 | AA                              | TT              | 1946842555               |
| SNP_P4_69673_6834384 | NC_021164.1    | Ca_kabuli_chr05 | 6834384                 | CC                              | AA              | 1946842557               |
| SNP_P4_69674_6834393 | NC_021164.1    | Ca_kabuli_chr05 | 6834393                 | TT                              | GG              | 1946842558               |
| SNP_P4_69675_6834482 | NC_021164.1    | Ca_kabuli_chr05 | 6834482                 | AA                              | TT              | 1946842560               |
| SNP_P4_69676_6834492 | NC_021164.1    | Ca_kabuli_chr05 | 6834492                 | TT                              | CC              | 1946842562               |
| SNP_P4_69677_6834577 | NC_021164.1    | Ca_kabuli_chr05 | 6834577                 | GG                              | AA              | 1946842564               |
| SNP_P4_69678_6834613 | NC_021164.1    | Ca_kabuli_chr05 | 6834613                 | AA                              | TT              | 1946842566               |
| SNP_P4_69679_6834614 | NC_021164.1    | Ca_kabuli_chr05 | 6834614                 | CC                              | TT              | 1946842568               |
| SNP_P4_69680_6834624 | NC_021164.1    | Ca_kabuli_chr05 | 6834624                 | GG                              | TT              | 1946842570               |
| SNP_P4_69681_6834675 | NC_021164.1    | Ca_kabuli_chr05 | 6834675                 | AA                              | CC              | 1946842572               |
| SNP_P4_69682_6834690 | NC_021164.1    | Ca_kabuli_chr05 | 6834690                 | TT                              | CC              | 1946842574               |
| SNP_P4_69683_6834698 | NC_021164.1    | Ca_kabuli_chr05 | 6834698                 | AA                              | CC              | 1946842576               |
| SNP_P4_69685_6834723 | NC_021164.1    | Ca_kabuli_chr05 | 6834723                 | TT                              | GG              | 1946842578               |
| SNP_P4_69686_6834755 | NC_021164.1    | Ca_kabuli_chr05 | 6834755                 | AA                              | TT              | 1946842580               |
| SNP_P4_69687_6834775 | NC_021164.1    | Ca_kabuli_chr05 | 6834775                 | TT                              | AA              | 1946842581               |
| SNP_P4_69688_6834835 | NC_021164.1    | Ca_kabuli_chr05 | 6834835                 | TT                              | AA              | 1946842583               |
| SNP_P4_69689_6834887 | NC_021164.1    | Ca_kabuli_chr05 | 6834887                 | CC                              | TT              | 1946842585               |
| SNP_P4_69690_6834888 | NC_021164.1    | Ca_kabuli_chr05 | 6834888                 | TT                              | AA              | 1946842587               |
| SNP_P4_69692_6835152 | NC_021164.1    | Ca_kabuli_chr05 | 6835152                 | GG                              | TT              | 1946842589               |
| SNP_P4_69693_6835200 | NC_021164.1    | Ca_kabuli_chr05 | 6835200                 | TT                              | CC              | 1946842591               |
| SNP_P4_69694_6835399 | NC_021164.1    | Ca_kabuli_chr05 | 6835399                 | AA                              | TT              | 1946842593               |
| SNP_P4_69695_6835547 | NC_021164.1    | Ca_kabuli_chr05 | 6835547                 | CC                              | AA              | 1946842595               |
| SNP_P4_69696_6835690 | NC_021164.1    | Ca_kabuli_chr05 | 6835690                 | TT                              | AA              | 1946842597               |
| SNP_P4_69697_6835695 | NC_021164.1    | Ca_kabuli_chr05 | 6835695                 | TT                              | GG              | 1946842599               |
| SNP_P4_69698_6835750 | NC_021164.1    | Ca_kabuli_chr05 | 6835750                 | GG                              | AA              | 1946842601               |
| SNP_P4_69699_6835751 | NC_021164.1    | Ca_kabuli_chr05 | 6835751                 | TT                              | CC              | 1946842603               |
| SNP_P4_69700_6835784 | NC_021164.1    | Ca_kabuli_chr05 | 6835784                 | GG                              | AA              | 1946842605               |
| SNP_P4_69701_6835863 | NC_021164.1    | Ca_kabuli_chr05 | 6835863                 | TT                              | CC              | 1946842607               |
| SNP_P4_69702_6835878 | NC_021164.1    | Ca_kabuli_chr05 | 6835878                 | CC                              | TT              | 1946842609               |
| SNP_P4_69703_6836020 | NC_021164.1    | Ca_kabuli_chr05 | 6836020                 | CC                              | TT              | 1946842611               |
| SNP_P4_69704_6836141 | NC_021164.1    | Ca_kabuli_chr05 | 6836141                 | AA                              | GG              | 1946842613               |
| SNP_P4_69705_6836160 | NC_021164.1    | Ca_kabuli_chr05 | 6836160                 | TT                              | CC              | 1946842615               |
| SNP_P4_69706_6836214 | NC_021164.1    | Ca_kabuli_chr05 | 6836214                 | CC                              | GG              | 1946842616               |
| SNP_P4_69707_6836350 | NC_021164.1    | Ca_kabuli_chr05 | 6836350                 | AA                              | TT              | 1946842736               |

| SNPs IDs             | Chromosome IDs | Chromosomes     | Physical positions (bp) | CDC Frontier (Reference genome) | (ILWC46 & LPNB) | NCBI SNPdb Accession IDs |
|----------------------|----------------|-----------------|-------------------------|---------------------------------|-----------------|--------------------------|
| SNP_P4_69708_6836450 | NC_021164.1    | Ca_kabuli_chr05 | 6836450                 | CC                              | GG              | 1946842738               |
| SNP_P4_69709_6836513 | NC_021164.1    | Ca_kabuli_chr05 | 6836513                 | CC                              | TT              | 1946842740               |
| SNP_P4_69710_6836567 | NC_021164.1    | Ca_kabuli_chr05 | 6836567                 | CC                              | TT              | 1946842742               |
| SNP_P4_69711_6836571 | NC_021164.1    | Ca_kabuli_chr05 | 6836571                 | AA                              | CC              | 1946842744               |
| SNP_P4_69712_6836615 | NC_021164.1    | Ca_kabuli_chr05 | 6836615                 | AA                              | GG              | 1946842746               |
| SNP_P4_69713_6837180 | NC_021164.1    | Ca_kabuli_chr05 | 6837180                 | TT                              | CC              | 1946842748               |
| SNP_P4_69714_6837235 | NC_021164.1    | Ca_kabuli_chr05 | 6837235                 | GG                              | AA              | 1946842750               |
| SNP_P4_69715_6837352 | NC_021164.1    | Ca_kabuli_chr05 | 6837352                 | AA                              | CC              | 1946842752               |
| SNP_P4_69716_6837415 | NC_021164.1    | Ca_kabuli_chr05 | 6837415                 | AA                              | TT              | 1946842754               |
| SNP_P4_69717_6837423 | NC_021164.1    | Ca_kabuli_chr05 | 6837423                 | CC                              | GG              | 1946842756               |
| SNP_P4_69718_6837425 | NC_021164.1    | Ca_kabuli_chr05 | 6837425                 | AA                              | GG              | 1946842758               |
| SNP_P4_69719_6837767 | NC_021164.1    | Ca_kabuli_chr05 | 6837767                 | CC                              | GG              | 1946842759               |
| SNP_P4_69720_6837905 | NC_021164.1    | Ca_kabuli_chr05 | 6837905                 | GG                              | AA              | 1946842761               |
| SNP_P4_69721_6837956 | NC_021164.1    | Ca_kabuli_chr05 | 6837956                 | AA                              | GG              | 1946842763               |
| SNP_P4_69723_6838027 | NC_021164.1    | Ca_kabuli_chr05 | 6838027                 | AA                              | GG              | 1946842765               |
| SNP_P4_69724_6849305 | NC_021164.1    | Ca_kabuli_chr05 | 6849305                 | CC                              | TT              | 1946842767               |
| SNP_P4_69725_6849417 | NC_021164.1    | Ca_kabuli_chr05 | 6849417                 | TT                              | CC              | 1946842769               |
| SNP_P4_69726_6872417 | NC_021164.1    | Ca_kabuli_chr05 | 6872417                 | GG                              | AA              | 1946842771               |
| SNP_P4_69727_6872508 | NC_021164.1    | Ca_kabuli_chr05 | 6872508                 | CC                              | TT              | 1946842773               |
| SNP_P4_69729_6875422 | NC_021164.1    | Ca_kabuli_chr05 | 6875422                 | GG                              | TT              | 1946842775               |
| SNP_P4_69730_6875426 | NC_021164.1    | Ca_kabuli_chr05 | 6875426                 | AA                              | GG              | 1946842777               |
| SNP_P4_69731_6896735 | NC_021164.1    | Ca_kabuli_chr05 | 6896735                 | GG                              | AA              | 1946842779               |
| SNP_P4_69732_6897083 | NC_021164.1    | Ca_kabuli_chr05 | 6897083                 | TT                              | GG              | 1946842781               |
| SNP_P4_69733_6897825 | NC_021164.1    | Ca_kabuli_chr05 | 6897825                 | TT                              | GG              | 1946842782               |
| SNP_P4_69734_6897939 | NC_021164.1    | Ca_kabuli_chr05 | 6897939                 | AA                              | TT              | 1946842783               |
| SNP_P4_69735_6897958 | NC_021164.1    | Ca_kabuli_chr05 | 6897958                 | GG                              | AA              | 1946842784               |
| SNP_P4_69736_6898303 | NC_021164.1    | Ca_kabuli_chr05 | 6898303                 | AA                              | TT              | 1946842785               |
| SNP_P4_69737_6898355 | NC_021164.1    | Ca_kabuli_chr05 | 6898355                 | TT                              | CC              | 1946842787               |
| SNP_P4_69738_6898443 | NC_021164.1    | Ca_kabuli_chr05 | 6898443                 | CC                              | GG              | 1946842789               |
| SNP_P4_69739_6898450 | NC_021164.1    | Ca_kabuli_chr05 | 6898450                 | AA                              | GG              | 1946842791               |
| SNP_P4_69740_6898458 | NC_021164.1    | Ca_kabuli_chr05 | 6898458                 | TT                              | CC              | 1946842793               |
| SNP_P4_69741_6898467 | NC_021164.1    | Ca_kabuli_chr05 | 6898467                 | TT                              | CC              | 1946842795               |
| SNP_P4_69742_6901712 | NC_021164.1    | Ca_kabuli_chr05 | 6901712                 | CC                              | TT              | 1946842797               |
| SNP_P4_69744_6906291 | NC_021164.1    | Ca_kabuli_chr05 | 6906291                 | GG                              | AA              | 1946842799               |
| SNP_P4_69745_6906431 | NC_021164.1    | Ca_kabuli_chr05 | 6906431                 | AA                              | GG              | 1946842801               |
| SNP_P4_69746_6906454 | NC_021164.1    | Ca_kabuli_chr05 | 6906454                 | GG                              | AA              | 1946842803               |
| SNP_P4_69747_6906629 | NC_021164.1    | Ca_kabuli_chr05 | 6906629                 | CC                              | TT              | 1946842805               |
| SNP_P4_69748_6906636 | NC_021164.1    | Ca_kabuli_chr05 | 6906636                 | AA                              | GG              | 1946842807               |
| SNP_P4_69749_6906774 | NC_021164.1    | Ca_kabuli_chr05 | 6906774                 | GG                              | CC              | 1946842808               |
| SNP_P4_69750_6906811 | NC_021164.1    | Ca_kabuli_chr05 | 6906811                 | AA                              | TT              | 1946842810               |
| SNP_P4_69751_6906930 | NC_021164.1    | Ca_kabuli_chr05 | 6906930                 | GG                              | TT              | 1946842812               |
| SNP_P4_69752_6907067 | NC_021164.1    | Ca_kabuli_chr05 | 6907067                 | CC                              | GG              | 1946842814               |

| SNPs IDs             | Chromosome IDs | Chromosomes     | Physical positions (bp) | CDC Frontier (Reference genome) | (ILWC46 & LPNB) | NCBI SNPdb Accession IDs |
|----------------------|----------------|-----------------|-------------------------|---------------------------------|-----------------|--------------------------|
| SNP_P4_69753_6907109 | NC_021164.1    | Ca_kabuli_chr05 | 6907109                 | CC                              | TT              | 1946842816               |
| SNP_P4_69754_6907236 | NC_021164.1    | Ca_kabuli_chr05 | 6907236                 | GG                              | AA              | 1946842818               |
| SNP_P4_69755_6907237 | NC_021164.1    | Ca_kabuli_chr05 | 6907237                 | TT                              | AA              | 1946842820               |
| SNP_P4_69756_6907238 | NC_021164.1    | Ca_kabuli_chr05 | 6907238                 | TT                              | AA              | 1946842822               |
| SNP_P4_69757_6907329 | NC_021164.1    | Ca_kabuli_chr05 | 6907329                 | TT                              | CC              | 1946842824               |
| SNP_P4_69758_6907335 | NC_021164.1    | Ca_kabuli_chr05 | 6907335                 | AA                              | GG              | 1946842826               |
| SNP_P4_69759_6907399 | NC_021164.1    | Ca_kabuli_chr05 | 6907399                 | GG                              | TT              | 1946842828               |
| SNP_P4_69760_6907403 | NC_021164.1    | Ca_kabuli_chr05 | 6907403                 | CC                              | TT              | 1946842830               |
| SNP_P4_69761_6907407 | NC_021164.1    | Ca_kabuli_chr05 | 6907407                 | AA                              | CC              | 1946842832               |
| SNP_P4_69762_6907409 | NC_021164.1    | Ca_kabuli_chr05 | 6907409                 | AA                              | GG              | 1946842834               |
| SNP_P4_69763_6907474 | NC_021164.1    | Ca_kabuli_chr05 | 6907474                 | TT                              | CC              | 1946842836               |
| SNP_P4_69764_6907524 | NC_021164.1    | Ca_kabuli_chr05 | 6907524                 | GG                              | AA              | 1946842837               |
| SNP_P4_69765_6907546 | NC_021164.1    | Ca_kabuli_chr05 | 6907546                 | AA                              | GG              | 1946842839               |
| SNP_P4_69767_6907661 | NC_021164.1    | Ca_kabuli_chr05 | 6907661                 | CC                              | TT              | 1946842841               |
| SNP_P4_69768_6907712 | NC_021164.1    | Ca_kabuli_chr05 | 6907712                 | GG                              | CC              | 1946842843               |
| SNP_P4_69769_6907713 | NC_021164.1    | Ca_kabuli_chr05 | 6907713                 | AA                              | GG              | 1946842845               |
| SNP_P4_69770_6907720 | NC_021164.1    | Ca_kabuli_chr05 | 6907720                 | GG                              | AA              | 1946842847               |
| SNP_P4_69771_6907781 | NC_021164.1    | Ca_kabuli_chr05 | 6907781                 | AA                              | GG              | 1946842849               |
| SNP_P4_69772_6907800 | NC_021164.1    | Ca_kabuli_chr05 | 6907800                 | TT                              | AA              | 1946842851               |
| SNP_P4_69774_6908161 | NC_021164.1    | Ca_kabuli_chr05 | 6908161                 | TT                              | CC              | 1946842853               |
| SNP_P4_69775_6908174 | NC_021164.1    | Ca_kabuli_chr05 | 6908174                 | TT                              | CC              | 1946842855               |
| SNP_P4_69776_6908242 | NC_021164.1    | Ca_kabuli_chr05 | 6908242                 | AA                              | GG              | 1946842857               |
| SNP_P4_69780_6909720 | NC_021164.1    | Ca_kabuli_chr05 | 6909720                 | GG                              | AA              | 1946842859               |
| SNP_P4_69781_6909722 | NC_021164.1    | Ca_kabuli_chr05 | 6909722                 | TT                              | CC              | 1946842861               |
| SNP_P4_69782_6909725 | NC_021164.1    | Ca_kabuli_chr05 | 6909725                 | TT                              | CC              | 1946842863               |
| SNP_P4_69783_6909817 | NC_021164.1    | Ca_kabuli_chr05 | 6909817                 | GG                              | AA              | 1946842865               |
| SNP_P4_69784_6909903 | NC_021164.1    | Ca_kabuli_chr05 | 6909903                 | CC                              | TT              | 1946842867               |
| SNP_P4_69785_6909912 | NC_021164.1    | Ca_kabuli_chr05 | 6909912                 | CC                              | TT              | 1946842869               |
| SNP_P4_69786_6909931 | NC_021164.1    | Ca_kabuli_chr05 | 6909931                 | TT                              | GG              | 1946842871               |
| SNP_P4_69788_6909995 | NC_021164.1    | Ca_kabuli_chr05 | 6909995                 | AA                              | GG              | 1946842873               |
| SNP_P4_69789_6910221 | NC_021164.1    | Ca_kabuli_chr05 | 6910221                 | GG                              | AA              | 1946842875               |
| SNP_P4_69791_6910707 | NC_021164.1    | Ca_kabuli_chr05 | 6910707                 | GG                              | TT              | 1946842877               |
| SNP_P4_69792_6910732 | NC_021164.1    | Ca_kabuli_chr05 | 6910732                 | TT                              | AA              | 1946842879               |
| SNP_P4_69793_6911796 | NC_021164.1    | Ca_kabuli_chr05 | 6911796                 | CC                              | GG              | 1946842881               |
| SNP_P4_69794_6911925 | NC_021164.1    | Ca_kabuli_chr05 | 6911925                 | AA                              | GG              | 1946842883               |
| SNP_P4_69795_6912562 | NC_021164.1    | Ca_kabuli_chr05 | 6912562                 | TT                              | CC              | 1946842885               |
| SNP_P4_69796_6912639 | NC_021164.1    | Ca_kabuli_chr05 | 6912639                 | AA                              | GG              | 1946842887               |
| SNP_P4_69797_6912653 | NC_021164.1    | Ca_kabuli_chr05 | 6912653                 | CC                              | TT              | 1946842889               |
| SNP_P4_69798_6913533 | NC_021164.1    | Ca_kabuli_chr05 | 6913533                 | AA                              | TT              | 1946842891               |
| SNP_P4_69799_6913570 | NC_021164.1    | Ca_kabuli_chr05 | 6913570                 | CC                              | TT              | 1946842893               |
| SNP_P4_69800_6913609 | NC_021164.1    | Ca_kabuli_chr05 | 6913609                 | AA                              | GG              | 1946842895               |
| SNP_P4_69801_6913632 | NC_021164.1    | Ca_kabuli_chr05 | 6913632                 | CC                              | AA              | 1946842897               |

| SNPs IDs             | Chromosome IDs | Chromosomes     | Physical positions (bp) | CDC Frontier (Reference genome) | (ILWC46 & LPNB) | NCBI SNPdb Accession IDs |
|----------------------|----------------|-----------------|-------------------------|---------------------------------|-----------------|--------------------------|
| SNP_P4_69802_6913635 | NC_021164.1    | Ca_kabuli_chr05 | 6913635                 | CC                              | GG              | 1946842899               |
| SNP_P4_69803_6913835 | NC_021164.1    | Ca_kabuli_chr05 | 6913835                 | TT                              | GG              | 1946842901               |
| SNP_P4_69804_6913861 | NC_021164.1    | Ca_kabuli_chr05 | 6913861                 | TT                              | GG              | 1946842903               |
| SNP_P4_69805_6913931 | NC_021164.1    | Ca_kabuli_chr05 | 6913931                 | CC                              | TT              | 1946842905               |
| SNP_P4_69806_6914049 | NC_021164.1    | Ca_kabuli_chr05 | 6914049                 | CC                              | TT              | 1946842907               |
| SNP_P4_69807_6914052 | NC_021164.1    | Ca_kabuli_chr05 | 6914052                 | AA                              | GG              | 1946842909               |
| SNP_P4_69808_6914194 | NC_021164.1    | Ca_kabuli_chr05 | 6914194                 | TT                              | CC              | 1946842911               |
| SNP_P4_69809_6914729 | NC_021164.1    | Ca_kabuli_chr05 | 6914729                 | AA                              | GG              | 1946842913               |
| SNP_P4_69810_6914776 | NC_021164.1    | Ca_kabuli_chr05 | 6914776                 | CC                              | AA              | 1946842915               |
| SNP_P4_69811_6914793 | NC_021164.1    | Ca_kabuli_chr05 | 6914793                 | CC                              | TT              | 1946842917               |
| SNP_P4_69812_6914913 | NC_021164.1    | Ca_kabuli_chr05 | 6914913                 | CC                              | TT              | 1946842919               |
| SNP_P4_69813_6914934 | NC_021164.1    | Ca_kabuli_chr05 | 6914934                 | GG                              | TT              | 1946842921               |
| SNP_P4_69814_6915081 | NC_021164.1    | Ca_kabuli_chr05 | 6915081                 | CC                              | TT              | 1946842923               |
| SNP_P4_69815_6915088 | NC_021164.1    | Ca_kabuli_chr05 | 6915088                 | GG                              | AA              | 1946842925               |
| SNP_P4_69816_6915112 | NC_021164.1    | Ca_kabuli_chr05 | 6915112                 | GG                              | AA              | 1946842927               |
| SNP_P4_69817_6915173 | NC_021164.1    | Ca_kabuli_chr05 | 6915173                 | TT                              | GG              | 1946842929               |
| SNP_P4_69818_6915178 | NC_021164.1    | Ca_kabuli_chr05 | 6915178                 | CC                              | GG              | 1946842931               |
| SNP_P4_69819_6915186 | NC_021164.1    | Ca_kabuli_chr05 | 6915186                 | GG                              | AA              | 1946842933               |
| SNP_P4_69820_6915187 | NC_021164.1    | Ca_kabuli_chr05 | 6915187                 | TT                              | AA              | 1946842935               |
| SNP_P4_69821_6915191 | NC_021164.1    | Ca_kabuli_chr05 | 6915191                 | TT                              | CC              | 1946842937               |
| SNP_P4_69822_6915211 | NC_021164.1    | Ca_kabuli_chr05 | 6915211                 | GG                              | AA              | 1946842939               |
| SNP_P4_69823_6942482 | NC_021164.1    | Ca_kabuli_chr05 | 6942482                 | AA                              | TT              | 1946842941               |
| SNP_P4_69824_7000860 | NC_021164.1    | Ca_kabuli_chr05 | 7000860                 | GG                              | AA              | 1946842943               |
| SNP_P4_69825_7002040 | NC_021164.1    | Ca_kabuli_chr05 | 7002040                 | AA                              | GG              | 1946842945               |
| SNP_P4_69826_7003273 | NC_021164.1    | Ca_kabuli_chr05 | 7003273                 | TT                              | CC              | 1946842947               |
| SNP_P4_69828_7023675 | NC_021164.1    | Ca_kabuli_chr05 | 7023675                 | GG                              | AA              | 1946842949               |
| SNP_P4_69829_7023682 | NC_021164.1    | Ca_kabuli_chr05 | 7023682                 | TT                              | CC              | 1946842951               |
| SNP_P4_69830_7023698 | NC_021164.1    | Ca_kabuli_chr05 | 7023698                 | AA                              | GG              | 1946842953               |
| SNP_P4_69831_7023908 | NC_021164.1    | Ca_kabuli_chr05 | 7023908                 | AA                              | GG              | 1946842955               |
| SNP_P4_69832_7034890 | NC_021164.1    | Ca_kabuli_chr05 | 7034890                 | CC                              | TT              | 1946842957               |
| SNP_P4_69833_7092535 | NC_021164.1    | Ca_kabuli_chr05 | 7092535                 | AA                              | CC              | 1946842959               |
| SNP_P4_69834_7092556 | NC_021164.1    | Ca_kabuli_chr05 | 7092556                 | TT                              | CC              | 1946842961               |
| SNP_P4_69835_7092589 | NC_021164.1    | Ca_kabuli_chr05 | 7092589                 | AA                              | GG              | 1946842963               |
| SNP_P4_69836_7092636 | NC_021164.1    | Ca_kabuli_chr05 | 7092636                 | AA                              | TT              | 1946842965               |
| SNP_P4_69837_7092763 | NC_021164.1    | Ca_kabuli_chr05 | 7092763                 | TT                              | CC              | 1946842967               |
| SNP_P4_69839_7092850 | NC_021164.1    | Ca_kabuli_chr05 | 7092850                 | TT                              | CC              | 1946842969               |
| SNP_P4_69840_7092866 | NC_021164.1    | Ca_kabuli_chr05 | 7092866                 | TT                              | CC              | 1946842971               |
| SNP_P4_69841_7092870 | NC_021164.1    | Ca_kabuli_chr05 | 7092870                 | AA                              | GG              | 1946842973               |
| SNP_P4_69842_7093141 | NC_021164.1    | Ca_kabuli_chr05 | 7093141                 | GG                              | AA              | 1946842975               |
| SNP_P4_69843_7093148 | NC_021164.1    | Ca_kabuli_chr05 | 7093148                 | TT                              | CC              | 1946842977               |
| SNP_P4_69845_7103654 | NC_021164.1    | Ca_kabuli_chr05 | 7103654                 | AA                              | TT              | 1946842979               |
| SNP_P4_69846_7103693 | NC_021164.1    | Ca_kabuli_chr05 | 7103693                 | TT                              | AA              | 1946842981               |

| SNPs IDs             | Chromosome IDs | Chromosomes     | Physical positions (bp) | CDC Frontier (Reference genome) | (ILWC46 & LPNB) | NCBI SNPdb Accession IDs |
|----------------------|----------------|-----------------|-------------------------|---------------------------------|-----------------|--------------------------|
| SNP_P4_69847_7103979 | NC_021164.1    | Ca_kabuli_chr05 | 7103979                 | AA                              | GG              | 1946842983               |
| SNP_P4_69849_7107072 | NC_021164.1    | Ca_kabuli_chr05 | 7107072                 | CC                              | GG              | 1946842985               |
| SNP_P4_69850_7107075 | NC_021164.1    | Ca_kabuli_chr05 | 7107075                 | AA                              | GG              | 1946842987               |
| SNP_P4_69851_7107124 | NC_021164.1    | Ca_kabuli_chr05 | 7107124                 | CC                              | TT              | 1946842989               |
| SNP_P4_69852_7107342 | NC_021164.1    | Ca_kabuli_chr05 | 7107342                 | AA                              | CC              | 1946842991               |
| SNP_P4_69853_7107804 | NC_021164.1    | Ca_kabuli_chr05 | 7107804                 | CC                              | TT              | 1946842993               |
| SNP_P4_69855_7114454 | NC_021164.1    | Ca_kabuli_chr05 | 7114454                 | GG                              | AA              | 1946842995               |
| SNP_P4_69856_7114484 | NC_021164.1    | Ca_kabuli_chr05 | 7114484                 | AA                              | GG              | 1946842997               |
| SNP_P4_69857_7114487 | NC_021164.1    | Ca_kabuli_chr05 | 7114487                 | TT                              | CC              | 1946842999               |
| SNP_P4_69858_7114509 | NC_021164.1    | Ca_kabuli_chr05 | 7114509                 | CC                              | TT              | 1946843001               |
| SNP_P4_69859_7114510 | NC_021164.1    | Ca_kabuli_chr05 | 7114510                 | TT                              | CC              | 1946843003               |
| SNP_P4_69861_7120141 | NC_021164.1    | Ca_kabuli_chr05 | 7120141                 | CC                              | TT              | 1946843005               |
| SNP_P4_69862_7120262 | NC_021164.1    | Ca_kabuli_chr05 | 7120262                 | CC                              | TT              | 1946843007               |
| SNP_P4_69863_7120303 | NC_021164.1    | Ca_kabuli_chr05 | 7120303                 | AA                              | GG              | 1946843009               |
| SNP_P4_69864_7123642 | NC_021164.1    | Ca_kabuli_chr05 | 7123642                 | AA                              | GG              | 1946843011               |
| SNP_P4_69865_7124053 | NC_021164.1    | Ca_kabuli_chr05 | 7124053                 | GG                              | TT              | 1946843013               |
| SNP_P4_69866_7124060 | NC_021164.1    | Ca_kabuli_chr05 | 7124060                 | TT                              | AA              | 1946843015               |
| SNP_P4_69867_7124064 | NC_021164.1    | Ca_kabuli_chr05 | 7124064                 | GG                              | CC              | 1946843017               |
| SNP_P4_69868_7125260 | NC_021164.1    | Ca_kabuli_chr05 | 7125260                 | GG                              | AA              | 1946843019               |
| SNP_P4_69869_7125305 | NC_021164.1    | Ca_kabuli_chr05 | 7125305                 | AA                              | GG              | 1946843021               |
| SNP_P4_69870_7125503 | NC_021164.1    | Ca_kabuli_chr05 | 7125503                 | TT                              | CC              | 1946843023               |
| SNP_P4_69871_7125559 | NC_021164.1    | Ca_kabuli_chr05 | 7125559                 | AA                              | CC              | 1946843025               |
| SNP_P4_69872_7125560 | NC_021164.1    | Ca_kabuli_chr05 | 7125560                 | AA                              | CC              | 1946843027               |
| SNP_P4_69873_7125570 | NC_021164.1    | Ca_kabuli_chr05 | 7125570                 | AA                              | TT              | 1946843029               |
| SNP_P4_69874_7125745 | NC_021164.1    | Ca_kabuli_chr05 | 7125745                 | TT                              | AA              | 1946843031               |
| SNP_P4_69875_7226932 | NC_021164.1    | Ca_kabuli_chr05 | 7226932                 | TT                              | CC              | 1946843033               |
| SNP_P4_69876_7227493 | NC_021164.1    | Ca_kabuli_chr05 | 7227493                 | AA                              | GG              | 1946843035               |
| SNP_P4_69877_7227497 | NC_021164.1    | Ca_kabuli_chr05 | 7227497                 | TT                              | GG              | 1946843038               |
| SNP_P4_69878_7227719 | NC_021164.1    | Ca_kabuli_chr05 | 7227719                 | GG                              | CC              | 1946843040               |
| SNP_P4_69879_7232850 | NC_021164.1    | Ca_kabuli_chr05 | 7232850                 | CC                              | TT              | 1946843042               |
| SNP_P4_69880_7233013 | NC_021164.1    | Ca_kabuli_chr05 | 7233013                 | AA                              | TT              | 1946843044               |
| SNP_P4_69881_7233043 | NC_021164.1    | Ca_kabuli_chr05 | 7233043                 | TT                              | CC              | 1946843046               |
| SNP_P4_69882_7233071 | NC_021164.1    | Ca_kabuli_chr05 | 7233071                 | TT                              | CC              | 1946843048               |
| SNP_P4_69883_7233162 | NC_021164.1    | Ca_kabuli_chr05 | 7233162                 | TT                              | CC              | 1946843050               |
| SNP_P4_69884_7236290 | NC_021164.1    | Ca_kabuli_chr05 | 7236290                 | CC                              | GG              | 1946843052               |
| SNP_P4_69885_7236321 | NC_021164.1    | Ca_kabuli_chr05 | 7236321                 | TT                              | GG              | 1946843054               |
| SNP_P4_69886_7236372 | NC_021164.1    | Ca_kabuli_chr05 | 7236372                 | CC                              | AA              | 1946843056               |
| SNP_P4_69887_7236374 | NC_021164.1    | Ca_kabuli_chr05 | 7236374                 | TT                              | GG              | 1946843058               |
| SNP_P4_69888_7236695 | NC_021164.1    | Ca_kabuli_chr05 | 7236695                 | TT                              | GG              | 1946843060               |
| SNP_P4_69890_7262211 | NC_021164.1    | Ca_kabuli_chr05 | 7262211                 | CC                              | TT              | 1946843062               |
| SNP_P4_69891_7263182 | NC_021164.1    | Ca_kabuli_chr05 | 7263182                 | GG                              | AA              | 1946843064               |
| SNP_P4_69892_7264054 | NC_021164.1    | Ca_kabuli_chr05 | 7264054                 | CC                              | GG              | 1946843066               |

| SNPs IDs             | Chromosome IDs | Chromosomes     | Physical positions (bp) | CDC Frontier (Reference genome) | (ILWC46 & LPNB) | NCBI SNPdb Accession IDs |
|----------------------|----------------|-----------------|-------------------------|---------------------------------|-----------------|--------------------------|
| SNP_P4_69893_7264067 | NC_021164.1    | Ca_kabuli_chr05 | 7264067                 | TT                              | CC              | 1946843068               |
| SNP_P4_69894_7267111 | NC_021164.1    | Ca_kabuli_chr05 | 7267111                 | TT                              | CC              | 1946843070               |
| SNP_P4_69895_7267566 | NC_021164.1    | Ca_kabuli_chr05 | 7267566                 | AA                              | GG              | 1946843072               |
| SNP_P4_69897_7293480 | NC_021164.1    | Ca_kabuli_chr05 | 7293480                 | AA                              | GG              | 1946843074               |
| SNP_P4_69898_7317569 | NC_021164.1    | Ca_kabuli_chr05 | 7317569                 | TT                              | CC              | 1946843076               |
| SNP_P4_69899_7317788 | NC_021164.1    | Ca_kabuli_chr05 | 7317788                 | TT                              | GG              | 1946843078               |
| SNP_P4_69900_7326932 | NC_021164.1    | Ca_kabuli_chr05 | 7326932                 | AA                              | TT              | 1946843080               |
| SNP_P4_69901_7327274 | NC_021164.1    | Ca_kabuli_chr05 | 7327274                 | AA                              | GG              | 1946843082               |
| SNP_P4_69902_7327349 | NC_021164.1    | Ca_kabuli_chr05 | 7327349                 | TT                              | AA              | 1946843084               |
| SNP_P4_69903_7339407 | NC_021164.1    | Ca_kabuli_chr05 | 7339407                 | TT                              | GG              | 1946843086               |
| SNP_P4_69904_7358598 | NC_021164.1    | Ca_kabuli_chr05 | 7358598                 | GG                              | AA              | 1946843088               |
| SNP_P4_69905_7359142 | NC_021164.1    | Ca_kabuli_chr05 | 7359142                 | AA                              | GG              | 1946843090               |
| SNP_P4_69906_7359185 | NC_021164.1    | Ca_kabuli_chr05 | 7359185                 | TT                              | CC              | 1946843091               |
| SNP_P4_69907_7359222 | NC_021164.1    | Ca_kabuli_chr05 | 7359222                 | TT                              | CC              | 1946843093               |
| SNP_P4_69908_7359527 | NC_021164.1    | Ca_kabuli_chr05 | 7359527                 | AA                              | GG              | 1946843095               |
| SNP_P4_69909_7359550 | NC_021164.1    | Ca_kabuli_chr05 | 7359550                 | TT                              | GG              | 1946843098               |
| SNP_P4_69910_7359610 | NC_021164.1    | Ca_kabuli_chr05 | 7359610                 | AA                              | GG              | 1946843100               |
| SNP_P4_69911_7359680 | NC_021164.1    | Ca_kabuli_chr05 | 7359680                 | AA                              | CC              | 1946843102               |
| SNP_P4_69912_7359709 | NC_021164.1    | Ca_kabuli_chr05 | 7359709                 | AA                              | GG              | 1946843104               |
| SNP_P4_69913_7359715 | NC_021164.1    | Ca_kabuli_chr05 | 7359715                 | CC                              | TT              | 1946843106               |
| SNP_P4_69914_7359725 | NC_021164.1    | Ca_kabuli_chr05 | 7359725                 | GG                              | TT              | 1946843108               |
| SNP_P4_69915_7359738 | NC_021164.1    | Ca_kabuli_chr05 | 7359738                 | TT                              | GG              | 1946843110               |
| SNP_P4_69916_7359769 | NC_021164.1    | Ca_kabuli_chr05 | 7359769                 | GG                              | AA              | 1946843112               |
| SNP_P4_69917_7365464 | NC_021164.1    | Ca_kabuli_chr05 | 7365464                 | TT                              | CC              | 1946843114               |
| SNP_P4_69918_7385679 | NC_021164.1    | Ca_kabuli_chr05 | 7385679                 | TT                              | AA              | 1946843116               |
| SNP_P4_69919_7388214 | NC_021164.1    | Ca_kabuli_chr05 | 7388214                 | GG                              | TT              | 1946843118               |
| SNP_P4_69920_7404116 | NC_021164.1    | Ca_kabuli_chr05 | 7404116                 | TT                              | GG              | 1946843120               |
| SNP_P4_69921_7448892 | NC_021164.1    | Ca_kabuli_chr05 | 7448892                 | AA                              | TT              | 1946843122               |
| SNP_P4_69922_7464834 | NC_021164.1    | Ca_kabuli_chr05 | 7464834                 | AA                              | GG              | 1946843124               |
| SNP_P4_69923_7498661 | NC_021164.1    | Ca_kabuli_chr05 | 7498661                 | CC                              | TT              | 1946843126               |
| SNP_P4_69924_7502924 | NC_021164.1    | Ca_kabuli_chr05 | 7502924                 | AA                              | CC              | 1946843128               |
| SNP_P4_69925_7503398 | NC_021164.1    | Ca_kabuli_chr05 | 7503398                 | AA                              | GG              | 1946843130               |
| SNP_P4_69926_7503444 | NC_021164.1    | Ca_kabuli_chr05 | 7503444                 | CC                              | TT              | 1946843132               |
| SNP_P4_69927_7509287 | NC_021164.1    | Ca_kabuli_chr05 | 7509287                 | AA                              | CC              | 1946843134               |
| SNP_P4_69928_7519387 | NC_021164.1    | Ca_kabuli_chr05 | 7519387                 | TT                              | CC              | 1946843136               |
| SNP_P4_69929_7519563 | NC_021164.1    | Ca_kabuli_chr05 | 7519563                 | GG                              | TT              | 1946843138               |
| SNP_P4_69932_7564906 | NC_021164.1    | Ca_kabuli_chr05 | 7564906                 | GG                              | AA              | 1946843140               |
| SNP_P4_69933_7569503 | NC_021164.1    | Ca_kabuli_chr05 | 7569503                 | AA                              | CC              | 1946843142               |
| SNP_P4_69934_7584380 | NC_021164.1    | Ca_kabuli_chr05 | 7584380                 | AA                              | CC              | 1946843144               |
| SNP_P4_69935_7602670 | NC_021164.1    | Ca_kabuli_chr05 | 7602670                 | CC                              | TT              | 1946843146               |
| SNP_P4_69936_7602678 | NC_021164.1    | Ca_kabuli_chr05 | 7602678                 | AA                              | CC              | 1946843148               |
| SNP_P4_69937_7617640 | NC_021164.1    | Ca_kabuli_chr05 | 7617640                 | GG                              | CC              | 1946843150               |



| SNPs IDs             | Chromosome IDs | Chromosomes     | Physical positions (bp) | CDC Frontier (Reference genome) | (ILWC46 & LPNB) | NCBI SNPdb Accession IDs |
|----------------------|----------------|-----------------|-------------------------|---------------------------------|-----------------|--------------------------|
| SNP_P4_69938_7624127 | NC_021164.1    | Ca_kabuli_chr05 | 7624127                 | GG                              | AA              | 1946843152               |
| SNP_P4_69940_7647035 | NC_021164.1    | Ca_kabuli_chr05 | 7647035                 | AA                              | GG              | 1946843154               |
| SNP_P4_69941_7648988 | NC_021164.1    | Ca_kabuli_chr05 | 7648988                 | TT                              | CC              | 1946843156               |
| SNP_P4_69942_7649078 | NC_021164.1    | Ca_kabuli_chr05 | 7649078                 | GG                              | AA              | 1946843158               |
| SNP_P4_69943_7649112 | NC_021164.1    | Ca_kabuli_chr05 | 7649112                 | CC                              | TT              | 1946843160               |
| SNP_P4_69944_7649114 | NC_021164.1    | Ca_kabuli_chr05 | 7649114                 | GG                              | AA              | 1946843162               |
| SNP_P4_69945_7654385 | NC_021164.1    | Ca_kabuli_chr05 | 7654385                 | TT                              | CC              | 1946843164               |
| SNP_P4_69946_7655024 | NC_021164.1    | Ca_kabuli_chr05 | 7655024                 | TT                              | CC              | 1946843166               |
| SNP_P4_69947_7688085 | NC_021164.1    | Ca_kabuli_chr05 | 7688085                 | GG                              | TT              | 1946843168               |
| SNP_P4_69948_7701490 | NC_021164.1    | Ca_kabuli_chr05 | 7701490                 | GG                              | AA              | 1946843170               |
| SNP_P4_69949_7701503 | NC_021164.1    | Ca_kabuli_chr05 | 7701503                 | TT                              | CC              | 1946843172               |
| SNP_P4_69950_7702329 | NC_021164.1    | Ca_kabuli_chr05 | 7702329                 | GG                              | AA              | 1946843174               |
| SNP_P4_69951_7705480 | NC_021164.1    | Ca_kabuli_chr05 | 7705480                 | AA                              | TT              | 1946843176               |
| SNP_P4_69952_7707391 | NC_021164.1    | Ca_kabuli_chr05 | 7707391                 | GG                              | TT              | 1946843178               |
| SNP_P4_69953_7707392 | NC_021164.1    | Ca_kabuli_chr05 | 7707392                 | AA                              | TT              | 1946843180               |
| SNP_P4_69954_7707511 | NC_021164.1    | Ca_kabuli_chr05 | 7707511                 | TT                              | AA              | 1946843182               |
| SNP_P4_69955_7707536 | NC_021164.1    | Ca_kabuli_chr05 | 7707536                 | AA                              | GG              | 1946843184               |
| SNP_P4_69956_7707558 | NC_021164.1    | Ca_kabuli_chr05 | 7707558                 | AA                              | GG              | 1946843186               |
| SNP_P4_69957_7707569 | NC_021164.1    | Ca_kabuli_chr05 | 7707569                 | AA                              | CC              | 1946843188               |
| SNP_P4_69958_7707599 | NC_021164.1    | Ca_kabuli_chr05 | 7707599                 | TT                              | CC              | 1946843190               |
| SNP_P4_69959_7707637 | NC_021164.1    | Ca_kabuli_chr05 | 7707637                 | AA                              | GG              | 1946843192               |
| SNP_P4_69960_7707650 | NC_021164.1    | Ca_kabuli_chr05 | 7707650                 | AA                              | CC              | 1946843194               |
| SNP_P4_69961_7707665 | NC_021164.1    | Ca_kabuli_chr05 | 7707665                 | AA                              | GG              | 1946843196               |
| SNP_P4_69962_7708050 | NC_021164.1    | Ca_kabuli_chr05 | 7708050                 | GG                              | CC              | 1946843198               |
| SNP_P4_69963_7710685 | NC_021164.1    | Ca_kabuli_chr05 | 7710685                 | GG                              | AA              | 1946843200               |
| SNP_P4_69964_7710692 | NC_021164.1    | Ca_kabuli_chr05 | 7710692                 | GG                              | AA              | 1946843202               |
| SNP_P4_69966_7728228 | NC_021164.1    | Ca_kabuli_chr05 | 7728228                 | CC                              | TT              | 1946843204               |
| SNP_P4_69967_7751934 | NC_021164.1    | Ca_kabuli_chr05 | 7751934                 | CC                              | TT              | 1946843206               |
| SNP_P4_69968_7751961 | NC_021164.1    | Ca_kabuli_chr05 | 7751961                 | AA                              | TT              | 1946843208               |
| SNP_P4_69969_7752108 | NC_021164.1    | Ca_kabuli_chr05 | 7752108                 | AA                              | GG              | 1946843210               |
| SNP_P4_69970_7752256 | NC_021164.1    | Ca_kabuli_chr05 | 7752256                 | GG                              | AA              | 1946843212               |
| SNP_P4_69971_7752284 | NC_021164.1    | Ca_kabuli_chr05 | 7752284                 | TT                              | AA              | 1946843214               |
| SNP_P4_69972_7752321 | NC_021164.1    | Ca_kabuli_chr05 | 7752321                 | CC                              | TT              | 1946843216               |
| SNP_P4_69973_7775038 | NC_021164.1    | Ca_kabuli_chr05 | 7775038                 | TT                              | CC              | 1946843218               |
| SNP_P4_69974_7775055 | NC_021164.1    | Ca_kabuli_chr05 | 7775055                 | GG                              | AA              | 1946843220               |
| SNP_P4_69975_7775065 | NC_021164.1    | Ca_kabuli_chr05 | 7775065                 | AA                              | CC              | 1946843222               |
| SNP_P4_69976_7775100 | NC_021164.1    | Ca_kabuli_chr05 | 7775100                 | GG                              | AA              | 1946843224               |
| SNP_P4_69977_7775122 | NC_021164.1    | Ca_kabuli_chr05 | 7775122                 | TT                              | CC              | 1946843226               |
| SNP_P4_69978_7775123 | NC_021164.1    | Ca_kabuli_chr05 | 7775123                 | TT                              | GG              | 1946843228               |
| SNP_P4_69979_7775172 | NC_021164.1    | Ca_kabuli_chr05 | 7775172                 | TT                              | CC              | 1946843230               |
| SNP_P4_69980_7775219 | NC_021164.1    | Ca_kabuli_chr05 | 7775219                 | CC                              | GG              | 1946843232               |
| SNP_P4_69981_7775298 | NC_021164.1    | Ca_kabuli_chr05 | 7775298                 | AA                              | TT              | 1946843234               |

| SNPs IDs             | Chromosome IDs | Chromosomes     | Physical positions (bp) | CDC Frontier (Reference genome) | (ILWC46 & LPNB) | NCBI SNPdb Accession IDs |
|----------------------|----------------|-----------------|-------------------------|---------------------------------|-----------------|--------------------------|
| SNP_P4_69982_7775375 | NC_021164.1    | Ca_kabuli_chr05 | 7775375                 | GG                              | AA              | 1946843236               |
| SNP_P4_69983_7775426 | NC_021164.1    | Ca_kabuli_chr05 | 7775426                 | GG                              | TT              | 1946843238               |
| SNP_P4_69984_7775456 | NC_021164.1    | Ca_kabuli_chr05 | 7775456                 | TT                              | CC              | 1946843240               |
| SNP_P4_69985_7775472 | NC_021164.1    | Ca_kabuli_chr05 | 7775472                 | GG                              | AA              | 1946843242               |
| SNP_P4_69986_7775497 | NC_021164.1    | Ca_kabuli_chr05 | 7775497                 | GG                              | CC              | 1946843243               |
| SNP_P4_69987_7775516 | NC_021164.1    | Ca_kabuli_chr05 | 7775516                 | AA                              | GG              | 1946843245               |
| SNP_P4_69989_7796712 | NC_021164.1    | Ca_kabuli_chr05 | 7796712                 | AA                              | TT              | 1946843247               |
| SNP_P4_69990_7802501 | NC_021164.1    | Ca_kabuli_chr05 | 7802501                 | TT                              | GG              | 1946843249               |
| SNP_P4_69991_7802979 | NC_021164.1    | Ca_kabuli_chr05 | 7802979                 | GG                              | AA              | 1946843251               |
| SNP_P4_69992_7805208 | NC_021164.1    | Ca_kabuli_chr05 | 7805208                 | TT                              | AA              | 1946843253               |
| SNP_P4_69993_7808088 | NC_021164.1    | Ca_kabuli_chr05 | 7808088                 | GG                              | TT              | 1946843255               |
| SNP_P4_69994_7808148 | NC_021164.1    | Ca_kabuli_chr05 | 7808148                 | CC                              | AA              | 1946843257               |
| SNP_P4_69995_7808154 | NC_021164.1    | Ca_kabuli_chr05 | 7808154                 | CC                              | TT              | 1946843259               |
| SNP_P4_69996_7808179 | NC_021164.1    | Ca_kabuli_chr05 | 7808179                 | TT                              | CC              | 1946843261               |
| SNP_P4_69997_7808407 | NC_021164.1    | Ca_kabuli_chr05 | 7808407                 | TT                              | AA              | 1946843263               |
| SNP_P4_69998_7823450 | NC_021164.1    | Ca_kabuli_chr05 | 7823450                 | GG                              | AA              | 1946843265               |
| SNP_P4_69999_7823487 | NC_021164.1    | Ca_kabuli_chr05 | 7823487                 | AA                              | GG              | 1946843267               |
| SNP_P4_70000_7823515 | NC_021164.1    | Ca_kabuli_chr05 | 7823515                 | CC                              | AA              | 1946843269               |
| SNP_P4_70001_7825517 | NC_021164.1    | Ca_kabuli_chr05 | 7825517                 | AA                              | GG              | 1946843271               |
| SNP_P4_70002_7829309 | NC_021164.1    | Ca_kabuli_chr05 | 7829309                 | AA                              | TT              | 1946843273               |
| SNP_P4_70003_7829311 | NC_021164.1    | Ca_kabuli_chr05 | 7829311                 | TT                              | AA              | 1946843275               |
| SNP_P4_70004_7829312 | NC_021164.1    | Ca_kabuli_chr05 | 7829312                 | TT                              | AA              | 1946843276               |
| SNP_P4_70005_7842160 | NC_021164.1    | Ca_kabuli_chr05 | 7842160                 | GG                              | AA              | 1946843278               |
| SNP_P4_70006_7846192 | NC_021164.1    | Ca_kabuli_chr05 | 7846192                 | CC                              | AA              | 1946843280               |
| SNP_P4_70008_7875689 | NC_021164.1    | Ca_kabuli_chr05 | 7875689                 | CC                              | TT              | 1946843282               |
| SNP_P4_70009_7879133 | NC_021164.1    | Ca_kabuli_chr05 | 7879133                 | TT                              | CC              | 1946843284               |
| SNP_P4_70010_7883611 | NC_021164.1    | Ca_kabuli_chr05 | 7883611                 | TT                              | CC              | 1946843286               |
| SNP_P4_70011_7885167 | NC_021164.1    | Ca_kabuli_chr05 | 7885167                 | AA                              | CC              | 1946843288               |
| SNP_P4_70013_7907286 | NC_021164.1    | Ca_kabuli_chr05 | 7907286                 | GG                              | CC              | 1946843290               |
| SNP_P4_70015_7928311 | NC_021164.1    | Ca_kabuli_chr05 | 7928311                 | GG                              | CC              | 1946843292               |
| SNP_P4_70016_7929683 | NC_021164.1    | Ca_kabuli_chr05 | 7929683                 | AA                              | GG              | 1946843294               |
| SNP_P4_70018_7929805 | NC_021164.1    | Ca_kabuli_chr05 | 7929805                 | AA                              | TT              | 1946843296               |
| SNP_P4_70019_7929826 | NC_021164.1    | Ca_kabuli_chr05 | 7929826                 | CC                              | AA              | 1946843298               |
| SNP_P4_70020_7930070 | NC_021164.1    | Ca_kabuli_chr05 | 7930070                 | GG                              | AA              | 1946843300               |
| SNP_P4_70021_7930096 | NC_021164.1    | Ca_kabuli_chr05 | 7930096                 | AA                              | GG              | 1946843302               |
| SNP_P4_70022_7930155 | NC_021164.1    | Ca_kabuli_chr05 | 7930155                 | AA                              | GG              | 1946843304               |
| SNP_P4_70023_7936996 | NC_021164.1    | Ca_kabuli_chr05 | 7936996                 | GG                              | AA              | 1946843306               |
| SNP_P4_70025_7937570 | NC_021164.1    | Ca_kabuli_chr05 | 7937570                 | AA                              | CC              | 1946843308               |
| SNP_P4_70026_7937594 | NC_021164.1    | Ca_kabuli_chr05 | 7937594                 | CC                              | AA              | 1946843310               |
| SNP_P4_70027_7937607 | NC_021164.1    | Ca_kabuli_chr05 | 7937607                 | AA                              | GG              | 1946843313               |
| SNP_P4_70028_7940728 | NC_021164.1    | Ca_kabuli_chr05 | 7940728                 | TT                              | CC              | 1946843315               |
| SNP_P4_70029_7940797 | NC_021164.1    | Ca_kabuli_chr05 | 7940797                 | TT                              | CC              | 1946843317               |

| SNPs IDs             | Chromosome IDs | Chromosomes     | Physical positions (bp) | CDC Frontier (Reference genome) | (ILWC46 & LPNB) | NCBI SNPdb Accession IDs |
|----------------------|----------------|-----------------|-------------------------|---------------------------------|-----------------|--------------------------|
| SNP_P4_70030_7941007 | NC_021164.1    | Ca_kabuli_chr05 | 7941007                 | GG                              | AA              | 1946843319               |
| SNP_P4_70032_7941072 | NC_021164.1    | Ca_kabuli_chr05 | 7941072                 | AA                              | GG              | 1946843321               |
| SNP_P4_70033_7941361 | NC_021164.1    | Ca_kabuli_chr05 | 7941361                 | CC                              | TT              | 1946843323               |
| SNP_P4_70034_7941440 | NC_021164.1    | Ca_kabuli_chr05 | 7941440                 | TT                              | AA              | 1946843325               |
| SNP_P4_70035_7941907 | NC_021164.1    | Ca_kabuli_chr05 | 7941907                 | GG                              | TT              | 1946843327               |
| SNP_P4_70036_7947631 | NC_021164.1    | Ca_kabuli_chr05 | 7947631                 | AA                              | GG              | 1946843329               |
| SNP_P4_70037_7947836 | NC_021164.1    | Ca_kabuli_chr05 | 7947836                 | TT                              | CC              | 1946843331               |
| SNP_P4_70038_7983428 | NC_021164.1    | Ca_kabuli_chr05 | 7983428                 | CC                              | TT              | 1946843333               |
| SNP_P4_70039_8035539 | NC_021164.1    | Ca_kabuli_chr05 | 8035539                 | TT                              | CC              | 1946843335               |
| SNP_P4_70040_8035642 | NC_021164.1    | Ca_kabuli_chr05 | 8035642                 | CC                              | TT              | 1946843337               |
| SNP_P4_70042_8040292 | NC_021164.1    | Ca_kabuli_chr05 | 8040292                 | AA                              | GG              | 1946843339               |
| SNP_P4_70043_8040389 | NC_021164.1    | Ca_kabuli_chr05 | 8040389                 | TT                              | CC              | 1946843341               |
| SNP_P4_70044_8040438 | NC_021164.1    | Ca_kabuli_chr05 | 8040438                 | TT                              | CC              | 1946843343               |
| SNP_P4_70045_8040483 | NC_021164.1    | Ca_kabuli_chr05 | 8040483                 | AA                              | GG              | 1946843345               |
| SNP_P4_70046_8040643 | NC_021164.1    | Ca_kabuli_chr05 | 8040643                 | TT                              | GG              | 1946843347               |
| SNP_P4_70047_8040673 | NC_021164.1    | Ca_kabuli_chr05 | 8040673                 | CC                              | GG              | 1946843349               |
| SNP_P4_70048_8040703 | NC_021164.1    | Ca_kabuli_chr05 | 8040703                 | TT                              | GG              | 1946843351               |
| SNP_P4_70049_8051471 | NC_021164.1    | Ca_kabuli_chr05 | 8051471                 | AA                              | CC              | 1946843353               |
| SNP_P4_70050_8053087 | NC_021164.1    | Ca_kabuli_chr05 | 8053087                 | AA                              | CC              | 1946843355               |
| SNP_P4_70051_8061494 | NC_021164.1    | Ca_kabuli_chr05 | 8061494                 | TT                              | CC              | 1946843357               |
| SNP_P4_70053_8126915 | NC_021164.1    | Ca_kabuli_chr05 | 8126915                 | AA                              | GG              | 1946843359               |
| SNP_P4_70055_8135924 | NC_021164.1    | Ca_kabuli_chr05 | 8135924                 | GG                              | CC              | 1946843361               |
| SNP_P4_70056_8138709 | NC_021164.1    | Ca_kabuli_chr05 | 8138709                 | AA                              | CC              | 1946843363               |
| SNP_P4_70057_8138733 | NC_021164.1    | Ca_kabuli_chr05 | 8138733                 | TT                              | CC              | 1946843365               |
| SNP_P4_70058_8161065 | NC_021164.1    | Ca_kabuli_chr05 | 8161065                 | AA                              | TT              | 1946843367               |
| SNP_P4_70059_8163698 | NC_021164.1    | Ca_kabuli_chr05 | 8163698                 | GG                              | AA              | 1946843369               |
| SNP_P4_70060_8163708 | NC_021164.1    | Ca_kabuli_chr05 | 8163708                 | TT                              | CC              | 1946843371               |
| SNP_P4_70061_8163713 | NC_021164.1    | Ca_kabuli_chr05 | 8163713                 | GG                              | AA              | 1946843373               |
| SNP_P4_70062_8164000 | NC_021164.1    | Ca_kabuli_chr05 | 8164000                 | CC                              | TT              | 1946843375               |
| SNP_P4_70063_8164003 | NC_021164.1    | Ca_kabuli_chr05 | 8164003                 | CC                              | TT              | 1946843377               |
| SNP_P4_70064_8164006 | NC_021164.1    | Ca_kabuli_chr05 | 8164006                 | AA                              | GG              | 1946843379               |
| SNP_P4_70065_8164630 | NC_021164.1    | Ca_kabuli_chr05 | 8164630                 | AA                              | GG              | 1946843381               |
| SNP_P4_70066_8164632 | NC_021164.1    | Ca_kabuli_chr05 | 8164632                 | AA                              | TT              | 1946843383               |
| SNP_P4_70067_8164726 | NC_021164.1    | Ca_kabuli_chr05 | 8164726                 | AA                              | TT              | 1946843385               |
| SNP_P4_70068_8167029 | NC_021164.1    | Ca_kabuli_chr05 | 8167029                 | AA                              | TT              | 1946843387               |
| SNP_P4_70069_8173546 | NC_021164.1    | Ca_kabuli_chr05 | 8173546                 | CC                              | TT              | 1946843389               |
| SNP_P4_70070_8185966 | NC_021164.1    | Ca_kabuli_chr05 | 8185966                 | AA                              | GG              | 1946843391               |
| SNP_P4_70071_8186229 | NC_021164.1    | Ca_kabuli_chr05 | 8186229                 | CC                              | TT              | 1946843393               |
| SNP_P4_70072_8186271 | NC_021164.1    | Ca_kabuli_chr05 | 8186271                 | TT                              | GG              | 1946843395               |
| SNP_P4_70073_8186585 | NC_021164.1    | Ca_kabuli_chr05 | 8186585                 | TT                              | GG              | 1946843397               |
| SNP_P4_70074_8186631 | NC_021164.1    | Ca_kabuli_chr05 | 8186631                 | GG                              | CC              | 1946843399               |
| SNP_P4_70075_8198094 | NC_021164.1    | Ca_kabuli_chr05 | 8198094                 | GG                              | TT              | 1946843401               |

| SNPs IDs             | Chromosome IDs | Chromosomes     | Physical positions (bp) | CDC Frontier (Reference genome) | (ILWC46 & LPNB) | NCBI SNPdb Accession IDs |
|----------------------|----------------|-----------------|-------------------------|---------------------------------|-----------------|--------------------------|
| SNP_P4_70076_8198483 | NC_021164.1    | Ca_kabuli_chr05 | 8198483                 | TT                              | AA              | 1946843403               |
| SNP_P4_70077_8198563 | NC_021164.1    | Ca_kabuli_chr05 | 8198563                 | CC                              | TT              | 1946843405               |
| SNP_P4_70078_8210305 | NC_021164.1    | Ca_kabuli_chr05 | 8210305                 | TT                              | CC              | 1946843407               |
| SNP_P4_70079_8222906 | NC_021164.1    | Ca_kabuli_chr05 | 8222906                 | GG                              | AA              | 1946843409               |
| SNP_P4_70080_8222914 | NC_021164.1    | Ca_kabuli_chr05 | 8222914                 | AA                              | GG              | 1946843411               |
| SNP_P4_70082_8231875 | NC_021164.1    | Ca_kabuli_chr05 | 8231875                 | TT                              | GG              | 1946843413               |
| SNP_P4_70083_8231904 | NC_021164.1    | Ca_kabuli_chr05 | 8231904                 | CC                              | AA              | 1946843415               |
| SNP_P4_70084_8233337 | NC_021164.1    | Ca_kabuli_chr05 | 8233337                 | TT                              | CC              | 1946843418               |
| SNP_P4_70085_8241170 | NC_021164.1    | Ca_kabuli_chr05 | 8241170                 | TT                              | AA              | 1946843420               |
| SNP_P4_70086_8241625 | NC_021164.1    | Ca_kabuli_chr05 | 8241625                 | GG                              | AA              | 1946843421               |
| SNP_P4_70087_8241683 | NC_021164.1    | Ca_kabuli_chr05 | 8241683                 | CC                              | TT              | 1946843423               |
| SNP_P4_70088_8241727 | NC_021164.1    | Ca_kabuli_chr05 | 8241727                 | CC                              | TT              | 1946843425               |
| SNP_P4_70090_8241850 | NC_021164.1    | Ca_kabuli_chr05 | 8241850                 | GG                              | AA              | 1946843427               |
| SNP_P4_70091_8259061 | NC_021164.1    | Ca_kabuli_chr05 | 8259061                 | CC                              | AA              | 1946843429               |
| SNP_P4_70093_8263214 | NC_021164.1    | Ca_kabuli_chr05 | 8263214                 | CC                              | TT              | 1946843431               |
| SNP_P4_70094_8263249 | NC_021164.1    | Ca_kabuli_chr05 | 8263249                 | TT                              | CC              | 1946843433               |
| SNP_P4_70095_8263304 | NC_021164.1    | Ca_kabuli_chr05 | 8263304                 | AA                              | GG              | 1946843435               |
| SNP_P4_70096_8263310 | NC_021164.1    | Ca_kabuli_chr05 | 8263310                 | AA                              | TT              | 1946843437               |
| SNP_P4_70097_8263421 | NC_021164.1    | Ca_kabuli_chr05 | 8263421                 | CC                              | TT              | 1946843439               |
| SNP_P4_70098_8263447 | NC_021164.1    | Ca_kabuli_chr05 | 8263447                 | AA                              | TT              | 1946843441               |
| SNP_P4_70099_8263483 | NC_021164.1    | Ca_kabuli_chr05 | 8263483                 | GG                              | AA              | 1946843443               |
| SNP_P4_70100_8263617 | NC_021164.1    | Ca_kabuli_chr05 | 8263617                 | AA                              | GG              | 1946843445               |
| SNP_P4_70101_8263624 | NC_021164.1    | Ca_kabuli_chr05 | 8263624                 | TT                              | GG              | 1946843447               |
| SNP_P4_70102_8263625 | NC_021164.1    | Ca_kabuli_chr05 | 8263625                 | AA                              | TT              | 1946843449               |
| SNP_P4_70103_8263631 | NC_021164.1    | Ca_kabuli_chr05 | 8263631                 | TT                              | GG              | 1946843451               |
| SNP_P4_70104_8263633 | NC_021164.1    | Ca_kabuli_chr05 | 8263633                 | CC                              | AA              | 1946843453               |
| SNP_P4_70105_8264941 | NC_021164.1    | Ca_kabuli_chr05 | 8264941                 | CC                              | AA              | 1946843455               |
| SNP_P4_70106_8264942 | NC_021164.1    | Ca_kabuli_chr05 | 8264942                 | GG                              | AA              | 1946843457               |
| SNP_P4_70107_8265721 | NC_021164.1    | Ca_kabuli_chr05 | 8265721                 | AA                              | CC              | 1946843459               |
| SNP_P4_70108_8272853 | NC_021164.1    | Ca_kabuli_chr05 | 8272853                 | AA                              | GG              | 1946843461               |
| SNP_P4_70109_8274839 | NC_021164.1    | Ca_kabuli_chr05 | 8274839                 | GG                              | AA              | 1946843463               |
| SNP_P4_70110_8278870 | NC_021164.1    | Ca_kabuli_chr05 | 8278870                 | TT                              | CC              | 1946843465               |
| SNP_P4_70111_8278876 | NC_021164.1    | Ca_kabuli_chr05 | 8278876                 | CC                              | TT              | 1946843467               |
| SNP_P4_70112_8281099 | NC_021164.1    | Ca_kabuli_chr05 | 8281099                 | CC                              | TT              | 1946843469               |
| SNP_P4_70113_8281390 | NC_021164.1    | Ca_kabuli_chr05 | 8281390                 | CC                              | TT              | 1946843471               |
| SNP_P4_70114_8284074 | NC_021164.1    | Ca_kabuli_chr05 | 8284074                 | TT                              | CC              | 1946843473               |
| SNP_P4_70115_8284168 | NC_021164.1    | Ca_kabuli_chr05 | 8284168                 | AA                              | CC              | 1946843475               |
| SNP_P4_70116_8293302 | NC_021164.1    | Ca_kabuli_chr05 | 8293302                 | TT                              | CC              | 1946843477               |
| SNP_P4_70117_8293325 | NC_021164.1    | Ca_kabuli_chr05 | 8293325                 | TT                              | AA              | 1946843479               |
| SNP_P4_70118_8293354 | NC_021164.1    | Ca_kabuli_chr05 | 8293354                 | TT                              | AA              | 1946843481               |
| SNP_P4_70119_8293355 | NC_021164.1    | Ca_kabuli_chr05 | 8293355                 | TT                              | CC              | 1946843483               |
| SNP_P4_70120_8293444 | NC_021164.1    | Ca_kabuli_chr05 | 8293444                 | CC                              | TT              | 1946843485               |

| SNPs IDs             | Chromosome IDs | Chromosomes     | Physical positions (bp) | CDC Frontier (Reference genome) | (ILWC46 & LPNB) | NCBI SNPdb Accession IDs |
|----------------------|----------------|-----------------|-------------------------|---------------------------------|-----------------|--------------------------|
| SNP_P4_70121_8293468 | NC_021164.1    | Ca_kabuli_chr05 | 8293468                 | TT                              | CC              | 1946843487               |
| SNP_P4_70122_8293510 | NC_021164.1    | Ca_kabuli_chr05 | 8293510                 | CC                              | TT              | 1946843489               |
| SNP_P4_70123_8293519 | NC_021164.1    | Ca_kabuli_chr05 | 8293519                 | TT                              | AA              | 1946843491               |
| SNP_P4_70124_8293520 | NC_021164.1    | Ca_kabuli_chr05 | 8293520                 | AA                              | GG              | 1946843493               |
| SNP_P4_70125_8293559 | NC_021164.1    | Ca_kabuli_chr05 | 8293559                 | GG                              | AA              | 1946843495               |
| SNP_P4_70126_8293572 | NC_021164.1    | Ca_kabuli_chr05 | 8293572                 | GG                              | AA              | 1946843497               |
| SNP_P4_70127_8309158 | NC_021164.1    | Ca_kabuli_chr05 | 8309158                 | GG                              | AA              | 1946843499               |
| SNP_P4_70128_8309180 | NC_021164.1    | Ca_kabuli_chr05 | 8309180                 | TT                              | GG              | 1946843501               |
| SNP_P4_70130_8314228 | NC_021164.1    | Ca_kabuli_chr05 | 8314228                 | AA                              | GG              | 1946843503               |
| SNP_P4_70131_8314239 | NC_021164.1    | Ca_kabuli_chr05 | 8314239                 | GG                              | AA              | 1946843505               |
| SNP_P4_70133_8314353 | NC_021164.1    | Ca_kabuli_chr05 | 8314353                 | CC                              | TT              | 1946843507               |
| SNP_P4_70134_8314359 | NC_021164.1    | Ca_kabuli_chr05 | 8314359                 | TT                              | CC              | 1946843509               |
| SNP_P4_70135_8314368 | NC_021164.1    | Ca_kabuli_chr05 | 8314368                 | CC                              | GG              | 1946843511               |
| SNP_P4_70136_8314395 | NC_021164.1    | Ca_kabuli_chr05 | 8314395                 | CC                              | TT              | 1946843513               |
| SNP_P4_70137_8314448 | NC_021164.1    | Ca_kabuli_chr05 | 8314448                 | TT                              | CC              | 1946843515               |
| SNP_P4_70138_8314475 | NC_021164.1    | Ca_kabuli_chr05 | 8314475                 | AA                              | GG              | 1946843517               |
| SNP_P4_70139_8342054 | NC_021164.1    | Ca_kabuli_chr05 | 8342054                 | GG                              | CC              | 1946843519               |
| SNP_P4_70141_8346490 | NC_021164.1    | Ca_kabuli_chr05 | 8346490                 | TT                              | GG              | 1946843520               |
| SNP_P4_70142_8346564 | NC_021164.1    | Ca_kabuli_chr05 | 8346564                 | TT                              | CC              | 1946843522               |
| SNP_P4_70143_8346573 | NC_021164.1    | Ca_kabuli_chr05 | 8346573                 | TT                              | AA              | 1946843524               |
| SNP_P4_70144_8346584 | NC_021164.1    | Ca_kabuli_chr05 | 8346584                 | TT                              | CC              | 1946843526               |
| SNP_P4_70145_8346607 | NC_021164.1    | Ca_kabuli_chr05 | 8346607                 | AA                              | GG              | 1946843528               |
| SNP_P4_70146_8361410 | NC_021164.1    | Ca_kabuli_chr05 | 8361410                 | TT                              | CC              | 1946843530               |
| SNP_P4_70147_8361879 | NC_021164.1    | Ca_kabuli_chr05 | 8361879                 | CC                              | TT              | 1946843532               |
| SNP_P4_70148_8361910 | NC_021164.1    | Ca_kabuli_chr05 | 8361910                 | CC                              | TT              | 1946843534               |
| SNP_P4_70149_8361985 | NC_021164.1    | Ca_kabuli_chr05 | 8361985                 | AA                              | TT              | 1946843536               |
| SNP_P4_70150_8362605 | NC_021164.1    | Ca_kabuli_chr05 | 8362605                 | CC                              | AA              | 1946843538               |
| SNP_P4_70151_8373567 | NC_021164.1    | Ca_kabuli_chr05 | 8373567                 | CC                              | TT              | 1946843540               |
| SNP_P4_70152_8387088 | NC_021164.1    | Ca_kabuli_chr05 | 8387088                 | GG                              | AA              | 1946843542               |
| SNP_P4_70153_8387195 | NC_021164.1    | Ca_kabuli_chr05 | 8387195                 | TT                              | GG              | 1946843544               |
| SNP_P4_70154_8410498 | NC_021164.1    | Ca_kabuli_chr05 | 8410498                 | TT                              | CC              | 1946843546               |
| SNP_P4_70155_8410905 | NC_021164.1    | Ca_kabuli_chr05 | 8410905                 | AA                              | CC              | 1946843548               |
| SNP_P4_70156_8412370 | NC_021164.1    | Ca_kabuli_chr05 | 8412370                 | AA                              | CC              | 1946843550               |
| SNP_P4_70157_8412373 | NC_021164.1    | Ca_kabuli_chr05 | 8412373                 | AA                              | CC              | 1946843552               |
| SNP_P4_70158_8412415 | NC_021164.1    | Ca_kabuli_chr05 | 8412415                 | GG                              | TT              | 1946843554               |
| SNP_P4_70159_8413204 | NC_021164.1    | Ca_kabuli_chr05 | 8413204                 | AA                              | TT              | 1946843556               |
| SNP_P4_70160_8413487 | NC_021164.1    | Ca_kabuli_chr05 | 8413487                 | AA                              | GG              | 1946843558               |
| SNP_P4_70161_8413754 | NC_021164.1    | Ca_kabuli_chr05 | 8413754                 | CC                              | TT              | 1946843560               |
| SNP_P4_70162_8413758 | NC_021164.1    | Ca_kabuli_chr05 | 8413758                 | GG                              | AA              | 1946843562               |
| SNP_P4_70163_8473090 | NC_021164.1    | Ca_kabuli_chr05 | 8473090                 | TT                              | AA              | 1946843564               |
| SNP_P4_70164_8478056 | NC_021164.1    | Ca_kabuli_chr05 | 8478056                 | GG                              | AA              | 1946843566               |
| SNP_P4_70165_8480965 | NC_021164.1    | Ca_kabuli_chr05 | 8480965                 | TT                              | CC              | 1946843568               |

| SNPs IDs             | Chromosome IDs | Chromosomes     | Physical positions (bp) | CDC Frontier (Reference genome) | (ILWC46 & LPNB) | NCBI SNPdb Accession IDs |
|----------------------|----------------|-----------------|-------------------------|---------------------------------|-----------------|--------------------------|
| SNP_P4_70166_8483257 | NC_021164.1    | Ca_kabuli_chr05 | 8483257                 | AA                              | TT              | 1946843570               |
| SNP_P4_70167_8483283 | NC_021164.1    | Ca_kabuli_chr05 | 8483283                 | CC                              | AA              | 1946843572               |
| SNP_P4_70168_8485517 | NC_021164.1    | Ca_kabuli_chr05 | 8485517                 | CC                              | AA              | 1946843574               |
| SNP_P4_70169_8485640 | NC_021164.1    | Ca_kabuli_chr05 | 8485640                 | AA                              | GG              | 1946843576               |
| SNP_P4_70170_8485665 | NC_021164.1    | Ca_kabuli_chr05 | 8485665                 | GG                              | AA              | 1946843578               |
| SNP_P4_70171_8485797 | NC_021164.1    | Ca_kabuli_chr05 | 8485797                 | GG                              | CC              | 1946843580               |
| SNP_P4_70172_8485909 | NC_021164.1    | Ca_kabuli_chr05 | 8485909                 | AA                              | GG              | 1946843582               |
| SNP_P4_70173_8485920 | NC_021164.1    | Ca_kabuli_chr05 | 8485920                 | CC                              | TT              | 1946843584               |
| SNP_P4_70174_8485926 | NC_021164.1    | Ca_kabuli_chr05 | 8485926                 | CC                              | GG              | 1946843586               |
| SNP_P4_70175_8485928 | NC_021164.1    | Ca_kabuli_chr05 | 8485928                 | CC                              | TT              | 1946843588               |
| SNP_P4_70176_8485992 | NC_021164.1    | Ca_kabuli_chr05 | 8485992                 | AA                              | GG              | 1946843590               |
| SNP_P4_70177_8486002 | NC_021164.1    | Ca_kabuli_chr05 | 8486002                 | GG                              | AA              | 1946843592               |
| SNP_P4_70178_8496235 | NC_021164.1    | Ca_kabuli_chr05 | 8496235                 | AA                              | CC              | 1946843594               |
| SNP_P4_70179_8500310 | NC_021164.1    | Ca_kabuli_chr05 | 8500310                 | GG                              | AA              | 1946843596               |
| SNP_P4_70180_8500624 | NC_021164.1    | Ca_kabuli_chr05 | 8500624                 | TT                              | AA              | 1946843598               |
| SNP_P4_70181_8512603 | NC_021164.1    | Ca_kabuli_chr05 | 8512603                 | AA                              | GG              | 1946843600               |
| SNP_P4_70182_8512612 | NC_021164.1    | Ca_kabuli_chr05 | 8512612                 | GG                              | AA              | 1946843602               |
| SNP_P4_70183_8531185 | NC_021164.1    | Ca_kabuli_chr05 | 8531185                 | TT                              | AA              | 1946843604               |
| SNP_P4_70184_8536194 | NC_021164.1    | Ca_kabuli_chr05 | 8536194                 | GG                              | AA              | 1946843606               |
| SNP_P4_70185_8559185 | NC_021164.1    | Ca_kabuli_chr05 | 8559185                 | AA                              | GG              | 1946843608               |
| SNP_P4_70186_8568156 | NC_021164.1    | Ca_kabuli_chr05 | 8568156                 | AA                              | GG              | 1946843610               |
| SNP_P4_70187_8582521 | NC_021164.1    | Ca_kabuli_chr05 | 8582521                 | TT                              | GG              | 1946843612               |
| SNP_P4_70188_8582522 | NC_021164.1    | Ca_kabuli_chr05 | 8582522                 | TT                              | GG              | 1946843614               |
| SNP_P4_70190_8599204 | NC_021164.1    | Ca_kabuli_chr05 | 8599204                 | GG                              | AA              | 1946843616               |
| SNP_P4_70192_8741740 | NC_021164.1    | Ca_kabuli_chr05 | 8741740                 | AA                              | GG              | 1946843618               |
| SNP_P4_70194_8764413 | NC_021164.1    | Ca_kabuli_chr05 | 8764413                 | GG                              | AA              | 1946843620               |
| SNP_P4_70195_8766079 | NC_021164.1    | Ca_kabuli_chr05 | 8766079                 | AA                              | TT              | 1946843622               |
| SNP_P4_70196_8766087 | NC_021164.1    | Ca_kabuli_chr05 | 8766087                 | TT                              | GG              | 1946843624               |
| SNP_P4_70197_8766117 | NC_021164.1    | Ca_kabuli_chr05 | 8766117                 | CC                              | TT              | 1946843626               |
| SNP_P4_70198_8766121 | NC_021164.1    | Ca_kabuli_chr05 | 8766121                 | TT                              | AA              | 1946843628               |
| SNP_P4_70199_8766132 | NC_021164.1    | Ca_kabuli_chr05 | 8766132                 | CC                              | TT              | 1946843630               |
| SNP_P4_70201_8805677 | NC_021164.1    | Ca_kabuli_chr05 | 8805677                 | GG                              | AA              | 1946843632               |
| SNP_P4_70202_8805954 | NC_021164.1    | Ca_kabuli_chr05 | 8805954                 | AA                              | CC              | 1946843634               |
| SNP_P4_70203_8805961 | NC_021164.1    | Ca_kabuli_chr05 | 8805961                 | AA                              | CC              | 1946843636               |
| SNP_P4_70204_8805981 | NC_021164.1    | Ca_kabuli_chr05 | 8805981                 | CC                              | TT              | 1946843638               |
| SNP_P4_70205_8805990 | NC_021164.1    | Ca_kabuli_chr05 | 8805990                 | GG                              | AA              | 1946843640               |
| SNP_P4_70206_8806001 | NC_021164.1    | Ca_kabuli_chr05 | 8806001                 | GG                              | AA              | 1946843642               |
| SNP_P4_70207_8806010 | NC_021164.1    | Ca_kabuli_chr05 | 8806010                 | GG                              | AA              | 1946843644               |
| SNP_P4_70208_8806027 | NC_021164.1    | Ca_kabuli_chr05 | 8806027                 | GG                              | AA              | 1946843646               |
| SNP_P4_70209_8806056 | NC_021164.1    | Ca_kabuli_chr05 | 8806056                 | TT                              | CC              | 1946843648               |
| SNP_P4_70210_8807187 | NC_021164.1    | Ca_kabuli_chr05 | 8807187                 | GG                              | AA              | 1946843650               |
| SNP_P4_70211_8807329 | NC_021164.1    | Ca_kabuli_chr05 | 8807329                 | TT                              | CC              | 1946843652               |

| SNPs IDs             | Chromosome IDs | Chromosomes     | Physical positions (bp) | CDC Frontier (Reference genome) | (ILWC46 & LPNB) | NCBI SNPdb Accession IDs |
|----------------------|----------------|-----------------|-------------------------|---------------------------------|-----------------|--------------------------|
| SNP_P4_70212_8807377 | NC_021164.1    | Ca_kabuli_chr05 | 8807377                 | GG                              | AA              | 1946843654               |
| SNP_P4_70213_8807408 | NC_021164.1    | Ca_kabuli_chr05 | 8807408                 | GG                              | AA              | 1946843656               |
| SNP_P4_70215_8836305 | NC_021164.1    | Ca_kabuli_chr05 | 8836305                 | CC                              | AA              | 1946843658               |
| SNP_P4_70216_8850814 | NC_021164.1    | Ca_kabuli_chr05 | 8850814                 | AA                              | GG              | 1946843660               |
| SNP_P4_70217_8853599 | NC_021164.1    | Ca_kabuli_chr05 | 8853599                 | AA                              | GG              | 1946843662               |
| SNP_P4_70218_8949604 | NC_021164.1    | Ca_kabuli_chr05 | 8949604                 | TT                              | AA              | 1946843664               |
| SNP_P4_70220_8975066 | NC_021164.1    | Ca_kabuli_chr05 | 8975066                 | CC                              | AA              | 1946843666               |
| SNP_P4_70221_8975073 | NC_021164.1    | Ca_kabuli_chr05 | 8975073                 | AA                              | GG              | 1946843668               |
| SNP_P4_70222_8975162 | NC_021164.1    | Ca_kabuli_chr05 | 8975162                 | GG                              | AA              | 1946843670               |
| SNP_P4_70224_8998746 | NC_021164.1    | Ca_kabuli_chr05 | 8998746                 | CC                              | TT              | 1946843672               |
| SNP_P4_70225_8998862 | NC_021164.1    | Ca_kabuli_chr05 | 8998862                 | TT                              | CC              | 1946843674               |
| SNP_P4_70226_8998951 | NC_021164.1    | Ca_kabuli_chr05 | 8998951                 | AA                              | GG              | 1946843676               |
| SNP_P4_70228_8999002 | NC_021164.1    | Ca_kabuli_chr05 | 8999002                 | TT                              | AA              | 1946843678               |
| SNP_P4_70229_8999030 | NC_021164.1    | Ca_kabuli_chr05 | 8999030                 | TT                              | CC              | 1946843680               |
| SNP_P4_70230_8999459 | NC_021164.1    | Ca_kabuli_chr05 | 8999459                 | CC                              | GG              | 1946843682               |
| SNP_P4_70231_8999610 | NC_021164.1    | Ca_kabuli_chr05 | 8999610                 | CC                              | TT              | 1946843684               |
| SNP_P4_70232_8999612 | NC_021164.1    | Ca_kabuli_chr05 | 8999612                 | CC                              | AA              | 1946843686               |
| SNP_P4_70233_8999629 | NC_021164.1    | Ca_kabuli_chr05 | 8999629                 | CC                              | AA              | 1946843688               |
| SNP_P4_70234_8999636 | NC_021164.1    | Ca_kabuli_chr05 | 8999636                 | GG                              | AA              | 1946843690               |
| SNP_P4_70236_8999842 | NC_021164.1    | Ca_kabuli_chr05 | 8999842                 | AA                              | GG              | 1946843692               |
| SNP_P4_70237_8999930 | NC_021164.1    | Ca_kabuli_chr05 | 8999930                 | GG                              | AA              | 1946843694               |
| SNP_P4_70238_8999946 | NC_021164.1    | Ca_kabuli_chr05 | 8999946                 | GG                              | AA              | 1946843696               |
| SNP_P4_70239_8999967 | NC_021164.1    | Ca_kabuli_chr05 | 8999967                 | GG                              | AA              | 1946843698               |
| SNP_P4_70240_8999969 | NC_021164.1    | Ca_kabuli_chr05 | 8999969                 | CC                              | AA              | 1946843699               |
| SNP_P4_70241_9000017 | NC_021164.1    | Ca_kabuli_chr05 | 9000017                 | AA                              | GG              | 1946843701               |
| SNP_P4_70242_9000338 | NC_021164.1    | Ca_kabuli_chr05 | 9000338                 | CC                              | TT              | 1946843703               |
| SNP_P4_70243_9039300 | NC_021164.1    | Ca_kabuli_chr05 | 9039300                 | AA                              | GG              | 1946843705               |
| SNP_P4_70244_9057350 | NC_021164.1    | Ca_kabuli_chr05 | 9057350                 | GG                              | AA              | 1946843707               |
| SNP_P4_70245_9091617 | NC_021164.1    | Ca_kabuli_chr05 | 9091617                 | AA                              | GG              | 1946843709               |
| SNP_P4_70246_9091691 | NC_021164.1    | Ca_kabuli_chr05 | 9091691                 | CC                              | TT              | 1946843711               |
| SNP_P4_70247_9091727 | NC_021164.1    | Ca_kabuli_chr05 | 9091727                 | AA                              | GG              | 1946843713               |
| SNP_P4_70248_9091915 | NC_021164.1    | Ca_kabuli_chr05 | 9091915                 | AA                              | GG              | 1946843715               |
| SNP_P4_70249_9092251 | NC_021164.1    | Ca_kabuli_chr05 | 9092251                 | AA                              | TT              | 1946843717               |
| SNP_P4_70250_9092255 | NC_021164.1    | Ca_kabuli_chr05 | 9092255                 | AA                              | GG              | 1946843719               |
| SNP_P4_70251_9092262 | NC_021164.1    | Ca_kabuli_chr05 | 9092262                 | CC                              | GG              | 1946843721               |
| SNP_P4_70252_9092324 | NC_021164.1    | Ca_kabuli_chr05 | 9092324                 | CC                              | GG              | 1946843723               |
| SNP_P4_70253_9092328 | NC_021164.1    | Ca_kabuli_chr05 | 9092328                 | TT                              | CC              | 1946843725               |
| SNP_P4_70255_9175008 | NC_021164.1    | Ca_kabuli_chr05 | 9175008                 | CC                              | TT              | 1946843727               |
| SNP_P4_70256_9187776 | NC_021164.1    | Ca_kabuli_chr05 | 9187776                 | AA                              | GG              | 1946843729               |
| SNP_P4_70257_9201874 | NC_021164.1    | Ca_kabuli_chr05 | 9201874                 | TT                              | AA              | 1946843731               |
| SNP_P4_70258_9201897 | NC_021164.1    | Ca_kabuli_chr05 | 9201897                 | TT                              | CC              | 1946843733               |
| SNP_P4_70259_9202241 | NC_021164.1    | Ca_kabuli_chr05 | 9202241                 | AA                              | GG              | 1946843735               |

| SNPs IDs             | Chromosome IDs | Chromosomes     | Physical positions (bp) | CDC Frontier (Reference genome) | (ILWC46 & LPNB) | NCBI SNPdb Accession IDs |
|----------------------|----------------|-----------------|-------------------------|---------------------------------|-----------------|--------------------------|
| SNP_P4_70260_9202471 | NC_021164.1    | Ca_kabuli_chr05 | 9202471                 | TT                              | GG              | 1946843737               |
| SNP_P4_70261_9202647 | NC_021164.1    | Ca_kabuli_chr05 | 9202647                 | CC                              | TT              | 1946843739               |
| SNP_P4_70262_9203027 | NC_021164.1    | Ca_kabuli_chr05 | 9203027                 | GG                              | AA              | 1946843741               |
| SNP_P4_70263_9212180 | NC_021164.1    | Ca_kabuli_chr05 | 9212180                 | GG                              | AA              | 1946843743               |
| SNP_P4_70264_9249182 | NC_021164.1    | Ca_kabuli_chr05 | 9249182                 | CC                              | TT              | 1946843745               |
| SNP_P4_70266_9256207 | NC_021164.1    | Ca_kabuli_chr05 | 9256207                 | AA                              | TT              | 1946843747               |
| SNP_P4_70269_9277895 | NC_021164.1    | Ca_kabuli_chr05 | 9277895                 | TT                              | GG              | 1946843749               |
| SNP_P4_70270_9294143 | NC_021164.1    | Ca_kabuli_chr05 | 9294143                 | GG                              | AA              | 1946843751               |
| SNP_P4_70271_9294161 | NC_021164.1    | Ca_kabuli_chr05 | 9294161                 | TT                              | GG              | 1946843753               |
| SNP_P4_70272_9304770 | NC_021164.1    | Ca_kabuli_chr05 | 9304770                 | AA                              | GG              | 1946843755               |
| SNP_P4_70273_9340234 | NC_021164.1    | Ca_kabuli_chr05 | 9340234                 | TT                              | AA              | 1946843757               |
| SNP_P4_70274_9345768 | NC_021164.1    | Ca_kabuli_chr05 | 9345768                 | TT                              | CC              | 1946843759               |
| SNP_P4_70276_9361169 | NC_021164.1    | Ca_kabuli_chr05 | 9361169                 | AA                              | GG              | 1946843761               |
| SNP_P4_70277_9365844 | NC_021164.1    | Ca_kabuli_chr05 | 9365844                 | AA                              | GG              | 1946843763               |
| SNP_P4_70278_9365865 | NC_021164.1    | Ca_kabuli_chr05 | 9365865                 | GG                              | CC              | 1946843765               |
| SNP_P4_70279_9365889 | NC_021164.1    | Ca_kabuli_chr05 | 9365889                 | TT                              | CC              | 1946843767               |
| SNP_P4_70280_9365934 | NC_021164.1    | Ca_kabuli_chr05 | 9365934                 | GG                              | AA              | 1946843769               |
| SNP_P4_70281_9366003 | NC_021164.1    | Ca_kabuli_chr05 | 9366003                 | GG                              | AA              | 1946843771               |
| SNP_P4_70282_9366053 | NC_021164.1    | Ca_kabuli_chr05 | 9366053                 | AA                              | TT              | 1946843773               |
| SNP_P4_70283_9366183 | NC_021164.1    | Ca_kabuli_chr05 | 9366183                 | AA                              | TT              | 1946843775               |
| SNP_P4_70284_9366210 | NC_021164.1    | Ca_kabuli_chr05 | 9366210                 | TT                              | AA              | 1946843777               |
| SNP_P4_70285_9366262 | NC_021164.1    | Ca_kabuli_chr05 | 9366262                 | AA                              | GG              | 1946843778               |
| SNP_P4_70286_9366291 | NC_021164.1    | Ca_kabuli_chr05 | 9366291                 | TT                              | CC              | 1946843780               |
| SNP_P4_70287_9366330 | NC_021164.1    | Ca_kabuli_chr05 | 9366330                 | TT                              | AA              | 1946843782               |
| SNP_P4_70288_9366401 | NC_021164.1    | Ca_kabuli_chr05 | 9366401                 | TT                              | CC              | 1946843784               |
| SNP_P4_70289_9368728 | NC_021164.1    | Ca_kabuli_chr05 | 9368728                 | AA                              | GG              | 1946843786               |
| SNP_P4_70290_9374176 | NC_021164.1    | Ca_kabuli_chr05 | 9374176                 | AA                              | GG              | 1946843788               |
| SNP_P4_70291_9374297 | NC_021164.1    | Ca_kabuli_chr05 | 9374297                 | TT                              | CC              | 1946843790               |
| SNP_P4_70292_9374450 | NC_021164.1    | Ca_kabuli_chr05 | 9374450                 | AA                              | GG              | 1946843792               |
| SNP_P4_70293_9374476 | NC_021164.1    | Ca_kabuli_chr05 | 9374476                 | GG                              | AA              | 1946843794               |
| SNP_P4_70294_9374487 | NC_021164.1    | Ca_kabuli_chr05 | 9374487                 | TT                              | GG              | 1946843796               |
| SNP_P4_70295_9374500 | NC_021164.1    | Ca_kabuli_chr05 | 9374500                 | TT                              | AA              | 1946843798               |
| SNP_P4_70296_9382672 | NC_021164.1    | Ca_kabuli_chr05 | 9382672                 | TT                              | AA              | 1946843800               |
| SNP_P4_70297_9382674 | NC_021164.1    | Ca_kabuli_chr05 | 9382674                 | CC                              | TT              | 1946843802               |
| SNP_P4_70298_9382828 | NC_021164.1    | Ca_kabuli_chr05 | 9382828                 | CC                              | TT              | 1946843804               |
| SNP_P4_70299_9384808 | NC_021164.1    | Ca_kabuli_chr05 | 9384808                 | AA                              | CC              | 1946843806               |
| SNP_P4_70302_9384913 | NC_021164.1    | Ca_kabuli_chr05 | 9384913                 | TT                              | AA              | 1946843808               |
| SNP_P4_70303_9393445 | NC_021164.1    | Ca_kabuli_chr05 | 9393445                 | AA                              | TT              | 1946843810               |
| SNP_P4_70304_9393453 | NC_021164.1    | Ca_kabuli_chr05 | 9393453                 | TT                              | CC              | 1946843812               |
| SNP_P4_70305_9393464 | NC_021164.1    | Ca_kabuli_chr05 | 9393464                 | TT                              | GG              | 1946843814               |
| SNP_P4_70306_9393472 | NC_021164.1    | Ca_kabuli_chr05 | 9393472                 | TT                              | CC              | 1946843816               |
| SNP_P4_70307_9403081 | NC_021164.1    | Ca_kabuli_chr05 | 9403081                 | AA                              | GG              | 1946843818               |



| SNPs IDs             | Chromosome IDs | Chromosomes     | Physical positions (bp) | CDC Frontier (Reference genome) | (ILWC46 & LPNB) | NCBI SNPdb Accession IDs |
|----------------------|----------------|-----------------|-------------------------|---------------------------------|-----------------|--------------------------|
| SNP_P4_70308_9403160 | NC_021164.1    | Ca_kabuli_chr05 | 9403160                 | GG                              | AA              | 1946843820               |
| SNP_P4_70309_9403166 | NC_021164.1    | Ca_kabuli_chr05 | 9403166                 | TT                              | AA              | 1946843822               |
| SNP_P4_70310_9403211 | NC_021164.1    | Ca_kabuli_chr05 | 9403211                 | GG                              | AA              | 1946843824               |
| SNP_P4_70311_9403389 | NC_021164.1    | Ca_kabuli_chr05 | 9403389                 | TT                              | CC              | 1946843826               |
| SNP_P4_70312_9403409 | NC_021164.1    | Ca_kabuli_chr05 | 9403409                 | AA                              | TT              | 1946843828               |
| SNP_P4_70314_9403491 | NC_021164.1    | Ca_kabuli_chr05 | 9403491                 | TT                              | CC              | 1946843830               |
| SNP_P4_70315_9403544 | NC_021164.1    | Ca_kabuli_chr05 | 9403544                 | AA                              | GG              | 1946843832               |
| SNP_P4_70316_9403605 | NC_021164.1    | Ca_kabuli_chr05 | 9403605                 | AA                              | CC              | 1946843834               |
| SNP_P4_70317_9403641 | NC_021164.1    | Ca_kabuli_chr05 | 9403641                 | CC                              | AA              | 1946843836               |
| SNP_P4_70318_9403713 | NC_021164.1    | Ca_kabuli_chr05 | 9403713                 | CC                              | GG              | 1946843838               |
| SNP_P4_70319_9403722 | NC_021164.1    | Ca_kabuli_chr05 | 9403722                 | GG                              | AA              | 1946843840               |
| SNP_P4_70320_9433577 | NC_021164.1    | Ca_kabuli_chr05 | 9433577                 | TT                              | CC              | 1946843842               |
| SNP_P4_70321_9433587 | NC_021164.1    | Ca_kabuli_chr05 | 9433587                 | TT                              | GG              | 1946843844               |
| SNP_P4_70322_9433683 | NC_021164.1    | Ca_kabuli_chr05 | 9433683                 | AA                              | GG              | 1946843846               |
| SNP_P4_70323_9433699 | NC_021164.1    | Ca_kabuli_chr05 | 9433699                 | AA                              | CC              | 1946843848               |
| SNP_P4_70324_9440091 | NC_021164.1    | Ca_kabuli_chr05 | 9440091                 | TT                              | CC              | 1946843850               |
| SNP_P4_70325_9440120 | NC_021164.1    | Ca_kabuli_chr05 | 9440120                 | AA                              | GG              | 1946843852               |
| SNP_P4_70328_9441794 | NC_021164.1    | Ca_kabuli_chr05 | 9441794                 | TT                              | CC              | 1946843854               |
| SNP_P4_70329_9467206 | NC_021164.1    | Ca_kabuli_chr05 | 9467206                 | GG                              | TT              | 1946843856               |
| SNP_P4_70330_9467215 | NC_021164.1    | Ca_kabuli_chr05 | 9467215                 | GG                              | AA              | 1946843858               |
| SNP_P4_70331_9467217 | NC_021164.1    | Ca_kabuli_chr05 | 9467217                 | GG                              | TT              | 1946843860               |
| SNP_P4_70332_9467518 | NC_021164.1    | Ca_kabuli_chr05 | 9467518                 | TT                              | CC              | 1946843862               |
| SNP_P4_70333_9467705 | NC_021164.1    | Ca_kabuli_chr05 | 9467705                 | AA                              | GG              | 1946843864               |
| SNP_P4_70334_9467778 | NC_021164.1    | Ca_kabuli_chr05 | 9467778                 | TT                              | AA              | 1946843866               |
| SNP_P4_70335_9467818 | NC_021164.1    | Ca_kabuli_chr05 | 9467818                 | AA                              | GG              | 1946843869               |
| SNP_P4_70336_9467905 | NC_021164.1    | Ca_kabuli_chr05 | 9467905                 | AA                              | GG              | 1946843871               |
| SNP_P4_70337_9467998 | NC_021164.1    | Ca_kabuli_chr05 | 9467998                 | AA                              | GG              | 1946843873               |
| SNP_P4_70338_9468232 | NC_021164.1    | Ca_kabuli_chr05 | 9468232                 | TT                              | CC              | 1946843875               |
| SNP_P4_70339_9468243 | NC_021164.1    | Ca_kabuli_chr05 | 9468243                 | CC                              | TT              | 1946843877               |
| SNP_P4_70340_9507378 | NC_021164.1    | Ca_kabuli_chr05 | 9507378                 | AA                              | GG              | 1946843880               |
| SNP_P4_70341_9540558 | NC_021164.1    | Ca_kabuli_chr05 | 9540558                 | CC                              | AA              | 1946843882               |
| SNP_P4_70342_9544133 | NC_021164.1    | Ca_kabuli_chr05 | 9544133                 | GG                              | TT              | 1946843884               |
| SNP_P4_70343_9553069 | NC_021164.1    | Ca_kabuli_chr05 | 9553069                 | GG                              | TT              | 1946843886               |
| SNP_P4_70344_9583818 | NC_021164.1    | Ca_kabuli_chr05 | 9583818                 | TT                              | CC              | 1946843888               |
| SNP_P4_70346_9625042 | NC_021164.1    | Ca_kabuli_chr05 | 9625042                 | CC                              | TT              | 1946843890               |
| SNP_P4_70347_9625659 | NC_021164.1    | Ca_kabuli_chr05 | 9625659                 | GG                              | CC              | 1946843892               |
| SNP_P4_70348_9625705 | NC_021164.1    | Ca_kabuli_chr05 | 9625705                 | AA                              | CC              | 1946843894               |
| SNP_P4_70349_9625870 | NC_021164.1    | Ca_kabuli_chr05 | 9625870                 | AA                              | TT              | 1946843896               |
| SNP_P4_70350_9625871 | NC_021164.1    | Ca_kabuli_chr05 | 9625871                 | TT                              | AA              | 1946843898               |
| SNP_P4_70351_9625872 | NC_021164.1    | Ca_kabuli_chr05 | 9625872                 | AA                              | CC              | 1946843900               |
| SNP_P4_70352_9625875 | NC_021164.1    | Ca_kabuli_chr05 | 9625875                 | GG                              | AA              | 1946843902               |
| SNP_P4_70353_9625887 | NC_021164.1    | Ca_kabuli_chr05 | 9625887                 | AA                              | GG              | 1946843904               |

| SNPs IDs              | Chromosome IDs | Chromosomes     | Physical positions (bp) | CDC Frontier (Reference genome) | (ILWC46 & LPNB) | NCBI SNPdb Accession IDs |
|-----------------------|----------------|-----------------|-------------------------|---------------------------------|-----------------|--------------------------|
| SNP_P4_70354_9626089  | NC_021164.1    | Ca_kabuli_chr05 | 9626089                 | GG                              | CC              | 1946843906               |
| SNP_P4_70355_9626230  | NC_021164.1    | Ca_kabuli_chr05 | 9626230                 | CC                              | AA              | 1946843908               |
| SNP_P4_70356_9651608  | NC_021164.1    | Ca_kabuli_chr05 | 9651608                 | GG                              | AA              | 1946843910               |
| SNP_P4_70357_9683936  | NC_021164.1    | Ca_kabuli_chr05 | 9683936                 | CC                              | TT              | 1946843912               |
| SNP_P4_70358_9690372  | NC_021164.1    | Ca_kabuli_chr05 | 9690372                 | TT                              | GG              | 1946843914               |
| SNP_P4_70359_9690596  | NC_021164.1    | Ca_kabuli_chr05 | 9690596                 | AA                              | GG              | 1946843916               |
| SNP_P4_70360_9690623  | NC_021164.1    | Ca_kabuli_chr05 | 9690623                 | CC                              | AA              | 1946843918               |
| SNP_P4_70361_9690625  | NC_021164.1    | Ca_kabuli_chr05 | 9690625                 | TT                              | CC              | 1946843920               |
| SNP_P4_70362_9690872  | NC_021164.1    | Ca_kabuli_chr05 | 9690872                 | AA                              | GG              | 1946843922               |
| SNP_P4_70363_9692530  | NC_021164.1    | Ca_kabuli_chr05 | 9692530                 | TT                              | AA              | 1946843924               |
| SNP_P4_70365_9713854  | NC_021164.1    | Ca_kabuli_chr05 | 9713854                 | CC                              | TT              | 1946843926               |
| SNP_P4_70366_9724910  | NC_021164.1    | Ca_kabuli_chr05 | 9724910                 | GG                              | AA              | 1946843927               |
| SNP_P4_70367_9732191  | NC_021164.1    | Ca_kabuli_chr05 | 9732191                 | TT                              | AA              | 1946843929               |
| SNP_P4_70369_9746188  | NC_021164.1    | Ca_kabuli_chr05 | 9746188                 | AA                              | GG              | 1946843931               |
| SNP_P4_70370_9746461  | NC_021164.1    | Ca_kabuli_chr05 | 9746461                 | AA                              | GG              | 1946843933               |
| SNP_P4_70371_9746586  | NC_021164.1    | Ca_kabuli_chr05 | 9746586                 | GG                              | AA              | 1946843935               |
| SNP_P4_70372_9769988  | NC_021164.1    | Ca_kabuli_chr05 | 9769988                 | TT                              | AA              | 1946843937               |
| SNP_P4_70375_9847746  | NC_021164.1    | Ca_kabuli_chr05 | 9847746                 | AA                              | TT              | 1946843939               |
| SNP_P4_70377_9898510  | NC_021164.1    | Ca_kabuli_chr05 | 9898510                 | TT                              | GG              | 1946843941               |
| SNP_P4_70378_9898514  | NC_021164.1    | Ca_kabuli_chr05 | 9898514                 | GG                              | AA              | 1946843943               |
| SNP_P4_70379_9914853  | NC_021164.1    | Ca_kabuli_chr05 | 9914853                 | AA                              | GG              | 1946843945               |
| SNP_P4_70380_9921190  | NC_021164.1    | Ca_kabuli_chr05 | 9921190                 | GG                              | AA              | 1946843947               |
| SNP_P4_70381_9921411  | NC_021164.1    | Ca_kabuli_chr05 | 9921411                 | TT                              | CC              | 1946843949               |
| SNP_P4_70382_9921458  | NC_021164.1    | Ca_kabuli_chr05 | 9921458                 | AA                              | CC              | 1946843951               |
| SNP_P4_70383_9921486  | NC_021164.1    | Ca_kabuli_chr05 | 9921486                 | GG                              | TT              | 1946843953               |
| SNP_P4_70384_9921526  | NC_021164.1    | Ca_kabuli_chr05 | 9921526                 | AA                              | TT              | 1946843955               |
| SNP_P4_70385_9924673  | NC_021164.1    | Ca_kabuli_chr05 | 9924673                 | CC                              | TT              | 1946843957               |
| SNP_P4_70386_9924750  | NC_021164.1    | Ca_kabuli_chr05 | 9924750                 | AA                              | TT              | 1946843959               |
| SNP_P4_70387_9936203  | NC_021164.1    | Ca_kabuli_chr05 | 9936203                 | AA                              | TT              | 1946843961               |
| SNP_P4_70388_9937412  | NC_021164.1    | Ca_kabuli_chr05 | 9937412                 | AA                              | GG              | 1946843963               |
| SNP_P4_70389_9937433  | NC_021164.1    | Ca_kabuli_chr05 | 9937433                 | TT                              | AA              | 1946843965               |
| SNP_P4_70390_9937738  | NC_021164.1    | Ca_kabuli_chr05 | 9937738                 | CC                              | TT              | 1946843966               |
| SNP_P4_70391_9937779  | NC_021164.1    | Ca_kabuli_chr05 | 9937779                 | GG                              | AA              | 1946843968               |
| SNP_P4_70392_9947267  | NC_021164.1    | Ca_kabuli_chr05 | 9947267                 | TT                              | CC              | 1946843970               |
| SNP_P4_70393_9947309  | NC_021164.1    | Ca_kabuli_chr05 | 9947309                 | CC                              | GG              | 1946843972               |
| SNP_P4_70394_9947644  | NC_021164.1    | Ca_kabuli_chr05 | 9947644                 | AA                              | GG              | 1946843974               |
| SNP_P4_70395_9947645  | NC_021164.1    | Ca_kabuli_chr05 | 9947645                 | GG                              | AA              | 1946843976               |
| SNP_P4_70396_9968761  | NC_021164.1    | Ca_kabuli_chr05 | 9968761                 | TT                              | CC              | 1946843978               |
| SNP_P4_70397_9978491  | NC_021164.1    | Ca_kabuli_chr05 | 9978491                 | TT                              | CC              | 1946843979               |
| SNP_P4_70398_10016532 | NC_021164.1    | Ca_kabuli_chr05 | 10016532                | AA                              | GG              | 1946843981               |
| SNP_P4_70399_10021506 | NC_021164.1    | Ca_kabuli_chr05 | 10021506                | CC                              | TT              | 1946843983               |
| SNP_P4_70400_10056571 | NC_021164.1    | Ca_kabuli_chr05 | 10056571                | TT                              | AA              | 1946843985               |

| SNPs IDs              | Chromosome IDs | Chromosomes     | Physical positions (bp) | CDC Frontier (Reference genome) | (ILWC46 & LPNB) | NCBI SNPdb Accession IDs |
|-----------------------|----------------|-----------------|-------------------------|---------------------------------|-----------------|--------------------------|
| SNP_P4_70401_10076960 | NC_021164.1    | Ca_kabuli_chr05 | 10076960                | TT                              | GG              | 1946843986               |
| SNP_P4_70403_10090081 | NC_021164.1    | Ca_kabuli_chr05 | 10090081                | AA                              | GG              | 1946843987               |
| SNP_P4_70404_10092912 | NC_021164.1    | Ca_kabuli_chr05 | 10092912                | AA                              | GG              | 1946843988               |
| SNP_P4_70405_10111551 | NC_021164.1    | Ca_kabuli_chr05 | 10111551                | GG                              | TT              | 1946843990               |
| SNP_P4_70406_10111993 | NC_021164.1    | Ca_kabuli_chr05 | 10111993                | TT                              | CC              | 1946843992               |
| SNP_P4_70407_10143468 | NC_021164.1    | Ca_kabuli_chr05 | 10143468                | GG                              | AA              | 1946843994               |
| SNP_P4_70409_10191995 | NC_021164.1    | Ca_kabuli_chr05 | 10191995                | CC                              | TT              | 1946843996               |
| SNP_P4_70410_10193740 | NC_021164.1    | Ca_kabuli_chr05 | 10193740                | AA                              | GG              | 1946843998               |
| SNP_P4_70411_10194749 | NC_021164.1    | Ca_kabuli_chr05 | 10194749                | GG                              | AA              | 1946844000               |
| SNP_P4_70412_10213511 | NC_021164.1    | Ca_kabuli_chr05 | 10213511                | TT                              | CC              | 1946844002               |
| SNP_P4_70413_10213519 | NC_021164.1    | Ca_kabuli_chr05 | 10213519                | CC                              | TT              | 1946844004               |
| SNP_P4_70414_10213532 | NC_021164.1    | Ca_kabuli_chr05 | 10213532                | AA                              | CC              | 1946844006               |
| SNP_P4_70416_10220368 | NC_021164.1    | Ca_kabuli_chr05 | 10220368                | AA                              | CC              | 1946844008               |
| SNP_P4_70417_10249954 | NC_021164.1    | Ca_kabuli_chr05 | 10249954                | TT                              | AA              | 1946844010               |
| SNP_P4_70418_10249957 | NC_021164.1    | Ca_kabuli_chr05 | 10249957                | TT                              | AA              | 1946844012               |
| SNP_P4_70419_10253770 | NC_021164.1    | Ca_kabuli_chr05 | 10253770                | CC                              | TT              | 1946844014               |
| SNP_P4_70420_10253892 | NC_021164.1    | Ca_kabuli_chr05 | 10253892                | AA                              | GG              | 1946844016               |
| SNP_P4_70422_10283358 | NC_021164.1    | Ca_kabuli_chr05 | 10283358                | CC                              | AA              | 1946844018               |
| SNP_P4_70423_10287151 | NC_021164.1    | Ca_kabuli_chr05 | 10287151                | AA                              | GG              | 1946844020               |
| SNP_P4_70424_10287153 | NC_021164.1    | Ca_kabuli_chr05 | 10287153                | AA                              | GG              | 1946844022               |
| SNP_P4_70425_10304318 | NC_021164.1    | Ca_kabuli_chr05 | 10304318                | CC                              | TT              | 1946844024               |
| SNP_P4_70428_10312564 | NC_021164.1    | Ca_kabuli_chr05 | 10312564                | CC                              | TT              | 1946844026               |
| SNP_P4_70429_10322794 | NC_021164.1    | Ca_kabuli_chr05 | 10322794                | TT                              | AA              | 1946844028               |
| SNP_P4_70430_10331288 | NC_021164.1    | Ca_kabuli_chr05 | 10331288                | CC                              | TT              | 1946844030               |
| SNP_P4_70431_10333050 | NC_021164.1    | Ca_kabuli_chr05 | 10333050                | GG                              | AA              | 1946844032               |
| SNP_P4_70432_10341859 | NC_021164.1    | Ca_kabuli_chr05 | 10341859                | TT                              | AA              | 1946844034               |
| SNP_P4_70433_10343780 | NC_021164.1    | Ca_kabuli_chr05 | 10343780                | GG                              | CC              | 1946844036               |
| SNP_P4_70434_10348759 | NC_021164.1    | Ca_kabuli_chr05 | 10348759                | TT                              | GG              | 1946844038               |
| SNP_P4_70435_10348765 | NC_021164.1    | Ca_kabuli_chr05 | 10348765                | CC                              | TT              | 1946844040               |
| SNP_P4_70436_10349158 | NC_021164.1    | Ca_kabuli_chr05 | 10349158                | GG                              | CC              | 1946844042               |
| SNP_P4_70437_10349164 | NC_021164.1    | Ca_kabuli_chr05 | 10349164                | AA                              | CC              | 1946844044               |
| SNP_P4_70438_10349191 | NC_021164.1    | Ca_kabuli_chr05 | 10349191                | AA                              | GG              | 1946844046               |
| SNP_P4_70439_10362633 | NC_021164.1    | Ca_kabuli_chr05 | 10362633                | CC                              | TT              | 1946844049               |
| SNP_P4_70440_10362889 | NC_021164.1    | Ca_kabuli_chr05 | 10362889                | TT                              | CC              | 1946844051               |
| SNP_P4_70441_10362983 | NC_021164.1    | Ca_kabuli_chr05 | 10362983                | GG                              | AA              | 1946844053               |
| SNP_P4_70442_10374021 | NC_021164.1    | Ca_kabuli_chr05 | 10374021                | TT                              | CC              | 1946844055               |
| SNP_P4_70443_10376091 | NC_021164.1    | Ca_kabuli_chr05 | 10376091                | AA                              | CC              | 1946844057               |
| SNP_P4_70444_10376120 | NC_021164.1    | Ca_kabuli_chr05 | 10376120                | TT                              | CC              | 1946844059               |
| SNP_P4_70445_10376384 | NC_021164.1    | Ca_kabuli_chr05 | 10376384                | AA                              | CC              | 1946844061               |
| SNP_P4_70446_10418977 | NC_021164.1    | Ca_kabuli_chr05 | 10418977                | TT                              | CC              | 1946844063               |
| SNP_P4_70449_10433830 | NC_021164.1    | Ca_kabuli_chr05 | 10433830                | GG                              | AA              | 1946844065               |
| SNP_P4_70450_10438709 | NC_021164.1    | Ca_kabuli_chr05 | 10438709                | GG                              | TT              | 1946844067               |

| SNPs IDs              | Chromosome IDs | Chromosomes     | Physical positions (bp) | CDC Frontier (Reference genome) | (ILWC46 & LPNB) | NCBI SNPdb Accession IDs |
|-----------------------|----------------|-----------------|-------------------------|---------------------------------|-----------------|--------------------------|
| SNP_P4_70451_10451704 | NC_021164.1    | Ca_kabuli_chr05 | 10451704                | TT                              | CC              | 1946844069               |
| SNP_P4_70452_10475930 | NC_021164.1    | Ca_kabuli_chr05 | 10475930                | TT                              | GG              | 1946844071               |
| SNP_P4_70453_10476333 | NC_021164.1    | Ca_kabuli_chr05 | 10476333                | CC                              | TT              | 1946844073               |
| SNP_P4_70454_10476586 | NC_021164.1    | Ca_kabuli_chr05 | 10476586                | TT                              | CC              | 1946844075               |
| SNP_P4_70455_10481409 | NC_021164.1    | Ca_kabuli_chr05 | 10481409                | TT                              | CC              | 1946844077               |
| SNP_P4_70456_10496251 | NC_021164.1    | Ca_kabuli_chr05 | 10496251                | AA                              | GG              | 1946844079               |
| SNP_P4_70459_10514214 | NC_021164.1    | Ca_kabuli_chr05 | 10514214                | TT                              | AA              | 1946844081               |
| SNP_P4_70460_10514217 | NC_021164.1    | Ca_kabuli_chr05 | 10514217                | TT                              | AA              | 1946844083               |
| SNP_P4_70461_10514445 | NC_021164.1    | Ca_kabuli_chr05 | 10514445                | GG                              | AA              | 1946844085               |
| SNP_P4_70462_10523358 | NC_021164.1    | Ca_kabuli_chr05 | 10523358                | TT                              | AA              | 1946844087               |
| SNP_P4_70463_10526035 | NC_021164.1    | Ca_kabuli_chr05 | 10526035                | CC                              | TT              | 1946844089               |
| SNP_P4_70464_10526133 | NC_021164.1    | Ca_kabuli_chr05 | 10526133                | CC                              | AA              | 1946844091               |
| SNP_P4_70465_10526751 | NC_021164.1    | Ca_kabuli_chr05 | 10526751                | CC                              | TT              | 1946844093               |
| SNP_P4_70466_10545265 | NC_021164.1    | Ca_kabuli_chr05 | 10545265                | CC                              | AA              | 1946844095               |
| SNP_P4_70468_10595352 | NC_021164.1    | Ca_kabuli_chr05 | 10595352                | AA                              | TT              | 1946844097               |
| SNP_P4_70469_10600691 | NC_021164.1    | Ca_kabuli_chr05 | 10600691                | AA                              | GG              | 1946844099               |
| SNP_P4_70470_10604599 | NC_021164.1    | Ca_kabuli_chr05 | 10604599                | TT                              | AA              | 1946844101               |
| SNP_P4_70471_10604953 | NC_021164.1    | Ca_kabuli_chr05 | 10604953                | AA                              | GG              | 1946844103               |
| SNP_P4_70472_10616900 | NC_021164.1    | Ca_kabuli_chr05 | 10616900                | GG                              | AA              | 1946844105               |
| SNP_P4_70473_10616912 | NC_021164.1    | Ca_kabuli_chr05 | 10616912                | AA                              | TT              | 1946844107               |
| SNP_P4_70474_10617038 | NC_021164.1    | Ca_kabuli_chr05 | 10617038                | TT                              | CC              | 1946844109               |
| SNP_P4_70475_10617116 | NC_021164.1    | Ca_kabuli_chr05 | 10617116                | AA                              | GG              | 1946844111               |
| SNP_P4_70476_10617405 | NC_021164.1    | Ca_kabuli_chr05 | 10617405                | GG                              | AA              | 1946844113               |
| SNP_P4_70477_10617417 | NC_021164.1    | Ca_kabuli_chr05 | 10617417                | AA                              | GG              | 1946844115               |
| SNP_P4_70478_10617659 | NC_021164.1    | Ca_kabuli_chr05 | 10617659                | GG                              | AA              | 1946844117               |
| SNP_P4_70479_10617760 | NC_021164.1    | Ca_kabuli_chr05 | 10617760                | GG                              | AA              | 1946844119               |
| SNP_P4_70480_10623982 | NC_021164.1    | Ca_kabuli_chr05 | 10623982                | TT                              | AA              | 1946844121               |
| SNP_P4_70481_10626737 | NC_021164.1    | Ca_kabuli_chr05 | 10626737                | CC                              | TT              | 1946844123               |
| SNP_P4_70482_10634092 | NC_021164.1    | Ca_kabuli_chr05 | 10634092                | CC                              | TT              | 1946844125               |
| SNP_P4_70483_10634191 | NC_021164.1    | Ca_kabuli_chr05 | 10634191                | CC                              | TT              | 1946844127               |
| SNP_P4_70485_10634346 | NC_021164.1    | Ca_kabuli_chr05 | 10634346                | TT                              | CC              | 1946844129               |
| SNP_P4_70486_10634448 | NC_021164.1    | Ca_kabuli_chr05 | 10634448                | GG                              | TT              | 1946844131               |
| SNP_P4_70487_10634480 | NC_021164.1    | Ca_kabuli_chr05 | 10634480                | AA                              | TT              | 1946844133               |
| SNP_P4_70488_10634489 | NC_021164.1    | Ca_kabuli_chr05 | 10634489                | AA                              | GG              | 1946844135               |
| SNP_P4_70489_10646516 | NC_021164.1    | Ca_kabuli_chr05 | 10646516                | AA                              | GG              | 1946844137               |
| SNP_P4_70490_10646750 | NC_021164.1    | Ca_kabuli_chr05 | 10646750                | CC                              | AA              | 1946844139               |
| SNP_P4_70491_10646908 | NC_021164.1    | Ca_kabuli_chr05 | 10646908                | CC                              | TT              | 1946844141               |
| SNP_P4_70492_10646944 | NC_021164.1    | Ca_kabuli_chr05 | 10646944                | TT                              | AA              | 1946844143               |
| SNP_P4_70493_10646951 | NC_021164.1    | Ca_kabuli_chr05 | 10646951                | TT                              | GG              | 1946844144               |
| SNP_P4_70494_10650234 | NC_021164.1    | Ca_kabuli_chr05 | 10650234                | GG                              | CC              | 1946844146               |
| SNP_P4_70495_10650278 | NC_021164.1    | Ca_kabuli_chr05 | 10650278                | TT                              | CC              | 1946844148               |
| SNP_P4_70496_10650280 | NC_021164.1    | Ca_kabuli_chr05 | 10650280                | CC                              | TT              | 1946844150               |

| SNPs IDs              | Chromosome IDs | Chromosomes     | Physical positions (bp) | CDC Frontier (Reference genome) | (ILWC46 & LPNB) | NCBI SNPdb Accession IDs |
|-----------------------|----------------|-----------------|-------------------------|---------------------------------|-----------------|--------------------------|
| SNP_P4_70497_10650366 | NC_021164.1    | Ca_kabuli_chr05 | 10650366                | TT                              | GG              | 1946844152               |
| SNP_P4_70498_10650532 | NC_021164.1    | Ca_kabuli_chr05 | 10650532                | TT                              | CC              | 1946844154               |
| SNP_P4_70499_10650586 | NC_021164.1    | Ca_kabuli_chr05 | 10650586                | AA                              | GG              | 1946844156               |
| SNP_P4_70500_10667937 | NC_021164.1    | Ca_kabuli_chr05 | 10667937                | TT                              | CC              | 1946844158               |
| SNP_P4_70501_10667964 | NC_021164.1    | Ca_kabuli_chr05 | 10667964                | GG                              | AA              | 1946844160               |
| SNP_P4_70502_10668048 | NC_021164.1    | Ca_kabuli_chr05 | 10668048                | GG                              | TT              | 1946844162               |
| SNP_P4_70504_10671952 | NC_021164.1    | Ca_kabuli_chr05 | 10671952                | CC                              | AA              | 1946844164               |
| SNP_P4_70505_10671984 | NC_021164.1    | Ca_kabuli_chr05 | 10671984                | TT                              | CC              | 1946844166               |
| SNP_P4_70506_10672038 | NC_021164.1    | Ca_kabuli_chr05 | 10672038                | CC                              | TT              | 1946844168               |
| SNP_P4_70507_10672091 | NC_021164.1    | Ca_kabuli_chr05 | 10672091                | AA                              | GG              | 1946844170               |
| SNP_P4_70508_10672102 | NC_021164.1    | Ca_kabuli_chr05 | 10672102                | CC                              | TT              | 1946844172               |
| SNP_P4_70509_10672108 | NC_021164.1    | Ca_kabuli_chr05 | 10672108                | TT                              | CC              | 1946844174               |
| SNP_P4_70510_10672242 | NC_021164.1    | Ca_kabuli_chr05 | 10672242                | GG                              | TT              | 1946844176               |
| SNP_P4_70511_10672246 | NC_021164.1    | Ca_kabuli_chr05 | 10672246                | CC                              | AA              | 1946844178               |
| SNP_P4_70512_10672313 | NC_021164.1    | Ca_kabuli_chr05 | 10672313                | AA                              | GG              | 1946844180               |
| SNP_P4_70513_10672325 | NC_021164.1    | Ca_kabuli_chr05 | 10672325                | CC                              | TT              | 1946844182               |
| SNP_P4_70514_10672377 | NC_021164.1    | Ca_kabuli_chr05 | 10672377                | GG                              | CC              | 1946844184               |
| SNP_P4_70515_10672423 | NC_021164.1    | Ca_kabuli_chr05 | 10672423                | GG                              | TT              | 1946844186               |
| SNP_P4_70516_10672510 | NC_021164.1    | Ca_kabuli_chr05 | 10672510                | CC                              | TT              | 1946844188               |
| SNP_P4_70517_10672635 | NC_021164.1    | Ca_kabuli_chr05 | 10672635                | GG                              | AA              | 1946844190               |
| SNP_P4_70518_10672825 | NC_021164.1    | Ca_kabuli_chr05 | 10672825                | CC                              | TT              | 1946844192               |
| SNP_P4_70519_10672969 | NC_021164.1    | Ca_kabuli_chr05 | 10672969                | TT                              | CC              | 1946844194               |
| SNP_P4_70520_10673009 | NC_021164.1    | Ca_kabuli_chr05 | 10673009                | TT                              | CC              | 1946844196               |
| SNP_P4_70521_10673179 | NC_021164.1    | Ca_kabuli_chr05 | 10673179                | GG                              | AA              | 1946844198               |
| SNP_P4_70522_10673403 | NC_021164.1    | Ca_kabuli_chr05 | 10673403                | CC                              | TT              | 1946844200               |
| SNP_P4_70523_10673605 | NC_021164.1    | Ca_kabuli_chr05 | 10673605                | TT                              | CC              | 1946844202               |
| SNP_P4_70524_10673819 | NC_021164.1    | Ca_kabuli_chr05 | 10673819                | GG                              | TT              | 1946844204               |
| SNP_P4_70525_10673820 | NC_021164.1    | Ca_kabuli_chr05 | 10673820                | TT                              | GG              | 1946844206               |
| SNP_P4_70526_10673821 | NC_021164.1    | Ca_kabuli_chr05 | 10673821                | GG                              | TT              | 1946844208               |
| SNP_P4_70527_10673831 | NC_021164.1    | Ca_kabuli_chr05 | 10673831                | GG                              | TT              | 1946844210               |
| SNP_P4_70528_10673882 | NC_021164.1    | Ca_kabuli_chr05 | 10673882                | TT                              | AA              | 1946844212               |
| SNP_P4_70529_10673913 | NC_021164.1    | Ca_kabuli_chr05 | 10673913                | AA                              | TT              | 1946844214               |
| SNP_P4_70530_10674136 | NC_021164.1    | Ca_kabuli_chr05 | 10674136                | GG                              | TT              | 1946844216               |
| SNP_P4_70531_10674158 | NC_021164.1    | Ca_kabuli_chr05 | 10674158                | GG                              | AA              | 1946844218               |
| SNP_P4_70532_10674211 | NC_021164.1    | Ca_kabuli_chr05 | 10674211                | CC                              | TT              | 1946844220               |
| SNP_P4_70533_10674506 | NC_021164.1    | Ca_kabuli_chr05 | 10674506                | GG                              | TT              | 1946844222               |
| SNP_P4_70534_10674546 | NC_021164.1    | Ca_kabuli_chr05 | 10674546                | AA                              | GG              | 1946844224               |
| SNP_P4_70535_10674718 | NC_021164.1    | Ca_kabuli_chr05 | 10674718                | AA                              | GG              | 1946844226               |
| SNP_P4_70536_10674808 | NC_021164.1    | Ca_kabuli_chr05 | 10674808                | CC                              | AA              | 1946844228               |
| SNP_P4_70537_10676063 | NC_021164.1    | Ca_kabuli_chr05 | 10676063                | GG                              | CC              | 1946844230               |
| SNP_P4_70538_10676093 | NC_021164.1    | Ca_kabuli_chr05 | 10676093                | CC                              | TT              | 1946844232               |
| SNP_P4_70539_10676159 | NC_021164.1    | Ca_kabuli_chr05 | 10676159                | GG                              | AA              | 1946844234               |

| SNPs IDs              | Chromosome IDs | Chromosomes     | Physical positions (bp) | CDC Frontier (Reference genome) | (ILWC46 & LPNB) | NCBI SNPdb Accession IDs |
|-----------------------|----------------|-----------------|-------------------------|---------------------------------|-----------------|--------------------------|
| SNP_P4_70540_10676299 | NC_021164.1    | Ca_kabuli_chr05 | 10676299                | CC                              | TT              | 1946844236               |
| SNP_P4_70541_10676416 | NC_021164.1    | Ca_kabuli_chr05 | 10676416                | GG                              | AA              | 1946844238               |
| SNP_P4_70542_10676548 | NC_021164.1    | Ca_kabuli_chr05 | 10676548                | AA                              | TT              | 1946844240               |
| SNP_P4_70543_10676603 | NC_021164.1    | Ca_kabuli_chr05 | 10676603                | TT                              | CC              | 1946844242               |
| SNP_P4_70544_10676608 | NC_021164.1    | Ca_kabuli_chr05 | 10676608                | AA                              | GG              | 1946844245               |
| SNP_P4_70545_10676761 | NC_021164.1    | Ca_kabuli_chr05 | 10676761                | TT                              | GG              | 1946844247               |
| SNP_P4_70546_10677705 | NC_021164.1    | Ca_kabuli_chr05 | 10677705                | TT                              | CC              | 1946844249               |
| SNP_P4_70547_10677868 | NC_021164.1    | Ca_kabuli_chr05 | 10677868                | GG                              | AA              | 1946844251               |
| SNP_P4_70548_10678076 | NC_021164.1    | Ca_kabuli_chr05 | 10678076                | GG                              | CC              | 1946844253               |
| SNP_P4_70549_10678201 | NC_021164.1    | Ca_kabuli_chr05 | 10678201                | CC                              | TT              | 1946844255               |
| SNP_P4_70550_10678206 | NC_021164.1    | Ca_kabuli_chr05 | 10678206                | AA                              | GG              | 1946844257               |
| SNP_P4_70551_10678303 | NC_021164.1    | Ca_kabuli_chr05 | 10678303                | CC                              | TT              | 1946844259               |
| SNP_P4_70552_10678305 | NC_021164.1    | Ca_kabuli_chr05 | 10678305                | GG                              | AA              | 1946844261               |
| SNP_P4_70553_10678331 | NC_021164.1    | Ca_kabuli_chr05 | 10678331                | GG                              | AA              | 1946844263               |
| SNP_P4_70554_10678351 | NC_021164.1    | Ca_kabuli_chr05 | 10678351                | TT                              | GG              | 1946844265               |
| SNP_P4_70555_10679836 | NC_021164.1    | Ca_kabuli_chr05 | 10679836                | CC                              | TT              | 1946844267               |
| SNP_P4_70556_10679843 | NC_021164.1    | Ca_kabuli_chr05 | 10679843                | AA                              | CC              | 1946844269               |
| SNP_P4_70557_10679884 | NC_021164.1    | Ca_kabuli_chr05 | 10679884                | TT                              | AA              | 1946844271               |
| SNP_P4_70558_10679910 | NC_021164.1    | Ca_kabuli_chr05 | 10679910                | CC                              | TT              | 1946844273               |
| SNP_P4_70559_10679919 | NC_021164.1    | Ca_kabuli_chr05 | 10679919                | TT                              | CC              | 1946844275               |
| SNP_P4_70560_10679957 | NC_021164.1    | Ca_kabuli_chr05 | 10679957                | CC                              | TT              | 1946844277               |
| SNP_P4_70561_10679963 | NC_021164.1    | Ca_kabuli_chr05 | 10679963                | CC                              | TT              | 1946844279               |
| SNP_P4_70562_10679967 | NC_021164.1    | Ca_kabuli_chr05 | 10679967                | TT                              | GG              | 1946844281               |
| SNP_P4_70563_10679989 | NC_021164.1    | Ca_kabuli_chr05 | 10679989                | GG                              | CC              | 1946844283               |
| SNP_P4_70564_10679991 | NC_021164.1    | Ca_kabuli_chr05 | 10679991                | CC                              | AA              | 1946844285               |
| SNP_P4_70565_10680016 | NC_021164.1    | Ca_kabuli_chr05 | 10680016                | CC                              | TT              | 1946844287               |
| SNP_P4_70566_10680056 | NC_021164.1    | Ca_kabuli_chr05 | 10680056                | GG                              | AA              | 1946844289               |
| SNP_P4_70567_10680063 | NC_021164.1    | Ca_kabuli_chr05 | 10680063                | GG                              | TT              | 1946844291               |
| SNP_P4_70568_10680066 | NC_021164.1    | Ca_kabuli_chr05 | 10680066                | TT                              | CC              | 1946844293               |
| SNP_P4_70569_10680067 | NC_021164.1    | Ca_kabuli_chr05 | 10680067                | CC                              | TT              | 1946844295               |
| SNP_P4_70570_10680100 | NC_021164.1    | Ca_kabuli_chr05 | 10680100                | CC                              | AA              | 1946844297               |
| SNP_P4_70571_10680107 | NC_021164.1    | Ca_kabuli_chr05 | 10680107                | AA                              | GG              | 1946844299               |
| SNP_P4_70572_10680109 | NC_021164.1    | Ca_kabuli_chr05 | 10680109                | CC                              | AA              | 1946844301               |
| SNP_P4_70573_10680152 | NC_021164.1    | Ca_kabuli_chr05 | 10680152                | AA                              | TT              | 1946844303               |
| SNP_P4_70574_10680168 | NC_021164.1    | Ca_kabuli_chr05 | 10680168                | AA                              | TT              | 1946844305               |
| SNP_P4_70575_10680170 | NC_021164.1    | Ca_kabuli_chr05 | 10680170                | GG                              | AA              | 1946844307               |
| SNP_P4_70576_10680185 | NC_021164.1    | Ca_kabuli_chr05 | 10680185                | CC                              | TT              | 1946844309               |
| SNP_P4_70577_10680193 | NC_021164.1    | Ca_kabuli_chr05 | 10680193                | TT                              | GG              | 1946844311               |
| SNP_P4_70578_10686889 | NC_021164.1    | Ca_kabuli_chr05 | 10686889                | AA                              | GG              | 1946844313               |
| SNP_P4_70579_10686922 | NC_021164.1    | Ca_kabuli_chr05 | 10686922                | CC                              | TT              | 1946844315               |
| SNP_P4_70580_10686957 | NC_021164.1    | Ca_kabuli_chr05 | 10686957                | TT                              | CC              | 1946844317               |
| SNP_P4_70581_10686975 | NC_021164.1    | Ca_kabuli_chr05 | 10686975                | TT                              | CC              | 1946844319               |

| SNPs IDs              | Chromosome IDs | Chromosomes     | Physical positions (bp) | CDC Frontier (Reference genome) | (ILWC46 & LPNB) | NCBI SNPdb Accession IDs |
|-----------------------|----------------|-----------------|-------------------------|---------------------------------|-----------------|--------------------------|
| SNP_P4_70583_10687100 | NC_021164.1    | Ca_kabuli_chr05 | 10687100                | TT                              | GG              | 1946844321               |
| SNP_P4_70584_10687131 | NC_021164.1    | Ca_kabuli_chr05 | 10687131                | AA                              | GG              | 1946844323               |
| SNP_P4_70585_10687204 | NC_021164.1    | Ca_kabuli_chr05 | 10687204                | TT                              | GG              | 1946844325               |
| SNP_P4_70586_10687251 | NC_021164.1    | Ca_kabuli_chr05 | 10687251                | GG                              | AA              | 1946844327               |
| SNP_P4_70587_10687320 | NC_021164.1    | Ca_kabuli_chr05 | 10687320                | GG                              | TT              | 1946844329               |
| SNP_P4_70588_10687375 | NC_021164.1    | Ca_kabuli_chr05 | 10687375                | TT                              | GG              | 1946844331               |
| SNP_P4_70589_10687455 | NC_021164.1    | Ca_kabuli_chr05 | 10687455                | AA                              | CC              | 1946844333               |
| SNP_P4_70590_10687490 | NC_021164.1    | Ca_kabuli_chr05 | 10687490                | TT                              | CC              | 1946844335               |
| SNP_P4_70591_10687500 | NC_021164.1    | Ca_kabuli_chr05 | 10687500                | TT                              | AA              | 1946844337               |
| SNP_P4_70592_10687502 | NC_021164.1    | Ca_kabuli_chr05 | 10687502                | CC                              | TT              | 1946844339               |
| SNP_P4_70593_10687823 | NC_021164.1    | Ca_kabuli_chr05 | 10687823                | TT                              | AA              | 1946844341               |
| SNP_P4_70595_10688106 | NC_021164.1    | Ca_kabuli_chr05 | 10688106                | CC                              | TT              | 1946844343               |
| SNP_P4_70596_10688108 | NC_021164.1    | Ca_kabuli_chr05 | 10688108                | CC                              | TT              | 1946844345               |
| SNP_P4_70597_10688182 | NC_021164.1    | Ca_kabuli_chr05 | 10688182                | AA                              | TT              | 1946844347               |
| SNP_P4_70598_10688185 | NC_021164.1    | Ca_kabuli_chr05 | 10688185                | GG                              | TT              | 1946844349               |
| SNP_P4_70599_10688278 | NC_021164.1    | Ca_kabuli_chr05 | 10688278                | GG                              | AA              | 1946844351               |
| SNP_P4_70600_10688368 | NC_021164.1    | Ca_kabuli_chr05 | 10688368                | TT                              | GG              | 1946844353               |
| SNP_P4_70601_10688549 | NC_021164.1    | Ca_kabuli_chr05 | 10688549                | GG                              | CC              | 1946844356               |
| SNP_P4_70603_10688585 | NC_021164.1    | Ca_kabuli_chr05 | 10688585                | CC                              | TT              | 1946844358               |
| SNP_P4_70604_10688847 | NC_021164.1    | Ca_kabuli_chr05 | 10688847                | GG                              | TT              | 1946844360               |
| SNP_P4_70605_10688886 | NC_021164.1    | Ca_kabuli_chr05 | 10688886                | CC                              | TT              | 1946844362               |
| SNP_P4_70606_10688896 | NC_021164.1    | Ca_kabuli_chr05 | 10688896                | TT                              | AA              | 1946844364               |
| SNP_P4_70607_10688907 | NC_021164.1    | Ca_kabuli_chr05 | 10688907                | AA                              | CC              | 1946844366               |
| SNP_P4_70611_10689336 | NC_021164.1    | Ca_kabuli_chr05 | 10689336                | AA                              | TT              | 1946844368               |
| SNP_P4_70612_10689387 | NC_021164.1    | Ca_kabuli_chr05 | 10689387                | TT                              | AA              | 1946844370               |
| SNP_P4_70613_10689433 | NC_021164.1    | Ca_kabuli_chr05 | 10689433                | TT                              | CC              | 1946844372               |
| SNP_P4_70615_10689693 | NC_021164.1    | Ca_kabuli_chr05 | 10689693                | GG                              | CC              | 1946844374               |
| SNP_P4_70616_10690245 | NC_021164.1    | Ca_kabuli_chr05 | 10690245                | AA                              | TT              | 1946844376               |
| SNP_P4_70617_10690942 | NC_021164.1    | Ca_kabuli_chr05 | 10690942                | TT                              | CC              | 1946844378               |
| SNP_P4_70618_10691274 | NC_021164.1    | Ca_kabuli_chr05 | 10691274                | TT                              | AA              | 1946844380               |
| SNP_P4_70619_10691317 | NC_021164.1    | Ca_kabuli_chr05 | 10691317                | AA                              | GG              | 1946844382               |
| SNP_P4_70620_10692068 | NC_021164.1    | Ca_kabuli_chr05 | 10692068                | AA                              | GG              | 1946844384               |
| SNP_P4_70621_10693440 | NC_021164.1    | Ca_kabuli_chr05 | 10693440                | AA                              | GG              | 1946844386               |
| SNP_P4_70622_10693715 | NC_021164.1    | Ca_kabuli_chr05 | 10693715                | TT                              | GG              | 1946844388               |
| SNP_P4_70624_10707083 | NC_021164.1    | Ca_kabuli_chr05 | 10707083                | TT                              | CC              | 1946844390               |
| SNP_P4_70625_10712216 | NC_021164.1    | Ca_kabuli_chr05 | 10712216                | AA                              | GG              | 1946844392               |
| SNP_P4_70626_10712222 | NC_021164.1    | Ca_kabuli_chr05 | 10712222                | AA                              | GG              | 1946844394               |
| SNP_P4_70627_10759700 | NC_021164.1    | Ca_kabuli_chr05 | 10759700                | TT                              | CC              | 1946844396               |
| SNP_P4_70628_10759855 | NC_021164.1    | Ca_kabuli_chr05 | 10759855                | GG                              | TT              | 1946844398               |
| SNP_P4_70629_10775580 | NC_021164.1    | Ca_kabuli_chr05 | 10775580                | GG                              | CC              | 1946844400               |
| SNP_P4_70630_10794946 | NC_021164.1    | Ca_kabuli_chr05 | 10794946                | TT                              | AA              | 1946844403               |
| SNP_P4_70633_10854988 | NC_021164.1    | Ca_kabuli_chr05 | 10854988                | GG                              | AA              | 1946844405               |

| SNPs IDs              | Chromosome IDs | Chromosomes     | Physical positions (bp) | CDC Frontier (Reference genome) | (ILWC46 & LPNB) | NCBI SNPdb Accession IDs |
|-----------------------|----------------|-----------------|-------------------------|---------------------------------|-----------------|--------------------------|
| SNP_P4_70634_10883756 | NC_021164.1    | Ca_kabuli_chr05 | 10883756                | TT                              | CC              | 1946844407               |
| SNP_P4_70636_10954805 | NC_021164.1    | Ca_kabuli_chr05 | 10954805                | CC                              | TT              | 1946844409               |
| SNP_P4_70637_10954884 | NC_021164.1    | Ca_kabuli_chr05 | 10954884                | TT                              | CC              | 1946844411               |
| SNP_P4_70638_10954911 | NC_021164.1    | Ca_kabuli_chr05 | 10954911                | TT                              | CC              | 1946844413               |
| SNP_P4_70639_10955241 | NC_021164.1    | Ca_kabuli_chr05 | 10955241                | CC                              | TT              | 1946844415               |
| SNP_P4_70640_10955344 | NC_021164.1    | Ca_kabuli_chr05 | 10955344                | TT                              | CC              | 1946844417               |
| SNP_P4_70641_10955345 | NC_021164.1    | Ca_kabuli_chr05 | 10955345                | GG                              | TT              | 1946844419               |
| SNP_P4_70642_10959596 | NC_021164.1    | Ca_kabuli_chr05 | 10959596                | AA                              | GG              | 1946844421               |
| SNP_P4_70643_10965995 | NC_021164.1    | Ca_kabuli_chr05 | 10965995                | GG                              | AA              | 1946844423               |
| SNP_P4_70644_10968130 | NC_021164.1    | Ca_kabuli_chr05 | 10968130                | TT                              | GG              | 1946844425               |
| SNP_P4_70645_10977631 | NC_021164.1    | Ca_kabuli_chr05 | 10977631                | CC                              | AA              | 1946844427               |
| SNP_P4_70646_10995542 | NC_021164.1    | Ca_kabuli_chr05 | 10995542                | TT                              | GG              | 1946844429               |
| SNP_P4_70647_10995548 | NC_021164.1    | Ca_kabuli_chr05 | 10995548                | AA                              | CC              | 1946844431               |
| SNP_P4_70648_11007801 | NC_021164.1    | Ca_kabuli_chr05 | 11007801                | GG                              | AA              | 1946844433               |
| SNP_P4_70649_11007972 | NC_021164.1    | Ca_kabuli_chr05 | 11007972                | TT                              | CC              | 1946844435               |
| SNP_P4_70650_11057513 | NC_021164.1    | Ca_kabuli_chr05 | 11057513                | AA                              | CC              | 1946844437               |
| SNP_P4_70651_11064390 | NC_021164.1    | Ca_kabuli_chr05 | 11064390                | AA                              | GG              | 1946844439               |
| SNP_P4_70652_11075430 | NC_021164.1    | Ca_kabuli_chr05 | 11075430                | AA                              | GG              | 1946844441               |
| SNP_P4_70653_11075471 | NC_021164.1    | Ca_kabuli_chr05 | 11075471                | AA                              | GG              | 1946844443               |
| SNP_P4_70654_11075490 | NC_021164.1    | Ca_kabuli_chr05 | 11075490                | AA                              | GG              | 1946844445               |
| SNP_P4_70655_11075517 | NC_021164.1    | Ca_kabuli_chr05 | 11075517                | AA                              | CC              | 1946844447               |
| SNP_P4_70656_11075547 | NC_021164.1    | Ca_kabuli_chr05 | 11075547                | CC                              | TT              | 1946844449               |
| SNP_P4_70658_11131153 | NC_021164.1    | Ca_kabuli_chr05 | 11131153                | AA                              | GG              | 1946844451               |
| SNP_P4_70659_11131266 | NC_021164.1    | Ca_kabuli_chr05 | 11131266                | GG                              | TT              | 1946844453               |
| SNP_P4_70660_11131292 | NC_021164.1    | Ca_kabuli_chr05 | 11131292                | TT                              | AA              | 1946844455               |
| SNP_P4_70661_11131301 | NC_021164.1    | Ca_kabuli_chr05 | 11131301                | GG                              | TT              | 1946844457               |
| SNP_P4_70662_11131304 | NC_021164.1    | Ca_kabuli_chr05 | 11131304                | CC                              | GG              | 1946844459               |
| SNP_P4_70663_11131344 | NC_021164.1    | Ca_kabuli_chr05 | 11131344                | GG                              | AA              | 1946844461               |
| SNP_P4_70664_11131345 | NC_021164.1    | Ca_kabuli_chr05 | 11131345                | TT                              | GG              | 1946844463               |
| SNP_P4_70665_11131348 | NC_021164.1    | Ca_kabuli_chr05 | 11131348                | AA                              | GG              | 1946844465               |
| SNP_P4_70666_11131356 | NC_021164.1    | Ca_kabuli_chr05 | 11131356                | TT                              | CC              | 1946844467               |
| SNP_P4_70667_11131364 | NC_021164.1    | Ca_kabuli_chr05 | 11131364                | CC                              | AA              | 1946844469               |
| SNP_P4_70668_11131368 | NC_021164.1    | Ca_kabuli_chr05 | 11131368                | GG                              | AA              | 1946844471               |
| SNP_P4_70669_11131534 | NC_021164.1    | Ca_kabuli_chr05 | 11131534                | TT                              | GG              | 1946844473               |
| SNP_P4_70670_11132450 | NC_021164.1    | Ca_kabuli_chr05 | 11132450                | AA                              | TT              | 1946844475               |
| SNP_P4_70671_11132502 | NC_021164.1    | Ca_kabuli_chr05 | 11132502                | CC                              | GG              | 1946844477               |
| SNP_P4_70672_11132567 | NC_021164.1    | Ca_kabuli_chr05 | 11132567                | TT                              | CC              | 1946844479               |
| SNP_P4_70673_11132616 | NC_021164.1    | Ca_kabuli_chr05 | 11132616                | AA                              | TT              | 1946844481               |
| SNP_P4_70675_11132747 | NC_021164.1    | Ca_kabuli_chr05 | 11132747                | TT                              | CC              | 1946844483               |
| SNP_P4_70676_11132768 | NC_021164.1    | Ca_kabuli_chr05 | 11132768                | AA                              | GG              | 1946844485               |
| SNP_P4_70677_11132778 | NC_021164.1    | Ca_kabuli_chr05 | 11132778                | CC                              | TT              | 1946844487               |
| SNP_P4_70678_11132945 | NC_021164.1    | Ca_kabuli_chr05 | 11132945                | GG                              | TT              | 1946844489               |



| SNPs IDs              | Chromosome IDs | Chromosomes     | Physical positions (bp) | CDC Frontier (Reference genome) | (ILWC46 & LPNB) | NCBI SNPdb Accession IDs |
|-----------------------|----------------|-----------------|-------------------------|---------------------------------|-----------------|--------------------------|
| SNP_P4_70679_11133031 | NC_021164.1    | Ca_kabuli_chr05 | 11133031                | CC                              | AA              | 1946844491               |
| SNP_P4_70681_11146857 | NC_021164.1    | Ca_kabuli_chr05 | 11146857                | GG                              | AA              | 1946844493               |
| SNP_P4_70682_11150528 | NC_021164.1    | Ca_kabuli_chr05 | 11150528                | TT                              | GG              | 1946844495               |
| SNP_P4_70683_11150531 | NC_021164.1    | Ca_kabuli_chr05 | 11150531                | AA                              | CC              | 1946844497               |
| SNP_P4_70684_11167454 | NC_021164.1    | Ca_kabuli_chr05 | 11167454                | GG                              | AA              | 1946844499               |
| SNP_P4_70685_11167551 | NC_021164.1    | Ca_kabuli_chr05 | 11167551                | TT                              | AA              | 1946844502               |
| SNP_P4_70686_11167607 | NC_021164.1    | Ca_kabuli_chr05 | 11167607                | AA                              | GG              | 1946844504               |
| SNP_P4_70687_11167791 | NC_021164.1    | Ca_kabuli_chr05 | 11167791                | AA                              | GG              | 1946844506               |
| SNP_P4_70688_11167841 | NC_021164.1    | Ca_kabuli_chr05 | 11167841                | TT                              | AA              | 1946844508               |
| SNP_P4_70690_11167868 | NC_021164.1    | Ca_kabuli_chr05 | 11167868                | GG                              | CC              | 1946844510               |
| SNP_P4_70691_11167878 | NC_021164.1    | Ca_kabuli_chr05 | 11167878                | TT                              | CC              | 1946844512               |
| SNP_P4_70692_11167883 | NC_021164.1    | Ca_kabuli_chr05 | 11167883                | AA                              | CC              | 1946844514               |
| SNP_P4_70693_11167887 | NC_021164.1    | Ca_kabuli_chr05 | 11167887                | TT                              | CC              | 1946844516               |
| SNP_P4_70694_11167891 | NC_021164.1    | Ca_kabuli_chr05 | 11167891                | GG                              | AA              | 1946844518               |
| SNP_P4_70695_11167892 | NC_021164.1    | Ca_kabuli_chr05 | 11167892                | TT                              | CC              | 1946844520               |
| SNP_P4_70696_11167898 | NC_021164.1    | Ca_kabuli_chr05 | 11167898                | AA                              | GG              | 1946844522               |
| SNP_P4_70697_11167900 | NC_021164.1    | Ca_kabuli_chr05 | 11167900                | TT                              | GG              | 1946844524               |
| SNP_P4_70698_11167944 | NC_021164.1    | Ca_kabuli_chr05 | 11167944                | GG                              | CC              | 1946844526               |
| SNP_P4_70699_11167948 | NC_021164.1    | Ca_kabuli_chr05 | 11167948                | CC                              | TT              | 1946844528               |
| SNP_P4_70700_11167975 | NC_021164.1    | Ca_kabuli_chr05 | 11167975                | TT                              | CC              | 1946844530               |
| SNP_P4_70701_11167977 | NC_021164.1    | Ca_kabuli_chr05 | 11167977                | CC                              | AA              | 1946844532               |
| SNP_P4_70702_11167986 | NC_021164.1    | Ca_kabuli_chr05 | 11167986                | TT                              | GG              | 1946844534               |
| SNP_P4_70703_11167997 | NC_021164.1    | Ca_kabuli_chr05 | 11167997                | CC                              | GG              | 1946844536               |
| SNP_P4_70704_11168012 | NC_021164.1    | Ca_kabuli_chr05 | 11168012                | GG                              | AA              | 1946844538               |
| SNP_P4_70705_11168022 | NC_021164.1    | Ca_kabuli_chr05 | 11168022                | TT                              | CC              | 1946844540               |
| SNP_P4_70706_11168046 | NC_021164.1    | Ca_kabuli_chr05 | 11168046                | TT                              | AA              | 1946844541               |
| SNP_P4_70707_11168052 | NC_021164.1    | Ca_kabuli_chr05 | 11168052                | TT                              | CC              | 1946844543               |
| SNP_P4_70708_11168115 | NC_021164.1    | Ca_kabuli_chr05 | 11168115                | CC                              | TT              | 1946844545               |
| SNP_P4_70709_11168142 | NC_021164.1    | Ca_kabuli_chr05 | 11168142                | AA                              | TT              | 1946844547               |
| SNP_P4_70710_11168165 | NC_021164.1    | Ca_kabuli_chr05 | 11168165                | GG                              | CC              | 1946844549               |
| SNP_P4_70711_11168237 | NC_021164.1    | Ca_kabuli_chr05 | 11168237                | AA                              | CC              | 1946844551               |
| SNP_P4_70712_11168238 | NC_021164.1    | Ca_kabuli_chr05 | 11168238                | AA                              | TT              | 1946844553               |
| SNP_P4_70714_11168454 | NC_021164.1    | Ca_kabuli_chr05 | 11168454                | TT                              | CC              | 1946844555               |
| SNP_P4_70715_11168514 | NC_021164.1    | Ca_kabuli_chr05 | 11168514                | GG                              | AA              | 1946844557               |
| SNP_P4_70716_11168544 | NC_021164.1    | Ca_kabuli_chr05 | 11168544                | GG                              | TT              | 1946844559               |
| SNP_P4_70717_11168611 | NC_021164.1    | Ca_kabuli_chr05 | 11168611                | AA                              | TT              | 1946844561               |
| SNP_P4_70718_11168644 | NC_021164.1    | Ca_kabuli_chr05 | 11168644                | TT                              | CC              | 1946844564               |
| SNP_P4_70719_11168668 | NC_021164.1    | Ca_kabuli_chr05 | 11168668                | GG                              | TT              | 1946844566               |
| SNP_P4_70720_11168669 | NC_021164.1    | Ca_kabuli_chr05 | 11168669                | AA                              | GG              | 1946844568               |
| SNP_P4_70721_11168754 | NC_021164.1    | Ca_kabuli_chr05 | 11168754                | AA                              | GG              | 1946844570               |
| SNP_P4_70723_11168829 | NC_021164.1    | Ca_kabuli_chr05 | 11168829                | TT                              | CC              | 1946844572               |
| SNP_P4_70724_11168861 | NC_021164.1    | Ca_kabuli_chr05 | 11168861                | GG                              | AA              | 1946844574               |

| SNPs IDs              | Chromosome IDs | Chromosomes     | Physical positions (bp) | CDC Frontier (Reference genome) | (ILWC46 & LPNB) | NCBI SNPdb Accession IDs |
|-----------------------|----------------|-----------------|-------------------------|---------------------------------|-----------------|--------------------------|
| SNP_P4_70725_11168864 | NC_021164.1    | Ca_kabuli_chr05 | 11168864                | TT                              | AA              | 1946844575               |
| SNP_P4_70726_11168881 | NC_021164.1    | Ca_kabuli_chr05 | 11168881                | CC                              | TT              | 1946844577               |
| SNP_P4_70727_11168882 | NC_021164.1    | Ca_kabuli_chr05 | 11168882                | CC                              | TT              | 1946844579               |
| SNP_P4_70729_11168984 | NC_021164.1    | Ca_kabuli_chr05 | 11168984                | AA                              | TT              | 1946844581               |
| SNP_P4_70730_11168986 | NC_021164.1    | Ca_kabuli_chr05 | 11168986                | CC                              | AA              | 1946844583               |
| SNP_P4_70732_11169069 | NC_021164.1    | Ca_kabuli_chr05 | 11169069                | GG                              | AA              | 1946844585               |
| SNP_P4_70733_11169094 | NC_021164.1    | Ca_kabuli_chr05 | 11169094                | GG                              | TT              | 1946844587               |
| SNP_P4_70734_11169151 | NC_021164.1    | Ca_kabuli_chr05 | 11169151                | AA                              | GG              | 1946844589               |
| SNP_P4_70735_11169198 | NC_021164.1    | Ca_kabuli_chr05 | 11169198                | CC                              | AA              | 1946844591               |
| SNP_P4_70736_11169218 | NC_021164.1    | Ca_kabuli_chr05 | 11169218                | TT                              | CC              | 1946844593               |
| SNP_P4_70737_11169228 | NC_021164.1    | Ca_kabuli_chr05 | 11169228                | CC                              | TT              | 1946844595               |
| SNP_P4_70738_11169234 | NC_021164.1    | Ca_kabuli_chr05 | 11169234                | AA                              | CC              | 1946844597               |
| SNP_P4_70739_11169282 | NC_021164.1    | Ca_kabuli_chr05 | 11169282                | GG                              | AA              | 1946844599               |
| SNP_P4_70740_11169372 | NC_021164.1    | Ca_kabuli_chr05 | 11169372                | TT                              | CC              | 1946844601               |
| SNP_P4_70741_11169396 | NC_021164.1    | Ca_kabuli_chr05 | 11169396                | CC                              | AA              | 1946844603               |
| SNP_P4_70742_11169409 | NC_021164.1    | Ca_kabuli_chr05 | 11169409                | AA                              | GG              | 1946844605               |
| SNP_P4_70743_11169531 | NC_021164.1    | Ca_kabuli_chr05 | 11169531                | TT                              | GG              | 1946844607               |
| SNP_P4_70744_11169543 | NC_021164.1    | Ca_kabuli_chr05 | 11169543                | AA                              | CC              | 1946844609               |
| SNP_P4_70745_11169550 | NC_021164.1    | Ca_kabuli_chr05 | 11169550                | GG                              | TT              | 1946844611               |
| SNP_P4_70746_11169552 | NC_021164.1    | Ca_kabuli_chr05 | 11169552                | AA                              | GG              | 1946844613               |
| SNP_P4_70747_11169578 | NC_021164.1    | Ca_kabuli_chr05 | 11169578                | CC                              | GG              | 1946844615               |
| SNP_P4_70748_11169588 | NC_021164.1    | Ca_kabuli_chr05 | 11169588                | CC                              | TT              | 1946844617               |
| SNP_P4_70750_11169627 | NC_021164.1    | Ca_kabuli_chr05 | 11169627                | AA                              | CC              | 1946844619               |
| SNP_P4_70751_11169638 | NC_021164.1    | Ca_kabuli_chr05 | 11169638                | AA                              | GG              | 1946844621               |
| SNP_P4_70752_11180493 | NC_021164.1    | Ca_kabuli_chr05 | 11180493                | CC                              | TT              | 1946844623               |
| SNP_P4_70753_11181702 | NC_021164.1    | Ca_kabuli_chr05 | 11181702                | GG                              | CC              | 1946844625               |
| SNP_P4_70754_11181747 | NC_021164.1    | Ca_kabuli_chr05 | 11181747                | TT                              | AA              | 1946844627               |
| SNP_P4_70755_11181769 | NC_021164.1    | Ca_kabuli_chr05 | 11181769                | TT                              | AA              | 1946844629               |
| SNP_P4_70756_11181788 | NC_021164.1    | Ca_kabuli_chr05 | 11181788                | CC                              | GG              | 1946844631               |
| SNP_P4_70757_11181865 | NC_021164.1    | Ca_kabuli_chr05 | 11181865                | TT                              | CC              | 1946844633               |
| SNP_P4_70758_11181896 | NC_021164.1    | Ca_kabuli_chr05 | 11181896                | GG                              | CC              | 1946844635               |
| SNP_P4_70759_11181899 | NC_021164.1    | Ca_kabuli_chr05 | 11181899                | GG                              | AA              | 1946844637               |
| SNP_P4_70760_11182020 | NC_021164.1    | Ca_kabuli_chr05 | 11182020                | AA                              | GG              | 1946844639               |
| SNP_P4_70761_11182140 | NC_021164.1    | Ca_kabuli_chr05 | 11182140                | GG                              | TT              | 1946844641               |
| SNP_P4_70762_11182235 | NC_021164.1    | Ca_kabuli_chr05 | 11182235                | CC                              | AA              | 1946844643               |
| SNP_P4_70763_11182292 | NC_021164.1    | Ca_kabuli_chr05 | 11182292                | CC                              | TT              | 1946844645               |
| SNP_P4_70764_11182506 | NC_021164.1    | Ca_kabuli_chr05 | 11182506                | AA                              | TT              | 1946844647               |
| SNP_P4_70765_11182518 | NC_021164.1    | Ca_kabuli_chr05 | 11182518                | GG                              | CC              | 1946844648               |
| SNP_P4_70766_11182557 | NC_021164.1    | Ca_kabuli_chr05 | 11182557                | CC                              | TT              | 1946844650               |
| SNP_P4_70767_11182561 | NC_021164.1    | Ca_kabuli_chr05 | 11182561                | TT                              | AA              | 1946844652               |
| SNP_P4_70768_11182617 | NC_021164.1    | Ca_kabuli_chr05 | 11182617                | CC                              | GG              | 1946844654               |
| SNP_P4_70769_11187940 | NC_021164.1    | Ca_kabuli_chr05 | 11187940                | TT                              | AA              | 1946844656               |

| SNPs IDs              | Chromosome IDs | Chromosomes     | Physical positions (bp) | CDC Frontier (Reference genome) | (ILWC46 & LPNB) | NCBI SNPdb Accession IDs |
|-----------------------|----------------|-----------------|-------------------------|---------------------------------|-----------------|--------------------------|
| SNP_P4_70770_11187969 | NC_021164.1    | Ca_kabuli_chr05 | 11187969                | CC                              | AA              | 1946844658               |
| SNP_P4_70771_11187971 | NC_021164.1    | Ca_kabuli_chr05 | 11187971                | AA                              | TT              | 1946844660               |
| SNP_P4_70772_11193040 | NC_021164.1    | Ca_kabuli_chr05 | 11193040                | TT                              | CC              | 1946844662               |
| SNP_P4_70773_11230713 | NC_021164.1    | Ca_kabuli_chr05 | 11230713                | TT                              | CC              | 1946844664               |
| SNP_P4_70774_11232966 | NC_021164.1    | Ca_kabuli_chr05 | 11232966                | GG                              | AA              | 1946844666               |
| SNP_P4_70775_11232984 | NC_021164.1    | Ca_kabuli_chr05 | 11232984                | CC                              | AA              | 1946844668               |
| SNP_P4_70777_11233259 | NC_021164.1    | Ca_kabuli_chr05 | 11233259                | CC                              | TT              | 1946844670               |
| SNP_P4_70778_11233456 | NC_021164.1    | Ca_kabuli_chr05 | 11233456                | GG                              | TT              | 1946844672               |
| SNP_P4_70779_11235459 | NC_021164.1    | Ca_kabuli_chr05 | 11235459                | CC                              | TT              | 1946844674               |
| SNP_P4_70780_11243728 | NC_021164.1    | Ca_kabuli_chr05 | 11243728                | TT                              | CC              | 1946844676               |
| SNP_P4_70781_11243886 | NC_021164.1    | Ca_kabuli_chr05 | 11243886                | CC                              | TT              | 1946844678               |
| SNP_P4_70782_11244012 | NC_021164.1    | Ca_kabuli_chr05 | 11244012                | GG                              | AA              | 1946844680               |
| SNP_P4_70783_11244028 | NC_021164.1    | Ca_kabuli_chr05 | 11244028                | AA                              | CC              | 1946844682               |
| SNP_P4_70784_11244064 | NC_021164.1    | Ca_kabuli_chr05 | 11244064                | GG                              | TT              | 1946844684               |
| SNP_P4_70785_11244084 | NC_021164.1    | Ca_kabuli_chr05 | 11244084                | TT                              | CC              | 1946844686               |
| SNP_P4_70786_11244182 | NC_021164.1    | Ca_kabuli_chr05 | 11244182                | AA                              | TT              | 1946844688               |
| SNP_P4_70787_11244241 | NC_021164.1    | Ca_kabuli_chr05 | 11244241                | TT                              | GG              | 1946844690               |
| SNP_P4_70788_11271174 | NC_021164.1    | Ca_kabuli_chr05 | 11271174                | GG                              | TT              | 1946844692               |
| SNP_P4_70789_11298179 | NC_021164.1    | Ca_kabuli_chr05 | 11298179                | CC                              | AA              | 1946844694               |
| SNP_P4_70790_11298181 | NC_021164.1    | Ca_kabuli_chr05 | 11298181                | AA                              | TT              | 1946844696               |
| SNP_P4_70791_11298624 | NC_021164.1    | Ca_kabuli_chr05 | 11298624                | GG                              | AA              | 1946844698               |
| SNP_P4_70792_11298773 | NC_021164.1    | Ca_kabuli_chr05 | 11298773                | TT                              | CC              | 1946844700               |
| SNP_P4_70793_11299194 | NC_021164.1    | Ca_kabuli_chr05 | 11299194                | CC                              | TT              | 1946844702               |
| SNP_P4_70794_11306879 | NC_021164.1    | Ca_kabuli_chr05 | 11306879                | CC                              | GG              | 1946844704               |
| SNP_P4_70795_11317445 | NC_021164.1    | Ca_kabuli_chr05 | 11317445                | TT                              | AA              | 1946844706               |
| SNP_P4_70796_11317455 | NC_021164.1    | Ca_kabuli_chr05 | 11317455                | GG                              | AA              | 1946844708               |
| SNP_P4_70797_11317456 | NC_021164.1    | Ca_kabuli_chr05 | 11317456                | CC                              | AA              | 1946844710               |
| SNP_P4_70799_11324576 | NC_021164.1    | Ca_kabuli_chr05 | 11324576                | CC                              | TT              | 1946844712               |
| SNP_P4_70800_11324578 | NC_021164.1    | Ca_kabuli_chr05 | 11324578                | AA                              | GG              | 1946844714               |
| SNP_P4_70801_11324664 | NC_021164.1    | Ca_kabuli_chr05 | 11324664                | AA                              | CC              | 1946844716               |
| SNP_P4_70802_11324668 | NC_021164.1    | Ca_kabuli_chr05 | 11324668                | CC                              | TT              | 1946844718               |
| SNP_P4_70803_11346306 | NC_021164.1    | Ca_kabuli_chr05 | 11346306                | TT                              | CC              | 1946844720               |
| SNP_P4_70804_11346317 | NC_021164.1    | Ca_kabuli_chr05 | 11346317                | TT                              | GG              | 1946844722               |
| SNP_P4_70805_11346407 | NC_021164.1    | Ca_kabuli_chr05 | 11346407                | CC                              | AA              | 1946844724               |
| SNP_P4_70806_11346428 | NC_021164.1    | Ca_kabuli_chr05 | 11346428                | GG                              | CC              | 1946844726               |
| SNP_P4_70807_11346441 | NC_021164.1    | Ca_kabuli_chr05 | 11346441                | TT                              | CC              | 1946844728               |
| SNP_P4_70808_11346647 | NC_021164.1    | Ca_kabuli_chr05 | 11346647                | TT                              | CC              | 1946844730               |
| SNP_P4_70809_11346677 | NC_021164.1    | Ca_kabuli_chr05 | 11346677                | AA                              | CC              | 1946844732               |
| SNP_P4_70810_11346683 | NC_021164.1    | Ca_kabuli_chr05 | 11346683                | TT                              | CC              | 1946844734               |
| SNP_P4_70811_11346704 | NC_021164.1    | Ca_kabuli_chr05 | 11346704                | GG                              | AA              | 1946844736               |
| SNP_P4_70812_11346752 | NC_021164.1    | Ca_kabuli_chr05 | 11346752                | GG                              | TT              | 1946844738               |
| SNP_P4_70813_11346760 | NC_021164.1    | Ca_kabuli_chr05 | 11346760                | GG                              | TT              | 1946844739               |

| SNPs IDs              | Chromosome IDs | Chromosomes     | Physical positions (bp) | CDC Frontier (Reference genome) | (ILWC46 & LPNB) | NCBI SNPdb Accession IDs |
|-----------------------|----------------|-----------------|-------------------------|---------------------------------|-----------------|--------------------------|
| SNP_P4_70814_11346766 | NC_021164.1    | Ca_kabuli_chr05 | 11346766                | AA                              | GG              | 1946844741               |
| SNP_P4_70815_11346825 | NC_021164.1    | Ca_kabuli_chr05 | 11346825                | TT                              | CC              | 1946844743               |
| SNP_P4_70816_11346864 | NC_021164.1    | Ca_kabuli_chr05 | 11346864                | CC                              | GG              | 1946844745               |
| SNP_P4_70817_11346866 | NC_021164.1    | Ca_kabuli_chr05 | 11346866                | TT                              | CC              | 1946844747               |
| SNP_P4_70818_11347018 | NC_021164.1    | Ca_kabuli_chr05 | 11347018                | TT                              | CC              | 1946844749               |
| SNP_P4_70819_11352071 | NC_021164.1    | Ca_kabuli_chr05 | 11352071                | GG                              | AA              | 1946844751               |
| SNP_P4_70820_11352601 | NC_021164.1    | Ca_kabuli_chr05 | 11352601                | GG                              | AA              | 1946844753               |
| SNP_P4_70821_11362580 | NC_021164.1    | Ca_kabuli_chr05 | 11362580                | AA                              | GG              | 1946844755               |
| SNP_P4_70822_11362940 | NC_021164.1    | Ca_kabuli_chr05 | 11362940                | AA                              | GG              | 1946844757               |
| SNP_P4_70825_11416802 | NC_021164.1    | Ca_kabuli_chr05 | 11416802                | GG                              | TT              | 1946844759               |
| SNP_P4_70826_11420751 | NC_021164.1    | Ca_kabuli_chr05 | 11420751                | AA                              | CC              | 1946844761               |
| SNP_P4_70827_11420779 | NC_021164.1    | Ca_kabuli_chr05 | 11420779                | CC                              | TT              | 1946844763               |
| SNP_P4_70831_11512091 | NC_021164.1    | Ca_kabuli_chr05 | 11512091                | TT                              | GG              | 1946844765               |
| SNP_P4_70832_11512541 | NC_021164.1    | Ca_kabuli_chr05 | 11512541                | TT                              | CC              | 1946844767               |
| SNP_P4_70833_11512560 | NC_021164.1    | Ca_kabuli_chr05 | 11512560                | AA                              | GG              | 1946844769               |
| SNP_P4_70834_11512585 | NC_021164.1    | Ca_kabuli_chr05 | 11512585                | CC                              | TT              | 1946844771               |
| SNP_P4_70835_11512589 | NC_021164.1    | Ca_kabuli_chr05 | 11512589                | AA                              | CC              | 1946844773               |
| SNP_P4_70836_11512617 | NC_021164.1    | Ca_kabuli_chr05 | 11512617                | TT                              | CC              | 1946844775               |
| SNP_P4_70837_11512715 | NC_021164.1    | Ca_kabuli_chr05 | 11512715                | GG                              | TT              | 1946844777               |
| SNP_P4_70838_11516009 | NC_021164.1    | Ca_kabuli_chr05 | 11516009                | AA                              | GG              | 1946844779               |
| SNP_P4_70839_11516014 | NC_021164.1    | Ca_kabuli_chr05 | 11516014                | CC                              | GG              | 1946844781               |
| SNP_P4_70840_11516070 | NC_021164.1    | Ca_kabuli_chr05 | 11516070                | AA                              | CC              | 1946844783               |
| SNP_P4_70841_11516098 | NC_021164.1    | Ca_kabuli_chr05 | 11516098                | TT                              | CC              | 1946844785               |
| SNP_P4_70842_11516114 | NC_021164.1    | Ca_kabuli_chr05 | 11516114                | CC                              | TT              | 1946844787               |
| SNP_P4_70843_11516472 | NC_021164.1    | Ca_kabuli_chr05 | 11516472                | GG                              | AA              | 1946844789               |
| SNP_P4_70844_11535296 | NC_021164.1    | Ca_kabuli_chr05 | 11535296                | TT                              | CC              | 1946844791               |
| SNP_P4_70845_11535311 | NC_021164.1    | Ca_kabuli_chr05 | 11535311                | AA                              | TT              | 1946844793               |
| SNP_P4_70846_11535333 | NC_021164.1    | Ca_kabuli_chr05 | 11535333                | TT                              | CC              | 1946844795               |
| SNP_P4_70847_11545381 | NC_021164.1    | Ca_kabuli_chr05 | 11545381                | TT                              | AA              | 1946844797               |
| SNP_P4_70848_11548226 | NC_021164.1    | Ca_kabuli_chr05 | 11548226                | GG                              | AA              | 1946844799               |
| SNP_P4_70849_11548976 | NC_021164.1    | Ca_kabuli_chr05 | 11548976                | TT                              | CC              | 1946844801               |
| SNP_P4_70851_11558972 | NC_021164.1    | Ca_kabuli_chr05 | 11558972                | AA                              | GG              | 1946844803               |
| SNP_P4_70852_11572403 | NC_021164.1    | Ca_kabuli_chr05 | 11572403                | TT                              | AA              | 1946844805               |
| SNP_P4_70854_11582978 | NC_021164.1    | Ca_kabuli_chr05 | 11582978                | TT                              | GG              | 1946844807               |
| SNP_P4_70855_11582991 | NC_021164.1    | Ca_kabuli_chr05 | 11582991                | CC                              | TT              | 1946844809               |
| SNP_P4_70856_11582994 | NC_021164.1    | Ca_kabuli_chr05 | 11582994                | CC                              | AA              | 1946844811               |
| SNP_P4_70857_11583028 | NC_021164.1    | Ca_kabuli_chr05 | 11583028                | TT                              | GG              | 1946844813               |
| SNP_P4_70858_11605069 | NC_021164.1    | Ca_kabuli_chr05 | 11605069                | TT                              | AA              | 1946844815               |
| SNP_P4_70859_11619152 | NC_021164.1    | Ca_kabuli_chr05 | 11619152                | AA                              | GG              | 1946844817               |
| SNP_P4_70860_11648799 | NC_021164.1    | Ca_kabuli_chr05 | 11648799                | GG                              | AA              | 1946844819               |
| SNP_P4_70861_11649032 | NC_021164.1    | Ca_kabuli_chr05 | 11649032                | AA                              | GG              | 1946844821               |
| SNP_P4_70862_11649033 | NC_021164.1    | Ca_kabuli_chr05 | 11649033                | CC                              | AA              | 1946844823               |

| SNPs IDs              | Chromosome IDs | Chromosomes     | Physical positions (bp) | CDC Frontier (Reference genome) | (ILWC46 & LPNB) | NCBI SNPdb Accession IDs |
|-----------------------|----------------|-----------------|-------------------------|---------------------------------|-----------------|--------------------------|
| SNP_P4_70863_11657149 | NC_021164.1    | Ca_kabuli_chr05 | 11657149                | CC                              | TT              | 1946844824               |
| SNP_P4_70865_11667517 | NC_021164.1    | Ca_kabuli_chr05 | 11667517                | TT                              | CC              | 1946844826               |
| SNP_P4_70866_11667522 | NC_021164.1    | Ca_kabuli_chr05 | 11667522                | TT                              | CC              | 1946844828               |
| SNP_P4_70867_11667531 | NC_021164.1    | Ca_kabuli_chr05 | 11667531                | AA                              | GG              | 1946844831               |
| SNP_P4_70868_11667532 | NC_021164.1    | Ca_kabuli_chr05 | 11667532                | CC                              | TT              | 1946844833               |
| SNP_P4_70869_11667561 | NC_021164.1    | Ca_kabuli_chr05 | 11667561                | TT                              | CC              | 1946844835               |
| SNP_P4_70870_11667567 | NC_021164.1    | Ca_kabuli_chr05 | 11667567                | GG                              | AA              | 1946844837               |
| SNP_P4_70871_11667574 | NC_021164.1    | Ca_kabuli_chr05 | 11667574                | TT                              | CC              | 1946844839               |
| SNP_P4_70872_11667919 | NC_021164.1    | Ca_kabuli_chr05 | 11667919                | TT                              | GG              | 1946844841               |
| SNP_P4_70873_11671644 | NC_021164.1    | Ca_kabuli_chr05 | 11671644                | TT                              | AA              | 1946844842               |
| SNP_P4_70874_11687588 | NC_021164.1    | Ca_kabuli_chr05 | 11687588                | AA                              | GG              | 1946844844               |
| SNP_P4_70875_11703812 | NC_021164.1    | Ca_kabuli_chr05 | 11703812                | TT                              | CC              | 1946844846               |
| SNP_P4_70876_11703837 | NC_021164.1    | Ca_kabuli_chr05 | 11703837                | GG                              | AA              | 1946844848               |
| SNP_P4_70877_11703849 | NC_021164.1    | Ca_kabuli_chr05 | 11703849                | TT                              | AA              | 1946844850               |
| SNP_P4_70878_11703852 | NC_021164.1    | Ca_kabuli_chr05 | 11703852                | AA                              | GG              | 1946844852               |
| SNP_P4_70879_11703872 | NC_021164.1    | Ca_kabuli_chr05 | 11703872                | AA                              | GG              | 1946844854               |
| SNP_P4_70880_11703923 | NC_021164.1    | Ca_kabuli_chr05 | 11703923                | GG                              | AA              | 1946844856               |
| SNP_P4_70881_11703932 | NC_021164.1    | Ca_kabuli_chr05 | 11703932                | TT                              | CC              | 1946844858               |
| SNP_P4_70882_11703947 | NC_021164.1    | Ca_kabuli_chr05 | 11703947                | AA                              | TT              | 1946844860               |
| SNP_P4_70883_11703950 | NC_021164.1    | Ca_kabuli_chr05 | 11703950                | GG                              | AA              | 1946844862               |
| SNP_P4_70884_11703953 | NC_021164.1    | Ca_kabuli_chr05 | 11703953                | GG                              | TT              | 1946844864               |
| SNP_P4_70885_11704287 | NC_021164.1    | Ca_kabuli_chr05 | 11704287                | TT                              | CC              | 1946844866               |
| SNP_P4_70886_11704294 | NC_021164.1    | Ca_kabuli_chr05 | 11704294                | CC                              | TT              | 1946844868               |
| SNP_P4_70887_11704315 | NC_021164.1    | Ca_kabuli_chr05 | 11704315                | CC                              | TT              | 1946844870               |
| SNP_P4_70888_11720426 | NC_021164.1    | Ca_kabuli_chr05 | 11720426                | GG                              | AA              | 1946844872               |
| SNP_P4_70889_11721060 | NC_021164.1    | Ca_kabuli_chr05 | 11721060                | GG                              | AA              | 1946844874               |
| SNP_P4_70890_11721982 | NC_021164.1    | Ca_kabuli_chr05 | 11721982                | AA                              | CC              | 1946844876               |
| SNP_P4_70891_11722285 | NC_021164.1    | Ca_kabuli_chr05 | 11722285                | TT                              | AA              | 1946844878               |
| SNP_P4_70892_11722474 | NC_021164.1    | Ca_kabuli_chr05 | 11722474                | CC                              | TT              | 1946844880               |
| SNP_P4_70893_11727515 | NC_021164.1    | Ca_kabuli_chr05 | 11727515                | TT                              | GG              | 1946844882               |
| SNP_P4_70894_11727588 | NC_021164.1    | Ca_kabuli_chr05 | 11727588                | AA                              | GG              | 1946844883               |
| SNP_P4_70895_11727710 | NC_021164.1    | Ca_kabuli_chr05 | 11727710                | CC                              | TT              | 1946844885               |
| SNP_P4_70897_11729501 | NC_021164.1    | Ca_kabuli_chr05 | 11729501                | AA                              | GG              | 1946844887               |
| SNP_P4_70898_11729551 | NC_021164.1    | Ca_kabuli_chr05 | 11729551                | AA                              | GG              | 1946844889               |
| SNP_P4_70899_11729556 | NC_021164.1    | Ca_kabuli_chr05 | 11729556                | AA                              | TT              | 1946844891               |
| SNP_P4_70901_11729608 | NC_021164.1    | Ca_kabuli_chr05 | 11729608                | AA                              | TT              | 1946844893               |
| SNP_P4_70902_11729725 | NC_021164.1    | Ca_kabuli_chr05 | 11729725                | TT                              | AA              | 1946844895               |
| SNP_P4_70903_11729839 | NC_021164.1    | Ca_kabuli_chr05 | 11729839                | AA                              | GG              | 1946844897               |
| SNP_P4_70904_11759275 | NC_021164.1    | Ca_kabuli_chr05 | 11759275                | CC                              | TT              | 1946844899               |
| SNP_P4_70905_11759289 | NC_021164.1    | Ca_kabuli_chr05 | 11759289                | TT                              | AA              | 1946844901               |
| SNP_P4_70906_11823098 | NC_021164.1    | Ca_kabuli_chr05 | 11823098                | GG                              | AA              | 1946844903               |
| SNP_P4_70907_11829850 | NC_021164.1    | Ca_kabuli_chr05 | 11829850                | TT                              | CC              | 1946844905               |

| SNPs IDs              | Chromosome IDs | Chromosomes     | Physical positions (bp) | CDC Frontier (Reference genome) | (ILWC46 & LPNB) | NCBI SNPdb Accession IDs |
|-----------------------|----------------|-----------------|-------------------------|---------------------------------|-----------------|--------------------------|
| SNP_P4_70908_11830155 | NC_021164.1    | Ca_kabuli_chr05 | 11830155                | TT                              | CC              | 1946844906               |
| SNP_P4_70909_11831527 | NC_021164.1    | Ca_kabuli_chr05 | 11831527                | CC                              | TT              | 1946844908               |
| SNP_P4_70910_11832435 | NC_021164.1    | Ca_kabuli_chr05 | 11832435                | CC                              | GG              | 1946844911               |
| SNP_P4_70911_11878903 | NC_021164.1    | Ca_kabuli_chr05 | 11878903                | GG                              | TT              | 1946844913               |
| SNP_P4_70913_11879188 | NC_021164.1    | Ca_kabuli_chr05 | 11879188                | TT                              | CC              | 1946844916               |
| SNP_P4_70914_11879285 | NC_021164.1    | Ca_kabuli_chr05 | 11879285                | AA                              | GG              | 1946844918               |
| SNP_P4_70915_11879333 | NC_021164.1    | Ca_kabuli_chr05 | 11879333                | TT                              | CC              | 1946844920               |
| SNP_P4_70916_11879395 | NC_021164.1    | Ca_kabuli_chr05 | 11879395                | AA                              | CC              | 1946844922               |
| SNP_P4_70917_11880600 | NC_021164.1    | Ca_kabuli_chr05 | 11880600                | TT                              | CC              | 1946844924               |
| SNP_P4_70918_11880609 | NC_021164.1    | Ca_kabuli_chr05 | 11880609                | TT                              | AA              | 1946844926               |
| SNP_P4_70919_11880929 | NC_021164.1    | Ca_kabuli_chr05 | 11880929                | CC                              | AA              | 1946844928               |
| SNP_P4_70920_11880931 | NC_021164.1    | Ca_kabuli_chr05 | 11880931                | TT                              | CC              | 1946844930               |
| SNP_P4_70921_11900472 | NC_021164.1    | Ca_kabuli_chr05 | 11900472                | TT                              | CC              | 1946844932               |
| SNP_P4_70922_11912911 | NC_021164.1    | Ca_kabuli_chr05 | 11912911                | AA                              | GG              | 1946844934               |
| SNP_P4_70923_11912938 | NC_021164.1    | Ca_kabuli_chr05 | 11912938                | TT                              | GG              | 1946844936               |
| SNP_P4_70924_11912950 | NC_021164.1    | Ca_kabuli_chr05 | 11912950                | AA                              | GG              | 1946844938               |
| SNP_P4_70925_11913251 | NC_021164.1    | Ca_kabuli_chr05 | 11913251                | TT                              | CC              | 1946844940               |
| SNP_P4_70926_11913269 | NC_021164.1    | Ca_kabuli_chr05 | 11913269                | GG                              | AA              | 1946844942               |
| SNP_P4_70927_11913279 | NC_021164.1    | Ca_kabuli_chr05 | 11913279                | AA                              | GG              | 1946844944               |
| SNP_P4_70928_11913322 | NC_021164.1    | Ca_kabuli_chr05 | 11913322                | TT                              | CC              | 1946844946               |
| SNP_P4_70929_11913326 | NC_021164.1    | Ca_kabuli_chr05 | 11913326                | AA                              | GG              | 1946844948               |
| SNP_P4_70930_11913352 | NC_021164.1    | Ca_kabuli_chr05 | 11913352                | TT                              | CC              | 1946844950               |
| SNP_P4_70931_11913362 | NC_021164.1    | Ca_kabuli_chr05 | 11913362                | TT                              | GG              | 1946844952               |
| SNP_P4_70932_11913390 | NC_021164.1    | Ca_kabuli_chr05 | 11913390                | AA                              | GG              | 1946844955               |
| SNP_P4_70933_11913391 | NC_021164.1    | Ca_kabuli_chr05 | 11913391                | GG                              | CC              | 1946844957               |
| SNP_P4_70934_11913408 | NC_021164.1    | Ca_kabuli_chr05 | 11913408                | CC                              | TT              | 1946844959               |
| SNP_P4_70935_11913421 | NC_021164.1    | Ca_kabuli_chr05 | 11913421                | AA                              | GG              | 1946844961               |
| SNP_P4_70936_11927562 | NC_021164.1    | Ca_kabuli_chr05 | 11927562                | CC                              | TT              | 1946844963               |
| SNP_P4_70937_11927570 | NC_021164.1    | Ca_kabuli_chr05 | 11927570                | TT                              | CC              | 1946844965               |
| SNP_P4_70938_11979625 | NC_021164.1    | Ca_kabuli_chr05 | 11979625                | AA                              | GG              | 1946844967               |
| SNP_P4_70939_11983015 | NC_021164.1    | Ca_kabuli_chr05 | 11983015                | TT                              | CC              | 1946844969               |
| SNP_P4_70940_11983713 | NC_021164.1    | Ca_kabuli_chr05 | 11983713                | TT                              | CC              | 1946844971               |
| SNP_P4_70942_12004067 | NC_021164.1    | Ca_kabuli_chr05 | 12004067                | GG                              | CC              | 1946844973               |
| SNP_P4_70943_12010496 | NC_021164.1    | Ca_kabuli_chr05 | 12010496                | AA                              | GG              | 1946844975               |
| SNP_P4_70944_12010520 | NC_021164.1    | Ca_kabuli_chr05 | 12010520                | TT                              | CC              | 1946844977               |
| SNP_P4_70945_12024836 | NC_021164.1    | Ca_kabuli_chr05 | 12024836                | CC                              | TT              | 1946844979               |
| SNP_P4_70946_12054078 | NC_021164.1    | Ca_kabuli_chr05 | 12054078                | AA                              | TT              | 1946844981               |
| SNP_P4_70947_12091099 | NC_021164.1    | Ca_kabuli_chr05 | 12091099                | AA                              | GG              | 1946844983               |
| SNP_P4_70948_12091100 | NC_021164.1    | Ca_kabuli_chr05 | 12091100                | CC                              | TT              | 1946844985               |
| SNP_P4_70949_12091106 | NC_021164.1    | Ca_kabuli_chr05 | 12091106                | AA                              | GG              | 1946844987               |
| SNP_P4_70950_12091153 | NC_021164.1    | Ca_kabuli_chr05 | 12091153                | GG                              | AA              | 1946844989               |
| SNP_P4_70951_12091167 | NC_021164.1    | Ca_kabuli_chr05 | 12091167                | AA                              | GG              | 1946844991               |

| SNPs IDs              | Chromosome IDs | Chromosomes     | Physical positions (bp) | CDC Frontier (Reference genome) | (ILWC46 & LPNB) | NCBI SNPdb Accession IDs |
|-----------------------|----------------|-----------------|-------------------------|---------------------------------|-----------------|--------------------------|
| SNP_P4_70952_12091408 | NC_021164.1    | Ca_kabuli_chr05 | 12091408                | AA                              | GG              | 1946844993               |
| SNP_P4_70953_12091460 | NC_021164.1    | Ca_kabuli_chr05 | 12091460                | GG                              | AA              | 1946844995               |
| SNP_P4_70954_12091461 | NC_021164.1    | Ca_kabuli_chr05 | 12091461                | TT                              | CC              | 1946844997               |
| SNP_P4_70955_12093279 | NC_021164.1    | Ca_kabuli_chr05 | 12093279                | AA                              | GG              | 1946844999               |
| SNP_P4_70956_12093621 | NC_021164.1    | Ca_kabuli_chr05 | 12093621                | CC                              | AA              | 1946845001               |
| SNP_P4_70957_12093637 | NC_021164.1    | Ca_kabuli_chr05 | 12093637                | TT                              | CC              | 1946845003               |
| SNP_P4_70958_12093639 | NC_021164.1    | Ca_kabuli_chr05 | 12093639                | GG                              | AA              | 1946845005               |
| SNP_P4_70959_12093643 | NC_021164.1    | Ca_kabuli_chr05 | 12093643                | TT                              | GG              | 1946845007               |
| SNP_P4_70960_12093649 | NC_021164.1    | Ca_kabuli_chr05 | 12093649                | AA                              | GG              | 1946845008               |
| SNP_P4_70961_12093706 | NC_021164.1    | Ca_kabuli_chr05 | 12093706                | TT                              | CC              | 1946845010               |
| SNP_P4_70962_12093746 | NC_021164.1    | Ca_kabuli_chr05 | 12093746                | AA                              | CC              | 1946845012               |
| SNP_P4_70963_12093747 | NC_021164.1    | Ca_kabuli_chr05 | 12093747                | GG                              | AA              | 1946845014               |
| SNP_P4_70964_12093764 | NC_021164.1    | Ca_kabuli_chr05 | 12093764                | GG                              | TT              | 1946845016               |
| SNP_P4_70965_12095764 | NC_021164.1    | Ca_kabuli_chr05 | 12095764                | CC                              | TT              | 1946845018               |
| SNP_P4_70966_12095768 | NC_021164.1    | Ca_kabuli_chr05 | 12095768                | AA                              | GG              | 1946845020               |
| SNP_P4_70967_12095769 | NC_021164.1    | Ca_kabuli_chr05 | 12095769                | TT                              | CC              | 1946845022               |
| SNP_P4_70969_12095796 | NC_021164.1    | Ca_kabuli_chr05 | 12095796                | TT                              | CC              | 1946845024               |
| SNP_P4_70970_12095849 | NC_021164.1    | Ca_kabuli_chr05 | 12095849                | TT                              | CC              | 1946845026               |
| SNP_P4_70971_12101420 | NC_021164.1    | Ca_kabuli_chr05 | 12101420                | AA                              | GG              | 1946845028               |
| SNP_P4_70973_12106429 | NC_021164.1    | Ca_kabuli_chr05 | 12106429                | AA                              | TT              | 1946845030               |
| SNP_P4_70974_12146898 | NC_021164.1    | Ca_kabuli_chr05 | 12146898                | AA                              | GG              | 1946845032               |
| SNP_P4_70975_12157014 | NC_021164.1    | Ca_kabuli_chr05 | 12157014                | GG                              | AA              | 1946845034               |
| SNP_P4_70976_12161736 | NC_021164.1    | Ca_kabuli_chr05 | 12161736                | TT                              | CC              | 1946845036               |
| SNP_P4_70977_12161802 | NC_021164.1    | Ca_kabuli_chr05 | 12161802                | GG                              | AA              | 1946845038               |
| SNP_P4_70978_12161811 | NC_021164.1    | Ca_kabuli_chr05 | 12161811                | GG                              | AA              | 1946845040               |
| SNP_P4_70980_12161910 | NC_021164.1    | Ca_kabuli_chr05 | 12161910                | GG                              | AA              | 1946845042               |
| SNP_P4_70981_12161933 | NC_021164.1    | Ca_kabuli_chr05 | 12161933                | CC                              | GG              | 1946845044               |
| SNP_P4_70983_12184134 | NC_021164.1    | Ca_kabuli_chr05 | 12184134                | GG                              | TT              | 1946845046               |
| SNP_P4_70984_12184142 | NC_021164.1    | Ca_kabuli_chr05 | 12184142                | GG                              | TT              | 1946845048               |
| SNP_P4_70985_12270941 | NC_021164.1    | Ca_kabuli_chr05 | 12270941                | GG                              | AA              | 1946845050               |
| SNP_P4_70986_12271799 | NC_021164.1    | Ca_kabuli_chr05 | 12271799                | GG                              | AA              | 1946845052               |
| SNP_P4_70987_12272966 | NC_021164.1    | Ca_kabuli_chr05 | 12272966                | TT                              | AA              | 1946845053               |
| SNP_P4_70988_12273148 | NC_021164.1    | Ca_kabuli_chr05 | 12273148                | AA                              | CC              | 1946845054               |
| SNP_P4_70989_12273385 | NC_021164.1    | Ca_kabuli_chr05 | 12273385                | AA                              | CC              | 1946845055               |
| SNP_P4_70990_12273390 | NC_021164.1    | Ca_kabuli_chr05 | 12273390                | CC                              | TT              | 1946845056               |
| SNP_P4_70991_12282440 | NC_021164.1    | Ca_kabuli_chr05 | 12282440                | TT                              | GG              | 1946845057               |
| SNP_P4_70992_12282459 | NC_021164.1    | Ca_kabuli_chr05 | 12282459                | AA                              | TT              | 1946845059               |
| SNP_P4_70993_12282774 | NC_021164.1    | Ca_kabuli_chr05 | 12282774                | GG                              | CC              | 1946845061               |
| SNP_P4_70994_12283226 | NC_021164.1    | Ca_kabuli_chr05 | 12283226                | CC                              | AA              | 1946845063               |
| SNP_P4_70995_12283228 | NC_021164.1    | Ca_kabuli_chr05 | 12283228                | AA                              | GG              | 1946845065               |
| SNP_P4_70996_12283306 | NC_021164.1    | Ca_kabuli_chr05 | 12283306                | AA                              | GG              | 1946845067               |
| SNP_P4_70997_12283543 | NC_021164.1    | Ca_kabuli_chr05 | 12283543                | TT                              | CC              | 1946845069               |

| SNPs IDs              | Chromosome IDs | Chromosomes     | Physical positions (bp) | CDC Frontier (Reference genome) | (ILWC46 & LPNB) | NCBI SNPdb Accession IDs |
|-----------------------|----------------|-----------------|-------------------------|---------------------------------|-----------------|--------------------------|
| SNP_P4_70998_12283569 | NC_021164.1    | Ca_kabuli_chr05 | 12283569                | AA                              | GG              | 1946845071               |
| SNP_P4_70999_12283627 | NC_021164.1    | Ca_kabuli_chr05 | 12283627                | TT                              | CC              | 1946845073               |
| SNP_P4_71000_12292339 | NC_021164.1    | Ca_kabuli_chr05 | 12292339                | TT                              | AA              | 1946845075               |
| SNP_P4_71001_12292340 | NC_021164.1    | Ca_kabuli_chr05 | 12292340                | TT                              | GG              | 1946845077               |
| SNP_P4_71002_12299512 | NC_021164.1    | Ca_kabuli_chr05 | 12299512                | GG                              | AA              | 1946845079               |
| SNP_P4_71003_12318714 | NC_021164.1    | Ca_kabuli_chr05 | 12318714                | GG                              | AA              | 1946845081               |
| SNP_P4_71004_12318880 | NC_021164.1    | Ca_kabuli_chr05 | 12318880                | TT                              | AA              | 1946845083               |
| SNP_P4_71006_12331268 | NC_021164.1    | Ca_kabuli_chr05 | 12331268                | GG                              | TT              | 1946845085               |
| SNP_P4_71007_12360829 | NC_021164.1    | Ca_kabuli_chr05 | 12360829                | GG                              | AA              | 1946845087               |
| SNP_P4_71008_12360912 | NC_021164.1    | Ca_kabuli_chr05 | 12360912                | TT                              | GG              | 1946845089               |
| SNP_P4_71009_12360934 | NC_021164.1    | Ca_kabuli_chr05 | 12360934                | AA                              | GG              | 1946845091               |
| SNP_P4_71010_12442308 | NC_021164.1    | Ca_kabuli_chr05 | 12442308                | AA                              | GG              | 1946845093               |
| SNP_P4_71011_12450029 | NC_021164.1    | Ca_kabuli_chr05 | 12450029                | TT                              | CC              | 1946845095               |
| SNP_P4_71012_12462023 | NC_021164.1    | Ca_kabuli_chr05 | 12462023                | TT                              | CC              | 1946845097               |
| SNP_P4_71013_12473858 | NC_021164.1    | Ca_kabuli_chr05 | 12473858                | GG                              | TT              | 1946845099               |
| SNP_P4_71014_12496390 | NC_021164.1    | Ca_kabuli_chr05 | 12496390                | TT                              | GG              | 1946845101               |
| SNP_P4_71015_12496391 | NC_021164.1    | Ca_kabuli_chr05 | 12496391                | TT                              | GG              | 1946845103               |
| SNP_P4_71017_12532713 | NC_021164.1    | Ca_kabuli_chr05 | 12532713                | AA                              | GG              | 1946845105               |
| SNP_P4_71018_12532785 | NC_021164.1    | Ca_kabuli_chr05 | 12532785                | AA                              | CC              | 1946845107               |
| SNP_P4_71019_12535132 | NC_021164.1    | Ca_kabuli_chr05 | 12535132                | GG                              | AA              | 1946845109               |
| SNP_P4_71020_12535216 | NC_021164.1    | Ca_kabuli_chr05 | 12535216                | AA                              | GG              | 1946845111               |
| SNP_P4_71022_12561356 | NC_021164.1    | Ca_kabuli_chr05 | 12561356                | TT                              | CC              | 1946845113               |
| SNP_P4_71023_12588682 | NC_021164.1    | Ca_kabuli_chr05 | 12588682                | AA                              | CC              | 1946845115               |
| SNP_P4_71024_12588822 | NC_021164.1    | Ca_kabuli_chr05 | 12588822                | AA                              | CC              | 1946845117               |
| SNP_P4_71025_12588847 | NC_021164.1    | Ca_kabuli_chr05 | 12588847                | GG                              | AA              | 1946845119               |
| SNP_P4_71026_12589969 | NC_021164.1    | Ca_kabuli_chr05 | 12589969                | TT                              | CC              | 1946845121               |
| SNP_P4_71027_12590676 | NC_021164.1    | Ca_kabuli_chr05 | 12590676                | CC                              | GG              | 1946845123               |
| SNP_P4_71028_12594321 | NC_021164.1    | Ca_kabuli_chr05 | 12594321                | TT                              | CC              | 1946845125               |
| SNP_P4_71029_12594429 | NC_021164.1    | Ca_kabuli_chr05 | 12594429                | AA                              | CC              | 1946845127               |
| SNP_P4_71030_12594666 | NC_021164.1    | Ca_kabuli_chr05 | 12594666                | CC                              | TT              | 1946845129               |
| SNP_P4_71031_12594833 | NC_021164.1    | Ca_kabuli_chr05 | 12594833                | AA                              | CC              | 1946845131               |
| SNP_P4_71032_12628453 | NC_021164.1    | Ca_kabuli_chr05 | 12628453                | CC                              | TT              | 1946845133               |
| SNP_P4_71033_12635305 | NC_021164.1    | Ca_kabuli_chr05 | 12635305                | TT                              | CC              | 1946845135               |
| SNP_P4_71034_12658736 | NC_021164.1    | Ca_kabuli_chr05 | 12658736                | TT                              | GG              | 1946845137               |
| SNP_P4_71035_12658854 | NC_021164.1    | Ca_kabuli_chr05 | 12658854                | AA                              | TT              | 1946845139               |
| SNP_P4_71036_12658868 | NC_021164.1    | Ca_kabuli_chr05 | 12658868                | AA                              | TT              | 1946845141               |
| SNP_P4_71037_12658882 | NC_021164.1    | Ca_kabuli_chr05 | 12658882                | CC                              | TT              | 1946845143               |
| SNP_P4_71038_12659040 | NC_021164.1    | Ca_kabuli_chr05 | 12659040                | GG                              | AA              | 1946845145               |
| SNP_P4_71040_12659177 | NC_021164.1    | Ca_kabuli_chr05 | 12659177                | TT                              | GG              | 1946845147               |
| SNP_P4_71041_12659178 | NC_021164.1    | Ca_kabuli_chr05 | 12659178                | AA                              | TT              | 1946845149               |
| SNP_P4_71042_12659221 | NC_021164.1    | Ca_kabuli_chr05 | 12659221                | CC                              | GG              | 1946845151               |
| SNP_P4_71043_12659223 | NC_021164.1    | Ca_kabuli_chr05 | 12659223                | CC                              | AA              | 1946845153               |



| SNPs IDs              | Chromosome IDs | Chromosomes     | Physical positions (bp) | CDC Frontier (Reference genome) | (ILWC46 & LPNB) | NCBI SNPdb Accession IDs |
|-----------------------|----------------|-----------------|-------------------------|---------------------------------|-----------------|--------------------------|
| SNP_P4_71044_12659225 | NC_021164.1    | Ca_kabuli_chr05 | 12659225                | AA                              | TT              | 1946845155               |
| SNP_P4_71045_12659228 | NC_021164.1    | Ca_kabuli_chr05 | 12659228                | TT                              | AA              | 1946845157               |
| SNP_P4_71047_12672873 | NC_021164.1    | Ca_kabuli_chr05 | 12672873                | GG                              | AA              | 1946845159               |
| SNP_P4_71048_12672886 | NC_021164.1    | Ca_kabuli_chr05 | 12672886                | CC                              | TT              | 1946845161               |
| SNP_P4_71049_12673242 | NC_021164.1    | Ca_kabuli_chr05 | 12673242                | TT                              | CC              | 1946845163               |
| SNP_P4_71050_12673256 | NC_021164.1    | Ca_kabuli_chr05 | 12673256                | AA                              | GG              | 1946845166               |
| SNP_P4_71051_12673284 | NC_021164.1    | Ca_kabuli_chr05 | 12673284                | CC                              | TT              | 1946845167               |
| SNP_P4_71052_12673305 | NC_021164.1    | Ca_kabuli_chr05 | 12673305                | AA                              | CC              | 1946845169               |
| SNP_P4_71053_12674532 | NC_021164.1    | Ca_kabuli_chr05 | 12674532                | AA                              | GG              | 1946845171               |
| SNP_P4_71054_13580166 | NC_021164.1    | Ca_kabuli_chr05 | 13580166                | GG                              | AA              | 1946845173               |
| SNP_P4_71055_13585384 | NC_021164.1    | Ca_kabuli_chr05 | 13585384                | CC                              | TT              | 1946845175               |
| SNP_P4_71056_13586052 | NC_021164.1    | Ca_kabuli_chr05 | 13586052                | AA                              | GG              | 1946845177               |
| SNP_P4_71057_13591851 | NC_021164.1    | Ca_kabuli_chr05 | 13591851                | TT                              | CC              | 1946845179               |
| SNP_P4_71058_13592721 | NC_021164.1    | Ca_kabuli_chr05 | 13592721                | TT                              | AA              | 1946845181               |
| SNP_P4_71059_13592722 | NC_021164.1    | Ca_kabuli_chr05 | 13592722                | TT                              | CC              | 1946845184               |
| SNP_P4_71060_13599581 | NC_021164.1    | Ca_kabuli_chr05 | 13599581                | AA                              | TT              | 1946845186               |
| SNP_P4_71061_13610540 | NC_021164.1    | Ca_kabuli_chr05 | 13610540                | GG                              | TT              | 1946845188               |
| SNP_P4_71062_13610551 | NC_021164.1    | Ca_kabuli_chr05 | 13610551                | GG                              | AA              | 1946845190               |
| SNP_P4_71063_13610554 | NC_021164.1    | Ca_kabuli_chr05 | 13610554                | TT                              | AA              | 1946845192               |
| SNP_P4_71064_13610566 | NC_021164.1    | Ca_kabuli_chr05 | 13610566                | CC                              | TT              | 1946845194               |
| SNP_P4_71065_13610570 | NC_021164.1    | Ca_kabuli_chr05 | 13610570                | TT                              | GG              | 1946845196               |
| SNP_P4_71066_13610826 | NC_021164.1    | Ca_kabuli_chr05 | 13610826                | TT                              | AA              | 1946845198               |
| SNP_P4_71067_13611760 | NC_021164.1    | Ca_kabuli_chr05 | 13611760                | AA                              | GG              | 1946845200               |
| SNP_P4_71068_13611775 | NC_021164.1    | Ca_kabuli_chr05 | 13611775                | GG                              | AA              | 1946845202               |
| SNP_P4_71069_13611853 | NC_021164.1    | Ca_kabuli_chr05 | 13611853                | AA                              | TT              | 1946845204               |
| SNP_P4_71070_13611905 | NC_021164.1    | Ca_kabuli_chr05 | 13611905                | GG                              | AA              | 1946845206               |
| SNP_P4_71071_13612084 | NC_021164.1    | Ca_kabuli_chr05 | 13612084                | CC                              | GG              | 1946845208               |
| SNP_P4_71072_13612107 | NC_021164.1    | Ca_kabuli_chr05 | 13612107                | CC                              | TT              | 1946845210               |
| SNP_P4_71073_13612168 | NC_021164.1    | Ca_kabuli_chr05 | 13612168                | GG                              | AA              | 1946845212               |
| SNP_P4_71074_13612188 | NC_021164.1    | Ca_kabuli_chr05 | 13612188                | TT                              | CC              | 1946845214               |
| SNP_P4_71075_13612192 | NC_021164.1    | Ca_kabuli_chr05 | 13612192                | GG                              | AA              | 1946845216               |
| SNP_P4_71076_13612212 | NC_021164.1    | Ca_kabuli_chr05 | 13612212                | TT                              | CC              | 1946845219               |
| SNP_P4_71077_13612221 | NC_021164.1    | Ca_kabuli_chr05 | 13612221                | AA                              | GG              | 1946845221               |
| SNP_P4_71078_13616029 | NC_021164.1    | Ca_kabuli_chr05 | 13616029                | CC                              | TT              | 1946845223               |
| SNP_P4_71079_13623728 | NC_021164.1    | Ca_kabuli_chr05 | 13623728                | AA                              | TT              | 1946845225               |
| SNP_P4_71080_13623833 | NC_021164.1    | Ca_kabuli_chr05 | 13623833                | GG                              | AA              | 1946845227               |
| SNP_P4_71081_13623877 | NC_021164.1    | Ca_kabuli_chr05 | 13623877                | AA                              | GG              | 1946845229               |
| SNP_P4_71082_13623898 | NC_021164.1    | Ca_kabuli_chr05 | 13623898                | TT                              | GG              | 1946845231               |
| SNP_P4_71083_13623983 | NC_021164.1    | Ca_kabuli_chr05 | 13623983                | GG                              | AA              | 1946845233               |
| SNP_P4_71084_13623989 | NC_021164.1    | Ca_kabuli_chr05 | 13623989                | GG                              | CC              | 1946845235               |
| SNP_P4_71085_13624047 | NC_021164.1    | Ca_kabuli_chr05 | 13624047                | AA                              | GG              | 1946845237               |
| SNP_P4_71086_13624077 | NC_021164.1    | Ca_kabuli_chr05 | 13624077                | GG                              | AA              | 1946845239               |

| SNPs IDs              | Chromosome IDs | Chromosomes     | Physical positions (bp) | CDC Frontier (Reference genome) | (ILWC46 & LPNB) | NCBI SNPdb Accession IDs |
|-----------------------|----------------|-----------------|-------------------------|---------------------------------|-----------------|--------------------------|
| SNP_P4_71087_13624275 | NC_021164.1    | Ca_kabuli_chr05 | 13624275                | TT                              | CC              | 1946845241               |
| SNP_P4_71089_13624305 | NC_021164.1    | Ca_kabuli_chr05 | 13624305                | TT                              | CC              | 1946845243               |
| SNP_P4_71090_13624307 | NC_021164.1    | Ca_kabuli_chr05 | 13624307                | TT                              | AA              | 1946845245               |
| SNP_P4_71091_13624331 | NC_021164.1    | Ca_kabuli_chr05 | 13624331                | TT                              | AA              | 1946845247               |
| SNP_P4_71092_13628491 | NC_021164.1    | Ca_kabuli_chr05 | 13628491                | TT                              | GG              | 1946845249               |
| SNP_P4_71093_13628512 | NC_021164.1    | Ca_kabuli_chr05 | 13628512                | GG                              | TT              | 1946845251               |
| SNP_P4_71094_13628536 | NC_021164.1    | Ca_kabuli_chr05 | 13628536                | GG                              | TT              | 1946845253               |
| SNP_P4_71095_13628746 | NC_021164.1    | Ca_kabuli_chr05 | 13628746                | CC                              | AA              | 1946845255               |
| SNP_P4_71096_13628773 | NC_021164.1    | Ca_kabuli_chr05 | 13628773                | CC                              | TT              | 1946845257               |
| SNP_P4_71097_13628789 | NC_021164.1    | Ca_kabuli_chr05 | 13628789                | TT                              | GG              | 1946845259               |
| SNP_P4_71098_13628934 | NC_021164.1    | Ca_kabuli_chr05 | 13628934                | GG                              | CC              | 1946845261               |
| SNP_P4_71099_13628974 | NC_021164.1    | Ca_kabuli_chr05 | 13628974                | TT                              | AA              | 1946845263               |
| SNP_P4_71100_13629051 | NC_021164.1    | Ca_kabuli_chr05 | 13629051                | CC                              | GG              | 1946845265               |
| SNP_P4_71101_13636242 | NC_021164.1    | Ca_kabuli_chr05 | 13636242                | GG                              | AA              | 1946845267               |
| SNP_P4_71102_13636255 | NC_021164.1    | Ca_kabuli_chr05 | 13636255                | AA                              | GG              | 1946845269               |
| SNP_P4_71104_13636558 | NC_021164.1    | Ca_kabuli_chr05 | 13636558                | AA                              | CC              | 1946845271               |
| SNP_P4_71105_13636663 | NC_021164.1    | Ca_kabuli_chr05 | 13636663                | TT                              | CC              | 1946845273               |
| SNP_P4_71106_13636672 | NC_021164.1    | Ca_kabuli_chr05 | 13636672                | AA                              | GG              | 1946845275               |
| SNP_P4_71107_13636815 | NC_021164.1    | Ca_kabuli_chr05 | 13636815                | TT                              | CC              | 1946845277               |
| SNP_P4_71108_13636852 | NC_021164.1    | Ca_kabuli_chr05 | 13636852                | AA                              | TT              | 1946845279               |
| SNP_P4_71109_13636910 | NC_021164.1    | Ca_kabuli_chr05 | 13636910                | CC                              | GG              | 1946845281               |
| SNP_P4_71111_13637051 | NC_021164.1    | Ca_kabuli_chr05 | 13637051                | AA                              | TT              | 1946845283               |
| SNP_P4_71112_13647436 | NC_021164.1    | Ca_kabuli_chr05 | 13647436                | CC                              | AA              | 1946845285               |
| SNP_P4_71113_13650792 | NC_021164.1    | Ca_kabuli_chr05 | 13650792                | CC                              | GG              | 1946845287               |
| SNP_P4_71114_13650977 | NC_021164.1    | Ca_kabuli_chr05 | 13650977                | TT                              | AA              | 1946845289               |
| SNP_P4_71115_13651001 | NC_021164.1    | Ca_kabuli_chr05 | 13651001                | CC                              | AA              | 1946845291               |
| SNP_P4_71116_13651029 | NC_021164.1    | Ca_kabuli_chr05 | 13651029                | GG                              | AA              | 1946845293               |
| SNP_P4_71117_13651179 | NC_021164.1    | Ca_kabuli_chr05 | 13651179                | CC                              | TT              | 1946845295               |
| SNP_P4_71118_13651264 | NC_021164.1    | Ca_kabuli_chr05 | 13651264                | AA                              | GG              | 1946845297               |
| SNP_P4_71119_13651268 | NC_021164.1    | Ca_kabuli_chr05 | 13651268                | CC                              | TT              | 1946845299               |
| SNP_P4_71120_13651299 | NC_021164.1    | Ca_kabuli_chr05 | 13651299                | AA                              | GG              | 1946845301               |
| SNP_P4_71121_13651363 | NC_021164.1    | Ca_kabuli_chr05 | 13651363                | CC                              | TT              | 1946845303               |
| SNP_P4_71122_13663530 | NC_021164.1    | Ca_kabuli_chr05 | 13663530                | TT                              | CC              | 1946845305               |
| SNP_P4_71123_13675438 | NC_021164.1    | Ca_kabuli_chr05 | 13675438                | GG                              | AA              | 1946845308               |
| SNP_P4_71124_13675486 | NC_021164.1    | Ca_kabuli_chr05 | 13675486                | GG                              | AA              | 1946845310               |
| SNP_P4_71125_13683442 | NC_021164.1    | Ca_kabuli_chr05 | 13683442                | AA                              | TT              | 1946845312               |
| SNP_P4_71126_13693752 | NC_021164.1    | Ca_kabuli_chr05 | 13693752                | AA                              | TT              | 1946845314               |
| SNP_P4_71127_13695613 | NC_021164.1    | Ca_kabuli_chr05 | 13695613                | AA                              | TT              | 1946845316               |
| SNP_P4_71128_13695676 | NC_021164.1    | Ca_kabuli_chr05 | 13695676                | TT                              | CC              | 1946845318               |
| SNP_P4_71129_13695944 | NC_021164.1    | Ca_kabuli_chr05 | 13695944                | TT                              | CC              | 1946845320               |
| SNP_P4_71130_13695975 | NC_021164.1    | Ca_kabuli_chr05 | 13695975                | GG                              | CC              | 1946845322               |
| SNP_P4_71131_13695993 | NC_021164.1    | Ca_kabuli_chr05 | 13695993                | AA                              | GG              | 1946845324               |

| SNPs IDs              | Chromosome IDs | Chromosomes     | Physical positions (bp) | CDC Frontier (Reference genome) | (ILWC46 & LPNB) | NCBI SNPdb Accession IDs |
|-----------------------|----------------|-----------------|-------------------------|---------------------------------|-----------------|--------------------------|
| SNP_P4_71132_13696022 | NC_021164.1    | Ca_kabuli_chr05 | 13696022                | CC                              | TT              | 1946845326               |
| SNP_P4_71133_13708156 | NC_021164.1    | Ca_kabuli_chr05 | 13708156                | CC                              | TT              | 1946845328               |
| SNP_P4_71134_13714932 | NC_021164.1    | Ca_kabuli_chr05 | 13714932                | AA                              | CC              | 1946845330               |
| SNP_P4_71135_13737116 | NC_021164.1    | Ca_kabuli_chr05 | 13737116                | CC                              | TT              | 1946845332               |
| SNP_P4_71136_13737536 | NC_021164.1    | Ca_kabuli_chr05 | 13737536                | AA                              | GG              | 1946845334               |
| SNP_P4_71137_13737550 | NC_021164.1    | Ca_kabuli_chr05 | 13737550                | TT                              | CC              | 1946845336               |
| SNP_P4_71139_13765808 | NC_021164.1    | Ca_kabuli_chr05 | 13765808                | AA                              | CC              | 1946845338               |
| SNP_P4_71140_13770895 | NC_021164.1    | Ca_kabuli_chr05 | 13770895                | GG                              | AA              | 1946845340               |
| SNP_P4_71142_13812292 | NC_021164.1    | Ca_kabuli_chr05 | 13812292                | TT                              | CC              | 1946845341               |
| SNP_P4_71143_13812315 | NC_021164.1    | Ca_kabuli_chr05 | 13812315                | TT                              | CC              | 1946845343               |
| SNP_P4_71144_13812321 | NC_021164.1    | Ca_kabuli_chr05 | 13812321                | TT                              | CC              | 1946845345               |
| SNP_P4_71145_13826373 | NC_021164.1    | Ca_kabuli_chr05 | 13826373                | TT                              | AA              | 1946845347               |
| SNP_P4_71146_13826378 | NC_021164.1    | Ca_kabuli_chr05 | 13826378                | AA                              | GG              | 1946845349               |
| SNP_P4_71147_13826400 | NC_021164.1    | Ca_kabuli_chr05 | 13826400                | AA                              | TT              | 1946845351               |
| SNP_P4_71148_13826404 | NC_021164.1    | Ca_kabuli_chr05 | 13826404                | TT                              | AA              | 1946845353               |
| SNP_P4_71149_13826406 | NC_021164.1    | Ca_kabuli_chr05 | 13826406                | AA                              | TT              | 1946845355               |
| SNP_P4_71150_13826413 | NC_021164.1    | Ca_kabuli_chr05 | 13826413                | TT                              | GG              | 1946845357               |
| SNP_P4_71151_13826419 | NC_021164.1    | Ca_kabuli_chr05 | 13826419                | AA                              | CC              | 1946845359               |
| SNP_P4_71152_13834404 | NC_021164.1    | Ca_kabuli_chr05 | 13834404                | CC                              | TT              | 1946845361               |
| SNP_P4_71153_13837553 | NC_021164.1    | Ca_kabuli_chr05 | 13837553                | AA                              | GG              | 1946845363               |
| SNP_P4_71154_13837615 | NC_021164.1    | Ca_kabuli_chr05 | 13837615                | GG                              | TT              | 1946845365               |
| SNP_P4_71155_13838120 | NC_021164.1    | Ca_kabuli_chr05 | 13838120                | TT                              | GG              | 1946845367               |
| SNP_P4_71156_13838445 | NC_021164.1    | Ca_kabuli_chr05 | 13838445                | AA                              | GG              | 1946845369               |
| SNP_P4_71157_13838453 | NC_021164.1    | Ca_kabuli_chr05 | 13838453                | TT                              | CC              | 1946845371               |
| SNP_P4_71158_13838474 | NC_021164.1    | Ca_kabuli_chr05 | 13838474                | AA                              | GG              | 1946845373               |
| SNP_P4_71159_13850015 | NC_021164.1    | Ca_kabuli_chr05 | 13850015                | AA                              | GG              | 1946845375               |
| SNP_P4_71160_13854320 | NC_021164.1    | Ca_kabuli_chr05 | 13854320                | TT                              | AA              | 1946845377               |
| SNP_P4_71161_13854334 | NC_021164.1    | Ca_kabuli_chr05 | 13854334                | TT                              | CC              | 1946845379               |
| SNP_P4_71162_13854335 | NC_021164.1    | Ca_kabuli_chr05 | 13854335                | CC                              | TT              | 1946845381               |
| SNP_P4_71163_13854362 | NC_021164.1    | Ca_kabuli_chr05 | 13854362                | TT                              | CC              | 1946845383               |
| SNP_P4_71164_13854416 | NC_021164.1    | Ca_kabuli_chr05 | 13854416                | CC                              | TT              | 1946845385               |
| SNP_P4_71165_13854583 | NC_021164.1    | Ca_kabuli_chr05 | 13854583                | TT                              | CC              | 1946845387               |
| SNP_P4_71166_13854592 | NC_021164.1    | Ca_kabuli_chr05 | 13854592                | TT                              | CC              | 1946845389               |
| SNP_P4_71167_13854614 | NC_021164.1    | Ca_kabuli_chr05 | 13854614                | AA                              | GG              | 1946845391               |
| SNP_P4_71168_13854627 | NC_021164.1    | Ca_kabuli_chr05 | 13854627                | AA                              | GG              | 1946845393               |
| SNP_P4_71169_13854631 | NC_021164.1    | Ca_kabuli_chr05 | 13854631                | GG                              | AA              | 1946845394               |
| SNP_P4_71170_13854652 | NC_021164.1    | Ca_kabuli_chr05 | 13854652                | GG                              | AA              | 1946845395               |
| SNP_P4_71171_13854655 | NC_021164.1    | Ca_kabuli_chr05 | 13854655                | TT                              | CC              | 1946845397               |
| SNP_P4_71172_13854663 | NC_021164.1    | Ca_kabuli_chr05 | 13854663                | TT                              | GG              | 1946845399               |
| SNP_P4_71173_13854694 | NC_021164.1    | Ca_kabuli_chr05 | 13854694                | CC                              | AA              | 1946845401               |
| SNP_P4_71174_13854721 | NC_021164.1    | Ca_kabuli_chr05 | 13854721                | TT                              | CC              | 1946845403               |
| SNP_P4_71175_13854725 | NC_021164.1    | Ca_kabuli_chr05 | 13854725                | AA                              | GG              | 1946845404               |

| SNPs IDs              | Chromosome IDs | Chromosomes     | Physical positions (bp) | CDC Frontier (Reference genome) | (ILWC46 & LPNB) | NCBI SNPdb Accession IDs |
|-----------------------|----------------|-----------------|-------------------------|---------------------------------|-----------------|--------------------------|
| SNP_P4_71176_13854730 | NC_021164.1    | Ca_kabuli_chr05 | 13854730                | GG                              | AA              | 1946845406               |
| SNP_P4_71178_13854751 | NC_021164.1    | Ca_kabuli_chr05 | 13854751                | CC                              | AA              | 1946845408               |
| SNP_P4_71179_13854757 | NC_021164.1    | Ca_kabuli_chr05 | 13854757                | CC                              | TT              | 1946845410               |
| SNP_P4_71180_13854775 | NC_021164.1    | Ca_kabuli_chr05 | 13854775                | TT                              | AA              | 1946845412               |
| SNP_P4_71181_13855484 | NC_021164.1    | Ca_kabuli_chr05 | 13855484                | AA                              | GG              | 1946845414               |
| SNP_P4_71182_13855569 | NC_021164.1    | Ca_kabuli_chr05 | 13855569                | TT                              | AA              | 1946845416               |
| SNP_P4_71183_13855593 | NC_021164.1    | Ca_kabuli_chr05 | 13855593                | CC                              | AA              | 1946845418               |
| SNP_P4_71184_13855616 | NC_021164.1    | Ca_kabuli_chr05 | 13855616                | TT                              | AA              | 1946845420               |
| SNP_P4_71185_13855627 | NC_021164.1    | Ca_kabuli_chr05 | 13855627                | CC                              | AA              | 1946845422               |
| SNP_P4_71186_13855650 | NC_021164.1    | Ca_kabuli_chr05 | 13855650                | TT                              | CC              | 1946845424               |
| SNP_P4_71187_13855720 | NC_021164.1    | Ca_kabuli_chr05 | 13855720                | CC                              | AA              | 1946845426               |
| SNP_P4_71188_13855736 | NC_021164.1    | Ca_kabuli_chr05 | 13855736                | AA                              | TT              | 1946845428               |
| SNP_P4_71189_13855892 | NC_021164.1    | Ca_kabuli_chr05 | 13855892                | TT                              | CC              | 1946845430               |
| SNP_P4_71190_13856038 | NC_021164.1    | Ca_kabuli_chr05 | 13856038                | TT                              | GG              | 1946845432               |
| SNP_P4_71191_13856113 | NC_021164.1    | Ca_kabuli_chr05 | 13856113                | AA                              | GG              | 1946845434               |
| SNP_P4_71192_13856199 | NC_021164.1    | Ca_kabuli_chr05 | 13856199                | AA                              | GG              | 1946845436               |
| SNP_P4_71193_13856203 | NC_021164.1    | Ca_kabuli_chr05 | 13856203                | GG                              | CC              | 1946845438               |
| SNP_P4_71194_13856393 | NC_021164.1    | Ca_kabuli_chr05 | 13856393                | TT                              | GG              | 1946845440               |
| SNP_P4_71195_13856397 | NC_021164.1    | Ca_kabuli_chr05 | 13856397                | AA                              | GG              | 1946845442               |
| SNP_P4_71196_13858149 | NC_021164.1    | Ca_kabuli_chr05 | 13858149                | GG                              | AA              | 1946845444               |
| SNP_P4_71197_13858475 | NC_021164.1    | Ca_kabuli_chr05 | 13858475                | GG                              | AA              | 1946845446               |
| SNP_P4_71198_13871740 | NC_021164.1    | Ca_kabuli_chr05 | 13871740                | TT                              | CC              | 1946845448               |
| SNP_P4_71199_13892532 | NC_021164.1    | Ca_kabuli_chr05 | 13892532                | TT                              | CC              | 1946845450               |
| SNP_P4_71200_13892549 | NC_021164.1    | Ca_kabuli_chr05 | 13892549                | CC                              | TT              | 1946845452               |
| SNP_P4_71201_13892575 | NC_021164.1    | Ca_kabuli_chr05 | 13892575                | AA                              | GG              | 1946845454               |
| SNP_P4_71202_13892590 | NC_021164.1    | Ca_kabuli_chr05 | 13892590                | AA                              | GG              | 1946845456               |
| SNP_P4_71203_13892613 | NC_021164.1    | Ca_kabuli_chr05 | 13892613                | CC                              | TT              | 1946845458               |
| SNP_P4_71204_13892637 | NC_021164.1    | Ca_kabuli_chr05 | 13892637                | TT                              | CC              | 1946845460               |
| SNP_P4_71205_13892648 | NC_021164.1    | Ca_kabuli_chr05 | 13892648                | GG                              | TT              | 1946845462               |
| SNP_P4_71206_13892670 | NC_021164.1    | Ca_kabuli_chr05 | 13892670                | CC                              | TT              | 1946845464               |
| SNP_P4_71207_13892699 | NC_021164.1    | Ca_kabuli_chr05 | 13892699                | AA                              | GG              | 1946845466               |
| SNP_P4_71208_13892711 | NC_021164.1    | Ca_kabuli_chr05 | 13892711                | AA                              | GG              | 1946845468               |
| SNP_P4_71209_13892900 | NC_021164.1    | Ca_kabuli_chr05 | 13892900                | GG                              | TT              | 1946845470               |
| SNP_P4_71210_13892953 | NC_021164.1    | Ca_kabuli_chr05 | 13892953                | TT                              | CC              | 1946845472               |
| SNP_P4_71211_13892969 | NC_021164.1    | Ca_kabuli_chr05 | 13892969                | CC                              | TT              | 1946845474               |
| SNP_P4_71212_13893013 | NC_021164.1    | Ca_kabuli_chr05 | 13893013                | TT                              | CC              | 1946845476               |
| SNP_P4_71213_13893036 | NC_021164.1    | Ca_kabuli_chr05 | 13893036                | TT                              | CC              | 1946845478               |
| SNP_P4_71214_13893112 | NC_021164.1    | Ca_kabuli_chr05 | 13893112                | GG                              | AA              | 1946845480               |
| SNP_P4_71215_13893148 | NC_021164.1    | Ca_kabuli_chr05 | 13893148                | TT                              | GG              | 1946845482               |
| SNP_P4_71216_13893161 | NC_021164.1    | Ca_kabuli_chr05 | 13893161                | AA                              | CC              | 1946845484               |
| SNP_P4_71217_13893173 | NC_021164.1    | Ca_kabuli_chr05 | 13893173                | TT                              | CC              | 1946845486               |
| SNP_P4_71218_13934955 | NC_021164.1    | Ca_kabuli_chr05 | 13934955                | TT                              | CC              | 1946845488               |

| SNPs IDs              | Chromosome IDs | Chromosomes     | Physical positions (bp) | CDC Frontier (Reference genome) | (ILWC46 & LPNB) | NCBI SNPdb Accession IDs |
|-----------------------|----------------|-----------------|-------------------------|---------------------------------|-----------------|--------------------------|
| SNP_P4_71219_13936232 | NC_021164.1    | Ca_kabuli_chr05 | 13936232                | AA                              | CC              | 1946845490               |
| SNP_P4_71220_13936246 | NC_021164.1    | Ca_kabuli_chr05 | 13936246                | GG                              | AA              | 1946845492               |
| SNP_P4_71221_13936250 | NC_021164.1    | Ca_kabuli_chr05 | 13936250                | AA                              | GG              | 1946845494               |
| SNP_P4_71222_13936923 | NC_021164.1    | Ca_kabuli_chr05 | 13936923                | GG                              | AA              | 1946845496               |
| SNP_P4_71223_13939179 | NC_021164.1    | Ca_kabuli_chr05 | 13939179                | GG                              | CC              | 1946845498               |
| SNP_P4_71224_13939195 | NC_021164.1    | Ca_kabuli_chr05 | 13939195                | TT                              | AA              | 1946845500               |
| SNP_P4_71225_13939232 | NC_021164.1    | Ca_kabuli_chr05 | 13939232                | AA                              | CC              | 1946845502               |
| SNP_P4_71226_13939251 | NC_021164.1    | Ca_kabuli_chr05 | 13939251                | GG                              | CC              | 1946845504               |
| SNP_P4_71227_13939270 | NC_021164.1    | Ca_kabuli_chr05 | 13939270                | AA                              | GG              | 1946845506               |
| SNP_P4_71228_13939286 | NC_021164.1    | Ca_kabuli_chr05 | 13939286                | CC                              | TT              | 1946845508               |
| SNP_P4_71229_13939299 | NC_021164.1    | Ca_kabuli_chr05 | 13939299                | GG                              | TT              | 1946845510               |
| SNP_P4_71230_13939383 | NC_021164.1    | Ca_kabuli_chr05 | 13939383                | GG                              | CC              | 1946845512               |
| SNP_P4_71231_13939394 | NC_021164.1    | Ca_kabuli_chr05 | 13939394                | GG                              | TT              | 1946845514               |
| SNP_P4_71232_13939398 | NC_021164.1    | Ca_kabuli_chr05 | 13939398                | CC                              | GG              | 1946845516               |
| SNP_P4_71233_13939447 | NC_021164.1    | Ca_kabuli_chr05 | 13939447                | TT                              | CC              | 1946845518               |
| SNP_P4_71234_13939465 | NC_021164.1    | Ca_kabuli_chr05 | 13939465                | AA                              | CC              | 1946845520               |
| SNP_P4_71235_13939815 | NC_021164.1    | Ca_kabuli_chr05 | 13939815                | TT                              | CC              | 1946845522               |
| SNP_P4_71236_13941069 | NC_021164.1    | Ca_kabuli_chr05 | 13941069                | TT                              | CC              | 1946845524               |
| SNP_P4_71238_13971753 | NC_021164.1    | Ca_kabuli_chr05 | 13971753                | TT                              | CC              | 1946845526               |
| SNP_P4_71239_13971800 | NC_021164.1    | Ca_kabuli_chr05 | 13971800                | GG                              | TT              | 1946845528               |
| SNP_P4_71241_13971986 | NC_021164.1    | Ca_kabuli_chr05 | 13971986                | CC                              | AA              | 1946845530               |
| SNP_P4_71242_13971994 | NC_021164.1    | Ca_kabuli_chr05 | 13971994                | TT                              | CC              | 1946845532               |
| SNP_P4_71243_13972029 | NC_021164.1    | Ca_kabuli_chr05 | 13972029                | TT                              | CC              | 1946845534               |
| SNP_P4_71244_13972096 | NC_021164.1    | Ca_kabuli_chr05 | 13972096                | TT                              | CC              | 1946845535               |
| SNP_P4_71245_13972686 | NC_021164.1    | Ca_kabuli_chr05 | 13972686                | AA                              | GG              | 1946845537               |
| SNP_P4_71246_13981561 | NC_021164.1    | Ca_kabuli_chr05 | 13981561                | GG                              | AA              | 1946845539               |
| SNP_P4_71247_13986878 | NC_021164.1    | Ca_kabuli_chr05 | 13986878                | AA                              | GG              | 1946845541               |
| SNP_P4_71248_13987161 | NC_021164.1    | Ca_kabuli_chr05 | 13987161                | TT                              | GG              | 1946845543               |
| SNP_P4_71249_13987176 | NC_021164.1    | Ca_kabuli_chr05 | 13987176                | AA                              | GG              | 1946845545               |
| SNP_P4_71250_14018190 | NC_021164.1    | Ca_kabuli_chr05 | 14018190                | AA                              | GG              | 1946845547               |
| SNP_P4_71251_14018404 | NC_021164.1    | Ca_kabuli_chr05 | 14018404                | TT                              | GG              | 1946845549               |
| SNP_P4_71252_14018409 | NC_021164.1    | Ca_kabuli_chr05 | 14018409                | TT                              | CC              | 1946845551               |
| SNP_P4_71253_14018418 | NC_021164.1    | Ca_kabuli_chr05 | 14018418                | AA                              | GG              | 1946845553               |
| SNP_P4_71254_14018433 | NC_021164.1    | Ca_kabuli_chr05 | 14018433                | AA                              | GG              | 1946845555               |
| SNP_P4_71255_14018447 | NC_021164.1    | Ca_kabuli_chr05 | 14018447                | AA                              | TT              | 1946845557               |
| SNP_P4_71256_14018469 | NC_021164.1    | Ca_kabuli_chr05 | 14018469                | GG                              | CC              | 1946845559               |
| SNP_P4_71257_14018512 | NC_021164.1    | Ca_kabuli_chr05 | 14018512                | TT                              | CC              | 1946845561               |
| SNP_P4_71258_14020378 | NC_021164.1    | Ca_kabuli_chr05 | 14020378                | AA                              | GG              | 1946845563               |
| SNP_P4_71260_14022690 | NC_021164.1    | Ca_kabuli_chr05 | 14022690                | TT                              | CC              | 1946845565               |
| SNP_P4_71261_14022808 | NC_021164.1    | Ca_kabuli_chr05 | 14022808                | CC                              | AA              | 1946845567               |
| SNP_P4_71262_14022846 | NC_021164.1    | Ca_kabuli_chr05 | 14022846                | AA                              | GG              | 1946845568               |
| SNP_P4_71263_14022857 | NC_021164.1    | Ca_kabuli_chr05 | 14022857                | GG                              | CC              | 1946845570               |

| SNPs IDs              | Chromosome IDs | Chromosomes     | Physical positions (bp) | CDC Frontier (Reference genome) | (ILWC46 & LPNB) | NCBI SNPdb Accession IDs |
|-----------------------|----------------|-----------------|-------------------------|---------------------------------|-----------------|--------------------------|
| SNP_P4_71264_14022863 | NC_021164.1    | Ca_kabuli_chr05 | 14022863                | AA                              | GG              | 1946845572               |
| SNP_P4_71265_14022888 | NC_021164.1    | Ca_kabuli_chr05 | 14022888                | TT                              | CC              | 1946845574               |
| SNP_P4_71266_14022906 | NC_021164.1    | Ca_kabuli_chr05 | 14022906                | AA                              | GG              | 1946845576               |
| SNP_P4_71267_14023077 | NC_021164.1    | Ca_kabuli_chr05 | 14023077                | CC                              | TT              | 1946845578               |
| SNP_P4_71268_14023082 | NC_021164.1    | Ca_kabuli_chr05 | 14023082                | AA                              | CC              | 1946845580               |
| SNP_P4_71269_14023085 | NC_021164.1    | Ca_kabuli_chr05 | 14023085                | GG                              | TT              | 1946845582               |
| SNP_P4_71270_14023097 | NC_021164.1    | Ca_kabuli_chr05 | 14023097                | CC                              | TT              | 1946845584               |
| SNP_P4_71271_14058224 | NC_021164.1    | Ca_kabuli_chr05 | 14058224                | CC                              | TT              | 1946845586               |
| SNP_P4_71272_14058233 | NC_021164.1    | Ca_kabuli_chr05 | 14058233                | CC                              | TT              | 1946845589               |
| SNP_P4_71273_14058275 | NC_021164.1    | Ca_kabuli_chr05 | 14058275                | TT                              | AA              | 1946845591               |
| SNP_P4_71274_14058299 | NC_021164.1    | Ca_kabuli_chr05 | 14058299                | TT                              | CC              | 1946845593               |
| SNP_P4_71275_14058315 | NC_021164.1    | Ca_kabuli_chr05 | 14058315                | CC                              | TT              | 1946845595               |
| SNP_P4_71276_14058329 | NC_021164.1    | Ca_kabuli_chr05 | 14058329                | GG                              | AA              | 1946845597               |
| SNP_P4_71277_14058360 | NC_021164.1    | Ca_kabuli_chr05 | 14058360                | GG                              | AA              | 1946845599               |
| SNP_P4_71278_14058363 | NC_021164.1    | Ca_kabuli_chr05 | 14058363                | TT                              | CC              | 1946845601               |
| SNP_P4_71279_14058380 | NC_021164.1    | Ca_kabuli_chr05 | 14058380                | TT                              | AA              | 1946845603               |
| SNP_P4_71280_14058384 | NC_021164.1    | Ca_kabuli_chr05 | 14058384                | CC                              | AA              | 1946845605               |
| SNP_P4_71281_14058398 | NC_021164.1    | Ca_kabuli_chr05 | 14058398                | CC                              | TT              | 1946845607               |
| SNP_P4_71282_14058557 | NC_021164.1    | Ca_kabuli_chr05 | 14058557                | CC                              | AA              | 1946845609               |
| SNP_P4_71283_14058649 | NC_021164.1    | Ca_kabuli_chr05 | 14058649                | TT                              | GG              | 1946845611               |
| SNP_P4_71284_14058651 | NC_021164.1    | Ca_kabuli_chr05 | 14058651                | GG                              | AA              | 1946845613               |
| SNP_P4_71285_14058670 | NC_021164.1    | Ca_kabuli_chr05 | 14058670                | CC                              | AA              | 1946845615               |
| SNP_P4_71286_14058678 | NC_021164.1    | Ca_kabuli_chr05 | 14058678                | AA                              | CC              | 1946845617               |
| SNP_P4_71287_14059136 | NC_021164.1    | Ca_kabuli_chr05 | 14059136                | GG                              | AA              | 1946845619               |
| SNP_P4_71288_14059159 | NC_021164.1    | Ca_kabuli_chr05 | 14059159                | TT                              | GG              | 1946845621               |
| SNP_P4_71290_14059398 | NC_021164.1    | Ca_kabuli_chr05 | 14059398                | CC                              | AA              | 1946845623               |
| SNP_P4_71291_14059493 | NC_021164.1    | Ca_kabuli_chr05 | 14059493                | GG                              | TT              | 1946845625               |
| SNP_P4_71292_14062493 | NC_021164.1    | Ca_kabuli_chr05 | 14062493                | CC                              | TT              | 1946845627               |
| SNP_P4_71293_14066299 | NC_021164.1    | Ca_kabuli_chr05 | 14066299                | AA                              | TT              | 1946845629               |
| SNP_P4_71294_14094766 | NC_021164.1    | Ca_kabuli_chr05 | 14094766                | AA                              | GG              | 1946845631               |
| SNP_P4_71295_14113067 | NC_021164.1    | Ca_kabuli_chr05 | 14113067                | AA                              | TT              | 1946845633               |
| SNP_P4_71296_14167390 | NC_021164.1    | Ca_kabuli_chr05 | 14167390                | TT                              | CC              | 1946845635               |
| SNP_P4_71297_14167402 | NC_021164.1    | Ca_kabuli_chr05 | 14167402                | TT                              | AA              | 1946845637               |
| SNP_P4_71298_14167619 | NC_021164.1    | Ca_kabuli_chr05 | 14167619                | CC                              | TT              | 1946845638               |
| SNP_P4_71299_14195844 | NC_021164.1    | Ca_kabuli_chr05 | 14195844                | CC                              | TT              | 1946845640               |
| SNP_P4_71300_14206595 | NC_021164.1    | Ca_kabuli_chr05 | 14206595                | GG                              | TT              | 1946845642               |
| SNP_P4_71301_14228474 | NC_021164.1    | Ca_kabuli_chr05 | 14228474                | TT                              | GG              | 1946845644               |
| SNP_P4_71302_14230362 | NC_021164.1    | Ca_kabuli_chr05 | 14230362                | AA                              | CC              | 1946845646               |
| SNP_P4_71304_14272964 | NC_021164.1    | Ca_kabuli_chr05 | 14272964                | GG                              | AA              | 1946845648               |
| SNP_P4_71305_14273109 | NC_021164.1    | Ca_kabuli_chr05 | 14273109                | CC                              | TT              | 1946845650               |
| SNP_P4_71306_14273186 | NC_021164.1    | Ca_kabuli_chr05 | 14273186                | AA                              | CC              | 1946845652               |
| SNP_P4_71307_14273342 | NC_021164.1    | Ca_kabuli_chr05 | 14273342                | CC                              | TT              | 1946845654               |

| SNPs IDs              | Chromosome IDs | Chromosomes     | Physical positions (bp) | CDC Frontier (Reference genome) | (ILWC46 & LPNB) | NCBI SNPdb Accession IDs |
|-----------------------|----------------|-----------------|-------------------------|---------------------------------|-----------------|--------------------------|
| SNP_P4_71308_14273343 | NC_021164.1    | Ca_kabuli_chr05 | 14273343                | AA                              | GG              | 1946845656               |
| SNP_P4_71311_14326489 | NC_021164.1    | Ca_kabuli_chr05 | 14326489                | GG                              | AA              | 1946845658               |
| SNP_P4_71312_14326512 | NC_021164.1    | Ca_kabuli_chr05 | 14326512                | CC                              | GG              | 1946845660               |
| SNP_P4_71314_14365035 | NC_021164.1    | Ca_kabuli_chr05 | 14365035                | AA                              | GG              | 1946845662               |
| SNP_P4_71315_14365036 | NC_021164.1    | Ca_kabuli_chr05 | 14365036                | AA                              | GG              | 1946845663               |
| SNP_P4_71316_14390596 | NC_021164.1    | Ca_kabuli_chr05 | 14390596                | CC                              | AA              | 1946845665               |
| SNP_P4_71317_14390600 | NC_021164.1    | Ca_kabuli_chr05 | 14390600                | CC                              | TT              | 1946845667               |
| SNP_P4_71318_14390605 | NC_021164.1    | Ca_kabuli_chr05 | 14390605                | TT                              | CC              | 1946845669               |
| SNP_P4_71320_14394944 | NC_021164.1    | Ca_kabuli_chr05 | 14394944                | CC                              | TT              | 1946845671               |
| SNP_P4_71321_14394979 | NC_021164.1    | Ca_kabuli_chr05 | 14394979                | TT                              | CC              | 1946845673               |
| SNP_P4_71322_14395026 | NC_021164.1    | Ca_kabuli_chr05 | 14395026                | TT                              | CC              | 1946845675               |
| SNP_P4_71323_14395028 | NC_021164.1    | Ca_kabuli_chr05 | 14395028                | TT                              | CC              | 1946845677               |
| SNP_P4_71324_14395043 | NC_021164.1    | Ca_kabuli_chr05 | 14395043                | AA                              | CC              | 1946845679               |
| SNP_P4_71325_14395108 | NC_021164.1    | Ca_kabuli_chr05 | 14395108                | AA                              | CC              | 1946845681               |
| SNP_P4_71326_14395115 | NC_021164.1    | Ca_kabuli_chr05 | 14395115                | GG                              | AA              | 1946845683               |
| SNP_P4_71327_14395132 | NC_021164.1    | Ca_kabuli_chr05 | 14395132                | TT                              | CC              | 1946845685               |
| SNP_P4_71328_14395139 | NC_021164.1    | Ca_kabuli_chr05 | 14395139                | TT                              | CC              | 1946845687               |
| SNP_P4_71329_14395217 | NC_021164.1    | Ca_kabuli_chr05 | 14395217                | CC                              | TT              | 1946845689               |
| SNP_P4_71330_14395272 | NC_021164.1    | Ca_kabuli_chr05 | 14395272                | TT                              | CC              | 1946845691               |
| SNP_P4_71331_14395286 | NC_021164.1    | Ca_kabuli_chr05 | 14395286                | CC                              | TT              | 1946845693               |
| SNP_P4_71332_14395334 | NC_021164.1    | Ca_kabuli_chr05 | 14395334                | TT                              | AA              | 1946845695               |
| SNP_P4_71333_14395347 | NC_021164.1    | Ca_kabuli_chr05 | 14395347                | AA                              | TT              | 1946845697               |
| SNP_P4_71334_14395372 | NC_021164.1    | Ca_kabuli_chr05 | 14395372                | CC                              | GG              | 1946845699               |
| SNP_P4_71335_14395437 | NC_021164.1    | Ca_kabuli_chr05 | 14395437                | CC                              | TT              | 1946845701               |
| SNP_P4_71336_15111962 | NC_021164.1    | Ca_kabuli_chr05 | 15111962                | TT                              | CC              | 1946845703               |
| SNP_P4_71337_15116182 | NC_021164.1    | Ca_kabuli_chr05 | 15116182                | AA                              | GG              | 1946845705               |
| SNP_P4_71338_15126450 | NC_021164.1    | Ca_kabuli_chr05 | 15126450                | GG                              | TT              | 1946845707               |
| SNP_P4_71339_15126573 | NC_021164.1    | Ca_kabuli_chr05 | 15126573                | TT                              | AA              | 1946845709               |
| SNP_P4_71340_15162884 | NC_021164.1    | Ca_kabuli_chr05 | 15162884                | GG                              | AA              | 1946845711               |
| SNP_P4_71341_15166612 | NC_021164.1    | Ca_kabuli_chr05 | 15166612                | TT                              | CC              | 1946845713               |
| SNP_P4_71342_15166626 | NC_021164.1    | Ca_kabuli_chr05 | 15166626                | AA                              | CC              | 1946845715               |
| SNP_P4_71343_15167483 | NC_021164.1    | Ca_kabuli_chr05 | 15167483                | AA                              | GG              | 1946845717               |
| SNP_P4_71344_15167501 | NC_021164.1    | Ca_kabuli_chr05 | 15167501                | TT                              | CC              | 1946845719               |
| SNP_P4_71345_15169926 | NC_021164.1    | Ca_kabuli_chr05 | 15169926                | TT                              | CC              | 1946845721               |
| SNP_P4_71346_15169997 | NC_021164.1    | Ca_kabuli_chr05 | 15169997                | CC                              | TT              | 1946845723               |
| SNP_P4_71347_15170385 | NC_021164.1    | Ca_kabuli_chr05 | 15170385                | AA                              | GG              | 1946845725               |
| SNP_P4_71348_15170912 | NC_021164.1    | Ca_kabuli_chr05 | 15170912                | GG                              | AA              | 1946845727               |
| SNP_P4_71350_15203010 | NC_021164.1    | Ca_kabuli_chr05 | 15203010                | TT                              | CC              | 1946845729               |
| SNP_P4_71351_15203049 | NC_021164.1    | Ca_kabuli_chr05 | 15203049                | CC                              | TT              | 1946845731               |
| SNP_P4_71352_15205030 | NC_021164.1    | Ca_kabuli_chr05 | 15205030                | AA                              | GG              | 1946845733               |
| SNP_P4_71353_15205033 | NC_021164.1    | Ca_kabuli_chr05 | 15205033                | AA                              | CC              | 1946845735               |
| SNP_P4_71354_15205070 | NC_021164.1    | Ca_kabuli_chr05 | 15205070                | AA                              | GG              | 1946845737               |

| SNPs IDs              | Chromosome IDs | Chromosomes     | Physical positions (bp) | CDC Frontier (Reference genome) | (ILWC46 & LPNB) | NCBI SNPdb Accession IDs |
|-----------------------|----------------|-----------------|-------------------------|---------------------------------|-----------------|--------------------------|
| SNP_P4_71355_15205076 | NC_021164.1    | Ca_kabuli_chr05 | 15205076                | GG                              | TT              | 1946845739               |
| SNP_P4_71356_15205145 | NC_021164.1    | Ca_kabuli_chr05 | 15205145                | GG                              | AA              | 1946845741               |
| SNP_P4_71357_15205166 | NC_021164.1    | Ca_kabuli_chr05 | 15205166                | CC                              | AA              | 1946845743               |
| SNP_P4_71358_15205180 | NC_021164.1    | Ca_kabuli_chr05 | 15205180                | CC                              | TT              | 1946845745               |
| SNP_P4_71359_15205486 | NC_021164.1    | Ca_kabuli_chr05 | 15205486                | TT                              | GG              | 1946845747               |
| SNP_P4_71360_15205493 | NC_021164.1    | Ca_kabuli_chr05 | 15205493                | AA                              | GG              | 1946845749               |
| SNP_P4_71361_15205659 | NC_021164.1    | Ca_kabuli_chr05 | 15205659                | GG                              | CC              | 1946845751               |
| SNP_P4_71362_15205736 | NC_021164.1    | Ca_kabuli_chr05 | 15205736                | TT                              | GG              | 1946845753               |
| SNP_P4_71363_15205767 | NC_021164.1    | Ca_kabuli_chr05 | 15205767                | GG                              | TT              | 1946845755               |
| SNP_P4_71364_15205786 | NC_021164.1    | Ca_kabuli_chr05 | 15205786                | TT                              | GG              | 1946845757               |
| SNP_P4_71365_15234926 | NC_021164.1    | Ca_kabuli_chr05 | 15234926                | CC                              | GG              | 1946845759               |
| SNP_P4_71366_15286454 | NC_021164.1    | Ca_kabuli_chr05 | 15286454                | TT                              | CC              | 1946845761               |
| SNP_P4_71367_15295924 | NC_021164.1    | Ca_kabuli_chr05 | 15295924                | CC                              | AA              | 1946845763               |
| SNP_P4_71368_15331504 | NC_021164.1    | Ca_kabuli_chr05 | 15331504                | CC                              | TT              | 1946845765               |
| SNP_P4_71369_15331513 | NC_021164.1    | Ca_kabuli_chr05 | 15331513                | CC                              | TT              | 1946845767               |
| SNP_P4_71371_15362485 | NC_021164.1    | Ca_kabuli_chr05 | 15362485                | TT                              | AA              | 1946845769               |
| SNP_P4_71372_15362529 | NC_021164.1    | Ca_kabuli_chr05 | 15362529                | GG                              | AA              | 1946845771               |
| SNP_P4_71373_15363002 | NC_021164.1    | Ca_kabuli_chr05 | 15363002                | TT                              | CC              | 1946845773               |
| SNP_P4_71374_15363023 | NC_021164.1    | Ca_kabuli_chr05 | 15363023                | CC                              | TT              | 1946845775               |
| SNP_P4_71375_15363031 | NC_021164.1    | Ca_kabuli_chr05 | 15363031                | TT                              | CC              | 1946845777               |
| SNP_P4_71376_15417246 | NC_021164.1    | Ca_kabuli_chr05 | 15417246                | CC                              | GG              | 1946845779               |
| SNP_P4_71377_15417248 | NC_021164.1    | Ca_kabuli_chr05 | 15417248                | GG                              | TT              | 1946845781               |
| SNP_P4_71378_15417251 | NC_021164.1    | Ca_kabuli_chr05 | 15417251                | AA                              | CC              | 1946845783               |
| SNP_P4_71379_15417266 | NC_021164.1    | Ca_kabuli_chr05 | 15417266                | TT                              | CC              | 1946845785               |
| SNP_P4_71380_15417274 | NC_021164.1    | Ca_kabuli_chr05 | 15417274                | CC                              | GG              | 1946845787               |
| SNP_P4_71381_15417286 | NC_021164.1    | Ca_kabuli_chr05 | 15417286                | TT                              | CC              | 1946845789               |
| SNP_P4_71382_15417313 | NC_021164.1    | Ca_kabuli_chr05 | 15417313                | GG                              | AA              | 1946845791               |
| SNP_P4_71383_15417315 | NC_021164.1    | Ca_kabuli_chr05 | 15417315                | TT                              | AA              | 1946845793               |
| SNP_P4_71384_15417317 | NC_021164.1    | Ca_kabuli_chr05 | 15417317                | TT                              | CC              | 1946845795               |
| SNP_P4_71385_15417363 | NC_021164.1    | Ca_kabuli_chr05 | 15417363                | TT                              | CC              | 1946845797               |
| SNP_P4_71386_15417396 | NC_021164.1    | Ca_kabuli_chr05 | 15417396                | AA                              | TT              | 1946845799               |
| SNP_P4_71387_15417397 | NC_021164.1    | Ca_kabuli_chr05 | 15417397                | CC                              | TT              | 1946845801               |
| SNP_P4_71388_15417398 | NC_021164.1    | Ca_kabuli_chr05 | 15417398                | AA                              | TT              | 1946845803               |
| SNP_P4_71389_15417544 | NC_021164.1    | Ca_kabuli_chr05 | 15417544                | CC                              | TT              | 1946845805               |
| SNP_P4_71390_15417708 | NC_021164.1    | Ca_kabuli_chr05 | 15417708                | AA                              | GG              | 1946845808               |
| SNP_P4_71391_15417709 | NC_021164.1    | Ca_kabuli_chr05 | 15417709                | AA                              | GG              | 1946845810               |
| SNP_P4_71392_15417723 | NC_021164.1    | Ca_kabuli_chr05 | 15417723                | GG                              | AA              | 1946845812               |
| SNP_P4_71393_15417981 | NC_021164.1    | Ca_kabuli_chr05 | 15417981                | CC                              | TT              | 1946845814               |
| SNP_P4_71394_15422563 | NC_021164.1    | Ca_kabuli_chr05 | 15422563                | CC                              | TT              | 1946845816               |
| SNP_P4_71395_15422625 | NC_021164.1    | Ca_kabuli_chr05 | 15422625                | TT                              | GG              | 1946845818               |
| SNP_P4_71396_15422985 | NC_021164.1    | Ca_kabuli_chr05 | 15422985                | AA                              | GG              | 1946845820               |
| SNP_P4_71397_15424446 | NC_021164.1    | Ca_kabuli_chr05 | 15424446                | TT                              | CC              | 1946845822               |



| SNPs IDs              | Chromosome IDs | Chromosomes     | Physical positions (bp) | CDC Frontier (Reference genome) | (ILWC46 & LPNB) | NCBI SNPdb Accession IDs |
|-----------------------|----------------|-----------------|-------------------------|---------------------------------|-----------------|--------------------------|
| SNP_P4_71398_15424560 | NC_021164.1    | Ca_kabuli_chr05 | 15424560                | CC                              | TT              | 1946845824               |
| SNP_P4_71399_15424561 | NC_021164.1    | Ca_kabuli_chr05 | 15424561                | AA                              | GG              | 1946845826               |
| SNP_P4_71400_15424586 | NC_021164.1    | Ca_kabuli_chr05 | 15424586                | GG                              | CC              | 1946845828               |
| SNP_P4_71401_15424626 | NC_021164.1    | Ca_kabuli_chr05 | 15424626                | AA                              | GG              | 1946845830               |
| SNP_P4_71402_15424649 | NC_021164.1    | Ca_kabuli_chr05 | 15424649                | AA                              | GG              | 1946845832               |
| SNP_P4_71403_15424705 | NC_021164.1    | Ca_kabuli_chr05 | 15424705                | TT                              | GG              | 1946845834               |
| SNP_P4_71404_15424728 | NC_021164.1    | Ca_kabuli_chr05 | 15424728                | AA                              | GG              | 1946845836               |
| SNP_P4_71405_15424737 | NC_021164.1    | Ca_kabuli_chr05 | 15424737                | TT                              | AA              | 1946845838               |
| SNP_P4_71406_15424974 | NC_021164.1    | Ca_kabuli_chr05 | 15424974                | AA                              | GG              | 1946845840               |
| SNP_P4_71407_15424997 | NC_021164.1    | Ca_kabuli_chr05 | 15424997                | CC                              | AA              | 1946845842               |
| SNP_P4_71408_15448131 | NC_021164.1    | Ca_kabuli_chr05 | 15448131                | GG                              | AA              | 1946845844               |
| SNP_P4_71411_15488007 | NC_021164.1    | Ca_kabuli_chr05 | 15488007                | GG                              | AA              | 1946845846               |
| SNP_P4_71412_15502367 | NC_021164.1    | Ca_kabuli_chr05 | 15502367                | GG                              | AA              | 1946845848               |
| SNP_P4_71413_15502761 | NC_021164.1    | Ca_kabuli_chr05 | 15502761                | AA                              | CC              | 1946845850               |
| SNP_P4_71414_15502783 | NC_021164.1    | Ca_kabuli_chr05 | 15502783                | CC                              | TT              | 1946845852               |
| SNP_P4_71415_15503457 | NC_021164.1    | Ca_kabuli_chr05 | 15503457                | GG                              | AA              | 1946845854               |
| SNP_P4_71416_15503474 | NC_021164.1    | Ca_kabuli_chr05 | 15503474                | GG                              | AA              | 1946845856               |
| SNP_P4_71417_15503491 | NC_021164.1    | Ca_kabuli_chr05 | 15503491                | GG                              | AA              | 1946845858               |
| SNP_P4_71418_15503801 | NC_021164.1    | Ca_kabuli_chr05 | 15503801                | TT                              | CC              | 1946845860               |
| SNP_P4_71420_15511389 | NC_021164.1    | Ca_kabuli_chr05 | 15511389                | TT                              | AA              | 1946845862               |
| SNP_P4_71421_15511983 | NC_021164.1    | Ca_kabuli_chr05 | 15511983                | AA                              | GG              | 1946845864               |
| SNP_P4_71422_15526431 | NC_021164.1    | Ca_kabuli_chr05 | 15526431                | TT                              | AA              | 1946845866               |
| SNP_P4_71423_15526439 | NC_021164.1    | Ca_kabuli_chr05 | 15526439                | CC                              | TT              | 1946845868               |
| SNP_P4_71424_15526483 | NC_021164.1    | Ca_kabuli_chr05 | 15526483                | TT                              | CC              | 1946845870               |
| SNP_P4_71425_15533821 | NC_021164.1    | Ca_kabuli_chr05 | 15533821                | TT                              | AA              | 1946845872               |
| SNP_P4_71426_15535240 | NC_021164.1    | Ca_kabuli_chr05 | 15535240                | GG                              | AA              | 1946845874               |
| SNP_P4_71427_15535289 | NC_021164.1    | Ca_kabuli_chr05 | 15535289                | TT                              | GG              | 1946845876               |
| SNP_P4_71428_15535303 | NC_021164.1    | Ca_kabuli_chr05 | 15535303                | AA                              | CC              | 1946845878               |
| SNP_P4_71429_15538001 | NC_021164.1    | Ca_kabuli_chr05 | 15538001                | TT                              | CC              | 1946845880               |
| SNP_P4_71430_15538008 | NC_021164.1    | Ca_kabuli_chr05 | 15538008                | AA                              | GG              | 1946845882               |
| SNP_P4_71432_15545994 | NC_021164.1    | Ca_kabuli_chr05 | 15545994                | GG                              | AA              | 1946845884               |
| SNP_P4_71433_15546009 | NC_021164.1    | Ca_kabuli_chr05 | 15546009                | TT                              | CC              | 1946845886               |
| SNP_P4_71434_15546277 | NC_021164.1    | Ca_kabuli_chr05 | 15546277                | CC                              | AA              | 1946845888               |
| SNP_P4_71435_15567759 | NC_021164.1    | Ca_kabuli_chr05 | 15567759                | GG                              | AA              | 1946845890               |
| SNP_P4_71436_15570698 | NC_021164.1    | Ca_kabuli_chr05 | 15570698                | AA                              | GG              | 1946845892               |
| SNP_P4_71437_15570724 | NC_021164.1    | Ca_kabuli_chr05 | 15570724                | AA                              | GG              | 1946845894               |
| SNP_P4_71438_15570853 | NC_021164.1    | Ca_kabuli_chr05 | 15570853                | AA                              | GG              | 1946845896               |
| SNP_P4_71439_15587146 | NC_021164.1    | Ca_kabuli_chr05 | 15587146                | TT                              | AA              | 1946845898               |
| SNP_P4_71440_15587166 | NC_021164.1    | Ca_kabuli_chr05 | 15587166                | CC                              | TT              | 1946845900               |
| SNP_P4_71441_15611358 | NC_021164.1    | Ca_kabuli_chr05 | 15611358                | TT                              | GG              | 1946845902               |
| SNP_P4_71442_15611418 | NC_021164.1    | Ca_kabuli_chr05 | 15611418                | CC                              | AA              | 1946845904               |
| SNP_P4_71443_15644966 | NC_021164.1    | Ca_kabuli_chr05 | 15644966                | TT                              | AA              | 1946845906               |

| SNPs IDs              | Chromosome IDs | Chromosomes     | Physical positions (bp) | CDC Frontier (Reference genome) | (ILWC46 & LPNB) | NCBI SNPdb Accession IDs |
|-----------------------|----------------|-----------------|-------------------------|---------------------------------|-----------------|--------------------------|
| SNP_P4_71444_15644998 | NC_021164.1    | Ca_kabuli_chr05 | 15644998                | AA                              | TT              | 1946845908               |
| SNP_P4_71445_15668343 | NC_021164.1    | Ca_kabuli_chr05 | 15668343                | AA                              | CC              | 1946845910               |
| SNP_P4_71446_15689869 | NC_021164.1    | Ca_kabuli_chr05 | 15689869                | TT                              | GG              | 1946845912               |
| SNP_P4_71449_15729540 | NC_021164.1    | Ca_kabuli_chr05 | 15729540                | GG                              | CC              | 1946845914               |
| SNP_P4_71451_15741564 | NC_021164.1    | Ca_kabuli_chr05 | 15741564                | TT                              | GG              | 1946845916               |
| SNP_P4_71452_15754804 | NC_021164.1    | Ca_kabuli_chr05 | 15754804                | CC                              | AA              | 1946845918               |
| SNP_P4_71455_15784342 | NC_021164.1    | Ca_kabuli_chr05 | 15784342                | TT                              | GG              | 1946845920               |
| SNP_P4_71456_15795284 | NC_021164.1    | Ca_kabuli_chr05 | 15795284                | AA                              | GG              | 1946845922               |
| SNP_P4_71457_15803978 | NC_021164.1    | Ca_kabuli_chr05 | 15803978                | AA                              | CC              | 1946845924               |
| SNP_P4_71458_15815214 | NC_021164.1    | Ca_kabuli_chr05 | 15815214                | AA                              | TT              | 1946845926               |
| SNP_P4_71459_15835005 | NC_021164.1    | Ca_kabuli_chr05 | 15835005                | CC                              | TT              | 1946845928               |
| SNP_P4_71460_15835151 | NC_021164.1    | Ca_kabuli_chr05 | 15835151                | CC                              | GG              | 1946845930               |
| SNP_P4_71461_15835203 | NC_021164.1    | Ca_kabuli_chr05 | 15835203                | CC                              | AA              | 1946845932               |
| SNP_P4_71462_15835217 | NC_021164.1    | Ca_kabuli_chr05 | 15835217                | AA                              | CC              | 1946845934               |
| SNP_P4_71463_15835242 | NC_021164.1    | Ca_kabuli_chr05 | 15835242                | TT                              | AA              | 1946845936               |
| SNP_P4_71464_15835278 | NC_021164.1    | Ca_kabuli_chr05 | 15835278                | TT                              | CC              | 1946845938               |
| SNP_P4_71465_15835338 | NC_021164.1    | Ca_kabuli_chr05 | 15835338                | AA                              | GG              | 1946845940               |
| SNP_P4_71466_15835352 | NC_021164.1    | Ca_kabuli_chr05 | 15835352                | TT                              | CC              | 1946845942               |
| SNP_P4_71468_15862598 | NC_021164.1    | Ca_kabuli_chr05 | 15862598                | TT                              | AA              | 1946845944               |
| SNP_P4_71469_15875910 | NC_021164.1    | Ca_kabuli_chr05 | 15875910                | AA                              | CC              | 1946845946               |
| SNP_P4_71470_15876693 | NC_021164.1    | Ca_kabuli_chr05 | 15876693                | AA                              | TT              | 1946845948               |
| SNP_P4_71471_15876821 | NC_021164.1    | Ca_kabuli_chr05 | 15876821                | CC                              | AA              | 1946845950               |
| SNP_P4_71472_15876823 | NC_021164.1    | Ca_kabuli_chr05 | 15876823                | GG                              | TT              | 1946845952               |
| SNP_P4_71473_15876888 | NC_021164.1    | Ca_kabuli_chr05 | 15876888                | AA                              | TT              | 1946845954               |
| SNP_P4_71474_15876897 | NC_021164.1    | Ca_kabuli_chr05 | 15876897                | AA                              | CC              | 1946845956               |
| SNP_P4_71475_15877053 | NC_021164.1    | Ca_kabuli_chr05 | 15877053                | GG                              | CC              | 1946845958               |
| SNP_P4_71476_15877056 | NC_021164.1    | Ca_kabuli_chr05 | 15877056                | GG                              | CC              | 1946845960               |
| SNP_P4_71477_15877077 | NC_021164.1    | Ca_kabuli_chr05 | 15877077                | AA                              | GG              | 1946845962               |
| SNP_P4_71478_15877179 | NC_021164.1    | Ca_kabuli_chr05 | 15877179                | GG                              | AA              | 1946845964               |
| SNP_P4_71479_15877242 | NC_021164.1    | Ca_kabuli_chr05 | 15877242                | TT                              | AA              | 1946845966               |
| SNP_P4_71480_15877335 | NC_021164.1    | Ca_kabuli_chr05 | 15877335                | TT                              | CC              | 1946845968               |
| SNP_P4_71482_15877456 | NC_021164.1    | Ca_kabuli_chr05 | 15877456                | GG                              | AA              | 1946845970               |
| SNP_P4_71483_15885177 | NC_021164.1    | Ca_kabuli_chr05 | 15885177                | AA                              | TT              | 1946845972               |
| SNP_P4_71484_15891872 | NC_021164.1    | Ca_kabuli_chr05 | 15891872                | GG                              | AA              | 1946845974               |
| SNP_P4_71485_15893272 | NC_021164.1    | Ca_kabuli_chr05 | 15893272                | GG                              | CC              | 1946845976               |
| SNP_P4_71486_15893283 | NC_021164.1    | Ca_kabuli_chr05 | 15893283                | TT                              | CC              | 1946845978               |
| SNP_P4_71487_15893308 | NC_021164.1    | Ca_kabuli_chr05 | 15893308                | CC                              | TT              | 1946845980               |
| SNP_P4_71488_15893411 | NC_021164.1    | Ca_kabuli_chr05 | 15893411                | CC                              | TT              | 1946845982               |
| SNP_P4_71489_15894641 | NC_021164.1    | Ca_kabuli_chr05 | 15894641                | AA                              | TT              | 1946845984               |
| SNP_P4_71490_15894720 | NC_021164.1    | Ca_kabuli_chr05 | 15894720                | TT                              | AA              | 1946845986               |
| SNP_P4_71491_15894724 | NC_021164.1    | Ca_kabuli_chr05 | 15894724                | AA                              | TT              | 1946845988               |
| SNP_P4_71492_15894842 | NC_021164.1    | Ca_kabuli_chr05 | 15894842                | TT                              | AA              | 1946845990               |

| SNPs IDs              | Chromosome IDs | Chromosomes     | Physical positions (bp) | CDC Frontier (Reference genome) | (ILWC46 & LPNB) | NCBI SNPdb Accession IDs |
|-----------------------|----------------|-----------------|-------------------------|---------------------------------|-----------------|--------------------------|
| SNP_P4_71493_15895047 | NC_021164.1    | Ca_kabuli_chr05 | 15895047                | TT                              | CC              | 1946845992               |
| SNP_P4_71494_15908469 | NC_021164.1    | Ca_kabuli_chr05 | 15908469                | GG                              | TT              | 1946845994               |
| SNP_P4_71495_15908479 | NC_021164.1    | Ca_kabuli_chr05 | 15908479                | AA                              | CC              | 1946845996               |
| SNP_P4_71496_15908497 | NC_021164.1    | Ca_kabuli_chr05 | 15908497                | AA                              | GG              | 1946845998               |
| SNP_P4_71497_15908509 | NC_021164.1    | Ca_kabuli_chr05 | 15908509                | AA                              | GG              | 1946846000               |
| SNP_P4_71498_15908521 | NC_021164.1    | Ca_kabuli_chr05 | 15908521                | CC                              | TT              | 1946846002               |
| SNP_P4_71499_15908523 | NC_021164.1    | Ca_kabuli_chr05 | 15908523                | CC                              | TT              | 1946846004               |
| SNP_P4_71500_15908535 | NC_021164.1    | Ca_kabuli_chr05 | 15908535                | GG                              | AA              | 1946846006               |
| SNP_P4_71501_15908546 | NC_021164.1    | Ca_kabuli_chr05 | 15908546                | CC                              | TT              | 1946846008               |
| SNP_P4_71502_15910607 | NC_021164.1    | Ca_kabuli_chr05 | 15910607                | TT                              | CC              | 1946846010               |
| SNP_P4_71503_15910620 | NC_021164.1    | Ca_kabuli_chr05 | 15910620                | GG                              | AA              | 1946846012               |
| SNP_P4_71504_15910628 | NC_021164.1    | Ca_kabuli_chr05 | 15910628                | GG                              | AA              | 1946846014               |
| SNP_P4_71505_15910634 | NC_021164.1    | Ca_kabuli_chr05 | 15910634                | TT                              | CC              | 1946846016               |
| SNP_P4_71506_15910869 | NC_021164.1    | Ca_kabuli_chr05 | 15910869                | CC                              | AA              | 1946846018               |
| SNP_P4_71507_15910947 | NC_021164.1    | Ca_kabuli_chr05 | 15910947                | GG                              | AA              | 1946846020               |
| SNP_P4_71508_15912222 | NC_021164.1    | Ca_kabuli_chr05 | 15912222                | TT                              | AA              | 1946846022               |
| SNP_P4_71509_15918447 | NC_021164.1    | Ca_kabuli_chr05 | 15918447                | GG                              | AA              | 1946846024               |
| SNP_P4_71511_15922251 | NC_021164.1    | Ca_kabuli_chr05 | 15922251                | AA                              | GG              | 1946846026               |
| SNP_P4_71512_15923733 | NC_021164.1    | Ca_kabuli_chr05 | 15923733                | TT                              | CC              | 1946846028               |
| SNP_P4_71513_15928680 | NC_021164.1    | Ca_kabuli_chr05 | 15928680                | CC                              | GG              | 1946846030               |
| SNP_P4_71515_15929285 | NC_021164.1    | Ca_kabuli_chr05 | 15929285                | CC                              | TT              | 1946846032               |
| SNP_P4_71516_15929288 | NC_021164.1    | Ca_kabuli_chr05 | 15929288                | TT                              | AA              | 1946846034               |
| SNP_P4_71517_15929317 | NC_021164.1    | Ca_kabuli_chr05 | 15929317                | TT                              | CC              | 1946846036               |
| SNP_P4_71519_15929590 | NC_021164.1    | Ca_kabuli_chr05 | 15929590                | AA                              | GG              | 1946846038               |
| SNP_P4_71520_15929617 | NC_021164.1    | Ca_kabuli_chr05 | 15929617                | AA                              | CC              | 1946846040               |
| SNP_P4_71521_15929658 | NC_021164.1    | Ca_kabuli_chr05 | 15929658                | AA                              | TT              | 1946846042               |
| SNP_P4_71522_15929716 | NC_021164.1    | Ca_kabuli_chr05 | 15929716                | AA                              | CC              | 1946846044               |
| SNP_P4_71523_15931178 | NC_021164.1    | Ca_kabuli_chr05 | 15931178                | AA                              | GG              | 1946846046               |
| SNP_P4_71524_15931556 | NC_021164.1    | Ca_kabuli_chr05 | 15931556                | TT                              | AA              | 1946846048               |
| SNP_P4_71525_15931594 | NC_021164.1    | Ca_kabuli_chr05 | 15931594                | AA                              | TT              | 1946846050               |
| SNP_P4_71526_15936778 | NC_021164.1    | Ca_kabuli_chr05 | 15936778                | CC                              | TT              | 1946846052               |
| SNP_P4_71527_15938554 | NC_021164.1    | Ca_kabuli_chr05 | 15938554                | AA                              | TT              | 1946846054               |
| SNP_P4_71528_15956833 | NC_021164.1    | Ca_kabuli_chr05 | 15956833                | AA                              | CC              | 1946846056               |
| SNP_P4_71529_15957391 | NC_021164.1    | Ca_kabuli_chr05 | 15957391                | CC                              | TT              | 1946846058               |
| SNP_P4_71530_15957631 | NC_021164.1    | Ca_kabuli_chr05 | 15957631                | CC                              | AA              | 1946846060               |
| SNP_P4_71531_15957678 | NC_021164.1    | Ca_kabuli_chr05 | 15957678                | GG                              | AA              | 1946846062               |
| SNP_P4_71533_16005498 | NC_021164.1    | Ca_kabuli_chr05 | 16005498                | TT                              | CC              | 1946846064               |
| SNP_P4_71534_16005551 | NC_021164.1    | Ca_kabuli_chr05 | 16005551                | TT                              | CC              | 1946846066               |
| SNP_P4_71535_16022067 | NC_021164.1    | Ca_kabuli_chr05 | 16022067                | TT                              | CC              | 1946846068               |
| SNP_P4_71536_16022568 | NC_021164.1    | Ca_kabuli_chr05 | 16022568                | TT                              | AA              | 1946846070               |
| SNP_P4_71537_16022728 | NC_021164.1    | Ca_kabuli_chr05 | 16022728                | TT                              | CC              | 1946846072               |
| SNP_P4_71538_16022785 | NC_021164.1    | Ca_kabuli_chr05 | 16022785                | TT                              | CC              | 1946846074               |

| SNPs IDs              | Chromosome IDs | Chromosomes     | Physical positions (bp) | CDC Frontier (Reference genome) | (ILWC46 & LPNB) | NCBI SNPdb Accession IDs |
|-----------------------|----------------|-----------------|-------------------------|---------------------------------|-----------------|--------------------------|
| SNP_P4_71539_16022808 | NC_021164.1    | Ca_kabuli_chr05 | 16022808                | AA                              | GG              | 1946846076               |
| SNP_P4_71540_16022822 | NC_021164.1    | Ca_kabuli_chr05 | 16022822                | GG                              | AA              | 1946846078               |
| SNP_P4_71542_16083111 | NC_021164.1    | Ca_kabuli_chr05 | 16083111                | CC                              | AA              | 1946846080               |
| SNP_P4_71543_16083241 | NC_021164.1    | Ca_kabuli_chr05 | 16083241                | AA                              | GG              | 1946846082               |
| SNP_P4_71544_16083267 | NC_021164.1    | Ca_kabuli_chr05 | 16083267                | GG                              | AA              | 1946846084               |
| SNP_P4_71546_16083460 | NC_021164.1    | Ca_kabuli_chr05 | 16083460                | TT                              | CC              | 1946846086               |
| SNP_P4_71547_16083503 | NC_021164.1    | Ca_kabuli_chr05 | 16083503                | TT                              | GG              | 1946846088               |
| SNP_P4_71548_16083504 | NC_021164.1    | Ca_kabuli_chr05 | 16083504                | TT                              | CC              | 1946846090               |
| SNP_P4_71549_16083549 | NC_021164.1    | Ca_kabuli_chr05 | 16083549                | TT                              | AA              | 1946846092               |
| SNP_P4_71550_16083613 | NC_021164.1    | Ca_kabuli_chr05 | 16083613                | AA                              | GG              | 1946846094               |
| SNP_P4_71551_16089552 | NC_021164.1    | Ca_kabuli_chr05 | 16089552                | AA                              | GG              | 1946846096               |
| SNP_P4_71552_16089901 | NC_021164.1    | Ca_kabuli_chr05 | 16089901                | TT                              | CC              | 1946846098               |
| SNP_P4_71553_16113319 | NC_021164.1    | Ca_kabuli_chr05 | 16113319                | TT                              | CC              | 1946846100               |
| SNP_P4_71554_16113395 | NC_021164.1    | Ca_kabuli_chr05 | 16113395                | TT                              | CC              | 1946846102               |
| SNP_P4_71555_16113583 | NC_021164.1    | Ca_kabuli_chr05 | 16113583                | TT                              | CC              | 1946846104               |
| SNP_P4_71556_16113585 | NC_021164.1    | Ca_kabuli_chr05 | 16113585                | GG                              | CC              | 1946846106               |
| SNP_P4_71557_16113600 | NC_021164.1    | Ca_kabuli_chr05 | 16113600                | CC                              | TT              | 1946846108               |
| SNP_P4_71558_16113664 | NC_021164.1    | Ca_kabuli_chr05 | 16113664                | TT                              | CC              | 1946846110               |
| SNP_P4_71559_16115274 | NC_021164.1    | Ca_kabuli_chr05 | 16115274                | CC                              | TT              | 1946846112               |
| SNP_P4_71561_16152144 | NC_021164.1    | Ca_kabuli_chr05 | 16152144                | GG                              | TT              | 1946846114               |
| SNP_P4_71562_16152239 | NC_021164.1    | Ca_kabuli_chr05 | 16152239                | GG                              | AA              | 1946846116               |
| SNP_P4_71563_16152299 | NC_021164.1    | Ca_kabuli_chr05 | 16152299                | AA                              | TT              | 1946846118               |
| SNP_P4_71564_16152304 | NC_021164.1    | Ca_kabuli_chr05 | 16152304                | GG                              | TT              | 1946846120               |
| SNP_P4_71565_16152338 | NC_021164.1    | Ca_kabuli_chr05 | 16152338                | TT                              | CC              | 1946846122               |
| SNP_P4_71566_16152340 | NC_021164.1    | Ca_kabuli_chr05 | 16152340                | AA                              | GG              | 1946846124               |
| SNP_P4_71567_16152444 | NC_021164.1    | Ca_kabuli_chr05 | 16152444                | TT                              | CC              | 1946846126               |
| SNP_P4_71568_16199625 | NC_021164.1    | Ca_kabuli_chr05 | 16199625                | CC                              | TT              | 1946846128               |
| SNP_P4_71569_16203643 | NC_021164.1    | Ca_kabuli_chr05 | 16203643                | GG                              | AA              | 1946846130               |
| SNP_P4_71570_16230576 | NC_021164.1    | Ca_kabuli_chr05 | 16230576                | AA                              | CC              | 1946846132               |
| SNP_P4_71571_16230599 | NC_021164.1    | Ca_kabuli_chr05 | 16230599                | TT                              | CC              | 1946846134               |
| SNP_P4_71572_16230633 | NC_021164.1    | Ca_kabuli_chr05 | 16230633                | CC                              | AA              | 1946846136               |
| SNP_P4_71573_16294887 | NC_021164.1    | Ca_kabuli_chr05 | 16294887                | AA                              | GG              | 1946846138               |
| SNP_P4_71574_16319742 | NC_021164.1    | Ca_kabuli_chr05 | 16319742                | TT                              | CC              | 1946846140               |
| SNP_P4_71575_16319897 | NC_021164.1    | Ca_kabuli_chr05 | 16319897                | GG                              | CC              | 1946846142               |
| SNP_P4_71577_16320123 | NC_021164.1    | Ca_kabuli_chr05 | 16320123                | AA                              | CC              | 1946846144               |
| SNP_P4_71578_16322032 | NC_021164.1    | Ca_kabuli_chr05 | 16322032                | AA                              | GG              | 1946846146               |
| SNP_P4_71579_16322048 | NC_021164.1    | Ca_kabuli_chr05 | 16322048                | AA                              | TT              | 1946846148               |
| SNP_P4_71580_16322082 | NC_021164.1    | Ca_kabuli_chr05 | 16322082                | TT                              | CC              | 1946846150               |
| SNP_P4_71581_16340492 | NC_021164.1    | Ca_kabuli_chr05 | 16340492                | GG                              | AA              | 1946846152               |
| SNP_P4_71582_16340525 | NC_021164.1    | Ca_kabuli_chr05 | 16340525                | AA                              | TT              | 1946846155               |
| SNP_P4_71583_16341179 | NC_021164.1    | Ca_kabuli_chr05 | 16341179                | TT                              | AA              | 1946846157               |
| SNP_P4_71584_16361302 | NC_021164.1    | Ca_kabuli_chr05 | 16361302                | GG                              | AA              | 1946846159               |

| SNPs IDs              | Chromosome IDs | Chromosomes     | Physical positions (bp) | CDC Frontier (Reference genome) | (ILWC46 & LPNB) | NCBI SNPdb Accession IDs |
|-----------------------|----------------|-----------------|-------------------------|---------------------------------|-----------------|--------------------------|
| SNP_P4_71585_16361368 | NC_021164.1    | Ca_kabuli_chr05 | 16361368                | AA                              | GG              | 1946846161               |
| SNP_P4_71586_16361532 | NC_021164.1    | Ca_kabuli_chr05 | 16361532                | GG                              | AA              | 1946846163               |
| SNP_P4_71587_16361637 | NC_021164.1    | Ca_kabuli_chr05 | 16361637                | TT                              | CC              | 1946846165               |
| SNP_P4_71588_16361640 | NC_021164.1    | Ca_kabuli_chr05 | 16361640                | AA                              | TT              | 1946846167               |
| SNP_P4_71589_16365729 | NC_021164.1    | Ca_kabuli_chr05 | 16365729                | AA                              | GG              | 1946846169               |
| SNP_P4_71590_16369783 | NC_021164.1    | Ca_kabuli_chr05 | 16369783                | CC                              | TT              | 1946846171               |
| SNP_P4_71591_16396119 | NC_021164.1    | Ca_kabuli_chr05 | 16396119                | GG                              | AA              | 1946846173               |
| SNP_P4_71593_16429580 | NC_021164.1    | Ca_kabuli_chr05 | 16429580                | GG                              | TT              | 1946846175               |
| SNP_P4_71594_16429607 | NC_021164.1    | Ca_kabuli_chr05 | 16429607                | AA                              | CC              | 1946846177               |
| SNP_P4_71595_16431636 | NC_021164.1    | Ca_kabuli_chr05 | 16431636                | AA                              | CC              | 1946846179               |
| SNP_P4_71597_16487834 | NC_021164.1    | Ca_kabuli_chr05 | 16487834                | AA                              | CC              | 1946846181               |
| SNP_P4_71598_16487836 | NC_021164.1    | Ca_kabuli_chr05 | 16487836                | AA                              | TT              | 1946846183               |
| SNP_P4_71599_16490126 | NC_021164.1    | Ca_kabuli_chr05 | 16490126                | GG                              | AA              | 1946846185               |
| SNP_P4_71600_16492243 | NC_021164.1    | Ca_kabuli_chr05 | 16492243                | AA                              | CC              | 1946846187               |
| SNP_P4_71601_16494096 | NC_021164.1    | Ca_kabuli_chr05 | 16494096                | AA                              | GG              | 1946846189               |
| SNP_P4_71602_16500064 | NC_021164.1    | Ca_kabuli_chr05 | 16500064                | TT                              | CC              | 1946846191               |
| SNP_P4_71603_16507256 | NC_021164.1    | Ca_kabuli_chr05 | 16507256                | AA                              | CC              | 1946846193               |
| SNP_P4_71604_16508337 | NC_021164.1    | Ca_kabuli_chr05 | 16508337                | GG                              | CC              | 1946846195               |
| SNP_P4_71608_16551859 | NC_021164.1    | Ca_kabuli_chr05 | 16551859                | TT                              | CC              | 1946846197               |
| SNP_P4_71609_16552298 | NC_021164.1    | Ca_kabuli_chr05 | 16552298                | AA                              | GG              | 1946846199               |
| SNP_P4_71610_16552310 | NC_021164.1    | Ca_kabuli_chr05 | 16552310                | TT                              | AA              | 1946846201               |
| SNP_P4_71612_16616871 | NC_021164.1    | Ca_kabuli_chr05 | 16616871                | GG                              | AA              | 1946846203               |
| SNP_P4_71613_16636111 | NC_021164.1    | Ca_kabuli_chr05 | 16636111                | AA                              | GG              | 1946846205               |
| SNP_P4_71615_16649867 | NC_021164.1    | Ca_kabuli_chr05 | 16649867                | CC                              | TT              | 1946846207               |
| SNP_P4_71616_16649904 | NC_021164.1    | Ca_kabuli_chr05 | 16649904                | CC                              | AA              | 1946846209               |
| SNP_P4_71617_16649946 | NC_021164.1    | Ca_kabuli_chr05 | 16649946                | GG                              | AA              | 1946846211               |
| SNP_P4_71619_16650646 | NC_021164.1    | Ca_kabuli_chr05 | 16650646                | AA                              | GG              | 1946846213               |
| SNP_P4_71620_16650668 | NC_021164.1    | Ca_kabuli_chr05 | 16650668                | GG                              | AA              | 1946846215               |
| SNP_P4_71621_16650859 | NC_021164.1    | Ca_kabuli_chr05 | 16650859                | CC                              | GG              | 1946846217               |
| SNP_P4_71622_16651514 | NC_021164.1    | Ca_kabuli_chr05 | 16651514                | TT                              | GG              | 1946846219               |
| SNP_P4_71623_16651521 | NC_021164.1    | Ca_kabuli_chr05 | 16651521                | TT                              | CC              | 1946846221               |
| SNP_P4_71624_16658326 | NC_021164.1    | Ca_kabuli_chr05 | 16658326                | AA                              | CC              | 1946846223               |
| SNP_P4_71625_16663245 | NC_021164.1    | Ca_kabuli_chr05 | 16663245                | AA                              | GG              | 1946846225               |
| SNP_P4_71626_16667273 | NC_021164.1    | Ca_kabuli_chr05 | 16667273                | GG                              | AA              | 1946846227               |
| SNP_P4_71627_16684531 | NC_021164.1    | Ca_kabuli_chr05 | 16684531                | GG                              | CC              | 1946846229               |
| SNP_P4_71628_16703325 | NC_021164.1    | Ca_kabuli_chr05 | 16703325                | TT                              | CC              | 1946846231               |
| SNP_P4_71629_16703465 | NC_021164.1    | Ca_kabuli_chr05 | 16703465                | AA                              | GG              | 1946846233               |
| SNP_P4_71630_16703469 | NC_021164.1    | Ca_kabuli_chr05 | 16703469                | AA                              | GG              | 1946846235               |
| SNP_P4_71631_16703494 | NC_021164.1    | Ca_kabuli_chr05 | 16703494                | TT                              | CC              | 1946846237               |
| SNP_P4_71632_16703529 | NC_021164.1    | Ca_kabuli_chr05 | 16703529                | TT                              | GG              | 1946846239               |
| SNP_P4_71633_16703531 | NC_021164.1    | Ca_kabuli_chr05 | 16703531                | AA                              | CC              | 1946846241               |
| SNP_P4_71634_16703546 | NC_021164.1    | Ca_kabuli_chr05 | 16703546                | TT                              | GG              | 1946846243               |

| SNPs IDs              | Chromosome IDs | Chromosomes     | Physical positions (bp) | CDC Frontier (Reference genome) | (ILWC46 & LPNB) | NCBI SNPdb Accession IDs |
|-----------------------|----------------|-----------------|-------------------------|---------------------------------|-----------------|--------------------------|
| SNP_P4_71635_16703553 | NC_021164.1    | Ca_kabuli_chr05 | 16703553                | TT                              | GG              | 1946846245               |
| SNP_P4_71636_16703701 | NC_021164.1    | Ca_kabuli_chr05 | 16703701                | TT                              | CC              | 1946846247               |
| SNP_P4_71639_16727592 | NC_021164.1    | Ca_kabuli_chr05 | 16727592                | TT                              | CC              | 1946846249               |
| SNP_P4_71640_16730064 | NC_021164.1    | Ca_kabuli_chr05 | 16730064                | GG                              | AA              | 1946846251               |
| SNP_P4_71642_16765983 | NC_021164.1    | Ca_kabuli_chr05 | 16765983                | CC                              | TT              | 1946846253               |
| SNP_P4_71643_16766060 | NC_021164.1    | Ca_kabuli_chr05 | 16766060                | GG                              | TT              | 1946846255               |
| SNP_P4_71644_16766128 | NC_021164.1    | Ca_kabuli_chr05 | 16766128                | TT                              | AA              | 1946846257               |
| SNP_P4_71645_16766130 | NC_021164.1    | Ca_kabuli_chr05 | 16766130                | AA                              | TT              | 1946846259               |
| SNP_P4_71646_16766132 | NC_021164.1    | Ca_kabuli_chr05 | 16766132                | TT                              | AA              | 1946846261               |
| SNP_P4_71647_16766167 | NC_021164.1    | Ca_kabuli_chr05 | 16766167                | CC                              | GG              | 1946846263               |
| SNP_P4_71648_16766290 | NC_021164.1    | Ca_kabuli_chr05 | 16766290                | GG                              | AA              | 1946846265               |
| SNP_P4_71649_16766978 | NC_021164.1    | Ca_kabuli_chr05 | 16766978                | AA                              | TT              | 1946846267               |
| SNP_P4_71650_16767958 | NC_021164.1    | Ca_kabuli_chr05 | 16767958                | GG                              | TT              | 1946846269               |
| SNP_P4_71651_16767965 | NC_021164.1    | Ca_kabuli_chr05 | 16767965                | AA                              | GG              | 1946846271               |
| SNP_P4_71652_16814475 | NC_021164.1    | Ca_kabuli_chr05 | 16814475                | AA                              | CC              | 1946846273               |
| SNP_P4_71653_16821291 | NC_021164.1    | Ca_kabuli_chr05 | 16821291                | GG                              | AA              | 1946846275               |
| SNP_P4_71654_16821294 | NC_021164.1    | Ca_kabuli_chr05 | 16821294                | CC                              | TT              | 1946846277               |
| SNP_P4_71655_16821310 | NC_021164.1    | Ca_kabuli_chr05 | 16821310                | CC                              | TT              | 1946846279               |
| SNP_P4_71656_16821365 | NC_021164.1    | Ca_kabuli_chr05 | 16821365                | GG                              | TT              | 1946846281               |
| SNP_P4_71657_16821405 | NC_021164.1    | Ca_kabuli_chr05 | 16821405                | CC                              | GG              | 1946846283               |
| SNP_P4_71658_16821412 | NC_021164.1    | Ca_kabuli_chr05 | 16821412                | GG                              | AA              | 1946846285               |
| SNP_P4_71659_16854591 | NC_021164.1    | Ca_kabuli_chr05 | 16854591                | GG                              | TT              | 1946846287               |
| SNP_P4_71660_16863622 | NC_021164.1    | Ca_kabuli_chr05 | 16863622                | AA                              | GG              | 1946846289               |
| SNP_P4_71661_16863646 | NC_021164.1    | Ca_kabuli_chr05 | 16863646                | TT                              | CC              | 1946846291               |
| SNP_P4_71662_16863799 | NC_021164.1    | Ca_kabuli_chr05 | 16863799                | AA                              | CC              | 1946846293               |
| SNP_P4_71663_16863986 | NC_021164.1    | Ca_kabuli_chr05 | 16863986                | TT                              | CC              | 1946846295               |
| SNP_P4_71664_16865795 | NC_021164.1    | Ca_kabuli_chr05 | 16865795                | CC                              | TT              | 1946846297               |
| SNP_P4_71665_16878790 | NC_021164.1    | Ca_kabuli_chr05 | 16878790                | AA                              | CC              | 1946846299               |
| SNP_P4_71667_16916776 | NC_021164.1    | Ca_kabuli_chr05 | 16916776                | GG                              | TT              | 1946846301               |
| SNP_P4_71668_16920589 | NC_021164.1    | Ca_kabuli_chr05 | 16920589                | CC                              | TT              | 1946846303               |
| SNP_P4_71669_16924382 | NC_021164.1    | Ca_kabuli_chr05 | 16924382                | AA                              | TT              | 1946846305               |
| SNP_P4_71670_16944978 | NC_021164.1    | Ca_kabuli_chr05 | 16944978                | AA                              | TT              | 1946846307               |
| SNP_P4_71672_16948672 | NC_021164.1    | Ca_kabuli_chr05 | 16948672                | AA                              | CC              | 1946846309               |
| SNP_P4_71673_16949252 | NC_021164.1    | Ca_kabuli_chr05 | 16949252                | AA                              | GG              | 1946846311               |
| SNP_P4_71674_16952591 | NC_021164.1    | Ca_kabuli_chr05 | 16952591                | GG                              | TT              | 1946846313               |
| SNP_P4_71675_16957693 | NC_021164.1    | Ca_kabuli_chr05 | 16957693                | TT                              | AA              | 1946846315               |
| SNP_P4_71676_16957706 | NC_021164.1    | Ca_kabuli_chr05 | 16957706                | GG                              | AA              | 1946846317               |
| SNP_P4_71677_16958100 | NC_021164.1    | Ca_kabuli_chr05 | 16958100                | GG                              | AA              | 1946846319               |
| SNP_P4_71678_16995629 | NC_021164.1    | Ca_kabuli_chr05 | 16995629                | CC                              | TT              | 1946846321               |
| SNP_P4_71679_17007180 | NC_021164.1    | Ca_kabuli_chr05 | 17007180                | AA                              | GG              | 1946846323               |
| SNP_P4_71681_17012385 | NC_021164.1    | Ca_kabuli_chr05 | 17012385                | GG                              | AA              | 1946846325               |
| SNP_P4_71682_17012411 | NC_021164.1    | Ca_kabuli_chr05 | 17012411                | AA                              | GG              | 1946846327               |

| SNPs IDs              | Chromosome IDs | Chromosomes     | Physical positions (bp) | CDC Frontier (Reference genome) | (ILWC46 & LPNB) | NCBI SNPdb Accession IDs |
|-----------------------|----------------|-----------------|-------------------------|---------------------------------|-----------------|--------------------------|
| SNP_P4_71683_17012417 | NC_021164.1    | Ca_kabuli_chr05 | 17012417                | AA                              | GG              | 1946846329               |
| SNP_P4_71684_17012608 | NC_021164.1    | Ca_kabuli_chr05 | 17012608                | GG                              | AA              | 1946846331               |
| SNP_P4_71685_17012635 | NC_021164.1    | Ca_kabuli_chr05 | 17012635                | TT                              | CC              | 1946846333               |
| SNP_P4_71686_17012653 | NC_021164.1    | Ca_kabuli_chr05 | 17012653                | AA                              | GG              | 1946846335               |
| SNP_P4_71687_17012665 | NC_021164.1    | Ca_kabuli_chr05 | 17012665                | GG                              | AA              | 1946846337               |
| SNP_P4_71688_17012686 | NC_021164.1    | Ca_kabuli_chr05 | 17012686                | TT                              | AA              | 1946846339               |
| SNP_P4_71689_17012701 | NC_021164.1    | Ca_kabuli_chr05 | 17012701                | CC                              | TT              | 1946846341               |
| SNP_P4_71690_17012708 | NC_021164.1    | Ca_kabuli_chr05 | 17012708                | CC                              | TT              | 1946846343               |
| SNP_P4_71691_17012740 | NC_021164.1    | Ca_kabuli_chr05 | 17012740                | AA                              | GG              | 1946846345               |
| SNP_P4_71692_17012749 | NC_021164.1    | Ca_kabuli_chr05 | 17012749                | CC                              | TT              | 1946846347               |
| SNP_P4_71693_17012751 | NC_021164.1    | Ca_kabuli_chr05 | 17012751                | AA                              | GG              | 1946846349               |
| SNP_P4_71694_17020456 | NC_021164.1    | Ca_kabuli_chr05 | 17020456                | GG                              | AA              | 1946846351               |
| SNP_P4_71695_17020542 | NC_021164.1    | Ca_kabuli_chr05 | 17020542                | TT                              | CC              | 1946846353               |
| SNP_P4_71697_17035780 | NC_021164.1    | Ca_kabuli_chr05 | 17035780                | GG                              | AA              | 1946846356               |
| SNP_P4_71699_17056653 | NC_021164.1    | Ca_kabuli_chr05 | 17056653                | TT                              | GG              | 1946846358               |
| SNP_P4_71700_17062623 | NC_021164.1    | Ca_kabuli_chr05 | 17062623                | TT                              | GG              | 1946846360               |
| SNP_P4_71701_17062990 | NC_021164.1    | Ca_kabuli_chr05 | 17062990                | CC                              | TT              | 1946846362               |
| SNP_P4_71702_17063013 | NC_021164.1    | Ca_kabuli_chr05 | 17063013                | AA                              | GG              | 1946846364               |
| SNP_P4_71703_17063047 | NC_021164.1    | Ca_kabuli_chr05 | 17063047                | AA                              | GG              | 1946846367               |
| SNP_P4_71704_17063048 | NC_021164.1    | Ca_kabuli_chr05 | 17063048                | AA                              | GG              | 1946846369               |
| SNP_P4_71705_17063068 | NC_021164.1    | Ca_kabuli_chr05 | 17063068                | AA                              | GG              | 1946846371               |
| SNP_P4_71706_17063074 | NC_021164.1    | Ca_kabuli_chr05 | 17063074                | GG                              | AA              | 1946846373               |
| SNP_P4_71707_17063092 | NC_021164.1    | Ca_kabuli_chr05 | 17063092                | TT                              | CC              | 1946846376               |
| SNP_P4_71708_17063121 | NC_021164.1    | Ca_kabuli_chr05 | 17063121                | AA                              | GG              | 1946846378               |
| SNP_P4_71709_17063129 | NC_021164.1    | Ca_kabuli_chr05 | 17063129                | TT                              | AA              | 1946846380               |
| SNP_P4_71710_17063150 | NC_021164.1    | Ca_kabuli_chr05 | 17063150                | AA                              | GG              | 1946846382               |
| SNP_P4_71711_17084748 | NC_021164.1    | Ca_kabuli_chr05 | 17084748                | AA                              | TT              | 1946846384               |
| SNP_P4_71713_17153648 | NC_021164.1    | Ca_kabuli_chr05 | 17153648                | CC                              | TT              | 1946846386               |
| SNP_P4_71714_17154856 | NC_021164.1    | Ca_kabuli_chr05 | 17154856                | TT                              | CC              | 1946846388               |
| SNP_P4_71715_17163637 | NC_021164.1    | Ca_kabuli_chr05 | 17163637                | TT                              | AA              | 1946846390               |
| SNP_P4_71716_17171749 | NC_021164.1    | Ca_kabuli_chr05 | 17171749                | TT                              | CC              | 1946846392               |
| SNP_P4_71717_17212909 | NC_021164.1    | Ca_kabuli_chr05 | 17212909                | GG                              | AA              | 1946846394               |
| SNP_P4_71718_17212939 | NC_021164.1    | Ca_kabuli_chr05 | 17212939                | GG                              | CC              | 1946846397               |
| SNP_P4_71719_17212941 | NC_021164.1    | Ca_kabuli_chr05 | 17212941                | TT                              | CC              | 1946846399               |
| SNP_P4_71720_17212959 | NC_021164.1    | Ca_kabuli_chr05 | 17212959                | GG                              | AA              | 1946846401               |
| SNP_P4_71721_17233803 | NC_021164.1    | Ca_kabuli_chr05 | 17233803                | AA                              | GG              | 1946846403               |
| SNP_P4_71722_17233854 | NC_021164.1    | Ca_kabuli_chr05 | 17233854                | AA                              | TT              | 1946846405               |
| SNP_P4_71723_17233872 | NC_021164.1    | Ca_kabuli_chr05 | 17233872                | CC                              | TT              | 1946846407               |
| SNP_P4_71724_17233881 | NC_021164.1    | Ca_kabuli_chr05 | 17233881                | CC                              | TT              | 1946846409               |
| SNP_P4_71725_17233897 | NC_021164.1    | Ca_kabuli_chr05 | 17233897                | AA                              | GG              | 1946846412               |
| SNP_P4_71726_17233907 | NC_021164.1    | Ca_kabuli_chr05 | 17233907                | GG                              | AA              | 1946846414               |
| SNP_P4_71727_17233968 | NC_021164.1    | Ca_kabuli_chr05 | 17233968                | AA                              | GG              | 1946846416               |

| SNPs IDs              | Chromosome IDs | Chromosomes     | Physical positions (bp) | CDC Frontier (Reference genome) | (ILWC46 & LPNB) | NCBI SNPdb Accession IDs |
|-----------------------|----------------|-----------------|-------------------------|---------------------------------|-----------------|--------------------------|
| SNP_P4_71728_17233976 | NC_021164.1    | Ca_kabuli_chr05 | 17233976                | GG                              | AA              | 1946846418               |
| SNP_P4_71729_17233989 | NC_021164.1    | Ca_kabuli_chr05 | 17233989                | TT                              | CC              | 1946846420               |
| SNP_P4_71730_17233995 | NC_021164.1    | Ca_kabuli_chr05 | 17233995                | AA                              | GG              | 1946846422               |
| SNP_P4_71731_17234235 | NC_021164.1    | Ca_kabuli_chr05 | 17234235                | CC                              | TT              | 1946846424               |
| SNP_P4_71732_17234361 | NC_021164.1    | Ca_kabuli_chr05 | 17234361                | CC                              | AA              | 1946846426               |
| SNP_P4_71733_17234362 | NC_021164.1    | Ca_kabuli_chr05 | 17234362                | AA                              | GG              | 1946846428               |
| SNP_P4_71734_17234464 | NC_021164.1    | Ca_kabuli_chr05 | 17234464                | AA                              | GG              | 1946846430               |
| SNP_P4_71735_17234704 | NC_021164.1    | Ca_kabuli_chr05 | 17234704                | GG                              | AA              | 1946846432               |
| SNP_P4_71736_17234740 | NC_021164.1    | Ca_kabuli_chr05 | 17234740                | TT                              | CC              | 1946846435               |
| SNP_P4_71737_17234746 | NC_021164.1    | Ca_kabuli_chr05 | 17234746                | GG                              | AA              | 1946846437               |
| SNP_P4_71738_17239539 | NC_021164.1    | Ca_kabuli_chr05 | 17239539                | CC                              | TT              | 1946846439               |
| SNP_P4_71739_17239623 | NC_021164.1    | Ca_kabuli_chr05 | 17239623                | GG                              | AA              | 1946846441               |
| SNP_P4_71740_17241041 | NC_021164.1    | Ca_kabuli_chr05 | 17241041                | GG                              | AA              | 1946846443               |
| SNP_P4_71741_17242922 | NC_021164.1    | Ca_kabuli_chr05 | 17242922                | AA                              | GG              | 1946846445               |
| SNP_P4_71742_17242964 | NC_021164.1    | Ca_kabuli_chr05 | 17242964                | TT                              | CC              | 1946846447               |
| SNP_P4_71743_17244321 | NC_021164.1    | Ca_kabuli_chr05 | 17244321                | AA                              | TT              | 1946846449               |
| SNP_P4_71745_17248815 | NC_021164.1    | Ca_kabuli_chr05 | 17248815                | CC                              | TT              | 1946846451               |
| SNP_P4_71746_17254721 | NC_021164.1    | Ca_kabuli_chr05 | 17254721                | TT                              | GG              | 1946846453               |
| SNP_P4_71747_17254791 | NC_021164.1    | Ca_kabuli_chr05 | 17254791                | TT                              | CC              | 1946846455               |
| SNP_P4_71748_17254825 | NC_021164.1    | Ca_kabuli_chr05 | 17254825                | TT                              | AA              | 1946846457               |
| SNP_P4_71749_17255086 | NC_021164.1    | Ca_kabuli_chr05 | 17255086                | AA                              | CC              | 1946846459               |
| SNP_P4_71750_17258956 | NC_021164.1    | Ca_kabuli_chr05 | 17258956                | GG                              | CC              | 1946846461               |
| SNP_P4_71751_17289859 | NC_021164.1    | Ca_kabuli_chr05 | 17289859                | CC                              | TT              | 1946846463               |
| SNP_P4_71752_17302451 | NC_021164.1    | Ca_kabuli_chr05 | 17302451                | CC                              | TT              | 1946846465               |
| SNP_P4_71753_17303939 | NC_021164.1    | Ca_kabuli_chr05 | 17303939                | TT                              | AA              | 1946846467               |
| SNP_P4_71755_17321708 | NC_021164.1    | Ca_kabuli_chr05 | 17321708                | CC                              | TT              | 1946846469               |
| SNP_P4_71756_17321710 | NC_021164.1    | Ca_kabuli_chr05 | 17321710                | GG                              | AA              | 1946846471               |
| SNP_P4_71757_17323606 | NC_021164.1    | Ca_kabuli_chr05 | 17323606                | TT                              | CC              | 1946846473               |
| SNP_P4_71758_17323751 | NC_021164.1    | Ca_kabuli_chr05 | 17323751                | GG                              | AA              | 1946846475               |
| SNP_P4_71759_17323827 | NC_021164.1    | Ca_kabuli_chr05 | 17323827                | AA                              | GG              | 1946846477               |
| SNP_P4_71760_17324019 | NC_021164.1    | Ca_kabuli_chr05 | 17324019                | AA                              | CC              | 1946846479               |
| SNP_P4_71761_17324100 | NC_021164.1    | Ca_kabuli_chr05 | 17324100                | AA                              | TT              | 1946846481               |
| SNP_P4_71762_17324102 | NC_021164.1    | Ca_kabuli_chr05 | 17324102                | TT                              | GG              | 1946846483               |
| SNP_P4_71763_17324112 | NC_021164.1    | Ca_kabuli_chr05 | 17324112                | CC                              | TT              | 1946846485               |
| SNP_P4_71764_17324113 | NC_021164.1    | Ca_kabuli_chr05 | 17324113                | AA                              | TT              | 1946846487               |
| SNP_P4_71765_17324168 | NC_021164.1    | Ca_kabuli_chr05 | 17324168                | GG                              | TT              | 1946846489               |
| SNP_P4_71766_17324224 | NC_021164.1    | Ca_kabuli_chr05 | 17324224                | TT                              | CC              | 1946846491               |
| SNP_P4_71767_17369906 | NC_021164.1    | Ca_kabuli_chr05 | 17369906                | CC                              | TT              | 1946846493               |
| SNP_P4_71768_17369907 | NC_021164.1    | Ca_kabuli_chr05 | 17369907                | GG                              | AA              | 1946846495               |
| SNP_P4_71769_17369908 | NC_021164.1    | Ca_kabuli_chr05 | 17369908                | AA                              | TT              | 1946846497               |
| SNP_P4_71770_17369910 | NC_021164.1    | Ca_kabuli_chr05 | 17369910                | AA                              | GG              | 1946846499               |
| SNP_P4_71771_17369931 | NC_021164.1    | Ca_kabuli_chr05 | 17369931                | AA                              | GG              | 1946846501               |



| SNPs IDs              | Chromosome IDs | Chromosomes     | Physical positions (bp) | CDC Frontier (Reference genome) | (ILWC46 & LPNB) | NCBI SNPdb Accession IDs |
|-----------------------|----------------|-----------------|-------------------------|---------------------------------|-----------------|--------------------------|
| SNP_P4_71772_17369954 | NC_021164.1    | Ca_kabuli_chr05 | 17369954                | GG                              | AA              | 1946846503               |
| SNP_P4_71773_17371043 | NC_021164.1    | Ca_kabuli_chr05 | 17371043                | TT                              | GG              | 1946846505               |
| SNP_P4_71774_17382597 | NC_021164.1    | Ca_kabuli_chr05 | 17382597                | AA                              | GG              | 1946846507               |
| SNP_P4_71776_17450330 | NC_021164.1    | Ca_kabuli_chr05 | 17450330                | AA                              | TT              | 1946846509               |
| SNP_P4_71777_17463174 | NC_021164.1    | Ca_kabuli_chr05 | 17463174                | AA                              | GG              | 1946846511               |
| SNP_P4_71778_17463259 | NC_021164.1    | Ca_kabuli_chr05 | 17463259                | AA                              | GG              | 1946846513               |
| SNP_P4_71779_17473825 | NC_021164.1    | Ca_kabuli_chr05 | 17473825                | TT                              | CC              | 1946846515               |
| SNP_P4_71780_17474044 | NC_021164.1    | Ca_kabuli_chr05 | 17474044                | CC                              | GG              | 1946846517               |
| SNP_P4_71781_17474216 | NC_021164.1    | Ca_kabuli_chr05 | 17474216                | TT                              | CC              | 1946846519               |
| SNP_P4_71782_17482654 | NC_021164.1    | Ca_kabuli_chr05 | 17482654                | AA                              | GG              | 1946846521               |
| SNP_P4_71783_17494731 | NC_021164.1    | Ca_kabuli_chr05 | 17494731                | AA                              | CC              | 1946846523               |
| SNP_P4_71784_17494742 | NC_021164.1    | Ca_kabuli_chr05 | 17494742                | TT                              | GG              | 1946846525               |
| SNP_P4_71785_17494750 | NC_021164.1    | Ca_kabuli_chr05 | 17494750                | GG                              | AA              | 1946846527               |
| SNP_P4_71786_17494840 | NC_021164.1    | Ca_kabuli_chr05 | 17494840                | AA                              | GG              | 1946846529               |
| SNP_P4_71788_17494898 | NC_021164.1    | Ca_kabuli_chr05 | 17494898                | AA                              | GG              | 1946846531               |
| SNP_P4_71789_17495060 | NC_021164.1    | Ca_kabuli_chr05 | 17495060                | AA                              | GG              | 1946846533               |
| SNP_P4_71790_17505399 | NC_021164.1    | Ca_kabuli_chr05 | 17505399                | GG                              | CC              | 1946846535               |
| SNP_P4_71791_17510319 | NC_021164.1    | Ca_kabuli_chr05 | 17510319                | CC                              | TT              | 1946846537               |
| SNP_P4_71792_17512926 | NC_021164.1    | Ca_kabuli_chr05 | 17512926                | GG                              | AA              | 1946846539               |
| SNP_P4_71793_17512978 | NC_021164.1    | Ca_kabuli_chr05 | 17512978                | TT                              | AA              | 1946846541               |
| SNP_P4_71794_17526678 | NC_021164.1    | Ca_kabuli_chr05 | 17526678                | AA                              | TT              | 1946846543               |
| SNP_P4_71796_17526907 | NC_021164.1    | Ca_kabuli_chr05 | 17526907                | CC                              | TT              | 1946846545               |
| SNP_P4_71797_17526910 | NC_021164.1    | Ca_kabuli_chr05 | 17526910                | TT                              | CC              | 1946846547               |
| SNP_P4_71798_17526919 | NC_021164.1    | Ca_kabuli_chr05 | 17526919                | CC                              | TT              | 1946846549               |
| SNP_P4_71799_17526949 | NC_021164.1    | Ca_kabuli_chr05 | 17526949                | AA                              | CC              | 1946846551               |
| SNP_P4_71801_17542381 | NC_021164.1    | Ca_kabuli_chr05 | 17542381                | TT                              | CC              | 1946846553               |
| SNP_P4_71802_17542853 | NC_021164.1    | Ca_kabuli_chr05 | 17542853                | AA                              | TT              | 1946846555               |
| SNP_P4_71803_17543055 | NC_021164.1    | Ca_kabuli_chr05 | 17543055                | GG                              | AA              | 1946846557               |
| SNP_P4_71804_17543069 | NC_021164.1    | Ca_kabuli_chr05 | 17543069                | AA                              | TT              | 1946846558               |
| SNP_P4_71806_17572985 | NC_021164.1    | Ca_kabuli_chr05 | 17572985                | AA                              | CC              | 1946846559               |
| SNP_P4_71807_17575494 | NC_021164.1    | Ca_kabuli_chr05 | 17575494                | CC                              | TT              | 1946846561               |
| SNP_P4_71808_17575508 | NC_021164.1    | Ca_kabuli_chr05 | 17575508                | CC                              | TT              | 1946846563               |
| SNP_P4_71809_17575524 | NC_021164.1    | Ca_kabuli_chr05 | 17575524                | AA                              | CC              | 1946846565               |
| SNP_P4_71810_17575527 | NC_021164.1    | Ca_kabuli_chr05 | 17575527                | AA                              | GG              | 1946846567               |
| SNP_P4_71811_17595567 | NC_021164.1    | Ca_kabuli_chr05 | 17595567                | GG                              | AA              | 1946846569               |
| SNP_P4_71812_17595576 | NC_021164.1    | Ca_kabuli_chr05 | 17595576                | TT                              | GG              | 1946846571               |
| SNP_P4_71813_17595606 | NC_021164.1    | Ca_kabuli_chr05 | 17595606                | TT                              | CC              | 1946846573               |
| SNP_P4_71814_17595840 | NC_021164.1    | Ca_kabuli_chr05 | 17595840                | AA                              | GG              | 1946846575               |
| SNP_P4_71815_17595909 | NC_021164.1    | Ca_kabuli_chr05 | 17595909                | AA                              | CC              | 1946846577               |
| SNP_P4_71816_17596219 | NC_021164.1    | Ca_kabuli_chr05 | 17596219                | CC                              | TT              | 1946846579               |
| SNP_P4_71817_17612217 | NC_021164.1    | Ca_kabuli_chr05 | 17612217                | TT                              | AA              | 1946846581               |
| SNP_P4_71818_17612347 | NC_021164.1    | Ca_kabuli_chr05 | 17612347                | TT                              | AA              | 1946846583               |

| SNPs IDs              | Chromosome IDs | Chromosomes     | Physical positions (bp) | CDC Frontier (Reference genome) | (ILWC46 & LPNB) | NCBI SNPdb Accession IDs |
|-----------------------|----------------|-----------------|-------------------------|---------------------------------|-----------------|--------------------------|
| SNP_P4_71819_17612381 | NC_021164.1    | Ca_kabuli_chr05 | 17612381                | AA                              | GG              | 1946846585               |
| SNP_P4_71820_17612405 | NC_021164.1    | Ca_kabuli_chr05 | 17612405                | CC                              | AA              | 1946846587               |
| SNP_P4_71821_17612495 | NC_021164.1    | Ca_kabuli_chr05 | 17612495                | CC                              | TT              | 1946846589               |
| SNP_P4_71822_17612559 | NC_021164.1    | Ca_kabuli_chr05 | 17612559                | GG                              | AA              | 1946846591               |
| SNP_P4_71823_17612664 | NC_021164.1    | Ca_kabuli_chr05 | 17612664                | CC                              | TT              | 1946846593               |
| SNP_P4_71824_17612680 | NC_021164.1    | Ca_kabuli_chr05 | 17612680                | TT                              | AA              | 1946846595               |
| SNP_P4_71825_17612718 | NC_021164.1    | Ca_kabuli_chr05 | 17612718                | TT                              | AA              | 1946846597               |
| SNP_P4_71826_17612758 | NC_021164.1    | Ca_kabuli_chr05 | 17612758                | AA                              | GG              | 1946846599               |
| SNP_P4_71827_17630967 | NC_021164.1    | Ca_kabuli_chr05 | 17630967                | AA                              | GG              | 1946846601               |
| SNP_P4_71828_17633202 | NC_021164.1    | Ca_kabuli_chr05 | 17633202                | AA                              | GG              | 1946846603               |
| SNP_P4_71829_17634057 | NC_021164.1    | Ca_kabuli_chr05 | 17634057                | AA                              | CC              | 1946846605               |
| SNP_P4_71830_17672076 | NC_021164.1    | Ca_kabuli_chr05 | 17672076                | CC                              | GG              | 1946846607               |
| SNP_P4_71831_17672092 | NC_021164.1    | Ca_kabuli_chr05 | 17672092                | GG                              | AA              | 1946846609               |
| SNP_P4_71832_17672137 | NC_021164.1    | Ca_kabuli_chr05 | 17672137                | AA                              | GG              | 1946846611               |
| SNP_P4_71833_17672148 | NC_021164.1    | Ca_kabuli_chr05 | 17672148                | TT                              | CC              | 1946846613               |
| SNP_P4_71834_17672406 | NC_021164.1    | Ca_kabuli_chr05 | 17672406                | GG                              | AA              | 1946846616               |
| SNP_P4_71835_17672420 | NC_021164.1    | Ca_kabuli_chr05 | 17672420                | TT                              | CC              | 1946846618               |
| SNP_P4_71836_17693889 | NC_021164.1    | Ca_kabuli_chr05 | 17693889                | TT                              | CC              | 1946846621               |
| SNP_P4_71837_17693891 | NC_021164.1    | Ca_kabuli_chr05 | 17693891                | TT                              | CC              | 1946846623               |
| SNP_P4_71838_17693892 | NC_021164.1    | Ca_kabuli_chr05 | 17693892                | TT                              | CC              | 1946846625               |
| SNP_P4_71839_17693909 | NC_021164.1    | Ca_kabuli_chr05 | 17693909                | CC                              | TT              | 1946846627               |
| SNP_P4_71840_17693922 | NC_021164.1    | Ca_kabuli_chr05 | 17693922                | CC                              | AA              | 1946846629               |
| SNP_P4_71841_17694000 | NC_021164.1    | Ca_kabuli_chr05 | 17694000                | GG                              | TT              | 1946846631               |
| SNP_P4_71842_17694337 | NC_021164.1    | Ca_kabuli_chr05 | 17694337                | AA                              | CC              | 1946846633               |
| SNP_P4_71843_17694346 | NC_021164.1    | Ca_kabuli_chr05 | 17694346                | TT                              | AA              | 1946846635               |
| SNP_P4_71844_17694373 | NC_021164.1    | Ca_kabuli_chr05 | 17694373                | AA                              | CC              | 1946846637               |
| SNP_P4_71845_17699826 | NC_021164.1    | Ca_kabuli_chr05 | 17699826                | CC                              | TT              | 1946846639               |
| SNP_P4_71846_17703790 | NC_021164.1    | Ca_kabuli_chr05 | 17703790                | TT                              | CC              | 1946846641               |
| SNP_P4_71847_17711802 | NC_021164.1    | Ca_kabuli_chr05 | 17711802                | GG                              | AA              | 1946846643               |
| SNP_P4_71848_17711891 | NC_021164.1    | Ca_kabuli_chr05 | 17711891                | TT                              | GG              | 1946846645               |
| SNP_P4_71850_17752662 | NC_021164.1    | Ca_kabuli_chr05 | 17752662                | AA                              | TT              | 1946846647               |
| SNP_P4_71852_17762239 | NC_021164.1    | Ca_kabuli_chr05 | 17762239                | AA                              | TT              | 1946846649               |
| SNP_P4_71853_17784140 | NC_021164.1    | Ca_kabuli_chr05 | 17784140                | CC                              | TT              | 1946846651               |
| SNP_P4_71854_17797996 | NC_021164.1    | Ca_kabuli_chr05 | 17797996                | AA                              | GG              | 1946846653               |
| SNP_P4_71855_17824373 | NC_021164.1    | Ca_kabuli_chr05 | 17824373                | CC                              | TT              | 1946846655               |
| SNP_P4_71856_17837850 | NC_021164.1    | Ca_kabuli_chr05 | 17837850                | CC                              | TT              | 1946846657               |
| SNP_P4_71857_17848441 | NC_021164.1    | Ca_kabuli_chr05 | 17848441                | GG                              | AA              | 1946846659               |
| SNP_P4_71858_17848749 | NC_021164.1    | Ca_kabuli_chr05 | 17848749                | AA                              | CC              | 1946846661               |
| SNP_P4_71859_17848853 | NC_021164.1    | Ca_kabuli_chr05 | 17848853                | TT                              | AA              | 1946846663               |
| SNP_P4_71860_17859794 | NC_021164.1    | Ca_kabuli_chr05 | 17859794                | AA                              | GG              | 1946846665               |
| SNP_P4_71861_17867151 | NC_021164.1    | Ca_kabuli_chr05 | 17867151                | AA                              | CC              | 1946846667               |
| SNP_P4_71862_17867384 | NC_021164.1    | Ca_kabuli_chr05 | 17867384                | CC                              | TT              | 1946846669               |

| SNPs IDs              | Chromosome IDs | Chromosomes     | Physical positions (bp) | CDC Frontier (Reference genome) | (ILWC46 & LPNB) | NCBI SNPdb Accession IDs |
|-----------------------|----------------|-----------------|-------------------------|---------------------------------|-----------------|--------------------------|
| SNP_P4_71863_17867397 | NC_021164.1    | Ca_kabuli_chr05 | 17867397                | CC                              | TT              | 1946846671               |
| SNP_P4_71864_17867498 | NC_021164.1    | Ca_kabuli_chr05 | 17867498                | GG                              | AA              | 1946846674               |
| SNP_P4_71865_17867556 | NC_021164.1    | Ca_kabuli_chr05 | 17867556                | TT                              | AA              | 1946846676               |
| SNP_P4_71866_17867719 | NC_021164.1    | Ca_kabuli_chr05 | 17867719                | CC                              | TT              | 1946846678               |
| SNP_P4_71867_17867746 | NC_021164.1    | Ca_kabuli_chr05 | 17867746                | TT                              | CC              | 1946846680               |
| SNP_P4_71868_17867763 | NC_021164.1    | Ca_kabuli_chr05 | 17867763                | GG                              | TT              | 1946846682               |
| SNP_P4_71869_17867786 | NC_021164.1    | Ca_kabuli_chr05 | 17867786                | AA                              | TT              | 1946846684               |
| SNP_P4_71870_17867787 | NC_021164.1    | Ca_kabuli_chr05 | 17867787                | CC                              | AA              | 1946846686               |
| SNP_P4_71871_17867801 | NC_021164.1    | Ca_kabuli_chr05 | 17867801                | GG                              | AA              | 1946846688               |
| SNP_P4_71872_17867844 | NC_021164.1    | Ca_kabuli_chr05 | 17867844                | TT                              | GG              | 1946846690               |
| SNP_P4_71873_17867916 | NC_021164.1    | Ca_kabuli_chr05 | 17867916                | GG                              | TT              | 1946846692               |
| SNP_P4_71874_17868190 | NC_021164.1    | Ca_kabuli_chr05 | 17868190                | AA                              | CC              | 1946846694               |
| SNP_P4_71875_17868231 | NC_021164.1    | Ca_kabuli_chr05 | 17868231                | CC                              | AA              | 1946846696               |
| SNP_P4_71876_17869668 | NC_021164.1    | Ca_kabuli_chr05 | 17869668                | TT                              | GG              | 1946846698               |
| SNP_P4_71877_17873478 | NC_021164.1    | Ca_kabuli_chr05 | 17873478                | GG                              | TT              | 1946846700               |
| SNP_P4_71878_17874845 | NC_021164.1    | Ca_kabuli_chr05 | 17874845                | GG                              | CC              | 1946846702               |
| SNP_P4_71879_17874869 | NC_021164.1    | Ca_kabuli_chr05 | 17874869                | TT                              | GG              | 1946846704               |
| SNP_P4_71880_17874896 | NC_021164.1    | Ca_kabuli_chr05 | 17874896                | CC                              | TT              | 1946846706               |
| SNP_P4_71882_17876545 | NC_021164.1    | Ca_kabuli_chr05 | 17876545                | GG                              | AA              | 1946846708               |
| SNP_P4_71883_17876569 | NC_021164.1    | Ca_kabuli_chr05 | 17876569                | AA                              | GG              | 1946846710               |
| SNP_P4_71884_17876602 | NC_021164.1    | Ca_kabuli_chr05 | 17876602                | CC                              | TT              | 1946846712               |
| SNP_P4_71885_17876608 | NC_021164.1    | Ca_kabuli_chr05 | 17876608                | AA                              | CC              | 1946846714               |
| SNP_P4_71886_17876611 | NC_021164.1    | Ca_kabuli_chr05 | 17876611                | TT                              | AA              | 1946846716               |
| SNP_P4_71887_17876613 | NC_021164.1    | Ca_kabuli_chr05 | 17876613                | CC                              | GG              | 1946846718               |
| SNP_P4_71888_17876643 | NC_021164.1    | Ca_kabuli_chr05 | 17876643                | CC                              | GG              | 1946846720               |
| SNP_P4_71889_17876650 | NC_021164.1    | Ca_kabuli_chr05 | 17876650                | AA                              | CC              | 1946846722               |
| SNP_P4_71892_17877144 | NC_021164.1    | Ca_kabuli_chr05 | 17877144                | TT                              | CC              | 1946846724               |
| SNP_P4_71893_17899595 | NC_021164.1    | Ca_kabuli_chr05 | 17899595                | CC                              | AA              | 1946846726               |
| SNP_P4_71894_17899607 | NC_021164.1    | Ca_kabuli_chr05 | 17899607                | TT                              | CC              | 1946846728               |
| SNP_P4_71895_17899625 | NC_021164.1    | Ca_kabuli_chr05 | 17899625                | CC                              | TT              | 1946846730               |
| SNP_P4_71896_17899632 | NC_021164.1    | Ca_kabuli_chr05 | 17899632                | AA                              | GG              | 1946846732               |
| SNP_P4_71897_17899633 | NC_021164.1    | Ca_kabuli_chr05 | 17899633                | AA                              | TT              | 1946846734               |
| SNP_P4_71898_17899682 | NC_021164.1    | Ca_kabuli_chr05 | 17899682                | TT                              | AA              | 1946846736               |
| SNP_P4_71899_17899727 | NC_021164.1    | Ca_kabuli_chr05 | 17899727                | AA                              | TT              | 1946846738               |
| SNP_P4_71900_17900074 | NC_021164.1    | Ca_kabuli_chr05 | 17900074                | AA                              | TT              | 1946846740               |
| SNP_P4_71901_17900101 | NC_021164.1    | Ca_kabuli_chr05 | 17900101                | TT                              | CC              | 1946846742               |
| SNP_P4_71902_17918034 | NC_021164.1    | Ca_kabuli_chr05 | 17918034                | AA                              | CC              | 1946846744               |
| SNP_P4_71903_17922055 | NC_021164.1    | Ca_kabuli_chr05 | 17922055                | TT                              | AA              | 1946846746               |
| SNP_P4_71904_17932508 | NC_021164.1    | Ca_kabuli_chr05 | 17932508                | TT                              | CC              | 1946846748               |
| SNP_P4_71905_17932521 | NC_021164.1    | Ca_kabuli_chr05 | 17932521                | TT                              | CC              | 1946846750               |
| SNP_P4_71906_17933066 | NC_021164.1    | Ca_kabuli_chr05 | 17933066                | AA                              | GG              | 1946846752               |
| SNP_P4_71908_17955840 | NC_021164.1    | Ca_kabuli_chr05 | 17955840                | AA                              | CC              | 1946846754               |

| SNPs IDs              | Chromosome IDs | Chromosomes     | Physical positions (bp) | CDC Frontier (Reference genome) | (ILWC46 & LPNB) | NCBI SNPdb Accession IDs |
|-----------------------|----------------|-----------------|-------------------------|---------------------------------|-----------------|--------------------------|
| SNP_P4_71910_17960218 | NC_021164.1    | Ca_kabuli_chr05 | 17960218                | CC                              | TT              | 1946846756               |
| SNP_P4_71911_17960418 | NC_021164.1    | Ca_kabuli_chr05 | 17960418                | AA                              | CC              | 1946846758               |
| SNP_P4_71912_18033831 | NC_021164.1    | Ca_kabuli_chr05 | 18033831                | GG                              | TT              | 1946846760               |
| SNP_P4_71913_18033846 | NC_021164.1    | Ca_kabuli_chr05 | 18033846                | TT                              | AA              | 1946846762               |
| SNP_P4_71914_18033849 | NC_021164.1    | Ca_kabuli_chr05 | 18033849                | AA                              | GG              | 1946846764               |
| SNP_P4_71915_18033850 | NC_021164.1    | Ca_kabuli_chr05 | 18033850                | TT                              | GG              | 1946846766               |
| SNP_P4_71917_18062620 | NC_021164.1    | Ca_kabuli_chr05 | 18062620                | CC                              | TT              | 1946846769               |
| SNP_P4_71918_18066767 | NC_021164.1    | Ca_kabuli_chr05 | 18066767                | AA                              | GG              | 1946846771               |
| SNP_P4_71919_18066773 | NC_021164.1    | Ca_kabuli_chr05 | 18066773                | TT                              | CC              | 1946846773               |
| SNP_P4_71920_18066777 | NC_021164.1    | Ca_kabuli_chr05 | 18066777                | TT                              | CC              | 1946846775               |
| SNP_P4_71921_18066785 | NC_021164.1    | Ca_kabuli_chr05 | 18066785                | AA                              | GG              | 1946846777               |
| SNP_P4_71923_18078809 | NC_021164.1    | Ca_kabuli_chr05 | 18078809                | AA                              | CC              | 1946846779               |
| SNP_P4_71924_18078976 | NC_021164.1    | Ca_kabuli_chr05 | 18078976                | GG                              | TT              | 1946846781               |
| SNP_P4_71925_18079120 | NC_021164.1    | Ca_kabuli_chr05 | 18079120                | CC                              | TT              | 1946846783               |
| SNP_P4_71926_18079206 | NC_021164.1    | Ca_kabuli_chr05 | 18079206                | GG                              | AA              | 1946846785               |
| SNP_P4_71927_18089263 | NC_021164.1    | Ca_kabuli_chr05 | 18089263                | TT                              | AA              | 1946846787               |
| SNP_P4_71928_18089267 | NC_021164.1    | Ca_kabuli_chr05 | 18089267                | AA                              | GG              | 1946846789               |
| SNP_P4_71929_18089329 | NC_021164.1    | Ca_kabuli_chr05 | 18089329                | TT                              | GG              | 1946846791               |
| SNP_P4_71930_18105246 | NC_021164.1    | Ca_kabuli_chr05 | 18105246                | GG                              | AA              | 1946846793               |
| SNP_P4_71931_18105771 | NC_021164.1    | Ca_kabuli_chr05 | 18105771                | GG                              | CC              | 1946846795               |
| SNP_P4_71932_18123759 | NC_021164.1    | Ca_kabuli_chr05 | 18123759                | GG                              | TT              | 1946846797               |
| SNP_P4_71933_18126688 | NC_021164.1    | Ca_kabuli_chr05 | 18126688                | TT                              | GG              | 1946846799               |
| SNP_P4_71934_18126697 | NC_021164.1    | Ca_kabuli_chr05 | 18126697                | GG                              | CC              | 1946846801               |
| SNP_P4_71935_18136075 | NC_021164.1    | Ca_kabuli_chr05 | 18136075                | TT                              | CC              | 1946846803               |
| SNP_P4_71937_18167755 | NC_021164.1    | Ca_kabuli_chr05 | 18167755                | AA                              | CC              | 1946846805               |
| SNP_P4_71938_18167757 | NC_021164.1    | Ca_kabuli_chr05 | 18167757                | AA                              | CC              | 1946846807               |
| SNP_P4_71940_18201139 | NC_021164.1    | Ca_kabuli_chr05 | 18201139                | AA                              | CC              | 1946846809               |
| SNP_P4_71941_18201171 | NC_021164.1    | Ca_kabuli_chr05 | 18201171                | GG                              | TT              | 1946846811               |
| SNP_P4_71942_18210001 | NC_021164.1    | Ca_kabuli_chr05 | 18210001                | AA                              | GG              | 1946846813               |
| SNP_P4_71943_18233194 | NC_021164.1    | Ca_kabuli_chr05 | 18233194                | TT                              | CC              | 1946846815               |
| SNP_P4_71944_18242652 | NC_021164.1    | Ca_kabuli_chr05 | 18242652                | TT                              | AA              | 1946846817               |
| SNP_P4_71945_18242679 | NC_021164.1    | Ca_kabuli_chr05 | 18242679                | GG                              | AA              | 1946846819               |
| SNP_P4_71946_18245970 | NC_021164.1    | Ca_kabuli_chr05 | 18245970                | GG                              | AA              | 1946846821               |
| SNP_P4_71947_18258033 | NC_021164.1    | Ca_kabuli_chr05 | 18258033                | TT                              | CC              | 1946846823               |
| SNP_P4_71948_18258035 | NC_021164.1    | Ca_kabuli_chr05 | 18258035                | AA                              | GG              | 1946846825               |
| SNP_P4_71949_18258041 | NC_021164.1    | Ca_kabuli_chr05 | 18258041                | CC                              | TT              | 1946846827               |
| SNP_P4_71950_18260035 | NC_021164.1    | Ca_kabuli_chr05 | 18260035                | TT                              | CC              | 1946846829               |
| SNP_P4_71951_18279548 | NC_021164.1    | Ca_kabuli_chr05 | 18279548                | GG                              | AA              | 1946846832               |
| SNP_P4_71952_18279557 | NC_021164.1    | Ca_kabuli_chr05 | 18279557                | GG                              | AA              | 1946846834               |
| SNP_P4_71953_18280471 | NC_021164.1    | Ca_kabuli_chr05 | 18280471                | AA                              | GG              | 1946846836               |
| SNP_P4_71954_18280514 | NC_021164.1    | Ca_kabuli_chr05 | 18280514                | AA                              | TT              | 1946846838               |
| SNP_P4_71955_18280623 | NC_021164.1    | Ca_kabuli_chr05 | 18280623                | AA                              | GG              | 1946846840               |

| SNPs IDs              | Chromosome IDs | Chromosomes     | Physical positions (bp) | CDC Frontier (Reference genome) | (ILWC46 & LPNB) | NCBI SNPdb Accession IDs |
|-----------------------|----------------|-----------------|-------------------------|---------------------------------|-----------------|--------------------------|
| SNP_P4_71956_18280672 | NC_021164.1    | Ca_kabuli_chr05 | 18280672                | TT                              | CC              | 1946846842               |
| SNP_P4_71957_18280718 | NC_021164.1    | Ca_kabuli_chr05 | 18280718                | TT                              | CC              | 1946846844               |
| SNP_P4_71958_18282715 | NC_021164.1    | Ca_kabuli_chr05 | 18282715                | AA                              | TT              | 1946846846               |
| SNP_P4_71959_18282873 | NC_021164.1    | Ca_kabuli_chr05 | 18282873                | AA                              | CC              | 1946846848               |
| SNP_P4_71960_18282875 | NC_021164.1    | Ca_kabuli_chr05 | 18282875                | TT                              | GG              | 1946846850               |
| SNP_P4_71961_18282916 | NC_021164.1    | Ca_kabuli_chr05 | 18282916                | TT                              | CC              | 1946846852               |
| SNP_P4_71962_18282944 | NC_021164.1    | Ca_kabuli_chr05 | 18282944                | TT                              | CC              | 1946846854               |
| SNP_P4_71963_18282952 | NC_021164.1    | Ca_kabuli_chr05 | 18282952                | CC                              | TT              | 1946846856               |
| SNP_P4_71964_18282985 | NC_021164.1    | Ca_kabuli_chr05 | 18282985                | CC                              | TT              | 1946846858               |
| SNP_P4_71965_18282988 | NC_021164.1    | Ca_kabuli_chr05 | 18282988                | GG                              | AA              | 1946846860               |
| SNP_P4_71966_18282997 | NC_021164.1    | Ca_kabuli_chr05 | 18282997                | TT                              | CC              | 1946846862               |
| SNP_P4_71967_18283009 | NC_021164.1    | Ca_kabuli_chr05 | 18283009                | GG                              | AA              | 1946846864               |
| SNP_P4_71968_18283197 | NC_021164.1    | Ca_kabuli_chr05 | 18283197                | TT                              | CC              | 1946846866               |
| SNP_P4_71969_18283237 | NC_021164.1    | Ca_kabuli_chr05 | 18283237                | AA                              | GG              | 1946846868               |
| SNP_P4_71970_18285792 | NC_021164.1    | Ca_kabuli_chr05 | 18285792                | TT                              | GG              | 1946846870               |
| SNP_P4_71971_18285826 | NC_021164.1    | Ca_kabuli_chr05 | 18285826                | CC                              | TT              | 1946846872               |
| SNP_P4_71972_18285829 | NC_021164.1    | Ca_kabuli_chr05 | 18285829                | TT                              | CC              | 1946846874               |
| SNP_P4_71973_18285911 | NC_021164.1    | Ca_kabuli_chr05 | 18285911                | AA                              | TT              | 1946846876               |
| SNP_P4_71974_18286173 | NC_021164.1    | Ca_kabuli_chr05 | 18286173                | TT                              | CC              | 1946846878               |
| SNP_P4_71975_18286181 | NC_021164.1    | Ca_kabuli_chr05 | 18286181                | TT                              | CC              | 1946846880               |
| SNP_P4_71976_18290490 | NC_021164.1    | Ca_kabuli_chr05 | 18290490                | TT                              | AA              | 1946846882               |
| SNP_P4_71977_18313560 | NC_021164.1    | Ca_kabuli_chr05 | 18313560                | TT                              | AA              | 1946846884               |
| SNP_P4_71978_18314132 | NC_021164.1    | Ca_kabuli_chr05 | 18314132                | CC                              | TT              | 1946846886               |
| SNP_P4_71979_18314451 | NC_021164.1    | Ca_kabuli_chr05 | 18314451                | GG                              | AA              | 1946846888               |
| SNP_P4_71980_18314465 | NC_021164.1    | Ca_kabuli_chr05 | 18314465                | TT                              | CC              | 1946846890               |
| SNP_P4_71981_18314467 | NC_021164.1    | Ca_kabuli_chr05 | 18314467                | AA                              | GG              | 1946846892               |
| SNP_P4_71982_18314495 | NC_021164.1    | Ca_kabuli_chr05 | 18314495                | TT                              | GG              | 1946846894               |
| SNP_P4_71983_18314500 | NC_021164.1    | Ca_kabuli_chr05 | 18314500                | GG                              | CC              | 1946846896               |
| SNP_P4_71984_18314599 | NC_021164.1    | Ca_kabuli_chr05 | 18314599                | CC                              | AA              | 1946846898               |
| SNP_P4_71985_18319890 | NC_021164.1    | Ca_kabuli_chr05 | 18319890                | AA                              | GG              | 1946846900               |
| SNP_P4_71986_18320214 | NC_021164.1    | Ca_kabuli_chr05 | 18320214                | GG                              | AA              | 1946846902               |
| SNP_P4_71987_18320245 | NC_021164.1    | Ca_kabuli_chr05 | 18320245                | TT                              | AA              | 1946846904               |
| SNP_P4_71988_18320280 | NC_021164.1    | Ca_kabuli_chr05 | 18320280                | AA                              | GG              | 1946846906               |
| SNP_P4_71989_18325015 | NC_021164.1    | Ca_kabuli_chr05 | 18325015                | AA                              | GG              | 1946846908               |
| SNP_P4_71990_18325448 | NC_021164.1    | Ca_kabuli_chr05 | 18325448                | TT                              | CC              | 1946846910               |
| SNP_P4_71991_18325955 | NC_021164.1    | Ca_kabuli_chr05 | 18325955                | GG                              | TT              | 1946846912               |
| SNP_P4_71992_18327005 | NC_021164.1    | Ca_kabuli_chr05 | 18327005                | AA                              | TT              | 1946846914               |
| SNP_P4_71993_18327177 | NC_021164.1    | Ca_kabuli_chr05 | 18327177                | AA                              | GG              | 1946846916               |
| SNP_P4_71994_18327194 | NC_021164.1    | Ca_kabuli_chr05 | 18327194                | AA                              | GG              | 1946846918               |
| SNP_P4_71995_18327206 | NC_021164.1    | Ca_kabuli_chr05 | 18327206                | GG                              | AA              | 1946846920               |
| SNP_P4_71996_18327207 | NC_021164.1    | Ca_kabuli_chr05 | 18327207                | AA                              | GG              | 1946846922               |
| SNP_P4_71997_18327231 | NC_021164.1    | Ca_kabuli_chr05 | 18327231                | GG                              | TT              | 1946846924               |

| SNPs IDs              | Chromosome IDs | Chromosomes     | Physical positions (bp) | CDC Frontier (Reference genome) | (ILWC46 & LPNB) | NCBI SNPdb Accession IDs |
|-----------------------|----------------|-----------------|-------------------------|---------------------------------|-----------------|--------------------------|
| SNP_P4_71998_18340373 | NC_021164.1    | Ca_kabuli_chr05 | 18340373                | TT                              | GG              | 1946846926               |
| SNP_P4_71999_18416359 | NC_021164.1    | Ca_kabuli_chr05 | 18416359                | CC                              | GG              | 1946846928               |
| SNP_P4_72000_18428698 | NC_021164.1    | Ca_kabuli_chr05 | 18428698                | AA                              | GG              | 1946846930               |
| SNP_P4_72001_18431838 | NC_021164.1    | Ca_kabuli_chr05 | 18431838                | TT                              | CC              | 1946846932               |
| SNP_P4_72002_18432135 | NC_021164.1    | Ca_kabuli_chr05 | 18432135                | GG                              | AA              | 1946846934               |
| SNP_P4_72003_18497775 | NC_021164.1    | Ca_kabuli_chr05 | 18497775                | AA                              | TT              | 1946846936               |
| SNP_P4_72004_18497985 | NC_021164.1    | Ca_kabuli_chr05 | 18497985                | TT                              | GG              | 1946846938               |
| SNP_P4_72005_18498005 | NC_021164.1    | Ca_kabuli_chr05 | 18498005                | AA                              | TT              | 1946846940               |
| SNP_P4_72006_18498031 | NC_021164.1    | Ca_kabuli_chr05 | 18498031                | AA                              | GG              | 1946846942               |
| SNP_P4_72007_18518322 | NC_021164.1    | Ca_kabuli_chr05 | 18518322                | TT                              | GG              | 1946846944               |
| SNP_P4_72008_18556603 | NC_021164.1    | Ca_kabuli_chr05 | 18556603                | TT                              | CC              | 1946846946               |
| SNP_P4_72009_18556652 | NC_021164.1    | Ca_kabuli_chr05 | 18556652                | TT                              | AA              | 1946846948               |
| SNP_P4_72010_18556659 | NC_021164.1    | Ca_kabuli_chr05 | 18556659                | GG                              | CC              | 1946846950               |
| SNP_P4_72011_18556712 | NC_021164.1    | Ca_kabuli_chr05 | 18556712                | GG                              | TT              | 1946846952               |
| SNP_P4_72012_18556726 | NC_021164.1    | Ca_kabuli_chr05 | 18556726                | CC                              | GG              | 1946846954               |
| SNP_P4_72013_18556733 | NC_021164.1    | Ca_kabuli_chr05 | 18556733                | GG                              | AA              | 1946846956               |
| SNP_P4_72014_18562039 | NC_021164.1    | Ca_kabuli_chr05 | 18562039                | GG                              | AA              | 1946846958               |
| SNP_P4_72016_18590368 | NC_021164.1    | Ca_kabuli_chr05 | 18590368                | TT                              | AA              | 1946846960               |
| SNP_P4_72017_18590395 | NC_021164.1    | Ca_kabuli_chr05 | 18590395                | TT                              | AA              | 1946846962               |
| SNP_P4_72018_18590427 | NC_021164.1    | Ca_kabuli_chr05 | 18590427                | GG                              | TT              | 1946846964               |
| SNP_P4_72019_18590616 | NC_021164.1    | Ca_kabuli_chr05 | 18590616                | GG                              | AA              | 1946846966               |
| SNP_P4_72020_18590622 | NC_021164.1    | Ca_kabuli_chr05 | 18590622                | GG                              | AA              | 1946846968               |
| SNP_P4_72021_18590661 | NC_021164.1    | Ca_kabuli_chr05 | 18590661                | CC                              | TT              | 1946846970               |
| SNP_P4_72022_18590692 | NC_021164.1    | Ca_kabuli_chr05 | 18590692                | CC                              | TT              | 1946846972               |
| SNP_P4_72023_18590828 | NC_021164.1    | Ca_kabuli_chr05 | 18590828                | TT                              | AA              | 1946846974               |
| SNP_P4_72024_18590833 | NC_021164.1    | Ca_kabuli_chr05 | 18590833                | TT                              | CC              | 1946846976               |
| SNP_P4_72025_18592479 | NC_021164.1    | Ca_kabuli_chr05 | 18592479                | TT                              | CC              | 1946846978               |
| SNP_P4_72026_18593008 | NC_021164.1    | Ca_kabuli_chr05 | 18593008                | TT                              | CC              | 1946846980               |
| SNP_P4_72027_18593104 | NC_021164.1    | Ca_kabuli_chr05 | 18593104                | AA                              | GG              | 1946846982               |
| SNP_P4_72028_18593110 | NC_021164.1    | Ca_kabuli_chr05 | 18593110                | AA                              | GG              | 1946846984               |
| SNP_P4_72029_18593146 | NC_021164.1    | Ca_kabuli_chr05 | 18593146                | AA                              | GG              | 1946846986               |
| SNP_P4_72030_18593178 | NC_021164.1    | Ca_kabuli_chr05 | 18593178                | TT                              | GG              | 1946846988               |
| SNP_P4_72031_18593202 | NC_021164.1    | Ca_kabuli_chr05 | 18593202                | AA                              | GG              | 1946846990               |
| SNP_P4_72032_18593223 | NC_021164.1    | Ca_kabuli_chr05 | 18593223                | TT                              | GG              | 1946846992               |
| SNP_P4_72033_18593365 | NC_021164.1    | Ca_kabuli_chr05 | 18593365                | GG                              | AA              | 1946846994               |
| SNP_P4_72034_18593383 | NC_021164.1    | Ca_kabuli_chr05 | 18593383                | GG                              | TT              | 1946846997               |
| SNP_P4_72035_18593403 | NC_021164.1    | Ca_kabuli_chr05 | 18593403                | AA                              | GG              | 1946846999               |
| SNP_P4_72036_18593578 | NC_021164.1    | Ca_kabuli_chr05 | 18593578                | GG                              | TT              | 1946847001               |
| SNP_P4_72037_18593642 | NC_021164.1    | Ca_kabuli_chr05 | 18593642                | GG                              | AA              | 1946847003               |
| SNP_P4_72038_18593649 | NC_021164.1    | Ca_kabuli_chr05 | 18593649                | GG                              | CC              | 1946847005               |
| SNP_P4_72039_18593736 | NC_021164.1    | Ca_kabuli_chr05 | 18593736                | AA                              | GG              | 1946847007               |
| SNP_P4_72040_18593780 | NC_021164.1    | Ca_kabuli_chr05 | 18593780                | AA                              | GG              | 1946847009               |

| SNPs IDs              | Chromosome IDs | Chromosomes     | Physical positions (bp) | CDC Frontier (Reference genome) | (ILWC46 & LPNB) | NCBI SNPdb Accession IDs |
|-----------------------|----------------|-----------------|-------------------------|---------------------------------|-----------------|--------------------------|
| SNP_P4_72041_18593830 | NC_021164.1    | Ca_kabuli_chr05 | 18593830                | GG                              | AA              | 1946847011               |
| SNP_P4_72043_18593958 | NC_021164.1    | Ca_kabuli_chr05 | 18593958                | AA                              | GG              | 1946847013               |
| SNP_P4_72044_18593960 | NC_021164.1    | Ca_kabuli_chr05 | 18593960                | GG                              | TT              | 1946847015               |
| SNP_P4_72045_18594078 | NC_021164.1    | Ca_kabuli_chr05 | 18594078                | GG                              | AA              | 1946847017               |
| SNP_P4_72046_18594132 | NC_021164.1    | Ca_kabuli_chr05 | 18594132                | GG                              | TT              | 1946847019               |
| SNP_P4_72047_18612809 | NC_021164.1    | Ca_kabuli_chr05 | 18612809                | TT                              | CC              | 1946847021               |
| SNP_P4_72048_18612810 | NC_021164.1    | Ca_kabuli_chr05 | 18612810                | TT                              | AA              | 1946847023               |
| SNP_P4_72049_18624861 | NC_021164.1    | Ca_kabuli_chr05 | 18624861                | TT                              | CC              | 1946847025               |
| SNP_P4_72050_18649701 | NC_021164.1    | Ca_kabuli_chr05 | 18649701                | CC                              | TT              | 1946847027               |
| SNP_P4_72051_18678592 | NC_021164.1    | Ca_kabuli_chr05 | 18678592                | TT                              | GG              | 1946847029               |
| SNP_P4_72052_18678615 | NC_021164.1    | Ca_kabuli_chr05 | 18678615                | TT                              | CC              | 1946847031               |
| SNP_P4_72053_18678649 | NC_021164.1    | Ca_kabuli_chr05 | 18678649                | AA                              | GG              | 1946847033               |
| SNP_P4_72054_18678701 | NC_021164.1    | Ca_kabuli_chr05 | 18678701                | AA                              | CC              | 1946847035               |
| SNP_P4_72055_18678703 | NC_021164.1    | Ca_kabuli_chr05 | 18678703                | GG                              | CC              | 1946847037               |
| SNP_P4_72056_18678723 | NC_021164.1    | Ca_kabuli_chr05 | 18678723                | AA                              | CC              | 1946847039               |
| SNP_P4_72057_18678736 | NC_021164.1    | Ca_kabuli_chr05 | 18678736                | AA                              | CC              | 1946847041               |
| SNP_P4_72058_18678773 | NC_021164.1    | Ca_kabuli_chr05 | 18678773                | GG                              | CC              | 1946847043               |
| SNP_P4_72059_18679655 | NC_021164.1    | Ca_kabuli_chr05 | 18679655                | AA                              | GG              | 1946847045               |
| SNP_P4_72060_18679660 | NC_021164.1    | Ca_kabuli_chr05 | 18679660                | GG                              | CC              | 1946847047               |
| SNP_P4_72061_18679683 | NC_021164.1    | Ca_kabuli_chr05 | 18679683                | TT                              | CC              | 1946847049               |
| SNP_P4_72062_18679734 | NC_021164.1    | Ca_kabuli_chr05 | 18679734                | AA                              | CC              | 1946847051               |
| SNP_P4_72063_18679737 | NC_021164.1    | Ca_kabuli_chr05 | 18679737                | TT                              | CC              | 1946847053               |
| SNP_P4_72064_18681538 | NC_021164.1    | Ca_kabuli_chr05 | 18681538                | GG                              | CC              | 1946847055               |
| SNP_P4_72065_18681540 | NC_021164.1    | Ca_kabuli_chr05 | 18681540                | CC                              | GG              | 1946847057               |
| SNP_P4_72066_18682921 | NC_021164.1    | Ca_kabuli_chr05 | 18682921                | GG                              | AA              | 1946847059               |
| SNP_P4_72067_18682979 | NC_021164.1    | Ca_kabuli_chr05 | 18682979                | AA                              | CC              | 1946847061               |
| SNP_P4_72068_18683047 | NC_021164.1    | Ca_kabuli_chr05 | 18683047                | GG                              | CC              | 1946847063               |
| SNP_P4_72069_18683064 | NC_021164.1    | Ca_kabuli_chr05 | 18683064                | TT                              | CC              | 1946847065               |
| SNP_P4_72070_18683067 | NC_021164.1    | Ca_kabuli_chr05 | 18683067                | AA                              | GG              | 1946847067               |
| SNP_P4_72071_18683081 | NC_021164.1    | Ca_kabuli_chr05 | 18683081                | AA                              | CC              | 1946847069               |
| SNP_P4_72072_18683156 | NC_021164.1    | Ca_kabuli_chr05 | 18683156                | TT                              | CC              | 1946847071               |
| SNP_P4_72073_18683174 | NC_021164.1    | Ca_kabuli_chr05 | 18683174                | AA                              | GG              | 1946847073               |
| SNP_P4_72075_18683922 | NC_021164.1    | Ca_kabuli_chr05 | 18683922                | AA                              | TT              | 1946847075               |
| SNP_P4_72076_18683950 | NC_021164.1    | Ca_kabuli_chr05 | 18683950                | TT                              | CC              | 1946847077               |
| SNP_P4_72077_18684009 | NC_021164.1    | Ca_kabuli_chr05 | 18684009                | AA                              | CC              | 1946847079               |
| SNP_P4_72078_18684021 | NC_021164.1    | Ca_kabuli_chr05 | 18684021                | CC                              | TT              | 1946847081               |
| SNP_P4_72079_18684035 | NC_021164.1    | Ca_kabuli_chr05 | 18684035                | AA                              | GG              | 1946847083               |
| SNP_P4_72080_18686075 | NC_021164.1    | Ca_kabuli_chr05 | 18686075                | AA                              | TT              | 1946847084               |
| SNP_P4_72082_18694592 | NC_021164.1    | Ca_kabuli_chr05 | 18694592                | CC                              | TT              | 1946847086               |
| SNP_P4_72083_18694616 | NC_021164.1    | Ca_kabuli_chr05 | 18694616                | CC                              | TT              | 1946847088               |
| SNP_P4_72084_18694638 | NC_021164.1    | Ca_kabuli_chr05 | 18694638                | CC                              | TT              | 1946847090               |
| SNP_P4_72085_18735388 | NC_021164.1    | Ca_kabuli_chr05 | 18735388                | GG                              | TT              | 1946847092               |

| SNPs IDs              | Chromosome IDs | Chromosomes     | Physical positions (bp) | CDC Frontier (Reference genome) | (ILWC46 & LPNB) | NCBI SNPdb Accession IDs |
|-----------------------|----------------|-----------------|-------------------------|---------------------------------|-----------------|--------------------------|
| SNP_P4_72086_18778753 | NC_021164.1    | Ca_kabuli_chr05 | 18778753                | CC                              | AA              | 1946847094               |
| SNP_P4_72087_18787497 | NC_021164.1    | Ca_kabuli_chr05 | 18787497                | CC                              | TT              | 1946847096               |
| SNP_P4_72088_18794069 | NC_021164.1    | Ca_kabuli_chr05 | 18794069                | AA                              | GG              | 1946847098               |
| SNP_P4_72089_18794142 | NC_021164.1    | Ca_kabuli_chr05 | 18794142                | TT                              | CC              | 1946847100               |
| SNP_P4_72090_18794162 | NC_021164.1    | Ca_kabuli_chr05 | 18794162                | TT                              | CC              | 1946847102               |
| SNP_P4_72091_18794198 | NC_021164.1    | Ca_kabuli_chr05 | 18794198                | GG                              | AA              | 1946847104               |
| SNP_P4_72092_18794554 | NC_021164.1    | Ca_kabuli_chr05 | 18794554                | TT                              | GG              | 1946847106               |
| SNP_P4_72094_18820942 | NC_021164.1    | Ca_kabuli_chr05 | 18820942                | TT                              | CC              | 1946847108               |
| SNP_P4_72095_18820952 | NC_021164.1    | Ca_kabuli_chr05 | 18820952                | TT                              | AA              | 1946847110               |
| SNP_P4_72096_18831787 | NC_021164.1    | Ca_kabuli_chr05 | 18831787                | GG                              | AA              | 1946847112               |
| SNP_P4_72097_18834755 | NC_021164.1    | Ca_kabuli_chr05 | 18834755                | TT                              | AA              | 1946847114               |
| SNP_P4_72098_18834760 | NC_021164.1    | Ca_kabuli_chr05 | 18834760                | TT                              | GG              | 1946847116               |
| SNP_P4_72099_18834783 | NC_021164.1    | Ca_kabuli_chr05 | 18834783                | TT                              | GG              | 1946847118               |
| SNP_P4_72100_18846403 | NC_021164.1    | Ca_kabuli_chr05 | 18846403                | CC                              | TT              | 1946847120               |
| SNP_P4_72101_18846424 | NC_021164.1    | Ca_kabuli_chr05 | 18846424                | AA                              | GG              | 1946847122               |
| SNP_P4_72102_18846490 | NC_021164.1    | Ca_kabuli_chr05 | 18846490                | CC                              | GG              | 1946847124               |
| SNP_P4_72103_18846759 | NC_021164.1    | Ca_kabuli_chr05 | 18846759                | AA                              | GG              | 1946847126               |
| SNP_P4_72104_18869370 | NC_021164.1    | Ca_kabuli_chr05 | 18869370                | TT                              | CC              | 1946847128               |
| SNP_P4_72105_18888650 | NC_021164.1    | Ca_kabuli_chr05 | 18888650                | AA                              | CC              | 1946847130               |
| SNP_P4_72106_18898511 | NC_021164.1    | Ca_kabuli_chr05 | 18898511                | CC                              | TT              | 1946847132               |
| SNP_P4_72107_18899964 | NC_021164.1    | Ca_kabuli_chr05 | 18899964                | AA                              | GG              | 1946847134               |
| SNP_P4_72108_18899996 | NC_021164.1    | Ca_kabuli_chr05 | 18899996                | AA                              | GG              | 1946847136               |
| SNP_P4_72109_18900004 | NC_021164.1    | Ca_kabuli_chr05 | 18900004                | TT                              | CC              | 1946847138               |
| SNP_P4_72110_18923780 | NC_021164.1    | Ca_kabuli_chr05 | 18923780                | AA                              | GG              | 1946847140               |
| SNP_P4_72111_18944145 | NC_021164.1    | Ca_kabuli_chr05 | 18944145                | GG                              | CC              | 1946847142               |
| SNP_P4_72112_18944209 | NC_021164.1    | Ca_kabuli_chr05 | 18944209                | CC                              | TT              | 1946847143               |
| SNP_P4_72113_18944248 | NC_021164.1    | Ca_kabuli_chr05 | 18944248                | CC                              | TT              | 1946847145               |
| SNP_P4_72114_18944273 | NC_021164.1    | Ca_kabuli_chr05 | 18944273                | GG                              | AA              | 1946847147               |
| SNP_P4_72115_18944292 | NC_021164.1    | Ca_kabuli_chr05 | 18944292                | AA                              | TT              | 1946847149               |
| SNP_P4_72116_18944340 | NC_021164.1    | Ca_kabuli_chr05 | 18944340                | CC                              | TT              | 1946847151               |
| SNP_P4_72117_18944364 | NC_021164.1    | Ca_kabuli_chr05 | 18944364                | TT                              | GG              | 1946847153               |
| SNP_P4_72118_18944468 | NC_021164.1    | Ca_kabuli_chr05 | 18944468                | GG                              | CC              | 1946847155               |
| SNP_P4_72119_18944483 | NC_021164.1    | Ca_kabuli_chr05 | 18944483                | AA                              | CC              | 1946847157               |
| SNP_P4_72120_18944501 | NC_021164.1    | Ca_kabuli_chr05 | 18944501                | CC                              | TT              | 1946847159               |
| SNP_P4_72121_18944543 | NC_021164.1    | Ca_kabuli_chr05 | 18944543                | AA                              | CC              | 1946847161               |
| SNP_P4_72122_18944547 | NC_021164.1    | Ca_kabuli_chr05 | 18944547                | GG                              | CC              | 1946847163               |
| SNP_P4_72124_18944708 | NC_021164.1    | Ca_kabuli_chr05 | 18944708                | TT                              | CC              | 1946847165               |
| SNP_P4_72125_18944719 | NC_021164.1    | Ca_kabuli_chr05 | 18944719                | TT                              | AA              | 1946847167               |
| SNP_P4_72126_18944725 | NC_021164.1    | Ca_kabuli_chr05 | 18944725                | TT                              | GG              | 1946847169               |
| SNP_P4_72127_18948093 | NC_021164.1    | Ca_kabuli_chr05 | 18948093                | CC                              | TT              | 1946847171               |
| SNP_P4_72128_18956156 | NC_021164.1    | Ca_kabuli_chr05 | 18956156                | TT                              | AA              | 1946847173               |
| SNP_P4_72130_19302043 | NC_021164.1    | Ca_kabuli_chr05 | 19302043                | AA                              | GG              | 1946847175               |



| SNPs IDs              | Chromosome IDs | Chromosomes     | Physical positions (bp) | CDC Frontier (Reference genome) | (ILWC46 & LPNB) | NCBI SNPdb Accession IDs |
|-----------------------|----------------|-----------------|-------------------------|---------------------------------|-----------------|--------------------------|
| SNP_P4_72131_19302068 | NC_021164.1    | Ca_kabuli_chr05 | 19302068                | GG                              | TT              | 1946847177               |
| SNP_P4_72132_19304922 | NC_021164.1    | Ca_kabuli_chr05 | 19304922                | TT                              | CC              | 1946847179               |
| SNP_P4_72133_19305070 | NC_021164.1    | Ca_kabuli_chr05 | 19305070                | GG                              | CC              | 1946847181               |
| SNP_P4_72134_19305394 | NC_021164.1    | Ca_kabuli_chr05 | 19305394                | GG                              | AA              | 1946847183               |
| SNP_P4_72135_19305750 | NC_021164.1    | Ca_kabuli_chr05 | 19305750                | AA                              | TT              | 1946847185               |
| SNP_P4_72136_19315676 | NC_021164.1    | Ca_kabuli_chr05 | 19315676                | GG                              | CC              | 1946847187               |
| SNP_P4_72137_19324327 | NC_021164.1    | Ca_kabuli_chr05 | 19324327                | GG                              | AA              | 1946847189               |
| SNP_P4_72138_19331809 | NC_021164.1    | Ca_kabuli_chr05 | 19331809                | TT                              | CC              | 1946847191               |
| SNP_P4_72139_19361654 | NC_021164.1    | Ca_kabuli_chr05 | 19361654                | GG                              | AA              | 1946847193               |
| SNP_P4_72140_19375004 | NC_021164.1    | Ca_kabuli_chr05 | 19375004                | GG                              | AA              | 1946847195               |
| SNP_P4_72141_19375013 | NC_021164.1    | Ca_kabuli_chr05 | 19375013                | GG                              | CC              | 1946847197               |
| SNP_P4_72142_19375029 | NC_021164.1    | Ca_kabuli_chr05 | 19375029                | CC                              | TT              | 1946847199               |
| SNP_P4_72143_19375034 | NC_021164.1    | Ca_kabuli_chr05 | 19375034                | GG                              | AA              | 1946847201               |
| SNP_P4_72144_19375035 | NC_021164.1    | Ca_kabuli_chr05 | 19375035                | CC                              | TT              | 1946847202               |
| SNP_P4_72145_19375042 | NC_021164.1    | Ca_kabuli_chr05 | 19375042                | CC                              | AA              | 1946847204               |
| SNP_P4_72146_19375062 | NC_021164.1    | Ca_kabuli_chr05 | 19375062                | CC                              | TT              | 1946847206               |
| SNP_P4_72147_19375063 | NC_021164.1    | Ca_kabuli_chr05 | 19375063                | AA                              | CC              | 1946847208               |
| SNP_P4_72148_19380620 | NC_021164.1    | Ca_kabuli_chr05 | 19380620                | CC                              | TT              | 1946847210               |
| SNP_P4_72149_19385578 | NC_021164.1    | Ca_kabuli_chr05 | 19385578                | TT                              | GG              | 1946847212               |
| SNP_P4_72150_19385631 | NC_021164.1    | Ca_kabuli_chr05 | 19385631                | TT                              | CC              | 1946847214               |
| SNP_P4_72151_19385951 | NC_021164.1    | Ca_kabuli_chr05 | 19385951                | CC                              | TT              | 1946847216               |
| SNP_P4_72152_19385953 | NC_021164.1    | Ca_kabuli_chr05 | 19385953                | AA                              | TT              | 1946847218               |
| SNP_P4_72153_19385973 | NC_021164.1    | Ca_kabuli_chr05 | 19385973                | AA                              | GG              | 1946847220               |
| SNP_P4_72154_19385978 | NC_021164.1    | Ca_kabuli_chr05 | 19385978                | TT                              | AA              | 1946847222               |
| SNP_P4_72155_19386682 | NC_021164.1    | Ca_kabuli_chr05 | 19386682                | TT                              | AA              | 1946847223               |
| SNP_P4_72156_19386704 | NC_021164.1    | Ca_kabuli_chr05 | 19386704                | TT                              | GG              | 1946847225               |
| SNP_P4_72157_19386720 | NC_021164.1    | Ca_kabuli_chr05 | 19386720                | GG                              | AA              | 1946847227               |
| SNP_P4_72158_19399641 | NC_021164.1    | Ca_kabuli_chr05 | 19399641                | GG                              | AA              | 1946847229               |
| SNP_P4_72159_19458061 | NC_021164.1    | Ca_kabuli_chr05 | 19458061                | CC                              | TT              | 1946847231               |
| SNP_P4_72160_19476571 | NC_021164.1    | Ca_kabuli_chr05 | 19476571                | TT                              | CC              | 1946847233               |
| SNP_P4_72161_19477821 | NC_021164.1    | Ca_kabuli_chr05 | 19477821                | TT                              | GG              | 1946847235               |
| SNP_P4_72162_19477902 | NC_021164.1    | Ca_kabuli_chr05 | 19477902                | AA                              | GG              | 1946847237               |
| SNP_P4_72163_19477905 | NC_021164.1    | Ca_kabuli_chr05 | 19477905                | AA                              | TT              | 1946847239               |
| SNP_P4_72164_19477943 | NC_021164.1    | Ca_kabuli_chr05 | 19477943                | GG                              | CC              | 1946847241               |
| SNP_P4_72165_19478219 | NC_021164.1    | Ca_kabuli_chr05 | 19478219                | TT                              | AA              | 1946847244               |
| SNP_P4_72166_19482483 | NC_021164.1    | Ca_kabuli_chr05 | 19482483                | AA                              | GG              | 1946847246               |
| SNP_P4_72167_19482511 | NC_021164.1    | Ca_kabuli_chr05 | 19482511                | AA                              | GG              | 1946847248               |
| SNP_P4_72168_19482888 | NC_021164.1    | Ca_kabuli_chr05 | 19482888                | AA                              | GG              | 1946847250               |
| SNP_P4_72169_19497917 | NC_021164.1    | Ca_kabuli_chr05 | 19497917                | CC                              | TT              | 1946847252               |
| SNP_P4_72170_19498331 | NC_021164.1    | Ca_kabuli_chr05 | 19498331                | GG                              | TT              | 1946847254               |
| SNP_P4_72171_19498558 | NC_021164.1    | Ca_kabuli_chr05 | 19498558                | TT                              | CC              | 1946847256               |
| SNP_P4_72172_19498586 | NC_021164.1    | Ca_kabuli_chr05 | 19498586                | AA                              | GG              | 1946847258               |

| SNPs IDs              | Chromosome IDs | Chromosomes     | Physical positions (bp) | CDC Frontier (Reference genome) | (ILWC46 & LPNB) | NCBI SNPdb Accession IDs |
|-----------------------|----------------|-----------------|-------------------------|---------------------------------|-----------------|--------------------------|
| SNP_P4_72173_19498588 | NC_021164.1    | Ca_kabuli_chr05 | 19498588                | AA                              | GG              | 1946847260               |
| SNP_P4_72174_19498610 | NC_021164.1    | Ca_kabuli_chr05 | 19498610                | CC                              | TT              | 1946847262               |
| SNP_P4_72175_19498649 | NC_021164.1    | Ca_kabuli_chr05 | 19498649                | TT                              | CC              | 1946847264               |
| SNP_P4_72176_19498692 | NC_021164.1    | Ca_kabuli_chr05 | 19498692                | AA                              | GG              | 1946847266               |
| SNP_P4_72177_19516883 | NC_021164.1    | Ca_kabuli_chr05 | 19516883                | TT                              | GG              | 1946847268               |
| SNP_P4_72178_19521087 | NC_021164.1    | Ca_kabuli_chr05 | 19521087                | AA                              | GG              | 1946847270               |
| SNP_P4_72179_19528633 | NC_021164.1    | Ca_kabuli_chr05 | 19528633                | AA                              | TT              | 1946847272               |
| SNP_P4_72180_19531083 | NC_021164.1    | Ca_kabuli_chr05 | 19531083                | AA                              | GG              | 1946847274               |
| SNP_P4_72181_19533810 | NC_021164.1    | Ca_kabuli_chr05 | 19533810                | TT                              | GG              | 1946847276               |
| SNP_P4_72182_19533911 | NC_021164.1    | Ca_kabuli_chr05 | 19533911                | CC                              | GG              | 1946847278               |
| SNP_P4_72183_19533955 | NC_021164.1    | Ca_kabuli_chr05 | 19533955                | TT                              | CC              | 1946847280               |
| SNP_P4_72184_19533992 | NC_021164.1    | Ca_kabuli_chr05 | 19533992                | CC                              | TT              | 1946847282               |
| SNP_P4_72185_19534218 | NC_021164.1    | Ca_kabuli_chr05 | 19534218                | CC                              | TT              | 1946847284               |
| SNP_P4_72186_19538397 | NC_021164.1    | Ca_kabuli_chr05 | 19538397                | AA                              | GG              | 1946847286               |
| SNP_P4_72187_19538724 | NC_021164.1    | Ca_kabuli_chr05 | 19538724                | TT                              | AA              | 1946847288               |
| SNP_P4_72188_19538882 | NC_021164.1    | Ca_kabuli_chr05 | 19538882                | TT                              | GG              | 1946847290               |
| SNP_P4_72189_19542846 | NC_021164.1    | Ca_kabuli_chr05 | 19542846                | CC                              | TT              | 1946847293               |
| SNP_P4_72191_19545066 | NC_021164.1    | Ca_kabuli_chr05 | 19545066                | TT                              | AA              | 1946847295               |
| SNP_P4_72192_19545067 | NC_021164.1    | Ca_kabuli_chr05 | 19545067                | GG                              | AA              | 1946847297               |
| SNP_P4_72193_19545068 | NC_021164.1    | Ca_kabuli_chr05 | 19545068                | GG                              | CC              | 1946847299               |
| SNP_P4_72194_19545488 | NC_021164.1    | Ca_kabuli_chr05 | 19545488                | AA                              | GG              | 1946847301               |
| SNP_P4_72195_19590084 | NC_021164.1    | Ca_kabuli_chr05 | 19590084                | TT                              | CC              | 1946847303               |
| SNP_P4_72196_19590673 | NC_021164.1    | Ca_kabuli_chr05 | 19590673                | TT                              | CC              | 1946847305               |
| SNP_P4_72197_19590750 | NC_021164.1    | Ca_kabuli_chr05 | 19590750                | GG                              | TT              | 1946847307               |
| SNP_P4_72198_19590759 | NC_021164.1    | Ca_kabuli_chr05 | 19590759                | TT                              | CC              | 1946847309               |
| SNP_P4_72199_19590856 | NC_021164.1    | Ca_kabuli_chr05 | 19590856                | AA                              | TT              | 1946847311               |
| SNP_P4_72200_19591054 | NC_021164.1    | Ca_kabuli_chr05 | 19591054                | TT                              | AA              | 1946847313               |
| SNP_P4_72201_19591147 | NC_021164.1    | Ca_kabuli_chr05 | 19591147                | TT                              | CC              | 1946847315               |
| SNP_P4_72203_19591367 | NC_021164.1    | Ca_kabuli_chr05 | 19591367                | TT                              | CC              | 1946847317               |
| SNP_P4_72204_19591429 | NC_021164.1    | Ca_kabuli_chr05 | 19591429                | GG                              | TT              | 1946847319               |
| SNP_P4_72205_19620515 | NC_021164.1    | Ca_kabuli_chr05 | 19620515                | TT                              | AA              | 1946847320               |
| SNP_P4_72206_19650569 | NC_021164.1    | Ca_kabuli_chr05 | 19650569                | AA                              | GG              | 1946847322               |
| SNP_P4_72207_19655200 | NC_021164.1    | Ca_kabuli_chr05 | 19655200                | AA                              | CC              | 1946847324               |
| SNP_P4_72208_19667500 | NC_021164.1    | Ca_kabuli_chr05 | 19667500                | CC                              | TT              | 1946847326               |
| SNP_P4_72209_19667587 | NC_021164.1    | Ca_kabuli_chr05 | 19667587                | GG                              | TT              | 1946847328               |
| SNP_P4_72210_19667626 | NC_021164.1    | Ca_kabuli_chr05 | 19667626                | AA                              | GG              | 1946847330               |
| SNP_P4_72211_19667697 | NC_021164.1    | Ca_kabuli_chr05 | 19667697                | AA                              | GG              | 1946847331               |
| SNP_P4_72212_19667853 | NC_021164.1    | Ca_kabuli_chr05 | 19667853                | GG                              | AA              | 1946847332               |
| SNP_P4_72213_19669598 | NC_021164.1    | Ca_kabuli_chr05 | 19669598                | AA                              | GG              | 1946847333               |
| SNP_P4_72214_19669602 | NC_021164.1    | Ca_kabuli_chr05 | 19669602                | TT                              | CC              | 1946847334               |
| SNP_P4_72215_19702801 | NC_021164.1    | Ca_kabuli_chr05 | 19702801                | TT                              | CC              | 1946847335               |
| SNP_P4_72216_19702828 | NC_021164.1    | Ca_kabuli_chr05 | 19702828                | GG                              | AA              | 1946847337               |

| SNPs IDs              | Chromosome IDs | Chromosomes     | Physical positions (bp) | CDC Frontier (Reference genome) | (ILWC46 & LPNB) | NCBI SNPdb Accession IDs |
|-----------------------|----------------|-----------------|-------------------------|---------------------------------|-----------------|--------------------------|
| SNP_P4_72217_19703017 | NC_021164.1    | Ca_kabuli_chr05 | 19703017                | GG                              | AA              | 1946847339               |
| SNP_P4_72218_19705241 | NC_021164.1    | Ca_kabuli_chr05 | 19705241                | CC                              | TT              | 1946847342               |
| SNP_P4_72220_19716362 | NC_021164.1    | Ca_kabuli_chr05 | 19716362                | GG                              | AA              | 1946847344               |
| SNP_P4_72221_19725589 | NC_021164.1    | Ca_kabuli_chr05 | 19725589                | AA                              | GG              | 1946847346               |
| SNP_P4_72222_19725658 | NC_021164.1    | Ca_kabuli_chr05 | 19725658                | CC                              | TT              | 1946847348               |
| SNP_P4_72223_19725742 | NC_021164.1    | Ca_kabuli_chr05 | 19725742                | TT                              | GG              | 1946847350               |
| SNP_P4_72225_19725982 | NC_021164.1    | Ca_kabuli_chr05 | 19725982                | GG                              | AA              | 1946847352               |
| SNP_P4_72226_19726096 | NC_021164.1    | Ca_kabuli_chr05 | 19726096                | CC                              | TT              | 1946847354               |
| SNP_P4_72227_19726102 | NC_021164.1    | Ca_kabuli_chr05 | 19726102                | AA                              | GG              | 1946847356               |
| SNP_P4_72228_19726114 | NC_021164.1    | Ca_kabuli_chr05 | 19726114                | GG                              | AA              | 1946847358               |
| SNP_P4_72229_19726130 | NC_021164.1    | Ca_kabuli_chr05 | 19726130                | CC                              | AA              | 1946847360               |
| SNP_P4_72230_19729692 | NC_021164.1    | Ca_kabuli_chr05 | 19729692                | GG                              | AA              | 1946847362               |
| SNP_P4_72231_19729737 | NC_021164.1    | Ca_kabuli_chr05 | 19729737                | AA                              | TT              | 1946847364               |
| SNP_P4_72232_19729740 | NC_021164.1    | Ca_kabuli_chr05 | 19729740                | TT                              | CC              | 1946847366               |
| SNP_P4_72233_19729743 | NC_021164.1    | Ca_kabuli_chr05 | 19729743                | GG                              | AA              | 1946847368               |
| SNP_P4_72234_19729749 | NC_021164.1    | Ca_kabuli_chr05 | 19729749                | GG                              | AA              | 1946847370               |
| SNP_P4_72235_19729785 | NC_021164.1    | Ca_kabuli_chr05 | 19729785                | CC                              | TT              | 1946847372               |
| SNP_P4_72236_19729788 | NC_021164.1    | Ca_kabuli_chr05 | 19729788                | CC                              | TT              | 1946847374               |
| SNP_P4_72237_19740875 | NC_021164.1    | Ca_kabuli_chr05 | 19740875                | GG                              | CC              | 1946847376               |
| SNP_P4_72238_19740877 | NC_021164.1    | Ca_kabuli_chr05 | 19740877                | TT                              | GG              | 1946847378               |
| SNP_P4_72240_19777085 | NC_021164.1    | Ca_kabuli_chr05 | 19777085                | AA                              | CC              | 1946847380               |
| SNP_P4_72241_19777092 | NC_021164.1    | Ca_kabuli_chr05 | 19777092                | AA                              | CC              | 1946847382               |
| SNP_P4_72242_19777105 | NC_021164.1    | Ca_kabuli_chr05 | 19777105                | AA                              | GG              | 1946847384               |
| SNP_P4_72246_19824306 | NC_021164.1    | Ca_kabuli_chr05 | 19824306                | TT                              | CC              | 1946847386               |
| SNP_P4_72247_19830608 | NC_021164.1    | Ca_kabuli_chr05 | 19830608                | AA                              | GG              | 1946847388               |
| SNP_P4_72248_19830784 | NC_021164.1    | Ca_kabuli_chr05 | 19830784                | GG                              | AA              | 1946847390               |
| SNP_P4_72249_19830806 | NC_021164.1    | Ca_kabuli_chr05 | 19830806                | TT                              | CC              | 1946847392               |
| SNP_P4_72250_19830907 | NC_021164.1    | Ca_kabuli_chr05 | 19830907                | TT                              | CC              | 1946847394               |
| SNP_P4_72251_19830985 | NC_021164.1    | Ca_kabuli_chr05 | 19830985                | GG                              | AA              | 1946847396               |
| SNP_P4_72252_19830997 | NC_021164.1    | Ca_kabuli_chr05 | 19830997                | GG                              | AA              | 1946847398               |
| SNP_P4_72253_19908543 | NC_021164.1    | Ca_kabuli_chr05 | 19908543                | TT                              | CC              | 1946847400               |
| SNP_P4_72254_19908777 | NC_021164.1    | Ca_kabuli_chr05 | 19908777                | TT                              | GG              | 1946847402               |
| SNP_P4_72255_19908788 | NC_021164.1    | Ca_kabuli_chr05 | 19908788                | CC                              | AA              | 1946847404               |
| SNP_P4_72256_19908815 | NC_021164.1    | Ca_kabuli_chr05 | 19908815                | AA                              | TT              | 1946847406               |
| SNP_P4_72257_19908818 | NC_021164.1    | Ca_kabuli_chr05 | 19908818                | TT                              | CC              | 1946847408               |
| SNP_P4_72258_19908926 | NC_021164.1    | Ca_kabuli_chr05 | 19908926                | AA                              | CC              | 1946847410               |
| SNP_P4_72259_19908957 | NC_021164.1    | Ca_kabuli_chr05 | 19908957                | TT                              | AA              | 1946847412               |
| SNP_P4_72260_19909123 | NC_021164.1    | Ca_kabuli_chr05 | 19909123                | TT                              | CC              | 1946847414               |
| SNP_P4_72261_19912815 | NC_021164.1    | Ca_kabuli_chr05 | 19912815                | TT                              | CC              | 1946847416               |
| SNP_P4_72262_19914397 | NC_021164.1    | Ca_kabuli_chr05 | 19914397                | AA                              | GG              | 1946847418               |
| SNP_P4_72263_19914453 | NC_021164.1    | Ca_kabuli_chr05 | 19914453                | GG                              | CC              | 1946847420               |
| SNP_P4_72266_19914536 | NC_021164.1    | Ca_kabuli_chr05 | 19914536                | TT                              | CC              | 1946847422               |

| SNPs IDs              | Chromosome IDs | Chromosomes     | Physical positions (bp) | CDC Frontier (Reference genome) | (ILWC46 & LPNB) | NCBI SNPdb Accession IDs |
|-----------------------|----------------|-----------------|-------------------------|---------------------------------|-----------------|--------------------------|
| SNP_P4_72267_19914578 | NC_021164.1    | Ca_kabuli_chr05 | 19914578                | GG                              | AA              | 1946847424               |
| SNP_P4_72269_19914599 | NC_021164.1    | Ca_kabuli_chr05 | 19914599                | CC                              | TT              | 1946847426               |
| SNP_P4_72270_19914602 | NC_021164.1    | Ca_kabuli_chr05 | 19914602                | GG                              | AA              | 1946847428               |
| SNP_P4_72271_19914604 | NC_021164.1    | Ca_kabuli_chr05 | 19914604                | CC                              | TT              | 1946847430               |
| SNP_P4_72272_19914611 | NC_021164.1    | Ca_kabuli_chr05 | 19914611                | TT                              | AA              | 1946847432               |
| SNP_P4_72273_19922077 | NC_021164.1    | Ca_kabuli_chr05 | 19922077                | AA                              | CC              | 1946847434               |
| SNP_P4_72274_19922129 | NC_021164.1    | Ca_kabuli_chr05 | 19922129                | AA                              | GG              | 1946847436               |
| SNP_P4_72275_19922157 | NC_021164.1    | Ca_kabuli_chr05 | 19922157                | TT                              | CC              | 1946847438               |
| SNP_P4_72276_19922350 | NC_021164.1    | Ca_kabuli_chr05 | 19922350                | GG                              | TT              | 1946847440               |
| SNP_P4_72277_19922486 | NC_021164.1    | Ca_kabuli_chr05 | 19922486                | AA                              | GG              | 1946847442               |
| SNP_P4_72278_19922498 | NC_021164.1    | Ca_kabuli_chr05 | 19922498                | TT                              | AA              | 1946847444               |
| SNP_P4_72279_19922506 | NC_021164.1    | Ca_kabuli_chr05 | 19922506                | CC                              | TT              | 1946847446               |
| SNP_P4_72280_19923519 | NC_021164.1    | Ca_kabuli_chr05 | 19923519                | AA                              | CC              | 1946847448               |
| SNP_P4_72281_19923564 | NC_021164.1    | Ca_kabuli_chr05 | 19923564                | GG                              | TT              | 1946847450               |
| SNP_P4_72283_19960976 | NC_021164.1    | Ca_kabuli_chr05 | 19960976                | CC                              | TT              | 1946847452               |
| SNP_P4_72284_19961102 | NC_021164.1    | Ca_kabuli_chr05 | 19961102                | TT                              | CC              | 1946847454               |
| SNP_P4_72285_19961222 | NC_021164.1    | Ca_kabuli_chr05 | 19961222                | TT                              | AA              | 1946847456               |
| SNP_P4_72286_19978581 | NC_021164.1    | Ca_kabuli_chr05 | 19978581                | GG                              | AA              | 1946847458               |
| SNP_P4_72287_19998269 | NC_021164.1    | Ca_kabuli_chr05 | 19998269                | GG                              | AA              | 1946847460               |
| SNP_P4_72288_19998317 | NC_021164.1    | Ca_kabuli_chr05 | 19998317                | TT                              | CC              | 1946847462               |
| SNP_P4_72289_19998359 | NC_021164.1    | Ca_kabuli_chr05 | 19998359                | TT                              | CC              | 1946847464               |
| SNP_P4_72290_19998437 | NC_021164.1    | Ca_kabuli_chr05 | 19998437                | TT                              | CC              | 1946847466               |
| SNP_P4_72291_19998479 | NC_021164.1    | Ca_kabuli_chr05 | 19998479                | AA                              | GG              | 1946847468               |
| SNP_P4_72293_20073961 | NC_021164.1    | Ca_kabuli_chr05 | 20073961                | AA                              | GG              | 1946847470               |
| SNP_P4_72294_20073969 | NC_021164.1    | Ca_kabuli_chr05 | 20073969                | TT                              | CC              | 1946847472               |
| SNP_P4_72295_20074004 | NC_021164.1    | Ca_kabuli_chr05 | 20074004                | TT                              | CC              | 1946847474               |
| SNP_P4_72296_20089268 | NC_021164.1    | Ca_kabuli_chr05 | 20089268                | AA                              | GG              | 1946847476               |
| SNP_P4_72297_20089389 | NC_021164.1    | Ca_kabuli_chr05 | 20089389                | CC                              | TT              | 1946847478               |
| SNP_P4_72298_20105937 | NC_021164.1    | Ca_kabuli_chr05 | 20105937                | TT                              | GG              | 1946847480               |
| SNP_P4_72299_20106115 | NC_021164.1    | Ca_kabuli_chr05 | 20106115                | GG                              | AA              | 1946847482               |
| SNP_P4_72301_20126734 | NC_021164.1    | Ca_kabuli_chr05 | 20126734                | CC                              | TT              | 1946847484               |
| SNP_P4_72302_20299666 | NC_021164.1    | Ca_kabuli_chr05 | 20299666                | AA                              | CC              | 1946847486               |
| SNP_P4_72303_20341571 | NC_021164.1    | Ca_kabuli_chr05 | 20341571                | AA                              | TT              | 1946847488               |
| SNP_P4_72304_20366777 | NC_021164.1    | Ca_kabuli_chr05 | 20366777                | TT                              | GG              | 1946847490               |
| SNP_P4_72305_20374586 | NC_021164.1    | Ca_kabuli_chr05 | 20374586                | TT                              | CC              | 1946847492               |
| SNP_P4_72306_20374601 | NC_021164.1    | Ca_kabuli_chr05 | 20374601                | TT                              | CC              | 1946847494               |
| SNP_P4_72307_20374628 | NC_021164.1    | Ca_kabuli_chr05 | 20374628                | CC                              | GG              | 1946847496               |
| SNP_P4_72308_20374674 | NC_021164.1    | Ca_kabuli_chr05 | 20374674                | TT                              | CC              | 1946847498               |
| SNP_P4_72309_20374974 | NC_021164.1    | Ca_kabuli_chr05 | 20374974                | CC                              | TT              | 1946847499               |
| SNP_P4_72310_20392292 | NC_021164.1    | Ca_kabuli_chr05 | 20392292                | AA                              | GG              | 1946847501               |
| SNP_P4_72311_20392336 | NC_021164.1    | Ca_kabuli_chr05 | 20392336                | AA                              | GG              | 1946847504               |
| SNP_P4_72312_20392379 | NC_021164.1    | Ca_kabuli_chr05 | 20392379                | TT                              | CC              | 1946847506               |

| SNPs IDs              | Chromosome IDs | Chromosomes     | Physical positions (bp) | CDC Frontier (Reference genome) | (ILWC46 & LPNB) | NCBI SNPdb Accession IDs |
|-----------------------|----------------|-----------------|-------------------------|---------------------------------|-----------------|--------------------------|
| SNP_P4_72313_20392646 | NC_021164.1    | Ca_kabuli_chr05 | 20392646                | AA                              | GG              | 1946847508               |
| SNP_P4_72314_20392702 | NC_021164.1    | Ca_kabuli_chr05 | 20392702                | TT                              | CC              | 1946847510               |
| SNP_P4_72315_20392842 | NC_021164.1    | Ca_kabuli_chr05 | 20392842                | TT                              | AA              | 1946847512               |
| SNP_P4_72316_20394374 | NC_021164.1    | Ca_kabuli_chr05 | 20394374                | TT                              | CC              | 1946847514               |
| SNP_P4_72317_20394377 | NC_021164.1    | Ca_kabuli_chr05 | 20394377                | AA                              | GG              | 1946847516               |
| SNP_P4_72318_20394434 | NC_021164.1    | Ca_kabuli_chr05 | 20394434                | TT                              | AA              | 1946847517               |
| SNP_P4_72319_20394441 | NC_021164.1    | Ca_kabuli_chr05 | 20394441                | AA                              | GG              | 1946847519               |
| SNP_P4_72320_20394445 | NC_021164.1    | Ca_kabuli_chr05 | 20394445                | AA                              | GG              | 1946847520               |
| SNP_P4_72321_20394465 | NC_021164.1    | Ca_kabuli_chr05 | 20394465                | TT                              | CC              | 1946847521               |
| SNP_P4_72322_20394499 | NC_021164.1    | Ca_kabuli_chr05 | 20394499                | TT                              | CC              | 1946847522               |
| SNP_P4_72323_20394511 | NC_021164.1    | Ca_kabuli_chr05 | 20394511                | TT                              | CC              | 1946847523               |
| SNP_P4_72324_20394620 | NC_021164.1    | Ca_kabuli_chr05 | 20394620                | TT                              | GG              | 1946847524               |
| SNP_P4_72325_20394694 | NC_021164.1    | Ca_kabuli_chr05 | 20394694                | CC                              | TT              | 1946847525               |
| SNP_P4_72326_20394717 | NC_021164.1    | Ca_kabuli_chr05 | 20394717                | TT                              | CC              | 1946847527               |
| SNP_P4_72327_20394872 | NC_021164.1    | Ca_kabuli_chr05 | 20394872                | AA                              | GG              | 1946847529               |
| SNP_P4_72328_20395149 | NC_021164.1    | Ca_kabuli_chr05 | 20395149                | CC                              | TT              | 1946847531               |
| SNP_P4_72329_20399044 | NC_021164.1    | Ca_kabuli_chr05 | 20399044                | TT                              | AA              | 1946847533               |
| SNP_P4_72330_20399211 | NC_021164.1    | Ca_kabuli_chr05 | 20399211                | TT                              | CC              | 1946847535               |
| SNP_P4_72331_20399441 | NC_021164.1    | Ca_kabuli_chr05 | 20399441                | AA                              | TT              | 1946847537               |
| SNP_P4_72332_20402581 | NC_021164.1    | Ca_kabuli_chr05 | 20402581                | TT                              | CC              | 1946847539               |
| SNP_P4_72333_20402624 | NC_021164.1    | Ca_kabuli_chr05 | 20402624                | TT                              | GG              | 1946847541               |
| SNP_P4_72334_20402838 | NC_021164.1    | Ca_kabuli_chr05 | 20402838                | GG                              | CC              | 1946847542               |
| SNP_P4_72336_20406364 | NC_021164.1    | Ca_kabuli_chr05 | 20406364                | TT                              | GG              | 1946847544               |
| SNP_P4_72337_20406370 | NC_021164.1    | Ca_kabuli_chr05 | 20406370                | TT                              | GG              | 1946847546               |
| SNP_P4_72338_20407202 | NC_021164.1    | Ca_kabuli_chr05 | 20407202                | TT                              | GG              | 1946847548               |
| SNP_P4_72339_20419329 | NC_021164.1    | Ca_kabuli_chr05 | 20419329                | CC                              | TT              | 1946847550               |
| SNP_P4_72340_20420798 | NC_021164.1    | Ca_kabuli_chr05 | 20420798                | TT                              | CC              | 1946847552               |
| SNP_P4_72341_20433227 | NC_021164.1    | Ca_kabuli_chr05 | 20433227                | TT                              | AA              | 1946847554               |
| SNP_P4_72342_20433559 | NC_021164.1    | Ca_kabuli_chr05 | 20433559                | AA                              | GG              | 1946847556               |
| SNP_P4_72343_20433564 | NC_021164.1    | Ca_kabuli_chr05 | 20433564                | CC                              | TT              | 1946847558               |
| SNP_P4_72344_20433646 | NC_021164.1    | Ca_kabuli_chr05 | 20433646                | TT                              | CC              | 1946847560               |
| SNP_P4_72345_20433864 | NC_021164.1    | Ca_kabuli_chr05 | 20433864                | AA                              | CC              | 1946847562               |
| SNP_P4_72346_20433892 | NC_021164.1    | Ca_kabuli_chr05 | 20433892                | GG                              | CC              | 1946847564               |
| SNP_P4_72347_20433926 | NC_021164.1    | Ca_kabuli_chr05 | 20433926                | AA                              | GG              | 1946847566               |
| SNP_P4_72348_20433946 | NC_021164.1    | Ca_kabuli_chr05 | 20433946                | AA                              | TT              | 1946847567               |
| SNP_P4_72349_20434493 | NC_021164.1    | Ca_kabuli_chr05 | 20434493                | TT                              | AA              | 1946847569               |
| SNP_P4_72351_20438984 | NC_021164.1    | Ca_kabuli_chr05 | 20438984                | GG                              | TT              | 1946847571               |
| SNP_P4_72352_20439692 | NC_021164.1    | Ca_kabuli_chr05 | 20439692                | AA                              | GG              | 1946847573               |
| SNP_P4_72353_20453050 | NC_021164.1    | Ca_kabuli_chr05 | 20453050                | GG                              | AA              | 1946847575               |
| SNP_P4_72354_20453051 | NC_021164.1    | Ca_kabuli_chr05 | 20453051                | CC                              | AA              | 1946847577               |
| SNP_P4_72355_20453168 | NC_021164.1    | Ca_kabuli_chr05 | 20453168                | CC                              | TT              | 1946847579               |
| SNP_P4_72356_20454386 | NC_021164.1    | Ca_kabuli_chr05 | 20454386                | CC                              | TT              | 1946847581               |

| SNPs IDs              | Chromosome IDs | Chromosomes     | Physical positions (bp) | CDC Frontier (Reference genome) | (ILWC46 & LPNB) | NCBI SNPdb Accession IDs |
|-----------------------|----------------|-----------------|-------------------------|---------------------------------|-----------------|--------------------------|
| SNP_P4_72357_20454388 | NC_021164.1    | Ca_kabuli_chr05 | 20454388                | CC                              | TT              | 1946847583               |
| SNP_P4_72358_20454414 | NC_021164.1    | Ca_kabuli_chr05 | 20454414                | CC                              | TT              | 1946847585               |
| SNP_P4_72359_20454415 | NC_021164.1    | Ca_kabuli_chr05 | 20454415                | CC                              | AA              | 1946847586               |
| SNP_P4_72360_20454419 | NC_021164.1    | Ca_kabuli_chr05 | 20454419                | TT                              | GG              | 1946847588               |
| SNP_P4_72361_20454541 | NC_021164.1    | Ca_kabuli_chr05 | 20454541                | AA                              | GG              | 1946847590               |
| SNP_P4_72362_20520198 | NC_021164.1    | Ca_kabuli_chr05 | 20520198                | GG                              | CC              | 1946847592               |
| SNP_P4_72363_20520488 | NC_021164.1    | Ca_kabuli_chr05 | 20520488                | CC                              | TT              | 1946847594               |
| SNP_P4_72364_20520638 | NC_021164.1    | Ca_kabuli_chr05 | 20520638                | AA                              | GG              | 1946847596               |
| SNP_P4_72365_20520673 | NC_021164.1    | Ca_kabuli_chr05 | 20520673                | CC                              | TT              | 1946847598               |
| SNP_P4_72367_20533524 | NC_021164.1    | Ca_kabuli_chr05 | 20533524                | TT                              | AA              | 1946847600               |
| SNP_P4_72370_20547373 | NC_021164.1    | Ca_kabuli_chr05 | 20547373                | GG                              | AA              | 1946847602               |
| SNP_P4_72371_20547724 | NC_021164.1    | Ca_kabuli_chr05 | 20547724                | AA                              | GG              | 1946847604               |
| SNP_P4_72372_20547725 | NC_021164.1    | Ca_kabuli_chr05 | 20547725                | GG                              | AA              | 1946847606               |
| SNP_P4_72373_20547781 | NC_021164.1    | Ca_kabuli_chr05 | 20547781                | CC                              | AA              | 1946847607               |
| SNP_P4_72374_20548242 | NC_021164.1    | Ca_kabuli_chr05 | 20548242                | TT                              | GG              | 1946847609               |
| SNP_P4_72375_20554208 | NC_021164.1    | Ca_kabuli_chr05 | 20554208                | CC                              | TT              | 1946847611               |
| SNP_P4_72376_20562474 | NC_021164.1    | Ca_kabuli_chr05 | 20562474                | CC                              | TT              | 1946847613               |
| SNP_P4_72377_20564722 | NC_021164.1    | Ca_kabuli_chr05 | 20564722                | GG                              | AA              | 1946847615               |
| SNP_P4_72378_20569357 | NC_021164.1    | Ca_kabuli_chr05 | 20569357                | AA                              | GG              | 1946847617               |
| SNP_P4_72379_20577015 | NC_021164.1    | Ca_kabuli_chr05 | 20577015                | GG                              | AA              | 1946847619               |
| SNP_P4_72380_20577018 | NC_021164.1    | Ca_kabuli_chr05 | 20577018                | AA                              | GG              | 1946847621               |
| SNP_P4_72381_20577042 | NC_021164.1    | Ca_kabuli_chr05 | 20577042                | CC                              | TT              | 1946847622               |
| SNP_P4_72382_20577071 | NC_021164.1    | Ca_kabuli_chr05 | 20577071                | GG                              | AA              | 1946847624               |
| SNP_P4_72383_20583856 | NC_021164.1    | Ca_kabuli_chr05 | 20583856                | TT                              | CC              | 1946847626               |
| SNP_P4_72384_20626078 | NC_021164.1    | Ca_kabuli_chr05 | 20626078                | GG                              | AA              | 1946847628               |
| SNP_P4_72385_20626180 | NC_021164.1    | Ca_kabuli_chr05 | 20626180                | CC                              | TT              | 1946847630               |
| SNP_P4_72386_20626194 | NC_021164.1    | Ca_kabuli_chr05 | 20626194                | TT                              | CC              | 1946847632               |
| SNP_P4_72387_20631880 | NC_021164.1    | Ca_kabuli_chr05 | 20631880                | CC                              | TT              | 1946847634               |
| SNP_P4_72388_20654590 | NC_021164.1    | Ca_kabuli_chr05 | 20654590                | GG                              | AA              | 1946847636               |
| SNP_P4_72389_20655287 | NC_021164.1    | Ca_kabuli_chr05 | 20655287                | TT                              | CC              | 1946847637               |
| SNP_P4_72390_20670619 | NC_021164.1    | Ca_kabuli_chr05 | 20670619                | CC                              | TT              | 1946847639               |
| SNP_P4_72391_20683425 | NC_021164.1    | Ca_kabuli_chr05 | 20683425                | CC                              | TT              | 1946847641               |
| SNP_P4_72392_20683439 | NC_021164.1    | Ca_kabuli_chr05 | 20683439                | CC                              | GG              | 1946847643               |
| SNP_P4_72393_20699614 | NC_021164.1    | Ca_kabuli_chr05 | 20699614                | GG                              | CC              | 1946847645               |
| SNP_P4_72394_20699782 | NC_021164.1    | Ca_kabuli_chr05 | 20699782                | GG                              | AA              | 1946847647               |
| SNP_P4_72395_20700146 | NC_021164.1    | Ca_kabuli_chr05 | 20700146                | CC                              | TT              | 1946847649               |
| SNP_P4_72396_20700186 | NC_021164.1    | Ca_kabuli_chr05 | 20700186                | AA                              | GG              | 1946847651               |
| SNP_P4_72397_20700212 | NC_021164.1    | Ca_kabuli_chr05 | 20700212                | CC                              | AA              | 1946847653               |
| SNP_P4_72398_20700216 | NC_021164.1    | Ca_kabuli_chr05 | 20700216                | TT                              | AA              | 1946847655               |
| SNP_P4_72399_20701061 | NC_021164.1    | Ca_kabuli_chr05 | 20701061                | GG                              | TT              | 1946847657               |
| SNP_P4_72400_20701118 | NC_021164.1    | Ca_kabuli_chr05 | 20701118                | TT                              | GG              | 1946847658               |
| SNP_P4_72401_20701152 | NC_021164.1    | Ca_kabuli_chr05 | 20701152                | CC                              | TT              | 1946847660               |

| SNPs IDs              | Chromosome IDs | Chromosomes     | Physical positions (bp) | CDC Frontier (Reference genome) | (ILWC46 & LPNB) | NCBI SNPdb Accession IDs |
|-----------------------|----------------|-----------------|-------------------------|---------------------------------|-----------------|--------------------------|
| SNP_P4_72402_20701157 | NC_021164.1    | Ca_kabuli_chr05 | 20701157                | CC                              | TT              | 1946847662               |
| SNP_P4_72403_20706454 | NC_021164.1    | Ca_kabuli_chr05 | 20706454                | TT                              | CC              | 1946847664               |
| SNP_P4_72406_20748244 | NC_021164.1    | Ca_kabuli_chr05 | 20748244                | GG                              | AA              | 1946847666               |
| SNP_P4_72407_20763503 | NC_021164.1    | Ca_kabuli_chr05 | 20763503                | AA                              | CC              | 1946847668               |
| SNP_P4_72409_20791695 | NC_021164.1    | Ca_kabuli_chr05 | 20791695                | AA                              | GG              | 1946847670               |
| SNP_P4_72410_20822348 | NC_021164.1    | Ca_kabuli_chr05 | 20822348                | CC                              | TT              | 1946847671               |
| SNP_P4_72411_20845062 | NC_021164.1    | Ca_kabuli_chr05 | 20845062                | CC                              | TT              | 1946847673               |
| SNP_P4_72412_20856693 | NC_021164.1    | Ca_kabuli_chr05 | 20856693                | TT                              | CC              | 1946847675               |
| SNP_P4_72413_20856696 | NC_021164.1    | Ca_kabuli_chr05 | 20856696                | TT                              | AA              | 1946847677               |
| SNP_P4_72414_20856701 | NC_021164.1    | Ca_kabuli_chr05 | 20856701                | TT                              | CC              | 1946847679               |
| SNP_P4_72415_20856775 | NC_021164.1    | Ca_kabuli_chr05 | 20856775                | TT                              | CC              | 1946847681               |
| SNP_P4_72416_20856826 | NC_021164.1    | Ca_kabuli_chr05 | 20856826                | CC                              | TT              | 1946847683               |
| SNP_P4_72417_20856979 | NC_021164.1    | Ca_kabuli_chr05 | 20856979                | CC                              | TT              | 1946847685               |
| SNP_P4_72418_20857025 | NC_021164.1    | Ca_kabuli_chr05 | 20857025                | AA                              | TT              | 1946847687               |
| SNP_P4_72419_20857027 | NC_021164.1    | Ca_kabuli_chr05 | 20857027                | AA                              | GG              | 1946847689               |
| SNP_P4_72420_20857028 | NC_021164.1    | Ca_kabuli_chr05 | 20857028                | TT                              | GG              | 1946847690               |
| SNP_P4_72421_20857067 | NC_021164.1    | Ca_kabuli_chr05 | 20857067                | AA                              | GG              | 1946847692               |
| SNP_P4_72422_20905357 | NC_021164.1    | Ca_kabuli_chr05 | 20905357                | GG                              | AA              | 1946847694               |
| SNP_P4_72424_20961140 | NC_021164.1    | Ca_kabuli_chr05 | 20961140                | AA                              | TT              | 1946847696               |
| SNP_P4_72425_20971397 | NC_021164.1    | Ca_kabuli_chr05 | 20971397                | TT                              | AA              | 1946847698               |
| SNP_P4_72426_20997792 | NC_021164.1    | Ca_kabuli_chr05 | 20997792                | CC                              | AA              | 1946847700               |
| SNP_P4_72428_21050663 | NC_021164.1    | Ca_kabuli_chr05 | 21050663                | GG                              | AA              | 1946847702               |
| SNP_P4_72429_21066307 | NC_021164.1    | Ca_kabuli_chr05 | 21066307                | AA                              | GG              | 1946847704               |
| SNP_P4_72430_21066317 | NC_021164.1    | Ca_kabuli_chr05 | 21066317                | AA                              | GG              | 1946847706               |
| SNP_P4_72431_21066334 | NC_021164.1    | Ca_kabuli_chr05 | 21066334                | GG                              | AA              | 1946847707               |
| SNP_P4_72432_21066341 | NC_021164.1    | Ca_kabuli_chr05 | 21066341                | GG                              | AA              | 1946847709               |
| SNP_P4_72433_21069882 | NC_021164.1    | Ca_kabuli_chr05 | 21069882                | TT                              | AA              | 1946847711               |
| SNP_P4_72435_21086032 | NC_021164.1    | Ca_kabuli_chr05 | 21086032                | TT                              | CC              | 1946847713               |
| SNP_P4_72436_21086040 | NC_021164.1    | Ca_kabuli_chr05 | 21086040                | GG                              | CC              | 1946847715               |
| SNP_P4_72437_21088836 | NC_021164.1    | Ca_kabuli_chr05 | 21088836                | GG                              | TT              | 1946847717               |
| SNP_P4_72438_21116527 | NC_021164.1    | Ca_kabuli_chr05 | 21116527                | GG                              | AA              | 1946847719               |
| SNP_P4_72439_21116806 | NC_021164.1    | Ca_kabuli_chr05 | 21116806                | TT                              | AA              | 1946847721               |
| SNP_P4_72440_21117105 | NC_021164.1    | Ca_kabuli_chr05 | 21117105                | AA                              | GG              | 1946847722               |
| SNP_P4_72441_21127290 | NC_021164.1    | Ca_kabuli_chr05 | 21127290                | TT                              | CC              | 1946847724               |
| SNP_P4_72442_21132201 | NC_021164.1    | Ca_kabuli_chr05 | 21132201                | CC                              | TT              | 1946847726               |
| SNP_P4_72443_21143197 | NC_021164.1    | Ca_kabuli_chr05 | 21143197                | GG                              | AA              | 1946847728               |
| SNP_P4_72444_21175545 | NC_021164.1    | Ca_kabuli_chr05 | 21175545                | GG                              | AA              | 1946847730               |
| SNP_P4_72446_21185177 | NC_021164.1    | Ca_kabuli_chr05 | 21185177                | AA                              | GG              | 1946847732               |
| SNP_P4_72448_21263308 | NC_021164.1    | Ca_kabuli_chr05 | 21263308                | TT                              | AA              | 1946847734               |
| SNP_P4_72449_21267551 | NC_021164.1    | Ca_kabuli_chr05 | 21267551                | TT                              | AA              | 1946847736               |
| SNP_P4_72450_21275016 | NC_021164.1    | Ca_kabuli_chr05 | 21275016                | TT                              | AA              | 1946847737               |
| SNP_P4_72451_21275036 | NC_021164.1    | Ca_kabuli_chr05 | 21275036                | CC                              | TT              | 1946847739               |

| SNPs IDs              | Chromosome IDs | Chromosomes     | Physical positions (bp) | CDC Frontier (Reference genome) | (ILWC46 & LPNB) | NCBI SNPdb Accession IDs |
|-----------------------|----------------|-----------------|-------------------------|---------------------------------|-----------------|--------------------------|
| SNP_P4_72452_21275056 | NC_021164.1    | Ca_kabuli_chr05 | 21275056                | TT                              | AA              | 1946847741               |
| SNP_P4_72456_21415415 | NC_021164.1    | Ca_kabuli_chr05 | 21415415                | TT                              | CC              | 1946847743               |
| SNP_P4_72457_21416688 | NC_021164.1    | Ca_kabuli_chr05 | 21416688                | GG                              | AA              | 1946847745               |
| SNP_P4_72458_21424465 | NC_021164.1    | Ca_kabuli_chr05 | 21424465                | AA                              | GG              | 1946847747               |
| SNP_P4_72459_21447319 | NC_021164.1    | Ca_kabuli_chr05 | 21447319                | AA                              | GG              | 1946847749               |
| SNP_P4_72460_21448692 | NC_021164.1    | Ca_kabuli_chr05 | 21448692                | TT                              | CC              | 1946847751               |
| SNP_P4_72463_21484934 | NC_021164.1    | Ca_kabuli_chr05 | 21484934                | TT                              | CC              | 1946847752               |
| SNP_P4_72464_21485195 | NC_021164.1    | Ca_kabuli_chr05 | 21485195                | TT                              | CC              | 1946847754               |
| SNP_P4_72465_21485228 | NC_021164.1    | Ca_kabuli_chr05 | 21485228                | AA                              | GG              | 1946847756               |
| SNP_P4_72466_21485245 | NC_021164.1    | Ca_kabuli_chr05 | 21485245                | AA                              | CC              | 1946847758               |
| SNP_P4_72467_21485250 | NC_021164.1    | Ca_kabuli_chr05 | 21485250                | AA                              | GG              | 1946847760               |
| SNP_P4_72468_21485255 | NC_021164.1    | Ca_kabuli_chr05 | 21485255                | AA                              | GG              | 1946847762               |
| SNP_P4_72469_21498121 | NC_021164.1    | Ca_kabuli_chr05 | 21498121                | GG                              | TT              | 1946847764               |
| SNP_P4_72470_21498128 | NC_021164.1    | Ca_kabuli_chr05 | 21498128                | TT                              | AA              | 1946847765               |
| SNP_P4_72471_21498147 | NC_021164.1    | Ca_kabuli_chr05 | 21498147                | GG                              | TT              | 1946847767               |
| SNP_P4_72472_21498312 | NC_021164.1    | Ca_kabuli_chr05 | 21498312                | TT                              | GG              | 1946847769               |
| SNP_P4_72474_21503156 | NC_021164.1    | Ca_kabuli_chr05 | 21503156                | AA                              | TT              | 1946847771               |
| SNP_P4_72476_21527085 | NC_021164.1    | Ca_kabuli_chr05 | 21527085                | AA                              | GG              | 1946847773               |
| SNP_P4_72477_21527146 | NC_021164.1    | Ca_kabuli_chr05 | 21527146                | AA                              | GG              | 1946847775               |
| SNP_P4_72478_21536673 | NC_021164.1    | Ca_kabuli_chr05 | 21536673                | TT                              | CC              | 1946847777               |
| SNP_P4_72479_21556587 | NC_021164.1    | Ca_kabuli_chr05 | 21556587                | TT                              | AA              | 1946847779               |
| SNP_P4_72480_21597910 | NC_021164.1    | Ca_kabuli_chr05 | 21597910                | CC                              | TT              | 1946847781               |
| SNP_P4_72482_21623168 | NC_021164.1    | Ca_kabuli_chr05 | 21623168                | CC                              | TT              | 1946847783               |
| SNP_P4_72483_21623397 | NC_021164.1    | Ca_kabuli_chr05 | 21623397                | AA                              | TT              | 1946847785               |
| SNP_P4_72485_21623579 | NC_021164.1    | Ca_kabuli_chr05 | 21623579                | CC                              | TT              | 1946847786               |
| SNP_P4_72486_21623842 | NC_021164.1    | Ca_kabuli_chr05 | 21623842                | AA                              | TT              | 1946847788               |
| SNP_P4_72487_21623847 | NC_021164.1    | Ca_kabuli_chr05 | 21623847                | TT                              | GG              | 1946847790               |
| SNP_P4_72488_21623986 | NC_021164.1    | Ca_kabuli_chr05 | 21623986                | AA                              | GG              | 1946847792               |
| SNP_P4_72489_21624086 | NC_021164.1    | Ca_kabuli_chr05 | 21624086                | GG                              | CC              | 1946847794               |
| SNP_P4_72490_21624281 | NC_021164.1    | Ca_kabuli_chr05 | 21624281                | AA                              | CC              | 1946847796               |
| SNP_P4_72491_21643837 | NC_021164.1    | Ca_kabuli_chr05 | 21643837                | TT                              | CC              | 1946847798               |
| SNP_P4_72492_21644662 | NC_021164.1    | Ca_kabuli_chr05 | 21644662                | AA                              | GG              | 1946847800               |
| SNP_P4_72493_21645511 | NC_021164.1    | Ca_kabuli_chr05 | 21645511                | TT                              | GG              | 1946847802               |
| SNP_P4_72494_21648650 | NC_021164.1    | Ca_kabuli_chr05 | 21648650                | CC                              | TT              | 1946847804               |
| SNP_P4_72495_21648701 | NC_021164.1    | Ca_kabuli_chr05 | 21648701                | TT                              | GG              | 1946847806               |
| SNP_P4_72496_21658675 | NC_021164.1    | Ca_kabuli_chr05 | 21658675                | TT                              | AA              | 1946847808               |
| SNP_P4_72497_21658682 | NC_021164.1    | Ca_kabuli_chr05 | 21658682                | GG                              | TT              | 1946847810               |
| SNP_P4_72498_21658704 | NC_021164.1    | Ca_kabuli_chr05 | 21658704                | GG                              | TT              | 1946847812               |
| SNP_P4_72499_21658842 | NC_021164.1    | Ca_kabuli_chr05 | 21658842                | TT                              | AA              | 1946847814               |
| SNP_P4_72500_21658966 | NC_021164.1    | Ca_kabuli_chr05 | 21658966                | GG                              | AA              | 1946847816               |
| SNP_P4_72501_21663556 | NC_021164.1    | Ca_kabuli_chr05 | 21663556                | CC                              | TT              | 1946847818               |
| SNP_P4_72502_21665858 | NC_021164.1    | Ca_kabuli_chr05 | 21665858                | GG                              | CC              | 1946847820               |



| SNPs IDs              | Chromosome IDs | Chromosomes     | Physical positions (bp) | CDC Frontier (Reference genome) | (ILWC46 & LPNB) | NCBI SNPdb Accession IDs |
|-----------------------|----------------|-----------------|-------------------------|---------------------------------|-----------------|--------------------------|
| SNP_P4_72503_21665898 | NC_021164.1    | Ca_kabuli_chr05 | 21665898                | TT                              | CC              | 1946847822               |
| SNP_P4_72504_21665906 | NC_021164.1    | Ca_kabuli_chr05 | 21665906                | GG                              | AA              | 1946847824               |
| SNP_P4_72505_21665931 | NC_021164.1    | Ca_kabuli_chr05 | 21665931                | GG                              | TT              | 1946847826               |
| SNP_P4_72506_21666258 | NC_021164.1    | Ca_kabuli_chr05 | 21666258                | TT                              | CC              | 1946847828               |
| SNP_P4_72507_21670974 | NC_021164.1    | Ca_kabuli_chr05 | 21670974                | CC                              | TT              | 1946847830               |
| SNP_P4_72508_21670976 | NC_021164.1    | Ca_kabuli_chr05 | 21670976                | AA                              | GG              | 1946847832               |
| SNP_P4_72509_21671052 | NC_021164.1    | Ca_kabuli_chr05 | 21671052                | CC                              | AA              | 1946847834               |
| SNP_P4_72510_21675813 | NC_021164.1    | Ca_kabuli_chr05 | 21675813                | AA                              | GG              | 1946847836               |
| SNP_P4_72511_21681648 | NC_021164.1    | Ca_kabuli_chr05 | 21681648                | GG                              | TT              | 1946847838               |
| SNP_P4_72512_21681649 | NC_021164.1    | Ca_kabuli_chr05 | 21681649                | TT                              | GG              | 1946847840               |
| SNP_P4_72513_21681655 | NC_021164.1    | Ca_kabuli_chr05 | 21681655                | CC                              | TT              | 1946847842               |
| SNP_P4_72514_21683445 | NC_021164.1    | Ca_kabuli_chr05 | 21683445                | CC                              | TT              | 1946847844               |
| SNP_P4_72515_21684225 | NC_021164.1    | Ca_kabuli_chr05 | 21684225                | AA                              | TT              | 1946847846               |
| SNP_P4_72516_21684232 | NC_021164.1    | Ca_kabuli_chr05 | 21684232                | GG                              | AA              | 1946847848               |
| SNP_P4_72517_21684233 | NC_021164.1    | Ca_kabuli_chr05 | 21684233                | TT                              | CC              | 1946847850               |
| SNP_P4_72518_21684235 | NC_021164.1    | Ca_kabuli_chr05 | 21684235                | TT                              | CC              | 1946847852               |
| SNP_P4_72519_21684389 | NC_021164.1    | Ca_kabuli_chr05 | 21684389                | AA                              | GG              | 1946847853               |
| SNP_P4_72520_21684507 | NC_021164.1    | Ca_kabuli_chr05 | 21684507                | CC                              | GG              | 1946847855               |
| SNP_P4_72521_21684529 | NC_021164.1    | Ca_kabuli_chr05 | 21684529                | AA                              | GG              | 1946847857               |
| SNP_P4_72522_21684537 | NC_021164.1    | Ca_kabuli_chr05 | 21684537                | TT                              | CC              | 1946847859               |
| SNP_P4_72523_21684553 | NC_021164.1    | Ca_kabuli_chr05 | 21684553                | CC                              | AA              | 1946847861               |
| SNP_P4_72524_21684825 | NC_021164.1    | Ca_kabuli_chr05 | 21684825                | GG                              | AA              | 1946847863               |
| SNP_P4_72525_21684906 | NC_021164.1    | Ca_kabuli_chr05 | 21684906                | GG                              | CC              | 1946847865               |
| SNP_P4_72526_21684929 | NC_021164.1    | Ca_kabuli_chr05 | 21684929                | CC                              | TT              | 1946847867               |
| SNP_P4_72527_21692138 | NC_021164.1    | Ca_kabuli_chr05 | 21692138                | AA                              | TT              | 1946847869               |
| SNP_P4_72528_21692283 | NC_021164.1    | Ca_kabuli_chr05 | 21692283                | GG                              | AA              | 1946847871               |
| SNP_P4_72529_21692570 | NC_021164.1    | Ca_kabuli_chr05 | 21692570                | GG                              | AA              | 1946847873               |
| SNP_P4_72530_21692581 | NC_021164.1    | Ca_kabuli_chr05 | 21692581                | TT                              | CC              | 1946847875               |
| SNP_P4_72531_21692711 | NC_021164.1    | Ca_kabuli_chr05 | 21692711                | AA                              | GG              | 1946847877               |
| SNP_P4_72532_21693039 | NC_021164.1    | Ca_kabuli_chr05 | 21693039                | CC                              | TT              | 1946847879               |
| SNP_P4_72533_21693382 | NC_021164.1    | Ca_kabuli_chr05 | 21693382                | AA                              | GG              | 1946847881               |
| SNP_P4_72534_21693399 | NC_021164.1    | Ca_kabuli_chr05 | 21693399                | AA                              | TT              | 1946847883               |
| SNP_P4_72535_21693416 | NC_021164.1    | Ca_kabuli_chr05 | 21693416                | CC                              | TT              | 1946847885               |
| SNP_P4_72536_21693530 | NC_021164.1    | Ca_kabuli_chr05 | 21693530                | TT                              | GG              | 1946847887               |
| SNP_P4_72537_21693671 | NC_021164.1    | Ca_kabuli_chr05 | 21693671                | GG                              | AA              | 1946847889               |
| SNP_P4_72538_21693672 | NC_021164.1    | Ca_kabuli_chr05 | 21693672                | TT                              | GG              | 1946847891               |
| SNP_P4_72539_21698909 | NC_021164.1    | Ca_kabuli_chr05 | 21698909                | GG                              | TT              | 1946847893               |
| SNP_P4_72540_21698910 | NC_021164.1    | Ca_kabuli_chr05 | 21698910                | CC                              | TT              | 1946847895               |
| SNP_P4_72541_21699491 | NC_021164.1    | Ca_kabuli_chr05 | 21699491                | CC                              | AA              | 1946847897               |
| SNP_P4_72542_21699522 | NC_021164.1    | Ca_kabuli_chr05 | 21699522                | GG                              | AA              | 1946847899               |
| SNP_P4_72543_21699646 | NC_021164.1    | Ca_kabuli_chr05 | 21699646                | TT                              | AA              | 1946847901               |
| SNP_P4_72544_21714085 | NC_021164.1    | Ca_kabuli_chr05 | 21714085                | CC                              | TT              | 1946847903               |

| SNPs IDs              | Chromosome IDs | Chromosomes     | Physical positions (bp) | CDC Frontier (Reference genome) | (ILWC46 & LPNB) | NCBI SNPdb Accession IDs |
|-----------------------|----------------|-----------------|-------------------------|---------------------------------|-----------------|--------------------------|
| SNP_P4_72545_21714096 | NC_021164.1    | Ca_kabuli_chr05 | 21714096                | AA                              | GG              | 1946847905               |
| SNP_P4_72546_21714097 | NC_021164.1    | Ca_kabuli_chr05 | 21714097                | AA                              | TT              | 1946847907               |
| SNP_P4_72547_21719090 | NC_021164.1    | Ca_kabuli_chr05 | 21719090                | TT                              | GG              | 1946847909               |
| SNP_P4_72548_21719111 | NC_021164.1    | Ca_kabuli_chr05 | 21719111                | GG                              | CC              | 1946847911               |
| SNP_P4_72549_21720786 | NC_021164.1    | Ca_kabuli_chr05 | 21720786                | CC                              | TT              | 1946847913               |
| SNP_P4_72550_21720826 | NC_021164.1    | Ca_kabuli_chr05 | 21720826                | AA                              | CC              | 1946847915               |
| SNP_P4_72551_21720843 | NC_021164.1    | Ca_kabuli_chr05 | 21720843                | CC                              | GG              | 1946847916               |
| SNP_P4_72552_21721001 | NC_021164.1    | Ca_kabuli_chr05 | 21721001                | CC                              | TT              | 1946847918               |
| SNP_P4_72553_21723302 | NC_021164.1    | Ca_kabuli_chr05 | 21723302                | TT                              | CC              | 1946847920               |
| SNP_P4_72554_21723696 | NC_021164.1    | Ca_kabuli_chr05 | 21723696                | TT                              | GG              | 1946847922               |
| SNP_P4_72555_21723945 | NC_021164.1    | Ca_kabuli_chr05 | 21723945                | GG                              | AA              | 1946847924               |
| SNP_P4_72556_21726057 | NC_021164.1    | Ca_kabuli_chr05 | 21726057                | GG                              | AA              | 1946847926               |
| SNP_P4_72557_21727759 | NC_021164.1    | Ca_kabuli_chr05 | 21727759                | TT                              | AA              | 1946847928               |
| SNP_P4_72558_21740618 | NC_021164.1    | Ca_kabuli_chr05 | 21740618                | CC                              | TT              | 1946847930               |
| SNP_P4_72559_21740678 | NC_021164.1    | Ca_kabuli_chr05 | 21740678                | AA                              | GG              | 1946847932               |
| SNP_P4_72560_21740920 | NC_021164.1    | Ca_kabuli_chr05 | 21740920                | TT                              | CC              | 1946847934               |
| SNP_P4_72561_21740939 | NC_021164.1    | Ca_kabuli_chr05 | 21740939                | TT                              | CC              | 1946847936               |
| SNP_P4_72562_21740948 | NC_021164.1    | Ca_kabuli_chr05 | 21740948                | CC                              | TT              | 1946847938               |
| SNP_P4_72563_21740970 | NC_021164.1    | Ca_kabuli_chr05 | 21740970                | TT                              | CC              | 1946847940               |
| SNP_P4_72564_21740972 | NC_021164.1    | Ca_kabuli_chr05 | 21740972                | TT                              | AA              | 1946847942               |
| SNP_P4_72565_21740990 | NC_021164.1    | Ca_kabuli_chr05 | 21740990                | CC                              | TT              | 1946847944               |
| SNP_P4_72566_21741001 | NC_021164.1    | Ca_kabuli_chr05 | 21741001                | AA                              | CC              | 1946847946               |
| SNP_P4_72567_21741063 | NC_021164.1    | Ca_kabuli_chr05 | 21741063                | CC                              | TT              | 1946847948               |
| SNP_P4_72568_21745782 | NC_021164.1    | Ca_kabuli_chr05 | 21745782                | AA                              | TT              | 1946847949               |
| SNP_P4_72569_21746170 | NC_021164.1    | Ca_kabuli_chr05 | 21746170                | TT                              | CC              | 1946847951               |
| SNP_P4_72570_21746172 | NC_021164.1    | Ca_kabuli_chr05 | 21746172                | TT                              | CC              | 1946847953               |
| SNP_P4_72571_21746181 | NC_021164.1    | Ca_kabuli_chr05 | 21746181                | TT                              | CC              | 1946847955               |
| SNP_P4_72572_21746241 | NC_021164.1    | Ca_kabuli_chr05 | 21746241                | TT                              | GG              | 1946847957               |
| SNP_P4_72574_21755230 | NC_021164.1    | Ca_kabuli_chr05 | 21755230                | AA                              | GG              | 1946847959               |
| SNP_P4_72576_21785992 | NC_021164.1    | Ca_kabuli_chr05 | 21785992                | CC                              | AA              | 1946847961               |
| SNP_P4_72577_21786261 | NC_021164.1    | Ca_kabuli_chr05 | 21786261                | CC                              | TT              | 1946847963               |
| SNP_P4_72578_21822450 | NC_021164.1    | Ca_kabuli_chr05 | 21822450                | GG                              | TT              | 1946847966               |
| SNP_P4_72579_21822475 | NC_021164.1    | Ca_kabuli_chr05 | 21822475                | GG                              | AA              | 1946847968               |
| SNP_P4_72580_21822477 | NC_021164.1    | Ca_kabuli_chr05 | 21822477                | TT                              | CC              | 1946847970               |
| SNP_P4_72581_21822478 | NC_021164.1    | Ca_kabuli_chr05 | 21822478                | GG                              | AA              | 1946847972               |
| SNP_P4_72582_21822479 | NC_021164.1    | Ca_kabuli_chr05 | 21822479                | AA                              | GG              | 1946847974               |
| SNP_P4_72583_21822501 | NC_021164.1    | Ca_kabuli_chr05 | 21822501                | AA                              | GG              | 1946847976               |
| SNP_P4_72584_21822511 | NC_021164.1    | Ca_kabuli_chr05 | 21822511                | AA                              | CC              | 1946847978               |
| SNP_P4_72585_21822514 | NC_021164.1    | Ca_kabuli_chr05 | 21822514                | TT                              | GG              | 1946847980               |
| SNP_P4_72586_21822536 | NC_021164.1    | Ca_kabuli_chr05 | 21822536                | TT                              | GG              | 1946847982               |
| SNP_P4_72587_21822920 | NC_021164.1    | Ca_kabuli_chr05 | 21822920                | TT                              | CC              | 1946847984               |
| SNP_P4_72588_21844419 | NC_021164.1    | Ca_kabuli_chr05 | 21844419                | CC                              | TT              | 1946847986               |

| SNPs IDs              | Chromosome IDs | Chromosomes     | Physical positions (bp) | CDC Frontier (Reference genome) | (ILWC46 & LPNB) | NCBI SNPdb Accession IDs |
|-----------------------|----------------|-----------------|-------------------------|---------------------------------|-----------------|--------------------------|
| SNP_P4_72589_21845212 | NC_021164.1    | Ca_kabuli_chr05 | 21845212                | GG                              | AA              | 1946847988               |
| SNP_P4_72590_21845225 | NC_021164.1    | Ca_kabuli_chr05 | 21845225                | TT                              | CC              | 1946847990               |
| SNP_P4_72591_21846422 | NC_021164.1    | Ca_kabuli_chr05 | 21846422                | GG                              | AA              | 1946847992               |
| SNP_P4_72592_21846444 | NC_021164.1    | Ca_kabuli_chr05 | 21846444                | TT                              | AA              | 1946847994               |
| SNP_P4_72593_21846449 | NC_021164.1    | Ca_kabuli_chr05 | 21846449                | AA                              | GG              | 1946847996               |
| SNP_P4_72594_21846562 | NC_021164.1    | Ca_kabuli_chr05 | 21846562                | GG                              | TT              | 1946847998               |
| SNP_P4_72595_21846567 | NC_021164.1    | Ca_kabuli_chr05 | 21846567                | AA                              | TT              | 1946848000               |
| SNP_P4_72596_21846608 | NC_021164.1    | Ca_kabuli_chr05 | 21846608                | GG                              | AA              | 1946848002               |
| SNP_P4_72597_21846662 | NC_021164.1    | Ca_kabuli_chr05 | 21846662                | TT                              | GG              | 1946848004               |
| SNP_P4_72598_21846677 | NC_021164.1    | Ca_kabuli_chr05 | 21846677                | TT                              | CC              | 1946848006               |
| SNP_P4_72599_21846685 | NC_021164.1    | Ca_kabuli_chr05 | 21846685                | AA                              | GG              | 1946848008               |
| SNP_P4_72600_21846725 | NC_021164.1    | Ca_kabuli_chr05 | 21846725                | AA                              | CC              | 1946848010               |
| SNP_P4_72601_21846807 | NC_021164.1    | Ca_kabuli_chr05 | 21846807                | AA                              | TT              | 1946848012               |
| SNP_P4_72602_21846827 | NC_021164.1    | Ca_kabuli_chr05 | 21846827                | AA                              | CC              | 1946848014               |
| SNP_P4_72603_21846832 | NC_021164.1    | Ca_kabuli_chr05 | 21846832                | AA                              | GG              | 1946848016               |
| SNP_P4_72604_21846876 | NC_021164.1    | Ca_kabuli_chr05 | 21846876                | AA                              | GG              | 1946848018               |
| SNP_P4_72605_21851286 | NC_021164.1    | Ca_kabuli_chr05 | 21851286                | GG                              | TT              | 1946848020               |
| SNP_P4_72606_21851290 | NC_021164.1    | Ca_kabuli_chr05 | 21851290                | GG                              | AA              | 1946848022               |
| SNP_P4_72607_21851369 | NC_021164.1    | Ca_kabuli_chr05 | 21851369                | TT                              | GG              | 1946848024               |
| SNP_P4_72608_21853701 | NC_021164.1    | Ca_kabuli_chr05 | 21853701                | TT                              | CC              | 1946848026               |
| SNP_P4_72609_21853717 | NC_021164.1    | Ca_kabuli_chr05 | 21853717                | TT                              | GG              | 1946848028               |
| SNP_P4_72611_21865103 | NC_021164.1    | Ca_kabuli_chr05 | 21865103                | TT                              | CC              | 1946848030               |
| SNP_P4_72612_21865444 | NC_021164.1    | Ca_kabuli_chr05 | 21865444                | TT                              | CC              | 1946848032               |
| SNP_P4_72613_21865477 | NC_021164.1    | Ca_kabuli_chr05 | 21865477                | GG                              | TT              | 1946848034               |
| SNP_P4_72614_21865490 | NC_021164.1    | Ca_kabuli_chr05 | 21865490                | TT                              | CC              | 1946848036               |
| SNP_P4_72615_21865540 | NC_021164.1    | Ca_kabuli_chr05 | 21865540                | AA                              | GG              | 1946848038               |
| SNP_P4_72616_21865543 | NC_021164.1    | Ca_kabuli_chr05 | 21865543                | AA                              | GG              | 1946848040               |
| SNP_P4_72618_21867725 | NC_021164.1    | Ca_kabuli_chr05 | 21867725                | TT                              | CC              | 1946848042               |
| SNP_P4_72619_21867734 | NC_021164.1    | Ca_kabuli_chr05 | 21867734                | AA                              | GG              | 1946848044               |
| SNP_P4_72620_21867781 | NC_021164.1    | Ca_kabuli_chr05 | 21867781                | TT                              | AA              | 1946848046               |
| SNP_P4_72621_21867902 | NC_021164.1    | Ca_kabuli_chr05 | 21867902                | TT                              | GG              | 1946848048               |
| SNP_P4_72622_21867963 | NC_021164.1    | Ca_kabuli_chr05 | 21867963                | AA                              | GG              | 1946848050               |
| SNP_P4_72623_21867965 | NC_021164.1    | Ca_kabuli_chr05 | 21867965                | AA                              | GG              | 1946848052               |
| SNP_P4_72624_21867967 | NC_021164.1    | Ca_kabuli_chr05 | 21867967                | TT                              | CC              | 1946848054               |
| SNP_P4_72625_21891779 | NC_021164.1    | Ca_kabuli_chr05 | 21891779                | TT                              | CC              | 1946848056               |
| SNP_P4_72626_21891815 | NC_021164.1    | Ca_kabuli_chr05 | 21891815                | AA                              | GG              | 1946848058               |
| SNP_P4_72627_21892004 | NC_021164.1    | Ca_kabuli_chr05 | 21892004                | AA                              | GG              | 1946848060               |
| SNP_P4_72628_21894619 | NC_021164.1    | Ca_kabuli_chr05 | 21894619                | TT                              | CC              | 1946848062               |
| SNP_P4_72629_21894925 | NC_021164.1    | Ca_kabuli_chr05 | 21894925                | TT                              | CC              | 1946848064               |
| SNP_P4_72630_21894939 | NC_021164.1    | Ca_kabuli_chr05 | 21894939                | AA                              | GG              | 1946848066               |
| SNP_P4_72631_21898491 | NC_021164.1    | Ca_kabuli_chr05 | 21898491                | GG                              | CC              | 1946848068               |
| SNP_P4_72632_21898552 | NC_021164.1    | Ca_kabuli_chr05 | 21898552                | GG                              | AA              | 1946848070               |

| SNPs IDs              | Chromosome IDs | Chromosomes     | Physical positions (bp) | CDC Frontier (Reference genome) | (ILWC46 & LPNB) | NCBI SNPdb Accession IDs |
|-----------------------|----------------|-----------------|-------------------------|---------------------------------|-----------------|--------------------------|
| SNP_P4_72633_21899296 | NC_021164.1    | Ca_kabuli_chr05 | 21899296                | AA                              | GG              | 1946848072               |
| SNP_P4_72635_21900721 | NC_021164.1    | Ca_kabuli_chr05 | 21900721                | AA                              | GG              | 1946848074               |
| SNP_P4_72636_21900803 | NC_021164.1    | Ca_kabuli_chr05 | 21900803                | GG                              | AA              | 1946848076               |
| SNP_P4_72637_21900809 | NC_021164.1    | Ca_kabuli_chr05 | 21900809                | AA                              | GG              | 1946848078               |
| SNP_P4_72638_21901069 | NC_021164.1    | Ca_kabuli_chr05 | 21901069                | TT                              | CC              | 1946848080               |
| SNP_P4_72639_21901094 | NC_021164.1    | Ca_kabuli_chr05 | 21901094                | GG                              | AA              | 1946848082               |
| SNP_P4_72640_21901113 | NC_021164.1    | Ca_kabuli_chr05 | 21901113                | TT                              | CC              | 1946848084               |
| SNP_P4_72641_21901124 | NC_021164.1    | Ca_kabuli_chr05 | 21901124                | GG                              | TT              | 1946848086               |
| SNP_P4_72642_21901149 | NC_021164.1    | Ca_kabuli_chr05 | 21901149                | AA                              | CC              | 1946848088               |
| SNP_P4_72643_21901206 | NC_021164.1    | Ca_kabuli_chr05 | 21901206                | AA                              | CC              | 1946848091               |
| SNP_P4_72644_21901207 | NC_021164.1    | Ca_kabuli_chr05 | 21901207                | TT                              | GG              | 1946848093               |
| SNP_P4_72645_21901208 | NC_021164.1    | Ca_kabuli_chr05 | 21901208                | GG                              | AA              | 1946848095               |
| SNP_P4_72646_21901224 | NC_021164.1    | Ca_kabuli_chr05 | 21901224                | GG                              | TT              | 1946848097               |
| SNP_P4_72647_21908414 | NC_021164.1    | Ca_kabuli_chr05 | 21908414                | TT                              | CC              | 1946848099               |
| SNP_P4_72648_21909051 | NC_021164.1    | Ca_kabuli_chr05 | 21909051                | CC                              | TT              | 1946848101               |
| SNP_P4_72649_21909350 | NC_021164.1    | Ca_kabuli_chr05 | 21909350                | TT                              | CC              | 1946848103               |
| SNP_P4_72650_21918442 | NC_021164.1    | Ca_kabuli_chr05 | 21918442                | TT                              | CC              | 1946848105               |
| SNP_P4_72651_21918445 | NC_021164.1    | Ca_kabuli_chr05 | 21918445                | TT                              | CC              | 1946848107               |
| SNP_P4_72652_21918804 | NC_021164.1    | Ca_kabuli_chr05 | 21918804                | AA                              | CC              | 1946848109               |
| SNP_P4_72653_21918813 | NC_021164.1    | Ca_kabuli_chr05 | 21918813                | AA                              | GG              | 1946848111               |
| SNP_P4_72654_21918846 | NC_021164.1    | Ca_kabuli_chr05 | 21918846                | TT                              | CC              | 1946848113               |
| SNP_P4_72655_21918863 | NC_021164.1    | Ca_kabuli_chr05 | 21918863                | CC                              | GG              | 1946848115               |
| SNP_P4_72656_21918870 | NC_021164.1    | Ca_kabuli_chr05 | 21918870                | CC                              | TT              | 1946848117               |
| SNP_P4_72657_21918876 | NC_021164.1    | Ca_kabuli_chr05 | 21918876                | AA                              | GG              | 1946848119               |
| SNP_P4_72658_21921123 | NC_021164.1    | Ca_kabuli_chr05 | 21921123                | TT                              | AA              | 1946848121               |
| SNP_P4_72659_21921362 | NC_021164.1    | Ca_kabuli_chr05 | 21921362                | TT                              | GG              | 1946848123               |
| SNP_P4_72660_21921387 | NC_021164.1    | Ca_kabuli_chr05 | 21921387                | GG                              | AA              | 1946848125               |
| SNP_P4_72661_21921388 | NC_021164.1    | Ca_kabuli_chr05 | 21921388                | TT                              | GG              | 1946848127               |
| SNP_P4_72662_21921402 | NC_021164.1    | Ca_kabuli_chr05 | 21921402                | CC                              | AA              | 1946848129               |
| SNP_P4_72663_21921472 | NC_021164.1    | Ca_kabuli_chr05 | 21921472                | TT                              | AA              | 1946848131               |
| SNP_P4_72664_21921528 | NC_021164.1    | Ca_kabuli_chr05 | 21921528                | AA                              | TT              | 1946848133               |
| SNP_P4_72665_21921543 | NC_021164.1    | Ca_kabuli_chr05 | 21921543                | TT                              | AA              | 1946848135               |
| SNP_P4_72666_21921547 | NC_021164.1    | Ca_kabuli_chr05 | 21921547                | GG                              | CC              | 1946848137               |
| SNP_P4_72667_21921590 | NC_021164.1    | Ca_kabuli_chr05 | 21921590                | TT                              | GG              | 1946848139               |
| SNP_P4_72668_21921609 | NC_021164.1    | Ca_kabuli_chr05 | 21921609                | TT                              | CC              | 1946848141               |
| SNP_P4_72669_21921665 | NC_021164.1    | Ca_kabuli_chr05 | 21921665                | AA                              | GG              | 1946848143               |
| SNP_P4_72670_21921783 | NC_021164.1    | Ca_kabuli_chr05 | 21921783                | TT                              | AA              | 1946848145               |
| SNP_P4_72671_21921803 | NC_021164.1    | Ca_kabuli_chr05 | 21921803                | TT                              | AA              | 1946848147               |
| SNP_P4_72672_21944872 | NC_021164.1    | Ca_kabuli_chr05 | 21944872                | GG                              | AA              | 1946848149               |
| SNP_P4_72675_22003166 | NC_021164.1    | Ca_kabuli_chr05 | 22003166                | TT                              | CC              | 1946848151               |
| SNP_P4_72676_22020648 | NC_021164.1    | Ca_kabuli_chr05 | 22020648                | TT                              | CC              | 1946848153               |
| SNP_P4_72677_22052624 | NC_021164.1    | Ca_kabuli_chr05 | 22052624                | GG                              | CC              | 1946848156               |

| SNPs IDs              | Chromosome IDs | Chromosomes     | Physical positions (bp) | CDC Frontier (Reference genome) | (ILWC46 & LPNB) | NCBI SNPdb Accession IDs |
|-----------------------|----------------|-----------------|-------------------------|---------------------------------|-----------------|--------------------------|
| SNP_P4_72678_22052856 | NC_021164.1    | Ca_kabuli_chr05 | 22052856                | CC                              | TT              | 1946848158               |
| SNP_P4_72679_22058575 | NC_021164.1    | Ca_kabuli_chr05 | 22058575                | AA                              | GG              | 1946848160               |
| SNP_P4_72680_22060397 | NC_021164.1    | Ca_kabuli_chr05 | 22060397                | TT                              | GG              | 1946848162               |
| SNP_P4_72684_22140842 | NC_021164.1    | Ca_kabuli_chr05 | 22140842                | AA                              | GG              | 1946848164               |
| SNP_P4_72685_22144960 | NC_021164.1    | Ca_kabuli_chr05 | 22144960                | AA                              | CC              | 1946848166               |
| SNP_P4_72688_22205883 | NC_021164.1    | Ca_kabuli_chr05 | 22205883                | AA                              | TT              | 1946848168               |
| SNP_P4_72689_22205901 | NC_021164.1    | Ca_kabuli_chr05 | 22205901                | CC                              | TT              | 1946848170               |
| SNP_P4_72690_22205934 | NC_021164.1    | Ca_kabuli_chr05 | 22205934                | TT                              | GG              | 1946848172               |
| SNP_P4_72692_22208806 | NC_021164.1    | Ca_kabuli_chr05 | 22208806                | GG                              | AA              | 1946848174               |
| SNP_P4_72693_22208813 | NC_021164.1    | Ca_kabuli_chr05 | 22208813                | GG                              | TT              | 1946848176               |
| SNP_P4_72694_22208814 | NC_021164.1    | Ca_kabuli_chr05 | 22208814                | GG                              | AA              | 1946848178               |
| SNP_P4_72695_22209036 | NC_021164.1    | Ca_kabuli_chr05 | 22209036                | AA                              | GG              | 1946848180               |
| SNP_P4_72696_22210180 | NC_021164.1    | Ca_kabuli_chr05 | 22210180                | TT                              | CC              | 1946848182               |
| SNP_P4_72697_22210200 | NC_021164.1    | Ca_kabuli_chr05 | 22210200                | CC                              | GG              | 1946848184               |
| SNP_P4_72698_22210338 | NC_021164.1    | Ca_kabuli_chr05 | 22210338                | TT                              | AA              | 1946848186               |
| SNP_P4_72699_22210629 | NC_021164.1    | Ca_kabuli_chr05 | 22210629                | GG                              | AA              | 1946848188               |
| SNP_P4_72700_22210632 | NC_021164.1    | Ca_kabuli_chr05 | 22210632                | GG                              | AA              | 1946848190               |
| SNP_P4_72701_22210637 | NC_021164.1    | Ca_kabuli_chr05 | 22210637                | TT                              | CC              | 1946848192               |
| SNP_P4_72702_22217445 | NC_021164.1    | Ca_kabuli_chr05 | 22217445                | TT                              | CC              | 1946848194               |
| SNP_P4_72704_22279101 | NC_021164.1    | Ca_kabuli_chr05 | 22279101                | GG                              | AA              | 1946848196               |
| SNP_P4_72705_22291211 | NC_021164.1    | Ca_kabuli_chr05 | 22291211                | TT                              | CC              | 1946848198               |
| SNP_P4_72706_22292536 | NC_021164.1    | Ca_kabuli_chr05 | 22292536                | CC                              | TT              | 1946848201               |
| SNP_P4_72707_22293745 | NC_021164.1    | Ca_kabuli_chr05 | 22293745                | AA                              | GG              | 1946848203               |
| SNP_P4_72708_22293768 | NC_021164.1    | Ca_kabuli_chr05 | 22293768                | TT                              | CC              | 1946848205               |
| SNP_P4_72709_22293778 | NC_021164.1    | Ca_kabuli_chr05 | 22293778                | TT                              | CC              | 1946848207               |
| SNP_P4_72710_22293826 | NC_021164.1    | Ca_kabuli_chr05 | 22293826                | TT                              | CC              | 1946848209               |
| SNP_P4_72711_22293909 | NC_021164.1    | Ca_kabuli_chr05 | 22293909                | TT                              | AA              | 1946848211               |
| SNP_P4_72712_22294110 | NC_021164.1    | Ca_kabuli_chr05 | 22294110                | AA                              | GG              | 1946848213               |
| SNP_P4_72713_22294142 | NC_021164.1    | Ca_kabuli_chr05 | 22294142                | GG                              | AA              | 1946848215               |
| SNP_P4_72714_22294156 | NC_021164.1    | Ca_kabuli_chr05 | 22294156                | GG                              | AA              | 1946848217               |
| SNP_P4_72715_22294157 | NC_021164.1    | Ca_kabuli_chr05 | 22294157                | TT                              | CC              | 1946848219               |
| SNP_P4_72716_22294175 | NC_021164.1    | Ca_kabuli_chr05 | 22294175                | GG                              | AA              | 1946848221               |
| SNP_P4_72717_22294247 | NC_021164.1    | Ca_kabuli_chr05 | 22294247                | CC                              | TT              | 1946848223               |
| SNP_P4_72718_22294329 | NC_021164.1    | Ca_kabuli_chr05 | 22294329                | AA                              | GG              | 1946848225               |
| SNP_P4_72719_22294596 | NC_021164.1    | Ca_kabuli_chr05 | 22294596                | CC                              | TT              | 1946848226               |
| SNP_P4_72720_22294607 | NC_021164.1    | Ca_kabuli_chr05 | 22294607                | TT                              | CC              | 1946848228               |
| SNP_P4_72721_22325909 | NC_021164.1    | Ca_kabuli_chr05 | 22325909                | CC                              | AA              | 1946848230               |
| SNP_P4_72722_22340812 | NC_021164.1    | Ca_kabuli_chr05 | 22340812                | CC                              | TT              | 1946848232               |
| SNP_P4_72724_22380898 | NC_021164.1    | Ca_kabuli_chr05 | 22380898                | CC                              | TT              | 1946848234               |
| SNP_P4_72725_22382212 | NC_021164.1    | Ca_kabuli_chr05 | 22382212                | TT                              | CC              | 1946848236               |
| SNP_P4_72727_22401676 | NC_021164.1    | Ca_kabuli_chr05 | 22401676                | TT                              | CC              | 1946848238               |
| SNP_P4_72728_22401678 | NC_021164.1    | Ca_kabuli_chr05 | 22401678                | GG                              | TT              | 1946848240               |

| SNPs IDs              | Chromosome IDs | Chromosomes     | Physical positions (bp) | CDC Frontier (Reference genome) | (ILWC46 & LPNB) | NCBI SNPdb Accession IDs |
|-----------------------|----------------|-----------------|-------------------------|---------------------------------|-----------------|--------------------------|
| SNP_P4_72729_22401684 | NC_021164.1    | Ca_kabuli_chr05 | 22401684                | GG                              | TT              | 1946848242               |
| SNP_P4_72730_22413301 | NC_021164.1    | Ca_kabuli_chr05 | 22413301                | GG                              | AA              | 1946848244               |
| SNP_P4_72731_22428521 | NC_021164.1    | Ca_kabuli_chr05 | 22428521                | CC                              | TT              | 1946848246               |
| SNP_P4_72732_22451722 | NC_021164.1    | Ca_kabuli_chr05 | 22451722                | AA                              | GG              | 1946848248               |
| SNP_P4_72734_22492041 | NC_021164.1    | Ca_kabuli_chr05 | 22492041                | GG                              | AA              | 1946848250               |
| SNP_P4_72735_22513598 | NC_021164.1    | Ca_kabuli_chr05 | 22513598                | GG                              | AA              | 1946848252               |
| SNP_P4_72736_22530793 | NC_021164.1    | Ca_kabuli_chr05 | 22530793                | AA                              | CC              | 1946848254               |
| SNP_P4_72737_22544087 | NC_021164.1    | Ca_kabuli_chr05 | 22544087                | TT                              | CC              | 1946848256               |
| SNP_P4_72738_22544376 | NC_021164.1    | Ca_kabuli_chr05 | 22544376                | TT                              | CC              | 1946848258               |
| SNP_P4_72739_22554519 | NC_021164.1    | Ca_kabuli_chr05 | 22554519                | CC                              | AA              | 1946848260               |
| SNP_P4_72740_22573026 | NC_021164.1    | Ca_kabuli_chr05 | 22573026                | GG                              | TT              | 1946848262               |
| SNP_P4_72742_22615555 | NC_021164.1    | Ca_kabuli_chr05 | 22615555                | CC                              | TT              | 1946848264               |
| SNP_P4_72743_22616048 | NC_021164.1    | Ca_kabuli_chr05 | 22616048                | TT                              | AA              | 1946848266               |
| SNP_P4_72744_22616312 | NC_021164.1    | Ca_kabuli_chr05 | 22616312                | CC                              | AA              | 1946848269               |
| SNP_P4_72745_22648438 | NC_021164.1    | Ca_kabuli_chr05 | 22648438                | TT                              | CC              | 1946848271               |
| SNP_P4_72746_22659192 | NC_021164.1    | Ca_kabuli_chr05 | 22659192                | AA                              | GG              | 1946848273               |
| SNP_P4_72747_22659218 | NC_021164.1    | Ca_kabuli_chr05 | 22659218                | CC                              | GG              | 1946848275               |
| SNP_P4_72749_22664344 | NC_021164.1    | Ca_kabuli_chr05 | 22664344                | AA                              | CC              | 1946848277               |
| SNP_P4_72750_22667893 | NC_021164.1    | Ca_kabuli_chr05 | 22667893                | CC                              | TT              | 1946848279               |
| SNP_P4_72751_22668897 | NC_021164.1    | Ca_kabuli_chr05 | 22668897                | AA                              | GG              | 1946848281               |
| SNP_P4_72752_22668920 | NC_021164.1    | Ca_kabuli_chr05 | 22668920                | CC                              | AA              | 1946848283               |
| SNP_P4_72753_22691809 | NC_021164.1    | Ca_kabuli_chr05 | 22691809                | GG                              | CC              | 1946848285               |
| SNP_P4_72754_22691819 | NC_021164.1    | Ca_kabuli_chr05 | 22691819                | GG                              | TT              | 1946848287               |
| SNP_P4_72755_22691820 | NC_021164.1    | Ca_kabuli_chr05 | 22691820                | AA                              | TT              | 1946848289               |
| SNP_P4_72756_22691831 | NC_021164.1    | Ca_kabuli_chr05 | 22691831                | TT                              | GG              | 1946848291               |
| SNP_P4_72757_22691832 | NC_021164.1    | Ca_kabuli_chr05 | 22691832                | GG                              | CC              | 1946848293               |
| SNP_P4_72758_22691841 | NC_021164.1    | Ca_kabuli_chr05 | 22691841                | CC                              | AA              | 1946848295               |
| SNP_P4_72759_22691844 | NC_021164.1    | Ca_kabuli_chr05 | 22691844                | CC                              | GG              | 1946848297               |
| SNP_P4_72760_22691874 | NC_021164.1    | Ca_kabuli_chr05 | 22691874                | CC                              | AA              | 1946848299               |
| SNP_P4_72761_22691876 | NC_021164.1    | Ca_kabuli_chr05 | 22691876                | TT                              | GG              | 1946848301               |
| SNP_P4_72762_22691880 | NC_021164.1    | Ca_kabuli_chr05 | 22691880                | GG                              | AA              | 1946848303               |
| SNP_P4_72763_22691910 | NC_021164.1    | Ca_kabuli_chr05 | 22691910                | TT                              | CC              | 1946848305               |
| SNP_P4_72764_22691957 | NC_021164.1    | Ca_kabuli_chr05 | 22691957                | CC                              | GG              | 1946848307               |
| SNP_P4_72765_22691958 | NC_021164.1    | Ca_kabuli_chr05 | 22691958                | AA                              | GG              | 1946848309               |
| SNP_P4_72766_22692002 | NC_021164.1    | Ca_kabuli_chr05 | 22692002                | TT                              | CC              | 1946848311               |
| SNP_P4_72768_22693505 | NC_021164.1    | Ca_kabuli_chr05 | 22693505                | AA                              | TT              | 1946848313               |
| SNP_P4_72769_22693788 | NC_021164.1    | Ca_kabuli_chr05 | 22693788                | GG                              | TT              | 1946848315               |
| SNP_P4_72770_22693789 | NC_021164.1    | Ca_kabuli_chr05 | 22693789                | AA                              | CC              | 1946848317               |
| SNP_P4_72771_22693936 | NC_021164.1    | Ca_kabuli_chr05 | 22693936                | CC                              | AA              | 1946848319               |
| SNP_P4_72772_22694037 | NC_021164.1    | Ca_kabuli_chr05 | 22694037                | CC                              | AA              | 1946848321               |
| SNP_P4_72773_22694063 | NC_021164.1    | Ca_kabuli_chr05 | 22694063                | AA                              | GG              | 1946848323               |
| SNP_P4_72774_22695590 | NC_021164.1    | Ca_kabuli_chr05 | 22695590                | TT                              | CC              | 1946848325               |

| SNPs IDs              | Chromosome IDs | Chromosomes     | Physical positions (bp) | CDC Frontier (Reference genome) | (ILWC46 & LPNB) | NCBI SNPdb Accession IDs |
|-----------------------|----------------|-----------------|-------------------------|---------------------------------|-----------------|--------------------------|
| SNP_P4_72776_22701744 | NC_021164.1    | Ca_kabuli_chr05 | 22701744                | GG                              | TT              | 1946848327               |
| SNP_P4_72777_22726987 | NC_021164.1    | Ca_kabuli_chr05 | 22726987                | AA                              | TT              | 1946848329               |
| SNP_P4_72778_22727365 | NC_021164.1    | Ca_kabuli_chr05 | 22727365                | AA                              | TT              | 1946848331               |
| SNP_P4_72779_22727366 | NC_021164.1    | Ca_kabuli_chr05 | 22727366                | AA                              | TT              | 1946848333               |
| SNP_P4_72782_22752254 | NC_021164.1    | Ca_kabuli_chr05 | 22752254                | CC                              | TT              | 1946848335               |
| SNP_P4_72784_22800625 | NC_021164.1    | Ca_kabuli_chr05 | 22800625                | CC                              | TT              | 1946848337               |
| SNP_P4_72785_22864595 | NC_021164.1    | Ca_kabuli_chr05 | 22864595                | TT                              | CC              | 1946848339               |
| SNP_P4_72786_22864602 | NC_021164.1    | Ca_kabuli_chr05 | 22864602                | CC                              | TT              | 1946848341               |
| SNP_P4_72787_22864635 | NC_021164.1    | Ca_kabuli_chr05 | 22864635                | TT                              | CC              | 1946848343               |
| SNP_P4_72788_22864643 | NC_021164.1    | Ca_kabuli_chr05 | 22864643                | AA                              | GG              | 1946848345               |
| SNP_P4_72789_22864767 | NC_021164.1    | Ca_kabuli_chr05 | 22864767                | GG                              | AA              | 1946848347               |
| SNP_P4_72790_22865575 | NC_021164.1    | Ca_kabuli_chr05 | 22865575                | TT                              | CC              | 1946848349               |
| SNP_P4_72791_22866034 | NC_021164.1    | Ca_kabuli_chr05 | 22866034                | AA                              | CC              | 1946848351               |
| SNP_P4_72792_22866105 | NC_021164.1    | Ca_kabuli_chr05 | 22866105                | GG                              | AA              | 1946848353               |
| SNP_P4_72793_22867431 | NC_021164.1    | Ca_kabuli_chr05 | 22867431                | TT                              | CC              | 1946848355               |
| SNP_P4_72794_22867454 | NC_021164.1    | Ca_kabuli_chr05 | 22867454                | TT                              | CC              | 1946848357               |
| SNP_P4_72795_22867618 | NC_021164.1    | Ca_kabuli_chr05 | 22867618                | AA                              | GG              | 1946848359               |
| SNP_P4_72796_22867876 | NC_021164.1    | Ca_kabuli_chr05 | 22867876                | GG                              | AA              | 1946848362               |
| SNP_P4_72797_22867956 | NC_021164.1    | Ca_kabuli_chr05 | 22867956                | AA                              | GG              | 1946848364               |
| SNP_P4_72798_22868003 | NC_021164.1    | Ca_kabuli_chr05 | 22868003                | GG                              | AA              | 1946848366               |
| SNP_P4_72799_22879766 | NC_021164.1    | Ca_kabuli_chr05 | 22879766                | CC                              | AA              | 1946848368               |
| SNP_P4_72800_22879854 | NC_021164.1    | Ca_kabuli_chr05 | 22879854                | GG                              | AA              | 1946848370               |
| SNP_P4_72801_22879856 | NC_021164.1    | Ca_kabuli_chr05 | 22879856                | CC                              | GG              | 1946848372               |
| SNP_P4_72802_22880160 | NC_021164.1    | Ca_kabuli_chr05 | 22880160                | CC                              | AA              | 1946848374               |
| SNP_P4_72803_22880346 | NC_021164.1    | Ca_kabuli_chr05 | 22880346                | CC                              | TT              | 1946848376               |
| SNP_P4_72804_22890875 | NC_021164.1    | Ca_kabuli_chr05 | 22890875                | GG                              | AA              | 1946848378               |
| SNP_P4_72805_22896273 | NC_021164.1    | Ca_kabuli_chr05 | 22896273                | TT                              | CC              | 1946848380               |
| SNP_P4_72806_22906559 | NC_021164.1    | Ca_kabuli_chr05 | 22906559                | AA                              | GG              | 1946848382               |
| SNP_P4_72807_22918209 | NC_021164.1    | Ca_kabuli_chr05 | 22918209                | AA                              | GG              | 1946848384               |
| SNP_P4_72808_22918247 | NC_021164.1    | Ca_kabuli_chr05 | 22918247                | GG                              | AA              | 1946848386               |
| SNP_P4_72809_22918293 | NC_021164.1    | Ca_kabuli_chr05 | 22918293                | AA                              | TT              | 1946848388               |
| SNP_P4_72810_22918353 | NC_021164.1    | Ca_kabuli_chr05 | 22918353                | TT                              | CC              | 1946848390               |
| SNP_P4_72811_22918357 | NC_021164.1    | Ca_kabuli_chr05 | 22918357                | CC                              | TT              | 1946848392               |
| SNP_P4_72812_22918439 | NC_021164.1    | Ca_kabuli_chr05 | 22918439                | CC                              | GG              | 1946848394               |
| SNP_P4_72815_22918579 | NC_021164.1    | Ca_kabuli_chr05 | 22918579                | AA                              | TT              | 1946848396               |
| SNP_P4_72816_22918580 | NC_021164.1    | Ca_kabuli_chr05 | 22918580                | TT                              | GG              | 1946848398               |
| SNP_P4_72817_22918582 | NC_021164.1    | Ca_kabuli_chr05 | 22918582                | AA                              | GG              | 1946848400               |
| SNP_P4_72818_22918600 | NC_021164.1    | Ca_kabuli_chr05 | 22918600                | CC                              | GG              | 1946848402               |
| SNP_P4_72819_22918622 | NC_021164.1    | Ca_kabuli_chr05 | 22918622                | CC                              | TT              | 1946848404               |
| SNP_P4_72820_22918640 | NC_021164.1    | Ca_kabuli_chr05 | 22918640                | AA                              | TT              | 1946848406               |
| SNP_P4_72821_22918677 | NC_021164.1    | Ca_kabuli_chr05 | 22918677                | AA                              | GG              | 1946848408               |
| SNP_P4_72822_22918684 | NC_021164.1    | Ca_kabuli_chr05 | 22918684                | TT                              | CC              | 1946848410               |

| SNPs IDs              | Chromosome IDs | Chromosomes     | Physical positions (bp) | CDC Frontier (Reference genome) | (ILWC46 & LPNB) | NCBI SNPdb Accession IDs |
|-----------------------|----------------|-----------------|-------------------------|---------------------------------|-----------------|--------------------------|
| SNP_P4_72823_22918685 | NC_021164.1    | Ca_kabuli_chr05 | 22918685                | CC                              | AA              | 1946848412               |
| SNP_P4_72824_22918694 | NC_021164.1    | Ca_kabuli_chr05 | 22918694                | TT                              | CC              | 1946848414               |
| SNP_P4_72825_22918855 | NC_021164.1    | Ca_kabuli_chr05 | 22918855                | CC                              | TT              | 1946848415               |
| SNP_P4_72826_22918863 | NC_021164.1    | Ca_kabuli_chr05 | 22918863                | TT                              | AA              | 1946848417               |
| SNP_P4_72827_22918880 | NC_021164.1    | Ca_kabuli_chr05 | 22918880                | CC                              | GG              | 1946848419               |
| SNP_P4_72828_22918883 | NC_021164.1    | Ca_kabuli_chr05 | 22918883                | AA                              | GG              | 1946848421               |
| SNP_P4_72829_22919267 | NC_021164.1    | Ca_kabuli_chr05 | 22919267                | AA                              | TT              | 1946848423               |
| SNP_P4_72830_22919298 | NC_021164.1    | Ca_kabuli_chr05 | 22919298                | GG                              | AA              | 1946848425               |
| SNP_P4_72831_22919314 | NC_021164.1    | Ca_kabuli_chr05 | 22919314                | TT                              | AA              | 1946848427               |
| SNP_P4_72832_22919387 | NC_021164.1    | Ca_kabuli_chr05 | 22919387                | AA                              | GG              | 1946848429               |
| SNP_P4_72833_22919393 | NC_021164.1    | Ca_kabuli_chr05 | 22919393                | TT                              | AA              | 1946848431               |
| SNP_P4_72834_22919430 | NC_021164.1    | Ca_kabuli_chr05 | 22919430                | AA                              | GG              | 1946848433               |
| SNP_P4_72835_22919484 | NC_021164.1    | Ca_kabuli_chr05 | 22919484                | TT                              | CC              | 1946848435               |
| SNP_P4_72836_22919514 | NC_021164.1    | Ca_kabuli_chr05 | 22919514                | TT                              | GG              | 1946848437               |
| SNP_P4_72837_22919534 | NC_021164.1    | Ca_kabuli_chr05 | 22919534                | GG                              | AA              | 1946848439               |
| SNP_P4_72838_22919601 | NC_021164.1    | Ca_kabuli_chr05 | 22919601                | CC                              | GG              | 1946848441               |
| SNP_P4_72840_22919703 | NC_021164.1    | Ca_kabuli_chr05 | 22919703                | GG                              | AA              | 1946848443               |
| SNP_P4_72842_22919734 | NC_021164.1    | Ca_kabuli_chr05 | 22919734                | GG                              | AA              | 1946848445               |
| SNP_P4_72843_22919760 | NC_021164.1    | Ca_kabuli_chr05 | 22919760                | TT                              | CC              | 1946848446               |
| SNP_P4_72844_22919777 | NC_021164.1    | Ca_kabuli_chr05 | 22919777                | CC                              | AA              | 1946848448               |
| SNP_P4_72845_22928381 | NC_021164.1    | Ca_kabuli_chr05 | 22928381                | TT                              | CC              | 1946848450               |
| SNP_P4_72846_22928382 | NC_021164.1    | Ca_kabuli_chr05 | 22928382                | GG                              | TT              | 1946848452               |
| SNP_P4_72847_22928409 | NC_021164.1    | Ca_kabuli_chr05 | 22928409                | GG                              | AA              | 1946848454               |
| SNP_P4_72848_22928427 | NC_021164.1    | Ca_kabuli_chr05 | 22928427                | CC                              | AA              | 1946848456               |
| SNP_P4_72849_22952088 | NC_021164.1    | Ca_kabuli_chr05 | 22952088                | CC                              | TT              | 1946848458               |
| SNP_P4_72850_22952323 | NC_021164.1    | Ca_kabuli_chr05 | 22952323                | GG                              | AA              | 1946848460               |
| SNP_P4_72851_22954113 | NC_021164.1    | Ca_kabuli_chr05 | 22954113                | TT                              | CC              | 1946848462               |
| SNP_P4_72852_22960155 | NC_021164.1    | Ca_kabuli_chr05 | 22960155                | GG                              | AA              | 1946848464               |
| SNP_P4_72853_22960168 | NC_021164.1    | Ca_kabuli_chr05 | 22960168                | TT                              | CC              | 1946848466               |
| SNP_P4_72854_22960169 | NC_021164.1    | Ca_kabuli_chr05 | 22960169                | CC                              | AA              | 1946848468               |
| SNP_P4_72855_22960186 | NC_021164.1    | Ca_kabuli_chr05 | 22960186                | CC                              | TT              | 1946848470               |
| SNP_P4_72856_22961372 | NC_021164.1    | Ca_kabuli_chr05 | 22961372                | TT                              | CC              | 1946848472               |
| SNP_P4_72858_23037194 | NC_021164.1    | Ca_kabuli_chr05 | 23037194                | CC                              | AA              | 1946848473               |
| SNP_P4_72859_23050152 | NC_021164.1    | Ca_kabuli_chr05 | 23050152                | AA                              | GG              | 1946848475               |
| SNP_P4_72861_23085223 | NC_021164.1    | Ca_kabuli_chr05 | 23085223                | AA                              | GG              | 1946848477               |
| SNP_P4_72862_23096845 | NC_021164.1    | Ca_kabuli_chr05 | 23096845                | CC                              | TT              | 1946848479               |
| SNP_P4_72863_23096939 | NC_021164.1    | Ca_kabuli_chr05 | 23096939                | CC                              | TT              | 1946848481               |
| SNP_P4_72864_23099260 | NC_021164.1    | Ca_kabuli_chr05 | 23099260                | GG                              | TT              | 1946848483               |
| SNP_P4_72866_23164818 | NC_021164.1    | Ca_kabuli_chr05 | 23164818                | CC                              | AA              | 1946848485               |
| SNP_P4_72867_23165902 | NC_021164.1    | Ca_kabuli_chr05 | 23165902                | TT                              | GG              | 1946848487               |
| SNP_P4_72870_23191302 | NC_021164.1    | Ca_kabuli_chr05 | 23191302                | CC                              | AA              | 1946848489               |
| SNP_P4_72871_23217483 | NC_021164.1    | Ca_kabuli_chr05 | 23217483                | AA                              | GG              | 1946848491               |



| SNPs IDs              | Chromosome IDs | Chromosomes     | Physical positions (bp) | CDC Frontier (Reference genome) | (ILWC46 & LPNB) | NCBI SNPdb Accession IDs |
|-----------------------|----------------|-----------------|-------------------------|---------------------------------|-----------------|--------------------------|
| SNP_P4_72872_23217491 | NC_021164.1    | Ca_kabuli_chr05 | 23217491                | GG                              | CC              | 1946848493               |
| SNP_P4_72873_23219924 | NC_021164.1    | Ca_kabuli_chr05 | 23219924                | GG                              | AA              | 1946848495               |
| SNP_P4_72874_23246623 | NC_021164.1    | Ca_kabuli_chr05 | 23246623                | TT                              | AA              | 1946848496               |
| SNP_P4_72875_23247963 | NC_021164.1    | Ca_kabuli_chr05 | 23247963                | CC                              | TT              | 1946848498               |
| SNP_P4_72877_23336109 | NC_021164.1    | Ca_kabuli_chr05 | 23336109                | TT                              | AA              | 1946848500               |
| SNP_P4_72878_23336129 | NC_021164.1    | Ca_kabuli_chr05 | 23336129                | TT                              | AA              | 1946848502               |
| SNP_P4_72879_23336130 | NC_021164.1    | Ca_kabuli_chr05 | 23336130                | AA                              | TT              | 1946848504               |
| SNP_P4_72880_23336151 | NC_021164.1    | Ca_kabuli_chr05 | 23336151                | CC                              | TT              | 1946848506               |
| SNP_P4_72881_23336212 | NC_021164.1    | Ca_kabuli_chr05 | 23336212                | AA                              | CC              | 1946848508               |
| SNP_P4_72882_23336462 | NC_021164.1    | Ca_kabuli_chr05 | 23336462                | GG                              | TT              | 1946848510               |
| SNP_P4_72883_23336547 | NC_021164.1    | Ca_kabuli_chr05 | 23336547                | TT                              | AA              | 1946848512               |
| SNP_P4_72884_23336556 | NC_021164.1    | Ca_kabuli_chr05 | 23336556                | AA                              | GG              | 1946848514               |
| SNP_P4_72885_23336615 | NC_021164.1    | Ca_kabuli_chr05 | 23336615                | AA                              | GG              | 1946848516               |
| SNP_P4_72886_23336651 | NC_021164.1    | Ca_kabuli_chr05 | 23336651                | GG                              | AA              | 1946848518               |
| SNP_P4_72887_23336730 | NC_021164.1    | Ca_kabuli_chr05 | 23336730                | CC                              | AA              | 1946848520               |
| SNP_P4_72888_23342599 | NC_021164.1    | Ca_kabuli_chr05 | 23342599                | GG                              | TT              | 1946848522               |
| SNP_P4_72889_23352213 | NC_021164.1    | Ca_kabuli_chr05 | 23352213                | TT                              | AA              | 1946848524               |
| SNP_P4_72890_23352449 | NC_021164.1    | Ca_kabuli_chr05 | 23352449                | GG                              | AA              | 1946848526               |
| SNP_P4_72891_23352485 | NC_021164.1    | Ca_kabuli_chr05 | 23352485                | AA                              | TT              | 1946848528               |
| SNP_P4_72892_23356005 | NC_021164.1    | Ca_kabuli_chr05 | 23356005                | TT                              | AA              | 1946848529               |
| SNP_P4_72893_23356014 | NC_021164.1    | Ca_kabuli_chr05 | 23356014                | CC                              | TT              | 1946848531               |
| SNP_P4_72894_23381473 | NC_021164.1    | Ca_kabuli_chr05 | 23381473                | AA                              | CC              | 1946848533               |
| SNP_P4_72895_23406363 | NC_021164.1    | Ca_kabuli_chr05 | 23406363                | GG                              | TT              | 1946848535               |
| SNP_P4_72896_23425243 | NC_021164.1    | Ca_kabuli_chr05 | 23425243                | GG                              | AA              | 1946848537               |
| SNP_P4_72897_23429678 | NC_021164.1    | Ca_kabuli_chr05 | 23429678                | GG                              | TT              | 1946848539               |
| SNP_P4_72898_23462452 | NC_021164.1    | Ca_kabuli_chr05 | 23462452                | GG                              | TT              | 1946848541               |
| SNP_P4_72899_23462461 | NC_021164.1    | Ca_kabuli_chr05 | 23462461                | TT                              | CC              | 1946848544               |
| SNP_P4_72900_23464788 | NC_021164.1    | Ca_kabuli_chr05 | 23464788                | CC                              | GG              | 1946848546               |
| SNP_P4_72901_23464795 | NC_021164.1    | Ca_kabuli_chr05 | 23464795                | TT                              | CC              | 1946848548               |
| SNP_P4_72902_23464819 | NC_021164.1    | Ca_kabuli_chr05 | 23464819                | GG                              | TT              | 1946848550               |
| SNP_P4_72903_23470581 | NC_021164.1    | Ca_kabuli_chr05 | 23470581                | CC                              | TT              | 1946848551               |
| SNP_P4_72904_23485413 | NC_021164.1    | Ca_kabuli_chr05 | 23485413                | CC                              | TT              | 1946848553               |
| SNP_P4_72905_23487805 | NC_021164.1    | Ca_kabuli_chr05 | 23487805                | GG                              | AA              | 1946848555               |
| SNP_P4_72906_23487809 | NC_021164.1    | Ca_kabuli_chr05 | 23487809                | AA                              | TT              | 1946848557               |
| SNP_P4_72907_23488117 | NC_021164.1    | Ca_kabuli_chr05 | 23488117                | AA                              | CC              | 1946848559               |
| SNP_P4_72908_23488250 | NC_021164.1    | Ca_kabuli_chr05 | 23488250                | CC                              | GG              | 1946848561               |
| SNP_P4_72909_23488679 | NC_021164.1    | Ca_kabuli_chr05 | 23488679                | GG                              | AA              | 1946848563               |
| SNP_P4_72910_23488705 | NC_021164.1    | Ca_kabuli_chr05 | 23488705                | AA                              | GG              | 1946848565               |
| SNP_P4_72911_23533742 | NC_021164.1    | Ca_kabuli_chr05 | 23533742                | CC                              | TT              | 1946848567               |
| SNP_P4_72912_23544732 | NC_021164.1    | Ca_kabuli_chr05 | 23544732                | CC                              | TT              | 1946848569               |
| SNP_P4_72913_23547645 | NC_021164.1    | Ca_kabuli_chr05 | 23547645                | AA                              | GG              | 1946848571               |
| SNP_P4_72914_23547666 | NC_021164.1    | Ca_kabuli_chr05 | 23547666                | CC                              | AA              | 1946848573               |

| SNPs IDs              | Chromosome IDs | Chromosomes     | Physical positions (bp) | CDC Frontier (Reference genome) | (ILWC46 & LPNB) | NCBI SNPdb Accession IDs |
|-----------------------|----------------|-----------------|-------------------------|---------------------------------|-----------------|--------------------------|
| SNP_P4_72915_23557378 | NC_021164.1    | Ca_kabuli_chr05 | 23557378                | CC                              | TT              | 1946848575               |
| SNP_P4_72917_23557651 | NC_021164.1    | Ca_kabuli_chr05 | 23557651                | AA                              | GG              | 1946848577               |
| SNP_P4_72918_23557661 | NC_021164.1    | Ca_kabuli_chr05 | 23557661                | CC                              | AA              | 1946848579               |
| SNP_P4_72919_23557662 | NC_021164.1    | Ca_kabuli_chr05 | 23557662                | GG                              | TT              | 1946848581               |
| SNP_P4_72920_23557665 | NC_021164.1    | Ca_kabuli_chr05 | 23557665                | GG                              | CC              | 1946848583               |
| SNP_P4_72921_23557666 | NC_021164.1    | Ca_kabuli_chr05 | 23557666                | AA                              | GG              | 1946848585               |
| SNP_P4_72922_23557703 | NC_021164.1    | Ca_kabuli_chr05 | 23557703                | TT                              | CC              | 1946848587               |
| SNP_P4_72923_23557735 | NC_021164.1    | Ca_kabuli_chr05 | 23557735                | TT                              | AA              | 1946848589               |
| SNP_P4_72924_23557754 | NC_021164.1    | Ca_kabuli_chr05 | 23557754                | TT                              | CC              | 1946848591               |
| SNP_P4_72925_23557762 | NC_021164.1    | Ca_kabuli_chr05 | 23557762                | TT                              | AA              | 1946848593               |
| SNP_P4_72926_23558112 | NC_021164.1    | Ca_kabuli_chr05 | 23558112                | TT                              | CC              | 1946848595               |
| SNP_P4_72927_23559200 | NC_021164.1    | Ca_kabuli_chr05 | 23559200                | TT                              | CC              | 1946848597               |
| SNP_P4_72928_23559208 | NC_021164.1    | Ca_kabuli_chr05 | 23559208                | TT                              | AA              | 1946848599               |
| SNP_P4_72929_23559219 | NC_021164.1    | Ca_kabuli_chr05 | 23559219                | TT                              | CC              | 1946848601               |
| SNP_P4_72930_23559226 | NC_021164.1    | Ca_kabuli_chr05 | 23559226                | TT                              | CC              | 1946848603               |
| SNP_P4_72931_23559232 | NC_021164.1    | Ca_kabuli_chr05 | 23559232                | CC                              | TT              | 1946848605               |
| SNP_P4_72932_23559237 | NC_021164.1    | Ca_kabuli_chr05 | 23559237                | TT                              | AA              | 1946848607               |
| SNP_P4_72933_23559271 | NC_021164.1    | Ca_kabuli_chr05 | 23559271                | CC                              | GG              | 1946848609               |
| SNP_P4_72934_23559280 | NC_021164.1    | Ca_kabuli_chr05 | 23559280                | TT                              | AA              | 1946848611               |
| SNP_P4_72935_23559292 | NC_021164.1    | Ca_kabuli_chr05 | 23559292                | TT                              | CC              | 1946848613               |
| SNP_P4_72936_23559294 | NC_021164.1    | Ca_kabuli_chr05 | 23559294                | AA                              | CC              | 1946848615               |
| SNP_P4_72937_23559296 | NC_021164.1    | Ca_kabuli_chr05 | 23559296                | GG                              | CC              | 1946848617               |
| SNP_P4_72938_23559302 | NC_021164.1    | Ca_kabuli_chr05 | 23559302                | GG                              | AA              | 1946848619               |
| SNP_P4_72939_23559310 | NC_021164.1    | Ca_kabuli_chr05 | 23559310                | AA                              | CC              | 1946848621               |
| SNP_P4_72940_23559311 | NC_021164.1    | Ca_kabuli_chr05 | 23559311                | TT                              | CC              | 1946848623               |
| SNP_P4_72941_23566676 | NC_021164.1    | Ca_kabuli_chr05 | 23566676                | GG                              | CC              | 1946848625               |
| SNP_P4_72942_23566740 | NC_021164.1    | Ca_kabuli_chr05 | 23566740                | TT                              | GG              | 1946848627               |
| SNP_P4_72943_23567091 | NC_021164.1    | Ca_kabuli_chr05 | 23567091                | AA                              | CC              | 1946848629               |
| SNP_P4_72944_23567114 | NC_021164.1    | Ca_kabuli_chr05 | 23567114                | TT                              | GG              | 1946848631               |
| SNP_P4_72945_23567119 | NC_021164.1    | Ca_kabuli_chr05 | 23567119                | GG                              | TT              | 1946848633               |
| SNP_P4_72946_23567130 | NC_021164.1    | Ca_kabuli_chr05 | 23567130                | AA                              | TT              | 1946848635               |
| SNP_P4_72948_23568336 | NC_021164.1    | Ca_kabuli_chr05 | 23568336                | CC                              | TT              | 1946848637               |
| SNP_P4_72949_23573083 | NC_021164.1    | Ca_kabuli_chr05 | 23573083                | GG                              | AA              | 1946848639               |
| SNP_P4_72950_23585048 | NC_021164.1    | Ca_kabuli_chr05 | 23585048                | CC                              | AA              | 1946848641               |
| SNP_P4_72951_23585072 | NC_021164.1    | Ca_kabuli_chr05 | 23585072                | CC                              | TT              | 1946848643               |
| SNP_P4_72952_23585118 | NC_021164.1    | Ca_kabuli_chr05 | 23585118                | TT                              | CC              | 1946848645               |
| SNP_P4_72953_23585130 | NC_021164.1    | Ca_kabuli_chr05 | 23585130                | GG                              | TT              | 1946848647               |
| SNP_P4_72954_23585491 | NC_021164.1    | Ca_kabuli_chr05 | 23585491                | TT                              | CC              | 1946848649               |
| SNP_P4_72955_23588479 | NC_021164.1    | Ca_kabuli_chr05 | 23588479                | TT                              | CC              | 1946848651               |
| SNP_P4_72956_23588820 | NC_021164.1    | Ca_kabuli_chr05 | 23588820                | TT                              | CC              | 1946848653               |
| SNP_P4_72957_23588926 | NC_021164.1    | Ca_kabuli_chr05 | 23588926                | GG                              | TT              | 1946848655               |
| SNP_P4_72958_23588937 | NC_021164.1    | Ca_kabuli_chr05 | 23588937                | GG                              | CC              | 1946848657               |

| SNPs IDs              | Chromosome IDs | Chromosomes     | Physical positions (bp) | CDC Frontier (Reference genome) | (ILWC46 & LPNB) | NCBI SNPdb Accession IDs |
|-----------------------|----------------|-----------------|-------------------------|---------------------------------|-----------------|--------------------------|
| SNP_P4_72959_23592945 | NC_021164.1    | Ca_kabuli_chr05 | 23592945                | AA                              | CC              | 1946848659               |
| SNP_P4_72960_23595400 | NC_021164.1    | Ca_kabuli_chr05 | 23595400                | GG                              | TT              | 1946848661               |
| SNP_P4_72961_23596547 | NC_021164.1    | Ca_kabuli_chr05 | 23596547                | GG                              | AA              | 1946848663               |
| SNP_P4_72962_23596643 | NC_021164.1    | Ca_kabuli_chr05 | 23596643                | AA                              | GG              | 1946848665               |
| SNP_P4_72963_23596690 | NC_021164.1    | Ca_kabuli_chr05 | 23596690                | TT                              | CC              | 1946848667               |
| SNP_P4_72964_23596842 | NC_021164.1    | Ca_kabuli_chr05 | 23596842                | AA                              | GG              | 1946848669               |
| SNP_P4_72965_23606244 | NC_021164.1    | Ca_kabuli_chr05 | 23606244                | GG                              | AA              | 1946848671               |
| SNP_P4_72966_23606271 | NC_021164.1    | Ca_kabuli_chr05 | 23606271                | TT                              | AA              | 1946848673               |
| SNP_P4_72967_23606472 | NC_021164.1    | Ca_kabuli_chr05 | 23606472                | GG                              | AA              | 1946848675               |
| SNP_P4_72968_23606509 | NC_021164.1    | Ca_kabuli_chr05 | 23606509                | AA                              | CC              | 1946848677               |
| SNP_P4_72969_23606525 | NC_021164.1    | Ca_kabuli_chr05 | 23606525                | CC                              | AA              | 1946848679               |
| SNP_P4_72970_23606527 | NC_021164.1    | Ca_kabuli_chr05 | 23606527                | TT                              | CC              | 1946848681               |
| SNP_P4_72971_23607238 | NC_021164.1    | Ca_kabuli_chr05 | 23607238                | AA                              | CC              | 1946848683               |
| SNP_P4_72972_23619493 | NC_021164.1    | Ca_kabuli_chr05 | 23619493                | TT                              | AA              | 1946848685               |
| SNP_P4_72973_23640818 | NC_021164.1    | Ca_kabuli_chr05 | 23640818                | TT                              | CC              | 1946848687               |
| SNP_P4_72974_23640828 | NC_021164.1    | Ca_kabuli_chr05 | 23640828                | TT                              | AA              | 1946848689               |
| SNP_P4_72975_23640859 | NC_021164.1    | Ca_kabuli_chr05 | 23640859                | GG                              | TT              | 1946848691               |
| SNP_P4_72977_23644704 | NC_021164.1    | Ca_kabuli_chr05 | 23644704                | TT                              | CC              | 1946848693               |
| SNP_P4_72978_23644770 | NC_021164.1    | Ca_kabuli_chr05 | 23644770                | TT                              | CC              | 1946848695               |
| SNP_P4_72979_23645018 | NC_021164.1    | Ca_kabuli_chr05 | 23645018                | GG                              | AA              | 1946848697               |
| SNP_P4_72980_23645021 | NC_021164.1    | Ca_kabuli_chr05 | 23645021                | GG                              | TT              | 1946848699               |
| SNP_P4_72981_23645121 | NC_021164.1    | Ca_kabuli_chr05 | 23645121                | CC                              | TT              | 1946848701               |
| SNP_P4_72982_23645153 | NC_021164.1    | Ca_kabuli_chr05 | 23645153                | GG                              | AA              | 1946848703               |
| SNP_P4_72983_23645186 | NC_021164.1    | Ca_kabuli_chr05 | 23645186                | AA                              | GG              | 1946848705               |
| SNP_P4_72984_23645206 | NC_021164.1    | Ca_kabuli_chr05 | 23645206                | AA                              | TT              | 1946848707               |
| SNP_P4_72985_23645213 | NC_021164.1    | Ca_kabuli_chr05 | 23645213                | AA                              | GG              | 1946848709               |
| SNP_P4_72986_23645228 | NC_021164.1    | Ca_kabuli_chr05 | 23645228                | AA                              | GG              | 1946848711               |
| SNP_P4_72987_23645295 | NC_021164.1    | Ca_kabuli_chr05 | 23645295                | GG                              | AA              | 1946848713               |
| SNP_P4_72988_23645347 | NC_021164.1    | Ca_kabuli_chr05 | 23645347                | AA                              | GG              | 1946848716               |
| SNP_P4_72989_23645961 | NC_021164.1    | Ca_kabuli_chr05 | 23645961                | CC                              | GG              | 1946848718               |
| SNP_P4_72990_23646303 | NC_021164.1    | Ca_kabuli_chr05 | 23646303                | AA                              | GG              | 1946848720               |
| SNP_P4_72991_23647028 | NC_021164.1    | Ca_kabuli_chr05 | 23647028                | AA                              | CC              | 1946848722               |
| SNP_P4_72992_23663069 | NC_021164.1    | Ca_kabuli_chr05 | 23663069                | TT                              | GG              | 1946848724               |
| SNP_P4_72994_23663168 | NC_021164.1    | Ca_kabuli_chr05 | 23663168                | AA                              | GG              | 1946848726               |
| SNP_P4_72995_23663195 | NC_021164.1    | Ca_kabuli_chr05 | 23663195                | CC                              | AA              | 1946848728               |
| SNP_P4_72996_23664201 | NC_021164.1    | Ca_kabuli_chr05 | 23664201                | AA                              | GG              | 1946848730               |
| SNP_P4_72997_23664245 | NC_021164.1    | Ca_kabuli_chr05 | 23664245                | TT                              | CC              | 1946848732               |
| SNP_P4_72998_23664292 | NC_021164.1    | Ca_kabuli_chr05 | 23664292                | AA                              | CC              | 1946848734               |
| SNP_P4_72999_23664301 | NC_021164.1    | Ca_kabuli_chr05 | 23664301                | AA                              | GG              | 1946848736               |
| SNP_P4_73000_23664373 | NC_021164.1    | Ca_kabuli_chr05 | 23664373                | AA                              | CC              | 1946848738               |
| SNP_P4_73001_23664483 | NC_021164.1    | Ca_kabuli_chr05 | 23664483                | AA                              | GG              | 1946848740               |
| SNP_P4_73002_23664514 | NC_021164.1    | Ca_kabuli_chr05 | 23664514                | AA                              | GG              | 1946848742               |

| SNPs IDs              | Chromosome IDs | Chromosomes     | Physical positions (bp) | CDC Frontier (Reference genome) | (ILWC46 & LPNB) | NCBI SNPdb Accession IDs |
|-----------------------|----------------|-----------------|-------------------------|---------------------------------|-----------------|--------------------------|
| SNP_P4_73003_23664561 | NC_021164.1    | Ca_kabuli_chr05 | 23664561                | TT                              | CC              | 1946848744               |
| SNP_P4_73005_23668830 | NC_021164.1    | Ca_kabuli_chr05 | 23668830                | GG                              | TT              | 1946848746               |
| SNP_P4_73006_23668919 | NC_021164.1    | Ca_kabuli_chr05 | 23668919                | GG                              | TT              | 1946848748               |
| SNP_P4_73007_23668943 | NC_021164.1    | Ca_kabuli_chr05 | 23668943                | GG                              | AA              | 1946848750               |
| SNP_P4_73008_23669358 | NC_021164.1    | Ca_kabuli_chr05 | 23669358                | TT                              | CC              | 1946848752               |
| SNP_P4_73009_23669370 | NC_021164.1    | Ca_kabuli_chr05 | 23669370                | TT                              | CC              | 1946848754               |
| SNP_P4_73010_23670085 | NC_021164.1    | Ca_kabuli_chr05 | 23670085                | TT                              | CC              | 1946848756               |
| SNP_P4_73011_23670111 | NC_021164.1    | Ca_kabuli_chr05 | 23670111                | AA                              | GG              | 1946848758               |
| SNP_P4_73012_23670171 | NC_021164.1    | Ca_kabuli_chr05 | 23670171                | AA                              | CC              | 1946848760               |
| SNP_P4_73013_23670548 | NC_021164.1    | Ca_kabuli_chr05 | 23670548                | AA                              | GG              | 1946848762               |
| SNP_P4_73014_23670567 | NC_021164.1    | Ca_kabuli_chr05 | 23670567                | AA                              | GG              | 1946848764               |
| SNP_P4_73015_23670617 | NC_021164.1    | Ca_kabuli_chr05 | 23670617                | CC                              | TT              | 1946848766               |
| SNP_P4_73016_23670762 | NC_021164.1    | Ca_kabuli_chr05 | 23670762                | AA                              | GG              | 1946848768               |
| SNP_P4_73017_23670780 | NC_021164.1    | Ca_kabuli_chr05 | 23670780                | TT                              | CC              | 1946848770               |
| SNP_P4_73018_23670875 | NC_021164.1    | Ca_kabuli_chr05 | 23670875                | TT                              | CC              | 1946848772               |
| SNP_P4_73019_23670919 | NC_021164.1    | Ca_kabuli_chr05 | 23670919                | TT                              | AA              | 1946848774               |
| SNP_P4_73020_23670932 | NC_021164.1    | Ca_kabuli_chr05 | 23670932                | AA                              | CC              | 1946848776               |
| SNP_P4_73021_23671224 | NC_021164.1    | Ca_kabuli_chr05 | 23671224                | TT                              | CC              | 1946848778               |
| SNP_P4_73022_23671250 | NC_021164.1    | Ca_kabuli_chr05 | 23671250                | AA                              | GG              | 1946848780               |
| SNP_P4_73023_23671278 | NC_021164.1    | Ca_kabuli_chr05 | 23671278                | TT                              | CC              | 1946848782               |
| SNP_P4_73024_23671337 | NC_021164.1    | Ca_kabuli_chr05 | 23671337                | TT                              | CC              | 1946848783               |
| SNP_P4_73025_23671356 | NC_021164.1    | Ca_kabuli_chr05 | 23671356                | CC                              | AA              | 1946848784               |
| SNP_P4_73026_23671386 | NC_021164.1    | Ca_kabuli_chr05 | 23671386                | TT                              | CC              | 1946848785               |
| SNP_P4_73028_23673810 | NC_021164.1    | Ca_kabuli_chr05 | 23673810                | AA                              | GG              | 1946848786               |
| SNP_P4_73029_23673860 | NC_021164.1    | Ca_kabuli_chr05 | 23673860                | TT                              | CC              | 1946848787               |
| SNP_P4_73030_23674057 | NC_021164.1    | Ca_kabuli_chr05 | 23674057                | AA                              | GG              | 1946848788               |
| SNP_P4_73031_23674065 | NC_021164.1    | Ca_kabuli_chr05 | 23674065                | AA                              | CC              | 1946848790               |
| SNP_P4_73032_23674462 | NC_021164.1    | Ca_kabuli_chr05 | 23674462                | TT                              | CC              | 1946848792               |
| SNP_P4_73033_23674485 | NC_021164.1    | Ca_kabuli_chr05 | 23674485                | AA                              | GG              | 1946848794               |
| SNP_P4_73034_23674525 | NC_021164.1    | Ca_kabuli_chr05 | 23674525                | TT                              | CC              | 1946848796               |
| SNP_P4_73035_23674586 | NC_021164.1    | Ca_kabuli_chr05 | 23674586                | TT                              | CC              | 1946848798               |
| SNP_P4_73036_23674595 | NC_021164.1    | Ca_kabuli_chr05 | 23674595                | TT                              | CC              | 1946848800               |
| SNP_P4_73037_23674758 | NC_021164.1    | Ca_kabuli_chr05 | 23674758                | TT                              | CC              | 1946848802               |
| SNP_P4_73038_23674768 | NC_021164.1    | Ca_kabuli_chr05 | 23674768                | CC                              | TT              | 1946848804               |
| SNP_P4_73039_23674846 | NC_021164.1    | Ca_kabuli_chr05 | 23674846                | TT                              | CC              | 1946848806               |
| SNP_P4_73040_23674893 | NC_021164.1    | Ca_kabuli_chr05 | 23674893                | AA                              | GG              | 1946848808               |
| SNP_P4_73042_23689684 | NC_021164.1    | Ca_kabuli_chr05 | 23689684                | AA                              | GG              | 1946848810               |
| SNP_P4_73043_23752386 | NC_021164.1    | Ca_kabuli_chr05 | 23752386                | CC                              | TT              | 1946848812               |
| SNP_P4_73045_23796696 | NC_021164.1    | Ca_kabuli_chr05 | 23796696                | AA                              | CC              | 1946848815               |
| SNP_P4_73046_23796724 | NC_021164.1    | Ca_kabuli_chr05 | 23796724                | TT                              | AA              | 1946848817               |
| SNP_P4_73047_23796726 | NC_021164.1    | Ca_kabuli_chr05 | 23796726                | AA                              | TT              | 1946848819               |
| SNP_P4_73048_23796740 | NC_021164.1    | Ca_kabuli_chr05 | 23796740                | GG                              | TT              | 1946848821               |

| SNPs IDs              | Chromosome IDs | Chromosomes     | Physical positions (bp) | CDC Frontier (Reference genome) | (ILWC46 & LPNB) | NCBI SNPdb Accession IDs |
|-----------------------|----------------|-----------------|-------------------------|---------------------------------|-----------------|--------------------------|
| SNP_P4_73049_23796741 | NC_021164.1    | Ca_kabuli_chr05 | 23796741                | CC                              | TT              | 1946848823               |
| SNP_P4_73051_23866904 | NC_021164.1    | Ca_kabuli_chr05 | 23866904                | AA                              | CC              | 1946848825               |
| SNP_P4_73053_23893910 | NC_021164.1    | Ca_kabuli_chr05 | 23893910                | TT                              | AA              | 1946848827               |
| SNP_P4_73054_23898899 | NC_021164.1    | Ca_kabuli_chr05 | 23898899                | AA                              | GG              | 1946848829               |
| SNP_P4_73056_23945743 | NC_021164.1    | Ca_kabuli_chr05 | 23945743                | TT                              | AA              | 1946848831               |
| SNP_P4_73057_23945746 | NC_021164.1    | Ca_kabuli_chr05 | 23945746                | AA                              | CC              | 1946848833               |
| SNP_P4_73058_23948553 | NC_021164.1    | Ca_kabuli_chr05 | 23948553                | AA                              | TT              | 1946848835               |
| SNP_P4_73060_23978688 | NC_021164.1    | Ca_kabuli_chr05 | 23978688                | GG                              | AA              | 1946848837               |
| SNP_P4_73062_24007395 | NC_021164.1    | Ca_kabuli_chr05 | 24007395                | CC                              | TT              | 1946848839               |
| SNP_P4_73063_24007396 | NC_021164.1    | Ca_kabuli_chr05 | 24007396                | AA                              | CC              | 1946848841               |
| SNP_P4_73064_24007434 | NC_021164.1    | Ca_kabuli_chr05 | 24007434                | GG                              | AA              | 1946848843               |
| SNP_P4_73065_24008088 | NC_021164.1    | Ca_kabuli_chr05 | 24008088                | CC                              | AA              | 1946848845               |
| SNP_P4_73067_24097291 | NC_021164.1    | Ca_kabuli_chr05 | 24097291                | TT                              | CC              | 1946848847               |
| SNP_P4_73069_24108537 | NC_021164.1    | Ca_kabuli_chr05 | 24108537                | GG                              | TT              | 1946848849               |
| SNP_P4_73070_24108541 | NC_021164.1    | Ca_kabuli_chr05 | 24108541                | GG                              | AA              | 1946848851               |
| SNP_P4_73071_24108556 | NC_021164.1    | Ca_kabuli_chr05 | 24108556                | GG                              | CC              | 1946848853               |
| SNP_P4_73072_24108557 | NC_021164.1    | Ca_kabuli_chr05 | 24108557                | TT                              | CC              | 1946848855               |
| SNP_P4_73073_24124147 | NC_021164.1    | Ca_kabuli_chr05 | 24124147                | TT                              | CC              | 1946848857               |
| SNP_P4_73074_24124148 | NC_021164.1    | Ca_kabuli_chr05 | 24124148                | CC                              | AA              | 1946848859               |
| SNP_P4_73075_24124149 | NC_021164.1    | Ca_kabuli_chr05 | 24124149                | GG                              | AA              | 1946848861               |
| SNP_P4_73076_24129659 | NC_021164.1    | Ca_kabuli_chr05 | 24129659                | GG                              | TT              | 1946848863               |
| SNP_P4_73077_24129701 | NC_021164.1    | Ca_kabuli_chr05 | 24129701                | GG                              | AA              | 1946848865               |
| SNP_P4_73078_24143587 | NC_021164.1    | Ca_kabuli_chr05 | 24143587                | AA                              | TT              | 1946848867               |
| SNP_P4_73079_24147920 | NC_021164.1    | Ca_kabuli_chr05 | 24147920                | GG                              | TT              | 1946848869               |
| SNP_P4_73080_24147951 | NC_021164.1    | Ca_kabuli_chr05 | 24147951                | TT                              | GG              | 1946848871               |
| SNP_P4_73082_24157268 | NC_021164.1    | Ca_kabuli_chr05 | 24157268                | CC                              | TT              | 1946848873               |
| SNP_P4_73083_24157319 | NC_021164.1    | Ca_kabuli_chr05 | 24157319                | CC                              | TT              | 1946848875               |
| SNP_P4_73084_24157347 | NC_021164.1    | Ca_kabuli_chr05 | 24157347                | AA                              | TT              | 1946848877               |
| SNP_P4_73085_24178939 | NC_021164.1    | Ca_kabuli_chr05 | 24178939                | AA                              | TT              | 1946848879               |
| SNP_P4_73086_24179002 | NC_021164.1    | Ca_kabuli_chr05 | 24179002                | AA                              | CC              | 1946848881               |
| SNP_P4_73087_24220226 | NC_021164.1    | Ca_kabuli_chr05 | 24220226                | GG                              | CC              | 1946848883               |
| SNP_P4_73088_24223696 | NC_021164.1    | Ca_kabuli_chr05 | 24223696                | TT                              | CC              | 1946848885               |
| SNP_P4_73089_24223710 | NC_021164.1    | Ca_kabuli_chr05 | 24223710                | TT                              | CC              | 1946848887               |
| SNP_P4_73090_24223798 | NC_021164.1    | Ca_kabuli_chr05 | 24223798                | TT                              | CC              | 1946848889               |
| SNP_P4_73091_24223887 | NC_021164.1    | Ca_kabuli_chr05 | 24223887                | TT                              | GG              | 1946848891               |
| SNP_P4_73092_24224139 | NC_021164.1    | Ca_kabuli_chr05 | 24224139                | GG                              | TT              | 1946848893               |
| SNP_P4_73093_24224156 | NC_021164.1    | Ca_kabuli_chr05 | 24224156                | TT                              | CC              | 1946848895               |
| SNP_P4_73094_24224219 | NC_021164.1    | Ca_kabuli_chr05 | 24224219                | GG                              | TT              | 1946848897               |
| SNP_P4_73095_24224244 | NC_021164.1    | Ca_kabuli_chr05 | 24224244                | TT                              | GG              | 1946848899               |
| SNP_P4_73096_24224250 | NC_021164.1    | Ca_kabuli_chr05 | 24224250                | TT                              | GG              | 1946848901               |
| SNP_P4_73097_24224259 | NC_021164.1    | Ca_kabuli_chr05 | 24224259                | CC                              | TT              | 1946848903               |
| SNP_P4_73098_24226716 | NC_021164.1    | Ca_kabuli_chr05 | 24226716                | TT                              | CC              | 1946848905               |

| SNPs IDs              | Chromosome IDs | Chromosomes     | Physical positions (bp) | CDC Frontier (Reference genome) | (ILWC46 & LPNB) | NCBI SNPdb Accession IDs |
|-----------------------|----------------|-----------------|-------------------------|---------------------------------|-----------------|--------------------------|
| SNP_P4_73099_24235883 | NC_021164.1    | Ca_kabuli_chr05 | 24235883                | CC                              | TT              | 1946848907               |
| SNP_P4_73100_24251813 | NC_021164.1    | Ca_kabuli_chr05 | 24251813                | CC                              | TT              | 1946848909               |
| SNP_P4_73101_24261236 | NC_021164.1    | Ca_kabuli_chr05 | 24261236                | TT                              | GG              | 1946848911               |
| SNP_P4_73102_24261248 | NC_021164.1    | Ca_kabuli_chr05 | 24261248                | AA                              | CC              | 1946848913               |
| SNP_P4_73103_24261364 | NC_021164.1    | Ca_kabuli_chr05 | 24261364                | GG                              | AA              | 1946848915               |
| SNP_P4_73105_24270348 | NC_021164.1    | Ca_kabuli_chr05 | 24270348                | TT                              | GG              | 1946848918               |
| SNP_P4_73106_24270698 | NC_021164.1    | Ca_kabuli_chr05 | 24270698                | AA                              | GG              | 1946848920               |
| SNP_P4_73107_24270727 | NC_021164.1    | Ca_kabuli_chr05 | 24270727                | AA                              | GG              | 1946848922               |
| SNP_P4_73108_24270756 | NC_021164.1    | Ca_kabuli_chr05 | 24270756                | CC                              | TT              | 1946848924               |
| SNP_P4_73109_24270798 | NC_021164.1    | Ca_kabuli_chr05 | 24270798                | TT                              | GG              | 1946848926               |
| SNP_P4_73110_24270825 | NC_021164.1    | Ca_kabuli_chr05 | 24270825                | GG                              | AA              | 1946848928               |
| SNP_P4_73111_24277139 | NC_021164.1    | Ca_kabuli_chr05 | 24277139                | AA                              | GG              | 1946848930               |
| SNP_P4_73112_24277168 | NC_021164.1    | Ca_kabuli_chr05 | 24277168                | AA                              | GG              | 1946848932               |
| SNP_P4_73113_24277172 | NC_021164.1    | Ca_kabuli_chr05 | 24277172                | AA                              | GG              | 1946848934               |
| SNP_P4_73114_24277713 | NC_021164.1    | Ca_kabuli_chr05 | 24277713                | TT                              | GG              | 1946848936               |
| SNP_P4_73115_24277727 | NC_021164.1    | Ca_kabuli_chr05 | 24277727                | AA                              | TT              | 1946848938               |
| SNP_P4_73116_24297764 | NC_021164.1    | Ca_kabuli_chr05 | 24297764                | AA                              | TT              | 1946848940               |
| SNP_P4_73117_24297807 | NC_021164.1    | Ca_kabuli_chr05 | 24297807                | CC                              | AA              | 1946848942               |
| SNP_P4_73119_24300515 | NC_021164.1    | Ca_kabuli_chr05 | 24300515                | AA                              | GG              | 1946848945               |
| SNP_P4_73120_24300516 | NC_021164.1    | Ca_kabuli_chr05 | 24300516                | AA                              | GG              | 1946848947               |
| SNP_P4_73121_24300954 | NC_021164.1    | Ca_kabuli_chr05 | 24300954                | AA                              | GG              | 1946848949               |
| SNP_P4_73122_24300995 | NC_021164.1    | Ca_kabuli_chr05 | 24300995                | GG                              | CC              | 1946848951               |
| SNP_P4_73123_24302287 | NC_021164.1    | Ca_kabuli_chr05 | 24302287                | AA                              | TT              | 1946848953               |
| SNP_P4_73124_24302290 | NC_021164.1    | Ca_kabuli_chr05 | 24302290                | GG                              | AA              | 1946848955               |
| SNP_P4_73125_24302324 | NC_021164.1    | Ca_kabuli_chr05 | 24302324                | TT                              | CC              | 1946848957               |
| SNP_P4_73126_24302326 | NC_021164.1    | Ca_kabuli_chr05 | 24302326                | AA                              | GG              | 1946848959               |
| SNP_P4_73127_24302327 | NC_021164.1    | Ca_kabuli_chr05 | 24302327                | AA                              | CC              | 1946848961               |
| SNP_P4_73128_24302333 | NC_021164.1    | Ca_kabuli_chr05 | 24302333                | GG                              | AA              | 1946848963               |
| SNP_P4_73129_24302345 | NC_021164.1    | Ca_kabuli_chr05 | 24302345                | CC                              | TT              | 1946848965               |
| SNP_P4_73130_24302374 | NC_021164.1    | Ca_kabuli_chr05 | 24302374                | AA                              | TT              | 1946848967               |
| SNP_P4_73131_24326797 | NC_021164.1    | Ca_kabuli_chr05 | 24326797                | GG                              | AA              | 1946848969               |
| SNP_P4_73132_24327693 | NC_021164.1    | Ca_kabuli_chr05 | 24327693                | AA                              | CC              | 1946848971               |
| SNP_P4_73133_24327708 | NC_021164.1    | Ca_kabuli_chr05 | 24327708                | AA                              | GG              | 1946848974               |
| SNP_P4_73134_24327821 | NC_021164.1    | Ca_kabuli_chr05 | 24327821                | TT                              | AA              | 1946848976               |
| SNP_P4_73135_24327880 | NC_021164.1    | Ca_kabuli_chr05 | 24327880                | AA                              | GG              | 1946848978               |
| SNP_P4_73136_24327903 | NC_021164.1    | Ca_kabuli_chr05 | 24327903                | CC                              | TT              | 1946848980               |
| SNP_P4_73137_24328122 | NC_021164.1    | Ca_kabuli_chr05 | 24328122                | TT                              | CC              | 1946848982               |
| SNP_P4_73138_24392151 | NC_021164.1    | Ca_kabuli_chr05 | 24392151                | TT                              | AA              | 1946848984               |
| SNP_P4_73139_24440144 | NC_021164.1    | Ca_kabuli_chr05 | 24440144                | AA                              | GG              | 1946848986               |
| SNP_P4_73140_24447137 | NC_021164.1    | Ca_kabuli_chr05 | 24447137                | TT                              | AA              | 1946848988               |
| SNP_P4_73141_24452364 | NC_021164.1    | Ca_kabuli_chr05 | 24452364                | CC                              | TT              | 1946848990               |
| SNP_P4_73142_24488052 | NC_021164.1    | Ca_kabuli_chr05 | 24488052                | TT                              | CC              | 1946848992               |

| SNPs IDs              | Chromosome IDs | Chromosomes     | Physical positions (bp) | CDC Frontier (Reference genome) | (ILWC46 & LPNB) | NCBI SNPdb Accession IDs |
|-----------------------|----------------|-----------------|-------------------------|---------------------------------|-----------------|--------------------------|
| SNP_P4_73143_24498439 | NC_021164.1    | Ca_kabuli_chr05 | 24498439                | AA                              | GG              | 1946848995               |
| SNP_P4_73144_24505821 | NC_021164.1    | Ca_kabuli_chr05 | 24505821                | CC                              | TT              | 1946848997               |
| SNP_P4_73145_24505836 | NC_021164.1    | Ca_kabuli_chr05 | 24505836                | AA                              | GG              | 1946848999               |
| SNP_P4_73146_24505912 | NC_021164.1    | Ca_kabuli_chr05 | 24505912                | AA                              | GG              | 1946849001               |
| SNP_P4_73148_24532449 | NC_021164.1    | Ca_kabuli_chr05 | 24532449                | CC                              | TT              | 1946849003               |
| SNP_P4_73149_24532530 | NC_021164.1    | Ca_kabuli_chr05 | 24532530                | CC                              | TT              | 1946849005               |
| SNP_P4_73150_24532540 | NC_021164.1    | Ca_kabuli_chr05 | 24532540                | AA                              | GG              | 1946849007               |
| SNP_P4_73151_24532548 | NC_021164.1    | Ca_kabuli_chr05 | 24532548                | TT                              | CC              | 1946849009               |
| SNP_P4_73152_24532604 | NC_021164.1    | Ca_kabuli_chr05 | 24532604                | GG                              | AA              | 1946849011               |
| SNP_P4_73153_24532819 | NC_021164.1    | Ca_kabuli_chr05 | 24532819                | AA                              | TT              | 1946849013               |
| SNP_P4_73155_24532855 | NC_021164.1    | Ca_kabuli_chr05 | 24532855                | TT                              | CC              | 1946849015               |
| SNP_P4_73156_24532883 | NC_021164.1    | Ca_kabuli_chr05 | 24532883                | GG                              | AA              | 1946849017               |
| SNP_P4_73157_24532904 | NC_021164.1    | Ca_kabuli_chr05 | 24532904                | CC                              | TT              | 1946849019               |
| SNP_P4_73158_24533815 | NC_021164.1    | Ca_kabuli_chr05 | 24533815                | GG                              | AA              | 1946849021               |
| SNP_P4_73159_24533968 | NC_021164.1    | Ca_kabuli_chr05 | 24533968                | AA                              | CC              | 1946849023               |
| SNP_P4_73160_24534632 | NC_021164.1    | Ca_kabuli_chr05 | 24534632                | TT                              | CC              | 1946849025               |
| SNP_P4_73161_24571965 | NC_021164.1    | Ca_kabuli_chr05 | 24571965                | TT                              | GG              | 1946849027               |
| SNP_P4_73162_24576561 | NC_021164.1    | Ca_kabuli_chr05 | 24576561                | AA                              | GG              | 1946849029               |
| SNP_P4_73163_24576593 | NC_021164.1    | Ca_kabuli_chr05 | 24576593                | TT                              | CC              | 1946849031               |
| SNP_P4_73164_24581358 | NC_021164.1    | Ca_kabuli_chr05 | 24581358                | CC                              | TT              | 1946849033               |
| SNP_P4_73165_24581367 | NC_021164.1    | Ca_kabuli_chr05 | 24581367                | CC                              | TT              | 1946849035               |
| SNP_P4_73166_24611746 | NC_021164.1    | Ca_kabuli_chr05 | 24611746                | TT                              | GG              | 1946849037               |
| SNP_P4_73168_24639135 | NC_021164.1    | Ca_kabuli_chr05 | 24639135                | TT                              | GG              | 1946849039               |
| SNP_P4_73169_24639254 | NC_021164.1    | Ca_kabuli_chr05 | 24639254                | TT                              | CC              | 1946849041               |
| SNP_P4_73170_24639522 | NC_021164.1    | Ca_kabuli_chr05 | 24639522                | GG                              | AA              | 1946849043               |
| SNP_P4_73171_24648713 | NC_021164.1    | Ca_kabuli_chr05 | 24648713                | TT                              | CC              | 1946849045               |
| SNP_P4_73172_24697575 | NC_021164.1    | Ca_kabuli_chr05 | 24697575                | TT                              | AA              | 1946849047               |
| SNP_P4_73173_24697576 | NC_021164.1    | Ca_kabuli_chr05 | 24697576                | AA                              | TT              | 1946849049               |
| SNP_P4_73175_24747179 | NC_021164.1    | Ca_kabuli_chr05 | 24747179                | AA                              | GG              | 1946849051               |
| SNP_P4_73176_24747587 | NC_021164.1    | Ca_kabuli_chr05 | 24747587                | CC                              | AA              | 1946849053               |
| SNP_P4_73178_24752512 | NC_021164.1    | Ca_kabuli_chr05 | 24752512                | CC                              | TT              | 1946849055               |
| SNP_P4_73179_24752529 | NC_021164.1    | Ca_kabuli_chr05 | 24752529                | TT                              | CC              | 1946849057               |
| SNP_P4_73180_24755888 | NC_021164.1    | Ca_kabuli_chr05 | 24755888                | TT                              | AA              | 1946849059               |
| SNP_P4_73181_24755893 | NC_021164.1    | Ca_kabuli_chr05 | 24755893                | GG                              | TT              | 1946849061               |
| SNP_P4_73182_24755919 | NC_021164.1    | Ca_kabuli_chr05 | 24755919                | CC                              | TT              | 1946849063               |
| SNP_P4_73183_24755921 | NC_021164.1    | Ca_kabuli_chr05 | 24755921                | AA                              | GG              | 1946849065               |
| SNP_P4_73184_24755948 | NC_021164.1    | Ca_kabuli_chr05 | 24755948                | CC                              | TT              | 1946849067               |
| SNP_P4_73185_24756085 | NC_021164.1    | Ca_kabuli_chr05 | 24756085                | GG                              | CC              | 1946849069               |
| SNP_P4_73186_24756401 | NC_021164.1    | Ca_kabuli_chr05 | 24756401                | AA                              | TT              | 1946849071               |
| SNP_P4_73187_24756459 | NC_021164.1    | Ca_kabuli_chr05 | 24756459                | TT                              | CC              | 1946849073               |
| SNP_P4_73188_24756466 | NC_021164.1    | Ca_kabuli_chr05 | 24756466                | CC                              | TT              | 1946849075               |
| SNP_P4_73189_24764359 | NC_021164.1    | Ca_kabuli_chr05 | 24764359                | CC                              | GG              | 1946849077               |

| SNPs IDs              | Chromosome IDs | Chromosomes     | Physical positions (bp) | CDC Frontier (Reference genome) | (ILWC46 & LPNB) | NCBI SNPdb Accession IDs |
|-----------------------|----------------|-----------------|-------------------------|---------------------------------|-----------------|--------------------------|
| SNP_P4_73190_24764505 | NC_021164.1    | Ca_kabuli_chr05 | 24764505                | TT                              | CC              | 1946849079               |
| SNP_P4_73191_24764741 | NC_021164.1    | Ca_kabuli_chr05 | 24764741                | GG                              | AA              | 1946849081               |
| SNP_P4_73192_24764742 | NC_021164.1    | Ca_kabuli_chr05 | 24764742                | TT                              | CC              | 1946849083               |
| SNP_P4_73193_24764942 | NC_021164.1    | Ca_kabuli_chr05 | 24764942                | TT                              | CC              | 1946849085               |
| SNP_P4_73194_24764952 | NC_021164.1    | Ca_kabuli_chr05 | 24764952                | AA                              | GG              | 1946849087               |
| SNP_P4_73195_24764962 | NC_021164.1    | Ca_kabuli_chr05 | 24764962                | CC                              | TT              | 1946849089               |
| SNP_P4_73196_24764979 | NC_021164.1    | Ca_kabuli_chr05 | 24764979                | CC                              | TT              | 1946849091               |
| SNP_P4_73197_24764999 | NC_021164.1    | Ca_kabuli_chr05 | 24764999                | GG                              | AA              | 1946849093               |
| SNP_P4_73199_24822328 | NC_021164.1    | Ca_kabuli_chr05 | 24822328                | AA                              | TT              | 1946849095               |
| SNP_P4_73201_24862023 | NC_021164.1    | Ca_kabuli_chr05 | 24862023                | TT                              | AA              | 1946849097               |
| SNP_P4_73202_24862085 | NC_021164.1    | Ca_kabuli_chr05 | 24862085                | TT                              | CC              | 1946849100               |
| SNP_P4_73203_24862734 | NC_021164.1    | Ca_kabuli_chr05 | 24862734                | TT                              | AA              | 1946849102               |
| SNP_P4_73204_24863994 | NC_021164.1    | Ca_kabuli_chr05 | 24863994                | AA                              | CC              | 1946849104               |
| SNP_P4_73205_24877812 | NC_021164.1    | Ca_kabuli_chr05 | 24877812                | GG                              | TT              | 1946849106               |
| SNP_P4_73207_24910390 | NC_021164.1    | Ca_kabuli_chr05 | 24910390                | AA                              | GG              | 1946849108               |
| SNP_P4_73208_24910412 | NC_021164.1    | Ca_kabuli_chr05 | 24910412                | AA                              | GG              | 1946849110               |
| SNP_P4_73209_24915371 | NC_021164.1    | Ca_kabuli_chr05 | 24915371                | GG                              | AA              | 1946849112               |
| SNP_P4_73210_24922969 | NC_021164.1    | Ca_kabuli_chr05 | 24922969                | TT                              | GG              | 1946849114               |
| SNP_P4_73211_24922987 | NC_021164.1    | Ca_kabuli_chr05 | 24922987                | CC                              | AA              | 1946849116               |
| SNP_P4_73212_24923629 | NC_021164.1    | Ca_kabuli_chr05 | 24923629                | TT                              | CC              | 1946849118               |
| SNP_P4_73213_24923632 | NC_021164.1    | Ca_kabuli_chr05 | 24923632                | TT                              | AA              | 1946849120               |
| SNP_P4_73214_24928850 | NC_021164.1    | Ca_kabuli_chr05 | 24928850                | GG                              | AA              | 1946849122               |
| SNP_P4_73216_24943592 | NC_021164.1    | Ca_kabuli_chr05 | 24943592                | GG                              | AA              | 1946849124               |
| SNP_P4_73217_24960390 | NC_021164.1    | Ca_kabuli_chr05 | 24960390                | AA                              | GG              | 1946849126               |
| SNP_P4_73219_24982143 | NC_021164.1    | Ca_kabuli_chr05 | 24982143                | GG                              | AA              | 1946849128               |
| SNP_P4_73221_24994903 | NC_021164.1    | Ca_kabuli_chr05 | 24994903                | AA                              | GG              | 1946849130               |
| SNP_P4_73222_24994915 | NC_021164.1    | Ca_kabuli_chr05 | 24994915                | AA                              | GG              | 1946849133               |
| SNP_P4_73223_24994939 | NC_021164.1    | Ca_kabuli_chr05 | 24994939                | AA                              | GG              | 1946849135               |
| SNP_P4_73224_24994994 | NC_021164.1    | Ca_kabuli_chr05 | 24994994                | AA                              | GG              | 1946849137               |
| SNP_P4_73225_25027123 | NC_021164.1    | Ca_kabuli_chr05 | 25027123                | AA                              | TT              | 1946849139               |
| SNP_P4_73227_25040355 | NC_021164.1    | Ca_kabuli_chr05 | 25040355                | TT                              | CC              | 1946849141               |
| SNP_P4_73228_25041909 | NC_021164.1    | Ca_kabuli_chr05 | 25041909                | GG                              | AA              | 1946849143               |
| SNP_P4_73229_25106662 | NC_021164.1    | Ca_kabuli_chr05 | 25106662                | AA                              | GG              | 1946849145               |
| SNP_P4_73230_25107702 | NC_021164.1    | Ca_kabuli_chr05 | 25107702                | CC                              | TT              | 1946849147               |
| SNP_P4_73231_25120661 | NC_021164.1    | Ca_kabuli_chr05 | 25120661                | GG                              | AA              | 1946849149               |
| SNP_P4_73233_25140422 | NC_021164.1    | Ca_kabuli_chr05 | 25140422                | TT                              | CC              | 1946849151               |
| SNP_P4_73234_25159675 | NC_021164.1    | Ca_kabuli_chr05 | 25159675                | TT                              | CC              | 1946849153               |
| SNP_P4_73235_25165836 | NC_021164.1    | Ca_kabuli_chr05 | 25165836                | TT                              | AA              | 1946849155               |
| SNP_P4_73236_25186064 | NC_021164.1    | Ca_kabuli_chr05 | 25186064                | CC                              | TT              | 1946849157               |
| SNP_P4_73239_25230823 | NC_021164.1    | Ca_kabuli_chr05 | 25230823                | TT                              | AA              | 1946849159               |
| SNP_P4_73240_25230834 | NC_021164.1    | Ca_kabuli_chr05 | 25230834                | GG                              | AA              | 1946849161               |
| SNP_P4_73241_25230835 | NC_021164.1    | Ca_kabuli_chr05 | 25230835                | AA                              | CC              | 1946849163               |



| SNPs IDs              | Chromosome IDs | Chromosomes     | Physical positions (bp) | CDC Frontier (Reference genome) | (ILWC46 & LPNB) | NCBI SNPdb Accession IDs |
|-----------------------|----------------|-----------------|-------------------------|---------------------------------|-----------------|--------------------------|
| SNP_P4_73242_25230879 | NC_021164.1    | Ca_kabuli_chr05 | 25230879                | CC                              | AA              | 1946849165               |
| SNP_P4_73243_25230897 | NC_021164.1    | Ca_kabuli_chr05 | 25230897                | TT                              | AA              | 1946849167               |
| SNP_P4_73244_25232440 | NC_021164.1    | Ca_kabuli_chr05 | 25232440                | TT                              | CC              | 1946849169               |
| SNP_P4_73245_25232455 | NC_021164.1    | Ca_kabuli_chr05 | 25232455                | GG                              | CC              | 1946849171               |
| SNP_P4_73246_25232466 | NC_021164.1    | Ca_kabuli_chr05 | 25232466                | AA                              | CC              | 1946849173               |
| SNP_P4_73248_25232512 | NC_021164.1    | Ca_kabuli_chr05 | 25232512                | AA                              | CC              | 1946849175               |
| SNP_P4_73249_25232520 | NC_021164.1    | Ca_kabuli_chr05 | 25232520                | TT                              | CC              | 1946849177               |
| SNP_P4_73250_25232530 | NC_021164.1    | Ca_kabuli_chr05 | 25232530                | GG                              | AA              | 1946849179               |
| SNP_P4_73252_25232711 | NC_021164.1    | Ca_kabuli_chr05 | 25232711                | AA                              | TT              | 1946849181               |
| SNP_P4_73253_25232850 | NC_021164.1    | Ca_kabuli_chr05 | 25232850                | GG                              | AA              | 1946849183               |
| SNP_P4_73254_25235983 | NC_021164.1    | Ca_kabuli_chr05 | 25235983                | AA                              | CC              | 1946849185               |
| SNP_P4_73255_25243049 | NC_021164.1    | Ca_kabuli_chr05 | 25243049                | AA                              | TT              | 1946849187               |
| SNP_P4_73256_25243441 | NC_021164.1    | Ca_kabuli_chr05 | 25243441                | GG                              | AA              | 1946849189               |
| SNP_P4_73257_25245845 | NC_021164.1    | Ca_kabuli_chr05 | 25245845                | TT                              | CC              | 1946849191               |
| SNP_P4_73258_25245858 | NC_021164.1    | Ca_kabuli_chr05 | 25245858                | AA                              | GG              | 1946849193               |
| SNP_P4_73259_25245886 | NC_021164.1    | Ca_kabuli_chr05 | 25245886                | AA                              | CC              | 1946849195               |
| SNP_P4_73260_25246049 | NC_021164.1    | Ca_kabuli_chr05 | 25246049                | AA                              | GG              | 1946849197               |
| SNP_P4_73261_25246214 | NC_021164.1    | Ca_kabuli_chr05 | 25246214                | TT                              | CC              | 1946849199               |
| SNP_P4_73262_25246239 | NC_021164.1    | Ca_kabuli_chr05 | 25246239                | AA                              | CC              | 1946849201               |
| SNP_P4_73263_25246248 | NC_021164.1    | Ca_kabuli_chr05 | 25246248                | AA                              | CC              | 1946849203               |
| SNP_P4_73264_25246374 | NC_021164.1    | Ca_kabuli_chr05 | 25246374                | GG                              | AA              | 1946849205               |
| SNP_P4_73265_25246655 | NC_021164.1    | Ca_kabuli_chr05 | 25246655                | AA                              | GG              | 1946849207               |
| SNP_P4_73266_25246761 | NC_021164.1    | Ca_kabuli_chr05 | 25246761                | GG                              | AA              | 1946849209               |
| SNP_P4_73267_25246762 | NC_021164.1    | Ca_kabuli_chr05 | 25246762                | TT                              | GG              | 1946849211               |
| SNP_P4_73268_25246763 | NC_021164.1    | Ca_kabuli_chr05 | 25246763                | TT                              | CC              | 1946849213               |
| SNP_P4_73269_25246791 | NC_021164.1    | Ca_kabuli_chr05 | 25246791                | AA                              | TT              | 1946849215               |
| SNP_P4_73270_25248719 | NC_021164.1    | Ca_kabuli_chr05 | 25248719                | CC                              | TT              | 1946849217               |
| SNP_P4_73271_25248747 | NC_021164.1    | Ca_kabuli_chr05 | 25248747                | CC                              | AA              | 1946849219               |
| SNP_P4_73272_25264989 | NC_021164.1    | Ca_kabuli_chr05 | 25264989                | CC                              | TT              | 1946849221               |
| SNP_P4_73273_25275121 | NC_021164.1    | Ca_kabuli_chr05 | 25275121                | TT                              | AA              | 1946849223               |
| SNP_P4_73274_25287534 | NC_021164.1    | Ca_kabuli_chr05 | 25287534                | GG                              | TT              | 1946849225               |
| SNP_P4_73275_25288153 | NC_021164.1    | Ca_kabuli_chr05 | 25288153                | GG                              | AA              | 1946849227               |
| SNP_P4_73276_25298830 | NC_021164.1    | Ca_kabuli_chr05 | 25298830                | GG                              | AA              | 1946849229               |
| SNP_P4_73277_25298833 | NC_021164.1    | Ca_kabuli_chr05 | 25298833                | AA                              | TT              | 1946849231               |
| SNP_P4_73278_25298888 | NC_021164.1    | Ca_kabuli_chr05 | 25298888                | TT                              | AA              | 1946849233               |
| SNP_P4_73279_25298890 | NC_021164.1    | Ca_kabuli_chr05 | 25298890                | CC                              | TT              | 1946849235               |
| SNP_P4_73280_25298900 | NC_021164.1    | Ca_kabuli_chr05 | 25298900                | TT                              | AA              | 1946849237               |
| SNP_P4_73281_25298901 | NC_021164.1    | Ca_kabuli_chr05 | 25298901                | CC                              | AA              | 1946849239               |
| SNP_P4_73282_25299069 | NC_021164.1    | Ca_kabuli_chr05 | 25299069                | CC                              | TT              | 1946849241               |
| SNP_P4_73283_25299074 | NC_021164.1    | Ca_kabuli_chr05 | 25299074                | AA                              | GG              | 1946849243               |
| SNP_P4_73284_25301733 | NC_021164.1    | Ca_kabuli_chr05 | 25301733                | TT                              | CC              | 1946849245               |
| SNP_P4_73285_25304276 | NC_021164.1    | Ca_kabuli_chr05 | 25304276                | AA                              | TT              | 1946849247               |

| SNPs IDs              | Chromosome IDs | Chromosomes     | Physical positions (bp) | CDC Frontier (Reference genome) | (ILWC46 & LPNB) | NCBI SNPdb Accession IDs |
|-----------------------|----------------|-----------------|-------------------------|---------------------------------|-----------------|--------------------------|
| SNP_P4_73286_25304290 | NC_021164.1    | Ca_kabuli_chr05 | 25304290                | TT                              | GG              | 1946849249               |
| SNP_P4_73287_25304307 | NC_021164.1    | Ca_kabuli_chr05 | 25304307                | TT                              | CC              | 1946849251               |
| SNP_P4_73288_25304311 | NC_021164.1    | Ca_kabuli_chr05 | 25304311                | GG                              | TT              | 1946849253               |
| SNP_P4_73289_25304447 | NC_021164.1    | Ca_kabuli_chr05 | 25304447                | TT                              | CC              | 1946849255               |
| SNP_P4_73290_25317329 | NC_021164.1    | Ca_kabuli_chr05 | 25317329                | TT                              | CC              | 1946849257               |
| SNP_P4_73291_25354605 | NC_021164.1    | Ca_kabuli_chr05 | 25354605                | CC                              | AA              | 1946849259               |
| SNP_P4_73292_25362947 | NC_021164.1    | Ca_kabuli_chr05 | 25362947                | AA                              | GG              | 1946849261               |
| SNP_P4_73293_25362949 | NC_021164.1    | Ca_kabuli_chr05 | 25362949                | TT                              | GG              | 1946849263               |
| SNP_P4_73294_25373699 | NC_021164.1    | Ca_kabuli_chr05 | 25373699                | CC                              | TT              | 1946849265               |
| SNP_P4_73295_25373712 | NC_021164.1    | Ca_kabuli_chr05 | 25373712                | AA                              | GG              | 1946849267               |
| SNP_P4_73297_25391240 | NC_021164.1    | Ca_kabuli_chr05 | 25391240                | CC                              | AA              | 1946849269               |
| SNP_P4_73298_25399115 | NC_021164.1    | Ca_kabuli_chr05 | 25399115                | TT                              | GG              | 1946849271               |
| SNP_P4_73299_25424017 | NC_021164.1    | Ca_kabuli_chr05 | 25424017                | AA                              | CC              | 1946849273               |
| SNP_P4_73300_25424032 | NC_021164.1    | Ca_kabuli_chr05 | 25424032                | CC                              | TT              | 1946849275               |
| SNP_P4_73301_25424056 | NC_021164.1    | Ca_kabuli_chr05 | 25424056                | TT                              | CC              | 1946849277               |
| SNP_P4_73302_25426290 | NC_021164.1    | Ca_kabuli_chr05 | 25426290                | TT                              | AA              | 1946849279               |
| SNP_P4_73303_25433829 | NC_021164.1    | Ca_kabuli_chr05 | 25433829                | TT                              | AA              | 1946849281               |
| SNP_P4_73304_25439352 | NC_021164.1    | Ca_kabuli_chr05 | 25439352                | TT                              | GG              | 1946849283               |
| SNP_P4_73305_25464920 | NC_021164.1    | Ca_kabuli_chr05 | 25464920                | AA                              | GG              | 1946849285               |
| SNP_P4_73306_25491103 | NC_021164.1    | Ca_kabuli_chr05 | 25491103                | TT                              | CC              | 1946849287               |
| SNP_P4_73307_25520927 | NC_021164.1    | Ca_kabuli_chr05 | 25520927                | GG                              | TT              | 1946849289               |
| SNP_P4_73308_25521078 | NC_021164.1    | Ca_kabuli_chr05 | 25521078                | CC                              | TT              | 1946849291               |
| SNP_P4_73309_25521118 | NC_021164.1    | Ca_kabuli_chr05 | 25521118                | CC                              | AA              | 1946849293               |
| SNP_P4_73310_25522140 | NC_021164.1    | Ca_kabuli_chr05 | 25522140                | CC                              | GG              | 1946849295               |
| SNP_P4_73311_25524459 | NC_021164.1    | Ca_kabuli_chr05 | 25524459                | AA                              | CC              | 1946849297               |
| SNP_P4_73312_25528141 | NC_021164.1    | Ca_kabuli_chr05 | 25528141                | TT                              | CC              | 1946849299               |
| SNP_P4_73313_25528157 | NC_021164.1    | Ca_kabuli_chr05 | 25528157                | TT                              | CC              | 1946849301               |
| SNP_P4_73314_25531157 | NC_021164.1    | Ca_kabuli_chr05 | 25531157                | CC                              | TT              | 1946849303               |
| SNP_P4_73316_25546423 | NC_021164.1    | Ca_kabuli_chr05 | 25546423                | TT                              | CC              | 1946849305               |
| SNP_P4_73317_25555630 | NC_021164.1    | Ca_kabuli_chr05 | 25555630                | CC                              | TT              | 1946849307               |
| SNP_P4_73318_25557608 | NC_021164.1    | Ca_kabuli_chr05 | 25557608                | AA                              | GG              | 1946849309               |
| SNP_P4_73319_25558820 | NC_021164.1    | Ca_kabuli_chr05 | 25558820                | TT                              | CC              | 1946849311               |
| SNP_P4_73321_25578113 | NC_021164.1    | Ca_kabuli_chr05 | 25578113                | AA                              | CC              | 1946849313               |
| SNP_P4_73323_25602692 | NC_021164.1    | Ca_kabuli_chr05 | 25602692                | AA                              | TT              | 1946849315               |
| SNP_P4_73324_25614796 | NC_021164.1    | Ca_kabuli_chr05 | 25614796                | GG                              | AA              | 1946849317               |
| SNP_P4_73327_25656626 | NC_021164.1    | Ca_kabuli_chr05 | 25656626                | AA                              | CC              | 1946849319               |
| SNP_P4_73328_25657008 | NC_021164.1    | Ca_kabuli_chr05 | 25657008                | TT                              | CC              | 1946849321               |
| SNP_P4_73329_25657056 | NC_021164.1    | Ca_kabuli_chr05 | 25657056                | CC                              | TT              | 1946849323               |
| SNP_P4_73330_25657073 | NC_021164.1    | Ca_kabuli_chr05 | 25657073                | CC                              | TT              | 1946849325               |
| SNP_P4_73333_25662141 | NC_021164.1    | Ca_kabuli_chr05 | 25662141                | TT                              | CC              | 1946849327               |
| SNP_P4_73334_25690627 | NC_021164.1    | Ca_kabuli_chr05 | 25690627                | TT                              | AA              | 1946849329               |
| SNP_P4_73335_25690880 | NC_021164.1    | Ca_kabuli_chr05 | 25690880                | AA                              | GG              | 1946849331               |

| SNPs IDs              | Chromosome IDs | Chromosomes     | Physical positions (bp) | CDC Frontier (Reference genome) | (ILWC46 & LPNB) | NCBI SNPdb Accession IDs |
|-----------------------|----------------|-----------------|-------------------------|---------------------------------|-----------------|--------------------------|
| SNP_P4_73336_25690882 | NC_021164.1    | Ca_kabuli_chr05 | 25690882                | TT                              | GG              | 1946849333               |
| SNP_P4_73337_25693342 | NC_021164.1    | Ca_kabuli_chr05 | 25693342                | GG                              | AA              | 1946849335               |
| SNP_P4_73338_25733650 | NC_021164.1    | Ca_kabuli_chr05 | 25733650                | AA                              | GG              | 1946849338               |
| SNP_P4_73339_25733677 | NC_021164.1    | Ca_kabuli_chr05 | 25733677                | TT                              | CC              | 1946849340               |
| SNP_P4_73340_25733984 | NC_021164.1    | Ca_kabuli_chr05 | 25733984                | TT                              | CC              | 1946849342               |
| SNP_P4_73341_25734035 | NC_021164.1    | Ca_kabuli_chr05 | 25734035                | TT                              | CC              | 1946849344               |
| SNP_P4_73342_25734075 | NC_021164.1    | Ca_kabuli_chr05 | 25734075                | GG                              | CC              | 1946849346               |
| SNP_P4_73343_25734090 | NC_021164.1    | Ca_kabuli_chr05 | 25734090                | GG                              | AA              | 1946849348               |
| SNP_P4_73345_25769500 | NC_021164.1    | Ca_kabuli_chr05 | 25769500                | AA                              | GG              | 1946849350               |
| SNP_P4_73346_25769643 | NC_021164.1    | Ca_kabuli_chr05 | 25769643                | AA                              | GG              | 1946849352               |
| SNP_P4_73349_25789328 | NC_021164.1    | Ca_kabuli_chr05 | 25789328                | AA                              | CC              | 1946849354               |
| SNP_P4_73350_25802216 | NC_021164.1    | Ca_kabuli_chr05 | 25802216                | AA                              | GG              | 1946849356               |
| SNP_P4_73352_25802262 | NC_021164.1    | Ca_kabuli_chr05 | 25802262                | GG                              | AA              | 1946849358               |
| SNP_P4_73353_25803726 | NC_021164.1    | Ca_kabuli_chr05 | 25803726                | CC                              | GG              | 1946849360               |
| SNP_P4_73354_25803731 | NC_021164.1    | Ca_kabuli_chr05 | 25803731                | CC                              | TT              | 1946849362               |
| SNP_P4_73356_25803883 | NC_021164.1    | Ca_kabuli_chr05 | 25803883                | TT                              | GG              | 1946849364               |
| SNP_P4_73357_25803912 | NC_021164.1    | Ca_kabuli_chr05 | 25803912                | TT                              | CC              | 1946849366               |
| SNP_P4_73358_25804029 | NC_021164.1    | Ca_kabuli_chr05 | 25804029                | GG                              | AA              | 1946849368               |
| SNP_P4_73359_25804093 | NC_021164.1    | Ca_kabuli_chr05 | 25804093                | CC                              | TT              | 1946849370               |
| SNP_P4_73360_25804190 | NC_021164.1    | Ca_kabuli_chr05 | 25804190                | CC                              | TT              | 1946849372               |
| SNP_P4_73361_25804195 | NC_021164.1    | Ca_kabuli_chr05 | 25804195                | TT                              | AA              | 1946849374               |
| SNP_P4_73362_25804254 | NC_021164.1    | Ca_kabuli_chr05 | 25804254                | CC                              | TT              | 1946849376               |
| SNP_P4_73363_25804256 | NC_021164.1    | Ca_kabuli_chr05 | 25804256                | AA                              | TT              | 1946849378               |
| SNP_P4_73364_25804289 | NC_021164.1    | Ca_kabuli_chr05 | 25804289                | TT                              | CC              | 1946849380               |
| SNP_P4_73365_25809970 | NC_021164.1    | Ca_kabuli_chr05 | 25809970                | CC                              | TT              | 1946849382               |
| SNP_P4_73366_25810020 | NC_021164.1    | Ca_kabuli_chr05 | 25810020                | GG                              | AA              | 1946849384               |
| SNP_P4_73368_25836446 | NC_021164.1    | Ca_kabuli_chr05 | 25836446                | CC                              | AA              | 1946849386               |
| SNP_P4_73370_25836538 | NC_021164.1    | Ca_kabuli_chr05 | 25836538                | TT                              | AA              | 1946849388               |
| SNP_P4_73371_25836635 | NC_021164.1    | Ca_kabuli_chr05 | 25836635                | CC                              | TT              | 1946849390               |
| SNP_P4_73372_25836690 | NC_021164.1    | Ca_kabuli_chr05 | 25836690                | AA                              | CC              | 1946849392               |
| SNP_P4_73373_25836706 | NC_021164.1    | Ca_kabuli_chr05 | 25836706                | TT                              | CC              | 1946849394               |
| SNP_P4_73374_25840875 | NC_021164.1    | Ca_kabuli_chr05 | 25840875                | CC                              | TT              | 1946849396               |
| SNP_P4_73375_25840887 | NC_021164.1    | Ca_kabuli_chr05 | 25840887                | TT                              | CC              | 1946849398               |
| SNP_P4_73376_25847787 | NC_021164.1    | Ca_kabuli_chr05 | 25847787                | GG                              | TT              | 1946849400               |
| SNP_P4_73377_25847793 | NC_021164.1    | Ca_kabuli_chr05 | 25847793                | TT                              | CC              | 1946849402               |
| SNP_P4_73378_25847880 | NC_021164.1    | Ca_kabuli_chr05 | 25847880                | AA                              | CC              | 1946849404               |
| SNP_P4_73379_25855120 | NC_021164.1    | Ca_kabuli_chr05 | 25855120                | GG                              | AA              | 1946849406               |
| SNP_P4_73381_25861494 | NC_021164.1    | Ca_kabuli_chr05 | 25861494                | TT                              | CC              | 1946849408               |
| SNP_P4_73382_25861512 | NC_021164.1    | Ca_kabuli_chr05 | 25861512                | TT                              | AA              | 1946849410               |
| SNP_P4_73385_25896597 | NC_021164.1    | Ca_kabuli_chr05 | 25896597                | AA                              | GG              | 1946849412               |
| SNP_P4_73387_25902942 | NC_021164.1    | Ca_kabuli_chr05 | 25902942                | TT                              | GG              | 1946849414               |
| SNP_P4_73389_25948241 | NC_021164.1    | Ca_kabuli_chr05 | 25948241                | TT                              | GG              | 1946849416               |

| SNPs IDs              | Chromosome IDs | Chromosomes     | Physical positions (bp) | CDC Frontier (Reference genome) | (ILWC46 & LPNB) | NCBI SNPdb Accession IDs |
|-----------------------|----------------|-----------------|-------------------------|---------------------------------|-----------------|--------------------------|
| SNP_P4_73390_25948263 | NC_021164.1    | Ca_kabuli_chr05 | 25948263                | TT                              | GG              | 1946849418               |
| SNP_P4_73391_25955128 | NC_021164.1    | Ca_kabuli_chr05 | 25955128                | TT                              | CC              | 1946849420               |
| SNP_P4_73392_25955187 | NC_021164.1    | Ca_kabuli_chr05 | 25955187                | TT                              | CC              | 1946849422               |
| SNP_P4_73393_25967565 | NC_021164.1    | Ca_kabuli_chr05 | 25967565                | CC                              | TT              | 1946849425               |
| SNP_P4_73394_25985508 | NC_021164.1    | Ca_kabuli_chr05 | 25985508                | AA                              | GG              | 1946849427               |
| SNP_P4_73395_26004663 | NC_021164.1    | Ca_kabuli_chr05 | 26004663                | GG                              | AA              | 1946849429               |
| SNP_P4_73396_26041712 | NC_021164.1    | Ca_kabuli_chr05 | 26041712                | AA                              | CC              | 1946849432               |
| SNP_P4_73397_26041713 | NC_021164.1    | Ca_kabuli_chr05 | 26041713                | TT                              | AA              | 1946849434               |
| SNP_P4_73398_26077290 | NC_021164.1    | Ca_kabuli_chr05 | 26077290                | AA                              | GG              | 1946849436               |
| SNP_P4_73399_26077341 | NC_021164.1    | Ca_kabuli_chr05 | 26077341                | CC                              | TT              | 1946849438               |
| SNP_P4_73400_26077393 | NC_021164.1    | Ca_kabuli_chr05 | 26077393                | AA                              | GG              | 1946849440               |
| SNP_P4_73401_26077524 | NC_021164.1    | Ca_kabuli_chr05 | 26077524                | CC                              | AA              | 1946849442               |
| SNP_P4_73402_26077754 | NC_021164.1    | Ca_kabuli_chr05 | 26077754                | GG                              | TT              | 1946849444               |
| SNP_P4_73403_26077808 | NC_021164.1    | Ca_kabuli_chr05 | 26077808                | CC                              | TT              | 1946849446               |
| SNP_P4_73404_26077864 | NC_021164.1    | Ca_kabuli_chr05 | 26077864                | TT                              | GG              | 1946849448               |
| SNP_P4_73405_26078188 | NC_021164.1    | Ca_kabuli_chr05 | 26078188                | GG                              | AA              | 1946849450               |
| SNP_P4_73406_26078219 | NC_021164.1    | Ca_kabuli_chr05 | 26078219                | GG                              | AA              | 1946849452               |
| SNP_P4_73407_26078664 | NC_021164.1    | Ca_kabuli_chr05 | 26078664                | CC                              | AA              | 1946849454               |
| SNP_P4_73408_26094460 | NC_021164.1    | Ca_kabuli_chr05 | 26094460                | AA                              | TT              | 1946849456               |
| SNP_P4_73409_26102181 | NC_021164.1    | Ca_kabuli_chr05 | 26102181                | CC                              | AA              | 1946849458               |
| SNP_P4_73412_26176247 | NC_021164.1    | Ca_kabuli_chr05 | 26176247                | CC                              | TT              | 1946849460               |
| SNP_P4_73413_26217776 | NC_021164.1    | Ca_kabuli_chr05 | 26217776                | TT                              | CC              | 1946849462               |
| SNP_P4_73414_26233295 | NC_021164.1    | Ca_kabuli_chr05 | 26233295                | AA                              | TT              | 1946849464               |
| SNP_P4_73415_26243893 | NC_021164.1    | Ca_kabuli_chr05 | 26243893                | AA                              | GG              | 1946849466               |
| SNP_P4_73417_26263553 | NC_021164.1    | Ca_kabuli_chr05 | 26263553                | TT                              | CC              | 1946849468               |
| SNP_P4_73418_26269688 | NC_021164.1    | Ca_kabuli_chr05 | 26269688                | CC                              | TT              | 1946849470               |
| SNP_P4_73420_26281314 | NC_021164.1    | Ca_kabuli_chr05 | 26281314                | TT                              | AA              | 1946849472               |
| SNP_P4_73421_26285400 | NC_021164.1    | Ca_kabuli_chr05 | 26285400                | TT                              | AA              | 1946849474               |
| SNP_P4_73422_26285409 | NC_021164.1    | Ca_kabuli_chr05 | 26285409                | CC                              | TT              | 1946849476               |
| SNP_P4_73423_26285482 | NC_021164.1    | Ca_kabuli_chr05 | 26285482                | GG                              | AA              | 1946849478               |
| SNP_P4_73424_26285676 | NC_021164.1    | Ca_kabuli_chr05 | 26285676                | CC                              | AA              | 1946849480               |
| SNP_P4_73425_26308208 | NC_021164.1    | Ca_kabuli_chr05 | 26308208                | AA                              | CC              | 1946849482               |
| SNP_P4_73426_26308231 | NC_021164.1    | Ca_kabuli_chr05 | 26308231                | CC                              | TT              | 1946849484               |
| SNP_P4_73427_26308235 | NC_021164.1    | Ca_kabuli_chr05 | 26308235                | TT                              | GG              | 1946849486               |
| SNP_P4_73428_26308258 | NC_021164.1    | Ca_kabuli_chr05 | 26308258                | CC                              | TT              | 1946849488               |
| SNP_P4_73430_26333626 | NC_021164.1    | Ca_kabuli_chr05 | 26333626                | TT                              | CC              | 1946849490               |
| SNP_P4_73431_26333677 | NC_021164.1    | Ca_kabuli_chr05 | 26333677                | AA                              | CC              | 1946849492               |
| SNP_P4_73432_26379452 | NC_021164.1    | Ca_kabuli_chr05 | 26379452                | GG                              | AA              | 1946849494               |
| SNP_P4_73433_26380022 | NC_021164.1    | Ca_kabuli_chr05 | 26380022                | TT                              | CC              | 1946849496               |
| SNP_P4_73434_26391147 | NC_021164.1    | Ca_kabuli_chr05 | 26391147                | AA                              | GG              | 1946849498               |
| SNP_P4_73435_26395735 | NC_021164.1    | Ca_kabuli_chr05 | 26395735                | CC                              | AA              | 1946849500               |
| SNP_P4_73436_26396668 | NC_021164.1    | Ca_kabuli_chr05 | 26396668                | CC                              | AA              | 1946849502               |

| SNPs IDs              | Chromosome IDs | Chromosomes     | Physical positions (bp) | CDC Frontier (Reference genome) | (ILWC46 & LPNB) | NCBI SNPdb Accession IDs |
|-----------------------|----------------|-----------------|-------------------------|---------------------------------|-----------------|--------------------------|
| SNP_P4_73438_26403823 | NC_021164.1    | Ca_kabuli_chr05 | 26403823                | TT                              | CC              | 1946849504               |
| SNP_P4_73439_26416040 | NC_021164.1    | Ca_kabuli_chr05 | 26416040                | AA                              | GG              | 1946849506               |
| SNP_P4_73440_26424859 | NC_021164.1    | Ca_kabuli_chr05 | 26424859                | AA                              | GG              | 1946849508               |
| SNP_P4_73441_26438761 | NC_021164.1    | Ca_kabuli_chr05 | 26438761                | CC                              | AA              | 1946849510               |
| SNP_P4_73442_26449326 | NC_021164.1    | Ca_kabuli_chr05 | 26449326                | CC                              | TT              | 1946849512               |
| SNP_P4_73443_26449343 | NC_021164.1    | Ca_kabuli_chr05 | 26449343                | CC                              | TT              | 1946849514               |
| SNP_P4_73444_26451440 | NC_021164.1    | Ca_kabuli_chr05 | 26451440                | CC                              | GG              | 1946849516               |
| SNP_P4_73445_26454077 | NC_021164.1    | Ca_kabuli_chr05 | 26454077                | TT                              | GG              | 1946849518               |
| SNP_P4_73446_26454136 | NC_021164.1    | Ca_kabuli_chr05 | 26454136                | TT                              | AA              | 1946849520               |
| SNP_P4_73447_26454172 | NC_021164.1    | Ca_kabuli_chr05 | 26454172                | GG                              | AA              | 1946849522               |
| SNP_P4_73448_26454210 | NC_021164.1    | Ca_kabuli_chr05 | 26454210                | GG                              | AA              | 1946849524               |
| SNP_P4_73449_26454469 | NC_021164.1    | Ca_kabuli_chr05 | 26454469                | AA                              | TT              | 1946849526               |
| SNP_P4_73450_26454475 | NC_021164.1    | Ca_kabuli_chr05 | 26454475                | TT                              | GG              | 1946849528               |
| SNP_P4_73451_26454480 | NC_021164.1    | Ca_kabuli_chr05 | 26454480                | TT                              | CC              | 1946849530               |
| SNP_P4_73452_26454499 | NC_021164.1    | Ca_kabuli_chr05 | 26454499                | AA                              | GG              | 1946849532               |
| SNP_P4_73453_26456545 | NC_021164.1    | Ca_kabuli_chr05 | 26456545                | AA                              | GG              | 1946849534               |
| SNP_P4_73454_26456995 | NC_021164.1    | Ca_kabuli_chr05 | 26456995                | TT                              | GG              | 1946849536               |
| SNP_P4_73456_26457062 | NC_021164.1    | Ca_kabuli_chr05 | 26457062                | AA                              | GG              | 1946849538               |
| SNP_P4_73457_26457067 | NC_021164.1    | Ca_kabuli_chr05 | 26457067                | AA                              | GG              | 1946849540               |
| SNP_P4_73458_26457101 | NC_021164.1    | Ca_kabuli_chr05 | 26457101                | GG                              | AA              | 1946849542               |
| SNP_P4_73459_26457104 | NC_021164.1    | Ca_kabuli_chr05 | 26457104                | TT                              | CC              | 1946849544               |
| SNP_P4_73460_26457118 | NC_021164.1    | Ca_kabuli_chr05 | 26457118                | AA                              | GG              | 1946849546               |
| SNP_P4_73461_26457121 | NC_021164.1    | Ca_kabuli_chr05 | 26457121                | TT                              | CC              | 1946849548               |
| SNP_P4_73462_26457135 | NC_021164.1    | Ca_kabuli_chr05 | 26457135                | TT                              | GG              | 1946849550               |
| SNP_P4_73463_26457136 | NC_021164.1    | Ca_kabuli_chr05 | 26457136                | TT                              | GG              | 1946849552               |
| SNP_P4_73464_26457140 | NC_021164.1    | Ca_kabuli_chr05 | 26457140                | TT                              | CC              | 1946849554               |
| SNP_P4_73465_26457176 | NC_021164.1    | Ca_kabuli_chr05 | 26457176                | AA                              | CC              | 1946849556               |
| SNP_P4_73466_26457181 | NC_021164.1    | Ca_kabuli_chr05 | 26457181                | TT                              | CC              | 1946849558               |
| SNP_P4_73467_26461676 | NC_021164.1    | Ca_kabuli_chr05 | 26461676                | CC                              | TT              | 1946849560               |
| SNP_P4_73468_26463127 | NC_021164.1    | Ca_kabuli_chr05 | 26463127                | GG                              | TT              | 1946849562               |
| SNP_P4_73469_26490362 | NC_021164.1    | Ca_kabuli_chr05 | 26490362                | TT                              | CC              | 1946849565               |
| SNP_P4_73470_26512780 | NC_021164.1    | Ca_kabuli_chr05 | 26512780                | TT                              | CC              | 1946849566               |
| SNP_P4_73471_26521330 | NC_021164.1    | Ca_kabuli_chr05 | 26521330                | AA                              | CC              | 1946849569               |
| SNP_P4_73473_26537446 | NC_021164.1    | Ca_kabuli_chr05 | 26537446                | TT                              | CC              | 1946849571               |
| SNP_P4_73476_26587957 | NC_021164.1    | Ca_kabuli_chr05 | 26587957                | CC                              | TT              | 1946849573               |
| SNP_P4_73477_26680631 | NC_021164.1    | Ca_kabuli_chr05 | 26680631                | GG                              | AA              | 1946849575               |
| SNP_P4_73478_26796601 | NC_021164.1    | Ca_kabuli_chr05 | 26796601                | TT                              | CC              | 1946849577               |
| SNP_P4_73479_26799718 | NC_021164.1    | Ca_kabuli_chr05 | 26799718                | CC                              | AA              | 1946849579               |
| SNP_P4_73481_26856682 | NC_021164.1    | Ca_kabuli_chr05 | 26856682                | AA                              | TT              | 1946849581               |
| SNP_P4_73482_26857687 | NC_021164.1    | Ca_kabuli_chr05 | 26857687                | AA                              | GG              | 1946849583               |
| SNP_P4_73485_26889308 | NC_021164.1    | Ca_kabuli_chr05 | 26889308                | CC                              | TT              | 1946849585               |
| SNP_P4_73486_26889327 | NC_021164.1    | Ca_kabuli_chr05 | 26889327                | TT                              | AA              | 1946849587               |

| SNPs IDs              | Chromosome IDs | Chromosomes     | Physical positions (bp) | CDC Frontier (Reference genome) | (ILWC46 & LPNB) | NCBI SNPdb Accession IDs |
|-----------------------|----------------|-----------------|-------------------------|---------------------------------|-----------------|--------------------------|
| SNP_P4_73487_26889404 | NC_021164.1    | Ca_kabuli_chr05 | 26889404                | CC                              | TT              | 1946849589               |
| SNP_P4_73488_26889407 | NC_021164.1    | Ca_kabuli_chr05 | 26889407                | TT                              | GG              | 1946849591               |
| SNP_P4_73490_26889538 | NC_021164.1    | Ca_kabuli_chr05 | 26889538                | GG                              | AA              | 1946849593               |
| SNP_P4_73491_26889539 | NC_021164.1    | Ca_kabuli_chr05 | 26889539                | TT                              | CC              | 1946849595               |
| SNP_P4_73492_26889555 | NC_021164.1    | Ca_kabuli_chr05 | 26889555                | GG                              | AA              | 1946849597               |
| SNP_P4_73493_26889557 | NC_021164.1    | Ca_kabuli_chr05 | 26889557                | TT                              | CC              | 1946849599               |
| SNP_P4_73494_26929010 | NC_021164.1    | Ca_kabuli_chr05 | 26929010                | GG                              | CC              | 1946849601               |
| SNP_P4_73495_26935803 | NC_021164.1    | Ca_kabuli_chr05 | 26935803                | CC                              | AA              | 1946849603               |
| SNP_P4_73496_26987645 | NC_021164.1    | Ca_kabuli_chr05 | 26987645                | TT                              | AA              | 1946849605               |
| SNP_P4_73497_26987679 | NC_021164.1    | Ca_kabuli_chr05 | 26987679                | AA                              | GG              | 1946849607               |
| SNP_P4_73498_26987707 | NC_021164.1    | Ca_kabuli_chr05 | 26987707                | TT                              | CC              | 1946849610               |
| SNP_P4_73499_26987788 | NC_021164.1    | Ca_kabuli_chr05 | 26987788                | AA                              | GG              | 1946849612               |
| SNP_P4_73500_26988136 | NC_021164.1    | Ca_kabuli_chr05 | 26988136                | GG                              | TT              | 1946849614               |
| SNP_P4_73501_26988162 | NC_021164.1    | Ca_kabuli_chr05 | 26988162                | TT                              | CC              | 1946849616               |
| SNP_P4_73502_26988206 | NC_021164.1    | Ca_kabuli_chr05 | 26988206                | CC                              | TT              | 1946849618               |
| SNP_P4_73503_26988211 | NC_021164.1    | Ca_kabuli_chr05 | 26988211                | CC                              | TT              | 1946849620               |
| SNP_P4_73504_26988271 | NC_021164.1    | Ca_kabuli_chr05 | 26988271                | TT                              | CC              | 1946849622               |
| SNP_P4_73505_26988367 | NC_021164.1    | Ca_kabuli_chr05 | 26988367                | TT                              | CC              | 1946849624               |
| SNP_P4_73506_26988417 | NC_021164.1    | Ca_kabuli_chr05 | 26988417                | TT                              | CC              | 1946849626               |
| SNP_P4_73507_26988445 | NC_021164.1    | Ca_kabuli_chr05 | 26988445                | TT                              | CC              | 1946849628               |
| SNP_P4_73508_26988967 | NC_021164.1    | Ca_kabuli_chr05 | 26988967                | AA                              | GG              | 1946849630               |
| SNP_P4_73509_26989104 | NC_021164.1    | Ca_kabuli_chr05 | 26989104                | AA                              | TT              | 1946849633               |
| SNP_P4_73510_26989121 | NC_021164.1    | Ca_kabuli_chr05 | 26989121                | CC                              | TT              | 1946849635               |
| SNP_P4_73512_26989181 | NC_021164.1    | Ca_kabuli_chr05 | 26989181                | TT                              | CC              | 1946849637               |
| SNP_P4_73513_26989268 | NC_021164.1    | Ca_kabuli_chr05 | 26989268                | TT                              | AA              | 1946849639               |
| SNP_P4_73514_26989282 | NC_021164.1    | Ca_kabuli_chr05 | 26989282                | AA                              | CC              | 1946849641               |
| SNP_P4_73515_26989455 | NC_021164.1    | Ca_kabuli_chr05 | 26989455                | TT                              | CC              | 1946849643               |
| SNP_P4_73516_26989457 | NC_021164.1    | Ca_kabuli_chr05 | 26989457                | GG                              | AA              | 1946849645               |
| SNP_P4_73517_26994524 | NC_021164.1    | Ca_kabuli_chr05 | 26994524                | AA                              | TT              | 1946849647               |
| SNP_P4_73518_26994526 | NC_021164.1    | Ca_kabuli_chr05 | 26994526                | TT                              | AA              | 1946849649               |
| SNP_P4_73519_26994527 | NC_021164.1    | Ca_kabuli_chr05 | 26994527                | TT                              | AA              | 1946849651               |
| SNP_P4_73520_26994528 | NC_021164.1    | Ca_kabuli_chr05 | 26994528                | CC                              | GG              | 1946849653               |
| SNP_P4_73521_26994529 | NC_021164.1    | Ca_kabuli_chr05 | 26994529                | TT                              | GG              | 1946849655               |
| SNP_P4_73522_26994530 | NC_021164.1    | Ca_kabuli_chr05 | 26994530                | GG                              | TT              | 1946849657               |
| SNP_P4_73523_26994531 | NC_021164.1    | Ca_kabuli_chr05 | 26994531                | CC                              | TT              | 1946849659               |
| SNP_P4_73524_26994560 | NC_021164.1    | Ca_kabuli_chr05 | 26994560                | CC                              | TT              | 1946849661               |
| SNP_P4_73525_26994609 | NC_021164.1    | Ca_kabuli_chr05 | 26994609                | GG                              | AA              | 1946849663               |
| SNP_P4_73526_26994661 | NC_021164.1    | Ca_kabuli_chr05 | 26994661                | CC                              | AA              | 1946849665               |
| SNP_P4_73527_26994821 | NC_021164.1    | Ca_kabuli_chr05 | 26994821                | TT                              | GG              | 1946849667               |
| SNP_P4_73528_26994864 | NC_021164.1    | Ca_kabuli_chr05 | 26994864                | TT                              | CC              | 1946849669               |
| SNP_P4_73529_26994930 | NC_021164.1    | Ca_kabuli_chr05 | 26994930                | TT                              | CC              | 1946849672               |
| SNP_P4_73530_26994958 | NC_021164.1    | Ca_kabuli_chr05 | 26994958                | TT                              | CC              | 1946849674               |

| SNPs IDs              | Chromosome IDs | Chromosomes     | Physical positions (bp) | CDC Frontier (Reference genome) | (ILWC46 & LPNB) | NCBI SNPdb Accession IDs |
|-----------------------|----------------|-----------------|-------------------------|---------------------------------|-----------------|--------------------------|
| SNP_P4_73531_26994986 | NC_021164.1    | Ca_kabuli_chr05 | 26994986                | TT                              | CC              | 1946849676               |
| SNP_P4_73533_26995062 | NC_021164.1    | Ca_kabuli_chr05 | 26995062                | AA                              | GG              | 1946849678               |
| SNP_P4_73534_26995118 | NC_021164.1    | Ca_kabuli_chr05 | 26995118                | GG                              | AA              | 1946849680               |
| SNP_P4_73535_26995132 | NC_021164.1    | Ca_kabuli_chr05 | 26995132                | AA                              | TT              | 1946849682               |
| SNP_P4_73537_26995983 | NC_021164.1    | Ca_kabuli_chr05 | 26995983                | TT                              | CC              | 1946849684               |
| SNP_P4_73538_26996045 | NC_021164.1    | Ca_kabuli_chr05 | 26996045                | CC                              | AA              | 1946849686               |
| SNP_P4_73539_26996074 | NC_021164.1    | Ca_kabuli_chr05 | 26996074                | TT                              | CC              | 1946849688               |
| SNP_P4_73540_26996096 | NC_021164.1    | Ca_kabuli_chr05 | 26996096                | AA                              | GG              | 1946849690               |
| SNP_P4_73541_26996104 | NC_021164.1    | Ca_kabuli_chr05 | 26996104                | TT                              | CC              | 1946849692               |
| SNP_P4_73542_26996105 | NC_021164.1    | Ca_kabuli_chr05 | 26996105                | TT                              | CC              | 1946849694               |
| SNP_P4_73543_26996106 | NC_021164.1    | Ca_kabuli_chr05 | 26996106                | AA                              | GG              | 1946849696               |
| SNP_P4_73545_26996197 | NC_021164.1    | Ca_kabuli_chr05 | 26996197                | AA                              | GG              | 1946849698               |
| SNP_P4_73546_26996207 | NC_021164.1    | Ca_kabuli_chr05 | 26996207                | TT                              | CC              | 1946849700               |
| SNP_P4_73547_26996218 | NC_021164.1    | Ca_kabuli_chr05 | 26996218                | TT                              | GG              | 1946849702               |
| SNP_P4_73548_26996236 | NC_021164.1    | Ca_kabuli_chr05 | 26996236                | AA                              | GG              | 1946849704               |
| SNP_P4_73549_26996352 | NC_021164.1    | Ca_kabuli_chr05 | 26996352                | TT                              | CC              | 1946849706               |
| SNP_P4_73550_26996382 | NC_021164.1    | Ca_kabuli_chr05 | 26996382                | AA                              | GG              | 1946849708               |
| SNP_P4_73551_26996391 | NC_021164.1    | Ca_kabuli_chr05 | 26996391                | TT                              | GG              | 1946849710               |
| SNP_P4_73552_26996409 | NC_021164.1    | Ca_kabuli_chr05 | 26996409                | AA                              | CC              | 1946849712               |
| SNP_P4_73553_26996436 | NC_021164.1    | Ca_kabuli_chr05 | 26996436                | AA                              | GG              | 1946849714               |
| SNP_P4_73554_26996475 | NC_021164.1    | Ca_kabuli_chr05 | 26996475                | AA                              | GG              | 1946849716               |
| SNP_P4_73555_26996485 | NC_021164.1    | Ca_kabuli_chr05 | 26996485                | AA                              | GG              | 1946849718               |
| SNP_P4_73556_26996515 | NC_021164.1    | Ca_kabuli_chr05 | 26996515                | TT                              | CC              | 1946849720               |
| SNP_P4_73557_26996536 | NC_021164.1    | Ca_kabuli_chr05 | 26996536                | TT                              | GG              | 1946849722               |
| SNP_P4_73558_26996555 | NC_021164.1    | Ca_kabuli_chr05 | 26996555                | TT                              | CC              | 1946849724               |
| SNP_P4_73559_26996764 | NC_021164.1    | Ca_kabuli_chr05 | 26996764                | AA                              | GG              | 1946849726               |
| SNP_P4_73560_26996793 | NC_021164.1    | Ca_kabuli_chr05 | 26996793                | AA                              | GG              | 1946849728               |
| SNP_P4_73562_26996819 | NC_021164.1    | Ca_kabuli_chr05 | 26996819                | CC                              | TT              | 1946849730               |
| SNP_P4_73563_26996903 | NC_021164.1    | Ca_kabuli_chr05 | 26996903                | GG                              | AA              | 1946849732               |
| SNP_P4_73564_26996912 | NC_021164.1    | Ca_kabuli_chr05 | 26996912                | GG                              | AA              | 1946849734               |
| SNP_P4_73565_26996927 | NC_021164.1    | Ca_kabuli_chr05 | 26996927                | AA                              | GG              | 1946849736               |
| SNP_P4_73566_26997057 | NC_021164.1    | Ca_kabuli_chr05 | 26997057                | TT                              | CC              | 1946849738               |
| SNP_P4_73567_26997067 | NC_021164.1    | Ca_kabuli_chr05 | 26997067                | AA                              | GG              | 1946849740               |
| SNP_P4_73568_26997209 | NC_021164.1    | Ca_kabuli_chr05 | 26997209                | TT                              | CC              | 1946849742               |
| SNP_P4_73569_26997245 | NC_021164.1    | Ca_kabuli_chr05 | 26997245                | TT                              | CC              | 1946849744               |
| SNP_P4_73570_26997263 | NC_021164.1    | Ca_kabuli_chr05 | 26997263                | AA                              | CC              | 1946849746               |
| SNP_P4_73571_26997489 | NC_021164.1    | Ca_kabuli_chr05 | 26997489                | AA                              | GG              | 1946849748               |
| SNP_P4_73572_26997512 | NC_021164.1    | Ca_kabuli_chr05 | 26997512                | TT                              | CC              | 1946849750               |
| SNP_P4_73573_26997632 | NC_021164.1    | Ca_kabuli_chr05 | 26997632                | TT                              | GG              | 1946849752               |
| SNP_P4_73574_26997647 | NC_021164.1    | Ca_kabuli_chr05 | 26997647                | TT                              | CC              | 1946849754               |
| SNP_P4_73575_26997826 | NC_021164.1    | Ca_kabuli_chr05 | 26997826                | TT                              | CC              | 1946849756               |
| SNP_P4_73576_26997832 | NC_021164.1    | Ca_kabuli_chr05 | 26997832                | TT                              | CC              | 1946849758               |

| SNPs IDs              | Chromosome IDs | Chromosomes     | Physical positions (bp) | CDC Frontier (Reference genome) | (ILWC46 & LPNB) | NCBI SNPdb Accession IDs |
|-----------------------|----------------|-----------------|-------------------------|---------------------------------|-----------------|--------------------------|
| SNP_P4_73577_26997868 | NC_021164.1    | Ca_kabuli_chr05 | 26997868                | AA                              | CC              | 1946849761               |
| SNP_P4_73578_26997927 | NC_021164.1    | Ca_kabuli_chr05 | 26997927                | AA                              | CC              | 1946849763               |
| SNP_P4_73579_26997937 | NC_021164.1    | Ca_kabuli_chr05 | 26997937                | TT                              | CC              | 1946849765               |
| SNP_P4_73580_26997968 | NC_021164.1    | Ca_kabuli_chr05 | 26997968                | AA                              | GG              | 1946849767               |
| SNP_P4_73581_26997987 | NC_021164.1    | Ca_kabuli_chr05 | 26997987                | TT                              | CC              | 1946849769               |
| SNP_P4_73582_26997997 | NC_021164.1    | Ca_kabuli_chr05 | 26997997                | TT                              | GG              | 1946849770               |
| SNP_P4_73583_26998004 | NC_021164.1    | Ca_kabuli_chr05 | 26998004                | TT                              | CC              | 1946849771               |
| SNP_P4_73584_26998028 | NC_021164.1    | Ca_kabuli_chr05 | 26998028                | TT                              | CC              | 1946849772               |
| SNP_P4_73585_26998036 | NC_021164.1    | Ca_kabuli_chr05 | 26998036                | AA                              | CC              | 1946849773               |
| SNP_P4_73586_26998051 | NC_021164.1    | Ca_kabuli_chr05 | 26998051                | AA                              | GG              | 1946849774               |
| SNP_P4_73587_26998141 | NC_021164.1    | Ca_kabuli_chr05 | 26998141                | AA                              | GG              | 1946849775               |
| SNP_P4_73588_26998172 | NC_021164.1    | Ca_kabuli_chr05 | 26998172                | AA                              | CC              | 1946849776               |
| SNP_P4_73589_26998219 | NC_021164.1    | Ca_kabuli_chr05 | 26998219                | TT                              | CC              | 1946849777               |
| SNP_P4_73590_26998354 | NC_021164.1    | Ca_kabuli_chr05 | 26998354                | TT                              | CC              | 1946849778               |
| SNP_P4_73591_26998414 | NC_021164.1    | Ca_kabuli_chr05 | 26998414                | TT                              | CC              | 1946849780               |
| SNP_P4_73592_26998429 | NC_021164.1    | Ca_kabuli_chr05 | 26998429                | TT                              | CC              | 1946849782               |
| SNP_P4_73593_26998483 | NC_021164.1    | Ca_kabuli_chr05 | 26998483                | TT                              | CC              | 1946849784               |
| SNP_P4_73594_26998558 | NC_021164.1    | Ca_kabuli_chr05 | 26998558                | GG                              | CC              | 1946849786               |
| SNP_P4_73596_26998614 | NC_021164.1    | Ca_kabuli_chr05 | 26998614                | CC                              | GG              | 1946849788               |
| SNP_P4_73597_26998624 | NC_021164.1    | Ca_kabuli_chr05 | 26998624                | TT                              | CC              | 1946849790               |
| SNP_P4_73598_26998653 | NC_021164.1    | Ca_kabuli_chr05 | 26998653                | AA                              | GG              | 1946849792               |
| SNP_P4_73599_26998683 | NC_021164.1    | Ca_kabuli_chr05 | 26998683                | TT                              | CC              | 1946849794               |
| SNP_P4_73600_26998848 | NC_021164.1    | Ca_kabuli_chr05 | 26998848                | AA                              | CC              | 1946849796               |
| SNP_P4_73601_26998866 | NC_021164.1    | Ca_kabuli_chr05 | 26998866                | AA                              | GG              | 1946849798               |
| SNP_P4_73602_26998891 | NC_021164.1    | Ca_kabuli_chr05 | 26998891                | AA                              | GG              | 1946849800               |
| SNP_P4_73603_26998900 | NC_021164.1    | Ca_kabuli_chr05 | 26998900                | AA                              | GG              | 1946849802               |
| SNP_P4_73604_26998937 | NC_021164.1    | Ca_kabuli_chr05 | 26998937                | GG                              | TT              | 1946849804               |
| SNP_P4_73605_26999584 | NC_021164.1    | Ca_kabuli_chr05 | 26999584                | TT                              | CC              | 1946849806               |
| SNP_P4_73606_26999645 | NC_021164.1    | Ca_kabuli_chr05 | 26999645                | GG                              | TT              | 1946849808               |
| SNP_P4_73607_26999681 | NC_021164.1    | Ca_kabuli_chr05 | 26999681                | AA                              | CC              | 1946849810               |
| SNP_P4_73608_26999797 | NC_021164.1    | Ca_kabuli_chr05 | 26999797                | AA                              | GG              | 1946849812               |
| SNP_P4_73609_26999813 | NC_021164.1    | Ca_kabuli_chr05 | 26999813                | TT                              | GG              | 1946849814               |
| SNP_P4_73610_26999851 | NC_021164.1    | Ca_kabuli_chr05 | 26999851                | CC                              | AA              | 1946849816               |
| SNP_P4_73611_26999898 | NC_021164.1    | Ca_kabuli_chr05 | 26999898                | AA                              | GG              | 1946849818               |
| SNP_P4_73612_26999903 | NC_021164.1    | Ca_kabuli_chr05 | 26999903                | TT                              | AA              | 1946849820               |
| SNP_P4_73613_26999950 | NC_021164.1    | Ca_kabuli_chr05 | 26999950                | AA                              | TT              | 1946849822               |
| SNP_P4_73615_27000090 | NC_021164.1    | Ca_kabuli_chr05 | 27000090                | AA                              | GG              | 1946849824               |
| SNP_P4_73616_27000104 | NC_021164.1    | Ca_kabuli_chr05 | 27000104                | AA                              | CC              | 1946849826               |
| SNP_P4_73619_27000280 | NC_021164.1    | Ca_kabuli_chr05 | 27000280                | TT                              | GG              | 1946849828               |
| SNP_P4_73620_27000295 | NC_021164.1    | Ca_kabuli_chr05 | 27000295                | AA                              | CC              | 1946849830               |
| SNP_P4_73621_27000343 | NC_021164.1    | Ca_kabuli_chr05 | 27000343                | TT                              | CC              | 1946849832               |
| SNP_P4_73622_27000385 | NC_021164.1    | Ca_kabuli_chr05 | 27000385                | TT                              | CC              | 1946849834               |



| SNPs IDs              | Chromosome IDs | Chromosomes     | Physical positions (bp) | CDC Frontier (Reference genome) | (ILWC46 & LPNB) | NCBI SNPdb Accession IDs |
|-----------------------|----------------|-----------------|-------------------------|---------------------------------|-----------------|--------------------------|
| SNP_P4_73624_27000506 | NC_021164.1    | Ca_kabuli_chr05 | 27000506                | TT                              | CC              | 1946849836               |
| SNP_P4_73625_27000508 | NC_021164.1    | Ca_kabuli_chr05 | 27000508                | CC                              | AA              | 1946849838               |
| SNP_P4_73626_27000509 | NC_021164.1    | Ca_kabuli_chr05 | 27000509                | GG                              | AA              | 1946849840               |
| SNP_P4_73628_27000545 | NC_021164.1    | Ca_kabuli_chr05 | 27000545                | GG                              | TT              | 1946849842               |
| SNP_P4_73629_27000550 | NC_021164.1    | Ca_kabuli_chr05 | 27000550                | CC                              | TT              | 1946849844               |
| SNP_P4_73630_27000627 | NC_021164.1    | Ca_kabuli_chr05 | 27000627                | AA                              | CC              | 1946849846               |
| SNP_P4_73631_27000630 | NC_021164.1    | Ca_kabuli_chr05 | 27000630                | AA                              | GG              | 1946849848               |
| SNP_P4_73632_27000723 | NC_021164.1    | Ca_kabuli_chr05 | 27000723                | CC                              | TT              | 1946849850               |
| SNP_P4_73634_27000810 | NC_021164.1    | Ca_kabuli_chr05 | 27000810                | CC                              | TT              | 1946849852               |
| SNP_P4_73636_27000878 | NC_021164.1    | Ca_kabuli_chr05 | 27000878                | TT                              | AA              | 1946849854               |
| SNP_P4_73637_27000886 | NC_021164.1    | Ca_kabuli_chr05 | 27000886                | AA                              | CC              | 1946849856               |
| SNP_P4_73638_27000994 | NC_021164.1    | Ca_kabuli_chr05 | 27000994                | AA                              | CC              | 1946849858               |
| SNP_P4_73639_27001020 | NC_021164.1    | Ca_kabuli_chr05 | 27001020                | AA                              | CC              | 1946849860               |
| SNP_P4_73640_27001081 | NC_021164.1    | Ca_kabuli_chr05 | 27001081                | AA                              | GG              | 1946849862               |
| SNP_P4_73641_27001101 | NC_021164.1    | Ca_kabuli_chr05 | 27001101                | AA                              | TT              | 1946849865               |
| SNP_P4_73642_27001116 | NC_021164.1    | Ca_kabuli_chr05 | 27001116                | AA                              | GG              | 1946849867               |
| SNP_P4_73643_27001118 | NC_021164.1    | Ca_kabuli_chr05 | 27001118                | TT                              | CC              | 1946849869               |
| SNP_P4_73644_27001273 | NC_021164.1    | Ca_kabuli_chr05 | 27001273                | CC                              | AA              | 1946849871               |
| SNP_P4_73645_27001503 | NC_021164.1    | Ca_kabuli_chr05 | 27001503                | GG                              | AA              | 1946849873               |
| SNP_P4_73646_27013751 | NC_021164.1    | Ca_kabuli_chr05 | 27013751                | TT                              | CC              | 1946849875               |
| SNP_P4_73647_27035167 | NC_021164.1    | Ca_kabuli_chr05 | 27035167                | TT                              | GG              | 1946849877               |
| SNP_P4_73648_27035168 | NC_021164.1    | Ca_kabuli_chr05 | 27035168                | CC                              | GG              | 1946849879               |
| SNP_P4_73649_27036944 | NC_021164.1    | Ca_kabuli_chr05 | 27036944                | AA                              | CC              | 1946849881               |
| SNP_P4_73650_27048712 | NC_021164.1    | Ca_kabuli_chr05 | 27048712                | CC                              | AA              | 1946849883               |
| SNP_P4_73651_27083599 | NC_021164.1    | Ca_kabuli_chr05 | 27083599                | CC                              | AA              | 1946849885               |
| SNP_P4_73652_27090240 | NC_021164.1    | Ca_kabuli_chr05 | 27090240                | GG                              | AA              | 1946849887               |
| SNP_P4_73653_27096271 | NC_021164.1    | Ca_kabuli_chr05 | 27096271                | CC                              | AA              | 1946849889               |
| SNP_P4_73655_27107278 | NC_021164.1    | Ca_kabuli_chr05 | 27107278                | AA                              | GG              | 1946849892               |
| SNP_P4_73656_27107320 | NC_021164.1    | Ca_kabuli_chr05 | 27107320                | AA                              | TT              | 1946849894               |
| SNP_P4_73657_27107343 | NC_021164.1    | Ca_kabuli_chr05 | 27107343                | AA                              | TT              | 1946849896               |
| SNP_P4_73658_27107349 | NC_021164.1    | Ca_kabuli_chr05 | 27107349                | TT                              | CC              | 1946849898               |
| SNP_P4_73659_27107383 | NC_021164.1    | Ca_kabuli_chr05 | 27107383                | AA                              | TT              | 1946849900               |
| SNP_P4_73660_27107639 | NC_021164.1    | Ca_kabuli_chr05 | 27107639                | CC                              | TT              | 1946849903               |
| SNP_P4_73661_27107670 | NC_021164.1    | Ca_kabuli_chr05 | 27107670                | TT                              | CC              | 1946849905               |
| SNP_P4_73662_27107718 | NC_021164.1    | Ca_kabuli_chr05 | 27107718                | CC                              | TT              | 1946849907               |
| SNP_P4_73663_27107725 | NC_021164.1    | Ca_kabuli_chr05 | 27107725                | TT                              | AA              | 1946849909               |
| SNP_P4_73664_27135749 | NC_021164.1    | Ca_kabuli_chr05 | 27135749                | GG                              | TT              | 1946849911               |
| SNP_P4_73665_27135768 | NC_021164.1    | Ca_kabuli_chr05 | 27135768                | CC                              | TT              | 1946849913               |
| SNP_P4_73666_27164955 | NC_021164.1    | Ca_kabuli_chr05 | 27164955                | AA                              | GG              | 1946849916               |
| SNP_P4_73667_27164956 | NC_021164.1    | Ca_kabuli_chr05 | 27164956                | TT                              | GG              | 1946849918               |
| SNP_P4_73668_27178567 | NC_021164.1    | Ca_kabuli_chr05 | 27178567                | CC                              | TT              | 1946849920               |
| SNP_P4_73669_27204647 | NC_021164.1    | Ca_kabuli_chr05 | 27204647                | CC                              | TT              | 1946849922               |

| SNPs IDs              | Chromosome IDs | Chromosomes     | Physical positions (bp) | CDC Frontier (Reference genome) | (ILWC46 & LPNB) | NCBI SNPdb Accession IDs |
|-----------------------|----------------|-----------------|-------------------------|---------------------------------|-----------------|--------------------------|
| SNP_P4_73670_27204847 | NC_021164.1    | Ca_kabuli_chr05 | 27204847                | TT                              | GG              | 1946849924               |
| SNP_P4_73671_27204848 | NC_021164.1    | Ca_kabuli_chr05 | 27204848                | TT                              | GG              | 1946849926               |
| SNP_P4_73672_27204849 | NC_021164.1    | Ca_kabuli_chr05 | 27204849                | TT                              | AA              | 1946849928               |
| SNP_P4_73673_27204850 | NC_021164.1    | Ca_kabuli_chr05 | 27204850                | TT                              | CC              | 1946849930               |
| SNP_P4_73674_27204851 | NC_021164.1    | Ca_kabuli_chr05 | 27204851                | CC                              | AA              | 1946849932               |
| SNP_P4_73675_27204852 | NC_021164.1    | Ca_kabuli_chr05 | 27204852                | GG                              | AA              | 1946849934               |
| SNP_P4_73676_27204853 | NC_021164.1    | Ca_kabuli_chr05 | 27204853                | GG                              | CC              | 1946849936               |
| SNP_P4_73677_27214628 | NC_021164.1    | Ca_kabuli_chr05 | 27214628                | CC                              | TT              | 1946849938               |
| SNP_P4_73679_27245074 | NC_021164.1    | Ca_kabuli_chr05 | 27245074                | TT                              | CC              | 1946849940               |
| SNP_P4_73680_27245099 | NC_021164.1    | Ca_kabuli_chr05 | 27245099                | TT                              | CC              | 1946849942               |
| SNP_P4_73681_27245148 | NC_021164.1    | Ca_kabuli_chr05 | 27245148                | TT                              | GG              | 1946849944               |
| SNP_P4_73682_27245167 | NC_021164.1    | Ca_kabuli_chr05 | 27245167                | GG                              | AA              | 1946849945               |
| SNP_P4_73683_27245177 | NC_021164.1    | Ca_kabuli_chr05 | 27245177                | AA                              | TT              | 1946849947               |
| SNP_P4_73684_27245201 | NC_021164.1    | Ca_kabuli_chr05 | 27245201                | TT                              | GG              | 1946849949               |
| SNP_P4_73685_27245206 | NC_021164.1    | Ca_kabuli_chr05 | 27245206                | AA                              | CC              | 1946849951               |
| SNP_P4_73686_27276804 | NC_021164.1    | Ca_kabuli_chr05 | 27276804                | AA                              | GG              | 1946849953               |
| SNP_P4_73687_27279897 | NC_021164.1    | Ca_kabuli_chr05 | 27279897                | AA                              | GG              | 1946849955               |
| SNP_P4_73688_27327344 | NC_021164.1    | Ca_kabuli_chr05 | 27327344                | CC                              | TT              | 1946849957               |
| SNP_P4_73689_27327353 | NC_021164.1    | Ca_kabuli_chr05 | 27327353                | CC                              | TT              | 1946849959               |
| SNP_P4_73690_27340650 | NC_021164.1    | Ca_kabuli_chr05 | 27340650                | GG                              | CC              | 1946849961               |
| SNP_P4_73691_27346713 | NC_021164.1    | Ca_kabuli_chr05 | 27346713                | TT                              | GG              | 1946849963               |
| SNP_P4_73692_27346714 | NC_021164.1    | Ca_kabuli_chr05 | 27346714                | AA                              | TT              | 1946849965               |
| SNP_P4_73693_27357084 | NC_021164.1    | Ca_kabuli_chr05 | 27357084                | TT                              | AA              | 1946849967               |
| SNP_P4_73694_27363412 | NC_021164.1    | Ca_kabuli_chr05 | 27363412                | AA                              | GG              | 1946849969               |
| SNP_P4_73695_27368447 | NC_021164.1    | Ca_kabuli_chr05 | 27368447                | AA                              | GG              | 1946849971               |
| SNP_P4_73696_27386961 | NC_021164.1    | Ca_kabuli_chr05 | 27386961                | TT                              | CC              | 1946849973               |
| SNP_P4_73697_27388096 | NC_021164.1    | Ca_kabuli_chr05 | 27388096                | AA                              | GG              | 1946849975               |
| SNP_P4_73699_27392954 | NC_021164.1    | Ca_kabuli_chr05 | 27392954                | TT                              | CC              | 1946849977               |
| SNP_P4_73701_27425053 | NC_021164.1    | Ca_kabuli_chr05 | 27425053                | GG                              | AA              | 1946849979               |
| SNP_P4_73702_27427458 | NC_021164.1    | Ca_kabuli_chr05 | 27427458                | TT                              | AA              | 1946849981               |
| SNP_P4_73703_27427459 | NC_021164.1    | Ca_kabuli_chr05 | 27427459                | GG                              | TT              | 1946849983               |
| SNP_P4_73704_27427622 | NC_021164.1    | Ca_kabuli_chr05 | 27427622                | AA                              | CC              | 1946849985               |
| SNP_P4_73705_27427694 | NC_021164.1    | Ca_kabuli_chr05 | 27427694                | GG                              | AA              | 1946849987               |
| SNP_P4_73706_27427695 | NC_021164.1    | Ca_kabuli_chr05 | 27427695                | TT                              | CC              | 1946849989               |
| SNP_P4_73707_27427699 | NC_021164.1    | Ca_kabuli_chr05 | 27427699                | AA                              | TT              | 1946849991               |
| SNP_P4_73708_27427710 | NC_021164.1    | Ca_kabuli_chr05 | 27427710                | CC                              | AA              | 1946849993               |
| SNP_P4_73709_27427714 | NC_021164.1    | Ca_kabuli_chr05 | 27427714                | GG                              | AA              | 1946849995               |
| SNP_P4_73710_27427716 | NC_021164.1    | Ca_kabuli_chr05 | 27427716                | GG                              | AA              | 1946849997               |
| SNP_P4_73711_27427725 | NC_021164.1    | Ca_kabuli_chr05 | 27427725                | GG                              | TT              | 1946849999               |
| SNP_P4_73712_27427732 | NC_021164.1    | Ca_kabuli_chr05 | 27427732                | CC                              | GG              | 1946850001               |
| SNP_P4_73713_27427734 | NC_021164.1    | Ca_kabuli_chr05 | 27427734                | TT                              | AA              | 1946850003               |
| SNP_P4_73714_27428266 | NC_021164.1    | Ca_kabuli_chr05 | 27428266                | CC                              | TT              | 1946850005               |

| SNPs IDs              | Chromosome IDs | Chromosomes     | Physical positions (bp) | CDC Frontier (Reference genome) | (ILWC46 & LPNB) | NCBI SNPdb Accession IDs |
|-----------------------|----------------|-----------------|-------------------------|---------------------------------|-----------------|--------------------------|
| SNP_P4_73715_27428580 | NC_021164.1    | Ca_kabuli_chr05 | 27428580                | CC                              | AA              | 1946850007               |
| SNP_P4_73716_27428642 | NC_021164.1    | Ca_kabuli_chr05 | 27428642                | TT                              | CC              | 1946850009               |
| SNP_P4_73717_27458394 | NC_021164.1    | Ca_kabuli_chr05 | 27458394                | AA                              | TT              | 1946850011               |
| SNP_P4_73718_27458395 | NC_021164.1    | Ca_kabuli_chr05 | 27458395                | TT                              | CC              | 1946850013               |
| SNP_P4_73721_27473345 | NC_021164.1    | Ca_kabuli_chr05 | 27473345                | CC                              | TT              | 1946850015               |
| SNP_P4_73722_27491979 | NC_021164.1    | Ca_kabuli_chr05 | 27491979                | GG                              | CC              | 1946850017               |
| SNP_P4_73725_27537329 | NC_021164.1    | Ca_kabuli_chr05 | 27537329                | AA                              | GG              | 1946850018               |
| SNP_P4_73726_27537332 | NC_021164.1    | Ca_kabuli_chr05 | 27537332                | TT                              | CC              | 1946850020               |
| SNP_P4_73727_27557946 | NC_021164.1    | Ca_kabuli_chr05 | 27557946                | TT                              | AA              | 1946850022               |
| SNP_P4_73728_27557947 | NC_021164.1    | Ca_kabuli_chr05 | 27557947                | AA                              | TT              | 1946850024               |
| SNP_P4_73729_27560636 | NC_021164.1    | Ca_kabuli_chr05 | 27560636                | CC                              | TT              | 1946850026               |
| SNP_P4_73730_27564998 | NC_021164.1    | Ca_kabuli_chr05 | 27564998                | GG                              | AA              | 1946850028               |
| SNP_P4_73731_27567171 | NC_021164.1    | Ca_kabuli_chr05 | 27567171                | AA                              | GG              | 1946850030               |
| SNP_P4_73732_27567201 | NC_021164.1    | Ca_kabuli_chr05 | 27567201                | AA                              | GG              | 1946850032               |
| SNP_P4_73733_27567237 | NC_021164.1    | Ca_kabuli_chr05 | 27567237                | TT                              | GG              | 1946850034               |
| SNP_P4_73734_27567254 | NC_021164.1    | Ca_kabuli_chr05 | 27567254                | AA                              | CC              | 1946850036               |
| SNP_P4_73735_27567545 | NC_021164.1    | Ca_kabuli_chr05 | 27567545                | GG                              | AA              | 1946850038               |
| SNP_P4_73736_27567571 | NC_021164.1    | Ca_kabuli_chr05 | 27567571                | TT                              | GG              | 1946850040               |
| SNP_P4_73737_27567659 | NC_021164.1    | Ca_kabuli_chr05 | 27567659                | TT                              | GG              | 1946850042               |
| SNP_P4_73738_27567675 | NC_021164.1    | Ca_kabuli_chr05 | 27567675                | TT                              | CC              | 1946850044               |
| SNP_P4_73739_27567681 | NC_021164.1    | Ca_kabuli_chr05 | 27567681                | TT                              | CC              | 1946850046               |
| SNP_P4_73740_27567710 | NC_021164.1    | Ca_kabuli_chr05 | 27567710                | AA                              | GG              | 1946850048               |
| SNP_P4_73741_27567730 | NC_021164.1    | Ca_kabuli_chr05 | 27567730                | GG                              | AA              | 1946850050               |
| SNP_P4_73742_27567731 | NC_021164.1    | Ca_kabuli_chr05 | 27567731                | TT                              | CC              | 1946850051               |
| SNP_P4_73743_27568476 | NC_021164.1    | Ca_kabuli_chr05 | 27568476                | TT                              | CC              | 1946850053               |
| SNP_P4_73744_27610388 | NC_021164.1    | Ca_kabuli_chr05 | 27610388                | GG                              | AA              | 1946850055               |
| SNP_P4_73745_27623757 | NC_021164.1    | Ca_kabuli_chr05 | 27623757                | AA                              | TT              | 1946850057               |
| SNP_P4_73746_27637650 | NC_021164.1    | Ca_kabuli_chr05 | 27637650                | GG                              | CC              | 1946850059               |
| SNP_P4_73747_27650094 | NC_021164.1    | Ca_kabuli_chr05 | 27650094                | CC                              | TT              | 1946850061               |
| SNP_P4_73748_27654801 | NC_021164.1    | Ca_kabuli_chr05 | 27654801                | AA                              | TT              | 1946850063               |
| SNP_P4_73749_27654802 | NC_021164.1    | Ca_kabuli_chr05 | 27654802                | AA                              | TT              | 1946850065               |
| SNP_P4_73750_27672246 | NC_021164.1    | Ca_kabuli_chr05 | 27672246                | GG                              | AA              | 1946850067               |
| SNP_P4_73751_27674600 | NC_021164.1    | Ca_kabuli_chr05 | 27674600                | CC                              | AA              | 1946850069               |
| SNP_P4_73752_27685793 | NC_021164.1    | Ca_kabuli_chr05 | 27685793                | GG                              | AA              | 1946850070               |
| SNP_P4_73754_27742656 | NC_021164.1    | Ca_kabuli_chr05 | 27742656                | AA                              | TT              | 1946850072               |
| SNP_P4_73756_27769317 | NC_021164.1    | Ca_kabuli_chr05 | 27769317                | CC                              | AA              | 1946850074               |
| SNP_P4_73757_27771129 | NC_021164.1    | Ca_kabuli_chr05 | 27771129                | AA                              | TT              | 1946850076               |
| SNP_P4_73761_27800816 | NC_021164.1    | Ca_kabuli_chr05 | 27800816                | GG                              | AA              | 1946850078               |
| SNP_P4_73763_27800979 | NC_021164.1    | Ca_kabuli_chr05 | 27800979                | GG                              | AA              | 1946850080               |
| SNP_P4_73764_27801044 | NC_021164.1    | Ca_kabuli_chr05 | 27801044                | GG                              | AA              | 1946850082               |
| SNP_P4_73765_27811474 | NC_021164.1    | Ca_kabuli_chr05 | 27811474                | CC                              | GG              | 1946850084               |
| SNP_P4_73766_27811625 | NC_021164.1    | Ca_kabuli_chr05 | 27811625                | CC                              | TT              | 1946850086               |

| SNPs IDs              | Chromosome IDs | Chromosomes     | Physical positions (bp) | CDC Frontier (Reference genome) | (ILWC46 & LPNB) | NCBI SNPdb Accession IDs |
|-----------------------|----------------|-----------------|-------------------------|---------------------------------|-----------------|--------------------------|
| SNP_P4_73767_27811811 | NC_021164.1    | Ca_kabuli_chr05 | 27811811                | CC                              | AA              | 1946850088               |
| SNP_P4_73768_27835135 | NC_021164.1    | Ca_kabuli_chr05 | 27835135                | GG                              | AA              | 1946850090               |
| SNP_P4_73769_27835141 | NC_021164.1    | Ca_kabuli_chr05 | 27835141                | CC                              | TT              | 1946850092               |
| SNP_P4_73770_27835154 | NC_021164.1    | Ca_kabuli_chr05 | 27835154                | AA                              | TT              | 1946850094               |
| SNP_P4_73771_27835228 | NC_021164.1    | Ca_kabuli_chr05 | 27835228                | AA                              | GG              | 1946850096               |
| SNP_P4_73772_27835250 | NC_021164.1    | Ca_kabuli_chr05 | 27835250                | CC                              | AA              | 1946850098               |
| SNP_P4_73773_27835281 | NC_021164.1    | Ca_kabuli_chr05 | 27835281                | CC                              | TT              | 1946850100               |
| SNP_P4_73774_27835286 | NC_021164.1    | Ca_kabuli_chr05 | 27835286                | AA                              | GG              | 1946850102               |
| SNP_P4_73775_27835292 | NC_021164.1    | Ca_kabuli_chr05 | 27835292                | AA                              | TT              | 1946850104               |
| SNP_P4_73776_27835348 | NC_021164.1    | Ca_kabuli_chr05 | 27835348                | TT                              | CC              | 1946850106               |
| SNP_P4_73777_27835545 | NC_021164.1    | Ca_kabuli_chr05 | 27835545                | CC                              | TT              | 1946850108               |
| SNP_P4_73778_27835663 | NC_021164.1    | Ca_kabuli_chr05 | 27835663                | TT                              | CC              | 1946850110               |
| SNP_P4_73779_27835712 | NC_021164.1    | Ca_kabuli_chr05 | 27835712                | GG                              | AA              | 1946850112               |
| SNP_P4_73780_27839295 | NC_021164.1    | Ca_kabuli_chr05 | 27839295                | GG                              | AA              | 1946850114               |
| SNP_P4_73781_27839604 | NC_021164.1    | Ca_kabuli_chr05 | 27839604                | TT                              | CC              | 1946850116               |
| SNP_P4_73782_27844864 | NC_021164.1    | Ca_kabuli_chr05 | 27844864                | TT                              | GG              | 1946850118               |
| SNP_P4_73783_27846104 | NC_021164.1    | Ca_kabuli_chr05 | 27846104                | AA                              | GG              | 1946850120               |
| SNP_P4_73784_27847858 | NC_021164.1    | Ca_kabuli_chr05 | 27847858                | CC                              | GG              | 1946850122               |
| SNP_P4_73785_27863580 | NC_021164.1    | Ca_kabuli_chr05 | 27863580                | TT                              | AA              | 1946850124               |
| SNP_P4_73786_27865856 | NC_021164.1    | Ca_kabuli_chr05 | 27865856                | TT                              | AA              | 1946850126               |
| SNP_P4_73787_27905228 | NC_021164.1    | Ca_kabuli_chr05 | 27905228                | TT                              | AA              | 1946850128               |
| SNP_P4_73789_27923605 | NC_021164.1    | Ca_kabuli_chr05 | 27923605                | TT                              | AA              | 1946850130               |
| SNP_P4_73790_27923611 | NC_021164.1    | Ca_kabuli_chr05 | 27923611                | AA                              | TT              | 1946850132               |
| SNP_P4_73791_27929617 | NC_021164.1    | Ca_kabuli_chr05 | 27929617                | TT                              | CC              | 1946850134               |
| SNP_P4_73793_27950142 | NC_021164.1    | Ca_kabuli_chr05 | 27950142                | TT                              | AA              | 1946850136               |
| SNP_P4_73794_27950372 | NC_021164.1    | Ca_kabuli_chr05 | 27950372                | GG                              | TT              | 1946850137               |
| SNP_P4_73795_27953082 | NC_021164.1    | Ca_kabuli_chr05 | 27953082                | CC                              | TT              | 1946850139               |
| SNP_P4_73796_27953109 | NC_021164.1    | Ca_kabuli_chr05 | 27953109                | CC                              | AA              | 1946850141               |
| SNP_P4_73797_27953161 | NC_021164.1    | Ca_kabuli_chr05 | 27953161                | GG                              | TT              | 1946850143               |
| SNP_P4_73798_27953164 | NC_021164.1    | Ca_kabuli_chr05 | 27953164                | GG                              | AA              | 1946850145               |
| SNP_P4_73799_27953200 | NC_021164.1    | Ca_kabuli_chr05 | 27953200                | GG                              | AA              | 1946850147               |
| SNP_P4_73800_27953206 | NC_021164.1    | Ca_kabuli_chr05 | 27953206                | TT                              | AA              | 1946850149               |
| SNP_P4_73801_27953212 | NC_021164.1    | Ca_kabuli_chr05 | 27953212                | TT                              | AA              | 1946850151               |
| SNP_P4_73802_27953245 | NC_021164.1    | Ca_kabuli_chr05 | 27953245                | GG                              | AA              | 1946850153               |
| SNP_P4_73803_27953293 | NC_021164.1    | Ca_kabuli_chr05 | 27953293                | GG                              | AA              | 1946850155               |
| SNP_P4_73804_27953475 | NC_021164.1    | Ca_kabuli_chr05 | 27953475                | GG                              | CC              | 1946850157               |
| SNP_P4_73805_27953501 | NC_021164.1    | Ca_kabuli_chr05 | 27953501                | TT                              | CC              | 1946850159               |
| SNP_P4_73806_27953505 | NC_021164.1    | Ca_kabuli_chr05 | 27953505                | CC                              | GG              | 1946850161               |
| SNP_P4_73807_27953633 | NC_021164.1    | Ca_kabuli_chr05 | 27953633                | GG                              | CC              | 1946850163               |
| SNP_P4_73808_27953635 | NC_021164.1    | Ca_kabuli_chr05 | 27953635                | GG                              | AA              | 1946850165               |
| SNP_P4_73809_27953648 | NC_021164.1    | Ca_kabuli_chr05 | 27953648                | AA                              | TT              | 1946850167               |
| SNP_P4_73810_27953649 | NC_021164.1    | Ca_kabuli_chr05 | 27953649                | AA                              | TT              | 1946850169               |

| SNPs IDs              | Chromosome IDs | Chromosomes     | Physical positions (bp) | CDC Frontier (Reference genome) | (ILWC46 & LPNB) | NCBI SNPdb Accession IDs |
|-----------------------|----------------|-----------------|-------------------------|---------------------------------|-----------------|--------------------------|
| SNP_P4_73811_27953650 | NC_021164.1    | Ca_kabuli_chr05 | 27953650                | TT                              | CC              | 1946850171               |
| SNP_P4_73812_27953654 | NC_021164.1    | Ca_kabuli_chr05 | 27953654                | AA                              | GG              | 1946850173               |
| SNP_P4_73814_27954262 | NC_021164.1    | Ca_kabuli_chr05 | 27954262                | AA                              | TT              | 1946850175               |
| SNP_P4_73815_27954369 | NC_021164.1    | Ca_kabuli_chr05 | 27954369                | AA                              | TT              | 1946850176               |
| SNP_P4_73816_27954390 | NC_021164.1    | Ca_kabuli_chr05 | 27954390                | CC                              | TT              | 1946850178               |
| SNP_P4_73817_27954692 | NC_021164.1    | Ca_kabuli_chr05 | 27954692                | GG                              | AA              | 1946850180               |
| SNP_P4_73818_27954712 | NC_021164.1    | Ca_kabuli_chr05 | 27954712                | GG                              | AA              | 1946850182               |
| SNP_P4_73819_27954714 | NC_021164.1    | Ca_kabuli_chr05 | 27954714                | AA                              | TT              | 1946850184               |
| SNP_P4_73820_27954722 | NC_021164.1    | Ca_kabuli_chr05 | 27954722                | TT                              | AA              | 1946850186               |
| SNP_P4_73821_27954723 | NC_021164.1    | Ca_kabuli_chr05 | 27954723                | TT                              | AA              | 1946850188               |
| SNP_P4_73822_27954801 | NC_021164.1    | Ca_kabuli_chr05 | 27954801                | AA                              | GG              | 1946850190               |
| SNP_P4_73823_27954820 | NC_021164.1    | Ca_kabuli_chr05 | 27954820                | CC                              | AA              | 1946850192               |
| SNP_P4_73824_27954850 | NC_021164.1    | Ca_kabuli_chr05 | 27954850                | TT                              | GG              | 1946850194               |
| SNP_P4_73826_27967328 | NC_021164.1    | Ca_kabuli_chr05 | 27967328                | AA                              | TT              | 1946850196               |
| SNP_P4_73828_28021031 | NC_021164.1    | Ca_kabuli_chr05 | 28021031                | TT                              | AA              | 1946850198               |
| SNP_P4_73829_28049808 | NC_021164.1    | Ca_kabuli_chr05 | 28049808                | CC                              | TT              | 1946850200               |
| SNP_P4_73830_28055695 | NC_021164.1    | Ca_kabuli_chr05 | 28055695                | CC                              | TT              | 1946850202               |
| SNP_P4_73831_28056188 | NC_021164.1    | Ca_kabuli_chr05 | 28056188                | GG                              | AA              | 1946850204               |
| SNP_P4_73832_28058152 | NC_021164.1    | Ca_kabuli_chr05 | 28058152                | CC                              | TT              | 1946850205               |
| SNP_P4_73833_28058181 | NC_021164.1    | Ca_kabuli_chr05 | 28058181                | GG                              | AA              | 1946850207               |
| SNP_P4_73834_28058213 | NC_021164.1    | Ca_kabuli_chr05 | 28058213                | TT                              | AA              | 1946850209               |
| SNP_P4_73835_28058489 | NC_021164.1    | Ca_kabuli_chr05 | 28058489                | GG                              | CC              | 1946850211               |
| SNP_P4_73836_28058519 | NC_021164.1    | Ca_kabuli_chr05 | 28058519                | GG                              | AA              | 1946850213               |
| SNP_P4_73837_28058532 | NC_021164.1    | Ca_kabuli_chr05 | 28058532                | TT                              | AA              | 1946850215               |
| SNP_P4_73838_28058584 | NC_021164.1    | Ca_kabuli_chr05 | 28058584                | TT                              | CC              | 1946850217               |
| SNP_P4_73840_28064131 | NC_021164.1    | Ca_kabuli_chr05 | 28064131                | GG                              | AA              | 1946850219               |
| SNP_P4_73841_28067487 | NC_021164.1    | Ca_kabuli_chr05 | 28067487                | TT                              | GG              | 1946850221               |
| SNP_P4_73842_28067515 | NC_021164.1    | Ca_kabuli_chr05 | 28067515                | CC                              | AA              | 1946850223               |
| SNP_P4_73843_28089250 | NC_021164.1    | Ca_kabuli_chr05 | 28089250                | CC                              | GG              | 1946850225               |
| SNP_P4_73844_28089455 | NC_021164.1    | Ca_kabuli_chr05 | 28089455                | TT                              | CC              | 1946850227               |
| SNP_P4_73846_28106519 | NC_021164.1    | Ca_kabuli_chr05 | 28106519                | CC                              | TT              | 1946850229               |
| SNP_P4_73847_28125407 | NC_021164.1    | Ca_kabuli_chr05 | 28125407                | TT                              | GG              | 1946850231               |
| SNP_P4_73848_28134972 | NC_021164.1    | Ca_kabuli_chr05 | 28134972                | AA                              | GG              | 1946850233               |
| SNP_P4_73849_28143069 | NC_021164.1    | Ca_kabuli_chr05 | 28143069                | CC                              | GG              | 1946850234               |
| SNP_P4_73851_28155678 | NC_021164.1    | Ca_kabuli_chr05 | 28155678                | TT                              | CC              | 1946850236               |
| SNP_P4_73854_28190973 | NC_021164.1    | Ca_kabuli_chr05 | 28190973                | GG                              | TT              | 1946850238               |
| SNP_P4_73856_28216712 | NC_021164.1    | Ca_kabuli_chr05 | 28216712                | TT                              | AA              | 1946850240               |
| SNP_P4_73857_28238681 | NC_021164.1    | Ca_kabuli_chr05 | 28238681                | TT                              | AA              | 1946850242               |
| SNP_P4_73858_28238682 | NC_021164.1    | Ca_kabuli_chr05 | 28238682                | AA                              | CC              | 1946850244               |
| SNP_P4_73861_28248454 | NC_021164.1    | Ca_kabuli_chr05 | 28248454                | CC                              | TT              | 1946850246               |
| SNP_P4_73862_28248460 | NC_021164.1    | Ca_kabuli_chr05 | 28248460                | AA                              | GG              | 1946850248               |
| SNP_P4_73863_28248737 | NC_021164.1    | Ca_kabuli_chr05 | 28248737                | AA                              | CC              | 1946850250               |

| SNPs IDs              | Chromosome IDs | Chromosomes     | Physical positions (bp) | CDC Frontier (Reference genome) | (ILWC46 & LPNB) | NCBI SNPdb Accession IDs |
|-----------------------|----------------|-----------------|-------------------------|---------------------------------|-----------------|--------------------------|
| SNP_P4_73864_28248743 | NC_021164.1    | Ca_kabuli_chr05 | 28248743                | GG                              | AA              | 1946850252               |
| SNP_P4_73865_28271732 | NC_021164.1    | Ca_kabuli_chr05 | 28271732                | CC                              | TT              | 1946850254               |
| SNP_P4_73866_28276686 | NC_021164.1    | Ca_kabuli_chr05 | 28276686                | AA                              | TT              | 1946850255               |
| SNP_P4_73869_28305429 | NC_021164.1    | Ca_kabuli_chr05 | 28305429                | AA                              | TT              | 1946850257               |
| SNP_P4_73871_28305498 | NC_021164.1    | Ca_kabuli_chr05 | 28305498                | AA                              | GG              | 1946850259               |
| SNP_P4_73872_28305499 | NC_021164.1    | Ca_kabuli_chr05 | 28305499                | TT                              | GG              | 1946850261               |
| SNP_P4_73873_28307501 | NC_021164.1    | Ca_kabuli_chr05 | 28307501                | TT                              | CC              | 1946850263               |
| SNP_P4_73875_28327868 | NC_021164.1    | Ca_kabuli_chr05 | 28327868                | GG                              | AA              | 1946850265               |
| SNP_P4_73877_28372589 | NC_021164.1    | Ca_kabuli_chr05 | 28372589                | CC                              | GG              | 1946850267               |
| SNP_P4_73878_28373745 | NC_021164.1    | Ca_kabuli_chr05 | 28373745                | AA                              | GG              | 1946850269               |
| SNP_P4_73879_28375215 | NC_021164.1    | Ca_kabuli_chr05 | 28375215                | AA                              | GG              | 1946850271               |
| SNP_P4_73880_28391737 | NC_021164.1    | Ca_kabuli_chr05 | 28391737                | AA                              | GG              | 1946850273               |
| SNP_P4_73881_28391780 | NC_021164.1    | Ca_kabuli_chr05 | 28391780                | TT                              | CC              | 1946850275               |
| SNP_P4_73882_28392189 | NC_021164.1    | Ca_kabuli_chr05 | 28392189                | AA                              | TT              | 1946850277               |
| SNP_P4_73883_28398388 | NC_021164.1    | Ca_kabuli_chr05 | 28398388                | GG                              | AA              | 1946850278               |
| SNP_P4_73885_28409305 | NC_021164.1    | Ca_kabuli_chr05 | 28409305                | TT                              | CC              | 1946850280               |
| SNP_P4_73886_28409621 | NC_021164.1    | Ca_kabuli_chr05 | 28409621                | GG                              | AA              | 1946850282               |
| SNP_P4_73887_28409782 | NC_021164.1    | Ca_kabuli_chr05 | 28409782                | TT                              | CC              | 1946850284               |
| SNP_P4_73888_28409788 | NC_021164.1    | Ca_kabuli_chr05 | 28409788                | GG                              | AA              | 1946850286               |
| SNP_P4_73889_28412985 | NC_021164.1    | Ca_kabuli_chr05 | 28412985                | TT                              | AA              | 1946850288               |
| SNP_P4_73891_28413409 | NC_021164.1    | Ca_kabuli_chr05 | 28413409                | CC                              | AA              | 1946850290               |
| SNP_P4_73892_28413468 | NC_021164.1    | Ca_kabuli_chr05 | 28413468                | TT                              | GG              | 1946850292               |
| SNP_P4_73893_28444799 | NC_021164.1    | Ca_kabuli_chr05 | 28444799                | GG                              | AA              | 1946850294               |
| SNP_P4_73895_28466923 | NC_021164.1    | Ca_kabuli_chr05 | 28466923                | CC                              | TT              | 1946850296               |
| SNP_P4_73896_28475128 | NC_021164.1    | Ca_kabuli_chr05 | 28475128                | GG                              | AA              | 1946850298               |
| SNP_P4_73897_28478220 | NC_021164.1    | Ca_kabuli_chr05 | 28478220                | AA                              | GG              | 1946850300               |
| SNP_P4_73898_28480018 | NC_021164.1    | Ca_kabuli_chr05 | 28480018                | TT                              | AA              | 1946850302               |
| SNP_P4_73899_28480051 | NC_021164.1    | Ca_kabuli_chr05 | 28480051                | AA                              | CC              | 1946850304               |
| SNP_P4_73900_28480125 | NC_021164.1    | Ca_kabuli_chr05 | 28480125                | CC                              | TT              | 1946850306               |
| SNP_P4_73901_28480126 | NC_021164.1    | Ca_kabuli_chr05 | 28480126                | TT                              | GG              | 1946850307               |
| SNP_P4_73902_28480396 | NC_021164.1    | Ca_kabuli_chr05 | 28480396                | AA                              | GG              | 1946850309               |
| SNP_P4_73903_28480434 | NC_021164.1    | Ca_kabuli_chr05 | 28480434                | AA                              | GG              | 1946850311               |
| SNP_P4_73904_28480454 | NC_021164.1    | Ca_kabuli_chr05 | 28480454                | TT                              | GG              | 1946850313               |
| SNP_P4_73905_28480455 | NC_021164.1    | Ca_kabuli_chr05 | 28480455                | AA                              | GG              | 1946850315               |
| SNP_P4_73906_28480505 | NC_021164.1    | Ca_kabuli_chr05 | 28480505                | TT                              | CC              | 1946850317               |
| SNP_P4_73907_28480511 | NC_021164.1    | Ca_kabuli_chr05 | 28480511                | TT                              | GG              | 1946850319               |
| SNP_P4_73908_28480574 | NC_021164.1    | Ca_kabuli_chr05 | 28480574                | TT                              | CC              | 1946850321               |
| SNP_P4_73909_28480938 | NC_021164.1    | Ca_kabuli_chr05 | 28480938                | GG                              | TT              | 1946850323               |
| SNP_P4_73911_28515721 | NC_021164.1    | Ca_kabuli_chr05 | 28515721                | AA                              | TT              | 1946850325               |
| SNP_P4_73912_28515723 | NC_021164.1    | Ca_kabuli_chr05 | 28515723                | TT                              | AA              | 1946850327               |
| SNP_P4_73913_28522632 | NC_021164.1    | Ca_kabuli_chr05 | 28522632                | TT                              | CC              | 1946850329               |
| SNP_P4_73914_28525109 | NC_021164.1    | Ca_kabuli_chr05 | 28525109                | AA                              | GG              | 1946850331               |

| SNPs IDs              | Chromosome IDs | Chromosomes     | Physical positions (bp) | CDC Frontier (Reference genome) | (ILWC46 & LPNB) | NCBI SNPdb Accession IDs |
|-----------------------|----------------|-----------------|-------------------------|---------------------------------|-----------------|--------------------------|
| SNP_P4_73915_28525127 | NC_021164.1    | Ca_kabuli_chr05 | 28525127                | AA                              | TT              | 1946850333               |
| SNP_P4_73916_28525151 | NC_021164.1    | Ca_kabuli_chr05 | 28525151                | AA                              | TT              | 1946850334               |
| SNP_P4_73917_28525158 | NC_021164.1    | Ca_kabuli_chr05 | 28525158                | GG                              | AA              | 1946850336               |
| SNP_P4_73918_28525162 | NC_021164.1    | Ca_kabuli_chr05 | 28525162                | AA                              | GG              | 1946850338               |
| SNP_P4_73919_28525200 | NC_021164.1    | Ca_kabuli_chr05 | 28525200                | AA                              | GG              | 1946850340               |
| SNP_P4_73920_28525282 | NC_021164.1    | Ca_kabuli_chr05 | 28525282                | AA                              | GG              | 1946850342               |
| SNP_P4_73921_28525309 | NC_021164.1    | Ca_kabuli_chr05 | 28525309                | GG                              | AA              | 1946850344               |
| SNP_P4_73922_28525415 | NC_021164.1    | Ca_kabuli_chr05 | 28525415                | GG                              | AA              | 1946850346               |
| SNP_P4_73923_28525444 | NC_021164.1    | Ca_kabuli_chr05 | 28525444                | AA                              | GG              | 1946850348               |
| SNP_P4_73924_28525478 | NC_021164.1    | Ca_kabuli_chr05 | 28525478                | GG                              | AA              | 1946850350               |
| SNP_P4_73925_28525514 | NC_021164.1    | Ca_kabuli_chr05 | 28525514                | GG                              | CC              | 1946850352               |
| SNP_P4_73926_28525527 | NC_021164.1    | Ca_kabuli_chr05 | 28525527                | CC                              | TT              | 1946850353               |
| SNP_P4_73927_28525547 | NC_021164.1    | Ca_kabuli_chr05 | 28525547                | AA                              | TT              | 1946850355               |
| SNP_P4_73928_28525586 | NC_021164.1    | Ca_kabuli_chr05 | 28525586                | CC                              | TT              | 1946850357               |
| SNP_P4_73929_28525622 | NC_021164.1    | Ca_kabuli_chr05 | 28525622                | TT                              | CC              | 1946850359               |
| SNP_P4_73930_28525630 | NC_021164.1    | Ca_kabuli_chr05 | 28525630                | AA                              | TT              | 1946850361               |
| SNP_P4_73931_28525635 | NC_021164.1    | Ca_kabuli_chr05 | 28525635                | AA                              | GG              | 1946850363               |
| SNP_P4_73932_28525662 | NC_021164.1    | Ca_kabuli_chr05 | 28525662                | TT                              | CC              | 1946850365               |
| SNP_P4_73933_28525687 | NC_021164.1    | Ca_kabuli_chr05 | 28525687                | TT                              | CC              | 1946850367               |
| SNP_P4_73934_28528483 | NC_021164.1    | Ca_kabuli_chr05 | 28528483                | TT                              | GG              | 1946850369               |
| SNP_P4_73935_28528496 | NC_021164.1    | Ca_kabuli_chr05 | 28528496                | AA                              | GG              | 1946850371               |
| SNP_P4_73936_28550564 | NC_021164.1    | Ca_kabuli_chr05 | 28550564                | GG                              | AA              | 1946850373               |
| SNP_P4_73937_28569378 | NC_021164.1    | Ca_kabuli_chr05 | 28569378                | CC                              | TT              | 1946850374               |
| SNP_P4_73938_28569962 | NC_021164.1    | Ca_kabuli_chr05 | 28569962                | AA                              | CC              | 1946850376               |
| SNP_P4_73939_28569993 | NC_021164.1    | Ca_kabuli_chr05 | 28569993                | AA                              | GG              | 1946850378               |
| SNP_P4_73940_28572382 | NC_021164.1    | Ca_kabuli_chr05 | 28572382                | TT                              | CC              | 1946850380               |
| SNP_P4_73941_28585610 | NC_021164.1    | Ca_kabuli_chr05 | 28585610                | AA                              | TT              | 1946850382               |
| SNP_P4_73942_28585966 | NC_021164.1    | Ca_kabuli_chr05 | 28585966                | CC                              | TT              | 1946850384               |
| SNP_P4_73944_28599225 | NC_021164.1    | Ca_kabuli_chr05 | 28599225                | AA                              | TT              | 1946850386               |
| SNP_P4_73945_28629586 | NC_021164.1    | Ca_kabuli_chr05 | 28629586                | TT                              | CC              | 1946850388               |
| SNP_P4_73946_28630501 | NC_021164.1    | Ca_kabuli_chr05 | 28630501                | CC                              | TT              | 1946850390               |
| SNP_P4_73947_28638658 | NC_021164.1    | Ca_kabuli_chr05 | 28638658                | TT                              | CC              | 1946850392               |
| SNP_P4_73948_28643246 | NC_021164.1    | Ca_kabuli_chr05 | 28643246                | AA                              | GG              | 1946850393               |
| SNP_P4_73949_28651625 | NC_021164.1    | Ca_kabuli_chr05 | 28651625                | CC                              | GG              | 1946850395               |
| SNP_P4_73950_28651650 | NC_021164.1    | Ca_kabuli_chr05 | 28651650                | TT                              | CC              | 1946850397               |
| SNP_P4_73951_28651663 | NC_021164.1    | Ca_kabuli_chr05 | 28651663                | GG                              | AA              | 1946850399               |
| SNP_P4_73952_28651676 | NC_021164.1    | Ca_kabuli_chr05 | 28651676                | CC                              | AA              | 1946850401               |
| SNP_P4_73953_28651680 | NC_021164.1    | Ca_kabuli_chr05 | 28651680                | TT                              | GG              | 1946850403               |
| SNP_P4_73954_28651724 | NC_021164.1    | Ca_kabuli_chr05 | 28651724                | TT                              | CC              | 1946850405               |
| SNP_P4_73955_28651771 | NC_021164.1    | Ca_kabuli_chr05 | 28651771                | AA                              | GG              | 1946850406               |
| SNP_P4_73956_28651916 | NC_021164.1    | Ca_kabuli_chr05 | 28651916                | AA                              | TT              | 1946850408               |
| SNP_P4_73957_28651992 | NC_021164.1    | Ca_kabuli_chr05 | 28651992                | GG                              | TT              | 1946850410               |

| SNPs IDs              | Chromosome IDs | Chromosomes     | Physical positions (bp) | CDC Frontier (Reference genome) | (ILWC46 & LPNB) | NCBI SNPdb Accession IDs |
|-----------------------|----------------|-----------------|-------------------------|---------------------------------|-----------------|--------------------------|
| SNP_P4_73958_28652604 | NC_021164.1    | Ca_kabuli_chr05 | 28652604                | GG                              | AA              | 1946850412               |
| SNP_P4_73959_28723419 | NC_021164.1    | Ca_kabuli_chr05 | 28723419                | AA                              | GG              | 1946850414               |
| SNP_P4_73961_28740552 | NC_021164.1    | Ca_kabuli_chr05 | 28740552                | CC                              | TT              | 1946850415               |
| SNP_P4_73962_28744009 | NC_021164.1    | Ca_kabuli_chr05 | 28744009                | CC                              | TT              | 1946850417               |
| SNP_P4_73963_28751469 | NC_021164.1    | Ca_kabuli_chr05 | 28751469                | AA                              | TT              | 1946850419               |
| SNP_P4_73964_28751471 | NC_021164.1    | Ca_kabuli_chr05 | 28751471                | AA                              | TT              | 1946850421               |
| SNP_P4_73965_28766391 | NC_021164.1    | Ca_kabuli_chr05 | 28766391                | GG                              | AA              | 1946850423               |
| SNP_P4_73966_28767700 | NC_021164.1    | Ca_kabuli_chr05 | 28767700                | TT                              | GG              | 1946850425               |
| SNP_P4_73967_28795015 | NC_021164.1    | Ca_kabuli_chr05 | 28795015                | GG                              | AA              | 1946850427               |
| SNP_P4_73969_28850202 | NC_021164.1    | Ca_kabuli_chr05 | 28850202                | AA                              | TT              | 1946850429               |
| SNP_P4_73971_28862385 | NC_021164.1    | Ca_kabuli_chr05 | 28862385                | CC                              | AA              | 1946850431               |
| SNP_P4_73973_28945844 | NC_021164.1    | Ca_kabuli_chr05 | 28945844                | TT                              | CC              | 1946850433               |
| SNP_P4_73974_28949573 | NC_021164.1    | Ca_kabuli_chr05 | 28949573                | GG                              | AA              | 1946850435               |
| SNP_P4_73976_28977894 | NC_021164.1    | Ca_kabuli_chr05 | 28977894                | TT                              | CC              | 1946850437               |
| SNP_P4_73977_28999129 | NC_021164.1    | Ca_kabuli_chr05 | 28999129                | GG                              | TT              | 1946850439               |
| SNP_P4_73979_29007346 | NC_021164.1    | Ca_kabuli_chr05 | 29007346                | GG                              | TT              | 1946850441               |
| SNP_P4_73985_29166328 | NC_021164.1    | Ca_kabuli_chr05 | 29166328                | GG                              | AA              | 1946850443               |
| SNP_P4_73986_29187445 | NC_021164.1    | Ca_kabuli_chr05 | 29187445                | AA                              | CC              | 1946850445               |
| SNP_P4_73987_29187479 | NC_021164.1    | Ca_kabuli_chr05 | 29187479                | AA                              | GG              | 1946850447               |
| SNP_P4_73988_29207171 | NC_021164.1    | Ca_kabuli_chr05 | 29207171                | AA                              | GG              | 1946850449               |
| SNP_P4_73989_29241199 | NC_021164.1    | Ca_kabuli_chr05 | 29241199                | CC                              | TT              | 1946850451               |
| SNP_P4_73990_29333305 | NC_021164.1    | Ca_kabuli_chr05 | 29333305                | TT                              | AA              | 1946850453               |
| SNP_P4_73992_29361455 | NC_021164.1    | Ca_kabuli_chr05 | 29361455                | AA                              | CC              | 1946850455               |
| SNP_P4_73996_29423069 | NC_021164.1    | Ca_kabuli_chr05 | 29423069                | AA                              | GG              | 1946850457               |
| SNP_P4_73997_29423070 | NC_021164.1    | Ca_kabuli_chr05 | 29423070                | AA                              | TT              | 1946850459               |
| SNP_P4_73998_29423303 | NC_021164.1    | Ca_kabuli_chr05 | 29423303                | GG                              | AA              | 1946850461               |
| SNP_P4_73999_29428189 | NC_021164.1    | Ca_kabuli_chr05 | 29428189                | CC                              | GG              | 1946850463               |
| SNP_P4_74000_29435247 | NC_021164.1    | Ca_kabuli_chr05 | 29435247                | AA                              | GG              | 1946850465               |
| SNP_P4_74001_29460824 | NC_021164.1    | Ca_kabuli_chr05 | 29460824                | CC                              | GG              | 1946850467               |
| SNP_P4_74003_29476543 | NC_021164.1    | Ca_kabuli_chr05 | 29476543                | TT                              | AA              | 1946850469               |
| SNP_P4_74004_29476544 | NC_021164.1    | Ca_kabuli_chr05 | 29476544                | GG                              | CC              | 1946850471               |
| SNP_P4_74005_29480541 | NC_021164.1    | Ca_kabuli_chr05 | 29480541                | GG                              | CC              | 1946850473               |
| SNP_P4_74006_29508793 | NC_021164.1    | Ca_kabuli_chr05 | 29508793                | TT                              | CC              | 1946850475               |
| SNP_P4_74007_29514470 | NC_021164.1    | Ca_kabuli_chr05 | 29514470                | GG                              | TT              | 1946850477               |
| SNP_P4_74008_29514479 | NC_021164.1    | Ca_kabuli_chr05 | 29514479                | GG                              | CC              | 1946850479               |
| SNP_P4_74010_29516246 | NC_021164.1    | Ca_kabuli_chr05 | 29516246                | TT                              | GG              | 1946850480               |
| SNP_P4_74011_29516249 | NC_021164.1    | Ca_kabuli_chr05 | 29516249                | GG                              | CC              | 1946850483               |
| SNP_P4_74012_29518833 | NC_021164.1    | Ca_kabuli_chr05 | 29518833                | AA                              | GG              | 1946850485               |
| SNP_P4_74013_29536189 | NC_021164.1    | Ca_kabuli_chr05 | 29536189                | TT                              | CC              | 1946850487               |
| SNP_P4_74014_29536303 | NC_021164.1    | Ca_kabuli_chr05 | 29536303                | TT                              | CC              | 1946850489               |
| SNP_P4_74015_29539133 | NC_021164.1    | Ca_kabuli_chr05 | 29539133                | CC                              | AA              | 1946850491               |
| SNP_P4_74016_29539677 | NC_021164.1    | Ca_kabuli_chr05 | 29539677                | AA                              | CC              | 1946850493               |



| SNPs IDs              | Chromosome IDs | Chromosomes     | Physical positions (bp) | CDC Frontier (Reference genome) | (ILWC46 & LPNB) | NCBI SNPdb Accession IDs |
|-----------------------|----------------|-----------------|-------------------------|---------------------------------|-----------------|--------------------------|
| SNP_P4_74017_29539702 | NC_021164.1    | Ca_kabuli_chr05 | 29539702                | GG                              | TT              | 1946850495               |
| SNP_P4_74019_29626480 | NC_021164.1    | Ca_kabuli_chr05 | 29626480                | AA                              | GG              | 1946850497               |
| SNP_P4_74020_29631895 | NC_021164.1    | Ca_kabuli_chr05 | 29631895                | TT                              | CC              | 1946850499               |
| SNP_P4_74021_29635805 | NC_021164.1    | Ca_kabuli_chr05 | 29635805                | AA                              | CC              | 1946850501               |
| SNP_P4_74022_29636658 | NC_021164.1    | Ca_kabuli_chr05 | 29636658                | AA                              | GG              | 1946850503               |
| SNP_P4_74026_29667351 | NC_021164.1    | Ca_kabuli_chr05 | 29667351                | TT                              | CC              | 1946850505               |
| SNP_P4_74027_29675843 | NC_021164.1    | Ca_kabuli_chr05 | 29675843                | AA                              | GG              | 1946850507               |
| SNP_P4_74028_29675844 | NC_021164.1    | Ca_kabuli_chr05 | 29675844                | AA                              | TT              | 1946850509               |
| SNP_P4_74029_29676442 | NC_021164.1    | Ca_kabuli_chr05 | 29676442                | TT                              | CC              | 1946850511               |
| SNP_P4_74030_29676471 | NC_021164.1    | Ca_kabuli_chr05 | 29676471                | CC                              | GG              | 1946850513               |
| SNP_P4_74031_29704202 | NC_021164.1    | Ca_kabuli_chr05 | 29704202                | AA                              | GG              | 1946850515               |
| SNP_P4_74032_29715100 | NC_021164.1    | Ca_kabuli_chr05 | 29715100                | TT                              | GG              | 1946850517               |
| SNP_P4_74033_29715102 | NC_021164.1    | Ca_kabuli_chr05 | 29715102                | AA                              | CC              | 1946850519               |
| SNP_P4_74034_29717122 | NC_021164.1    | Ca_kabuli_chr05 | 29717122                | CC                              | AA              | 1946850521               |
| SNP_P4_74035_29721738 | NC_021164.1    | Ca_kabuli_chr05 | 29721738                | CC                              | TT              | 1946850523               |
| SNP_P4_74036_29724119 | NC_021164.1    | Ca_kabuli_chr05 | 29724119                | CC                              | TT              | 1946850525               |
| SNP_P4_74040_29739368 | NC_021164.1    | Ca_kabuli_chr05 | 29739368                | TT                              | CC              | 1946850527               |
| SNP_P4_74042_29759720 | NC_021164.1    | Ca_kabuli_chr05 | 29759720                | TT                              | AA              | 1946850529               |
| SNP_P4_74044_29778105 | NC_021164.1    | Ca_kabuli_chr05 | 29778105                | GG                              | AA              | 1946850531               |
| SNP_P4_74045_29778113 | NC_021164.1    | Ca_kabuli_chr05 | 29778113                | CC                              | TT              | 1946850533               |
| SNP_P4_74046_29778227 | NC_021164.1    | Ca_kabuli_chr05 | 29778227                | AA                              | GG              | 1946850535               |
| SNP_P4_74047_29838244 | NC_021164.1    | Ca_kabuli_chr05 | 29838244                | GG                              | AA              | 1946850537               |
| SNP_P4_74048_29841197 | NC_021164.1    | Ca_kabuli_chr05 | 29841197                | AA                              | GG              | 1946850539               |
| SNP_P4_74049_29856975 | NC_021164.1    | Ca_kabuli_chr05 | 29856975                | CC                              | AA              | 1946850541               |
| SNP_P4_74050_29858315 | NC_021164.1    | Ca_kabuli_chr05 | 29858315                | CC                              | AA              | 1946850543               |
| SNP_P4_74053_29859687 | NC_021164.1    | Ca_kabuli_chr05 | 29859687                | TT                              | AA              | 1946850545               |
| SNP_P4_74055_29911227 | NC_021164.1    | Ca_kabuli_chr05 | 29911227                | GG                              | AA              | 1946850546               |
| SNP_P4_74056_29917613 | NC_021164.1    | Ca_kabuli_chr05 | 29917613                | CC                              | TT              | 1946850548               |
| SNP_P4_74057_29917651 | NC_021164.1    | Ca_kabuli_chr05 | 29917651                | TT                              | GG              | 1946850550               |
| SNP_P4_74058_29917680 | NC_021164.1    | Ca_kabuli_chr05 | 29917680                | TT                              | AA              | 1946850552               |
| SNP_P4_74059_29919284 | NC_021164.1    | Ca_kabuli_chr05 | 29919284                | GG                              | AA              | 1946850554               |
| SNP_P4_74061_29920999 | NC_021164.1    | Ca_kabuli_chr05 | 29920999                | AA                              | CC              | 1946850557               |
| SNP_P4_74062_29921049 | NC_021164.1    | Ca_kabuli_chr05 | 29921049                | CC                              | TT              | 1946850559               |
| SNP_P4_74063_29921081 | NC_021164.1    | Ca_kabuli_chr05 | 29921081                | AA                              | TT              | 1946850561               |
| SNP_P4_74064_29921082 | NC_021164.1    | Ca_kabuli_chr05 | 29921082                | AA                              | GG              | 1946850563               |
| SNP_P4_74065_29932064 | NC_021164.1    | Ca_kabuli_chr05 | 29932064                | TT                              | CC              | 1946850565               |
| SNP_P4_74066_29932135 | NC_021164.1    | Ca_kabuli_chr05 | 29932135                | GG                              | TT              | 1946850567               |
| SNP_P4_74067_29932159 | NC_021164.1    | Ca_kabuli_chr05 | 29932159                | CC                              | TT              | 1946850569               |
| SNP_P4_74068_29932160 | NC_021164.1    | Ca_kabuli_chr05 | 29932160                | CC                              | GG              | 1946850571               |
| SNP_P4_74069_29932161 | NC_021164.1    | Ca_kabuli_chr05 | 29932161                | TT                              | AA              | 1946850573               |
| SNP_P4_74070_29932304 | NC_021164.1    | Ca_kabuli_chr05 | 29932304                | TT                              | GG              | 1946850575               |
| SNP_P4_74071_29932320 | NC_021164.1    | Ca_kabuli_chr05 | 29932320                | GG                              | AA              | 1946850577               |

| SNPs IDs              | Chromosome IDs | Chromosomes     | Physical positions (bp) | CDC Frontier (Reference genome) | (ILWC46 & LPNB) | NCBI SNPdb Accession IDs |
|-----------------------|----------------|-----------------|-------------------------|---------------------------------|-----------------|--------------------------|
| SNP_P4_74072_29932330 | NC_021164.1    | Ca_kabuli_chr05 | 29932330                | GG                              | AA              | 1946850579               |
| SNP_P4_74073_29932355 | NC_021164.1    | Ca_kabuli_chr05 | 29932355                | GG                              | AA              | 1946850581               |
| SNP_P4_74074_29932374 | NC_021164.1    | Ca_kabuli_chr05 | 29932374                | GG                              | AA              | 1946850583               |
| SNP_P4_74075_29932515 | NC_021164.1    | Ca_kabuli_chr05 | 29932515                | GG                              | AA              | 1946850585               |
| SNP_P4_74076_29933084 | NC_021164.1    | Ca_kabuli_chr05 | 29933084                | CC                              | GG              | 1946850587               |
| SNP_P4_74078_29933992 | NC_021164.1    | Ca_kabuli_chr05 | 29933992                | TT                              | CC              | 1946850590               |
| SNP_P4_74079_29934615 | NC_021164.1    | Ca_kabuli_chr05 | 29934615                | CC                              | TT              | 1946850592               |
| SNP_P4_74080_29938073 | NC_021164.1    | Ca_kabuli_chr05 | 29938073                | AA                              | TT              | 1946850594               |
| SNP_P4_74081_29938136 | NC_021164.1    | Ca_kabuli_chr05 | 29938136                | GG                              | AA              | 1946850596               |
| SNP_P4_74084_29938497 | NC_021164.1    | Ca_kabuli_chr05 | 29938497                | TT                              | GG              | 1946850598               |
| SNP_P4_74085_29964303 | NC_021164.1    | Ca_kabuli_chr05 | 29964303                | GG                              | AA              | 1946850600               |
| SNP_P4_74086_29974791 | NC_021164.1    | Ca_kabuli_chr05 | 29974791                | AA                              | GG              | 1946850602               |
| SNP_P4_74087_29978279 | NC_021164.1    | Ca_kabuli_chr05 | 29978279                | AA                              | GG              | 1946850604               |
| SNP_P4_74088_29999161 | NC_021164.1    | Ca_kabuli_chr05 | 29999161                | TT                              | CC              | 1946850606               |
| SNP_P4_74089_30008557 | NC_021164.1    | Ca_kabuli_chr05 | 30008557                | GG                              | AA              | 1946850608               |
| SNP_P4_74090_30011657 | NC_021164.1    | Ca_kabuli_chr05 | 30011657                | AA                              | TT              | 1946850610               |
| SNP_P4_74091_30018549 | NC_021164.1    | Ca_kabuli_chr05 | 30018549                | CC                              | TT              | 1946850612               |
| SNP_P4_74092_30019097 | NC_021164.1    | Ca_kabuli_chr05 | 30019097                | GG                              | AA              | 1946850614               |
| SNP_P4_74093_30035410 | NC_021164.1    | Ca_kabuli_chr05 | 30035410                | TT                              | CC              | 1946850616               |
| SNP_P4_74094_30040605 | NC_021164.1    | Ca_kabuli_chr05 | 30040605                | TT                              | AA              | 1946850618               |
| SNP_P4_74095_30052812 | NC_021164.1    | Ca_kabuli_chr05 | 30052812                | AA                              | TT              | 1946850620               |
| SNP_P4_74096_30058024 | NC_021164.1    | Ca_kabuli_chr05 | 30058024                | CC                              | TT              | 1946850622               |
| SNP_P4_74097_30106400 | NC_021164.1    | Ca_kabuli_chr05 | 30106400                | TT                              | GG              | 1946850624               |
| SNP_P4_74098_30106660 | NC_021164.1    | Ca_kabuli_chr05 | 30106660                | GG                              | AA              | 1946850626               |
| SNP_P4_74099_30106730 | NC_021164.1    | Ca_kabuli_chr05 | 30106730                | CC                              | AA              | 1946850628               |
| SNP_P4_74100_30106871 | NC_021164.1    | Ca_kabuli_chr05 | 30106871                | GG                              | CC              | 1946850630               |
| SNP_P4_74102_30107037 | NC_021164.1    | Ca_kabuli_chr05 | 30107037                | GG                              | AA              | 1946850632               |
| SNP_P4_74103_30107041 | NC_021164.1    | Ca_kabuli_chr05 | 30107041                | CC                              | TT              | 1946850634               |
| SNP_P4_74104_30107049 | NC_021164.1    | Ca_kabuli_chr05 | 30107049                | TT                              | CC              | 1946850636               |
| SNP_P4_74105_30107160 | NC_021164.1    | Ca_kabuli_chr05 | 30107160                | GG                              | AA              | 1946850638               |
| SNP_P4_74106_30107213 | NC_021164.1    | Ca_kabuli_chr05 | 30107213                | TT                              | CC              | 1946850640               |
| SNP_P4_74107_30107279 | NC_021164.1    | Ca_kabuli_chr05 | 30107279                | AA                              | GG              | 1946850642               |
| SNP_P4_74108_30107307 | NC_021164.1    | Ca_kabuli_chr05 | 30107307                | TT                              | AA              | 1946850644               |
| SNP_P4_74109_30107315 | NC_021164.1    | Ca_kabuli_chr05 | 30107315                | CC                              | TT              | 1946850646               |
| SNP_P4_74110_30107550 | NC_021164.1    | Ca_kabuli_chr05 | 30107550                | TT                              | CC              | 1946850648               |
| SNP_P4_74111_30107576 | NC_021164.1    | Ca_kabuli_chr05 | 30107576                | AA                              | CC              | 1946850650               |
| SNP_P4_74112_30108506 | NC_021164.1    | Ca_kabuli_chr05 | 30108506                | GG                              | CC              | 1946850652               |
| SNP_P4_74113_30108652 | NC_021164.1    | Ca_kabuli_chr05 | 30108652                | TT                              | GG              | 1946850654               |
| SNP_P4_74114_30108819 | NC_021164.1    | Ca_kabuli_chr05 | 30108819                | CC                              | GG              | 1946850656               |
| SNP_P4_74115_30108824 | NC_021164.1    | Ca_kabuli_chr05 | 30108824                | CC                              | GG              | 1946850658               |
| SNP_P4_74116_30108829 | NC_021164.1    | Ca_kabuli_chr05 | 30108829                | CC                              | TT              | 1946850660               |
| SNP_P4_74117_30108842 | NC_021164.1    | Ca_kabuli_chr05 | 30108842                | AA                              | GG              | 1946850662               |

| SNPs IDs              | Chromosome IDs | Chromosomes     | Physical positions (bp) | CDC Frontier (Reference genome) | (ILWC46 & LPNB) | NCBI SNPdb Accession IDs |
|-----------------------|----------------|-----------------|-------------------------|---------------------------------|-----------------|--------------------------|
| SNP_P4_74118_30109033 | NC_021164.1    | Ca_kabuli_chr05 | 30109033                | CC                              | TT              | 1946850664               |
| SNP_P4_74119_30109034 | NC_021164.1    | Ca_kabuli_chr05 | 30109034                | TT                              | CC              | 1946850666               |
| SNP_P4_74120_30109040 | NC_021164.1    | Ca_kabuli_chr05 | 30109040                | TT                              | CC              | 1946850668               |
| SNP_P4_74121_30109116 | NC_021164.1    | Ca_kabuli_chr05 | 30109116                | TT                              | AA              | 1946850670               |
| SNP_P4_74122_30109197 | NC_021164.1    | Ca_kabuli_chr05 | 30109197                | GG                              | AA              | 1946850672               |
| SNP_P4_74123_30109266 | NC_021164.1    | Ca_kabuli_chr05 | 30109266                | AA                              | GG              | 1946850674               |
| SNP_P4_74124_30109382 | NC_021164.1    | Ca_kabuli_chr05 | 30109382                | TT                              | CC              | 1946850676               |
| SNP_P4_74125_30112270 | NC_021164.1    | Ca_kabuli_chr05 | 30112270                | CC                              | TT              | 1946850678               |
| SNP_P4_74127_30114946 | NC_021164.1    | Ca_kabuli_chr05 | 30114946                | GG                              | AA              | 1946850680               |
| SNP_P4_74128_30114971 | NC_021164.1    | Ca_kabuli_chr05 | 30114971                | AA                              | TT              | 1946850682               |
| SNP_P4_74129_30119135 | NC_021164.1    | Ca_kabuli_chr05 | 30119135                | CC                              | TT              | 1946850684               |
| SNP_P4_74130_30119743 | NC_021164.1    | Ca_kabuli_chr05 | 30119743                | TT                              | GG              | 1946850686               |
| SNP_P4_74131_30119775 | NC_021164.1    | Ca_kabuli_chr05 | 30119775                | TT                              | CC              | 1946850688               |
| SNP_P4_74132_30120257 | NC_021164.1    | Ca_kabuli_chr05 | 30120257                | AA                              | GG              | 1946850690               |
| SNP_P4_74133_30120264 | NC_021164.1    | Ca_kabuli_chr05 | 30120264                | GG                              | AA              | 1946850692               |
| SNP_P4_74135_30121304 | NC_021164.1    | Ca_kabuli_chr05 | 30121304                | CC                              | AA              | 1946850694               |
| SNP_P4_74137_30123179 | NC_021164.1    | Ca_kabuli_chr05 | 30123179                | AA                              | TT              | 1946850696               |
| SNP_P4_74138_30123327 | NC_021164.1    | Ca_kabuli_chr05 | 30123327                | CC                              | TT              | 1946850698               |
| SNP_P4_74139_30123407 | NC_021164.1    | Ca_kabuli_chr05 | 30123407                | GG                              | CC              | 1946850700               |
| SNP_P4_74140_30123675 | NC_021164.1    | Ca_kabuli_chr05 | 30123675                | GG                              | CC              | 1946850702               |
| SNP_P4_74141_30123687 | NC_021164.1    | Ca_kabuli_chr05 | 30123687                | CC                              | AA              | 1946850704               |
| SNP_P4_74142_30124086 | NC_021164.1    | Ca_kabuli_chr05 | 30124086                | GG                              | CC              | 1946850706               |
| SNP_P4_74143_30125552 | NC_021164.1    | Ca_kabuli_chr05 | 30125552                | AA                              | TT              | 1946850708               |
| SNP_P4_74145_30127094 | NC_021164.1    | Ca_kabuli_chr05 | 30127094                | TT                              | AA              | 1946850710               |
| SNP_P4_74146_30127852 | NC_021164.1    | Ca_kabuli_chr05 | 30127852                | CC                              | TT              | 1946850712               |
| SNP_P4_74147_30128630 | NC_021164.1    | Ca_kabuli_chr05 | 30128630                | GG                              | TT              | 1946850714               |
| SNP_P4_74148_30128762 | NC_021164.1    | Ca_kabuli_chr05 | 30128762                | CC                              | TT              | 1946850716               |
| SNP_P4_74150_30129022 | NC_021164.1    | Ca_kabuli_chr05 | 30129022                | AA                              | TT              | 1946850718               |
| SNP_P4_74151_30129094 | NC_021164.1    | Ca_kabuli_chr05 | 30129094                | CC                              | TT              | 1946850721               |
| SNP_P4_74153_30131107 | NC_021164.1    | Ca_kabuli_chr05 | 30131107                | TT                              | GG              | 1946850723               |
| SNP_P4_74154_30132470 | NC_021164.1    | Ca_kabuli_chr05 | 30132470                | TT                              | CC              | 1946850725               |
| SNP_P4_74155_30136055 | NC_021164.1    | Ca_kabuli_chr05 | 30136055                | CC                              | TT              | 1946850727               |
| SNP_P4_74156_30138508 | NC_021164.1    | Ca_kabuli_chr05 | 30138508                | TT                              | AA              | 1946850730               |
| SNP_P4_74157_30147290 | NC_021164.1    | Ca_kabuli_chr05 | 30147290                | TT                              | GG              | 1946850732               |
| SNP_P4_74158_30195906 | NC_021164.1    | Ca_kabuli_chr05 | 30195906                | TT                              | CC              | 1946850734               |
| SNP_P4_74159_30227140 | NC_021164.1    | Ca_kabuli_chr05 | 30227140                | CC                              | TT              | 1946850736               |
| SNP_P4_74160_30227400 | NC_021164.1    | Ca_kabuli_chr05 | 30227400                | GG                              | AA              | 1946850738               |
| SNP_P4_74161_30234403 | NC_021164.1    | Ca_kabuli_chr05 | 30234403                | AA                              | TT              | 1946850740               |
| SNP_P4_74162_30279788 | NC_021164.1    | Ca_kabuli_chr05 | 30279788                | AA                              | GG              | 1946850742               |
| SNP_P4_74164_30322938 | NC_021164.1    | Ca_kabuli_chr05 | 30322938                | TT                              | AA              | 1946850744               |
| SNP_P4_74166_30396252 | NC_021164.1    | Ca_kabuli_chr05 | 30396252                | AA                              | TT              | 1946850747               |
| SNP_P4_74167_30396366 | NC_021164.1    | Ca_kabuli_chr05 | 30396366                | TT                              | CC              | 1946850749               |

| SNPs IDs              | Chromosome IDs | Chromosomes     | Physical positions (bp) | CDC Frontier (Reference genome) | (ILWC46 & LPNB) | NCBI SNPdb Accession IDs |
|-----------------------|----------------|-----------------|-------------------------|---------------------------------|-----------------|--------------------------|
| SNP_P4_74168_30396428 | NC_021164.1    | Ca_kabuli_chr05 | 30396428                | CC                              | GG              | 1946850751               |
| SNP_P4_74169_30396495 | NC_021164.1    | Ca_kabuli_chr05 | 30396495                | AA                              | GG              | 1946850753               |
| SNP_P4_74170_30396633 | NC_021164.1    | Ca_kabuli_chr05 | 30396633                | AA                              | GG              | 1946850755               |
| SNP_P4_74171_30396786 | NC_021164.1    | Ca_kabuli_chr05 | 30396786                | TT                              | GG              | 1946850757               |
| SNP_P4_74172_30396821 | NC_021164.1    | Ca_kabuli_chr05 | 30396821                | AA                              | TT              | 1946850759               |
| SNP_P4_74173_30398522 | NC_021164.1    | Ca_kabuli_chr05 | 30398522                | AA                              | TT              | 1946850761               |
| SNP_P4_74174_30431522 | NC_021164.1    | Ca_kabuli_chr05 | 30431522                | GG                              | AA              | 1946850763               |
| SNP_P4_74175_30440174 | NC_021164.1    | Ca_kabuli_chr05 | 30440174                | AA                              | GG              | 1946850765               |
| SNP_P4_74176_30445297 | NC_021164.1    | Ca_kabuli_chr05 | 30445297                | CC                              | TT              | 1946850767               |
| SNP_P4_74177_30458215 | NC_021164.1    | Ca_kabuli_chr05 | 30458215                | TT                              | CC              | 1946850769               |
| SNP_P4_74178_30480146 | NC_021164.1    | Ca_kabuli_chr05 | 30480146                | TT                              | CC              | 1946850771               |
| SNP_P4_74179_30487887 | NC_021164.1    | Ca_kabuli_chr05 | 30487887                | CC                              | TT              | 1946850773               |
| SNP_P4_74180_30487938 | NC_021164.1    | Ca_kabuli_chr05 | 30487938                | AA                              | TT              | 1946850775               |
| SNP_P4_74181_30488163 | NC_021164.1    | Ca_kabuli_chr05 | 30488163                | CC                              | TT              | 1946850777               |
| SNP_P4_74182_30488178 | NC_021164.1    | Ca_kabuli_chr05 | 30488178                | AA                              | GG              | 1946850779               |
| SNP_P4_74183_30488185 | NC_021164.1    | Ca_kabuli_chr05 | 30488185                | TT                              | CC              | 1946850781               |
| SNP_P4_74184_30488268 | NC_021164.1    | Ca_kabuli_chr05 | 30488268                | CC                              | TT              | 1946850783               |
| SNP_P4_74185_30488280 | NC_021164.1    | Ca_kabuli_chr05 | 30488280                | AA                              | GG              | 1946850785               |
| SNP_P4_74186_30540100 | NC_021164.1    | Ca_kabuli_chr05 | 30540100                | AA                              | TT              | 1946850787               |
| SNP_P4_74187_30542079 | NC_021164.1    | Ca_kabuli_chr05 | 30542079                | TT                              | CC              | 1946850789               |
| SNP_P4_74188_30543001 | NC_021164.1    | Ca_kabuli_chr05 | 30543001                | GG                              | AA              | 1946850791               |
| SNP_P4_74189_30547556 | NC_021164.1    | Ca_kabuli_chr05 | 30547556                | AA                              | TT              | 1946850793               |
| SNP_P4_74190_30547557 | NC_021164.1    | Ca_kabuli_chr05 | 30547557                | CC                              | TT              | 1946850795               |
| SNP_P4_74192_30570443 | NC_021164.1    | Ca_kabuli_chr05 | 30570443                | CC                              | TT              | 1946850797               |
| SNP_P4_74193_30581344 | NC_021164.1    | Ca_kabuli_chr05 | 30581344                | TT                              | CC              | 1946850799               |
| SNP_P4_74194_30584240 | NC_021164.1    | Ca_kabuli_chr05 | 30584240                | TT                              | CC              | 1946850801               |
| SNP_P4_74195_30589828 | NC_021164.1    | Ca_kabuli_chr05 | 30589828                | AA                              | TT              | 1946850803               |
| SNP_P4_74196_30590531 | NC_021164.1    | Ca_kabuli_chr05 | 30590531                | CC                              | GG              | 1946850805               |
| SNP_P4_74197_30609683 | NC_021164.1    | Ca_kabuli_chr05 | 30609683                | AA                              | TT              | 1946850807               |
| SNP_P4_74198_30609687 | NC_021164.1    | Ca_kabuli_chr05 | 30609687                | TT                              | GG              | 1946850809               |
| SNP_P4_74199_30609808 | NC_021164.1    | Ca_kabuli_chr05 | 30609808                | GG                              | AA              | 1946850811               |
| SNP_P4_74200_30612404 | NC_021164.1    | Ca_kabuli_chr05 | 30612404                | GG                              | AA              | 1946850813               |
| SNP_P4_74203_30619976 | NC_021164.1    | Ca_kabuli_chr05 | 30619976                | GG                              | AA              | 1946850815               |
| SNP_P4_74204_30621409 | NC_021164.1    | Ca_kabuli_chr05 | 30621409                | CC                              | TT              | 1946850817               |
| SNP_P4_74205_30623658 | NC_021164.1    | Ca_kabuli_chr05 | 30623658                | AA                              | GG              | 1946850819               |
| SNP_P4_74206_30623659 | NC_021164.1    | Ca_kabuli_chr05 | 30623659                | AA                              | TT              | 1946850821               |
| SNP_P4_74207_30641839 | NC_021164.1    | Ca_kabuli_chr05 | 30641839                | TT                              | CC              | 1946850823               |
| SNP_P4_74208_30643231 | NC_021164.1    | Ca_kabuli_chr05 | 30643231                | TT                              | GG              | 1946850825               |
| SNP_P4_74209_30668275 | NC_021164.1    | Ca_kabuli_chr05 | 30668275                | CC                              | TT              | 1946850827               |
| SNP_P4_74210_30669337 | NC_021164.1    | Ca_kabuli_chr05 | 30669337                | CC                              | TT              | 1946850829               |
| SNP_P4_74211_30669343 | NC_021164.1    | Ca_kabuli_chr05 | 30669343                | CC                              | TT              | 1946850831               |
| SNP_P4_74212_30672490 | NC_021164.1    | Ca_kabuli_chr05 | 30672490                | TT                              | AA              | 1946850833               |

| SNPs IDs              | Chromosome IDs | Chromosomes     | Physical positions (bp) | CDC Frontier (Reference genome) | (ILWC46 & LPNB) | NCBI SNPdb Accession IDs |
|-----------------------|----------------|-----------------|-------------------------|---------------------------------|-----------------|--------------------------|
| SNP_P4_74213_30678899 | NC_021164.1    | Ca_kabuli_chr05 | 30678899                | AA                              | GG              | 1946850835               |
| SNP_P4_74214_30684188 | NC_021164.1    | Ca_kabuli_chr05 | 30684188                | AA                              | GG              | 1946850837               |
| SNP_P4_74215_30684876 | NC_021164.1    | Ca_kabuli_chr05 | 30684876                | TT                              | CC              | 1946850839               |
| SNP_P4_74216_30710575 | NC_021164.1    | Ca_kabuli_chr05 | 30710575                | GG                              | AA              | 1946850841               |
| SNP_P4_74218_30731086 | NC_021164.1    | Ca_kabuli_chr05 | 30731086                | AA                              | TT              | 1946850843               |
| SNP_P4_74219_30731087 | NC_021164.1    | Ca_kabuli_chr05 | 30731087                | AA                              | TT              | 1946850845               |
| SNP_P4_74220_30731120 | NC_021164.1    | Ca_kabuli_chr05 | 30731120                | AA                              | TT              | 1946850846               |
| SNP_P4_74221_30738220 | NC_021164.1    | Ca_kabuli_chr05 | 30738220                | GG                              | TT              | 1946850848               |
| SNP_P4_74222_30773870 | NC_021164.1    | Ca_kabuli_chr05 | 30773870                | CC                              | TT              | 1946850850               |
| SNP_P4_74223_30774235 | NC_021164.1    | Ca_kabuli_chr05 | 30774235                | CC                              | AA              | 1946850852               |
| SNP_P4_74224_30777285 | NC_021164.1    | Ca_kabuli_chr05 | 30777285                | AA                              | GG              | 1946850854               |
| SNP_P4_74225_30777582 | NC_021164.1    | Ca_kabuli_chr05 | 30777582                | GG                              | AA              | 1946850856               |
| SNP_P4_74226_30818525 | NC_021164.1    | Ca_kabuli_chr05 | 30818525                | AA                              | CC              | 1946850858               |
| SNP_P4_74227_30827707 | NC_021164.1    | Ca_kabuli_chr05 | 30827707                | CC                              | AA              | 1946850860               |
| SNP_P4_74228_30837244 | NC_021164.1    | Ca_kabuli_chr05 | 30837244                | TT                              | CC              | 1946850862               |
| SNP_P4_74229_30837453 | NC_021164.1    | Ca_kabuli_chr05 | 30837453                | GG                              | TT              | 1946850864               |
| SNP_P4_74230_30839071 | NC_021164.1    | Ca_kabuli_chr05 | 30839071                | GG                              | AA              | 1946850866               |
| SNP_P4_74231_30839135 | NC_021164.1    | Ca_kabuli_chr05 | 30839135                | TT                              | CC              | 1946850868               |
| SNP_P4_74232_30881257 | NC_021164.1    | Ca_kabuli_chr05 | 30881257                | CC                              | TT              | 1946850870               |
| SNP_P4_74233_30904770 | NC_021164.1    | Ca_kabuli_chr05 | 30904770                | AA                              | GG              | 1946850872               |
| SNP_P4_74234_30912408 | NC_021164.1    | Ca_kabuli_chr05 | 30912408                | CC                              | TT              | 1946850874               |
| SNP_P4_74235_30912448 | NC_021164.1    | Ca_kabuli_chr05 | 30912448                | CC                              | TT              | 1946850876               |
| SNP_P4_74236_30915418 | NC_021164.1    | Ca_kabuli_chr05 | 30915418                | TT                              | CC              | 1946850878               |
| SNP_P4_74237_30915446 | NC_021164.1    | Ca_kabuli_chr05 | 30915446                | AA                              | TT              | 1946850880               |
| SNP_P4_74239_30917890 | NC_021164.1    | Ca_kabuli_chr05 | 30917890                | CC                              | TT              | 1946850882               |
| SNP_P4_74240_30920163 | NC_021164.1    | Ca_kabuli_chr05 | 30920163                | CC                              | TT              | 1946850884               |
| SNP_P4_74241_30935949 | NC_021164.1    | Ca_kabuli_chr05 | 30935949                | AA                              | TT              | 1946850886               |
| SNP_P4_74243_31017414 | NC_021164.1    | Ca_kabuli_chr05 | 31017414                | AA                              | GG              | 1946850888               |
| SNP_P4_74244_31027816 | NC_021164.1    | Ca_kabuli_chr05 | 31027816                | TT                              | CC              | 1946850890               |
| SNP_P4_74245_31029900 | NC_021164.1    | Ca_kabuli_chr05 | 31029900                | TT                              | CC              | 1946850892               |
| SNP_P4_74246_31039652 | NC_021164.1    | Ca_kabuli_chr05 | 31039652                | CC                              | TT              | 1946850894               |
| SNP_P4_74247_31044565 | NC_021164.1    | Ca_kabuli_chr05 | 31044565                | CC                              | TT              | 1946850896               |
| SNP_P4_74250_31074899 | NC_021164.1    | Ca_kabuli_chr05 | 31074899                | AA                              | GG              | 1946850898               |
| SNP_P4_74251_31084489 | NC_021164.1    | Ca_kabuli_chr05 | 31084489                | CC                              | TT              | 1946850900               |
| SNP_P4_74253_31114917 | NC_021164.1    | Ca_kabuli_chr05 | 31114917                | CC                              | TT              | 1946850902               |
| SNP_P4_74254_31129973 | NC_021164.1    | Ca_kabuli_chr05 | 31129973                | TT                              | AA              | 1946850904               |
| SNP_P4_74255_31129979 | NC_021164.1    | Ca_kabuli_chr05 | 31129979                | AA                              | GG              | 1946850906               |
| SNP_P4_74256_31130014 | NC_021164.1    | Ca_kabuli_chr05 | 31130014                | AA                              | TT              | 1946850908               |
| SNP_P4_74257_31130886 | NC_021164.1    | Ca_kabuli_chr05 | 31130886                | TT                              | CC              | 1946850910               |
| SNP_P4_74258_31131001 | NC_021164.1    | Ca_kabuli_chr05 | 31131001                | TT                              | GG              | 1946850912               |
| SNP_P4_74259_31131066 | NC_021164.1    | Ca_kabuli_chr05 | 31131066                | TT                              | AA              | 1946850914               |
| SNP_P4_74260_31131237 | NC_021164.1    | Ca_kabuli_chr05 | 31131237                | TT                              | AA              | 1946850916               |

| SNPs IDs              | Chromosome IDs | Chromosomes     | Physical positions (bp) | CDC Frontier (Reference genome) | (ILWC46 & LPNB) | NCBI SNPdb Accession IDs |
|-----------------------|----------------|-----------------|-------------------------|---------------------------------|-----------------|--------------------------|
| SNP_P4_74261_31131246 | NC_021164.1    | Ca_kabuli_chr05 | 31131246                | TT                              | CC              | 1946850918               |
| SNP_P4_74262_31132377 | NC_021164.1    | Ca_kabuli_chr05 | 31132377                | GG                              | TT              | 1946850920               |
| SNP_P4_74263_31132379 | NC_021164.1    | Ca_kabuli_chr05 | 31132379                | TT                              | AA              | 1946850922               |
| SNP_P4_74264_31133718 | NC_021164.1    | Ca_kabuli_chr05 | 31133718                | GG                              | AA              | 1946850924               |
| SNP_P4_74265_31133737 | NC_021164.1    | Ca_kabuli_chr05 | 31133737                | AA                              | GG              | 1946850926               |
| SNP_P4_74266_31133739 | NC_021164.1    | Ca_kabuli_chr05 | 31133739                | TT                              | AA              | 1946850928               |
| SNP_P4_74267_31133740 | NC_021164.1    | Ca_kabuli_chr05 | 31133740                | TT                              | GG              | 1946850930               |
| SNP_P4_74269_31135633 | NC_021164.1    | Ca_kabuli_chr05 | 31135633                | GG                              | AA              | 1946850932               |
| SNP_P4_74272_31144603 | NC_021164.1    | Ca_kabuli_chr05 | 31144603                | TT                              | AA              | 1946850934               |
| SNP_P4_74273_31144606 | NC_021164.1    | Ca_kabuli_chr05 | 31144606                | CC                              | AA              | 1946850936               |
| SNP_P4_74274_31144805 | NC_021164.1    | Ca_kabuli_chr05 | 31144805                | CC                              | TT              | 1946850938               |
| SNP_P4_74275_31144916 | NC_021164.1    | Ca_kabuli_chr05 | 31144916                | AA                              | GG              | 1946850940               |
| SNP_P4_74276_31144994 | NC_021164.1    | Ca_kabuli_chr05 | 31144994                | TT                              | CC              | 1946850942               |
| SNP_P4_74277_31146847 | NC_021164.1    | Ca_kabuli_chr05 | 31146847                | CC                              | GG              | 1946850944               |
| SNP_P4_74278_31146854 | NC_021164.1    | Ca_kabuli_chr05 | 31146854                | AA                              | GG              | 1946850946               |
| SNP_P4_74280_31147733 | NC_021164.1    | Ca_kabuli_chr05 | 31147733                | AA                              | TT              | 1946850948               |
| SNP_P4_74281_31149462 | NC_021164.1    | Ca_kabuli_chr05 | 31149462                | TT                              | AA              | 1946850950               |
| SNP_P4_74282_31153276 | NC_021164.1    | Ca_kabuli_chr05 | 31153276                | GG                              | AA              | 1946850952               |
| SNP_P4_74283_31153608 | NC_021164.1    | Ca_kabuli_chr05 | 31153608                | AA                              | GG              | 1946850954               |
| SNP_P4_74284_31153765 | NC_021164.1    | Ca_kabuli_chr05 | 31153765                | GG                              | TT              | 1946850956               |
| SNP_P4_74285_31153770 | NC_021164.1    | Ca_kabuli_chr05 | 31153770                | TT                              | CC              | 1946850958               |
| SNP_P4_74286_31153781 | NC_021164.1    | Ca_kabuli_chr05 | 31153781                | GG                              | AA              | 1946850960               |
| SNP_P4_74287_31153809 | NC_021164.1    | Ca_kabuli_chr05 | 31153809                | AA                              | TT              | 1946850962               |
| SNP_P4_74289_31153958 | NC_021164.1    | Ca_kabuli_chr05 | 31153958                | AA                              | GG              | 1946850964               |
| SNP_P4_74290_31154082 | NC_021164.1    | Ca_kabuli_chr05 | 31154082                | GG                              | TT              | 1946850966               |
| SNP_P4_74291_31154110 | NC_021164.1    | Ca_kabuli_chr05 | 31154110                | CC                              | GG              | 1946850968               |
| SNP_P4_74293_31154245 | NC_021164.1    | Ca_kabuli_chr05 | 31154245                | GG                              | AA              | 1946850970               |
| SNP_P4_74294_31154270 | NC_021164.1    | Ca_kabuli_chr05 | 31154270                | GG                              | AA              | 1946850972               |
| SNP_P4_74295_31154284 | NC_021164.1    | Ca_kabuli_chr05 | 31154284                | AA                              | CC              | 1946850974               |
| SNP_P4_74296_31154288 | NC_021164.1    | Ca_kabuli_chr05 | 31154288                | GG                              | AA              | 1946850976               |
| SNP_P4_74297_31154422 | NC_021164.1    | Ca_kabuli_chr05 | 31154422                | AA                              | GG              | 1946850978               |
| SNP_P4_74298_31154635 | NC_021164.1    | Ca_kabuli_chr05 | 31154635                | TT                              | GG              | 1946850980               |
| SNP_P4_74300_31155316 | NC_021164.1    | Ca_kabuli_chr05 | 31155316                | GG                              | AA              | 1946850982               |
| SNP_P4_74301_31156842 | NC_021164.1    | Ca_kabuli_chr05 | 31156842                | AA                              | GG              | 1946850984               |
| SNP_P4_74302_31157370 | NC_021164.1    | Ca_kabuli_chr05 | 31157370                | AA                              | GG              | 1946850986               |
| SNP_P4_74303_31157420 | NC_021164.1    | Ca_kabuli_chr05 | 31157420                | GG                              | CC              | 1946850988               |
| SNP_P4_74304_31158582 | NC_021164.1    | Ca_kabuli_chr05 | 31158582                | GG                              | AA              | 1946850990               |
| SNP_P4_74305_31160820 | NC_021164.1    | Ca_kabuli_chr05 | 31160820                | CC                              | GG              | 1946850992               |
| SNP_P4_74306_31161085 | NC_021164.1    | Ca_kabuli_chr05 | 31161085                | AA                              | GG              | 1946850994               |
| SNP_P4_74308_31163338 | NC_021164.1    | Ca_kabuli_chr05 | 31163338                | TT                              | CC              | 1946850996               |
| SNP_P4_74309_31163431 | NC_021164.1    | Ca_kabuli_chr05 | 31163431                | GG                              | AA              | 1946850998               |
| SNP_P4_74310_31163437 | NC_021164.1    | Ca_kabuli_chr05 | 31163437                | CC                              | GG              | 1946851000               |

| SNPs IDs              | Chromosome IDs | Chromosomes     | Physical positions (bp) | CDC Frontier (Reference genome) | (ILWC46 & LPNB) | NCBI SNPdb Accession IDs |
|-----------------------|----------------|-----------------|-------------------------|---------------------------------|-----------------|--------------------------|
| SNP_P4_74311_31165905 | NC_021164.1    | Ca_kabuli_chr05 | 31165905                | GG                              | AA              | 1946851002               |
| SNP_P4_74313_31166845 | NC_021164.1    | Ca_kabuli_chr05 | 31166845                | TT                              | CC              | 1946851004               |
| SNP_P4_74314_31166862 | NC_021164.1    | Ca_kabuli_chr05 | 31166862                | CC                              | TT              | 1946851006               |
| SNP_P4_74315_31168151 | NC_021164.1    | Ca_kabuli_chr05 | 31168151                | AA                              | GG              | 1946851008               |
| SNP_P4_74316_31168202 | NC_021164.1    | Ca_kabuli_chr05 | 31168202                | GG                              | TT              | 1946851010               |
| SNP_P4_74317_31168221 | NC_021164.1    | Ca_kabuli_chr05 | 31168221                | CC                              | TT              | 1946851012               |
| SNP_P4_74318_31174783 | NC_021164.1    | Ca_kabuli_chr05 | 31174783                | GG                              | AA              | 1946851014               |
| SNP_P4_74319_31175436 | NC_021164.1    | Ca_kabuli_chr05 | 31175436                | TT                              | CC              | 1946851016               |
| SNP_P4_74320_31179582 | NC_021164.1    | Ca_kabuli_chr05 | 31179582                | TT                              | CC              | 1946851018               |
| SNP_P4_74321_31181676 | NC_021164.1    | Ca_kabuli_chr05 | 31181676                | CC                              | TT              | 1946851020               |
| SNP_P4_74322_31181716 | NC_021164.1    | Ca_kabuli_chr05 | 31181716                | CC                              | GG              | 1946851022               |
| SNP_P4_74323_31182861 | NC_021164.1    | Ca_kabuli_chr05 | 31182861                | CC                              | AA              | 1946851024               |
| SNP_P4_74325_31183146 | NC_021164.1    | Ca_kabuli_chr05 | 31183146                | CC                              | TT              | 1946851026               |
| SNP_P4_74326_31183153 | NC_021164.1    | Ca_kabuli_chr05 | 31183153                | CC                              | AA              | 1946851028               |
| SNP_P4_74327_31183231 | NC_021164.1    | Ca_kabuli_chr05 | 31183231                | TT                              | CC              | 1946851030               |
| SNP_P4_74328_31183243 | NC_021164.1    | Ca_kabuli_chr05 | 31183243                | AA                              | TT              | 1946851032               |
| SNP_P4_74329_31183927 | NC_021164.1    | Ca_kabuli_chr05 | 31183927                | AA                              | TT              | 1946851034               |
| SNP_P4_74330_31183969 | NC_021164.1    | Ca_kabuli_chr05 | 31183969                | TT                              | CC              | 1946851036               |
| SNP_P4_74331_31184009 | NC_021164.1    | Ca_kabuli_chr05 | 31184009                | AA                              | GG              | 1946851038               |
| SNP_P4_74332_31184014 | NC_021164.1    | Ca_kabuli_chr05 | 31184014                | AA                              | GG              | 1946851040               |
| SNP_P4_74333_31184210 | NC_021164.1    | Ca_kabuli_chr05 | 31184210                | GG                              | AA              | 1946851042               |
| SNP_P4_74334_31185136 | NC_021164.1    | Ca_kabuli_chr05 | 31185136                | AA                              | CC              | 1946851044               |
| SNP_P4_74335_31186998 | NC_021164.1    | Ca_kabuli_chr05 | 31186998                | AA                              | GG              | 1946851046               |
| SNP_P4_74337_31187062 | NC_021164.1    | Ca_kabuli_chr05 | 31187062                | GG                              | AA              | 1946851048               |
| SNP_P4_74338_31187069 | NC_021164.1    | Ca_kabuli_chr05 | 31187069                | TT                              | AA              | 1946851050               |
| SNP_P4_74339_31187169 | NC_021164.1    | Ca_kabuli_chr05 | 31187169                | TT                              | CC              | 1946851052               |
| SNP_P4_74340_31187208 | NC_021164.1    | Ca_kabuli_chr05 | 31187208                | GG                              | AA              | 1946851054               |
| SNP_P4_74341_31187755 | NC_021164.1    | Ca_kabuli_chr05 | 31187755                | AA                              | GG              | 1946851056               |
| SNP_P4_74342_31187801 | NC_021164.1    | Ca_kabuli_chr05 | 31187801                | AA                              | CC              | 1946851058               |
| SNP_P4_74344_31188036 | NC_021164.1    | Ca_kabuli_chr05 | 31188036                | GG                              | CC              | 1946851060               |
| SNP_P4_74345_31188780 | NC_021164.1    | Ca_kabuli_chr05 | 31188780                | CC                              | GG              | 1946851062               |
| SNP_P4_74346_31188964 | NC_021164.1    | Ca_kabuli_chr05 | 31188964                | CC                              | TT              | 1946851064               |
| SNP_P4_74347_31189089 | NC_021164.1    | Ca_kabuli_chr05 | 31189089                | GG                              | CC              | 1946851065               |
| SNP_P4_74348_31193822 | NC_021164.1    | Ca_kabuli_chr05 | 31193822                | TT                              | CC              | 1946851067               |
| SNP_P4_74349_31212093 | NC_021164.1    | Ca_kabuli_chr05 | 31212093                | AA                              | GG              | 1946851069               |
| SNP_P4_74352_31258746 | NC_021164.1    | Ca_kabuli_chr05 | 31258746                | AA                              | CC              | 1946851071               |
| SNP_P4_74353_31281875 | NC_021164.1    | Ca_kabuli_chr05 | 31281875                | TT                              | GG              | 1946851073               |
| SNP_P4_74355_31317816 | NC_021164.1    | Ca_kabuli_chr05 | 31317816                | AA                              | GG              | 1946851075               |
| SNP_P4_74356_31318463 | NC_021164.1    | Ca_kabuli_chr05 | 31318463                | CC                              | TT              | 1946851077               |
| SNP_P4_74357_31318990 | NC_021164.1    | Ca_kabuli_chr05 | 31318990                | CC                              | AA              | 1946851079               |
| SNP_P4_74360_31392222 | NC_021164.1    | Ca_kabuli_chr05 | 31392222                | GG                              | AA              | 1946851081               |
| SNP_P4_74361_31392433 | NC_021164.1    | Ca_kabuli_chr05 | 31392433                | GG                              | TT              | 1946851083               |

| SNPs IDs              | Chromosome IDs | Chromosomes     | Physical positions (bp) | CDC Frontier (Reference genome) | (ILWC46 & LPNB) | NCBI SNPdb Accession IDs |
|-----------------------|----------------|-----------------|-------------------------|---------------------------------|-----------------|--------------------------|
| SNP_P4_74362_31409652 | NC_021164.1    | Ca_kabuli_chr05 | 31409652                | AA                              | GG              | 1946851085               |
| SNP_P4_74364_31441446 | NC_021164.1    | Ca_kabuli_chr05 | 31441446                | GG                              | AA              | 1946851087               |
| SNP_P4_74365_31454357 | NC_021164.1    | Ca_kabuli_chr05 | 31454357                | GG                              | AA              | 1946851089               |
| SNP_P4_74366_31454366 | NC_021164.1    | Ca_kabuli_chr05 | 31454366                | GG                              | AA              | 1946851091               |
| SNP_P4_74367_31454742 | NC_021164.1    | Ca_kabuli_chr05 | 31454742                | AA                              | CC              | 1946851093               |
| SNP_P4_74368_31454744 | NC_021164.1    | Ca_kabuli_chr05 | 31454744                | CC                              | GG              | 1946851095               |
| SNP_P4_74369_31507836 | NC_021164.1    | Ca_kabuli_chr05 | 31507836                | CC                              | TT              | 1946851097               |
| SNP_P4_74371_31535354 | NC_021164.1    | Ca_kabuli_chr05 | 31535354                | TT                              | AA              | 1946851099               |
| SNP_P4_74372_31535643 | NC_021164.1    | Ca_kabuli_chr05 | 31535643                | CC                              | TT              | 1946851101               |
| SNP_P4_74373_31538205 | NC_021164.1    | Ca_kabuli_chr05 | 31538205                | TT                              | AA              | 1946851103               |
| SNP_P4_74374_31543534 | NC_021164.1    | Ca_kabuli_chr05 | 31543534                | AA                              | TT              | 1946851105               |
| SNP_P4_74375_31543538 | NC_021164.1    | Ca_kabuli_chr05 | 31543538                | AA                              | TT              | 1946851107               |
| SNP_P4_74378_31636544 | NC_021164.1    | Ca_kabuli_chr05 | 31636544                | CC                              | AA              | 1946851109               |
| SNP_P4_74379_31641564 | NC_021164.1    | Ca_kabuli_chr05 | 31641564                | AA                              | GG              | 1946851111               |
| SNP_P4_74380_31643263 | NC_021164.1    | Ca_kabuli_chr05 | 31643263                | AA                              | GG              | 1946851113               |
| SNP_P4_74381_31660205 | NC_021164.1    | Ca_kabuli_chr05 | 31660205                | TT                              | AA              | 1946851115               |
| SNP_P4_74383_31686725 | NC_021164.1    | Ca_kabuli_chr05 | 31686725                | GG                              | AA              | 1946851117               |
| SNP_P4_74384_31686759 | NC_021164.1    | Ca_kabuli_chr05 | 31686759                | CC                              | TT              | 1946851119               |
| SNP_P4_74387_31708309 | NC_021164.1    | Ca_kabuli_chr05 | 31708309                | GG                              | TT              | 1946851121               |
| SNP_P4_74388_31718567 | NC_021164.1    | Ca_kabuli_chr05 | 31718567                | AA                              | TT              | 1946851123               |
| SNP_P4_74390_31719044 | NC_021164.1    | Ca_kabuli_chr05 | 31719044                | GG                              | CC              | 1946851125               |
| SNP_P4_74391_31734272 | NC_021164.1    | Ca_kabuli_chr05 | 31734272                | CC                              | TT              | 1946851127               |
| SNP_P4_74392_31735773 | NC_021164.1    | Ca_kabuli_chr05 | 31735773                | TT                              | CC              | 1946851129               |
| SNP_P4_74393_31745941 | NC_021164.1    | Ca_kabuli_chr05 | 31745941                | CC                              | TT              | 1946851131               |
| SNP_P4_74394_31754573 | NC_021164.1    | Ca_kabuli_chr05 | 31754573                | GG                              | AA              | 1946851133               |
| SNP_P4_74395_31763913 | NC_021164.1    | Ca_kabuli_chr05 | 31763913                | GG                              | AA              | 1946851135               |
| SNP_P4_74396_31763986 | NC_021164.1    | Ca_kabuli_chr05 | 31763986                | GG                              | CC              | 1946851137               |
| SNP_P4_74397_31764063 | NC_021164.1    | Ca_kabuli_chr05 | 31764063                | AA                              | TT              | 1946851139               |
| SNP_P4_74398_31784797 | NC_021164.1    | Ca_kabuli_chr05 | 31784797                | CC                              | TT              | 1946851141               |
| SNP_P4_74399_31789683 | NC_021164.1    | Ca_kabuli_chr05 | 31789683                | AA                              | TT              | 1946851143               |
| SNP_P4_74401_31807512 | NC_021164.1    | Ca_kabuli_chr05 | 31807512                | CC                              | GG              | 1946851145               |
| SNP_P4_74403_31813984 | NC_021164.1    | Ca_kabuli_chr05 | 31813984                | AA                              | GG              | 1946851147               |
| SNP_P4_74404_31819529 | NC_021164.1    | Ca_kabuli_chr05 | 31819529                | GG                              | TT              | 1946851149               |
| SNP_P4_74408_31858682 | NC_021164.1    | Ca_kabuli_chr05 | 31858682                | TT                              | AA              | 1946851151               |
| SNP_P4_74410_31861858 | NC_021164.1    | Ca_kabuli_chr05 | 31861858                | CC                              | AA              | 1946851153               |
| SNP_P4_74411_31905420 | NC_021164.1    | Ca_kabuli_chr05 | 31905420                | TT                              | GG              | 1946851155               |
| SNP_P4_74412_31905422 | NC_021164.1    | Ca_kabuli_chr05 | 31905422                | TT                              | AA              | 1946851157               |
| SNP_P4_74414_31941411 | NC_021164.1    | Ca_kabuli_chr05 | 31941411                | AA                              | TT              | 1946851159               |
| SNP_P4_74415_31943052 | NC_021164.1    | Ca_kabuli_chr05 | 31943052                | GG                              | AA              | 1946851161               |
| SNP_P4_74418_31961787 | NC_021164.1    | Ca_kabuli_chr05 | 31961787                | AA                              | TT              | 1946851163               |
| SNP_P4_74420_32034978 | NC_021164.1    | Ca_kabuli_chr05 | 32034978                | CC                              | AA              | 1946851166               |
| SNP_P4_74421_32034987 | NC_021164.1    | Ca_kabuli_chr05 | 32034987                | TT                              | GG              | 1946851168               |



| SNPs IDs              | Chromosome IDs | Chromosomes     | Physical positions (bp) | CDC Frontier (Reference genome) | (ILWC46 & LPNB) | NCBI SNPdb Accession IDs |
|-----------------------|----------------|-----------------|-------------------------|---------------------------------|-----------------|--------------------------|
| SNP_P4_74422_32040708 | NC_021164.1    | Ca_kabuli_chr05 | 32040708                | AA                              | CC              | 1946851170               |
| SNP_P4_74423_32065972 | NC_021164.1    | Ca_kabuli_chr05 | 32065972                | AA                              | CC              | 1946851172               |
| SNP_P4_74424_32081544 | NC_021164.1    | Ca_kabuli_chr05 | 32081544                | GG                              | AA              | 1946851174               |
| SNP_P4_74425_32089818 | NC_021164.1    | Ca_kabuli_chr05 | 32089818                | AA                              | TT              | 1946851176               |
| SNP_P4_74427_32121088 | NC_021164.1    | Ca_kabuli_chr05 | 32121088                | GG                              | AA              | 1946851178               |
| SNP_P4_74428_32121176 | NC_021164.1    | Ca_kabuli_chr05 | 32121176                | GG                              | CC              | 1946851180               |
| SNP_P4_74429_32122292 | NC_021164.1    | Ca_kabuli_chr05 | 32122292                | GG                              | CC              | 1946851182               |
| SNP_P4_74430_32122474 | NC_021164.1    | Ca_kabuli_chr05 | 32122474                | CC                              | TT              | 1946851184               |
| SNP_P4_74431_32122723 | NC_021164.1    | Ca_kabuli_chr05 | 32122723                | TT                              | CC              | 1946851186               |
| SNP_P4_74432_32122829 | NC_021164.1    | Ca_kabuli_chr05 | 32122829                | AA                              | CC              | 1946851188               |
| SNP_P4_74433_32123010 | NC_021164.1    | Ca_kabuli_chr05 | 32123010                | TT                              | AA              | 1946851190               |
| SNP_P4_74434_32123127 | NC_021164.1    | Ca_kabuli_chr05 | 32123127                | AA                              | TT              | 1946851192               |
| SNP_P4_74435_32123568 | NC_021164.1    | Ca_kabuli_chr05 | 32123568                | GG                              | TT              | 1946851194               |
| SNP_P4_74436_32123569 | NC_021164.1    | Ca_kabuli_chr05 | 32123569                | AA                              | GG              | 1946851196               |
| SNP_P4_74437_32137331 | NC_021164.1    | Ca_kabuli_chr05 | 32137331                | AA                              | GG              | 1946851198               |
| SNP_P4_74438_32137370 | NC_021164.1    | Ca_kabuli_chr05 | 32137370                | GG                              | CC              | 1946851200               |
| SNP_P4_74439_32137589 | NC_021164.1    | Ca_kabuli_chr05 | 32137589                | AA                              | GG              | 1946851202               |
| SNP_P4_74440_32138539 | NC_021164.1    | Ca_kabuli_chr05 | 32138539                | AA                              | TT              | 1946851204               |
| SNP_P4_74442_32140117 | NC_021164.1    | Ca_kabuli_chr05 | 32140117                | TT                              | AA              | 1946851206               |
| SNP_P4_74443_32160960 | NC_021164.1    | Ca_kabuli_chr05 | 32160960                | AA                              | TT              | 1946851208               |
| SNP_P4_74445_32239799 | NC_021164.1    | Ca_kabuli_chr05 | 32239799                | TT                              | AA              | 1946851210               |
| SNP_P4_74446_32239800 | NC_021164.1    | Ca_kabuli_chr05 | 32239800                | TT                              | AA              | 1946851212               |
| SNP_P4_74447_32244650 | NC_021164.1    | Ca_kabuli_chr05 | 32244650                | AA                              | GG              | 1946851214               |
| SNP_P4_74448_32244685 | NC_021164.1    | Ca_kabuli_chr05 | 32244685                | AA                              | TT              | 1946851216               |
| SNP_P4_74449_32244689 | NC_021164.1    | Ca_kabuli_chr05 | 32244689                | AA                              | CC              | 1946851218               |
| SNP_P4_74450_32248470 | NC_021164.1    | Ca_kabuli_chr05 | 32248470                | AA                              | CC              | 1946851220               |
| SNP_P4_74451_32248485 | NC_021164.1    | Ca_kabuli_chr05 | 32248485                | TT                              | CC              | 1946851222               |
| SNP_P4_74452_32248502 | NC_021164.1    | Ca_kabuli_chr05 | 32248502                | GG                              | AA              | 1946851224               |
| SNP_P4_74453_32248627 | NC_021164.1    | Ca_kabuli_chr05 | 32248627                | GG                              | TT              | 1946851226               |
| SNP_P4_74454_32258201 | NC_021164.1    | Ca_kabuli_chr05 | 32258201                | CC                              | TT              | 1946851228               |
| SNP_P4_74455_32258212 | NC_021164.1    | Ca_kabuli_chr05 | 32258212                | AA                              | GG              | 1946851230               |
| SNP_P4_74456_32259464 | NC_021164.1    | Ca_kabuli_chr05 | 32259464                | GG                              | AA              | 1946851232               |
| SNP_P4_74457_32261109 | NC_021164.1    | Ca_kabuli_chr05 | 32261109                | GG                              | TT              | 1946851234               |
| SNP_P4_74458_32270313 | NC_021164.1    | Ca_kabuli_chr05 | 32270313                | CC                              | TT              | 1946851236               |
| SNP_P4_74460_32292902 | NC_021164.1    | Ca_kabuli_chr05 | 32292902                | GG                              | AA              | 1946851238               |
| SNP_P4_74461_32293209 | NC_021164.1    | Ca_kabuli_chr05 | 32293209                | GG                              | TT              | 1946851240               |
| SNP_P4_74462_32293210 | NC_021164.1    | Ca_kabuli_chr05 | 32293210                | GG                              | AA              | 1946851242               |
| SNP_P4_74464_32302701 | NC_021164.1    | Ca_kabuli_chr05 | 32302701                | GG                              | TT              | 1946851243               |
| SNP_P4_74467_32378560 | NC_021164.1    | Ca_kabuli_chr05 | 32378560                | AA                              | GG              | 1946851245               |
| SNP_P4_74468_32385541 | NC_021164.1    | Ca_kabuli_chr05 | 32385541                | GG                              | TT              | 1946851247               |
| SNP_P4_74470_32395519 | NC_021164.1    | Ca_kabuli_chr05 | 32395519                | TT                              | CC              | 1946851249               |
| SNP_P4_74472_32397838 | NC_021164.1    | Ca_kabuli_chr05 | 32397838                | TT                              | CC              | 1946851251               |

| SNPs IDs              | Chromosome IDs | Chromosomes     | Physical positions (bp) | CDC Frontier (Reference genome) | (ILWC46 & LPNB) | NCBI SNPdb Accession IDs |
|-----------------------|----------------|-----------------|-------------------------|---------------------------------|-----------------|--------------------------|
| SNP_P4_74473_32411324 | NC_021164.1    | Ca_kabuli_chr05 | 32411324                | AA                              | CC              | 1946851253               |
| SNP_P4_74474_32411331 | NC_021164.1    | Ca_kabuli_chr05 | 32411331                | GG                              | TT              | 1946851255               |
| SNP_P4_74475_32411332 | NC_021164.1    | Ca_kabuli_chr05 | 32411332                | GG                              | TT              | 1946851257               |
| SNP_P4_74476_32448226 | NC_021164.1    | Ca_kabuli_chr05 | 32448226                | TT                              | GG              | 1946851259               |
| SNP_P4_74478_32505424 | NC_021164.1    | Ca_kabuli_chr05 | 32505424                | CC                              | TT              | 1946851261               |
| SNP_P4_74480_32544459 | NC_021164.1    | Ca_kabuli_chr05 | 32544459                | GG                              | AA              | 1946851263               |
| SNP_P4_74482_32600970 | NC_021164.1    | Ca_kabuli_chr05 | 32600970                | CC                              | GG              | 1946851265               |
| SNP_P4_74484_32608864 | NC_021164.1    | Ca_kabuli_chr05 | 32608864                | CC                              | TT              | 1946851267               |
| SNP_P4_74487_32651929 | NC_021164.1    | Ca_kabuli_chr05 | 32651929                | AA                              | CC              | 1946851269               |
| SNP_P4_74488_32652222 | NC_021164.1    | Ca_kabuli_chr05 | 32652222                | AA                              | GG              | 1946851271               |
| SNP_P4_74489_32664231 | NC_021164.1    | Ca_kabuli_chr05 | 32664231                | CC                              | TT              | 1946851273               |
| SNP_P4_74490_32707094 | NC_021164.1    | Ca_kabuli_chr05 | 32707094                | TT                              | AA              | 1946851275               |
| SNP_P4_74491_32709727 | NC_021164.1    | Ca_kabuli_chr05 | 32709727                | TT                              | AA              | 1946851277               |
| SNP_P4_74492_32735771 | NC_021164.1    | Ca_kabuli_chr05 | 32735771                | TT                              | CC              | 1946851279               |
| SNP_P4_74495_32745696 | NC_021164.1    | Ca_kabuli_chr05 | 32745696                | GG                              | AA              | 1946851281               |
| SNP_P4_74497_32747737 | NC_021164.1    | Ca_kabuli_chr05 | 32747737                | GG                              | TT              | 1946851283               |
| SNP_P4_74498_32764330 | NC_021164.1    | Ca_kabuli_chr05 | 32764330                | GG                              | CC              | 1946851285               |
| SNP_P4_74501_32771729 | NC_021164.1    | Ca_kabuli_chr05 | 32771729                | CC                              | TT              | 1946851287               |
| SNP_P4_74503_32786872 | NC_021164.1    | Ca_kabuli_chr05 | 32786872                | CC                              | TT              | 1946851289               |
| SNP_P4_74504_32812067 | NC_021164.1    | Ca_kabuli_chr05 | 32812067                | AA                              | TT              | 1946851291               |
| SNP_P4_74508_32882585 | NC_021164.1    | Ca_kabuli_chr05 | 32882585                | TT                              | CC              | 1946851293               |
| SNP_P4_74510_32919776 | NC_021164.1    | Ca_kabuli_chr05 | 32919776                | AA                              | GG              | 1946851295               |
| SNP_P4_74512_32952924 | NC_021164.1    | Ca_kabuli_chr05 | 32952924                | TT                              | GG              | 1946851297               |
| SNP_P4_74513_32962877 | NC_021164.1    | Ca_kabuli_chr05 | 32962877                | AA                              | GG              | 1946851299               |
| SNP_P4_74514_32988632 | NC_021164.1    | Ca_kabuli_chr05 | 32988632                | CC                              | TT              | 1946851301               |
| SNP_P4_74515_32988633 | NC_021164.1    | Ca_kabuli_chr05 | 32988633                | TT                              | CC              | 1946851303               |
| SNP_P4_74516_32988636 | NC_021164.1    | Ca_kabuli_chr05 | 32988636                | AA                              | GG              | 1946851305               |
| SNP_P4_74517_33009048 | NC_021164.1    | Ca_kabuli_chr05 | 33009048                | CC                              | TT              | 1946851307               |
| SNP_P4_74519_33069404 | NC_021164.1    | Ca_kabuli_chr05 | 33069404                | AA                              | GG              | 1946851309               |
| SNP_P4_74520_33069406 | NC_021164.1    | Ca_kabuli_chr05 | 33069406                | TT                              | AA              | 1946851311               |
| SNP_P4_74521_33076432 | NC_021164.1    | Ca_kabuli_chr05 | 33076432                | AA                              | CC              | 1946851313               |
| SNP_P4_74522_33087589 | NC_021164.1    | Ca_kabuli_chr05 | 33087589                | GG                              | AA              | 1946851315               |
| SNP_P4_74523_33087604 | NC_021164.1    | Ca_kabuli_chr05 | 33087604                | TT                              | CC              | 1946851317               |
| SNP_P4_74524_33087711 | NC_021164.1    | Ca_kabuli_chr05 | 33087711                | AA                              | GG              | 1946851320               |
| SNP_P4_74525_33088076 | NC_021164.1    | Ca_kabuli_chr05 | 33088076                | GG                              | AA              | 1946851322               |
| SNP_P4_74526_33088090 | NC_021164.1    | Ca_kabuli_chr05 | 33088090                | GG                              | AA              | 1946851324               |
| SNP_P4_74527_33088099 | NC_021164.1    | Ca_kabuli_chr05 | 33088099                | AA                              | GG              | 1946851326               |
| SNP_P4_74528_33091001 | NC_021164.1    | Ca_kabuli_chr05 | 33091001                | TT                              | GG              | 1946851328               |
| SNP_P4_74529_33091002 | NC_021164.1    | Ca_kabuli_chr05 | 33091002                | AA                              | TT              | 1946851330               |
| SNP_P4_74530_33094509 | NC_021164.1    | Ca_kabuli_chr05 | 33094509                | TT                              | AA              | 1946851332               |
| SNP_P4_74531_33094861 | NC_021164.1    | Ca_kabuli_chr05 | 33094861                | GG                              | AA              | 1946851334               |
| SNP_P4_74532_33099246 | NC_021164.1    | Ca_kabuli_chr05 | 33099246                | AA                              | CC              | 1946851336               |

| SNPs IDs              | Chromosome IDs | Chromosomes     | Physical positions (bp) | CDC Frontier (Reference genome) | (ILWC46 & LPNB) | NCBI SNPdb Accession IDs |
|-----------------------|----------------|-----------------|-------------------------|---------------------------------|-----------------|--------------------------|
| SNP_P4_74533_33099604 | NC_021164.1    | Ca_kabuli_chr05 | 33099604                | TT                              | GG              | 1946851338               |
| SNP_P4_74534_33099608 | NC_021164.1    | Ca_kabuli_chr05 | 33099608                | TT                              | CC              | 1946851340               |
| SNP_P4_74535_33099634 | NC_021164.1    | Ca_kabuli_chr05 | 33099634                | AA                              | GG              | 1946851342               |
| SNP_P4_74536_33099641 | NC_021164.1    | Ca_kabuli_chr05 | 33099641                | TT                              | CC              | 1946851344               |
| SNP_P4_74537_33099643 | NC_021164.1    | Ca_kabuli_chr05 | 33099643                | AA                              | GG              | 1946851346               |
| SNP_P4_74538_33125077 | NC_021164.1    | Ca_kabuli_chr05 | 33125077                | TT                              | CC              | 1946851348               |
| SNP_P4_74539_33140280 | NC_021164.1    | Ca_kabuli_chr05 | 33140280                | TT                              | CC              | 1946851350               |
| SNP_P4_74541_33146742 | NC_021164.1    | Ca_kabuli_chr05 | 33146742                | GG                              | AA              | 1946851352               |
| SNP_P4_74542_33166345 | NC_021164.1    | Ca_kabuli_chr05 | 33166345                | CC                              | TT              | 1946851354               |
| SNP_P4_74543_33166901 | NC_021164.1    | Ca_kabuli_chr05 | 33166901                | GG                              | AA              | 1946851356               |
| SNP_P4_74544_33184267 | NC_021164.1    | Ca_kabuli_chr05 | 33184267                | CC                              | TT              | 1946851358               |
| SNP_P4_74546_33225210 | NC_021164.1    | Ca_kabuli_chr05 | 33225210                | CC                              | TT              | 1946851360               |
| SNP_P4_74547_33225287 | NC_021164.1    | Ca_kabuli_chr05 | 33225287                | AA                              | GG              | 1946851362               |
| SNP_P4_74548_33225329 | NC_021164.1    | Ca_kabuli_chr05 | 33225329                | CC                              | TT              | 1946851364               |
| SNP_P4_74549_33225588 | NC_021164.1    | Ca_kabuli_chr05 | 33225588                | CC                              | AA              | 1946851366               |
| SNP_P4_74550_33225721 | NC_021164.1    | Ca_kabuli_chr05 | 33225721                | TT                              | CC              | 1946851369               |
| SNP_P4_74551_33225778 | NC_021164.1    | Ca_kabuli_chr05 | 33225778                | GG                              | AA              | 1946851371               |
| SNP_P4_74552_33225814 | NC_021164.1    | Ca_kabuli_chr05 | 33225814                | AA                              | CC              | 1946851373               |
| SNP_P4_74553_33270337 | NC_021164.1    | Ca_kabuli_chr05 | 33270337                | TT                              | CC              | 1946851375               |
| SNP_P4_74554_33296571 | NC_021164.1    | Ca_kabuli_chr05 | 33296571                | TT                              | CC              | 1946851377               |
| SNP_P4_74557_33364234 | NC_021164.1    | Ca_kabuli_chr05 | 33364234                | AA                              | GG              | 1946851379               |
| SNP_P4_74558_33378371 | NC_021164.1    | Ca_kabuli_chr05 | 33378371                | AA                              | CC              | 1946851381               |
| SNP_P4_74559_33390580 | NC_021164.1    | Ca_kabuli_chr05 | 33390580                | AA                              | CC              | 1946851383               |
| SNP_P4_74560_33390594 | NC_021164.1    | Ca_kabuli_chr05 | 33390594                | AA                              | TT              | 1946851385               |
| SNP_P4_74562_33423266 | NC_021164.1    | Ca_kabuli_chr05 | 33423266                | CC                              | TT              | 1946851387               |
| SNP_P4_74564_33438724 | NC_021164.1    | Ca_kabuli_chr05 | 33438724                | AA                              | TT              | 1946851389               |
| SNP_P4_74566_33439192 | NC_021164.1    | Ca_kabuli_chr05 | 33439192                | TT                              | CC              | 1946851391               |
| SNP_P4_74567_33441027 | NC_021164.1    | Ca_kabuli_chr05 | 33441027                | TT                              | CC              | 1946851393               |
| SNP_P4_74568_33441362 | NC_021164.1    | Ca_kabuli_chr05 | 33441362                | GG                              | TT              | 1946851395               |
| SNP_P4_74571_33454577 | NC_021164.1    | Ca_kabuli_chr05 | 33454577                | CC                              | TT              | 1946851397               |
| SNP_P4_74574_33457504 | NC_021164.1    | Ca_kabuli_chr05 | 33457504                | CC                              | AA              | 1946851399               |
| SNP_P4_74575_33457639 | NC_021164.1    | Ca_kabuli_chr05 | 33457639                | TT                              | CC              | 1946851401               |
| SNP_P4_74576_33457689 | NC_021164.1    | Ca_kabuli_chr05 | 33457689                | CC                              | TT              | 1946851403               |
| SNP_P4_74577_33457884 | NC_021164.1    | Ca_kabuli_chr05 | 33457884                | GG                              | TT              | 1946851405               |
| SNP_P4_74579_33457965 | NC_021164.1    | Ca_kabuli_chr05 | 33457965                | GG                              | AA              | 1946851407               |
| SNP_P4_74580_33457987 | NC_021164.1    | Ca_kabuli_chr05 | 33457987                | TT                              | CC              | 1946851409               |
| SNP_P4_74581_33460909 | NC_021164.1    | Ca_kabuli_chr05 | 33460909                | AA                              | GG              | 1946851411               |
| SNP_P4_74582_33465441 | NC_021164.1    | Ca_kabuli_chr05 | 33465441                | AA                              | CC              | 1946851414               |
| SNP_P4_74583_33524082 | NC_021164.1    | Ca_kabuli_chr05 | 33524082                | CC                              | AA              | 1946851416               |
| SNP_P4_74585_33526756 | NC_021164.1    | Ca_kabuli_chr05 | 33526756                | CC                              | TT              | 1946851418               |
| SNP_P4_74588_33544930 | NC_021164.1    | Ca_kabuli_chr05 | 33544930                | AA                              | TT              | 1946851420               |
| SNP_P4_74589_33546527 | NC_021164.1    | Ca_kabuli_chr05 | 33546527                | TT                              | CC              | 1946851422               |

| SNPs IDs              | Chromosome IDs | Chromosomes     | Physical positions (bp) | CDC Frontier (Reference genome) | (ILWC46 & LPNB) | NCBI SNPdb Accession IDs |
|-----------------------|----------------|-----------------|-------------------------|---------------------------------|-----------------|--------------------------|
| SNP_P4_74590_33547060 | NC_021164.1    | Ca_kabuli_chr05 | 33547060                | GG                              | AA              | 1946851424               |
| SNP_P4_74593_33569536 | NC_021164.1    | Ca_kabuli_chr05 | 33569536                | GG                              | CC              | 1946851426               |
| SNP_P4_74594_33600032 | NC_021164.1    | Ca_kabuli_chr05 | 33600032                | AA                              | CC              | 1946851428               |
| SNP_P4_74598_33606891 | NC_021164.1    | Ca_kabuli_chr05 | 33606891                | TT                              | CC              | 1946851430               |
| SNP_P4_74599_33609474 | NC_021164.1    | Ca_kabuli_chr05 | 33609474                | TT                              | AA              | 1946851432               |
| SNP_P4_74600_33613417 | NC_021164.1    | Ca_kabuli_chr05 | 33613417                | GG                              | CC              | 1946851434               |
| SNP_P4_74601_33613418 | NC_021164.1    | Ca_kabuli_chr05 | 33613418                | AA                              | TT              | 1946851436               |
| SNP_P4_74602_33661117 | NC_021164.1    | Ca_kabuli_chr05 | 33661117                | TT                              | CC              | 1946851438               |
| SNP_P4_74603_33672192 | NC_021164.1    | Ca_kabuli_chr05 | 33672192                | CC                              | TT              | 1946851440               |
| SNP_P4_74605_33684469 | NC_021164.1    | Ca_kabuli_chr05 | 33684469                | CC                              | TT              | 1946851442               |
| SNP_P4_74606_33701168 | NC_021164.1    | Ca_kabuli_chr05 | 33701168                | TT                              | CC              | 1946851444               |
| SNP_P4_74607_33728774 | NC_021164.1    | Ca_kabuli_chr05 | 33728774                | CC                              | TT              | 1946851446               |
| SNP_P4_74608_33731460 | NC_021164.1    | Ca_kabuli_chr05 | 33731460                | TT                              | AA              | 1946851448               |
| SNP_P4_74609_33739677 | NC_021164.1    | Ca_kabuli_chr05 | 33739677                | AA                              | TT              | 1946851450               |
| SNP_P4_74610_33743006 | NC_021164.1    | Ca_kabuli_chr05 | 33743006                | CC                              | TT              | 1946851452               |
| SNP_P4_74611_33777264 | NC_021164.1    | Ca_kabuli_chr05 | 33777264                | GG                              | TT              | 1946851454               |
| SNP_P4_74615_33834518 | NC_021164.1    | Ca_kabuli_chr05 | 33834518                | TT                              | CC              | 1946851456               |
| SNP_P4_74616_33865775 | NC_021164.1    | Ca_kabuli_chr05 | 33865775                | TT                              | GG              | 1946851458               |
| SNP_P4_74617_33876935 | NC_021164.1    | Ca_kabuli_chr05 | 33876935                | TT                              | AA              | 1946851460               |
| SNP_P4_74619_33895603 | NC_021164.1    | Ca_kabuli_chr05 | 33895603                | TT                              | CC              | 1946851462               |
| SNP_P4_74621_33911671 | NC_021164.1    | Ca_kabuli_chr05 | 33911671                | CC                              | TT              | 1946851464               |
| SNP_P4_74622_33931184 | NC_021164.1    | Ca_kabuli_chr05 | 33931184                | CC                              | TT              | 1946851466               |
| SNP_P4_74623_33937965 | NC_021164.1    | Ca_kabuli_chr05 | 33937965                | TT                              | AA              | 1946851468               |
| SNP_P4_74624_33940574 | NC_021164.1    | Ca_kabuli_chr05 | 33940574                | GG                              | TT              | 1946851470               |
| SNP_P4_74626_34043449 | NC_021164.1    | Ca_kabuli_chr05 | 34043449                | GG                              | AA              | 1946851472               |
| SNP_P4_74627_34048847 | NC_021164.1    | Ca_kabuli_chr05 | 34048847                | TT                              | CC              | 1946851474               |
| SNP_P4_74628_34071492 | NC_021164.1    | Ca_kabuli_chr05 | 34071492                | GG                              | TT              | 1946851476               |
| SNP_P4_74629_34085208 | NC_021164.1    | Ca_kabuli_chr05 | 34085208                | TT                              | CC              | 1946851478               |
| SNP_P4_74630_34090958 | NC_021164.1    | Ca_kabuli_chr05 | 34090958                | CC                              | TT              | 1946851480               |
| SNP_P4_74631_34171605 | NC_021164.1    | Ca_kabuli_chr05 | 34171605                | TT                              | CC              | 1946851482               |
| SNP_P4_74632_34174462 | NC_021164.1    | Ca_kabuli_chr05 | 34174462                | CC                              | AA              | 1946851484               |
| SNP_P4_74633_34186144 | NC_021164.1    | Ca_kabuli_chr05 | 34186144                | CC                              | TT              | 1946851486               |
| SNP_P4_74636_34229625 | NC_021164.1    | Ca_kabuli_chr05 | 34229625                | AA                              | CC              | 1946851488               |
| SNP_P4_74637_34254121 | NC_021164.1    | Ca_kabuli_chr05 | 34254121                | TT                              | AA              | 1946851490               |
| SNP_P4_74640_34335067 | NC_021164.1    | Ca_kabuli_chr05 | 34335067                | GG                              | AA              | 1946851492               |
| SNP_P4_74641_34380773 | NC_021164.1    | Ca_kabuli_chr05 | 34380773                | CC                              | TT              | 1946851494               |
| SNP_P4_74642_34380931 | NC_021164.1    | Ca_kabuli_chr05 | 34380931                | CC                              | AA              | 1946851496               |
| SNP_P4_74643_34381022 | NC_021164.1    | Ca_kabuli_chr05 | 34381022                | GG                              | AA              | 1946851498               |
| SNP_P4_74644_34381037 | NC_021164.1    | Ca_kabuli_chr05 | 34381037                | AA                              | GG              | 1946851500               |
| SNP_P4_74645_34381347 | NC_021164.1    | Ca_kabuli_chr05 | 34381347                | CC                              | GG              | 1946851502               |
| SNP_P4_74646_34381394 | NC_021164.1    | Ca_kabuli_chr05 | 34381394                | TT                              | CC              | 1946851504               |
| SNP_P4_74647_34381463 | NC_021164.1    | Ca_kabuli_chr05 | 34381463                | TT                              | CC              | 1946851506               |

| SNPs IDs              | Chromosome IDs | Chromosomes     | Physical positions (bp) | CDC Frontier (Reference genome) | (ILWC46 & LPNB) | NCBI SNPdb Accession IDs |
|-----------------------|----------------|-----------------|-------------------------|---------------------------------|-----------------|--------------------------|
| SNP_P4_74648_34381516 | NC_021164.1    | Ca_kabuli_chr05 | 34381516                | TT                              | CC              | 1946851508               |
| SNP_P4_74649_34413348 | NC_021164.1    | Ca_kabuli_chr05 | 34413348                | TT                              | GG              | 1946851510               |
| SNP_P4_74650_34443716 | NC_021164.1    | Ca_kabuli_chr05 | 34443716                | TT                              | AA              | 1946851512               |
| SNP_P4_74651_34462416 | NC_021164.1    | Ca_kabuli_chr05 | 34462416                | AA                              | GG              | 1946851514               |
| SNP_P4_74652_34466303 | NC_021164.1    | Ca_kabuli_chr05 | 34466303                | AA                              | GG              | 1946851516               |
| SNP_P4_74654_34471542 | NC_021164.1    | Ca_kabuli_chr05 | 34471542                | GG                              | AA              | 1946851518               |
| SNP_P4_74655_34471781 | NC_021164.1    | Ca_kabuli_chr05 | 34471781                | TT                              | GG              | 1946851520               |
| SNP_P4_74656_34471783 | NC_021164.1    | Ca_kabuli_chr05 | 34471783                | GG                              | AA              | 1946851522               |
| SNP_P4_74657_34473893 | NC_021164.1    | Ca_kabuli_chr05 | 34473893                | GG                              | AA              | 1946851524               |
| SNP_P4_74658_34473894 | NC_021164.1    | Ca_kabuli_chr05 | 34473894                | GG                              | TT              | 1946851526               |
| SNP_P4_74659_34503023 | NC_021164.1    | Ca_kabuli_chr05 | 34503023                | CC                              | TT              | 1946851528               |
| SNP_P4_74660_34521416 | NC_021164.1    | Ca_kabuli_chr05 | 34521416                | TT                              | AA              | 1946851530               |
| SNP_P4_74663_34546779 | NC_021164.1    | Ca_kabuli_chr05 | 34546779                | GG                              | AA              | 1946851532               |
| SNP_P4_74664_34567597 | NC_021164.1    | Ca_kabuli_chr05 | 34567597                | CC                              | TT              | 1946851534               |
| SNP_P4_74665_34567599 | NC_021164.1    | Ca_kabuli_chr05 | 34567599                | GG                              | CC              | 1946851536               |
| SNP_P4_74666_34574452 | NC_021164.1    | Ca_kabuli_chr05 | 34574452                | AA                              | GG              | 1946851538               |
| SNP_P4_74667_34576953 | NC_021164.1    | Ca_kabuli_chr05 | 34576953                | AA                              | TT              | 1946851540               |
| SNP_P4_74668_34617276 | NC_021164.1    | Ca_kabuli_chr05 | 34617276                | TT                              | AA              | 1946851542               |
| SNP_P4_74669_34623869 | NC_021164.1    | Ca_kabuli_chr05 | 34623869                | CC                              | AA              | 1946851544               |
| SNP_P4_74670_34654158 | NC_021164.1    | Ca_kabuli_chr05 | 34654158                | AA                              | TT              | 1946851546               |
| SNP_P4_74671_34654159 | NC_021164.1    | Ca_kabuli_chr05 | 34654159                | AA                              | TT              | 1946851548               |
| SNP_P4_74673_34732024 | NC_021164.1    | Ca_kabuli_chr05 | 34732024                | CC                              | TT              | 1946851550               |
| SNP_P4_74674_34768581 | NC_021164.1    | Ca_kabuli_chr05 | 34768581                | TT                              | CC              | 1946851552               |
| SNP_P4_74676_34776387 | NC_021164.1    | Ca_kabuli_chr05 | 34776387                | TT                              | CC              | 1946851554               |
| SNP_P4_74677_34777131 | NC_021164.1    | Ca_kabuli_chr05 | 34777131                | AA                              | GG              | 1946851556               |
| SNP_P4_74678_34802868 | NC_021164.1    | Ca_kabuli_chr05 | 34802868                | CC                              | TT              | 1946851558               |
| SNP_P4_74679_34802899 | NC_021164.1    | Ca_kabuli_chr05 | 34802899                | AA                              | GG              | 1946851560               |
| SNP_P4_74680_34825347 | NC_021164.1    | Ca_kabuli_chr05 | 34825347                | AA                              | GG              | 1946851562               |
| SNP_P4_74682_34852947 | NC_021164.1    | Ca_kabuli_chr05 | 34852947                | TT                              | CC              | 1946851564               |
| SNP_P4_74683_34852948 | NC_021164.1    | Ca_kabuli_chr05 | 34852948                | TT                              | CC              | 1946851566               |
| SNP_P4_74685_34874947 | NC_021164.1    | Ca_kabuli_chr05 | 34874947                | CC                              | TT              | 1946851568               |
| SNP_P4_74686_34875205 | NC_021164.1    | Ca_kabuli_chr05 | 34875205                | AA                              | GG              | 1946851569               |
| SNP_P4_74687_34875212 | NC_021164.1    | Ca_kabuli_chr05 | 34875212                | AA                              | GG              | 1946851571               |
| SNP_P4_74688_34875259 | NC_021164.1    | Ca_kabuli_chr05 | 34875259                | GG                              | TT              | 1946851574               |
| SNP_P4_74689_34875286 | NC_021164.1    | Ca_kabuli_chr05 | 34875286                | TT                              | CC              | 1946851576               |
| SNP_P4_74690_34875308 | NC_021164.1    | Ca_kabuli_chr05 | 34875308                | AA                              | GG              | 1946851578               |
| SNP_P4_74691_34875356 | NC_021164.1    | Ca_kabuli_chr05 | 34875356                | CC                              | TT              | 1946851580               |
| SNP_P4_74692_34875412 | NC_021164.1    | Ca_kabuli_chr05 | 34875412                | TT                              | GG              | 1946851582               |
| SNP_P4_74693_34876507 | NC_021164.1    | Ca_kabuli_chr05 | 34876507                | CC                              | TT              | 1946851584               |
| SNP_P4_74694_34876654 | NC_021164.1    | Ca_kabuli_chr05 | 34876654                | CC                              | TT              | 1946851586               |
| SNP_P4_74695_34883986 | NC_021164.1    | Ca_kabuli_chr05 | 34883986                | AA                              | CC              | 1946851588               |
| SNP_P4_74697_34893292 | NC_021164.1    | Ca_kabuli_chr05 | 34893292                | AA                              | GG              | 1946851589               |

| SNPs IDs              | Chromosome IDs | Chromosomes     | Physical positions (bp) | CDC Frontier (Reference genome) | (ILWC46 & LPNB) | NCBI SNPdb Accession IDs |
|-----------------------|----------------|-----------------|-------------------------|---------------------------------|-----------------|--------------------------|
| SNP_P4_74698_34898389 | NC_021164.1    | Ca_kabuli_chr05 | 34898389                | TT                              | AA              | 1946851591               |
| SNP_P4_74699_34961522 | NC_021164.1    | Ca_kabuli_chr05 | 34961522                | CC                              | TT              | 1946851593               |
| SNP_P4_74701_34995296 | NC_021164.1    | Ca_kabuli_chr05 | 34995296                | GG                              | AA              | 1946851595               |
| SNP_P4_74702_35015266 | NC_021164.1    | Ca_kabuli_chr05 | 35015266                | GG                              | AA              | 1946851597               |
| SNP_P4_74704_35032122 | NC_021164.1    | Ca_kabuli_chr05 | 35032122                | TT                              | AA              | 1946851599               |
| SNP_P4_74705_35034915 | NC_021164.1    | Ca_kabuli_chr05 | 35034915                | AA                              | GG              | 1946851601               |
| SNP_P4_74707_35049540 | NC_021164.1    | Ca_kabuli_chr05 | 35049540                | CC                              | TT              | 1946851603               |
| SNP_P4_74709_35059729 | NC_021164.1    | Ca_kabuli_chr05 | 35059729                | GG                              | AA              | 1946851605               |
| SNP_P4_74712_35099855 | NC_021164.1    | Ca_kabuli_chr05 | 35099855                | GG                              | AA              | 1946851607               |
| SNP_P4_74713_35108668 | NC_021164.1    | Ca_kabuli_chr05 | 35108668                | AA                              | GG              | 1946851609               |
| SNP_P4_74715_35144958 | NC_021164.1    | Ca_kabuli_chr05 | 35144958                | GG                              | AA              | 1946851611               |
| SNP_P4_74716_35146483 | NC_021164.1    | Ca_kabuli_chr05 | 35146483                | TT                              | CC              | 1946851612               |
| SNP_P4_74719_35197432 | NC_021164.1    | Ca_kabuli_chr05 | 35197432                | GG                              | AA              | 1946851614               |
| SNP_P4_74720_35202350 | NC_021164.1    | Ca_kabuli_chr05 | 35202350                | TT                              | CC              | 1946851616               |
| SNP_P4_74721_35202352 | NC_021164.1    | Ca_kabuli_chr05 | 35202352                | TT                              | GG              | 1946851618               |
| SNP_P4_74723_35260056 | NC_021164.1    | Ca_kabuli_chr05 | 35260056                | CC                              | TT              | 1946851620               |
| SNP_P4_74726_35371507 | NC_021164.1    | Ca_kabuli_chr05 | 35371507                | CC                              | GG              | 1946851622               |
| SNP_P4_74727_35378636 | NC_021164.1    | Ca_kabuli_chr05 | 35378636                | AA                              | CC              | 1946851624               |
| SNP_P4_74728_35383422 | NC_021164.1    | Ca_kabuli_chr05 | 35383422                | AA                              | TT              | 1946851626               |
| SNP_P4_74729_35387905 | NC_021164.1    | Ca_kabuli_chr05 | 35387905                | CC                              | TT              | 1946851628               |
| SNP_P4_74731_35410591 | NC_021164.1    | Ca_kabuli_chr05 | 35410591                | TT                              | CC              | 1946851630               |
| SNP_P4_74733_35462425 | NC_021164.1    | Ca_kabuli_chr05 | 35462425                | TT                              | GG              | 1946851632               |
| SNP_P4_74738_35507381 | NC_021164.1    | Ca_kabuli_chr05 | 35507381                | TT                              | AA              | 1946851633               |
| SNP_P4_74739_35526926 | NC_021164.1    | Ca_kabuli_chr05 | 35526926                | AA                              | GG              | 1946851635               |
| SNP_P4_74740_35551564 | NC_021164.1    | Ca_kabuli_chr05 | 35551564                | AA                              | GG              | 1946851637               |
| SNP_P4_74741_35570227 | NC_021164.1    | Ca_kabuli_chr05 | 35570227                | AA                              | CC              | 1946851639               |
| SNP_P4_74742_35570453 | NC_021164.1    | Ca_kabuli_chr05 | 35570453                | GG                              | TT              | 1946851641               |
| SNP_P4_74743_35570533 | NC_021164.1    | Ca_kabuli_chr05 | 35570533                | TT                              | AA              | 1946851643               |
| SNP_P4_74744_35571374 | NC_021164.1    | Ca_kabuli_chr05 | 35571374                | TT                              | AA              | 1946851645               |
| SNP_P4_74745_35571428 | NC_021164.1    | Ca_kabuli_chr05 | 35571428                | AA                              | CC              | 1946851648               |
| SNP_P4_74746_35571452 | NC_021164.1    | Ca_kabuli_chr05 | 35571452                | AA                              | CC              | 1946851650               |
| SNP_P4_74747_35571466 | NC_021164.1    | Ca_kabuli_chr05 | 35571466                | GG                              | TT              | 1946851652               |
| SNP_P4_74748_35571474 | NC_021164.1    | Ca_kabuli_chr05 | 35571474                | CC                              | GG              | 1946851654               |
| SNP_P4_74749_35571486 | NC_021164.1    | Ca_kabuli_chr05 | 35571486                | AA                              | CC              | 1946851656               |
| SNP_P4_74750_35578321 | NC_021164.1    | Ca_kabuli_chr05 | 35578321                | TT                              | CC              | 1946851658               |
| SNP_P4_74751_35582472 | NC_021164.1    | Ca_kabuli_chr05 | 35582472                | GG                              | AA              | 1946851660               |
| SNP_P4_74754_35606571 | NC_021164.1    | Ca_kabuli_chr05 | 35606571                | GG                              | AA              | 1946851662               |
| SNP_P4_74755_35645107 | NC_021164.1    | Ca_kabuli_chr05 | 35645107                | TT                              | CC              | 1946851664               |
| SNP_P4_74758_35716462 | NC_021164.1    | Ca_kabuli_chr05 | 35716462                | TT                              | CC              | 1946851666               |
| SNP_P4_74761_35798219 | NC_021164.1    | Ca_kabuli_chr05 | 35798219                | AA                              | TT              | 1946851668               |
| SNP_P4_74763_35861485 | NC_021164.1    | Ca_kabuli_chr05 | 35861485                | TT                              | CC              | 1946851670               |
| SNP_P4_74765_35875023 | NC_021164.1    | Ca_kabuli_chr05 | 35875023                | AA                              | GG              | 1946851672               |

| SNPs IDs              | Chromosome IDs | Chromosomes     | Physical positions (bp) | CDC Frontier (Reference genome) | (ILWC46 & LPNB) | NCBI SNPdb Accession IDs |
|-----------------------|----------------|-----------------|-------------------------|---------------------------------|-----------------|--------------------------|
| SNP_P4_74767_35909420 | NC_021164.1    | Ca_kabuli_chr05 | 35909420                | TT                              | GG              | 1946851675               |
| SNP_P4_74768_35909424 | NC_021164.1    | Ca_kabuli_chr05 | 35909424                | AA                              | TT              | 1946851677               |
| SNP_P4_74769_35914563 | NC_021164.1    | Ca_kabuli_chr05 | 35914563                | TT                              | GG              | 1946851679               |
| SNP_P4_74771_35915976 | NC_021164.1    | Ca_kabuli_chr05 | 35915976                | CC                              | TT              | 1946851682               |
| SNP_P4_74772_35916254 | NC_021164.1    | Ca_kabuli_chr05 | 35916254                | GG                              | AA              | 1946851684               |
| SNP_P4_74773_35962399 | NC_021164.1    | Ca_kabuli_chr05 | 35962399                | TT                              | CC              | 1946851686               |
| SNP_P4_74774_36021877 | NC_021164.1    | Ca_kabuli_chr05 | 36021877                | AA                              | GG              | 1946851688               |
| SNP_P4_74777_36052579 | NC_021164.1    | Ca_kabuli_chr05 | 36052579                | AA                              | CC              | 1946851690               |
| SNP_P4_74778_36064281 | NC_021164.1    | Ca_kabuli_chr05 | 36064281                | TT                              | GG              | 1946851692               |
| SNP_P4_74779_36074082 | NC_021164.1    | Ca_kabuli_chr05 | 36074082                | TT                              | AA              | 1946851694               |
| SNP_P4_74780_36084329 | NC_021164.1    | Ca_kabuli_chr05 | 36084329                | TT                              | GG              | 1946851696               |
| SNP_P4_74781_36086209 | NC_021164.1    | Ca_kabuli_chr05 | 36086209                | GG                              | AA              | 1946851698               |
| SNP_P4_74783_36101596 | NC_021164.1    | Ca_kabuli_chr05 | 36101596                | TT                              | AA              | 1946851700               |
| SNP_P4_74784_36145337 | NC_021164.1    | Ca_kabuli_chr05 | 36145337                | CC                              | TT              | 1946851703               |
| SNP_P4_74785_36149807 | NC_021164.1    | Ca_kabuli_chr05 | 36149807                | AA                              | GG              | 1946851705               |
| SNP_P4_74786_36161742 | NC_021164.1    | Ca_kabuli_chr05 | 36161742                | CC                              | TT              | 1946851707               |
| SNP_P4_74787_36173667 | NC_021164.1    | Ca_kabuli_chr05 | 36173667                | TT                              | CC              | 1946851709               |
| SNP_P4_74790_36238875 | NC_021164.1    | Ca_kabuli_chr05 | 36238875                | GG                              | AA              | 1946851711               |
| SNP_P4_74791_36254208 | NC_021164.1    | Ca_kabuli_chr05 | 36254208                | CC                              | AA              | 1946851714               |
| SNP_P4_74792_36276541 | NC_021164.1    | Ca_kabuli_chr05 | 36276541                | AA                              | TT              | 1946851716               |
| SNP_P4_74793_36280459 | NC_021164.1    | Ca_kabuli_chr05 | 36280459                | AA                              | CC              | 1946851718               |
| SNP_P4_74794_36280465 | NC_021164.1    | Ca_kabuli_chr05 | 36280465                | TT                              | GG              | 1946851720               |
| SNP_P4_74795_36294142 | NC_021164.1    | Ca_kabuli_chr05 | 36294142                | GG                              | AA              | 1946851722               |
| SNP_P4_74798_36327318 | NC_021164.1    | Ca_kabuli_chr05 | 36327318                | AA                              | CC              | 1946851724               |
| SNP_P4_74799_36346780 | NC_021164.1    | Ca_kabuli_chr05 | 36346780                | TT                              | CC              | 1946851726               |
| SNP_P4_74800_36364328 | NC_021164.1    | Ca_kabuli_chr05 | 36364328                | TT                              | CC              | 1946851728               |
| SNP_P4_74801_36364595 | NC_021164.1    | Ca_kabuli_chr05 | 36364595                | GG                              | TT              | 1946851730               |
| SNP_P4_74802_36379972 | NC_021164.1    | Ca_kabuli_chr05 | 36379972                | AA                              | GG              | 1946851732               |
| SNP_P4_74803_36388885 | NC_021164.1    | Ca_kabuli_chr05 | 36388885                | CC                              | TT              | 1946851734               |
| SNP_P4_74804_36389717 | NC_021164.1    | Ca_kabuli_chr05 | 36389717                | AA                              | GG              | 1946851736               |
| SNP_P4_74805_36389718 | NC_021164.1    | Ca_kabuli_chr05 | 36389718                | AA                              | TT              | 1946851738               |
| SNP_P4_74808_36421509 | NC_021164.1    | Ca_kabuli_chr05 | 36421509                | AA                              | TT              | 1946851740               |
| SNP_P4_74810_36445217 | NC_021164.1    | Ca_kabuli_chr05 | 36445217                | AA                              | GG              | 1946851742               |
| SNP_P4_74811_36445229 | NC_021164.1    | Ca_kabuli_chr05 | 36445229                | TT                              | AA              | 1946851744               |
| SNP_P4_74812_36445324 | NC_021164.1    | Ca_kabuli_chr05 | 36445324                | CC                              | TT              | 1946851746               |
| SNP_P4_74813_36445326 | NC_021164.1    | Ca_kabuli_chr05 | 36445326                | CC                              | TT              | 1946851748               |
| SNP_P4_74814_36445365 | NC_021164.1    | Ca_kabuli_chr05 | 36445365                | AA                              | GG              | 1946851750               |
| SNP_P4_74815_36445369 | NC_021164.1    | Ca_kabuli_chr05 | 36445369                | CC                              | TT              | 1946851752               |
| SNP_P4_74816_36445372 | NC_021164.1    | Ca_kabuli_chr05 | 36445372                | TT                              | CC              | 1946851754               |
| SNP_P4_74817_36445797 | NC_021164.1    | Ca_kabuli_chr05 | 36445797                | TT                              | CC              | 1946851756               |
| SNP_P4_74818_36446027 | NC_021164.1    | Ca_kabuli_chr05 | 36446027                | CC                              | TT              | 1946851758               |
| SNP_P4_74819_36453515 | NC_021164.1    | Ca_kabuli_chr05 | 36453515                | TT                              | GG              | 1946851760               |

| SNPs IDs              | Chromosome IDs | Chromosomes     | Physical positions (bp) | CDC Frontier (Reference genome) | (ILWC46 & LPNB) | NCBI SNPdb Accession IDs |
|-----------------------|----------------|-----------------|-------------------------|---------------------------------|-----------------|--------------------------|
| SNP_P4_74820_36454516 | NC_021164.1    | Ca_kabuli_chr05 | 36454516                | GG                              | AA              | 1946851762               |
| SNP_P4_74821_36454521 | NC_021164.1    | Ca_kabuli_chr05 | 36454521                | TT                              | CC              | 1946851764               |
| SNP_P4_74822_36483864 | NC_021164.1    | Ca_kabuli_chr05 | 36483864                | TT                              | GG              | 1946851766               |
| SNP_P4_74823_36491135 | NC_021164.1    | Ca_kabuli_chr05 | 36491135                | AA                              | GG              | 1946851768               |
| SNP_P4_74824_36491535 | NC_021164.1    | Ca_kabuli_chr05 | 36491535                | AA                              | GG              | 1946851770               |
| SNP_P4_74825_36492370 | NC_021164.1    | Ca_kabuli_chr05 | 36492370                | TT                              | AA              | 1946851772               |
| SNP_P4_74826_36492416 | NC_021164.1    | Ca_kabuli_chr05 | 36492416                | TT                              | CC              | 1946851774               |
| SNP_P4_74827_36492417 | NC_021164.1    | Ca_kabuli_chr05 | 36492417                | AA                              | GG              | 1946851776               |
| SNP_P4_74828_36492445 | NC_021164.1    | Ca_kabuli_chr05 | 36492445                | AA                              | GG              | 1946851778               |
| SNP_P4_74829_36492446 | NC_021164.1    | Ca_kabuli_chr05 | 36492446                | AA                              | GG              | 1946851780               |
| SNP_P4_74830_36492453 | NC_021164.1    | Ca_kabuli_chr05 | 36492453                | GG                              | TT              | 1946851782               |
| SNP_P4_74831_36492476 | NC_021164.1    | Ca_kabuli_chr05 | 36492476                | GG                              | AA              | 1946851784               |
| SNP_P4_74832_36492747 | NC_021164.1    | Ca_kabuli_chr05 | 36492747                | GG                              | AA              | 1946851786               |
| SNP_P4_74833_36492753 | NC_021164.1    | Ca_kabuli_chr05 | 36492753                | AA                              | GG              | 1946851788               |
| SNP_P4_74834_36492851 | NC_021164.1    | Ca_kabuli_chr05 | 36492851                | AA                              | GG              | 1946851790               |
| SNP_P4_74835_36503903 | NC_021164.1    | Ca_kabuli_chr05 | 36503903                | TT                              | CC              | 1946851792               |
| SNP_P4_74836_36503907 | NC_021164.1    | Ca_kabuli_chr05 | 36503907                | TT                              | GG              | 1946851794               |
| SNP_P4_74837_36513977 | NC_021164.1    | Ca_kabuli_chr05 | 36513977                | CC                              | TT              | 1946851796               |
| SNP_P4_74838_36521459 | NC_021164.1    | Ca_kabuli_chr05 | 36521459                | AA                              | GG              | 1946851798               |
| SNP_P4_74839_36537049 | NC_021164.1    | Ca_kabuli_chr05 | 36537049                | TT                              | AA              | 1946851800               |
| SNP_P4_74840_36538079 | NC_021164.1    | Ca_kabuli_chr05 | 36538079                | AA                              | GG              | 1946851802               |
| SNP_P4_74841_36545941 | NC_021164.1    | Ca_kabuli_chr05 | 36545941                | TT                              | CC              | 1946851804               |
| SNP_P4_74842_36550540 | NC_021164.1    | Ca_kabuli_chr05 | 36550540                | CC                              | TT              | 1946851806               |
| SNP_P4_74843_36563788 | NC_021164.1    | Ca_kabuli_chr05 | 36563788                | AA                              | TT              | 1946851808               |
| SNP_P4_74844_36568931 | NC_021164.1    | Ca_kabuli_chr05 | 36568931                | GG                              | CC              | 1946851810               |
| SNP_P4_74845_36575597 | NC_021164.1    | Ca_kabuli_chr05 | 36575597                | TT                              | AA              | 1946851812               |
| SNP_P4_74846_36580463 | NC_021164.1    | Ca_kabuli_chr05 | 36580463                | CC                              | TT              | 1946851814               |
| SNP_P4_74847_36582005 | NC_021164.1    | Ca_kabuli_chr05 | 36582005                | AA                              | GG              | 1946851816               |
| SNP_P4_74848_36583849 | NC_021164.1    | Ca_kabuli_chr05 | 36583849                | TT                              | AA              | 1946851818               |
| SNP_P4_74849_36583851 | NC_021164.1    | Ca_kabuli_chr05 | 36583851                | TT                              | GG              | 1946851820               |
| SNP_P4_74851_36597222 | NC_021164.1    | Ca_kabuli_chr05 | 36597222                | AA                              | TT              | 1946851821               |
| SNP_P4_74852_36640449 | NC_021164.1    | Ca_kabuli_chr05 | 36640449                | GG                              | AA              | 1946851823               |
| SNP_P4_74854_36658480 | NC_021164.1    | Ca_kabuli_chr05 | 36658480                | TT                              | AA              | 1946851825               |
| SNP_P4_74855_36659077 | NC_021164.1    | Ca_kabuli_chr05 | 36659077                | GG                              | AA              | 1946851827               |
| SNP_P4_74856_36670844 | NC_021164.1    | Ca_kabuli_chr05 | 36670844                | GG                              | AA              | 1946851829               |
| SNP_P4_74857_36680674 | NC_021164.1    | Ca_kabuli_chr05 | 36680674                | TT                              | GG              | 1946851831               |
| SNP_P4_74858_36680675 | NC_021164.1    | Ca_kabuli_chr05 | 36680675                | TT                              | CC              | 1946851833               |
| SNP_P4_74860_36739511 | NC_021164.1    | Ca_kabuli_chr05 | 36739511                | GG                              | AA              | 1946851835               |
| SNP_P4_74861_36793740 | NC_021164.1    | Ca_kabuli_chr05 | 36793740                | GG                              | TT              | 1946851837               |
| SNP_P4_74863_36879280 | NC_021164.1    | Ca_kabuli_chr05 | 36879280                | AA                              | GG              | 1946851839               |
| SNP_P4_74864_36879340 | NC_021164.1    | Ca_kabuli_chr05 | 36879340                | TT                              | CC              | 1946851841               |
| SNP_P4_74865_36879837 | NC_021164.1    | Ca_kabuli_chr05 | 36879837                | CC                              | AA              | 1946851843               |



| SNPs IDs              | Chromosome IDs | Chromosomes     | Physical positions (bp) | CDC Frontier (Reference genome) | (ILWC46 & LPNB) | NCBI SNPdb Accession IDs |
|-----------------------|----------------|-----------------|-------------------------|---------------------------------|-----------------|--------------------------|
| SNP_P4_74867_36957723 | NC_021164.1    | Ca_kabuli_chr05 | 36957723                | CC                              | GG              | 1946851845               |
| SNP_P4_74868_36957774 | NC_021164.1    | Ca_kabuli_chr05 | 36957774                | GG                              | AA              | 1946851847               |
| SNP_P4_74869_36959789 | NC_021164.1    | Ca_kabuli_chr05 | 36959789                | CC                              | TT              | 1946851849               |
| SNP_P4_74872_36971146 | NC_021164.1    | Ca_kabuli_chr05 | 36971146                | AA                              | GG              | 1946851851               |
| SNP_P4_74873_37003561 | NC_021164.1    | Ca_kabuli_chr05 | 37003561                | TT                              | CC              | 1946851853               |
| SNP_P4_74874_37004408 | NC_021164.1    | Ca_kabuli_chr05 | 37004408                | TT                              | CC              | 1946851855               |
| SNP_P4_74877_37089525 | NC_021164.1    | Ca_kabuli_chr05 | 37089525                | CC                              | TT              | 1946851857               |
| SNP_P4_74878_37094316 | NC_021164.1    | Ca_kabuli_chr05 | 37094316                | TT                              | GG              | 1946851859               |
| SNP_P4_74881_37126371 | NC_021164.1    | Ca_kabuli_chr05 | 37126371                | AA                              | GG              | 1946851861               |
| SNP_P4_74882_37131572 | NC_021164.1    | Ca_kabuli_chr05 | 37131572                | TT                              | CC              | 1946851863               |
| SNP_P4_74883_37142253 | NC_021164.1    | Ca_kabuli_chr05 | 37142253                | CC                              | TT              | 1946851865               |
| SNP_P4_74884_37151176 | NC_021164.1    | Ca_kabuli_chr05 | 37151176                | AA                              | CC              | 1946851867               |
| SNP_P4_74885_37151179 | NC_021164.1    | Ca_kabuli_chr05 | 37151179                | AA                              | TT              | 1946851869               |
| SNP_P4_74889_37217549 | NC_021164.1    | Ca_kabuli_chr05 | 37217549                | TT                              | AA              | 1946851871               |
| SNP_P4_74890_37217550 | NC_021164.1    | Ca_kabuli_chr05 | 37217550                | CC                              | TT              | 1946851873               |
| SNP_P4_74892_37220394 | NC_021164.1    | Ca_kabuli_chr05 | 37220394                | CC                              | TT              | 1946851875               |
| SNP_P4_74895_37270697 | NC_021164.1    | Ca_kabuli_chr05 | 37270697                | GG                              | AA              | 1946851877               |
| SNP_P4_74897_37281675 | NC_021164.1    | Ca_kabuli_chr05 | 37281675                | TT                              | CC              | 1946851879               |
| SNP_P4_74898_37285399 | NC_021164.1    | Ca_kabuli_chr05 | 37285399                | CC                              | TT              | 1946851881               |
| SNP_P4_74899_37285532 | NC_021164.1    | Ca_kabuli_chr05 | 37285532                | AA                              | TT              | 1946851883               |
| SNP_P4_74900_37285590 | NC_021164.1    | Ca_kabuli_chr05 | 37285590                | TT                              | AA              | 1946851885               |
| SNP_P4_74901_37285963 | NC_021164.1    | Ca_kabuli_chr05 | 37285963                | TT                              | CC              | 1946851887               |
| SNP_P4_74902_37300667 | NC_021164.1    | Ca_kabuli_chr05 | 37300667                | GG                              | TT              | 1946851889               |
| SNP_P4_74903_37320200 | NC_021164.1    | Ca_kabuli_chr05 | 37320200                | CC                              | TT              | 1946851891               |
| SNP_P4_74904_37321473 | NC_021164.1    | Ca_kabuli_chr05 | 37321473                | TT                              | AA              | 1946851893               |
| SNP_P4_74905_37345506 | NC_021164.1    | Ca_kabuli_chr05 | 37345506                | TT                              | GG              | 1946851895               |
| SNP_P4_74906_37345507 | NC_021164.1    | Ca_kabuli_chr05 | 37345507                | TT                              | AA              | 1946851897               |
| SNP_P4_74907_37415869 | NC_021164.1    | Ca_kabuli_chr05 | 37415869                | GG                              | AA              | 1946851899               |
| SNP_P4_74908_37417067 | NC_021164.1    | Ca_kabuli_chr05 | 37417067                | CC                              | TT              | 1946851901               |
| SNP_P4_74909_37427732 | NC_021164.1    | Ca_kabuli_chr05 | 37427732                | GG                              | AA              | 1946851903               |
| SNP_P4_74911_37474184 | NC_021164.1    | Ca_kabuli_chr05 | 37474184                | CC                              | TT              | 1946851905               |
| SNP_P4_74912_37481747 | NC_021164.1    | Ca_kabuli_chr05 | 37481747                | GG                              | AA              | 1946851907               |
| SNP_P4_74913_37491974 | NC_021164.1    | Ca_kabuli_chr05 | 37491974                | AA                              | TT              | 1946851909               |
| SNP_P4_74914_37494457 | NC_021164.1    | Ca_kabuli_chr05 | 37494457                | TT                              | AA              | 1946851911               |
| SNP_P4_74915_37503452 | NC_021164.1    | Ca_kabuli_chr05 | 37503452                | AA                              | GG              | 1946851913               |
| SNP_P4_74916_37559969 | NC_021164.1    | Ca_kabuli_chr05 | 37559969                | GG                              | AA              | 1946851915               |
| SNP_P4_74917_37559970 | NC_021164.1    | Ca_kabuli_chr05 | 37559970                | AA                              | TT              | 1946851917               |
| SNP_P4_74918_37562226 | NC_021164.1    | Ca_kabuli_chr05 | 37562226                | GG                              | AA              | 1946851919               |
| SNP_P4_74919_37567325 | NC_021164.1    | Ca_kabuli_chr05 | 37567325                | AA                              | GG              | 1946851920               |
| SNP_P4_74920_37567418 | NC_021164.1    | Ca_kabuli_chr05 | 37567418                | AA                              | GG              | 1946851922               |
| SNP_P4_74921_37567436 | NC_021164.1    | Ca_kabuli_chr05 | 37567436                | AA                              | CC              | 1946851924               |
| SNP_P4_74922_37567559 | NC_021164.1    | Ca_kabuli_chr05 | 37567559                | GG                              | AA              | 1946851926               |

| SNPs IDs              | Chromosome IDs | Chromosomes     | Physical positions (bp) | CDC Frontier (Reference genome) | (ILWC46 & LPNB) | NCBI SNPdb Accession IDs |
|-----------------------|----------------|-----------------|-------------------------|---------------------------------|-----------------|--------------------------|
| SNP_P4_74923_37567819 | NC_021164.1    | Ca_kabuli_chr05 | 37567819                | TT                              | CC              | 1946851928               |
| SNP_P4_74924_37567913 | NC_021164.1    | Ca_kabuli_chr05 | 37567913                | AA                              | CC              | 1946851930               |
| SNP_P4_74925_37567915 | NC_021164.1    | Ca_kabuli_chr05 | 37567915                | TT                              | CC              | 1946851932               |
| SNP_P4_74926_37567922 | NC_021164.1    | Ca_kabuli_chr05 | 37567922                | AA                              | GG              | 1946851934               |
| SNP_P4_74927_37575017 | NC_021164.1    | Ca_kabuli_chr05 | 37575017                | AA                              | GG              | 1946851936               |
| SNP_P4_74928_37603303 | NC_021164.1    | Ca_kabuli_chr05 | 37603303                | CC                              | TT              | 1946851938               |
| SNP_P4_74930_37647119 | NC_021164.1    | Ca_kabuli_chr05 | 37647119                | GG                              | TT              | 1946851940               |
| SNP_P4_74931_37653934 | NC_021164.1    | Ca_kabuli_chr05 | 37653934                | AA                              | GG              | 1946851942               |
| SNP_P4_74932_37653935 | NC_021164.1    | Ca_kabuli_chr05 | 37653935                | CC                              | AA              | 1946851944               |
| SNP_P4_74933_37654472 | NC_021164.1    | Ca_kabuli_chr05 | 37654472                | CC                              | TT              | 1946851946               |
| SNP_P4_74934_37654473 | NC_021164.1    | Ca_kabuli_chr05 | 37654473                | AA                              | TT              | 1946851948               |
| SNP_P4_74936_37673369 | NC_021164.1    | Ca_kabuli_chr05 | 37673369                | AA                              | GG              | 1946851950               |
| SNP_P4_74937_37686471 | NC_021164.1    | Ca_kabuli_chr05 | 37686471                | GG                              | AA              | 1946851952               |
| SNP_P4_74938_37686472 | NC_021164.1    | Ca_kabuli_chr05 | 37686472                | GG                              | AA              | 1946851954               |
| SNP_P4_74940_37692524 | NC_021164.1    | Ca_kabuli_chr05 | 37692524                | AA                              | GG              | 1946851956               |
| SNP_P4_74941_37701887 | NC_021164.1    | Ca_kabuli_chr05 | 37701887                | AA                              | TT              | 1946851958               |
| SNP_P4_74942_37705928 | NC_021164.1    | Ca_kabuli_chr05 | 37705928                | AA                              | TT              | 1946851960               |
| SNP_P4_74943_37715689 | NC_021164.1    | Ca_kabuli_chr05 | 37715689                | GG                              | TT              | 1946851962               |
| SNP_P4_74944_37737562 | NC_021164.1    | Ca_kabuli_chr05 | 37737562                | AA                              | TT              | 1946851964               |
| SNP_P4_74946_37839251 | NC_021164.1    | Ca_kabuli_chr05 | 37839251                | GG                              | AA              | 1946851966               |
| SNP_P4_74947_37839293 | NC_021164.1    | Ca_kabuli_chr05 | 37839293                | GG                              | AA              | 1946851968               |
| SNP_P4_74948_37843519 | NC_021164.1    | Ca_kabuli_chr05 | 37843519                | AA                              | GG              | 1946851970               |
| SNP_P4_74949_37848333 | NC_021164.1    | Ca_kabuli_chr05 | 37848333                | AA                              | GG              | 1946851972               |
| SNP_P4_74951_37866161 | NC_021164.1    | Ca_kabuli_chr05 | 37866161                | TT                              | AA              | 1946851974               |
| SNP_P4_74952_37888337 | NC_021164.1    | Ca_kabuli_chr05 | 37888337                | AA                              | GG              | 1946851976               |
| SNP_P4_74953_37888343 | NC_021164.1    | Ca_kabuli_chr05 | 37888343                | AA                              | CC              | 1946851978               |
| SNP_P4_74954_37888347 | NC_021164.1    | Ca_kabuli_chr05 | 37888347                | AA                              | GG              | 1946851980               |
| SNP_P4_74956_37919734 | NC_021164.1    | Ca_kabuli_chr05 | 37919734                | TT                              | CC              | 1946851982               |
| SNP_P4_74958_37934144 | NC_021164.1    | Ca_kabuli_chr05 | 37934144                | CC                              | GG              | 1946851984               |
| SNP_P4_74961_37958023 | NC_021164.1    | Ca_kabuli_chr05 | 37958023                | TT                              | CC              | 1946851986               |
| SNP_P4_74962_37975637 | NC_021164.1    | Ca_kabuli_chr05 | 37975637                | CC                              | TT              | 1946851988               |
| SNP_P4_74963_37978977 | NC_021164.1    | Ca_kabuli_chr05 | 37978977                | GG                              | TT              | 1946851990               |
| SNP_P4_74964_37979008 | NC_021164.1    | Ca_kabuli_chr05 | 37979008                | CC                              | AA              | 1946851992               |
| SNP_P4_74965_37979060 | NC_021164.1    | Ca_kabuli_chr05 | 37979060                | TT                              | GG              | 1946851994               |
| SNP_P4_74966_37980836 | NC_021164.1    | Ca_kabuli_chr05 | 37980836                | CC                              | TT              | 1946851996               |
| SNP_P4_74967_37980848 | NC_021164.1    | Ca_kabuli_chr05 | 37980848                | GG                              | AA              | 1946851998               |
| SNP_P4_74968_37981030 | NC_021164.1    | Ca_kabuli_chr05 | 37981030                | AA                              | TT              | 1946852000               |
| SNP_P4_74969_37981066 | NC_021164.1    | Ca_kabuli_chr05 | 37981066                | AA                              | GG              | 1946852002               |
| SNP_P4_74970_37981068 | NC_021164.1    | Ca_kabuli_chr05 | 37981068                | TT                              | CC              | 1946852004               |
| SNP_P4_74971_37981131 | NC_021164.1    | Ca_kabuli_chr05 | 37981131                | CC                              | AA              | 1946852006               |
| SNP_P4_74972_37981183 | NC_021164.1    | Ca_kabuli_chr05 | 37981183                | AA                              | GG              | 1946852008               |
| SNP_P4_74975_37982839 | NC_021164.1    | Ca_kabuli_chr05 | 37982839                | AA                              | CC              | 1946852010               |

| SNPs IDs              | Chromosome IDs | Chromosomes     | Physical positions (bp) | CDC Frontier (Reference genome) | (ILWC46 & LPNB) | NCBI SNPdb Accession IDs |
|-----------------------|----------------|-----------------|-------------------------|---------------------------------|-----------------|--------------------------|
| SNP_P4_74976_37983528 | NC_021164.1    | Ca_kabuli_chr05 | 37983528                | CC                              | AA              | 1946852011               |
| SNP_P4_74977_37983886 | NC_021164.1    | Ca_kabuli_chr05 | 37983886                | TT                              | AA              | 1946852013               |
| SNP_P4_74978_37984861 | NC_021164.1    | Ca_kabuli_chr05 | 37984861                | TT                              | GG              | 1946852015               |
| SNP_P4_74979_37984880 | NC_021164.1    | Ca_kabuli_chr05 | 37984880                | CC                              | TT              | 1946852017               |
| SNP_P4_74980_37986001 | NC_021164.1    | Ca_kabuli_chr05 | 37986001                | TT                              | CC              | 1946852019               |
| SNP_P4_74981_37986084 | NC_021164.1    | Ca_kabuli_chr05 | 37986084                | TT                              | CC              | 1946852021               |
| SNP_P4_74982_37986336 | NC_021164.1    | Ca_kabuli_chr05 | 37986336                | CC                              | GG              | 1946852023               |
| SNP_P4_74983_37986479 | NC_021164.1    | Ca_kabuli_chr05 | 37986479                | AA                              | GG              | 1946852025               |
| SNP_P4_74984_37987059 | NC_021164.1    | Ca_kabuli_chr05 | 37987059                | GG                              | AA              | 1946852027               |
| SNP_P4_74985_37987150 | NC_021164.1    | Ca_kabuli_chr05 | 37987150                | CC                              | GG              | 1946852028               |
| SNP_P4_74986_37987307 | NC_021164.1    | Ca_kabuli_chr05 | 37987307                | CC                              | AA              | 1946852029               |
| SNP_P4_74987_37987323 | NC_021164.1    | Ca_kabuli_chr05 | 37987323                | AA                              | TT              | 1946852031               |
| SNP_P4_74988_37987334 | NC_021164.1    | Ca_kabuli_chr05 | 37987334                | TT                              | CC              | 1946852032               |
| SNP_P4_74989_37987529 | NC_021164.1    | Ca_kabuli_chr05 | 37987529                | GG                              | AA              | 1946852034               |
| SNP_P4_74990_37987548 | NC_021164.1    | Ca_kabuli_chr05 | 37987548                | CC                              | AA              | 1946852036               |
| SNP_P4_74991_37987845 | NC_021164.1    | Ca_kabuli_chr05 | 37987845                | GG                              | AA              | 1946852038               |
| SNP_P4_74992_37987882 | NC_021164.1    | Ca_kabuli_chr05 | 37987882                | GG                              | AA              | 1946852040               |
| SNP_P4_74993_37988352 | NC_021164.1    | Ca_kabuli_chr05 | 37988352                | GG                              | CC              | 1946852042               |
| SNP_P4_74994_37988596 | NC_021164.1    | Ca_kabuli_chr05 | 37988596                | AA                              | GG              | 1946852044               |
| SNP_P4_74995_37988632 | NC_021164.1    | Ca_kabuli_chr05 | 37988632                | GG                              | TT              | 1946852046               |
| SNP_P4_74996_37988690 | NC_021164.1    | Ca_kabuli_chr05 | 37988690                | CC                              | TT              | 1946852048               |
| SNP_P4_74997_37988706 | NC_021164.1    | Ca_kabuli_chr05 | 37988706                | AA                              | GG              | 1946852050               |
| SNP_P4_74998_37988973 | NC_021164.1    | Ca_kabuli_chr05 | 37988973                | AA                              | TT              | 1946852052               |
| SNP_P4_74999_37989052 | NC_021164.1    | Ca_kabuli_chr05 | 37989052                | AA                              | GG              | 1946852054               |
| SNP_P4_75000_37989303 | NC_021164.1    | Ca_kabuli_chr05 | 37989303                | CC                              | TT              | 1946852056               |
| SNP_P4_75001_37989306 | NC_021164.1    | Ca_kabuli_chr05 | 37989306                | TT                              | CC              | 1946852058               |
| SNP_P4_75002_37990836 | NC_021164.1    | Ca_kabuli_chr05 | 37990836                | GG                              | TT              | 1946852060               |
| SNP_P4_75004_37993079 | NC_021164.1    | Ca_kabuli_chr05 | 37993079                | TT                              | AA              | 1946852062               |
| SNP_P4_75005_37993775 | NC_021164.1    | Ca_kabuli_chr05 | 37993775                | GG                              | CC              | 1946852064               |
| SNP_P4_75006_37993800 | NC_021164.1    | Ca_kabuli_chr05 | 37993800                | AA                              | TT              | 1946852066               |
| SNP_P4_75007_37994129 | NC_021164.1    | Ca_kabuli_chr05 | 37994129                | TT                              | CC              | 1946852068               |
| SNP_P4_75008_37997213 | NC_021164.1    | Ca_kabuli_chr05 | 37997213                | TT                              | AA              | 1946852070               |
| SNP_P4_75009_37998201 | NC_021164.1    | Ca_kabuli_chr05 | 37998201                | CC                              | TT              | 1946852072               |
| SNP_P4_75010_37998450 | NC_021164.1    | Ca_kabuli_chr05 | 37998450                | CC                              | TT              | 1946852074               |
| SNP_P4_75011_37999994 | NC_021164.1    | Ca_kabuli_chr05 | 37999994                | TT                              | CC              | 1946852076               |
| SNP_P4_75012_38000874 | NC_021164.1    | Ca_kabuli_chr05 | 38000874                | TT                              | GG              | 1946852078               |
| SNP_P4_75013_38001820 | NC_021164.1    | Ca_kabuli_chr05 | 38001820                | GG                              | AA              | 1946852080               |
| SNP_P4_75014_38001833 | NC_021164.1    | Ca_kabuli_chr05 | 38001833                | AA                              | GG              | 1946852082               |
| SNP_P4_75015_38002059 | NC_021164.1    | Ca_kabuli_chr05 | 38002059                | GG                              | AA              | 1946852084               |
| SNP_P4_75016_38002255 | NC_021164.1    | Ca_kabuli_chr05 | 38002255                | GG                              | CC              | 1946852086               |
| SNP_P4_75017_38002403 | NC_021164.1    | Ca_kabuli_chr05 | 38002403                | TT                              | AA              | 1946852088               |
| SNP_P4_75018_38002705 | NC_021164.1    | Ca_kabuli_chr05 | 38002705                | TT                              | GG              | 1946852090               |

| SNPs IDs              | Chromosome IDs | Chromosomes     | Physical positions (bp) | CDC Frontier (Reference genome) | (ILWC46 & LPNB) | NCBI SNPdb Accession IDs |
|-----------------------|----------------|-----------------|-------------------------|---------------------------------|-----------------|--------------------------|
| SNP_P4_75019_38005011 | NC_021164.1    | Ca_kabuli_chr05 | 38005011                | CC                              | TT              | 1946852092               |
| SNP_P4_75020_38005109 | NC_021164.1    | Ca_kabuli_chr05 | 38005109                | CC                              | AA              | 1946852094               |
| SNP_P4_75022_38005518 | NC_021164.1    | Ca_kabuli_chr05 | 38005518                | AA                              | TT              | 1946852096               |
| SNP_P4_75023_38005523 | NC_021164.1    | Ca_kabuli_chr05 | 38005523                | TT                              | CC              | 1946852098               |
| SNP_P4_75025_38008464 | NC_021164.1    | Ca_kabuli_chr05 | 38008464                | GG                              | AA              | 1946852100               |
| SNP_P4_75026_38010475 | NC_021164.1    | Ca_kabuli_chr05 | 38010475                | TT                              | AA              | 1946852102               |
| SNP_P4_75027_38011956 | NC_021164.1    | Ca_kabuli_chr05 | 38011956                | AA                              | CC              | 1946852104               |
| SNP_P4_75028_38011987 | NC_021164.1    | Ca_kabuli_chr05 | 38011987                | CC                              | TT              | 1946852106               |
| SNP_P4_75029_38012198 | NC_021164.1    | Ca_kabuli_chr05 | 38012198                | GG                              | AA              | 1946852108               |
| SNP_P4_75030_38012201 | NC_021164.1    | Ca_kabuli_chr05 | 38012201                | TT                              | CC              | 1946852110               |
| SNP_P4_75031_38012214 | NC_021164.1    | Ca_kabuli_chr05 | 38012214                | GG                              | AA              | 1946852112               |
| SNP_P4_75032_38013510 | NC_021164.1    | Ca_kabuli_chr05 | 38013510                | CC                              | GG              | 1946852114               |
| SNP_P4_75033_38013514 | NC_021164.1    | Ca_kabuli_chr05 | 38013514                | CC                              | TT              | 1946852116               |
| SNP_P4_75034_38013520 | NC_021164.1    | Ca_kabuli_chr05 | 38013520                | CC                              | AA              | 1946852117               |
| SNP_P4_75035_38013523 | NC_021164.1    | Ca_kabuli_chr05 | 38013523                | TT                              | CC              | 1946852119               |
| SNP_P4_75036_38014597 | NC_021164.1    | Ca_kabuli_chr05 | 38014597                | AA                              | GG              | 1946852121               |
| SNP_P4_75037_38015026 | NC_021164.1    | Ca_kabuli_chr05 | 38015026                | TT                              | GG              | 1946852123               |
| SNP_P4_75038_38015366 | NC_021164.1    | Ca_kabuli_chr05 | 38015366                | TT                              | AA              | 1946852125               |
| SNP_P4_75039_38015905 | NC_021164.1    | Ca_kabuli_chr05 | 38015905                | GG                              | CC              | 1946852127               |
| SNP_P4_75040_38016422 | NC_021164.1    | Ca_kabuli_chr05 | 38016422                | GG                              | TT              | 1946852129               |
| SNP_P4_75041_38016606 | NC_021164.1    | Ca_kabuli_chr05 | 38016606                | CC                              | TT              | 1946852131               |
| SNP_P4_75043_38016968 | NC_021164.1    | Ca_kabuli_chr05 | 38016968                | TT                              | GG              | 1946852133               |
| SNP_P4_75044_38017039 | NC_021164.1    | Ca_kabuli_chr05 | 38017039                | TT                              | AA              | 1946852135               |
| SNP_P4_75045_38017291 | NC_021164.1    | Ca_kabuli_chr05 | 38017291                | TT                              | CC              | 1946852137               |
| SNP_P4_75046_38017292 | NC_021164.1    | Ca_kabuli_chr05 | 38017292                | TT                              | GG              | 1946852139               |
| SNP_P4_75047_38017313 | NC_021164.1    | Ca_kabuli_chr05 | 38017313                | TT                              | CC              | 1946852141               |
| SNP_P4_75048_38017322 | NC_021164.1    | Ca_kabuli_chr05 | 38017322                | AA                              | TT              | 1946852143               |
| SNP_P4_75049_38017456 | NC_021164.1    | Ca_kabuli_chr05 | 38017456                | CC                              | TT              | 1946852144               |
| SNP_P4_75050_38017666 | NC_021164.1    | Ca_kabuli_chr05 | 38017666                | TT                              | GG              | 1946852146               |
| SNP_P4_75052_38017803 | NC_021164.1    | Ca_kabuli_chr05 | 38017803                | TT                              | CC              | 1946852148               |
| SNP_P4_75053_38017808 | NC_021164.1    | Ca_kabuli_chr05 | 38017808                | TT                              | CC              | 1946852150               |
| SNP_P4_75054_38018552 | NC_021164.1    | Ca_kabuli_chr05 | 38018552                | AA                              | TT              | 1946852152               |
| SNP_P4_75055_38018558 | NC_021164.1    | Ca_kabuli_chr05 | 38018558                | GG                              | CC              | 1946852154               |
| SNP_P4_75056_38018575 | NC_021164.1    | Ca_kabuli_chr05 | 38018575                | CC                              | TT              | 1946852156               |
| SNP_P4_75057_38018584 | NC_021164.1    | Ca_kabuli_chr05 | 38018584                | GG                              | AA              | 1946852157               |
| SNP_P4_75058_38018616 | NC_021164.1    | Ca_kabuli_chr05 | 38018616                | GG                              | CC              | 1946852159               |
| SNP_P4_75059_38019014 | NC_021164.1    | Ca_kabuli_chr05 | 38019014                | TT                              | GG              | 1946852161               |
| SNP_P4_75060_38019036 | NC_021164.1    | Ca_kabuli_chr05 | 38019036                | GG                              | CC              | 1946852163               |
| SNP_P4_75061_38019045 | NC_021164.1    | Ca_kabuli_chr05 | 38019045                | GG                              | CC              | 1946852165               |
| SNP_P4_75062_38019193 | NC_021164.1    | Ca_kabuli_chr05 | 38019193                | TT                              | AA              | 1946852167               |
| SNP_P4_75063_38019275 | NC_021164.1    | Ca_kabuli_chr05 | 38019275                | TT                              | CC              | 1946852169               |
| SNP_P4_75064_38020635 | NC_021164.1    | Ca_kabuli_chr05 | 38020635                | AA                              | GG              | 1946852171               |

| SNPs IDs              | Chromosome IDs | Chromosomes     | Physical positions (bp) | CDC Frontier (Reference genome) | (ILWC46 & LPNB) | NCBI SNPdb Accession IDs |
|-----------------------|----------------|-----------------|-------------------------|---------------------------------|-----------------|--------------------------|
| SNP_P4_75065_38021514 | NC_021164.1    | Ca_kabuli_chr05 | 38021514                | AA                              | TT              | 1946852173               |
| SNP_P4_75066_38021780 | NC_021164.1    | Ca_kabuli_chr05 | 38021780                | TT                              | CC              | 1946852174               |
| SNP_P4_75067_38021982 | NC_021164.1    | Ca_kabuli_chr05 | 38021982                | CC                              | TT              | 1946852176               |
| SNP_P4_75068_38021994 | NC_021164.1    | Ca_kabuli_chr05 | 38021994                | GG                              | AA              | 1946852178               |
| SNP_P4_75069_38023211 | NC_021164.1    | Ca_kabuli_chr05 | 38023211                | CC                              | TT              | 1946852180               |
| SNP_P4_75070_38023213 | NC_021164.1    | Ca_kabuli_chr05 | 38023213                | CC                              | AA              | 1946852182               |
| SNP_P4_75071_38023934 | NC_021164.1    | Ca_kabuli_chr05 | 38023934                | AA                              | TT              | 1946852184               |
| SNP_P4_75073_38024030 | NC_021164.1    | Ca_kabuli_chr05 | 38024030                | CC                              | AA              | 1946852186               |
| SNP_P4_75074_38024145 | NC_021164.1    | Ca_kabuli_chr05 | 38024145                | TT                              | CC              | 1946852188               |
| SNP_P4_75075_38024283 | NC_021164.1    | Ca_kabuli_chr05 | 38024283                | CC                              | GG              | 1946852190               |
| SNP_P4_75076_38024289 | NC_021164.1    | Ca_kabuli_chr05 | 38024289                | CC                              | AA              | 1946852192               |
| SNP_P4_75077_38024471 | NC_021164.1    | Ca_kabuli_chr05 | 38024471                | GG                              | CC              | 1946852194               |
| SNP_P4_75078_38024532 | NC_021164.1    | Ca_kabuli_chr05 | 38024532                | GG                              | TT              | 1946852196               |
| SNP_P4_75079_38025739 | NC_021164.1    | Ca_kabuli_chr05 | 38025739                | CC                              | TT              | 1946852198               |
| SNP_P4_75080_38025753 | NC_021164.1    | Ca_kabuli_chr05 | 38025753                | TT                              | GG              | 1946852200               |
| SNP_P4_75082_38026752 | NC_021164.1    | Ca_kabuli_chr05 | 38026752                | CC                              | GG              | 1946852202               |
| SNP_P4_75084_38027770 | NC_021164.1    | Ca_kabuli_chr05 | 38027770                | CC                              | GG              | 1946852204               |
| SNP_P4_75085_38027823 | NC_021164.1    | Ca_kabuli_chr05 | 38027823                | CC                              | TT              | 1946852206               |
| SNP_P4_75086_38027829 | NC_021164.1    | Ca_kabuli_chr05 | 38027829                | TT                              | CC              | 1946852208               |
| SNP_P4_75087_38027994 | NC_021164.1    | Ca_kabuli_chr05 | 38027994                | CC                              | TT              | 1946852210               |
| SNP_P4_75088_38028071 | NC_021164.1    | Ca_kabuli_chr05 | 38028071                | TT                              | AA              | 1946852212               |
| SNP_P4_75089_38028131 | NC_021164.1    | Ca_kabuli_chr05 | 38028131                | CC                              | TT              | 1946852214               |
| SNP_P4_75090_38028141 | NC_021164.1    | Ca_kabuli_chr05 | 38028141                | TT                              | AA              | 1946852216               |
| SNP_P4_75091_38028143 | NC_021164.1    | Ca_kabuli_chr05 | 38028143                | GG                              | CC              | 1946852218               |
| SNP_P4_75092_38028176 | NC_021164.1    | Ca_kabuli_chr05 | 38028176                | TT                              | CC              | 1946852220               |
| SNP_P4_75094_38028225 | NC_021164.1    | Ca_kabuli_chr05 | 38028225                | TT                              | CC              | 1946852222               |
| SNP_P4_75095_38028462 | NC_021164.1    | Ca_kabuli_chr05 | 38028462                | AA                              | GG              | 1946852224               |
| SNP_P4_75096_38028475 | NC_021164.1    | Ca_kabuli_chr05 | 38028475                | TT                              | CC              | 1946852226               |
| SNP_P4_75097_38028486 | NC_021164.1    | Ca_kabuli_chr05 | 38028486                | TT                              | CC              | 1946852228               |
| SNP_P4_75098_38028510 | NC_021164.1    | Ca_kabuli_chr05 | 38028510                | TT                              | AA              | 1946852230               |
| SNP_P4_75099_38028566 | NC_021164.1    | Ca_kabuli_chr05 | 38028566                | TT                              | GG              | 1946852232               |
| SNP_P4_75100_38028747 | NC_021164.1    | Ca_kabuli_chr05 | 38028747                | CC                              | TT              | 1946852234               |
| SNP_P4_75102_38028771 | NC_021164.1    | Ca_kabuli_chr05 | 38028771                | TT                              | CC              | 1946852236               |
| SNP_P4_75104_38029099 | NC_021164.1    | Ca_kabuli_chr05 | 38029099                | CC                              | TT              | 1946852238               |
| SNP_P4_75105_38029125 | NC_021164.1    | Ca_kabuli_chr05 | 38029125                | GG                              | AA              | 1946852241               |
| SNP_P4_75106_38029141 | NC_021164.1    | Ca_kabuli_chr05 | 38029141                | CC                              | TT              | 1946852243               |
| SNP_P4_75107_38030042 | NC_021164.1    | Ca_kabuli_chr05 | 38030042                | AA                              | TT              | 1946852245               |
| SNP_P4_75109_38030102 | NC_021164.1    | Ca_kabuli_chr05 | 38030102                | TT                              | CC              | 1946852247               |
| SNP_P4_75111_38030280 | NC_021164.1    | Ca_kabuli_chr05 | 38030280                | GG                              | AA              | 1946852249               |
| SNP_P4_75112_38031223 | NC_021164.1    | Ca_kabuli_chr05 | 38031223                | CC                              | TT              | 1946852251               |
| SNP_P4_75113_38031235 | NC_021164.1    | Ca_kabuli_chr05 | 38031235                | CC                              | TT              | 1946852253               |
| SNP_P4_75114_38031500 | NC_021164.1    | Ca_kabuli_chr05 | 38031500                | AA                              | TT              | 1946852255               |

| SNPs IDs              | Chromosome IDs | Chromosomes     | Physical positions (bp) | CDC Frontier (Reference genome) | (ILWC46 & LPNB) | NCBI SNPdb Accession IDs |
|-----------------------|----------------|-----------------|-------------------------|---------------------------------|-----------------|--------------------------|
| SNP_P4_75115_38033325 | NC_021164.1    | Ca_kabuli_chr05 | 38033325                | AA                              | GG              | 1946852257               |
| SNP_P4_75117_38034386 | NC_021164.1    | Ca_kabuli_chr05 | 38034386                | CC                              | TT              | 1946852259               |
| SNP_P4_75122_38035069 | NC_021164.1    | Ca_kabuli_chr05 | 38035069                | TT                              | GG              | 1946852261               |
| SNP_P4_75123_38035072 | NC_021164.1    | Ca_kabuli_chr05 | 38035072                | AA                              | GG              | 1946852263               |
| SNP_P4_75124_38035968 | NC_021164.1    | Ca_kabuli_chr05 | 38035968                | CC                              | TT              | 1946852265               |
| SNP_P4_75125_38036020 | NC_021164.1    | Ca_kabuli_chr05 | 38036020                | AA                              | GG              | 1946852267               |
| SNP_P4_75126_38036526 | NC_021164.1    | Ca_kabuli_chr05 | 38036526                | TT                              | CC              | 1946852269               |
| SNP_P4_75127_38036532 | NC_021164.1    | Ca_kabuli_chr05 | 38036532                | CC                              | TT              | 1946852271               |
| SNP_P4_75128_38036594 | NC_021164.1    | Ca_kabuli_chr05 | 38036594                | AA                              | GG              | 1946852273               |
| SNP_P4_75129_38036603 | NC_021164.1    | Ca_kabuli_chr05 | 38036603                | TT                              | CC              | 1946852275               |
| SNP_P4_75130_38036726 | NC_021164.1    | Ca_kabuli_chr05 | 38036726                | GG                              | AA              | 1946852277               |
| SNP_P4_75132_38036812 | NC_021164.1    | Ca_kabuli_chr05 | 38036812                | TT                              | CC              | 1946852279               |
| SNP_P4_75133_38036831 | NC_021164.1    | Ca_kabuli_chr05 | 38036831                | TT                              | CC              | 1946852281               |
| SNP_P4_75134_38037049 | NC_021164.1    | Ca_kabuli_chr05 | 38037049                | AA                              | GG              | 1946852284               |
| SNP_P4_75135_38037088 | NC_021164.1    | Ca_kabuli_chr05 | 38037088                | AA                              | GG              | 1946852286               |
| SNP_P4_75136_38037231 | NC_021164.1    | Ca_kabuli_chr05 | 38037231                | TT                              | AA              | 1946852288               |
| SNP_P4_75137_38037348 | NC_021164.1    | Ca_kabuli_chr05 | 38037348                | GG                              | AA              | 1946852290               |
| SNP_P4_75138_38038789 | NC_021164.1    | Ca_kabuli_chr05 | 38038789                | CC                              | TT              | 1946852292               |
| SNP_P4_75139_38038813 | NC_021164.1    | Ca_kabuli_chr05 | 38038813                | AA                              | TT              | 1946852294               |
| SNP_P4_75140_38039050 | NC_021164.1    | Ca_kabuli_chr05 | 38039050                | TT                              | CC              | 1946852296               |
| SNP_P4_75141_38040834 | NC_021164.1    | Ca_kabuli_chr05 | 38040834                | GG                              | TT              | 1946852298               |
| SNP_P4_75142_38040986 | NC_021164.1    | Ca_kabuli_chr05 | 38040986                | TT                              | CC              | 1946852300               |
| SNP_P4_75144_38042492 | NC_021164.1    | Ca_kabuli_chr05 | 38042492                | GG                              | AA              | 1946852302               |
| SNP_P4_75145_38042503 | NC_021164.1    | Ca_kabuli_chr05 | 38042503                | TT                              | CC              | 1946852304               |
| SNP_P4_75147_38043032 | NC_021164.1    | Ca_kabuli_chr05 | 38043032                | TT                              | CC              | 1946852306               |
| SNP_P4_75148_38043467 | NC_021164.1    | Ca_kabuli_chr05 | 38043467                | GG                              | AA              | 1946852308               |
| SNP_P4_75149_38043749 | NC_021164.1    | Ca_kabuli_chr05 | 38043749                | AA                              | TT              | 1946852310               |
| SNP_P4_75151_38043815 | NC_021164.1    | Ca_kabuli_chr05 | 38043815                | CC                              | TT              | 1946852312               |
| SNP_P4_75153_38043882 | NC_021164.1    | Ca_kabuli_chr05 | 38043882                | GG                              | AA              | 1946852314               |
| SNP_P4_75154_38044115 | NC_021164.1    | Ca_kabuli_chr05 | 38044115                | GG                              | AA              | 1946852316               |
| SNP_P4_75155_38044122 | NC_021164.1    | Ca_kabuli_chr05 | 38044122                | AA                              | GG              | 1946852319               |
| SNP_P4_75156_38044128 | NC_021164.1    | Ca_kabuli_chr05 | 38044128                | AA                              | GG              | 1946852321               |
| SNP_P4_75157_38045611 | NC_021164.1    | Ca_kabuli_chr05 | 38045611                | GG                              | TT              | 1946852323               |
| SNP_P4_75158_38045698 | NC_021164.1    | Ca_kabuli_chr05 | 38045698                | GG                              | AA              | 1946852325               |
| SNP_P4_75159_38045955 | NC_021164.1    | Ca_kabuli_chr05 | 38045955                | AA                              | GG              | 1946852327               |
| SNP_P4_75161_38046158 | NC_021164.1    | Ca_kabuli_chr05 | 38046158                | CC                              | TT              | 1946852329               |
| SNP_P4_75162_38046188 | NC_021164.1    | Ca_kabuli_chr05 | 38046188                | CC                              | TT              | 1946852331               |
| SNP_P4_75163_38046204 | NC_021164.1    | Ca_kabuli_chr05 | 38046204                | AA                              | GG              | 1946852333               |
| SNP_P4_75164_38048799 | NC_021164.1    | Ca_kabuli_chr05 | 38048799                | TT                              | AA              | 1946852335               |
| SNP_P4_75165_38048872 | NC_021164.1    | Ca_kabuli_chr05 | 38048872                | AA                              | TT              | 1946852337               |
| SNP_P4_75167_38050022 | NC_021164.1    | Ca_kabuli_chr05 | 38050022                | CC                              | TT              | 1946852339               |
| SNP_P4_75168_38050024 | NC_021164.1    | Ca_kabuli_chr05 | 38050024                | TT                              | CC              | 1946852341               |

| SNPs IDs              | Chromosome IDs | Chromosomes     | Physical positions (bp) | CDC Frontier (Reference genome) | (ILWC46 & LPNB) | NCBI SNPdb Accession IDs |
|-----------------------|----------------|-----------------|-------------------------|---------------------------------|-----------------|--------------------------|
| SNP_P4_75169_38050298 | NC_021164.1    | Ca_kabuli_chr05 | 38050298                | TT                              | CC              | 1946852343               |
| SNP_P4_75170_38050306 | NC_021164.1    | Ca_kabuli_chr05 | 38050306                | AA                              | TT              | 1946852345               |
| SNP_P4_75171_38050413 | NC_021164.1    | Ca_kabuli_chr05 | 38050413                | GG                              | TT              | 1946852347               |
| SNP_P4_75172_38050442 | NC_021164.1    | Ca_kabuli_chr05 | 38050442                | GG                              | AA              | 1946852349               |
| SNP_P4_75173_38051836 | NC_021164.1    | Ca_kabuli_chr05 | 38051836                | GG                              | AA              | 1946852351               |
| SNP_P4_75175_38052230 | NC_021164.1    | Ca_kabuli_chr05 | 38052230                | CC                              | AA              | 1946852354               |
| SNP_P4_75176_38052586 | NC_021164.1    | Ca_kabuli_chr05 | 38052586                | GG                              | AA              | 1946852356               |
| SNP_P4_75177_38052614 | NC_021164.1    | Ca_kabuli_chr05 | 38052614                | CC                              | TT              | 1946852358               |
| SNP_P4_75178_38052659 | NC_021164.1    | Ca_kabuli_chr05 | 38052659                | GG                              | TT              | 1946852360               |
| SNP_P4_75179_38052664 | NC_021164.1    | Ca_kabuli_chr05 | 38052664                | AA                              | GG              | 1946852362               |
| SNP_P4_75180_38052676 | NC_021164.1    | Ca_kabuli_chr05 | 38052676                | AA                              | GG              | 1946852364               |
| SNP_P4_75181_38052804 | NC_021164.1    | Ca_kabuli_chr05 | 38052804                | TT                              | CC              | 1946852366               |
| SNP_P4_75182_38052826 | NC_021164.1    | Ca_kabuli_chr05 | 38052826                | TT                              | AA              | 1946852368               |
| SNP_P4_75183_38053086 | NC_021164.1    | Ca_kabuli_chr05 | 38053086                | TT                              | CC              | 1946852370               |
| SNP_P4_75184_38053096 | NC_021164.1    | Ca_kabuli_chr05 | 38053096                | AA                              | GG              | 1946852372               |
| SNP_P4_75185_38053102 | NC_021164.1    | Ca_kabuli_chr05 | 38053102                | CC                              | GG              | 1946852374               |
| SNP_P4_75186_38053114 | NC_021164.1    | Ca_kabuli_chr05 | 38053114                | CC                              | TT              | 1946852376               |
| SNP_P4_75187_38053508 | NC_021164.1    | Ca_kabuli_chr05 | 38053508                | TT                              | CC              | 1946852378               |
| SNP_P4_75188_38056267 | NC_021164.1    | Ca_kabuli_chr05 | 38056267                | AA                              | CC              | 1946852380               |
| SNP_P4_75189_38057072 | NC_021164.1    | Ca_kabuli_chr05 | 38057072                | CC                              | TT              | 1946852382               |
| SNP_P4_75190_38057430 | NC_021164.1    | Ca_kabuli_chr05 | 38057430                | AA                              | GG              | 1946852384               |
| SNP_P4_75192_38059097 | NC_021164.1    | Ca_kabuli_chr05 | 38059097                | TT                              | AA              | 1946852387               |
| SNP_P4_75194_38062576 | NC_021164.1    | Ca_kabuli_chr05 | 38062576                | GG                              | AA              | 1946852389               |
| SNP_P4_75195_38063311 | NC_021164.1    | Ca_kabuli_chr05 | 38063311                | TT                              | GG              | 1946852391               |
| SNP_P4_75197_38067399 | NC_021164.1    | Ca_kabuli_chr05 | 38067399                | CC                              | TT              | 1946852393               |
| SNP_P4_75198_38067458 | NC_021164.1    | Ca_kabuli_chr05 | 38067458                | TT                              | AA              | 1946852395               |
| SNP_P4_75200_38067876 | NC_021164.1    | Ca_kabuli_chr05 | 38067876                | TT                              | GG              | 1946852397               |
| SNP_P4_75201_38068023 | NC_021164.1    | Ca_kabuli_chr05 | 38068023                | AA                              | CC              | 1946852399               |
| SNP_P4_75204_38068301 | NC_021164.1    | Ca_kabuli_chr05 | 38068301                | TT                              | AA              | 1946852401               |
| SNP_P4_75205_38068593 | NC_021164.1    | Ca_kabuli_chr05 | 38068593                | GG                              | TT              | 1946852403               |
| SNP_P4_75206_38068684 | NC_021164.1    | Ca_kabuli_chr05 | 38068684                | CC                              | GG              | 1946852405               |
| SNP_P4_75207_38068736 | NC_021164.1    | Ca_kabuli_chr05 | 38068736                | GG                              | AA              | 1946852407               |
| SNP_P4_75208_38068750 | NC_021164.1    | Ca_kabuli_chr05 | 38068750                | GG                              | CC              | 1946852409               |
| SNP_P4_75209_38068773 | NC_021164.1    | Ca_kabuli_chr05 | 38068773                | AA                              | CC              | 1946852411               |
| SNP_P4_75210_38068932 | NC_021164.1    | Ca_kabuli_chr05 | 38068932                | TT                              | CC              | 1946852413               |
| SNP_P4_75211_38068933 | NC_021164.1    | Ca_kabuli_chr05 | 38068933                | AA                              | GG              | 1946852415               |
| SNP_P4_75212_38068956 | NC_021164.1    | Ca_kabuli_chr05 | 38068956                | TT                              | CC              | 1946852417               |
| SNP_P4_75213_38069438 | NC_021164.1    | Ca_kabuli_chr05 | 38069438                | AA                              | GG              | 1946852419               |
| SNP_P4_75214_38069503 | NC_021164.1    | Ca_kabuli_chr05 | 38069503                | TT                              | AA              | 1946852421               |
| SNP_P4_75215_38069504 | NC_021164.1    | Ca_kabuli_chr05 | 38069504                | TT                              | AA              | 1946852423               |
| SNP_P4_75216_38069670 | NC_021164.1    | Ca_kabuli_chr05 | 38069670                | AA                              | GG              | 1946852425               |
| SNP_P4_75217_38069714 | NC_021164.1    | Ca_kabuli_chr05 | 38069714                | GG                              | TT              | 1946852427               |

| SNPs IDs              | Chromosome IDs | Chromosomes     | Physical positions (bp) | CDC Frontier (Reference genome) | (ILWC46 & LPNB) | NCBI SNPdb Accession IDs |
|-----------------------|----------------|-----------------|-------------------------|---------------------------------|-----------------|--------------------------|
| SNP_P4_75218_38069968 | NC_021164.1    | Ca_kabuli_chr05 | 38069968                | CC                              | TT              | 1946852429               |
| SNP_P4_75219_38070707 | NC_021164.1    | Ca_kabuli_chr05 | 38070707                | AA                              | GG              | 1946852431               |
| SNP_P4_75220_38070821 | NC_021164.1    | Ca_kabuli_chr05 | 38070821                | AA                              | CC              | 1946852433               |
| SNP_P4_75221_38070963 | NC_021164.1    | Ca_kabuli_chr05 | 38070963                | TT                              | AA              | 1946852435               |
| SNP_P4_75222_38070985 | NC_021164.1    | Ca_kabuli_chr05 | 38070985                | TT                              | CC              | 1946852437               |
| SNP_P4_75223_38071048 | NC_021164.1    | Ca_kabuli_chr05 | 38071048                | GG                              | AA              | 1946852439               |
| SNP_P4_75224_38071066 | NC_021164.1    | Ca_kabuli_chr05 | 38071066                | TT                              | AA              | 1946852441               |
| SNP_P4_75225_38071076 | NC_021164.1    | Ca_kabuli_chr05 | 38071076                | AA                              | TT              | 1946852443               |
| SNP_P4_75226_38071087 | NC_021164.1    | Ca_kabuli_chr05 | 38071087                | GG                              | AA              | 1946852445               |
| SNP_P4_75227_38071111 | NC_021164.1    | Ca_kabuli_chr05 | 38071111                | AA                              | GG              | 1946852447               |
| SNP_P4_75228_38071118 | NC_021164.1    | Ca_kabuli_chr05 | 38071118                | AA                              | GG              | 1946852449               |
| SNP_P4_75229_38072218 | NC_021164.1    | Ca_kabuli_chr05 | 38072218                | CC                              | AA              | 1946852451               |
| SNP_P4_75231_38075765 | NC_021164.1    | Ca_kabuli_chr05 | 38075765                | CC                              | GG              | 1946852453               |
| SNP_P4_75233_38076396 | NC_021164.1    | Ca_kabuli_chr05 | 38076396                | AA                              | GG              | 1946852455               |
| SNP_P4_75234_38076402 | NC_021164.1    | Ca_kabuli_chr05 | 38076402                | GG                              | CC              | 1946852457               |
| SNP_P4_75235_38076464 | NC_021164.1    | Ca_kabuli_chr05 | 38076464                | AA                              | TT              | 1946852459               |
| SNP_P4_75236_38076469 | NC_021164.1    | Ca_kabuli_chr05 | 38076469                | CC                              | TT              | 1946852461               |
| SNP_P4_75237_38076925 | NC_021164.1    | Ca_kabuli_chr05 | 38076925                | AA                              | GG              | 1946852463               |
| SNP_P4_75238_38076950 | NC_021164.1    | Ca_kabuli_chr05 | 38076950                | GG                              | TT              | 1946852465               |
| SNP_P4_75239_38078572 | NC_021164.1    | Ca_kabuli_chr05 | 38078572                | TT                              | AA              | 1946852467               |
| SNP_P4_75241_38078815 | NC_021164.1    | Ca_kabuli_chr05 | 38078815                | TT                              | CC              | 1946852469               |
| SNP_P4_75242_38079071 | NC_021164.1    | Ca_kabuli_chr05 | 38079071                | GG                              | CC              | 1946852471               |
| SNP_P4_75243_38079311 | NC_021164.1    | Ca_kabuli_chr05 | 38079311                | CC                              | TT              | 1946852473               |
| SNP_P4_75246_38081123 | NC_021164.1    | Ca_kabuli_chr05 | 38081123                | TT                              | CC              | 1946852475               |
| SNP_P4_75248_38085258 | NC_021164.1    | Ca_kabuli_chr05 | 38085258                | CC                              | TT              | 1946852477               |
| SNP_P4_75249_38085395 | NC_021164.1    | Ca_kabuli_chr05 | 38085395                | GG                              | AA              | 1946852479               |
| SNP_P4_75250_38085397 | NC_021164.1    | Ca_kabuli_chr05 | 38085397                | GG                              | AA              | 1946852481               |
| SNP_P4_75251_38085423 | NC_021164.1    | Ca_kabuli_chr05 | 38085423                | AA                              | GG              | 1946852483               |
| SNP_P4_75252_38086672 | NC_021164.1    | Ca_kabuli_chr05 | 38086672                | GG                              | TT              | 1946852485               |
| SNP_P4_75253_38086691 | NC_021164.1    | Ca_kabuli_chr05 | 38086691                | AA                              | CC              | 1946852487               |
| SNP_P4_75254_38086757 | NC_021164.1    | Ca_kabuli_chr05 | 38086757                | AA                              | TT              | 1946852489               |
| SNP_P4_75255_38087101 | NC_021164.1    | Ca_kabuli_chr05 | 38087101                | GG                              | CC              | 1946852491               |
| SNP_P4_75256_38087123 | NC_021164.1    | Ca_kabuli_chr05 | 38087123                | AA                              | CC              | 1946852493               |
| SNP_P4_75257_38087167 | NC_021164.1    | Ca_kabuli_chr05 | 38087167                | CC                              | AA              | 1946852495               |
| SNP_P4_75258_38087709 | NC_021164.1    | Ca_kabuli_chr05 | 38087709                | TT                              | CC              | 1946852497               |
| SNP_P4_75260_38088230 | NC_021164.1    | Ca_kabuli_chr05 | 38088230                | CC                              | GG              | 1946852499               |
| SNP_P4_75261_38088242 | NC_021164.1    | Ca_kabuli_chr05 | 38088242                | CC                              | AA              | 1946852501               |
| SNP_P4_75262_38088250 | NC_021164.1    | Ca_kabuli_chr05 | 38088250                | GG                              | AA              | 1946852503               |
| SNP_P4_75263_38091238 | NC_021164.1    | Ca_kabuli_chr05 | 38091238                | TT                              | CC              | 1946852505               |
| SNP_P4_75264_38091275 | NC_021164.1    | Ca_kabuli_chr05 | 38091275                | TT                              | CC              | 1946852507               |
| SNP_P4_75266_38092025 | NC_021164.1    | Ca_kabuli_chr05 | 38092025                | AA                              | GG              | 1946852509               |
| SNP_P4_75267_38092129 | NC_021164.1    | Ca_kabuli_chr05 | 38092129                | TT                              | AA              | 1946852511               |



| SNPs IDs              | Chromosome IDs | Chromosomes     | Physical positions (bp) | CDC Frontier (Reference genome) | (ILWC46 & LPNB) | NCBI SNPdb Accession IDs |
|-----------------------|----------------|-----------------|-------------------------|---------------------------------|-----------------|--------------------------|
| SNP_P4_75268_38092165 | NC_021164.1    | Ca_kabuli_chr05 | 38092165                | GG                              | TT              | 1946852513               |
| SNP_P4_75269_38092412 | NC_021164.1    | Ca_kabuli_chr05 | 38092412                | GG                              | AA              | 1946852515               |
| SNP_P4_75270_38092735 | NC_021164.1    | Ca_kabuli_chr05 | 38092735                | CC                              | TT              | 1946852517               |
| SNP_P4_75271_38092793 | NC_021164.1    | Ca_kabuli_chr05 | 38092793                | CC                              | TT              | 1946852519               |
| SNP_P4_75272_38093111 | NC_021164.1    | Ca_kabuli_chr05 | 38093111                | AA                              | GG              | 1946852521               |
| SNP_P4_75274_38093839 | NC_021164.1    | Ca_kabuli_chr05 | 38093839                | TT                              | CC              | 1946852523               |
| SNP_P4_75275_38094026 | NC_021164.1    | Ca_kabuli_chr05 | 38094026                | CC                              | TT              | 1946852526               |
| SNP_P4_75276_38094034 | NC_021164.1    | Ca_kabuli_chr05 | 38094034                | CC                              | TT              | 1946852528               |
| SNP_P4_75277_38094191 | NC_021164.1    | Ca_kabuli_chr05 | 38094191                | TT                              | AA              | 1946852530               |
| SNP_P4_75278_38094450 | NC_021164.1    | Ca_kabuli_chr05 | 38094450                | CC                              | TT              | 1946852532               |
| SNP_P4_75279_38094456 | NC_021164.1    | Ca_kabuli_chr05 | 38094456                | CC                              | TT              | 1946852534               |
| SNP_P4_75281_38094545 | NC_021164.1    | Ca_kabuli_chr05 | 38094545                | GG                              | AA              | 1946852536               |
| SNP_P4_75282_38094784 | NC_021164.1    | Ca_kabuli_chr05 | 38094784                | GG                              | AA              | 1946852538               |
| SNP_P4_75283_38095075 | NC_021164.1    | Ca_kabuli_chr05 | 38095075                | GG                              | CC              | 1946852540               |
| SNP_P4_75284_38095086 | NC_021164.1    | Ca_kabuli_chr05 | 38095086                | TT                              | CC              | 1946852542               |
| SNP_P4_75285_38095088 | NC_021164.1    | Ca_kabuli_chr05 | 38095088                | AA                              | TT              | 1946852544               |
| SNP_P4_75286_38095297 | NC_021164.1    | Ca_kabuli_chr05 | 38095297                | CC                              | TT              | 1946852546               |
| SNP_P4_75287_38095573 | NC_021164.1    | Ca_kabuli_chr05 | 38095573                | TT                              | AA              | 1946852548               |
| SNP_P4_75288_38095630 | NC_021164.1    | Ca_kabuli_chr05 | 38095630                | GG                              | AA              | 1946852550               |
| SNP_P4_75289_38095889 | NC_021164.1    | Ca_kabuli_chr05 | 38095889                | TT                              | AA              | 1946852552               |
| SNP_P4_75290_38096164 | NC_021164.1    | Ca_kabuli_chr05 | 38096164                | TT                              | GG              | 1946852554               |
| SNP_P4_75291_38096285 | NC_021164.1    | Ca_kabuli_chr05 | 38096285                | AA                              | GG              | 1946852556               |
| SNP_P4_75292_38096321 | NC_021164.1    | Ca_kabuli_chr05 | 38096321                | TT                              | AA              | 1946852558               |
| SNP_P4_75293_38096493 | NC_021164.1    | Ca_kabuli_chr05 | 38096493                | TT                              | CC              | 1946852560               |
| SNP_P4_75294_38097029 | NC_021164.1    | Ca_kabuli_chr05 | 38097029                | TT                              | GG              | 1946852562               |
| SNP_P4_75295_38097050 | NC_021164.1    | Ca_kabuli_chr05 | 38097050                | GG                              | AA              | 1946852564               |
| SNP_P4_75296_38097113 | NC_021164.1    | Ca_kabuli_chr05 | 38097113                | CC                              | AA              | 1946852566               |
| SNP_P4_75297_38097155 | NC_021164.1    | Ca_kabuli_chr05 | 38097155                | AA                              | GG              | 1946852568               |
| SNP_P4_75298_38097182 | NC_021164.1    | Ca_kabuli_chr05 | 38097182                | GG                              | TT              | 1946852570               |
| SNP_P4_75299_38097204 | NC_021164.1    | Ca_kabuli_chr05 | 38097204                | TT                              | CC              | 1946852572               |
| SNP_P4_75300_38097238 | NC_021164.1    | Ca_kabuli_chr05 | 38097238                | GG                              | AA              | 1946852574               |
| SNP_P4_75301_38098072 | NC_021164.1    | Ca_kabuli_chr05 | 38098072                | AA                              | GG              | 1946852576               |
| SNP_P4_75302_38098102 | NC_021164.1    | Ca_kabuli_chr05 | 38098102                | TT                              | AA              | 1946852578               |
| SNP_P4_75303_38098660 | NC_021164.1    | Ca_kabuli_chr05 | 38098660                | AA                              | TT              | 1946852580               |
| SNP_P4_75305_38100503 | NC_021164.1    | Ca_kabuli_chr05 | 38100503                | TT                              | CC              | 1946852582               |
| SNP_P4_75306_38100599 | NC_021164.1    | Ca_kabuli_chr05 | 38100599                | CC                              | TT              | 1946852584               |
| SNP_P4_75309_38104698 | NC_021164.1    | Ca_kabuli_chr05 | 38104698                | AA                              | GG              | 1946852586               |
| SNP_P4_75310_38107294 | NC_021164.1    | Ca_kabuli_chr05 | 38107294                | AA                              | TT              | 1946852588               |
| SNP_P4_75311_38107737 | NC_021164.1    | Ca_kabuli_chr05 | 38107737                | CC                              | TT              | 1946852590               |
| SNP_P4_75312_38110090 | NC_021164.1    | Ca_kabuli_chr05 | 38110090                | TT                              | CC              | 1946852592               |
| SNP_P4_75313_38110802 | NC_021164.1    | Ca_kabuli_chr05 | 38110802                | AA                              | GG              | 1946852594               |
| SNP_P4_75315_38111832 | NC_021164.1    | Ca_kabuli_chr05 | 38111832                | GG                              | AA              | 1946852596               |

| SNPs IDs              | Chromosome IDs | Chromosomes     | Physical positions (bp) | CDC Frontier (Reference genome) | (ILWC46 & LPNB) | NCBI SNPdb Accession IDs |
|-----------------------|----------------|-----------------|-------------------------|---------------------------------|-----------------|--------------------------|
| SNP_P4_75316_38113458 | NC_021164.1    | Ca_kabuli_chr05 | 38113458                | AA                              | TT              | 1946852598               |
| SNP_P4_75317_38114798 | NC_021164.1    | Ca_kabuli_chr05 | 38114798                | TT                              | GG              | 1946852600               |
| SNP_P4_75318_38115727 | NC_021164.1    | Ca_kabuli_chr05 | 38115727                | GG                              | CC              | 1946852602               |
| SNP_P4_75319_38116880 | NC_021164.1    | Ca_kabuli_chr05 | 38116880                | TT                              | CC              | 1946852604               |
| SNP_P4_75320_38117015 | NC_021164.1    | Ca_kabuli_chr05 | 38117015                | GG                              | TT              | 1946852606               |
| SNP_P4_75321_38117181 | NC_021164.1    | Ca_kabuli_chr05 | 38117181                | GG                              | AA              | 1946852608               |
| SNP_P4_75322_38119183 | NC_021164.1    | Ca_kabuli_chr05 | 38119183                | CC                              | TT              | 1946852610               |
| SNP_P4_75323_38119445 | NC_021164.1    | Ca_kabuli_chr05 | 38119445                | GG                              | TT              | 1946852612               |
| SNP_P4_75324_38121021 | NC_021164.1    | Ca_kabuli_chr05 | 38121021                | GG                              | CC              | 1946852614               |
| SNP_P4_75325_38121151 | NC_021164.1    | Ca_kabuli_chr05 | 38121151                | TT                              | AA              | 1946852616               |
| SNP_P4_75326_38121805 | NC_021164.1    | Ca_kabuli_chr05 | 38121805                | AA                              | GG              | 1946852618               |
| SNP_P4_75327_38121968 | NC_021164.1    | Ca_kabuli_chr05 | 38121968                | AA                              | GG              | 1946852620               |
| SNP_P4_75328_38121975 | NC_021164.1    | Ca_kabuli_chr05 | 38121975                | AA                              | GG              | 1946852621               |
| SNP_P4_75329_38121982 | NC_021164.1    | Ca_kabuli_chr05 | 38121982                | TT                              | CC              | 1946852623               |
| SNP_P4_75330_38121989 | NC_021164.1    | Ca_kabuli_chr05 | 38121989                | AA                              | TT              | 1946852625               |
| SNP_P4_75331_38122004 | NC_021164.1    | Ca_kabuli_chr05 | 38122004                | TT                              | CC              | 1946852627               |
| SNP_P4_75332_38122140 | NC_021164.1    | Ca_kabuli_chr05 | 38122140                | CC                              | AA              | 1946852629               |
| SNP_P4_75334_38122274 | NC_021164.1    | Ca_kabuli_chr05 | 38122274                | CC                              | TT              | 1946852631               |
| SNP_P4_75335_38122276 | NC_021164.1    | Ca_kabuli_chr05 | 38122276                | AA                              | GG              | 1946852633               |
| SNP_P4_75336_38122284 | NC_021164.1    | Ca_kabuli_chr05 | 38122284                | AA                              | TT              | 1946852635               |
| SNP_P4_75337_38122312 | NC_021164.1    | Ca_kabuli_chr05 | 38122312                | GG                              | CC              | 1946852637               |
| SNP_P4_75338_38122392 | NC_021164.1    | Ca_kabuli_chr05 | 38122392                | AA                              | TT              | 1946852639               |
| SNP_P4_75339_38122445 | NC_021164.1    | Ca_kabuli_chr05 | 38122445                | AA                              | GG              | 1946852641               |
| SNP_P4_75340_38122551 | NC_021164.1    | Ca_kabuli_chr05 | 38122551                | TT                              | CC              | 1946852643               |
| SNP_P4_75341_38122597 | NC_021164.1    | Ca_kabuli_chr05 | 38122597                | GG                              | AA              | 1946852645               |
| SNP_P4_75342_38122941 | NC_021164.1    | Ca_kabuli_chr05 | 38122941                | AA                              | TT              | 1946852647               |
| SNP_P4_75343_38125266 | NC_021164.1    | Ca_kabuli_chr05 | 38125266                | GG                              | AA              | 1946852649               |
| SNP_P4_75344_38126346 | NC_021164.1    | Ca_kabuli_chr05 | 38126346                | AA                              | GG              | 1946852651               |
| SNP_P4_75345_38126377 | NC_021164.1    | Ca_kabuli_chr05 | 38126377                | AA                              | GG              | 1946852653               |
| SNP_P4_75346_38126392 | NC_021164.1    | Ca_kabuli_chr05 | 38126392                | TT                              | CC              | 1946852655               |
| SNP_P4_75348_38126988 | NC_021164.1    | Ca_kabuli_chr05 | 38126988                | AA                              | TT              | 1946852657               |
| SNP_P4_75349_38127016 | NC_021164.1    | Ca_kabuli_chr05 | 38127016                | AA                              | GG              | 1946852659               |
| SNP_P4_75350_38127064 | NC_021164.1    | Ca_kabuli_chr05 | 38127064                | TT                              | CC              | 1946852661               |
| SNP_P4_75351_38127286 | NC_021164.1    | Ca_kabuli_chr05 | 38127286                | CC                              | TT              | 1946852663               |
| SNP_P4_75352_38127362 | NC_021164.1    | Ca_kabuli_chr05 | 38127362                | GG                              | CC              | 1946852665               |
| SNP_P4_75353_38127511 | NC_021164.1    | Ca_kabuli_chr05 | 38127511                | AA                              | GG              | 1946852667               |
| SNP_P4_75354_38127515 | NC_021164.1    | Ca_kabuli_chr05 | 38127515                | CC                              | GG              | 1946852669               |
| SNP_P4_75356_38128440 | NC_021164.1    | Ca_kabuli_chr05 | 38128440                | AA                              | GG              | 1946852671               |
| SNP_P4_75357_38128443 | NC_021164.1    | Ca_kabuli_chr05 | 38128443                | AA                              | TT              | 1946852673               |
| SNP_P4_75358_38132300 | NC_021164.1    | Ca_kabuli_chr05 | 38132300                | GG                              | AA              | 1946852675               |
| SNP_P4_75359_38132423 | NC_021164.1    | Ca_kabuli_chr05 | 38132423                | CC                              | TT              | 1946852677               |
| SNP_P4_75360_38132433 | NC_021164.1    | Ca_kabuli_chr05 | 38132433                | AA                              | TT              | 1946852679               |

| SNPs IDs              | Chromosome IDs | Chromosomes     | Physical positions (bp) | CDC Frontier (Reference genome) | (ILWC46 & LPNB) | NCBI SNPdb Accession IDs |
|-----------------------|----------------|-----------------|-------------------------|---------------------------------|-----------------|--------------------------|
| SNP_P4_75361_38132456 | NC_021164.1    | Ca_kabuli_chr05 | 38132456                | TT                              | AA              | 1946852681               |
| SNP_P4_75362_38133402 | NC_021164.1    | Ca_kabuli_chr05 | 38133402                | AA                              | GG              | 1946852683               |
| SNP_P4_75363_38133404 | NC_021164.1    | Ca_kabuli_chr05 | 38133404                | AA                              | GG              | 1946852685               |
| SNP_P4_75364_38133442 | NC_021164.1    | Ca_kabuli_chr05 | 38133442                | AA                              | TT              | 1946852687               |
| SNP_P4_75365_38133447 | NC_021164.1    | Ca_kabuli_chr05 | 38133447                | GG                              | AA              | 1946852689               |
| SNP_P4_75366_38133453 | NC_021164.1    | Ca_kabuli_chr05 | 38133453                | AA                              | TT              | 1946852691               |
| SNP_P4_75367_38133454 | NC_021164.1    | Ca_kabuli_chr05 | 38133454                | TT                              | AA              | 1946852693               |
| SNP_P4_75368_38133455 | NC_021164.1    | Ca_kabuli_chr05 | 38133455                | GG                              | TT              | 1946852695               |
| SNP_P4_75369_38133457 | NC_021164.1    | Ca_kabuli_chr05 | 38133457                | AA                              | TT              | 1946852697               |
| SNP_P4_75371_38133794 | NC_021164.1    | Ca_kabuli_chr05 | 38133794                | CC                              | TT              | 1946852699               |
| SNP_P4_75372_38136946 | NC_021164.1    | Ca_kabuli_chr05 | 38136946                | TT                              | CC              | 1946852701               |
| SNP_P4_75373_38136957 | NC_021164.1    | Ca_kabuli_chr05 | 38136957                | GG                              | AA              | 1946852703               |
| SNP_P4_75374_38137011 | NC_021164.1    | Ca_kabuli_chr05 | 38137011                | GG                              | AA              | 1946852705               |
| SNP_P4_75375_38137012 | NC_021164.1    | Ca_kabuli_chr05 | 38137012                | AA                              | GG              | 1946852707               |
| SNP_P4_75376_38137015 | NC_021164.1    | Ca_kabuli_chr05 | 38137015                | TT                              | CC              | 1946852709               |
| SNP_P4_75377_38137038 | NC_021164.1    | Ca_kabuli_chr05 | 38137038                | CC                              | TT              | 1946852711               |
| SNP_P4_75378_38137039 | NC_021164.1    | Ca_kabuli_chr05 | 38137039                | TT                              | CC              | 1946852713               |
| SNP_P4_75379_38137083 | NC_021164.1    | Ca_kabuli_chr05 | 38137083                | GG                              | AA              | 1946852715               |
| SNP_P4_75380_38137092 | NC_021164.1    | Ca_kabuli_chr05 | 38137092                | GG                              | AA              | 1946852717               |
| SNP_P4_75381_38137099 | NC_021164.1    | Ca_kabuli_chr05 | 38137099                | AA                              | GG              | 1946852718               |
| SNP_P4_75382_38137129 | NC_021164.1    | Ca_kabuli_chr05 | 38137129                | AA                              | GG              | 1946852720               |
| SNP_P4_75383_38137132 | NC_021164.1    | Ca_kabuli_chr05 | 38137132                | AA                              | TT              | 1946852722               |
| SNP_P4_75384_38137441 | NC_021164.1    | Ca_kabuli_chr05 | 38137441                | CC                              | TT              | 1946852724               |
| SNP_P4_75385_38138148 | NC_021164.1    | Ca_kabuli_chr05 | 38138148                | TT                              | CC              | 1946852726               |
| SNP_P4_75386_38138314 | NC_021164.1    | Ca_kabuli_chr05 | 38138314                | AA                              | TT              | 1946852728               |
| SNP_P4_75387_38139801 | NC_021164.1    | Ca_kabuli_chr05 | 38139801                | CC                              | TT              | 1946852730               |
| SNP_P4_75388_38139803 | NC_021164.1    | Ca_kabuli_chr05 | 38139803                | TT                              | CC              | 1946852732               |
| SNP_P4_75389_38139897 | NC_021164.1    | Ca_kabuli_chr05 | 38139897                | AA                              | GG              | 1946852734               |
| SNP_P4_75390_38140056 | NC_021164.1    | Ca_kabuli_chr05 | 38140056                | AA                              | TT              | 1946852736               |
| SNP_P4_75391_38140294 | NC_021164.1    | Ca_kabuli_chr05 | 38140294                | CC                              | GG              | 1946852738               |
| SNP_P4_75393_38140462 | NC_021164.1    | Ca_kabuli_chr05 | 38140462                | TT                              | AA              | 1946852740               |
| SNP_P4_75394_38140473 | NC_021164.1    | Ca_kabuli_chr05 | 38140473                | GG                              | AA              | 1946852742               |
| SNP_P4_75395_38140581 | NC_021164.1    | Ca_kabuli_chr05 | 38140581                | TT                              | CC              | 1946852744               |
| SNP_P4_75396_38140851 | NC_021164.1    | Ca_kabuli_chr05 | 38140851                | CC                              | TT              | 1946852746               |
| SNP_P4_75397_38140859 | NC_021164.1    | Ca_kabuli_chr05 | 38140859                | GG                              | CC              | 1946852748               |
| SNP_P4_75399_38140949 | NC_021164.1    | Ca_kabuli_chr05 | 38140949                | CC                              | GG              | 1946852750               |
| SNP_P4_75400_38140953 | NC_021164.1    | Ca_kabuli_chr05 | 38140953                | GG                              | AA              | 1946852752               |
| SNP_P4_75401_38140954 | NC_021164.1    | Ca_kabuli_chr05 | 38140954                | GG                              | AA              | 1946852754               |
| SNP_P4_75402_38141066 | NC_021164.1    | Ca_kabuli_chr05 | 38141066                | AA                              | TT              | 1946852756               |
| SNP_P4_75403_38141103 | NC_021164.1    | Ca_kabuli_chr05 | 38141103                | GG                              | CC              | 1946852758               |
| SNP_P4_75404_38141126 | NC_021164.1    | Ca_kabuli_chr05 | 38141126                | TT                              | AA              | 1946852760               |
| SNP_P4_75405_38141154 | NC_021164.1    | Ca_kabuli_chr05 | 38141154                | TT                              | AA              | 1946852762               |

| SNPs IDs              | Chromosome IDs | Chromosomes     | Physical positions (bp) | CDC Frontier (Reference genome) | (ILWC46 & LPNB) | NCBI SNPdb Accession IDs |
|-----------------------|----------------|-----------------|-------------------------|---------------------------------|-----------------|--------------------------|
| SNP_P4_75406_38141228 | NC_021164.1    | Ca_kabuli_chr05 | 38141228                | CC                              | TT              | 1946852764               |
| SNP_P4_75408_38142165 | NC_021164.1    | Ca_kabuli_chr05 | 38142165                | CC                              | TT              | 1946852766               |
| SNP_P4_75411_38147773 | NC_021164.1    | Ca_kabuli_chr05 | 38147773                | GG                              | AA              | 1946852768               |
| SNP_P4_75412_38147798 | NC_021164.1    | Ca_kabuli_chr05 | 38147798                | AA                              | GG              | 1946852770               |
| SNP_P4_75413_38147858 | NC_021164.1    | Ca_kabuli_chr05 | 38147858                | AA                              | GG              | 1946852772               |
| SNP_P4_75414_38147886 | NC_021164.1    | Ca_kabuli_chr05 | 38147886                | CC                              | TT              | 1946852774               |
| SNP_P4_75415_38148149 | NC_021164.1    | Ca_kabuli_chr05 | 38148149                | CC                              | GG              | 1946852776               |
| SNP_P4_75416_38148978 | NC_021164.1    | Ca_kabuli_chr05 | 38148978                | AA                              | TT              | 1946852778               |
| SNP_P4_75417_38148979 | NC_021164.1    | Ca_kabuli_chr05 | 38148979                | CC                              | AA              | 1946852780               |
| SNP_P4_75418_38149017 | NC_021164.1    | Ca_kabuli_chr05 | 38149017                | TT                              | CC              | 1946852782               |
| SNP_P4_75420_38150017 | NC_021164.1    | Ca_kabuli_chr05 | 38150017                | AA                              | GG              | 1946852784               |
| SNP_P4_75421_38150033 | NC_021164.1    | Ca_kabuli_chr05 | 38150033                | AA                              | GG              | 1946852785               |
| SNP_P4_75422_38150389 | NC_021164.1    | Ca_kabuli_chr05 | 38150389                | AA                              | CC              | 1946852787               |
| SNP_P4_75423_38150426 | NC_021164.1    | Ca_kabuli_chr05 | 38150426                | CC                              | TT              | 1946852789               |
| SNP_P4_75424_38150751 | NC_021164.1    | Ca_kabuli_chr05 | 38150751                | AA                              | GG              | 1946852791               |
| SNP_P4_75425_38150836 | NC_021164.1    | Ca_kabuli_chr05 | 38150836                | GG                              | TT              | 1946852793               |
| SNP_P4_75427_38151063 | NC_021164.1    | Ca_kabuli_chr05 | 38151063                | TT                              | CC              | 1946852795               |
| SNP_P4_75428_38151066 | NC_021164.1    | Ca_kabuli_chr05 | 38151066                | CC                              | TT              | 1946852797               |
| SNP_P4_75429_38152895 | NC_021164.1    | Ca_kabuli_chr05 | 38152895                | CC                              | TT              | 1946852799               |
| SNP_P4_75430_38152921 | NC_021164.1    | Ca_kabuli_chr05 | 38152921                | TT                              | CC              | 1946852801               |
| SNP_P4_75432_38153143 | NC_021164.1    | Ca_kabuli_chr05 | 38153143                | AA                              | CC              | 1946852803               |
| SNP_P4_75433_38153390 | NC_021164.1    | Ca_kabuli_chr05 | 38153390                | TT                              | CC              | 1946852805               |
| SNP_P4_75434_38153400 | NC_021164.1    | Ca_kabuli_chr05 | 38153400                | TT                              | AA              | 1946852807               |
| SNP_P4_75435_38153403 | NC_021164.1    | Ca_kabuli_chr05 | 38153403                | CC                              | TT              | 1946852809               |
| SNP_P4_75436_38153406 | NC_021164.1    | Ca_kabuli_chr05 | 38153406                | GG                              | CC              | 1946852811               |
| SNP_P4_75437_38153824 | NC_021164.1    | Ca_kabuli_chr05 | 38153824                | TT                              | CC              | 1946852813               |
| SNP_P4_75438_38153867 | NC_021164.1    | Ca_kabuli_chr05 | 38153867                | TT                              | AA              | 1946852815               |
| SNP_P4_75439_38153870 | NC_021164.1    | Ca_kabuli_chr05 | 38153870                | CC                              | TT              | 1946852817               |
| SNP_P4_75440_38154222 | NC_021164.1    | Ca_kabuli_chr05 | 38154222                | AA                              | GG              | 1946852819               |
| SNP_P4_75443_38155189 | NC_021164.1    | Ca_kabuli_chr05 | 38155189                | AA                              | GG              | 1946852821               |
| SNP_P4_75444_38155245 | NC_021164.1    | Ca_kabuli_chr05 | 38155245                | GG                              | TT              | 1946852823               |
| SNP_P4_75445_38155248 | NC_021164.1    | Ca_kabuli_chr05 | 38155248                | GG                              | TT              | 1946852825               |
| SNP_P4_75448_38155432 | NC_021164.1    | Ca_kabuli_chr05 | 38155432                | GG                              | AA              | 1946852827               |
| SNP_P4_75449_38155438 | NC_021164.1    | Ca_kabuli_chr05 | 38155438                | AA                              | TT              | 1946852829               |
| SNP_P4_75450_38155490 | NC_021164.1    | Ca_kabuli_chr05 | 38155490                | TT                              | CC              | 1946852831               |
| SNP_P4_75452_38155794 | NC_021164.1    | Ca_kabuli_chr05 | 38155794                | CC                              | GG              | 1946852833               |
| SNP_P4_75453_38156260 | NC_021164.1    | Ca_kabuli_chr05 | 38156260                | TT                              | CC              | 1946852835               |
| SNP_P4_75454_38156354 | NC_021164.1    | Ca_kabuli_chr05 | 38156354                | AA                              | CC              | 1946852837               |
| SNP_P4_75455_38156558 | NC_021164.1    | Ca_kabuli_chr05 | 38156558                | AA                              | GG              | 1946852839               |
| SNP_P4_75456_38157048 | NC_021164.1    | Ca_kabuli_chr05 | 38157048                | AA                              | GG              | 1946852841               |
| SNP_P4_75457_38157055 | NC_021164.1    | Ca_kabuli_chr05 | 38157055                | GG                              | AA              | 1946852843               |
| SNP_P4_75458_38157063 | NC_021164.1    | Ca_kabuli_chr05 | 38157063                | TT                              | CC              | 1946852845               |

| SNPs IDs              | Chromosome IDs | Chromosomes     | Physical positions (bp) | CDC Frontier (Reference genome) | (ILWC46 & LPNB) | NCBI SNPdb Accession IDs |
|-----------------------|----------------|-----------------|-------------------------|---------------------------------|-----------------|--------------------------|
| SNP_P4_75459_38157566 | NC_021164.1    | Ca_kabuli_chr05 | 38157566                | TT                              | AA              | 1946852847               |
| SNP_P4_75460_38157659 | NC_021164.1    | Ca_kabuli_chr05 | 38157659                | AA                              | GG              | 1946852849               |
| SNP_P4_75461_38157806 | NC_021164.1    | Ca_kabuli_chr05 | 38157806                | TT                              | AA              | 1946852851               |
| SNP_P4_75462_38157813 | NC_021164.1    | Ca_kabuli_chr05 | 38157813                | AA                              | TT              | 1946852853               |
| SNP_P4_75463_38159380 | NC_021164.1    | Ca_kabuli_chr05 | 38159380                | CC                              | GG              | 1946852855               |
| SNP_P4_75464_38159394 | NC_021164.1    | Ca_kabuli_chr05 | 38159394                | AA                              | GG              | 1946852856               |
| SNP_P4_75465_38159481 | NC_021164.1    | Ca_kabuli_chr05 | 38159481                | GG                              | AA              | 1946852858               |
| SNP_P4_75466_38159637 | NC_021164.1    | Ca_kabuli_chr05 | 38159637                | AA                              | CC              | 1946852860               |
| SNP_P4_75467_38159777 | NC_021164.1    | Ca_kabuli_chr05 | 38159777                | AA                              | GG              | 1946852862               |
| SNP_P4_75468_38159784 | NC_021164.1    | Ca_kabuli_chr05 | 38159784                | TT                              | CC              | 1946852864               |
| SNP_P4_75469_38160507 | NC_021164.1    | Ca_kabuli_chr05 | 38160507                | AA                              | GG              | 1946852866               |
| SNP_P4_75470_38160549 | NC_021164.1    | Ca_kabuli_chr05 | 38160549                | AA                              | GG              | 1946852868               |
| SNP_P4_75471_38160560 | NC_021164.1    | Ca_kabuli_chr05 | 38160560                | AA                              | GG              | 1946852870               |
| SNP_P4_75472_38164940 | NC_021164.1    | Ca_kabuli_chr05 | 38164940                | AA                              | GG              | 1946852872               |
| SNP_P4_75473_38165057 | NC_021164.1    | Ca_kabuli_chr05 | 38165057                | GG                              | CC              | 1946852874               |
| SNP_P4_75475_38165088 | NC_021164.1    | Ca_kabuli_chr05 | 38165088                | AA                              | TT              | 1946852876               |
| SNP_P4_75476_38165099 | NC_021164.1    | Ca_kabuli_chr05 | 38165099                | CC                              | GG              | 1946852878               |
| SNP_P4_75477_38165688 | NC_021164.1    | Ca_kabuli_chr05 | 38165688                | TT                              | CC              | 1946852880               |
| SNP_P4_75478_38165690 | NC_021164.1    | Ca_kabuli_chr05 | 38165690                | TT                              | AA              | 1946852882               |
| SNP_P4_75479_38165702 | NC_021164.1    | Ca_kabuli_chr05 | 38165702                | CC                              | GG              | 1946852884               |
| SNP_P4_75480_38203496 | NC_021164.1    | Ca_kabuli_chr05 | 38203496                | TT                              | CC              | 1946852886               |
| SNP_P4_75481_38203526 | NC_021164.1    | Ca_kabuli_chr05 | 38203526                | AA                              | GG              | 1946852888               |
| SNP_P4_75482_38203541 | NC_021164.1    | Ca_kabuli_chr05 | 38203541                | GG                              | TT              | 1946852890               |
| SNP_P4_75483_38203732 | NC_021164.1    | Ca_kabuli_chr05 | 38203732                | TT                              | CC              | 1946852891               |
| SNP_P4_75484_38203733 | NC_021164.1    | Ca_kabuli_chr05 | 38203733                | TT                              | CC              | 1946852893               |
| SNP_P4_75485_38203786 | NC_021164.1    | Ca_kabuli_chr05 | 38203786                | GG                              | AA              | 1946852895               |
| SNP_P4_75486_38210165 | NC_021164.1    | Ca_kabuli_chr05 | 38210165                | TT                              | CC              | 1946852897               |
| SNP_P4_75487_38228592 | NC_021164.1    | Ca_kabuli_chr05 | 38228592                | TT                              | GG              | 1946852899               |
| SNP_P4_75488_38228918 | NC_021164.1    | Ca_kabuli_chr05 | 38228918                | TT                              | CC              | 1946852901               |
| SNP_P4_75489_38228930 | NC_021164.1    | Ca_kabuli_chr05 | 38228930                | TT                              | CC              | 1946852903               |
| SNP_P4_75490_38229012 | NC_021164.1    | Ca_kabuli_chr05 | 38229012                | TT                              | CC              | 1946852905               |
| SNP_P4_75492_38235664 | NC_021164.1    | Ca_kabuli_chr05 | 38235664                | GG                              | CC              | 1946852907               |
| SNP_P4_75494_38259315 | NC_021164.1    | Ca_kabuli_chr05 | 38259315                | CC                              | AA              | 1946852909               |
| SNP_P4_75495_38285467 | NC_021164.1    | Ca_kabuli_chr05 | 38285467                | TT                              | CC              | 1946852911               |
| SNP_P4_75496_38320729 | NC_021164.1    | Ca_kabuli_chr05 | 38320729                | AA                              | CC              | 1946852913               |
| SNP_P4_75497_38327204 | NC_021164.1    | Ca_kabuli_chr05 | 38327204                | GG                              | AA              | 1946852915               |
| SNP_P4_75498_38328973 | NC_021164.1    | Ca_kabuli_chr05 | 38328973                | CC                              | TT              | 1946852917               |
| SNP_P4_75499_38331673 | NC_021164.1    | Ca_kabuli_chr05 | 38331673                | GG                              | AA              | 1946852919               |
| SNP_P4_75500_38364208 | NC_021164.1    | Ca_kabuli_chr05 | 38364208                | TT                              | CC              | 1946852921               |
| SNP_P4_75502_38374351 | NC_021164.1    | Ca_kabuli_chr05 | 38374351                | AA                              | GG              | 1946852923               |
| SNP_P4_75503_38374353 | NC_021164.1    | Ca_kabuli_chr05 | 38374353                | AA                              | CC              | 1946852925               |
| SNP_P4_75504_38377510 | NC_021164.1    | Ca_kabuli_chr05 | 38377510                | TT                              | AA              | 1946852927               |

| SNPs IDs              | Chromosome IDs | Chromosomes     | Physical positions (bp) | CDC Frontier (Reference genome) | (ILWC46 & LPNB) | NCBI SNPdb Accession IDs |
|-----------------------|----------------|-----------------|-------------------------|---------------------------------|-----------------|--------------------------|
| SNP_P4_75506_38385872 | NC_021164.1    | Ca_kabuli_chr05 | 38385872                | TT                              | AA              | 1946852929               |
| SNP_P4_75507_38389973 | NC_021164.1    | Ca_kabuli_chr05 | 38389973                | GG                              | AA              | 1946852931               |
| SNP_P4_75508_38406010 | NC_021164.1    | Ca_kabuli_chr05 | 38406010                | AA                              | CC              | 1946852933               |
| SNP_P4_75509_38406995 | NC_021164.1    | Ca_kabuli_chr05 | 38406995                | CC                              | TT              | 1946852935               |
| SNP_P4_75512_38407290 | NC_021164.1    | Ca_kabuli_chr05 | 38407290                | GG                              | AA              | 1946852937               |
| SNP_P4_75513_38407302 | NC_021164.1    | Ca_kabuli_chr05 | 38407302                | AA                              | GG              | 1946852939               |
| SNP_P4_75514_38407316 | NC_021164.1    | Ca_kabuli_chr05 | 38407316                | CC                              | AA              | 1946852941               |
| SNP_P4_75515_38407331 | NC_021164.1    | Ca_kabuli_chr05 | 38407331                | GG                              | TT              | 1946852943               |
| SNP_P4_75516_38407349 | NC_021164.1    | Ca_kabuli_chr05 | 38407349                | TT                              | CC              | 1946852945               |
| SNP_P4_75517_38407362 | NC_021164.1    | Ca_kabuli_chr05 | 38407362                | AA                              | GG              | 1946852946               |
| SNP_P4_75518_38407397 | NC_021164.1    | Ca_kabuli_chr05 | 38407397                | TT                              | AA              | 1946852948               |
| SNP_P4_75519_38407399 | NC_021164.1    | Ca_kabuli_chr05 | 38407399                | GG                              | AA              | 1946852950               |
| SNP_P4_75520_38407420 | NC_021164.1    | Ca_kabuli_chr05 | 38407420                | GG                              | AA              | 1946852952               |
| SNP_P4_75521_38407428 | NC_021164.1    | Ca_kabuli_chr05 | 38407428                | TT                              | CC              | 1946852954               |
| SNP_P4_75522_38407439 | NC_021164.1    | Ca_kabuli_chr05 | 38407439                | GG                              | AA              | 1946852956               |
| SNP_P4_75523_38407532 | NC_021164.1    | Ca_kabuli_chr05 | 38407532                | CC                              | TT              | 1946852958               |
| SNP_P4_75524_38407581 | NC_021164.1    | Ca_kabuli_chr05 | 38407581                | AA                              | CC              | 1946852960               |
| SNP_P4_75525_38407630 | NC_021164.1    | Ca_kabuli_chr05 | 38407630                | AA                              | GG              | 1946852962               |
| SNP_P4_75526_38407631 | NC_021164.1    | Ca_kabuli_chr05 | 38407631                | GG                              | AA              | 1946852964               |
| SNP_P4_75527_38425532 | NC_021164.1    | Ca_kabuli_chr05 | 38425532                | CC                              | TT              | 1946852966               |
| SNP_P4_75528_38432466 | NC_021164.1    | Ca_kabuli_chr05 | 38432466                | TT                              | GG              | 1946852968               |
| SNP_P4_75529_38432585 | NC_021164.1    | Ca_kabuli_chr05 | 38432585                | CC                              | GG              | 1946852970               |
| SNP_P4_75530_38432627 | NC_021164.1    | Ca_kabuli_chr05 | 38432627                | TT                              | AA              | 1946852972               |
| SNP_P4_75531_38432763 | NC_021164.1    | Ca_kabuli_chr05 | 38432763                | TT                              | CC              | 1946852974               |
| SNP_P4_75532_38432881 | NC_021164.1    | Ca_kabuli_chr05 | 38432881                | AA                              | GG              | 1946852976               |
| SNP_P4_75533_38432936 | NC_021164.1    | Ca_kabuli_chr05 | 38432936                | AA                              | CC              | 1946852978               |
| SNP_P4_75534_38433089 | NC_021164.1    | Ca_kabuli_chr05 | 38433089                | AA                              | GG              | 1946852980               |
| SNP_P4_75535_38433195 | NC_021164.1    | Ca_kabuli_chr05 | 38433195                | AA                              | GG              | 1946852982               |
| SNP_P4_75536_38433296 | NC_021164.1    | Ca_kabuli_chr05 | 38433296                | TT                              | CC              | 1946852984               |
| SNP_P4_75537_38440681 | NC_021164.1    | Ca_kabuli_chr05 | 38440681                | CC                              | AA              | 1946852986               |
| SNP_P4_75538_38476431 | NC_021164.1    | Ca_kabuli_chr05 | 38476431                | GG                              | AA              | 1946852988               |
| SNP_P4_75539_38476468 | NC_021164.1    | Ca_kabuli_chr05 | 38476468                | TT                              | CC              | 1946852990               |
| SNP_P4_75540_38476480 | NC_021164.1    | Ca_kabuli_chr05 | 38476480                | TT                              | CC              | 1946852992               |
| SNP_P4_75541_38476492 | NC_021164.1    | Ca_kabuli_chr05 | 38476492                | AA                              | GG              | 1946852994               |
| SNP_P4_75542_38476563 | NC_021164.1    | Ca_kabuli_chr05 | 38476563                | GG                              | AA              | 1946852996               |
| SNP_P4_75543_38476621 | NC_021164.1    | Ca_kabuli_chr05 | 38476621                | GG                              | TT              | 1946852998               |
| SNP_P4_75544_38476789 | NC_021164.1    | Ca_kabuli_chr05 | 38476789                | AA                              | GG              | 1946853000               |
| SNP_P4_75545_38476801 | NC_021164.1    | Ca_kabuli_chr05 | 38476801                | TT                              | CC              | 1946853002               |
| SNP_P4_75546_38476869 | NC_021164.1    | Ca_kabuli_chr05 | 38476869                | AA                              | GG              | 1946853004               |
| SNP_P4_75547_38476879 | NC_021164.1    | Ca_kabuli_chr05 | 38476879                | TT                              | CC              | 1946853006               |
| SNP_P4_75548_38476894 | NC_021164.1    | Ca_kabuli_chr05 | 38476894                | TT                              | AA              | 1946853008               |
| SNP_P4_75549_38476895 | NC_021164.1    | Ca_kabuli_chr05 | 38476895                | CC                              | TT              | 1946853010               |

| SNPs IDs              | Chromosome IDs | Chromosomes     | Physical positions (bp) | CDC Frontier (Reference genome) | (ILWC46 & LPNB) | NCBI SNPdb Accession IDs |
|-----------------------|----------------|-----------------|-------------------------|---------------------------------|-----------------|--------------------------|
| SNP_P4_75550_38476934 | NC_021164.1    | Ca_kabuli_chr05 | 38476934                | AA                              | CC              | 1946853012               |
| SNP_P4_75551_38476935 | NC_021164.1    | Ca_kabuli_chr05 | 38476935                | TT                              | GG              | 1946853014               |
| SNP_P4_75552_38476989 | NC_021164.1    | Ca_kabuli_chr05 | 38476989                | AA                              | GG              | 1946853016               |
| SNP_P4_75553_38479617 | NC_021164.1    | Ca_kabuli_chr05 | 38479617                | GG                              | AA              | 1946853018               |
| SNP_P4_75554_38500285 | NC_021164.1    | Ca_kabuli_chr05 | 38500285                | TT                              | CC              | 1946853020               |
| SNP_P4_75555_38508026 | NC_021164.1    | Ca_kabuli_chr05 | 38508026                | AA                              | GG              | 1946853022               |
| SNP_P4_75556_38514049 | NC_021164.1    | Ca_kabuli_chr05 | 38514049                | GG                              | TT              | 1946853024               |
| SNP_P4_75557_38517472 | NC_021164.1    | Ca_kabuli_chr05 | 38517472                | TT                              | CC              | 1946853026               |
| SNP_P4_75558_38598619 | NC_021164.1    | Ca_kabuli_chr05 | 38598619                | TT                              | CC              | 1946853028               |
| SNP_P4_75559_38613576 | NC_021164.1    | Ca_kabuli_chr05 | 38613576                | TT                              | AA              | 1946853030               |
| SNP_P4_75560_38652326 | NC_021164.1    | Ca_kabuli_chr05 | 38652326                | AA                              | GG              | 1946853032               |
| SNP_P4_75561_38691223 | NC_021164.1    | Ca_kabuli_chr05 | 38691223                | GG                              | AA              | 1946853034               |
| SNP_P4_75562_38691273 | NC_021164.1    | Ca_kabuli_chr05 | 38691273                | GG                              | AA              | 1946853036               |
| SNP_P4_75566_38727876 | NC_021164.1    | Ca_kabuli_chr05 | 38727876                | AA                              | TT              | 1946853037               |
| SNP_P4_75567_38746885 | NC_021164.1    | Ca_kabuli_chr05 | 38746885                | TT                              | CC              | 1946853039               |
| SNP_P4_75568_38746886 | NC_021164.1    | Ca_kabuli_chr05 | 38746886                | CC                              | TT              | 1946853041               |
| SNP_P4_75569_38746928 | NC_021164.1    | Ca_kabuli_chr05 | 38746928                | TT                              | GG              | 1946853043               |
| SNP_P4_75570_38754040 | NC_021164.1    | Ca_kabuli_chr05 | 38754040                | CC                              | TT              | 1946853045               |
| SNP_P4_75573_38765085 | NC_021164.1    | Ca_kabuli_chr05 | 38765085                | AA                              | CC              | 1946853047               |
| SNP_P4_75574_38779546 | NC_021164.1    | Ca_kabuli_chr05 | 38779546                | CC                              | TT              | 1946853049               |
| SNP_P4_75575_38779550 | NC_021164.1    | Ca_kabuli_chr05 | 38779550                | AA                              | GG              | 1946853051               |
| SNP_P4_75576_38815279 | NC_021164.1    | Ca_kabuli_chr05 | 38815279                | TT                              | GG              | 1946853053               |
| SNP_P4_75577_38815282 | NC_021164.1    | Ca_kabuli_chr05 | 38815282                | GG                              | CC              | 1946853055               |
| SNP_P4_75578_38822187 | NC_021164.1    | Ca_kabuli_chr05 | 38822187                | CC                              | TT              | 1946853057               |
| SNP_P4_75580_38848828 | NC_021164.1    | Ca_kabuli_chr05 | 38848828                | TT                              | CC              | 1946853059               |
| SNP_P4_75581_38849197 | NC_021164.1    | Ca_kabuli_chr05 | 38849197                | AA                              | GG              | 1946853061               |
| SNP_P4_75583_38849207 | NC_021164.1    | Ca_kabuli_chr05 | 38849207                | GG                              | TT              | 1946853063               |
| SNP_P4_75584_38849210 | NC_021164.1    | Ca_kabuli_chr05 | 38849210                | AA                              | GG              | 1946853065               |
| SNP_P4_75585_38853739 | NC_021164.1    | Ca_kabuli_chr05 | 38853739                | TT                              | CC              | 1946853067               |
| SNP_P4_75588_38891162 | NC_021164.1    | Ca_kabuli_chr05 | 38891162                | TT                              | CC              | 1946853069               |
| SNP_P4_75591_38914319 | NC_021164.1    | Ca_kabuli_chr05 | 38914319                | AA                              | TT              | 1946853071               |
| SNP_P4_75592_38943094 | NC_021164.1    | Ca_kabuli_chr05 | 38943094                | AA                              | GG              | 1946853073               |
| SNP_P4_75593_38978952 | NC_021164.1    | Ca_kabuli_chr05 | 38978952                | TT                              | CC              | 1946853075               |
| SNP_P4_75594_38980212 | NC_021164.1    | Ca_kabuli_chr05 | 38980212                | TT                              | AA              | 1946853077               |
| SNP_P4_75595_38992422 | NC_021164.1    | Ca_kabuli_chr05 | 38992422                | AA                              | GG              | 1946853078               |
| SNP_P4_75596_38992426 | NC_021164.1    | Ca_kabuli_chr05 | 38992426                | TT                              | CC              | 1946853080               |
| SNP_P4_75597_38996220 | NC_021164.1    | Ca_kabuli_chr05 | 38996220                | TT                              | AA              | 1946853082               |
| SNP_P4_75598_38996716 | NC_021164.1    | Ca_kabuli_chr05 | 38996716                | CC                              | TT              | 1946853084               |
| SNP_P4_75600_39040491 | NC_021164.1    | Ca_kabuli_chr05 | 39040491                | TT                              | CC              | 1946853086               |
| SNP_P4_75601_39055630 | NC_021164.1    | Ca_kabuli_chr05 | 39055630                | AA                              | GG              | 1946853088               |
| SNP_P4_75602_39055871 | NC_021164.1    | Ca_kabuli_chr05 | 39055871                | TT                              | CC              | 1946853090               |
| SNP_P4_75603_39055940 | NC_021164.1    | Ca_kabuli_chr05 | 39055940                | CC                              | TT              | 1946853092               |

| SNPs IDs              | Chromosome IDs | Chromosomes     | Physical positions (bp) | CDC Frontier (Reference genome) | (ILWC46 & LPNB) | NCBI SNPdb Accession IDs |
|-----------------------|----------------|-----------------|-------------------------|---------------------------------|-----------------|--------------------------|
| SNP_P4_75605_39056208 | NC_021164.1    | Ca_kabuli_chr05 | 39056208                | CC                              | GG              | 1946853094               |
| SNP_P4_75606_39056299 | NC_021164.1    | Ca_kabuli_chr05 | 39056299                | AA                              | GG              | 1946853096               |
| SNP_P4_75607_39056326 | NC_021164.1    | Ca_kabuli_chr05 | 39056326                | CC                              | TT              | 1946853098               |
| SNP_P4_75608_39068532 | NC_021164.1    | Ca_kabuli_chr05 | 39068532                | CC                              | TT              | 1946853100               |
| SNP_P4_75609_39091056 | NC_021164.1    | Ca_kabuli_chr05 | 39091056                | GG                              | CC              | 1946853102               |
| SNP_P4_75611_39118865 | NC_021164.1    | Ca_kabuli_chr05 | 39118865                | AA                              | CC              | 1946853104               |
| SNP_P4_75612_39118874 | NC_021164.1    | Ca_kabuli_chr05 | 39118874                | TT                              | CC              | 1946853106               |
| SNP_P4_75613_39118904 | NC_021164.1    | Ca_kabuli_chr05 | 39118904                | AA                              | CC              | 1946853108               |
| SNP_P4_75614_39150847 | NC_021164.1    | Ca_kabuli_chr05 | 39150847                | TT                              | CC              | 1946853110               |
| SNP_P4_75616_39166030 | NC_021164.1    | Ca_kabuli_chr05 | 39166030                | AA                              | CC              | 1946853112               |
| SNP_P4_75617_39219048 | NC_021164.1    | Ca_kabuli_chr05 | 39219048                | GG                              | AA              | 1946853114               |
| SNP_P4_75618_39219072 | NC_021164.1    | Ca_kabuli_chr05 | 39219072                | GG                              | TT              | 1946853116               |
| SNP_P4_75620_39221975 | NC_021164.1    | Ca_kabuli_chr05 | 39221975                | AA                              | GG              | 1946853118               |
| SNP_P4_75621_39252590 | NC_021164.1    | Ca_kabuli_chr05 | 39252590                | TT                              | CC              | 1946853121               |
| SNP_P4_75622_39287696 | NC_021164.1    | Ca_kabuli_chr05 | 39287696                | CC                              | GG              | 1946853123               |
| SNP_P4_75623_39292578 | NC_021164.1    | Ca_kabuli_chr05 | 39292578                | AA                              | GG              | 1946853125               |
| SNP_P4_75624_39326699 | NC_021164.1    | Ca_kabuli_chr05 | 39326699                | AA                              | CC              | 1946853127               |
| SNP_P4_75625_39327110 | NC_021164.1    | Ca_kabuli_chr05 | 39327110                | AA                              | CC              | 1946853129               |
| SNP_P4_75626_39327116 | NC_021164.1    | Ca_kabuli_chr05 | 39327116                | CC                              | TT              | 1946853131               |
| SNP_P4_75627_39327154 | NC_021164.1    | Ca_kabuli_chr05 | 39327154                | AA                              | GG              | 1946853133               |
| SNP_P4_75628_39327180 | NC_021164.1    | Ca_kabuli_chr05 | 39327180                | AA                              | GG              | 1946853135               |
| SNP_P4_75629_39328725 | NC_021164.1    | Ca_kabuli_chr05 | 39328725                | AA                              | GG              | 1946853137               |
| SNP_P4_75630_39328925 | NC_021164.1    | Ca_kabuli_chr05 | 39328925                | GG                              | AA              | 1946853139               |
| SNP_P4_75631_39335802 | NC_021164.1    | Ca_kabuli_chr05 | 39335802                | CC                              | TT              | 1946853141               |
| SNP_P4_75632_39335879 | NC_021164.1    | Ca_kabuli_chr05 | 39335879                | GG                              | AA              | 1946853143               |
| SNP_P4_75633_39358245 | NC_021164.1    | Ca_kabuli_chr05 | 39358245                | TT                              | GG              | 1946853145               |
| SNP_P4_75634_39358257 | NC_021164.1    | Ca_kabuli_chr05 | 39358257                | TT                              | AA              | 1946853147               |
| SNP_P4_75635_39360190 | NC_021164.1    | Ca_kabuli_chr05 | 39360190                | AA                              | GG              | 1946853149               |
| SNP_P4_75636_39360699 | NC_021164.1    | Ca_kabuli_chr05 | 39360699                | CC                              | TT              | 1946853151               |
| SNP_P4_75637_39366062 | NC_021164.1    | Ca_kabuli_chr05 | 39366062                | CC                              | TT              | 1946853153               |
| SNP_P4_75638_39368967 | NC_021164.1    | Ca_kabuli_chr05 | 39368967                | TT                              | AA              | 1946853155               |
| SNP_P4_75639_39369661 | NC_021164.1    | Ca_kabuli_chr05 | 39369661                | GG                              | AA              | 1946853157               |
| SNP_P4_75640_39370568 | NC_021164.1    | Ca_kabuli_chr05 | 39370568                | TT                              | AA              | 1946853159               |
| SNP_P4_75641_39391131 | NC_021164.1    | Ca_kabuli_chr05 | 39391131                | TT                              | CC              | 1946853161               |
| SNP_P4_75642_39391140 | NC_021164.1    | Ca_kabuli_chr05 | 39391140                | TT                              | CC              | 1946853163               |
| SNP_P4_75643_39392013 | NC_021164.1    | Ca_kabuli_chr05 | 39392013                | TT                              | CC              | 1946853165               |
| SNP_P4_75644_39392039 | NC_021164.1    | Ca_kabuli_chr05 | 39392039                | CC                              | TT              | 1946853167               |
| SNP_P4_75645_39393225 | NC_021164.1    | Ca_kabuli_chr05 | 39393225                | GG                              | AA              | 1946853169               |
| SNP_P4_75646_39399486 | NC_021164.1    | Ca_kabuli_chr05 | 39399486                | CC                              | TT              | 1946853171               |
| SNP_P4_75649_39453199 | NC_021164.1    | Ca_kabuli_chr05 | 39453199                | GG                              | AA              | 1946853173               |
| SNP_P4_75650_39462670 | NC_021164.1    | Ca_kabuli_chr05 | 39462670                | TT                              | GG              | 1946853175               |
| SNP_P4_75651_39468566 | NC_021164.1    | Ca_kabuli_chr05 | 39468566                | CC                              | GG              | 1946853177               |



| SNPs IDs              | Chromosome IDs | Chromosomes     | Physical positions (bp) | CDC Frontier (Reference genome) | (ILWC46 & LPNB) | NCBI SNPdb Accession IDs |
|-----------------------|----------------|-----------------|-------------------------|---------------------------------|-----------------|--------------------------|
| SNP_P4_75652_39472809 | NC_021164.1    | Ca_kabuli_chr05 | 39472809                | AA                              | CC              | 1946853179               |
| SNP_P4_75653_39472812 | NC_021164.1    | Ca_kabuli_chr05 | 39472812                | AA                              | CC              | 1946853181               |
| SNP_P4_75654_39476932 | NC_021164.1    | Ca_kabuli_chr05 | 39476932                | AA                              | TT              | 1946853183               |
| SNP_P4_75656_39489155 | NC_021164.1    | Ca_kabuli_chr05 | 39489155                | GG                              | AA              | 1946853185               |
| SNP_P4_75657_39489160 | NC_021164.1    | Ca_kabuli_chr05 | 39489160                | AA                              | CC              | 1946853187               |
| SNP_P4_75658_39516572 | NC_021164.1    | Ca_kabuli_chr05 | 39516572                | GG                              | AA              | 1946853189               |
| SNP_P4_75659_39525289 | NC_021164.1    | Ca_kabuli_chr05 | 39525289                | CC                              | TT              | 1946853190               |
| SNP_P4_75660_39525519 | NC_021164.1    | Ca_kabuli_chr05 | 39525519                | CC                              | TT              | 1946853192               |
| SNP_P4_75661_39530192 | NC_021164.1    | Ca_kabuli_chr05 | 39530192                | AA                              | GG              | 1946853194               |
| SNP_P4_75662_39530200 | NC_021164.1    | Ca_kabuli_chr05 | 39530200                | GG                              | CC              | 1946853197               |
| SNP_P4_75663_39530251 | NC_021164.1    | Ca_kabuli_chr05 | 39530251                | AA                              | CC              | 1946853199               |
| SNP_P4_75664_39530323 | NC_021164.1    | Ca_kabuli_chr05 | 39530323                | TT                              | CC              | 1946853201               |
| SNP_P4_75665_39530658 | NC_021164.1    | Ca_kabuli_chr05 | 39530658                | TT                              | GG              | 1946853203               |
| SNP_P4_75666_39530670 | NC_021164.1    | Ca_kabuli_chr05 | 39530670                | TT                              | CC              | 1946853205               |
| SNP_P4_75668_39537213 | NC_021164.1    | Ca_kabuli_chr05 | 39537213                | AA                              | CC              | 1946853207               |
| SNP_P4_75670_39537649 | NC_021164.1    | Ca_kabuli_chr05 | 39537649                | GG                              | AA              | 1946853209               |
| SNP_P4_75671_39544932 | NC_021164.1    | Ca_kabuli_chr05 | 39544932                | TT                              | CC              | 1946853211               |
| SNP_P4_75672_39552598 | NC_021164.1    | Ca_kabuli_chr05 | 39552598                | GG                              | AA              | 1946853213               |
| SNP_P4_75673_39553355 | NC_021164.1    | Ca_kabuli_chr05 | 39553355                | GG                              | AA              | 1946853215               |
| SNP_P4_75674_39553496 | NC_021164.1    | Ca_kabuli_chr05 | 39553496                | TT                              | CC              | 1946853217               |
| SNP_P4_75675_39553499 | NC_021164.1    | Ca_kabuli_chr05 | 39553499                | TT                              | AA              | 1946853219               |
| SNP_P4_75678_39576160 | NC_021164.1    | Ca_kabuli_chr05 | 39576160                | AA                              | GG              | 1946853221               |
| SNP_P4_75679_39576384 | NC_021164.1    | Ca_kabuli_chr05 | 39576384                | AA                              | GG              | 1946853223               |
| SNP_P4_75680_39576445 | NC_021164.1    | Ca_kabuli_chr05 | 39576445                | AA                              | GG              | 1946853225               |
| SNP_P4_75681_39642862 | NC_021164.1    | Ca_kabuli_chr05 | 39642862                | CC                              | TT              | 1946853227               |
| SNP_P4_75682_39675794 | NC_021164.1    | Ca_kabuli_chr05 | 39675794                | CC                              | TT              | 1946853229               |
| SNP_P4_75683_39706631 | NC_021164.1    | Ca_kabuli_chr05 | 39706631                | CC                              | TT              | 1946853230               |
| SNP_P4_75684_39707201 | NC_021164.1    | Ca_kabuli_chr05 | 39707201                | AA                              | GG              | 1946853232               |
| SNP_P4_75685_39720969 | NC_021164.1    | Ca_kabuli_chr05 | 39720969                | GG                              | AA              | 1946853234               |
| SNP_P4_75686_39724546 | NC_021164.1    | Ca_kabuli_chr05 | 39724546                | GG                              | AA              | 1946853236               |
| SNP_P4_75687_39735604 | NC_021164.1    | Ca_kabuli_chr05 | 39735604                | CC                              | TT              | 1946853238               |
| SNP_P4_75688_39741542 | NC_021164.1    | Ca_kabuli_chr05 | 39741542                | GG                              | AA              | 1946853240               |
| SNP_P4_75690_39748003 | NC_021164.1    | Ca_kabuli_chr05 | 39748003                | CC                              | GG              | 1946853242               |
| SNP_P4_75691_39748854 | NC_021164.1    | Ca_kabuli_chr05 | 39748854                | GG                              | AA              | 1946853244               |
| SNP_P4_75693_39777509 | NC_021164.1    | Ca_kabuli_chr05 | 39777509                | TT                              | CC              | 1946853246               |
| SNP_P4_75694_39778842 | NC_021164.1    | Ca_kabuli_chr05 | 39778842                | CC                              | TT              | 1946853248               |
| SNP_P4_75696_39800613 | NC_021164.1    | Ca_kabuli_chr05 | 39800613                | TT                              | CC              | 1946853250               |
| SNP_P4_75698_39809162 | NC_021164.1    | Ca_kabuli_chr05 | 39809162                | AA                              | GG              | 1946853252               |
| SNP_P4_75699_39809820 | NC_021164.1    | Ca_kabuli_chr05 | 39809820                | TT                              | CC              | 1946853254               |
| SNP_P4_75700_39815001 | NC_021164.1    | Ca_kabuli_chr05 | 39815001                | TT                              | CC              | 1946853256               |
| SNP_P4_75701_39831856 | NC_021164.1    | Ca_kabuli_chr05 | 39831856                | GG                              | TT              | 1946853258               |
| SNP_P4_75702_39835285 | NC_021164.1    | Ca_kabuli_chr05 | 39835285                | AA                              | TT              | 1946853260               |

| SNPs IDs              | Chromosome IDs | Chromosomes     | Physical positions (bp) | CDC Frontier (Reference genome) | (ILWC46 & LPNB) | NCBI SNPdb Accession IDs |
|-----------------------|----------------|-----------------|-------------------------|---------------------------------|-----------------|--------------------------|
| SNP_P4_75703_39844274 | NC_021164.1    | Ca_kabuli_chr05 | 39844274                | TT                              | CC              | 1946853262               |
| SNP_P4_75704_39844278 | NC_021164.1    | Ca_kabuli_chr05 | 39844278                | AA                              | GG              | 1946853264               |
| SNP_P4_75705_39854460 | NC_021164.1    | Ca_kabuli_chr05 | 39854460                | CC                              | AA              | 1946853266               |
| SNP_P4_75706_39856720 | NC_021164.1    | Ca_kabuli_chr05 | 39856720                | AA                              | CC              | 1946853268               |
| SNP_P4_75707_39860428 | NC_021164.1    | Ca_kabuli_chr05 | 39860428                | AA                              | GG              | 1946853270               |
| SNP_P4_75708_39868162 | NC_021164.1    | Ca_kabuli_chr05 | 39868162                | CC                              | TT              | 1946853272               |
| SNP_P4_75710_39874912 | NC_021164.1    | Ca_kabuli_chr05 | 39874912                | AA                              | GG              | 1946853274               |
| SNP_P4_75711_39884479 | NC_021164.1    | Ca_kabuli_chr05 | 39884479                | AA                              | GG              | 1946853276               |
| SNP_P4_75712_39915384 | NC_021164.1    | Ca_kabuli_chr05 | 39915384                | AA                              | TT              | 1946853278               |
| SNP_P4_75713_39918059 | NC_021164.1    | Ca_kabuli_chr05 | 39918059                | CC                              | AA              | 1946853280               |
| SNP_P4_75714_39919266 | NC_021164.1    | Ca_kabuli_chr05 | 39919266                | GG                              | AA              | 1946853282               |
| SNP_P4_75716_39963301 | NC_021164.1    | Ca_kabuli_chr05 | 39963301                | TT                              | CC              | 1946853284               |
| SNP_P4_75717_39963303 | NC_021164.1    | Ca_kabuli_chr05 | 39963303                | TT                              | GG              | 1946853286               |
| SNP_P4_75718_39967683 | NC_021164.1    | Ca_kabuli_chr05 | 39967683                | AA                              | TT              | 1946853288               |
| SNP_P4_75720_39994365 | NC_021164.1    | Ca_kabuli_chr05 | 39994365                | CC                              | TT              | 1946853290               |
| SNP_P4_75721_40005187 | NC_021164.1    | Ca_kabuli_chr05 | 40005187                | CC                              | TT              | 1946853292               |
| SNP_P4_75722_40034041 | NC_021164.1    | Ca_kabuli_chr05 | 40034041                | CC                              | AA              | 1946853294               |
| SNP_P4_75723_40053325 | NC_021164.1    | Ca_kabuli_chr05 | 40053325                | AA                              | GG              | 1946853296               |
| SNP_P4_75724_40057624 | NC_021164.1    | Ca_kabuli_chr05 | 40057624                | AA                              | TT              | 1946853298               |
| SNP_P4_75725_40057933 | NC_021164.1    | Ca_kabuli_chr05 | 40057933                | TT                              | GG              | 1946853300               |
| SNP_P4_75726_40063078 | NC_021164.1    | Ca_kabuli_chr05 | 40063078                | AA                              | CC              | 1946853301               |
| SNP_P4_75727_40090170 | NC_021164.1    | Ca_kabuli_chr05 | 40090170                | GG                              | CC              | 1946853304               |
| SNP_P4_75728_40101472 | NC_021164.1    | Ca_kabuli_chr05 | 40101472                | TT                              | AA              | 1946853306               |
| SNP_P4_75730_40206846 | NC_021164.1    | Ca_kabuli_chr05 | 40206846                | CC                              | TT              | 1946853307               |
| SNP_P4_75731_40232232 | NC_021164.1    | Ca_kabuli_chr05 | 40232232                | CC                              | TT              | 1946853309               |
| SNP_P4_75732_40256857 | NC_021164.1    | Ca_kabuli_chr05 | 40256857                | AA                              | GG              | 1946853311               |
| SNP_P4_75734_40264780 | NC_021164.1    | Ca_kabuli_chr05 | 40264780                | AA                              | GG              | 1946853313               |
| SNP_P4_75735_40264805 | NC_021164.1    | Ca_kabuli_chr05 | 40264805                | CC                              | AA              | 1946853315               |
| SNP_P4_75736_40270707 | NC_021164.1    | Ca_kabuli_chr05 | 40270707                | GG                              | AA              | 1946853317               |
| SNP_P4_75738_40308874 | NC_021164.1    | Ca_kabuli_chr05 | 40308874                | TT                              | CC              | 1946853319               |
| SNP_P4_75739_40308894 | NC_021164.1    | Ca_kabuli_chr05 | 40308894                | TT                              | CC              | 1946853321               |
| SNP_P4_75740_40308896 | NC_021164.1    | Ca_kabuli_chr05 | 40308896                | GG                              | AA              | 1946853323               |
| SNP_P4_75741_40308906 | NC_021164.1    | Ca_kabuli_chr05 | 40308906                | TT                              | CC              | 1946853325               |
| SNP_P4_75742_40308947 | NC_021164.1    | Ca_kabuli_chr05 | 40308947                | TT                              | CC              | 1946853327               |
| SNP_P4_75743_40308948 | NC_021164.1    | Ca_kabuli_chr05 | 40308948                | TT                              | CC              | 1946853329               |
| SNP_P4_75744_40308989 | NC_021164.1    | Ca_kabuli_chr05 | 40308989                | AA                              | GG              | 1946853331               |
| SNP_P4_75746_40319811 | NC_021164.1    | Ca_kabuli_chr05 | 40319811                | TT                              | AA              | 1946853333               |
| SNP_P4_75747_40328636 | NC_021164.1    | Ca_kabuli_chr05 | 40328636                | AA                              | TT              | 1946853334               |
| SNP_P4_75748_40330457 | NC_021164.1    | Ca_kabuli_chr05 | 40330457                | AA                              | GG              | 1946853336               |
| SNP_P4_75749_40330533 | NC_021164.1    | Ca_kabuli_chr05 | 40330533                | GG                              | AA              | 1946853339               |
| SNP_P4_75750_40331738 | NC_021164.1    | Ca_kabuli_chr05 | 40331738                | GG                              | AA              | 1946853341               |
| SNP_P4_75751_40332055 | NC_021164.1    | Ca_kabuli_chr05 | 40332055                | AA                              | CC              | 1946853343               |

| SNPs IDs              | Chromosome IDs | Chromosomes     | Physical positions (bp) | CDC Frontier (Reference genome) | (ILWC46 & LPNB) | NCBI SNPdb Accession IDs |
|-----------------------|----------------|-----------------|-------------------------|---------------------------------|-----------------|--------------------------|
| SNP_P4_75752_40332092 | NC_021164.1    | Ca_kabuli_chr05 | 40332092                | AA                              | GG              | 1946853345               |
| SNP_P4_75753_40332104 | NC_021164.1    | Ca_kabuli_chr05 | 40332104                | AA                              | GG              | 1946853347               |
| SNP_P4_75754_40332106 | NC_021164.1    | Ca_kabuli_chr05 | 40332106                | AA                              | CC              | 1946853349               |
| SNP_P4_75755_40332120 | NC_021164.1    | Ca_kabuli_chr05 | 40332120                | TT                              | GG              | 1946853351               |
| SNP_P4_75756_40332125 | NC_021164.1    | Ca_kabuli_chr05 | 40332125                | TT                              | CC              | 1946853353               |
| SNP_P4_75757_40332503 | NC_021164.1    | Ca_kabuli_chr05 | 40332503                | TT                              | CC              | 1946853355               |
| SNP_P4_75758_40337055 | NC_021164.1    | Ca_kabuli_chr05 | 40337055                | CC                              | TT              | 1946853357               |
| SNP_P4_75759_40339166 | NC_021164.1    | Ca_kabuli_chr05 | 40339166                | TT                              | CC              | 1946853359               |
| SNP_P4_75760_40350101 | NC_021164.1    | Ca_kabuli_chr05 | 40350101                | TT                              | CC              | 1946853361               |
| SNP_P4_75761_40355725 | NC_021164.1    | Ca_kabuli_chr05 | 40355725                | CC                              | TT              | 1946853363               |
| SNP_P4_75763_40361845 | NC_021164.1    | Ca_kabuli_chr05 | 40361845                | AA                              | GG              | 1946853365               |
| SNP_P4_75765_40417423 | NC_021164.1    | Ca_kabuli_chr05 | 40417423                | AA                              | CC              | 1946853367               |
| SNP_P4_75767_40419139 | NC_021164.1    | Ca_kabuli_chr05 | 40419139                | CC                              | TT              | 1946853369               |
| SNP_P4_75769_40488618 | NC_021164.1    | Ca_kabuli_chr05 | 40488618                | CC                              | AA              | 1946853371               |
| SNP_P4_75770_40511733 | NC_021164.1    | Ca_kabuli_chr05 | 40511733                | CC                              | TT              | 1946853373               |
| SNP_P4_75773_40512651 | NC_021164.1    | Ca_kabuli_chr05 | 40512651                | AA                              | GG              | 1946853375               |
| SNP_P4_75774_40512655 | NC_021164.1    | Ca_kabuli_chr05 | 40512655                | TT                              | CC              | 1946853377               |
| SNP_P4_75776_40588196 | NC_021164.1    | Ca_kabuli_chr05 | 40588196                | CC                              | TT              | 1946853380               |
| SNP_P4_75777_40588315 | NC_021164.1    | Ca_kabuli_chr05 | 40588315                | GG                              | AA              | 1946853382               |
| SNP_P4_75778_40600636 | NC_021164.1    | Ca_kabuli_chr05 | 40600636                | AA                              | GG              | 1946853384               |
| SNP_P4_75779_40600651 | NC_021164.1    | Ca_kabuli_chr05 | 40600651                | TT                              | CC              | 1946853386               |
| SNP_P4_75780_40600678 | NC_021164.1    | Ca_kabuli_chr05 | 40600678                | TT                              | CC              | 1946853388               |
| SNP_P4_75781_40601053 | NC_021164.1    | Ca_kabuli_chr05 | 40601053                | TT                              | CC              | 1946853390               |
| SNP_P4_75782_40604063 | NC_021164.1    | Ca_kabuli_chr05 | 40604063                | GG                              | AA              | 1946853392               |
| SNP_P4_75783_40604084 | NC_021164.1    | Ca_kabuli_chr05 | 40604084                | AA                              | GG              | 1946853393               |
| SNP_P4_75784_40604086 | NC_021164.1    | Ca_kabuli_chr05 | 40604086                | CC                              | GG              | 1946853394               |
| SNP_P4_75785_40604093 | NC_021164.1    | Ca_kabuli_chr05 | 40604093                | AA                              | GG              | 1946853395               |
| SNP_P4_75786_40604098 | NC_021164.1    | Ca_kabuli_chr05 | 40604098                | TT                              | AA              | 1946853396               |
| SNP_P4_75789_40621176 | NC_021164.1    | Ca_kabuli_chr05 | 40621176                | CC                              | TT              | 1946853397               |
| SNP_P4_75790_40621181 | NC_021164.1    | Ca_kabuli_chr05 | 40621181                | TT                              | GG              | 1946853398               |
| SNP_P4_75791_40622102 | NC_021164.1    | Ca_kabuli_chr05 | 40622102                | AA                              | GG              | 1946853399               |
| SNP_P4_75792_40655503 | NC_021164.1    | Ca_kabuli_chr05 | 40655503                | CC                              | TT              | 1946853400               |
| SNP_P4_75793_40678876 | NC_021164.1    | Ca_kabuli_chr05 | 40678876                | CC                              | AA              | 1946853401               |
| SNP_P4_75794_40679031 | NC_021164.1    | Ca_kabuli_chr05 | 40679031                | GG                              | AA              | 1946853403               |
| SNP_P4_75796_40693966 | NC_021164.1    | Ca_kabuli_chr05 | 40693966                | CC                              | TT              | 1946853405               |
| SNP_P4_75798_40758814 | NC_021164.1    | Ca_kabuli_chr05 | 40758814                | GG                              | AA              | 1946853407               |
| SNP_P4_75799_40780636 | NC_021164.1    | Ca_kabuli_chr05 | 40780636                | TT                              | CC              | 1946853409               |
| SNP_P4_75802_40819772 | NC_021164.1    | Ca_kabuli_chr05 | 40819772                | TT                              | CC              | 1946853411               |
| SNP_P4_75803_40821108 | NC_021164.1    | Ca_kabuli_chr05 | 40821108                | TT                              | GG              | 1946853414               |
| SNP_P4_75804_40830148 | NC_021164.1    | Ca_kabuli_chr05 | 40830148                | TT                              | CC              | 1946853416               |
| SNP_P4_75805_40830163 | NC_021164.1    | Ca_kabuli_chr05 | 40830163                | AA                              | GG              | 1946853418               |
| SNP_P4_75806_40830167 | NC_021164.1    | Ca_kabuli_chr05 | 40830167                | GG                              | AA              | 1946853420               |

| SNPs IDs              | Chromosome IDs | Chromosomes     | Physical positions (bp) | CDC Frontier (Reference genome) | (ILWC46 & LPNB) | NCBI SNPdb Accession IDs |
|-----------------------|----------------|-----------------|-------------------------|---------------------------------|-----------------|--------------------------|
| SNP_P4_75807_40830176 | NC_021164.1    | Ca_kabuli_chr05 | 40830176                | AA                              | GG              | 1946853422               |
| SNP_P4_75808_40835923 | NC_021164.1    | Ca_kabuli_chr05 | 40835923                | AA                              | GG              | 1946853424               |
| SNP_P4_75809_40835929 | NC_021164.1    | Ca_kabuli_chr05 | 40835929                | AA                              | CC              | 1946853426               |
| SNP_P4_75810_40854773 | NC_021164.1    | Ca_kabuli_chr05 | 40854773                | TT                              | AA              | 1946853428               |
| SNP_P4_75811_40858034 | NC_021164.1    | Ca_kabuli_chr05 | 40858034                | GG                              | AA              | 1946853430               |
| SNP_P4_75812_40858046 | NC_021164.1    | Ca_kabuli_chr05 | 40858046                | AA                              | GG              | 1946853432               |
| SNP_P4_75813_40858054 | NC_021164.1    | Ca_kabuli_chr05 | 40858054                | GG                              | AA              | 1946853434               |
| SNP_P4_75814_40858055 | NC_021164.1    | Ca_kabuli_chr05 | 40858055                | TT                              | AA              | 1946853436               |
| SNP_P4_75815_40858062 | NC_021164.1    | Ca_kabuli_chr05 | 40858062                | AA                              | CC              | 1946853438               |
| SNP_P4_75816_40858166 | NC_021164.1    | Ca_kabuli_chr05 | 40858166                | AA                              | TT              | 1946853440               |
| SNP_P4_75818_40904835 | NC_021164.1    | Ca_kabuli_chr05 | 40904835                | TT                              | AA              | 1946853442               |
| SNP_P4_75819_40907708 | NC_021164.1    | Ca_kabuli_chr05 | 40907708                | AA                              | TT              | 1946853444               |
| SNP_P4_75820_40907709 | NC_021164.1    | Ca_kabuli_chr05 | 40907709                | AA                              | CC              | 1946853446               |
| SNP_P4_75821_40917638 | NC_021164.1    | Ca_kabuli_chr05 | 40917638                | TT                              | AA              | 1946853448               |
| SNP_P4_75822_40946431 | NC_021164.1    | Ca_kabuli_chr05 | 40946431                | AA                              | TT              | 1946853450               |
| SNP_P4_75823_40946434 | NC_021164.1    | Ca_kabuli_chr05 | 40946434                | AA                              | TT              | 1946853452               |
| SNP_P4_75824_40946437 | NC_021164.1    | Ca_kabuli_chr05 | 40946437                | AA                              | TT              | 1946853454               |
| SNP_P4_75825_40951213 | NC_021164.1    | Ca_kabuli_chr05 | 40951213                | AA                              | GG              | 1946853456               |
| SNP_P4_75826_40973722 | NC_021164.1    | Ca_kabuli_chr05 | 40973722                | AA                              | TT              | 1946853458               |
| SNP_P4_75827_40991573 | NC_021164.1    | Ca_kabuli_chr05 | 40991573                | AA                              | TT              | 1946853460               |
| SNP_P4_75829_41164540 | NC_021164.1    | Ca_kabuli_chr05 | 41164540                | AA                              | TT              | 1946853462               |
| SNP_P4_75830_41166691 | NC_021164.1    | Ca_kabuli_chr05 | 41166691                | GG                              | AA              | 1946853464               |
| SNP_P4_75831_41173893 | NC_021164.1    | Ca_kabuli_chr05 | 41173893                | GG                              | CC              | 1946853466               |
| SNP_P4_75832_41186997 | NC_021164.1    | Ca_kabuli_chr05 | 41186997                | TT                              | CC              | 1946853468               |
| SNP_P4_75833_41190940 | NC_021164.1    | Ca_kabuli_chr05 | 41190940                | AA                              | CC              | 1946853470               |
| SNP_P4_75834_41190962 | NC_021164.1    | Ca_kabuli_chr05 | 41190962                | AA                              | TT              | 1946853472               |
| SNP_P4_75835_41191004 | NC_021164.1    | Ca_kabuli_chr05 | 41191004                | CC                              | TT              | 1946853474               |
| SNP_P4_75836_41191055 | NC_021164.1    | Ca_kabuli_chr05 | 41191055                | GG                              | TT              | 1946853476               |
| SNP_P4_75837_41191126 | NC_021164.1    | Ca_kabuli_chr05 | 41191126                | GG                              | AA              | 1946853478               |
| SNP_P4_75838_41191129 | NC_021164.1    | Ca_kabuli_chr05 | 41191129                | AA                              | GG              | 1946853480               |
| SNP_P4_75839_41191386 | NC_021164.1    | Ca_kabuli_chr05 | 41191386                | GG                              | TT              | 1946853482               |
| SNP_P4_75842_41257481 | NC_021164.1    | Ca_kabuli_chr05 | 41257481                | AA                              | TT              | 1946853484               |
| SNP_P4_75843_41257680 | NC_021164.1    | Ca_kabuli_chr05 | 41257680                | TT                              | GG              | 1946853486               |
| SNP_P4_75844_41259045 | NC_021164.1    | Ca_kabuli_chr05 | 41259045                | AA                              | GG              | 1946853488               |
| SNP_P4_75845_41279896 | NC_021164.1    | Ca_kabuli_chr05 | 41279896                | GG                              | AA              | 1946853490               |
| SNP_P4_75846_41318811 | NC_021164.1    | Ca_kabuli_chr05 | 41318811                | TT                              | CC              | 1946853492               |
| SNP_P4_75847_41318859 | NC_021164.1    | Ca_kabuli_chr05 | 41318859                | CC                              | TT              | 1946853493               |
| SNP_P4_75848_41319216 | NC_021164.1    | Ca_kabuli_chr05 | 41319216                | CC                              | TT              | 1946853495               |
| SNP_P4_75849_41334027 | NC_021164.1    | Ca_kabuli_chr05 | 41334027                | GG                              | CC              | 1946853497               |
| SNP_P4_75850_41334182 | NC_021164.1    | Ca_kabuli_chr05 | 41334182                | TT                              | CC              | 1946853499               |
| SNP_P4_75851_41337254 | NC_021164.1    | Ca_kabuli_chr05 | 41337254                | GG                              | AA              | 1946853501               |
| SNP_P4_75852_41337557 | NC_021164.1    | Ca_kabuli_chr05 | 41337557                | TT                              | CC              | 1946853503               |

| SNPs IDs              | Chromosome IDs | Chromosomes     | Physical positions (bp) | CDC Frontier (Reference genome) | (ILWC46 & LPNB) | NCBI SNPdb Accession IDs |
|-----------------------|----------------|-----------------|-------------------------|---------------------------------|-----------------|--------------------------|
| SNP_P4_75853_41337585 | NC_021164.1    | Ca_kabuli_chr05 | 41337585                | TT                              | AA              | 1946853505               |
| SNP_P4_75854_41337674 | NC_021164.1    | Ca_kabuli_chr05 | 41337674                | TT                              | AA              | 1946853507               |
| SNP_P4_75855_41346009 | NC_021164.1    | Ca_kabuli_chr05 | 41346009                | CC                              | TT              | 1946853509               |
| SNP_P4_75856_41351148 | NC_021164.1    | Ca_kabuli_chr05 | 41351148                | CC                              | TT              | 1946853511               |
| SNP_P4_75857_41358333 | NC_021164.1    | Ca_kabuli_chr05 | 41358333                | CC                              | TT              | 1946853513               |
| SNP_P4_75858_41358604 | NC_021164.1    | Ca_kabuli_chr05 | 41358604                | CC                              | TT              | 1946853515               |
| SNP_P4_75859_41370878 | NC_021164.1    | Ca_kabuli_chr05 | 41370878                | GG                              | AA              | 1946853517               |
| SNP_P4_75860_41374172 | NC_021164.1    | Ca_kabuli_chr05 | 41374172                | GG                              | TT              | 1946853519               |
| SNP_P4_75862_41377727 | NC_021164.1    | Ca_kabuli_chr05 | 41377727                | CC                              | TT              | 1946853521               |
| SNP_P4_75863_41377735 | NC_021164.1    | Ca_kabuli_chr05 | 41377735                | CC                              | TT              | 1946853523               |
| SNP_P4_75864_41417493 | NC_021164.1    | Ca_kabuli_chr05 | 41417493                | TT                              | AA              | 1946853525               |
| SNP_P4_75865_41417494 | NC_021164.1    | Ca_kabuli_chr05 | 41417494                | TT                              | AA              | 1946853527               |
| SNP_P4_75866_41419987 | NC_021164.1    | Ca_kabuli_chr05 | 41419987                | TT                              | AA              | 1946853529               |
| SNP_P4_75867_41422814 | NC_021164.1    | Ca_kabuli_chr05 | 41422814                | AA                              | TT              | 1946853531               |
| SNP_P4_75868_41422923 | NC_021164.1    | Ca_kabuli_chr05 | 41422923                | TT                              | GG              | 1946853533               |
| SNP_P4_75869_41422942 | NC_021164.1    | Ca_kabuli_chr05 | 41422942                | CC                              | TT              | 1946853535               |
| SNP_P4_75870_41422979 | NC_021164.1    | Ca_kabuli_chr05 | 41422979                | TT                              | CC              | 1946853537               |
| SNP_P4_75871_41423259 | NC_021164.1    | Ca_kabuli_chr05 | 41423259                | CC                              | TT              | 1946853539               |
| SNP_P4_75872_41423281 | NC_021164.1    | Ca_kabuli_chr05 | 41423281                | CC                              | TT              | 1946853541               |
| SNP_P4_75873_41423291 | NC_021164.1    | Ca_kabuli_chr05 | 41423291                | CC                              | GG              | 1946853543               |
| SNP_P4_75875_41428660 | NC_021164.1    | Ca_kabuli_chr05 | 41428660                | AA                              | GG              | 1946853545               |
| SNP_P4_75876_41428708 | NC_021164.1    | Ca_kabuli_chr05 | 41428708                | CC                              | TT              | 1946853547               |
| SNP_P4_75878_41428757 | NC_021164.1    | Ca_kabuli_chr05 | 41428757                | AA                              | TT              | 1946853549               |
| SNP_P4_75880_41428873 | NC_021164.1    | Ca_kabuli_chr05 | 41428873                | AA                              | GG              | 1946853551               |
| SNP_P4_75881_41428877 | NC_021164.1    | Ca_kabuli_chr05 | 41428877                | TT                              | AA              | 1946853553               |
| SNP_P4_75883_41428996 | NC_021164.1    | Ca_kabuli_chr05 | 41428996                | AA                              | GG              | 1946853555               |
| SNP_P4_75884_41429016 | NC_021164.1    | Ca_kabuli_chr05 | 41429016                | TT                              | AA              | 1946853557               |
| SNP_P4_75885_41429097 | NC_021164.1    | Ca_kabuli_chr05 | 41429097                | AA                              | GG              | 1946853559               |
| SNP_P4_75886_41429142 | NC_021164.1    | Ca_kabuli_chr05 | 41429142                | GG                              | AA              | 1946853561               |
| SNP_P4_75888_41437762 | NC_021164.1    | Ca_kabuli_chr05 | 41437762                | CC                              | TT              | 1946853563               |
| SNP_P4_75889_41438853 | NC_021164.1    | Ca_kabuli_chr05 | 41438853                | TT                              | CC              | 1946853565               |
| SNP_P4_75890_41460606 | NC_021164.1    | Ca_kabuli_chr05 | 41460606                | AA                              | TT              | 1946853567               |
| SNP_P4_75891_41460608 | NC_021164.1    | Ca_kabuli_chr05 | 41460608                | GG                              | AA              | 1946853569               |
| SNP_P4_75892_41460611 | NC_021164.1    | Ca_kabuli_chr05 | 41460611                | GG                              | CC              | 1946853571               |
| SNP_P4_75894_41463574 | NC_021164.1    | Ca_kabuli_chr05 | 41463574                | TT                              | CC              | 1946853573               |
| SNP_P4_75895_41467616 | NC_021164.1    | Ca_kabuli_chr05 | 41467616                | CC                              | AA              | 1946853575               |
| SNP_P4_75897_41467907 | NC_021164.1    | Ca_kabuli_chr05 | 41467907                | AA                              | TT              | 1946853577               |
| SNP_P4_75898_41467933 | NC_021164.1    | Ca_kabuli_chr05 | 41467933                | TT                              | AA              | 1946853579               |
| SNP_P4_75899_41467937 | NC_021164.1    | Ca_kabuli_chr05 | 41467937                | CC                              | TT              | 1946853581               |
| SNP_P4_75901_41468260 | NC_021164.1    | Ca_kabuli_chr05 | 41468260                | AA                              | TT              | 1946853583               |
| SNP_P4_75902_41468267 | NC_021164.1    | Ca_kabuli_chr05 | 41468267                | AA                              | CC              | 1946853585               |
| SNP_P4_75903_41468285 | NC_021164.1    | Ca_kabuli_chr05 | 41468285                | GG                              | CC              | 1946853586               |

| SNPs IDs              | Chromosome IDs | Chromosomes     | Physical positions (bp) | CDC Frontier (Reference genome) | (ILWC46 & LPNB) | NCBI SNPdb Accession IDs |
|-----------------------|----------------|-----------------|-------------------------|---------------------------------|-----------------|--------------------------|
| SNP_P4_75904_41471429 | NC_021164.1    | Ca_kabuli_chr05 | 41471429                | TT                              | CC              | 1946853587               |
| SNP_P4_75905_41471490 | NC_021164.1    | Ca_kabuli_chr05 | 41471490                | AA                              | TT              | 1946853588               |
| SNP_P4_75906_41477660 | NC_021164.1    | Ca_kabuli_chr05 | 41477660                | TT                              | CC              | 1946853589               |
| SNP_P4_75907_41477692 | NC_021164.1    | Ca_kabuli_chr05 | 41477692                | TT                              | GG              | 1946853591               |
| SNP_P4_75910_41553033 | NC_021164.1    | Ca_kabuli_chr05 | 41553033                | TT                              | CC              | 1946853593               |
| SNP_P4_75911_41556074 | NC_021164.1    | Ca_kabuli_chr05 | 41556074                | AA                              | GG              | 1946853595               |
| SNP_P4_75912_41556282 | NC_021164.1    | Ca_kabuli_chr05 | 41556282                | CC                              | TT              | 1946853597               |
| SNP_P4_75913_41564254 | NC_021164.1    | Ca_kabuli_chr05 | 41564254                | TT                              | AA              | 1946853599               |
| SNP_P4_75914_41571463 | NC_021164.1    | Ca_kabuli_chr05 | 41571463                | CC                              | TT              | 1946853601               |
| SNP_P4_75915_41571468 | NC_021164.1    | Ca_kabuli_chr05 | 41571468                | TT                              | AA              | 1946853603               |
| SNP_P4_75916_41580496 | NC_021164.1    | Ca_kabuli_chr05 | 41580496                | CC                              | AA              | 1946853605               |
| SNP_P4_75917_41586247 | NC_021164.1    | Ca_kabuli_chr05 | 41586247                | TT                              | CC              | 1946853607               |
| SNP_P4_75919_41604861 | NC_021164.1    | Ca_kabuli_chr05 | 41604861                | AA                              | GG              | 1946853609               |
| SNP_P4_75920_41605212 | NC_021164.1    | Ca_kabuli_chr05 | 41605212                | GG                              | AA              | 1946853611               |
| SNP_P4_75921_41607844 | NC_021164.1    | Ca_kabuli_chr05 | 41607844                | AA                              | TT              | 1946853613               |
| SNP_P4_75922_41613728 | NC_021164.1    | Ca_kabuli_chr05 | 41613728                | CC                              | GG              | 1946853614               |
| SNP_P4_75924_41644262 | NC_021164.1    | Ca_kabuli_chr05 | 41644262                | AA                              | GG              | 1946853616               |
| SNP_P4_75925_41644340 | NC_021164.1    | Ca_kabuli_chr05 | 41644340                | AA                              | GG              | 1946853618               |
| SNP_P4_75926_41644364 | NC_021164.1    | Ca_kabuli_chr05 | 41644364                | AA                              | GG              | 1946853620               |
| SNP_P4_75927_41645788 | NC_021164.1    | Ca_kabuli_chr05 | 41645788                | TT                              | AA              | 1946853622               |
| SNP_P4_75928_41645793 | NC_021164.1    | Ca_kabuli_chr05 | 41645793                | CC                              | AA              | 1946853624               |
| SNP_P4_75929_41645798 | NC_021164.1    | Ca_kabuli_chr05 | 41645798                | CC                              | AA              | 1946853626               |
| SNP_P4_75930_41646334 | NC_021164.1    | Ca_kabuli_chr05 | 41646334                | CC                              | TT              | 1946853628               |
| SNP_P4_75931_41646372 | NC_021164.1    | Ca_kabuli_chr05 | 41646372                | AA                              | CC              | 1946853630               |
| SNP_P4_75932_41672227 | NC_021164.1    | Ca_kabuli_chr05 | 41672227                | GG                              | AA              | 1946853631               |
| SNP_P4_75933_41677766 | NC_021164.1    | Ca_kabuli_chr05 | 41677766                | CC                              | AA              | 1946853633               |
| SNP_P4_75934_41677791 | NC_021164.1    | Ca_kabuli_chr05 | 41677791                | AA                              | CC              | 1946853635               |
| SNP_P4_75935_41677800 | NC_021164.1    | Ca_kabuli_chr05 | 41677800                | AA                              | TT              | 1946853637               |
| SNP_P4_75936_41677806 | NC_021164.1    | Ca_kabuli_chr05 | 41677806                | TT                              | CC              | 1946853639               |
| SNP_P4_75937_41677816 | NC_021164.1    | Ca_kabuli_chr05 | 41677816                | GG                              | AA              | 1946853641               |
| SNP_P4_75938_41677928 | NC_021164.1    | Ca_kabuli_chr05 | 41677928                | CC                              | AA              | 1946853643               |
| SNP_P4_75939_41677966 | NC_021164.1    | Ca_kabuli_chr05 | 41677966                | TT                              | GG              | 1946853645               |
| SNP_P4_75940_41677967 | NC_021164.1    | Ca_kabuli_chr05 | 41677967                | AA                              | TT              | 1946853646               |
| SNP_P4_75941_41677979 | NC_021164.1    | Ca_kabuli_chr05 | 41677979                | CC                              | AA              | 1946853648               |
| SNP_P4_75942_41678072 | NC_021164.1    | Ca_kabuli_chr05 | 41678072                | AA                              | TT              | 1946853650               |
| SNP_P4_75944_41678164 | NC_021164.1    | Ca_kabuli_chr05 | 41678164                | GG                              | AA              | 1946853652               |
| SNP_P4_75945_41678192 | NC_021164.1    | Ca_kabuli_chr05 | 41678192                | GG                              | AA              | 1946853654               |
| SNP_P4_75946_41717317 | NC_021164.1    | Ca_kabuli_chr05 | 41717317                | CC                              | TT              | 1946853656               |
| SNP_P4_75947_41727327 | NC_021164.1    | Ca_kabuli_chr05 | 41727327                | AA                              | GG              | 1946853658               |
| SNP_P4_75950_41778523 | NC_021164.1    | Ca_kabuli_chr05 | 41778523                | AA                              | GG              | 1946853660               |
| SNP_P4_75951_41788093 | NC_021164.1    | Ca_kabuli_chr05 | 41788093                | AA                              | CC              | 1946853662               |
| SNP_P4_75952_41794813 | NC_021164.1    | Ca_kabuli_chr05 | 41794813                | TT                              | GG              | 1946853664               |

| SNPs IDs              | Chromosome IDs | Chromosomes     | Physical positions (bp) | CDC Frontier (Reference genome) | (ILWC46 & LPNB) | NCBI SNPdb Accession IDs |
|-----------------------|----------------|-----------------|-------------------------|---------------------------------|-----------------|--------------------------|
| SNP_P4_75953_41795075 | NC_021164.1    | Ca_kabuli_chr05 | 41795075                | CC                              | TT              | 1946853665               |
| SNP_P4_75954_41795326 | NC_021164.1    | Ca_kabuli_chr05 | 41795326                | AA                              | GG              | 1946853667               |
| SNP_P4_75955_41795560 | NC_021164.1    | Ca_kabuli_chr05 | 41795560                | CC                              | GG              | 1946853669               |
| SNP_P4_75956_41795694 | NC_021164.1    | Ca_kabuli_chr05 | 41795694                | GG                              | AA              | 1946853671               |
| SNP_P4_75957_41795809 | NC_021164.1    | Ca_kabuli_chr05 | 41795809                | CC                              | TT              | 1946853673               |
| SNP_P4_75959_41797922 | NC_021164.1    | Ca_kabuli_chr05 | 41797922                | GG                              | AA              | 1946853675               |
| SNP_P4_75960_41800062 | NC_021164.1    | Ca_kabuli_chr05 | 41800062                | AA                              | GG              | 1946853677               |
| SNP_P4_75961_41812775 | NC_021164.1    | Ca_kabuli_chr05 | 41812775                | GG                              | TT              | 1946853679               |
| SNP_P4_75962_41813276 | NC_021164.1    | Ca_kabuli_chr05 | 41813276                | CC                              | TT              | 1946853680               |
| SNP_P4_75963_41813446 | NC_021164.1    | Ca_kabuli_chr05 | 41813446                | AA                              | TT              | 1946853682               |
| SNP_P4_75964_41831496 | NC_021164.1    | Ca_kabuli_chr05 | 41831496                | GG                              | AA              | 1946853684               |
| SNP_P4_75965_41832095 | NC_021164.1    | Ca_kabuli_chr05 | 41832095                | CC                              | TT              | 1946853686               |
| SNP_P4_75966_41896537 | NC_021164.1    | Ca_kabuli_chr05 | 41896537                | CC                              | TT              | 1946853688               |
| SNP_P4_75967_41915832 | NC_021164.1    | Ca_kabuli_chr05 | 41915832                | AA                              | CC              | 1946853690               |
| SNP_P4_75968_41915885 | NC_021164.1    | Ca_kabuli_chr05 | 41915885                | AA                              | GG              | 1946853692               |
| SNP_P4_75969_41915905 | NC_021164.1    | Ca_kabuli_chr05 | 41915905                | AA                              | TT              | 1946853694               |
| SNP_P4_75970_41922057 | NC_021164.1    | Ca_kabuli_chr05 | 41922057                | AA                              | CC              | 1946853696               |
| SNP_P4_75971_41967738 | NC_021164.1    | Ca_kabuli_chr05 | 41967738                | GG                              | AA              | 1946853698               |
| SNP_P4_75972_41981884 | NC_021164.1    | Ca_kabuli_chr05 | 41981884                | TT                              | GG              | 1946853699               |
| SNP_P4_75974_41992570 | NC_021164.1    | Ca_kabuli_chr05 | 41992570                | GG                              | AA              | 1946853701               |
| SNP_P4_75975_42014869 | NC_021164.1    | Ca_kabuli_chr05 | 42014869                | AA                              | TT              | 1946853703               |
| SNP_P4_75976_42026227 | NC_021164.1    | Ca_kabuli_chr05 | 42026227                | AA                              | GG              | 1946853705               |
| SNP_P4_75979_42081209 | NC_021164.1    | Ca_kabuli_chr05 | 42081209                | AA                              | GG              | 1946853707               |
| SNP_P4_75980_42081776 | NC_021164.1    | Ca_kabuli_chr05 | 42081776                | TT                              | CC              | 1946853709               |
| SNP_P4_75981_42081779 | NC_021164.1    | Ca_kabuli_chr05 | 42081779                | TT                              | CC              | 1946853711               |
| SNP_P4_75982_42096054 | NC_021164.1    | Ca_kabuli_chr05 | 42096054                | TT                              | AA              | 1946853713               |
| SNP_P4_75983_42096495 | NC_021164.1    | Ca_kabuli_chr05 | 42096495                | CC                              | TT              | 1946853715               |
| SNP_P4_75984_42129001 | NC_021164.1    | Ca_kabuli_chr05 | 42129001                | TT                              | AA              | 1946853717               |
| SNP_P4_75986_42133321 | NC_021164.1    | Ca_kabuli_chr05 | 42133321                | TT                              | CC              | 1946853719               |
| SNP_P4_75987_42135267 | NC_021164.1    | Ca_kabuli_chr05 | 42135267                | GG                              | TT              | 1946853721               |
| SNP_P4_75988_42136976 | NC_021164.1    | Ca_kabuli_chr05 | 42136976                | GG                              | AA              | 1946853723               |
| SNP_P4_75990_42146193 | NC_021164.1    | Ca_kabuli_chr05 | 42146193                | AA                              | GG              | 1946853725               |
| SNP_P4_75993_42219800 | NC_021164.1    | Ca_kabuli_chr05 | 42219800                | TT                              | GG              | 1946853727               |
| SNP_P4_75995_42245818 | NC_021164.1    | Ca_kabuli_chr05 | 42245818                | TT                              | CC              | 1946853729               |
| SNP_P4_75996_42245840 | NC_021164.1    | Ca_kabuli_chr05 | 42245840                | CC                              | TT              | 1946853731               |
| SNP_P4_75997_42245847 | NC_021164.1    | Ca_kabuli_chr05 | 42245847                | AA                              | GG              | 1946853732               |
| SNP_P4_75998_42245849 | NC_021164.1    | Ca_kabuli_chr05 | 42245849                | GG                              | TT              | 1946853734               |
| SNP_P4_75999_42246859 | NC_021164.1    | Ca_kabuli_chr05 | 42246859                | GG                              | TT              | 1946853736               |
| SNP_P4_76000_42248753 | NC_021164.1    | Ca_kabuli_chr05 | 42248753                | CC                              | TT              | 1946853738               |
| SNP_P4_76001_42299075 | NC_021164.1    | Ca_kabuli_chr05 | 42299075                | GG                              | AA              | 1946853740               |
| SNP_P4_76002_42317101 | NC_021164.1    | Ca_kabuli_chr05 | 42317101                | CC                              | TT              | 1946853742               |
| SNP_P4_76003_42317115 | NC_021164.1    | Ca_kabuli_chr05 | 42317115                | GG                              | AA              | 1946853744               |

| SNPs IDs              | Chromosome IDs | Chromosomes     | Physical positions (bp) | CDC Frontier (Reference genome) | (ILWC46 & LPNB) | NCBI SNPdb Accession IDs |
|-----------------------|----------------|-----------------|-------------------------|---------------------------------|-----------------|--------------------------|
| SNP_P4_76005_42317171 | NC_021164.1    | Ca_kabuli_chr05 | 42317171                | AA                              | CC              | 1946853746               |
| SNP_P4_76006_42323884 | NC_021164.1    | Ca_kabuli_chr05 | 42323884                | TT                              | GG              | 1946853747               |
| SNP_P4_76007_42326427 | NC_021164.1    | Ca_kabuli_chr05 | 42326427                | AA                              | GG              | 1946853749               |
| SNP_P4_76008_42352576 | NC_021164.1    | Ca_kabuli_chr05 | 42352576                | AA                              | TT              | 1946853751               |
| SNP_P4_76009_42352577 | NC_021164.1    | Ca_kabuli_chr05 | 42352577                | AA                              | CC              | 1946853753               |
| SNP_P4_76010_42358115 | NC_021164.1    | Ca_kabuli_chr05 | 42358115                | TT                              | AA              | 1946853755               |
| SNP_P4_76012_42364843 | NC_021164.1    | Ca_kabuli_chr05 | 42364843                | CC                              | TT              | 1946853757               |
| SNP_P4_76013_42392510 | NC_021164.1    | Ca_kabuli_chr05 | 42392510                | CC                              | AA              | 1946853759               |
| SNP_P4_76014_42392566 | NC_021164.1    | Ca_kabuli_chr05 | 42392566                | TT                              | CC              | 1946853761               |
| SNP_P4_76015_42392616 | NC_021164.1    | Ca_kabuli_chr05 | 42392616                | AA                              | GG              | 1946853763               |
| SNP_P4_76016_42392768 | NC_021164.1    | Ca_kabuli_chr05 | 42392768                | AA                              | TT              | 1946853765               |
| SNP_P4_76017_42392942 | NC_021164.1    | Ca_kabuli_chr05 | 42392942                | GG                              | CC              | 1946853767               |
| SNP_P4_76018_42392954 | NC_021164.1    | Ca_kabuli_chr05 | 42392954                | GG                              | AA              | 1946853769               |
| SNP_P4_76019_42392962 | NC_021164.1    | Ca_kabuli_chr05 | 42392962                | AA                              | TT              | 1946853771               |
| SNP_P4_76020_42401688 | NC_021164.1    | Ca_kabuli_chr05 | 42401688                | CC                              | TT              | 1946853773               |
| SNP_P4_76021_42401965 | NC_021164.1    | Ca_kabuli_chr05 | 42401965                | TT                              | CC              | 1946853775               |
| SNP_P4_76022_42401983 | NC_021164.1    | Ca_kabuli_chr05 | 42401983                | GG                              | AA              | 1946853777               |
| SNP_P4_76023_42402006 | NC_021164.1    | Ca_kabuli_chr05 | 42402006                | CC                              | TT              | 1946853779               |
| SNP_P4_76026_42491641 | NC_021164.1    | Ca_kabuli_chr05 | 42491641                | GG                              | AA              | 1946853781               |
| SNP_P4_76027_42513147 | NC_021164.1    | Ca_kabuli_chr05 | 42513147                | AA                              | TT              | 1946853783               |
| SNP_P4_76028_42513149 | NC_021164.1    | Ca_kabuli_chr05 | 42513149                | TT                              | CC              | 1946853785               |
| SNP_P4_76029_42513806 | NC_021164.1    | Ca_kabuli_chr05 | 42513806                | TT                              | AA              | 1946853787               |
| SNP_P4_76032_42577897 | NC_021164.1    | Ca_kabuli_chr05 | 42577897                | GG                              | AA              | 1946853789               |
| SNP_P4_76034_42593363 | NC_021164.1    | Ca_kabuli_chr05 | 42593363                | AA                              | CC              | 1946853791               |
| SNP_P4_76036_42627458 | NC_021164.1    | Ca_kabuli_chr05 | 42627458                | TT                              | CC              | 1946853793               |
| SNP_P4_76038_42637712 | NC_021164.1    | Ca_kabuli_chr05 | 42637712                | AA                              | GG              | 1946853795               |
| SNP_P4_76040_42693011 | NC_021164.1    | Ca_kabuli_chr05 | 42693011                | AA                              | GG              | 1946853797               |
| SNP_P4_76041_42696579 | NC_021164.1    | Ca_kabuli_chr05 | 42696579                | AA                              | GG              | 1946853799               |
| SNP_P4_76042_42706002 | NC_021164.1    | Ca_kabuli_chr05 | 42706002                | TT                              | CC              | 1946853801               |
| SNP_P4_76043_42706006 | NC_021164.1    | Ca_kabuli_chr05 | 42706006                | CC                              | TT              | 1946853803               |
| SNP_P4_76044_42720153 | NC_021164.1    | Ca_kabuli_chr05 | 42720153                | TT                              | CC              | 1946853805               |
| SNP_P4_76045_42728112 | NC_021164.1    | Ca_kabuli_chr05 | 42728112                | CC                              | TT              | 1946853807               |
| SNP_P4_76046_42737401 | NC_021164.1    | Ca_kabuli_chr05 | 42737401                | AA                              | TT              | 1946853809               |
| SNP_P4_76047_42738682 | NC_021164.1    | Ca_kabuli_chr05 | 42738682                | TT                              | CC              | 1946853811               |
| SNP_P4_76048_42794032 | NC_021164.1    | Ca_kabuli_chr05 | 42794032                | TT                              | CC              | 1946853813               |
| SNP_P4_76050_42822489 | NC_021164.1    | Ca_kabuli_chr05 | 42822489                | TT                              | CC              | 1946853814               |
| SNP_P4_76051_42838374 | NC_021164.1    | Ca_kabuli_chr05 | 42838374                | AA                              | TT              | 1946853816               |
| SNP_P4_76052_42855627 | NC_021164.1    | Ca_kabuli_chr05 | 42855627                | TT                              | CC              | 1946853818               |
| SNP_P4_76053_42862826 | NC_021164.1    | Ca_kabuli_chr05 | 42862826                | GG                              | TT              | 1946853820               |
| SNP_P4_76055_42891049 | NC_021164.1    | Ca_kabuli_chr05 | 42891049                | TT                              | AA              | 1946853822               |
| SNP_P4_76056_42894438 | NC_021164.1    | Ca_kabuli_chr05 | 42894438                | TT                              | AA              | 1946853824               |
| SNP_P4_76058_42919871 | NC_021164.1    | Ca_kabuli_chr05 | 42919871                | GG                              | AA              | 1946853826               |



| SNPs IDs              | Chromosome IDs | Chromosomes     | Physical positions (bp) | CDC Frontier (Reference genome) | (ILWC46 & LPNB) | NCBI SNPdb Accession IDs |
|-----------------------|----------------|-----------------|-------------------------|---------------------------------|-----------------|--------------------------|
| SNP_P4_76059_42919928 | NC_021164.1    | Ca_kabuli_chr05 | 42919928                | TT                              | CC              | 1946853828               |
| SNP_P4_76060_42920260 | NC_021164.1    | Ca_kabuli_chr05 | 42920260                | GG                              | AA              | 1946853830               |
| SNP_P4_76061_42921669 | NC_021164.1    | Ca_kabuli_chr05 | 42921669                | TT                              | GG              | 1946853833               |
| SNP_P4_76062_42924340 | NC_021164.1    | Ca_kabuli_chr05 | 42924340                | GG                              | AA              | 1946853835               |
| SNP_P4_76064_42965447 | NC_021164.1    | Ca_kabuli_chr05 | 42965447                | CC                              | GG              | 1946853837               |
| SNP_P4_76065_42965451 | NC_021164.1    | Ca_kabuli_chr05 | 42965451                | AA                              | GG              | 1946853839               |
| SNP_P4_76067_42992875 | NC_021164.1    | Ca_kabuli_chr05 | 42992875                | CC                              | GG              | 1946853841               |
| SNP_P4_76068_42996595 | NC_021164.1    | Ca_kabuli_chr05 | 42996595                | GG                              | AA              | 1946853843               |
| SNP_P4_76070_43030512 | NC_021164.1    | Ca_kabuli_chr05 | 43030512                | TT                              | GG              | 1946853845               |
| SNP_P4_76071_43030513 | NC_021164.1    | Ca_kabuli_chr05 | 43030513                | TT                              | GG              | 1946853847               |
| SNP_P4_76072_43051274 | NC_021164.1    | Ca_kabuli_chr05 | 43051274                | CC                              | TT              | 1946853849               |
| SNP_P4_76074_43162435 | NC_021164.1    | Ca_kabuli_chr05 | 43162435                | TT                              | AA              | 1946853851               |
| SNP_P4_76075_43162456 | NC_021164.1    | Ca_kabuli_chr05 | 43162456                | CC                              | TT              | 1946853853               |
| SNP_P4_76076_43162458 | NC_021164.1    | Ca_kabuli_chr05 | 43162458                | AA                              | CC              | 1946853855               |
| SNP_P4_76077_43162482 | NC_021164.1    | Ca_kabuli_chr05 | 43162482                | TT                              | CC              | 1946853857               |
| SNP_P4_76078_43162496 | NC_021164.1    | Ca_kabuli_chr05 | 43162496                | TT                              | AA              | 1946853859               |
| SNP_P4_76079_43162502 | NC_021164.1    | Ca_kabuli_chr05 | 43162502                | TT                              | CC              | 1946853861               |
| SNP_P4_76081_43180828 | NC_021164.1    | Ca_kabuli_chr05 | 43180828                | TT                              | CC              | 1946853863               |
| SNP_P4_76085_43319821 | NC_021164.1    | Ca_kabuli_chr05 | 43319821                | TT                              | CC              | 1946853865               |
| SNP_P4_76088_43367090 | NC_021164.1    | Ca_kabuli_chr05 | 43367090                | AA                              | CC              | 1946853867               |
| SNP_P4_76089_43367091 | NC_021164.1    | Ca_kabuli_chr05 | 43367091                | AA                              | CC              | 1946853869               |
| SNP_P4_76090_43372578 | NC_021164.1    | Ca_kabuli_chr05 | 43372578                | AA                              | GG              | 1946853871               |
| SNP_P4_76091_43404558 | NC_021164.1    | Ca_kabuli_chr05 | 43404558                | CC                              | TT              | 1946853873               |
| SNP_P4_76092_43405206 | NC_021164.1    | Ca_kabuli_chr05 | 43405206                | AA                              | TT              | 1946853875               |
| SNP_P4_76093_43408901 | NC_021164.1    | Ca_kabuli_chr05 | 43408901                | CC                              | TT              | 1946853877               |
| SNP_P4_76094_43442857 | NC_021164.1    | Ca_kabuli_chr05 | 43442857                | GG                              | TT              | 1946853879               |
| SNP_P4_76096_43473325 | NC_021164.1    | Ca_kabuli_chr05 | 43473325                | TT                              | CC              | 1946853881               |
| SNP_P4_76097_43480956 | NC_021164.1    | Ca_kabuli_chr05 | 43480956                | GG                              | TT              | 1946853883               |
| SNP_P4_76098_43481069 | NC_021164.1    | Ca_kabuli_chr05 | 43481069                | TT                              | CC              | 1946853885               |
| SNP_P4_76099_43481098 | NC_021164.1    | Ca_kabuli_chr05 | 43481098                | AA                              | CC              | 1946853887               |
| SNP_P4_76100_43481174 | NC_021164.1    | Ca_kabuli_chr05 | 43481174                | GG                              | TT              | 1946853889               |
| SNP_P4_76101_43481216 | NC_021164.1    | Ca_kabuli_chr05 | 43481216                | GG                              | AA              | 1946853891               |
| SNP_P4_76102_43481263 | NC_021164.1    | Ca_kabuli_chr05 | 43481263                | CC                              | AA              | 1946853893               |
| SNP_P4_76103_43481378 | NC_021164.1    | Ca_kabuli_chr05 | 43481378                | GG                              | AA              | 1946853895               |
| SNP_P4_76104_43481403 | NC_021164.1    | Ca_kabuli_chr05 | 43481403                | GG                              | AA              | 1946853897               |
| SNP_P4_76107_43495595 | NC_021164.1    | Ca_kabuli_chr05 | 43495595                | AA                              | TT              | 1946853899               |
| SNP_P4_76108_43504965 | NC_021164.1    | Ca_kabuli_chr05 | 43504965                | CC                              | TT              | 1946853901               |
| SNP_P4_76110_43550425 | NC_021164.1    | Ca_kabuli_chr05 | 43550425                | CC                              | AA              | 1946853903               |
| SNP_P4_76111_43574420 | NC_021164.1    | Ca_kabuli_chr05 | 43574420                | TT                              | AA              | 1946853905               |
| SNP_P4_76113_43575441 | NC_021164.1    | Ca_kabuli_chr05 | 43575441                | GG                              | CC              | 1946853907               |
| SNP_P4_76114_43582311 | NC_021164.1    | Ca_kabuli_chr05 | 43582311                | CC                              | TT              | 1946853909               |
| SNP_P4_76115_43588047 | NC_021164.1    | Ca_kabuli_chr05 | 43588047                | TT                              | CC              | 1946853911               |

| SNPs IDs              | Chromosome IDs | Chromosomes     | Physical positions (bp) | CDC Frontier (Reference genome) | (ILWC46 & LPNB) | NCBI SNPdb Accession IDs |
|-----------------------|----------------|-----------------|-------------------------|---------------------------------|-----------------|--------------------------|
| SNP_P4_76116_43593019 | NC_021164.1    | Ca_kabuli_chr05 | 43593019                | GG                              | AA              | 1946853913               |
| SNP_P4_76117_43599558 | NC_021164.1    | Ca_kabuli_chr05 | 43599558                | CC                              | TT              | 1946853915               |
| SNP_P4_76118_43599709 | NC_021164.1    | Ca_kabuli_chr05 | 43599709                | CC                              | TT              | 1946853917               |
| SNP_P4_76120_43628991 | NC_021164.1    | Ca_kabuli_chr05 | 43628991                | CC                              | TT              | 1946853919               |
| SNP_P4_76121_43655801 | NC_021164.1    | Ca_kabuli_chr05 | 43655801                | AA                              | TT              | 1946853921               |
| SNP_P4_76123_43699250 | NC_021164.1    | Ca_kabuli_chr05 | 43699250                | AA                              | GG              | 1946853923               |
| SNP_P4_76124_43724398 | NC_021164.1    | Ca_kabuli_chr05 | 43724398                | GG                              | AA              | 1946853924               |
| SNP_P4_76125_43730636 | NC_021164.1    | Ca_kabuli_chr05 | 43730636                | AA                              | TT              | 1946853926               |
| SNP_P4_76127_43744483 | NC_021164.1    | Ca_kabuli_chr05 | 43744483                | AA                              | TT              | 1946853928               |
| SNP_P4_76130_43806706 | NC_021164.1    | Ca_kabuli_chr05 | 43806706                | GG                              | CC              | 1946853930               |
| SNP_P4_76132_43839357 | NC_021164.1    | Ca_kabuli_chr05 | 43839357                | CC                              | TT              | 1946853932               |
| SNP_P4_76139_43904849 | NC_021164.1    | Ca_kabuli_chr05 | 43904849                | TT                              | CC              | 1946853934               |
| SNP_P4_76140_43904871 | NC_021164.1    | Ca_kabuli_chr05 | 43904871                | TT                              | CC              | 1946853936               |
| SNP_P4_76141_43904941 | NC_021164.1    | Ca_kabuli_chr05 | 43904941                | TT                              | GG              | 1946853938               |
| SNP_P4_76142_43905103 | NC_021164.1    | Ca_kabuli_chr05 | 43905103                | TT                              | CC              | 1946853940               |
| SNP_P4_76143_43905233 | NC_021164.1    | Ca_kabuli_chr05 | 43905233                | TT                              | CC              | 1946853942               |
| SNP_P4_76144_43905274 | NC_021164.1    | Ca_kabuli_chr05 | 43905274                | TT                              | AA              | 1946853944               |
| SNP_P4_76145_43905358 | NC_021164.1    | Ca_kabuli_chr05 | 43905358                | AA                              | GG              | 1946853946               |
| SNP_P4_76146_43910241 | NC_021164.1    | Ca_kabuli_chr05 | 43910241                | GG                              | AA              | 1946853948               |
| SNP_P4_76147_43918828 | NC_021164.1    | Ca_kabuli_chr05 | 43918828                | GG                              | TT              | 1946853950               |
| SNP_P4_76148_43918840 | NC_021164.1    | Ca_kabuli_chr05 | 43918840                | TT                              | AA              | 1946853952               |
| SNP_P4_76149_43918865 | NC_021164.1    | Ca_kabuli_chr05 | 43918865                | AA                              | TT              | 1946853954               |
| SNP_P4_76150_43918874 | NC_021164.1    | Ca_kabuli_chr05 | 43918874                | GG                              | AA              | 1946853956               |
| SNP_P4_76151_43918930 | NC_021164.1    | Ca_kabuli_chr05 | 43918930                | GG                              | AA              | 1946853958               |
| SNP_P4_76152_43918947 | NC_021164.1    | Ca_kabuli_chr05 | 43918947                | CC                              | TT              | 1946853960               |
| SNP_P4_76154_43919249 | NC_021164.1    | Ca_kabuli_chr05 | 43919249                | TT                              | AA              | 1946853962               |
| SNP_P4_76155_43919288 | NC_021164.1    | Ca_kabuli_chr05 | 43919288                | TT                              | GG              | 1946853964               |
| SNP_P4_76156_43920256 | NC_021164.1    | Ca_kabuli_chr05 | 43920256                | AA                              | TT              | 1946853966               |
| SNP_P4_76157_43920269 | NC_021164.1    | Ca_kabuli_chr05 | 43920269                | TT                              | CC              | 1946853969               |
| SNP_P4_76158_43920275 | NC_021164.1    | Ca_kabuli_chr05 | 43920275                | AA                              | GG              | 1946853971               |
| SNP_P4_76159_43920637 | NC_021164.1    | Ca_kabuli_chr05 | 43920637                | GG                              | CC              | 1946853973               |
| SNP_P4_76160_43920639 | NC_021164.1    | Ca_kabuli_chr05 | 43920639                | GG                              | AA              | 1946853975               |
| SNP_P4_76161_43920646 | NC_021164.1    | Ca_kabuli_chr05 | 43920646                | CC                              | TT              | 1946853977               |
| SNP_P4_76162_43920658 | NC_021164.1    | Ca_kabuli_chr05 | 43920658                | AA                              | GG              | 1946853979               |
| SNP_P4_76163_43920662 | NC_021164.1    | Ca_kabuli_chr05 | 43920662                | CC                              | TT              | 1946853981               |
| SNP_P4_76164_43920724 | NC_021164.1    | Ca_kabuli_chr05 | 43920724                | AA                              | GG              | 1946853983               |
| SNP_P4_76165_43920732 | NC_021164.1    | Ca_kabuli_chr05 | 43920732                | TT                              | CC              | 1946853985               |
| SNP_P4_76166_43920741 | NC_021164.1    | Ca_kabuli_chr05 | 43920741                | AA                              | CC              | 1946853987               |
| SNP_P4_76167_43920748 | NC_021164.1    | Ca_kabuli_chr05 | 43920748                | AA                              | GG              | 1946853989               |
| SNP_P4_76168_43920753 | NC_021164.1    | Ca_kabuli_chr05 | 43920753                | CC                              | TT              | 1946853991               |
| SNP_P4_76169_43920754 | NC_021164.1    | Ca_kabuli_chr05 | 43920754                | CC                              | TT              | 1946853993               |
| SNP_P4_76170_43920808 | NC_021164.1    | Ca_kabuli_chr05 | 43920808                | AA                              | CC              | 1946853995               |

| SNPs IDs              | Chromosome IDs | Chromosomes     | Physical positions (bp) | CDC Frontier (Reference genome) | (ILWC46 & LPNB) | NCBI SNPdb Accession IDs |
|-----------------------|----------------|-----------------|-------------------------|---------------------------------|-----------------|--------------------------|
| SNP_P4_76171_43920809 | NC_021164.1    | Ca_kabuli_chr05 | 43920809                | CC                              | TT              | 1946853997               |
| SNP_P4_76172_43920853 | NC_021164.1    | Ca_kabuli_chr05 | 43920853                | TT                              | CC              | 1946853999               |
| SNP_P4_76173_43920890 | NC_021164.1    | Ca_kabuli_chr05 | 43920890                | TT                              | AA              | 1946854001               |
| SNP_P4_76174_43920929 | NC_021164.1    | Ca_kabuli_chr05 | 43920929                | AA                              | GG              | 1946854003               |
| SNP_P4_76175_43920993 | NC_021164.1    | Ca_kabuli_chr05 | 43920993                | GG                              | TT              | 1946854005               |
| SNP_P4_76176_43921026 | NC_021164.1    | Ca_kabuli_chr05 | 43921026                | CC                              | TT              | 1946854007               |
| SNP_P4_76177_43921030 | NC_021164.1    | Ca_kabuli_chr05 | 43921030                | CC                              | AA              | 1946854009               |
| SNP_P4_76178_43921062 | NC_021164.1    | Ca_kabuli_chr05 | 43921062                | TT                              | AA              | 1946854011               |
| SNP_P4_76179_43921068 | NC_021164.1    | Ca_kabuli_chr05 | 43921068                | TT                              | CC              | 1946854013               |
| SNP_P4_76180_43921284 | NC_021164.1    | Ca_kabuli_chr05 | 43921284                | TT                              | CC              | 1946854015               |
| SNP_P4_76181_43936519 | NC_021164.1    | Ca_kabuli_chr05 | 43936519                | CC                              | TT              | 1946854017               |
| SNP_P4_76183_43972577 | NC_021164.1    | Ca_kabuli_chr05 | 43972577                | AA                              | TT              | 1946854019               |
| SNP_P4_76184_44027348 | NC_021164.1    | Ca_kabuli_chr05 | 44027348                | CC                              | TT              | 1946854021               |
| SNP_P4_76185_44067565 | NC_021164.1    | Ca_kabuli_chr05 | 44067565                | AA                              | CC              | 1946854023               |
| SNP_P4_76186_44082396 | NC_021164.1    | Ca_kabuli_chr05 | 44082396                | TT                              | CC              | 1946854025               |
| SNP_P4_76187_44082401 | NC_021164.1    | Ca_kabuli_chr05 | 44082401                | TT                              | GG              | 1946854027               |
| SNP_P4_76189_44091932 | NC_021164.1    | Ca_kabuli_chr05 | 44091932                | GG                              | AA              | 1946854029               |
| SNP_P4_76190_44092959 | NC_021164.1    | Ca_kabuli_chr05 | 44092959                | AA                              | GG              | 1946854031               |
| SNP_P4_76191_44103804 | NC_021164.1    | Ca_kabuli_chr05 | 44103804                | TT                              | AA              | 1946854033               |
| SNP_P4_76192_44103813 | NC_021164.1    | Ca_kabuli_chr05 | 44103813                | GG                              | AA              | 1946854035               |
| SNP_P4_76194_44151692 | NC_021164.1    | Ca_kabuli_chr05 | 44151692                | GG                              | AA              | 1946854037               |
| SNP_P4_76197_44177885 | NC_021164.1    | Ca_kabuli_chr05 | 44177885                | TT                              | CC              | 1946854039               |
| SNP_P4_76198_44178154 | NC_021164.1    | Ca_kabuli_chr05 | 44178154                | AA                              | GG              | 1946854041               |
| SNP_P4_76199_44208018 | NC_021164.1    | Ca_kabuli_chr05 | 44208018                | TT                              | CC              | 1946854043               |
| SNP_P4_76200_44208728 | NC_021164.1    | Ca_kabuli_chr05 | 44208728                | TT                              | CC              | 1946854045               |
| SNP_P4_76201_44209044 | NC_021164.1    | Ca_kabuli_chr05 | 44209044                | GG                              | AA              | 1946854047               |
| SNP_P4_76202_44209053 | NC_021164.1    | Ca_kabuli_chr05 | 44209053                | GG                              | AA              | 1946854049               |
| SNP_P4_76203_44209146 | NC_021164.1    | Ca_kabuli_chr05 | 44209146                | AA                              | GG              | 1946854051               |
| SNP_P4_76204_44211645 | NC_021164.1    | Ca_kabuli_chr05 | 44211645                | TT                              | CC              | 1946854053               |
| SNP_P4_76205_44211648 | NC_021164.1    | Ca_kabuli_chr05 | 44211648                | CC                              | TT              | 1946854055               |
| SNP_P4_76206_44211667 | NC_021164.1    | Ca_kabuli_chr05 | 44211667                | GG                              | AA              | 1946854057               |
| SNP_P4_76207_44211673 | NC_021164.1    | Ca_kabuli_chr05 | 44211673                | AA                              | GG              | 1946854059               |
| SNP_P4_76208_44211701 | NC_021164.1    | Ca_kabuli_chr05 | 44211701                | TT                              | GG              | 1946854061               |
| SNP_P4_76209_44211706 | NC_021164.1    | Ca_kabuli_chr05 | 44211706                | AA                              | GG              | 1946854063               |
| SNP_P4_76210_44212038 | NC_021164.1    | Ca_kabuli_chr05 | 44212038                | TT                              | CC              | 1946854065               |
| SNP_P4_76211_44212501 | NC_021164.1    | Ca_kabuli_chr05 | 44212501                | CC                              | AA              | 1946854067               |
| SNP_P4_76212_44215439 | NC_021164.1    | Ca_kabuli_chr05 | 44215439                | GG                              | CC              | 1946854069               |
| SNP_P4_76213_44215471 | NC_021164.1    | Ca_kabuli_chr05 | 44215471                | CC                              | TT              | 1946854071               |
| SNP_P4_76215_44243876 | NC_021164.1    | Ca_kabuli_chr05 | 44243876                | GG                              | AA              | 1946854073               |
| SNP_P4_76217_44269323 | NC_021164.1    | Ca_kabuli_chr05 | 44269323                | CC                              | TT              | 1946854075               |
| SNP_P4_76218_44281953 | NC_021164.1    | Ca_kabuli_chr05 | 44281953                | GG                              | TT              | 1946854077               |
| SNP_P4_76219_44299261 | NC_021164.1    | Ca_kabuli_chr05 | 44299261                | GG                              | CC              | 1946854079               |

| SNPs IDs              | Chromosome IDs | Chromosomes     | Physical positions (bp) | CDC Frontier (Reference genome) | (ILWC46 & LPNB) | NCBI SNPdb Accession IDs |
|-----------------------|----------------|-----------------|-------------------------|---------------------------------|-----------------|--------------------------|
| SNP_P4_76220_44400047 | NC_021164.1    | Ca_kabuli_chr05 | 44400047                | CC                              | TT              | 1946854081               |
| SNP_P4_76221_44400048 | NC_021164.1    | Ca_kabuli_chr05 | 44400048                | GG                              | AA              | 1946854083               |
| SNP_P4_76222_44411901 | NC_021164.1    | Ca_kabuli_chr05 | 44411901                | TT                              | GG              | 1946854085               |
| SNP_P4_76223_44454858 | NC_021164.1    | Ca_kabuli_chr05 | 44454858                | TT                              | AA              | 1946854087               |
| SNP_P4_76224_44454861 | NC_021164.1    | Ca_kabuli_chr05 | 44454861                | CC                              | AA              | 1946854089               |
| SNP_P4_76225_44476396 | NC_021164.1    | Ca_kabuli_chr05 | 44476396                | AA                              | GG              | 1946854091               |
| SNP_P4_76227_44528084 | NC_021164.1    | Ca_kabuli_chr05 | 44528084                | TT                              | CC              | 1946854093               |
| SNP_P4_76228_44592012 | NC_021164.1    | Ca_kabuli_chr05 | 44592012                | TT                              | AA              | 1946854095               |
| SNP_P4_76229_44592021 | NC_021164.1    | Ca_kabuli_chr05 | 44592021                | GG                              | AA              | 1946854097               |
| SNP_P4_76230_44592097 | NC_021164.1    | Ca_kabuli_chr05 | 44592097                | CC                              | AA              | 1946854099               |
| SNP_P4_76231_44596762 | NC_021164.1    | Ca_kabuli_chr05 | 44596762                | TT                              | AA              | 1946854101               |
| SNP_P4_76232_44596763 | NC_021164.1    | Ca_kabuli_chr05 | 44596763                | TT                              | AA              | 1946854103               |
| SNP_P4_76234_44596823 | NC_021164.1    | Ca_kabuli_chr05 | 44596823                | TT                              | CC              | 1946854105               |
| SNP_P4_76235_44596933 | NC_021164.1    | Ca_kabuli_chr05 | 44596933                | AA                              | CC              | 1946854107               |
| SNP_P4_76237_44597163 | NC_021164.1    | Ca_kabuli_chr05 | 44597163                | TT                              | AA              | 1946854109               |
| SNP_P4_76238_44597168 | NC_021164.1    | Ca_kabuli_chr05 | 44597168                | CC                              | TT              | 1946854111               |
| SNP_P4_76239_44597207 | NC_021164.1    | Ca_kabuli_chr05 | 44597207                | TT                              | CC              | 1946854113               |
| SNP_P4_76240_44597222 | NC_021164.1    | Ca_kabuli_chr05 | 44597222                | TT                              | CC              | 1946854115               |
| SNP_P4_76241_44670157 | NC_021164.1    | Ca_kabuli_chr05 | 44670157                | GG                              | AA              | 1946854117               |
| SNP_P4_76242_44674926 | NC_021164.1    | Ca_kabuli_chr05 | 44674926                | CC                              | TT              | 1946854119               |
| SNP_P4_76244_44744513 | NC_021164.1    | Ca_kabuli_chr05 | 44744513                | AA                              | TT              | 1946854121               |
| SNP_P4_76245_44744606 | NC_021164.1    | Ca_kabuli_chr05 | 44744606                | AA                              | TT              | 1946854122               |
| SNP_P4_76246_44775282 | NC_021164.1    | Ca_kabuli_chr05 | 44775282                | TT                              | CC              | 1946854124               |
| SNP_P4_76249_44830067 | NC_021164.1    | Ca_kabuli_chr05 | 44830067                | AA                              | GG              | 1946854126               |
| SNP_P4_76250_44844309 | NC_021164.1    | Ca_kabuli_chr05 | 44844309                | AA                              | GG              | 1946854128               |
| SNP_P4_76252_44844467 | NC_021164.1    | Ca_kabuli_chr05 | 44844467                | CC                              | TT              | 1946854130               |
| SNP_P4_76253_44906511 | NC_021164.1    | Ca_kabuli_chr05 | 44906511                | TT                              | CC              | 1946854132               |
| SNP_P4_76256_44947416 | NC_021164.1    | Ca_kabuli_chr05 | 44947416                | CC                              | TT              | 1946854134               |
| SNP_P4_76257_44966108 | NC_021164.1    | Ca_kabuli_chr05 | 44966108                | TT                              | CC              | 1946854136               |
| SNP_P4_76258_44967759 | NC_021164.1    | Ca_kabuli_chr05 | 44967759                | TT                              | CC              | 1946854138               |
| SNP_P4_76259_44988217 | NC_021164.1    | Ca_kabuli_chr05 | 44988217                | TT                              | GG              | 1946854140               |
| SNP_P4_76260_44999471 | NC_021164.1    | Ca_kabuli_chr05 | 44999471                | TT                              | CC              | 1946854142               |
| SNP_P4_76261_45000614 | NC_021164.1    | Ca_kabuli_chr05 | 45000614                | CC                              | AA              | 1946854144               |
| SNP_P4_76262_45016811 | NC_021164.1    | Ca_kabuli_chr05 | 45016811                | TT                              | CC              | 1946854146               |
| SNP_P4_76263_45053472 | NC_021164.1    | Ca_kabuli_chr05 | 45053472                | GG                              | AA              | 1946854148               |
| SNP_P4_76264_45085417 | NC_021164.1    | Ca_kabuli_chr05 | 45085417                | TT                              | AA              | 1946854150               |
| SNP_P4_76265_45086457 | NC_021164.1    | Ca_kabuli_chr05 | 45086457                | AA                              | GG              | 1946854152               |
| SNP_P4_76266_45086611 | NC_021164.1    | Ca_kabuli_chr05 | 45086611                | AA                              | TT              | 1946854154               |
| SNP_P4_76267_45086818 | NC_021164.1    | Ca_kabuli_chr05 | 45086818                | CC                              | TT              | 1946854156               |
| SNP_P4_76269_45087028 | NC_021164.1    | Ca_kabuli_chr05 | 45087028                | CC                              | TT              | 1946854158               |
| SNP_P4_76271_45094324 | NC_021164.1    | Ca_kabuli_chr05 | 45094324                | TT                              | AA              | 1946854160               |
| SNP_P4_76272_45094365 | NC_021164.1    | Ca_kabuli_chr05 | 45094365                | CC                              | TT              | 1946854162               |

| SNPs IDs              | Chromosome IDs | Chromosomes     | Physical positions (bp) | CDC Frontier (Reference genome) | (ILWC46 & LPNB) | NCBI SNPdb Accession IDs |
|-----------------------|----------------|-----------------|-------------------------|---------------------------------|-----------------|--------------------------|
| SNP_P4_76274_45096025 | NC_021164.1    | Ca_kabuli_chr05 | 45096025                | GG                              | AA              | 1946854164               |
| SNP_P4_76275_45096272 | NC_021164.1    | Ca_kabuli_chr05 | 45096272                | GG                              | AA              | 1946854166               |
| SNP_P4_76276_45097448 | NC_021164.1    | Ca_kabuli_chr05 | 45097448                | GG                              | AA              | 1946854168               |
| SNP_P4_76278_45097741 | NC_021164.1    | Ca_kabuli_chr05 | 45097741                | AA                              | CC              | 1946854170               |
| SNP_P4_76279_45097789 | NC_021164.1    | Ca_kabuli_chr05 | 45097789                | TT                              | AA              | 1946854172               |
| SNP_P4_76281_45098312 | NC_021164.1    | Ca_kabuli_chr05 | 45098312                | GG                              | AA              | 1946854174               |
| SNP_P4_76282_45098420 | NC_021164.1    | Ca_kabuli_chr05 | 45098420                | AA                              | GG              | 1946854176               |
| SNP_P4_76283_45103704 | NC_021164.1    | Ca_kabuli_chr05 | 45103704                | CC                              | TT              | 1946854178               |
| SNP_P4_76284_45136528 | NC_021164.1    | Ca_kabuli_chr05 | 45136528                | GG                              | AA              | 1946854180               |
| SNP_P4_76285_45146936 | NC_021164.1    | Ca_kabuli_chr05 | 45146936                | GG                              | AA              | 1946854182               |
| SNP_P4_76286_45164377 | NC_021164.1    | Ca_kabuli_chr05 | 45164377                | AA                              | GG              | 1946854184               |
| SNP_P4_76287_45164386 | NC_021164.1    | Ca_kabuli_chr05 | 45164386                | GG                              | AA              | 1946854186               |
| SNP_P4_76289_45206277 | NC_021164.1    | Ca_kabuli_chr05 | 45206277                | CC                              | GG              | 1946854188               |
| SNP_P4_76290_45209560 | NC_021164.1    | Ca_kabuli_chr05 | 45209560                | AA                              | GG              | 1946854190               |
| SNP_P4_76291_45224851 | NC_021164.1    | Ca_kabuli_chr05 | 45224851                | GG                              | TT              | 1946854192               |
| SNP_P4_76292_45235849 | NC_021164.1    | Ca_kabuli_chr05 | 45235849                | CC                              | TT              | 1946854194               |
| SNP_P4_76293_45252849 | NC_021164.1    | Ca_kabuli_chr05 | 45252849                | GG                              | AA              | 1946854196               |
| SNP_P4_76294_45268005 | NC_021164.1    | Ca_kabuli_chr05 | 45268005                | GG                              | TT              | 1946854198               |
| SNP_P4_76296_45283373 | NC_021164.1    | Ca_kabuli_chr05 | 45283373                | GG                              | TT              | 1946854200               |
| SNP_P4_76298_45318637 | NC_021164.1    | Ca_kabuli_chr05 | 45318637                | GG                              | AA              | 1946854201               |
| SNP_P4_76299_45321277 | NC_021164.1    | Ca_kabuli_chr05 | 45321277                | CC                              | GG              | 1946854203               |
| SNP_P4_76302_45343670 | NC_021164.1    | Ca_kabuli_chr05 | 45343670                | GG                              | AA              | 1946854205               |
| SNP_P4_76303_45364920 | NC_021164.1    | Ca_kabuli_chr05 | 45364920                | AA                              | CC              | 1946854207               |
| SNP_P4_76304_45364922 | NC_021164.1    | Ca_kabuli_chr05 | 45364922                | AA                              | GG              | 1946854209               |
| SNP_P4_76307_45378468 | NC_021164.1    | Ca_kabuli_chr05 | 45378468                | AA                              | GG              | 1946854211               |
| SNP_P4_76308_45378469 | NC_021164.1    | Ca_kabuli_chr05 | 45378469                | TT                              | GG              | 1946854213               |
| SNP_P4_76309_45438815 | NC_021164.1    | Ca_kabuli_chr05 | 45438815                | GG                              | AA              | 1946854215               |
| SNP_P4_76310_45452444 | NC_021164.1    | Ca_kabuli_chr05 | 45452444                | GG                              | AA              | 1946854217               |
| SNP_P4_76311_45508712 | NC_021164.1    | Ca_kabuli_chr05 | 45508712                | CC                              | TT              | 1946854219               |
| SNP_P4_76312_45523534 | NC_021164.1    | Ca_kabuli_chr05 | 45523534                | GG                              | AA              | 1946854221               |
| SNP_P4_76315_45568825 | NC_021164.1    | Ca_kabuli_chr05 | 45568825                | AA                              | CC              | 1946854223               |
| SNP_P4_76316_45632695 | NC_021164.1    | Ca_kabuli_chr05 | 45632695                | TT                              | CC              | 1946854225               |
| SNP_P4_76317_45712070 | NC_021164.1    | Ca_kabuli_chr05 | 45712070                | CC                              | TT              | 1946854227               |
| SNP_P4_76318_45724499 | NC_021164.1    | Ca_kabuli_chr05 | 45724499                | CC                              | AA              | 1946854229               |
| SNP_P4_76320_45745864 | NC_021164.1    | Ca_kabuli_chr05 | 45745864                | TT                              | CC              | 1946854231               |
| SNP_P4_76321_45746955 | NC_021164.1    | Ca_kabuli_chr05 | 45746955                | AA                              | CC              | 1946854233               |
| SNP_P4_76323_45750181 | NC_021164.1    | Ca_kabuli_chr05 | 45750181                | CC                              | GG              | 1946854235               |
| SNP_P4_76324_45750222 | NC_021164.1    | Ca_kabuli_chr05 | 45750222                | AA                              | GG              | 1946854238               |
| SNP_P4_76325_45760127 | NC_021164.1    | Ca_kabuli_chr05 | 45760127                | AA                              | TT              | 1946854240               |
| SNP_P4_76326_45771267 | NC_021164.1    | Ca_kabuli_chr05 | 45771267                | GG                              | AA              | 1946854242               |
| SNP_P4_76327_45776450 | NC_021164.1    | Ca_kabuli_chr05 | 45776450                | AA                              | GG              | 1946854244               |
| SNP_P4_76328_45781044 | NC_021164.1    | Ca_kabuli_chr05 | 45781044                | TT                              | AA              | 1946854246               |

| SNPs IDs              | Chromosome IDs | Chromosomes     | Physical positions (bp) | CDC Frontier (Reference genome) | (ILWC46 & LPNB) | NCBI SNPdb Accession IDs |
|-----------------------|----------------|-----------------|-------------------------|---------------------------------|-----------------|--------------------------|
| SNP_P4_76329_45781047 | NC_021164.1    | Ca_kabuli_chr05 | 45781047                | AA                              | GG              | 1946854248               |
| SNP_P4_76332_45795920 | NC_021164.1    | Ca_kabuli_chr05 | 45795920                | AA                              | TT              | 1946854250               |
| SNP_P4_76333_45816473 | NC_021164.1    | Ca_kabuli_chr05 | 45816473                | CC                              | TT              | 1946854252               |
| SNP_P4_76334_45821193 | NC_021164.1    | Ca_kabuli_chr05 | 45821193                | AA                              | TT              | 1946854254               |
| SNP_P4_76335_45851552 | NC_021164.1    | Ca_kabuli_chr05 | 45851552                | GG                              | AA              | 1946854256               |
| SNP_P4_76336_45880000 | NC_021164.1    | Ca_kabuli_chr05 | 45880000                | GG                              | AA              | 1946854258               |
| SNP_P4_76337_45881075 | NC_021164.1    | Ca_kabuli_chr05 | 45881075                | CC                              | TT              | 1946854260               |
| SNP_P4_76338_45897361 | NC_021164.1    | Ca_kabuli_chr05 | 45897361                | AA                              | TT              | 1946854262               |
| SNP_P4_76339_45929658 | NC_021164.1    | Ca_kabuli_chr05 | 45929658                | GG                              | AA              | 1946854264               |
| SNP_P4_76340_45959127 | NC_021164.1    | Ca_kabuli_chr05 | 45959127                | TT                              | CC              | 1946854266               |
| SNP_P4_76341_45963348 | NC_021164.1    | Ca_kabuli_chr05 | 45963348                | TT                              | CC              | 1946854268               |
| SNP_P4_76344_46034019 | NC_021164.1    | Ca_kabuli_chr05 | 46034019                | TT                              | CC              | 1946854270               |
| SNP_P4_76345_46034053 | NC_021164.1    | Ca_kabuli_chr05 | 46034053                | AA                              | CC              | 1946854272               |
| SNP_P4_76346_46041790 | NC_021164.1    | Ca_kabuli_chr05 | 46041790                | AA                              | TT              | 1946854274               |
| SNP_P4_76347_46041800 | NC_021164.1    | Ca_kabuli_chr05 | 46041800                | CC                              | TT              | 1946854276               |
| SNP_P4_76348_46054788 | NC_021164.1    | Ca_kabuli_chr05 | 46054788                | AA                              | CC              | 1946854278               |
| SNP_P4_76350_46091707 | NC_021164.1    | Ca_kabuli_chr05 | 46091707                | AA                              | GG              | 1946854280               |
| SNP_P4_76352_46122923 | NC_021164.1    | Ca_kabuli_chr05 | 46122923                | CC                              | TT              | 1946854282               |
| SNP_P4_76353_46122942 | NC_021164.1    | Ca_kabuli_chr05 | 46122942                | TT                              | GG              | 1946854284               |
| SNP_P4_76355_46189479 | NC_021164.1    | Ca_kabuli_chr05 | 46189479                | CC                              | GG              | 1946854286               |
| SNP_P4_76356_46201740 | NC_021164.1    | Ca_kabuli_chr05 | 46201740                | AA                              | TT              | 1946854288               |
| SNP_P4_76357_46201803 | NC_021164.1    | Ca_kabuli_chr05 | 46201803                | TT                              | AA              | 1946854290               |
| SNP_P4_76358_46207871 | NC_021164.1    | Ca_kabuli_chr05 | 46207871                | AA                              | TT              | 1946854292               |
| SNP_P4_76359_46208242 | NC_021164.1    | Ca_kabuli_chr05 | 46208242                | TT                              | GG              | 1946854294               |
| SNP_P4_76360_46208381 | NC_021164.1    | Ca_kabuli_chr05 | 46208381                | AA                              | TT              | 1946854296               |
| SNP_P4_76362_46304727 | NC_021164.1    | Ca_kabuli_chr05 | 46304727                | AA                              | GG              | 1946854298               |
| SNP_P4_76364_46313281 | NC_021164.1    | Ca_kabuli_chr05 | 46313281                | GG                              | CC              | 1946854300               |
| SNP_P4_76366_46342586 | NC_021164.1    | Ca_kabuli_chr05 | 46342586                | GG                              | AA              | 1946854302               |
| SNP_P4_76367_46349093 | NC_021164.1    | Ca_kabuli_chr05 | 46349093                | GG                              | AA              | 1946854304               |
| SNP_P4_76369_46393283 | NC_021164.1    | Ca_kabuli_chr05 | 46393283                | TT                              | CC              | 1946854306               |
| SNP_P4_76371_46399854 | NC_021164.1    | Ca_kabuli_chr05 | 46399854                | AA                              | GG              | 1946854308               |
| SNP_P4_76372_46418383 | NC_021164.1    | Ca_kabuli_chr05 | 46418383                | TT                              | CC              | 1946854310               |
| SNP_P4_76374_46467297 | NC_021164.1    | Ca_kabuli_chr05 | 46467297                | TT                              | CC              | 1946854312               |
| SNP_P4_76375_46479583 | NC_021164.1    | Ca_kabuli_chr05 | 46479583                | AA                              | GG              | 1946854314               |
| SNP_P4_76376_46484334 | NC_021164.1    | Ca_kabuli_chr05 | 46484334                | TT                              | CC              | 1946854316               |
| SNP_P4_76377_46537018 | NC_021164.1    | Ca_kabuli_chr05 | 46537018                | GG                              | TT              | 1946854318               |
| SNP_P4_76380_46566358 | NC_021164.1    | Ca_kabuli_chr05 | 46566358                | TT                              | CC              | 1946854320               |
| SNP_P4_76381_46569569 | NC_021164.1    | Ca_kabuli_chr05 | 46569569                | AA                              | TT              | 1946854322               |
| SNP_P4_76382_46576527 | NC_021164.1    | Ca_kabuli_chr05 | 46576527                | TT                              | CC              | 1946854324               |
| SNP_P4_76383_46576530 | NC_021164.1    | Ca_kabuli_chr05 | 46576530                | AA                              | GG              | 1946854326               |
| SNP_P4_76384_46619279 | NC_021164.1    | Ca_kabuli_chr05 | 46619279                | TT                              | GG              | 1946854328               |
| SNP_P4_76385_46655029 | NC_021164.1    | Ca_kabuli_chr05 | 46655029                | AA                              | TT              | 1946854329               |

| SNPs IDs              | Chromosome IDs | Chromosomes     | Physical positions (bp) | CDC Frontier (Reference genome) | (ILWC46 & LPNB) | NCBI SNPdb Accession IDs |
|-----------------------|----------------|-----------------|-------------------------|---------------------------------|-----------------|--------------------------|
| SNP_P4_76386_46659984 | NC_021164.1    | Ca_kabuli_chr05 | 46659984                | TT                              | CC              | 1946854332               |
| SNP_P4_76389_46718482 | NC_021164.1    | Ca_kabuli_chr05 | 46718482                | CC                              | TT              | 1946854334               |
| SNP_P4_76390_46768826 | NC_021164.1    | Ca_kabuli_chr05 | 46768826                | GG                              | AA              | 1946854336               |
| SNP_P4_76391_46807655 | NC_021164.1    | Ca_kabuli_chr05 | 46807655                | TT                              | GG              | 1946854338               |
| SNP_P4_76392_46821620 | NC_021164.1    | Ca_kabuli_chr05 | 46821620                | CC                              | TT              | 1946854340               |
| SNP_P4_76393_46835647 | NC_021164.1    | Ca_kabuli_chr05 | 46835647                | AA                              | CC              | 1946854342               |
| SNP_P4_76394_46850765 | NC_021164.1    | Ca_kabuli_chr05 | 46850765                | TT                              | CC              | 1946854344               |
| SNP_P4_76395_46860781 | NC_021164.1    | Ca_kabuli_chr05 | 46860781                | GG                              | AA              | 1946854346               |
| SNP_P4_76396_46870374 | NC_021164.1    | Ca_kabuli_chr05 | 46870374                | TT                              | GG              | 1946854348               |
| SNP_P4_76397_46870629 | NC_021164.1    | Ca_kabuli_chr05 | 46870629                | CC                              | TT              | 1946854349               |
| SNP_P4_76398_46871016 | NC_021164.1    | Ca_kabuli_chr05 | 46871016                | AA                              | GG              | 1946854351               |
| SNP_P4_76400_46880556 | NC_021164.1    | Ca_kabuli_chr05 | 46880556                | GG                              | CC              | 1946854353               |
| SNP_P4_76401_46886426 | NC_021164.1    | Ca_kabuli_chr05 | 46886426                | AA                              | CC              | 1946854355               |
| SNP_P4_76403_46889752 | NC_021164.1    | Ca_kabuli_chr05 | 46889752                | AA                              | TT              | 1946854357               |
| SNP_P4_76404_46906351 | NC_021164.1    | Ca_kabuli_chr05 | 46906351                | GG                              | AA              | 1946854359               |
| SNP_P4_76406_46923822 | NC_021164.1    | Ca_kabuli_chr05 | 46923822                | CC                              | GG              | 1946854361               |
| SNP_P4_76407_46944803 | NC_021164.1    | Ca_kabuli_chr05 | 46944803                | TT                              | CC              | 1946854363               |
| SNP_P4_76408_46944804 | NC_021164.1    | Ca_kabuli_chr05 | 46944804                | GG                              | AA              | 1946854365               |
| SNP_P4_76409_46945144 | NC_021164.1    | Ca_kabuli_chr05 | 46945144                | GG                              | AA              | 1946854367               |
| SNP_P4_76410_46945170 | NC_021164.1    | Ca_kabuli_chr05 | 46945170                | CC                              | GG              | 1946854369               |
| SNP_P4_76413_46986486 | NC_021164.1    | Ca_kabuli_chr05 | 46986486                | TT                              | CC              | 1946854371               |
| SNP_P4_76414_47000684 | NC_021164.1    | Ca_kabuli_chr05 | 47000684                | GG                              | AA              | 1946854373               |
| SNP_P4_76415_47011106 | NC_021164.1    | Ca_kabuli_chr05 | 47011106                | GG                              | AA              | 1946854375               |
| SNP_P4_76416_47032436 | NC_021164.1    | Ca_kabuli_chr05 | 47032436                | GG                              | AA              | 1946854377               |
| SNP_P4_76417_47084970 | NC_021164.1    | Ca_kabuli_chr05 | 47084970                | CC                              | AA              | 1946854379               |
| SNP_P4_76418_47106093 | NC_021164.1    | Ca_kabuli_chr05 | 47106093                | TT                              | CC              | 1946854381               |
| SNP_P4_76419_47106094 | NC_021164.1    | Ca_kabuli_chr05 | 47106094                | TT                              | GG              | 1946854383               |
| SNP_P4_76422_47156203 | NC_021164.1    | Ca_kabuli_chr05 | 47156203                | GG                              | TT              | 1946854385               |
| SNP_P4_76423_47160777 | NC_021164.1    | Ca_kabuli_chr05 | 47160777                | CC                              | TT              | 1946854387               |
| SNP_P4_76424_47162584 | NC_021164.1    | Ca_kabuli_chr05 | 47162584                | TT                              | AA              | 1946854389               |
| SNP_P4_76425_47176414 | NC_021164.1    | Ca_kabuli_chr05 | 47176414                | AA                              | TT              | 1946854391               |
| SNP_P4_76428_47267376 | NC_021164.1    | Ca_kabuli_chr05 | 47267376                | AA                              | GG              | 1946854392               |
| SNP_P4_76429_47268423 | NC_021164.1    | Ca_kabuli_chr05 | 47268423                | TT                              | GG              | 1946854394               |
| SNP_P4_76431_47272578 | NC_021164.1    | Ca_kabuli_chr05 | 47272578                | GG                              | AA              | 1946854396               |
| SNP_P4_76432_47275121 | NC_021164.1    | Ca_kabuli_chr05 | 47275121                | CC                              | TT              | 1946854398               |
| SNP_P4_76433_47275441 | NC_021164.1    | Ca_kabuli_chr05 | 47275441                | TT                              | GG              | 1946854400               |
| SNP_P4_76434_47281193 | NC_021164.1    | Ca_kabuli_chr05 | 47281193                | CC                              | TT              | 1946854402               |
| SNP_P4_76435_47291871 | NC_021164.1    | Ca_kabuli_chr05 | 47291871                | GG                              | AA              | 1946854404               |
| SNP_P4_76436_47304292 | NC_021164.1    | Ca_kabuli_chr05 | 47304292                | CC                              | AA              | 1946854406               |
| SNP_P4_76437_47345993 | NC_021164.1    | Ca_kabuli_chr05 | 47345993                | TT                              | GG              | 1946854408               |
| SNP_P4_76438_47361333 | NC_021164.1    | Ca_kabuli_chr05 | 47361333                | TT                              | AA              | 1946854410               |
| SNP_P4_76439_47404557 | NC_021164.1    | Ca_kabuli_chr05 | 47404557                | GG                              | AA              | 1946854412               |

| SNPs IDs              | Chromosome IDs | Chromosomes     | Physical positions (bp) | CDC Frontier (Reference genome) | (ILWC46 & LPNB) | NCBI SNPdb Accession IDs |
|-----------------------|----------------|-----------------|-------------------------|---------------------------------|-----------------|--------------------------|
| SNP_P4_76440_47414386 | NC_021164.1    | Ca_kabuli_chr05 | 47414386                | TT                              | AA              | 1946854414               |
| SNP_P4_76441_47414454 | NC_021164.1    | Ca_kabuli_chr05 | 47414454                | AA                              | GG              | 1946854416               |
| SNP_P4_76442_47434915 | NC_021164.1    | Ca_kabuli_chr05 | 47434915                | TT                              | CC              | 1946854418               |
| SNP_P4_76443_47440540 | NC_021164.1    | Ca_kabuli_chr05 | 47440540                | CC                              | TT              | 1946854420               |
| SNP_P4_76444_47445494 | NC_021164.1    | Ca_kabuli_chr05 | 47445494                | TT                              | CC              | 1946854422               |
| SNP_P4_76445_47452299 | NC_021164.1    | Ca_kabuli_chr05 | 47452299                | AA                              | GG              | 1946854424               |
| SNP_P4_76446_47452668 | NC_021164.1    | Ca_kabuli_chr05 | 47452668                | CC                              | TT              | 1946854426               |
| SNP_P4_76447_47453352 | NC_021164.1    | Ca_kabuli_chr05 | 47453352                | AA                              | TT              | 1946854428               |
| SNP_P4_76448_47453425 | NC_021164.1    | Ca_kabuli_chr05 | 47453425                | AA                              | CC              | 1946854430               |
| SNP_P4_76449_47453577 | NC_021164.1    | Ca_kabuli_chr05 | 47453577                | CC                              | TT              | 1946854432               |
| SNP_P4_76450_47453607 | NC_021164.1    | Ca_kabuli_chr05 | 47453607                | GG                              | AA              | 1946854434               |
| SNP_P4_76451_47453628 | NC_021164.1    | Ca_kabuli_chr05 | 47453628                | AA                              | CC              | 1946854436               |
| SNP_P4_76452_47454950 | NC_021164.1    | Ca_kabuli_chr05 | 47454950                | AA                              | TT              | 1946854438               |
| SNP_P4_76453_47455240 | NC_021164.1    | Ca_kabuli_chr05 | 47455240                | AA                              | CC              | 1946854440               |
| SNP_P4_76454_47455301 | NC_021164.1    | Ca_kabuli_chr05 | 47455301                | AA                              | TT              | 1946854442               |
| SNP_P4_76455_47455417 | NC_021164.1    | Ca_kabuli_chr05 | 47455417                | GG                              | AA              | 1946854444               |
| SNP_P4_76456_47455473 | NC_021164.1    | Ca_kabuli_chr05 | 47455473                | GG                              | AA              | 1946854446               |
| SNP_P4_76457_47455494 | NC_021164.1    | Ca_kabuli_chr05 | 47455494                | GG                              | CC              | 1946854448               |
| SNP_P4_76458_47455509 | NC_021164.1    | Ca_kabuli_chr05 | 47455509                | CC                              | TT              | 1946854450               |
| SNP_P4_76459_47455513 | NC_021164.1    | Ca_kabuli_chr05 | 47455513                | AA                              | TT              | 1946854452               |
| SNP_P4_76460_47455554 | NC_021164.1    | Ca_kabuli_chr05 | 47455554                | CC                              | TT              | 1946854454               |
| SNP_P4_76461_47455562 | NC_021164.1    | Ca_kabuli_chr05 | 47455562                | CC                              | TT              | 1946854456               |
| SNP_P4_76462_47455565 | NC_021164.1    | Ca_kabuli_chr05 | 47455565                | TT                              | AA              | 1946854458               |
| SNP_P4_76463_47455578 | NC_021164.1    | Ca_kabuli_chr05 | 47455578                | AA                              | TT              | 1946854460               |
| SNP_P4_76466_47519942 | NC_021164.1    | Ca_kabuli_chr05 | 47519942                | TT                              | AA              | 1946854462               |
| SNP_P4_76467_47553736 | NC_021164.1    | Ca_kabuli_chr05 | 47553736                | CC                              | TT              | 1946854464               |
| SNP_P4_76468_47557859 | NC_021164.1    | Ca_kabuli_chr05 | 47557859                | TT                              | GG              | 1946854466               |
| SNP_P4_76469_47603590 | NC_021164.1    | Ca_kabuli_chr05 | 47603590                | AA                              | GG              | 1946854468               |
| SNP_P4_76471_47658499 | NC_021164.1    | Ca_kabuli_chr05 | 47658499                | GG                              | CC              | 1946854470               |
| SNP_P4_76472_47664967 | NC_021164.1    | Ca_kabuli_chr05 | 47664967                | AA                              | GG              | 1946854472               |
| SNP_P4_76475_47679005 | NC_021164.1    | Ca_kabuli_chr05 | 47679005                | AA                              | TT              | 1946854474               |
| SNP_P4_76479_47716515 | NC_021164.1    | Ca_kabuli_chr05 | 47716515                | CC                              | TT              | 1946854476               |
| SNP_P4_76480_47794704 | NC_021164.1    | Ca_kabuli_chr05 | 47794704                | GG                              | CC              | 1946854478               |
| SNP_P4_76481_47798022 | NC_021164.1    | Ca_kabuli_chr05 | 47798022                | TT                              | AA              | 1946854480               |
| SNP_P4_76484_47843390 | NC_021164.1    | Ca_kabuli_chr05 | 47843390                | GG                              | AA              | 1946854482               |
| SNP_P4_76485_47875330 | NC_021164.1    | Ca_kabuli_chr05 | 47875330                | TT                              | CC              | 1946854484               |
| SNP_P4_76486_47875332 | NC_021164.1    | Ca_kabuli_chr05 | 47875332                | TT                              | CC              | 1946854486               |
| SNP_P4_76487_47880836 | NC_021164.1    | Ca_kabuli_chr05 | 47880836                | CC                              | TT              | 1946854488               |
| SNP_P4_76488_47920819 | NC_021164.1    | Ca_kabuli_chr05 | 47920819                | GG                              | CC              | 1946854490               |
| SNP_P4_76489_47940050 | NC_021164.1    | Ca_kabuli_chr05 | 47940050                | CC                              | TT              | 1946854492               |
| SNP_P4_76491_47955297 | NC_021164.1    | Ca_kabuli_chr05 | 47955297                | TT                              | AA              | 1946854494               |
| SNP_P4_76492_47963230 | NC_021164.1    | Ca_kabuli_chr05 | 47963230                | AA                              | TT              | 1946854495               |



| SNPs IDs              | Chromosome IDs | Chromosomes     | Physical positions (bp) | CDC Frontier (Reference genome) | (ILWC46 & LPNB) | NCBI SNPdb Accession IDs |
|-----------------------|----------------|-----------------|-------------------------|---------------------------------|-----------------|--------------------------|
| SNP_P4_76494_47983754 | NC_021164.1    | Ca_kabuli_chr05 | 47983754                | CC                              | GG              | 1946854497               |
| SNP_P4_76496_48022859 | NC_021164.1    | Ca_kabuli_chr05 | 48022859                | CC                              | AA              | 1946854499               |
| SNP_P4_76500_48122467 | NC_021164.1    | Ca_kabuli_chr05 | 48122467                | AA                              | GG              | 1946854501               |
| SNP_P4_76503_48156475 | NC_021164.1    | Ca_kabuli_chr05 | 48156475                | CC                              | GG              | 1946854503               |
| SNP_P4_76504_48156508 | NC_021164.1    | Ca_kabuli_chr05 | 48156508                | GG                              | AA              | 1946854505               |
| SNP_P4_76505_48156531 | NC_021164.1    | Ca_kabuli_chr05 | 48156531                | CC                              | TT              | 1946854507               |
| SNP_P4_76506_48157292 | NC_021164.1    | Ca_kabuli_chr05 | 48157292                | CC                              | TT              | 1946854509               |
| SNP_P4_76507_48157630 | NC_021164.1    | Ca_kabuli_chr05 | 48157630                | TT                              | AA              | 1946854511               |
| SNP_P4_76508_48164369 | NC_021164.1    | Ca_kabuli_chr05 | 48164369                | AA                              | GG              | 1946854513               |
| SNP_P4_76510_23921    | NC_021165.1    | Ca_kabuli_chr06 | 23921                   | GG                              | TT              | 1946854515               |
| SNP_P4_76512_59447    | NC_021165.1    | Ca_kabuli_chr06 | 59447                   | TT                              | GG              | 1946854517               |
| SNP_P4_76514_99026    | NC_021165.1    | Ca_kabuli_chr06 | 99026                   | GG                              | AA              | 1946854519               |
| SNP_P4_76515_99075    | NC_021165.1    | Ca_kabuli_chr06 | 99075                   | TT                              | CC              | 1946854521               |
| SNP_P4_76516_99079    | NC_021165.1    | Ca_kabuli_chr06 | 99079                   | CC                              | TT              | 1946854523               |
| SNP_P4_76517_112807   | NC_021165.1    | Ca_kabuli_chr06 | 112807                  | AA                              | GG              | 1946854525               |
| SNP_P4_76518_112843   | NC_021165.1    | Ca_kabuli_chr06 | 112843                  | TT                              | GG              | 1946854527               |
| SNP_P4_76519_112866   | NC_021165.1    | Ca_kabuli_chr06 | 112866                  | CC                              | AA              | 1946854529               |
| SNP_P4_76521_113047   | NC_021165.1    | Ca_kabuli_chr06 | 113047                  | CC                              | TT              | 1946854530               |
| SNP_P4_76522_113115   | NC_021165.1    | Ca_kabuli_chr06 | 113115                  | AA                              | GG              | 1946854532               |
| SNP_P4_76523_113186   | NC_021165.1    | Ca_kabuli_chr06 | 113186                  | AA                              | GG              | 1946854534               |
| SNP_P4_76524_113222   | NC_021165.1    | Ca_kabuli_chr06 | 113222                  | TT                              | CC              | 1946854536               |
| SNP_P4_76525_113251   | NC_021165.1    | Ca_kabuli_chr06 | 113251                  | AA                              | GG              | 1946854538               |
| SNP_P4_76526_113252   | NC_021165.1    | Ca_kabuli_chr06 | 113252                  | AA                              | GG              | 1946854540               |
| SNP_P4_76527_120177   | NC_021165.1    | Ca_kabuli_chr06 | 120177                  | CC                              | TT              | 1946854542               |
| SNP_P4_76528_120278   | NC_021165.1    | Ca_kabuli_chr06 | 120278                  | CC                              | AA              | 1946854544               |
| SNP_P4_76529_120556   | NC_021165.1    | Ca_kabuli_chr06 | 120556                  | CC                              | TT              | 1946854546               |
| SNP_P4_76530_130698   | NC_021165.1    | Ca_kabuli_chr06 | 130698                  | AA                              | CC              | 1946854548               |
| SNP_P4_76531_130986   | NC_021165.1    | Ca_kabuli_chr06 | 130986                  | AA                              | GG              | 1946854550               |
| SNP_P4_76532_131003   | NC_021165.1    | Ca_kabuli_chr06 | 131003                  | TT                              | CC              | 1946854551               |
| SNP_P4_76533_140816   | NC_021165.1    | Ca_kabuli_chr06 | 140816                  | AA                              | CC              | 1946854553               |
| SNP_P4_76534_140820   | NC_021165.1    | Ca_kabuli_chr06 | 140820                  | GG                              | CC              | 1946854555               |
| SNP_P4_76535_141275   | NC_021165.1    | Ca_kabuli_chr06 | 141275                  | CC                              | TT              | 1946854557               |
| SNP_P4_76536_141892   | NC_021165.1    | Ca_kabuli_chr06 | 141892                  | AA                              | TT              | 1946854559               |
| SNP_P4_76537_149089   | NC_021165.1    | Ca_kabuli_chr06 | 149089                  | AA                              | CC              | 1946854561               |
| SNP_P4_76538_149103   | NC_021165.1    | Ca_kabuli_chr06 | 149103                  | TT                              | CC              | 1946854564               |
| SNP_P4_76539_159091   | NC_021165.1    | Ca_kabuli_chr06 | 159091                  | TT                              | AA              | 1946854566               |
| SNP_P4_76540_159101   | NC_021165.1    | Ca_kabuli_chr06 | 159101                  | CC                              | TT              | 1946854568               |
| SNP_P4_76541_159117   | NC_021165.1    | Ca_kabuli_chr06 | 159117                  | AA                              | GG              | 1946854570               |
| SNP_P4_76542_164338   | NC_021165.1    | Ca_kabuli_chr06 | 164338                  | CC                              | TT              | 1946854572               |
| SNP_P4_76543_168226   | NC_021165.1    | Ca_kabuli_chr06 | 168226                  | TT                              | CC              | 1946854574               |
| SNP_P4_76544_168229   | NC_021165.1    | Ca_kabuli_chr06 | 168229                  | TT                              | AA              | 1946854576               |
| SNP_P4_76545_168291   | NC_021165.1    | Ca_kabuli_chr06 | 168291                  | TT                              | CC              | 1946854578               |

| SNPs IDs             | Chromosome IDs | Chromosomes     | Physical positions (bp) | CDC Frontier (Reference genome) | (ILWC46 & LPNB) | NCBI SNPdb Accession IDs |
|----------------------|----------------|-----------------|-------------------------|---------------------------------|-----------------|--------------------------|
| SNP_P4_76546_168304  | NC_021165.1    | Ca_kabuli_chr06 | 168304                  | CC                              | GG              | 1946854579               |
| SNP_P4_76549_197876  | NC_021165.1    | Ca_kabuli_chr06 | 197876                  | GG                              | AA              | 1946854580               |
| SNP_P4_76550_204174  | NC_021165.1    | Ca_kabuli_chr06 | 204174                  | TT                              | CC              | 1946854581               |
| SNP_P4_76551_204195  | NC_021165.1    | Ca_kabuli_chr06 | 204195                  | AA                              | CC              | 1946854583               |
| SNP_P4_76554_252478  | NC_021165.1    | Ca_kabuli_chr06 | 252478                  | CC                              | TT              | 1946854585               |
| SNP_P4_76556_260659  | NC_021165.1    | Ca_kabuli_chr06 | 260659                  | CC                              | TT              | 1946854587               |
| SNP_P4_76557_281990  | NC_021165.1    | Ca_kabuli_chr06 | 281990                  | CC                              | TT              | 1946854589               |
| SNP_P4_76558_310885  | NC_021165.1    | Ca_kabuli_chr06 | 310885                  | AA                              | GG              | 1946854591               |
| SNP_P4_76559_328782  | NC_021165.1    | Ca_kabuli_chr06 | 328782                  | CC                              | TT              | 1946854593               |
| SNP_P4_76561_354149  | NC_021165.1    | Ca_kabuli_chr06 | 354149                  | GG                              | AA              | 1946854595               |
| SNP_P4_76562_356732  | NC_021165.1    | Ca_kabuli_chr06 | 356732                  | CC                              | TT              | 1946854597               |
| SNP_P4_76563_398127  | NC_021165.1    | Ca_kabuli_chr06 | 398127                  | TT                              | GG              | 1946854599               |
| SNP_P4_76565_418601  | NC_021165.1    | Ca_kabuli_chr06 | 418601                  | AA                              | GG              | 1946854601               |
| SNP_P4_76566_423757  | NC_021165.1    | Ca_kabuli_chr06 | 423757                  | TT                              | AA              | 1946854602               |
| SNP_P4_76568_438458  | NC_021165.1    | Ca_kabuli_chr06 | 438458                  | TT                              | CC              | 1946854604               |
| SNP_P4_76572_474489  | NC_021165.1    | Ca_kabuli_chr06 | 474489                  | CC                              | AA              | 1946854606               |
| SNP_P4_76573_530971  | NC_021165.1    | Ca_kabuli_chr06 | 530971                  | AA                              | GG              | 1946854608               |
| SNP_P4_76574_563656  | NC_021165.1    | Ca_kabuli_chr06 | 563656                  | AA                              | TT              | 1946854610               |
| SNP_P4_76577_607425  | NC_021165.1    | Ca_kabuli_chr06 | 607425                  | GG                              | AA              | 1946854612               |
| SNP_P4_76578_607995  | NC_021165.1    | Ca_kabuli_chr06 | 607995                  | GG                              | AA              | 1946854614               |
| SNP_P4_76582_697360  | NC_021165.1    | Ca_kabuli_chr06 | 697360                  | GG                              | AA              | 1946854616               |
| SNP_P4_76584_705548  | NC_021165.1    | Ca_kabuli_chr06 | 705548                  | CC                              | TT              | 1946854618               |
| SNP_P4_76585_705861  | NC_021165.1    | Ca_kabuli_chr06 | 705861                  | CC                              | TT              | 1946854620               |
| SNP_P4_76586_720573  | NC_021165.1    | Ca_kabuli_chr06 | 720573                  | AA                              | CC              | 1946854622               |
| SNP_P4_76587_745960  | NC_021165.1    | Ca_kabuli_chr06 | 745960                  | CC                              | GG              | 1946854624               |
| SNP_P4_76588_772058  | NC_021165.1    | Ca_kabuli_chr06 | 772058                  | AA                              | TT              | 1946854626               |
| SNP_P4_76590_850859  | NC_021165.1    | Ca_kabuli_chr06 | 850859                  | TT                              | CC              | 1946854628               |
| SNP_P4_76592_851070  | NC_021165.1    | Ca_kabuli_chr06 | 851070                  | TT                              | CC              | 1946854630               |
| SNP_P4_76593_851212  | NC_021165.1    | Ca_kabuli_chr06 | 851212                  | CC                              | GG              | 1946854632               |
| SNP_P4_76594_851269  | NC_021165.1    | Ca_kabuli_chr06 | 851269                  | GG                              | TT              | 1946854634               |
| SNP_P4_76595_897078  | NC_021165.1    | Ca_kabuli_chr06 | 897078                  | AA                              | GG              | 1946854635               |
| SNP_P4_76596_912106  | NC_021165.1    | Ca_kabuli_chr06 | 912106                  | TT                              | AA              | 1946854637               |
| SNP_P4_76597_924401  | NC_021165.1    | Ca_kabuli_chr06 | 924401                  | TT                              | GG              | 1946854639               |
| SNP_P4_76599_943691  | NC_021165.1    | Ca_kabuli_chr06 | 943691                  | TT                              | CC              | 1946854641               |
| SNP_P4_76600_974929  | NC_021165.1    | Ca_kabuli_chr06 | 974929                  | TT                              | CC              | 1946854643               |
| SNP_P4_76601_982553  | NC_021165.1    | Ca_kabuli_chr06 | 982553                  | AA                              | GG              | 1946854645               |
| SNP_P4_76602_982557  | NC_021165.1    | Ca_kabuli_chr06 | 982557                  | TT                              | GG              | 1946854647               |
| SNP_P4_76603_988471  | NC_021165.1    | Ca_kabuli_chr06 | 988471                  | AA                              | CC              | 1946854649               |
| SNP_P4_76604_1037641 | NC_021165.1    | Ca_kabuli_chr06 | 1037641                 | GG                              | AA              | 1946854651               |
| SNP_P4_76605_1043823 | NC_021165.1    | Ca_kabuli_chr06 | 1043823                 | CC                              | TT              | 1946854653               |
| SNP_P4_76608_1094916 | NC_021165.1    | Ca_kabuli_chr06 | 1094916                 | TT                              | CC              | 1946854655               |
| SNP_P4_76609_1095172 | NC_021165.1    | Ca_kabuli_chr06 | 1095172                 | GG                              | AA              | 1946854657               |

| SNPs IDs             | Chromosome IDs | Chromosomes     | Physical positions (bp) | CDC Frontier (Reference genome) | (ILWC46 & LPNB) | NCBI SNPdb Accession IDs |
|----------------------|----------------|-----------------|-------------------------|---------------------------------|-----------------|--------------------------|
| SNP_P4_76610_1121692 | NC_021165.1    | Ca_kabuli_chr06 | 1121692                 | CC                              | AA              | 1946854659               |
| SNP_P4_76611_1125508 | NC_021165.1    | Ca_kabuli_chr06 | 1125508                 | AA                              | GG              | 1946854661               |
| SNP_P4_76612_1127877 | NC_021165.1    | Ca_kabuli_chr06 | 1127877                 | GG                              | AA              | 1946854663               |
| SNP_P4_76613_1129162 | NC_021165.1    | Ca_kabuli_chr06 | 1129162                 | AA                              | CC              | 1946854665               |
| SNP_P4_76614_1142285 | NC_021165.1    | Ca_kabuli_chr06 | 1142285                 | TT                              | CC              | 1946854667               |
| SNP_P4_76615_1142518 | NC_021165.1    | Ca_kabuli_chr06 | 1142518                 | AA                              | CC              | 1946854669               |
| SNP_P4_76616_1175620 | NC_021165.1    | Ca_kabuli_chr06 | 1175620                 | GG                              | AA              | 1946854671               |
| SNP_P4_76617_1175626 | NC_021165.1    | Ca_kabuli_chr06 | 1175626                 | TT                              | GG              | 1946854673               |
| SNP_P4_76618_1175639 | NC_021165.1    | Ca_kabuli_chr06 | 1175639                 | TT                              | GG              | 1946854675               |
| SNP_P4_76619_1175646 | NC_021165.1    | Ca_kabuli_chr06 | 1175646                 | TT                              | CC              | 1946854677               |
| SNP_P4_76620_1175648 | NC_021165.1    | Ca_kabuli_chr06 | 1175648                 | CC                              | TT              | 1946854679               |
| SNP_P4_76621_1175719 | NC_021165.1    | Ca_kabuli_chr06 | 1175719                 | AA                              | CC              | 1946854681               |
| SNP_P4_76622_1175753 | NC_021165.1    | Ca_kabuli_chr06 | 1175753                 | AA                              | TT              | 1946854683               |
| SNP_P4_76623_1175754 | NC_021165.1    | Ca_kabuli_chr06 | 1175754                 | TT                              | AA              | 1946854685               |
| SNP_P4_76624_1175775 | NC_021165.1    | Ca_kabuli_chr06 | 1175775                 | CC                              | TT              | 1946854687               |
| SNP_P4_76625_1175780 | NC_021165.1    | Ca_kabuli_chr06 | 1175780                 | TT                              | AA              | 1946854689               |
| SNP_P4_76626_1175919 | NC_021165.1    | Ca_kabuli_chr06 | 1175919                 | TT                              | CC              | 1946854691               |
| SNP_P4_76627_1175922 | NC_021165.1    | Ca_kabuli_chr06 | 1175922                 | AA                              | GG              | 1946854693               |
| SNP_P4_76628_1176009 | NC_021165.1    | Ca_kabuli_chr06 | 1176009                 | CC                              | TT              | 1946854695               |
| SNP_P4_76629_1176089 | NC_021165.1    | Ca_kabuli_chr06 | 1176089                 | TT                              | CC              | 1946854697               |
| SNP_P4_76630_1176187 | NC_021165.1    | Ca_kabuli_chr06 | 1176187                 | TT                              | GG              | 1946854698               |
| SNP_P4_76632_1205668 | NC_021165.1    | Ca_kabuli_chr06 | 1205668                 | TT                              | CC              | 1946854700               |
| SNP_P4_76633_1205669 | NC_021165.1    | Ca_kabuli_chr06 | 1205669                 | TT                              | CC              | 1946854702               |
| SNP_P4_76634_1205678 | NC_021165.1    | Ca_kabuli_chr06 | 1205678                 | TT                              | AA              | 1946854704               |
| SNP_P4_76636_1223491 | NC_021165.1    | Ca_kabuli_chr06 | 1223491                 | GG                              | TT              | 1946854706               |
| SNP_P4_76637_1240421 | NC_021165.1    | Ca_kabuli_chr06 | 1240421                 | AA                              | TT              | 1946854708               |
| SNP_P4_76638_1256228 | NC_021165.1    | Ca_kabuli_chr06 | 1256228                 | AA                              | TT              | 1946854710               |
| SNP_P4_76641_1304687 | NC_021165.1    | Ca_kabuli_chr06 | 1304687                 | TT                              | AA              | 1946854712               |
| SNP_P4_76642_1304691 | NC_021165.1    | Ca_kabuli_chr06 | 1304691                 | AA                              | CC              | 1946854714               |
| SNP_P4_76643_1320838 | NC_021165.1    | Ca_kabuli_chr06 | 1320838                 | AA                              | TT              | 1946854716               |
| SNP_P4_76644_1337230 | NC_021165.1    | Ca_kabuli_chr06 | 1337230                 | TT                              | CC              | 1946854718               |
| SNP_P4_76646_1337445 | NC_021165.1    | Ca_kabuli_chr06 | 1337445                 | TT                              | CC              | 1946854720               |
| SNP_P4_76647_1337697 | NC_021165.1    | Ca_kabuli_chr06 | 1337697                 | AA                              | TT              | 1946854722               |
| SNP_P4_76648_1338910 | NC_021165.1    | Ca_kabuli_chr06 | 1338910                 | CC                              | AA              | 1946854724               |
| SNP_P4_76649_1338986 | NC_021165.1    | Ca_kabuli_chr06 | 1338986                 | TT                              | CC              | 1946854726               |
| SNP_P4_76650_1338999 | NC_021165.1    | Ca_kabuli_chr06 | 1338999                 | TT                              | GG              | 1946854728               |
| SNP_P4_76651_1339002 | NC_021165.1    | Ca_kabuli_chr06 | 1339002                 | TT                              | GG              | 1946854730               |
| SNP_P4_76652_1339013 | NC_021165.1    | Ca_kabuli_chr06 | 1339013                 | AA                              | GG              | 1946854732               |
| SNP_P4_76653_1339024 | NC_021165.1    | Ca_kabuli_chr06 | 1339024                 | CC                              | TT              | 1946854734               |
| SNP_P4_76654_1339032 | NC_021165.1    | Ca_kabuli_chr06 | 1339032                 | TT                              | GG              | 1946854736               |
| SNP_P4_76655_1339034 | NC_021165.1    | Ca_kabuli_chr06 | 1339034                 | AA                              | CC              | 1946854738               |
| SNP_P4_76656_1339083 | NC_021165.1    | Ca_kabuli_chr06 | 1339083                 | AA                              | GG              | 1946854740               |

| SNPs IDs             | Chromosome IDs | Chromosomes     | Physical positions (bp) | CDC Frontier (Reference genome) | (ILWC46 & LPNB) | NCBI SNPdb Accession IDs |
|----------------------|----------------|-----------------|-------------------------|---------------------------------|-----------------|--------------------------|
| SNP_P4_76657_1339108 | NC_021165.1    | Ca_kabuli_chr06 | 1339108                 | TT                              | CC              | 1946854742               |
| SNP_P4_76658_1339112 | NC_021165.1    | Ca_kabuli_chr06 | 1339112                 | CC                              | TT              | 1946854744               |
| SNP_P4_76659_1339123 | NC_021165.1    | Ca_kabuli_chr06 | 1339123                 | CC                              | TT              | 1946854746               |
| SNP_P4_76660_1339653 | NC_021165.1    | Ca_kabuli_chr06 | 1339653                 | AA                              | GG              | 1946854748               |
| SNP_P4_76661_1339981 | NC_021165.1    | Ca_kabuli_chr06 | 1339981                 | TT                              | CC              | 1946854750               |
| SNP_P4_76662_1340030 | NC_021165.1    | Ca_kabuli_chr06 | 1340030                 | TT                              | CC              | 1946854752               |
| SNP_P4_76663_1343521 | NC_021165.1    | Ca_kabuli_chr06 | 1343521                 | AA                              | GG              | 1946854754               |
| SNP_P4_76665_1344177 | NC_021165.1    | Ca_kabuli_chr06 | 1344177                 | TT                              | AA              | 1946854756               |
| SNP_P4_76666_1345570 | NC_021165.1    | Ca_kabuli_chr06 | 1345570                 | CC                              | AA              | 1946854758               |
| SNP_P4_76667_1348922 | NC_021165.1    | Ca_kabuli_chr06 | 1348922                 | AA                              | GG              | 1946854760               |
| SNP_P4_76668_1348954 | NC_021165.1    | Ca_kabuli_chr06 | 1348954                 | TT                              | CC              | 1946854762               |
| SNP_P4_76669_1349015 | NC_021165.1    | Ca_kabuli_chr06 | 1349015                 | TT                              | AA              | 1946854765               |
| SNP_P4_76670_1349032 | NC_021165.1    | Ca_kabuli_chr06 | 1349032                 | GG                              | AA              | 1946854767               |
| SNP_P4_76671_1349069 | NC_021165.1    | Ca_kabuli_chr06 | 1349069                 | GG                              | CC              | 1946854769               |
| SNP_P4_76672_1349310 | NC_021165.1    | Ca_kabuli_chr06 | 1349310                 | CC                              | TT              | 1946854772               |
| SNP_P4_76673_1349335 | NC_021165.1    | Ca_kabuli_chr06 | 1349335                 | TT                              | CC              | 1946854774               |
| SNP_P4_76675_1349389 | NC_021165.1    | Ca_kabuli_chr06 | 1349389                 | GG                              | CC              | 1946854775               |
| SNP_P4_76676_1349471 | NC_021165.1    | Ca_kabuli_chr06 | 1349471                 | AA                              | CC              | 1946854777               |
| SNP_P4_76677_1349476 | NC_021165.1    | Ca_kabuli_chr06 | 1349476                 | CC                              | TT              | 1946854779               |
| SNP_P4_76678_1349836 | NC_021165.1    | Ca_kabuli_chr06 | 1349836                 | CC                              | TT              | 1946854781               |
| SNP_P4_76679_1349926 | NC_021165.1    | Ca_kabuli_chr06 | 1349926                 | TT                              | CC              | 1946854783               |
| SNP_P4_76680_1350103 | NC_021165.1    | Ca_kabuli_chr06 | 1350103                 | TT                              | AA              | 1946854784               |
| SNP_P4_76681_1350274 | NC_021165.1    | Ca_kabuli_chr06 | 1350274                 | TT                              | AA              | 1946854785               |
| SNP_P4_76682_1350303 | NC_021165.1    | Ca_kabuli_chr06 | 1350303                 | GG                              | AA              | 1946854786               |
| SNP_P4_76683_1350310 | NC_021165.1    | Ca_kabuli_chr06 | 1350310                 | AA                              | TT              | 1946854787               |
| SNP_P4_76684_1350790 | NC_021165.1    | Ca_kabuli_chr06 | 1350790                 | TT                              | GG              | 1946854788               |
| SNP_P4_76685_1350830 | NC_021165.1    | Ca_kabuli_chr06 | 1350830                 | AA                              | GG              | 1946854789               |
| SNP_P4_76687_1350965 | NC_021165.1    | Ca_kabuli_chr06 | 1350965                 | GG                              | AA              | 1946854790               |
| SNP_P4_76688_1351173 | NC_021165.1    | Ca_kabuli_chr06 | 1351173                 | GG                              | AA              | 1946854792               |
| SNP_P4_76689_1351254 | NC_021165.1    | Ca_kabuli_chr06 | 1351254                 | CC                              | GG              | 1946854794               |
| SNP_P4_76690_1351284 | NC_021165.1    | Ca_kabuli_chr06 | 1351284                 | AA                              | GG              | 1946854796               |
| SNP_P4_76691_1351545 | NC_021165.1    | Ca_kabuli_chr06 | 1351545                 | CC                              | GG              | 1946854798               |
| SNP_P4_76692_1353981 | NC_021165.1    | Ca_kabuli_chr06 | 1353981                 | CC                              | TT              | 1946854800               |
| SNP_P4_76693_1354003 | NC_021165.1    | Ca_kabuli_chr06 | 1354003                 | TT                              | AA              | 1946854802               |
| SNP_P4_76694_1354062 | NC_021165.1    | Ca_kabuli_chr06 | 1354062                 | GG                              | TT              | 1946854804               |
| SNP_P4_76695_1354127 | NC_021165.1    | Ca_kabuli_chr06 | 1354127                 | GG                              | AA              | 1946854806               |
| SNP_P4_76696_1354306 | NC_021165.1    | Ca_kabuli_chr06 | 1354306                 | AA                              | GG              | 1946854808               |
| SNP_P4_76698_1354328 | NC_021165.1    | Ca_kabuli_chr06 | 1354328                 | CC                              | TT              | 1946854810               |
| SNP_P4_76699_1354347 | NC_021165.1    | Ca_kabuli_chr06 | 1354347                 | GG                              | AA              | 1946854812               |
| SNP_P4_76700_1354351 | NC_021165.1    | Ca_kabuli_chr06 | 1354351                 | CC                              | TT              | 1946854814               |
| SNP_P4_76701_1354378 | NC_021165.1    | Ca_kabuli_chr06 | 1354378                 | AA                              | TT              | 1946854816               |
| SNP_P4_76702_1354424 | NC_021165.1    | Ca_kabuli_chr06 | 1354424                 | CC                              | TT              | 1946854818               |

| SNPs IDs             | Chromosome IDs | Chromosomes     | Physical positions (bp) | CDC Frontier (Reference genome) | (ILWC46 & LPNB) | NCBI SNPdb Accession IDs |
|----------------------|----------------|-----------------|-------------------------|---------------------------------|-----------------|--------------------------|
| SNP_P4_76703_1360619 | NC_021165.1    | Ca_kabuli_chr06 | 1360619                 | AA                              | GG              | 1946854821               |
| SNP_P4_76704_1361976 | NC_021165.1    | Ca_kabuli_chr06 | 1361976                 | TT                              | CC              | 1946854823               |
| SNP_P4_76705_1362233 | NC_021165.1    | Ca_kabuli_chr06 | 1362233                 | TT                              | CC              | 1946854825               |
| SNP_P4_76706_1362261 | NC_021165.1    | Ca_kabuli_chr06 | 1362261                 | AA                              | CC              | 1946854827               |
| SNP_P4_76707_1362309 | NC_021165.1    | Ca_kabuli_chr06 | 1362309                 | TT                              | GG              | 1946854829               |
| SNP_P4_76708_1362354 | NC_021165.1    | Ca_kabuli_chr06 | 1362354                 | GG                              | AA              | 1946854831               |
| SNP_P4_76709_1369758 | NC_021165.1    | Ca_kabuli_chr06 | 1369758                 | TT                              | CC              | 1946854834               |
| SNP_P4_76710_1377886 | NC_021165.1    | Ca_kabuli_chr06 | 1377886                 | CC                              | TT              | 1946854836               |
| SNP_P4_76711_1378156 | NC_021165.1    | Ca_kabuli_chr06 | 1378156                 | GG                              | AA              | 1946854838               |
| SNP_P4_76712_1378234 | NC_021165.1    | Ca_kabuli_chr06 | 1378234                 | CC                              | AA              | 1946854840               |
| SNP_P4_76713_1384524 | NC_021165.1    | Ca_kabuli_chr06 | 1384524                 | GG                              | AA              | 1946854842               |
| SNP_P4_76714_1385002 | NC_021165.1    | Ca_kabuli_chr06 | 1385002                 | CC                              | GG              | 1946854844               |
| SNP_P4_76715_1386891 | NC_021165.1    | Ca_kabuli_chr06 | 1386891                 | GG                              | AA              | 1946854846               |
| SNP_P4_76716_1387280 | NC_021165.1    | Ca_kabuli_chr06 | 1387280                 | AA                              | TT              | 1946854848               |
| SNP_P4_76717_1406259 | NC_021165.1    | Ca_kabuli_chr06 | 1406259                 | CC                              | GG              | 1946854850               |
| SNP_P4_76718_1407868 | NC_021165.1    | Ca_kabuli_chr06 | 1407868                 | CC                              | TT              | 1946854852               |
| SNP_P4_76719_1408251 | NC_021165.1    | Ca_kabuli_chr06 | 1408251                 | CC                              | GG              | 1946854854               |
| SNP_P4_76720_1410138 | NC_021165.1    | Ca_kabuli_chr06 | 1410138                 | GG                              | AA              | 1946854856               |
| SNP_P4_76721_1433416 | NC_021165.1    | Ca_kabuli_chr06 | 1433416                 | AA                              | CC              | 1946854858               |
| SNP_P4_76722_1433419 | NC_021165.1    | Ca_kabuli_chr06 | 1433419                 | CC                              | GG              | 1946854860               |
| SNP_P4_76723_1491398 | NC_021165.1    | Ca_kabuli_chr06 | 1491398                 | CC                              | TT              | 1946854862               |
| SNP_P4_76724_1491403 | NC_021165.1    | Ca_kabuli_chr06 | 1491403                 | AA                              | GG              | 1946854864               |
| SNP_P4_76725_1491472 | NC_021165.1    | Ca_kabuli_chr06 | 1491472                 | AA                              | CC              | 1946854866               |
| SNP_P4_76726_1491501 | NC_021165.1    | Ca_kabuli_chr06 | 1491501                 | TT                              | AA              | 1946854868               |
| SNP_P4_76727_1491597 | NC_021165.1    | Ca_kabuli_chr06 | 1491597                 | TT                              | CC              | 1946854870               |
| SNP_P4_76728_1491610 | NC_021165.1    | Ca_kabuli_chr06 | 1491610                 | GG                              | AA              | 1946854872               |
| SNP_P4_76729_1491673 | NC_021165.1    | Ca_kabuli_chr06 | 1491673                 | GG                              | CC              | 1946854874               |
| SNP_P4_76730_1491729 | NC_021165.1    | Ca_kabuli_chr06 | 1491729                 | GG                              | TT              | 1946854876               |
| SNP_P4_76731_1491748 | NC_021165.1    | Ca_kabuli_chr06 | 1491748                 | CC                              | TT              | 1946854878               |
| SNP_P4_76732_1491780 | NC_021165.1    | Ca_kabuli_chr06 | 1491780                 | AA                              | GG              | 1946854880               |
| SNP_P4_76733_1491810 | NC_021165.1    | Ca_kabuli_chr06 | 1491810                 | CC                              | TT              | 1946854882               |
| SNP_P4_76734_1491856 | NC_021165.1    | Ca_kabuli_chr06 | 1491856                 | GG                              | AA              | 1946854884               |
| SNP_P4_76735_1491865 | NC_021165.1    | Ca_kabuli_chr06 | 1491865                 | GG                              | AA              | 1946854886               |
| SNP_P4_76736_1491885 | NC_021165.1    | Ca_kabuli_chr06 | 1491885                 | AA                              | TT              | 1946854888               |
| SNP_P4_76738_1491957 | NC_021165.1    | Ca_kabuli_chr06 | 1491957                 | CC                              | TT              | 1946854890               |
| SNP_P4_76739_1491999 | NC_021165.1    | Ca_kabuli_chr06 | 1491999                 | CC                              | AA              | 1946854892               |
| SNP_P4_76740_1492011 | NC_021165.1    | Ca_kabuli_chr06 | 1492011                 | GG                              | AA              | 1946854894               |
| SNP_P4_76741_1492061 | NC_021165.1    | Ca_kabuli_chr06 | 1492061                 | GG                              | AA              | 1946854896               |
| SNP_P4_76742_1492064 | NC_021165.1    | Ca_kabuli_chr06 | 1492064                 | CC                              | AA              | 1946854898               |
| SNP_P4_76743_1492142 | NC_021165.1    | Ca_kabuli_chr06 | 1492142                 | GG                              | TT              | 1946854900               |
| SNP_P4_76744_1492144 | NC_021165.1    | Ca_kabuli_chr06 | 1492144                 | TT                              | AA              | 1946854901               |
| SNP_P4_76745_1492171 | NC_021165.1    | Ca_kabuli_chr06 | 1492171                 | GG                              | AA              | 1946854903               |

| SNPs IDs             | Chromosome IDs | Chromosomes     | Physical positions (bp) | CDC Frontier (Reference genome) | (ILWC46 & LPNB) | NCBI SNPdb Accession IDs |
|----------------------|----------------|-----------------|-------------------------|---------------------------------|-----------------|--------------------------|
| SNP_P4_76746_1492211 | NC_021165.1    | Ca_kabuli_chr06 | 1492211                 | AA                              | TT              | 1946854905               |
| SNP_P4_76747_1492246 | NC_021165.1    | Ca_kabuli_chr06 | 1492246                 | AA                              | GG              | 1946854907               |
| SNP_P4_76748_1492272 | NC_021165.1    | Ca_kabuli_chr06 | 1492272                 | TT                              | CC              | 1946854909               |
| SNP_P4_76749_1492280 | NC_021165.1    | Ca_kabuli_chr06 | 1492280                 | TT                              | AA              | 1946854911               |
| SNP_P4_76750_1492289 | NC_021165.1    | Ca_kabuli_chr06 | 1492289                 | AA                              | GG              | 1946854913               |
| SNP_P4_76751_1492310 | NC_021165.1    | Ca_kabuli_chr06 | 1492310                 | CC                              | TT              | 1946854915               |
| SNP_P4_76752_1492341 | NC_021165.1    | Ca_kabuli_chr06 | 1492341                 | CC                              | GG              | 1946854917               |
| SNP_P4_76754_1492388 | NC_021165.1    | Ca_kabuli_chr06 | 1492388                 | CC                              | TT              | 1946854919               |
| SNP_P4_76755_1492423 | NC_021165.1    | Ca_kabuli_chr06 | 1492423                 | GG                              | CC              | 1946854921               |
| SNP_P4_76756_1492432 | NC_021165.1    | Ca_kabuli_chr06 | 1492432                 | CC                              | AA              | 1946854923               |
| SNP_P4_76757_1492443 | NC_021165.1    | Ca_kabuli_chr06 | 1492443                 | GG                              | TT              | 1946854925               |
| SNP_P4_76758_1492545 | NC_021165.1    | Ca_kabuli_chr06 | 1492545                 | TT                              | CC              | 1946854927               |
| SNP_P4_76759_1492620 | NC_021165.1    | Ca_kabuli_chr06 | 1492620                 | AA                              | CC              | 1946854929               |
| SNP_P4_76760_1492681 | NC_021165.1    | Ca_kabuli_chr06 | 1492681                 | AA                              | GG              | 1946854931               |
| SNP_P4_76761_1492682 | NC_021165.1    | Ca_kabuli_chr06 | 1492682                 | CC                              | TT              | 1946854933               |
| SNP_P4_76762_1492721 | NC_021165.1    | Ca_kabuli_chr06 | 1492721                 | AA                              | TT              | 1946854935               |
| SNP_P4_76764_1492822 | NC_021165.1    | Ca_kabuli_chr06 | 1492822                 | GG                              | TT              | 1946854937               |
| SNP_P4_76765_1492844 | NC_021165.1    | Ca_kabuli_chr06 | 1492844                 | CC                              | TT              | 1946854939               |
| SNP_P4_76766_1492963 | NC_021165.1    | Ca_kabuli_chr06 | 1492963                 | CC                              | TT              | 1946854941               |
| SNP_P4_76767_1497053 | NC_021165.1    | Ca_kabuli_chr06 | 1497053                 | TT                              | CC              | 1946854943               |
| SNP_P4_76768_1505916 | NC_021165.1    | Ca_kabuli_chr06 | 1505916                 | AA                              | TT              | 1946854945               |
| SNP_P4_76769_1506164 | NC_021165.1    | Ca_kabuli_chr06 | 1506164                 | AA                              | TT              | 1946854947               |
| SNP_P4_76770_1506891 | NC_021165.1    | Ca_kabuli_chr06 | 1506891                 | AA                              | CC              | 1946854949               |
| SNP_P4_76772_1515702 | NC_021165.1    | Ca_kabuli_chr06 | 1515702                 | TT                              | CC              | 1946854951               |
| SNP_P4_76773_1516843 | NC_021165.1    | Ca_kabuli_chr06 | 1516843                 | AA                              | GG              | 1946854953               |
| SNP_P4_76774_1516847 | NC_021165.1    | Ca_kabuli_chr06 | 1516847                 | TT                              | GG              | 1946854955               |
| SNP_P4_76775_1516865 | NC_021165.1    | Ca_kabuli_chr06 | 1516865                 | TT                              | CC              | 1946854957               |
| SNP_P4_76776_1516869 | NC_021165.1    | Ca_kabuli_chr06 | 1516869                 | TT                              | CC              | 1946854959               |
| SNP_P4_76777_1516879 | NC_021165.1    | Ca_kabuli_chr06 | 1516879                 | TT                              | AA              | 1946854961               |
| SNP_P4_76778_1540094 | NC_021165.1    | Ca_kabuli_chr06 | 1540094                 | TT                              | CC              | 1946854963               |
| SNP_P4_76779_1540110 | NC_021165.1    | Ca_kabuli_chr06 | 1540110                 | AA                              | GG              | 1946854964               |
| SNP_P4_76780_1540170 | NC_021165.1    | Ca_kabuli_chr06 | 1540170                 | AA                              | TT              | 1946854966               |
| SNP_P4_76781_1540298 | NC_021165.1    | Ca_kabuli_chr06 | 1540298                 | CC                              | GG              | 1946854968               |
| SNP_P4_76783_1540893 | NC_021165.1    | Ca_kabuli_chr06 | 1540893                 | CC                              | TT              | 1946854970               |
| SNP_P4_76784_1541753 | NC_021165.1    | Ca_kabuli_chr06 | 1541753                 | GG                              | AA              | 1946854972               |
| SNP_P4_76785_1541788 | NC_021165.1    | Ca_kabuli_chr06 | 1541788                 | TT                              | AA              | 1946854974               |
| SNP_P4_76786_1541813 | NC_021165.1    | Ca_kabuli_chr06 | 1541813                 | AA                              | GG              | 1946854976               |
| SNP_P4_76787_1542030 | NC_021165.1    | Ca_kabuli_chr06 | 1542030                 | AA                              | CC              | 1946854978               |
| SNP_P4_76789_1542219 | NC_021165.1    | Ca_kabuli_chr06 | 1542219                 | TT                              | AA              | 1946854980               |
| SNP_P4_76790_1542255 | NC_021165.1    | Ca_kabuli_chr06 | 1542255                 | AA                              | CC              | 1946854982               |
| SNP_P4_76791_1542284 | NC_021165.1    | Ca_kabuli_chr06 | 1542284                 | CC                              | TT              | 1946854984               |
| SNP_P4_76792_1542375 | NC_021165.1    | Ca_kabuli_chr06 | 1542375                 | TT                              | CC              | 1946854986               |

| SNPs IDs             | Chromosome IDs | Chromosomes     | Physical positions (bp) | CDC Frontier (Reference genome) | (ILWC46 & LPNB) | NCBI SNPdb Accession IDs |
|----------------------|----------------|-----------------|-------------------------|---------------------------------|-----------------|--------------------------|
| SNP_P4_76793_1542396 | NC_021165.1    | Ca_kabuli_chr06 | 1542396                 | TT                              | AA              | 1946854988               |
| SNP_P4_76794_1542456 | NC_021165.1    | Ca_kabuli_chr06 | 1542456                 | TT                              | CC              | 1946854990               |
| SNP_P4_76795_1542665 | NC_021165.1    | Ca_kabuli_chr06 | 1542665                 | TT                              | AA              | 1946854992               |
| SNP_P4_76796_1543767 | NC_021165.1    | Ca_kabuli_chr06 | 1543767                 | GG                              | AA              | 1946854994               |
| SNP_P4_76797_1543768 | NC_021165.1    | Ca_kabuli_chr06 | 1543768                 | AA                              | GG              | 1946854996               |
| SNP_P4_76798_1543785 | NC_021165.1    | Ca_kabuli_chr06 | 1543785                 | GG                              | AA              | 1946854998               |
| SNP_P4_76799_1543802 | NC_021165.1    | Ca_kabuli_chr06 | 1543802                 | GG                              | AA              | 1946855000               |
| SNP_P4_76800_1543865 | NC_021165.1    | Ca_kabuli_chr06 | 1543865                 | CC                              | TT              | 1946855002               |
| SNP_P4_76801_1543943 | NC_021165.1    | Ca_kabuli_chr06 | 1543943                 | TT                              | AA              | 1946855004               |
| SNP_P4_76802_1544021 | NC_021165.1    | Ca_kabuli_chr06 | 1544021                 | TT                              | GG              | 1946855006               |
| SNP_P4_76803_1544036 | NC_021165.1    | Ca_kabuli_chr06 | 1544036                 | AA                              | TT              | 1946855008               |
| SNP_P4_76804_1544135 | NC_021165.1    | Ca_kabuli_chr06 | 1544135                 | CC                              | TT              | 1946855010               |
| SNP_P4_76805_1544281 | NC_021165.1    | Ca_kabuli_chr06 | 1544281                 | AA                              | GG              | 1946855012               |
| SNP_P4_76806_1544283 | NC_021165.1    | Ca_kabuli_chr06 | 1544283                 | AA                              | TT              | 1946855014               |
| SNP_P4_76807_1544395 | NC_021165.1    | Ca_kabuli_chr06 | 1544395                 | AA                              | CC              | 1946855016               |
| SNP_P4_76808_1546010 | NC_021165.1    | Ca_kabuli_chr06 | 1546010                 | GG                              | AA              | 1946855018               |
| SNP_P4_76809_1546034 | NC_021165.1    | Ca_kabuli_chr06 | 1546034                 | GG                              | AA              | 1946855020               |
| SNP_P4_76810_1546056 | NC_021165.1    | Ca_kabuli_chr06 | 1546056                 | AA                              | TT              | 1946855022               |
| SNP_P4_76811_1546108 | NC_021165.1    | Ca_kabuli_chr06 | 1546108                 | AA                              | TT              | 1946855024               |
| SNP_P4_76812_1546563 | NC_021165.1    | Ca_kabuli_chr06 | 1546563                 | CC                              | TT              | 1946855026               |
| SNP_P4_76813_1547355 | NC_021165.1    | Ca_kabuli_chr06 | 1547355                 | AA                              | GG              | 1946855028               |
| SNP_P4_76814_1547764 | NC_021165.1    | Ca_kabuli_chr06 | 1547764                 | TT                              | CC              | 1946855030               |
| SNP_P4_76815_1547784 | NC_021165.1    | Ca_kabuli_chr06 | 1547784                 | CC                              | TT              | 1946855032               |
| SNP_P4_76816_1548128 | NC_021165.1    | Ca_kabuli_chr06 | 1548128                 | AA                              | TT              | 1946855034               |
| SNP_P4_76817_1548667 | NC_021165.1    | Ca_kabuli_chr06 | 1548667                 | CC                              | TT              | 1946855036               |
| SNP_P4_76818_1548721 | NC_021165.1    | Ca_kabuli_chr06 | 1548721                 | AA                              | GG              | 1946855038               |
| SNP_P4_76819_1548907 | NC_021165.1    | Ca_kabuli_chr06 | 1548907                 | GG                              | TT              | 1946855040               |
| SNP_P4_76820_1549266 | NC_021165.1    | Ca_kabuli_chr06 | 1549266                 | GG                              | AA              | 1946855042               |
| SNP_P4_76821_1553689 | NC_021165.1    | Ca_kabuli_chr06 | 1553689                 | GG                              | TT              | 1946855044               |
| SNP_P4_76822_1556050 | NC_021165.1    | Ca_kabuli_chr06 | 1556050                 | CC                              | AA              | 1946855046               |
| SNP_P4_76823_1556067 | NC_021165.1    | Ca_kabuli_chr06 | 1556067                 | GG                              | AA              | 1946855048               |
| SNP_P4_76825_1556407 | NC_021165.1    | Ca_kabuli_chr06 | 1556407                 | TT                              | CC              | 1946855050               |
| SNP_P4_76826_1556427 | NC_021165.1    | Ca_kabuli_chr06 | 1556427                 | AA                              | CC              | 1946855052               |
| SNP_P4_76827_1556434 | NC_021165.1    | Ca_kabuli_chr06 | 1556434                 | CC                              | TT              | 1946855054               |
| SNP_P4_76828_1556538 | NC_021165.1    | Ca_kabuli_chr06 | 1556538                 | AA                              | GG              | 1946855056               |
| SNP_P4_76829_1556565 | NC_021165.1    | Ca_kabuli_chr06 | 1556565                 | GG                              | AA              | 1946855058               |
| SNP_P4_76830_1556618 | NC_021165.1    | Ca_kabuli_chr06 | 1556618                 | TT                              | CC              | 1946855060               |
| SNP_P4_76831_1556629 | NC_021165.1    | Ca_kabuli_chr06 | 1556629                 | CC                              | AA              | 1946855062               |
| SNP_P4_76832_1556677 | NC_021165.1    | Ca_kabuli_chr06 | 1556677                 | TT                              | CC              | 1946855064               |
| SNP_P4_76834_1556885 | NC_021165.1    | Ca_kabuli_chr06 | 1556885                 | AA                              | TT              | 1946855066               |
| SNP_P4_76835_1556938 | NC_021165.1    | Ca_kabuli_chr06 | 1556938                 | CC                              | TT              | 1946855068               |
| SNP_P4_76836_1556939 | NC_021165.1    | Ca_kabuli_chr06 | 1556939                 | TT                              | AA              | 1946855070               |

| SNPs IDs             | Chromosome IDs | Chromosomes     | Physical positions (bp) | CDC Frontier (Reference genome) | (ILWC46 & LPNB) | NCBI SNPdb Accession IDs |
|----------------------|----------------|-----------------|-------------------------|---------------------------------|-----------------|--------------------------|
| SNP_P4_76837_1556972 | NC_021165.1    | Ca_kabuli_chr06 | 1556972                 | AA                              | GG              | 1946855072               |
| SNP_P4_76838_1557078 | NC_021165.1    | Ca_kabuli_chr06 | 1557078                 | GG                              | AA              | 1946855074               |
| SNP_P4_76840_1557141 | NC_021165.1    | Ca_kabuli_chr06 | 1557141                 | AA                              | GG              | 1946855076               |
| SNP_P4_76841_1557358 | NC_021165.1    | Ca_kabuli_chr06 | 1557358                 | GG                              | TT              | 1946855078               |
| SNP_P4_76842_1557513 | NC_021165.1    | Ca_kabuli_chr06 | 1557513                 | CC                              | TT              | 1946855080               |
| SNP_P4_76843_1557559 | NC_021165.1    | Ca_kabuli_chr06 | 1557559                 | TT                              | GG              | 1946855082               |
| SNP_P4_76844_1557565 | NC_021165.1    | Ca_kabuli_chr06 | 1557565                 | CC                              | AA              | 1946855084               |
| SNP_P4_76845_1557567 | NC_021165.1    | Ca_kabuli_chr06 | 1557567                 | CC                              | AA              | 1946855086               |
| SNP_P4_76846_1557588 | NC_021165.1    | Ca_kabuli_chr06 | 1557588                 | AA                              | GG              | 1946855088               |
| SNP_P4_76847_1557599 | NC_021165.1    | Ca_kabuli_chr06 | 1557599                 | CC                              | TT              | 1946855090               |
| SNP_P4_76848_1557610 | NC_021165.1    | Ca_kabuli_chr06 | 1557610                 | TT                              | GG              | 1946855092               |
| SNP_P4_76849_1557611 | NC_021165.1    | Ca_kabuli_chr06 | 1557611                 | CC                              | TT              | 1946855094               |
| SNP_P4_76850_1557632 | NC_021165.1    | Ca_kabuli_chr06 | 1557632                 | AA                              | GG              | 1946855096               |
| SNP_P4_76851_1557637 | NC_021165.1    | Ca_kabuli_chr06 | 1557637                 | GG                              | AA              | 1946855098               |
| SNP_P4_76853_1559104 | NC_021165.1    | Ca_kabuli_chr06 | 1559104                 | TT                              | CC              | 1946855100               |
| SNP_P4_76854_1559161 | NC_021165.1    | Ca_kabuli_chr06 | 1559161                 | TT                              | CC              | 1946855101               |
| SNP_P4_76855_1559267 | NC_021165.1    | Ca_kabuli_chr06 | 1559267                 | CC                              | AA              | 1946855103               |
| SNP_P4_76857_1559396 | NC_021165.1    | Ca_kabuli_chr06 | 1559396                 | GG                              | AA              | 1946855105               |
| SNP_P4_76858_1559398 | NC_021165.1    | Ca_kabuli_chr06 | 1559398                 | AA                              | TT              | 1946855107               |
| SNP_P4_76859_1559485 | NC_021165.1    | Ca_kabuli_chr06 | 1559485                 | TT                              | AA              | 1946855109               |
| SNP_P4_76860_1559515 | NC_021165.1    | Ca_kabuli_chr06 | 1559515                 | CC                              | TT              | 1946855111               |
| SNP_P4_76861_1559555 | NC_021165.1    | Ca_kabuli_chr06 | 1559555                 | GG                              | AA              | 1946855113               |
| SNP_P4_76863_1559632 | NC_021165.1    | Ca_kabuli_chr06 | 1559632                 | AA                              | CC              | 1946855115               |
| SNP_P4_76864_1559664 | NC_021165.1    | Ca_kabuli_chr06 | 1559664                 | AA                              | TT              | 1946855117               |
| SNP_P4_76865_1559677 | NC_021165.1    | Ca_kabuli_chr06 | 1559677                 | TT                              | CC              | 1946855119               |
| SNP_P4_76866_1559836 | NC_021165.1    | Ca_kabuli_chr06 | 1559836                 | GG                              | AA              | 1946855121               |
| SNP_P4_76867_1559924 | NC_021165.1    | Ca_kabuli_chr06 | 1559924                 | GG                              | TT              | 1946855123               |
| SNP_P4_76870_1560023 | NC_021165.1    | Ca_kabuli_chr06 | 1560023                 | CC                              | AA              | 1946855125               |
| SNP_P4_76871_1561424 | NC_021165.1    | Ca_kabuli_chr06 | 1561424                 | CC                              | TT              | 1946855127               |
| SNP_P4_76872_1596305 | NC_021165.1    | Ca_kabuli_chr06 | 1596305                 | TT                              | CC              | 1946855129               |
| SNP_P4_76873_1599927 | NC_021165.1    | Ca_kabuli_chr06 | 1599927                 | TT                              | CC              | 1946855131               |
| SNP_P4_76874_1599938 | NC_021165.1    | Ca_kabuli_chr06 | 1599938                 | CC                              | AA              | 1946855133               |
| SNP_P4_76875_1600010 | NC_021165.1    | Ca_kabuli_chr06 | 1600010                 | GG                              | TT              | 1946855135               |
| SNP_P4_76876_1600189 | NC_021165.1    | Ca_kabuli_chr06 | 1600189                 | AA                              | GG              | 1946855137               |
| SNP_P4_76877_1600200 | NC_021165.1    | Ca_kabuli_chr06 | 1600200                 | AA                              | TT              | 1946855139               |
| SNP_P4_76878_1622652 | NC_021165.1    | Ca_kabuli_chr06 | 1622652                 | AA                              | TT              | 1946855141               |
| SNP_P4_76879_1625382 | NC_021165.1    | Ca_kabuli_chr06 | 1625382                 | GG                              | AA              | 1946855143               |
| SNP_P4_76880_1625385 | NC_021165.1    | Ca_kabuli_chr06 | 1625385                 | AA                              | GG              | 1946855145               |
| SNP_P4_76881_1625404 | NC_021165.1    | Ca_kabuli_chr06 | 1625404                 | AA                              | GG              | 1946855147               |
| SNP_P4_76882_1625405 | NC_021165.1    | Ca_kabuli_chr06 | 1625405                 | CC                              | GG              | 1946855149               |
| SNP_P4_76883_1625439 | NC_021165.1    | Ca_kabuli_chr06 | 1625439                 | TT                              | CC              | 1946855151               |
| SNP_P4_76884_1625442 | NC_021165.1    | Ca_kabuli_chr06 | 1625442                 | TT                              | AA              | 1946855153               |



| SNPs IDs             | Chromosome IDs | Chromosomes     | Physical positions (bp) | CDC Frontier (Reference genome) | (ILWC46 & LPNB) | NCBI SNPdb Accession IDs |
|----------------------|----------------|-----------------|-------------------------|---------------------------------|-----------------|--------------------------|
| SNP_P4_76885_1625444 | NC_021165.1    | Ca_kabuli_chr06 | 1625444                 | TT                              | CC              | 1946855155               |
| SNP_P4_76886_1625631 | NC_021165.1    | Ca_kabuli_chr06 | 1625631                 | TT                              | AA              | 1946855157               |
| SNP_P4_76887_1625842 | NC_021165.1    | Ca_kabuli_chr06 | 1625842                 | CC                              | AA              | 1946855159               |
| SNP_P4_76888_1625887 | NC_021165.1    | Ca_kabuli_chr06 | 1625887                 | TT                              | AA              | 1946855161               |
| SNP_P4_76890_1636974 | NC_021165.1    | Ca_kabuli_chr06 | 1636974                 | AA                              | GG              | 1946855163               |
| SNP_P4_76891_1662479 | NC_021165.1    | Ca_kabuli_chr06 | 1662479                 | AA                              | GG              | 1946855165               |
| SNP_P4_76892_1664731 | NC_021165.1    | Ca_kabuli_chr06 | 1664731                 | TT                              | CC              | 1946855167               |
| SNP_P4_76893_1664738 | NC_021165.1    | Ca_kabuli_chr06 | 1664738                 | AA                              | GG              | 1946855169               |
| SNP_P4_76894_1672973 | NC_021165.1    | Ca_kabuli_chr06 | 1672973                 | CC                              | TT              | 1946855171               |
| SNP_P4_76895_1682018 | NC_021165.1    | Ca_kabuli_chr06 | 1682018                 | GG                              | TT              | 1946855173               |
| SNP_P4_76896_1682060 | NC_021165.1    | Ca_kabuli_chr06 | 1682060                 | CC                              | TT              | 1946855174               |
| SNP_P4_76897_1682076 | NC_021165.1    | Ca_kabuli_chr06 | 1682076                 | CC                              | TT              | 1946855176               |
| SNP_P4_76898_1682101 | NC_021165.1    | Ca_kabuli_chr06 | 1682101                 | TT                              | CC              | 1946855178               |
| SNP_P4_76899_1682105 | NC_021165.1    | Ca_kabuli_chr06 | 1682105                 | CC                              | TT              | 1946855180               |
| SNP_P4_76900_1682193 | NC_021165.1    | Ca_kabuli_chr06 | 1682193                 | GG                              | AA              | 1946855182               |
| SNP_P4_76901_1682198 | NC_021165.1    | Ca_kabuli_chr06 | 1682198                 | GG                              | AA              | 1946855184               |
| SNP_P4_76902_1682204 | NC_021165.1    | Ca_kabuli_chr06 | 1682204                 | CC                              | TT              | 1946855186               |
| SNP_P4_76903_1682219 | NC_021165.1    | Ca_kabuli_chr06 | 1682219                 | TT                              | CC              | 1946855188               |
| SNP_P4_76904_1682227 | NC_021165.1    | Ca_kabuli_chr06 | 1682227                 | AA                              | CC              | 1946855190               |
| SNP_P4_76905_1682289 | NC_021165.1    | Ca_kabuli_chr06 | 1682289                 | GG                              | AA              | 1946855192               |
| SNP_P4_76906_1682390 | NC_021165.1    | Ca_kabuli_chr06 | 1682390                 | GG                              | TT              | 1946855195               |
| SNP_P4_76907_1682439 | NC_021165.1    | Ca_kabuli_chr06 | 1682439                 | GG                              | AA              | 1946855197               |
| SNP_P4_76908_1682491 | NC_021165.1    | Ca_kabuli_chr06 | 1682491                 | AA                              | CC              | 1946855199               |
| SNP_P4_76909_1682552 | NC_021165.1    | Ca_kabuli_chr06 | 1682552                 | GG                              | AA              | 1946855201               |
| SNP_P4_76910_1682576 | NC_021165.1    | Ca_kabuli_chr06 | 1682576                 | AA                              | GG              | 1946855203               |
| SNP_P4_76911_1682599 | NC_021165.1    | Ca_kabuli_chr06 | 1682599                 | TT                              | AA              | 1946855205               |
| SNP_P4_76912_1682602 | NC_021165.1    | Ca_kabuli_chr06 | 1682602                 | CC                              | TT              | 1946855207               |
| SNP_P4_76913_1682622 | NC_021165.1    | Ca_kabuli_chr06 | 1682622                 | GG                              | AA              | 1946855209               |
| SNP_P4_76914_1682693 | NC_021165.1    | Ca_kabuli_chr06 | 1682693                 | CC                              | TT              | 1946855211               |
| SNP_P4_76916_1682756 | NC_021165.1    | Ca_kabuli_chr06 | 1682756                 | AA                              | GG              | 1946855213               |
| SNP_P4_76917_1682769 | NC_021165.1    | Ca_kabuli_chr06 | 1682769                 | CC                              | TT              | 1946855215               |
| SNP_P4_76918_1682790 | NC_021165.1    | Ca_kabuli_chr06 | 1682790                 | AA                              | GG              | 1946855217               |
| SNP_P4_76919_1682807 | NC_021165.1    | Ca_kabuli_chr06 | 1682807                 | TT                              | CC              | 1946855220               |
| SNP_P4_76920_1682836 | NC_021165.1    | Ca_kabuli_chr06 | 1682836                 | TT                              | CC              | 1946855222               |
| SNP_P4_76921_1682862 | NC_021165.1    | Ca_kabuli_chr06 | 1682862                 | CC                              | TT              | 1946855224               |
| SNP_P4_76922_1682920 | NC_021165.1    | Ca_kabuli_chr06 | 1682920                 | TT                              | CC              | 1946855226               |
| SNP_P4_76923_1682921 | NC_021165.1    | Ca_kabuli_chr06 | 1682921                 | GG                              | AA              | 1946855228               |
| SNP_P4_76924_1682965 | NC_021165.1    | Ca_kabuli_chr06 | 1682965                 | GG                              | AA              | 1946855230               |
| SNP_P4_76925_1682967 | NC_021165.1    | Ca_kabuli_chr06 | 1682967                 | TT                              | AA              | 1946855232               |
| SNP_P4_76926_1682968 | NC_021165.1    | Ca_kabuli_chr06 | 1682968                 | AA                              | TT              | 1946855234               |
| SNP_P4_76927_1683003 | NC_021165.1    | Ca_kabuli_chr06 | 1683003                 | CC                              | TT              | 1946855236               |
| SNP_P4_76928_1683033 | NC_021165.1    | Ca_kabuli_chr06 | 1683033                 | TT                              | CC              | 1946855238               |

| SNPs IDs             | Chromosome IDs | Chromosomes     | Physical positions (bp) | CDC Frontier (Reference genome) | (ILWC46 & LPNB) | NCBI SNPdb Accession IDs |
|----------------------|----------------|-----------------|-------------------------|---------------------------------|-----------------|--------------------------|
| SNP_P4_76929_1683045 | NC_021165.1    | Ca_kabuli_chr06 | 1683045                 | AA                              | GG              | 1946855240               |
| SNP_P4_76930_1683046 | NC_021165.1    | Ca_kabuli_chr06 | 1683046                 | AA                              | CC              | 1946855242               |
| SNP_P4_76931_1683083 | NC_021165.1    | Ca_kabuli_chr06 | 1683083                 | GG                              | AA              | 1946855244               |
| SNP_P4_76933_1683118 | NC_021165.1    | Ca_kabuli_chr06 | 1683118                 | TT                              | CC              | 1946855246               |
| SNP_P4_76934_1683190 | NC_021165.1    | Ca_kabuli_chr06 | 1683190                 | CC                              | AA              | 1946855248               |
| SNP_P4_76935_1683221 | NC_021165.1    | Ca_kabuli_chr06 | 1683221                 | TT                              | CC              | 1946855250               |
| SNP_P4_76938_1683348 | NC_021165.1    | Ca_kabuli_chr06 | 1683348                 | GG                              | TT              | 1946855252               |
| SNP_P4_76939_1683365 | NC_021165.1    | Ca_kabuli_chr06 | 1683365                 | TT                              | CC              | 1946855254               |
| SNP_P4_76940_1683401 | NC_021165.1    | Ca_kabuli_chr06 | 1683401                 | CC                              | TT              | 1946855256               |
| SNP_P4_76941_1683452 | NC_021165.1    | Ca_kabuli_chr06 | 1683452                 | CC                              | TT              | 1946855258               |
| SNP_P4_76943_1683528 | NC_021165.1    | Ca_kabuli_chr06 | 1683528                 | AA                              | TT              | 1946855260               |
| SNP_P4_76944_1683531 | NC_021165.1    | Ca_kabuli_chr06 | 1683531                 | GG                              | AA              | 1946855262               |
| SNP_P4_76945_1683617 | NC_021165.1    | Ca_kabuli_chr06 | 1683617                 | GG                              | AA              | 1946855264               |
| SNP_P4_76946_1683653 | NC_021165.1    | Ca_kabuli_chr06 | 1683653                 | AA                              | GG              | 1946855266               |
| SNP_P4_76947_1683676 | NC_021165.1    | Ca_kabuli_chr06 | 1683676                 | TT                              | GG              | 1946855268               |
| SNP_P4_76948_1683700 | NC_021165.1    | Ca_kabuli_chr06 | 1683700                 | AA                              | TT              | 1946855270               |
| SNP_P4_76949_1683702 | NC_021165.1    | Ca_kabuli_chr06 | 1683702                 | GG                              | AA              | 1946855272               |
| SNP_P4_76950_1697930 | NC_021165.1    | Ca_kabuli_chr06 | 1697930                 | TT                              | CC              | 1946855274               |
| SNP_P4_76951_1722405 | NC_021165.1    | Ca_kabuli_chr06 | 1722405                 | CC                              | TT              | 1946855276               |
| SNP_P4_76952_1722858 | NC_021165.1    | Ca_kabuli_chr06 | 1722858                 | GG                              | AA              | 1946855278               |
| SNP_P4_76954_1747254 | NC_021165.1    | Ca_kabuli_chr06 | 1747254                 | GG                              | AA              | 1946855280               |
| SNP_P4_76955_1747269 | NC_021165.1    | Ca_kabuli_chr06 | 1747269                 | AA                              | GG              | 1946855282               |
| SNP_P4_76956_1767088 | NC_021165.1    | Ca_kabuli_chr06 | 1767088                 | AA                              | GG              | 1946855284               |
| SNP_P4_76958_1773438 | NC_021165.1    | Ca_kabuli_chr06 | 1773438                 | CC                              | TT              | 1946855286               |
| SNP_P4_76959_1774026 | NC_021165.1    | Ca_kabuli_chr06 | 1774026                 | TT                              | GG              | 1946855288               |
| SNP_P4_76960_1782073 | NC_021165.1    | Ca_kabuli_chr06 | 1782073                 | CC                              | TT              | 1946855290               |
| SNP_P4_76961_1786958 | NC_021165.1    | Ca_kabuli_chr06 | 1786958                 | GG                              | AA              | 1946855292               |
| SNP_P4_76963_1793740 | NC_021165.1    | Ca_kabuli_chr06 | 1793740                 | TT                              | CC              | 1946855294               |
| SNP_P4_76964_1800765 | NC_021165.1    | Ca_kabuli_chr06 | 1800765                 | GG                              | AA              | 1946855296               |
| SNP_P4_76966_1802147 | NC_021165.1    | Ca_kabuli_chr06 | 1802147                 | TT                              | AA              | 1946855298               |
| SNP_P4_76967_1803053 | NC_021165.1    | Ca_kabuli_chr06 | 1803053                 | AA                              | TT              | 1946855300               |
| SNP_P4_76968_1803222 | NC_021165.1    | Ca_kabuli_chr06 | 1803222                 | CC                              | TT              | 1946855302               |
| SNP_P4_76969_1803248 | NC_021165.1    | Ca_kabuli_chr06 | 1803248                 | TT                              | CC              | 1946855304               |
| SNP_P4_76970_1803704 | NC_021165.1    | Ca_kabuli_chr06 | 1803704                 | AA                              | GG              | 1946855306               |
| SNP_P4_76971_1804513 | NC_021165.1    | Ca_kabuli_chr06 | 1804513                 | CC                              | GG              | 1946855308               |
| SNP_P4_76972_1804844 | NC_021165.1    | Ca_kabuli_chr06 | 1804844                 | TT                              | CC              | 1946855310               |
| SNP_P4_76973_1807757 | NC_021165.1    | Ca_kabuli_chr06 | 1807757                 | GG                              | AA              | 1946855312               |
| SNP_P4_76974_1808567 | NC_021165.1    | Ca_kabuli_chr06 | 1808567                 | CC                              | TT              | 1946855313               |
| SNP_P4_76975_1808610 | NC_021165.1    | Ca_kabuli_chr06 | 1808610                 | AA                              | GG              | 1946855315               |
| SNP_P4_76976_1809433 | NC_021165.1    | Ca_kabuli_chr06 | 1809433                 | TT                              | GG              | 1946855317               |
| SNP_P4_76977_1809677 | NC_021165.1    | Ca_kabuli_chr06 | 1809677                 | AA                              | CC              | 1946855319               |
| SNP_P4_76978_1809940 | NC_021165.1    | Ca_kabuli_chr06 | 1809940                 | TT                              | CC              | 1946855321               |

| SNPs IDs             | Chromosome IDs | Chromosomes     | Physical positions (bp) | CDC Frontier (Reference genome) | (ILWC46 & LPNB) | NCBI SNPdb Accession IDs |
|----------------------|----------------|-----------------|-------------------------|---------------------------------|-----------------|--------------------------|
| SNP_P4_76979_1810475 | NC_021165.1    | Ca_kabuli_chr06 | 1810475                 | CC                              | AA              | 1946855323               |
| SNP_P4_76980_1811162 | NC_021165.1    | Ca_kabuli_chr06 | 1811162                 | GG                              | AA              | 1946855325               |
| SNP_P4_76981_1813819 | NC_021165.1    | Ca_kabuli_chr06 | 1813819                 | TT                              | CC              | 1946855327               |
| SNP_P4_76982_1813984 | NC_021165.1    | Ca_kabuli_chr06 | 1813984                 | TT                              | CC              | 1946855329               |
| SNP_P4_76984_1814155 | NC_021165.1    | Ca_kabuli_chr06 | 1814155                 | AA                              | TT              | 1946855331               |
| SNP_P4_76985_1814251 | NC_021165.1    | Ca_kabuli_chr06 | 1814251                 | GG                              | AA              | 1946855333               |
| SNP_P4_76986_1814273 | NC_021165.1    | Ca_kabuli_chr06 | 1814273                 | AA                              | CC              | 1946855335               |
| SNP_P4_76987_1814947 | NC_021165.1    | Ca_kabuli_chr06 | 1814947                 | GG                              | AA              | 1946855337               |
| SNP_P4_76988_1820614 | NC_021165.1    | Ca_kabuli_chr06 | 1820614                 | AA                              | CC              | 1946855339               |
| SNP_P4_76989_1820938 | NC_021165.1    | Ca_kabuli_chr06 | 1820938                 | TT                              | AA              | 1946855341               |
| SNP_P4_76990_1820952 | NC_021165.1    | Ca_kabuli_chr06 | 1820952                 | TT                              | CC              | 1946855343               |
| SNP_P4_76991_1820958 | NC_021165.1    | Ca_kabuli_chr06 | 1820958                 | GG                              | AA              | 1946855345               |
| SNP_P4_76992_1820966 | NC_021165.1    | Ca_kabuli_chr06 | 1820966                 | AA                              | GG              | 1946855347               |
| SNP_P4_76993_1820991 | NC_021165.1    | Ca_kabuli_chr06 | 1820991                 | TT                              | CC              | 1946855349               |
| SNP_P4_76994_1821009 | NC_021165.1    | Ca_kabuli_chr06 | 1821009                 | TT                              | CC              | 1946855351               |
| SNP_P4_76995_1821037 | NC_021165.1    | Ca_kabuli_chr06 | 1821037                 | AA                              | GG              | 1946855353               |
| SNP_P4_76996_1823496 | NC_021165.1    | Ca_kabuli_chr06 | 1823496                 | TT                              | AA              | 1946855355               |
| SNP_P4_76997_1824006 | NC_021165.1    | Ca_kabuli_chr06 | 1824006                 | GG                              | AA              | 1946855357               |
| SNP_P4_76998_1824026 | NC_021165.1    | Ca_kabuli_chr06 | 1824026                 | TT                              | GG              | 1946855359               |
| SNP_P4_76999_1824305 | NC_021165.1    | Ca_kabuli_chr06 | 1824305                 | AA                              | GG              | 1946855361               |
| SNP_P4_77000_1824306 | NC_021165.1    | Ca_kabuli_chr06 | 1824306                 | TT                              | CC              | 1946855363               |
| SNP_P4_77002_1824365 | NC_021165.1    | Ca_kabuli_chr06 | 1824365                 | CC                              | TT              | 1946855365               |
| SNP_P4_77003_1824639 | NC_021165.1    | Ca_kabuli_chr06 | 1824639                 | GG                              | AA              | 1946855367               |
| SNP_P4_77005_1824663 | NC_021165.1    | Ca_kabuli_chr06 | 1824663                 | TT                              | AA              | 1946855369               |
| SNP_P4_77006_1824711 | NC_021165.1    | Ca_kabuli_chr06 | 1824711                 | GG                              | CC              | 1946855371               |
| SNP_P4_77008_1825126 | NC_021165.1    | Ca_kabuli_chr06 | 1825126                 | TT                              | CC              | 1946855373               |
| SNP_P4_77009_1825140 | NC_021165.1    | Ca_kabuli_chr06 | 1825140                 | TT                              | CC              | 1946855375               |
| SNP_P4_77010_1825156 | NC_021165.1    | Ca_kabuli_chr06 | 1825156                 | AA                              | GG              | 1946855377               |
| SNP_P4_77011_1825166 | NC_021165.1    | Ca_kabuli_chr06 | 1825166                 | AA                              | GG              | 1946855379               |
| SNP_P4_77012_1825345 | NC_021165.1    | Ca_kabuli_chr06 | 1825345                 | CC                              | GG              | 1946855381               |
| SNP_P4_77013_1825368 | NC_021165.1    | Ca_kabuli_chr06 | 1825368                 | GG                              | AA              | 1946855383               |
| SNP_P4_77014_1825453 | NC_021165.1    | Ca_kabuli_chr06 | 1825453                 | GG                              | AA              | 1946855385               |
| SNP_P4_77015_1828364 | NC_021165.1    | Ca_kabuli_chr06 | 1828364                 | TT                              | CC              | 1946855387               |
| SNP_P4_77016_1828481 | NC_021165.1    | Ca_kabuli_chr06 | 1828481                 | GG                              | AA              | 1946855389               |
| SNP_P4_77018_1829113 | NC_021165.1    | Ca_kabuli_chr06 | 1829113                 | AA                              | GG              | 1946855391               |
| SNP_P4_77019_1829169 | NC_021165.1    | Ca_kabuli_chr06 | 1829169                 | CC                              | TT              | 1946855393               |
| SNP_P4_77020_1829267 | NC_021165.1    | Ca_kabuli_chr06 | 1829267                 | GG                              | AA              | 1946855395               |
| SNP_P4_77021_1829754 | NC_021165.1    | Ca_kabuli_chr06 | 1829754                 | AA                              | GG              | 1946855397               |
| SNP_P4_77022_1829761 | NC_021165.1    | Ca_kabuli_chr06 | 1829761                 | AA                              | GG              | 1946855399               |
| SNP_P4_77024_1831276 | NC_021165.1    | Ca_kabuli_chr06 | 1831276                 | AA                              | TT              | 1946855401               |
| SNP_P4_77027_1831441 | NC_021165.1    | Ca_kabuli_chr06 | 1831441                 | TT                              | AA              | 1946855403               |
| SNP_P4_77028_1831497 | NC_021165.1    | Ca_kabuli_chr06 | 1831497                 | CC                              | TT              | 1946855404               |

| SNPs IDs             | Chromosome IDs | Chromosomes     | Physical positions (bp) | CDC Frontier (Reference genome) | (ILWC46 & LPNB) | NCBI SNPdb Accession IDs |
|----------------------|----------------|-----------------|-------------------------|---------------------------------|-----------------|--------------------------|
| SNP_P4_77029_1831533 | NC_021165.1    | Ca_kabuli_chr06 | 1831533                 | TT                              | CC              | 1946855406               |
| SNP_P4_77030_1831541 | NC_021165.1    | Ca_kabuli_chr06 | 1831541                 | CC                              | TT              | 1946855408               |
| SNP_P4_77031_1831561 | NC_021165.1    | Ca_kabuli_chr06 | 1831561                 | CC                              | GG              | 1946855410               |
| SNP_P4_77032_1831574 | NC_021165.1    | Ca_kabuli_chr06 | 1831574                 | AA                              | GG              | 1946855412               |
| SNP_P4_77033_1831581 | NC_021165.1    | Ca_kabuli_chr06 | 1831581                 | TT                              | CC              | 1946855414               |
| SNP_P4_77034_1831584 | NC_021165.1    | Ca_kabuli_chr06 | 1831584                 | GG                              | AA              | 1946855416               |
| SNP_P4_77035_1831591 | NC_021165.1    | Ca_kabuli_chr06 | 1831591                 | AA                              | GG              | 1946855418               |
| SNP_P4_77036_1831658 | NC_021165.1    | Ca_kabuli_chr06 | 1831658                 | TT                              | CC              | 1946855420               |
| SNP_P4_77037_1831710 | NC_021165.1    | Ca_kabuli_chr06 | 1831710                 | TT                              | GG              | 1946855422               |
| SNP_P4_77038_1831797 | NC_021165.1    | Ca_kabuli_chr06 | 1831797                 | CC                              | TT              | 1946855424               |
| SNP_P4_77039_1831803 | NC_021165.1    | Ca_kabuli_chr06 | 1831803                 | AA                              | GG              | 1946855426               |
| SNP_P4_77040_1831805 | NC_021165.1    | Ca_kabuli_chr06 | 1831805                 | AA                              | GG              | 1946855428               |
| SNP_P4_77041_1831818 | NC_021165.1    | Ca_kabuli_chr06 | 1831818                 | GG                              | TT              | 1946855430               |
| SNP_P4_77042_1831826 | NC_021165.1    | Ca_kabuli_chr06 | 1831826                 | TT                              | CC              | 1946855432               |
| SNP_P4_77043_1832027 | NC_021165.1    | Ca_kabuli_chr06 | 1832027                 | AA                              | TT              | 1946855434               |
| SNP_P4_77045_1832762 | NC_021165.1    | Ca_kabuli_chr06 | 1832762                 | TT                              | AA              | 1946855436               |
| SNP_P4_77047_1834124 | NC_021165.1    | Ca_kabuli_chr06 | 1834124                 | AA                              | CC              | 1946855438               |
| SNP_P4_77049_1834335 | NC_021165.1    | Ca_kabuli_chr06 | 1834335                 | AA                              | TT              | 1946855440               |
| SNP_P4_77050_1842924 | NC_021165.1    | Ca_kabuli_chr06 | 1842924                 | GG                              | AA              | 1946855442               |
| SNP_P4_77051_1843115 | NC_021165.1    | Ca_kabuli_chr06 | 1843115                 | TT                              | CC              | 1946855444               |
| SNP_P4_77052_1843173 | NC_021165.1    | Ca_kabuli_chr06 | 1843173                 | TT                              | AA              | 1946855446               |
| SNP_P4_77053_1843174 | NC_021165.1    | Ca_kabuli_chr06 | 1843174                 | GG                              | TT              | 1946855448               |
| SNP_P4_77055_1843949 | NC_021165.1    | Ca_kabuli_chr06 | 1843949                 | TT                              | CC              | 1946855450               |
| SNP_P4_77056_1843960 | NC_021165.1    | Ca_kabuli_chr06 | 1843960                 | TT                              | CC              | 1946855452               |
| SNP_P4_77057_1846506 | NC_021165.1    | Ca_kabuli_chr06 | 1846506                 | AA                              | GG              | 1946855454               |
| SNP_P4_77058_1846830 | NC_021165.1    | Ca_kabuli_chr06 | 1846830                 | GG                              | AA              | 1946855456               |
| SNP_P4_77059_1847010 | NC_021165.1    | Ca_kabuli_chr06 | 1847010                 | CC                              | TT              | 1946855458               |
| SNP_P4_77061_1849780 | NC_021165.1    | Ca_kabuli_chr06 | 1849780                 | CC                              | TT              | 1946855460               |
| SNP_P4_77062_1860421 | NC_021165.1    | Ca_kabuli_chr06 | 1860421                 | TT                              | CC              | 1946855462               |
| SNP_P4_77063_1860720 | NC_021165.1    | Ca_kabuli_chr06 | 1860720                 | CC                              | AA              | 1946855464               |
| SNP_P4_77064_1860881 | NC_021165.1    | Ca_kabuli_chr06 | 1860881                 | TT                              | CC              | 1946855466               |
| SNP_P4_77065_1863821 | NC_021165.1    | Ca_kabuli_chr06 | 1863821                 | AA                              | GG              | 1946855468               |
| SNP_P4_77066_1863829 | NC_021165.1    | Ca_kabuli_chr06 | 1863829                 | AA                              | GG              | 1946855470               |
| SNP_P4_77067_1864154 | NC_021165.1    | Ca_kabuli_chr06 | 1864154                 | TT                              | CC              | 1946855472               |
| SNP_P4_77069_1864171 | NC_021165.1    | Ca_kabuli_chr06 | 1864171                 | GG                              | AA              | 1946855474               |
| SNP_P4_77070_1864833 | NC_021165.1    | Ca_kabuli_chr06 | 1864833                 | CC                              | TT              | 1946855476               |
| SNP_P4_77071_1865032 | NC_021165.1    | Ca_kabuli_chr06 | 1865032                 | GG                              | TT              | 1946855478               |
| SNP_P4_77072_1866100 | NC_021165.1    | Ca_kabuli_chr06 | 1866100                 | GG                              | AA              | 1946855480               |
| SNP_P4_77074_1866137 | NC_021165.1    | Ca_kabuli_chr06 | 1866137                 | CC                              | TT              | 1946855482               |
| SNP_P4_77075_1866138 | NC_021165.1    | Ca_kabuli_chr06 | 1866138                 | CC                              | TT              | 1946855484               |
| SNP_P4_77076_1866190 | NC_021165.1    | Ca_kabuli_chr06 | 1866190                 | AA                              | CC              | 1946855486               |
| SNP_P4_77077_1866604 | NC_021165.1    | Ca_kabuli_chr06 | 1866604                 | AA                              | GG              | 1946855488               |

| SNPs IDs             | Chromosome IDs | Chromosomes     | Physical positions (bp) | CDC Frontier (Reference genome) | (ILWC46 & LPNB) | NCBI SNPdb Accession IDs |
|----------------------|----------------|-----------------|-------------------------|---------------------------------|-----------------|--------------------------|
| SNP_P4_77078_1866933 | NC_021165.1    | Ca_kabuli_chr06 | 1866933                 | TT                              | AA              | 1946855490               |
| SNP_P4_77080_1866984 | NC_021165.1    | Ca_kabuli_chr06 | 1866984                 | CC                              | AA              | 1946855492               |
| SNP_P4_77083_1867039 | NC_021165.1    | Ca_kabuli_chr06 | 1867039                 | TT                              | CC              | 1946855494               |
| SNP_P4_77084_1879482 | NC_021165.1    | Ca_kabuli_chr06 | 1879482                 | TT                              | GG              | 1946855496               |
| SNP_P4_77085_1879855 | NC_021165.1    | Ca_kabuli_chr06 | 1879855                 | TT                              | GG              | 1946855498               |
| SNP_P4_77086_1895505 | NC_021165.1    | Ca_kabuli_chr06 | 1895505                 | AA                              | CC              | 1946855500               |
| SNP_P4_77088_1907631 | NC_021165.1    | Ca_kabuli_chr06 | 1907631                 | AA                              | GG              | 1946855502               |
| SNP_P4_77089_1908069 | NC_021165.1    | Ca_kabuli_chr06 | 1908069                 | CC                              | TT              | 1946855504               |
| SNP_P4_77090_1925114 | NC_021165.1    | Ca_kabuli_chr06 | 1925114                 | TT                              | CC              | 1946855506               |
| SNP_P4_77092_1943184 | NC_021165.1    | Ca_kabuli_chr06 | 1943184                 | AA                              | GG              | 1946855508               |
| SNP_P4_77093_1943348 | NC_021165.1    | Ca_kabuli_chr06 | 1943348                 | GG                              | AA              | 1946855510               |
| SNP_P4_77095_1958924 | NC_021165.1    | Ca_kabuli_chr06 | 1958924                 | GG                              | AA              | 1946855512               |
| SNP_P4_77096_1975396 | NC_021165.1    | Ca_kabuli_chr06 | 1975396                 | AA                              | GG              | 1946855514               |
| SNP_P4_77097_1975397 | NC_021165.1    | Ca_kabuli_chr06 | 1975397                 | AA                              | GG              | 1946855516               |
| SNP_P4_77101_1976791 | NC_021165.1    | Ca_kabuli_chr06 | 1976791                 | CC                              | AA              | 1946855518               |
| SNP_P4_77102_1976795 | NC_021165.1    | Ca_kabuli_chr06 | 1976795                 | AA                              | TT              | 1946855520               |
| SNP_P4_77103_1976815 | NC_021165.1    | Ca_kabuli_chr06 | 1976815                 | GG                              | TT              | 1946855522               |
| SNP_P4_77104_1976884 | NC_021165.1    | Ca_kabuli_chr06 | 1976884                 | GG                              | AA              | 1946855524               |
| SNP_P4_77105_1976911 | NC_021165.1    | Ca_kabuli_chr06 | 1976911                 | AA                              | GG              | 1946855526               |
| SNP_P4_77106_1977015 | NC_021165.1    | Ca_kabuli_chr06 | 1977015                 | AA                              | TT              | 1946855528               |
| SNP_P4_77107_1977026 | NC_021165.1    | Ca_kabuli_chr06 | 1977026                 | TT                              | AA              | 1946855530               |
| SNP_P4_77109_1977439 | NC_021165.1    | Ca_kabuli_chr06 | 1977439                 | TT                              | GG              | 1946855532               |
| SNP_P4_77110_1977482 | NC_021165.1    | Ca_kabuli_chr06 | 1977482                 | TT                              | CC              | 1946855534               |
| SNP_P4_77111_1977499 | NC_021165.1    | Ca_kabuli_chr06 | 1977499                 | CC                              | AA              | 1946855536               |
| SNP_P4_77112_1977508 | NC_021165.1    | Ca_kabuli_chr06 | 1977508                 | TT                              | CC              | 1946855538               |
| SNP_P4_77113_1977552 | NC_021165.1    | Ca_kabuli_chr06 | 1977552                 | CC                              | AA              | 1946855540               |
| SNP_P4_77114_1977604 | NC_021165.1    | Ca_kabuli_chr06 | 1977604                 | TT                              | CC              | 1946855542               |
| SNP_P4_77115_1977620 | NC_021165.1    | Ca_kabuli_chr06 | 1977620                 | GG                              | AA              | 1946855544               |
| SNP_P4_77117_1978383 | NC_021165.1    | Ca_kabuli_chr06 | 1978383                 | TT                              | CC              | 1946855546               |
| SNP_P4_77118_1978421 | NC_021165.1    | Ca_kabuli_chr06 | 1978421                 | TT                              | CC              | 1946855548               |
| SNP_P4_77119_1978444 | NC_021165.1    | Ca_kabuli_chr06 | 1978444                 | TT                              | CC              | 1946855550               |
| SNP_P4_77120_1978531 | NC_021165.1    | Ca_kabuli_chr06 | 1978531                 | CC                              | AA              | 1946855552               |
| SNP_P4_77121_1978557 | NC_021165.1    | Ca_kabuli_chr06 | 1978557                 | AA                              | CC              | 1946855554               |
| SNP_P4_77122_1978629 | NC_021165.1    | Ca_kabuli_chr06 | 1978629                 | AA                              | GG              | 1946855556               |
| SNP_P4_77123_1978642 | NC_021165.1    | Ca_kabuli_chr06 | 1978642                 | TT                              | CC              | 1946855558               |
| SNP_P4_77124_1978750 | NC_021165.1    | Ca_kabuli_chr06 | 1978750                 | TT                              | CC              | 1946855560               |
| SNP_P4_77125_1978792 | NC_021165.1    | Ca_kabuli_chr06 | 1978792                 | CC                              | GG              | 1946855562               |
| SNP_P4_77126_1979293 | NC_021165.1    | Ca_kabuli_chr06 | 1979293                 | TT                              | CC              | 1946855564               |
| SNP_P4_77127_1979294 | NC_021165.1    | Ca_kabuli_chr06 | 1979294                 | CC                              | AA              | 1946855566               |
| SNP_P4_77128_1979295 | NC_021165.1    | Ca_kabuli_chr06 | 1979295                 | CC                              | TT              | 1946855568               |
| SNP_P4_77129_1979296 | NC_021165.1    | Ca_kabuli_chr06 | 1979296                 | CC                              | TT              | 1946855570               |
| SNP_P4_77130_1979297 | NC_021165.1    | Ca_kabuli_chr06 | 1979297                 | CC                              | GG              | 1946855572               |

| SNPs IDs             | Chromosome IDs | Chromosomes     | Physical positions (bp) | CDC Frontier (Reference genome) | (ILWC46 & LPNB) | NCBI SNPdb Accession IDs |
|----------------------|----------------|-----------------|-------------------------|---------------------------------|-----------------|--------------------------|
| SNP_P4_77131_1994999 | NC_021165.1    | Ca_kabuli_chr06 | 1994999                 | CC                              | TT              | 1946855574               |
| SNP_P4_77132_2002650 | NC_021165.1    | Ca_kabuli_chr06 | 2002650                 | TT                              | GG              | 1946855576               |
| SNP_P4_77134_2031623 | NC_021165.1    | Ca_kabuli_chr06 | 2031623                 | AA                              | TT              | 1946855578               |
| SNP_P4_77140_2153602 | NC_021165.1    | Ca_kabuli_chr06 | 2153602                 | AA                              | GG              | 1946855580               |
| SNP_P4_77143_2221611 | NC_021165.1    | Ca_kabuli_chr06 | 2221611                 | CC                              | TT              | 1946855582               |
| SNP_P4_77144_2231206 | NC_021165.1    | Ca_kabuli_chr06 | 2231206                 | TT                              | AA              | 1946855584               |
| SNP_P4_77145_2231210 | NC_021165.1    | Ca_kabuli_chr06 | 2231210                 | AA                              | TT              | 1946855586               |
| SNP_P4_77146_2233946 | NC_021165.1    | Ca_kabuli_chr06 | 2233946                 | GG                              | AA              | 1946855588               |
| SNP_P4_77147_2241235 | NC_021165.1    | Ca_kabuli_chr06 | 2241235                 | GG                              | CC              | 1946855590               |
| SNP_P4_77148_2250426 | NC_021165.1    | Ca_kabuli_chr06 | 2250426                 | AA                              | CC              | 1946855592               |
| SNP_P4_77149_2257945 | NC_021165.1    | Ca_kabuli_chr06 | 2257945                 | GG                              | AA              | 1946855594               |
| SNP_P4_77150_2272251 | NC_021165.1    | Ca_kabuli_chr06 | 2272251                 | AA                              | GG              | 1946855596               |
| SNP_P4_77151_2272923 | NC_021165.1    | Ca_kabuli_chr06 | 2272923                 | GG                              | AA              | 1946855598               |
| SNP_P4_77152_2307816 | NC_021165.1    | Ca_kabuli_chr06 | 2307816                 | AA                              | TT              | 1946855600               |
| SNP_P4_77153_2323028 | NC_021165.1    | Ca_kabuli_chr06 | 2323028                 | AA                              | TT              | 1946855602               |
| SNP_P4_77154_2323173 | NC_021165.1    | Ca_kabuli_chr06 | 2323173                 | CC                              | AA              | 1946855604               |
| SNP_P4_77155_2329718 | NC_021165.1    | Ca_kabuli_chr06 | 2329718                 | AA                              | GG              | 1946855606               |
| SNP_P4_77157_2342209 | NC_021165.1    | Ca_kabuli_chr06 | 2342209                 | TT                              | AA              | 1946855608               |
| SNP_P4_77158_2374098 | NC_021165.1    | Ca_kabuli_chr06 | 2374098                 | TT                              | CC              | 1946855610               |
| SNP_P4_77159_2374106 | NC_021165.1    | Ca_kabuli_chr06 | 2374106                 | AA                              | GG              | 1946855612               |
| SNP_P4_77160_2374498 | NC_021165.1    | Ca_kabuli_chr06 | 2374498                 | AA                              | GG              | 1946855614               |
| SNP_P4_77161_2374503 | NC_021165.1    | Ca_kabuli_chr06 | 2374503                 | TT                              | CC              | 1946855616               |
| SNP_P4_77162_2374547 | NC_021165.1    | Ca_kabuli_chr06 | 2374547                 | TT                              | GG              | 1946855618               |
| SNP_P4_77163_2378236 | NC_021165.1    | Ca_kabuli_chr06 | 2378236                 | TT                              | AA              | 1946855620               |
| SNP_P4_77167_2392640 | NC_021165.1    | Ca_kabuli_chr06 | 2392640                 | CC                              | TT              | 1946855622               |
| SNP_P4_77168_2392913 | NC_021165.1    | Ca_kabuli_chr06 | 2392913                 | AA                              | TT              | 1946855624               |
| SNP_P4_77169_2392921 | NC_021165.1    | Ca_kabuli_chr06 | 2392921                 | CC                              | TT              | 1946855626               |
| SNP_P4_77170_2433325 | NC_021165.1    | Ca_kabuli_chr06 | 2433325                 | CC                              | AA              | 1946855628               |
| SNP_P4_77171_2435749 | NC_021165.1    | Ca_kabuli_chr06 | 2435749                 | GG                              | AA              | 1946855630               |
| SNP_P4_77172_2436073 | NC_021165.1    | Ca_kabuli_chr06 | 2436073                 | AA                              | TT              | 1946855632               |
| SNP_P4_77174_2504661 | NC_021165.1    | Ca_kabuli_chr06 | 2504661                 | AA                              | TT              | 1946855634               |
| SNP_P4_77176_2514036 | NC_021165.1    | Ca_kabuli_chr06 | 2514036                 | AA                              | CC              | 1946855636               |
| SNP_P4_77177_2514841 | NC_021165.1    | Ca_kabuli_chr06 | 2514841                 | GG                              | TT              | 1946855638               |
| SNP_P4_77178_2514891 | NC_021165.1    | Ca_kabuli_chr06 | 2514891                 | GG                              | AA              | 1946855640               |
| SNP_P4_77179_2514956 | NC_021165.1    | Ca_kabuli_chr06 | 2514956                 | GG                              | AA              | 1946855642               |
| SNP_P4_77180_2515976 | NC_021165.1    | Ca_kabuli_chr06 | 2515976                 | TT                              | GG              | 1946855644               |
| SNP_P4_77182_2516214 | NC_021165.1    | Ca_kabuli_chr06 | 2516214                 | CC                              | TT              | 1946855646               |
| SNP_P4_77184_2518393 | NC_021165.1    | Ca_kabuli_chr06 | 2518393                 | CC                              | TT              | 1946855648               |
| SNP_P4_77185_2518394 | NC_021165.1    | Ca_kabuli_chr06 | 2518394                 | GG                              | AA              | 1946855650               |
| SNP_P4_77186_2518402 | NC_021165.1    | Ca_kabuli_chr06 | 2518402                 | TT                              | GG              | 1946855652               |
| SNP_P4_77187_2518408 | NC_021165.1    | Ca_kabuli_chr06 | 2518408                 | GG                              | TT              | 1946855654               |
| SNP_P4_77188_2518774 | NC_021165.1    | Ca_kabuli_chr06 | 2518774                 | TT                              | AA              | 1946855656               |

| SNPs IDs             | Chromosome IDs | Chromosomes     | Physical positions (bp) | CDC Frontier (Reference genome) | (ILWC46 & LPNB) | NCBI SNPdb Accession IDs |
|----------------------|----------------|-----------------|-------------------------|---------------------------------|-----------------|--------------------------|
| SNP_P4_77190_2518816 | NC_021165.1    | Ca_kabuli_chr06 | 2518816                 | GG                              | TT              | 1946855658               |
| SNP_P4_77191_2521824 | NC_021165.1    | Ca_kabuli_chr06 | 2521824                 | TT                              | GG              | 1946855659               |
| SNP_P4_77192_2521876 | NC_021165.1    | Ca_kabuli_chr06 | 2521876                 | GG                              | TT              | 1946855661               |
| SNP_P4_77193_2523028 | NC_021165.1    | Ca_kabuli_chr06 | 2523028                 | TT                              | GG              | 1946855663               |
| SNP_P4_77195_2523275 | NC_021165.1    | Ca_kabuli_chr06 | 2523275                 | AA                              | TT              | 1946855665               |
| SNP_P4_77196_2523302 | NC_021165.1    | Ca_kabuli_chr06 | 2523302                 | CC                              | GG              | 1946855667               |
| SNP_P4_77198_2523387 | NC_021165.1    | Ca_kabuli_chr06 | 2523387                 | TT                              | AA              | 1946855669               |
| SNP_P4_77199_2523493 | NC_021165.1    | Ca_kabuli_chr06 | 2523493                 | TT                              | AA              | 1946855671               |
| SNP_P4_77200_2523495 | NC_021165.1    | Ca_kabuli_chr06 | 2523495                 | CC                              | TT              | 1946855673               |
| SNP_P4_77201_2523780 | NC_021165.1    | Ca_kabuli_chr06 | 2523780                 | TT                              | AA              | 1946855675               |
| SNP_P4_77202_2523929 | NC_021165.1    | Ca_kabuli_chr06 | 2523929                 | GG                              | AA              | 1946855677               |
| SNP_P4_77203_2523959 | NC_021165.1    | Ca_kabuli_chr06 | 2523959                 | GG                              | TT              | 1946855679               |
| SNP_P4_77204_2524211 | NC_021165.1    | Ca_kabuli_chr06 | 2524211                 | TT                              | CC              | 1946855681               |
| SNP_P4_77205_2524236 | NC_021165.1    | Ca_kabuli_chr06 | 2524236                 | TT                              | GG              | 1946855683               |
| SNP_P4_77206_2524240 | NC_021165.1    | Ca_kabuli_chr06 | 2524240                 | AA                              | GG              | 1946855685               |
| SNP_P4_77207_2524256 | NC_021165.1    | Ca_kabuli_chr06 | 2524256                 | AA                              | GG              | 1946855687               |
| SNP_P4_77208_2524594 | NC_021165.1    | Ca_kabuli_chr06 | 2524594                 | GG                              | AA              | 1946855688               |
| SNP_P4_77211_2525711 | NC_021165.1    | Ca_kabuli_chr06 | 2525711                 | CC                              | AA              | 1946855689               |
| SNP_P4_77212_2525978 | NC_021165.1    | Ca_kabuli_chr06 | 2525978                 | CC                              | AA              | 1946855690               |
| SNP_P4_77213_2526080 | NC_021165.1    | Ca_kabuli_chr06 | 2526080                 | CC                              | TT              | 1946855691               |
| SNP_P4_77214_2527272 | NC_021165.1    | Ca_kabuli_chr06 | 2527272                 | GG                              | AA              | 1946855692               |
| SNP_P4_77215_2527304 | NC_021165.1    | Ca_kabuli_chr06 | 2527304                 | AA                              | GG              | 1946855694               |
| SNP_P4_77216_2527308 | NC_021165.1    | Ca_kabuli_chr06 | 2527308                 | GG                              | AA              | 1946855696               |
| SNP_P4_77217_2527331 | NC_021165.1    | Ca_kabuli_chr06 | 2527331                 | AA                              | GG              | 1946855698               |
| SNP_P4_77218_2527335 | NC_021165.1    | Ca_kabuli_chr06 | 2527335                 | GG                              | AA              | 1946855700               |
| SNP_P4_77219_2527497 | NC_021165.1    | Ca_kabuli_chr06 | 2527497                 | GG                              | AA              | 1946855702               |
| SNP_P4_77220_2527768 | NC_021165.1    | Ca_kabuli_chr06 | 2527768                 | AA                              | GG              | 1946855704               |
| SNP_P4_77222_2532441 | NC_021165.1    | Ca_kabuli_chr06 | 2532441                 | TT                              | CC              | 1946855706               |
| SNP_P4_77223_2532458 | NC_021165.1    | Ca_kabuli_chr06 | 2532458                 | AA                              | TT              | 1946855708               |
| SNP_P4_77224_2532467 | NC_021165.1    | Ca_kabuli_chr06 | 2532467                 | TT                              | CC              | 1946855710               |
| SNP_P4_77225_2532661 | NC_021165.1    | Ca_kabuli_chr06 | 2532661                 | TT                              | GG              | 1946855712               |
| SNP_P4_77226_2534361 | NC_021165.1    | Ca_kabuli_chr06 | 2534361                 | CC                              | TT              | 1946855714               |
| SNP_P4_77227_2534367 | NC_021165.1    | Ca_kabuli_chr06 | 2534367                 | TT                              | AA              | 1946855716               |
| SNP_P4_77228_2537134 | NC_021165.1    | Ca_kabuli_chr06 | 2537134                 | CC                              | AA              | 1946855718               |
| SNP_P4_77229_2537410 | NC_021165.1    | Ca_kabuli_chr06 | 2537410                 | GG                              | TT              | 1946855720               |
| SNP_P4_77230_2537441 | NC_021165.1    | Ca_kabuli_chr06 | 2537441                 | TT                              | CC              | 1946855722               |
| SNP_P4_77231_2539071 | NC_021165.1    | Ca_kabuli_chr06 | 2539071                 | GG                              | CC              | 1946855724               |
| SNP_P4_77232_2539104 | NC_021165.1    | Ca_kabuli_chr06 | 2539104                 | CC                              | TT              | 1946855726               |
| SNP_P4_77233_2539207 | NC_021165.1    | Ca_kabuli_chr06 | 2539207                 | GG                              | CC              | 1946855728               |
| SNP_P4_77234_2539263 | NC_021165.1    | Ca_kabuli_chr06 | 2539263                 | CC                              | TT              | 1946855730               |
| SNP_P4_77235_2539272 | NC_021165.1    | Ca_kabuli_chr06 | 2539272                 | AA                              | TT              | 1946855732               |
| SNP_P4_77236_2539461 | NC_021165.1    | Ca_kabuli_chr06 | 2539461                 | AA                              | TT              | 1946855735               |

| SNPs IDs             | Chromosome IDs | Chromosomes     | Physical positions (bp) | CDC Frontier (Reference genome) | (ILWC46 & LPNB) | NCBI SNPdb Accession IDs |
|----------------------|----------------|-----------------|-------------------------|---------------------------------|-----------------|--------------------------|
| SNP_P4_77237_2539494 | NC_021165.1    | Ca_kabuli_chr06 | 2539494                 | GG                              | CC              | 1946855737               |
| SNP_P4_77238_2539499 | NC_021165.1    | Ca_kabuli_chr06 | 2539499                 | AA                              | GG              | 1946855739               |
| SNP_P4_77239_2539611 | NC_021165.1    | Ca_kabuli_chr06 | 2539611                 | CC                              | AA              | 1946855741               |
| SNP_P4_77240_2539927 | NC_021165.1    | Ca_kabuli_chr06 | 2539927                 | AA                              | GG              | 1946855743               |
| SNP_P4_77241_2541088 | NC_021165.1    | Ca_kabuli_chr06 | 2541088                 | TT                              | AA              | 1946855745               |
| SNP_P4_77242_2541567 | NC_021165.1    | Ca_kabuli_chr06 | 2541567                 | TT                              | CC              | 1946855747               |
| SNP_P4_77243_2541698 | NC_021165.1    | Ca_kabuli_chr06 | 2541698                 | AA                              | CC              | 1946855749               |
| SNP_P4_77244_2541940 | NC_021165.1    | Ca_kabuli_chr06 | 2541940                 | TT                              | GG              | 1946855751               |
| SNP_P4_77245_2543393 | NC_021165.1    | Ca_kabuli_chr06 | 2543393                 | CC                              | TT              | 1946855753               |
| SNP_P4_77246_2543420 | NC_021165.1    | Ca_kabuli_chr06 | 2543420                 | AA                              | GG              | 1946855755               |
| SNP_P4_77247_2543431 | NC_021165.1    | Ca_kabuli_chr06 | 2543431                 | TT                              | AA              | 1946855757               |
| SNP_P4_77248_2543477 | NC_021165.1    | Ca_kabuli_chr06 | 2543477                 | GG                              | TT              | 1946855759               |
| SNP_P4_77249_2543678 | NC_021165.1    | Ca_kabuli_chr06 | 2543678                 | TT                              | GG              | 1946855761               |
| SNP_P4_77251_2549826 | NC_021165.1    | Ca_kabuli_chr06 | 2549826                 | GG                              | AA              | 1946855762               |
| SNP_P4_77252_2557109 | NC_021165.1    | Ca_kabuli_chr06 | 2557109                 | TT                              | AA              | 1946855764               |
| SNP_P4_77253_2565762 | NC_021165.1    | Ca_kabuli_chr06 | 2565762                 | TT                              | AA              | 1946855766               |
| SNP_P4_77254_2565937 | NC_021165.1    | Ca_kabuli_chr06 | 2565937                 | GG                              | AA              | 1946855768               |
| SNP_P4_77255_2572341 | NC_021165.1    | Ca_kabuli_chr06 | 2572341                 | AA                              | GG              | 1946855770               |
| SNP_P4_77256_2574692 | NC_021165.1    | Ca_kabuli_chr06 | 2574692                 | CC                              | TT              | 1946855772               |
| SNP_P4_77257_2578822 | NC_021165.1    | Ca_kabuli_chr06 | 2578822                 | GG                              | TT              | 1946855774               |
| SNP_P4_77258_2583726 | NC_021165.1    | Ca_kabuli_chr06 | 2583726                 | AA                              | TT              | 1946855776               |
| SNP_P4_77259_2596397 | NC_021165.1    | Ca_kabuli_chr06 | 2596397                 | TT                              | CC              | 1946855779               |
| SNP_P4_77262_2647254 | NC_021165.1    | Ca_kabuli_chr06 | 2647254                 | AA                              | GG              | 1946855782               |
| SNP_P4_77263_2652048 | NC_021165.1    | Ca_kabuli_chr06 | 2652048                 | CC                              | AA              | 1946855784               |
| SNP_P4_77264_2662459 | NC_021165.1    | Ca_kabuli_chr06 | 2662459                 | GG                              | AA              | 1946855786               |
| SNP_P4_77266_2665262 | NC_021165.1    | Ca_kabuli_chr06 | 2665262                 | GG                              | AA              | 1946855788               |
| SNP_P4_77267_2674677 | NC_021165.1    | Ca_kabuli_chr06 | 2674677                 | GG                              | AA              | 1946855790               |
| SNP_P4_77268_2674682 | NC_021165.1    | Ca_kabuli_chr06 | 2674682                 | AA                              | GG              | 1946855792               |
| SNP_P4_77270_2675039 | NC_021165.1    | Ca_kabuli_chr06 | 2675039                 | TT                              | CC              | 1946855794               |
| SNP_P4_77271_2675068 | NC_021165.1    | Ca_kabuli_chr06 | 2675068                 | AA                              | GG              | 1946855796               |
| SNP_P4_77272_2683199 | NC_021165.1    | Ca_kabuli_chr06 | 2683199                 | AA                              | GG              | 1946855798               |
| SNP_P4_77274_2699526 | NC_021165.1    | Ca_kabuli_chr06 | 2699526                 | GG                              | AA              | 1946855800               |
| SNP_P4_77275_2713884 | NC_021165.1    | Ca_kabuli_chr06 | 2713884                 | TT                              | CC              | 1946855802               |
| SNP_P4_77276_2713887 | NC_021165.1    | Ca_kabuli_chr06 | 2713887                 | TT                              | AA              | 1946855804               |
| SNP_P4_77277_2727031 | NC_021165.1    | Ca_kabuli_chr06 | 2727031                 | CC                              | TT              | 1946855806               |
| SNP_P4_77278_2727039 | NC_021165.1    | Ca_kabuli_chr06 | 2727039                 | GG                              | AA              | 1946855808               |
| SNP_P4_77279_2727043 | NC_021165.1    | Ca_kabuli_chr06 | 2727043                 | TT                              | CC              | 1946855810               |
| SNP_P4_77280_2733402 | NC_021165.1    | Ca_kabuli_chr06 | 2733402                 | CC                              | TT              | 1946855812               |
| SNP_P4_77281_2746732 | NC_021165.1    | Ca_kabuli_chr06 | 2746732                 | GG                              | AA              | 1946855814               |
| SNP_P4_77283_2753725 | NC_021165.1    | Ca_kabuli_chr06 | 2753725                 | AA                              | GG              | 1946855816               |
| SNP_P4_77285_2783893 | NC_021165.1    | Ca_kabuli_chr06 | 2783893                 | AA                              | CC              | 1946855818               |
| SNP_P4_77286_2806906 | NC_021165.1    | Ca_kabuli_chr06 | 2806906                 | AA                              | TT              | 1946855820               |



| SNPs IDs             | Chromosome IDs | Chromosomes     | Physical positions (bp) | CDC Frontier (Reference genome) | (ILWC46 & LPNB) | NCBI SNPdb Accession IDs |
|----------------------|----------------|-----------------|-------------------------|---------------------------------|-----------------|--------------------------|
| SNP_P4_77288_2869685 | NC_021165.1    | Ca_kabuli_chr06 | 2869685                 | CC                              | TT              | 1946855822               |
| SNP_P4_77289_2875000 | NC_021165.1    | Ca_kabuli_chr06 | 2875000                 | TT                              | CC              | 1946855824               |
| SNP_P4_77290_2878656 | NC_021165.1    | Ca_kabuli_chr06 | 2878656                 | TT                              | AA              | 1946855826               |
| SNP_P4_77291_2897277 | NC_021165.1    | Ca_kabuli_chr06 | 2897277                 | TT                              | AA              | 1946855828               |
| SNP_P4_77292_2902621 | NC_021165.1    | Ca_kabuli_chr06 | 2902621                 | AA                              | GG              | 1946855830               |
| SNP_P4_77293_2911905 | NC_021165.1    | Ca_kabuli_chr06 | 2911905                 | TT                              | CC              | 1946855832               |
| SNP_P4_77294_2943606 | NC_021165.1    | Ca_kabuli_chr06 | 2943606                 | GG                              | AA              | 1946855834               |
| SNP_P4_77295_2960747 | NC_021165.1    | Ca_kabuli_chr06 | 2960747                 | TT                              | CC              | 1946855836               |
| SNP_P4_77296_2979643 | NC_021165.1    | Ca_kabuli_chr06 | 2979643                 | GG                              | AA              | 1946855838               |
| SNP_P4_77297_3001580 | NC_021165.1    | Ca_kabuli_chr06 | 3001580                 | AA                              | GG              | 1946855840               |
| SNP_P4_77298_3016003 | NC_021165.1    | Ca_kabuli_chr06 | 3016003                 | CC                              | TT              | 1946855842               |
| SNP_P4_77300_3023166 | NC_021165.1    | Ca_kabuli_chr06 | 3023166                 | TT                              | CC              | 1946855844               |
| SNP_P4_77301_3042039 | NC_021165.1    | Ca_kabuli_chr06 | 3042039                 | GG                              | CC              | 1946855846               |
| SNP_P4_77302_3068169 | NC_021165.1    | Ca_kabuli_chr06 | 3068169                 | TT                              | CC              | 1946855848               |
| SNP_P4_77304_3091334 | NC_021165.1    | Ca_kabuli_chr06 | 3091334                 | TT                              | CC              | 1946855850               |
| SNP_P4_77306_3096293 | NC_021165.1    | Ca_kabuli_chr06 | 3096293                 | AA                              | GG              | 1946855852               |
| SNP_P4_77307_3097631 | NC_021165.1    | Ca_kabuli_chr06 | 3097631                 | AA                              | GG              | 1946855855               |
| SNP_P4_77308_3103939 | NC_021165.1    | Ca_kabuli_chr06 | 3103939                 | CC                              | TT              | 1946855857               |
| SNP_P4_77309_3106978 | NC_021165.1    | Ca_kabuli_chr06 | 3106978                 | AA                              | CC              | 1946855859               |
| SNP_P4_77311_3111026 | NC_021165.1    | Ca_kabuli_chr06 | 3111026                 | CC                              | TT              | 1946855861               |
| SNP_P4_77312_3111776 | NC_021165.1    | Ca_kabuli_chr06 | 3111776                 | GG                              | AA              | 1946855863               |
| SNP_P4_77313_3116643 | NC_021165.1    | Ca_kabuli_chr06 | 3116643                 | GG                              | AA              | 1946855865               |
| SNP_P4_77314_3133180 | NC_021165.1    | Ca_kabuli_chr06 | 3133180                 | AA                              | TT              | 1946855867               |
| SNP_P4_77315_3133202 | NC_021165.1    | Ca_kabuli_chr06 | 3133202                 | GG                              | AA              | 1946855869               |
| SNP_P4_77316_3133209 | NC_021165.1    | Ca_kabuli_chr06 | 3133209                 | CC                              | AA              | 1946855871               |
| SNP_P4_77317_3133237 | NC_021165.1    | Ca_kabuli_chr06 | 3133237                 | CC                              | AA              | 1946855873               |
| SNP_P4_77318_3133253 | NC_021165.1    | Ca_kabuli_chr06 | 3133253                 | TT                              | GG              | 1946855875               |
| SNP_P4_77319_3133298 | NC_021165.1    | Ca_kabuli_chr06 | 3133298                 | CC                              | GG              | 1946855877               |
| SNP_P4_77320_3133876 | NC_021165.1    | Ca_kabuli_chr06 | 3133876                 | GG                              | AA              | 1946855879               |
| SNP_P4_77321_3134224 | NC_021165.1    | Ca_kabuli_chr06 | 3134224                 | GG                              | AA              | 1946855881               |
| SNP_P4_77322_3134251 | NC_021165.1    | Ca_kabuli_chr06 | 3134251                 | TT                              | CC              | 1946855883               |
| SNP_P4_77323_3134295 | NC_021165.1    | Ca_kabuli_chr06 | 3134295                 | CC                              | AA              | 1946855885               |
| SNP_P4_77324_3134310 | NC_021165.1    | Ca_kabuli_chr06 | 3134310                 | GG                              | AA              | 1946855887               |
| SNP_P4_77325_3134311 | NC_021165.1    | Ca_kabuli_chr06 | 3134311                 | GG                              | AA              | 1946855889               |
| SNP_P4_77326_3134345 | NC_021165.1    | Ca_kabuli_chr06 | 3134345                 | GG                              | AA              | 1946855891               |
| SNP_P4_77327_3134348 | NC_021165.1    | Ca_kabuli_chr06 | 3134348                 | GG                              | TT              | 1946855893               |
| SNP_P4_77328_3134353 | NC_021165.1    | Ca_kabuli_chr06 | 3134353                 | CC                              | GG              | 1946855895               |
| SNP_P4_77329_3134383 | NC_021165.1    | Ca_kabuli_chr06 | 3134383                 | GG                              | TT              | 1946855896               |
| SNP_P4_77330_3134384 | NC_021165.1    | Ca_kabuli_chr06 | 3134384                 | TT                              | GG              | 1946855898               |
| SNP_P4_77331_3134405 | NC_021165.1    | Ca_kabuli_chr06 | 3134405                 | GG                              | AA              | 1946855900               |
| SNP_P4_77332_3134416 | NC_021165.1    | Ca_kabuli_chr06 | 3134416                 | TT                              | CC              | 1946855902               |
| SNP_P4_77333_3145623 | NC_021165.1    | Ca_kabuli_chr06 | 3145623                 | CC                              | AA              | 1946855904               |

| SNPs IDs             | Chromosome IDs | Chromosomes     | Physical positions (bp) | CDC Frontier (Reference genome) | (ILWC46 & LPNB) | NCBI SNPdb Accession IDs |
|----------------------|----------------|-----------------|-------------------------|---------------------------------|-----------------|--------------------------|
| SNP_P4_77334_3149021 | NC_021165.1    | Ca_kabuli_chr06 | 3149021                 | CC                              | AA              | 1946855906               |
| SNP_P4_77335_3158919 | NC_021165.1    | Ca_kabuli_chr06 | 3158919                 | TT                              | GG              | 1946855908               |
| SNP_P4_77336_3160548 | NC_021165.1    | Ca_kabuli_chr06 | 3160548                 | CC                              | GG              | 1946855910               |
| SNP_P4_77337_3162446 | NC_021165.1    | Ca_kabuli_chr06 | 3162446                 | GG                              | AA              | 1946855912               |
| SNP_P4_77338_3164467 | NC_021165.1    | Ca_kabuli_chr06 | 3164467                 | TT                              | AA              | 1946855914               |
| SNP_P4_77339_3164558 | NC_021165.1    | Ca_kabuli_chr06 | 3164558                 | AA                              | CC              | 1946855916               |
| SNP_P4_77340_3164560 | NC_021165.1    | Ca_kabuli_chr06 | 3164560                 | GG                              | AA              | 1946855918               |
| SNP_P4_77341_3165404 | NC_021165.1    | Ca_kabuli_chr06 | 3165404                 | GG                              | AA              | 1946855920               |
| SNP_P4_77342_3165503 | NC_021165.1    | Ca_kabuli_chr06 | 3165503                 | TT                              | AA              | 1946855922               |
| SNP_P4_77343_3165843 | NC_021165.1    | Ca_kabuli_chr06 | 3165843                 | TT                              | CC              | 1946855924               |
| SNP_P4_77345_3166256 | NC_021165.1    | Ca_kabuli_chr06 | 3166256                 | AA                              | GG              | 1946855926               |
| SNP_P4_77346_3166264 | NC_021165.1    | Ca_kabuli_chr06 | 3166264                 | GG                              | AA              | 1946855927               |
| SNP_P4_77347_3166275 | NC_021165.1    | Ca_kabuli_chr06 | 3166275                 | TT                              | CC              | 1946855929               |
| SNP_P4_77348_3166584 | NC_021165.1    | Ca_kabuli_chr06 | 3166584                 | GG                              | AA              | 1946855931               |
| SNP_P4_77349_3166993 | NC_021165.1    | Ca_kabuli_chr06 | 3166993                 | GG                              | AA              | 1946855933               |
| SNP_P4_77350_3167397 | NC_021165.1    | Ca_kabuli_chr06 | 3167397                 | TT                              | CC              | 1946855935               |
| SNP_P4_77351_3167469 | NC_021165.1    | Ca_kabuli_chr06 | 3167469                 | TT                              | CC              | 1946855937               |
| SNP_P4_77352_3167493 | NC_021165.1    | Ca_kabuli_chr06 | 3167493                 | AA                              | GG              | 1946855939               |
| SNP_P4_77353_3170662 | NC_021165.1    | Ca_kabuli_chr06 | 3170662                 | CC                              | TT              | 1946855941               |
| SNP_P4_77354_3175525 | NC_021165.1    | Ca_kabuli_chr06 | 3175525                 | AA                              | CC              | 1946855943               |
| SNP_P4_77355_3175668 | NC_021165.1    | Ca_kabuli_chr06 | 3175668                 | CC                              | TT              | 1946855945               |
| SNP_P4_77356_3175694 | NC_021165.1    | Ca_kabuli_chr06 | 3175694                 | TT                              | CC              | 1946855947               |
| SNP_P4_77357_3175780 | NC_021165.1    | Ca_kabuli_chr06 | 3175780                 | CC                              | AA              | 1946855948               |
| SNP_P4_77358_3175788 | NC_021165.1    | Ca_kabuli_chr06 | 3175788                 | TT                              | AA              | 1946855950               |
| SNP_P4_77360_3176058 | NC_021165.1    | Ca_kabuli_chr06 | 3176058                 | GG                              | TT              | 1946855952               |
| SNP_P4_77361_3178925 | NC_021165.1    | Ca_kabuli_chr06 | 3178925                 | CC                              | TT              | 1946855954               |
| SNP_P4_77362_3181435 | NC_021165.1    | Ca_kabuli_chr06 | 3181435                 | GG                              | AA              | 1946855956               |
| SNP_P4_77364_3204319 | NC_021165.1    | Ca_kabuli_chr06 | 3204319                 | AA                              | GG              | 1946855958               |
| SNP_P4_77365_3249230 | NC_021165.1    | Ca_kabuli_chr06 | 3249230                 | GG                              | AA              | 1946855960               |
| SNP_P4_77366_3249288 | NC_021165.1    | Ca_kabuli_chr06 | 3249288                 | GG                              | AA              | 1946855962               |
| SNP_P4_77367_3249488 | NC_021165.1    | Ca_kabuli_chr06 | 3249488                 | AA                              | CC              | 1946855964               |
| SNP_P4_77368_3250008 | NC_021165.1    | Ca_kabuli_chr06 | 3250008                 | AA                              | GG              | 1946855966               |
| SNP_P4_77369_3250130 | NC_021165.1    | Ca_kabuli_chr06 | 3250130                 | TT                              | GG              | 1946855968               |
| SNP_P4_77370_3250138 | NC_021165.1    | Ca_kabuli_chr06 | 3250138                 | AA                              | GG              | 1946855970               |
| SNP_P4_77371_3250221 | NC_021165.1    | Ca_kabuli_chr06 | 3250221                 | TT                              | GG              | 1946855972               |
| SNP_P4_77372_3250227 | NC_021165.1    | Ca_kabuli_chr06 | 3250227                 | GG                              | AA              | 1946855974               |
| SNP_P4_77373_3250363 | NC_021165.1    | Ca_kabuli_chr06 | 3250363                 | CC                              | AA              | 1946855976               |
| SNP_P4_77374_3250388 | NC_021165.1    | Ca_kabuli_chr06 | 3250388                 | CC                              | AA              | 1946855978               |
| SNP_P4_77375_3250429 | NC_021165.1    | Ca_kabuli_chr06 | 3250429                 | CC                              | AA              | 1946855980               |
| SNP_P4_77376_3250445 | NC_021165.1    | Ca_kabuli_chr06 | 3250445                 | TT                              | CC              | 1946855982               |
| SNP_P4_77377_3250448 | NC_021165.1    | Ca_kabuli_chr06 | 3250448                 | GG                              | AA              | 1946855984               |
| SNP_P4_77378_3250482 | NC_021165.1    | Ca_kabuli_chr06 | 3250482                 | CC                              | TT              | 1946855986               |

| SNPs IDs             | Chromosome IDs | Chromosomes     | Physical positions (bp) | CDC Frontier (Reference genome) | (ILWC46 & LPNB) | NCBI SNPdb Accession IDs |
|----------------------|----------------|-----------------|-------------------------|---------------------------------|-----------------|--------------------------|
| SNP_P4_77379_3250529 | NC_021165.1    | Ca_kabuli_chr06 | 3250529                 | AA                              | TT              | 1946855988               |
| SNP_P4_77380_3250552 | NC_021165.1    | Ca_kabuli_chr06 | 3250552                 | GG                              | AA              | 1946855990               |
| SNP_P4_77381_3250564 | NC_021165.1    | Ca_kabuli_chr06 | 3250564                 | GG                              | AA              | 1946855992               |
| SNP_P4_77382_3250593 | NC_021165.1    | Ca_kabuli_chr06 | 3250593                 | AA                              | TT              | 1946855994               |
| SNP_P4_77384_3286459 | NC_021165.1    | Ca_kabuli_chr06 | 3286459                 | CC                              | TT              | 1946855995               |
| SNP_P4_77385_3287399 | NC_021165.1    | Ca_kabuli_chr06 | 3287399                 | CC                              | TT              | 1946855997               |
| SNP_P4_77386_3325887 | NC_021165.1    | Ca_kabuli_chr06 | 3325887                 | GG                              | AA              | 1946855999               |
| SNP_P4_77389_3334943 | NC_021165.1    | Ca_kabuli_chr06 | 3334943                 | AA                              | GG              | 1946856002               |
| SNP_P4_77391_3340781 | NC_021165.1    | Ca_kabuli_chr06 | 3340781                 | GG                              | AA              | 1946856004               |
| SNP_P4_77393_3347279 | NC_021165.1    | Ca_kabuli_chr06 | 3347279                 | AA                              | TT              | 1946856006               |
| SNP_P4_77394_3347280 | NC_021165.1    | Ca_kabuli_chr06 | 3347280                 | AA                              | TT              | 1946856008               |
| SNP_P4_77395_3347283 | NC_021165.1    | Ca_kabuli_chr06 | 3347283                 | TT                              | CC              | 1946856010               |
| SNP_P4_77396_3347304 | NC_021165.1    | Ca_kabuli_chr06 | 3347304                 | GG                              | TT              | 1946856012               |
| SNP_P4_77397_3347709 | NC_021165.1    | Ca_kabuli_chr06 | 3347709                 | AA                              | GG              | 1946856014               |
| SNP_P4_77398_3347730 | NC_021165.1    | Ca_kabuli_chr06 | 3347730                 | CC                              | GG              | 1946856016               |
| SNP_P4_77399_3348760 | NC_021165.1    | Ca_kabuli_chr06 | 3348760                 | TT                              | GG              | 1946856018               |
| SNP_P4_77400_3348847 | NC_021165.1    | Ca_kabuli_chr06 | 3348847                 | GG                              | AA              | 1946856020               |
| SNP_P4_77401_3348891 | NC_021165.1    | Ca_kabuli_chr06 | 3348891                 | AA                              | GG              | 1946856022               |
| SNP_P4_77402_3349028 | NC_021165.1    | Ca_kabuli_chr06 | 3349028                 | TT                              | CC              | 1946856024               |
| SNP_P4_77403_3349145 | NC_021165.1    | Ca_kabuli_chr06 | 3349145                 | TT                              | GG              | 1946856026               |
| SNP_P4_77404_3349276 | NC_021165.1    | Ca_kabuli_chr06 | 3349276                 | CC                              | TT              | 1946856028               |
| SNP_P4_77405_3349412 | NC_021165.1    | Ca_kabuli_chr06 | 3349412                 | AA                              | GG              | 1946856030               |
| SNP_P4_77406_3349478 | NC_021165.1    | Ca_kabuli_chr06 | 3349478                 | AA                              | CC              | 1946856032               |
| SNP_P4_77407_3349512 | NC_021165.1    | Ca_kabuli_chr06 | 3349512                 | GG                              | AA              | 1946856034               |
| SNP_P4_77408_3349709 | NC_021165.1    | Ca_kabuli_chr06 | 3349709                 | CC                              | TT              | 1946856036               |
| SNP_P4_77409_3351526 | NC_021165.1    | Ca_kabuli_chr06 | 3351526                 | AA                              | TT              | 1946856038               |
| SNP_P4_77411_3351594 | NC_021165.1    | Ca_kabuli_chr06 | 3351594                 | GG                              | TT              | 1946856040               |
| SNP_P4_77412_3351645 | NC_021165.1    | Ca_kabuli_chr06 | 3351645                 | GG                              | CC              | 1946856042               |
| SNP_P4_77415_3351690 | NC_021165.1    | Ca_kabuli_chr06 | 3351690                 | AA                              | GG              | 1946856044               |
| SNP_P4_77418_3351812 | NC_021165.1    | Ca_kabuli_chr06 | 3351812                 | AA                              | GG              | 1946856046               |
| SNP_P4_77419_3351841 | NC_021165.1    | Ca_kabuli_chr06 | 3351841                 | TT                              | CC              | 1946856048               |
| SNP_P4_77420_3351889 | NC_021165.1    | Ca_kabuli_chr06 | 3351889                 | AA                              | GG              | 1946856050               |
| SNP_P4_77421_3352838 | NC_021165.1    | Ca_kabuli_chr06 | 3352838                 | GG                              | AA              | 1946856052               |
| SNP_P4_77423_3353060 | NC_021165.1    | Ca_kabuli_chr06 | 3353060                 | GG                              | AA              | 1946856054               |
| SNP_P4_77424_3353065 | NC_021165.1    | Ca_kabuli_chr06 | 3353065                 | TT                              | CC              | 1946856056               |
| SNP_P4_77425_3353066 | NC_021165.1    | Ca_kabuli_chr06 | 3353066                 | GG                              | AA              | 1946856058               |
| SNP_P4_77426_3353108 | NC_021165.1    | Ca_kabuli_chr06 | 3353108                 | TT                              | AA              | 1946856059               |
| SNP_P4_77427_3353142 | NC_021165.1    | Ca_kabuli_chr06 | 3353142                 | GG                              | TT              | 1946856061               |
| SNP_P4_77428_3353160 | NC_021165.1    | Ca_kabuli_chr06 | 3353160                 | TT                              | AA              | 1946856063               |
| SNP_P4_77429_3353202 | NC_021165.1    | Ca_kabuli_chr06 | 3353202                 | AA                              | CC              | 1946856065               |
| SNP_P4_77430_3353420 | NC_021165.1    | Ca_kabuli_chr06 | 3353420                 | AA                              | CC              | 1946856067               |
| SNP_P4_77431_3353475 | NC_021165.1    | Ca_kabuli_chr06 | 3353475                 | TT                              | AA              | 1946856069               |

| SNPs IDs             | Chromosome IDs | Chromosomes     | Physical positions (bp) | CDC Frontier (Reference genome) | (ILWC46 & LPNB) | NCBI SNPdb Accession IDs |
|----------------------|----------------|-----------------|-------------------------|---------------------------------|-----------------|--------------------------|
| SNP_P4_77432_3354042 | NC_021165.1    | Ca_kabuli_chr06 | 3354042                 | CC                              | TT              | 1946856071               |
| SNP_P4_77433_3354090 | NC_021165.1    | Ca_kabuli_chr06 | 3354090                 | TT                              | CC              | 1946856073               |
| SNP_P4_77434_3354094 | NC_021165.1    | Ca_kabuli_chr06 | 3354094                 | GG                              | AA              | 1946856075               |
| SNP_P4_77435_3354164 | NC_021165.1    | Ca_kabuli_chr06 | 3354164                 | TT                              | CC              | 1946856077               |
| SNP_P4_77436_3354179 | NC_021165.1    | Ca_kabuli_chr06 | 3354179                 | GG                              | AA              | 1946856079               |
| SNP_P4_77437_3354505 | NC_021165.1    | Ca_kabuli_chr06 | 3354505                 | AA                              | GG              | 1946856081               |
| SNP_P4_77439_3355318 | NC_021165.1    | Ca_kabuli_chr06 | 3355318                 | CC                              | TT              | 1946856083               |
| SNP_P4_77440_3355372 | NC_021165.1    | Ca_kabuli_chr06 | 3355372                 | GG                              | TT              | 1946856085               |
| SNP_P4_77441_3355386 | NC_021165.1    | Ca_kabuli_chr06 | 3355386                 | CC                              | AA              | 1946856087               |
| SNP_P4_77442_3355644 | NC_021165.1    | Ca_kabuli_chr06 | 3355644                 | AA                              | GG              | 1946856088               |
| SNP_P4_77443_3355720 | NC_021165.1    | Ca_kabuli_chr06 | 3355720                 | GG                              | AA              | 1946856090               |
| SNP_P4_77444_3355726 | NC_021165.1    | Ca_kabuli_chr06 | 3355726                 | CC                              | AA              | 1946856092               |
| SNP_P4_77445_3355753 | NC_021165.1    | Ca_kabuli_chr06 | 3355753                 | AA                              | GG              | 1946856094               |
| SNP_P4_77447_3355898 | NC_021165.1    | Ca_kabuli_chr06 | 3355898                 | AA                              | TT              | 1946856096               |
| SNP_P4_77448_3355954 | NC_021165.1    | Ca_kabuli_chr06 | 3355954                 | CC                              | TT              | 1946856098               |
| SNP_P4_77449_3355961 | NC_021165.1    | Ca_kabuli_chr06 | 3355961                 | AA                              | GG              | 1946856100               |
| SNP_P4_77450_3356057 | NC_021165.1    | Ca_kabuli_chr06 | 3356057                 | TT                              | CC              | 1946856102               |
| SNP_P4_77451_3356083 | NC_021165.1    | Ca_kabuli_chr06 | 3356083                 | AA                              | GG              | 1946856104               |
| SNP_P4_77452_3356120 | NC_021165.1    | Ca_kabuli_chr06 | 3356120                 | TT                              | AA              | 1946856106               |
| SNP_P4_77453_3356150 | NC_021165.1    | Ca_kabuli_chr06 | 3356150                 | CC                              | AA              | 1946856108               |
| SNP_P4_77454_3356152 | NC_021165.1    | Ca_kabuli_chr06 | 3356152                 | GG                              | AA              | 1946856110               |
| SNP_P4_77455_3356222 | NC_021165.1    | Ca_kabuli_chr06 | 3356222                 | GG                              | TT              | 1946856112               |
| SNP_P4_77456_3356250 | NC_021165.1    | Ca_kabuli_chr06 | 3356250                 | CC                              | AA              | 1946856114               |
| SNP_P4_77457_3356260 | NC_021165.1    | Ca_kabuli_chr06 | 3356260                 | GG                              | AA              | 1946856116               |
| SNP_P4_77458_3356373 | NC_021165.1    | Ca_kabuli_chr06 | 3356373                 | CC                              | TT              | 1946856118               |
| SNP_P4_77459_3356425 | NC_021165.1    | Ca_kabuli_chr06 | 3356425                 | GG                              | AA              | 1946856120               |
| SNP_P4_77460_3356473 | NC_021165.1    | Ca_kabuli_chr06 | 3356473                 | TT                              | CC              | 1946856122               |
| SNP_P4_77461_3356543 | NC_021165.1    | Ca_kabuli_chr06 | 3356543                 | TT                              | CC              | 1946856124               |
| SNP_P4_77463_3374607 | NC_021165.1    | Ca_kabuli_chr06 | 3374607                 | CC                              | TT              | 1946856126               |
| SNP_P4_77464_3374657 | NC_021165.1    | Ca_kabuli_chr06 | 3374657                 | AA                              | TT              | 1946856127               |
| SNP_P4_77465_3374707 | NC_021165.1    | Ca_kabuli_chr06 | 3374707                 | AA                              | GG              | 1946856129               |
| SNP_P4_77466_3374899 | NC_021165.1    | Ca_kabuli_chr06 | 3374899                 | AA                              | TT              | 1946856131               |
| SNP_P4_77467_3374906 | NC_021165.1    | Ca_kabuli_chr06 | 3374906                 | CC                              | TT              | 1946856133               |
| SNP_P4_77468_3374986 | NC_021165.1    | Ca_kabuli_chr06 | 3374986                 | AA                              | GG              | 1946856135               |
| SNP_P4_77469_3375089 | NC_021165.1    | Ca_kabuli_chr06 | 3375089                 | AA                              | TT              | 1946856137               |
| SNP_P4_77470_3375209 | NC_021165.1    | Ca_kabuli_chr06 | 3375209                 | CC                              | TT              | 1946856139               |
| SNP_P4_77471_3375264 | NC_021165.1    | Ca_kabuli_chr06 | 3375264                 | TT                              | AA              | 1946856141               |
| SNP_P4_77473_3375285 | NC_021165.1    | Ca_kabuli_chr06 | 3375285                 | GG                              | TT              | 1946856143               |
| SNP_P4_77474_3377317 | NC_021165.1    | Ca_kabuli_chr06 | 3377317                 | CC                              | GG              | 1946856144               |
| SNP_P4_77475_3377545 | NC_021165.1    | Ca_kabuli_chr06 | 3377545                 | CC                              | GG              | 1946856146               |
| SNP_P4_77476_3377575 | NC_021165.1    | Ca_kabuli_chr06 | 3377575                 | CC                              | AA              | 1946856148               |
| SNP_P4_77478_3377612 | NC_021165.1    | Ca_kabuli_chr06 | 3377612                 | TT                              | CC              | 1946856150               |

| SNPs IDs             | Chromosome IDs | Chromosomes     | Physical positions (bp) | CDC Frontier (Reference genome) | (ILWC46 & LPNB) | NCBI SNPdb Accession IDs |
|----------------------|----------------|-----------------|-------------------------|---------------------------------|-----------------|--------------------------|
| SNP_P4_77479_3377633 | NC_021165.1    | Ca_kabuli_chr06 | 3377633                 | AA                              | CC              | 1946856152               |
| SNP_P4_77480_3377644 | NC_021165.1    | Ca_kabuli_chr06 | 3377644                 | CC                              | GG              | 1946856154               |
| SNP_P4_77481_3377675 | NC_021165.1    | Ca_kabuli_chr06 | 3377675                 | GG                              | AA              | 1946856156               |
| SNP_P4_77482_3377688 | NC_021165.1    | Ca_kabuli_chr06 | 3377688                 | TT                              | CC              | 1946856158               |
| SNP_P4_77483_3377694 | NC_021165.1    | Ca_kabuli_chr06 | 3377694                 | CC                              | AA              | 1946856160               |
| SNP_P4_77484_3378075 | NC_021165.1    | Ca_kabuli_chr06 | 3378075                 | CC                              | GG              | 1946856162               |
| SNP_P4_77485_3378076 | NC_021165.1    | Ca_kabuli_chr06 | 3378076                 | TT                              | AA              | 1946856164               |
| SNP_P4_77486_3378086 | NC_021165.1    | Ca_kabuli_chr06 | 3378086                 | AA                              | CC              | 1946856166               |
| SNP_P4_77487_3378096 | NC_021165.1    | Ca_kabuli_chr06 | 3378096                 | TT                              | CC              | 1946856168               |
| SNP_P4_77488_3378114 | NC_021165.1    | Ca_kabuli_chr06 | 3378114                 | GG                              | AA              | 1946856170               |
| SNP_P4_77490_3378129 | NC_021165.1    | Ca_kabuli_chr06 | 3378129                 | TT                              | GG              | 1946856171               |
| SNP_P4_77491_3378760 | NC_021165.1    | Ca_kabuli_chr06 | 3378760                 | GG                              | CC              | 1946856173               |
| SNP_P4_77492_3378765 | NC_021165.1    | Ca_kabuli_chr06 | 3378765                 | CC                              | TT              | 1946856175               |
| SNP_P4_77493_3378773 | NC_021165.1    | Ca_kabuli_chr06 | 3378773                 | CC                              | TT              | 1946856177               |
| SNP_P4_77494_3378957 | NC_021165.1    | Ca_kabuli_chr06 | 3378957                 | GG                              | AA              | 1946856179               |
| SNP_P4_77495_3378989 | NC_021165.1    | Ca_kabuli_chr06 | 3378989                 | TT                              | CC              | 1946856181               |
| SNP_P4_77496_3378992 | NC_021165.1    | Ca_kabuli_chr06 | 3378992                 | GG                              | AA              | 1946856183               |
| SNP_P4_77497_3379238 | NC_021165.1    | Ca_kabuli_chr06 | 3379238                 | CC                              | AA              | 1946856185               |
| SNP_P4_77498_3379517 | NC_021165.1    | Ca_kabuli_chr06 | 3379517                 | GG                              | AA              | 1946856187               |
| SNP_P4_77500_3382730 | NC_021165.1    | Ca_kabuli_chr06 | 3382730                 | AA                              | TT              | 1946856189               |
| SNP_P4_77501_3382747 | NC_021165.1    | Ca_kabuli_chr06 | 3382747                 | GG                              | AA              | 1946856190               |
| SNP_P4_77502_3382770 | NC_021165.1    | Ca_kabuli_chr06 | 3382770                 | AA                              | GG              | 1946856192               |
| SNP_P4_77503_3382771 | NC_021165.1    | Ca_kabuli_chr06 | 3382771                 | TT                              | AA              | 1946856194               |
| SNP_P4_77505_3382848 | NC_021165.1    | Ca_kabuli_chr06 | 3382848                 | GG                              | TT              | 1946856196               |
| SNP_P4_77506_3382890 | NC_021165.1    | Ca_kabuli_chr06 | 3382890                 | AA                              | CC              | 1946856197               |
| SNP_P4_77508_3382960 | NC_021165.1    | Ca_kabuli_chr06 | 3382960                 | TT                              | GG              | 1946856198               |
| SNP_P4_77509_3383016 | NC_021165.1    | Ca_kabuli_chr06 | 3383016                 | TT                              | AA              | 1946856199               |
| SNP_P4_77510_3383082 | NC_021165.1    | Ca_kabuli_chr06 | 3383082                 | GG                              | TT              | 1946856200               |
| SNP_P4_77512_3387473 | NC_021165.1    | Ca_kabuli_chr06 | 3387473                 | TT                              | AA              | 1946856201               |
| SNP_P4_77513_3387540 | NC_021165.1    | Ca_kabuli_chr06 | 3387540                 | AA                              | GG              | 1946856202               |
| SNP_P4_77514_3387543 | NC_021165.1    | Ca_kabuli_chr06 | 3387543                 | GG                              | CC              | 1946856203               |
| SNP_P4_77515_3387610 | NC_021165.1    | Ca_kabuli_chr06 | 3387610                 | CC                              | TT              | 1946856204               |
| SNP_P4_77519_3392434 | NC_021165.1    | Ca_kabuli_chr06 | 3392434                 | CC                              | TT              | 1946856205               |
| SNP_P4_77522_3392869 | NC_021165.1    | Ca_kabuli_chr06 | 3392869                 | AA                              | GG              | 1946856206               |
| SNP_P4_77523_3393426 | NC_021165.1    | Ca_kabuli_chr06 | 3393426                 | GG                              | AA              | 1946856207               |
| SNP_P4_77524_3393462 | NC_021165.1    | Ca_kabuli_chr06 | 3393462                 | TT                              | CC              | 1946856208               |
| SNP_P4_77525_3393463 | NC_021165.1    | Ca_kabuli_chr06 | 3393463                 | TT                              | GG              | 1946856209               |
| SNP_P4_77526_3393465 | NC_021165.1    | Ca_kabuli_chr06 | 3393465                 | CC                              | TT              | 1946856210               |
| SNP_P4_77527_3393497 | NC_021165.1    | Ca_kabuli_chr06 | 3393497                 | CC                              | TT              | 1946856211               |
| SNP_P4_77528_3393513 | NC_021165.1    | Ca_kabuli_chr06 | 3393513                 | TT                              | GG              | 1946856212               |
| SNP_P4_77529_3393593 | NC_021165.1    | Ca_kabuli_chr06 | 3393593                 | GG                              | AA              | 1946856213               |
| SNP_P4_77531_3393691 | NC_021165.1    | Ca_kabuli_chr06 | 3393691                 | AA                              | GG              | 1946856214               |

| SNPs IDs             | Chromosome IDs | Chromosomes     | Physical positions (bp) | CDC Frontier (Reference genome) | (ILWC46 & LPNB) | NCBI SNPdb Accession IDs |
|----------------------|----------------|-----------------|-------------------------|---------------------------------|-----------------|--------------------------|
| SNP_P4_77532_3393740 | NC_021165.1    | Ca_kabuli_chr06 | 3393740                 | TT                              | GG              | 1946856216               |
| SNP_P4_77533_3393753 | NC_021165.1    | Ca_kabuli_chr06 | 3393753                 | AA                              | GG              | 1946856218               |
| SNP_P4_77534_3393761 | NC_021165.1    | Ca_kabuli_chr06 | 3393761                 | AA                              | TT              | 1946856219               |
| SNP_P4_77535_3393782 | NC_021165.1    | Ca_kabuli_chr06 | 3393782                 | CC                              | TT              | 1946856221               |
| SNP_P4_77536_3393784 | NC_021165.1    | Ca_kabuli_chr06 | 3393784                 | TT                              | CC              | 1946856223               |
| SNP_P4_77537_3393792 | NC_021165.1    | Ca_kabuli_chr06 | 3393792                 | AA                              | CC              | 1946856225               |
| SNP_P4_77538_3393817 | NC_021165.1    | Ca_kabuli_chr06 | 3393817                 | GG                              | TT              | 1946856227               |
| SNP_P4_77539_3393831 | NC_021165.1    | Ca_kabuli_chr06 | 3393831                 | TT                              | GG              | 1946856229               |
| SNP_P4_77540_3393843 | NC_021165.1    | Ca_kabuli_chr06 | 3393843                 | AA                              | GG              | 1946856231               |
| SNP_P4_77541_3393850 | NC_021165.1    | Ca_kabuli_chr06 | 3393850                 | TT                              | CC              | 1946856233               |
| SNP_P4_77542_3393923 | NC_021165.1    | Ca_kabuli_chr06 | 3393923                 | AA                              | GG              | 1946856235               |
| SNP_P4_77543_3393933 | NC_021165.1    | Ca_kabuli_chr06 | 3393933                 | CC                              | TT              | 1946856236               |
| SNP_P4_77544_3394013 | NC_021165.1    | Ca_kabuli_chr06 | 3394013                 | AA                              | GG              | 1946856238               |
| SNP_P4_77545_3394024 | NC_021165.1    | Ca_kabuli_chr06 | 3394024                 | AA                              | GG              | 1946856240               |
| SNP_P4_77546_3394025 | NC_021165.1    | Ca_kabuli_chr06 | 3394025                 | TT                              | CC              | 1946856242               |
| SNP_P4_77547_3394034 | NC_021165.1    | Ca_kabuli_chr06 | 3394034                 | AA                              | TT              | 1946856244               |
| SNP_P4_77548_3394044 | NC_021165.1    | Ca_kabuli_chr06 | 3394044                 | GG                              | AA              | 1946856246               |
| SNP_P4_77549_3394064 | NC_021165.1    | Ca_kabuli_chr06 | 3394064                 | CC                              | TT              | 1946856248               |
| SNP_P4_77552_3394244 | NC_021165.1    | Ca_kabuli_chr06 | 3394244                 | AA                              | GG              | 1946856250               |
| SNP_P4_77553_3394257 | NC_021165.1    | Ca_kabuli_chr06 | 3394257                 | TT                              | CC              | 1946856252               |
| SNP_P4_77554_3394293 | NC_021165.1    | Ca_kabuli_chr06 | 3394293                 | CC                              | TT              | 1946856254               |
| SNP_P4_77555_3394322 | NC_021165.1    | Ca_kabuli_chr06 | 3394322                 | TT                              | GG              | 1946856255               |
| SNP_P4_77556_3394327 | NC_021165.1    | Ca_kabuli_chr06 | 3394327                 | AA                              | GG              | 1946856257               |
| SNP_P4_77557_3394383 | NC_021165.1    | Ca_kabuli_chr06 | 3394383                 | TT                              | CC              | 1946856259               |
| SNP_P4_77558_3394481 | NC_021165.1    | Ca_kabuli_chr06 | 3394481                 | TT                              | AA              | 1946856261               |
| SNP_P4_77559_3394604 | NC_021165.1    | Ca_kabuli_chr06 | 3394604                 | CC                              | AA              | 1946856263               |
| SNP_P4_77560_3394656 | NC_021165.1    | Ca_kabuli_chr06 | 3394656                 | TT                              | CC              | 1946856265               |
| SNP_P4_77561_3394697 | NC_021165.1    | Ca_kabuli_chr06 | 3394697                 | GG                              | AA              | 1946856267               |
| SNP_P4_77562_3394747 | NC_021165.1    | Ca_kabuli_chr06 | 3394747                 | CC                              | TT              | 1946856269               |
| SNP_P4_77563_3394774 | NC_021165.1    | Ca_kabuli_chr06 | 3394774                 | CC                              | TT              | 1946856271               |
| SNP_P4_77564_3394784 | NC_021165.1    | Ca_kabuli_chr06 | 3394784                 | CC                              | GG              | 1946856272               |
| SNP_P4_77565_3394857 | NC_021165.1    | Ca_kabuli_chr06 | 3394857                 | CC                              | TT              | 1946856274               |
| SNP_P4_77566_3394876 | NC_021165.1    | Ca_kabuli_chr06 | 3394876                 | GG                              | AA              | 1946856276               |
| SNP_P4_77567_3394898 | NC_021165.1    | Ca_kabuli_chr06 | 3394898                 | AA                              | TT              | 1946856278               |
| SNP_P4_77568_3394908 | NC_021165.1    | Ca_kabuli_chr06 | 3394908                 | GG                              | TT              | 1946856280               |
| SNP_P4_77569_3394921 | NC_021165.1    | Ca_kabuli_chr06 | 3394921                 | AA                              | GG              | 1946856282               |
| SNP_P4_77570_3395024 | NC_021165.1    | Ca_kabuli_chr06 | 3395024                 | GG                              | AA              | 1946856284               |
| SNP_P4_77571_3395253 | NC_021165.1    | Ca_kabuli_chr06 | 3395253                 | GG                              | AA              | 1946856286               |
| SNP_P4_77572_3395440 | NC_021165.1    | Ca_kabuli_chr06 | 3395440                 | AA                              | GG              | 1946856288               |
| SNP_P4_77573_3395467 | NC_021165.1    | Ca_kabuli_chr06 | 3395467                 | TT                              | GG              | 1946856290               |
| SNP_P4_77574_3395508 | NC_021165.1    | Ca_kabuli_chr06 | 3395508                 | AA                              | GG              | 1946856292               |
| SNP_P4_77575_3395512 | NC_021165.1    | Ca_kabuli_chr06 | 3395512                 | AA                              | TT              | 1946856294               |

| SNPs IDs             | Chromosome IDs | Chromosomes     | Physical positions (bp) | CDC Frontier (Reference genome) | (ILWC46 & LPNB) | NCBI SNPdb Accession IDs |
|----------------------|----------------|-----------------|-------------------------|---------------------------------|-----------------|--------------------------|
| SNP_P4_77576_3395528 | NC_021165.1    | Ca_kabuli_chr06 | 3395528                 | CC                              | TT              | 1946856296               |
| SNP_P4_77577_3395546 | NC_021165.1    | Ca_kabuli_chr06 | 3395546                 | TT                              | CC              | 1946856298               |
| SNP_P4_77578_3395590 | NC_021165.1    | Ca_kabuli_chr06 | 3395590                 | TT                              | CC              | 1946856300               |
| SNP_P4_77579_3395617 | NC_021165.1    | Ca_kabuli_chr06 | 3395617                 | GG                              | CC              | 1946856301               |
| SNP_P4_77580_3395620 | NC_021165.1    | Ca_kabuli_chr06 | 3395620                 | TT                              | CC              | 1946856303               |
| SNP_P4_77582_3395651 | NC_021165.1    | Ca_kabuli_chr06 | 3395651                 | CC                              | GG              | 1946856305               |
| SNP_P4_77583_3395654 | NC_021165.1    | Ca_kabuli_chr06 | 3395654                 | CC                              | TT              | 1946856307               |
| SNP_P4_77584_3395674 | NC_021165.1    | Ca_kabuli_chr06 | 3395674                 | CC                              | AA              | 1946856309               |
| SNP_P4_77585_3395676 | NC_021165.1    | Ca_kabuli_chr06 | 3395676                 | GG                              | AA              | 1946856311               |
| SNP_P4_77586_3395698 | NC_021165.1    | Ca_kabuli_chr06 | 3395698                 | CC                              | AA              | 1946856312               |
| SNP_P4_77587_3395700 | NC_021165.1    | Ca_kabuli_chr06 | 3395700                 | GG                              | AA              | 1946856314               |
| SNP_P4_77588_3395715 | NC_021165.1    | Ca_kabuli_chr06 | 3395715                 | AA                              | GG              | 1946856316               |
| SNP_P4_77589_3395740 | NC_021165.1    | Ca_kabuli_chr06 | 3395740                 | AA                              | GG              | 1946856318               |
| SNP_P4_77590_3395756 | NC_021165.1    | Ca_kabuli_chr06 | 3395756                 | GG                              | AA              | 1946856320               |
| SNP_P4_77591_3413857 | NC_021165.1    | Ca_kabuli_chr06 | 3413857                 | CC                              | AA              | 1946856322               |
| SNP_P4_77593_3461974 | NC_021165.1    | Ca_kabuli_chr06 | 3461974                 | GG                              | AA              | 1946856323               |
| SNP_P4_77594_3477549 | NC_021165.1    | Ca_kabuli_chr06 | 3477549                 | TT                              | CC              | 1946856325               |
| SNP_P4_77595_3495509 | NC_021165.1    | Ca_kabuli_chr06 | 3495509                 | AA                              | CC              | 1946856327               |
| SNP_P4_77597_3553527 | NC_021165.1    | Ca_kabuli_chr06 | 3553527                 | TT                              | AA              | 1946856329               |
| SNP_P4_77600_3591461 | NC_021165.1    | Ca_kabuli_chr06 | 3591461                 | AA                              | GG              | 1946856331               |
| SNP_P4_77601_3591533 | NC_021165.1    | Ca_kabuli_chr06 | 3591533                 | AA                              | CC              | 1946856333               |
| SNP_P4_77602_3591949 | NC_021165.1    | Ca_kabuli_chr06 | 3591949                 | CC                              | TT              | 1946856335               |
| SNP_P4_77603_3592810 | NC_021165.1    | Ca_kabuli_chr06 | 3592810                 | GG                              | AA              | 1946856337               |
| SNP_P4_77604_3599525 | NC_021165.1    | Ca_kabuli_chr06 | 3599525                 | AA                              | CC              | 1946856339               |
| SNP_P4_77605_3636638 | NC_021165.1    | Ca_kabuli_chr06 | 3636638                 | TT                              | CC              | 1946856340               |
| SNP_P4_77606_3656738 | NC_021165.1    | Ca_kabuli_chr06 | 3656738                 | AA                              | CC              | 1946856342               |
| SNP_P4_77607_3656741 | NC_021165.1    | Ca_kabuli_chr06 | 3656741                 | TT                              | CC              | 1946856344               |
| SNP_P4_77608_3672364 | NC_021165.1    | Ca_kabuli_chr06 | 3672364                 | GG                              | AA              | 1946856346               |
| SNP_P4_77609_3672394 | NC_021165.1    | Ca_kabuli_chr06 | 3672394                 | GG                              | TT              | 1946856348               |
| SNP_P4_77610_3672637 | NC_021165.1    | Ca_kabuli_chr06 | 3672637                 | AA                              | GG              | 1946856350               |
| SNP_P4_77611_3680077 | NC_021165.1    | Ca_kabuli_chr06 | 3680077                 | AA                              | GG              | 1946856352               |
| SNP_P4_77612_3685370 | NC_021165.1    | Ca_kabuli_chr06 | 3685370                 | AA                              | TT              | 1946856354               |
| SNP_P4_77613_3685371 | NC_021165.1    | Ca_kabuli_chr06 | 3685371                 | AA                              | TT              | 1946856355               |
| SNP_P4_77614_3685372 | NC_021165.1    | Ca_kabuli_chr06 | 3685372                 | AA                              | TT              | 1946856357               |
| SNP_P4_77617_3761493 | NC_021165.1    | Ca_kabuli_chr06 | 3761493                 | GG                              | AA              | 1946856359               |
| SNP_P4_77619_3795592 | NC_021165.1    | Ca_kabuli_chr06 | 3795592                 | AA                              | GG              | 1946856361               |
| SNP_P4_77620_3798574 | NC_021165.1    | Ca_kabuli_chr06 | 3798574                 | AA                              | CC              | 1946856363               |
| SNP_P4_77621_3824607 | NC_021165.1    | Ca_kabuli_chr06 | 3824607                 | CC                              | TT              | 1946856365               |
| SNP_P4_77624_3855800 | NC_021165.1    | Ca_kabuli_chr06 | 3855800                 | TT                              | GG              | 1946856367               |
| SNP_P4_77625_3864189 | NC_021165.1    | Ca_kabuli_chr06 | 3864189                 | TT                              | CC              | 1946856369               |
| SNP_P4_77626_3869148 | NC_021165.1    | Ca_kabuli_chr06 | 3869148                 | CC                              | AA              | 1946856371               |
| SNP_P4_77627_3870486 | NC_021165.1    | Ca_kabuli_chr06 | 3870486                 | AA                              | GG              | 1946856372               |

| SNPs IDs             | Chromosome IDs | Chromosomes     | Physical positions (bp) | CDC Frontier (Reference genome) | (ILWC46 & LPNB) | NCBI SNPdb Accession IDs |
|----------------------|----------------|-----------------|-------------------------|---------------------------------|-----------------|--------------------------|
| SNP_P4_77628_3885847 | NC_021165.1    | Ca_kabuli_chr06 | 3885847                 | GG                              | AA              | 1946856374               |
| SNP_P4_77629_3928224 | NC_021165.1    | Ca_kabuli_chr06 | 3928224                 | GG                              | AA              | 1946856376               |
| SNP_P4_77631_3939516 | NC_021165.1    | Ca_kabuli_chr06 | 3939516                 | AA                              | GG              | 1946856378               |
| SNP_P4_77632_3944701 | NC_021165.1    | Ca_kabuli_chr06 | 3944701                 | GG                              | AA              | 1946856380               |
| SNP_P4_77633_3947325 | NC_021165.1    | Ca_kabuli_chr06 | 3947325                 | CC                              | GG              | 1946856382               |
| SNP_P4_77634_3975477 | NC_021165.1    | Ca_kabuli_chr06 | 3975477                 | CC                              | GG              | 1946856384               |
| SNP_P4_77635_3975479 | NC_021165.1    | Ca_kabuli_chr06 | 3975479                 | AA                              | GG              | 1946856386               |
| SNP_P4_77638_3997270 | NC_021165.1    | Ca_kabuli_chr06 | 3997270                 | TT                              | GG              | 1946856387               |
| SNP_P4_77640_4064879 | NC_021165.1    | Ca_kabuli_chr06 | 4064879                 | TT                              | AA              | 1946856389               |
| SNP_P4_77641_4064881 | NC_021165.1    | Ca_kabuli_chr06 | 4064881                 | TT                              | AA              | 1946856391               |
| SNP_P4_77642_4133324 | NC_021165.1    | Ca_kabuli_chr06 | 4133324                 | AA                              | GG              | 1946856393               |
| SNP_P4_77643_4139808 | NC_021165.1    | Ca_kabuli_chr06 | 4139808                 | TT                              | CC              | 1946856395               |
| SNP_P4_77644_4212039 | NC_021165.1    | Ca_kabuli_chr06 | 4212039                 | AA                              | GG              | 1946856397               |
| SNP_P4_77645_4224048 | NC_021165.1    | Ca_kabuli_chr06 | 4224048                 | TT                              | CC              | 1946856399               |
| SNP_P4_77646_4249280 | NC_021165.1    | Ca_kabuli_chr06 | 4249280                 | AA                              | GG              | 1946856401               |
| SNP_P4_77647_4249297 | NC_021165.1    | Ca_kabuli_chr06 | 4249297                 | CC                              | TT              | 1946856403               |
| SNP_P4_77648_4249373 | NC_021165.1    | Ca_kabuli_chr06 | 4249373                 | CC                              | TT              | 1946856405               |
| SNP_P4_77649_4249383 | NC_021165.1    | Ca_kabuli_chr06 | 4249383                 | TT                              | CC              | 1946856407               |
| SNP_P4_77650_4249556 | NC_021165.1    | Ca_kabuli_chr06 | 4249556                 | AA                              | GG              | 1946856409               |
| SNP_P4_77651_4251522 | NC_021165.1    | Ca_kabuli_chr06 | 4251522                 | TT                              | CC              | 1946856410               |
| SNP_P4_77652_4268966 | NC_021165.1    | Ca_kabuli_chr06 | 4268966                 | CC                              | AA              | 1946856412               |
| SNP_P4_77653_4290885 | NC_021165.1    | Ca_kabuli_chr06 | 4290885                 | TT                              | CC              | 1946856414               |
| SNP_P4_77654_4291065 | NC_021165.1    | Ca_kabuli_chr06 | 4291065                 | GG                              | AA              | 1946856416               |
| SNP_P4_77656_4368571 | NC_021165.1    | Ca_kabuli_chr06 | 4368571                 | AA                              | GG              | 1946856418               |
| SNP_P4_77657_4385936 | NC_021165.1    | Ca_kabuli_chr06 | 4385936                 | TT                              | CC              | 1946856420               |
| SNP_P4_77658_4391856 | NC_021165.1    | Ca_kabuli_chr06 | 4391856                 | AA                              | GG              | 1946856422               |
| SNP_P4_77659_4392049 | NC_021165.1    | Ca_kabuli_chr06 | 4392049                 | GG                              | AA              | 1946856424               |
| SNP_P4_77660_4404720 | NC_021165.1    | Ca_kabuli_chr06 | 4404720                 | CC                              | TT              | 1946856426               |
| SNP_P4_77662_4447480 | NC_021165.1    | Ca_kabuli_chr06 | 4447480                 | TT                              | AA              | 1946856428               |
| SNP_P4_77663_4447482 | NC_021165.1    | Ca_kabuli_chr06 | 4447482                 | AA                              | GG              | 1946856430               |
| SNP_P4_77664_4470406 | NC_021165.1    | Ca_kabuli_chr06 | 4470406                 | AA                              | GG              | 1946856432               |
| SNP_P4_77665_4491937 | NC_021165.1    | Ca_kabuli_chr06 | 4491937                 | AA                              | GG              | 1946856434               |
| SNP_P4_77669_4588643 | NC_021165.1    | Ca_kabuli_chr06 | 4588643                 | CC                              | AA              | 1946856436               |
| SNP_P4_77671_4635376 | NC_021165.1    | Ca_kabuli_chr06 | 4635376                 | TT                              | CC              | 1946856438               |
| SNP_P4_77673_4658183 | NC_021165.1    | Ca_kabuli_chr06 | 4658183                 | AA                              | GG              | 1946856440               |
| SNP_P4_77675_4699620 | NC_021165.1    | Ca_kabuli_chr06 | 4699620                 | AA                              | GG              | 1946856442               |
| SNP_P4_77676_4699725 | NC_021165.1    | Ca_kabuli_chr06 | 4699725                 | TT                              | AA              | 1946856444               |
| SNP_P4_77677_4699773 | NC_021165.1    | Ca_kabuli_chr06 | 4699773                 | TT                              | AA              | 1946856446               |
| SNP_P4_77678_4712912 | NC_021165.1    | Ca_kabuli_chr06 | 4712912                 | AA                              | GG              | 1946856448               |
| SNP_P4_77679_4713000 | NC_021165.1    | Ca_kabuli_chr06 | 4713000                 | AA                              | GG              | 1946856450               |
| SNP_P4_77680_4713064 | NC_021165.1    | Ca_kabuli_chr06 | 4713064                 | TT                              | AA              | 1946856452               |
| SNP_P4_77681_4713103 | NC_021165.1    | Ca_kabuli_chr06 | 4713103                 | TT                              | CC              | 1946856454               |



| SNPs IDs             | Chromosome IDs | Chromosomes     | Physical positions (bp) | CDC Frontier (Reference genome) | (ILWC46 & LPNB) | NCBI SNPdb Accession IDs |
|----------------------|----------------|-----------------|-------------------------|---------------------------------|-----------------|--------------------------|
| SNP_P4_77682_4713260 | NC_021165.1    | Ca_kabuli_chr06 | 4713260                 | TT                              | AA              | 1946856456               |
| SNP_P4_77683_4713325 | NC_021165.1    | Ca_kabuli_chr06 | 4713325                 | AA                              | TT              | 1946856459               |
| SNP_P4_77684_4713379 | NC_021165.1    | Ca_kabuli_chr06 | 4713379                 | AA                              | GG              | 1946856461               |
| SNP_P4_77686_4724539 | NC_021165.1    | Ca_kabuli_chr06 | 4724539                 | CC                              | AA              | 1946856463               |
| SNP_P4_77687_4747279 | NC_021165.1    | Ca_kabuli_chr06 | 4747279                 | CC                              | TT              | 1946856465               |
| SNP_P4_77688_4747598 | NC_021165.1    | Ca_kabuli_chr06 | 4747598                 | TT                              | CC              | 1946856467               |
| SNP_P4_77689_4747765 | NC_021165.1    | Ca_kabuli_chr06 | 4747765                 | CC                              | TT              | 1946856469               |
| SNP_P4_77691_4764129 | NC_021165.1    | Ca_kabuli_chr06 | 4764129                 | AA                              | TT              | 1946856471               |
| SNP_P4_77692_4764130 | NC_021165.1    | Ca_kabuli_chr06 | 4764130                 | AA                              | TT              | 1946856473               |
| SNP_P4_77693_4765516 | NC_021165.1    | Ca_kabuli_chr06 | 4765516                 | CC                              | TT              | 1946856475               |
| SNP_P4_77696_4798257 | NC_021165.1    | Ca_kabuli_chr06 | 4798257                 | AA                              | TT              | 1946856477               |
| SNP_P4_77697_4800068 | NC_021165.1    | Ca_kabuli_chr06 | 4800068                 | AA                              | GG              | 1946856479               |
| SNP_P4_77700_4812860 | NC_021165.1    | Ca_kabuli_chr06 | 4812860                 | AA                              | GG              | 1946856481               |
| SNP_P4_77703_4826428 | NC_021165.1    | Ca_kabuli_chr06 | 4826428                 | AA                              | CC              | 1946856483               |
| SNP_P4_77704_4826429 | NC_021165.1    | Ca_kabuli_chr06 | 4826429                 | TT                              | AA              | 1946856485               |
| SNP_P4_77705_4826431 | NC_021165.1    | Ca_kabuli_chr06 | 4826431                 | TT                              | AA              | 1946856487               |
| SNP_P4_77706_4837220 | NC_021165.1    | Ca_kabuli_chr06 | 4837220                 | GG                              | AA              | 1946856489               |
| SNP_P4_77708_4849363 | NC_021165.1    | Ca_kabuli_chr06 | 4849363                 | GG                              | AA              | 1946856491               |
| SNP_P4_77709_4895168 | NC_021165.1    | Ca_kabuli_chr06 | 4895168                 | GG                              | AA              | 1946856493               |
| SNP_P4_77710_4911723 | NC_021165.1    | Ca_kabuli_chr06 | 4911723                 | GG                              | AA              | 1946856495               |
| SNP_P4_77712_4928255 | NC_021165.1    | Ca_kabuli_chr06 | 4928255                 | TT                              | GG              | 1946856497               |
| SNP_P4_77715_5004596 | NC_021165.1    | Ca_kabuli_chr06 | 5004596                 | GG                              | AA              | 1946856499               |
| SNP_P4_77716_5025543 | NC_021165.1    | Ca_kabuli_chr06 | 5025543                 | CC                              | GG              | 1946856501               |
| SNP_P4_77720_5070171 | NC_021165.1    | Ca_kabuli_chr06 | 5070171                 | CC                              | TT              | 1946856503               |
| SNP_P4_77721_5074925 | NC_021165.1    | Ca_kabuli_chr06 | 5074925                 | AA                              | TT              | 1946856505               |
| SNP_P4_77722_5153721 | NC_021165.1    | Ca_kabuli_chr06 | 5153721                 | TT                              | CC              | 1946856507               |
| SNP_P4_77723_5181594 | NC_021165.1    | Ca_kabuli_chr06 | 5181594                 | AA                              | TT              | 1946856509               |
| SNP_P4_77724_5183454 | NC_021165.1    | Ca_kabuli_chr06 | 5183454                 | AA                              | GG              | 1946856511               |
| SNP_P4_77726_5209157 | NC_021165.1    | Ca_kabuli_chr06 | 5209157                 | GG                              | CC              | 1946856513               |
| SNP_P4_77727_5245304 | NC_021165.1    | Ca_kabuli_chr06 | 5245304                 | GG                              | AA              | 1946856515               |
| SNP_P4_77728_5246303 | NC_021165.1    | Ca_kabuli_chr06 | 5246303                 | AA                              | TT              | 1946856517               |
| SNP_P4_77729_5263151 | NC_021165.1    | Ca_kabuli_chr06 | 5263151                 | AA                              | GG              | 1946856519               |
| SNP_P4_77730_5270884 | NC_021165.1    | Ca_kabuli_chr06 | 5270884                 | AA                              | GG              | 1946856521               |
| SNP_P4_77731_5287617 | NC_021165.1    | Ca_kabuli_chr06 | 5287617                 | GG                              | AA              | 1946856522               |
| SNP_P4_77732_5287636 | NC_021165.1    | Ca_kabuli_chr06 | 5287636                 | GG                              | AA              | 1946856524               |
| SNP_P4_77733_5287885 | NC_021165.1    | Ca_kabuli_chr06 | 5287885                 | AA                              | GG              | 1946856526               |
| SNP_P4_77735_5287905 | NC_021165.1    | Ca_kabuli_chr06 | 5287905                 | TT                              | AA              | 1946856528               |
| SNP_P4_77736_5287955 | NC_021165.1    | Ca_kabuli_chr06 | 5287955                 | TT                              | GG              | 1946856530               |
| SNP_P4_77737_5288024 | NC_021165.1    | Ca_kabuli_chr06 | 5288024                 | GG                              | AA              | 1946856532               |
| SNP_P4_77739_5297327 | NC_021165.1    | Ca_kabuli_chr06 | 5297327                 | TT                              | AA              | 1946856534               |
| SNP_P4_77740_5297328 | NC_021165.1    | Ca_kabuli_chr06 | 5297328                 | TT                              | AA              | 1946856536               |
| SNP_P4_77741_5329363 | NC_021165.1    | Ca_kabuli_chr06 | 5329363                 | AA                              | TT              | 1946856538               |

| SNPs IDs             | Chromosome IDs | Chromosomes     | Physical positions (bp) | CDC Frontier (Reference genome) | (ILWC46 & LPNB) | NCBI SNPdb Accession IDs |
|----------------------|----------------|-----------------|-------------------------|---------------------------------|-----------------|--------------------------|
| SNP_P4_77742_5334228 | NC_021165.1    | Ca_kabuli_chr06 | 5334228                 | GG                              | TT              | 1946856540               |
| SNP_P4_77743_5335020 | NC_021165.1    | Ca_kabuli_chr06 | 5335020                 | TT                              | CC              | 1946856542               |
| SNP_P4_77744_5335382 | NC_021165.1    | Ca_kabuli_chr06 | 5335382                 | TT                              | AA              | 1946856544               |
| SNP_P4_77745_5335435 | NC_021165.1    | Ca_kabuli_chr06 | 5335435                 | TT                              | CC              | 1946856546               |
| SNP_P4_77746_5335473 | NC_021165.1    | Ca_kabuli_chr06 | 5335473                 | CC                              | TT              | 1946856548               |
| SNP_P4_77747_5335617 | NC_021165.1    | Ca_kabuli_chr06 | 5335617                 | TT                              | CC              | 1946856549               |
| SNP_P4_77748_5364532 | NC_021165.1    | Ca_kabuli_chr06 | 5364532                 | GG                              | AA              | 1946856551               |
| SNP_P4_77749_5385822 | NC_021165.1    | Ca_kabuli_chr06 | 5385822                 | TT                              | CC              | 1946856553               |
| SNP_P4_77750_5387608 | NC_021165.1    | Ca_kabuli_chr06 | 5387608                 | AA                              | GG              | 1946856555               |
| SNP_P4_77752_5438513 | NC_021165.1    | Ca_kabuli_chr06 | 5438513                 | TT                              | CC              | 1946856557               |
| SNP_P4_77753_5441173 | NC_021165.1    | Ca_kabuli_chr06 | 5441173                 | GG                              | AA              | 1946856559               |
| SNP_P4_77755_5471515 | NC_021165.1    | Ca_kabuli_chr06 | 5471515                 | GG                              | AA              | 1946856561               |
| SNP_P4_77756_5495880 | NC_021165.1    | Ca_kabuli_chr06 | 5495880                 | CC                              | GG              | 1946856563               |
| SNP_P4_77759_5549021 | NC_021165.1    | Ca_kabuli_chr06 | 5549021                 | AA                              | TT              | 1946856565               |
| SNP_P4_77760_5549046 | NC_021165.1    | Ca_kabuli_chr06 | 5549046                 | AA                              | GG              | 1946856567               |
| SNP_P4_77761_5549055 | NC_021165.1    | Ca_kabuli_chr06 | 5549055                 | TT                              | CC              | 1946856569               |
| SNP_P4_77762_5549210 | NC_021165.1    | Ca_kabuli_chr06 | 5549210                 | GG                              | CC              | 1946856571               |
| SNP_P4_77763_5549415 | NC_021165.1    | Ca_kabuli_chr06 | 5549415                 | AA                              | GG              | 1946856573               |
| SNP_P4_77765_5567272 | NC_021165.1    | Ca_kabuli_chr06 | 5567272                 | TT                              | CC              | 1946856575               |
| SNP_P4_77766_5594986 | NC_021165.1    | Ca_kabuli_chr06 | 5594986                 | AA                              | GG              | 1946856576               |
| SNP_P4_77767_5596470 | NC_021165.1    | Ca_kabuli_chr06 | 5596470                 | TT                              | CC              | 1946856578               |
| SNP_P4_77769_5637934 | NC_021165.1    | Ca_kabuli_chr06 | 5637934                 | TT                              | AA              | 1946856580               |
| SNP_P4_77771_5648594 | NC_021165.1    | Ca_kabuli_chr06 | 5648594                 | CC                              | TT              | 1946856582               |
| SNP_P4_77773_5657237 | NC_021165.1    | Ca_kabuli_chr06 | 5657237                 | TT                              | AA              | 1946856584               |
| SNP_P4_77774_5669873 | NC_021165.1    | Ca_kabuli_chr06 | 5669873                 | AA                              | GG              | 1946856586               |
| SNP_P4_77775_5671697 | NC_021165.1    | Ca_kabuli_chr06 | 5671697                 | TT                              | CC              | 1946856588               |
| SNP_P4_77776_5713774 | NC_021165.1    | Ca_kabuli_chr06 | 5713774                 | AA                              | TT              | 1946856590               |
| SNP_P4_77777_5713775 | NC_021165.1    | Ca_kabuli_chr06 | 5713775                 | TT                              | AA              | 1946856592               |
| SNP_P4_77778_5722981 | NC_021165.1    | Ca_kabuli_chr06 | 5722981                 | AA                              | GG              | 1946856594               |
| SNP_P4_77779_5726782 | NC_021165.1    | Ca_kabuli_chr06 | 5726782                 | CC                              | TT              | 1946856596               |
| SNP_P4_77781_5737118 | NC_021165.1    | Ca_kabuli_chr06 | 5737118                 | GG                              | AA              | 1946856598               |
| SNP_P4_77783_5747959 | NC_021165.1    | Ca_kabuli_chr06 | 5747959                 | AA                              | TT              | 1946856600               |
| SNP_P4_77784_5751003 | NC_021165.1    | Ca_kabuli_chr06 | 5751003                 | AA                              | TT              | 1946856602               |
| SNP_P4_77786_5783530 | NC_021165.1    | Ca_kabuli_chr06 | 5783530                 | GG                              | AA              | 1946856604               |
| SNP_P4_77787_5795459 | NC_021165.1    | Ca_kabuli_chr06 | 5795459                 | TT                              | CC              | 1946856605               |
| SNP_P4_77788_5797105 | NC_021165.1    | Ca_kabuli_chr06 | 5797105                 | CC                              | GG              | 1946856607               |
| SNP_P4_77789_5803335 | NC_021165.1    | Ca_kabuli_chr06 | 5803335                 | TT                              | CC              | 1946856609               |
| SNP_P4_77790_5810377 | NC_021165.1    | Ca_kabuli_chr06 | 5810377                 | TT                              | AA              | 1946856611               |
| SNP_P4_77791_5843747 | NC_021165.1    | Ca_kabuli_chr06 | 5843747                 | GG                              | AA              | 1946856613               |
| SNP_P4_77792_5846079 | NC_021165.1    | Ca_kabuli_chr06 | 5846079                 | AA                              | GG              | 1946856615               |
| SNP_P4_77797_5854876 | NC_021165.1    | Ca_kabuli_chr06 | 5854876                 | TT                              | CC              | 1946856617               |
| SNP_P4_77798_5864710 | NC_021165.1    | Ca_kabuli_chr06 | 5864710                 | TT                              | AA              | 1946856619               |

| SNPs IDs             | Chromosome IDs | Chromosomes     | Physical positions (bp) | CDC Frontier (Reference genome) | (ILWC46 & LPNB) | NCBI SNPdb Accession IDs |
|----------------------|----------------|-----------------|-------------------------|---------------------------------|-----------------|--------------------------|
| SNP_P4_77799_5880131 | NC_021165.1    | Ca_kabuli_chr06 | 5880131                 | CC                              | AA              | 1946856621               |
| SNP_P4_77800_5882072 | NC_021165.1    | Ca_kabuli_chr06 | 5882072                 | GG                              | AA              | 1946856623               |
| SNP_P4_77801_5892305 | NC_021165.1    | Ca_kabuli_chr06 | 5892305                 | CC                              | TT              | 1946856626               |
| SNP_P4_77802_5895408 | NC_021165.1    | Ca_kabuli_chr06 | 5895408                 | TT                              | AA              | 1946856628               |
| SNP_P4_77803_5951942 | NC_021165.1    | Ca_kabuli_chr06 | 5951942                 | TT                              | GG              | 1946856629               |
| SNP_P4_77804_5954148 | NC_021165.1    | Ca_kabuli_chr06 | 5954148                 | GG                              | AA              | 1946856631               |
| SNP_P4_77805_5957401 | NC_021165.1    | Ca_kabuli_chr06 | 5957401                 | GG                              | AA              | 1946856633               |
| SNP_P4_77806_5960267 | NC_021165.1    | Ca_kabuli_chr06 | 5960267                 | TT                              | AA              | 1946856635               |
| SNP_P4_77807_5962147 | NC_021165.1    | Ca_kabuli_chr06 | 5962147                 | TT                              | GG              | 1946856637               |
| SNP_P4_77808_5962150 | NC_021165.1    | Ca_kabuli_chr06 | 5962150                 | AA                              | CC              | 1946856639               |
| SNP_P4_77809_6001917 | NC_021165.1    | Ca_kabuli_chr06 | 6001917                 | GG                              | AA              | 1946856641               |
| SNP_P4_77810_6009427 | NC_021165.1    | Ca_kabuli_chr06 | 6009427                 | CC                              | TT              | 1946856643               |
| SNP_P4_77811_6013716 | NC_021165.1    | Ca_kabuli_chr06 | 6013716                 | TT                              | AA              | 1946856645               |
| SNP_P4_77812_6021573 | NC_021165.1    | Ca_kabuli_chr06 | 6021573                 | AA                              | TT              | 1946856647               |
| SNP_P4_77813_6071447 | NC_021165.1    | Ca_kabuli_chr06 | 6071447                 | CC                              | TT              | 1946856649               |
| SNP_P4_77815_6086645 | NC_021165.1    | Ca_kabuli_chr06 | 6086645                 | GG                              | CC              | 1946856651               |
| SNP_P4_77817_6100457 | NC_021165.1    | Ca_kabuli_chr06 | 6100457                 | TT                              | CC              | 1946856653               |
| SNP_P4_77818_6120280 | NC_021165.1    | Ca_kabuli_chr06 | 6120280                 | GG                              | TT              | 1946856655               |
| SNP_P4_77819_6132257 | NC_021165.1    | Ca_kabuli_chr06 | 6132257                 | TT                              | CC              | 1946856657               |
| SNP_P4_77820_6134321 | NC_021165.1    | Ca_kabuli_chr06 | 6134321                 | AA                              | GG              | 1946856659               |
| SNP_P4_77823_6153089 | NC_021165.1    | Ca_kabuli_chr06 | 6153089                 | TT                              | CC              | 1946856661               |
| SNP_P4_77826_6204091 | NC_021165.1    | Ca_kabuli_chr06 | 6204091                 | TT                              | CC              | 1946856662               |
| SNP_P4_77827_6226877 | NC_021165.1    | Ca_kabuli_chr06 | 6226877                 | TT                              | CC              | 1946856664               |
| SNP_P4_77828_6302780 | NC_021165.1    | Ca_kabuli_chr06 | 6302780                 | GG                              | AA              | 1946856666               |
| SNP_P4_77831_6321248 | NC_021165.1    | Ca_kabuli_chr06 | 6321248                 | AA                              | CC              | 1946856668               |
| SNP_P4_77833_6330957 | NC_021165.1    | Ca_kabuli_chr06 | 6330957                 | GG                              | TT              | 1946856670               |
| SNP_P4_77835_6334322 | NC_021165.1    | Ca_kabuli_chr06 | 6334322                 | TT                              | CC              | 1946856672               |
| SNP_P4_77836_6334324 | NC_021165.1    | Ca_kabuli_chr06 | 6334324                 | TT                              | CC              | 1946856674               |
| SNP_P4_77837_6340493 | NC_021165.1    | Ca_kabuli_chr06 | 6340493                 | TT                              | AA              | 1946856676               |
| SNP_P4_77838_6340498 | NC_021165.1    | Ca_kabuli_chr06 | 6340498                 | AA                              | TT              | 1946856678               |
| SNP_P4_77839_6340902 | NC_021165.1    | Ca_kabuli_chr06 | 6340902                 | TT                              | AA              | 1946856680               |
| SNP_P4_77841_6354476 | NC_021165.1    | Ca_kabuli_chr06 | 6354476                 | TT                              | CC              | 1946856682               |
| SNP_P4_77843_6410090 | NC_021165.1    | Ca_kabuli_chr06 | 6410090                 | TT                              | GG              | 1946856684               |
| SNP_P4_77844_6410097 | NC_021165.1    | Ca_kabuli_chr06 | 6410097                 | TT                              | CC              | 1946856686               |
| SNP_P4_77845_6410106 | NC_021165.1    | Ca_kabuli_chr06 | 6410106                 | AA                              | CC              | 1946856688               |
| SNP_P4_77846_6410715 | NC_021165.1    | Ca_kabuli_chr06 | 6410715                 | AA                              | CC              | 1946856690               |
| SNP_P4_77847_6411115 | NC_021165.1    | Ca_kabuli_chr06 | 6411115                 | CC                              | TT              | 1946856692               |
| SNP_P4_77851_6432304 | NC_021165.1    | Ca_kabuli_chr06 | 6432304                 | TT                              | CC              | 1946856694               |
| SNP_P4_77853_6447347 | NC_021165.1    | Ca_kabuli_chr06 | 6447347                 | CC                              | TT              | 1946856696               |
| SNP_P4_77855_6475269 | NC_021165.1    | Ca_kabuli_chr06 | 6475269                 | AA                              | GG              | 1946856698               |
| SNP_P4_77859_6493296 | NC_021165.1    | Ca_kabuli_chr06 | 6493296                 | AA                              | GG              | 1946856700               |
| SNP_P4_77860_6517726 | NC_021165.1    | Ca_kabuli_chr06 | 6517726                 | CC                              | TT              | 1946856702               |

| SNPs IDs             | Chromosome IDs | Chromosomes     | Physical positions (bp) | CDC Frontier (Reference genome) | (ILWC46 & LPNB) | NCBI SNPdb Accession IDs |
|----------------------|----------------|-----------------|-------------------------|---------------------------------|-----------------|--------------------------|
| SNP_P4_77861_6560136 | NC_021165.1    | Ca_kabuli_chr06 | 6560136                 | CC                              | TT              | 1946856705               |
| SNP_P4_77862_6573769 | NC_021165.1    | Ca_kabuli_chr06 | 6573769                 | AA                              | GG              | 1946856707               |
| SNP_P4_77863_6580437 | NC_021165.1    | Ca_kabuli_chr06 | 6580437                 | TT                              | CC              | 1946856709               |
| SNP_P4_77864_6601881 | NC_021165.1    | Ca_kabuli_chr06 | 6601881                 | GG                              | AA              | 1946856711               |
| SNP_P4_77865_6634781 | NC_021165.1    | Ca_kabuli_chr06 | 6634781                 | CC                              | TT              | 1946856713               |
| SNP_P4_77866_6643468 | NC_021165.1    | Ca_kabuli_chr06 | 6643468                 | AA                              | GG              | 1946856715               |
| SNP_P4_77867_6678981 | NC_021165.1    | Ca_kabuli_chr06 | 6678981                 | AA                              | GG              | 1946856717               |
| SNP_P4_77868_6688798 | NC_021165.1    | Ca_kabuli_chr06 | 6688798                 | TT                              | GG              | 1946856719               |
| SNP_P4_77870_6730661 | NC_021165.1    | Ca_kabuli_chr06 | 6730661                 | CC                              | AA              | 1946856721               |
| SNP_P4_77871_6747065 | NC_021165.1    | Ca_kabuli_chr06 | 6747065                 | CC                              | AA              | 1946856723               |
| SNP_P4_77873_6748899 | NC_021165.1    | Ca_kabuli_chr06 | 6748899                 | AA                              | GG              | 1946856725               |
| SNP_P4_77874_6748901 | NC_021165.1    | Ca_kabuli_chr06 | 6748901                 | GG                              | AA              | 1946856727               |
| SNP_P4_77875_6749281 | NC_021165.1    | Ca_kabuli_chr06 | 6749281                 | AA                              | GG              | 1946856729               |
| SNP_P4_77876_6749299 | NC_021165.1    | Ca_kabuli_chr06 | 6749299                 | TT                              | CC              | 1946856731               |
| SNP_P4_77877_6760013 | NC_021165.1    | Ca_kabuli_chr06 | 6760013                 | TT                              | CC              | 1946856733               |
| SNP_P4_77878_6760014 | NC_021165.1    | Ca_kabuli_chr06 | 6760014                 | TT                              | AA              | 1946856735               |
| SNP_P4_77879_6760248 | NC_021165.1    | Ca_kabuli_chr06 | 6760248                 | CC                              | TT              | 1946856737               |
| SNP_P4_77880_6785943 | NC_021165.1    | Ca_kabuli_chr06 | 6785943                 | GG                              | TT              | 1946856740               |
| SNP_P4_77881_6820610 | NC_021165.1    | Ca_kabuli_chr06 | 6820610                 | TT                              | CC              | 1946856742               |
| SNP_P4_77882_6821943 | NC_021165.1    | Ca_kabuli_chr06 | 6821943                 | CC                              | TT              | 1946856744               |
| SNP_P4_77884_6863328 | NC_021165.1    | Ca_kabuli_chr06 | 6863328                 | AA                              | GG              | 1946856746               |
| SNP_P4_77885_6890708 | NC_021165.1    | Ca_kabuli_chr06 | 6890708                 | GG                              | TT              | 1946856748               |
| SNP_P4_77886_6919290 | NC_021165.1    | Ca_kabuli_chr06 | 6919290                 | GG                              | AA              | 1946856750               |
| SNP_P4_77887_6919581 | NC_021165.1    | Ca_kabuli_chr06 | 6919581                 | TT                              | CC              | 1946856752               |
| SNP_P4_77888_6920432 | NC_021165.1    | Ca_kabuli_chr06 | 6920432                 | GG                              | CC              | 1946856754               |
| SNP_P4_77889_6922356 | NC_021165.1    | Ca_kabuli_chr06 | 6922356                 | CC                              | TT              | 1946856756               |
| SNP_P4_77890_6922421 | NC_021165.1    | Ca_kabuli_chr06 | 6922421                 | AA                              | TT              | 1946856758               |
| SNP_P4_77891_6922605 | NC_021165.1    | Ca_kabuli_chr06 | 6922605                 | TT                              | CC              | 1946856760               |
| SNP_P4_77892_6922873 | NC_021165.1    | Ca_kabuli_chr06 | 6922873                 | CC                              | AA              | 1946856762               |
| SNP_P4_77893_6922928 | NC_021165.1    | Ca_kabuli_chr06 | 6922928                 | CC                              | TT              | 1946856764               |
| SNP_P4_77894_6922950 | NC_021165.1    | Ca_kabuli_chr06 | 6922950                 | TT                              | AA              | 1946856766               |
| SNP_P4_77896_6923167 | NC_021165.1    | Ca_kabuli_chr06 | 6923167                 | CC                              | TT              | 1946856768               |
| SNP_P4_77899_6984565 | NC_021165.1    | Ca_kabuli_chr06 | 6984565                 | TT                              | GG              | 1946856770               |
| SNP_P4_77900_7001236 | NC_021165.1    | Ca_kabuli_chr06 | 7001236                 | CC                              | TT              | 1946856772               |
| SNP_P4_77901_7012353 | NC_021165.1    | Ca_kabuli_chr06 | 7012353                 | TT                              | CC              | 1946856774               |
| SNP_P4_77902_7015483 | NC_021165.1    | Ca_kabuli_chr06 | 7015483                 | AA                              | GG              | 1946856776               |
| SNP_P4_77903_7099522 | NC_021165.1    | Ca_kabuli_chr06 | 7099522                 | GG                              | AA              | 1946856778               |
| SNP_P4_77905_7125932 | NC_021165.1    | Ca_kabuli_chr06 | 7125932                 | TT                              | CC              | 1946856780               |
| SNP_P4_77906_7144277 | NC_021165.1    | Ca_kabuli_chr06 | 7144277                 | TT                              | CC              | 1946856782               |
| SNP_P4_77907_7161181 | NC_021165.1    | Ca_kabuli_chr06 | 7161181                 | AA                              | TT              | 1946856784               |
| SNP_P4_77908_7183182 | NC_021165.1    | Ca_kabuli_chr06 | 7183182                 | TT                              | AA              | 1946856786               |
| SNP_P4_77910_7192131 | NC_021165.1    | Ca_kabuli_chr06 | 7192131                 | CC                              | AA              | 1946856788               |

| SNPs IDs             | Chromosome IDs | Chromosomes     | Physical positions (bp) | CDC Frontier (Reference genome) | (ILWC46 & LPNB) | NCBI SNPdb Accession IDs |
|----------------------|----------------|-----------------|-------------------------|---------------------------------|-----------------|--------------------------|
| SNP_P4_77911_7192204 | NC_021165.1    | Ca_kabuli_chr06 | 7192204                 | CC                              | TT              | 1946856790               |
| SNP_P4_77912_7192206 | NC_021165.1    | Ca_kabuli_chr06 | 7192206                 | CC                              | TT              | 1946856792               |
| SNP_P4_77913_7192215 | NC_021165.1    | Ca_kabuli_chr06 | 7192215                 | AA                              | CC              | 1946856794               |
| SNP_P4_77914_7192360 | NC_021165.1    | Ca_kabuli_chr06 | 7192360                 | TT                              | CC              | 1946856796               |
| SNP_P4_77915_7224663 | NC_021165.1    | Ca_kabuli_chr06 | 7224663                 | AA                              | GG              | 1946856798               |
| SNP_P4_77916_7229819 | NC_021165.1    | Ca_kabuli_chr06 | 7229819                 | GG                              | AA              | 1946856800               |
| SNP_P4_77917_7231830 | NC_021165.1    | Ca_kabuli_chr06 | 7231830                 | TT                              | GG              | 1946856802               |
| SNP_P4_77918_7231832 | NC_021165.1    | Ca_kabuli_chr06 | 7231832                 | TT                              | AA              | 1946856804               |
| SNP_P4_77919_7261022 | NC_021165.1    | Ca_kabuli_chr06 | 7261022                 | GG                              | CC              | 1946856806               |
| SNP_P4_77924_7329242 | NC_021165.1    | Ca_kabuli_chr06 | 7329242                 | CC                              | TT              | 1946856808               |
| SNP_P4_77926_7344708 | NC_021165.1    | Ca_kabuli_chr06 | 7344708                 | CC                              | GG              | 1946856810               |
| SNP_P4_77927_7344748 | NC_021165.1    | Ca_kabuli_chr06 | 7344748                 | TT                              | CC              | 1946856812               |
| SNP_P4_77930_7357481 | NC_021165.1    | Ca_kabuli_chr06 | 7357481                 | TT                              | AA              | 1946856814               |
| SNP_P4_77933_7399858 | NC_021165.1    | Ca_kabuli_chr06 | 7399858                 | TT                              | CC              | 1946856816               |
| SNP_P4_77934_7413520 | NC_021165.1    | Ca_kabuli_chr06 | 7413520                 | TT                              | AA              | 1946856818               |
| SNP_P4_77937_7496239 | NC_021165.1    | Ca_kabuli_chr06 | 7496239                 | AA                              | CC              | 1946856820               |
| SNP_P4_77938_7496499 | NC_021165.1    | Ca_kabuli_chr06 | 7496499                 | GG                              | TT              | 1946856822               |
| SNP_P4_77940_7534932 | NC_021165.1    | Ca_kabuli_chr06 | 7534932                 | AA                              | GG              | 1946856824               |
| SNP_P4_77941_7535506 | NC_021165.1    | Ca_kabuli_chr06 | 7535506                 | TT                              | AA              | 1946856827               |
| SNP_P4_77942_7537398 | NC_021165.1    | Ca_kabuli_chr06 | 7537398                 | CC                              | AA              | 1946856829               |
| SNP_P4_77943_7537642 | NC_021165.1    | Ca_kabuli_chr06 | 7537642                 | GG                              | CC              | 1946856831               |
| SNP_P4_77944_7537689 | NC_021165.1    | Ca_kabuli_chr06 | 7537689                 | AA                              | GG              | 1946856833               |
| SNP_P4_77945_7537746 | NC_021165.1    | Ca_kabuli_chr06 | 7537746                 | TT                              | CC              | 1946856835               |
| SNP_P4_77946_7549453 | NC_021165.1    | Ca_kabuli_chr06 | 7549453                 | AA                              | CC              | 1946856837               |
| SNP_P4_77947_7552797 | NC_021165.1    | Ca_kabuli_chr06 | 7552797                 | GG                              | AA              | 1946856839               |
| SNP_P4_77948_7552980 | NC_021165.1    | Ca_kabuli_chr06 | 7552980                 | TT                              | CC              | 1946856841               |
| SNP_P4_77949_7553694 | NC_021165.1    | Ca_kabuli_chr06 | 7553694                 | AA                              | CC              | 1946856843               |
| SNP_P4_77950_7554094 | NC_021165.1    | Ca_kabuli_chr06 | 7554094                 | AA                              | TT              | 1946856845               |
| SNP_P4_77951_7554101 | NC_021165.1    | Ca_kabuli_chr06 | 7554101                 | GG                              | CC              | 1946856847               |
| SNP_P4_77952_7554313 | NC_021165.1    | Ca_kabuli_chr06 | 7554313                 | AA                              | TT              | 1946856849               |
| SNP_P4_77953_7555125 | NC_021165.1    | Ca_kabuli_chr06 | 7555125                 | CC                              | TT              | 1946856851               |
| SNP_P4_77954_7555396 | NC_021165.1    | Ca_kabuli_chr06 | 7555396                 | GG                              | AA              | 1946856853               |
| SNP_P4_77955_7556276 | NC_021165.1    | Ca_kabuli_chr06 | 7556276                 | TT                              | GG              | 1946856855               |
| SNP_P4_77956_7556323 | NC_021165.1    | Ca_kabuli_chr06 | 7556323                 | TT                              | CC              | 1946856857               |
| SNP_P4_77957_7556424 | NC_021165.1    | Ca_kabuli_chr06 | 7556424                 | AA                              | GG              | 1946856859               |
| SNP_P4_77958_7557116 | NC_021165.1    | Ca_kabuli_chr06 | 7557116                 | AA                              | CC              | 1946856861               |
| SNP_P4_77959_7557164 | NC_021165.1    | Ca_kabuli_chr06 | 7557164                 | GG                              | AA              | 1946856863               |
| SNP_P4_77960_7557184 | NC_021165.1    | Ca_kabuli_chr06 | 7557184                 | CC                              | TT              | 1946856865               |
| SNP_P4_77962_7557635 | NC_021165.1    | Ca_kabuli_chr06 | 7557635                 | GG                              | AA              | 1946856867               |
| SNP_P4_77963_7558177 | NC_021165.1    | Ca_kabuli_chr06 | 7558177                 | CC                              | TT              | 1946856869               |
| SNP_P4_77964_7558393 | NC_021165.1    | Ca_kabuli_chr06 | 7558393                 | GG                              | AA              | 1946856871               |
| SNP_P4_77965_7558455 | NC_021165.1    | Ca_kabuli_chr06 | 7558455                 | AA                              | GG              | 1946856873               |

| SNPs IDs             | Chromosome IDs | Chromosomes     | Physical positions (bp) | CDC Frontier (Reference genome) | (ILWC46 & LPNB) | NCBI SNPdb Accession IDs |
|----------------------|----------------|-----------------|-------------------------|---------------------------------|-----------------|--------------------------|
| SNP_P4_77966_7558542 | NC_021165.1    | Ca_kabuli_chr06 | 7558542                 | AA                              | GG              | 1946856875               |
| SNP_P4_77967_7558569 | NC_021165.1    | Ca_kabuli_chr06 | 7558569                 | GG                              | AA              | 1946856877               |
| SNP_P4_77968_7558599 | NC_021165.1    | Ca_kabuli_chr06 | 7558599                 | GG                              | TT              | 1946856879               |
| SNP_P4_77969_7558614 | NC_021165.1    | Ca_kabuli_chr06 | 7558614                 | AA                              | CC              | 1946856881               |
| SNP_P4_77970_7562826 | NC_021165.1    | Ca_kabuli_chr06 | 7562826                 | CC                              | TT              | 1946856883               |
| SNP_P4_77971_7562865 | NC_021165.1    | Ca_kabuli_chr06 | 7562865                 | GG                              | AA              | 1946856885               |
| SNP_P4_77972_7564186 | NC_021165.1    | Ca_kabuli_chr06 | 7564186                 | CC                              | TT              | 1946856887               |
| SNP_P4_77973_7564657 | NC_021165.1    | Ca_kabuli_chr06 | 7564657                 | GG                              | AA              | 1946856889               |
| SNP_P4_77975_7565534 | NC_021165.1    | Ca_kabuli_chr06 | 7565534                 | TT                              | AA              | 1946856891               |
| SNP_P4_77976_7566480 | NC_021165.1    | Ca_kabuli_chr06 | 7566480                 | TT                              | AA              | 1946856893               |
| SNP_P4_77977_7567212 | NC_021165.1    | Ca_kabuli_chr06 | 7567212                 | TT                              | AA              | 1946856895               |
| SNP_P4_77978_7568709 | NC_021165.1    | Ca_kabuli_chr06 | 7568709                 | GG                              | AA              | 1946856897               |
| SNP_P4_77979_7568778 | NC_021165.1    | Ca_kabuli_chr06 | 7568778                 | TT                              | CC              | 1946856899               |
| SNP_P4_77980_7569722 | NC_021165.1    | Ca_kabuli_chr06 | 7569722                 | GG                              | AA              | 1946856901               |
| SNP_P4_77982_7571776 | NC_021165.1    | Ca_kabuli_chr06 | 7571776                 | CC                              | TT              | 1946856903               |
| SNP_P4_77983_7571792 | NC_021165.1    | Ca_kabuli_chr06 | 7571792                 | AA                              | TT              | 1946856905               |
| SNP_P4_77984_7573584 | NC_021165.1    | Ca_kabuli_chr06 | 7573584                 | AA                              | GG              | 1946856907               |
| SNP_P4_77985_7575420 | NC_021165.1    | Ca_kabuli_chr06 | 7575420                 | AA                              | GG              | 1946856909               |
| SNP_P4_77986_7575424 | NC_021165.1    | Ca_kabuli_chr06 | 7575424                 | CC                              | TT              | 1946856911               |
| SNP_P4_77988_7579189 | NC_021165.1    | Ca_kabuli_chr06 | 7579189                 | GG                              | AA              | 1946856913               |
| SNP_P4_77990_7579579 | NC_021165.1    | Ca_kabuli_chr06 | 7579579                 | TT                              | CC              | 1946856915               |
| SNP_P4_77991_7579861 | NC_021165.1    | Ca_kabuli_chr06 | 7579861                 | GG                              | CC              | 1946856917               |
| SNP_P4_77992_7580107 | NC_021165.1    | Ca_kabuli_chr06 | 7580107                 | TT                              | GG              | 1946856919               |
| SNP_P4_77993_7580459 | NC_021165.1    | Ca_kabuli_chr06 | 7580459                 | GG                              | AA              | 1946856921               |
| SNP_P4_77994_7581060 | NC_021165.1    | Ca_kabuli_chr06 | 7581060                 | AA                              | GG              | 1946856923               |
| SNP_P4_77995_7581678 | NC_021165.1    | Ca_kabuli_chr06 | 7581678                 | TT                              | GG              | 1946856925               |
| SNP_P4_77996_7582008 | NC_021165.1    | Ca_kabuli_chr06 | 7582008                 | AA                              | GG              | 1946856927               |
| SNP_P4_77997_7582212 | NC_021165.1    | Ca_kabuli_chr06 | 7582212                 | TT                              | AA              | 1946856930               |
| SNP_P4_77998_7582252 | NC_021165.1    | Ca_kabuli_chr06 | 7582252                 | TT                              | GG              | 1946856932               |
| SNP_P4_77999_7583022 | NC_021165.1    | Ca_kabuli_chr06 | 7583022                 | TT                              | CC              | 1946856934               |
| SNP_P4_78000_7583538 | NC_021165.1    | Ca_kabuli_chr06 | 7583538                 | GG                              | AA              | 1946856936               |
| SNP_P4_78001_7583682 | NC_021165.1    | Ca_kabuli_chr06 | 7583682                 | CC                              | TT              | 1946856937               |
| SNP_P4_78002_7583728 | NC_021165.1    | Ca_kabuli_chr06 | 7583728                 | CC                              | TT              | 1946856939               |
| SNP_P4_78003_7584103 | NC_021165.1    | Ca_kabuli_chr06 | 7584103                 | GG                              | TT              | 1946856941               |
| SNP_P4_78004_7586103 | NC_021165.1    | Ca_kabuli_chr06 | 7586103                 | CC                              | GG              | 1946856943               |
| SNP_P4_78006_7586269 | NC_021165.1    | Ca_kabuli_chr06 | 7586269                 | CC                              | TT              | 1946856945               |
| SNP_P4_78008_7587121 | NC_021165.1    | Ca_kabuli_chr06 | 7587121                 | AA                              | GG              | 1946856947               |
| SNP_P4_78009_7587165 | NC_021165.1    | Ca_kabuli_chr06 | 7587165                 | GG                              | AA              | 1946856949               |
| SNP_P4_78010_7587195 | NC_021165.1    | Ca_kabuli_chr06 | 7587195                 | CC                              | GG              | 1946856951               |
| SNP_P4_78012_7588145 | NC_021165.1    | Ca_kabuli_chr06 | 7588145                 | GG                              | AA              | 1946856953               |
| SNP_P4_78014_7588371 | NC_021165.1    | Ca_kabuli_chr06 | 7588371                 | AA                              | GG              | 1946856955               |
| SNP_P4_78015_7588373 | NC_021165.1    | Ca_kabuli_chr06 | 7588373                 | AA                              | GG              | 1946856957               |

| SNPs IDs             | Chromosome IDs | Chromosomes     | Physical positions (bp) | CDC Frontier (Reference genome) | (ILWC46 & LPNB) | NCBI SNPdb Accession IDs |
|----------------------|----------------|-----------------|-------------------------|---------------------------------|-----------------|--------------------------|
| SNP_P4_78017_7588879 | NC_021165.1    | Ca_kabuli_chr06 | 7588879                 | AA                              | GG              | 1946856959               |
| SNP_P4_78018_7590096 | NC_021165.1    | Ca_kabuli_chr06 | 7590096                 | CC                              | TT              | 1946856961               |
| SNP_P4_78019_7590252 | NC_021165.1    | Ca_kabuli_chr06 | 7590252                 | TT                              | CC              | 1946856963               |
| SNP_P4_78020_7590402 | NC_021165.1    | Ca_kabuli_chr06 | 7590402                 | GG                              | AA              | 1946856965               |
| SNP_P4_78021_7590420 | NC_021165.1    | Ca_kabuli_chr06 | 7590420                 | CC                              | TT              | 1946856967               |
| SNP_P4_78022_7590444 | NC_021165.1    | Ca_kabuli_chr06 | 7590444                 | AA                              | CC              | 1946856969               |
| SNP_P4_78023_7590455 | NC_021165.1    | Ca_kabuli_chr06 | 7590455                 | AA                              | GG              | 1946856971               |
| SNP_P4_78024_7593581 | NC_021165.1    | Ca_kabuli_chr06 | 7593581                 | TT                              | AA              | 1946856973               |
| SNP_P4_78025_7593840 | NC_021165.1    | Ca_kabuli_chr06 | 7593840                 | GG                              | AA              | 1946856975               |
| SNP_P4_78026_7593898 | NC_021165.1    | Ca_kabuli_chr06 | 7593898                 | CC                              | TT              | 1946856977               |
| SNP_P4_78027_7594012 | NC_021165.1    | Ca_kabuli_chr06 | 7594012                 | TT                              | GG              | 1946856979               |
| SNP_P4_78028_7594016 | NC_021165.1    | Ca_kabuli_chr06 | 7594016                 | CC                              | TT              | 1946856981               |
| SNP_P4_78029_7594168 | NC_021165.1    | Ca_kabuli_chr06 | 7594168                 | GG                              | CC              | 1946856983               |
| SNP_P4_78030_7594237 | NC_021165.1    | Ca_kabuli_chr06 | 7594237                 | TT                              | CC              | 1946856985               |
| SNP_P4_78034_7595418 | NC_021165.1    | Ca_kabuli_chr06 | 7595418                 | GG                              | AA              | 1946856987               |
| SNP_P4_78035_7596766 | NC_021165.1    | Ca_kabuli_chr06 | 7596766                 | TT                              | CC              | 1946856989               |
| SNP_P4_78036_7596782 | NC_021165.1    | Ca_kabuli_chr06 | 7596782                 | CC                              | GG              | 1946856991               |
| SNP_P4_78037_7596821 | NC_021165.1    | Ca_kabuli_chr06 | 7596821                 | CC                              | TT              | 1946856993               |
| SNP_P4_78038_7596867 | NC_021165.1    | Ca_kabuli_chr06 | 7596867                 | CC                              | TT              | 1946856995               |
| SNP_P4_78040_7598246 | NC_021165.1    | Ca_kabuli_chr06 | 7598246                 | GG                              | CC              | 1946856997               |
| SNP_P4_78041_7599353 | NC_021165.1    | Ca_kabuli_chr06 | 7599353                 | GG                              | AA              | 1946856999               |
| SNP_P4_78042_7599435 | NC_021165.1    | Ca_kabuli_chr06 | 7599435                 | TT                              | CC              | 1946857001               |
| SNP_P4_78044_7599763 | NC_021165.1    | Ca_kabuli_chr06 | 7599763                 | CC                              | TT              | 1946857003               |
| SNP_P4_78045_7600817 | NC_021165.1    | Ca_kabuli_chr06 | 7600817                 | GG                              | AA              | 1946857005               |
| SNP_P4_78046_7601120 | NC_021165.1    | Ca_kabuli_chr06 | 7601120                 | CC                              | TT              | 1946857007               |
| SNP_P4_78047_7603436 | NC_021165.1    | Ca_kabuli_chr06 | 7603436                 | GG                              | AA              | 1946857009               |
| SNP_P4_78048_7604344 | NC_021165.1    | Ca_kabuli_chr06 | 7604344                 | TT                              | AA              | 1946857011               |
| SNP_P4_78049_7605560 | NC_021165.1    | Ca_kabuli_chr06 | 7605560                 | GG                              | AA              | 1946857013               |
| SNP_P4_78050_7607196 | NC_021165.1    | Ca_kabuli_chr06 | 7607196                 | CC                              | GG              | 1946857015               |
| SNP_P4_78051_7607252 | NC_021165.1    | Ca_kabuli_chr06 | 7607252                 | CC                              | TT              | 1946857017               |
| SNP_P4_78052_7608996 | NC_021165.1    | Ca_kabuli_chr06 | 7608996                 | GG                              | TT              | 1946857019               |
| SNP_P4_78054_7609243 | NC_021165.1    | Ca_kabuli_chr06 | 7609243                 | AA                              | GG              | 1946857021               |
| SNP_P4_78055_7609244 | NC_021165.1    | Ca_kabuli_chr06 | 7609244                 | AA                              | GG              | 1946857023               |
| SNP_P4_78056_7610335 | NC_021165.1    | Ca_kabuli_chr06 | 7610335                 | TT                              | CC              | 1946857026               |
| SNP_P4_78057_7610823 | NC_021165.1    | Ca_kabuli_chr06 | 7610823                 | CC                              | GG              | 1946857028               |
| SNP_P4_78058_7610941 | NC_021165.1    | Ca_kabuli_chr06 | 7610941                 | TT                              | GG              | 1946857030               |
| SNP_P4_78059_7611263 | NC_021165.1    | Ca_kabuli_chr06 | 7611263                 | GG                              | AA              | 1946857032               |
| SNP_P4_78060_7611464 | NC_021165.1    | Ca_kabuli_chr06 | 7611464                 | TT                              | CC              | 1946857034               |
| SNP_P4_78063_7612784 | NC_021165.1    | Ca_kabuli_chr06 | 7612784                 | TT                              | AA              | 1946857036               |
| SNP_P4_78065_7612977 | NC_021165.1    | Ca_kabuli_chr06 | 7612977                 | GG                              | TT              | 1946857038               |
| SNP_P4_78066_7613292 | NC_021165.1    | Ca_kabuli_chr06 | 7613292                 | CC                              | TT              | 1946857040               |
| SNP_P4_78067_7613568 | NC_021165.1    | Ca_kabuli_chr06 | 7613568                 | TT                              | CC              | 1946857042               |

| SNPs IDs             | Chromosome IDs | Chromosomes     | Physical positions (bp) | CDC Frontier (Reference genome) | (ILWC46 & LPNB) | NCBI SNPdb Accession IDs |
|----------------------|----------------|-----------------|-------------------------|---------------------------------|-----------------|--------------------------|
| SNP_P4_78068_7613571 | NC_021165.1    | Ca_kabuli_chr06 | 7613571                 | CC                              | TT              | 1946857044               |
| SNP_P4_78069_7613577 | NC_021165.1    | Ca_kabuli_chr06 | 7613577                 | TT                              | GG              | 1946857046               |
| SNP_P4_78070_7613615 | NC_021165.1    | Ca_kabuli_chr06 | 7613615                 | CC                              | TT              | 1946857047               |
| SNP_P4_78072_7613874 | NC_021165.1    | Ca_kabuli_chr06 | 7613874                 | CC                              | AA              | 1946857049               |
| SNP_P4_78073_7613906 | NC_021165.1    | Ca_kabuli_chr06 | 7613906                 | AA                              | GG              | 1946857051               |
| SNP_P4_78074_7615454 | NC_021165.1    | Ca_kabuli_chr06 | 7615454                 | CC                              | TT              | 1946857053               |
| SNP_P4_78075_7621672 | NC_021165.1    | Ca_kabuli_chr06 | 7621672                 | TT                              | AA              | 1946857055               |
| SNP_P4_78076_7621736 | NC_021165.1    | Ca_kabuli_chr06 | 7621736                 | AA                              | CC              | 1946857057               |
| SNP_P4_78077_7624384 | NC_021165.1    | Ca_kabuli_chr06 | 7624384                 | GG                              | AA              | 1946857059               |
| SNP_P4_78078_7625866 | NC_021165.1    | Ca_kabuli_chr06 | 7625866                 | AA                              | GG              | 1946857061               |
| SNP_P4_78079_7626159 | NC_021165.1    | Ca_kabuli_chr06 | 7626159                 | CC                              | TT              | 1946857063               |
| SNP_P4_78081_7626579 | NC_021165.1    | Ca_kabuli_chr06 | 7626579                 | GG                              | AA              | 1946857065               |
| SNP_P4_78082_7626909 | NC_021165.1    | Ca_kabuli_chr06 | 7626909                 | CC                              | TT              | 1946857067               |
| SNP_P4_78084_7629102 | NC_021165.1    | Ca_kabuli_chr06 | 7629102                 | AA                              | GG              | 1946857069               |
| SNP_P4_78085_7629205 | NC_021165.1    | Ca_kabuli_chr06 | 7629205                 | GG                              | AA              | 1946857071               |
| SNP_P4_78086_7629207 | NC_021165.1    | Ca_kabuli_chr06 | 7629207                 | TT                              | CC              | 1946857073               |
| SNP_P4_78087_7629795 | NC_021165.1    | Ca_kabuli_chr06 | 7629795                 | TT                              | GG              | 1946857075               |
| SNP_P4_78088_7630971 | NC_021165.1    | Ca_kabuli_chr06 | 7630971                 | TT                              | CC              | 1946857077               |
| SNP_P4_78090_7632724 | NC_021165.1    | Ca_kabuli_chr06 | 7632724                 | AA                              | GG              | 1946857079               |
| SNP_P4_78091_7632732 | NC_021165.1    | Ca_kabuli_chr06 | 7632732                 | CC                              | GG              | 1946857081               |
| SNP_P4_78092_7634008 | NC_021165.1    | Ca_kabuli_chr06 | 7634008                 | TT                              | CC              | 1946857083               |
| SNP_P4_78094_7634080 | NC_021165.1    | Ca_kabuli_chr06 | 7634080                 | GG                              | TT              | 1946857085               |
| SNP_P4_78095_7634969 | NC_021165.1    | Ca_kabuli_chr06 | 7634969                 | GG                              | AA              | 1946857087               |
| SNP_P4_78096_7635021 | NC_021165.1    | Ca_kabuli_chr06 | 7635021                 | AA                              | TT              | 1946857089               |
| SNP_P4_78097_7635280 | NC_021165.1    | Ca_kabuli_chr06 | 7635280                 | GG                              | AA              | 1946857091               |
| SNP_P4_78098_7635282 | NC_021165.1    | Ca_kabuli_chr06 | 7635282                 | GG                              | TT              | 1946857093               |
| SNP_P4_78099_7635298 | NC_021165.1    | Ca_kabuli_chr06 | 7635298                 | GG                              | AA              | 1946857095               |
| SNP_P4_78100_7635831 | NC_021165.1    | Ca_kabuli_chr06 | 7635831                 | GG                              | CC              | 1946857097               |
| SNP_P4_78101_7635837 | NC_021165.1    | Ca_kabuli_chr06 | 7635837                 | CC                              | TT              | 1946857099               |
| SNP_P4_78102_7635842 | NC_021165.1    | Ca_kabuli_chr06 | 7635842                 | CC                              | TT              | 1946857101               |
| SNP_P4_78103_7636156 | NC_021165.1    | Ca_kabuli_chr06 | 7636156                 | CC                              | TT              | 1946857103               |
| SNP_P4_78104_7636230 | NC_021165.1    | Ca_kabuli_chr06 | 7636230                 | TT                              | GG              | 1946857105               |
| SNP_P4_78106_7636250 | NC_021165.1    | Ca_kabuli_chr06 | 7636250                 | CC                              | GG              | 1946857107               |
| SNP_P4_78107_7638717 | NC_021165.1    | Ca_kabuli_chr06 | 7638717                 | TT                              | CC              | 1946857109               |
| SNP_P4_78111_7641907 | NC_021165.1    | Ca_kabuli_chr06 | 7641907                 | AA                              | GG              | 1946857111               |
| SNP_P4_78112_7641934 | NC_021165.1    | Ca_kabuli_chr06 | 7641934                 | TT                              | CC              | 1946857113               |
| SNP_P4_78113_7642913 | NC_021165.1    | Ca_kabuli_chr06 | 7642913                 | GG                              | TT              | 1946857115               |
| SNP_P4_78114_7642930 | NC_021165.1    | Ca_kabuli_chr06 | 7642930                 | TT                              | CC              | 1946857117               |
| SNP_P4_78115_7642960 | NC_021165.1    | Ca_kabuli_chr06 | 7642960                 | AA                              | TT              | 1946857119               |
| SNP_P4_78116_7643232 | NC_021165.1    | Ca_kabuli_chr06 | 7643232                 | AA                              | GG              | 1946857121               |
| SNP_P4_78118_7643313 | NC_021165.1    | Ca_kabuli_chr06 | 7643313                 | TT                              | CC              | 1946857123               |
| SNP_P4_78120_7643440 | NC_021165.1    | Ca_kabuli_chr06 | 7643440                 | TT                              | GG              | 1946857125               |



| SNPs IDs             | Chromosome IDs | Chromosomes     | Physical positions (bp) | CDC Frontier (Reference genome) | (ILWC46 & LPNB) | NCBI SNPdb Accession IDs |
|----------------------|----------------|-----------------|-------------------------|---------------------------------|-----------------|--------------------------|
| SNP_P4_78121_7643529 | NC_021165.1    | Ca_kabuli_chr06 | 7643529                 | AA                              | GG              | 1946857127               |
| SNP_P4_78123_7643629 | NC_021165.1    | Ca_kabuli_chr06 | 7643629                 | GG                              | AA              | 1946857128               |
| SNP_P4_78124_7643641 | NC_021165.1    | Ca_kabuli_chr06 | 7643641                 | AA                              | GG              | 1946857130               |
| SNP_P4_78125_7643684 | NC_021165.1    | Ca_kabuli_chr06 | 7643684                 | AA                              | GG              | 1946857132               |
| SNP_P4_78126_7644510 | NC_021165.1    | Ca_kabuli_chr06 | 7644510                 | CC                              | GG              | 1946857134               |
| SNP_P4_78127_7644707 | NC_021165.1    | Ca_kabuli_chr06 | 7644707                 | AA                              | CC              | 1946857136               |
| SNP_P4_78129_7645115 | NC_021165.1    | Ca_kabuli_chr06 | 7645115                 | TT                              | AA              | 1946857138               |
| SNP_P4_78130_7645975 | NC_021165.1    | Ca_kabuli_chr06 | 7645975                 | TT                              | AA              | 1946857140               |
| SNP_P4_78132_7648108 | NC_021165.1    | Ca_kabuli_chr06 | 7648108                 | TT                              | CC              | 1946857142               |
| SNP_P4_78135_7651130 | NC_021165.1    | Ca_kabuli_chr06 | 7651130                 | AA                              | GG              | 1946857144               |
| SNP_P4_78137_7651982 | NC_021165.1    | Ca_kabuli_chr06 | 7651982                 | CC                              | TT              | 1946857146               |
| SNP_P4_78138_7651989 | NC_021165.1    | Ca_kabuli_chr06 | 7651989                 | TT                              | AA              | 1946857148               |
| SNP_P4_78139_7652142 | NC_021165.1    | Ca_kabuli_chr06 | 7652142                 | AA                              | CC              | 1946857150               |
| SNP_P4_78140_7652147 | NC_021165.1    | Ca_kabuli_chr06 | 7652147                 | AA                              | GG              | 1946857152               |
| SNP_P4_78142_7655973 | NC_021165.1    | Ca_kabuli_chr06 | 7655973                 | TT                              | AA              | 1946857154               |
| SNP_P4_78143_7655980 | NC_021165.1    | Ca_kabuli_chr06 | 7655980                 | TT                              | GG              | 1946857156               |
| SNP_P4_78144_7656252 | NC_021165.1    | Ca_kabuli_chr06 | 7656252                 | AA                              | TT              | 1946857158               |
| SNP_P4_78145_7656259 | NC_021165.1    | Ca_kabuli_chr06 | 7656259                 | TT                              | AA              | 1946857160               |
| SNP_P4_78146_7656281 | NC_021165.1    | Ca_kabuli_chr06 | 7656281                 | CC                              | TT              | 1946857162               |
| SNP_P4_78147_7656302 | NC_021165.1    | Ca_kabuli_chr06 | 7656302                 | TT                              | CC              | 1946857164               |
| SNP_P4_78148_7656303 | NC_021165.1    | Ca_kabuli_chr06 | 7656303                 | GG                              | AA              | 1946857166               |
| SNP_P4_78149_7657382 | NC_021165.1    | Ca_kabuli_chr06 | 7657382                 | TT                              | CC              | 1946857168               |
| SNP_P4_78150_7657587 | NC_021165.1    | Ca_kabuli_chr06 | 7657587                 | CC                              | TT              | 1946857170               |
| SNP_P4_78151_7657623 | NC_021165.1    | Ca_kabuli_chr06 | 7657623                 | CC                              | GG              | 1946857172               |
| SNP_P4_78152_7657629 | NC_021165.1    | Ca_kabuli_chr06 | 7657629                 | AA                              | GG              | 1946857174               |
| SNP_P4_78153_7657641 | NC_021165.1    | Ca_kabuli_chr06 | 7657641                 | CC                              | GG              | 1946857176               |
| SNP_P4_78154_7657842 | NC_021165.1    | Ca_kabuli_chr06 | 7657842                 | TT                              | CC              | 1946857178               |
| SNP_P4_78155_7658633 | NC_021165.1    | Ca_kabuli_chr06 | 7658633                 | AA                              | GG              | 1946857180               |
| SNP_P4_78156_7660612 | NC_021165.1    | Ca_kabuli_chr06 | 7660612                 | AA                              | TT              | 1946857182               |
| SNP_P4_78157_7660660 | NC_021165.1    | Ca_kabuli_chr06 | 7660660                 | CC                              | TT              | 1946857185               |
| SNP_P4_78159_7660768 | NC_021165.1    | Ca_kabuli_chr06 | 7660768                 | AA                              | CC              | 1946857187               |
| SNP_P4_78160_7660814 | NC_021165.1    | Ca_kabuli_chr06 | 7660814                 | GG                              | AA              | 1946857189               |
| SNP_P4_78161_7660875 | NC_021165.1    | Ca_kabuli_chr06 | 7660875                 | AA                              | GG              | 1946857191               |
| SNP_P4_78162_7660894 | NC_021165.1    | Ca_kabuli_chr06 | 7660894                 | CC                              | TT              | 1946857193               |
| SNP_P4_78163_7660922 | NC_021165.1    | Ca_kabuli_chr06 | 7660922                 | CC                              | TT              | 1946857195               |
| SNP_P4_78165_7663045 | NC_021165.1    | Ca_kabuli_chr06 | 7663045                 | AA                              | TT              | 1946857197               |
| SNP_P4_78166_7664403 | NC_021165.1    | Ca_kabuli_chr06 | 7664403                 | AA                              | GG              | 1946857199               |
| SNP_P4_78167_7664647 | NC_021165.1    | Ca_kabuli_chr06 | 7664647                 | CC                              | GG              | 1946857201               |
| SNP_P4_78168_7664715 | NC_021165.1    | Ca_kabuli_chr06 | 7664715                 | TT                              | AA              | 1946857203               |
| SNP_P4_78169_7664716 | NC_021165.1    | Ca_kabuli_chr06 | 7664716                 | TT                              | CC              | 1946857206               |
| SNP_P4_78171_7664919 | NC_021165.1    | Ca_kabuli_chr06 | 7664919                 | CC                              | TT              | 1946857208               |
| SNP_P4_78172_7664925 | NC_021165.1    | Ca_kabuli_chr06 | 7664925                 | CC                              | TT              | 1946857210               |

| SNPs IDs             | Chromosome IDs | Chromosomes     | Physical positions (bp) | CDC Frontier (Reference genome) | (ILWC46 & LPNB) | NCBI SNPdb Accession IDs |
|----------------------|----------------|-----------------|-------------------------|---------------------------------|-----------------|--------------------------|
| SNP_P4_78174_7665353 | NC_021165.1    | Ca_kabuli_chr06 | 7665353                 | CC                              | TT              | 1946857212               |
| SNP_P4_78176_7665670 | NC_021165.1    | Ca_kabuli_chr06 | 7665670                 | CC                              | TT              | 1946857214               |
| SNP_P4_78177_7668474 | NC_021165.1    | Ca_kabuli_chr06 | 7668474                 | TT                              | AA              | 1946857216               |
| SNP_P4_78178_7668494 | NC_021165.1    | Ca_kabuli_chr06 | 7668494                 | CC                              | TT              | 1946857218               |
| SNP_P4_78179_7668738 | NC_021165.1    | Ca_kabuli_chr06 | 7668738                 | AA                              | GG              | 1946857220               |
| SNP_P4_78180_7668775 | NC_021165.1    | Ca_kabuli_chr06 | 7668775                 | TT                              | CC              | 1946857223               |
| SNP_P4_78181_7668970 | NC_021165.1    | Ca_kabuli_chr06 | 7668970                 | TT                              | AA              | 1946857225               |
| SNP_P4_78182_7669001 | NC_021165.1    | Ca_kabuli_chr06 | 7669001                 | GG                              | AA              | 1946857227               |
| SNP_P4_78183_7669424 | NC_021165.1    | Ca_kabuli_chr06 | 7669424                 | GG                              | TT              | 1946857229               |
| SNP_P4_78184_7669451 | NC_021165.1    | Ca_kabuli_chr06 | 7669451                 | AA                              | TT              | 1946857231               |
| SNP_P4_78185_7669452 | NC_021165.1    | Ca_kabuli_chr06 | 7669452                 | TT                              | AA              | 1946857233               |
| SNP_P4_78186_7669846 | NC_021165.1    | Ca_kabuli_chr06 | 7669846                 | AA                              | TT              | 1946857235               |
| SNP_P4_78187_7669847 | NC_021165.1    | Ca_kabuli_chr06 | 7669847                 | AA                              | CC              | 1946857237               |
| SNP_P4_78188_7669906 | NC_021165.1    | Ca_kabuli_chr06 | 7669906                 | AA                              | GG              | 1946857239               |
| SNP_P4_78189_7669922 | NC_021165.1    | Ca_kabuli_chr06 | 7669922                 | TT                              | CC              | 1946857241               |
| SNP_P4_78190_7669995 | NC_021165.1    | Ca_kabuli_chr06 | 7669995                 | CC                              | TT              | 1946857243               |
| SNP_P4_78191_7670166 | NC_021165.1    | Ca_kabuli_chr06 | 7670166                 | TT                              | AA              | 1946857245               |
| SNP_P4_78193_7670222 | NC_021165.1    | Ca_kabuli_chr06 | 7670222                 | AA                              | TT              | 1946857247               |
| SNP_P4_78195_7670347 | NC_021165.1    | Ca_kabuli_chr06 | 7670347                 | CC                              | TT              | 1946857249               |
| SNP_P4_78196_7673202 | NC_021165.1    | Ca_kabuli_chr06 | 7673202                 | TT                              | CC              | 1946857251               |
| SNP_P4_78197_7674627 | NC_021165.1    | Ca_kabuli_chr06 | 7674627                 | AA                              | GG              | 1946857253               |
| SNP_P4_78198_7675687 | NC_021165.1    | Ca_kabuli_chr06 | 7675687                 | AA                              | TT              | 1946857255               |
| SNP_P4_78199_7678948 | NC_021165.1    | Ca_kabuli_chr06 | 7678948                 | AA                              | TT              | 1946857257               |
| SNP_P4_78200_7679015 | NC_021165.1    | Ca_kabuli_chr06 | 7679015                 | TT                              | CC              | 1946857259               |
| SNP_P4_78201_7679290 | NC_021165.1    | Ca_kabuli_chr06 | 7679290                 | CC                              | TT              | 1946857261               |
| SNP_P4_78202_7686028 | NC_021165.1    | Ca_kabuli_chr06 | 7686028                 | CC                              | TT              | 1946857262               |
| SNP_P4_78203_7687543 | NC_021165.1    | Ca_kabuli_chr06 | 7687543                 | GG                              | AA              | 1946857264               |
| SNP_P4_78204_7688655 | NC_021165.1    | Ca_kabuli_chr06 | 7688655                 | TT                              | CC              | 1946857266               |
| SNP_P4_78206_7689126 | NC_021165.1    | Ca_kabuli_chr06 | 7689126                 | GG                              | AA              | 1946857268               |
| SNP_P4_78208_7690681 | NC_021165.1    | Ca_kabuli_chr06 | 7690681                 | TT                              | GG              | 1946857270               |
| SNP_P4_78210_7691837 | NC_021165.1    | Ca_kabuli_chr06 | 7691837                 | TT                              | AA              | 1946857272               |
| SNP_P4_78211_7692431 | NC_021165.1    | Ca_kabuli_chr06 | 7692431                 | GG                              | TT              | 1946857274               |
| SNP_P4_78212_7694944 | NC_021165.1    | Ca_kabuli_chr06 | 7694944                 | CC                              | AA              | 1946857276               |
| SNP_P4_78213_7694961 | NC_021165.1    | Ca_kabuli_chr06 | 7694961                 | CC                              | GG              | 1946857278               |
| SNP_P4_78215_7695446 | NC_021165.1    | Ca_kabuli_chr06 | 7695446                 | CC                              | AA              | 1946857280               |
| SNP_P4_78216_7696024 | NC_021165.1    | Ca_kabuli_chr06 | 7696024                 | TT                              | AA              | 1946857282               |
| SNP_P4_78217_7696855 | NC_021165.1    | Ca_kabuli_chr06 | 7696855                 | AA                              | TT              | 1946857284               |
| SNP_P4_78218_7697026 | NC_021165.1    | Ca_kabuli_chr06 | 7697026                 | GG                              | AA              | 1946857286               |
| SNP_P4_78219_7698928 | NC_021165.1    | Ca_kabuli_chr06 | 7698928                 | CC                              | TT              | 1946857288               |
| SNP_P4_78221_7700204 | NC_021165.1    | Ca_kabuli_chr06 | 7700204                 | GG                              | AA              | 1946857289               |
| SNP_P4_78222_7701058 | NC_021165.1    | Ca_kabuli_chr06 | 7701058                 | CC                              | TT              | 1946857291               |
| SNP_P4_78223_7701741 | NC_021165.1    | Ca_kabuli_chr06 | 7701741                 | GG                              | AA              | 1946857294               |

| SNPs IDs             | Chromosome IDs | Chromosomes     | Physical positions (bp) | CDC Frontier (Reference genome) | (ILWC46 & LPNB) | NCBI SNPdb Accession IDs |
|----------------------|----------------|-----------------|-------------------------|---------------------------------|-----------------|--------------------------|
| SNP_P4_78224_7702583 | NC_021165.1    | Ca_kabuli_chr06 | 7702583                 | AA                              | GG              | 1946857295               |
| SNP_P4_78225_7703594 | NC_021165.1    | Ca_kabuli_chr06 | 7703594                 | AA                              | GG              | 1946857298               |
| SNP_P4_78226_7703702 | NC_021165.1    | Ca_kabuli_chr06 | 7703702                 | GG                              | AA              | 1946857299               |
| SNP_P4_78227_7703981 | NC_021165.1    | Ca_kabuli_chr06 | 7703981                 | AA                              | GG              | 1946857301               |
| SNP_P4_78228_7703987 | NC_021165.1    | Ca_kabuli_chr06 | 7703987                 | GG                              | AA              | 1946857303               |
| SNP_P4_78229_7704573 | NC_021165.1    | Ca_kabuli_chr06 | 7704573                 | CC                              | TT              | 1946857305               |
| SNP_P4_78232_7706430 | NC_021165.1    | Ca_kabuli_chr06 | 7706430                 | AA                              | TT              | 1946857307               |
| SNP_P4_78233_7706467 | NC_021165.1    | Ca_kabuli_chr06 | 7706467                 | CC                              | TT              | 1946857309               |
| SNP_P4_78234_7706469 | NC_021165.1    | Ca_kabuli_chr06 | 7706469                 | CC                              | AA              | 1946857311               |
| SNP_P4_78235_7706491 | NC_021165.1    | Ca_kabuli_chr06 | 7706491                 | CC                              | TT              | 1946857313               |
| SNP_P4_78236_7706511 | NC_021165.1    | Ca_kabuli_chr06 | 7706511                 | AA                              | TT              | 1946857315               |
| SNP_P4_78237_7707660 | NC_021165.1    | Ca_kabuli_chr06 | 7707660                 | TT                              | CC              | 1946857317               |
| SNP_P4_78239_7708394 | NC_021165.1    | Ca_kabuli_chr06 | 7708394                 | CC                              | TT              | 1946857319               |
| SNP_P4_78241_7708942 | NC_021165.1    | Ca_kabuli_chr06 | 7708942                 | AA                              | TT              | 1946857321               |
| SNP_P4_78242_7709245 | NC_021165.1    | Ca_kabuli_chr06 | 7709245                 | AA                              | CC              | 1946857323               |
| SNP_P4_78243_7709507 | NC_021165.1    | Ca_kabuli_chr06 | 7709507                 | GG                              | AA              | 1946857325               |
| SNP_P4_78244_7709534 | NC_021165.1    | Ca_kabuli_chr06 | 7709534                 | CC                              | AA              | 1946857327               |
| SNP_P4_78245_7709540 | NC_021165.1    | Ca_kabuli_chr06 | 7709540                 | AA                              | CC              | 1946857329               |
| SNP_P4_78246_7709553 | NC_021165.1    | Ca_kabuli_chr06 | 7709553                 | CC                              | AA              | 1946857331               |
| SNP_P4_78247_7709591 | NC_021165.1    | Ca_kabuli_chr06 | 7709591                 | GG                              | AA              | 1946857333               |
| SNP_P4_78248_7709930 | NC_021165.1    | Ca_kabuli_chr06 | 7709930                 | AA                              | GG              | 1946857335               |
| SNP_P4_78249_7710162 | NC_021165.1    | Ca_kabuli_chr06 | 7710162                 | TT                              | CC              | 1946857337               |
| SNP_P4_78250_7710482 | NC_021165.1    | Ca_kabuli_chr06 | 7710482                 | TT                              | CC              | 1946857339               |
| SNP_P4_78251_7711012 | NC_021165.1    | Ca_kabuli_chr06 | 7711012                 | AA                              | GG              | 1946857341               |
| SNP_P4_78253_7711977 | NC_021165.1    | Ca_kabuli_chr06 | 7711977                 | TT                              | CC              | 1946857343               |
| SNP_P4_78255_7713429 | NC_021165.1    | Ca_kabuli_chr06 | 7713429                 | TT                              | AA              | 1946857345               |
| SNP_P4_78256_7713430 | NC_021165.1    | Ca_kabuli_chr06 | 7713430                 | AA                              | CC              | 1946857347               |
| SNP_P4_78257_7713711 | NC_021165.1    | Ca_kabuli_chr06 | 7713711                 | TT                              | CC              | 1946857349               |
| SNP_P4_78258_7713851 | NC_021165.1    | Ca_kabuli_chr06 | 7713851                 | TT                              | AA              | 1946857351               |
| SNP_P4_78260_7714008 | NC_021165.1    | Ca_kabuli_chr06 | 7714008                 | CC                              | TT              | 1946857353               |
| SNP_P4_78261_7714029 | NC_021165.1    | Ca_kabuli_chr06 | 7714029                 | TT                              | GG              | 1946857355               |
| SNP_P4_78262_7714032 | NC_021165.1    | Ca_kabuli_chr06 | 7714032                 | CC                              | GG              | 1946857357               |
| SNP_P4_78263_7714040 | NC_021165.1    | Ca_kabuli_chr06 | 7714040                 | AA                              | CC              | 1946857359               |
| SNP_P4_78264_7714044 | NC_021165.1    | Ca_kabuli_chr06 | 7714044                 | GG                              | AA              | 1946857361               |
| SNP_P4_78265_7714051 | NC_021165.1    | Ca_kabuli_chr06 | 7714051                 | CC                              | TT              | 1946857363               |
| SNP_P4_78266_7714097 | NC_021165.1    | Ca_kabuli_chr06 | 7714097                 | GG                              | AA              | 1946857365               |
| SNP_P4_78267_7714109 | NC_021165.1    | Ca_kabuli_chr06 | 7714109                 | TT                              | CC              | 1946857367               |
| SNP_P4_78268_7714144 | NC_021165.1    | Ca_kabuli_chr06 | 7714144                 | AA                              | CC              | 1946857369               |
| SNP_P4_78269_7714247 | NC_021165.1    | Ca_kabuli_chr06 | 7714247                 | GG                              | AA              | 1946857371               |
| SNP_P4_78270_7714319 | NC_021165.1    | Ca_kabuli_chr06 | 7714319                 | AA                              | TT              | 1946857373               |
| SNP_P4_78271_7714327 | NC_021165.1    | Ca_kabuli_chr06 | 7714327                 | GG                              | AA              | 1946857375               |
| SNP_P4_78272_7714338 | NC_021165.1    | Ca_kabuli_chr06 | 7714338                 | CC                              | TT              | 1946857377               |

| SNPs IDs             | Chromosome IDs | Chromosomes     | Physical positions (bp) | CDC Frontier (Reference genome) | (ILWC46 & LPNB) | NCBI SNPdb Accession IDs |
|----------------------|----------------|-----------------|-------------------------|---------------------------------|-----------------|--------------------------|
| SNP_P4_78273_7714340 | NC_021165.1    | Ca_kabuli_chr06 | 7714340                 | CC                              | TT              | 1946857380               |
| SNP_P4_78274_7714354 | NC_021165.1    | Ca_kabuli_chr06 | 7714354                 | CC                              | TT              | 1946857382               |
| SNP_P4_78275_7714393 | NC_021165.1    | Ca_kabuli_chr06 | 7714393                 | TT                              | GG              | 1946857384               |
| SNP_P4_78276_7714412 | NC_021165.1    | Ca_kabuli_chr06 | 7714412                 | GG                              | AA              | 1946857386               |
| SNP_P4_78277_7715867 | NC_021165.1    | Ca_kabuli_chr06 | 7715867                 | AA                              | GG              | 1946857388               |
| SNP_P4_78278_7716762 | NC_021165.1    | Ca_kabuli_chr06 | 7716762                 | AA                              | TT              | 1946857390               |
| SNP_P4_78279_7716783 | NC_021165.1    | Ca_kabuli_chr06 | 7716783                 | TT                              | CC              | 1946857392               |
| SNP_P4_78280_7716788 | NC_021165.1    | Ca_kabuli_chr06 | 7716788                 | GG                              | AA              | 1946857395               |
| SNP_P4_78281_7716987 | NC_021165.1    | Ca_kabuli_chr06 | 7716987                 | CC                              | TT              | 1946857397               |
| SNP_P4_78282_7717005 | NC_021165.1    | Ca_kabuli_chr06 | 7717005                 | TT                              | CC              | 1946857399               |
| SNP_P4_78283_7717016 | NC_021165.1    | Ca_kabuli_chr06 | 7717016                 | CC                              | TT              | 1946857401               |
| SNP_P4_78284_7717017 | NC_021165.1    | Ca_kabuli_chr06 | 7717017                 | GG                              | AA              | 1946857403               |
| SNP_P4_78285_7717039 | NC_021165.1    | Ca_kabuli_chr06 | 7717039                 | CC                              | TT              | 1946857405               |
| SNP_P4_78286_7717048 | NC_021165.1    | Ca_kabuli_chr06 | 7717048                 | AA                              | GG              | 1946857407               |
| SNP_P4_78287_7717052 | NC_021165.1    | Ca_kabuli_chr06 | 7717052                 | GG                              | AA              | 1946857409               |
| SNP_P4_78288_7717093 | NC_021165.1    | Ca_kabuli_chr06 | 7717093                 | TT                              | CC              | 1946857411               |
| SNP_P4_78289_7717094 | NC_021165.1    | Ca_kabuli_chr06 | 7717094                 | CC                              | GG              | 1946857413               |
| SNP_P4_78290_7717097 | NC_021165.1    | Ca_kabuli_chr06 | 7717097                 | AA                              | GG              | 1946857415               |
| SNP_P4_78291_7717111 | NC_021165.1    | Ca_kabuli_chr06 | 7717111                 | GG                              | AA              | 1946857418               |
| SNP_P4_78292_7717115 | NC_021165.1    | Ca_kabuli_chr06 | 7717115                 | TT                              | GG              | 1946857420               |
| SNP_P4_78293_7717154 | NC_021165.1    | Ca_kabuli_chr06 | 7717154                 | GG                              | AA              | 1946857422               |
| SNP_P4_78294_7718370 | NC_021165.1    | Ca_kabuli_chr06 | 7718370                 | AA                              | CC              | 1946857424               |
| SNP_P4_78295_7718399 | NC_021165.1    | Ca_kabuli_chr06 | 7718399                 | GG                              | AA              | 1946857426               |
| SNP_P4_78296_7718445 | NC_021165.1    | Ca_kabuli_chr06 | 7718445                 | CC                              | TT              | 1946857428               |
| SNP_P4_78297_7718450 | NC_021165.1    | Ca_kabuli_chr06 | 7718450                 | TT                              | GG              | 1946857430               |
| SNP_P4_78299_7719238 | NC_021165.1    | Ca_kabuli_chr06 | 7719238                 | GG                              | AA              | 1946857432               |
| SNP_P4_78300_7720058 | NC_021165.1    | Ca_kabuli_chr06 | 7720058                 | AA                              | CC              | 1946857434               |
| SNP_P4_78301_7720078 | NC_021165.1    | Ca_kabuli_chr06 | 7720078                 | AA                              | TT              | 1946857436               |
| SNP_P4_78302_7720096 | NC_021165.1    | Ca_kabuli_chr06 | 7720096                 | GG                              | CC              | 1946857438               |
| SNP_P4_78303_7720113 | NC_021165.1    | Ca_kabuli_chr06 | 7720113                 | TT                              | AA              | 1946857440               |
| SNP_P4_78304_7720114 | NC_021165.1    | Ca_kabuli_chr06 | 7720114                 | TT                              | GG              | 1946857442               |
| SNP_P4_78305_7722430 | NC_021165.1    | Ca_kabuli_chr06 | 7722430                 | AA                              | CC              | 1946857444               |
| SNP_P4_78306_7722731 | NC_021165.1    | Ca_kabuli_chr06 | 7722731                 | AA                              | GG              | 1946857446               |
| SNP_P4_78308_7723155 | NC_021165.1    | Ca_kabuli_chr06 | 7723155                 | TT                              | AA              | 1946857448               |
| SNP_P4_78310_7723950 | NC_021165.1    | Ca_kabuli_chr06 | 7723950                 | GG                              | AA              | 1946857450               |
| SNP_P4_78311_7726452 | NC_021165.1    | Ca_kabuli_chr06 | 7726452                 | AA                              | GG              | 1946857452               |
| SNP_P4_78312_7726734 | NC_021165.1    | Ca_kabuli_chr06 | 7726734                 | AA                              | TT              | 1946857454               |
| SNP_P4_78313_7727431 | NC_021165.1    | Ca_kabuli_chr06 | 7727431                 | GG                              | AA              | 1946857457               |
| SNP_P4_78314_7727898 | NC_021165.1    | Ca_kabuli_chr06 | 7727898                 | CC                              | GG              | 1946857459               |
| SNP_P4_78315_7728685 | NC_021165.1    | Ca_kabuli_chr06 | 7728685                 | AA                              | TT              | 1946857461               |
| SNP_P4_78316_7728686 | NC_021165.1    | Ca_kabuli_chr06 | 7728686                 | GG                              | AA              | 1946857463               |
| SNP_P4_78317_7728988 | NC_021165.1    | Ca_kabuli_chr06 | 7728988                 | TT                              | GG              | 1946857465               |

| SNPs IDs             | Chromosome IDs | Chromosomes     | Physical positions (bp) | CDC Frontier (Reference genome) | (ILWC46 & LPNB) | NCBI SNPdb Accession IDs |
|----------------------|----------------|-----------------|-------------------------|---------------------------------|-----------------|--------------------------|
| SNP_P4_78318_7729004 | NC_021165.1    | Ca_kabuli_chr06 | 7729004                 | GG                              | AA              | 1946857467               |
| SNP_P4_78319_7729257 | NC_021165.1    | Ca_kabuli_chr06 | 7729257                 | GG                              | TT              | 1946857469               |
| SNP_P4_78320_7729264 | NC_021165.1    | Ca_kabuli_chr06 | 7729264                 | GG                              | AA              | 1946857471               |
| SNP_P4_78322_7729345 | NC_021165.1    | Ca_kabuli_chr06 | 7729345                 | TT                              | GG              | 1946857473               |
| SNP_P4_78323_7729362 | NC_021165.1    | Ca_kabuli_chr06 | 7729362                 | AA                              | GG              | 1946857475               |
| SNP_P4_78324_7729549 | NC_021165.1    | Ca_kabuli_chr06 | 7729549                 | GG                              | CC              | 1946857477               |
| SNP_P4_78325_7729611 | NC_021165.1    | Ca_kabuli_chr06 | 7729611                 | GG                              | TT              | 1946857479               |
| SNP_P4_78326_7729642 | NC_021165.1    | Ca_kabuli_chr06 | 7729642                 | TT                              | AA              | 1946857481               |
| SNP_P4_78327_7729662 | NC_021165.1    | Ca_kabuli_chr06 | 7729662                 | CC                              | TT              | 1946857483               |
| SNP_P4_78328_7729846 | NC_021165.1    | Ca_kabuli_chr06 | 7729846                 | AA                              | GG              | 1946857485               |
| SNP_P4_78329_7729863 | NC_021165.1    | Ca_kabuli_chr06 | 7729863                 | AA                              | GG              | 1946857487               |
| SNP_P4_78330_7730615 | NC_021165.1    | Ca_kabuli_chr06 | 7730615                 | AA                              | TT              | 1946857489               |
| SNP_P4_78331_7730623 | NC_021165.1    | Ca_kabuli_chr06 | 7730623                 | AA                              | GG              | 1946857491               |
| SNP_P4_78332_7730766 | NC_021165.1    | Ca_kabuli_chr06 | 7730766                 | GG                              | AA              | 1946857493               |
| SNP_P4_78333_7730773 | NC_021165.1    | Ca_kabuli_chr06 | 7730773                 | GG                              | CC              | 1946857495               |
| SNP_P4_78334_7730994 | NC_021165.1    | Ca_kabuli_chr06 | 7730994                 | GG                              | TT              | 1946857497               |
| SNP_P4_78335_7731014 | NC_021165.1    | Ca_kabuli_chr06 | 7731014                 | GG                              | CC              | 1946857499               |
| SNP_P4_78336_7731026 | NC_021165.1    | Ca_kabuli_chr06 | 7731026                 | AA                              | GG              | 1946857501               |
| SNP_P4_78337_7731525 | NC_021165.1    | Ca_kabuli_chr06 | 7731525                 | CC                              | AA              | 1946857503               |
| SNP_P4_78338_7732116 | NC_021165.1    | Ca_kabuli_chr06 | 7732116                 | AA                              | GG              | 1946857505               |
| SNP_P4_78341_7734345 | NC_021165.1    | Ca_kabuli_chr06 | 7734345                 | GG                              | AA              | 1946857507               |
| SNP_P4_78343_7734776 | NC_021165.1    | Ca_kabuli_chr06 | 7734776                 | GG                              | AA              | 1946857509               |
| SNP_P4_78344_7734780 | NC_021165.1    | Ca_kabuli_chr06 | 7734780                 | CC                              | TT              | 1946857511               |
| SNP_P4_78346_7736652 | NC_021165.1    | Ca_kabuli_chr06 | 7736652                 | CC                              | GG              | 1946857513               |
| SNP_P4_78347_7737189 | NC_021165.1    | Ca_kabuli_chr06 | 7737189                 | TT                              | CC              | 1946857515               |
| SNP_P4_78348_7737352 | NC_021165.1    | Ca_kabuli_chr06 | 7737352                 | GG                              | TT              | 1946857517               |
| SNP_P4_78349_7737381 | NC_021165.1    | Ca_kabuli_chr06 | 7737381                 | GG                              | TT              | 1946857519               |
| SNP_P4_78350_7737382 | NC_021165.1    | Ca_kabuli_chr06 | 7737382                 | CC                              | AA              | 1946857521               |
| SNP_P4_78351_7737479 | NC_021165.1    | Ca_kabuli_chr06 | 7737479                 | CC                              | TT              | 1946857523               |
| SNP_P4_78352_7737541 | NC_021165.1    | Ca_kabuli_chr06 | 7737541                 | AA                              | GG              | 1946857525               |
| SNP_P4_78353_7737554 | NC_021165.1    | Ca_kabuli_chr06 | 7737554                 | TT                              | GG              | 1946857527               |
| SNP_P4_78354_7737697 | NC_021165.1    | Ca_kabuli_chr06 | 7737697                 | CC                              | TT              | 1946857529               |
| SNP_P4_78355_7737702 | NC_021165.1    | Ca_kabuli_chr06 | 7737702                 | TT                              | CC              | 1946857531               |
| SNP_P4_78356_7737715 | NC_021165.1    | Ca_kabuli_chr06 | 7737715                 | AA                              | GG              | 1946857533               |
| SNP_P4_78357_7737762 | NC_021165.1    | Ca_kabuli_chr06 | 7737762                 | TT                              | CC              | 1946857535               |
| SNP_P4_78358_7737786 | NC_021165.1    | Ca_kabuli_chr06 | 7737786                 | TT                              | GG              | 1946857537               |
| SNP_P4_78359_7737793 | NC_021165.1    | Ca_kabuli_chr06 | 7737793                 | TT                              | GG              | 1946857539               |
| SNP_P4_78360_7737845 | NC_021165.1    | Ca_kabuli_chr06 | 7737845                 | CC                              | TT              | 1946857541               |
| SNP_P4_78361_7737909 | NC_021165.1    | Ca_kabuli_chr06 | 7737909                 | TT                              | CC              | 1946857543               |
| SNP_P4_78363_7738077 | NC_021165.1    | Ca_kabuli_chr06 | 7738077                 | TT                              | CC              | 1946857545               |
| SNP_P4_78364_7738206 | NC_021165.1    | Ca_kabuli_chr06 | 7738206                 | AA                              | GG              | 1946857547               |
| SNP_P4_78365_7738248 | NC_021165.1    | Ca_kabuli_chr06 | 7738248                 | TT                              | CC              | 1946857549               |

| SNPs IDs             | Chromosome IDs | Chromosomes     | Physical positions (bp) | CDC Frontier (Reference genome) | (ILWC46 & LPNB) | NCBI SNPdb Accession IDs |
|----------------------|----------------|-----------------|-------------------------|---------------------------------|-----------------|--------------------------|
| SNP_P4_78366_7738254 | NC_021165.1    | Ca_kabuli_chr06 | 7738254                 | GG                              | AA              | 1946857551               |
| SNP_P4_78367_7738287 | NC_021165.1    | Ca_kabuli_chr06 | 7738287                 | TT                              | GG              | 1946857553               |
| SNP_P4_78368_7738350 | NC_021165.1    | Ca_kabuli_chr06 | 7738350                 | AA                              | GG              | 1946857555               |
| SNP_P4_78369_7738464 | NC_021165.1    | Ca_kabuli_chr06 | 7738464                 | TT                              | CC              | 1946857557               |
| SNP_P4_78370_7738465 | NC_021165.1    | Ca_kabuli_chr06 | 7738465                 | CC                              | TT              | 1946857559               |
| SNP_P4_78371_7738491 | NC_021165.1    | Ca_kabuli_chr06 | 7738491                 | CC                              | TT              | 1946857561               |
| SNP_P4_78372_7738847 | NC_021165.1    | Ca_kabuli_chr06 | 7738847                 | TT                              | CC              | 1946857563               |
| SNP_P4_78373_7738855 | NC_021165.1    | Ca_kabuli_chr06 | 7738855                 | CC                              | AA              | 1946857565               |
| SNP_P4_78374_7738859 | NC_021165.1    | Ca_kabuli_chr06 | 7738859                 | CC                              | TT              | 1946857567               |
| SNP_P4_78375_7739141 | NC_021165.1    | Ca_kabuli_chr06 | 7739141                 | TT                              | AA              | 1946857569               |
| SNP_P4_78376_7739152 | NC_021165.1    | Ca_kabuli_chr06 | 7739152                 | CC                              | AA              | 1946857571               |
| SNP_P4_78377_7739160 | NC_021165.1    | Ca_kabuli_chr06 | 7739160                 | AA                              | GG              | 1946857573               |
| SNP_P4_78378_7739329 | NC_021165.1    | Ca_kabuli_chr06 | 7739329                 | CC                              | TT              | 1946857575               |
| SNP_P4_78379_7739346 | NC_021165.1    | Ca_kabuli_chr06 | 7739346                 | GG                              | AA              | 1946857577               |
| SNP_P4_78380_7739348 | NC_021165.1    | Ca_kabuli_chr06 | 7739348                 | TT                              | CC              | 1946857579               |
| SNP_P4_78381_7739530 | NC_021165.1    | Ca_kabuli_chr06 | 7739530                 | TT                              | CC              | 1946857581               |
| SNP_P4_78382_7739531 | NC_021165.1    | Ca_kabuli_chr06 | 7739531                 | TT                              | CC              | 1946857583               |
| SNP_P4_78383_7739572 | NC_021165.1    | Ca_kabuli_chr06 | 7739572                 | CC                              | TT              | 1946857585               |
| SNP_P4_78384_7739694 | NC_021165.1    | Ca_kabuli_chr06 | 7739694                 | GG                              | AA              | 1946857587               |
| SNP_P4_78385_7739696 | NC_021165.1    | Ca_kabuli_chr06 | 7739696                 | TT                              | CC              | 1946857589               |
| SNP_P4_78386_7739855 | NC_021165.1    | Ca_kabuli_chr06 | 7739855                 | GG                              | TT              | 1946857591               |
| SNP_P4_78387_7741267 | NC_021165.1    | Ca_kabuli_chr06 | 7741267                 | GG                              | AA              | 1946857594               |
| SNP_P4_78388_7742010 | NC_021165.1    | Ca_kabuli_chr06 | 7742010                 | TT                              | CC              | 1946857596               |
| SNP_P4_78389_7743429 | NC_021165.1    | Ca_kabuli_chr06 | 7743429                 | TT                              | CC              | 1946857598               |
| SNP_P4_78390_7744730 | NC_021165.1    | Ca_kabuli_chr06 | 7744730                 | AA                              | GG              | 1946857600               |
| SNP_P4_78391_7745726 | NC_021165.1    | Ca_kabuli_chr06 | 7745726                 | AA                              | TT              | 1946857602               |
| SNP_P4_78392_7746005 | NC_021165.1    | Ca_kabuli_chr06 | 7746005                 | CC                              | AA              | 1946857604               |
| SNP_P4_78393_7746202 | NC_021165.1    | Ca_kabuli_chr06 | 7746202                 | CC                              | TT              | 1946857605               |
| SNP_P4_78394_7747254 | NC_021165.1    | Ca_kabuli_chr06 | 7747254                 | GG                              | AA              | 1946857607               |
| SNP_P4_78396_7749123 | NC_021165.1    | Ca_kabuli_chr06 | 7749123                 | CC                              | TT              | 1946857609               |
| SNP_P4_78397_7749233 | NC_021165.1    | Ca_kabuli_chr06 | 7749233                 | GG                              | AA              | 1946857611               |
| SNP_P4_78398_7750383 | NC_021165.1    | Ca_kabuli_chr06 | 7750383                 | TT                              | CC              | 1946857613               |
| SNP_P4_78399_7750986 | NC_021165.1    | Ca_kabuli_chr06 | 7750986                 | AA                              | TT              | 1946857615               |
| SNP_P4_78400_7751039 | NC_021165.1    | Ca_kabuli_chr06 | 7751039                 | AA                              | CC              | 1946857617               |
| SNP_P4_78401_7751100 | NC_021165.1    | Ca_kabuli_chr06 | 7751100                 | GG                              | CC              | 1946857619               |
| SNP_P4_78402_7752337 | NC_021165.1    | Ca_kabuli_chr06 | 7752337                 | TT                              | CC              | 1946857621               |
| SNP_P4_78403_7752658 | NC_021165.1    | Ca_kabuli_chr06 | 7752658                 | GG                              | AA              | 1946857623               |
| SNP_P4_78404_7752679 | NC_021165.1    | Ca_kabuli_chr06 | 7752679                 | CC                              | TT              | 1946857625               |
| SNP_P4_78405_7753941 | NC_021165.1    | Ca_kabuli_chr06 | 7753941                 | TT                              | AA              | 1946857627               |
| SNP_P4_78406_7755382 | NC_021165.1    | Ca_kabuli_chr06 | 7755382                 | CC                              | AA              | 1946857629               |
| SNP_P4_78407_7759206 | NC_021165.1    | Ca_kabuli_chr06 | 7759206                 | AA                              | TT              | 1946857631               |
| SNP_P4_78408_7759227 | NC_021165.1    | Ca_kabuli_chr06 | 7759227                 | GG                              | AA              | 1946857633               |

| SNPs IDs             | Chromosome IDs | Chromosomes     | Physical positions (bp) | CDC Frontier (Reference genome) | (ILWC46 & LPNB) | NCBI SNPdb Accession IDs |
|----------------------|----------------|-----------------|-------------------------|---------------------------------|-----------------|--------------------------|
| SNP_P4_78410_7760924 | NC_021165.1    | Ca_kabuli_chr06 | 7760924                 | GG                              | TT              | 1946857635               |
| SNP_P4_78411_7766924 | NC_021165.1    | Ca_kabuli_chr06 | 7766924                 | GG                              | TT              | 1946857637               |
| SNP_P4_78413_7769938 | NC_021165.1    | Ca_kabuli_chr06 | 7769938                 | AA                              | TT              | 1946857639               |
| SNP_P4_78414_7770357 | NC_021165.1    | Ca_kabuli_chr06 | 7770357                 | CC                              | TT              | 1946857641               |
| SNP_P4_78415_7772943 | NC_021165.1    | Ca_kabuli_chr06 | 7772943                 | CC                              | AA              | 1946857643               |
| SNP_P4_78416_7773113 | NC_021165.1    | Ca_kabuli_chr06 | 7773113                 | TT                              | CC              | 1946857645               |
| SNP_P4_78418_7773527 | NC_021165.1    | Ca_kabuli_chr06 | 7773527                 | CC                              | TT              | 1946857647               |
| SNP_P4_78419_7773990 | NC_021165.1    | Ca_kabuli_chr06 | 7773990                 | TT                              | CC              | 1946857649               |
| SNP_P4_78420_7774893 | NC_021165.1    | Ca_kabuli_chr06 | 7774893                 | GG                              | AA              | 1946857651               |
| SNP_P4_78421_7775315 | NC_021165.1    | Ca_kabuli_chr06 | 7775315                 | CC                              | TT              | 1946857653               |
| SNP_P4_78422_7775459 | NC_021165.1    | Ca_kabuli_chr06 | 7775459                 | CC                              | AA              | 1946857655               |
| SNP_P4_78424_7777042 | NC_021165.1    | Ca_kabuli_chr06 | 7777042                 | GG                              | AA              | 1946857657               |
| SNP_P4_78425_7777633 | NC_021165.1    | Ca_kabuli_chr06 | 7777633                 | CC                              | TT              | 1946857659               |
| SNP_P4_78426_7777986 | NC_021165.1    | Ca_kabuli_chr06 | 7777986                 | CC                              | TT              | 1946857661               |
| SNP_P4_78427_7779956 | NC_021165.1    | Ca_kabuli_chr06 | 7779956                 | GG                              | AA              | 1946857663               |
| SNP_P4_78428_7779967 | NC_021165.1    | Ca_kabuli_chr06 | 7779967                 | TT                              | CC              | 1946857665               |
| SNP_P4_78429_7780323 | NC_021165.1    | Ca_kabuli_chr06 | 7780323                 | TT                              | CC              | 1946857667               |
| SNP_P4_78430_7781115 | NC_021165.1    | Ca_kabuli_chr06 | 7781115                 | AA                              | GG              | 1946857669               |
| SNP_P4_78432_7783814 | NC_021165.1    | Ca_kabuli_chr06 | 7783814                 | CC                              | GG              | 1946857671               |
| SNP_P4_78433_7785026 | NC_021165.1    | Ca_kabuli_chr06 | 7785026                 | TT                              | CC              | 1946857673               |
| SNP_P4_78434_7785373 | NC_021165.1    | Ca_kabuli_chr06 | 7785373                 | CC                              | TT              | 1946857675               |
| SNP_P4_78435_7785414 | NC_021165.1    | Ca_kabuli_chr06 | 7785414                 | GG                              | TT              | 1946857677               |
| SNP_P4_78436_7786412 | NC_021165.1    | Ca_kabuli_chr06 | 7786412                 | TT                              | AA              | 1946857679               |
| SNP_P4_78437_7788799 | NC_021165.1    | Ca_kabuli_chr06 | 7788799                 | TT                              | CC              | 1946857681               |
| SNP_P4_78438_7788813 | NC_021165.1    | Ca_kabuli_chr06 | 7788813                 | TT                              | CC              | 1946857683               |
| SNP_P4_78439_7788816 | NC_021165.1    | Ca_kabuli_chr06 | 7788816                 | CC                              | AA              | 1946857685               |
| SNP_P4_78440_7789687 | NC_021165.1    | Ca_kabuli_chr06 | 7789687                 | TT                              | AA              | 1946857687               |
| SNP_P4_78441_7789826 | NC_021165.1    | Ca_kabuli_chr06 | 7789826                 | GG                              | CC              | 1946857689               |
| SNP_P4_78442_7789834 | NC_021165.1    | Ca_kabuli_chr06 | 7789834                 | AA                              | GG              | 1946857691               |
| SNP_P4_78443_7789853 | NC_021165.1    | Ca_kabuli_chr06 | 7789853                 | TT                              | CC              | 1946857693               |
| SNP_P4_78444_7790044 | NC_021165.1    | Ca_kabuli_chr06 | 7790044                 | AA                              | GG              | 1946857695               |
| SNP_P4_78445_7790046 | NC_021165.1    | Ca_kabuli_chr06 | 7790046                 | AA                              | TT              | 1946857697               |
| SNP_P4_78446_7790115 | NC_021165.1    | Ca_kabuli_chr06 | 7790115                 | GG                              | AA              | 1946857699               |
| SNP_P4_78447_7790166 | NC_021165.1    | Ca_kabuli_chr06 | 7790166                 | AA                              | GG              | 1946857701               |
| SNP_P4_78448_7793139 | NC_021165.1    | Ca_kabuli_chr06 | 7793139                 | AA                              | TT              | 1946857703               |
| SNP_P4_78449_7797625 | NC_021165.1    | Ca_kabuli_chr06 | 7797625                 | CC                              | TT              | 1946857705               |
| SNP_P4_78450_7798844 | NC_021165.1    | Ca_kabuli_chr06 | 7798844                 | CC                              | AA              | 1946857707               |
| SNP_P4_78451_7798845 | NC_021165.1    | Ca_kabuli_chr06 | 7798845                 | AA                              | TT              | 1946857709               |
| SNP_P4_78452_7798846 | NC_021165.1    | Ca_kabuli_chr06 | 7798846                 | TT                              | AA              | 1946857711               |
| SNP_P4_78453_7798952 | NC_021165.1    | Ca_kabuli_chr06 | 7798952                 | CC                              | GG              | 1946857713               |
| SNP_P4_78454_7798965 | NC_021165.1    | Ca_kabuli_chr06 | 7798965                 | GG                              | TT              | 1946857715               |
| SNP_P4_78455_7799134 | NC_021165.1    | Ca_kabuli_chr06 | 7799134                 | TT                              | CC              | 1946857717               |

| SNPs IDs             | Chromosome IDs | Chromosomes     | Physical positions (bp) | CDC Frontier (Reference genome) | (ILWC46 & LPNB) | NCBI SNPdb Accession IDs |
|----------------------|----------------|-----------------|-------------------------|---------------------------------|-----------------|--------------------------|
| SNP_P4_78456_7799137 | NC_021165.1    | Ca_kabuli_chr06 | 7799137                 | GG                              | AA              | 1946857719               |
| SNP_P4_78457_7799239 | NC_021165.1    | Ca_kabuli_chr06 | 7799239                 | CC                              | TT              | 1946857721               |
| SNP_P4_78458_7799246 | NC_021165.1    | Ca_kabuli_chr06 | 7799246                 | GG                              | AA              | 1946857723               |
| SNP_P4_78459_7799251 | NC_021165.1    | Ca_kabuli_chr06 | 7799251                 | TT                              | CC              | 1946857725               |
| SNP_P4_78460_7799254 | NC_021165.1    | Ca_kabuli_chr06 | 7799254                 | TT                              | AA              | 1946857727               |
| SNP_P4_78461_7799267 | NC_021165.1    | Ca_kabuli_chr06 | 7799267                 | GG                              | TT              | 1946857729               |
| SNP_P4_78462_7799275 | NC_021165.1    | Ca_kabuli_chr06 | 7799275                 | GG                              | AA              | 1946857731               |
| SNP_P4_78464_7799648 | NC_021165.1    | Ca_kabuli_chr06 | 7799648                 | TT                              | AA              | 1946857733               |
| SNP_P4_78465_7800104 | NC_021165.1    | Ca_kabuli_chr06 | 7800104                 | AA                              | TT              | 1946857735               |
| SNP_P4_78466_7801573 | NC_021165.1    | Ca_kabuli_chr06 | 7801573                 | AA                              | TT              | 1946857737               |
| SNP_P4_78468_7801593 | NC_021165.1    | Ca_kabuli_chr06 | 7801593                 | GG                              | AA              | 1946857739               |
| SNP_P4_78469_7801599 | NC_021165.1    | Ca_kabuli_chr06 | 7801599                 | GG                              | AA              | 1946857741               |
| SNP_P4_78471_7803335 | NC_021165.1    | Ca_kabuli_chr06 | 7803335                 | AA                              | GG              | 1946857743               |
| SNP_P4_78472_7803349 | NC_021165.1    | Ca_kabuli_chr06 | 7803349                 | GG                              | AA              | 1946857745               |
| SNP_P4_78473_7803453 | NC_021165.1    | Ca_kabuli_chr06 | 7803453                 | CC                              | AA              | 1946857748               |
| SNP_P4_78474_7803477 | NC_021165.1    | Ca_kabuli_chr06 | 7803477                 | TT                              | CC              | 1946857750               |
| SNP_P4_78475_7803540 | NC_021165.1    | Ca_kabuli_chr06 | 7803540                 | TT                              | AA              | 1946857752               |
| SNP_P4_78476_7803851 | NC_021165.1    | Ca_kabuli_chr06 | 7803851                 | TT                              | CC              | 1946857754               |
| SNP_P4_78477_7806339 | NC_021165.1    | Ca_kabuli_chr06 | 7806339                 | TT                              | CC              | 1946857757               |
| SNP_P4_78478_7806374 | NC_021165.1    | Ca_kabuli_chr06 | 7806374                 | GG                              | CC              | 1946857759               |
| SNP_P4_78479_7806667 | NC_021165.1    | Ca_kabuli_chr06 | 7806667                 | TT                              | CC              | 1946857761               |
| SNP_P4_78482_7807086 | NC_021165.1    | Ca_kabuli_chr06 | 7807086                 | CC                              | GG              | 1946857763               |
| SNP_P4_78483_7807498 | NC_021165.1    | Ca_kabuli_chr06 | 7807498                 | AA                              | GG              | 1946857765               |
| SNP_P4_78484_7812199 | NC_021165.1    | Ca_kabuli_chr06 | 7812199                 | CC                              | TT              | 1946857767               |
| SNP_P4_78485_7812784 | NC_021165.1    | Ca_kabuli_chr06 | 7812784                 | TT                              | GG              | 1946857769               |
| SNP_P4_78487_7813146 | NC_021165.1    | Ca_kabuli_chr06 | 7813146                 | GG                              | AA              | 1946857771               |
| SNP_P4_78488_7813177 | NC_021165.1    | Ca_kabuli_chr06 | 7813177                 | TT                              | CC              | 1946857773               |
| SNP_P4_78489_7813663 | NC_021165.1    | Ca_kabuli_chr06 | 7813663                 | TT                              | AA              | 1946857775               |
| SNP_P4_78490_7813666 | NC_021165.1    | Ca_kabuli_chr06 | 7813666                 | GG                              | TT              | 1946857777               |
| SNP_P4_78491_7813867 | NC_021165.1    | Ca_kabuli_chr06 | 7813867                 | AA                              | TT              | 1946857779               |
| SNP_P4_78492_7814050 | NC_021165.1    | Ca_kabuli_chr06 | 7814050                 | CC                              | TT              | 1946857781               |
| SNP_P4_78493_7814058 | NC_021165.1    | Ca_kabuli_chr06 | 7814058                 | AA                              | GG              | 1946857783               |
| SNP_P4_78495_7814288 | NC_021165.1    | Ca_kabuli_chr06 | 7814288                 | CC                              | GG              | 1946857785               |
| SNP_P4_78496_7814292 | NC_021165.1    | Ca_kabuli_chr06 | 7814292                 | TT                              | CC              | 1946857787               |
| SNP_P4_78497_7815424 | NC_021165.1    | Ca_kabuli_chr06 | 7815424                 | GG                              | TT              | 1946857789               |
| SNP_P4_78498_7815572 | NC_021165.1    | Ca_kabuli_chr06 | 7815572                 | GG                              | AA              | 1946857791               |
| SNP_P4_78499_7815589 | NC_021165.1    | Ca_kabuli_chr06 | 7815589                 | CC                              | AA              | 1946857793               |
| SNP_P4_78500_7815625 | NC_021165.1    | Ca_kabuli_chr06 | 7815625                 | TT                              | GG              | 1946857795               |
| SNP_P4_78501_7815700 | NC_021165.1    | Ca_kabuli_chr06 | 7815700                 | AA                              | TT              | 1946857797               |
| SNP_P4_78502_7815708 | NC_021165.1    | Ca_kabuli_chr06 | 7815708                 | GG                              | TT              | 1946857799               |
| SNP_P4_78503_7815724 | NC_021165.1    | Ca_kabuli_chr06 | 7815724                 | CC                              | AA              | 1946857801               |
| SNP_P4_78504_7815783 | NC_021165.1    | Ca_kabuli_chr06 | 7815783                 | GG                              | AA              | 1946857803               |



| SNPs IDs             | Chromosome IDs | Chromosomes     | Physical positions (bp) | CDC Frontier (Reference genome) | (ILWC46 & LPNB) | NCBI SNPdb Accession IDs |
|----------------------|----------------|-----------------|-------------------------|---------------------------------|-----------------|--------------------------|
| SNP_P4_78505_7815904 | NC_021165.1    | Ca_kabuli_chr06 | 7815904                 | CC                              | TT              | 1946857805               |
| SNP_P4_78506_7815947 | NC_021165.1    | Ca_kabuli_chr06 | 7815947                 | AA                              | GG              | 1946857807               |
| SNP_P4_78507_7815956 | NC_021165.1    | Ca_kabuli_chr06 | 7815956                 | AA                              | GG              | 1946857809               |
| SNP_P4_78508_7815973 | NC_021165.1    | Ca_kabuli_chr06 | 7815973                 | TT                              | CC              | 1946857810               |
| SNP_P4_78509_7815992 | NC_021165.1    | Ca_kabuli_chr06 | 7815992                 | TT                              | AA              | 1946857812               |
| SNP_P4_78510_7815993 | NC_021165.1    | Ca_kabuli_chr06 | 7815993                 | AA                              | TT              | 1946857814               |
| SNP_P4_78511_7816134 | NC_021165.1    | Ca_kabuli_chr06 | 7816134                 | TT                              | GG              | 1946857816               |
| SNP_P4_78512_7817205 | NC_021165.1    | Ca_kabuli_chr06 | 7817205                 | CC                              | TT              | 1946857818               |
| SNP_P4_78513_7817222 | NC_021165.1    | Ca_kabuli_chr06 | 7817222                 | AA                              | GG              | 1946857820               |
| SNP_P4_78514_7817272 | NC_021165.1    | Ca_kabuli_chr06 | 7817272                 | AA                              | GG              | 1946857822               |
| SNP_P4_78515_7818106 | NC_021165.1    | Ca_kabuli_chr06 | 7818106                 | GG                              | AA              | 1946857825               |
| SNP_P4_78516_7818133 | NC_021165.1    | Ca_kabuli_chr06 | 7818133                 | GG                              | TT              | 1946857827               |
| SNP_P4_78517_7818134 | NC_021165.1    | Ca_kabuli_chr06 | 7818134                 | GG                              | AA              | 1946857829               |
| SNP_P4_78518_7818424 | NC_021165.1    | Ca_kabuli_chr06 | 7818424                 | CC                              | TT              | 1946857831               |
| SNP_P4_78519_7819233 | NC_021165.1    | Ca_kabuli_chr06 | 7819233                 | AA                              | GG              | 1946857833               |
| SNP_P4_78520_7819348 | NC_021165.1    | Ca_kabuli_chr06 | 7819348                 | CC                              | TT              | 1946857835               |
| SNP_P4_78522_7819913 | NC_021165.1    | Ca_kabuli_chr06 | 7819913                 | TT                              | AA              | 1946857837               |
| SNP_P4_78523_7825781 | NC_021165.1    | Ca_kabuli_chr06 | 7825781                 | AA                              | TT              | 1946857839               |
| SNP_P4_78524_7825859 | NC_021165.1    | Ca_kabuli_chr06 | 7825859                 | AA                              | GG              | 1946857841               |
| SNP_P4_78525_7826030 | NC_021165.1    | Ca_kabuli_chr06 | 7826030                 | GG                              | AA              | 1946857843               |
| SNP_P4_78526_7826608 | NC_021165.1    | Ca_kabuli_chr06 | 7826608                 | CC                              | TT              | 1946857845               |
| SNP_P4_78528_7826748 | NC_021165.1    | Ca_kabuli_chr06 | 7826748                 | CC                              | GG              | 1946857847               |
| SNP_P4_78529_7826948 | NC_021165.1    | Ca_kabuli_chr06 | 7826948                 | AA                              | GG              | 1946857849               |
| SNP_P4_78530_7827009 | NC_021165.1    | Ca_kabuli_chr06 | 7827009                 | CC                              | TT              | 1946857851               |
| SNP_P4_78531_7828925 | NC_021165.1    | Ca_kabuli_chr06 | 7828925                 | TT                              | AA              | 1946857853               |
| SNP_P4_78533_7829272 | NC_021165.1    | Ca_kabuli_chr06 | 7829272                 | CC                              | TT              | 1946857855               |
| SNP_P4_78534_7831409 | NC_021165.1    | Ca_kabuli_chr06 | 7831409                 | CC                              | TT              | 1946857857               |
| SNP_P4_78535_7832129 | NC_021165.1    | Ca_kabuli_chr06 | 7832129                 | AA                              | GG              | 1946857859               |
| SNP_P4_78536_7832679 | NC_021165.1    | Ca_kabuli_chr06 | 7832679                 | AA                              | GG              | 1946857861               |
| SNP_P4_78537_7833429 | NC_021165.1    | Ca_kabuli_chr06 | 7833429                 | CC                              | TT              | 1946857863               |
| SNP_P4_78538_7834922 | NC_021165.1    | Ca_kabuli_chr06 | 7834922                 | GG                              | AA              | 1946857865               |
| SNP_P4_78539_7834976 | NC_021165.1    | Ca_kabuli_chr06 | 7834976                 | GG                              | AA              | 1946857867               |
| SNP_P4_78540_7835984 | NC_021165.1    | Ca_kabuli_chr06 | 7835984                 | TT                              | AA              | 1946857869               |
| SNP_P4_78542_7841024 | NC_021165.1    | Ca_kabuli_chr06 | 7841024                 | CC                              | TT              | 1946857871               |
| SNP_P4_78543_7841071 | NC_021165.1    | Ca_kabuli_chr06 | 7841071                 | TT                              | CC              | 1946857873               |
| SNP_P4_78544_7841084 | NC_021165.1    | Ca_kabuli_chr06 | 7841084                 | CC                              | TT              | 1946857875               |
| SNP_P4_78545_7841316 | NC_021165.1    | Ca_kabuli_chr06 | 7841316                 | TT                              | AA              | 1946857877               |
| SNP_P4_78546_7841345 | NC_021165.1    | Ca_kabuli_chr06 | 7841345                 | CC                              | TT              | 1946857879               |
| SNP_P4_78547_7841347 | NC_021165.1    | Ca_kabuli_chr06 | 7841347                 | TT                              | GG              | 1946857881               |
| SNP_P4_78548_7841586 | NC_021165.1    | Ca_kabuli_chr06 | 7841586                 | AA                              | TT              | 1946857883               |
| SNP_P4_78549_7843051 | NC_021165.1    | Ca_kabuli_chr06 | 7843051                 | AA                              | TT              | 1946857885               |
| SNP_P4_78550_7843084 | NC_021165.1    | Ca_kabuli_chr06 | 7843084                 | TT                              | CC              | 1946857887               |

| SNPs IDs             | Chromosome IDs | Chromosomes     | Physical positions (bp) | CDC Frontier (Reference genome) | (ILWC46 & LPNB) | NCBI SNPdb Accession IDs |
|----------------------|----------------|-----------------|-------------------------|---------------------------------|-----------------|--------------------------|
| SNP_P4_78551_7843124 | NC_021165.1    | Ca_kabuli_chr06 | 7843124                 | GG                              | AA              | 1946857889               |
| SNP_P4_78552_7846701 | NC_021165.1    | Ca_kabuli_chr06 | 7846701                 | TT                              | AA              | 1946857891               |
| SNP_P4_78553_7847424 | NC_021165.1    | Ca_kabuli_chr06 | 7847424                 | AA                              | GG              | 1946857893               |
| SNP_P4_78554_7847667 | NC_021165.1    | Ca_kabuli_chr06 | 7847667                 | CC                              | GG              | 1946857895               |
| SNP_P4_78555_7847724 | NC_021165.1    | Ca_kabuli_chr06 | 7847724                 | GG                              | AA              | 1946857897               |
| SNP_P4_78557_7849253 | NC_021165.1    | Ca_kabuli_chr06 | 7849253                 | TT                              | CC              | 1946857899               |
| SNP_P4_78558_7849718 | NC_021165.1    | Ca_kabuli_chr06 | 7849718                 | CC                              | TT              | 1946857901               |
| SNP_P4_78559_7854374 | NC_021165.1    | Ca_kabuli_chr06 | 7854374                 | CC                              | TT              | 1946857903               |
| SNP_P4_78560_7854377 | NC_021165.1    | Ca_kabuli_chr06 | 7854377                 | CC                              | GG              | 1946857905               |
| SNP_P4_78561_7855628 | NC_021165.1    | Ca_kabuli_chr06 | 7855628                 | TT                              | CC              | 1946857907               |
| SNP_P4_78562_7855632 | NC_021165.1    | Ca_kabuli_chr06 | 7855632                 | CC                              | TT              | 1946857909               |
| SNP_P4_78563_7855685 | NC_021165.1    | Ca_kabuli_chr06 | 7855685                 | GG                              | AA              | 1946857911               |
| SNP_P4_78564_7857649 | NC_021165.1    | Ca_kabuli_chr06 | 7857649                 | GG                              | AA              | 1946857913               |
| SNP_P4_78565_7857784 | NC_021165.1    | Ca_kabuli_chr06 | 7857784                 | TT                              | AA              | 1946857915               |
| SNP_P4_78566_7858265 | NC_021165.1    | Ca_kabuli_chr06 | 7858265                 | AA                              | CC              | 1946857917               |
| SNP_P4_78567_7858703 | NC_021165.1    | Ca_kabuli_chr06 | 7858703                 | GG                              | TT              | 1946857919               |
| SNP_P4_78568_7858712 | NC_021165.1    | Ca_kabuli_chr06 | 7858712                 | GG                              | AA              | 1946857921               |
| SNP_P4_78569_7859630 | NC_021165.1    | Ca_kabuli_chr06 | 7859630                 | GG                              | TT              | 1946857923               |
| SNP_P4_78572_7860327 | NC_021165.1    | Ca_kabuli_chr06 | 7860327                 | TT                              | CC              | 1946857925               |
| SNP_P4_78573_7860998 | NC_021165.1    | Ca_kabuli_chr06 | 7860998                 | TT                              | CC              | 1946857927               |
| SNP_P4_78575_7861173 | NC_021165.1    | Ca_kabuli_chr06 | 7861173                 | GG                              | AA              | 1946857929               |
| SNP_P4_78576_7861225 | NC_021165.1    | Ca_kabuli_chr06 | 7861225                 | AA                              | CC              | 1946857931               |
| SNP_P4_78577_7861287 | NC_021165.1    | Ca_kabuli_chr06 | 7861287                 | CC                              | AA              | 1946857933               |
| SNP_P4_78578_7861355 | NC_021165.1    | Ca_kabuli_chr06 | 7861355                 | TT                              | GG              | 1946857935               |
| SNP_P4_78579_7861361 | NC_021165.1    | Ca_kabuli_chr06 | 7861361                 | CC                              | TT              | 1946857937               |
| SNP_P4_78580_7861433 | NC_021165.1    | Ca_kabuli_chr06 | 7861433                 | GG                              | TT              | 1946857940               |
| SNP_P4_78581_7861523 | NC_021165.1    | Ca_kabuli_chr06 | 7861523                 | CC                              | TT              | 1946857942               |
| SNP_P4_78582_7862925 | NC_021165.1    | Ca_kabuli_chr06 | 7862925                 | GG                              | AA              | 1946857944               |
| SNP_P4_78583_7862956 | NC_021165.1    | Ca_kabuli_chr06 | 7862956                 | TT                              | CC              | 1946857946               |
| SNP_P4_78584_7862984 | NC_021165.1    | Ca_kabuli_chr06 | 7862984                 | TT                              | CC              | 1946857948               |
| SNP_P4_78585_7863030 | NC_021165.1    | Ca_kabuli_chr06 | 7863030                 | TT                              | AA              | 1946857950               |
| SNP_P4_78586_7863031 | NC_021165.1    | Ca_kabuli_chr06 | 7863031                 | TT                              | AA              | 1946857952               |
| SNP_P4_78587_7863307 | NC_021165.1    | Ca_kabuli_chr06 | 7863307                 | AA                              | GG              | 1946857954               |
| SNP_P4_78588_7865049 | NC_021165.1    | Ca_kabuli_chr06 | 7865049                 | TT                              | CC              | 1946857956               |
| SNP_P4_78589_7865163 | NC_021165.1    | Ca_kabuli_chr06 | 7865163                 | TT                              | CC              | 1946857958               |
| SNP_P4_78590_7867433 | NC_021165.1    | Ca_kabuli_chr06 | 7867433                 | CC                              | TT              | 1946857960               |
| SNP_P4_78591_7867814 | NC_021165.1    | Ca_kabuli_chr06 | 7867814                 | CC                              | AA              | 1946857962               |
| SNP_P4_78592_7867879 | NC_021165.1    | Ca_kabuli_chr06 | 7867879                 | GG                              | AA              | 1946857964               |
| SNP_P4_78593_7867990 | NC_021165.1    | Ca_kabuli_chr06 | 7867990                 | AA                              | GG              | 1946857966               |
| SNP_P4_78594_7868347 | NC_021165.1    | Ca_kabuli_chr06 | 7868347                 | GG                              | AA              | 1946857969               |
| SNP_P4_78595_7869375 | NC_021165.1    | Ca_kabuli_chr06 | 7869375                 | CC                              | AA              | 1946857971               |
| SNP_P4_78596_7869654 | NC_021165.1    | Ca_kabuli_chr06 | 7869654                 | AA                              | GG              | 1946857973               |

| SNPs IDs             | Chromosome IDs | Chromosomes     | Physical positions (bp) | CDC Frontier (Reference genome) | (ILWC46 & LPNB) | NCBI SNPdb Accession IDs |
|----------------------|----------------|-----------------|-------------------------|---------------------------------|-----------------|--------------------------|
| SNP_P4_78599_7870086 | NC_021165.1    | Ca_kabuli_chr06 | 7870086                 | TT                              | AA              | 1946857975               |
| SNP_P4_78600_7870280 | NC_021165.1    | Ca_kabuli_chr06 | 7870280                 | GG                              | TT              | 1946857977               |
| SNP_P4_78601_7870300 | NC_021165.1    | Ca_kabuli_chr06 | 7870300                 | GG                              | AA              | 1946857979               |
| SNP_P4_78602_7872093 | NC_021165.1    | Ca_kabuli_chr06 | 7872093                 | AA                              | GG              | 1946857981               |
| SNP_P4_78603_7872110 | NC_021165.1    | Ca_kabuli_chr06 | 7872110                 | GG                              | CC              | 1946857983               |
| SNP_P4_78604_7872149 | NC_021165.1    | Ca_kabuli_chr06 | 7872149                 | GG                              | CC              | 1946857985               |
| SNP_P4_78605_7872153 | NC_021165.1    | Ca_kabuli_chr06 | 7872153                 | TT                              | CC              | 1946857987               |
| SNP_P4_78606_7872172 | NC_021165.1    | Ca_kabuli_chr06 | 7872172                 | AA                              | CC              | 1946857989               |
| SNP_P4_78607_7872179 | NC_021165.1    | Ca_kabuli_chr06 | 7872179                 | AA                              | CC              | 1946857991               |
| SNP_P4_78608_7872452 | NC_021165.1    | Ca_kabuli_chr06 | 7872452                 | CC                              | TT              | 1946857993               |
| SNP_P4_78609_7872466 | NC_021165.1    | Ca_kabuli_chr06 | 7872466                 | TT                              | AA              | 1946857995               |
| SNP_P4_78611_7872596 | NC_021165.1    | Ca_kabuli_chr06 | 7872596                 | GG                              | TT              | 1946857997               |
| SNP_P4_78612_7872984 | NC_021165.1    | Ca_kabuli_chr06 | 7872984                 | AA                              | TT              | 1946857999               |
| SNP_P4_78613_7873806 | NC_021165.1    | Ca_kabuli_chr06 | 7873806                 | GG                              | TT              | 1946858001               |
| SNP_P4_78614_7877561 | NC_021165.1    | Ca_kabuli_chr06 | 7877561                 | TT                              | GG              | 1946858003               |
| SNP_P4_78615_7877596 | NC_021165.1    | Ca_kabuli_chr06 | 7877596                 | CC                              | AA              | 1946858005               |
| SNP_P4_78616_7877599 | NC_021165.1    | Ca_kabuli_chr06 | 7877599                 | AA                              | TT              | 1946858007               |
| SNP_P4_78617_7878591 | NC_021165.1    | Ca_kabuli_chr06 | 7878591                 | CC                              | TT              | 1946858009               |
| SNP_P4_78621_7881404 | NC_021165.1    | Ca_kabuli_chr06 | 7881404                 | GG                              | AA              | 1946858011               |
| SNP_P4_78622_7881411 | NC_021165.1    | Ca_kabuli_chr06 | 7881411                 | AA                              | GG              | 1946858013               |
| SNP_P4_78624_7883169 | NC_021165.1    | Ca_kabuli_chr06 | 7883169                 | CC                              | TT              | 1946858015               |
| SNP_P4_78625_7883193 | NC_021165.1    | Ca_kabuli_chr06 | 7883193                 | TT                              | CC              | 1946858017               |
| SNP_P4_78626_7883218 | NC_021165.1    | Ca_kabuli_chr06 | 7883218                 | GG                              | AA              | 1946858019               |
| SNP_P4_78628_7883356 | NC_021165.1    | Ca_kabuli_chr06 | 7883356                 | GG                              | AA              | 1946858021               |
| SNP_P4_78629_7883362 | NC_021165.1    | Ca_kabuli_chr06 | 7883362                 | GG                              | AA              | 1946858023               |
| SNP_P4_78630_7883387 | NC_021165.1    | Ca_kabuli_chr06 | 7883387                 | CC                              | TT              | 1946858025               |
| SNP_P4_78632_7883962 | NC_021165.1    | Ca_kabuli_chr06 | 7883962                 | GG                              | AA              | 1946858027               |
| SNP_P4_78633_7884014 | NC_021165.1    | Ca_kabuli_chr06 | 7884014                 | GG                              | TT              | 1946858029               |
| SNP_P4_78634_7884161 | NC_021165.1    | Ca_kabuli_chr06 | 7884161                 | CC                              | GG              | 1946858031               |
| SNP_P4_78635_7884456 | NC_021165.1    | Ca_kabuli_chr06 | 7884456                 | TT                              | CC              | 1946858033               |
| SNP_P4_78637_7884584 | NC_021165.1    | Ca_kabuli_chr06 | 7884584                 | AA                              | TT              | 1946858036               |
| SNP_P4_78638_7884790 | NC_021165.1    | Ca_kabuli_chr06 | 7884790                 | AA                              | TT              | 1946858038               |
| SNP_P4_78639_7886972 | NC_021165.1    | Ca_kabuli_chr06 | 7886972                 | TT                              | CC              | 1946858040               |
| SNP_P4_78640_7892652 | NC_021165.1    | Ca_kabuli_chr06 | 7892652                 | GG                              | CC              | 1946858042               |
| SNP_P4_78642_7893005 | NC_021165.1    | Ca_kabuli_chr06 | 7893005                 | GG                              | CC              | 1946858044               |
| SNP_P4_78644_7893523 | NC_021165.1    | Ca_kabuli_chr06 | 7893523                 | AA                              | TT              | 1946858046               |
| SNP_P4_78645_7893524 | NC_021165.1    | Ca_kabuli_chr06 | 7893524                 | CC                              | AA              | 1946858048               |
| SNP_P4_78646_7893868 | NC_021165.1    | Ca_kabuli_chr06 | 7893868                 | TT                              | CC              | 1946858050               |
| SNP_P4_78647_7893885 | NC_021165.1    | Ca_kabuli_chr06 | 7893885                 | GG                              | CC              | 1946858052               |
| SNP_P4_78648_7894003 | NC_021165.1    | Ca_kabuli_chr06 | 7894003                 | CC                              | AA              | 1946858054               |
| SNP_P4_78649_7894483 | NC_021165.1    | Ca_kabuli_chr06 | 7894483                 | GG                              | AA              | 1946858056               |
| SNP_P4_78650_7894532 | NC_021165.1    | Ca_kabuli_chr06 | 7894532                 | AA                              | GG              | 1946858058               |

| SNPs IDs             | Chromosome IDs | Chromosomes     | Physical positions (bp) | CDC Frontier (Reference genome) | (ILWC46 & LPNB) | NCBI SNPdb Accession IDs |
|----------------------|----------------|-----------------|-------------------------|---------------------------------|-----------------|--------------------------|
| SNP_P4_78651_7894559 | NC_021165.1    | Ca_kabuli_chr06 | 7894559                 | AA                              | GG              | 1946858060               |
| SNP_P4_78653_7895575 | NC_021165.1    | Ca_kabuli_chr06 | 7895575                 | AA                              | TT              | 1946858062               |
| SNP_P4_78654_7896499 | NC_021165.1    | Ca_kabuli_chr06 | 7896499                 | AA                              | GG              | 1946858065               |
| SNP_P4_78655_7896586 | NC_021165.1    | Ca_kabuli_chr06 | 7896586                 | CC                              | TT              | 1946858067               |
| SNP_P4_78656_7896772 | NC_021165.1    | Ca_kabuli_chr06 | 7896772                 | TT                              | CC              | 1946858069               |
| SNP_P4_78657_7896788 | NC_021165.1    | Ca_kabuli_chr06 | 7896788                 | GG                              | TT              | 1946858071               |
| SNP_P4_78658_7896797 | NC_021165.1    | Ca_kabuli_chr06 | 7896797                 | AA                              | GG              | 1946858073               |
| SNP_P4_78659_7896816 | NC_021165.1    | Ca_kabuli_chr06 | 7896816                 | TT                              | AA              | 1946858076               |
| SNP_P4_78660_7896827 | NC_021165.1    | Ca_kabuli_chr06 | 7896827                 | CC                              | TT              | 1946858078               |
| SNP_P4_78661_7896837 | NC_021165.1    | Ca_kabuli_chr06 | 7896837                 | CC                              | TT              | 1946858080               |
| SNP_P4_78662_7897017 | NC_021165.1    | Ca_kabuli_chr06 | 7897017                 | GG                              | AA              | 1946858082               |
| SNP_P4_78663_7897046 | NC_021165.1    | Ca_kabuli_chr06 | 7897046                 | GG                              | AA              | 1946858084               |
| SNP_P4_78664_7897057 | NC_021165.1    | Ca_kabuli_chr06 | 7897057                 | TT                              | AA              | 1946858086               |
| SNP_P4_78665_7897178 | NC_021165.1    | Ca_kabuli_chr06 | 7897178                 | CC                              | TT              | 1946858088               |
| SNP_P4_78666_7897354 | NC_021165.1    | Ca_kabuli_chr06 | 7897354                 | AA                              | GG              | 1946858090               |
| SNP_P4_78668_7898942 | NC_021165.1    | Ca_kabuli_chr06 | 7898942                 | AA                              | GG              | 1946858092               |
| SNP_P4_78669_7898966 | NC_021165.1    | Ca_kabuli_chr06 | 7898966                 | AA                              | TT              | 1946858094               |
| SNP_P4_78670_7899005 | NC_021165.1    | Ca_kabuli_chr06 | 7899005                 | AA                              | CC              | 1946858096               |
| SNP_P4_78671_7899182 | NC_021165.1    | Ca_kabuli_chr06 | 7899182                 | TT                              | AA              | 1946858098               |
| SNP_P4_78672_7899189 | NC_021165.1    | Ca_kabuli_chr06 | 7899189                 | AA                              | TT              | 1946858100               |
| SNP_P4_78674_7899248 | NC_021165.1    | Ca_kabuli_chr06 | 7899248                 | GG                              | AA              | 1946858102               |
| SNP_P4_78677_7901636 | NC_021165.1    | Ca_kabuli_chr06 | 7901636                 | CC                              | TT              | 1946858104               |
| SNP_P4_78678_7902999 | NC_021165.1    | Ca_kabuli_chr06 | 7902999                 | GG                              | AA              | 1946858106               |
| SNP_P4_78680_7904060 | NC_021165.1    | Ca_kabuli_chr06 | 7904060                 | CC                              | TT              | 1946858108               |
| SNP_P4_78681_7904064 | NC_021165.1    | Ca_kabuli_chr06 | 7904064                 | CC                              | TT              | 1946858110               |
| SNP_P4_78682_7904406 | NC_021165.1    | Ca_kabuli_chr06 | 7904406                 | TT                              | GG              | 1946858112               |
| SNP_P4_78684_7906658 | NC_021165.1    | Ca_kabuli_chr06 | 7906658                 | GG                              | TT              | 1946858114               |
| SNP_P4_78685_7906973 | NC_021165.1    | Ca_kabuli_chr06 | 7906973                 | GG                              | CC              | 1946858116               |
| SNP_P4_78686_7907013 | NC_021165.1    | Ca_kabuli_chr06 | 7907013                 | GG                              | AA              | 1946858118               |
| SNP_P4_78687_7907331 | NC_021165.1    | Ca_kabuli_chr06 | 7907331                 | AA                              | TT              | 1946858120               |
| SNP_P4_78688_7907332 | NC_021165.1    | Ca_kabuli_chr06 | 7907332                 | AA                              | GG              | 1946858122               |
| SNP_P4_78689_7907360 | NC_021165.1    | Ca_kabuli_chr06 | 7907360                 | AA                              | TT              | 1946858124               |
| SNP_P4_78690_7907389 | NC_021165.1    | Ca_kabuli_chr06 | 7907389                 | GG                              | AA              | 1946858126               |
| SNP_P4_78691_7907414 | NC_021165.1    | Ca_kabuli_chr06 | 7907414                 | GG                              | AA              | 1946858128               |
| SNP_P4_78692_7907568 | NC_021165.1    | Ca_kabuli_chr06 | 7907568                 | GG                              | AA              | 1946858130               |
| SNP_P4_78693_7907851 | NC_021165.1    | Ca_kabuli_chr06 | 7907851                 | GG                              | TT              | 1946858132               |
| SNP_P4_78694_7908380 | NC_021165.1    | Ca_kabuli_chr06 | 7908380                 | TT                              | CC              | 1946858134               |
| SNP_P4_78695_7908846 | NC_021165.1    | Ca_kabuli_chr06 | 7908846                 | AA                              | GG              | 1946858136               |
| SNP_P4_78696_7909836 | NC_021165.1    | Ca_kabuli_chr06 | 7909836                 | AA                              | CC              | 1946858138               |
| SNP_P4_78697_7909900 | NC_021165.1    | Ca_kabuli_chr06 | 7909900                 | TT                              | CC              | 1946858140               |
| SNP_P4_78698_7911430 | NC_021165.1    | Ca_kabuli_chr06 | 7911430                 | TT                              | GG              | 1946858142               |
| SNP_P4_78700_7911496 | NC_021165.1    | Ca_kabuli_chr06 | 7911496                 | CC                              | AA              | 1946858144               |

| SNPs IDs             | Chromosome IDs | Chromosomes     | Physical positions (bp) | CDC Frontier (Reference genome) | (ILWC46 & LPNB) | NCBI SNPdb Accession IDs |
|----------------------|----------------|-----------------|-------------------------|---------------------------------|-----------------|--------------------------|
| SNP_P4_78702_7912978 | NC_021165.1    | Ca_kabuli_chr06 | 7912978                 | TT                              | CC              | 1946858147               |
| SNP_P4_78703_7912988 | NC_021165.1    | Ca_kabuli_chr06 | 7912988                 | CC                              | TT              | 1946858149               |
| SNP_P4_78704_7913021 | NC_021165.1    | Ca_kabuli_chr06 | 7913021                 | AA                              | GG              | 1946858151               |
| SNP_P4_78705_7915351 | NC_021165.1    | Ca_kabuli_chr06 | 7915351                 | TT                              | AA              | 1946858153               |
| SNP_P4_78706_7916107 | NC_021165.1    | Ca_kabuli_chr06 | 7916107                 | AA                              | GG              | 1946858155               |
| SNP_P4_78707_7916662 | NC_021165.1    | Ca_kabuli_chr06 | 7916662                 | CC                              | AA              | 1946858157               |
| SNP_P4_78708_7916712 | NC_021165.1    | Ca_kabuli_chr06 | 7916712                 | CC                              | AA              | 1946858159               |
| SNP_P4_78709_7916715 | NC_021165.1    | Ca_kabuli_chr06 | 7916715                 | AA                              | GG              | 1946858161               |
| SNP_P4_78710_7916741 | NC_021165.1    | Ca_kabuli_chr06 | 7916741                 | CC                              | TT              | 1946858163               |
| SNP_P4_78711_7918992 | NC_021165.1    | Ca_kabuli_chr06 | 7918992                 | TT                              | GG              | 1946858165               |
| SNP_P4_78712_7919453 | NC_021165.1    | Ca_kabuli_chr06 | 7919453                 | AA                              | GG              | 1946858167               |
| SNP_P4_78713_7919606 | NC_021165.1    | Ca_kabuli_chr06 | 7919606                 | TT                              | AA              | 1946858169               |
| SNP_P4_78714_7919628 | NC_021165.1    | Ca_kabuli_chr06 | 7919628                 | GG                              | AA              | 1946858171               |
| SNP_P4_78715_7919770 | NC_021165.1    | Ca_kabuli_chr06 | 7919770                 | AA                              | GG              | 1946858173               |
| SNP_P4_78716_7919774 | NC_021165.1    | Ca_kabuli_chr06 | 7919774                 | GG                              | AA              | 1946858175               |
| SNP_P4_78717_7920226 | NC_021165.1    | Ca_kabuli_chr06 | 7920226                 | TT                              | CC              | 1946858177               |
| SNP_P4_78718_7920227 | NC_021165.1    | Ca_kabuli_chr06 | 7920227                 | GG                              | CC              | 1946858179               |
| SNP_P4_78719_7920230 | NC_021165.1    | Ca_kabuli_chr06 | 7920230                 | TT                              | CC              | 1946858181               |
| SNP_P4_78720_7920251 | NC_021165.1    | Ca_kabuli_chr06 | 7920251                 | AA                              | GG              | 1946858183               |
| SNP_P4_78721_7920316 | NC_021165.1    | Ca_kabuli_chr06 | 7920316                 | GG                              | CC              | 1946858185               |
| SNP_P4_78722_7920375 | NC_021165.1    | Ca_kabuli_chr06 | 7920375                 | GG                              | AA              | 1946858187               |
| SNP_P4_78723_7920944 | NC_021165.1    | Ca_kabuli_chr06 | 7920944                 | AA                              | GG              | 1946858189               |
| SNP_P4_78725_7921523 | NC_021165.1    | Ca_kabuli_chr06 | 7921523                 | CC                              | TT              | 1946858191               |
| SNP_P4_78726_7921530 | NC_021165.1    | Ca_kabuli_chr06 | 7921530                 | TT                              | CC              | 1946858193               |
| SNP_P4_78727_7921585 | NC_021165.1    | Ca_kabuli_chr06 | 7921585                 | TT                              | AA              | 1946858195               |
| SNP_P4_78728_7921848 | NC_021165.1    | Ca_kabuli_chr06 | 7921848                 | AA                              | TT              | 1946858197               |
| SNP_P4_78729_7921862 | NC_021165.1    | Ca_kabuli_chr06 | 7921862                 | GG                              | AA              | 1946858199               |
| SNP_P4_78730_7922036 | NC_021165.1    | Ca_kabuli_chr06 | 7922036                 | AA                              | GG              | 1946858201               |
| SNP_P4_78731_7922118 | NC_021165.1    | Ca_kabuli_chr06 | 7922118                 | TT                              | GG              | 1946858203               |
| SNP_P4_78732_7922146 | NC_021165.1    | Ca_kabuli_chr06 | 7922146                 | AA                              | TT              | 1946858205               |
| SNP_P4_78733_7922219 | NC_021165.1    | Ca_kabuli_chr06 | 7922219                 | CC                              | AA              | 1946858207               |
| SNP_P4_78735_7922285 | NC_021165.1    | Ca_kabuli_chr06 | 7922285                 | CC                              | TT              | 1946858209               |
| SNP_P4_78736_7922304 | NC_021165.1    | Ca_kabuli_chr06 | 7922304                 | AA                              | CC              | 1946858211               |
| SNP_P4_78737_7922320 | NC_021165.1    | Ca_kabuli_chr06 | 7922320                 | AA                              | CC              | 1946858213               |
| SNP_P4_78738_7922514 | NC_021165.1    | Ca_kabuli_chr06 | 7922514                 | CC                              | TT              | 1946858215               |
| SNP_P4_78739_7922568 | NC_021165.1    | Ca_kabuli_chr06 | 7922568                 | CC                              | TT              | 1946858217               |
| SNP_P4_78740_7922572 | NC_021165.1    | Ca_kabuli_chr06 | 7922572                 | TT                              | AA              | 1946858219               |
| SNP_P4_78741_7922593 | NC_021165.1    | Ca_kabuli_chr06 | 7922593                 | GG                              | CC              | 1946858222               |
| SNP_P4_78742_7922806 | NC_021165.1    | Ca_kabuli_chr06 | 7922806                 | AA                              | GG              | 1946858224               |
| SNP_P4_78743_7922817 | NC_021165.1    | Ca_kabuli_chr06 | 7922817                 | AA                              | TT              | 1946858225               |
| SNP_P4_78744_7922988 | NC_021165.1    | Ca_kabuli_chr06 | 7922988                 | CC                              | TT              | 1946858228               |
| SNP_P4_78745_7923096 | NC_021165.1    | Ca_kabuli_chr06 | 7923096                 | GG                              | CC              | 1946858230               |

| SNPs IDs             | Chromosome IDs | Chromosomes     | Physical positions (bp) | CDC Frontier (Reference genome) | (ILWC46 & LPNB) | NCBI SNPdb Accession IDs |
|----------------------|----------------|-----------------|-------------------------|---------------------------------|-----------------|--------------------------|
| SNP_P4_78746_7923401 | NC_021165.1    | Ca_kabuli_chr06 | 7923401                 | CC                              | TT              | 1946858232               |
| SNP_P4_78747_7924415 | NC_021165.1    | Ca_kabuli_chr06 | 7924415                 | CC                              | AA              | 1946858234               |
| SNP_P4_78748_7926251 | NC_021165.1    | Ca_kabuli_chr06 | 7926251                 | TT                              | CC              | 1946858236               |
| SNP_P4_78749_7926814 | NC_021165.1    | Ca_kabuli_chr06 | 7926814                 | AA                              | GG              | 1946858238               |
| SNP_P4_78750_7927043 | NC_021165.1    | Ca_kabuli_chr06 | 7927043                 | GG                              | AA              | 1946858240               |
| SNP_P4_78751_7927061 | NC_021165.1    | Ca_kabuli_chr06 | 7927061                 | TT                              | AA              | 1946858241               |
| SNP_P4_78752_7927080 | NC_021165.1    | Ca_kabuli_chr06 | 7927080                 | AA                              | TT              | 1946858243               |
| SNP_P4_78753_7928067 | NC_021165.1    | Ca_kabuli_chr06 | 7928067                 | TT                              | CC              | 1946858245               |
| SNP_P4_78754_7929263 | NC_021165.1    | Ca_kabuli_chr06 | 7929263                 | CC                              | TT              | 1946858247               |
| SNP_P4_78755_7929338 | NC_021165.1    | Ca_kabuli_chr06 | 7929338                 | TT                              | CC              | 1946858249               |
| SNP_P4_78756_7929339 | NC_021165.1    | Ca_kabuli_chr06 | 7929339                 | GG                              | AA              | 1946858251               |
| SNP_P4_78757_7932202 | NC_021165.1    | Ca_kabuli_chr06 | 7932202                 | AA                              | GG              | 1946858253               |
| SNP_P4_78758_7932255 | NC_021165.1    | Ca_kabuli_chr06 | 7932255                 | AA                              | CC              | 1946858255               |
| SNP_P4_78759_7932802 | NC_021165.1    | Ca_kabuli_chr06 | 7932802                 | AA                              | TT              | 1946858257               |
| SNP_P4_78760_7933294 | NC_021165.1    | Ca_kabuli_chr06 | 7933294                 | CC                              | GG              | 1946858259               |
| SNP_P4_78761_7934144 | NC_021165.1    | Ca_kabuli_chr06 | 7934144                 | AA                              | GG              | 1946858261               |
| SNP_P4_78762_7934155 | NC_021165.1    | Ca_kabuli_chr06 | 7934155                 | AA                              | CC              | 1946858263               |
| SNP_P4_78763_7934320 | NC_021165.1    | Ca_kabuli_chr06 | 7934320                 | AA                              | GG              | 1946858265               |
| SNP_P4_78764_7934458 | NC_021165.1    | Ca_kabuli_chr06 | 7934458                 | CC                              | TT              | 1946858267               |
| SNP_P4_78765_7934471 | NC_021165.1    | Ca_kabuli_chr06 | 7934471                 | TT                              | CC              | 1946858269               |
| SNP_P4_78766_7934546 | NC_021165.1    | Ca_kabuli_chr06 | 7934546                 | TT                              | CC              | 1946858271               |
| SNP_P4_78767_7934594 | NC_021165.1    | Ca_kabuli_chr06 | 7934594                 | CC                              | TT              | 1946858273               |
| SNP_P4_78768_7934669 | NC_021165.1    | Ca_kabuli_chr06 | 7934669                 | TT                              | CC              | 1946858275               |
| SNP_P4_78769_7934696 | NC_021165.1    | Ca_kabuli_chr06 | 7934696                 | GG                              | AA              | 1946858277               |
| SNP_P4_78770_7934736 | NC_021165.1    | Ca_kabuli_chr06 | 7934736                 | CC                              | TT              | 1946858279               |
| SNP_P4_78771_7934777 | NC_021165.1    | Ca_kabuli_chr06 | 7934777                 | GG                              | CC              | 1946858281               |
| SNP_P4_78772_7934782 | NC_021165.1    | Ca_kabuli_chr06 | 7934782                 | GG                              | AA              | 1946858283               |
| SNP_P4_78773_7935413 | NC_021165.1    | Ca_kabuli_chr06 | 7935413                 | TT                              | GG              | 1946858285               |
| SNP_P4_78775_7935487 | NC_021165.1    | Ca_kabuli_chr06 | 7935487                 | TT                              | CC              | 1946858287               |
| SNP_P4_78776_7935534 | NC_021165.1    | Ca_kabuli_chr06 | 7935534                 | GG                              | AA              | 1946858289               |
| SNP_P4_78777_7935799 | NC_021165.1    | Ca_kabuli_chr06 | 7935799                 | GG                              | AA              | 1946858291               |
| SNP_P4_78779_7936157 | NC_021165.1    | Ca_kabuli_chr06 | 7936157                 | TT                              | CC              | 1946858293               |
| SNP_P4_78780_7936493 | NC_021165.1    | Ca_kabuli_chr06 | 7936493                 | AA                              | GG              | 1946858295               |
| SNP_P4_78781_7936838 | NC_021165.1    | Ca_kabuli_chr06 | 7936838                 | GG                              | AA              | 1946858297               |
| SNP_P4_78782_7939646 | NC_021165.1    | Ca_kabuli_chr06 | 7939646                 | TT                              | AA              | 1946858299               |
| SNP_P4_78783_7939666 | NC_021165.1    | Ca_kabuli_chr06 | 7939666                 | TT                              | AA              | 1946858301               |
| SNP_P4_78784_7940632 | NC_021165.1    | Ca_kabuli_chr06 | 7940632                 | TT                              | GG              | 1946858303               |
| SNP_P4_78786_7941967 | NC_021165.1    | Ca_kabuli_chr06 | 7941967                 | GG                              | AA              | 1946858305               |
| SNP_P4_78787_7942026 | NC_021165.1    | Ca_kabuli_chr06 | 7942026                 | AA                              | TT              | 1946858307               |
| SNP_P4_78788_7942551 | NC_021165.1    | Ca_kabuli_chr06 | 7942551                 | CC                              | AA              | 1946858309               |
| SNP_P4_78790_7942871 | NC_021165.1    | Ca_kabuli_chr06 | 7942871                 | GG                              | TT              | 1946858311               |
| SNP_P4_78791_7942874 | NC_021165.1    | Ca_kabuli_chr06 | 7942874                 | AA                              | TT              | 1946858313               |

| SNPs IDs             | Chromosome IDs | Chromosomes     | Physical positions (bp) | CDC Frontier (Reference genome) | (ILWC46 & LPNB) | NCBI SNPdb Accession IDs |
|----------------------|----------------|-----------------|-------------------------|---------------------------------|-----------------|--------------------------|
| SNP_P4_78792_7943621 | NC_021165.1    | Ca_kabuli_chr06 | 7943621                 | TT                              | GG              | 1946858315               |
| SNP_P4_78793_7943846 | NC_021165.1    | Ca_kabuli_chr06 | 7943846                 | AA                              | GG              | 1946858317               |
| SNP_P4_78794_7945538 | NC_021165.1    | Ca_kabuli_chr06 | 7945538                 | GG                              | TT              | 1946858319               |
| SNP_P4_78795_7946971 | NC_021165.1    | Ca_kabuli_chr06 | 7946971                 | TT                              | AA              | 1946858321               |
| SNP_P4_78796_7946998 | NC_021165.1    | Ca_kabuli_chr06 | 7946998                 | TT                              | AA              | 1946858323               |
| SNP_P4_78798_7947266 | NC_021165.1    | Ca_kabuli_chr06 | 7947266                 | CC                              | TT              | 1946858325               |
| SNP_P4_78799_7947881 | NC_021165.1    | Ca_kabuli_chr06 | 7947881                 | GG                              | TT              | 1946858327               |
| SNP_P4_78800_7947888 | NC_021165.1    | Ca_kabuli_chr06 | 7947888                 | AA                              | TT              | 1946858329               |
| SNP_P4_78802_7948216 | NC_021165.1    | Ca_kabuli_chr06 | 7948216                 | TT                              | CC              | 1946858331               |
| SNP_P4_78803_7948500 | NC_021165.1    | Ca_kabuli_chr06 | 7948500                 | CC                              | AA              | 1946858333               |
| SNP_P4_78804_7948523 | NC_021165.1    | Ca_kabuli_chr06 | 7948523                 | AA                              | GG              | 1946858335               |
| SNP_P4_78805_7948539 | NC_021165.1    | Ca_kabuli_chr06 | 7948539                 | TT                              | CC              | 1946858337               |
| SNP_P4_78807_7948639 | NC_021165.1    | Ca_kabuli_chr06 | 7948639                 | AA                              | TT              | 1946858339               |
| SNP_P4_78809_7949158 | NC_021165.1    | Ca_kabuli_chr06 | 7949158                 | AA                              | TT              | 1946858341               |
| SNP_P4_78810_7951491 | NC_021165.1    | Ca_kabuli_chr06 | 7951491                 | AA                              | TT              | 1946858343               |
| SNP_P4_78811_7951492 | NC_021165.1    | Ca_kabuli_chr06 | 7951492                 | AA                              | TT              | 1946858345               |
| SNP_P4_78812_7951493 | NC_021165.1    | Ca_kabuli_chr06 | 7951493                 | AA                              | TT              | 1946858347               |
| SNP_P4_78813_7951494 | NC_021165.1    | Ca_kabuli_chr06 | 7951494                 | AA                              | TT              | 1946858349               |
| SNP_P4_78814_7951495 | NC_021165.1    | Ca_kabuli_chr06 | 7951495                 | AA                              | TT              | 1946858351               |
| SNP_P4_78815_7951508 | NC_021165.1    | Ca_kabuli_chr06 | 7951508                 | GG                              | AA              | 1946858353               |
| SNP_P4_78816_7951717 | NC_021165.1    | Ca_kabuli_chr06 | 7951717                 | TT                              | CC              | 1946858355               |
| SNP_P4_78817_7951739 | NC_021165.1    | Ca_kabuli_chr06 | 7951739                 | TT                              | CC              | 1946858357               |
| SNP_P4_78818_7951912 | NC_021165.1    | Ca_kabuli_chr06 | 7951912                 | GG                              | TT              | 1946858359               |
| SNP_P4_78819_7951935 | NC_021165.1    | Ca_kabuli_chr06 | 7951935                 | GG                              | AA              | 1946858361               |
| SNP_P4_78820_7951947 | NC_021165.1    | Ca_kabuli_chr06 | 7951947                 | CC                              | AA              | 1946858363               |
| SNP_P4_78821_7952895 | NC_021165.1    | Ca_kabuli_chr06 | 7952895                 | AA                              | TT              | 1946858365               |
| SNP_P4_78822_7952952 | NC_021165.1    | Ca_kabuli_chr06 | 7952952                 | CC                              | AA              | 1946858367               |
| SNP_P4_78823_7953177 | NC_021165.1    | Ca_kabuli_chr06 | 7953177                 | TT                              | CC              | 1946858369               |
| SNP_P4_78824_7953209 | NC_021165.1    | Ca_kabuli_chr06 | 7953209                 | TT                              | AA              | 1946858371               |
| SNP_P4_78826_7953508 | NC_021165.1    | Ca_kabuli_chr06 | 7953508                 | GG                              | AA              | 1946858373               |
| SNP_P4_78827_7953893 | NC_021165.1    | Ca_kabuli_chr06 | 7953893                 | CC                              | TT              | 1946858375               |
| SNP_P4_78828_7953947 | NC_021165.1    | Ca_kabuli_chr06 | 7953947                 | CC                              | GG              | 1946858377               |
| SNP_P4_78830_7954480 | NC_021165.1    | Ca_kabuli_chr06 | 7954480                 | CC                              | GG              | 1946858379               |
| SNP_P4_78832_7955115 | NC_021165.1    | Ca_kabuli_chr06 | 7955115                 | TT                              | AA              | 1946858381               |
| SNP_P4_78833_7955323 | NC_021165.1    | Ca_kabuli_chr06 | 7955323                 | GG                              | TT              | 1946858383               |
| SNP_P4_78834_7955540 | NC_021165.1    | Ca_kabuli_chr06 | 7955540                 | AA                              | TT              | 1946858385               |
| SNP_P4_78835_7955562 | NC_021165.1    | Ca_kabuli_chr06 | 7955562                 | AA                              | GG              | 1946858387               |
| SNP_P4_78836_7955587 | NC_021165.1    | Ca_kabuli_chr06 | 7955587                 | CC                              | TT              | 1946858389               |
| SNP_P4_78837_7955590 | NC_021165.1    | Ca_kabuli_chr06 | 7955590                 | GG                              | AA              | 1946858391               |
| SNP_P4_78838_7955634 | NC_021165.1    | Ca_kabuli_chr06 | 7955634                 | CC                              | TT              | 1946858393               |
| SNP_P4_78839_7955794 | NC_021165.1    | Ca_kabuli_chr06 | 7955794                 | AA                              | TT              | 1946858395               |
| SNP_P4_78840_7955809 | NC_021165.1    | Ca_kabuli_chr06 | 7955809                 | AA                              | TT              | 1946858397               |

| SNPs IDs             | Chromosome IDs | Chromosomes     | Physical positions (bp) | CDC Frontier (Reference genome) | (ILWC46 & LPNB) | NCBI SNPdb Accession IDs |
|----------------------|----------------|-----------------|-------------------------|---------------------------------|-----------------|--------------------------|
| SNP_P4_78841_7955811 | NC_021165.1    | Ca_kabuli_chr06 | 7955811                 | AA                              | TT              | 1946858399               |
| SNP_P4_78842_7957428 | NC_021165.1    | Ca_kabuli_chr06 | 7957428                 | GG                              | TT              | 1946858401               |
| SNP_P4_78843_7957443 | NC_021165.1    | Ca_kabuli_chr06 | 7957443                 | GG                              | AA              | 1946858403               |
| SNP_P4_78844_7957446 | NC_021165.1    | Ca_kabuli_chr06 | 7957446                 | CC                              | AA              | 1946858405               |
| SNP_P4_78845_7957464 | NC_021165.1    | Ca_kabuli_chr06 | 7957464                 | CC                              | TT              | 1946858407               |
| SNP_P4_78846_7957562 | NC_021165.1    | Ca_kabuli_chr06 | 7957562                 | TT                              | CC              | 1946858409               |
| SNP_P4_78847_7958013 | NC_021165.1    | Ca_kabuli_chr06 | 7958013                 | AA                              | TT              | 1946858411               |
| SNP_P4_78848_7958141 | NC_021165.1    | Ca_kabuli_chr06 | 7958141                 | TT                              | CC              | 1946858413               |
| SNP_P4_78850_7958380 | NC_021165.1    | Ca_kabuli_chr06 | 7958380                 | AA                              | GG              | 1946858415               |
| SNP_P4_78851_7958384 | NC_021165.1    | Ca_kabuli_chr06 | 7958384                 | CC                              | TT              | 1946858417               |
| SNP_P4_78852_7958402 | NC_021165.1    | Ca_kabuli_chr06 | 7958402                 | GG                              | AA              | 1946858419               |
| SNP_P4_78853_7958432 | NC_021165.1    | Ca_kabuli_chr06 | 7958432                 | AA                              | GG              | 1946858421               |
| SNP_P4_78854_7958723 | NC_021165.1    | Ca_kabuli_chr06 | 7958723                 | TT                              | CC              | 1946858423               |
| SNP_P4_78856_7958795 | NC_021165.1    | Ca_kabuli_chr06 | 7958795                 | CC                              | TT              | 1946858425               |
| SNP_P4_78857_7958807 | NC_021165.1    | Ca_kabuli_chr06 | 7958807                 | AA                              | GG              | 1946858427               |
| SNP_P4_78858_7958842 | NC_021165.1    | Ca_kabuli_chr06 | 7958842                 | TT                              | CC              | 1946858429               |
| SNP_P4_78859_7959016 | NC_021165.1    | Ca_kabuli_chr06 | 7959016                 | TT                              | CC              | 1946858431               |
| SNP_P4_78860_7959018 | NC_021165.1    | Ca_kabuli_chr06 | 7959018                 | CC                              | GG              | 1946858433               |
| SNP_P4_78861_7959177 | NC_021165.1    | Ca_kabuli_chr06 | 7959177                 | TT                              | GG              | 1946858435               |
| SNP_P4_78862_7959217 | NC_021165.1    | Ca_kabuli_chr06 | 7959217                 | GG                              | AA              | 1946858437               |
| SNP_P4_78863_7959265 | NC_021165.1    | Ca_kabuli_chr06 | 7959265                 | GG                              | AA              | 1946858439               |
| SNP_P4_78864_7959286 | NC_021165.1    | Ca_kabuli_chr06 | 7959286                 | CC                              | TT              | 1946858441               |
| SNP_P4_78865_7959291 | NC_021165.1    | Ca_kabuli_chr06 | 7959291                 | CC                              | AA              | 1946858443               |
| SNP_P4_78866_7959317 | NC_021165.1    | Ca_kabuli_chr06 | 7959317                 | CC                              | TT              | 1946858445               |
| SNP_P4_78867_7959318 | NC_021165.1    | Ca_kabuli_chr06 | 7959318                 | CC                              | TT              | 1946858447               |
| SNP_P4_78868_7959319 | NC_021165.1    | Ca_kabuli_chr06 | 7959319                 | GG                              | CC              | 1946858449               |
| SNP_P4_78869_7959321 | NC_021165.1    | Ca_kabuli_chr06 | 7959321                 | GG                              | AA              | 1946858451               |
| SNP_P4_78870_7959334 | NC_021165.1    | Ca_kabuli_chr06 | 7959334                 | TT                              | CC              | 1946858454               |
| SNP_P4_78871_7959497 | NC_021165.1    | Ca_kabuli_chr06 | 7959497                 | TT                              | AA              | 1946858456               |
| SNP_P4_78872_7959504 | NC_021165.1    | Ca_kabuli_chr06 | 7959504                 | GG                              | TT              | 1946858458               |
| SNP_P4_78873_7959679 | NC_021165.1    | Ca_kabuli_chr06 | 7959679                 | GG                              | TT              | 1946858460               |
| SNP_P4_78874_7959690 | NC_021165.1    | Ca_kabuli_chr06 | 7959690                 | GG                              | CC              | 1946858462               |
| SNP_P4_78875_7959699 | NC_021165.1    | Ca_kabuli_chr06 | 7959699                 | AA                              | GG              | 1946858464               |
| SNP_P4_78876_7959831 | NC_021165.1    | Ca_kabuli_chr06 | 7959831                 | GG                              | AA              | 1946858466               |
| SNP_P4_78877_7959911 | NC_021165.1    | Ca_kabuli_chr06 | 7959911                 | GG                              | TT              | 1946858468               |
| SNP_P4_78878_7960117 | NC_021165.1    | Ca_kabuli_chr06 | 7960117                 | GG                              | CC              | 1946858470               |
| SNP_P4_78879_7960151 | NC_021165.1    | Ca_kabuli_chr06 | 7960151                 | AA                              | GG              | 1946858472               |
| SNP_P4_78880_7960166 | NC_021165.1    | Ca_kabuli_chr06 | 7960166                 | TT                              | CC              | 1946858474               |
| SNP_P4_78881_7960168 | NC_021165.1    | Ca_kabuli_chr06 | 7960168                 | CC                              | TT              | 1946858476               |
| SNP_P4_78882_7960180 | NC_021165.1    | Ca_kabuli_chr06 | 7960180                 | AA                              | GG              | 1946858478               |
| SNP_P4_78883_7960204 | NC_021165.1    | Ca_kabuli_chr06 | 7960204                 | GG                              | AA              | 1946858480               |
| SNP_P4_78884_7960262 | NC_021165.1    | Ca_kabuli_chr06 | 7960262                 | CC                              | TT              | 1946858482               |



| SNPs IDs             | Chromosome IDs | Chromosomes     | Physical positions (bp) | CDC Frontier (Reference genome) | (ILWC46 & LPNB) | NCBI SNPdb Accession IDs |
|----------------------|----------------|-----------------|-------------------------|---------------------------------|-----------------|--------------------------|
| SNP_P4_78885_7960441 | NC_021165.1    | Ca_kabuli_chr06 | 7960441                 | CC                              | TT              | 1946858484               |
| SNP_P4_78886_7960455 | NC_021165.1    | Ca_kabuli_chr06 | 7960455                 | AA                              | CC              | 1946858486               |
| SNP_P4_78887_7960483 | NC_021165.1    | Ca_kabuli_chr06 | 7960483                 | CC                              | GG              | 1946858489               |
| SNP_P4_78888_7960496 | NC_021165.1    | Ca_kabuli_chr06 | 7960496                 | CC                              | AA              | 1946858491               |
| SNP_P4_78889_7960507 | NC_021165.1    | Ca_kabuli_chr06 | 7960507                 | TT                              | CC              | 1946858493               |
| SNP_P4_78890_7960511 | NC_021165.1    | Ca_kabuli_chr06 | 7960511                 | TT                              | CC              | 1946858495               |
| SNP_P4_78891_7960669 | NC_021165.1    | Ca_kabuli_chr06 | 7960669                 | TT                              | AA              | 1946858497               |
| SNP_P4_78892_7960696 | NC_021165.1    | Ca_kabuli_chr06 | 7960696                 | GG                              | AA              | 1946858499               |
| SNP_P4_78893_7960856 | NC_021165.1    | Ca_kabuli_chr06 | 7960856                 | GG                              | AA              | 1946858501               |
| SNP_P4_78894_7960865 | NC_021165.1    | Ca_kabuli_chr06 | 7960865                 | GG                              | AA              | 1946858503               |
| SNP_P4_78897_7961797 | NC_021165.1    | Ca_kabuli_chr06 | 7961797                 | CC                              | AA              | 1946858505               |
| SNP_P4_78898_7961856 | NC_021165.1    | Ca_kabuli_chr06 | 7961856                 | AA                              | CC              | 1946858506               |
| SNP_P4_78899_7961859 | NC_021165.1    | Ca_kabuli_chr06 | 7961859                 | AA                              | CC              | 1946858508               |
| SNP_P4_78900_7961884 | NC_021165.1    | Ca_kabuli_chr06 | 7961884                 | AA                              | GG              | 1946858510               |
| SNP_P4_78901_7961889 | NC_021165.1    | Ca_kabuli_chr06 | 7961889                 | CC                              | TT              | 1946858512               |
| SNP_P4_78902_7961894 | NC_021165.1    | Ca_kabuli_chr06 | 7961894                 | AA                              | TT              | 1946858514               |
| SNP_P4_78903_7961933 | NC_021165.1    | Ca_kabuli_chr06 | 7961933                 | AA                              | GG              | 1946858516               |
| SNP_P4_78905_7962151 | NC_021165.1    | Ca_kabuli_chr06 | 7962151                 | GG                              | TT              | 1946858518               |
| SNP_P4_78906_7962405 | NC_021165.1    | Ca_kabuli_chr06 | 7962405                 | CC                              | TT              | 1946858520               |
| SNP_P4_78907_7964196 | NC_021165.1    | Ca_kabuli_chr06 | 7964196                 | TT                              | GG              | 1946858522               |
| SNP_P4_78908_7964200 | NC_021165.1    | Ca_kabuli_chr06 | 7964200                 | TT                              | CC              | 1946858524               |
| SNP_P4_78909_7964232 | NC_021165.1    | Ca_kabuli_chr06 | 7964232                 | CC                              | TT              | 1946858526               |
| SNP_P4_78910_7965140 | NC_021165.1    | Ca_kabuli_chr06 | 7965140                 | CC                              | TT              | 1946858528               |
| SNP_P4_78911_7965142 | NC_021165.1    | Ca_kabuli_chr06 | 7965142                 | AA                              | CC              | 1946858530               |
| SNP_P4_78913_7966027 | NC_021165.1    | Ca_kabuli_chr06 | 7966027                 | AA                              | GG              | 1946858532               |
| SNP_P4_78914_7966330 | NC_021165.1    | Ca_kabuli_chr06 | 7966330                 | GG                              | AA              | 1946858534               |
| SNP_P4_78915_7966337 | NC_021165.1    | Ca_kabuli_chr06 | 7966337                 | AA                              | GG              | 1946858536               |
| SNP_P4_78916_7966348 | NC_021165.1    | Ca_kabuli_chr06 | 7966348                 | AA                              | GG              | 1946858538               |
| SNP_P4_78917_7966367 | NC_021165.1    | Ca_kabuli_chr06 | 7966367                 | AA                              | GG              | 1946858540               |
| SNP_P4_78918_7966371 | NC_021165.1    | Ca_kabuli_chr06 | 7966371                 | GG                              | CC              | 1946858542               |
| SNP_P4_78919_7966420 | NC_021165.1    | Ca_kabuli_chr06 | 7966420                 | TT                              | CC              | 1946858544               |
| SNP_P4_78920_7966425 | NC_021165.1    | Ca_kabuli_chr06 | 7966425                 | GG                              | AA              | 1946858546               |
| SNP_P4_78922_7966620 | NC_021165.1    | Ca_kabuli_chr06 | 7966620                 | AA                              | CC              | 1946858548               |
| SNP_P4_78923_7966626 | NC_021165.1    | Ca_kabuli_chr06 | 7966626                 | TT                              | CC              | 1946858550               |
| SNP_P4_78924_7966629 | NC_021165.1    | Ca_kabuli_chr06 | 7966629                 | TT                              | CC              | 1946858552               |
| SNP_P4_78925_7966749 | NC_021165.1    | Ca_kabuli_chr06 | 7966749                 | TT                              | CC              | 1946858554               |
| SNP_P4_78926_7966761 | NC_021165.1    | Ca_kabuli_chr06 | 7966761                 | TT                              | AA              | 1946858556               |
| SNP_P4_78929_7968354 | NC_021165.1    | Ca_kabuli_chr06 | 7968354                 | CC                              | GG              | 1946858558               |
| SNP_P4_78930_7969317 | NC_021165.1    | Ca_kabuli_chr06 | 7969317                 | AA                              | TT              | 1946858560               |
| SNP_P4_78931_7969616 | NC_021165.1    | Ca_kabuli_chr06 | 7969616                 | TT                              | AA              | 1946858562               |
| SNP_P4_78932_7969633 | NC_021165.1    | Ca_kabuli_chr06 | 7969633                 | TT                              | AA              | 1946858564               |
| SNP_P4_78934_7970092 | NC_021165.1    | Ca_kabuli_chr06 | 7970092                 | CC                              | AA              | 1946858566               |

| SNPs IDs             | Chromosome IDs | Chromosomes     | Physical positions (bp) | CDC Frontier (Reference genome) | (ILWC46 & LPNB) | NCBI SNPdb Accession IDs |
|----------------------|----------------|-----------------|-------------------------|---------------------------------|-----------------|--------------------------|
| SNP_P4_78936_7970218 | NC_021165.1    | Ca_kabuli_chr06 | 7970218                 | CC                              | GG              | 1946858568               |
| SNP_P4_78937_7970551 | NC_021165.1    | Ca_kabuli_chr06 | 7970551                 | TT                              | AA              | 1946858570               |
| SNP_P4_78938_7970557 | NC_021165.1    | Ca_kabuli_chr06 | 7970557                 | TT                              | CC              | 1946858572               |
| SNP_P4_78941_7970836 | NC_021165.1    | Ca_kabuli_chr06 | 7970836                 | TT                              | CC              | 1946858574               |
| SNP_P4_78942_7971428 | NC_021165.1    | Ca_kabuli_chr06 | 7971428                 | CC                              | TT              | 1946858576               |
| SNP_P4_78943_7971751 | NC_021165.1    | Ca_kabuli_chr06 | 7971751                 | TT                              | CC              | 1946858578               |
| SNP_P4_78944_7971810 | NC_021165.1    | Ca_kabuli_chr06 | 7971810                 | CC                              | AA              | 1946858580               |
| SNP_P4_78946_7972641 | NC_021165.1    | Ca_kabuli_chr06 | 7972641                 | GG                              | AA              | 1946858582               |
| SNP_P4_78947_7972683 | NC_021165.1    | Ca_kabuli_chr06 | 7972683                 | AA                              | CC              | 1946858584               |
| SNP_P4_78949_7972738 | NC_021165.1    | Ca_kabuli_chr06 | 7972738                 | AA                              | GG              | 1946858586               |
| SNP_P4_78950_7972748 | NC_021165.1    | Ca_kabuli_chr06 | 7972748                 | TT                              | CC              | 1946858588               |
| SNP_P4_78953_7973757 | NC_021165.1    | Ca_kabuli_chr06 | 7973757                 | CC                              | TT              | 1946858590               |
| SNP_P4_78954_7974740 | NC_021165.1    | Ca_kabuli_chr06 | 7974740                 | AA                              | TT              | 1946858592               |
| SNP_P4_78955_7974917 | NC_021165.1    | Ca_kabuli_chr06 | 7974917                 | AA                              | GG              | 1946858594               |
| SNP_P4_78956_7974948 | NC_021165.1    | Ca_kabuli_chr06 | 7974948                 | AA                              | GG              | 1946858596               |
| SNP_P4_78957_7974976 | NC_021165.1    | Ca_kabuli_chr06 | 7974976                 | CC                              | TT              | 1946858598               |
| SNP_P4_78958_7974978 | NC_021165.1    | Ca_kabuli_chr06 | 7974978                 | TT                              | GG              | 1946858600               |
| SNP_P4_78959_7975405 | NC_021165.1    | Ca_kabuli_chr06 | 7975405                 | CC                              | AA              | 1946858602               |
| SNP_P4_78960_7975409 | NC_021165.1    | Ca_kabuli_chr06 | 7975409                 | GG                              | TT              | 1946858604               |
| SNP_P4_78961_7975410 | NC_021165.1    | Ca_kabuli_chr06 | 7975410                 | AA                              | TT              | 1946858606               |
| SNP_P4_78962_7975996 | NC_021165.1    | Ca_kabuli_chr06 | 7975996                 | AA                              | GG              | 1946858608               |
| SNP_P4_78963_7976608 | NC_021165.1    | Ca_kabuli_chr06 | 7976608                 | AA                              | TT              | 1946858610               |
| SNP_P4_78964_7976609 | NC_021165.1    | Ca_kabuli_chr06 | 7976609                 | CC                              | TT              | 1946858612               |
| SNP_P4_78965_7976809 | NC_021165.1    | Ca_kabuli_chr06 | 7976809                 | TT                              | AA              | 1946858614               |
| SNP_P4_78967_7976995 | NC_021165.1    | Ca_kabuli_chr06 | 7976995                 | AA                              | GG              | 1946858616               |
| SNP_P4_78968_7977129 | NC_021165.1    | Ca_kabuli_chr06 | 7977129                 | AA                              | GG              | 1946858618               |
| SNP_P4_78969_7977144 | NC_021165.1    | Ca_kabuli_chr06 | 7977144                 | TT                              | GG              | 1946858620               |
| SNP_P4_78970_7977281 | NC_021165.1    | Ca_kabuli_chr06 | 7977281                 | CC                              | AA              | 1946858622               |
| SNP_P4_78971_7977819 | NC_021165.1    | Ca_kabuli_chr06 | 7977819                 | TT                              | GG              | 1946858624               |
| SNP_P4_78972_7980755 | NC_021165.1    | Ca_kabuli_chr06 | 7980755                 | CC                              | TT              | 1946858626               |
| SNP_P4_78973_7980758 | NC_021165.1    | Ca_kabuli_chr06 | 7980758                 | CC                              | TT              | 1946858628               |
| SNP_P4_78974_7980775 | NC_021165.1    | Ca_kabuli_chr06 | 7980775                 | AA                              | GG              | 1946858630               |
| SNP_P4_78975_7980777 | NC_021165.1    | Ca_kabuli_chr06 | 7980777                 | AA                              | GG              | 1946858632               |
| SNP_P4_78976_7981100 | NC_021165.1    | Ca_kabuli_chr06 | 7981100                 | TT                              | AA              | 1946858634               |
| SNP_P4_78980_7985555 | NC_021165.1    | Ca_kabuli_chr06 | 7985555                 | CC                              | TT              | 1946858636               |
| SNP_P4_78981_7985629 | NC_021165.1    | Ca_kabuli_chr06 | 7985629                 | AA                              | TT              | 1946858638               |
| SNP_P4_78982_7985971 | NC_021165.1    | Ca_kabuli_chr06 | 7985971                 | TT                              | AA              | 1946858640               |
| SNP_P4_78983_7986263 | NC_021165.1    | Ca_kabuli_chr06 | 7986263                 | GG                              | CC              | 1946858642               |
| SNP_P4_78984_7987263 | NC_021165.1    | Ca_kabuli_chr06 | 7987263                 | CC                              | TT              | 1946858644               |
| SNP_P4_78985_7987271 | NC_021165.1    | Ca_kabuli_chr06 | 7987271                 | TT                              | AA              | 1946858646               |
| SNP_P4_78986_7987319 | NC_021165.1    | Ca_kabuli_chr06 | 7987319                 | CC                              | GG              | 1946858648               |
| SNP_P4_78987_7987887 | NC_021165.1    | Ca_kabuli_chr06 | 7987887                 | CC                              | GG              | 1946858650               |

| SNPs IDs             | Chromosome IDs | Chromosomes     | Physical positions (bp) | CDC Frontier (Reference genome) | (ILWC46 & LPNB) | NCBI SNPdb Accession IDs |
|----------------------|----------------|-----------------|-------------------------|---------------------------------|-----------------|--------------------------|
| SNP_P4_78988_7987888 | NC_021165.1    | Ca_kabuli_chr06 | 7987888                 | TT                              | AA              | 1946858652               |
| SNP_P4_78989_7987910 | NC_021165.1    | Ca_kabuli_chr06 | 7987910                 | TT                              | CC              | 1946858654               |
| SNP_P4_78990_7988082 | NC_021165.1    | Ca_kabuli_chr06 | 7988082                 | CC                              | TT              | 1946858656               |
| SNP_P4_78991_7988194 | NC_021165.1    | Ca_kabuli_chr06 | 7988194                 | CC                              | AA              | 1946858658               |
| SNP_P4_78992_7988236 | NC_021165.1    | Ca_kabuli_chr06 | 7988236                 | AA                              | TT              | 1946858660               |
| SNP_P4_78993_7988276 | NC_021165.1    | Ca_kabuli_chr06 | 7988276                 | AA                              | GG              | 1946858662               |
| SNP_P4_78994_7989166 | NC_021165.1    | Ca_kabuli_chr06 | 7989166                 | CC                              | TT              | 1946858664               |
| SNP_P4_78997_7990403 | NC_021165.1    | Ca_kabuli_chr06 | 7990403                 | TT                              | GG              | 1946858666               |
| SNP_P4_78999_7990592 | NC_021165.1    | Ca_kabuli_chr06 | 7990592                 | TT                              | CC              | 1946858668               |
| SNP_P4_79000_7990598 | NC_021165.1    | Ca_kabuli_chr06 | 7990598                 | GG                              | AA              | 1946858670               |
| SNP_P4_79001_7991652 | NC_021165.1    | Ca_kabuli_chr06 | 7991652                 | CC                              | AA              | 1946858672               |
| SNP_P4_79002_7991656 | NC_021165.1    | Ca_kabuli_chr06 | 7991656                 | GG                              | TT              | 1946858674               |
| SNP_P4_79003_7991774 | NC_021165.1    | Ca_kabuli_chr06 | 7991774                 | GG                              | CC              | 1946858676               |
| SNP_P4_79004_7991793 | NC_021165.1    | Ca_kabuli_chr06 | 7991793                 | CC                              | TT              | 1946858678               |
| SNP_P4_79006_7991851 | NC_021165.1    | Ca_kabuli_chr06 | 7991851                 | CC                              | TT              | 1946858680               |
| SNP_P4_79007_7991866 | NC_021165.1    | Ca_kabuli_chr06 | 7991866                 | GG                              | AA              | 1946858682               |
| SNP_P4_79008_7991869 | NC_021165.1    | Ca_kabuli_chr06 | 7991869                 | GG                              | AA              | 1946858684               |
| SNP_P4_79009_7994271 | NC_021165.1    | Ca_kabuli_chr06 | 7994271                 | GG                              | AA              | 1946858686               |
| SNP_P4_79010_7994495 | NC_021165.1    | Ca_kabuli_chr06 | 7994495                 | GG                              | TT              | 1946858688               |
| SNP_P4_79011_7994509 | NC_021165.1    | Ca_kabuli_chr06 | 7994509                 | CC                              | TT              | 1946858690               |
| SNP_P4_79012_7995504 | NC_021165.1    | Ca_kabuli_chr06 | 7995504                 | TT                              | GG              | 1946858692               |
| SNP_P4_79013_7995509 | NC_021165.1    | Ca_kabuli_chr06 | 7995509                 | TT                              | GG              | 1946858694               |
| SNP_P4_79014_7995515 | NC_021165.1    | Ca_kabuli_chr06 | 7995515                 | AA                              | TT              | 1946858696               |
| SNP_P4_79015_7995516 | NC_021165.1    | Ca_kabuli_chr06 | 7995516                 | TT                              | AA              | 1946858698               |
| SNP_P4_79017_7995680 | NC_021165.1    | Ca_kabuli_chr06 | 7995680                 | TT                              | GG              | 1946858700               |
| SNP_P4_79019_7996758 | NC_021165.1    | Ca_kabuli_chr06 | 7996758                 | AA                              | GG              | 1946858702               |
| SNP_P4_79020_7996788 | NC_021165.1    | Ca_kabuli_chr06 | 7996788                 | CC                              | TT              | 1946858704               |
| SNP_P4_79021_7996813 | NC_021165.1    | Ca_kabuli_chr06 | 7996813                 | GG                              | AA              | 1946858706               |
| SNP_P4_79022_7997116 | NC_021165.1    | Ca_kabuli_chr06 | 7997116                 | CC                              | AA              | 1946858708               |
| SNP_P4_79025_8000165 | NC_021165.1    | Ca_kabuli_chr06 | 8000165                 | GG                              | AA              | 1946858710               |
| SNP_P4_79026_8000300 | NC_021165.1    | Ca_kabuli_chr06 | 8000300                 | CC                              | GG              | 1946858712               |
| SNP_P4_79027_8000563 | NC_021165.1    | Ca_kabuli_chr06 | 8000563                 | GG                              | AA              | 1946858714               |
| SNP_P4_79028_8000639 | NC_021165.1    | Ca_kabuli_chr06 | 8000639                 | AA                              | GG              | 1946858716               |
| SNP_P4_79029_8000661 | NC_021165.1    | Ca_kabuli_chr06 | 8000661                 | CC                              | GG              | 1946858718               |
| SNP_P4_79030_8001818 | NC_021165.1    | Ca_kabuli_chr06 | 8001818                 | TT                              | AA              | 1946858720               |
| SNP_P4_79031_8002927 | NC_021165.1    | Ca_kabuli_chr06 | 8002927                 | AA                              | CC              | 1946858722               |
| SNP_P4_79033_8004161 | NC_021165.1    | Ca_kabuli_chr06 | 8004161                 | CC                              | AA              | 1946858724               |
| SNP_P4_79034_8004210 | NC_021165.1    | Ca_kabuli_chr06 | 8004210                 | CC                              | GG              | 1946858726               |
| SNP_P4_79035_8004224 | NC_021165.1    | Ca_kabuli_chr06 | 8004224                 | AA                              | TT              | 1946858728               |
| SNP_P4_79036_8004508 | NC_021165.1    | Ca_kabuli_chr06 | 8004508                 | AA                              | TT              | 1946858730               |
| SNP_P4_79037_8004690 | NC_021165.1    | Ca_kabuli_chr06 | 8004690                 | CC                              | GG              | 1946858732               |
| SNP_P4_79038_8004939 | NC_021165.1    | Ca_kabuli_chr06 | 8004939                 | CC                              | GG              | 1946858734               |

| SNPs IDs             | Chromosome IDs | Chromosomes     | Physical positions (bp) | CDC Frontier (Reference genome) | (ILWC46 & LPNB) | NCBI SNPdb Accession IDs |
|----------------------|----------------|-----------------|-------------------------|---------------------------------|-----------------|--------------------------|
| SNP_P4_79039_8004942 | NC_021165.1    | Ca_kabuli_chr06 | 8004942                 | CC                              | AA              | 1946858736               |
| SNP_P4_79040_8005141 | NC_021165.1    | Ca_kabuli_chr06 | 8005141                 | TT                              | GG              | 1946858738               |
| SNP_P4_79041_8005163 | NC_021165.1    | Ca_kabuli_chr06 | 8005163                 | GG                              | AA              | 1946858740               |
| SNP_P4_79042_8005185 | NC_021165.1    | Ca_kabuli_chr06 | 8005185                 | TT                              | AA              | 1946858742               |
| SNP_P4_79043_8005448 | NC_021165.1    | Ca_kabuli_chr06 | 8005448                 | CC                              | TT              | 1946858744               |
| SNP_P4_79044_8005661 | NC_021165.1    | Ca_kabuli_chr06 | 8005661                 | GG                              | AA              | 1946858746               |
| SNP_P4_79045_8005703 | NC_021165.1    | Ca_kabuli_chr06 | 8005703                 | AA                              | TT              | 1946858748               |
| SNP_P4_79046_8005722 | NC_021165.1    | Ca_kabuli_chr06 | 8005722                 | GG                              | AA              | 1946858750               |
| SNP_P4_79049_8006966 | NC_021165.1    | Ca_kabuli_chr06 | 8006966                 | TT                              | CC              | 1946858752               |
| SNP_P4_79050_8007015 | NC_021165.1    | Ca_kabuli_chr06 | 8007015                 | TT                              | AA              | 1946858754               |
| SNP_P4_79051_8007059 | NC_021165.1    | Ca_kabuli_chr06 | 8007059                 | TT                              | GG              | 1946858756               |
| SNP_P4_79052_8007154 | NC_021165.1    | Ca_kabuli_chr06 | 8007154                 | GG                              | TT              | 1946858758               |
| SNP_P4_79053_8007316 | NC_021165.1    | Ca_kabuli_chr06 | 8007316                 | AA                              | TT              | 1946858760               |
| SNP_P4_79054_8007396 | NC_021165.1    | Ca_kabuli_chr06 | 8007396                 | GG                              | AA              | 1946858762               |
| SNP_P4_79056_8008299 | NC_021165.1    | Ca_kabuli_chr06 | 8008299                 | CC                              | TT              | 1946858764               |
| SNP_P4_79057_8008300 | NC_021165.1    | Ca_kabuli_chr06 | 8008300                 | TT                              | GG              | 1946858766               |
| SNP_P4_79058_8008629 | NC_021165.1    | Ca_kabuli_chr06 | 8008629                 | AA                              | CC              | 1946858768               |
| SNP_P4_79059_8008878 | NC_021165.1    | Ca_kabuli_chr06 | 8008878                 | GG                              | AA              | 1946858770               |
| SNP_P4_79060_8018898 | NC_021165.1    | Ca_kabuli_chr06 | 8018898                 | TT                              | CC              | 1946858772               |
| SNP_P4_79061_8019952 | NC_021165.1    | Ca_kabuli_chr06 | 8019952                 | AA                              | TT              | 1946858774               |
| SNP_P4_79062_8019953 | NC_021165.1    | Ca_kabuli_chr06 | 8019953                 | TT                              | AA              | 1946858776               |
| SNP_P4_79063_8020347 | NC_021165.1    | Ca_kabuli_chr06 | 8020347                 | AA                              | CC              | 1946858778               |
| SNP_P4_79064_8020352 | NC_021165.1    | Ca_kabuli_chr06 | 8020352                 | AA                              | CC              | 1946858780               |
| SNP_P4_79065_8021870 | NC_021165.1    | Ca_kabuli_chr06 | 8021870                 | CC                              | TT              | 1946858782               |
| SNP_P4_79066_8022090 | NC_021165.1    | Ca_kabuli_chr06 | 8022090                 | AA                              | TT              | 1946858784               |
| SNP_P4_79068_8023167 | NC_021165.1    | Ca_kabuli_chr06 | 8023167                 | TT                              | CC              | 1946858786               |
| SNP_P4_79069_8023731 | NC_021165.1    | Ca_kabuli_chr06 | 8023731                 | TT                              | GG              | 1946858788               |
| SNP_P4_79070_8023976 | NC_021165.1    | Ca_kabuli_chr06 | 8023976                 | CC                              | TT              | 1946858790               |
| SNP_P4_79071_8024324 | NC_021165.1    | Ca_kabuli_chr06 | 8024324                 | TT                              | AA              | 1946858792               |
| SNP_P4_79072_8024495 | NC_021165.1    | Ca_kabuli_chr06 | 8024495                 | AA                              | GG              | 1946858794               |
| SNP_P4_79073_8024513 | NC_021165.1    | Ca_kabuli_chr06 | 8024513                 | GG                              | AA              | 1946858796               |
| SNP_P4_79074_8024529 | NC_021165.1    | Ca_kabuli_chr06 | 8024529                 | GG                              | AA              | 1946858798               |
| SNP_P4_79075_8024753 | NC_021165.1    | Ca_kabuli_chr06 | 8024753                 | GG                              | CC              | 1946858800               |
| SNP_P4_79076_8025189 | NC_021165.1    | Ca_kabuli_chr06 | 8025189                 | TT                              | CC              | 1946858802               |
| SNP_P4_79077_8025218 | NC_021165.1    | Ca_kabuli_chr06 | 8025218                 | GG                              | AA              | 1946858804               |
| SNP_P4_79078_8025279 | NC_021165.1    | Ca_kabuli_chr06 | 8025279                 | GG                              | AA              | 1946858806               |
| SNP_P4_79079_8026342 | NC_021165.1    | Ca_kabuli_chr06 | 8026342                 | TT                              | CC              | 1946858808               |
| SNP_P4_79080_8026719 | NC_021165.1    | Ca_kabuli_chr06 | 8026719                 | TT                              | GG              | 1946858810               |
| SNP_P4_79081_8027081 | NC_021165.1    | Ca_kabuli_chr06 | 8027081                 | TT                              | GG              | 1946858812               |
| SNP_P4_79082_8030143 | NC_021165.1    | Ca_kabuli_chr06 | 8030143                 | TT                              | GG              | 1946858814               |
| SNP_P4_79083_8030443 | NC_021165.1    | Ca_kabuli_chr06 | 8030443                 | AA                              | TT              | 1946858816               |
| SNP_P4_79084_8031959 | NC_021165.1    | Ca_kabuli_chr06 | 8031959                 | AA                              | TT              | 1946858818               |

| SNPs IDs             | Chromosome IDs | Chromosomes     | Physical positions (bp) | CDC Frontier (Reference genome) | (ILWC46 & LPNB) | NCBI SNPdb Accession IDs |
|----------------------|----------------|-----------------|-------------------------|---------------------------------|-----------------|--------------------------|
| SNP_P4_79085_8031970 | NC_021165.1    | Ca_kabuli_chr06 | 8031970                 | GG                              | AA              | 1946858820               |
| SNP_P4_79086_8031976 | NC_021165.1    | Ca_kabuli_chr06 | 8031976                 | AA                              | CC              | 1946858822               |
| SNP_P4_79087_8033152 | NC_021165.1    | Ca_kabuli_chr06 | 8033152                 | TT                              | CC              | 1946858824               |
| SNP_P4_79088_8033174 | NC_021165.1    | Ca_kabuli_chr06 | 8033174                 | TT                              | CC              | 1946858826               |
| SNP_P4_79089_8033218 | NC_021165.1    | Ca_kabuli_chr06 | 8033218                 | TT                              | CC              | 1946858828               |
| SNP_P4_79090_8033325 | NC_021165.1    | Ca_kabuli_chr06 | 8033325                 | GG                              | AA              | 1946858830               |
| SNP_P4_79091_8033338 | NC_021165.1    | Ca_kabuli_chr06 | 8033338                 | CC                              | TT              | 1946858832               |
| SNP_P4_79092_8033398 | NC_021165.1    | Ca_kabuli_chr06 | 8033398                 | AA                              | GG              | 1946858834               |
| SNP_P4_79093_8033400 | NC_021165.1    | Ca_kabuli_chr06 | 8033400                 | AA                              | GG              | 1946858836               |
| SNP_P4_79094_8033585 | NC_021165.1    | Ca_kabuli_chr06 | 8033585                 | AA                              | CC              | 1946858838               |
| SNP_P4_79095_8033623 | NC_021165.1    | Ca_kabuli_chr06 | 8033623                 | TT                              | CC              | 1946858840               |
| SNP_P4_79097_8033936 | NC_021165.1    | Ca_kabuli_chr06 | 8033936                 | TT                              | AA              | 1946858842               |
| SNP_P4_79098_8034115 | NC_021165.1    | Ca_kabuli_chr06 | 8034115                 | CC                              | GG              | 1946858844               |
| SNP_P4_79099_8034162 | NC_021165.1    | Ca_kabuli_chr06 | 8034162                 | GG                              | CC              | 1946858846               |
| SNP_P4_79100_8034439 | NC_021165.1    | Ca_kabuli_chr06 | 8034439                 | TT                              | CC              | 1946858848               |
| SNP_P4_79101_8034473 | NC_021165.1    | Ca_kabuli_chr06 | 8034473                 | CC                              | TT              | 1946858850               |
| SNP_P4_79102_8035119 | NC_021165.1    | Ca_kabuli_chr06 | 8035119                 | CC                              | GG              | 1946858852               |
| SNP_P4_79104_8035269 | NC_021165.1    | Ca_kabuli_chr06 | 8035269                 | TT                              | AA              | 1946858854               |
| SNP_P4_79107_8037073 | NC_021165.1    | Ca_kabuli_chr06 | 8037073                 | TT                              | AA              | 1946858856               |
| SNP_P4_79108_8038685 | NC_021165.1    | Ca_kabuli_chr06 | 8038685                 | GG                              | TT              | 1946858858               |
| SNP_P4_79109_8039372 | NC_021165.1    | Ca_kabuli_chr06 | 8039372                 | AA                              | CC              | 1946858860               |
| SNP_P4_79110_8039633 | NC_021165.1    | Ca_kabuli_chr06 | 8039633                 | GG                              | AA              | 1946858862               |
| SNP_P4_79111_8039682 | NC_021165.1    | Ca_kabuli_chr06 | 8039682                 | TT                              | CC              | 1946858864               |
| SNP_P4_79112_8039885 | NC_021165.1    | Ca_kabuli_chr06 | 8039885                 | CC                              | TT              | 1946858866               |
| SNP_P4_79113_8039886 | NC_021165.1    | Ca_kabuli_chr06 | 8039886                 | AA                              | CC              | 1946858868               |
| SNP_P4_79114_8040006 | NC_021165.1    | Ca_kabuli_chr06 | 8040006                 | TT                              | CC              | 1946858870               |
| SNP_P4_79115_8040020 | NC_021165.1    | Ca_kabuli_chr06 | 8040020                 | AA                              | GG              | 1946858872               |
| SNP_P4_79116_8040033 | NC_021165.1    | Ca_kabuli_chr06 | 8040033                 | GG                              | AA              | 1946858874               |
| SNP_P4_79117_8040143 | NC_021165.1    | Ca_kabuli_chr06 | 8040143                 | GG                              | AA              | 1946858876               |
| SNP_P4_79118_8040178 | NC_021165.1    | Ca_kabuli_chr06 | 8040178                 | AA                              | TT              | 1946858878               |
| SNP_P4_79119_8040301 | NC_021165.1    | Ca_kabuli_chr06 | 8040301                 | AA                              | CC              | 1946858880               |
| SNP_P4_79120_8040403 | NC_021165.1    | Ca_kabuli_chr06 | 8040403                 | AA                              | GG              | 1946858882               |
| SNP_P4_79121_8040405 | NC_021165.1    | Ca_kabuli_chr06 | 8040405                 | AA                              | GG              | 1946858884               |
| SNP_P4_79122_8040409 | NC_021165.1    | Ca_kabuli_chr06 | 8040409                 | CC                              | TT              | 1946858886               |
| SNP_P4_79123_8040412 | NC_021165.1    | Ca_kabuli_chr06 | 8040412                 | TT                              | GG              | 1946858888               |
| SNP_P4_79124_8040474 | NC_021165.1    | Ca_kabuli_chr06 | 8040474                 | CC                              | TT              | 1946858890               |
| SNP_P4_79125_8040498 | NC_021165.1    | Ca_kabuli_chr06 | 8040498                 | AA                              | CC              | 1946858891               |
| SNP_P4_79126_8040499 | NC_021165.1    | Ca_kabuli_chr06 | 8040499                 | TT                              | CC              | 1946858893               |
| SNP_P4_79127_8040722 | NC_021165.1    | Ca_kabuli_chr06 | 8040722                 | GG                              | AA              | 1946858895               |
| SNP_P4_79128_8040724 | NC_021165.1    | Ca_kabuli_chr06 | 8040724                 | GG                              | AA              | 1946858897               |
| SNP_P4_79129_8040780 | NC_021165.1    | Ca_kabuli_chr06 | 8040780                 | CC                              | TT              | 1946858899               |
| SNP_P4_79130_8042102 | NC_021165.1    | Ca_kabuli_chr06 | 8042102                 | GG                              | AA              | 1946858902               |

| SNPs IDs             | Chromosome IDs | Chromosomes     | Physical positions (bp) | CDC Frontier (Reference genome) | (ILWC46 & LPNB) | NCBI SNPdb Accession IDs |
|----------------------|----------------|-----------------|-------------------------|---------------------------------|-----------------|--------------------------|
| SNP_P4_79131_8042938 | NC_021165.1    | Ca_kabuli_chr06 | 8042938                 | GG                              | AA              | 1946858904               |
| SNP_P4_79132_8043230 | NC_021165.1    | Ca_kabuli_chr06 | 8043230                 | TT                              | CC              | 1946858906               |
| SNP_P4_79133_8043471 | NC_021165.1    | Ca_kabuli_chr06 | 8043471                 | CC                              | TT              | 1946858908               |
| SNP_P4_79134_8043755 | NC_021165.1    | Ca_kabuli_chr06 | 8043755                 | TT                              | CC              | 1946858910               |
| SNP_P4_79135_8043789 | NC_021165.1    | Ca_kabuli_chr06 | 8043789                 | TT                              | GG              | 1946858912               |
| SNP_P4_79136_8044031 | NC_021165.1    | Ca_kabuli_chr06 | 8044031                 | AA                              | TT              | 1946858914               |
| SNP_P4_79137_8044033 | NC_021165.1    | Ca_kabuli_chr06 | 8044033                 | AA                              | TT              | 1946858916               |
| SNP_P4_79138_8044087 | NC_021165.1    | Ca_kabuli_chr06 | 8044087                 | GG                              | AA              | 1946858918               |
| SNP_P4_79139_8044113 | NC_021165.1    | Ca_kabuli_chr06 | 8044113                 | GG                              | AA              | 1946858920               |
| SNP_P4_79140_8044323 | NC_021165.1    | Ca_kabuli_chr06 | 8044323                 | AA                              | CC              | 1946858922               |
| SNP_P4_79141_8044348 | NC_021165.1    | Ca_kabuli_chr06 | 8044348                 | CC                              | TT              | 1946858924               |
| SNP_P4_79143_8044694 | NC_021165.1    | Ca_kabuli_chr06 | 8044694                 | TT                              | AA              | 1946858926               |
| SNP_P4_79144_8045078 | NC_021165.1    | Ca_kabuli_chr06 | 8045078                 | TT                              | CC              | 1946858928               |
| SNP_P4_79145_8045823 | NC_021165.1    | Ca_kabuli_chr06 | 8045823                 | AA                              | GG              | 1946858930               |
| SNP_P4_79146_8046313 | NC_021165.1    | Ca_kabuli_chr06 | 8046313                 | CC                              | TT              | 1946858932               |
| SNP_P4_79147_8048054 | NC_021165.1    | Ca_kabuli_chr06 | 8048054                 | CC                              | TT              | 1946858934               |
| SNP_P4_79148_8048353 | NC_021165.1    | Ca_kabuli_chr06 | 8048353                 | CC                              | TT              | 1946858936               |
| SNP_P4_79149_8048779 | NC_021165.1    | Ca_kabuli_chr06 | 8048779                 | GG                              | AA              | 1946858938               |
| SNP_P4_79150_8048806 | NC_021165.1    | Ca_kabuli_chr06 | 8048806                 | TT                              | CC              | 1946858941               |
| SNP_P4_79151_8048831 | NC_021165.1    | Ca_kabuli_chr06 | 8048831                 | GG                              | AA              | 1946858943               |
| SNP_P4_79152_8048833 | NC_021165.1    | Ca_kabuli_chr06 | 8048833                 | TT                              | CC              | 1946858945               |
| SNP_P4_79153_8048837 | NC_021165.1    | Ca_kabuli_chr06 | 8048837                 | TT                              | AA              | 1946858947               |
| SNP_P4_79154_8048872 | NC_021165.1    | Ca_kabuli_chr06 | 8048872                 | TT                              | GG              | 1946858949               |
| SNP_P4_79155_8048886 | NC_021165.1    | Ca_kabuli_chr06 | 8048886                 | AA                              | TT              | 1946858951               |
| SNP_P4_79156_8048903 | NC_021165.1    | Ca_kabuli_chr06 | 8048903                 | AA                              | TT              | 1946858953               |
| SNP_P4_79158_8049013 | NC_021165.1    | Ca_kabuli_chr06 | 8049013                 | TT                              | AA              | 1946858955               |
| SNP_P4_79159_8049034 | NC_021165.1    | Ca_kabuli_chr06 | 8049034                 | AA                              | GG              | 1946858957               |
| SNP_P4_79160_8049045 | NC_021165.1    | Ca_kabuli_chr06 | 8049045                 | AA                              | GG              | 1946858960               |
| SNP_P4_79161_8049483 | NC_021165.1    | Ca_kabuli_chr06 | 8049483                 | TT                              | AA              | 1946858962               |
| SNP_P4_79162_8050003 | NC_021165.1    | Ca_kabuli_chr06 | 8050003                 | AA                              | GG              | 1946858964               |
| SNP_P4_79163_8050941 | NC_021165.1    | Ca_kabuli_chr06 | 8050941                 | CC                              | GG              | 1946858966               |
| SNP_P4_79164_8050977 | NC_021165.1    | Ca_kabuli_chr06 | 8050977                 | AA                              | GG              | 1946858968               |
| SNP_P4_79165_8051041 | NC_021165.1    | Ca_kabuli_chr06 | 8051041                 | AA                              | TT              | 1946858970               |
| SNP_P4_79166_8051593 | NC_021165.1    | Ca_kabuli_chr06 | 8051593                 | TT                              | CC              | 1946858972               |
| SNP_P4_79167_8052083 | NC_021165.1    | Ca_kabuli_chr06 | 8052083                 | AA                              | TT              | 1946858974               |
| SNP_P4_79168_8053763 | NC_021165.1    | Ca_kabuli_chr06 | 8053763                 | AA                              | GG              | 1946858976               |
| SNP_P4_79169_8054402 | NC_021165.1    | Ca_kabuli_chr06 | 8054402                 | GG                              | CC              | 1946858978               |
| SNP_P4_79170_8054539 | NC_021165.1    | Ca_kabuli_chr06 | 8054539                 | CC                              | TT              | 1946858980               |
| SNP_P4_79171_8054797 | NC_021165.1    | Ca_kabuli_chr06 | 8054797                 | GG                              | AA              | 1946858982               |
| SNP_P4_79172_8055704 | NC_021165.1    | Ca_kabuli_chr06 | 8055704                 | TT                              | CC              | 1946858984               |
| SNP_P4_79173_8055904 | NC_021165.1    | Ca_kabuli_chr06 | 8055904                 | TT                              | CC              | 1946858986               |
| SNP_P4_79174_8056017 | NC_021165.1    | Ca_kabuli_chr06 | 8056017                 | TT                              | CC              | 1946858988               |

| SNPs IDs             | Chromosome IDs | Chromosomes     | Physical positions (bp) | CDC Frontier (Reference genome) | (ILWC46 & LPNB) | NCBI SNPdb Accession IDs |
|----------------------|----------------|-----------------|-------------------------|---------------------------------|-----------------|--------------------------|
| SNP_P4_79175_8056034 | NC_021165.1    | Ca_kabuli_chr06 | 8056034                 | GG                              | AA              | 1946858990               |
| SNP_P4_79176_8056141 | NC_021165.1    | Ca_kabuli_chr06 | 8056141                 | TT                              | CC              | 1946858992               |
| SNP_P4_79177_8056197 | NC_021165.1    | Ca_kabuli_chr06 | 8056197                 | CC                              | TT              | 1946858994               |
| SNP_P4_79178_8058545 | NC_021165.1    | Ca_kabuli_chr06 | 8058545                 | AA                              | GG              | 1946858996               |
| SNP_P4_79179_8058936 | NC_021165.1    | Ca_kabuli_chr06 | 8058936                 | TT                              | GG              | 1946858998               |
| SNP_P4_79180_8059472 | NC_021165.1    | Ca_kabuli_chr06 | 8059472                 | TT                              | CC              | 1946859000               |
| SNP_P4_79181_8059886 | NC_021165.1    | Ca_kabuli_chr06 | 8059886                 | TT                              | GG              | 1946859002               |
| SNP_P4_79182_8059952 | NC_021165.1    | Ca_kabuli_chr06 | 8059952                 | CC                              | AA              | 1946859004               |
| SNP_P4_79183_8060322 | NC_021165.1    | Ca_kabuli_chr06 | 8060322                 | AA                              | TT              | 1946859006               |
| SNP_P4_79184_8060371 | NC_021165.1    | Ca_kabuli_chr06 | 8060371                 | CC                              | TT              | 1946859008               |
| SNP_P4_79186_8061834 | NC_021165.1    | Ca_kabuli_chr06 | 8061834                 | CC                              | TT              | 1946859010               |
| SNP_P4_79187_8061843 | NC_021165.1    | Ca_kabuli_chr06 | 8061843                 | TT                              | CC              | 1946859012               |
| SNP_P4_79188_8061853 | NC_021165.1    | Ca_kabuli_chr06 | 8061853                 | AA                              | TT              | 1946859014               |
| SNP_P4_79189_8061865 | NC_021165.1    | Ca_kabuli_chr06 | 8061865                 | AA                              | GG              | 1946859016               |
| SNP_P4_79190_8061923 | NC_021165.1    | Ca_kabuli_chr06 | 8061923                 | AA                              | CC              | 1946859018               |
| SNP_P4_79191_8061942 | NC_021165.1    | Ca_kabuli_chr06 | 8061942                 | TT                              | CC              | 1946859020               |
| SNP_P4_79192_8061969 | NC_021165.1    | Ca_kabuli_chr06 | 8061969                 | CC                              | TT              | 1946859022               |
| SNP_P4_79193_8062163 | NC_021165.1    | Ca_kabuli_chr06 | 8062163                 | GG                              | CC              | 1946859024               |
| SNP_P4_79195_8062182 | NC_021165.1    | Ca_kabuli_chr06 | 8062182                 | TT                              | CC              | 1946859025               |
| SNP_P4_79196_8062228 | NC_021165.1    | Ca_kabuli_chr06 | 8062228                 | TT                              | CC              | 1946859027               |
| SNP_P4_79197_8062307 | NC_021165.1    | Ca_kabuli_chr06 | 8062307                 | AA                              | CC              | 1946859029               |
| SNP_P4_79198_8062386 | NC_021165.1    | Ca_kabuli_chr06 | 8062386                 | CC                              | TT              | 1946859031               |
| SNP_P4_79199_8062399 | NC_021165.1    | Ca_kabuli_chr06 | 8062399                 | GG                              | AA              | 1946859033               |
| SNP_P4_79200_8062630 | NC_021165.1    | Ca_kabuli_chr06 | 8062630                 | GG                              | CC              | 1946859035               |
| SNP_P4_79202_8062719 | NC_021165.1    | Ca_kabuli_chr06 | 8062719                 | GG                              | CC              | 1946859037               |
| SNP_P4_79203_8062720 | NC_021165.1    | Ca_kabuli_chr06 | 8062720                 | CC                              | TT              | 1946859039               |
| SNP_P4_79204_8062722 | NC_021165.1    | Ca_kabuli_chr06 | 8062722                 | TT                              | CC              | 1946859041               |
| SNP_P4_79205_8062743 | NC_021165.1    | Ca_kabuli_chr06 | 8062743                 | GG                              | AA              | 1946859043               |
| SNP_P4_79206_8062744 | NC_021165.1    | Ca_kabuli_chr06 | 8062744                 | GG                              | AA              | 1946859045               |
| SNP_P4_79208_8062796 | NC_021165.1    | Ca_kabuli_chr06 | 8062796                 | GG                              | AA              | 1946859047               |
| SNP_P4_79209_8064029 | NC_021165.1    | Ca_kabuli_chr06 | 8064029                 | CC                              | AA              | 1946859049               |
| SNP_P4_79210_8064347 | NC_021165.1    | Ca_kabuli_chr06 | 8064347                 | TT                              | GG              | 1946859051               |
| SNP_P4_79211_8064787 | NC_021165.1    | Ca_kabuli_chr06 | 8064787                 | AA                              | GG              | 1946859053               |
| SNP_P4_79212_8064808 | NC_021165.1    | Ca_kabuli_chr06 | 8064808                 | AA                              | GG              | 1946859055               |
| SNP_P4_79214_8065231 | NC_021165.1    | Ca_kabuli_chr06 | 8065231                 | TT                              | GG              | 1946859057               |
| SNP_P4_79215_8065816 | NC_021165.1    | Ca_kabuli_chr06 | 8065816                 | CC                              | TT              | 1946859059               |
| SNP_P4_79216_8066133 | NC_021165.1    | Ca_kabuli_chr06 | 8066133                 | AA                              | GG              | 1946859061               |
| SNP_P4_79217_8066158 | NC_021165.1    | Ca_kabuli_chr06 | 8066158                 | GG                              | AA              | 1946859063               |
| SNP_P4_79219_8066492 | NC_021165.1    | Ca_kabuli_chr06 | 8066492                 | GG                              | AA              | 1946859065               |
| SNP_P4_79220_8070427 | NC_021165.1    | Ca_kabuli_chr06 | 8070427                 | TT                              | CC              | 1946859067               |
| SNP_P4_79221_8071639 | NC_021165.1    | Ca_kabuli_chr06 | 8071639                 | CC                              | AA              | 1946859069               |
| SNP_P4_79222_8073172 | NC_021165.1    | Ca_kabuli_chr06 | 8073172                 | GG                              | TT              | 1946859071               |

| SNPs IDs             | Chromosome IDs | Chromosomes     | Physical positions (bp) | CDC Frontier (Reference genome) | (ILWC46 & LPNB) | NCBI SNPdb Accession IDs |
|----------------------|----------------|-----------------|-------------------------|---------------------------------|-----------------|--------------------------|
| SNP_P4_79223_8073237 | NC_021165.1    | Ca_kabuli_chr06 | 8073237                 | CC                              | AA              | 1946859073               |
| SNP_P4_79225_8075973 | NC_021165.1    | Ca_kabuli_chr06 | 8075973                 | GG                              | TT              | 1946859075               |
| SNP_P4_79226_8076099 | NC_021165.1    | Ca_kabuli_chr06 | 8076099                 | CC                              | GG              | 1946859077               |
| SNP_P4_79227_8076124 | NC_021165.1    | Ca_kabuli_chr06 | 8076124                 | TT                              | CC              | 1946859079               |
| SNP_P4_79228_8076125 | NC_021165.1    | Ca_kabuli_chr06 | 8076125                 | GG                              | AA              | 1946859081               |
| SNP_P4_79229_8076128 | NC_021165.1    | Ca_kabuli_chr06 | 8076128                 | GG                              | AA              | 1946859083               |
| SNP_P4_79230_8076157 | NC_021165.1    | Ca_kabuli_chr06 | 8076157                 | CC                              | AA              | 1946859085               |
| SNP_P4_79231_8076749 | NC_021165.1    | Ca_kabuli_chr06 | 8076749                 | TT                              | CC              | 1946859087               |
| SNP_P4_79232_8076931 | NC_021165.1    | Ca_kabuli_chr06 | 8076931                 | TT                              | CC              | 1946859089               |
| SNP_P4_79233_8077196 | NC_021165.1    | Ca_kabuli_chr06 | 8077196                 | TT                              | CC              | 1946859091               |
| SNP_P4_79234_8077568 | NC_021165.1    | Ca_kabuli_chr06 | 8077568                 | GG                              | AA              | 1946859094               |
| SNP_P4_79236_8078310 | NC_021165.1    | Ca_kabuli_chr06 | 8078310                 | TT                              | CC              | 1946859096               |
| SNP_P4_79239_8087337 | NC_021165.1    | Ca_kabuli_chr06 | 8087337                 | TT                              | AA              | 1946859098               |
| SNP_P4_79241_8088180 | NC_021165.1    | Ca_kabuli_chr06 | 8088180                 | AA                              | TT              | 1946859100               |
| SNP_P4_79242_8088256 | NC_021165.1    | Ca_kabuli_chr06 | 8088256                 | TT                              | CC              | 1946859102               |
| SNP_P4_79243_8088309 | NC_021165.1    | Ca_kabuli_chr06 | 8088309                 | TT                              | CC              | 1946859104               |
| SNP_P4_79244_8088593 | NC_021165.1    | Ca_kabuli_chr06 | 8088593                 | CC                              | TT              | 1946859106               |
| SNP_P4_79245_8088618 | NC_021165.1    | Ca_kabuli_chr06 | 8088618                 | CC                              | GG              | 1946859108               |
| SNP_P4_79246_8089025 | NC_021165.1    | Ca_kabuli_chr06 | 8089025                 | CC                              | TT              | 1946859110               |
| SNP_P4_79247_8089117 | NC_021165.1    | Ca_kabuli_chr06 | 8089117                 | AA                              | GG              | 1946859112               |
| SNP_P4_79248_8089254 | NC_021165.1    | Ca_kabuli_chr06 | 8089254                 | TT                              | GG              | 1946859114               |
| SNP_P4_79249_8089260 | NC_021165.1    | Ca_kabuli_chr06 | 8089260                 | CC                              | TT              | 1946859116               |
| SNP_P4_79250_8090264 | NC_021165.1    | Ca_kabuli_chr06 | 8090264                 | GG                              | AA              | 1946859118               |
| SNP_P4_79251_8091765 | NC_021165.1    | Ca_kabuli_chr06 | 8091765                 | TT                              | AA              | 1946859120               |
| SNP_P4_79252_8092134 | NC_021165.1    | Ca_kabuli_chr06 | 8092134                 | AA                              | GG              | 1946859122               |
| SNP_P4_79253_8092460 | NC_021165.1    | Ca_kabuli_chr06 | 8092460                 | TT                              | CC              | 1946859125               |
| SNP_P4_79254_8093235 | NC_021165.1    | Ca_kabuli_chr06 | 8093235                 | CC                              | AA              | 1946859127               |
| SNP_P4_79256_8093355 | NC_021165.1    | Ca_kabuli_chr06 | 8093355                 | CC                              | TT              | 1946859129               |
| SNP_P4_79257_8093659 | NC_021165.1    | Ca_kabuli_chr06 | 8093659                 | CC                              | TT              | 1946859131               |
| SNP_P4_79258_8093709 | NC_021165.1    | Ca_kabuli_chr06 | 8093709                 | GG                              | AA              | 1946859133               |
| SNP_P4_79259_8093913 | NC_021165.1    | Ca_kabuli_chr06 | 8093913                 | TT                              | GG              | 1946859135               |
| SNP_P4_79260_8095992 | NC_021165.1    | Ca_kabuli_chr06 | 8095992                 | GG                              | AA              | 1946859137               |
| SNP_P4_79261_8096871 | NC_021165.1    | Ca_kabuli_chr06 | 8096871                 | TT                              | AA              | 1946859139               |
| SNP_P4_79262_8097661 | NC_021165.1    | Ca_kabuli_chr06 | 8097661                 | AA                              | GG              | 1946859141               |
| SNP_P4_79263_8098701 | NC_021165.1    | Ca_kabuli_chr06 | 8098701                 | AA                              | GG              | 1946859143               |
| SNP_P4_79265_8098976 | NC_021165.1    | Ca_kabuli_chr06 | 8098976                 | TT                              | CC              | 1946859145               |
| SNP_P4_79266_8099271 | NC_021165.1    | Ca_kabuli_chr06 | 8099271                 | AA                              | TT              | 1946859147               |
| SNP_P4_79267_8099342 | NC_021165.1    | Ca_kabuli_chr06 | 8099342                 | TT                              | AA              | 1946859149               |
| SNP_P4_79269_8099421 | NC_021165.1    | Ca_kabuli_chr06 | 8099421                 | AA                              | GG              | 1946859151               |
| SNP_P4_79270_8099436 | NC_021165.1    | Ca_kabuli_chr06 | 8099436                 | TT                              | AA              | 1946859153               |
| SNP_P4_79271_8099458 | NC_021165.1    | Ca_kabuli_chr06 | 8099458                 | TT                              | CC              | 1946859155               |
| SNP_P4_79272_8099471 | NC_021165.1    | Ca_kabuli_chr06 | 8099471                 | TT                              | GG              | 1946859157               |



| SNPs IDs             | Chromosome IDs | Chromosomes     | Physical positions (bp) | CDC Frontier (Reference genome) | (ILWC46 & LPNB) | NCBI SNPdb Accession IDs |
|----------------------|----------------|-----------------|-------------------------|---------------------------------|-----------------|--------------------------|
| SNP_P4_79273_8100319 | NC_021165.1    | Ca_kabuli_chr06 | 8100319                 | AA                              | GG              | 1946859159               |
| SNP_P4_79274_8100331 | NC_021165.1    | Ca_kabuli_chr06 | 8100331                 | AA                              | GG              | 1946859161               |
| SNP_P4_79276_8100418 | NC_021165.1    | Ca_kabuli_chr06 | 8100418                 | CC                              | GG              | 1946859163               |
| SNP_P4_79277_8100584 | NC_021165.1    | Ca_kabuli_chr06 | 8100584                 | AA                              | TT              | 1946859165               |
| SNP_P4_79278_8100587 | NC_021165.1    | Ca_kabuli_chr06 | 8100587                 | TT                              | AA              | 1946859167               |
| SNP_P4_79279_8101691 | NC_021165.1    | Ca_kabuli_chr06 | 8101691                 | TT                              | AA              | 1946859169               |
| SNP_P4_79280_8101694 | NC_021165.1    | Ca_kabuli_chr06 | 8101694                 | CC                              | TT              | 1946859171               |
| SNP_P4_79282_8107924 | NC_021165.1    | Ca_kabuli_chr06 | 8107924                 | TT                              | AA              | 1946859173               |
| SNP_P4_79283_8108144 | NC_021165.1    | Ca_kabuli_chr06 | 8108144                 | TT                              | CC              | 1946859175               |
| SNP_P4_79284_8108394 | NC_021165.1    | Ca_kabuli_chr06 | 8108394                 | AA                              | GG              | 1946859177               |
| SNP_P4_79285_8108420 | NC_021165.1    | Ca_kabuli_chr06 | 8108420                 | CC                              | TT              | 1946859179               |
| SNP_P4_79286_8110104 | NC_021165.1    | Ca_kabuli_chr06 | 8110104                 | TT                              | CC              | 1946859180               |
| SNP_P4_79287_8111924 | NC_021165.1    | Ca_kabuli_chr06 | 8111924                 | CC                              | TT              | 1946859182               |
| SNP_P4_79288_8112053 | NC_021165.1    | Ca_kabuli_chr06 | 8112053                 | AA                              | GG              | 1946859184               |
| SNP_P4_79289_8112165 | NC_021165.1    | Ca_kabuli_chr06 | 8112165                 | TT                              | CC              | 1946859186               |
| SNP_P4_79290_8117996 | NC_021165.1    | Ca_kabuli_chr06 | 8117996                 | CC                              | TT              | 1946859188               |
| SNP_P4_79291_8118343 | NC_021165.1    | Ca_kabuli_chr06 | 8118343                 | AA                              | CC              | 1946859190               |
| SNP_P4_79292_8118886 | NC_021165.1    | Ca_kabuli_chr06 | 8118886                 | CC                              | GG              | 1946859192               |
| SNP_P4_79293_8118915 | NC_021165.1    | Ca_kabuli_chr06 | 8118915                 | AA                              | CC              | 1946859194               |
| SNP_P4_79294_8121292 | NC_021165.1    | Ca_kabuli_chr06 | 8121292                 | AA                              | GG              | 1946859196               |
| SNP_P4_79295_8122718 | NC_021165.1    | Ca_kabuli_chr06 | 8122718                 | GG                              | TT              | 1946859198               |
| SNP_P4_79297_8122822 | NC_021165.1    | Ca_kabuli_chr06 | 8122822                 | AA                              | TT              | 1946859200               |
| SNP_P4_79298_8122823 | NC_021165.1    | Ca_kabuli_chr06 | 8122823                 | AA                              | GG              | 1946859202               |
| SNP_P4_79299_8122923 | NC_021165.1    | Ca_kabuli_chr06 | 8122923                 | AA                              | GG              | 1946859204               |
| SNP_P4_79300_8122947 | NC_021165.1    | Ca_kabuli_chr06 | 8122947                 | GG                              | TT              | 1946859206               |
| SNP_P4_79301_8123240 | NC_021165.1    | Ca_kabuli_chr06 | 8123240                 | AA                              | GG              | 1946859208               |
| SNP_P4_79302_8123439 | NC_021165.1    | Ca_kabuli_chr06 | 8123439                 | GG                              | AA              | 1946859210               |
| SNP_P4_79303_8123625 | NC_021165.1    | Ca_kabuli_chr06 | 8123625                 | CC                              | TT              | 1946859212               |
| SNP_P4_79305_8123681 | NC_021165.1    | Ca_kabuli_chr06 | 8123681                 | CC                              | TT              | 1946859214               |
| SNP_P4_79306_8126124 | NC_021165.1    | Ca_kabuli_chr06 | 8126124                 | AA                              | GG              | 1946859216               |
| SNP_P4_79307_8126866 | NC_021165.1    | Ca_kabuli_chr06 | 8126866                 | AA                              | TT              | 1946859218               |
| SNP_P4_79308_8126872 | NC_021165.1    | Ca_kabuli_chr06 | 8126872                 | GG                              | AA              | 1946859220               |
| SNP_P4_79309_8127651 | NC_021165.1    | Ca_kabuli_chr06 | 8127651                 | AA                              | CC              | 1946859222               |
| SNP_P4_79310_8127677 | NC_021165.1    | Ca_kabuli_chr06 | 8127677                 | GG                              | CC              | 1946859225               |
| SNP_P4_79311_8127704 | NC_021165.1    | Ca_kabuli_chr06 | 8127704                 | CC                              | TT              | 1946859227               |
| SNP_P4_79312_8127717 | NC_021165.1    | Ca_kabuli_chr06 | 8127717                 | AA                              | TT              | 1946859229               |
| SNP_P4_79313_8127744 | NC_021165.1    | Ca_kabuli_chr06 | 8127744                 | TT                              | CC              | 1946859231               |
| SNP_P4_79314_8127747 | NC_021165.1    | Ca_kabuli_chr06 | 8127747                 | GG                              | CC              | 1946859233               |
| SNP_P4_79315_8127756 | NC_021165.1    | Ca_kabuli_chr06 | 8127756                 | GG                              | AA              | 1946859235               |
| SNP_P4_79316_8127853 | NC_021165.1    | Ca_kabuli_chr06 | 8127853                 | CC                              | AA              | 1946859237               |
| SNP_P4_79317_8128436 | NC_021165.1    | Ca_kabuli_chr06 | 8128436                 | CC                              | AA              | 1946859239               |
| SNP_P4_79318_8128465 | NC_021165.1    | Ca_kabuli_chr06 | 8128465                 | TT                              | CC              | 1946859241               |

| SNPs IDs             | Chromosome IDs | Chromosomes     | Physical positions (bp) | CDC Frontier (Reference genome) | (ILWC46 & LPNB) | NCBI SNPdb Accession IDs |
|----------------------|----------------|-----------------|-------------------------|---------------------------------|-----------------|--------------------------|
| SNP_P4_79319_8128753 | NC_021165.1    | Ca_kabuli_chr06 | 8128753                 | AA                              | TT              | 1946859243               |
| SNP_P4_79320_8128812 | NC_021165.1    | Ca_kabuli_chr06 | 8128812                 | GG                              | AA              | 1946859245               |
| SNP_P4_79321_8129714 | NC_021165.1    | Ca_kabuli_chr06 | 8129714                 | AA                              | CC              | 1946859247               |
| SNP_P4_79322_8130842 | NC_021165.1    | Ca_kabuli_chr06 | 8130842                 | CC                              | TT              | 1946859249               |
| SNP_P4_79323_8131036 | NC_021165.1    | Ca_kabuli_chr06 | 8131036                 | AA                              | GG              | 1946859251               |
| SNP_P4_79326_8133209 | NC_021165.1    | Ca_kabuli_chr06 | 8133209                 | CC                              | AA              | 1946859253               |
| SNP_P4_79328_8133455 | NC_021165.1    | Ca_kabuli_chr06 | 8133455                 | AA                              | GG              | 1946859255               |
| SNP_P4_79329_8135714 | NC_021165.1    | Ca_kabuli_chr06 | 8135714                 | CC                              | TT              | 1946859257               |
| SNP_P4_79330_8135848 | NC_021165.1    | Ca_kabuli_chr06 | 8135848                 | TT                              | CC              | 1946859258               |
| SNP_P4_79331_8135855 | NC_021165.1    | Ca_kabuli_chr06 | 8135855                 | CC                              | TT              | 1946859260               |
| SNP_P4_79332_8136511 | NC_021165.1    | Ca_kabuli_chr06 | 8136511                 | CC                              | TT              | 1946859262               |
| SNP_P4_79333_8138776 | NC_021165.1    | Ca_kabuli_chr06 | 8138776                 | AA                              | GG              | 1946859264               |
| SNP_P4_79334_8139949 | NC_021165.1    | Ca_kabuli_chr06 | 8139949                 | AA                              | CC              | 1946859266               |
| SNP_P4_79335_8140131 | NC_021165.1    | Ca_kabuli_chr06 | 8140131                 | CC                              | AA              | 1946859268               |
| SNP_P4_79336_8140167 | NC_021165.1    | Ca_kabuli_chr06 | 8140167                 | TT                              | CC              | 1946859270               |
| SNP_P4_79337_8140496 | NC_021165.1    | Ca_kabuli_chr06 | 8140496                 | GG                              | CC              | 1946859272               |
| SNP_P4_79338_8140512 | NC_021165.1    | Ca_kabuli_chr06 | 8140512                 | GG                              | AA              | 1946859275               |
| SNP_P4_79339_8140517 | NC_021165.1    | Ca_kabuli_chr06 | 8140517                 | GG                              | TT              | 1946859277               |
| SNP_P4_79340_8140737 | NC_021165.1    | Ca_kabuli_chr06 | 8140737                 | AA                              | GG              | 1946859279               |
| SNP_P4_79342_8143999 | NC_021165.1    | Ca_kabuli_chr06 | 8143999                 | CC                              | AA              | 1946859281               |
| SNP_P4_79343_8144015 | NC_021165.1    | Ca_kabuli_chr06 | 8144015                 | AA                              | GG              | 1946859283               |
| SNP_P4_79344_8144020 | NC_021165.1    | Ca_kabuli_chr06 | 8144020                 | TT                              | CC              | 1946859285               |
| SNP_P4_79345_8144029 | NC_021165.1    | Ca_kabuli_chr06 | 8144029                 | GG                              | TT              | 1946859287               |
| SNP_P4_79346_8144227 | NC_021165.1    | Ca_kabuli_chr06 | 8144227                 | TT                              | CC              | 1946859289               |
| SNP_P4_79347_8144338 | NC_021165.1    | Ca_kabuli_chr06 | 8144338                 | AA                              | GG              | 1946859291               |
| SNP_P4_79348_8144360 | NC_021165.1    | Ca_kabuli_chr06 | 8144360                 | TT                              | CC              | 1946859293               |
| SNP_P4_79349_8144371 | NC_021165.1    | Ca_kabuli_chr06 | 8144371                 | TT                              | CC              | 1946859295               |
| SNP_P4_79350_8146197 | NC_021165.1    | Ca_kabuli_chr06 | 8146197                 | CC                              | GG              | 1946859297               |
| SNP_P4_79351_8146212 | NC_021165.1    | Ca_kabuli_chr06 | 8146212                 | GG                              | AA              | 1946859299               |
| SNP_P4_79352_8146241 | NC_021165.1    | Ca_kabuli_chr06 | 8146241                 | AA                              | GG              | 1946859301               |
| SNP_P4_79353_8146791 | NC_021165.1    | Ca_kabuli_chr06 | 8146791                 | AA                              | GG              | 1946859303               |
| SNP_P4_79354_8146861 | NC_021165.1    | Ca_kabuli_chr06 | 8146861                 | AA                              | GG              | 1946859305               |
| SNP_P4_79355_8153219 | NC_021165.1    | Ca_kabuli_chr06 | 8153219                 | AA                              | TT              | 1946859307               |
| SNP_P4_79356_8153604 | NC_021165.1    | Ca_kabuli_chr06 | 8153604                 | AA                              | TT              | 1946859309               |
| SNP_P4_79357_8153631 | NC_021165.1    | Ca_kabuli_chr06 | 8153631                 | GG                              | AA              | 1946859311               |
| SNP_P4_79358_8153636 | NC_021165.1    | Ca_kabuli_chr06 | 8153636                 | AA                              | TT              | 1946859313               |
| SNP_P4_79359_8153694 | NC_021165.1    | Ca_kabuli_chr06 | 8153694                 | GG                              | AA              | 1946859315               |
| SNP_P4_79360_8153714 | NC_021165.1    | Ca_kabuli_chr06 | 8153714                 | TT                              | CC              | 1946859317               |
| SNP_P4_79361_8153726 | NC_021165.1    | Ca_kabuli_chr06 | 8153726                 | TT                              | CC              | 1946859319               |
| SNP_P4_79362_8153772 | NC_021165.1    | Ca_kabuli_chr06 | 8153772                 | AA                              | TT              | 1946859321               |
| SNP_P4_79363_8154142 | NC_021165.1    | Ca_kabuli_chr06 | 8154142                 | CC                              | TT              | 1946859323               |
| SNP_P4_79365_8156721 | NC_021165.1    | Ca_kabuli_chr06 | 8156721                 | AA                              | TT              | 1946859326               |

| SNPs IDs             | Chromosome IDs | Chromosomes     | Physical positions (bp) | CDC Frontier (Reference genome) | (ILWC46 & LPNB) | NCBI SNPdb Accession IDs |
|----------------------|----------------|-----------------|-------------------------|---------------------------------|-----------------|--------------------------|
| SNP_P4_79366_8156782 | NC_021165.1    | Ca_kabuli_chr06 | 8156782                 | GG                              | AA              | 1946859328               |
| SNP_P4_79367_8159694 | NC_021165.1    | Ca_kabuli_chr06 | 8159694                 | TT                              | CC              | 1946859330               |
| SNP_P4_79368_8161056 | NC_021165.1    | Ca_kabuli_chr06 | 8161056                 | TT                              | CC              | 1946859332               |
| SNP_P4_79369_8161366 | NC_021165.1    | Ca_kabuli_chr06 | 8161366                 | CC                              | TT              | 1946859334               |
| SNP_P4_79370_8161368 | NC_021165.1    | Ca_kabuli_chr06 | 8161368                 | TT                              | GG              | 1946859336               |
| SNP_P4_79371_8161975 | NC_021165.1    | Ca_kabuli_chr06 | 8161975                 | GG                              | AA              | 1946859338               |
| SNP_P4_79372_8162472 | NC_021165.1    | Ca_kabuli_chr06 | 8162472                 | AA                              | GG              | 1946859340               |
| SNP_P4_79374_8164639 | NC_021165.1    | Ca_kabuli_chr06 | 8164639                 | CC                              | GG              | 1946859342               |
| SNP_P4_79375_8165162 | NC_021165.1    | Ca_kabuli_chr06 | 8165162                 | TT                              | AA              | 1946859344               |
| SNP_P4_79376_8168662 | NC_021165.1    | Ca_kabuli_chr06 | 8168662                 | GG                              | AA              | 1946859345               |
| SNP_P4_79377_8169198 | NC_021165.1    | Ca_kabuli_chr06 | 8169198                 | GG                              | AA              | 1946859346               |
| SNP_P4_79378_8169502 | NC_021165.1    | Ca_kabuli_chr06 | 8169502                 | GG                              | CC              | 1946859347               |
| SNP_P4_79379_8170170 | NC_021165.1    | Ca_kabuli_chr06 | 8170170                 | CC                              | AA              | 1946859348               |
| SNP_P4_79380_8171569 | NC_021165.1    | Ca_kabuli_chr06 | 8171569                 | GG                              | CC              | 1946859350               |
| SNP_P4_79381_8171581 | NC_021165.1    | Ca_kabuli_chr06 | 8171581                 | AA                              | GG              | 1946859352               |
| SNP_P4_79382_8171591 | NC_021165.1    | Ca_kabuli_chr06 | 8171591                 | CC                              | TT              | 1946859354               |
| SNP_P4_79383_8173997 | NC_021165.1    | Ca_kabuli_chr06 | 8173997                 | AA                              | GG              | 1946859356               |
| SNP_P4_79384_8174049 | NC_021165.1    | Ca_kabuli_chr06 | 8174049                 | CC                              | TT              | 1946859358               |
| SNP_P4_79385_8174054 | NC_021165.1    | Ca_kabuli_chr06 | 8174054                 | AA                              | GG              | 1946859360               |
| SNP_P4_79386_8174103 | NC_021165.1    | Ca_kabuli_chr06 | 8174103                 | GG                              | AA              | 1946859362               |
| SNP_P4_79387_8174139 | NC_021165.1    | Ca_kabuli_chr06 | 8174139                 | TT                              | CC              | 1946859364               |
| SNP_P4_79389_8174417 | NC_021165.1    | Ca_kabuli_chr06 | 8174417                 | AA                              | TT              | 1946859366               |
| SNP_P4_79390_8174449 | NC_021165.1    | Ca_kabuli_chr06 | 8174449                 | GG                              | TT              | 1946859368               |
| SNP_P4_79391_8174490 | NC_021165.1    | Ca_kabuli_chr06 | 8174490                 | AA                              | GG              | 1946859370               |
| SNP_P4_79392_8175518 | NC_021165.1    | Ca_kabuli_chr06 | 8175518                 | CC                              | AA              | 1946859372               |
| SNP_P4_79393_8175564 | NC_021165.1    | Ca_kabuli_chr06 | 8175564                 | GG                              | AA              | 1946859374               |
| SNP_P4_79394_8175813 | NC_021165.1    | Ca_kabuli_chr06 | 8175813                 | CC                              | TT              | 1946859376               |
| SNP_P4_79395_8176168 | NC_021165.1    | Ca_kabuli_chr06 | 8176168                 | TT                              | CC              | 1946859378               |
| SNP_P4_79396_8176187 | NC_021165.1    | Ca_kabuli_chr06 | 8176187                 | TT                              | CC              | 1946859380               |
| SNP_P4_79397_8176950 | NC_021165.1    | Ca_kabuli_chr06 | 8176950                 | CC                              | TT              | 1946859382               |
| SNP_P4_79398_8176953 | NC_021165.1    | Ca_kabuli_chr06 | 8176953                 | AA                              | GG              | 1946859384               |
| SNP_P4_79400_8177355 | NC_021165.1    | Ca_kabuli_chr06 | 8177355                 | TT                              | CC              | 1946859386               |
| SNP_P4_79401_8177924 | NC_021165.1    | Ca_kabuli_chr06 | 8177924                 | TT                              | CC              | 1946859388               |
| SNP_P4_79403_8178326 | NC_021165.1    | Ca_kabuli_chr06 | 8178326                 | AA                              | CC              | 1946859390               |
| SNP_P4_79404_8179739 | NC_021165.1    | Ca_kabuli_chr06 | 8179739                 | GG                              | CC              | 1946859392               |
| SNP_P4_79405_8181320 | NC_021165.1    | Ca_kabuli_chr06 | 8181320                 | GG                              | CC              | 1946859394               |
| SNP_P4_79407_8181978 | NC_021165.1    | Ca_kabuli_chr06 | 8181978                 | CC                              | AA              | 1946859396               |
| SNP_P4_79408_8182016 | NC_021165.1    | Ca_kabuli_chr06 | 8182016                 | TT                              | GG              | 1946859398               |
| SNP_P4_79409_8182306 | NC_021165.1    | Ca_kabuli_chr06 | 8182306                 | AA                              | TT              | 1946859400               |
| SNP_P4_79410_8182355 | NC_021165.1    | Ca_kabuli_chr06 | 8182355                 | AA                              | GG              | 1946859402               |
| SNP_P4_79412_8182784 | NC_021165.1    | Ca_kabuli_chr06 | 8182784                 | AA                              | CC              | 1946859404               |
| SNP_P4_79413_8182790 | NC_021165.1    | Ca_kabuli_chr06 | 8182790                 | AA                              | TT              | 1946859406               |

| SNPs IDs             | Chromosome IDs | Chromosomes     | Physical positions (bp) | CDC Frontier (Reference genome) | (ILWC46 & LPNB) | NCBI SNPdb Accession IDs |
|----------------------|----------------|-----------------|-------------------------|---------------------------------|-----------------|--------------------------|
| SNP_P4_79414_8182810 | NC_021165.1    | Ca_kabuli_chr06 | 8182810                 | AA                              | GG              | 1946859408               |
| SNP_P4_79415_8192974 | NC_021165.1    | Ca_kabuli_chr06 | 8192974                 | AA                              | CC              | 1946859410               |
| SNP_P4_79416_8192976 | NC_021165.1    | Ca_kabuli_chr06 | 8192976                 | CC                              | AA              | 1946859412               |
| SNP_P4_79417_8193006 | NC_021165.1    | Ca_kabuli_chr06 | 8193006                 | TT                              | AA              | 1946859414               |
| SNP_P4_79418_8193458 | NC_021165.1    | Ca_kabuli_chr06 | 8193458                 | GG                              | AA              | 1946859416               |
| SNP_P4_79419_8194460 | NC_021165.1    | Ca_kabuli_chr06 | 8194460                 | TT                              | GG              | 1946859418               |
| SNP_P4_79421_8194815 | NC_021165.1    | Ca_kabuli_chr06 | 8194815                 | CC                              | AA              | 1946859420               |
| SNP_P4_79422_8195431 | NC_021165.1    | Ca_kabuli_chr06 | 8195431                 | CC                              | GG              | 1946859422               |
| SNP_P4_79423_8196378 | NC_021165.1    | Ca_kabuli_chr06 | 8196378                 | TT                              | AA              | 1946859424               |
| SNP_P4_79424_8196382 | NC_021165.1    | Ca_kabuli_chr06 | 8196382                 | AA                              | GG              | 1946859426               |
| SNP_P4_79425_8196878 | NC_021165.1    | Ca_kabuli_chr06 | 8196878                 | AA                              | TT              | 1946859428               |
| SNP_P4_79426_8198573 | NC_021165.1    | Ca_kabuli_chr06 | 8198573                 | CC                              | TT              | 1946859430               |
| SNP_P4_79427_8198909 | NC_021165.1    | Ca_kabuli_chr06 | 8198909                 | GG                              | CC              | 1946859432               |
| SNP_P4_79428_8199092 | NC_021165.1    | Ca_kabuli_chr06 | 8199092                 | CC                              | TT              | 1946859434               |
| SNP_P4_79429_8199152 | NC_021165.1    | Ca_kabuli_chr06 | 8199152                 | CC                              | AA              | 1946859436               |
| SNP_P4_79431_8200260 | NC_021165.1    | Ca_kabuli_chr06 | 8200260                 | AA                              | GG              | 1946859438               |
| SNP_P4_79432_8211065 | NC_021165.1    | Ca_kabuli_chr06 | 8211065                 | AA                              | GG              | 1946859440               |
| SNP_P4_79433_8218518 | NC_021165.1    | Ca_kabuli_chr06 | 8218518                 | AA                              | TT              | 1946859442               |
| SNP_P4_79434_8230177 | NC_021165.1    | Ca_kabuli_chr06 | 8230177                 | TT                              | GG              | 1946859444               |
| SNP_P4_79435_8230180 | NC_021165.1    | Ca_kabuli_chr06 | 8230180                 | TT                              | GG              | 1946859446               |
| SNP_P4_79436_8230330 | NC_021165.1    | Ca_kabuli_chr06 | 8230330                 | GG                              | AA              | 1946859448               |
| SNP_P4_79439_8254293 | NC_021165.1    | Ca_kabuli_chr06 | 8254293                 | CC                              | TT              | 1946859450               |
| SNP_P4_79440_8267794 | NC_021165.1    | Ca_kabuli_chr06 | 8267794                 | CC                              | AA              | 1946859452               |
| SNP_P4_79441_8279402 | NC_021165.1    | Ca_kabuli_chr06 | 8279402                 | GG                              | AA              | 1946859454               |
| SNP_P4_79442_8290244 | NC_021165.1    | Ca_kabuli_chr06 | 8290244                 | AA                              | GG              | 1946859456               |
| SNP_P4_79443_8299602 | NC_021165.1    | Ca_kabuli_chr06 | 8299602                 | TT                              | CC              | 1946859458               |
| SNP_P4_79444_8309139 | NC_021165.1    | Ca_kabuli_chr06 | 8309139                 | GG                              | TT              | 1946859460               |
| SNP_P4_79445_8310221 | NC_021165.1    | Ca_kabuli_chr06 | 8310221                 | TT                              | CC              | 1946859462               |
| SNP_P4_79447_8318726 | NC_021165.1    | Ca_kabuli_chr06 | 8318726                 | TT                              | CC              | 1946859464               |
| SNP_P4_79448_8319297 | NC_021165.1    | Ca_kabuli_chr06 | 8319297                 | TT                              | GG              | 1946859466               |
| SNP_P4_79449_8319747 | NC_021165.1    | Ca_kabuli_chr06 | 8319747                 | TT                              | CC              | 1946859468               |
| SNP_P4_79450_8333689 | NC_021165.1    | Ca_kabuli_chr06 | 8333689                 | TT                              | CC              | 1946859470               |
| SNP_P4_79451_8347070 | NC_021165.1    | Ca_kabuli_chr06 | 8347070                 | GG                              | TT              | 1946859472               |
| SNP_P4_79452_8354929 | NC_021165.1    | Ca_kabuli_chr06 | 8354929                 | TT                              | CC              | 1946859474               |
| SNP_P4_79453_8361266 | NC_021165.1    | Ca_kabuli_chr06 | 8361266                 | GG                              | AA              | 1946859476               |
| SNP_P4_79454_8364641 | NC_021165.1    | Ca_kabuli_chr06 | 8364641                 | GG                              | AA              | 1946859478               |
| SNP_P4_79455_8372959 | NC_021165.1    | Ca_kabuli_chr06 | 8372959                 | TT                              | AA              | 1946859480               |
| SNP_P4_79456_8391265 | NC_021165.1    | Ca_kabuli_chr06 | 8391265                 | AA                              | GG              | 1946859482               |
| SNP_P4_79457_8394340 | NC_021165.1    | Ca_kabuli_chr06 | 8394340                 | TT                              | CC              | 1946859484               |
| SNP_P4_79459_8417693 | NC_021165.1    | Ca_kabuli_chr06 | 8417693                 | GG                              | AA              | 1946859486               |
| SNP_P4_79460_8418651 | NC_021165.1    | Ca_kabuli_chr06 | 8418651                 | CC                              | TT              | 1946859488               |
| SNP_P4_79461_8418660 | NC_021165.1    | Ca_kabuli_chr06 | 8418660                 | TT                              | CC              | 1946859490               |

| SNPs IDs             | Chromosome IDs | Chromosomes     | Physical positions (bp) | CDC Frontier (Reference genome) | (ILWC46 & LPNB) | NCBI SNPdb Accession IDs |
|----------------------|----------------|-----------------|-------------------------|---------------------------------|-----------------|--------------------------|
| SNP_P4_79462_8433740 | NC_021165.1    | Ca_kabuli_chr06 | 8433740                 | AA                              | GG              | 1946859492               |
| SNP_P4_79463_8433743 | NC_021165.1    | Ca_kabuli_chr06 | 8433743                 | AA                              | GG              | 1946859494               |
| SNP_P4_79464_8433745 | NC_021165.1    | Ca_kabuli_chr06 | 8433745                 | TT                              | AA              | 1946859496               |
| SNP_P4_79465_8446218 | NC_021165.1    | Ca_kabuli_chr06 | 8446218                 | TT                              | AA              | 1946859498               |
| SNP_P4_79466_8448335 | NC_021165.1    | Ca_kabuli_chr06 | 8448335                 | TT                              | GG              | 1946859500               |
| SNP_P4_79467_8448729 | NC_021165.1    | Ca_kabuli_chr06 | 8448729                 | TT                              | AA              | 1946859502               |
| SNP_P4_79468_8448741 | NC_021165.1    | Ca_kabuli_chr06 | 8448741                 | CC                              | AA              | 1946859504               |
| SNP_P4_79469_8448823 | NC_021165.1    | Ca_kabuli_chr06 | 8448823                 | CC                              | TT              | 1946859506               |
| SNP_P4_79470_8448825 | NC_021165.1    | Ca_kabuli_chr06 | 8448825                 | AA                              | GG              | 1946859508               |
| SNP_P4_79471_8449386 | NC_021165.1    | Ca_kabuli_chr06 | 8449386                 | AA                              | GG              | 1946859510               |
| SNP_P4_79472_8449470 | NC_021165.1    | Ca_kabuli_chr06 | 8449470                 | CC                              | GG              | 1946859512               |
| SNP_P4_79473_8451562 | NC_021165.1    | Ca_kabuli_chr06 | 8451562                 | AA                              | GG              | 1946859514               |
| SNP_P4_79474_8451627 | NC_021165.1    | Ca_kabuli_chr06 | 8451627                 | GG                              | CC              | 1946859516               |
| SNP_P4_79475_8451648 | NC_021165.1    | Ca_kabuli_chr06 | 8451648                 | TT                              | CC              | 1946859518               |
| SNP_P4_79476_8452359 | NC_021165.1    | Ca_kabuli_chr06 | 8452359                 | CC                              | TT              | 1946859520               |
| SNP_P4_79477_8452376 | NC_021165.1    | Ca_kabuli_chr06 | 8452376                 | AA                              | GG              | 1946859522               |
| SNP_P4_79478_8477671 | NC_021165.1    | Ca_kabuli_chr06 | 8477671                 | CC                              | TT              | 1946859524               |
| SNP_P4_79479_8478122 | NC_021165.1    | Ca_kabuli_chr06 | 8478122                 | GG                              | AA              | 1946859526               |
| SNP_P4_79480_8512534 | NC_021165.1    | Ca_kabuli_chr06 | 8512534                 | TT                              | GG              | 1946859527               |
| SNP_P4_79481_8521896 | NC_021165.1    | Ca_kabuli_chr06 | 8521896                 | CC                              | TT              | 1946859529               |
| SNP_P4_79482_8522061 | NC_021165.1    | Ca_kabuli_chr06 | 8522061                 | TT                              | AA              | 1946859531               |
| SNP_P4_79483_8522129 | NC_021165.1    | Ca_kabuli_chr06 | 8522129                 | GG                              | AA              | 1946859533               |
| SNP_P4_79484_8522158 | NC_021165.1    | Ca_kabuli_chr06 | 8522158                 | TT                              | GG              | 1946859535               |
| SNP_P4_79485_8522512 | NC_021165.1    | Ca_kabuli_chr06 | 8522512                 | GG                              | TT              | 1946859537               |
| SNP_P4_79486_8523061 | NC_021165.1    | Ca_kabuli_chr06 | 8523061                 | CC                              | GG              | 1946859539               |
| SNP_P4_79487_8524248 | NC_021165.1    | Ca_kabuli_chr06 | 8524248                 | AA                              | TT              | 1946859541               |
| SNP_P4_79488_8524250 | NC_021165.1    | Ca_kabuli_chr06 | 8524250                 | TT                              | CC              | 1946859543               |
| SNP_P4_79489_8527799 | NC_021165.1    | Ca_kabuli_chr06 | 8527799                 | AA                              | GG              | 1946859545               |
| SNP_P4_79490_8533518 | NC_021165.1    | Ca_kabuli_chr06 | 8533518                 | GG                              | CC              | 1946859547               |
| SNP_P4_79494_8661704 | NC_021165.1    | Ca_kabuli_chr06 | 8661704                 | CC                              | TT              | 1946859549               |
| SNP_P4_79495_8663797 | NC_021165.1    | Ca_kabuli_chr06 | 8663797                 | AA                              | GG              | 1946859551               |
| SNP_P4_79497_8675164 | NC_021165.1    | Ca_kabuli_chr06 | 8675164                 | TT                              | GG              | 1946859553               |
| SNP_P4_79498_8679602 | NC_021165.1    | Ca_kabuli_chr06 | 8679602                 | AA                              | GG              | 1946859555               |
| SNP_P4_79499_8682586 | NC_021165.1    | Ca_kabuli_chr06 | 8682586                 | AA                              | CC              | 1946859557               |
| SNP_P4_79500_8682588 | NC_021165.1    | Ca_kabuli_chr06 | 8682588                 | AA                              | GG              | 1946859559               |
| SNP_P4_79501_8699558 | NC_021165.1    | Ca_kabuli_chr06 | 8699558                 | CC                              | TT              | 1946859561               |
| SNP_P4_79502_8700197 | NC_021165.1    | Ca_kabuli_chr06 | 8700197                 | GG                              | AA              | 1946859562               |
| SNP_P4_79503_8700411 | NC_021165.1    | Ca_kabuli_chr06 | 8700411                 | CC                              | TT              | 1946859564               |
| SNP_P4_79505_8723023 | NC_021165.1    | Ca_kabuli_chr06 | 8723023                 | TT                              | GG              | 1946859566               |
| SNP_P4_79506_8723218 | NC_021165.1    | Ca_kabuli_chr06 | 8723218                 | GG                              | CC              | 1946859568               |
| SNP_P4_79507_8723446 | NC_021165.1    | Ca_kabuli_chr06 | 8723446                 | GG                              | CC              | 1946859570               |
| SNP_P4_79508_8723571 | NC_021165.1    | Ca_kabuli_chr06 | 8723571                 | CC                              | GG              | 1946859572               |

| SNPs IDs             | Chromosome IDs | Chromosomes     | Physical positions (bp) | CDC Frontier (Reference genome) | (ILWC46 & LPNB) | NCBI SNPdb Accession IDs |
|----------------------|----------------|-----------------|-------------------------|---------------------------------|-----------------|--------------------------|
| SNP_P4_79509_8723630 | NC_021165.1    | Ca_kabuli_chr06 | 8723630                 | CC                              | TT              | 1946859574               |
| SNP_P4_79510_8740965 | NC_021165.1    | Ca_kabuli_chr06 | 8740965                 | GG                              | AA              | 1946859576               |
| SNP_P4_79511_8755862 | NC_021165.1    | Ca_kabuli_chr06 | 8755862                 | AA                              | GG              | 1946859578               |
| SNP_P4_79512_8759848 | NC_021165.1    | Ca_kabuli_chr06 | 8759848                 | AA                              | TT              | 1946859580               |
| SNP_P4_79514_8779978 | NC_021165.1    | Ca_kabuli_chr06 | 8779978                 | TT                              | CC              | 1946859582               |
| SNP_P4_79515_8788403 | NC_021165.1    | Ca_kabuli_chr06 | 8788403                 | CC                              | TT              | 1946859584               |
| SNP_P4_79516_8796436 | NC_021165.1    | Ca_kabuli_chr06 | 8796436                 | TT                              | CC              | 1946859586               |
| SNP_P4_79517_8796693 | NC_021165.1    | Ca_kabuli_chr06 | 8796693                 | CC                              | TT              | 1946859587               |
| SNP_P4_79518_8796701 | NC_021165.1    | Ca_kabuli_chr06 | 8796701                 | CC                              | TT              | 1946859589               |
| SNP_P4_79519_8796873 | NC_021165.1    | Ca_kabuli_chr06 | 8796873                 | AA                              | CC              | 1946859591               |
| SNP_P4_79520_8796939 | NC_021165.1    | Ca_kabuli_chr06 | 8796939                 | CC                              | AA              | 1946859593               |
| SNP_P4_79522_8797066 | NC_021165.1    | Ca_kabuli_chr06 | 8797066                 | AA                              | GG              | 1946859595               |
| SNP_P4_79523_8798031 | NC_021165.1    | Ca_kabuli_chr06 | 8798031                 | TT                              | GG              | 1946859597               |
| SNP_P4_79524_8809501 | NC_021165.1    | Ca_kabuli_chr06 | 8809501                 | AA                              | TT              | 1946859599               |
| SNP_P4_79526_8809838 | NC_021165.1    | Ca_kabuli_chr06 | 8809838                 | AA                              | GG              | 1946859601               |
| SNP_P4_79527_8809840 | NC_021165.1    | Ca_kabuli_chr06 | 8809840                 | TT                              | AA              | 1946859603               |
| SNP_P4_79528_8814615 | NC_021165.1    | Ca_kabuli_chr06 | 8814615                 | GG                              | TT              | 1946859605               |
| SNP_P4_79529_8819513 | NC_021165.1    | Ca_kabuli_chr06 | 8819513                 | TT                              | CC              | 1946859607               |
| SNP_P4_79530_8820884 | NC_021165.1    | Ca_kabuli_chr06 | 8820884                 | GG                              | AA              | 1946859609               |
| SNP_P4_79531_8821040 | NC_021165.1    | Ca_kabuli_chr06 | 8821040                 | GG                              | AA              | 1946859611               |
| SNP_P4_79532_8821057 | NC_021165.1    | Ca_kabuli_chr06 | 8821057                 | CC                              | TT              | 1946859613               |
| SNP_P4_79533_8828973 | NC_021165.1    | Ca_kabuli_chr06 | 8828973                 | TT                              | CC              | 1946859615               |
| SNP_P4_79534_8829081 | NC_021165.1    | Ca_kabuli_chr06 | 8829081                 | TT                              | CC              | 1946859617               |
| SNP_P4_79535_8829800 | NC_021165.1    | Ca_kabuli_chr06 | 8829800                 | AA                              | GG              | 1946859619               |
| SNP_P4_79536_8829877 | NC_021165.1    | Ca_kabuli_chr06 | 8829877                 | CC                              | GG              | 1946859621               |
| SNP_P4_79537_8833755 | NC_021165.1    | Ca_kabuli_chr06 | 8833755                 | AA                              | CC              | 1946859623               |
| SNP_P4_79539_8835756 | NC_021165.1    | Ca_kabuli_chr06 | 8835756                 | AA                              | TT              | 1946859625               |
| SNP_P4_79540_8847575 | NC_021165.1    | Ca_kabuli_chr06 | 8847575                 | TT                              | CC              | 1946859627               |
| SNP_P4_79541_8847577 | NC_021165.1    | Ca_kabuli_chr06 | 8847577                 | TT                              | GG              | 1946859629               |
| SNP_P4_79542_8847585 | NC_021165.1    | Ca_kabuli_chr06 | 8847585                 | CC                              | TT              | 1946859631               |
| SNP_P4_79543_8847725 | NC_021165.1    | Ca_kabuli_chr06 | 8847725                 | CC                              | TT              | 1946859633               |
| SNP_P4_79545_8858905 | NC_021165.1    | Ca_kabuli_chr06 | 8858905                 | GG                              | CC              | 1946859635               |
| SNP_P4_79546_8862708 | NC_021165.1    | Ca_kabuli_chr06 | 8862708                 | TT                              | CC              | 1946859637               |
| SNP_P4_79547_8863736 | NC_021165.1    | Ca_kabuli_chr06 | 8863736                 | AA                              | GG              | 1946859638               |
| SNP_P4_79548_8879497 | NC_021165.1    | Ca_kabuli_chr06 | 8879497                 | TT                              | AA              | 1946859640               |
| SNP_P4_79550_8914484 | NC_021165.1    | Ca_kabuli_chr06 | 8914484                 | GG                              | TT              | 1946859642               |
| SNP_P4_79551_8920153 | NC_021165.1    | Ca_kabuli_chr06 | 8920153                 | CC                              | TT              | 1946859644               |
| SNP_P4_79552_8925079 | NC_021165.1    | Ca_kabuli_chr06 | 8925079                 | AA                              | TT              | 1946859646               |
| SNP_P4_79553_8925194 | NC_021165.1    | Ca_kabuli_chr06 | 8925194                 | AA                              | GG              | 1946859648               |
| SNP_P4_79554_8950805 | NC_021165.1    | Ca_kabuli_chr06 | 8950805                 | AA                              | TT              | 1946859650               |
| SNP_P4_79555_8987539 | NC_021165.1    | Ca_kabuli_chr06 | 8987539                 | TT                              | CC              | 1946859652               |
| SNP_P4_79556_9000470 | NC_021165.1    | Ca_kabuli_chr06 | 9000470                 | GG                              | AA              | 1946859654               |

| SNPs IDs             | Chromosome IDs | Chromosomes     | Physical positions (bp) | CDC Frontier (Reference genome) | (ILWC46 & LPNB) | NCBI SNPdb Accession IDs |
|----------------------|----------------|-----------------|-------------------------|---------------------------------|-----------------|--------------------------|
| SNP_P4_79557_9000706 | NC_021165.1    | Ca_kabuli_chr06 | 9000706                 | TT                              | CC              | 1946859656               |
| SNP_P4_79558_9000714 | NC_021165.1    | Ca_kabuli_chr06 | 9000714                 | AA                              | GG              | 1946859658               |
| SNP_P4_79559_9001656 | NC_021165.1    | Ca_kabuli_chr06 | 9001656                 | AA                              | GG              | 1946859660               |
| SNP_P4_79562_9016542 | NC_021165.1    | Ca_kabuli_chr06 | 9016542                 | TT                              | CC              | 1946859662               |
| SNP_P4_79563_9017982 | NC_021165.1    | Ca_kabuli_chr06 | 9017982                 | AA                              | GG              | 1946859664               |
| SNP_P4_79565_9019073 | NC_021165.1    | Ca_kabuli_chr06 | 9019073                 | CC                              | TT              | 1946859666               |
| SNP_P4_79566_9019084 | NC_021165.1    | Ca_kabuli_chr06 | 9019084                 | AA                              | GG              | 1946859668               |
| SNP_P4_79567_9030714 | NC_021165.1    | Ca_kabuli_chr06 | 9030714                 | CC                              | GG              | 1946859670               |
| SNP_P4_79568_9060357 | NC_021165.1    | Ca_kabuli_chr06 | 9060357                 | CC                              | GG              | 1946859672               |
| SNP_P4_79569_9060366 | NC_021165.1    | Ca_kabuli_chr06 | 9060366                 | CC                              | TT              | 1946859674               |
| SNP_P4_79571_9060465 | NC_021165.1    | Ca_kabuli_chr06 | 9060465                 | AA                              | CC              | 1946859676               |
| SNP_P4_79572_9060495 | NC_021165.1    | Ca_kabuli_chr06 | 9060495                 | AA                              | CC              | 1946859678               |
| SNP_P4_79573_9060621 | NC_021165.1    | Ca_kabuli_chr06 | 9060621                 | AA                              | GG              | 1946859680               |
| SNP_P4_79574_9060696 | NC_021165.1    | Ca_kabuli_chr06 | 9060696                 | CC                              | TT              | 1946859682               |
| SNP_P4_79575_9062743 | NC_021165.1    | Ca_kabuli_chr06 | 9062743                 | GG                              | TT              | 1946859684               |
| SNP_P4_79576_9081859 | NC_021165.1    | Ca_kabuli_chr06 | 9081859                 | AA                              | GG              | 1946859686               |
| SNP_P4_79577_9101468 | NC_021165.1    | Ca_kabuli_chr06 | 9101468                 | GG                              | TT              | 1946859688               |
| SNP_P4_79578_9101482 | NC_021165.1    | Ca_kabuli_chr06 | 9101482                 | GG                              | AA              | 1946859689               |
| SNP_P4_79579_9101653 | NC_021165.1    | Ca_kabuli_chr06 | 9101653                 | TT                              | AA              | 1946859691               |
| SNP_P4_79580_9102030 | NC_021165.1    | Ca_kabuli_chr06 | 9102030                 | TT                              | CC              | 1946859693               |
| SNP_P4_79581_9103094 | NC_021165.1    | Ca_kabuli_chr06 | 9103094                 | TT                              | AA              | 1946859695               |
| SNP_P4_79583_9128629 | NC_021165.1    | Ca_kabuli_chr06 | 9128629                 | GG                              | AA              | 1946859697               |
| SNP_P4_79584_9133807 | NC_021165.1    | Ca_kabuli_chr06 | 9133807                 | AA                              | GG              | 1946859699               |
| SNP_P4_79585_9137887 | NC_021165.1    | Ca_kabuli_chr06 | 9137887                 | GG                              | CC              | 1946859701               |
| SNP_P4_79586_9171307 | NC_021165.1    | Ca_kabuli_chr06 | 9171307                 | GG                              | AA              | 1946859703               |
| SNP_P4_79587_9192765 | NC_021165.1    | Ca_kabuli_chr06 | 9192765                 | GG                              | TT              | 1946859705               |
| SNP_P4_79589_9204000 | NC_021165.1    | Ca_kabuli_chr06 | 9204000                 | TT                              | CC              | 1946859706               |
| SNP_P4_79590_9225074 | NC_021165.1    | Ca_kabuli_chr06 | 9225074                 | AA                              | GG              | 1946859708               |
| SNP_P4_79591_9238606 | NC_021165.1    | Ca_kabuli_chr06 | 9238606                 | AA                              | TT              | 1946859710               |
| SNP_P4_79592_9238608 | NC_021165.1    | Ca_kabuli_chr06 | 9238608                 | AA                              | CC              | 1946859712               |
| SNP_P4_79593_9238610 | NC_021165.1    | Ca_kabuli_chr06 | 9238610                 | AA                              | CC              | 1946859714               |
| SNP_P4_79595_9258770 | NC_021165.1    | Ca_kabuli_chr06 | 9258770                 | GG                              | AA              | 1946859716               |
| SNP_P4_79597_9258868 | NC_021165.1    | Ca_kabuli_chr06 | 9258868                 | GG                              | AA              | 1946859718               |
| SNP_P4_79598_9258869 | NC_021165.1    | Ca_kabuli_chr06 | 9258869                 | AA                              | TT              | 1946859720               |
| SNP_P4_79599_9296260 | NC_021165.1    | Ca_kabuli_chr06 | 9296260                 | CC                              | AA              | 1946859722               |
| SNP_P4_79600_9298816 | NC_021165.1    | Ca_kabuli_chr06 | 9298816                 | AA                              | TT              | 1946859724               |
| SNP_P4_79601_9306849 | NC_021165.1    | Ca_kabuli_chr06 | 9306849                 | GG                              | TT              | 1946859726               |
| SNP_P4_79602_9308450 | NC_021165.1    | Ca_kabuli_chr06 | 9308450                 | CC                              | TT              | 1946859728               |
| SNP_P4_79603_9311572 | NC_021165.1    | Ca_kabuli_chr06 | 9311572                 | TT                              | AA              | 1946859730               |
| SNP_P4_79604_9333003 | NC_021165.1    | Ca_kabuli_chr06 | 9333003                 | GG                              | TT              | 1946859732               |
| SNP_P4_79605_9334907 | NC_021165.1    | Ca_kabuli_chr06 | 9334907                 | GG                              | CC              | 1946859734               |
| SNP_P4_79607_9347530 | NC_021165.1    | Ca_kabuli_chr06 | 9347530                 | CC                              | TT              | 1946859736               |

| SNPs IDs              | Chromosome IDs | Chromosomes     | Physical positions (bp) | CDC Frontier (Reference genome) | (ILWC46 & LPNB) | NCBI SNPdb Accession IDs |
|-----------------------|----------------|-----------------|-------------------------|---------------------------------|-----------------|--------------------------|
| SNP_P4_79608_9349563  | NC_021165.1    | Ca_kabuli_chr06 | 9349563                 | GG                              | AA              | 1946859738               |
| SNP_P4_79609_9443968  | NC_021165.1    | Ca_kabuli_chr06 | 9443968                 | AA                              | CC              | 1946859740               |
| SNP_P4_79610_9443970  | NC_021165.1    | Ca_kabuli_chr06 | 9443970                 | GG                              | TT              | 1946859742               |
| SNP_P4_79611_9448662  | NC_021165.1    | Ca_kabuli_chr06 | 9448662                 | GG                              | TT              | 1946859744               |
| SNP_P4_79612_9454457  | NC_021165.1    | Ca_kabuli_chr06 | 9454457                 | CC                              | TT              | 1946859746               |
| SNP_P4_79613_9454545  | NC_021165.1    | Ca_kabuli_chr06 | 9454545                 | TT                              | CC              | 1946859748               |
| SNP_P4_79614_9483784  | NC_021165.1    | Ca_kabuli_chr06 | 9483784                 | TT                              | CC              | 1946859750               |
| SNP_P4_79616_9501200  | NC_021165.1    | Ca_kabuli_chr06 | 9501200                 | TT                              | CC              | 1946859752               |
| SNP_P4_79617_9519481  | NC_021165.1    | Ca_kabuli_chr06 | 9519481                 | CC                              | TT              | 1946859754               |
| SNP_P4_79618_9579545  | NC_021165.1    | Ca_kabuli_chr06 | 9579545                 | GG                              | AA              | 1946859756               |
| SNP_P4_79619_9594013  | NC_021165.1    | Ca_kabuli_chr06 | 9594013                 | TT                              | AA              | 1946859758               |
| SNP_P4_79620_9597809  | NC_021165.1    | Ca_kabuli_chr06 | 9597809                 | AA                              | CC              | 1946859760               |
| SNP_P4_79621_9601776  | NC_021165.1    | Ca_kabuli_chr06 | 9601776                 | TT                              | AA              | 1946859762               |
| SNP_P4_79622_9601777  | NC_021165.1    | Ca_kabuli_chr06 | 9601777                 | TT                              | AA              | 1946859764               |
| SNP_P4_79623_9649374  | NC_021165.1    | Ca_kabuli_chr06 | 9649374                 | TT                              | CC              | 1946859766               |
| SNP_P4_79624_9661680  | NC_021165.1    | Ca_kabuli_chr06 | 9661680                 | GG                              | AA              | 1946859768               |
| SNP_P4_79625_9675020  | NC_021165.1    | Ca_kabuli_chr06 | 9675020                 | GG                              | TT              | 1946859770               |
| SNP_P4_79626_9698769  | NC_021165.1    | Ca_kabuli_chr06 | 9698769                 | CC                              | GG              | 1946859772               |
| SNP_P4_79627_9753489  | NC_021165.1    | Ca_kabuli_chr06 | 9753489                 | GG                              | AA              | 1946859774               |
| SNP_P4_79628_9757937  | NC_021165.1    | Ca_kabuli_chr06 | 9757937                 | CC                              | AA              | 1946859776               |
| SNP_P4_79629_9781176  | NC_021165.1    | Ca_kabuli_chr06 | 9781176                 | GG                              | AA              | 1946859778               |
| SNP_P4_79630_9781218  | NC_021165.1    | Ca_kabuli_chr06 | 9781218                 | AA                              | GG              | 1946859780               |
| SNP_P4_79631_9781219  | NC_021165.1    | Ca_kabuli_chr06 | 9781219                 | TT                              | CC              | 1946859782               |
| SNP_P4_79632_9804331  | NC_021165.1    | Ca_kabuli_chr06 | 9804331                 | AA                              | TT              | 1946859784               |
| SNP_P4_79633_9850886  | NC_021165.1    | Ca_kabuli_chr06 | 9850886                 | CC                              | TT              | 1946859786               |
| SNP_P4_79635_9880535  | NC_021165.1    | Ca_kabuli_chr06 | 9880535                 | CC                              | AA              | 1946859788               |
| SNP_P4_79636_9887393  | NC_021165.1    | Ca_kabuli_chr06 | 9887393                 | CC                              | TT              | 1946859790               |
| SNP_P4_79637_9901126  | NC_021165.1    | Ca_kabuli_chr06 | 9901126                 | GG                              | CC              | 1946859792               |
| SNP_P4_79638_9901393  | NC_021165.1    | Ca_kabuli_chr06 | 9901393                 | GG                              | CC              | 1946859794               |
| SNP_P4_79639_9901397  | NC_021165.1    | Ca_kabuli_chr06 | 9901397                 | CC                              | AA              | 1946859796               |
| SNP_P4_79640_9905491  | NC_021165.1    | Ca_kabuli_chr06 | 9905491                 | TT                              | AA              | 1946859798               |
| SNP_P4_79641_9906509  | NC_021165.1    | Ca_kabuli_chr06 | 9906509                 | CC                              | TT              | 1946859800               |
| SNP_P4_79645_9954175  | NC_021165.1    | Ca_kabuli_chr06 | 9954175                 | GG                              | AA              | 1946859802               |
| SNP_P4_79646_9954324  | NC_021165.1    | Ca_kabuli_chr06 | 9954324                 | AA                              | TT              | 1946859804               |
| SNP_P4_79647_9980273  | NC_021165.1    | Ca_kabuli_chr06 | 9980273                 | AA                              | CC              | 1946859806               |
| SNP_P4_79648_9980274  | NC_021165.1    | Ca_kabuli_chr06 | 9980274                 | AA                              | GG              | 1946859808               |
| SNP_P4_79650_10001337 | NC_021165.1    | Ca_kabuli_chr06 | 10001337                | TT                              | AA              | 1946859810               |
| SNP_P4_79652_10033887 | NC_021165.1    | Ca_kabuli_chr06 | 10033887                | GG                              | AA              | 1946859812               |
| SNP_P4_79653_10047858 | NC_021165.1    | Ca_kabuli_chr06 | 10047858                | GG                              | AA              | 1946859814               |
| SNP_P4_79654_10060474 | NC_021165.1    | Ca_kabuli_chr06 | 10060474                | GG                              | AA              | 1946859816               |
| SNP_P4_79655_10062198 | NC_021165.1    | Ca_kabuli_chr06 | 10062198                | TT                              | AA              | 1946859818               |
| SNP_P4_79656_10062199 | NC_021165.1    | Ca_kabuli_chr06 | 10062199                | TT                              | GG              | 1946859820               |



| SNPs IDs              | Chromosome IDs | Chromosomes     | Physical positions (bp) | CDC Frontier (Reference genome) | (ILWC46 & LPNB) | NCBI SNPdb Accession IDs |
|-----------------------|----------------|-----------------|-------------------------|---------------------------------|-----------------|--------------------------|
| SNP_P4_79657_10082427 | NC_021165.1    | Ca_kabuli_chr06 | 10082427                | AA                              | TT              | 1946859822               |
| SNP_P4_79658_10085352 | NC_021165.1    | Ca_kabuli_chr06 | 10085352                | CC                              | TT              | 1946859824               |
| SNP_P4_79660_10107280 | NC_021165.1    | Ca_kabuli_chr06 | 10107280                | TT                              | CC              | 1946859826               |
| SNP_P4_79664_10164847 | NC_021165.1    | Ca_kabuli_chr06 | 10164847                | GG                              | TT              | 1946859828               |
| SNP_P4_79665_10170774 | NC_021165.1    | Ca_kabuli_chr06 | 10170774                | AA                              | TT              | 1946859830               |
| SNP_P4_79666_10174446 | NC_021165.1    | Ca_kabuli_chr06 | 10174446                | AA                              | TT              | 1946859832               |
| SNP_P4_79668_10207345 | NC_021165.1    | Ca_kabuli_chr06 | 10207345                | GG                              | AA              | 1946859834               |
| SNP_P4_79669_10209172 | NC_021165.1    | Ca_kabuli_chr06 | 10209172                | CC                              | TT              | 1946859836               |
| SNP_P4_79670_10230792 | NC_021165.1    | Ca_kabuli_chr06 | 10230792                | TT                              | CC              | 1946859838               |
| SNP_P4_79671_10233002 | NC_021165.1    | Ca_kabuli_chr06 | 10233002                | GG                              | AA              | 1946859840               |
| SNP_P4_79672_10241965 | NC_021165.1    | Ca_kabuli_chr06 | 10241965                | CC                              | AA              | 1946859842               |
| SNP_P4_79674_10257722 | NC_021165.1    | Ca_kabuli_chr06 | 10257722                | CC                              | TT              | 1946859844               |
| SNP_P4_79675_10304535 | NC_021165.1    | Ca_kabuli_chr06 | 10304535                | AA                              | GG              | 1946859846               |
| SNP_P4_79676_10321883 | NC_021165.1    | Ca_kabuli_chr06 | 10321883                | AA                              | GG              | 1946859848               |
| SNP_P4_79677_10323528 | NC_021165.1    | Ca_kabuli_chr06 | 10323528                | AA                              | TT              | 1946859850               |
| SNP_P4_79678_10323531 | NC_021165.1    | Ca_kabuli_chr06 | 10323531                | TT                              | GG              | 1946859852               |
| SNP_P4_79679_10323561 | NC_021165.1    | Ca_kabuli_chr06 | 10323561                | TT                              | AA              | 1946859854               |
| SNP_P4_79681_10329060 | NC_021165.1    | Ca_kabuli_chr06 | 10329060                | AA                              | GG              | 1946859856               |
| SNP_P4_79682_10331061 | NC_021165.1    | Ca_kabuli_chr06 | 10331061                | TT                              | CC              | 1946859858               |
| SNP_P4_79683_10331130 | NC_021165.1    | Ca_kabuli_chr06 | 10331130                | CC                              | TT              | 1946859860               |
| SNP_P4_79686_10359898 | NC_021165.1    | Ca_kabuli_chr06 | 10359898                | CC                              | TT              | 1946859862               |
| SNP_P4_79687_10371107 | NC_021165.1    | Ca_kabuli_chr06 | 10371107                | CC                              | TT              | 1946859864               |
| SNP_P4_79688_10372253 | NC_021165.1    | Ca_kabuli_chr06 | 10372253                | AA                              | GG              | 1946859866               |
| SNP_P4_79690_10383891 | NC_021165.1    | Ca_kabuli_chr06 | 10383891                | GG                              | AA              | 1946859868               |
| SNP_P4_79691_10403887 | NC_021165.1    | Ca_kabuli_chr06 | 10403887                | TT                              | CC              | 1946859870               |
| SNP_P4_79692_10493066 | NC_021165.1    | Ca_kabuli_chr06 | 10493066                | GG                              | AA              | 1946859872               |
| SNP_P4_79694_10498273 | NC_021165.1    | Ca_kabuli_chr06 | 10498273                | GG                              | AA              | 1946859874               |
| SNP_P4_79696_10502595 | NC_021165.1    | Ca_kabuli_chr06 | 10502595                | TT                              | AA              | 1946859876               |
| SNP_P4_79697_10502624 | NC_021165.1    | Ca_kabuli_chr06 | 10502624                | CC                              | GG              | 1946859878               |
| SNP_P4_79698_10502630 | NC_021165.1    | Ca_kabuli_chr06 | 10502630                | AA                              | GG              | 1946859880               |
| SNP_P4_79699_10502684 | NC_021165.1    | Ca_kabuli_chr06 | 10502684                | CC                              | TT              | 1946859882               |
| SNP_P4_79701_10503183 | NC_021165.1    | Ca_kabuli_chr06 | 10503183                | CC                              | AA              | 1946859884               |
| SNP_P4_79703_10503263 | NC_021165.1    | Ca_kabuli_chr06 | 10503263                | AA                              | GG              | 1946859886               |
| SNP_P4_79704_10503385 | NC_021165.1    | Ca_kabuli_chr06 | 10503385                | GG                              | AA              | 1946859888               |
| SNP_P4_79705_10503426 | NC_021165.1    | Ca_kabuli_chr06 | 10503426                | AA                              | GG              | 1946859890               |
| SNP_P4_79706_10503864 | NC_021165.1    | Ca_kabuli_chr06 | 10503864                | TT                              | GG              | 1946859892               |
| SNP_P4_79707_10503876 | NC_021165.1    | Ca_kabuli_chr06 | 10503876                | AA                              | GG              | 1946859894               |
| SNP_P4_79708_10507686 | NC_021165.1    | Ca_kabuli_chr06 | 10507686                | TT                              | CC              | 1946859896               |
| SNP_P4_79709_10508416 | NC_021165.1    | Ca_kabuli_chr06 | 10508416                | GG                              | CC              | 1946859898               |
| SNP_P4_79710_10508829 | NC_021165.1    | Ca_kabuli_chr06 | 10508829                | GG                              | AA              | 1946859900               |
| SNP_P4_79711_10509749 | NC_021165.1    | Ca_kabuli_chr06 | 10509749                | AA                              | GG              | 1946859902               |
| SNP_P4_79712_10510492 | NC_021165.1    | Ca_kabuli_chr06 | 10510492                | TT                              | AA              | 1946859904               |

| SNPs IDs              | Chromosome IDs | Chromosomes     | Physical positions (bp) | CDC Frontier (Reference genome) | (ILWC46 & LPNB) | NCBI SNPdb Accession IDs |
|-----------------------|----------------|-----------------|-------------------------|---------------------------------|-----------------|--------------------------|
| SNP_P4_79713_10510699 | NC_021165.1    | Ca_kabuli_chr06 | 10510699                | CC                              | TT              | 1946859906               |
| SNP_P4_79715_10510780 | NC_021165.1    | Ca_kabuli_chr06 | 10510780                | CC                              | AA              | 1946859908               |
| SNP_P4_79716_10511971 | NC_021165.1    | Ca_kabuli_chr06 | 10511971                | CC                              | AA              | 1946859910               |
| SNP_P4_79717_10512021 | NC_021165.1    | Ca_kabuli_chr06 | 10512021                | AA                              | GG              | 1946859912               |
| SNP_P4_79722_10514105 | NC_021165.1    | Ca_kabuli_chr06 | 10514105                | CC                              | TT              | 1946859914               |
| SNP_P4_79725_10514610 | NC_021165.1    | Ca_kabuli_chr06 | 10514610                | GG                              | AA              | 1946859916               |
| SNP_P4_79726_10514621 | NC_021165.1    | Ca_kabuli_chr06 | 10514621                | CC                              | TT              | 1946859918               |
| SNP_P4_79727_10514819 | NC_021165.1    | Ca_kabuli_chr06 | 10514819                | AA                              | GG              | 1946859920               |
| SNP_P4_79728_10514830 | NC_021165.1    | Ca_kabuli_chr06 | 10514830                | CC                              | TT              | 1946859922               |
| SNP_P4_79729_10515365 | NC_021165.1    | Ca_kabuli_chr06 | 10515365                | GG                              | AA              | 1946859924               |
| SNP_P4_79730_10515368 | NC_021165.1    | Ca_kabuli_chr06 | 10515368                | CC                              | TT              | 1946859926               |
| SNP_P4_79731_10515384 | NC_021165.1    | Ca_kabuli_chr06 | 10515384                | TT                              | AA              | 1946859928               |
| SNP_P4_79732_10515401 | NC_021165.1    | Ca_kabuli_chr06 | 10515401                | TT                              | CC              | 1946859930               |
| SNP_P4_79734_10516341 | NC_021165.1    | Ca_kabuli_chr06 | 10516341                | CC                              | TT              | 1946859932               |
| SNP_P4_79735_10516537 | NC_021165.1    | Ca_kabuli_chr06 | 10516537                | AA                              | CC              | 1946859935               |
| SNP_P4_79736_10516576 | NC_021165.1    | Ca_kabuli_chr06 | 10516576                | GG                              | AA              | 1946859937               |
| SNP_P4_79737_10516802 | NC_021165.1    | Ca_kabuli_chr06 | 10516802                | TT                              | CC              | 1946859939               |
| SNP_P4_79738_10516826 | NC_021165.1    | Ca_kabuli_chr06 | 10516826                | AA                              | GG              | 1946859941               |
| SNP_P4_79739_10516837 | NC_021165.1    | Ca_kabuli_chr06 | 10516837                | TT                              | GG              | 1946859943               |
| SNP_P4_79740_10516842 | NC_021165.1    | Ca_kabuli_chr06 | 10516842                | CC                              | TT              | 1946859945               |
| SNP_P4_79741_10516844 | NC_021165.1    | Ca_kabuli_chr06 | 10516844                | AA                              | GG              | 1946859947               |
| SNP_P4_79742_10517023 | NC_021165.1    | Ca_kabuli_chr06 | 10517023                | AA                              | CC              | 1946859949               |
| SNP_P4_79743_10517400 | NC_021165.1    | Ca_kabuli_chr06 | 10517400                | TT                              | GG              | 1946859951               |
| SNP_P4_79744_10517426 | NC_021165.1    | Ca_kabuli_chr06 | 10517426                | CC                              | TT              | 1946859953               |
| SNP_P4_79745_10517427 | NC_021165.1    | Ca_kabuli_chr06 | 10517427                | AA                              | GG              | 1946859955               |
| SNP_P4_79746_10517441 | NC_021165.1    | Ca_kabuli_chr06 | 10517441                | AA                              | TT              | 1946859957               |
| SNP_P4_79747_10517444 | NC_021165.1    | Ca_kabuli_chr06 | 10517444                | AA                              | GG              | 1946859959               |
| SNP_P4_79749_10517508 | NC_021165.1    | Ca_kabuli_chr06 | 10517508                | GG                              | AA              | 1946859960               |
| SNP_P4_79750_10517518 | NC_021165.1    | Ca_kabuli_chr06 | 10517518                | AA                              | CC              | 1946859962               |
| SNP_P4_79751_10552059 | NC_021165.1    | Ca_kabuli_chr06 | 10552059                | TT                              | CC              | 1946859964               |
| SNP_P4_79754_10553604 | NC_021165.1    | Ca_kabuli_chr06 | 10553604                | AA                              | TT              | 1946859966               |
| SNP_P4_79755_10553628 | NC_021165.1    | Ca_kabuli_chr06 | 10553628                | AA                              | GG              | 1946859968               |
| SNP_P4_79756_10553839 | NC_021165.1    | Ca_kabuli_chr06 | 10553839                | AA                              | GG              | 1946859970               |
| SNP_P4_79757_10553876 | NC_021165.1    | Ca_kabuli_chr06 | 10553876                | AA                              | GG              | 1946859972               |
| SNP_P4_79758_10553902 | NC_021165.1    | Ca_kabuli_chr06 | 10553902                | CC                              | TT              | 1946859974               |
| SNP_P4_79759_10553916 | NC_021165.1    | Ca_kabuli_chr06 | 10553916                | GG                              | AA              | 1946859976               |
| SNP_P4_79760_10554051 | NC_021165.1    | Ca_kabuli_chr06 | 10554051                | AA                              | TT              | 1946859978               |
| SNP_P4_79762_10554175 | NC_021165.1    | Ca_kabuli_chr06 | 10554175                | GG                              | TT              | 1946859980               |
| SNP_P4_79763_10554211 | NC_021165.1    | Ca_kabuli_chr06 | 10554211                | AA                              | TT              | 1946859982               |
| SNP_P4_79764_10554245 | NC_021165.1    | Ca_kabuli_chr06 | 10554245                | GG                              | AA              | 1946859984               |
| SNP_P4_79765_10554300 | NC_021165.1    | Ca_kabuli_chr06 | 10554300                | GG                              | AA              | 1946859986               |
| SNP_P4_79766_10554334 | NC_021165.1    | Ca_kabuli_chr06 | 10554334                | TT                              | GG              | 1946859988               |

| SNPs IDs              | Chromosome IDs | Chromosomes     | Physical positions (bp) | CDC Frontier (Reference genome) | (ILWC46 & LPNB) | NCBI SNPdb Accession IDs |
|-----------------------|----------------|-----------------|-------------------------|---------------------------------|-----------------|--------------------------|
| SNP_P4_79767_10554352 | NC_021165.1    | Ca_kabuli_chr06 | 10554352                | AA                              | GG              | 1946859990               |
| SNP_P4_79768_10554359 | NC_021165.1    | Ca_kabuli_chr06 | 10554359                | TT                              | CC              | 1946859992               |
| SNP_P4_79770_10555524 | NC_021165.1    | Ca_kabuli_chr06 | 10555524                | GG                              | AA              | 1946859994               |
| SNP_P4_79771_10555525 | NC_021165.1    | Ca_kabuli_chr06 | 10555525                | GG                              | AA              | 1946859995               |
| SNP_P4_79773_10555698 | NC_021165.1    | Ca_kabuli_chr06 | 10555698                | AA                              | TT              | 1946859997               |
| SNP_P4_79774_10555765 | NC_021165.1    | Ca_kabuli_chr06 | 10555765                | AA                              | TT              | 1946859999               |
| SNP_P4_79775_10555788 | NC_021165.1    | Ca_kabuli_chr06 | 10555788                | TT                              | CC              | 1946860001               |
| SNP_P4_79776_10555791 | NC_021165.1    | Ca_kabuli_chr06 | 10555791                | CC                              | TT              | 1946860003               |
| SNP_P4_79777_10555794 | NC_021165.1    | Ca_kabuli_chr06 | 10555794                | CC                              | TT              | 1946860005               |
| SNP_P4_79778_10555818 | NC_021165.1    | Ca_kabuli_chr06 | 10555818                | AA                              | TT              | 1946860007               |
| SNP_P4_79779_10555841 | NC_021165.1    | Ca_kabuli_chr06 | 10555841                | CC                              | TT              | 1946860009               |
| SNP_P4_79780_10555868 | NC_021165.1    | Ca_kabuli_chr06 | 10555868                | GG                              | AA              | 1946860011               |
| SNP_P4_79781_10555898 | NC_021165.1    | Ca_kabuli_chr06 | 10555898                | TT                              | CC              | 1946860013               |
| SNP_P4_79782_10555901 | NC_021165.1    | Ca_kabuli_chr06 | 10555901                | AA                              | TT              | 1946860015               |
| SNP_P4_79783_10556260 | NC_021165.1    | Ca_kabuli_chr06 | 10556260                | AA                              | GG              | 1946860017               |
| SNP_P4_79784_10556268 | NC_021165.1    | Ca_kabuli_chr06 | 10556268                | CC                              | TT              | 1946860019               |
| SNP_P4_79785_10556311 | NC_021165.1    | Ca_kabuli_chr06 | 10556311                | AA                              | CC              | 1946860021               |
| SNP_P4_79786_10556786 | NC_021165.1    | Ca_kabuli_chr06 | 10556786                | AA                              | CC              | 1946860023               |
| SNP_P4_79787_10556803 | NC_021165.1    | Ca_kabuli_chr06 | 10556803                | CC                              | TT              | 1946860025               |
| SNP_P4_79789_10557427 | NC_021165.1    | Ca_kabuli_chr06 | 10557427                | CC                              | TT              | 1946860027               |
| SNP_P4_79790_10557544 | NC_021165.1    | Ca_kabuli_chr06 | 10557544                | GG                              | AA              | 1946860029               |
| SNP_P4_79791_10557751 | NC_021165.1    | Ca_kabuli_chr06 | 10557751                | CC                              | TT              | 1946860031               |
| SNP_P4_79792_10558619 | NC_021165.1    | Ca_kabuli_chr06 | 10558619                | TT                              | GG              | 1946860033               |
| SNP_P4_79793_10558783 | NC_021165.1    | Ca_kabuli_chr06 | 10558783                | AA                              | GG              | 1946860035               |
| SNP_P4_79794_10559051 | NC_021165.1    | Ca_kabuli_chr06 | 10559051                | GG                              | AA              | 1946860036               |
| SNP_P4_79795_10559111 | NC_021165.1    | Ca_kabuli_chr06 | 10559111                | TT                              | CC              | 1946860038               |
| SNP_P4_79796_10559113 | NC_021165.1    | Ca_kabuli_chr06 | 10559113                | AA                              | GG              | 1946860040               |
| SNP_P4_79797_10559115 | NC_021165.1    | Ca_kabuli_chr06 | 10559115                | CC                              | TT              | 1946860042               |
| SNP_P4_79798_10559230 | NC_021165.1    | Ca_kabuli_chr06 | 10559230                | TT                              | CC              | 1946860044               |
| SNP_P4_79799_10559254 | NC_021165.1    | Ca_kabuli_chr06 | 10559254                | GG                              | TT              | 1946860046               |
| SNP_P4_79800_10559267 | NC_021165.1    | Ca_kabuli_chr06 | 10559267                | CC                              | AA              | 1946860048               |
| SNP_P4_79801_10559288 | NC_021165.1    | Ca_kabuli_chr06 | 10559288                | GG                              | AA              | 1946860050               |
| SNP_P4_79802_10559308 | NC_021165.1    | Ca_kabuli_chr06 | 10559308                | CC                              | TT              | 1946860052               |
| SNP_P4_79803_10559316 | NC_021165.1    | Ca_kabuli_chr06 | 10559316                | CC                              | TT              | 1946860054               |
| SNP_P4_79804_10559333 | NC_021165.1    | Ca_kabuli_chr06 | 10559333                | TT                              | CC              | 1946860055               |
| SNP_P4_79805_10559448 | NC_021165.1    | Ca_kabuli_chr06 | 10559448                | TT                              | CC              | 1946860057               |
| SNP_P4_79806_10560918 | NC_021165.1    | Ca_kabuli_chr06 | 10560918                | TT                              | GG              | 1946860059               |
| SNP_P4_79807_10560982 | NC_021165.1    | Ca_kabuli_chr06 | 10560982                | AA                              | TT              | 1946860061               |
| SNP_P4_79808_10560983 | NC_021165.1    | Ca_kabuli_chr06 | 10560983                | TT                              | AA              | 1946860063               |
| SNP_P4_79810_10562839 | NC_021165.1    | Ca_kabuli_chr06 | 10562839                | AA                              | GG              | 1946860065               |
| SNP_P4_79811_10562879 | NC_021165.1    | Ca_kabuli_chr06 | 10562879                | AA                              | GG              | 1946860067               |
| SNP_P4_79812_10562885 | NC_021165.1    | Ca_kabuli_chr06 | 10562885                | AA                              | GG              | 1946860069               |

| SNPs IDs              | Chromosome IDs | Chromosomes     | Physical positions (bp) | CDC Frontier (Reference genome) | (ILWC46 & LPNB) | NCBI SNPdb Accession IDs |
|-----------------------|----------------|-----------------|-------------------------|---------------------------------|-----------------|--------------------------|
| SNP_P4_79813_10563059 | NC_021165.1    | Ca_kabuli_chr06 | 10563059                | GG                              | AA              | 1946860070               |
| SNP_P4_79814_10563084 | NC_021165.1    | Ca_kabuli_chr06 | 10563084                | AA                              | TT              | 1946860072               |
| SNP_P4_79816_10564021 | NC_021165.1    | Ca_kabuli_chr06 | 10564021                | CC                              | TT              | 1946860074               |
| SNP_P4_79818_10564070 | NC_021165.1    | Ca_kabuli_chr06 | 10564070                | AA                              | GG              | 1946860077               |
| SNP_P4_79820_10565167 | NC_021165.1    | Ca_kabuli_chr06 | 10565167                | TT                              | CC              | 1946860079               |
| SNP_P4_79821_10565192 | NC_021165.1    | Ca_kabuli_chr06 | 10565192                | CC                              | TT              | 1946860081               |
| SNP_P4_79822_10565211 | NC_021165.1    | Ca_kabuli_chr06 | 10565211                | TT                              | CC              | 1946860083               |
| SNP_P4_79823_10565230 | NC_021165.1    | Ca_kabuli_chr06 | 10565230                | AA                              | GG              | 1946860085               |
| SNP_P4_79824_10565252 | NC_021165.1    | Ca_kabuli_chr06 | 10565252                | AA                              | GG              | 1946860087               |
| SNP_P4_79825_10565819 | NC_021165.1    | Ca_kabuli_chr06 | 10565819                | AA                              | GG              | 1946860089               |
| SNP_P4_79826_10565828 | NC_021165.1    | Ca_kabuli_chr06 | 10565828                | CC                              | AA              | 1946860091               |
| SNP_P4_79827_10565829 | NC_021165.1    | Ca_kabuli_chr06 | 10565829                | CC                              | TT              | 1946860093               |
| SNP_P4_79828_10565859 | NC_021165.1    | Ca_kabuli_chr06 | 10565859                | CC                              | TT              | 1946860095               |
| SNP_P4_79829_10566137 | NC_021165.1    | Ca_kabuli_chr06 | 10566137                | AA                              | CC              | 1946860097               |
| SNP_P4_79830_10566181 | NC_021165.1    | Ca_kabuli_chr06 | 10566181                | AA                              | GG              | 1946860099               |
| SNP_P4_79831_10566241 | NC_021165.1    | Ca_kabuli_chr06 | 10566241                | AA                              | GG              | 1946860101               |
| SNP_P4_79832_10566416 | NC_021165.1    | Ca_kabuli_chr06 | 10566416                | TT                              | CC              | 1946860103               |
| SNP_P4_79833_10566453 | NC_021165.1    | Ca_kabuli_chr06 | 10566453                | GG                              | AA              | 1946860105               |
| SNP_P4_79834_10566494 | NC_021165.1    | Ca_kabuli_chr06 | 10566494                | AA                              | GG              | 1946860107               |
| SNP_P4_79836_10566712 | NC_021165.1    | Ca_kabuli_chr06 | 10566712                | TT                              | CC              | 1946860109               |
| SNP_P4_79837_10566770 | NC_021165.1    | Ca_kabuli_chr06 | 10566770                | GG                              | AA              | 1946860111               |
| SNP_P4_79838_10566994 | NC_021165.1    | Ca_kabuli_chr06 | 10566994                | GG                              | AA              | 1946860113               |
| SNP_P4_79839_10567019 | NC_021165.1    | Ca_kabuli_chr06 | 10567019                | TT                              | CC              | 1946860115               |
| SNP_P4_79840_10567211 | NC_021165.1    | Ca_kabuli_chr06 | 10567211                | GG                              | CC              | 1946860117               |
| SNP_P4_79841_10569647 | NC_021165.1    | Ca_kabuli_chr06 | 10569647                | CC                              | GG              | 1946860119               |
| SNP_P4_79842_10570230 | NC_021165.1    | Ca_kabuli_chr06 | 10570230                | TT                              | AA              | 1946860121               |
| SNP_P4_79843_10570887 | NC_021165.1    | Ca_kabuli_chr06 | 10570887                | AA                              | TT              | 1946860123               |
| SNP_P4_79844_10571701 | NC_021165.1    | Ca_kabuli_chr06 | 10571701                | TT                              | CC              | 1946860125               |
| SNP_P4_79846_10572542 | NC_021165.1    | Ca_kabuli_chr06 | 10572542                | TT                              | AA              | 1946860127               |
| SNP_P4_79847_10575096 | NC_021165.1    | Ca_kabuli_chr06 | 10575096                | TT                              | AA              | 1946860129               |
| SNP_P4_79848_10575384 | NC_021165.1    | Ca_kabuli_chr06 | 10575384                | AA                              | GG              | 1946860131               |
| SNP_P4_79850_10576388 | NC_021165.1    | Ca_kabuli_chr06 | 10576388                | CC                              | TT              | 1946860133               |
| SNP_P4_79851_10576413 | NC_021165.1    | Ca_kabuli_chr06 | 10576413                | TT                              | GG              | 1946860135               |
| SNP_P4_79852_10576483 | NC_021165.1    | Ca_kabuli_chr06 | 10576483                | AA                              | GG              | 1946860137               |
| SNP_P4_79854_10576624 | NC_021165.1    | Ca_kabuli_chr06 | 10576624                | AA                              | GG              | 1946860139               |
| SNP_P4_79855_10576949 | NC_021165.1    | Ca_kabuli_chr06 | 10576949                | GG                              | AA              | 1946860141               |
| SNP_P4_79856_10576987 | NC_021165.1    | Ca_kabuli_chr06 | 10576987                | GG                              | AA              | 1946860143               |
| SNP_P4_79857_10577044 | NC_021165.1    | Ca_kabuli_chr06 | 10577044                | CC                              | TT              | 1946860145               |
| SNP_P4_79858_10577072 | NC_021165.1    | Ca_kabuli_chr06 | 10577072                | TT                              | AA              | 1946860147               |
| SNP_P4_79859_10577092 | NC_021165.1    | Ca_kabuli_chr06 | 10577092                | CC                              | TT              | 1946860149               |
| SNP_P4_79860_10577097 | NC_021165.1    | Ca_kabuli_chr06 | 10577097                | TT                              | CC              | 1946860151               |
| SNP_P4_79861_10577104 | NC_021165.1    | Ca_kabuli_chr06 | 10577104                | TT                              | CC              | 1946860153               |

| SNPs IDs              | Chromosome IDs | Chromosomes     | Physical positions (bp) | CDC Frontier (Reference genome) | (ILWC46 & LPNB) | NCBI SNPdb Accession IDs |
|-----------------------|----------------|-----------------|-------------------------|---------------------------------|-----------------|--------------------------|
| SNP_P4_79862_10577328 | NC_021165.1    | Ca_kabuli_chr06 | 10577328                | GG                              | AA              | 1946860155               |
| SNP_P4_79863_10577365 | NC_021165.1    | Ca_kabuli_chr06 | 10577365                | TT                              | CC              | 1946860157               |
| SNP_P4_79864_10577369 | NC_021165.1    | Ca_kabuli_chr06 | 10577369                | GG                              | AA              | 1946860159               |
| SNP_P4_79865_10577637 | NC_021165.1    | Ca_kabuli_chr06 | 10577637                | AA                              | GG              | 1946860161               |
| SNP_P4_79866_10577693 | NC_021165.1    | Ca_kabuli_chr06 | 10577693                | AA                              | TT              | 1946860163               |
| SNP_P4_79867_10577822 | NC_021165.1    | Ca_kabuli_chr06 | 10577822                | CC                              | TT              | 1946860165               |
| SNP_P4_79868_10578011 | NC_021165.1    | Ca_kabuli_chr06 | 10578011                | GG                              | AA              | 1946860167               |
| SNP_P4_79869_10578444 | NC_021165.1    | Ca_kabuli_chr06 | 10578444                | AA                              | TT              | 1946860169               |
| SNP_P4_79870_10578476 | NC_021165.1    | Ca_kabuli_chr06 | 10578476                | CC                              | TT              | 1946860171               |
| SNP_P4_79871_10578482 | NC_021165.1    | Ca_kabuli_chr06 | 10578482                | TT                              | CC              | 1946860173               |
| SNP_P4_79872_10578811 | NC_021165.1    | Ca_kabuli_chr06 | 10578811                | GG                              | AA              | 1946860175               |
| SNP_P4_79873_10578822 | NC_021165.1    | Ca_kabuli_chr06 | 10578822                | AA                              | GG              | 1946860177               |
| SNP_P4_79874_10578877 | NC_021165.1    | Ca_kabuli_chr06 | 10578877                | CC                              | AA              | 1946860179               |
| SNP_P4_79875_10578960 | NC_021165.1    | Ca_kabuli_chr06 | 10578960                | TT                              | GG              | 1946860181               |
| SNP_P4_79876_10578970 | NC_021165.1    | Ca_kabuli_chr06 | 10578970                | GG                              | AA              | 1946860183               |
| SNP_P4_79877_10578979 | NC_021165.1    | Ca_kabuli_chr06 | 10578979                | AA                              | CC              | 1946860185               |
| SNP_P4_79878_10578988 | NC_021165.1    | Ca_kabuli_chr06 | 10578988                | GG                              | CC              | 1946860187               |
| SNP_P4_79879_10579352 | NC_021165.1    | Ca_kabuli_chr06 | 10579352                | TT                              | CC              | 1946860189               |
| SNP_P4_79880_10579683 | NC_021165.1    | Ca_kabuli_chr06 | 10579683                | AA                              | CC              | 1946860191               |
| SNP_P4_79881_10579711 | NC_021165.1    | Ca_kabuli_chr06 | 10579711                | GG                              | AA              | 1946860193               |
| SNP_P4_79882_10580035 | NC_021165.1    | Ca_kabuli_chr06 | 10580035                | AA                              | GG              | 1946860195               |
| SNP_P4_79883_10583041 | NC_021165.1    | Ca_kabuli_chr06 | 10583041                | CC                              | TT              | 1946860197               |
| SNP_P4_79884_10583055 | NC_021165.1    | Ca_kabuli_chr06 | 10583055                | CC                              | AA              | 1946860199               |
| SNP_P4_79885_10583058 | NC_021165.1    | Ca_kabuli_chr06 | 10583058                | TT                              | CC              | 1946860201               |
| SNP_P4_79886_10583059 | NC_021165.1    | Ca_kabuli_chr06 | 10583059                | AA                              | GG              | 1946860203               |
| SNP_P4_79887_10583065 | NC_021165.1    | Ca_kabuli_chr06 | 10583065                | GG                              | CC              | 1946860205               |
| SNP_P4_79888_10583091 | NC_021165.1    | Ca_kabuli_chr06 | 10583091                | AA                              | TT              | 1946860207               |
| SNP_P4_79889_10583666 | NC_021165.1    | Ca_kabuli_chr06 | 10583666                | CC                              | AA              | 1946860208               |
| SNP_P4_79890_10584478 | NC_021165.1    | Ca_kabuli_chr06 | 10584478                | AA                              | CC              | 1946860210               |
| SNP_P4_79891_10584479 | NC_021165.1    | Ca_kabuli_chr06 | 10584479                | TT                              | CC              | 1946860212               |
| SNP_P4_79892_10584526 | NC_021165.1    | Ca_kabuli_chr06 | 10584526                | TT                              | CC              | 1946860214               |
| SNP_P4_79893_10584531 | NC_021165.1    | Ca_kabuli_chr06 | 10584531                | AA                              | GG              | 1946860216               |
| SNP_P4_79894_10584565 | NC_021165.1    | Ca_kabuli_chr06 | 10584565                | GG                              | CC              | 1946860218               |
| SNP_P4_79895_10584597 | NC_021165.1    | Ca_kabuli_chr06 | 10584597                | AA                              | GG              | 1946860220               |
| SNP_P4_79896_10584605 | NC_021165.1    | Ca_kabuli_chr06 | 10584605                | CC                              | TT              | 1946860222               |
| SNP_P4_79897_10584624 | NC_021165.1    | Ca_kabuli_chr06 | 10584624                | TT                              | CC              | 1946860224               |
| SNP_P4_79898_10584643 | NC_021165.1    | Ca_kabuli_chr06 | 10584643                | TT                              | CC              | 1946860226               |
| SNP_P4_79899_10584651 | NC_021165.1    | Ca_kabuli_chr06 | 10584651                | CC                              | TT              | 1946860228               |
| SNP_P4_79900_10584827 | NC_021165.1    | Ca_kabuli_chr06 | 10584827                | TT                              | CC              | 1946860230               |
| SNP_P4_79901_10584864 | NC_021165.1    | Ca_kabuli_chr06 | 10584864                | AA                              | GG              | 1946860232               |
| SNP_P4_79902_10584868 | NC_021165.1    | Ca_kabuli_chr06 | 10584868                | AA                              | GG              | 1946860234               |
| SNP_P4_79903_10584874 | NC_021165.1    | Ca_kabuli_chr06 | 10584874                | TT                              | AA              | 1946860236               |

| SNPs IDs              | Chromosome IDs | Chromosomes     | Physical positions (bp) | CDC Frontier (Reference genome) | (ILWC46 & LPNB) | NCBI SNPdb Accession IDs |
|-----------------------|----------------|-----------------|-------------------------|---------------------------------|-----------------|--------------------------|
| SNP_P4_79904_10584947 | NC_021165.1    | Ca_kabuli_chr06 | 10584947                | AA                              | GG              | 1946860238               |
| SNP_P4_79905_10584950 | NC_021165.1    | Ca_kabuli_chr06 | 10584950                | TT                              | GG              | 1946860240               |
| SNP_P4_79906_10585048 | NC_021165.1    | Ca_kabuli_chr06 | 10585048                | AA                              | CC              | 1946860242               |
| SNP_P4_79907_10585090 | NC_021165.1    | Ca_kabuli_chr06 | 10585090                | TT                              | AA              | 1946860244               |
| SNP_P4_79908_10585103 | NC_021165.1    | Ca_kabuli_chr06 | 10585103                | GG                              | AA              | 1946860246               |
| SNP_P4_79909_10585141 | NC_021165.1    | Ca_kabuli_chr06 | 10585141                | GG                              | CC              | 1946860248               |
| SNP_P4_79910_10585197 | NC_021165.1    | Ca_kabuli_chr06 | 10585197                | CC                              | AA              | 1946860250               |
| SNP_P4_79911_10585211 | NC_021165.1    | Ca_kabuli_chr06 | 10585211                | CC                              | TT              | 1946860252               |
| SNP_P4_79912_10585224 | NC_021165.1    | Ca_kabuli_chr06 | 10585224                | CC                              | TT              | 1946860254               |
| SNP_P4_79913_10585449 | NC_021165.1    | Ca_kabuli_chr06 | 10585449                | CC                              | TT              | 1946860256               |
| SNP_P4_79914_10585457 | NC_021165.1    | Ca_kabuli_chr06 | 10585457                | GG                              | AA              | 1946860258               |
| SNP_P4_79915_10585483 | NC_021165.1    | Ca_kabuli_chr06 | 10585483                | GG                              | AA              | 1946860260               |
| SNP_P4_79916_10585972 | NC_021165.1    | Ca_kabuli_chr06 | 10585972                | CC                              | AA              | 1946860262               |
| SNP_P4_79917_10585974 | NC_021165.1    | Ca_kabuli_chr06 | 10585974                | AA                              | GG              | 1946860264               |
| SNP_P4_79918_10585975 | NC_021165.1    | Ca_kabuli_chr06 | 10585975                | GG                              | AA              | 1946860266               |
| SNP_P4_79919_10586196 | NC_021165.1    | Ca_kabuli_chr06 | 10586196                | GG                              | CC              | 1946860268               |
| SNP_P4_79920_10586197 | NC_021165.1    | Ca_kabuli_chr06 | 10586197                | GG                              | AA              | 1946860270               |
| SNP_P4_79921_10586198 | NC_021165.1    | Ca_kabuli_chr06 | 10586198                | CC                              | AA              | 1946860272               |
| SNP_P4_79922_10586236 | NC_021165.1    | Ca_kabuli_chr06 | 10586236                | AA                              | GG              | 1946860274               |
| SNP_P4_79923_10586247 | NC_021165.1    | Ca_kabuli_chr06 | 10586247                | AA                              | GG              | 1946860276               |
| SNP_P4_79924_10586248 | NC_021165.1    | Ca_kabuli_chr06 | 10586248                | GG                              | AA              | 1946860278               |
| SNP_P4_79925_10586539 | NC_021165.1    | Ca_kabuli_chr06 | 10586539                | CC                              | TT              | 1946860281               |
| SNP_P4_79927_10586847 | NC_021165.1    | Ca_kabuli_chr06 | 10586847                | AA                              | GG              | 1946860283               |
| SNP_P4_79928_10586941 | NC_021165.1    | Ca_kabuli_chr06 | 10586941                | GG                              | CC              | 1946860285               |
| SNP_P4_79929_10587123 | NC_021165.1    | Ca_kabuli_chr06 | 10587123                | CC                              | AA              | 1946860287               |
| SNP_P4_79930_10587173 | NC_021165.1    | Ca_kabuli_chr06 | 10587173                | CC                              | GG              | 1946860289               |
| SNP_P4_79931_10589566 | NC_021165.1    | Ca_kabuli_chr06 | 10589566                | AA                              | GG              | 1946860291               |
| SNP_P4_79932_10590386 | NC_021165.1    | Ca_kabuli_chr06 | 10590386                | TT                              | CC              | 1946860293               |
| SNP_P4_79933_10591011 | NC_021165.1    | Ca_kabuli_chr06 | 10591011                | TT                              | CC              | 1946860295               |
| SNP_P4_79934_10591023 | NC_021165.1    | Ca_kabuli_chr06 | 10591023                | AA                              | TT              | 1946860297               |
| SNP_P4_79935_10592170 | NC_021165.1    | Ca_kabuli_chr06 | 10592170                | AA                              | GG              | 1946860299               |
| SNP_P4_79936_10592565 | NC_021165.1    | Ca_kabuli_chr06 | 10592565                | TT                              | AA              | 1946860301               |
| SNP_P4_79937_10592598 | NC_021165.1    | Ca_kabuli_chr06 | 10592598                | TT                              | GG              | 1946860303               |
| SNP_P4_79938_10592736 | NC_021165.1    | Ca_kabuli_chr06 | 10592736                | CC                              | AA              | 1946860305               |
| SNP_P4_79939_10592787 | NC_021165.1    | Ca_kabuli_chr06 | 10592787                | TT                              | AA              | 1946860307               |
| SNP_P4_79940_10592808 | NC_021165.1    | Ca_kabuli_chr06 | 10592808                | GG                              | AA              | 1946860310               |
| SNP_P4_79942_10594945 | NC_021165.1    | Ca_kabuli_chr06 | 10594945                | AA                              | GG              | 1946860312               |
| SNP_P4_79943_10594978 | NC_021165.1    | Ca_kabuli_chr06 | 10594978                | TT                              | CC              | 1946860314               |
| SNP_P4_79944_10594988 | NC_021165.1    | Ca_kabuli_chr06 | 10594988                | TT                              | CC              | 1946860316               |
| SNP_P4_79945_10595130 | NC_021165.1    | Ca_kabuli_chr06 | 10595130                | GG                              | TT              | 1946860317               |
| SNP_P4_79946_10595299 | NC_021165.1    | Ca_kabuli_chr06 | 10595299                | AA                              | TT              | 1946860319               |
| SNP_P4_79947_10595382 | NC_021165.1    | Ca_kabuli_chr06 | 10595382                | TT                              | AA              | 1946860321               |

| SNPs IDs              | Chromosome IDs | Chromosomes     | Physical positions (bp) | CDC Frontier (Reference genome) | (ILWC46 & LPNB) | NCBI SNPdb Accession IDs |
|-----------------------|----------------|-----------------|-------------------------|---------------------------------|-----------------|--------------------------|
| SNP_P4_79948_10595384 | NC_021165.1    | Ca_kabuli_chr06 | 10595384                | CC                              | TT              | 1946860323               |
| SNP_P4_79949_10595426 | NC_021165.1    | Ca_kabuli_chr06 | 10595426                | GG                              | AA              | 1946860325               |
| SNP_P4_79950_10595447 | NC_021165.1    | Ca_kabuli_chr06 | 10595447                | GG                              | AA              | 1946860327               |
| SNP_P4_79951_10595448 | NC_021165.1    | Ca_kabuli_chr06 | 10595448                | AA                              | GG              | 1946860329               |
| SNP_P4_79952_10595944 | NC_021165.1    | Ca_kabuli_chr06 | 10595944                | TT                              | AA              | 1946860331               |
| SNP_P4_79953_10596404 | NC_021165.1    | Ca_kabuli_chr06 | 10596404                | TT                              | GG              | 1946860333               |
| SNP_P4_79954_10596405 | NC_021165.1    | Ca_kabuli_chr06 | 10596405                | AA                              | TT              | 1946860335               |
| SNP_P4_79955_10596416 | NC_021165.1    | Ca_kabuli_chr06 | 10596416                | AA                              | GG              | 1946860337               |
| SNP_P4_79956_10596445 | NC_021165.1    | Ca_kabuli_chr06 | 10596445                | AA                              | GG              | 1946860339               |
| SNP_P4_79957_10596487 | NC_021165.1    | Ca_kabuli_chr06 | 10596487                | AA                              | GG              | 1946860341               |
| SNP_P4_79958_10596522 | NC_021165.1    | Ca_kabuli_chr06 | 10596522                | TT                              | CC              | 1946860343               |
| SNP_P4_79959_10596564 | NC_021165.1    | Ca_kabuli_chr06 | 10596564                | TT                              | CC              | 1946860345               |
| SNP_P4_79961_10597024 | NC_021165.1    | Ca_kabuli_chr06 | 10597024                | GG                              | AA              | 1946860347               |
| SNP_P4_79962_10597035 | NC_021165.1    | Ca_kabuli_chr06 | 10597035                | TT                              | GG              | 1946860349               |
| SNP_P4_79963_10597135 | NC_021165.1    | Ca_kabuli_chr06 | 10597135                | CC                              | TT              | 1946860351               |
| SNP_P4_79964_10597510 | NC_021165.1    | Ca_kabuli_chr06 | 10597510                | AA                              | TT              | 1946860353               |
| SNP_P4_79965_10597564 | NC_021165.1    | Ca_kabuli_chr06 | 10597564                | TT                              | CC              | 1946860355               |
| SNP_P4_79966_10597633 | NC_021165.1    | Ca_kabuli_chr06 | 10597633                | AA                              | CC              | 1946860357               |
| SNP_P4_79967_10598912 | NC_021165.1    | Ca_kabuli_chr06 | 10598912                | GG                              | CC              | 1946860359               |
| SNP_P4_79968_10599554 | NC_021165.1    | Ca_kabuli_chr06 | 10599554                | TT                              | CC              | 1946860361               |
| SNP_P4_79969_10601148 | NC_021165.1    | Ca_kabuli_chr06 | 10601148                | GG                              | AA              | 1946860363               |
| SNP_P4_79970_10602722 | NC_021165.1    | Ca_kabuli_chr06 | 10602722                | TT                              | CC              | 1946860365               |
| SNP_P4_79971_10602771 | NC_021165.1    | Ca_kabuli_chr06 | 10602771                | GG                              | AA              | 1946860367               |
| SNP_P4_79972_10603025 | NC_021165.1    | Ca_kabuli_chr06 | 10603025                | TT                              | CC              | 1946860369               |
| SNP_P4_79973_10603284 | NC_021165.1    | Ca_kabuli_chr06 | 10603284                | GG                              | AA              | 1946860371               |
| SNP_P4_79974_10604330 | NC_021165.1    | Ca_kabuli_chr06 | 10604330                | TT                              | CC              | 1946860373               |
| SNP_P4_79975_10604669 | NC_021165.1    | Ca_kabuli_chr06 | 10604669                | GG                              | CC              | 1946860374               |
| SNP_P4_79977_10606263 | NC_021165.1    | Ca_kabuli_chr06 | 10606263                | TT                              | GG              | 1946860376               |
| SNP_P4_79978_10606668 | NC_021165.1    | Ca_kabuli_chr06 | 10606668                | CC                              | TT              | 1946860378               |
| SNP_P4_79979_10608291 | NC_021165.1    | Ca_kabuli_chr06 | 10608291                | AA                              | CC              | 1946860380               |
| SNP_P4_79980_10608301 | NC_021165.1    | Ca_kabuli_chr06 | 10608301                | TT                              | CC              | 1946860382               |
| SNP_P4_79982_10608322 | NC_021165.1    | Ca_kabuli_chr06 | 10608322                | GG                              | AA              | 1946860384               |
| SNP_P4_79984_10608640 | NC_021165.1    | Ca_kabuli_chr06 | 10608640                | TT                              | CC              | 1946860386               |
| SNP_P4_79985_10608850 | NC_021165.1    | Ca_kabuli_chr06 | 10608850                | AA                              | GG              | 1946860388               |
| SNP_P4_79987_10609211 | NC_021165.1    | Ca_kabuli_chr06 | 10609211                | CC                              | TT              | 1946860390               |
| SNP_P4_79988_10610841 | NC_021165.1    | Ca_kabuli_chr06 | 10610841                | TT                              | GG              | 1946860392               |
| SNP_P4_79990_10611378 | NC_021165.1    | Ca_kabuli_chr06 | 10611378                | TT                              | CC              | 1946860394               |
| SNP_P4_79992_10611747 | NC_021165.1    | Ca_kabuli_chr06 | 10611747                | TT                              | CC              | 1946860396               |
| SNP_P4_79993_10615530 | NC_021165.1    | Ca_kabuli_chr06 | 10615530                | TT                              | AA              | 1946860398               |
| SNP_P4_79994_10615862 | NC_021165.1    | Ca_kabuli_chr06 | 10615862                | GG                              | AA              | 1946860400               |
| SNP_P4_79997_10616560 | NC_021165.1    | Ca_kabuli_chr06 | 10616560                | CC                              | TT              | 1946860402               |
| SNP_P4_79998_10616787 | NC_021165.1    | Ca_kabuli_chr06 | 10616787                | AA                              | GG              | 1946860404               |

| SNPs IDs              | Chromosome IDs | Chromosomes     | Physical positions (bp) | CDC Frontier (Reference genome) | (ILWC46 & LPNB) | NCBI SNPdb Accession IDs |
|-----------------------|----------------|-----------------|-------------------------|---------------------------------|-----------------|--------------------------|
| SNP_P4_79999_10616789 | NC_021165.1    | Ca_kabuli_chr06 | 10616789                | GG                              | AA              | 1946860406               |
| SNP_P4_80001_10617158 | NC_021165.1    | Ca_kabuli_chr06 | 10617158                | AA                              | GG              | 1946860408               |
| SNP_P4_80002_10617163 | NC_021165.1    | Ca_kabuli_chr06 | 10617163                | AA                              | TT              | 1946860409               |
| SNP_P4_80003_10617289 | NC_021165.1    | Ca_kabuli_chr06 | 10617289                | AA                              | GG              | 1946860411               |
| SNP_P4_80004_10617332 | NC_021165.1    | Ca_kabuli_chr06 | 10617332                | TT                              | GG              | 1946860413               |
| SNP_P4_80005_10618059 | NC_021165.1    | Ca_kabuli_chr06 | 10618059                | GG                              | TT              | 1946860415               |
| SNP_P4_80006_10618295 | NC_021165.1    | Ca_kabuli_chr06 | 10618295                | GG                              | TT              | 1946860417               |
| SNP_P4_80008_10618386 | NC_021165.1    | Ca_kabuli_chr06 | 10618386                | TT                              | CC              | 1946860419               |
| SNP_P4_80009_10618389 | NC_021165.1    | Ca_kabuli_chr06 | 10618389                | GG                              | AA              | 1946860421               |
| SNP_P4_80010_10618423 | NC_021165.1    | Ca_kabuli_chr06 | 10618423                | AA                              | GG              | 1946860423               |
| SNP_P4_80011_10618619 | NC_021165.1    | Ca_kabuli_chr06 | 10618619                | GG                              | AA              | 1946860425               |
| SNP_P4_80013_10618965 | NC_021165.1    | Ca_kabuli_chr06 | 10618965                | GG                              | TT              | 1946860427               |
| SNP_P4_80014_10618975 | NC_021165.1    | Ca_kabuli_chr06 | 10618975                | CC                              | AA              | 1946860429               |
| SNP_P4_80015_10619143 | NC_021165.1    | Ca_kabuli_chr06 | 10619143                | TT                              | AA              | 1946860431               |
| SNP_P4_80016_10619294 | NC_021165.1    | Ca_kabuli_chr06 | 10619294                | CC                              | TT              | 1946860433               |
| SNP_P4_80018_10621834 | NC_021165.1    | Ca_kabuli_chr06 | 10621834                | AA                              | GG              | 1946860435               |
| SNP_P4_80019_10621844 | NC_021165.1    | Ca_kabuli_chr06 | 10621844                | AA                              | GG              | 1946860437               |
| SNP_P4_80020_10621911 | NC_021165.1    | Ca_kabuli_chr06 | 10621911                | CC                              | TT              | 1946860439               |
| SNP_P4_80021_10621995 | NC_021165.1    | Ca_kabuli_chr06 | 10621995                | CC                              | TT              | 1946860441               |
| SNP_P4_80023_10622275 | NC_021165.1    | Ca_kabuli_chr06 | 10622275                | AA                              | GG              | 1946860443               |
| SNP_P4_80024_10622297 | NC_021165.1    | Ca_kabuli_chr06 | 10622297                | AA                              | GG              | 1946860445               |
| SNP_P4_80025_10622538 | NC_021165.1    | Ca_kabuli_chr06 | 10622538                | TT                              | CC              | 1946860447               |
| SNP_P4_80026_10622575 | NC_021165.1    | Ca_kabuli_chr06 | 10622575                | TT                              | CC              | 1946860449               |
| SNP_P4_80028_10622750 | NC_021165.1    | Ca_kabuli_chr06 | 10622750                | AA                              | TT              | 1946860451               |
| SNP_P4_80029_10622973 | NC_021165.1    | Ca_kabuli_chr06 | 10622973                | GG                              | TT              | 1946860453               |
| SNP_P4_80030_10622977 | NC_021165.1    | Ca_kabuli_chr06 | 10622977                | GG                              | AA              | 1946860455               |
| SNP_P4_80032_10623557 | NC_021165.1    | Ca_kabuli_chr06 | 10623557                | TT                              | CC              | 1946860457               |
| SNP_P4_80033_10623748 | NC_021165.1    | Ca_kabuli_chr06 | 10623748                | AA                              | GG              | 1946860459               |
| SNP_P4_80034_10623801 | NC_021165.1    | Ca_kabuli_chr06 | 10623801                | GG                              | AA              | 1946860461               |
| SNP_P4_80035_10623939 | NC_021165.1    | Ca_kabuli_chr06 | 10623939                | GG                              | AA              | 1946860463               |
| SNP_P4_80036_10623962 | NC_021165.1    | Ca_kabuli_chr06 | 10623962                | GG                              | AA              | 1946860465               |
| SNP_P4_80038_10624019 | NC_021165.1    | Ca_kabuli_chr06 | 10624019                | AA                              | GG              | 1946860467               |
| SNP_P4_80039_10624254 | NC_021165.1    | Ca_kabuli_chr06 | 10624254                | TT                              | AA              | 1946860469               |
| SNP_P4_80041_10625671 | NC_021165.1    | Ca_kabuli_chr06 | 10625671                | GG                              | AA              | 1946860471               |
| SNP_P4_80043_10628096 | NC_021165.1    | Ca_kabuli_chr06 | 10628096                | AA                              | GG              | 1946860473               |
| SNP_P4_80044_10630434 | NC_021165.1    | Ca_kabuli_chr06 | 10630434                | GG                              | TT              | 1946860475               |
| SNP_P4_80045_10631338 | NC_021165.1    | Ca_kabuli_chr06 | 10631338                | AA                              | TT              | 1946860477               |
| SNP_P4_80046_10631344 | NC_021165.1    | Ca_kabuli_chr06 | 10631344                | TT                              | CC              | 1946860479               |
| SNP_P4_80049_10643345 | NC_021165.1    | Ca_kabuli_chr06 | 10643345                | AA                              | GG              | 1946860481               |
| SNP_P4_80050_10643713 | NC_021165.1    | Ca_kabuli_chr06 | 10643713                | CC                              | TT              | 1946860483               |
| SNP_P4_80051_10644039 | NC_021165.1    | Ca_kabuli_chr06 | 10644039                | TT                              | CC              | 1946860485               |
| SNP_P4_80052_10644042 | NC_021165.1    | Ca_kabuli_chr06 | 10644042                | GG                              | CC              | 1946860487               |



| SNPs IDs              | Chromosome IDs | Chromosomes     | Physical positions (bp) | CDC Frontier (Reference genome) | (ILWC46 & LPNB) | NCBI SNPdb Accession IDs |
|-----------------------|----------------|-----------------|-------------------------|---------------------------------|-----------------|--------------------------|
| SNP_P4_80053_10644045 | NC_021165.1    | Ca_kabuli_chr06 | 10644045                | TT                              | CC              | 1946860488               |
| SNP_P4_80054_10644052 | NC_021165.1    | Ca_kabuli_chr06 | 10644052                | GG                              | AA              | 1946860490               |
| SNP_P4_80055_10645894 | NC_021165.1    | Ca_kabuli_chr06 | 10645894                | TT                              | AA              | 1946860492               |
| SNP_P4_80056_10645901 | NC_021165.1    | Ca_kabuli_chr06 | 10645901                | GG                              | AA              | 1946860494               |
| SNP_P4_80057_10645902 | NC_021165.1    | Ca_kabuli_chr06 | 10645902                | CC                              | TT              | 1946860496               |
| SNP_P4_80058_10646168 | NC_021165.1    | Ca_kabuli_chr06 | 10646168                | GG                              | TT              | 1946860498               |
| SNP_P4_80059_10646184 | NC_021165.1    | Ca_kabuli_chr06 | 10646184                | GG                              | AA              | 1946860500               |
| SNP_P4_80060_10646198 | NC_021165.1    | Ca_kabuli_chr06 | 10646198                | GG                              | CC              | 1946860501               |
| SNP_P4_80061_10646547 | NC_021165.1    | Ca_kabuli_chr06 | 10646547                | CC                              | AA              | 1946860503               |
| SNP_P4_80062_10647797 | NC_021165.1    | Ca_kabuli_chr06 | 10647797                | CC                              | TT              | 1946860505               |
| SNP_P4_80063_10647841 | NC_021165.1    | Ca_kabuli_chr06 | 10647841                | CC                              | TT              | 1946860507               |
| SNP_P4_80064_10647882 | NC_021165.1    | Ca_kabuli_chr06 | 10647882                | TT                              | AA              | 1946860509               |
| SNP_P4_80065_10648544 | NC_021165.1    | Ca_kabuli_chr06 | 10648544                | AA                              | GG              | 1946860511               |
| SNP_P4_80066_10649704 | NC_021165.1    | Ca_kabuli_chr06 | 10649704                | CC                              | GG              | 1946860513               |
| SNP_P4_80067_10649729 | NC_021165.1    | Ca_kabuli_chr06 | 10649729                | TT                              | CC              | 1946860515               |
| SNP_P4_80068_10649731 | NC_021165.1    | Ca_kabuli_chr06 | 10649731                | AA                              | GG              | 1946860517               |
| SNP_P4_80070_10649881 | NC_021165.1    | Ca_kabuli_chr06 | 10649881                | CC                              | TT              | 1946860519               |
| SNP_P4_80071_10649883 | NC_021165.1    | Ca_kabuli_chr06 | 10649883                | CC                              | GG              | 1946860521               |
| SNP_P4_80073_10650731 | NC_021165.1    | Ca_kabuli_chr06 | 10650731                | GG                              | AA              | 1946860523               |
| SNP_P4_80074_10650864 | NC_021165.1    | Ca_kabuli_chr06 | 10650864                | GG                              | TT              | 1946860525               |
| SNP_P4_80075_10651386 | NC_021165.1    | Ca_kabuli_chr06 | 10651386                | GG                              | AA              | 1946860527               |
| SNP_P4_80077_10653254 | NC_021165.1    | Ca_kabuli_chr06 | 10653254                | AA                              | TT              | 1946860529               |
| SNP_P4_80078_10654374 | NC_021165.1    | Ca_kabuli_chr06 | 10654374                | GG                              | AA              | 1946860530               |
| SNP_P4_80079_10654443 | NC_021165.1    | Ca_kabuli_chr06 | 10654443                | GG                              | CC              | 1946860532               |
| SNP_P4_80080_10656450 | NC_021165.1    | Ca_kabuli_chr06 | 10656450                | TT                              | AA              | 1946860534               |
| SNP_P4_80081_10657055 | NC_021165.1    | Ca_kabuli_chr06 | 10657055                | AA                              | GG              | 1946860536               |
| SNP_P4_80082_10657335 | NC_021165.1    | Ca_kabuli_chr06 | 10657335                | GG                              | TT              | 1946860538               |
| SNP_P4_80083_10657650 | NC_021165.1    | Ca_kabuli_chr06 | 10657650                | TT                              | CC              | 1946860540               |
| SNP_P4_80084_10657683 | NC_021165.1    | Ca_kabuli_chr06 | 10657683                | GG                              | AA              | 1946860542               |
| SNP_P4_80085_10658053 | NC_021165.1    | Ca_kabuli_chr06 | 10658053                | TT                              | AA              | 1946860544               |
| SNP_P4_80088_10661011 | NC_021165.1    | Ca_kabuli_chr06 | 10661011                | AA                              | TT              | 1946860546               |
| SNP_P4_80089_10661057 | NC_021165.1    | Ca_kabuli_chr06 | 10661057                | GG                              | AA              | 1946860548               |
| SNP_P4_80090_10661070 | NC_021165.1    | Ca_kabuli_chr06 | 10661070                | TT                              | CC              | 1946860550               |
| SNP_P4_80092_10662015 | NC_021165.1    | Ca_kabuli_chr06 | 10662015                | GG                              | TT              | 1946860551               |
| SNP_P4_80093_10662221 | NC_021165.1    | Ca_kabuli_chr06 | 10662221                | TT                              | CC              | 1946860553               |
| SNP_P4_80094_10662231 | NC_021165.1    | Ca_kabuli_chr06 | 10662231                | CC                              | TT              | 1946860555               |
| SNP_P4_80095_10662251 | NC_021165.1    | Ca_kabuli_chr06 | 10662251                | TT                              | AA              | 1946860557               |
| SNP_P4_80096_10662668 | NC_021165.1    | Ca_kabuli_chr06 | 10662668                | TT                              | CC              | 1946860559               |
| SNP_P4_80097_10663249 | NC_021165.1    | Ca_kabuli_chr06 | 10663249                | CC                              | AA              | 1946860561               |
| SNP_P4_80098_10664207 | NC_021165.1    | Ca_kabuli_chr06 | 10664207                | CC                              | TT              | 1946860563               |
| SNP_P4_80099_10664219 | NC_021165.1    | Ca_kabuli_chr06 | 10664219                | CC                              | GG              | 1946860565               |
| SNP_P4_80100_10664237 | NC_021165.1    | Ca_kabuli_chr06 | 10664237                | GG                              | AA              | 1946860567               |

| SNPs IDs              | Chromosome IDs | Chromosomes     | Physical positions (bp) | CDC Frontier (Reference genome) | (ILWC46 & LPNB) | NCBI SNPdb Accession IDs |
|-----------------------|----------------|-----------------|-------------------------|---------------------------------|-----------------|--------------------------|
| SNP_P4_80101_10664270 | NC_021165.1    | Ca_kabuli_chr06 | 10664270                | GG                              | AA              | 1946860569               |
| SNP_P4_80104_10664554 | NC_021165.1    | Ca_kabuli_chr06 | 10664554                | GG                              | TT              | 1946860571               |
| SNP_P4_80105_10664585 | NC_021165.1    | Ca_kabuli_chr06 | 10664585                | CC                              | AA              | 1946860572               |
| SNP_P4_80107_10664771 | NC_021165.1    | Ca_kabuli_chr06 | 10664771                | CC                              | TT              | 1946860574               |
| SNP_P4_80108_10664850 | NC_021165.1    | Ca_kabuli_chr06 | 10664850                | TT                              | CC              | 1946860576               |
| SNP_P4_80109_10665142 | NC_021165.1    | Ca_kabuli_chr06 | 10665142                | TT                              | AA              | 1946860578               |
| SNP_P4_80110_10665143 | NC_021165.1    | Ca_kabuli_chr06 | 10665143                | AA                              | GG              | 1946860580               |
| SNP_P4_80111_10665368 | NC_021165.1    | Ca_kabuli_chr06 | 10665368                | AA                              | CC              | 1946860582               |
| SNP_P4_80112_10665460 | NC_021165.1    | Ca_kabuli_chr06 | 10665460                | TT                              | CC              | 1946860584               |
| SNP_P4_80113_10665465 | NC_021165.1    | Ca_kabuli_chr06 | 10665465                | GG                              | AA              | 1946860586               |
| SNP_P4_80114_10665716 | NC_021165.1    | Ca_kabuli_chr06 | 10665716                | GG                              | AA              | 1946860587               |
| SNP_P4_80115_10666029 | NC_021165.1    | Ca_kabuli_chr06 | 10666029                | AA                              | GG              | 1946860589               |
| SNP_P4_80116_10666049 | NC_021165.1    | Ca_kabuli_chr06 | 10666049                | CC                              | TT              | 1946860591               |
| SNP_P4_80117_10668013 | NC_021165.1    | Ca_kabuli_chr06 | 10668013                | TT                              | GG              | 1946860593               |
| SNP_P4_80118_10670368 | NC_021165.1    | Ca_kabuli_chr06 | 10670368                | AA                              | GG              | 1946860595               |
| SNP_P4_80119_10670773 | NC_021165.1    | Ca_kabuli_chr06 | 10670773                | CC                              | AA              | 1946860597               |
| SNP_P4_80121_10671394 | NC_021165.1    | Ca_kabuli_chr06 | 10671394                | TT                              | CC              | 1946860599               |
| SNP_P4_80122_10671444 | NC_021165.1    | Ca_kabuli_chr06 | 10671444                | CC                              | AA              | 1946860601               |
| SNP_P4_80123_10673251 | NC_021165.1    | Ca_kabuli_chr06 | 10673251                | CC                              | TT              | 1946860603               |
| SNP_P4_80125_10675985 | NC_021165.1    | Ca_kabuli_chr06 | 10675985                | CC                              | GG              | 1946860605               |
| SNP_P4_80126_10676005 | NC_021165.1    | Ca_kabuli_chr06 | 10676005                | AA                              | CC              | 1946860607               |
| SNP_P4_80127_10676293 | NC_021165.1    | Ca_kabuli_chr06 | 10676293                | GG                              | AA              | 1946860608               |
| SNP_P4_80128_10676434 | NC_021165.1    | Ca_kabuli_chr06 | 10676434                | GG                              | AA              | 1946860610               |
| SNP_P4_80129_10677230 | NC_021165.1    | Ca_kabuli_chr06 | 10677230                | CC                              | AA              | 1946860612               |
| SNP_P4_80130_10677303 | NC_021165.1    | Ca_kabuli_chr06 | 10677303                | GG                              | TT              | 1946860614               |
| SNP_P4_80131_10678337 | NC_021165.1    | Ca_kabuli_chr06 | 10678337                | CC                              | TT              | 1946860616               |
| SNP_P4_80132_10679443 | NC_021165.1    | Ca_kabuli_chr06 | 10679443                | AA                              | GG              | 1946860618               |
| SNP_P4_80133_10680840 | NC_021165.1    | Ca_kabuli_chr06 | 10680840                | AA                              | GG              | 1946860620               |
| SNP_P4_80134_10680994 | NC_021165.1    | Ca_kabuli_chr06 | 10680994                | AA                              | GG              | 1946860622               |
| SNP_P4_80135_10681055 | NC_021165.1    | Ca_kabuli_chr06 | 10681055                | TT                              | CC              | 1946860623               |
| SNP_P4_80136_10681057 | NC_021165.1    | Ca_kabuli_chr06 | 10681057                | AA                              | CC              | 1946860625               |
| SNP_P4_80137_10683328 | NC_021165.1    | Ca_kabuli_chr06 | 10683328                | CC                              | TT              | 1946860627               |
| SNP_P4_80138_10683331 | NC_021165.1    | Ca_kabuli_chr06 | 10683331                | GG                              | AA              | 1946860629               |
| SNP_P4_80139_10683620 | NC_021165.1    | Ca_kabuli_chr06 | 10683620                | GG                              | AA              | 1946860631               |
| SNP_P4_80140_10683680 | NC_021165.1    | Ca_kabuli_chr06 | 10683680                | TT                              | CC              | 1946860633               |
| SNP_P4_80141_10683874 | NC_021165.1    | Ca_kabuli_chr06 | 10683874                | GG                              | AA              | 1946860635               |
| SNP_P4_80142_10684551 | NC_021165.1    | Ca_kabuli_chr06 | 10684551                | GG                              | AA              | 1946860637               |
| SNP_P4_80143_10685094 | NC_021165.1    | Ca_kabuli_chr06 | 10685094                | GG                              | AA              | 1946860639               |
| SNP_P4_80144_10688982 | NC_021165.1    | Ca_kabuli_chr06 | 10688982                | CC                              | TT              | 1946860640               |
| SNP_P4_80145_10689030 | NC_021165.1    | Ca_kabuli_chr06 | 10689030                | AA                              | GG              | 1946860642               |
| SNP_P4_80147_10689212 | NC_021165.1    | Ca_kabuli_chr06 | 10689212                | AA                              | CC              | 1946860644               |
| SNP_P4_80148_10689297 | NC_021165.1    | Ca_kabuli_chr06 | 10689297                | CC                              | AA              | 1946860646               |

| SNPs IDs              | Chromosome IDs | Chromosomes     | Physical positions (bp) | CDC Frontier (Reference genome) | (ILWC46 & LPNB) | NCBI SNPdb Accession IDs |
|-----------------------|----------------|-----------------|-------------------------|---------------------------------|-----------------|--------------------------|
| SNP_P4_80149_10689341 | NC_021165.1    | Ca_kabuli_chr06 | 10689341                | AA                              | CC              | 1946860648               |
| SNP_P4_80150_10689703 | NC_021165.1    | Ca_kabuli_chr06 | 10689703                | AA                              | GG              | 1946860650               |
| SNP_P4_80151_10690622 | NC_021165.1    | Ca_kabuli_chr06 | 10690622                | CC                              | TT              | 1946860652               |
| SNP_P4_80152_10690853 | NC_021165.1    | Ca_kabuli_chr06 | 10690853                | AA                              | GG              | 1946860654               |
| SNP_P4_80153_10690857 | NC_021165.1    | Ca_kabuli_chr06 | 10690857                | AA                              | TT              | 1946860656               |
| SNP_P4_80154_10692958 | NC_021165.1    | Ca_kabuli_chr06 | 10692958                | CC                              | TT              | 1946860658               |
| SNP_P4_80155_10693273 | NC_021165.1    | Ca_kabuli_chr06 | 10693273                | AA                              | TT              | 1946860660               |
| SNP_P4_80156_10693906 | NC_021165.1    | Ca_kabuli_chr06 | 10693906                | TT                              | GG              | 1946860662               |
| SNP_P4_80157_10694197 | NC_021165.1    | Ca_kabuli_chr06 | 10694197                | AA                              | TT              | 1946860664               |
| SNP_P4_80159_10697640 | NC_021165.1    | Ca_kabuli_chr06 | 10697640                | CC                              | TT              | 1946860666               |
| SNP_P4_80160_10697755 | NC_021165.1    | Ca_kabuli_chr06 | 10697755                | AA                              | TT              | 1946860668               |
| SNP_P4_80161_10697796 | NC_021165.1    | Ca_kabuli_chr06 | 10697796                | CC                              | GG              | 1946860670               |
| SNP_P4_80162_10698102 | NC_021165.1    | Ca_kabuli_chr06 | 10698102                | GG                              | AA              | 1946860672               |
| SNP_P4_80163_10700535 | NC_021165.1    | Ca_kabuli_chr06 | 10700535                | CC                              | AA              | 1946860674               |
| SNP_P4_80164_10700610 | NC_021165.1    | Ca_kabuli_chr06 | 10700610                | TT                              | AA              | 1946860676               |
| SNP_P4_80166_10700737 | NC_021165.1    | Ca_kabuli_chr06 | 10700737                | AA                              | CC              | 1946860678               |
| SNP_P4_80167_10700978 | NC_021165.1    | Ca_kabuli_chr06 | 10700978                | CC                              | AA              | 1946860680               |
| SNP_P4_80168_10701054 | NC_021165.1    | Ca_kabuli_chr06 | 10701054                | TT                              | CC              | 1946860682               |
| SNP_P4_80169_10701086 | NC_021165.1    | Ca_kabuli_chr06 | 10701086                | TT                              | CC              | 1946860684               |
| SNP_P4_80170_10701194 | NC_021165.1    | Ca_kabuli_chr06 | 10701194                | GG                              | AA              | 1946860686               |
| SNP_P4_80171_10701353 | NC_021165.1    | Ca_kabuli_chr06 | 10701353                | TT                              | CC              | 1946860688               |
| SNP_P4_80173_10701513 | NC_021165.1    | Ca_kabuli_chr06 | 10701513                | TT                              | AA              | 1946860690               |
| SNP_P4_80174_10701515 | NC_021165.1    | Ca_kabuli_chr06 | 10701515                | GG                              | AA              | 1946860692               |
| SNP_P4_80175_10702103 | NC_021165.1    | Ca_kabuli_chr06 | 10702103                | TT                              | AA              | 1946860694               |
| SNP_P4_80176_10702109 | NC_021165.1    | Ca_kabuli_chr06 | 10702109                | GG                              | AA              | 1946860696               |
| SNP_P4_80178_10702368 | NC_021165.1    | Ca_kabuli_chr06 | 10702368                | GG                              | AA              | 1946860698               |
| SNP_P4_80179_10702442 | NC_021165.1    | Ca_kabuli_chr06 | 10702442                | GG                              | AA              | 1946860700               |
| SNP_P4_80180_10702444 | NC_021165.1    | Ca_kabuli_chr06 | 10702444                | AA                              | TT              | 1946860702               |
| SNP_P4_80181_10702446 | NC_021165.1    | Ca_kabuli_chr06 | 10702446                | CC                              | TT              | 1946860704               |
| SNP_P4_80182_10705138 | NC_021165.1    | Ca_kabuli_chr06 | 10705138                | TT                              | CC              | 1946860706               |
| SNP_P4_80183_10705315 | NC_021165.1    | Ca_kabuli_chr06 | 10705315                | AA                              | CC              | 1946860708               |
| SNP_P4_80184_10705893 | NC_021165.1    | Ca_kabuli_chr06 | 10705893                | AA                              | TT              | 1946860710               |
| SNP_P4_80185_10705923 | NC_021165.1    | Ca_kabuli_chr06 | 10705923                | GG                              | CC              | 1946860712               |
| SNP_P4_80186_10706067 | NC_021165.1    | Ca_kabuli_chr06 | 10706067                | AA                              | TT              | 1946860714               |
| SNP_P4_80187_10706816 | NC_021165.1    | Ca_kabuli_chr06 | 10706816                | TT                              | CC              | 1946860716               |
| SNP_P4_80188_10707209 | NC_021165.1    | Ca_kabuli_chr06 | 10707209                | AA                              | GG              | 1946860718               |
| SNP_P4_80189_10707520 | NC_021165.1    | Ca_kabuli_chr06 | 10707520                | TT                              | CC              | 1946860720               |
| SNP_P4_80190_10707534 | NC_021165.1    | Ca_kabuli_chr06 | 10707534                | CC                              | TT              | 1946860722               |
| SNP_P4_80191_10707948 | NC_021165.1    | Ca_kabuli_chr06 | 10707948                | TT                              | AA              | 1946860724               |
| SNP_P4_80193_10708152 | NC_021165.1    | Ca_kabuli_chr06 | 10708152                | GG                              | TT              | 1946860726               |
| SNP_P4_80195_10708635 | NC_021165.1    | Ca_kabuli_chr06 | 10708635                | GG                              | AA              | 1946860728               |
| SNP_P4_80197_10708877 | NC_021165.1    | Ca_kabuli_chr06 | 10708877                | TT                              | CC              | 1946860730               |

| SNPs IDs              | Chromosome IDs | Chromosomes     | Physical positions (bp) | CDC Frontier (Reference genome) | (ILWC46 & LPNB) | NCBI SNPdb Accession IDs |
|-----------------------|----------------|-----------------|-------------------------|---------------------------------|-----------------|--------------------------|
| SNP_P4_80198_10709199 | NC_021165.1    | Ca_kabuli_chr06 | 10709199                | GG                              | AA              | 1946860732               |
| SNP_P4_80199_10709226 | NC_021165.1    | Ca_kabuli_chr06 | 10709226                | AA                              | TT              | 1946860734               |
| SNP_P4_80200_10709262 | NC_021165.1    | Ca_kabuli_chr06 | 10709262                | AA                              | TT              | 1946860736               |
| SNP_P4_80201_10724098 | NC_021165.1    | Ca_kabuli_chr06 | 10724098                | GG                              | CC              | 1946860738               |
| SNP_P4_80202_10729166 | NC_021165.1    | Ca_kabuli_chr06 | 10729166                | AA                              | GG              | 1946860740               |
| SNP_P4_80203_10729170 | NC_021165.1    | Ca_kabuli_chr06 | 10729170                | TT                              | CC              | 1946860742               |
| SNP_P4_80204_10748859 | NC_021165.1    | Ca_kabuli_chr06 | 10748859                | AA                              | GG              | 1946860744               |
| SNP_P4_80205_10749027 | NC_021165.1    | Ca_kabuli_chr06 | 10749027                | GG                              | CC              | 1946860746               |
| SNP_P4_80206_10750843 | NC_021165.1    | Ca_kabuli_chr06 | 10750843                | GG                              | AA              | 1946860748               |
| SNP_P4_80207_10751176 | NC_021165.1    | Ca_kabuli_chr06 | 10751176                | TT                              | AA              | 1946860750               |
| SNP_P4_80208_10751209 | NC_021165.1    | Ca_kabuli_chr06 | 10751209                | AA                              | TT              | 1946860752               |
| SNP_P4_80209_10753535 | NC_021165.1    | Ca_kabuli_chr06 | 10753535                | AA                              | GG              | 1946860754               |
| SNP_P4_80210_10792165 | NC_021165.1    | Ca_kabuli_chr06 | 10792165                | GG                              | AA              | 1946860756               |
| SNP_P4_80212_10815763 | NC_021165.1    | Ca_kabuli_chr06 | 10815763                | CC                              | TT              | 1946860758               |
| SNP_P4_80213_10818657 | NC_021165.1    | Ca_kabuli_chr06 | 10818657                | AA                              | GG              | 1946860760               |
| SNP_P4_80214_10821971 | NC_021165.1    | Ca_kabuli_chr06 | 10821971                | CC                              | TT              | 1946860762               |
| SNP_P4_80215_10822140 | NC_021165.1    | Ca_kabuli_chr06 | 10822140                | AA                              | GG              | 1946860764               |
| SNP_P4_80216_10822229 | NC_021165.1    | Ca_kabuli_chr06 | 10822229                | AA                              | CC              | 1946860766               |
| SNP_P4_80217_10822320 | NC_021165.1    | Ca_kabuli_chr06 | 10822320                | AA                              | CC              | 1946860768               |
| SNP_P4_80218_10822423 | NC_021165.1    | Ca_kabuli_chr06 | 10822423                | AA                              | CC              | 1946860770               |
| SNP_P4_80219_10825376 | NC_021165.1    | Ca_kabuli_chr06 | 10825376                | CC                              | TT              | 1946860772               |
| SNP_P4_80220_10828909 | NC_021165.1    | Ca_kabuli_chr06 | 10828909                | GG                              | CC              | 1946860774               |
| SNP_P4_80221_10841532 | NC_021165.1    | Ca_kabuli_chr06 | 10841532                | CC                              | TT              | 1946860776               |
| SNP_P4_80223_10875505 | NC_021165.1    | Ca_kabuli_chr06 | 10875505                | GG                              | TT              | 1946860778               |
| SNP_P4_80224_10894363 | NC_021165.1    | Ca_kabuli_chr06 | 10894363                | GG                              | AA              | 1946860779               |
| SNP_P4_80225_10930098 | NC_021165.1    | Ca_kabuli_chr06 | 10930098                | GG                              | CC              | 1946860781               |
| SNP_P4_80226_10930188 | NC_021165.1    | Ca_kabuli_chr06 | 10930188                | GG                              | AA              | 1946860783               |
| SNP_P4_80227_10930332 | NC_021165.1    | Ca_kabuli_chr06 | 10930332                | CC                              | TT              | 1946860785               |
| SNP_P4_80228_10948462 | NC_021165.1    | Ca_kabuli_chr06 | 10948462                | CC                              | TT              | 1946860787               |
| SNP_P4_80229_10948623 | NC_021165.1    | Ca_kabuli_chr06 | 10948623                | TT                              | AA              | 1946860789               |
| SNP_P4_80230_10948630 | NC_021165.1    | Ca_kabuli_chr06 | 10948630                | AA                              | CC              | 1946860791               |
| SNP_P4_80231_10948637 | NC_021165.1    | Ca_kabuli_chr06 | 10948637                | GG                              | TT              | 1946860793               |
| SNP_P4_80232_10948679 | NC_021165.1    | Ca_kabuli_chr06 | 10948679                | AA                              | GG              | 1946860795               |
| SNP_P4_80233_10948700 | NC_021165.1    | Ca_kabuli_chr06 | 10948700                | GG                              | CC              | 1946860797               |
| SNP_P4_80234_10948719 | NC_021165.1    | Ca_kabuli_chr06 | 10948719                | TT                              | CC              | 1946860799               |
| SNP_P4_80236_10953638 | NC_021165.1    | Ca_kabuli_chr06 | 10953638                | AA                              | GG              | 1946860800               |
| SNP_P4_80237_10953640 | NC_021165.1    | Ca_kabuli_chr06 | 10953640                | AA                              | TT              | 1946860802               |
| SNP_P4_80238_10957017 | NC_021165.1    | Ca_kabuli_chr06 | 10957017                | AA                              | GG              | 1946860804               |
| SNP_P4_80239_10965323 | NC_021165.1    | Ca_kabuli_chr06 | 10965323                | AA                              | TT              | 1946860806               |
| SNP_P4_80241_10993774 | NC_021165.1    | Ca_kabuli_chr06 | 10993774                | AA                              | GG              | 1946860808               |
| SNP_P4_80242_10997457 | NC_021165.1    | Ca_kabuli_chr06 | 10997457                | AA                              | GG              | 1946860810               |
| SNP_P4_80243_10998841 | NC_021165.1    | Ca_kabuli_chr06 | 10998841                | TT                              | AA              | 1946860812               |

| SNPs IDs              | Chromosome IDs | Chromosomes     | Physical positions (bp) | CDC Frontier (Reference genome) | (ILWC46 & LPNB) | NCBI SNPdb Accession IDs |
|-----------------------|----------------|-----------------|-------------------------|---------------------------------|-----------------|--------------------------|
| SNP_P4_80244_10998893 | NC_021165.1    | Ca_kabuli_chr06 | 10998893                | TT                              | AA              | 1946860814               |
| SNP_P4_80245_10998894 | NC_021165.1    | Ca_kabuli_chr06 | 10998894                | TT                              | AA              | 1946860816               |
| SNP_P4_80246_11029574 | NC_021165.1    | Ca_kabuli_chr06 | 11029574                | CC                              | TT              | 1946860818               |
| SNP_P4_80247_11031549 | NC_021165.1    | Ca_kabuli_chr06 | 11031549                | GG                              | AA              | 1946860820               |
| SNP_P4_80250_11039586 | NC_021165.1    | Ca_kabuli_chr06 | 11039586                | TT                              | AA              | 1946860822               |
| SNP_P4_80251_11063990 | NC_021165.1    | Ca_kabuli_chr06 | 11063990                | TT                              | CC              | 1946860824               |
| SNP_P4_80252_11067513 | NC_021165.1    | Ca_kabuli_chr06 | 11067513                | GG                              | CC              | 1946860826               |
| SNP_P4_80253_11072244 | NC_021165.1    | Ca_kabuli_chr06 | 11072244                | GG                              | AA              | 1946860828               |
| SNP_P4_80254_11077586 | NC_021165.1    | Ca_kabuli_chr06 | 11077586                | CC                              | TT              | 1946860829               |
| SNP_P4_80255_11079439 | NC_021165.1    | Ca_kabuli_chr06 | 11079439                | TT                              | AA              | 1946860830               |
| SNP_P4_80256_11084696 | NC_021165.1    | Ca_kabuli_chr06 | 11084696                | GG                              | AA              | 1946860831               |
| SNP_P4_80258_11085182 | NC_021165.1    | Ca_kabuli_chr06 | 11085182                | AA                              | GG              | 1946860832               |
| SNP_P4_80259_11109883 | NC_021165.1    | Ca_kabuli_chr06 | 11109883                | TT                              | CC              | 1946860833               |
| SNP_P4_80260_11134846 | NC_021165.1    | Ca_kabuli_chr06 | 11134846                | CC                              | TT              | 1946860834               |
| SNP_P4_80261_11140599 | NC_021165.1    | Ca_kabuli_chr06 | 11140599                | GG                              | AA              | 1946860835               |
| SNP_P4_80262_11151787 | NC_021165.1    | Ca_kabuli_chr06 | 11151787                | AA                              | GG              | 1946860837               |
| SNP_P4_80263_11163190 | NC_021165.1    | Ca_kabuli_chr06 | 11163190                | AA                              | CC              | 1946860839               |
| SNP_P4_80264_11221346 | NC_021165.1    | Ca_kabuli_chr06 | 11221346                | GG                              | CC              | 1946860841               |
| SNP_P4_80265_11232276 | NC_021165.1    | Ca_kabuli_chr06 | 11232276                | CC                              | TT              | 1946860843               |
| SNP_P4_80266_11248001 | NC_021165.1    | Ca_kabuli_chr06 | 11248001                | AA                              | CC              | 1946860845               |
| SNP_P4_80267_11258908 | NC_021165.1    | Ca_kabuli_chr06 | 11258908                | AA                              | GG              | 1946860846               |
| SNP_P4_80268_11277565 | NC_021165.1    | Ca_kabuli_chr06 | 11277565                | GG                              | AA              | 1946860848               |
| SNP_P4_80269_11278756 | NC_021165.1    | Ca_kabuli_chr06 | 11278756                | AA                              | CC              | 1946860850               |
| SNP_P4_80270_11278760 | NC_021165.1    | Ca_kabuli_chr06 | 11278760                | TT                              | GG              | 1946860852               |
| SNP_P4_80271_11308949 | NC_021165.1    | Ca_kabuli_chr06 | 11308949                | AA                              | CC              | 1946860854               |
| SNP_P4_80272_11309088 | NC_021165.1    | Ca_kabuli_chr06 | 11309088                | CC                              | AA              | 1946860856               |
| SNP_P4_80273_11309337 | NC_021165.1    | Ca_kabuli_chr06 | 11309337                | GG                              | AA              | 1946860858               |
| SNP_P4_80274_11309346 | NC_021165.1    | Ca_kabuli_chr06 | 11309346                | AA                              | TT              | 1946860860               |
| SNP_P4_80275_11309486 | NC_021165.1    | Ca_kabuli_chr06 | 11309486                | GG                              | AA              | 1946860862               |
| SNP_P4_80276_11309834 | NC_021165.1    | Ca_kabuli_chr06 | 11309834                | GG                              | TT              | 1946860864               |
| SNP_P4_80278_11310351 | NC_021165.1    | Ca_kabuli_chr06 | 11310351                | AA                              | GG              | 1946860866               |
| SNP_P4_80279_11310383 | NC_021165.1    | Ca_kabuli_chr06 | 11310383                | CC                              | AA              | 1946860868               |
| SNP_P4_80280_11310559 | NC_021165.1    | Ca_kabuli_chr06 | 11310559                | AA                              | GG              | 1946860870               |
| SNP_P4_80281_11310568 | NC_021165.1    | Ca_kabuli_chr06 | 11310568                | GG                              | AA              | 1946860872               |
| SNP_P4_80282_11310610 | NC_021165.1    | Ca_kabuli_chr06 | 11310610                | TT                              | GG              | 1946860874               |
| SNP_P4_80283_11310654 | NC_021165.1    | Ca_kabuli_chr06 | 11310654                | CC                              | GG              | 1946860876               |
| SNP_P4_80284_11310678 | NC_021165.1    | Ca_kabuli_chr06 | 11310678                | TT                              | CC              | 1946860878               |
| SNP_P4_80285_11310736 | NC_021165.1    | Ca_kabuli_chr06 | 11310736                | AA                              | GG              | 1946860880               |
| SNP_P4_80286_11310754 | NC_021165.1    | Ca_kabuli_chr06 | 11310754                | AA                              | TT              | 1946860882               |
| SNP_P4_80287_11310788 | NC_021165.1    | Ca_kabuli_chr06 | 11310788                | TT                              | CC              | 1946860884               |
| SNP_P4_80289_11311012 | NC_021165.1    | Ca_kabuli_chr06 | 11311012                | CC                              | TT              | 1946860886               |
| SNP_P4_80290_11311101 | NC_021165.1    | Ca_kabuli_chr06 | 11311101                | TT                              | GG              | 1946860888               |

| SNPs IDs              | Chromosome IDs | Chromosomes     | Physical positions (bp) | CDC Frontier (Reference genome) | (ILWC46 & LPNB) | NCBI SNPdb Accession IDs |
|-----------------------|----------------|-----------------|-------------------------|---------------------------------|-----------------|--------------------------|
| SNP_P4_80291_11311154 | NC_021165.1    | Ca_kabuli_chr06 | 11311154                | GG                              | AA              | 1946860890               |
| SNP_P4_80292_11311238 | NC_021165.1    | Ca_kabuli_chr06 | 11311238                | CC                              | TT              | 1946860892               |
| SNP_P4_80293_11311261 | NC_021165.1    | Ca_kabuli_chr06 | 11311261                | CC                              | TT              | 1946860894               |
| SNP_P4_80294_11311281 | NC_021165.1    | Ca_kabuli_chr06 | 11311281                | TT                              | AA              | 1946860896               |
| SNP_P4_80295_11311282 | NC_021165.1    | Ca_kabuli_chr06 | 11311282                | CC                              | AA              | 1946860898               |
| SNP_P4_80296_11311283 | NC_021165.1    | Ca_kabuli_chr06 | 11311283                | AA                              | TT              | 1946860900               |
| SNP_P4_80297_11311304 | NC_021165.1    | Ca_kabuli_chr06 | 11311304                | TT                              | CC              | 1946860902               |
| SNP_P4_80298_11311425 | NC_021165.1    | Ca_kabuli_chr06 | 11311425                | TT                              | AA              | 1946860904               |
| SNP_P4_80299_11313985 | NC_021165.1    | Ca_kabuli_chr06 | 11313985                | AA                              | GG              | 1946860906               |
| SNP_P4_80300_11314221 | NC_021165.1    | Ca_kabuli_chr06 | 11314221                | CC                              | AA              | 1946860908               |
| SNP_P4_80301_11314266 | NC_021165.1    | Ca_kabuli_chr06 | 11314266                | TT                              | CC              | 1946860910               |
| SNP_P4_80302_11314339 | NC_021165.1    | Ca_kabuli_chr06 | 11314339                | CC                              | GG              | 1946860912               |
| SNP_P4_80303_11314398 | NC_021165.1    | Ca_kabuli_chr06 | 11314398                | CC                              | AA              | 1946860914               |
| SNP_P4_80304_11315482 | NC_021165.1    | Ca_kabuli_chr06 | 11315482                | TT                              | CC              | 1946860916               |
| SNP_P4_80305_11315500 | NC_021165.1    | Ca_kabuli_chr06 | 11315500                | GG                              | CC              | 1946860918               |
| SNP_P4_80306_11315516 | NC_021165.1    | Ca_kabuli_chr06 | 11315516                | GG                              | TT              | 1946860920               |
| SNP_P4_80307_11315521 | NC_021165.1    | Ca_kabuli_chr06 | 11315521                | AA                              | TT              | 1946860922               |
| SNP_P4_80308_11315522 | NC_021165.1    | Ca_kabuli_chr06 | 11315522                | AA                              | GG              | 1946860924               |
| SNP_P4_80309_11315524 | NC_021165.1    | Ca_kabuli_chr06 | 11315524                | GG                              | CC              | 1946860926               |
| SNP_P4_80310_11315851 | NC_021165.1    | Ca_kabuli_chr06 | 11315851                | TT                              | CC              | 1946860928               |
| SNP_P4_80311_11315871 | NC_021165.1    | Ca_kabuli_chr06 | 11315871                | AA                              | GG              | 1946860930               |
| SNP_P4_80312_11315966 | NC_021165.1    | Ca_kabuli_chr06 | 11315966                | AA                              | TT              | 1946860932               |
| SNP_P4_80314_11316131 | NC_021165.1    | Ca_kabuli_chr06 | 11316131                | TT                              | CC              | 1946860934               |
| SNP_P4_80315_11316303 | NC_021165.1    | Ca_kabuli_chr06 | 11316303                | GG                              | TT              | 1946860936               |
| SNP_P4_80316_11316358 | NC_021165.1    | Ca_kabuli_chr06 | 11316358                | AA                              | TT              | 1946860938               |
| SNP_P4_80317_11316359 | NC_021165.1    | Ca_kabuli_chr06 | 11316359                | TT                              | AA              | 1946860940               |
| SNP_P4_80318_11359541 | NC_021165.1    | Ca_kabuli_chr06 | 11359541                | AA                              | GG              | 1946860943               |
| SNP_P4_80319_11360386 | NC_021165.1    | Ca_kabuli_chr06 | 11360386                | GG                              | AA              | 1946860945               |
| SNP_P4_80321_11363508 | NC_021165.1    | Ca_kabuli_chr06 | 11363508                | TT                              | CC              | 1946860947               |
| SNP_P4_80322_11383638 | NC_021165.1    | Ca_kabuli_chr06 | 11383638                | TT                              | CC              | 1946860949               |
| SNP_P4_80323_11390881 | NC_021165.1    | Ca_kabuli_chr06 | 11390881                | AA                              | GG              | 1946860951               |
| SNP_P4_80325_11402701 | NC_021165.1    | Ca_kabuli_chr06 | 11402701                | AA                              | TT              | 1946860953               |
| SNP_P4_80326_11417198 | NC_021165.1    | Ca_kabuli_chr06 | 11417198                | AA                              | GG              | 1946860955               |
| SNP_P4_80327_11420155 | NC_021165.1    | Ca_kabuli_chr06 | 11420155                | TT                              | AA              | 1946860957               |
| SNP_P4_80329_11427657 | NC_021165.1    | Ca_kabuli_chr06 | 11427657                | TT                              | CC              | 1946860959               |
| SNP_P4_80330_11451980 | NC_021165.1    | Ca_kabuli_chr06 | 11451980                | AA                              | TT              | 1946860961               |
| SNP_P4_80331_11457061 | NC_021165.1    | Ca_kabuli_chr06 | 11457061                | TT                              | CC              | 1946860963               |
| SNP_P4_80332_11457377 | NC_021165.1    | Ca_kabuli_chr06 | 11457377                | TT                              | AA              | 1946860965               |
| SNP_P4_80335_11457521 | NC_021165.1    | Ca_kabuli_chr06 | 11457521                | TT                              | CC              | 1946860967               |
| SNP_P4_80336_11457525 | NC_021165.1    | Ca_kabuli_chr06 | 11457525                | GG                              | AA              | 1946860969               |
| SNP_P4_80337_11482767 | NC_021165.1    | Ca_kabuli_chr06 | 11482767                | GG                              | AA              | 1946860971               |
| SNP_P4_80338_11490698 | NC_021165.1    | Ca_kabuli_chr06 | 11490698                | TT                              | AA              | 1946860973               |

| SNPs IDs              | Chromosome IDs | Chromosomes     | Physical positions (bp) | CDC Frontier (Reference genome) | (ILWC46 & LPNB) | NCBI SNPdb Accession IDs |
|-----------------------|----------------|-----------------|-------------------------|---------------------------------|-----------------|--------------------------|
| SNP_P4_80340_11493187 | NC_021165.1    | Ca_kabuli_chr06 | 11493187                | TT                              | GG              | 1946860976               |
| SNP_P4_80341_11494838 | NC_021165.1    | Ca_kabuli_chr06 | 11494838                | TT                              | CC              | 1946860978               |
| SNP_P4_80344_11513694 | NC_021165.1    | Ca_kabuli_chr06 | 11513694                | GG                              | CC              | 1946860980               |
| SNP_P4_80345_11517650 | NC_021165.1    | Ca_kabuli_chr06 | 11517650                | CC                              | TT              | 1946860982               |
| SNP_P4_80346_11523127 | NC_021165.1    | Ca_kabuli_chr06 | 11523127                | TT                              | GG              | 1946860985               |
| SNP_P4_80347_11538019 | NC_021165.1    | Ca_kabuli_chr06 | 11538019                | GG                              | AA              | 1946860987               |
| SNP_P4_80348_11545886 | NC_021165.1    | Ca_kabuli_chr06 | 11545886                | TT                              | CC              | 1946860989               |
| SNP_P4_80349_11545948 | NC_021165.1    | Ca_kabuli_chr06 | 11545948                | GG                              | AA              | 1946860991               |
| SNP_P4_80351_11546167 | NC_021165.1    | Ca_kabuli_chr06 | 11546167                | GG                              | CC              | 1946860993               |
| SNP_P4_80352_11546178 | NC_021165.1    | Ca_kabuli_chr06 | 11546178                | GG                              | AA              | 1946860995               |
| SNP_P4_80353_11546338 | NC_021165.1    | Ca_kabuli_chr06 | 11546338                | AA                              | CC              | 1946860997               |
| SNP_P4_80355_11546553 | NC_021165.1    | Ca_kabuli_chr06 | 11546553                | AA                              | GG              | 1946860999               |
| SNP_P4_80356_11546598 | NC_021165.1    | Ca_kabuli_chr06 | 11546598                | AA                              | TT              | 1946861001               |
| SNP_P4_80357_11546645 | NC_021165.1    | Ca_kabuli_chr06 | 11546645                | CC                              | GG              | 1946861003               |
| SNP_P4_80358_11546660 | NC_021165.1    | Ca_kabuli_chr06 | 11546660                | CC                              | AA              | 1946861005               |
| SNP_P4_80359_11546696 | NC_021165.1    | Ca_kabuli_chr06 | 11546696                | AA                              | TT              | 1946861007               |
| SNP_P4_80360_11562385 | NC_021165.1    | Ca_kabuli_chr06 | 11562385                | CC                              | TT              | 1946861009               |
| SNP_P4_80363_11565294 | NC_021165.1    | Ca_kabuli_chr06 | 11565294                | TT                              | GG              | 1946861011               |
| SNP_P4_80365_11568355 | NC_021165.1    | Ca_kabuli_chr06 | 11568355                | AA                              | TT              | 1946861013               |
| SNP_P4_80366_11568781 | NC_021165.1    | Ca_kabuli_chr06 | 11568781                | CC                              | GG              | 1946861015               |
| SNP_P4_80367_11569090 | NC_021165.1    | Ca_kabuli_chr06 | 11569090                | TT                              | AA              | 1946861017               |
| SNP_P4_80370_11569260 | NC_021165.1    | Ca_kabuli_chr06 | 11569260                | TT                              | CC              | 1946861019               |
| SNP_P4_80371_11574157 | NC_021165.1    | Ca_kabuli_chr06 | 11574157                | TT                              | AA              | 1946861021               |
| SNP_P4_80372_11578237 | NC_021165.1    | Ca_kabuli_chr06 | 11578237                | AA                              | GG              | 1946861023               |
| SNP_P4_80373_11578527 | NC_021165.1    | Ca_kabuli_chr06 | 11578527                | TT                              | CC              | 1946861025               |
| SNP_P4_80374_11590041 | NC_021165.1    | Ca_kabuli_chr06 | 11590041                | AA                              | GG              | 1946861027               |
| SNP_P4_80375_11590442 | NC_021165.1    | Ca_kabuli_chr06 | 11590442                | TT                              | CC              | 1946861029               |
| SNP_P4_80376_11590458 | NC_021165.1    | Ca_kabuli_chr06 | 11590458                | CC                              | AA              | 1946861031               |
| SNP_P4_80377_11590539 | NC_021165.1    | Ca_kabuli_chr06 | 11590539                | CC                              | TT              | 1946861033               |
| SNP_P4_80378_11590674 | NC_021165.1    | Ca_kabuli_chr06 | 11590674                | AA                              | GG              | 1946861035               |
| SNP_P4_80379_11590843 | NC_021165.1    | Ca_kabuli_chr06 | 11590843                | AA                              | TT              | 1946861037               |
| SNP_P4_80380_11590972 | NC_021165.1    | Ca_kabuli_chr06 | 11590972                | CC                              | TT              | 1946861039               |
| SNP_P4_80382_11591135 | NC_021165.1    | Ca_kabuli_chr06 | 11591135                | GG                              | AA              | 1946861041               |
| SNP_P4_80384_11593235 | NC_021165.1    | Ca_kabuli_chr06 | 11593235                | AA                              | GG              | 1946861043               |
| SNP_P4_80385_11593277 | NC_021165.1    | Ca_kabuli_chr06 | 11593277                | AA                              | CC              | 1946861045               |
| SNP_P4_80386_11593699 | NC_021165.1    | Ca_kabuli_chr06 | 11593699                | CC                              | TT              | 1946861047               |
| SNP_P4_80387_11594736 | NC_021165.1    | Ca_kabuli_chr06 | 11594736                | AA                              | GG              | 1946861049               |
| SNP_P4_80388_11594774 | NC_021165.1    | Ca_kabuli_chr06 | 11594774                | AA                              | GG              | 1946861051               |
| SNP_P4_80389_11594786 | NC_021165.1    | Ca_kabuli_chr06 | 11594786                | CC                              | AA              | 1946861053               |
| SNP_P4_80390_11594907 | NC_021165.1    | Ca_kabuli_chr06 | 11594907                | GG                              | TT              | 1946861055               |
| SNP_P4_80391_11595485 | NC_021165.1    | Ca_kabuli_chr06 | 11595485                | TT                              | AA              | 1946861057               |
| SNP_P4_80392_11595486 | NC_021165.1    | Ca_kabuli_chr06 | 11595486                | GG                              | TT              | 1946861059               |

| SNPs IDs              | Chromosome IDs | Chromosomes     | Physical positions (bp) | CDC Frontier (Reference genome) | (ILWC46 & LPNB) | NCBI SNPdb Accession IDs |
|-----------------------|----------------|-----------------|-------------------------|---------------------------------|-----------------|--------------------------|
| SNP_P4_80393_11596048 | NC_021165.1    | Ca_kabuli_chr06 | 11596048                | CC                              | AA              | 1946861061               |
| SNP_P4_80394_11597678 | NC_021165.1    | Ca_kabuli_chr06 | 11597678                | TT                              | AA              | 1946861064               |
| SNP_P4_80395_11597722 | NC_021165.1    | Ca_kabuli_chr06 | 11597722                | AA                              | TT              | 1946861067               |
| SNP_P4_80396_11598069 | NC_021165.1    | Ca_kabuli_chr06 | 11598069                | CC                              | AA              | 1946861069               |
| SNP_P4_80397_11598534 | NC_021165.1    | Ca_kabuli_chr06 | 11598534                | GG                              | AA              | 1946861071               |
| SNP_P4_80399_11599281 | NC_021165.1    | Ca_kabuli_chr06 | 11599281                | CC                              | TT              | 1946861073               |
| SNP_P4_80400_11600185 | NC_021165.1    | Ca_kabuli_chr06 | 11600185                | GG                              | AA              | 1946861075               |
| SNP_P4_80401_11600337 | NC_021165.1    | Ca_kabuli_chr06 | 11600337                | AA                              | TT              | 1946861077               |
| SNP_P4_80402_11601782 | NC_021165.1    | Ca_kabuli_chr06 | 11601782                | GG                              | AA              | 1946861079               |
| SNP_P4_80403_11601836 | NC_021165.1    | Ca_kabuli_chr06 | 11601836                | GG                              | TT              | 1946861081               |
| SNP_P4_80404_11601855 | NC_021165.1    | Ca_kabuli_chr06 | 11601855                | AA                              | GG              | 1946861083               |
| SNP_P4_80405_11602299 | NC_021165.1    | Ca_kabuli_chr06 | 11602299                | AA                              | GG              | 1946861085               |
| SNP_P4_80406_11602388 | NC_021165.1    | Ca_kabuli_chr06 | 11602388                | GG                              | AA              | 1946861087               |
| SNP_P4_80407_11604286 | NC_021165.1    | Ca_kabuli_chr06 | 11604286                | AA                              | TT              | 1946861089               |
| SNP_P4_80409_11604396 | NC_021165.1    | Ca_kabuli_chr06 | 11604396                | GG                              | AA              | 1946861091               |
| SNP_P4_80410_11606251 | NC_021165.1    | Ca_kabuli_chr06 | 11606251                | AA                              | GG              | 1946861093               |
| SNP_P4_80411_11608173 | NC_021165.1    | Ca_kabuli_chr06 | 11608173                | CC                              | GG              | 1946861095               |
| SNP_P4_80412_11608460 | NC_021165.1    | Ca_kabuli_chr06 | 11608460                | CC                              | TT              | 1946861097               |
| SNP_P4_80414_11611099 | NC_021165.1    | Ca_kabuli_chr06 | 11611099                | GG                              | AA              | 1946861099               |
| SNP_P4_80415_11611276 | NC_021165.1    | Ca_kabuli_chr06 | 11611276                | GG                              | AA              | 1946861101               |
| SNP_P4_80416_11611456 | NC_021165.1    | Ca_kabuli_chr06 | 11611456                | AA                              | CC              | 1946861103               |
| SNP_P4_80417_11611459 | NC_021165.1    | Ca_kabuli_chr06 | 11611459                | AA                              | GG              | 1946861105               |
| SNP_P4_80418_11612152 | NC_021165.1    | Ca_kabuli_chr06 | 11612152                | AA                              | GG              | 1946861107               |
| SNP_P4_80419_11612578 | NC_021165.1    | Ca_kabuli_chr06 | 11612578                | TT                              | CC              | 1946861109               |
| SNP_P4_80420_11613343 | NC_021165.1    | Ca_kabuli_chr06 | 11613343                | TT                              | CC              | 1946861111               |
| SNP_P4_80421_11613994 | NC_021165.1    | Ca_kabuli_chr06 | 11613994                | TT                              | CC              | 1946861113               |
| SNP_P4_80422_11614493 | NC_021165.1    | Ca_kabuli_chr06 | 11614493                | TT                              | CC              | 1946861116               |
| SNP_P4_80423_11614911 | NC_021165.1    | Ca_kabuli_chr06 | 11614911                | AA                              | GG              | 1946861117               |
| SNP_P4_80424_11619210 | NC_021165.1    | Ca_kabuli_chr06 | 11619210                | GG                              | AA              | 1946861119               |
| SNP_P4_80426_11620171 | NC_021165.1    | Ca_kabuli_chr06 | 11620171                | CC                              | TT              | 1946861122               |
| SNP_P4_80427_11621057 | NC_021165.1    | Ca_kabuli_chr06 | 11621057                | CC                              | TT              | 1946861124               |
| SNP_P4_80428_11622141 | NC_021165.1    | Ca_kabuli_chr06 | 11622141                | AA                              | GG              | 1946861126               |
| SNP_P4_80429_11622163 | NC_021165.1    | Ca_kabuli_chr06 | 11622163                | CC                              | TT              | 1946861128               |
| SNP_P4_80430_11622521 | NC_021165.1    | Ca_kabuli_chr06 | 11622521                | CC                              | TT              | 1946861130               |
| SNP_P4_80431_11623180 | NC_021165.1    | Ca_kabuli_chr06 | 11623180                | TT                              | GG              | 1946861132               |
| SNP_P4_80432_11623201 | NC_021165.1    | Ca_kabuli_chr06 | 11623201                | CC                              | TT              | 1946861134               |
| SNP_P4_80433_11623452 | NC_021165.1    | Ca_kabuli_chr06 | 11623452                | AA                              | GG              | 1946861136               |
| SNP_P4_80434_11627398 | NC_021165.1    | Ca_kabuli_chr06 | 11627398                | AA                              | GG              | 1946861138               |
| SNP_P4_80435_11627420 | NC_021165.1    | Ca_kabuli_chr06 | 11627420                | CC                              | AA              | 1946861140               |
| SNP_P4_80436_11627653 | NC_021165.1    | Ca_kabuli_chr06 | 11627653                | CC                              | TT              | 1946861142               |
| SNP_P4_80438_11628312 | NC_021165.1    | Ca_kabuli_chr06 | 11628312                | CC                              | AA              | 1946861144               |
| SNP_P4_80439_11628497 | NC_021165.1    | Ca_kabuli_chr06 | 11628497                | AA                              | CC              | 1946861146               |



| SNPs IDs              | Chromosome IDs | Chromosomes     | Physical positions (bp) | CDC Frontier (Reference genome) | (ILWC46 & LPNB) | NCBI SNPdb Accession IDs |
|-----------------------|----------------|-----------------|-------------------------|---------------------------------|-----------------|--------------------------|
| SNP_P4_80440_11628568 | NC_021165.1    | Ca_kabuli_chr06 | 11628568                | CC                              | TT              | 1946861148               |
| SNP_P4_80441_11630396 | NC_021165.1    | Ca_kabuli_chr06 | 11630396                | GG                              | AA              | 1946861150               |
| SNP_P4_80442_11631349 | NC_021165.1    | Ca_kabuli_chr06 | 11631349                | CC                              | GG              | 1946861152               |
| SNP_P4_80444_11637331 | NC_021165.1    | Ca_kabuli_chr06 | 11637331                | TT                              | CC              | 1946861154               |
| SNP_P4_80445_11637354 | NC_021165.1    | Ca_kabuli_chr06 | 11637354                | TT                              | AA              | 1946861156               |
| SNP_P4_80446_11637695 | NC_021165.1    | Ca_kabuli_chr06 | 11637695                | TT                              | GG              | 1946861158               |
| SNP_P4_80447_11637974 | NC_021165.1    | Ca_kabuli_chr06 | 11637974                | TT                              | GG              | 1946861160               |
| SNP_P4_80448_11642890 | NC_021165.1    | Ca_kabuli_chr06 | 11642890                | CC                              | GG              | 1946861162               |
| SNP_P4_80449_11643002 | NC_021165.1    | Ca_kabuli_chr06 | 11643002                | CC                              | TT              | 1946861165               |
| SNP_P4_80450_11643785 | NC_021165.1    | Ca_kabuli_chr06 | 11643785                | GG                              | TT              | 1946861167               |
| SNP_P4_80452_11645339 | NC_021165.1    | Ca_kabuli_chr06 | 11645339                | AA                              | GG              | 1946861169               |
| SNP_P4_80453_11646626 | NC_021165.1    | Ca_kabuli_chr06 | 11646626                | GG                              | AA              | 1946861171               |
| SNP_P4_80454_11646752 | NC_021165.1    | Ca_kabuli_chr06 | 11646752                | GG                              | AA              | 1946861173               |
| SNP_P4_80455_11647110 | NC_021165.1    | Ca_kabuli_chr06 | 11647110                | AA                              | CC              | 1946861175               |
| SNP_P4_80456_11649004 | NC_021165.1    | Ca_kabuli_chr06 | 11649004                | AA                              | GG              | 1946861177               |
| SNP_P4_80457_11649612 | NC_021165.1    | Ca_kabuli_chr06 | 11649612                | AA                              | GG              | 1946861179               |
| SNP_P4_80459_11649937 | NC_021165.1    | Ca_kabuli_chr06 | 11649937                | CC                              | TT              | 1946861182               |
| SNP_P4_80460_11650875 | NC_021165.1    | Ca_kabuli_chr06 | 11650875                | AA                              | GG              | 1946861184               |
| SNP_P4_80461_11650946 | NC_021165.1    | Ca_kabuli_chr06 | 11650946                | TT                              | CC              | 1946861186               |
| SNP_P4_80462_11650978 | NC_021165.1    | Ca_kabuli_chr06 | 11650978                | TT                              | AA              | 1946861188               |
| SNP_P4_80463_11650984 | NC_021165.1    | Ca_kabuli_chr06 | 11650984                | GG                              | TT              | 1946861190               |
| SNP_P4_80464_11650991 | NC_021165.1    | Ca_kabuli_chr06 | 11650991                | AA                              | TT              | 1946861192               |
| SNP_P4_80466_11656216 | NC_021165.1    | Ca_kabuli_chr06 | 11656216                | AA                              | GG              | 1946861194               |
| SNP_P4_80467_11657603 | NC_021165.1    | Ca_kabuli_chr06 | 11657603                | CC                              | TT              | 1946861197               |
| SNP_P4_80468_11659693 | NC_021165.1    | Ca_kabuli_chr06 | 11659693                | TT                              | CC              | 1946861199               |
| SNP_P4_80469_11660434 | NC_021165.1    | Ca_kabuli_chr06 | 11660434                | GG                              | CC              | 1946861201               |
| SNP_P4_80470_11660455 | NC_021165.1    | Ca_kabuli_chr06 | 11660455                | AA                              | TT              | 1946861203               |
| SNP_P4_80471_11660456 | NC_021165.1    | Ca_kabuli_chr06 | 11660456                | AA                              | CC              | 1946861205               |
| SNP_P4_80472_11660458 | NC_021165.1    | Ca_kabuli_chr06 | 11660458                | GG                              | CC              | 1946861207               |
| SNP_P4_80473_11660474 | NC_021165.1    | Ca_kabuli_chr06 | 11660474                | AA                              | GG              | 1946861210               |
| SNP_P4_80474_11661474 | NC_021165.1    | Ca_kabuli_chr06 | 11661474                | GG                              | AA              | 1946861212               |
| SNP_P4_80476_11661553 | NC_021165.1    | Ca_kabuli_chr06 | 11661553                | CC                              | TT              | 1946861214               |
| SNP_P4_80477_11663388 | NC_021165.1    | Ca_kabuli_chr06 | 11663388                | GG                              | AA              | 1946861216               |
| SNP_P4_80478_11663395 | NC_021165.1    | Ca_kabuli_chr06 | 11663395                | GG                              | AA              | 1946861219               |
| SNP_P4_80479_11663419 | NC_021165.1    | Ca_kabuli_chr06 | 11663419                | AA                              | GG              | 1946861221               |
| SNP_P4_80480_11663420 | NC_021165.1    | Ca_kabuli_chr06 | 11663420                | TT                              | CC              | 1946861223               |
| SNP_P4_80482_11663727 | NC_021165.1    | Ca_kabuli_chr06 | 11663727                | TT                              | CC              | 1946861225               |
| SNP_P4_80483_11663737 | NC_021165.1    | Ca_kabuli_chr06 | 11663737                | GG                              | TT              | 1946861227               |
| SNP_P4_80484_11664220 | NC_021165.1    | Ca_kabuli_chr06 | 11664220                | TT                              | CC              | 1946861229               |
| SNP_P4_80485_11669260 | NC_021165.1    | Ca_kabuli_chr06 | 11669260                | GG                              | AA              | 1946861231               |
| SNP_P4_80486_11669398 | NC_021165.1    | Ca_kabuli_chr06 | 11669398                | CC                              | TT              | 1946861233               |
| SNP_P4_80488_11671481 | NC_021165.1    | Ca_kabuli_chr06 | 11671481                | TT                              | CC              | 1946861235               |

| SNPs IDs              | Chromosome IDs | Chromosomes     | Physical positions (bp) | CDC Frontier (Reference genome) | (ILWC46 & LPNB) | NCBI SNPdb Accession IDs |
|-----------------------|----------------|-----------------|-------------------------|---------------------------------|-----------------|--------------------------|
| SNP_P4_80489_11671498 | NC_021165.1    | Ca_kabuli_chr06 | 11671498                | TT                              | CC              | 1946861237               |
| SNP_P4_80490_11671567 | NC_021165.1    | Ca_kabuli_chr06 | 11671567                | CC                              | AA              | 1946861239               |
| SNP_P4_80491_11674692 | NC_021165.1    | Ca_kabuli_chr06 | 11674692                | AA                              | GG              | 1946861241               |
| SNP_P4_80492_11674718 | NC_021165.1    | Ca_kabuli_chr06 | 11674718                | TT                              | CC              | 1946861243               |
| SNP_P4_80493_11675048 | NC_021165.1    | Ca_kabuli_chr06 | 11675048                | CC                              | GG              | 1946861245               |
| SNP_P4_80494_11675050 | NC_021165.1    | Ca_kabuli_chr06 | 11675050                | AA                              | GG              | 1946861247               |
| SNP_P4_80495_11676629 | NC_021165.1    | Ca_kabuli_chr06 | 11676629                | GG                              | AA              | 1946861249               |
| SNP_P4_80496_11677411 | NC_021165.1    | Ca_kabuli_chr06 | 11677411                | TT                              | CC              | 1946861251               |
| SNP_P4_80497_11677484 | NC_021165.1    | Ca_kabuli_chr06 | 11677484                | GG                              | AA              | 1946861253               |
| SNP_P4_80498_11677489 | NC_021165.1    | Ca_kabuli_chr06 | 11677489                | AA                              | CC              | 1946861255               |
| SNP_P4_80499_11677518 | NC_021165.1    | Ca_kabuli_chr06 | 11677518                | GG                              | TT              | 1946861257               |
| SNP_P4_80500_11677585 | NC_021165.1    | Ca_kabuli_chr06 | 11677585                | TT                              | CC              | 1946861259               |
| SNP_P4_80501_11677600 | NC_021165.1    | Ca_kabuli_chr06 | 11677600                | CC                              | GG              | 1946861261               |
| SNP_P4_80502_11677699 | NC_021165.1    | Ca_kabuli_chr06 | 11677699                | GG                              | AA              | 1946861263               |
| SNP_P4_80503_11677757 | NC_021165.1    | Ca_kabuli_chr06 | 11677757                | CC                              | GG              | 1946861265               |
| SNP_P4_80504_11677774 | NC_021165.1    | Ca_kabuli_chr06 | 11677774                | GG                              | AA              | 1946861268               |
| SNP_P4_80505_11677828 | NC_021165.1    | Ca_kabuli_chr06 | 11677828                | TT                              | CC              | 1946861270               |
| SNP_P4_80506_11677929 | NC_021165.1    | Ca_kabuli_chr06 | 11677929                | GG                              | TT              | 1946861272               |
| SNP_P4_80507_11678427 | NC_021165.1    | Ca_kabuli_chr06 | 11678427                | TT                              | CC              | 1946861274               |
| SNP_P4_80508_11679168 | NC_021165.1    | Ca_kabuli_chr06 | 11679168                | GG                              | TT              | 1946861276               |
| SNP_P4_80509_11679351 | NC_021165.1    | Ca_kabuli_chr06 | 11679351                | GG                              | AA              | 1946861278               |
| SNP_P4_80510_11679392 | NC_021165.1    | Ca_kabuli_chr06 | 11679392                | AA                              | CC              | 1946861279               |
| SNP_P4_80511_11679463 | NC_021165.1    | Ca_kabuli_chr06 | 11679463                | GG                              | AA              | 1946861281               |
| SNP_P4_80512_11679471 | NC_021165.1    | Ca_kabuli_chr06 | 11679471                | CC                              | TT              | 1946861283               |
| SNP_P4_80513_11679494 | NC_021165.1    | Ca_kabuli_chr06 | 11679494                | CC                              | TT              | 1946861285               |
| SNP_P4_80514_11679941 | NC_021165.1    | Ca_kabuli_chr06 | 11679941                | AA                              | GG              | 1946861287               |
| SNP_P4_80515_11679983 | NC_021165.1    | Ca_kabuli_chr06 | 11679983                | AA                              | CC              | 1946861290               |
| SNP_P4_80517_11680618 | NC_021165.1    | Ca_kabuli_chr06 | 11680618                | TT                              | CC              | 1946861292               |
| SNP_P4_80518_11680706 | NC_021165.1    | Ca_kabuli_chr06 | 11680706                | GG                              | AA              | 1946861294               |
| SNP_P4_80519_11680817 | NC_021165.1    | Ca_kabuli_chr06 | 11680817                | AA                              | GG              | 1946861296               |
| SNP_P4_80520_11681020 | NC_021165.1    | Ca_kabuli_chr06 | 11681020                | AA                              | GG              | 1946861298               |
| SNP_P4_80521_11682518 | NC_021165.1    | Ca_kabuli_chr06 | 11682518                | CC                              | TT              | 1946861300               |
| SNP_P4_80522_11682748 | NC_021165.1    | Ca_kabuli_chr06 | 11682748                | CC                              | TT              | 1946861302               |
| SNP_P4_80523_11682751 | NC_021165.1    | Ca_kabuli_chr06 | 11682751                | TT                              | CC              | 1946861304               |
| SNP_P4_80524_11682782 | NC_021165.1    | Ca_kabuli_chr06 | 11682782                | AA                              | GG              | 1946861306               |
| SNP_P4_80525_11682789 | NC_021165.1    | Ca_kabuli_chr06 | 11682789                | TT                              | CC              | 1946861308               |
| SNP_P4_80526_11682816 | NC_021165.1    | Ca_kabuli_chr06 | 11682816                | GG                              | AA              | 1946861310               |
| SNP_P4_80527_11682833 | NC_021165.1    | Ca_kabuli_chr06 | 11682833                | CC                              | GG              | 1946861312               |
| SNP_P4_80528_11682933 | NC_021165.1    | Ca_kabuli_chr06 | 11682933                | TT                              | AA              | 1946861314               |
| SNP_P4_80529_11682996 | NC_021165.1    | Ca_kabuli_chr06 | 11682996                | CC                              | AA              | 1946861316               |
| SNP_P4_80530_11683083 | NC_021165.1    | Ca_kabuli_chr06 | 11683083                | AA                              | TT              | 1946861318               |
| SNP_P4_80531_11683100 | NC_021165.1    | Ca_kabuli_chr06 | 11683100                | TT                              | CC              | 1946861319               |

| SNPs IDs              | Chromosome IDs | Chromosomes     | Physical positions (bp) | CDC Frontier (Reference genome) | (ILWC46 & LPNB) | NCBI SNPdb Accession IDs |
|-----------------------|----------------|-----------------|-------------------------|---------------------------------|-----------------|--------------------------|
| SNP_P4_80532_11683229 | NC_021165.1    | Ca_kabuli_chr06 | 11683229                | TT                              | AA              | 1946861321               |
| SNP_P4_80533_11684215 | NC_021165.1    | Ca_kabuli_chr06 | 11684215                | AA                              | CC              | 1946861323               |
| SNP_P4_80534_11684233 | NC_021165.1    | Ca_kabuli_chr06 | 11684233                | GG                              | AA              | 1946861325               |
| SNP_P4_80536_11686430 | NC_021165.1    | Ca_kabuli_chr06 | 11686430                | TT                              | CC              | 1946861327               |
| SNP_P4_80537_11686456 | NC_021165.1    | Ca_kabuli_chr06 | 11686456                | AA                              | TT              | 1946861329               |
| SNP_P4_80538_11687619 | NC_021165.1    | Ca_kabuli_chr06 | 11687619                | AA                              | GG              | 1946861331               |
| SNP_P4_80540_11689632 | NC_021165.1    | Ca_kabuli_chr06 | 11689632                | GG                              | AA              | 1946861333               |
| SNP_P4_80541_11689699 | NC_021165.1    | Ca_kabuli_chr06 | 11689699                | TT                              | CC              | 1946861335               |
| SNP_P4_80542_11689724 | NC_021165.1    | Ca_kabuli_chr06 | 11689724                | GG                              | CC              | 1946861337               |
| SNP_P4_80543_11690243 | NC_021165.1    | Ca_kabuli_chr06 | 11690243                | GG                              | AA              | 1946861339               |
| SNP_P4_80544_11692449 | NC_021165.1    | Ca_kabuli_chr06 | 11692449                | GG                              | CC              | 1946861341               |
| SNP_P4_80545_11692686 | NC_021165.1    | Ca_kabuli_chr06 | 11692686                | CC                              | TT              | 1946861344               |
| SNP_P4_80547_11693413 | NC_021165.1    | Ca_kabuli_chr06 | 11693413                | CC                              | TT              | 1946861346               |
| SNP_P4_80548_11693442 | NC_021165.1    | Ca_kabuli_chr06 | 11693442                | CC                              | TT              | 1946861348               |
| SNP_P4_80549_11696444 | NC_021165.1    | Ca_kabuli_chr06 | 11696444                | AA                              | CC              | 1946861350               |
| SNP_P4_80550_11697697 | NC_021165.1    | Ca_kabuli_chr06 | 11697697                | GG                              | AA              | 1946861352               |
| SNP_P4_80551_11700261 | NC_021165.1    | Ca_kabuli_chr06 | 11700261                | GG                              | AA              | 1946861354               |
| SNP_P4_80552_11700275 | NC_021165.1    | Ca_kabuli_chr06 | 11700275                | GG                              | AA              | 1946861356               |
| SNP_P4_80553_11700284 | NC_021165.1    | Ca_kabuli_chr06 | 11700284                | AA                              | CC              | 1946861358               |
| SNP_P4_80554_11700312 | NC_021165.1    | Ca_kabuli_chr06 | 11700312                | AA                              | GG              | 1946861360               |
| SNP_P4_80555_11700329 | NC_021165.1    | Ca_kabuli_chr06 | 11700329                | CC                              | AA              | 1946861362               |
| SNP_P4_80556_11700400 | NC_021165.1    | Ca_kabuli_chr06 | 11700400                | AA                              | CC              | 1946861364               |
| SNP_P4_80557_11700432 | NC_021165.1    | Ca_kabuli_chr06 | 11700432                | TT                              | GG              | 1946861366               |
| SNP_P4_80558_11701061 | NC_021165.1    | Ca_kabuli_chr06 | 11701061                | AA                              | GG              | 1946861368               |
| SNP_P4_80559_11702020 | NC_021165.1    | Ca_kabuli_chr06 | 11702020                | GG                              | AA              | 1946861370               |
| SNP_P4_80560_11703234 | NC_021165.1    | Ca_kabuli_chr06 | 11703234                | TT                              | CC              | 1946861372               |
| SNP_P4_80561_11703438 | NC_021165.1    | Ca_kabuli_chr06 | 11703438                | TT                              | GG              | 1946861374               |
| SNP_P4_80562_11703483 | NC_021165.1    | Ca_kabuli_chr06 | 11703483                | CC                              | TT              | 1946861376               |
| SNP_P4_80564_11707305 | NC_021165.1    | Ca_kabuli_chr06 | 11707305                | TT                              | CC              | 1946861378               |
| SNP_P4_80565_11707307 | NC_021165.1    | Ca_kabuli_chr06 | 11707307                | AA                              | GG              | 1946861380               |
| SNP_P4_80566_11708648 | NC_021165.1    | Ca_kabuli_chr06 | 11708648                | GG                              | AA              | 1946861382               |
| SNP_P4_80567_11708965 | NC_021165.1    | Ca_kabuli_chr06 | 11708965                | GG                              | TT              | 1946861384               |
| SNP_P4_80568_11709955 | NC_021165.1    | Ca_kabuli_chr06 | 11709955                | CC                              | GG              | 1946861386               |
| SNP_P4_80569_11710399 | NC_021165.1    | Ca_kabuli_chr06 | 11710399                | TT                              | CC              | 1946861388               |
| SNP_P4_80570_11711008 | NC_021165.1    | Ca_kabuli_chr06 | 11711008                | AA                              | GG              | 1946861390               |
| SNP_P4_80571_11712489 | NC_021165.1    | Ca_kabuli_chr06 | 11712489                | AA                              | GG              | 1946861392               |
| SNP_P4_80572_11717879 | NC_021165.1    | Ca_kabuli_chr06 | 11717879                | TT                              | AA              | 1946861394               |
| SNP_P4_80573_11718118 | NC_021165.1    | Ca_kabuli_chr06 | 11718118                | GG                              | AA              | 1946861396               |
| SNP_P4_80574_11718281 | NC_021165.1    | Ca_kabuli_chr06 | 11718281                | GG                              | CC              | 1946861398               |
| SNP_P4_80575_11718287 | NC_021165.1    | Ca_kabuli_chr06 | 11718287                | GG                              | TT              | 1946861400               |
| SNP_P4_80576_11718306 | NC_021165.1    | Ca_kabuli_chr06 | 11718306                | GG                              | AA              | 1946861402               |
| SNP_P4_80577_11719649 | NC_021165.1    | Ca_kabuli_chr06 | 11719649                | AA                              | GG              | 1946861404               |

| SNPs IDs              | Chromosome IDs | Chromosomes     | Physical positions (bp) | CDC Frontier (Reference genome) | (ILWC46 & LPNB) | NCBI SNPdb Accession IDs |
|-----------------------|----------------|-----------------|-------------------------|---------------------------------|-----------------|--------------------------|
| SNP_P4_80578_11719928 | NC_021165.1    | Ca_kabuli_chr06 | 11719928                | GG                              | AA              | 1946861407               |
| SNP_P4_80579_11719931 | NC_021165.1    | Ca_kabuli_chr06 | 11719931                | AA                              | CC              | 1946861409               |
| SNP_P4_80580_11719936 | NC_021165.1    | Ca_kabuli_chr06 | 11719936                | TT                              | CC              | 1946861411               |
| SNP_P4_80581_11719959 | NC_021165.1    | Ca_kabuli_chr06 | 11719959                | TT                              | CC              | 1946861413               |
| SNP_P4_80582_11719963 | NC_021165.1    | Ca_kabuli_chr06 | 11719963                | GG                              | TT              | 1946861415               |
| SNP_P4_80583_11720366 | NC_021165.1    | Ca_kabuli_chr06 | 11720366                | GG                              | AA              | 1946861417               |
| SNP_P4_80584_11720583 | NC_021165.1    | Ca_kabuli_chr06 | 11720583                | GG                              | AA              | 1946861419               |
| SNP_P4_80585_11720615 | NC_021165.1    | Ca_kabuli_chr06 | 11720615                | CC                              | TT              | 1946861421               |
| SNP_P4_80586_11721255 | NC_021165.1    | Ca_kabuli_chr06 | 11721255                | GG                              | AA              | 1946861425               |
| SNP_P4_80587_11722299 | NC_021165.1    | Ca_kabuli_chr06 | 11722299                | TT                              | CC              | 1946861427               |
| SNP_P4_80588_11722355 | NC_021165.1    | Ca_kabuli_chr06 | 11722355                | GG                              | AA              | 1946861429               |
| SNP_P4_80589_11722366 | NC_021165.1    | Ca_kabuli_chr06 | 11722366                | CC                              | GG              | 1946861431               |
| SNP_P4_80590_11722411 | NC_021165.1    | Ca_kabuli_chr06 | 11722411                | GG                              | AA              | 1946861433               |
| SNP_P4_80592_11722769 | NC_021165.1    | Ca_kabuli_chr06 | 11722769                | GG                              | TT              | 1946861435               |
| SNP_P4_80593_11723042 | NC_021165.1    | Ca_kabuli_chr06 | 11723042                | AA                              | GG              | 1946861437               |
| SNP_P4_80594_11723742 | NC_021165.1    | Ca_kabuli_chr06 | 11723742                | GG                              | TT              | 1946861439               |
| SNP_P4_80596_11728844 | NC_021165.1    | Ca_kabuli_chr06 | 11728844                | AA                              | TT              | 1946861441               |
| SNP_P4_80597_11730806 | NC_021165.1    | Ca_kabuli_chr06 | 11730806                | CC                              | TT              | 1946861442               |
| SNP_P4_80598_11731017 | NC_021165.1    | Ca_kabuli_chr06 | 11731017                | AA                              | GG              | 1946861445               |
| SNP_P4_80599_11734680 | NC_021165.1    | Ca_kabuli_chr06 | 11734680                | GG                              | AA              | 1946861448               |
| SNP_P4_80600_11734725 | NC_021165.1    | Ca_kabuli_chr06 | 11734725                | GG                              | AA              | 1946861450               |
| SNP_P4_80601_11735058 | NC_021165.1    | Ca_kabuli_chr06 | 11735058                | AA                              | TT              | 1946861452               |
| SNP_P4_80602_11738329 | NC_021165.1    | Ca_kabuli_chr06 | 11738329                | CC                              | TT              | 1946861454               |
| SNP_P4_80603_11738437 | NC_021165.1    | Ca_kabuli_chr06 | 11738437                | GG                              | AA              | 1946861456               |
| SNP_P4_80604_11738883 | NC_021165.1    | Ca_kabuli_chr06 | 11738883                | CC                              | AA              | 1946861457               |
| SNP_P4_80606_11739289 | NC_021165.1    | Ca_kabuli_chr06 | 11739289                | TT                              | AA              | 1946861459               |
| SNP_P4_80607_11739294 | NC_021165.1    | Ca_kabuli_chr06 | 11739294                | AA                              | CC              | 1946861461               |
| SNP_P4_80608_11739436 | NC_021165.1    | Ca_kabuli_chr06 | 11739436                | GG                              | AA              | 1946861463               |
| SNP_P4_80609_11740875 | NC_021165.1    | Ca_kabuli_chr06 | 11740875                | AA                              | GG              | 1946861465               |
| SNP_P4_80610_11741024 | NC_021165.1    | Ca_kabuli_chr06 | 11741024                | CC                              | TT              | 1946861467               |
| SNP_P4_80611_11741195 | NC_021165.1    | Ca_kabuli_chr06 | 11741195                | CC                              | AA              | 1946861469               |
| SNP_P4_80613_11741330 | NC_021165.1    | Ca_kabuli_chr06 | 11741330                | GG                              | AA              | 1946861471               |
| SNP_P4_80614_11741686 | NC_021165.1    | Ca_kabuli_chr06 | 11741686                | TT                              | CC              | 1946861474               |
| SNP_P4_80618_11746279 | NC_021165.1    | Ca_kabuli_chr06 | 11746279                | TT                              | GG              | 1946861476               |
| SNP_P4_80620_11748770 | NC_021165.1    | Ca_kabuli_chr06 | 11748770                | GG                              | AA              | 1946861478               |
| SNP_P4_80621_11749428 | NC_021165.1    | Ca_kabuli_chr06 | 11749428                | GG                              | AA              | 1946861480               |
| SNP_P4_80623_11755181 | NC_021165.1    | Ca_kabuli_chr06 | 11755181                | TT                              | AA              | 1946861482               |
| SNP_P4_80624_11756414 | NC_021165.1    | Ca_kabuli_chr06 | 11756414                | TT                              | GG              | 1946861484               |
| SNP_P4_80625_11756814 | NC_021165.1    | Ca_kabuli_chr06 | 11756814                | CC                              | TT              | 1946861486               |
| SNP_P4_80626_11757481 | NC_021165.1    | Ca_kabuli_chr06 | 11757481                | CC                              | TT              | 1946861488               |
| SNP_P4_80627_11760698 | NC_021165.1    | Ca_kabuli_chr06 | 11760698                | GG                              | TT              | 1946861490               |
| SNP_P4_80628_11760957 | NC_021165.1    | Ca_kabuli_chr06 | 11760957                | CC                              | TT              | 1946861492               |

| SNPs IDs              | Chromosome IDs | Chromosomes     | Physical positions (bp) | CDC Frontier (Reference genome) | (ILWC46 & LPNB) | NCBI SNPdb Accession IDs |
|-----------------------|----------------|-----------------|-------------------------|---------------------------------|-----------------|--------------------------|
| SNP_P4_80629_11761465 | NC_021165.1    | Ca_kabuli_chr06 | 11761465                | TT                              | CC              | 1946861494               |
| SNP_P4_80630_11761856 | NC_021165.1    | Ca_kabuli_chr06 | 11761856                | AA                              | GG              | 1946861496               |
| SNP_P4_80632_11762121 | NC_021165.1    | Ca_kabuli_chr06 | 11762121                | TT                              | AA              | 1946861498               |
| SNP_P4_80633_11762131 | NC_021165.1    | Ca_kabuli_chr06 | 11762131                | TT                              | AA              | 1946861500               |
| SNP_P4_80634_11762412 | NC_021165.1    | Ca_kabuli_chr06 | 11762412                | GG                              | AA              | 1946861502               |
| SNP_P4_80635_11763052 | NC_021165.1    | Ca_kabuli_chr06 | 11763052                | TT                              | CC              | 1946861504               |
| SNP_P4_80636_11763097 | NC_021165.1    | Ca_kabuli_chr06 | 11763097                | TT                              | CC              | 1946861506               |
| SNP_P4_80637_11765666 | NC_021165.1    | Ca_kabuli_chr06 | 11765666                | GG                              | TT              | 1946861508               |
| SNP_P4_80638_11776525 | NC_021165.1    | Ca_kabuli_chr06 | 11776525                | CC                              | TT              | 1946861510               |
| SNP_P4_80639_11777222 | NC_021165.1    | Ca_kabuli_chr06 | 11777222                | GG                              | AA              | 1946861512               |
| SNP_P4_80640_11777293 | NC_021165.1    | Ca_kabuli_chr06 | 11777293                | TT                              | CC              | 1946861514               |
| SNP_P4_80641_11778124 | NC_021165.1    | Ca_kabuli_chr06 | 11778124                | GG                              | AA              | 1946861516               |
| SNP_P4_80642_11780043 | NC_021165.1    | Ca_kabuli_chr06 | 11780043                | CC                              | TT              | 1946861518               |
| SNP_P4_80643_11781101 | NC_021165.1    | Ca_kabuli_chr06 | 11781101                | AA                              | GG              | 1946861520               |
| SNP_P4_80644_11781369 | NC_021165.1    | Ca_kabuli_chr06 | 11781369                | CC                              | GG              | 1946861522               |
| SNP_P4_80645_11785159 | NC_021165.1    | Ca_kabuli_chr06 | 11785159                | CC                              | TT              | 1946861524               |
| SNP_P4_80646_11787933 | NC_021165.1    | Ca_kabuli_chr06 | 11787933                | GG                              | TT              | 1946861526               |
| SNP_P4_80647_11788663 | NC_021165.1    | Ca_kabuli_chr06 | 11788663                | AA                              | CC              | 1946861528               |
| SNP_P4_80649_11791072 | NC_021165.1    | Ca_kabuli_chr06 | 11791072                | CC                              | TT              | 1946861530               |
| SNP_P4_80650_11792000 | NC_021165.1    | Ca_kabuli_chr06 | 11792000                | AA                              | CC              | 1946861532               |
| SNP_P4_80651_11807697 | NC_021165.1    | Ca_kabuli_chr06 | 11807697                | AA                              | GG              | 1946861534               |
| SNP_P4_80652_11807854 | NC_021165.1    | Ca_kabuli_chr06 | 11807854                | GG                              | AA              | 1946861536               |
| SNP_P4_80653_11812294 | NC_021165.1    | Ca_kabuli_chr06 | 11812294                | TT                              | GG              | 1946861538               |
| SNP_P4_80654_11812329 | NC_021165.1    | Ca_kabuli_chr06 | 11812329                | CC                              | TT              | 1946861540               |
| SNP_P4_80655_11812959 | NC_021165.1    | Ca_kabuli_chr06 | 11812959                | AA                              | CC              | 1946861542               |
| SNP_P4_80656_11813076 | NC_021165.1    | Ca_kabuli_chr06 | 11813076                | AA                              | TT              | 1946861544               |
| SNP_P4_80657_11813082 | NC_021165.1    | Ca_kabuli_chr06 | 11813082                | TT                              | CC              | 1946861546               |
| SNP_P4_80658_11814413 | NC_021165.1    | Ca_kabuli_chr06 | 11814413                | CC                              | TT              | 1946861548               |
| SNP_P4_80659_11827647 | NC_021165.1    | Ca_kabuli_chr06 | 11827647                | GG                              | TT              | 1946861550               |
| SNP_P4_80660_11827685 | NC_021165.1    | Ca_kabuli_chr06 | 11827685                | GG                              | AA              | 1946861552               |
| SNP_P4_80661_11839494 | NC_021165.1    | Ca_kabuli_chr06 | 11839494                | GG                              | TT              | 1946861554               |
| SNP_P4_80662_11839811 | NC_021165.1    | Ca_kabuli_chr06 | 11839811                | TT                              | CC              | 1946861556               |
| SNP_P4_80663_11840028 | NC_021165.1    | Ca_kabuli_chr06 | 11840028                | TT                              | GG              | 1946861558               |
| SNP_P4_80664_11840071 | NC_021165.1    | Ca_kabuli_chr06 | 11840071                | GG                              | AA              | 1946861560               |
| SNP_P4_80665_11840233 | NC_021165.1    | Ca_kabuli_chr06 | 11840233                | CC                              | GG              | 1946861562               |
| SNP_P4_80666_11840249 | NC_021165.1    | Ca_kabuli_chr06 | 11840249                | CC                              | AA              | 1946861564               |
| SNP_P4_80667_11840279 | NC_021165.1    | Ca_kabuli_chr06 | 11840279                | GG                              | AA              | 1946861566               |
| SNP_P4_80668_11840287 | NC_021165.1    | Ca_kabuli_chr06 | 11840287                | CC                              | TT              | 1946861568               |
| SNP_P4_80669_11840293 | NC_021165.1    | Ca_kabuli_chr06 | 11840293                | TT                              | CC              | 1946861570               |
| SNP_P4_80670_11840373 | NC_021165.1    | Ca_kabuli_chr06 | 11840373                | TT                              | CC              | 1946861572               |
| SNP_P4_80671_11840398 | NC_021165.1    | Ca_kabuli_chr06 | 11840398                | TT                              | CC              | 1946861574               |
| SNP_P4_80672_11840433 | NC_021165.1    | Ca_kabuli_chr06 | 11840433                | CC                              | AA              | 1946861576               |

| SNPs IDs              | Chromosome IDs | Chromosomes     | Physical positions (bp) | CDC Frontier (Reference genome) | (ILWC46 & LPNB) | NCBI SNPdb Accession IDs |
|-----------------------|----------------|-----------------|-------------------------|---------------------------------|-----------------|--------------------------|
| SNP_P4_80673_11840628 | NC_021165.1    | Ca_kabuli_chr06 | 11840628                | AA                              | GG              | 1946861579               |
| SNP_P4_80674_11883412 | NC_021165.1    | Ca_kabuli_chr06 | 11883412                | AA                              | TT              | 1946861581               |
| SNP_P4_80675_11883497 | NC_021165.1    | Ca_kabuli_chr06 | 11883497                | AA                              | CC              | 1946861583               |
| SNP_P4_80676_11883503 | NC_021165.1    | Ca_kabuli_chr06 | 11883503                | AA                              | TT              | 1946861585               |
| SNP_P4_80677_11883814 | NC_021165.1    | Ca_kabuli_chr06 | 11883814                | TT                              | CC              | 1946861587               |
| SNP_P4_80678_11883837 | NC_021165.1    | Ca_kabuli_chr06 | 11883837                | AA                              | CC              | 1946861589               |
| SNP_P4_80679_11883887 | NC_021165.1    | Ca_kabuli_chr06 | 11883887                | CC                              | TT              | 1946861591               |
| SNP_P4_80680_11883892 | NC_021165.1    | Ca_kabuli_chr06 | 11883892                | TT                              | AA              | 1946861593               |
| SNP_P4_80681_11883893 | NC_021165.1    | Ca_kabuli_chr06 | 11883893                | GG                              | AA              | 1946861595               |
| SNP_P4_80682_11883910 | NC_021165.1    | Ca_kabuli_chr06 | 11883910                | AA                              | GG              | 1946861597               |
| SNP_P4_80683_11885274 | NC_021165.1    | Ca_kabuli_chr06 | 11885274                | CC                              | AA              | 1946861598               |
| SNP_P4_80684_11890200 | NC_021165.1    | Ca_kabuli_chr06 | 11890200                | GG                              | TT              | 1946861600               |
| SNP_P4_80685_11902699 | NC_021165.1    | Ca_kabuli_chr06 | 11902699                | AA                              | CC              | 1946861602               |
| SNP_P4_80686_11957518 | NC_021165.1    | Ca_kabuli_chr06 | 11957518                | TT                              | CC              | 1946861604               |
| SNP_P4_80687_11968977 | NC_021165.1    | Ca_kabuli_chr06 | 11968977                | AA                              | CC              | 1946861606               |
| SNP_P4_80688_11969069 | NC_021165.1    | Ca_kabuli_chr06 | 11969069                | TT                              | GG              | 1946861608               |
| SNP_P4_80689_11969089 | NC_021165.1    | Ca_kabuli_chr06 | 11969089                | TT                              | CC              | 1946861610               |
| SNP_P4_80690_11969092 | NC_021165.1    | Ca_kabuli_chr06 | 11969092                | GG                              | TT              | 1946861612               |
| SNP_P4_80691_11969137 | NC_021165.1    | Ca_kabuli_chr06 | 11969137                | AA                              | GG              | 1946861614               |
| SNP_P4_80692_11969224 | NC_021165.1    | Ca_kabuli_chr06 | 11969224                | AA                              | GG              | 1946861616               |
| SNP_P4_80693_11969245 | NC_021165.1    | Ca_kabuli_chr06 | 11969245                | AA                              | CC              | 1946861618               |
| SNP_P4_80694_11969256 | NC_021165.1    | Ca_kabuli_chr06 | 11969256                | AA                              | GG              | 1946861620               |
| SNP_P4_80695_11969297 | NC_021165.1    | Ca_kabuli_chr06 | 11969297                | CC                              | TT              | 1946861622               |
| SNP_P4_80696_11969316 | NC_021165.1    | Ca_kabuli_chr06 | 11969316                | GG                              | AA              | 1946861624               |
| SNP_P4_80697_11993693 | NC_021165.1    | Ca_kabuli_chr06 | 11993693                | GG                              | CC              | 1946861626               |
| SNP_P4_80699_12007388 | NC_021165.1    | Ca_kabuli_chr06 | 12007388                | CC                              | TT              | 1946861628               |
| SNP_P4_80700_12007642 | NC_021165.1    | Ca_kabuli_chr06 | 12007642                | TT                              | CC              | 1946861630               |
| SNP_P4_80701_12042007 | NC_021165.1    | Ca_kabuli_chr06 | 12042007                | CC                              | TT              | 1946861632               |
| SNP_P4_80702_12044552 | NC_021165.1    | Ca_kabuli_chr06 | 12044552                | AA                              | CC              | 1946861634               |
| SNP_P4_80703_12044927 | NC_021165.1    | Ca_kabuli_chr06 | 12044927                | AA                              | GG              | 1946861636               |
| SNP_P4_80705_12089612 | NC_021165.1    | Ca_kabuli_chr06 | 12089612                | TT                              | CC              | 1946861638               |
| SNP_P4_80706_12089707 | NC_021165.1    | Ca_kabuli_chr06 | 12089707                | TT                              | CC              | 1946861640               |
| SNP_P4_80707_12089996 | NC_021165.1    | Ca_kabuli_chr06 | 12089996                | AA                              | GG              | 1946861642               |
| SNP_P4_80708_12090984 | NC_021165.1    | Ca_kabuli_chr06 | 12090984                | AA                              | GG              | 1946861644               |
| SNP_P4_80709_12090997 | NC_021165.1    | Ca_kabuli_chr06 | 12090997                | TT                              | CC              | 1946861646               |
| SNP_P4_80710_12091041 | NC_021165.1    | Ca_kabuli_chr06 | 12091041                | AA                              | GG              | 1946861648               |
| SNP_P4_80711_12091432 | NC_021165.1    | Ca_kabuli_chr06 | 12091432                | AA                              | CC              | 1946861650               |
| SNP_P4_80712_12091466 | NC_021165.1    | Ca_kabuli_chr06 | 12091466                | CC                              | TT              | 1946861652               |
| SNP_P4_80713_12103329 | NC_021165.1    | Ca_kabuli_chr06 | 12103329                | AA                              | CC              | 1946861654               |
| SNP_P4_80714_12103336 | NC_021165.1    | Ca_kabuli_chr06 | 12103336                | TT                              | AA              | 1946861656               |
| SNP_P4_80715_12104865 | NC_021165.1    | Ca_kabuli_chr06 | 12104865                | AA                              | GG              | 1946861658               |
| SNP_P4_80716_12104869 | NC_021165.1    | Ca_kabuli_chr06 | 12104869                | CC                              | TT              | 1946861660               |

| SNPs IDs              | Chromosome IDs | Chromosomes     | Physical positions (bp) | CDC Frontier (Reference genome) | (ILWC46 & LPNB) | NCBI SNPdb Accession IDs |
|-----------------------|----------------|-----------------|-------------------------|---------------------------------|-----------------|--------------------------|
| SNP_P4_80717_12104931 | NC_021165.1    | Ca_kabuli_chr06 | 12104931                | GG                              | AA              | 1946861662               |
| SNP_P4_80718_12109386 | NC_021165.1    | Ca_kabuli_chr06 | 12109386                | CC                              | TT              | 1946861664               |
| SNP_P4_80719_12112868 | NC_021165.1    | Ca_kabuli_chr06 | 12112868                | GG                              | AA              | 1946861666               |
| SNP_P4_80720_12113130 | NC_021165.1    | Ca_kabuli_chr06 | 12113130                | AA                              | GG              | 1946861668               |
| SNP_P4_80721_12126493 | NC_021165.1    | Ca_kabuli_chr06 | 12126493                | AA                              | CC              | 1946861670               |
| SNP_P4_80722_12126775 | NC_021165.1    | Ca_kabuli_chr06 | 12126775                | TT                              | CC              | 1946861672               |
| SNP_P4_80723_12127257 | NC_021165.1    | Ca_kabuli_chr06 | 12127257                | TT                              | AA              | 1946861674               |
| SNP_P4_80724_12127465 | NC_021165.1    | Ca_kabuli_chr06 | 12127465                | CC                              | TT              | 1946861676               |
| SNP_P4_80725_12127481 | NC_021165.1    | Ca_kabuli_chr06 | 12127481                | GG                              | AA              | 1946861678               |
| SNP_P4_80726_12129982 | NC_021165.1    | Ca_kabuli_chr06 | 12129982                | GG                              | CC              | 1946861680               |
| SNP_P4_80727_12130313 | NC_021165.1    | Ca_kabuli_chr06 | 12130313                | TT                              | CC              | 1946861682               |
| SNP_P4_80728_12163895 | NC_021165.1    | Ca_kabuli_chr06 | 12163895                | GG                              | AA              | 1946861684               |
| SNP_P4_80730_12236494 | NC_021165.1    | Ca_kabuli_chr06 | 12236494                | TT                              | CC              | 1946861686               |
| SNP_P4_80731_12236535 | NC_021165.1    | Ca_kabuli_chr06 | 12236535                | TT                              | CC              | 1946861688               |
| SNP_P4_80732_12236576 | NC_021165.1    | Ca_kabuli_chr06 | 12236576                | TT                              | CC              | 1946861690               |
| SNP_P4_80733_12236595 | NC_021165.1    | Ca_kabuli_chr06 | 12236595                | TT                              | GG              | 1946861692               |
| SNP_P4_80734_12236898 | NC_021165.1    | Ca_kabuli_chr06 | 12236898                | GG                              | AA              | 1946861694               |
| SNP_P4_80735_12238250 | NC_021165.1    | Ca_kabuli_chr06 | 12238250                | GG                              | TT              | 1946861696               |
| SNP_P4_80736_12238253 | NC_021165.1    | Ca_kabuli_chr06 | 12238253                | GG                              | AA              | 1946861698               |
| SNP_P4_80737_12238293 | NC_021165.1    | Ca_kabuli_chr06 | 12238293                | GG                              | TT              | 1946861700               |
| SNP_P4_80738_12238386 | NC_021165.1    | Ca_kabuli_chr06 | 12238386                | TT                              | AA              | 1946861702               |
| SNP_P4_80739_12238695 | NC_021165.1    | Ca_kabuli_chr06 | 12238695                | CC                              | AA              | 1946861704               |
| SNP_P4_80740_12238696 | NC_021165.1    | Ca_kabuli_chr06 | 12238696                | AA                              | TT              | 1946861706               |
| SNP_P4_80741_12238698 | NC_021165.1    | Ca_kabuli_chr06 | 12238698                | CC                              | AA              | 1946861708               |
| SNP_P4_80742_12238704 | NC_021165.1    | Ca_kabuli_chr06 | 12238704                | TT                              | AA              | 1946861710               |
| SNP_P4_80743_12238720 | NC_021165.1    | Ca_kabuli_chr06 | 12238720                | CC                              | TT              | 1946861712               |
| SNP_P4_80744_12238722 | NC_021165.1    | Ca_kabuli_chr06 | 12238722                | TT                              | AA              | 1946861714               |
| SNP_P4_80745_12243348 | NC_021165.1    | Ca_kabuli_chr06 | 12243348                | CC                              | GG              | 1946861716               |
| SNP_P4_80746_12247835 | NC_021165.1    | Ca_kabuli_chr06 | 12247835                | GG                              | AA              | 1946861718               |
| SNP_P4_80747_12251664 | NC_021165.1    | Ca_kabuli_chr06 | 12251664                | GG                              | AA              | 1946861720               |
| SNP_P4_80748_12252262 | NC_021165.1    | Ca_kabuli_chr06 | 12252262                | AA                              | GG              | 1946861722               |
| SNP_P4_80750_12255417 | NC_021165.1    | Ca_kabuli_chr06 | 12255417                | GG                              | AA              | 1946861724               |
| SNP_P4_80751_12255418 | NC_021165.1    | Ca_kabuli_chr06 | 12255418                | AA                              | TT              | 1946861726               |
| SNP_P4_80752_12258934 | NC_021165.1    | Ca_kabuli_chr06 | 12258934                | AA                              | GG              | 1946861728               |
| SNP_P4_80753_12258948 | NC_021165.1    | Ca_kabuli_chr06 | 12258948                | GG                              | AA              | 1946861730               |
| SNP_P4_80754_12258959 | NC_021165.1    | Ca_kabuli_chr06 | 12258959                | GG                              | AA              | 1946861732               |
| SNP_P4_80755_12258962 | NC_021165.1    | Ca_kabuli_chr06 | 12258962                | CC                              | GG              | 1946861734               |
| SNP_P4_80756_12260137 | NC_021165.1    | Ca_kabuli_chr06 | 12260137                | GG                              | AA              | 1946861736               |
| SNP_P4_80757_12260202 | NC_021165.1    | Ca_kabuli_chr06 | 12260202                | AA                              | CC              | 1946861738               |
| SNP_P4_80758_12260205 | NC_021165.1    | Ca_kabuli_chr06 | 12260205                | CC                              | TT              | 1946861741               |
| SNP_P4_80759_12270658 | NC_021165.1    | Ca_kabuli_chr06 | 12270658                | CC                              | TT              | 1946861743               |
| SNP_P4_80760_12296002 | NC_021165.1    | Ca_kabuli_chr06 | 12296002                | TT                              | AA              | 1946861745               |

| SNPs IDs              | Chromosome IDs | Chromosomes     | Physical positions (bp) | CDC Frontier (Reference genome) | (ILWC46 & LPNB) | NCBI SNPdb Accession IDs |
|-----------------------|----------------|-----------------|-------------------------|---------------------------------|-----------------|--------------------------|
| SNP_P4_80761_12309279 | NC_021165.1    | Ca_kabuli_chr06 | 12309279                | CC                              | AA              | 1946861747               |
| SNP_P4_80763_12332421 | NC_021165.1    | Ca_kabuli_chr06 | 12332421                | CC                              | TT              | 1946861749               |
| SNP_P4_80764_12334932 | NC_021165.1    | Ca_kabuli_chr06 | 12334932                | CC                              | AA              | 1946861751               |
| SNP_P4_80765_12335042 | NC_021165.1    | Ca_kabuli_chr06 | 12335042                | TT                              | CC              | 1946861753               |
| SNP_P4_80767_12335803 | NC_021165.1    | Ca_kabuli_chr06 | 12335803                | AA                              | TT              | 1946861755               |
| SNP_P4_80768_12335969 | NC_021165.1    | Ca_kabuli_chr06 | 12335969                | AA                              | GG              | 1946861757               |
| SNP_P4_80769_12340733 | NC_021165.1    | Ca_kabuli_chr06 | 12340733                | CC                              | TT              | 1946861759               |
| SNP_P4_80770_12340748 | NC_021165.1    | Ca_kabuli_chr06 | 12340748                | GG                              | AA              | 1946861761               |
| SNP_P4_80771_12345017 | NC_021165.1    | Ca_kabuli_chr06 | 12345017                | CC                              | TT              | 1946861763               |
| SNP_P4_80772_12357573 | NC_021165.1    | Ca_kabuli_chr06 | 12357573                | AA                              | GG              | 1946861765               |
| SNP_P4_80773_12357602 | NC_021165.1    | Ca_kabuli_chr06 | 12357602                | TT                              | GG              | 1946861767               |
| SNP_P4_80774_12357705 | NC_021165.1    | Ca_kabuli_chr06 | 12357705                | AA                              | TT              | 1946861769               |
| SNP_P4_80775_12361434 | NC_021165.1    | Ca_kabuli_chr06 | 12361434                | GG                              | AA              | 1946861771               |
| SNP_P4_80776_12376796 | NC_021165.1    | Ca_kabuli_chr06 | 12376796                | TT                              | CC              | 1946861773               |
| SNP_P4_80777_12419903 | NC_021165.1    | Ca_kabuli_chr06 | 12419903                | TT                              | GG              | 1946861775               |
| SNP_P4_80778_12419904 | NC_021165.1    | Ca_kabuli_chr06 | 12419904                | TT                              | CC              | 1946861777               |
| SNP_P4_80779_12425741 | NC_021165.1    | Ca_kabuli_chr06 | 12425741                | CC                              | TT              | 1946861779               |
| SNP_P4_80780_12427865 | NC_021165.1    | Ca_kabuli_chr06 | 12427865                | CC                              | GG              | 1946861781               |
| SNP_P4_80781_12447519 | NC_021165.1    | Ca_kabuli_chr06 | 12447519                | CC                              | TT              | 1946861783               |
| SNP_P4_80782_12472909 | NC_021165.1    | Ca_kabuli_chr06 | 12472909                | CC                              | TT              | 1946861784               |
| SNP_P4_80783_12506929 | NC_021165.1    | Ca_kabuli_chr06 | 12506929                | GG                              | AA              | 1946861785               |
| SNP_P4_80785_12526647 | NC_021165.1    | Ca_kabuli_chr06 | 12526647                | AA                              | TT              | 1946861786               |
| SNP_P4_80786_12529905 | NC_021165.1    | Ca_kabuli_chr06 | 12529905                | TT                              | AA              | 1946861787               |
| SNP_P4_80788_12537836 | NC_021165.1    | Ca_kabuli_chr06 | 12537836                | TT                              | CC              | 1946861788               |
| SNP_P4_80790_12629176 | NC_021165.1    | Ca_kabuli_chr06 | 12629176                | AA                              | GG              | 1946861789               |
| SNP_P4_80791_12665936 | NC_021165.1    | Ca_kabuli_chr06 | 12665936                | AA                              | GG              | 1946861790               |
| SNP_P4_80792_12665952 | NC_021165.1    | Ca_kabuli_chr06 | 12665952                | CC                              | TT              | 1946861791               |
| SNP_P4_80795_12699720 | NC_021165.1    | Ca_kabuli_chr06 | 12699720                | AA                              | GG              | 1946861792               |
| SNP_P4_80796_12700908 | NC_021165.1    | Ca_kabuli_chr06 | 12700908                | TT                              | GG              | 1946861793               |
| SNP_P4_80797_12700911 | NC_021165.1    | Ca_kabuli_chr06 | 12700911                | TT                              | GG              | 1946861794               |
| SNP_P4_80799_12724592 | NC_021165.1    | Ca_kabuli_chr06 | 12724592                | TT                              | AA              | 1946861796               |
| SNP_P4_80800_12734297 | NC_021165.1    | Ca_kabuli_chr06 | 12734297                | GG                              | TT              | 1946861798               |
| SNP_P4_80801_12734470 | NC_021165.1    | Ca_kabuli_chr06 | 12734470                | GG                              | AA              | 1946861800               |
| SNP_P4_80802_12744242 | NC_021165.1    | Ca_kabuli_chr06 | 12744242                | CC                              | TT              | 1946861803               |
| SNP_P4_80803_12753531 | NC_021165.1    | Ca_kabuli_chr06 | 12753531                | GG                              | AA              | 1946861805               |
| SNP_P4_80804_12754275 | NC_021165.1    | Ca_kabuli_chr06 | 12754275                | AA                              | TT              | 1946861807               |
| SNP_P4_80805_12758535 | NC_021165.1    | Ca_kabuli_chr06 | 12758535                | AA                              | GG              | 1946861809               |
| SNP_P4_80808_12789047 | NC_021165.1    | Ca_kabuli_chr06 | 12789047                | CC                              | TT              | 1946861811               |
| SNP_P4_80809_12789076 | NC_021165.1    | Ca_kabuli_chr06 | 12789076                | CC                              | TT              | 1946861813               |
| SNP_P4_80810_12819684 | NC_021165.1    | Ca_kabuli_chr06 | 12819684                | TT                              | AA              | 1946861815               |
| SNP_P4_80811_12834200 | NC_021165.1    | Ca_kabuli_chr06 | 12834200                | AA                              | GG              | 1946861817               |
| SNP_P4_80812_12834277 | NC_021165.1    | Ca_kabuli_chr06 | 12834277                | CC                              | TT              | 1946861819               |



| SNPs IDs              | Chromosome IDs | Chromosomes     | Physical positions (bp) | CDC Frontier (Reference genome) | (ILWC46 & LPNB) | NCBI SNPdb Accession IDs |
|-----------------------|----------------|-----------------|-------------------------|---------------------------------|-----------------|--------------------------|
| SNP_P4_80813_12837744 | NC_021165.1    | Ca_kabuli_chr06 | 12837744                | AA                              | TT              | 1946861821               |
| SNP_P4_80814_12837745 | NC_021165.1    | Ca_kabuli_chr06 | 12837745                | TT                              | CC              | 1946861823               |
| SNP_P4_80815_12856467 | NC_021165.1    | Ca_kabuli_chr06 | 12856467                | TT                              | CC              | 1946861825               |
| SNP_P4_80816_12856479 | NC_021165.1    | Ca_kabuli_chr06 | 12856479                | GG                              | CC              | 1946861827               |
| SNP_P4_80817_12860104 | NC_021165.1    | Ca_kabuli_chr06 | 12860104                | GG                              | AA              | 1946861830               |
| SNP_P4_80818_12860510 | NC_021165.1    | Ca_kabuli_chr06 | 12860510                | GG                              | TT              | 1946861832               |
| SNP_P4_80819_12860518 | NC_021165.1    | Ca_kabuli_chr06 | 12860518                | CC                              | TT              | 1946861834               |
| SNP_P4_80820_12861151 | NC_021165.1    | Ca_kabuli_chr06 | 12861151                | GG                              | TT              | 1946861836               |
| SNP_P4_80821_12861153 | NC_021165.1    | Ca_kabuli_chr06 | 12861153                | TT                              | CC              | 1946861838               |
| SNP_P4_80823_12862085 | NC_021165.1    | Ca_kabuli_chr06 | 12862085                | CC                              | TT              | 1946861840               |
| SNP_P4_80824_12862590 | NC_021165.1    | Ca_kabuli_chr06 | 12862590                | TT                              | CC              | 1946861842               |
| SNP_P4_80825_12863637 | NC_021165.1    | Ca_kabuli_chr06 | 12863637                | AA                              | CC              | 1946861844               |
| SNP_P4_80829_12865931 | NC_021165.1    | Ca_kabuli_chr06 | 12865931                | GG                              | TT              | 1946861846               |
| SNP_P4_80830_12865968 | NC_021165.1    | Ca_kabuli_chr06 | 12865968                | CC                              | TT              | 1946861848               |
| SNP_P4_80832_12866503 | NC_021165.1    | Ca_kabuli_chr06 | 12866503                | AA                              | GG              | 1946861851               |
| SNP_P4_80833_12866880 | NC_021165.1    | Ca_kabuli_chr06 | 12866880                | GG                              | AA              | 1946861853               |
| SNP_P4_80835_12868410 | NC_021165.1    | Ca_kabuli_chr06 | 12868410                | GG                              | TT              | 1946861855               |
| SNP_P4_80836_12870225 | NC_021165.1    | Ca_kabuli_chr06 | 12870225                | CC                              | GG              | 1946861857               |
| SNP_P4_80838_12871234 | NC_021165.1    | Ca_kabuli_chr06 | 12871234                | AA                              | TT              | 1946861859               |
| SNP_P4_80839_12871250 | NC_021165.1    | Ca_kabuli_chr06 | 12871250                | CC                              | TT              | 1946861861               |
| SNP_P4_80840_12871268 | NC_021165.1    | Ca_kabuli_chr06 | 12871268                | GG                              | AA              | 1946861863               |
| SNP_P4_80841_12871284 | NC_021165.1    | Ca_kabuli_chr06 | 12871284                | TT                              | AA              | 1946861865               |
| SNP_P4_80842_12871346 | NC_021165.1    | Ca_kabuli_chr06 | 12871346                | AA                              | GG              | 1946861867               |
| SNP_P4_80844_12872093 | NC_021165.1    | Ca_kabuli_chr06 | 12872093                | CC                              | AA              | 1946861869               |
| SNP_P4_80845_12877206 | NC_021165.1    | Ca_kabuli_chr06 | 12877206                | CC                              | GG              | 1946861871               |
| SNP_P4_80846_12877278 | NC_021165.1    | Ca_kabuli_chr06 | 12877278                | GG                              | AA              | 1946861873               |
| SNP_P4_80848_12877357 | NC_021165.1    | Ca_kabuli_chr06 | 12877357                | TT                              | CC              | 1946861876               |
| SNP_P4_80849_12877364 | NC_021165.1    | Ca_kabuli_chr06 | 12877364                | CC                              | TT              | 1946861878               |
| SNP_P4_80850_12877529 | NC_021165.1    | Ca_kabuli_chr06 | 12877529                | GG                              | AA              | 1946861880               |
| SNP_P4_80851_12880685 | NC_021165.1    | Ca_kabuli_chr06 | 12880685                | CC                              | AA              | 1946861882               |
| SNP_P4_80852_12880909 | NC_021165.1    | Ca_kabuli_chr06 | 12880909                | TT                              | AA              | 1946861884               |
| SNP_P4_80853_12880998 | NC_021165.1    | Ca_kabuli_chr06 | 12880998                | GG                              | TT              | 1946861886               |
| SNP_P4_80854_12882229 | NC_021165.1    | Ca_kabuli_chr06 | 12882229                | CC                              | TT              | 1946861888               |
| SNP_P4_80855_12882605 | NC_021165.1    | Ca_kabuli_chr06 | 12882605                | TT                              | AA              | 1946861890               |
| SNP_P4_80856_12882627 | NC_021165.1    | Ca_kabuli_chr06 | 12882627                | GG                              | AA              | 1946861892               |
| SNP_P4_80857_12883303 | NC_021165.1    | Ca_kabuli_chr06 | 12883303                | AA                              | GG              | 1946861894               |
| SNP_P4_80858_12884942 | NC_021165.1    | Ca_kabuli_chr06 | 12884942                | AA                              | CC              | 1946861896               |
| SNP_P4_80859_12884943 | NC_021165.1    | Ca_kabuli_chr06 | 12884943                | TT                              | AA              | 1946861898               |
| SNP_P4_80860_12885059 | NC_021165.1    | Ca_kabuli_chr06 | 12885059                | GG                              | AA              | 1946861900               |
| SNP_P4_80861_12887005 | NC_021165.1    | Ca_kabuli_chr06 | 12887005                | TT                              | CC              | 1946861902               |
| SNP_P4_80862_12887019 | NC_021165.1    | Ca_kabuli_chr06 | 12887019                | CC                              | AA              | 1946861904               |
| SNP_P4_80863_12887025 | NC_021165.1    | Ca_kabuli_chr06 | 12887025                | GG                              | AA              | 1946861906               |

| SNPs IDs              | Chromosome IDs | Chromosomes     | Physical positions (bp) | CDC Frontier (Reference genome) | (ILWC46 & LPNB) | NCBI SNPdb Accession IDs |
|-----------------------|----------------|-----------------|-------------------------|---------------------------------|-----------------|--------------------------|
| SNP_P4_80864_12887027 | NC_021165.1    | Ca_kabuli_chr06 | 12887027                | CC                              | TT              | 1946861908               |
| SNP_P4_80865_12887033 | NC_021165.1    | Ca_kabuli_chr06 | 12887033                | AA                              | GG              | 1946861910               |
| SNP_P4_80866_12887035 | NC_021165.1    | Ca_kabuli_chr06 | 12887035                | TT                              | CC              | 1946861912               |
| SNP_P4_80867_12887048 | NC_021165.1    | Ca_kabuli_chr06 | 12887048                | AA                              | GG              | 1946861914               |
| SNP_P4_80868_12887247 | NC_021165.1    | Ca_kabuli_chr06 | 12887247                | CC                              | TT              | 1946861916               |
| SNP_P4_80869_12887321 | NC_021165.1    | Ca_kabuli_chr06 | 12887321                | GG                              | AA              | 1946861918               |
| SNP_P4_80870_12887344 | NC_021165.1    | Ca_kabuli_chr06 | 12887344                | CC                              | GG              | 1946861920               |
| SNP_P4_80871_12887463 | NC_021165.1    | Ca_kabuli_chr06 | 12887463                | CC                              | TT              | 1946861922               |
| SNP_P4_80872_12887487 | NC_021165.1    | Ca_kabuli_chr06 | 12887487                | CC                              | TT              | 1946861924               |
| SNP_P4_80873_12887495 | NC_021165.1    | Ca_kabuli_chr06 | 12887495                | TT                              | AA              | 1946861926               |
| SNP_P4_80874_12887504 | NC_021165.1    | Ca_kabuli_chr06 | 12887504                | TT                              | CC              | 1946861928               |
| SNP_P4_80876_12887681 | NC_021165.1    | Ca_kabuli_chr06 | 12887681                | TT                              | CC              | 1946861931               |
| SNP_P4_80877_12887706 | NC_021165.1    | Ca_kabuli_chr06 | 12887706                | CC                              | TT              | 1946861933               |
| SNP_P4_80878_12887716 | NC_021165.1    | Ca_kabuli_chr06 | 12887716                | GG                              | AA              | 1946861935               |
| SNP_P4_80879_12887722 | NC_021165.1    | Ca_kabuli_chr06 | 12887722                | TT                              | CC              | 1946861937               |
| SNP_P4_80880_12887741 | NC_021165.1    | Ca_kabuli_chr06 | 12887741                | AA                              | GG              | 1946861939               |
| SNP_P4_80881_12887744 | NC_021165.1    | Ca_kabuli_chr06 | 12887744                | AA                              | CC              | 1946861941               |
| SNP_P4_80882_12887755 | NC_021165.1    | Ca_kabuli_chr06 | 12887755                | TT                              | CC              | 1946861943               |
| SNP_P4_80883_12887781 | NC_021165.1    | Ca_kabuli_chr06 | 12887781                | TT                              | AA              | 1946861945               |
| SNP_P4_80885_12890909 | NC_021165.1    | Ca_kabuli_chr06 | 12890909                | CC                              | TT              | 1946861947               |
| SNP_P4_80886_12890997 | NC_021165.1    | Ca_kabuli_chr06 | 12890997                | CC                              | TT              | 1946861949               |
| SNP_P4_80887_12891001 | NC_021165.1    | Ca_kabuli_chr06 | 12891001                | GG                              | TT              | 1946861951               |
| SNP_P4_80888_12891071 | NC_021165.1    | Ca_kabuli_chr06 | 12891071                | AA                              | GG              | 1946861953               |
| SNP_P4_80889_12891092 | NC_021165.1    | Ca_kabuli_chr06 | 12891092                | CC                              | TT              | 1946861955               |
| SNP_P4_80890_12891822 | NC_021165.1    | Ca_kabuli_chr06 | 12891822                | AA                              | GG              | 1946861957               |
| SNP_P4_80891_12892158 | NC_021165.1    | Ca_kabuli_chr06 | 12892158                | GG                              | AA              | 1946861959               |
| SNP_P4_80892_12892405 | NC_021165.1    | Ca_kabuli_chr06 | 12892405                | TT                              | AA              | 1946861961               |
| SNP_P4_80893_12894142 | NC_021165.1    | Ca_kabuli_chr06 | 12894142                | CC                              | AA              | 1946861963               |
| SNP_P4_80894_12895887 | NC_021165.1    | Ca_kabuli_chr06 | 12895887                | GG                              | AA              | 1946861965               |
| SNP_P4_80895_12896725 | NC_021165.1    | Ca_kabuli_chr06 | 12896725                | TT                              | CC              | 1946861967               |
| SNP_P4_80896_12896991 | NC_021165.1    | Ca_kabuli_chr06 | 12896991                | CC                              | TT              | 1946861969               |
| SNP_P4_80897_12898234 | NC_021165.1    | Ca_kabuli_chr06 | 12898234                | CC                              | TT              | 1946861971               |
| SNP_P4_80899_12899058 | NC_021165.1    | Ca_kabuli_chr06 | 12899058                | GG                              | AA              | 1946861973               |
| SNP_P4_80900_12899299 | NC_021165.1    | Ca_kabuli_chr06 | 12899299                | GG                              | AA              | 1946861975               |
| SNP_P4_80902_12899967 | NC_021165.1    | Ca_kabuli_chr06 | 12899967                | TT                              | AA              | 1946861977               |
| SNP_P4_80903_12904402 | NC_021165.1    | Ca_kabuli_chr06 | 12904402                | GG                              | AA              | 1946861979               |
| SNP_P4_80904_12904458 | NC_021165.1    | Ca_kabuli_chr06 | 12904458                | AA                              | CC              | 1946861981               |
| SNP_P4_80906_12908458 | NC_021165.1    | Ca_kabuli_chr06 | 12908458                | AA                              | TT              | 1946861983               |
| SNP_P4_80907_12908459 | NC_021165.1    | Ca_kabuli_chr06 | 12908459                | GG                              | AA              | 1946861985               |
| SNP_P4_80909_12908719 | NC_021165.1    | Ca_kabuli_chr06 | 12908719                | CC                              | AA              | 1946861987               |
| SNP_P4_80910_12908966 | NC_021165.1    | Ca_kabuli_chr06 | 12908966                | CC                              | GG              | 1946861989               |
| SNP_P4_80911_12909328 | NC_021165.1    | Ca_kabuli_chr06 | 12909328                | CC                              | TT              | 1946861991               |

| SNPs IDs              | Chromosome IDs | Chromosomes     | Physical positions (bp) | CDC Frontier (Reference genome) | (ILWC46 & LPNB) | NCBI SNPdb Accession IDs |
|-----------------------|----------------|-----------------|-------------------------|---------------------------------|-----------------|--------------------------|
| SNP_P4_80912_12910044 | NC_021165.1    | Ca_kabuli_chr06 | 12910044                | AA                              | GG              | 1946861993               |
| SNP_P4_80913_12910076 | NC_021165.1    | Ca_kabuli_chr06 | 12910076                | TT                              | GG              | 1946861995               |
| SNP_P4_80915_12910622 | NC_021165.1    | Ca_kabuli_chr06 | 12910622                | GG                              | AA              | 1946861997               |
| SNP_P4_80916_12910632 | NC_021165.1    | Ca_kabuli_chr06 | 12910632                | GG                              | AA              | 1946861999               |
| SNP_P4_80917_12910935 | NC_021165.1    | Ca_kabuli_chr06 | 12910935                | TT                              | CC              | 1946862001               |
| SNP_P4_80919_12910947 | NC_021165.1    | Ca_kabuli_chr06 | 12910947                | GG                              | AA              | 1946862003               |
| SNP_P4_80920_12919432 | NC_021165.1    | Ca_kabuli_chr06 | 12919432                | CC                              | TT              | 1946862005               |
| SNP_P4_80921_12919463 | NC_021165.1    | Ca_kabuli_chr06 | 12919463                | CC                              | TT              | 1946862007               |
| SNP_P4_80925_12921814 | NC_021165.1    | Ca_kabuli_chr06 | 12921814                | GG                              | AA              | 1946862009               |
| SNP_P4_80929_12923844 | NC_021165.1    | Ca_kabuli_chr06 | 12923844                | AA                              | CC              | 1946862011               |
| SNP_P4_80930_12923884 | NC_021165.1    | Ca_kabuli_chr06 | 12923884                | GG                              | AA              | 1946862013               |
| SNP_P4_80931_12923890 | NC_021165.1    | Ca_kabuli_chr06 | 12923890                | TT                              | CC              | 1946862015               |
| SNP_P4_80932_12923893 | NC_021165.1    | Ca_kabuli_chr06 | 12923893                | CC                              | TT              | 1946862017               |
| SNP_P4_80933_12923903 | NC_021165.1    | Ca_kabuli_chr06 | 12923903                | TT                              | AA              | 1946862019               |
| SNP_P4_80934_12924774 | NC_021165.1    | Ca_kabuli_chr06 | 12924774                | CC                              | AA              | 1946862021               |
| SNP_P4_80935_12924825 | NC_021165.1    | Ca_kabuli_chr06 | 12924825                | AA                              | GG              | 1946862023               |
| SNP_P4_80936_12924971 | NC_021165.1    | Ca_kabuli_chr06 | 12924971                | CC                              | TT              | 1946862025               |
| SNP_P4_80937_12928150 | NC_021165.1    | Ca_kabuli_chr06 | 12928150                | AA                              | GG              | 1946862027               |
| SNP_P4_80938_12929722 | NC_021165.1    | Ca_kabuli_chr06 | 12929722                | CC                              | AA              | 1946862029               |
| SNP_P4_80939_12929793 | NC_021165.1    | Ca_kabuli_chr06 | 12929793                | TT                              | CC              | 1946862031               |
| SNP_P4_80940_12930102 | NC_021165.1    | Ca_kabuli_chr06 | 12930102                | GG                              | TT              | 1946862033               |
| SNP_P4_80941_12930311 | NC_021165.1    | Ca_kabuli_chr06 | 12930311                | AA                              | TT              | 1946862035               |
| SNP_P4_80942_12930822 | NC_021165.1    | Ca_kabuli_chr06 | 12930822                | AA                              | TT              | 1946862037               |
| SNP_P4_80943_12931262 | NC_021165.1    | Ca_kabuli_chr06 | 12931262                | GG                              | AA              | 1946862039               |
| SNP_P4_80944_12931296 | NC_021165.1    | Ca_kabuli_chr06 | 12931296                | GG                              | CC              | 1946862041               |
| SNP_P4_80946_12931532 | NC_021165.1    | Ca_kabuli_chr06 | 12931532                | TT                              | CC              | 1946862043               |
| SNP_P4_80947_12931579 | NC_021165.1    | Ca_kabuli_chr06 | 12931579                | AA                              | TT              | 1946862045               |
| SNP_P4_80949_12932930 | NC_021165.1    | Ca_kabuli_chr06 | 12932930                | CC                              | TT              | 1946862047               |
| SNP_P4_80952_12933516 | NC_021165.1    | Ca_kabuli_chr06 | 12933516                | TT                              | AA              | 1946862049               |
| SNP_P4_80953_12933668 | NC_021165.1    | Ca_kabuli_chr06 | 12933668                | TT                              | CC              | 1946862051               |
| SNP_P4_80955_12933684 | NC_021165.1    | Ca_kabuli_chr06 | 12933684                | CC                              | GG              | 1946862053               |
| SNP_P4_80956_12933692 | NC_021165.1    | Ca_kabuli_chr06 | 12933692                | TT                              | CC              | 1946862055               |
| SNP_P4_80957_12933755 | NC_021165.1    | Ca_kabuli_chr06 | 12933755                | GG                              | AA              | 1946862057               |
| SNP_P4_80958_12933772 | NC_021165.1    | Ca_kabuli_chr06 | 12933772                | GG                              | CC              | 1946862059               |
| SNP_P4_80959_12933799 | NC_021165.1    | Ca_kabuli_chr06 | 12933799                | TT                              | GG              | 1946862061               |
| SNP_P4_80961_12933869 | NC_021165.1    | Ca_kabuli_chr06 | 12933869                | GG                              | AA              | 1946862063               |
| SNP_P4_80962_12934129 | NC_021165.1    | Ca_kabuli_chr06 | 12934129                | GG                              | AA              | 1946862065               |
| SNP_P4_80963_12934148 | NC_021165.1    | Ca_kabuli_chr06 | 12934148                | AA                              | CC              | 1946862067               |
| SNP_P4_80964_12934333 | NC_021165.1    | Ca_kabuli_chr06 | 12934333                | AA                              | TT              | 1946862069               |
| SNP_P4_80966_12934938 | NC_021165.1    | Ca_kabuli_chr06 | 12934938                | GG                              | TT              | 1946862071               |
| SNP_P4_80967_12935820 | NC_021165.1    | Ca_kabuli_chr06 | 12935820                | TT                              | AA              | 1946862073               |
| SNP_P4_80968_12935821 | NC_021165.1    | Ca_kabuli_chr06 | 12935821                | CC                              | AA              | 1946862075               |

| SNPs IDs              | Chromosome IDs | Chromosomes     | Physical positions (bp) | CDC Frontier (Reference genome) | (ILWC46 & LPNB) | NCBI SNPdb Accession IDs |
|-----------------------|----------------|-----------------|-------------------------|---------------------------------|-----------------|--------------------------|
| SNP_P4_80969_12936311 | NC_021165.1    | Ca_kabuli_chr06 | 12936311                | CC                              | TT              | 1946862077               |
| SNP_P4_80971_12940196 | NC_021165.1    | Ca_kabuli_chr06 | 12940196                | GG                              | TT              | 1946862079               |
| SNP_P4_80972_12941517 | NC_021165.1    | Ca_kabuli_chr06 | 12941517                | GG                              | TT              | 1946862081               |
| SNP_P4_80973_12944129 | NC_021165.1    | Ca_kabuli_chr06 | 12944129                | CC                              | TT              | 1946862083               |
| SNP_P4_80974_12944448 | NC_021165.1    | Ca_kabuli_chr06 | 12944448                | CC                              | GG              | 1946862085               |
| SNP_P4_80976_12944562 | NC_021165.1    | Ca_kabuli_chr06 | 12944562                | AA                              | GG              | 1946862087               |
| SNP_P4_80977_12944858 | NC_021165.1    | Ca_kabuli_chr06 | 12944858                | CC                              | TT              | 1946862089               |
| SNP_P4_80978_12944865 | NC_021165.1    | Ca_kabuli_chr06 | 12944865                | TT                              | GG              | 1946862091               |
| SNP_P4_80979_12945315 | NC_021165.1    | Ca_kabuli_chr06 | 12945315                | TT                              | CC              | 1946862093               |
| SNP_P4_80980_12945320 | NC_021165.1    | Ca_kabuli_chr06 | 12945320                | CC                              | GG              | 1946862095               |
| SNP_P4_80982_12945451 | NC_021165.1    | Ca_kabuli_chr06 | 12945451                | TT                              | CC              | 1946862097               |
| SNP_P4_80983_12945593 | NC_021165.1    | Ca_kabuli_chr06 | 12945593                | GG                              | CC              | 1946862099               |
| SNP_P4_80984_12945744 | NC_021165.1    | Ca_kabuli_chr06 | 12945744                | AA                              | GG              | 1946862101               |
| SNP_P4_80985_12945768 | NC_021165.1    | Ca_kabuli_chr06 | 12945768                | AA                              | GG              | 1946862103               |
| SNP_P4_80986_12945769 | NC_021165.1    | Ca_kabuli_chr06 | 12945769                | CC                              | TT              | 1946862105               |
| SNP_P4_80987_12945783 | NC_021165.1    | Ca_kabuli_chr06 | 12945783                | GG                              | AA              | 1946862107               |
| SNP_P4_80988_12945823 | NC_021165.1    | Ca_kabuli_chr06 | 12945823                | CC                              | TT              | 1946862109               |
| SNP_P4_80989_12945859 | NC_021165.1    | Ca_kabuli_chr06 | 12945859                | AA                              | GG              | 1946862111               |
| SNP_P4_80990_12945871 | NC_021165.1    | Ca_kabuli_chr06 | 12945871                | GG                              | AA              | 1946862113               |
| SNP_P4_80991_12945880 | NC_021165.1    | Ca_kabuli_chr06 | 12945880                | AA                              | GG              | 1946862115               |
| SNP_P4_80992_12945885 | NC_021165.1    | Ca_kabuli_chr06 | 12945885                | GG                              | AA              | 1946862117               |
| SNP_P4_80993_12946123 | NC_021165.1    | Ca_kabuli_chr06 | 12946123                | GG                              | AA              | 1946862119               |
| SNP_P4_80994_12948400 | NC_021165.1    | Ca_kabuli_chr06 | 12948400                | GG                              | TT              | 1946862121               |
| SNP_P4_80995_12948421 | NC_021165.1    | Ca_kabuli_chr06 | 12948421                | GG                              | AA              | 1946862123               |
| SNP_P4_80996_12948423 | NC_021165.1    | Ca_kabuli_chr06 | 12948423                | AA                              | TT              | 1946862125               |
| SNP_P4_80997_12948454 | NC_021165.1    | Ca_kabuli_chr06 | 12948454                | AA                              | GG              | 1946862127               |
| SNP_P4_80999_12948494 | NC_021165.1    | Ca_kabuli_chr06 | 12948494                | TT                              | CC              | 1946862129               |
| SNP_P4_81000_12948544 | NC_021165.1    | Ca_kabuli_chr06 | 12948544                | GG                              | TT              | 1946862131               |
| SNP_P4_81001_12948756 | NC_021165.1    | Ca_kabuli_chr06 | 12948756                | CC                              | AA              | 1946862133               |
| SNP_P4_81002_12949456 | NC_021165.1    | Ca_kabuli_chr06 | 12949456                | TT                              | GG              | 1946862135               |
| SNP_P4_81004_12949496 | NC_021165.1    | Ca_kabuli_chr06 | 12949496                | TT                              | GG              | 1946862137               |
| SNP_P4_81005_12949769 | NC_021165.1    | Ca_kabuli_chr06 | 12949769                | AA                              | TT              | 1946862139               |
| SNP_P4_81006_12949811 | NC_021165.1    | Ca_kabuli_chr06 | 12949811                | GG                              | AA              | 1946862141               |
| SNP_P4_81007_12949837 | NC_021165.1    | Ca_kabuli_chr06 | 12949837                | GG                              | TT              | 1946862143               |
| SNP_P4_81008_12949880 | NC_021165.1    | Ca_kabuli_chr06 | 12949880                | AA                              | TT              | 1946862145               |
| SNP_P4_81009_12950534 | NC_021165.1    | Ca_kabuli_chr06 | 12950534                | GG                              | TT              | 1946862147               |
| SNP_P4_81010_12950577 | NC_021165.1    | Ca_kabuli_chr06 | 12950577                | CC                              | TT              | 1946862150               |
| SNP_P4_81011_12950585 | NC_021165.1    | Ca_kabuli_chr06 | 12950585                | TT                              | GG              | 1946862152               |
| SNP_P4_81012_12950799 | NC_021165.1    | Ca_kabuli_chr06 | 12950799                | TT                              | GG              | 1946862154               |
| SNP_P4_81013_12952466 | NC_021165.1    | Ca_kabuli_chr06 | 12952466                | AA                              | TT              | 1946862156               |
| SNP_P4_81015_12952916 | NC_021165.1    | Ca_kabuli_chr06 | 12952916                | GG                              | AA              | 1946862158               |
| SNP_P4_81016_12953183 | NC_021165.1    | Ca_kabuli_chr06 | 12953183                | GG                              | AA              | 1946862160               |

| SNPs IDs              | Chromosome IDs | Chromosomes     | Physical positions (bp) | CDC Frontier (Reference genome) | (ILWC46 & LPNB) | NCBI SNPdb Accession IDs |
|-----------------------|----------------|-----------------|-------------------------|---------------------------------|-----------------|--------------------------|
| SNP_P4_81017_12953841 | NC_021165.1    | Ca_kabuli_chr06 | 12953841                | AA                              | GG              | 1946862162               |
| SNP_P4_81018_12953956 | NC_021165.1    | Ca_kabuli_chr06 | 12953956                | AA                              | GG              | 1946862164               |
| SNP_P4_81019_12954041 | NC_021165.1    | Ca_kabuli_chr06 | 12954041                | CC                              | AA              | 1946862166               |
| SNP_P4_81020_12954386 | NC_021165.1    | Ca_kabuli_chr06 | 12954386                | GG                              | AA              | 1946862167               |
| SNP_P4_81021_12954469 | NC_021165.1    | Ca_kabuli_chr06 | 12954469                | GG                              | AA              | 1946862169               |
| SNP_P4_81022_12954534 | NC_021165.1    | Ca_kabuli_chr06 | 12954534                | GG                              | AA              | 1946862171               |
| SNP_P4_81023_12954538 | NC_021165.1    | Ca_kabuli_chr06 | 12954538                | TT                              | CC              | 1946862173               |
| SNP_P4_81024_12954558 | NC_021165.1    | Ca_kabuli_chr06 | 12954558                | CC                              | TT              | 1946862175               |
| SNP_P4_81025_12954577 | NC_021165.1    | Ca_kabuli_chr06 | 12954577                | TT                              | CC              | 1946862177               |
| SNP_P4_81026_12954599 | NC_021165.1    | Ca_kabuli_chr06 | 12954599                | CC                              | AA              | 1946862179               |
| SNP_P4_81027_12954619 | NC_021165.1    | Ca_kabuli_chr06 | 12954619                | AA                              | TT              | 1946862181               |
| SNP_P4_81028_12954628 | NC_021165.1    | Ca_kabuli_chr06 | 12954628                | AA                              | GG              | 1946862183               |
| SNP_P4_81030_12955509 | NC_021165.1    | Ca_kabuli_chr06 | 12955509                | AA                              | GG              | 1946862185               |
| SNP_P4_81032_12956236 | NC_021165.1    | Ca_kabuli_chr06 | 12956236                | CC                              | TT              | 1946862187               |
| SNP_P4_81033_12956242 | NC_021165.1    | Ca_kabuli_chr06 | 12956242                | CC                              | TT              | 1946862189               |
| SNP_P4_81034_12956438 | NC_021165.1    | Ca_kabuli_chr06 | 12956438                | GG                              | AA              | 1946862191               |
| SNP_P4_81035_12956492 | NC_021165.1    | Ca_kabuli_chr06 | 12956492                | TT                              | CC              | 1946862193               |
| SNP_P4_81036_12956676 | NC_021165.1    | Ca_kabuli_chr06 | 12956676                | TT                              | AA              | 1946862194               |
| SNP_P4_81037_12956978 | NC_021165.1    | Ca_kabuli_chr06 | 12956978                | AA                              | GG              | 1946862196               |
| SNP_P4_81038_12957152 | NC_021165.1    | Ca_kabuli_chr06 | 12957152                | AA                              | TT              | 1946862198               |
| SNP_P4_81040_12957171 | NC_021165.1    | Ca_kabuli_chr06 | 12957171                | GG                              | AA              | 1946862200               |
| SNP_P4_81041_12957287 | NC_021165.1    | Ca_kabuli_chr06 | 12957287                | CC                              | TT              | 1946862202               |
| SNP_P4_81043_12957689 | NC_021165.1    | Ca_kabuli_chr06 | 12957689                | CC                              | AA              | 1946862204               |
| SNP_P4_81045_12957998 | NC_021165.1    | Ca_kabuli_chr06 | 12957998                | CC                              | GG              | 1946862206               |
| SNP_P4_81046_12958186 | NC_021165.1    | Ca_kabuli_chr06 | 12958186                | CC                              | AA              | 1946862208               |
| SNP_P4_81048_12958324 | NC_021165.1    | Ca_kabuli_chr06 | 12958324                | TT                              | GG              | 1946862210               |
| SNP_P4_81051_12958461 | NC_021165.1    | Ca_kabuli_chr06 | 12958461                | GG                              | TT              | 1946862212               |
| SNP_P4_81053_12959314 | NC_021165.1    | Ca_kabuli_chr06 | 12959314                | AA                              | GG              | 1946862214               |
| SNP_P4_81056_12964457 | NC_021165.1    | Ca_kabuli_chr06 | 12964457                | GG                              | AA              | 1946862216               |
| SNP_P4_81057_12964866 | NC_021165.1    | Ca_kabuli_chr06 | 12964866                | AA                              | GG              | 1946862218               |
| SNP_P4_81059_12964960 | NC_021165.1    | Ca_kabuli_chr06 | 12964960                | TT                              | AA              | 1946862220               |
| SNP_P4_81060_12965016 | NC_021165.1    | Ca_kabuli_chr06 | 12965016                | CC                              | TT              | 1946862222               |
| SNP_P4_81061_12965225 | NC_021165.1    | Ca_kabuli_chr06 | 12965225                | TT                              | AA              | 1946862224               |
| SNP_P4_81062_12965272 | NC_021165.1    | Ca_kabuli_chr06 | 12965272                | AA                              | GG              | 1946862226               |
| SNP_P4_81063_12965285 | NC_021165.1    | Ca_kabuli_chr06 | 12965285                | AA                              | GG              | 1946862228               |
| SNP_P4_81064_12965335 | NC_021165.1    | Ca_kabuli_chr06 | 12965335                | CC                              | TT              | 1946862230               |
| SNP_P4_81066_12966061 | NC_021165.1    | Ca_kabuli_chr06 | 12966061                | TT                              | CC              | 1946862232               |
| SNP_P4_81067_12966243 | NC_021165.1    | Ca_kabuli_chr06 | 12966243                | CC                              | TT              | 1946862234               |
| SNP_P4_81068_12966285 | NC_021165.1    | Ca_kabuli_chr06 | 12966285                | AA                              | TT              | 1946862236               |
| SNP_P4_81069_12966286 | NC_021165.1    | Ca_kabuli_chr06 | 12966286                | AA                              | GG              | 1946862238               |
| SNP_P4_81070_12966287 | NC_021165.1    | Ca_kabuli_chr06 | 12966287                | AA                              | TT              | 1946862240               |
| SNP_P4_81071_12966288 | NC_021165.1    | Ca_kabuli_chr06 | 12966288                | AA                              | TT              | 1946862242               |

| SNPs IDs              | Chromosome IDs | Chromosomes     | Physical positions (bp) | CDC Frontier (Reference genome) | (ILWC46 & LPNB) | NCBI SNPdb Accession IDs |
|-----------------------|----------------|-----------------|-------------------------|---------------------------------|-----------------|--------------------------|
| SNP_P4_81072_12966289 | NC_021165.1    | Ca_kabuli_chr06 | 12966289                | AA                              | TT              | 1946862244               |
| SNP_P4_81073_12966292 | NC_021165.1    | Ca_kabuli_chr06 | 12966292                | CC                              | TT              | 1946862246               |
| SNP_P4_81074_12966295 | NC_021165.1    | Ca_kabuli_chr06 | 12966295                | GG                              | TT              | 1946862248               |
| SNP_P4_81075_12966298 | NC_021165.1    | Ca_kabuli_chr06 | 12966298                | CC                              | TT              | 1946862250               |
| SNP_P4_81076_12966306 | NC_021165.1    | Ca_kabuli_chr06 | 12966306                | TT                              | CC              | 1946862252               |
| SNP_P4_81077_12966563 | NC_021165.1    | Ca_kabuli_chr06 | 12966563                | AA                              | GG              | 1946862254               |
| SNP_P4_81078_12967057 | NC_021165.1    | Ca_kabuli_chr06 | 12967057                | GG                              | CC              | 1946862256               |
| SNP_P4_81080_12967149 | NC_021165.1    | Ca_kabuli_chr06 | 12967149                | GG                              | AA              | 1946862258               |
| SNP_P4_81081_12967412 | NC_021165.1    | Ca_kabuli_chr06 | 12967412                | AA                              | GG              | 1946862260               |
| SNP_P4_81082_12967494 | NC_021165.1    | Ca_kabuli_chr06 | 12967494                | GG                              | AA              | 1946862262               |
| SNP_P4_81083_12967506 | NC_021165.1    | Ca_kabuli_chr06 | 12967506                | TT                              | AA              | 1946862264               |
| SNP_P4_81084_12967783 | NC_021165.1    | Ca_kabuli_chr06 | 12967783                | AA                              | GG              | 1946862266               |
| SNP_P4_81085_12969915 | NC_021165.1    | Ca_kabuli_chr06 | 12969915                | CC                              | TT              | 1946862268               |
| SNP_P4_81087_12970216 | NC_021165.1    | Ca_kabuli_chr06 | 12970216                | CC                              | AA              | 1946862270               |
| SNP_P4_81088_12970270 | NC_021165.1    | Ca_kabuli_chr06 | 12970270                | AA                              | CC              | 1946862272               |
| SNP_P4_81089_12970275 | NC_021165.1    | Ca_kabuli_chr06 | 12970275                | TT                              | GG              | 1946862274               |
| SNP_P4_81091_12970474 | NC_021165.1    | Ca_kabuli_chr06 | 12970474                | TT                              | CC              | 1946862276               |
| SNP_P4_81092_12972137 | NC_021165.1    | Ca_kabuli_chr06 | 12972137                | CC                              | AA              | 1946862278               |
| SNP_P4_81093_12973198 | NC_021165.1    | Ca_kabuli_chr06 | 12973198                | TT                              | CC              | 1946862280               |
| SNP_P4_81094_12977741 | NC_021165.1    | Ca_kabuli_chr06 | 12977741                | AA                              | CC              | 1946862281               |
| SNP_P4_81095_12977856 | NC_021165.1    | Ca_kabuli_chr06 | 12977856                | AA                              | TT              | 1946862283               |
| SNP_P4_81096_12977890 | NC_021165.1    | Ca_kabuli_chr06 | 12977890                | AA                              | GG              | 1946862285               |
| SNP_P4_81097_12977907 | NC_021165.1    | Ca_kabuli_chr06 | 12977907                | AA                              | TT              | 1946862288               |
| SNP_P4_81098_12977908 | NC_021165.1    | Ca_kabuli_chr06 | 12977908                | AA                              | TT              | 1946862290               |
| SNP_P4_81099_12977919 | NC_021165.1    | Ca_kabuli_chr06 | 12977919                | AA                              | TT              | 1946862292               |
| SNP_P4_81100_12978324 | NC_021165.1    | Ca_kabuli_chr06 | 12978324                | GG                              | AA              | 1946862294               |
| SNP_P4_81101_12979484 | NC_021165.1    | Ca_kabuli_chr06 | 12979484                | AA                              | GG              | 1946862296               |
| SNP_P4_81102_12979644 | NC_021165.1    | Ca_kabuli_chr06 | 12979644                | AA                              | CC              | 1946862298               |
| SNP_P4_81103_12980466 | NC_021165.1    | Ca_kabuli_chr06 | 12980466                | GG                              | AA              | 1946862300               |
| SNP_P4_81104_12980726 | NC_021165.1    | Ca_kabuli_chr06 | 12980726                | TT                              | AA              | 1946862302               |
| SNP_P4_81107_12989162 | NC_021165.1    | Ca_kabuli_chr06 | 12989162                | TT                              | CC              | 1946862304               |
| SNP_P4_81109_12994031 | NC_021165.1    | Ca_kabuli_chr06 | 12994031                | CC                              | TT              | 1946862305               |
| SNP_P4_81111_12999186 | NC_021165.1    | Ca_kabuli_chr06 | 12999186                | TT                              | AA              | 1946862307               |
| SNP_P4_81112_12999855 | NC_021165.1    | Ca_kabuli_chr06 | 12999855                | CC                              | TT              | 1946862309               |
| SNP_P4_81114_13002193 | NC_021165.1    | Ca_kabuli_chr06 | 13002193                | GG                              | AA              | 1946862311               |
| SNP_P4_81115_13002210 | NC_021165.1    | Ca_kabuli_chr06 | 13002210                | CC                              | TT              | 1946862313               |
| SNP_P4_81116_13002219 | NC_021165.1    | Ca_kabuli_chr06 | 13002219                | AA                              | GG              | 1946862315               |
| SNP_P4_81118_13006691 | NC_021165.1    | Ca_kabuli_chr06 | 13006691                | CC                              | GG              | 1946862318               |
| SNP_P4_81119_13007473 | NC_021165.1    | Ca_kabuli_chr06 | 13007473                | AA                              | TT              | 1946862320               |
| SNP_P4_81120_13014451 | NC_021165.1    | Ca_kabuli_chr06 | 13014451                | TT                              | CC              | 1946862322               |
| SNP_P4_81121_13016256 | NC_021165.1    | Ca_kabuli_chr06 | 13016256                | CC                              | AA              | 1946862324               |
| SNP_P4_81122_13016486 | NC_021165.1    | Ca_kabuli_chr06 | 13016486                | CC                              | TT              | 1946862326               |

| SNPs IDs              | Chromosome IDs | Chromosomes     | Physical positions (bp) | CDC Frontier (Reference genome) | (ILWC46 & LPNB) | NCBI SNPdb Accession IDs |
|-----------------------|----------------|-----------------|-------------------------|---------------------------------|-----------------|--------------------------|
| SNP_P4_81124_13024871 | NC_021165.1    | Ca_kabuli_chr06 | 13024871                | AA                              | GG              | 1946862328               |
| SNP_P4_81125_13025128 | NC_021165.1    | Ca_kabuli_chr06 | 13025128                | AA                              | GG              | 1946862330               |
| SNP_P4_81126_13025137 | NC_021165.1    | Ca_kabuli_chr06 | 13025137                | AA                              | GG              | 1946862332               |
| SNP_P4_81127_13025452 | NC_021165.1    | Ca_kabuli_chr06 | 13025452                | GG                              | AA              | 1946862334               |
| SNP_P4_81128_13029297 | NC_021165.1    | Ca_kabuli_chr06 | 13029297                | CC                              | TT              | 1946862336               |
| SNP_P4_81129_13031677 | NC_021165.1    | Ca_kabuli_chr06 | 13031677                | TT                              | CC              | 1946862338               |
| SNP_P4_81130_13033270 | NC_021165.1    | Ca_kabuli_chr06 | 13033270                | CC                              | TT              | 1946862340               |
| SNP_P4_81131_13033364 | NC_021165.1    | Ca_kabuli_chr06 | 13033364                | TT                              | CC              | 1946862342               |
| SNP_P4_81133_13033578 | NC_021165.1    | Ca_kabuli_chr06 | 13033578                | GG                              | AA              | 1946862344               |
| SNP_P4_81134_13033686 | NC_021165.1    | Ca_kabuli_chr06 | 13033686                | CC                              | TT              | 1946862346               |
| SNP_P4_81135_13036318 | NC_021165.1    | Ca_kabuli_chr06 | 13036318                | TT                              | CC              | 1946862348               |
| SNP_P4_81136_13038549 | NC_021165.1    | Ca_kabuli_chr06 | 13038549                | AA                              | TT              | 1946862350               |
| SNP_P4_81137_13041181 | NC_021165.1    | Ca_kabuli_chr06 | 13041181                | AA                              | GG              | 1946862352               |
| SNP_P4_81138_13043090 | NC_021165.1    | Ca_kabuli_chr06 | 13043090                | CC                              | TT              | 1946862354               |
| SNP_P4_81139_13044911 | NC_021165.1    | Ca_kabuli_chr06 | 13044911                | GG                              | AA              | 1946862356               |
| SNP_P4_81140_13052739 | NC_021165.1    | Ca_kabuli_chr06 | 13052739                | TT                              | AA              | 1946862358               |
| SNP_P4_81141_13053122 | NC_021165.1    | Ca_kabuli_chr06 | 13053122                | CC                              | GG              | 1946862360               |
| SNP_P4_81144_13128503 | NC_021165.1    | Ca_kabuli_chr06 | 13128503                | GG                              | AA              | 1946862362               |
| SNP_P4_81146_13131131 | NC_021165.1    | Ca_kabuli_chr06 | 13131131                | TT                              | GG              | 1946862364               |
| SNP_P4_81147_13136955 | NC_021165.1    | Ca_kabuli_chr06 | 13136955                | AA                              | GG              | 1946862366               |
| SNP_P4_81148_13154970 | NC_021165.1    | Ca_kabuli_chr06 | 13154970                | TT                              | CC              | 1946862368               |
| SNP_P4_81152_13199430 | NC_021165.1    | Ca_kabuli_chr06 | 13199430                | TT                              | CC              | 1946862370               |
| SNP_P4_81153_13246342 | NC_021165.1    | Ca_kabuli_chr06 | 13246342                | GG                              | AA              | 1946862372               |
| SNP_P4_81154_13247770 | NC_021165.1    | Ca_kabuli_chr06 | 13247770                | TT                              | AA              | 1946862374               |
| SNP_P4_81155_13262265 | NC_021165.1    | Ca_kabuli_chr06 | 13262265                | TT                              | GG              | 1946862376               |
| SNP_P4_81157_13282130 | NC_021165.1    | Ca_kabuli_chr06 | 13282130                | TT                              | CC              | 1946862378               |
| SNP_P4_81158_13285928 | NC_021165.1    | Ca_kabuli_chr06 | 13285928                | AA                              | TT              | 1946862380               |
| SNP_P4_81159_13285953 | NC_021165.1    | Ca_kabuli_chr06 | 13285953                | AA                              | CC              | 1946862382               |
| SNP_P4_81160_13324228 | NC_021165.1    | Ca_kabuli_chr06 | 13324228                | AA                              | GG              | 1946862384               |
| SNP_P4_81161_13326910 | NC_021165.1    | Ca_kabuli_chr06 | 13326910                | CC                              | AA              | 1946862386               |
| SNP_P4_81163_13393243 | NC_021165.1    | Ca_kabuli_chr06 | 13393243                | TT                              | CC              | 1946862388               |
| SNP_P4_81164_13393326 | NC_021165.1    | Ca_kabuli_chr06 | 13393326                | TT                              | AA              | 1946862390               |
| SNP_P4_81165_13393368 | NC_021165.1    | Ca_kabuli_chr06 | 13393368                | TT                              | CC              | 1946862392               |
| SNP_P4_81166_13393414 | NC_021165.1    | Ca_kabuli_chr06 | 13393414                | AA                              | CC              | 1946862394               |
| SNP_P4_81167_13393428 | NC_021165.1    | Ca_kabuli_chr06 | 13393428                | AA                              | GG              | 1946862396               |
| SNP_P4_81168_13393452 | NC_021165.1    | Ca_kabuli_chr06 | 13393452                | TT                              | AA              | 1946862398               |
| SNP_P4_81169_13393678 | NC_021165.1    | Ca_kabuli_chr06 | 13393678                | TT                              | CC              | 1946862400               |
| SNP_P4_81170_13411326 | NC_021165.1    | Ca_kabuli_chr06 | 13411326                | TT                              | CC              | 1946862402               |
| SNP_P4_81171_13416643 | NC_021165.1    | Ca_kabuli_chr06 | 13416643                | CC                              | GG              | 1946862404               |
| SNP_P4_81172_13416653 | NC_021165.1    | Ca_kabuli_chr06 | 13416653                | CC                              | TT              | 1946862406               |
| SNP_P4_81173_13416947 | NC_021165.1    | Ca_kabuli_chr06 | 13416947                | GG                              | AA              | 1946862408               |
| SNP_P4_81174_13416976 | NC_021165.1    | Ca_kabuli_chr06 | 13416976                | AA                              | CC              | 1946862410               |

| SNPs IDs              | Chromosome IDs | Chromosomes     | Physical positions (bp) | CDC Frontier (Reference genome) | (ILWC46 & LPNB) | NCBI SNPdb Accession IDs |
|-----------------------|----------------|-----------------|-------------------------|---------------------------------|-----------------|--------------------------|
| SNP_P4_81175_13417026 | NC_021165.1    | Ca_kabuli_chr06 | 13417026                | TT                              | CC              | 1946862412               |
| SNP_P4_81176_13436503 | NC_021165.1    | Ca_kabuli_chr06 | 13436503                | CC                              | AA              | 1946862414               |
| SNP_P4_81177_13436529 | NC_021165.1    | Ca_kabuli_chr06 | 13436529                | GG                              | AA              | 1946862416               |
| SNP_P4_81178_13437095 | NC_021165.1    | Ca_kabuli_chr06 | 13437095                | GG                              | AA              | 1946862418               |
| SNP_P4_81181_13451253 | NC_021165.1    | Ca_kabuli_chr06 | 13451253                | GG                              | TT              | 1946862420               |
| SNP_P4_81182_13468153 | NC_021165.1    | Ca_kabuli_chr06 | 13468153                | GG                              | CC              | 1946862422               |
| SNP_P4_81183_13468160 | NC_021165.1    | Ca_kabuli_chr06 | 13468160                | GG                              | AA              | 1946862424               |
| SNP_P4_81184_13468169 | NC_021165.1    | Ca_kabuli_chr06 | 13468169                | TT                              | CC              | 1946862426               |
| SNP_P4_81185_13468187 | NC_021165.1    | Ca_kabuli_chr06 | 13468187                | CC                              | TT              | 1946862428               |
| SNP_P4_81187_13469900 | NC_021165.1    | Ca_kabuli_chr06 | 13469900                | GG                              | AA              | 1946862430               |
| SNP_P4_81188_13470558 | NC_021165.1    | Ca_kabuli_chr06 | 13470558                | GG                              | AA              | 1946862432               |
| SNP_P4_81189_13470560 | NC_021165.1    | Ca_kabuli_chr06 | 13470560                | AA                              | GG              | 1946862434               |
| SNP_P4_81191_13533952 | NC_021165.1    | Ca_kabuli_chr06 | 13533952                | TT                              | CC              | 1946862436               |
| SNP_P4_81193_13560671 | NC_021165.1    | Ca_kabuli_chr06 | 13560671                | AA                              | GG              | 1946862438               |
| SNP_P4_81194_13560675 | NC_021165.1    | Ca_kabuli_chr06 | 13560675                | GG                              | AA              | 1946862440               |
| SNP_P4_81196_13626535 | NC_021165.1    | Ca_kabuli_chr06 | 13626535                | AA                              | TT              | 1946862442               |
| SNP_P4_81197_13626570 | NC_021165.1    | Ca_kabuli_chr06 | 13626570                | CC                              | AA              | 1946862444               |
| SNP_P4_81199_13674889 | NC_021165.1    | Ca_kabuli_chr06 | 13674889                | GG                              | CC              | 1946862446               |
| SNP_P4_81200_13686263 | NC_021165.1    | Ca_kabuli_chr06 | 13686263                | GG                              | AA              | 1946862448               |
| SNP_P4_81201_13738508 | NC_021165.1    | Ca_kabuli_chr06 | 13738508                | AA                              | CC              | 1946862450               |
| SNP_P4_81202_13738514 | NC_021165.1    | Ca_kabuli_chr06 | 13738514                | TT                              | CC              | 1946862452               |
| SNP_P4_81203_13767104 | NC_021165.1    | Ca_kabuli_chr06 | 13767104                | GG                              | AA              | 1946862454               |
| SNP_P4_81204_13767110 | NC_021165.1    | Ca_kabuli_chr06 | 13767110                | CC                              | AA              | 1946862456               |
| SNP_P4_81205_13767117 | NC_021165.1    | Ca_kabuli_chr06 | 13767117                | CC                              | AA              | 1946862459               |
| SNP_P4_81206_13782083 | NC_021165.1    | Ca_kabuli_chr06 | 13782083                | CC                              | TT              | 1946862461               |
| SNP_P4_81207_13782732 | NC_021165.1    | Ca_kabuli_chr06 | 13782732                | AA                              | GG              | 1946862463               |
| SNP_P4_81208_13825462 | NC_021165.1    | Ca_kabuli_chr06 | 13825462                | TT                              | AA              | 1946862465               |
| SNP_P4_81210_13839308 | NC_021165.1    | Ca_kabuli_chr06 | 13839308                | AA                              | GG              | 1946862467               |
| SNP_P4_81211_13856123 | NC_021165.1    | Ca_kabuli_chr06 | 13856123                | AA                              | GG              | 1946862469               |
| SNP_P4_81212_13856382 | NC_021165.1    | Ca_kabuli_chr06 | 13856382                | TT                              | CC              | 1946862471               |
| SNP_P4_81213_13959895 | NC_021165.1    | Ca_kabuli_chr06 | 13959895                | TT                              | CC              | 1946862473               |
| SNP_P4_81215_13962777 | NC_021165.1    | Ca_kabuli_chr06 | 13962777                | AA                              | CC              | 1946862475               |
| SNP_P4_81216_13962779 | NC_021165.1    | Ca_kabuli_chr06 | 13962779                | TT                              | CC              | 1946862477               |
| SNP_P4_81219_14049316 | NC_021165.1    | Ca_kabuli_chr06 | 14049316                | CC                              | GG              | 1946862479               |
| SNP_P4_81220_14049333 | NC_021165.1    | Ca_kabuli_chr06 | 14049333                | CC                              | GG              | 1946862481               |
| SNP_P4_81221_14049334 | NC_021165.1    | Ca_kabuli_chr06 | 14049334                | AA                              | GG              | 1946862483               |
| SNP_P4_81222_14064489 | NC_021165.1    | Ca_kabuli_chr06 | 14064489                | CC                              | TT              | 1946862485               |
| SNP_P4_81223_14064582 | NC_021165.1    | Ca_kabuli_chr06 | 14064582                | CC                              | AA              | 1946862487               |
| SNP_P4_81224_14064686 | NC_021165.1    | Ca_kabuli_chr06 | 14064686                | CC                              | TT              | 1946862489               |
| SNP_P4_81225_14064700 | NC_021165.1    | Ca_kabuli_chr06 | 14064700                | TT                              | CC              | 1946862491               |
| SNP_P4_81226_14064951 | NC_021165.1    | Ca_kabuli_chr06 | 14064951                | TT                              | CC              | 1946862493               |
| SNP_P4_81227_14065088 | NC_021165.1    | Ca_kabuli_chr06 | 14065088                | TT                              | CC              | 1946862495               |



| SNPs IDs              | Chromosome IDs | Chromosomes     | Physical positions (bp) | CDC Frontier (Reference genome) | (ILWC46 & LPNB) | NCBI SNPdb Accession IDs |
|-----------------------|----------------|-----------------|-------------------------|---------------------------------|-----------------|--------------------------|
| SNP_P4_81228_14075343 | NC_021165.1    | Ca_kabuli_chr06 | 14075343                | AA                              | TT              | 1946862497               |
| SNP_P4_81229_14084090 | NC_021165.1    | Ca_kabuli_chr06 | 14084090                | TT                              | CC              | 1946862499               |
| SNP_P4_81230_14084119 | NC_021165.1    | Ca_kabuli_chr06 | 14084119                | GG                              | AA              | 1946862501               |
| SNP_P4_81231_14084131 | NC_021165.1    | Ca_kabuli_chr06 | 14084131                | AA                              | CC              | 1946862503               |
| SNP_P4_81232_14105408 | NC_021165.1    | Ca_kabuli_chr06 | 14105408                | GG                              | AA              | 1946862505               |
| SNP_P4_81234_14170010 | NC_021165.1    | Ca_kabuli_chr06 | 14170010                | TT                              | CC              | 1946862507               |
| SNP_P4_81236_14190235 | NC_021165.1    | Ca_kabuli_chr06 | 14190235                | TT                              | AA              | 1946862509               |
| SNP_P4_81240_14274669 | NC_021165.1    | Ca_kabuli_chr06 | 14274669                | TT                              | AA              | 1946862511               |
| SNP_P4_81241_14276471 | NC_021165.1    | Ca_kabuli_chr06 | 14276471                | GG                              | AA              | 1946862513               |
| SNP_P4_81242_14278734 | NC_021165.1    | Ca_kabuli_chr06 | 14278734                | GG                              | AA              | 1946862515               |
| SNP_P4_81243_14278757 | NC_021165.1    | Ca_kabuli_chr06 | 14278757                | GG                              | CC              | 1946862517               |
| SNP_P4_81244_14279406 | NC_021165.1    | Ca_kabuli_chr06 | 14279406                | TT                              | CC              | 1946862519               |
| SNP_P4_81245_14279410 | NC_021165.1    | Ca_kabuli_chr06 | 14279410                | GG                              | TT              | 1946862521               |
| SNP_P4_81246_14297845 | NC_021165.1    | Ca_kabuli_chr06 | 14297845                | AA                              | GG              | 1946862523               |
| SNP_P4_81247_14297846 | NC_021165.1    | Ca_kabuli_chr06 | 14297846                | AA                              | TT              | 1946862525               |
| SNP_P4_81248_14313103 | NC_021165.1    | Ca_kabuli_chr06 | 14313103                | AA                              | GG              | 1946862527               |
| SNP_P4_81249_14313107 | NC_021165.1    | Ca_kabuli_chr06 | 14313107                | TT                              | CC              | 1946862529               |
| SNP_P4_81250_14338188 | NC_021165.1    | Ca_kabuli_chr06 | 14338188                | AA                              | TT              | 1946862531               |
| SNP_P4_81251_14338189 | NC_021165.1    | Ca_kabuli_chr06 | 14338189                | TT                              | GG              | 1946862533               |
| SNP_P4_81252_14345264 | NC_021165.1    | Ca_kabuli_chr06 | 14345264                | GG                              | TT              | 1946862535               |
| SNP_P4_81253_14351359 | NC_021165.1    | Ca_kabuli_chr06 | 14351359                | GG                              | AA              | 1946862537               |
| SNP_P4_81254_14351734 | NC_021165.1    | Ca_kabuli_chr06 | 14351734                | GG                              | TT              | 1946862539               |
| SNP_P4_81255_14351744 | NC_021165.1    | Ca_kabuli_chr06 | 14351744                | AA                              | GG              | 1946862541               |
| SNP_P4_81256_14389720 | NC_021165.1    | Ca_kabuli_chr06 | 14389720                | TT                              | AA              | 1946862543               |
| SNP_P4_81257_14398175 | NC_021165.1    | Ca_kabuli_chr06 | 14398175                | CC                              | TT              | 1946862545               |
| SNP_P4_81259_14410793 | NC_021165.1    | Ca_kabuli_chr06 | 14410793                | TT                              | CC              | 1946862547               |
| SNP_P4_81260_14410798 | NC_021165.1    | Ca_kabuli_chr06 | 14410798                | AA                              | GG              | 1946862549               |
| SNP_P4_81261_14410804 | NC_021165.1    | Ca_kabuli_chr06 | 14410804                | TT                              | AA              | 1946862551               |
| SNP_P4_81262_14410805 | NC_021165.1    | Ca_kabuli_chr06 | 14410805                | TT                              | AA              | 1946862553               |
| SNP_P4_81263_14429848 | NC_021165.1    | Ca_kabuli_chr06 | 14429848                | GG                              | AA              | 1946862555               |
| SNP_P4_81264_14452356 | NC_021165.1    | Ca_kabuli_chr06 | 14452356                | CC                              | AA              | 1946862557               |
| SNP_P4_81265_14455897 | NC_021165.1    | Ca_kabuli_chr06 | 14455897                | GG                              | AA              | 1946862559               |
| SNP_P4_81266_14456106 | NC_021165.1    | Ca_kabuli_chr06 | 14456106                | GG                              | TT              | 1946862561               |
| SNP_P4_81267_14456117 | NC_021165.1    | Ca_kabuli_chr06 | 14456117                | CC                              | AA              | 1946862563               |
| SNP_P4_81268_14456128 | NC_021165.1    | Ca_kabuli_chr06 | 14456128                | TT                              | GG              | 1946862565               |
| SNP_P4_81269_14456131 | NC_021165.1    | Ca_kabuli_chr06 | 14456131                | GG                              | AA              | 1946862567               |
| SNP_P4_81270_14456179 | NC_021165.1    | Ca_kabuli_chr06 | 14456179                | CC                              | TT              | 1946862569               |
| SNP_P4_81271_14456182 | NC_021165.1    | Ca_kabuli_chr06 | 14456182                | GG                              | AA              | 1946862571               |
| SNP_P4_81272_14456188 | NC_021165.1    | Ca_kabuli_chr06 | 14456188                | AA                              | GG              | 1946862573               |
| SNP_P4_81273_14470388 | NC_021165.1    | Ca_kabuli_chr06 | 14470388                | CC                              | TT              | 1946862575               |
| SNP_P4_81274_14470415 | NC_021165.1    | Ca_kabuli_chr06 | 14470415                | CC                              | TT              | 1946862577               |
| SNP_P4_81275_14471059 | NC_021165.1    | Ca_kabuli_chr06 | 14471059                | GG                              | AA              | 1946862579               |

| SNPs IDs              | Chromosome IDs | Chromosomes     | Physical positions (bp) | CDC Frontier (Reference genome) | (ILWC46 & LPNB) | NCBI SNPdb Accession IDs |
|-----------------------|----------------|-----------------|-------------------------|---------------------------------|-----------------|--------------------------|
| SNP_P4_81276_14471677 | NC_021165.1    | Ca_kabuli_chr06 | 14471677                | GG                              | AA              | 1946862581               |
| SNP_P4_81278_14532857 | NC_021165.1    | Ca_kabuli_chr06 | 14532857                | GG                              | AA              | 1946862583               |
| SNP_P4_81279_14553248 | NC_021165.1    | Ca_kabuli_chr06 | 14553248                | GG                              | TT              | 1946862585               |
| SNP_P4_81280_14553476 | NC_021165.1    | Ca_kabuli_chr06 | 14553476                | AA                              | TT              | 1946862587               |
| SNP_P4_81281_14553477 | NC_021165.1    | Ca_kabuli_chr06 | 14553477                | TT                              | AA              | 1946862589               |
| SNP_P4_81283_14553671 | NC_021165.1    | Ca_kabuli_chr06 | 14553671                | AA                              | GG              | 1946862591               |
| SNP_P4_81284_14554090 | NC_021165.1    | Ca_kabuli_chr06 | 14554090                | CC                              | TT              | 1946862593               |
| SNP_P4_81285_14554109 | NC_021165.1    | Ca_kabuli_chr06 | 14554109                | TT                              | GG              | 1946862595               |
| SNP_P4_81286_14584096 | NC_021165.1    | Ca_kabuli_chr06 | 14584096                | TT                              | AA              | 1946862597               |
| SNP_P4_81287_14599516 | NC_021165.1    | Ca_kabuli_chr06 | 14599516                | GG                              | CC              | 1946862599               |
| SNP_P4_81288_14599786 | NC_021165.1    | Ca_kabuli_chr06 | 14599786                | TT                              | GG              | 1946862601               |
| SNP_P4_81289_14633003 | NC_021165.1    | Ca_kabuli_chr06 | 14633003                | TT                              | CC              | 1946862603               |
| SNP_P4_81290_14641832 | NC_021165.1    | Ca_kabuli_chr06 | 14641832                | CC                              | TT              | 1946862605               |
| SNP_P4_81293_14715124 | NC_021165.1    | Ca_kabuli_chr06 | 14715124                | GG                              | AA              | 1946862607               |
| SNP_P4_81294_14743747 | NC_021165.1    | Ca_kabuli_chr06 | 14743747                | TT                              | CC              | 1946862609               |
| SNP_P4_81295_14754671 | NC_021165.1    | Ca_kabuli_chr06 | 14754671                | AA                              | GG              | 1946862611               |
| SNP_P4_81296_14754677 | NC_021165.1    | Ca_kabuli_chr06 | 14754677                | GG                              | AA              | 1946862613               |
| SNP_P4_81297_14755095 | NC_021165.1    | Ca_kabuli_chr06 | 14755095                | CC                              | TT              | 1946862615               |
| SNP_P4_81298_14755507 | NC_021165.1    | Ca_kabuli_chr06 | 14755507                | AA                              | TT              | 1946862617               |
| SNP_P4_81300_14792511 | NC_021165.1    | Ca_kabuli_chr06 | 14792511                | GG                              | AA              | 1946862619               |
| SNP_P4_81301_14804017 | NC_021165.1    | Ca_kabuli_chr06 | 14804017                | TT                              | CC              | 1946862621               |
| SNP_P4_81302_14839768 | NC_021165.1    | Ca_kabuli_chr06 | 14839768                | AA                              | GG              | 1946862623               |
| SNP_P4_81303_14864886 | NC_021165.1    | Ca_kabuli_chr06 | 14864886                | TT                              | CC              | 1946862625               |
| SNP_P4_81305_14899535 | NC_021165.1    | Ca_kabuli_chr06 | 14899535                | TT                              | CC              | 1946862627               |
| SNP_P4_81306_14906106 | NC_021165.1    | Ca_kabuli_chr06 | 14906106                | TT                              | GG              | 1946862629               |
| SNP_P4_81307_14918088 | NC_021165.1    | Ca_kabuli_chr06 | 14918088                | TT                              | AA              | 1946862631               |
| SNP_P4_81308_14933584 | NC_021165.1    | Ca_kabuli_chr06 | 14933584                | TT                              | AA              | 1946862633               |
| SNP_P4_81309_14936143 | NC_021165.1    | Ca_kabuli_chr06 | 14936143                | CC                              | AA              | 1946862635               |
| SNP_P4_81312_15046540 | NC_021165.1    | Ca_kabuli_chr06 | 15046540                | AA                              | CC              | 1946862637               |
| SNP_P4_81313_15046556 | NC_021165.1    | Ca_kabuli_chr06 | 15046556                | TT                              | CC              | 1946862639               |
| SNP_P4_81314_15054729 | NC_021165.1    | Ca_kabuli_chr06 | 15054729                | AA                              | GG              | 1946862641               |
| SNP_P4_81316_15078032 | NC_021165.1    | Ca_kabuli_chr06 | 15078032                | AA                              | CC              | 1946862643               |
| SNP_P4_81317_15080363 | NC_021165.1    | Ca_kabuli_chr06 | 15080363                | TT                              | GG              | 1946862645               |
| SNP_P4_81318_15080591 | NC_021165.1    | Ca_kabuli_chr06 | 15080591                | CC                              | AA              | 1946862647               |
| SNP_P4_81319_15080732 | NC_021165.1    | Ca_kabuli_chr06 | 15080732                | AA                              | TT              | 1946862649               |
| SNP_P4_81320_15083742 | NC_021165.1    | Ca_kabuli_chr06 | 15083742                | AA                              | GG              | 1946862651               |
| SNP_P4_81321_15083747 | NC_021165.1    | Ca_kabuli_chr06 | 15083747                | GG                              | AA              | 1946862653               |
| SNP_P4_81322_15083754 | NC_021165.1    | Ca_kabuli_chr06 | 15083754                | TT                              | CC              | 1946862655               |
| SNP_P4_81323_15083819 | NC_021165.1    | Ca_kabuli_chr06 | 15083819                | TT                              | CC              | 1946862657               |
| SNP_P4_81324_15083837 | NC_021165.1    | Ca_kabuli_chr06 | 15083837                | TT                              | CC              | 1946862659               |
| SNP_P4_81325_15083839 | NC_021165.1    | Ca_kabuli_chr06 | 15083839                | TT                              | GG              | 1946862661               |
| SNP_P4_81326_15083852 | NC_021165.1    | Ca_kabuli_chr06 | 15083852                | CC                              | TT              | 1946862663               |

| SNPs IDs              | Chromosome IDs | Chromosomes     | Physical positions (bp) | CDC Frontier (Reference genome) | (ILWC46 & LPNB) | NCBI SNPdb Accession IDs |
|-----------------------|----------------|-----------------|-------------------------|---------------------------------|-----------------|--------------------------|
| SNP_P4_81327_15083861 | NC_021165.1    | Ca_kabuli_chr06 | 15083861                | TT                              | CC              | 1946862665               |
| SNP_P4_81328_15084070 | NC_021165.1    | Ca_kabuli_chr06 | 15084070                | CC                              | TT              | 1946862667               |
| SNP_P4_81329_15084188 | NC_021165.1    | Ca_kabuli_chr06 | 15084188                | TT                              | AA              | 1946862669               |
| SNP_P4_81331_15104243 | NC_021165.1    | Ca_kabuli_chr06 | 15104243                | AA                              | TT              | 1946862671               |
| SNP_P4_81332_15135218 | NC_021165.1    | Ca_kabuli_chr06 | 15135218                | AA                              | TT              | 1946862673               |
| SNP_P4_81333_15137552 | NC_021165.1    | Ca_kabuli_chr06 | 15137552                | TT                              | AA              | 1946862675               |
| SNP_P4_81334_15159915 | NC_021165.1    | Ca_kabuli_chr06 | 15159915                | CC                              | TT              | 1946862677               |
| SNP_P4_81335_15220078 | NC_021165.1    | Ca_kabuli_chr06 | 15220078                | CC                              | AA              | 1946862679               |
| SNP_P4_81336_15222827 | NC_021165.1    | Ca_kabuli_chr06 | 15222827                | GG                              | AA              | 1946862681               |
| SNP_P4_81337_15244672 | NC_021165.1    | Ca_kabuli_chr06 | 15244672                | GG                              | AA              | 1946862683               |
| SNP_P4_81338_15249566 | NC_021165.1    | Ca_kabuli_chr06 | 15249566                | AA                              | TT              | 1946862685               |
| SNP_P4_81339_15257652 | NC_021165.1    | Ca_kabuli_chr06 | 15257652                | AA                              | GG              | 1946862687               |
| SNP_P4_81340_15260175 | NC_021165.1    | Ca_kabuli_chr06 | 15260175                | TT                              | CC              | 1946862689               |
| SNP_P4_81341_15275926 | NC_021165.1    | Ca_kabuli_chr06 | 15275926                | CC                              | GG              | 1946862691               |
| SNP_P4_81343_15277709 | NC_021165.1    | Ca_kabuli_chr06 | 15277709                | AA                              | CC              | 1946862693               |
| SNP_P4_81344_15286803 | NC_021165.1    | Ca_kabuli_chr06 | 15286803                | CC                              | AA              | 1946862695               |
| SNP_P4_81345_15354006 | NC_021165.1    | Ca_kabuli_chr06 | 15354006                | AA                              | CC              | 1946862697               |
| SNP_P4_81346_15375965 | NC_021165.1    | Ca_kabuli_chr06 | 15375965                | CC                              | TT              | 1946862699               |
| SNP_P4_81347_15390816 | NC_021165.1    | Ca_kabuli_chr06 | 15390816                | AA                              | GG              | 1946862701               |
| SNP_P4_81349_15415543 | NC_021165.1    | Ca_kabuli_chr06 | 15415543                | CC                              | TT              | 1946862703               |
| SNP_P4_81350_15417706 | NC_021165.1    | Ca_kabuli_chr06 | 15417706                | TT                              | GG              | 1946862705               |
| SNP_P4_81351_15425830 | NC_021165.1    | Ca_kabuli_chr06 | 15425830                | AA                              | CC              | 1946862707               |
| SNP_P4_81353_15453028 | NC_021165.1    | Ca_kabuli_chr06 | 15453028                | AA                              | GG              | 1946862709               |
| SNP_P4_81355_15495023 | NC_021165.1    | Ca_kabuli_chr06 | 15495023                | AA                              | GG              | 1946862711               |
| SNP_P4_81356_15495139 | NC_021165.1    | Ca_kabuli_chr06 | 15495139                | AA                              | GG              | 1946862713               |
| SNP_P4_81357_15495146 | NC_021165.1    | Ca_kabuli_chr06 | 15495146                | GG                              | AA              | 1946862715               |
| SNP_P4_81358_15501561 | NC_021165.1    | Ca_kabuli_chr06 | 15501561                | AA                              | GG              | 1946862717               |
| SNP_P4_81359_15505188 | NC_021165.1    | Ca_kabuli_chr06 | 15505188                | TT                              | CC              | 1946862719               |
| SNP_P4_81360_15508755 | NC_021165.1    | Ca_kabuli_chr06 | 15508755                | AA                              | GG              | 1946862721               |
| SNP_P4_81361_15508758 | NC_021165.1    | Ca_kabuli_chr06 | 15508758                | AA                              | TT              | 1946862723               |
| SNP_P4_81364_15528993 | NC_021165.1    | Ca_kabuli_chr06 | 15528993                | CC                              | TT              | 1946862725               |
| SNP_P4_81365_15554654 | NC_021165.1    | Ca_kabuli_chr06 | 15554654                | CC                              | TT              | 1946862727               |
| SNP_P4_81366_15555549 | NC_021165.1    | Ca_kabuli_chr06 | 15555549                | GG                              | AA              | 1946862729               |
| SNP_P4_81367_15555553 | NC_021165.1    | Ca_kabuli_chr06 | 15555553                | TT                              | CC              | 1946862731               |
| SNP_P4_81368_15555582 | NC_021165.1    | Ca_kabuli_chr06 | 15555582                | TT                              | AA              | 1946862733               |
| SNP_P4_81370_15555869 | NC_021165.1    | Ca_kabuli_chr06 | 15555869                | AA                              | GG              | 1946862735               |
| SNP_P4_81371_15559111 | NC_021165.1    | Ca_kabuli_chr06 | 15559111                | AA                              | GG              | 1946862737               |
| SNP_P4_81374_15559178 | NC_021165.1    | Ca_kabuli_chr06 | 15559178                | CC                              | TT              | 1946862739               |
| SNP_P4_81375_15559597 | NC_021165.1    | Ca_kabuli_chr06 | 15559597                | AA                              | GG              | 1946862741               |
| SNP_P4_81376_15562545 | NC_021165.1    | Ca_kabuli_chr06 | 15562545                | TT                              | AA              | 1946862743               |
| SNP_P4_81377_15562582 | NC_021165.1    | Ca_kabuli_chr06 | 15562582                | TT                              | CC              | 1946862745               |
| SNP_P4_81378_15562631 | NC_021165.1    | Ca_kabuli_chr06 | 15562631                | GG                              | AA              | 1946862747               |

| SNPs IDs              | Chromosome IDs | Chromosomes     | Physical positions (bp) | CDC Frontier (Reference genome) | (ILWC46 & LPNB) | NCBI SNPdb Accession IDs |
|-----------------------|----------------|-----------------|-------------------------|---------------------------------|-----------------|--------------------------|
| SNP_P4_81379_15562660 | NC_021165.1    | Ca_kabuli_chr06 | 15562660                | AA                              | GG              | 1946862749               |
| SNP_P4_81380_15562679 | NC_021165.1    | Ca_kabuli_chr06 | 15562679                | GG                              | AA              | 1946862751               |
| SNP_P4_81381_15562687 | NC_021165.1    | Ca_kabuli_chr06 | 15562687                | GG                              | TT              | 1946862753               |
| SNP_P4_81382_15564181 | NC_021165.1    | Ca_kabuli_chr06 | 15564181                | AA                              | GG              | 1946862755               |
| SNP_P4_81383_15564356 | NC_021165.1    | Ca_kabuli_chr06 | 15564356                | AA                              | CC              | 1946862757               |
| SNP_P4_81384_15564407 | NC_021165.1    | Ca_kabuli_chr06 | 15564407                | CC                              | TT              | 1946862759               |
| SNP_P4_81385_15564424 | NC_021165.1    | Ca_kabuli_chr06 | 15564424                | AA                              | GG              | 1946862761               |
| SNP_P4_81386_15564439 | NC_021165.1    | Ca_kabuli_chr06 | 15564439                | AA                              | GG              | 1946862763               |
| SNP_P4_81387_15564494 | NC_021165.1    | Ca_kabuli_chr06 | 15564494                | CC                              | AA              | 1946862765               |
| SNP_P4_81388_15564537 | NC_021165.1    | Ca_kabuli_chr06 | 15564537                | TT                              | CC              | 1946862767               |
| SNP_P4_81389_15564552 | NC_021165.1    | Ca_kabuli_chr06 | 15564552                | GG                              | TT              | 1946862769               |
| SNP_P4_81390_15564557 | NC_021165.1    | Ca_kabuli_chr06 | 15564557                | AA                              | TT              | 1946862771               |
| SNP_P4_81391_15564562 | NC_021165.1    | Ca_kabuli_chr06 | 15564562                | CC                              | TT              | 1946862773               |
| SNP_P4_81392_15564607 | NC_021165.1    | Ca_kabuli_chr06 | 15564607                | TT                              | CC              | 1946862775               |
| SNP_P4_81393_15565467 | NC_021165.1    | Ca_kabuli_chr06 | 15565467                | GG                              | TT              | 1946862777               |
| SNP_P4_81394_15576998 | NC_021165.1    | Ca_kabuli_chr06 | 15576998                | CC                              | AA              | 1946862779               |
| SNP_P4_81395_15577376 | NC_021165.1    | Ca_kabuli_chr06 | 15577376                | CC                              | AA              | 1946862781               |
| SNP_P4_81396_15577400 | NC_021165.1    | Ca_kabuli_chr06 | 15577400                | GG                              | AA              | 1946862783               |
| SNP_P4_81397_15577423 | NC_021165.1    | Ca_kabuli_chr06 | 15577423                | AA                              | GG              | 1946862785               |
| SNP_P4_81398_15577434 | NC_021165.1    | Ca_kabuli_chr06 | 15577434                | CC                              | AA              | 1946862787               |
| SNP_P4_81399_15577439 | NC_021165.1    | Ca_kabuli_chr06 | 15577439                | GG                              | AA              | 1946862789               |
| SNP_P4_81400_15577789 | NC_021165.1    | Ca_kabuli_chr06 | 15577789                | AA                              | GG              | 1946862791               |
| SNP_P4_81401_15579902 | NC_021165.1    | Ca_kabuli_chr06 | 15579902                | TT                              | CC              | 1946862793               |
| SNP_P4_81402_15579949 | NC_021165.1    | Ca_kabuli_chr06 | 15579949                | TT                              | AA              | 1946862795               |
| SNP_P4_81403_15579950 | NC_021165.1    | Ca_kabuli_chr06 | 15579950                | AA                              | GG              | 1946862797               |
| SNP_P4_81404_15579951 | NC_021165.1    | Ca_kabuli_chr06 | 15579951                | CC                              | TT              | 1946862799               |
| SNP_P4_81405_15579985 | NC_021165.1    | Ca_kabuli_chr06 | 15579985                | GG                              | TT              | 1946862801               |
| SNP_P4_81406_15579988 | NC_021165.1    | Ca_kabuli_chr06 | 15579988                | TT                              | CC              | 1946862803               |
| SNP_P4_81407_15587204 | NC_021165.1    | Ca_kabuli_chr06 | 15587204                | CC                              | TT              | 1946862805               |
| SNP_P4_81409_15597921 | NC_021165.1    | Ca_kabuli_chr06 | 15597921                | GG                              | AA              | 1946862807               |
| SNP_P4_81410_15597960 | NC_021165.1    | Ca_kabuli_chr06 | 15597960                | TT                              | AA              | 1946862809               |
| SNP_P4_81412_15612607 | NC_021165.1    | Ca_kabuli_chr06 | 15612607                | CC                              | GG              | 1946862811               |
| SNP_P4_81413_15612666 | NC_021165.1    | Ca_kabuli_chr06 | 15612666                | AA                              | CC              | 1946862813               |
| SNP_P4_81414_15612690 | NC_021165.1    | Ca_kabuli_chr06 | 15612690                | AA                              | GG              | 1946862815               |
| SNP_P4_81415_15612757 | NC_021165.1    | Ca_kabuli_chr06 | 15612757                | TT                              | CC              | 1946862817               |
| SNP_P4_81416_15612920 | NC_021165.1    | Ca_kabuli_chr06 | 15612920                | GG                              | AA              | 1946862819               |
| SNP_P4_81417_15613045 | NC_021165.1    | Ca_kabuli_chr06 | 15613045                | AA                              | CC              | 1946862821               |
| SNP_P4_81418_15616037 | NC_021165.1    | Ca_kabuli_chr06 | 15616037                | CC                              | AA              | 1946862823               |
| SNP_P4_81419_15629498 | NC_021165.1    | Ca_kabuli_chr06 | 15629498                | AA                              | GG              | 1946862825               |
| SNP_P4_81420_15638649 | NC_021165.1    | Ca_kabuli_chr06 | 15638649                | TT                              | AA              | 1946862827               |
| SNP_P4_81421_15656888 | NC_021165.1    | Ca_kabuli_chr06 | 15656888                | TT                              | CC              | 1946862829               |
| SNP_P4_81422_15656908 | NC_021165.1    | Ca_kabuli_chr06 | 15656908                | AA                              | TT              | 1946862831               |

| SNPs IDs              | Chromosome IDs | Chromosomes     | Physical positions (bp) | CDC Frontier (Reference genome) | (ILWC46 & LPNB) | NCBI SNPdb Accession IDs |
|-----------------------|----------------|-----------------|-------------------------|---------------------------------|-----------------|--------------------------|
| SNP_P4_81423_15657231 | NC_021165.1    | Ca_kabuli_chr06 | 15657231                | CC                              | TT              | 1946862833               |
| SNP_P4_81424_15657235 | NC_021165.1    | Ca_kabuli_chr06 | 15657235                | AA                              | GG              | 1946862835               |
| SNP_P4_81425_15657250 | NC_021165.1    | Ca_kabuli_chr06 | 15657250                | TT                              | AA              | 1946862838               |
| SNP_P4_81426_15657290 | NC_021165.1    | Ca_kabuli_chr06 | 15657290                | AA                              | GG              | 1946862840               |
| SNP_P4_81427_15659826 | NC_021165.1    | Ca_kabuli_chr06 | 15659826                | AA                              | GG              | 1946862842               |
| SNP_P4_81428_15680659 | NC_021165.1    | Ca_kabuli_chr06 | 15680659                | AA                              | GG              | 1946862844               |
| SNP_P4_81429_15680992 | NC_021165.1    | Ca_kabuli_chr06 | 15680992                | AA                              | CC              | 1946862846               |
| SNP_P4_81430_15681156 | NC_021165.1    | Ca_kabuli_chr06 | 15681156                | GG                              | AA              | 1946862848               |
| SNP_P4_81431_15715991 | NC_021165.1    | Ca_kabuli_chr06 | 15715991                | GG                              | AA              | 1946862850               |
| SNP_P4_81432_15726791 | NC_021165.1    | Ca_kabuli_chr06 | 15726791                | GG                              | AA              | 1946862852               |
| SNP_P4_81433_15726978 | NC_021165.1    | Ca_kabuli_chr06 | 15726978                | GG                              | AA              | 1946862854               |
| SNP_P4_81434_15727060 | NC_021165.1    | Ca_kabuli_chr06 | 15727060                | CC                              | AA              | 1946862856               |
| SNP_P4_81436_15727213 | NC_021165.1    | Ca_kabuli_chr06 | 15727213                | AA                              | GG              | 1946862858               |
| SNP_P4_81437_15727340 | NC_021165.1    | Ca_kabuli_chr06 | 15727340                | TT                              | GG              | 1946862860               |
| SNP_P4_81438_15727466 | NC_021165.1    | Ca_kabuli_chr06 | 15727466                | GG                              | TT              | 1946862862               |
| SNP_P4_81440_15727591 | NC_021165.1    | Ca_kabuli_chr06 | 15727591                | TT                              | CC              | 1946862864               |
| SNP_P4_81441_15727635 | NC_021165.1    | Ca_kabuli_chr06 | 15727635                | GG                              | CC              | 1946862866               |
| SNP_P4_81442_15727708 | NC_021165.1    | Ca_kabuli_chr06 | 15727708                | CC                              | TT              | 1946862868               |
| SNP_P4_81443_15727735 | NC_021165.1    | Ca_kabuli_chr06 | 15727735                | CC                              | AA              | 1946862870               |
| SNP_P4_81445_15729637 | NC_021165.1    | Ca_kabuli_chr06 | 15729637                | TT                              | CC              | 1946862872               |
| SNP_P4_81446_15730611 | NC_021165.1    | Ca_kabuli_chr06 | 15730611                | TT                              | AA              | 1946862874               |
| SNP_P4_81448_15730726 | NC_021165.1    | Ca_kabuli_chr06 | 15730726                | GG                              | CC              | 1946862876               |
| SNP_P4_81449_15730751 | NC_021165.1    | Ca_kabuli_chr06 | 15730751                | TT                              | GG              | 1946862878               |
| SNP_P4_81450_15730794 | NC_021165.1    | Ca_kabuli_chr06 | 15730794                | CC                              | TT              | 1946862880               |
| SNP_P4_81452_15730858 | NC_021165.1    | Ca_kabuli_chr06 | 15730858                | AA                              | GG              | 1946862882               |
| SNP_P4_81453_15730874 | NC_021165.1    | Ca_kabuli_chr06 | 15730874                | CC                              | AA              | 1946862884               |
| SNP_P4_81454_15730935 | NC_021165.1    | Ca_kabuli_chr06 | 15730935                | AA                              | TT              | 1946862886               |
| SNP_P4_81455_15730980 | NC_021165.1    | Ca_kabuli_chr06 | 15730980                | AA                              | GG              | 1946862888               |
| SNP_P4_81456_15731043 | NC_021165.1    | Ca_kabuli_chr06 | 15731043                | TT                              | AA              | 1946862890               |
| SNP_P4_81458_15731068 | NC_021165.1    | Ca_kabuli_chr06 | 15731068                | AA                              | TT              | 1946862892               |
| SNP_P4_81459_15731077 | NC_021165.1    | Ca_kabuli_chr06 | 15731077                | CC                              | GG              | 1946862894               |
| SNP_P4_81460_15731112 | NC_021165.1    | Ca_kabuli_chr06 | 15731112                | CC                              | TT              | 1946862896               |
| SNP_P4_81461_15731119 | NC_021165.1    | Ca_kabuli_chr06 | 15731119                | CC                              | TT              | 1946862898               |
| SNP_P4_81462_15731304 | NC_021165.1    | Ca_kabuli_chr06 | 15731304                | GG                              | TT              | 1946862900               |
| SNP_P4_81463_15731305 | NC_021165.1    | Ca_kabuli_chr06 | 15731305                | GG                              | AA              | 1946862902               |
| SNP_P4_81464_15731332 | NC_021165.1    | Ca_kabuli_chr06 | 15731332                | CC                              | TT              | 1946862904               |
| SNP_P4_81465_15731348 | NC_021165.1    | Ca_kabuli_chr06 | 15731348                | GG                              | TT              | 1946862906               |
| SNP_P4_81466_15731354 | NC_021165.1    | Ca_kabuli_chr06 | 15731354                | CC                              | TT              | 1946862908               |
| SNP_P4_81467_15731381 | NC_021165.1    | Ca_kabuli_chr06 | 15731381                | TT                              | CC              | 1946862910               |
| SNP_P4_81468_15731385 | NC_021165.1    | Ca_kabuli_chr06 | 15731385                | CC                              | TT              | 1946862912               |
| SNP_P4_81469_15733526 | NC_021165.1    | Ca_kabuli_chr06 | 15733526                | CC                              | AA              | 1946862914               |
| SNP_P4_81470_15733541 | NC_021165.1    | Ca_kabuli_chr06 | 15733541                | GG                              | AA              | 1946862916               |

| SNPs IDs              | Chromosome IDs | Chromosomes     | Physical positions (bp) | CDC Frontier (Reference genome) | (ILWC46 & LPNB) | NCBI SNPdb Accession IDs |
|-----------------------|----------------|-----------------|-------------------------|---------------------------------|-----------------|--------------------------|
| SNP_P4_81471_15733545 | NC_021165.1    | Ca_kabuli_chr06 | 15733545                | TT                              | CC              | 1946862918               |
| SNP_P4_81472_15734639 | NC_021165.1    | Ca_kabuli_chr06 | 15734639                | AA                              | CC              | 1946862920               |
| SNP_P4_81473_15737804 | NC_021165.1    | Ca_kabuli_chr06 | 15737804                | CC                              | TT              | 1946862922               |
| SNP_P4_81474_15784012 | NC_021165.1    | Ca_kabuli_chr06 | 15784012                | GG                              | TT              | 1946862924               |
| SNP_P4_81476_15819390 | NC_021165.1    | Ca_kabuli_chr06 | 15819390                | CC                              | TT              | 1946862926               |
| SNP_P4_81477_15826128 | NC_021165.1    | Ca_kabuli_chr06 | 15826128                | CC                              | AA              | 1946862928               |
| SNP_P4_81478_15826129 | NC_021165.1    | Ca_kabuli_chr06 | 15826129                | TT                              | GG              | 1946862930               |
| SNP_P4_81479_15835854 | NC_021165.1    | Ca_kabuli_chr06 | 15835854                | TT                              | GG              | 1946862932               |
| SNP_P4_81480_15841256 | NC_021165.1    | Ca_kabuli_chr06 | 15841256                | GG                              | AA              | 1946862934               |
| SNP_P4_81481_15867441 | NC_021165.1    | Ca_kabuli_chr06 | 15867441                | TT                              | CC              | 1946862936               |
| SNP_P4_81484_15924552 | NC_021165.1    | Ca_kabuli_chr06 | 15924552                | GG                              | TT              | 1946862938               |
| SNP_P4_81485_15940280 | NC_021165.1    | Ca_kabuli_chr06 | 15940280                | GG                              | AA              | 1946862940               |
| SNP_P4_81486_15944754 | NC_021165.1    | Ca_kabuli_chr06 | 15944754                | GG                              | AA              | 1946862942               |
| SNP_P4_81488_15959860 | NC_021165.1    | Ca_kabuli_chr06 | 15959860                | TT                              | AA              | 1946862944               |
| SNP_P4_81490_15981667 | NC_021165.1    | Ca_kabuli_chr06 | 15981667                | TT                              | AA              | 1946862946               |
| SNP_P4_81491_15982024 | NC_021165.1    | Ca_kabuli_chr06 | 15982024                | AA                              | TT              | 1946862948               |
| SNP_P4_81492_15982085 | NC_021165.1    | Ca_kabuli_chr06 | 15982085                | GG                              | CC              | 1946862950               |
| SNP_P4_81493_15982347 | NC_021165.1    | Ca_kabuli_chr06 | 15982347                | GG                              | TT              | 1946862952               |
| SNP_P4_81494_15982536 | NC_021165.1    | Ca_kabuli_chr06 | 15982536                | AA                              | TT              | 1946862954               |
| SNP_P4_81495_15982754 | NC_021165.1    | Ca_kabuli_chr06 | 15982754                | AA                              | GG              | 1946862956               |
| SNP_P4_81496_15982761 | NC_021165.1    | Ca_kabuli_chr06 | 15982761                | CC                              | TT              | 1946862958               |
| SNP_P4_81497_15983221 | NC_021165.1    | Ca_kabuli_chr06 | 15983221                | TT                              | CC              | 1946862960               |
| SNP_P4_81498_15990710 | NC_021165.1    | Ca_kabuli_chr06 | 15990710                | CC                              | TT              | 1946862962               |
| SNP_P4_81499_15990801 | NC_021165.1    | Ca_kabuli_chr06 | 15990801                | TT                              | CC              | 1946862965               |
| SNP_P4_81500_15990804 | NC_021165.1    | Ca_kabuli_chr06 | 15990804                | CC                              | TT              | 1946862967               |
| SNP_P4_81501_15990884 | NC_021165.1    | Ca_kabuli_chr06 | 15990884                | AA                              | TT              | 1946862969               |
| SNP_P4_81502_15990958 | NC_021165.1    | Ca_kabuli_chr06 | 15990958                | TT                              | CC              | 1946862971               |
| SNP_P4_81503_15991143 | NC_021165.1    | Ca_kabuli_chr06 | 15991143                | TT                              | GG              | 1946862973               |
| SNP_P4_81504_15991147 | NC_021165.1    | Ca_kabuli_chr06 | 15991147                | AA                              | GG              | 1946862975               |
| SNP_P4_81505_15991154 | NC_021165.1    | Ca_kabuli_chr06 | 15991154                | GG                              | CC              | 1946862977               |
| SNP_P4_81506_15991177 | NC_021165.1    | Ca_kabuli_chr06 | 15991177                | CC                              | TT              | 1946862979               |
| SNP_P4_81507_15991239 | NC_021165.1    | Ca_kabuli_chr06 | 15991239                | TT                              | CC              | 1946862981               |
| SNP_P4_81508_15991354 | NC_021165.1    | Ca_kabuli_chr06 | 15991354                | GG                              | CC              | 1946862983               |
| SNP_P4_81509_15991357 | NC_021165.1    | Ca_kabuli_chr06 | 15991357                | TT                              | GG              | 1946862985               |
| SNP_P4_81510_15991762 | NC_021165.1    | Ca_kabuli_chr06 | 15991762                | TT                              | GG              | 1946862987               |
| SNP_P4_81511_15991775 | NC_021165.1    | Ca_kabuli_chr06 | 15991775                | GG                              | AA              | 1946862989               |
| SNP_P4_81512_15993095 | NC_021165.1    | Ca_kabuli_chr06 | 15993095                | TT                              | GG              | 1946862991               |
| SNP_P4_81513_15993358 | NC_021165.1    | Ca_kabuli_chr06 | 15993358                | TT                              | CC              | 1946862993               |
| SNP_P4_81514_15993473 | NC_021165.1    | Ca_kabuli_chr06 | 15993473                | CC                              | AA              | 1946862995               |
| SNP_P4_81515_15993526 | NC_021165.1    | Ca_kabuli_chr06 | 15993526                | GG                              | AA              | 1946862997               |
| SNP_P4_81516_15993746 | NC_021165.1    | Ca_kabuli_chr06 | 15993746                | GG                              | CC              | 1946862999               |
| SNP_P4_81518_15999992 | NC_021165.1    | Ca_kabuli_chr06 | 15999992                | CC                              | AA              | 1946863001               |

| SNPs IDs              | Chromosome IDs | Chromosomes     | Physical positions (bp) | CDC Frontier (Reference genome) | (ILWC46 & LPNB) | NCBI SNPdb Accession IDs |
|-----------------------|----------------|-----------------|-------------------------|---------------------------------|-----------------|--------------------------|
| SNP_P4_81519_16000189 | NC_021165.1    | Ca_kabuli_chr06 | 16000189                | TT                              | GG              | 1946863003               |
| SNP_P4_81520_16000222 | NC_021165.1    | Ca_kabuli_chr06 | 16000222                | TT                              | CC              | 1946863005               |
| SNP_P4_81521_16000256 | NC_021165.1    | Ca_kabuli_chr06 | 16000256                | TT                              | AA              | 1946863007               |
| SNP_P4_81522_16000258 | NC_021165.1    | Ca_kabuli_chr06 | 16000258                | GG                              | TT              | 1946863009               |
| SNP_P4_81523_16010494 | NC_021165.1    | Ca_kabuli_chr06 | 16010494                | TT                              | AA              | 1946863011               |
| SNP_P4_81524_16010535 | NC_021165.1    | Ca_kabuli_chr06 | 16010535                | AA                              | TT              | 1946863013               |
| SNP_P4_81525_16010596 | NC_021165.1    | Ca_kabuli_chr06 | 16010596                | TT                              | CC              | 1946863015               |
| SNP_P4_81526_16010641 | NC_021165.1    | Ca_kabuli_chr06 | 16010641                | GG                              | TT              | 1946863017               |
| SNP_P4_81527_16010649 | NC_021165.1    | Ca_kabuli_chr06 | 16010649                | TT                              | AA              | 1946863019               |
| SNP_P4_81528_16010743 | NC_021165.1    | Ca_kabuli_chr06 | 16010743                | AA                              | GG              | 1946863021               |
| SNP_P4_81529_16010796 | NC_021165.1    | Ca_kabuli_chr06 | 16010796                | AA                              | GG              | 1946863023               |
| SNP_P4_81530_16010801 | NC_021165.1    | Ca_kabuli_chr06 | 16010801                | GG                              | CC              | 1946863025               |
| SNP_P4_81531_16010859 | NC_021165.1    | Ca_kabuli_chr06 | 16010859                | CC                              | TT              | 1946863026               |
| SNP_P4_81532_16010912 | NC_021165.1    | Ca_kabuli_chr06 | 16010912                | TT                              | CC              | 1946863027               |
| SNP_P4_81533_16010924 | NC_021165.1    | Ca_kabuli_chr06 | 16010924                | TT                              | CC              | 1946863028               |
| SNP_P4_81534_16011070 | NC_021165.1    | Ca_kabuli_chr06 | 16011070                | TT                              | AA              | 1946863029               |
| SNP_P4_81536_16013267 | NC_021165.1    | Ca_kabuli_chr06 | 16013267                | AA                              | GG              | 1946863030               |
| SNP_P4_81537_16013327 | NC_021165.1    | Ca_kabuli_chr06 | 16013327                | AA                              | CC              | 1946863031               |
| SNP_P4_81538_16013527 | NC_021165.1    | Ca_kabuli_chr06 | 16013527                | TT                              | GG              | 1946863032               |
| SNP_P4_81539_16013656 | NC_021165.1    | Ca_kabuli_chr06 | 16013656                | AA                              | GG              | 1946863033               |
| SNP_P4_81540_16013733 | NC_021165.1    | Ca_kabuli_chr06 | 16013733                | AA                              | GG              | 1946863034               |
| SNP_P4_81541_16013734 | NC_021165.1    | Ca_kabuli_chr06 | 16013734                | AA                              | GG              | 1946863035               |
| SNP_P4_81542_16013742 | NC_021165.1    | Ca_kabuli_chr06 | 16013742                | GG                              | AA              | 1946863036               |
| SNP_P4_81543_16018067 | NC_021165.1    | Ca_kabuli_chr06 | 16018067                | CC                              | TT              | 1946863037               |
| SNP_P4_81544_16018103 | NC_021165.1    | Ca_kabuli_chr06 | 16018103                | GG                              | AA              | 1946863038               |
| SNP_P4_81545_16018267 | NC_021165.1    | Ca_kabuli_chr06 | 16018267                | GG                              | AA              | 1946863039               |
| SNP_P4_81546_16018421 | NC_021165.1    | Ca_kabuli_chr06 | 16018421                | CC                              | GG              | 1946863040               |
| SNP_P4_81547_16018794 | NC_021165.1    | Ca_kabuli_chr06 | 16018794                | TT                              | CC              | 1946863041               |
| SNP_P4_81548_16019074 | NC_021165.1    | Ca_kabuli_chr06 | 16019074                | TT                              | CC              | 1946863042               |
| SNP_P4_81549_16019119 | NC_021165.1    | Ca_kabuli_chr06 | 16019119                | TT                              | CC              | 1946863043               |
| SNP_P4_81550_16019462 | NC_021165.1    | Ca_kabuli_chr06 | 16019462                | CC                              | TT              | 1946863044               |
| SNP_P4_81551_16019517 | NC_021165.1    | Ca_kabuli_chr06 | 16019517                | TT                              | GG              | 1946863045               |
| SNP_P4_81552_16019685 | NC_021165.1    | Ca_kabuli_chr06 | 16019685                | AA                              | GG              | 1946863046               |
| SNP_P4_81553_16019735 | NC_021165.1    | Ca_kabuli_chr06 | 16019735                | TT                              | CC              | 1946863047               |
| SNP_P4_81554_16019934 | NC_021165.1    | Ca_kabuli_chr06 | 16019934                | CC                              | TT              | 1946863048               |
| SNP_P4_81555_16020114 | NC_021165.1    | Ca_kabuli_chr06 | 16020114                | GG                              | TT              | 1946863049               |
| SNP_P4_81556_16020243 | NC_021165.1    | Ca_kabuli_chr06 | 16020243                | AA                              | GG              | 1946863051               |
| SNP_P4_81557_16020535 | NC_021165.1    | Ca_kabuli_chr06 | 16020535                | GG                              | AA              | 1946863053               |
| SNP_P4_81558_16027380 | NC_021165.1    | Ca_kabuli_chr06 | 16027380                | AA                              | GG              | 1946863055               |
| SNP_P4_81559_16027437 | NC_021165.1    | Ca_kabuli_chr06 | 16027437                | TT                              | CC              | 1946863057               |
| SNP_P4_81560_16063277 | NC_021165.1    | Ca_kabuli_chr06 | 16063277                | CC                              | TT              | 1946863059               |
| SNP_P4_81561_16063301 | NC_021165.1    | Ca_kabuli_chr06 | 16063301                | AA                              | CC              | 1946863061               |

| SNPs IDs              | Chromosome IDs | Chromosomes     | Physical positions (bp) | CDC Frontier (Reference genome) | (ILWC46 & LPNB) | NCBI SNPdb Accession IDs |
|-----------------------|----------------|-----------------|-------------------------|---------------------------------|-----------------|--------------------------|
| SNP_P4_81562_16063323 | NC_021165.1    | Ca_kabuli_chr06 | 16063323                | TT                              | GG              | 1946863063               |
| SNP_P4_81563_16063353 | NC_021165.1    | Ca_kabuli_chr06 | 16063353                | CC                              | AA              | 1946863065               |
| SNP_P4_81565_16063372 | NC_021165.1    | Ca_kabuli_chr06 | 16063372                | GG                              | AA              | 1946863068               |
| SNP_P4_81566_16075354 | NC_021165.1    | Ca_kabuli_chr06 | 16075354                | CC                              | AA              | 1946863070               |
| SNP_P4_81567_16079297 | NC_021165.1    | Ca_kabuli_chr06 | 16079297                | CC                              | AA              | 1946863072               |
| SNP_P4_81568_16087492 | NC_021165.1    | Ca_kabuli_chr06 | 16087492                | CC                              | AA              | 1946863074               |
| SNP_P4_81570_16098354 | NC_021165.1    | Ca_kabuli_chr06 | 16098354                | TT                              | CC              | 1946863076               |
| SNP_P4_81572_16137350 | NC_021165.1    | Ca_kabuli_chr06 | 16137350                | GG                              | AA              | 1946863078               |
| SNP_P4_81573_16143744 | NC_021165.1    | Ca_kabuli_chr06 | 16143744                | CC                              | TT              | 1946863080               |
| SNP_P4_81574_16166811 | NC_021165.1    | Ca_kabuli_chr06 | 16166811                | GG                              | AA              | 1946863082               |
| SNP_P4_81575_16181607 | NC_021165.1    | Ca_kabuli_chr06 | 16181607                | TT                              | CC              | 1946863084               |
| SNP_P4_81577_16222778 | NC_021165.1    | Ca_kabuli_chr06 | 16222778                | GG                              | AA              | 1946863086               |
| SNP_P4_81578_16246571 | NC_021165.1    | Ca_kabuli_chr06 | 16246571                | AA                              | GG              | 1946863088               |
| SNP_P4_81579_16246865 | NC_021165.1    | Ca_kabuli_chr06 | 16246865                | TT                              | CC              | 1946863090               |
| SNP_P4_81580_16246885 | NC_021165.1    | Ca_kabuli_chr06 | 16246885                | AA                              | TT              | 1946863092               |
| SNP_P4_81581_16246926 | NC_021165.1    | Ca_kabuli_chr06 | 16246926                | TT                              | CC              | 1946863094               |
| SNP_P4_81583_16259832 | NC_021165.1    | Ca_kabuli_chr06 | 16259832                | CC                              | TT              | 1946863096               |
| SNP_P4_81584_16261675 | NC_021165.1    | Ca_kabuli_chr06 | 16261675                | TT                              | GG              | 1946863098               |
| SNP_P4_81585_16271150 | NC_021165.1    | Ca_kabuli_chr06 | 16271150                | AA                              | GG              | 1946863100               |
| SNP_P4_81587_16341008 | NC_021165.1    | Ca_kabuli_chr06 | 16341008                | GG                              | AA              | 1946863102               |
| SNP_P4_81590_16409154 | NC_021165.1    | Ca_kabuli_chr06 | 16409154                | TT                              | AA              | 1946863104               |
| SNP_P4_81591_16414994 | NC_021165.1    | Ca_kabuli_chr06 | 16414994                | GG                              | AA              | 1946863106               |
| SNP_P4_81592_16425951 | NC_021165.1    | Ca_kabuli_chr06 | 16425951                | TT                              | AA              | 1946863108               |
| SNP_P4_81593_16425952 | NC_021165.1    | Ca_kabuli_chr06 | 16425952                | CC                              | TT              | 1946863110               |
| SNP_P4_81594_16425988 | NC_021165.1    | Ca_kabuli_chr06 | 16425988                | CC                              | TT              | 1946863112               |
| SNP_P4_81595_16425998 | NC_021165.1    | Ca_kabuli_chr06 | 16425998                | CC                              | AA              | 1946863114               |
| SNP_P4_81596_16426087 | NC_021165.1    | Ca_kabuli_chr06 | 16426087                | GG                              | AA              | 1946863116               |
| SNP_P4_81597_16426245 | NC_021165.1    | Ca_kabuli_chr06 | 16426245                | AA                              | CC              | 1946863118               |
| SNP_P4_81598_16426255 | NC_021165.1    | Ca_kabuli_chr06 | 16426255                | CC                              | AA              | 1946863120               |
| SNP_P4_81599_16426262 | NC_021165.1    | Ca_kabuli_chr06 | 16426262                | GG                              | AA              | 1946863122               |
| SNP_P4_81600_16426282 | NC_021165.1    | Ca_kabuli_chr06 | 16426282                | AA                              | GG              | 1946863124               |
| SNP_P4_81601_16426350 | NC_021165.1    | Ca_kabuli_chr06 | 16426350                | AA                              | GG              | 1946863126               |
| SNP_P4_81602_16428087 | NC_021165.1    | Ca_kabuli_chr06 | 16428087                | CC                              | TT              | 1946863128               |
| SNP_P4_81603_16428132 | NC_021165.1    | Ca_kabuli_chr06 | 16428132                | AA                              | GG              | 1946863131               |
| SNP_P4_81604_16428134 | NC_021165.1    | Ca_kabuli_chr06 | 16428134                | AA                              | CC              | 1946863133               |
| SNP_P4_81605_16428164 | NC_021165.1    | Ca_kabuli_chr06 | 16428164                | AA                              | GG              | 1946863135               |
| SNP_P4_81606_16428202 | NC_021165.1    | Ca_kabuli_chr06 | 16428202                | TT                              | CC              | 1946863137               |
| SNP_P4_81607_16428260 | NC_021165.1    | Ca_kabuli_chr06 | 16428260                | CC                              | TT              | 1946863139               |
| SNP_P4_81608_16428412 | NC_021165.1    | Ca_kabuli_chr06 | 16428412                | TT                              | CC              | 1946863141               |
| SNP_P4_81609_16428450 | NC_021165.1    | Ca_kabuli_chr06 | 16428450                | TT                              | CC              | 1946863143               |
| SNP_P4_81610_16428504 | NC_021165.1    | Ca_kabuli_chr06 | 16428504                | GG                              | AA              | 1946863145               |
| SNP_P4_81611_16428943 | NC_021165.1    | Ca_kabuli_chr06 | 16428943                | AA                              | GG              | 1946863147               |



| SNPs IDs              | Chromosome IDs | Chromosomes     | Physical positions (bp) | CDC Frontier (Reference genome) | (ILWC46 & LPNB) | NCBI SNPdb Accession IDs |
|-----------------------|----------------|-----------------|-------------------------|---------------------------------|-----------------|--------------------------|
| SNP_P4_81612_16442764 | NC_021165.1    | Ca_kabuli_chr06 | 16442764                | TT                              | AA              | 1946863149               |
| SNP_P4_81613_16442766 | NC_021165.1    | Ca_kabuli_chr06 | 16442766                | TT                              | CC              | 1946863151               |
| SNP_P4_81614_16473011 | NC_021165.1    | Ca_kabuli_chr06 | 16473011                | GG                              | AA              | 1946863153               |
| SNP_P4_81615_16473012 | NC_021165.1    | Ca_kabuli_chr06 | 16473012                | TT                              | GG              | 1946863155               |
| SNP_P4_81616_16475172 | NC_021165.1    | Ca_kabuli_chr06 | 16475172                | CC                              | GG              | 1946863156               |
| SNP_P4_81617_16475417 | NC_021165.1    | Ca_kabuli_chr06 | 16475417                | AA                              | GG              | 1946863158               |
| SNP_P4_81618_16476550 | NC_021165.1    | Ca_kabuli_chr06 | 16476550                | TT                              | CC              | 1946863160               |
| SNP_P4_81619_16478139 | NC_021165.1    | Ca_kabuli_chr06 | 16478139                | GG                              | TT              | 1946863162               |
| SNP_P4_81620_16478140 | NC_021165.1    | Ca_kabuli_chr06 | 16478140                | AA                              | TT              | 1946863164               |
| SNP_P4_81622_16528497 | NC_021165.1    | Ca_kabuli_chr06 | 16528497                | AA                              | TT              | 1946863166               |
| SNP_P4_81623_16528615 | NC_021165.1    | Ca_kabuli_chr06 | 16528615                | TT                              | AA              | 1946863168               |
| SNP_P4_81624_16528670 | NC_021165.1    | Ca_kabuli_chr06 | 16528670                | TT                              | AA              | 1946863170               |
| SNP_P4_81625_16529317 | NC_021165.1    | Ca_kabuli_chr06 | 16529317                | GG                              | TT              | 1946863172               |
| SNP_P4_81626_16533507 | NC_021165.1    | Ca_kabuli_chr06 | 16533507                | GG                              | CC              | 1946863174               |
| SNP_P4_81630_16600012 | NC_021165.1    | Ca_kabuli_chr06 | 16600012                | GG                              | AA              | 1946863176               |
| SNP_P4_81631_16600116 | NC_021165.1    | Ca_kabuli_chr06 | 16600116                | AA                              | CC              | 1946863178               |
| SNP_P4_81632_16600321 | NC_021165.1    | Ca_kabuli_chr06 | 16600321                | TT                              | CC              | 1946863180               |
| SNP_P4_81633_16603610 | NC_021165.1    | Ca_kabuli_chr06 | 16603610                | CC                              | TT              | 1946863182               |
| SNP_P4_81634_16603879 | NC_021165.1    | Ca_kabuli_chr06 | 16603879                | AA                              | TT              | 1946863184               |
| SNP_P4_81635_16612039 | NC_021165.1    | Ca_kabuli_chr06 | 16612039                | GG                              | AA              | 1946863186               |
| SNP_P4_81636_16617719 | NC_021165.1    | Ca_kabuli_chr06 | 16617719                | TT                              | CC              | 1946863188               |
| SNP_P4_81637_16617725 | NC_021165.1    | Ca_kabuli_chr06 | 16617725                | GG                              | AA              | 1946863190               |
| SNP_P4_81638_16617737 | NC_021165.1    | Ca_kabuli_chr06 | 16617737                | AA                              | CC              | 1946863192               |
| SNP_P4_81639_16617738 | NC_021165.1    | Ca_kabuli_chr06 | 16617738                | AA                              | TT              | 1946863194               |
| SNP_P4_81641_16660294 | NC_021165.1    | Ca_kabuli_chr06 | 16660294                | TT                              | CC              | 1946863196               |
| SNP_P4_81642_16686453 | NC_021165.1    | Ca_kabuli_chr06 | 16686453                | GG                              | AA              | 1946863198               |
| SNP_P4_81645_16712277 | NC_021165.1    | Ca_kabuli_chr06 | 16712277                | GG                              | AA              | 1946863200               |
| SNP_P4_81646_16718268 | NC_021165.1    | Ca_kabuli_chr06 | 16718268                | GG                              | AA              | 1946863202               |
| SNP_P4_81647_16740945 | NC_021165.1    | Ca_kabuli_chr06 | 16740945                | AA                              | TT              | 1946863204               |
| SNP_P4_81648_16760227 | NC_021165.1    | Ca_kabuli_chr06 | 16760227                | CC                              | TT              | 1946863206               |
| SNP_P4_81649_16762106 | NC_021165.1    | Ca_kabuli_chr06 | 16762106                | TT                              | GG              | 1946863208               |
| SNP_P4_81650_16762133 | NC_021165.1    | Ca_kabuli_chr06 | 16762133                | GG                              | AA              | 1946863210               |
| SNP_P4_81651_16762150 | NC_021165.1    | Ca_kabuli_chr06 | 16762150                | TT                              | GG              | 1946863212               |
| SNP_P4_81653_16792830 | NC_021165.1    | Ca_kabuli_chr06 | 16792830                | AA                              | GG              | 1946863214               |
| SNP_P4_81654_16805517 | NC_021165.1    | Ca_kabuli_chr06 | 16805517                | CC                              | AA              | 1946863216               |
| SNP_P4_81655_16806908 | NC_021165.1    | Ca_kabuli_chr06 | 16806908                | AA                              | TT              | 1946863218               |
| SNP_P4_81656_16821715 | NC_021165.1    | Ca_kabuli_chr06 | 16821715                | GG                              | TT              | 1946863220               |
| SNP_P4_81657_16822011 | NC_021165.1    | Ca_kabuli_chr06 | 16822011                | CC                              | TT              | 1946863222               |
| SNP_P4_81658_16822025 | NC_021165.1    | Ca_kabuli_chr06 | 16822025                | TT                              | AA              | 1946863224               |
| SNP_P4_81659_16822042 | NC_021165.1    | Ca_kabuli_chr06 | 16822042                | TT                              | CC              | 1946863226               |
| SNP_P4_81660_16822056 | NC_021165.1    | Ca_kabuli_chr06 | 16822056                | CC                              | TT              | 1946863228               |
| SNP_P4_81661_16822245 | NC_021165.1    | Ca_kabuli_chr06 | 16822245                | AA                              | GG              | 1946863230               |

| SNPs IDs              | Chromosome IDs | Chromosomes     | Physical positions (bp) | CDC Frontier (Reference genome) | (ILWC46 & LPNB) | NCBI SNPdb Accession IDs |
|-----------------------|----------------|-----------------|-------------------------|---------------------------------|-----------------|--------------------------|
| SNP_P4_81662_16822275 | NC_021165.1    | Ca_kabuli_chr06 | 16822275                | AA                              | GG              | 1946863232               |
| SNP_P4_81663_16822289 | NC_021165.1    | Ca_kabuli_chr06 | 16822289                | CC                              | TT              | 1946863234               |
| SNP_P4_81664_16822351 | NC_021165.1    | Ca_kabuli_chr06 | 16822351                | AA                              | GG              | 1946863236               |
| SNP_P4_81665_16822402 | NC_021165.1    | Ca_kabuli_chr06 | 16822402                | TT                              | CC              | 1946863238               |
| SNP_P4_81666_16822485 | NC_021165.1    | Ca_kabuli_chr06 | 16822485                | AA                              | GG              | 1946863240               |
| SNP_P4_81667_16825742 | NC_021165.1    | Ca_kabuli_chr06 | 16825742                | GG                              | AA              | 1946863242               |
| SNP_P4_81668_16827893 | NC_021165.1    | Ca_kabuli_chr06 | 16827893                | AA                              | GG              | 1946863244               |
| SNP_P4_81669_16827902 | NC_021165.1    | Ca_kabuli_chr06 | 16827902                | TT                              | CC              | 1946863247               |
| SNP_P4_81670_16828275 | NC_021165.1    | Ca_kabuli_chr06 | 16828275                | TT                              | CC              | 1946863249               |
| SNP_P4_81671_16833327 | NC_021165.1    | Ca_kabuli_chr06 | 16833327                | CC                              | TT              | 1946863252               |
| SNP_P4_81672_16853048 | NC_021165.1    | Ca_kabuli_chr06 | 16853048                | TT                              | CC              | 1946863254               |
| SNP_P4_81673_16867478 | NC_021165.1    | Ca_kabuli_chr06 | 16867478                | AA                              | GG              | 1946863256               |
| SNP_P4_81674_16868237 | NC_021165.1    | Ca_kabuli_chr06 | 16868237                | GG                              | AA              | 1946863258               |
| SNP_P4_81675_16877525 | NC_021165.1    | Ca_kabuli_chr06 | 16877525                | TT                              | CC              | 1946863260               |
| SNP_P4_81676_16878466 | NC_021165.1    | Ca_kabuli_chr06 | 16878466                | GG                              | AA              | 1946863262               |
| SNP_P4_81677_16881522 | NC_021165.1    | Ca_kabuli_chr06 | 16881522                | TT                              | GG              | 1946863264               |
| SNP_P4_81678_16904194 | NC_021165.1    | Ca_kabuli_chr06 | 16904194                | TT                              | CC              | 1946863266               |
| SNP_P4_81680_16917124 | NC_021165.1    | Ca_kabuli_chr06 | 16917124                | AA                              | CC              | 1946863268               |
| SNP_P4_81681_16920595 | NC_021165.1    | Ca_kabuli_chr06 | 16920595                | AA                              | TT              | 1946863270               |
| SNP_P4_81682_16931756 | NC_021165.1    | Ca_kabuli_chr06 | 16931756                | CC                              | AA              | 1946863272               |
| SNP_P4_81683_16942361 | NC_021165.1    | Ca_kabuli_chr06 | 16942361                | AA                              | TT              | 1946863274               |
| SNP_P4_81684_16942627 | NC_021165.1    | Ca_kabuli_chr06 | 16942627                | AA                              | GG              | 1946863276               |
| SNP_P4_81687_16962131 | NC_021165.1    | Ca_kabuli_chr06 | 16962131                | AA                              | GG              | 1946863278               |
| SNP_P4_81688_16962132 | NC_021165.1    | Ca_kabuli_chr06 | 16962132                | CC                              | AA              | 1946863280               |
| SNP_P4_81689_16962134 | NC_021165.1    | Ca_kabuli_chr06 | 16962134                | AA                              | GG              | 1946863282               |
| SNP_P4_81690_16983287 | NC_021165.1    | Ca_kabuli_chr06 | 16983287                | CC                              | TT              | 1946863284               |
| SNP_P4_81691_16983559 | NC_021165.1    | Ca_kabuli_chr06 | 16983559                | AA                              | GG              | 1946863286               |
| SNP_P4_81692_16983560 | NC_021165.1    | Ca_kabuli_chr06 | 16983560                | CC                              | AA              | 1946863288               |
| SNP_P4_81693_16983612 | NC_021165.1    | Ca_kabuli_chr06 | 16983612                | TT                              | AA              | 1946863290               |
| SNP_P4_81694_16987350 | NC_021165.1    | Ca_kabuli_chr06 | 16987350                | GG                              | AA              | 1946863292               |
| SNP_P4_81695_16991797 | NC_021165.1    | Ca_kabuli_chr06 | 16991797                | CC                              | TT              | 1946863294               |
| SNP_P4_81696_16994573 | NC_021165.1    | Ca_kabuli_chr06 | 16994573                | CC                              | TT              | 1946863296               |
| SNP_P4_81698_16995068 | NC_021165.1    | Ca_kabuli_chr06 | 16995068                | TT                              | CC              | 1946863298               |
| SNP_P4_81699_16995428 | NC_021165.1    | Ca_kabuli_chr06 | 16995428                | AA                              | GG              | 1946863300               |
| SNP_P4_81700_16995808 | NC_021165.1    | Ca_kabuli_chr06 | 16995808                | CC                              | TT              | 1946863302               |
| SNP_P4_81701_16996537 | NC_021165.1    | Ca_kabuli_chr06 | 16996537                | AA                              | GG              | 1946863304               |
| SNP_P4_81702_16998274 | NC_021165.1    | Ca_kabuli_chr06 | 16998274                | TT                              | CC              | 1946863306               |
| SNP_P4_81703_16998528 | NC_021165.1    | Ca_kabuli_chr06 | 16998528                | AA                              | GG              | 1946863308               |
| SNP_P4_81705_17012931 | NC_021165.1    | Ca_kabuli_chr06 | 17012931                | CC                              | TT              | 1946863310               |
| SNP_P4_81706_17014310 | NC_021165.1    | Ca_kabuli_chr06 | 17014310                | TT                              | AA              | 1946863312               |
| SNP_P4_81707_17018941 | NC_021165.1    | Ca_kabuli_chr06 | 17018941                | CC                              | AA              | 1946863314               |
| SNP_P4_81711_17033731 | NC_021165.1    | Ca_kabuli_chr06 | 17033731                | AA                              | GG              | 1946863316               |

| SNPs IDs              | Chromosome IDs | Chromosomes     | Physical positions (bp) | CDC Frontier (Reference genome) | (ILWC46 & LPNB) | NCBI SNPdb Accession IDs |
|-----------------------|----------------|-----------------|-------------------------|---------------------------------|-----------------|--------------------------|
| SNP_P4_81712_17040063 | NC_021165.1    | Ca_kabuli_chr06 | 17040063                | AA                              | CC              | 1946863318               |
| SNP_P4_81713_17042020 | NC_021165.1    | Ca_kabuli_chr06 | 17042020                | AA                              | TT              | 1946863320               |
| SNP_P4_81714_17042226 | NC_021165.1    | Ca_kabuli_chr06 | 17042226                | GG                              | AA              | 1946863322               |
| SNP_P4_81716_17043858 | NC_021165.1    | Ca_kabuli_chr06 | 17043858                | GG                              | TT              | 1946863324               |
| SNP_P4_81718_17045320 | NC_021165.1    | Ca_kabuli_chr06 | 17045320                | GG                              | AA              | 1946863326               |
| SNP_P4_81719_17055998 | NC_021165.1    | Ca_kabuli_chr06 | 17055998                | GG                              | AA              | 1946863328               |
| SNP_P4_81720_17056370 | NC_021165.1    | Ca_kabuli_chr06 | 17056370                | TT                              | CC              | 1946863330               |
| SNP_P4_81721_17056572 | NC_021165.1    | Ca_kabuli_chr06 | 17056572                | GG                              | AA              | 1946863332               |
| SNP_P4_81722_17056589 | NC_021165.1    | Ca_kabuli_chr06 | 17056589                | AA                              | TT              | 1946863334               |
| SNP_P4_81723_17056624 | NC_021165.1    | Ca_kabuli_chr06 | 17056624                | AA                              | CC              | 1946863336               |
| SNP_P4_81724_17056708 | NC_021165.1    | Ca_kabuli_chr06 | 17056708                | GG                              | CC              | 1946863338               |
| SNP_P4_81725_17056747 | NC_021165.1    | Ca_kabuli_chr06 | 17056747                | CC                              | AA              | 1946863340               |
| SNP_P4_81726_17056945 | NC_021165.1    | Ca_kabuli_chr06 | 17056945                | CC                              | TT              | 1946863342               |
| SNP_P4_81727_17056989 | NC_021165.1    | Ca_kabuli_chr06 | 17056989                | AA                              | GG              | 1946863344               |
| SNP_P4_81730_17057216 | NC_021165.1    | Ca_kabuli_chr06 | 17057216                | TT                              | CC              | 1946863346               |
| SNP_P4_81731_17057620 | NC_021165.1    | Ca_kabuli_chr06 | 17057620                | CC                              | TT              | 1946863348               |
| SNP_P4_81732_17058377 | NC_021165.1    | Ca_kabuli_chr06 | 17058377                | CC                              | TT              | 1946863350               |
| SNP_P4_81734_17058925 | NC_021165.1    | Ca_kabuli_chr06 | 17058925                | CC                              | TT              | 1946863352               |
| SNP_P4_81736_17059137 | NC_021165.1    | Ca_kabuli_chr06 | 17059137                | AA                              | GG              | 1946863354               |
| SNP_P4_81737_17059149 | NC_021165.1    | Ca_kabuli_chr06 | 17059149                | CC                              | TT              | 1946863356               |
| SNP_P4_81738_17059319 | NC_021165.1    | Ca_kabuli_chr06 | 17059319                | AA                              | TT              | 1946863358               |
| SNP_P4_81739_17063645 | NC_021165.1    | Ca_kabuli_chr06 | 17063645                | TT                              | AA              | 1946863360               |
| SNP_P4_81741_17064221 | NC_021165.1    | Ca_kabuli_chr06 | 17064221                | TT                              | CC              | 1946863362               |
| SNP_P4_81742_17064265 | NC_021165.1    | Ca_kabuli_chr06 | 17064265                | AA                              | CC              | 1946863364               |
| SNP_P4_81743_17064272 | NC_021165.1    | Ca_kabuli_chr06 | 17064272                | AA                              | GG              | 1946863366               |
| SNP_P4_81744_17064316 | NC_021165.1    | Ca_kabuli_chr06 | 17064316                | TT                              | CC              | 1946863368               |
| SNP_P4_81745_17064869 | NC_021165.1    | Ca_kabuli_chr06 | 17064869                | GG                              | CC              | 1946863370               |
| SNP_P4_81746_17064879 | NC_021165.1    | Ca_kabuli_chr06 | 17064879                | GG                              | TT              | 1946863372               |
| SNP_P4_81747_17065086 | NC_021165.1    | Ca_kabuli_chr06 | 17065086                | GG                              | AA              | 1946863374               |
| SNP_P4_81748_17065290 | NC_021165.1    | Ca_kabuli_chr06 | 17065290                | GG                              | AA              | 1946863376               |
| SNP_P4_81749_17065657 | NC_021165.1    | Ca_kabuli_chr06 | 17065657                | GG                              | CC              | 1946863378               |
| SNP_P4_81750_17067171 | NC_021165.1    | Ca_kabuli_chr06 | 17067171                | AA                              | TT              | 1946863380               |
| SNP_P4_81751_17067179 | NC_021165.1    | Ca_kabuli_chr06 | 17067179                | TT                              | AA              | 1946863382               |
| SNP_P4_81752_17067279 | NC_021165.1    | Ca_kabuli_chr06 | 17067279                | AA                              | GG              | 1946863384               |
| SNP_P4_81753_17068898 | NC_021165.1    | Ca_kabuli_chr06 | 17068898                | GG                              | TT              | 1946863386               |
| SNP_P4_81754_17069704 | NC_021165.1    | Ca_kabuli_chr06 | 17069704                | TT                              | CC              | 1946863388               |
| SNP_P4_81755_17069735 | NC_021165.1    | Ca_kabuli_chr06 | 17069735                | CC                              | TT              | 1946863390               |
| SNP_P4_81756_17070121 | NC_021165.1    | Ca_kabuli_chr06 | 17070121                | AA                              | GG              | 1946863392               |
| SNP_P4_81757_17070135 | NC_021165.1    | Ca_kabuli_chr06 | 17070135                | TT                              | CC              | 1946863394               |
| SNP_P4_81758_17070244 | NC_021165.1    | Ca_kabuli_chr06 | 17070244                | CC                              | TT              | 1946863396               |
| SNP_P4_81759_17070268 | NC_021165.1    | Ca_kabuli_chr06 | 17070268                | TT                              | CC              | 1946863398               |
| SNP_P4_81760_17070296 | NC_021165.1    | Ca_kabuli_chr06 | 17070296                | CC                              | TT              | 1946863400               |

| SNPs IDs              | Chromosome IDs | Chromosomes     | Physical positions (bp) | CDC Frontier (Reference genome) | (ILWC46 & LPNB) | NCBI SNPdb Accession IDs |
|-----------------------|----------------|-----------------|-------------------------|---------------------------------|-----------------|--------------------------|
| SNP_P4_81761_17070898 | NC_021165.1    | Ca_kabuli_chr06 | 17070898                | GG                              | AA              | 1946863402               |
| SNP_P4_81762_17070926 | NC_021165.1    | Ca_kabuli_chr06 | 17070926                | TT                              | CC              | 1946863404               |
| SNP_P4_81763_17072155 | NC_021165.1    | Ca_kabuli_chr06 | 17072155                | CC                              | TT              | 1946863406               |
| SNP_P4_81764_17072392 | NC_021165.1    | Ca_kabuli_chr06 | 17072392                | CC                              | TT              | 1946863408               |
| SNP_P4_81765_17072611 | NC_021165.1    | Ca_kabuli_chr06 | 17072611                | CC                              | TT              | 1946863410               |
| SNP_P4_81766_17072615 | NC_021165.1    | Ca_kabuli_chr06 | 17072615                | TT                              | CC              | 1946863412               |
| SNP_P4_81767_17072623 | NC_021165.1    | Ca_kabuli_chr06 | 17072623                | AA                              | CC              | 1946863414               |
| SNP_P4_81768_17072641 | NC_021165.1    | Ca_kabuli_chr06 | 17072641                | AA                              | GG              | 1946863416               |
| SNP_P4_81769_17072679 | NC_021165.1    | Ca_kabuli_chr06 | 17072679                | AA                              | CC              | 1946863418               |
| SNP_P4_81770_17072693 | NC_021165.1    | Ca_kabuli_chr06 | 17072693                | AA                              | GG              | 1946863420               |
| SNP_P4_81771_17072755 | NC_021165.1    | Ca_kabuli_chr06 | 17072755                | GG                              | AA              | 1946863422               |
| SNP_P4_81772_17072818 | NC_021165.1    | Ca_kabuli_chr06 | 17072818                | CC                              | GG              | 1946863424               |
| SNP_P4_81773_17073353 | NC_021165.1    | Ca_kabuli_chr06 | 17073353                | GG                              | AA              | 1946863426               |
| SNP_P4_81774_17075299 | NC_021165.1    | Ca_kabuli_chr06 | 17075299                | AA                              | GG              | 1946863428               |
| SNP_P4_81775_17075342 | NC_021165.1    | Ca_kabuli_chr06 | 17075342                | TT                              | CC              | 1946863430               |
| SNP_P4_81776_17075346 | NC_021165.1    | Ca_kabuli_chr06 | 17075346                | TT                              | GG              | 1946863432               |
| SNP_P4_81777_17075509 | NC_021165.1    | Ca_kabuli_chr06 | 17075509                | CC                              | TT              | 1946863434               |
| SNP_P4_81778_17075513 | NC_021165.1    | Ca_kabuli_chr06 | 17075513                | GG                              | CC              | 1946863436               |
| SNP_P4_81779_17075573 | NC_021165.1    | Ca_kabuli_chr06 | 17075573                | TT                              | AA              | 1946863438               |
| SNP_P4_81780_17075584 | NC_021165.1    | Ca_kabuli_chr06 | 17075584                | CC                              | GG              | 1946863440               |
| SNP_P4_81782_17076918 | NC_021165.1    | Ca_kabuli_chr06 | 17076918                | AA                              | GG              | 1946863442               |
| SNP_P4_81783_17077655 | NC_021165.1    | Ca_kabuli_chr06 | 17077655                | GG                              | AA              | 1946863444               |
| SNP_P4_81784_17077656 | NC_021165.1    | Ca_kabuli_chr06 | 17077656                | AA                              | TT              | 1946863446               |
| SNP_P4_81785_17083120 | NC_021165.1    | Ca_kabuli_chr06 | 17083120                | CC                              | TT              | 1946863448               |
| SNP_P4_81787_17083155 | NC_021165.1    | Ca_kabuli_chr06 | 17083155                | TT                              | CC              | 1946863450               |
| SNP_P4_81788_17083178 | NC_021165.1    | Ca_kabuli_chr06 | 17083178                | AA                              | TT              | 1946863452               |
| SNP_P4_81789_17083377 | NC_021165.1    | Ca_kabuli_chr06 | 17083377                | AA                              | GG              | 1946863454               |
| SNP_P4_81790_17084193 | NC_021165.1    | Ca_kabuli_chr06 | 17084193                | CC                              | TT              | 1946863456               |
| SNP_P4_81791_17084194 | NC_021165.1    | Ca_kabuli_chr06 | 17084194                | TT                              | CC              | 1946863458               |
| SNP_P4_81792_17084399 | NC_021165.1    | Ca_kabuli_chr06 | 17084399                | TT                              | GG              | 1946863460               |
| SNP_P4_81793_17084457 | NC_021165.1    | Ca_kabuli_chr06 | 17084457                | GG                              | AA              | 1946863462               |
| SNP_P4_81794_17084491 | NC_021165.1    | Ca_kabuli_chr06 | 17084491                | GG                              | AA              | 1946863464               |
| SNP_P4_81795_17084992 | NC_021165.1    | Ca_kabuli_chr06 | 17084992                | GG                              | AA              | 1946863466               |
| SNP_P4_81797_17085087 | NC_021165.1    | Ca_kabuli_chr06 | 17085087                | TT                              | GG              | 1946863468               |
| SNP_P4_81799_17085670 | NC_021165.1    | Ca_kabuli_chr06 | 17085670                | AA                              | TT              | 1946863469               |
| SNP_P4_81800_17085969 | NC_021165.1    | Ca_kabuli_chr06 | 17085969                | TT                              | CC              | 1946863471               |
| SNP_P4_81801_17086452 | NC_021165.1    | Ca_kabuli_chr06 | 17086452                | GG                              | AA              | 1946863473               |
| SNP_P4_81802_17087596 | NC_021165.1    | Ca_kabuli_chr06 | 17087596                | CC                              | AA              | 1946863475               |
| SNP_P4_81803_17087609 | NC_021165.1    | Ca_kabuli_chr06 | 17087609                | CC                              | TT              | 1946863477               |
| SNP_P4_81804_17087610 | NC_021165.1    | Ca_kabuli_chr06 | 17087610                | CC                              | AA              | 1946863479               |
| SNP_P4_81805_17087611 | NC_021165.1    | Ca_kabuli_chr06 | 17087611                | GG                              | AA              | 1946863481               |
| SNP_P4_81806_17087621 | NC_021165.1    | Ca_kabuli_chr06 | 17087621                | AA                              | TT              | 1946863483               |

| SNPs IDs              | Chromosome IDs | Chromosomes     | Physical positions (bp) | CDC Frontier (Reference genome) | (ILWC46 & LPNB) | NCBI SNPdb Accession IDs |
|-----------------------|----------------|-----------------|-------------------------|---------------------------------|-----------------|--------------------------|
| SNP_P4_81807_17087669 | NC_021165.1    | Ca_kabuli_chr06 | 17087669                | AA                              | GG              | 1946863485               |
| SNP_P4_81808_17087777 | NC_021165.1    | Ca_kabuli_chr06 | 17087777                | AA                              | GG              | 1946863487               |
| SNP_P4_81809_17087977 | NC_021165.1    | Ca_kabuli_chr06 | 17087977                | AA                              | GG              | 1946863490               |
| SNP_P4_81811_17088823 | NC_021165.1    | Ca_kabuli_chr06 | 17088823                | TT                              | AA              | 1946863492               |
| SNP_P4_81812_17088848 | NC_021165.1    | Ca_kabuli_chr06 | 17088848                | TT                              | AA              | 1946863494               |
| SNP_P4_81814_17089609 | NC_021165.1    | Ca_kabuli_chr06 | 17089609                | AA                              | GG              | 1946863496               |
| SNP_P4_81815_17089626 | NC_021165.1    | Ca_kabuli_chr06 | 17089626                | TT                              | CC              | 1946863498               |
| SNP_P4_81817_17092155 | NC_021165.1    | Ca_kabuli_chr06 | 17092155                | CC                              | GG              | 1946863500               |
| SNP_P4_81818_17092636 | NC_021165.1    | Ca_kabuli_chr06 | 17092636                | CC                              | TT              | 1946863502               |
| SNP_P4_81819_17092638 | NC_021165.1    | Ca_kabuli_chr06 | 17092638                | CC                              | TT              | 1946863504               |
| SNP_P4_81820_17093260 | NC_021165.1    | Ca_kabuli_chr06 | 17093260                | AA                              | GG              | 1946863506               |
| SNP_P4_81821_17093541 | NC_021165.1    | Ca_kabuli_chr06 | 17093541                | AA                              | TT              | 1946863508               |
| SNP_P4_81822_17094188 | NC_021165.1    | Ca_kabuli_chr06 | 17094188                | GG                              | AA              | 1946863510               |
| SNP_P4_81824_17096214 | NC_021165.1    | Ca_kabuli_chr06 | 17096214                | CC                              | TT              | 1946863512               |
| SNP_P4_81825_17097289 | NC_021165.1    | Ca_kabuli_chr06 | 17097289                | AA                              | GG              | 1946863514               |
| SNP_P4_81826_17097314 | NC_021165.1    | Ca_kabuli_chr06 | 17097314                | GG                              | AA              | 1946863516               |
| SNP_P4_81827_17097349 | NC_021165.1    | Ca_kabuli_chr06 | 17097349                | CC                              | GG              | 1946863518               |
| SNP_P4_81828_17097385 | NC_021165.1    | Ca_kabuli_chr06 | 17097385                | AA                              | TT              | 1946863520               |
| SNP_P4_81829_17097405 | NC_021165.1    | Ca_kabuli_chr06 | 17097405                | TT                              | AA              | 1946863522               |
| SNP_P4_81830_17097450 | NC_021165.1    | Ca_kabuli_chr06 | 17097450                | TT                              | GG              | 1946863524               |
| SNP_P4_81831_17097491 | NC_021165.1    | Ca_kabuli_chr06 | 17097491                | AA                              | GG              | 1946863526               |
| SNP_P4_81833_17097559 | NC_021165.1    | Ca_kabuli_chr06 | 17097559                | AA                              | GG              | 1946863528               |
| SNP_P4_81834_17097561 | NC_021165.1    | Ca_kabuli_chr06 | 17097561                | AA                              | GG              | 1946863530               |
| SNP_P4_81835_17098511 | NC_021165.1    | Ca_kabuli_chr06 | 17098511                | AA                              | GG              | 1946863532               |
| SNP_P4_81836_17098540 | NC_021165.1    | Ca_kabuli_chr06 | 17098540                | CC                              | TT              | 1946863534               |
| SNP_P4_81837_17098562 | NC_021165.1    | Ca_kabuli_chr06 | 17098562                | CC                              | TT              | 1946863536               |
| SNP_P4_81838_17100912 | NC_021165.1    | Ca_kabuli_chr06 | 17100912                | AA                              | TT              | 1946863538               |
| SNP_P4_81839_17101122 | NC_021165.1    | Ca_kabuli_chr06 | 17101122                | AA                              | GG              | 1946863540               |
| SNP_P4_81840_17101146 | NC_021165.1    | Ca_kabuli_chr06 | 17101146                | GG                              | AA              | 1946863542               |
| SNP_P4_81842_17101299 | NC_021165.1    | Ca_kabuli_chr06 | 17101299                | CC                              | TT              | 1946863544               |
| SNP_P4_81843_17101307 | NC_021165.1    | Ca_kabuli_chr06 | 17101307                | TT                              | CC              | 1946863546               |
| SNP_P4_81844_17101346 | NC_021165.1    | Ca_kabuli_chr06 | 17101346                | AA                              | GG              | 1946863548               |
| SNP_P4_81845_17101373 | NC_021165.1    | Ca_kabuli_chr06 | 17101373                | GG                              | CC              | 1946863550               |
| SNP_P4_81846_17101426 | NC_021165.1    | Ca_kabuli_chr06 | 17101426                | AA                              | TT              | 1946863552               |
| SNP_P4_81847_17101579 | NC_021165.1    | Ca_kabuli_chr06 | 17101579                | AA                              | GG              | 1946863553               |
| SNP_P4_81849_17101904 | NC_021165.1    | Ca_kabuli_chr06 | 17101904                | AA                              | GG              | 1946863555               |
| SNP_P4_81850_17101930 | NC_021165.1    | Ca_kabuli_chr06 | 17101930                | GG                              | AA              | 1946863557               |
| SNP_P4_81851_17102000 | NC_021165.1    | Ca_kabuli_chr06 | 17102000                | TT                              | AA              | 1946863559               |
| SNP_P4_81852_17102018 | NC_021165.1    | Ca_kabuli_chr06 | 17102018                | TT                              | CC              | 1946863561               |
| SNP_P4_81854_17102061 | NC_021165.1    | Ca_kabuli_chr06 | 17102061                | TT                              | CC              | 1946863563               |
| SNP_P4_81855_17102283 | NC_021165.1    | Ca_kabuli_chr06 | 17102283                | AA                              | GG              | 1946863565               |
| SNP_P4_81856_17102315 | NC_021165.1    | Ca_kabuli_chr06 | 17102315                | TT                              | CC              | 1946863567               |

| SNPs IDs              | Chromosome IDs | Chromosomes     | Physical positions (bp) | CDC Frontier (Reference genome) | (ILWC46 & LPNB) | NCBI SNPdb Accession IDs |
|-----------------------|----------------|-----------------|-------------------------|---------------------------------|-----------------|--------------------------|
| SNP_P4_81858_17103410 | NC_021165.1    | Ca_kabuli_chr06 | 17103410                | AA                              | TT              | 1946863569               |
| SNP_P4_81859_17103729 | NC_021165.1    | Ca_kabuli_chr06 | 17103729                | AA                              | GG              | 1946863571               |
| SNP_P4_81860_17103737 | NC_021165.1    | Ca_kabuli_chr06 | 17103737                | AA                              | GG              | 1946863573               |
| SNP_P4_81862_17103776 | NC_021165.1    | Ca_kabuli_chr06 | 17103776                | AA                              | GG              | 1946863575               |
| SNP_P4_81864_17104244 | NC_021165.1    | Ca_kabuli_chr06 | 17104244                | CC                              | AA              | 1946863577               |
| SNP_P4_81865_17104294 | NC_021165.1    | Ca_kabuli_chr06 | 17104294                | AA                              | CC              | 1946863579               |
| SNP_P4_81866_17104308 | NC_021165.1    | Ca_kabuli_chr06 | 17104308                | GG                              | TT              | 1946863581               |
| SNP_P4_81867_17104312 | NC_021165.1    | Ca_kabuli_chr06 | 17104312                | AA                              | TT              | 1946863583               |
| SNP_P4_81868_17104327 | NC_021165.1    | Ca_kabuli_chr06 | 17104327                | TT                              | GG              | 1946863584               |
| SNP_P4_81869_17104461 | NC_021165.1    | Ca_kabuli_chr06 | 17104461                | CC                              | TT              | 1946863586               |
| SNP_P4_81870_17104758 | NC_021165.1    | Ca_kabuli_chr06 | 17104758                | GG                              | TT              | 1946863588               |
| SNP_P4_81871_17104796 | NC_021165.1    | Ca_kabuli_chr06 | 17104796                | GG                              | AA              | 1946863590               |
| SNP_P4_81872_17105814 | NC_021165.1    | Ca_kabuli_chr06 | 17105814                | AA                              | TT              | 1946863592               |
| SNP_P4_81873_17106034 | NC_021165.1    | Ca_kabuli_chr06 | 17106034                | TT                              | CC              | 1946863593               |
| SNP_P4_81874_17106292 | NC_021165.1    | Ca_kabuli_chr06 | 17106292                | CC                              | TT              | 1946863594               |
| SNP_P4_81875_17108535 | NC_021165.1    | Ca_kabuli_chr06 | 17108535                | TT                              | CC              | 1946863595               |
| SNP_P4_81876_17109370 | NC_021165.1    | Ca_kabuli_chr06 | 17109370                | AA                              | GG              | 1946863596               |
| SNP_P4_81878_17110580 | NC_021165.1    | Ca_kabuli_chr06 | 17110580                | CC                              | TT              | 1946863598               |
| SNP_P4_81879_17110851 | NC_021165.1    | Ca_kabuli_chr06 | 17110851                | AA                              | TT              | 1946863600               |
| SNP_P4_81880_17111106 | NC_021165.1    | Ca_kabuli_chr06 | 17111106                | TT                              | GG              | 1946863602               |
| SNP_P4_81881_17111473 | NC_021165.1    | Ca_kabuli_chr06 | 17111473                | GG                              | AA              | 1946863604               |
| SNP_P4_81882_17111732 | NC_021165.1    | Ca_kabuli_chr06 | 17111732                | TT                              | CC              | 1946863606               |
| SNP_P4_81883_17113751 | NC_021165.1    | Ca_kabuli_chr06 | 17113751                | TT                              | CC              | 1946863608               |
| SNP_P4_81884_17114699 | NC_021165.1    | Ca_kabuli_chr06 | 17114699                | AA                              | GG              | 1946863610               |
| SNP_P4_81885_17114720 | NC_021165.1    | Ca_kabuli_chr06 | 17114720                | CC                              | TT              | 1946863612               |
| SNP_P4_81886_17115067 | NC_021165.1    | Ca_kabuli_chr06 | 17115067                | TT                              | CC              | 1946863614               |
| SNP_P4_81887_17116440 | NC_021165.1    | Ca_kabuli_chr06 | 17116440                | AA                              | CC              | 1946863616               |
| SNP_P4_81888_17116619 | NC_021165.1    | Ca_kabuli_chr06 | 17116619                | TT                              | CC              | 1946863618               |
| SNP_P4_81889_17116852 | NC_021165.1    | Ca_kabuli_chr06 | 17116852                | GG                              | AA              | 1946863620               |
| SNP_P4_81890_17117857 | NC_021165.1    | Ca_kabuli_chr06 | 17117857                | AA                              | GG              | 1946863622               |
| SNP_P4_81891_17119006 | NC_021165.1    | Ca_kabuli_chr06 | 17119006                | CC                              | TT              | 1946863624               |
| SNP_P4_81892_17119008 | NC_021165.1    | Ca_kabuli_chr06 | 17119008                | TT                              | CC              | 1946863626               |
| SNP_P4_81893_17119944 | NC_021165.1    | Ca_kabuli_chr06 | 17119944                | CC                              | TT              | 1946863629               |
| SNP_P4_81894_17123067 | NC_021165.1    | Ca_kabuli_chr06 | 17123067                | TT                              | AA              | 1946863631               |
| SNP_P4_81895_17125738 | NC_021165.1    | Ca_kabuli_chr06 | 17125738                | AA                              | GG              | 1946863633               |
| SNP_P4_81896_17125865 | NC_021165.1    | Ca_kabuli_chr06 | 17125865                | AA                              | GG              | 1946863635               |
| SNP_P4_81897_17125871 | NC_021165.1    | Ca_kabuli_chr06 | 17125871                | CC                              | TT              | 1946863637               |
| SNP_P4_81898_17125874 | NC_021165.1    | Ca_kabuli_chr06 | 17125874                | GG                              | AA              | 1946863639               |
| SNP_P4_81899_17125977 | NC_021165.1    | Ca_kabuli_chr06 | 17125977                | CC                              | TT              | 1946863640               |
| SNP_P4_81900_17125978 | NC_021165.1    | Ca_kabuli_chr06 | 17125978                | GG                              | AA              | 1946863642               |
| SNP_P4_81901_17125986 | NC_021165.1    | Ca_kabuli_chr06 | 17125986                | GG                              | AA              | 1946863644               |
| SNP_P4_81902_17126016 | NC_021165.1    | Ca_kabuli_chr06 | 17126016                | CC                              | TT              | 1946863646               |

| SNPs IDs              | Chromosome IDs | Chromosomes     | Physical positions (bp) | CDC Frontier (Reference genome) | (ILWC46 & LPNB) | NCBI SNPdb Accession IDs |
|-----------------------|----------------|-----------------|-------------------------|---------------------------------|-----------------|--------------------------|
| SNP_P4_81903_17126037 | NC_021165.1    | Ca_kabuli_chr06 | 17126037                | AA                              | GG              | 1946863648               |
| SNP_P4_81904_17127149 | NC_021165.1    | Ca_kabuli_chr06 | 17127149                | GG                              | AA              | 1946863650               |
| SNP_P4_81905_17127954 | NC_021165.1    | Ca_kabuli_chr06 | 17127954                | CC                              | TT              | 1946863652               |
| SNP_P4_81906_17127985 | NC_021165.1    | Ca_kabuli_chr06 | 17127985                | TT                              | CC              | 1946863654               |
| SNP_P4_81907_17128047 | NC_021165.1    | Ca_kabuli_chr06 | 17128047                | GG                              | AA              | 1946863656               |
| SNP_P4_81908_17128054 | NC_021165.1    | Ca_kabuli_chr06 | 17128054                | CC                              | AA              | 1946863658               |
| SNP_P4_81909_17128069 | NC_021165.1    | Ca_kabuli_chr06 | 17128069                | GG                              | AA              | 1946863660               |
| SNP_P4_81910_17128648 | NC_021165.1    | Ca_kabuli_chr06 | 17128648                | TT                              | GG              | 1946863662               |
| SNP_P4_81911_17129046 | NC_021165.1    | Ca_kabuli_chr06 | 17129046                | AA                              | CC              | 1946863664               |
| SNP_P4_81912_17129574 | NC_021165.1    | Ca_kabuli_chr06 | 17129574                | AA                              | GG              | 1946863666               |
| SNP_P4_81913_17129695 | NC_021165.1    | Ca_kabuli_chr06 | 17129695                | TT                              | AA              | 1946863668               |
| SNP_P4_81914_17132577 | NC_021165.1    | Ca_kabuli_chr06 | 17132577                | TT                              | CC              | 1946863670               |
| SNP_P4_81915_17134162 | NC_021165.1    | Ca_kabuli_chr06 | 17134162                | TT                              | CC              | 1946863671               |
| SNP_P4_81916_17134314 | NC_021165.1    | Ca_kabuli_chr06 | 17134314                | TT                              | CC              | 1946863674               |
| SNP_P4_81917_17135893 | NC_021165.1    | Ca_kabuli_chr06 | 17135893                | GG                              | AA              | 1946863676               |
| SNP_P4_81918_17135907 | NC_021165.1    | Ca_kabuli_chr06 | 17135907                | GG                              | TT              | 1946863678               |
| SNP_P4_81921_17136481 | NC_021165.1    | Ca_kabuli_chr06 | 17136481                | TT                              | AA              | 1946863680               |
| SNP_P4_81922_17136531 | NC_021165.1    | Ca_kabuli_chr06 | 17136531                | AA                              | GG              | 1946863681               |
| SNP_P4_81923_17138292 | NC_021165.1    | Ca_kabuli_chr06 | 17138292                | GG                              | AA              | 1946863683               |
| SNP_P4_81925_17138775 | NC_021165.1    | Ca_kabuli_chr06 | 17138775                | AA                              | GG              | 1946863685               |
| SNP_P4_81926_17138806 | NC_021165.1    | Ca_kabuli_chr06 | 17138806                | GG                              | AA              | 1946863687               |
| SNP_P4_81927_17139082 | NC_021165.1    | Ca_kabuli_chr06 | 17139082                | TT                              | CC              | 1946863689               |
| SNP_P4_81928_17139108 | NC_021165.1    | Ca_kabuli_chr06 | 17139108                | CC                              | TT              | 1946863691               |
| SNP_P4_81929_17139126 | NC_021165.1    | Ca_kabuli_chr06 | 17139126                | CC                              | TT              | 1946863693               |
| SNP_P4_81931_17163379 | NC_021165.1    | Ca_kabuli_chr06 | 17163379                | GG                              | CC              | 1946863695               |
| SNP_P4_81934_17174965 | NC_021165.1    | Ca_kabuli_chr06 | 17174965                | TT                              | AA              | 1946863697               |
| SNP_P4_81935_17174968 | NC_021165.1    | Ca_kabuli_chr06 | 17174968                | TT                              | AA              | 1946863699               |
| SNP_P4_81936_17179610 | NC_021165.1    | Ca_kabuli_chr06 | 17179610                | AA                              | GG              | 1946863701               |
| SNP_P4_81937_17182775 | NC_021165.1    | Ca_kabuli_chr06 | 17182775                | TT                              | CC              | 1946863703               |
| SNP_P4_81938_17182945 | NC_021165.1    | Ca_kabuli_chr06 | 17182945                | GG                              | AA              | 1946863705               |
| SNP_P4_81941_17194377 | NC_021165.1    | Ca_kabuli_chr06 | 17194377                | CC                              | AA              | 1946863707               |
| SNP_P4_81942_17198096 | NC_021165.1    | Ca_kabuli_chr06 | 17198096                | GG                              | TT              | 1946863709               |
| SNP_P4_81944_17207691 | NC_021165.1    | Ca_kabuli_chr06 | 17207691                | GG                              | AA              | 1946863711               |
| SNP_P4_81946_17271870 | NC_021165.1    | Ca_kabuli_chr06 | 17271870                | CC                              | TT              | 1946863713               |
| SNP_P4_81947_17302693 | NC_021165.1    | Ca_kabuli_chr06 | 17302693                | AA                              | CC              | 1946863715               |
| SNP_P4_81948_17302694 | NC_021165.1    | Ca_kabuli_chr06 | 17302694                | AA                              | GG              | 1946863717               |
| SNP_P4_81950_17355841 | NC_021165.1    | Ca_kabuli_chr06 | 17355841                | GG                              | TT              | 1946863719               |
| SNP_P4_81952_17390124 | NC_021165.1    | Ca_kabuli_chr06 | 17390124                | TT                              | AA              | 1946863721               |
| SNP_P4_81953_17392285 | NC_021165.1    | Ca_kabuli_chr06 | 17392285                | AA                              | TT              | 1946863723               |
| SNP_P4_81954_17392888 | NC_021165.1    | Ca_kabuli_chr06 | 17392888                | AA                              | CC              | 1946863725               |
| SNP_P4_81955_17392890 | NC_021165.1    | Ca_kabuli_chr06 | 17392890                | AA                              | CC              | 1946863727               |
| SNP_P4_81957_17412366 | NC_021165.1    | Ca_kabuli_chr06 | 17412366                | CC                              | GG              | 1946863729               |

| SNPs IDs              | Chromosome IDs | Chromosomes     | Physical positions (bp) | CDC Frontier (Reference genome) | (ILWC46 & LPNB) | NCBI SNPdb Accession IDs |
|-----------------------|----------------|-----------------|-------------------------|---------------------------------|-----------------|--------------------------|
| SNP_P4_81958_17413804 | NC_021165.1    | Ca_kabuli_chr06 | 17413804                | AA                              | GG              | 1946863731               |
| SNP_P4_81960_17414926 | NC_021165.1    | Ca_kabuli_chr06 | 17414926                | CC                              | GG              | 1946863732               |
| SNP_P4_81961_17423474 | NC_021165.1    | Ca_kabuli_chr06 | 17423474                | TT                              | CC              | 1946863733               |
| SNP_P4_81962_17461206 | NC_021165.1    | Ca_kabuli_chr06 | 17461206                | TT                              | AA              | 1946863734               |
| SNP_P4_81963_17461294 | NC_021165.1    | Ca_kabuli_chr06 | 17461294                | AA                              | TT              | 1946863735               |
| SNP_P4_81964_17461633 | NC_021165.1    | Ca_kabuli_chr06 | 17461633                | GG                              | AA              | 1946863737               |
| SNP_P4_81965_17489718 | NC_021165.1    | Ca_kabuli_chr06 | 17489718                | TT                              | CC              | 1946863738               |
| SNP_P4_81967_17503324 | NC_021165.1    | Ca_kabuli_chr06 | 17503324                | GG                              | AA              | 1946863740               |
| SNP_P4_81969_17511515 | NC_021165.1    | Ca_kabuli_chr06 | 17511515                | CC                              | TT              | 1946863743               |
| SNP_P4_81970_17511744 | NC_021165.1    | Ca_kabuli_chr06 | 17511744                | AA                              | GG              | 1946863744               |
| SNP_P4_81971_17521663 | NC_021165.1    | Ca_kabuli_chr06 | 17521663                | AA                              | GG              | 1946863747               |
| SNP_P4_81972_17521712 | NC_021165.1    | Ca_kabuli_chr06 | 17521712                | CC                              | TT              | 1946863749               |
| SNP_P4_81973_17532896 | NC_021165.1    | Ca_kabuli_chr06 | 17532896                | AA                              | GG              | 1946863751               |
| SNP_P4_81974_17532900 | NC_021165.1    | Ca_kabuli_chr06 | 17532900                | AA                              | GG              | 1946863753               |
| SNP_P4_81975_17532971 | NC_021165.1    | Ca_kabuli_chr06 | 17532971                | GG                              | TT              | 1946863754               |
| SNP_P4_81976_17577596 | NC_021165.1    | Ca_kabuli_chr06 | 17577596                | GG                              | AA              | 1946863756               |
| SNP_P4_81977_17614020 | NC_021165.1    | Ca_kabuli_chr06 | 17614020                | CC                              | TT              | 1946863758               |
| SNP_P4_81980_17722183 | NC_021165.1    | Ca_kabuli_chr06 | 17722183                | GG                              | TT              | 1946863760               |
| SNP_P4_81981_17726096 | NC_021165.1    | Ca_kabuli_chr06 | 17726096                | GG                              | AA              | 1946863762               |
| SNP_P4_81983_17744495 | NC_021165.1    | Ca_kabuli_chr06 | 17744495                | AA                              | GG              | 1946863764               |
| SNP_P4_81984_17744583 | NC_021165.1    | Ca_kabuli_chr06 | 17744583                | TT                              | GG              | 1946863766               |
| SNP_P4_81985_17752007 | NC_021165.1    | Ca_kabuli_chr06 | 17752007                | TT                              | CC              | 1946863768               |
| SNP_P4_81986_17753138 | NC_021165.1    | Ca_kabuli_chr06 | 17753138                | TT                              | GG              | 1946863770               |
| SNP_P4_81988_17762997 | NC_021165.1    | Ca_kabuli_chr06 | 17762997                | TT                              | GG              | 1946863772               |
| SNP_P4_81989_17762999 | NC_021165.1    | Ca_kabuli_chr06 | 17762999                | AA                              | CC              | 1946863774               |
| SNP_P4_81990_17796718 | NC_021165.1    | Ca_kabuli_chr06 | 17796718                | AA                              | CC              | 1946863776               |
| SNP_P4_81991_17799480 | NC_021165.1    | Ca_kabuli_chr06 | 17799480                | AA                              | CC              | 1946863778               |
| SNP_P4_81992_17799482 | NC_021165.1    | Ca_kabuli_chr06 | 17799482                | TT                              | CC              | 1946863780               |
| SNP_P4_81993_17801883 | NC_021165.1    | Ca_kabuli_chr06 | 17801883                | GG                              | AA              | 1946863782               |
| SNP_P4_81994_17843999 | NC_021165.1    | Ca_kabuli_chr06 | 17843999                | AA                              | GG              | 1946863784               |
| SNP_P4_81995_17844189 | NC_021165.1    | Ca_kabuli_chr06 | 17844189                | TT                              | GG              | 1946863786               |
| SNP_P4_81998_17852851 | NC_021165.1    | Ca_kabuli_chr06 | 17852851                | TT                              | CC              | 1946863787               |
| SNP_P4_82000_17859016 | NC_021165.1    | Ca_kabuli_chr06 | 17859016                | GG                              | CC              | 1946863789               |
| SNP_P4_82001_17878067 | NC_021165.1    | Ca_kabuli_chr06 | 17878067                | CC                              | TT              | 1946863791               |
| SNP_P4_82002_17882403 | NC_021165.1    | Ca_kabuli_chr06 | 17882403                | GG                              | TT              | 1946863793               |
| SNP_P4_82003_17883451 | NC_021165.1    | Ca_kabuli_chr06 | 17883451                | CC                              | TT              | 1946863795               |
| SNP_P4_82004_17906627 | NC_021165.1    | Ca_kabuli_chr06 | 17906627                | AA                              | TT              | 1946863797               |
| SNP_P4_82005_17911410 | NC_021165.1    | Ca_kabuli_chr06 | 17911410                | CC                              | TT              | 1946863799               |
| SNP_P4_82006_17923028 | NC_021165.1    | Ca_kabuli_chr06 | 17923028                | AA                              | GG              | 1946863801               |
| SNP_P4_82007_17923030 | NC_021165.1    | Ca_kabuli_chr06 | 17923030                | AA                              | CC              | 1946863803               |
| SNP_P4_82009_17947182 | NC_021165.1    | Ca_kabuli_chr06 | 17947182                | CC                              | TT              | 1946863805               |
| SNP_P4_82010_17960465 | NC_021165.1    | Ca_kabuli_chr06 | 17960465                | CC                              | TT              | 1946863807               |



| SNPs IDs              | Chromosome IDs | Chromosomes     | Physical positions (bp) | CDC Frontier (Reference genome) | (ILWC46 & LPNB) | NCBI SNPdb Accession IDs |
|-----------------------|----------------|-----------------|-------------------------|---------------------------------|-----------------|--------------------------|
| SNP_P4_82011_17993291 | NC_021165.1    | Ca_kabuli_chr06 | 17993291                | GG                              | TT              | 1946863809               |
| SNP_P4_82012_17993605 | NC_021165.1    | Ca_kabuli_chr06 | 17993605                | CC                              | AA              | 1946863811               |
| SNP_P4_82013_17993606 | NC_021165.1    | Ca_kabuli_chr06 | 17993606                | AA                              | CC              | 1946863813               |
| SNP_P4_82014_17993613 | NC_021165.1    | Ca_kabuli_chr06 | 17993613                | TT                              | CC              | 1946863815               |
| SNP_P4_82015_17993614 | NC_021165.1    | Ca_kabuli_chr06 | 17993614                | CC                              | AA              | 1946863817               |
| SNP_P4_82016_17993642 | NC_021165.1    | Ca_kabuli_chr06 | 17993642                | CC                              | AA              | 1946863819               |
| SNP_P4_82017_17993649 | NC_021165.1    | Ca_kabuli_chr06 | 17993649                | CC                              | AA              | 1946863821               |
| SNP_P4_82018_17994499 | NC_021165.1    | Ca_kabuli_chr06 | 17994499                | GG                              | AA              | 1946863823               |
| SNP_P4_82019_17994880 | NC_021165.1    | Ca_kabuli_chr06 | 17994880                | AA                              | TT              | 1946863825               |
| SNP_P4_82020_18002936 | NC_021165.1    | Ca_kabuli_chr06 | 18002936                | CC                              | TT              | 1946863827               |
| SNP_P4_82021_18013466 | NC_021165.1    | Ca_kabuli_chr06 | 18013466                | TT                              | AA              | 1946863829               |
| SNP_P4_82022_18027862 | NC_021165.1    | Ca_kabuli_chr06 | 18027862                | AA                              | GG              | 1946863831               |
| SNP_P4_82023_18032408 | NC_021165.1    | Ca_kabuli_chr06 | 18032408                | CC                              | AA              | 1946863833               |
| SNP_P4_82024_18040326 | NC_021165.1    | Ca_kabuli_chr06 | 18040326                | AA                              | GG              | 1946863835               |
| SNP_P4_82025_18080452 | NC_021165.1    | Ca_kabuli_chr06 | 18080452                | TT                              | CC              | 1946863837               |
| SNP_P4_82026_18116235 | NC_021165.1    | Ca_kabuli_chr06 | 18116235                | TT                              | CC              | 1946863839               |
| SNP_P4_82027_18156327 | NC_021165.1    | Ca_kabuli_chr06 | 18156327                | GG                              | AA              | 1946863841               |
| SNP_P4_82028_18156653 | NC_021165.1    | Ca_kabuli_chr06 | 18156653                | GG                              | AA              | 1946863843               |
| SNP_P4_82029_18162545 | NC_021165.1    | Ca_kabuli_chr06 | 18162545                | GG                              | AA              | 1946863845               |
| SNP_P4_82031_18178351 | NC_021165.1    | Ca_kabuli_chr06 | 18178351                | GG                              | AA              | 1946863847               |
| SNP_P4_82032_18178467 | NC_021165.1    | Ca_kabuli_chr06 | 18178467                | TT                              | GG              | 1946863849               |
| SNP_P4_82033_18179128 | NC_021165.1    | Ca_kabuli_chr06 | 18179128                | AA                              | TT              | 1946863851               |
| SNP_P4_82035_18194962 | NC_021165.1    | Ca_kabuli_chr06 | 18194962                | CC                              | TT              | 1946863853               |
| SNP_P4_82036_18195229 | NC_021165.1    | Ca_kabuli_chr06 | 18195229                | CC                              | GG              | 1946863855               |
| SNP_P4_82037_18204531 | NC_021165.1    | Ca_kabuli_chr06 | 18204531                | CC                              | TT              | 1946863857               |
| SNP_P4_82039_18216332 | NC_021165.1    | Ca_kabuli_chr06 | 18216332                | TT                              | CC              | 1946863859               |
| SNP_P4_82041_18247661 | NC_021165.1    | Ca_kabuli_chr06 | 18247661                | AA                              | GG              | 1946863861               |
| SNP_P4_82042_18277437 | NC_021165.1    | Ca_kabuli_chr06 | 18277437                | GG                              | AA              | 1946863863               |
| SNP_P4_82043_18281042 | NC_021165.1    | Ca_kabuli_chr06 | 18281042                | CC                              | TT              | 1946863865               |
| SNP_P4_82045_18333424 | NC_021165.1    | Ca_kabuli_chr06 | 18333424                | GG                              | CC              | 1946863867               |
| SNP_P4_82046_18343611 | NC_021165.1    | Ca_kabuli_chr06 | 18343611                | CC                              | TT              | 1946863869               |
| SNP_P4_82047_18343651 | NC_021165.1    | Ca_kabuli_chr06 | 18343651                | CC                              | TT              | 1946863871               |
| SNP_P4_82048_18343740 | NC_021165.1    | Ca_kabuli_chr06 | 18343740                | AA                              | GG              | 1946863873               |
| SNP_P4_82049_18344002 | NC_021165.1    | Ca_kabuli_chr06 | 18344002                | GG                              | AA              | 1946863875               |
| SNP_P4_82050_18355370 | NC_021165.1    | Ca_kabuli_chr06 | 18355370                | GG                              | AA              | 1946863877               |
| SNP_P4_82051_18355516 | NC_021165.1    | Ca_kabuli_chr06 | 18355516                | CC                              | TT              | 1946863879               |
| SNP_P4_82052_18355544 | NC_021165.1    | Ca_kabuli_chr06 | 18355544                | CC                              | TT              | 1946863881               |
| SNP_P4_82053_18355765 | NC_021165.1    | Ca_kabuli_chr06 | 18355765                | CC                              | TT              | 1946863883               |
| SNP_P4_82054_18355771 | NC_021165.1    | Ca_kabuli_chr06 | 18355771                | AA                              | TT              | 1946863885               |
| SNP_P4_82055_18355834 | NC_021165.1    | Ca_kabuli_chr06 | 18355834                | TT                              | CC              | 1946863887               |
| SNP_P4_82056_18355917 | NC_021165.1    | Ca_kabuli_chr06 | 18355917                | AA                              | GG              | 1946863888               |
| SNP_P4_82057_18384439 | NC_021165.1    | Ca_kabuli_chr06 | 18384439                | GG                              | AA              | 1946863890               |

| SNPs IDs              | Chromosome IDs | Chromosomes     | Physical positions (bp) | CDC Frontier (Reference genome) | (ILWC46 & LPNB) | NCBI SNPdb Accession IDs |
|-----------------------|----------------|-----------------|-------------------------|---------------------------------|-----------------|--------------------------|
| SNP_P4_82058_18384447 | NC_021165.1    | Ca_kabuli_chr06 | 18384447                | GG                              | AA              | 1946863892               |
| SNP_P4_82059_18385033 | NC_021165.1    | Ca_kabuli_chr06 | 18385033                | GG                              | AA              | 1946863894               |
| SNP_P4_82060_18386402 | NC_021165.1    | Ca_kabuli_chr06 | 18386402                | CC                              | TT              | 1946863896               |
| SNP_P4_82061_18401129 | NC_021165.1    | Ca_kabuli_chr06 | 18401129                | GG                              | AA              | 1946863898               |
| SNP_P4_82062_18414175 | NC_021165.1    | Ca_kabuli_chr06 | 18414175                | AA                              | TT              | 1946863900               |
| SNP_P4_82063_18414178 | NC_021165.1    | Ca_kabuli_chr06 | 18414178                | AA                              | CC              | 1946863902               |
| SNP_P4_82066_18429085 | NC_021165.1    | Ca_kabuli_chr06 | 18429085                | GG                              | AA              | 1946863904               |
| SNP_P4_82067_18434067 | NC_021165.1    | Ca_kabuli_chr06 | 18434067                | AA                              | GG              | 1946863906               |
| SNP_P4_82068_18449386 | NC_021165.1    | Ca_kabuli_chr06 | 18449386                | AA                              | GG              | 1946863908               |
| SNP_P4_82069_18451470 | NC_021165.1    | Ca_kabuli_chr06 | 18451470                | TT                              | AA              | 1946863910               |
| SNP_P4_82070_18469548 | NC_021165.1    | Ca_kabuli_chr06 | 18469548                | TT                              | CC              | 1946863912               |
| SNP_P4_82071_18469916 | NC_021165.1    | Ca_kabuli_chr06 | 18469916                | CC                              | TT              | 1946863914               |
| SNP_P4_82073_18489850 | NC_021165.1    | Ca_kabuli_chr06 | 18489850                | TT                              | CC              | 1946863916               |
| SNP_P4_82074_18503743 | NC_021165.1    | Ca_kabuli_chr06 | 18503743                | TT                              | AA              | 1946863918               |
| SNP_P4_82076_18517547 | NC_021165.1    | Ca_kabuli_chr06 | 18517547                | GG                              | AA              | 1946863920               |
| SNP_P4_82077_18517659 | NC_021165.1    | Ca_kabuli_chr06 | 18517659                | AA                              | TT              | 1946863922               |
| SNP_P4_82078_18535533 | NC_021165.1    | Ca_kabuli_chr06 | 18535533                | TT                              | CC              | 1946863924               |
| SNP_P4_82079_18535694 | NC_021165.1    | Ca_kabuli_chr06 | 18535694                | GG                              | TT              | 1946863926               |
| SNP_P4_82080_18539985 | NC_021165.1    | Ca_kabuli_chr06 | 18539985                | CC                              | GG              | 1946863928               |
| SNP_P4_82081_18540833 | NC_021165.1    | Ca_kabuli_chr06 | 18540833                | GG                              | AA              | 1946863930               |
| SNP_P4_82083_18569486 | NC_021165.1    | Ca_kabuli_chr06 | 18569486                | TT                              | AA              | 1946863932               |
| SNP_P4_82085_18571148 | NC_021165.1    | Ca_kabuli_chr06 | 18571148                | TT                              | AA              | 1946863934               |
| SNP_P4_82086_18575315 | NC_021165.1    | Ca_kabuli_chr06 | 18575315                | TT                              | GG              | 1946863936               |
| SNP_P4_82087_18594475 | NC_021165.1    | Ca_kabuli_chr06 | 18594475                | GG                              | AA              | 1946863938               |
| SNP_P4_82088_18594555 | NC_021165.1    | Ca_kabuli_chr06 | 18594555                | TT                              | GG              | 1946863940               |
| SNP_P4_82089_18594576 | NC_021165.1    | Ca_kabuli_chr06 | 18594576                | GG                              | TT              | 1946863942               |
| SNP_P4_82090_18599825 | NC_021165.1    | Ca_kabuli_chr06 | 18599825                | CC                              | TT              | 1946863944               |
| SNP_P4_82091_18601335 | NC_021165.1    | Ca_kabuli_chr06 | 18601335                | TT                              | CC              | 1946863946               |
| SNP_P4_82092_18603043 | NC_021165.1    | Ca_kabuli_chr06 | 18603043                | AA                              | GG              | 1946863948               |
| SNP_P4_82093_18616176 | NC_021165.1    | Ca_kabuli_chr06 | 18616176                | TT                              | CC              | 1946863950               |
| SNP_P4_82094_18617680 | NC_021165.1    | Ca_kabuli_chr06 | 18617680                | TT                              | CC              | 1946863952               |
| SNP_P4_82095_18617729 | NC_021165.1    | Ca_kabuli_chr06 | 18617729                | AA                              | GG              | 1946863954               |
| SNP_P4_82096_18617923 | NC_021165.1    | Ca_kabuli_chr06 | 18617923                | GG                              | AA              | 1946863956               |
| SNP_P4_82097_18617968 | NC_021165.1    | Ca_kabuli_chr06 | 18617968                | AA                              | GG              | 1946863958               |
| SNP_P4_82098_18622184 | NC_021165.1    | Ca_kabuli_chr06 | 18622184                | GG                              | AA              | 1946863960               |
| SNP_P4_82099_18622197 | NC_021165.1    | Ca_kabuli_chr06 | 18622197                | CC                              | AA              | 1946863961               |
| SNP_P4_82100_18622249 | NC_021165.1    | Ca_kabuli_chr06 | 18622249                | GG                              | AA              | 1946863963               |
| SNP_P4_82101_18622592 | NC_021165.1    | Ca_kabuli_chr06 | 18622592                | TT                              | CC              | 1946863965               |
| SNP_P4_82104_18627787 | NC_021165.1    | Ca_kabuli_chr06 | 18627787                | GG                              | AA              | 1946863967               |
| SNP_P4_82105_18638873 | NC_021165.1    | Ca_kabuli_chr06 | 18638873                | GG                              | AA              | 1946863969               |
| SNP_P4_82106_18662849 | NC_021165.1    | Ca_kabuli_chr06 | 18662849                | CC                              | TT              | 1946863971               |
| SNP_P4_82107_18688158 | NC_021165.1    | Ca_kabuli_chr06 | 18688158                | AA                              | GG              | 1946863973               |

| SNPs IDs              | Chromosome IDs | Chromosomes     | Physical positions (bp) | CDC Frontier (Reference genome) | (ILWC46 & LPNB) | NCBI SNPdb Accession IDs |
|-----------------------|----------------|-----------------|-------------------------|---------------------------------|-----------------|--------------------------|
| SNP_P4_82108_18693672 | NC_021165.1    | Ca_kabuli_chr06 | 18693672                | CC                              | TT              | 1946863975               |
| SNP_P4_82109_18693706 | NC_021165.1    | Ca_kabuli_chr06 | 18693706                | CC                              | TT              | 1946863977               |
| SNP_P4_82110_18695117 | NC_021165.1    | Ca_kabuli_chr06 | 18695117                | TT                              | CC              | 1946863979               |
| SNP_P4_82111_18698676 | NC_021165.1    | Ca_kabuli_chr06 | 18698676                | TT                              | AA              | 1946863981               |
| SNP_P4_82112_18699452 | NC_021165.1    | Ca_kabuli_chr06 | 18699452                | AA                              | TT              | 1946863983               |
| SNP_P4_82113_18703997 | NC_021165.1    | Ca_kabuli_chr06 | 18703997                | AA                              | GG              | 1946863985               |
| SNP_P4_82114_18705615 | NC_021165.1    | Ca_kabuli_chr06 | 18705615                | TT                              | CC              | 1946863987               |
| SNP_P4_82115_18706830 | NC_021165.1    | Ca_kabuli_chr06 | 18706830                | GG                              | AA              | 1946863989               |
| SNP_P4_82116_18719697 | NC_021165.1    | Ca_kabuli_chr06 | 18719697                | CC                              | TT              | 1946863991               |
| SNP_P4_82118_18790726 | NC_021165.1    | Ca_kabuli_chr06 | 18790726                | AA                              | GG              | 1946863993               |
| SNP_P4_82120_18792021 | NC_021165.1    | Ca_kabuli_chr06 | 18792021                | CC                              | AA              | 1946863995               |
| SNP_P4_82121_18859563 | NC_021165.1    | Ca_kabuli_chr06 | 18859563                | TT                              | CC              | 1946863997               |
| SNP_P4_82122_18872108 | NC_021165.1    | Ca_kabuli_chr06 | 18872108                | GG                              | AA              | 1946863999               |
| SNP_P4_82123_18874033 | NC_021165.1    | Ca_kabuli_chr06 | 18874033                | AA                              | GG              | 1946864001               |
| SNP_P4_82124_18881565 | NC_021165.1    | Ca_kabuli_chr06 | 18881565                | TT                              | CC              | 1946864003               |
| SNP_P4_82125_18933037 | NC_021165.1    | Ca_kabuli_chr06 | 18933037                | GG                              | AA              | 1946864005               |
| SNP_P4_82126_18938461 | NC_021165.1    | Ca_kabuli_chr06 | 18938461                | TT                              | CC              | 1946864007               |
| SNP_P4_82127_18946162 | NC_021165.1    | Ca_kabuli_chr06 | 18946162                | GG                              | CC              | 1946864009               |
| SNP_P4_82128_18958715 | NC_021165.1    | Ca_kabuli_chr06 | 18958715                | AA                              | GG              | 1946864011               |
| SNP_P4_82129_19009194 | NC_021165.1    | Ca_kabuli_chr06 | 19009194                | CC                              | AA              | 1946864013               |
| SNP_P4_82130_19022833 | NC_021165.1    | Ca_kabuli_chr06 | 19022833                | GG                              | AA              | 1946864015               |
| SNP_P4_82131_19038036 | NC_021165.1    | Ca_kabuli_chr06 | 19038036                | CC                              | TT              | 1946864017               |
| SNP_P4_82134_19095438 | NC_021165.1    | Ca_kabuli_chr06 | 19095438                | TT                              | CC              | 1946864019               |
| SNP_P4_82135_19100400 | NC_021165.1    | Ca_kabuli_chr06 | 19100400                | AA                              | GG              | 1946864021               |
| SNP_P4_82136_19121663 | NC_021165.1    | Ca_kabuli_chr06 | 19121663                | AA                              | GG              | 1946864023               |
| SNP_P4_82138_19175029 | NC_021165.1    | Ca_kabuli_chr06 | 19175029                | TT                              | CC              | 1946864025               |
| SNP_P4_82139_19193218 | NC_021165.1    | Ca_kabuli_chr06 | 19193218                | TT                              | CC              | 1946864027               |
| SNP_P4_82140_19194297 | NC_021165.1    | Ca_kabuli_chr06 | 19194297                | GG                              | AA              | 1946864029               |
| SNP_P4_82141_19222596 | NC_021165.1    | Ca_kabuli_chr06 | 19222596                | TT                              | CC              | 1946864031               |
| SNP_P4_82142_19239771 | NC_021165.1    | Ca_kabuli_chr06 | 19239771                | GG                              | CC              | 1946864033               |
| SNP_P4_82144_19245362 | NC_021165.1    | Ca_kabuli_chr06 | 19245362                | CC                              | TT              | 1946864035               |
| SNP_P4_82145_19251977 | NC_021165.1    | Ca_kabuli_chr06 | 19251977                | GG                              | AA              | 1946864037               |
| SNP_P4_82146_19253835 | NC_021165.1    | Ca_kabuli_chr06 | 19253835                | GG                              | AA              | 1946864039               |
| SNP_P4_82147_19257610 | NC_021165.1    | Ca_kabuli_chr06 | 19257610                | TT                              | AA              | 1946864041               |
| SNP_P4_82149_19259676 | NC_021165.1    | Ca_kabuli_chr06 | 19259676                | TT                              | AA              | 1946864043               |
| SNP_P4_82150_19277024 | NC_021165.1    | Ca_kabuli_chr06 | 19277024                | CC                              | TT              | 1946864045               |
| SNP_P4_82151_19285689 | NC_021165.1    | Ca_kabuli_chr06 | 19285689                | AA                              | GG              | 1946864047               |
| SNP_P4_82152_19293264 | NC_021165.1    | Ca_kabuli_chr06 | 19293264                | GG                              | AA              | 1946864049               |
| SNP_P4_82153_19307719 | NC_021165.1    | Ca_kabuli_chr06 | 19307719                | GG                              | AA              | 1946864051               |
| SNP_P4_82154_19307724 | NC_021165.1    | Ca_kabuli_chr06 | 19307724                | CC                              | TT              | 1946864053               |
| SNP_P4_82156_19339164 | NC_021165.1    | Ca_kabuli_chr06 | 19339164                | AA                              | TT              | 1946864055               |
| SNP_P4_82157_19340108 | NC_021165.1    | Ca_kabuli_chr06 | 19340108                | TT                              | GG              | 1946864057               |

| SNPs IDs              | Chromosome IDs | Chromosomes     | Physical positions (bp) | CDC Frontier (Reference genome) | (ILWC46 & LPNB) | NCBI SNPdb Accession IDs |
|-----------------------|----------------|-----------------|-------------------------|---------------------------------|-----------------|--------------------------|
| SNP_P4_82158_19349297 | NC_021165.1    | Ca_kabuli_chr06 | 19349297                | GG                              | AA              | 1946864059               |
| SNP_P4_82159_19351168 | NC_021165.1    | Ca_kabuli_chr06 | 19351168                | AA                              | GG              | 1946864062               |
| SNP_P4_82160_19362071 | NC_021165.1    | Ca_kabuli_chr06 | 19362071                | AA                              | GG              | 1946864064               |
| SNP_P4_82161_19363107 | NC_021165.1    | Ca_kabuli_chr06 | 19363107                | TT                              | GG              | 1946864066               |
| SNP_P4_82162_19376992 | NC_021165.1    | Ca_kabuli_chr06 | 19376992                | TT                              | CC              | 1946864068               |
| SNP_P4_82163_19385781 | NC_021165.1    | Ca_kabuli_chr06 | 19385781                | GG                              | AA              | 1946864070               |
| SNP_P4_82164_19412675 | NC_021165.1    | Ca_kabuli_chr06 | 19412675                | CC                              | TT              | 1946864072               |
| SNP_P4_82166_19424174 | NC_021165.1    | Ca_kabuli_chr06 | 19424174                | TT                              | CC              | 1946864074               |
| SNP_P4_82167_19438742 | NC_021165.1    | Ca_kabuli_chr06 | 19438742                | AA                              | GG              | 1946864076               |
| SNP_P4_82168_19445840 | NC_021165.1    | Ca_kabuli_chr06 | 19445840                | AA                              | GG              | 1946864078               |
| SNP_P4_82169_19445844 | NC_021165.1    | Ca_kabuli_chr06 | 19445844                | TT                              | CC              | 1946864080               |
| SNP_P4_82170_19479920 | NC_021165.1    | Ca_kabuli_chr06 | 19479920                | TT                              | CC              | 1946864082               |
| SNP_P4_82171_19496143 | NC_021165.1    | Ca_kabuli_chr06 | 19496143                | AA                              | TT              | 1946864084               |
| SNP_P4_82172_19498756 | NC_021165.1    | Ca_kabuli_chr06 | 19498756                | CC                              | TT              | 1946864086               |
| SNP_P4_82173_19501297 | NC_021165.1    | Ca_kabuli_chr06 | 19501297                | AA                              | GG              | 1946864088               |
| SNP_P4_82177_19612494 | NC_021165.1    | Ca_kabuli_chr06 | 19612494                | TT                              | GG              | 1946864090               |
| SNP_P4_82180_19670306 | NC_021165.1    | Ca_kabuli_chr06 | 19670306                | GG                              | AA              | 1946864092               |
| SNP_P4_82183_19709781 | NC_021165.1    | Ca_kabuli_chr06 | 19709781                | AA                              | GG              | 1946864094               |
| SNP_P4_82184_19721635 | NC_021165.1    | Ca_kabuli_chr06 | 19721635                | CC                              | TT              | 1946864096               |
| SNP_P4_82185_19750547 | NC_021165.1    | Ca_kabuli_chr06 | 19750547                | TT                              | CC              | 1946864098               |
| SNP_P4_82186_19751290 | NC_021165.1    | Ca_kabuli_chr06 | 19751290                | CC                              | TT              | 1946864100               |
| SNP_P4_82187_20493921 | NC_021165.1    | Ca_kabuli_chr06 | 20493921                | GG                              | AA              | 1946864102               |
| SNP_P4_82188_20493974 | NC_021165.1    | Ca_kabuli_chr06 | 20493974                | CC                              | TT              | 1946864104               |
| SNP_P4_82189_20494040 | NC_021165.1    | Ca_kabuli_chr06 | 20494040                | AA                              | GG              | 1946864106               |
| SNP_P4_82190_20494183 | NC_021165.1    | Ca_kabuli_chr06 | 20494183                | GG                              | AA              | 1946864108               |
| SNP_P4_82191_20494202 | NC_021165.1    | Ca_kabuli_chr06 | 20494202                | AA                              | TT              | 1946864110               |
| SNP_P4_82192_20494467 | NC_021165.1    | Ca_kabuli_chr06 | 20494467                | TT                              | CC              | 1946864112               |
| SNP_P4_82193_20494689 | NC_021165.1    | Ca_kabuli_chr06 | 20494689                | TT                              | CC              | 1946864114               |
| SNP_P4_82194_20546429 | NC_021165.1    | Ca_kabuli_chr06 | 20546429                | AA                              | CC              | 1946864116               |
| SNP_P4_82195_20546439 | NC_021165.1    | Ca_kabuli_chr06 | 20546439                | CC                              | TT              | 1946864118               |
| SNP_P4_82196_20551417 | NC_021165.1    | Ca_kabuli_chr06 | 20551417                | CC                              | TT              | 1946864120               |
| SNP_P4_82197_20582839 | NC_021165.1    | Ca_kabuli_chr06 | 20582839                | TT                              | AA              | 1946864122               |
| SNP_P4_82198_20588655 | NC_021165.1    | Ca_kabuli_chr06 | 20588655                | TT                              | AA              | 1946864124               |
| SNP_P4_82200_20605610 | NC_021165.1    | Ca_kabuli_chr06 | 20605610                | CC                              | TT              | 1946864126               |
| SNP_P4_82201_20619093 | NC_021165.1    | Ca_kabuli_chr06 | 20619093                | CC                              | TT              | 1946864128               |
| SNP_P4_82202_20644805 | NC_021165.1    | Ca_kabuli_chr06 | 20644805                | TT                              | GG              | 1946864130               |
| SNP_P4_82203_20644828 | NC_021165.1    | Ca_kabuli_chr06 | 20644828                | CC                              | GG              | 1946864132               |
| SNP_P4_82204_20645179 | NC_021165.1    | Ca_kabuli_chr06 | 20645179                | TT                              | CC              | 1946864134               |
| SNP_P4_82205_20646879 | NC_021165.1    | Ca_kabuli_chr06 | 20646879                | AA                              | GG              | 1946864136               |
| SNP_P4_82206_20656100 | NC_021165.1    | Ca_kabuli_chr06 | 20656100                | AA                              | TT              | 1946864138               |
| SNP_P4_82207_20657674 | NC_021165.1    | Ca_kabuli_chr06 | 20657674                | AA                              | GG              | 1946864140               |
| SNP_P4_82209_20678153 | NC_021165.1    | Ca_kabuli_chr06 | 20678153                | CC                              | TT              | 1946864142               |

| SNPs IDs              | Chromosome IDs | Chromosomes     | Physical positions (bp) | CDC Frontier (Reference genome) | (ILWC46 & LPNB) | NCBI SNPdb Accession IDs |
|-----------------------|----------------|-----------------|-------------------------|---------------------------------|-----------------|--------------------------|
| SNP_P4_82211_20689916 | NC_021165.1    | Ca_kabuli_chr06 | 20689916                | CC                              | AA              | 1946864144               |
| SNP_P4_82213_20706471 | NC_021165.1    | Ca_kabuli_chr06 | 20706471                | CC                              | TT              | 1946864146               |
| SNP_P4_82214_20706491 | NC_021165.1    | Ca_kabuli_chr06 | 20706491                | CC                              | TT              | 1946864148               |
| SNP_P4_82215_20711633 | NC_021165.1    | Ca_kabuli_chr06 | 20711633                | TT                              | AA              | 1946864150               |
| SNP_P4_82216_20711635 | NC_021165.1    | Ca_kabuli_chr06 | 20711635                | TT                              | AA              | 1946864152               |
| SNP_P4_82217_20715740 | NC_021165.1    | Ca_kabuli_chr06 | 20715740                | GG                              | AA              | 1946864154               |
| SNP_P4_82218_20715877 | NC_021165.1    | Ca_kabuli_chr06 | 20715877                | CC                              | AA              | 1946864156               |
| SNP_P4_82219_20716105 | NC_021165.1    | Ca_kabuli_chr06 | 20716105                | CC                              | TT              | 1946864158               |
| SNP_P4_82220_20716295 | NC_021165.1    | Ca_kabuli_chr06 | 20716295                | GG                              | AA              | 1946864160               |
| SNP_P4_82221_20730379 | NC_021165.1    | Ca_kabuli_chr06 | 20730379                | GG                              | CC              | 1946864162               |
| SNP_P4_82222_20745747 | NC_021165.1    | Ca_kabuli_chr06 | 20745747                | AA                              | GG              | 1946864164               |
| SNP_P4_82223_20747413 | NC_021165.1    | Ca_kabuli_chr06 | 20747413                | TT                              | CC              | 1946864166               |
| SNP_P4_82224_20786192 | NC_021165.1    | Ca_kabuli_chr06 | 20786192                | TT                              | CC              | 1946864168               |
| SNP_P4_82225_20789672 | NC_021165.1    | Ca_kabuli_chr06 | 20789672                | TT                              | CC              | 1946864170               |
| SNP_P4_82226_20789712 | NC_021165.1    | Ca_kabuli_chr06 | 20789712                | TT                              | CC              | 1946864172               |
| SNP_P4_82227_20790226 | NC_021165.1    | Ca_kabuli_chr06 | 20790226                | TT                              | CC              | 1946864174               |
| SNP_P4_82228_20793547 | NC_021165.1    | Ca_kabuli_chr06 | 20793547                | AA                              | GG              | 1946864176               |
| SNP_P4_82229_20793551 | NC_021165.1    | Ca_kabuli_chr06 | 20793551                | TT                              | CC              | 1946864178               |
| SNP_P4_82230_20793553 | NC_021165.1    | Ca_kabuli_chr06 | 20793553                | AA                              | GG              | 1946864180               |
| SNP_P4_82231_20799907 | NC_021165.1    | Ca_kabuli_chr06 | 20799907                | AA                              | GG              | 1946864182               |
| SNP_P4_82232_20799913 | NC_021165.1    | Ca_kabuli_chr06 | 20799913                | TT                              | CC              | 1946864184               |
| SNP_P4_82233_20800130 | NC_021165.1    | Ca_kabuli_chr06 | 20800130                | GG                              | AA              | 1946864186               |
| SNP_P4_82234_20816797 | NC_021165.1    | Ca_kabuli_chr06 | 20816797                | AA                              | TT              | 1946864188               |
| SNP_P4_82235_20825820 | NC_021165.1    | Ca_kabuli_chr06 | 20825820                | AA                              | GG              | 1946864190               |
| SNP_P4_82236_20838551 | NC_021165.1    | Ca_kabuli_chr06 | 20838551                | TT                              | CC              | 1946864192               |
| SNP_P4_82237_20840473 | NC_021165.1    | Ca_kabuli_chr06 | 20840473                | AA                              | CC              | 1946864194               |
| SNP_P4_82238_20858499 | NC_021165.1    | Ca_kabuli_chr06 | 20858499                | CC                              | GG              | 1946864196               |
| SNP_P4_82239_20858503 | NC_021165.1    | Ca_kabuli_chr06 | 20858503                | CC                              | TT              | 1946864198               |
| SNP_P4_82240_20860322 | NC_021165.1    | Ca_kabuli_chr06 | 20860322                | CC                              | TT              | 1946864200               |
| SNP_P4_82241_20866847 | NC_021165.1    | Ca_kabuli_chr06 | 20866847                | AA                              | GG              | 1946864202               |
| SNP_P4_82242_20867012 | NC_021165.1    | Ca_kabuli_chr06 | 20867012                | AA                              | TT              | 1946864204               |
| SNP_P4_82243_20867251 | NC_021165.1    | Ca_kabuli_chr06 | 20867251                | CC                              | GG              | 1946864206               |
| SNP_P4_82245_20891713 | NC_021165.1    | Ca_kabuli_chr06 | 20891713                | GG                              | AA              | 1946864209               |
| SNP_P4_82246_20897512 | NC_021165.1    | Ca_kabuli_chr06 | 20897512                | AA                              | TT              | 1946864211               |
| SNP_P4_82247_20915126 | NC_021165.1    | Ca_kabuli_chr06 | 20915126                | AA                              | GG              | 1946864213               |
| SNP_P4_82248_20950384 | NC_021165.1    | Ca_kabuli_chr06 | 20950384                | CC                              | TT              | 1946864215               |
| SNP_P4_82249_20954553 | NC_021165.1    | Ca_kabuli_chr06 | 20954553                | AA                              | TT              | 1946864217               |
| SNP_P4_82250_20977784 | NC_021165.1    | Ca_kabuli_chr06 | 20977784                | CC                              | AA              | 1946864219               |
| SNP_P4_82251_20984311 | NC_021165.1    | Ca_kabuli_chr06 | 20984311                | CC                              | TT              | 1946864221               |
| SNP_P4_82252_20990611 | NC_021165.1    | Ca_kabuli_chr06 | 20990611                | GG                              | TT              | 1946864223               |
| SNP_P4_82253_20993269 | NC_021165.1    | Ca_kabuli_chr06 | 20993269                | CC                              | AA              | 1946864226               |
| SNP_P4_82256_21020701 | NC_021165.1    | Ca_kabuli_chr06 | 21020701                | GG                              | TT              | 1946864228               |

| SNPs IDs              | Chromosome IDs | Chromosomes     | Physical positions (bp) | CDC Frontier (Reference genome) | (ILWC46 & LPNB) | NCBI SNPdb Accession IDs |
|-----------------------|----------------|-----------------|-------------------------|---------------------------------|-----------------|--------------------------|
| SNP_P4_82257_21021095 | NC_021165.1    | Ca_kabuli_chr06 | 21021095                | AA                              | GG              | 1946864230               |
| SNP_P4_82258_21021308 | NC_021165.1    | Ca_kabuli_chr06 | 21021308                | TT                              | CC              | 1946864232               |
| SNP_P4_82260_21021717 | NC_021165.1    | Ca_kabuli_chr06 | 21021717                | AA                              | GG              | 1946864234               |
| SNP_P4_82261_21021722 | NC_021165.1    | Ca_kabuli_chr06 | 21021722                | TT                              | CC              | 1946864236               |
| SNP_P4_82262_21044690 | NC_021165.1    | Ca_kabuli_chr06 | 21044690                | TT                              | CC              | 1946864238               |
| SNP_P4_82263_21077761 | NC_021165.1    | Ca_kabuli_chr06 | 21077761                | TT                              | AA              | 1946864240               |
| SNP_P4_82264_21092402 | NC_021165.1    | Ca_kabuli_chr06 | 21092402                | CC                              | TT              | 1946864243               |
| SNP_P4_82266_21116648 | NC_021165.1    | Ca_kabuli_chr06 | 21116648                | GG                              | TT              | 1946864245               |
| SNP_P4_82267_21116654 | NC_021165.1    | Ca_kabuli_chr06 | 21116654                | GG                              | CC              | 1946864247               |
| SNP_P4_82268_21117162 | NC_021165.1    | Ca_kabuli_chr06 | 21117162                | GG                              | AA              | 1946864249               |
| SNP_P4_82269_21122071 | NC_021165.1    | Ca_kabuli_chr06 | 21122071                | GG                              | AA              | 1946864251               |
| SNP_P4_82270_21134225 | NC_021165.1    | Ca_kabuli_chr06 | 21134225                | TT                              | CC              | 1946864253               |
| SNP_P4_82271_21134231 | NC_021165.1    | Ca_kabuli_chr06 | 21134231                | AA                              | CC              | 1946864255               |
| SNP_P4_82272_21138549 | NC_021165.1    | Ca_kabuli_chr06 | 21138549                | TT                              | CC              | 1946864257               |
| SNP_P4_82274_21141069 | NC_021165.1    | Ca_kabuli_chr06 | 21141069                | AA                              | TT              | 1946864259               |
| SNP_P4_82275_21141373 | NC_021165.1    | Ca_kabuli_chr06 | 21141373                | TT                              | CC              | 1946864261               |
| SNP_P4_82276_21141490 | NC_021165.1    | Ca_kabuli_chr06 | 21141490                | CC                              | TT              | 1946864263               |
| SNP_P4_82277_21141520 | NC_021165.1    | Ca_kabuli_chr06 | 21141520                | CC                              | GG              | 1946864266               |
| SNP_P4_82278_21141532 | NC_021165.1    | Ca_kabuli_chr06 | 21141532                | CC                              | TT              | 1946864268               |
| SNP_P4_82280_21141919 | NC_021165.1    | Ca_kabuli_chr06 | 21141919                | CC                              | TT              | 1946864270               |
| SNP_P4_82281_21146755 | NC_021165.1    | Ca_kabuli_chr06 | 21146755                | AA                              | GG              | 1946864272               |
| SNP_P4_82282_21146764 | NC_021165.1    | Ca_kabuli_chr06 | 21146764                | CC                              | GG              | 1946864274               |
| SNP_P4_82283_21147100 | NC_021165.1    | Ca_kabuli_chr06 | 21147100                | GG                              | TT              | 1946864276               |
| SNP_P4_82284_21147107 | NC_021165.1    | Ca_kabuli_chr06 | 21147107                | GG                              | AA              | 1946864278               |
| SNP_P4_82285_21147120 | NC_021165.1    | Ca_kabuli_chr06 | 21147120                | AA                              | TT              | 1946864280               |
| SNP_P4_82286_21147125 | NC_021165.1    | Ca_kabuli_chr06 | 21147125                | TT                              | CC              | 1946864282               |
| SNP_P4_82287_21147134 | NC_021165.1    | Ca_kabuli_chr06 | 21147134                | GG                              | AA              | 1946864284               |
| SNP_P4_82288_21147137 | NC_021165.1    | Ca_kabuli_chr06 | 21147137                | TT                              | GG              | 1946864286               |
| SNP_P4_82289_21147446 | NC_021165.1    | Ca_kabuli_chr06 | 21147446                | AA                              | GG              | 1946864289               |
| SNP_P4_82290_21151248 | NC_021165.1    | Ca_kabuli_chr06 | 21151248                | AA                              | GG              | 1946864291               |
| SNP_P4_82291_21151300 | NC_021165.1    | Ca_kabuli_chr06 | 21151300                | AA                              | GG              | 1946864293               |
| SNP_P4_82292_21153912 | NC_021165.1    | Ca_kabuli_chr06 | 21153912                | GG                              | AA              | 1946864295               |
| SNP_P4_82293_21154155 | NC_021165.1    | Ca_kabuli_chr06 | 21154155                | GG                              | AA              | 1946864297               |
| SNP_P4_82294_21154161 | NC_021165.1    | Ca_kabuli_chr06 | 21154161                | CC                              | TT              | 1946864299               |
| SNP_P4_82296_21154451 | NC_021165.1    | Ca_kabuli_chr06 | 21154451                | CC                              | TT              | 1946864301               |
| SNP_P4_82297_21154470 | NC_021165.1    | Ca_kabuli_chr06 | 21154470                | CC                              | TT              | 1946864303               |
| SNP_P4_82298_21154584 | NC_021165.1    | Ca_kabuli_chr06 | 21154584                | TT                              | CC              | 1946864305               |
| SNP_P4_82299_21154748 | NC_021165.1    | Ca_kabuli_chr06 | 21154748                | TT                              | CC              | 1946864307               |
| SNP_P4_82300_21154777 | NC_021165.1    | Ca_kabuli_chr06 | 21154777                | AA                              | GG              | 1946864308               |
| SNP_P4_82301_21154790 | NC_021165.1    | Ca_kabuli_chr06 | 21154790                | CC                              | TT              | 1946864310               |
| SNP_P4_82302_21155164 | NC_021165.1    | Ca_kabuli_chr06 | 21155164                | TT                              | CC              | 1946864312               |
| SNP_P4_82303_21156699 | NC_021165.1    | Ca_kabuli_chr06 | 21156699                | CC                              | TT              | 1946864314               |

| SNPs IDs              | Chromosome IDs | Chromosomes     | Physical positions (bp) | CDC Frontier (Reference genome) | (ILWC46 & LPNB) | NCBI SNPdb Accession IDs |
|-----------------------|----------------|-----------------|-------------------------|---------------------------------|-----------------|--------------------------|
| SNP_P4_82304_21187544 | NC_021165.1    | Ca_kabuli_chr06 | 21187544                | TT                              | AA              | 1946864316               |
| SNP_P4_82305_21187545 | NC_021165.1    | Ca_kabuli_chr06 | 21187545                | GG                              | AA              | 1946864318               |
| SNP_P4_82307_21259595 | NC_021165.1    | Ca_kabuli_chr06 | 21259595                | TT                              | CC              | 1946864320               |
| SNP_P4_82308_21259637 | NC_021165.1    | Ca_kabuli_chr06 | 21259637                | AA                              | TT              | 1946864323               |
| SNP_P4_82309_21259650 | NC_021165.1    | Ca_kabuli_chr06 | 21259650                | AA                              | GG              | 1946864325               |
| SNP_P4_82310_21259663 | NC_021165.1    | Ca_kabuli_chr06 | 21259663                | AA                              | GG              | 1946864327               |
| SNP_P4_82311_21260207 | NC_021165.1    | Ca_kabuli_chr06 | 21260207                | GG                              | CC              | 1946864329               |
| SNP_P4_82312_21260628 | NC_021165.1    | Ca_kabuli_chr06 | 21260628                | CC                              | TT              | 1946864331               |
| SNP_P4_82313_21261810 | NC_021165.1    | Ca_kabuli_chr06 | 21261810                | TT                              | GG              | 1946864333               |
| SNP_P4_82315_21289359 | NC_021165.1    | Ca_kabuli_chr06 | 21289359                | GG                              | AA              | 1946864335               |
| SNP_P4_82316_21303227 | NC_021165.1    | Ca_kabuli_chr06 | 21303227                | GG                              | TT              | 1946864337               |
| SNP_P4_82317_21317678 | NC_021165.1    | Ca_kabuli_chr06 | 21317678                | CC                              | TT              | 1946864339               |
| SNP_P4_82318_21318623 | NC_021165.1    | Ca_kabuli_chr06 | 21318623                | CC                              | TT              | 1946864341               |
| SNP_P4_82319_21332546 | NC_021165.1    | Ca_kabuli_chr06 | 21332546                | GG                              | TT              | 1946864343               |
| SNP_P4_82321_21342937 | NC_021165.1    | Ca_kabuli_chr06 | 21342937                | AA                              | CC              | 1946864345               |
| SNP_P4_82322_21342939 | NC_021165.1    | Ca_kabuli_chr06 | 21342939                | TT                              | GG              | 1946864347               |
| SNP_P4_82323_21353727 | NC_021165.1    | Ca_kabuli_chr06 | 21353727                | TT                              | CC              | 1946864349               |
| SNP_P4_82324_21353806 | NC_021165.1    | Ca_kabuli_chr06 | 21353806                | GG                              | TT              | 1946864351               |
| SNP_P4_82325_21355932 | NC_021165.1    | Ca_kabuli_chr06 | 21355932                | GG                              | AA              | 1946864353               |
| SNP_P4_82326_21370870 | NC_021165.1    | Ca_kabuli_chr06 | 21370870                | CC                              | TT              | 1946864355               |
| SNP_P4_82328_21393359 | NC_021165.1    | Ca_kabuli_chr06 | 21393359                | TT                              | AA              | 1946864357               |
| SNP_P4_82329_21393365 | NC_021165.1    | Ca_kabuli_chr06 | 21393365                | AA                              | TT              | 1946864359               |
| SNP_P4_82330_21393366 | NC_021165.1    | Ca_kabuli_chr06 | 21393366                | CC                              | AA              | 1946864361               |
| SNP_P4_82331_21396314 | NC_021165.1    | Ca_kabuli_chr06 | 21396314                | TT                              | CC              | 1946864363               |
| SNP_P4_82332_21396367 | NC_021165.1    | Ca_kabuli_chr06 | 21396367                | AA                              | TT              | 1946864365               |
| SNP_P4_82333_21396668 | NC_021165.1    | Ca_kabuli_chr06 | 21396668                | AA                              | GG              | 1946864367               |
| SNP_P4_82335_21397357 | NC_021165.1    | Ca_kabuli_chr06 | 21397357                | AA                              | TT              | 1946864369               |
| SNP_P4_82336_21397377 | NC_021165.1    | Ca_kabuli_chr06 | 21397377                | GG                              | AA              | 1946864371               |
| SNP_P4_82337_21397392 | NC_021165.1    | Ca_kabuli_chr06 | 21397392                | CC                              | GG              | 1946864373               |
| SNP_P4_82338_21397464 | NC_021165.1    | Ca_kabuli_chr06 | 21397464                | AA                              | GG              | 1946864375               |
| SNP_P4_82339_21397488 | NC_021165.1    | Ca_kabuli_chr06 | 21397488                | AA                              | GG              | 1946864377               |
| SNP_P4_82340_21397493 | NC_021165.1    | Ca_kabuli_chr06 | 21397493                | AA                              | GG              | 1946864379               |
| SNP_P4_82341_21397524 | NC_021165.1    | Ca_kabuli_chr06 | 21397524                | TT                              | AA              | 1946864381               |
| SNP_P4_82342_21397589 | NC_021165.1    | Ca_kabuli_chr06 | 21397589                | AA                              | TT              | 1946864383               |
| SNP_P4_82344_21399687 | NC_021165.1    | Ca_kabuli_chr06 | 21399687                | TT                              | CC              | 1946864385               |
| SNP_P4_82346_21400766 | NC_021165.1    | Ca_kabuli_chr06 | 21400766                | AA                              | GG              | 1946864387               |
| SNP_P4_82347_21400914 | NC_021165.1    | Ca_kabuli_chr06 | 21400914                | CC                              | TT              | 1946864389               |
| SNP_P4_82348_21401149 | NC_021165.1    | Ca_kabuli_chr06 | 21401149                | TT                              | CC              | 1946864391               |
| SNP_P4_82349_21401225 | NC_021165.1    | Ca_kabuli_chr06 | 21401225                | GG                              | AA              | 1946864393               |
| SNP_P4_82350_21401248 | NC_021165.1    | Ca_kabuli_chr06 | 21401248                | AA                              | GG              | 1946864395               |
| SNP_P4_82352_21401577 | NC_021165.1    | Ca_kabuli_chr06 | 21401577                | GG                              | AA              | 1946864397               |
| SNP_P4_82353_21401656 | NC_021165.1    | Ca_kabuli_chr06 | 21401656                | CC                              | TT              | 1946864399               |

| SNPs IDs              | Chromosome IDs | Chromosomes     | Physical positions (bp) | CDC Frontier (Reference genome) | (ILWC46 & LPNB) | NCBI SNPdb Accession IDs |
|-----------------------|----------------|-----------------|-------------------------|---------------------------------|-----------------|--------------------------|
| SNP_P4_82354_21401815 | NC_021165.1    | Ca_kabuli_chr06 | 21401815                | GG                              | AA              | 1946864401               |
| SNP_P4_82356_21461317 | NC_021165.1    | Ca_kabuli_chr06 | 21461317                | GG                              | TT              | 1946864403               |
| SNP_P4_82358_21481389 | NC_021165.1    | Ca_kabuli_chr06 | 21481389                | GG                              | TT              | 1946864405               |
| SNP_P4_82359_21485207 | NC_021165.1    | Ca_kabuli_chr06 | 21485207                | CC                              | TT              | 1946864407               |
| SNP_P4_82360_21485249 | NC_021165.1    | Ca_kabuli_chr06 | 21485249                | CC                              | AA              | 1946864409               |
| SNP_P4_82361_21485363 | NC_021165.1    | Ca_kabuli_chr06 | 21485363                | GG                              | AA              | 1946864411               |
| SNP_P4_82362_21485391 | NC_021165.1    | Ca_kabuli_chr06 | 21485391                | AA                              | TT              | 1946864414               |
| SNP_P4_82363_21485502 | NC_021165.1    | Ca_kabuli_chr06 | 21485502                | TT                              | CC              | 1946864416               |
| SNP_P4_82364_21485530 | NC_021165.1    | Ca_kabuli_chr06 | 21485530                | AA                              | TT              | 1946864418               |
| SNP_P4_82366_21485610 | NC_021165.1    | Ca_kabuli_chr06 | 21485610                | GG                              | AA              | 1946864419               |
| SNP_P4_82367_21485656 | NC_021165.1    | Ca_kabuli_chr06 | 21485656                | TT                              | GG              | 1946864421               |
| SNP_P4_82369_21522993 | NC_021165.1    | Ca_kabuli_chr06 | 21522993                | GG                              | AA              | 1946864424               |
| SNP_P4_82370_21523008 | NC_021165.1    | Ca_kabuli_chr06 | 21523008                | GG                              | AA              | 1946864426               |
| SNP_P4_82371_21523277 | NC_021165.1    | Ca_kabuli_chr06 | 21523277                | GG                              | AA              | 1946864428               |
| SNP_P4_82372_21523301 | NC_021165.1    | Ca_kabuli_chr06 | 21523301                | GG                              | AA              | 1946864430               |
| SNP_P4_82373_21523310 | NC_021165.1    | Ca_kabuli_chr06 | 21523310                | GG                              | AA              | 1946864432               |
| SNP_P4_82374_21523337 | NC_021165.1    | Ca_kabuli_chr06 | 21523337                | GG                              | AA              | 1946864434               |
| SNP_P4_82375_21523379 | NC_021165.1    | Ca_kabuli_chr06 | 21523379                | AA                              | TT              | 1946864436               |
| SNP_P4_82376_21523409 | NC_021165.1    | Ca_kabuli_chr06 | 21523409                | TT                              | CC              | 1946864438               |
| SNP_P4_82377_21523763 | NC_021165.1    | Ca_kabuli_chr06 | 21523763                | AA                              | GG              | 1946864440               |
| SNP_P4_82378_21523772 | NC_021165.1    | Ca_kabuli_chr06 | 21523772                | TT                              | CC              | 1946864442               |
| SNP_P4_82379_21523784 | NC_021165.1    | Ca_kabuli_chr06 | 21523784                | TT                              | CC              | 1946864444               |
| SNP_P4_82380_21523954 | NC_021165.1    | Ca_kabuli_chr06 | 21523954                | GG                              | AA              | 1946864446               |
| SNP_P4_82381_21523982 | NC_021165.1    | Ca_kabuli_chr06 | 21523982                | GG                              | TT              | 1946864448               |
| SNP_P4_82382_21523984 | NC_021165.1    | Ca_kabuli_chr06 | 21523984                | GG                              | AA              | 1946864450               |
| SNP_P4_82383_21524021 | NC_021165.1    | Ca_kabuli_chr06 | 21524021                | TT                              | AA              | 1946864452               |
| SNP_P4_82384_21524058 | NC_021165.1    | Ca_kabuli_chr06 | 21524058                | AA                              | GG              | 1946864454               |
| SNP_P4_82385_21524070 | NC_021165.1    | Ca_kabuli_chr06 | 21524070                | GG                              | AA              | 1946864456               |
| SNP_P4_82386_21524108 | NC_021165.1    | Ca_kabuli_chr06 | 21524108                | TT                              | AA              | 1946864458               |
| SNP_P4_82387_21524134 | NC_021165.1    | Ca_kabuli_chr06 | 21524134                | CC                              | TT              | 1946864460               |
| SNP_P4_82388_21524150 | NC_021165.1    | Ca_kabuli_chr06 | 21524150                | CC                              | TT              | 1946864462               |
| SNP_P4_82389_21524187 | NC_021165.1    | Ca_kabuli_chr06 | 21524187                | GG                              | AA              | 1946864464               |
| SNP_P4_82390_21524492 | NC_021165.1    | Ca_kabuli_chr06 | 21524492                | GG                              | AA              | 1946864466               |
| SNP_P4_82391_21524497 | NC_021165.1    | Ca_kabuli_chr06 | 21524497                | CC                              | TT              | 1946864468               |
| SNP_P4_82392_21524821 | NC_021165.1    | Ca_kabuli_chr06 | 21524821                | CC                              | TT              | 1946864470               |
| SNP_P4_82393_21530719 | NC_021165.1    | Ca_kabuli_chr06 | 21530719                | AA                              | GG              | 1946864472               |
| SNP_P4_82394_21530732 | NC_021165.1    | Ca_kabuli_chr06 | 21530732                | CC                              | TT              | 1946864474               |
| SNP_P4_82395_21530779 | NC_021165.1    | Ca_kabuli_chr06 | 21530779                | GG                              | AA              | 1946864476               |
| SNP_P4_82396_21530926 | NC_021165.1    | Ca_kabuli_chr06 | 21530926                | TT                              | CC              | 1946864478               |
| SNP_P4_82397_21548519 | NC_021165.1    | Ca_kabuli_chr06 | 21548519                | GG                              | AA              | 1946864479               |
| SNP_P4_82400_21606137 | NC_021165.1    | Ca_kabuli_chr06 | 21606137                | AA                              | GG              | 1946864481               |
| SNP_P4_82401_21620815 | NC_021165.1    | Ca_kabuli_chr06 | 21620815                | GG                              | TT              | 1946864483               |



| SNPs IDs              | Chromosome IDs | Chromosomes     | Physical positions (bp) | CDC Frontier (Reference genome) | (ILWC46 & LPNB) | NCBI SNPdb Accession IDs |
|-----------------------|----------------|-----------------|-------------------------|---------------------------------|-----------------|--------------------------|
| SNP_P4_82402_21620816 | NC_021165.1    | Ca_kabuli_chr06 | 21620816                | CC                              | GG              | 1946864485               |
| SNP_P4_82403_21634205 | NC_021165.1    | Ca_kabuli_chr06 | 21634205                | AA                              | GG              | 1946864487               |
| SNP_P4_82405_21693307 | NC_021165.1    | Ca_kabuli_chr06 | 21693307                | TT                              | AA              | 1946864489               |
| SNP_P4_82406_21697946 | NC_021165.1    | Ca_kabuli_chr06 | 21697946                | TT                              | CC              | 1946864491               |
| SNP_P4_82407_21719297 | NC_021165.1    | Ca_kabuli_chr06 | 21719297                | AA                              | TT              | 1946864493               |
| SNP_P4_82408_21734299 | NC_021165.1    | Ca_kabuli_chr06 | 21734299                | CC                              | TT              | 1946864495               |
| SNP_P4_82410_21744829 | NC_021165.1    | Ca_kabuli_chr06 | 21744829                | AA                              | CC              | 1946864497               |
| SNP_P4_82411_21745528 | NC_021165.1    | Ca_kabuli_chr06 | 21745528                | TT                              | CC              | 1946864499               |
| SNP_P4_82412_21755722 | NC_021165.1    | Ca_kabuli_chr06 | 21755722                | TT                              | CC              | 1946864501               |
| SNP_P4_82413_21756152 | NC_021165.1    | Ca_kabuli_chr06 | 21756152                | TT                              | CC              | 1946864503               |
| SNP_P4_82414_21767950 | NC_021165.1    | Ca_kabuli_chr06 | 21767950                | AA                              | GG              | 1946864505               |
| SNP_P4_82416_21769740 | NC_021165.1    | Ca_kabuli_chr06 | 21769740                | CC                              | AA              | 1946864507               |
| SNP_P4_82417_21773418 | NC_021165.1    | Ca_kabuli_chr06 | 21773418                | CC                              | AA              | 1946864509               |
| SNP_P4_82418_21777523 | NC_021165.1    | Ca_kabuli_chr06 | 21777523                | TT                              | AA              | 1946864511               |
| SNP_P4_82419_21777722 | NC_021165.1    | Ca_kabuli_chr06 | 21777722                | AA                              | TT              | 1946864513               |
| SNP_P4_82422_21778900 | NC_021165.1    | Ca_kabuli_chr06 | 21778900                | CC                              | GG              | 1946864515               |
| SNP_P4_82423_21779163 | NC_021165.1    | Ca_kabuli_chr06 | 21779163                | TT                              | CC              | 1946864517               |
| SNP_P4_82424_21779191 | NC_021165.1    | Ca_kabuli_chr06 | 21779191                | AA                              | GG              | 1946864519               |
| SNP_P4_82425_21779194 | NC_021165.1    | Ca_kabuli_chr06 | 21779194                | TT                              | AA              | 1946864521               |
| SNP_P4_82426_21779618 | NC_021165.1    | Ca_kabuli_chr06 | 21779618                | AA                              | CC              | 1946864523               |
| SNP_P4_82428_21782460 | NC_021165.1    | Ca_kabuli_chr06 | 21782460                | TT                              | CC              | 1946864525               |
| SNP_P4_82429_21782519 | NC_021165.1    | Ca_kabuli_chr06 | 21782519                | CC                              | AA              | 1946864527               |
| SNP_P4_82430_21782533 | NC_021165.1    | Ca_kabuli_chr06 | 21782533                | TT                              | AA              | 1946864529               |
| SNP_P4_82431_21782554 | NC_021165.1    | Ca_kabuli_chr06 | 21782554                | TT                              | AA              | 1946864531               |
| SNP_P4_82432_21782797 | NC_021165.1    | Ca_kabuli_chr06 | 21782797                | AA                              | GG              | 1946864533               |
| SNP_P4_82433_21782811 | NC_021165.1    | Ca_kabuli_chr06 | 21782811                | TT                              | CC              | 1946864535               |
| SNP_P4_82435_21782830 | NC_021165.1    | Ca_kabuli_chr06 | 21782830                | TT                              | AA              | 1946864537               |
| SNP_P4_82436_21782973 | NC_021165.1    | Ca_kabuli_chr06 | 21782973                | GG                              | CC              | 1946864539               |
| SNP_P4_82437_21790005 | NC_021165.1    | Ca_kabuli_chr06 | 21790005                | GG                              | AA              | 1946864541               |
| SNP_P4_82438_21792069 | NC_021165.1    | Ca_kabuli_chr06 | 21792069                | AA                              | GG              | 1946864543               |
| SNP_P4_82439_21792091 | NC_021165.1    | Ca_kabuli_chr06 | 21792091                | GG                              | AA              | 1946864545               |
| SNP_P4_82440_21792112 | NC_021165.1    | Ca_kabuli_chr06 | 21792112                | AA                              | TT              | 1946864547               |
| SNP_P4_82441_21792168 | NC_021165.1    | Ca_kabuli_chr06 | 21792168                | TT                              | AA              | 1946864549               |
| SNP_P4_82442_21792499 | NC_021165.1    | Ca_kabuli_chr06 | 21792499                | TT                              | AA              | 1946864551               |
| SNP_P4_82443_21793888 | NC_021165.1    | Ca_kabuli_chr06 | 21793888                | TT                              | AA              | 1946864553               |
| SNP_P4_82444_21793901 | NC_021165.1    | Ca_kabuli_chr06 | 21793901                | TT                              | AA              | 1946864555               |
| SNP_P4_82445_21793920 | NC_021165.1    | Ca_kabuli_chr06 | 21793920                | GG                              | AA              | 1946864557               |
| SNP_P4_82446_21794085 | NC_021165.1    | Ca_kabuli_chr06 | 21794085                | TT                              | CC              | 1946864559               |
| SNP_P4_82447_21794133 | NC_021165.1    | Ca_kabuli_chr06 | 21794133                | TT                              | AA              | 1946864561               |
| SNP_P4_82448_21794135 | NC_021165.1    | Ca_kabuli_chr06 | 21794135                | TT                              | CC              | 1946864563               |
| SNP_P4_82449_21794148 | NC_021165.1    | Ca_kabuli_chr06 | 21794148                | CC                              | TT              | 1946864565               |
| SNP_P4_82450_21795210 | NC_021165.1    | Ca_kabuli_chr06 | 21795210                | AA                              | CC              | 1946864567               |

| SNPs IDs              | Chromosome IDs | Chromosomes     | Physical positions (bp) | CDC Frontier (Reference genome) | (ILWC46 & LPNB) | NCBI SNPdb Accession IDs |
|-----------------------|----------------|-----------------|-------------------------|---------------------------------|-----------------|--------------------------|
| SNP_P4_82451_21795254 | NC_021165.1    | Ca_kabuli_chr06 | 21795254                | AA                              | TT              | 1946864569               |
| SNP_P4_82452_21795305 | NC_021165.1    | Ca_kabuli_chr06 | 21795305                | AA                              | GG              | 1946864571               |
| SNP_P4_82453_21795308 | NC_021165.1    | Ca_kabuli_chr06 | 21795308                | GG                              | AA              | 1946864573               |
| SNP_P4_82455_21799061 | NC_021165.1    | Ca_kabuli_chr06 | 21799061                | TT                              | GG              | 1946864575               |
| SNP_P4_82457_21799263 | NC_021165.1    | Ca_kabuli_chr06 | 21799263                | TT                              | GG              | 1946864577               |
| SNP_P4_82458_21800428 | NC_021165.1    | Ca_kabuli_chr06 | 21800428                | TT                              | CC              | 1946864579               |
| SNP_P4_82459_21801075 | NC_021165.1    | Ca_kabuli_chr06 | 21801075                | TT                              | CC              | 1946864581               |
| SNP_P4_82460_21801121 | NC_021165.1    | Ca_kabuli_chr06 | 21801121                | TT                              | CC              | 1946864583               |
| SNP_P4_82461_21801134 | NC_021165.1    | Ca_kabuli_chr06 | 21801134                | CC                              | TT              | 1946864585               |
| SNP_P4_82462_21801413 | NC_021165.1    | Ca_kabuli_chr06 | 21801413                | CC                              | GG              | 1946864587               |
| SNP_P4_82464_21801729 | NC_021165.1    | Ca_kabuli_chr06 | 21801729                | CC                              | GG              | 1946864589               |
| SNP_P4_82465_21801821 | NC_021165.1    | Ca_kabuli_chr06 | 21801821                | GG                              | AA              | 1946864591               |
| SNP_P4_82466_21801962 | NC_021165.1    | Ca_kabuli_chr06 | 21801962                | AA                              | TT              | 1946864593               |
| SNP_P4_82467_21802153 | NC_021165.1    | Ca_kabuli_chr06 | 21802153                | CC                              | AA              | 1946864595               |
| SNP_P4_82468_21802455 | NC_021165.1    | Ca_kabuli_chr06 | 21802455                | AA                              | CC              | 1946864598               |
| SNP_P4_82469_21802502 | NC_021165.1    | Ca_kabuli_chr06 | 21802502                | AA                              | GG              | 1946864600               |
| SNP_P4_82470_21803812 | NC_021165.1    | Ca_kabuli_chr06 | 21803812                | CC                              | TT              | 1946864602               |
| SNP_P4_82471_21803829 | NC_021165.1    | Ca_kabuli_chr06 | 21803829                | TT                              | CC              | 1946864604               |
| SNP_P4_82472_21804337 | NC_021165.1    | Ca_kabuli_chr06 | 21804337                | GG                              | CC              | 1946864606               |
| SNP_P4_82473_21804400 | NC_021165.1    | Ca_kabuli_chr06 | 21804400                | GG                              | TT              | 1946864608               |
| SNP_P4_82474_21804476 | NC_021165.1    | Ca_kabuli_chr06 | 21804476                | TT                              | CC              | 1946864610               |
| SNP_P4_82475_21804510 | NC_021165.1    | Ca_kabuli_chr06 | 21804510                | CC                              | TT              | 1946864612               |
| SNP_P4_82476_21804563 | NC_021165.1    | Ca_kabuli_chr06 | 21804563                | GG                              | AA              | 1946864614               |
| SNP_P4_82477_21804827 | NC_021165.1    | Ca_kabuli_chr06 | 21804827                | TT                              | GG              | 1946864616               |
| SNP_P4_82478_21805168 | NC_021165.1    | Ca_kabuli_chr06 | 21805168                | AA                              | GG              | 1946864618               |
| SNP_P4_82479_21805483 | NC_021165.1    | Ca_kabuli_chr06 | 21805483                | CC                              | TT              | 1946864620               |
| SNP_P4_82480_21808285 | NC_021165.1    | Ca_kabuli_chr06 | 21808285                | TT                              | CC              | 1946864622               |
| SNP_P4_82481_21811041 | NC_021165.1    | Ca_kabuli_chr06 | 21811041                | AA                              | GG              | 1946864624               |
| SNP_P4_82483_21818802 | NC_021165.1    | Ca_kabuli_chr06 | 21818802                | GG                              | AA              | 1946864626               |
| SNP_P4_82484_21822449 | NC_021165.1    | Ca_kabuli_chr06 | 21822449                | TT                              | CC              | 1946864628               |
| SNP_P4_82485_21822458 | NC_021165.1    | Ca_kabuli_chr06 | 21822458                | TT                              | GG              | 1946864630               |
| SNP_P4_82486_21822549 | NC_021165.1    | Ca_kabuli_chr06 | 21822549                | GG                              | AA              | 1946864632               |
| SNP_P4_82487_21822597 | NC_021165.1    | Ca_kabuli_chr06 | 21822597                | AA                              | GG              | 1946864634               |
| SNP_P4_82489_21822777 | NC_021165.1    | Ca_kabuli_chr06 | 21822777                | GG                              | TT              | 1946864636               |
| SNP_P4_82490_21822824 | NC_021165.1    | Ca_kabuli_chr06 | 21822824                | GG                              | TT              | 1946864638               |
| SNP_P4_82491_21822895 | NC_021165.1    | Ca_kabuli_chr06 | 21822895                | AA                              | GG              | 1946864640               |
| SNP_P4_82492_21822935 | NC_021165.1    | Ca_kabuli_chr06 | 21822935                | TT                              | GG              | 1946864642               |
| SNP_P4_82493_21822970 | NC_021165.1    | Ca_kabuli_chr06 | 21822970                | TT                              | GG              | 1946864644               |
| SNP_P4_82494_21822978 | NC_021165.1    | Ca_kabuli_chr06 | 21822978                | AA                              | GG              | 1946864646               |
| SNP_P4_82495_21822991 | NC_021165.1    | Ca_kabuli_chr06 | 21822991                | TT                              | CC              | 1946864648               |
| SNP_P4_82496_21823034 | NC_021165.1    | Ca_kabuli_chr06 | 21823034                | GG                              | TT              | 1946864650               |
| SNP_P4_82497_21823509 | NC_021165.1    | Ca_kabuli_chr06 | 21823509                | AA                              | GG              | 1946864652               |

| SNPs IDs              | Chromosome IDs | Chromosomes     | Physical positions (bp) | CDC Frontier (Reference genome) | (ILWC46 & LPNB) | NCBI SNPdb Accession IDs |
|-----------------------|----------------|-----------------|-------------------------|---------------------------------|-----------------|--------------------------|
| SNP_P4_82498_21844013 | NC_021165.1    | Ca_kabuli_chr06 | 21844013                | AA                              | GG              | 1946864654               |
| SNP_P4_82499_21846216 | NC_021165.1    | Ca_kabuli_chr06 | 21846216                | GG                              | AA              | 1946864656               |
| SNP_P4_82500_21849679 | NC_021165.1    | Ca_kabuli_chr06 | 21849679                | GG                              | AA              | 1946864658               |
| SNP_P4_82501_21855302 | NC_021165.1    | Ca_kabuli_chr06 | 21855302                | AA                              | CC              | 1946864660               |
| SNP_P4_82502_21865426 | NC_021165.1    | Ca_kabuli_chr06 | 21865426                | GG                              | TT              | 1946864662               |
| SNP_P4_82503_21881581 | NC_021165.1    | Ca_kabuli_chr06 | 21881581                | GG                              | AA              | 1946864664               |
| SNP_P4_82504_21889070 | NC_021165.1    | Ca_kabuli_chr06 | 21889070                | AA                              | GG              | 1946864681               |
| SNP_P4_82505_21889091 | NC_021165.1    | Ca_kabuli_chr06 | 21889091                | GG                              | CC              | 1946864683               |
| SNP_P4_82508_21902555 | NC_021165.1    | Ca_kabuli_chr06 | 21902555                | AA                              | GG              | 1946864685               |
| SNP_P4_82509_21906402 | NC_021165.1    | Ca_kabuli_chr06 | 21906402                | CC                              | TT              | 1946864687               |
| SNP_P4_82510_21909381 | NC_021165.1    | Ca_kabuli_chr06 | 21909381                | AA                              | TT              | 1946864689               |
| SNP_P4_82513_21928121 | NC_021165.1    | Ca_kabuli_chr06 | 21928121                | TT                              | AA              | 1946864691               |
| SNP_P4_82514_21936134 | NC_021165.1    | Ca_kabuli_chr06 | 21936134                | TT                              | CC              | 1946864693               |
| SNP_P4_82515_21942206 | NC_021165.1    | Ca_kabuli_chr06 | 21942206                | GG                              | AA              | 1946864695               |
| SNP_P4_82516_21943826 | NC_021165.1    | Ca_kabuli_chr06 | 21943826                | TT                              | CC              | 1946864697               |
| SNP_P4_82517_21952623 | NC_021165.1    | Ca_kabuli_chr06 | 21952623                | TT                              | CC              | 1946864699               |
| SNP_P4_82518_21956368 | NC_021165.1    | Ca_kabuli_chr06 | 21956368                | CC                              | TT              | 1946864701               |
| SNP_P4_82519_21966291 | NC_021165.1    | Ca_kabuli_chr06 | 21966291                | AA                              | TT              | 1946864703               |
| SNP_P4_82520_21982061 | NC_021165.1    | Ca_kabuli_chr06 | 21982061                | TT                              | GG              | 1946864705               |
| SNP_P4_82522_21989714 | NC_021165.1    | Ca_kabuli_chr06 | 21989714                | CC                              | AA              | 1946864707               |
| SNP_P4_82523_21994167 | NC_021165.1    | Ca_kabuli_chr06 | 21994167                | AA                              | GG              | 1946864709               |
| SNP_P4_82524_21994168 | NC_021165.1    | Ca_kabuli_chr06 | 21994168                | AA                              | GG              | 1946864711               |
| SNP_P4_82525_21994469 | NC_021165.1    | Ca_kabuli_chr06 | 21994469                | GG                              | AA              | 1946864713               |
| SNP_P4_82526_22010102 | NC_021165.1    | Ca_kabuli_chr06 | 22010102                | AA                              | GG              | 1946864715               |
| SNP_P4_82527_22027885 | NC_021165.1    | Ca_kabuli_chr06 | 22027885                | TT                              | AA              | 1946864717               |
| SNP_P4_82529_22047435 | NC_021165.1    | Ca_kabuli_chr06 | 22047435                | AA                              | CC              | 1946864719               |
| SNP_P4_82530_22047438 | NC_021165.1    | Ca_kabuli_chr06 | 22047438                | TT                              | CC              | 1946864721               |
| SNP_P4_82531_22067988 | NC_021165.1    | Ca_kabuli_chr06 | 22067988                | CC                              | AA              | 1946864723               |
| SNP_P4_82533_22099385 | NC_021165.1    | Ca_kabuli_chr06 | 22099385                | TT                              | CC              | 1946864725               |
| SNP_P4_82535_22099758 | NC_021165.1    | Ca_kabuli_chr06 | 22099758                | TT                              | CC              | 1946864727               |
| SNP_P4_82536_22117994 | NC_021165.1    | Ca_kabuli_chr06 | 22117994                | CC                              | TT              | 1946864729               |
| SNP_P4_82539_22129033 | NC_021165.1    | Ca_kabuli_chr06 | 22129033                | AA                              | GG              | 1946864731               |
| SNP_P4_82540_22129323 | NC_021165.1    | Ca_kabuli_chr06 | 22129323                | TT                              | CC              | 1946864733               |
| SNP_P4_82541_22130437 | NC_021165.1    | Ca_kabuli_chr06 | 22130437                | GG                              | TT              | 1946864735               |
| SNP_P4_82542_22152241 | NC_021165.1    | Ca_kabuli_chr06 | 22152241                | TT                              | AA              | 1946864737               |
| SNP_P4_82543_22152243 | NC_021165.1    | Ca_kabuli_chr06 | 22152243                | TT                              | CC              | 1946864739               |
| SNP_P4_82544_22152775 | NC_021165.1    | Ca_kabuli_chr06 | 22152775                | AA                              | GG              | 1946864741               |
| SNP_P4_82545_22195743 | NC_021165.1    | Ca_kabuli_chr06 | 22195743                | AA                              | GG              | 1946864743               |
| SNP_P4_82546_22197194 | NC_021165.1    | Ca_kabuli_chr06 | 22197194                | CC                              | AA              | 1946864745               |
| SNP_P4_82547_22225647 | NC_021165.1    | Ca_kabuli_chr06 | 22225647                | TT                              | GG              | 1946864748               |
| SNP_P4_82548_22225720 | NC_021165.1    | Ca_kabuli_chr06 | 22225720                | TT                              | CC              | 1946864750               |
| SNP_P4_82549_22231737 | NC_021165.1    | Ca_kabuli_chr06 | 22231737                | AA                              | TT              | 1946864752               |

| SNPs IDs              | Chromosome IDs | Chromosomes     | Physical positions (bp) | CDC Frontier (Reference genome) | (ILWC46 & LPNB) | NCBI SNPdb Accession IDs |
|-----------------------|----------------|-----------------|-------------------------|---------------------------------|-----------------|--------------------------|
| SNP_P4_82550_22248763 | NC_021165.1    | Ca_kabuli_chr06 | 22248763                | TT                              | CC              | 1946864755               |
| SNP_P4_82551_22252319 | NC_021165.1    | Ca_kabuli_chr06 | 22252319                | GG                              | AA              | 1946864757               |
| SNP_P4_82552_22252699 | NC_021165.1    | Ca_kabuli_chr06 | 22252699                | TT                              | GG              | 1946864759               |
| SNP_P4_82553_22252717 | NC_021165.1    | Ca_kabuli_chr06 | 22252717                | AA                              | GG              | 1946864761               |
| SNP_P4_82554_22285519 | NC_021165.1    | Ca_kabuli_chr06 | 22285519                | AA                              | TT              | 1946864763               |
| SNP_P4_82555_22285520 | NC_021165.1    | Ca_kabuli_chr06 | 22285520                | AA                              | TT              | 1946864765               |
| SNP_P4_82556_22285521 | NC_021165.1    | Ca_kabuli_chr06 | 22285521                | AA                              | TT              | 1946864767               |
| SNP_P4_82557_22285522 | NC_021165.1    | Ca_kabuli_chr06 | 22285522                | AA                              | TT              | 1946864769               |
| SNP_P4_82558_22300833 | NC_021165.1    | Ca_kabuli_chr06 | 22300833                | CC                              | TT              | 1946864771               |
| SNP_P4_82559_22302195 | NC_021165.1    | Ca_kabuli_chr06 | 22302195                | TT                              | AA              | 1946864773               |
| SNP_P4_82560_22311253 | NC_021165.1    | Ca_kabuli_chr06 | 22311253                | AA                              | TT              | 1946864775               |
| SNP_P4_82561_22320396 | NC_021165.1    | Ca_kabuli_chr06 | 22320396                | TT                              | CC              | 1946864777               |
| SNP_P4_82562_22320417 | NC_021165.1    | Ca_kabuli_chr06 | 22320417                | CC                              | TT              | 1946864779               |
| SNP_P4_82563_22320451 | NC_021165.1    | Ca_kabuli_chr06 | 22320451                | GG                              | AA              | 1946864781               |
| SNP_P4_82564_22320565 | NC_021165.1    | Ca_kabuli_chr06 | 22320565                | AA                              | TT              | 1946864783               |
| SNP_P4_82565_22320802 | NC_021165.1    | Ca_kabuli_chr06 | 22320802                | AA                              | GG              | 1946864785               |
| SNP_P4_82566_22320807 | NC_021165.1    | Ca_kabuli_chr06 | 22320807                | CC                              | TT              | 1946864787               |
| SNP_P4_82567_22320823 | NC_021165.1    | Ca_kabuli_chr06 | 22320823                | AA                              | GG              | 1946864789               |
| SNP_P4_82568_22320935 | NC_021165.1    | Ca_kabuli_chr06 | 22320935                | TT                              | CC              | 1946864791               |
| SNP_P4_82569_22320959 | NC_021165.1    | Ca_kabuli_chr06 | 22320959                | GG                              | AA              | 1946864793               |
| SNP_P4_82570_22322638 | NC_021165.1    | Ca_kabuli_chr06 | 22322638                | GG                              | AA              | 1946864795               |
| SNP_P4_82571_22322954 | NC_021165.1    | Ca_kabuli_chr06 | 22322954                | TT                              | CC              | 1946864797               |
| SNP_P4_82572_22323031 | NC_021165.1    | Ca_kabuli_chr06 | 22323031                | AA                              | GG              | 1946864799               |
| SNP_P4_82573_22323040 | NC_021165.1    | Ca_kabuli_chr06 | 22323040                | TT                              | AA              | 1946864801               |
| SNP_P4_82574_22323045 | NC_021165.1    | Ca_kabuli_chr06 | 22323045                | TT                              | AA              | 1946864803               |
| SNP_P4_82575_22337728 | NC_021165.1    | Ca_kabuli_chr06 | 22337728                | AA                              | CC              | 1946864805               |
| SNP_P4_82576_22351809 | NC_021165.1    | Ca_kabuli_chr06 | 22351809                | TT                              | GG              | 1946864808               |
| SNP_P4_82577_22351988 | NC_021165.1    | Ca_kabuli_chr06 | 22351988                | CC                              | TT              | 1946864810               |
| SNP_P4_82578_22370973 | NC_021165.1    | Ca_kabuli_chr06 | 22370973                | TT                              | CC              | 1946864812               |
| SNP_P4_82579_22391741 | NC_021165.1    | Ca_kabuli_chr06 | 22391741                | TT                              | AA              | 1946864814               |
| SNP_P4_82580_22393576 | NC_021165.1    | Ca_kabuli_chr06 | 22393576                | TT                              | AA              | 1946864816               |
| SNP_P4_82582_22415072 | NC_021165.1    | Ca_kabuli_chr06 | 22415072                | AA                              | GG              | 1946864819               |
| SNP_P4_82583_22415427 | NC_021165.1    | Ca_kabuli_chr06 | 22415427                | TT                              | CC              | 1946864821               |
| SNP_P4_82584_22415433 | NC_021165.1    | Ca_kabuli_chr06 | 22415433                | AA                              | GG              | 1946864823               |
| SNP_P4_82585_22415439 | NC_021165.1    | Ca_kabuli_chr06 | 22415439                | TT                              | AA              | 1946864824               |
| SNP_P4_82586_22415489 | NC_021165.1    | Ca_kabuli_chr06 | 22415489                | TT                              | GG              | 1946864825               |
| SNP_P4_82587_22419025 | NC_021165.1    | Ca_kabuli_chr06 | 22419025                | AA                              | TT              | 1946864826               |
| SNP_P4_82588_22419041 | NC_021165.1    | Ca_kabuli_chr06 | 22419041                | GG                              | AA              | 1946864827               |
| SNP_P4_82589_22419073 | NC_021165.1    | Ca_kabuli_chr06 | 22419073                | AA                              | GG              | 1946864830               |
| SNP_P4_82590_22419141 | NC_021165.1    | Ca_kabuli_chr06 | 22419141                | TT                              | CC              | 1946864832               |
| SNP_P4_82591_22419413 | NC_021165.1    | Ca_kabuli_chr06 | 22419413                | CC                              | TT              | 1946864834               |
| SNP_P4_82592_22419453 | NC_021165.1    | Ca_kabuli_chr06 | 22419453                | AA                              | GG              | 1946864836               |

| SNPs IDs              | Chromosome IDs | Chromosomes     | Physical positions (bp) | CDC Frontier (Reference genome) | (ILWC46 & LPNB) | NCBI SNPdb Accession IDs |
|-----------------------|----------------|-----------------|-------------------------|---------------------------------|-----------------|--------------------------|
| SNP_P4_82593_22419457 | NC_021165.1    | Ca_kabuli_chr06 | 22419457                | AA                              | GG              | 1946864838               |
| SNP_P4_82594_22419463 | NC_021165.1    | Ca_kabuli_chr06 | 22419463                | TT                              | AA              | 1946864841               |
| SNP_P4_82595_22419483 | NC_021165.1    | Ca_kabuli_chr06 | 22419483                | AA                              | GG              | 1946864843               |
| SNP_P4_82596_22440821 | NC_021165.1    | Ca_kabuli_chr06 | 22440821                | GG                              | AA              | 1946864845               |
| SNP_P4_82597_22443618 | NC_021165.1    | Ca_kabuli_chr06 | 22443618                | TT                              | CC              | 1946864848               |
| SNP_P4_82598_22464326 | NC_021165.1    | Ca_kabuli_chr06 | 22464326                | CC                              | TT              | 1946864850               |
| SNP_P4_82599_22464621 | NC_021165.1    | Ca_kabuli_chr06 | 22464621                | CC                              | TT              | 1946864852               |
| SNP_P4_82600_22464661 | NC_021165.1    | Ca_kabuli_chr06 | 22464661                | CC                              | TT              | 1946864854               |
| SNP_P4_82601_22464676 | NC_021165.1    | Ca_kabuli_chr06 | 22464676                | CC                              | TT              | 1946864856               |
| SNP_P4_82602_22464728 | NC_021165.1    | Ca_kabuli_chr06 | 22464728                | GG                              | AA              | 1946864858               |
| SNP_P4_82604_22528611 | NC_021165.1    | Ca_kabuli_chr06 | 22528611                | TT                              | CC              | 1946864860               |
| SNP_P4_82605_22856885 | NC_021165.1    | Ca_kabuli_chr06 | 22856885                | GG                              | TT              | 1946864862               |
| SNP_P4_82606_22859127 | NC_021165.1    | Ca_kabuli_chr06 | 22859127                | CC                              | TT              | 1946864863               |
| SNP_P4_82607_22859442 | NC_021165.1    | Ca_kabuli_chr06 | 22859442                | CC                              | TT              | 1946864865               |
| SNP_P4_82608_22860720 | NC_021165.1    | Ca_kabuli_chr06 | 22860720                | GG                              | AA              | 1946864867               |
| SNP_P4_82609_22860726 | NC_021165.1    | Ca_kabuli_chr06 | 22860726                | TT                              | CC              | 1946864870               |
| SNP_P4_82610_22893878 | NC_021165.1    | Ca_kabuli_chr06 | 22893878                | TT                              | GG              | 1946864871               |
| SNP_P4_82611_22898400 | NC_021165.1    | Ca_kabuli_chr06 | 22898400                | GG                              | TT              | 1946864873               |
| SNP_P4_82612_22898696 | NC_021165.1    | Ca_kabuli_chr06 | 22898696                | CC                              | TT              | 1946864875               |
| SNP_P4_82613_22906289 | NC_021165.1    | Ca_kabuli_chr06 | 22906289                | AA                              | GG              | 1946864877               |
| SNP_P4_82614_22926278 | NC_021165.1    | Ca_kabuli_chr06 | 22926278                | AA                              | GG              | 1946864879               |
| SNP_P4_82615_22926322 | NC_021165.1    | Ca_kabuli_chr06 | 22926322                | TT                              | CC              | 1946864881               |
| SNP_P4_82616_22926363 | NC_021165.1    | Ca_kabuli_chr06 | 22926363                | AA                              | GG              | 1946864883               |
| SNP_P4_82618_23004783 | NC_021165.1    | Ca_kabuli_chr06 | 23004783                | GG                              | AA              | 1946864885               |
| SNP_P4_82619_23009654 | NC_021165.1    | Ca_kabuli_chr06 | 23009654                | TT                              | CC              | 1946864887               |
| SNP_P4_82620_23038994 | NC_021165.1    | Ca_kabuli_chr06 | 23038994                | TT                              | CC              | 1946864889               |
| SNP_P4_82621_23039015 | NC_021165.1    | Ca_kabuli_chr06 | 23039015                | TT                              | GG              | 1946864892               |
| SNP_P4_82622_23039029 | NC_021165.1    | Ca_kabuli_chr06 | 23039029                | TT                              | AA              | 1946864893               |
| SNP_P4_82623_23039097 | NC_021165.1    | Ca_kabuli_chr06 | 23039097                | TT                              | CC              | 1946864896               |
| SNP_P4_82624_23039570 | NC_021165.1    | Ca_kabuli_chr06 | 23039570                | TT                              | CC              | 1946864898               |
| SNP_P4_82625_23039901 | NC_021165.1    | Ca_kabuli_chr06 | 23039901                | TT                              | AA              | 1946864899               |
| SNP_P4_82626_23039925 | NC_021165.1    | Ca_kabuli_chr06 | 23039925                | AA                              | TT              | 1946864901               |
| SNP_P4_82627_23039955 | NC_021165.1    | Ca_kabuli_chr06 | 23039955                | AA                              | GG              | 1946864903               |
| SNP_P4_82628_23039956 | NC_021165.1    | Ca_kabuli_chr06 | 23039956                | GG                              | CC              | 1946864905               |
| SNP_P4_82629_23039961 | NC_021165.1    | Ca_kabuli_chr06 | 23039961                | CC                              | TT              | 1946864908               |
| SNP_P4_82630_23040044 | NC_021165.1    | Ca_kabuli_chr06 | 23040044                | TT                              | AA              | 1946864910               |
| SNP_P4_82631_23040091 | NC_021165.1    | Ca_kabuli_chr06 | 23040091                | TT                              | CC              | 1946864912               |
| SNP_P4_82632_23040275 | NC_021165.1    | Ca_kabuli_chr06 | 23040275                | GG                              | CC              | 1946864914               |
| SNP_P4_82634_23040522 | NC_021165.1    | Ca_kabuli_chr06 | 23040522                | TT                              | CC              | 1946864915               |
| SNP_P4_82635_23040528 | NC_021165.1    | Ca_kabuli_chr06 | 23040528                | AA                              | TT              | 1946864918               |
| SNP_P4_82636_23040553 | NC_021165.1    | Ca_kabuli_chr06 | 23040553                | TT                              | CC              | 1946864919               |
| SNP_P4_82637_23042691 | NC_021165.1    | Ca_kabuli_chr06 | 23042691                | AA                              | CC              | 1946864921               |

| SNPs IDs              | Chromosome IDs | Chromosomes     | Physical positions (bp) | CDC Frontier (Reference genome) | (ILWC46 & LPNB) | NCBI SNPdb Accession IDs |
|-----------------------|----------------|-----------------|-------------------------|---------------------------------|-----------------|--------------------------|
| SNP_P4_82638_23042723 | NC_021165.1    | Ca_kabuli_chr06 | 23042723                | TT                              | CC              | 1946864923               |
| SNP_P4_82641_23042883 | NC_021165.1    | Ca_kabuli_chr06 | 23042883                | TT                              | AA              | 1946864925               |
| SNP_P4_82642_23042940 | NC_021165.1    | Ca_kabuli_chr06 | 23042940                | CC                              | TT              | 1946864928               |
| SNP_P4_82644_23043052 | NC_021165.1    | Ca_kabuli_chr06 | 23043052                | AA                              | GG              | 1946864930               |
| SNP_P4_82645_23043057 | NC_021165.1    | Ca_kabuli_chr06 | 23043057                | TT                              | AA              | 1946864932               |
| SNP_P4_82646_23043135 | NC_021165.1    | Ca_kabuli_chr06 | 23043135                | CC                              | TT              | 1946864934               |
| SNP_P4_82647_23043419 | NC_021165.1    | Ca_kabuli_chr06 | 23043419                | CC                              | TT              | 1946864936               |
| SNP_P4_82648_23043424 | NC_021165.1    | Ca_kabuli_chr06 | 23043424                | CC                              | TT              | 1946864938               |
| SNP_P4_82649_23064545 | NC_021165.1    | Ca_kabuli_chr06 | 23064545                | GG                              | AA              | 1946864940               |
| SNP_P4_82650_23064629 | NC_021165.1    | Ca_kabuli_chr06 | 23064629                | AA                              | GG              | 1946864942               |
| SNP_P4_82651_23064737 | NC_021165.1    | Ca_kabuli_chr06 | 23064737                | CC                              | TT              | 1946864944               |
| SNP_P4_82653_23064793 | NC_021165.1    | Ca_kabuli_chr06 | 23064793                | GG                              | AA              | 1946864946               |
| SNP_P4_82654_23064885 | NC_021165.1    | Ca_kabuli_chr06 | 23064885                | CC                              | TT              | 1946864948               |
| SNP_P4_82656_23065059 | NC_021165.1    | Ca_kabuli_chr06 | 23065059                | AA                              | TT              | 1946864950               |
| SNP_P4_82657_23065124 | NC_021165.1    | Ca_kabuli_chr06 | 23065124                | GG                              | CC              | 1946864952               |
| SNP_P4_82658_23065269 | NC_021165.1    | Ca_kabuli_chr06 | 23065269                | AA                              | GG              | 1946864954               |
| SNP_P4_82659_23065312 | NC_021165.1    | Ca_kabuli_chr06 | 23065312                | CC                              | TT              | 1946864956               |
| SNP_P4_82660_23065314 | NC_021165.1    | Ca_kabuli_chr06 | 23065314                | GG                              | AA              | 1946864958               |
| SNP_P4_82661_23065419 | NC_021165.1    | Ca_kabuli_chr06 | 23065419                | AA                              | GG              | 1946864960               |
| SNP_P4_82662_23065568 | NC_021165.1    | Ca_kabuli_chr06 | 23065568                | GG                              | TT              | 1946864962               |
| SNP_P4_82663_23065600 | NC_021165.1    | Ca_kabuli_chr06 | 23065600                | CC                              | TT              | 1946864964               |
| SNP_P4_82664_23065664 | NC_021165.1    | Ca_kabuli_chr06 | 23065664                | GG                              | CC              | 1946864966               |
| SNP_P4_82665_23068304 | NC_021165.1    | Ca_kabuli_chr06 | 23068304                | TT                              | CC              | 1946864968               |
| SNP_P4_82666_23068644 | NC_021165.1    | Ca_kabuli_chr06 | 23068644                | CC                              | AA              | 1946864970               |
| SNP_P4_82667_23068776 | NC_021165.1    | Ca_kabuli_chr06 | 23068776                | GG                              | AA              | 1946864972               |
| SNP_P4_82668_23071023 | NC_021165.1    | Ca_kabuli_chr06 | 23071023                | TT                              | AA              | 1946864974               |
| SNP_P4_82669_23071162 | NC_021165.1    | Ca_kabuli_chr06 | 23071162                | AA                              | GG              | 1946864976               |
| SNP_P4_82670_23071228 | NC_021165.1    | Ca_kabuli_chr06 | 23071228                | GG                              | AA              | 1946864978               |
| SNP_P4_82671_23071245 | NC_021165.1    | Ca_kabuli_chr06 | 23071245                | TT                              | AA              | 1946864980               |
| SNP_P4_82672_23071397 | NC_021165.1    | Ca_kabuli_chr06 | 23071397                | CC                              | TT              | 1946864982               |
| SNP_P4_82673_23071801 | NC_021165.1    | Ca_kabuli_chr06 | 23071801                | AA                              | TT              | 1946864984               |
| SNP_P4_82674_23071808 | NC_021165.1    | Ca_kabuli_chr06 | 23071808                | GG                              | TT              | 1946864986               |
| SNP_P4_82675_23071819 | NC_021165.1    | Ca_kabuli_chr06 | 23071819                | CC                              | AA              | 1946864988               |
| SNP_P4_82676_23071863 | NC_021165.1    | Ca_kabuli_chr06 | 23071863                | AA                              | GG              | 1946864990               |
| SNP_P4_82677_23072016 | NC_021165.1    | Ca_kabuli_chr06 | 23072016                | AA                              | GG              | 1946864992               |
| SNP_P4_82678_23072075 | NC_021165.1    | Ca_kabuli_chr06 | 23072075                | AA                              | GG              | 1946864994               |
| SNP_P4_82679_23072084 | NC_021165.1    | Ca_kabuli_chr06 | 23072084                | TT                              | CC              | 1946864996               |
| SNP_P4_82680_23072245 | NC_021165.1    | Ca_kabuli_chr06 | 23072245                | CC                              | TT              | 1946864998               |
| SNP_P4_82681_23072825 | NC_021165.1    | Ca_kabuli_chr06 | 23072825                | AA                              | GG              | 1946865000               |
| SNP_P4_82682_23076895 | NC_021165.1    | Ca_kabuli_chr06 | 23076895                | GG                              | AA              | 1946865001               |
| SNP_P4_82683_23076995 | NC_021165.1    | Ca_kabuli_chr06 | 23076995                | GG                              | AA              | 1946865003               |
| SNP_P4_82684_23077170 | NC_021165.1    | Ca_kabuli_chr06 | 23077170                | GG                              | AA              | 1946865005               |

| SNPs IDs              | Chromosome IDs | Chromosomes     | Physical positions (bp) | CDC Frontier (Reference genome) | (ILWC46 & LPNB) | NCBI SNPdb Accession IDs |
|-----------------------|----------------|-----------------|-------------------------|---------------------------------|-----------------|--------------------------|
| SNP_P4_82685_23077642 | NC_021165.1    | Ca_kabuli_chr06 | 23077642                | AA                              | GG              | 1946865007               |
| SNP_P4_82686_23077684 | NC_021165.1    | Ca_kabuli_chr06 | 23077684                | AA                              | GG              | 1946865009               |
| SNP_P4_82687_23077692 | NC_021165.1    | Ca_kabuli_chr06 | 23077692                | GG                              | TT              | 1946865011               |
| SNP_P4_82688_23077713 | NC_021165.1    | Ca_kabuli_chr06 | 23077713                | TT                              | CC              | 1946865013               |
| SNP_P4_82689_23077849 | NC_021165.1    | Ca_kabuli_chr06 | 23077849                | AA                              | GG              | 1946865015               |
| SNP_P4_82690_23077867 | NC_021165.1    | Ca_kabuli_chr06 | 23077867                | CC                              | TT              | 1946865017               |
| SNP_P4_82691_23078087 | NC_021165.1    | Ca_kabuli_chr06 | 23078087                | TT                              | GG              | 1946865019               |
| SNP_P4_82692_23078559 | NC_021165.1    | Ca_kabuli_chr06 | 23078559                | GG                              | AA              | 1946865021               |
| SNP_P4_82693_23078705 | NC_021165.1    | Ca_kabuli_chr06 | 23078705                | GG                              | TT              | 1946865023               |
| SNP_P4_82695_23078794 | NC_021165.1    | Ca_kabuli_chr06 | 23078794                | CC                              | TT              | 1946865025               |
| SNP_P4_82696_23078804 | NC_021165.1    | Ca_kabuli_chr06 | 23078804                | GG                              | AA              | 1946865027               |
| SNP_P4_82697_23078847 | NC_021165.1    | Ca_kabuli_chr06 | 23078847                | TT                              | CC              | 1946865029               |
| SNP_P4_82699_23078963 | NC_021165.1    | Ca_kabuli_chr06 | 23078963                | CC                              | TT              | 1946865031               |
| SNP_P4_82700_23078967 | NC_021165.1    | Ca_kabuli_chr06 | 23078967                | TT                              | CC              | 1946865033               |
| SNP_P4_82701_23079094 | NC_021165.1    | Ca_kabuli_chr06 | 23079094                | TT                              | AA              | 1946865035               |
| SNP_P4_82702_23079141 | NC_021165.1    | Ca_kabuli_chr06 | 23079141                | TT                              | GG              | 1946865037               |
| SNP_P4_82703_23085741 | NC_021165.1    | Ca_kabuli_chr06 | 23085741                | CC                              | GG              | 1946865039               |
| SNP_P4_82704_23090221 | NC_021165.1    | Ca_kabuli_chr06 | 23090221                | GG                              | CC              | 1946865041               |
| SNP_P4_82705_23090267 | NC_021165.1    | Ca_kabuli_chr06 | 23090267                | GG                              | AA              | 1946865043               |
| SNP_P4_82706_23090475 | NC_021165.1    | Ca_kabuli_chr06 | 23090475                | TT                              | AA              | 1946865045               |
| SNP_P4_82708_23116417 | NC_021165.1    | Ca_kabuli_chr06 | 23116417                | CC                              | TT              | 1946865047               |
| SNP_P4_82709_23119085 | NC_021165.1    | Ca_kabuli_chr06 | 23119085                | CC                              | TT              | 1946865049               |
| SNP_P4_82710_23154739 | NC_021165.1    | Ca_kabuli_chr06 | 23154739                | TT                              | AA              | 1946865051               |
| SNP_P4_82711_23154793 | NC_021165.1    | Ca_kabuli_chr06 | 23154793                | AA                              | GG              | 1946865053               |
| SNP_P4_82712_23181621 | NC_021165.1    | Ca_kabuli_chr06 | 23181621                | TT                              | GG              | 1946865055               |
| SNP_P4_82713_23194041 | NC_021165.1    | Ca_kabuli_chr06 | 23194041                | AA                              | GG              | 1946865057               |
| SNP_P4_82714_23199009 | NC_021165.1    | Ca_kabuli_chr06 | 23199009                | AA                              | GG              | 1946865059               |
| SNP_P4_82715_23206864 | NC_021165.1    | Ca_kabuli_chr06 | 23206864                | TT                              | AA              | 1946865062               |
| SNP_P4_82716_23207714 | NC_021165.1    | Ca_kabuli_chr06 | 23207714                | CC                              | AA              | 1946865064               |
| SNP_P4_82717_23213265 | NC_021165.1    | Ca_kabuli_chr06 | 23213265                | CC                              | TT              | 1946865066               |
| SNP_P4_82718_23216357 | NC_021165.1    | Ca_kabuli_chr06 | 23216357                | TT                              | CC              | 1946865068               |
| SNP_P4_82720_23245627 | NC_021165.1    | Ca_kabuli_chr06 | 23245627                | AA                              | GG              | 1946865070               |
| SNP_P4_82721_23284176 | NC_021165.1    | Ca_kabuli_chr06 | 23284176                | CC                              | TT              | 1946865072               |
| SNP_P4_82722_23290405 | NC_021165.1    | Ca_kabuli_chr06 | 23290405                | GG                              | TT              | 1946865074               |
| SNP_P4_82724_23327901 | NC_021165.1    | Ca_kabuli_chr06 | 23327901                | GG                              | TT              | 1946865076               |
| SNP_P4_82725_23344004 | NC_021165.1    | Ca_kabuli_chr06 | 23344004                | TT                              | GG              | 1946865078               |
| SNP_P4_82727_23376289 | NC_021165.1    | Ca_kabuli_chr06 | 23376289                | TT                              | CC              | 1946865080               |
| SNP_P4_82728_23386456 | NC_021165.1    | Ca_kabuli_chr06 | 23386456                | TT                              | GG              | 1946865082               |
| SNP_P4_82729_23386460 | NC_021165.1    | Ca_kabuli_chr06 | 23386460                | AA                              | CC              | 1946865083               |
| SNP_P4_82730_23392059 | NC_021165.1    | Ca_kabuli_chr06 | 23392059                | CC                              | TT              | 1946865085               |
| SNP_P4_82731_23399514 | NC_021165.1    | Ca_kabuli_chr06 | 23399514                | AA                              | CC              | 1946865087               |
| SNP_P4_82732_23399515 | NC_021165.1    | Ca_kabuli_chr06 | 23399515                | AA                              | GG              | 1946865089               |

| SNPs IDs              | Chromosome IDs | Chromosomes     | Physical positions (bp) | CDC Frontier (Reference genome) | (ILWC46 & LPNB) | NCBI SNPdb Accession IDs |
|-----------------------|----------------|-----------------|-------------------------|---------------------------------|-----------------|--------------------------|
| SNP_P4_82733_23401668 | NC_021165.1    | Ca_kabuli_chr06 | 23401668                | GG                              | AA              | 1946865091               |
| SNP_P4_82735_23434219 | NC_021165.1    | Ca_kabuli_chr06 | 23434219                | TT                              | AA              | 1946865093               |
| SNP_P4_82736_23442555 | NC_021165.1    | Ca_kabuli_chr06 | 23442555                | TT                              | AA              | 1946865095               |
| SNP_P4_82737_23443541 | NC_021165.1    | Ca_kabuli_chr06 | 23443541                | AA                              | TT              | 1946865097               |
| SNP_P4_82738_23500714 | NC_021165.1    | Ca_kabuli_chr06 | 23500714                | GG                              | TT              | 1946865099               |
| SNP_P4_82739_23530559 | NC_021165.1    | Ca_kabuli_chr06 | 23530559                | CC                              | TT              | 1946865101               |
| SNP_P4_82740_23572681 | NC_021165.1    | Ca_kabuli_chr06 | 23572681                | GG                              | AA              | 1946865103               |
| SNP_P4_82742_23589983 | NC_021165.1    | Ca_kabuli_chr06 | 23589983                | GG                              | AA              | 1946865105               |
| SNP_P4_82745_23671654 | NC_021165.1    | Ca_kabuli_chr06 | 23671654                | AA                              | CC              | 1946865107               |
| SNP_P4_82746_23680874 | NC_021165.1    | Ca_kabuli_chr06 | 23680874                | AA                              | CC              | 1946865109               |
| SNP_P4_82747_23681357 | NC_021165.1    | Ca_kabuli_chr06 | 23681357                | AA                              | GG              | 1946865111               |
| SNP_P4_82748_23692673 | NC_021165.1    | Ca_kabuli_chr06 | 23692673                | CC                              | TT              | 1946865113               |
| SNP_P4_82749_23701130 | NC_021165.1    | Ca_kabuli_chr06 | 23701130                | GG                              | AA              | 1946865115               |
| SNP_P4_82750_23719545 | NC_021165.1    | Ca_kabuli_chr06 | 23719545                | AA                              | CC              | 1946865117               |
| SNP_P4_82752_23754787 | NC_021165.1    | Ca_kabuli_chr06 | 23754787                | TT                              | GG              | 1946865119               |
| SNP_P4_82753_23755266 | NC_021165.1    | Ca_kabuli_chr06 | 23755266                | CC                              | TT              | 1946865122               |
| SNP_P4_82754_23755330 | NC_021165.1    | Ca_kabuli_chr06 | 23755330                | CC                              | TT              | 1946865124               |
| SNP_P4_82755_23755356 | NC_021165.1    | Ca_kabuli_chr06 | 23755356                | TT                              | CC              | 1946865126               |
| SNP_P4_82756_23755379 | NC_021165.1    | Ca_kabuli_chr06 | 23755379                | TT                              | CC              | 1946865128               |
| SNP_P4_82757_23755414 | NC_021165.1    | Ca_kabuli_chr06 | 23755414                | TT                              | CC              | 1946865130               |
| SNP_P4_82758_23762178 | NC_021165.1    | Ca_kabuli_chr06 | 23762178                | GG                              | TT              | 1946865132               |
| SNP_P4_82759_23780862 | NC_021165.1    | Ca_kabuli_chr06 | 23780862                | TT                              | CC              | 1946865134               |
| SNP_P4_82760_23782279 | NC_021165.1    | Ca_kabuli_chr06 | 23782279                | CC                              | TT              | 1946865136               |
| SNP_P4_82761_23802596 | NC_021165.1    | Ca_kabuli_chr06 | 23802596                | CC                              | TT              | 1946865138               |
| SNP_P4_82762_23817241 | NC_021165.1    | Ca_kabuli_chr06 | 23817241                | TT                              | AA              | 1946865140               |
| SNP_P4_82763_23826454 | NC_021165.1    | Ca_kabuli_chr06 | 23826454                | CC                              | AA              | 1946865142               |
| SNP_P4_82764_23828496 | NC_021165.1    | Ca_kabuli_chr06 | 23828496                | TT                              | GG              | 1946865144               |
| SNP_P4_82767_23926974 | NC_021165.1    | Ca_kabuli_chr06 | 23926974                | GG                              | TT              | 1946865146               |
| SNP_P4_82768_23936572 | NC_021165.1    | Ca_kabuli_chr06 | 23936572                | GG                              | AA              | 1946865148               |
| SNP_P4_82770_23984469 | NC_021165.1    | Ca_kabuli_chr06 | 23984469                | GG                              | AA              | 1946865150               |
| SNP_P4_82772_24027303 | NC_021165.1    | Ca_kabuli_chr06 | 24027303                | GG                              | AA              | 1946865152               |
| SNP_P4_82773_24049778 | NC_021165.1    | Ca_kabuli_chr06 | 24049778                | AA                              | TT              | 1946865154               |
| SNP_P4_82774_24082681 | NC_021165.1    | Ca_kabuli_chr06 | 24082681                | GG                              | AA              | 1946865156               |
| SNP_P4_82775_24125893 | NC_021165.1    | Ca_kabuli_chr06 | 24125893                | GG                              | AA              | 1946865158               |
| SNP_P4_82776_24126167 | NC_021165.1    | Ca_kabuli_chr06 | 24126167                | CC                              | AA              | 1946865160               |
| SNP_P4_82777_24126183 | NC_021165.1    | Ca_kabuli_chr06 | 24126183                | AA                              | GG              | 1946865162               |
| SNP_P4_82778_24126217 | NC_021165.1    | Ca_kabuli_chr06 | 24126217                | TT                              | CC              | 1946865164               |
| SNP_P4_82779_24126242 | NC_021165.1    | Ca_kabuli_chr06 | 24126242                | GG                              | AA              | 1946865166               |
| SNP_P4_82780_24126253 | NC_021165.1    | Ca_kabuli_chr06 | 24126253                | AA                              | TT              | 1946865169               |
| SNP_P4_82781_24126258 | NC_021165.1    | Ca_kabuli_chr06 | 24126258                | TT                              | AA              | 1946865170               |
| SNP_P4_82782_24126262 | NC_021165.1    | Ca_kabuli_chr06 | 24126262                | TT                              | AA              | 1946865172               |
| SNP_P4_82783_24126287 | NC_021165.1    | Ca_kabuli_chr06 | 24126287                | GG                              | AA              | 1946865174               |



| SNPs IDs              | Chromosome IDs | Chromosomes     | Physical positions (bp) | CDC Frontier (Reference genome) | (ILWC46 & LPNB) | NCBI SNPdb Accession IDs |
|-----------------------|----------------|-----------------|-------------------------|---------------------------------|-----------------|--------------------------|
| SNP_P4_82784_24126294 | NC_021165.1    | Ca_kabuli_chr06 | 24126294                | GG                              | AA              | 1946865176               |
| SNP_P4_82785_24126530 | NC_021165.1    | Ca_kabuli_chr06 | 24126530                | GG                              | AA              | 1946865178               |
| SNP_P4_82786_24126951 | NC_021165.1    | Ca_kabuli_chr06 | 24126951                | CC                              | AA              | 1946865181               |
| SNP_P4_82787_24127055 | NC_021165.1    | Ca_kabuli_chr06 | 24127055                | AA                              | GG              | 1946865183               |
| SNP_P4_82788_24127058 | NC_021165.1    | Ca_kabuli_chr06 | 24127058                | AA                              | GG              | 1946865184               |
| SNP_P4_82789_24127306 | NC_021165.1    | Ca_kabuli_chr06 | 24127306                | CC                              | TT              | 1946865187               |
| SNP_P4_82790_24127335 | NC_021165.1    | Ca_kabuli_chr06 | 24127335                | AA                              | TT              | 1946865189               |
| SNP_P4_82791_24127395 | NC_021165.1    | Ca_kabuli_chr06 | 24127395                | TT                              | GG              | 1946865191               |
| SNP_P4_82792_24127824 | NC_021165.1    | Ca_kabuli_chr06 | 24127824                | TT                              | CC              | 1946865193               |
| SNP_P4_82793_24162591 | NC_021165.1    | Ca_kabuli_chr06 | 24162591                | TT                              | GG              | 1946865195               |
| SNP_P4_82795_24208736 | NC_021165.1    | Ca_kabuli_chr06 | 24208736                | CC                              | AA              | 1946865197               |
| SNP_P4_82796_24208737 | NC_021165.1    | Ca_kabuli_chr06 | 24208737                | TT                              | AA              | 1946865199               |
| SNP_P4_82797_24208738 | NC_021165.1    | Ca_kabuli_chr06 | 24208738                | AA                              | GG              | 1946865201               |
| SNP_P4_82798_24208745 | NC_021165.1    | Ca_kabuli_chr06 | 24208745                | TT                              | AA              | 1946865203               |
| SNP_P4_82799_24209831 | NC_021165.1    | Ca_kabuli_chr06 | 24209831                | AA                              | TT              | 1946865205               |
| SNP_P4_82800_24210246 | NC_021165.1    | Ca_kabuli_chr06 | 24210246                | TT                              | CC              | 1946865207               |
| SNP_P4_82802_24235200 | NC_021165.1    | Ca_kabuli_chr06 | 24235200                | AA                              | CC              | 1946865209               |
| SNP_P4_82803_24240719 | NC_021165.1    | Ca_kabuli_chr06 | 24240719                | TT                              | CC              | 1946865211               |
| SNP_P4_82804_24240740 | NC_021165.1    | Ca_kabuli_chr06 | 24240740                | TT                              | CC              | 1946865213               |
| SNP_P4_82805_24240742 | NC_021165.1    | Ca_kabuli_chr06 | 24240742                | TT                              | GG              | 1946865215               |
| SNP_P4_82806_24240764 | NC_021165.1    | Ca_kabuli_chr06 | 24240764                | AA                              | GG              | 1946865217               |
| SNP_P4_82807_24240780 | NC_021165.1    | Ca_kabuli_chr06 | 24240780                | AA                              | GG              | 1946865219               |
| SNP_P4_82808_24240810 | NC_021165.1    | Ca_kabuli_chr06 | 24240810                | AA                              | CC              | 1946865222               |
| SNP_P4_82809_24240852 | NC_021165.1    | Ca_kabuli_chr06 | 24240852                | TT                              | GG              | 1946865224               |
| SNP_P4_82810_24240863 | NC_021165.1    | Ca_kabuli_chr06 | 24240863                | AA                              | GG              | 1946865226               |
| SNP_P4_82811_24240931 | NC_021165.1    | Ca_kabuli_chr06 | 24240931                | TT                              | CC              | 1946865228               |
| SNP_P4_82812_24241040 | NC_021165.1    | Ca_kabuli_chr06 | 24241040                | CC                              | AA              | 1946865230               |
| SNP_P4_82813_24241166 | NC_021165.1    | Ca_kabuli_chr06 | 24241166                | AA                              | TT              | 1946865232               |
| SNP_P4_82814_24241211 | NC_021165.1    | Ca_kabuli_chr06 | 24241211                | AA                              | TT              | 1946865234               |
| SNP_P4_82815_24241256 | NC_021165.1    | Ca_kabuli_chr06 | 24241256                | TT                              | CC              | 1946865236               |
| SNP_P4_82816_24241261 | NC_021165.1    | Ca_kabuli_chr06 | 24241261                | CC                              | AA              | 1946865238               |
| SNP_P4_82818_24241464 | NC_021165.1    | Ca_kabuli_chr06 | 24241464                | GG                              | AA              | 1946865240               |
| SNP_P4_82819_24241478 | NC_021165.1    | Ca_kabuli_chr06 | 24241478                | AA                              | CC              | 1946865242               |
| SNP_P4_82820_24241493 | NC_021165.1    | Ca_kabuli_chr06 | 24241493                | AA                              | GG              | 1946865244               |
| SNP_P4_82821_24241495 | NC_021165.1    | Ca_kabuli_chr06 | 24241495                | CC                              | TT              | 1946865246               |
| SNP_P4_82822_24241503 | NC_021165.1    | Ca_kabuli_chr06 | 24241503                | AA                              | GG              | 1946865248               |
| SNP_P4_82823_24241533 | NC_021165.1    | Ca_kabuli_chr06 | 24241533                | GG                              | AA              | 1946865250               |
| SNP_P4_82824_24241613 | NC_021165.1    | Ca_kabuli_chr06 | 24241613                | TT                              | CC              | 1946865252               |
| SNP_P4_82825_24241780 | NC_021165.1    | Ca_kabuli_chr06 | 24241780                | GG                              | AA              | 1946865254               |
| SNP_P4_82826_24241794 | NC_021165.1    | Ca_kabuli_chr06 | 24241794                | TT                              | CC              | 1946865256               |
| SNP_P4_82827_24241944 | NC_021165.1    | Ca_kabuli_chr06 | 24241944                | GG                              | TT              | 1946865258               |
| SNP_P4_82828_24241950 | NC_021165.1    | Ca_kabuli_chr06 | 24241950                | CC                              | GG              | 1946865260               |

| SNPs IDs              | Chromosome IDs | Chromosomes     | Physical positions (bp) | CDC Frontier (Reference genome) | (ILWC46 & LPNB) | NCBI SNPdb Accession IDs |
|-----------------------|----------------|-----------------|-------------------------|---------------------------------|-----------------|--------------------------|
| SNP_P4_82829_24242035 | NC_021165.1    | Ca_kabuli_chr06 | 24242035                | TT                              | AA              | 1946865262               |
| SNP_P4_82830_24242088 | NC_021165.1    | Ca_kabuli_chr06 | 24242088                | AA                              | GG              | 1946865264               |
| SNP_P4_82832_24266107 | NC_021165.1    | Ca_kabuli_chr06 | 24266107                | GG                              | CC              | 1946865266               |
| SNP_P4_82835_24309681 | NC_021165.1    | Ca_kabuli_chr06 | 24309681                | CC                              | TT              | 1946865268               |
| SNP_P4_82837_24322651 | NC_021165.1    | Ca_kabuli_chr06 | 24322651                | AA                              | GG              | 1946865270               |
| SNP_P4_82838_24328932 | NC_021165.1    | Ca_kabuli_chr06 | 24328932                | TT                              | CC              | 1946865272               |
| SNP_P4_82839_24333298 | NC_021165.1    | Ca_kabuli_chr06 | 24333298                | GG                              | AA              | 1946865274               |
| SNP_P4_82840_24366677 | NC_021165.1    | Ca_kabuli_chr06 | 24366677                | GG                              | AA              | 1946865276               |
| SNP_P4_82841_24394339 | NC_021165.1    | Ca_kabuli_chr06 | 24394339                | GG                              | TT              | 1946865278               |
| SNP_P4_82842_24397174 | NC_021165.1    | Ca_kabuli_chr06 | 24397174                | CC                              | TT              | 1946865280               |
| SNP_P4_82843_24419833 | NC_021165.1    | Ca_kabuli_chr06 | 24419833                | AA                              | GG              | 1946865282               |
| SNP_P4_82844_24441492 | NC_021165.1    | Ca_kabuli_chr06 | 24441492                | CC                              | AA              | 1946865284               |
| SNP_P4_82845_24573040 | NC_021165.1    | Ca_kabuli_chr06 | 24573040                | TT                              | AA              | 1946865286               |
| SNP_P4_82846_24573042 | NC_021165.1    | Ca_kabuli_chr06 | 24573042                | TT                              | CC              | 1946865287               |
| SNP_P4_82848_24589380 | NC_021165.1    | Ca_kabuli_chr06 | 24589380                | AA                              | GG              | 1946865289               |
| SNP_P4_82849_24608085 | NC_021165.1    | Ca_kabuli_chr06 | 24608085                | TT                              | GG              | 1946865291               |
| SNP_P4_82850_24608391 | NC_021165.1    | Ca_kabuli_chr06 | 24608391                | AA                              | CC              | 1946865293               |
| SNP_P4_82852_24673216 | NC_021165.1    | Ca_kabuli_chr06 | 24673216                | CC                              | TT              | 1946865295               |
| SNP_P4_82853_24714578 | NC_021165.1    | Ca_kabuli_chr06 | 24714578                | AA                              | GG              | 1946865297               |
| SNP_P4_82854_24714626 | NC_021165.1    | Ca_kabuli_chr06 | 24714626                | AA                              | GG              | 1946865299               |
| SNP_P4_82855_24736246 | NC_021165.1    | Ca_kabuli_chr06 | 24736246                | GG                              | CC              | 1946865301               |
| SNP_P4_82856_24744265 | NC_021165.1    | Ca_kabuli_chr06 | 24744265                | TT                              | CC              | 1946865303               |
| SNP_P4_82858_24744619 | NC_021165.1    | Ca_kabuli_chr06 | 24744619                | TT                              | GG              | 1946865305               |
| SNP_P4_82859_24756637 | NC_021165.1    | Ca_kabuli_chr06 | 24756637                | GG                              | AA              | 1946865307               |
| SNP_P4_82860_24756701 | NC_021165.1    | Ca_kabuli_chr06 | 24756701                | TT                              | CC              | 1946865309               |
| SNP_P4_82861_24757046 | NC_021165.1    | Ca_kabuli_chr06 | 24757046                | GG                              | TT              | 1946865311               |
| SNP_P4_82862_24757070 | NC_021165.1    | Ca_kabuli_chr06 | 24757070                | AA                              | CC              | 1946865313               |
| SNP_P4_82863_24770513 | NC_021165.1    | Ca_kabuli_chr06 | 24770513                | CC                              | TT              | 1946865315               |
| SNP_P4_82864_24770755 | NC_021165.1    | Ca_kabuli_chr06 | 24770755                | TT                              | CC              | 1946865317               |
| SNP_P4_82865_24770765 | NC_021165.1    | Ca_kabuli_chr06 | 24770765                | TT                              | CC              | 1946865318               |
| SNP_P4_82866_24783300 | NC_021165.1    | Ca_kabuli_chr06 | 24783300                | TT                              | CC              | 1946865321               |
| SNP_P4_82867_24856065 | NC_021165.1    | Ca_kabuli_chr06 | 24856065                | GG                              | TT              | 1946865323               |
| SNP_P4_82868_24856083 | NC_021165.1    | Ca_kabuli_chr06 | 24856083                | AA                              | TT              | 1946865325               |
| SNP_P4_82869_24857925 | NC_021165.1    | Ca_kabuli_chr06 | 24857925                | TT                              | GG              | 1946865326               |
| SNP_P4_82870_24857980 | NC_021165.1    | Ca_kabuli_chr06 | 24857980                | GG                              | AA              | 1946865328               |
| SNP_P4_82871_24869444 | NC_021165.1    | Ca_kabuli_chr06 | 24869444                | GG                              | TT              | 1946865330               |
| SNP_P4_82873_24876342 | NC_021165.1    | Ca_kabuli_chr06 | 24876342                | CC                              | TT              | 1946865332               |
| SNP_P4_82874_24876363 | NC_021165.1    | Ca_kabuli_chr06 | 24876363                | TT                              | CC              | 1946865334               |
| SNP_P4_82875_24884991 | NC_021165.1    | Ca_kabuli_chr06 | 24884991                | TT                              | GG              | 1946865336               |
| SNP_P4_82876_24902818 | NC_021165.1    | Ca_kabuli_chr06 | 24902818                | AA                              | GG              | 1946865338               |
| SNP_P4_82877_24903311 | NC_021165.1    | Ca_kabuli_chr06 | 24903311                | GG                              | AA              | 1946865340               |
| SNP_P4_82878_24903405 | NC_021165.1    | Ca_kabuli_chr06 | 24903405                | TT                              | AA              | 1946865342               |

| SNPs IDs              | Chromosome IDs | Chromosomes     | Physical positions (bp) | CDC Frontier (Reference genome) | (ILWC46 & LPNB) | NCBI SNPdb Accession IDs |
|-----------------------|----------------|-----------------|-------------------------|---------------------------------|-----------------|--------------------------|
| SNP_P4_82879_24904311 | NC_021165.1    | Ca_kabuli_chr06 | 24904311                | AA                              | GG              | 1946865344               |
| SNP_P4_82880_24904803 | NC_021165.1    | Ca_kabuli_chr06 | 24904803                | CC                              | TT              | 1946865346               |
| SNP_P4_82881_24904806 | NC_021165.1    | Ca_kabuli_chr06 | 24904806                | AA                              | GG              | 1946865348               |
| SNP_P4_82882_24905364 | NC_021165.1    | Ca_kabuli_chr06 | 24905364                | CC                              | TT              | 1946865350               |
| SNP_P4_82883_24905397 | NC_021165.1    | Ca_kabuli_chr06 | 24905397                | GG                              | TT              | 1946865352               |
| SNP_P4_82884_24919223 | NC_021165.1    | Ca_kabuli_chr06 | 24919223                | AA                              | CC              | 1946865354               |
| SNP_P4_82885_24930541 | NC_021165.1    | Ca_kabuli_chr06 | 24930541                | GG                              | AA              | 1946865356               |
| SNP_P4_82886_24941433 | NC_021165.1    | Ca_kabuli_chr06 | 24941433                | AA                              | GG              | 1946865358               |
| SNP_P4_82887_24941531 | NC_021165.1    | Ca_kabuli_chr06 | 24941531                | CC                              | TT              | 1946865360               |
| SNP_P4_82888_24942001 | NC_021165.1    | Ca_kabuli_chr06 | 24942001                | CC                              | TT              | 1946865362               |
| SNP_P4_82889_24942116 | NC_021165.1    | Ca_kabuli_chr06 | 24942116                | AA                              | GG              | 1946865364               |
| SNP_P4_82890_24942129 | NC_021165.1    | Ca_kabuli_chr06 | 24942129                | TT                              | CC              | 1946865365               |
| SNP_P4_82891_24942137 | NC_021165.1    | Ca_kabuli_chr06 | 24942137                | GG                              | AA              | 1946865367               |
| SNP_P4_82892_24948287 | NC_021165.1    | Ca_kabuli_chr06 | 24948287                | GG                              | AA              | 1946865369               |
| SNP_P4_82893_24948288 | NC_021165.1    | Ca_kabuli_chr06 | 24948288                | TT                              | AA              | 1946865371               |
| SNP_P4_82894_24952724 | NC_021165.1    | Ca_kabuli_chr06 | 24952724                | GG                              | TT              | 1946865373               |
| SNP_P4_82895_24952744 | NC_021165.1    | Ca_kabuli_chr06 | 24952744                | AA                              | GG              | 1946865375               |
| SNP_P4_82896_24958945 | NC_021165.1    | Ca_kabuli_chr06 | 24958945                | CC                              | TT              | 1946865377               |
| SNP_P4_82898_25014259 | NC_021165.1    | Ca_kabuli_chr06 | 25014259                | GG                              | AA              | 1946865379               |
| SNP_P4_82899_25046528 | NC_021165.1    | Ca_kabuli_chr06 | 25046528                | GG                              | TT              | 1946865381               |
| SNP_P4_82900_25067467 | NC_021165.1    | Ca_kabuli_chr06 | 25067467                | TT                              | CC              | 1946865382               |
| SNP_P4_82901_25067495 | NC_021165.1    | Ca_kabuli_chr06 | 25067495                | GG                              | AA              | 1946865384               |
| SNP_P4_82902_25069187 | NC_021165.1    | Ca_kabuli_chr06 | 25069187                | TT                              | CC              | 1946865386               |
| SNP_P4_82903_25069583 | NC_021165.1    | Ca_kabuli_chr06 | 25069583                | AA                              | CC              | 1946865388               |
| SNP_P4_82904_25130866 | NC_021165.1    | Ca_kabuli_chr06 | 25130866                | GG                              | TT              | 1946865390               |
| SNP_P4_82906_25131144 | NC_021165.1    | Ca_kabuli_chr06 | 25131144                | CC                              | AA              | 1946865392               |
| SNP_P4_82907_25131149 | NC_021165.1    | Ca_kabuli_chr06 | 25131149                | AA                              | CC              | 1946865394               |
| SNP_P4_82908_25131182 | NC_021165.1    | Ca_kabuli_chr06 | 25131182                | GG                              | TT              | 1946865396               |
| SNP_P4_82909_25131380 | NC_021165.1    | Ca_kabuli_chr06 | 25131380                | TT                              | AA              | 1946865397               |
| SNP_P4_82910_25131528 | NC_021165.1    | Ca_kabuli_chr06 | 25131528                | TT                              | CC              | 1946865399               |
| SNP_P4_82911_25131544 | NC_021165.1    | Ca_kabuli_chr06 | 25131544                | TT                              | AA              | 1946865401               |
| SNP_P4_82912_25162778 | NC_021165.1    | Ca_kabuli_chr06 | 25162778                | CC                              | TT              | 1946865403               |
| SNP_P4_82913_25199749 | NC_021165.1    | Ca_kabuli_chr06 | 25199749                | TT                              | AA              | 1946865405               |
| SNP_P4_82914_25199751 | NC_021165.1    | Ca_kabuli_chr06 | 25199751                | TT                              | AA              | 1946865407               |
| SNP_P4_82915_25209904 | NC_021165.1    | Ca_kabuli_chr06 | 25209904                | CC                              | TT              | 1946865409               |
| SNP_P4_82916_25209928 | NC_021165.1    | Ca_kabuli_chr06 | 25209928                | GG                              | CC              | 1946865411               |
| SNP_P4_82917_25209931 | NC_021165.1    | Ca_kabuli_chr06 | 25209931                | CC                              | TT              | 1946865413               |
| SNP_P4_82918_25209958 | NC_021165.1    | Ca_kabuli_chr06 | 25209958                | CC                              | AA              | 1946865415               |
| SNP_P4_82919_25212720 | NC_021165.1    | Ca_kabuli_chr06 | 25212720                | CC                              | TT              | 1946865417               |
| SNP_P4_82920_25212822 | NC_021165.1    | Ca_kabuli_chr06 | 25212822                | TT                              | CC              | 1946865419               |
| SNP_P4_82921_25216080 | NC_021165.1    | Ca_kabuli_chr06 | 25216080                | TT                              | CC              | 1946865421               |
| SNP_P4_82922_25230559 | NC_021165.1    | Ca_kabuli_chr06 | 25230559                | GG                              | AA              | 1946865423               |

| SNPs IDs              | Chromosome IDs | Chromosomes     | Physical positions (bp) | CDC Frontier (Reference genome) | (ILWC46 & LPNB) | NCBI SNPdb Accession IDs |
|-----------------------|----------------|-----------------|-------------------------|---------------------------------|-----------------|--------------------------|
| SNP_P4_82923_25240737 | NC_021165.1    | Ca_kabuli_chr06 | 25240737                | GG                              | AA              | 1946865425               |
| SNP_P4_82924_25248786 | NC_021165.1    | Ca_kabuli_chr06 | 25248786                | CC                              | TT              | 1946865427               |
| SNP_P4_82925_25272033 | NC_021165.1    | Ca_kabuli_chr06 | 25272033                | AA                              | GG              | 1946865429               |
| SNP_P4_82926_25272092 | NC_021165.1    | Ca_kabuli_chr06 | 25272092                | CC                              | GG              | 1946865431               |
| SNP_P4_82927_25272093 | NC_021165.1    | Ca_kabuli_chr06 | 25272093                | AA                              | TT              | 1946865433               |
| SNP_P4_82928_25272105 | NC_021165.1    | Ca_kabuli_chr06 | 25272105                | TT                              | CC              | 1946865435               |
| SNP_P4_82929_25272112 | NC_021165.1    | Ca_kabuli_chr06 | 25272112                | AA                              | GG              | 1946865437               |
| SNP_P4_82930_25272114 | NC_021165.1    | Ca_kabuli_chr06 | 25272114                | TT                              | AA              | 1946865439               |
| SNP_P4_82931_25272480 | NC_021165.1    | Ca_kabuli_chr06 | 25272480                | AA                              | CC              | 1946865441               |
| SNP_P4_82932_25272484 | NC_021165.1    | Ca_kabuli_chr06 | 25272484                | AA                              | GG              | 1946865443               |
| SNP_P4_82933_25298917 | NC_021165.1    | Ca_kabuli_chr06 | 25298917                | CC                              | TT              | 1946865445               |
| SNP_P4_82934_25300226 | NC_021165.1    | Ca_kabuli_chr06 | 25300226                | TT                              | AA              | 1946865447               |
| SNP_P4_82935_25300230 | NC_021165.1    | Ca_kabuli_chr06 | 25300230                | TT                              | CC              | 1946865449               |
| SNP_P4_82936_25300272 | NC_021165.1    | Ca_kabuli_chr06 | 25300272                | TT                              | CC              | 1946865451               |
| SNP_P4_82937_25300288 | NC_021165.1    | Ca_kabuli_chr06 | 25300288                | TT                              | GG              | 1946865453               |
| SNP_P4_82938_25300540 | NC_021165.1    | Ca_kabuli_chr06 | 25300540                | TT                              | CC              | 1946865455               |
| SNP_P4_82939_25300549 | NC_021165.1    | Ca_kabuli_chr06 | 25300549                | AA                              | TT              | 1946865457               |
| SNP_P4_82940_25300574 | NC_021165.1    | Ca_kabuli_chr06 | 25300574                | AA                              | GG              | 1946865459               |
| SNP_P4_82941_25300599 | NC_021165.1    | Ca_kabuli_chr06 | 25300599                | TT                              | CC              | 1946865461               |
| SNP_P4_82942_25302355 | NC_021165.1    | Ca_kabuli_chr06 | 25302355                | TT                              | CC              | 1946865463               |
| SNP_P4_82943_25302361 | NC_021165.1    | Ca_kabuli_chr06 | 25302361                | GG                              | AA              | 1946865465               |
| SNP_P4_82944_25302384 | NC_021165.1    | Ca_kabuli_chr06 | 25302384                | CC                              | GG              | 1946865467               |
| SNP_P4_82945_25302388 | NC_021165.1    | Ca_kabuli_chr06 | 25302388                | AA                              | CC              | 1946865468               |
| SNP_P4_82946_25302391 | NC_021165.1    | Ca_kabuli_chr06 | 25302391                | GG                              | AA              | 1946865470               |
| SNP_P4_82947_25302945 | NC_021165.1    | Ca_kabuli_chr06 | 25302945                | AA                              | CC              | 1946865472               |
| SNP_P4_82949_25314572 | NC_021165.1    | Ca_kabuli_chr06 | 25314572                | GG                              | TT              | 1946865474               |
| SNP_P4_82950_25314762 | NC_021165.1    | Ca_kabuli_chr06 | 25314762                | AA                              | GG              | 1946865476               |
| SNP_P4_82951_25314849 | NC_021165.1    | Ca_kabuli_chr06 | 25314849                | TT                              | CC              | 1946865479               |
| SNP_P4_82952_25314861 | NC_021165.1    | Ca_kabuli_chr06 | 25314861                | TT                              | CC              | 1946865481               |
| SNP_P4_82953_25314874 | NC_021165.1    | Ca_kabuli_chr06 | 25314874                | AA                              | TT              | 1946865483               |
| SNP_P4_82954_25314890 | NC_021165.1    | Ca_kabuli_chr06 | 25314890                | AA                              | GG              | 1946865485               |
| SNP_P4_82955_25314896 | NC_021165.1    | Ca_kabuli_chr06 | 25314896                | TT                              | CC              | 1946865487               |
| SNP_P4_82956_25314931 | NC_021165.1    | Ca_kabuli_chr06 | 25314931                | TT                              | GG              | 1946865489               |
| SNP_P4_82957_25314937 | NC_021165.1    | Ca_kabuli_chr06 | 25314937                | GG                              | AA              | 1946865491               |
| SNP_P4_82958_25314959 | NC_021165.1    | Ca_kabuli_chr06 | 25314959                | AA                              | GG              | 1946865493               |
| SNP_P4_82959_25320867 | NC_021165.1    | Ca_kabuli_chr06 | 25320867                | GG                              | AA              | 1946865495               |
| SNP_P4_82960_25324979 | NC_021165.1    | Ca_kabuli_chr06 | 25324979                | TT                              | GG              | 1946865497               |
| SNP_P4_82961_25325248 | NC_021165.1    | Ca_kabuli_chr06 | 25325248                | CC                              | TT              | 1946865499               |
| SNP_P4_82962_25325249 | NC_021165.1    | Ca_kabuli_chr06 | 25325249                | TT                              | CC              | 1946865501               |
| SNP_P4_82963_25325275 | NC_021165.1    | Ca_kabuli_chr06 | 25325275                | GG                              | AA              | 1946865502               |
| SNP_P4_82964_25325293 | NC_021165.1    | Ca_kabuli_chr06 | 25325293                | AA                              | TT              | 1946865504               |
| SNP_P4_82965_25325314 | NC_021165.1    | Ca_kabuli_chr06 | 25325314                | CC                              | TT              | 1946865506               |

| SNPs IDs              | Chromosome IDs | Chromosomes     | Physical positions (bp) | CDC Frontier (Reference genome) | (ILWC46 & LPNB) | NCBI SNPdb Accession IDs |
|-----------------------|----------------|-----------------|-------------------------|---------------------------------|-----------------|--------------------------|
| SNP_P4_82966_25325329 | NC_021165.1    | Ca_kabuli_chr06 | 25325329                | TT                              | CC              | 1946865508               |
| SNP_P4_82967_25325359 | NC_021165.1    | Ca_kabuli_chr06 | 25325359                | CC                              | TT              | 1946865510               |
| SNP_P4_82968_25325410 | NC_021165.1    | Ca_kabuli_chr06 | 25325410                | TT                              | CC              | 1946865512               |
| SNP_P4_82969_25325418 | NC_021165.1    | Ca_kabuli_chr06 | 25325418                | TT                              | CC              | 1946865515               |
| SNP_P4_82970_25325502 | NC_021165.1    | Ca_kabuli_chr06 | 25325502                | AA                              | CC              | 1946865517               |
| SNP_P4_82971_25330087 | NC_021165.1    | Ca_kabuli_chr06 | 25330087                | AA                              | TT              | 1946865519               |
| SNP_P4_82972_25330157 | NC_021165.1    | Ca_kabuli_chr06 | 25330157                | CC                              | GG              | 1946865521               |
| SNP_P4_82973_25336105 | NC_021165.1    | Ca_kabuli_chr06 | 25336105                | TT                              | CC              | 1946865523               |
| SNP_P4_82974_25337974 | NC_021165.1    | Ca_kabuli_chr06 | 25337974                | AA                              | GG              | 1946865525               |
| SNP_P4_82975_25344708 | NC_021165.1    | Ca_kabuli_chr06 | 25344708                | GG                              | AA              | 1946865527               |
| SNP_P4_82976_25352458 | NC_021165.1    | Ca_kabuli_chr06 | 25352458                | AA                              | TT              | 1946865529               |
| SNP_P4_82977_25352513 | NC_021165.1    | Ca_kabuli_chr06 | 25352513                | AA                              | TT              | 1946865531               |
| SNP_P4_82978_25352555 | NC_021165.1    | Ca_kabuli_chr06 | 25352555                | GG                              | AA              | 1946865533               |
| SNP_P4_82979_25352576 | NC_021165.1    | Ca_kabuli_chr06 | 25352576                | TT                              | AA              | 1946865535               |
| SNP_P4_82980_25356064 | NC_021165.1    | Ca_kabuli_chr06 | 25356064                | TT                              | CC              | 1946865537               |
| SNP_P4_82981_25356080 | NC_021165.1    | Ca_kabuli_chr06 | 25356080                | CC                              | AA              | 1946865539               |
| SNP_P4_82982_25356096 | NC_021165.1    | Ca_kabuli_chr06 | 25356096                | TT                              | CC              | 1946865541               |
| SNP_P4_82984_25383139 | NC_021165.1    | Ca_kabuli_chr06 | 25383139                | TT                              | CC              | 1946865543               |
| SNP_P4_82985_25440561 | NC_021165.1    | Ca_kabuli_chr06 | 25440561                | CC                              | GG              | 1946865545               |
| SNP_P4_82986_25440571 | NC_021165.1    | Ca_kabuli_chr06 | 25440571                | CC                              | TT              | 1946865546               |
| SNP_P4_82987_25440575 | NC_021165.1    | Ca_kabuli_chr06 | 25440575                | CC                              | GG              | 1946865548               |
| SNP_P4_82989_25501552 | NC_021165.1    | Ca_kabuli_chr06 | 25501552                | AA                              | TT              | 1946865550               |
| SNP_P4_82990_25501563 | NC_021165.1    | Ca_kabuli_chr06 | 25501563                | CC                              | GG              | 1946865552               |
| SNP_P4_82991_25501573 | NC_021165.1    | Ca_kabuli_chr06 | 25501573                | AA                              | GG              | 1946865554               |
| SNP_P4_82992_25501579 | NC_021165.1    | Ca_kabuli_chr06 | 25501579                | AA                              | TT              | 1946865556               |
| SNP_P4_82993_25501748 | NC_021165.1    | Ca_kabuli_chr06 | 25501748                | CC                              | AA              | 1946865558               |
| SNP_P4_82994_25531267 | NC_021165.1    | Ca_kabuli_chr06 | 25531267                | TT                              | CC              | 1946865559               |
| SNP_P4_82995_25534711 | NC_021165.1    | Ca_kabuli_chr06 | 25534711                | TT                              | GG              | 1946865561               |
| SNP_P4_82996_25545682 | NC_021165.1    | Ca_kabuli_chr06 | 25545682                | TT                              | GG              | 1946865563               |
| SNP_P4_82997_25548298 | NC_021165.1    | Ca_kabuli_chr06 | 25548298                | TT                              | AA              | 1946865565               |
| SNP_P4_82998_25548722 | NC_021165.1    | Ca_kabuli_chr06 | 25548722                | GG                              | AA              | 1946865567               |
| SNP_P4_82999_25549570 | NC_021165.1    | Ca_kabuli_chr06 | 25549570                | CC                              | AA              | 1946865569               |
| SNP_P4_83000_25549592 | NC_021165.1    | Ca_kabuli_chr06 | 25549592                | CC                              | TT              | 1946865571               |
| SNP_P4_83001_25549600 | NC_021165.1    | Ca_kabuli_chr06 | 25549600                | AA                              | GG              | 1946865573               |
| SNP_P4_83002_25549602 | NC_021165.1    | Ca_kabuli_chr06 | 25549602                | TT                              | CC              | 1946865575               |
| SNP_P4_83003_25549620 | NC_021165.1    | Ca_kabuli_chr06 | 25549620                | GG                              | TT              | 1946865576               |
| SNP_P4_83004_25549639 | NC_021165.1    | Ca_kabuli_chr06 | 25549639                | TT                              | CC              | 1946865578               |
| SNP_P4_83005_25549666 | NC_021165.1    | Ca_kabuli_chr06 | 25549666                | TT                              | CC              | 1946865580               |
| SNP_P4_83006_25549678 | NC_021165.1    | Ca_kabuli_chr06 | 25549678                | TT                              | AA              | 1946865582               |
| SNP_P4_83007_25549693 | NC_021165.1    | Ca_kabuli_chr06 | 25549693                | TT                              | CC              | 1946865584               |
| SNP_P4_83008_25549711 | NC_021165.1    | Ca_kabuli_chr06 | 25549711                | TT                              | CC              | 1946865586               |
| SNP_P4_83009_25549712 | NC_021165.1    | Ca_kabuli_chr06 | 25549712                | TT                              | CC              | 1946865588               |

| SNPs IDs              | Chromosome IDs | Chromosomes     | Physical positions (bp) | CDC Frontier (Reference genome) | (ILWC46 & LPNB) | NCBI SNPdb Accession IDs |
|-----------------------|----------------|-----------------|-------------------------|---------------------------------|-----------------|--------------------------|
| SNP_P4_83010_25549744 | NC_021165.1    | Ca_kabuli_chr06 | 25549744                | AA                              | GG              | 1946865590               |
| SNP_P4_83011_25549798 | NC_021165.1    | Ca_kabuli_chr06 | 25549798                | TT                              | CC              | 1946865592               |
| SNP_P4_83012_25549801 | NC_021165.1    | Ca_kabuli_chr06 | 25549801                | TT                              | GG              | 1946865594               |
| SNP_P4_83013_25549807 | NC_021165.1    | Ca_kabuli_chr06 | 25549807                | GG                              | AA              | 1946865596               |
| SNP_P4_83014_25549825 | NC_021165.1    | Ca_kabuli_chr06 | 25549825                | AA                              | GG              | 1946865598               |
| SNP_P4_83015_25549831 | NC_021165.1    | Ca_kabuli_chr06 | 25549831                | CC                              | TT              | 1946865600               |
| SNP_P4_83016_25549834 | NC_021165.1    | Ca_kabuli_chr06 | 25549834                | GG                              | AA              | 1946865602               |
| SNP_P4_83017_25549837 | NC_021165.1    | Ca_kabuli_chr06 | 25549837                | AA                              | GG              | 1946865604               |
| SNP_P4_83018_25549970 | NC_021165.1    | Ca_kabuli_chr06 | 25549970                | GG                              | AA              | 1946865606               |
| SNP_P4_83019_25550043 | NC_021165.1    | Ca_kabuli_chr06 | 25550043                | CC                              | AA              | 1946865608               |
| SNP_P4_83020_25550081 | NC_021165.1    | Ca_kabuli_chr06 | 25550081                | AA                              | GG              | 1946865610               |
| SNP_P4_83021_25550087 | NC_021165.1    | Ca_kabuli_chr06 | 25550087                | CC                              | TT              | 1946865612               |
| SNP_P4_83022_25550090 | NC_021165.1    | Ca_kabuli_chr06 | 25550090                | CC                              | TT              | 1946865614               |
| SNP_P4_83023_25550123 | NC_021165.1    | Ca_kabuli_chr06 | 25550123                | TT                              | AA              | 1946865616               |
| SNP_P4_83024_25550126 | NC_021165.1    | Ca_kabuli_chr06 | 25550126                | AA                              | GG              | 1946865618               |
| SNP_P4_83025_25550132 | NC_021165.1    | Ca_kabuli_chr06 | 25550132                | GG                              | AA              | 1946865620               |
| SNP_P4_83026_25550189 | NC_021165.1    | Ca_kabuli_chr06 | 25550189                | AA                              | GG              | 1946865622               |
| SNP_P4_83027_25569675 | NC_021165.1    | Ca_kabuli_chr06 | 25569675                | TT                              | CC              | 1946865623               |
| SNP_P4_83028_25569990 | NC_021165.1    | Ca_kabuli_chr06 | 25569990                | TT                              | GG              | 1946865625               |
| SNP_P4_83029_25570033 | NC_021165.1    | Ca_kabuli_chr06 | 25570033                | AA                              | GG              | 1946865627               |
| SNP_P4_83030_25570179 | NC_021165.1    | Ca_kabuli_chr06 | 25570179                | TT                              | CC              | 1946865629               |
| SNP_P4_83031_25572462 | NC_021165.1    | Ca_kabuli_chr06 | 25572462                | AA                              | GG              | 1946865631               |
| SNP_P4_83032_25572471 | NC_021165.1    | Ca_kabuli_chr06 | 25572471                | GG                              | AA              | 1946865633               |
| SNP_P4_83033_25572473 | NC_021165.1    | Ca_kabuli_chr06 | 25572473                | AA                              | TT              | 1946865635               |
| SNP_P4_83034_25572494 | NC_021165.1    | Ca_kabuli_chr06 | 25572494                | GG                              | AA              | 1946865637               |
| SNP_P4_83035_25573599 | NC_021165.1    | Ca_kabuli_chr06 | 25573599                | CC                              | AA              | 1946865639               |
| SNP_P4_83037_25595905 | NC_021165.1    | Ca_kabuli_chr06 | 25595905                | TT                              | CC              | 1946865641               |
| SNP_P4_83038_25595906 | NC_021165.1    | Ca_kabuli_chr06 | 25595906                | AA                              | GG              | 1946865643               |
| SNP_P4_83039_25599512 | NC_021165.1    | Ca_kabuli_chr06 | 25599512                | AA                              | TT              | 1946865644               |
| SNP_P4_83040_25611670 | NC_021165.1    | Ca_kabuli_chr06 | 25611670                | AA                              | CC              | 1946865646               |
| SNP_P4_83041_25612477 | NC_021165.1    | Ca_kabuli_chr06 | 25612477                | TT                              | AA              | 1946865648               |
| SNP_P4_83042_25613292 | NC_021165.1    | Ca_kabuli_chr06 | 25613292                | TT                              | AA              | 1946865650               |
| SNP_P4_83043_25624727 | NC_021165.1    | Ca_kabuli_chr06 | 25624727                | CC                              | TT              | 1946865652               |
| SNP_P4_83044_25624741 | NC_021165.1    | Ca_kabuli_chr06 | 25624741                | GG                              | TT              | 1946865654               |
| SNP_P4_83045_25626097 | NC_021165.1    | Ca_kabuli_chr06 | 25626097                | GG                              | AA              | 1946865656               |
| SNP_P4_83046_25638387 | NC_021165.1    | Ca_kabuli_chr06 | 25638387                | TT                              | CC              | 1946865658               |
| SNP_P4_83047_25638459 | NC_021165.1    | Ca_kabuli_chr06 | 25638459                | CC                              | TT              | 1946865660               |
| SNP_P4_83048_25638748 | NC_021165.1    | Ca_kabuli_chr06 | 25638748                | TT                              | GG              | 1946865662               |
| SNP_P4_83049_25638757 | NC_021165.1    | Ca_kabuli_chr06 | 25638757                | TT                              | AA              | 1946865664               |
| SNP_P4_83050_25639623 | NC_021165.1    | Ca_kabuli_chr06 | 25639623                | CC                              | AA              | 1946865665               |
| SNP_P4_83051_25643992 | NC_021165.1    | Ca_kabuli_chr06 | 25643992                | GG                              | AA              | 1946865667               |
| SNP_P4_83052_25645208 | NC_021165.1    | Ca_kabuli_chr06 | 25645208                | TT                              | GG              | 1946865669               |

| SNPs IDs              | Chromosome IDs | Chromosomes     | Physical positions (bp) | CDC Frontier (Reference genome) | (ILWC46 & LPNB) | NCBI SNPdb Accession IDs |
|-----------------------|----------------|-----------------|-------------------------|---------------------------------|-----------------|--------------------------|
| SNP_P4_83053_25645241 | NC_021165.1    | Ca_kabuli_chr06 | 25645241                | CC                              | GG              | 1946865671               |
| SNP_P4_83054_25650952 | NC_021165.1    | Ca_kabuli_chr06 | 25650952                | AA                              | TT              | 1946865673               |
| SNP_P4_83055_25659933 | NC_021165.1    | Ca_kabuli_chr06 | 25659933                | GG                              | AA              | 1946865675               |
| SNP_P4_83056_25663581 | NC_021165.1    | Ca_kabuli_chr06 | 25663581                | TT                              | AA              | 1946865677               |
| SNP_P4_83057_25671405 | NC_021165.1    | Ca_kabuli_chr06 | 25671405                | TT                              | AA              | 1946865679               |
| SNP_P4_83058_25671453 | NC_021165.1    | Ca_kabuli_chr06 | 25671453                | AA                              | GG              | 1946865681               |
| SNP_P4_83059_25671783 | NC_021165.1    | Ca_kabuli_chr06 | 25671783                | AA                              | TT              | 1946865683               |
| SNP_P4_83060_25671833 | NC_021165.1    | Ca_kabuli_chr06 | 25671833                | AA                              | TT              | 1946865685               |
| SNP_P4_83061_25671912 | NC_021165.1    | Ca_kabuli_chr06 | 25671912                | TT                              | GG              | 1946865687               |
| SNP_P4_83062_25672063 | NC_021165.1    | Ca_kabuli_chr06 | 25672063                | AA                              | TT              | 1946865689               |
| SNP_P4_83063_25687449 | NC_021165.1    | Ca_kabuli_chr06 | 25687449                | GG                              | TT              | 1946865691               |
| SNP_P4_83064_25689137 | NC_021165.1    | Ca_kabuli_chr06 | 25689137                | GG                              | TT              | 1946865693               |
| SNP_P4_83065_25689448 | NC_021165.1    | Ca_kabuli_chr06 | 25689448                | TT                              | GG              | 1946865695               |
| SNP_P4_83066_25689457 | NC_021165.1    | Ca_kabuli_chr06 | 25689457                | TT                              | AA              | 1946865697               |
| SNP_P4_83068_25695905 | NC_021165.1    | Ca_kabuli_chr06 | 25695905                | CC                              | TT              | 1946865699               |
| SNP_P4_83069_25695913 | NC_021165.1    | Ca_kabuli_chr06 | 25695913                | TT                              | CC              | 1946865701               |
| SNP_P4_83070_25696882 | NC_021165.1    | Ca_kabuli_chr06 | 25696882                | CC                              | TT              | 1946865703               |
| SNP_P4_83071_25697054 | NC_021165.1    | Ca_kabuli_chr06 | 25697054                | CC                              | AA              | 1946865705               |
| SNP_P4_83072_25697192 | NC_021165.1    | Ca_kabuli_chr06 | 25697192                | TT                              | CC              | 1946865707               |
| SNP_P4_83073_25697222 | NC_021165.1    | Ca_kabuli_chr06 | 25697222                | TT                              | CC              | 1946865708               |
| SNP_P4_83074_25697272 | NC_021165.1    | Ca_kabuli_chr06 | 25697272                | TT                              | CC              | 1946865710               |
| SNP_P4_83075_25726495 | NC_021165.1    | Ca_kabuli_chr06 | 25726495                | CC                              | TT              | 1946865712               |
| SNP_P4_83076_25726519 | NC_021165.1    | Ca_kabuli_chr06 | 25726519                | TT                              | GG              | 1946865714               |
| SNP_P4_83077_25726665 | NC_021165.1    | Ca_kabuli_chr06 | 25726665                | CC                              | TT              | 1946865716               |
| SNP_P4_83078_25726690 | NC_021165.1    | Ca_kabuli_chr06 | 25726690                | GG                              | AA              | 1946865718               |
| SNP_P4_83079_25726708 | NC_021165.1    | Ca_kabuli_chr06 | 25726708                | TT                              | AA              | 1946865720               |
| SNP_P4_83080_25732992 | NC_021165.1    | Ca_kabuli_chr06 | 25732992                | AA                              | GG              | 1946865722               |
| SNP_P4_83081_25733010 | NC_021165.1    | Ca_kabuli_chr06 | 25733010                | TT                              | AA              | 1946865724               |
| SNP_P4_83082_25733031 | NC_021165.1    | Ca_kabuli_chr06 | 25733031                | AA                              | GG              | 1946865726               |
| SNP_P4_83083_25733362 | NC_021165.1    | Ca_kabuli_chr06 | 25733362                | GG                              | AA              | 1946865728               |
| SNP_P4_83084_25733407 | NC_021165.1    | Ca_kabuli_chr06 | 25733407                | TT                              | CC              | 1946865730               |
| SNP_P4_83085_25733421 | NC_021165.1    | Ca_kabuli_chr06 | 25733421                | AA                              | TT              | 1946865732               |
| SNP_P4_83086_25733422 | NC_021165.1    | Ca_kabuli_chr06 | 25733422                | AA                              | GG              | 1946865734               |
| SNP_P4_83087_25733584 | NC_021165.1    | Ca_kabuli_chr06 | 25733584                | TT                              | CC              | 1946865736               |
| SNP_P4_83088_25733620 | NC_021165.1    | Ca_kabuli_chr06 | 25733620                | CC                              | TT              | 1946865738               |
| SNP_P4_83089_25733627 | NC_021165.1    | Ca_kabuli_chr06 | 25733627                | GG                              | TT              | 1946865739               |
| SNP_P4_83090_25733729 | NC_021165.1    | Ca_kabuli_chr06 | 25733729                | CC                              | TT              | 1946865741               |
| SNP_P4_83091_25733743 | NC_021165.1    | Ca_kabuli_chr06 | 25733743                | AA                              | GG              | 1946865743               |
| SNP_P4_83092_25733745 | NC_021165.1    | Ca_kabuli_chr06 | 25733745                | GG                              | AA              | 1946865745               |
| SNP_P4_83093_25733774 | NC_021165.1    | Ca_kabuli_chr06 | 25733774                | CC                              | TT              | 1946865747               |
| SNP_P4_83094_25733917 | NC_021165.1    | Ca_kabuli_chr06 | 25733917                | CC                              | TT              | 1946865749               |
| SNP_P4_83095_25733920 | NC_021165.1    | Ca_kabuli_chr06 | 25733920                | GG                              | TT              | 1946865751               |

| SNPs IDs              | Chromosome IDs | Chromosomes     | Physical positions (bp) | CDC Frontier (Reference genome) | (ILWC46 & LPNB) | NCBI SNPdb Accession IDs |
|-----------------------|----------------|-----------------|-------------------------|---------------------------------|-----------------|--------------------------|
| SNP_P4_83096_25733949 | NC_021165.1    | Ca_kabuli_chr06 | 25733949                | TT                              | GG              | 1946865753               |
| SNP_P4_83097_25751760 | NC_021165.1    | Ca_kabuli_chr06 | 25751760                | AA                              | CC              | 1946865755               |
| SNP_P4_83098_25752006 | NC_021165.1    | Ca_kabuli_chr06 | 25752006                | GG                              | AA              | 1946865757               |
| SNP_P4_83099_25752245 | NC_021165.1    | Ca_kabuli_chr06 | 25752245                | CC                              | TT              | 1946865759               |
| SNP_P4_83100_25754760 | NC_021165.1    | Ca_kabuli_chr06 | 25754760                | GG                              | AA              | 1946865761               |
| SNP_P4_83101_25757902 | NC_021165.1    | Ca_kabuli_chr06 | 25757902                | AA                              | CC              | 1946865762               |
| SNP_P4_83102_25757939 | NC_021165.1    | Ca_kabuli_chr06 | 25757939                | AA                              | TT              | 1946865764               |
| SNP_P4_83103_25757998 | NC_021165.1    | Ca_kabuli_chr06 | 25757998                | AA                              | GG              | 1946865766               |
| SNP_P4_83104_25757999 | NC_021165.1    | Ca_kabuli_chr06 | 25757999                | AA                              | GG              | 1946865768               |
| SNP_P4_83105_25758105 | NC_021165.1    | Ca_kabuli_chr06 | 25758105                | GG                              | AA              | 1946865770               |
| SNP_P4_83106_25773506 | NC_021165.1    | Ca_kabuli_chr06 | 25773506                | AA                              | GG              | 1946865772               |
| SNP_P4_83107_25789400 | NC_021165.1    | Ca_kabuli_chr06 | 25789400                | CC                              | TT              | 1946865774               |
| SNP_P4_83108_25789415 | NC_021165.1    | Ca_kabuli_chr06 | 25789415                | AA                              | GG              | 1946865776               |
| SNP_P4_83109_25805315 | NC_021165.1    | Ca_kabuli_chr06 | 25805315                | AA                              | TT              | 1946865778               |
| SNP_P4_83110_25815726 | NC_021165.1    | Ca_kabuli_chr06 | 25815726                | TT                              | AA              | 1946865780               |
| SNP_P4_83111_25834379 | NC_021165.1    | Ca_kabuli_chr06 | 25834379                | TT                              | CC              | 1946865782               |
| SNP_P4_83112_25851475 | NC_021165.1    | Ca_kabuli_chr06 | 25851475                | CC                              | TT              | 1946865784               |
| SNP_P4_83113_25867550 | NC_021165.1    | Ca_kabuli_chr06 | 25867550                | CC                              | AA              | 1946865786               |
| SNP_P4_83114_25867568 | NC_021165.1    | Ca_kabuli_chr06 | 25867568                | TT                              | AA              | 1946865788               |
| SNP_P4_83115_25869062 | NC_021165.1    | Ca_kabuli_chr06 | 25869062                | TT                              | GG              | 1946865790               |
| SNP_P4_83116_25869140 | NC_021165.1    | Ca_kabuli_chr06 | 25869140                | AA                              | CC              | 1946865792               |
| SNP_P4_83117_25869181 | NC_021165.1    | Ca_kabuli_chr06 | 25869181                | TT                              | CC              | 1946865794               |
| SNP_P4_83118_25869226 | NC_021165.1    | Ca_kabuli_chr06 | 25869226                | TT                              | AA              | 1946865796               |
| SNP_P4_83119_25869229 | NC_021165.1    | Ca_kabuli_chr06 | 25869229                | CC                              | AA              | 1946865798               |
| SNP_P4_83120_25869230 | NC_021165.1    | Ca_kabuli_chr06 | 25869230                | AA                              | GG              | 1946865800               |
| SNP_P4_83121_25869231 | NC_021165.1    | Ca_kabuli_chr06 | 25869231                | CC                              | GG              | 1946865802               |
| SNP_P4_83122_25869408 | NC_021165.1    | Ca_kabuli_chr06 | 25869408                | GG                              | CC              | 1946865804               |
| SNP_P4_83123_25869411 | NC_021165.1    | Ca_kabuli_chr06 | 25869411                | TT                              | GG              | 1946865806               |
| SNP_P4_83124_25869437 | NC_021165.1    | Ca_kabuli_chr06 | 25869437                | CC                              | GG              | 1946865808               |
| SNP_P4_83125_25869441 | NC_021165.1    | Ca_kabuli_chr06 | 25869441                | TT                              | GG              | 1946865810               |
| SNP_P4_83126_25869463 | NC_021165.1    | Ca_kabuli_chr06 | 25869463                | GG                              | TT              | 1946865811               |
| SNP_P4_83127_25869497 | NC_021165.1    | Ca_kabuli_chr06 | 25869497                | CC                              | TT              | 1946865813               |
| SNP_P4_83128_25887069 | NC_021165.1    | Ca_kabuli_chr06 | 25887069                | TT                              | CC              | 1946865815               |
| SNP_P4_83129_25894744 | NC_021165.1    | Ca_kabuli_chr06 | 25894744                | CC                              | AA              | 1946865817               |
| SNP_P4_83130_25894748 | NC_021165.1    | Ca_kabuli_chr06 | 25894748                | TT                              | GG              | 1946865819               |
| SNP_P4_83131_25895032 | NC_021165.1    | Ca_kabuli_chr06 | 25895032                | GG                              | AA              | 1946865821               |
| SNP_P4_83132_25895052 | NC_021165.1    | Ca_kabuli_chr06 | 25895052                | TT                              | AA              | 1946865823               |
| SNP_P4_83133_25916473 | NC_021165.1    | Ca_kabuli_chr06 | 25916473                | AA                              | CC              | 1946865825               |
| SNP_P4_83134_25916477 | NC_021165.1    | Ca_kabuli_chr06 | 25916477                | TT                              | CC              | 1946865827               |
| SNP_P4_83136_25916500 | NC_021165.1    | Ca_kabuli_chr06 | 25916500                | AA                              | GG              | 1946865829               |
| SNP_P4_83137_25916522 | NC_021165.1    | Ca_kabuli_chr06 | 25916522                | AA                              | GG              | 1946865831               |
| SNP_P4_83138_25916531 | NC_021165.1    | Ca_kabuli_chr06 | 25916531                | TT                              | GG              | 1946865833               |



| SNPs IDs              | Chromosome IDs | Chromosomes     | Physical positions (bp) | CDC Frontier (Reference genome) | (ILWC46 & LPNB) | NCBI SNPdb Accession IDs |
|-----------------------|----------------|-----------------|-------------------------|---------------------------------|-----------------|--------------------------|
| SNP_P4_83139_25916541 | NC_021165.1    | Ca_kabuli_chr06 | 25916541                | AA                              | GG              | 1946865835               |
| SNP_P4_83140_25916552 | NC_021165.1    | Ca_kabuli_chr06 | 25916552                | TT                              | CC              | 1946865837               |
| SNP_P4_83141_25916568 | NC_021165.1    | Ca_kabuli_chr06 | 25916568                | TT                              | GG              | 1946865839               |
| SNP_P4_83142_25916587 | NC_021165.1    | Ca_kabuli_chr06 | 25916587                | GG                              | AA              | 1946865841               |
| SNP_P4_83143_25916600 | NC_021165.1    | Ca_kabuli_chr06 | 25916600                | GG                              | AA              | 1946865843               |
| SNP_P4_83144_25916624 | NC_021165.1    | Ca_kabuli_chr06 | 25916624                | AA                              | GG              | 1946865845               |
| SNP_P4_83145_25916625 | NC_021165.1    | Ca_kabuli_chr06 | 25916625                | AA                              | CC              | 1946865847               |
| SNP_P4_83146_25916630 | NC_021165.1    | Ca_kabuli_chr06 | 25916630                | CC                              | TT              | 1946865849               |
| SNP_P4_83147_25916639 | NC_021165.1    | Ca_kabuli_chr06 | 25916639                | CC                              | TT              | 1946865851               |
| SNP_P4_83149_25916776 | NC_021165.1    | Ca_kabuli_chr06 | 25916776                | TT                              | CC              | 1946865853               |
| SNP_P4_83150_25916902 | NC_021165.1    | Ca_kabuli_chr06 | 25916902                | AA                              | GG              | 1946865855               |
| SNP_P4_83151_25916935 | NC_021165.1    | Ca_kabuli_chr06 | 25916935                | CC                              | AA              | 1946865857               |
| SNP_P4_83152_25917007 | NC_021165.1    | Ca_kabuli_chr06 | 25917007                | GG                              | AA              | 1946865859               |
| SNP_P4_83153_25919402 | NC_021165.1    | Ca_kabuli_chr06 | 25919402                | GG                              | AA              | 1946865860               |
| SNP_P4_83154_25919412 | NC_021165.1    | Ca_kabuli_chr06 | 25919412                | AA                              | GG              | 1946865862               |
| SNP_P4_83155_25919812 | NC_021165.1    | Ca_kabuli_chr06 | 25919812                | TT                              | GG              | 1946865864               |
| SNP_P4_83156_25941060 | NC_021165.1    | Ca_kabuli_chr06 | 25941060                | AA                              | CC              | 1946865866               |
| SNP_P4_83157_25954415 | NC_021165.1    | Ca_kabuli_chr06 | 25954415                | TT                              | CC              | 1946865868               |
| SNP_P4_83159_25966973 | NC_021165.1    | Ca_kabuli_chr06 | 25966973                | CC                              | TT              | 1946865870               |
| SNP_P4_83160_25967366 | NC_021165.1    | Ca_kabuli_chr06 | 25967366                | CC                              | TT              | 1946865872               |
| SNP_P4_83161_25967706 | NC_021165.1    | Ca_kabuli_chr06 | 25967706                | GG                              | CC              | 1946865874               |
| SNP_P4_83162_25967713 | NC_021165.1    | Ca_kabuli_chr06 | 25967713                | CC                              | TT              | 1946865876               |
| SNP_P4_83164_25976915 | NC_021165.1    | Ca_kabuli_chr06 | 25976915                | GG                              | CC              | 1946865878               |
| SNP_P4_83165_25977884 | NC_021165.1    | Ca_kabuli_chr06 | 25977884                | TT                              | CC              | 1946865880               |
| SNP_P4_83166_25977919 | NC_021165.1    | Ca_kabuli_chr06 | 25977919                | TT                              | GG              | 1946865882               |
| SNP_P4_83167_25977994 | NC_021165.1    | Ca_kabuli_chr06 | 25977994                | TT                              | GG              | 1946865884               |
| SNP_P4_83168_26023113 | NC_021165.1    | Ca_kabuli_chr06 | 26023113                | AA                              | GG              | 1946865886               |
| SNP_P4_83169_26027557 | NC_021165.1    | Ca_kabuli_chr06 | 26027557                | GG                              | AA              | 1946865888               |
| SNP_P4_83170_26027560 | NC_021165.1    | Ca_kabuli_chr06 | 26027560                | TT                              | CC              | 1946865890               |
| SNP_P4_83171_26027576 | NC_021165.1    | Ca_kabuli_chr06 | 26027576                | AA                              | GG              | 1946865892               |
| SNP_P4_83172_26027582 | NC_021165.1    | Ca_kabuli_chr06 | 26027582                | CC                              | TT              | 1946865894               |
| SNP_P4_83173_26027612 | NC_021165.1    | Ca_kabuli_chr06 | 26027612                | CC                              | TT              | 1946865896               |
| SNP_P4_83174_26027613 | NC_021165.1    | Ca_kabuli_chr06 | 26027613                | TT                              | CC              | 1946865897               |
| SNP_P4_83175_26027628 | NC_021165.1    | Ca_kabuli_chr06 | 26027628                | AA                              | GG              | 1946865899               |
| SNP_P4_83176_26027635 | NC_021165.1    | Ca_kabuli_chr06 | 26027635                | GG                              | TT              | 1946865901               |
| SNP_P4_83177_26030922 | NC_021165.1    | Ca_kabuli_chr06 | 26030922                | AA                              | TT              | 1946865903               |
| SNP_P4_83179_26059970 | NC_021165.1    | Ca_kabuli_chr06 | 26059970                | AA                              | TT              | 1946865905               |
| SNP_P4_83180_26060725 | NC_021165.1    | Ca_kabuli_chr06 | 26060725                | CC                              | GG              | 1946865907               |
| SNP_P4_83181_26060736 | NC_021165.1    | Ca_kabuli_chr06 | 26060736                | GG                              | AA              | 1946865909               |
| SNP_P4_83182_26060989 | NC_021165.1    | Ca_kabuli_chr06 | 26060989                | CC                              | AA              | 1946865911               |
| SNP_P4_83183_26061037 | NC_021165.1    | Ca_kabuli_chr06 | 26061037                | GG                              | AA              | 1946865913               |
| SNP_P4_83184_26065926 | NC_021165.1    | Ca_kabuli_chr06 | 26065926                | TT                              | GG              | 1946865915               |

| SNPs IDs              | Chromosome IDs | Chromosomes     | Physical positions (bp) | CDC Frontier (Reference genome) | (ILWC46 & LPNB) | NCBI SNPdb Accession IDs |
|-----------------------|----------------|-----------------|-------------------------|---------------------------------|-----------------|--------------------------|
| SNP_P4_83185_26066478 | NC_021165.1    | Ca_kabuli_chr06 | 26066478                | TT                              | CC              | 1946865917               |
| SNP_P4_83186_26066480 | NC_021165.1    | Ca_kabuli_chr06 | 26066480                | TT                              | GG              | 1946865920               |
| SNP_P4_83187_26066496 | NC_021165.1    | Ca_kabuli_chr06 | 26066496                | GG                              | AA              | 1946865922               |
| SNP_P4_83188_26066506 | NC_021165.1    | Ca_kabuli_chr06 | 26066506                | CC                              | TT              | 1946865925               |
| SNP_P4_83190_26095343 | NC_021165.1    | Ca_kabuli_chr06 | 26095343                | TT                              | CC              | 1946865927               |
| SNP_P4_83191_26095678 | NC_021165.1    | Ca_kabuli_chr06 | 26095678                | GG                              | AA              | 1946865929               |
| SNP_P4_83192_26095699 | NC_021165.1    | Ca_kabuli_chr06 | 26095699                | AA                              | GG              | 1946865931               |
| SNP_P4_83194_26114644 | NC_021165.1    | Ca_kabuli_chr06 | 26114644                | AA                              | TT              | 1946865933               |
| SNP_P4_83195_26117368 | NC_021165.1    | Ca_kabuli_chr06 | 26117368                | CC                              | TT              | 1946865935               |
| SNP_P4_83196_26132045 | NC_021165.1    | Ca_kabuli_chr06 | 26132045                | TT                              | AA              | 1946865937               |
| SNP_P4_83197_26132093 | NC_021165.1    | Ca_kabuli_chr06 | 26132093                | AA                              | GG              | 1946865939               |
| SNP_P4_83198_26135817 | NC_021165.1    | Ca_kabuli_chr06 | 26135817                | AA                              | GG              | 1946865941               |
| SNP_P4_83199_26135877 | NC_021165.1    | Ca_kabuli_chr06 | 26135877                | AA                              | GG              | 1946865943               |
| SNP_P4_83200_26136197 | NC_021165.1    | Ca_kabuli_chr06 | 26136197                | TT                              | CC              | 1946865945               |
| SNP_P4_83201_26136209 | NC_021165.1    | Ca_kabuli_chr06 | 26136209                | CC                              | GG              | 1946865947               |
| SNP_P4_83202_26136255 | NC_021165.1    | Ca_kabuli_chr06 | 26136255                | TT                              | CC              | 1946865949               |
| SNP_P4_83203_26136260 | NC_021165.1    | Ca_kabuli_chr06 | 26136260                | AA                              | GG              | 1946865951               |
| SNP_P4_83204_26137862 | NC_021165.1    | Ca_kabuli_chr06 | 26137862                | AA                              | TT              | 1946865953               |
| SNP_P4_83205_26140233 | NC_021165.1    | Ca_kabuli_chr06 | 26140233                | AA                              | TT              | 1946865955               |
| SNP_P4_83206_26152473 | NC_021165.1    | Ca_kabuli_chr06 | 26152473                | TT                              | AA              | 1946865957               |
| SNP_P4_83207_26152483 | NC_021165.1    | Ca_kabuli_chr06 | 26152483                | GG                              | CC              | 1946865959               |
| SNP_P4_83208_26152742 | NC_021165.1    | Ca_kabuli_chr06 | 26152742                | AA                              | GG              | 1946865961               |
| SNP_P4_83209_26152745 | NC_021165.1    | Ca_kabuli_chr06 | 26152745                | AA                              | GG              | 1946865963               |
| SNP_P4_83211_26152823 | NC_021165.1    | Ca_kabuli_chr06 | 26152823                | AA                              | GG              | 1946865965               |
| SNP_P4_83212_26152861 | NC_021165.1    | Ca_kabuli_chr06 | 26152861                | AA                              | GG              | 1946865967               |
| SNP_P4_83213_26156915 | NC_021165.1    | Ca_kabuli_chr06 | 26156915                | CC                              | TT              | 1946865969               |
| SNP_P4_83214_26156947 | NC_021165.1    | Ca_kabuli_chr06 | 26156947                | AA                              | CC              | 1946865971               |
| SNP_P4_83215_26157749 | NC_021165.1    | Ca_kabuli_chr06 | 26157749                | TT                              | CC              | 1946865973               |
| SNP_P4_83216_26157755 | NC_021165.1    | Ca_kabuli_chr06 | 26157755                | CC                              | TT              | 1946865975               |
| SNP_P4_83217_26157757 | NC_021165.1    | Ca_kabuli_chr06 | 26157757                | TT                              | CC              | 1946865977               |
| SNP_P4_83218_26159928 | NC_021165.1    | Ca_kabuli_chr06 | 26159928                | CC                              | GG              | 1946865979               |
| SNP_P4_83219_26159931 | NC_021165.1    | Ca_kabuli_chr06 | 26159931                | GG                              | AA              | 1946865981               |
| SNP_P4_83220_26208584 | NC_021165.1    | Ca_kabuli_chr06 | 26208584                | CC                              | GG              | 1946865983               |
| SNP_P4_83221_26209309 | NC_021165.1    | Ca_kabuli_chr06 | 26209309                | TT                              | GG              | 1946865985               |
| SNP_P4_83222_26209776 | NC_021165.1    | Ca_kabuli_chr06 | 26209776                | TT                              | CC              | 1946865987               |
| SNP_P4_83223_26213125 | NC_021165.1    | Ca_kabuli_chr06 | 26213125                | TT                              | CC              | 1946865989               |
| SNP_P4_83224_26240562 | NC_021165.1    | Ca_kabuli_chr06 | 26240562                | TT                              | CC              | 1946865991               |
| SNP_P4_83225_26244243 | NC_021165.1    | Ca_kabuli_chr06 | 26244243                | TT                              | CC              | 1946865992               |
| SNP_P4_83226_26244266 | NC_021165.1    | Ca_kabuli_chr06 | 26244266                | GG                              | AA              | 1946865994               |
| SNP_P4_83227_26244267 | NC_021165.1    | Ca_kabuli_chr06 | 26244267                | GG                              | AA              | 1946865996               |
| SNP_P4_83228_26244282 | NC_021165.1    | Ca_kabuli_chr06 | 26244282                | TT                              | CC              | 1946865998               |
| SNP_P4_83229_26244306 | NC_021165.1    | Ca_kabuli_chr06 | 26244306                | CC                              | TT              | 1946866000               |

| SNPs IDs              | Chromosome IDs | Chromosomes     | Physical positions (bp) | CDC Frontier (Reference genome) | (ILWC46 & LPNB) | NCBI SNPdb Accession IDs |
|-----------------------|----------------|-----------------|-------------------------|---------------------------------|-----------------|--------------------------|
| SNP_P4_83230_26244308 | NC_021165.1    | Ca_kabuli_chr06 | 26244308                | GG                              | AA              | 1946866002               |
| SNP_P4_83232_26244318 | NC_021165.1    | Ca_kabuli_chr06 | 26244318                | TT                              | AA              | 1946866004               |
| SNP_P4_83233_26247924 | NC_021165.1    | Ca_kabuli_chr06 | 26247924                | GG                              | AA              | 1946866006               |
| SNP_P4_83234_26247957 | NC_021165.1    | Ca_kabuli_chr06 | 26247957                | CC                              | TT              | 1946866008               |
| SNP_P4_83235_26247969 | NC_021165.1    | Ca_kabuli_chr06 | 26247969                | CC                              | TT              | 1946866010               |
| SNP_P4_83236_26247987 | NC_021165.1    | Ca_kabuli_chr06 | 26247987                | CC                              | TT              | 1946866012               |
| SNP_P4_83237_26248015 | NC_021165.1    | Ca_kabuli_chr06 | 26248015                | AA                              | TT              | 1946866014               |
| SNP_P4_83238_26248041 | NC_021165.1    | Ca_kabuli_chr06 | 26248041                | TT                              | GG              | 1946866016               |
| SNP_P4_83239_26254674 | NC_021165.1    | Ca_kabuli_chr06 | 26254674                | CC                              | GG              | 1946866018               |
| SNP_P4_83240_26254686 | NC_021165.1    | Ca_kabuli_chr06 | 26254686                | TT                              | CC              | 1946866020               |
| SNP_P4_83241_26255020 | NC_021165.1    | Ca_kabuli_chr06 | 26255020                | TT                              | GG              | 1946866022               |
| SNP_P4_83242_26255050 | NC_021165.1    | Ca_kabuli_chr06 | 26255050                | AA                              | CC              | 1946866024               |
| SNP_P4_83243_26255052 | NC_021165.1    | Ca_kabuli_chr06 | 26255052                | AA                              | TT              | 1946866026               |
| SNP_P4_83244_26255063 | NC_021165.1    | Ca_kabuli_chr06 | 26255063                | TT                              | AA              | 1946866028               |
| SNP_P4_83245_26255067 | NC_021165.1    | Ca_kabuli_chr06 | 26255067                | AA                              | GG              | 1946866030               |
| SNP_P4_83246_26255885 | NC_021165.1    | Ca_kabuli_chr06 | 26255885                | TT                              | CC              | 1946866032               |
| SNP_P4_83247_26255902 | NC_021165.1    | Ca_kabuli_chr06 | 26255902                | AA                              | GG              | 1946866034               |
| SNP_P4_83248_26255907 | NC_021165.1    | Ca_kabuli_chr06 | 26255907                | CC                              | AA              | 1946866036               |
| SNP_P4_83249_26255920 | NC_021165.1    | Ca_kabuli_chr06 | 26255920                | TT                              | GG              | 1946866037               |
| SNP_P4_83250_26263538 | NC_021165.1    | Ca_kabuli_chr06 | 26263538                | AA                              | GG              | 1946866039               |
| SNP_P4_83252_26277580 | NC_021165.1    | Ca_kabuli_chr06 | 26277580                | CC                              | TT              | 1946866041               |
| SNP_P4_83253_26277598 | NC_021165.1    | Ca_kabuli_chr06 | 26277598                | CC                              | TT              | 1946866043               |
| SNP_P4_83255_26277714 | NC_021165.1    | Ca_kabuli_chr06 | 26277714                | GG                              | TT              | 1946866045               |
| SNP_P4_83257_26277748 | NC_021165.1    | Ca_kabuli_chr06 | 26277748                | CC                              | AA              | 1946866047               |
| SNP_P4_83258_26277848 | NC_021165.1    | Ca_kabuli_chr06 | 26277848                | AA                              | TT              | 1946866049               |
| SNP_P4_83259_26278144 | NC_021165.1    | Ca_kabuli_chr06 | 26278144                | AA                              | GG              | 1946866051               |
| SNP_P4_83260_26278198 | NC_021165.1    | Ca_kabuli_chr06 | 26278198                | AA                              | GG              | 1946866053               |
| SNP_P4_83261_26278201 | NC_021165.1    | Ca_kabuli_chr06 | 26278201                | TT                              | AA              | 1946866055               |
| SNP_P4_83262_26278230 | NC_021165.1    | Ca_kabuli_chr06 | 26278230                | AA                              | GG              | 1946866057               |
| SNP_P4_83263_26278239 | NC_021165.1    | Ca_kabuli_chr06 | 26278239                | AA                              | GG              | 1946866059               |
| SNP_P4_83264_26278254 | NC_021165.1    | Ca_kabuli_chr06 | 26278254                | CC                              | TT              | 1946866061               |
| SNP_P4_83265_26278271 | NC_021165.1    | Ca_kabuli_chr06 | 26278271                | AA                              | GG              | 1946866063               |
| SNP_P4_83266_26278309 | NC_021165.1    | Ca_kabuli_chr06 | 26278309                | TT                              | GG              | 1946866065               |
| SNP_P4_83267_26286025 | NC_021165.1    | Ca_kabuli_chr06 | 26286025                | GG                              | TT              | 1946866067               |
| SNP_P4_83268_26286038 | NC_021165.1    | Ca_kabuli_chr06 | 26286038                | AA                              | GG              | 1946866069               |
| SNP_P4_83269_26286409 | NC_021165.1    | Ca_kabuli_chr06 | 26286409                | TT                              | CC              | 1946866071               |
| SNP_P4_83270_26286460 | NC_021165.1    | Ca_kabuli_chr06 | 26286460                | AA                              | GG              | 1946866073               |
| SNP_P4_83271_26286807 | NC_021165.1    | Ca_kabuli_chr06 | 26286807                | AA                              | TT              | 1946866074               |
| SNP_P4_83272_26286810 | NC_021165.1    | Ca_kabuli_chr06 | 26286810                | GG                              | AA              | 1946866076               |
| SNP_P4_83273_26286831 | NC_021165.1    | Ca_kabuli_chr06 | 26286831                | AA                              | CC              | 1946866078               |
| SNP_P4_83274_26286894 | NC_021165.1    | Ca_kabuli_chr06 | 26286894                | AA                              | TT              | 1946866080               |
| SNP_P4_83275_26297895 | NC_021165.1    | Ca_kabuli_chr06 | 26297895                | TT                              | CC              | 1946866082               |

| SNPs IDs              | Chromosome IDs | Chromosomes     | Physical positions (bp) | CDC Frontier (Reference genome) | (ILWC46 & LPNB) | NCBI SNPdb Accession IDs |
|-----------------------|----------------|-----------------|-------------------------|---------------------------------|-----------------|--------------------------|
| SNP_P4_83276_26303429 | NC_021165.1    | Ca_kabuli_chr06 | 26303429                | AA                              | GG              | 1946866084               |
| SNP_P4_83277_26303777 | NC_021165.1    | Ca_kabuli_chr06 | 26303777                | TT                              | AA              | 1946866086               |
| SNP_P4_83278_26307942 | NC_021165.1    | Ca_kabuli_chr06 | 26307942                | CC                              | TT              | 1946866088               |
| SNP_P4_83279_26307950 | NC_021165.1    | Ca_kabuli_chr06 | 26307950                | CC                              | TT              | 1946866090               |
| SNP_P4_83280_26309669 | NC_021165.1    | Ca_kabuli_chr06 | 26309669                | TT                              | GG              | 1946866092               |
| SNP_P4_83281_26309682 | NC_021165.1    | Ca_kabuli_chr06 | 26309682                | CC                              | AA              | 1946866094               |
| SNP_P4_83282_26309979 | NC_021165.1    | Ca_kabuli_chr06 | 26309979                | CC                              | AA              | 1946866096               |
| SNP_P4_83283_26310022 | NC_021165.1    | Ca_kabuli_chr06 | 26310022                | AA                              | CC              | 1946866098               |
| SNP_P4_83284_26310042 | NC_021165.1    | Ca_kabuli_chr06 | 26310042                | AA                              | GG              | 1946866099               |
| SNP_P4_83285_26310050 | NC_021165.1    | Ca_kabuli_chr06 | 26310050                | TT                              | CC              | 1946866101               |
| SNP_P4_83286_26310052 | NC_021165.1    | Ca_kabuli_chr06 | 26310052                | TT                              | GG              | 1946866104               |
| SNP_P4_83287_26310067 | NC_021165.1    | Ca_kabuli_chr06 | 26310067                | GG                              | TT              | 1946866106               |
| SNP_P4_83288_26323793 | NC_021165.1    | Ca_kabuli_chr06 | 26323793                | GG                              | CC              | 1946866108               |
| SNP_P4_83289_26341449 | NC_021165.1    | Ca_kabuli_chr06 | 26341449                | CC                              | TT              | 1946866110               |
| SNP_P4_83290_26341592 | NC_021165.1    | Ca_kabuli_chr06 | 26341592                | TT                              | GG              | 1946866112               |
| SNP_P4_83291_26345029 | NC_021165.1    | Ca_kabuli_chr06 | 26345029                | CC                              | TT              | 1946866114               |
| SNP_P4_83292_26345071 | NC_021165.1    | Ca_kabuli_chr06 | 26345071                | CC                              | TT              | 1946866116               |
| SNP_P4_83293_26349258 | NC_021165.1    | Ca_kabuli_chr06 | 26349258                | TT                              | GG              | 1946866118               |
| SNP_P4_83294_26349451 | NC_021165.1    | Ca_kabuli_chr06 | 26349451                | CC                              | TT              | 1946866120               |
| SNP_P4_83295_26349681 | NC_021165.1    | Ca_kabuli_chr06 | 26349681                | AA                              | CC              | 1946866122               |
| SNP_P4_83296_26349692 | NC_021165.1    | Ca_kabuli_chr06 | 26349692                | GG                              | AA              | 1946866124               |
| SNP_P4_83297_26349749 | NC_021165.1    | Ca_kabuli_chr06 | 26349749                | GG                              | AA              | 1946866126               |
| SNP_P4_83298_26349778 | NC_021165.1    | Ca_kabuli_chr06 | 26349778                | GG                              | AA              | 1946866128               |
| SNP_P4_83299_26349935 | NC_021165.1    | Ca_kabuli_chr06 | 26349935                | TT                              | AA              | 1946866130               |
| SNP_P4_83300_26350007 | NC_021165.1    | Ca_kabuli_chr06 | 26350007                | AA                              | CC              | 1946866132               |
| SNP_P4_83301_26350036 | NC_021165.1    | Ca_kabuli_chr06 | 26350036                | CC                              | GG              | 1946866134               |
| SNP_P4_83302_26350137 | NC_021165.1    | Ca_kabuli_chr06 | 26350137                | CC                              | TT              | 1946866136               |
| SNP_P4_83303_26350198 | NC_021165.1    | Ca_kabuli_chr06 | 26350198                | GG                              | AA              | 1946866138               |
| SNP_P4_83304_26351914 | NC_021165.1    | Ca_kabuli_chr06 | 26351914                | GG                              | CC              | 1946866140               |
| SNP_P4_83305_26352698 | NC_021165.1    | Ca_kabuli_chr06 | 26352698                | AA                              | CC              | 1946866142               |
| SNP_P4_83306_26353401 | NC_021165.1    | Ca_kabuli_chr06 | 26353401                | CC                              | GG              | 1946866144               |
| SNP_P4_83307_26354118 | NC_021165.1    | Ca_kabuli_chr06 | 26354118                | AA                              | GG              | 1946866146               |
| SNP_P4_83309_26374829 | NC_021165.1    | Ca_kabuli_chr06 | 26374829                | CC                              | TT              | 1946866148               |
| SNP_P4_83310_26377687 | NC_021165.1    | Ca_kabuli_chr06 | 26377687                | GG                              | AA              | 1946866150               |
| SNP_P4_83313_26398891 | NC_021165.1    | Ca_kabuli_chr06 | 26398891                | GG                              | TT              | 1946866152               |
| SNP_P4_83314_26401314 | NC_021165.1    | Ca_kabuli_chr06 | 26401314                | CC                              | GG              | 1946866154               |
| SNP_P4_83315_26415899 | NC_021165.1    | Ca_kabuli_chr06 | 26415899                | AA                              | GG              | 1946866156               |
| SNP_P4_83316_26418018 | NC_021165.1    | Ca_kabuli_chr06 | 26418018                | CC                              | TT              | 1946866158               |
| SNP_P4_83317_26428027 | NC_021165.1    | Ca_kabuli_chr06 | 26428027                | GG                              | AA              | 1946866160               |
| SNP_P4_83320_26439279 | NC_021165.1    | Ca_kabuli_chr06 | 26439279                | AA                              | GG              | 1946866162               |
| SNP_P4_83321_26454472 | NC_021165.1    | Ca_kabuli_chr06 | 26454472                | GG                              | AA              | 1946866164               |
| SNP_P4_83322_26466588 | NC_021165.1    | Ca_kabuli_chr06 | 26466588                | GG                              | AA              | 1946866166               |

| SNPs IDs              | Chromosome IDs | Chromosomes     | Physical positions (bp) | CDC Frontier (Reference genome) | (ILWC46 & LPNB) | NCBI SNPdb Accession IDs |
|-----------------------|----------------|-----------------|-------------------------|---------------------------------|-----------------|--------------------------|
| SNP_P4_83323_26467062 | NC_021165.1    | Ca_kabuli_chr06 | 26467062                | CC                              | TT              | 1946866168               |
| SNP_P4_83324_26479701 | NC_021165.1    | Ca_kabuli_chr06 | 26479701                | GG                              | AA              | 1946866170               |
| SNP_P4_83326_26499154 | NC_021165.1    | Ca_kabuli_chr06 | 26499154                | AA                              | GG              | 1946866172               |
| SNP_P4_83328_26545277 | NC_021165.1    | Ca_kabuli_chr06 | 26545277                | AA                              | GG              | 1946866174               |
| SNP_P4_83329_26545286 | NC_021165.1    | Ca_kabuli_chr06 | 26545286                | AA                              | GG              | 1946866175               |
| SNP_P4_83332_26560605 | NC_021165.1    | Ca_kabuli_chr06 | 26560605                | AA                              | GG              | 1946866177               |
| SNP_P4_83333_26573750 | NC_021165.1    | Ca_kabuli_chr06 | 26573750                | CC                              | GG              | 1946866179               |
| SNP_P4_83334_26585895 | NC_021165.1    | Ca_kabuli_chr06 | 26585895                | GG                              | AA              | 1946866181               |
| SNP_P4_83335_26604882 | NC_021165.1    | Ca_kabuli_chr06 | 26604882                | AA                              | CC              | 1946866183               |
| SNP_P4_83336_26614647 | NC_021165.1    | Ca_kabuli_chr06 | 26614647                | CC                              | TT              | 1946866185               |
| SNP_P4_83337_26614969 | NC_021165.1    | Ca_kabuli_chr06 | 26614969                | TT                              | CC              | 1946866187               |
| SNP_P4_83338_26637538 | NC_021165.1    | Ca_kabuli_chr06 | 26637538                | CC                              | AA              | 1946866189               |
| SNP_P4_83340_26673881 | NC_021165.1    | Ca_kabuli_chr06 | 26673881                | AA                              | GG              | 1946866191               |
| SNP_P4_83341_26686040 | NC_021165.1    | Ca_kabuli_chr06 | 26686040                | AA                              | CC              | 1946866193               |
| SNP_P4_83342_26686087 | NC_021165.1    | Ca_kabuli_chr06 | 26686087                | AA                              | TT              | 1946866195               |
| SNP_P4_83343_26686289 | NC_021165.1    | Ca_kabuli_chr06 | 26686289                | TT                              | AA              | 1946866197               |
| SNP_P4_83345_26686587 | NC_021165.1    | Ca_kabuli_chr06 | 26686587                | CC                              | TT              | 1946866199               |
| SNP_P4_83346_26703215 | NC_021165.1    | Ca_kabuli_chr06 | 26703215                | AA                              | GG              | 1946866201               |
| SNP_P4_83348_26721504 | NC_021165.1    | Ca_kabuli_chr06 | 26721504                | TT                              | CC              | 1946866203               |
| SNP_P4_83349_26737583 | NC_021165.1    | Ca_kabuli_chr06 | 26737583                | GG                              | AA              | 1946866205               |
| SNP_P4_83350_26741975 | NC_021165.1    | Ca_kabuli_chr06 | 26741975                | TT                              | GG              | 1946866207               |
| SNP_P4_83351_26741976 | NC_021165.1    | Ca_kabuli_chr06 | 26741976                | AA                              | CC              | 1946866209               |
| SNP_P4_83352_26741984 | NC_021165.1    | Ca_kabuli_chr06 | 26741984                | TT                              | CC              | 1946866211               |
| SNP_P4_83353_26741989 | NC_021165.1    | Ca_kabuli_chr06 | 26741989                | AA                              | GG              | 1946866213               |
| SNP_P4_83355_26761725 | NC_021165.1    | Ca_kabuli_chr06 | 26761725                | AA                              | GG              | 1946866215               |
| SNP_P4_83356_26775126 | NC_021165.1    | Ca_kabuli_chr06 | 26775126                | GG                              | AA              | 1946866217               |
| SNP_P4_83358_26796182 | NC_021165.1    | Ca_kabuli_chr06 | 26796182                | AA                              | GG              | 1946866219               |
| SNP_P4_83360_26808507 | NC_021165.1    | Ca_kabuli_chr06 | 26808507                | TT                              | CC              | 1946866221               |
| SNP_P4_83362_26815115 | NC_021165.1    | Ca_kabuli_chr06 | 26815115                | TT                              | GG              | 1946866223               |
| SNP_P4_83363_26818104 | NC_021165.1    | Ca_kabuli_chr06 | 26818104                | CC                              | TT              | 1946866225               |
| SNP_P4_83364_26828982 | NC_021165.1    | Ca_kabuli_chr06 | 26828982                | CC                              | AA              | 1946866227               |
| SNP_P4_83365_26828987 | NC_021165.1    | Ca_kabuli_chr06 | 26828987                | TT                              | GG              | 1946866229               |
| SNP_P4_83366_26832825 | NC_021165.1    | Ca_kabuli_chr06 | 26832825                | GG                              | CC              | 1946866231               |
| SNP_P4_83368_26867663 | NC_021165.1    | Ca_kabuli_chr06 | 26867663                | TT                              | GG              | 1946866233               |
| SNP_P4_83370_26893141 | NC_021165.1    | Ca_kabuli_chr06 | 26893141                | AA                              | GG              | 1946866235               |
| SNP_P4_83371_26910479 | NC_021165.1    | Ca_kabuli_chr06 | 26910479                | AA                              | GG              | 1946866237               |
| SNP_P4_83373_26937699 | NC_021165.1    | Ca_kabuli_chr06 | 26937699                | CC                              | TT              | 1946866295               |
| SNP_P4_83374_26939893 | NC_021165.1    | Ca_kabuli_chr06 | 26939893                | GG                              | TT              | 1946866297               |
| SNP_P4_83375_26946222 | NC_021165.1    | Ca_kabuli_chr06 | 26946222                | CC                              | TT              | 1946866299               |
| SNP_P4_83376_26946328 | NC_021165.1    | Ca_kabuli_chr06 | 26946328                | TT                              | CC              | 1946866301               |
| SNP_P4_83377_26949946 | NC_021165.1    | Ca_kabuli_chr06 | 26949946                | GG                              | CC              | 1946866303               |
| SNP_P4_83378_26949949 | NC_021165.1    | Ca_kabuli_chr06 | 26949949                | GG                              | TT              | 1946866305               |

| SNPs IDs              | Chromosome IDs | Chromosomes     | Physical positions (bp) | CDC Frontier (Reference genome) | (ILWC46 & LPNB) | NCBI SNPdb Accession IDs |
|-----------------------|----------------|-----------------|-------------------------|---------------------------------|-----------------|--------------------------|
| SNP_P4_83379_26950010 | NC_021165.1    | Ca_kabuli_chr06 | 26950010                | CC                              | TT              | 1946866307               |
| SNP_P4_83380_26950979 | NC_021165.1    | Ca_kabuli_chr06 | 26950979                | TT                              | AA              | 1946866309               |
| SNP_P4_83381_26954303 | NC_021165.1    | Ca_kabuli_chr06 | 26954303                | AA                              | TT              | 1946866312               |
| SNP_P4_83382_26978596 | NC_021165.1    | Ca_kabuli_chr06 | 26978596                | AA                              | GG              | 1946866314               |
| SNP_P4_83383_26984461 | NC_021165.1    | Ca_kabuli_chr06 | 26984461                | GG                              | AA              | 1946866316               |
| SNP_P4_83384_26985446 | NC_021165.1    | Ca_kabuli_chr06 | 26985446                | CC                              | TT              | 1946866318               |
| SNP_P4_83385_26998139 | NC_021165.1    | Ca_kabuli_chr06 | 26998139                | CC                              | TT              | 1946866321               |
| SNP_P4_83386_27002740 | NC_021165.1    | Ca_kabuli_chr06 | 27002740                | TT                              | AA              | 1946866323               |
| SNP_P4_83387_27002741 | NC_021165.1    | Ca_kabuli_chr06 | 27002741                | CC                              | TT              | 1946866325               |
| SNP_P4_83388_27007705 | NC_021165.1    | Ca_kabuli_chr06 | 27007705                | TT                              | CC              | 1946866327               |
| SNP_P4_83389_27007713 | NC_021165.1    | Ca_kabuli_chr06 | 27007713                | CC                              | AA              | 1946866329               |
| SNP_P4_83390_27007721 | NC_021165.1    | Ca_kabuli_chr06 | 27007721                | GG                              | CC              | 1946866331               |
| SNP_P4_83391_27008100 | NC_021165.1    | Ca_kabuli_chr06 | 27008100                | GG                              | AA              | 1946866333               |
| SNP_P4_83392_27008119 | NC_021165.1    | Ca_kabuli_chr06 | 27008119                | AA                              | GG              | 1946866336               |
| SNP_P4_83393_27008131 | NC_021165.1    | Ca_kabuli_chr06 | 27008131                | TT                              | CC              | 1946866337               |
| SNP_P4_83394_27009357 | NC_021165.1    | Ca_kabuli_chr06 | 27009357                | GG                              | AA              | 1946866339               |
| SNP_P4_83397_27039013 | NC_021165.1    | Ca_kabuli_chr06 | 27039013                | AA                              | TT              | 1946866341               |
| SNP_P4_83398_27039047 | NC_021165.1    | Ca_kabuli_chr06 | 27039047                | CC                              | TT              | 1946866343               |
| SNP_P4_83399_27039074 | NC_021165.1    | Ca_kabuli_chr06 | 27039074                | AA                              | GG              | 1946866345               |
| SNP_P4_83400_27039091 | NC_021165.1    | Ca_kabuli_chr06 | 27039091                | CC                              | AA              | 1946866347               |
| SNP_P4_83401_27039094 | NC_021165.1    | Ca_kabuli_chr06 | 27039094                | CC                              | TT              | 1946866349               |
| SNP_P4_83402_27039133 | NC_021165.1    | Ca_kabuli_chr06 | 27039133                | GG                              | AA              | 1946866351               |
| SNP_P4_83403_27039138 | NC_021165.1    | Ca_kabuli_chr06 | 27039138                | TT                              | CC              | 1946866352               |
| SNP_P4_83404_27039143 | NC_021165.1    | Ca_kabuli_chr06 | 27039143                | GG                              | AA              | 1946866354               |
| SNP_P4_83405_27039232 | NC_021165.1    | Ca_kabuli_chr06 | 27039232                | CC                              | TT              | 1946866356               |
| SNP_P4_83406_27039348 | NC_021165.1    | Ca_kabuli_chr06 | 27039348                | AA                              | TT              | 1946866358               |
| SNP_P4_83407_27039409 | NC_021165.1    | Ca_kabuli_chr06 | 27039409                | TT                              | GG              | 1946866360               |
| SNP_P4_83408_27041742 | NC_021165.1    | Ca_kabuli_chr06 | 27041742                | GG                              | AA              | 1946866362               |
| SNP_P4_83409_27045501 | NC_021165.1    | Ca_kabuli_chr06 | 27045501                | GG                              | AA              | 1946866364               |
| SNP_P4_83410_27067743 | NC_021165.1    | Ca_kabuli_chr06 | 27067743                | GG                              | AA              | 1946866366               |
| SNP_P4_83411_27067792 | NC_021165.1    | Ca_kabuli_chr06 | 27067792                | CC                              | TT              | 1946866368               |
| SNP_P4_83412_27067856 | NC_021165.1    | Ca_kabuli_chr06 | 27067856                | CC                              | TT              | 1946866370               |
| SNP_P4_83413_27074864 | NC_021165.1    | Ca_kabuli_chr06 | 27074864                | CC                              | TT              | 1946866372               |
| SNP_P4_83414_27087271 | NC_021165.1    | Ca_kabuli_chr06 | 27087271                | TT                              | AA              | 1946866374               |
| SNP_P4_83415_27108197 | NC_021165.1    | Ca_kabuli_chr06 | 27108197                | TT                              | GG              | 1946866376               |
| SNP_P4_83416_27108207 | NC_021165.1    | Ca_kabuli_chr06 | 27108207                | GG                              | AA              | 1946866378               |
| SNP_P4_83417_27108240 | NC_021165.1    | Ca_kabuli_chr06 | 27108240                | TT                              | AA              | 1946866380               |
| SNP_P4_83419_27128461 | NC_021165.1    | Ca_kabuli_chr06 | 27128461                | TT                              | GG              | 1946866383               |
| SNP_P4_83422_27138691 | NC_021165.1    | Ca_kabuli_chr06 | 27138691                | AA                              | CC              | 1946866385               |
| SNP_P4_83423_27147435 | NC_021165.1    | Ca_kabuli_chr06 | 27147435                | AA                              | GG              | 1946866386               |
| SNP_P4_83426_27171319 | NC_021165.1    | Ca_kabuli_chr06 | 27171319                | AA                              | TT              | 1946866388               |
| SNP_P4_83427_27184049 | NC_021165.1    | Ca_kabuli_chr06 | 27184049                | GG                              | AA              | 1946866390               |

| SNPs IDs              | Chromosome IDs | Chromosomes     | Physical positions (bp) | CDC Frontier (Reference genome) | (ILWC46 & LPNB) | NCBI SNPdb Accession IDs |
|-----------------------|----------------|-----------------|-------------------------|---------------------------------|-----------------|--------------------------|
| SNP_P4_83428_27184137 | NC_021165.1    | Ca_kabuli_chr06 | 27184137                | CC                              | AA              | 1946866392               |
| SNP_P4_83430_27195950 | NC_021165.1    | Ca_kabuli_chr06 | 27195950                | CC                              | AA              | 1946866394               |
| SNP_P4_83431_27207423 | NC_021165.1    | Ca_kabuli_chr06 | 27207423                | GG                              | AA              | 1946866396               |
| SNP_P4_83432_27217471 | NC_021165.1    | Ca_kabuli_chr06 | 27217471                | AA                              | TT              | 1946866398               |
| SNP_P4_83433_27226950 | NC_021165.1    | Ca_kabuli_chr06 | 27226950                | TT                              | GG              | 1946866400               |
| SNP_P4_83434_27250488 | NC_021165.1    | Ca_kabuli_chr06 | 27250488                | GG                              | AA              | 1946866402               |
| SNP_P4_83436_27280819 | NC_021165.1    | Ca_kabuli_chr06 | 27280819                | AA                              | GG              | 1946866404               |
| SNP_P4_83438_27289118 | NC_021165.1    | Ca_kabuli_chr06 | 27289118                | CC                              | GG              | 1946866406               |
| SNP_P4_83439_27289128 | NC_021165.1    | Ca_kabuli_chr06 | 27289128                | TT                              | AA              | 1946866408               |
| SNP_P4_83440_27289452 | NC_021165.1    | Ca_kabuli_chr06 | 27289452                | TT                              | AA              | 1946866410               |
| SNP_P4_83442_27317475 | NC_021165.1    | Ca_kabuli_chr06 | 27317475                | AA                              | TT              | 1946866412               |
| SNP_P4_83443_27317476 | NC_021165.1    | Ca_kabuli_chr06 | 27317476                | AA                              | TT              | 1946866414               |
| SNP_P4_83444_27318383 | NC_021165.1    | Ca_kabuli_chr06 | 27318383                | TT                              | AA              | 1946866416               |
| SNP_P4_83445_27318384 | NC_021165.1    | Ca_kabuli_chr06 | 27318384                | TT                              | AA              | 1946866418               |
| SNP_P4_83446_27340457 | NC_021165.1    | Ca_kabuli_chr06 | 27340457                | CC                              | TT              | 1946866420               |
| SNP_P4_83449_27349315 | NC_021165.1    | Ca_kabuli_chr06 | 27349315                | GG                              | AA              | 1946866422               |
| SNP_P4_83450_27357670 | NC_021165.1    | Ca_kabuli_chr06 | 27357670                | AA                              | TT              | 1946866424               |
| SNP_P4_83451_27359657 | NC_021165.1    | Ca_kabuli_chr06 | 27359657                | CC                              | GG              | 1946866426               |
| SNP_P4_83452_27360223 | NC_021165.1    | Ca_kabuli_chr06 | 27360223                | AA                              | GG              | 1946866428               |
| SNP_P4_83453_27384777 | NC_021165.1    | Ca_kabuli_chr06 | 27384777                | CC                              | AA              | 1946866430               |
| SNP_P4_83454_27393166 | NC_021165.1    | Ca_kabuli_chr06 | 27393166                | GG                              | AA              | 1946866432               |
| SNP_P4_83455_27396343 | NC_021165.1    | Ca_kabuli_chr06 | 27396343                | AA                              | CC              | 1946866434               |
| SNP_P4_83456_27399837 | NC_021165.1    | Ca_kabuli_chr06 | 27399837                | CC                              | GG              | 1946866436               |
| SNP_P4_83457_27401063 | NC_021165.1    | Ca_kabuli_chr06 | 27401063                | GG                              | AA              | 1946866438               |
| SNP_P4_83458_27402049 | NC_021165.1    | Ca_kabuli_chr06 | 27402049                | GG                              | AA              | 1946866439               |
| SNP_P4_83459_27420544 | NC_021165.1    | Ca_kabuli_chr06 | 27420544                | TT                              | AA              | 1946866441               |
| SNP_P4_83463_27450356 | NC_021165.1    | Ca_kabuli_chr06 | 27450356                | CC                              | GG              | 1946866443               |
| SNP_P4_83464_27473939 | NC_021165.1    | Ca_kabuli_chr06 | 27473939                | AA                              | GG              | 1946866445               |
| SNP_P4_83465_27474009 | NC_021165.1    | Ca_kabuli_chr06 | 27474009                | GG                              | AA              | 1946866447               |
| SNP_P4_83466_27499675 | NC_021165.1    | Ca_kabuli_chr06 | 27499675                | CC                              | TT              | 1946866448               |
| SNP_P4_83467_27512085 | NC_021165.1    | Ca_kabuli_chr06 | 27512085                | GG                              | AA              | 1946866450               |
| SNP_P4_83468_27519195 | NC_021165.1    | Ca_kabuli_chr06 | 27519195                | AA                              | GG              | 1946866452               |
| SNP_P4_83469_27522518 | NC_021165.1    | Ca_kabuli_chr06 | 27522518                | AA                              | TT              | 1946866454               |
| SNP_P4_83470_27522520 | NC_021165.1    | Ca_kabuli_chr06 | 27522520                | TT                              | GG              | 1946866456               |
| SNP_P4_83471_27522573 | NC_021165.1    | Ca_kabuli_chr06 | 27522573                | TT                              | GG              | 1946866458               |
| SNP_P4_83472_27540329 | NC_021165.1    | Ca_kabuli_chr06 | 27540329                | TT                              | AA              | 1946866460               |
| SNP_P4_83473_27540331 | NC_021165.1    | Ca_kabuli_chr06 | 27540331                | AA                              | GG              | 1946866462               |
| SNP_P4_83474_27611823 | NC_021165.1    | Ca_kabuli_chr06 | 27611823                | GG                              | AA              | 1946866464               |
| SNP_P4_83475_27612327 | NC_021165.1    | Ca_kabuli_chr06 | 27612327                | CC                              | TT              | 1946866466               |
| SNP_P4_83476_27624987 | NC_021165.1    | Ca_kabuli_chr06 | 27624987                | TT                              | CC              | 1946866468               |
| SNP_P4_83477_27633242 | NC_021165.1    | Ca_kabuli_chr06 | 27633242                | CC                              | TT              | 1946866469               |
| SNP_P4_83478_27634407 | NC_021165.1    | Ca_kabuli_chr06 | 27634407                | TT                              | CC              | 1946866471               |

| SNPs IDs              | Chromosome IDs | Chromosomes     | Physical positions (bp) | CDC Frontier (Reference genome) | (ILWC46 & LPNB) | NCBI SNPdb Accession IDs |
|-----------------------|----------------|-----------------|-------------------------|---------------------------------|-----------------|--------------------------|
| SNP_P4_83479_27641141 | NC_021165.1    | Ca_kabuli_chr06 | 27641141                | GG                              | AA              | 1946866473               |
| SNP_P4_83480_27674707 | NC_021165.1    | Ca_kabuli_chr06 | 27674707                | AA                              | GG              | 1946866475               |
| SNP_P4_83482_27700775 | NC_021165.1    | Ca_kabuli_chr06 | 27700775                | TT                              | CC              | 1946866477               |
| SNP_P4_83483_27740338 | NC_021165.1    | Ca_kabuli_chr06 | 27740338                | GG                              | AA              | 1946866479               |
| SNP_P4_83484_27756138 | NC_021165.1    | Ca_kabuli_chr06 | 27756138                | CC                              | AA              | 1946866481               |
| SNP_P4_83485_27756145 | NC_021165.1    | Ca_kabuli_chr06 | 27756145                | TT                              | AA              | 1946866483               |
| SNP_P4_83486_27777185 | NC_021165.1    | Ca_kabuli_chr06 | 27777185                | AA                              | GG              | 1946866485               |
| SNP_P4_83487_27777329 | NC_021165.1    | Ca_kabuli_chr06 | 27777329                | CC                              | TT              | 1946866487               |
| SNP_P4_83488_27777350 | NC_021165.1    | Ca_kabuli_chr06 | 27777350                | TT                              | CC              | 1946866489               |
| SNP_P4_83489_27777629 | NC_021165.1    | Ca_kabuli_chr06 | 27777629                | CC                              | TT              | 1946866490               |
| SNP_P4_83490_27777671 | NC_021165.1    | Ca_kabuli_chr06 | 27777671                | CC                              | AA              | 1946866492               |
| SNP_P4_83491_27798115 | NC_021165.1    | Ca_kabuli_chr06 | 27798115                | CC                              | AA              | 1946866494               |
| SNP_P4_83492_27825713 | NC_021165.1    | Ca_kabuli_chr06 | 27825713                | AA                              | GG              | 1946866496               |
| SNP_P4_83493_27827631 | NC_021165.1    | Ca_kabuli_chr06 | 27827631                | CC                              | TT              | 1946866497               |
| SNP_P4_83494_27827654 | NC_021165.1    | Ca_kabuli_chr06 | 27827654                | GG                              | AA              | 1946866499               |
| SNP_P4_83495_27902168 | NC_021165.1    | Ca_kabuli_chr06 | 27902168                | CC                              | TT              | 1946866501               |
| SNP_P4_83496_27902221 | NC_021165.1    | Ca_kabuli_chr06 | 27902221                | TT                              | CC              | 1946866503               |
| SNP_P4_83497_27902255 | NC_021165.1    | Ca_kabuli_chr06 | 27902255                | AA                              | TT              | 1946866505               |
| SNP_P4_83498_27902282 | NC_021165.1    | Ca_kabuli_chr06 | 27902282                | CC                              | TT              | 1946866507               |
| SNP_P4_83499_27902344 | NC_021165.1    | Ca_kabuli_chr06 | 27902344                | GG                              | CC              | 1946866509               |
| SNP_P4_83501_27902602 | NC_021165.1    | Ca_kabuli_chr06 | 27902602                | CC                              | TT              | 1946866511               |
| SNP_P4_83502_27910472 | NC_021165.1    | Ca_kabuli_chr06 | 27910472                | AA                              | TT              | 1946866512               |
| SNP_P4_83503_27910476 | NC_021165.1    | Ca_kabuli_chr06 | 27910476                | GG                              | TT              | 1946866514               |
| SNP_P4_83504_27910486 | NC_021165.1    | Ca_kabuli_chr06 | 27910486                | TT                              | CC              | 1946866516               |
| SNP_P4_83505_27910524 | NC_021165.1    | Ca_kabuli_chr06 | 27910524                | AA                              | CC              | 1946866518               |
| SNP_P4_83506_27910529 | NC_021165.1    | Ca_kabuli_chr06 | 27910529                | GG                              | TT              | 1946866520               |
| SNP_P4_83507_27910552 | NC_021165.1    | Ca_kabuli_chr06 | 27910552                | AA                              | TT              | 1946866522               |
| SNP_P4_83508_27910558 | NC_021165.1    | Ca_kabuli_chr06 | 27910558                | AA                              | GG              | 1946866524               |
| SNP_P4_83509_27910573 | NC_021165.1    | Ca_kabuli_chr06 | 27910573                | TT                              | CC              | 1946866526               |
| SNP_P4_83510_27910577 | NC_021165.1    | Ca_kabuli_chr06 | 27910577                | AA                              | TT              | 1946866528               |
| SNP_P4_83511_27910582 | NC_021165.1    | Ca_kabuli_chr06 | 27910582                | TT                              | CC              | 1946866530               |
| SNP_P4_83512_27910590 | NC_021165.1    | Ca_kabuli_chr06 | 27910590                | AA                              | GG              | 1946866532               |
| SNP_P4_83513_27910598 | NC_021165.1    | Ca_kabuli_chr06 | 27910598                | TT                              | AA              | 1946866534               |
| SNP_P4_83514_27910613 | NC_021165.1    | Ca_kabuli_chr06 | 27910613                | TT                              | CC              | 1946866536               |
| SNP_P4_83515_27910672 | NC_021165.1    | Ca_kabuli_chr06 | 27910672                | TT                              | GG              | 1946866538               |
| SNP_P4_83516_27910673 | NC_021165.1    | Ca_kabuli_chr06 | 27910673                | GG                              | TT              | 1946866540               |
| SNP_P4_83517_27910675 | NC_021165.1    | Ca_kabuli_chr06 | 27910675                | TT                              | GG              | 1946866542               |
| SNP_P4_83518_27910810 | NC_021165.1    | Ca_kabuli_chr06 | 27910810                | CC                              | TT              | 1946866544               |
| SNP_P4_83519_27918301 | NC_021165.1    | Ca_kabuli_chr06 | 27918301                | GG                              | AA              | 1946866546               |
| SNP_P4_83520_27929932 | NC_021165.1    | Ca_kabuli_chr06 | 27929932                | CC                              | AA              | 1946866548               |
| SNP_P4_83521_27950006 | NC_021165.1    | Ca_kabuli_chr06 | 27950006                | TT                              | AA              | 1946866549               |
| SNP_P4_83522_27951131 | NC_021165.1    | Ca_kabuli_chr06 | 27951131                | CC                              | GG              | 1946866551               |



| SNPs IDs              | Chromosome IDs | Chromosomes     | Physical positions (bp) | CDC Frontier (Reference genome) | (ILWC46 & LPNB) | NCBI SNPdb Accession IDs |
|-----------------------|----------------|-----------------|-------------------------|---------------------------------|-----------------|--------------------------|
| SNP_P4_83524_27983525 | NC_021165.1    | Ca_kabuli_chr06 | 27983525                | CC                              | GG              | 1946866554               |
| SNP_P4_83525_27992768 | NC_021165.1    | Ca_kabuli_chr06 | 27992768                | CC                              | GG              | 1946866555               |
| SNP_P4_83526_28004803 | NC_021165.1    | Ca_kabuli_chr06 | 28004803                | TT                              | CC              | 1946866557               |
| SNP_P4_83527_28010121 | NC_021165.1    | Ca_kabuli_chr06 | 28010121                | TT                              | CC              | 1946866559               |
| SNP_P4_83528_28010132 | NC_021165.1    | Ca_kabuli_chr06 | 28010132                | CC                              | TT              | 1946866561               |
| SNP_P4_83529_28010135 | NC_021165.1    | Ca_kabuli_chr06 | 28010135                | GG                              | AA              | 1946866563               |
| SNP_P4_83530_28017828 | NC_021165.1    | Ca_kabuli_chr06 | 28017828                | TT                              | CC              | 1946866565               |
| SNP_P4_83531_28068553 | NC_021165.1    | Ca_kabuli_chr06 | 28068553                | TT                              | GG              | 1946866567               |
| SNP_P4_83532_28082952 | NC_021165.1    | Ca_kabuli_chr06 | 28082952                | TT                              | GG              | 1946866569               |
| SNP_P4_83533_28084597 | NC_021165.1    | Ca_kabuli_chr06 | 28084597                | GG                              | AA              | 1946866571               |
| SNP_P4_83534_28096919 | NC_021165.1    | Ca_kabuli_chr06 | 28096919                | TT                              | CC              | 1946866573               |
| SNP_P4_83535_28119941 | NC_021165.1    | Ca_kabuli_chr06 | 28119941                | AA                              | CC              | 1946866575               |
| SNP_P4_83536_28131878 | NC_021165.1    | Ca_kabuli_chr06 | 28131878                | CC                              | AA              | 1946866577               |
| SNP_P4_83537_28139244 | NC_021165.1    | Ca_kabuli_chr06 | 28139244                | CC                              | TT              | 1946866579               |
| SNP_P4_83538_28139247 | NC_021165.1    | Ca_kabuli_chr06 | 28139247                | TT                              | CC              | 1946866581               |
| SNP_P4_83539_28139262 | NC_021165.1    | Ca_kabuli_chr06 | 28139262                | TT                              | CC              | 1946866583               |
| SNP_P4_83540_28139279 | NC_021165.1    | Ca_kabuli_chr06 | 28139279                | AA                              | GG              | 1946866585               |
| SNP_P4_83541_28139302 | NC_021165.1    | Ca_kabuli_chr06 | 28139302                | AA                              | GG              | 1946866587               |
| SNP_P4_83542_28139318 | NC_021165.1    | Ca_kabuli_chr06 | 28139318                | TT                              | CC              | 1946866589               |
| SNP_P4_83543_28139333 | NC_021165.1    | Ca_kabuli_chr06 | 28139333                | AA                              | GG              | 1946866591               |
| SNP_P4_83544_28139643 | NC_021165.1    | Ca_kabuli_chr06 | 28139643                | AA                              | CC              | 1946866593               |
| SNP_P4_83545_28139648 | NC_021165.1    | Ca_kabuli_chr06 | 28139648                | TT                              | AA              | 1946866595               |
| SNP_P4_83546_28139694 | NC_021165.1    | Ca_kabuli_chr06 | 28139694                | AA                              | TT              | 1946866597               |
| SNP_P4_83549_28190159 | NC_021165.1    | Ca_kabuli_chr06 | 28190159                | AA                              | TT              | 1946866599               |
| SNP_P4_83550_28190298 | NC_021165.1    | Ca_kabuli_chr06 | 28190298                | TT                              | AA              | 1946866601               |
| SNP_P4_83553_28191009 | NC_021165.1    | Ca_kabuli_chr06 | 28191009                | TT                              | AA              | 1946866603               |
| SNP_P4_83554_28191044 | NC_021165.1    | Ca_kabuli_chr06 | 28191044                | CC                              | AA              | 1946866605               |
| SNP_P4_83555_28191069 | NC_021165.1    | Ca_kabuli_chr06 | 28191069                | AA                              | TT              | 1946866607               |
| SNP_P4_83556_28191552 | NC_021165.1    | Ca_kabuli_chr06 | 28191552                | CC                              | GG              | 1946866610               |
| SNP_P4_83557_28191672 | NC_021165.1    | Ca_kabuli_chr06 | 28191672                | CC                              | TT              | 1946866611               |
| SNP_P4_83558_28192208 | NC_021165.1    | Ca_kabuli_chr06 | 28192208                | TT                              | CC              | 1946866614               |
| SNP_P4_83559_28192404 | NC_021165.1    | Ca_kabuli_chr06 | 28192404                | CC                              | TT              | 1946866616               |
| SNP_P4_83560_28192424 | NC_021165.1    | Ca_kabuli_chr06 | 28192424                | GG                              | AA              | 1946866618               |
| SNP_P4_83561_28192873 | NC_021165.1    | Ca_kabuli_chr06 | 28192873                | TT                              | GG              | 1946866620               |
| SNP_P4_83562_28192875 | NC_021165.1    | Ca_kabuli_chr06 | 28192875                | CC                              | GG              | 1946866622               |
| SNP_P4_83565_28214295 | NC_021165.1    | Ca_kabuli_chr06 | 28214295                | CC                              | TT              | 1946866624               |
| SNP_P4_83568_28225908 | NC_021165.1    | Ca_kabuli_chr06 | 28225908                | GG                              | AA              | 1946866626               |
| SNP_P4_83569_28237735 | NC_021165.1    | Ca_kabuli_chr06 | 28237735                | TT                              | CC              | 1946866628               |
| SNP_P4_83570_28263935 | NC_021165.1    | Ca_kabuli_chr06 | 28263935                | AA                              | TT              | 1946866630               |
| SNP_P4_83572_28275055 | NC_021165.1    | Ca_kabuli_chr06 | 28275055                | GG                              | TT              | 1946866632               |
| SNP_P4_83573_28276128 | NC_021165.1    | Ca_kabuli_chr06 | 28276128                | AA                              | GG              | 1946866635               |
| SNP_P4_83574_28276134 | NC_021165.1    | Ca_kabuli_chr06 | 28276134                | GG                              | TT              | 1946866637               |

| SNPs IDs              | Chromosome IDs | Chromosomes     | Physical positions (bp) | CDC Frontier (Reference genome) | (ILWC46 & LPNB) | NCBI SNPdb Accession IDs |
|-----------------------|----------------|-----------------|-------------------------|---------------------------------|-----------------|--------------------------|
| SNP_P4_83575_28276135 | NC_021165.1    | Ca_kabuli_chr06 | 28276135                | TT                              | AA              | 1946866639               |
| SNP_P4_83576_28276136 | NC_021165.1    | Ca_kabuli_chr06 | 28276136                | AA                              | GG              | 1946866641               |
| SNP_P4_83577_28276241 | NC_021165.1    | Ca_kabuli_chr06 | 28276241                | TT                              | CC              | 1946866643               |
| SNP_P4_83578_28276589 | NC_021165.1    | Ca_kabuli_chr06 | 28276589                | AA                              | GG              | 1946866645               |
| SNP_P4_83579_28276605 | NC_021165.1    | Ca_kabuli_chr06 | 28276605                | TT                              | CC              | 1946866647               |
| SNP_P4_83580_28281778 | NC_021165.1    | Ca_kabuli_chr06 | 28281778                | CC                              | TT              | 1946866649               |
| SNP_P4_83581_28283779 | NC_021165.1    | Ca_kabuli_chr06 | 28283779                | GG                              | CC              | 1946866651               |
| SNP_P4_83582_28301419 | NC_021165.1    | Ca_kabuli_chr06 | 28301419                | GG                              | AA              | 1946866653               |
| SNP_P4_83583_28305119 | NC_021165.1    | Ca_kabuli_chr06 | 28305119                | AA                              | GG              | 1946866655               |
| SNP_P4_83584_28305144 | NC_021165.1    | Ca_kabuli_chr06 | 28305144                | AA                              | GG              | 1946866657               |
| SNP_P4_83585_28305516 | NC_021165.1    | Ca_kabuli_chr06 | 28305516                | TT                              | AA              | 1946866659               |
| SNP_P4_83586_28309456 | NC_021165.1    | Ca_kabuli_chr06 | 28309456                | AA                              | CC              | 1946866661               |
| SNP_P4_83587_28323082 | NC_021165.1    | Ca_kabuli_chr06 | 28323082                | AA                              | TT              | 1946866664               |
| SNP_P4_83588_28323750 | NC_021165.1    | Ca_kabuli_chr06 | 28323750                | GG                              | TT              | 1946866666               |
| SNP_P4_83589_28323869 | NC_021165.1    | Ca_kabuli_chr06 | 28323869                | CC                              | GG              | 1946866668               |
| SNP_P4_83590_28323948 | NC_021165.1    | Ca_kabuli_chr06 | 28323948                | CC                              | TT              | 1946866671               |
| SNP_P4_83591_28323949 | NC_021165.1    | Ca_kabuli_chr06 | 28323949                | GG                              | TT              | 1946866673               |
| SNP_P4_83592_28324048 | NC_021165.1    | Ca_kabuli_chr06 | 28324048                | GG                              | TT              | 1946866675               |
| SNP_P4_83593_28324059 | NC_021165.1    | Ca_kabuli_chr06 | 28324059                | GG                              | AA              | 1946866677               |
| SNP_P4_83594_28324066 | NC_021165.1    | Ca_kabuli_chr06 | 28324066                | GG                              | TT              | 1946866679               |
| SNP_P4_83595_28324067 | NC_021165.1    | Ca_kabuli_chr06 | 28324067                | TT                              | AA              | 1946866681               |
| SNP_P4_83596_28324162 | NC_021165.1    | Ca_kabuli_chr06 | 28324162                | TT                              | CC              | 1946866683               |
| SNP_P4_83597_28324545 | NC_021165.1    | Ca_kabuli_chr06 | 28324545                | AA                              | GG              | 1946866685               |
| SNP_P4_83598_28324623 | NC_021165.1    | Ca_kabuli_chr06 | 28324623                | CC                              | TT              | 1946866688               |
| SNP_P4_83599_28324807 | NC_021165.1    | Ca_kabuli_chr06 | 28324807                | TT                              | AA              | 1946866690               |
| SNP_P4_83600_28324811 | NC_021165.1    | Ca_kabuli_chr06 | 28324811                | TT                              | GG              | 1946866692               |
| SNP_P4_83601_28324837 | NC_021165.1    | Ca_kabuli_chr06 | 28324837                | GG                              | TT              | 1946866694               |
| SNP_P4_83602_28324861 | NC_021165.1    | Ca_kabuli_chr06 | 28324861                | CC                              | TT              | 1946866696               |
| SNP_P4_83603_28324895 | NC_021165.1    | Ca_kabuli_chr06 | 28324895                | AA                              | GG              | 1946866698               |
| SNP_P4_83604_28324898 | NC_021165.1    | Ca_kabuli_chr06 | 28324898                | TT                              | AA              | 1946866700               |
| SNP_P4_83605_28324906 | NC_021165.1    | Ca_kabuli_chr06 | 28324906                | TT                              | CC              | 1946866702               |
| SNP_P4_83606_28326153 | NC_021165.1    | Ca_kabuli_chr06 | 28326153                | AA                              | GG              | 1946866704               |
| SNP_P4_83608_28327043 | NC_021165.1    | Ca_kabuli_chr06 | 28327043                | GG                              | AA              | 1946866706               |
| SNP_P4_83609_28327235 | NC_021165.1    | Ca_kabuli_chr06 | 28327235                | GG                              | AA              | 1946866708               |
| SNP_P4_83610_28327241 | NC_021165.1    | Ca_kabuli_chr06 | 28327241                | AA                              | TT              | 1946866710               |
| SNP_P4_83612_28327975 | NC_021165.1    | Ca_kabuli_chr06 | 28327975                | CC                              | TT              | 1946866712               |
| SNP_P4_83613_28328440 | NC_021165.1    | Ca_kabuli_chr06 | 28328440                | CC                              | AA              | 1946866714               |
| SNP_P4_83614_28328449 | NC_021165.1    | Ca_kabuli_chr06 | 28328449                | GG                              | TT              | 1946866716               |
| SNP_P4_83615_28328835 | NC_021165.1    | Ca_kabuli_chr06 | 28328835                | TT                              | CC              | 1946866718               |
| SNP_P4_83616_28330617 | NC_021165.1    | Ca_kabuli_chr06 | 28330617                | AA                              | GG              | 1946866720               |
| SNP_P4_83617_28330651 | NC_021165.1    | Ca_kabuli_chr06 | 28330651                | GG                              | AA              | 1946866722               |
| SNP_P4_83618_28330901 | NC_021165.1    | Ca_kabuli_chr06 | 28330901                | TT                              | AA              | 1946866724               |

| SNPs IDs              | Chromosome IDs | Chromosomes     | Physical positions (bp) | CDC Frontier (Reference genome) | (ILWC46 & LPNB) | NCBI SNPdb Accession IDs |
|-----------------------|----------------|-----------------|-------------------------|---------------------------------|-----------------|--------------------------|
| SNP_P4_83619_28330934 | NC_021165.1    | Ca_kabuli_chr06 | 28330934                | AA                              | GG              | 1946866726               |
| SNP_P4_83620_28330946 | NC_021165.1    | Ca_kabuli_chr06 | 28330946                | GG                              | TT              | 1946866728               |
| SNP_P4_83621_28330968 | NC_021165.1    | Ca_kabuli_chr06 | 28330968                | CC                              | TT              | 1946866730               |
| SNP_P4_83622_28331101 | NC_021165.1    | Ca_kabuli_chr06 | 28331101                | TT                              | CC              | 1946866732               |
| SNP_P4_83623_28331109 | NC_021165.1    | Ca_kabuli_chr06 | 28331109                | CC                              | TT              | 1946866734               |
| SNP_P4_83624_28331116 | NC_021165.1    | Ca_kabuli_chr06 | 28331116                | AA                              | TT              | 1946866736               |
| SNP_P4_83625_28331136 | NC_021165.1    | Ca_kabuli_chr06 | 28331136                | TT                              | CC              | 1946866738               |
| SNP_P4_83626_28332019 | NC_021165.1    | Ca_kabuli_chr06 | 28332019                | AA                              | GG              | 1946866740               |
| SNP_P4_83627_28332044 | NC_021165.1    | Ca_kabuli_chr06 | 28332044                | CC                              | AA              | 1946866742               |
| SNP_P4_83628_28332074 | NC_021165.1    | Ca_kabuli_chr06 | 28332074                | AA                              | GG              | 1946866744               |
| SNP_P4_83629_28332107 | NC_021165.1    | Ca_kabuli_chr06 | 28332107                | TT                              | GG              | 1946866746               |
| SNP_P4_83630_28332112 | NC_021165.1    | Ca_kabuli_chr06 | 28332112                | CC                              | AA              | 1946866748               |
| SNP_P4_83631_28332163 | NC_021165.1    | Ca_kabuli_chr06 | 28332163                | CC                              | TT              | 1946866750               |
| SNP_P4_83632_28332259 | NC_021165.1    | Ca_kabuli_chr06 | 28332259                | TT                              | GG              | 1946866752               |
| SNP_P4_83633_28332269 | NC_021165.1    | Ca_kabuli_chr06 | 28332269                | AA                              | TT              | 1946866754               |
| SNP_P4_83635_28332367 | NC_021165.1    | Ca_kabuli_chr06 | 28332367                | AA                              | CC              | 1946866756               |
| SNP_P4_83637_28332422 | NC_021165.1    | Ca_kabuli_chr06 | 28332422                | TT                              | CC              | 1946866758               |
| SNP_P4_83638_28332424 | NC_021165.1    | Ca_kabuli_chr06 | 28332424                | GG                              | AA              | 1946866760               |
| SNP_P4_83639_28332469 | NC_021165.1    | Ca_kabuli_chr06 | 28332469                | CC                              | AA              | 1946866762               |
| SNP_P4_83640_28332483 | NC_021165.1    | Ca_kabuli_chr06 | 28332483                | GG                              | TT              | 1946866764               |
| SNP_P4_83641_28332489 | NC_021165.1    | Ca_kabuli_chr06 | 28332489                | CC                              | TT              | 1946866766               |
| SNP_P4_83642_28332550 | NC_021165.1    | Ca_kabuli_chr06 | 28332550                | AA                              | GG              | 1946866769               |
| SNP_P4_83643_28332561 | NC_021165.1    | Ca_kabuli_chr06 | 28332561                | TT                              | GG              | 1946866771               |
| SNP_P4_83645_28332621 | NC_021165.1    | Ca_kabuli_chr06 | 28332621                | TT                              | AA              | 1946866773               |
| SNP_P4_83646_28332630 | NC_021165.1    | Ca_kabuli_chr06 | 28332630                | TT                              | GG              | 1946866775               |
| SNP_P4_83647_28332647 | NC_021165.1    | Ca_kabuli_chr06 | 28332647                | CC                              | GG              | 1946866776               |
| SNP_P4_83649_28332660 | NC_021165.1    | Ca_kabuli_chr06 | 28332660                | AA                              | GG              | 1946866778               |
| SNP_P4_83650_28332705 | NC_021165.1    | Ca_kabuli_chr06 | 28332705                | TT                              | CC              | 1946866780               |
| SNP_P4_83651_28332722 | NC_021165.1    | Ca_kabuli_chr06 | 28332722                | TT                              | CC              | 1946866782               |
| SNP_P4_83652_28332726 | NC_021165.1    | Ca_kabuli_chr06 | 28332726                | TT                              | GG              | 1946866784               |
| SNP_P4_83654_28332774 | NC_021165.1    | Ca_kabuli_chr06 | 28332774                | CC                              | TT              | 1946866786               |
| SNP_P4_83655_28332786 | NC_021165.1    | Ca_kabuli_chr06 | 28332786                | GG                              | AA              | 1946866789               |
| SNP_P4_83656_28332883 | NC_021165.1    | Ca_kabuli_chr06 | 28332883                | TT                              | CC              | 1946866791               |
| SNP_P4_83657_28332935 | NC_021165.1    | Ca_kabuli_chr06 | 28332935                | GG                              | AA              | 1946866793               |
| SNP_P4_83659_28333063 | NC_021165.1    | Ca_kabuli_chr06 | 28333063                | AA                              | GG              | 1946866795               |
| SNP_P4_83660_28333177 | NC_021165.1    | Ca_kabuli_chr06 | 28333177                | AA                              | GG              | 1946866797               |
| SNP_P4_83661_28333220 | NC_021165.1    | Ca_kabuli_chr06 | 28333220                | CC                              | TT              | 1946866799               |
| SNP_P4_83662_28334226 | NC_021165.1    | Ca_kabuli_chr06 | 28334226                | TT                              | CC              | 1946866801               |
| SNP_P4_83663_28335846 | NC_021165.1    | Ca_kabuli_chr06 | 28335846                | GG                              | AA              | 1946866803               |
| SNP_P4_83665_28336720 | NC_021165.1    | Ca_kabuli_chr06 | 28336720                | TT                              | CC              | 1946866805               |
| SNP_P4_83666_28336773 | NC_021165.1    | Ca_kabuli_chr06 | 28336773                | CC                              | TT              | 1946866807               |
| SNP_P4_83667_28336795 | NC_021165.1    | Ca_kabuli_chr06 | 28336795                | GG                              | TT              | 1946866809               |

| SNPs IDs              | Chromosome IDs | Chromosomes     | Physical positions (bp) | CDC Frontier (Reference genome) | (ILWC46 & LPNB) | NCBI SNPdb Accession IDs |
|-----------------------|----------------|-----------------|-------------------------|---------------------------------|-----------------|--------------------------|
| SNP_P4_83668_28336872 | NC_021165.1    | Ca_kabuli_chr06 | 28336872                | AA                              | CC              | 1946866812               |
| SNP_P4_83669_28336893 | NC_021165.1    | Ca_kabuli_chr06 | 28336893                | TT                              | AA              | 1946866814               |
| SNP_P4_83670_28336896 | NC_021165.1    | Ca_kabuli_chr06 | 28336896                | TT                              | AA              | 1946866816               |
| SNP_P4_83671_28336902 | NC_021165.1    | Ca_kabuli_chr06 | 28336902                | GG                              | AA              | 1946866818               |
| SNP_P4_83672_28336938 | NC_021165.1    | Ca_kabuli_chr06 | 28336938                | TT                              | GG              | 1946866820               |
| SNP_P4_83673_28336951 | NC_021165.1    | Ca_kabuli_chr06 | 28336951                | CC                              | TT              | 1946866822               |
| SNP_P4_83674_28336967 | NC_021165.1    | Ca_kabuli_chr06 | 28336967                | TT                              | CC              | 1946866824               |
| SNP_P4_83675_28336971 | NC_021165.1    | Ca_kabuli_chr06 | 28336971                | TT                              | CC              | 1946866826               |
| SNP_P4_83676_28336980 | NC_021165.1    | Ca_kabuli_chr06 | 28336980                | TT                              | AA              | 1946866828               |
| SNP_P4_83677_28337031 | NC_021165.1    | Ca_kabuli_chr06 | 28337031                | GG                              | AA              | 1946866830               |
| SNP_P4_83678_28337049 | NC_021165.1    | Ca_kabuli_chr06 | 28337049                | CC                              | AA              | 1946866832               |
| SNP_P4_83679_28337130 | NC_021165.1    | Ca_kabuli_chr06 | 28337130                | CC                              | AA              | 1946866834               |
| SNP_P4_83680_28337162 | NC_021165.1    | Ca_kabuli_chr06 | 28337162                | GG                              | TT              | 1946866836               |
| SNP_P4_83681_28337170 | NC_021165.1    | Ca_kabuli_chr06 | 28337170                | CC                              | GG              | 1946866838               |
| SNP_P4_83682_28337205 | NC_021165.1    | Ca_kabuli_chr06 | 28337205                | TT                              | CC              | 1946866840               |
| SNP_P4_83683_28337230 | NC_021165.1    | Ca_kabuli_chr06 | 28337230                | GG                              | AA              | 1946866842               |
| SNP_P4_83684_28337239 | NC_021165.1    | Ca_kabuli_chr06 | 28337239                | AA                              | GG              | 1946866844               |
| SNP_P4_83685_28337316 | NC_021165.1    | Ca_kabuli_chr06 | 28337316                | GG                              | AA              | 1946866846               |
| SNP_P4_83686_28337356 | NC_021165.1    | Ca_kabuli_chr06 | 28337356                | TT                              | GG              | 1946866848               |
| SNP_P4_83687_28337362 | NC_021165.1    | Ca_kabuli_chr06 | 28337362                | GG                              | TT              | 1946866850               |
| SNP_P4_83688_28337375 | NC_021165.1    | Ca_kabuli_chr06 | 28337375                | TT                              | AA              | 1946866852               |
| SNP_P4_83689_28342444 | NC_021165.1    | Ca_kabuli_chr06 | 28342444                | GG                              | TT              | 1946866854               |
| SNP_P4_83690_28347151 | NC_021165.1    | Ca_kabuli_chr06 | 28347151                | GG                              | TT              | 1946866856               |
| SNP_P4_83691_28350715 | NC_021165.1    | Ca_kabuli_chr06 | 28350715                | GG                              | AA              | 1946866858               |
| SNP_P4_83692_28350872 | NC_021165.1    | Ca_kabuli_chr06 | 28350872                | TT                              | CC              | 1946866860               |
| SNP_P4_83693_28350958 | NC_021165.1    | Ca_kabuli_chr06 | 28350958                | TT                              | CC              | 1946866863               |
| SNP_P4_83694_28350993 | NC_021165.1    | Ca_kabuli_chr06 | 28350993                | AA                              | GG              | 1946866865               |
| SNP_P4_83695_28351061 | NC_021165.1    | Ca_kabuli_chr06 | 28351061                | CC                              | AA              | 1946866867               |
| SNP_P4_83696_28351228 | NC_021165.1    | Ca_kabuli_chr06 | 28351228                | GG                              | AA              | 1946866869               |
| SNP_P4_83697_28351378 | NC_021165.1    | Ca_kabuli_chr06 | 28351378                | CC                              | TT              | 1946866871               |
| SNP_P4_83698_28353434 | NC_021165.1    | Ca_kabuli_chr06 | 28353434                | AA                              | TT              | 1946866873               |
| SNP_P4_83699_28353544 | NC_021165.1    | Ca_kabuli_chr06 | 28353544                | CC                              | TT              | 1946866875               |
| SNP_P4_83700_28353628 | NC_021165.1    | Ca_kabuli_chr06 | 28353628                | GG                              | AA              | 1946866877               |
| SNP_P4_83701_28354240 | NC_021165.1    | Ca_kabuli_chr06 | 28354240                | CC                              | AA              | 1946866879               |
| SNP_P4_83702_28354495 | NC_021165.1    | Ca_kabuli_chr06 | 28354495                | GG                              | TT              | 1946866881               |
| SNP_P4_83703_28354622 | NC_021165.1    | Ca_kabuli_chr06 | 28354622                | GG                              | AA              | 1946866883               |
| SNP_P4_83704_28354828 | NC_021165.1    | Ca_kabuli_chr06 | 28354828                | TT                              | CC              | 1946866885               |
| SNP_P4_83706_28354982 | NC_021165.1    | Ca_kabuli_chr06 | 28354982                | TT                              | CC              | 1946866887               |
| SNP_P4_83707_28355011 | NC_021165.1    | Ca_kabuli_chr06 | 28355011                | TT                              | CC              | 1946866889               |
| SNP_P4_83708_28355086 | NC_021165.1    | Ca_kabuli_chr06 | 28355086                | GG                              | AA              | 1946866891               |
| SNP_P4_83709_28355195 | NC_021165.1    | Ca_kabuli_chr06 | 28355195                | GG                              | TT              | 1946866892               |
| SNP_P4_83710_28355225 | NC_021165.1    | Ca_kabuli_chr06 | 28355225                | TT                              | AA              | 1946866894               |

| SNPs IDs              | Chromosome IDs | Chromosomes     | Physical positions (bp) | CDC Frontier (Reference genome) | (ILWC46 & LPNB) | NCBI SNPdb Accession IDs |
|-----------------------|----------------|-----------------|-------------------------|---------------------------------|-----------------|--------------------------|
| SNP_P4_83711_28355628 | NC_021165.1    | Ca_kabuli_chr06 | 28355628                | TT                              | CC              | 1946866896               |
| SNP_P4_83712_28355844 | NC_021165.1    | Ca_kabuli_chr06 | 28355844                | CC                              | TT              | 1946866898               |
| SNP_P4_83713_28356046 | NC_021165.1    | Ca_kabuli_chr06 | 28356046                | AA                              | GG              | 1946866900               |
| SNP_P4_83714_28374060 | NC_021165.1    | Ca_kabuli_chr06 | 28374060                | TT                              | CC              | 1946866902               |
| SNP_P4_83715_28386976 | NC_021165.1    | Ca_kabuli_chr06 | 28386976                | AA                              | GG              | 1946866904               |
| SNP_P4_83716_28387023 | NC_021165.1    | Ca_kabuli_chr06 | 28387023                | CC                              | TT              | 1946866906               |
| SNP_P4_83717_28388227 | NC_021165.1    | Ca_kabuli_chr06 | 28388227                | CC                              | TT              | 1946866907               |
| SNP_P4_83718_28388247 | NC_021165.1    | Ca_kabuli_chr06 | 28388247                | TT                              | CC              | 1946866909               |
| SNP_P4_83720_28394270 | NC_021165.1    | Ca_kabuli_chr06 | 28394270                | TT                              | CC              | 1946866912               |
| SNP_P4_83721_28394622 | NC_021165.1    | Ca_kabuli_chr06 | 28394622                | TT                              | AA              | 1946866913               |
| SNP_P4_83722_28394645 | NC_021165.1    | Ca_kabuli_chr06 | 28394645                | TT                              | CC              | 1946866915               |
| SNP_P4_83723_28396692 | NC_021165.1    | Ca_kabuli_chr06 | 28396692                | AA                              | TT              | 1946866917               |
| SNP_P4_83725_28427509 | NC_021165.1    | Ca_kabuli_chr06 | 28427509                | AA                              | TT              | 1946866919               |
| SNP_P4_83726_28427517 | NC_021165.1    | Ca_kabuli_chr06 | 28427517                | TT                              | CC              | 1946866921               |
| SNP_P4_83727_28427518 | NC_021165.1    | Ca_kabuli_chr06 | 28427518                | CC                              | GG              | 1946866923               |
| SNP_P4_83728_28431056 | NC_021165.1    | Ca_kabuli_chr06 | 28431056                | GG                              | TT              | 1946866925               |
| SNP_P4_83729_28431160 | NC_021165.1    | Ca_kabuli_chr06 | 28431160                | AA                              | GG              | 1946866927               |
| SNP_P4_83730_28433491 | NC_021165.1    | Ca_kabuli_chr06 | 28433491                | AA                              | GG              | 1946866929               |
| SNP_P4_83731_28442088 | NC_021165.1    | Ca_kabuli_chr06 | 28442088                | TT                              | CC              | 1946866930               |
| SNP_P4_83732_28442157 | NC_021165.1    | Ca_kabuli_chr06 | 28442157                | CC                              | TT              | 1946866932               |
| SNP_P4_83733_28442161 | NC_021165.1    | Ca_kabuli_chr06 | 28442161                | GG                              | AA              | 1946866934               |
| SNP_P4_83734_28442162 | NC_021165.1    | Ca_kabuli_chr06 | 28442162                | AA                              | GG              | 1946866936               |
| SNP_P4_83735_28442301 | NC_021165.1    | Ca_kabuli_chr06 | 28442301                | AA                              | CC              | 1946866938               |
| SNP_P4_83736_28442360 | NC_021165.1    | Ca_kabuli_chr06 | 28442360                | AA                              | GG              | 1946866940               |
| SNP_P4_83737_28442900 | NC_021165.1    | Ca_kabuli_chr06 | 28442900                | CC                              | TT              | 1946866942               |
| SNP_P4_83738_28443046 | NC_021165.1    | Ca_kabuli_chr06 | 28443046                | TT                              | CC              | 1946866944               |
| SNP_P4_83739_28443119 | NC_021165.1    | Ca_kabuli_chr06 | 28443119                | TT                              | CC              | 1946866946               |
| SNP_P4_83740_28443167 | NC_021165.1    | Ca_kabuli_chr06 | 28443167                | TT                              | AA              | 1946866948               |
| SNP_P4_83741_28443182 | NC_021165.1    | Ca_kabuli_chr06 | 28443182                | GG                              | AA              | 1946866950               |
| SNP_P4_83744_28443714 | NC_021165.1    | Ca_kabuli_chr06 | 28443714                | TT                              | CC              | 1946866952               |
| SNP_P4_83745_28443740 | NC_021165.1    | Ca_kabuli_chr06 | 28443740                | AA                              | CC              | 1946866954               |
| SNP_P4_83746_28443917 | NC_021165.1    | Ca_kabuli_chr06 | 28443917                | AA                              | TT              | 1946866956               |
| SNP_P4_83747_28443918 | NC_021165.1    | Ca_kabuli_chr06 | 28443918                | TT                              | AA              | 1946866958               |
| SNP_P4_83748_28444022 | NC_021165.1    | Ca_kabuli_chr06 | 28444022                | CC                              | TT              | 1946866960               |
| SNP_P4_83749_28444079 | NC_021165.1    | Ca_kabuli_chr06 | 28444079                | CC                              | GG              | 1946866962               |
| SNP_P4_83750_28444153 | NC_021165.1    | Ca_kabuli_chr06 | 28444153                | CC                              | TT              | 1946866964               |
| SNP_P4_83751_28444181 | NC_021165.1    | Ca_kabuli_chr06 | 28444181                | GG                              | CC              | 1946866966               |
| SNP_P4_83752_28444404 | NC_021165.1    | Ca_kabuli_chr06 | 28444404                | GG                              | AA              | 1946866968               |
| SNP_P4_83753_28444509 | NC_021165.1    | Ca_kabuli_chr06 | 28444509                | AA                              | GG              | 1946866970               |
| SNP_P4_83754_28444517 | NC_021165.1    | Ca_kabuli_chr06 | 28444517                | CC                              | TT              | 1946866972               |
| SNP_P4_83755_28444553 | NC_021165.1    | Ca_kabuli_chr06 | 28444553                | AA                              | GG              | 1946866974               |
| SNP_P4_83756_28444562 | NC_021165.1    | Ca_kabuli_chr06 | 28444562                | AA                              | CC              | 1946866976               |

| SNPs IDs              | Chromosome IDs | Chromosomes     | Physical positions (bp) | CDC Frontier (Reference genome) | (ILWC46 & LPNB) | NCBI SNPdb Accession IDs |
|-----------------------|----------------|-----------------|-------------------------|---------------------------------|-----------------|--------------------------|
| SNP_P4_83757_28444565 | NC_021165.1    | Ca_kabuli_chr06 | 28444565                | CC                              | TT              | 1946866978               |
| SNP_P4_83759_28444771 | NC_021165.1    | Ca_kabuli_chr06 | 28444771                | GG                              | AA              | 1946866980               |
| SNP_P4_83760_28445005 | NC_021165.1    | Ca_kabuli_chr06 | 28445005                | GG                              | TT              | 1946866982               |
| SNP_P4_83761_28445089 | NC_021165.1    | Ca_kabuli_chr06 | 28445089                | GG                              | TT              | 1946866983               |
| SNP_P4_83762_28453621 | NC_021165.1    | Ca_kabuli_chr06 | 28453621                | TT                              | CC              | 1946866986               |
| SNP_P4_83763_28484587 | NC_021165.1    | Ca_kabuli_chr06 | 28484587                | AA                              | TT              | 1946866988               |
| SNP_P4_83764_28495536 | NC_021165.1    | Ca_kabuli_chr06 | 28495536                | TT                              | CC              | 1946866990               |
| SNP_P4_83765_28495983 | NC_021165.1    | Ca_kabuli_chr06 | 28495983                | TT                              | CC              | 1946866992               |
| SNP_P4_83766_28495997 | NC_021165.1    | Ca_kabuli_chr06 | 28495997                | CC                              | TT              | 1946866994               |
| SNP_P4_83768_28503501 | NC_021165.1    | Ca_kabuli_chr06 | 28503501                | CC                              | TT              | 1946866996               |
| SNP_P4_83769_28503510 | NC_021165.1    | Ca_kabuli_chr06 | 28503510                | AA                              | GG              | 1946866998               |
| SNP_P4_83770_28503513 | NC_021165.1    | Ca_kabuli_chr06 | 28503513                | GG                              | TT              | 1946867000               |
| SNP_P4_83771_28503574 | NC_021165.1    | Ca_kabuli_chr06 | 28503574                | GG                              | AA              | 1946867002               |
| SNP_P4_83772_28503750 | NC_021165.1    | Ca_kabuli_chr06 | 28503750                | AA                              | GG              | 1946867004               |
| SNP_P4_83773_28504073 | NC_021165.1    | Ca_kabuli_chr06 | 28504073                | CC                              | TT              | 1946867006               |
| SNP_P4_83774_28505148 | NC_021165.1    | Ca_kabuli_chr06 | 28505148                | CC                              | TT              | 1946867008               |
| SNP_P4_83775_28505340 | NC_021165.1    | Ca_kabuli_chr06 | 28505340                | GG                              | TT              | 1946867010               |
| SNP_P4_83776_28505363 | NC_021165.1    | Ca_kabuli_chr06 | 28505363                | CC                              | GG              | 1946867012               |
| SNP_P4_83777_28505387 | NC_021165.1    | Ca_kabuli_chr06 | 28505387                | CC                              | TT              | 1946867014               |
| SNP_P4_83778_28511308 | NC_021165.1    | Ca_kabuli_chr06 | 28511308                | TT                              | GG              | 1946867016               |
| SNP_P4_83779_28511331 | NC_021165.1    | Ca_kabuli_chr06 | 28511331                | AA                              | CC              | 1946867018               |
| SNP_P4_83780_28511333 | NC_021165.1    | Ca_kabuli_chr06 | 28511333                | TT                              | AA              | 1946867020               |
| SNP_P4_83781_28511348 | NC_021165.1    | Ca_kabuli_chr06 | 28511348                | TT                              | AA              | 1946867022               |
| SNP_P4_83782_28511349 | NC_021165.1    | Ca_kabuli_chr06 | 28511349                | GG                              | TT              | 1946867024               |
| SNP_P4_83783_28511406 | NC_021165.1    | Ca_kabuli_chr06 | 28511406                | GG                              | AA              | 1946867026               |
| SNP_P4_83784_28512948 | NC_021165.1    | Ca_kabuli_chr06 | 28512948                | TT                              | CC              | 1946867030               |
| SNP_P4_83785_28513487 | NC_021165.1    | Ca_kabuli_chr06 | 28513487                | GG                              | TT              | 1946867032               |
| SNP_P4_83786_28513491 | NC_021165.1    | Ca_kabuli_chr06 | 28513491                | TT                              | CC              | 1946867034               |
| SNP_P4_83788_28513971 | NC_021165.1    | Ca_kabuli_chr06 | 28513971                | TT                              | AA              | 1946867036               |
| SNP_P4_83789_28513975 | NC_021165.1    | Ca_kabuli_chr06 | 28513975                | TT                              | GG              | 1946867038               |
| SNP_P4_83790_28514085 | NC_021165.1    | Ca_kabuli_chr06 | 28514085                | AA                              | CC              | 1946867040               |
| SNP_P4_83791_28514150 | NC_021165.1    | Ca_kabuli_chr06 | 28514150                | CC                              | GG              | 1946867042               |
| SNP_P4_83792_28515791 | NC_021165.1    | Ca_kabuli_chr06 | 28515791                | CC                              | TT              | 1946867044               |
| SNP_P4_83793_28518347 | NC_021165.1    | Ca_kabuli_chr06 | 28518347                | GG                              | AA              | 1946867046               |
| SNP_P4_83797_28521046 | NC_021165.1    | Ca_kabuli_chr06 | 28521046                | CC                              | TT              | 1946867048               |
| SNP_P4_83799_28521101 | NC_021165.1    | Ca_kabuli_chr06 | 28521101                | TT                              | CC              | 1946867050               |
| SNP_P4_83800_28521107 | NC_021165.1    | Ca_kabuli_chr06 | 28521107                | TT                              | CC              | 1946867052               |
| SNP_P4_83801_28521115 | NC_021165.1    | Ca_kabuli_chr06 | 28521115                | GG                              | AA              | 1946867054               |
| SNP_P4_83802_28521123 | NC_021165.1    | Ca_kabuli_chr06 | 28521123                | CC                              | TT              | 1946867056               |
| SNP_P4_83803_28521222 | NC_021165.1    | Ca_kabuli_chr06 | 28521222                | AA                              | TT              | 1946867058               |
| SNP_P4_83804_28521272 | NC_021165.1    | Ca_kabuli_chr06 | 28521272                | TT                              | AA              | 1946867060               |
| SNP_P4_83805_28521273 | NC_021165.1    | Ca_kabuli_chr06 | 28521273                | TT                              | CC              | 1946867062               |

| SNPs IDs              | Chromosome IDs | Chromosomes     | Physical positions (bp) | CDC Frontier (Reference genome) | (ILWC46 & LPNB) | NCBI SNPdb Accession IDs |
|-----------------------|----------------|-----------------|-------------------------|---------------------------------|-----------------|--------------------------|
| SNP_P4_83806_28521312 | NC_021165.1    | Ca_kabuli_chr06 | 28521312                | GG                              | AA              | 1946867064               |
| SNP_P4_83807_28521382 | NC_021165.1    | Ca_kabuli_chr06 | 28521382                | AA                              | GG              | 1946867066               |
| SNP_P4_83808_28521575 | NC_021165.1    | Ca_kabuli_chr06 | 28521575                | AA                              | CC              | 1946867068               |
| SNP_P4_83809_28521576 | NC_021165.1    | Ca_kabuli_chr06 | 28521576                | AA                              | TT              | 1946867070               |
| SNP_P4_83810_28521618 | NC_021165.1    | Ca_kabuli_chr06 | 28521618                | TT                              | GG              | 1946867072               |
| SNP_P4_83811_28521699 | NC_021165.1    | Ca_kabuli_chr06 | 28521699                | CC                              | GG              | 1946867074               |
| SNP_P4_83812_28521788 | NC_021165.1    | Ca_kabuli_chr06 | 28521788                | AA                              | GG              | 1946867076               |
| SNP_P4_83813_28536075 | NC_021165.1    | Ca_kabuli_chr06 | 28536075                | AA                              | GG              | 1946867078               |
| SNP_P4_83814_28537120 | NC_021165.1    | Ca_kabuli_chr06 | 28537120                | CC                              | GG              | 1946867080               |
| SNP_P4_83815_28537166 | NC_021165.1    | Ca_kabuli_chr06 | 28537166                | AA                              | CC              | 1946867083               |
| SNP_P4_83816_28546203 | NC_021165.1    | Ca_kabuli_chr06 | 28546203                | TT                              | CC              | 1946867085               |
| SNP_P4_83817_28546529 | NC_021165.1    | Ca_kabuli_chr06 | 28546529                | CC                              | GG              | 1946867087               |
| SNP_P4_83818_28546531 | NC_021165.1    | Ca_kabuli_chr06 | 28546531                | CC                              | AA              | 1946867089               |
| SNP_P4_83819_28550935 | NC_021165.1    | Ca_kabuli_chr06 | 28550935                | GG                              | AA              | 1946867091               |
| SNP_P4_83820_28553973 | NC_021165.1    | Ca_kabuli_chr06 | 28553973                | GG                              | AA              | 1946867093               |
| SNP_P4_83821_28572685 | NC_021165.1    | Ca_kabuli_chr06 | 28572685                | GG                              | TT              | 1946867095               |
| SNP_P4_83822_28575607 | NC_021165.1    | Ca_kabuli_chr06 | 28575607                | TT                              | CC              | 1946867097               |
| SNP_P4_83825_28606807 | NC_021165.1    | Ca_kabuli_chr06 | 28606807                | TT                              | CC              | 1946867099               |
| SNP_P4_83826_28644615 | NC_021165.1    | Ca_kabuli_chr06 | 28644615                | AA                              | GG              | 1946867102               |
| SNP_P4_83827_28644659 | NC_021165.1    | Ca_kabuli_chr06 | 28644659                | CC                              | AA              | 1946867104               |
| SNP_P4_83828_28644671 | NC_021165.1    | Ca_kabuli_chr06 | 28644671                | AA                              | TT              | 1946867106               |
| SNP_P4_83829_28644675 | NC_021165.1    | Ca_kabuli_chr06 | 28644675                | AA                              | TT              | 1946867108               |
| SNP_P4_83830_28670253 | NC_021165.1    | Ca_kabuli_chr06 | 28670253                | CC                              | TT              | 1946867110               |
| SNP_P4_83831_28747316 | NC_021165.1    | Ca_kabuli_chr06 | 28747316                | CC                              | TT              | 1946867112               |
| SNP_P4_83832_28747326 | NC_021165.1    | Ca_kabuli_chr06 | 28747326                | CC                              | AA              | 1946867114               |
| SNP_P4_83833_28747340 | NC_021165.1    | Ca_kabuli_chr06 | 28747340                | AA                              | CC              | 1946867116               |
| SNP_P4_83834_28747346 | NC_021165.1    | Ca_kabuli_chr06 | 28747346                | TT                              | CC              | 1946867118               |
| SNP_P4_83835_28772270 | NC_021165.1    | Ca_kabuli_chr06 | 28772270                | TT                              | GG              | 1946867120               |
| SNP_P4_83836_28772306 | NC_021165.1    | Ca_kabuli_chr06 | 28772306                | CC                              | TT              | 1946867122               |
| SNP_P4_83837_28785380 | NC_021165.1    | Ca_kabuli_chr06 | 28785380                | AA                              | GG              | 1946867124               |
| SNP_P4_83838_28801048 | NC_021165.1    | Ca_kabuli_chr06 | 28801048                | TT                              | CC              | 1946867126               |
| SNP_P4_83839_28821153 | NC_021165.1    | Ca_kabuli_chr06 | 28821153                | GG                              | AA              | 1946867128               |
| SNP_P4_83840_28821161 | NC_021165.1    | Ca_kabuli_chr06 | 28821161                | CC                              | AA              | 1946867130               |
| SNP_P4_83841_28821547 | NC_021165.1    | Ca_kabuli_chr06 | 28821547                | GG                              | AA              | 1946867133               |
| SNP_P4_83842_28821556 | NC_021165.1    | Ca_kabuli_chr06 | 28821556                | AA                              | GG              | 1946867135               |
| SNP_P4_83843_28821565 | NC_021165.1    | Ca_kabuli_chr06 | 28821565                | CC                              | TT              | 1946867137               |
| SNP_P4_83844_28821596 | NC_021165.1    | Ca_kabuli_chr06 | 28821596                | GG                              | AA              | 1946867139               |
| SNP_P4_83845_28821608 | NC_021165.1    | Ca_kabuli_chr06 | 28821608                | TT                              | AA              | 1946867141               |
| SNP_P4_83846_28821723 | NC_021165.1    | Ca_kabuli_chr06 | 28821723                | TT                              | CC              | 1946867143               |
| SNP_P4_83847_28821765 | NC_021165.1    | Ca_kabuli_chr06 | 28821765                | TT                              | CC              | 1946867145               |
| SNP_P4_83848_28821825 | NC_021165.1    | Ca_kabuli_chr06 | 28821825                | TT                              | CC              | 1946867148               |
| SNP_P4_83849_28821961 | NC_021165.1    | Ca_kabuli_chr06 | 28821961                | GG                              | AA              | 1946867150               |

| SNPs IDs              | Chromosome IDs | Chromosomes     | Physical positions (bp) | CDC Frontier (Reference genome) | (ILWC46 & LPNB) | NCBI SNPdb Accession IDs |
|-----------------------|----------------|-----------------|-------------------------|---------------------------------|-----------------|--------------------------|
| SNP_P4_83850_28821968 | NC_021165.1    | Ca_kabuli_chr06 | 28821968                | TT                              | CC              | 1946867152               |
| SNP_P4_83851_28821974 | NC_021165.1    | Ca_kabuli_chr06 | 28821974                | CC                              | TT              | 1946867154               |
| SNP_P4_83852_28821985 | NC_021165.1    | Ca_kabuli_chr06 | 28821985                | CC                              | TT              | 1946867156               |
| SNP_P4_83853_28821986 | NC_021165.1    | Ca_kabuli_chr06 | 28821986                | AA                              | GG              | 1946867158               |
| SNP_P4_83854_28822021 | NC_021165.1    | Ca_kabuli_chr06 | 28822021                | TT                              | GG              | 1946867160               |
| SNP_P4_83855_28822053 | NC_021165.1    | Ca_kabuli_chr06 | 28822053                | AA                              | CC              | 1946867162               |
| SNP_P4_83856_28822090 | NC_021165.1    | Ca_kabuli_chr06 | 28822090                | AA                              | GG              | 1946867164               |
| SNP_P4_83857_28822093 | NC_021165.1    | Ca_kabuli_chr06 | 28822093                | AA                              | GG              | 1946867166               |
| SNP_P4_83858_28822099 | NC_021165.1    | Ca_kabuli_chr06 | 28822099                | TT                              | AA              | 1946867168               |
| SNP_P4_83859_28822113 | NC_021165.1    | Ca_kabuli_chr06 | 28822113                | GG                              | AA              | 1946867170               |
| SNP_P4_83860_28822172 | NC_021165.1    | Ca_kabuli_chr06 | 28822172                | TT                              | GG              | 1946867172               |
| SNP_P4_83861_28822184 | NC_021165.1    | Ca_kabuli_chr06 | 28822184                | AA                              | GG              | 1946867174               |
| SNP_P4_83862_28822193 | NC_021165.1    | Ca_kabuli_chr06 | 28822193                | AA                              | GG              | 1946867176               |
| SNP_P4_83863_28822194 | NC_021165.1    | Ca_kabuli_chr06 | 28822194                | TT                              | CC              | 1946867178               |
| SNP_P4_83864_28825491 | NC_021165.1    | Ca_kabuli_chr06 | 28825491                | TT                              | AA              | 1946867180               |
| SNP_P4_83866_28878425 | NC_021165.1    | Ca_kabuli_chr06 | 28878425                | AA                              | GG              | 1946867182               |
| SNP_P4_83867_28878435 | NC_021165.1    | Ca_kabuli_chr06 | 28878435                | TT                              | CC              | 1946867184               |
| SNP_P4_83869_28878917 | NC_021165.1    | Ca_kabuli_chr06 | 28878917                | TT                              | CC              | 1946867186               |
| SNP_P4_83870_28911504 | NC_021165.1    | Ca_kabuli_chr06 | 28911504                | TT                              | CC              | 1946867188               |
| SNP_P4_83871_28917029 | NC_021165.1    | Ca_kabuli_chr06 | 28917029                | CC                              | TT              | 1946867190               |
| SNP_P4_83872_28917038 | NC_021165.1    | Ca_kabuli_chr06 | 28917038                | CC                              | AA              | 1946867192               |
| SNP_P4_83873_28943020 | NC_021165.1    | Ca_kabuli_chr06 | 28943020                | TT                              | CC              | 1946867194               |
| SNP_P4_83874_28957647 | NC_021165.1    | Ca_kabuli_chr06 | 28957647                | AA                              | TT              | 1946867197               |
| SNP_P4_83875_28977220 | NC_021165.1    | Ca_kabuli_chr06 | 28977220                | AA                              | CC              | 1946867199               |
| SNP_P4_83877_28977593 | NC_021165.1    | Ca_kabuli_chr06 | 28977593                | AA                              | TT              | 1946867201               |
| SNP_P4_83878_28980567 | NC_021165.1    | Ca_kabuli_chr06 | 28980567                | GG                              | AA              | 1946867203               |
| SNP_P4_83879_28981047 | NC_021165.1    | Ca_kabuli_chr06 | 28981047                | TT                              | CC              | 1946867205               |
| SNP_P4_83881_29063216 | NC_021165.1    | Ca_kabuli_chr06 | 29063216                | TT                              | CC              | 1946867207               |
| SNP_P4_83882_29063220 | NC_021165.1    | Ca_kabuli_chr06 | 29063220                | TT                              | CC              | 1946867209               |
| SNP_P4_83883_29063436 | NC_021165.1    | Ca_kabuli_chr06 | 29063436                | AA                              | GG              | 1946867212               |
| SNP_P4_83884_29063583 | NC_021165.1    | Ca_kabuli_chr06 | 29063583                | TT                              | CC              | 1946867214               |
| SNP_P4_83885_29070943 | NC_021165.1    | Ca_kabuli_chr06 | 29070943                | GG                              | AA              | 1946867216               |
| SNP_P4_83886_29070944 | NC_021165.1    | Ca_kabuli_chr06 | 29070944                | CC                              | TT              | 1946867218               |
| SNP_P4_83887_29075918 | NC_021165.1    | Ca_kabuli_chr06 | 29075918                | AA                              | CC              | 1946867219               |
| SNP_P4_83889_29109091 | NC_021165.1    | Ca_kabuli_chr06 | 29109091                | AA                              | CC              | 1946867221               |
| SNP_P4_83890_29109125 | NC_021165.1    | Ca_kabuli_chr06 | 29109125                | AA                              | TT              | 1946867223               |
| SNP_P4_83891_29109127 | NC_021165.1    | Ca_kabuli_chr06 | 29109127                | AA                              | GG              | 1946867225               |
| SNP_P4_83892_29109295 | NC_021165.1    | Ca_kabuli_chr06 | 29109295                | TT                              | CC              | 1946867227               |
| SNP_P4_83893_29112743 | NC_021165.1    | Ca_kabuli_chr06 | 29112743                | CC                              | TT              | 1946867229               |
| SNP_P4_83894_29139878 | NC_021165.1    | Ca_kabuli_chr06 | 29139878                | TT                              | GG              | 1946867231               |
| SNP_P4_83895_29145891 | NC_021165.1    | Ca_kabuli_chr06 | 29145891                | TT                              | CC              | 1946867233               |
| SNP_P4_83896_29146009 | NC_021165.1    | Ca_kabuli_chr06 | 29146009                | CC                              | AA              | 1946867235               |



| SNPs IDs              | Chromosome IDs | Chromosomes     | Physical positions (bp) | CDC Frontier (Reference genome) | (ILWC46 & LPNB) | NCBI SNPdb Accession IDs |
|-----------------------|----------------|-----------------|-------------------------|---------------------------------|-----------------|--------------------------|
| SNP_P4_83897_29164509 | NC_021165.1    | Ca_kabuli_chr06 | 29164509                | AA                              | CC              | 1946867237               |
| SNP_P4_83898_29177289 | NC_021165.1    | Ca_kabuli_chr06 | 29177289                | AA                              | GG              | 1946867239               |
| SNP_P4_83899_29177617 | NC_021165.1    | Ca_kabuli_chr06 | 29177617                | AA                              | CC              | 1946867241               |
| SNP_P4_83900_29177662 | NC_021165.1    | Ca_kabuli_chr06 | 29177662                | AA                              | GG              | 1946867243               |
| SNP_P4_83901_29177666 | NC_021165.1    | Ca_kabuli_chr06 | 29177666                | AA                              | GG              | 1946867245               |
| SNP_P4_83902_29185012 | NC_021165.1    | Ca_kabuli_chr06 | 29185012                | GG                              | AA              | 1946867247               |
| SNP_P4_83903_29185028 | NC_021165.1    | Ca_kabuli_chr06 | 29185028                | TT                              | GG              | 1946867249               |
| SNP_P4_83904_29185039 | NC_021165.1    | Ca_kabuli_chr06 | 29185039                | AA                              | GG              | 1946867251               |
| SNP_P4_83905_29185075 | NC_021165.1    | Ca_kabuli_chr06 | 29185075                | TT                              | CC              | 1946867253               |
| SNP_P4_83906_29185099 | NC_021165.1    | Ca_kabuli_chr06 | 29185099                | GG                              | AA              | 1946867255               |
| SNP_P4_83907_29185102 | NC_021165.1    | Ca_kabuli_chr06 | 29185102                | GG                              | AA              | 1946867257               |
| SNP_P4_83908_29185197 | NC_021165.1    | Ca_kabuli_chr06 | 29185197                | AA                              | TT              | 1946867259               |
| SNP_P4_83909_29185203 | NC_021165.1    | Ca_kabuli_chr06 | 29185203                | TT                              | CC              | 1946867260               |
| SNP_P4_83910_29185206 | NC_021165.1    | Ca_kabuli_chr06 | 29185206                | GG                              | AA              | 1946867262               |
| SNP_P4_83911_29185209 | NC_021165.1    | Ca_kabuli_chr06 | 29185209                | AA                              | GG              | 1946867264               |
| SNP_P4_83912_29185224 | NC_021165.1    | Ca_kabuli_chr06 | 29185224                | TT                              | AA              | 1946867266               |
| SNP_P4_83913_29185239 | NC_021165.1    | Ca_kabuli_chr06 | 29185239                | CC                              | TT              | 1946867268               |
| SNP_P4_83914_29185240 | NC_021165.1    | Ca_kabuli_chr06 | 29185240                | CC                              | TT              | 1946867270               |
| SNP_P4_83915_29185241 | NC_021165.1    | Ca_kabuli_chr06 | 29185241                | AA                              | TT              | 1946867272               |
| SNP_P4_83916_29185257 | NC_021165.1    | Ca_kabuli_chr06 | 29185257                | TT                              | AA              | 1946867274               |
| SNP_P4_83917_29185291 | NC_021165.1    | Ca_kabuli_chr06 | 29185291                | GG                              | CC              | 1946867276               |
| SNP_P4_83918_29185292 | NC_021165.1    | Ca_kabuli_chr06 | 29185292                | CC                              | TT              | 1946867278               |
| SNP_P4_83919_29185318 | NC_021165.1    | Ca_kabuli_chr06 | 29185318                | AA                              | GG              | 1946867280               |
| SNP_P4_83920_29185479 | NC_021165.1    | Ca_kabuli_chr06 | 29185479                | AA                              | GG              | 1946867282               |
| SNP_P4_83921_29194241 | NC_021165.1    | Ca_kabuli_chr06 | 29194241                | AA                              | TT              | 1946867284               |
| SNP_P4_83922_29194244 | NC_021165.1    | Ca_kabuli_chr06 | 29194244                | TT                              | GG              | 1946867286               |
| SNP_P4_83923_29229412 | NC_021165.1    | Ca_kabuli_chr06 | 29229412                | GG                              | AA              | 1946867288               |
| SNP_P4_83924_29229711 | NC_021165.1    | Ca_kabuli_chr06 | 29229711                | TT                              | GG              | 1946867290               |
| SNP_P4_83928_29283571 | NC_021165.1    | Ca_kabuli_chr06 | 29283571                | GG                              | AA              | 1946867292               |
| SNP_P4_83929_29290170 | NC_021165.1    | Ca_kabuli_chr06 | 29290170                | GG                              | TT              | 1946867294               |
| SNP_P4_83930_29290184 | NC_021165.1    | Ca_kabuli_chr06 | 29290184                | GG                              | AA              | 1946867296               |
| SNP_P4_83931_29290879 | NC_021165.1    | Ca_kabuli_chr06 | 29290879                | AA                              | GG              | 1946867298               |
| SNP_P4_83932_29290931 | NC_021165.1    | Ca_kabuli_chr06 | 29290931                | CC                              | TT              | 1946867300               |
| SNP_P4_83934_29316800 | NC_021165.1    | Ca_kabuli_chr06 | 29316800                | TT                              | GG              | 1946867302               |
| SNP_P4_83936_29397129 | NC_021165.1    | Ca_kabuli_chr06 | 29397129                | CC                              | TT              | 1946867304               |
| SNP_P4_83937_29402464 | NC_021165.1    | Ca_kabuli_chr06 | 29402464                | CC                              | AA              | 1946867307               |
| SNP_P4_83938_29465821 | NC_021165.1    | Ca_kabuli_chr06 | 29465821                | TT                              | AA              | 1946867309               |
| SNP_P4_83940_29480841 | NC_021165.1    | Ca_kabuli_chr06 | 29480841                | TT                              | CC              | 1946867311               |
| SNP_P4_83941_29487047 | NC_021165.1    | Ca_kabuli_chr06 | 29487047                | GG                              | AA              | 1946867313               |
| SNP_P4_83942_29487049 | NC_021165.1    | Ca_kabuli_chr06 | 29487049                | AA                              | GG              | 1946867315               |
| SNP_P4_83944_29488497 | NC_021165.1    | Ca_kabuli_chr06 | 29488497                | TT                              | CC              | 1946867317               |
| SNP_P4_83945_29488522 | NC_021165.1    | Ca_kabuli_chr06 | 29488522                | TT                              | GG              | 1946867319               |

| SNPs IDs              | Chromosome IDs | Chromosomes     | Physical positions (bp) | CDC Frontier (Reference genome) | (ILWC46 & LPNB) | NCBI SNPdb Accession IDs |
|-----------------------|----------------|-----------------|-------------------------|---------------------------------|-----------------|--------------------------|
| SNP_P4_83946_29488569 | NC_021165.1    | Ca_kabuli_chr06 | 29488569                | CC                              | AA              | 1946867321               |
| SNP_P4_83947_29488581 | NC_021165.1    | Ca_kabuli_chr06 | 29488581                | GG                              | AA              | 1946867323               |
| SNP_P4_83948_29488620 | NC_021165.1    | Ca_kabuli_chr06 | 29488620                | AA                              | CC              | 1946867325               |
| SNP_P4_83949_29488782 | NC_021165.1    | Ca_kabuli_chr06 | 29488782                | TT                              | CC              | 1946867327               |
| SNP_P4_83950_29491985 | NC_021165.1    | Ca_kabuli_chr06 | 29491985                | TT                              | CC              | 1946867329               |
| SNP_P4_83951_29491996 | NC_021165.1    | Ca_kabuli_chr06 | 29491996                | AA                              | CC              | 1946867331               |
| SNP_P4_83952_29492030 | NC_021165.1    | Ca_kabuli_chr06 | 29492030                | GG                              | AA              | 1946867333               |
| SNP_P4_83953_29492032 | NC_021165.1    | Ca_kabuli_chr06 | 29492032                | TT                              | CC              | 1946867335               |
| SNP_P4_83954_29492042 | NC_021165.1    | Ca_kabuli_chr06 | 29492042                | GG                              | AA              | 1946867337               |
| SNP_P4_83955_29492051 | NC_021165.1    | Ca_kabuli_chr06 | 29492051                | CC                              | AA              | 1946867339               |
| SNP_P4_83956_29492078 | NC_021165.1    | Ca_kabuli_chr06 | 29492078                | AA                              | GG              | 1946867341               |
| SNP_P4_83957_29492187 | NC_021165.1    | Ca_kabuli_chr06 | 29492187                | TT                              | CC              | 1946867343               |
| SNP_P4_83958_29496351 | NC_021165.1    | Ca_kabuli_chr06 | 29496351                | TT                              | GG              | 1946867345               |
| SNP_P4_83959_29497312 | NC_021165.1    | Ca_kabuli_chr06 | 29497312                | GG                              | AA              | 1946867347               |
| SNP_P4_83960_29500099 | NC_021165.1    | Ca_kabuli_chr06 | 29500099                | GG                              | AA              | 1946867349               |
| SNP_P4_83961_29500132 | NC_021165.1    | Ca_kabuli_chr06 | 29500132                | TT                              | AA              | 1946867351               |
| SNP_P4_83962_29500136 | NC_021165.1    | Ca_kabuli_chr06 | 29500136                | AA                              | GG              | 1946867353               |
| SNP_P4_83963_29500141 | NC_021165.1    | Ca_kabuli_chr06 | 29500141                | AA                              | GG              | 1946867355               |
| SNP_P4_83964_29500162 | NC_021165.1    | Ca_kabuli_chr06 | 29500162                | TT                              | CC              | 1946867357               |
| SNP_P4_83965_29500192 | NC_021165.1    | Ca_kabuli_chr06 | 29500192                | TT                              | CC              | 1946867359               |
| SNP_P4_83966_29500228 | NC_021165.1    | Ca_kabuli_chr06 | 29500228                | CC                              | TT              | 1946867361               |
| SNP_P4_83967_29500802 | NC_021165.1    | Ca_kabuli_chr06 | 29500802                | AA                              | GG              | 1946867363               |
| SNP_P4_83968_29514652 | NC_021165.1    | Ca_kabuli_chr06 | 29514652                | CC                              | AA              | 1946867365               |
| SNP_P4_83969_29523568 | NC_021165.1    | Ca_kabuli_chr06 | 29523568                | GG                              | AA              | 1946867367               |
| SNP_P4_83970_29523593 | NC_021165.1    | Ca_kabuli_chr06 | 29523593                | TT                              | GG              | 1946867368               |
| SNP_P4_83971_29523595 | NC_021165.1    | Ca_kabuli_chr06 | 29523595                | AA                              | GG              | 1946867370               |
| SNP_P4_83972_29523596 | NC_021165.1    | Ca_kabuli_chr06 | 29523596                | GG                              | AA              | 1946867372               |
| SNP_P4_83973_29524866 | NC_021165.1    | Ca_kabuli_chr06 | 29524866                | TT                              | CC              | 1946867374               |
| SNP_P4_83974_29531053 | NC_021165.1    | Ca_kabuli_chr06 | 29531053                | CC                              | TT              | 1946867376               |
| SNP_P4_83975_29536077 | NC_021165.1    | Ca_kabuli_chr06 | 29536077                | AA                              | GG              | 1946867378               |
| SNP_P4_83976_29536096 | NC_021165.1    | Ca_kabuli_chr06 | 29536096                | CC                              | TT              | 1946867380               |
| SNP_P4_83977_29536193 | NC_021165.1    | Ca_kabuli_chr06 | 29536193                | CC                              | TT              | 1946867382               |
| SNP_P4_83979_29536251 | NC_021165.1    | Ca_kabuli_chr06 | 29536251                | CC                              | TT              | 1946867384               |
| SNP_P4_83980_29536603 | NC_021165.1    | Ca_kabuli_chr06 | 29536603                | TT                              | CC              | 1946867386               |
| SNP_P4_83981_29537264 | NC_021165.1    | Ca_kabuli_chr06 | 29537264                | AA                              | CC              | 1946867388               |
| SNP_P4_83982_29557208 | NC_021165.1    | Ca_kabuli_chr06 | 29557208                | AA                              | TT              | 1946867390               |
| SNP_P4_83983_29557490 | NC_021165.1    | Ca_kabuli_chr06 | 29557490                | TT                              | GG              | 1946867392               |
| SNP_P4_83984_29578199 | NC_021165.1    | Ca_kabuli_chr06 | 29578199                | AA                              | TT              | 1946867394               |
| SNP_P4_83985_29655439 | NC_021165.1    | Ca_kabuli_chr06 | 29655439                | CC                              | TT              | 1946867396               |
| SNP_P4_83986_29655457 | NC_021165.1    | Ca_kabuli_chr06 | 29655457                | TT                              | CC              | 1946867398               |
| SNP_P4_83987_29667435 | NC_021165.1    | Ca_kabuli_chr06 | 29667435                | CC                              | AA              | 1946867400               |
| SNP_P4_83988_29668972 | NC_021165.1    | Ca_kabuli_chr06 | 29668972                | GG                              | TT              | 1946867401               |

| SNPs IDs              | Chromosome IDs | Chromosomes     | Physical positions (bp) | CDC Frontier (Reference genome) | (ILWC46 & LPNB) | NCBI SNPdb Accession IDs |
|-----------------------|----------------|-----------------|-------------------------|---------------------------------|-----------------|--------------------------|
| SNP_P4_83990_29669051 | NC_021165.1    | Ca_kabuli_chr06 | 29669051                | GG                              | TT              | 1946867403               |
| SNP_P4_83991_29669062 | NC_021165.1    | Ca_kabuli_chr06 | 29669062                | CC                              | TT              | 1946867405               |
| SNP_P4_83992_29669192 | NC_021165.1    | Ca_kabuli_chr06 | 29669192                | GG                              | AA              | 1946867407               |
| SNP_P4_83993_29669216 | NC_021165.1    | Ca_kabuli_chr06 | 29669216                | CC                              | AA              | 1946867409               |
| SNP_P4_83994_29669337 | NC_021165.1    | Ca_kabuli_chr06 | 29669337                | CC                              | TT              | 1946867411               |
| SNP_P4_83995_29678351 | NC_021165.1    | Ca_kabuli_chr06 | 29678351                | TT                              | GG              | 1946867413               |
| SNP_P4_83996_29678450 | NC_021165.1    | Ca_kabuli_chr06 | 29678450                | TT                              | CC              | 1946867415               |
| SNP_P4_83997_29684299 | NC_021165.1    | Ca_kabuli_chr06 | 29684299                | CC                              | TT              | 1946867417               |
| SNP_P4_83998_29684729 | NC_021165.1    | Ca_kabuli_chr06 | 29684729                | AA                              | GG              | 1946867419               |
| SNP_P4_83999_29686211 | NC_021165.1    | Ca_kabuli_chr06 | 29686211                | GG                              | AA              | 1946867421               |
| SNP_P4_84000_29686449 | NC_021165.1    | Ca_kabuli_chr06 | 29686449                | TT                              | CC              | 1946867423               |
| SNP_P4_84001_29686562 | NC_021165.1    | Ca_kabuli_chr06 | 29686562                | TT                              | CC              | 1946867425               |
| SNP_P4_84002_29687529 | NC_021165.1    | Ca_kabuli_chr06 | 29687529                | AA                              | GG              | 1946867426               |
| SNP_P4_84003_29687581 | NC_021165.1    | Ca_kabuli_chr06 | 29687581                | CC                              | TT              | 1946867428               |
| SNP_P4_84004_29711060 | NC_021165.1    | Ca_kabuli_chr06 | 29711060                | AA                              | CC              | 1946867430               |
| SNP_P4_84005_29711127 | NC_021165.1    | Ca_kabuli_chr06 | 29711127                | AA                              | GG              | 1946867432               |
| SNP_P4_84006_29711164 | NC_021165.1    | Ca_kabuli_chr06 | 29711164                | AA                              | GG              | 1946867434               |
| SNP_P4_84007_29711168 | NC_021165.1    | Ca_kabuli_chr06 | 29711168                | CC                              | AA              | 1946867436               |
| SNP_P4_84008_29711320 | NC_021165.1    | Ca_kabuli_chr06 | 29711320                | AA                              | GG              | 1946867438               |
| SNP_P4_84009_29711641 | NC_021165.1    | Ca_kabuli_chr06 | 29711641                | TT                              | GG              | 1946867440               |
| SNP_P4_84010_29713016 | NC_021165.1    | Ca_kabuli_chr06 | 29713016                | GG                              | AA              | 1946867443               |
| SNP_P4_84011_29713112 | NC_021165.1    | Ca_kabuli_chr06 | 29713112                | GG                              | AA              | 1946867444               |
| SNP_P4_84012_29713121 | NC_021165.1    | Ca_kabuli_chr06 | 29713121                | GG                              | AA              | 1946867446               |
| SNP_P4_84013_29713242 | NC_021165.1    | Ca_kabuli_chr06 | 29713242                | GG                              | CC              | 1946867448               |
| SNP_P4_84014_29713533 | NC_021165.1    | Ca_kabuli_chr06 | 29713533                | GG                              | AA              | 1946867450               |
| SNP_P4_84015_29713593 | NC_021165.1    | Ca_kabuli_chr06 | 29713593                | TT                              | GG              | 1946867452               |
| SNP_P4_84016_29713692 | NC_021165.1    | Ca_kabuli_chr06 | 29713692                | CC                              | TT              | 1946867454               |
| SNP_P4_84017_29713776 | NC_021165.1    | Ca_kabuli_chr06 | 29713776                | TT                              | GG              | 1946867456               |
| SNP_P4_84018_29713938 | NC_021165.1    | Ca_kabuli_chr06 | 29713938                | TT                              | GG              | 1946867457               |
| SNP_P4_84019_29713968 | NC_021165.1    | Ca_kabuli_chr06 | 29713968                | AA                              | GG              | 1946867459               |
| SNP_P4_84020_29714019 | NC_021165.1    | Ca_kabuli_chr06 | 29714019                | TT                              | CC              | 1946867461               |
| SNP_P4_84021_29715995 | NC_021165.1    | Ca_kabuli_chr06 | 29715995                | AA                              | CC              | 1946867462               |
| SNP_P4_84022_29716576 | NC_021165.1    | Ca_kabuli_chr06 | 29716576                | AA                              | GG              | 1946867463               |
| SNP_P4_84023_29716592 | NC_021165.1    | Ca_kabuli_chr06 | 29716592                | TT                              | AA              | 1946867464               |
| SNP_P4_84024_29724604 | NC_021165.1    | Ca_kabuli_chr06 | 29724604                | TT                              | AA              | 1946867465               |
| SNP_P4_84025_29724632 | NC_021165.1    | Ca_kabuli_chr06 | 29724632                | CC                              | GG              | 1946867466               |
| SNP_P4_84026_29724720 | NC_021165.1    | Ca_kabuli_chr06 | 29724720                | AA                              | TT              | 1946867467               |
| SNP_P4_84027_29724848 | NC_021165.1    | Ca_kabuli_chr06 | 29724848                | CC                              | TT              | 1946867468               |
| SNP_P4_84028_29724909 | NC_021165.1    | Ca_kabuli_chr06 | 29724909                | AA                              | TT              | 1946867469               |
| SNP_P4_84029_29747947 | NC_021165.1    | Ca_kabuli_chr06 | 29747947                | AA                              | CC              | 1946867470               |
| SNP_P4_84030_29778324 | NC_021165.1    | Ca_kabuli_chr06 | 29778324                | GG                              | AA              | 1946867471               |
| SNP_P4_84031_29784839 | NC_021165.1    | Ca_kabuli_chr06 | 29784839                | AA                              | GG              | 1946867472               |

| SNPs IDs              | Chromosome IDs | Chromosomes     | Physical positions (bp) | CDC Frontier (Reference genome) | (ILWC46 & LPNB) | NCBI SNPdb Accession IDs |
|-----------------------|----------------|-----------------|-------------------------|---------------------------------|-----------------|--------------------------|
| SNP_P4_84032_29784853 | NC_021165.1    | Ca_kabuli_chr06 | 29784853                | TT                              | CC              | 1946867473               |
| SNP_P4_84033_29784919 | NC_021165.1    | Ca_kabuli_chr06 | 29784919                | AA                              | GG              | 1946867474               |
| SNP_P4_84034_29784947 | NC_021165.1    | Ca_kabuli_chr06 | 29784947                | TT                              | AA              | 1946867475               |
| SNP_P4_84035_29784951 | NC_021165.1    | Ca_kabuli_chr06 | 29784951                | AA                              | GG              | 1946867476               |
| SNP_P4_84036_29785015 | NC_021165.1    | Ca_kabuli_chr06 | 29785015                | GG                              | AA              | 1946867477               |
| SNP_P4_84037_29785043 | NC_021165.1    | Ca_kabuli_chr06 | 29785043                | AA                              | TT              | 1946867478               |
| SNP_P4_84038_29785057 | NC_021165.1    | Ca_kabuli_chr06 | 29785057                | TT                              | GG              | 1946867479               |
| SNP_P4_84039_29785080 | NC_021165.1    | Ca_kabuli_chr06 | 29785080                | CC                              | TT              | 1946867480               |
| SNP_P4_84040_29785141 | NC_021165.1    | Ca_kabuli_chr06 | 29785141                | TT                              | GG              | 1946867481               |
| SNP_P4_84041_29785156 | NC_021165.1    | Ca_kabuli_chr06 | 29785156                | AA                              | TT              | 1946867482               |
| SNP_P4_84042_29785160 | NC_021165.1    | Ca_kabuli_chr06 | 29785160                | AA                              | GG              | 1946867484               |
| SNP_P4_84043_29785193 | NC_021165.1    | Ca_kabuli_chr06 | 29785193                | TT                              | AA              | 1946867486               |
| SNP_P4_84045_29823956 | NC_021165.1    | Ca_kabuli_chr06 | 29823956                | TT                              | AA              | 1946867488               |
| SNP_P4_84046_29823978 | NC_021165.1    | Ca_kabuli_chr06 | 29823978                | AA                              | GG              | 1946867490               |
| SNP_P4_84048_29833269 | NC_021165.1    | Ca_kabuli_chr06 | 29833269                | GG                              | TT              | 1946867492               |
| SNP_P4_84049_29836471 | NC_021165.1    | Ca_kabuli_chr06 | 29836471                | AA                              | TT              | 1946867494               |
| SNP_P4_84050_29852188 | NC_021165.1    | Ca_kabuli_chr06 | 29852188                | TT                              | CC              | 1946867496               |
| SNP_P4_84051_29853588 | NC_021165.1    | Ca_kabuli_chr06 | 29853588                | GG                              | AA              | 1946867498               |
| SNP_P4_84052_29868991 | NC_021165.1    | Ca_kabuli_chr06 | 29868991                | CC                              | TT              | 1946867500               |
| SNP_P4_84053_29904438 | NC_021165.1    | Ca_kabuli_chr06 | 29904438                | TT                              | AA              | 1946867502               |
| SNP_P4_84054_29909227 | NC_021165.1    | Ca_kabuli_chr06 | 29909227                | CC                              | TT              | 1946867504               |
| SNP_P4_84055_29909310 | NC_021165.1    | Ca_kabuli_chr06 | 29909310                | AA                              | GG              | 1946867506               |
| SNP_P4_84056_29909319 | NC_021165.1    | Ca_kabuli_chr06 | 29909319                | CC                              | AA              | 1946867508               |
| SNP_P4_84057_29909323 | NC_021165.1    | Ca_kabuli_chr06 | 29909323                | AA                              | TT              | 1946867510               |
| SNP_P4_84058_29909325 | NC_021165.1    | Ca_kabuli_chr06 | 29909325                | GG                              | TT              | 1946867511               |
| SNP_P4_84059_29909482 | NC_021165.1    | Ca_kabuli_chr06 | 29909482                | GG                              | CC              | 1946867513               |
| SNP_P4_84060_29909483 | NC_021165.1    | Ca_kabuli_chr06 | 29909483                | GG                              | AA              | 1946867515               |
| SNP_P4_84061_29909535 | NC_021165.1    | Ca_kabuli_chr06 | 29909535                | TT                              | CC              | 1946867517               |
| SNP_P4_84062_29909631 | NC_021165.1    | Ca_kabuli_chr06 | 29909631                | AA                              | GG              | 1946867519               |
| SNP_P4_84064_29940794 | NC_021165.1    | Ca_kabuli_chr06 | 29940794                | TT                              | CC              | 1946867521               |
| SNP_P4_84067_29969813 | NC_021165.1    | Ca_kabuli_chr06 | 29969813                | TT                              | CC              | 1946867523               |
| SNP_P4_84068_29994580 | NC_021165.1    | Ca_kabuli_chr06 | 29994580                | AA                              | TT              | 1946867525               |
| SNP_P4_84069_30057265 | NC_021165.1    | Ca_kabuli_chr06 | 30057265                | CC                              | TT              | 1946867527               |
| SNP_P4_84070_30088106 | NC_021165.1    | Ca_kabuli_chr06 | 30088106                | GG                              | AA              | 1946867529               |
| SNP_P4_84071_30093681 | NC_021165.1    | Ca_kabuli_chr06 | 30093681                | GG                              | CC              | 1946867531               |
| SNP_P4_84075_30135094 | NC_021165.1    | Ca_kabuli_chr06 | 30135094                | CC                              | GG              | 1946867533               |
| SNP_P4_84076_30136627 | NC_021165.1    | Ca_kabuli_chr06 | 30136627                | TT                              | AA              | 1946867535               |
| SNP_P4_84077_30136645 | NC_021165.1    | Ca_kabuli_chr06 | 30136645                | CC                              | TT              | 1946867537               |
| SNP_P4_84078_30136657 | NC_021165.1    | Ca_kabuli_chr06 | 30136657                | TT                              | GG              | 1946867539               |
| SNP_P4_84079_30136666 | NC_021165.1    | Ca_kabuli_chr06 | 30136666                | CC                              | TT              | 1946867541               |
| SNP_P4_84080_30136668 | NC_021165.1    | Ca_kabuli_chr06 | 30136668                | CC                              | TT              | 1946867543               |
| SNP_P4_84081_30146292 | NC_021165.1    | Ca_kabuli_chr06 | 30146292                | TT                              | AA              | 1946867545               |

| SNPs IDs              | Chromosome IDs | Chromosomes     | Physical positions (bp) | CDC Frontier (Reference genome) | (ILWC46 & LPNB) | NCBI SNPdb Accession IDs |
|-----------------------|----------------|-----------------|-------------------------|---------------------------------|-----------------|--------------------------|
| SNP_P4_84082_30149693 | NC_021165.1    | Ca_kabuli_chr06 | 30149693                | TT                              | CC              | 1946867547               |
| SNP_P4_84083_30149738 | NC_021165.1    | Ca_kabuli_chr06 | 30149738                | GG                              | AA              | 1946867549               |
| SNP_P4_84084_30149851 | NC_021165.1    | Ca_kabuli_chr06 | 30149851                | AA                              | GG              | 1946867550               |
| SNP_P4_84085_30149892 | NC_021165.1    | Ca_kabuli_chr06 | 30149892                | CC                              | TT              | 1946867552               |
| SNP_P4_84086_30149894 | NC_021165.1    | Ca_kabuli_chr06 | 30149894                | AA                              | TT              | 1946867554               |
| SNP_P4_84087_30150144 | NC_021165.1    | Ca_kabuli_chr06 | 30150144                | GG                              | AA              | 1946867557               |
| SNP_P4_84088_30151465 | NC_021165.1    | Ca_kabuli_chr06 | 30151465                | CC                              | TT              | 1946867558               |
| SNP_P4_84089_30151470 | NC_021165.1    | Ca_kabuli_chr06 | 30151470                | CC                              | TT              | 1946867560               |
| SNP_P4_84090_30151489 | NC_021165.1    | Ca_kabuli_chr06 | 30151489                | CC                              | TT              | 1946867562               |
| SNP_P4_84091_30151500 | NC_021165.1    | Ca_kabuli_chr06 | 30151500                | CC                              | TT              | 1946867564               |
| SNP_P4_84092_30151509 | NC_021165.1    | Ca_kabuli_chr06 | 30151509                | AA                              | GG              | 1946867566               |
| SNP_P4_84093_30151533 | NC_021165.1    | Ca_kabuli_chr06 | 30151533                | GG                              | AA              | 1946867568               |
| SNP_P4_84094_30151540 | NC_021165.1    | Ca_kabuli_chr06 | 30151540                | AA                              | GG              | 1946867570               |
| SNP_P4_84095_30151542 | NC_021165.1    | Ca_kabuli_chr06 | 30151542                | AA                              | GG              | 1946867572               |
| SNP_P4_84096_30151576 | NC_021165.1    | Ca_kabuli_chr06 | 30151576                | TT                              | CC              | 1946867574               |
| SNP_P4_84097_30151598 | NC_021165.1    | Ca_kabuli_chr06 | 30151598                | CC                              | TT              | 1946867576               |
| SNP_P4_84098_30151605 | NC_021165.1    | Ca_kabuli_chr06 | 30151605                | AA                              | GG              | 1946867578               |
| SNP_P4_84099_30153852 | NC_021165.1    | Ca_kabuli_chr06 | 30153852                | GG                              | AA              | 1946867580               |
| SNP_P4_84100_30155732 | NC_021165.1    | Ca_kabuli_chr06 | 30155732                | CC                              | TT              | 1946867582               |
| SNP_P4_84101_30155934 | NC_021165.1    | Ca_kabuli_chr06 | 30155934                | GG                              | AA              | 1946867583               |
| SNP_P4_84102_30159272 | NC_021165.1    | Ca_kabuli_chr06 | 30159272                | AA                              | TT              | 1946867585               |
| SNP_P4_84103_30159289 | NC_021165.1    | Ca_kabuli_chr06 | 30159289                | AA                              | CC              | 1946867587               |
| SNP_P4_84104_30159666 | NC_021165.1    | Ca_kabuli_chr06 | 30159666                | AA                              | GG              | 1946867589               |
| SNP_P4_84105_30159680 | NC_021165.1    | Ca_kabuli_chr06 | 30159680                | TT                              | CC              | 1946867591               |
| SNP_P4_84106_30164325 | NC_021165.1    | Ca_kabuli_chr06 | 30164325                | TT                              | CC              | 1946867593               |
| SNP_P4_84107_30165897 | NC_021165.1    | Ca_kabuli_chr06 | 30165897                | TT                              | GG              | 1946867595               |
| SNP_P4_84108_30165925 | NC_021165.1    | Ca_kabuli_chr06 | 30165925                | TT                              | CC              | 1946867597               |
| SNP_P4_84109_30165929 | NC_021165.1    | Ca_kabuli_chr06 | 30165929                | TT                              | GG              | 1946867599               |
| SNP_P4_84110_30165937 | NC_021165.1    | Ca_kabuli_chr06 | 30165937                | GG                              | AA              | 1946867601               |
| SNP_P4_84111_30166250 | NC_021165.1    | Ca_kabuli_chr06 | 30166250                | GG                              | AA              | 1946867603               |
| SNP_P4_84112_30166255 | NC_021165.1    | Ca_kabuli_chr06 | 30166255                | AA                              | GG              | 1946867605               |
| SNP_P4_84113_30166256 | NC_021165.1    | Ca_kabuli_chr06 | 30166256                | AA                              | GG              | 1946867607               |
| SNP_P4_84114_30167298 | NC_021165.1    | Ca_kabuli_chr06 | 30167298                | GG                              | AA              | 1946867609               |
| SNP_P4_84115_30167307 | NC_021165.1    | Ca_kabuli_chr06 | 30167307                | AA                              | GG              | 1946867611               |
| SNP_P4_84116_30167312 | NC_021165.1    | Ca_kabuli_chr06 | 30167312                | AA                              | GG              | 1946867613               |
| SNP_P4_84117_30167315 | NC_021165.1    | Ca_kabuli_chr06 | 30167315                | AA                              | CC              | 1946867615               |
| SNP_P4_84118_30167328 | NC_021165.1    | Ca_kabuli_chr06 | 30167328                | TT                              | CC              | 1946867617               |
| SNP_P4_84119_30167346 | NC_021165.1    | Ca_kabuli_chr06 | 30167346                | GG                              | AA              | 1946867619               |
| SNP_P4_84120_30167557 | NC_021165.1    | Ca_kabuli_chr06 | 30167557                | GG                              | AA              | 1946867620               |
| SNP_P4_84121_30170198 | NC_021165.1    | Ca_kabuli_chr06 | 30170198                | GG                              | AA              | 1946867622               |
| SNP_P4_84122_30170546 | NC_021165.1    | Ca_kabuli_chr06 | 30170546                | TT                              | CC              | 1946867624               |
| SNP_P4_84123_30170557 | NC_021165.1    | Ca_kabuli_chr06 | 30170557                | TT                              | CC              | 1946867626               |

| SNPs IDs              | Chromosome IDs | Chromosomes     | Physical positions (bp) | CDC Frontier (Reference genome) | (ILWC46 & LPNB) | NCBI SNPdb Accession IDs |
|-----------------------|----------------|-----------------|-------------------------|---------------------------------|-----------------|--------------------------|
| SNP_P4_84124_30170566 | NC_021165.1    | Ca_kabuli_chr06 | 30170566                | CC                              | TT              | 1946867628               |
| SNP_P4_84126_30201357 | NC_021165.1    | Ca_kabuli_chr06 | 30201357                | TT                              | CC              | 1946867630               |
| SNP_P4_84127_30203039 | NC_021165.1    | Ca_kabuli_chr06 | 30203039                | CC                              | TT              | 1946867632               |
| SNP_P4_84128_30253537 | NC_021165.1    | Ca_kabuli_chr06 | 30253537                | GG                              | AA              | 1946867634               |
| SNP_P4_84129_30258455 | NC_021165.1    | Ca_kabuli_chr06 | 30258455                | TT                              | CC              | 1946867635               |
| SNP_P4_84130_30264982 | NC_021165.1    | Ca_kabuli_chr06 | 30264982                | AA                              | CC              | 1946867637               |
| SNP_P4_84131_30265027 | NC_021165.1    | Ca_kabuli_chr06 | 30265027                | CC                              | TT              | 1946867639               |
| SNP_P4_84132_30265326 | NC_021165.1    | Ca_kabuli_chr06 | 30265326                | AA                              | TT              | 1946867641               |
| SNP_P4_84133_30267189 | NC_021165.1    | Ca_kabuli_chr06 | 30267189                | GG                              | AA              | 1946867643               |
| SNP_P4_84134_30310064 | NC_021165.1    | Ca_kabuli_chr06 | 30310064                | TT                              | CC              | 1946867645               |
| SNP_P4_84135_30310391 | NC_021165.1    | Ca_kabuli_chr06 | 30310391                | GG                              | TT              | 1946867647               |
| SNP_P4_84136_30339031 | NC_021165.1    | Ca_kabuli_chr06 | 30339031                | GG                              | CC              | 1946867648               |
| SNP_P4_84137_30344073 | NC_021165.1    | Ca_kabuli_chr06 | 30344073                | AA                              | GG              | 1946867650               |
| SNP_P4_84138_30357815 | NC_021165.1    | Ca_kabuli_chr06 | 30357815                | AA                              | TT              | 1946867652               |
| SNP_P4_84140_30365366 | NC_021165.1    | Ca_kabuli_chr06 | 30365366                | GG                              | TT              | 1946867654               |
| SNP_P4_84141_30383132 | NC_021165.1    | Ca_kabuli_chr06 | 30383132                | CC                              | TT              | 1946867656               |
| SNP_P4_84142_30383136 | NC_021165.1    | Ca_kabuli_chr06 | 30383136                | CC                              | AA              | 1946867658               |
| SNP_P4_84143_30383144 | NC_021165.1    | Ca_kabuli_chr06 | 30383144                | GG                              | AA              | 1946867660               |
| SNP_P4_84144_30383540 | NC_021165.1    | Ca_kabuli_chr06 | 30383540                | CC                              | TT              | 1946867662               |
| SNP_P4_84145_30399802 | NC_021165.1    | Ca_kabuli_chr06 | 30399802                | CC                              | TT              | 1946867664               |
| SNP_P4_84146_30401479 | NC_021165.1    | Ca_kabuli_chr06 | 30401479                | AA                              | TT              | 1946867666               |
| SNP_P4_84147_30415070 | NC_021165.1    | Ca_kabuli_chr06 | 30415070                | GG                              | AA              | 1946867668               |
| SNP_P4_84148_30419807 | NC_021165.1    | Ca_kabuli_chr06 | 30419807                | AA                              | TT              | 1946867670               |
| SNP_P4_84149_30429780 | NC_021165.1    | Ca_kabuli_chr06 | 30429780                | CC                              | TT              | 1946867672               |
| SNP_P4_84150_30442652 | NC_021165.1    | Ca_kabuli_chr06 | 30442652                | AA                              | GG              | 1946867674               |
| SNP_P4_84151_30454134 | NC_021165.1    | Ca_kabuli_chr06 | 30454134                | TT                              | CC              | 1946867676               |
| SNP_P4_84153_30463688 | NC_021165.1    | Ca_kabuli_chr06 | 30463688                | TT                              | GG              | 1946867678               |
| SNP_P4_84154_30480933 | NC_021165.1    | Ca_kabuli_chr06 | 30480933                | TT                              | AA              | 1946867680               |
| SNP_P4_84155_30499682 | NC_021165.1    | Ca_kabuli_chr06 | 30499682                | CC                              | TT              | 1946867682               |
| SNP_P4_84156_30499687 | NC_021165.1    | Ca_kabuli_chr06 | 30499687                | AA                              | GG              | 1946867683               |
| SNP_P4_84157_30501639 | NC_021165.1    | Ca_kabuli_chr06 | 30501639                | CC                              | TT              | 1946867685               |
| SNP_P4_84158_30516163 | NC_021165.1    | Ca_kabuli_chr06 | 30516163                | GG                              | AA              | 1946867687               |
| SNP_P4_84159_30525094 | NC_021165.1    | Ca_kabuli_chr06 | 30525094                | TT                              | CC              | 1946867689               |
| SNP_P4_84160_30525466 | NC_021165.1    | Ca_kabuli_chr06 | 30525466                | AA                              | CC              | 1946867692               |
| SNP_P4_84162_30584840 | NC_021165.1    | Ca_kabuli_chr06 | 30584840                | GG                              | AA              | 1946867694               |
| SNP_P4_84163_30584842 | NC_021165.1    | Ca_kabuli_chr06 | 30584842                | CC                              | AA              | 1946867696               |
| SNP_P4_84164_30587869 | NC_021165.1    | Ca_kabuli_chr06 | 30587869                | AA                              | GG              | 1946867698               |
| SNP_P4_84165_30587969 | NC_021165.1    | Ca_kabuli_chr06 | 30587969                | AA                              | GG              | 1946867700               |
| SNP_P4_84166_30588174 | NC_021165.1    | Ca_kabuli_chr06 | 30588174                | AA                              | CC              | 1946867702               |
| SNP_P4_84168_30588336 | NC_021165.1    | Ca_kabuli_chr06 | 30588336                | GG                              | AA              | 1946867704               |
| SNP_P4_84169_30588397 | NC_021165.1    | Ca_kabuli_chr06 | 30588397                | TT                              | CC              | 1946867706               |
| SNP_P4_84171_30618351 | NC_021165.1    | Ca_kabuli_chr06 | 30618351                | TT                              | GG              | 1946867708               |

| SNPs IDs              | Chromosome IDs | Chromosomes     | Physical positions (bp) | CDC Frontier (Reference genome) | (ILWC46 & LPNB) | NCBI SNPdb Accession IDs |
|-----------------------|----------------|-----------------|-------------------------|---------------------------------|-----------------|--------------------------|
| SNP_P4_84172_30618671 | NC_021165.1    | Ca_kabuli_chr06 | 30618671                | TT                              | CC              | 1946867710               |
| SNP_P4_84174_30638647 | NC_021165.1    | Ca_kabuli_chr06 | 30638647                | TT                              | CC              | 1946867712               |
| SNP_P4_84176_30666020 | NC_021165.1    | Ca_kabuli_chr06 | 30666020                | TT                              | CC              | 1946867714               |
| SNP_P4_84177_30678651 | NC_021165.1    | Ca_kabuli_chr06 | 30678651                | CC                              | AA              | 1946867716               |
| SNP_P4_84178_30678678 | NC_021165.1    | Ca_kabuli_chr06 | 30678678                | TT                              | AA              | 1946867718               |
| SNP_P4_84179_30678707 | NC_021165.1    | Ca_kabuli_chr06 | 30678707                | AA                              | GG              | 1946867720               |
| SNP_P4_84180_30678729 | NC_021165.1    | Ca_kabuli_chr06 | 30678729                | CC                              | TT              | 1946867722               |
| SNP_P4_84181_30678756 | NC_021165.1    | Ca_kabuli_chr06 | 30678756                | CC                              | TT              | 1946867724               |
| SNP_P4_84182_30678875 | NC_021165.1    | Ca_kabuli_chr06 | 30678875                | GG                              | CC              | 1946867726               |
| SNP_P4_84183_30678877 | NC_021165.1    | Ca_kabuli_chr06 | 30678877                | GG                              | TT              | 1946867728               |
| SNP_P4_84184_30678878 | NC_021165.1    | Ca_kabuli_chr06 | 30678878                | TT                              | GG              | 1946867730               |
| SNP_P4_84185_30678891 | NC_021165.1    | Ca_kabuli_chr06 | 30678891                | TT                              | GG              | 1946867732               |
| SNP_P4_84186_30678902 | NC_021165.1    | Ca_kabuli_chr06 | 30678902                | AA                              | GG              | 1946867734               |
| SNP_P4_84187_30678990 | NC_021165.1    | Ca_kabuli_chr06 | 30678990                | AA                              | TT              | 1946867736               |
| SNP_P4_84188_30679404 | NC_021165.1    | Ca_kabuli_chr06 | 30679404                | CC                              | GG              | 1946867738               |
| SNP_P4_84189_30679461 | NC_021165.1    | Ca_kabuli_chr06 | 30679461                | CC                              | TT              | 1946867740               |
| SNP_P4_84190_30682967 | NC_021165.1    | Ca_kabuli_chr06 | 30682967                | TT                              | CC              | 1946867742               |
| SNP_P4_84191_30683022 | NC_021165.1    | Ca_kabuli_chr06 | 30683022                | TT                              | CC              | 1946867744               |
| SNP_P4_84192_30683025 | NC_021165.1    | Ca_kabuli_chr06 | 30683025                | AA                              | GG              | 1946867746               |
| SNP_P4_84193_30691160 | NC_021165.1    | Ca_kabuli_chr06 | 30691160                | TT                              | CC              | 1946867748               |
| SNP_P4_84195_30701038 | NC_021165.1    | Ca_kabuli_chr06 | 30701038                | TT                              | CC              | 1946867750               |
| SNP_P4_84197_30725397 | NC_021165.1    | Ca_kabuli_chr06 | 30725397                | TT                              | AA              | 1946867752               |
| SNP_P4_84198_30736670 | NC_021165.1    | Ca_kabuli_chr06 | 30736670                | CC                              | TT              | 1946867754               |
| SNP_P4_84199_30752297 | NC_021165.1    | Ca_kabuli_chr06 | 30752297                | AA                              | GG              | 1946867756               |
| SNP_P4_84200_30752670 | NC_021165.1    | Ca_kabuli_chr06 | 30752670                | AA                              | CC              | 1946867758               |
| SNP_P4_84201_30752677 | NC_021165.1    | Ca_kabuli_chr06 | 30752677                | AA                              | CC              | 1946867760               |
| SNP_P4_84202_30752685 | NC_021165.1    | Ca_kabuli_chr06 | 30752685                | AA                              | GG              | 1946867762               |
| SNP_P4_84203_30752697 | NC_021165.1    | Ca_kabuli_chr06 | 30752697                | AA                              | TT              | 1946867764               |
| SNP_P4_84204_30752704 | NC_021165.1    | Ca_kabuli_chr06 | 30752704                | AA                              | GG              | 1946867766               |
| SNP_P4_84205_30752746 | NC_021165.1    | Ca_kabuli_chr06 | 30752746                | GG                              | AA              | 1946867768               |
| SNP_P4_84207_30845841 | NC_021165.1    | Ca_kabuli_chr06 | 30845841                | CC                              | TT              | 1946867770               |
| SNP_P4_84208_30845870 | NC_021165.1    | Ca_kabuli_chr06 | 30845870                | AA                              | GG              | 1946867772               |
| SNP_P4_84209_30845879 | NC_021165.1    | Ca_kabuli_chr06 | 30845879                | TT                              | CC              | 1946867774               |
| SNP_P4_84210_30845890 | NC_021165.1    | Ca_kabuli_chr06 | 30845890                | CC                              | TT              | 1946867776               |
| SNP_P4_84211_30845930 | NC_021165.1    | Ca_kabuli_chr06 | 30845930                | CC                              | TT              | 1946867778               |
| SNP_P4_84212_30856677 | NC_021165.1    | Ca_kabuli_chr06 | 30856677                | CC                              | TT              | 1946867780               |
| SNP_P4_84213_30859585 | NC_021165.1    | Ca_kabuli_chr06 | 30859585                | GG                              | AA              | 1946867782               |
| SNP_P4_84215_30881540 | NC_021165.1    | Ca_kabuli_chr06 | 30881540                | TT                              | AA              | 1946867784               |
| SNP_P4_84216_30908549 | NC_021165.1    | Ca_kabuli_chr06 | 30908549                | AA                              | GG              | 1946867786               |
| SNP_P4_84217_30988801 | NC_021165.1    | Ca_kabuli_chr06 | 30988801                | TT                              | GG              | 1946867788               |
| SNP_P4_84218_30988884 | NC_021165.1    | Ca_kabuli_chr06 | 30988884                | CC                              | TT              | 1946867790               |
| SNP_P4_84220_30988987 | NC_021165.1    | Ca_kabuli_chr06 | 30988987                | GG                              | TT              | 1946867792               |

| SNPs IDs              | Chromosome IDs | Chromosomes     | Physical positions (bp) | CDC Frontier (Reference genome) | (ILWC46 & LPNB) | NCBI SNPdb Accession IDs |
|-----------------------|----------------|-----------------|-------------------------|---------------------------------|-----------------|--------------------------|
| SNP_P4_84221_31007630 | NC_021165.1    | Ca_kabuli_chr06 | 31007630                | TT                              | AA              | 1946867794               |
| SNP_P4_84222_31033780 | NC_021165.1    | Ca_kabuli_chr06 | 31033780                | TT                              | CC              | 1946867796               |
| SNP_P4_84223_31040248 | NC_021165.1    | Ca_kabuli_chr06 | 31040248                | TT                              | AA              | 1946867798               |
| SNP_P4_84224_31041342 | NC_021165.1    | Ca_kabuli_chr06 | 31041342                | AA                              | GG              | 1946867800               |
| SNP_P4_84226_31079372 | NC_021165.1    | Ca_kabuli_chr06 | 31079372                | AA                              | TT              | 1946867802               |
| SNP_P4_84227_31079377 | NC_021165.1    | Ca_kabuli_chr06 | 31079377                | AA                              | CC              | 1946867804               |
| SNP_P4_84229_31096871 | NC_021165.1    | Ca_kabuli_chr06 | 31096871                | CC                              | AA              | 1946867806               |
| SNP_P4_84230_31096873 | NC_021165.1    | Ca_kabuli_chr06 | 31096873                | AA                              | GG              | 1946867808               |
| SNP_P4_84231_31097002 | NC_021165.1    | Ca_kabuli_chr06 | 31097002                | AA                              | TT              | 1946867810               |
| SNP_P4_84232_31097018 | NC_021165.1    | Ca_kabuli_chr06 | 31097018                | CC                              | TT              | 1946867812               |
| SNP_P4_84233_31097043 | NC_021165.1    | Ca_kabuli_chr06 | 31097043                | TT                              | CC              | 1946867814               |
| SNP_P4_84235_31097088 | NC_021165.1    | Ca_kabuli_chr06 | 31097088                | GG                              | TT              | 1946867815               |
| SNP_P4_84237_31097195 | NC_021165.1    | Ca_kabuli_chr06 | 31097195                | CC                              | GG              | 1946867817               |
| SNP_P4_84239_31097321 | NC_021165.1    | Ca_kabuli_chr06 | 31097321                | GG                              | AA              | 1946867819               |
| SNP_P4_84240_31097404 | NC_021165.1    | Ca_kabuli_chr06 | 31097404                | TT                              | AA              | 1946867821               |
| SNP_P4_84241_31097425 | NC_021165.1    | Ca_kabuli_chr06 | 31097425                | AA                              | GG              | 1946867823               |
| SNP_P4_84242_31097492 | NC_021165.1    | Ca_kabuli_chr06 | 31097492                | TT                              | CC              | 1946867825               |
| SNP_P4_84243_31097583 | NC_021165.1    | Ca_kabuli_chr06 | 31097583                | GG                              | CC              | 1946867827               |
| SNP_P4_84244_31097606 | NC_021165.1    | Ca_kabuli_chr06 | 31097606                | CC                              | TT              | 1946867829               |
| SNP_P4_84245_31097617 | NC_021165.1    | Ca_kabuli_chr06 | 31097617                | CC                              | TT              | 1946867831               |
| SNP_P4_84246_31097625 | NC_021165.1    | Ca_kabuli_chr06 | 31097625                | TT                              | GG              | 1946867833               |
| SNP_P4_84247_31097626 | NC_021165.1    | Ca_kabuli_chr06 | 31097626                | TT                              | CC              | 1946867835               |
| SNP_P4_84248_31097688 | NC_021165.1    | Ca_kabuli_chr06 | 31097688                | TT                              | GG              | 1946867837               |
| SNP_P4_84249_31099455 | NC_021165.1    | Ca_kabuli_chr06 | 31099455                | TT                              | AA              | 1946867839               |
| SNP_P4_84251_31099590 | NC_021165.1    | Ca_kabuli_chr06 | 31099590                | TT                              | CC              | 1946867841               |
| SNP_P4_84252_31099616 | NC_021165.1    | Ca_kabuli_chr06 | 31099616                | AA                              | GG              | 1946867843               |
| SNP_P4_84253_31099641 | NC_021165.1    | Ca_kabuli_chr06 | 31099641                | TT                              | CC              | 1946867845               |
| SNP_P4_84254_31121051 | NC_021165.1    | Ca_kabuli_chr06 | 31121051                | CC                              | TT              | 1946867847               |
| SNP_P4_84255_31121076 | NC_021165.1    | Ca_kabuli_chr06 | 31121076                | TT                              | CC              | 1946867849               |
| SNP_P4_84256_31121569 | NC_021165.1    | Ca_kabuli_chr06 | 31121569                | GG                              | CC              | 1946867851               |
| SNP_P4_84257_31121576 | NC_021165.1    | Ca_kabuli_chr06 | 31121576                | GG                              | CC              | 1946867853               |
| SNP_P4_84258_31121581 | NC_021165.1    | Ca_kabuli_chr06 | 31121581                | AA                              | GG              | 1946867855               |
| SNP_P4_84259_31121608 | NC_021165.1    | Ca_kabuli_chr06 | 31121608                | TT                              | CC              | 1946867857               |
| SNP_P4_84260_31122922 | NC_021165.1    | Ca_kabuli_chr06 | 31122922                | TT                              | CC              | 1946867859               |
| SNP_P4_84261_31123575 | NC_021165.1    | Ca_kabuli_chr06 | 31123575                | TT                              | CC              | 1946867862               |
| SNP_P4_84262_31123692 | NC_021165.1    | Ca_kabuli_chr06 | 31123692                | AA                              | GG              | 1946867864               |
| SNP_P4_84263_31131495 | NC_021165.1    | Ca_kabuli_chr06 | 31131495                | GG                              | AA              | 1946867866               |
| SNP_P4_84264_31132783 | NC_021165.1    | Ca_kabuli_chr06 | 31132783                | AA                              | GG              | 1946867868               |
| SNP_P4_84266_31153644 | NC_021165.1    | Ca_kabuli_chr06 | 31153644                | TT                              | CC              | 1946867870               |
| SNP_P4_84267_31153992 | NC_021165.1    | Ca_kabuli_chr06 | 31153992                | AA                              | CC              | 1946867872               |
| SNP_P4_84268_31155260 | NC_021165.1    | Ca_kabuli_chr06 | 31155260                | AA                              | GG              | 1946867874               |
| SNP_P4_84269_31155646 | NC_021165.1    | Ca_kabuli_chr06 | 31155646                | AA                              | TT              | 1946867876               |



| SNPs IDs              | Chromosome IDs | Chromosomes     | Physical positions (bp) | CDC Frontier (Reference genome) | (ILWC46 & LPNB) | NCBI SNPdb Accession IDs |
|-----------------------|----------------|-----------------|-------------------------|---------------------------------|-----------------|--------------------------|
| SNP_P4_84270_31162916 | NC_021165.1    | Ca_kabuli_chr06 | 31162916                | GG                              | AA              | 1946867878               |
| SNP_P4_84271_31162958 | NC_021165.1    | Ca_kabuli_chr06 | 31162958                | TT                              | CC              | 1946867880               |
| SNP_P4_84272_31163057 | NC_021165.1    | Ca_kabuli_chr06 | 31163057                | GG                              | TT              | 1946867882               |
| SNP_P4_84273_31163060 | NC_021165.1    | Ca_kabuli_chr06 | 31163060                | GG                              | AA              | 1946867884               |
| SNP_P4_84274_31163108 | NC_021165.1    | Ca_kabuli_chr06 | 31163108                | AA                              | GG              | 1946867886               |
| SNP_P4_84275_31163127 | NC_021165.1    | Ca_kabuli_chr06 | 31163127                | CC                              | TT              | 1946867888               |
| SNP_P4_84276_31163143 | NC_021165.1    | Ca_kabuli_chr06 | 31163143                | TT                              | CC              | 1946867890               |
| SNP_P4_84277_31163144 | NC_021165.1    | Ca_kabuli_chr06 | 31163144                | GG                              | AA              | 1946867892               |
| SNP_P4_84278_31163158 | NC_021165.1    | Ca_kabuli_chr06 | 31163158                | CC                              | AA              | 1946867894               |
| SNP_P4_84279_31163855 | NC_021165.1    | Ca_kabuli_chr06 | 31163855                | TT                              | GG              | 1946867896               |
| SNP_P4_84280_31168306 | NC_021165.1    | Ca_kabuli_chr06 | 31168306                | AA                              | GG              | 1946867898               |
| SNP_P4_84281_31168649 | NC_021165.1    | Ca_kabuli_chr06 | 31168649                | TT                              | GG              | 1946867900               |
| SNP_P4_84282_31168674 | NC_021165.1    | Ca_kabuli_chr06 | 31168674                | TT                              | CC              | 1946867902               |
| SNP_P4_84283_31168731 | NC_021165.1    | Ca_kabuli_chr06 | 31168731                | AA                              | GG              | 1946867904               |
| SNP_P4_84284_31168835 | NC_021165.1    | Ca_kabuli_chr06 | 31168835                | TT                              | CC              | 1946867907               |
| SNP_P4_84285_31168838 | NC_021165.1    | Ca_kabuli_chr06 | 31168838                | TT                              | AA              | 1946867909               |
| SNP_P4_84286_31168875 | NC_021165.1    | Ca_kabuli_chr06 | 31168875                | CC                              | AA              | 1946867911               |
| SNP_P4_84287_31168902 | NC_021165.1    | Ca_kabuli_chr06 | 31168902                | TT                              | AA              | 1946867913               |
| SNP_P4_84288_31168904 | NC_021165.1    | Ca_kabuli_chr06 | 31168904                | CC                              | TT              | 1946867915               |
| SNP_P4_84289_31168932 | NC_021165.1    | Ca_kabuli_chr06 | 31168932                | GG                              | AA              | 1946867917               |
| SNP_P4_84290_31168976 | NC_021165.1    | Ca_kabuli_chr06 | 31168976                | CC                              | TT              | 1946867920               |
| SNP_P4_84291_31169006 | NC_021165.1    | Ca_kabuli_chr06 | 31169006                | CC                              | AA              | 1946867922               |
| SNP_P4_84292_31169044 | NC_021165.1    | Ca_kabuli_chr06 | 31169044                | AA                              | CC              | 1946867925               |
| SNP_P4_84293_31169057 | NC_021165.1    | Ca_kabuli_chr06 | 31169057                | GG                              | AA              | 1946867927               |
| SNP_P4_84294_31169088 | NC_021165.1    | Ca_kabuli_chr06 | 31169088                | GG                              | AA              | 1946867929               |
| SNP_P4_84295_31169102 | NC_021165.1    | Ca_kabuli_chr06 | 31169102                | AA                              | GG              | 1946867931               |
| SNP_P4_84296_31180115 | NC_021165.1    | Ca_kabuli_chr06 | 31180115                | AA                              | TT              | 1946867933               |
| SNP_P4_84297_31180129 | NC_021165.1    | Ca_kabuli_chr06 | 31180129                | GG                              | TT              | 1946867935               |
| SNP_P4_84298_31180133 | NC_021165.1    | Ca_kabuli_chr06 | 31180133                | AA                              | GG              | 1946867937               |
| SNP_P4_84299_31183764 | NC_021165.1    | Ca_kabuli_chr06 | 31183764                | GG                              | AA              | 1946867939               |
| SNP_P4_84300_31184208 | NC_021165.1    | Ca_kabuli_chr06 | 31184208                | CC                              | GG              | 1946867941               |
| SNP_P4_84301_31184218 | NC_021165.1    | Ca_kabuli_chr06 | 31184218                | AA                              | GG              | 1946867943               |
| SNP_P4_84302_31184278 | NC_021165.1    | Ca_kabuli_chr06 | 31184278                | AA                              | GG              | 1946867945               |
| SNP_P4_84303_31184298 | NC_021165.1    | Ca_kabuli_chr06 | 31184298                | AA                              | CC              | 1946867947               |
| SNP_P4_84304_31185419 | NC_021165.1    | Ca_kabuli_chr06 | 31185419                | GG                              | TT              | 1946867949               |
| SNP_P4_84305_31187319 | NC_021165.1    | Ca_kabuli_chr06 | 31187319                | TT                              | CC              | 1946867951               |
| SNP_P4_84306_31187320 | NC_021165.1    | Ca_kabuli_chr06 | 31187320                | GG                              | AA              | 1946867953               |
| SNP_P4_84307_31187332 | NC_021165.1    | Ca_kabuli_chr06 | 31187332                | GG                              | AA              | 1946867955               |
| SNP_P4_84308_31187337 | NC_021165.1    | Ca_kabuli_chr06 | 31187337                | CC                              | TT              | 1946867957               |
| SNP_P4_84309_31187362 | NC_021165.1    | Ca_kabuli_chr06 | 31187362                | GG                              | TT              | 1946867959               |
| SNP_P4_84310_31187367 | NC_021165.1    | Ca_kabuli_chr06 | 31187367                | TT                              | AA              | 1946867961               |
| SNP_P4_84311_31187391 | NC_021165.1    | Ca_kabuli_chr06 | 31187391                | GG                              | AA              | 1946867963               |

| SNPs IDs              | Chromosome IDs | Chromosomes     | Physical positions (bp) | CDC Frontier (Reference genome) | (ILWC46 & LPNB) | NCBI SNPdb Accession IDs |
|-----------------------|----------------|-----------------|-------------------------|---------------------------------|-----------------|--------------------------|
| SNP_P4_84312_31187409 | NC_021165.1    | Ca_kabuli_chr06 | 31187409                | AA                              | GG              | 1946867965               |
| SNP_P4_84313_31187434 | NC_021165.1    | Ca_kabuli_chr06 | 31187434                | AA                              | CC              | 1946867967               |
| SNP_P4_84314_31187470 | NC_021165.1    | Ca_kabuli_chr06 | 31187470                | CC                              | GG              | 1946867969               |
| SNP_P4_84315_31187582 | NC_021165.1    | Ca_kabuli_chr06 | 31187582                | AA                              | GG              | 1946867971               |
| SNP_P4_84316_31187584 | NC_021165.1    | Ca_kabuli_chr06 | 31187584                | AA                              | TT              | 1946867973               |
| SNP_P4_84317_31188007 | NC_021165.1    | Ca_kabuli_chr06 | 31188007                | GG                              | AA              | 1946867975               |
| SNP_P4_84318_31195110 | NC_021165.1    | Ca_kabuli_chr06 | 31195110                | TT                              | AA              | 1946867977               |
| SNP_P4_84319_31195368 | NC_021165.1    | Ca_kabuli_chr06 | 31195368                | GG                              | AA              | 1946867980               |
| SNP_P4_84320_31195403 | NC_021165.1    | Ca_kabuli_chr06 | 31195403                | CC                              | TT              | 1946867982               |
| SNP_P4_84321_31195404 | NC_021165.1    | Ca_kabuli_chr06 | 31195404                | CC                              | TT              | 1946867983               |
| SNP_P4_84322_31211233 | NC_021165.1    | Ca_kabuli_chr06 | 31211233                | CC                              | AA              | 1946867985               |
| SNP_P4_84325_31273999 | NC_021165.1    | Ca_kabuli_chr06 | 31273999                | TT                              | CC              | 1946867987               |
| SNP_P4_84326_31274546 | NC_021165.1    | Ca_kabuli_chr06 | 31274546                | CC                              | TT              | 1946867989               |
| SNP_P4_84328_31292919 | NC_021165.1    | Ca_kabuli_chr06 | 31292919                | TT                              | AA              | 1946867991               |
| SNP_P4_84329_31297950 | NC_021165.1    | Ca_kabuli_chr06 | 31297950                | AA                              | GG              | 1946867993               |
| SNP_P4_84330_31297984 | NC_021165.1    | Ca_kabuli_chr06 | 31297984                | TT                              | CC              | 1946867995               |
| SNP_P4_84331_31298846 | NC_021165.1    | Ca_kabuli_chr06 | 31298846                | TT                              | GG              | 1946867997               |
| SNP_P4_84332_31303541 | NC_021165.1    | Ca_kabuli_chr06 | 31303541                | TT                              | AA              | 1946867999               |
| SNP_P4_84333_31303542 | NC_021165.1    | Ca_kabuli_chr06 | 31303542                | GG                              | CC              | 1946868001               |
| SNP_P4_84334_31331495 | NC_021165.1    | Ca_kabuli_chr06 | 31331495                | TT                              | CC              | 1946868003               |
| SNP_P4_84335_31331862 | NC_021165.1    | Ca_kabuli_chr06 | 31331862                | AA                              | GG              | 1946868005               |
| SNP_P4_84337_31337797 | NC_021165.1    | Ca_kabuli_chr06 | 31337797                | CC                              | TT              | 1946868007               |
| SNP_P4_84338_31344232 | NC_021165.1    | Ca_kabuli_chr06 | 31344232                | GG                              | TT              | 1946868009               |
| SNP_P4_84339_31370847 | NC_021165.1    | Ca_kabuli_chr06 | 31370847                | TT                              | AA              | 1946868011               |
| SNP_P4_84340_31371489 | NC_021165.1    | Ca_kabuli_chr06 | 31371489                | AA                              | GG              | 1946868013               |
| SNP_P4_84341_31371490 | NC_021165.1    | Ca_kabuli_chr06 | 31371490                | GG                              | AA              | 1946868015               |
| SNP_P4_84342_31371502 | NC_021165.1    | Ca_kabuli_chr06 | 31371502                | GG                              | AA              | 1946868017               |
| SNP_P4_84343_31371504 | NC_021165.1    | Ca_kabuli_chr06 | 31371504                | AA                              | GG              | 1946868019               |
| SNP_P4_84344_31371891 | NC_021165.1    | Ca_kabuli_chr06 | 31371891                | CC                              | TT              | 1946868021               |
| SNP_P4_84345_31372243 | NC_021165.1    | Ca_kabuli_chr06 | 31372243                | TT                              | CC              | 1946868023               |
| SNP_P4_84346_31372244 | NC_021165.1    | Ca_kabuli_chr06 | 31372244                | AA                              | GG              | 1946868025               |
| SNP_P4_84347_31372266 | NC_021165.1    | Ca_kabuli_chr06 | 31372266                | TT                              | CC              | 1946868027               |
| SNP_P4_84348_31372269 | NC_021165.1    | Ca_kabuli_chr06 | 31372269                | AA                              | GG              | 1946868029               |
| SNP_P4_84349_31372299 | NC_021165.1    | Ca_kabuli_chr06 | 31372299                | AA                              | GG              | 1946868031               |
| SNP_P4_84350_31372328 | NC_021165.1    | Ca_kabuli_chr06 | 31372328                | AA                              | CC              | 1946868033               |
| SNP_P4_84351_31372336 | NC_021165.1    | Ca_kabuli_chr06 | 31372336                | TT                              | CC              | 1946868035               |
| SNP_P4_84352_31372339 | NC_021165.1    | Ca_kabuli_chr06 | 31372339                | CC                              | TT              | 1946868037               |
| SNP_P4_84353_31372348 | NC_021165.1    | Ca_kabuli_chr06 | 31372348                | AA                              | GG              | 1946868039               |
| SNP_P4_84354_31372378 | NC_021165.1    | Ca_kabuli_chr06 | 31372378                | CC                              | TT              | 1946868041               |
| SNP_P4_84355_31380557 | NC_021165.1    | Ca_kabuli_chr06 | 31380557                | CC                              | GG              | 1946868043               |
| SNP_P4_84356_31390481 | NC_021165.1    | Ca_kabuli_chr06 | 31390481                | GG                              | AA              | 1946868045               |
| SNP_P4_84357_31407197 | NC_021165.1    | Ca_kabuli_chr06 | 31407197                | TT                              | CC              | 1946868047               |

| SNPs IDs              | Chromosome IDs | Chromosomes     | Physical positions (bp) | CDC Frontier (Reference genome) | (ILWC46 & LPNB) | NCBI SNPdb Accession IDs |
|-----------------------|----------------|-----------------|-------------------------|---------------------------------|-----------------|--------------------------|
| SNP_P4_84358_31413050 | NC_021165.1    | Ca_kabuli_chr06 | 31413050                | AA                              | GG              | 1946868049               |
| SNP_P4_84359_31416456 | NC_021165.1    | Ca_kabuli_chr06 | 31416456                | AA                              | TT              | 1946868051               |
| SNP_P4_84362_31430512 | NC_021165.1    | Ca_kabuli_chr06 | 31430512                | GG                              | AA              | 1946868053               |
| SNP_P4_84363_31430929 | NC_021165.1    | Ca_kabuli_chr06 | 31430929                | GG                              | CC              | 1946868055               |
| SNP_P4_84364_31431154 | NC_021165.1    | Ca_kabuli_chr06 | 31431154                | AA                              | GG              | 1946868057               |
| SNP_P4_84365_31431564 | NC_021165.1    | Ca_kabuli_chr06 | 31431564                | AA                              | GG              | 1946868059               |
| SNP_P4_84366_31470381 | NC_021165.1    | Ca_kabuli_chr06 | 31470381                | CC                              | AA              | 1946868061               |
| SNP_P4_84368_31472224 | NC_021165.1    | Ca_kabuli_chr06 | 31472224                | AA                              | CC              | 1946868063               |
| SNP_P4_84369_31472270 | NC_021165.1    | Ca_kabuli_chr06 | 31472270                | TT                              | CC              | 1946868065               |
| SNP_P4_84370_31472543 | NC_021165.1    | Ca_kabuli_chr06 | 31472543                | TT                              | CC              | 1946868067               |
| SNP_P4_84371_31472568 | NC_021165.1    | Ca_kabuli_chr06 | 31472568                | AA                              | CC              | 1946868069               |
| SNP_P4_84372_31497539 | NC_021165.1    | Ca_kabuli_chr06 | 31497539                | GG                              | CC              | 1946868071               |
| SNP_P4_84373_31522358 | NC_021165.1    | Ca_kabuli_chr06 | 31522358                | GG                              | AA              | 1946868073               |
| SNP_P4_84374_31537032 | NC_021165.1    | Ca_kabuli_chr06 | 31537032                | GG                              | AA              | 1946868075               |
| SNP_P4_84375_31545602 | NC_021165.1    | Ca_kabuli_chr06 | 31545602                | GG                              | AA              | 1946868077               |
| SNP_P4_84376_31545621 | NC_021165.1    | Ca_kabuli_chr06 | 31545621                | CC                              | AA              | 1946868080               |
| SNP_P4_84378_31599654 | NC_021165.1    | Ca_kabuli_chr06 | 31599654                | TT                              | CC              | 1946868082               |
| SNP_P4_84379_31599691 | NC_021165.1    | Ca_kabuli_chr06 | 31599691                | GG                              | TT              | 1946868084               |
| SNP_P4_84381_31604783 | NC_021165.1    | Ca_kabuli_chr06 | 31604783                | GG                              | AA              | 1946868086               |
| SNP_P4_84382_31604832 | NC_021165.1    | Ca_kabuli_chr06 | 31604832                | GG                              | AA              | 1946868087               |
| SNP_P4_84383_31604842 | NC_021165.1    | Ca_kabuli_chr06 | 31604842                | TT                              | AA              | 1946868089               |
| SNP_P4_84384_31604851 | NC_021165.1    | Ca_kabuli_chr06 | 31604851                | AA                              | GG              | 1946868091               |
| SNP_P4_84385_31604889 | NC_021165.1    | Ca_kabuli_chr06 | 31604889                | AA                              | GG              | 1946868094               |
| SNP_P4_84387_31608175 | NC_021165.1    | Ca_kabuli_chr06 | 31608175                | AA                              | TT              | 1946868096               |
| SNP_P4_84388_31608176 | NC_021165.1    | Ca_kabuli_chr06 | 31608176                | TT                              | CC              | 1946868098               |
| SNP_P4_84389_31614920 | NC_021165.1    | Ca_kabuli_chr06 | 31614920                | GG                              | AA              | 1946868100               |
| SNP_P4_84391_31632407 | NC_021165.1    | Ca_kabuli_chr06 | 31632407                | CC                              | TT              | 1946868102               |
| SNP_P4_84392_31632989 | NC_021165.1    | Ca_kabuli_chr06 | 31632989                | AA                              | TT              | 1946868104               |
| SNP_P4_84393_31638696 | NC_021165.1    | Ca_kabuli_chr06 | 31638696                | TT                              | GG              | 1946868107               |
| SNP_P4_84394_31659595 | NC_021165.1    | Ca_kabuli_chr06 | 31659595                | AA                              | GG              | 1946868109               |
| SNP_P4_84396_31707464 | NC_021165.1    | Ca_kabuli_chr06 | 31707464                | TT                              | AA              | 1946868111               |
| SNP_P4_84397_31710390 | NC_021165.1    | Ca_kabuli_chr06 | 31710390                | TT                              | GG              | 1946868113               |
| SNP_P4_84398_31712105 | NC_021165.1    | Ca_kabuli_chr06 | 31712105                | GG                              | TT              | 1946868115               |
| SNP_P4_84399_31717672 | NC_021165.1    | Ca_kabuli_chr06 | 31717672                | AA                              | GG              | 1946868117               |
| SNP_P4_84402_31741841 | NC_021165.1    | Ca_kabuli_chr06 | 31741841                | CC                              | TT              | 1946868119               |
| SNP_P4_84403_31741849 | NC_021165.1    | Ca_kabuli_chr06 | 31741849                | TT                              | GG              | 1946868121               |
| SNP_P4_84404_31741899 | NC_021165.1    | Ca_kabuli_chr06 | 31741899                | AA                              | GG              | 1946868123               |
| SNP_P4_84405_31742235 | NC_021165.1    | Ca_kabuli_chr06 | 31742235                | TT                              | CC              | 1946868125               |
| SNP_P4_84406_31742237 | NC_021165.1    | Ca_kabuli_chr06 | 31742237                | TT                              | GG              | 1946868127               |
| SNP_P4_84407_31744925 | NC_021165.1    | Ca_kabuli_chr06 | 31744925                | CC                              | AA              | 1946868129               |
| SNP_P4_84408_31744964 | NC_021165.1    | Ca_kabuli_chr06 | 31744964                | CC                              | TT              | 1946868131               |
| SNP_P4_84409_31747136 | NC_021165.1    | Ca_kabuli_chr06 | 31747136                | AA                              | GG              | 1946868133               |

| SNPs IDs              | Chromosome IDs | Chromosomes     | Physical positions (bp) | CDC Frontier (Reference genome) | (ILWC46 & LPNB) | NCBI SNPdb Accession IDs |
|-----------------------|----------------|-----------------|-------------------------|---------------------------------|-----------------|--------------------------|
| SNP_P4_84410_31753798 | NC_021165.1    | Ca_kabuli_chr06 | 31753798                | AA                              | GG              | 1946868136               |
| SNP_P4_84411_31753804 | NC_021165.1    | Ca_kabuli_chr06 | 31753804                | TT                              | CC              | 1946868138               |
| SNP_P4_84412_31753834 | NC_021165.1    | Ca_kabuli_chr06 | 31753834                | TT                              | CC              | 1946868140               |
| SNP_P4_84413_31753836 | NC_021165.1    | Ca_kabuli_chr06 | 31753836                | GG                              | AA              | 1946868142               |
| SNP_P4_84414_31753853 | NC_021165.1    | Ca_kabuli_chr06 | 31753853                | GG                              | TT              | 1946868144               |
| SNP_P4_84415_31753875 | NC_021165.1    | Ca_kabuli_chr06 | 31753875                | TT                              | GG              | 1946868146               |
| SNP_P4_84416_31753881 | NC_021165.1    | Ca_kabuli_chr06 | 31753881                | AA                              | GG              | 1946868148               |
| SNP_P4_84417_31754248 | NC_021165.1    | Ca_kabuli_chr06 | 31754248                | AA                              | GG              | 1946868150               |
| SNP_P4_84418_31769439 | NC_021165.1    | Ca_kabuli_chr06 | 31769439                | GG                              | TT              | 1946868152               |
| SNP_P4_84420_31770305 | NC_021165.1    | Ca_kabuli_chr06 | 31770305                | CC                              | AA              | 1946868154               |
| SNP_P4_84421_31770331 | NC_021165.1    | Ca_kabuli_chr06 | 31770331                | GG                              | AA              | 1946868156               |
| SNP_P4_84422_31784530 | NC_021165.1    | Ca_kabuli_chr06 | 31784530                | CC                              | AA              | 1946868158               |
| SNP_P4_84423_31789871 | NC_021165.1    | Ca_kabuli_chr06 | 31789871                | AA                              | GG              | 1946868160               |
| SNP_P4_84424_31793106 | NC_021165.1    | Ca_kabuli_chr06 | 31793106                | AA                              | CC              | 1946868162               |
| SNP_P4_84425_31830196 | NC_021165.1    | Ca_kabuli_chr06 | 31830196                | CC                              | TT              | 1946868164               |
| SNP_P4_84426_31835514 | NC_021165.1    | Ca_kabuli_chr06 | 31835514                | TT                              | CC              | 1946868167               |
| SNP_P4_84427_31859421 | NC_021165.1    | Ca_kabuli_chr06 | 31859421                | GG                              | TT              | 1946868169               |
| SNP_P4_84428_31867770 | NC_021165.1    | Ca_kabuli_chr06 | 31867770                | GG                              | AA              | 1946868171               |
| SNP_P4_84429_31922008 | NC_021165.1    | Ca_kabuli_chr06 | 31922008                | CC                              | TT              | 1946868173               |
| SNP_P4_84430_31939442 | NC_021165.1    | Ca_kabuli_chr06 | 31939442                | CC                              | AA              | 1946868175               |
| SNP_P4_84431_31939447 | NC_021165.1    | Ca_kabuli_chr06 | 31939447                | CC                              | TT              | 1946868177               |
| SNP_P4_84432_31939456 | NC_021165.1    | Ca_kabuli_chr06 | 31939456                | TT                              | CC              | 1946868179               |
| SNP_P4_84433_31939465 | NC_021165.1    | Ca_kabuli_chr06 | 31939465                | GG                              | AA              | 1946868181               |
| SNP_P4_84434_31939480 | NC_021165.1    | Ca_kabuli_chr06 | 31939480                | AA                              | GG              | 1946868183               |
| SNP_P4_84435_31939496 | NC_021165.1    | Ca_kabuli_chr06 | 31939496                | TT                              | CC              | 1946868185               |
| SNP_P4_84436_31939498 | NC_021165.1    | Ca_kabuli_chr06 | 31939498                | GG                              | AA              | 1946868187               |
| SNP_P4_84437_31939513 | NC_021165.1    | Ca_kabuli_chr06 | 31939513                | GG                              | AA              | 1946868190               |
| SNP_P4_84438_31939549 | NC_021165.1    | Ca_kabuli_chr06 | 31939549                | CC                              | TT              | 1946868192               |
| SNP_P4_84439_31939555 | NC_021165.1    | Ca_kabuli_chr06 | 31939555                | CC                              | TT              | 1946868194               |
| SNP_P4_84440_31939574 | NC_021165.1    | Ca_kabuli_chr06 | 31939574                | AA                              | GG              | 1946868196               |
| SNP_P4_84441_31939594 | NC_021165.1    | Ca_kabuli_chr06 | 31939594                | GG                              | AA              | 1946868198               |
| SNP_P4_84442_31939599 | NC_021165.1    | Ca_kabuli_chr06 | 31939599                | CC                              | AA              | 1946868200               |
| SNP_P4_84443_31939626 | NC_021165.1    | Ca_kabuli_chr06 | 31939626                | AA                              | GG              | 1946868202               |
| SNP_P4_84445_31939701 | NC_021165.1    | Ca_kabuli_chr06 | 31939701                | CC                              | TT              | 1946868204               |
| SNP_P4_84446_31939816 | NC_021165.1    | Ca_kabuli_chr06 | 31939816                | AA                              | GG              | 1946868206               |
| SNP_P4_84447_31939920 | NC_021165.1    | Ca_kabuli_chr06 | 31939920                | AA                              | GG              | 1946868208               |
| SNP_P4_84448_31939935 | NC_021165.1    | Ca_kabuli_chr06 | 31939935                | TT                              | CC              | 1946868210               |
| SNP_P4_84449_31944210 | NC_021165.1    | Ca_kabuli_chr06 | 31944210                | CC                              | TT              | 1946868212               |
| SNP_P4_84451_31947271 | NC_021165.1    | Ca_kabuli_chr06 | 31947271                | TT                              | CC              | 1946868214               |
| SNP_P4_84452_31947358 | NC_021165.1    | Ca_kabuli_chr06 | 31947358                | TT                              | AA              | 1946868216               |
| SNP_P4_84453_31947423 | NC_021165.1    | Ca_kabuli_chr06 | 31947423                | CC                              | TT              | 1946868218               |
| SNP_P4_84454_31947449 | NC_021165.1    | Ca_kabuli_chr06 | 31947449                | TT                              | CC              | 1946868220               |

| SNPs IDs              | Chromosome IDs | Chromosomes     | Physical positions (bp) | CDC Frontier (Reference genome) | (ILWC46 & LPNB) | NCBI SNPdb Accession IDs |
|-----------------------|----------------|-----------------|-------------------------|---------------------------------|-----------------|--------------------------|
| SNP_P4_84455_31947450 | NC_021165.1    | Ca_kabuli_chr06 | 31947450                | TT                              | CC              | 1946868222               |
| SNP_P4_84456_31947452 | NC_021165.1    | Ca_kabuli_chr06 | 31947452                | TT                              | CC              | 1946868224               |
| SNP_P4_84457_31947460 | NC_021165.1    | Ca_kabuli_chr06 | 31947460                | AA                              | GG              | 1946868226               |
| SNP_P4_84458_31947617 | NC_021165.1    | Ca_kabuli_chr06 | 31947617                | TT                              | CC              | 1946868228               |
| SNP_P4_84459_31950394 | NC_021165.1    | Ca_kabuli_chr06 | 31950394                | CC                              | TT              | 1946868230               |
| SNP_P4_84460_31960753 | NC_021165.1    | Ca_kabuli_chr06 | 31960753                | AA                              | CC              | 1946868232               |
| SNP_P4_84461_31960960 | NC_021165.1    | Ca_kabuli_chr06 | 31960960                | TT                              | AA              | 1946868234               |
| SNP_P4_84462_31989023 | NC_021165.1    | Ca_kabuli_chr06 | 31989023                | TT                              | GG              | 1946868236               |
| SNP_P4_84463_31995938 | NC_021165.1    | Ca_kabuli_chr06 | 31995938                | CC                              | TT              | 1946868238               |
| SNP_P4_84464_31998612 | NC_021165.1    | Ca_kabuli_chr06 | 31998612                | TT                              | CC              | 1946868240               |
| SNP_P4_84465_31998620 | NC_021165.1    | Ca_kabuli_chr06 | 31998620                | AA                              | TT              | 1946868242               |
| SNP_P4_84466_31998628 | NC_021165.1    | Ca_kabuli_chr06 | 31998628                | AA                              | TT              | 1946868244               |
| SNP_P4_84467_32007774 | NC_021165.1    | Ca_kabuli_chr06 | 32007774                | AA                              | TT              | 1946868246               |
| SNP_P4_84468_32015994 | NC_021165.1    | Ca_kabuli_chr06 | 32015994                | CC                              | TT              | 1946868248               |
| SNP_P4_84469_32059247 | NC_021165.1    | Ca_kabuli_chr06 | 32059247                | AA                              | TT              | 1946868250               |
| SNP_P4_84470_32059443 | NC_021165.1    | Ca_kabuli_chr06 | 32059443                | CC                              | AA              | 1946868252               |
| SNP_P4_84471_32059447 | NC_021165.1    | Ca_kabuli_chr06 | 32059447                | AA                              | CC              | 1946868254               |
| SNP_P4_84472_32059540 | NC_021165.1    | Ca_kabuli_chr06 | 32059540                | GG                              | AA              | 1946868256               |
| SNP_P4_84473_32059572 | NC_021165.1    | Ca_kabuli_chr06 | 32059572                | AA                              | TT              | 1946868258               |
| SNP_P4_84474_32059601 | NC_021165.1    | Ca_kabuli_chr06 | 32059601                | TT                              | GG              | 1946868260               |
| SNP_P4_84475_32059642 | NC_021165.1    | Ca_kabuli_chr06 | 32059642                | AA                              | GG              | 1946868262               |
| SNP_P4_84476_32059690 | NC_021165.1    | Ca_kabuli_chr06 | 32059690                | CC                              | AA              | 1946868264               |
| SNP_P4_84477_32093795 | NC_021165.1    | Ca_kabuli_chr06 | 32093795                | TT                              | AA              | 1946868266               |
| SNP_P4_84478_32096107 | NC_021165.1    | Ca_kabuli_chr06 | 32096107                | CC                              | TT              | 1946868268               |
| SNP_P4_84479_32105944 | NC_021165.1    | Ca_kabuli_chr06 | 32105944                | AA                              | GG              | 1946868270               |
| SNP_P4_84480_32124053 | NC_021165.1    | Ca_kabuli_chr06 | 32124053                | GG                              | AA              | 1946868272               |
| SNP_P4_84481_32124066 | NC_021165.1    | Ca_kabuli_chr06 | 32124066                | GG                              | AA              | 1946868274               |
| SNP_P4_84482_32124150 | NC_021165.1    | Ca_kabuli_chr06 | 32124150                | CC                              | TT              | 1946868276               |
| SNP_P4_84483_32124153 | NC_021165.1    | Ca_kabuli_chr06 | 32124153                | GG                              | TT              | 1946868278               |
| SNP_P4_84485_32124415 | NC_021165.1    | Ca_kabuli_chr06 | 32124415                | GG                              | CC              | 1946868280               |
| SNP_P4_84486_32124481 | NC_021165.1    | Ca_kabuli_chr06 | 32124481                | AA                              | GG              | 1946868282               |
| SNP_P4_84487_32149498 | NC_021165.1    | Ca_kabuli_chr06 | 32149498                | TT                              | AA              | 1946868284               |
| SNP_P4_84489_32182037 | NC_021165.1    | Ca_kabuli_chr06 | 32182037                | AA                              | GG              | 1946868286               |
| SNP_P4_84490_32187315 | NC_021165.1    | Ca_kabuli_chr06 | 32187315                | GG                              | TT              | 1946868288               |
| SNP_P4_84491_32194212 | NC_021165.1    | Ca_kabuli_chr06 | 32194212                | AA                              | GG              | 1946868290               |
| SNP_P4_84492_32194224 | NC_021165.1    | Ca_kabuli_chr06 | 32194224                | AA                              | GG              | 1946868292               |
| SNP_P4_84494_32194631 | NC_021165.1    | Ca_kabuli_chr06 | 32194631                | AA                              | GG              | 1946868294               |
| SNP_P4_84495_32194640 | NC_021165.1    | Ca_kabuli_chr06 | 32194640                | TT                              | CC              | 1946868296               |
| SNP_P4_84496_32194655 | NC_021165.1    | Ca_kabuli_chr06 | 32194655                | TT                              | AA              | 1946868298               |
| SNP_P4_84497_32194675 | NC_021165.1    | Ca_kabuli_chr06 | 32194675                | TT                              | CC              | 1946868300               |
| SNP_P4_84498_32194692 | NC_021165.1    | Ca_kabuli_chr06 | 32194692                | AA                              | GG              | 1946868302               |
| SNP_P4_84499_32194705 | NC_021165.1    | Ca_kabuli_chr06 | 32194705                | AA                              | TT              | 1946868304               |

| SNPs IDs              | Chromosome IDs | Chromosomes     | Physical positions (bp) | CDC Frontier (Reference genome) | (ILWC46 & LPNB) | NCBI SNPdb Accession IDs |
|-----------------------|----------------|-----------------|-------------------------|---------------------------------|-----------------|--------------------------|
| SNP_P4_84500_32194719 | NC_021165.1    | Ca_kabuli_chr06 | 32194719                | AA                              | TT              | 1946868306               |
| SNP_P4_84501_32194740 | NC_021165.1    | Ca_kabuli_chr06 | 32194740                | AA                              | GG              | 1946868308               |
| SNP_P4_84502_32194749 | NC_021165.1    | Ca_kabuli_chr06 | 32194749                | GG                              | AA              | 1946868310               |
| SNP_P4_84503_32194778 | NC_021165.1    | Ca_kabuli_chr06 | 32194778                | AA                              | GG              | 1946868312               |
| SNP_P4_84504_32195192 | NC_021165.1    | Ca_kabuli_chr06 | 32195192                | TT                              | CC              | 1946868314               |
| SNP_P4_84505_32195222 | NC_021165.1    | Ca_kabuli_chr06 | 32195222                | TT                              | CC              | 1946868316               |
| SNP_P4_84506_32197583 | NC_021165.1    | Ca_kabuli_chr06 | 32197583                | CC                              | TT              | 1946868318               |
| SNP_P4_84507_32216917 | NC_021165.1    | Ca_kabuli_chr06 | 32216917                | CC                              | AA              | 1946868320               |
| SNP_P4_84508_32217010 | NC_021165.1    | Ca_kabuli_chr06 | 32217010                | TT                              | CC              | 1946868323               |
| SNP_P4_84509_32217032 | NC_021165.1    | Ca_kabuli_chr06 | 32217032                | TT                              | CC              | 1946868325               |
| SNP_P4_84510_32217417 | NC_021165.1    | Ca_kabuli_chr06 | 32217417                | TT                              | CC              | 1946868327               |
| SNP_P4_84511_32217418 | NC_021165.1    | Ca_kabuli_chr06 | 32217418                | GG                              | AA              | 1946868329               |
| SNP_P4_84512_32217622 | NC_021165.1    | Ca_kabuli_chr06 | 32217622                | TT                              | CC              | 1946868331               |
| SNP_P4_84513_32227469 | NC_021165.1    | Ca_kabuli_chr06 | 32227469                | CC                              | TT              | 1946868333               |
| SNP_P4_84514_32232983 | NC_021165.1    | Ca_kabuli_chr06 | 32232983                | TT                              | CC              | 1946868335               |
| SNP_P4_84515_32257436 | NC_021165.1    | Ca_kabuli_chr06 | 32257436                | CC                              | GG              | 1946868337               |
| SNP_P4_84516_32261524 | NC_021165.1    | Ca_kabuli_chr06 | 32261524                | AA                              | TT              | 1946868339               |
| SNP_P4_84518_32298953 | NC_021165.1    | Ca_kabuli_chr06 | 32298953                | TT                              | CC              | 1946868341               |
| SNP_P4_84521_32320443 | NC_021165.1    | Ca_kabuli_chr06 | 32320443                | CC                              | AA              | 1946868343               |
| SNP_P4_84522_32327577 | NC_021165.1    | Ca_kabuli_chr06 | 32327577                | AA                              | GG              | 1946868345               |
| SNP_P4_84523_32350654 | NC_021165.1    | Ca_kabuli_chr06 | 32350654                | AA                              | TT              | 1946868347               |
| SNP_P4_84526_32371234 | NC_021165.1    | Ca_kabuli_chr06 | 32371234                | TT                              | CC              | 1946868350               |
| SNP_P4_84527_32371453 | NC_021165.1    | Ca_kabuli_chr06 | 32371453                | AA                              | TT              | 1946868352               |
| SNP_P4_84528_32371595 | NC_021165.1    | Ca_kabuli_chr06 | 32371595                | AA                              | CC              | 1946868354               |
| SNP_P4_84529_32372459 | NC_021165.1    | Ca_kabuli_chr06 | 32372459                | TT                              | CC              | 1946868356               |
| SNP_P4_84530_32372570 | NC_021165.1    | Ca_kabuli_chr06 | 32372570                | TT                              | CC              | 1946868358               |
| SNP_P4_84531_32372700 | NC_021165.1    | Ca_kabuli_chr06 | 32372700                | TT                              | CC              | 1946868360               |
| SNP_P4_84532_32372821 | NC_021165.1    | Ca_kabuli_chr06 | 32372821                | GG                              | AA              | 1946868362               |
| SNP_P4_84534_32372844 | NC_021165.1    | Ca_kabuli_chr06 | 32372844                | AA                              | GG              | 1946868364               |
| SNP_P4_84535_32372970 | NC_021165.1    | Ca_kabuli_chr06 | 32372970                | GG                              | AA              | 1946868366               |
| SNP_P4_84537_32373087 | NC_021165.1    | Ca_kabuli_chr06 | 32373087                | GG                              | TT              | 1946868369               |
| SNP_P4_84538_32373095 | NC_021165.1    | Ca_kabuli_chr06 | 32373095                | GG                              | CC              | 1946868371               |
| SNP_P4_84539_32373112 | NC_021165.1    | Ca_kabuli_chr06 | 32373112                | TT                              | CC              | 1946868373               |
| SNP_P4_84540_32373182 | NC_021165.1    | Ca_kabuli_chr06 | 32373182                | GG                              | TT              | 1946868375               |
| SNP_P4_84541_32373281 | NC_021165.1    | Ca_kabuli_chr06 | 32373281                | CC                              | TT              | 1946868377               |
| SNP_P4_84542_32373285 | NC_021165.1    | Ca_kabuli_chr06 | 32373285                | TT                              | CC              | 1946868379               |
| SNP_P4_84543_32373319 | NC_021165.1    | Ca_kabuli_chr06 | 32373319                | TT                              | GG              | 1946868381               |
| SNP_P4_84544_32373387 | NC_021165.1    | Ca_kabuli_chr06 | 32373387                | GG                              | AA              | 1946868383               |
| SNP_P4_84545_32373413 | NC_021165.1    | Ca_kabuli_chr06 | 32373413                | CC                              | TT              | 1946868385               |
| SNP_P4_84546_32373427 | NC_021165.1    | Ca_kabuli_chr06 | 32373427                | GG                              | AA              | 1946868387               |
| SNP_P4_84547_32373447 | NC_021165.1    | Ca_kabuli_chr06 | 32373447                | CC                              | TT              | 1946868389               |
| SNP_P4_84549_32373652 | NC_021165.1    | Ca_kabuli_chr06 | 32373652                | AA                              | TT              | 1946868391               |

| SNPs IDs              | Chromosome IDs | Chromosomes     | Physical positions (bp) | CDC Frontier (Reference genome) | (ILWC46 & LPNB) | NCBI SNPdb Accession IDs |
|-----------------------|----------------|-----------------|-------------------------|---------------------------------|-----------------|--------------------------|
| SNP_P4_84550_32373793 | NC_021165.1    | Ca_kabuli_chr06 | 32373793                | AA                              | TT              | 1946868393               |
| SNP_P4_84551_32379628 | NC_021165.1    | Ca_kabuli_chr06 | 32379628                | CC                              | TT              | 1946868395               |
| SNP_P4_84552_32379638 | NC_021165.1    | Ca_kabuli_chr06 | 32379638                | TT                              | CC              | 1946868397               |
| SNP_P4_84553_32391487 | NC_021165.1    | Ca_kabuli_chr06 | 32391487                | GG                              | CC              | 1946868400               |
| SNP_P4_84554_32391495 | NC_021165.1    | Ca_kabuli_chr06 | 32391495                | GG                              | AA              | 1946868402               |
| SNP_P4_84555_32391751 | NC_021165.1    | Ca_kabuli_chr06 | 32391751                | AA                              | CC              | 1946868403               |
| SNP_P4_84557_32391875 | NC_021165.1    | Ca_kabuli_chr06 | 32391875                | AA                              | TT              | 1946868405               |
| SNP_P4_84558_32391942 | NC_021165.1    | Ca_kabuli_chr06 | 32391942                | TT                              | CC              | 1946868407               |
| SNP_P4_84559_32392125 | NC_021165.1    | Ca_kabuli_chr06 | 32392125                | AA                              | TT              | 1946868409               |
| SNP_P4_84560_32392127 | NC_021165.1    | Ca_kabuli_chr06 | 32392127                | AA                              | GG              | 1946868411               |
| SNP_P4_84561_32392161 | NC_021165.1    | Ca_kabuli_chr06 | 32392161                | TT                              | GG              | 1946868413               |
| SNP_P4_84562_32392685 | NC_021165.1    | Ca_kabuli_chr06 | 32392685                | TT                              | CC              | 1946868415               |
| SNP_P4_84563_32393787 | NC_021165.1    | Ca_kabuli_chr06 | 32393787                | GG                              | CC              | 1946868417               |
| SNP_P4_84564_32406870 | NC_021165.1    | Ca_kabuli_chr06 | 32406870                | CC                              | TT              | 1946868419               |
| SNP_P4_84565_32407021 | NC_021165.1    | Ca_kabuli_chr06 | 32407021                | CC                              | TT              | 1946868421               |
| SNP_P4_84566_32407046 | NC_021165.1    | Ca_kabuli_chr06 | 32407046                | AA                              | GG              | 1946868423               |
| SNP_P4_84567_32450150 | NC_021165.1    | Ca_kabuli_chr06 | 32450150                | TT                              | CC              | 1946868425               |
| SNP_P4_84568_32466570 | NC_021165.1    | Ca_kabuli_chr06 | 32466570                | CC                              | TT              | 1946868427               |
| SNP_P4_84569_32476151 | NC_021165.1    | Ca_kabuli_chr06 | 32476151                | AA                              | TT              | 1946868429               |
| SNP_P4_84571_32481477 | NC_021165.1    | Ca_kabuli_chr06 | 32481477                | AA                              | GG              | 1946868431               |
| SNP_P4_84572_32500905 | NC_021165.1    | Ca_kabuli_chr06 | 32500905                | TT                              | CC              | 1946868433               |
| SNP_P4_84573_32501686 | NC_021165.1    | Ca_kabuli_chr06 | 32501686                | AA                              | GG              | 1946868435               |
| SNP_P4_84574_32508525 | NC_021165.1    | Ca_kabuli_chr06 | 32508525                | CC                              | TT              | 1946868437               |
| SNP_P4_84575_32508527 | NC_021165.1    | Ca_kabuli_chr06 | 32508527                | CC                              | TT              | 1946868439               |
| SNP_P4_84576_32508606 | NC_021165.1    | Ca_kabuli_chr06 | 32508606                | GG                              | AA              | 1946868441               |
| SNP_P4_84577_32508630 | NC_021165.1    | Ca_kabuli_chr06 | 32508630                | GG                              | AA              | 1946868443               |
| SNP_P4_84578_32508719 | NC_021165.1    | Ca_kabuli_chr06 | 32508719                | CC                              | TT              | 1946868445               |
| SNP_P4_84579_32508734 | NC_021165.1    | Ca_kabuli_chr06 | 32508734                | TT                              | GG              | 1946868447               |
| SNP_P4_84580_32508840 | NC_021165.1    | Ca_kabuli_chr06 | 32508840                | GG                              | AA              | 1946868449               |
| SNP_P4_84581_32508857 | NC_021165.1    | Ca_kabuli_chr06 | 32508857                | CC                              | TT              | 1946868451               |
| SNP_P4_84582_32508861 | NC_021165.1    | Ca_kabuli_chr06 | 32508861                | AA                              | CC              | 1946868453               |
| SNP_P4_84583_32512369 | NC_021165.1    | Ca_kabuli_chr06 | 32512369                | CC                              | AA              | 1946868455               |
| SNP_P4_84584_32512401 | NC_021165.1    | Ca_kabuli_chr06 | 32512401                | TT                              | AA              | 1946868457               |
| SNP_P4_84585_32512418 | NC_021165.1    | Ca_kabuli_chr06 | 32512418                | GG                              | AA              | 1946868459               |
| SNP_P4_84586_32512435 | NC_021165.1    | Ca_kabuli_chr06 | 32512435                | CC                              | AA              | 1946868461               |
| SNP_P4_84587_32512707 | NC_021165.1    | Ca_kabuli_chr06 | 32512707                | GG                              | AA              | 1946868463               |
| SNP_P4_84588_32512735 | NC_021165.1    | Ca_kabuli_chr06 | 32512735                | AA                              | GG              | 1946868465               |
| SNP_P4_84589_32513609 | NC_021165.1    | Ca_kabuli_chr06 | 32513609                | GG                              | AA              | 1946868467               |
| SNP_P4_84590_32513671 | NC_021165.1    | Ca_kabuli_chr06 | 32513671                | GG                              | AA              | 1946868469               |
| SNP_P4_84591_32513673 | NC_021165.1    | Ca_kabuli_chr06 | 32513673                | GG                              | AA              | 1946868471               |
| SNP_P4_84592_32513852 | NC_021165.1    | Ca_kabuli_chr06 | 32513852                | CC                              | TT              | 1946868473               |
| SNP_P4_84593_32513943 | NC_021165.1    | Ca_kabuli_chr06 | 32513943                | AA                              | CC              | 1946868476               |

| SNPs IDs              | Chromosome IDs | Chromosomes     | Physical positions (bp) | CDC Frontier (Reference genome) | (ILWC46 & LPNB) | NCBI SNPdb Accession IDs |
|-----------------------|----------------|-----------------|-------------------------|---------------------------------|-----------------|--------------------------|
| SNP_P4_84594_32514087 | NC_021165.1    | Ca_kabuli_chr06 | 32514087                | AA                              | GG              | 1946868478               |
| SNP_P4_84595_32519566 | NC_021165.1    | Ca_kabuli_chr06 | 32519566                | GG                              | AA              | 1946868480               |
| SNP_P4_84596_32519573 | NC_021165.1    | Ca_kabuli_chr06 | 32519573                | CC                              | GG              | 1946868482               |
| SNP_P4_84598_32519699 | NC_021165.1    | Ca_kabuli_chr06 | 32519699                | GG                              | AA              | 1946868484               |
| SNP_P4_84599_32519847 | NC_021165.1    | Ca_kabuli_chr06 | 32519847                | GG                              | AA              | 1946868486               |
| SNP_P4_84600_32520026 | NC_021165.1    | Ca_kabuli_chr06 | 32520026                | GG                              | CC              | 1946868488               |
| SNP_P4_84601_32520066 | NC_021165.1    | Ca_kabuli_chr06 | 32520066                | TT                              | CC              | 1946868490               |
| SNP_P4_84602_32520244 | NC_021165.1    | Ca_kabuli_chr06 | 32520244                | GG                              | AA              | 1946868492               |
| SNP_P4_84603_32520392 | NC_021165.1    | Ca_kabuli_chr06 | 32520392                | TT                              | CC              | 1946868494               |
| SNP_P4_84604_32520460 | NC_021165.1    | Ca_kabuli_chr06 | 32520460                | TT                              | AA              | 1946868496               |
| SNP_P4_84605_32520495 | NC_021165.1    | Ca_kabuli_chr06 | 32520495                | AA                              | CC              | 1946868498               |
| SNP_P4_84606_32520504 | NC_021165.1    | Ca_kabuli_chr06 | 32520504                | GG                              | AA              | 1946868500               |
| SNP_P4_84607_32520612 | NC_021165.1    | Ca_kabuli_chr06 | 32520612                | CC                              | GG              | 1946868502               |
| SNP_P4_84608_32520661 | NC_021165.1    | Ca_kabuli_chr06 | 32520661                | AA                              | TT              | 1946868504               |
| SNP_P4_84609_32520778 | NC_021165.1    | Ca_kabuli_chr06 | 32520778                | CC                              | TT              | 1946868506               |
| SNP_P4_84610_32521173 | NC_021165.1    | Ca_kabuli_chr06 | 32521173                | CC                              | TT              | 1946868508               |
| SNP_P4_84612_32521631 | NC_021165.1    | Ca_kabuli_chr06 | 32521631                | TT                              | AA              | 1946868510               |
| SNP_P4_84613_32521698 | NC_021165.1    | Ca_kabuli_chr06 | 32521698                | CC                              | AA              | 1946868512               |
| SNP_P4_84614_32521765 | NC_021165.1    | Ca_kabuli_chr06 | 32521765                | GG                              | AA              | 1946868514               |
| SNP_P4_84615_32521804 | NC_021165.1    | Ca_kabuli_chr06 | 32521804                | GG                              | AA              | 1946868516               |
| SNP_P4_84616_32522005 | NC_021165.1    | Ca_kabuli_chr06 | 32522005                | TT                              | CC              | 1946868518               |
| SNP_P4_84618_32522392 | NC_021165.1    | Ca_kabuli_chr06 | 32522392                | CC                              | TT              | 1946868520               |
| SNP_P4_84619_32539335 | NC_021165.1    | Ca_kabuli_chr06 | 32539335                | TT                              | AA              | 1946868522               |
| SNP_P4_84620_32539688 | NC_021165.1    | Ca_kabuli_chr06 | 32539688                | AA                              | TT              | 1946868524               |
| SNP_P4_84621_32539690 | NC_021165.1    | Ca_kabuli_chr06 | 32539690                | TT                              | AA              | 1946868526               |
| SNP_P4_84623_32539917 | NC_021165.1    | Ca_kabuli_chr06 | 32539917                | AA                              | GG              | 1946868528               |
| SNP_P4_84624_32539977 | NC_021165.1    | Ca_kabuli_chr06 | 32539977                | AA                              | TT              | 1946868530               |
| SNP_P4_84625_32540048 | NC_021165.1    | Ca_kabuli_chr06 | 32540048                | TT                              | GG              | 1946868532               |
| SNP_P4_84626_32540055 | NC_021165.1    | Ca_kabuli_chr06 | 32540055                | GG                              | TT              | 1946868534               |
| SNP_P4_84627_32540109 | NC_021165.1    | Ca_kabuli_chr06 | 32540109                | GG                              | AA              | 1946868536               |
| SNP_P4_84628_32540112 | NC_021165.1    | Ca_kabuli_chr06 | 32540112                | TT                              | AA              | 1946868538               |
| SNP_P4_84631_32540298 | NC_021165.1    | Ca_kabuli_chr06 | 32540298                | AA                              | GG              | 1946868540               |
| SNP_P4_84632_32540301 | NC_021165.1    | Ca_kabuli_chr06 | 32540301                | TT                              | CC              | 1946868542               |
| SNP_P4_84633_32540313 | NC_021165.1    | Ca_kabuli_chr06 | 32540313                | TT                              | CC              | 1946868544               |
| SNP_P4_84634_32540339 | NC_021165.1    | Ca_kabuli_chr06 | 32540339                | GG                              | CC              | 1946868546               |
| SNP_P4_84635_32540372 | NC_021165.1    | Ca_kabuli_chr06 | 32540372                | CC                              | TT              | 1946868548               |
| SNP_P4_84637_32540525 | NC_021165.1    | Ca_kabuli_chr06 | 32540525                | AA                              | TT              | 1946868550               |
| SNP_P4_84639_32540634 | NC_021165.1    | Ca_kabuli_chr06 | 32540634                | GG                              | CC              | 1946868552               |
| SNP_P4_84640_32540642 | NC_021165.1    | Ca_kabuli_chr06 | 32540642                | TT                              | CC              | 1946868554               |
| SNP_P4_84641_32540649 | NC_021165.1    | Ca_kabuli_chr06 | 32540649                | TT                              | CC              | 1946868556               |
| SNP_P4_84642_32540732 | NC_021165.1    | Ca_kabuli_chr06 | 32540732                | GG                              | AA              | 1946868558               |
| SNP_P4_84643_32540733 | NC_021165.1    | Ca_kabuli_chr06 | 32540733                | TT                              | CC              | 1946868560               |



| SNPs IDs              | Chromosome IDs | Chromosomes     | Physical positions (bp) | CDC Frontier (Reference genome) | (ILWC46 & LPNB) | NCBI SNPdb Accession IDs |
|-----------------------|----------------|-----------------|-------------------------|---------------------------------|-----------------|--------------------------|
| SNP_P4_84644_32552472 | NC_021165.1    | Ca_kabuli_chr06 | 32552472                | GG                              | AA              | 1946868562               |
| SNP_P4_84645_32552512 | NC_021165.1    | Ca_kabuli_chr06 | 32552512                | AA                              | TT              | 1946868564               |
| SNP_P4_84646_32552896 | NC_021165.1    | Ca_kabuli_chr06 | 32552896                | GG                              | AA              | 1946868566               |
| SNP_P4_84647_32553086 | NC_021165.1    | Ca_kabuli_chr06 | 32553086                | GG                              | AA              | 1946868568               |
| SNP_P4_84648_32553275 | NC_021165.1    | Ca_kabuli_chr06 | 32553275                | GG                              | AA              | 1946868570               |
| SNP_P4_84649_32553400 | NC_021165.1    | Ca_kabuli_chr06 | 32553400                | TT                              | CC              | 1946868572               |
| SNP_P4_84650_32553493 | NC_021165.1    | Ca_kabuli_chr06 | 32553493                | AA                              | CC              | 1946868574               |
| SNP_P4_84651_32556437 | NC_021165.1    | Ca_kabuli_chr06 | 32556437                | CC                              | TT              | 1946868576               |
| SNP_P4_84652_32556532 | NC_021165.1    | Ca_kabuli_chr06 | 32556532                | TT                              | GG              | 1946868578               |
| SNP_P4_84653_32556544 | NC_021165.1    | Ca_kabuli_chr06 | 32556544                | CC                              | TT              | 1946868580               |
| SNP_P4_84654_32571745 | NC_021165.1    | Ca_kabuli_chr06 | 32571745                | TT                              | AA              | 1946868582               |
| SNP_P4_84655_32571751 | NC_021165.1    | Ca_kabuli_chr06 | 32571751                | GG                              | AA              | 1946868584               |
| SNP_P4_84656_32572028 | NC_021165.1    | Ca_kabuli_chr06 | 32572028                | AA                              | TT              | 1946868586               |
| SNP_P4_84657_32572645 | NC_021165.1    | Ca_kabuli_chr06 | 32572645                | AA                              | GG              | 1946868588               |
| SNP_P4_84658_32576086 | NC_021165.1    | Ca_kabuli_chr06 | 32576086                | AA                              | TT              | 1946868590               |
| SNP_P4_84659_32609165 | NC_021165.1    | Ca_kabuli_chr06 | 32609165                | TT                              | CC              | 1946868592               |
| SNP_P4_84660_32609283 | NC_021165.1    | Ca_kabuli_chr06 | 32609283                | AA                              | TT              | 1946868594               |
| SNP_P4_84661_32609299 | NC_021165.1    | Ca_kabuli_chr06 | 32609299                | GG                              | AA              | 1946868596               |
| SNP_P4_84662_32609339 | NC_021165.1    | Ca_kabuli_chr06 | 32609339                | AA                              | GG              | 1946868598               |
| SNP_P4_84663_32609448 | NC_021165.1    | Ca_kabuli_chr06 | 32609448                | TT                              | CC              | 1946868600               |
| SNP_P4_84664_32609589 | NC_021165.1    | Ca_kabuli_chr06 | 32609589                | CC                              | GG              | 1946868602               |
| SNP_P4_84665_32609649 | NC_021165.1    | Ca_kabuli_chr06 | 32609649                | GG                              | CC              | 1946868604               |
| SNP_P4_84666_32609665 | NC_021165.1    | Ca_kabuli_chr06 | 32609665                | AA                              | GG              | 1946868606               |
| SNP_P4_84667_32609670 | NC_021165.1    | Ca_kabuli_chr06 | 32609670                | GG                              | AA              | 1946868608               |
| SNP_P4_84668_32609734 | NC_021165.1    | Ca_kabuli_chr06 | 32609734                | AA                              | CC              | 1946868610               |
| SNP_P4_84669_32609747 | NC_021165.1    | Ca_kabuli_chr06 | 32609747                | GG                              | AA              | 1946868612               |
| SNP_P4_84670_32609753 | NC_021165.1    | Ca_kabuli_chr06 | 32609753                | AA                              | GG              | 1946868613               |
| SNP_P4_84671_32611021 | NC_021165.1    | Ca_kabuli_chr06 | 32611021                | CC                              | AA              | 1946868615               |
| SNP_P4_84672_32611024 | NC_021165.1    | Ca_kabuli_chr06 | 32611024                | AA                              | GG              | 1946868617               |
| SNP_P4_84673_32615361 | NC_021165.1    | Ca_kabuli_chr06 | 32615361                | GG                              | AA              | 1946868619               |
| SNP_P4_84674_32615390 | NC_021165.1    | Ca_kabuli_chr06 | 32615390                | AA                              | TT              | 1946868621               |
| SNP_P4_84675_32615408 | NC_021165.1    | Ca_kabuli_chr06 | 32615408                | TT                              | CC              | 1946868623               |
| SNP_P4_84676_32615486 | NC_021165.1    | Ca_kabuli_chr06 | 32615486                | TT                              | CC              | 1946868625               |
| SNP_P4_84677_32615513 | NC_021165.1    | Ca_kabuli_chr06 | 32615513                | AA                              | GG              | 1946868627               |
| SNP_P4_84678_32615711 | NC_021165.1    | Ca_kabuli_chr06 | 32615711                | AA                              | TT              | 1946868629               |
| SNP_P4_84679_32615730 | NC_021165.1    | Ca_kabuli_chr06 | 32615730                | TT                              | CC              | 1946868631               |
| SNP_P4_84680_32615734 | NC_021165.1    | Ca_kabuli_chr06 | 32615734                | CC                              | TT              | 1946868633               |
| SNP_P4_84681_32615786 | NC_021165.1    | Ca_kabuli_chr06 | 32615786                | AA                              | GG              | 1946868635               |
| SNP_P4_84683_32623050 | NC_021165.1    | Ca_kabuli_chr06 | 32623050                | AA                              | GG              | 1946868637               |
| SNP_P4_84686_32630168 | NC_021165.1    | Ca_kabuli_chr06 | 32630168                | CC                              | TT              | 1946868639               |
| SNP_P4_84687_32630177 | NC_021165.1    | Ca_kabuli_chr06 | 32630177                | TT                              | CC              | 1946868641               |
| SNP_P4_84688_32630194 | NC_021165.1    | Ca_kabuli_chr06 | 32630194                | CC                              | TT              | 1946868643               |

| SNPs IDs              | Chromosome IDs | Chromosomes     | Physical positions (bp) | CDC Frontier (Reference genome) | (ILWC46 & LPNB) | NCBI SNPdb Accession IDs |
|-----------------------|----------------|-----------------|-------------------------|---------------------------------|-----------------|--------------------------|
| SNP_P4_84689_32630353 | NC_021165.1    | Ca_kabuli_chr06 | 32630353                | AA                              | GG              | 1946868645               |
| SNP_P4_84690_32630367 | NC_021165.1    | Ca_kabuli_chr06 | 32630367                | TT                              | CC              | 1946868647               |
| SNP_P4_84692_32630610 | NC_021165.1    | Ca_kabuli_chr06 | 32630610                | CC                              | GG              | 1946868649               |
| SNP_P4_84693_32635417 | NC_021165.1    | Ca_kabuli_chr06 | 32635417                | GG                              | AA              | 1946868651               |
| SNP_P4_84694_32635783 | NC_021165.1    | Ca_kabuli_chr06 | 32635783                | CC                              | TT              | 1946868653               |
| SNP_P4_84695_32637964 | NC_021165.1    | Ca_kabuli_chr06 | 32637964                | TT                              | CC              | 1946868655               |
| SNP_P4_84696_32658706 | NC_021165.1    | Ca_kabuli_chr06 | 32658706                | TT                              | CC              | 1946868657               |
| SNP_P4_84697_32670765 | NC_021165.1    | Ca_kabuli_chr06 | 32670765                | CC                              | TT              | 1946868659               |
| SNP_P4_84698_32688879 | NC_021165.1    | Ca_kabuli_chr06 | 32688879                | AA                              | CC              | 1946868661               |
| SNP_P4_84699_32688886 | NC_021165.1    | Ca_kabuli_chr06 | 32688886                | CC                              | TT              | 1946868663               |
| SNP_P4_84700_32689421 | NC_021165.1    | Ca_kabuli_chr06 | 32689421                | CC                              | TT              | 1946868665               |
| SNP_P4_84701_32689433 | NC_021165.1    | Ca_kabuli_chr06 | 32689433                | CC                              | AA              | 1946868667               |
| SNP_P4_84702_32689465 | NC_021165.1    | Ca_kabuli_chr06 | 32689465                | TT                              | CC              | 1946868669               |
| SNP_P4_84703_32689477 | NC_021165.1    | Ca_kabuli_chr06 | 32689477                | AA                              | GG              | 1946868671               |
| SNP_P4_84704_32690942 | NC_021165.1    | Ca_kabuli_chr06 | 32690942                | AA                              | CC              | 1946868673               |
| SNP_P4_84705_32690943 | NC_021165.1    | Ca_kabuli_chr06 | 32690943                | CC                              | TT              | 1946868675               |
| SNP_P4_84706_32698713 | NC_021165.1    | Ca_kabuli_chr06 | 32698713                | GG                              | TT              | 1946868677               |
| SNP_P4_84707_32730277 | NC_021165.1    | Ca_kabuli_chr06 | 32730277                | GG                              | AA              | 1946868679               |
| SNP_P4_84708_32737046 | NC_021165.1    | Ca_kabuli_chr06 | 32737046                | AA                              | TT              | 1946868681               |
| SNP_P4_84709_32780820 | NC_021165.1    | Ca_kabuli_chr06 | 32780820                | CC                              | TT              | 1946868683               |
| SNP_P4_84710_32805711 | NC_021165.1    | Ca_kabuli_chr06 | 32805711                | CC                              | TT              | 1946868685               |
| SNP_P4_84711_32812084 | NC_021165.1    | Ca_kabuli_chr06 | 32812084                | TT                              | AA              | 1946868687               |
| SNP_P4_84712_32846938 | NC_021165.1    | Ca_kabuli_chr06 | 32846938                | AA                              | GG              | 1946868689               |
| SNP_P4_84713_32846954 | NC_021165.1    | Ca_kabuli_chr06 | 32846954                | AA                              | GG              | 1946868691               |
| SNP_P4_84714_32868321 | NC_021165.1    | Ca_kabuli_chr06 | 32868321                | AA                              | CC              | 1946868692               |
| SNP_P4_84715_32877178 | NC_021165.1    | Ca_kabuli_chr06 | 32877178                | AA                              | GG              | 1946868694               |
| SNP_P4_84716_32888163 | NC_021165.1    | Ca_kabuli_chr06 | 32888163                | GG                              | CC              | 1946868696               |
| SNP_P4_84718_32932010 | NC_021165.1    | Ca_kabuli_chr06 | 32932010                | CC                              | AA              | 1946868698               |
| SNP_P4_84719_32932018 | NC_021165.1    | Ca_kabuli_chr06 | 32932018                | CC                              | TT              | 1946868700               |
| SNP_P4_84721_33032374 | NC_021165.1    | Ca_kabuli_chr06 | 33032374                | CC                              | TT              | 1946868702               |
| SNP_P4_84722_33039774 | NC_021165.1    | Ca_kabuli_chr06 | 33039774                | TT                              | CC              | 1946868704               |
| SNP_P4_84723_33039866 | NC_021165.1    | Ca_kabuli_chr06 | 33039866                | AA                              | GG              | 1946868706               |
| SNP_P4_84724_33039919 | NC_021165.1    | Ca_kabuli_chr06 | 33039919                | CC                              | TT              | 1946868708               |
| SNP_P4_84725_33039946 | NC_021165.1    | Ca_kabuli_chr06 | 33039946                | AA                              | GG              | 1946868710               |
| SNP_P4_84726_33039998 | NC_021165.1    | Ca_kabuli_chr06 | 33039998                | CC                              | TT              | 1946868712               |
| SNP_P4_84727_33042411 | NC_021165.1    | Ca_kabuli_chr06 | 33042411                | TT                              | CC              | 1946868714               |
| SNP_P4_84728_33055211 | NC_021165.1    | Ca_kabuli_chr06 | 33055211                | GG                              | AA              | 1946868716               |
| SNP_P4_84729_33055378 | NC_021165.1    | Ca_kabuli_chr06 | 33055378                | TT                              | AA              | 1946868718               |
| SNP_P4_84731_33055492 | NC_021165.1    | Ca_kabuli_chr06 | 33055492                | AA                              | CC              | 1946868720               |
| SNP_P4_84732_33055512 | NC_021165.1    | Ca_kabuli_chr06 | 33055512                | TT                              | CC              | 1946868723               |
| SNP_P4_84733_33087643 | NC_021165.1    | Ca_kabuli_chr06 | 33087643                | AA                              | GG              | 1946868725               |
| SNP_P4_84734_33088112 | NC_021165.1    | Ca_kabuli_chr06 | 33088112                | AA                              | GG              | 1946868727               |

| SNPs IDs              | Chromosome IDs | Chromosomes     | Physical positions (bp) | CDC Frontier (Reference genome) | (ILWC46 & LPNB) | NCBI SNPdb Accession IDs |
|-----------------------|----------------|-----------------|-------------------------|---------------------------------|-----------------|--------------------------|
| SNP_P4_84735_33094115 | NC_021165.1    | Ca_kabuli_chr06 | 33094115                | GG                              | AA              | 1946868729               |
| SNP_P4_84736_33094128 | NC_021165.1    | Ca_kabuli_chr06 | 33094128                | TT                              | CC              | 1946868731               |
| SNP_P4_84737_33094201 | NC_021165.1    | Ca_kabuli_chr06 | 33094201                | CC                              | TT              | 1946868733               |
| SNP_P4_84738_33094227 | NC_021165.1    | Ca_kabuli_chr06 | 33094227                | GG                              | CC              | 1946868735               |
| SNP_P4_84739_33094241 | NC_021165.1    | Ca_kabuli_chr06 | 33094241                | CC                              | TT              | 1946868737               |
| SNP_P4_84740_33094249 | NC_021165.1    | Ca_kabuli_chr06 | 33094249                | TT                              | CC              | 1946868739               |
| SNP_P4_84741_33094269 | NC_021165.1    | Ca_kabuli_chr06 | 33094269                | AA                              | GG              | 1946868741               |
| SNP_P4_84742_33094293 | NC_021165.1    | Ca_kabuli_chr06 | 33094293                | CC                              | TT              | 1946868743               |
| SNP_P4_84743_33094309 | NC_021165.1    | Ca_kabuli_chr06 | 33094309                | GG                              | AA              | 1946868745               |
| SNP_P4_84744_33094315 | NC_021165.1    | Ca_kabuli_chr06 | 33094315                | AA                              | TT              | 1946868747               |
| SNP_P4_84745_33094337 | NC_021165.1    | Ca_kabuli_chr06 | 33094337                | CC                              | TT              | 1946868749               |
| SNP_P4_84746_33094358 | NC_021165.1    | Ca_kabuli_chr06 | 33094358                | GG                              | AA              | 1946868752               |
| SNP_P4_84747_33094384 | NC_021165.1    | Ca_kabuli_chr06 | 33094384                | TT                              | CC              | 1946868754               |
| SNP_P4_84748_33094404 | NC_021165.1    | Ca_kabuli_chr06 | 33094404                | CC                              | TT              | 1946868756               |
| SNP_P4_84749_33094436 | NC_021165.1    | Ca_kabuli_chr06 | 33094436                | AA                              | TT              | 1946868758               |
| SNP_P4_84750_33094450 | NC_021165.1    | Ca_kabuli_chr06 | 33094450                | CC                              | TT              | 1946868760               |
| SNP_P4_84751_33094502 | NC_021165.1    | Ca_kabuli_chr06 | 33094502                | TT                              | CC              | 1946868762               |
| SNP_P4_84752_33094548 | NC_021165.1    | Ca_kabuli_chr06 | 33094548                | AA                              | CC              | 1946868764               |
| SNP_P4_84753_33094583 | NC_021165.1    | Ca_kabuli_chr06 | 33094583                | AA                              | CC              | 1946868766               |
| SNP_P4_84754_33094590 | NC_021165.1    | Ca_kabuli_chr06 | 33094590                | CC                              | TT              | 1946868768               |
| SNP_P4_84756_33094656 | NC_021165.1    | Ca_kabuli_chr06 | 33094656                | TT                              | CC              | 1946868769               |
| SNP_P4_84758_33094876 | NC_021165.1    | Ca_kabuli_chr06 | 33094876                | GG                              | AA              | 1946868771               |
| SNP_P4_84759_33094905 | NC_021165.1    | Ca_kabuli_chr06 | 33094905                | GG                              | AA              | 1946868773               |
| SNP_P4_84761_33105230 | NC_021165.1    | Ca_kabuli_chr06 | 33105230                | CC                              | TT              | 1946868775               |
| SNP_P4_84762_33105246 | NC_021165.1    | Ca_kabuli_chr06 | 33105246                | GG                              | AA              | 1946868777               |
| SNP_P4_84763_33105340 | NC_021165.1    | Ca_kabuli_chr06 | 33105340                | TT                              | CC              | 1946868779               |
| SNP_P4_84764_33105372 | NC_021165.1    | Ca_kabuli_chr06 | 33105372                | GG                              | AA              | 1946868781               |
| SNP_P4_84765_33105972 | NC_021165.1    | Ca_kabuli_chr06 | 33105972                | AA                              | GG              | 1946868783               |
| SNP_P4_84766_33106397 | NC_021165.1    | Ca_kabuli_chr06 | 33106397                | GG                              | AA              | 1946868786               |
| SNP_P4_84767_33106430 | NC_021165.1    | Ca_kabuli_chr06 | 33106430                | AA                              | GG              | 1946868788               |
| SNP_P4_84768_33106479 | NC_021165.1    | Ca_kabuli_chr06 | 33106479                | AA                              | GG              | 1946868790               |
| SNP_P4_84769_33106568 | NC_021165.1    | Ca_kabuli_chr06 | 33106568                | AA                              | GG              | 1946868792               |
| SNP_P4_84771_33120392 | NC_021165.1    | Ca_kabuli_chr06 | 33120392                | AA                              | GG              | 1946868794               |
| SNP_P4_84772_33132425 | NC_021165.1    | Ca_kabuli_chr06 | 33132425                | AA                              | TT              | 1946868796               |
| SNP_P4_84773_33166895 | NC_021165.1    | Ca_kabuli_chr06 | 33166895                | TT                              | GG              | 1946868797               |
| SNP_P4_84774_33174500 | NC_021165.1    | Ca_kabuli_chr06 | 33174500                | AA                              | GG              | 1946868799               |
| SNP_P4_84775_33176504 | NC_021165.1    | Ca_kabuli_chr06 | 33176504                | TT                              | AA              | 1946868801               |
| SNP_P4_84776_33176508 | NC_021165.1    | Ca_kabuli_chr06 | 33176508                | CC                              | TT              | 1946868803               |
| SNP_P4_84777_33177446 | NC_021165.1    | Ca_kabuli_chr06 | 33177446                | AA                              | GG              | 1946868805               |
| SNP_P4_84778_33177545 | NC_021165.1    | Ca_kabuli_chr06 | 33177545                | TT                              | CC              | 1946868807               |
| SNP_P4_84779_33177655 | NC_021165.1    | Ca_kabuli_chr06 | 33177655                | AA                              | GG              | 1946868809               |
| SNP_P4_84780_33177669 | NC_021165.1    | Ca_kabuli_chr06 | 33177669                | AA                              | TT              | 1946868811               |

| SNPs IDs              | Chromosome IDs | Chromosomes     | Physical positions (bp) | CDC Frontier (Reference genome) | (ILWC46 & LPNB) | NCBI SNPdb Accession IDs |
|-----------------------|----------------|-----------------|-------------------------|---------------------------------|-----------------|--------------------------|
| SNP_P4_84781_33177703 | NC_021165.1    | Ca_kabuli_chr06 | 33177703                | CC                              | GG              | 1946868813               |
| SNP_P4_84782_33177704 | NC_021165.1    | Ca_kabuli_chr06 | 33177704                | TT                              | AA              | 1946868815               |
| SNP_P4_84783_33177705 | NC_021165.1    | Ca_kabuli_chr06 | 33177705                | CC                              | AA              | 1946868817               |
| SNP_P4_84784_33177708 | NC_021165.1    | Ca_kabuli_chr06 | 33177708                | CC                              | GG              | 1946868819               |
| SNP_P4_84785_33177868 | NC_021165.1    | Ca_kabuli_chr06 | 33177868                | TT                              | CC              | 1946868821               |
| SNP_P4_84786_33177902 | NC_021165.1    | Ca_kabuli_chr06 | 33177902                | TT                              | CC              | 1946868823               |
| SNP_P4_84787_33177931 | NC_021165.1    | Ca_kabuli_chr06 | 33177931                | AA                              | GG              | 1946868825               |
| SNP_P4_84788_33177970 | NC_021165.1    | Ca_kabuli_chr06 | 33177970                | TT                              | GG              | 1946868827               |
| SNP_P4_84789_33178020 | NC_021165.1    | Ca_kabuli_chr06 | 33178020                | CC                              | TT              | 1946868829               |
| SNP_P4_84790_33180280 | NC_021165.1    | Ca_kabuli_chr06 | 33180280                | CC                              | TT              | 1946868831               |
| SNP_P4_84791_33183683 | NC_021165.1    | Ca_kabuli_chr06 | 33183683                | CC                              | TT              | 1946868833               |
| SNP_P4_84792_33183704 | NC_021165.1    | Ca_kabuli_chr06 | 33183704                | CC                              | TT              | 1946868835               |
| SNP_P4_84793_33183714 | NC_021165.1    | Ca_kabuli_chr06 | 33183714                | TT                              | GG              | 1946868837               |
| SNP_P4_84794_33183716 | NC_021165.1    | Ca_kabuli_chr06 | 33183716                | TT                              | GG              | 1946868839               |
| SNP_P4_84795_33188171 | NC_021165.1    | Ca_kabuli_chr06 | 33188171                | AA                              | CC              | 1946868841               |
| SNP_P4_84796_33188202 | NC_021165.1    | Ca_kabuli_chr06 | 33188202                | AA                              | GG              | 1946868843               |
| SNP_P4_84797_33188216 | NC_021165.1    | Ca_kabuli_chr06 | 33188216                | TT                              | CC              | 1946868845               |
| SNP_P4_84798_33188234 | NC_021165.1    | Ca_kabuli_chr06 | 33188234                | TT                              | GG              | 1946868847               |
| SNP_P4_84799_33188243 | NC_021165.1    | Ca_kabuli_chr06 | 33188243                | GG                              | AA              | 1946868849               |
| SNP_P4_84800_33188249 | NC_021165.1    | Ca_kabuli_chr06 | 33188249                | GG                              | AA              | 1946868851               |
| SNP_P4_84801_33188256 | NC_021165.1    | Ca_kabuli_chr06 | 33188256                | GG                              | AA              | 1946868853               |
| SNP_P4_84802_33188265 | NC_021165.1    | Ca_kabuli_chr06 | 33188265                | TT                              | GG              | 1946868855               |
| SNP_P4_84803_33188269 | NC_021165.1    | Ca_kabuli_chr06 | 33188269                | GG                              | TT              | 1946868857               |
| SNP_P4_84804_33188585 | NC_021165.1    | Ca_kabuli_chr06 | 33188585                | TT                              | AA              | 1946868859               |
| SNP_P4_84805_33210434 | NC_021165.1    | Ca_kabuli_chr06 | 33210434                | TT                              | CC              | 1946868861               |
| SNP_P4_84806_33210467 | NC_021165.1    | Ca_kabuli_chr06 | 33210467                | CC                              | AA              | 1946868863               |
| SNP_P4_84807_33210473 | NC_021165.1    | Ca_kabuli_chr06 | 33210473                | GG                              | CC              | 1946868865               |
| SNP_P4_84808_33210480 | NC_021165.1    | Ca_kabuli_chr06 | 33210480                | AA                              | CC              | 1946868867               |
| SNP_P4_84809_33210548 | NC_021165.1    | Ca_kabuli_chr06 | 33210548                | AA                              | TT              | 1946868869               |
| SNP_P4_84810_33210569 | NC_021165.1    | Ca_kabuli_chr06 | 33210569                | CC                              | TT              | 1946868871               |
| SNP_P4_84812_33210767 | NC_021165.1    | Ca_kabuli_chr06 | 33210767                | AA                              | GG              | 1946868873               |
| SNP_P4_84813_33210819 | NC_021165.1    | Ca_kabuli_chr06 | 33210819                | CC                              | TT              | 1946868875               |
| SNP_P4_84814_33210824 | NC_021165.1    | Ca_kabuli_chr06 | 33210824                | CC                              | AA              | 1946868877               |
| SNP_P4_84815_33210838 | NC_021165.1    | Ca_kabuli_chr06 | 33210838                | AA                              | TT              | 1946868879               |
| SNP_P4_84816_33222469 | NC_021165.1    | Ca_kabuli_chr06 | 33222469                | GG                              | AA              | 1946868881               |
| SNP_P4_84817_33223469 | NC_021165.1    | Ca_kabuli_chr06 | 33223469                | TT                              | CC              | 1946868883               |
| SNP_P4_84818_33223480 | NC_021165.1    | Ca_kabuli_chr06 | 33223480                | TT                              | GG              | 1946868885               |
| SNP_P4_84819_33223505 | NC_021165.1    | Ca_kabuli_chr06 | 33223505                | CC                              | AA              | 1946868887               |
| SNP_P4_84820_33223512 | NC_021165.1    | Ca_kabuli_chr06 | 33223512                | CC                              | GG              | 1946868889               |
| SNP_P4_84821_33223539 | NC_021165.1    | Ca_kabuli_chr06 | 33223539                | TT                              | CC              | 1946868891               |
| SNP_P4_84822_33228418 | NC_021165.1    | Ca_kabuli_chr06 | 33228418                | TT                              | GG              | 1946868893               |
| SNP_P4_84823_33228598 | NC_021165.1    | Ca_kabuli_chr06 | 33228598                | TT                              | AA              | 1946868895               |

| SNPs IDs              | Chromosome IDs | Chromosomes     | Physical positions (bp) | CDC Frontier (Reference genome) | (ILWC46 & LPNB) | NCBI SNPdb Accession IDs |
|-----------------------|----------------|-----------------|-------------------------|---------------------------------|-----------------|--------------------------|
| SNP_P4_84824_33228667 | NC_021165.1    | Ca_kabuli_chr06 | 33228667                | TT                              | AA              | 1946868897               |
| SNP_P4_84825_33228688 | NC_021165.1    | Ca_kabuli_chr06 | 33228688                | CC                              | TT              | 1946868899               |
| SNP_P4_84826_33228970 | NC_021165.1    | Ca_kabuli_chr06 | 33228970                | TT                              | CC              | 1946868901               |
| SNP_P4_84827_33228985 | NC_021165.1    | Ca_kabuli_chr06 | 33228985                | CC                              | TT              | 1946868903               |
| SNP_P4_84828_33229106 | NC_021165.1    | Ca_kabuli_chr06 | 33229106                | GG                              | TT              | 1946868905               |
| SNP_P4_84829_33229108 | NC_021165.1    | Ca_kabuli_chr06 | 33229108                | TT                              | AA              | 1946868907               |
| SNP_P4_84832_33229305 | NC_021165.1    | Ca_kabuli_chr06 | 33229305                | TT                              | AA              | 1946868909               |
| SNP_P4_84833_33229398 | NC_021165.1    | Ca_kabuli_chr06 | 33229398                | AA                              | CC              | 1946868911               |
| SNP_P4_84834_33229465 | NC_021165.1    | Ca_kabuli_chr06 | 33229465                | AA                              | GG              | 1946868913               |
| SNP_P4_84835_33229469 | NC_021165.1    | Ca_kabuli_chr06 | 33229469                | TT                              | AA              | 1946868914               |
| SNP_P4_84836_33229481 | NC_021165.1    | Ca_kabuli_chr06 | 33229481                | CC                              | TT              | 1946868916               |
| SNP_P4_84838_33229560 | NC_021165.1    | Ca_kabuli_chr06 | 33229560                | CC                              | TT              | 1946868918               |
| SNP_P4_84839_33229652 | NC_021165.1    | Ca_kabuli_chr06 | 33229652                | TT                              | AA              | 1946868920               |
| SNP_P4_84840_33229713 | NC_021165.1    | Ca_kabuli_chr06 | 33229713                | TT                              | CC              | 1946868922               |
| SNP_P4_84841_33229723 | NC_021165.1    | Ca_kabuli_chr06 | 33229723                | TT                              | CC              | 1946868924               |
| SNP_P4_84842_33229744 | NC_021165.1    | Ca_kabuli_chr06 | 33229744                | AA                              | GG              | 1946868926               |
| SNP_P4_84843_33229776 | NC_021165.1    | Ca_kabuli_chr06 | 33229776                | AA                              | GG              | 1946868928               |
| SNP_P4_84845_33229821 | NC_021165.1    | Ca_kabuli_chr06 | 33229821                | TT                              | GG              | 1946868930               |
| SNP_P4_84847_33229871 | NC_021165.1    | Ca_kabuli_chr06 | 33229871                | GG                              | TT              | 1946868932               |
| SNP_P4_84848_33229872 | NC_021165.1    | Ca_kabuli_chr06 | 33229872                | GG                              | TT              | 1946868934               |
| SNP_P4_84849_33229887 | NC_021165.1    | Ca_kabuli_chr06 | 33229887                | GG                              | AA              | 1946868936               |
| SNP_P4_84850_33229889 | NC_021165.1    | Ca_kabuli_chr06 | 33229889                | TT                              | CC              | 1946868938               |
| SNP_P4_84851_33229924 | NC_021165.1    | Ca_kabuli_chr06 | 33229924                | TT                              | GG              | 1946868940               |
| SNP_P4_84852_33229930 | NC_021165.1    | Ca_kabuli_chr06 | 33229930                | TT                              | AA              | 1946868942               |
| SNP_P4_84853_33229987 | NC_021165.1    | Ca_kabuli_chr06 | 33229987                | AA                              | TT              | 1946868944               |
| SNP_P4_84854_33230001 | NC_021165.1    | Ca_kabuli_chr06 | 33230001                | TT                              | GG              | 1946868946               |
| SNP_P4_84855_33230014 | NC_021165.1    | Ca_kabuli_chr06 | 33230014                | AA                              | TT              | 1946868948               |
| SNP_P4_84856_33230084 | NC_021165.1    | Ca_kabuli_chr06 | 33230084                | GG                              | AA              | 1946868950               |
| SNP_P4_84857_33230304 | NC_021165.1    | Ca_kabuli_chr06 | 33230304                | CC                              | TT              | 1946868952               |
| SNP_P4_84858_33230328 | NC_021165.1    | Ca_kabuli_chr06 | 33230328                | TT                              | CC              | 1946868954               |
| SNP_P4_84859_33230334 | NC_021165.1    | Ca_kabuli_chr06 | 33230334                | AA                              | GG              | 1946868956               |
| SNP_P4_84860_33230335 | NC_021165.1    | Ca_kabuli_chr06 | 33230335                | GG                              | AA              | 1946868957               |
| SNP_P4_84861_33230346 | NC_021165.1    | Ca_kabuli_chr06 | 33230346                | CC                              | GG              | 1946868960               |
| SNP_P4_84862_33230493 | NC_021165.1    | Ca_kabuli_chr06 | 33230493                | CC                              | TT              | 1946868962               |
| SNP_P4_84864_33231693 | NC_021165.1    | Ca_kabuli_chr06 | 33231693                | CC                              | TT              | 1946868964               |
| SNP_P4_84866_33233710 | NC_021165.1    | Ca_kabuli_chr06 | 33233710                | CC                              | TT              | 1946868966               |
| SNP_P4_84867_33233716 | NC_021165.1    | Ca_kabuli_chr06 | 33233716                | TT                              | CC              | 1946868968               |
| SNP_P4_84868_33233728 | NC_021165.1    | Ca_kabuli_chr06 | 33233728                | GG                              | AA              | 1946868970               |
| SNP_P4_84869_33233768 | NC_021165.1    | Ca_kabuli_chr06 | 33233768                | CC                              | TT              | 1946868972               |
| SNP_P4_84870_33233791 | NC_021165.1    | Ca_kabuli_chr06 | 33233791                | AA                              | GG              | 1946868974               |
| SNP_P4_84871_33233859 | NC_021165.1    | Ca_kabuli_chr06 | 33233859                | TT                              | GG              | 1946868976               |
| SNP_P4_84872_33234076 | NC_021165.1    | Ca_kabuli_chr06 | 33234076                | AA                              | TT              | 1946868977               |

| SNPs IDs              | Chromosome IDs | Chromosomes     | Physical positions (bp) | CDC Frontier (Reference genome) | (ILWC46 & LPNB) | NCBI SNPdb Accession IDs |
|-----------------------|----------------|-----------------|-------------------------|---------------------------------|-----------------|--------------------------|
| SNP_P4_84873_33234297 | NC_021165.1    | Ca_kabuli_chr06 | 33234297                | CC                              | AA              | 1946868979               |
| SNP_P4_84874_33234428 | NC_021165.1    | Ca_kabuli_chr06 | 33234428                | TT                              | AA              | 1946868981               |
| SNP_P4_84875_33234444 | NC_021165.1    | Ca_kabuli_chr06 | 33234444                | TT                              | CC              | 1946868983               |
| SNP_P4_84876_33234513 | NC_021165.1    | Ca_kabuli_chr06 | 33234513                | GG                              | TT              | 1946868985               |
| SNP_P4_84877_33234543 | NC_021165.1    | Ca_kabuli_chr06 | 33234543                | TT                              | AA              | 1946868987               |
| SNP_P4_84878_33236189 | NC_021165.1    | Ca_kabuli_chr06 | 33236189                | AA                              | TT              | 1946868989               |
| SNP_P4_84879_33240124 | NC_021165.1    | Ca_kabuli_chr06 | 33240124                | GG                              | AA              | 1946868991               |
| SNP_P4_84880_33240127 | NC_021165.1    | Ca_kabuli_chr06 | 33240127                | TT                              | GG              | 1946868993               |
| SNP_P4_84881_33240198 | NC_021165.1    | Ca_kabuli_chr06 | 33240198                | CC                              | GG              | 1946868995               |
| SNP_P4_84883_33240324 | NC_021165.1    | Ca_kabuli_chr06 | 33240324                | TT                              | CC              | 1946868997               |
| SNP_P4_84884_33240337 | NC_021165.1    | Ca_kabuli_chr06 | 33240337                | CC                              | TT              | 1946868999               |
| SNP_P4_84886_33240397 | NC_021165.1    | Ca_kabuli_chr06 | 33240397                | GG                              | TT              | 1946869001               |
| SNP_P4_84887_33240405 | NC_021165.1    | Ca_kabuli_chr06 | 33240405                | TT                              | GG              | 1946869003               |
| SNP_P4_84888_33240416 | NC_021165.1    | Ca_kabuli_chr06 | 33240416                | GG                              | TT              | 1946869005               |
| SNP_P4_84889_33240535 | NC_021165.1    | Ca_kabuli_chr06 | 33240535                | AA                              | CC              | 1946869007               |
| SNP_P4_84890_33240538 | NC_021165.1    | Ca_kabuli_chr06 | 33240538                | TT                              | AA              | 1946869009               |
| SNP_P4_84891_33240550 | NC_021165.1    | Ca_kabuli_chr06 | 33240550                | TT                              | CC              | 1946869012               |
| SNP_P4_84892_33240564 | NC_021165.1    | Ca_kabuli_chr06 | 33240564                | TT                              | AA              | 1946869013               |
| SNP_P4_84893_33240601 | NC_021165.1    | Ca_kabuli_chr06 | 33240601                | CC                              | TT              | 1946869015               |
| SNP_P4_84894_33240617 | NC_021165.1    | Ca_kabuli_chr06 | 33240617                | AA                              | GG              | 1946869017               |
| SNP_P4_84895_33240651 | NC_021165.1    | Ca_kabuli_chr06 | 33240651                | GG                              | AA              | 1946869019               |
| SNP_P4_84896_33240662 | NC_021165.1    | Ca_kabuli_chr06 | 33240662                | TT                              | AA              | 1946869022               |
| SNP_P4_84897_33240685 | NC_021165.1    | Ca_kabuli_chr06 | 33240685                | CC                              | TT              | 1946869023               |
| SNP_P4_84899_33240811 | NC_021165.1    | Ca_kabuli_chr06 | 33240811                | GG                              | CC              | 1946869025               |
| SNP_P4_84900_33240844 | NC_021165.1    | Ca_kabuli_chr06 | 33240844                | TT                              | CC              | 1946869027               |
| SNP_P4_84901_33240911 | NC_021165.1    | Ca_kabuli_chr06 | 33240911                | AA                              | GG              | 1946869029               |
| SNP_P4_84902_33240966 | NC_021165.1    | Ca_kabuli_chr06 | 33240966                | AA                              | GG              | 1946869031               |
| SNP_P4_84903_33241158 | NC_021165.1    | Ca_kabuli_chr06 | 33241158                | AA                              | GG              | 1946869033               |
| SNP_P4_84904_33241203 | NC_021165.1    | Ca_kabuli_chr06 | 33241203                | TT                              | AA              | 1946869035               |
| SNP_P4_84905_33241211 | NC_021165.1    | Ca_kabuli_chr06 | 33241211                | GG                              | AA              | 1946869037               |
| SNP_P4_84906_33241236 | NC_021165.1    | Ca_kabuli_chr06 | 33241236                | CC                              | AA              | 1946869039               |
| SNP_P4_84907_33241247 | NC_021165.1    | Ca_kabuli_chr06 | 33241247                | CC                              | TT              | 1946869041               |
| SNP_P4_84908_33241264 | NC_021165.1    | Ca_kabuli_chr06 | 33241264                | CC                              | TT              | 1946869043               |
| SNP_P4_84909_33241304 | NC_021165.1    | Ca_kabuli_chr06 | 33241304                | CC                              | AA              | 1946869045               |
| SNP_P4_84910_33241307 | NC_021165.1    | Ca_kabuli_chr06 | 33241307                | AA                              | CC              | 1946869047               |
| SNP_P4_84911_33282965 | NC_021165.1    | Ca_kabuli_chr06 | 33282965                | AA                              | GG              | 1946869049               |
| SNP_P4_84912_33282973 | NC_021165.1    | Ca_kabuli_chr06 | 33282973                | TT                              | CC              | 1946869051               |
| SNP_P4_84913_33283015 | NC_021165.1    | Ca_kabuli_chr06 | 33283015                | AA                              | TT              | 1946869053               |
| SNP_P4_84914_33283032 | NC_021165.1    | Ca_kabuli_chr06 | 33283032                | AA                              | TT              | 1946869055               |
| SNP_P4_84915_33283038 | NC_021165.1    | Ca_kabuli_chr06 | 33283038                | GG                              | TT              | 1946869057               |
| SNP_P4_84916_33283053 | NC_021165.1    | Ca_kabuli_chr06 | 33283053                | CC                              | AA              | 1946869059               |
| SNP_P4_84917_33283058 | NC_021165.1    | Ca_kabuli_chr06 | 33283058                | TT                              | AA              | 1946869061               |

| SNPs IDs              | Chromosome IDs | Chromosomes     | Physical positions (bp) | CDC Frontier (Reference genome) | (ILWC46 & LPNB) | NCBI SNPdb Accession IDs |
|-----------------------|----------------|-----------------|-------------------------|---------------------------------|-----------------|--------------------------|
| SNP_P4_84918_33283076 | NC_021165.1    | Ca_kabuli_chr06 | 33283076                | TT                              | CC              | 1946869063               |
| SNP_P4_84919_33283094 | NC_021165.1    | Ca_kabuli_chr06 | 33283094                | CC                              | TT              | 1946869065               |
| SNP_P4_84920_33283115 | NC_021165.1    | Ca_kabuli_chr06 | 33283115                | AA                              | TT              | 1946869067               |
| SNP_P4_84921_33283123 | NC_021165.1    | Ca_kabuli_chr06 | 33283123                | AA                              | GG              | 1946869069               |
| SNP_P4_84922_33283129 | NC_021165.1    | Ca_kabuli_chr06 | 33283129                | GG                              | AA              | 1946869071               |
| SNP_P4_84923_33283149 | NC_021165.1    | Ca_kabuli_chr06 | 33283149                | GG                              | TT              | 1946869073               |
| SNP_P4_84924_33283210 | NC_021165.1    | Ca_kabuli_chr06 | 33283210                | GG                              | AA              | 1946869075               |
| SNP_P4_84925_33283225 | NC_021165.1    | Ca_kabuli_chr06 | 33283225                | AA                              | GG              | 1946869078               |
| SNP_P4_84926_33283227 | NC_021165.1    | Ca_kabuli_chr06 | 33283227                | GG                              | AA              | 1946869080               |
| SNP_P4_84927_33283326 | NC_021165.1    | Ca_kabuli_chr06 | 33283326                | CC                              | GG              | 1946869082               |
| SNP_P4_84928_33283365 | NC_021165.1    | Ca_kabuli_chr06 | 33283365                | CC                              | TT              | 1946869084               |
| SNP_P4_84929_33283381 | NC_021165.1    | Ca_kabuli_chr06 | 33283381                | TT                              | GG              | 1946869086               |
| SNP_P4_84930_33283440 | NC_021165.1    | Ca_kabuli_chr06 | 33283440                | CC                              | TT              | 1946869088               |
| SNP_P4_84931_33283659 | NC_021165.1    | Ca_kabuli_chr06 | 33283659                | CC                              | AA              | 1946869090               |
| SNP_P4_84932_33284022 | NC_021165.1    | Ca_kabuli_chr06 | 33284022                | GG                              | AA              | 1946869092               |
| SNP_P4_84933_33284063 | NC_021165.1    | Ca_kabuli_chr06 | 33284063                | GG                              | TT              | 1946869094               |
| SNP_P4_84935_33293477 | NC_021165.1    | Ca_kabuli_chr06 | 33293477                | AA                              | TT              | 1946869096               |
| SNP_P4_84936_33293560 | NC_021165.1    | Ca_kabuli_chr06 | 33293560                | CC                              | TT              | 1946869098               |
| SNP_P4_84937_33293679 | NC_021165.1    | Ca_kabuli_chr06 | 33293679                | GG                              | TT              | 1946869100               |
| SNP_P4_84938_33293697 | NC_021165.1    | Ca_kabuli_chr06 | 33293697                | AA                              | GG              | 1946869102               |
| SNP_P4_84939_33293737 | NC_021165.1    | Ca_kabuli_chr06 | 33293737                | GG                              | AA              | 1946869104               |
| SNP_P4_84940_33293738 | NC_021165.1    | Ca_kabuli_chr06 | 33293738                | AA                              | TT              | 1946869106               |
| SNP_P4_84941_33293792 | NC_021165.1    | Ca_kabuli_chr06 | 33293792                | AA                              | GG              | 1946869108               |
| SNP_P4_84943_33293861 | NC_021165.1    | Ca_kabuli_chr06 | 33293861                | TT                              | AA              | 1946869110               |
| SNP_P4_84944_33293862 | NC_021165.1    | Ca_kabuli_chr06 | 33293862                | TT                              | GG              | 1946869112               |
| SNP_P4_84945_33295156 | NC_021165.1    | Ca_kabuli_chr06 | 33295156                | CC                              | TT              | 1946869114               |
| SNP_P4_84946_33295168 | NC_021165.1    | Ca_kabuli_chr06 | 33295168                | TT                              | GG              | 1946869116               |
| SNP_P4_84947_33295212 | NC_021165.1    | Ca_kabuli_chr06 | 33295212                | GG                              | AA              | 1946869118               |
| SNP_P4_84948_33295551 | NC_021165.1    | Ca_kabuli_chr06 | 33295551                | GG                              | TT              | 1946869120               |
| SNP_P4_84949_33295749 | NC_021165.1    | Ca_kabuli_chr06 | 33295749                | GG                              | CC              | 1946869122               |
| SNP_P4_84950_33295779 | NC_021165.1    | Ca_kabuli_chr06 | 33295779                | GG                              | CC              | 1946869124               |
| SNP_P4_84951_33295821 | NC_021165.1    | Ca_kabuli_chr06 | 33295821                | TT                              | AA              | 1946869126               |
| SNP_P4_84952_33295842 | NC_021165.1    | Ca_kabuli_chr06 | 33295842                | GG                              | AA              | 1946869128               |
| SNP_P4_84953_33295852 | NC_021165.1    | Ca_kabuli_chr06 | 33295852                | AA                              | CC              | 1946869130               |
| SNP_P4_84954_33295936 | NC_021165.1    | Ca_kabuli_chr06 | 33295936                | CC                              | TT              | 1946869132               |
| SNP_P4_84955_33295985 | NC_021165.1    | Ca_kabuli_chr06 | 33295985                | TT                              | CC              | 1946869133               |
| SNP_P4_84956_33295998 | NC_021165.1    | Ca_kabuli_chr06 | 33295998                | TT                              | CC              | 1946869136               |
| SNP_P4_84957_33296014 | NC_021165.1    | Ca_kabuli_chr06 | 33296014                | CC                              | TT              | 1946869138               |
| SNP_P4_84958_33296017 | NC_021165.1    | Ca_kabuli_chr06 | 33296017                | AA                              | GG              | 1946869140               |
| SNP_P4_84959_33296053 | NC_021165.1    | Ca_kabuli_chr06 | 33296053                | TT                              | CC              | 1946869142               |
| SNP_P4_84960_33296054 | NC_021165.1    | Ca_kabuli_chr06 | 33296054                | GG                              | AA              | 1946869144               |
| SNP_P4_84961_33296060 | NC_021165.1    | Ca_kabuli_chr06 | 33296060                | AA                              | GG              | 1946869146               |

| SNPs IDs              | Chromosome IDs | Chromosomes     | Physical positions (bp) | CDC Frontier (Reference genome) | (ILWC46 & LPNB) | NCBI SNPdb Accession IDs |
|-----------------------|----------------|-----------------|-------------------------|---------------------------------|-----------------|--------------------------|
| SNP_P4_84962_33296147 | NC_021165.1    | Ca_kabuli_chr06 | 33296147                | GG                              | CC              | 1946869148               |
| SNP_P4_84963_33296174 | NC_021165.1    | Ca_kabuli_chr06 | 33296174                | GG                              | CC              | 1946869150               |
| SNP_P4_84964_33296181 | NC_021165.1    | Ca_kabuli_chr06 | 33296181                | AA                              | CC              | 1946869152               |
| SNP_P4_84965_33296248 | NC_021165.1    | Ca_kabuli_chr06 | 33296248                | AA                              | CC              | 1946869154               |
| SNP_P4_84966_33296296 | NC_021165.1    | Ca_kabuli_chr06 | 33296296                | TT                              | AA              | 1946869156               |
| SNP_P4_84967_33296297 | NC_021165.1    | Ca_kabuli_chr06 | 33296297                | CC                              | TT              | 1946869158               |
| SNP_P4_84969_33296317 | NC_021165.1    | Ca_kabuli_chr06 | 33296317                | GG                              | AA              | 1946869160               |
| SNP_P4_84970_33296423 | NC_021165.1    | Ca_kabuli_chr06 | 33296423                | TT                              | CC              | 1946869162               |
| SNP_P4_84971_33296497 | NC_021165.1    | Ca_kabuli_chr06 | 33296497                | GG                              | TT              | 1946869164               |
| SNP_P4_84972_33296606 | NC_021165.1    | Ca_kabuli_chr06 | 33296606                | AA                              | TT              | 1946869166               |
| SNP_P4_84973_33296649 | NC_021165.1    | Ca_kabuli_chr06 | 33296649                | CC                              | TT              | 1946869168               |
| SNP_P4_84974_33296672 | NC_021165.1    | Ca_kabuli_chr06 | 33296672                | CC                              | AA              | 1946869170               |
| SNP_P4_84975_33296692 | NC_021165.1    | Ca_kabuli_chr06 | 33296692                | AA                              | GG              | 1946869172               |
| SNP_P4_84976_33296728 | NC_021165.1    | Ca_kabuli_chr06 | 33296728                | GG                              | AA              | 1946869174               |
| SNP_P4_84977_33296929 | NC_021165.1    | Ca_kabuli_chr06 | 33296929                | GG                              | AA              | 1946869176               |
| SNP_P4_84978_33296936 | NC_021165.1    | Ca_kabuli_chr06 | 33296936                | GG                              | AA              | 1946869178               |
| SNP_P4_84979_33296952 | NC_021165.1    | Ca_kabuli_chr06 | 33296952                | AA                              | GG              | 1946869180               |
| SNP_P4_84980_33297091 | NC_021165.1    | Ca_kabuli_chr06 | 33297091                | AA                              | CC              | 1946869182               |
| SNP_P4_84981_33297132 | NC_021165.1    | Ca_kabuli_chr06 | 33297132                | TT                              | CC              | 1946869184               |
| SNP_P4_84982_33297152 | NC_021165.1    | Ca_kabuli_chr06 | 33297152                | TT                              | GG              | 1946869186               |
| SNP_P4_84983_33297159 | NC_021165.1    | Ca_kabuli_chr06 | 33297159                | AA                              | GG              | 1946869188               |
| SNP_P4_84984_33297272 | NC_021165.1    | Ca_kabuli_chr06 | 33297272                | GG                              | AA              | 1946869190               |
| SNP_P4_84985_33297426 | NC_021165.1    | Ca_kabuli_chr06 | 33297426                | AA                              | GG              | 1946869192               |
| SNP_P4_84986_33298877 | NC_021165.1    | Ca_kabuli_chr06 | 33298877                | TT                              | AA              | 1946869194               |
| SNP_P4_84987_33299943 | NC_021165.1    | Ca_kabuli_chr06 | 33299943                | CC                              | GG              | 1946869196               |
| SNP_P4_84988_33299948 | NC_021165.1    | Ca_kabuli_chr06 | 33299948                | GG                              | TT              | 1946869198               |
| SNP_P4_84989_33299966 | NC_021165.1    | Ca_kabuli_chr06 | 33299966                | CC                              | GG              | 1946869200               |
| SNP_P4_84990_33300123 | NC_021165.1    | Ca_kabuli_chr06 | 33300123                | AA                              | TT              | 1946869203               |
| SNP_P4_84991_33300188 | NC_021165.1    | Ca_kabuli_chr06 | 33300188                | AA                              | GG              | 1946869205               |
| SNP_P4_84992_33310269 | NC_021165.1    | Ca_kabuli_chr06 | 33310269                | AA                              | GG              | 1946869207               |
| SNP_P4_84993_33310356 | NC_021165.1    | Ca_kabuli_chr06 | 33310356                | CC                              | AA              | 1946869209               |
| SNP_P4_84994_33314086 | NC_021165.1    | Ca_kabuli_chr06 | 33314086                | AA                              | TT              | 1946869211               |
| SNP_P4_84995_33314164 | NC_021165.1    | Ca_kabuli_chr06 | 33314164                | TT                              | AA              | 1946869213               |
| SNP_P4_84996_33316767 | NC_021165.1    | Ca_kabuli_chr06 | 33316767                | AA                              | GG              | 1946869215               |
| SNP_P4_84997_33316791 | NC_021165.1    | Ca_kabuli_chr06 | 33316791                | AA                              | GG              | 1946869217               |
| SNP_P4_84998_33317010 | NC_021165.1    | Ca_kabuli_chr06 | 33317010                | AA                              | GG              | 1946869219               |
| SNP_P4_84999_33317038 | NC_021165.1    | Ca_kabuli_chr06 | 33317038                | AA                              | TT              | 1946869221               |
| SNP_P4_85000_33317045 | NC_021165.1    | Ca_kabuli_chr06 | 33317045                | TT                              | AA              | 1946869223               |
| SNP_P4_85001_33317564 | NC_021165.1    | Ca_kabuli_chr06 | 33317564                | AA                              | TT              | 1946869225               |
| SNP_P4_85002_33322018 | NC_021165.1    | Ca_kabuli_chr06 | 33322018                | TT                              | CC              | 1946869227               |
| SNP_P4_85003_33322312 | NC_021165.1    | Ca_kabuli_chr06 | 33322312                | GG                              | AA              | 1946869229               |
| SNP_P4_85005_33336087 | NC_021165.1    | Ca_kabuli_chr06 | 33336087                | CC                              | TT              | 1946869231               |



| SNPs IDs              | Chromosome IDs | Chromosomes     | Physical positions (bp) | CDC Frontier (Reference genome) | (ILWC46 & LPNB) | NCBI SNPdb Accession IDs |
|-----------------------|----------------|-----------------|-------------------------|---------------------------------|-----------------|--------------------------|
| SNP_P4_85006_33337880 | NC_021165.1    | Ca_kabuli_chr06 | 33337880                | AA                              | GG              | 1946869233               |
| SNP_P4_85007_33340457 | NC_021165.1    | Ca_kabuli_chr06 | 33340457                | CC                              | TT              | 1946869235               |
| SNP_P4_85008_33340469 | NC_021165.1    | Ca_kabuli_chr06 | 33340469                | TT                              | CC              | 1946869237               |
| SNP_P4_85009_33340590 | NC_021165.1    | Ca_kabuli_chr06 | 33340590                | AA                              | TT              | 1946869239               |
| SNP_P4_85010_33340746 | NC_021165.1    | Ca_kabuli_chr06 | 33340746                | GG                              | AA              | 1946869241               |
| SNP_P4_85011_33340775 | NC_021165.1    | Ca_kabuli_chr06 | 33340775                | GG                              | TT              | 1946869243               |
| SNP_P4_85012_33340878 | NC_021165.1    | Ca_kabuli_chr06 | 33340878                | CC                              | AA              | 1946869245               |
| SNP_P4_85013_33340891 | NC_021165.1    | Ca_kabuli_chr06 | 33340891                | CC                              | TT              | 1946869247               |
| SNP_P4_85014_33340909 | NC_021165.1    | Ca_kabuli_chr06 | 33340909                | TT                              | CC              | 1946869249               |
| SNP_P4_85015_33340911 | NC_021165.1    | Ca_kabuli_chr06 | 33340911                | GG                              | AA              | 1946869251               |
| SNP_P4_85016_33340994 | NC_021165.1    | Ca_kabuli_chr06 | 33340994                | AA                              | GG              | 1946869253               |
| SNP_P4_85017_33341001 | NC_021165.1    | Ca_kabuli_chr06 | 33341001                | AA                              | GG              | 1946869255               |
| SNP_P4_85018_33341024 | NC_021165.1    | Ca_kabuli_chr06 | 33341024                | TT                              | CC              | 1946869257               |
| SNP_P4_85019_33341074 | NC_021165.1    | Ca_kabuli_chr06 | 33341074                | CC                              | TT              | 1946869259               |
| SNP_P4_85020_33341077 | NC_021165.1    | Ca_kabuli_chr06 | 33341077                | TT                              | CC              | 1946869261               |
| SNP_P4_85021_33341154 | NC_021165.1    | Ca_kabuli_chr06 | 33341154                | GG                              | AA              | 1946869263               |
| SNP_P4_85022_33341161 | NC_021165.1    | Ca_kabuli_chr06 | 33341161                | CC                              | AA              | 1946869265               |
| SNP_P4_85023_33341241 | NC_021165.1    | Ca_kabuli_chr06 | 33341241                | TT                              | CC              | 1946869267               |
| SNP_P4_85024_33341336 | NC_021165.1    | Ca_kabuli_chr06 | 33341336                | GG                              | TT              | 1946869269               |
| SNP_P4_85025_33341349 | NC_021165.1    | Ca_kabuli_chr06 | 33341349                | TT                              | CC              | 1946869271               |
| SNP_P4_85026_33341363 | NC_021165.1    | Ca_kabuli_chr06 | 33341363                | GG                              | AA              | 1946869273               |
| SNP_P4_85027_33341480 | NC_021165.1    | Ca_kabuli_chr06 | 33341480                | TT                              | CC              | 1946869274               |
| SNP_P4_85028_33341619 | NC_021165.1    | Ca_kabuli_chr06 | 33341619                | TT                              | CC              | 1946869277               |
| SNP_P4_85029_33341634 | NC_021165.1    | Ca_kabuli_chr06 | 33341634                | TT                              | GG              | 1946869279               |
| SNP_P4_85030_33341723 | NC_021165.1    | Ca_kabuli_chr06 | 33341723                | TT                              | AA              | 1946869280               |
| SNP_P4_85031_33346283 | NC_021165.1    | Ca_kabuli_chr06 | 33346283                | AA                              | GG              | 1946869281               |
| SNP_P4_85032_33346716 | NC_021165.1    | Ca_kabuli_chr06 | 33346716                | AA                              | GG              | 1946869282               |
| SNP_P4_85033_33357582 | NC_021165.1    | Ca_kabuli_chr06 | 33357582                | GG                              | TT              | 1946869283               |
| SNP_P4_85034_33358386 | NC_021165.1    | Ca_kabuli_chr06 | 33358386                | GG                              | AA              | 1946869284               |
| SNP_P4_85035_33360050 | NC_021165.1    | Ca_kabuli_chr06 | 33360050                | AA                              | GG              | 1946869286               |
| SNP_P4_85036_33392258 | NC_021165.1    | Ca_kabuli_chr06 | 33392258                | AA                              | TT              | 1946869288               |
| SNP_P4_85037_33408278 | NC_021165.1    | Ca_kabuli_chr06 | 33408278                | CC                              | AA              | 1946869290               |
| SNP_P4_85038_33426918 | NC_021165.1    | Ca_kabuli_chr06 | 33426918                | CC                              | AA              | 1946869292               |
| SNP_P4_85039_33427939 | NC_021165.1    | Ca_kabuli_chr06 | 33427939                | CC                              | TT              | 1946869294               |
| SNP_P4_85040_33443946 | NC_021165.1    | Ca_kabuli_chr06 | 33443946                | AA                              | GG              | 1946869296               |
| SNP_P4_85041_33444373 | NC_021165.1    | Ca_kabuli_chr06 | 33444373                | CC                              | TT              | 1946869298               |
| SNP_P4_85042_33444632 | NC_021165.1    | Ca_kabuli_chr06 | 33444632                | AA                              | CC              | 1946869300               |
| SNP_P4_85043_33444633 | NC_021165.1    | Ca_kabuli_chr06 | 33444633                | AA                              | TT              | 1946869302               |
| SNP_P4_85044_33444634 | NC_021165.1    | Ca_kabuli_chr06 | 33444634                | GG                              | CC              | 1946869304               |
| SNP_P4_85045_33444674 | NC_021165.1    | Ca_kabuli_chr06 | 33444674                | CC                              | AA              | 1946869306               |
| SNP_P4_85046_33444679 | NC_021165.1    | Ca_kabuli_chr06 | 33444679                | CC                              | TT              | 1946869308               |
| SNP_P4_85047_33444700 | NC_021165.1    | Ca_kabuli_chr06 | 33444700                | GG                              | AA              | 1946869310               |

| SNPs IDs              | Chromosome IDs | Chromosomes     | Physical positions (bp) | CDC Frontier (Reference genome) | (ILWC46 & LPNB) | NCBI SNPdb Accession IDs |
|-----------------------|----------------|-----------------|-------------------------|---------------------------------|-----------------|--------------------------|
| SNP_P4_85048_33444784 | NC_021165.1    | Ca_kabuli_chr06 | 33444784                | TT                              | AA              | 1946869312               |
| SNP_P4_85049_33444855 | NC_021165.1    | Ca_kabuli_chr06 | 33444855                | CC                              | TT              | 1946869314               |
| SNP_P4_85050_33457860 | NC_021165.1    | Ca_kabuli_chr06 | 33457860                | GG                              | TT              | 1946869316               |
| SNP_P4_85051_33457863 | NC_021165.1    | Ca_kabuli_chr06 | 33457863                | TT                              | GG              | 1946869318               |
| SNP_P4_85052_33457876 | NC_021165.1    | Ca_kabuli_chr06 | 33457876                | GG                              | TT              | 1946869320               |
| SNP_P4_85053_33457923 | NC_021165.1    | Ca_kabuli_chr06 | 33457923                | TT                              | CC              | 1946869322               |
| SNP_P4_85054_33457937 | NC_021165.1    | Ca_kabuli_chr06 | 33457937                | CC                              | TT              | 1946869324               |
| SNP_P4_85055_33458027 | NC_021165.1    | Ca_kabuli_chr06 | 33458027                | TT                              | CC              | 1946869326               |
| SNP_P4_85056_33458072 | NC_021165.1    | Ca_kabuli_chr06 | 33458072                | CC                              | TT              | 1946869328               |
| SNP_P4_85057_33474471 | NC_021165.1    | Ca_kabuli_chr06 | 33474471                | CC                              | TT              | 1946869330               |
| SNP_P4_85058_33474472 | NC_021165.1    | Ca_kabuli_chr06 | 33474472                | AA                              | TT              | 1946869332               |
| SNP_P4_85059_33491553 | NC_021165.1    | Ca_kabuli_chr06 | 33491553                | CC                              | TT              | 1946869334               |
| SNP_P4_85061_33534422 | NC_021165.1    | Ca_kabuli_chr06 | 33534422                | TT                              | GG              | 1946869336               |
| SNP_P4_85064_33578407 | NC_021165.1    | Ca_kabuli_chr06 | 33578407                | GG                              | AA              | 1946869338               |
| SNP_P4_85065_33578414 | NC_021165.1    | Ca_kabuli_chr06 | 33578414                | AA                              | TT              | 1946869340               |
| SNP_P4_85066_33578426 | NC_021165.1    | Ca_kabuli_chr06 | 33578426                | GG                              | AA              | 1946869343               |
| SNP_P4_85067_33578434 | NC_021165.1    | Ca_kabuli_chr06 | 33578434                | AA                              | TT              | 1946869345               |
| SNP_P4_85068_33589864 | NC_021165.1    | Ca_kabuli_chr06 | 33589864                | TT                              | AA              | 1946869347               |
| SNP_P4_85069_33633062 | NC_021165.1    | Ca_kabuli_chr06 | 33633062                | TT                              | CC              | 1946869349               |
| SNP_P4_85070_33633083 | NC_021165.1    | Ca_kabuli_chr06 | 33633083                | AA                              | GG              | 1946869351               |
| SNP_P4_85071_33633101 | NC_021165.1    | Ca_kabuli_chr06 | 33633101                | GG                              | AA              | 1946869352               |
| SNP_P4_85072_33649077 | NC_021165.1    | Ca_kabuli_chr06 | 33649077                | AA                              | CC              | 1946869353               |
| SNP_P4_85073_33649314 | NC_021165.1    | Ca_kabuli_chr06 | 33649314                | AA                              | GG              | 1946869354               |
| SNP_P4_85074_33649319 | NC_021165.1    | Ca_kabuli_chr06 | 33649319                | AA                              | GG              | 1946869355               |
| SNP_P4_85075_33649868 | NC_021165.1    | Ca_kabuli_chr06 | 33649868                | CC                              | TT              | 1946869357               |
| SNP_P4_85076_33649884 | NC_021165.1    | Ca_kabuli_chr06 | 33649884                | TT                              | CC              | 1946869359               |
| SNP_P4_85077_33650878 | NC_021165.1    | Ca_kabuli_chr06 | 33650878                | GG                              | AA              | 1946869361               |
| SNP_P4_85078_33651229 | NC_021165.1    | Ca_kabuli_chr06 | 33651229                | GG                              | AA              | 1946869363               |
| SNP_P4_85079_33651308 | NC_021165.1    | Ca_kabuli_chr06 | 33651308                | TT                              | CC              | 1946869365               |
| SNP_P4_85080_33651311 | NC_021165.1    | Ca_kabuli_chr06 | 33651311                | TT                              | CC              | 1946869367               |
| SNP_P4_85081_33651323 | NC_021165.1    | Ca_kabuli_chr06 | 33651323                | CC                              | TT              | 1946869369               |
| SNP_P4_85082_33651326 | NC_021165.1    | Ca_kabuli_chr06 | 33651326                | GG                              | AA              | 1946869371               |
| SNP_P4_85083_33651681 | NC_021165.1    | Ca_kabuli_chr06 | 33651681                | GG                              | AA              | 1946869373               |
| SNP_P4_85084_33655992 | NC_021165.1    | Ca_kabuli_chr06 | 33655992                | GG                              | AA              | 1946869375               |
| SNP_P4_85085_33657608 | NC_021165.1    | Ca_kabuli_chr06 | 33657608                | GG                              | AA              | 1946869377               |
| SNP_P4_85086_33769491 | NC_021165.1    | Ca_kabuli_chr06 | 33769491                | AA                              | GG              | 1946869379               |
| SNP_P4_85087_33787248 | NC_021165.1    | Ca_kabuli_chr06 | 33787248                | GG                              | AA              | 1946869381               |
| SNP_P4_85088_33787257 | NC_021165.1    | Ca_kabuli_chr06 | 33787257                | GG                              | AA              | 1946869383               |
| SNP_P4_85089_33802917 | NC_021165.1    | Ca_kabuli_chr06 | 33802917                | AA                              | GG              | 1946869385               |
| SNP_P4_85090_33851030 | NC_021165.1    | Ca_kabuli_chr06 | 33851030                | GG                              | CC              | 1946869387               |
| SNP_P4_85091_33877877 | NC_021165.1    | Ca_kabuli_chr06 | 33877877                | AA                              | GG              | 1946869389               |
| SNP_P4_85092_33877896 | NC_021165.1    | Ca_kabuli_chr06 | 33877896                | GG                              | AA              | 1946869391               |

| SNPs IDs              | Chromosome IDs | Chromosomes     | Physical positions (bp) | CDC Frontier (Reference genome) | (ILWC46 & LPNB) | NCBI SNPdb Accession IDs |
|-----------------------|----------------|-----------------|-------------------------|---------------------------------|-----------------|--------------------------|
| SNP_P4_85093_33886236 | NC_021165.1    | Ca_kabuli_chr06 | 33886236                | AA                              | CC              | 1946869393               |
| SNP_P4_85094_33886581 | NC_021165.1    | Ca_kabuli_chr06 | 33886581                | CC                              | AA              | 1946869394               |
| SNP_P4_85095_33886622 | NC_021165.1    | Ca_kabuli_chr06 | 33886622                | AA                              | CC              | 1946869396               |
| SNP_P4_85096_33889740 | NC_021165.1    | Ca_kabuli_chr06 | 33889740                | TT                              | CC              | 1946869398               |
| SNP_P4_85097_33918564 | NC_021165.1    | Ca_kabuli_chr06 | 33918564                | TT                              | CC              | 1946869400               |
| SNP_P4_85098_33918584 | NC_021165.1    | Ca_kabuli_chr06 | 33918584                | GG                              | TT              | 1946869402               |
| SNP_P4_85099_33919866 | NC_021165.1    | Ca_kabuli_chr06 | 33919866                | GG                              | AA              | 1946869404               |
| SNP_P4_85100_33928851 | NC_021165.1    | Ca_kabuli_chr06 | 33928851                | GG                              | AA              | 1946869406               |
| SNP_P4_85101_33941863 | NC_021165.1    | Ca_kabuli_chr06 | 33941863                | TT                              | CC              | 1946869408               |
| SNP_P4_85102_33941866 | NC_021165.1    | Ca_kabuli_chr06 | 33941866                | CC                              | TT              | 1946869410               |
| SNP_P4_85103_33942061 | NC_021165.1    | Ca_kabuli_chr06 | 33942061                | CC                              | TT              | 1946869412               |
| SNP_P4_85104_33942074 | NC_021165.1    | Ca_kabuli_chr06 | 33942074                | AA                              | GG              | 1946869414               |
| SNP_P4_85105_33946800 | NC_021165.1    | Ca_kabuli_chr06 | 33946800                | TT                              | GG              | 1946869416               |
| SNP_P4_85106_33969155 | NC_021165.1    | Ca_kabuli_chr06 | 33969155                | AA                              | GG              | 1946869418               |
| SNP_P4_85107_33974241 | NC_021165.1    | Ca_kabuli_chr06 | 33974241                | AA                              | TT              | 1946869420               |
| SNP_P4_85108_33974244 | NC_021165.1    | Ca_kabuli_chr06 | 33974244                | CC                              | AA              | 1946869422               |
| SNP_P4_85109_33981482 | NC_021165.1    | Ca_kabuli_chr06 | 33981482                | CC                              | TT              | 1946869424               |
| SNP_P4_85111_33981666 | NC_021165.1    | Ca_kabuli_chr06 | 33981666                | GG                              | AA              | 1946869426               |
| SNP_P4_85112_33986296 | NC_021165.1    | Ca_kabuli_chr06 | 33986296                | AA                              | GG              | 1946869428               |
| SNP_P4_85113_33986325 | NC_021165.1    | Ca_kabuli_chr06 | 33986325                | TT                              | CC              | 1946869430               |
| SNP_P4_85114_33988652 | NC_021165.1    | Ca_kabuli_chr06 | 33988652                | TT                              | CC              | 1946869432               |
| SNP_P4_85115_33988733 | NC_021165.1    | Ca_kabuli_chr06 | 33988733                | TT                              | AA              | 1946869434               |
| SNP_P4_85116_33988794 | NC_021165.1    | Ca_kabuli_chr06 | 33988794                | GG                              | AA              | 1946869436               |
| SNP_P4_85117_33988908 | NC_021165.1    | Ca_kabuli_chr06 | 33988908                | CC                              | TT              | 1946869438               |
| SNP_P4_85118_33988965 | NC_021165.1    | Ca_kabuli_chr06 | 33988965                | CC                              | TT              | 1946869440               |
| SNP_P4_85119_33988987 | NC_021165.1    | Ca_kabuli_chr06 | 33988987                | TT                              | AA              | 1946869441               |
| SNP_P4_85120_33989002 | NC_021165.1    | Ca_kabuli_chr06 | 33989002                | TT                              | GG              | 1946869443               |
| SNP_P4_85121_33989015 | NC_021165.1    | Ca_kabuli_chr06 | 33989015                | GG                              | AA              | 1946869445               |
| SNP_P4_85122_33989067 | NC_021165.1    | Ca_kabuli_chr06 | 33989067                | CC                              | AA              | 1946869447               |
| SNP_P4_85123_33989076 | NC_021165.1    | Ca_kabuli_chr06 | 33989076                | CC                              | GG              | 1946869449               |
| SNP_P4_85124_33989115 | NC_021165.1    | Ca_kabuli_chr06 | 33989115                | CC                              | TT              | 1946869451               |
| SNP_P4_85125_33995807 | NC_021165.1    | Ca_kabuli_chr06 | 33995807                | AA                              | GG              | 1946869453               |
| SNP_P4_85127_34008584 | NC_021165.1    | Ca_kabuli_chr06 | 34008584                | GG                              | AA              | 1946869455               |
| SNP_P4_85128_34015273 | NC_021165.1    | Ca_kabuli_chr06 | 34015273                | CC                              | TT              | 1946869457               |
| SNP_P4_85129_34015281 | NC_021165.1    | Ca_kabuli_chr06 | 34015281                | AA                              | TT              | 1946869459               |
| SNP_P4_85130_34020955 | NC_021165.1    | Ca_kabuli_chr06 | 34020955                | GG                              | AA              | 1946869461               |
| SNP_P4_85131_34021795 | NC_021165.1    | Ca_kabuli_chr06 | 34021795                | TT                              | AA              | 1946869463               |
| SNP_P4_85132_34029781 | NC_021165.1    | Ca_kabuli_chr06 | 34029781                | CC                              | TT              | 1946869465               |
| SNP_P4_85133_34029812 | NC_021165.1    | Ca_kabuli_chr06 | 34029812                | TT                              | CC              | 1946869467               |
| SNP_P4_85135_34047891 | NC_021165.1    | Ca_kabuli_chr06 | 34047891                | AA                              | TT              | 1946869469               |
| SNP_P4_85136_34052328 | NC_021165.1    | Ca_kabuli_chr06 | 34052328                | CC                              | GG              | 1946869471               |
| SNP_P4_85137_34058248 | NC_021165.1    | Ca_kabuli_chr06 | 34058248                | AA                              | TT              | 1946869473               |

| SNPs IDs              | Chromosome IDs | Chromosomes     | Physical positions (bp) | CDC Frontier (Reference genome) | (ILWC46 & LPNB) | NCBI SNPdb Accession IDs |
|-----------------------|----------------|-----------------|-------------------------|---------------------------------|-----------------|--------------------------|
| SNP_P4_85138_34058321 | NC_021165.1    | Ca_kabuli_chr06 | 34058321                | TT                              | CC              | 1946869475               |
| SNP_P4_85139_34058616 | NC_021165.1    | Ca_kabuli_chr06 | 34058616                | GG                              | AA              | 1946869477               |
| SNP_P4_85140_34058647 | NC_021165.1    | Ca_kabuli_chr06 | 34058647                | TT                              | CC              | 1946869479               |
| SNP_P4_85141_34058665 | NC_021165.1    | Ca_kabuli_chr06 | 34058665                | CC                              | GG              | 1946869481               |
| SNP_P4_85142_34058666 | NC_021165.1    | Ca_kabuli_chr06 | 34058666                | AA                              | GG              | 1946869483               |
| SNP_P4_85143_34058695 | NC_021165.1    | Ca_kabuli_chr06 | 34058695                | TT                              | CC              | 1946869485               |
| SNP_P4_85144_34058737 | NC_021165.1    | Ca_kabuli_chr06 | 34058737                | GG                              | AA              | 1946869487               |
| SNP_P4_85145_34065190 | NC_021165.1    | Ca_kabuli_chr06 | 34065190                | CC                              | TT              | 1946869489               |
| SNP_P4_85146_34065490 | NC_021165.1    | Ca_kabuli_chr06 | 34065490                | TT                              | CC              | 1946869491               |
| SNP_P4_85147_34065492 | NC_021165.1    | Ca_kabuli_chr06 | 34065492                | AA                              | CC              | 1946869493               |
| SNP_P4_85148_34065493 | NC_021165.1    | Ca_kabuli_chr06 | 34065493                | CC                              | AA              | 1946869495               |
| SNP_P4_85149_34065508 | NC_021165.1    | Ca_kabuli_chr06 | 34065508                | TT                              | AA              | 1946869497               |
| SNP_P4_85150_34090664 | NC_021165.1    | Ca_kabuli_chr06 | 34090664                | GG                              | AA              | 1946869499               |
| SNP_P4_85151_34091727 | NC_021165.1    | Ca_kabuli_chr06 | 34091727                | TT                              | GG              | 1946869501               |
| SNP_P4_85152_34091742 | NC_021165.1    | Ca_kabuli_chr06 | 34091742                | AA                              | TT              | 1946869503               |
| SNP_P4_85153_34091743 | NC_021165.1    | Ca_kabuli_chr06 | 34091743                | TT                              | CC              | 1946869505               |
| SNP_P4_85154_34092061 | NC_021165.1    | Ca_kabuli_chr06 | 34092061                | CC                              | TT              | 1946869507               |
| SNP_P4_85155_34092916 | NC_021165.1    | Ca_kabuli_chr06 | 34092916                | CC                              | GG              | 1946869509               |
| SNP_P4_85156_34117482 | NC_021165.1    | Ca_kabuli_chr06 | 34117482                | TT                              | GG              | 1946869511               |
| SNP_P4_85157_34125795 | NC_021165.1    | Ca_kabuli_chr06 | 34125795                | AA                              | GG              | 1946869513               |
| SNP_P4_85159_34135502 | NC_021165.1    | Ca_kabuli_chr06 | 34135502                | TT                              | GG              | 1946869515               |
| SNP_P4_85160_34143440 | NC_021165.1    | Ca_kabuli_chr06 | 34143440                | GG                              | AA              | 1946869517               |
| SNP_P4_85161_34143442 | NC_021165.1    | Ca_kabuli_chr06 | 34143442                | GG                              | AA              | 1946869519               |
| SNP_P4_85162_34143443 | NC_021165.1    | Ca_kabuli_chr06 | 34143443                | CC                              | TT              | 1946869521               |
| SNP_P4_85163_34143445 | NC_021165.1    | Ca_kabuli_chr06 | 34143445                | AA                              | GG              | 1946869523               |
| SNP_P4_85164_34144518 | NC_021165.1    | Ca_kabuli_chr06 | 34144518                | TT                              | AA              | 1946869525               |
| SNP_P4_85165_34144528 | NC_021165.1    | Ca_kabuli_chr06 | 34144528                | TT                              | GG              | 1946869527               |
| SNP_P4_85166_34144550 | NC_021165.1    | Ca_kabuli_chr06 | 34144550                | GG                              | AA              | 1946869529               |
| SNP_P4_85167_34144576 | NC_021165.1    | Ca_kabuli_chr06 | 34144576                | GG                              | CC              | 1946869531               |
| SNP_P4_85168_34144590 | NC_021165.1    | Ca_kabuli_chr06 | 34144590                | AA                              | TT              | 1946869533               |
| SNP_P4_85169_34144594 | NC_021165.1    | Ca_kabuli_chr06 | 34144594                | CC                              | TT              | 1946869535               |
| SNP_P4_85170_34144606 | NC_021165.1    | Ca_kabuli_chr06 | 34144606                | AA                              | GG              | 1946869537               |
| SNP_P4_85171_34144620 | NC_021165.1    | Ca_kabuli_chr06 | 34144620                | AA                              | CC              | 1946869539               |
| SNP_P4_85172_34144653 | NC_021165.1    | Ca_kabuli_chr06 | 34144653                | AA                              | TT              | 1946869541               |
| SNP_P4_85173_34144654 | NC_021165.1    | Ca_kabuli_chr06 | 34144654                | TT                              | AA              | 1946869543               |
| SNP_P4_85174_34144669 | NC_021165.1    | Ca_kabuli_chr06 | 34144669                | CC                              | GG              | 1946869545               |
| SNP_P4_85175_34144946 | NC_021165.1    | Ca_kabuli_chr06 | 34144946                | TT                              | CC              | 1946869547               |
| SNP_P4_85176_34144962 | NC_021165.1    | Ca_kabuli_chr06 | 34144962                | TT                              | AA              | 1946869549               |
| SNP_P4_85177_34144975 | NC_021165.1    | Ca_kabuli_chr06 | 34144975                | AA                              | GG              | 1946869551               |
| SNP_P4_85178_34145005 | NC_021165.1    | Ca_kabuli_chr06 | 34145005                | TT                              | GG              | 1946869553               |
| SNP_P4_85179_34145096 | NC_021165.1    | Ca_kabuli_chr06 | 34145096                | AA                              | TT              | 1946869555               |
| SNP_P4_85180_34162053 | NC_021165.1    | Ca_kabuli_chr06 | 34162053                | TT                              | CC              | 1946869557               |

| SNPs IDs              | Chromosome IDs | Chromosomes     | Physical positions (bp) | CDC Frontier (Reference genome) | (ILWC46 & LPNB) | NCBI SNPdb Accession IDs |
|-----------------------|----------------|-----------------|-------------------------|---------------------------------|-----------------|--------------------------|
| SNP_P4_85181_34162098 | NC_021165.1    | Ca_kabuli_chr06 | 34162098                | AA                              | TT              | 1946869559               |
| SNP_P4_85182_34162115 | NC_021165.1    | Ca_kabuli_chr06 | 34162115                | AA                              | GG              | 1946869561               |
| SNP_P4_85184_34162270 | NC_021165.1    | Ca_kabuli_chr06 | 34162270                | TT                              | AA              | 1946869563               |
| SNP_P4_85185_34162299 | NC_021165.1    | Ca_kabuli_chr06 | 34162299                | GG                              | TT              | 1946869565               |
| SNP_P4_85186_34162369 | NC_021165.1    | Ca_kabuli_chr06 | 34162369                | TT                              | AA              | 1946869567               |
| SNP_P4_85187_34162372 | NC_021165.1    | Ca_kabuli_chr06 | 34162372                | AA                              | CC              | 1946869569               |
| SNP_P4_85188_34162544 | NC_021165.1    | Ca_kabuli_chr06 | 34162544                | CC                              | AA              | 1946869571               |
| SNP_P4_85189_34162552 | NC_021165.1    | Ca_kabuli_chr06 | 34162552                | AA                              | CC              | 1946869573               |
| SNP_P4_85190_34162808 | NC_021165.1    | Ca_kabuli_chr06 | 34162808                | CC                              | TT              | 1946869575               |
| SNP_P4_85191_34163692 | NC_021165.1    | Ca_kabuli_chr06 | 34163692                | GG                              | CC              | 1946869577               |
| SNP_P4_85192_34164186 | NC_021165.1    | Ca_kabuli_chr06 | 34164186                | GG                              | AA              | 1946869579               |
| SNP_P4_85193_34164255 | NC_021165.1    | Ca_kabuli_chr06 | 34164255                | CC                              | AA              | 1946869581               |
| SNP_P4_85194_34164271 | NC_021165.1    | Ca_kabuli_chr06 | 34164271                | CC                              | TT              | 1946869583               |
| SNP_P4_85195_34164326 | NC_021165.1    | Ca_kabuli_chr06 | 34164326                | TT                              | CC              | 1946869585               |
| SNP_P4_85196_34164361 | NC_021165.1    | Ca_kabuli_chr06 | 34164361                | CC                              | TT              | 1946869587               |
| SNP_P4_85197_34164374 | NC_021165.1    | Ca_kabuli_chr06 | 34164374                | TT                              | AA              | 1946869589               |
| SNP_P4_85198_34164382 | NC_021165.1    | Ca_kabuli_chr06 | 34164382                | AA                              | TT              | 1946869591               |
| SNP_P4_85199_34164405 | NC_021165.1    | Ca_kabuli_chr06 | 34164405                | GG                              | AA              | 1946869593               |
| SNP_P4_85200_34164428 | NC_021165.1    | Ca_kabuli_chr06 | 34164428                | AA                              | TT              | 1946869595               |
| SNP_P4_85201_34164493 | NC_021165.1    | Ca_kabuli_chr06 | 34164493                | AA                              | GG              | 1946869598               |
| SNP_P4_85202_34164500 | NC_021165.1    | Ca_kabuli_chr06 | 34164500                | CC                              | AA              | 1946869600               |
| SNP_P4_85203_34164542 | NC_021165.1    | Ca_kabuli_chr06 | 34164542                | TT                              | AA              | 1946869602               |
| SNP_P4_85204_34164567 | NC_021165.1    | Ca_kabuli_chr06 | 34164567                | CC                              | AA              | 1946869604               |
| SNP_P4_85205_34164568 | NC_021165.1    | Ca_kabuli_chr06 | 34164568                | CC                              | AA              | 1946869606               |
| SNP_P4_85206_34164641 | NC_021165.1    | Ca_kabuli_chr06 | 34164641                | TT                              | GG              | 1946869608               |
| SNP_P4_85207_34164677 | NC_021165.1    | Ca_kabuli_chr06 | 34164677                | GG                              | AA              | 1946869610               |
| SNP_P4_85209_34164785 | NC_021165.1    | Ca_kabuli_chr06 | 34164785                | TT                              | GG              | 1946869612               |
| SNP_P4_85210_34164787 | NC_021165.1    | Ca_kabuli_chr06 | 34164787                | AA                              | GG              | 1946869614               |
| SNP_P4_85211_34164824 | NC_021165.1    | Ca_kabuli_chr06 | 34164824                | CC                              | TT              | 1946869616               |
| SNP_P4_85212_34164845 | NC_021165.1    | Ca_kabuli_chr06 | 34164845                | TT                              | CC              | 1946869618               |
| SNP_P4_85213_34164875 | NC_021165.1    | Ca_kabuli_chr06 | 34164875                | GG                              | AA              | 1946869620               |
| SNP_P4_85214_34164899 | NC_021165.1    | Ca_kabuli_chr06 | 34164899                | TT                              | AA              | 1946869623               |
| SNP_P4_85215_34164916 | NC_021165.1    | Ca_kabuli_chr06 | 34164916                | GG                              | TT              | 1946869625               |
| SNP_P4_85216_34164922 | NC_021165.1    | Ca_kabuli_chr06 | 34164922                | CC                              | AA              | 1946869627               |
| SNP_P4_85217_34164940 | NC_021165.1    | Ca_kabuli_chr06 | 34164940                | CC                              | TT              | 1946869629               |
| SNP_P4_85218_34165916 | NC_021165.1    | Ca_kabuli_chr06 | 34165916                | TT                              | AA              | 1946869631               |
| SNP_P4_85219_34165935 | NC_021165.1    | Ca_kabuli_chr06 | 34165935                | TT                              | CC              | 1946869633               |
| SNP_P4_85220_34165940 | NC_021165.1    | Ca_kabuli_chr06 | 34165940                | CC                              | GG              | 1946869635               |
| SNP_P4_85221_34165942 | NC_021165.1    | Ca_kabuli_chr06 | 34165942                | TT                              | CC              | 1946869637               |
| SNP_P4_85222_34166303 | NC_021165.1    | Ca_kabuli_chr06 | 34166303                | AA                              | TT              | 1946869639               |
| SNP_P4_85223_34166338 | NC_021165.1    | Ca_kabuli_chr06 | 34166338                | TT                              | AA              | 1946869641               |
| SNP_P4_85224_34169563 | NC_021165.1    | Ca_kabuli_chr06 | 34169563                | AA                              | GG              | 1946869643               |

| SNPs IDs              | Chromosome IDs | Chromosomes     | Physical positions (bp) | CDC Frontier (Reference genome) | (ILWC46 & LPNB) | NCBI SNPdb Accession IDs |
|-----------------------|----------------|-----------------|-------------------------|---------------------------------|-----------------|--------------------------|
| SNP_P4_85226_34186047 | NC_021165.1    | Ca_kabuli_chr06 | 34186047                | GG                              | TT              | 1946869645               |
| SNP_P4_85227_34190393 | NC_021165.1    | Ca_kabuli_chr06 | 34190393                | TT                              | CC              | 1946869647               |
| SNP_P4_85228_34190711 | NC_021165.1    | Ca_kabuli_chr06 | 34190711                | CC                              | TT              | 1946869649               |
| SNP_P4_85229_34211809 | NC_021165.1    | Ca_kabuli_chr06 | 34211809                | GG                              | AA              | 1946869651               |
| SNP_P4_85232_34362493 | NC_021165.1    | Ca_kabuli_chr06 | 34362493                | TT                              | AA              | 1946869653               |
| SNP_P4_85233_34434180 | NC_021165.1    | Ca_kabuli_chr06 | 34434180                | AA                              | GG              | 1946869655               |
| SNP_P4_85234_34439378 | NC_021165.1    | Ca_kabuli_chr06 | 34439378                | GG                              | AA              | 1946869657               |
| SNP_P4_85235_34457463 | NC_021165.1    | Ca_kabuli_chr06 | 34457463                | TT                              | CC              | 1946869660               |
| SNP_P4_85236_34469778 | NC_021165.1    | Ca_kabuli_chr06 | 34469778                | GG                              | AA              | 1946869662               |
| SNP_P4_85237_34473494 | NC_021165.1    | Ca_kabuli_chr06 | 34473494                | CC                              | TT              | 1946869664               |
| SNP_P4_85238_34503833 | NC_021165.1    | Ca_kabuli_chr06 | 34503833                | GG                              | AA              | 1946869666               |
| SNP_P4_85239_34528851 | NC_021165.1    | Ca_kabuli_chr06 | 34528851                | AA                              | GG              | 1946869668               |
| SNP_P4_85241_34564531 | NC_021165.1    | Ca_kabuli_chr06 | 34564531                | GG                              | AA              | 1946869670               |
| SNP_P4_85242_34564592 | NC_021165.1    | Ca_kabuli_chr06 | 34564592                | AA                              | GG              | 1946869672               |
| SNP_P4_85243_34565082 | NC_021165.1    | Ca_kabuli_chr06 | 34565082                | AA                              | TT              | 1946869674               |
| SNP_P4_85244_34567388 | NC_021165.1    | Ca_kabuli_chr06 | 34567388                | CC                              | TT              | 1946869676               |
| SNP_P4_85245_34567404 | NC_021165.1    | Ca_kabuli_chr06 | 34567404                | CC                              | TT              | 1946869678               |
| SNP_P4_85246_34567840 | NC_021165.1    | Ca_kabuli_chr06 | 34567840                | AA                              | TT              | 1946869680               |
| SNP_P4_85247_34567868 | NC_021165.1    | Ca_kabuli_chr06 | 34567868                | AA                              | GG              | 1946869682               |
| SNP_P4_85248_34567915 | NC_021165.1    | Ca_kabuli_chr06 | 34567915                | TT                              | AA              | 1946869684               |
| SNP_P4_85249_34568424 | NC_021165.1    | Ca_kabuli_chr06 | 34568424                | AA                              | GG              | 1946869686               |
| SNP_P4_85250_34568508 | NC_021165.1    | Ca_kabuli_chr06 | 34568508                | GG                              | AA              | 1946869688               |
| SNP_P4_85251_34569956 | NC_021165.1    | Ca_kabuli_chr06 | 34569956                | CC                              | TT              | 1946869690               |
| SNP_P4_85252_34569991 | NC_021165.1    | Ca_kabuli_chr06 | 34569991                | TT                              | AA              | 1946869692               |
| SNP_P4_85253_34570076 | NC_021165.1    | Ca_kabuli_chr06 | 34570076                | TT                              | CC              | 1946869694               |
| SNP_P4_85255_34570332 | NC_021165.1    | Ca_kabuli_chr06 | 34570332                | TT                              | CC              | 1946869697               |
| SNP_P4_85256_34570339 | NC_021165.1    | Ca_kabuli_chr06 | 34570339                | CC                              | TT              | 1946869699               |
| SNP_P4_85257_34570354 | NC_021165.1    | Ca_kabuli_chr06 | 34570354                | GG                              | AA              | 1946869701               |
| SNP_P4_85258_34570587 | NC_021165.1    | Ca_kabuli_chr06 | 34570587                | TT                              | CC              | 1946869703               |
| SNP_P4_85259_34570856 | NC_021165.1    | Ca_kabuli_chr06 | 34570856                | AA                              | GG              | 1946869705               |
| SNP_P4_85260_34570889 | NC_021165.1    | Ca_kabuli_chr06 | 34570889                | CC                              | AA              | 1946869707               |
| SNP_P4_85261_34570890 | NC_021165.1    | Ca_kabuli_chr06 | 34570890                | GG                              | AA              | 1946869709               |
| SNP_P4_85262_34570892 | NC_021165.1    | Ca_kabuli_chr06 | 34570892                | TT                              | CC              | 1946869711               |
| SNP_P4_85263_34570908 | NC_021165.1    | Ca_kabuli_chr06 | 34570908                | CC                              | AA              | 1946869713               |
| SNP_P4_85264_34614916 | NC_021165.1    | Ca_kabuli_chr06 | 34614916                | TT                              | CC              | 1946869715               |
| SNP_P4_85265_34614925 | NC_021165.1    | Ca_kabuli_chr06 | 34614925                | TT                              | CC              | 1946869717               |
| SNP_P4_85266_34614926 | NC_021165.1    | Ca_kabuli_chr06 | 34614926                | AA                              | GG              | 1946869719               |
| SNP_P4_85267_34632261 | NC_021165.1    | Ca_kabuli_chr06 | 34632261                | TT                              | AA              | 1946869721               |
| SNP_P4_85268_34662202 | NC_021165.1    | Ca_kabuli_chr06 | 34662202                | GG                              | AA              | 1946869723               |
| SNP_P4_85269_34662207 | NC_021165.1    | Ca_kabuli_chr06 | 34662207                | AA                              | TT              | 1946869725               |
| SNP_P4_85270_34662237 | NC_021165.1    | Ca_kabuli_chr06 | 34662237                | GG                              | CC              | 1946869727               |
| SNP_P4_85271_34662249 | NC_021165.1    | Ca_kabuli_chr06 | 34662249                | TT                              | CC              | 1946869730               |

| SNPs IDs              | Chromosome IDs | Chromosomes     | Physical positions (bp) | CDC Frontier (Reference genome) | (ILWC46 & LPNB) | NCBI SNPdb Accession IDs |
|-----------------------|----------------|-----------------|-------------------------|---------------------------------|-----------------|--------------------------|
| SNP_P4_85272_34662251 | NC_021165.1    | Ca_kabuli_chr06 | 34662251                | TT                              | CC              | 1946869732               |
| SNP_P4_85273_34662313 | NC_021165.1    | Ca_kabuli_chr06 | 34662313                | CC                              | TT              | 1946869734               |
| SNP_P4_85274_34684298 | NC_021165.1    | Ca_kabuli_chr06 | 34684298                | CC                              | TT              | 1946869736               |
| SNP_P4_85275_34684384 | NC_021165.1    | Ca_kabuli_chr06 | 34684384                | TT                              | CC              | 1946869738               |
| SNP_P4_85277_34684473 | NC_021165.1    | Ca_kabuli_chr06 | 34684473                | TT                              | CC              | 1946869740               |
| SNP_P4_85278_34684676 | NC_021165.1    | Ca_kabuli_chr06 | 34684676                | AA                              | TT              | 1946869742               |
| SNP_P4_85279_34684677 | NC_021165.1    | Ca_kabuli_chr06 | 34684677                | CC                              | TT              | 1946869744               |
| SNP_P4_85280_34684679 | NC_021165.1    | Ca_kabuli_chr06 | 34684679                | TT                              | GG              | 1946869746               |
| SNP_P4_85281_34684687 | NC_021165.1    | Ca_kabuli_chr06 | 34684687                | GG                              | AA              | 1946869749               |
| SNP_P4_85282_34684722 | NC_021165.1    | Ca_kabuli_chr06 | 34684722                | TT                              | AA              | 1946869751               |
| SNP_P4_85283_34705335 | NC_021165.1    | Ca_kabuli_chr06 | 34705335                | CC                              | TT              | 1946869753               |
| SNP_P4_85285_34741513 | NC_021165.1    | Ca_kabuli_chr06 | 34741513                | GG                              | AA              | 1946869755               |
| SNP_P4_85287_34749827 | NC_021165.1    | Ca_kabuli_chr06 | 34749827                | CC                              | TT              | 1946869757               |
| SNP_P4_85288_34763089 | NC_021165.1    | Ca_kabuli_chr06 | 34763089                | GG                              | AA              | 1946869759               |
| SNP_P4_85289_34799476 | NC_021165.1    | Ca_kabuli_chr06 | 34799476                | AA                              | GG              | 1946869761               |
| SNP_P4_85290_34799512 | NC_021165.1    | Ca_kabuli_chr06 | 34799512                | TT                              | GG              | 1946869763               |
| SNP_P4_85291_34799518 | NC_021165.1    | Ca_kabuli_chr06 | 34799518                | AA                              | GG              | 1946869765               |
| SNP_P4_85292_34799527 | NC_021165.1    | Ca_kabuli_chr06 | 34799527                | AA                              | GG              | 1946869767               |
| SNP_P4_85293_34799538 | NC_021165.1    | Ca_kabuli_chr06 | 34799538                | CC                              | TT              | 1946869770               |
| SNP_P4_85294_34799564 | NC_021165.1    | Ca_kabuli_chr06 | 34799564                | AA                              | GG              | 1946869772               |
| SNP_P4_85295_34799938 | NC_021165.1    | Ca_kabuli_chr06 | 34799938                | AA                              | GG              | 1946869774               |
| SNP_P4_85296_34799954 | NC_021165.1    | Ca_kabuli_chr06 | 34799954                | GG                              | AA              | 1946869776               |
| SNP_P4_85297_34806679 | NC_021165.1    | Ca_kabuli_chr06 | 34806679                | TT                              | CC              | 1946869778               |
| SNP_P4_85298_34809769 | NC_021165.1    | Ca_kabuli_chr06 | 34809769                | AA                              | TT              | 1946869780               |
| SNP_P4_85299_34809802 | NC_021165.1    | Ca_kabuli_chr06 | 34809802                | AA                              | TT              | 1946869782               |
| SNP_P4_85300_34809850 | NC_021165.1    | Ca_kabuli_chr06 | 34809850                | CC                              | TT              | 1946869784               |
| SNP_P4_85301_34810189 | NC_021165.1    | Ca_kabuli_chr06 | 34810189                | CC                              | TT              | 1946869786               |
| SNP_P4_85302_34810217 | NC_021165.1    | Ca_kabuli_chr06 | 34810217                | GG                              | CC              | 1946869788               |
| SNP_P4_85303_34814324 | NC_021165.1    | Ca_kabuli_chr06 | 34814324                | AA                              | GG              | 1946869790               |
| SNP_P4_85304_34814562 | NC_021165.1    | Ca_kabuli_chr06 | 34814562                | TT                              | CC              | 1946869792               |
| SNP_P4_85305_34814656 | NC_021165.1    | Ca_kabuli_chr06 | 34814656                | AA                              | GG              | 1946869794               |
| SNP_P4_85306_34814693 | NC_021165.1    | Ca_kabuli_chr06 | 34814693                | TT                              | CC              | 1946869796               |
| SNP_P4_85307_34814718 | NC_021165.1    | Ca_kabuli_chr06 | 34814718                | GG                              | AA              | 1946869798               |
| SNP_P4_85309_34816145 | NC_021165.1    | Ca_kabuli_chr06 | 34816145                | CC                              | TT              | 1946869800               |
| SNP_P4_85310_34816146 | NC_021165.1    | Ca_kabuli_chr06 | 34816146                | GG                              | AA              | 1946869802               |
| SNP_P4_85311_34820420 | NC_021165.1    | Ca_kabuli_chr06 | 34820420                | AA                              | TT              | 1946869804               |
| SNP_P4_85312_34820421 | NC_021165.1    | Ca_kabuli_chr06 | 34820421                | CC                              | TT              | 1946869806               |
| SNP_P4_85313_34820422 | NC_021165.1    | Ca_kabuli_chr06 | 34820422                | AA                              | TT              | 1946869808               |
| SNP_P4_85314_34820424 | NC_021165.1    | Ca_kabuli_chr06 | 34820424                | TT                              | GG              | 1946869810               |
| SNP_P4_85317_34836781 | NC_021165.1    | Ca_kabuli_chr06 | 34836781                | CC                              | TT              | 1946869812               |
| SNP_P4_85319_34847119 | NC_021165.1    | Ca_kabuli_chr06 | 34847119                | GG                              | TT              | 1946869814               |
| SNP_P4_85320_34851314 | NC_021165.1    | Ca_kabuli_chr06 | 34851314                | TT                              | AA              | 1946869817               |

| SNPs IDs              | Chromosome IDs | Chromosomes     | Physical positions (bp) | CDC Frontier (Reference genome) | (ILWC46 & LPNB) | NCBI SNPdb Accession IDs |
|-----------------------|----------------|-----------------|-------------------------|---------------------------------|-----------------|--------------------------|
| SNP_P4_85322_34862527 | NC_021165.1    | Ca_kabuli_chr06 | 34862527                | GG                              | TT              | 1946869819               |
| SNP_P4_85323_34866397 | NC_021165.1    | Ca_kabuli_chr06 | 34866397                | GG                              | TT              | 1946869821               |
| SNP_P4_85324_34866406 | NC_021165.1    | Ca_kabuli_chr06 | 34866406                | AA                              | TT              | 1946869823               |
| SNP_P4_85325_34869402 | NC_021165.1    | Ca_kabuli_chr06 | 34869402                | GG                              | TT              | 1946869825               |
| SNP_P4_85326_34874329 | NC_021165.1    | Ca_kabuli_chr06 | 34874329                | CC                              | TT              | 1946869827               |
| SNP_P4_85328_34902107 | NC_021165.1    | Ca_kabuli_chr06 | 34902107                | GG                              | AA              | 1946869829               |
| SNP_P4_85329_34904070 | NC_021165.1    | Ca_kabuli_chr06 | 34904070                | GG                              | TT              | 1946869831               |
| SNP_P4_85330_34930662 | NC_021165.1    | Ca_kabuli_chr06 | 34930662                | GG                              | AA              | 1946869833               |
| SNP_P4_85331_34937572 | NC_021165.1    | Ca_kabuli_chr06 | 34937572                | GG                              | TT              | 1946869835               |
| SNP_P4_85332_34956426 | NC_021165.1    | Ca_kabuli_chr06 | 34956426                | GG                              | AA              | 1946869837               |
| SNP_P4_85333_34956571 | NC_021165.1    | Ca_kabuli_chr06 | 34956571                | TT                              | AA              | 1946869839               |
| SNP_P4_85334_34956580 | NC_021165.1    | Ca_kabuli_chr06 | 34956580                | AA                              | GG              | 1946869841               |
| SNP_P4_85335_34956596 | NC_021165.1    | Ca_kabuli_chr06 | 34956596                | AA                              | TT              | 1946869843               |
| SNP_P4_85336_34956600 | NC_021165.1    | Ca_kabuli_chr06 | 34956600                | AA                              | TT              | 1946869845               |
| SNP_P4_85337_34981114 | NC_021165.1    | Ca_kabuli_chr06 | 34981114                | AA                              | GG              | 1946869847               |
| SNP_P4_85339_34984008 | NC_021165.1    | Ca_kabuli_chr06 | 34984008                | AA                              | TT              | 1946869850               |
| SNP_P4_85340_35040209 | NC_021165.1    | Ca_kabuli_chr06 | 35040209                | CC                              | TT              | 1946869852               |
| SNP_P4_85342_35078686 | NC_021165.1    | Ca_kabuli_chr06 | 35078686                | CC                              | TT              | 1946869854               |
| SNP_P4_85344_35113806 | NC_021165.1    | Ca_kabuli_chr06 | 35113806                | AA                              | CC              | 1946869856               |
| SNP_P4_85345_35124647 | NC_021165.1    | Ca_kabuli_chr06 | 35124647                | GG                              | AA              | 1946869858               |
| SNP_P4_85346_35153944 | NC_021165.1    | Ca_kabuli_chr06 | 35153944                | GG                              | CC              | 1946869860               |
| SNP_P4_85347_35157910 | NC_021165.1    | Ca_kabuli_chr06 | 35157910                | CC                              | TT              | 1946869862               |
| SNP_P4_85348_35161466 | NC_021165.1    | Ca_kabuli_chr06 | 35161466                | AA                              | GG              | 1946869867               |
| SNP_P4_85349_35161598 | NC_021165.1    | Ca_kabuli_chr06 | 35161598                | AA                              | CC              | 1946869874               |
| SNP_P4_85350_35161619 | NC_021165.1    | Ca_kabuli_chr06 | 35161619                | AA                              | GG              | 1946869876               |
| SNP_P4_85351_35161698 | NC_021165.1    | Ca_kabuli_chr06 | 35161698                | TT                              | CC              | 1946869878               |
| SNP_P4_85352_35161771 | NC_021165.1    | Ca_kabuli_chr06 | 35161771                | TT                              | CC              | 1946869880               |
| SNP_P4_85353_35161784 | NC_021165.1    | Ca_kabuli_chr06 | 35161784                | CC                              | TT              | 1946869882               |
| SNP_P4_85354_35161789 | NC_021165.1    | Ca_kabuli_chr06 | 35161789                | AA                              | GG              | 1946869884               |
| SNP_P4_85356_35161839 | NC_021165.1    | Ca_kabuli_chr06 | 35161839                | GG                              | AA              | 1946869886               |
| SNP_P4_85357_35161860 | NC_021165.1    | Ca_kabuli_chr06 | 35161860                | TT                              | AA              | 1946869888               |
| SNP_P4_85358_35161938 | NC_021165.1    | Ca_kabuli_chr06 | 35161938                | AA                              | GG              | 1946869890               |
| SNP_P4_85359_35161984 | NC_021165.1    | Ca_kabuli_chr06 | 35161984                | AA                              | GG              | 1946869892               |
| SNP_P4_85360_35161987 | NC_021165.1    | Ca_kabuli_chr06 | 35161987                | AA                              | TT              | 1946869893               |
| SNP_P4_85361_35162091 | NC_021165.1    | Ca_kabuli_chr06 | 35162091                | TT                              | CC              | 1946869895               |
| SNP_P4_85362_35167215 | NC_021165.1    | Ca_kabuli_chr06 | 35167215                | AA                              | GG              | 1946869897               |
| SNP_P4_85363_35167598 | NC_021165.1    | Ca_kabuli_chr06 | 35167598                | AA                              | GG              | 1946869899               |
| SNP_P4_85364_35168288 | NC_021165.1    | Ca_kabuli_chr06 | 35168288                | TT                              | CC              | 1946869901               |
| SNP_P4_85365_35168290 | NC_021165.1    | Ca_kabuli_chr06 | 35168290                | AA                              | GG              | 1946869903               |
| SNP_P4_85366_35168347 | NC_021165.1    | Ca_kabuli_chr06 | 35168347                | AA                              | TT              | 1946869905               |
| SNP_P4_85367_35169645 | NC_021165.1    | Ca_kabuli_chr06 | 35169645                | TT                              | CC              | 1946869907               |
| SNP_P4_85369_35177881 | NC_021165.1    | Ca_kabuli_chr06 | 35177881                | AA                              | TT              | 1946869909               |



| SNPs IDs              | Chromosome IDs | Chromosomes     | Physical positions (bp) | CDC Frontier (Reference genome) | (ILWC46 & LPNB) | NCBI SNPdb Accession IDs |
|-----------------------|----------------|-----------------|-------------------------|---------------------------------|-----------------|--------------------------|
| SNP_P4_85370_35202671 | NC_021165.1    | Ca_kabuli_chr06 | 35202671                | AA                              | TT              | 1946869911               |
| SNP_P4_85371_35202685 | NC_021165.1    | Ca_kabuli_chr06 | 35202685                | AA                              | GG              | 1946869913               |
| SNP_P4_85372_35228466 | NC_021165.1    | Ca_kabuli_chr06 | 35228466                | GG                              | TT              | 1946869915               |
| SNP_P4_85373_35228506 | NC_021165.1    | Ca_kabuli_chr06 | 35228506                | AA                              | TT              | 1946869917               |
| SNP_P4_85374_35228507 | NC_021165.1    | Ca_kabuli_chr06 | 35228507                | TT                              | GG              | 1946869919               |
| SNP_P4_85375_35228508 | NC_021165.1    | Ca_kabuli_chr06 | 35228508                | TT                              | AA              | 1946869922               |
| SNP_P4_85377_35255101 | NC_021165.1    | Ca_kabuli_chr06 | 35255101                | GG                              | AA              | 1946869924               |
| SNP_P4_85378_35258067 | NC_021165.1    | Ca_kabuli_chr06 | 35258067                | AA                              | GG              | 1946869926               |
| SNP_P4_85379_35262126 | NC_021165.1    | Ca_kabuli_chr06 | 35262126                | CC                              | GG              | 1946869928               |
| SNP_P4_85380_35291741 | NC_021165.1    | Ca_kabuli_chr06 | 35291741                | AA                              | GG              | 1946869930               |
| SNP_P4_85381_35315382 | NC_021165.1    | Ca_kabuli_chr06 | 35315382                | CC                              | TT              | 1946869932               |
| SNP_P4_85382_35335161 | NC_021165.1    | Ca_kabuli_chr06 | 35335161                | TT                              | CC              | 1946869933               |
| SNP_P4_85383_35357598 | NC_021165.1    | Ca_kabuli_chr06 | 35357598                | TT                              | CC              | 1946869935               |
| SNP_P4_85384_35363637 | NC_021165.1    | Ca_kabuli_chr06 | 35363637                | AA                              | GG              | 1946869937               |
| SNP_P4_85385_35363652 | NC_021165.1    | Ca_kabuli_chr06 | 35363652                | CC                              | TT              | 1946869939               |
| SNP_P4_85386_35363698 | NC_021165.1    | Ca_kabuli_chr06 | 35363698                | CC                              | TT              | 1946869941               |
| SNP_P4_85387_35363719 | NC_021165.1    | Ca_kabuli_chr06 | 35363719                | AA                              | TT              | 1946869943               |
| SNP_P4_85388_35366799 | NC_021165.1    | Ca_kabuli_chr06 | 35366799                | TT                              | AA              | 1946869945               |
| SNP_P4_85389_35366809 | NC_021165.1    | Ca_kabuli_chr06 | 35366809                | CC                              | TT              | 1946869947               |
| SNP_P4_85390_35367038 | NC_021165.1    | Ca_kabuli_chr06 | 35367038                | GG                              | TT              | 1946869949               |
| SNP_P4_85391_35367039 | NC_021165.1    | Ca_kabuli_chr06 | 35367039                | AA                              | TT              | 1946869950               |
| SNP_P4_85392_35367084 | NC_021165.1    | Ca_kabuli_chr06 | 35367084                | AA                              | CC              | 1946869952               |
| SNP_P4_85393_35367106 | NC_021165.1    | Ca_kabuli_chr06 | 35367106                | AA                              | GG              | 1946869954               |
| SNP_P4_85394_35367113 | NC_021165.1    | Ca_kabuli_chr06 | 35367113                | AA                              | CC              | 1946869956               |
| SNP_P4_85395_35367215 | NC_021165.1    | Ca_kabuli_chr06 | 35367215                | GG                              | TT              | 1946869958               |
| SNP_P4_85396_35367219 | NC_021165.1    | Ca_kabuli_chr06 | 35367219                | CC                              | TT              | 1946869960               |
| SNP_P4_85397_35367226 | NC_021165.1    | Ca_kabuli_chr06 | 35367226                | GG                              | TT              | 1946869962               |
| SNP_P4_85398_35375537 | NC_021165.1    | Ca_kabuli_chr06 | 35375537                | TT                              | CC              | 1946869964               |
| SNP_P4_85399_35375554 | NC_021165.1    | Ca_kabuli_chr06 | 35375554                | TT                              | GG              | 1946869966               |
| SNP_P4_85400_35375561 | NC_021165.1    | Ca_kabuli_chr06 | 35375561                | GG                              | AA              | 1946869968               |
| SNP_P4_85401_35375564 | NC_021165.1    | Ca_kabuli_chr06 | 35375564                | GG                              | AA              | 1946869970               |
| SNP_P4_85402_35377542 | NC_021165.1    | Ca_kabuli_chr06 | 35377542                | GG                              | AA              | 1946869972               |
| SNP_P4_85403_35399112 | NC_021165.1    | Ca_kabuli_chr06 | 35399112                | AA                              | GG              | 1946869974               |
| SNP_P4_85406_35401375 | NC_021165.1    | Ca_kabuli_chr06 | 35401375                | TT                              | CC              | 1946869976               |
| SNP_P4_85407_35401496 | NC_021165.1    | Ca_kabuli_chr06 | 35401496                | TT                              | CC              | 1946869978               |
| SNP_P4_85408_35418429 | NC_021165.1    | Ca_kabuli_chr06 | 35418429                | TT                              | AA              | 1946869980               |
| SNP_P4_85409_35418449 | NC_021165.1    | Ca_kabuli_chr06 | 35418449                | CC                              | AA              | 1946869981               |
| SNP_P4_85410_35428886 | NC_021165.1    | Ca_kabuli_chr06 | 35428886                | CC                              | TT              | 1946869983               |
| SNP_P4_85411_35459248 | NC_021165.1    | Ca_kabuli_chr06 | 35459248                | TT                              | CC              | 1946869985               |
| SNP_P4_85412_35461423 | NC_021165.1    | Ca_kabuli_chr06 | 35461423                | CC                              | GG              | 1946869987               |
| SNP_P4_85413_35461535 | NC_021165.1    | Ca_kabuli_chr06 | 35461535                | TT                              | GG              | 1946869989               |
| SNP_P4_85414_35466442 | NC_021165.1    | Ca_kabuli_chr06 | 35466442                | GG                              | AA              | 1946869991               |

| SNPs IDs              | Chromosome IDs | Chromosomes     | Physical positions (bp) | CDC Frontier (Reference genome) | (ILWC46 & LPNB) | NCBI SNPdb Accession IDs |
|-----------------------|----------------|-----------------|-------------------------|---------------------------------|-----------------|--------------------------|
| SNP_P4_85415_35467447 | NC_021165.1    | Ca_kabuli_chr06 | 35467447                | TT                              | AA              | 1946869993               |
| SNP_P4_85416_35477739 | NC_021165.1    | Ca_kabuli_chr06 | 35477739                | AA                              | CC              | 1946869995               |
| SNP_P4_85417_35488761 | NC_021165.1    | Ca_kabuli_chr06 | 35488761                | TT                              | CC              | 1946869997               |
| SNP_P4_85418_35488783 | NC_021165.1    | Ca_kabuli_chr06 | 35488783                | TT                              | CC              | 1946869999               |
| SNP_P4_85419_35512231 | NC_021165.1    | Ca_kabuli_chr06 | 35512231                | TT                              | GG              | 1946870001               |
| SNP_P4_85420_35561090 | NC_021165.1    | Ca_kabuli_chr06 | 35561090                | TT                              | AA              | 1946870003               |
| SNP_P4_85421_35573611 | NC_021165.1    | Ca_kabuli_chr06 | 35573611                | AA                              | GG              | 1946870005               |
| SNP_P4_85422_35594853 | NC_021165.1    | Ca_kabuli_chr06 | 35594853                | AA                              | CC              | 1946870007               |
| SNP_P4_85423_35596035 | NC_021165.1    | Ca_kabuli_chr06 | 35596035                | GG                              | AA              | 1946870009               |
| SNP_P4_85424_35596078 | NC_021165.1    | Ca_kabuli_chr06 | 35596078                | TT                              | AA              | 1946870011               |
| SNP_P4_85425_35608438 | NC_021165.1    | Ca_kabuli_chr06 | 35608438                | TT                              | CC              | 1946870013               |
| SNP_P4_85426_35608863 | NC_021165.1    | Ca_kabuli_chr06 | 35608863                | CC                              | GG              | 1946870015               |
| SNP_P4_85427_35608895 | NC_021165.1    | Ca_kabuli_chr06 | 35608895                | TT                              | CC              | 1946870017               |
| SNP_P4_85428_35608923 | NC_021165.1    | Ca_kabuli_chr06 | 35608923                | CC                              | TT              | 1946870019               |
| SNP_P4_85429_35611752 | NC_021165.1    | Ca_kabuli_chr06 | 35611752                | GG                              | AA              | 1946870021               |
| SNP_P4_85431_35689995 | NC_021165.1    | Ca_kabuli_chr06 | 35689995                | TT                              | CC              | 1946870023               |
| SNP_P4_85432_35696407 | NC_021165.1    | Ca_kabuli_chr06 | 35696407                | TT                              | GG              | 1946870025               |
| SNP_P4_85433_35703442 | NC_021165.1    | Ca_kabuli_chr06 | 35703442                | AA                              | GG              | 1946870027               |
| SNP_P4_85434_35704079 | NC_021165.1    | Ca_kabuli_chr06 | 35704079                | TT                              | AA              | 1946870029               |
| SNP_P4_85435_35704873 | NC_021165.1    | Ca_kabuli_chr06 | 35704873                | AA                              | GG              | 1946870031               |
| SNP_P4_85436_35704879 | NC_021165.1    | Ca_kabuli_chr06 | 35704879                | TT                              | GG              | 1946870033               |
| SNP_P4_85437_35704894 | NC_021165.1    | Ca_kabuli_chr06 | 35704894                | AA                              | GG              | 1946870035               |
| SNP_P4_85438_35704921 | NC_021165.1    | Ca_kabuli_chr06 | 35704921                | TT                              | CC              | 1946870037               |
| SNP_P4_85439_35704942 | NC_021165.1    | Ca_kabuli_chr06 | 35704942                | AA                              | GG              | 1946870039               |
| SNP_P4_85440_35704957 | NC_021165.1    | Ca_kabuli_chr06 | 35704957                | AA                              | GG              | 1946870041               |
| SNP_P4_85441_35704979 | NC_021165.1    | Ca_kabuli_chr06 | 35704979                | TT                              | CC              | 1946870043               |
| SNP_P4_85442_35704980 | NC_021165.1    | Ca_kabuli_chr06 | 35704980                | GG                              | CC              | 1946870045               |
| SNP_P4_85443_35705011 | NC_021165.1    | Ca_kabuli_chr06 | 35705011                | CC                              | TT              | 1946870047               |
| SNP_P4_85444_35705036 | NC_021165.1    | Ca_kabuli_chr06 | 35705036                | GG                              | TT              | 1946870049               |
| SNP_P4_85445_35705047 | NC_021165.1    | Ca_kabuli_chr06 | 35705047                | TT                              | CC              | 1946870051               |
| SNP_P4_85446_35705068 | NC_021165.1    | Ca_kabuli_chr06 | 35705068                | AA                              | GG              | 1946870053               |
| SNP_P4_85447_35705072 | NC_021165.1    | Ca_kabuli_chr06 | 35705072                | TT                              | GG              | 1946870055               |
| SNP_P4_85448_35705099 | NC_021165.1    | Ca_kabuli_chr06 | 35705099                | TT                              | CC              | 1946870057               |
| SNP_P4_85449_35705128 | NC_021165.1    | Ca_kabuli_chr06 | 35705128                | TT                              | GG              | 1946870059               |
| SNP_P4_85450_35705207 | NC_021165.1    | Ca_kabuli_chr06 | 35705207                | TT                              | GG              | 1946870061               |
| SNP_P4_85451_35705237 | NC_021165.1    | Ca_kabuli_chr06 | 35705237                | GG                              | TT              | 1946870063               |
| SNP_P4_85452_35705241 | NC_021165.1    | Ca_kabuli_chr06 | 35705241                | TT                              | CC              | 1946870065               |
| SNP_P4_85453_35705258 | NC_021165.1    | Ca_kabuli_chr06 | 35705258                | TT                              | GG              | 1946870067               |
| SNP_P4_85454_35705278 | NC_021165.1    | Ca_kabuli_chr06 | 35705278                | AA                              | CC              | 1946870069               |
| SNP_P4_85455_35705287 | NC_021165.1    | Ca_kabuli_chr06 | 35705287                | CC                              | TT              | 1946870071               |
| SNP_P4_85456_35705301 | NC_021165.1    | Ca_kabuli_chr06 | 35705301                | TT                              | CC              | 1946870073               |
| SNP_P4_85457_35705311 | NC_021165.1    | Ca_kabuli_chr06 | 35705311                | GG                              | TT              | 1946870075               |

| SNPs IDs              | Chromosome IDs | Chromosomes     | Physical positions (bp) | CDC Frontier (Reference genome) | (ILWC46 & LPNB) | NCBI SNPdb Accession IDs |
|-----------------------|----------------|-----------------|-------------------------|---------------------------------|-----------------|--------------------------|
| SNP_P4_85458_35705327 | NC_021165.1    | Ca_kabuli_chr06 | 35705327                | GG                              | AA              | 1946870077               |
| SNP_P4_85459_35705336 | NC_021165.1    | Ca_kabuli_chr06 | 35705336                | TT                              | CC              | 1946870079               |
| SNP_P4_85460_35705390 | NC_021165.1    | Ca_kabuli_chr06 | 35705390                | TT                              | CC              | 1946870081               |
| SNP_P4_85461_35705491 | NC_021165.1    | Ca_kabuli_chr06 | 35705491                | TT                              | CC              | 1946870083               |
| SNP_P4_85462_35705521 | NC_021165.1    | Ca_kabuli_chr06 | 35705521                | AA                              | GG              | 1946870085               |
| SNP_P4_85463_35705611 | NC_021165.1    | Ca_kabuli_chr06 | 35705611                | AA                              | GG              | 1946870086               |
| SNP_P4_85464_35705843 | NC_021165.1    | Ca_kabuli_chr06 | 35705843                | TT                              | AA              | 1946870087               |
| SNP_P4_85465_35705866 | NC_021165.1    | Ca_kabuli_chr06 | 35705866                | TT                              | GG              | 1946870088               |
| SNP_P4_85466_35705873 | NC_021165.1    | Ca_kabuli_chr06 | 35705873                | AA                              | CC              | 1946870089               |
| SNP_P4_85467_35705878 | NC_021165.1    | Ca_kabuli_chr06 | 35705878                | AA                              | GG              | 1946870090               |
| SNP_P4_85469_35720009 | NC_021165.1    | Ca_kabuli_chr06 | 35720009                | TT                              | GG              | 1946870092               |
| SNP_P4_85470_35721482 | NC_021165.1    | Ca_kabuli_chr06 | 35721482                | AA                              | GG              | 1946870094               |
| SNP_P4_85471_35768800 | NC_021165.1    | Ca_kabuli_chr06 | 35768800                | GG                              | AA              | 1946870096               |
| SNP_P4_85472_35771310 | NC_021165.1    | Ca_kabuli_chr06 | 35771310                | GG                              | AA              | 1946870098               |
| SNP_P4_85473_35771457 | NC_021165.1    | Ca_kabuli_chr06 | 35771457                | AA                              | CC              | 1946870100               |
| SNP_P4_85474_35771466 | NC_021165.1    | Ca_kabuli_chr06 | 35771466                | GG                              | CC              | 1946870102               |
| SNP_P4_85475_35771851 | NC_021165.1    | Ca_kabuli_chr06 | 35771851                | AA                              | GG              | 1946870104               |
| SNP_P4_85476_35771882 | NC_021165.1    | Ca_kabuli_chr06 | 35771882                | GG                              | AA              | 1946870106               |
| SNP_P4_85477_35771934 | NC_021165.1    | Ca_kabuli_chr06 | 35771934                | GG                              | AA              | 1946870108               |
| SNP_P4_85479_35802110 | NC_021165.1    | Ca_kabuli_chr06 | 35802110                | GG                              | AA              | 1946870110               |
| SNP_P4_85480_35802500 | NC_021165.1    | Ca_kabuli_chr06 | 35802500                | TT                              | CC              | 1946870112               |
| SNP_P4_85481_35802502 | NC_021165.1    | Ca_kabuli_chr06 | 35802502                | GG                              | AA              | 1946870114               |
| SNP_P4_85483_35803368 | NC_021165.1    | Ca_kabuli_chr06 | 35803368                | GG                              | AA              | 1946870116               |
| SNP_P4_85484_35803559 | NC_021165.1    | Ca_kabuli_chr06 | 35803559                | AA                              | GG              | 1946870118               |
| SNP_P4_85485_35805862 | NC_021165.1    | Ca_kabuli_chr06 | 35805862                | TT                              | CC              | 1946870120               |
| SNP_P4_85486_35806888 | NC_021165.1    | Ca_kabuli_chr06 | 35806888                | AA                              | GG              | 1946870122               |
| SNP_P4_85487_35807315 | NC_021165.1    | Ca_kabuli_chr06 | 35807315                | GG                              | AA              | 1946870124               |
| SNP_P4_85488_35809324 | NC_021165.1    | Ca_kabuli_chr06 | 35809324                | AA                              | GG              | 1946870126               |
| SNP_P4_85489_35809507 | NC_021165.1    | Ca_kabuli_chr06 | 35809507                | CC                              | TT              | 1946870128               |
| SNP_P4_85491_35810795 | NC_021165.1    | Ca_kabuli_chr06 | 35810795                | TT                              | CC              | 1946870130               |
| SNP_P4_85492_35811042 | NC_021165.1    | Ca_kabuli_chr06 | 35811042                | TT                              | CC              | 1946870132               |
| SNP_P4_85493_35811506 | NC_021165.1    | Ca_kabuli_chr06 | 35811506                | TT                              | GG              | 1946870134               |
| SNP_P4_85494_35811645 | NC_021165.1    | Ca_kabuli_chr06 | 35811645                | AA                              | CC              | 1946870136               |
| SNP_P4_85495_35811859 | NC_021165.1    | Ca_kabuli_chr06 | 35811859                | CC                              | TT              | 1946870138               |
| SNP_P4_85496_35812804 | NC_021165.1    | Ca_kabuli_chr06 | 35812804                | AA                              | GG              | 1946870140               |
| SNP_P4_85497_35812913 | NC_021165.1    | Ca_kabuli_chr06 | 35812913                | GG                              | TT              | 1946870142               |
| SNP_P4_85498_35812959 | NC_021165.1    | Ca_kabuli_chr06 | 35812959                | AA                              | GG              | 1946870144               |
| SNP_P4_85499_35813310 | NC_021165.1    | Ca_kabuli_chr06 | 35813310                | GG                              | AA              | 1946870146               |
| SNP_P4_85500_35813316 | NC_021165.1    | Ca_kabuli_chr06 | 35813316                | GG                              | AA              | 1946870148               |
| SNP_P4_85502_35817077 | NC_021165.1    | Ca_kabuli_chr06 | 35817077                | AA                              | CC              | 1946870150               |
| SNP_P4_85503_35818704 | NC_021165.1    | Ca_kabuli_chr06 | 35818704                | AA                              | TT              | 1946870152               |
| SNP_P4_85504_35818709 | NC_021165.1    | Ca_kabuli_chr06 | 35818709                | AA                              | GG              | 1946870154               |

| SNPs IDs              | Chromosome IDs | Chromosomes     | Physical positions (bp) | CDC Frontier (Reference genome) | (ILWC46 & LPNB) | NCBI SNPdb Accession IDs |
|-----------------------|----------------|-----------------|-------------------------|---------------------------------|-----------------|--------------------------|
| SNP_P4_85505_35819427 | NC_021165.1    | Ca_kabuli_chr06 | 35819427                | GG                              | TT              | 1946870156               |
| SNP_P4_85506_35820727 | NC_021165.1    | Ca_kabuli_chr06 | 35820727                | AA                              | GG              | 1946870158               |
| SNP_P4_85507_35821704 | NC_021165.1    | Ca_kabuli_chr06 | 35821704                | CC                              | TT              | 1946870160               |
| SNP_P4_85508_35831572 | NC_021165.1    | Ca_kabuli_chr06 | 35831572                | AA                              | TT              | 1946870162               |
| SNP_P4_85509_35831590 | NC_021165.1    | Ca_kabuli_chr06 | 35831590                | AA                              | CC              | 1946870164               |
| SNP_P4_85510_35831683 | NC_021165.1    | Ca_kabuli_chr06 | 35831683                | GG                              | TT              | 1946870166               |
| SNP_P4_85511_35831885 | NC_021165.1    | Ca_kabuli_chr06 | 35831885                | GG                              | AA              | 1946870168               |
| SNP_P4_85512_35831916 | NC_021165.1    | Ca_kabuli_chr06 | 35831916                | GG                              | CC              | 1946870170               |
| SNP_P4_85513_35831924 | NC_021165.1    | Ca_kabuli_chr06 | 35831924                | AA                              | TT              | 1946870172               |
| SNP_P4_85514_35831939 | NC_021165.1    | Ca_kabuli_chr06 | 35831939                | AA                              | GG              | 1946870174               |
| SNP_P4_85515_35831976 | NC_021165.1    | Ca_kabuli_chr06 | 35831976                | TT                              | CC              | 1946870176               |
| SNP_P4_85517_35867814 | NC_021165.1    | Ca_kabuli_chr06 | 35867814                | AA                              | TT              | 1946870178               |
| SNP_P4_85518_35922038 | NC_021165.1    | Ca_kabuli_chr06 | 35922038                | AA                              | GG              | 1946870180               |
| SNP_P4_85519_35922140 | NC_021165.1    | Ca_kabuli_chr06 | 35922140                | AA                              | GG              | 1946870182               |
| SNP_P4_85520_35922358 | NC_021165.1    | Ca_kabuli_chr06 | 35922358                | AA                              | CC              | 1946870184               |
| SNP_P4_85522_35922435 | NC_021165.1    | Ca_kabuli_chr06 | 35922435                | AA                              | GG              | 1946870186               |
| SNP_P4_85523_35922438 | NC_021165.1    | Ca_kabuli_chr06 | 35922438                | AA                              | GG              | 1946870188               |
| SNP_P4_85524_35922450 | NC_021165.1    | Ca_kabuli_chr06 | 35922450                | AA                              | GG              | 1946870190               |
| SNP_P4_85525_35922506 | NC_021165.1    | Ca_kabuli_chr06 | 35922506                | CC                              | AA              | 1946870192               |
| SNP_P4_85526_35922516 | NC_021165.1    | Ca_kabuli_chr06 | 35922516                | TT                              | GG              | 1946870194               |
| SNP_P4_85527_35954475 | NC_021165.1    | Ca_kabuli_chr06 | 35954475                | TT                              | AA              | 1946870196               |
| SNP_P4_85528_35979087 | NC_021165.1    | Ca_kabuli_chr06 | 35979087                | TT                              | AA              | 1946870198               |
| SNP_P4_85529_35980756 | NC_021165.1    | Ca_kabuli_chr06 | 35980756                | CC                              | TT              | 1946870200               |
| SNP_P4_85530_35998531 | NC_021165.1    | Ca_kabuli_chr06 | 35998531                | TT                              | CC              | 1946870202               |
| SNP_P4_85531_35998757 | NC_021165.1    | Ca_kabuli_chr06 | 35998757                | CC                              | AA              | 1946870204               |
| SNP_P4_85532_35998785 | NC_021165.1    | Ca_kabuli_chr06 | 35998785                | TT                              | AA              | 1946870206               |
| SNP_P4_85533_35998985 | NC_021165.1    | Ca_kabuli_chr06 | 35998985                | GG                              | TT              | 1946870208               |
| SNP_P4_85534_35999053 | NC_021165.1    | Ca_kabuli_chr06 | 35999053                | GG                              | CC              | 1946870210               |
| SNP_P4_85535_35999338 | NC_021165.1    | Ca_kabuli_chr06 | 35999338                | TT                              | CC              | 1946870212               |
| SNP_P4_85536_35999509 | NC_021165.1    | Ca_kabuli_chr06 | 35999509                | GG                              | AA              | 1946870213               |
| SNP_P4_85537_36000241 | NC_021165.1    | Ca_kabuli_chr06 | 36000241                | TT                              | AA              | 1946870215               |
| SNP_P4_85538_36000807 | NC_021165.1    | Ca_kabuli_chr06 | 36000807                | AA                              | GG              | 1946870217               |
| SNP_P4_85539_36005814 | NC_021165.1    | Ca_kabuli_chr06 | 36005814                | AA                              | TT              | 1946870219               |
| SNP_P4_85540_36029339 | NC_021165.1    | Ca_kabuli_chr06 | 36029339                | TT                              | GG              | 1946870221               |
| SNP_P4_85542_36030309 | NC_021165.1    | Ca_kabuli_chr06 | 36030309                | TT                              | CC              | 1946870223               |
| SNP_P4_85543_36032729 | NC_021165.1    | Ca_kabuli_chr06 | 36032729                | AA                              | TT              | 1946870225               |
| SNP_P4_85544_36039320 | NC_021165.1    | Ca_kabuli_chr06 | 36039320                | AA                              | CC              | 1946870227               |
| SNP_P4_85545_36039680 | NC_021165.1    | Ca_kabuli_chr06 | 36039680                | AA                              | CC              | 1946870229               |
| SNP_P4_85546_36061265 | NC_021165.1    | Ca_kabuli_chr06 | 36061265                | AA                              | GG              | 1946870231               |
| SNP_P4_85547_36061276 | NC_021165.1    | Ca_kabuli_chr06 | 36061276                | GG                              | AA              | 1946870233               |
| SNP_P4_85548_36062115 | NC_021165.1    | Ca_kabuli_chr06 | 36062115                | TT                              | GG              | 1946870235               |
| SNP_P4_85549_36062128 | NC_021165.1    | Ca_kabuli_chr06 | 36062128                | CC                              | TT              | 1946870237               |

| SNPs IDs              | Chromosome IDs | Chromosomes     | Physical positions (bp) | CDC Frontier (Reference genome) | (ILWC46 & LPNB) | NCBI SNPdb Accession IDs |
|-----------------------|----------------|-----------------|-------------------------|---------------------------------|-----------------|--------------------------|
| SNP_P4_85550_36062140 | NC_021165.1    | Ca_kabuli_chr06 | 36062140                | AA                              | TT              | 1946870239               |
| SNP_P4_85551_36062149 | NC_021165.1    | Ca_kabuli_chr06 | 36062149                | TT                              | CC              | 1946870241               |
| SNP_P4_85552_36067557 | NC_021165.1    | Ca_kabuli_chr06 | 36067557                | CC                              | TT              | 1946870243               |
| SNP_P4_85553_36067565 | NC_021165.1    | Ca_kabuli_chr06 | 36067565                | AA                              | GG              | 1946870245               |
| SNP_P4_85555_36070365 | NC_021165.1    | Ca_kabuli_chr06 | 36070365                | AA                              | GG              | 1946870246               |
| SNP_P4_85556_36070372 | NC_021165.1    | Ca_kabuli_chr06 | 36070372                | TT                              | CC              | 1946870248               |
| SNP_P4_85557_36070496 | NC_021165.1    | Ca_kabuli_chr06 | 36070496                | GG                              | AA              | 1946870250               |
| SNP_P4_85558_36078345 | NC_021165.1    | Ca_kabuli_chr06 | 36078345                | CC                              | TT              | 1946870252               |
| SNP_P4_85559_36083571 | NC_021165.1    | Ca_kabuli_chr06 | 36083571                | TT                              | GG              | 1946870254               |
| SNP_P4_85560_36083697 | NC_021165.1    | Ca_kabuli_chr06 | 36083697                | TT                              | CC              | 1946870256               |
| SNP_P4_85561_36083781 | NC_021165.1    | Ca_kabuli_chr06 | 36083781                | TT                              | CC              | 1946870258               |
| SNP_P4_85562_36083811 | NC_021165.1    | Ca_kabuli_chr06 | 36083811                | GG                              | AA              | 1946870260               |
| SNP_P4_85563_36083851 | NC_021165.1    | Ca_kabuli_chr06 | 36083851                | TT                              | GG              | 1946870262               |
| SNP_P4_85564_36083853 | NC_021165.1    | Ca_kabuli_chr06 | 36083853                | GG                              | AA              | 1946870264               |
| SNP_P4_85565_36083870 | NC_021165.1    | Ca_kabuli_chr06 | 36083870                | TT                              | CC              | 1946870266               |
| SNP_P4_85566_36083872 | NC_021165.1    | Ca_kabuli_chr06 | 36083872                | AA                              | GG              | 1946870268               |
| SNP_P4_85567_36086881 | NC_021165.1    | Ca_kabuli_chr06 | 36086881                | GG                              | TT              | 1946870270               |
| SNP_P4_85568_36124333 | NC_021165.1    | Ca_kabuli_chr06 | 36124333                | GG                              | CC              | 1946870272               |
| SNP_P4_85570_36176577 | NC_021165.1    | Ca_kabuli_chr06 | 36176577                | GG                              | AA              | 1946870274               |
| SNP_P4_85572_36230198 | NC_021165.1    | Ca_kabuli_chr06 | 36230198                | AA                              | GG              | 1946870276               |
| SNP_P4_85573_36235186 | NC_021165.1    | Ca_kabuli_chr06 | 36235186                | GG                              | AA              | 1946870278               |
| SNP_P4_85575_36246507 | NC_021165.1    | Ca_kabuli_chr06 | 36246507                | GG                              | AA              | 1946870280               |
| SNP_P4_85576_36246516 | NC_021165.1    | Ca_kabuli_chr06 | 36246516                | AA                              | GG              | 1946870282               |
| SNP_P4_85577_36246544 | NC_021165.1    | Ca_kabuli_chr06 | 36246544                | TT                              | CC              | 1946870284               |
| SNP_P4_85578_36339307 | NC_021165.1    | Ca_kabuli_chr06 | 36339307                | AA                              | GG              | 1946870286               |
| SNP_P4_85579_36346232 | NC_021165.1    | Ca_kabuli_chr06 | 36346232                | CC                              | TT              | 1946870288               |
| SNP_P4_85580_36377599 | NC_021165.1    | Ca_kabuli_chr06 | 36377599                | AA                              | CC              | 1946870290               |
| SNP_P4_85581_36389233 | NC_021165.1    | Ca_kabuli_chr06 | 36389233                | GG                              | AA              | 1946870292               |
| SNP_P4_85582_36412269 | NC_021165.1    | Ca_kabuli_chr06 | 36412269                | AA                              | GG              | 1946870294               |
| SNP_P4_85583_36412464 | NC_021165.1    | Ca_kabuli_chr06 | 36412464                | GG                              | AA              | 1946870296               |
| SNP_P4_85584_36412545 | NC_021165.1    | Ca_kabuli_chr06 | 36412545                | CC                              | TT              | 1946870298               |
| SNP_P4_85585_36412559 | NC_021165.1    | Ca_kabuli_chr06 | 36412559                | TT                              | CC              | 1946870300               |
| SNP_P4_85586_36412621 | NC_021165.1    | Ca_kabuli_chr06 | 36412621                | GG                              | AA              | 1946870302               |
| SNP_P4_85587_36412623 | NC_021165.1    | Ca_kabuli_chr06 | 36412623                | AA                              | GG              | 1946870304               |
| SNP_P4_85588_36412624 | NC_021165.1    | Ca_kabuli_chr06 | 36412624                | AA                              | GG              | 1946870306               |
| SNP_P4_85589_36412654 | NC_021165.1    | Ca_kabuli_chr06 | 36412654                | TT                              | AA              | 1946870307               |
| SNP_P4_85590_36412664 | NC_021165.1    | Ca_kabuli_chr06 | 36412664                | GG                              | AA              | 1946870309               |
| SNP_P4_85591_36450470 | NC_021165.1    | Ca_kabuli_chr06 | 36450470                | TT                              | CC              | 1946870311               |
| SNP_P4_85592_36450508 | NC_021165.1    | Ca_kabuli_chr06 | 36450508                | GG                              | AA              | 1946870313               |
| SNP_P4_85593_36450821 | NC_021165.1    | Ca_kabuli_chr06 | 36450821                | AA                              | GG              | 1946870315               |
| SNP_P4_85594_36468880 | NC_021165.1    | Ca_kabuli_chr06 | 36468880                | TT                              | CC              | 1946870317               |
| SNP_P4_85595_36468902 | NC_021165.1    | Ca_kabuli_chr06 | 36468902                | CC                              | GG              | 1946870319               |

| SNPs IDs              | Chromosome IDs | Chromosomes     | Physical positions (bp) | CDC Frontier (Reference genome) | (ILWC46 & LPNB) | NCBI SNPdb Accession IDs |
|-----------------------|----------------|-----------------|-------------------------|---------------------------------|-----------------|--------------------------|
| SNP_P4_85596_36468919 | NC_021165.1    | Ca_kabuli_chr06 | 36468919                | GG                              | AA              | 1946870321               |
| SNP_P4_85597_36487675 | NC_021165.1    | Ca_kabuli_chr06 | 36487675                | AA                              | GG              | 1946870323               |
| SNP_P4_85598_36487986 | NC_021165.1    | Ca_kabuli_chr06 | 36487986                | CC                              | AA              | 1946870325               |
| SNP_P4_85599_36487990 | NC_021165.1    | Ca_kabuli_chr06 | 36487990                | CC                              | TT              | 1946870327               |
| SNP_P4_85600_36488015 | NC_021165.1    | Ca_kabuli_chr06 | 36488015                | AA                              | CC              | 1946870329               |
| SNP_P4_85601_36488091 | NC_021165.1    | Ca_kabuli_chr06 | 36488091                | CC                              | TT              | 1946870331               |
| SNP_P4_85602_36488097 | NC_021165.1    | Ca_kabuli_chr06 | 36488097                | AA                              | GG              | 1946870333               |
| SNP_P4_85603_36488115 | NC_021165.1    | Ca_kabuli_chr06 | 36488115                | GG                              | AA              | 1946870334               |
| SNP_P4_85604_36490704 | NC_021165.1    | Ca_kabuli_chr06 | 36490704                | AA                              | TT              | 1946870336               |
| SNP_P4_85605_36490723 | NC_021165.1    | Ca_kabuli_chr06 | 36490723                | AA                              | TT              | 1946870338               |
| SNP_P4_85606_36490737 | NC_021165.1    | Ca_kabuli_chr06 | 36490737                | CC                              | TT              | 1946870340               |
| SNP_P4_85607_36490789 | NC_021165.1    | Ca_kabuli_chr06 | 36490789                | GG                              | AA              | 1946870342               |
| SNP_P4_85608_36491192 | NC_021165.1    | Ca_kabuli_chr06 | 36491192                | TT                              | CC              | 1946870344               |
| SNP_P4_85609_36508854 | NC_021165.1    | Ca_kabuli_chr06 | 36508854                | GG                              | AA              | 1946870346               |
| SNP_P4_85610_36510588 | NC_021165.1    | Ca_kabuli_chr06 | 36510588                | AA                              | GG              | 1946870348               |
| SNP_P4_85611_36518125 | NC_021165.1    | Ca_kabuli_chr06 | 36518125                | GG                              | AA              | 1946870350               |
| SNP_P4_85612_36518146 | NC_021165.1    | Ca_kabuli_chr06 | 36518146                | CC                              | TT              | 1946870352               |
| SNP_P4_85613_36518463 | NC_021165.1    | Ca_kabuli_chr06 | 36518463                | TT                              | CC              | 1946870354               |
| SNP_P4_85614_36518493 | NC_021165.1    | Ca_kabuli_chr06 | 36518493                | GG                              | AA              | 1946870356               |
| SNP_P4_85615_36518513 | NC_021165.1    | Ca_kabuli_chr06 | 36518513                | CC                              | TT              | 1946870358               |
| SNP_P4_85616_36518519 | NC_021165.1    | Ca_kabuli_chr06 | 36518519                | TT                              | CC              | 1946870360               |
| SNP_P4_85617_36520424 | NC_021165.1    | Ca_kabuli_chr06 | 36520424                | GG                              | TT              | 1946870362               |
| SNP_P4_85618_36520438 | NC_021165.1    | Ca_kabuli_chr06 | 36520438                | CC                              | AA              | 1946870365               |
| SNP_P4_85619_36555464 | NC_021165.1    | Ca_kabuli_chr06 | 36555464                | TT                              | CC              | 1946870367               |
| SNP_P4_85620_36559548 | NC_021165.1    | Ca_kabuli_chr06 | 36559548                | CC                              | AA              | 1946870369               |
| SNP_P4_85621_36559557 | NC_021165.1    | Ca_kabuli_chr06 | 36559557                | TT                              | AA              | 1946870371               |
| SNP_P4_85623_36617177 | NC_021165.1    | Ca_kabuli_chr06 | 36617177                | AA                              | GG              | 1946870373               |
| SNP_P4_85624_36642628 | NC_021165.1    | Ca_kabuli_chr06 | 36642628                | TT                              | GG              | 1946870375               |
| SNP_P4_85625_36642676 | NC_021165.1    | Ca_kabuli_chr06 | 36642676                | AA                              | GG              | 1946870377               |
| SNP_P4_85626_36644363 | NC_021165.1    | Ca_kabuli_chr06 | 36644363                | TT                              | CC              | 1946870379               |
| SNP_P4_85628_36654190 | NC_021165.1    | Ca_kabuli_chr06 | 36654190                | TT                              | AA              | 1946870381               |
| SNP_P4_85629_36657956 | NC_021165.1    | Ca_kabuli_chr06 | 36657956                | TT                              | AA              | 1946870383               |
| SNP_P4_85630_36659167 | NC_021165.1    | Ca_kabuli_chr06 | 36659167                | TT                              | CC              | 1946870385               |
| SNP_P4_85631_36659437 | NC_021165.1    | Ca_kabuli_chr06 | 36659437                | TT                              | GG              | 1946870387               |
| SNP_P4_85632_36659448 | NC_021165.1    | Ca_kabuli_chr06 | 36659448                | TT                              | CC              | 1946870389               |
| SNP_P4_85633_36670369 | NC_021165.1    | Ca_kabuli_chr06 | 36670369                | AA                              | TT              | 1946870391               |
| SNP_P4_85634_36684461 | NC_021165.1    | Ca_kabuli_chr06 | 36684461                | GG                              | TT              | 1946870393               |
| SNP_P4_85635_36688860 | NC_021165.1    | Ca_kabuli_chr06 | 36688860                | CC                              | TT              | 1946870395               |
| SNP_P4_85636_36716619 | NC_021165.1    | Ca_kabuli_chr06 | 36716619                | TT                              | AA              | 1946870397               |
| SNP_P4_85637_36716620 | NC_021165.1    | Ca_kabuli_chr06 | 36716620                | TT                              | AA              | 1946870399               |
| SNP_P4_85638_36721146 | NC_021165.1    | Ca_kabuli_chr06 | 36721146                | CC                              | TT              | 1946870401               |
| SNP_P4_85639_36721148 | NC_021165.1    | Ca_kabuli_chr06 | 36721148                | TT                              | GG              | 1946870403               |

| SNPs IDs              | Chromosome IDs | Chromosomes     | Physical positions (bp) | CDC Frontier (Reference genome) | (ILWC46 & LPNB) | NCBI SNPdb Accession IDs |
|-----------------------|----------------|-----------------|-------------------------|---------------------------------|-----------------|--------------------------|
| SNP_P4_85640_36721160 | NC_021165.1    | Ca_kabuli_chr06 | 36721160                | TT                              | CC              | 1946870405               |
| SNP_P4_85641_36721164 | NC_021165.1    | Ca_kabuli_chr06 | 36721164                | TT                              | GG              | 1946870407               |
| SNP_P4_85642_36721179 | NC_021165.1    | Ca_kabuli_chr06 | 36721179                | CC                              | TT              | 1946870409               |
| SNP_P4_85645_36722678 | NC_021165.1    | Ca_kabuli_chr06 | 36722678                | AA                              | TT              | 1946870411               |
| SNP_P4_85646_36723493 | NC_021165.1    | Ca_kabuli_chr06 | 36723493                | CC                              | TT              | 1946870413               |
| SNP_P4_85647_36773762 | NC_021165.1    | Ca_kabuli_chr06 | 36773762                | AA                              | GG              | 1946870415               |
| SNP_P4_85648_36773776 | NC_021165.1    | Ca_kabuli_chr06 | 36773776                | AA                              | GG              | 1946870417               |
| SNP_P4_85649_36773782 | NC_021165.1    | Ca_kabuli_chr06 | 36773782                | AA                              | GG              | 1946870419               |
| SNP_P4_85650_36773804 | NC_021165.1    | Ca_kabuli_chr06 | 36773804                | TT                              | GG              | 1946870421               |
| SNP_P4_85651_36773996 | NC_021165.1    | Ca_kabuli_chr06 | 36773996                | AA                              | TT              | 1946870423               |
| SNP_P4_85652_36773998 | NC_021165.1    | Ca_kabuli_chr06 | 36773998                | AA                              | TT              | 1946870425               |
| SNP_P4_85653_36774113 | NC_021165.1    | Ca_kabuli_chr06 | 36774113                | AA                              | GG              | 1946870427               |
| SNP_P4_85654_36783509 | NC_021165.1    | Ca_kabuli_chr06 | 36783509                | AA                              | GG              | 1946870429               |
| SNP_P4_85655_36783539 | NC_021165.1    | Ca_kabuli_chr06 | 36783539                | TT                              | CC              | 1946870431               |
| SNP_P4_85656_36783552 | NC_021165.1    | Ca_kabuli_chr06 | 36783552                | TT                              | CC              | 1946870433               |
| SNP_P4_85657_36783745 | NC_021165.1    | Ca_kabuli_chr06 | 36783745                | AA                              | GG              | 1946870435               |
| SNP_P4_85658_36783746 | NC_021165.1    | Ca_kabuli_chr06 | 36783746                | TT                              | CC              | 1946870437               |
| SNP_P4_85659_36783751 | NC_021165.1    | Ca_kabuli_chr06 | 36783751                | AA                              | TT              | 1946870439               |
| SNP_P4_85660_36783758 | NC_021165.1    | Ca_kabuli_chr06 | 36783758                | CC                              | TT              | 1946870441               |
| SNP_P4_85661_36784116 | NC_021165.1    | Ca_kabuli_chr06 | 36784116                | CC                              | TT              | 1946870443               |
| SNP_P4_85662_36784505 | NC_021165.1    | Ca_kabuli_chr06 | 36784505                | CC                              | TT              | 1946870445               |
| SNP_P4_85663_36784515 | NC_021165.1    | Ca_kabuli_chr06 | 36784515                | GG                              | AA              | 1946870447               |
| SNP_P4_85664_36784555 | NC_021165.1    | Ca_kabuli_chr06 | 36784555                | GG                              | TT              | 1946870449               |
| SNP_P4_85665_36786095 | NC_021165.1    | Ca_kabuli_chr06 | 36786095                | TT                              | GG              | 1946870451               |
| SNP_P4_85666_36786138 | NC_021165.1    | Ca_kabuli_chr06 | 36786138                | AA                              | TT              | 1946870453               |
| SNP_P4_85667_36786160 | NC_021165.1    | Ca_kabuli_chr06 | 36786160                | TT                              | CC              | 1946870455               |
| SNP_P4_85668_36786161 | NC_021165.1    | Ca_kabuli_chr06 | 36786161                | AA                              | GG              | 1946870457               |
| SNP_P4_85669_36786173 | NC_021165.1    | Ca_kabuli_chr06 | 36786173                | CC                              | AA              | 1946870459               |
| SNP_P4_85670_36786175 | NC_021165.1    | Ca_kabuli_chr06 | 36786175                | GG                              | TT              | 1946870461               |
| SNP_P4_85671_36786212 | NC_021165.1    | Ca_kabuli_chr06 | 36786212                | AA                              | GG              | 1946870463               |
| SNP_P4_85672_36786225 | NC_021165.1    | Ca_kabuli_chr06 | 36786225                | TT                              | CC              | 1946870465               |
| SNP_P4_85673_36786325 | NC_021165.1    | Ca_kabuli_chr06 | 36786325                | CC                              | TT              | 1946870467               |
| SNP_P4_85674_36786551 | NC_021165.1    | Ca_kabuli_chr06 | 36786551                | GG                              | AA              | 1946870469               |
| SNP_P4_85675_36787315 | NC_021165.1    | Ca_kabuli_chr06 | 36787315                | TT                              | CC              | 1946870471               |
| SNP_P4_85676_36787370 | NC_021165.1    | Ca_kabuli_chr06 | 36787370                | TT                              | CC              | 1946870473               |
| SNP_P4_85677_36787539 | NC_021165.1    | Ca_kabuli_chr06 | 36787539                | AA                              | CC              | 1946870475               |
| SNP_P4_85678_36787603 | NC_021165.1    | Ca_kabuli_chr06 | 36787603                | TT                              | CC              | 1946870477               |
| SNP_P4_85679_36787641 | NC_021165.1    | Ca_kabuli_chr06 | 36787641                | CC                              | AA              | 1946870479               |
| SNP_P4_85680_36787802 | NC_021165.1    | Ca_kabuli_chr06 | 36787802                | TT                              | CC              | 1946870481               |
| SNP_P4_85681_36789577 | NC_021165.1    | Ca_kabuli_chr06 | 36789577                | AA                              | GG              | 1946870483               |
| SNP_P4_85683_36789658 | NC_021165.1    | Ca_kabuli_chr06 | 36789658                | TT                              | CC              | 1946870485               |
| SNP_P4_85684_36789720 | NC_021165.1    | Ca_kabuli_chr06 | 36789720                | TT                              | CC              | 1946870487               |

| SNPs IDs              | Chromosome IDs | Chromosomes     | Physical positions (bp) | CDC Frontier (Reference genome) | (ILWC46 & LPNB) | NCBI SNPdb Accession IDs |
|-----------------------|----------------|-----------------|-------------------------|---------------------------------|-----------------|--------------------------|
| SNP_P4_85685_36790084 | NC_021165.1    | Ca_kabuli_chr06 | 36790084                | AA                              | CC              | 1946870489               |
| SNP_P4_85686_36790123 | NC_021165.1    | Ca_kabuli_chr06 | 36790123                | TT                              | CC              | 1946870491               |
| SNP_P4_85687_36845477 | NC_021165.1    | Ca_kabuli_chr06 | 36845477                | TT                              | CC              | 1946870493               |
| SNP_P4_85688_36890716 | NC_021165.1    | Ca_kabuli_chr06 | 36890716                | TT                              | GG              | 1946870495               |
| SNP_P4_85689_36890718 | NC_021165.1    | Ca_kabuli_chr06 | 36890718                | CC                              | TT              | 1946870497               |
| SNP_P4_85690_36890734 | NC_021165.1    | Ca_kabuli_chr06 | 36890734                | AA                              | TT              | 1946870499               |
| SNP_P4_85691_36892867 | NC_021165.1    | Ca_kabuli_chr06 | 36892867                | GG                              | AA              | 1946870501               |
| SNP_P4_85692_36892913 | NC_021165.1    | Ca_kabuli_chr06 | 36892913                | CC                              | TT              | 1946870503               |
| SNP_P4_85693_36892927 | NC_021165.1    | Ca_kabuli_chr06 | 36892927                | AA                              | TT              | 1946870505               |
| SNP_P4_85694_36893091 | NC_021165.1    | Ca_kabuli_chr06 | 36893091                | GG                              | AA              | 1946870507               |
| SNP_P4_85695_36893113 | NC_021165.1    | Ca_kabuli_chr06 | 36893113                | CC                              | AA              | 1946870509               |
| SNP_P4_85696_36893139 | NC_021165.1    | Ca_kabuli_chr06 | 36893139                | AA                              | CC              | 1946870511               |
| SNP_P4_85697_36893140 | NC_021165.1    | Ca_kabuli_chr06 | 36893140                | CC                              | AA              | 1946870513               |
| SNP_P4_85698_36893148 | NC_021165.1    | Ca_kabuli_chr06 | 36893148                | TT                              | AA              | 1946870515               |
| SNP_P4_85699_36893210 | NC_021165.1    | Ca_kabuli_chr06 | 36893210                | TT                              | CC              | 1946870517               |
| SNP_P4_85700_36893273 | NC_021165.1    | Ca_kabuli_chr06 | 36893273                | GG                              | AA              | 1946870519               |
| SNP_P4_85701_36893286 | NC_021165.1    | Ca_kabuli_chr06 | 36893286                | TT                              | AA              | 1946870521               |
| SNP_P4_85702_36893293 | NC_021165.1    | Ca_kabuli_chr06 | 36893293                | CC                              | AA              | 1946870523               |
| SNP_P4_85704_36893317 | NC_021165.1    | Ca_kabuli_chr06 | 36893317                | TT                              | AA              | 1946870525               |
| SNP_P4_85705_36897577 | NC_021165.1    | Ca_kabuli_chr06 | 36897577                | AA                              | GG              | 1946870527               |
| SNP_P4_85706_36897588 | NC_021165.1    | Ca_kabuli_chr06 | 36897588                | CC                              | TT              | 1946870529               |
| SNP_P4_85708_36930324 | NC_021165.1    | Ca_kabuli_chr06 | 36930324                | TT                              | CC              | 1946870531               |
| SNP_P4_85709_36951517 | NC_021165.1    | Ca_kabuli_chr06 | 36951517                | TT                              | GG              | 1946870533               |
| SNP_P4_85710_36955523 | NC_021165.1    | Ca_kabuli_chr06 | 36955523                | AA                              | CC              | 1946870535               |
| SNP_P4_85711_36956911 | NC_021165.1    | Ca_kabuli_chr06 | 36956911                | CC                              | TT              | 1946870537               |
| SNP_P4_85712_36981602 | NC_021165.1    | Ca_kabuli_chr06 | 36981602                | TT                              | CC              | 1946870539               |
| SNP_P4_85713_37002871 | NC_021165.1    | Ca_kabuli_chr06 | 37002871                | CC                              | TT              | 1946870541               |
| SNP_P4_85714_37028141 | NC_021165.1    | Ca_kabuli_chr06 | 37028141                | AA                              | GG              | 1946870543               |
| SNP_P4_85715_37028160 | NC_021165.1    | Ca_kabuli_chr06 | 37028160                | AA                              | TT              | 1946870545               |
| SNP_P4_85716_37028197 | NC_021165.1    | Ca_kabuli_chr06 | 37028197                | CC                              | TT              | 1946870547               |
| SNP_P4_85717_37028232 | NC_021165.1    | Ca_kabuli_chr06 | 37028232                | TT                              | CC              | 1946870549               |
| SNP_P4_85719_37115598 | NC_021165.1    | Ca_kabuli_chr06 | 37115598                | CC                              | TT              | 1946870551               |
| SNP_P4_85720_37172214 | NC_021165.1    | Ca_kabuli_chr06 | 37172214                | CC                              | TT              | 1946870553               |
| SNP_P4_85721_37172230 | NC_021165.1    | Ca_kabuli_chr06 | 37172230                | AA                              | TT              | 1946870555               |
| SNP_P4_85722_37172244 | NC_021165.1    | Ca_kabuli_chr06 | 37172244                | TT                              | CC              | 1946870557               |
| SNP_P4_85723_37172262 | NC_021165.1    | Ca_kabuli_chr06 | 37172262                | GG                              | AA              | 1946870559               |
| SNP_P4_85724_37172342 | NC_021165.1    | Ca_kabuli_chr06 | 37172342                | GG                              | AA              | 1946870561               |
| SNP_P4_85725_37172354 | NC_021165.1    | Ca_kabuli_chr06 | 37172354                | CC                              | TT              | 1946870563               |
| SNP_P4_85726_37172615 | NC_021165.1    | Ca_kabuli_chr06 | 37172615                | CC                              | AA              | 1946870565               |
| SNP_P4_85727_37172648 | NC_021165.1    | Ca_kabuli_chr06 | 37172648                | AA                              | GG              | 1946870567               |
| SNP_P4_85728_37172881 | NC_021165.1    | Ca_kabuli_chr06 | 37172881                | AA                              | GG              | 1946870569               |
| SNP_P4_85729_37197708 | NC_021165.1    | Ca_kabuli_chr06 | 37197708                | CC                              | TT              | 1946870571               |



| SNPs IDs              | Chromosome IDs | Chromosomes     | Physical positions (bp) | CDC Frontier (Reference genome) | (ILWC46 & LPNB) | NCBI SNPdb Accession IDs |
|-----------------------|----------------|-----------------|-------------------------|---------------------------------|-----------------|--------------------------|
| SNP_P4_85731_37212990 | NC_021165.1    | Ca_kabuli_chr06 | 37212990                | GG                              | AA              | 1946870573               |
| SNP_P4_85732_37213008 | NC_021165.1    | Ca_kabuli_chr06 | 37213008                | CC                              | TT              | 1946870575               |
| SNP_P4_85733_37213015 | NC_021165.1    | Ca_kabuli_chr06 | 37213015                | AA                              | GG              | 1946870577               |
| SNP_P4_85734_37221504 | NC_021165.1    | Ca_kabuli_chr06 | 37221504                | GG                              | AA              | 1946870579               |
| SNP_P4_85735_37221510 | NC_021165.1    | Ca_kabuli_chr06 | 37221510                | TT                              | CC              | 1946870581               |
| SNP_P4_85736_37221579 | NC_021165.1    | Ca_kabuli_chr06 | 37221579                | TT                              | CC              | 1946870583               |
| SNP_P4_85737_37221783 | NC_021165.1    | Ca_kabuli_chr06 | 37221783                | TT                              | CC              | 1946870585               |
| SNP_P4_85738_37221816 | NC_021165.1    | Ca_kabuli_chr06 | 37221816                | TT                              | CC              | 1946870587               |
| SNP_P4_85739_37221830 | NC_021165.1    | Ca_kabuli_chr06 | 37221830                | TT                              | CC              | 1946870589               |
| SNP_P4_85740_37221833 | NC_021165.1    | Ca_kabuli_chr06 | 37221833                | AA                              | GG              | 1946870591               |
| SNP_P4_85741_37221845 | NC_021165.1    | Ca_kabuli_chr06 | 37221845                | AA                              | GG              | 1946870593               |
| SNP_P4_85742_37221862 | NC_021165.1    | Ca_kabuli_chr06 | 37221862                | TT                              | CC              | 1946870595               |
| SNP_P4_85743_37221880 | NC_021165.1    | Ca_kabuli_chr06 | 37221880                | AA                              | GG              | 1946870597               |
| SNP_P4_85745_37221984 | NC_021165.1    | Ca_kabuli_chr06 | 37221984                | TT                              | GG              | 1946870599               |
| SNP_P4_85746_37221995 | NC_021165.1    | Ca_kabuli_chr06 | 37221995                | AA                              | GG              | 1946870601               |
| SNP_P4_85747_37222026 | NC_021165.1    | Ca_kabuli_chr06 | 37222026                | TT                              | CC              | 1946870603               |
| SNP_P4_85748_37222239 | NC_021165.1    | Ca_kabuli_chr06 | 37222239                | TT                              | CC              | 1946870605               |
| SNP_P4_85749_37229747 | NC_021165.1    | Ca_kabuli_chr06 | 37229747                | TT                              | AA              | 1946870607               |
| SNP_P4_85750_37232313 | NC_021165.1    | Ca_kabuli_chr06 | 37232313                | GG                              | TT              | 1946870609               |
| SNP_P4_85751_37246348 | NC_021165.1    | Ca_kabuli_chr06 | 37246348                | AA                              | TT              | 1946870611               |
| SNP_P4_85752_37283598 | NC_021165.1    | Ca_kabuli_chr06 | 37283598                | CC                              | TT              | 1946870613               |
| SNP_P4_85753_37283635 | NC_021165.1    | Ca_kabuli_chr06 | 37283635                | CC                              | GG              | 1946870615               |
| SNP_P4_85754_37284152 | NC_021165.1    | Ca_kabuli_chr06 | 37284152                | GG                              | AA              | 1946870617               |
| SNP_P4_85755_37295650 | NC_021165.1    | Ca_kabuli_chr06 | 37295650                | TT                              | CC              | 1946870619               |
| SNP_P4_85756_37295734 | NC_021165.1    | Ca_kabuli_chr06 | 37295734                | GG                              | TT              | 1946870621               |
| SNP_P4_85757_37295904 | NC_021165.1    | Ca_kabuli_chr06 | 37295904                | AA                              | GG              | 1946870623               |
| SNP_P4_85758_37295911 | NC_021165.1    | Ca_kabuli_chr06 | 37295911                | TT                              | CC              | 1946870625               |
| SNP_P4_85759_37295927 | NC_021165.1    | Ca_kabuli_chr06 | 37295927                | AA                              | GG              | 1946870627               |
| SNP_P4_85760_37295935 | NC_021165.1    | Ca_kabuli_chr06 | 37295935                | AA                              | GG              | 1946870629               |
| SNP_P4_85761_37297513 | NC_021165.1    | Ca_kabuli_chr06 | 37297513                | CC                              | TT              | 1946870631               |
| SNP_P4_85762_37297521 | NC_021165.1    | Ca_kabuli_chr06 | 37297521                | TT                              | CC              | 1946870633               |
| SNP_P4_85763_37297549 | NC_021165.1    | Ca_kabuli_chr06 | 37297549                | TT                              | AA              | 1946870635               |
| SNP_P4_85764_37297651 | NC_021165.1    | Ca_kabuli_chr06 | 37297651                | TT                              | CC              | 1946870637               |
| SNP_P4_85765_37297667 | NC_021165.1    | Ca_kabuli_chr06 | 37297667                | CC                              | TT              | 1946870639               |
| SNP_P4_85766_37297676 | NC_021165.1    | Ca_kabuli_chr06 | 37297676                | TT                              | GG              | 1946870641               |
| SNP_P4_85767_37315997 | NC_021165.1    | Ca_kabuli_chr06 | 37315997                | GG                              | CC              | 1946870643               |
| SNP_P4_85768_37316134 | NC_021165.1    | Ca_kabuli_chr06 | 37316134                | CC                              | AA              | 1946870645               |
| SNP_P4_85769_37354310 | NC_021165.1    | Ca_kabuli_chr06 | 37354310                | TT                              | CC              | 1946870647               |
| SNP_P4_85770_37360211 | NC_021165.1    | Ca_kabuli_chr06 | 37360211                | CC                              | TT              | 1946870649               |
| SNP_P4_85771_37403550 | NC_021165.1    | Ca_kabuli_chr06 | 37403550                | AA                              | GG              | 1946870651               |
| SNP_P4_85772_37452986 | NC_021165.1    | Ca_kabuli_chr06 | 37452986                | GG                              | TT              | 1946870653               |
| SNP_P4_85773_37453018 | NC_021165.1    | Ca_kabuli_chr06 | 37453018                | AA                              | GG              | 1946870655               |

| SNPs IDs              | Chromosome IDs | Chromosomes     | Physical positions (bp) | CDC Frontier (Reference genome) | (ILWC46 & LPNB) | NCBI SNPdb Accession IDs |
|-----------------------|----------------|-----------------|-------------------------|---------------------------------|-----------------|--------------------------|
| SNP_P4_85774_37453340 | NC_021165.1    | Ca_kabuli_chr06 | 37453340                | TT                              | GG              | 1946870657               |
| SNP_P4_85775_37453405 | NC_021165.1    | Ca_kabuli_chr06 | 37453405                | TT                              | CC              | 1946870659               |
| SNP_P4_85776_37453436 | NC_021165.1    | Ca_kabuli_chr06 | 37453436                | TT                              | CC              | 1946870661               |
| SNP_P4_85777_37453464 | NC_021165.1    | Ca_kabuli_chr06 | 37453464                | AA                              | TT              | 1946870663               |
| SNP_P4_85778_37453472 | NC_021165.1    | Ca_kabuli_chr06 | 37453472                | TT                              | CC              | 1946870665               |
| SNP_P4_85779_37453481 | NC_021165.1    | Ca_kabuli_chr06 | 37453481                | TT                              | GG              | 1946870667               |
| SNP_P4_85780_37453492 | NC_021165.1    | Ca_kabuli_chr06 | 37453492                | CC                              | AA              | 1946870669               |
| SNP_P4_85781_37453518 | NC_021165.1    | Ca_kabuli_chr06 | 37453518                | TT                              | CC              | 1946870671               |
| SNP_P4_85782_37453565 | NC_021165.1    | Ca_kabuli_chr06 | 37453565                | CC                              | GG              | 1946870673               |
| SNP_P4_85783_37453667 | NC_021165.1    | Ca_kabuli_chr06 | 37453667                | TT                              | GG              | 1946870675               |
| SNP_P4_85784_37453674 | NC_021165.1    | Ca_kabuli_chr06 | 37453674                | AA                              | GG              | 1946870677               |
| SNP_P4_85785_37453704 | NC_021165.1    | Ca_kabuli_chr06 | 37453704                | AA                              | CC              | 1946870679               |
| SNP_P4_85786_37453797 | NC_021165.1    | Ca_kabuli_chr06 | 37453797                | AA                              | GG              | 1946870681               |
| SNP_P4_85787_37453864 | NC_021165.1    | Ca_kabuli_chr06 | 37453864                | TT                              | CC              | 1946870683               |
| SNP_P4_85788_37453871 | NC_021165.1    | Ca_kabuli_chr06 | 37453871                | AA                              | GG              | 1946870685               |
| SNP_P4_85789_37468419 | NC_021165.1    | Ca_kabuli_chr06 | 37468419                | CC                              | TT              | 1946870686               |
| SNP_P4_85790_37496318 | NC_021165.1    | Ca_kabuli_chr06 | 37496318                | GG                              | AA              | 1946870688               |
| SNP_P4_85791_37523402 | NC_021165.1    | Ca_kabuli_chr06 | 37523402                | GG                              | TT              | 1946870690               |
| SNP_P4_85792_37535115 | NC_021165.1    | Ca_kabuli_chr06 | 37535115                | AA                              | GG              | 1946870692               |
| SNP_P4_85793_37545724 | NC_021165.1    | Ca_kabuli_chr06 | 37545724                | TT                              | AA              | 1946870694               |
| SNP_P4_85794_37560609 | NC_021165.1    | Ca_kabuli_chr06 | 37560609                | AA                              | CC              | 1946870696               |
| SNP_P4_85795_37560783 | NC_021165.1    | Ca_kabuli_chr06 | 37560783                | TT                              | CC              | 1946870698               |
| SNP_P4_85796_37560790 | NC_021165.1    | Ca_kabuli_chr06 | 37560790                | TT                              | AA              | 1946870700               |
| SNP_P4_85797_37611075 | NC_021165.1    | Ca_kabuli_chr06 | 37611075                | CC                              | TT              | 1946870702               |
| SNP_P4_85798_37611146 | NC_021165.1    | Ca_kabuli_chr06 | 37611146                | GG                              | AA              | 1946870704               |
| SNP_P4_85799_37612239 | NC_021165.1    | Ca_kabuli_chr06 | 37612239                | CC                              | TT              | 1946870706               |
| SNP_P4_85800_37613194 | NC_021165.1    | Ca_kabuli_chr06 | 37613194                | AA                              | CC              | 1946870708               |
| SNP_P4_85801_37613195 | NC_021165.1    | Ca_kabuli_chr06 | 37613195                | AA                              | GG              | 1946870710               |
| SNP_P4_85802_37617400 | NC_021165.1    | Ca_kabuli_chr06 | 37617400                | AA                              | CC              | 1946870712               |
| SNP_P4_85803_37636394 | NC_021165.1    | Ca_kabuli_chr06 | 37636394                | GG                              | AA              | 1946870714               |
| SNP_P4_85804_37636395 | NC_021165.1    | Ca_kabuli_chr06 | 37636395                | GG                              | CC              | 1946870716               |
| SNP_P4_85805_37636413 | NC_021165.1    | Ca_kabuli_chr06 | 37636413                | GG                              | CC              | 1946870718               |
| SNP_P4_85806_37636483 | NC_021165.1    | Ca_kabuli_chr06 | 37636483                | GG                              | AA              | 1946870720               |
| SNP_P4_85807_37636487 | NC_021165.1    | Ca_kabuli_chr06 | 37636487                | AA                              | GG              | 1946870722               |
| SNP_P4_85808_37636869 | NC_021165.1    | Ca_kabuli_chr06 | 37636869                | GG                              | AA              | 1946870724               |
| SNP_P4_85809_37637331 | NC_021165.1    | Ca_kabuli_chr06 | 37637331                | GG                              | AA              | 1946870726               |
| SNP_P4_85810_37637409 | NC_021165.1    | Ca_kabuli_chr06 | 37637409                | CC                              | TT              | 1946870728               |
| SNP_P4_85811_37639095 | NC_021165.1    | Ca_kabuli_chr06 | 37639095                | AA                              | CC              | 1946870729               |
| SNP_P4_85812_37639174 | NC_021165.1    | Ca_kabuli_chr06 | 37639174                | CC                              | GG              | 1946870731               |
| SNP_P4_85813_37639435 | NC_021165.1    | Ca_kabuli_chr06 | 37639435                | TT                              | CC              | 1946870733               |
| SNP_P4_85814_37639473 | NC_021165.1    | Ca_kabuli_chr06 | 37639473                | TT                              | AA              | 1946870735               |
| SNP_P4_85815_37639502 | NC_021165.1    | Ca_kabuli_chr06 | 37639502                | AA                              | TT              | 1946870737               |

| SNPs IDs              | Chromosome IDs | Chromosomes     | Physical positions (bp) | CDC Frontier (Reference genome) | (ILWC46 & LPNB) | NCBI SNPdb Accession IDs |
|-----------------------|----------------|-----------------|-------------------------|---------------------------------|-----------------|--------------------------|
| SNP_P4_85816_37639505 | NC_021165.1    | Ca_kabuli_chr06 | 37639505                | CC                              | AA              | 1946870739               |
| SNP_P4_85817_37639516 | NC_021165.1    | Ca_kabuli_chr06 | 37639516                | GG                              | TT              | 1946870741               |
| SNP_P4_85818_37639549 | NC_021165.1    | Ca_kabuli_chr06 | 37639549                | AA                              | GG              | 1946870743               |
| SNP_P4_85820_37643198 | NC_021165.1    | Ca_kabuli_chr06 | 37643198                | TT                              | CC              | 1946870745               |
| SNP_P4_85821_37652281 | NC_021165.1    | Ca_kabuli_chr06 | 37652281                | CC                              | TT              | 1946870747               |
| SNP_P4_85822_37658133 | NC_021165.1    | Ca_kabuli_chr06 | 37658133                | TT                              | CC              | 1946870749               |
| SNP_P4_85823_37658139 | NC_021165.1    | Ca_kabuli_chr06 | 37658139                | TT                              | CC              | 1946870751               |
| SNP_P4_85824_37658497 | NC_021165.1    | Ca_kabuli_chr06 | 37658497                | TT                              | CC              | 1946870753               |
| SNP_P4_85825_37693714 | NC_021165.1    | Ca_kabuli_chr06 | 37693714                | GG                              | AA              | 1946870755               |
| SNP_P4_85826_37711890 | NC_021165.1    | Ca_kabuli_chr06 | 37711890                | GG                              | TT              | 1946870757               |
| SNP_P4_85827_37725109 | NC_021165.1    | Ca_kabuli_chr06 | 37725109                | CC                              | TT              | 1946870759               |
| SNP_P4_85829_37787144 | NC_021165.1    | Ca_kabuli_chr06 | 37787144                | CC                              | TT              | 1946870761               |
| SNP_P4_85831_37827502 | NC_021165.1    | Ca_kabuli_chr06 | 37827502                | AA                              | TT              | 1946870763               |
| SNP_P4_85832_37834682 | NC_021165.1    | Ca_kabuli_chr06 | 37834682                | CC                              | TT              | 1946870765               |
| SNP_P4_85833_37834872 | NC_021165.1    | Ca_kabuli_chr06 | 37834872                | CC                              | TT              | 1946870768               |
| SNP_P4_85834_37834971 | NC_021165.1    | Ca_kabuli_chr06 | 37834971                | AA                              | GG              | 1946870770               |
| SNP_P4_85835_37835316 | NC_021165.1    | Ca_kabuli_chr06 | 37835316                | TT                              | CC              | 1946870772               |
| SNP_P4_85836_37835332 | NC_021165.1    | Ca_kabuli_chr06 | 37835332                | AA                              | GG              | 1946870774               |
| SNP_P4_85837_37835350 | NC_021165.1    | Ca_kabuli_chr06 | 37835350                | TT                              | CC              | 1946870776               |
| SNP_P4_85838_37835470 | NC_021165.1    | Ca_kabuli_chr06 | 37835470                | GG                              | AA              | 1946870778               |
| SNP_P4_85839_37836482 | NC_021165.1    | Ca_kabuli_chr06 | 37836482                | TT                              | CC              | 1946870780               |
| SNP_P4_85840_37836553 | NC_021165.1    | Ca_kabuli_chr06 | 37836553                | TT                              | CC              | 1946870782               |
| SNP_P4_85841_37836554 | NC_021165.1    | Ca_kabuli_chr06 | 37836554                | CC                              | TT              | 1946870784               |
| SNP_P4_85842_37836600 | NC_021165.1    | Ca_kabuli_chr06 | 37836600                | GG                              | CC              | 1946870786               |
| SNP_P4_85843_37836632 | NC_021165.1    | Ca_kabuli_chr06 | 37836632                | AA                              | TT              | 1946870788               |
| SNP_P4_85844_37893614 | NC_021165.1    | Ca_kabuli_chr06 | 37893614                | TT                              | AA              | 1946870790               |
| SNP_P4_85845_37893686 | NC_021165.1    | Ca_kabuli_chr06 | 37893686                | AA                              | GG              | 1946870792               |
| SNP_P4_85846_37894142 | NC_021165.1    | Ca_kabuli_chr06 | 37894142                | GG                              | AA              | 1946870794               |
| SNP_P4_85847_37894148 | NC_021165.1    | Ca_kabuli_chr06 | 37894148                | TT                              | CC              | 1946870796               |
| SNP_P4_85848_37901728 | NC_021165.1    | Ca_kabuli_chr06 | 37901728                | GG                              | AA              | 1946870798               |
| SNP_P4_85849_37901771 | NC_021165.1    | Ca_kabuli_chr06 | 37901771                | TT                              | CC              | 1946870800               |
| SNP_P4_85850_37901778 | NC_021165.1    | Ca_kabuli_chr06 | 37901778                | CC                              | GG              | 1946870802               |
| SNP_P4_85851_37901800 | NC_021165.1    | Ca_kabuli_chr06 | 37901800                | TT                              | CC              | 1946870804               |
| SNP_P4_85852_37901801 | NC_021165.1    | Ca_kabuli_chr06 | 37901801                | GG                              | AA              | 1946870806               |
| SNP_P4_85853_37901811 | NC_021165.1    | Ca_kabuli_chr06 | 37901811                | GG                              | TT              | 1946870808               |
| SNP_P4_85854_37901841 | NC_021165.1    | Ca_kabuli_chr06 | 37901841                | AA                              | GG              | 1946870810               |
| SNP_P4_85856_37902301 | NC_021165.1    | Ca_kabuli_chr06 | 37902301                | GG                              | AA              | 1946870812               |
| SNP_P4_85857_37934640 | NC_021165.1    | Ca_kabuli_chr06 | 37934640                | AA                              | GG              | 1946870814               |
| SNP_P4_85858_37934808 | NC_021165.1    | Ca_kabuli_chr06 | 37934808                | AA                              | GG              | 1946870816               |
| SNP_P4_85859_37934824 | NC_021165.1    | Ca_kabuli_chr06 | 37934824                | AA                              | CC              | 1946870818               |
| SNP_P4_85860_37934834 | NC_021165.1    | Ca_kabuli_chr06 | 37934834                | TT                              | CC              | 1946870819               |
| SNP_P4_85861_37935183 | NC_021165.1    | Ca_kabuli_chr06 | 37935183                | CC                              | AA              | 1946870821               |

| SNPs IDs              | Chromosome IDs | Chromosomes     | Physical positions (bp) | CDC Frontier (Reference genome) | (ILWC46 & LPNB) | NCBI SNPdb Accession IDs |
|-----------------------|----------------|-----------------|-------------------------|---------------------------------|-----------------|--------------------------|
| SNP_P4_85862_37938263 | NC_021165.1    | Ca_kabuli_chr06 | 37938263                | TT                              | GG              | 1946870823               |
| SNP_P4_85863_37938500 | NC_021165.1    | Ca_kabuli_chr06 | 37938500                | AA                              | GG              | 1946870825               |
| SNP_P4_85864_37938572 | NC_021165.1    | Ca_kabuli_chr06 | 37938572                | GG                              | AA              | 1946870827               |
| SNP_P4_85865_37938584 | NC_021165.1    | Ca_kabuli_chr06 | 37938584                | TT                              | CC              | 1946870829               |
| SNP_P4_85866_37975373 | NC_021165.1    | Ca_kabuli_chr06 | 37975373                | AA                              | TT              | 1946870831               |
| SNP_P4_85867_37975655 | NC_021165.1    | Ca_kabuli_chr06 | 37975655                | CC                              | AA              | 1946870833               |
| SNP_P4_85868_37975721 | NC_021165.1    | Ca_kabuli_chr06 | 37975721                | CC                              | TT              | 1946870836               |
| SNP_P4_85869_37975781 | NC_021165.1    | Ca_kabuli_chr06 | 37975781                | TT                              | AA              | 1946870838               |
| SNP_P4_85870_37975813 | NC_021165.1    | Ca_kabuli_chr06 | 37975813                | TT                              | CC              | 1946870840               |
| SNP_P4_85871_37975858 | NC_021165.1    | Ca_kabuli_chr06 | 37975858                | TT                              | AA              | 1946870842               |
| SNP_P4_85872_37975966 | NC_021165.1    | Ca_kabuli_chr06 | 37975966                | CC                              | AA              | 1946870844               |
| SNP_P4_85873_37975984 | NC_021165.1    | Ca_kabuli_chr06 | 37975984                | GG                              | AA              | 1946870846               |
| SNP_P4_85874_37976046 | NC_021165.1    | Ca_kabuli_chr06 | 37976046                | TT                              | GG              | 1946870848               |
| SNP_P4_85875_37976126 | NC_021165.1    | Ca_kabuli_chr06 | 37976126                | GG                              | AA              | 1946870850               |
| SNP_P4_85876_37976137 | NC_021165.1    | Ca_kabuli_chr06 | 37976137                | TT                              | AA              | 1946870852               |
| SNP_P4_85877_37976160 | NC_021165.1    | Ca_kabuli_chr06 | 37976160                | CC                              | TT              | 1946870854               |
| SNP_P4_85878_37976164 | NC_021165.1    | Ca_kabuli_chr06 | 37976164                | CC                              | TT              | 1946870856               |
| SNP_P4_85879_37976294 | NC_021165.1    | Ca_kabuli_chr06 | 37976294                | AA                              | TT              | 1946870858               |
| SNP_P4_85880_37977467 | NC_021165.1    | Ca_kabuli_chr06 | 37977467                | AA                              | GG              | 1946870860               |
| SNP_P4_85881_37980683 | NC_021165.1    | Ca_kabuli_chr06 | 37980683                | GG                              | AA              | 1946870862               |
| SNP_P4_85882_37980719 | NC_021165.1    | Ca_kabuli_chr06 | 37980719                | TT                              | GG              | 1946870864               |
| SNP_P4_85883_37980750 | NC_021165.1    | Ca_kabuli_chr06 | 37980750                | GG                              | AA              | 1946870866               |
| SNP_P4_85884_37981131 | NC_021165.1    | Ca_kabuli_chr06 | 37981131                | GG                              | CC              | 1946870868               |
| SNP_P4_85885_37981144 | NC_021165.1    | Ca_kabuli_chr06 | 37981144                | GG                              | TT              | 1946870870               |
| SNP_P4_85887_37981355 | NC_021165.1    | Ca_kabuli_chr06 | 37981355                | TT                              | CC              | 1946870872               |
| SNP_P4_85889_37981480 | NC_021165.1    | Ca_kabuli_chr06 | 37981480                | GG                              | AA              | 1946870874               |
| SNP_P4_85890_37981519 | NC_021165.1    | Ca_kabuli_chr06 | 37981519                | AA                              | GG              | 1946870876               |
| SNP_P4_85891_37981593 | NC_021165.1    | Ca_kabuli_chr06 | 37981593                | AA                              | GG              | 1946870879               |
| SNP_P4_85892_37981676 | NC_021165.1    | Ca_kabuli_chr06 | 37981676                | GG                              | AA              | 1946870880               |
| SNP_P4_85893_37981699 | NC_021165.1    | Ca_kabuli_chr06 | 37981699                | TT                              | CC              | 1946870882               |
| SNP_P4_85894_37981708 | NC_021165.1    | Ca_kabuli_chr06 | 37981708                | CC                              | TT              | 1946870885               |
| SNP_P4_85895_37981786 | NC_021165.1    | Ca_kabuli_chr06 | 37981786                | CC                              | TT              | 1946870887               |
| SNP_P4_85897_37981881 | NC_021165.1    | Ca_kabuli_chr06 | 37981881                | GG                              | AA              | 1946870889               |
| SNP_P4_85898_37982008 | NC_021165.1    | Ca_kabuli_chr06 | 37982008                | AA                              | CC              | 1946870891               |
| SNP_P4_85899_37982062 | NC_021165.1    | Ca_kabuli_chr06 | 37982062                | TT                              | GG              | 1946870893               |
| SNP_P4_85901_37982188 | NC_021165.1    | Ca_kabuli_chr06 | 37982188                | CC                              | AA              | 1946870895               |
| SNP_P4_85902_37986106 | NC_021165.1    | Ca_kabuli_chr06 | 37986106                | TT                              | CC              | 1946870897               |
| SNP_P4_85903_37986136 | NC_021165.1    | Ca_kabuli_chr06 | 37986136                | AA                              | TT              | 1946870899               |
| SNP_P4_85904_37986140 | NC_021165.1    | Ca_kabuli_chr06 | 37986140                | AA                              | GG              | 1946870901               |
| SNP_P4_85905_37986141 | NC_021165.1    | Ca_kabuli_chr06 | 37986141                | AA                              | TT              | 1946870903               |
| SNP_P4_85906_38054675 | NC_021165.1    | Ca_kabuli_chr06 | 38054675                | AA                              | GG              | 1946870905               |
| SNP_P4_85907_38059556 | NC_021165.1    | Ca_kabuli_chr06 | 38059556                | AA                              | GG              | 1946870907               |

| SNPs IDs              | Chromosome IDs | Chromosomes     | Physical positions (bp) | CDC Frontier (Reference genome) | (ILWC46 & LPNB) | NCBI SNPdb Accession IDs |
|-----------------------|----------------|-----------------|-------------------------|---------------------------------|-----------------|--------------------------|
| SNP_P4_85908_38112528 | NC_021165.1    | Ca_kabuli_chr06 | 38112528                | AA                              | GG              | 1946870909               |
| SNP_P4_85909_38112887 | NC_021165.1    | Ca_kabuli_chr06 | 38112887                | AA                              | CC              | 1946870911               |
| SNP_P4_85910_38114778 | NC_021165.1    | Ca_kabuli_chr06 | 38114778                | TT                              | CC              | 1946870913               |
| SNP_P4_85911_38117032 | NC_021165.1    | Ca_kabuli_chr06 | 38117032                | TT                              | CC              | 1946870915               |
| SNP_P4_85912_38124341 | NC_021165.1    | Ca_kabuli_chr06 | 38124341                | AA                              | GG              | 1946870917               |
| SNP_P4_85913_38124396 | NC_021165.1    | Ca_kabuli_chr06 | 38124396                | TT                              | CC              | 1946870919               |
| SNP_P4_85914_38124398 | NC_021165.1    | Ca_kabuli_chr06 | 38124398                | GG                              | AA              | 1946870921               |
| SNP_P4_85915_38124568 | NC_021165.1    | Ca_kabuli_chr06 | 38124568                | TT                              | CC              | 1946870923               |
| SNP_P4_85916_38124580 | NC_021165.1    | Ca_kabuli_chr06 | 38124580                | AA                              | GG              | 1946870925               |
| SNP_P4_85917_38124620 | NC_021165.1    | Ca_kabuli_chr06 | 38124620                | AA                              | GG              | 1946870927               |
| SNP_P4_85918_38124653 | NC_021165.1    | Ca_kabuli_chr06 | 38124653                | AA                              | GG              | 1946870929               |
| SNP_P4_85919_38124654 | NC_021165.1    | Ca_kabuli_chr06 | 38124654                | CC                              | TT              | 1946870931               |
| SNP_P4_85920_38124660 | NC_021165.1    | Ca_kabuli_chr06 | 38124660                | AA                              | GG              | 1946870933               |
| SNP_P4_85921_38124671 | NC_021165.1    | Ca_kabuli_chr06 | 38124671                | CC                              | AA              | 1946870935               |
| SNP_P4_85922_38124686 | NC_021165.1    | Ca_kabuli_chr06 | 38124686                | GG                              | TT              | 1946870937               |
| SNP_P4_85923_38124687 | NC_021165.1    | Ca_kabuli_chr06 | 38124687                | CC                              | TT              | 1946870939               |
| SNP_P4_85924_38124758 | NC_021165.1    | Ca_kabuli_chr06 | 38124758                | AA                              | GG              | 1946870941               |
| SNP_P4_85925_38135089 | NC_021165.1    | Ca_kabuli_chr06 | 38135089                | TT                              | CC              | 1946870943               |
| SNP_P4_85926_38135203 | NC_021165.1    | Ca_kabuli_chr06 | 38135203                | AA                              | GG              | 1946870945               |
| SNP_P4_85927_38135229 | NC_021165.1    | Ca_kabuli_chr06 | 38135229                | TT                              | CC              | 1946870947               |
| SNP_P4_85928_38135341 | NC_021165.1    | Ca_kabuli_chr06 | 38135341                | AA                              | GG              | 1946870949               |
| SNP_P4_85929_38135351 | NC_021165.1    | Ca_kabuli_chr06 | 38135351                | TT                              | CC              | 1946870951               |
| SNP_P4_85930_38135383 | NC_021165.1    | Ca_kabuli_chr06 | 38135383                | TT                              | AA              | 1946870953               |
| SNP_P4_85931_38135404 | NC_021165.1    | Ca_kabuli_chr06 | 38135404                | GG                              | AA              | 1946870955               |
| SNP_P4_85932_38135421 | NC_021165.1    | Ca_kabuli_chr06 | 38135421                | CC                              | AA              | 1946870957               |
| SNP_P4_85933_38135422 | NC_021165.1    | Ca_kabuli_chr06 | 38135422                | TT                              | AA              | 1946870959               |
| SNP_P4_85934_38135425 | NC_021165.1    | Ca_kabuli_chr06 | 38135425                | AA                              | GG              | 1946870961               |
| SNP_P4_85935_38135467 | NC_021165.1    | Ca_kabuli_chr06 | 38135467                | TT                              | CC              | 1946870963               |
| SNP_P4_85936_38135483 | NC_021165.1    | Ca_kabuli_chr06 | 38135483                | TT                              | CC              | 1946870965               |
| SNP_P4_85937_38135490 | NC_021165.1    | Ca_kabuli_chr06 | 38135490                | AA                              | GG              | 1946870967               |
| SNP_P4_85938_38135492 | NC_021165.1    | Ca_kabuli_chr06 | 38135492                | AA                              | GG              | 1946870969               |
| SNP_P4_85939_38135506 | NC_021165.1    | Ca_kabuli_chr06 | 38135506                | AA                              | GG              | 1946870971               |
| SNP_P4_85940_38135527 | NC_021165.1    | Ca_kabuli_chr06 | 38135527                | CC                              | TT              | 1946870973               |
| SNP_P4_85941_38144329 | NC_021165.1    | Ca_kabuli_chr06 | 38144329                | AA                              | CC              | 1946870975               |
| SNP_P4_85942_38180098 | NC_021165.1    | Ca_kabuli_chr06 | 38180098                | CC                              | AA              | 1946870977               |
| SNP_P4_85943_38181722 | NC_021165.1    | Ca_kabuli_chr06 | 38181722                | CC                              | TT              | 1946870979               |
| SNP_P4_85944_38181724 | NC_021165.1    | Ca_kabuli_chr06 | 38181724                | AA                              | GG              | 1946870981               |
| SNP_P4_85945_38188275 | NC_021165.1    | Ca_kabuli_chr06 | 38188275                | GG                              | AA              | 1946870983               |
| SNP_P4_85946_38196044 | NC_021165.1    | Ca_kabuli_chr06 | 38196044                | GG                              | AA              | 1946870985               |
| SNP_P4_85947_38196165 | NC_021165.1    | Ca_kabuli_chr06 | 38196165                | AA                              | CC              | 1946870987               |
| SNP_P4_85948_38196208 | NC_021165.1    | Ca_kabuli_chr06 | 38196208                | AA                              | TT              | 1946870989               |
| SNP_P4_85949_38196244 | NC_021165.1    | Ca_kabuli_chr06 | 38196244                | CC                              | TT              | 1946870991               |

| SNPs IDs              | Chromosome IDs | Chromosomes     | Physical positions (bp) | CDC Frontier (Reference genome) | (ILWC46 & LPNB) | NCBI SNPdb Accession IDs |
|-----------------------|----------------|-----------------|-------------------------|---------------------------------|-----------------|--------------------------|
| SNP_P4_85950_38196457 | NC_021165.1    | Ca_kabuli_chr06 | 38196457                | TT                              | GG              | 1946870993               |
| SNP_P4_85951_38196460 | NC_021165.1    | Ca_kabuli_chr06 | 38196460                | AA                              | GG              | 1946870995               |
| SNP_P4_85952_38196474 | NC_021165.1    | Ca_kabuli_chr06 | 38196474                | TT                              | CC              | 1946870997               |
| SNP_P4_85953_38196496 | NC_021165.1    | Ca_kabuli_chr06 | 38196496                | AA                              | GG              | 1946870999               |
| SNP_P4_85954_38196502 | NC_021165.1    | Ca_kabuli_chr06 | 38196502                | AA                              | TT              | 1946871001               |
| SNP_P4_85955_38196508 | NC_021165.1    | Ca_kabuli_chr06 | 38196508                | AA                              | TT              | 1946871003               |
| SNP_P4_85956_38196541 | NC_021165.1    | Ca_kabuli_chr06 | 38196541                | AA                              | GG              | 1946871005               |
| SNP_P4_85957_38196556 | NC_021165.1    | Ca_kabuli_chr06 | 38196556                | AA                              | GG              | 1946871007               |
| SNP_P4_85958_38197790 | NC_021165.1    | Ca_kabuli_chr06 | 38197790                | AA                              | TT              | 1946871009               |
| SNP_P4_85959_38201291 | NC_021165.1    | Ca_kabuli_chr06 | 38201291                | AA                              | GG              | 1946871011               |
| SNP_P4_85960_38201324 | NC_021165.1    | Ca_kabuli_chr06 | 38201324                | TT                              | AA              | 1946871013               |
| SNP_P4_85962_38201620 | NC_021165.1    | Ca_kabuli_chr06 | 38201620                | GG                              | AA              | 1946871015               |
| SNP_P4_85963_38201646 | NC_021165.1    | Ca_kabuli_chr06 | 38201646                | TT                              | GG              | 1946871017               |
| SNP_P4_85964_38202156 | NC_021165.1    | Ca_kabuli_chr06 | 38202156                | AA                              | GG              | 1946871019               |
| SNP_P4_85965_38202188 | NC_021165.1    | Ca_kabuli_chr06 | 38202188                | AA                              | GG              | 1946871021               |
| SNP_P4_85967_38202245 | NC_021165.1    | Ca_kabuli_chr06 | 38202245                | AA                              | GG              | 1946871023               |
| SNP_P4_85968_38202251 | NC_021165.1    | Ca_kabuli_chr06 | 38202251                | AA                              | GG              | 1946871025               |
| SNP_P4_85969_38209070 | NC_021165.1    | Ca_kabuli_chr06 | 38209070                | CC                              | TT              | 1946871027               |
| SNP_P4_85971_38238007 | NC_021165.1    | Ca_kabuli_chr06 | 38238007                | AA                              | CC              | 1946871029               |
| SNP_P4_85972_38248310 | NC_021165.1    | Ca_kabuli_chr06 | 38248310                | CC                              | TT              | 1946871031               |
| SNP_P4_85973_38250532 | NC_021165.1    | Ca_kabuli_chr06 | 38250532                | GG                              | AA              | 1946871033               |
| SNP_P4_85974_38266786 | NC_021165.1    | Ca_kabuli_chr06 | 38266786                | AA                              | GG              | 1946871035               |
| SNP_P4_85975_38272653 | NC_021165.1    | Ca_kabuli_chr06 | 38272653                | GG                              | AA              | 1946871037               |
| SNP_P4_85976_38296409 | NC_021165.1    | Ca_kabuli_chr06 | 38296409                | AA                              | GG              | 1946871039               |
| SNP_P4_85977_38304226 | NC_021165.1    | Ca_kabuli_chr06 | 38304226                | GG                              | TT              | 1946871041               |
| SNP_P4_85978_38312044 | NC_021165.1    | Ca_kabuli_chr06 | 38312044                | AA                              | TT              | 1946871043               |
| SNP_P4_85979_38316288 | NC_021165.1    | Ca_kabuli_chr06 | 38316288                | TT                              | CC              | 1946871045               |
| SNP_P4_85980_38316289 | NC_021165.1    | Ca_kabuli_chr06 | 38316289                | TT                              | GG              | 1946871047               |
| SNP_P4_85981_38368946 | NC_021165.1    | Ca_kabuli_chr06 | 38368946                | CC                              | TT              | 1946871049               |
| SNP_P4_85982_38371731 | NC_021165.1    | Ca_kabuli_chr06 | 38371731                | TT                              | CC              | 1946871051               |
| SNP_P4_85983_38374403 | NC_021165.1    | Ca_kabuli_chr06 | 38374403                | AA                              | GG              | 1946871053               |
| SNP_P4_85984_38378699 | NC_021165.1    | Ca_kabuli_chr06 | 38378699                | GG                              | AA              | 1946871055               |
| SNP_P4_85985_38380289 | NC_021165.1    | Ca_kabuli_chr06 | 38380289                | AA                              | GG              | 1946871057               |
| SNP_P4_85986_38382095 | NC_021165.1    | Ca_kabuli_chr06 | 38382095                | AA                              | GG              | 1946871059               |
| SNP_P4_85988_38422960 | NC_021165.1    | Ca_kabuli_chr06 | 38422960                | GG                              | AA              | 1946871061               |
| SNP_P4_85989_38438002 | NC_021165.1    | Ca_kabuli_chr06 | 38438002                | TT                              | CC              | 1946871063               |
| SNP_P4_85990_38449043 | NC_021165.1    | Ca_kabuli_chr06 | 38449043                | AA                              | GG              | 1946871065               |
| SNP_P4_85991_38449084 | NC_021165.1    | Ca_kabuli_chr06 | 38449084                | TT                              | AA              | 1946871067               |
| SNP_P4_85992_38449102 | NC_021165.1    | Ca_kabuli_chr06 | 38449102                | CC                              | AA              | 1946871069               |
| SNP_P4_85993_38460652 | NC_021165.1    | Ca_kabuli_chr06 | 38460652                | TT                              | CC              | 1946871071               |
| SNP_P4_85994_38461159 | NC_021165.1    | Ca_kabuli_chr06 | 38461159                | GG                              | TT              | 1946871073               |
| SNP_P4_85995_38473041 | NC_021165.1    | Ca_kabuli_chr06 | 38473041                | CC                              | TT              | 1946871074               |

| SNPs IDs              | Chromosome IDs | Chromosomes     | Physical positions (bp) | CDC Frontier (Reference genome) | (ILWC46 & LPNB) | NCBI SNPdb Accession IDs |
|-----------------------|----------------|-----------------|-------------------------|---------------------------------|-----------------|--------------------------|
| SNP_P4_85996_38473045 | NC_021165.1    | Ca_kabuli_chr06 | 38473045                | GG                              | AA              | 1946871076               |
| SNP_P4_85997_38473180 | NC_021165.1    | Ca_kabuli_chr06 | 38473180                | GG                              | AA              | 1946871078               |
| SNP_P4_85998_38473191 | NC_021165.1    | Ca_kabuli_chr06 | 38473191                | GG                              | AA              | 1946871080               |
| SNP_P4_85999_38473214 | NC_021165.1    | Ca_kabuli_chr06 | 38473214                | AA                              | TT              | 1946871082               |
| SNP_P4_86000_38473223 | NC_021165.1    | Ca_kabuli_chr06 | 38473223                | AA                              | TT              | 1946871084               |
| SNP_P4_86001_38473278 | NC_021165.1    | Ca_kabuli_chr06 | 38473278                | GG                              | AA              | 1946871086               |
| SNP_P4_86002_38473280 | NC_021165.1    | Ca_kabuli_chr06 | 38473280                | TT                              | CC              | 1946871088               |
| SNP_P4_86003_38473299 | NC_021165.1    | Ca_kabuli_chr06 | 38473299                | CC                              | TT              | 1946871090               |
| SNP_P4_86004_38473401 | NC_021165.1    | Ca_kabuli_chr06 | 38473401                | TT                              | CC              | 1946871092               |
| SNP_P4_86005_38473480 | NC_021165.1    | Ca_kabuli_chr06 | 38473480                | GG                              | AA              | 1946871094               |
| SNP_P4_86006_38473489 | NC_021165.1    | Ca_kabuli_chr06 | 38473489                | AA                              | GG              | 1946871096               |
| SNP_P4_86007_38473636 | NC_021165.1    | Ca_kabuli_chr06 | 38473636                | CC                              | TT              | 1946871098               |
| SNP_P4_86008_38505799 | NC_021165.1    | Ca_kabuli_chr06 | 38505799                | CC                              | TT              | 1946871100               |
| SNP_P4_86009_38505819 | NC_021165.1    | Ca_kabuli_chr06 | 38505819                | AA                              | TT              | 1946871102               |
| SNP_P4_86010_38511786 | NC_021165.1    | Ca_kabuli_chr06 | 38511786                | AA                              | CC              | 1946871104               |
| SNP_P4_86011_38512489 | NC_021165.1    | Ca_kabuli_chr06 | 38512489                | CC                              | AA              | 1946871106               |
| SNP_P4_86012_38575380 | NC_021165.1    | Ca_kabuli_chr06 | 38575380                | TT                              | GG              | 1946871108               |
| SNP_P4_86013_38575455 | NC_021165.1    | Ca_kabuli_chr06 | 38575455                | GG                              | AA              | 1946871110               |
| SNP_P4_86014_38575464 | NC_021165.1    | Ca_kabuli_chr06 | 38575464                | CC                              | GG              | 1946871112               |
| SNP_P4_86015_38575498 | NC_021165.1    | Ca_kabuli_chr06 | 38575498                | CC                              | TT              | 1946871114               |
| SNP_P4_86016_38575646 | NC_021165.1    | Ca_kabuli_chr06 | 38575646                | TT                              | CC              | 1946871116               |
| SNP_P4_86017_38575673 | NC_021165.1    | Ca_kabuli_chr06 | 38575673                | GG                              | AA              | 1946871118               |
| SNP_P4_86018_38575679 | NC_021165.1    | Ca_kabuli_chr06 | 38575679                | AA                              | GG              | 1946871120               |
| SNP_P4_86019_38575702 | NC_021165.1    | Ca_kabuli_chr06 | 38575702                | TT                              | CC              | 1946871122               |
| SNP_P4_86020_38575745 | NC_021165.1    | Ca_kabuli_chr06 | 38575745                | GG                              | TT              | 1946871124               |
| SNP_P4_86021_38575763 | NC_021165.1    | Ca_kabuli_chr06 | 38575763                | TT                              | AA              | 1946871126               |
| SNP_P4_86022_38576577 | NC_021165.1    | Ca_kabuli_chr06 | 38576577                | GG                              | TT              | 1946871128               |
| SNP_P4_86023_38577930 | NC_021165.1    | Ca_kabuli_chr06 | 38577930                | CC                              | TT              | 1946871130               |
| SNP_P4_86024_38577977 | NC_021165.1    | Ca_kabuli_chr06 | 38577977                | TT                              | CC              | 1946871132               |
| SNP_P4_86025_38578207 | NC_021165.1    | Ca_kabuli_chr06 | 38578207                | TT                              | CC              | 1946871134               |
| SNP_P4_86026_38595607 | NC_021165.1    | Ca_kabuli_chr06 | 38595607                | TT                              | CC              | 1946871136               |
| SNP_P4_86027_38600443 | NC_021165.1    | Ca_kabuli_chr06 | 38600443                | TT                              | GG              | 1946871138               |
| SNP_P4_86028_38622604 | NC_021165.1    | Ca_kabuli_chr06 | 38622604                | AA                              | GG              | 1946871140               |
| SNP_P4_86029_38629139 | NC_021165.1    | Ca_kabuli_chr06 | 38629139                | AA                              | GG              | 1946871142               |
| SNP_P4_86030_38643835 | NC_021165.1    | Ca_kabuli_chr06 | 38643835                | CC                              | TT              | 1946871144               |
| SNP_P4_86031_38659593 | NC_021165.1    | Ca_kabuli_chr06 | 38659593                | AA                              | TT              | 1946871146               |
| SNP_P4_86032_38659999 | NC_021165.1    | Ca_kabuli_chr06 | 38659999                | TT                              | CC              | 1946871148               |
| SNP_P4_86033_38669741 | NC_021165.1    | Ca_kabuli_chr06 | 38669741                | TT                              | CC              | 1946871150               |
| SNP_P4_86034_38670841 | NC_021165.1    | Ca_kabuli_chr06 | 38670841                | TT                              | CC              | 1946871152               |
| SNP_P4_86035_38670860 | NC_021165.1    | Ca_kabuli_chr06 | 38670860                | TT                              | CC              | 1946871154               |
| SNP_P4_86036_38670885 | NC_021165.1    | Ca_kabuli_chr06 | 38670885                | AA                              | GG              | 1946871156               |
| SNP_P4_86038_38695006 | NC_021165.1    | Ca_kabuli_chr06 | 38695006                | CC                              | TT              | 1946871158               |

| SNPs IDs              | Chromosome IDs | Chromosomes     | Physical positions (bp) | CDC Frontier (Reference genome) | (ILWC46 & LPNB) | NCBI SNPdb Accession IDs |
|-----------------------|----------------|-----------------|-------------------------|---------------------------------|-----------------|--------------------------|
| SNP_P4_86039_38695010 | NC_021165.1    | Ca_kabuli_chr06 | 38695010                | AA                              | TT              | 1946871160               |
| SNP_P4_86040_38695072 | NC_021165.1    | Ca_kabuli_chr06 | 38695072                | CC                              | GG              | 1946871162               |
| SNP_P4_86041_38695080 | NC_021165.1    | Ca_kabuli_chr06 | 38695080                | AA                              | GG              | 1946871164               |
| SNP_P4_86042_38695081 | NC_021165.1    | Ca_kabuli_chr06 | 38695081                | GG                              | AA              | 1946871166               |
| SNP_P4_86043_38701971 | NC_021165.1    | Ca_kabuli_chr06 | 38701971                | GG                              | CC              | 1946871168               |
| SNP_P4_86044_38705211 | NC_021165.1    | Ca_kabuli_chr06 | 38705211                | TT                              | CC              | 1946871170               |
| SNP_P4_86045_38717685 | NC_021165.1    | Ca_kabuli_chr06 | 38717685                | AA                              | GG              | 1946871172               |
| SNP_P4_86046_38717855 | NC_021165.1    | Ca_kabuli_chr06 | 38717855                | AA                              | GG              | 1946871174               |
| SNP_P4_86047_38717985 | NC_021165.1    | Ca_kabuli_chr06 | 38717985                | GG                              | TT              | 1946871176               |
| SNP_P4_86048_38718062 | NC_021165.1    | Ca_kabuli_chr06 | 38718062                | TT                              | CC              | 1946871178               |
| SNP_P4_86050_38726825 | NC_021165.1    | Ca_kabuli_chr06 | 38726825                | CC                              | TT              | 1946871180               |
| SNP_P4_86051_38745537 | NC_021165.1    | Ca_kabuli_chr06 | 38745537                | AA                              | TT              | 1946871182               |
| SNP_P4_86052_38745844 | NC_021165.1    | Ca_kabuli_chr06 | 38745844                | AA                              | GG              | 1946871184               |
| SNP_P4_86053_38745870 | NC_021165.1    | Ca_kabuli_chr06 | 38745870                | GG                              | AA              | 1946871186               |
| SNP_P4_86054_38781154 | NC_021165.1    | Ca_kabuli_chr06 | 38781154                | GG                              | AA              | 1946871188               |
| SNP_P4_86055_38789783 | NC_021165.1    | Ca_kabuli_chr06 | 38789783                | TT                              | CC              | 1946871190               |
| SNP_P4_86056_38799398 | NC_021165.1    | Ca_kabuli_chr06 | 38799398                | TT                              | CC              | 1946871192               |
| SNP_P4_86057_38805317 | NC_021165.1    | Ca_kabuli_chr06 | 38805317                | AA                              | GG              | 1946871194               |
| SNP_P4_86058_38806590 | NC_021165.1    | Ca_kabuli_chr06 | 38806590                | TT                              | GG              | 1946871196               |
| SNP_P4_86059_38828162 | NC_021165.1    | Ca_kabuli_chr06 | 38828162                | AA                              | GG              | 1946871198               |
| SNP_P4_86060_38829993 | NC_021165.1    | Ca_kabuli_chr06 | 38829993                | TT                              | AA              | 1946871200               |
| SNP_P4_86061_38829994 | NC_021165.1    | Ca_kabuli_chr06 | 38829994                | AA                              | TT              | 1946871202               |
| SNP_P4_86062_38863472 | NC_021165.1    | Ca_kabuli_chr06 | 38863472                | TT                              | AA              | 1946871204               |
| SNP_P4_86063_38863508 | NC_021165.1    | Ca_kabuli_chr06 | 38863508                | TT                              | CC              | 1946871206               |
| SNP_P4_86064_38863512 | NC_021165.1    | Ca_kabuli_chr06 | 38863512                | TT                              | CC              | 1946871208               |
| SNP_P4_86065_38863516 | NC_021165.1    | Ca_kabuli_chr06 | 38863516                | CC                              | TT              | 1946871210               |
| SNP_P4_86066_38863556 | NC_021165.1    | Ca_kabuli_chr06 | 38863556                | TT                              | CC              | 1946871212               |
| SNP_P4_86068_38863672 | NC_021165.1    | Ca_kabuli_chr06 | 38863672                | CC                              | TT              | 1946871214               |
| SNP_P4_86069_38863941 | NC_021165.1    | Ca_kabuli_chr06 | 38863941                | CC                              | TT              | 1946871216               |
| SNP_P4_86070_38863968 | NC_021165.1    | Ca_kabuli_chr06 | 38863968                | TT                              | CC              | 1946871218               |
| SNP_P4_86071_38863998 | NC_021165.1    | Ca_kabuli_chr06 | 38863998                | TT                              | AA              | 1946871220               |
| SNP_P4_86072_38864028 | NC_021165.1    | Ca_kabuli_chr06 | 38864028                | TT                              | AA              | 1946871222               |
| SNP_P4_86073_38865491 | NC_021165.1    | Ca_kabuli_chr06 | 38865491                | AA                              | GG              | 1946871224               |
| SNP_P4_86074_38865493 | NC_021165.1    | Ca_kabuli_chr06 | 38865493                | GG                              | AA              | 1946871226               |
| SNP_P4_86075_38865517 | NC_021165.1    | Ca_kabuli_chr06 | 38865517                | TT                              | CC              | 1946871228               |
| SNP_P4_86076_38865521 | NC_021165.1    | Ca_kabuli_chr06 | 38865521                | TT                              | GG              | 1946871230               |
| SNP_P4_86077_38878340 | NC_021165.1    | Ca_kabuli_chr06 | 38878340                | CC                              | TT              | 1946871232               |
| SNP_P4_86078_38906490 | NC_021165.1    | Ca_kabuli_chr06 | 38906490                | AA                              | GG              | 1946871234               |
| SNP_P4_86080_38948520 | NC_021165.1    | Ca_kabuli_chr06 | 38948520                | TT                              | CC              | 1946871236               |
| SNP_P4_86081_38951638 | NC_021165.1    | Ca_kabuli_chr06 | 38951638                | CC                              | TT              | 1946871238               |
| SNP_P4_86082_38955716 | NC_021165.1    | Ca_kabuli_chr06 | 38955716                | AA                              | TT              | 1946871240               |
| SNP_P4_86083_39016845 | NC_021165.1    | Ca_kabuli_chr06 | 39016845                | AA                              | CC              | 1946871242               |



| SNPs IDs              | Chromosome IDs | Chromosomes     | Physical positions (bp) | CDC Frontier (Reference genome) | (ILWC46 & LPNB) | NCBI SNPdb Accession IDs |
|-----------------------|----------------|-----------------|-------------------------|---------------------------------|-----------------|--------------------------|
| SNP_P4_86084_39031880 | NC_021165.1    | Ca_kabuli_chr06 | 39031880                | TT                              | AA              | 1946871244               |
| SNP_P4_86085_39048226 | NC_021165.1    | Ca_kabuli_chr06 | 39048226                | TT                              | CC              | 1946871246               |
| SNP_P4_86086_39048481 | NC_021165.1    | Ca_kabuli_chr06 | 39048481                | CC                              | AA              | 1946871248               |
| SNP_P4_86087_39048497 | NC_021165.1    | Ca_kabuli_chr06 | 39048497                | CC                              | TT              | 1946871250               |
| SNP_P4_86088_39048501 | NC_021165.1    | Ca_kabuli_chr06 | 39048501                | AA                              | GG              | 1946871252               |
| SNP_P4_86089_39048534 | NC_021165.1    | Ca_kabuli_chr06 | 39048534                | CC                              | TT              | 1946871254               |
| SNP_P4_86090_39048732 | NC_021165.1    | Ca_kabuli_chr06 | 39048732                | TT                              | CC              | 1946871256               |
| SNP_P4_86091_39048758 | NC_021165.1    | Ca_kabuli_chr06 | 39048758                | CC                              | TT              | 1946871258               |
| SNP_P4_86092_39049025 | NC_021165.1    | Ca_kabuli_chr06 | 39049025                | AA                              | TT              | 1946871260               |
| SNP_P4_86093_39049028 | NC_021165.1    | Ca_kabuli_chr06 | 39049028                | TT                              | GG              | 1946871262               |
| SNP_P4_86094_39049360 | NC_021165.1    | Ca_kabuli_chr06 | 39049360                | TT                              | CC              | 1946871264               |
| SNP_P4_86095_39049391 | NC_021165.1    | Ca_kabuli_chr06 | 39049391                | CC                              | TT              | 1946871266               |
| SNP_P4_86096_39049418 | NC_021165.1    | Ca_kabuli_chr06 | 39049418                | AA                              | GG              | 1946871268               |
| SNP_P4_86097_39049425 | NC_021165.1    | Ca_kabuli_chr06 | 39049425                | CC                              | TT              | 1946871270               |
| SNP_P4_86098_39049469 | NC_021165.1    | Ca_kabuli_chr06 | 39049469                | CC                              | TT              | 1946871272               |
| SNP_P4_86099_39049480 | NC_021165.1    | Ca_kabuli_chr06 | 39049480                | CC                              | TT              | 1946871274               |
| SNP_P4_86100_39049702 | NC_021165.1    | Ca_kabuli_chr06 | 39049702                | CC                              | AA              | 1946871276               |
| SNP_P4_86101_39049720 | NC_021165.1    | Ca_kabuli_chr06 | 39049720                | GG                              | AA              | 1946871278               |
| SNP_P4_86102_39049736 | NC_021165.1    | Ca_kabuli_chr06 | 39049736                | CC                              | AA              | 1946871280               |
| SNP_P4_86104_39049944 | NC_021165.1    | Ca_kabuli_chr06 | 39049944                | TT                              | CC              | 1946871282               |
| SNP_P4_86105_39049958 | NC_021165.1    | Ca_kabuli_chr06 | 39049958                | GG                              | TT              | 1946871284               |
| SNP_P4_86106_39049967 | NC_021165.1    | Ca_kabuli_chr06 | 39049967                | TT                              | CC              | 1946871286               |
| SNP_P4_86107_39055564 | NC_021165.1    | Ca_kabuli_chr06 | 39055564                | AA                              | TT              | 1946871288               |
| SNP_P4_86108_39055568 | NC_021165.1    | Ca_kabuli_chr06 | 39055568                | TT                              | GG              | 1946871290               |
| SNP_P4_86109_39055594 | NC_021165.1    | Ca_kabuli_chr06 | 39055594                | TT                              | CC              | 1946871292               |
| SNP_P4_86110_39056031 | NC_021165.1    | Ca_kabuli_chr06 | 39056031                | AA                              | CC              | 1946871294               |
| SNP_P4_86111_39062178 | NC_021165.1    | Ca_kabuli_chr06 | 39062178                | CC                              | TT              | 1946871296               |
| SNP_P4_86112_39079018 | NC_021165.1    | Ca_kabuli_chr06 | 39079018                | TT                              | CC              | 1946871298               |
| SNP_P4_86113_39096084 | NC_021165.1    | Ca_kabuli_chr06 | 39096084                | AA                              | GG              | 1946871300               |
| SNP_P4_86115_39128151 | NC_021165.1    | Ca_kabuli_chr06 | 39128151                | TT                              | CC              | 1946871302               |
| SNP_P4_86116_39162886 | NC_021165.1    | Ca_kabuli_chr06 | 39162886                | TT                              | GG              | 1946871304               |
| SNP_P4_86117_39165803 | NC_021165.1    | Ca_kabuli_chr06 | 39165803                | TT                              | CC              | 1946871306               |
| SNP_P4_86118_39166197 | NC_021165.1    | Ca_kabuli_chr06 | 39166197                | TT                              | CC              | 1946871308               |
| SNP_P4_86119_39182914 | NC_021165.1    | Ca_kabuli_chr06 | 39182914                | TT                              | CC              | 1946871310               |
| SNP_P4_86120_39194616 | NC_021165.1    | Ca_kabuli_chr06 | 39194616                | GG                              | AA              | 1946871312               |
| SNP_P4_86121_39213384 | NC_021165.1    | Ca_kabuli_chr06 | 39213384                | GG                              | CC              | 1946871314               |
| SNP_P4_86123_39249985 | NC_021165.1    | Ca_kabuli_chr06 | 39249985                | AA                              | GG              | 1946871316               |
| SNP_P4_86125_39267012 | NC_021165.1    | Ca_kabuli_chr06 | 39267012                | AA                              | GG              | 1946871318               |
| SNP_P4_86126_39272261 | NC_021165.1    | Ca_kabuli_chr06 | 39272261                | TT                              | CC              | 1946871321               |
| SNP_P4_86127_39283809 | NC_021165.1    | Ca_kabuli_chr06 | 39283809                | AA                              | GG              | 1946871323               |
| SNP_P4_86128_39284149 | NC_021165.1    | Ca_kabuli_chr06 | 39284149                | AA                              | GG              | 1946871325               |
| SNP_P4_86129_39284154 | NC_021165.1    | Ca_kabuli_chr06 | 39284154                | CC                              | TT              | 1946871327               |

| SNPs IDs              | Chromosome IDs | Chromosomes     | Physical positions (bp) | CDC Frontier (Reference genome) | (ILWC46 & LPNB) | NCBI SNPdb Accession IDs |
|-----------------------|----------------|-----------------|-------------------------|---------------------------------|-----------------|--------------------------|
| SNP_P4_86130_39284246 | NC_021165.1    | Ca_kabuli_chr06 | 39284246                | AA                              | GG              | 1946871329               |
| SNP_P4_86131_39301737 | NC_021165.1    | Ca_kabuli_chr06 | 39301737                | GG                              | TT              | 1946871331               |
| SNP_P4_86132_39301746 | NC_021165.1    | Ca_kabuli_chr06 | 39301746                | CC                              | TT              | 1946871333               |
| SNP_P4_86133_39302166 | NC_021165.1    | Ca_kabuli_chr06 | 39302166                | CC                              | AA              | 1946871335               |
| SNP_P4_86134_39348987 | NC_021165.1    | Ca_kabuli_chr06 | 39348987                | TT                              | GG              | 1946871337               |
| SNP_P4_86136_39446280 | NC_021165.1    | Ca_kabuli_chr06 | 39446280                | TT                              | CC              | 1946871339               |
| SNP_P4_86137_39446517 | NC_021165.1    | Ca_kabuli_chr06 | 39446517                | CC                              | TT              | 1946871341               |
| SNP_P4_86138_39450064 | NC_021165.1    | Ca_kabuli_chr06 | 39450064                | GG                              | AA              | 1946871343               |
| SNP_P4_86140_39465034 | NC_021165.1    | Ca_kabuli_chr06 | 39465034                | CC                              | TT              | 1946871345               |
| SNP_P4_86143_39469851 | NC_021165.1    | Ca_kabuli_chr06 | 39469851                | GG                              | AA              | 1946871347               |
| SNP_P4_86144_39497030 | NC_021165.1    | Ca_kabuli_chr06 | 39497030                | AA                              | GG              | 1946871349               |
| SNP_P4_86145_39499994 | NC_021165.1    | Ca_kabuli_chr06 | 39499994                | AA                              | GG              | 1946871351               |
| SNP_P4_86146_39500189 | NC_021165.1    | Ca_kabuli_chr06 | 39500189                | TT                              | CC              | 1946871353               |
| SNP_P4_86147_39500214 | NC_021165.1    | Ca_kabuli_chr06 | 39500214                | GG                              | AA              | 1946871355               |
| SNP_P4_86148_39500217 | NC_021165.1    | Ca_kabuli_chr06 | 39500217                | CC                              | TT              | 1946871357               |
| SNP_P4_86149_39501189 | NC_021165.1    | Ca_kabuli_chr06 | 39501189                | AA                              | CC              | 1946871359               |
| SNP_P4_86150_39514572 | NC_021165.1    | Ca_kabuli_chr06 | 39514572                | AA                              | GG              | 1946871361               |
| SNP_P4_86151_39533052 | NC_021165.1    | Ca_kabuli_chr06 | 39533052                | TT                              | CC              | 1946871363               |
| SNP_P4_86152_39545322 | NC_021165.1    | Ca_kabuli_chr06 | 39545322                | TT                              | CC              | 1946871365               |
| SNP_P4_86153_39551268 | NC_021165.1    | Ca_kabuli_chr06 | 39551268                | GG                              | AA              | 1946871367               |
| SNP_P4_86154_39604302 | NC_021165.1    | Ca_kabuli_chr06 | 39604302                | AA                              | GG              | 1946871369               |
| SNP_P4_86155_39622112 | NC_021165.1    | Ca_kabuli_chr06 | 39622112                | TT                              | AA              | 1946871371               |
| SNP_P4_86156_39639756 | NC_021165.1    | Ca_kabuli_chr06 | 39639756                | CC                              | TT              | 1946871373               |
| SNP_P4_86157_39646379 | NC_021165.1    | Ca_kabuli_chr06 | 39646379                | CC                              | AA              | 1946871375               |
| SNP_P4_86158_39679167 | NC_021165.1    | Ca_kabuli_chr06 | 39679167                | TT                              | CC              | 1946871377               |
| SNP_P4_86159_39679170 | NC_021165.1    | Ca_kabuli_chr06 | 39679170                | AA                              | GG              | 1946871379               |
| SNP_P4_86160_39679171 | NC_021165.1    | Ca_kabuli_chr06 | 39679171                | TT                              | AA              | 1946871381               |
| SNP_P4_86161_39679180 | NC_021165.1    | Ca_kabuli_chr06 | 39679180                | AA                              | CC              | 1946871383               |
| SNP_P4_86162_39679186 | NC_021165.1    | Ca_kabuli_chr06 | 39679186                | CC                              | TT              | 1946871385               |
| SNP_P4_86163_39680853 | NC_021165.1    | Ca_kabuli_chr06 | 39680853                | CC                              | TT              | 1946871387               |
| SNP_P4_86164_39689540 | NC_021165.1    | Ca_kabuli_chr06 | 39689540                | AA                              | GG              | 1946871389               |
| SNP_P4_86165_39696227 | NC_021165.1    | Ca_kabuli_chr06 | 39696227                | TT                              | GG              | 1946871391               |
| SNP_P4_86166_39721676 | NC_021165.1    | Ca_kabuli_chr06 | 39721676                | GG                              | AA              | 1946871393               |
| SNP_P4_86167_39723653 | NC_021165.1    | Ca_kabuli_chr06 | 39723653                | AA                              | GG              | 1946871395               |
| SNP_P4_86168_39743992 | NC_021165.1    | Ca_kabuli_chr06 | 39743992                | GG                              | AA              | 1946871397               |
| SNP_P4_86169_39751422 | NC_021165.1    | Ca_kabuli_chr06 | 39751422                | TT                              | GG              | 1946871399               |
| SNP_P4_86170_39755486 | NC_021165.1    | Ca_kabuli_chr06 | 39755486                | GG                              | AA              | 1946871401               |
| SNP_P4_86171_39759819 | NC_021165.1    | Ca_kabuli_chr06 | 39759819                | CC                              | TT              | 1946871403               |
| SNP_P4_86172_39759983 | NC_021165.1    | Ca_kabuli_chr06 | 39759983                | GG                              | AA              | 1946871405               |
| SNP_P4_86173_39765444 | NC_021165.1    | Ca_kabuli_chr06 | 39765444                | TT                              | CC              | 1946871407               |
| SNP_P4_86175_39781442 | NC_021165.1    | Ca_kabuli_chr06 | 39781442                | CC                              | TT              | 1946871409               |
| SNP_P4_86177_39790409 | NC_021165.1    | Ca_kabuli_chr06 | 39790409                | TT                              | AA              | 1946871411               |

| SNPs IDs              | Chromosome IDs | Chromosomes     | Physical positions (bp) | CDC Frontier (Reference genome) | (ILWC46 & LPNB) | NCBI SNPdb Accession IDs |
|-----------------------|----------------|-----------------|-------------------------|---------------------------------|-----------------|--------------------------|
| SNP_P4_86178_39790414 | NC_021165.1    | Ca_kabuli_chr06 | 39790414                | TT                              | CC              | 1946871413               |
| SNP_P4_86179_39790446 | NC_021165.1    | Ca_kabuli_chr06 | 39790446                | CC                              | TT              | 1946871415               |
| SNP_P4_86181_39792449 | NC_021165.1    | Ca_kabuli_chr06 | 39792449                | GG                              | AA              | 1946871417               |
| SNP_P4_86182_39797412 | NC_021165.1    | Ca_kabuli_chr06 | 39797412                | GG                              | TT              | 1946871419               |
| SNP_P4_86183_39797451 | NC_021165.1    | Ca_kabuli_chr06 | 39797451                | TT                              | CC              | 1946871421               |
| SNP_P4_86185_39811135 | NC_021165.1    | Ca_kabuli_chr06 | 39811135                | TT                              | AA              | 1946871423               |
| SNP_P4_86186_39811481 | NC_021165.1    | Ca_kabuli_chr06 | 39811481                | AA                              | GG              | 1946871425               |
| SNP_P4_86187_39813934 | NC_021165.1    | Ca_kabuli_chr06 | 39813934                | TT                              | CC              | 1946871427               |
| SNP_P4_86188_39826129 | NC_021165.1    | Ca_kabuli_chr06 | 39826129                | TT                              | CC              | 1946871429               |
| SNP_P4_86191_39834190 | NC_021165.1    | Ca_kabuli_chr06 | 39834190                | GG                              | AA              | 1946871431               |
| SNP_P4_86192_39842934 | NC_021165.1    | Ca_kabuli_chr06 | 39842934                | CC                              | TT              | 1946871433               |
| SNP_P4_86193_39842936 | NC_021165.1    | Ca_kabuli_chr06 | 39842936                | AA                              | GG              | 1946871435               |
| SNP_P4_86194_39862887 | NC_021165.1    | Ca_kabuli_chr06 | 39862887                | AA                              | GG              | 1946871437               |
| SNP_P4_86195_39862964 | NC_021165.1    | Ca_kabuli_chr06 | 39862964                | TT                              | CC              | 1946871439               |
| SNP_P4_86196_39862965 | NC_021165.1    | Ca_kabuli_chr06 | 39862965                | GG                              | AA              | 1946871441               |
| SNP_P4_86197_39863002 | NC_021165.1    | Ca_kabuli_chr06 | 39863002                | AA                              | CC              | 1946871443               |
| SNP_P4_86200_39880218 | NC_021165.1    | Ca_kabuli_chr06 | 39880218                | AA                              | GG              | 1946871445               |
| SNP_P4_86201_39880231 | NC_021165.1    | Ca_kabuli_chr06 | 39880231                | AA                              | GG              | 1946871447               |
| SNP_P4_86202_39880259 | NC_021165.1    | Ca_kabuli_chr06 | 39880259                | TT                              | CC              | 1946871449               |
| SNP_P4_86203_39880266 | NC_021165.1    | Ca_kabuli_chr06 | 39880266                | AA                              | CC              | 1946871451               |
| SNP_P4_86204_39902903 | NC_021165.1    | Ca_kabuli_chr06 | 39902903                | TT                              | CC              | 1946871453               |
| SNP_P4_86205_39923494 | NC_021165.1    | Ca_kabuli_chr06 | 39923494                | GG                              | AA              | 1946871455               |
| SNP_P4_86206_39923539 | NC_021165.1    | Ca_kabuli_chr06 | 39923539                | TT                              | CC              | 1946871457               |
| SNP_P4_86207_39923898 | NC_021165.1    | Ca_kabuli_chr06 | 39923898                | CC                              | TT              | 1946871459               |
| SNP_P4_86208_39923920 | NC_021165.1    | Ca_kabuli_chr06 | 39923920                | GG                              | AA              | 1946871461               |
| SNP_P4_86210_39951946 | NC_021165.1    | Ca_kabuli_chr06 | 39951946                | TT                              | CC              | 1946871463               |
| SNP_P4_86211_39961236 | NC_021165.1    | Ca_kabuli_chr06 | 39961236                | AA                              | TT              | 1946871465               |
| SNP_P4_86212_39972075 | NC_021165.1    | Ca_kabuli_chr06 | 39972075                | AA                              | CC              | 1946871467               |
| SNP_P4_86213_40024171 | NC_021165.1    | Ca_kabuli_chr06 | 40024171                | GG                              | CC              | 1946871469               |
| SNP_P4_86215_40035983 | NC_021165.1    | Ca_kabuli_chr06 | 40035983                | CC                              | AA              | 1946871471               |
| SNP_P4_86216_40036217 | NC_021165.1    | Ca_kabuli_chr06 | 40036217                | GG                              | CC              | 1946871473               |
| SNP_P4_86217_40036466 | NC_021165.1    | Ca_kabuli_chr06 | 40036466                | TT                              | GG              | 1946871475               |
| SNP_P4_86218_40036483 | NC_021165.1    | Ca_kabuli_chr06 | 40036483                | TT                              | AA              | 1946871477               |
| SNP_P4_86219_40036489 | NC_021165.1    | Ca_kabuli_chr06 | 40036489                | AA                              | GG              | 1946871479               |
| SNP_P4_86220_40036985 | NC_021165.1    | Ca_kabuli_chr06 | 40036985                | TT                              | AA              | 1946871481               |
| SNP_P4_86221_40037039 | NC_021165.1    | Ca_kabuli_chr06 | 40037039                | AA                              | CC              | 1946871483               |
| SNP_P4_86222_40037090 | NC_021165.1    | Ca_kabuli_chr06 | 40037090                | GG                              | TT              | 1946871485               |
| SNP_P4_86223_40100644 | NC_021165.1    | Ca_kabuli_chr06 | 40100644                | GG                              | AA              | 1946871487               |
| SNP_P4_86224_40100680 | NC_021165.1    | Ca_kabuli_chr06 | 40100680                | GG                              | TT              | 1946871489               |
| SNP_P4_86225_40100759 | NC_021165.1    | Ca_kabuli_chr06 | 40100759                | AA                              | CC              | 1946871491               |
| SNP_P4_86226_40102475 | NC_021165.1    | Ca_kabuli_chr06 | 40102475                | GG                              | AA              | 1946871493               |
| SNP_P4_86227_40108122 | NC_021165.1    | Ca_kabuli_chr06 | 40108122                | TT                              | CC              | 1946871495               |

| SNPs IDs              | Chromosome IDs | Chromosomes     | Physical positions (bp) | CDC Frontier (Reference genome) | (ILWC46 & LPNB) | NCBI SNPdb Accession IDs |
|-----------------------|----------------|-----------------|-------------------------|---------------------------------|-----------------|--------------------------|
| SNP_P4_86228_40119326 | NC_021165.1    | Ca_kabuli_chr06 | 40119326                | GG                              | TT              | 1946871497               |
| SNP_P4_86229_40119712 | NC_021165.1    | Ca_kabuli_chr06 | 40119712                | TT                              | GG              | 1946871499               |
| SNP_P4_86230_40119715 | NC_021165.1    | Ca_kabuli_chr06 | 40119715                | AA                              | GG              | 1946871501               |
| SNP_P4_86231_40131900 | NC_021165.1    | Ca_kabuli_chr06 | 40131900                | GG                              | AA              | 1946871503               |
| SNP_P4_86232_40131906 | NC_021165.1    | Ca_kabuli_chr06 | 40131906                | AA                              | GG              | 1946871505               |
| SNP_P4_86233_40131929 | NC_021165.1    | Ca_kabuli_chr06 | 40131929                | GG                              | AA              | 1946871507               |
| SNP_P4_86234_40132179 | NC_021165.1    | Ca_kabuli_chr06 | 40132179                | TT                              | CC              | 1946871509               |
| SNP_P4_86235_40144533 | NC_021165.1    | Ca_kabuli_chr06 | 40144533                | AA                              | TT              | 1946871511               |
| SNP_P4_86236_40144723 | NC_021165.1    | Ca_kabuli_chr06 | 40144723                | CC                              | GG              | 1946871513               |
| SNP_P4_86237_40144726 | NC_021165.1    | Ca_kabuli_chr06 | 40144726                | AA                              | GG              | 1946871515               |
| SNP_P4_86238_40144754 | NC_021165.1    | Ca_kabuli_chr06 | 40144754                | AA                              | GG              | 1946871517               |
| SNP_P4_86239_40146966 | NC_021165.1    | Ca_kabuli_chr06 | 40146966                | CC                              | AA              | 1946871518               |
| SNP_P4_86240_40186621 | NC_021165.1    | Ca_kabuli_chr06 | 40186621                | GG                              | AA              | 1946871520               |
| SNP_P4_86241_40188290 | NC_021165.1    | Ca_kabuli_chr06 | 40188290                | TT                              | CC              | 1946871522               |
| SNP_P4_86242_40188339 | NC_021165.1    | Ca_kabuli_chr06 | 40188339                | TT                              | GG              | 1946871524               |
| SNP_P4_86243_40188342 | NC_021165.1    | Ca_kabuli_chr06 | 40188342                | CC                              | TT              | 1946871526               |
| SNP_P4_86244_40188396 | NC_021165.1    | Ca_kabuli_chr06 | 40188396                | GG                              | AA              | 1946871529               |
| SNP_P4_86245_40188400 | NC_021165.1    | Ca_kabuli_chr06 | 40188400                | TT                              | AA              | 1946871531               |
| SNP_P4_86246_40188542 | NC_021165.1    | Ca_kabuli_chr06 | 40188542                | TT                              | AA              | 1946871534               |
| SNP_P4_86247_40188651 | NC_021165.1    | Ca_kabuli_chr06 | 40188651                | TT                              | GG              | 1946871536               |
| SNP_P4_86248_40221963 | NC_021165.1    | Ca_kabuli_chr06 | 40221963                | CC                              | AA              | 1946871538               |
| SNP_P4_86249_40245757 | NC_021165.1    | Ca_kabuli_chr06 | 40245757                | AA                              | TT              | 1946871540               |
| SNP_P4_86250_40249035 | NC_021165.1    | Ca_kabuli_chr06 | 40249035                | GG                              | AA              | 1946871542               |
| SNP_P4_86251_40294611 | NC_021165.1    | Ca_kabuli_chr06 | 40294611                | GG                              | TT              | 1946871544               |
| SNP_P4_86252_40316293 | NC_021165.1    | Ca_kabuli_chr06 | 40316293                | GG                              | TT              | 1946871546               |
| SNP_P4_86253_40361196 | NC_021165.1    | Ca_kabuli_chr06 | 40361196                | GG                              | AA              | 1946871548               |
| SNP_P4_86254_40364666 | NC_021165.1    | Ca_kabuli_chr06 | 40364666                | CC                              | TT              | 1946871550               |
| SNP_P4_86255_40389894 | NC_021165.1    | Ca_kabuli_chr06 | 40389894                | AA                              | CC              | 1946871552               |
| SNP_P4_86256_40389895 | NC_021165.1    | Ca_kabuli_chr06 | 40389895                | CC                              | TT              | 1946871554               |
| SNP_P4_86257_40453114 | NC_021165.1    | Ca_kabuli_chr06 | 40453114                | AA                              | GG              | 1946871556               |
| SNP_P4_86258_40491146 | NC_021165.1    | Ca_kabuli_chr06 | 40491146                | AA                              | TT              | 1946871558               |
| SNP_P4_86260_40515957 | NC_021165.1    | Ca_kabuli_chr06 | 40515957                | CC                              | GG              | 1946871560               |
| SNP_P4_86261_40522759 | NC_021165.1    | Ca_kabuli_chr06 | 40522759                | GG                              | AA              | 1946871562               |
| SNP_P4_86262_40523106 | NC_021165.1    | Ca_kabuli_chr06 | 40523106                | GG                              | AA              | 1946871564               |
| SNP_P4_86263_40523694 | NC_021165.1    | Ca_kabuli_chr06 | 40523694                | AA                              | TT              | 1946871566               |
| SNP_P4_86264_40523716 | NC_021165.1    | Ca_kabuli_chr06 | 40523716                | TT                              | CC              | 1946871568               |
| SNP_P4_86265_40533291 | NC_021165.1    | Ca_kabuli_chr06 | 40533291                | TT                              | CC              | 1946871570               |
| SNP_P4_86266_40536554 | NC_021165.1    | Ca_kabuli_chr06 | 40536554                | AA                              | GG              | 1946871572               |
| SNP_P4_86267_40536577 | NC_021165.1    | Ca_kabuli_chr06 | 40536577                | CC                              | TT              | 1946871574               |
| SNP_P4_86268_40536640 | NC_021165.1    | Ca_kabuli_chr06 | 40536640                | CC                              | TT              | 1946871576               |
| SNP_P4_86269_40536843 | NC_021165.1    | Ca_kabuli_chr06 | 40536843                | GG                              | TT              | 1946871578               |
| SNP_P4_86270_40536893 | NC_021165.1    | Ca_kabuli_chr06 | 40536893                | AA                              | TT              | 1946871579               |

| SNPs IDs              | Chromosome IDs | Chromosomes     | Physical positions (bp) | CDC Frontier (Reference genome) | (ILWC46 & LPNB) | NCBI SNPdb Accession IDs |
|-----------------------|----------------|-----------------|-------------------------|---------------------------------|-----------------|--------------------------|
| SNP_P4_86271_40536903 | NC_021165.1    | Ca_kabuli_chr06 | 40536903                | TT                              | AA              | 1946871581               |
| SNP_P4_86272_40542381 | NC_021165.1    | Ca_kabuli_chr06 | 40542381                | CC                              | AA              | 1946871583               |
| SNP_P4_86273_40550601 | NC_021165.1    | Ca_kabuli_chr06 | 40550601                | GG                              | AA              | 1946871585               |
| SNP_P4_86274_40560506 | NC_021165.1    | Ca_kabuli_chr06 | 40560506                | CC                              | TT              | 1946871587               |
| SNP_P4_86275_40590565 | NC_021165.1    | Ca_kabuli_chr06 | 40590565                | TT                              | CC              | 1946871589               |
| SNP_P4_86277_40614394 | NC_021165.1    | Ca_kabuli_chr06 | 40614394                | CC                              | TT              | 1946871591               |
| SNP_P4_86278_40649274 | NC_021165.1    | Ca_kabuli_chr06 | 40649274                | TT                              | AA              | 1946871593               |
| SNP_P4_86279_40684403 | NC_021165.1    | Ca_kabuli_chr06 | 40684403                | AA                              | GG              | 1946871595               |
| SNP_P4_86281_40705411 | NC_021165.1    | Ca_kabuli_chr06 | 40705411                | TT                              | GG              | 1946871597               |
| SNP_P4_86282_40705921 | NC_021165.1    | Ca_kabuli_chr06 | 40705921                | AA                              | TT              | 1946871599               |
| SNP_P4_86283_40723282 | NC_021165.1    | Ca_kabuli_chr06 | 40723282                | TT                              | CC              | 1946871601               |
| SNP_P4_86285_40752997 | NC_021165.1    | Ca_kabuli_chr06 | 40752997                | CC                              | TT              | 1946871603               |
| SNP_P4_86286_40758555 | NC_021165.1    | Ca_kabuli_chr06 | 40758555                | CC                              | TT              | 1946871605               |
| SNP_P4_86287_40760819 | NC_021165.1    | Ca_kabuli_chr06 | 40760819                | TT                              | CC              | 1946871607               |
| SNP_P4_86288_40800355 | NC_021165.1    | Ca_kabuli_chr06 | 40800355                | AA                              | GG              | 1946871609               |
| SNP_P4_86290_40820871 | NC_021165.1    | Ca_kabuli_chr06 | 40820871                | AA                              | CC              | 1946871611               |
| SNP_P4_86291_40820882 | NC_021165.1    | Ca_kabuli_chr06 | 40820882                | TT                              | GG              | 1946871613               |
| SNP_P4_86292_40843167 | NC_021165.1    | Ca_kabuli_chr06 | 40843167                | TT                              | AA              | 1946871615               |
| SNP_P4_86293_40845396 | NC_021165.1    | Ca_kabuli_chr06 | 40845396                | TT                              | CC              | 1946871617               |
| SNP_P4_86294_40855293 | NC_021165.1    | Ca_kabuli_chr06 | 40855293                | AA                              | TT              | 1946871619               |
| SNP_P4_86295_40860051 | NC_021165.1    | Ca_kabuli_chr06 | 40860051                | AA                              | GG              | 1946871621               |
| SNP_P4_86296_40860319 | NC_021165.1    | Ca_kabuli_chr06 | 40860319                | CC                              | TT              | 1946871623               |
| SNP_P4_86297_40860320 | NC_021165.1    | Ca_kabuli_chr06 | 40860320                | TT                              | CC              | 1946871625               |
| SNP_P4_86298_40860505 | NC_021165.1    | Ca_kabuli_chr06 | 40860505                | GG                              | AA              | 1946871627               |
| SNP_P4_86299_40860539 | NC_021165.1    | Ca_kabuli_chr06 | 40860539                | GG                              | AA              | 1946871629               |
| SNP_P4_86300_40862379 | NC_021165.1    | Ca_kabuli_chr06 | 40862379                | TT                              | CC              | 1946871631               |
| SNP_P4_86301_40863517 | NC_021165.1    | Ca_kabuli_chr06 | 40863517                | AA                              | TT              | 1946871633               |
| SNP_P4_86302_40863521 | NC_021165.1    | Ca_kabuli_chr06 | 40863521                | AA                              | TT              | 1946871635               |
| SNP_P4_86303_40863522 | NC_021165.1    | Ca_kabuli_chr06 | 40863522                | AA                              | TT              | 1946871637               |
| SNP_P4_86304_40864458 | NC_021165.1    | Ca_kabuli_chr06 | 40864458                | GG                              | AA              | 1946871639               |
| SNP_P4_86305_40864466 | NC_021165.1    | Ca_kabuli_chr06 | 40864466                | GG                              | CC              | 1946871641               |
| SNP_P4_86306_40880281 | NC_021165.1    | Ca_kabuli_chr06 | 40880281                | GG                              | CC              | 1946871643               |
| SNP_P4_86307_40892078 | NC_021165.1    | Ca_kabuli_chr06 | 40892078                | GG                              | CC              | 1946871645               |
| SNP_P4_86308_40901224 | NC_021165.1    | Ca_kabuli_chr06 | 40901224                | CC                              | TT              | 1946871647               |
| SNP_P4_86309_40908318 | NC_021165.1    | Ca_kabuli_chr06 | 40908318                | CC                              | TT              | 1946871649               |
| SNP_P4_86310_40928224 | NC_021165.1    | Ca_kabuli_chr06 | 40928224                | TT                              | CC              | 1946871651               |
| SNP_P4_86311_40932430 | NC_021165.1    | Ca_kabuli_chr06 | 40932430                | TT                              | GG              | 1946871653               |
| SNP_P4_86312_40944965 | NC_021165.1    | Ca_kabuli_chr06 | 40944965                | TT                              | AA              | 1946871655               |
| SNP_P4_86313_40955355 | NC_021165.1    | Ca_kabuli_chr06 | 40955355                | CC                              | TT              | 1946871657               |
| SNP_P4_86314_40955711 | NC_021165.1    | Ca_kabuli_chr06 | 40955711                | AA                              | TT              | 1946871659               |
| SNP_P4_86315_40975126 | NC_021165.1    | Ca_kabuli_chr06 | 40975126                | TT                              | AA              | 1946871661               |
| SNP_P4_86316_40975160 | NC_021165.1    | Ca_kabuli_chr06 | 40975160                | GG                              | AA              | 1946871663               |

| SNPs IDs              | Chromosome IDs | Chromosomes     | Physical positions (bp) | CDC Frontier (Reference genome) | (ILWC46 & LPNB) | NCBI SNPdb Accession IDs |
|-----------------------|----------------|-----------------|-------------------------|---------------------------------|-----------------|--------------------------|
| SNP_P4_86317_40975181 | NC_021165.1    | Ca_kabuli_chr06 | 40975181                | CC                              | AA              | 1946871665               |
| SNP_P4_86318_40979433 | NC_021165.1    | Ca_kabuli_chr06 | 40979433                | TT                              | CC              | 1946871667               |
| SNP_P4_86319_41000814 | NC_021165.1    | Ca_kabuli_chr06 | 41000814                | GG                              | AA              | 1946871669               |
| SNP_P4_86320_41001193 | NC_021165.1    | Ca_kabuli_chr06 | 41001193                | GG                              | AA              | 1946871671               |
| SNP_P4_86321_41001279 | NC_021165.1    | Ca_kabuli_chr06 | 41001279                | CC                              | TT              | 1946871672               |
| SNP_P4_86322_41001832 | NC_021165.1    | Ca_kabuli_chr06 | 41001832                | TT                              | CC              | 1946871674               |
| SNP_P4_86323_41012548 | NC_021165.1    | Ca_kabuli_chr06 | 41012548                | TT                              | CC              | 1946871676               |
| SNP_P4_86324_41026946 | NC_021165.1    | Ca_kabuli_chr06 | 41026946                | AA                              | GG              | 1946871679               |
| SNP_P4_86325_41028734 | NC_021165.1    | Ca_kabuli_chr06 | 41028734                | AA                              | GG              | 1946871681               |
| SNP_P4_86326_41117868 | NC_021165.1    | Ca_kabuli_chr06 | 41117868                | GG                              | CC              | 1946871683               |
| SNP_P4_86327_41117922 | NC_021165.1    | Ca_kabuli_chr06 | 41117922                | GG                              | TT              | 1946871685               |
| SNP_P4_86328_41117925 | NC_021165.1    | Ca_kabuli_chr06 | 41117925                | CC                              | AA              | 1946871687               |
| SNP_P4_86329_41118125 | NC_021165.1    | Ca_kabuli_chr06 | 41118125                | TT                              | CC              | 1946871689               |
| SNP_P4_86330_41118308 | NC_021165.1    | Ca_kabuli_chr06 | 41118308                | TT                              | GG              | 1946871690               |
| SNP_P4_86331_41118330 | NC_021165.1    | Ca_kabuli_chr06 | 41118330                | AA                              | GG              | 1946871692               |
| SNP_P4_86332_41118380 | NC_021165.1    | Ca_kabuli_chr06 | 41118380                | GG                              | AA              | 1946871694               |
| SNP_P4_86333_41118424 | NC_021165.1    | Ca_kabuli_chr06 | 41118424                | AA                              | TT              | 1946871696               |
| SNP_P4_86334_41118432 | NC_021165.1    | Ca_kabuli_chr06 | 41118432                | AA                              | TT              | 1946871698               |
| SNP_P4_86335_41118624 | NC_021165.1    | Ca_kabuli_chr06 | 41118624                | AA                              | TT              | 1946871700               |
| SNP_P4_86337_41118978 | NC_021165.1    | Ca_kabuli_chr06 | 41118978                | TT                              | CC              | 1946871702               |
| SNP_P4_86338_41118983 | NC_021165.1    | Ca_kabuli_chr06 | 41118983                | AA                              | TT              | 1946871704               |
| SNP_P4_86339_41118993 | NC_021165.1    | Ca_kabuli_chr06 | 41118993                | AA                              | GG              | 1946871706               |
| SNP_P4_86340_41119058 | NC_021165.1    | Ca_kabuli_chr06 | 41119058                | TT                              | CC              | 1946871708               |
| SNP_P4_86341_41119107 | NC_021165.1    | Ca_kabuli_chr06 | 41119107                | TT                              | CC              | 1946871710               |
| SNP_P4_86342_41128429 | NC_021165.1    | Ca_kabuli_chr06 | 41128429                | CC                              | TT              | 1946871712               |
| SNP_P4_86343_41128440 | NC_021165.1    | Ca_kabuli_chr06 | 41128440                | CC                              | TT              | 1946871714               |
| SNP_P4_86344_41128534 | NC_021165.1    | Ca_kabuli_chr06 | 41128534                | AA                              | GG              | 1946871716               |
| SNP_P4_86346_41128688 | NC_021165.1    | Ca_kabuli_chr06 | 41128688                | CC                              | TT              | 1946871718               |
| SNP_P4_86347_41128693 | NC_021165.1    | Ca_kabuli_chr06 | 41128693                | AA                              | GG              | 1946871720               |
| SNP_P4_86348_41128699 | NC_021165.1    | Ca_kabuli_chr06 | 41128699                | CC                              | TT              | 1946871722               |
| SNP_P4_86349_41128701 | NC_021165.1    | Ca_kabuli_chr06 | 41128701                | GG                              | AA              | 1946871724               |
| SNP_P4_86350_41128726 | NC_021165.1    | Ca_kabuli_chr06 | 41128726                | TT                              | CC              | 1946871726               |
| SNP_P4_86351_41128736 | NC_021165.1    | Ca_kabuli_chr06 | 41128736                | CC                              | TT              | 1946871728               |
| SNP_P4_86352_41128786 | NC_021165.1    | Ca_kabuli_chr06 | 41128786                | GG                              | TT              | 1946871730               |
| SNP_P4_86353_41128847 | NC_021165.1    | Ca_kabuli_chr06 | 41128847                | CC                              | TT              | 1946871732               |
| SNP_P4_86354_41129211 | NC_021165.1    | Ca_kabuli_chr06 | 41129211                | AA                              | GG              | 1946871734               |
| SNP_P4_86355_41129346 | NC_021165.1    | Ca_kabuli_chr06 | 41129346                | AA                              | TT              | 1946871736               |
| SNP_P4_86356_41129358 | NC_021165.1    | Ca_kabuli_chr06 | 41129358                | CC                              | TT              | 1946871738               |
| SNP_P4_86357_41129841 | NC_021165.1    | Ca_kabuli_chr06 | 41129841                | CC                              | AA              | 1946871740               |
| SNP_P4_86358_41129861 | NC_021165.1    | Ca_kabuli_chr06 | 41129861                | GG                              | AA              | 1946871742               |
| SNP_P4_86359_41129865 | NC_021165.1    | Ca_kabuli_chr06 | 41129865                | TT                              | CC              | 1946871744               |
| SNP_P4_86360_41130071 | NC_021165.1    | Ca_kabuli_chr06 | 41130071                | AA                              | CC              | 1946871746               |

| SNPs IDs              | Chromosome IDs | Chromosomes     | Physical positions (bp) | CDC Frontier (Reference genome) | (ILWC46 & LPNB) | NCBI SNPdb Accession IDs |
|-----------------------|----------------|-----------------|-------------------------|---------------------------------|-----------------|--------------------------|
| SNP_P4_86361_41130198 | NC_021165.1    | Ca_kabuli_chr06 | 41130198                | TT                              | CC              | 1946871748               |
| SNP_P4_86362_41130273 | NC_021165.1    | Ca_kabuli_chr06 | 41130273                | AA                              | GG              | 1946871750               |
| SNP_P4_86363_41131983 | NC_021165.1    | Ca_kabuli_chr06 | 41131983                | CC                              | TT              | 1946871752               |
| SNP_P4_86364_41132399 | NC_021165.1    | Ca_kabuli_chr06 | 41132399                | AA                              | CC              | 1946871754               |
| SNP_P4_86365_41135134 | NC_021165.1    | Ca_kabuli_chr06 | 41135134                | GG                              | AA              | 1946871756               |
| SNP_P4_86366_41135162 | NC_021165.1    | Ca_kabuli_chr06 | 41135162                | CC                              | TT              | 1946871758               |
| SNP_P4_86367_41135169 | NC_021165.1    | Ca_kabuli_chr06 | 41135169                | GG                              | TT              | 1946871760               |
| SNP_P4_86368_41135291 | NC_021165.1    | Ca_kabuli_chr06 | 41135291                | TT                              | CC              | 1946871762               |
| SNP_P4_86370_41151487 | NC_021165.1    | Ca_kabuli_chr06 | 41151487                | CC                              | AA              | 1946871764               |
| SNP_P4_86371_41152479 | NC_021165.1    | Ca_kabuli_chr06 | 41152479                | GG                              | AA              | 1946871766               |
| SNP_P4_86372_41159351 | NC_021165.1    | Ca_kabuli_chr06 | 41159351                | TT                              | AA              | 1946871768               |
| SNP_P4_86373_41159352 | NC_021165.1    | Ca_kabuli_chr06 | 41159352                | TT                              | CC              | 1946871769               |
| SNP_P4_86374_41160108 | NC_021165.1    | Ca_kabuli_chr06 | 41160108                | CC                              | TT              | 1946871771               |
| SNP_P4_86375_41165413 | NC_021165.1    | Ca_kabuli_chr06 | 41165413                | CC                              | TT              | 1946871773               |
| SNP_P4_86376_41165430 | NC_021165.1    | Ca_kabuli_chr06 | 41165430                | GG                              | CC              | 1946871775               |
| SNP_P4_86377_41165468 | NC_021165.1    | Ca_kabuli_chr06 | 41165468                | CC                              | TT              | 1946871777               |
| SNP_P4_86378_41165561 | NC_021165.1    | Ca_kabuli_chr06 | 41165561                | AA                              | TT              | 1946871779               |
| SNP_P4_86380_41171940 | NC_021165.1    | Ca_kabuli_chr06 | 41171940                | CC                              | GG              | 1946871781               |
| SNP_P4_86381_41177592 | NC_021165.1    | Ca_kabuli_chr06 | 41177592                | TT                              | AA              | 1946871783               |
| SNP_P4_86382_41177826 | NC_021165.1    | Ca_kabuli_chr06 | 41177826                | TT                              | GG              | 1946871785               |
| SNP_P4_86383_41177865 | NC_021165.1    | Ca_kabuli_chr06 | 41177865                | TT                              | GG              | 1946871787               |
| SNP_P4_86385_41229188 | NC_021165.1    | Ca_kabuli_chr06 | 41229188                | AA                              | TT              | 1946871789               |
| SNP_P4_86386_41230156 | NC_021165.1    | Ca_kabuli_chr06 | 41230156                | CC                              | TT              | 1946871791               |
| SNP_P4_86387_41230433 | NC_021165.1    | Ca_kabuli_chr06 | 41230433                | AA                              | CC              | 1946871793               |
| SNP_P4_86388_41230434 | NC_021165.1    | Ca_kabuli_chr06 | 41230434                | TT                              | AA              | 1946871795               |
| SNP_P4_86389_41230449 | NC_021165.1    | Ca_kabuli_chr06 | 41230449                | CC                              | TT              | 1946871797               |
| SNP_P4_86390_41230463 | NC_021165.1    | Ca_kabuli_chr06 | 41230463                | AA                              | GG              | 1946871799               |
| SNP_P4_86391_41230486 | NC_021165.1    | Ca_kabuli_chr06 | 41230486                | GG                              | TT              | 1946871801               |
| SNP_P4_86392_41230489 | NC_021165.1    | Ca_kabuli_chr06 | 41230489                | GG                              | AA              | 1946871803               |
| SNP_P4_86393_41230594 | NC_021165.1    | Ca_kabuli_chr06 | 41230594                | AA                              | GG              | 1946871805               |
| SNP_P4_86394_41241073 | NC_021165.1    | Ca_kabuli_chr06 | 41241073                | TT                              | CC              | 1946871807               |
| SNP_P4_86395_41258705 | NC_021165.1    | Ca_kabuli_chr06 | 41258705                | CC                              | AA              | 1946871808               |
| SNP_P4_86396_41263233 | NC_021165.1    | Ca_kabuli_chr06 | 41263233                | CC                              | TT              | 1946871811               |
| SNP_P4_86397_41288113 | NC_021165.1    | Ca_kabuli_chr06 | 41288113                | AA                              | TT              | 1946871813               |
| SNP_P4_86398_41301667 | NC_021165.1    | Ca_kabuli_chr06 | 41301667                | CC                              | TT              | 1946871814               |
| SNP_P4_86399_41301896 | NC_021165.1    | Ca_kabuli_chr06 | 41301896                | TT                              | AA              | 1946871816               |
| SNP_P4_86400_41315378 | NC_021165.1    | Ca_kabuli_chr06 | 41315378                | GG                              | AA              | 1946871818               |
| SNP_P4_86401_41315382 | NC_021165.1    | Ca_kabuli_chr06 | 41315382                | TT                              | AA              | 1946871820               |
| SNP_P4_86402_41315386 | NC_021165.1    | Ca_kabuli_chr06 | 41315386                | CC                              | AA              | 1946871822               |
| SNP_P4_86403_41318957 | NC_021165.1    | Ca_kabuli_chr06 | 41318957                | CC                              | TT              | 1946871824               |
| SNP_P4_86404_41318982 | NC_021165.1    | Ca_kabuli_chr06 | 41318982                | TT                              | GG              | 1946871826               |
| SNP_P4_86405_41319184 | NC_021165.1    | Ca_kabuli_chr06 | 41319184                | GG                              | AA              | 1946871828               |

| SNPs IDs              | Chromosome IDs | Chromosomes     | Physical positions (bp) | CDC Frontier (Reference genome) | (ILWC46 & LPNB) | NCBI SNPdb Accession IDs |
|-----------------------|----------------|-----------------|-------------------------|---------------------------------|-----------------|--------------------------|
| SNP_P4_86406_41320328 | NC_021165.1    | Ca_kabuli_chr06 | 41320328                | AA                              | TT              | 1946871830               |
| SNP_P4_86407_41322556 | NC_021165.1    | Ca_kabuli_chr06 | 41322556                | GG                              | AA              | 1946871832               |
| SNP_P4_86408_41322764 | NC_021165.1    | Ca_kabuli_chr06 | 41322764                | AA                              | GG              | 1946871834               |
| SNP_P4_86409_41324466 | NC_021165.1    | Ca_kabuli_chr06 | 41324466                | GG                              | AA              | 1946871836               |
| SNP_P4_86410_41342868 | NC_021165.1    | Ca_kabuli_chr06 | 41342868                | TT                              | CC              | 1946871837               |
| SNP_P4_86411_41350804 | NC_021165.1    | Ca_kabuli_chr06 | 41350804                | AA                              | GG              | 1946871839               |
| SNP_P4_86412_41358615 | NC_021165.1    | Ca_kabuli_chr06 | 41358615                | TT                              | CC              | 1946871841               |
| SNP_P4_86413_41393889 | NC_021165.1    | Ca_kabuli_chr06 | 41393889                | TT                              | AA              | 1946871843               |
| SNP_P4_86414_41395913 | NC_021165.1    | Ca_kabuli_chr06 | 41395913                | AA                              | GG              | 1946871845               |
| SNP_P4_86415_41397962 | NC_021165.1    | Ca_kabuli_chr06 | 41397962                | GG                              | AA              | 1946871847               |
| SNP_P4_86416_41405706 | NC_021165.1    | Ca_kabuli_chr06 | 41405706                | AA                              | TT              | 1946871849               |
| SNP_P4_86417_41456271 | NC_021165.1    | Ca_kabuli_chr06 | 41456271                | TT                              | AA              | 1946871851               |
| SNP_P4_86418_41464139 | NC_021165.1    | Ca_kabuli_chr06 | 41464139                | TT                              | CC              | 1946871853               |
| SNP_P4_86419_41464177 | NC_021165.1    | Ca_kabuli_chr06 | 41464177                | AA                              | GG              | 1946871855               |
| SNP_P4_86421_41464303 | NC_021165.1    | Ca_kabuli_chr06 | 41464303                | TT                              | CC              | 1946871857               |
| SNP_P4_86423_41464335 | NC_021165.1    | Ca_kabuli_chr06 | 41464335                | CC                              | TT              | 1946871859               |
| SNP_P4_86424_41464338 | NC_021165.1    | Ca_kabuli_chr06 | 41464338                | GG                              | TT              | 1946871861               |
| SNP_P4_86425_41464372 | NC_021165.1    | Ca_kabuli_chr06 | 41464372                | TT                              | CC              | 1946871863               |
| SNP_P4_86426_41464374 | NC_021165.1    | Ca_kabuli_chr06 | 41464374                | AA                              | GG              | 1946871865               |
| SNP_P4_86428_41522493 | NC_021165.1    | Ca_kabuli_chr06 | 41522493                | TT                              | CC              | 1946871867               |
| SNP_P4_86429_41549768 | NC_021165.1    | Ca_kabuli_chr06 | 41549768                | GG                              | TT              | 1946871869               |
| SNP_P4_86430_41559634 | NC_021165.1    | Ca_kabuli_chr06 | 41559634                | CC                              | TT              | 1946871871               |
| SNP_P4_86431_41573549 | NC_021165.1    | Ca_kabuli_chr06 | 41573549                | TT                              | CC              | 1946871873               |
| SNP_P4_86432_41573697 | NC_021165.1    | Ca_kabuli_chr06 | 41573697                | GG                              | TT              | 1946871875               |
| SNP_P4_86433_41573699 | NC_021165.1    | Ca_kabuli_chr06 | 41573699                | AA                              | GG              | 1946871877               |
| SNP_P4_86434_41573792 | NC_021165.1    | Ca_kabuli_chr06 | 41573792                | GG                              | AA              | 1946871879               |
| SNP_P4_86435_41573798 | NC_021165.1    | Ca_kabuli_chr06 | 41573798                | AA                              | GG              | 1946871881               |
| SNP_P4_86436_41573808 | NC_021165.1    | Ca_kabuli_chr06 | 41573808                | AA                              | TT              | 1946871883               |
| SNP_P4_86437_41574151 | NC_021165.1    | Ca_kabuli_chr06 | 41574151                | AA                              | GG              | 1946871885               |
| SNP_P4_86438_41574185 | NC_021165.1    | Ca_kabuli_chr06 | 41574185                | TT                              | AA              | 1946871887               |
| SNP_P4_86441_41574431 | NC_021165.1    | Ca_kabuli_chr06 | 41574431                | CC                              | AA              | 1946871889               |
| SNP_P4_86442_41574457 | NC_021165.1    | Ca_kabuli_chr06 | 41574457                | TT                              | CC              | 1946871891               |
| SNP_P4_86443_41574589 | NC_021165.1    | Ca_kabuli_chr06 | 41574589                | AA                              | TT              | 1946871893               |
| SNP_P4_86444_41608131 | NC_021165.1    | Ca_kabuli_chr06 | 41608131                | CC                              | TT              | 1946871896               |
| SNP_P4_86446_41617228 | NC_021165.1    | Ca_kabuli_chr06 | 41617228                | GG                              | AA              | 1946871898               |
| SNP_P4_86447_41643552 | NC_021165.1    | Ca_kabuli_chr06 | 41643552                | GG                              | AA              | 1946871900               |
| SNP_P4_86448_41648171 | NC_021165.1    | Ca_kabuli_chr06 | 41648171                | GG                              | TT              | 1946871902               |
| SNP_P4_86449_41653680 | NC_021165.1    | Ca_kabuli_chr06 | 41653680                | TT                              | GG              | 1946871904               |
| SNP_P4_86450_41654361 | NC_021165.1    | Ca_kabuli_chr06 | 41654361                | AA                              | GG              | 1946871906               |
| SNP_P4_86451_41654678 | NC_021165.1    | Ca_kabuli_chr06 | 41654678                | TT                              | AA              | 1946871908               |
| SNP_P4_86452_41654699 | NC_021165.1    | Ca_kabuli_chr06 | 41654699                | AA                              | TT              | 1946871910               |
| SNP_P4_86453_41654726 | NC_021165.1    | Ca_kabuli_chr06 | 41654726                | AA                              | CC              | 1946871912               |



| SNPs IDs              | Chromosome IDs | Chromosomes     | Physical positions (bp) | CDC Frontier (Reference genome) | (ILWC46 & LPNB) | NCBI SNPdb Accession IDs |
|-----------------------|----------------|-----------------|-------------------------|---------------------------------|-----------------|--------------------------|
| SNP_P4_86454_41654781 | NC_021165.1    | Ca_kabuli_chr06 | 41654781                | AA                              | GG              | 1946871914               |
| SNP_P4_86455_41654972 | NC_021165.1    | Ca_kabuli_chr06 | 41654972                | CC                              | TT              | 1946871916               |
| SNP_P4_86456_41655587 | NC_021165.1    | Ca_kabuli_chr06 | 41655587                | TT                              | AA              | 1946871918               |
| SNP_P4_86457_41656240 | NC_021165.1    | Ca_kabuli_chr06 | 41656240                | CC                              | TT              | 1946871920               |
| SNP_P4_86458_41656963 | NC_021165.1    | Ca_kabuli_chr06 | 41656963                | TT                              | GG              | 1946871923               |
| SNP_P4_86459_41657226 | NC_021165.1    | Ca_kabuli_chr06 | 41657226                | CC                              | TT              | 1946871925               |
| SNP_P4_86460_41658087 | NC_021165.1    | Ca_kabuli_chr06 | 41658087                | AA                              | GG              | 1946871927               |
| SNP_P4_86461_41658962 | NC_021165.1    | Ca_kabuli_chr06 | 41658962                | AA                              | CC              | 1946871929               |
| SNP_P4_86462_41659251 | NC_021165.1    | Ca_kabuli_chr06 | 41659251                | GG                              | AA              | 1946871931               |
| SNP_P4_86463_41659380 | NC_021165.1    | Ca_kabuli_chr06 | 41659380                | TT                              | CC              | 1946871933               |
| SNP_P4_86465_41659773 | NC_021165.1    | Ca_kabuli_chr06 | 41659773                | AA                              | GG              | 1946871935               |
| SNP_P4_86466_41660675 | NC_021165.1    | Ca_kabuli_chr06 | 41660675                | GG                              | AA              | 1946871937               |
| SNP_P4_86467_41660679 | NC_021165.1    | Ca_kabuli_chr06 | 41660679                | AA                              | TT              | 1946871938               |
| SNP_P4_86468_41660936 | NC_021165.1    | Ca_kabuli_chr06 | 41660936                | CC                              | TT              | 1946871940               |
| SNP_P4_86469_41661628 | NC_021165.1    | Ca_kabuli_chr06 | 41661628                | GG                              | TT              | 1946871942               |
| SNP_P4_86470_41661653 | NC_021165.1    | Ca_kabuli_chr06 | 41661653                | CC                              | TT              | 1946871944               |
| SNP_P4_86472_41668610 | NC_021165.1    | Ca_kabuli_chr06 | 41668610                | AA                              | GG              | 1946871946               |
| SNP_P4_86475_41679434 | NC_021165.1    | Ca_kabuli_chr06 | 41679434                | CC                              | AA              | 1946871948               |
| SNP_P4_86476_41679451 | NC_021165.1    | Ca_kabuli_chr06 | 41679451                | GG                              | AA              | 1946871950               |
| SNP_P4_86477_41681175 | NC_021165.1    | Ca_kabuli_chr06 | 41681175                | TT                              | AA              | 1946871952               |
| SNP_P4_86478_41681179 | NC_021165.1    | Ca_kabuli_chr06 | 41681179                | TT                              | AA              | 1946871954               |
| SNP_P4_86479_41681191 | NC_021165.1    | Ca_kabuli_chr06 | 41681191                | GG                              | AA              | 1946871956               |
| SNP_P4_86480_41681360 | NC_021165.1    | Ca_kabuli_chr06 | 41681360                | TT                              | CC              | 1946871958               |
| SNP_P4_86481_41687165 | NC_021165.1    | Ca_kabuli_chr06 | 41687165                | GG                              | CC              | 1946871960               |
| SNP_P4_86482_41693514 | NC_021165.1    | Ca_kabuli_chr06 | 41693514                | CC                              | GG              | 1946871962               |
| SNP_P4_86483_41706510 | NC_021165.1    | Ca_kabuli_chr06 | 41706510                | GG                              | AA              | 1946871964               |
| SNP_P4_86484_41706560 | NC_021165.1    | Ca_kabuli_chr06 | 41706560                | GG                              | AA              | 1946871965               |
| SNP_P4_86485_41706635 | NC_021165.1    | Ca_kabuli_chr06 | 41706635                | CC                              | AA              | 1946871967               |
| SNP_P4_86486_41706640 | NC_021165.1    | Ca_kabuli_chr06 | 41706640                | TT                              | AA              | 1946871969               |
| SNP_P4_86487_41706983 | NC_021165.1    | Ca_kabuli_chr06 | 41706983                | AA                              | GG              | 1946871971               |
| SNP_P4_86488_41726126 | NC_021165.1    | Ca_kabuli_chr06 | 41726126                | GG                              | AA              | 1946871973               |
| SNP_P4_86489_41726127 | NC_021165.1    | Ca_kabuli_chr06 | 41726127                | CC                              | TT              | 1946871975               |
| SNP_P4_86490_41726147 | NC_021165.1    | Ca_kabuli_chr06 | 41726147                | AA                              | GG              | 1946871977               |
| SNP_P4_86491_41726431 | NC_021165.1    | Ca_kabuli_chr06 | 41726431                | TT                              | GG              | 1946871979               |
| SNP_P4_86492_41743221 | NC_021165.1    | Ca_kabuli_chr06 | 41743221                | CC                              | TT              | 1946871981               |
| SNP_P4_86493_41743306 | NC_021165.1    | Ca_kabuli_chr06 | 41743306                | GG                              | AA              | 1946871983               |
| SNP_P4_86494_41743388 | NC_021165.1    | Ca_kabuli_chr06 | 41743388                | AA                              | GG              | 1946871985               |
| SNP_P4_86495_41743574 | NC_021165.1    | Ca_kabuli_chr06 | 41743574                | TT                              | CC              | 1946871987               |
| SNP_P4_86496_41743678 | NC_021165.1    | Ca_kabuli_chr06 | 41743678                | AA                              | CC              | 1946871989               |
| SNP_P4_86497_41743714 | NC_021165.1    | Ca_kabuli_chr06 | 41743714                | CC                              | TT              | 1946871990               |
| SNP_P4_86498_41743723 | NC_021165.1    | Ca_kabuli_chr06 | 41743723                | AA                              | GG              | 1946871992               |
| SNP_P4_86499_41743744 | NC_021165.1    | Ca_kabuli_chr06 | 41743744                | TT                              | CC              | 1946871994               |

| SNPs IDs              | Chromosome IDs | Chromosomes     | Physical positions (bp) | CDC Frontier (Reference genome) | (ILWC46 & LPNB) | NCBI SNPdb Accession IDs |
|-----------------------|----------------|-----------------|-------------------------|---------------------------------|-----------------|--------------------------|
| SNP_P4_86500_41743824 | NC_021165.1    | Ca_kabuli_chr06 | 41743824                | GG                              | AA              | 1946871996               |
| SNP_P4_86501_41755546 | NC_021165.1    | Ca_kabuli_chr06 | 41755546                | GG                              | AA              | 1946871998               |
| SNP_P4_86502_41755589 | NC_021165.1    | Ca_kabuli_chr06 | 41755589                | TT                              | CC              | 1946872000               |
| SNP_P4_86503_41755590 | NC_021165.1    | Ca_kabuli_chr06 | 41755590                | TT                              | AA              | 1946872002               |
| SNP_P4_86504_41772237 | NC_021165.1    | Ca_kabuli_chr06 | 41772237                | CC                              | GG              | 1946872003               |
| SNP_P4_86506_41803705 | NC_021165.1    | Ca_kabuli_chr06 | 41803705                | TT                              | AA              | 1946872005               |
| SNP_P4_86507_41828396 | NC_021165.1    | Ca_kabuli_chr06 | 41828396                | AA                              | GG              | 1946872007               |
| SNP_P4_86508_41844046 | NC_021165.1    | Ca_kabuli_chr06 | 41844046                | CC                              | TT              | 1946872009               |
| SNP_P4_86509_41856308 | NC_021165.1    | Ca_kabuli_chr06 | 41856308                | CC                              | TT              | 1946872011               |
| SNP_P4_86510_41856348 | NC_021165.1    | Ca_kabuli_chr06 | 41856348                | CC                              | TT              | 1946872013               |
| SNP_P4_86511_41856350 | NC_021165.1    | Ca_kabuli_chr06 | 41856350                | AA                              | TT              | 1946872015               |
| SNP_P4_86512_41856360 | NC_021165.1    | Ca_kabuli_chr06 | 41856360                | AA                              | TT              | 1946872017               |
| SNP_P4_86513_41856366 | NC_021165.1    | Ca_kabuli_chr06 | 41856366                | TT                              | AA              | 1946872019               |
| SNP_P4_86514_41856400 | NC_021165.1    | Ca_kabuli_chr06 | 41856400                | TT                              | CC              | 1946872021               |
| SNP_P4_86515_41856401 | NC_021165.1    | Ca_kabuli_chr06 | 41856401                | CC                              | TT              | 1946872023               |
| SNP_P4_86516_41856421 | NC_021165.1    | Ca_kabuli_chr06 | 41856421                | CC                              | TT              | 1946872025               |
| SNP_P4_86518_41856424 | NC_021165.1    | Ca_kabuli_chr06 | 41856424                | CC                              | AA              | 1946872027               |
| SNP_P4_86519_41856465 | NC_021165.1    | Ca_kabuli_chr06 | 41856465                | AA                              | GG              | 1946872028               |
| SNP_P4_86520_41856494 | NC_021165.1    | Ca_kabuli_chr06 | 41856494                | AA                              | GG              | 1946872030               |
| SNP_P4_86521_41856911 | NC_021165.1    | Ca_kabuli_chr06 | 41856911                | GG                              | AA              | 1946872032               |
| SNP_P4_86522_41856915 | NC_021165.1    | Ca_kabuli_chr06 | 41856915                | TT                              | AA              | 1946872034               |
| SNP_P4_86523_41860519 | NC_021165.1    | Ca_kabuli_chr06 | 41860519                | TT                              | CC              | 1946872036               |
| SNP_P4_86524_41871770 | NC_021165.1    | Ca_kabuli_chr06 | 41871770                | TT                              | CC              | 1946872038               |
| SNP_P4_86525_41873252 | NC_021165.1    | Ca_kabuli_chr06 | 41873252                | CC                              | TT              | 1946872040               |
| SNP_P4_86526_41873619 | NC_021165.1    | Ca_kabuli_chr06 | 41873619                | TT                              | GG              | 1946872042               |
| SNP_P4_86527_41873990 | NC_021165.1    | Ca_kabuli_chr06 | 41873990                | TT                              | AA              | 1946872044               |
| SNP_P4_86528_41874579 | NC_021165.1    | Ca_kabuli_chr06 | 41874579                | TT                              | CC              | 1946872046               |
| SNP_P4_86530_41875027 | NC_021165.1    | Ca_kabuli_chr06 | 41875027                | GG                              | TT              | 1946872048               |
| SNP_P4_86531_41875103 | NC_021165.1    | Ca_kabuli_chr06 | 41875103                | TT                              | CC              | 1946872050               |
| SNP_P4_86532_41900299 | NC_021165.1    | Ca_kabuli_chr06 | 41900299                | CC                              | TT              | 1946872052               |
| SNP_P4_86535_41955253 | NC_021165.1    | Ca_kabuli_chr06 | 41955253                | CC                              | TT              | 1946872054               |
| SNP_P4_86537_41960485 | NC_021165.1    | Ca_kabuli_chr06 | 41960485                | AA                              | TT              | 1946872056               |
| SNP_P4_86538_41960518 | NC_021165.1    | Ca_kabuli_chr06 | 41960518                | CC                              | TT              | 1946872058               |
| SNP_P4_86539_41960543 | NC_021165.1    | Ca_kabuli_chr06 | 41960543                | GG                              | AA              | 1946872060               |
| SNP_P4_86540_41970025 | NC_021165.1    | Ca_kabuli_chr06 | 41970025                | AA                              | GG              | 1946872062               |
| SNP_P4_86541_41990627 | NC_021165.1    | Ca_kabuli_chr06 | 41990627                | TT                              | AA              | 1946872064               |
| SNP_P4_86542_42005319 | NC_021165.1    | Ca_kabuli_chr06 | 42005319                | CC                              | GG              | 1946872066               |
| SNP_P4_86543_42011670 | NC_021165.1    | Ca_kabuli_chr06 | 42011670                | TT                              | CC              | 1946872068               |
| SNP_P4_86544_42017302 | NC_021165.1    | Ca_kabuli_chr06 | 42017302                | TT                              | CC              | 1946872070               |
| SNP_P4_86545_42017886 | NC_021165.1    | Ca_kabuli_chr06 | 42017886                | GG                              | AA              | 1946872072               |
| SNP_P4_86546_42017931 | NC_021165.1    | Ca_kabuli_chr06 | 42017931                | AA                              | GG              | 1946872074               |
| SNP_P4_86547_42019994 | NC_021165.1    | Ca_kabuli_chr06 | 42019994                | CC                              | TT              | 1946872076               |

| SNPs IDs              | Chromosome IDs | Chromosomes     | Physical positions (bp) | CDC Frontier (Reference genome) | (ILWC46 & LPNB) | NCBI SNPdb Accession IDs |
|-----------------------|----------------|-----------------|-------------------------|---------------------------------|-----------------|--------------------------|
| SNP_P4_86548_42020003 | NC_021165.1    | Ca_kabuli_chr06 | 42020003                | TT                              | CC              | 1946872078               |
| SNP_P4_86549_42020022 | NC_021165.1    | Ca_kabuli_chr06 | 42020022                | TT                              | AA              | 1946872080               |
| SNP_P4_86550_42020083 | NC_021165.1    | Ca_kabuli_chr06 | 42020083                | CC                              | TT              | 1946872082               |
| SNP_P4_86551_42020091 | NC_021165.1    | Ca_kabuli_chr06 | 42020091                | AA                              | GG              | 1946872084               |
| SNP_P4_86552_42020463 | NC_021165.1    | Ca_kabuli_chr06 | 42020463                | AA                              | GG              | 1946872086               |
| SNP_P4_86553_42020494 | NC_021165.1    | Ca_kabuli_chr06 | 42020494                | CC                              | GG              | 1946872088               |
| SNP_P4_86554_42020503 | NC_021165.1    | Ca_kabuli_chr06 | 42020503                | TT                              | GG              | 1946872090               |
| SNP_P4_86555_42032525 | NC_021165.1    | Ca_kabuli_chr06 | 42032525                | GG                              | CC              | 1946872092               |
| SNP_P4_86556_42032535 | NC_021165.1    | Ca_kabuli_chr06 | 42032535                | GG                              | AA              | 1946872094               |
| SNP_P4_86557_42033434 | NC_021165.1    | Ca_kabuli_chr06 | 42033434                | TT                              | GG              | 1946872096               |
| SNP_P4_86558_42033656 | NC_021165.1    | Ca_kabuli_chr06 | 42033656                | AA                              | GG              | 1946872097               |
| SNP_P4_86559_42033667 | NC_021165.1    | Ca_kabuli_chr06 | 42033667                | CC                              | AA              | 1946872099               |
| SNP_P4_86560_42035091 | NC_021165.1    | Ca_kabuli_chr06 | 42035091                | TT                              | CC              | 1946872101               |
| SNP_P4_86561_42035137 | NC_021165.1    | Ca_kabuli_chr06 | 42035137                | TT                              | GG              | 1946872103               |
| SNP_P4_86562_42035176 | NC_021165.1    | Ca_kabuli_chr06 | 42035176                | AA                              | GG              | 1946872105               |
| SNP_P4_86563_42061832 | NC_021165.1    | Ca_kabuli_chr06 | 42061832                | TT                              | CC              | 1946872107               |
| SNP_P4_86564_42087288 | NC_021165.1    | Ca_kabuli_chr06 | 42087288                | CC                              | AA              | 1946872109               |
| SNP_P4_86565_42088327 | NC_021165.1    | Ca_kabuli_chr06 | 42088327                | CC                              | TT              | 1946872111               |
| SNP_P4_86566_42101060 | NC_021165.1    | Ca_kabuli_chr06 | 42101060                | TT                              | CC              | 1946872113               |
| SNP_P4_86567_42120706 | NC_021165.1    | Ca_kabuli_chr06 | 42120706                | AA                              | CC              | 1946872115               |
| SNP_P4_86569_42146136 | NC_021165.1    | Ca_kabuli_chr06 | 42146136                | TT                              | CC              | 1946872117               |
| SNP_P4_86570_42171277 | NC_021165.1    | Ca_kabuli_chr06 | 42171277                | AA                              | CC              | 1946872119               |
| SNP_P4_86571_42182809 | NC_021165.1    | Ca_kabuli_chr06 | 42182809                | AA                              | GG              | 1946872120               |
| SNP_P4_86572_42182815 | NC_021165.1    | Ca_kabuli_chr06 | 42182815                | TT                              | AA              | 1946872122               |
| SNP_P4_86573_42182817 | NC_021165.1    | Ca_kabuli_chr06 | 42182817                | GG                              | TT              | 1946872124               |
| SNP_P4_86574_42208281 | NC_021165.1    | Ca_kabuli_chr06 | 42208281                | CC                              | TT              | 1946872126               |
| SNP_P4_86575_42208667 | NC_021165.1    | Ca_kabuli_chr06 | 42208667                | CC                              | TT              | 1946872129               |
| SNP_P4_86576_42208684 | NC_021165.1    | Ca_kabuli_chr06 | 42208684                | GG                              | AA              | 1946872131               |
| SNP_P4_86577_42208688 | NC_021165.1    | Ca_kabuli_chr06 | 42208688                | GG                              | AA              | 1946872133               |
| SNP_P4_86578_42208691 | NC_021165.1    | Ca_kabuli_chr06 | 42208691                | TT                              | CC              | 1946872135               |
| SNP_P4_86579_42208694 | NC_021165.1    | Ca_kabuli_chr06 | 42208694                | AA                              | CC              | 1946872137               |
| SNP_P4_86580_42208712 | NC_021165.1    | Ca_kabuli_chr06 | 42208712                | GG                              | AA              | 1946872139               |
| SNP_P4_86581_42208739 | NC_021165.1    | Ca_kabuli_chr06 | 42208739                | AA                              | GG              | 1946872141               |
| SNP_P4_86582_42208775 | NC_021165.1    | Ca_kabuli_chr06 | 42208775                | CC                              | TT              | 1946872143               |
| SNP_P4_86583_42237577 | NC_021165.1    | Ca_kabuli_chr06 | 42237577                | CC                              | TT              | 1946872145               |
| SNP_P4_86584_42239998 | NC_021165.1    | Ca_kabuli_chr06 | 42239998                | AA                              | GG              | 1946872147               |
| SNP_P4_86586_42269942 | NC_021165.1    | Ca_kabuli_chr06 | 42269942                | TT                              | CC              | 1946872149               |
| SNP_P4_86587_42269951 | NC_021165.1    | Ca_kabuli_chr06 | 42269951                | GG                              | AA              | 1946872151               |
| SNP_P4_86589_42342666 | NC_021165.1    | Ca_kabuli_chr06 | 42342666                | CC                              | TT              | 1946872153               |
| SNP_P4_86590_42342733 | NC_021165.1    | Ca_kabuli_chr06 | 42342733                | TT                              | CC              | 1946872155               |
| SNP_P4_86591_42353425 | NC_021165.1    | Ca_kabuli_chr06 | 42353425                | GG                              | AA              | 1946872157               |
| SNP_P4_86592_42353475 | NC_021165.1    | Ca_kabuli_chr06 | 42353475                | AA                              | GG              | 1946872159               |

| SNPs IDs              | Chromosome IDs | Chromosomes     | Physical positions (bp) | CDC Frontier (Reference genome) | (ILWC46 & LPNB) | NCBI SNPdb Accession IDs |
|-----------------------|----------------|-----------------|-------------------------|---------------------------------|-----------------|--------------------------|
| SNP_P4_86593_42360126 | NC_021165.1    | Ca_kabuli_chr06 | 42360126                | TT                              | GG              | 1946872161               |
| SNP_P4_86595_42386552 | NC_021165.1    | Ca_kabuli_chr06 | 42386552                | GG                              | CC              | 1946872163               |
| SNP_P4_86596_42391538 | NC_021165.1    | Ca_kabuli_chr06 | 42391538                | TT                              | CC              | 1946872165               |
| SNP_P4_86597_42391544 | NC_021165.1    | Ca_kabuli_chr06 | 42391544                | CC                              | GG              | 1946872167               |
| SNP_P4_86598_42391558 | NC_021165.1    | Ca_kabuli_chr06 | 42391558                | AA                              | TT              | 1946872169               |
| SNP_P4_86599_42391846 | NC_021165.1    | Ca_kabuli_chr06 | 42391846                | GG                              | AA              | 1946872171               |
| SNP_P4_86600_42391854 | NC_021165.1    | Ca_kabuli_chr06 | 42391854                | GG                              | AA              | 1946872173               |
| SNP_P4_86601_42391862 | NC_021165.1    | Ca_kabuli_chr06 | 42391862                | GG                              | TT              | 1946872175               |
| SNP_P4_86602_42396638 | NC_021165.1    | Ca_kabuli_chr06 | 42396638                | TT                              | GG              | 1946872177               |
| SNP_P4_86603_42396672 | NC_021165.1    | Ca_kabuli_chr06 | 42396672                | GG                              | AA              | 1946872179               |
| SNP_P4_86604_42396734 | NC_021165.1    | Ca_kabuli_chr06 | 42396734                | TT                              | GG              | 1946872181               |
| SNP_P4_86605_42396782 | NC_021165.1    | Ca_kabuli_chr06 | 42396782                | TT                              | AA              | 1946872183               |
| SNP_P4_86606_42396882 | NC_021165.1    | Ca_kabuli_chr06 | 42396882                | TT                              | GG              | 1946872185               |
| SNP_P4_86607_42397053 | NC_021165.1    | Ca_kabuli_chr06 | 42397053                | TT                              | AA              | 1946872187               |
| SNP_P4_86608_42397080 | NC_021165.1    | Ca_kabuli_chr06 | 42397080                | TT                              | AA              | 1946872189               |
| SNP_P4_86609_42397089 | NC_021165.1    | Ca_kabuli_chr06 | 42397089                | GG                              | AA              | 1946872191               |
| SNP_P4_86610_42397157 | NC_021165.1    | Ca_kabuli_chr06 | 42397157                | CC                              | AA              | 1946872193               |
| SNP_P4_86611_42397203 | NC_021165.1    | Ca_kabuli_chr06 | 42397203                | AA                              | TT              | 1946872195               |
| SNP_P4_86612_42397206 | NC_021165.1    | Ca_kabuli_chr06 | 42397206                | CC                              | TT              | 1946872197               |
| SNP_P4_86613_42397225 | NC_021165.1    | Ca_kabuli_chr06 | 42397225                | CC                              | TT              | 1946872199               |
| SNP_P4_86614_42397299 | NC_021165.1    | Ca_kabuli_chr06 | 42397299                | TT                              | CC              | 1946872201               |
| SNP_P4_86615_42397333 | NC_021165.1    | Ca_kabuli_chr06 | 42397333                | AA                              | CC              | 1946872203               |
| SNP_P4_86616_42398582 | NC_021165.1    | Ca_kabuli_chr06 | 42398582                | TT                              | CC              | 1946872205               |
| SNP_P4_86617_42398670 | NC_021165.1    | Ca_kabuli_chr06 | 42398670                | AA                              | TT              | 1946872207               |
| SNP_P4_86619_42398689 | NC_021165.1    | Ca_kabuli_chr06 | 42398689                | CC                              | TT              | 1946872209               |
| SNP_P4_86620_42405600 | NC_021165.1    | Ca_kabuli_chr06 | 42405600                | CC                              | AA              | 1946872211               |
| SNP_P4_86622_42436320 | NC_021165.1    | Ca_kabuli_chr06 | 42436320                | AA                              | GG              | 1946872213               |
| SNP_P4_86623_42437451 | NC_021165.1    | Ca_kabuli_chr06 | 42437451                | TT                              | CC              | 1946872215               |
| SNP_P4_86624_42437490 | NC_021165.1    | Ca_kabuli_chr06 | 42437490                | AA                              | CC              | 1946872217               |
| SNP_P4_86625_42444288 | NC_021165.1    | Ca_kabuli_chr06 | 42444288                | AA                              | GG              | 1946872218               |
| SNP_P4_86626_42445787 | NC_021165.1    | Ca_kabuli_chr06 | 42445787                | CC                              | TT              | 1946872220               |
| SNP_P4_86627_42454543 | NC_021165.1    | Ca_kabuli_chr06 | 42454543                | AA                              | CC              | 1946872222               |
| SNP_P4_86628_42461278 | NC_021165.1    | Ca_kabuli_chr06 | 42461278                | AA                              | GG              | 1946872224               |
| SNP_P4_86629_42461347 | NC_021165.1    | Ca_kabuli_chr06 | 42461347                | AA                              | TT              | 1946872226               |
| SNP_P4_86630_42461544 | NC_021165.1    | Ca_kabuli_chr06 | 42461544                | TT                              | CC              | 1946872228               |
| SNP_P4_86631_42461688 | NC_021165.1    | Ca_kabuli_chr06 | 42461688                | GG                              | TT              | 1946872230               |
| SNP_P4_86632_42461700 | NC_021165.1    | Ca_kabuli_chr06 | 42461700                | TT                              | CC              | 1946872232               |
| SNP_P4_86633_42464604 | NC_021165.1    | Ca_kabuli_chr06 | 42464604                | CC                              | TT              | 1946872234               |
| SNP_P4_86634_42464623 | NC_021165.1    | Ca_kabuli_chr06 | 42464623                | AA                              | TT              | 1946872236               |
| SNP_P4_86635_42464626 | NC_021165.1    | Ca_kabuli_chr06 | 42464626                | CC                              | TT              | 1946872238               |
| SNP_P4_86636_42464634 | NC_021165.1    | Ca_kabuli_chr06 | 42464634                | CC                              | GG              | 1946872240               |
| SNP_P4_86637_42464643 | NC_021165.1    | Ca_kabuli_chr06 | 42464643                | AA                              | GG              | 1946872242               |

| SNPs IDs              | Chromosome IDs | Chromosomes     | Physical positions (bp) | CDC Frontier (Reference genome) | (ILWC46 & LPNB) | NCBI SNPdb Accession IDs |
|-----------------------|----------------|-----------------|-------------------------|---------------------------------|-----------------|--------------------------|
| SNP_P4_86638_42464702 | NC_021165.1    | Ca_kabuli_chr06 | 42464702                | AA                              | GG              | 1946872244               |
| SNP_P4_86639_42464710 | NC_021165.1    | Ca_kabuli_chr06 | 42464710                | GG                              | AA              | 1946872246               |
| SNP_P4_86640_42464888 | NC_021165.1    | Ca_kabuli_chr06 | 42464888                | GG                              | AA              | 1946872248               |
| SNP_P4_86641_42464911 | NC_021165.1    | Ca_kabuli_chr06 | 42464911                | TT                              | AA              | 1946872250               |
| SNP_P4_86642_42464941 | NC_021165.1    | Ca_kabuli_chr06 | 42464941                | AA                              | CC              | 1946872252               |
| SNP_P4_86644_42465002 | NC_021165.1    | Ca_kabuli_chr06 | 42465002                | AA                              | TT              | 1946872254               |
| SNP_P4_86645_42470626 | NC_021165.1    | Ca_kabuli_chr06 | 42470626                | AA                              | CC              | 1946872256               |
| SNP_P4_86646_42473804 | NC_021165.1    | Ca_kabuli_chr06 | 42473804                | GG                              | AA              | 1946872258               |
| SNP_P4_86647_42473817 | NC_021165.1    | Ca_kabuli_chr06 | 42473817                | CC                              | TT              | 1946872260               |
| SNP_P4_86648_42473868 | NC_021165.1    | Ca_kabuli_chr06 | 42473868                | CC                              | GG              | 1946872262               |
| SNP_P4_86649_42473869 | NC_021165.1    | Ca_kabuli_chr06 | 42473869                | AA                              | GG              | 1946872264               |
| SNP_P4_86650_42473874 | NC_021165.1    | Ca_kabuli_chr06 | 42473874                | GG                              | AA              | 1946872265               |
| SNP_P4_86651_42473878 | NC_021165.1    | Ca_kabuli_chr06 | 42473878                | GG                              | TT              | 1946872266               |
| SNP_P4_86652_42473916 | NC_021165.1    | Ca_kabuli_chr06 | 42473916                | GG                              | AA              | 1946872267               |
| SNP_P4_86653_42473978 | NC_021165.1    | Ca_kabuli_chr06 | 42473978                | GG                              | TT              | 1946872269               |
| SNP_P4_86654_42474207 | NC_021165.1    | Ca_kabuli_chr06 | 42474207                | CC                              | AA              | 1946872271               |
| SNP_P4_86655_42476391 | NC_021165.1    | Ca_kabuli_chr06 | 42476391                | TT                              | AA              | 1946872273               |
| SNP_P4_86656_42476454 | NC_021165.1    | Ca_kabuli_chr06 | 42476454                | CC                              | AA              | 1946872275               |
| SNP_P4_86657_42478455 | NC_021165.1    | Ca_kabuli_chr06 | 42478455                | TT                              | AA              | 1946872277               |
| SNP_P4_86659_42481073 | NC_021165.1    | Ca_kabuli_chr06 | 42481073                | CC                              | TT              | 1946872279               |
| SNP_P4_86660_42481151 | NC_021165.1    | Ca_kabuli_chr06 | 42481151                | TT                              | CC              | 1946872281               |
| SNP_P4_86661_42481155 | NC_021165.1    | Ca_kabuli_chr06 | 42481155                | GG                              | AA              | 1946872283               |
| SNP_P4_86662_42481206 | NC_021165.1    | Ca_kabuli_chr06 | 42481206                | TT                              | CC              | 1946872285               |
| SNP_P4_86663_42482637 | NC_021165.1    | Ca_kabuli_chr06 | 42482637                | AA                              | CC              | 1946872287               |
| SNP_P4_86664_42524812 | NC_021165.1    | Ca_kabuli_chr06 | 42524812                | AA                              | TT              | 1946872289               |
| SNP_P4_86665_42526524 | NC_021165.1    | Ca_kabuli_chr06 | 42526524                | TT                              | CC              | 1946872291               |
| SNP_P4_86666_42526538 | NC_021165.1    | Ca_kabuli_chr06 | 42526538                | TT                              | CC              | 1946872293               |
| SNP_P4_86667_42527978 | NC_021165.1    | Ca_kabuli_chr06 | 42527978                | TT                              | CC              | 1946872295               |
| SNP_P4_86668_42534655 | NC_021165.1    | Ca_kabuli_chr06 | 42534655                | AA                              | TT              | 1946872297               |
| SNP_P4_86670_42591105 | NC_021165.1    | Ca_kabuli_chr06 | 42591105                | CC                              | TT              | 1946872299               |
| SNP_P4_86671_42602042 | NC_021165.1    | Ca_kabuli_chr06 | 42602042                | GG                              | TT              | 1946872301               |
| SNP_P4_86673_42618520 | NC_021165.1    | Ca_kabuli_chr06 | 42618520                | GG                              | CC              | 1946872303               |
| SNP_P4_86674_42625135 | NC_021165.1    | Ca_kabuli_chr06 | 42625135                | GG                              | TT              | 1946872305               |
| SNP_P4_86675_42625154 | NC_021165.1    | Ca_kabuli_chr06 | 42625154                | GG                              | CC              | 1946872307               |
| SNP_P4_86676_42625250 | NC_021165.1    | Ca_kabuli_chr06 | 42625250                | CC                              | TT              | 1946872309               |
| SNP_P4_86677_42625319 | NC_021165.1    | Ca_kabuli_chr06 | 42625319                | AA                              | TT              | 1946872311               |
| SNP_P4_86678_42625323 | NC_021165.1    | Ca_kabuli_chr06 | 42625323                | TT                              | AA              | 1946872313               |
| SNP_P4_86679_42625330 | NC_021165.1    | Ca_kabuli_chr06 | 42625330                | TT                              | GG              | 1946872315               |
| SNP_P4_86680_42625493 | NC_021165.1    | Ca_kabuli_chr06 | 42625493                | TT                              | CC              | 1946872317               |
| SNP_P4_86681_42625501 | NC_021165.1    | Ca_kabuli_chr06 | 42625501                | AA                              | GG              | 1946872319               |
| SNP_P4_86682_42625524 | NC_021165.1    | Ca_kabuli_chr06 | 42625524                | GG                              | TT              | 1946872321               |
| SNP_P4_86683_42625572 | NC_021165.1    | Ca_kabuli_chr06 | 42625572                | AA                              | GG              | 1946872322               |

| SNPs IDs              | Chromosome IDs | Chromosomes     | Physical positions (bp) | CDC Frontier (Reference genome) | (ILWC46 & LPNB) | NCBI SNPdb Accession IDs |
|-----------------------|----------------|-----------------|-------------------------|---------------------------------|-----------------|--------------------------|
| SNP_P4_86684_42625621 | NC_021165.1    | Ca_kabuli_chr06 | 42625621                | AA                              | GG              | 1946872324               |
| SNP_P4_86685_42625664 | NC_021165.1    | Ca_kabuli_chr06 | 42625664                | AA                              | GG              | 1946872326               |
| SNP_P4_86686_42627676 | NC_021165.1    | Ca_kabuli_chr06 | 42627676                | GG                              | AA              | 1946872328               |
| SNP_P4_86687_42643159 | NC_021165.1    | Ca_kabuli_chr06 | 42643159                | AA                              | GG              | 1946872330               |
| SNP_P4_86688_42658551 | NC_021165.1    | Ca_kabuli_chr06 | 42658551                | AA                              | GG              | 1946872332               |
| SNP_P4_86689_42672504 | NC_021165.1    | Ca_kabuli_chr06 | 42672504                | TT                              | AA              | 1946872334               |
| SNP_P4_86690_42672505 | NC_021165.1    | Ca_kabuli_chr06 | 42672505                | AA                              | TT              | 1946872336               |
| SNP_P4_86691_42674025 | NC_021165.1    | Ca_kabuli_chr06 | 42674025                | TT                              | GG              | 1946872338               |
| SNP_P4_86692_42674026 | NC_021165.1    | Ca_kabuli_chr06 | 42674026                | TT                              | AA              | 1946872340               |
| SNP_P4_86693_42674037 | NC_021165.1    | Ca_kabuli_chr06 | 42674037                | AA                              | TT              | 1946872342               |
| SNP_P4_86694_42776166 | NC_021165.1    | Ca_kabuli_chr06 | 42776166                | CC                              | TT              | 1946872344               |
| SNP_P4_86695_42782371 | NC_021165.1    | Ca_kabuli_chr06 | 42782371                | TT                              | CC              | 1946872346               |
| SNP_P4_86696_42859737 | NC_021165.1    | Ca_kabuli_chr06 | 42859737                | GG                              | AA              | 1946872348               |
| SNP_P4_86697_42859876 | NC_021165.1    | Ca_kabuli_chr06 | 42859876                | AA                              | TT              | 1946872349               |
| SNP_P4_86698_42859900 | NC_021165.1    | Ca_kabuli_chr06 | 42859900                | GG                              | CC              | 1946872351               |
| SNP_P4_86699_42863786 | NC_021165.1    | Ca_kabuli_chr06 | 42863786                | TT                              | CC              | 1946872353               |
| SNP_P4_86700_42896699 | NC_021165.1    | Ca_kabuli_chr06 | 42896699                | TT                              | CC              | 1946872355               |
| SNP_P4_86701_42896766 | NC_021165.1    | Ca_kabuli_chr06 | 42896766                | TT                              | CC              | 1946872357               |
| SNP_P4_86702_42899634 | NC_021165.1    | Ca_kabuli_chr06 | 42899634                | AA                              | GG              | 1946872359               |
| SNP_P4_86703_42907106 | NC_021165.1    | Ca_kabuli_chr06 | 42907106                | GG                              | AA              | 1946872361               |
| SNP_P4_86704_42907478 | NC_021165.1    | Ca_kabuli_chr06 | 42907478                | TT                              | CC              | 1946872363               |
| SNP_P4_86705_42910051 | NC_021165.1    | Ca_kabuli_chr06 | 42910051                | CC                              | TT              | 1946872365               |
| SNP_P4_86706_42910086 | NC_021165.1    | Ca_kabuli_chr06 | 42910086                | CC                              | TT              | 1946872367               |
| SNP_P4_86707_42910547 | NC_021165.1    | Ca_kabuli_chr06 | 42910547                | AA                              | GG              | 1946872369               |
| SNP_P4_86708_42910601 | NC_021165.1    | Ca_kabuli_chr06 | 42910601                | TT                              | AA              | 1946872371               |
| SNP_P4_86709_42913845 | NC_021165.1    | Ca_kabuli_chr06 | 42913845                | TT                              | CC              | 1946872373               |
| SNP_P4_86710_42937431 | NC_021165.1    | Ca_kabuli_chr06 | 42937431                | AA                              | TT              | 1946872375               |
| SNP_P4_86711_42937468 | NC_021165.1    | Ca_kabuli_chr06 | 42937468                | AA                              | CC              | 1946872377               |
| SNP_P4_86712_42937531 | NC_021165.1    | Ca_kabuli_chr06 | 42937531                | CC                              | TT              | 1946872379               |
| SNP_P4_86713_42937542 | NC_021165.1    | Ca_kabuli_chr06 | 42937542                | CC                              | AA              | 1946872381               |
| SNP_P4_86714_42937544 | NC_021165.1    | Ca_kabuli_chr06 | 42937544                | CC                              | TT              | 1946872383               |
| SNP_P4_86715_42937631 | NC_021165.1    | Ca_kabuli_chr06 | 42937631                | CC                              | TT              | 1946872385               |
| SNP_P4_86716_42938778 | NC_021165.1    | Ca_kabuli_chr06 | 42938778                | CC                              | TT              | 1946872387               |
| SNP_P4_86717_42939096 | NC_021165.1    | Ca_kabuli_chr06 | 42939096                | TT                              | CC              | 1946872389               |
| SNP_P4_86718_42939247 | NC_021165.1    | Ca_kabuli_chr06 | 42939247                | CC                              | TT              | 1946872391               |
| SNP_P4_86719_42939266 | NC_021165.1    | Ca_kabuli_chr06 | 42939266                | TT                              | GG              | 1946872393               |
| SNP_P4_86720_42939276 | NC_021165.1    | Ca_kabuli_chr06 | 42939276                | CC                              | TT              | 1946872395               |
| SNP_P4_86721_42939771 | NC_021165.1    | Ca_kabuli_chr06 | 42939771                | TT                              | CC              | 1946872397               |
| SNP_P4_86722_42939772 | NC_021165.1    | Ca_kabuli_chr06 | 42939772                | GG                              | AA              | 1946872399               |
| SNP_P4_86723_42940567 | NC_021165.1    | Ca_kabuli_chr06 | 42940567                | CC                              | TT              | 1946872401               |
| SNP_P4_86724_42940596 | NC_021165.1    | Ca_kabuli_chr06 | 42940596                | AA                              | GG              | 1946872403               |
| SNP_P4_86725_42944248 | NC_021165.1    | Ca_kabuli_chr06 | 42944248                | GG                              | TT              | 1946872405               |

| SNPs IDs              | Chromosome IDs | Chromosomes     | Physical positions (bp) | CDC Frontier (Reference genome) | (ILWC46 & LPNB) | NCBI SNPdb Accession IDs |
|-----------------------|----------------|-----------------|-------------------------|---------------------------------|-----------------|--------------------------|
| SNP_P4_86726_42946717 | NC_021165.1    | Ca_kabuli_chr06 | 42946717                | CC                              | AA              | 1946872407               |
| SNP_P4_86727_42956171 | NC_021165.1    | Ca_kabuli_chr06 | 42956171                | GG                              | AA              | 1946872409               |
| SNP_P4_86728_42980677 | NC_021165.1    | Ca_kabuli_chr06 | 42980677                | CC                              | TT              | 1946872411               |
| SNP_P4_86729_42993882 | NC_021165.1    | Ca_kabuli_chr06 | 42993882                | AA                              | GG              | 1946872413               |
| SNP_P4_86730_42999720 | NC_021165.1    | Ca_kabuli_chr06 | 42999720                | GG                              | AA              | 1946872415               |
| SNP_P4_86731_43000072 | NC_021165.1    | Ca_kabuli_chr06 | 43000072                | CC                              | AA              | 1946872417               |
| SNP_P4_86732_43005044 | NC_021165.1    | Ca_kabuli_chr06 | 43005044                | TT                              | CC              | 1946872419               |
| SNP_P4_86733_43005050 | NC_021165.1    | Ca_kabuli_chr06 | 43005050                | AA                              | TT              | 1946872421               |
| SNP_P4_86734_43010751 | NC_021165.1    | Ca_kabuli_chr06 | 43010751                | CC                              | TT              | 1946872423               |
| SNP_P4_86735_43010896 | NC_021165.1    | Ca_kabuli_chr06 | 43010896                | GG                              | AA              | 1946872425               |
| SNP_P4_86736_43010930 | NC_021165.1    | Ca_kabuli_chr06 | 43010930                | TT                              | AA              | 1946872427               |
| SNP_P4_86737_43011015 | NC_021165.1    | Ca_kabuli_chr06 | 43011015                | TT                              | GG              | 1946872429               |
| SNP_P4_86738_43011198 | NC_021165.1    | Ca_kabuli_chr06 | 43011198                | TT                              | AA              | 1946872431               |
| SNP_P4_86739_43012021 | NC_021165.1    | Ca_kabuli_chr06 | 43012021                | AA                              | TT              | 1946872433               |
| SNP_P4_86740_43012049 | NC_021165.1    | Ca_kabuli_chr06 | 43012049                | CC                              | TT              | 1946872435               |
| SNP_P4_86741_43012614 | NC_021165.1    | Ca_kabuli_chr06 | 43012614                | TT                              | AA              | 1946872437               |
| SNP_P4_86742_43017241 | NC_021165.1    | Ca_kabuli_chr06 | 43017241                | CC                              | TT              | 1946872439               |
| SNP_P4_86743_43017246 | NC_021165.1    | Ca_kabuli_chr06 | 43017246                | TT                              | AA              | 1946872441               |
| SNP_P4_86744_43017264 | NC_021165.1    | Ca_kabuli_chr06 | 43017264                | GG                              | CC              | 1946872443               |
| SNP_P4_86745_43017282 | NC_021165.1    | Ca_kabuli_chr06 | 43017282                | AA                              | CC              | 1946872445               |
| SNP_P4_86746_43017283 | NC_021165.1    | Ca_kabuli_chr06 | 43017283                | AA                              | CC              | 1946872447               |
| SNP_P4_86747_43017343 | NC_021165.1    | Ca_kabuli_chr06 | 43017343                | CC                              | AA              | 1946872449               |
| SNP_P4_86748_43017344 | NC_021165.1    | Ca_kabuli_chr06 | 43017344                | AA                              | CC              | 1946872451               |
| SNP_P4_86749_43017614 | NC_021165.1    | Ca_kabuli_chr06 | 43017614                | AA                              | TT              | 1946872453               |
| SNP_P4_86751_43017670 | NC_021165.1    | Ca_kabuli_chr06 | 43017670                | AA                              | CC              | 1946872455               |
| SNP_P4_86752_43017691 | NC_021165.1    | Ca_kabuli_chr06 | 43017691                | TT                              | CC              | 1946872457               |
| SNP_P4_86753_43035633 | NC_021165.1    | Ca_kabuli_chr06 | 43035633                | GG                              | CC              | 1946872459               |
| SNP_P4_86754_43042922 | NC_021165.1    | Ca_kabuli_chr06 | 43042922                | GG                              | AA              | 1946872461               |
| SNP_P4_86755_43042931 | NC_021165.1    | Ca_kabuli_chr06 | 43042931                | AA                              | TT              | 1946872463               |
| SNP_P4_86756_43042933 | NC_021165.1    | Ca_kabuli_chr06 | 43042933                | CC                              | AA              | 1946872465               |
| SNP_P4_86757_43042934 | NC_021165.1    | Ca_kabuli_chr06 | 43042934                | GG                              | AA              | 1946872467               |
| SNP_P4_86758_43043060 | NC_021165.1    | Ca_kabuli_chr06 | 43043060                | AA                              | GG              | 1946872469               |
| SNP_P4_86760_43044580 | NC_021165.1    | Ca_kabuli_chr06 | 43044580                | AA                              | GG              | 1946872471               |
| SNP_P4_86761_43044783 | NC_021165.1    | Ca_kabuli_chr06 | 43044783                | AA                              | TT              | 1946872473               |
| SNP_P4_86762_43045628 | NC_021165.1    | Ca_kabuli_chr06 | 43045628                | CC                              | TT              | 1946872475               |
| SNP_P4_86763_43045643 | NC_021165.1    | Ca_kabuli_chr06 | 43045643                | CC                              | AA              | 1946872477               |
| SNP_P4_86764_43045682 | NC_021165.1    | Ca_kabuli_chr06 | 43045682                | CC                              | AA              | 1946872479               |
| SNP_P4_86765_43045713 | NC_021165.1    | Ca_kabuli_chr06 | 43045713                | CC                              | TT              | 1946872481               |
| SNP_P4_86766_43045785 | NC_021165.1    | Ca_kabuli_chr06 | 43045785                | CC                              | TT              | 1946872483               |
| SNP_P4_86767_43045847 | NC_021165.1    | Ca_kabuli_chr06 | 43045847                | AA                              | GG              | 1946872485               |
| SNP_P4_86768_43045901 | NC_021165.1    | Ca_kabuli_chr06 | 43045901                | AA                              | GG              | 1946872487               |
| SNP_P4_86769_43045902 | NC_021165.1    | Ca_kabuli_chr06 | 43045902                | CC                              | GG              | 1946872489               |

| SNPs IDs              | Chromosome IDs | Chromosomes     | Physical positions (bp) | CDC Frontier (Reference genome) | (ILWC46 & LPNB) | NCBI SNPdb Accession IDs |
|-----------------------|----------------|-----------------|-------------------------|---------------------------------|-----------------|--------------------------|
| SNP_P4_86770_43045964 | NC_021165.1    | Ca_kabuli_chr06 | 43045964                | TT                              | CC              | 1946872491               |
| SNP_P4_86771_43045969 | NC_021165.1    | Ca_kabuli_chr06 | 43045969                | TT                              | CC              | 1946872493               |
| SNP_P4_86772_43045970 | NC_021165.1    | Ca_kabuli_chr06 | 43045970                | GG                              | AA              | 1946872495               |
| SNP_P4_86773_43045975 | NC_021165.1    | Ca_kabuli_chr06 | 43045975                | GG                              | TT              | 1946872497               |
| SNP_P4_86774_43050245 | NC_021165.1    | Ca_kabuli_chr06 | 43050245                | GG                              | AA              | 1946872499               |
| SNP_P4_86775_43052866 | NC_021165.1    | Ca_kabuli_chr06 | 43052866                | CC                              | AA              | 1946872501               |
| SNP_P4_86776_43053166 | NC_021165.1    | Ca_kabuli_chr06 | 43053166                | AA                              | GG              | 1946872503               |
| SNP_P4_86777_43058419 | NC_021165.1    | Ca_kabuli_chr06 | 43058419                | AA                              | TT              | 1946872505               |
| SNP_P4_86778_43058954 | NC_021165.1    | Ca_kabuli_chr06 | 43058954                | AA                              | CC              | 1946872507               |
| SNP_P4_86779_43059239 | NC_021165.1    | Ca_kabuli_chr06 | 43059239                | TT                              | AA              | 1946872509               |
| SNP_P4_86780_43059809 | NC_021165.1    | Ca_kabuli_chr06 | 43059809                | GG                              | AA              | 1946872511               |
| SNP_P4_86781_43060001 | NC_021165.1    | Ca_kabuli_chr06 | 43060001                | CC                              | AA              | 1946872513               |
| SNP_P4_86782_43060287 | NC_021165.1    | Ca_kabuli_chr06 | 43060287                | TT                              | CC              | 1946872515               |
| SNP_P4_86783_43060372 | NC_021165.1    | Ca_kabuli_chr06 | 43060372                | CC                              | TT              | 1946872517               |
| SNP_P4_86784_43060419 | NC_021165.1    | Ca_kabuli_chr06 | 43060419                | TT                              | GG              | 1946872519               |
| SNP_P4_86785_43060690 | NC_021165.1    | Ca_kabuli_chr06 | 43060690                | CC                              | TT              | 1946872521               |
| SNP_P4_86786_43060709 | NC_021165.1    | Ca_kabuli_chr06 | 43060709                | CC                              | GG              | 1946872523               |
| SNP_P4_86787_43060833 | NC_021165.1    | Ca_kabuli_chr06 | 43060833                | TT                              | AA              | 1946872525               |
| SNP_P4_86788_43061251 | NC_021165.1    | Ca_kabuli_chr06 | 43061251                | CC                              | TT              | 1946872527               |
| SNP_P4_86789_43061273 | NC_021165.1    | Ca_kabuli_chr06 | 43061273                | AA                              | GG              | 1946872529               |
| SNP_P4_86790_43062195 | NC_021165.1    | Ca_kabuli_chr06 | 43062195                | TT                              | CC              | 1946872531               |
| SNP_P4_86791_43062263 | NC_021165.1    | Ca_kabuli_chr06 | 43062263                | GG                              | TT              | 1946872533               |
| SNP_P4_86792_43064263 | NC_021165.1    | Ca_kabuli_chr06 | 43064263                | GG                              | AA              | 1946872535               |
| SNP_P4_86794_43064373 | NC_021165.1    | Ca_kabuli_chr06 | 43064373                | CC                              | AA              | 1946872537               |
| SNP_P4_86795_43064385 | NC_021165.1    | Ca_kabuli_chr06 | 43064385                | AA                              | GG              | 1946872539               |
| SNP_P4_86796_43064386 | NC_021165.1    | Ca_kabuli_chr06 | 43064386                | CC                              | AA              | 1946872541               |
| SNP_P4_86797_43064472 | NC_021165.1    | Ca_kabuli_chr06 | 43064472                | TT                              | AA              | 1946872543               |
| SNP_P4_86798_43064503 | NC_021165.1    | Ca_kabuli_chr06 | 43064503                | TT                              | CC              | 1946872545               |
| SNP_P4_86799_43064513 | NC_021165.1    | Ca_kabuli_chr06 | 43064513                | CC                              | AA              | 1946872547               |
| SNP_P4_86800_43064525 | NC_021165.1    | Ca_kabuli_chr06 | 43064525                | AA                              | CC              | 1946872549               |
| SNP_P4_86801_43064666 | NC_021165.1    | Ca_kabuli_chr06 | 43064666                | AA                              | GG              | 1946872551               |
| SNP_P4_86803_43064794 | NC_021165.1    | Ca_kabuli_chr06 | 43064794                | TT                              | CC              | 1946872553               |
| SNP_P4_86804_43065065 | NC_021165.1    | Ca_kabuli_chr06 | 43065065                | AA                              | GG              | 1946872555               |
| SNP_P4_86805_43065327 | NC_021165.1    | Ca_kabuli_chr06 | 43065327                | GG                              | AA              | 1946872557               |
| SNP_P4_86806_43066540 | NC_021165.1    | Ca_kabuli_chr06 | 43066540                | AA                              | CC              | 1946872559               |
| SNP_P4_86807_43070578 | NC_021165.1    | Ca_kabuli_chr06 | 43070578                | TT                              | CC              | 1946872561               |
| SNP_P4_86808_43071056 | NC_021165.1    | Ca_kabuli_chr06 | 43071056                | CC                              | TT              | 1946872563               |
| SNP_P4_86809_43072714 | NC_021165.1    | Ca_kabuli_chr06 | 43072714                | AA                              | GG              | 1946872565               |
| SNP_P4_86810_43072716 | NC_021165.1    | Ca_kabuli_chr06 | 43072716                | TT                              | AA              | 1946872567               |
| SNP_P4_86811_43076191 | NC_021165.1    | Ca_kabuli_chr06 | 43076191                | CC                              | AA              | 1946872569               |
| SNP_P4_86812_43076200 | NC_021165.1    | Ca_kabuli_chr06 | 43076200                | CC                              | TT              | 1946872571               |
| SNP_P4_86813_43076261 | NC_021165.1    | Ca_kabuli_chr06 | 43076261                | TT                              | GG              | 1946872573               |



| SNPs IDs              | Chromosome IDs | Chromosomes     | Physical positions (bp) | CDC Frontier (Reference genome) | (ILWC46 & LPNB) | NCBI SNPdb Accession IDs |
|-----------------------|----------------|-----------------|-------------------------|---------------------------------|-----------------|--------------------------|
| SNP_P4_86814_43076289 | NC_021165.1    | Ca_kabuli_chr06 | 43076289                | TT                              | GG              | 1946872575               |
| SNP_P4_86815_43076929 | NC_021165.1    | Ca_kabuli_chr06 | 43076929                | AA                              | GG              | 1946872577               |
| SNP_P4_86816_43077738 | NC_021165.1    | Ca_kabuli_chr06 | 43077738                | GG                              | AA              | 1946872579               |
| SNP_P4_86817_43138283 | NC_021165.1    | Ca_kabuli_chr06 | 43138283                | GG                              | TT              | 1946872580               |
| SNP_P4_86819_43154162 | NC_021165.1    | Ca_kabuli_chr06 | 43154162                | CC                              | TT              | 1946872582               |
| SNP_P4_86820_43156397 | NC_021165.1    | Ca_kabuli_chr06 | 43156397                | AA                              | CC              | 1946872584               |
| SNP_P4_86821_43163240 | NC_021165.1    | Ca_kabuli_chr06 | 43163240                | TT                              | AA              | 1946872586               |
| SNP_P4_86822_43163243 | NC_021165.1    | Ca_kabuli_chr06 | 43163243                | GG                              | CC              | 1946872588               |
| SNP_P4_86823_43165903 | NC_021165.1    | Ca_kabuli_chr06 | 43165903                | AA                              | TT              | 1946872590               |
| SNP_P4_86824_43165909 | NC_021165.1    | Ca_kabuli_chr06 | 43165909                | AA                              | GG              | 1946872592               |
| SNP_P4_86825_43165910 | NC_021165.1    | Ca_kabuli_chr06 | 43165910                | TT                              | GG              | 1946872594               |
| SNP_P4_86826_43165962 | NC_021165.1    | Ca_kabuli_chr06 | 43165962                | AA                              | CC              | 1946872596               |
| SNP_P4_86827_43166369 | NC_021165.1    | Ca_kabuli_chr06 | 43166369                | CC                              | TT              | 1946872598               |
| SNP_P4_86828_43166391 | NC_021165.1    | Ca_kabuli_chr06 | 43166391                | AA                              | GG              | 1946872600               |
| SNP_P4_86829_43166413 | NC_021165.1    | Ca_kabuli_chr06 | 43166413                | AA                              | CC              | 1946872602               |
| SNP_P4_86830_43166488 | NC_021165.1    | Ca_kabuli_chr06 | 43166488                | TT                              | CC              | 1946872604               |
| SNP_P4_86831_43166561 | NC_021165.1    | Ca_kabuli_chr06 | 43166561                | CC                              | TT              | 1946872606               |
| SNP_P4_86832_43166568 | NC_021165.1    | Ca_kabuli_chr06 | 43166568                | TT                              | AA              | 1946872608               |
| SNP_P4_86833_43166604 | NC_021165.1    | Ca_kabuli_chr06 | 43166604                | AA                              | GG              | 1946872610               |
| SNP_P4_86834_43166627 | NC_021165.1    | Ca_kabuli_chr06 | 43166627                | TT                              | CC              | 1946872612               |
| SNP_P4_86835_43166628 | NC_021165.1    | Ca_kabuli_chr06 | 43166628                | AA                              | TT              | 1946872614               |
| SNP_P4_86836_43166635 | NC_021165.1    | Ca_kabuli_chr06 | 43166635                | AA                              | TT              | 1946872616               |
| SNP_P4_86837_43166657 | NC_021165.1    | Ca_kabuli_chr06 | 43166657                | AA                              | TT              | 1946872618               |
| SNP_P4_86838_43166752 | NC_021165.1    | Ca_kabuli_chr06 | 43166752                | TT                              | GG              | 1946872620               |
| SNP_P4_86839_43166760 | NC_021165.1    | Ca_kabuli_chr06 | 43166760                | CC                              | AA              | 1946872622               |
| SNP_P4_86840_43166827 | NC_021165.1    | Ca_kabuli_chr06 | 43166827                | GG                              | CC              | 1946872624               |
| SNP_P4_86841_43166992 | NC_021165.1    | Ca_kabuli_chr06 | 43166992                | GG                              | TT              | 1946872626               |
| SNP_P4_86842_43167304 | NC_021165.1    | Ca_kabuli_chr06 | 43167304                | CC                              | GG              | 1946872628               |
| SNP_P4_86843_43167504 | NC_021165.1    | Ca_kabuli_chr06 | 43167504                | TT                              | CC              | 1946872630               |
| SNP_P4_86844_43167534 | NC_021165.1    | Ca_kabuli_chr06 | 43167534                | TT                              | GG              | 1946872632               |
| SNP_P4_86845_43167552 | NC_021165.1    | Ca_kabuli_chr06 | 43167552                | AA                              | TT              | 1946872634               |
| SNP_P4_86846_43167591 | NC_021165.1    | Ca_kabuli_chr06 | 43167591                | GG                              | TT              | 1946872636               |
| SNP_P4_86847_43167625 | NC_021165.1    | Ca_kabuli_chr06 | 43167625                | CC                              | GG              | 1946872638               |
| SNP_P4_86848_43167631 | NC_021165.1    | Ca_kabuli_chr06 | 43167631                | CC                              | GG              | 1946872640               |
| SNP_P4_86849_43167635 | NC_021165.1    | Ca_kabuli_chr06 | 43167635                | GG                              | TT              | 1946872642               |
| SNP_P4_86850_43167663 | NC_021165.1    | Ca_kabuli_chr06 | 43167663                | GG                              | CC              | 1946872644               |
| SNP_P4_86851_43167688 | NC_021165.1    | Ca_kabuli_chr06 | 43167688                | TT                              | AA              | 1946872646               |
| SNP_P4_86852_43167952 | NC_021165.1    | Ca_kabuli_chr06 | 43167952                | TT                              | CC              | 1946872648               |
| SNP_P4_86853_43167963 | NC_021165.1    | Ca_kabuli_chr06 | 43167963                | CC                              | GG              | 1946872650               |
| SNP_P4_86854_43168284 | NC_021165.1    | Ca_kabuli_chr06 | 43168284                | CC                              | AA              | 1946872652               |
| SNP_P4_86855_43168635 | NC_021165.1    | Ca_kabuli_chr06 | 43168635                | AA                              | TT              | 1946872654               |
| SNP_P4_86856_43168704 | NC_021165.1    | Ca_kabuli_chr06 | 43168704                | CC                              | TT              | 1946872656               |

| SNPs IDs              | Chromosome IDs | Chromosomes     | Physical positions (bp) | CDC Frontier (Reference genome) | (ILWC46 & LPNB) | NCBI SNPdb Accession IDs |
|-----------------------|----------------|-----------------|-------------------------|---------------------------------|-----------------|--------------------------|
| SNP_P4_86857_43168716 | NC_021165.1    | Ca_kabuli_chr06 | 43168716                | GG                              | CC              | 1946872658               |
| SNP_P4_86858_43168762 | NC_021165.1    | Ca_kabuli_chr06 | 43168762                | TT                              | CC              | 1946872660               |
| SNP_P4_86859_43168763 | NC_021165.1    | Ca_kabuli_chr06 | 43168763                | TT                              | AA              | 1946872662               |
| SNP_P4_86860_43168806 | NC_021165.1    | Ca_kabuli_chr06 | 43168806                | AA                              | TT              | 1946872664               |
| SNP_P4_86861_43168832 | NC_021165.1    | Ca_kabuli_chr06 | 43168832                | GG                              | AA              | 1946872666               |
| SNP_P4_86862_43168835 | NC_021165.1    | Ca_kabuli_chr06 | 43168835                | CC                              | GG              | 1946872668               |
| SNP_P4_86863_43168901 | NC_021165.1    | Ca_kabuli_chr06 | 43168901                | AA                              | GG              | 1946872670               |
| SNP_P4_86864_43168955 | NC_021165.1    | Ca_kabuli_chr06 | 43168955                | CC                              | TT              | 1946872672               |
| SNP_P4_86865_43168971 | NC_021165.1    | Ca_kabuli_chr06 | 43168971                | TT                              | GG              | 1946872674               |
| SNP_P4_86866_43168979 | NC_021165.1    | Ca_kabuli_chr06 | 43168979                | AA                              | GG              | 1946872676               |
| SNP_P4_86867_43169168 | NC_021165.1    | Ca_kabuli_chr06 | 43169168                | CC                              | TT              | 1946872678               |
| SNP_P4_86868_43169184 | NC_021165.1    | Ca_kabuli_chr06 | 43169184                | TT                              | CC              | 1946872680               |
| SNP_P4_86869_43169366 | NC_021165.1    | Ca_kabuli_chr06 | 43169366                | AA                              | CC              | 1946872682               |
| SNP_P4_86870_43169394 | NC_021165.1    | Ca_kabuli_chr06 | 43169394                | TT                              | CC              | 1946872684               |
| SNP_P4_86871_43169427 | NC_021165.1    | Ca_kabuli_chr06 | 43169427                | CC                              | TT              | 1946872686               |
| SNP_P4_86872_43175440 | NC_021165.1    | Ca_kabuli_chr06 | 43175440                | GG                              | TT              | 1946872688               |
| SNP_P4_86873_43176146 | NC_021165.1    | Ca_kabuli_chr06 | 43176146                | TT                              | CC              | 1946872690               |
| SNP_P4_86874_43176175 | NC_021165.1    | Ca_kabuli_chr06 | 43176175                | GG                              | AA              | 1946872692               |
| SNP_P4_86875_43176244 | NC_021165.1    | Ca_kabuli_chr06 | 43176244                | GG                              | AA              | 1946872694               |
| SNP_P4_86876_43176313 | NC_021165.1    | Ca_kabuli_chr06 | 43176313                | TT                              | CC              | 1946872696               |
| SNP_P4_86877_43659945 | NC_021165.1    | Ca_kabuli_chr06 | 43659945                | TT                              | AA              | 1946872698               |
| SNP_P4_86878_43685995 | NC_021165.1    | Ca_kabuli_chr06 | 43685995                | GG                              | AA              | 1946872700               |
| SNP_P4_86879_43707456 | NC_021165.1    | Ca_kabuli_chr06 | 43707456                | TT                              | CC              | 1946872702               |
| SNP_P4_86880_43707724 | NC_021165.1    | Ca_kabuli_chr06 | 43707724                | TT                              | CC              | 1946872704               |
| SNP_P4_86881_43707760 | NC_021165.1    | Ca_kabuli_chr06 | 43707760                | TT                              | CC              | 1946872706               |
| SNP_P4_86882_43707827 | NC_021165.1    | Ca_kabuli_chr06 | 43707827                | TT                              | CC              | 1946872708               |
| SNP_P4_86883_43708077 | NC_021165.1    | Ca_kabuli_chr06 | 43708077                | GG                              | AA              | 1946872710               |
| SNP_P4_86884_43710885 | NC_021165.1    | Ca_kabuli_chr06 | 43710885                | CC                              | TT              | 1946872712               |
| SNP_P4_86885_43713732 | NC_021165.1    | Ca_kabuli_chr06 | 43713732                | GG                              | AA              | 1946872714               |
| SNP_P4_86886_43755510 | NC_021165.1    | Ca_kabuli_chr06 | 43755510                | TT                              | CC              | 1946872716               |
| SNP_P4_86887_43755783 | NC_021165.1    | Ca_kabuli_chr06 | 43755783                | CC                              | TT              | 1946872718               |
| SNP_P4_86888_43770276 | NC_021165.1    | Ca_kabuli_chr06 | 43770276                | AA                              | TT              | 1946872720               |
| SNP_P4_86889_43770287 | NC_021165.1    | Ca_kabuli_chr06 | 43770287                | AA                              | CC              | 1946872722               |
| SNP_P4_86890_43770297 | NC_021165.1    | Ca_kabuli_chr06 | 43770297                | TT                              | CC              | 1946872724               |
| SNP_P4_86891_43775356 | NC_021165.1    | Ca_kabuli_chr06 | 43775356                | GG                              | TT              | 1946872726               |
| SNP_P4_86892_43796140 | NC_021165.1    | Ca_kabuli_chr06 | 43796140                | CC                              | GG              | 1946872728               |
| SNP_P4_86893_43808412 | NC_021165.1    | Ca_kabuli_chr06 | 43808412                | CC                              | TT              | 1946872730               |
| SNP_P4_86894_43842506 | NC_021165.1    | Ca_kabuli_chr06 | 43842506                | GG                              | AA              | 1946872732               |
| SNP_P4_86895_43842574 | NC_021165.1    | Ca_kabuli_chr06 | 43842574                | CC                              | TT              | 1946872734               |
| SNP_P4_86896_43842588 | NC_021165.1    | Ca_kabuli_chr06 | 43842588                | GG                              | AA              | 1946872736               |
| SNP_P4_86897_43842589 | NC_021165.1    | Ca_kabuli_chr06 | 43842589                | AA                              | GG              | 1946872738               |
| SNP_P4_86898_43842615 | NC_021165.1    | Ca_kabuli_chr06 | 43842615                | GG                              | CC              | 1946872740               |

| SNPs IDs              | Chromosome IDs | Chromosomes     | Physical positions (bp) | CDC Frontier (Reference genome) | (ILWC46 & LPNB) | NCBI SNPdb Accession IDs |
|-----------------------|----------------|-----------------|-------------------------|---------------------------------|-----------------|--------------------------|
| SNP_P4_86900_43842916 | NC_021165.1    | Ca_kabuli_chr06 | 43842916                | CC                              | TT              | 1946872742               |
| SNP_P4_86901_43842960 | NC_021165.1    | Ca_kabuli_chr06 | 43842960                | TT                              | CC              | 1946872744               |
| SNP_P4_86902_43847697 | NC_021165.1    | Ca_kabuli_chr06 | 43847697                | TT                              | AA              | 1946872746               |
| SNP_P4_86903_43847701 | NC_021165.1    | Ca_kabuli_chr06 | 43847701                | TT                              | CC              | 1946872748               |
| SNP_P4_86904_43847714 | NC_021165.1    | Ca_kabuli_chr06 | 43847714                | AA                              | TT              | 1946872750               |
| SNP_P4_86905_43847768 | NC_021165.1    | Ca_kabuli_chr06 | 43847768                | TT                              | AA              | 1946872752               |
| SNP_P4_86906_43880740 | NC_021165.1    | Ca_kabuli_chr06 | 43880740                | AA                              | GG              | 1946872754               |
| SNP_P4_86907_43880973 | NC_021165.1    | Ca_kabuli_chr06 | 43880973                | CC                              | AA              | 1946872756               |
| SNP_P4_86908_43881022 | NC_021165.1    | Ca_kabuli_chr06 | 43881022                | AA                              | GG              | 1946872758               |
| SNP_P4_86909_43881056 | NC_021165.1    | Ca_kabuli_chr06 | 43881056                | GG                              | TT              | 1946872760               |
| SNP_P4_86910_43881350 | NC_021165.1    | Ca_kabuli_chr06 | 43881350                | AA                              | GG              | 1946872762               |
| SNP_P4_86911_43889896 | NC_021165.1    | Ca_kabuli_chr06 | 43889896                | TT                              | CC              | 1946872764               |
| SNP_P4_86912_43889962 | NC_021165.1    | Ca_kabuli_chr06 | 43889962                | GG                              | AA              | 1946872766               |
| SNP_P4_86913_43890011 | NC_021165.1    | Ca_kabuli_chr06 | 43890011                | TT                              | CC              | 1946872768               |
| SNP_P4_86914_43890149 | NC_021165.1    | Ca_kabuli_chr06 | 43890149                | TT                              | CC              | 1946872770               |
| SNP_P4_86915_43890184 | NC_021165.1    | Ca_kabuli_chr06 | 43890184                | AA                              | TT              | 1946872772               |
| SNP_P4_86916_43890333 | NC_021165.1    | Ca_kabuli_chr06 | 43890333                | AA                              | CC              | 1946872774               |
| SNP_P4_86917_43890339 | NC_021165.1    | Ca_kabuli_chr06 | 43890339                | TT                              | CC              | 1946872776               |
| SNP_P4_86918_43890506 | NC_021165.1    | Ca_kabuli_chr06 | 43890506                | GG                              | AA              | 1946872778               |
| SNP_P4_86920_43909309 | NC_021165.1    | Ca_kabuli_chr06 | 43909309                | CC                              | AA              | 1946872780               |
| SNP_P4_86921_43909347 | NC_021165.1    | Ca_kabuli_chr06 | 43909347                | TT                              | GG              | 1946872782               |
| SNP_P4_86922_43909404 | NC_021165.1    | Ca_kabuli_chr06 | 43909404                | AA                              | TT              | 1946872784               |
| SNP_P4_86923_43909405 | NC_021165.1    | Ca_kabuli_chr06 | 43909405                | AA                              | CC              | 1946872786               |
| SNP_P4_86924_43909406 | NC_021165.1    | Ca_kabuli_chr06 | 43909406                | CC                              | TT              | 1946872788               |
| SNP_P4_86925_43909407 | NC_021165.1    | Ca_kabuli_chr06 | 43909407                | TT                              | GG              | 1946872790               |
| SNP_P4_86926_43909413 | NC_021165.1    | Ca_kabuli_chr06 | 43909413                | GG                              | AA              | 1946872792               |
| SNP_P4_86929_44003854 | NC_021165.1    | Ca_kabuli_chr06 | 44003854                | CC                              | AA              | 1946872794               |
| SNP_P4_86930_44011268 | NC_021165.1    | Ca_kabuli_chr06 | 44011268                | AA                              | GG              | 1946872796               |
| SNP_P4_86931_44077281 | NC_021165.1    | Ca_kabuli_chr06 | 44077281                | TT                              | CC              | 1946872798               |
| SNP_P4_86932_44117407 | NC_021165.1    | Ca_kabuli_chr06 | 44117407                | GG                              | AA              | 1946872800               |
| SNP_P4_86933_44127634 | NC_021165.1    | Ca_kabuli_chr06 | 44127634                | CC                              | TT              | 1946872802               |
| SNP_P4_86935_44143518 | NC_021165.1    | Ca_kabuli_chr06 | 44143518                | CC                              | TT              | 1946872804               |
| SNP_P4_86936_44147877 | NC_021165.1    | Ca_kabuli_chr06 | 44147877                | AA                              | GG              | 1946872806               |
| SNP_P4_86937_44152311 | NC_021165.1    | Ca_kabuli_chr06 | 44152311                | TT                              | GG              | 1946872808               |
| SNP_P4_86938_44152509 | NC_021165.1    | Ca_kabuli_chr06 | 44152509                | CC                              | AA              | 1946872810               |
| SNP_P4_86939_44158683 | NC_021165.1    | Ca_kabuli_chr06 | 44158683                | GG                              | AA              | 1946872812               |
| SNP_P4_86940_44160495 | NC_021165.1    | Ca_kabuli_chr06 | 44160495                | CC                              | TT              | 1946872814               |
| SNP_P4_86941_44160522 | NC_021165.1    | Ca_kabuli_chr06 | 44160522                | TT                              | CC              | 1946872816               |
| SNP_P4_86942_44160559 | NC_021165.1    | Ca_kabuli_chr06 | 44160559                | CC                              | TT              | 1946872818               |
| SNP_P4_86943_44160690 | NC_021165.1    | Ca_kabuli_chr06 | 44160690                | CC                              | AA              | 1946872820               |
| SNP_P4_86944_44160702 | NC_021165.1    | Ca_kabuli_chr06 | 44160702                | GG                              | AA              | 1946872822               |
| SNP_P4_86945_44160779 | NC_021165.1    | Ca_kabuli_chr06 | 44160779                | TT                              | AA              | 1946872824               |

| SNPs IDs              | Chromosome IDs | Chromosomes     | Physical positions (bp) | CDC Frontier (Reference genome) | (ILWC46 & LPNB) | NCBI SNPdb Accession IDs |
|-----------------------|----------------|-----------------|-------------------------|---------------------------------|-----------------|--------------------------|
| SNP_P4_86946_44160827 | NC_021165.1    | Ca_kabuli_chr06 | 44160827                | TT                              | CC              | 1946872826               |
| SNP_P4_86947_44160864 | NC_021165.1    | Ca_kabuli_chr06 | 44160864                | TT                              | GG              | 1946872828               |
| SNP_P4_86948_44160889 | NC_021165.1    | Ca_kabuli_chr06 | 44160889                | AA                              | GG              | 1946872830               |
| SNP_P4_86949_44160929 | NC_021165.1    | Ca_kabuli_chr06 | 44160929                | CC                              | AA              | 1946872832               |
| SNP_P4_86950_44160936 | NC_021165.1    | Ca_kabuli_chr06 | 44160936                | AA                              | CC              | 1946872834               |
| SNP_P4_86951_44160978 | NC_021165.1    | Ca_kabuli_chr06 | 44160978                | AA                              | GG              | 1946872836               |
| SNP_P4_86952_44160983 | NC_021165.1    | Ca_kabuli_chr06 | 44160983                | AA                              | GG              | 1946872838               |
| SNP_P4_86953_44160993 | NC_021165.1    | Ca_kabuli_chr06 | 44160993                | GG                              | AA              | 1946872840               |
| SNP_P4_86954_44161019 | NC_021165.1    | Ca_kabuli_chr06 | 44161019                | CC                              | TT              | 1946872842               |
| SNP_P4_86955_44161040 | NC_021165.1    | Ca_kabuli_chr06 | 44161040                | TT                              | AA              | 1946872844               |
| SNP_P4_86956_44161042 | NC_021165.1    | Ca_kabuli_chr06 | 44161042                | GG                              | CC              | 1946872846               |
| SNP_P4_86957_44161063 | NC_021165.1    | Ca_kabuli_chr06 | 44161063                | AA                              | CC              | 1946872848               |
| SNP_P4_86958_44164268 | NC_021165.1    | Ca_kabuli_chr06 | 44164268                | TT                              | AA              | 1946872849               |
| SNP_P4_86959_44185732 | NC_021165.1    | Ca_kabuli_chr06 | 44185732                | AA                              | TT              | 1946872850               |
| SNP_P4_86960_44200578 | NC_021165.1    | Ca_kabuli_chr06 | 44200578                | CC                              | TT              | 1946872851               |
| SNP_P4_86962_44264982 | NC_021165.1    | Ca_kabuli_chr06 | 44264982                | AA                              | TT              | 1946872852               |
| SNP_P4_86963_44265393 | NC_021165.1    | Ca_kabuli_chr06 | 44265393                | TT                              | AA              | 1946872853               |
| SNP_P4_86964_44265403 | NC_021165.1    | Ca_kabuli_chr06 | 44265403                | TT                              | AA              | 1946872854               |
| SNP_P4_86965_44265437 | NC_021165.1    | Ca_kabuli_chr06 | 44265437                | CC                              | AA              | 1946872855               |
| SNP_P4_86966_44265449 | NC_021165.1    | Ca_kabuli_chr06 | 44265449                | GG                              | AA              | 1946872856               |
| SNP_P4_86967_44265487 | NC_021165.1    | Ca_kabuli_chr06 | 44265487                | TT                              | CC              | 1946872857               |
| SNP_P4_86968_44268985 | NC_021165.1    | Ca_kabuli_chr06 | 44268985                | TT                              | AA              | 1946872858               |
| SNP_P4_86969_44278941 | NC_021165.1    | Ca_kabuli_chr06 | 44278941                | TT                              | CC              | 1946872859               |
| SNP_P4_86970_44278947 | NC_021165.1    | Ca_kabuli_chr06 | 44278947                | AA                              | GG              | 1946872860               |
| SNP_P4_86971_44278948 | NC_021165.1    | Ca_kabuli_chr06 | 44278948                | CC                              | AA              | 1946872861               |
| SNP_P4_86972_44287163 | NC_021165.1    | Ca_kabuli_chr06 | 44287163                | GG                              | AA              | 1946872862               |
| SNP_P4_86974_44294269 | NC_021165.1    | Ca_kabuli_chr06 | 44294269                | AA                              | GG              | 1946872863               |
| SNP_P4_86975_44294315 | NC_021165.1    | Ca_kabuli_chr06 | 44294315                | CC                              | TT              | 1946872864               |
| SNP_P4_86976_44294318 | NC_021165.1    | Ca_kabuli_chr06 | 44294318                | CC                              | TT              | 1946872865               |
| SNP_P4_86977_44294329 | NC_021165.1    | Ca_kabuli_chr06 | 44294329                | GG                              | AA              | 1946872866               |
| SNP_P4_86979_44302036 | NC_021165.1    | Ca_kabuli_chr06 | 44302036                | TT                              | CC              | 1946872867               |
| SNP_P4_86980_44302176 | NC_021165.1    | Ca_kabuli_chr06 | 44302176                | TT                              | GG              | 1946872868               |
| SNP_P4_86981_44302462 | NC_021165.1    | Ca_kabuli_chr06 | 44302462                | AA                              | CC              | 1946872869               |
| SNP_P4_86982_44302518 | NC_021165.1    | Ca_kabuli_chr06 | 44302518                | CC                              | TT              | 1946872870               |
| SNP_P4_86983_44302575 | NC_021165.1    | Ca_kabuli_chr06 | 44302575                | AA                              | TT              | 1946872871               |
| SNP_P4_86984_44302576 | NC_021165.1    | Ca_kabuli_chr06 | 44302576                | AA                              | GG              | 1946872872               |
| SNP_P4_86985_44302654 | NC_021165.1    | Ca_kabuli_chr06 | 44302654                | TT                              | GG              | 1946872874               |
| SNP_P4_86986_44302659 | NC_021165.1    | Ca_kabuli_chr06 | 44302659                | CC                              | TT              | 1946872876               |
| SNP_P4_86987_44302663 | NC_021165.1    | Ca_kabuli_chr06 | 44302663                | CC                              | AA              | 1946872878               |
| SNP_P4_86988_44303603 | NC_021165.1    | Ca_kabuli_chr06 | 44303603                | TT                              | CC              | 1946872880               |
| SNP_P4_86989_44330792 | NC_021165.1    | Ca_kabuli_chr06 | 44330792                | AA                              | TT              | 1946872882               |
| SNP_P4_86990_44330800 | NC_021165.1    | Ca_kabuli_chr06 | 44330800                | TT                              | GG              | 1946872884               |

| SNPs IDs              | Chromosome IDs | Chromosomes     | Physical positions (bp) | CDC Frontier (Reference genome) | (ILWC46 & LPNB) | NCBI SNPdb Accession IDs |
|-----------------------|----------------|-----------------|-------------------------|---------------------------------|-----------------|--------------------------|
| SNP_P4_86991_44330802 | NC_021165.1    | Ca_kabuli_chr06 | 44330802                | AA                              | GG              | 1946872886               |
| SNP_P4_86992_44353457 | NC_021165.1    | Ca_kabuli_chr06 | 44353457                | CC                              | GG              | 1946872888               |
| SNP_P4_86995_44439213 | NC_021165.1    | Ca_kabuli_chr06 | 44439213                | TT                              | CC              | 1946872890               |
| SNP_P4_86996_44439258 | NC_021165.1    | Ca_kabuli_chr06 | 44439258                | AA                              | CC              | 1946872892               |
| SNP_P4_86997_44439297 | NC_021165.1    | Ca_kabuli_chr06 | 44439297                | CC                              | GG              | 1946872894               |
| SNP_P4_86998_44439310 | NC_021165.1    | Ca_kabuli_chr06 | 44439310                | TT                              | CC              | 1946872896               |
| SNP_P4_86999_44439330 | NC_021165.1    | Ca_kabuli_chr06 | 44439330                | GG                              | AA              | 1946872898               |
| SNP_P4_87000_44439347 | NC_021165.1    | Ca_kabuli_chr06 | 44439347                | AA                              | GG              | 1946872900               |
| SNP_P4_87001_44439637 | NC_021165.1    | Ca_kabuli_chr06 | 44439637                | AA                              | TT              | 1946872902               |
| SNP_P4_87002_44439683 | NC_021165.1    | Ca_kabuli_chr06 | 44439683                | AA                              | GG              | 1946872904               |
| SNP_P4_87003_44439730 | NC_021165.1    | Ca_kabuli_chr06 | 44439730                | TT                              | CC              | 1946872906               |
| SNP_P4_87004_44439750 | NC_021165.1    | Ca_kabuli_chr06 | 44439750                | AA                              | GG              | 1946872908               |
| SNP_P4_87006_44491123 | NC_021165.1    | Ca_kabuli_chr06 | 44491123                | TT                              | GG              | 1946872910               |
| SNP_P4_87007_44495104 | NC_021165.1    | Ca_kabuli_chr06 | 44495104                | GG                              | AA              | 1946872912               |
| SNP_P4_87008_44495786 | NC_021165.1    | Ca_kabuli_chr06 | 44495786                | AA                              | TT              | 1946872914               |
| SNP_P4_87009_44516407 | NC_021165.1    | Ca_kabuli_chr06 | 44516407                | AA                              | TT              | 1946872916               |
| SNP_P4_87010_44516593 | NC_021165.1    | Ca_kabuli_chr06 | 44516593                | GG                              | AA              | 1946872918               |
| SNP_P4_87011_44516673 | NC_021165.1    | Ca_kabuli_chr06 | 44516673                | TT                              | GG              | 1946872920               |
| SNP_P4_87012_44516682 | NC_021165.1    | Ca_kabuli_chr06 | 44516682                | TT                              | CC              | 1946872922               |
| SNP_P4_87013_44516687 | NC_021165.1    | Ca_kabuli_chr06 | 44516687                | TT                              | GG              | 1946872924               |
| SNP_P4_87014_44516751 | NC_021165.1    | Ca_kabuli_chr06 | 44516751                | CC                              | TT              | 1946872926               |
| SNP_P4_87015_44516785 | NC_021165.1    | Ca_kabuli_chr06 | 44516785                | AA                              | GG              | 1946872928               |
| SNP_P4_87016_44516789 | NC_021165.1    | Ca_kabuli_chr06 | 44516789                | GG                              | AA              | 1946872930               |
| SNP_P4_87017_44516799 | NC_021165.1    | Ca_kabuli_chr06 | 44516799                | CC                              | TT              | 1946872932               |
| SNP_P4_87018_44516806 | NC_021165.1    | Ca_kabuli_chr06 | 44516806                | CC                              | TT              | 1946872934               |
| SNP_P4_87019_44516807 | NC_021165.1    | Ca_kabuli_chr06 | 44516807                | GG                              | AA              | 1946872936               |
| SNP_P4_87020_44565960 | NC_021165.1    | Ca_kabuli_chr06 | 44565960                | AA                              | GG              | 1946872937               |
| SNP_P4_87021_44568487 | NC_021165.1    | Ca_kabuli_chr06 | 44568487                | AA                              | GG              | 1946872939               |
| SNP_P4_87022_44580800 | NC_021165.1    | Ca_kabuli_chr06 | 44580800                | TT                              | CC              | 1946872941               |
| SNP_P4_87023_44580845 | NC_021165.1    | Ca_kabuli_chr06 | 44580845                | TT                              | CC              | 1946872943               |
| SNP_P4_87024_44592368 | NC_021165.1    | Ca_kabuli_chr06 | 44592368                | AA                              | TT              | 1946872945               |
| SNP_P4_87025_44606529 | NC_021165.1    | Ca_kabuli_chr06 | 44606529                | GG                              | AA              | 1946872947               |
| SNP_P4_87027_44626570 | NC_021165.1    | Ca_kabuli_chr06 | 44626570                | GG                              | AA              | 1946872949               |
| SNP_P4_87028_44626599 | NC_021165.1    | Ca_kabuli_chr06 | 44626599                | TT                              | GG              | 1946872951               |
| SNP_P4_87029_44626948 | NC_021165.1    | Ca_kabuli_chr06 | 44626948                | CC                              | GG              | 1946872953               |
| SNP_P4_87030_44626950 | NC_021165.1    | Ca_kabuli_chr06 | 44626950                | AA                              | GG              | 1946872955               |
| SNP_P4_87031_44627030 | NC_021165.1    | Ca_kabuli_chr06 | 44627030                | TT                              | AA              | 1946872957               |
| SNP_P4_87034_44648174 | NC_021165.1    | Ca_kabuli_chr06 | 44648174                | TT                              | CC              | 1946872959               |
| SNP_P4_87035_44648772 | NC_021165.1    | Ca_kabuli_chr06 | 44648772                | CC                              | AA              | 1946872960               |
| SNP_P4_87036_44652368 | NC_021165.1    | Ca_kabuli_chr06 | 44652368                | AA                              | GG              | 1946872962               |
| SNP_P4_87037_44652401 | NC_021165.1    | Ca_kabuli_chr06 | 44652401                | TT                              | CC              | 1946872964               |
| SNP_P4_87038_44652436 | NC_021165.1    | Ca_kabuli_chr06 | 44652436                | GG                              | AA              | 1946872966               |

| SNPs IDs              | Chromosome IDs | Chromosomes     | Physical positions (bp) | CDC Frontier (Reference genome) | (ILWC46 & LPNB) | NCBI SNPdb Accession IDs |
|-----------------------|----------------|-----------------|-------------------------|---------------------------------|-----------------|--------------------------|
| SNP_P4_87039_44653483 | NC_021165.1    | Ca_kabuli_chr06 | 44653483                | TT                              | CC              | 1946872968               |
| SNP_P4_87040_44653584 | NC_021165.1    | Ca_kabuli_chr06 | 44653584                | TT                              | AA              | 1946872970               |
| SNP_P4_87041_44653850 | NC_021165.1    | Ca_kabuli_chr06 | 44653850                | TT                              | CC              | 1946872972               |
| SNP_P4_87042_44653872 | NC_021165.1    | Ca_kabuli_chr06 | 44653872                | GG                              | AA              | 1946872974               |
| SNP_P4_87043_44654059 | NC_021165.1    | Ca_kabuli_chr06 | 44654059                | AA                              | TT              | 1946872976               |
| SNP_P4_87044_44654510 | NC_021165.1    | Ca_kabuli_chr06 | 44654510                | TT                              | CC              | 1946872978               |
| SNP_P4_87045_44654696 | NC_021165.1    | Ca_kabuli_chr06 | 44654696                | CC                              | TT              | 1946872980               |
| SNP_P4_87046_44678121 | NC_021165.1    | Ca_kabuli_chr06 | 44678121                | AA                              | GG              | 1946872982               |
| SNP_P4_87047_44678157 | NC_021165.1    | Ca_kabuli_chr06 | 44678157                | GG                              | AA              | 1946872984               |
| SNP_P4_87048_44678169 | NC_021165.1    | Ca_kabuli_chr06 | 44678169                | GG                              | TT              | 1946872986               |
| SNP_P4_87049_44678281 | NC_021165.1    | Ca_kabuli_chr06 | 44678281                | AA                              | TT              | 1946872988               |
| SNP_P4_87050_44678318 | NC_021165.1    | Ca_kabuli_chr06 | 44678318                | TT                              | GG              | 1946872990               |
| SNP_P4_87051_44678400 | NC_021165.1    | Ca_kabuli_chr06 | 44678400                | AA                              | TT              | 1946872992               |
| SNP_P4_87052_44680132 | NC_021165.1    | Ca_kabuli_chr06 | 44680132                | CC                              | TT              | 1946872995               |
| SNP_P4_87053_44680156 | NC_021165.1    | Ca_kabuli_chr06 | 44680156                | CC                              | TT              | 1946872997               |
| SNP_P4_87054_44680162 | NC_021165.1    | Ca_kabuli_chr06 | 44680162                | CC                              | TT              | 1946872999               |
| SNP_P4_87055_44681508 | NC_021165.1    | Ca_kabuli_chr06 | 44681508                | TT                              | CC              | 1946873001               |
| SNP_P4_87056_44681589 | NC_021165.1    | Ca_kabuli_chr06 | 44681589                | GG                              | AA              | 1946873003               |
| SNP_P4_87057_44681644 | NC_021165.1    | Ca_kabuli_chr06 | 44681644                | GG                              | AA              | 1946873005               |
| SNP_P4_87058_44681965 | NC_021165.1    | Ca_kabuli_chr06 | 44681965                | TT                              | AA              | 1946873007               |
| SNP_P4_87059_44681970 | NC_021165.1    | Ca_kabuli_chr06 | 44681970                | AA                              | GG              | 1946873009               |
| SNP_P4_87060_44681983 | NC_021165.1    | Ca_kabuli_chr06 | 44681983                | TT                              | CC              | 1946873011               |
| SNP_P4_87061_44682605 | NC_021165.1    | Ca_kabuli_chr06 | 44682605                | AA                              | GG              | 1946873013               |
| SNP_P4_87062_44682821 | NC_021165.1    | Ca_kabuli_chr06 | 44682821                | AA                              | TT              | 1946873015               |
| SNP_P4_87063_44682837 | NC_021165.1    | Ca_kabuli_chr06 | 44682837                | GG                              | AA              | 1946873017               |
| SNP_P4_87064_44682900 | NC_021165.1    | Ca_kabuli_chr06 | 44682900                | TT                              | AA              | 1946873019               |
| SNP_P4_87065_44682923 | NC_021165.1    | Ca_kabuli_chr06 | 44682923                | AA                              | GG              | 1946873021               |
| SNP_P4_87066_44682958 | NC_021165.1    | Ca_kabuli_chr06 | 44682958                | AA                              | GG              | 1946873023               |
| SNP_P4_87067_44683107 | NC_021165.1    | Ca_kabuli_chr06 | 44683107                | TT                              | CC              | 1946873025               |
| SNP_P4_87068_44700012 | NC_021165.1    | Ca_kabuli_chr06 | 44700012                | AA                              | GG              | 1946873027               |
| SNP_P4_87069_44700098 | NC_021165.1    | Ca_kabuli_chr06 | 44700098                | GG                              | AA              | 1946873029               |
| SNP_P4_87070_44700112 | NC_021165.1    | Ca_kabuli_chr06 | 44700112                | GG                              | TT              | 1946873031               |
| SNP_P4_87071_44700127 | NC_021165.1    | Ca_kabuli_chr06 | 44700127                | CC                              | TT              | 1946873033               |
| SNP_P4_87072_44707092 | NC_021165.1    | Ca_kabuli_chr06 | 44707092                | TT                              | CC              | 1946873035               |
| SNP_P4_87073_44707338 | NC_021165.1    | Ca_kabuli_chr06 | 44707338                | CC                              | TT              | 1946873037               |
| SNP_P4_87074_44707396 | NC_021165.1    | Ca_kabuli_chr06 | 44707396                | CC                              | TT              | 1946873038               |
| SNP_P4_87075_44707432 | NC_021165.1    | Ca_kabuli_chr06 | 44707432                | GG                              | AA              | 1946873040               |
| SNP_P4_87076_44709079 | NC_021165.1    | Ca_kabuli_chr06 | 44709079                | CC                              | TT              | 1946873042               |
| SNP_P4_87077_44709081 | NC_021165.1    | Ca_kabuli_chr06 | 44709081                | AA                              | CC              | 1946873044               |
| SNP_P4_87078_44709123 | NC_021165.1    | Ca_kabuli_chr06 | 44709123                | CC                              | TT              | 1946873046               |
| SNP_P4_87079_44709126 | NC_021165.1    | Ca_kabuli_chr06 | 44709126                | AA                              | GG              | 1946873048               |
| SNP_P4_87080_44709145 | NC_021165.1    | Ca_kabuli_chr06 | 44709145                | GG                              | AA              | 1946873050               |

| SNPs IDs              | Chromosome IDs | Chromosomes     | Physical positions (bp) | CDC Frontier (Reference genome) | (ILWC46 & LPNB) | NCBI SNPdb Accession IDs |
|-----------------------|----------------|-----------------|-------------------------|---------------------------------|-----------------|--------------------------|
| SNP_P4_87081_44709173 | NC_021165.1    | Ca_kabuli_chr06 | 44709173                | TT                              | CC              | 1946873052               |
| SNP_P4_87082_44709177 | NC_021165.1    | Ca_kabuli_chr06 | 44709177                | GG                              | AA              | 1946873054               |
| SNP_P4_87083_44709746 | NC_021165.1    | Ca_kabuli_chr06 | 44709746                | AA                              | TT              | 1946873056               |
| SNP_P4_87084_44711166 | NC_021165.1    | Ca_kabuli_chr06 | 44711166                | GG                              | AA              | 1946873057               |
| SNP_P4_87085_44712907 | NC_021165.1    | Ca_kabuli_chr06 | 44712907                | CC                              | TT              | 1946873059               |
| SNP_P4_87086_44712921 | NC_021165.1    | Ca_kabuli_chr06 | 44712921                | AA                              | GG              | 1946873061               |
| SNP_P4_87087_44712937 | NC_021165.1    | Ca_kabuli_chr06 | 44712937                | GG                              | AA              | 1946873063               |
| SNP_P4_87088_44724199 | NC_021165.1    | Ca_kabuli_chr06 | 44724199                | AA                              | TT              | 1946873065               |
| SNP_P4_87089_44724595 | NC_021165.1    | Ca_kabuli_chr06 | 44724595                | AA                              | GG              | 1946873067               |
| SNP_P4_87091_44727051 | NC_021165.1    | Ca_kabuli_chr06 | 44727051                | AA                              | GG              | 1946873069               |
| SNP_P4_87092_44727062 | NC_021165.1    | Ca_kabuli_chr06 | 44727062                | AA                              | TT              | 1946873071               |
| SNP_P4_87093_44727072 | NC_021165.1    | Ca_kabuli_chr06 | 44727072                | TT                              | CC              | 1946873073               |
| SNP_P4_87094_44727103 | NC_021165.1    | Ca_kabuli_chr06 | 44727103                | GG                              | TT              | 1946873075               |
| SNP_P4_87095_44727114 | NC_021165.1    | Ca_kabuli_chr06 | 44727114                | AA                              | CC              | 1946873077               |
| SNP_P4_87096_44727160 | NC_021165.1    | Ca_kabuli_chr06 | 44727160                | AA                              | CC              | 1946873079               |
| SNP_P4_87097_44727471 | NC_021165.1    | Ca_kabuli_chr06 | 44727471                | AA                              | CC              | 1946873080               |
| SNP_P4_87098_44737973 | NC_021165.1    | Ca_kabuli_chr06 | 44737973                | CC                              | TT              | 1946873082               |
| SNP_P4_87099_44758440 | NC_021165.1    | Ca_kabuli_chr06 | 44758440                | AA                              | GG              | 1946873084               |
| SNP_P4_87100_44776401 | NC_021165.1    | Ca_kabuli_chr06 | 44776401                | GG                              | AA              | 1946873086               |
| SNP_P4_87101_44776757 | NC_021165.1    | Ca_kabuli_chr06 | 44776757                | AA                              | GG              | 1946873088               |
| SNP_P4_87102_44776760 | NC_021165.1    | Ca_kabuli_chr06 | 44776760                | AA                              | CC              | 1946873090               |
| SNP_P4_87103_44814157 | NC_021165.1    | Ca_kabuli_chr06 | 44814157                | TT                              | CC              | 1946873092               |
| SNP_P4_87105_44847359 | NC_021165.1    | Ca_kabuli_chr06 | 44847359                | GG                              | AA              | 1946873094               |
| SNP_P4_87107_44919795 | NC_021165.1    | Ca_kabuli_chr06 | 44919795                | TT                              | CC              | 1946873096               |
| SNP_P4_87108_44952675 | NC_021165.1    | Ca_kabuli_chr06 | 44952675                | TT                              | CC              | 1946873098               |
| SNP_P4_87109_44952741 | NC_021165.1    | Ca_kabuli_chr06 | 44952741                | TT                              | CC              | 1946873100               |
| SNP_P4_87110_44952748 | NC_021165.1    | Ca_kabuli_chr06 | 44952748                | CC                              | TT              | 1946873102               |
| SNP_P4_87111_44954219 | NC_021165.1    | Ca_kabuli_chr06 | 44954219                | CC                              | TT              | 1946873104               |
| SNP_P4_87112_44954224 | NC_021165.1    | Ca_kabuli_chr06 | 44954224                | GG                              | AA              | 1946873106               |
| SNP_P4_87113_44954265 | NC_021165.1    | Ca_kabuli_chr06 | 44954265                | GG                              | AA              | 1946873108               |
| SNP_P4_87114_44954270 | NC_021165.1    | Ca_kabuli_chr06 | 44954270                | TT                              | CC              | 1946873110               |
| SNP_P4_87115_44954280 | NC_021165.1    | Ca_kabuli_chr06 | 44954280                | TT                              | CC              | 1946873112               |
| SNP_P4_87116_44954546 | NC_021165.1    | Ca_kabuli_chr06 | 44954546                | AA                              | GG              | 1946873114               |
| SNP_P4_87117_44955899 | NC_021165.1    | Ca_kabuli_chr06 | 44955899                | GG                              | AA              | 1946873116               |
| SNP_P4_87118_44960206 | NC_021165.1    | Ca_kabuli_chr06 | 44960206                | AA                              | CC              | 1946873118               |
| SNP_P4_87119_44960243 | NC_021165.1    | Ca_kabuli_chr06 | 44960243                | GG                              | AA              | 1946873120               |
| SNP_P4_87120_44960248 | NC_021165.1    | Ca_kabuli_chr06 | 44960248                | GG                              | CC              | 1946873122               |
| SNP_P4_87121_44960250 | NC_021165.1    | Ca_kabuli_chr06 | 44960250                | TT                              | CC              | 1946873124               |
| SNP_P4_87122_44960273 | NC_021165.1    | Ca_kabuli_chr06 | 44960273                | TT                              | CC              | 1946873126               |
| SNP_P4_87123_44960282 | NC_021165.1    | Ca_kabuli_chr06 | 44960282                | GG                              | TT              | 1946873128               |
| SNP_P4_87124_44960297 | NC_021165.1    | Ca_kabuli_chr06 | 44960297                | CC                              | AA              | 1946873130               |
| SNP_P4_87125_44960315 | NC_021165.1    | Ca_kabuli_chr06 | 44960315                | AA                              | GG              | 1946873132               |

| SNPs IDs              | Chromosome IDs | Chromosomes     | Physical positions (bp) | CDC Frontier (Reference genome) | (ILWC46 & LPNB) | NCBI SNPdb Accession IDs |
|-----------------------|----------------|-----------------|-------------------------|---------------------------------|-----------------|--------------------------|
| SNP_P4_87126_44960447 | NC_021165.1    | Ca_kabuli_chr06 | 44960447                | CC                              | AA              | 1946873134               |
| SNP_P4_87127_44960457 | NC_021165.1    | Ca_kabuli_chr06 | 44960457                | TT                              | CC              | 1946873136               |
| SNP_P4_87128_44960459 | NC_021165.1    | Ca_kabuli_chr06 | 44960459                | TT                              | CC              | 1946873138               |
| SNP_P4_87129_44960500 | NC_021165.1    | Ca_kabuli_chr06 | 44960500                | GG                              | AA              | 1946873140               |
| SNP_P4_87130_44960546 | NC_021165.1    | Ca_kabuli_chr06 | 44960546                | TT                              | AA              | 1946873142               |
| SNP_P4_87131_44960608 | NC_021165.1    | Ca_kabuli_chr06 | 44960608                | GG                              | AA              | 1946873144               |
| SNP_P4_87132_44970678 | NC_021165.1    | Ca_kabuli_chr06 | 44970678                | GG                              | AA              | 1946873146               |
| SNP_P4_87134_44977562 | NC_021165.1    | Ca_kabuli_chr06 | 44977562                | CC                              | TT              | 1946873148               |
| SNP_P4_87135_44991016 | NC_021165.1    | Ca_kabuli_chr06 | 44991016                | AA                              | GG              | 1946873150               |
| SNP_P4_87136_44996256 | NC_021165.1    | Ca_kabuli_chr06 | 44996256                | GG                              | CC              | 1946873152               |
| SNP_P4_87137_44996258 | NC_021165.1    | Ca_kabuli_chr06 | 44996258                | GG                              | AA              | 1946873154               |
| SNP_P4_87138_44996613 | NC_021165.1    | Ca_kabuli_chr06 | 44996613                | CC                              | TT              | 1946873156               |
| SNP_P4_87139_45007780 | NC_021165.1    | Ca_kabuli_chr06 | 45007780                | CC                              | TT              | 1946873158               |
| SNP_P4_87140_45009222 | NC_021165.1    | Ca_kabuli_chr06 | 45009222                | TT                              | GG              | 1946873160               |
| SNP_P4_87141_45018485 | NC_021165.1    | Ca_kabuli_chr06 | 45018485                | TT                              | CC              | 1946873162               |
| SNP_P4_87142_45018517 | NC_021165.1    | Ca_kabuli_chr06 | 45018517                | AA                              | CC              | 1946873164               |
| SNP_P4_87143_45018790 | NC_021165.1    | Ca_kabuli_chr06 | 45018790                | CC                              | TT              | 1946873166               |
| SNP_P4_87144_45018792 | NC_021165.1    | Ca_kabuli_chr06 | 45018792                | CC                              | TT              | 1946873168               |
| SNP_P4_87145_45018796 | NC_021165.1    | Ca_kabuli_chr06 | 45018796                | AA                              | CC              | 1946873170               |
| SNP_P4_87146_45020857 | NC_021165.1    | Ca_kabuli_chr06 | 45020857                | AA                              | GG              | 1946873172               |
| SNP_P4_87147_45020910 | NC_021165.1    | Ca_kabuli_chr06 | 45020910                | TT                              | CC              | 1946873174               |
| SNP_P4_87148_45020947 | NC_021165.1    | Ca_kabuli_chr06 | 45020947                | GG                              | AA              | 1946873176               |
| SNP_P4_87149_45021341 | NC_021165.1    | Ca_kabuli_chr06 | 45021341                | AA                              | CC              | 1946873178               |
| SNP_P4_87150_45076732 | NC_021165.1    | Ca_kabuli_chr06 | 45076732                | TT                              | CC              | 1946873180               |
| SNP_P4_87151_45088454 | NC_021165.1    | Ca_kabuli_chr06 | 45088454                | TT                              | CC              | 1946873182               |
| SNP_P4_87152_45097492 | NC_021165.1    | Ca_kabuli_chr06 | 45097492                | AA                              | GG              | 1946873184               |
| SNP_P4_87153_45128419 | NC_021165.1    | Ca_kabuli_chr06 | 45128419                | TT                              | CC              | 1946873186               |
| SNP_P4_87154_45135131 | NC_021165.1    | Ca_kabuli_chr06 | 45135131                | AA                              | GG              | 1946873188               |
| SNP_P4_87155_45135153 | NC_021165.1    | Ca_kabuli_chr06 | 45135153                | GG                              | TT              | 1946873190               |
| SNP_P4_87156_45135301 | NC_021165.1    | Ca_kabuli_chr06 | 45135301                | AA                              | GG              | 1946873192               |
| SNP_P4_87157_45135325 | NC_021165.1    | Ca_kabuli_chr06 | 45135325                | GG                              | CC              | 1946873194               |
| SNP_P4_87158_45136187 | NC_021165.1    | Ca_kabuli_chr06 | 45136187                | AA                              | CC              | 1946873196               |
| SNP_P4_87159_45145873 | NC_021165.1    | Ca_kabuli_chr06 | 45145873                | TT                              | CC              | 1946873198               |
| SNP_P4_87160_45145896 | NC_021165.1    | Ca_kabuli_chr06 | 45145896                | GG                              | AA              | 1946873200               |
| SNP_P4_87161_45150783 | NC_021165.1    | Ca_kabuli_chr06 | 45150783                | GG                              | AA              | 1946873202               |
| SNP_P4_87162_45177553 | NC_021165.1    | Ca_kabuli_chr06 | 45177553                | CC                              | TT              | 1946873204               |
| SNP_P4_87163_45177608 | NC_021165.1    | Ca_kabuli_chr06 | 45177608                | AA                              | CC              | 1946873206               |
| SNP_P4_87164_45186579 | NC_021165.1    | Ca_kabuli_chr06 | 45186579                | CC                              | TT              | 1946873208               |
| SNP_P4_87165_45186593 | NC_021165.1    | Ca_kabuli_chr06 | 45186593                | CC                              | TT              | 1946873210               |
| SNP_P4_87166_45196774 | NC_021165.1    | Ca_kabuli_chr06 | 45196774                | AA                              | TT              | 1946873212               |
| SNP_P4_87167_45225540 | NC_021165.1    | Ca_kabuli_chr06 | 45225540                | GG                              | AA              | 1946873214               |
| SNP_P4_87168_45226379 | NC_021165.1    | Ca_kabuli_chr06 | 45226379                | GG                              | AA              | 1946873216               |



| SNPs IDs              | Chromosome IDs | Chromosomes     | Physical positions (bp) | CDC Frontier (Reference genome) | (ILWC46 & LPNB) | NCBI SNPdb Accession IDs |
|-----------------------|----------------|-----------------|-------------------------|---------------------------------|-----------------|--------------------------|
| SNP_P4_87169_45274614 | NC_021165.1    | Ca_kabuli_chr06 | 45274614                | CC                              | TT              | 1946873218               |
| SNP_P4_87170_45274623 | NC_021165.1    | Ca_kabuli_chr06 | 45274623                | TT                              | CC              | 1946873220               |
| SNP_P4_87171_45274641 | NC_021165.1    | Ca_kabuli_chr06 | 45274641                | AA                              | TT              | 1946873222               |
| SNP_P4_87172_45274661 | NC_021165.1    | Ca_kabuli_chr06 | 45274661                | TT                              | AA              | 1946873224               |
| SNP_P4_87173_45274669 | NC_021165.1    | Ca_kabuli_chr06 | 45274669                | CC                              | AA              | 1946873226               |
| SNP_P4_87174_45274704 | NC_021165.1    | Ca_kabuli_chr06 | 45274704                | AA                              | GG              | 1946873228               |
| SNP_P4_87175_45274710 | NC_021165.1    | Ca_kabuli_chr06 | 45274710                | TT                              | GG              | 1946873230               |
| SNP_P4_87176_45274726 | NC_021165.1    | Ca_kabuli_chr06 | 45274726                | CC                              | TT              | 1946873232               |
| SNP_P4_87177_45274842 | NC_021165.1    | Ca_kabuli_chr06 | 45274842                | AA                              | GG              | 1946873235               |
| SNP_P4_87178_45274863 | NC_021165.1    | Ca_kabuli_chr06 | 45274863                | TT                              | CC              | 1946873237               |
| SNP_P4_87179_45274872 | NC_021165.1    | Ca_kabuli_chr06 | 45274872                | TT                              | CC              | 1946873239               |
| SNP_P4_87180_45274894 | NC_021165.1    | Ca_kabuli_chr06 | 45274894                | AA                              | GG              | 1946873241               |
| SNP_P4_87181_45274902 | NC_021165.1    | Ca_kabuli_chr06 | 45274902                | TT                              | CC              | 1946873243               |
| SNP_P4_87182_45274932 | NC_021165.1    | Ca_kabuli_chr06 | 45274932                | TT                              | AA              | 1946873245               |
| SNP_P4_87183_45274935 | NC_021165.1    | Ca_kabuli_chr06 | 45274935                | TT                              | CC              | 1946873247               |
| SNP_P4_87184_45274947 | NC_021165.1    | Ca_kabuli_chr06 | 45274947                | GG                              | AA              | 1946873249               |
| SNP_P4_87185_45274965 | NC_021165.1    | Ca_kabuli_chr06 | 45274965                | GG                              | AA              | 1946873251               |
| SNP_P4_87186_45277882 | NC_021165.1    | Ca_kabuli_chr06 | 45277882                | AA                              | GG              | 1946873253               |
| SNP_P4_87188_45277978 | NC_021165.1    | Ca_kabuli_chr06 | 45277978                | TT                              | CC              | 1946873255               |
| SNP_P4_87189_45278057 | NC_021165.1    | Ca_kabuli_chr06 | 45278057                | AA                              | CC              | 1946873257               |
| SNP_P4_87190_45278411 | NC_021165.1    | Ca_kabuli_chr06 | 45278411                | CC                              | AA              | 1946873259               |
| SNP_P4_87192_45282710 | NC_021165.1    | Ca_kabuli_chr06 | 45282710                | TT                              | CC              | 1946873261               |
| SNP_P4_87193_45282717 | NC_021165.1    | Ca_kabuli_chr06 | 45282717                | AA                              | GG              | 1946873263               |
| SNP_P4_87194_45284925 | NC_021165.1    | Ca_kabuli_chr06 | 45284925                | TT                              | CC              | 1946873265               |
| SNP_P4_87195_45286966 | NC_021165.1    | Ca_kabuli_chr06 | 45286966                | CC                              | AA              | 1946873267               |
| SNP_P4_87196_45286970 | NC_021165.1    | Ca_kabuli_chr06 | 45286970                | GG                              | AA              | 1946873269               |
| SNP_P4_87197_45289111 | NC_021165.1    | Ca_kabuli_chr06 | 45289111                | CC                              | TT              | 1946873271               |
| SNP_P4_87198_45289616 | NC_021165.1    | Ca_kabuli_chr06 | 45289616                | CC                              | TT              | 1946873273               |
| SNP_P4_87199_45290150 | NC_021165.1    | Ca_kabuli_chr06 | 45290150                | GG                              | AA              | 1946873275               |
| SNP_P4_87200_45290210 | NC_021165.1    | Ca_kabuli_chr06 | 45290210                | AA                              | GG              | 1946873277               |
| SNP_P4_87201_45290265 | NC_021165.1    | Ca_kabuli_chr06 | 45290265                | AA                              | GG              | 1946873279               |
| SNP_P4_87202_45290343 | NC_021165.1    | Ca_kabuli_chr06 | 45290343                | AA                              | GG              | 1946873281               |
| SNP_P4_87203_45290473 | NC_021165.1    | Ca_kabuli_chr06 | 45290473                | AA                              | TT              | 1946873283               |
| SNP_P4_87204_45290475 | NC_021165.1    | Ca_kabuli_chr06 | 45290475                | AA                              | TT              | 1946873285               |
| SNP_P4_87206_45304992 | NC_021165.1    | Ca_kabuli_chr06 | 45304992                | TT                              | AA              | 1946873287               |
| SNP_P4_87207_45304997 | NC_021165.1    | Ca_kabuli_chr06 | 45304997                | AA                              | GG              | 1946873289               |
| SNP_P4_87208_45305003 | NC_021165.1    | Ca_kabuli_chr06 | 45305003                | GG                              | AA              | 1946873291               |
| SNP_P4_87209_45314372 | NC_021165.1    | Ca_kabuli_chr06 | 45314372                | AA                              | GG              | 1946873293               |
| SNP_P4_87210_45323822 | NC_021165.1    | Ca_kabuli_chr06 | 45323822                | GG                              | AA              | 1946873295               |
| SNP_P4_87212_45329277 | NC_021165.1    | Ca_kabuli_chr06 | 45329277                | CC                              | AA              | 1946873297               |
| SNP_P4_87214_45329327 | NC_021165.1    | Ca_kabuli_chr06 | 45329327                | CC                              | TT              | 1946873299               |
| SNP_P4_87215_45329465 | NC_021165.1    | Ca_kabuli_chr06 | 45329465                | CC                              | TT              | 1946873301               |

| SNPs IDs              | Chromosome IDs | Chromosomes     | Physical positions (bp) | CDC Frontier (Reference genome) | (ILWC46 & LPNB) | NCBI SNPdb Accession IDs |
|-----------------------|----------------|-----------------|-------------------------|---------------------------------|-----------------|--------------------------|
| SNP_P4_87216_45329473 | NC_021165.1    | Ca_kabuli_chr06 | 45329473                | GG                              | TT              | 1946873303               |
| SNP_P4_87217_45329567 | NC_021165.1    | Ca_kabuli_chr06 | 45329567                | TT                              | CC              | 1946873305               |
| SNP_P4_87218_45331035 | NC_021165.1    | Ca_kabuli_chr06 | 45331035                | TT                              | CC              | 1946873307               |
| SNP_P4_87219_45331040 | NC_021165.1    | Ca_kabuli_chr06 | 45331040                | AA                              | CC              | 1946873309               |
| SNP_P4_87220_45331071 | NC_021165.1    | Ca_kabuli_chr06 | 45331071                | CC                              | TT              | 1946873311               |
| SNP_P4_87221_45331117 | NC_021165.1    | Ca_kabuli_chr06 | 45331117                | TT                              | CC              | 1946873313               |
| SNP_P4_87222_45331130 | NC_021165.1    | Ca_kabuli_chr06 | 45331130                | AA                              | GG              | 1946873315               |
| SNP_P4_87224_45350358 | NC_021165.1    | Ca_kabuli_chr06 | 45350358                | AA                              | GG              | 1946873317               |
| SNP_P4_87225_45366467 | NC_021165.1    | Ca_kabuli_chr06 | 45366467                | CC                              | AA              | 1946873319               |
| SNP_P4_87227_45393166 | NC_021165.1    | Ca_kabuli_chr06 | 45393166                | TT                              | CC              | 1946873321               |
| SNP_P4_87228_45404944 | NC_021165.1    | Ca_kabuli_chr06 | 45404944                | AA                              | GG              | 1946873323               |
| SNP_P4_87229_45404974 | NC_021165.1    | Ca_kabuli_chr06 | 45404974                | CC                              | TT              | 1946873325               |
| SNP_P4_87230_45405322 | NC_021165.1    | Ca_kabuli_chr06 | 45405322                | TT                              | CC              | 1946873327               |
| SNP_P4_87231_45405853 | NC_021165.1    | Ca_kabuli_chr06 | 45405853                | AA                              | TT              | 1946873329               |
| SNP_P4_87232_45405969 | NC_021165.1    | Ca_kabuli_chr06 | 45405969                | AA                              | TT              | 1946873331               |
| SNP_P4_87233_45408784 | NC_021165.1    | Ca_kabuli_chr06 | 45408784                | TT                              | CC              | 1946873333               |
| SNP_P4_87234_45469356 | NC_021165.1    | Ca_kabuli_chr06 | 45469356                | TT                              | CC              | 1946873335               |
| SNP_P4_87235_45469415 | NC_021165.1    | Ca_kabuli_chr06 | 45469415                | GG                              | AA              | 1946873337               |
| SNP_P4_87236_45469492 | NC_021165.1    | Ca_kabuli_chr06 | 45469492                | TT                              | CC              | 1946873339               |
| SNP_P4_87237_45469568 | NC_021165.1    | Ca_kabuli_chr06 | 45469568                | GG                              | CC              | 1946873342               |
| SNP_P4_87238_45469625 | NC_021165.1    | Ca_kabuli_chr06 | 45469625                | TT                              | CC              | 1946873344               |
| SNP_P4_87239_45469658 | NC_021165.1    | Ca_kabuli_chr06 | 45469658                | CC                              | TT              | 1946873346               |
| SNP_P4_87240_45469676 | NC_021165.1    | Ca_kabuli_chr06 | 45469676                | AA                              | CC              | 1946873348               |
| SNP_P4_87241_45469954 | NC_021165.1    | Ca_kabuli_chr06 | 45469954                | TT                              | CC              | 1946873350               |
| SNP_P4_87242_45473283 | NC_021165.1    | Ca_kabuli_chr06 | 45473283                | GG                              | AA              | 1946873352               |
| SNP_P4_87243_45473358 | NC_021165.1    | Ca_kabuli_chr06 | 45473358                | CC                              | TT              | 1946873354               |
| SNP_P4_87244_45473407 | NC_021165.1    | Ca_kabuli_chr06 | 45473407                | TT                              | CC              | 1946873356               |
| SNP_P4_87245_45473616 | NC_021165.1    | Ca_kabuli_chr06 | 45473616                | GG                              | TT              | 1946873358               |
| SNP_P4_87246_45473641 | NC_021165.1    | Ca_kabuli_chr06 | 45473641                | TT                              | AA              | 1946873360               |
| SNP_P4_87247_45473729 | NC_021165.1    | Ca_kabuli_chr06 | 45473729                | CC                              | TT              | 1946873362               |
| SNP_P4_87248_45473848 | NC_021165.1    | Ca_kabuli_chr06 | 45473848                | AA                              | GG              | 1946873364               |
| SNP_P4_87249_45473849 | NC_021165.1    | Ca_kabuli_chr06 | 45473849                | TT                              | CC              | 1946873366               |
| SNP_P4_87250_45500498 | NC_021165.1    | Ca_kabuli_chr06 | 45500498                | TT                              | GG              | 1946873368               |
| SNP_P4_87251_45500503 | NC_021165.1    | Ca_kabuli_chr06 | 45500503                | AA                              | TT              | 1946873370               |
| SNP_P4_87252_45502335 | NC_021165.1    | Ca_kabuli_chr06 | 45502335                | TT                              | CC              | 1946873372               |
| SNP_P4_87253_45509931 | NC_021165.1    | Ca_kabuli_chr06 | 45509931                | GG                              | AA              | 1946873374               |
| SNP_P4_87254_45564436 | NC_021165.1    | Ca_kabuli_chr06 | 45564436                | CC                              | TT              | 1946873376               |
| SNP_P4_87255_45564482 | NC_021165.1    | Ca_kabuli_chr06 | 45564482                | GG                              | TT              | 1946873378               |
| SNP_P4_87256_45564497 | NC_021165.1    | Ca_kabuli_chr06 | 45564497                | AA                              | TT              | 1946873379               |
| SNP_P4_87257_45566972 | NC_021165.1    | Ca_kabuli_chr06 | 45566972                | AA                              | GG              | 1946873380               |
| SNP_P4_87258_45566977 | NC_021165.1    | Ca_kabuli_chr06 | 45566977                | AA                              | CC              | 1946873381               |
| SNP_P4_87259_45572362 | NC_021165.1    | Ca_kabuli_chr06 | 45572362                | AA                              | TT              | 1946873382               |

| SNPs IDs              | Chromosome IDs | Chromosomes     | Physical positions (bp) | CDC Frontier (Reference genome) | (ILWC46 & LPNB) | NCBI SNPdb Accession IDs |
|-----------------------|----------------|-----------------|-------------------------|---------------------------------|-----------------|--------------------------|
| SNP_P4_87260_45572396 | NC_021165.1    | Ca_kabuli_chr06 | 45572396                | TT                              | AA              | 1946873383               |
| SNP_P4_87262_45585452 | NC_021165.1    | Ca_kabuli_chr06 | 45585452                | AA                              | TT              | 1946873384               |
| SNP_P4_87263_45585668 | NC_021165.1    | Ca_kabuli_chr06 | 45585668                | TT                              | CC              | 1946873385               |
| SNP_P4_87264_45585669 | NC_021165.1    | Ca_kabuli_chr06 | 45585669                | AA                              | GG              | 1946873386               |
| SNP_P4_87265_45599627 | NC_021165.1    | Ca_kabuli_chr06 | 45599627                | CC                              | TT              | 1946873387               |
| SNP_P4_87266_45599642 | NC_021165.1    | Ca_kabuli_chr06 | 45599642                | AA                              | GG              | 1946873388               |
| SNP_P4_87267_45599651 | NC_021165.1    | Ca_kabuli_chr06 | 45599651                | TT                              | GG              | 1946873389               |
| SNP_P4_87268_45599671 | NC_021165.1    | Ca_kabuli_chr06 | 45599671                | TT                              | CC              | 1946873390               |
| SNP_P4_87269_45599680 | NC_021165.1    | Ca_kabuli_chr06 | 45599680                | TT                              | CC              | 1946873391               |
| SNP_P4_87270_45599685 | NC_021165.1    | Ca_kabuli_chr06 | 45599685                | AA                              | TT              | 1946873392               |
| SNP_P4_87271_45600018 | NC_021165.1    | Ca_kabuli_chr06 | 45600018                | CC                              | TT              | 1946873393               |
| SNP_P4_87272_45600031 | NC_021165.1    | Ca_kabuli_chr06 | 45600031                | CC                              | TT              | 1946873394               |
| SNP_P4_87273_45600044 | NC_021165.1    | Ca_kabuli_chr06 | 45600044                | AA                              | CC              | 1946873395               |
| SNP_P4_87274_45643171 | NC_021165.1    | Ca_kabuli_chr06 | 45643171                | AA                              | CC              | 1946873396               |
| SNP_P4_87275_45643228 | NC_021165.1    | Ca_kabuli_chr06 | 45643228                | GG                              | AA              | 1946873397               |
| SNP_P4_87276_45643318 | NC_021165.1    | Ca_kabuli_chr06 | 45643318                | CC                              | TT              | 1946873398               |
| SNP_P4_87277_45643364 | NC_021165.1    | Ca_kabuli_chr06 | 45643364                | AA                              | GG              | 1946873399               |
| SNP_P4_87278_45653982 | NC_021165.1    | Ca_kabuli_chr06 | 45653982                | TT                              | GG              | 1946873400               |
| SNP_P4_87279_45666912 | NC_021165.1    | Ca_kabuli_chr06 | 45666912                | GG                              | AA              | 1946873401               |
| SNP_P4_87280_45724290 | NC_021165.1    | Ca_kabuli_chr06 | 45724290                | AA                              | GG              | 1946873402               |
| SNP_P4_87281_45747420 | NC_021165.1    | Ca_kabuli_chr06 | 45747420                | AA                              | GG              | 1946873403               |
| SNP_P4_87282_45755000 | NC_021165.1    | Ca_kabuli_chr06 | 45755000                | TT                              | GG              | 1946873404               |
| SNP_P4_87283_45756828 | NC_021165.1    | Ca_kabuli_chr06 | 45756828                | TT                              | CC              | 1946873405               |
| SNP_P4_87284_45761595 | NC_021165.1    | Ca_kabuli_chr06 | 45761595                | TT                              | CC              | 1946873406               |
| SNP_P4_87285_45772236 | NC_021165.1    | Ca_kabuli_chr06 | 45772236                | AA                              | TT              | 1946873407               |
| SNP_P4_87287_45850866 | NC_021165.1    | Ca_kabuli_chr06 | 45850866                | AA                              | CC              | 1946873408               |
| SNP_P4_87288_45850933 | NC_021165.1    | Ca_kabuli_chr06 | 45850933                | TT                              | CC              | 1946873409               |
| SNP_P4_87289_45851427 | NC_021165.1    | Ca_kabuli_chr06 | 45851427                | AA                              | CC              | 1946873410               |
| SNP_P4_87290_45851428 | NC_021165.1    | Ca_kabuli_chr06 | 45851428                | AA                              | CC              | 1946873411               |
| SNP_P4_87291_45851806 | NC_021165.1    | Ca_kabuli_chr06 | 45851806                | GG                              | AA              | 1946873412               |
| SNP_P4_87292_45852805 | NC_021165.1    | Ca_kabuli_chr06 | 45852805                | CC                              | GG              | 1946873413               |
| SNP_P4_87293_45852810 | NC_021165.1    | Ca_kabuli_chr06 | 45852810                | TT                              | CC              | 1946873414               |
| SNP_P4_87294_45872643 | NC_021165.1    | Ca_kabuli_chr06 | 45872643                | AA                              | GG              | 1946873415               |
| SNP_P4_87295_45872645 | NC_021165.1    | Ca_kabuli_chr06 | 45872645                | GG                              | AA              | 1946873416               |
| SNP_P4_87297_45896263 | NC_021165.1    | Ca_kabuli_chr06 | 45896263                | TT                              | GG              | 1946873417               |
| SNP_P4_87298_45896358 | NC_021165.1    | Ca_kabuli_chr06 | 45896358                | GG                              | CC              | 1946873418               |
| SNP_P4_87299_45896360 | NC_021165.1    | Ca_kabuli_chr06 | 45896360                | AA                              | CC              | 1946873419               |
| SNP_P4_87300_45896661 | NC_021165.1    | Ca_kabuli_chr06 | 45896661                | AA                              | GG              | 1946873420               |
| SNP_P4_87301_45896671 | NC_021165.1    | Ca_kabuli_chr06 | 45896671                | GG                              | CC              | 1946873421               |
| SNP_P4_87302_45896729 | NC_021165.1    | Ca_kabuli_chr06 | 45896729                | TT                              | CC              | 1946873422               |
| SNP_P4_87303_45896734 | NC_021165.1    | Ca_kabuli_chr06 | 45896734                | AA                              | GG              | 1946873423               |
| SNP_P4_87304_45899714 | NC_021165.1    | Ca_kabuli_chr06 | 45899714                | GG                              | AA              | 1946873424               |

| SNPs IDs              | Chromosome IDs | Chromosomes     | Physical positions (bp) | CDC Frontier (Reference genome) | (ILWC46 & LPNB) | NCBI SNPdb Accession IDs |
|-----------------------|----------------|-----------------|-------------------------|---------------------------------|-----------------|--------------------------|
| SNP_P4_87308_45949130 | NC_021165.1    | Ca_kabuli_chr06 | 45949130                | TT                              | AA              | 1946873425               |
| SNP_P4_87309_45950881 | NC_021165.1    | Ca_kabuli_chr06 | 45950881                | CC                              | TT              | 1946873426               |
| SNP_P4_87310_45950883 | NC_021165.1    | Ca_kabuli_chr06 | 45950883                | GG                              | AA              | 1946873427               |
| SNP_P4_87311_45964276 | NC_021165.1    | Ca_kabuli_chr06 | 45964276                | TT                              | GG              | 1946873428               |
| SNP_P4_87312_45964658 | NC_021165.1    | Ca_kabuli_chr06 | 45964658                | AA                              | GG              | 1946873429               |
| SNP_P4_87313_45964661 | NC_021165.1    | Ca_kabuli_chr06 | 45964661                | AA                              | TT              | 1946873430               |
| SNP_P4_87314_45964675 | NC_021165.1    | Ca_kabuli_chr06 | 45964675                | TT                              | CC              | 1946873431               |
| SNP_P4_87315_45999374 | NC_021165.1    | Ca_kabuli_chr06 | 45999374                | TT                              | CC              | 1946873432               |
| SNP_P4_87316_45999690 | NC_021165.1    | Ca_kabuli_chr06 | 45999690                | AA                              | CC              | 1946873433               |
| SNP_P4_87317_46006543 | NC_021165.1    | Ca_kabuli_chr06 | 46006543                | CC                              | TT              | 1946873434               |
| SNP_P4_87318_46006545 | NC_021165.1    | Ca_kabuli_chr06 | 46006545                | TT                              | AA              | 1946873435               |
| SNP_P4_87320_46020071 | NC_021165.1    | Ca_kabuli_chr06 | 46020071                | TT                              | GG              | 1946873436               |
| SNP_P4_87321_46020073 | NC_021165.1    | Ca_kabuli_chr06 | 46020073                | AA                              | CC              | 1946873437               |
| SNP_P4_87323_46029211 | NC_021165.1    | Ca_kabuli_chr06 | 46029211                | AA                              | CC              | 1946873438               |
| SNP_P4_87324_46031243 | NC_021165.1    | Ca_kabuli_chr06 | 46031243                | GG                              | AA              | 1946873439               |
| SNP_P4_87325_46031825 | NC_021165.1    | Ca_kabuli_chr06 | 46031825                | CC                              | AA              | 1946873440               |
| SNP_P4_87326_46031846 | NC_021165.1    | Ca_kabuli_chr06 | 46031846                | GG                              | AA              | 1946873441               |
| SNP_P4_87327_46031890 | NC_021165.1    | Ca_kabuli_chr06 | 46031890                | GG                              | TT              | 1946873442               |
| SNP_P4_87328_46031897 | NC_021165.1    | Ca_kabuli_chr06 | 46031897                | GG                              | AA              | 1946873443               |
| SNP_P4_87329_46031941 | NC_021165.1    | Ca_kabuli_chr06 | 46031941                | GG                              | AA              | 1946873444               |
| SNP_P4_87330_46034161 | NC_021165.1    | Ca_kabuli_chr06 | 46034161                | AA                              | GG              | 1946873445               |
| SNP_P4_87331_46034172 | NC_021165.1    | Ca_kabuli_chr06 | 46034172                | AA                              | TT              | 1946873446               |
| SNP_P4_87332_46034362 | NC_021165.1    | Ca_kabuli_chr06 | 46034362                | TT                              | AA              | 1946873447               |
| SNP_P4_87333_46035779 | NC_021165.1    | Ca_kabuli_chr06 | 46035779                | AA                              | CC              | 1946873448               |
| SNP_P4_87334_46035883 | NC_021165.1    | Ca_kabuli_chr06 | 46035883                | GG                              | AA              | 1946873449               |
| SNP_P4_87335_46036150 | NC_021165.1    | Ca_kabuli_chr06 | 46036150                | GG                              | AA              | 1946873450               |
| SNP_P4_87336_46036175 | NC_021165.1    | Ca_kabuli_chr06 | 46036175                | CC                              | TT              | 1946873451               |
| SNP_P4_87337_46036249 | NC_021165.1    | Ca_kabuli_chr06 | 46036249                | AA                              | GG              | 1946873452               |
| SNP_P4_87338_46051053 | NC_021165.1    | Ca_kabuli_chr06 | 46051053                | AA                              | GG              | 1946873453               |
| SNP_P4_87339_46051054 | NC_021165.1    | Ca_kabuli_chr06 | 46051054                | AA                              | GG              | 1946873454               |
| SNP_P4_87340_46080195 | NC_021165.1    | Ca_kabuli_chr06 | 46080195                | AA                              | GG              | 1946873455               |
| SNP_P4_87341_46080197 | NC_021165.1    | Ca_kabuli_chr06 | 46080197                | AA                              | CC              | 1946873456               |
| SNP_P4_87342_46082777 | NC_021165.1    | Ca_kabuli_chr06 | 46082777                | CC                              | TT              | 1946873457               |
| SNP_P4_87343_46112879 | NC_021165.1    | Ca_kabuli_chr06 | 46112879                | AA                              | CC              | 1946873458               |
| SNP_P4_87344_46116863 | NC_021165.1    | Ca_kabuli_chr06 | 46116863                | TT                              | CC              | 1946873459               |
| SNP_P4_87345_46116957 | NC_021165.1    | Ca_kabuli_chr06 | 46116957                | AA                              | GG              | 1946873460               |
| SNP_P4_87346_46117122 | NC_021165.1    | Ca_kabuli_chr06 | 46117122                | AA                              | GG              | 1946873461               |
| SNP_P4_87348_46152445 | NC_021165.1    | Ca_kabuli_chr06 | 46152445                | AA                              | TT              | 1946873462               |
| SNP_P4_87349_46163499 | NC_021165.1    | Ca_kabuli_chr06 | 46163499                | AA                              | CC              | 1946873463               |
| SNP_P4_87350_46163512 | NC_021165.1    | Ca_kabuli_chr06 | 46163512                | GG                              | CC              | 1946873464               |
| SNP_P4_87351_46163576 | NC_021165.1    | Ca_kabuli_chr06 | 46163576                | GG                              | TT              | 1946873465               |
| SNP_P4_87352_46164526 | NC_021165.1    | Ca_kabuli_chr06 | 46164526                | GG                              | TT              | 1946873466               |

| SNPs IDs              | Chromosome IDs | Chromosomes     | Physical positions (bp) | CDC Frontier (Reference genome) | (ILWC46 & LPNB) | NCBI SNPdb Accession IDs |
|-----------------------|----------------|-----------------|-------------------------|---------------------------------|-----------------|--------------------------|
| SNP_P4_87353_46164533 | NC_021165.1    | Ca_kabuli_chr06 | 46164533                | GG                              | TT              | 1946873467               |
| SNP_P4_87354_46164775 | NC_021165.1    | Ca_kabuli_chr06 | 46164775                | AA                              | CC              | 1946873468               |
| SNP_P4_87355_46164790 | NC_021165.1    | Ca_kabuli_chr06 | 46164790                | GG                              | CC              | 1946873469               |
| SNP_P4_87356_46164923 | NC_021165.1    | Ca_kabuli_chr06 | 46164923                | AA                              | GG              | 1946873470               |
| SNP_P4_87357_46180738 | NC_021165.1    | Ca_kabuli_chr06 | 46180738                | TT                              | CC              | 1946873471               |
| SNP_P4_87358_46180766 | NC_021165.1    | Ca_kabuli_chr06 | 46180766                | TT                              | CC              | 1946873473               |
| SNP_P4_87359_46181062 | NC_021165.1    | Ca_kabuli_chr06 | 46181062                | CC                              | TT              | 1946873475               |
| SNP_P4_87360_46181090 | NC_021165.1    | Ca_kabuli_chr06 | 46181090                | AA                              | TT              | 1946873477               |
| SNP_P4_87361_46181102 | NC_021165.1    | Ca_kabuli_chr06 | 46181102                | GG                              | TT              | 1946873479               |
| SNP_P4_87362_46210371 | NC_021165.1    | Ca_kabuli_chr06 | 46210371                | AA                              | GG              | 1946873481               |
| SNP_P4_87363_46224254 | NC_021165.1    | Ca_kabuli_chr06 | 46224254                | TT                              | AA              | 1946873483               |
| SNP_P4_87364_46252523 | NC_021165.1    | Ca_kabuli_chr06 | 46252523                | AA                              | TT              | 1946873485               |
| SNP_P4_87366_46317702 | NC_021165.1    | Ca_kabuli_chr06 | 46317702                | AA                              | GG              | 1946873487               |
| SNP_P4_87367_46330243 | NC_021165.1    | Ca_kabuli_chr06 | 46330243                | AA                              | GG              | 1946873489               |
| SNP_P4_87368_46330282 | NC_021165.1    | Ca_kabuli_chr06 | 46330282                | TT                              | AA              | 1946873491               |
| SNP_P4_87369_46330286 | NC_021165.1    | Ca_kabuli_chr06 | 46330286                | AA                              | TT              | 1946873493               |
| SNP_P4_87370_46330305 | NC_021165.1    | Ca_kabuli_chr06 | 46330305                | AA                              | GG              | 1946873495               |
| SNP_P4_87371_46330391 | NC_021165.1    | Ca_kabuli_chr06 | 46330391                | GG                              | TT              | 1946873497               |
| SNP_P4_87372_46330414 | NC_021165.1    | Ca_kabuli_chr06 | 46330414                | GG                              | AA              | 1946873499               |
| SNP_P4_87373_46330415 | NC_021165.1    | Ca_kabuli_chr06 | 46330415                | TT                              | CC              | 1946873501               |
| SNP_P4_87375_46346631 | NC_021165.1    | Ca_kabuli_chr06 | 46346631                | TT                              | CC              | 1946873503               |
| SNP_P4_87376_46346636 | NC_021165.1    | Ca_kabuli_chr06 | 46346636                | AA                              | GG              | 1946873505               |
| SNP_P4_87377_46346656 | NC_021165.1    | Ca_kabuli_chr06 | 46346656                | CC                              | TT              | 1946873507               |
| SNP_P4_87378_46346662 | NC_021165.1    | Ca_kabuli_chr06 | 46346662                | TT                              | AA              | 1946873509               |
| SNP_P4_87379_46346689 | NC_021165.1    | Ca_kabuli_chr06 | 46346689                | TT                              | CC              | 1946873511               |
| SNP_P4_87380_46346716 | NC_021165.1    | Ca_kabuli_chr06 | 46346716                | AA                              | GG              | 1946873513               |
| SNP_P4_87381_46346854 | NC_021165.1    | Ca_kabuli_chr06 | 46346854                | TT                              | CC              | 1946873515               |
| SNP_P4_87382_46347018 | NC_021165.1    | Ca_kabuli_chr06 | 46347018                | CC                              | TT              | 1946873517               |
| SNP_P4_87383_46347081 | NC_021165.1    | Ca_kabuli_chr06 | 46347081                | CC                              | TT              | 1946873519               |
| SNP_P4_87384_46351997 | NC_021165.1    | Ca_kabuli_chr06 | 46351997                | AA                              | GG              | 1946873521               |
| SNP_P4_87385_46351999 | NC_021165.1    | Ca_kabuli_chr06 | 46351999                | GG                              | AA              | 1946873523               |
| SNP_P4_87386_46352003 | NC_021165.1    | Ca_kabuli_chr06 | 46352003                | AA                              | GG              | 1946873525               |
| SNP_P4_87387_46352019 | NC_021165.1    | Ca_kabuli_chr06 | 46352019                | GG                              | AA              | 1946873527               |
| SNP_P4_87388_46352176 | NC_021165.1    | Ca_kabuli_chr06 | 46352176                | GG                              | AA              | 1946873529               |
| SNP_P4_87389_46352181 | NC_021165.1    | Ca_kabuli_chr06 | 46352181                | GG                              | AA              | 1946873531               |
| SNP_P4_87390_46352212 | NC_021165.1    | Ca_kabuli_chr06 | 46352212                | CC                              | AA              | 1946873533               |
| SNP_P4_87391_46354330 | NC_021165.1    | Ca_kabuli_chr06 | 46354330                | GG                              | CC              | 1946873535               |
| SNP_P4_87392_46354397 | NC_021165.1    | Ca_kabuli_chr06 | 46354397                | AA                              | GG              | 1946873537               |
| SNP_P4_87393_46354850 | NC_021165.1    | Ca_kabuli_chr06 | 46354850                | CC                              | GG              | 1946873539               |
| SNP_P4_87394_46354937 | NC_021165.1    | Ca_kabuli_chr06 | 46354937                | TT                              | AA              | 1946873541               |
| SNP_P4_87395_46365987 | NC_021165.1    | Ca_kabuli_chr06 | 46365987                | TT                              | CC              | 1946873543               |
| SNP_P4_87396_46368078 | NC_021165.1    | Ca_kabuli_chr06 | 46368078                | TT                              | CC              | 1946873545               |

| SNPs IDs              | Chromosome IDs | Chromosomes     | Physical positions (bp) | CDC Frontier (Reference genome) | (ILWC46 & LPNB) | NCBI SNPdb Accession IDs |
|-----------------------|----------------|-----------------|-------------------------|---------------------------------|-----------------|--------------------------|
| SNP_P4_87397_46368873 | NC_021165.1    | Ca_kabuli_chr06 | 46368873                | AA                              | GG              | 1946873547               |
| SNP_P4_87398_46368965 | NC_021165.1    | Ca_kabuli_chr06 | 46368965                | GG                              | AA              | 1946873549               |
| SNP_P4_87399_46369091 | NC_021165.1    | Ca_kabuli_chr06 | 46369091                | GG                              | CC              | 1946873551               |
| SNP_P4_87400_46369159 | NC_021165.1    | Ca_kabuli_chr06 | 46369159                | GG                              | CC              | 1946873553               |
| SNP_P4_87401_46369221 | NC_021165.1    | Ca_kabuli_chr06 | 46369221                | AA                              | CC              | 1946873555               |
| SNP_P4_87402_46369314 | NC_021165.1    | Ca_kabuli_chr06 | 46369314                | TT                              | CC              | 1946873557               |
| SNP_P4_87403_46369442 | NC_021165.1    | Ca_kabuli_chr06 | 46369442                | AA                              | GG              | 1946873559               |
| SNP_P4_87404_46369494 | NC_021165.1    | Ca_kabuli_chr06 | 46369494                | TT                              | CC              | 1946873561               |
| SNP_P4_87405_46369548 | NC_021165.1    | Ca_kabuli_chr06 | 46369548                | TT                              | CC              | 1946873563               |
| SNP_P4_87406_46369570 | NC_021165.1    | Ca_kabuli_chr06 | 46369570                | AA                              | CC              | 1946873565               |
| SNP_P4_87407_46369584 | NC_021165.1    | Ca_kabuli_chr06 | 46369584                | AA                              | CC              | 1946873567               |
| SNP_P4_87408_46369801 | NC_021165.1    | Ca_kabuli_chr06 | 46369801                | AA                              | GG              | 1946873569               |
| SNP_P4_87409_46385492 | NC_021165.1    | Ca_kabuli_chr06 | 46385492                | CC                              | AA              | 1946873571               |
| SNP_P4_87410_46385816 | NC_021165.1    | Ca_kabuli_chr06 | 46385816                | CC                              | TT              | 1946873573               |
| SNP_P4_87411_46385918 | NC_021165.1    | Ca_kabuli_chr06 | 46385918                | AA                              | TT              | 1946873575               |
| SNP_P4_87412_46385934 | NC_021165.1    | Ca_kabuli_chr06 | 46385934                | GG                              | CC              | 1946873577               |
| SNP_P4_87413_46385939 | NC_021165.1    | Ca_kabuli_chr06 | 46385939                | GG                              | AA              | 1946873579               |
| SNP_P4_87414_46388177 | NC_021165.1    | Ca_kabuli_chr06 | 46388177                | AA                              | TT              | 1946873581               |
| SNP_P4_87415_46388387 | NC_021165.1    | Ca_kabuli_chr06 | 46388387                | GG                              | AA              | 1946873583               |
| SNP_P4_87416_46388400 | NC_021165.1    | Ca_kabuli_chr06 | 46388400                | TT                              | AA              | 1946873585               |
| SNP_P4_87417_46388446 | NC_021165.1    | Ca_kabuli_chr06 | 46388446                | AA                              | TT              | 1946873587               |
| SNP_P4_87418_46388462 | NC_021165.1    | Ca_kabuli_chr06 | 46388462                | AA                              | CC              | 1946873589               |
| SNP_P4_87419_46388464 | NC_021165.1    | Ca_kabuli_chr06 | 46388464                | GG                              | AA              | 1946873590               |
| SNP_P4_87420_46388613 | NC_021165.1    | Ca_kabuli_chr06 | 46388613                | CC                              | TT              | 1946873592               |
| SNP_P4_87421_46390991 | NC_021165.1    | Ca_kabuli_chr06 | 46390991                | AA                              | TT              | 1946873594               |
| SNP_P4_87422_46391002 | NC_021165.1    | Ca_kabuli_chr06 | 46391002                | TT                              | AA              | 1946873596               |
| SNP_P4_87423_46391031 | NC_021165.1    | Ca_kabuli_chr06 | 46391031                | TT                              | AA              | 1946873598               |
| SNP_P4_87424_46391033 | NC_021165.1    | Ca_kabuli_chr06 | 46391033                | GG                              | AA              | 1946873600               |
| SNP_P4_87425_46391073 | NC_021165.1    | Ca_kabuli_chr06 | 46391073                | AA                              | CC              | 1946873602               |
| SNP_P4_87426_46391202 | NC_021165.1    | Ca_kabuli_chr06 | 46391202                | GG                              | TT              | 1946873604               |
| SNP_P4_87427_46391222 | NC_021165.1    | Ca_kabuli_chr06 | 46391222                | CC                              | TT              | 1946873606               |
| SNP_P4_87428_46391249 | NC_021165.1    | Ca_kabuli_chr06 | 46391249                | AA                              | TT              | 1946873608               |
| SNP_P4_87429_46391259 | NC_021165.1    | Ca_kabuli_chr06 | 46391259                | TT                              | AA              | 1946873610               |
| SNP_P4_87430_46391359 | NC_021165.1    | Ca_kabuli_chr06 | 46391359                | GG                              | AA              | 1946873612               |
| SNP_P4_87431_46391361 | NC_021165.1    | Ca_kabuli_chr06 | 46391361                | TT                              | CC              | 1946873615               |
| SNP_P4_87432_46391364 | NC_021165.1    | Ca_kabuli_chr06 | 46391364                | CC                              | AA              | 1946873617               |
| SNP_P4_87433_46391429 | NC_021165.1    | Ca_kabuli_chr06 | 46391429                | AA                              | GG              | 1946873619               |
| SNP_P4_87434_46391435 | NC_021165.1    | Ca_kabuli_chr06 | 46391435                | AA                              | TT              | 1946873621               |
| SNP_P4_87435_46391436 | NC_021165.1    | Ca_kabuli_chr06 | 46391436                | TT                              | CC              | 1946873623               |
| SNP_P4_87436_46391483 | NC_021165.1    | Ca_kabuli_chr06 | 46391483                | TT                              | CC              | 1946873625               |
| SNP_P4_87437_46391568 | NC_021165.1    | Ca_kabuli_chr06 | 46391568                | AA                              | GG              | 1946873627               |
| SNP_P4_87438_46391573 | NC_021165.1    | Ca_kabuli_chr06 | 46391573                | TT                              | CC              | 1946873629               |

| SNPs IDs              | Chromosome IDs | Chromosomes     | Physical positions (bp) | CDC Frontier (Reference genome) | (ILWC46 & LPNB) | NCBI SNPdb Accession IDs |
|-----------------------|----------------|-----------------|-------------------------|---------------------------------|-----------------|--------------------------|
| SNP_P4_87439_46391602 | NC_021165.1    | Ca_kabuli_chr06 | 46391602                | AA                              | GG              | 1946873631               |
| SNP_P4_87440_46391638 | NC_021165.1    | Ca_kabuli_chr06 | 46391638                | TT                              | CC              | 1946873633               |
| SNP_P4_87441_46391691 | NC_021165.1    | Ca_kabuli_chr06 | 46391691                | GG                              | AA              | 1946873635               |
| SNP_P4_87442_46391823 | NC_021165.1    | Ca_kabuli_chr06 | 46391823                | CC                              | TT              | 1946873637               |
| SNP_P4_87443_46391852 | NC_021165.1    | Ca_kabuli_chr06 | 46391852                | TT                              | CC              | 1946873639               |
| SNP_P4_87444_46391933 | NC_021165.1    | Ca_kabuli_chr06 | 46391933                | TT                              | CC              | 1946873641               |
| SNP_P4_87445_46391943 | NC_021165.1    | Ca_kabuli_chr06 | 46391943                | AA                              | GG              | 1946873643               |
| SNP_P4_87446_46391960 | NC_021165.1    | Ca_kabuli_chr06 | 46391960                | TT                              | AA              | 1946873645               |
| SNP_P4_87447_46391989 | NC_021165.1    | Ca_kabuli_chr06 | 46391989                | TT                              | CC              | 1946873647               |
| SNP_P4_87448_46398183 | NC_021165.1    | Ca_kabuli_chr06 | 46398183                | AA                              | GG              | 1946873649               |
| SNP_P4_87449_46398475 | NC_021165.1    | Ca_kabuli_chr06 | 46398475                | TT                              | CC              | 1946873650               |
| SNP_P4_87450_46398537 | NC_021165.1    | Ca_kabuli_chr06 | 46398537                | AA                              | GG              | 1946873652               |
| SNP_P4_87451_46398562 | NC_021165.1    | Ca_kabuli_chr06 | 46398562                | GG                              | AA              | 1946873654               |
| SNP_P4_87452_46398600 | NC_021165.1    | Ca_kabuli_chr06 | 46398600                | TT                              | CC              | 1946873656               |
| SNP_P4_87453_46398611 | NC_021165.1    | Ca_kabuli_chr06 | 46398611                | CC                              | GG              | 1946873658               |
| SNP_P4_87454_46398799 | NC_021165.1    | Ca_kabuli_chr06 | 46398799                | AA                              | GG              | 1946873660               |
| SNP_P4_87455_46399691 | NC_021165.1    | Ca_kabuli_chr06 | 46399691                | TT                              | CC              | 1946873662               |
| SNP_P4_87456_46399701 | NC_021165.1    | Ca_kabuli_chr06 | 46399701                | TT                              | CC              | 1946873664               |
| SNP_P4_87457_46399725 | NC_021165.1    | Ca_kabuli_chr06 | 46399725                | AA                              | GG              | 1946873666               |
| SNP_P4_87458_46399742 | NC_021165.1    | Ca_kabuli_chr06 | 46399742                | TT                              | GG              | 1946873668               |
| SNP_P4_87460_46399871 | NC_021165.1    | Ca_kabuli_chr06 | 46399871                | AA                              | GG              | 1946873670               |
| SNP_P4_87461_46399888 | NC_021165.1    | Ca_kabuli_chr06 | 46399888                | TT                              | CC              | 1946873672               |
| SNP_P4_87462_46399925 | NC_021165.1    | Ca_kabuli_chr06 | 46399925                | CC                              | TT              | 1946873674               |
| SNP_P4_87463_46399935 | NC_021165.1    | Ca_kabuli_chr06 | 46399935                | GG                              | AA              | 1946873676               |
| SNP_P4_87464_46400113 | NC_021165.1    | Ca_kabuli_chr06 | 46400113                | CC                              | TT              | 1946873678               |
| SNP_P4_87465_46400146 | NC_021165.1    | Ca_kabuli_chr06 | 46400146                | AA                              | GG              | 1946873680               |
| SNP_P4_87466_46481993 | NC_021165.1    | Ca_kabuli_chr06 | 46481993                | TT                              | AA              | 1946873682               |
| SNP_P4_87467_46491803 | NC_021165.1    | Ca_kabuli_chr06 | 46491803                | CC                              | TT              | 1946873684               |
| SNP_P4_87468_46504037 | NC_021165.1    | Ca_kabuli_chr06 | 46504037                | GG                              | AA              | 1946873686               |
| SNP_P4_87469_46504038 | NC_021165.1    | Ca_kabuli_chr06 | 46504038                | AA                              | GG              | 1946873688               |
| SNP_P4_87470_46506385 | NC_021165.1    | Ca_kabuli_chr06 | 46506385                | GG                              | AA              | 1946873690               |
| SNP_P4_87471_46506387 | NC_021165.1    | Ca_kabuli_chr06 | 46506387                | CC                              | TT              | 1946873692               |
| SNP_P4_87472_46506409 | NC_021165.1    | Ca_kabuli_chr06 | 46506409                | TT                              | GG              | 1946873694               |
| SNP_P4_87473_46506460 | NC_021165.1    | Ca_kabuli_chr06 | 46506460                | GG                              | AA              | 1946873696               |
| SNP_P4_87474_46506463 | NC_021165.1    | Ca_kabuli_chr06 | 46506463                | CC                              | TT              | 1946873698               |
| SNP_P4_87475_46508774 | NC_021165.1    | Ca_kabuli_chr06 | 46508774                | CC                              | AA              | 1946873700               |
| SNP_P4_87477_46576873 | NC_021165.1    | Ca_kabuli_chr06 | 46576873                | GG                              | AA              | 1946873702               |
| SNP_P4_87478_46577462 | NC_021165.1    | Ca_kabuli_chr06 | 46577462                | TT                              | CC              | 1946873704               |
| SNP_P4_87479_46610483 | NC_021165.1    | Ca_kabuli_chr06 | 46610483                | TT                              | CC              | 1946873706               |
| SNP_P4_87480_46621153 | NC_021165.1    | Ca_kabuli_chr06 | 46621153                | TT                              | CC              | 1946873708               |
| SNP_P4_87481_46621613 | NC_021165.1    | Ca_kabuli_chr06 | 46621613                | TT                              | CC              | 1946873710               |
| SNP_P4_87482_46679658 | NC_021165.1    | Ca_kabuli_chr06 | 46679658                | GG                              | TT              | 1946873712               |

| SNPs IDs              | Chromosome IDs | Chromosomes     | Physical positions (bp) | CDC Frontier (Reference genome) | (ILWC46 & LPNB) | NCBI SNPdb Accession IDs |
|-----------------------|----------------|-----------------|-------------------------|---------------------------------|-----------------|--------------------------|
| SNP_P4_87483_46679659 | NC_021165.1    | Ca_kabuli_chr06 | 46679659                | AA                              | GG              | 1946873714               |
| SNP_P4_87484_46689990 | NC_021165.1    | Ca_kabuli_chr06 | 46689990                | TT                              | AA              | 1946873716               |
| SNP_P4_87485_46690086 | NC_021165.1    | Ca_kabuli_chr06 | 46690086                | CC                              | TT              | 1946873718               |
| SNP_P4_87486_46690112 | NC_021165.1    | Ca_kabuli_chr06 | 46690112                | GG                              | TT              | 1946873720               |
| SNP_P4_87487_46690182 | NC_021165.1    | Ca_kabuli_chr06 | 46690182                | AA                              | GG              | 1946873722               |
| SNP_P4_87488_46690258 | NC_021165.1    | Ca_kabuli_chr06 | 46690258                | TT                              | GG              | 1946873724               |
| SNP_P4_87489_46690333 | NC_021165.1    | Ca_kabuli_chr06 | 46690333                | AA                              | GG              | 1946873726               |
| SNP_P4_87490_46690335 | NC_021165.1    | Ca_kabuli_chr06 | 46690335                | AA                              | GG              | 1946873728               |
| SNP_P4_87491_46690341 | NC_021165.1    | Ca_kabuli_chr06 | 46690341                | GG                              | AA              | 1946873730               |
| SNP_P4_87492_46690353 | NC_021165.1    | Ca_kabuli_chr06 | 46690353                | TT                              | CC              | 1946873732               |
| SNP_P4_87493_46690429 | NC_021165.1    | Ca_kabuli_chr06 | 46690429                | TT                              | CC              | 1946873734               |
| SNP_P4_87494_46690432 | NC_021165.1    | Ca_kabuli_chr06 | 46690432                | AA                              | GG              | 1946873736               |
| SNP_P4_87495_46690449 | NC_021165.1    | Ca_kabuli_chr06 | 46690449                | AA                              | GG              | 1946873738               |
| SNP_P4_87496_46690498 | NC_021165.1    | Ca_kabuli_chr06 | 46690498                | AA                              | GG              | 1946873740               |
| SNP_P4_87497_46690502 | NC_021165.1    | Ca_kabuli_chr06 | 46690502                | TT                              | CC              | 1946873742               |
| SNP_P4_87498_46690514 | NC_021165.1    | Ca_kabuli_chr06 | 46690514                | CC                              | TT              | 1946873744               |
| SNP_P4_87499_46690580 | NC_021165.1    | Ca_kabuli_chr06 | 46690580                | AA                              | CC              | 1946873746               |
| SNP_P4_87500_46690583 | NC_021165.1    | Ca_kabuli_chr06 | 46690583                | TT                              | CC              | 1946873748               |
| SNP_P4_87501_46690891 | NC_021165.1    | Ca_kabuli_chr06 | 46690891                | AA                              | GG              | 1946873750               |
| SNP_P4_87502_46763357 | NC_021165.1    | Ca_kabuli_chr06 | 46763357                | GG                              | CC              | 1946873752               |
| SNP_P4_87503_46772284 | NC_021165.1    | Ca_kabuli_chr06 | 46772284                | GG                              | AA              | 1946873754               |
| SNP_P4_87504_46772311 | NC_021165.1    | Ca_kabuli_chr06 | 46772311                | GG                              | CC              | 1946873756               |
| SNP_P4_87505_46772325 | NC_021165.1    | Ca_kabuli_chr06 | 46772325                | TT                              | GG              | 1946873758               |
| SNP_P4_87506_46772329 | NC_021165.1    | Ca_kabuli_chr06 | 46772329                | CC                              | AA              | 1946873760               |
| SNP_P4_87507_46772333 | NC_021165.1    | Ca_kabuli_chr06 | 46772333                | AA                              | GG              | 1946873762               |
| SNP_P4_87508_46772733 | NC_021165.1    | Ca_kabuli_chr06 | 46772733                | TT                              | GG              | 1946873764               |
| SNP_P4_87509_46772917 | NC_021165.1    | Ca_kabuli_chr06 | 46772917                | CC                              | TT              | 1946873766               |
| SNP_P4_87511_46773681 | NC_021165.1    | Ca_kabuli_chr06 | 46773681                | CC                              | TT              | 1946873768               |
| SNP_P4_87512_46779478 | NC_021165.1    | Ca_kabuli_chr06 | 46779478                | GG                              | AA              | 1946873770               |
| SNP_P4_87513_46789806 | NC_021165.1    | Ca_kabuli_chr06 | 46789806                | CC                              | TT              | 1946873772               |
| SNP_P4_87515_46790070 | NC_021165.1    | Ca_kabuli_chr06 | 46790070                | TT                              | AA              | 1946873774               |
| SNP_P4_87516_46795871 | NC_021165.1    | Ca_kabuli_chr06 | 46795871                | GG                              | TT              | 1946873776               |
| SNP_P4_87517_46796715 | NC_021165.1    | Ca_kabuli_chr06 | 46796715                | CC                              | AA              | 1946873778               |
| SNP_P4_87518_46797063 | NC_021165.1    | Ca_kabuli_chr06 | 46797063                | TT                              | CC              | 1946873780               |
| SNP_P4_87519_46797078 | NC_021165.1    | Ca_kabuli_chr06 | 46797078                | TT                              | CC              | 1946873782               |
| SNP_P4_87520_46817622 | NC_021165.1    | Ca_kabuli_chr06 | 46817622                | CC                              | AA              | 1946873784               |
| SNP_P4_87521_46819012 | NC_021165.1    | Ca_kabuli_chr06 | 46819012                | TT                              | AA              | 1946873786               |
| SNP_P4_87523_46848092 | NC_021165.1    | Ca_kabuli_chr06 | 46848092                | CC                              | TT              | 1946873788               |
| SNP_P4_87524_46848093 | NC_021165.1    | Ca_kabuli_chr06 | 46848093                | TT                              | CC              | 1946873790               |
| SNP_P4_87525_46848742 | NC_021165.1    | Ca_kabuli_chr06 | 46848742                | TT                              | AA              | 1946873792               |
| SNP_P4_87526_46848743 | NC_021165.1    | Ca_kabuli_chr06 | 46848743                | TT                              | CC              | 1946873794               |
| SNP_P4_87527_46896666 | NC_021165.1    | Ca_kabuli_chr06 | 46896666                | TT                              | GG              | 1946873796               |



| SNPs IDs              | Chromosome IDs | Chromosomes     | Physical positions (bp) | CDC Frontier (Reference genome) | (ILWC46 & LPNB) | NCBI SNPdb Accession IDs |
|-----------------------|----------------|-----------------|-------------------------|---------------------------------|-----------------|--------------------------|
| SNP_P4_87528_46896889 | NC_021165.1    | Ca_kabuli_chr06 | 46896889                | CC                              | TT              | 1946873798               |
| SNP_P4_87529_46896903 | NC_021165.1    | Ca_kabuli_chr06 | 46896903                | CC                              | TT              | 1946873800               |
| SNP_P4_87530_46896934 | NC_021165.1    | Ca_kabuli_chr06 | 46896934                | CC                              | GG              | 1946873802               |
| SNP_P4_87531_46897210 | NC_021165.1    | Ca_kabuli_chr06 | 46897210                | GG                              | TT              | 1946873804               |
| SNP_P4_87532_46897710 | NC_021165.1    | Ca_kabuli_chr06 | 46897710                | AA                              | GG              | 1946873806               |
| SNP_P4_87533_46897930 | NC_021165.1    | Ca_kabuli_chr06 | 46897930                | CC                              | TT              | 1946873808               |
| SNP_P4_87534_46898502 | NC_021165.1    | Ca_kabuli_chr06 | 46898502                | CC                              | AA              | 1946873810               |
| SNP_P4_87535_46898640 | NC_021165.1    | Ca_kabuli_chr06 | 46898640                | CC                              | GG              | 1946873812               |
| SNP_P4_87536_46898828 | NC_021165.1    | Ca_kabuli_chr06 | 46898828                | CC                              | TT              | 1946873814               |
| SNP_P4_87537_46899229 | NC_021165.1    | Ca_kabuli_chr06 | 46899229                | GG                              | AA              | 1946873816               |
| SNP_P4_87538_46993353 | NC_021165.1    | Ca_kabuli_chr06 | 46993353                | AA                              | CC              | 1946873818               |
| SNP_P4_87539_46996795 | NC_021165.1    | Ca_kabuli_chr06 | 46996795                | AA                              | GG              | 1946873820               |
| SNP_P4_87540_46997112 | NC_021165.1    | Ca_kabuli_chr06 | 46997112                | GG                              | AA              | 1946873822               |
| SNP_P4_87541_47001025 | NC_021165.1    | Ca_kabuli_chr06 | 47001025                | GG                              | TT              | 1946873824               |
| SNP_P4_87543_47001105 | NC_021165.1    | Ca_kabuli_chr06 | 47001105                | TT                              | CC              | 1946873827               |
| SNP_P4_87544_47001142 | NC_021165.1    | Ca_kabuli_chr06 | 47001142                | GG                              | AA              | 1946873829               |
| SNP_P4_87545_47001167 | NC_021165.1    | Ca_kabuli_chr06 | 47001167                | CC                              | GG              | 1946873831               |
| SNP_P4_87546_47002237 | NC_021165.1    | Ca_kabuli_chr06 | 47002237                | CC                              | TT              | 1946873833               |
| SNP_P4_87547_47002484 | NC_021165.1    | Ca_kabuli_chr06 | 47002484                | AA                              | TT              | 1946873835               |
| SNP_P4_87551_47056449 | NC_021165.1    | Ca_kabuli_chr06 | 47056449                | GG                              | AA              | 1946873836               |
| SNP_P4_87552_47073903 | NC_021165.1    | Ca_kabuli_chr06 | 47073903                | CC                              | AA              | 1946873839               |
| SNP_P4_87553_47075435 | NC_021165.1    | Ca_kabuli_chr06 | 47075435                | CC                              | TT              | 1946873841               |
| SNP_P4_87554_47130531 | NC_021165.1    | Ca_kabuli_chr06 | 47130531                | TT                              | GG              | 1946873843               |
| SNP_P4_87555_47134887 | NC_021165.1    | Ca_kabuli_chr06 | 47134887                | GG                              | AA              | 1946873845               |
| SNP_P4_87556_47141301 | NC_021165.1    | Ca_kabuli_chr06 | 47141301                | CC                              | TT              | 1946873846               |
| SNP_P4_87558_47141653 | NC_021165.1    | Ca_kabuli_chr06 | 47141653                | TT                              | CC              | 1946873848               |
| SNP_P4_87559_47141675 | NC_021165.1    | Ca_kabuli_chr06 | 47141675                | TT                              | GG              | 1946873850               |
| SNP_P4_87560_47148881 | NC_021165.1    | Ca_kabuli_chr06 | 47148881                | AA                              | GG              | 1946873852               |
| SNP_P4_87561_47149056 | NC_021165.1    | Ca_kabuli_chr06 | 47149056                | AA                              | CC              | 1946873854               |
| SNP_P4_87562_47149066 | NC_021165.1    | Ca_kabuli_chr06 | 47149066                | CC                              | AA              | 1946873856               |
| SNP_P4_87563_47149070 | NC_021165.1    | Ca_kabuli_chr06 | 47149070                | TT                              | CC              | 1946873858               |
| SNP_P4_87564_47149086 | NC_021165.1    | Ca_kabuli_chr06 | 47149086                | AA                              | GG              | 1946873860               |
| SNP_P4_87565_47149096 | NC_021165.1    | Ca_kabuli_chr06 | 47149096                | AA                              | CC              | 1946873862               |
| SNP_P4_87566_47149099 | NC_021165.1    | Ca_kabuli_chr06 | 47149099                | GG                              | CC              | 1946873864               |
| SNP_P4_87567_47149161 | NC_021165.1    | Ca_kabuli_chr06 | 47149161                | TT                              | CC              | 1946873866               |
| SNP_P4_87568_47149205 | NC_021165.1    | Ca_kabuli_chr06 | 47149205                | CC                              | AA              | 1946873868               |
| SNP_P4_87569_47149208 | NC_021165.1    | Ca_kabuli_chr06 | 47149208                | CC                              | TT              | 1946873870               |
| SNP_P4_87570_47149224 | NC_021165.1    | Ca_kabuli_chr06 | 47149224                | TT                              | CC              | 1946873872               |
| SNP_P4_87571_47149237 | NC_021165.1    | Ca_kabuli_chr06 | 47149237                | TT                              | AA              | 1946873874               |
| SNP_P4_87572_47151211 | NC_021165.1    | Ca_kabuli_chr06 | 47151211                | GG                              | AA              | 1946873876               |
| SNP_P4_87573_47151251 | NC_021165.1    | Ca_kabuli_chr06 | 47151251                | GG                              | AA              | 1946873878               |
| SNP_P4_87574_47151270 | NC_021165.1    | Ca_kabuli_chr06 | 47151270                | AA                              | CC              | 1946873880               |

| SNPs IDs              | Chromosome IDs | Chromosomes     | Physical positions (bp) | CDC Frontier (Reference genome) | (ILWC46 & LPNB) | NCBI SNPdb Accession IDs |
|-----------------------|----------------|-----------------|-------------------------|---------------------------------|-----------------|--------------------------|
| SNP_P4_87575_47151284 | NC_021165.1    | Ca_kabuli_chr06 | 47151284                | AA                              | GG              | 1946873882               |
| SNP_P4_87576_47151595 | NC_021165.1    | Ca_kabuli_chr06 | 47151595                | AA                              | GG              | 1946873884               |
| SNP_P4_87577_47151615 | NC_021165.1    | Ca_kabuli_chr06 | 47151615                | TT                              | CC              | 1946873886               |
| SNP_P4_87578_47209648 | NC_021165.1    | Ca_kabuli_chr06 | 47209648                | GG                              | CC              | 1946873888               |
| SNP_P4_87579_47209713 | NC_021165.1    | Ca_kabuli_chr06 | 47209713                | GG                              | TT              | 1946873890               |
| SNP_P4_87580_47209981 | NC_021165.1    | Ca_kabuli_chr06 | 47209981                | TT                              | CC              | 1946873892               |
| SNP_P4_87581_47209986 | NC_021165.1    | Ca_kabuli_chr06 | 47209986                | CC                              | TT              | 1946873894               |
| SNP_P4_87582_47210005 | NC_021165.1    | Ca_kabuli_chr06 | 47210005                | CC                              | TT              | 1946873896               |
| SNP_P4_87583_47210028 | NC_021165.1    | Ca_kabuli_chr06 | 47210028                | AA                              | GG              | 1946873898               |
| SNP_P4_87584_47217126 | NC_021165.1    | Ca_kabuli_chr06 | 47217126                | GG                              | TT              | 1946873900               |
| SNP_P4_87585_47227165 | NC_021165.1    | Ca_kabuli_chr06 | 47227165                | TT                              | GG              | 1946873902               |
| SNP_P4_87586_47227177 | NC_021165.1    | Ca_kabuli_chr06 | 47227177                | TT                              | GG              | 1946873904               |
| SNP_P4_87587_47227186 | NC_021165.1    | Ca_kabuli_chr06 | 47227186                | TT                              | CC              | 1946873906               |
| SNP_P4_87588_47227465 | NC_021165.1    | Ca_kabuli_chr06 | 47227465                | AA                              | GG              | 1946873908               |
| SNP_P4_87589_47258545 | NC_021165.1    | Ca_kabuli_chr06 | 47258545                | CC                              | AA              | 1946873910               |
| SNP_P4_87590_47260201 | NC_021165.1    | Ca_kabuli_chr06 | 47260201                | AA                              | GG              | 1946873912               |
| SNP_P4_87591_47260222 | NC_021165.1    | Ca_kabuli_chr06 | 47260222                | GG                              | AA              | 1946873914               |
| SNP_P4_87592_47267699 | NC_021165.1    | Ca_kabuli_chr06 | 47267699                | AA                              | GG              | 1946873916               |
| SNP_P4_87593_47268177 | NC_021165.1    | Ca_kabuli_chr06 | 47268177                | TT                              | AA              | 1946873918               |
| SNP_P4_87594_47268179 | NC_021165.1    | Ca_kabuli_chr06 | 47268179                | AA                              | CC              | 1946873920               |
| SNP_P4_87595_47268216 | NC_021165.1    | Ca_kabuli_chr06 | 47268216                | TT                              | GG              | 1946873922               |
| SNP_P4_87596_47290692 | NC_021165.1    | Ca_kabuli_chr06 | 47290692                | GG                              | CC              | 1946873924               |
| SNP_P4_87597_47298267 | NC_021165.1    | Ca_kabuli_chr06 | 47298267                | TT                              | AA              | 1946873926               |
| SNP_P4_87598_47298270 | NC_021165.1    | Ca_kabuli_chr06 | 47298270                | AA                              | TT              | 1946873928               |
| SNP_P4_87599_47299543 | NC_021165.1    | Ca_kabuli_chr06 | 47299543                | AA                              | TT              | 1946873930               |
| SNP_P4_87600_47299551 | NC_021165.1    | Ca_kabuli_chr06 | 47299551                | GG                              | AA              | 1946873932               |
| SNP_P4_87601_47299592 | NC_021165.1    | Ca_kabuli_chr06 | 47299592                | CC                              | TT              | 1946873934               |
| SNP_P4_87602_47299608 | NC_021165.1    | Ca_kabuli_chr06 | 47299608                | TT                              | CC              | 1946873936               |
| SNP_P4_87603_47299610 | NC_021165.1    | Ca_kabuli_chr06 | 47299610                | GG                              | AA              | 1946873938               |
| SNP_P4_87605_47312017 | NC_021165.1    | Ca_kabuli_chr06 | 47312017                | TT                              | CC              | 1946873940               |
| SNP_P4_87606_47312020 | NC_021165.1    | Ca_kabuli_chr06 | 47312020                | AA                              | GG              | 1946873942               |
| SNP_P4_87607_47312050 | NC_021165.1    | Ca_kabuli_chr06 | 47312050                | GG                              | AA              | 1946873944               |
| SNP_P4_87608_47312267 | NC_021165.1    | Ca_kabuli_chr06 | 47312267                | AA                              | GG              | 1946873946               |
| SNP_P4_87609_47312295 | NC_021165.1    | Ca_kabuli_chr06 | 47312295                | TT                              | CC              | 1946873948               |
| SNP_P4_87610_47312346 | NC_021165.1    | Ca_kabuli_chr06 | 47312346                | CC                              | TT              | 1946873950               |
| SNP_P4_87612_47312527 | NC_021165.1    | Ca_kabuli_chr06 | 47312527                | AA                              | TT              | 1946873952               |
| SNP_P4_87613_47312562 | NC_021165.1    | Ca_kabuli_chr06 | 47312562                | AA                              | GG              | 1946873954               |
| SNP_P4_87614_47312586 | NC_021165.1    | Ca_kabuli_chr06 | 47312586                | CC                              | TT              | 1946873956               |
| SNP_P4_87615_47312595 | NC_021165.1    | Ca_kabuli_chr06 | 47312595                | CC                              | TT              | 1946873958               |
| SNP_P4_87616_47332062 | NC_021165.1    | Ca_kabuli_chr06 | 47332062                | GG                              | AA              | 1946873960               |
| SNP_P4_87617_47341678 | NC_021165.1    | Ca_kabuli_chr06 | 47341678                | TT                              | CC              | 1946873962               |
| SNP_P4_87618_47361065 | NC_021165.1    | Ca_kabuli_chr06 | 47361065                | AA                              | TT              | 1946873964               |

| SNPs IDs              | Chromosome IDs | Chromosomes     | Physical positions (bp) | CDC Frontier (Reference genome) | (ILWC46 & LPNB) | NCBI SNPdb Accession IDs |
|-----------------------|----------------|-----------------|-------------------------|---------------------------------|-----------------|--------------------------|
| SNP_P4_87619_47436244 | NC_021165.1    | Ca_kabuli_chr06 | 47436244                | GG                              | TT              | 1946873966               |
| SNP_P4_87620_47438086 | NC_021165.1    | Ca_kabuli_chr06 | 47438086                | TT                              | CC              | 1946873968               |
| SNP_P4_87621_47468816 | NC_021165.1    | Ca_kabuli_chr06 | 47468816                | GG                              | AA              | 1946873970               |
| SNP_P4_87622_47504431 | NC_021165.1    | Ca_kabuli_chr06 | 47504431                | AA                              | GG              | 1946873972               |
| SNP_P4_87623_47505180 | NC_021165.1    | Ca_kabuli_chr06 | 47505180                | AA                              | GG              | 1946873974               |
| SNP_P4_87624_47505367 | NC_021165.1    | Ca_kabuli_chr06 | 47505367                | AA                              | CC              | 1946873976               |
| SNP_P4_87625_47505464 | NC_021165.1    | Ca_kabuli_chr06 | 47505464                | TT                              | GG              | 1946873978               |
| SNP_P4_87626_47505470 | NC_021165.1    | Ca_kabuli_chr06 | 47505470                | GG                              | AA              | 1946873980               |
| SNP_P4_87627_47507413 | NC_021165.1    | Ca_kabuli_chr06 | 47507413                | GG                              | AA              | 1946873982               |
| SNP_P4_87628_47509060 | NC_021165.1    | Ca_kabuli_chr06 | 47509060                | CC                              | TT              | 1946873984               |
| SNP_P4_87629_47509094 | NC_021165.1    | Ca_kabuli_chr06 | 47509094                | TT                              | CC              | 1946873986               |
| SNP_P4_87630_47509096 | NC_021165.1    | Ca_kabuli_chr06 | 47509096                | AA                              | GG              | 1946873988               |
| SNP_P4_87631_47509097 | NC_021165.1    | Ca_kabuli_chr06 | 47509097                | GG                              | CC              | 1946873990               |
| SNP_P4_87632_47509422 | NC_021165.1    | Ca_kabuli_chr06 | 47509422                | AA                              | TT              | 1946873992               |
| SNP_P4_87633_47509444 | NC_021165.1    | Ca_kabuli_chr06 | 47509444                | CC                              | AA              | 1946873994               |
| SNP_P4_87635_47563240 | NC_021165.1    | Ca_kabuli_chr06 | 47563240                | CC                              | TT              | 1946873996               |
| SNP_P4_87636_47568503 | NC_021165.1    | Ca_kabuli_chr06 | 47568503                | GG                              | AA              | 1946873998               |
| SNP_P4_87637_47571056 | NC_021165.1    | Ca_kabuli_chr06 | 47571056                | CC                              | AA              | 1946874000               |
| SNP_P4_87638_47580946 | NC_021165.1    | Ca_kabuli_chr06 | 47580946                | CC                              | TT              | 1946874002               |
| SNP_P4_87639_47588138 | NC_021165.1    | Ca_kabuli_chr06 | 47588138                | AA                              | CC              | 1946874004               |
| SNP_P4_87640_47609273 | NC_021165.1    | Ca_kabuli_chr06 | 47609273                | TT                              | CC              | 1946874006               |
| SNP_P4_87641_47615175 | NC_021165.1    | Ca_kabuli_chr06 | 47615175                | CC                              | TT              | 1946874008               |
| SNP_P4_87643_47616872 | NC_021165.1    | Ca_kabuli_chr06 | 47616872                | AA                              | GG              | 1946874010               |
| SNP_P4_87644_47617206 | NC_021165.1    | Ca_kabuli_chr06 | 47617206                | GG                              | AA              | 1946874012               |
| SNP_P4_87645_47619173 | NC_021165.1    | Ca_kabuli_chr06 | 47619173                | GG                              | AA              | 1946874014               |
| SNP_P4_87646_47620581 | NC_021165.1    | Ca_kabuli_chr06 | 47620581                | GG                              | AA              | 1946874016               |
| SNP_P4_87647_47620626 | NC_021165.1    | Ca_kabuli_chr06 | 47620626                | GG                              | AA              | 1946874018               |
| SNP_P4_87648_47621979 | NC_021165.1    | Ca_kabuli_chr06 | 47621979                | GG                              | AA              | 1946874020               |
| SNP_P4_87649_47622022 | NC_021165.1    | Ca_kabuli_chr06 | 47622022                | GG                              | AA              | 1946874022               |
| SNP_P4_87650_47622067 | NC_021165.1    | Ca_kabuli_chr06 | 47622067                | AA                              | CC              | 1946874024               |
| SNP_P4_87651_47622072 | NC_021165.1    | Ca_kabuli_chr06 | 47622072                | AA                              | GG              | 1946874026               |
| SNP_P4_87652_47622244 | NC_021165.1    | Ca_kabuli_chr06 | 47622244                | CC                              | GG              | 1946874028               |
| SNP_P4_87653_47622264 | NC_021165.1    | Ca_kabuli_chr06 | 47622264                | AA                              | GG              | 1946874030               |
| SNP_P4_87654_47622281 | NC_021165.1    | Ca_kabuli_chr06 | 47622281                | AA                              | CC              | 1946874032               |
| SNP_P4_87655_47622282 | NC_021165.1    | Ca_kabuli_chr06 | 47622282                | AA                              | GG              | 1946874034               |
| SNP_P4_87656_47647504 | NC_021165.1    | Ca_kabuli_chr06 | 47647504                | AA                              | GG              | 1946874036               |
| SNP_P4_87657_47647524 | NC_021165.1    | Ca_kabuli_chr06 | 47647524                | GG                              | AA              | 1946874038               |
| SNP_P4_87658_47654007 | NC_021165.1    | Ca_kabuli_chr06 | 47654007                | TT                              | CC              | 1946874040               |
| SNP_P4_87659_47654265 | NC_021165.1    | Ca_kabuli_chr06 | 47654265                | AA                              | GG              | 1946874042               |
| SNP_P4_87660_47654306 | NC_021165.1    | Ca_kabuli_chr06 | 47654306                | GG                              | CC              | 1946874044               |
| SNP_P4_87661_47654323 | NC_021165.1    | Ca_kabuli_chr06 | 47654323                | TT                              | GG              | 1946874046               |
| SNP_P4_87662_47654331 | NC_021165.1    | Ca_kabuli_chr06 | 47654331                | TT                              | AA              | 1946874048               |

| SNPs IDs              | Chromosome IDs | Chromosomes     | Physical positions (bp) | CDC Frontier (Reference genome) | (ILWC46 & LPNB) | NCBI SNPdb Accession IDs |
|-----------------------|----------------|-----------------|-------------------------|---------------------------------|-----------------|--------------------------|
| SNP_P4_87663_47656378 | NC_021165.1    | Ca_kabuli_chr06 | 47656378                | GG                              | CC              | 1946874050               |
| SNP_P4_87664_47656383 | NC_021165.1    | Ca_kabuli_chr06 | 47656383                | GG                              | AA              | 1946874052               |
| SNP_P4_87665_47656385 | NC_021165.1    | Ca_kabuli_chr06 | 47656385                | TT                              | CC              | 1946874054               |
| SNP_P4_87666_47657141 | NC_021165.1    | Ca_kabuli_chr06 | 47657141                | GG                              | TT              | 1946874056               |
| SNP_P4_87667_47657147 | NC_021165.1    | Ca_kabuli_chr06 | 47657147                | AA                              | CC              | 1946874058               |
| SNP_P4_87668_47657633 | NC_021165.1    | Ca_kabuli_chr06 | 47657633                | CC                              | AA              | 1946874060               |
| SNP_P4_87669_47657664 | NC_021165.1    | Ca_kabuli_chr06 | 47657664                | GG                              | AA              | 1946874062               |
| SNP_P4_87670_47657667 | NC_021165.1    | Ca_kabuli_chr06 | 47657667                | GG                              | AA              | 1946874064               |
| SNP_P4_87671_47657683 | NC_021165.1    | Ca_kabuli_chr06 | 47657683                | GG                              | AA              | 1946874066               |
| SNP_P4_87672_47658657 | NC_021165.1    | Ca_kabuli_chr06 | 47658657                | CC                              | TT              | 1946874068               |
| SNP_P4_87673_47675179 | NC_021165.1    | Ca_kabuli_chr06 | 47675179                | GG                              | AA              | 1946874070               |
| SNP_P4_87674_47675497 | NC_021165.1    | Ca_kabuli_chr06 | 47675497                | TT                              | AA              | 1946874072               |
| SNP_P4_87675_47675696 | NC_021165.1    | Ca_kabuli_chr06 | 47675696                | TT                              | GG              | 1946874074               |
| SNP_P4_87676_47675737 | NC_021165.1    | Ca_kabuli_chr06 | 47675737                | CC                              | TT              | 1946874076               |
| SNP_P4_87677_47697567 | NC_021165.1    | Ca_kabuli_chr06 | 47697567                | GG                              | AA              | 1946874077               |
| SNP_P4_87678_47697671 | NC_021165.1    | Ca_kabuli_chr06 | 47697671                | GG                              | AA              | 1946874079               |
| SNP_P4_87679_47697851 | NC_021165.1    | Ca_kabuli_chr06 | 47697851                | CC                              | GG              | 1946874081               |
| SNP_P4_87680_47697924 | NC_021165.1    | Ca_kabuli_chr06 | 47697924                | AA                              | CC              | 1946874083               |
| SNP_P4_87681_47698044 | NC_021165.1    | Ca_kabuli_chr06 | 47698044                | GG                              | CC              | 1946874085               |
| SNP_P4_87682_47698052 | NC_021165.1    | Ca_kabuli_chr06 | 47698052                | AA                              | GG              | 1946874087               |
| SNP_P4_87683_47699206 | NC_021165.1    | Ca_kabuli_chr06 | 47699206                | AA                              | GG              | 1946874089               |
| SNP_P4_87684_47699252 | NC_021165.1    | Ca_kabuli_chr06 | 47699252                | TT                              | CC              | 1946874091               |
| SNP_P4_87685_47699526 | NC_021165.1    | Ca_kabuli_chr06 | 47699526                | TT                              | GG              | 1946874093               |
| SNP_P4_87686_47699527 | NC_021165.1    | Ca_kabuli_chr06 | 47699527                | GG                              | TT              | 1946874095               |
| SNP_P4_87687_47699545 | NC_021165.1    | Ca_kabuli_chr06 | 47699545                | AA                              | GG              | 1946874097               |
| SNP_P4_87688_47699567 | NC_021165.1    | Ca_kabuli_chr06 | 47699567                | TT                              | AA              | 1946874099               |
| SNP_P4_87690_47702252 | NC_021165.1    | Ca_kabuli_chr06 | 47702252                | TT                              | AA              | 1946874101               |
| SNP_P4_87691_47708590 | NC_021165.1    | Ca_kabuli_chr06 | 47708590                | GG                              | CC              | 1946874103               |
| SNP_P4_87692_47708595 | NC_021165.1    | Ca_kabuli_chr06 | 47708595                | CC                              | TT              | 1946874105               |
| SNP_P4_87693_47708596 | NC_021165.1    | Ca_kabuli_chr06 | 47708596                | TT                              | GG              | 1946874107               |
| SNP_P4_87694_47716666 | NC_021165.1    | Ca_kabuli_chr06 | 47716666                | TT                              | CC              | 1946874109               |
| SNP_P4_87695_47716746 | NC_021165.1    | Ca_kabuli_chr06 | 47716746                | GG                              | AA              | 1946874111               |
| SNP_P4_87696_47716896 | NC_021165.1    | Ca_kabuli_chr06 | 47716896                | CC                              | TT              | 1946874113               |
| SNP_P4_87697_47716911 | NC_021165.1    | Ca_kabuli_chr06 | 47716911                | CC                              | TT              | 1946874115               |
| SNP_P4_87698_47716924 | NC_021165.1    | Ca_kabuli_chr06 | 47716924                | CC                              | TT              | 1946874117               |
| SNP_P4_87699_47717039 | NC_021165.1    | Ca_kabuli_chr06 | 47717039                | CC                              | GG              | 1946874119               |
| SNP_P4_87700_47717056 | NC_021165.1    | Ca_kabuli_chr06 | 47717056                | TT                              | GG              | 1946874121               |
| SNP_P4_87701_47717096 | NC_021165.1    | Ca_kabuli_chr06 | 47717096                | AA                              | CC              | 1946874123               |
| SNP_P4_87702_47717106 | NC_021165.1    | Ca_kabuli_chr06 | 47717106                | CC                              | TT              | 1946874125               |
| SNP_P4_87703_47717190 | NC_021165.1    | Ca_kabuli_chr06 | 47717190                | GG                              | AA              | 1946874127               |
| SNP_P4_87704_47721765 | NC_021165.1    | Ca_kabuli_chr06 | 47721765                | TT                              | CC              | 1946874129               |
| SNP_P4_87705_47721769 | NC_021165.1    | Ca_kabuli_chr06 | 47721769                | CC                              | TT              | 1946874131               |

| SNPs IDs              | Chromosome IDs | Chromosomes     | Physical positions (bp) | CDC Frontier (Reference genome) | (ILWC46 & LPNB) | NCBI SNPdb Accession IDs |
|-----------------------|----------------|-----------------|-------------------------|---------------------------------|-----------------|--------------------------|
| SNP_P4_87706_47721770 | NC_021165.1    | Ca_kabuli_chr06 | 47721770                | AA                              | CC              | 1946874133               |
| SNP_P4_87707_47721778 | NC_021165.1    | Ca_kabuli_chr06 | 47721778                | CC                              | GG              | 1946874135               |
| SNP_P4_87708_47722930 | NC_021165.1    | Ca_kabuli_chr06 | 47722930                | AA                              | GG              | 1946874137               |
| SNP_P4_87709_47723049 | NC_021165.1    | Ca_kabuli_chr06 | 47723049                | CC                              | AA              | 1946874139               |
| SNP_P4_87710_47723050 | NC_021165.1    | Ca_kabuli_chr06 | 47723050                | TT                              | CC              | 1946874141               |
| SNP_P4_87711_47723065 | NC_021165.1    | Ca_kabuli_chr06 | 47723065                | AA                              | GG              | 1946874143               |
| SNP_P4_87712_47723077 | NC_021165.1    | Ca_kabuli_chr06 | 47723077                | TT                              | AA              | 1946874145               |
| SNP_P4_87713_47723083 | NC_021165.1    | Ca_kabuli_chr06 | 47723083                | CC                              | TT              | 1946874148               |
| SNP_P4_87714_47723368 | NC_021165.1    | Ca_kabuli_chr06 | 47723368                | TT                              | GG              | 1946874150               |
| SNP_P4_87715_47737935 | NC_021165.1    | Ca_kabuli_chr06 | 47737935                | TT                              | AA              | 1946874152               |
| SNP_P4_87716_47745853 | NC_021165.1    | Ca_kabuli_chr06 | 47745853                | AA                              | GG              | 1946874154               |
| SNP_P4_87717_47745887 | NC_021165.1    | Ca_kabuli_chr06 | 47745887                | CC                              | AA              | 1946874156               |
| SNP_P4_87718_47753623 | NC_021165.1    | Ca_kabuli_chr06 | 47753623                | TT                              | CC              | 1946874158               |
| SNP_P4_87719_47753658 | NC_021165.1    | Ca_kabuli_chr06 | 47753658                | AA                              | GG              | 1946874160               |
| SNP_P4_87720_47753728 | NC_021165.1    | Ca_kabuli_chr06 | 47753728                | TT                              | GG              | 1946874162               |
| SNP_P4_87721_47754029 | NC_021165.1    | Ca_kabuli_chr06 | 47754029                | CC                              | TT              | 1946874164               |
| SNP_P4_87722_47758812 | NC_021165.1    | Ca_kabuli_chr06 | 47758812                | AA                              | GG              | 1946874166               |
| SNP_P4_87723_47758837 | NC_021165.1    | Ca_kabuli_chr06 | 47758837                | AA                              | GG              | 1946874168               |
| SNP_P4_87724_47758851 | NC_021165.1    | Ca_kabuli_chr06 | 47758851                | CC                              | TT              | 1946874170               |
| SNP_P4_87725_47758859 | NC_021165.1    | Ca_kabuli_chr06 | 47758859                | AA                              | GG              | 1946874172               |
| SNP_P4_87726_47758874 | NC_021165.1    | Ca_kabuli_chr06 | 47758874                | AA                              | GG              | 1946874174               |
| SNP_P4_87727_47758921 | NC_021165.1    | Ca_kabuli_chr06 | 47758921                | AA                              | GG              | 1946874176               |
| SNP_P4_87728_47758925 | NC_021165.1    | Ca_kabuli_chr06 | 47758925                | GG                              | AA              | 1946874178               |
| SNP_P4_87729_47760741 | NC_021165.1    | Ca_kabuli_chr06 | 47760741                | GG                              | AA              | 1946874180               |
| SNP_P4_87730_47761044 | NC_021165.1    | Ca_kabuli_chr06 | 47761044                | CC                              | GG              | 1946874182               |
| SNP_P4_87731_47761064 | NC_021165.1    | Ca_kabuli_chr06 | 47761064                | CC                              | AA              | 1946874184               |
| SNP_P4_87732_47779022 | NC_021165.1    | Ca_kabuli_chr06 | 47779022                | TT                              | CC              | 1946874186               |
| SNP_P4_87733_47779071 | NC_021165.1    | Ca_kabuli_chr06 | 47779071                | GG                              | CC              | 1946874189               |
| SNP_P4_87734_47779082 | NC_021165.1    | Ca_kabuli_chr06 | 47779082                | AA                              | CC              | 1946874191               |
| SNP_P4_87735_47779250 | NC_021165.1    | Ca_kabuli_chr06 | 47779250                | TT                              | CC              | 1946874193               |
| SNP_P4_87736_47779290 | NC_021165.1    | Ca_kabuli_chr06 | 47779290                | CC                              | TT              | 1946874195               |
| SNP_P4_87737_47783708 | NC_021165.1    | Ca_kabuli_chr06 | 47783708                | TT                              | AA              | 1946874197               |
| SNP_P4_87740_47798352 | NC_021165.1    | Ca_kabuli_chr06 | 47798352                | CC                              | GG              | 1946874199               |
| SNP_P4_87741_47805921 | NC_021165.1    | Ca_kabuli_chr06 | 47805921                | GG                              | TT              | 1946874201               |
| SNP_P4_87742_47815919 | NC_021165.1    | Ca_kabuli_chr06 | 47815919                | GG                              | TT              | 1946874203               |
| SNP_P4_87743_47829991 | NC_021165.1    | Ca_kabuli_chr06 | 47829991                | TT                              | CC              | 1946874205               |
| SNP_P4_87744_47830019 | NC_021165.1    | Ca_kabuli_chr06 | 47830019                | GG                              | AA              | 1946874207               |
| SNP_P4_87745_47830020 | NC_021165.1    | Ca_kabuli_chr06 | 47830020                | CC                              | TT              | 1946874209               |
| SNP_P4_87746_47830096 | NC_021165.1    | Ca_kabuli_chr06 | 47830096                | TT                              | GG              | 1946874211               |
| SNP_P4_87747_47830520 | NC_021165.1    | Ca_kabuli_chr06 | 47830520                | CC                              | TT              | 1946874213               |
| SNP_P4_87748_47830601 | NC_021165.1    | Ca_kabuli_chr06 | 47830601                | GG                              | AA              | 1946874215               |
| SNP_P4_87750_47837797 | NC_021165.1    | Ca_kabuli_chr06 | 47837797                | GG                              | AA              | 1946874217               |

| SNPs IDs              | Chromosome IDs | Chromosomes     | Physical positions (bp) | CDC Frontier (Reference genome) | (ILWC46 & LPNB) | NCBI SNPdb Accession IDs |
|-----------------------|----------------|-----------------|-------------------------|---------------------------------|-----------------|--------------------------|
| SNP_P4_87751_47854752 | NC_021165.1    | Ca_kabuli_chr06 | 47854752                | CC                              | TT              | 1946874219               |
| SNP_P4_87753_47904994 | NC_021165.1    | Ca_kabuli_chr06 | 47904994                | TT                              | AA              | 1946874221               |
| SNP_P4_87754_47905387 | NC_021165.1    | Ca_kabuli_chr06 | 47905387                | TT                              | AA              | 1946874223               |
| SNP_P4_87755_47906227 | NC_021165.1    | Ca_kabuli_chr06 | 47906227                | AA                              | CC              | 1946874225               |
| SNP_P4_87756_47906243 | NC_021165.1    | Ca_kabuli_chr06 | 47906243                | AA                              | CC              | 1946874227               |
| SNP_P4_87758_47906312 | NC_021165.1    | Ca_kabuli_chr06 | 47906312                | TT                              | CC              | 1946874229               |
| SNP_P4_87759_47906452 | NC_021165.1    | Ca_kabuli_chr06 | 47906452                | TT                              | AA              | 1946874231               |
| SNP_P4_87760_47906461 | NC_021165.1    | Ca_kabuli_chr06 | 47906461                | GG                              | TT              | 1946874233               |
| SNP_P4_87761_47910514 | NC_021165.1    | Ca_kabuli_chr06 | 47910514                | GG                              | AA              | 1946874235               |
| SNP_P4_87762_47910517 | NC_021165.1    | Ca_kabuli_chr06 | 47910517                | CC                              | TT              | 1946874238               |
| SNP_P4_87763_47910557 | NC_021165.1    | Ca_kabuli_chr06 | 47910557                | AA                              | GG              | 1946874240               |
| SNP_P4_87764_47910568 | NC_021165.1    | Ca_kabuli_chr06 | 47910568                | GG                              | AA              | 1946874242               |
| SNP_P4_87765_47910631 | NC_021165.1    | Ca_kabuli_chr06 | 47910631                | GG                              | TT              | 1946874244               |
| SNP_P4_87766_47910797 | NC_021165.1    | Ca_kabuli_chr06 | 47910797                | GG                              | TT              | 1946874246               |
| SNP_P4_87767_47930510 | NC_021165.1    | Ca_kabuli_chr06 | 47930510                | GG                              | CC              | 1946874248               |
| SNP_P4_87768_47946346 | NC_021165.1    | Ca_kabuli_chr06 | 47946346                | GG                              | AA              | 1946874250               |
| SNP_P4_87769_47947755 | NC_021165.1    | Ca_kabuli_chr06 | 47947755                | CC                              | TT              | 1946874252               |
| SNP_P4_87770_47947792 | NC_021165.1    | Ca_kabuli_chr06 | 47947792                | TT                              | CC              | 1946874254               |
| SNP_P4_87771_47947816 | NC_021165.1    | Ca_kabuli_chr06 | 47947816                | AA                              | GG              | 1946874256               |
| SNP_P4_87772_47947846 | NC_021165.1    | Ca_kabuli_chr06 | 47947846                | TT                              | CC              | 1946874258               |
| SNP_P4_87773_47947852 | NC_021165.1    | Ca_kabuli_chr06 | 47947852                | TT                              | CC              | 1946874260               |
| SNP_P4_87774_47947860 | NC_021165.1    | Ca_kabuli_chr06 | 47947860                | TT                              | GG              | 1946874262               |
| SNP_P4_87775_47947866 | NC_021165.1    | Ca_kabuli_chr06 | 47947866                | AA                              | GG              | 1946874264               |
| SNP_P4_87776_47947879 | NC_021165.1    | Ca_kabuli_chr06 | 47947879                | CC                              | TT              | 1946874265               |
| SNP_P4_87777_47947942 | NC_021165.1    | Ca_kabuli_chr06 | 47947942                | GG                              | AA              | 1946874266               |
| SNP_P4_87778_47947951 | NC_021165.1    | Ca_kabuli_chr06 | 47947951                | TT                              | CC              | 1946874267               |
| SNP_P4_87779_47947954 | NC_021165.1    | Ca_kabuli_chr06 | 47947954                | TT                              | GG              | 1946874268               |
| SNP_P4_87780_47947972 | NC_021165.1    | Ca_kabuli_chr06 | 47947972                | CC                              | AA              | 1946874269               |
| SNP_P4_87781_47948086 | NC_021165.1    | Ca_kabuli_chr06 | 47948086                | GG                              | AA              | 1946874270               |
| SNP_P4_87782_47948191 | NC_021165.1    | Ca_kabuli_chr06 | 47948191                | AA                              | GG              | 1946874271               |
| SNP_P4_87783_47948194 | NC_021165.1    | Ca_kabuli_chr06 | 47948194                | GG                              | AA              | 1946874273               |
| SNP_P4_87784_47948278 | NC_021165.1    | Ca_kabuli_chr06 | 47948278                | CC                              | TT              | 1946874275               |
| SNP_P4_87785_47960885 | NC_021165.1    | Ca_kabuli_chr06 | 47960885                | AA                              | CC              | 1946874277               |
| SNP_P4_87786_47993066 | NC_021165.1    | Ca_kabuli_chr06 | 47993066                | TT                              | AA              | 1946874279               |
| SNP_P4_87787_47993439 | NC_021165.1    | Ca_kabuli_chr06 | 47993439                | CC                              | TT              | 1946874281               |
| SNP_P4_87788_48003554 | NC_021165.1    | Ca_kabuli_chr06 | 48003554                | AA                              | GG              | 1946874283               |
| SNP_P4_87789_48003559 | NC_021165.1    | Ca_kabuli_chr06 | 48003559                | GG                              | AA              | 1946874285               |
| SNP_P4_87791_48023153 | NC_021165.1    | Ca_kabuli_chr06 | 48023153                | TT                              | CC              | 1946874287               |
| SNP_P4_87792_48034619 | NC_021165.1    | Ca_kabuli_chr06 | 48034619                | AA                              | GG              | 1946874289               |
| SNP_P4_87793_48034639 | NC_021165.1    | Ca_kabuli_chr06 | 48034639                | AA                              | CC              | 1946874291               |
| SNP_P4_87794_48034994 | NC_021165.1    | Ca_kabuli_chr06 | 48034994                | GG                              | AA              | 1946874293               |
| SNP_P4_87795_48035063 | NC_021165.1    | Ca_kabuli_chr06 | 48035063                | GG                              | AA              | 1946874295               |

| SNPs IDs              | Chromosome IDs | Chromosomes     | Physical positions (bp) | CDC Frontier (Reference genome) | (ILWC46 & LPNB) | NCBI SNPdb Accession IDs |
|-----------------------|----------------|-----------------|-------------------------|---------------------------------|-----------------|--------------------------|
| SNP_P4_87797_48051447 | NC_021165.1    | Ca_kabuli_chr06 | 48051447                | AA                              | GG              | 1946874297               |
| SNP_P4_87798_48051454 | NC_021165.1    | Ca_kabuli_chr06 | 48051454                | CC                              | AA              | 1946874299               |
| SNP_P4_87799_48052673 | NC_021165.1    | Ca_kabuli_chr06 | 48052673                | AA                              | GG              | 1946874301               |
| SNP_P4_87800_48053668 | NC_021165.1    | Ca_kabuli_chr06 | 48053668                | CC                              | GG              | 1946874303               |
| SNP_P4_87801_48053960 | NC_021165.1    | Ca_kabuli_chr06 | 48053960                | TT                              | GG              | 1946874305               |
| SNP_P4_87802_48053989 | NC_021165.1    | Ca_kabuli_chr06 | 48053989                | GG                              | AA              | 1946874307               |
| SNP_P4_87803_48053996 | NC_021165.1    | Ca_kabuli_chr06 | 48053996                | TT                              | CC              | 1946874309               |
| SNP_P4_87804_48054034 | NC_021165.1    | Ca_kabuli_chr06 | 48054034                | CC                              | GG              | 1946874311               |
| SNP_P4_87805_48063619 | NC_021165.1    | Ca_kabuli_chr06 | 48063619                | CC                              | TT              | 1946874313               |
| SNP_P4_87806_48063626 | NC_021165.1    | Ca_kabuli_chr06 | 48063626                | GG                              | AA              | 1946874315               |
| SNP_P4_87807_48063635 | NC_021165.1    | Ca_kabuli_chr06 | 48063635                | CC                              | TT              | 1946874317               |
| SNP_P4_87808_48063659 | NC_021165.1    | Ca_kabuli_chr06 | 48063659                | TT                              | AA              | 1946874319               |
| SNP_P4_87809_48063809 | NC_021165.1    | Ca_kabuli_chr06 | 48063809                | TT                              | CC              | 1946874321               |
| SNP_P4_87810_48063837 | NC_021165.1    | Ca_kabuli_chr06 | 48063837                | TT                              | CC              | 1946874323               |
| SNP_P4_87812_48064128 | NC_021165.1    | Ca_kabuli_chr06 | 48064128                | AA                              | TT              | 1946874325               |
| SNP_P4_87813_48064210 | NC_021165.1    | Ca_kabuli_chr06 | 48064210                | TT                              | CC              | 1946874327               |
| SNP_P4_87814_48064237 | NC_021165.1    | Ca_kabuli_chr06 | 48064237                | AA                              | GG              | 1946874329               |
| SNP_P4_87815_48064253 | NC_021165.1    | Ca_kabuli_chr06 | 48064253                | TT                              | CC              | 1946874331               |
| SNP_P4_87816_48064604 | NC_021165.1    | Ca_kabuli_chr06 | 48064604                | AA                              | GG              | 1946874333               |
| SNP_P4_87817_48067490 | NC_021165.1    | Ca_kabuli_chr06 | 48067490                | TT                              | CC              | 1946874335               |
| SNP_P4_87818_48109439 | NC_021165.1    | Ca_kabuli_chr06 | 48109439                | TT                              | CC              | 1946874337               |
| SNP_P4_87819_48110078 | NC_021165.1    | Ca_kabuli_chr06 | 48110078                | CC                              | TT              | 1946874339               |
| SNP_P4_87820_48129708 | NC_021165.1    | Ca_kabuli_chr06 | 48129708                | GG                              | AA              | 1946874341               |
| SNP_P4_87822_48144570 | NC_021165.1    | Ca_kabuli_chr06 | 48144570                | AA                              | TT              | 1946874343               |
| SNP_P4_87823_48188692 | NC_021165.1    | Ca_kabuli_chr06 | 48188692                | GG                              | TT              | 1946874345               |
| SNP_P4_87824_48191554 | NC_021165.1    | Ca_kabuli_chr06 | 48191554                | GG                              | TT              | 1946874347               |
| SNP_P4_87825_48191577 | NC_021165.1    | Ca_kabuli_chr06 | 48191577                | AA                              | GG              | 1946874349               |
| SNP_P4_87826_48191615 | NC_021165.1    | Ca_kabuli_chr06 | 48191615                | AA                              | GG              | 1946874351               |
| SNP_P4_87828_48247312 | NC_021165.1    | Ca_kabuli_chr06 | 48247312                | TT                              | AA              | 1946874353               |
| SNP_P4_87829_48247437 | NC_021165.1    | Ca_kabuli_chr06 | 48247437                | GG                              | AA              | 1946874355               |
| SNP_P4_87830_48253755 | NC_021165.1    | Ca_kabuli_chr06 | 48253755                | CC                              | TT              | 1946874357               |
| SNP_P4_87831_48253805 | NC_021165.1    | Ca_kabuli_chr06 | 48253805                | GG                              | AA              | 1946874359               |
| SNP_P4_87832_48253885 | NC_021165.1    | Ca_kabuli_chr06 | 48253885                | CC                              | TT              | 1946874361               |
| SNP_P4_87833_48253949 | NC_021165.1    | Ca_kabuli_chr06 | 48253949                | GG                              | AA              | 1946874363               |
| SNP_P4_87834_48253974 | NC_021165.1    | Ca_kabuli_chr06 | 48253974                | GG                              | AA              | 1946874365               |
| SNP_P4_87835_48254099 | NC_021165.1    | Ca_kabuli_chr06 | 48254099                | TT                              | CC              | 1946874367               |
| SNP_P4_87836_48256788 | NC_021165.1    | Ca_kabuli_chr06 | 48256788                | GG                              | AA              | 1946874369               |
| SNP_P4_87838_48261153 | NC_021165.1    | Ca_kabuli_chr06 | 48261153                | TT                              | GG              | 1946874371               |
| SNP_P4_87839_48262122 | NC_021165.1    | Ca_kabuli_chr06 | 48262122                | TT                              | CC              | 1946874373               |
| SNP_P4_87840_48262333 | NC_021165.1    | Ca_kabuli_chr06 | 48262333                | TT                              | CC              | 1946874375               |
| SNP_P4_87841_48262381 | NC_021165.1    | Ca_kabuli_chr06 | 48262381                | AA                              | TT              | 1946874377               |
| SNP_P4_87842_48262643 | NC_021165.1    | Ca_kabuli_chr06 | 48262643                | AA                              | CC              | 1946874379               |

| SNPs IDs              | Chromosome IDs | Chromosomes     | Physical positions (bp) | CDC Frontier (Reference genome) | (ILWC46 & LPNB) | NCBI SNPdb Accession IDs |
|-----------------------|----------------|-----------------|-------------------------|---------------------------------|-----------------|--------------------------|
| SNP_P4_87843_48266972 | NC_021165.1    | Ca_kabuli_chr06 | 48266972                | AA                              | GG              | 1946874381               |
| SNP_P4_87844_48267213 | NC_021165.1    | Ca_kabuli_chr06 | 48267213                | TT                              | CC              | 1946874383               |
| SNP_P4_87845_48267450 | NC_021165.1    | Ca_kabuli_chr06 | 48267450                | AA                              | TT              | 1946874385               |
| SNP_P4_87846_48267457 | NC_021165.1    | Ca_kabuli_chr06 | 48267457                | TT                              | CC              | 1946874387               |
| SNP_P4_87848_48269409 | NC_021165.1    | Ca_kabuli_chr06 | 48269409                | TT                              | AA              | 1946874389               |
| SNP_P4_87849_48269483 | NC_021165.1    | Ca_kabuli_chr06 | 48269483                | AA                              | TT              | 1946874391               |
| SNP_P4_87850_48269706 | NC_021165.1    | Ca_kabuli_chr06 | 48269706                | TT                              | CC              | 1946874393               |
| SNP_P4_87851_48270262 | NC_021165.1    | Ca_kabuli_chr06 | 48270262                | CC                              | TT              | 1946874395               |
| SNP_P4_87852_48270267 | NC_021165.1    | Ca_kabuli_chr06 | 48270267                | GG                              | AA              | 1946874397               |
| SNP_P4_87853_48270630 | NC_021165.1    | Ca_kabuli_chr06 | 48270630                | AA                              | CC              | 1946874399               |
| SNP_P4_87854_48270752 | NC_021165.1    | Ca_kabuli_chr06 | 48270752                | AA                              | TT              | 1946874401               |
| SNP_P4_87855_48270772 | NC_021165.1    | Ca_kabuli_chr06 | 48270772                | AA                              | GG              | 1946874403               |
| SNP_P4_87856_48270807 | NC_021165.1    | Ca_kabuli_chr06 | 48270807                | CC                              | TT              | 1946874405               |
| SNP_P4_87857_48270839 | NC_021165.1    | Ca_kabuli_chr06 | 48270839                | AA                              | CC              | 1946874407               |
| SNP_P4_87858_48270866 | NC_021165.1    | Ca_kabuli_chr06 | 48270866                | AA                              | GG              | 1946874409               |
| SNP_P4_87859_48270905 | NC_021165.1    | Ca_kabuli_chr06 | 48270905                | GG                              | AA              | 1946874411               |
| SNP_P4_87860_48270940 | NC_021165.1    | Ca_kabuli_chr06 | 48270940                | GG                              | TT              | 1946874413               |
| SNP_P4_87861_48270965 | NC_021165.1    | Ca_kabuli_chr06 | 48270965                | AA                              | GG              | 1946874415               |
| SNP_P4_87862_48270973 | NC_021165.1    | Ca_kabuli_chr06 | 48270973                | GG                              | AA              | 1946874417               |
| SNP_P4_87863_48270977 | NC_021165.1    | Ca_kabuli_chr06 | 48270977                | TT                              | CC              | 1946874419               |
| SNP_P4_87864_48270996 | NC_021165.1    | Ca_kabuli_chr06 | 48270996                | CC                              | TT              | 1946874421               |
| SNP_P4_87865_48271058 | NC_021165.1    | Ca_kabuli_chr06 | 48271058                | TT                              | CC              | 1946874424               |
| SNP_P4_87866_48271128 | NC_021165.1    | Ca_kabuli_chr06 | 48271128                | CC                              | GG              | 1946874426               |
| SNP_P4_87867_48271129 | NC_021165.1    | Ca_kabuli_chr06 | 48271129                | AA                              | GG              | 1946874428               |
| SNP_P4_87868_48271177 | NC_021165.1    | Ca_kabuli_chr06 | 48271177                | CC                              | TT              | 1946874430               |
| SNP_P4_87869_48271205 | NC_021165.1    | Ca_kabuli_chr06 | 48271205                | TT                              | CC              | 1946874432               |
| SNP_P4_87871_48271522 | NC_021165.1    | Ca_kabuli_chr06 | 48271522                | CC                              | TT              | 1946874434               |
| SNP_P4_87872_48271548 | NC_021165.1    | Ca_kabuli_chr06 | 48271548                | GG                              | AA              | 1946874436               |
| SNP_P4_87873_48271562 | NC_021165.1    | Ca_kabuli_chr06 | 48271562                | GG                              | AA              | 1946874438               |
| SNP_P4_87874_48276041 | NC_021165.1    | Ca_kabuli_chr06 | 48276041                | TT                              | CC              | 1946874441               |
| SNP_P4_87875_48276516 | NC_021165.1    | Ca_kabuli_chr06 | 48276516                | AA                              | CC              | 1946874443               |
| SNP_P4_87876_48276591 | NC_021165.1    | Ca_kabuli_chr06 | 48276591                | TT                              | CC              | 1946874445               |
| SNP_P4_87877_48277676 | NC_021165.1    | Ca_kabuli_chr06 | 48277676                | GG                              | AA              | 1946874447               |
| SNP_P4_87878_48277726 | NC_021165.1    | Ca_kabuli_chr06 | 48277726                | GG                              | CC              | 1946874449               |
| SNP_P4_87879_48277780 | NC_021165.1    | Ca_kabuli_chr06 | 48277780                | AA                              | TT              | 1946874452               |
| SNP_P4_87880_48278548 | NC_021165.1    | Ca_kabuli_chr06 | 48278548                | TT                              | CC              | 1946874454               |
| SNP_P4_87881_48278999 | NC_021165.1    | Ca_kabuli_chr06 | 48278999                | AA                              | CC              | 1946874456               |
| SNP_P4_87882_48279066 | NC_021165.1    | Ca_kabuli_chr06 | 48279066                | CC                              | GG              | 1946874458               |
| SNP_P4_87883_48279068 | NC_021165.1    | Ca_kabuli_chr06 | 48279068                | GG                              | TT              | 1946874460               |
| SNP_P4_87884_48279072 | NC_021165.1    | Ca_kabuli_chr06 | 48279072                | TT                              | AA              | 1946874463               |
| SNP_P4_87885_48279076 | NC_021165.1    | Ca_kabuli_chr06 | 48279076                | TT                              | CC              | 1946874465               |
| SNP_P4_87886_48279231 | NC_021165.1    | Ca_kabuli_chr06 | 48279231                | TT                              | CC              | 1946874467               |



| SNPs IDs              | Chromosome IDs | Chromosomes     | Physical positions (bp) | CDC Frontier (Reference genome) | (ILWC46 & LPNB) | NCBI SNPdb Accession IDs |
|-----------------------|----------------|-----------------|-------------------------|---------------------------------|-----------------|--------------------------|
| SNP_P4_87887_48279240 | NC_021165.1    | Ca_kabuli_chr06 | 48279240                | GG                              | TT              | 1946874469               |
| SNP_P4_87888_48279263 | NC_021165.1    | Ca_kabuli_chr06 | 48279263                | CC                              | GG              | 1946874471               |
| SNP_P4_87889_48279275 | NC_021165.1    | Ca_kabuli_chr06 | 48279275                | TT                              | CC              | 1946874474               |
| SNP_P4_87890_48279283 | NC_021165.1    | Ca_kabuli_chr06 | 48279283                | CC                              | TT              | 1946874476               |
| SNP_P4_87891_48279331 | NC_021165.1    | Ca_kabuli_chr06 | 48279331                | TT                              | GG              | 1946874478               |
| SNP_P4_87892_48279337 | NC_021165.1    | Ca_kabuli_chr06 | 48279337                | TT                              | AA              | 1946874480               |
| SNP_P4_87893_48279381 | NC_021165.1    | Ca_kabuli_chr06 | 48279381                | AA                              | CC              | 1946874482               |
| SNP_P4_87895_48279493 | NC_021165.1    | Ca_kabuli_chr06 | 48279493                | TT                              | CC              | 1946874484               |
| SNP_P4_87896_48279555 | NC_021165.1    | Ca_kabuli_chr06 | 48279555                | CC                              | TT              | 1946874486               |
| SNP_P4_87898_48279794 | NC_021165.1    | Ca_kabuli_chr06 | 48279794                | TT                              | CC              | 1946874488               |
| SNP_P4_87899_48279850 | NC_021165.1    | Ca_kabuli_chr06 | 48279850                | GG                              | CC              | 1946874490               |
| SNP_P4_87900_48279888 | NC_021165.1    | Ca_kabuli_chr06 | 48279888                | GG                              | CC              | 1946874492               |
| SNP_P4_87901_48279935 | NC_021165.1    | Ca_kabuli_chr06 | 48279935                | AA                              | GG              | 1946874494               |
| SNP_P4_87902_48279981 | NC_021165.1    | Ca_kabuli_chr06 | 48279981                | GG                              | AA              | 1946874496               |
| SNP_P4_87903_48279983 | NC_021165.1    | Ca_kabuli_chr06 | 48279983                | GG                              | AA              | 1946874498               |
| SNP_P4_87904_48280047 | NC_021165.1    | Ca_kabuli_chr06 | 48280047                | TT                              | AA              | 1946874500               |
| SNP_P4_87905_48280053 | NC_021165.1    | Ca_kabuli_chr06 | 48280053                | AA                              | TT              | 1946874502               |
| SNP_P4_87907_48280117 | NC_021165.1    | Ca_kabuli_chr06 | 48280117                | CC                              | GG              | 1946874504               |
| SNP_P4_87908_48280165 | NC_021165.1    | Ca_kabuli_chr06 | 48280165                | TT                              | CC              | 1946874506               |
| SNP_P4_87909_48280182 | NC_021165.1    | Ca_kabuli_chr06 | 48280182                | CC                              | AA              | 1946874508               |
| SNP_P4_87911_48280249 | NC_021165.1    | Ca_kabuli_chr06 | 48280249                | CC                              | TT              | 1946874510               |
| SNP_P4_87913_48280329 | NC_021165.1    | Ca_kabuli_chr06 | 48280329                | GG                              | AA              | 1946874512               |
| SNP_P4_87914_48280362 | NC_021165.1    | Ca_kabuli_chr06 | 48280362                | GG                              | AA              | 1946874514               |
| SNP_P4_87915_48280368 | NC_021165.1    | Ca_kabuli_chr06 | 48280368                | TT                              | CC              | 1946874516               |
| SNP_P4_87916_48280373 | NC_021165.1    | Ca_kabuli_chr06 | 48280373                | AA                              | CC              | 1946874518               |
| SNP_P4_87917_48280417 | NC_021165.1    | Ca_kabuli_chr06 | 48280417                | AA                              | GG              | 1946874520               |
| SNP_P4_87918_48280424 | NC_021165.1    | Ca_kabuli_chr06 | 48280424                | GG                              | AA              | 1946874522               |
| SNP_P4_87919_48280445 | NC_021165.1    | Ca_kabuli_chr06 | 48280445                | AA                              | GG              | 1946874524               |
| SNP_P4_87920_48280500 | NC_021165.1    | Ca_kabuli_chr06 | 48280500                | GG                              | AA              | 1946874526               |
| SNP_P4_87922_48280595 | NC_021165.1    | Ca_kabuli_chr06 | 48280595                | AA                              | GG              | 1946874528               |
| SNP_P4_87923_48280597 | NC_021165.1    | Ca_kabuli_chr06 | 48280597                | AA                              | CC              | 1946874530               |
| SNP_P4_87924_48280608 | NC_021165.1    | Ca_kabuli_chr06 | 48280608                | GG                              | AA              | 1946874532               |
| SNP_P4_87925_48280612 | NC_021165.1    | Ca_kabuli_chr06 | 48280612                | AA                              | GG              | 1946874534               |
| SNP_P4_87926_48280622 | NC_021165.1    | Ca_kabuli_chr06 | 48280622                | AA                              | GG              | 1946874536               |
| SNP_P4_87927_48280713 | NC_021165.1    | Ca_kabuli_chr06 | 48280713                | AA                              | TT              | 1946874538               |
| SNP_P4_87928_48280762 | NC_021165.1    | Ca_kabuli_chr06 | 48280762                | AA                              | TT              | 1946874540               |
| SNP_P4_87930_48280837 | NC_021165.1    | Ca_kabuli_chr06 | 48280837                | AA                              | CC              | 1946874542               |
| SNP_P4_87931_48281097 | NC_021165.1    | Ca_kabuli_chr06 | 48281097                | AA                              | GG              | 1946874544               |
| SNP_P4_87932_48281161 | NC_021165.1    | Ca_kabuli_chr06 | 48281161                | CC                              | TT              | 1946874546               |
| SNP_P4_87933_48281321 | NC_021165.1    | Ca_kabuli_chr06 | 48281321                | GG                              | AA              | 1946874548               |
| SNP_P4_87934_48281357 | NC_021165.1    | Ca_kabuli_chr06 | 48281357                | TT                              | CC              | 1946874550               |
| SNP_P4_87935_48281359 | NC_021165.1    | Ca_kabuli_chr06 | 48281359                | AA                              | CC              | 1946874552               |

| SNPs IDs              | Chromosome IDs | Chromosomes     | Physical positions (bp) | CDC Frontier (Reference genome) | (ILWC46 & LPNB) | NCBI SNPdb Accession IDs |
|-----------------------|----------------|-----------------|-------------------------|---------------------------------|-----------------|--------------------------|
| SNP_P4_87936_48281360 | NC_021165.1    | Ca_kabuli_chr06 | 48281360                | TT                              | AA              | 1946874554               |
| SNP_P4_87938_48281410 | NC_021165.1    | Ca_kabuli_chr06 | 48281410                | CC                              | AA              | 1946874556               |
| SNP_P4_87939_48281445 | NC_021165.1    | Ca_kabuli_chr06 | 48281445                | TT                              | GG              | 1946874558               |
| SNP_P4_87940_48281508 | NC_021165.1    | Ca_kabuli_chr06 | 48281508                | AA                              | GG              | 1946874560               |
| SNP_P4_87942_48281665 | NC_021165.1    | Ca_kabuli_chr06 | 48281665                | GG                              | CC              | 1946874562               |
| SNP_P4_87943_48281668 | NC_021165.1    | Ca_kabuli_chr06 | 48281668                | CC                              | AA              | 1946874564               |
| SNP_P4_87944_48281688 | NC_021165.1    | Ca_kabuli_chr06 | 48281688                | TT                              | CC              | 1946874566               |
| SNP_P4_87945_48281822 | NC_021165.1    | Ca_kabuli_chr06 | 48281822                | TT                              | CC              | 1946874568               |
| SNP_P4_87946_48281893 | NC_021165.1    | Ca_kabuli_chr06 | 48281893                | GG                              | AA              | 1946874570               |
| SNP_P4_87947_48281894 | NC_021165.1    | Ca_kabuli_chr06 | 48281894                | AA                              | GG              | 1946874572               |
| SNP_P4_87948_48281911 | NC_021165.1    | Ca_kabuli_chr06 | 48281911                | GG                              | CC              | 1946874574               |
| SNP_P4_87949_48281932 | NC_021165.1    | Ca_kabuli_chr06 | 48281932                | TT                              | GG              | 1946874576               |
| SNP_P4_87950_48281951 | NC_021165.1    | Ca_kabuli_chr06 | 48281951                | AA                              | GG              | 1946874578               |
| SNP_P4_87951_48281960 | NC_021165.1    | Ca_kabuli_chr06 | 48281960                | CC                              | TT              | 1946874580               |
| SNP_P4_87952_48281964 | NC_021165.1    | Ca_kabuli_chr06 | 48281964                | GG                              | AA              | 1946874582               |
| SNP_P4_87953_48282068 | NC_021165.1    | Ca_kabuli_chr06 | 48282068                | TT                              | AA              | 1946874584               |
| SNP_P4_87954_48303251 | NC_021165.1    | Ca_kabuli_chr06 | 48303251                | AA                              | CC              | 1946874586               |
| SNP_P4_87955_48311730 | NC_021165.1    | Ca_kabuli_chr06 | 48311730                | CC                              | TT              | 1946874588               |
| SNP_P4_87956_48317123 | NC_021165.1    | Ca_kabuli_chr06 | 48317123                | AA                              | CC              | 1946874590               |
| SNP_P4_87957_48361917 | NC_021165.1    | Ca_kabuli_chr06 | 48361917                | AA                              | GG              | 1946874592               |
| SNP_P4_87960_48710228 | NC_021165.1    | Ca_kabuli_chr06 | 48710228                | AA                              | GG              | 1946874594               |
| SNP_P4_87961_48710281 | NC_021165.1    | Ca_kabuli_chr06 | 48710281                | TT                              | CC              | 1946874596               |
| SNP_P4_87962_48710296 | NC_021165.1    | Ca_kabuli_chr06 | 48710296                | TT                              | CC              | 1946874598               |
| SNP_P4_87963_48710305 | NC_021165.1    | Ca_kabuli_chr06 | 48710305                | CC                              | TT              | 1946874600               |
| SNP_P4_87964_48710318 | NC_021165.1    | Ca_kabuli_chr06 | 48710318                | AA                              | GG              | 1946874602               |
| SNP_P4_87965_48710408 | NC_021165.1    | Ca_kabuli_chr06 | 48710408                | CC                              | TT              | 1946874604               |
| SNP_P4_87966_48710826 | NC_021165.1    | Ca_kabuli_chr06 | 48710826                | AA                              | CC              | 1946874606               |
| SNP_P4_87967_48710846 | NC_021165.1    | Ca_kabuli_chr06 | 48710846                | AA                              | GG              | 1946874608               |
| SNP_P4_87968_48710854 | NC_021165.1    | Ca_kabuli_chr06 | 48710854                | AA                              | GG              | 1946874610               |
| SNP_P4_87969_48710886 | NC_021165.1    | Ca_kabuli_chr06 | 48710886                | AA                              | GG              | 1946874612               |
| SNP_P4_87971_48710910 | NC_021165.1    | Ca_kabuli_chr06 | 48710910                | AA                              | GG              | 1946874614               |
| SNP_P4_87972_48710935 | NC_021165.1    | Ca_kabuli_chr06 | 48710935                | CC                              | TT              | 1946874616               |
| SNP_P4_87973_48734098 | NC_021165.1    | Ca_kabuli_chr06 | 48734098                | AA                              | GG              | 1946874618               |
| SNP_P4_87974_48738348 | NC_021165.1    | Ca_kabuli_chr06 | 48738348                | AA                              | GG              | 1946874620               |
| SNP_P4_87975_48788156 | NC_021165.1    | Ca_kabuli_chr06 | 48788156                | AA                              | GG              | 1946874622               |
| SNP_P4_87976_48788552 | NC_021165.1    | Ca_kabuli_chr06 | 48788552                | GG                              | AA              | 1946874624               |
| SNP_P4_87977_48788638 | NC_021165.1    | Ca_kabuli_chr06 | 48788638                | AA                              | GG              | 1946874626               |
| SNP_P4_87978_48788645 | NC_021165.1    | Ca_kabuli_chr06 | 48788645                | GG                              | AA              | 1946874628               |
| SNP_P4_87979_48791924 | NC_021165.1    | Ca_kabuli_chr06 | 48791924                | AA                              | GG              | 1946874631               |
| SNP_P4_87980_48792019 | NC_021165.1    | Ca_kabuli_chr06 | 48792019                | AA                              | TT              | 1946874633               |
| SNP_P4_87982_48792402 | NC_021165.1    | Ca_kabuli_chr06 | 48792402                | TT                              | CC              | 1946874635               |
| SNP_P4_87983_48792599 | NC_021165.1    | Ca_kabuli_chr06 | 48792599                | TT                              | CC              | 1946874637               |

| SNPs IDs              | Chromosome IDs | Chromosomes     | Physical positions (bp) | CDC Frontier (Reference genome) | (ILWC46 & LPNB) | NCBI SNPdb Accession IDs |
|-----------------------|----------------|-----------------|-------------------------|---------------------------------|-----------------|--------------------------|
| SNP_P4_87984_48793058 | NC_021165.1    | Ca_kabuli_chr06 | 48793058                | AA                              | TT              | 1946874639               |
| SNP_P4_87985_48793584 | NC_021165.1    | Ca_kabuli_chr06 | 48793584                | GG                              | TT              | 1946874641               |
| SNP_P4_87986_48806114 | NC_021165.1    | Ca_kabuli_chr06 | 48806114                | TT                              | AA              | 1946874643               |
| SNP_P4_87987_48819640 | NC_021165.1    | Ca_kabuli_chr06 | 48819640                | CC                              | TT              | 1946874645               |
| SNP_P4_87989_48826774 | NC_021165.1    | Ca_kabuli_chr06 | 48826774                | AA                              | GG              | 1946874647               |
| SNP_P4_87990_48845143 | NC_021165.1    | Ca_kabuli_chr06 | 48845143                | GG                              | TT              | 1946874649               |
| SNP_P4_87992_48856440 | NC_021165.1    | Ca_kabuli_chr06 | 48856440                | TT                              | AA              | 1946874651               |
| SNP_P4_87994_48898195 | NC_021165.1    | Ca_kabuli_chr06 | 48898195                | CC                              | TT              | 1946874653               |
| SNP_P4_87995_48898249 | NC_021165.1    | Ca_kabuli_chr06 | 48898249                | GG                              | TT              | 1946874655               |
| SNP_P4_87996_48898261 | NC_021165.1    | Ca_kabuli_chr06 | 48898261                | CC                              | TT              | 1946874657               |
| SNP_P4_87997_48903993 | NC_021165.1    | Ca_kabuli_chr06 | 48903993                | CC                              | AA              | 1946874659               |
| SNP_P4_87998_48905381 | NC_021165.1    | Ca_kabuli_chr06 | 48905381                | AA                              | TT              | 1946874661               |
| SNP_P4_88000_48962227 | NC_021165.1    | Ca_kabuli_chr06 | 48962227                | GG                              | TT              | 1946874663               |
| SNP_P4_88001_48991822 | NC_021165.1    | Ca_kabuli_chr06 | 48991822                | TT                              | CC              | 1946874665               |
| SNP_P4_88002_49016387 | NC_021165.1    | Ca_kabuli_chr06 | 49016387                | TT                              | AA              | 1946874667               |
| SNP_P4_88003_49016395 | NC_021165.1    | Ca_kabuli_chr06 | 49016395                | AA                              | GG              | 1946874669               |
| SNP_P4_88004_49016740 | NC_021165.1    | Ca_kabuli_chr06 | 49016740                | TT                              | CC              | 1946874671               |
| SNP_P4_88005_49016757 | NC_021165.1    | Ca_kabuli_chr06 | 49016757                | AA                              | GG              | 1946874673               |
| SNP_P4_88006_49018419 | NC_021165.1    | Ca_kabuli_chr06 | 49018419                | CC                              | TT              | 1946874675               |
| SNP_P4_88007_49018444 | NC_021165.1    | Ca_kabuli_chr06 | 49018444                | AA                              | GG              | 1946874677               |
| SNP_P4_88008_49018454 | NC_021165.1    | Ca_kabuli_chr06 | 49018454                | GG                              | AA              | 1946874679               |
| SNP_P4_88009_49018457 | NC_021165.1    | Ca_kabuli_chr06 | 49018457                | AA                              | CC              | 1946874681               |
| SNP_P4_88010_49021986 | NC_021165.1    | Ca_kabuli_chr06 | 49021986                | AA                              | GG              | 1946874683               |
| SNP_P4_88011_49022777 | NC_021165.1    | Ca_kabuli_chr06 | 49022777                | AA                              | TT              | 1946874685               |
| SNP_P4_88012_49022846 | NC_021165.1    | Ca_kabuli_chr06 | 49022846                | GG                              | CC              | 1946874687               |
| SNP_P4_88013_49025518 | NC_021165.1    | Ca_kabuli_chr06 | 49025518                | GG                              | AA              | 1946874689               |
| SNP_P4_88014_49026079 | NC_021165.1    | Ca_kabuli_chr06 | 49026079                | TT                              | CC              | 1946874691               |
| SNP_P4_88015_49029509 | NC_021165.1    | Ca_kabuli_chr06 | 49029509                | TT                              | CC              | 1946874693               |
| SNP_P4_88016_49056485 | NC_021165.1    | Ca_kabuli_chr06 | 49056485                | CC                              | TT              | 1946874695               |
| SNP_P4_88017_49056513 | NC_021165.1    | Ca_kabuli_chr06 | 49056513                | TT                              | CC              | 1946874697               |
| SNP_P4_88018_49056538 | NC_021165.1    | Ca_kabuli_chr06 | 49056538                | GG                              | AA              | 1946874699               |
| SNP_P4_88019_49058653 | NC_021165.1    | Ca_kabuli_chr06 | 49058653                | AA                              | GG              | 1946874701               |
| SNP_P4_88020_49058655 | NC_021165.1    | Ca_kabuli_chr06 | 49058655                | TT                              | CC              | 1946874703               |
| SNP_P4_88022_49079979 | NC_021165.1    | Ca_kabuli_chr06 | 49079979                | AA                              | CC              | 1946874705               |
| SNP_P4_88023_49086621 | NC_021165.1    | Ca_kabuli_chr06 | 49086621                | TT                              | CC              | 1946874707               |
| SNP_P4_88024_49097006 | NC_021165.1    | Ca_kabuli_chr06 | 49097006                | TT                              | AA              | 1946874709               |
| SNP_P4_88025_49115934 | NC_021165.1    | Ca_kabuli_chr06 | 49115934                | TT                              | CC              | 1946874711               |
| SNP_P4_88026_49116892 | NC_021165.1    | Ca_kabuli_chr06 | 49116892                | AA                              | CC              | 1946874713               |
| SNP_P4_88027_49130607 | NC_021165.1    | Ca_kabuli_chr06 | 49130607                | TT                              | GG              | 1946874715               |
| SNP_P4_88029_49180784 | NC_021165.1    | Ca_kabuli_chr06 | 49180784                | AA                              | GG              | 1946874717               |
| SNP_P4_88030_49204218 | NC_021165.1    | Ca_kabuli_chr06 | 49204218                | GG                              | CC              | 1946874719               |
| SNP_P4_88031_49204477 | NC_021165.1    | Ca_kabuli_chr06 | 49204477                | TT                              | AA              | 1946874721               |

| SNPs IDs              | Chromosome IDs | Chromosomes     | Physical positions (bp) | CDC Frontier (Reference genome) | (ILWC46 & LPNB) | NCBI SNPdb Accession IDs |
|-----------------------|----------------|-----------------|-------------------------|---------------------------------|-----------------|--------------------------|
| SNP_P4_88032_49204479 | NC_021165.1    | Ca_kabuli_chr06 | 49204479                | CC                              | GG              | 1946874723               |
| SNP_P4_88033_49218844 | NC_021165.1    | Ca_kabuli_chr06 | 49218844                | TT                              | GG              | 1946874725               |
| SNP_P4_88034_49218873 | NC_021165.1    | Ca_kabuli_chr06 | 49218873                | CC                              | GG              | 1946874727               |
| SNP_P4_88035_49218874 | NC_021165.1    | Ca_kabuli_chr06 | 49218874                | AA                              | TT              | 1946874729               |
| SNP_P4_88037_49218951 | NC_021165.1    | Ca_kabuli_chr06 | 49218951                | TT                              | AA              | 1946874731               |
| SNP_P4_88038_49219126 | NC_021165.1    | Ca_kabuli_chr06 | 49219126                | GG                              | AA              | 1946874733               |
| SNP_P4_88039_49219423 | NC_021165.1    | Ca_kabuli_chr06 | 49219423                | AA                              | CC              | 1946874735               |
| SNP_P4_88040_49219430 | NC_021165.1    | Ca_kabuli_chr06 | 49219430                | AA                              | CC              | 1946874737               |
| SNP_P4_88041_49219557 | NC_021165.1    | Ca_kabuli_chr06 | 49219557                | GG                              | AA              | 1946874739               |
| SNP_P4_88042_49220284 | NC_021165.1    | Ca_kabuli_chr06 | 49220284                | TT                              | CC              | 1946874741               |
| SNP_P4_88043_49221067 | NC_021165.1    | Ca_kabuli_chr06 | 49221067                | AA                              | GG              | 1946874743               |
| SNP_P4_88044_49221075 | NC_021165.1    | Ca_kabuli_chr06 | 49221075                | CC                              | TT              | 1946874745               |
| SNP_P4_88045_49221814 | NC_021165.1    | Ca_kabuli_chr06 | 49221814                | TT                              | CC              | 1946874747               |
| SNP_P4_88046_49221992 | NC_021165.1    | Ca_kabuli_chr06 | 49221992                | AA                              | TT              | 1946874749               |
| SNP_P4_88047_49222089 | NC_021165.1    | Ca_kabuli_chr06 | 49222089                | AA                              | TT              | 1946874751               |
| SNP_P4_88048_49222153 | NC_021165.1    | Ca_kabuli_chr06 | 49222153                | CC                              | TT              | 1946874753               |
| SNP_P4_88050_49222223 | NC_021165.1    | Ca_kabuli_chr06 | 49222223                | TT                              | GG              | 1946874755               |
| SNP_P4_88051_49222235 | NC_021165.1    | Ca_kabuli_chr06 | 49222235                | GG                              | CC              | 1946874757               |
| SNP_P4_88052_49222251 | NC_021165.1    | Ca_kabuli_chr06 | 49222251                | GG                              | AA              | 1946874759               |
| SNP_P4_88053_49222268 | NC_021165.1    | Ca_kabuli_chr06 | 49222268                | TT                              | AA              | 1946874761               |
| SNP_P4_88054_49222275 | NC_021165.1    | Ca_kabuli_chr06 | 49222275                | AA                              | CC              | 1946874763               |
| SNP_P4_88055_49222290 | NC_021165.1    | Ca_kabuli_chr06 | 49222290                | CC                              | TT              | 1946874765               |
| SNP_P4_88056_49222291 | NC_021165.1    | Ca_kabuli_chr06 | 49222291                | GG                              | AA              | 1946874767               |
| SNP_P4_88057_49222384 | NC_021165.1    | Ca_kabuli_chr06 | 49222384                | AA                              | CC              | 1946874769               |
| SNP_P4_88058_49241539 | NC_021165.1    | Ca_kabuli_chr06 | 49241539                | TT                              | CC              | 1946874771               |
| SNP_P4_88059_49243197 | NC_021165.1    | Ca_kabuli_chr06 | 49243197                | CC                              | TT              | 1946874773               |
| SNP_P4_88060_49258844 | NC_021165.1    | Ca_kabuli_chr06 | 49258844                | AA                              | CC              | 1946874775               |
| SNP_P4_88061_49258982 | NC_021165.1    | Ca_kabuli_chr06 | 49258982                | CC                              | TT              | 1946874777               |
| SNP_P4_88062_49259009 | NC_021165.1    | Ca_kabuli_chr06 | 49259009                | GG                              | AA              | 1946874779               |
| SNP_P4_88063_49261949 | NC_021165.1    | Ca_kabuli_chr06 | 49261949                | AA                              | GG              | 1946874781               |
| SNP_P4_88064_49262223 | NC_021165.1    | Ca_kabuli_chr06 | 49262223                | TT                              | CC              | 1946874783               |
| SNP_P4_88065_49262267 | NC_021165.1    | Ca_kabuli_chr06 | 49262267                | TT                              | CC              | 1946874785               |
| SNP_P4_88066_49262359 | NC_021165.1    | Ca_kabuli_chr06 | 49262359                | GG                              | AA              | 1946874787               |
| SNP_P4_88067_49263267 | NC_021165.1    | Ca_kabuli_chr06 | 49263267                | GG                              | AA              | 1946874789               |
| SNP_P4_88068_49263344 | NC_021165.1    | Ca_kabuli_chr06 | 49263344                | CC                              | AA              | 1946874791               |
| SNP_P4_88069_49266758 | NC_021165.1    | Ca_kabuli_chr06 | 49266758                | AA                              | CC              | 1946874793               |
| SNP_P4_88070_49267051 | NC_021165.1    | Ca_kabuli_chr06 | 49267051                | CC                              | TT              | 1946874796               |
| SNP_P4_88071_49267067 | NC_021165.1    | Ca_kabuli_chr06 | 49267067                | AA                              | TT              | 1946874798               |
| SNP_P4_88072_49267123 | NC_021165.1    | Ca_kabuli_chr06 | 49267123                | TT                              | GG              | 1946874800               |
| SNP_P4_88073_49267536 | NC_021165.1    | Ca_kabuli_chr06 | 49267536                | CC                              | TT              | 1946874802               |
| SNP_P4_88074_49302494 | NC_021165.1    | Ca_kabuli_chr06 | 49302494                | CC                              | TT              | 1946874804               |
| SNP_P4_88075_49318258 | NC_021165.1    | Ca_kabuli_chr06 | 49318258                | CC                              | TT              | 1946874806               |

| SNPs IDs              | Chromosome IDs | Chromosomes     | Physical positions (bp) | CDC Frontier (Reference genome) | (ILWC46 & LPNB) | NCBI SNPdb Accession IDs |
|-----------------------|----------------|-----------------|-------------------------|---------------------------------|-----------------|--------------------------|
| SNP_P4_88076_49318702 | NC_021165.1    | Ca_kabuli_chr06 | 49318702                | GG                              | AA              | 1946874808               |
| SNP_P4_88077_49319204 | NC_021165.1    | Ca_kabuli_chr06 | 49319204                | CC                              | TT              | 1946874811               |
| SNP_P4_88078_49319205 | NC_021165.1    | Ca_kabuli_chr06 | 49319205                | CC                              | TT              | 1946874813               |
| SNP_P4_88079_49319214 | NC_021165.1    | Ca_kabuli_chr06 | 49319214                | CC                              | TT              | 1946874815               |
| SNP_P4_88080_49324511 | NC_021165.1    | Ca_kabuli_chr06 | 49324511                | GG                              | AA              | 1946874817               |
| SNP_P4_88081_49376366 | NC_021165.1    | Ca_kabuli_chr06 | 49376366                | CC                              | GG              | 1946874819               |
| SNP_P4_88082_49377275 | NC_021165.1    | Ca_kabuli_chr06 | 49377275                | GG                              | AA              | 1946874822               |
| SNP_P4_88083_49433430 | NC_021165.1    | Ca_kabuli_chr06 | 49433430                | GG                              | AA              | 1946874824               |
| SNP_P4_88085_49438298 | NC_021165.1    | Ca_kabuli_chr06 | 49438298                | GG                              | AA              | 1946874826               |
| SNP_P4_88086_49438326 | NC_021165.1    | Ca_kabuli_chr06 | 49438326                | AA                              | GG              | 1946874828               |
| SNP_P4_88087_49438379 | NC_021165.1    | Ca_kabuli_chr06 | 49438379                | TT                              | CC              | 1946874830               |
| SNP_P4_88088_49438381 | NC_021165.1    | Ca_kabuli_chr06 | 49438381                | AA                              | GG              | 1946874832               |
| SNP_P4_88089_49463277 | NC_021165.1    | Ca_kabuli_chr06 | 49463277                | AA                              | CC              | 1946874834               |
| SNP_P4_88092_49567833 | NC_021165.1    | Ca_kabuli_chr06 | 49567833                | AA                              | GG              | 1946874836               |
| SNP_P4_88093_49572551 | NC_021165.1    | Ca_kabuli_chr06 | 49572551                | AA                              | TT              | 1946874838               |
| SNP_P4_88096_49628542 | NC_021165.1    | Ca_kabuli_chr06 | 49628542                | AA                              | CC              | 1946874840               |
| SNP_P4_88097_49628921 | NC_021165.1    | Ca_kabuli_chr06 | 49628921                | TT                              | CC              | 1946874842               |
| SNP_P4_88098_49629599 | NC_021165.1    | Ca_kabuli_chr06 | 49629599                | TT                              | AA              | 1946874844               |
| SNP_P4_88099_49629674 | NC_021165.1    | Ca_kabuli_chr06 | 49629674                | AA                              | GG              | 1946874846               |
| SNP_P4_88100_49629946 | NC_021165.1    | Ca_kabuli_chr06 | 49629946                | AA                              | GG              | 1946874848               |
| SNP_P4_88101_49629988 | NC_021165.1    | Ca_kabuli_chr06 | 49629988                | TT                              | CC              | 1946874850               |
| SNP_P4_88102_49629991 | NC_021165.1    | Ca_kabuli_chr06 | 49629991                | AA                              | GG              | 1946874852               |
| SNP_P4_88103_49644557 | NC_021165.1    | Ca_kabuli_chr06 | 49644557                | AA                              | GG              | 1946874855               |
| SNP_P4_88105_49693205 | NC_021165.1    | Ca_kabuli_chr06 | 49693205                | TT                              | CC              | 1946874857               |
| SNP_P4_88106_49707175 | NC_021165.1    | Ca_kabuli_chr06 | 49707175                | GG                              | AA              | 1946874859               |
| SNP_P4_88107_49727353 | NC_021165.1    | Ca_kabuli_chr06 | 49727353                | GG                              | CC              | 1946874861               |
| SNP_P4_88108_49727380 | NC_021165.1    | Ca_kabuli_chr06 | 49727380                | TT                              | GG              | 1946874863               |
| SNP_P4_88109_49727392 | NC_021165.1    | Ca_kabuli_chr06 | 49727392                | TT                              | AA              | 1946874865               |
| SNP_P4_88110_49727397 | NC_021165.1    | Ca_kabuli_chr06 | 49727397                | GG                              | AA              | 1946874867               |
| SNP_P4_88111_49727412 | NC_021165.1    | Ca_kabuli_chr06 | 49727412                | GG                              | AA              | 1946874869               |
| SNP_P4_88112_49727427 | NC_021165.1    | Ca_kabuli_chr06 | 49727427                | AA                              | GG              | 1946874871               |
| SNP_P4_88113_49727442 | NC_021165.1    | Ca_kabuli_chr06 | 49727442                | TT                              | CC              | 1946874873               |
| SNP_P4_88114_49727444 | NC_021165.1    | Ca_kabuli_chr06 | 49727444                | TT                              | AA              | 1946874875               |
| SNP_P4_88115_49727445 | NC_021165.1    | Ca_kabuli_chr06 | 49727445                | AA                              | TT              | 1946874877               |
| SNP_P4_88116_49727448 | NC_021165.1    | Ca_kabuli_chr06 | 49727448                | AA                              | GG              | 1946874879               |
| SNP_P4_88117_49727452 | NC_021165.1    | Ca_kabuli_chr06 | 49727452                | TT                              | CC              | 1946874881               |
| SNP_P4_88118_49727460 | NC_021165.1    | Ca_kabuli_chr06 | 49727460                | AA                              | CC              | 1946874882               |
| SNP_P4_88119_49727857 | NC_021165.1    | Ca_kabuli_chr06 | 49727857                | CC                              | AA              | 1946874883               |
| SNP_P4_88120_49727913 | NC_021165.1    | Ca_kabuli_chr06 | 49727913                | GG                              | TT              | 1946874884               |
| SNP_P4_88121_49727920 | NC_021165.1    | Ca_kabuli_chr06 | 49727920                | AA                              | TT              | 1946874886               |
| SNP_P4_88122_49727922 | NC_021165.1    | Ca_kabuli_chr06 | 49727922                | GG                              | CC              | 1946874888               |
| SNP_P4_88123_49727928 | NC_021165.1    | Ca_kabuli_chr06 | 49727928                | AA                              | GG              | 1946874890               |

| SNPs IDs              | Chromosome IDs | Chromosomes     | Physical positions (bp) | CDC Frontier (Reference genome) | (ILWC46 & LPNB) | NCBI SNPdb Accession IDs |
|-----------------------|----------------|-----------------|-------------------------|---------------------------------|-----------------|--------------------------|
| SNP_P4_88124_49727950 | NC_021165.1    | Ca_kabuli_chr06 | 49727950                | TT                              | CC              | 1946874892               |
| SNP_P4_88125_49727962 | NC_021165.1    | Ca_kabuli_chr06 | 49727962                | GG                              | TT              | 1946874894               |
| SNP_P4_88126_49727963 | NC_021165.1    | Ca_kabuli_chr06 | 49727963                | GG                              | TT              | 1946874896               |
| SNP_P4_88127_49727968 | NC_021165.1    | Ca_kabuli_chr06 | 49727968                | AA                              | GG              | 1946874898               |
| SNP_P4_88128_49727979 | NC_021165.1    | Ca_kabuli_chr06 | 49727979                | TT                              | GG              | 1946874900               |
| SNP_P4_88129_49728123 | NC_021165.1    | Ca_kabuli_chr06 | 49728123                | CC                              | AA              | 1946874902               |
| SNP_P4_88130_49728136 | NC_021165.1    | Ca_kabuli_chr06 | 49728136                | TT                              | CC              | 1946874904               |
| SNP_P4_88131_49728139 | NC_021165.1    | Ca_kabuli_chr06 | 49728139                | GG                              | CC              | 1946874906               |
| SNP_P4_88132_49728150 | NC_021165.1    | Ca_kabuli_chr06 | 49728150                | AA                              | GG              | 1946874908               |
| SNP_P4_88133_49728215 | NC_021165.1    | Ca_kabuli_chr06 | 49728215                | AA                              | GG              | 1946874910               |
| SNP_P4_88134_49728235 | NC_021165.1    | Ca_kabuli_chr06 | 49728235                | TT                              | AA              | 1946874912               |
| SNP_P4_88135_49728480 | NC_021165.1    | Ca_kabuli_chr06 | 49728480                | CC                              | TT              | 1946874914               |
| SNP_P4_88136_49728496 | NC_021165.1    | Ca_kabuli_chr06 | 49728496                | GG                              | AA              | 1946874916               |
| SNP_P4_88137_49728764 | NC_021165.1    | Ca_kabuli_chr06 | 49728764                | TT                              | AA              | 1946874918               |
| SNP_P4_88138_49728765 | NC_021165.1    | Ca_kabuli_chr06 | 49728765                | TT                              | CC              | 1946874920               |
| SNP_P4_88139_49728777 | NC_021165.1    | Ca_kabuli_chr06 | 49728777                | GG                              | CC              | 1946874922               |
| SNP_P4_88142_49775198 | NC_021165.1    | Ca_kabuli_chr06 | 49775198                | CC                              | TT              | 1946874924               |
| SNP_P4_88143_49778895 | NC_021165.1    | Ca_kabuli_chr06 | 49778895                | AA                              | CC              | 1946874926               |
| SNP_P4_88144_49793786 | NC_021165.1    | Ca_kabuli_chr06 | 49793786                | AA                              | TT              | 1946874928               |
| SNP_P4_88145_49806012 | NC_021165.1    | Ca_kabuli_chr06 | 49806012                | AA                              | CC              | 1946874930               |
| SNP_P4_88146_49806057 | NC_021165.1    | Ca_kabuli_chr06 | 49806057                | AA                              | GG              | 1946874932               |
| SNP_P4_88147_49806063 | NC_021165.1    | Ca_kabuli_chr06 | 49806063                | TT                              | CC              | 1946874934               |
| SNP_P4_88148_49806425 | NC_021165.1    | Ca_kabuli_chr06 | 49806425                | AA                              | GG              | 1946874936               |
| SNP_P4_88149_49806447 | NC_021165.1    | Ca_kabuli_chr06 | 49806447                | CC                              | AA              | 1946874938               |
| SNP_P4_88150_49813093 | NC_021165.1    | Ca_kabuli_chr06 | 49813093                | CC                              | TT              | 1946874940               |
| SNP_P4_88151_49828341 | NC_021165.1    | Ca_kabuli_chr06 | 49828341                | TT                              | AA              | 1946874942               |
| SNP_P4_88152_49841921 | NC_021165.1    | Ca_kabuli_chr06 | 49841921                | TT                              | AA              | 1946874944               |
| SNP_P4_88153_49848847 | NC_021165.1    | Ca_kabuli_chr06 | 49848847                | TT                              | AA              | 1946874946               |
| SNP_P4_88155_49870650 | NC_021165.1    | Ca_kabuli_chr06 | 49870650                | TT                              | CC              | 1946874948               |
| SNP_P4_88156_49876075 | NC_021165.1    | Ca_kabuli_chr06 | 49876075                | GG                              | CC              | 1946874950               |
| SNP_P4_88157_49894427 | NC_021165.1    | Ca_kabuli_chr06 | 49894427                | GG                              | AA              | 1946874952               |
| SNP_P4_88158_49916899 | NC_021165.1    | Ca_kabuli_chr06 | 49916899                | AA                              | CC              | 1946874954               |
| SNP_P4_88159_49916901 | NC_021165.1    | Ca_kabuli_chr06 | 49916901                | AA                              | CC              | 1946874956               |
| SNP_P4_88161_49924684 | NC_021165.1    | Ca_kabuli_chr06 | 49924684                | CC                              | AA              | 1946874958               |
| SNP_P4_88162_49934172 | NC_021165.1    | Ca_kabuli_chr06 | 49934172                | CC                              | GG              | 1946874960               |
| SNP_P4_88163_49936008 | NC_021165.1    | Ca_kabuli_chr06 | 49936008                | GG                              | AA              | 1946874962               |
| SNP_P4_88164_49941024 | NC_021165.1    | Ca_kabuli_chr06 | 49941024                | CC                              | GG              | 1946874964               |
| SNP_P4_88165_49949271 | NC_021165.1    | Ca_kabuli_chr06 | 49949271                | TT                              | CC              | 1946874966               |
| SNP_P4_88166_49951222 | NC_021165.1    | Ca_kabuli_chr06 | 49951222                | AA                              | GG              | 1946874968               |
| SNP_P4_88167_49953922 | NC_021165.1    | Ca_kabuli_chr06 | 49953922                | TT                              | GG              | 1946874970               |
| SNP_P4_88168_49953943 | NC_021165.1    | Ca_kabuli_chr06 | 49953943                | CC                              | AA              | 1946874972               |
| SNP_P4_88169_49954082 | NC_021165.1    | Ca_kabuli_chr06 | 49954082                | AA                              | GG              | 1946874974               |

| SNPs IDs              | Chromosome IDs | Chromosomes     | Physical positions (bp) | CDC Frontier (Reference genome) | (ILWC46 & LPNB) | NCBI SNPdb Accession IDs |
|-----------------------|----------------|-----------------|-------------------------|---------------------------------|-----------------|--------------------------|
| SNP_P4_88170_49954093 | NC_021165.1    | Ca_kabuli_chr06 | 49954093                | GG                              | TT              | 1946874976               |
| SNP_P4_88171_49998782 | NC_021165.1    | Ca_kabuli_chr06 | 49998782                | TT                              | CC              | 1946874978               |
| SNP_P4_88172_49998785 | NC_021165.1    | Ca_kabuli_chr06 | 49998785                | GG                              | TT              | 1946874980               |
| SNP_P4_88175_50002110 | NC_021165.1    | Ca_kabuli_chr06 | 50002110                | CC                              | AA              | 1946874982               |
| SNP_P4_88176_50002114 | NC_021165.1    | Ca_kabuli_chr06 | 50002114                | AA                              | GG              | 1946874984               |
| SNP_P4_88177_50002153 | NC_021165.1    | Ca_kabuli_chr06 | 50002153                | CC                              | TT              | 1946874986               |
| SNP_P4_88178_50014226 | NC_021165.1    | Ca_kabuli_chr06 | 50014226                | CC                              | TT              | 1946874988               |
| SNP_P4_88179_50023270 | NC_021165.1    | Ca_kabuli_chr06 | 50023270                | GG                              | AA              | 1946874990               |
| SNP_P4_88180_50038168 | NC_021165.1    | Ca_kabuli_chr06 | 50038168                | GG                              | AA              | 1946874992               |
| SNP_P4_88181_50038174 | NC_021165.1    | Ca_kabuli_chr06 | 50038174                | TT                              | CC              | 1946874994               |
| SNP_P4_88182_50041715 | NC_021165.1    | Ca_kabuli_chr06 | 50041715                | GG                              | AA              | 1946874996               |
| SNP_P4_88183_50044332 | NC_021165.1    | Ca_kabuli_chr06 | 50044332                | CC                              | TT              | 1946874998               |
| SNP_P4_88184_50105155 | NC_021165.1    | Ca_kabuli_chr06 | 50105155                | TT                              | CC              | 1946875000               |
| SNP_P4_88185_50123885 | NC_021165.1    | Ca_kabuli_chr06 | 50123885                | AA                              | TT              | 1946875002               |
| SNP_P4_88186_50131847 | NC_021165.1    | Ca_kabuli_chr06 | 50131847                | GG                              | AA              | 1946875004               |
| SNP_P4_88187_50148593 | NC_021165.1    | Ca_kabuli_chr06 | 50148593                | TT                              | CC              | 1946875006               |
| SNP_P4_88188_50149310 | NC_021165.1    | Ca_kabuli_chr06 | 50149310                | GG                              | AA              | 1946875008               |
| SNP_P4_88189_50153419 | NC_021165.1    | Ca_kabuli_chr06 | 50153419                | GG                              | AA              | 1946875010               |
| SNP_P4_88190_50157468 | NC_021165.1    | Ca_kabuli_chr06 | 50157468                | CC                              | TT              | 1946875012               |
| SNP_P4_88191_50162493 | NC_021165.1    | Ca_kabuli_chr06 | 50162493                | TT                              | AA              | 1946875014               |
| SNP_P4_88192_50162501 | NC_021165.1    | Ca_kabuli_chr06 | 50162501                | CC                              | TT              | 1946875016               |
| SNP_P4_88193_50162804 | NC_021165.1    | Ca_kabuli_chr06 | 50162804                | AA                              | TT              | 1946875018               |
| SNP_P4_88194_50162907 | NC_021165.1    | Ca_kabuli_chr06 | 50162907                | CC                              | TT              | 1946875020               |
| SNP_P4_88195_50162918 | NC_021165.1    | Ca_kabuli_chr06 | 50162918                | CC                              | TT              | 1946875022               |
| SNP_P4_88196_50162981 | NC_021165.1    | Ca_kabuli_chr06 | 50162981                | TT                              | CC              | 1946875024               |
| SNP_P4_88197_50163016 | NC_021165.1    | Ca_kabuli_chr06 | 50163016                | CC                              | AA              | 1946875026               |
| SNP_P4_88198_50185084 | NC_021165.1    | Ca_kabuli_chr06 | 50185084                | TT                              | CC              | 1946875028               |
| SNP_P4_88199_50185095 | NC_021165.1    | Ca_kabuli_chr06 | 50185095                | TT                              | GG              | 1946875030               |
| SNP_P4_88200_50185099 | NC_021165.1    | Ca_kabuli_chr06 | 50185099                | CC                              | TT              | 1946875032               |
| SNP_P4_88201_50185195 | NC_021165.1    | Ca_kabuli_chr06 | 50185195                | AA                              | GG              | 1946875034               |
| SNP_P4_88202_50185198 | NC_021165.1    | Ca_kabuli_chr06 | 50185198                | TT                              | GG              | 1946875036               |
| SNP_P4_88203_50185229 | NC_021165.1    | Ca_kabuli_chr06 | 50185229                | AA                              | TT              | 1946875039               |
| SNP_P4_88204_50215306 | NC_021165.1    | Ca_kabuli_chr06 | 50215306                | TT                              | AA              | 1946875042               |
| SNP_P4_88205_50215307 | NC_021165.1    | Ca_kabuli_chr06 | 50215307                | TT                              | AA              | 1946875044               |
| SNP_P4_88206_50237547 | NC_021165.1    | Ca_kabuli_chr06 | 50237547                | GG                              | TT              | 1946875047               |
| SNP_P4_88207_50240862 | NC_021165.1    | Ca_kabuli_chr06 | 50240862                | GG                              | AA              | 1946875049               |
| SNP_P4_88208_50260463 | NC_021165.1    | Ca_kabuli_chr06 | 50260463                | TT                              | AA              | 1946875052               |
| SNP_P4_88209_50276298 | NC_021165.1    | Ca_kabuli_chr06 | 50276298                | TT                              | CC              | 1946875054               |
| SNP_P4_88210_50295765 | NC_021165.1    | Ca_kabuli_chr06 | 50295765                | AA                              | GG              | 1946875057               |
| SNP_P4_88211_50296363 | NC_021165.1    | Ca_kabuli_chr06 | 50296363                | CC                              | AA              | 1946875059               |
| SNP_P4_88212_50296387 | NC_021165.1    | Ca_kabuli_chr06 | 50296387                | GG                              | AA              | 1946875061               |
| SNP_P4_88213_50300829 | NC_021165.1    | Ca_kabuli_chr06 | 50300829                | GG                              | AA              | 1946875063               |

| SNPs IDs              | Chromosome IDs | Chromosomes     | Physical positions (bp) | CDC Frontier (Reference genome) | (ILWC46 & LPNB) | NCBI SNPdb Accession IDs |
|-----------------------|----------------|-----------------|-------------------------|---------------------------------|-----------------|--------------------------|
| SNP_P4_88214_50300836 | NC_021165.1    | Ca_kabuli_chr06 | 50300836                | GG                              | AA              | 1946875065               |
| SNP_P4_88215_50300877 | NC_021165.1    | Ca_kabuli_chr06 | 50300877                | AA                              | GG              | 1946875067               |
| SNP_P4_88216_50301286 | NC_021165.1    | Ca_kabuli_chr06 | 50301286                | AA                              | GG              | 1946875069               |
| SNP_P4_88217_50301302 | NC_021165.1    | Ca_kabuli_chr06 | 50301302                | TT                              | CC              | 1946875071               |
| SNP_P4_88218_50306321 | NC_021165.1    | Ca_kabuli_chr06 | 50306321                | AA                              | GG              | 1946875073               |
| SNP_P4_88219_50308486 | NC_021165.1    | Ca_kabuli_chr06 | 50308486                | TT                              | CC              | 1946875075               |
| SNP_P4_88220_50327912 | NC_021165.1    | Ca_kabuli_chr06 | 50327912                | CC                              | AA              | 1946875077               |
| SNP_P4_88221_50338228 | NC_021165.1    | Ca_kabuli_chr06 | 50338228                | CC                              | TT              | 1946875079               |
| SNP_P4_88222_50348386 | NC_021165.1    | Ca_kabuli_chr06 | 50348386                | CC                              | AA              | 1946875081               |
| SNP_P4_88224_50428699 | NC_021165.1    | Ca_kabuli_chr06 | 50428699                | AA                              | GG              | 1946875083               |
| SNP_P4_88225_50466116 | NC_021165.1    | Ca_kabuli_chr06 | 50466116                | CC                              | TT              | 1946875085               |
| SNP_P4_88227_50506640 | NC_021165.1    | Ca_kabuli_chr06 | 50506640                | CC                              | TT              | 1946875087               |
| SNP_P4_88228_50516062 | NC_021165.1    | Ca_kabuli_chr06 | 50516062                | TT                              | AA              | 1946875089               |
| SNP_P4_88230_50525420 | NC_021165.1    | Ca_kabuli_chr06 | 50525420                | CC                              | TT              | 1946875091               |
| SNP_P4_88232_50528892 | NC_021165.1    | Ca_kabuli_chr06 | 50528892                | AA                              | TT              | 1946875093               |
| SNP_P4_88233_50568117 | NC_021165.1    | Ca_kabuli_chr06 | 50568117                | TT                              | CC              | 1946875095               |
| SNP_P4_88234_50650096 | NC_021165.1    | Ca_kabuli_chr06 | 50650096                | TT                              | GG              | 1946875097               |
| SNP_P4_88235_50659206 | NC_021165.1    | Ca_kabuli_chr06 | 50659206                | AA                              | TT              | 1946875099               |
| SNP_P4_88236_50659378 | NC_021165.1    | Ca_kabuli_chr06 | 50659378                | GG                              | AA              | 1946875101               |
| SNP_P4_88237_50681175 | NC_021165.1    | Ca_kabuli_chr06 | 50681175                | AA                              | TT              | 1946875103               |
| SNP_P4_88238_50682232 | NC_021165.1    | Ca_kabuli_chr06 | 50682232                | AA                              | TT              | 1946875105               |
| SNP_P4_88239_50760995 | NC_021165.1    | Ca_kabuli_chr06 | 50760995                | GG                              | AA              | 1946875107               |
| SNP_P4_88240_50764834 | NC_021165.1    | Ca_kabuli_chr06 | 50764834                | AA                              | CC              | 1946875109               |
| SNP_P4_88241_50788287 | NC_021165.1    | Ca_kabuli_chr06 | 50788287                | TT                              | GG              | 1946875111               |
| SNP_P4_88242_50788308 | NC_021165.1    | Ca_kabuli_chr06 | 50788308                | GG                              | AA              | 1946875113               |
| SNP_P4_88243_50788341 | NC_021165.1    | Ca_kabuli_chr06 | 50788341                | TT                              | CC              | 1946875115               |
| SNP_P4_88244_50788416 | NC_021165.1    | Ca_kabuli_chr06 | 50788416                | GG                              | TT              | 1946875117               |
| SNP_P4_88245_50788684 | NC_021165.1    | Ca_kabuli_chr06 | 50788684                | AA                              | GG              | 1946875119               |
| SNP_P4_88246_50796792 | NC_021165.1    | Ca_kabuli_chr06 | 50796792                | TT                              | CC              | 1946875121               |
| SNP_P4_88247_50796797 | NC_021165.1    | Ca_kabuli_chr06 | 50796797                | AA                              | GG              | 1946875123               |
| SNP_P4_88248_50796818 | NC_021165.1    | Ca_kabuli_chr06 | 50796818                | TT                              | CC              | 1946875125               |
| SNP_P4_88249_50796833 | NC_021165.1    | Ca_kabuli_chr06 | 50796833                | CC                              | TT              | 1946875127               |
| SNP_P4_88250_50796883 | NC_021165.1    | Ca_kabuli_chr06 | 50796883                | TT                              | CC              | 1946875129               |
| SNP_P4_88252_50797048 | NC_021165.1    | Ca_kabuli_chr06 | 50797048                | AA                              | GG              | 1946875131               |
| SNP_P4_88253_50797051 | NC_021165.1    | Ca_kabuli_chr06 | 50797051                | TT                              | GG              | 1946875133               |
| SNP_P4_88254_50797117 | NC_021165.1    | Ca_kabuli_chr06 | 50797117                | CC                              | TT              | 1946875135               |
| SNP_P4_88255_50797170 | NC_021165.1    | Ca_kabuli_chr06 | 50797170                | CC                              | TT              | 1946875137               |
| SNP_P4_88256_50797176 | NC_021165.1    | Ca_kabuli_chr06 | 50797176                | TT                              | CC              | 1946875139               |
| SNP_P4_88257_50797191 | NC_021165.1    | Ca_kabuli_chr06 | 50797191                | TT                              | GG              | 1946875141               |
| SNP_P4_88258_50797326 | NC_021165.1    | Ca_kabuli_chr06 | 50797326                | GG                              | AA              | 1946875143               |
| SNP_P4_88259_50797365 | NC_021165.1    | Ca_kabuli_chr06 | 50797365                | AA                              | GG              | 1946875145               |
| SNP_P4_88260_50797480 | NC_021165.1    | Ca_kabuli_chr06 | 50797480                | GG                              | AA              | 1946875147               |



| SNPs IDs              | Chromosome IDs | Chromosomes     | Physical positions (bp) | CDC Frontier (Reference genome) | (ILWC46 & LPNB) | NCBI SNPdb Accession IDs |
|-----------------------|----------------|-----------------|-------------------------|---------------------------------|-----------------|--------------------------|
| SNP_P4_88261_50797481 | NC_021165.1    | Ca_kabuli_chr06 | 50797481                | GG                              | AA              | 1946875149               |
| SNP_P4_88262_50797504 | NC_021165.1    | Ca_kabuli_chr06 | 50797504                | TT                              | AA              | 1946875151               |
| SNP_P4_88263_50797525 | NC_021165.1    | Ca_kabuli_chr06 | 50797525                | GG                              | AA              | 1946875153               |
| SNP_P4_88264_50797531 | NC_021165.1    | Ca_kabuli_chr06 | 50797531                | CC                              | GG              | 1946875155               |
| SNP_P4_88265_50797536 | NC_021165.1    | Ca_kabuli_chr06 | 50797536                | CC                              | AA              | 1946875157               |
| SNP_P4_88266_50797616 | NC_021165.1    | Ca_kabuli_chr06 | 50797616                | CC                              | AA              | 1946875159               |
| SNP_P4_88267_50797674 | NC_021165.1    | Ca_kabuli_chr06 | 50797674                | CC                              | AA              | 1946875161               |
| SNP_P4_88268_50797872 | NC_021165.1    | Ca_kabuli_chr06 | 50797872                | TT                              | CC              | 1946875163               |
| SNP_P4_88269_50797873 | NC_021165.1    | Ca_kabuli_chr06 | 50797873                | GG                              | TT              | 1946875165               |
| SNP_P4_88270_50797903 | NC_021165.1    | Ca_kabuli_chr06 | 50797903                | TT                              | AA              | 1946875167               |
| SNP_P4_88271_50797991 | NC_021165.1    | Ca_kabuli_chr06 | 50797991                | TT                              | AA              | 1946875169               |
| SNP_P4_88272_50798090 | NC_021165.1    | Ca_kabuli_chr06 | 50798090                | GG                              | CC              | 1946875171               |
| SNP_P4_88273_50798119 | NC_021165.1    | Ca_kabuli_chr06 | 50798119                | CC                              | TT              | 1946875173               |
| SNP_P4_88274_50798158 | NC_021165.1    | Ca_kabuli_chr06 | 50798158                | CC                              | AA              | 1946875175               |
| SNP_P4_88275_50798168 | NC_021165.1    | Ca_kabuli_chr06 | 50798168                | AA                              | GG              | 1946875177               |
| SNP_P4_88276_50798253 | NC_021165.1    | Ca_kabuli_chr06 | 50798253                | TT                              | CC              | 1946875180               |
| SNP_P4_88277_50798260 | NC_021165.1    | Ca_kabuli_chr06 | 50798260                | AA                              | GG              | 1946875182               |
| SNP_P4_88278_50798261 | NC_021165.1    | Ca_kabuli_chr06 | 50798261                | AA                              | GG              | 1946875184               |
| SNP_P4_88279_50798364 | NC_021165.1    | Ca_kabuli_chr06 | 50798364                | CC                              | TT              | 1946875186               |
| SNP_P4_88280_50799379 | NC_021165.1    | Ca_kabuli_chr06 | 50799379                | CC                              | GG              | 1946875188               |
| SNP_P4_88281_50799517 | NC_021165.1    | Ca_kabuli_chr06 | 50799517                | AA                              | GG              | 1946875190               |
| SNP_P4_88282_50799625 | NC_021165.1    | Ca_kabuli_chr06 | 50799625                | AA                              | TT              | 1946875192               |
| SNP_P4_88283_50799645 | NC_021165.1    | Ca_kabuli_chr06 | 50799645                | CC                              | AA              | 1946875194               |
| SNP_P4_88284_50799822 | NC_021165.1    | Ca_kabuli_chr06 | 50799822                | GG                              | AA              | 1946875196               |
| SNP_P4_88285_50818088 | NC_021165.1    | Ca_kabuli_chr06 | 50818088                | AA                              | TT              | 1946875198               |
| SNP_P4_88286_50818104 | NC_021165.1    | Ca_kabuli_chr06 | 50818104                | AA                              | GG              | 1946875200               |
| SNP_P4_88287_50828717 | NC_021165.1    | Ca_kabuli_chr06 | 50828717                | GG                              | TT              | 1946875202               |
| SNP_P4_88288_50829342 | NC_021165.1    | Ca_kabuli_chr06 | 50829342                | AA                              | TT              | 1946875204               |
| SNP_P4_88289_50829351 | NC_021165.1    | Ca_kabuli_chr06 | 50829351                | TT                              | AA              | 1946875206               |
| SNP_P4_88290_50830073 | NC_021165.1    | Ca_kabuli_chr06 | 50830073                | AA                              | GG              | 1946875208               |
| SNP_P4_88291_50830417 | NC_021165.1    | Ca_kabuli_chr06 | 50830417                | AA                              | CC              | 1946875210               |
| SNP_P4_88292_50830553 | NC_021165.1    | Ca_kabuli_chr06 | 50830553                | CC                              | TT              | 1946875212               |
| SNP_P4_88293_50835028 | NC_021165.1    | Ca_kabuli_chr06 | 50835028                | TT                              | CC              | 1946875214               |
| SNP_P4_88294_50848757 | NC_021165.1    | Ca_kabuli_chr06 | 50848757                | AA                              | GG              | 1946875216               |
| SNP_P4_88295_50854517 | NC_021165.1    | Ca_kabuli_chr06 | 50854517                | AA                              | GG              | 1946875218               |
| SNP_P4_88297_50930598 | NC_021165.1    | Ca_kabuli_chr06 | 50930598                | AA                              | CC              | 1946875220               |
| SNP_P4_88299_50952980 | NC_021165.1    | Ca_kabuli_chr06 | 50952980                | CC                              | TT              | 1946875222               |
| SNP_P4_88300_50954419 | NC_021165.1    | Ca_kabuli_chr06 | 50954419                | AA                              | CC              | 1946875224               |
| SNP_P4_88301_50954420 | NC_021165.1    | Ca_kabuli_chr06 | 50954420                | CC                              | AA              | 1946875226               |
| SNP_P4_88302_50954754 | NC_021165.1    | Ca_kabuli_chr06 | 50954754                | TT                              | CC              | 1946875228               |
| SNP_P4_88304_50977014 | NC_021165.1    | Ca_kabuli_chr06 | 50977014                | TT                              | CC              | 1946875230               |
| SNP_P4_88305_50977034 | NC_021165.1    | Ca_kabuli_chr06 | 50977034                | TT                              | CC              | 1946875232               |

| SNPs IDs              | Chromosome IDs | Chromosomes     | Physical positions (bp) | CDC Frontier (Reference genome) | (ILWC46 & LPNB) | NCBI SNPdb Accession IDs |
|-----------------------|----------------|-----------------|-------------------------|---------------------------------|-----------------|--------------------------|
| SNP_P4_88306_50977086 | NC_021165.1    | Ca_kabuli_chr06 | 50977086                | CC                              | TT              | 1946875234               |
| SNP_P4_88307_50977168 | NC_021165.1    | Ca_kabuli_chr06 | 50977168                | TT                              | AA              | 1946875236               |
| SNP_P4_88308_50977186 | NC_021165.1    | Ca_kabuli_chr06 | 50977186                | TT                              | CC              | 1946875238               |
| SNP_P4_88309_50977263 | NC_021165.1    | Ca_kabuli_chr06 | 50977263                | AA                              | CC              | 1946875240               |
| SNP_P4_88310_50977269 | NC_021165.1    | Ca_kabuli_chr06 | 50977269                | TT                              | CC              | 1946875242               |
| SNP_P4_88311_50977340 | NC_021165.1    | Ca_kabuli_chr06 | 50977340                | CC                              | TT              | 1946875244               |
| SNP_P4_88312_50977360 | NC_021165.1    | Ca_kabuli_chr06 | 50977360                | TT                              | GG              | 1946875246               |
| SNP_P4_88313_50977467 | NC_021165.1    | Ca_kabuli_chr06 | 50977467                | AA                              | GG              | 1946875248               |
| SNP_P4_88315_50977528 | NC_021165.1    | Ca_kabuli_chr06 | 50977528                | AA                              | GG              | 1946875250               |
| SNP_P4_88316_51009261 | NC_021165.1    | Ca_kabuli_chr06 | 51009261                | TT                              | AA              | 1946875252               |
| SNP_P4_88317_51031237 | NC_021165.1    | Ca_kabuli_chr06 | 51031237                | AA                              | CC              | 1946875254               |
| SNP_P4_88318_51031241 | NC_021165.1    | Ca_kabuli_chr06 | 51031241                | GG                              | TT              | 1946875256               |
| SNP_P4_88319_51031593 | NC_021165.1    | Ca_kabuli_chr06 | 51031593                | TT                              | CC              | 1946875258               |
| SNP_P4_88321_51041992 | NC_021165.1    | Ca_kabuli_chr06 | 51041992                | CC                              | TT              | 1946875260               |
| SNP_P4_88322_51073566 | NC_021165.1    | Ca_kabuli_chr06 | 51073566                | GG                              | AA              | 1946875262               |
| SNP_P4_88323_51073823 | NC_021165.1    | Ca_kabuli_chr06 | 51073823                | TT                              | CC              | 1946875265               |
| SNP_P4_88324_51073853 | NC_021165.1    | Ca_kabuli_chr06 | 51073853                | TT                              | AA              | 1946875267               |
| SNP_P4_88325_51074754 | NC_021165.1    | Ca_kabuli_chr06 | 51074754                | AA                              | CC              | 1946875269               |
| SNP_P4_88326_51074777 | NC_021165.1    | Ca_kabuli_chr06 | 51074777                | CC                              | GG              | 1946875271               |
| SNP_P4_88327_51074784 | NC_021165.1    | Ca_kabuli_chr06 | 51074784                | TT                              | CC              | 1946875273               |
| SNP_P4_88328_51074799 | NC_021165.1    | Ca_kabuli_chr06 | 51074799                | TT                              | CC              | 1946875275               |
| SNP_P4_88329_51074803 | NC_021165.1    | Ca_kabuli_chr06 | 51074803                | GG                              | CC              | 1946875277               |
| SNP_P4_88330_51074805 | NC_021165.1    | Ca_kabuli_chr06 | 51074805                | GG                              | TT              | 1946875279               |
| SNP_P4_88331_51075513 | NC_021165.1    | Ca_kabuli_chr06 | 51075513                | GG                              | CC              | 1946875281               |
| SNP_P4_88332_51077681 | NC_021165.1    | Ca_kabuli_chr06 | 51077681                | CC                              | TT              | 1946875283               |
| SNP_P4_88333_51082486 | NC_021165.1    | Ca_kabuli_chr06 | 51082486                | CC                              | TT              | 1946875285               |
| SNP_P4_88334_51083158 | NC_021165.1    | Ca_kabuli_chr06 | 51083158                | AA                              | GG              | 1946875287               |
| SNP_P4_88335_51088246 | NC_021165.1    | Ca_kabuli_chr06 | 51088246                | AA                              | GG              | 1946875289               |
| SNP_P4_88337_51166459 | NC_021165.1    | Ca_kabuli_chr06 | 51166459                | AA                              | GG              | 1946875291               |
| SNP_P4_88338_51166479 | NC_021165.1    | Ca_kabuli_chr06 | 51166479                | GG                              | AA              | 1946875293               |
| SNP_P4_88339_51166484 | NC_021165.1    | Ca_kabuli_chr06 | 51166484                | CC                              | AA              | 1946875295               |
| SNP_P4_88340_51172958 | NC_021165.1    | Ca_kabuli_chr06 | 51172958                | GG                              | AA              | 1946875296               |
| SNP_P4_88341_51180753 | NC_021165.1    | Ca_kabuli_chr06 | 51180753                | AA                              | CC              | 1946875298               |
| SNP_P4_88342_51219779 | NC_021165.1    | Ca_kabuli_chr06 | 51219779                | AA                              | GG              | 1946875300               |
| SNP_P4_88343_51220151 | NC_021165.1    | Ca_kabuli_chr06 | 51220151                | TT                              | GG              | 1946875302               |
| SNP_P4_88344_51220209 | NC_021165.1    | Ca_kabuli_chr06 | 51220209                | AA                              | GG              | 1946875304               |
| SNP_P4_88345_51220269 | NC_021165.1    | Ca_kabuli_chr06 | 51220269                | CC                              | TT              | 1946875306               |
| SNP_P4_88346_51220334 | NC_021165.1    | Ca_kabuli_chr06 | 51220334                | AA                              | GG              | 1946875308               |
| SNP_P4_88347_51220384 | NC_021165.1    | Ca_kabuli_chr06 | 51220384                | AA                              | TT              | 1946875310               |
| SNP_P4_88348_51246075 | NC_021165.1    | Ca_kabuli_chr06 | 51246075                | TT                              | CC              | 1946875312               |
| SNP_P4_88349_51256721 | NC_021165.1    | Ca_kabuli_chr06 | 51256721                | CC                              | TT              | 1946875314               |
| SNP_P4_88350_51270062 | NC_021165.1    | Ca_kabuli_chr06 | 51270062                | GG                              | AA              | 1946875316               |

| SNPs IDs              | Chromosome IDs | Chromosomes     | Physical positions (bp) | CDC Frontier (Reference genome) | (ILWC46 & LPNB) | NCBI SNPdb Accession IDs |
|-----------------------|----------------|-----------------|-------------------------|---------------------------------|-----------------|--------------------------|
| SNP_P4_88352_51277678 | NC_021165.1    | Ca_kabuli_chr06 | 51277678                | GG                              | AA              | 1946875318               |
| SNP_P4_88353_51321455 | NC_021165.1    | Ca_kabuli_chr06 | 51321455                | CC                              | TT              | 1946875320               |
| SNP_P4_88354_51324156 | NC_021165.1    | Ca_kabuli_chr06 | 51324156                | AA                              | CC              | 1946875322               |
| SNP_P4_88355_51324467 | NC_021165.1    | Ca_kabuli_chr06 | 51324467                | TT                              | GG              | 1946875324               |
| SNP_P4_88356_51324468 | NC_021165.1    | Ca_kabuli_chr06 | 51324468                | AA                              | GG              | 1946875326               |
| SNP_P4_88357_51329042 | NC_021165.1    | Ca_kabuli_chr06 | 51329042                | GG                              | AA              | 1946875327               |
| SNP_P4_88358_51347146 | NC_021165.1    | Ca_kabuli_chr06 | 51347146                | GG                              | CC              | 1946875329               |
| SNP_P4_88360_51356537 | NC_021165.1    | Ca_kabuli_chr06 | 51356537                | TT                              | GG              | 1946875331               |
| SNP_P4_88361_51357953 | NC_021165.1    | Ca_kabuli_chr06 | 51357953                | TT                              | GG              | 1946875333               |
| SNP_P4_88362_51358271 | NC_021165.1    | Ca_kabuli_chr06 | 51358271                | CC                              | AA              | 1946875335               |
| SNP_P4_88363_51358314 | NC_021165.1    | Ca_kabuli_chr06 | 51358314                | CC                              | AA              | 1946875337               |
| SNP_P4_88364_51391199 | NC_021165.1    | Ca_kabuli_chr06 | 51391199                | GG                              | AA              | 1946875339               |
| SNP_P4_88366_51396406 | NC_021165.1    | Ca_kabuli_chr06 | 51396406                | CC                              | TT              | 1946875341               |
| SNP_P4_88367_51397116 | NC_021165.1    | Ca_kabuli_chr06 | 51397116                | TT                              | CC              | 1946875343               |
| SNP_P4_88368_51397525 | NC_021165.1    | Ca_kabuli_chr06 | 51397525                | AA                              | GG              | 1946875345               |
| SNP_P4_88369_51397532 | NC_021165.1    | Ca_kabuli_chr06 | 51397532                | AA                              | GG              | 1946875347               |
| SNP_P4_88371_51434125 | NC_021165.1    | Ca_kabuli_chr06 | 51434125                | TT                              | CC              | 1946875349               |
| SNP_P4_88372_51435036 | NC_021165.1    | Ca_kabuli_chr06 | 51435036                | CC                              | AA              | 1946875351               |
| SNP_P4_88373_51435590 | NC_021165.1    | Ca_kabuli_chr06 | 51435590                | AA                              | CC              | 1946875353               |
| SNP_P4_88374_51435592 | NC_021165.1    | Ca_kabuli_chr06 | 51435592                | AA                              | CC              | 1946875355               |
| SNP_P4_88375_51441594 | NC_021165.1    | Ca_kabuli_chr06 | 51441594                | GG                              | AA              | 1946875356               |
| SNP_P4_88376_51441603 | NC_021165.1    | Ca_kabuli_chr06 | 51441603                | CC                              | TT              | 1946875358               |
| SNP_P4_88377_51444105 | NC_021165.1    | Ca_kabuli_chr06 | 51444105                | TT                              | CC              | 1946875360               |
| SNP_P4_88378_51444377 | NC_021165.1    | Ca_kabuli_chr06 | 51444377                | CC                              | TT              | 1946875362               |
| SNP_P4_88379_51444381 | NC_021165.1    | Ca_kabuli_chr06 | 51444381                | AA                              | GG              | 1946875364               |
| SNP_P4_88380_51444405 | NC_021165.1    | Ca_kabuli_chr06 | 51444405                | TT                              | AA              | 1946875366               |
| SNP_P4_88381_51444434 | NC_021165.1    | Ca_kabuli_chr06 | 51444434                | AA                              | GG              | 1946875368               |
| SNP_P4_88382_51444474 | NC_021165.1    | Ca_kabuli_chr06 | 51444474                | TT                              | AA              | 1946875370               |
| SNP_P4_88383_51444475 | NC_021165.1    | Ca_kabuli_chr06 | 51444475                | AA                              | CC              | 1946875372               |
| SNP_P4_88384_51444476 | NC_021165.1    | Ca_kabuli_chr06 | 51444476                | TT                              | CC              | 1946875374               |
| SNP_P4_88385_51444477 | NC_021165.1    | Ca_kabuli_chr06 | 51444477                | TT                              | CC              | 1946875376               |
| SNP_P4_88386_51444478 | NC_021165.1    | Ca_kabuli_chr06 | 51444478                | TT                              | CC              | 1946875378               |
| SNP_P4_88387_51444493 | NC_021165.1    | Ca_kabuli_chr06 | 51444493                | GG                              | AA              | 1946875380               |
| SNP_P4_88388_51444577 | NC_021165.1    | Ca_kabuli_chr06 | 51444577                | CC                              | GG              | 1946875382               |
| SNP_P4_88389_51444608 | NC_021165.1    | Ca_kabuli_chr06 | 51444608                | AA                              | CC              | 1946875384               |
| SNP_P4_88390_51444626 | NC_021165.1    | Ca_kabuli_chr06 | 51444626                | TT                              | CC              | 1946875386               |
| SNP_P4_88391_51449022 | NC_021165.1    | Ca_kabuli_chr06 | 51449022                | CC                              | TT              | 1946875387               |
| SNP_P4_88392_51450169 | NC_021165.1    | Ca_kabuli_chr06 | 51450169                | TT                              | CC              | 1946875389               |
| SNP_P4_88394_51482593 | NC_021165.1    | Ca_kabuli_chr06 | 51482593                | CC                              | TT              | 1946875391               |
| SNP_P4_88396_51482640 | NC_021165.1    | Ca_kabuli_chr06 | 51482640                | AA                              | CC              | 1946875393               |
| SNP_P4_88397_51483056 | NC_021165.1    | Ca_kabuli_chr06 | 51483056                | TT                              | AA              | 1946875395               |
| SNP_P4_88398_51486469 | NC_021165.1    | Ca_kabuli_chr06 | 51486469                | AA                              | GG              | 1946875397               |

| SNPs IDs              | Chromosome IDs | Chromosomes     | Physical positions (bp) | CDC Frontier (Reference genome) | (ILWC46 & LPNB) | NCBI SNPdb Accession IDs |
|-----------------------|----------------|-----------------|-------------------------|---------------------------------|-----------------|--------------------------|
| SNP_P4_88401_51504970 | NC_021165.1    | Ca_kabuli_chr06 | 51504970                | AA                              | TT              | 1946875399               |
| SNP_P4_88402_51506574 | NC_021165.1    | Ca_kabuli_chr06 | 51506574                | CC                              | AA              | 1946875401               |
| SNP_P4_88403_51506612 | NC_021165.1    | Ca_kabuli_chr06 | 51506612                | AA                              | GG              | 1946875403               |
| SNP_P4_88404_51506743 | NC_021165.1    | Ca_kabuli_chr06 | 51506743                | CC                              | AA              | 1946875405               |
| SNP_P4_88405_51506777 | NC_021165.1    | Ca_kabuli_chr06 | 51506777                | TT                              | AA              | 1946875407               |
| SNP_P4_88406_51506858 | NC_021165.1    | Ca_kabuli_chr06 | 51506858                | AA                              | GG              | 1946875409               |
| SNP_P4_88407_51533765 | NC_021165.1    | Ca_kabuli_chr06 | 51533765                | TT                              | CC              | 1946875411               |
| SNP_P4_88408_51533782 | NC_021165.1    | Ca_kabuli_chr06 | 51533782                | CC                              | AA              | 1946875413               |
| SNP_P4_88409_51533797 | NC_021165.1    | Ca_kabuli_chr06 | 51533797                | GG                              | AA              | 1946875415               |
| SNP_P4_88410_51537047 | NC_021165.1    | Ca_kabuli_chr06 | 51537047                | TT                              | CC              | 1946875417               |
| SNP_P4_88411_51563747 | NC_021165.1    | Ca_kabuli_chr06 | 51563747                | TT                              | GG              | 1946875419               |
| SNP_P4_88412_51588814 | NC_021165.1    | Ca_kabuli_chr06 | 51588814                | TT                              | CC              | 1946875421               |
| SNP_P4_88413_51588888 | NC_021165.1    | Ca_kabuli_chr06 | 51588888                | AA                              | GG              | 1946875423               |
| SNP_P4_88414_51593678 | NC_021165.1    | Ca_kabuli_chr06 | 51593678                | CC                              | AA              | 1946875425               |
| SNP_P4_88415_51617449 | NC_021165.1    | Ca_kabuli_chr06 | 51617449                | TT                              | CC              | 1946875427               |
| SNP_P4_88416_51617681 | NC_021165.1    | Ca_kabuli_chr06 | 51617681                | TT                              | AA              | 1946875429               |
| SNP_P4_88417_51620145 | NC_021165.1    | Ca_kabuli_chr06 | 51620145                | CC                              | AA              | 1946875431               |
| SNP_P4_88418_51620670 | NC_021165.1    | Ca_kabuli_chr06 | 51620670                | TT                              | GG              | 1946875433               |
| SNP_P4_88419_51671986 | NC_021165.1    | Ca_kabuli_chr06 | 51671986                | GG                              | AA              | 1946875435               |
| SNP_P4_88420_51672042 | NC_021165.1    | Ca_kabuli_chr06 | 51672042                | CC                              | TT              | 1946875437               |
| SNP_P4_88421_51672074 | NC_021165.1    | Ca_kabuli_chr06 | 51672074                | AA                              | CC              | 1946875439               |
| SNP_P4_88422_51673257 | NC_021165.1    | Ca_kabuli_chr06 | 51673257                | AA                              | GG              | 1946875441               |
| SNP_P4_88423_51673379 | NC_021165.1    | Ca_kabuli_chr06 | 51673379                | GG                              | AA              | 1946875443               |
| SNP_P4_88424_51673404 | NC_021165.1    | Ca_kabuli_chr06 | 51673404                | TT                              | AA              | 1946875445               |
| SNP_P4_88425_51675181 | NC_021165.1    | Ca_kabuli_chr06 | 51675181                | TT                              | CC              | 1946875447               |
| SNP_P4_88426_51675188 | NC_021165.1    | Ca_kabuli_chr06 | 51675188                | CC                              | GG              | 1946875449               |
| SNP_P4_88427_51675205 | NC_021165.1    | Ca_kabuli_chr06 | 51675205                | CC                              | AA              | 1946875450               |
| SNP_P4_88428_51675262 | NC_021165.1    | Ca_kabuli_chr06 | 51675262                | GG                              | AA              | 1946875452               |
| SNP_P4_88429_51675562 | NC_021165.1    | Ca_kabuli_chr06 | 51675562                | TT                              | CC              | 1946875454               |
| SNP_P4_88430_51675577 | NC_021165.1    | Ca_kabuli_chr06 | 51675577                | GG                              | AA              | 1946875456               |
| SNP_P4_88431_51675595 | NC_021165.1    | Ca_kabuli_chr06 | 51675595                | AA                              | GG              | 1946875458               |
| SNP_P4_88432_51678031 | NC_021165.1    | Ca_kabuli_chr06 | 51678031                | TT                              | CC              | 1946875460               |
| SNP_P4_88433_51678932 | NC_021165.1    | Ca_kabuli_chr06 | 51678932                | AA                              | CC              | 1946875462               |
| SNP_P4_88434_51678939 | NC_021165.1    | Ca_kabuli_chr06 | 51678939                | AA                              | TT              | 1946875464               |
| SNP_P4_88435_51679191 | NC_021165.1    | Ca_kabuli_chr06 | 51679191                | TT                              | CC              | 1946875466               |
| SNP_P4_88436_51679239 | NC_021165.1    | Ca_kabuli_chr06 | 51679239                | AA                              | GG              | 1946875468               |
| SNP_P4_88437_51700841 | NC_021165.1    | Ca_kabuli_chr06 | 51700841                | AA                              | TT              | 1946875470               |
| SNP_P4_88438_51700901 | NC_021165.1    | Ca_kabuli_chr06 | 51700901                | AA                              | CC              | 1946875472               |
| SNP_P4_88439_51725706 | NC_021165.1    | Ca_kabuli_chr06 | 51725706                | TT                              | CC              | 1946875474               |
| SNP_P4_88440_51737260 | NC_021165.1    | Ca_kabuli_chr06 | 51737260                | CC                              | AA              | 1946875476               |
| SNP_P4_88441_51737325 | NC_021165.1    | Ca_kabuli_chr06 | 51737325                | GG                              | AA              | 1946875478               |
| SNP_P4_88442_51737707 | NC_021165.1    | Ca_kabuli_chr06 | 51737707                | TT                              | CC              | 1946875480               |

| SNPs IDs              | Chromosome IDs | Chromosomes     | Physical positions (bp) | CDC Frontier (Reference genome) | (ILWC46 & LPNB) | NCBI SNPdb Accession IDs |
|-----------------------|----------------|-----------------|-------------------------|---------------------------------|-----------------|--------------------------|
| SNP_P4_88443_51737708 | NC_021165.1    | Ca_kabuli_chr06 | 51737708                | AA                              | GG              | 1946875482               |
| SNP_P4_88445_51764411 | NC_021165.1    | Ca_kabuli_chr06 | 51764411                | AA                              | GG              | 1946875484               |
| SNP_P4_88446_51767433 | NC_021165.1    | Ca_kabuli_chr06 | 51767433                | AA                              | GG              | 1946875486               |
| SNP_P4_88447_51767471 | NC_021165.1    | Ca_kabuli_chr06 | 51767471                | AA                              | CC              | 1946875487               |
| SNP_P4_88448_51767512 | NC_021165.1    | Ca_kabuli_chr06 | 51767512                | AA                              | CC              | 1946875489               |
| SNP_P4_88449_51767671 | NC_021165.1    | Ca_kabuli_chr06 | 51767671                | CC                              | TT              | 1946875491               |
| SNP_P4_88450_51767876 | NC_021165.1    | Ca_kabuli_chr06 | 51767876                | TT                              | GG              | 1946875493               |
| SNP_P4_88451_51767889 | NC_021165.1    | Ca_kabuli_chr06 | 51767889                | AA                              | GG              | 1946875495               |
| SNP_P4_88452_51767902 | NC_021165.1    | Ca_kabuli_chr06 | 51767902                | AA                              | CC              | 1946875497               |
| SNP_P4_88453_51767924 | NC_021165.1    | Ca_kabuli_chr06 | 51767924                | TT                              | GG              | 1946875499               |
| SNP_P4_88454_51768028 | NC_021165.1    | Ca_kabuli_chr06 | 51768028                | GG                              | AA              | 1946875501               |
| SNP_P4_88455_51768069 | NC_021165.1    | Ca_kabuli_chr06 | 51768069                | TT                              | GG              | 1946875503               |
| SNP_P4_88456_51769036 | NC_021165.1    | Ca_kabuli_chr06 | 51769036                | CC                              | AA              | 1946875505               |
| SNP_P4_88457_51770263 | NC_021165.1    | Ca_kabuli_chr06 | 51770263                | GG                              | AA              | 1946875507               |
| SNP_P4_88458_51770311 | NC_021165.1    | Ca_kabuli_chr06 | 51770311                | TT                              | CC              | 1946875509               |
| SNP_P4_88459_51770358 | NC_021165.1    | Ca_kabuli_chr06 | 51770358                | AA                              | CC              | 1946875511               |
| SNP_P4_88460_51770385 | NC_021165.1    | Ca_kabuli_chr06 | 51770385                | CC                              | TT              | 1946875513               |
| SNP_P4_88461_51770577 | NC_021165.1    | Ca_kabuli_chr06 | 51770577                | GG                              | AA              | 1946875515               |
| SNP_P4_88462_51771227 | NC_021165.1    | Ca_kabuli_chr06 | 51771227                | AA                              | TT              | 1946875517               |
| SNP_P4_88463_51771228 | NC_021165.1    | Ca_kabuli_chr06 | 51771228                | AA                              | CC              | 1946875519               |
| SNP_P4_88464_51771266 | NC_021165.1    | Ca_kabuli_chr06 | 51771266                | TT                              | CC              | 1946875521               |
| SNP_P4_88465_51771278 | NC_021165.1    | Ca_kabuli_chr06 | 51771278                | AA                              | CC              | 1946875523               |
| SNP_P4_88466_51771291 | NC_021165.1    | Ca_kabuli_chr06 | 51771291                | TT                              | CC              | 1946875525               |
| SNP_P4_88467_51771534 | NC_021165.1    | Ca_kabuli_chr06 | 51771534                | AA                              | CC              | 1946875527               |
| SNP_P4_88468_51772169 | NC_021165.1    | Ca_kabuli_chr06 | 51772169                | TT                              | AA              | 1946875529               |
| SNP_P4_88470_51772820 | NC_021165.1    | Ca_kabuli_chr06 | 51772820                | AA                              | GG              | 1946875531               |
| SNP_P4_88472_51772898 | NC_021165.1    | Ca_kabuli_chr06 | 51772898                | AA                              | TT              | 1946875533               |
| SNP_P4_88473_51773194 | NC_021165.1    | Ca_kabuli_chr06 | 51773194                | AA                              | GG              | 1946875536               |
| SNP_P4_88474_51775827 | NC_021165.1    | Ca_kabuli_chr06 | 51775827                | CC                              | TT              | 1946875538               |
| SNP_P4_88476_51775941 | NC_021165.1    | Ca_kabuli_chr06 | 51775941                | TT                              | CC              | 1946875540               |
| SNP_P4_88477_51776063 | NC_021165.1    | Ca_kabuli_chr06 | 51776063                | AA                              | TT              | 1946875542               |
| SNP_P4_88479_51791817 | NC_021165.1    | Ca_kabuli_chr06 | 51791817                | TT                              | CC              | 1946875544               |
| SNP_P4_88480_51801790 | NC_021165.1    | Ca_kabuli_chr06 | 51801790                | CC                              | TT              | 1946875546               |
| SNP_P4_88481_51801813 | NC_021165.1    | Ca_kabuli_chr06 | 51801813                | CC                              | AA              | 1946875548               |
| SNP_P4_88482_51802102 | NC_021165.1    | Ca_kabuli_chr06 | 51802102                | CC                              | GG              | 1946875550               |
| SNP_P4_88483_51806309 | NC_021165.1    | Ca_kabuli_chr06 | 51806309                | AA                              | GG              | 1946875552               |
| SNP_P4_88485_51824441 | NC_021165.1    | Ca_kabuli_chr06 | 51824441                | AA                              | TT              | 1946875554               |
| SNP_P4_88486_51828472 | NC_021165.1    | Ca_kabuli_chr06 | 51828472                | GG                              | AA              | 1946875556               |
| SNP_P4_88487_51828966 | NC_021165.1    | Ca_kabuli_chr06 | 51828966                | GG                              | CC              | 1946875558               |
| SNP_P4_88488_51829013 | NC_021165.1    | Ca_kabuli_chr06 | 51829013                | AA                              | GG              | 1946875560               |
| SNP_P4_88489_51829235 | NC_021165.1    | Ca_kabuli_chr06 | 51829235                | AA                              | CC              | 1946875562               |
| SNP_P4_88490_51829254 | NC_021165.1    | Ca_kabuli_chr06 | 51829254                | TT                              | CC              | 1946875564               |

| SNPs IDs              | Chromosome IDs | Chromosomes     | Physical positions (bp) | CDC Frontier (Reference genome) | (ILWC46 & LPNB) | NCBI SNPdb Accession IDs |
|-----------------------|----------------|-----------------|-------------------------|---------------------------------|-----------------|--------------------------|
| SNP_P4_88491_51830284 | NC_021165.1    | Ca_kabuli_chr06 | 51830284                | CC                              | AA              | 1946875566               |
| SNP_P4_88492_51830304 | NC_021165.1    | Ca_kabuli_chr06 | 51830304                | AA                              | GG              | 1946875568               |
| SNP_P4_88493_51846196 | NC_021165.1    | Ca_kabuli_chr06 | 51846196                | TT                              | GG              | 1946875570               |
| SNP_P4_88494_51846208 | NC_021165.1    | Ca_kabuli_chr06 | 51846208                | GG                              | AA              | 1946875572               |
| SNP_P4_88495_51846209 | NC_021165.1    | Ca_kabuli_chr06 | 51846209                | TT                              | CC              | 1946875574               |
| SNP_P4_88496_51867059 | NC_021165.1    | Ca_kabuli_chr06 | 51867059                | AA                              | GG              | 1946875576               |
| SNP_P4_88497_51867086 | NC_021165.1    | Ca_kabuli_chr06 | 51867086                | TT                              | AA              | 1946875577               |
| SNP_P4_88498_51880356 | NC_021165.1    | Ca_kabuli_chr06 | 51880356                | TT                              | CC              | 1946875579               |
| SNP_P4_88499_51880675 | NC_021165.1    | Ca_kabuli_chr06 | 51880675                | AA                              | GG              | 1946875581               |
| SNP_P4_88500_51895388 | NC_021165.1    | Ca_kabuli_chr06 | 51895388                | AA                              | TT              | 1946875583               |
| SNP_P4_88501_51895403 | NC_021165.1    | Ca_kabuli_chr06 | 51895403                | GG                              | TT              | 1946875585               |
| SNP_P4_88502_51906437 | NC_021165.1    | Ca_kabuli_chr06 | 51906437                | AA                              | GG              | 1946875587               |
| SNP_P4_88503_51906592 | NC_021165.1    | Ca_kabuli_chr06 | 51906592                | AA                              | GG              | 1946875589               |
| SNP_P4_88504_51922233 | NC_021165.1    | Ca_kabuli_chr06 | 51922233                | AA                              | CC              | 1946875591               |
| SNP_P4_88505_51933667 | NC_021165.1    | Ca_kabuli_chr06 | 51933667                | AA                              | GG              | 1946875593               |
| SNP_P4_88506_51934146 | NC_021165.1    | Ca_kabuli_chr06 | 51934146                | AA                              | GG              | 1946875595               |
| SNP_P4_88507_51934154 | NC_021165.1    | Ca_kabuli_chr06 | 51934154                | GG                              | AA              | 1946875597               |
| SNP_P4_88508_51949439 | NC_021165.1    | Ca_kabuli_chr06 | 51949439                | TT                              | CC              | 1946875599               |
| SNP_P4_88509_51954845 | NC_021165.1    | Ca_kabuli_chr06 | 51954845                | CC                              | TT              | 1946875601               |
| SNP_P4_88510_51955243 | NC_021165.1    | Ca_kabuli_chr06 | 51955243                | AA                              | CC              | 1946875603               |
| SNP_P4_88511_51959760 | NC_021165.1    | Ca_kabuli_chr06 | 51959760                | TT                              | CC              | 1946875605               |
| SNP_P4_88513_51982989 | NC_021165.1    | Ca_kabuli_chr06 | 51982989                | TT                              | AA              | 1946875607               |
| SNP_P4_88514_52003659 | NC_021165.1    | Ca_kabuli_chr06 | 52003659                | GG                              | AA              | 1946875609               |
| SNP_P4_88515_52003768 | NC_021165.1    | Ca_kabuli_chr06 | 52003768                | TT                              | AA              | 1946875611               |
| SNP_P4_88516_52008922 | NC_021165.1    | Ca_kabuli_chr06 | 52008922                | AA                              | TT              | 1946875613               |
| SNP_P4_88517_52008929 | NC_021165.1    | Ca_kabuli_chr06 | 52008929                | CC                              | TT              | 1946875615               |
| SNP_P4_88518_52009059 | NC_021165.1    | Ca_kabuli_chr06 | 52009059                | GG                              | AA              | 1946875617               |
| SNP_P4_88519_52041719 | NC_021165.1    | Ca_kabuli_chr06 | 52041719                | GG                              | TT              | 1946875619               |
| SNP_P4_88520_52074912 | NC_021165.1    | Ca_kabuli_chr06 | 52074912                | AA                              | CC              | 1946875621               |
| SNP_P4_88521_52075027 | NC_021165.1    | Ca_kabuli_chr06 | 52075027                | TT                              | AA              | 1946875623               |
| SNP_P4_88523_52075115 | NC_021165.1    | Ca_kabuli_chr06 | 52075115                | TT                              | CC              | 1946875625               |
| SNP_P4_88524_52075165 | NC_021165.1    | Ca_kabuli_chr06 | 52075165                | TT                              | CC              | 1946875627               |
| SNP_P4_88525_52075334 | NC_021165.1    | Ca_kabuli_chr06 | 52075334                | CC                              | TT              | 1946875629               |
| SNP_P4_88526_52086792 | NC_021165.1    | Ca_kabuli_chr06 | 52086792                | GG                              | AA              | 1946875631               |
| SNP_P4_88527_52086882 | NC_021165.1    | Ca_kabuli_chr06 | 52086882                | GG                              | TT              | 1946875633               |
| SNP_P4_88529_52087910 | NC_021165.1    | Ca_kabuli_chr06 | 52087910                | CC                              | GG              | 1946875635               |
| SNP_P4_88530_52088095 | NC_021165.1    | Ca_kabuli_chr06 | 52088095                | GG                              | CC              | 1946875637               |
| SNP_P4_88531_52088185 | NC_021165.1    | Ca_kabuli_chr06 | 52088185                | AA                              | CC              | 1946875638               |
| SNP_P4_88532_52088350 | NC_021165.1    | Ca_kabuli_chr06 | 52088350                | TT                              | CC              | 1946875640               |
| SNP_P4_88533_52088388 | NC_021165.1    | Ca_kabuli_chr06 | 52088388                | AA                              | TT              | 1946875642               |
| SNP_P4_88534_52088720 | NC_021165.1    | Ca_kabuli_chr06 | 52088720                | TT                              | GG              | 1946875644               |
| SNP_P4_88535_52088832 | NC_021165.1    | Ca_kabuli_chr06 | 52088832                | AA                              | GG              | 1946875646               |

| SNPs IDs              | Chromosome IDs | Chromosomes     | Physical positions (bp) | CDC Frontier (Reference genome) | (ILWC46 & LPNB) | NCBI SNPdb Accession IDs |
|-----------------------|----------------|-----------------|-------------------------|---------------------------------|-----------------|--------------------------|
| SNP_P4_88536_52088834 | NC_021165.1    | Ca_kabuli_chr06 | 52088834                | CC                              | GG              | 1946875648               |
| SNP_P4_88537_52088933 | NC_021165.1    | Ca_kabuli_chr06 | 52088933                | GG                              | TT              | 1946875650               |
| SNP_P4_88538_52088934 | NC_021165.1    | Ca_kabuli_chr06 | 52088934                | GG                              | TT              | 1946875652               |
| SNP_P4_88539_52088939 | NC_021165.1    | Ca_kabuli_chr06 | 52088939                | AA                              | CC              | 1946875654               |
| SNP_P4_88540_52088940 | NC_021165.1    | Ca_kabuli_chr06 | 52088940                | GG                              | AA              | 1946875656               |
| SNP_P4_88541_52088943 | NC_021165.1    | Ca_kabuli_chr06 | 52088943                | GG                              | CC              | 1946875658               |
| SNP_P4_88542_52088948 | NC_021165.1    | Ca_kabuli_chr06 | 52088948                | TT                              | AA              | 1946875660               |
| SNP_P4_88543_52088949 | NC_021165.1    | Ca_kabuli_chr06 | 52088949                | TT                              | GG              | 1946875662               |
| SNP_P4_88544_52088952 | NC_021165.1    | Ca_kabuli_chr06 | 52088952                | AA                              | GG              | 1946875664               |
| SNP_P4_88545_52088955 | NC_021165.1    | Ca_kabuli_chr06 | 52088955                | GG                              | CC              | 1946875666               |
| SNP_P4_88546_52089071 | NC_021165.1    | Ca_kabuli_chr06 | 52089071                | TT                              | AA              | 1946875668               |
| SNP_P4_88547_52089097 | NC_021165.1    | Ca_kabuli_chr06 | 52089097                | CC                              | GG              | 1946875670               |
| SNP_P4_88548_52089098 | NC_021165.1    | Ca_kabuli_chr06 | 52089098                | AA                              | GG              | 1946875672               |
| SNP_P4_88549_52089100 | NC_021165.1    | Ca_kabuli_chr06 | 52089100                | AA                              | CC              | 1946875674               |
| SNP_P4_88550_52089109 | NC_021165.1    | Ca_kabuli_chr06 | 52089109                | GG                              | AA              | 1946875676               |
| SNP_P4_88551_52089111 | NC_021165.1    | Ca_kabuli_chr06 | 52089111                | TT                              | GG              | 1946875678               |
| SNP_P4_88552_52089118 | NC_021165.1    | Ca_kabuli_chr06 | 52089118                | TT                              | AA              | 1946875680               |
| SNP_P4_88553_52089121 | NC_021165.1    | Ca_kabuli_chr06 | 52089121                | TT                              | CC              | 1946875682               |
| SNP_P4_88554_52089122 | NC_021165.1    | Ca_kabuli_chr06 | 52089122                | AA                              | GG              | 1946875684               |
| SNP_P4_88555_52089152 | NC_021165.1    | Ca_kabuli_chr06 | 52089152                | TT                              | AA              | 1946875686               |
| SNP_P4_88556_52089273 | NC_021165.1    | Ca_kabuli_chr06 | 52089273                | AA                              | CC              | 1946875688               |
| SNP_P4_88557_52089316 | NC_021165.1    | Ca_kabuli_chr06 | 52089316                | AA                              | GG              | 1946875690               |
| SNP_P4_88558_52089339 | NC_021165.1    | Ca_kabuli_chr06 | 52089339                | CC                              | GG              | 1946875692               |
| SNP_P4_88559_52089344 | NC_021165.1    | Ca_kabuli_chr06 | 52089344                | CC                              | TT              | 1946875694               |
| SNP_P4_88560_52089428 | NC_021165.1    | Ca_kabuli_chr06 | 52089428                | GG                              | AA              | 1946875695               |
| SNP_P4_88561_52089448 | NC_021165.1    | Ca_kabuli_chr06 | 52089448                | TT                              | CC              | 1946875696               |
| SNP_P4_88562_52089474 | NC_021165.1    | Ca_kabuli_chr06 | 52089474                | GG                              | TT              | 1946875697               |
| SNP_P4_88563_52089605 | NC_021165.1    | Ca_kabuli_chr06 | 52089605                | AA                              | TT              | 1946875698               |
| SNP_P4_88564_52089619 | NC_021165.1    | Ca_kabuli_chr06 | 52089619                | TT                              | AA              | 1946875699               |
| SNP_P4_88565_52089647 | NC_021165.1    | Ca_kabuli_chr06 | 52089647                | AA                              | TT              | 1946875700               |
| SNP_P4_88566_52089653 | NC_021165.1    | Ca_kabuli_chr06 | 52089653                | AA                              | GG              | 1946875701               |
| SNP_P4_88567_52089711 | NC_021165.1    | Ca_kabuli_chr06 | 52089711                | TT                              | CC              | 1946875702               |
| SNP_P4_88568_52089739 | NC_021165.1    | Ca_kabuli_chr06 | 52089739                | CC                              | TT              | 1946875703               |
| SNP_P4_88569_52089757 | NC_021165.1    | Ca_kabuli_chr06 | 52089757                | TT                              | AA              | 1946875704               |
| SNP_P4_88570_52090004 | NC_021165.1    | Ca_kabuli_chr06 | 52090004                | TT                              | CC              | 1946875705               |
| SNP_P4_88571_52090058 | NC_021165.1    | Ca_kabuli_chr06 | 52090058                | AA                              | TT              | 1946875706               |
| SNP_P4_88572_52090060 | NC_021165.1    | Ca_kabuli_chr06 | 52090060                | CC                              | TT              | 1946875708               |
| SNP_P4_88573_52093489 | NC_021165.1    | Ca_kabuli_chr06 | 52093489                | CC                              | GG              | 1946875710               |
| SNP_P4_88574_52093491 | NC_021165.1    | Ca_kabuli_chr06 | 52093491                | TT                              | CC              | 1946875712               |
| SNP_P4_88575_52093498 | NC_021165.1    | Ca_kabuli_chr06 | 52093498                | AA                              | GG              | 1946875714               |
| SNP_P4_88576_52093552 | NC_021165.1    | Ca_kabuli_chr06 | 52093552                | CC                              | AA              | 1946875716               |
| SNP_P4_88577_52093800 | NC_021165.1    | Ca_kabuli_chr06 | 52093800                | AA                              | GG              | 1946875718               |

| SNPs IDs              | Chromosome IDs | Chromosomes     | Physical positions (bp) | CDC Frontier (Reference genome) | (ILWC46 & LPNB) | NCBI SNPdb Accession IDs |
|-----------------------|----------------|-----------------|-------------------------|---------------------------------|-----------------|--------------------------|
| SNP_P4_88578_52093811 | NC_021165.1    | Ca_kabuli_chr06 | 52093811                | AA                              | GG              | 1946875720               |
| SNP_P4_88579_52093816 | NC_021165.1    | Ca_kabuli_chr06 | 52093816                | CC                              | TT              | 1946875722               |
| SNP_P4_88581_52107585 | NC_021165.1    | Ca_kabuli_chr06 | 52107585                | CC                              | GG              | 1946875724               |
| SNP_P4_88582_52107590 | NC_021165.1    | Ca_kabuli_chr06 | 52107590                | GG                              | CC              | 1946875726               |
| SNP_P4_88583_52107606 | NC_021165.1    | Ca_kabuli_chr06 | 52107606                | TT                              | CC              | 1946875728               |
| SNP_P4_88584_52118422 | NC_021165.1    | Ca_kabuli_chr06 | 52118422                | GG                              | AA              | 1946875730               |
| SNP_P4_88585_52120312 | NC_021165.1    | Ca_kabuli_chr06 | 52120312                | AA                              | CC              | 1946875732               |
| SNP_P4_88586_52120442 | NC_021165.1    | Ca_kabuli_chr06 | 52120442                | CC                              | GG              | 1946875734               |
| SNP_P4_88587_52120478 | NC_021165.1    | Ca_kabuli_chr06 | 52120478                | TT                              | CC              | 1946875736               |
| SNP_P4_88588_52120483 | NC_021165.1    | Ca_kabuli_chr06 | 52120483                | CC                              | AA              | 1946875738               |
| SNP_P4_88589_52120508 | NC_021165.1    | Ca_kabuli_chr06 | 52120508                | AA                              | CC              | 1946875740               |
| SNP_P4_88590_52120587 | NC_021165.1    | Ca_kabuli_chr06 | 52120587                | CC                              | AA              | 1946875742               |
| SNP_P4_88591_52120625 | NC_021165.1    | Ca_kabuli_chr06 | 52120625                | TT                              | AA              | 1946875744               |
| SNP_P4_88592_52120664 | NC_021165.1    | Ca_kabuli_chr06 | 52120664                | CC                              | TT              | 1946875746               |
| SNP_P4_88593_52120678 | NC_021165.1    | Ca_kabuli_chr06 | 52120678                | TT                              | CC              | 1946875748               |
| SNP_P4_88594_52120739 | NC_021165.1    | Ca_kabuli_chr06 | 52120739                | AA                              | TT              | 1946875750               |
| SNP_P4_88595_52120757 | NC_021165.1    | Ca_kabuli_chr06 | 52120757                | AA                              | GG              | 1946875752               |
| SNP_P4_88596_52122024 | NC_021165.1    | Ca_kabuli_chr06 | 52122024                | CC                              | GG              | 1946875754               |
| SNP_P4_88597_52122046 | NC_021165.1    | Ca_kabuli_chr06 | 52122046                | TT                              | CC              | 1946875756               |
| SNP_P4_88598_52122069 | NC_021165.1    | Ca_kabuli_chr06 | 52122069                | TT                              | GG              | 1946875758               |
| SNP_P4_88599_52124940 | NC_021165.1    | Ca_kabuli_chr06 | 52124940                | GG                              | TT              | 1946875760               |
| SNP_P4_88600_52125066 | NC_021165.1    | Ca_kabuli_chr06 | 52125066                | GG                              | AA              | 1946875762               |
| SNP_P4_88601_52125120 | NC_021165.1    | Ca_kabuli_chr06 | 52125120                | GG                              | AA              | 1946875764               |
| SNP_P4_88602_52125392 | NC_021165.1    | Ca_kabuli_chr06 | 52125392                | TT                              | CC              | 1946875766               |
| SNP_P4_88603_52125456 | NC_021165.1    | Ca_kabuli_chr06 | 52125456                | CC                              | GG              | 1946875768               |
| SNP_P4_88604_52126344 | NC_021165.1    | Ca_kabuli_chr06 | 52126344                | TT                              | CC              | 1946875770               |
| SNP_P4_88605_52138762 | NC_021165.1    | Ca_kabuli_chr06 | 52138762                | AA                              | GG              | 1946875771               |
| SNP_P4_88606_52150477 | NC_021165.1    | Ca_kabuli_chr06 | 52150477                | GG                              | AA              | 1946875773               |
| SNP_P4_88607_52176793 | NC_021165.1    | Ca_kabuli_chr06 | 52176793                | GG                              | AA              | 1946875775               |
| SNP_P4_88608_52220240 | NC_021165.1    | Ca_kabuli_chr06 | 52220240                | TT                              | AA              | 1946875777               |
| SNP_P4_88609_52240243 | NC_021165.1    | Ca_kabuli_chr06 | 52240243                | CC                              | TT              | 1946875779               |
| SNP_P4_88610_52248297 | NC_021165.1    | Ca_kabuli_chr06 | 52248297                | AA                              | GG              | 1946875781               |
| SNP_P4_88611_52250877 | NC_021165.1    | Ca_kabuli_chr06 | 52250877                | GG                              | AA              | 1946875783               |
| SNP_P4_88612_52250931 | NC_021165.1    | Ca_kabuli_chr06 | 52250931                | TT                              | CC              | 1946875785               |
| SNP_P4_88613_52251192 | NC_021165.1    | Ca_kabuli_chr06 | 52251192                | AA                              | CC              | 1946875787               |
| SNP_P4_88614_52251202 | NC_021165.1    | Ca_kabuli_chr06 | 52251202                | AA                              | GG              | 1946875789               |
| SNP_P4_88615_52251278 | NC_021165.1    | Ca_kabuli_chr06 | 52251278                | GG                              | CC              | 1946875791               |
| SNP_P4_88616_52251296 | NC_021165.1    | Ca_kabuli_chr06 | 52251296                | GG                              | AA              | 1946875793               |
| SNP_P4_88617_52267676 | NC_021165.1    | Ca_kabuli_chr06 | 52267676                | AA                              | GG              | 1946875795               |
| SNP_P4_88618_52267711 | NC_021165.1    | Ca_kabuli_chr06 | 52267711                | TT                              | CC              | 1946875797               |
| SNP_P4_88619_52267742 | NC_021165.1    | Ca_kabuli_chr06 | 52267742                | GG                              | AA              | 1946875799               |
| SNP_P4_88620_52267776 | NC_021165.1    | Ca_kabuli_chr06 | 52267776                | GG                              | CC              | 1946875800               |



| SNPs IDs              | Chromosome IDs | Chromosomes     | Physical positions (bp) | CDC Frontier (Reference genome) | (ILWC46 & LPNB) | NCBI SNPdb Accession IDs |
|-----------------------|----------------|-----------------|-------------------------|---------------------------------|-----------------|--------------------------|
| SNP_P4_88621_52267790 | NC_021165.1    | Ca_kabuli_chr06 | 52267790                | AA                              | GG              | 1946875802               |
| SNP_P4_88622_52267809 | NC_021165.1    | Ca_kabuli_chr06 | 52267809                | TT                              | CC              | 1946875804               |
| SNP_P4_88623_52267839 | NC_021165.1    | Ca_kabuli_chr06 | 52267839                | TT                              | CC              | 1946875806               |
| SNP_P4_88624_52267902 | NC_021165.1    | Ca_kabuli_chr06 | 52267902                | TT                              | AA              | 1946875808               |
| SNP_P4_88625_52268002 | NC_021165.1    | Ca_kabuli_chr06 | 52268002                | GG                              | AA              | 1946875810               |
| SNP_P4_88626_52268005 | NC_021165.1    | Ca_kabuli_chr06 | 52268005                | AA                              | TT              | 1946875812               |
| SNP_P4_88627_52269381 | NC_021165.1    | Ca_kabuli_chr06 | 52269381                | CC                              | GG              | 1946875814               |
| SNP_P4_88628_52273089 | NC_021165.1    | Ca_kabuli_chr06 | 52273089                | TT                              | AA              | 1946875816               |
| SNP_P4_88629_52273091 | NC_021165.1    | Ca_kabuli_chr06 | 52273091                | AA                              | TT              | 1946875818               |
| SNP_P4_88630_52290301 | NC_021165.1    | Ca_kabuli_chr06 | 52290301                | AA                              | TT              | 1946875820               |
| SNP_P4_88631_52290303 | NC_021165.1    | Ca_kabuli_chr06 | 52290303                | CC                              | TT              | 1946875822               |
| SNP_P4_88633_52363976 | NC_021165.1    | Ca_kabuli_chr06 | 52363976                | TT                              | AA              | 1946875824               |
| SNP_P4_88634_52375738 | NC_021165.1    | Ca_kabuli_chr06 | 52375738                | TT                              | CC              | 1946875825               |
| SNP_P4_88635_52411975 | NC_021165.1    | Ca_kabuli_chr06 | 52411975                | AA                              | GG              | 1946875827               |
| SNP_P4_88636_52417636 | NC_021165.1    | Ca_kabuli_chr06 | 52417636                | TT                              | CC              | 1946875829               |
| SNP_P4_88637_52426832 | NC_021165.1    | Ca_kabuli_chr06 | 52426832                | TT                              | CC              | 1946875831               |
| SNP_P4_88638_52457808 | NC_021165.1    | Ca_kabuli_chr06 | 52457808                | TT                              | GG              | 1946875833               |
| SNP_P4_88639_52478181 | NC_021165.1    | Ca_kabuli_chr06 | 52478181                | GG                              | TT              | 1946875835               |
| SNP_P4_88641_52486155 | NC_021165.1    | Ca_kabuli_chr06 | 52486155                | AA                              | GG              | 1946875837               |
| SNP_P4_88642_52486171 | NC_021165.1    | Ca_kabuli_chr06 | 52486171                | TT                              | CC              | 1946875839               |
| SNP_P4_88643_52486300 | NC_021165.1    | Ca_kabuli_chr06 | 52486300                | TT                              | CC              | 1946875841               |
| SNP_P4_88644_52486358 | NC_021165.1    | Ca_kabuli_chr06 | 52486358                | TT                              | CC              | 1946875843               |
| SNP_P4_88645_52486378 | NC_021165.1    | Ca_kabuli_chr06 | 52486378                | GG                              | TT              | 1946875844               |
| SNP_P4_88648_52529891 | NC_021165.1    | Ca_kabuli_chr06 | 52529891                | GG                              | AA              | 1946875846               |
| SNP_P4_88649_52530187 | NC_021165.1    | Ca_kabuli_chr06 | 52530187                | TT                              | CC              | 1946875848               |
| SNP_P4_88650_52530191 | NC_021165.1    | Ca_kabuli_chr06 | 52530191                | CC                              | TT              | 1946875850               |
| SNP_P4_88651_52531294 | NC_021165.1    | Ca_kabuli_chr06 | 52531294                | AA                              | TT              | 1946875852               |
| SNP_P4_88652_52552823 | NC_021165.1    | Ca_kabuli_chr06 | 52552823                | AA                              | TT              | 1946875854               |
| SNP_P4_88653_52594928 | NC_021165.1    | Ca_kabuli_chr06 | 52594928                | TT                              | GG              | 1946875856               |
| SNP_P4_88654_52608769 | NC_021165.1    | Ca_kabuli_chr06 | 52608769                | CC                              | AA              | 1946875858               |
| SNP_P4_88655_52610067 | NC_021165.1    | Ca_kabuli_chr06 | 52610067                | TT                              | GG              | 1946875860               |
| SNP_P4_88656_52644961 | NC_021165.1    | Ca_kabuli_chr06 | 52644961                | CC                              | AA              | 1946875862               |
| SNP_P4_88657_52648829 | NC_021165.1    | Ca_kabuli_chr06 | 52648829                | TT                              | CC              | 1946875864               |
| SNP_P4_88659_52662394 | NC_021165.1    | Ca_kabuli_chr06 | 52662394                | AA                              | TT              | 1946875866               |
| SNP_P4_88660_52676714 | NC_021165.1    | Ca_kabuli_chr06 | 52676714                | GG                              | AA              | 1946875867               |
| SNP_P4_88661_52696183 | NC_021165.1    | Ca_kabuli_chr06 | 52696183                | AA                              | TT              | 1946875869               |
| SNP_P4_88662_52697062 | NC_021165.1    | Ca_kabuli_chr06 | 52697062                | AA                              | CC              | 1946875871               |
| SNP_P4_88663_52697071 | NC_021165.1    | Ca_kabuli_chr06 | 52697071                | AA                              | GG              | 1946875873               |
| SNP_P4_88664_52697120 | NC_021165.1    | Ca_kabuli_chr06 | 52697120                | TT                              | CC              | 1946875875               |
| SNP_P4_88665_52698843 | NC_021165.1    | Ca_kabuli_chr06 | 52698843                | AA                              | GG              | 1946875877               |
| SNP_P4_88666_52703130 | NC_021165.1    | Ca_kabuli_chr06 | 52703130                | TT                              | CC              | 1946875879               |
| SNP_P4_88667_52711823 | NC_021165.1    | Ca_kabuli_chr06 | 52711823                | CC                              | TT              | 1946875881               |

| SNPs IDs              | Chromosome IDs | Chromosomes     | Physical positions (bp) | CDC Frontier (Reference genome) | (ILWC46 & LPNB) | NCBI SNPdb Accession IDs |
|-----------------------|----------------|-----------------|-------------------------|---------------------------------|-----------------|--------------------------|
| SNP_P4_88668_52711956 | NC_021165.1    | Ca_kabuli_chr06 | 52711956                | GG                              | AA              | 1946875883               |
| SNP_P4_88669_52763550 | NC_021165.1    | Ca_kabuli_chr06 | 52763550                | TT                              | AA              | 1946875885               |
| SNP_P4_88670_52763551 | NC_021165.1    | Ca_kabuli_chr06 | 52763551                | AA                              | CC              | 1946875887               |
| SNP_P4_88671_52763557 | NC_021165.1    | Ca_kabuli_chr06 | 52763557                | GG                              | AA              | 1946875889               |
| SNP_P4_88672_52763571 | NC_021165.1    | Ca_kabuli_chr06 | 52763571                | GG                              | TT              | 1946875891               |
| SNP_P4_88674_52778702 | NC_021165.1    | Ca_kabuli_chr06 | 52778702                | AA                              | GG              | 1946875893               |
| SNP_P4_88675_52779377 | NC_021165.1    | Ca_kabuli_chr06 | 52779377                | GG                              | AA              | 1946875895               |
| SNP_P4_88676_52783393 | NC_021165.1    | Ca_kabuli_chr06 | 52783393                | GG                              | AA              | 1946875897               |
| SNP_P4_88677_52783469 | NC_021165.1    | Ca_kabuli_chr06 | 52783469                | TT                              | CC              | 1946875899               |
| SNP_P4_88678_52786401 | NC_021165.1    | Ca_kabuli_chr06 | 52786401                | TT                              | CC              | 1946875901               |
| SNP_P4_88679_52786403 | NC_021165.1    | Ca_kabuli_chr06 | 52786403                | GG                              | TT              | 1946875903               |
| SNP_P4_88680_52787935 | NC_021165.1    | Ca_kabuli_chr06 | 52787935                | GG                              | TT              | 1946875905               |
| SNP_P4_88682_52787985 | NC_021165.1    | Ca_kabuli_chr06 | 52787985                | CC                              | TT              | 1946875907               |
| SNP_P4_88683_52819986 | NC_021165.1    | Ca_kabuli_chr06 | 52819986                | GG                              | TT              | 1946875909               |
| SNP_P4_88684_52820038 | NC_021165.1    | Ca_kabuli_chr06 | 52820038                | GG                              | AA              | 1946875911               |
| SNP_P4_88685_52825935 | NC_021165.1    | Ca_kabuli_chr06 | 52825935                | CC                              | TT              | 1946875913               |
| SNP_P4_88686_52825948 | NC_021165.1    | Ca_kabuli_chr06 | 52825948                | TT                              | AA              | 1946875915               |
| SNP_P4_88687_52841606 | NC_021165.1    | Ca_kabuli_chr06 | 52841606                | CC                              | AA              | 1946875917               |
| SNP_P4_88688_52841810 | NC_021165.1    | Ca_kabuli_chr06 | 52841810                | CC                              | AA              | 1946875919               |
| SNP_P4_88690_52849183 | NC_021165.1    | Ca_kabuli_chr06 | 52849183                | TT                              | CC              | 1946875921               |
| SNP_P4_88693_52854012 | NC_021165.1    | Ca_kabuli_chr06 | 52854012                | CC                              | TT              | 1946875923               |
| SNP_P4_88694_52854185 | NC_021165.1    | Ca_kabuli_chr06 | 52854185                | GG                              | AA              | 1946875925               |
| SNP_P4_88695_52854317 | NC_021165.1    | Ca_kabuli_chr06 | 52854317                | AA                              | GG              | 1946875927               |
| SNP_P4_88696_52854599 | NC_021165.1    | Ca_kabuli_chr06 | 52854599                | TT                              | GG              | 1946875929               |
| SNP_P4_88698_52855095 | NC_021165.1    | Ca_kabuli_chr06 | 52855095                | GG                              | TT              | 1946875931               |
| SNP_P4_88699_52855645 | NC_021165.1    | Ca_kabuli_chr06 | 52855645                | GG                              | AA              | 1946875933               |
| SNP_P4_88700_52855684 | NC_021165.1    | Ca_kabuli_chr06 | 52855684                | GG                              | AA              | 1946875935               |
| SNP_P4_88701_52855756 | NC_021165.1    | Ca_kabuli_chr06 | 52855756                | GG                              | AA              | 1946875937               |
| SNP_P4_88702_52855852 | NC_021165.1    | Ca_kabuli_chr06 | 52855852                | TT                              | AA              | 1946875939               |
| SNP_P4_88703_52855949 | NC_021165.1    | Ca_kabuli_chr06 | 52855949                | TT                              | CC              | 1946875941               |
| SNP_P4_88704_52856023 | NC_021165.1    | Ca_kabuli_chr06 | 52856023                | GG                              | AA              | 1946875943               |
| SNP_P4_88705_52856029 | NC_021165.1    | Ca_kabuli_chr06 | 52856029                | GG                              | TT              | 1946875945               |
| SNP_P4_88706_52856034 | NC_021165.1    | Ca_kabuli_chr06 | 52856034                | GG                              | TT              | 1946875947               |
| SNP_P4_88707_52856048 | NC_021165.1    | Ca_kabuli_chr06 | 52856048                | GG                              | AA              | 1946875949               |
| SNP_P4_88709_52857748 | NC_021165.1    | Ca_kabuli_chr06 | 52857748                | GG                              | TT              | 1946875951               |
| SNP_P4_88710_52857929 | NC_021165.1    | Ca_kabuli_chr06 | 52857929                | TT                              | CC              | 1946875953               |
| SNP_P4_88711_52858012 | NC_021165.1    | Ca_kabuli_chr06 | 52858012                | CC                              | TT              | 1946875955               |
| SNP_P4_88712_52858159 | NC_021165.1    | Ca_kabuli_chr06 | 52858159                | AA                              | CC              | 1946875957               |
| SNP_P4_88713_52858224 | NC_021165.1    | Ca_kabuli_chr06 | 52858224                | CC                              | TT              | 1946875959               |
| SNP_P4_88714_52858227 | NC_021165.1    | Ca_kabuli_chr06 | 52858227                | AA                              | CC              | 1946875961               |
| SNP_P4_88715_52858229 | NC_021165.1    | Ca_kabuli_chr06 | 52858229                | AA                              | CC              | 1946875963               |
| SNP_P4_88716_52858256 | NC_021165.1    | Ca_kabuli_chr06 | 52858256                | TT                              | CC              | 1946875965               |

| SNPs IDs              | Chromosome IDs | Chromosomes     | Physical positions (bp) | CDC Frontier (Reference genome) | (ILWC46 & LPNB) | NCBI SNPdb Accession IDs |
|-----------------------|----------------|-----------------|-------------------------|---------------------------------|-----------------|--------------------------|
| SNP_P4_88717_52858263 | NC_021165.1    | Ca_kabuli_chr06 | 52858263                | TT                              | AA              | 1946875967               |
| SNP_P4_88718_52858269 | NC_021165.1    | Ca_kabuli_chr06 | 52858269                | CC                              | AA              | 1946875968               |
| SNP_P4_88720_52858359 | NC_021165.1    | Ca_kabuli_chr06 | 52858359                | AA                              | GG              | 1946875970               |
| SNP_P4_88722_52858687 | NC_021165.1    | Ca_kabuli_chr06 | 52858687                | AA                              | GG              | 1946875972               |
| SNP_P4_88723_52858706 | NC_021165.1    | Ca_kabuli_chr06 | 52858706                | CC                              | TT              | 1946875974               |
| SNP_P4_88724_52858987 | NC_021165.1    | Ca_kabuli_chr06 | 52858987                | TT                              | CC              | 1946875976               |
| SNP_P4_88726_52859191 | NC_021165.1    | Ca_kabuli_chr06 | 52859191                | AA                              | TT              | 1946875978               |
| SNP_P4_88729_52862751 | NC_021165.1    | Ca_kabuli_chr06 | 52862751                | GG                              | TT              | 1946875980               |
| SNP_P4_88730_52863062 | NC_021165.1    | Ca_kabuli_chr06 | 52863062                | AA                              | TT              | 1946875981               |
| SNP_P4_88731_52863083 | NC_021165.1    | Ca_kabuli_chr06 | 52863083                | TT                              | CC              | 1946875983               |
| SNP_P4_88732_52863253 | NC_021165.1    | Ca_kabuli_chr06 | 52863253                | TT                              | GG              | 1946875985               |
| SNP_P4_88733_52868927 | NC_021165.1    | Ca_kabuli_chr06 | 52868927                | TT                              | AA              | 1946875987               |
| SNP_P4_88734_52868948 | NC_021165.1    | Ca_kabuli_chr06 | 52868948                | AA                              | TT              | 1946875989               |
| SNP_P4_88735_52868968 | NC_021165.1    | Ca_kabuli_chr06 | 52868968                | GG                              | AA              | 1946875991               |
| SNP_P4_88736_52868997 | NC_021165.1    | Ca_kabuli_chr06 | 52868997                | AA                              | CC              | 1946875993               |
| SNP_P4_88737_52869002 | NC_021165.1    | Ca_kabuli_chr06 | 52869002                | TT                              | AA              | 1946875995               |
| SNP_P4_88738_52869190 | NC_021165.1    | Ca_kabuli_chr06 | 52869190                | CC                              | TT              | 1946875997               |
| SNP_P4_88739_52869229 | NC_021165.1    | Ca_kabuli_chr06 | 52869229                | AA                              | CC              | 1946875999               |
| SNP_P4_88740_52869268 | NC_021165.1    | Ca_kabuli_chr06 | 52869268                | TT                              | CC              | 1946876001               |
| SNP_P4_88741_52869305 | NC_021165.1    | Ca_kabuli_chr06 | 52869305                | CC                              | AA              | 1946876002               |
| SNP_P4_88742_52869414 | NC_021165.1    | Ca_kabuli_chr06 | 52869414                | CC                              | AA              | 1946876004               |
| SNP_P4_88743_52869555 | NC_021165.1    | Ca_kabuli_chr06 | 52869555                | CC                              | TT              | 1946876006               |
| SNP_P4_88744_52869672 | NC_021165.1    | Ca_kabuli_chr06 | 52869672                | GG                              | TT              | 1946876008               |
| SNP_P4_88745_52869685 | NC_021165.1    | Ca_kabuli_chr06 | 52869685                | TT                              | CC              | 1946876010               |
| SNP_P4_88746_52869774 | NC_021165.1    | Ca_kabuli_chr06 | 52869774                | AA                              | GG              | 1946876012               |
| SNP_P4_88747_52870695 | NC_021165.1    | Ca_kabuli_chr06 | 52870695                | GG                              | TT              | 1946876014               |
| SNP_P4_88748_52878966 | NC_021165.1    | Ca_kabuli_chr06 | 52878966                | AA                              | TT              | 1946876016               |
| SNP_P4_88749_52885298 | NC_021165.1    | Ca_kabuli_chr06 | 52885298                | CC                              | AA              | 1946876019               |
| SNP_P4_88750_52885332 | NC_021165.1    | Ca_kabuli_chr06 | 52885332                | CC                              | AA              | 1946876021               |
| SNP_P4_88751_52885362 | NC_021165.1    | Ca_kabuli_chr06 | 52885362                | CC                              | TT              | 1946876023               |
| SNP_P4_88752_52885405 | NC_021165.1    | Ca_kabuli_chr06 | 52885405                | TT                              | CC              | 1946876025               |
| SNP_P4_88753_52885416 | NC_021165.1    | Ca_kabuli_chr06 | 52885416                | GG                              | AA              | 1946876027               |
| SNP_P4_88754_52885418 | NC_021165.1    | Ca_kabuli_chr06 | 52885418                | CC                              | AA              | 1946876029               |
| SNP_P4_88755_52885657 | NC_021165.1    | Ca_kabuli_chr06 | 52885657                | AA                              | GG              | 1946876031               |
| SNP_P4_88756_52885741 | NC_021165.1    | Ca_kabuli_chr06 | 52885741                | AA                              | CC              | 1946876033               |
| SNP_P4_88757_52885745 | NC_021165.1    | Ca_kabuli_chr06 | 52885745                | AA                              | TT              | 1946876035               |
| SNP_P4_88758_52885951 | NC_021165.1    | Ca_kabuli_chr06 | 52885951                | CC                              | AA              | 1946876037               |
| SNP_P4_88759_52885956 | NC_021165.1    | Ca_kabuli_chr06 | 52885956                | GG                              | AA              | 1946876039               |
| SNP_P4_88760_52885973 | NC_021165.1    | Ca_kabuli_chr06 | 52885973                | CC                              | TT              | 1946876041               |
| SNP_P4_88761_52885981 | NC_021165.1    | Ca_kabuli_chr06 | 52885981                | AA                              | GG              | 1946876043               |
| SNP_P4_88762_52885984 | NC_021165.1    | Ca_kabuli_chr06 | 52885984                | CC                              | TT              | 1946876045               |
| SNP_P4_88764_52889942 | NC_021165.1    | Ca_kabuli_chr06 | 52889942                | CC                              | GG              | 1946876047               |

| SNPs IDs              | Chromosome IDs | Chromosomes     | Physical positions (bp) | CDC Frontier (Reference genome) | (ILWC46 & LPNB) | NCBI SNPdb Accession IDs |
|-----------------------|----------------|-----------------|-------------------------|---------------------------------|-----------------|--------------------------|
| SNP_P4_88765_52890010 | NC_021165.1    | Ca_kabuli_chr06 | 52890010                | TT                              | AA              | 1946876049               |
| SNP_P4_88766_52890054 | NC_021165.1    | Ca_kabuli_chr06 | 52890054                | TT                              | CC              | 1946876051               |
| SNP_P4_88768_52890343 | NC_021165.1    | Ca_kabuli_chr06 | 52890343                | TT                              | CC              | 1946876053               |
| SNP_P4_88769_52890482 | NC_021165.1    | Ca_kabuli_chr06 | 52890482                | TT                              | CC              | 1946876055               |
| SNP_P4_88770_52890534 | NC_021165.1    | Ca_kabuli_chr06 | 52890534                | AA                              | GG              | 1946876057               |
| SNP_P4_88771_52895880 | NC_021165.1    | Ca_kabuli_chr06 | 52895880                | TT                              | CC              | 1946876059               |
| SNP_P4_88772_52895884 | NC_021165.1    | Ca_kabuli_chr06 | 52895884                | GG                              | CC              | 1946876061               |
| SNP_P4_88773_52895907 | NC_021165.1    | Ca_kabuli_chr06 | 52895907                | CC                              | TT              | 1946876062               |
| SNP_P4_88774_52895926 | NC_021165.1    | Ca_kabuli_chr06 | 52895926                | TT                              | CC              | 1946876064               |
| SNP_P4_88775_52931607 | NC_021165.1    | Ca_kabuli_chr06 | 52931607                | GG                              | AA              | 1946876066               |
| SNP_P4_88776_52931624 | NC_021165.1    | Ca_kabuli_chr06 | 52931624                | CC                              | TT              | 1946876068               |
| SNP_P4_88777_52931637 | NC_021165.1    | Ca_kabuli_chr06 | 52931637                | CC                              | TT              | 1946876070               |
| SNP_P4_88778_52931648 | NC_021165.1    | Ca_kabuli_chr06 | 52931648                | CC                              | TT              | 1946876072               |
| SNP_P4_88780_52958944 | NC_021165.1    | Ca_kabuli_chr06 | 52958944                | AA                              | CC              | 1946876074               |
| SNP_P4_88782_52960348 | NC_021165.1    | Ca_kabuli_chr06 | 52960348                | CC                              | TT              | 1946876076               |
| SNP_P4_88783_52960369 | NC_021165.1    | Ca_kabuli_chr06 | 52960369                | GG                              | CC              | 1946876078               |
| SNP_P4_88784_52971877 | NC_021165.1    | Ca_kabuli_chr06 | 52971877                | AA                              | GG              | 1946876080               |
| SNP_P4_88785_52991239 | NC_021165.1    | Ca_kabuli_chr06 | 52991239                | TT                              | CC              | 1946876082               |
| SNP_P4_88787_53002670 | NC_021165.1    | Ca_kabuli_chr06 | 53002670                | AA                              | TT              | 1946876084               |
| SNP_P4_88788_53005329 | NC_021165.1    | Ca_kabuli_chr06 | 53005329                | AA                              | TT              | 1946876086               |
| SNP_P4_88789_53005511 | NC_021165.1    | Ca_kabuli_chr06 | 53005511                | GG                              | CC              | 1946876088               |
| SNP_P4_88790_53005538 | NC_021165.1    | Ca_kabuli_chr06 | 53005538                | GG                              | TT              | 1946876090               |
| SNP_P4_88791_53010148 | NC_021165.1    | Ca_kabuli_chr06 | 53010148                | AA                              | GG              | 1946876092               |
| SNP_P4_88792_53010332 | NC_021165.1    | Ca_kabuli_chr06 | 53010332                | TT                              | CC              | 1946876094               |
| SNP_P4_88793_53010335 | NC_021165.1    | Ca_kabuli_chr06 | 53010335                | GG                              | AA              | 1946876096               |
| SNP_P4_88794_53010526 | NC_021165.1    | Ca_kabuli_chr06 | 53010526                | AA                              | TT              | 1946876098               |
| SNP_P4_88795_53010541 | NC_021165.1    | Ca_kabuli_chr06 | 53010541                | CC                              | AA              | 1946876100               |
| SNP_P4_88797_53029084 | NC_021165.1    | Ca_kabuli_chr06 | 53029084                | AA                              | TT              | 1946876101               |
| SNP_P4_88798_53029106 | NC_021165.1    | Ca_kabuli_chr06 | 53029106                | AA                              | GG              | 1946876103               |
| SNP_P4_88799_53029243 | NC_021165.1    | Ca_kabuli_chr06 | 53029243                | AA                              | GG              | 1946876105               |
| SNP_P4_88800_53030785 | NC_021165.1    | Ca_kabuli_chr06 | 53030785                | AA                              | GG              | 1946876107               |
| SNP_P4_88801_53045374 | NC_021165.1    | Ca_kabuli_chr06 | 53045374                | CC                              | GG              | 1946876109               |
| SNP_P4_88802_53045382 | NC_021165.1    | Ca_kabuli_chr06 | 53045382                | TT                              | GG              | 1946876111               |
| SNP_P4_88803_53045397 | NC_021165.1    | Ca_kabuli_chr06 | 53045397                | TT                              | CC              | 1946876112               |
| SNP_P4_88804_53046712 | NC_021165.1    | Ca_kabuli_chr06 | 53046712                | GG                              | TT              | 1946876114               |
| SNP_P4_88805_53057658 | NC_021165.1    | Ca_kabuli_chr06 | 53057658                | AA                              | GG              | 1946876116               |
| SNP_P4_88806_53057659 | NC_021165.1    | Ca_kabuli_chr06 | 53057659                | AA                              | TT              | 1946876118               |
| SNP_P4_88807_53057663 | NC_021165.1    | Ca_kabuli_chr06 | 53057663                | CC                              | GG              | 1946876120               |
| SNP_P4_88808_53057676 | NC_021165.1    | Ca_kabuli_chr06 | 53057676                | AA                              | GG              | 1946876122               |
| SNP_P4_88809_53057829 | NC_021165.1    | Ca_kabuli_chr06 | 53057829                | GG                              | AA              | 1946876124               |
| SNP_P4_88810_53057913 | NC_021165.1    | Ca_kabuli_chr06 | 53057913                | TT                              | CC              | 1946876126               |
| SNP_P4_88811_53057951 | NC_021165.1    | Ca_kabuli_chr06 | 53057951                | TT                              | CC              | 1946876128               |

| SNPs IDs              | Chromosome IDs | Chromosomes     | Physical positions (bp) | CDC Frontier (Reference genome) | (ILWC46 & LPNB) | NCBI SNPdb Accession IDs |
|-----------------------|----------------|-----------------|-------------------------|---------------------------------|-----------------|--------------------------|
| SNP_P4_88812_53057972 | NC_021165.1    | Ca_kabuli_chr06 | 53057972                | AA                              | GG              | 1946876130               |
| SNP_P4_88813_53057973 | NC_021165.1    | Ca_kabuli_chr06 | 53057973                | GG                              | AA              | 1946876132               |
| SNP_P4_88814_53058040 | NC_021165.1    | Ca_kabuli_chr06 | 53058040                | GG                              | CC              | 1946876134               |
| SNP_P4_88815_53058053 | NC_021165.1    | Ca_kabuli_chr06 | 53058053                | CC                              | AA              | 1946876136               |
| SNP_P4_88816_53058096 | NC_021165.1    | Ca_kabuli_chr06 | 53058096                | AA                              | GG              | 1946876138               |
| SNP_P4_88817_53058159 | NC_021165.1    | Ca_kabuli_chr06 | 53058159                | AA                              | TT              | 1946876140               |
| SNP_P4_88818_53058164 | NC_021165.1    | Ca_kabuli_chr06 | 53058164                | TT                              | GG              | 1946876142               |
| SNP_P4_88819_53058167 | NC_021165.1    | Ca_kabuli_chr06 | 53058167                | TT                              | CC              | 1946876144               |
| SNP_P4_88820_53072875 | NC_021165.1    | Ca_kabuli_chr06 | 53072875                | AA                              | CC              | 1946876146               |
| SNP_P4_88821_53099277 | NC_021165.1    | Ca_kabuli_chr06 | 53099277                | AA                              | TT              | 1946876148               |
| SNP_P4_88822_53126812 | NC_021165.1    | Ca_kabuli_chr06 | 53126812                | AA                              | GG              | 1946876150               |
| SNP_P4_88823_53128934 | NC_021165.1    | Ca_kabuli_chr06 | 53128934                | AA                              | TT              | 1946876152               |
| SNP_P4_88824_53144911 | NC_021165.1    | Ca_kabuli_chr06 | 53144911                | CC                              | TT              | 1946876154               |
| SNP_P4_88825_53146479 | NC_021165.1    | Ca_kabuli_chr06 | 53146479                | AA                              | TT              | 1946876156               |
| SNP_P4_88826_53177612 | NC_021165.1    | Ca_kabuli_chr06 | 53177612                | GG                              | TT              | 1946876158               |
| SNP_P4_88827_53177614 | NC_021165.1    | Ca_kabuli_chr06 | 53177614                | AA                              | TT              | 1946876160               |
| SNP_P4_88828_53191216 | NC_021165.1    | Ca_kabuli_chr06 | 53191216                | CC                              | TT              | 1946876162               |
| SNP_P4_88829_53191536 | NC_021165.1    | Ca_kabuli_chr06 | 53191536                | GG                              | TT              | 1946876164               |
| SNP_P4_88830_53217679 | NC_021165.1    | Ca_kabuli_chr06 | 53217679                | GG                              | CC              | 1946876166               |
| SNP_P4_88831_53217687 | NC_021165.1    | Ca_kabuli_chr06 | 53217687                | CC                              | TT              | 1946876168               |
| SNP_P4_88832_53219850 | NC_021165.1    | Ca_kabuli_chr06 | 53219850                | TT                              | AA              | 1946876170               |
| SNP_P4_88834_53270579 | NC_021165.1    | Ca_kabuli_chr06 | 53270579                | AA                              | CC              | 1946876172               |
| SNP_P4_88835_53279414 | NC_021165.1    | Ca_kabuli_chr06 | 53279414                | CC                              | AA              | 1946876174               |
| SNP_P4_88836_53285311 | NC_021165.1    | Ca_kabuli_chr06 | 53285311                | AA                              | TT              | 1946876176               |
| SNP_P4_88837_53285314 | NC_021165.1    | Ca_kabuli_chr06 | 53285314                | TT                              | GG              | 1946876178               |
| SNP_P4_88838_53303257 | NC_021165.1    | Ca_kabuli_chr06 | 53303257                | GG                              | AA              | 1946876180               |
| SNP_P4_88839_53304277 | NC_021165.1    | Ca_kabuli_chr06 | 53304277                | CC                              | TT              | 1946876182               |
| SNP_P4_88840_53304345 | NC_021165.1    | Ca_kabuli_chr06 | 53304345                | TT                              | CC              | 1946876184               |
| SNP_P4_88842_53304459 | NC_021165.1    | Ca_kabuli_chr06 | 53304459                | TT                              | GG              | 1946876186               |
| SNP_P4_88843_53304498 | NC_021165.1    | Ca_kabuli_chr06 | 53304498                | AA                              | GG              | 1946876188               |
| SNP_P4_88844_53304583 | NC_021165.1    | Ca_kabuli_chr06 | 53304583                | AA                              | GG              | 1946876190               |
| SNP_P4_88845_53304630 | NC_021165.1    | Ca_kabuli_chr06 | 53304630                | CC                              | TT              | 1946876193               |
| SNP_P4_88846_53304644 | NC_021165.1    | Ca_kabuli_chr06 | 53304644                | GG                              | TT              | 1946876195               |
| SNP_P4_88847_53304750 | NC_021165.1    | Ca_kabuli_chr06 | 53304750                | CC                              | TT              | 1946876197               |
| SNP_P4_88848_53304760 | NC_021165.1    | Ca_kabuli_chr06 | 53304760                | TT                              | CC              | 1946876199               |
| SNP_P4_88849_53304761 | NC_021165.1    | Ca_kabuli_chr06 | 53304761                | CC                              | TT              | 1946876201               |
| SNP_P4_88850_53304803 | NC_021165.1    | Ca_kabuli_chr06 | 53304803                | AA                              | TT              | 1946876203               |
| SNP_P4_88851_53304830 | NC_021165.1    | Ca_kabuli_chr06 | 53304830                | GG                              | TT              | 1946876205               |
| SNP_P4_88852_53304900 | NC_021165.1    | Ca_kabuli_chr06 | 53304900                | CC                              | TT              | 1946876207               |
| SNP_P4_88853_53304910 | NC_021165.1    | Ca_kabuli_chr06 | 53304910                | GG                              | CC              | 1946876209               |
| SNP_P4_88854_53304942 | NC_021165.1    | Ca_kabuli_chr06 | 53304942                | TT                              | CC              | 1946876211               |
| SNP_P4_88855_53304969 | NC_021165.1    | Ca_kabuli_chr06 | 53304969                | TT                              | CC              | 1946876213               |

| SNPs IDs              | Chromosome IDs | Chromosomes     | Physical positions (bp) | CDC Frontier (Reference genome) | (ILWC46 & LPNB) | NCBI SNPdb Accession IDs |
|-----------------------|----------------|-----------------|-------------------------|---------------------------------|-----------------|--------------------------|
| SNP_P4_88856_53305040 | NC_021165.1    | Ca_kabuli_chr06 | 53305040                | AA                              | CC              | 1946876215               |
| SNP_P4_88857_53305059 | NC_021165.1    | Ca_kabuli_chr06 | 53305059                | GG                              | AA              | 1946876217               |
| SNP_P4_88858_53305064 | NC_021165.1    | Ca_kabuli_chr06 | 53305064                | CC                              | TT              | 1946876219               |
| SNP_P4_88859_53305083 | NC_021165.1    | Ca_kabuli_chr06 | 53305083                | TT                              | AA              | 1946876221               |
| SNP_P4_88860_53305092 | NC_021165.1    | Ca_kabuli_chr06 | 53305092                | AA                              | TT              | 1946876223               |
| SNP_P4_88861_53305120 | NC_021165.1    | Ca_kabuli_chr06 | 53305120                | GG                              | CC              | 1946876225               |
| SNP_P4_88862_53305256 | NC_021165.1    | Ca_kabuli_chr06 | 53305256                | GG                              | TT              | 1946876227               |
| SNP_P4_88863_53305293 | NC_021165.1    | Ca_kabuli_chr06 | 53305293                | TT                              | CC              | 1946876229               |
| SNP_P4_88864_53305304 | NC_021165.1    | Ca_kabuli_chr06 | 53305304                | GG                              | AA              | 1946876231               |
| SNP_P4_88866_53305491 | NC_021165.1    | Ca_kabuli_chr06 | 53305491                | TT                              | CC              | 1946876233               |
| SNP_P4_88867_53305503 | NC_021165.1    | Ca_kabuli_chr06 | 53305503                | TT                              | GG              | 1946876236               |
| SNP_P4_88868_53305581 | NC_021165.1    | Ca_kabuli_chr06 | 53305581                | CC                              | TT              | 1946876238               |
| SNP_P4_88869_53305597 | NC_021165.1    | Ca_kabuli_chr06 | 53305597                | TT                              | CC              | 1946876240               |
| SNP_P4_88870_53310289 | NC_021165.1    | Ca_kabuli_chr06 | 53310289                | TT                              | GG              | 1946876242               |
| SNP_P4_88871_53310315 | NC_021165.1    | Ca_kabuli_chr06 | 53310315                | AA                              | TT              | 1946876244               |
| SNP_P4_88872_53310359 | NC_021165.1    | Ca_kabuli_chr06 | 53310359                | GG                              | AA              | 1946876246               |
| SNP_P4_88873_53310392 | NC_021165.1    | Ca_kabuli_chr06 | 53310392                | GG                              | AA              | 1946876248               |
| SNP_P4_88874_53310403 | NC_021165.1    | Ca_kabuli_chr06 | 53310403                | AA                              | CC              | 1946876250               |
| SNP_P4_88875_53310411 | NC_021165.1    | Ca_kabuli_chr06 | 53310411                | CC                              | GG              | 1946876252               |
| SNP_P4_88876_53310421 | NC_021165.1    | Ca_kabuli_chr06 | 53310421                | GG                              | TT              | 1946876254               |
| SNP_P4_88877_53310468 | NC_021165.1    | Ca_kabuli_chr06 | 53310468                | GG                              | AA              | 1946876256               |
| SNP_P4_88878_53310491 | NC_021165.1    | Ca_kabuli_chr06 | 53310491                | GG                              | AA              | 1946876258               |
| SNP_P4_88879_53310648 | NC_021165.1    | Ca_kabuli_chr06 | 53310648                | TT                              | GG              | 1946876260               |
| SNP_P4_88880_53311167 | NC_021165.1    | Ca_kabuli_chr06 | 53311167                | GG                              | AA              | 1946876262               |
| SNP_P4_88881_53311208 | NC_021165.1    | Ca_kabuli_chr06 | 53311208                | AA                              | TT              | 1946876264               |
| SNP_P4_88883_53311453 | NC_021165.1    | Ca_kabuli_chr06 | 53311453                | CC                              | TT              | 1946876266               |
| SNP_P4_88884_53312050 | NC_021165.1    | Ca_kabuli_chr06 | 53312050                | GG                              | AA              | 1946876268               |
| SNP_P4_88885_53312174 | NC_021165.1    | Ca_kabuli_chr06 | 53312174                | GG                              | CC              | 1946876270               |
| SNP_P4_88886_53312233 | NC_021165.1    | Ca_kabuli_chr06 | 53312233                | CC                              | AA              | 1946876272               |
| SNP_P4_88888_53312388 | NC_021165.1    | Ca_kabuli_chr06 | 53312388                | TT                              | CC              | 1946876274               |
| SNP_P4_88889_53312435 | NC_021165.1    | Ca_kabuli_chr06 | 53312435                | GG                              | CC              | 1946876276               |
| SNP_P4_88890_53312476 | NC_021165.1    | Ca_kabuli_chr06 | 53312476                | TT                              | AA              | 1946876278               |
| SNP_P4_88891_53312547 | NC_021165.1    | Ca_kabuli_chr06 | 53312547                | AA                              | CC              | 1946876280               |
| SNP_P4_88892_53312551 | NC_021165.1    | Ca_kabuli_chr06 | 53312551                | TT                              | AA              | 1946876283               |
| SNP_P4_88893_53312614 | NC_021165.1    | Ca_kabuli_chr06 | 53312614                | AA                              | CC              | 1946876284               |
| SNP_P4_88894_53312841 | NC_021165.1    | Ca_kabuli_chr06 | 53312841                | CC                              | AA              | 1946876286               |
| SNP_P4_88895_53312868 | NC_021165.1    | Ca_kabuli_chr06 | 53312868                | TT                              | AA              | 1946876288               |
| SNP_P4_88896_53312908 | NC_021165.1    | Ca_kabuli_chr06 | 53312908                | GG                              | AA              | 1946876290               |
| SNP_P4_88897_53312951 | NC_021165.1    | Ca_kabuli_chr06 | 53312951                | CC                              | GG              | 1946876292               |
| SNP_P4_88898_53312994 | NC_021165.1    | Ca_kabuli_chr06 | 53312994                | GG                              | CC              | 1946876294               |
| SNP_P4_88899_53313124 | NC_021165.1    | Ca_kabuli_chr06 | 53313124                | TT                              | CC              | 1946876296               |
| SNP_P4_88900_53313174 | NC_021165.1    | Ca_kabuli_chr06 | 53313174                | TT                              | AA              | 1946876298               |

| SNPs IDs              | Chromosome IDs | Chromosomes     | Physical positions (bp) | CDC Frontier (Reference genome) | (ILWC46 & LPNB) | NCBI SNPdb Accession IDs |
|-----------------------|----------------|-----------------|-------------------------|---------------------------------|-----------------|--------------------------|
| SNP_P4_88901_53313180 | NC_021165.1    | Ca_kabuli_chr06 | 53313180                | CC                              | TT              | 1946876300               |
| SNP_P4_88902_53337285 | NC_021165.1    | Ca_kabuli_chr06 | 53337285                | GG                              | AA              | 1946876302               |
| SNP_P4_88903_53337765 | NC_021165.1    | Ca_kabuli_chr06 | 53337765                | GG                              | AA              | 1946876304               |
| SNP_P4_88904_53342649 | NC_021165.1    | Ca_kabuli_chr06 | 53342649                | AA                              | CC              | 1946876306               |
| SNP_P4_88905_53342654 | NC_021165.1    | Ca_kabuli_chr06 | 53342654                | CC                              | TT              | 1946876308               |
| SNP_P4_88906_53342675 | NC_021165.1    | Ca_kabuli_chr06 | 53342675                | AA                              | GG              | 1946876310               |
| SNP_P4_88907_53342702 | NC_021165.1    | Ca_kabuli_chr06 | 53342702                | CC                              | TT              | 1946876312               |
| SNP_P4_88908_53344248 | NC_021165.1    | Ca_kabuli_chr06 | 53344248                | CC                              | TT              | 1946876314               |
| SNP_P4_88909_53344261 | NC_021165.1    | Ca_kabuli_chr06 | 53344261                | GG                              | AA              | 1946876316               |
| SNP_P4_88910_53344269 | NC_021165.1    | Ca_kabuli_chr06 | 53344269                | TT                              | CC              | 1946876318               |
| SNP_P4_88911_53344275 | NC_021165.1    | Ca_kabuli_chr06 | 53344275                | TT                              | AA              | 1946876320               |
| SNP_P4_88912_53344279 | NC_021165.1    | Ca_kabuli_chr06 | 53344279                | TT                              | GG              | 1946876322               |
| SNP_P4_88913_53344280 | NC_021165.1    | Ca_kabuli_chr06 | 53344280                | CC                              | GG              | 1946876323               |
| SNP_P4_88914_53344281 | NC_021165.1    | Ca_kabuli_chr06 | 53344281                | AA                              | GG              | 1946876325               |
| SNP_P4_88916_53360945 | NC_021165.1    | Ca_kabuli_chr06 | 53360945                | CC                              | TT              | 1946876327               |
| SNP_P4_88917_53363334 | NC_021165.1    | Ca_kabuli_chr06 | 53363334                | GG                              | TT              | 1946876329               |
| SNP_P4_88918_53363564 | NC_021165.1    | Ca_kabuli_chr06 | 53363564                | AA                              | GG              | 1946876331               |
| SNP_P4_88919_53363578 | NC_021165.1    | Ca_kabuli_chr06 | 53363578                | AA                              | GG              | 1946876333               |
| SNP_P4_88920_53363657 | NC_021165.1    | Ca_kabuli_chr06 | 53363657                | AA                              | GG              | 1946876335               |
| SNP_P4_88922_53363681 | NC_021165.1    | Ca_kabuli_chr06 | 53363681                | AA                              | CC              | 1946876337               |
| SNP_P4_88923_53372267 | NC_021165.1    | Ca_kabuli_chr06 | 53372267                | GG                              | AA              | 1946876339               |
| SNP_P4_88924_53372291 | NC_021165.1    | Ca_kabuli_chr06 | 53372291                | TT                              | AA              | 1946876341               |
| SNP_P4_88925_53372295 | NC_021165.1    | Ca_kabuli_chr06 | 53372295                | AA                              | GG              | 1946876343               |
| SNP_P4_88926_53372395 | NC_021165.1    | Ca_kabuli_chr06 | 53372395                | TT                              | GG              | 1946876345               |
| SNP_P4_88927_53372396 | NC_021165.1    | Ca_kabuli_chr06 | 53372396                | TT                              | CC              | 1946876346               |
| SNP_P4_88928_53398985 | NC_021165.1    | Ca_kabuli_chr06 | 53398985                | TT                              | CC              | 1946876348               |
| SNP_P4_88929_53411173 | NC_021165.1    | Ca_kabuli_chr06 | 53411173                | AA                              | CC              | 1946876350               |
| SNP_P4_88930_53411295 | NC_021165.1    | Ca_kabuli_chr06 | 53411295                | AA                              | GG              | 1946876352               |
| SNP_P4_88931_53411304 | NC_021165.1    | Ca_kabuli_chr06 | 53411304                | TT                              | GG              | 1946876354               |
| SNP_P4_88932_53411546 | NC_021165.1    | Ca_kabuli_chr06 | 53411546                | GG                              | TT              | 1946876356               |
| SNP_P4_88933_53413657 | NC_021165.1    | Ca_kabuli_chr06 | 53413657                | AA                              | GG              | 1946876358               |
| SNP_P4_88935_53414009 | NC_021165.1    | Ca_kabuli_chr06 | 53414009                | TT                              | CC              | 1946876360               |
| SNP_P4_88936_53414028 | NC_021165.1    | Ca_kabuli_chr06 | 53414028                | TT                              | CC              | 1946876362               |
| SNP_P4_88937_53414073 | NC_021165.1    | Ca_kabuli_chr06 | 53414073                | TT                              | GG              | 1946876364               |
| SNP_P4_88940_53487314 | NC_021165.1    | Ca_kabuli_chr06 | 53487314                | GG                              | AA              | 1946876366               |
| SNP_P4_88942_53493546 | NC_021165.1    | Ca_kabuli_chr06 | 53493546                | TT                              | CC              | 1946876368               |
| SNP_P4_88943_53493580 | NC_021165.1    | Ca_kabuli_chr06 | 53493580                | AA                              | CC              | 1946876370               |
| SNP_P4_88944_53493733 | NC_021165.1    | Ca_kabuli_chr06 | 53493733                | AA                              | CC              | 1946876372               |
| SNP_P4_88945_53512000 | NC_021165.1    | Ca_kabuli_chr06 | 53512000                | CC                              | AA              | 1946876374               |
| SNP_P4_88946_53518149 | NC_021165.1    | Ca_kabuli_chr06 | 53518149                | TT                              | CC              | 1946876376               |
| SNP_P4_88947_53522010 | NC_021165.1    | Ca_kabuli_chr06 | 53522010                | CC                              | TT              | 1946876378               |
| SNP_P4_88948_53522023 | NC_021165.1    | Ca_kabuli_chr06 | 53522023                | TT                              | CC              | 1946876381               |

| SNPs IDs              | Chromosome IDs | Chromosomes     | Physical positions (bp) | CDC Frontier (Reference genome) | (ILWC46 & LPNB) | NCBI SNPdb Accession IDs |
|-----------------------|----------------|-----------------|-------------------------|---------------------------------|-----------------|--------------------------|
| SNP_P4_88949_53525254 | NC_021165.1    | Ca_kabuli_chr06 | 53525254                | TT                              | CC              | 1946876383               |
| SNP_P4_88950_53525384 | NC_021165.1    | Ca_kabuli_chr06 | 53525384                | AA                              | GG              | 1946876385               |
| SNP_P4_88951_53531350 | NC_021165.1    | Ca_kabuli_chr06 | 53531350                | GG                              | CC              | 1946876387               |
| SNP_P4_88952_53531623 | NC_021165.1    | Ca_kabuli_chr06 | 53531623                | CC                              | AA              | 1946876389               |
| SNP_P4_88953_53545741 | NC_021165.1    | Ca_kabuli_chr06 | 53545741                | GG                              | TT              | 1946876391               |
| SNP_P4_88954_53547845 | NC_021165.1    | Ca_kabuli_chr06 | 53547845                | TT                              | CC              | 1946876393               |
| SNP_P4_88955_53551878 | NC_021165.1    | Ca_kabuli_chr06 | 53551878                | CC                              | AA              | 1946876395               |
| SNP_P4_88956_53582484 | NC_021165.1    | Ca_kabuli_chr06 | 53582484                | CC                              | TT              | 1946876397               |
| SNP_P4_88957_53585323 | NC_021165.1    | Ca_kabuli_chr06 | 53585323                | AA                              | GG              | 1946876399               |
| SNP_P4_88958_53599299 | NC_021165.1    | Ca_kabuli_chr06 | 53599299                | CC                              | TT              | 1946876401               |
| SNP_P4_88959_53616096 | NC_021165.1    | Ca_kabuli_chr06 | 53616096                | AA                              | CC              | 1946876403               |
| SNP_P4_88960_53619087 | NC_021165.1    | Ca_kabuli_chr06 | 53619087                | CC                              | TT              | 1946876405               |
| SNP_P4_88961_53627299 | NC_021165.1    | Ca_kabuli_chr06 | 53627299                | CC                              | TT              | 1946876407               |
| SNP_P4_88962_53630525 | NC_021165.1    | Ca_kabuli_chr06 | 53630525                | GG                              | AA              | 1946876408               |
| SNP_P4_88963_53646431 | NC_021165.1    | Ca_kabuli_chr06 | 53646431                | TT                              | GG              | 1946876410               |
| SNP_P4_88964_53646432 | NC_021165.1    | Ca_kabuli_chr06 | 53646432                | GG                              | TT              | 1946876412               |
| SNP_P4_88965_53648977 | NC_021165.1    | Ca_kabuli_chr06 | 53648977                | GG                              | AA              | 1946876414               |
| SNP_P4_88968_53670483 | NC_021165.1    | Ca_kabuli_chr06 | 53670483                | TT                              | AA              | 1946876417               |
| SNP_P4_88969_53691467 | NC_021165.1    | Ca_kabuli_chr06 | 53691467                | TT                              | AA              | 1946876419               |
| SNP_P4_88971_53730484 | NC_021165.1    | Ca_kabuli_chr06 | 53730484                | GG                              | AA              | 1946876421               |
| SNP_P4_88972_53736444 | NC_021165.1    | Ca_kabuli_chr06 | 53736444                | CC                              | TT              | 1946876423               |
| SNP_P4_88973_53736475 | NC_021165.1    | Ca_kabuli_chr06 | 53736475                | AA                              | GG              | 1946876425               |
| SNP_P4_88974_53739129 | NC_021165.1    | Ca_kabuli_chr06 | 53739129                | GG                              | AA              | 1946876427               |
| SNP_P4_88975_53761180 | NC_021165.1    | Ca_kabuli_chr06 | 53761180                | AA                              | TT              | 1946876429               |
| SNP_P4_88977_53794896 | NC_021165.1    | Ca_kabuli_chr06 | 53794896                | TT                              | AA              | 1946876431               |
| SNP_P4_88978_53794900 | NC_021165.1    | Ca_kabuli_chr06 | 53794900                | AA                              | TT              | 1946876433               |
| SNP_P4_88979_53794901 | NC_021165.1    | Ca_kabuli_chr06 | 53794901                | AA                              | TT              | 1946876435               |
| SNP_P4_88980_53794905 | NC_021165.1    | Ca_kabuli_chr06 | 53794905                | GG                              | AA              | 1946876437               |
| SNP_P4_88981_53794910 | NC_021165.1    | Ca_kabuli_chr06 | 53794910                | AA                              | TT              | 1946876439               |
| SNP_P4_88982_53797720 | NC_021165.1    | Ca_kabuli_chr06 | 53797720                | TT                              | CC              | 1946876441               |
| SNP_P4_88983_53797876 | NC_021165.1    | Ca_kabuli_chr06 | 53797876                | CC                              | GG              | 1946876443               |
| SNP_P4_88984_53797942 | NC_021165.1    | Ca_kabuli_chr06 | 53797942                | AA                              | TT              | 1946876445               |
| SNP_P4_88986_53811557 | NC_021165.1    | Ca_kabuli_chr06 | 53811557                | TT                              | CC              | 1946876447               |
| SNP_P4_88987_53811725 | NC_021165.1    | Ca_kabuli_chr06 | 53811725                | TT                              | CC              | 1946876449               |
| SNP_P4_88988_53815021 | NC_021165.1    | Ca_kabuli_chr06 | 53815021                | AA                              | GG              | 1946876451               |
| SNP_P4_88989_53815025 | NC_021165.1    | Ca_kabuli_chr06 | 53815025                | AA                              | GG              | 1946876453               |
| SNP_P4_88990_53815108 | NC_021165.1    | Ca_kabuli_chr06 | 53815108                | CC                              | TT              | 1946876455               |
| SNP_P4_88991_53832362 | NC_021165.1    | Ca_kabuli_chr06 | 53832362                | TT                              | CC              | 1946876457               |
| SNP_P4_88992_53849103 | NC_021165.1    | Ca_kabuli_chr06 | 53849103                | AA                              | TT              | 1946876459               |
| SNP_P4_88993_53910885 | NC_021165.1    | Ca_kabuli_chr06 | 53910885                | AA                              | CC              | 1946876461               |
| SNP_P4_88994_53910886 | NC_021165.1    | Ca_kabuli_chr06 | 53910886                | TT                              | GG              | 1946876463               |
| SNP_P4_88995_53910912 | NC_021165.1    | Ca_kabuli_chr06 | 53910912                | GG                              | AA              | 1946876465               |



| SNPs IDs              | Chromosome IDs | Chromosomes     | Physical positions (bp) | CDC Frontier (Reference genome) | (ILWC46 & LPNB) | NCBI SNPdb Accession IDs |
|-----------------------|----------------|-----------------|-------------------------|---------------------------------|-----------------|--------------------------|
| SNP_P4_88996_53919898 | NC_021165.1    | Ca_kabuli_chr06 | 53919898                | TT                              | AA              | 1946876467               |
| SNP_P4_88997_53920272 | NC_021165.1    | Ca_kabuli_chr06 | 53920272                | TT                              | AA              | 1946876469               |
| SNP_P4_88998_53928170 | NC_021165.1    | Ca_kabuli_chr06 | 53928170                | CC                              | GG              | 1946876471               |
| SNP_P4_88999_53973583 | NC_021165.1    | Ca_kabuli_chr06 | 53973583                | AA                              | GG              | 1946876473               |
| SNP_P4_89000_53980393 | NC_021165.1    | Ca_kabuli_chr06 | 53980393                | TT                              | GG              | 1946876475               |
| SNP_P4_89001_53980449 | NC_021165.1    | Ca_kabuli_chr06 | 53980449                | CC                              | TT              | 1946876477               |
| SNP_P4_89002_53987033 | NC_021165.1    | Ca_kabuli_chr06 | 53987033                | GG                              | TT              | 1946876479               |
| SNP_P4_89003_53987054 | NC_021165.1    | Ca_kabuli_chr06 | 53987054                | AA                              | GG              | 1946876481               |
| SNP_P4_89004_54017617 | NC_021165.1    | Ca_kabuli_chr06 | 54017617                | GG                              | AA              | 1946876483               |
| SNP_P4_89005_54019206 | NC_021165.1    | Ca_kabuli_chr06 | 54019206                | TT                              | AA              | 1946876485               |
| SNP_P4_89006_54028611 | NC_021165.1    | Ca_kabuli_chr06 | 54028611                | TT                              | AA              | 1946876487               |
| SNP_P4_89007_54028666 | NC_021165.1    | Ca_kabuli_chr06 | 54028666                | TT                              | CC              | 1946876489               |
| SNP_P4_89008_54028721 | NC_021165.1    | Ca_kabuli_chr06 | 54028721                | GG                              | AA              | 1946876492               |
| SNP_P4_89009_54028739 | NC_021165.1    | Ca_kabuli_chr06 | 54028739                | CC                              | AA              | 1946876494               |
| SNP_P4_89010_54028884 | NC_021165.1    | Ca_kabuli_chr06 | 54028884                | AA                              | CC              | 1946876496               |
| SNP_P4_89011_54028885 | NC_021165.1    | Ca_kabuli_chr06 | 54028885                | AA                              | GG              | 1946876498               |
| SNP_P4_89012_54028892 | NC_021165.1    | Ca_kabuli_chr06 | 54028892                | CC                              | TT              | 1946876500               |
| SNP_P4_89015_54068770 | NC_021165.1    | Ca_kabuli_chr06 | 54068770                | GG                              | TT              | 1946876502               |
| SNP_P4_89016_54068841 | NC_021165.1    | Ca_kabuli_chr06 | 54068841                | GG                              | TT              | 1946876504               |
| SNP_P4_89020_54069012 | NC_021165.1    | Ca_kabuli_chr06 | 54069012                | TT                              | CC              | 1946876506               |
| SNP_P4_89021_54069087 | NC_021165.1    | Ca_kabuli_chr06 | 54069087                | GG                              | TT              | 1946876508               |
| SNP_P4_89022_54069103 | NC_021165.1    | Ca_kabuli_chr06 | 54069103                | CC                              | TT              | 1946876510               |
| SNP_P4_89024_54069173 | NC_021165.1    | Ca_kabuli_chr06 | 54069173                | TT                              | AA              | 1946876512               |
| SNP_P4_89025_54069745 | NC_021165.1    | Ca_kabuli_chr06 | 54069745                | AA                              | CC              | 1946876514               |
| SNP_P4_89026_54069756 | NC_021165.1    | Ca_kabuli_chr06 | 54069756                | AA                              | GG              | 1946876516               |
| SNP_P4_89027_54069773 | NC_021165.1    | Ca_kabuli_chr06 | 54069773                | GG                              | AA              | 1946876518               |
| SNP_P4_89028_54069784 | NC_021165.1    | Ca_kabuli_chr06 | 54069784                | AA                              | CC              | 1946876520               |
| SNP_P4_89029_54069833 | NC_021165.1    | Ca_kabuli_chr06 | 54069833                | TT                              | CC              | 1946876522               |
| SNP_P4_89030_54069846 | NC_021165.1    | Ca_kabuli_chr06 | 54069846                | TT                              | CC              | 1946876524               |
| SNP_P4_89031_54069883 | NC_021165.1    | Ca_kabuli_chr06 | 54069883                | TT                              | AA              | 1946876526               |
| SNP_P4_89033_54070041 | NC_021165.1    | Ca_kabuli_chr06 | 54070041                | AA                              | CC              | 1946876528               |
| SNP_P4_89034_54070050 | NC_021165.1    | Ca_kabuli_chr06 | 54070050                | TT                              | GG              | 1946876530               |
| SNP_P4_89035_54070066 | NC_021165.1    | Ca_kabuli_chr06 | 54070066                | TT                              | AA              | 1946876532               |
| SNP_P4_89037_54070150 | NC_021165.1    | Ca_kabuli_chr06 | 54070150                | TT                              | CC              | 1946876534               |
| SNP_P4_89038_54070176 | NC_021165.1    | Ca_kabuli_chr06 | 54070176                | CC                              | GG              | 1946876536               |
| SNP_P4_89039_54070190 | NC_021165.1    | Ca_kabuli_chr06 | 54070190                | TT                              | CC              | 1946876538               |
| SNP_P4_89040_54070215 | NC_021165.1    | Ca_kabuli_chr06 | 54070215                | CC                              | TT              | 1946876540               |
| SNP_P4_89041_54070231 | NC_021165.1    | Ca_kabuli_chr06 | 54070231                | GG                              | AA              | 1946876542               |
| SNP_P4_89043_54070274 | NC_021165.1    | Ca_kabuli_chr06 | 54070274                | CC                              | TT              | 1946876544               |
| SNP_P4_89044_54070277 | NC_021165.1    | Ca_kabuli_chr06 | 54070277                | AA                              | CC              | 1946876546               |
| SNP_P4_89045_54070287 | NC_021165.1    | Ca_kabuli_chr06 | 54070287                | CC                              | TT              | 1946876548               |
| SNP_P4_89046_54083952 | NC_021165.1    | Ca_kabuli_chr06 | 54083952                | AA                              | GG              | 1946876551               |

| SNPs IDs              | Chromosome IDs | Chromosomes     | Physical positions (bp) | CDC Frontier (Reference genome) | (ILWC46 & LPNB) | NCBI SNPdb Accession IDs |
|-----------------------|----------------|-----------------|-------------------------|---------------------------------|-----------------|--------------------------|
| SNP_P4_89048_54117888 | NC_021165.1    | Ca_kabuli_chr06 | 54117888                | AA                              | TT              | 1946876553               |
| SNP_P4_89049_54122139 | NC_021165.1    | Ca_kabuli_chr06 | 54122139                | CC                              | AA              | 1946876555               |
| SNP_P4_89051_54143323 | NC_021165.1    | Ca_kabuli_chr06 | 54143323                | AA                              | GG              | 1946876557               |
| SNP_P4_89053_54143409 | NC_021165.1    | Ca_kabuli_chr06 | 54143409                | GG                              | AA              | 1946876559               |
| SNP_P4_89054_54143425 | NC_021165.1    | Ca_kabuli_chr06 | 54143425                | AA                              | TT              | 1946876561               |
| SNP_P4_89055_54143477 | NC_021165.1    | Ca_kabuli_chr06 | 54143477                | AA                              | TT              | 1946876563               |
| SNP_P4_89056_54143512 | NC_021165.1    | Ca_kabuli_chr06 | 54143512                | CC                              | TT              | 1946876565               |
| SNP_P4_89058_54143678 | NC_021165.1    | Ca_kabuli_chr06 | 54143678                | AA                              | TT              | 1946876567               |
| SNP_P4_89060_54143820 | NC_021165.1    | Ca_kabuli_chr06 | 54143820                | GG                              | TT              | 1946876569               |
| SNP_P4_89061_54143881 | NC_021165.1    | Ca_kabuli_chr06 | 54143881                | CC                              | TT              | 1946876571               |
| SNP_P4_89062_54144064 | NC_021165.1    | Ca_kabuli_chr06 | 54144064                | GG                              | AA              | 1946876573               |
| SNP_P4_89064_54144113 | NC_021165.1    | Ca_kabuli_chr06 | 54144113                | AA                              | CC              | 1946876575               |
| SNP_P4_89066_54144462 | NC_021165.1    | Ca_kabuli_chr06 | 54144462                | CC                              | GG              | 1946876577               |
| SNP_P4_89067_54144469 | NC_021165.1    | Ca_kabuli_chr06 | 54144469                | AA                              | TT              | 1946876579               |
| SNP_P4_89068_54144780 | NC_021165.1    | Ca_kabuli_chr06 | 54144780                | AA                              | TT              | 1946876581               |
| SNP_P4_89069_54144787 | NC_021165.1    | Ca_kabuli_chr06 | 54144787                | TT                              | AA              | 1946876583               |
| SNP_P4_89070_54146560 | NC_021165.1    | Ca_kabuli_chr06 | 54146560                | GG                              | AA              | 1946876585               |
| SNP_P4_89071_54146818 | NC_021165.1    | Ca_kabuli_chr06 | 54146818                | GG                              | AA              | 1946876587               |
| SNP_P4_89072_54146882 | NC_021165.1    | Ca_kabuli_chr06 | 54146882                | GG                              | AA              | 1946876589               |
| SNP_P4_89073_54147186 | NC_021165.1    | Ca_kabuli_chr06 | 54147186                | GG                              | AA              | 1946876591               |
| SNP_P4_89074_54147199 | NC_021165.1    | Ca_kabuli_chr06 | 54147199                | AA                              | GG              | 1946876593               |
| SNP_P4_89075_54147205 | NC_021165.1    | Ca_kabuli_chr06 | 54147205                | GG                              | TT              | 1946876595               |
| SNP_P4_89076_54148627 | NC_021165.1    | Ca_kabuli_chr06 | 54148627                | CC                              | GG              | 1946876597               |
| SNP_P4_89077_54149346 | NC_021165.1    | Ca_kabuli_chr06 | 54149346                | AA                              | TT              | 1946876599               |
| SNP_P4_89078_54151685 | NC_021165.1    | Ca_kabuli_chr06 | 54151685                | CC                              | TT              | 1946876601               |
| SNP_P4_89079_54152426 | NC_021165.1    | Ca_kabuli_chr06 | 54152426                | GG                              | CC              | 1946876603               |
| SNP_P4_89080_54152436 | NC_021165.1    | Ca_kabuli_chr06 | 54152436                | TT                              | AA              | 1946876605               |
| SNP_P4_89082_54152630 | NC_021165.1    | Ca_kabuli_chr06 | 54152630                | GG                              | AA              | 1946876607               |
| SNP_P4_89083_54152638 | NC_021165.1    | Ca_kabuli_chr06 | 54152638                | GG                              | AA              | 1946876609               |
| SNP_P4_89084_54154123 | NC_021165.1    | Ca_kabuli_chr06 | 54154123                | TT                              | GG              | 1946876611               |
| SNP_P4_89085_54157685 | NC_021165.1    | Ca_kabuli_chr06 | 54157685                | TT                              | AA              | 1946876613               |
| SNP_P4_89086_54159160 | NC_021165.1    | Ca_kabuli_chr06 | 54159160                | TT                              | CC              | 1946876615               |
| SNP_P4_89087_54160602 | NC_021165.1    | Ca_kabuli_chr06 | 54160602                | AA                              | TT              | 1946876617               |
| SNP_P4_89088_54160684 | NC_021165.1    | Ca_kabuli_chr06 | 54160684                | TT                              | CC              | 1946876620               |
| SNP_P4_89092_54161054 | NC_021165.1    | Ca_kabuli_chr06 | 54161054                | GG                              | TT              | 1946876622               |
| SNP_P4_89093_54161495 | NC_021165.1    | Ca_kabuli_chr06 | 54161495                | AA                              | GG              | 1946876624               |
| SNP_P4_89094_54161506 | NC_021165.1    | Ca_kabuli_chr06 | 54161506                | GG                              | AA              | 1946876626               |
| SNP_P4_89095_54162220 | NC_021165.1    | Ca_kabuli_chr06 | 54162220                | GG                              | AA              | 1946876628               |
| SNP_P4_89096_54162233 | NC_021165.1    | Ca_kabuli_chr06 | 54162233                | AA                              | GG              | 1946876630               |
| SNP_P4_89097_54162432 | NC_021165.1    | Ca_kabuli_chr06 | 54162432                | TT                              | CC              | 1946876632               |
| SNP_P4_89098_54162693 | NC_021165.1    | Ca_kabuli_chr06 | 54162693                | TT                              | GG              | 1946876634               |
| SNP_P4_89099_54162757 | NC_021165.1    | Ca_kabuli_chr06 | 54162757                | CC                              | TT              | 1946876636               |

| SNPs IDs              | Chromosome IDs | Chromosomes     | Physical positions (bp) | CDC Frontier (Reference genome) | (ILWC46 & LPNB) | NCBI SNPdb Accession IDs |
|-----------------------|----------------|-----------------|-------------------------|---------------------------------|-----------------|--------------------------|
| SNP_P4_89100_54163767 | NC_021165.1    | Ca_kabuli_chr06 | 54163767                | TT                              | CC              | 1946876638               |
| SNP_P4_89101_54163798 | NC_021165.1    | Ca_kabuli_chr06 | 54163798                | TT                              | CC              | 1946876640               |
| SNP_P4_89103_54164085 | NC_021165.1    | Ca_kabuli_chr06 | 54164085                | GG                              | AA              | 1946876642               |
| SNP_P4_89104_54164099 | NC_021165.1    | Ca_kabuli_chr06 | 54164099                | CC                              | TT              | 1946876644               |
| SNP_P4_89105_54164116 | NC_021165.1    | Ca_kabuli_chr06 | 54164116                | TT                              | CC              | 1946876646               |
| SNP_P4_89106_54164131 | NC_021165.1    | Ca_kabuli_chr06 | 54164131                | CC                              | AA              | 1946876648               |
| SNP_P4_89107_54174938 | NC_021165.1    | Ca_kabuli_chr06 | 54174938                | TT                              | CC              | 1946876650               |
| SNP_P4_89108_54175050 | NC_021165.1    | Ca_kabuli_chr06 | 54175050                | AA                              | TT              | 1946876652               |
| SNP_P4_89110_54180260 | NC_021165.1    | Ca_kabuli_chr06 | 54180260                | TT                              | CC              | 1946876653               |
| SNP_P4_89111_54182633 | NC_021165.1    | Ca_kabuli_chr06 | 54182633                | TT                              | AA              | 1946876654               |
| SNP_P4_89112_54182639 | NC_021165.1    | Ca_kabuli_chr06 | 54182639                | CC                              | TT              | 1946876655               |
| SNP_P4_89115_54200102 | NC_021165.1    | Ca_kabuli_chr06 | 54200102                | GG                              | CC              | 1946876656               |
| SNP_P4_89116_54219385 | NC_021165.1    | Ca_kabuli_chr06 | 54219385                | CC                              | TT              | 1946876657               |
| SNP_P4_89117_54220955 | NC_021165.1    | Ca_kabuli_chr06 | 54220955                | CC                              | GG              | 1946876660               |
| SNP_P4_89118_54271455 | NC_021165.1    | Ca_kabuli_chr06 | 54271455                | AA                              | GG              | 1946876662               |
| SNP_P4_89119_54277455 | NC_021165.1    | Ca_kabuli_chr06 | 54277455                | GG                              | AA              | 1946876664               |
| SNP_P4_89120_54288666 | NC_021165.1    | Ca_kabuli_chr06 | 54288666                | AA                              | TT              | 1946876666               |
| SNP_P4_89121_54303639 | NC_021165.1    | Ca_kabuli_chr06 | 54303639                | GG                              | TT              | 1946876668               |
| SNP_P4_89122_54315075 | NC_021165.1    | Ca_kabuli_chr06 | 54315075                | CC                              | TT              | 1946876670               |
| SNP_P4_89123_54315079 | NC_021165.1    | Ca_kabuli_chr06 | 54315079                | AA                              | GG              | 1946876672               |
| SNP_P4_89124_54315123 | NC_021165.1    | Ca_kabuli_chr06 | 54315123                | GG                              | AA              | 1946876674               |
| SNP_P4_89125_54315177 | NC_021165.1    | Ca_kabuli_chr06 | 54315177                | GG                              | AA              | 1946876676               |
| SNP_P4_89126_54315183 | NC_021165.1    | Ca_kabuli_chr06 | 54315183                | GG                              | AA              | 1946876678               |
| SNP_P4_89127_54315184 | NC_021165.1    | Ca_kabuli_chr06 | 54315184                | TT                              | CC              | 1946876680               |
| SNP_P4_89128_54315192 | NC_021165.1    | Ca_kabuli_chr06 | 54315192                | GG                              | AA              | 1946876682               |
| SNP_P4_89129_54315198 | NC_021165.1    | Ca_kabuli_chr06 | 54315198                | AA                              | TT              | 1946876684               |
| SNP_P4_89130_54315467 | NC_021165.1    | Ca_kabuli_chr06 | 54315467                | GG                              | TT              | 1946876686               |
| SNP_P4_89132_54320882 | NC_021165.1    | Ca_kabuli_chr06 | 54320882                | AA                              | CC              | 1946876688               |
| SNP_P4_89133_54322501 | NC_021165.1    | Ca_kabuli_chr06 | 54322501                | CC                              | TT              | 1946876690               |
| SNP_P4_89134_54322504 | NC_021165.1    | Ca_kabuli_chr06 | 54322504                | CC                              | TT              | 1946876692               |
| SNP_P4_89135_54322535 | NC_021165.1    | Ca_kabuli_chr06 | 54322535                | TT                              | CC              | 1946876694               |
| SNP_P4_89136_54322539 | NC_021165.1    | Ca_kabuli_chr06 | 54322539                | AA                              | GG              | 1946876696               |
| SNP_P4_89137_54322570 | NC_021165.1    | Ca_kabuli_chr06 | 54322570                | CC                              | TT              | 1946876698               |
| SNP_P4_89138_54323129 | NC_021165.1    | Ca_kabuli_chr06 | 54323129                | AA                              | GG              | 1946876700               |
| SNP_P4_89139_54323137 | NC_021165.1    | Ca_kabuli_chr06 | 54323137                | CC                              | TT              | 1946876703               |
| SNP_P4_89140_54323139 | NC_021165.1    | Ca_kabuli_chr06 | 54323139                | CC                              | AA              | 1946876705               |
| SNP_P4_89141_54323261 | NC_021165.1    | Ca_kabuli_chr06 | 54323261                | GG                              | TT              | 1946876707               |
| SNP_P4_89142_54323360 | NC_021165.1    | Ca_kabuli_chr06 | 54323360                | GG                              | AA              | 1946876709               |
| SNP_P4_89143_54323612 | NC_021165.1    | Ca_kabuli_chr06 | 54323612                | TT                              | CC              | 1946876711               |
| SNP_P4_89144_54323683 | NC_021165.1    | Ca_kabuli_chr06 | 54323683                | TT                              | CC              | 1946876713               |
| SNP_P4_89145_54324123 | NC_021165.1    | Ca_kabuli_chr06 | 54324123                | AA                              | GG              | 1946876715               |
| SNP_P4_89146_54324130 | NC_021165.1    | Ca_kabuli_chr06 | 54324130                | TT                              | CC              | 1946876717               |

| SNPs IDs              | Chromosome IDs | Chromosomes     | Physical positions (bp) | CDC Frontier (Reference genome) | (ILWC46 & LPNB) | NCBI SNPdb Accession IDs |
|-----------------------|----------------|-----------------|-------------------------|---------------------------------|-----------------|--------------------------|
| SNP_P4_89147_54324137 | NC_021165.1    | Ca_kabuli_chr06 | 54324137                | GG                              | AA              | 1946876719               |
| SNP_P4_89148_54333829 | NC_021165.1    | Ca_kabuli_chr06 | 54333829                | CC                              | TT              | 1946876721               |
| SNP_P4_89149_54333945 | NC_021165.1    | Ca_kabuli_chr06 | 54333945                | AA                              | GG              | 1946876723               |
| SNP_P4_89150_54335163 | NC_021165.1    | Ca_kabuli_chr06 | 54335163                | GG                              | TT              | 1946876725               |
| SNP_P4_89151_54335892 | NC_021165.1    | Ca_kabuli_chr06 | 54335892                | CC                              | TT              | 1946876727               |
| SNP_P4_89152_54336071 | NC_021165.1    | Ca_kabuli_chr06 | 54336071                | CC                              | GG              | 1946876729               |
| SNP_P4_89153_54338661 | NC_021165.1    | Ca_kabuli_chr06 | 54338661                | GG                              | AA              | 1946876731               |
| SNP_P4_89154_54338910 | NC_021165.1    | Ca_kabuli_chr06 | 54338910                | TT                              | AA              | 1946876733               |
| SNP_P4_89155_54338969 | NC_021165.1    | Ca_kabuli_chr06 | 54338969                | TT                              | CC              | 1946876736               |
| SNP_P4_89156_54338987 | NC_021165.1    | Ca_kabuli_chr06 | 54338987                | TT                              | GG              | 1946876738               |
| SNP_P4_89157_54339144 | NC_021165.1    | Ca_kabuli_chr06 | 54339144                | AA                              | GG              | 1946876740               |
| SNP_P4_89158_54340047 | NC_021165.1    | Ca_kabuli_chr06 | 54340047                | CC                              | TT              | 1946876742               |
| SNP_P4_89159_54340402 | NC_021165.1    | Ca_kabuli_chr06 | 54340402                | AA                              | GG              | 1946876744               |
| SNP_P4_89160_54340466 | NC_021165.1    | Ca_kabuli_chr06 | 54340466                | TT                              | CC              | 1946876746               |
| SNP_P4_89161_54340467 | NC_021165.1    | Ca_kabuli_chr06 | 54340467                | CC                              | TT              | 1946876749               |
| SNP_P4_89162_54341482 | NC_021165.1    | Ca_kabuli_chr06 | 54341482                | CC                              | GG              | 1946876751               |
| SNP_P4_89163_54341588 | NC_021165.1    | Ca_kabuli_chr06 | 54341588                | TT                              | CC              | 1946876753               |
| SNP_P4_89164_54341596 | NC_021165.1    | Ca_kabuli_chr06 | 54341596                | GG                              | AA              | 1946876755               |
| SNP_P4_89165_54342417 | NC_021165.1    | Ca_kabuli_chr06 | 54342417                | AA                              | CC              | 1946876757               |
| SNP_P4_89166_54342611 | NC_021165.1    | Ca_kabuli_chr06 | 54342611                | TT                              | CC              | 1946876759               |
| SNP_P4_89167_54342615 | NC_021165.1    | Ca_kabuli_chr06 | 54342615                | CC                              | TT              | 1946876761               |
| SNP_P4_89168_54343046 | NC_021165.1    | Ca_kabuli_chr06 | 54343046                | TT                              | CC              | 1946876763               |
| SNP_P4_89169_54343329 | NC_021165.1    | Ca_kabuli_chr06 | 54343329                | TT                              | CC              | 1946876765               |
| SNP_P4_89170_54343379 | NC_021165.1    | Ca_kabuli_chr06 | 54343379                | TT                              | AA              | 1946876767               |
| SNP_P4_89171_54343382 | NC_021165.1    | Ca_kabuli_chr06 | 54343382                | GG                              | AA              | 1946876769               |
| SNP_P4_89173_54344165 | NC_021165.1    | Ca_kabuli_chr06 | 54344165                | CC                              | TT              | 1946876771               |
| SNP_P4_89174_54344254 | NC_021165.1    | Ca_kabuli_chr06 | 54344254                | GG                              | AA              | 1946876773               |
| SNP_P4_89175_54345634 | NC_021165.1    | Ca_kabuli_chr06 | 54345634                | TT                              | AA              | 1946876775               |
| SNP_P4_89176_54345664 | NC_021165.1    | Ca_kabuli_chr06 | 54345664                | CC                              | AA              | 1946876776               |
| SNP_P4_89177_54345694 | NC_021165.1    | Ca_kabuli_chr06 | 54345694                | TT                              | CC              | 1946876778               |
| SNP_P4_89178_54345711 | NC_021165.1    | Ca_kabuli_chr06 | 54345711                | GG                              | AA              | 1946876780               |
| SNP_P4_89179_54348867 | NC_021165.1    | Ca_kabuli_chr06 | 54348867                | TT                              | CC              | 1946876782               |
| SNP_P4_89180_54349125 | NC_021165.1    | Ca_kabuli_chr06 | 54349125                | AA                              | CC              | 1946876784               |
| SNP_P4_89181_54349891 | NC_021165.1    | Ca_kabuli_chr06 | 54349891                | TT                              | GG              | 1946876786               |
| SNP_P4_89182_54353579 | NC_021165.1    | Ca_kabuli_chr06 | 54353579                | TT                              | AA              | 1946876788               |
| SNP_P4_89183_54353603 | NC_021165.1    | Ca_kabuli_chr06 | 54353603                | AA                              | GG              | 1946876790               |
| SNP_P4_89184_54353614 | NC_021165.1    | Ca_kabuli_chr06 | 54353614                | TT                              | CC              | 1946876792               |
| SNP_P4_89185_54353624 | NC_021165.1    | Ca_kabuli_chr06 | 54353624                | GG                              | CC              | 1946876794               |
| SNP_P4_89186_54353821 | NC_021165.1    | Ca_kabuli_chr06 | 54353821                | GG                              | TT              | 1946876796               |
| SNP_P4_89187_54354063 | NC_021165.1    | Ca_kabuli_chr06 | 54354063                | TT                              | AA              | 1946876798               |
| SNP_P4_89190_54355122 | NC_021165.1    | Ca_kabuli_chr06 | 54355122                | AA                              | TT              | 1946876800               |
| SNP_P4_89191_54355125 | NC_021165.1    | Ca_kabuli_chr06 | 54355125                | TT                              | CC              | 1946876802               |

| SNPs IDs              | Chromosome IDs | Chromosomes     | Physical positions (bp) | CDC Frontier (Reference genome) | (ILWC46 & LPNB) | NCBI SNPdb Accession IDs |
|-----------------------|----------------|-----------------|-------------------------|---------------------------------|-----------------|--------------------------|
| SNP_P4_89192_54355419 | NC_021165.1    | Ca_kabuli_chr06 | 54355419                | GG                              | AA              | 1946876804               |
| SNP_P4_89193_54355420 | NC_021165.1    | Ca_kabuli_chr06 | 54355420                | TT                              | CC              | 1946876806               |
| SNP_P4_89194_54355427 | NC_021165.1    | Ca_kabuli_chr06 | 54355427                | AA                              | GG              | 1946876808               |
| SNP_P4_89195_54355786 | NC_021165.1    | Ca_kabuli_chr06 | 54355786                | GG                              | AA              | 1946876810               |
| SNP_P4_89196_54355813 | NC_021165.1    | Ca_kabuli_chr06 | 54355813                | AA                              | GG              | 1946876811               |
| SNP_P4_89197_54355962 | NC_021165.1    | Ca_kabuli_chr06 | 54355962                | CC                              | TT              | 1946876813               |
| SNP_P4_89198_54355965 | NC_021165.1    | Ca_kabuli_chr06 | 54355965                | CC                              | TT              | 1946876815               |
| SNP_P4_89199_54355971 | NC_021165.1    | Ca_kabuli_chr06 | 54355971                | TT                              | AA              | 1946876817               |
| SNP_P4_89200_54356472 | NC_021165.1    | Ca_kabuli_chr06 | 54356472                | TT                              | CC              | 1946876819               |
| SNP_P4_89201_54357400 | NC_021165.1    | Ca_kabuli_chr06 | 54357400                | TT                              | AA              | 1946876821               |
| SNP_P4_89202_54357519 | NC_021165.1    | Ca_kabuli_chr06 | 54357519                | AA                              | GG              | 1946876823               |
| SNP_P4_89203_54357576 | NC_021165.1    | Ca_kabuli_chr06 | 54357576                | AA                              | TT              | 1946876825               |
| SNP_P4_89204_54357605 | NC_021165.1    | Ca_kabuli_chr06 | 54357605                | CC                              | AA              | 1946876827               |
| SNP_P4_89205_54359869 | NC_021165.1    | Ca_kabuli_chr06 | 54359869                | TT                              | GG              | 1946876829               |
| SNP_P4_89207_54360866 | NC_021165.1    | Ca_kabuli_chr06 | 54360866                | TT                              | GG              | 1946876831               |
| SNP_P4_89208_54361155 | NC_021165.1    | Ca_kabuli_chr06 | 54361155                | TT                              | CC              | 1946876833               |
| SNP_P4_89209_54362257 | NC_021165.1    | Ca_kabuli_chr06 | 54362257                | AA                              | GG              | 1946876835               |
| SNP_P4_89210_54362832 | NC_021165.1    | Ca_kabuli_chr06 | 54362832                | CC                              | TT              | 1946876836               |
| SNP_P4_89211_54362881 | NC_021165.1    | Ca_kabuli_chr06 | 54362881                | AA                              | GG              | 1946876838               |
| SNP_P4_89212_54362892 | NC_021165.1    | Ca_kabuli_chr06 | 54362892                | AA                              | GG              | 1946876840               |
| SNP_P4_89213_54362898 | NC_021165.1    | Ca_kabuli_chr06 | 54362898                | TT                              | CC              | 1946876842               |
| SNP_P4_89214_54362910 | NC_021165.1    | Ca_kabuli_chr06 | 54362910                | GG                              | AA              | 1946876844               |
| SNP_P4_89215_54363197 | NC_021165.1    | Ca_kabuli_chr06 | 54363197                | TT                              | GG              | 1946876846               |
| SNP_P4_89216_54363691 | NC_021165.1    | Ca_kabuli_chr06 | 54363691                | AA                              | GG              | 1946876848               |
| SNP_P4_89217_54363693 | NC_021165.1    | Ca_kabuli_chr06 | 54363693                | AA                              | GG              | 1946876850               |
| SNP_P4_89218_54363697 | NC_021165.1    | Ca_kabuli_chr06 | 54363697                | CC                              | AA              | 1946876852               |
| SNP_P4_89219_54363710 | NC_021165.1    | Ca_kabuli_chr06 | 54363710                | CC                              | TT              | 1946876854               |
| SNP_P4_89220_54363936 | NC_021165.1    | Ca_kabuli_chr06 | 54363936                | TT                              | GG              | 1946876855               |
| SNP_P4_89222_54365710 | NC_021165.1    | Ca_kabuli_chr06 | 54365710                | CC                              | TT              | 1946876857               |
| SNP_P4_89223_54365712 | NC_021165.1    | Ca_kabuli_chr06 | 54365712                | GG                              | AA              | 1946876859               |
| SNP_P4_89224_54365721 | NC_021165.1    | Ca_kabuli_chr06 | 54365721                | GG                              | CC              | 1946876861               |
| SNP_P4_89225_54365770 | NC_021165.1    | Ca_kabuli_chr06 | 54365770                | AA                              | GG              | 1946876863               |
| SNP_P4_89226_54365896 | NC_021165.1    | Ca_kabuli_chr06 | 54365896                | GG                              | CC              | 1946876865               |
| SNP_P4_89227_54365918 | NC_021165.1    | Ca_kabuli_chr06 | 54365918                | TT                              | AA              | 1946876867               |
| SNP_P4_89229_54680933 | NC_021165.1    | Ca_kabuli_chr06 | 54680933                | GG                              | AA              | 1946876869               |
| SNP_P4_89230_54680985 | NC_021165.1    | Ca_kabuli_chr06 | 54680985                | AA                              | CC              | 1946876870               |
| SNP_P4_89231_54681289 | NC_021165.1    | Ca_kabuli_chr06 | 54681289                | AA                              | CC              | 1946876872               |
| SNP_P4_89232_54681291 | NC_021165.1    | Ca_kabuli_chr06 | 54681291                | TT                              | GG              | 1946876874               |
| SNP_P4_89233_54681386 | NC_021165.1    | Ca_kabuli_chr06 | 54681386                | AA                              | CC              | 1946876876               |
| SNP_P4_89235_54720435 | NC_021165.1    | Ca_kabuli_chr06 | 54720435                | GG                              | CC              | 1946876878               |
| SNP_P4_89236_54720790 | NC_021165.1    | Ca_kabuli_chr06 | 54720790                | TT                              | CC              | 1946876880               |
| SNP_P4_89237_54754673 | NC_021165.1    | Ca_kabuli_chr06 | 54754673                | AA                              | GG              | 1946876882               |

| SNPs IDs              | Chromosome IDs | Chromosomes     | Physical positions (bp) | CDC Frontier (Reference genome) | (ILWC46 & LPNB) | NCBI SNPdb Accession IDs |
|-----------------------|----------------|-----------------|-------------------------|---------------------------------|-----------------|--------------------------|
| SNP_P4_89238_54754815 | NC_021165.1    | Ca_kabuli_chr06 | 54754815                | TT                              | AA              | 1946876884               |
| SNP_P4_89240_54754859 | NC_021165.1    | Ca_kabuli_chr06 | 54754859                | AA                              | GG              | 1946876886               |
| SNP_P4_89241_54754886 | NC_021165.1    | Ca_kabuli_chr06 | 54754886                | TT                              | GG              | 1946876888               |
| SNP_P4_89242_54754890 | NC_021165.1    | Ca_kabuli_chr06 | 54754890                | AA                              | CC              | 1946876890               |
| SNP_P4_89243_54754922 | NC_021165.1    | Ca_kabuli_chr06 | 54754922                | GG                              | AA              | 1946876892               |
| SNP_P4_89244_54755368 | NC_021165.1    | Ca_kabuli_chr06 | 54755368                | AA                              | TT              | 1946876894               |
| SNP_P4_89245_54766774 | NC_021165.1    | Ca_kabuli_chr06 | 54766774                | AA                              | CC              | 1946876895               |
| SNP_P4_89246_54792476 | NC_021165.1    | Ca_kabuli_chr06 | 54792476                | GG                              | AA              | 1946876897               |
| SNP_P4_89247_54792784 | NC_021165.1    | Ca_kabuli_chr06 | 54792784                | TT                              | AA              | 1946876899               |
| SNP_P4_89248_54792817 | NC_021165.1    | Ca_kabuli_chr06 | 54792817                | CC                              | GG              | 1946876901               |
| SNP_P4_89249_54792821 | NC_021165.1    | Ca_kabuli_chr06 | 54792821                | GG                              | TT              | 1946876903               |
| SNP_P4_89250_54807622 | NC_021165.1    | Ca_kabuli_chr06 | 54807622                | GG                              | AA              | 1946876905               |
| SNP_P4_89251_54831150 | NC_021165.1    | Ca_kabuli_chr06 | 54831150                | AA                              | GG              | 1946876907               |
| SNP_P4_89252_54843047 | NC_021165.1    | Ca_kabuli_chr06 | 54843047                | CC                              | TT              | 1946876909               |
| SNP_P4_89253_54868793 | NC_021165.1    | Ca_kabuli_chr06 | 54868793                | TT                              | GG              | 1946876911               |
| SNP_P4_89254_54869227 | NC_021165.1    | Ca_kabuli_chr06 | 54869227                | CC                              | TT              | 1946876912               |
| SNP_P4_89255_54882563 | NC_021165.1    | Ca_kabuli_chr06 | 54882563                | GG                              | TT              | 1946876914               |
| SNP_P4_89256_54882585 | NC_021165.1    | Ca_kabuli_chr06 | 54882585                | AA                              | GG              | 1946876916               |
| SNP_P4_89257_54883777 | NC_021165.1    | Ca_kabuli_chr06 | 54883777                | CC                              | GG              | 1946876918               |
| SNP_P4_89258_54883818 | NC_021165.1    | Ca_kabuli_chr06 | 54883818                | TT                              | GG              | 1946876920               |
| SNP_P4_89259_54884120 | NC_021165.1    | Ca_kabuli_chr06 | 54884120                | GG                              | AA              | 1946876922               |
| SNP_P4_89260_54884235 | NC_021165.1    | Ca_kabuli_chr06 | 54884235                | TT                              | GG              | 1946876924               |
| SNP_P4_89261_54886705 | NC_021165.1    | Ca_kabuli_chr06 | 54886705                | AA                              | GG              | 1946876926               |
| SNP_P4_89262_54886715 | NC_021165.1    | Ca_kabuli_chr06 | 54886715                | CC                              | TT              | 1946876927               |
| SNP_P4_89263_54886733 | NC_021165.1    | Ca_kabuli_chr06 | 54886733                | AA                              | GG              | 1946876929               |
| SNP_P4_89264_54886736 | NC_021165.1    | Ca_kabuli_chr06 | 54886736                | GG                              | AA              | 1946876931               |
| SNP_P4_89265_54886832 | NC_021165.1    | Ca_kabuli_chr06 | 54886832                | GG                              | AA              | 1946876933               |
| SNP_P4_89266_54886877 | NC_021165.1    | Ca_kabuli_chr06 | 54886877                | GG                              | AA              | 1946876935               |
| SNP_P4_89267_54887103 | NC_021165.1    | Ca_kabuli_chr06 | 54887103                | TT                              | CC              | 1946876937               |
| SNP_P4_89268_54887202 | NC_021165.1    | Ca_kabuli_chr06 | 54887202                | CC                              | TT              | 1946876939               |
| SNP_P4_89269_54889106 | NC_021165.1    | Ca_kabuli_chr06 | 54889106                | CC                              | TT              | 1946876941               |
| SNP_P4_89270_54889112 | NC_021165.1    | Ca_kabuli_chr06 | 54889112                | GG                              | AA              | 1946876943               |
| SNP_P4_89271_54913474 | NC_021165.1    | Ca_kabuli_chr06 | 54913474                | TT                              | CC              | 1946876945               |
| SNP_P4_89272_54933189 | NC_021165.1    | Ca_kabuli_chr06 | 54933189                | CC                              | TT              | 1946876947               |
| SNP_P4_89273_54933290 | NC_021165.1    | Ca_kabuli_chr06 | 54933290                | CC                              | TT              | 1946876949               |
| SNP_P4_89275_54933294 | NC_021165.1    | Ca_kabuli_chr06 | 54933294                | TT                              | CC              | 1946876951               |
| SNP_P4_89276_54933329 | NC_021165.1    | Ca_kabuli_chr06 | 54933329                | AA                              | GG              | 1946876953               |
| SNP_P4_89278_54933522 | NC_021165.1    | Ca_kabuli_chr06 | 54933522                | GG                              | TT              | 1946876955               |
| SNP_P4_89280_54933646 | NC_021165.1    | Ca_kabuli_chr06 | 54933646                | TT                              | AA              | 1946876957               |
| SNP_P4_89281_54934216 | NC_021165.1    | Ca_kabuli_chr06 | 54934216                | TT                              | CC              | 1946876959               |
| SNP_P4_89282_54934232 | NC_021165.1    | Ca_kabuli_chr06 | 54934232                | CC                              | TT              | 1946876960               |
| SNP_P4_89283_54934624 | NC_021165.1    | Ca_kabuli_chr06 | 54934624                | CC                              | TT              | 1946876962               |

| SNPs IDs              | Chromosome IDs | Chromosomes     | Physical positions (bp) | CDC Frontier (Reference genome) | (ILWC46 & LPNB) | NCBI SNPdb Accession IDs |
|-----------------------|----------------|-----------------|-------------------------|---------------------------------|-----------------|--------------------------|
| SNP_P4_89284_54934670 | NC_021165.1    | Ca_kabuli_chr06 | 54934670                | GG                              | AA              | 1946876964               |
| SNP_P4_89285_54936083 | NC_021165.1    | Ca_kabuli_chr06 | 54936083                | CC                              | GG              | 1946876966               |
| SNP_P4_89286_54936090 | NC_021165.1    | Ca_kabuli_chr06 | 54936090                | TT                              | CC              | 1946876968               |
| SNP_P4_89287_54938304 | NC_021165.1    | Ca_kabuli_chr06 | 54938304                | TT                              | CC              | 1946876970               |
| SNP_P4_89288_54938388 | NC_021165.1    | Ca_kabuli_chr06 | 54938388                | GG                              | AA              | 1946876972               |
| SNP_P4_89289_54938415 | NC_021165.1    | Ca_kabuli_chr06 | 54938415                | GG                              | AA              | 1946876975               |
| SNP_P4_89290_54938660 | NC_021165.1    | Ca_kabuli_chr06 | 54938660                | TT                              | CC              | 1946876977               |
| SNP_P4_89291_54938803 | NC_021165.1    | Ca_kabuli_chr06 | 54938803                | AA                              | GG              | 1946876979               |
| SNP_P4_89292_54938869 | NC_021165.1    | Ca_kabuli_chr06 | 54938869                | GG                              | AA              | 1946876981               |
| SNP_P4_89293_54938888 | NC_021165.1    | Ca_kabuli_chr06 | 54938888                | CC                              | TT              | 1946876983               |
| SNP_P4_89294_54938908 | NC_021165.1    | Ca_kabuli_chr06 | 54938908                | GG                              | TT              | 1946876985               |
| SNP_P4_89295_54938937 | NC_021165.1    | Ca_kabuli_chr06 | 54938937                | AA                              | CC              | 1946876987               |
| SNP_P4_89296_54942105 | NC_021165.1    | Ca_kabuli_chr06 | 54942105                | CC                              | TT              | 1946876989               |
| SNP_P4_89298_54964385 | NC_021165.1    | Ca_kabuli_chr06 | 54964385                | AA                              | GG              | 1946876991               |
| SNP_P4_89299_54969033 | NC_021165.1    | Ca_kabuli_chr06 | 54969033                | AA                              | CC              | 1946876993               |
| SNP_P4_89300_55004068 | NC_021165.1    | Ca_kabuli_chr06 | 55004068                | CC                              | TT              | 1946876995               |
| SNP_P4_89301_55004069 | NC_021165.1    | Ca_kabuli_chr06 | 55004069                | AA                              | GG              | 1946876997               |
| SNP_P4_89302_55004072 | NC_021165.1    | Ca_kabuli_chr06 | 55004072                | AA                              | GG              | 1946876999               |
| SNP_P4_89303_55004114 | NC_021165.1    | Ca_kabuli_chr06 | 55004114                | CC                              | TT              | 1946877001               |
| SNP_P4_89304_55015589 | NC_021165.1    | Ca_kabuli_chr06 | 55015589                | TT                              | AA              | 1946877003               |
| SNP_P4_89305_55016561 | NC_021165.1    | Ca_kabuli_chr06 | 55016561                | GG                              | AA              | 1946877005               |
| SNP_P4_89306_55020198 | NC_021165.1    | Ca_kabuli_chr06 | 55020198                | CC                              | TT              | 1946877007               |
| SNP_P4_89307_55111662 | NC_021165.1    | Ca_kabuli_chr06 | 55111662                | CC                              | TT              | 1946877009               |
| SNP_P4_89308_55112853 | NC_021165.1    | Ca_kabuli_chr06 | 55112853                | TT                              | GG              | 1946877011               |
| SNP_P4_89309_55113130 | NC_021165.1    | Ca_kabuli_chr06 | 55113130                | AA                              | GG              | 1946877013               |
| SNP_P4_89310_55113309 | NC_021165.1    | Ca_kabuli_chr06 | 55113309                | TT                              | GG              | 1946877014               |
| SNP_P4_89311_55113355 | NC_021165.1    | Ca_kabuli_chr06 | 55113355                | CC                              | TT              | 1946877016               |
| SNP_P4_89312_55113478 | NC_021165.1    | Ca_kabuli_chr06 | 55113478                | AA                              | GG              | 1946877018               |
| SNP_P4_89313_55113511 | NC_021165.1    | Ca_kabuli_chr06 | 55113511                | GG                              | TT              | 1946877020               |
| SNP_P4_89314_55113524 | NC_021165.1    | Ca_kabuli_chr06 | 55113524                | AA                              | GG              | 1946877022               |
| SNP_P4_89315_55113530 | NC_021165.1    | Ca_kabuli_chr06 | 55113530                | TT                              | CC              | 1946877024               |
| SNP_P4_89316_55113542 | NC_021165.1    | Ca_kabuli_chr06 | 55113542                | AA                              | CC              | 1946877026               |
| SNP_P4_89317_55113563 | NC_021165.1    | Ca_kabuli_chr06 | 55113563                | TT                              | CC              | 1946877028               |
| SNP_P4_89318_55139396 | NC_021165.1    | Ca_kabuli_chr06 | 55139396                | AA                              | CC              | 1946877030               |
| SNP_P4_89320_55156015 | NC_021165.1    | Ca_kabuli_chr06 | 55156015                | CC                              | TT              | 1946877032               |
| SNP_P4_89321_55156117 | NC_021165.1    | Ca_kabuli_chr06 | 55156117                | GG                              | AA              | 1946877034               |
| SNP_P4_89322_55162570 | NC_021165.1    | Ca_kabuli_chr06 | 55162570                | AA                              | GG              | 1946877036               |
| SNP_P4_89323_55163069 | NC_021165.1    | Ca_kabuli_chr06 | 55163069                | GG                              | CC              | 1946877037               |
| SNP_P4_89324_55229666 | NC_021165.1    | Ca_kabuli_chr06 | 55229666                | CC                              | TT              | 1946877039               |
| SNP_P4_89325_55279325 | NC_021165.1    | Ca_kabuli_chr06 | 55279325                | TT                              | CC              | 1946877041               |
| SNP_P4_89326_55342477 | NC_021165.1    | Ca_kabuli_chr06 | 55342477                | CC                              | TT              | 1946877043               |
| SNP_P4_89327_55345396 | NC_021165.1    | Ca_kabuli_chr06 | 55345396                | TT                              | GG              | 1946877045               |

| SNPs IDs              | Chromosome IDs | Chromosomes     | Physical positions (bp) | CDC Frontier (Reference genome) | (ILWC46 & LPNB) | NCBI SNPdb Accession IDs |
|-----------------------|----------------|-----------------|-------------------------|---------------------------------|-----------------|--------------------------|
| SNP_P4_89328_55345421 | NC_021165.1    | Ca_kabuli_chr06 | 55345421                | TT                              | CC              | 1946877047               |
| SNP_P4_89329_55345450 | NC_021165.1    | Ca_kabuli_chr06 | 55345450                | AA                              | GG              | 1946877049               |
| SNP_P4_89330_55345458 | NC_021165.1    | Ca_kabuli_chr06 | 55345458                | CC                              | GG              | 1946877051               |
| SNP_P4_89331_55345839 | NC_021165.1    | Ca_kabuli_chr06 | 55345839                | TT                              | CC              | 1946877053               |
| SNP_P4_89332_55347975 | NC_021165.1    | Ca_kabuli_chr06 | 55347975                | AA                              | GG              | 1946877055               |
| SNP_P4_89333_55348163 | NC_021165.1    | Ca_kabuli_chr06 | 55348163                | TT                              | CC              | 1946877057               |
| SNP_P4_89334_55350443 | NC_021165.1    | Ca_kabuli_chr06 | 55350443                | CC                              | AA              | 1946877059               |
| SNP_P4_89335_55359915 | NC_021165.1    | Ca_kabuli_chr06 | 55359915                | CC                              | TT              | 1946877061               |
| SNP_P4_89336_55399737 | NC_021165.1    | Ca_kabuli_chr06 | 55399737                | TT                              | AA              | 1946877063               |
| SNP_P4_89337_55399764 | NC_021165.1    | Ca_kabuli_chr06 | 55399764                | CC                              | TT              | 1946877065               |
| SNP_P4_89338_55399783 | NC_021165.1    | Ca_kabuli_chr06 | 55399783                | TT                              | AA              | 1946877067               |
| SNP_P4_89339_55399785 | NC_021165.1    | Ca_kabuli_chr06 | 55399785                | TT                              | AA              | 1946877069               |
| SNP_P4_89340_55399918 | NC_021165.1    | Ca_kabuli_chr06 | 55399918                | CC                              | TT              | 1946877071               |
| SNP_P4_89341_55399955 | NC_021165.1    | Ca_kabuli_chr06 | 55399955                | GG                              | AA              | 1946877073               |
| SNP_P4_89342_55431499 | NC_021165.1    | Ca_kabuli_chr06 | 55431499                | AA                              | GG              | 1946877075               |
| SNP_P4_89343_55445420 | NC_021165.1    | Ca_kabuli_chr06 | 55445420                | AA                              | CC              | 1946877077               |
| SNP_P4_89344_55445551 | NC_021165.1    | Ca_kabuli_chr06 | 55445551                | GG                              | TT              | 1946877079               |
| SNP_P4_89346_55445679 | NC_021165.1    | Ca_kabuli_chr06 | 55445679                | TT                              | AA              | 1946877081               |
| SNP_P4_89347_55445695 | NC_021165.1    | Ca_kabuli_chr06 | 55445695                | TT                              | GG              | 1946877083               |
| SNP_P4_89348_55445768 | NC_021165.1    | Ca_kabuli_chr06 | 55445768                | TT                              | GG              | 1946877085               |
| SNP_P4_89349_55445817 | NC_021165.1    | Ca_kabuli_chr06 | 55445817                | GG                              | AA              | 1946877087               |
| SNP_P4_89351_55446198 | NC_021165.1    | Ca_kabuli_chr06 | 55446198                | TT                              | CC              | 1946877089               |
| SNP_P4_89352_55446235 | NC_021165.1    | Ca_kabuli_chr06 | 55446235                | GG                              | AA              | 1946877091               |
| SNP_P4_89353_55446294 | NC_021165.1    | Ca_kabuli_chr06 | 55446294                | GG                              | AA              | 1946877093               |
| SNP_P4_89354_55446331 | NC_021165.1    | Ca_kabuli_chr06 | 55446331                | CC                              | GG              | 1946877095               |
| SNP_P4_89355_55446339 | NC_021165.1    | Ca_kabuli_chr06 | 55446339                | GG                              | AA              | 1946877097               |
| SNP_P4_89356_55446365 | NC_021165.1    | Ca_kabuli_chr06 | 55446365                | AA                              | GG              | 1946877099               |
| SNP_P4_89357_55446366 | NC_021165.1    | Ca_kabuli_chr06 | 55446366                | GG                              | AA              | 1946877101               |
| SNP_P4_89358_55446400 | NC_021165.1    | Ca_kabuli_chr06 | 55446400                | CC                              | AA              | 1946877103               |
| SNP_P4_89360_55450679 | NC_021165.1    | Ca_kabuli_chr06 | 55450679                | AA                              | TT              | 1946877105               |
| SNP_P4_89361_55450680 | NC_021165.1    | Ca_kabuli_chr06 | 55450680                | AA                              | CC              | 1946877107               |
| SNP_P4_89362_55450721 | NC_021165.1    | Ca_kabuli_chr06 | 55450721                | TT                              | CC              | 1946877109               |
| SNP_P4_89363_55452215 | NC_021165.1    | Ca_kabuli_chr06 | 55452215                | AA                              | CC              | 1946877111               |
| SNP_P4_89364_55455250 | NC_021165.1    | Ca_kabuli_chr06 | 55455250                | AA                              | GG              | 1946877113               |
| SNP_P4_89365_55455251 | NC_021165.1    | Ca_kabuli_chr06 | 55455251                | TT                              | CC              | 1946877115               |
| SNP_P4_89366_55455349 | NC_021165.1    | Ca_kabuli_chr06 | 55455349                | GG                              | AA              | 1946877117               |
| SNP_P4_89367_55455401 | NC_021165.1    | Ca_kabuli_chr06 | 55455401                | AA                              | CC              | 1946877119               |
| SNP_P4_89368_55455803 | NC_021165.1    | Ca_kabuli_chr06 | 55455803                | CC                              | GG              | 1946877121               |
| SNP_P4_89369_55455904 | NC_021165.1    | Ca_kabuli_chr06 | 55455904                | CC                              | TT              | 1946877123               |
| SNP_P4_89370_55455905 | NC_021165.1    | Ca_kabuli_chr06 | 55455905                | GG                              | TT              | 1946877125               |
| SNP_P4_89371_55455906 | NC_021165.1    | Ca_kabuli_chr06 | 55455906                | TT                              | GG              | 1946877127               |
| SNP_P4_89372_55460366 | NC_021165.1    | Ca_kabuli_chr06 | 55460366                | TT                              | CC              | 1946877129               |



| SNPs IDs              | Chromosome IDs | Chromosomes     | Physical positions (bp) | CDC Frontier (Reference genome) | (ILWC46 & LPNB) | NCBI SNPdb Accession IDs |
|-----------------------|----------------|-----------------|-------------------------|---------------------------------|-----------------|--------------------------|
| SNP_P4_89376_55514958 | NC_021165.1    | Ca_kabuli_chr06 | 55514958                | AA                              | GG              | 1946877131               |
| SNP_P4_89377_55514986 | NC_021165.1    | Ca_kabuli_chr06 | 55514986                | TT                              | CC              | 1946877133               |
| SNP_P4_89378_55529888 | NC_021165.1    | Ca_kabuli_chr06 | 55529888                | AA                              | CC              | 1946877135               |
| SNP_P4_89379_55529890 | NC_021165.1    | Ca_kabuli_chr06 | 55529890                | CC                              | AA              | 1946877137               |
| SNP_P4_89380_55542066 | NC_021165.1    | Ca_kabuli_chr06 | 55542066                | CC                              | TT              | 1946877139               |
| SNP_P4_89381_55543706 | NC_021165.1    | Ca_kabuli_chr06 | 55543706                | TT                              | AA              | 1946877141               |
| SNP_P4_89382_55551093 | NC_021165.1    | Ca_kabuli_chr06 | 55551093                | CC                              | GG              | 1946877143               |
| SNP_P4_89383_55567216 | NC_021165.1    | Ca_kabuli_chr06 | 55567216                | AA                              | GG              | 1946877145               |
| SNP_P4_89385_55607439 | NC_021165.1    | Ca_kabuli_chr06 | 55607439                | TT                              | GG              | 1946877147               |
| SNP_P4_89386_55607454 | NC_021165.1    | Ca_kabuli_chr06 | 55607454                | TT                              | CC              | 1946877149               |
| SNP_P4_89387_55607457 | NC_021165.1    | Ca_kabuli_chr06 | 55607457                | TT                              | CC              | 1946877151               |
| SNP_P4_89388_55607786 | NC_021165.1    | Ca_kabuli_chr06 | 55607786                | CC                              | TT              | 1946877153               |
| SNP_P4_89389_55607862 | NC_021165.1    | Ca_kabuli_chr06 | 55607862                | TT                              | AA              | 1946877155               |
| SNP_P4_89390_55607866 | NC_021165.1    | Ca_kabuli_chr06 | 55607866                | TT                              | GG              | 1946877157               |
| SNP_P4_89391_55607908 | NC_021165.1    | Ca_kabuli_chr06 | 55607908                | TT                              | CC              | 1946877159               |
| SNP_P4_89392_55609276 | NC_021165.1    | Ca_kabuli_chr06 | 55609276                | CC                              | TT              | 1946877161               |
| SNP_P4_89393_55609551 | NC_021165.1    | Ca_kabuli_chr06 | 55609551                | AA                              | GG              | 1946877163               |
| SNP_P4_89394_55609587 | NC_021165.1    | Ca_kabuli_chr06 | 55609587                | CC                              | TT              | 1946877165               |
| SNP_P4_89395_55635113 | NC_021165.1    | Ca_kabuli_chr06 | 55635113                | GG                              | CC              | 1946877167               |
| SNP_P4_89396_55635139 | NC_021165.1    | Ca_kabuli_chr06 | 55635139                | GG                              | CC              | 1946877169               |
| SNP_P4_89397_55661941 | NC_021165.1    | Ca_kabuli_chr06 | 55661941                | GG                              | AA              | 1946877171               |
| SNP_P4_89398_55682820 | NC_021165.1    | Ca_kabuli_chr06 | 55682820                | CC                              | GG              | 1946877173               |
| SNP_P4_89399_55682847 | NC_021165.1    | Ca_kabuli_chr06 | 55682847                | GG                              | TT              | 1946877175               |
| SNP_P4_89400_55682963 | NC_021165.1    | Ca_kabuli_chr06 | 55682963                | CC                              | TT              | 1946877177               |
| SNP_P4_89401_55683009 | NC_021165.1    | Ca_kabuli_chr06 | 55683009                | CC                              | TT              | 1946877179               |
| SNP_P4_89402_55685101 | NC_021165.1    | Ca_kabuli_chr06 | 55685101                | CC                              | AA              | 1946877181               |
| SNP_P4_89403_55715588 | NC_021165.1    | Ca_kabuli_chr06 | 55715588                | AA                              | TT              | 1946877183               |
| SNP_P4_89404_55727926 | NC_021165.1    | Ca_kabuli_chr06 | 55727926                | GG                              | CC              | 1946877185               |
| SNP_P4_89405_55752502 | NC_021165.1    | Ca_kabuli_chr06 | 55752502                | GG                              | AA              | 1946877187               |
| SNP_P4_89406_55754708 | NC_021165.1    | Ca_kabuli_chr06 | 55754708                | AA                              | GG              | 1946877189               |
| SNP_P4_89407_55754726 | NC_021165.1    | Ca_kabuli_chr06 | 55754726                | AA                              | GG              | 1946877191               |
| SNP_P4_89408_55754732 | NC_021165.1    | Ca_kabuli_chr06 | 55754732                | TT                              | CC              | 1946877193               |
| SNP_P4_89409_55754792 | NC_021165.1    | Ca_kabuli_chr06 | 55754792                | AA                              | CC              | 1946877195               |
| SNP_P4_89410_55754795 | NC_021165.1    | Ca_kabuli_chr06 | 55754795                | AA                              | TT              | 1946877197               |
| SNP_P4_89412_55770399 | NC_021165.1    | Ca_kabuli_chr06 | 55770399                | GG                              | AA              | 1946877199               |
| SNP_P4_89413_55770422 | NC_021165.1    | Ca_kabuli_chr06 | 55770422                | TT                              | CC              | 1946877201               |
| SNP_P4_89414_55771091 | NC_021165.1    | Ca_kabuli_chr06 | 55771091                | AA                              | GG              | 1946877203               |
| SNP_P4_89417_55771600 | NC_021165.1    | Ca_kabuli_chr06 | 55771600                | AA                              | GG              | 1946877205               |
| SNP_P4_89419_55783029 | NC_021165.1    | Ca_kabuli_chr06 | 55783029                | AA                              | GG              | 1946877207               |
| SNP_P4_89420_55798649 | NC_021165.1    | Ca_kabuli_chr06 | 55798649                | TT                              | AA              | 1946877209               |
| SNP_P4_89421_55826298 | NC_021165.1    | Ca_kabuli_chr06 | 55826298                | AA                              | GG              | 1946877211               |
| SNP_P4_89422_55826329 | NC_021165.1    | Ca_kabuli_chr06 | 55826329                | TT                              | AA              | 1946877213               |

| SNPs IDs              | Chromosome IDs | Chromosomes     | Physical positions (bp) | CDC Frontier (Reference genome) | (ILWC46 & LPNB) | NCBI SNPdb Accession IDs |
|-----------------------|----------------|-----------------|-------------------------|---------------------------------|-----------------|--------------------------|
| SNP_P4_89423_55826388 | NC_021165.1    | Ca_kabuli_chr06 | 55826388                | TT                              | AA              | 1946877215               |
| SNP_P4_89424_55826392 | NC_021165.1    | Ca_kabuli_chr06 | 55826392                | TT                              | CC              | 1946877217               |
| SNP_P4_89425_55826412 | NC_021165.1    | Ca_kabuli_chr06 | 55826412                | CC                              | TT              | 1946877218               |
| SNP_P4_89426_55826428 | NC_021165.1    | Ca_kabuli_chr06 | 55826428                | CC                              | TT              | 1946877220               |
| SNP_P4_89427_55826576 | NC_021165.1    | Ca_kabuli_chr06 | 55826576                | TT                              | CC              | 1946877222               |
| SNP_P4_89428_55826779 | NC_021165.1    | Ca_kabuli_chr06 | 55826779                | TT                              | AA              | 1946877224               |
| SNP_P4_89429_55826832 | NC_021165.1    | Ca_kabuli_chr06 | 55826832                | GG                              | AA              | 1946877226               |
| SNP_P4_89430_55826845 | NC_021165.1    | Ca_kabuli_chr06 | 55826845                | GG                              | TT              | 1946877228               |
| SNP_P4_89431_55826854 | NC_021165.1    | Ca_kabuli_chr06 | 55826854                | GG                              | TT              | 1946877230               |
| SNP_P4_89432_55826902 | NC_021165.1    | Ca_kabuli_chr06 | 55826902                | CC                              | TT              | 1946877231               |
| SNP_P4_89433_55833901 | NC_021165.1    | Ca_kabuli_chr06 | 55833901                | TT                              | GG              | 1946877233               |
| SNP_P4_89434_55833942 | NC_021165.1    | Ca_kabuli_chr06 | 55833942                | AA                              | GG              | 1946877235               |
| SNP_P4_89435_55833949 | NC_021165.1    | Ca_kabuli_chr06 | 55833949                | TT                              | AA              | 1946877237               |
| SNP_P4_89436_55834361 | NC_021165.1    | Ca_kabuli_chr06 | 55834361                | AA                              | TT              | 1946877239               |
| SNP_P4_89438_55847708 | NC_021165.1    | Ca_kabuli_chr06 | 55847708                | GG                              | AA              | 1946877241               |
| SNP_P4_89439_55847923 | NC_021165.1    | Ca_kabuli_chr06 | 55847923                | AA                              | CC              | 1946877243               |
| SNP_P4_89440_55847941 | NC_021165.1    | Ca_kabuli_chr06 | 55847941                | AA                              | GG              | 1946877245               |
| SNP_P4_89441_55867189 | NC_021165.1    | Ca_kabuli_chr06 | 55867189                | CC                              | TT              | 1946877247               |
| SNP_P4_89443_55890229 | NC_021165.1    | Ca_kabuli_chr06 | 55890229                | TT                              | GG              | 1946877248               |
| SNP_P4_89444_55945173 | NC_021165.1    | Ca_kabuli_chr06 | 55945173                | GG                              | AA              | 1946877250               |
| SNP_P4_89445_55945174 | NC_021165.1    | Ca_kabuli_chr06 | 55945174                | AA                              | CC              | 1946877252               |
| SNP_P4_89446_55947042 | NC_021165.1    | Ca_kabuli_chr06 | 55947042                | TT                              | CC              | 1946877254               |
| SNP_P4_89447_55948499 | NC_021165.1    | Ca_kabuli_chr06 | 55948499                | AA                              | GG              | 1946877256               |
| SNP_P4_89448_55951307 | NC_021165.1    | Ca_kabuli_chr06 | 55951307                | TT                              | CC              | 1946877258               |
| SNP_P4_89449_55951360 | NC_021165.1    | Ca_kabuli_chr06 | 55951360                | CC                              | TT              | 1946877260               |
| SNP_P4_89450_55951361 | NC_021165.1    | Ca_kabuli_chr06 | 55951361                | CC                              | TT              | 1946877262               |
| SNP_P4_89451_55951647 | NC_021165.1    | Ca_kabuli_chr06 | 55951647                | GG                              | AA              | 1946877264               |
| SNP_P4_89452_55951687 | NC_021165.1    | Ca_kabuli_chr06 | 55951687                | TT                              | CC              | 1946877266               |
| SNP_P4_89453_55951689 | NC_021165.1    | Ca_kabuli_chr06 | 55951689                | GG                              | AA              | 1946877268               |
| SNP_P4_89454_55951702 | NC_021165.1    | Ca_kabuli_chr06 | 55951702                | CC                              | AA              | 1946877270               |
| SNP_P4_89455_55951717 | NC_021165.1    | Ca_kabuli_chr06 | 55951717                | CC                              | TT              | 1946877272               |
| SNP_P4_89456_55951748 | NC_021165.1    | Ca_kabuli_chr06 | 55951748                | TT                              | CC              | 1946877274               |
| SNP_P4_89457_55960161 | NC_021165.1    | Ca_kabuli_chr06 | 55960161                | AA                              | GG              | 1946877276               |
| SNP_P4_89458_55961293 | NC_021165.1    | Ca_kabuli_chr06 | 55961293                | GG                              | CC              | 1946877278               |
| SNP_P4_89459_55972776 | NC_021165.1    | Ca_kabuli_chr06 | 55972776                | AA                              | GG              | 1946877280               |
| SNP_P4_89460_55973048 | NC_021165.1    | Ca_kabuli_chr06 | 55973048                | TT                              | CC              | 1946877281               |
| SNP_P4_89462_56010077 | NC_021165.1    | Ca_kabuli_chr06 | 56010077                | AA                              | GG              | 1946877283               |
| SNP_P4_89463_56036585 | NC_021165.1    | Ca_kabuli_chr06 | 56036585                | AA                              | GG              | 1946877285               |
| SNP_P4_89464_56039269 | NC_021165.1    | Ca_kabuli_chr06 | 56039269                | TT                              | CC              | 1946877287               |
| SNP_P4_89465_56047227 | NC_021165.1    | Ca_kabuli_chr06 | 56047227                | AA                              | GG              | 1946877289               |
| SNP_P4_89466_56047552 | NC_021165.1    | Ca_kabuli_chr06 | 56047552                | CC                              | TT              | 1946877291               |
| SNP_P4_89467_56054446 | NC_021165.1    | Ca_kabuli_chr06 | 56054446                | TT                              | CC              | 1946877293               |

| SNPs IDs              | Chromosome IDs | Chromosomes     | Physical positions (bp) | CDC Frontier (Reference genome) | (ILWC46 & LPNB) | NCBI SNPdb Accession IDs |
|-----------------------|----------------|-----------------|-------------------------|---------------------------------|-----------------|--------------------------|
| SNP_P4_89469_56063522 | NC_021165.1    | Ca_kabuli_chr06 | 56063522                | AA                              | TT              | 1946877295               |
| SNP_P4_89470_56081784 | NC_021165.1    | Ca_kabuli_chr06 | 56081784                | CC                              | TT              | 1946877297               |
| SNP_P4_89471_56082017 | NC_021165.1    | Ca_kabuli_chr06 | 56082017                | AA                              | GG              | 1946877299               |
| SNP_P4_89472_56082029 | NC_021165.1    | Ca_kabuli_chr06 | 56082029                | AA                              | TT              | 1946877301               |
| SNP_P4_89473_56087625 | NC_021165.1    | Ca_kabuli_chr06 | 56087625                | AA                              | GG              | 1946877303               |
| SNP_P4_89475_56087747 | NC_021165.1    | Ca_kabuli_chr06 | 56087747                | CC                              | TT              | 1946877305               |
| SNP_P4_89476_56136239 | NC_021165.1    | Ca_kabuli_chr06 | 56136239                | AA                              | GG              | 1946877307               |
| SNP_P4_89477_56136253 | NC_021165.1    | Ca_kabuli_chr06 | 56136253                | AA                              | GG              | 1946877309               |
| SNP_P4_89478_56138314 | NC_021165.1    | Ca_kabuli_chr06 | 56138314                | GG                              | TT              | 1946877311               |
| SNP_P4_89479_56138593 | NC_021165.1    | Ca_kabuli_chr06 | 56138593                | GG                              | AA              | 1946877312               |
| SNP_P4_89480_56138641 | NC_021165.1    | Ca_kabuli_chr06 | 56138641                | CC                              | TT              | 1946877314               |
| SNP_P4_89481_56138696 | NC_021165.1    | Ca_kabuli_chr06 | 56138696                | GG                              | AA              | 1946877316               |
| SNP_P4_89482_56138719 | NC_021165.1    | Ca_kabuli_chr06 | 56138719                | TT                              | CC              | 1946877318               |
| SNP_P4_89483_56138793 | NC_021165.1    | Ca_kabuli_chr06 | 56138793                | TT                              | CC              | 1946877320               |
| SNP_P4_89484_56138816 | NC_021165.1    | Ca_kabuli_chr06 | 56138816                | TT                              | GG              | 1946877322               |
| SNP_P4_89485_56138823 | NC_021165.1    | Ca_kabuli_chr06 | 56138823                | TT                              | CC              | 1946877324               |
| SNP_P4_89486_56138883 | NC_021165.1    | Ca_kabuli_chr06 | 56138883                | GG                              | AA              | 1946877326               |
| SNP_P4_89487_56138918 | NC_021165.1    | Ca_kabuli_chr06 | 56138918                | TT                              | GG              | 1946877328               |
| SNP_P4_89488_56138924 | NC_021165.1    | Ca_kabuli_chr06 | 56138924                | GG                              | AA              | 1946877330               |
| SNP_P4_89489_56139045 | NC_021165.1    | Ca_kabuli_chr06 | 56139045                | AA                              | GG              | 1946877332               |
| SNP_P4_89491_56139152 | NC_021165.1    | Ca_kabuli_chr06 | 56139152                | AA                              | GG              | 1946877334               |
| SNP_P4_89492_56139180 | NC_021165.1    | Ca_kabuli_chr06 | 56139180                | TT                              | CC              | 1946877336               |
| SNP_P4_89493_56139211 | NC_021165.1    | Ca_kabuli_chr06 | 56139211                | TT                              | CC              | 1946877338               |
| SNP_P4_89494_56139303 | NC_021165.1    | Ca_kabuli_chr06 | 56139303                | AA                              | TT              | 1946877340               |
| SNP_P4_89495_56139310 | NC_021165.1    | Ca_kabuli_chr06 | 56139310                | AA                              | GG              | 1946877342               |
| SNP_P4_89496_56139342 | NC_021165.1    | Ca_kabuli_chr06 | 56139342                | TT                              | AA              | 1946877344               |
| SNP_P4_89497_56139349 | NC_021165.1    | Ca_kabuli_chr06 | 56139349                | CC                              | GG              | 1946877346               |
| SNP_P4_89498_56139376 | NC_021165.1    | Ca_kabuli_chr06 | 56139376                | CC                              | TT              | 1946877348               |
| SNP_P4_89499_56139395 | NC_021165.1    | Ca_kabuli_chr06 | 56139395                | TT                              | GG              | 1946877350               |
| SNP_P4_89500_56139456 | NC_021165.1    | Ca_kabuli_chr06 | 56139456                | AA                              | GG              | 1946877352               |
| SNP_P4_89501_56139457 | NC_021165.1    | Ca_kabuli_chr06 | 56139457                | TT                              | GG              | 1946877353               |
| SNP_P4_89502_56139459 | NC_021165.1    | Ca_kabuli_chr06 | 56139459                | TT                              | GG              | 1946877355               |
| SNP_P4_89503_56145677 | NC_021165.1    | Ca_kabuli_chr06 | 56145677                | CC                              | GG              | 1946877357               |
| SNP_P4_89504_56145681 | NC_021165.1    | Ca_kabuli_chr06 | 56145681                | CC                              | AA              | 1946877359               |
| SNP_P4_89505_56176361 | NC_021165.1    | Ca_kabuli_chr06 | 56176361                | CC                              | GG              | 1946877361               |
| SNP_P4_89506_56187781 | NC_021165.1    | Ca_kabuli_chr06 | 56187781                | TT                              | CC              | 1946877362               |
| SNP_P4_89507_56187789 | NC_021165.1    | Ca_kabuli_chr06 | 56187789                | AA                              | GG              | 1946877363               |
| SNP_P4_89509_56193013 | NC_021165.1    | Ca_kabuli_chr06 | 56193013                | AA                              | GG              | 1946877364               |
| SNP_P4_89510_56193039 | NC_021165.1    | Ca_kabuli_chr06 | 56193039                | AA                              | GG              | 1946877365               |
| SNP_P4_89511_56193346 | NC_021165.1    | Ca_kabuli_chr06 | 56193346                | CC                              | TT              | 1946877366               |
| SNP_P4_89512_56193520 | NC_021165.1    | Ca_kabuli_chr06 | 56193520                | AA                              | GG              | 1946877367               |
| SNP_P4_89513_56216253 | NC_021165.1    | Ca_kabuli_chr06 | 56216253                | CC                              | AA              | 1946877369               |

| SNPs IDs              | Chromosome IDs | Chromosomes     | Physical positions (bp) | CDC Frontier (Reference genome) | (ILWC46 & LPNB) | NCBI SNPdb Accession IDs |
|-----------------------|----------------|-----------------|-------------------------|---------------------------------|-----------------|--------------------------|
| SNP_P4_89514_56233623 | NC_021165.1    | Ca_kabuli_chr06 | 56233623                | CC                              | AA              | 1946877370               |
| SNP_P4_89515_56233636 | NC_021165.1    | Ca_kabuli_chr06 | 56233636                | TT                              | CC              | 1946877372               |
| SNP_P4_89516_56291664 | NC_021165.1    | Ca_kabuli_chr06 | 56291664                | AA                              | GG              | 1946877374               |
| SNP_P4_89517_56293091 | NC_021165.1    | Ca_kabuli_chr06 | 56293091                | CC                              | TT              | 1946877376               |
| SNP_P4_89518_56301898 | NC_021165.1    | Ca_kabuli_chr06 | 56301898                | AA                              | GG              | 1946877378               |
| SNP_P4_89519_56303100 | NC_021165.1    | Ca_kabuli_chr06 | 56303100                | AA                              | TT              | 1946877380               |
| SNP_P4_89520_56303103 | NC_021165.1    | Ca_kabuli_chr06 | 56303103                | CC                              | GG              | 1946877382               |
| SNP_P4_89521_56303217 | NC_021165.1    | Ca_kabuli_chr06 | 56303217                | CC                              | TT              | 1946877384               |
| SNP_P4_89522_56304463 | NC_021165.1    | Ca_kabuli_chr06 | 56304463                | CC                              | TT              | 1946877386               |
| SNP_P4_89523_56304474 | NC_021165.1    | Ca_kabuli_chr06 | 56304474                | GG                              | AA              | 1946877388               |
| SNP_P4_89524_56304475 | NC_021165.1    | Ca_kabuli_chr06 | 56304475                | TT                              | AA              | 1946877390               |
| SNP_P4_89525_56304482 | NC_021165.1    | Ca_kabuli_chr06 | 56304482                | AA                              | TT              | 1946877392               |
| SNP_P4_89526_56304500 | NC_021165.1    | Ca_kabuli_chr06 | 56304500                | GG                              | AA              | 1946877394               |
| SNP_P4_89527_56304506 | NC_021165.1    | Ca_kabuli_chr06 | 56304506                | GG                              | AA              | 1946877395               |
| SNP_P4_89529_56304629 | NC_021165.1    | Ca_kabuli_chr06 | 56304629                | TT                              | CC              | 1946877397               |
| SNP_P4_89530_56304688 | NC_021165.1    | Ca_kabuli_chr06 | 56304688                | TT                              | CC              | 1946877399               |
| SNP_P4_89531_56304716 | NC_021165.1    | Ca_kabuli_chr06 | 56304716                | AA                              | GG              | 1946877401               |
| SNP_P4_89532_56304753 | NC_021165.1    | Ca_kabuli_chr06 | 56304753                | TT                              | CC              | 1946877403               |
| SNP_P4_89533_56304780 | NC_021165.1    | Ca_kabuli_chr06 | 56304780                | CC                              | GG              | 1946877405               |
| SNP_P4_89534_56304804 | NC_021165.1    | Ca_kabuli_chr06 | 56304804                | TT                              | CC              | 1946877407               |
| SNP_P4_89535_56304851 | NC_021165.1    | Ca_kabuli_chr06 | 56304851                | AA                              | CC              | 1946877409               |
| SNP_P4_89536_56304874 | NC_021165.1    | Ca_kabuli_chr06 | 56304874                | TT                              | AA              | 1946877411               |
| SNP_P4_89537_56304916 | NC_021165.1    | Ca_kabuli_chr06 | 56304916                | GG                              | AA              | 1946877413               |
| SNP_P4_89538_56305005 | NC_021165.1    | Ca_kabuli_chr06 | 56305005                | TT                              | CC              | 1946877414               |
| SNP_P4_89539_56305017 | NC_021165.1    | Ca_kabuli_chr06 | 56305017                | TT                              | CC              | 1946877416               |
| SNP_P4_89540_56305049 | NC_021165.1    | Ca_kabuli_chr06 | 56305049                | AA                              | TT              | 1946877418               |
| SNP_P4_89541_56311156 | NC_021165.1    | Ca_kabuli_chr06 | 56311156                | CC                              | AA              | 1946877420               |
| SNP_P4_89542_56311163 | NC_021165.1    | Ca_kabuli_chr06 | 56311163                | AA                              | GG              | 1946877422               |
| SNP_P4_89543_56315569 | NC_021165.1    | Ca_kabuli_chr06 | 56315569                | CC                              | GG              | 1946877424               |
| SNP_P4_89544_56315574 | NC_021165.1    | Ca_kabuli_chr06 | 56315574                | CC                              | TT              | 1946877426               |
| SNP_P4_89545_56325287 | NC_021165.1    | Ca_kabuli_chr06 | 56325287                | GG                              | AA              | 1946877428               |
| SNP_P4_89546_56327509 | NC_021165.1    | Ca_kabuli_chr06 | 56327509                | CC                              | AA              | 1946877430               |
| SNP_P4_89547_56332882 | NC_021165.1    | Ca_kabuli_chr06 | 56332882                | CC                              | TT              | 1946877432               |
| SNP_P4_89548_56348954 | NC_021165.1    | Ca_kabuli_chr06 | 56348954                | GG                              | AA              | 1946877434               |
| SNP_P4_89549_56350686 | NC_021165.1    | Ca_kabuli_chr06 | 56350686                | CC                              | TT              | 1946877436               |
| SNP_P4_89550_56350698 | NC_021165.1    | Ca_kabuli_chr06 | 56350698                | GG                              | CC              | 1946877438               |
| SNP_P4_89551_56397689 | NC_021165.1    | Ca_kabuli_chr06 | 56397689                | GG                              | AA              | 1946877439               |
| SNP_P4_89552_56397694 | NC_021165.1    | Ca_kabuli_chr06 | 56397694                | TT                              | CC              | 1946877441               |
| SNP_P4_89553_56397942 | NC_021165.1    | Ca_kabuli_chr06 | 56397942                | TT                              | CC              | 1946877443               |
| SNP_P4_89554_56397973 | NC_021165.1    | Ca_kabuli_chr06 | 56397973                | GG                              | AA              | 1946877445               |
| SNP_P4_89555_56397986 | NC_021165.1    | Ca_kabuli_chr06 | 56397986                | TT                              | CC              | 1946877447               |
| SNP_P4_89556_56397993 | NC_021165.1    | Ca_kabuli_chr06 | 56397993                | AA                              | GG              | 1946877449               |

| SNPs IDs              | Chromosome IDs | Chromosomes     | Physical positions (bp) | CDC Frontier (Reference genome) | (ILWC46 & LPNB) | NCBI SNPdb Accession IDs |
|-----------------------|----------------|-----------------|-------------------------|---------------------------------|-----------------|--------------------------|
| SNP_P4_89558_56411826 | NC_021165.1    | Ca_kabuli_chr06 | 56411826                | GG                              | AA              | 1946877451               |
| SNP_P4_89559_56423129 | NC_021165.1    | Ca_kabuli_chr06 | 56423129                | CC                              | AA              | 1946877453               |
| SNP_P4_89560_56457761 | NC_021165.1    | Ca_kabuli_chr06 | 56457761                | GG                              | CC              | 1946877455               |
| SNP_P4_89561_56464718 | NC_021165.1    | Ca_kabuli_chr06 | 56464718                | CC                              | TT              | 1946877457               |
| SNP_P4_89562_56464722 | NC_021165.1    | Ca_kabuli_chr06 | 56464722                | CC                              | GG              | 1946877459               |
| SNP_P4_89563_56464762 | NC_021165.1    | Ca_kabuli_chr06 | 56464762                | GG                              | TT              | 1946877461               |
| SNP_P4_89564_56464769 | NC_021165.1    | Ca_kabuli_chr06 | 56464769                | CC                              | TT              | 1946877463               |
| SNP_P4_89565_56464791 | NC_021165.1    | Ca_kabuli_chr06 | 56464791                | TT                              | CC              | 1946877464               |
| SNP_P4_89566_56479238 | NC_021165.1    | Ca_kabuli_chr06 | 56479238                | GG                              | AA              | 1946877466               |
| SNP_P4_89567_56479245 | NC_021165.1    | Ca_kabuli_chr06 | 56479245                | GG                              | TT              | 1946877468               |
| SNP_P4_89568_56502583 | NC_021165.1    | Ca_kabuli_chr06 | 56502583                | AA                              | TT              | 1946877470               |
| SNP_P4_89569_56502686 | NC_021165.1    | Ca_kabuli_chr06 | 56502686                | CC                              | AA              | 1946877472               |
| SNP_P4_89570_56502736 | NC_021165.1    | Ca_kabuli_chr06 | 56502736                | TT                              | CC              | 1946877474               |
| SNP_P4_89572_56503561 | NC_021165.1    | Ca_kabuli_chr06 | 56503561                | AA                              | TT              | 1946877476               |
| SNP_P4_89573_56503597 | NC_021165.1    | Ca_kabuli_chr06 | 56503597                | AA                              | TT              | 1946877478               |
| SNP_P4_89574_56503611 | NC_021165.1    | Ca_kabuli_chr06 | 56503611                | AA                              | GG              | 1946877480               |
| SNP_P4_89575_56503616 | NC_021165.1    | Ca_kabuli_chr06 | 56503616                | GG                              | AA              | 1946877482               |
| SNP_P4_89576_56503617 | NC_021165.1    | Ca_kabuli_chr06 | 56503617                | CC                              | GG              | 1946877483               |
| SNP_P4_89577_56503657 | NC_021165.1    | Ca_kabuli_chr06 | 56503657                | CC                              | TT              | 1946877485               |
| SNP_P4_89578_56503683 | NC_021165.1    | Ca_kabuli_chr06 | 56503683                | CC                              | TT              | 1946877487               |
| SNP_P4_89579_56503687 | NC_021165.1    | Ca_kabuli_chr06 | 56503687                | TT                              | CC              | 1946877489               |
| SNP_P4_89580_56503716 | NC_021165.1    | Ca_kabuli_chr06 | 56503716                | CC                              | AA              | 1946877491               |
| SNP_P4_89581_56503720 | NC_021165.1    | Ca_kabuli_chr06 | 56503720                | TT                              | GG              | 1946877493               |
| SNP_P4_89583_56503874 | NC_021165.1    | Ca_kabuli_chr06 | 56503874                | TT                              | AA              | 1946877495               |
| SNP_P4_89584_56503880 | NC_021165.1    | Ca_kabuli_chr06 | 56503880                | CC                              | AA              | 1946877497               |
| SNP_P4_89585_56503888 | NC_021165.1    | Ca_kabuli_chr06 | 56503888                | AA                              | CC              | 1946877499               |
| SNP_P4_89586_56503913 | NC_021165.1    | Ca_kabuli_chr06 | 56503913                | TT                              | CC              | 1946877501               |
| SNP_P4_89587_56503916 | NC_021165.1    | Ca_kabuli_chr06 | 56503916                | CC                              | TT              | 1946877503               |
| SNP_P4_89588_56503941 | NC_021165.1    | Ca_kabuli_chr06 | 56503941                | GG                              | AA              | 1946877504               |
| SNP_P4_89591_56504050 | NC_021165.1    | Ca_kabuli_chr06 | 56504050                | AA                              | GG              | 1946877506               |
| SNP_P4_89592_56504061 | NC_021165.1    | Ca_kabuli_chr06 | 56504061                | AA                              | TT              | 1946877508               |
| SNP_P4_89593_56504070 | NC_021165.1    | Ca_kabuli_chr06 | 56504070                | AA                              | GG              | 1946877510               |
| SNP_P4_89594_56504080 | NC_021165.1    | Ca_kabuli_chr06 | 56504080                | CC                              | TT              | 1946877512               |
| SNP_P4_89595_56504088 | NC_021165.1    | Ca_kabuli_chr06 | 56504088                | TT                              | CC              | 1946877514               |
| SNP_P4_89596_56504090 | NC_021165.1    | Ca_kabuli_chr06 | 56504090                | TT                              | CC              | 1946877516               |
| SNP_P4_89597_56504092 | NC_021165.1    | Ca_kabuli_chr06 | 56504092                | TT                              | AA              | 1946877518               |
| SNP_P4_89599_56504237 | NC_021165.1    | Ca_kabuli_chr06 | 56504237                | TT                              | CC              | 1946877520               |
| SNP_P4_89600_56504316 | NC_021165.1    | Ca_kabuli_chr06 | 56504316                | AA                              | GG              | 1946877522               |
| SNP_P4_89601_56504334 | NC_021165.1    | Ca_kabuli_chr06 | 56504334                | TT                              | AA              | 1946877523               |
| SNP_P4_89602_56504348 | NC_021165.1    | Ca_kabuli_chr06 | 56504348                | AA                              | CC              | 1946877525               |
| SNP_P4_89603_56504355 | NC_021165.1    | Ca_kabuli_chr06 | 56504355                | TT                              | AA              | 1946877527               |
| SNP_P4_89604_56504541 | NC_021165.1    | Ca_kabuli_chr06 | 56504541                | CC                              | GG              | 1946877529               |

| SNPs IDs              | Chromosome IDs | Chromosomes     | Physical positions (bp) | CDC Frontier (Reference genome) | (ILWC46 & LPNB) | NCBI SNPdb Accession IDs |
|-----------------------|----------------|-----------------|-------------------------|---------------------------------|-----------------|--------------------------|
| SNP_P4_89605_56504611 | NC_021165.1    | Ca_kabuli_chr06 | 56504611                | TT                              | AA              | 1946877531               |
| SNP_P4_89606_56504620 | NC_021165.1    | Ca_kabuli_chr06 | 56504620                | AA                              | CC              | 1946877533               |
| SNP_P4_89607_56504633 | NC_021165.1    | Ca_kabuli_chr06 | 56504633                | GG                              | AA              | 1946877535               |
| SNP_P4_89609_56504785 | NC_021165.1    | Ca_kabuli_chr06 | 56504785                | TT                              | AA              | 1946877536               |
| SNP_P4_89610_56504833 | NC_021165.1    | Ca_kabuli_chr06 | 56504833                | GG                              | TT              | 1946877538               |
| SNP_P4_89611_56505062 | NC_021165.1    | Ca_kabuli_chr06 | 56505062                | TT                              | GG              | 1946877540               |
| SNP_P4_89612_56505159 | NC_021165.1    | Ca_kabuli_chr06 | 56505159                | CC                              | TT              | 1946877542               |
| SNP_P4_89613_56505167 | NC_021165.1    | Ca_kabuli_chr06 | 56505167                | CC                              | TT              | 1946877544               |
| SNP_P4_89614_56505197 | NC_021165.1    | Ca_kabuli_chr06 | 56505197                | AA                              | GG              | 1946877546               |
| SNP_P4_89615_56505202 | NC_021165.1    | Ca_kabuli_chr06 | 56505202                | AA                              | GG              | 1946877547               |
| SNP_P4_89616_56505205 | NC_021165.1    | Ca_kabuli_chr06 | 56505205                | TT                              | CC              | 1946877549               |
| SNP_P4_89617_56505317 | NC_021165.1    | Ca_kabuli_chr06 | 56505317                | CC                              | TT              | 1946877551               |
| SNP_P4_89618_56505321 | NC_021165.1    | Ca_kabuli_chr06 | 56505321                | TT                              | CC              | 1946877553               |
| SNP_P4_89619_56505327 | NC_021165.1    | Ca_kabuli_chr06 | 56505327                | CC                              | AA              | 1946877555               |
| SNP_P4_89620_56505389 | NC_021165.1    | Ca_kabuli_chr06 | 56505389                | TT                              | CC              | 1946877557               |
| SNP_P4_89621_56505400 | NC_021165.1    | Ca_kabuli_chr06 | 56505400                | TT                              | AA              | 1946877559               |
| SNP_P4_89622_56505409 | NC_021165.1    | Ca_kabuli_chr06 | 56505409                | AA                              | GG              | 1946877561               |
| SNP_P4_89623_56505420 | NC_021165.1    | Ca_kabuli_chr06 | 56505420                | GG                              | CC              | 1946877563               |
| SNP_P4_89624_56505475 | NC_021165.1    | Ca_kabuli_chr06 | 56505475                | AA                              | CC              | 1946877565               |
| SNP_P4_89625_56505478 | NC_021165.1    | Ca_kabuli_chr06 | 56505478                | GG                              | AA              | 1946877567               |
| SNP_P4_89626_56505492 | NC_021165.1    | Ca_kabuli_chr06 | 56505492                | GG                              | AA              | 1946877569               |
| SNP_P4_89627_56505499 | NC_021165.1    | Ca_kabuli_chr06 | 56505499                | CC                              | GG              | 1946877571               |
| SNP_P4_89628_56505548 | NC_021165.1    | Ca_kabuli_chr06 | 56505548                | TT                              | CC              | 1946877573               |
| SNP_P4_89630_56506744 | NC_021165.1    | Ca_kabuli_chr06 | 56506744                | AA                              | GG              | 1946877575               |
| SNP_P4_89631_56506806 | NC_021165.1    | Ca_kabuli_chr06 | 56506806                | GG                              | AA              | 1946877577               |
| SNP_P4_89633_56506953 | NC_021165.1    | Ca_kabuli_chr06 | 56506953                | CC                              | TT              | 1946877579               |
| SNP_P4_89634_56506985 | NC_021165.1    | Ca_kabuli_chr06 | 56506985                | TT                              | CC              | 1946877581               |
| SNP_P4_89635_56507120 | NC_021165.1    | Ca_kabuli_chr06 | 56507120                | GG                              | AA              | 1946877583               |
| SNP_P4_89636_56507132 | NC_021165.1    | Ca_kabuli_chr06 | 56507132                | TT                              | CC              | 1946877585               |
| SNP_P4_89637_56507160 | NC_021165.1    | Ca_kabuli_chr06 | 56507160                | AA                              | GG              | 1946877587               |
| SNP_P4_89638_56507352 | NC_021165.1    | Ca_kabuli_chr06 | 56507352                | CC                              | TT              | 1946877589               |
| SNP_P4_89639_56507373 | NC_021165.1    | Ca_kabuli_chr06 | 56507373                | CC                              | AA              | 1946877591               |
| SNP_P4_89640_56507394 | NC_021165.1    | Ca_kabuli_chr06 | 56507394                | TT                              | AA              | 1946877593               |
| SNP_P4_89642_56507463 | NC_021165.1    | Ca_kabuli_chr06 | 56507463                | CC                              | AA              | 1946877595               |
| SNP_P4_89643_56507466 | NC_021165.1    | Ca_kabuli_chr06 | 56507466                | GG                              | AA              | 1946877597               |
| SNP_P4_89644_56507487 | NC_021165.1    | Ca_kabuli_chr06 | 56507487                | TT                              | AA              | 1946877599               |
| SNP_P4_89645_56507715 | NC_021165.1    | Ca_kabuli_chr06 | 56507715                | TT                              | CC              | 1946877601               |
| SNP_P4_89647_56507746 | NC_021165.1    | Ca_kabuli_chr06 | 56507746                | TT                              | AA              | 1946877603               |
| SNP_P4_89648_56507791 | NC_021165.1    | Ca_kabuli_chr06 | 56507791                | CC                              | TT              | 1946877605               |
| SNP_P4_89650_56507803 | NC_021165.1    | Ca_kabuli_chr06 | 56507803                | GG                              | AA              | 1946877607               |
| SNP_P4_89651_56507938 | NC_021165.1    | Ca_kabuli_chr06 | 56507938                | TT                              | CC              | 1946877609               |
| SNP_P4_89652_56508135 | NC_021165.1    | Ca_kabuli_chr06 | 56508135                | GG                              | AA              | 1946877611               |

| SNPs IDs              | Chromosome IDs | Chromosomes     | Physical positions (bp) | CDC Frontier (Reference genome) | (ILWC46 & LPNB) | NCBI SNPdb Accession IDs |
|-----------------------|----------------|-----------------|-------------------------|---------------------------------|-----------------|--------------------------|
| SNP_P4_89653_56508190 | NC_021165.1    | Ca_kabuli_chr06 | 56508190                | AA                              | TT              | 1946877613               |
| SNP_P4_89654_56537529 | NC_021165.1    | Ca_kabuli_chr06 | 56537529                | TT                              | GG              | 1946877615               |
| SNP_P4_89655_56537530 | NC_021165.1    | Ca_kabuli_chr06 | 56537530                | TT                              | GG              | 1946877617               |
| SNP_P4_89656_56539284 | NC_021165.1    | Ca_kabuli_chr06 | 56539284                | GG                              | AA              | 1946877619               |
| SNP_P4_89657_56560731 | NC_021165.1    | Ca_kabuli_chr06 | 56560731                | AA                              | GG              | 1946877621               |
| SNP_P4_89659_56587860 | NC_021165.1    | Ca_kabuli_chr06 | 56587860                | TT                              | CC              | 1946877623               |
| SNP_P4_89660_56594715 | NC_021165.1    | Ca_kabuli_chr06 | 56594715                | AA                              | CC              | 1946877625               |
| SNP_P4_89661_56607470 | NC_021165.1    | Ca_kabuli_chr06 | 56607470                | AA                              | CC              | 1946877627               |
| SNP_P4_89662_56610206 | NC_021165.1    | Ca_kabuli_chr06 | 56610206                | TT                              | CC              | 1946877629               |
| SNP_P4_89663_56616019 | NC_021165.1    | Ca_kabuli_chr06 | 56616019                | CC                              | AA              | 1946877631               |
| SNP_P4_89664_56616893 | NC_021165.1    | Ca_kabuli_chr06 | 56616893                | TT                              | CC              | 1946877633               |
| SNP_P4_89665_56616927 | NC_021165.1    | Ca_kabuli_chr06 | 56616927                | TT                              | AA              | 1946877635               |
| SNP_P4_89666_56616928 | NC_021165.1    | Ca_kabuli_chr06 | 56616928                | GG                              | CC              | 1946877637               |
| SNP_P4_89667_56621648 | NC_021165.1    | Ca_kabuli_chr06 | 56621648                | CC                              | GG              | 1946877639               |
| SNP_P4_89668_56674052 | NC_021165.1    | Ca_kabuli_chr06 | 56674052                | CC                              | TT              | 1946877641               |
| SNP_P4_89669_56674693 | NC_021165.1    | Ca_kabuli_chr06 | 56674693                | CC                              | TT              | 1946877642               |
| SNP_P4_89671_56713005 | NC_021165.1    | Ca_kabuli_chr06 | 56713005                | AA                              | GG              | 1946877645               |
| SNP_P4_89672_56713020 | NC_021165.1    | Ca_kabuli_chr06 | 56713020                | GG                              | TT              | 1946877647               |
| SNP_P4_89673_56713316 | NC_021165.1    | Ca_kabuli_chr06 | 56713316                | TT                              | CC              | 1946877649               |
| SNP_P4_89674_56713374 | NC_021165.1    | Ca_kabuli_chr06 | 56713374                | CC                              | TT              | 1946877651               |
| SNP_P4_89677_56728535 | NC_021165.1    | Ca_kabuli_chr06 | 56728535                | TT                              | AA              | 1946877653               |
| SNP_P4_89678_56728595 | NC_021165.1    | Ca_kabuli_chr06 | 56728595                | AA                              | GG              | 1946877655               |
| SNP_P4_89680_56728926 | NC_021165.1    | Ca_kabuli_chr06 | 56728926                | TT                              | CC              | 1946877657               |
| SNP_P4_89682_56755391 | NC_021165.1    | Ca_kabuli_chr06 | 56755391                | TT                              | CC              | 1946877659               |
| SNP_P4_89684_56812676 | NC_021165.1    | Ca_kabuli_chr06 | 56812676                | TT                              | AA              | 1946877661               |
| SNP_P4_89685_56846146 | NC_021165.1    | Ca_kabuli_chr06 | 56846146                | CC                              | AA              | 1946877663               |
| SNP_P4_89686_56859370 | NC_021165.1    | Ca_kabuli_chr06 | 56859370                | CC                              | TT              | 1946877665               |
| SNP_P4_89687_56866276 | NC_021165.1    | Ca_kabuli_chr06 | 56866276                | TT                              | AA              | 1946877667               |
| SNP_P4_89688_56877704 | NC_021165.1    | Ca_kabuli_chr06 | 56877704                | CC                              | TT              | 1946877669               |
| SNP_P4_89689_56878992 | NC_021165.1    | Ca_kabuli_chr06 | 56878992                | TT                              | CC              | 1946877671               |
| SNP_P4_89690_56887055 | NC_021165.1    | Ca_kabuli_chr06 | 56887055                | GG                              | AA              | 1946877673               |
| SNP_P4_89691_56907665 | NC_021165.1    | Ca_kabuli_chr06 | 56907665                | CC                              | TT              | 1946877675               |
| SNP_P4_89692_56909262 | NC_021165.1    | Ca_kabuli_chr06 | 56909262                | AA                              | GG              | 1946877677               |
| SNP_P4_89693_56956125 | NC_021165.1    | Ca_kabuli_chr06 | 56956125                | TT                              | CC              | 1946877679               |
| SNP_P4_89694_56956151 | NC_021165.1    | Ca_kabuli_chr06 | 56956151                | TT                              | CC              | 1946877681               |
| SNP_P4_89695_56971150 | NC_021165.1    | Ca_kabuli_chr06 | 56971150                | AA                              | TT              | 1946877683               |
| SNP_P4_89696_56997270 | NC_021165.1    | Ca_kabuli_chr06 | 56997270                | CC                              | TT              | 1946877685               |
| SNP_P4_89697_57007837 | NC_021165.1    | Ca_kabuli_chr06 | 57007837                | AA                              | GG              | 1946877687               |
| SNP_P4_89699_57057848 | NC_021165.1    | Ca_kabuli_chr06 | 57057848                | TT                              | GG              | 1946877689               |
| SNP_P4_89700_57058868 | NC_021165.1    | Ca_kabuli_chr06 | 57058868                | AA                              | CC              | 1946877691               |
| SNP_P4_89701_57059715 | NC_021165.1    | Ca_kabuli_chr06 | 57059715                | TT                              | GG              | 1946877693               |
| SNP_P4_89702_57069570 | NC_021165.1    | Ca_kabuli_chr06 | 57069570                | AA                              | TT              | 1946877695               |

| SNPs IDs              | Chromosome IDs | Chromosomes     | Physical positions (bp) | CDC Frontier (Reference genome) | (ILWC46 & LPNB) | NCBI SNPdb Accession IDs |
|-----------------------|----------------|-----------------|-------------------------|---------------------------------|-----------------|--------------------------|
| SNP_P4_89703_57084572 | NC_021165.1    | Ca_kabuli_chr06 | 57084572                | AA                              | CC              | 1946877697               |
| SNP_P4_89704_57090344 | NC_021165.1    | Ca_kabuli_chr06 | 57090344                | TT                              | CC              | 1946877699               |
| SNP_P4_89705_57090345 | NC_021165.1    | Ca_kabuli_chr06 | 57090345                | AA                              | TT              | 1946877701               |
| SNP_P4_89706_57093866 | NC_021165.1    | Ca_kabuli_chr06 | 57093866                | GG                              | AA              | 1946877703               |
| SNP_P4_89707_57093868 | NC_021165.1    | Ca_kabuli_chr06 | 57093868                | CC                              | GG              | 1946877705               |
| SNP_P4_89708_57100128 | NC_021165.1    | Ca_kabuli_chr06 | 57100128                | TT                              | GG              | 1946877707               |
| SNP_P4_89709_57100382 | NC_021165.1    | Ca_kabuli_chr06 | 57100382                | AA                              | GG              | 1946877709               |
| SNP_P4_89710_57110641 | NC_021165.1    | Ca_kabuli_chr06 | 57110641                | CC                              | AA              | 1946877711               |
| SNP_P4_89712_57128914 | NC_021165.1    | Ca_kabuli_chr06 | 57128914                | CC                              | GG              | 1946877713               |
| SNP_P4_89714_57133798 | NC_021165.1    | Ca_kabuli_chr06 | 57133798                | AA                              | CC              | 1946877715               |
| SNP_P4_89715_57133799 | NC_021165.1    | Ca_kabuli_chr06 | 57133799                | TT                              | GG              | 1946877717               |
| SNP_P4_89716_57135083 | NC_021165.1    | Ca_kabuli_chr06 | 57135083                | AA                              | GG              | 1946877719               |
| SNP_P4_89717_57136189 | NC_021165.1    | Ca_kabuli_chr06 | 57136189                | GG                              | AA              | 1946877721               |
| SNP_P4_89718_57136194 | NC_021165.1    | Ca_kabuli_chr06 | 57136194                | GG                              | TT              | 1946877723               |
| SNP_P4_89719_57138536 | NC_021165.1    | Ca_kabuli_chr06 | 57138536                | TT                              | CC              | 1946877725               |
| SNP_P4_89720_57138577 | NC_021165.1    | Ca_kabuli_chr06 | 57138577                | GG                              | AA              | 1946877727               |
| SNP_P4_89721_57143179 | NC_021165.1    | Ca_kabuli_chr06 | 57143179                | TT                              | CC              | 1946877729               |
| SNP_P4_89722_57143918 | NC_021165.1    | Ca_kabuli_chr06 | 57143918                | TT                              | AA              | 1946877731               |
| SNP_P4_89723_57144221 | NC_021165.1    | Ca_kabuli_chr06 | 57144221                | TT                              | CC              | 1946877733               |
| SNP_P4_89724_57144243 | NC_021165.1    | Ca_kabuli_chr06 | 57144243                | TT                              | CC              | 1946877735               |
| SNP_P4_89725_57144255 | NC_021165.1    | Ca_kabuli_chr06 | 57144255                | AA                              | GG              | 1946877737               |
| SNP_P4_89726_57144319 | NC_021165.1    | Ca_kabuli_chr06 | 57144319                | TT                              | CC              | 1946877739               |
| SNP_P4_89727_57144321 | NC_021165.1    | Ca_kabuli_chr06 | 57144321                | TT                              | CC              | 1946877741               |
| SNP_P4_89728_57155847 | NC_021165.1    | Ca_kabuli_chr06 | 57155847                | AA                              | TT              | 1946877743               |
| SNP_P4_89729_57160466 | NC_021165.1    | Ca_kabuli_chr06 | 57160466                | AA                              | GG              | 1946877745               |
| SNP_P4_89730_57160887 | NC_021165.1    | Ca_kabuli_chr06 | 57160887                | TT                              | CC              | 1946877747               |
| SNP_P4_89731_57160889 | NC_021165.1    | Ca_kabuli_chr06 | 57160889                | TT                              | CC              | 1946877749               |
| SNP_P4_89732_57172869 | NC_021165.1    | Ca_kabuli_chr06 | 57172869                | GG                              | CC              | 1946877751               |
| SNP_P4_89733_57172892 | NC_021165.1    | Ca_kabuli_chr06 | 57172892                | TT                              | CC              | 1946877753               |
| SNP_P4_89734_57172921 | NC_021165.1    | Ca_kabuli_chr06 | 57172921                | CC                              | TT              | 1946877755               |
| SNP_P4_89735_57173435 | NC_021165.1    | Ca_kabuli_chr06 | 57173435                | GG                              | AA              | 1946877757               |
| SNP_P4_89736_57173517 | NC_021165.1    | Ca_kabuli_chr06 | 57173517                | TT                              | AA              | 1946877759               |
| SNP_P4_89737_57173520 | NC_021165.1    | Ca_kabuli_chr06 | 57173520                | CC                              | AA              | 1946877761               |
| SNP_P4_89738_57173530 | NC_021165.1    | Ca_kabuli_chr06 | 57173530                | GG                              | CC              | 1946877763               |
| SNP_P4_89739_57173535 | NC_021165.1    | Ca_kabuli_chr06 | 57173535                | CC                              | TT              | 1946877765               |
| SNP_P4_89740_57173536 | NC_021165.1    | Ca_kabuli_chr06 | 57173536                | AA                              | GG              | 1946877767               |
| SNP_P4_89741_57173556 | NC_021165.1    | Ca_kabuli_chr06 | 57173556                | GG                              | AA              | 1946877769               |
| SNP_P4_89742_57173638 | NC_021165.1    | Ca_kabuli_chr06 | 57173638                | AA                              | CC              | 1946877771               |
| SNP_P4_89743_57173648 | NC_021165.1    | Ca_kabuli_chr06 | 57173648                | CC                              | TT              | 1946877773               |
| SNP_P4_89744_57173652 | NC_021165.1    | Ca_kabuli_chr06 | 57173652                | AA                              | CC              | 1946877775               |
| SNP_P4_89745_57173657 | NC_021165.1    | Ca_kabuli_chr06 | 57173657                | AA                              | GG              | 1946877777               |
| SNP_P4_89746_57173671 | NC_021165.1    | Ca_kabuli_chr06 | 57173671                | AA                              | GG              | 1946877779               |



| SNPs IDs              | Chromosome IDs | Chromosomes     | Physical positions (bp) | CDC Frontier (Reference genome) | (ILWC46 & LPNB) | NCBI SNPdb Accession IDs |
|-----------------------|----------------|-----------------|-------------------------|---------------------------------|-----------------|--------------------------|
| SNP_P4_89747_57173684 | NC_021165.1    | Ca_kabuli_chr06 | 57173684                | AA                              | GG              | 1946877781               |
| SNP_P4_89748_57173688 | NC_021165.1    | Ca_kabuli_chr06 | 57173688                | AA                              | CC              | 1946877783               |
| SNP_P4_89749_57173695 | NC_021165.1    | Ca_kabuli_chr06 | 57173695                | AA                              | GG              | 1946877785               |
| SNP_P4_89750_57173882 | NC_021165.1    | Ca_kabuli_chr06 | 57173882                | CC                              | GG              | 1946877786               |
| SNP_P4_89751_57173945 | NC_021165.1    | Ca_kabuli_chr06 | 57173945                | CC                              | GG              | 1946877788               |
| SNP_P4_89752_57173946 | NC_021165.1    | Ca_kabuli_chr06 | 57173946                | TT                              | AA              | 1946877790               |
| SNP_P4_89753_57173979 | NC_021165.1    | Ca_kabuli_chr06 | 57173979                | TT                              | AA              | 1946877792               |
| SNP_P4_89754_57173987 | NC_021165.1    | Ca_kabuli_chr06 | 57173987                | TT                              | GG              | 1946877794               |
| SNP_P4_89755_57174350 | NC_021165.1    | Ca_kabuli_chr06 | 57174350                | AA                              | GG              | 1946877796               |
| SNP_P4_89756_57174363 | NC_021165.1    | Ca_kabuli_chr06 | 57174363                | AA                              | GG              | 1946877798               |
| SNP_P4_89757_57174368 | NC_021165.1    | Ca_kabuli_chr06 | 57174368                | GG                              | TT              | 1946877800               |
| SNP_P4_89758_57178318 | NC_021165.1    | Ca_kabuli_chr06 | 57178318                | GG                              | TT              | 1946877802               |
| SNP_P4_89759_57178351 | NC_021165.1    | Ca_kabuli_chr06 | 57178351                | AA                              | GG              | 1946877804               |
| SNP_P4_89760_57206686 | NC_021165.1    | Ca_kabuli_chr06 | 57206686                | AA                              | TT              | 1946877806               |
| SNP_P4_89761_57232099 | NC_021165.1    | Ca_kabuli_chr06 | 57232099                | CC                              | TT              | 1946877808               |
| SNP_P4_89762_57255367 | NC_021165.1    | Ca_kabuli_chr06 | 57255367                | CC                              | TT              | 1946877810               |
| SNP_P4_89763_57255393 | NC_021165.1    | Ca_kabuli_chr06 | 57255393                | GG                              | AA              | 1946877812               |
| SNP_P4_89764_57255394 | NC_021165.1    | Ca_kabuli_chr06 | 57255394                | GG                              | AA              | 1946877814               |
| SNP_P4_89765_57255399 | NC_021165.1    | Ca_kabuli_chr06 | 57255399                | AA                              | CC              | 1946877816               |
| SNP_P4_89766_57255411 | NC_021165.1    | Ca_kabuli_chr06 | 57255411                | CC                              | AA              | 1946877818               |
| SNP_P4_89767_57256346 | NC_021165.1    | Ca_kabuli_chr06 | 57256346                | CC                              | AA              | 1946877820               |
| SNP_P4_89768_57256347 | NC_021165.1    | Ca_kabuli_chr06 | 57256347                | TT                              | AA              | 1946877822               |
| SNP_P4_89769_57256580 | NC_021165.1    | Ca_kabuli_chr06 | 57256580                | CC                              | AA              | 1946877824               |
| SNP_P4_89770_57409070 | NC_021165.1    | Ca_kabuli_chr06 | 57409070                | CC                              | TT              | 1946877825               |
| SNP_P4_89771_57425772 | NC_021165.1    | Ca_kabuli_chr06 | 57425772                | AA                              | CC              | 1946877827               |
| SNP_P4_89772_57426097 | NC_021165.1    | Ca_kabuli_chr06 | 57426097                | CC                              | TT              | 1946877829               |
| SNP_P4_89773_57441956 | NC_021165.1    | Ca_kabuli_chr06 | 57441956                | TT                              | AA              | 1946877831               |
| SNP_P4_89774_57460842 | NC_021165.1    | Ca_kabuli_chr06 | 57460842                | GG                              | AA              | 1946877833               |
| SNP_P4_89775_57460917 | NC_021165.1    | Ca_kabuli_chr06 | 57460917                | GG                              | CC              | 1946877835               |
| SNP_P4_89777_57471518 | NC_021165.1    | Ca_kabuli_chr06 | 57471518                | GG                              | CC              | 1946877837               |
| SNP_P4_89778_57487954 | NC_021165.1    | Ca_kabuli_chr06 | 57487954                | TT                              | CC              | 1946877839               |
| SNP_P4_89779_57488358 | NC_021165.1    | Ca_kabuli_chr06 | 57488358                | TT                              | GG              | 1946877841               |
| SNP_P4_89780_57488978 | NC_021165.1    | Ca_kabuli_chr06 | 57488978                | TT                              | CC              | 1946877843               |
| SNP_P4_89781_57490382 | NC_021165.1    | Ca_kabuli_chr06 | 57490382                | GG                              | CC              | 1946877845               |
| SNP_P4_89782_57490423 | NC_021165.1    | Ca_kabuli_chr06 | 57490423                | TT                              | CC              | 1946877847               |
| SNP_P4_89783_57491566 | NC_021165.1    | Ca_kabuli_chr06 | 57491566                | GG                              | TT              | 1946877849               |
| SNP_P4_89784_57528249 | NC_021165.1    | Ca_kabuli_chr06 | 57528249                | AA                              | GG              | 1946877851               |
| SNP_P4_89785_57545558 | NC_021165.1    | Ca_kabuli_chr06 | 57545558                | AA                              | GG              | 1946877853               |
| SNP_P4_89786_57554123 | NC_021165.1    | Ca_kabuli_chr06 | 57554123                | CC                              | TT              | 1946877855               |
| SNP_P4_89787_57568068 | NC_021165.1    | Ca_kabuli_chr06 | 57568068                | TT                              | GG              | 1946877857               |
| SNP_P4_89789_57608037 | NC_021165.1    | Ca_kabuli_chr06 | 57608037                | GG                              | TT              | 1946877860               |
| SNP_P4_89790_57608265 | NC_021165.1    | Ca_kabuli_chr06 | 57608265                | GG                              | AA              | 1946877862               |

| SNPs IDs              | Chromosome IDs | Chromosomes     | Physical positions (bp) | CDC Frontier (Reference genome) | (ILWC46 & LPNB) | NCBI SNPdb Accession IDs |
|-----------------------|----------------|-----------------|-------------------------|---------------------------------|-----------------|--------------------------|
| SNP_P4_89791_57608310 | NC_021165.1    | Ca_kabuli_chr06 | 57608310                | TT                              | CC              | 1946877864               |
| SNP_P4_89792_57608318 | NC_021165.1    | Ca_kabuli_chr06 | 57608318                | GG                              | CC              | 1946877866               |
| SNP_P4_89793_57619092 | NC_021165.1    | Ca_kabuli_chr06 | 57619092                | AA                              | TT              | 1946877868               |
| SNP_P4_89794_57628013 | NC_021165.1    | Ca_kabuli_chr06 | 57628013                | GG                              | AA              | 1946877870               |
| SNP_P4_89795_57637372 | NC_021165.1    | Ca_kabuli_chr06 | 57637372                | TT                              | CC              | 1946877872               |
| SNP_P4_89796_57641566 | NC_021165.1    | Ca_kabuli_chr06 | 57641566                | CC                              | AA              | 1946877874               |
| SNP_P4_89798_57657651 | NC_021165.1    | Ca_kabuli_chr06 | 57657651                | AA                              | CC              | 1946877876               |
| SNP_P4_89799_57672618 | NC_021165.1    | Ca_kabuli_chr06 | 57672618                | TT                              | AA              | 1946877878               |
| SNP_P4_89800_57702981 | NC_021165.1    | Ca_kabuli_chr06 | 57702981                | GG                              | TT              | 1946877880               |
| SNP_P4_89801_57741896 | NC_021165.1    | Ca_kabuli_chr06 | 57741896                | AA                              | GG              | 1946877882               |
| SNP_P4_89802_57779073 | NC_021165.1    | Ca_kabuli_chr06 | 57779073                | GG                              | AA              | 1946877884               |
| SNP_P4_89804_57795920 | NC_021165.1    | Ca_kabuli_chr06 | 57795920                | GG                              | AA              | 1946877886               |
| SNP_P4_89805_57844983 | NC_021165.1    | Ca_kabuli_chr06 | 57844983                | CC                              | TT              | 1946877888               |
| SNP_P4_89806_57846699 | NC_021165.1    | Ca_kabuli_chr06 | 57846699                | TT                              | AA              | 1946877890               |
| SNP_P4_89807_57883989 | NC_021165.1    | Ca_kabuli_chr06 | 57883989                | GG                              | AA              | 1946877892               |
| SNP_P4_89809_57935810 | NC_021165.1    | Ca_kabuli_chr06 | 57935810                | TT                              | GG              | 1946877894               |
| SNP_P4_89810_57936057 | NC_021165.1    | Ca_kabuli_chr06 | 57936057                | AA                              | GG              | 1946877896               |
| SNP_P4_89811_57936059 | NC_021165.1    | Ca_kabuli_chr06 | 57936059                | AA                              | GG              | 1946877898               |
| SNP_P4_89812_57945330 | NC_021165.1    | Ca_kabuli_chr06 | 57945330                | TT                              | AA              | 1946877900               |
| SNP_P4_89813_57951710 | NC_021165.1    | Ca_kabuli_chr06 | 57951710                | AA                              | TT              | 1946877903               |
| SNP_P4_89814_57980293 | NC_021165.1    | Ca_kabuli_chr06 | 57980293                | AA                              | GG              | 1946877905               |
| SNP_P4_89815_57980311 | NC_021165.1    | Ca_kabuli_chr06 | 57980311                | TT                              | CC              | 1946877907               |
| SNP_P4_89816_57980316 | NC_021165.1    | Ca_kabuli_chr06 | 57980316                | TT                              | AA              | 1946877909               |
| SNP_P4_89817_57980321 | NC_021165.1    | Ca_kabuli_chr06 | 57980321                | TT                              | CC              | 1946877911               |
| SNP_P4_89818_57980348 | NC_021165.1    | Ca_kabuli_chr06 | 57980348                | GG                              | AA              | 1946877913               |
| SNP_P4_89819_57981132 | NC_021165.1    | Ca_kabuli_chr06 | 57981132                | AA                              | TT              | 1946877915               |
| SNP_P4_89821_58017545 | NC_021165.1    | Ca_kabuli_chr06 | 58017545                | GG                              | TT              | 1946877917               |
| SNP_P4_89822_58017780 | NC_021165.1    | Ca_kabuli_chr06 | 58017780                | CC                              | AA              | 1946877919               |
| SNP_P4_89823_58018910 | NC_021165.1    | Ca_kabuli_chr06 | 58018910                | CC                              | AA              | 1946877921               |
| SNP_P4_89824_58094129 | NC_021165.1    | Ca_kabuli_chr06 | 58094129                | TT                              | CC              | 1946877923               |
| SNP_P4_89825_58130207 | NC_021165.1    | Ca_kabuli_chr06 | 58130207                | CC                              | TT              | 1946877925               |
| SNP_P4_89826_58150946 | NC_021165.1    | Ca_kabuli_chr06 | 58150946                | TT                              | AA              | 1946877927               |
| SNP_P4_89827_58186753 | NC_021165.1    | Ca_kabuli_chr06 | 58186753                | GG                              | AA              | 1946877929               |
| SNP_P4_89829_58257069 | NC_021165.1    | Ca_kabuli_chr06 | 58257069                | GG                              | AA              | 1946877931               |
| SNP_P4_89832_58340194 | NC_021165.1    | Ca_kabuli_chr06 | 58340194                | TT                              | CC              | 1946877933               |
| SNP_P4_89833_58370060 | NC_021165.1    | Ca_kabuli_chr06 | 58370060                | TT                              | CC              | 1946877935               |
| SNP_P4_89834_58370988 | NC_021165.1    | Ca_kabuli_chr06 | 58370988                | AA                              | GG              | 1946877937               |
| SNP_P4_89835_58373373 | NC_021165.1    | Ca_kabuli_chr06 | 58373373                | CC                              | TT              | 1946877940               |
| SNP_P4_89837_58401093 | NC_021165.1    | Ca_kabuli_chr06 | 58401093                | CC                              | AA              | 1946877942               |
| SNP_P4_89838_58404842 | NC_021165.1    | Ca_kabuli_chr06 | 58404842                | AA                              | GG              | 1946877944               |
| SNP_P4_89839_58405031 | NC_021165.1    | Ca_kabuli_chr06 | 58405031                | TT                              | CC              | 1946877946               |
| SNP_P4_89840_58409691 | NC_021165.1    | Ca_kabuli_chr06 | 58409691                | TT                              | AA              | 1946877948               |

| SNPs IDs              | Chromosome IDs | Chromosomes     | Physical positions (bp) | CDC Frontier (Reference genome) | (ILWC46 & LPNB) | NCBI SNPdb Accession IDs |
|-----------------------|----------------|-----------------|-------------------------|---------------------------------|-----------------|--------------------------|
| SNP_P4_89841_58415104 | NC_021165.1    | Ca_kabuli_chr06 | 58415104                | TT                              | AA              | 1946877950               |
| SNP_P4_89842_58415105 | NC_021165.1    | Ca_kabuli_chr06 | 58415105                | TT                              | AA              | 1946877952               |
| SNP_P4_89843_58519327 | NC_021165.1    | Ca_kabuli_chr06 | 58519327                | AA                              | GG              | 1946877954               |
| SNP_P4_89844_58521364 | NC_021165.1    | Ca_kabuli_chr06 | 58521364                | GG                              | AA              | 1946877956               |
| SNP_P4_89845_58534910 | NC_021165.1    | Ca_kabuli_chr06 | 58534910                | GG                              | AA              | 1946877958               |
| SNP_P4_89846_58538185 | NC_021165.1    | Ca_kabuli_chr06 | 58538185                | CC                              | TT              | 1946877960               |
| SNP_P4_89848_58553095 | NC_021165.1    | Ca_kabuli_chr06 | 58553095                | AA                              | TT              | 1946877962               |
| SNP_P4_89849_58565789 | NC_021165.1    | Ca_kabuli_chr06 | 58565789                | GG                              | AA              | 1946877964               |
| SNP_P4_89850_58569469 | NC_021165.1    | Ca_kabuli_chr06 | 58569469                | CC                              | AA              | 1946877966               |
| SNP_P4_89851_58588040 | NC_021165.1    | Ca_kabuli_chr06 | 58588040                | AA                              | TT              | 1946877968               |
| SNP_P4_89855_58628812 | NC_021165.1    | Ca_kabuli_chr06 | 58628812                | AA                              | TT              | 1946877970               |
| SNP_P4_89856_58628816 | NC_021165.1    | Ca_kabuli_chr06 | 58628816                | GG                              | AA              | 1946877972               |
| SNP_P4_89857_58629491 | NC_021165.1    | Ca_kabuli_chr06 | 58629491                | AA                              | GG              | 1946877974               |
| SNP_P4_89858_58634795 | NC_021165.1    | Ca_kabuli_chr06 | 58634795                | TT                              | CC              | 1946877976               |
| SNP_P4_89859_58646428 | NC_021165.1    | Ca_kabuli_chr06 | 58646428                | AA                              | GG              | 1946877978               |
| SNP_P4_89860_58647248 | NC_021165.1    | Ca_kabuli_chr06 | 58647248                | TT                              | GG              | 1946877980               |
| SNP_P4_89861_58652192 | NC_021165.1    | Ca_kabuli_chr06 | 58652192                | CC                              | TT              | 1946877982               |
| SNP_P4_89862_58658219 | NC_021165.1    | Ca_kabuli_chr06 | 58658219                | TT                              | AA              | 1946877984               |
| SNP_P4_89863_58679850 | NC_021165.1    | Ca_kabuli_chr06 | 58679850                | CC                              | TT              | 1946877986               |
| SNP_P4_89864_58691110 | NC_021165.1    | Ca_kabuli_chr06 | 58691110                | TT                              | GG              | 1946877988               |
| SNP_P4_89865_58691111 | NC_021165.1    | Ca_kabuli_chr06 | 58691111                | AA                              | GG              | 1946877990               |
| SNP_P4_89866_58695319 | NC_021165.1    | Ca_kabuli_chr06 | 58695319                | TT                              | CC              | 1946877992               |
| SNP_P4_89867_58705923 | NC_021165.1    | Ca_kabuli_chr06 | 58705923                | CC                              | TT              | 1946877994               |
| SNP_P4_89868_58727781 | NC_021165.1    | Ca_kabuli_chr06 | 58727781                | GG                              | AA              | 1946877996               |
| SNP_P4_89869_58739789 | NC_021165.1    | Ca_kabuli_chr06 | 58739789                | GG                              | TT              | 1946877998               |
| SNP_P4_89870_58739877 | NC_021165.1    | Ca_kabuli_chr06 | 58739877                | GG                              | TT              | 1946877999               |
| SNP_P4_89872_58781646 | NC_021165.1    | Ca_kabuli_chr06 | 58781646                | GG                              | AA              | 1946878001               |
| SNP_P4_89874_58781690 | NC_021165.1    | Ca_kabuli_chr06 | 58781690                | AA                              | TT              | 1946878003               |
| SNP_P4_89875_58781702 | NC_021165.1    | Ca_kabuli_chr06 | 58781702                | GG                              | AA              | 1946878005               |
| SNP_P4_89876_58781720 | NC_021165.1    | Ca_kabuli_chr06 | 58781720                | AA                              | GG              | 1946878007               |
| SNP_P4_89877_58782003 | NC_021165.1    | Ca_kabuli_chr06 | 58782003                | CC                              | GG              | 1946878009               |
| SNP_P4_89878_58782013 | NC_021165.1    | Ca_kabuli_chr06 | 58782013                | TT                              | AA              | 1946878011               |
| SNP_P4_89879_58782573 | NC_021165.1    | Ca_kabuli_chr06 | 58782573                | TT                              | GG              | 1946878013               |
| SNP_P4_89880_58782595 | NC_021165.1    | Ca_kabuli_chr06 | 58782595                | AA                              | GG              | 1946878015               |
| SNP_P4_89881_58782599 | NC_021165.1    | Ca_kabuli_chr06 | 58782599                | GG                              | AA              | 1946878017               |
| SNP_P4_89883_58782767 | NC_021165.1    | Ca_kabuli_chr06 | 58782767                | GG                              | AA              | 1946878019               |
| SNP_P4_89885_58783145 | NC_021165.1    | Ca_kabuli_chr06 | 58783145                | GG                              | AA              | 1946878021               |
| SNP_P4_89886_58783420 | NC_021165.1    | Ca_kabuli_chr06 | 58783420                | AA                              | TT              | 1946878023               |
| SNP_P4_89887_58783421 | NC_021165.1    | Ca_kabuli_chr06 | 58783421                | AA                              | TT              | 1946878025               |
| SNP_P4_89888_58783440 | NC_021165.1    | Ca_kabuli_chr06 | 58783440                | AA                              | GG              | 1946878027               |
| SNP_P4_89890_58783892 | NC_021165.1    | Ca_kabuli_chr06 | 58783892                | AA                              | TT              | 1946878029               |
| SNP_P4_89891_58783893 | NC_021165.1    | Ca_kabuli_chr06 | 58783893                | TT                              | CC              | 1946878031               |

| SNPs IDs              | Chromosome IDs | Chromosomes     | Physical positions (bp) | CDC Frontier (Reference genome) | (ILWC46 & LPNB) | NCBI SNPdb Accession IDs |
|-----------------------|----------------|-----------------|-------------------------|---------------------------------|-----------------|--------------------------|
| SNP_P4_89892_58784049 | NC_021165.1    | Ca_kabuli_chr06 | 58784049                | AA                              | GG              | 1946878032               |
| SNP_P4_89897_58785702 | NC_021165.1    | Ca_kabuli_chr06 | 58785702                | TT                              | GG              | 1946878034               |
| SNP_P4_89898_58785761 | NC_021165.1    | Ca_kabuli_chr06 | 58785761                | CC                              | TT              | 1946878036               |
| SNP_P4_89900_58786001 | NC_021165.1    | Ca_kabuli_chr06 | 58786001                | TT                              | GG              | 1946878038               |
| SNP_P4_89901_58786027 | NC_021165.1    | Ca_kabuli_chr06 | 58786027                | TT                              | AA              | 1946878040               |
| SNP_P4_89902_58786030 | NC_021165.1    | Ca_kabuli_chr06 | 58786030                | AA                              | TT              | 1946878042               |
| SNP_P4_89904_58786118 | NC_021165.1    | Ca_kabuli_chr06 | 58786118                | GG                              | AA              | 1946878044               |
| SNP_P4_89905_58786239 | NC_021165.1    | Ca_kabuli_chr06 | 58786239                | TT                              | AA              | 1946878046               |
| SNP_P4_89908_58787716 | NC_021165.1    | Ca_kabuli_chr06 | 58787716                | GG                              | AA              | 1946878048               |
| SNP_P4_89909_58788135 | NC_021165.1    | Ca_kabuli_chr06 | 58788135                | AA                              | GG              | 1946878050               |
| SNP_P4_89910_58788557 | NC_021165.1    | Ca_kabuli_chr06 | 58788557                | AA                              | GG              | 1946878052               |
| SNP_P4_89911_58788558 | NC_021165.1    | Ca_kabuli_chr06 | 58788558                | TT                              | CC              | 1946878054               |
| SNP_P4_89912_58788795 | NC_021165.1    | Ca_kabuli_chr06 | 58788795                | GG                              | AA              | 1946878056               |
| SNP_P4_89913_58789037 | NC_021165.1    | Ca_kabuli_chr06 | 58789037                | TT                              | CC              | 1946878058               |
| SNP_P4_89914_58789175 | NC_021165.1    | Ca_kabuli_chr06 | 58789175                | GG                              | AA              | 1946878060               |
| SNP_P4_89915_58789768 | NC_021165.1    | Ca_kabuli_chr06 | 58789768                | AA                              | GG              | 1946878062               |
| SNP_P4_89916_58790175 | NC_021165.1    | Ca_kabuli_chr06 | 58790175                | AA                              | GG              | 1946878063               |
| SNP_P4_89917_58790179 | NC_021165.1    | Ca_kabuli_chr06 | 58790179                | CC                              | TT              | 1946878065               |
| SNP_P4_89918_58790498 | NC_021165.1    | Ca_kabuli_chr06 | 58790498                | TT                              | AA              | 1946878067               |
| SNP_P4_89919_58790500 | NC_021165.1    | Ca_kabuli_chr06 | 58790500                | CC                              | AA              | 1946878069               |
| SNP_P4_89921_58790780 | NC_021165.1    | Ca_kabuli_chr06 | 58790780                | GG                              | AA              | 1946878071               |
| SNP_P4_89922_58790796 | NC_021165.1    | Ca_kabuli_chr06 | 58790796                | TT                              | CC              | 1946878073               |
| SNP_P4_89923_58790806 | NC_021165.1    | Ca_kabuli_chr06 | 58790806                | AA                              | GG              | 1946878075               |
| SNP_P4_89925_58794211 | NC_021165.1    | Ca_kabuli_chr06 | 58794211                | CC                              | AA              | 1946878078               |
| SNP_P4_89926_58794583 | NC_021165.1    | Ca_kabuli_chr06 | 58794583                | CC                              | TT              | 1946878080               |
| SNP_P4_89927_58794607 | NC_021165.1    | Ca_kabuli_chr06 | 58794607                | AA                              | GG              | 1946878082               |
| SNP_P4_89928_58794694 | NC_021165.1    | Ca_kabuli_chr06 | 58794694                | CC                              | AA              | 1946878084               |
| SNP_P4_89929_58799340 | NC_021165.1    | Ca_kabuli_chr06 | 58799340                | CC                              | TT              | 1946878086               |
| SNP_P4_89930_58799662 | NC_021165.1    | Ca_kabuli_chr06 | 58799662                | GG                              | AA              | 1946878088               |
| SNP_P4_89931_58799675 | NC_021165.1    | Ca_kabuli_chr06 | 58799675                | TT                              | AA              | 1946878090               |
| SNP_P4_89932_58800041 | NC_021165.1    | Ca_kabuli_chr06 | 58800041                | AA                              | TT              | 1946878092               |
| SNP_P4_89933_58800286 | NC_021165.1    | Ca_kabuli_chr06 | 58800286                | CC                              | TT              | 1946878094               |
| SNP_P4_89934_58800991 | NC_021165.1    | Ca_kabuli_chr06 | 58800991                | CC                              | TT              | 1946878096               |
| SNP_P4_89935_58800992 | NC_021165.1    | Ca_kabuli_chr06 | 58800992                | TT                              | CC              | 1946878098               |
| SNP_P4_89936_58801276 | NC_021165.1    | Ca_kabuli_chr06 | 58801276                | GG                              | AA              | 1946878100               |
| SNP_P4_89937_58801293 | NC_021165.1    | Ca_kabuli_chr06 | 58801293                | GG                              | AA              | 1946878102               |
| SNP_P4_89938_58801755 | NC_021165.1    | Ca_kabuli_chr06 | 58801755                | CC                              | TT              | 1946878104               |
| SNP_P4_89939_58802017 | NC_021165.1    | Ca_kabuli_chr06 | 58802017                | TT                              | AA              | 1946878106               |
| SNP_P4_89940_58802777 | NC_021165.1    | Ca_kabuli_chr06 | 58802777                | TT                              | CC              | 1946878108               |
| SNP_P4_89941_58802788 | NC_021165.1    | Ca_kabuli_chr06 | 58802788                | TT                              | CC              | 1946878110               |
| SNP_P4_89942_58802979 | NC_021165.1    | Ca_kabuli_chr06 | 58802979                | GG                              | AA              | 1946878112               |
| SNP_P4_89943_58803915 | NC_021165.1    | Ca_kabuli_chr06 | 58803915                | CC                              | TT              | 1946878114               |

| SNPs IDs              | Chromosome IDs | Chromosomes     | Physical positions (bp) | CDC Frontier (Reference genome) | (ILWC46 & LPNB) | NCBI SNPdb Accession IDs |
|-----------------------|----------------|-----------------|-------------------------|---------------------------------|-----------------|--------------------------|
| SNP_P4_89944_58803917 | NC_021165.1    | Ca_kabuli_chr06 | 58803917                | AA                              | GG              | 1946878115               |
| SNP_P4_89945_58803919 | NC_021165.1    | Ca_kabuli_chr06 | 58803919                | AA                              | GG              | 1946878117               |
| SNP_P4_89946_58804006 | NC_021165.1    | Ca_kabuli_chr06 | 58804006                | AA                              | GG              | 1946878119               |
| SNP_P4_89947_58804039 | NC_021165.1    | Ca_kabuli_chr06 | 58804039                | TT                              | CC              | 1946878121               |
| SNP_P4_89948_58804155 | NC_021165.1    | Ca_kabuli_chr06 | 58804155                | CC                              | TT              | 1946878122               |
| SNP_P4_89949_58804524 | NC_021165.1    | Ca_kabuli_chr06 | 58804524                | GG                              | AA              | 1946878123               |
| SNP_P4_89950_58805065 | NC_021165.1    | Ca_kabuli_chr06 | 58805065                | CC                              | TT              | 1946878124               |
| SNP_P4_89952_58805398 | NC_021165.1    | Ca_kabuli_chr06 | 58805398                | AA                              | GG              | 1946878125               |
| SNP_P4_89953_58805399 | NC_021165.1    | Ca_kabuli_chr06 | 58805399                | AA                              | GG              | 1946878126               |
| SNP_P4_89954_58805564 | NC_021165.1    | Ca_kabuli_chr06 | 58805564                | AA                              | GG              | 1946878127               |
| SNP_P4_89955_58805887 | NC_021165.1    | Ca_kabuli_chr06 | 58805887                | GG                              | CC              | 1946878128               |
| SNP_P4_89956_58805897 | NC_021165.1    | Ca_kabuli_chr06 | 58805897                | AA                              | TT              | 1946878129               |
| SNP_P4_89957_58806283 | NC_021165.1    | Ca_kabuli_chr06 | 58806283                | CC                              | GG              | 1946878130               |
| SNP_P4_89959_58807618 | NC_021165.1    | Ca_kabuli_chr06 | 58807618                | AA                              | GG              | 1946878131               |
| SNP_P4_89960_58807637 | NC_021165.1    | Ca_kabuli_chr06 | 58807637                | AA                              | GG              | 1946878133               |
| SNP_P4_89961_58807638 | NC_021165.1    | Ca_kabuli_chr06 | 58807638                | GG                              | AA              | 1946878135               |
| SNP_P4_89963_58808874 | NC_021165.1    | Ca_kabuli_chr06 | 58808874                | AA                              | TT              | 1946878136               |
| SNP_P4_89964_58811226 | NC_021165.1    | Ca_kabuli_chr06 | 58811226                | GG                              | AA              | 1946878138               |
| SNP_P4_89966_58811553 | NC_021165.1    | Ca_kabuli_chr06 | 58811553                | TT                              | CC              | 1946878140               |
| SNP_P4_89967_58811650 | NC_021165.1    | Ca_kabuli_chr06 | 58811650                | AA                              | TT              | 1946878142               |
| SNP_P4_89968_58813650 | NC_021165.1    | Ca_kabuli_chr06 | 58813650                | GG                              | AA              | 1946878144               |
| SNP_P4_89969_58813937 | NC_021165.1    | Ca_kabuli_chr06 | 58813937                | CC                              | TT              | 1946878146               |
| SNP_P4_89970_58813938 | NC_021165.1    | Ca_kabuli_chr06 | 58813938                | GG                              | TT              | 1946878148               |
| SNP_P4_89972_58816554 | NC_021165.1    | Ca_kabuli_chr06 | 58816554                | AA                              | TT              | 1946878150               |
| SNP_P4_89973_58817307 | NC_021165.1    | Ca_kabuli_chr06 | 58817307                | AA                              | GG              | 1946878152               |
| SNP_P4_89974_58817370 | NC_021165.1    | Ca_kabuli_chr06 | 58817370                | CC                              | TT              | 1946878154               |
| SNP_P4_89975_58817735 | NC_021165.1    | Ca_kabuli_chr06 | 58817735                | CC                              | TT              | 1946878156               |
| SNP_P4_89976_58817740 | NC_021165.1    | Ca_kabuli_chr06 | 58817740                | AA                              | TT              | 1946878158               |
| SNP_P4_89977_58817747 | NC_021165.1    | Ca_kabuli_chr06 | 58817747                | AA                              | TT              | 1946878159               |
| SNP_P4_89980_58819500 | NC_021165.1    | Ca_kabuli_chr06 | 58819500                | TT                              | CC              | 1946878161               |
| SNP_P4_89981_58819527 | NC_021165.1    | Ca_kabuli_chr06 | 58819527                | TT                              | CC              | 1946878163               |
| SNP_P4_89982_58819529 | NC_021165.1    | Ca_kabuli_chr06 | 58819529                | CC                              | AA              | 1946878165               |
| SNP_P4_89983_58819772 | NC_021165.1    | Ca_kabuli_chr06 | 58819772                | CC                              | TT              | 1946878167               |
| SNP_P4_89984_58819778 | NC_021165.1    | Ca_kabuli_chr06 | 58819778                | TT                              | CC              | 1946878169               |
| SNP_P4_89985_58822544 | NC_021165.1    | Ca_kabuli_chr06 | 58822544                | TT                              | AA              | 1946878171               |
| SNP_P4_89986_58823642 | NC_021165.1    | Ca_kabuli_chr06 | 58823642                | AA                              | CC              | 1946878173               |
| SNP_P4_89988_58823728 | NC_021165.1    | Ca_kabuli_chr06 | 58823728                | GG                              | AA              | 1946878175               |
| SNP_P4_89989_58823733 | NC_021165.1    | Ca_kabuli_chr06 | 58823733                | CC                              | TT              | 1946878176               |
| SNP_P4_89990_58826442 | NC_021165.1    | Ca_kabuli_chr06 | 58826442                | CC                              | GG              | 1946878178               |
| SNP_P4_89991_58826729 | NC_021165.1    | Ca_kabuli_chr06 | 58826729                | AA                              | CC              | 1946878180               |
| SNP_P4_89992_58826903 | NC_021165.1    | Ca_kabuli_chr06 | 58826903                | CC                              | TT              | 1946878182               |
| SNP_P4_89994_58827206 | NC_021165.1    | Ca_kabuli_chr06 | 58827206                | AA                              | CC              | 1946878184               |

| SNPs IDs              | Chromosome IDs | Chromosomes     | Physical positions (bp) | CDC Frontier (Reference genome) | (ILWC46 & LPNB) | NCBI SNPdb Accession IDs |
|-----------------------|----------------|-----------------|-------------------------|---------------------------------|-----------------|--------------------------|
| SNP_P4_89995_58827208 | NC_021165.1    | Ca_kabuli_chr06 | 58827208                | TT                              | GG              | 1946878186               |
| SNP_P4_89996_58841568 | NC_021165.1    | Ca_kabuli_chr06 | 58841568                | AA                              | GG              | 1946878188               |
| SNP_P4_89999_58854303 | NC_021165.1    | Ca_kabuli_chr06 | 58854303                | AA                              | GG              | 1946878190               |
| SNP_P4_90000_58872005 | NC_021165.1    | Ca_kabuli_chr06 | 58872005                | GG                              | CC              | 1946878192               |
| SNP_P4_90005_58887017 | NC_021165.1    | Ca_kabuli_chr06 | 58887017                | GG                              | TT              | 1946878193               |
| SNP_P4_90006_58887055 | NC_021165.1    | Ca_kabuli_chr06 | 58887055                | AA                              | TT              | 1946878195               |
| SNP_P4_90007_58887356 | NC_021165.1    | Ca_kabuli_chr06 | 58887356                | CC                              | TT              | 1946878197               |
| SNP_P4_90008_58897252 | NC_021165.1    | Ca_kabuli_chr06 | 58897252                | CC                              | TT              | 1946878199               |
| SNP_P4_90009_58959709 | NC_021165.1    | Ca_kabuli_chr06 | 58959709                | TT                              | AA              | 1946878201               |
| SNP_P4_90010_59042449 | NC_021165.1    | Ca_kabuli_chr06 | 59042449                | GG                              | AA              | 1946878203               |
| SNP_P4_90011_59050250 | NC_021165.1    | Ca_kabuli_chr06 | 59050250                | TT                              | GG              | 1946878205               |
| SNP_P4_90012_59058564 | NC_021165.1    | Ca_kabuli_chr06 | 59058564                | AA                              | TT              | 1946878207               |
| SNP_P4_90013_59058577 | NC_021165.1    | Ca_kabuli_chr06 | 59058577                | TT                              | AA              | 1946878209               |
| SNP_P4_90014_59058580 | NC_021165.1    | Ca_kabuli_chr06 | 59058580                | AA                              | CC              | 1946878211               |
| SNP_P4_90015_59058643 | NC_021165.1    | Ca_kabuli_chr06 | 59058643                | GG                              | AA              | 1946878213               |
| SNP_P4_90016_59058650 | NC_021165.1    | Ca_kabuli_chr06 | 59058650                | CC                              | AA              | 1946878215               |
| SNP_P4_90018_59060216 | NC_021165.1    | Ca_kabuli_chr06 | 59060216                | CC                              | TT              | 1946878216               |
| SNP_P4_90019_59061201 | NC_021165.1    | Ca_kabuli_chr06 | 59061201                | CC                              | TT              | 1946878218               |
| SNP_P4_90020_59062839 | NC_021165.1    | Ca_kabuli_chr06 | 59062839                | TT                              | GG              | 1946878220               |
| SNP_P4_90022_59068904 | NC_021165.1    | Ca_kabuli_chr06 | 59068904                | GG                              | AA              | 1946878222               |
| SNP_P4_90023_59069160 | NC_021165.1    | Ca_kabuli_chr06 | 59069160                | CC                              | TT              | 1946878224               |
| SNP_P4_90024_59069164 | NC_021165.1    | Ca_kabuli_chr06 | 59069164                | GG                              | AA              | 1946878226               |
| SNP_P4_90025_59069232 | NC_021165.1    | Ca_kabuli_chr06 | 59069232                | AA                              | GG              | 1946878228               |
| SNP_P4_90026_59069245 | NC_021165.1    | Ca_kabuli_chr06 | 59069245                | AA                              | GG              | 1946878230               |
| SNP_P4_90027_59069249 | NC_021165.1    | Ca_kabuli_chr06 | 59069249                | CC                              | TT              | 1946878232               |
| SNP_P4_90028_59069274 | NC_021165.1    | Ca_kabuli_chr06 | 59069274                | GG                              | AA              | 1946878234               |
| SNP_P4_90029_59069420 | NC_021165.1    | Ca_kabuli_chr06 | 59069420                | TT                              | CC              | 1946878236               |
| SNP_P4_90030_59071289 | NC_021165.1    | Ca_kabuli_chr06 | 59071289                | AA                              | CC              | 1946878237               |
| SNP_P4_90031_59071841 | NC_021165.1    | Ca_kabuli_chr06 | 59071841                | GG                              | AA              | 1946878239               |
| SNP_P4_90032_59072741 | NC_021165.1    | Ca_kabuli_chr06 | 59072741                | TT                              | CC              | 1946878242               |
| SNP_P4_90033_59072802 | NC_021165.1    | Ca_kabuli_chr06 | 59072802                | AA                              | CC              | 1946878244               |
| SNP_P4_90034_59072935 | NC_021165.1    | Ca_kabuli_chr06 | 59072935                | CC                              | AA              | 1946878246               |
| SNP_P4_90036_59074241 | NC_021165.1    | Ca_kabuli_chr06 | 59074241                | GG                              | CC              | 1946878248               |
| SNP_P4_90037_59074307 | NC_021165.1    | Ca_kabuli_chr06 | 59074307                | CC                              | AA              | 1946878250               |
| SNP_P4_90038_59074331 | NC_021165.1    | Ca_kabuli_chr06 | 59074331                | GG                              | AA              | 1946878252               |
| SNP_P4_90039_59074389 | NC_021165.1    | Ca_kabuli_chr06 | 59074389                | GG                              | AA              | 1946878254               |
| SNP_P4_90040_59074415 | NC_021165.1    | Ca_kabuli_chr06 | 59074415                | TT                              | CC              | 1946878256               |
| SNP_P4_90041_59074516 | NC_021165.1    | Ca_kabuli_chr06 | 59074516                | CC                              | TT              | 1946878258               |
| SNP_P4_90042_59074543 | NC_021165.1    | Ca_kabuli_chr06 | 59074543                | CC                              | TT              | 1946878260               |
| SNP_P4_90044_59075004 | NC_021165.1    | Ca_kabuli_chr06 | 59075004                | CC                              | AA              | 1946878262               |
| SNP_P4_90045_59077581 | NC_021165.1    | Ca_kabuli_chr06 | 59077581                | AA                              | GG              | 1946878264               |
| SNP_P4_90046_59077660 | NC_021165.1    | Ca_kabuli_chr06 | 59077660                | GG                              | AA              | 1946878266               |

| SNPs IDs              | Chromosome IDs | Chromosomes     | Physical positions (bp) | CDC Frontier (Reference genome) | (ILWC46 & LPNB) | NCBI SNPdb Accession IDs |
|-----------------------|----------------|-----------------|-------------------------|---------------------------------|-----------------|--------------------------|
| SNP_P4_90047_59077856 | NC_021165.1    | Ca_kabuli_chr06 | 59077856                | CC                              | TT              | 1946878267               |
| SNP_P4_90048_59078381 | NC_021165.1    | Ca_kabuli_chr06 | 59078381                | CC                              | GG              | 1946878269               |
| SNP_P4_90049_59081341 | NC_021165.1    | Ca_kabuli_chr06 | 59081341                | AA                              | GG              | 1946878272               |
| SNP_P4_90051_59084865 | NC_021165.1    | Ca_kabuli_chr06 | 59084865                | AA                              | GG              | 1946878274               |
| SNP_P4_90054_59119515 | NC_021165.1    | Ca_kabuli_chr06 | 59119515                | CC                              | TT              | 1946878276               |
| SNP_P4_90055_59133132 | NC_021165.1    | Ca_kabuli_chr06 | 59133132                | AA                              | GG              | 1946878278               |
| SNP_P4_90057_59134713 | NC_021165.1    | Ca_kabuli_chr06 | 59134713                | CC                              | TT              | 1946878280               |
| SNP_P4_90058_59151364 | NC_021165.1    | Ca_kabuli_chr06 | 59151364                | AA                              | GG              | 1946878282               |
| SNP_P4_90059_59189795 | NC_021165.1    | Ca_kabuli_chr06 | 59189795                | TT                              | CC              | 1946878284               |
| SNP_P4_90060_59190509 | NC_021165.1    | Ca_kabuli_chr06 | 59190509                | TT                              | CC              | 1946878286               |
| SNP_P4_90062_59216778 | NC_021165.1    | Ca_kabuli_chr06 | 59216778                | GG                              | TT              | 1946878288               |
| SNP_P4_90063_59221039 | NC_021165.1    | Ca_kabuli_chr06 | 59221039                | CC                              | TT              | 1946878290               |
| SNP_P4_90064_59221625 | NC_021165.1    | Ca_kabuli_chr06 | 59221625                | AA                              | TT              | 1946878292               |
| SNP_P4_90065_59238274 | NC_021165.1    | Ca_kabuli_chr06 | 59238274                | GG                              | AA              | 1946878294               |
| SNP_P4_90067_59261448 | NC_021165.1    | Ca_kabuli_chr06 | 59261448                | AA                              | GG              | 1946878296               |
| SNP_P4_90068_59262844 | NC_021165.1    | Ca_kabuli_chr06 | 59262844                | GG                              | TT              | 1946878298               |
| SNP_P4_90069_59262846 | NC_021165.1    | Ca_kabuli_chr06 | 59262846                | CC                              | TT              | 1946878300               |
| SNP_P4_90070_59270768 | NC_021165.1    | Ca_kabuli_chr06 | 59270768                | TT                              | AA              | 1946878302               |
| SNP_P4_90071_59271005 | NC_021165.1    | Ca_kabuli_chr06 | 59271005                | TT                              | CC              | 1946878304               |
| SNP_P4_90072_59271053 | NC_021165.1    | Ca_kabuli_chr06 | 59271053                | TT                              | CC              | 1946878306               |
| SNP_P4_90073_59271065 | NC_021165.1    | Ca_kabuli_chr06 | 59271065                | TT                              | CC              | 1946878308               |
| SNP_P4_90074_59272876 | NC_021165.1    | Ca_kabuli_chr06 | 59272876                | CC                              | AA              | 1946878310               |
| SNP_P4_90075_59272891 | NC_021165.1    | Ca_kabuli_chr06 | 59272891                | TT                              | CC              | 1946878312               |
| SNP_P4_90076_59272907 | NC_021165.1    | Ca_kabuli_chr06 | 59272907                | GG                              | TT              | 1946878314               |
| SNP_P4_90078_59274672 | NC_021165.1    | Ca_kabuli_chr06 | 59274672                | AA                              | GG              | 1946878316               |
| SNP_P4_90079_59277491 | NC_021165.1    | Ca_kabuli_chr06 | 59277491                | GG                              | AA              | 1946878318               |
| SNP_P4_90080_59278216 | NC_021165.1    | Ca_kabuli_chr06 | 59278216                | TT                              | GG              | 1946878320               |
| SNP_P4_90081_59278292 | NC_021165.1    | Ca_kabuli_chr06 | 59278292                | TT                              | GG              | 1946878322               |
| SNP_P4_90082_59301026 | NC_021165.1    | Ca_kabuli_chr06 | 59301026                | TT                              | GG              | 1946878324               |
| SNP_P4_90083_59327339 | NC_021165.1    | Ca_kabuli_chr06 | 59327339                | TT                              | CC              | 1946878326               |
| SNP_P4_90084_59329441 | NC_021165.1    | Ca_kabuli_chr06 | 59329441                | AA                              | GG              | 1946878328               |
| SNP_P4_90085_59333631 | NC_021165.1    | Ca_kabuli_chr06 | 59333631                | CC                              | AA              | 1946878330               |
| SNP_P4_90086_59346287 | NC_021165.1    | Ca_kabuli_chr06 | 59346287                | CC                              | AA              | 1946878332               |
| SNP_P4_90087_59346290 | NC_021165.1    | Ca_kabuli_chr06 | 59346290                | CC                              | AA              | 1946878334               |
| SNP_P4_90089_59372226 | NC_021165.1    | Ca_kabuli_chr06 | 59372226                | GG                              | AA              | 1946878336               |
| SNP_P4_90091_59387817 | NC_021165.1    | Ca_kabuli_chr06 | 59387817                | CC                              | TT              | 1946878338               |
| SNP_P4_90094_59424858 | NC_021165.1    | Ca_kabuli_chr06 | 59424858                | GG                              | AA              | 1946878340               |
| SNP_P4_90096_59434642 | NC_021165.1    | Ca_kabuli_chr06 | 59434642                | GG                              | AA              | 1946878342               |
| SNP_P4_90097_59443487 | NC_021165.1    | Ca_kabuli_chr06 | 59443487                | AA                              | CC              | 1946878344               |
| SNP_P4_90098_59443492 | NC_021165.1    | Ca_kabuli_chr06 | 59443492                | CC                              | TT              | 1946878346               |
| SNP_P4_90099_59443499 | NC_021165.1    | Ca_kabuli_chr06 | 59443499                | TT                              | GG              | 1946878348               |
| SNP_P4_90100_59443512 | NC_021165.1    | Ca_kabuli_chr06 | 59443512                | AA                              | GG              | 1946878350               |

| SNPs IDs              | Chromosome IDs | Chromosomes     | Physical positions (bp) | CDC Frontier (Reference genome) | (ILWC46 & LPNB) | NCBI SNPdb Accession IDs |
|-----------------------|----------------|-----------------|-------------------------|---------------------------------|-----------------|--------------------------|
| SNP_P4_90101_59443549 | NC_021165.1    | Ca_kabuli_chr06 | 59443549                | GG                              | AA              | 1946878352               |
| SNP_P4_90102_59443572 | NC_021165.1    | Ca_kabuli_chr06 | 59443572                | CC                              | TT              | 1946878354               |
| SNP_P4_90103_59443578 | NC_021165.1    | Ca_kabuli_chr06 | 59443578                | TT                              | GG              | 1946878357               |
| SNP_P4_90104_59443666 | NC_021165.1    | Ca_kabuli_chr06 | 59443666                | CC                              | TT              | 1946878359               |
| SNP_P4_90105_59443796 | NC_021165.1    | Ca_kabuli_chr06 | 59443796                | TT                              | CC              | 1946878361               |
| SNP_P4_90106_59443865 | NC_021165.1    | Ca_kabuli_chr06 | 59443865                | TT                              | AA              | 1946878363               |
| SNP_P4_90107_59444298 | NC_021165.1    | Ca_kabuli_chr06 | 59444298                | GG                              | CC              | 1946878365               |
| SNP_P4_90108_59444340 | NC_021165.1    | Ca_kabuli_chr06 | 59444340                | TT                              | CC              | 1946878367               |
| SNP_P4_90109_59450271 | NC_021165.1    | Ca_kabuli_chr06 | 59450271                | AA                              | CC              | 1946878369               |
| SNP_P4_90110_59452489 | NC_021165.1    | Ca_kabuli_chr06 | 59452489                | TT                              | CC              | 1946878371               |
| SNP_P4_90111_59459355 | NC_021165.1    | Ca_kabuli_chr06 | 59459355                | TT                              | GG              | 1946878373               |
| SNP_P4_90112_59460588 | NC_021165.1    | Ca_kabuli_chr06 | 59460588                | GG                              | TT              | 1946878375               |
| SNP_P4_90113_59462696 | NC_021165.1    | Ca_kabuli_chr06 | 59462696                | GG                              | AA              | 1946878377               |
| SNP_P4_90114_375      | NC_021166.1    | Ca_kabuli_chr07 | 375                     | AA                              | GG              | 1946878379               |
| SNP_P4_90115_443      | NC_021166.1    | Ca_kabuli_chr07 | 443                     | AA                              | GG              | 1946878381               |
| SNP_P4_90116_449      | NC_021166.1    | Ca_kabuli_chr07 | 449                     | AA                              | TT              | 1946878383               |
| SNP_P4_90117_651      | NC_021166.1    | Ca_kabuli_chr07 | 651                     | GG                              | TT              | 1946878385               |
| SNP_P4_90118_53942    | NC_021166.1    | Ca_kabuli_chr07 | 53942                   | GG                              | CC              | 1946878387               |
| SNP_P4_90119_53951    | NC_021166.1    | Ca_kabuli_chr07 | 53951                   | TT                              | AA              | 1946878389               |
| SNP_P4_90120_70169    | NC_021166.1    | Ca_kabuli_chr07 | 70169                   | AA                              | TT              | 1946878391               |
| SNP_P4_90121_70172    | NC_021166.1    | Ca_kabuli_chr07 | 70172                   | TT                              | GG              | 1946878393               |
| SNP_P4_90122_70317    | NC_021166.1    | Ca_kabuli_chr07 | 70317                   | AA                              | TT              | 1946878395               |
| SNP_P4_90125_117662   | NC_021166.1    | Ca_kabuli_chr07 | 117662                  | TT                              | AA              | 1946878397               |
| SNP_P4_90126_137627   | NC_021166.1    | Ca_kabuli_chr07 | 137627                  | TT                              | AA              | 1946878399               |
| SNP_P4_90127_143448   | NC_021166.1    | Ca_kabuli_chr07 | 143448                  | AA                              | TT              | 1946878401               |
| SNP_P4_90128_144969   | NC_021166.1    | Ca_kabuli_chr07 | 144969                  | AA                              | TT              | 1946878403               |
| SNP_P4_90129_155787   | NC_021166.1    | Ca_kabuli_chr07 | 155787                  | CC                              | TT              | 1946878405               |
| SNP_P4_90130_156028   | NC_021166.1    | Ca_kabuli_chr07 | 156028                  | TT                              | AA              | 1946878407               |
| SNP_P4_90131_156031   | NC_021166.1    | Ca_kabuli_chr07 | 156031                  | GG                              | AA              | 1946878409               |
| SNP_P4_90132_158556   | NC_021166.1    | Ca_kabuli_chr07 | 158556                  | CC                              | TT              | 1946878411               |
| SNP_P4_90134_158584   | NC_021166.1    | Ca_kabuli_chr07 | 158584                  | GG                              | TT              | 1946878413               |
| SNP_P4_90136_173818   | NC_021166.1    | Ca_kabuli_chr07 | 173818                  | TT                              | AA              | 1946878415               |
| SNP_P4_90139_177403   | NC_021166.1    | Ca_kabuli_chr07 | 177403                  | TT                              | AA              | 1946878417               |
| SNP_P4_90140_180384   | NC_021166.1    | Ca_kabuli_chr07 | 180384                  | CC                              | TT              | 1946878419               |
| SNP_P4_90142_180436   | NC_021166.1    | Ca_kabuli_chr07 | 180436                  | TT                              | CC              | 1946878421               |
| SNP_P4_90143_180470   | NC_021166.1    | Ca_kabuli_chr07 | 180470                  | TT                              | AA              | 1946878423               |
| SNP_P4_90144_180542   | NC_021166.1    | Ca_kabuli_chr07 | 180542                  | CC                              | TT              | 1946878425               |
| SNP_P4_90145_180806   | NC_021166.1    | Ca_kabuli_chr07 | 180806                  | AA                              | GG              | 1946878427               |
| SNP_P4_90146_180882   | NC_021166.1    | Ca_kabuli_chr07 | 180882                  | TT                              | CC              | 1946878429               |
| SNP_P4_90147_180910   | NC_021166.1    | Ca_kabuli_chr07 | 180910                  | AA                              | GG              | 1946878431               |
| SNP_P4_90148_182242   | NC_021166.1    | Ca_kabuli_chr07 | 182242                  | CC                              | TT              | 1946878433               |
| SNP_P4_90149_193947   | NC_021166.1    | Ca_kabuli_chr07 | 193947                  | TT                              | AA              | 1946878435               |



| SNPs IDs            | Chromosome IDs | Chromosomes     | Physical positions (bp) | CDC Frontier (Reference genome) | (ILWC46 & LPNB) | NCBI SNPdb Accession IDs |
|---------------------|----------------|-----------------|-------------------------|---------------------------------|-----------------|--------------------------|
| SNP_P4_90150_197464 | NC_021166.1    | Ca_kabuli_chr07 | 197464                  | CC                              | TT              | 1946878437               |
| SNP_P4_90151_197831 | NC_021166.1    | Ca_kabuli_chr07 | 197831                  | GG                              | TT              | 1946878439               |
| SNP_P4_90152_199205 | NC_021166.1    | Ca_kabuli_chr07 | 199205                  | TT                              | CC              | 1946878441               |
| SNP_P4_90153_212772 | NC_021166.1    | Ca_kabuli_chr07 | 212772                  | TT                              | GG              | 1946878444               |
| SNP_P4_90154_226092 | NC_021166.1    | Ca_kabuli_chr07 | 226092                  | AA                              | GG              | 1946878446               |
| SNP_P4_90155_253474 | NC_021166.1    | Ca_kabuli_chr07 | 253474                  | AA                              | GG              | 1946878448               |
| SNP_P4_90156_284823 | NC_021166.1    | Ca_kabuli_chr07 | 284823                  | GG                              | TT              | 1946878450               |
| SNP_P4_90157_329132 | NC_021166.1    | Ca_kabuli_chr07 | 329132                  | CC                              | TT              | 1946878452               |
| SNP_P4_90158_336366 | NC_021166.1    | Ca_kabuli_chr07 | 336366                  | AA                              | GG              | 1946878454               |
| SNP_P4_90159_343730 | NC_021166.1    | Ca_kabuli_chr07 | 343730                  | GG                              | AA              | 1946878456               |
| SNP_P4_90160_357667 | NC_021166.1    | Ca_kabuli_chr07 | 357667                  | TT                              | CC              | 1946878458               |
| SNP_P4_90161_357678 | NC_021166.1    | Ca_kabuli_chr07 | 357678                  | TT                              | CC              | 1946878460               |
| SNP_P4_90162_357690 | NC_021166.1    | Ca_kabuli_chr07 | 357690                  | GG                              | AA              | 1946878462               |
| SNP_P4_90163_357691 | NC_021166.1    | Ca_kabuli_chr07 | 357691                  | AA                              | GG              | 1946878464               |
| SNP_P4_90164_357764 | NC_021166.1    | Ca_kabuli_chr07 | 357764                  | TT                              | GG              | 1946878466               |
| SNP_P4_90165_357813 | NC_021166.1    | Ca_kabuli_chr07 | 357813                  | CC                              | TT              | 1946878468               |
| SNP_P4_90166_357840 | NC_021166.1    | Ca_kabuli_chr07 | 357840                  | AA                              | TT              | 1946878470               |
| SNP_P4_90167_362704 | NC_021166.1    | Ca_kabuli_chr07 | 362704                  | TT                              | GG              | 1946878472               |
| SNP_P4_90168_374989 | NC_021166.1    | Ca_kabuli_chr07 | 374989                  | CC                              | GG              | 1946878474               |
| SNP_P4_90169_405369 | NC_021166.1    | Ca_kabuli_chr07 | 405369                  | GG                              | AA              | 1946878476               |
| SNP_P4_90170_405371 | NC_021166.1    | Ca_kabuli_chr07 | 405371                  | AA                              | GG              | 1946878478               |
| SNP_P4_90171_419776 | NC_021166.1    | Ca_kabuli_chr07 | 419776                  | TT                              | AA              | 1946878480               |
| SNP_P4_90172_423774 | NC_021166.1    | Ca_kabuli_chr07 | 423774                  | CC                              | AA              | 1946878482               |
| SNP_P4_90173_433563 | NC_021166.1    | Ca_kabuli_chr07 | 433563                  | GG                              | TT              | 1946878484               |
| SNP_P4_90174_450223 | NC_021166.1    | Ca_kabuli_chr07 | 450223                  | AA                              | GG              | 1946878486               |
| SNP_P4_90175_450602 | NC_021166.1    | Ca_kabuli_chr07 | 450602                  | TT                              | AA              | 1946878488               |
| SNP_P4_90176_456628 | NC_021166.1    | Ca_kabuli_chr07 | 456628                  | GG                              | AA              | 1946878490               |
| SNP_P4_90177_457803 | NC_021166.1    | Ca_kabuli_chr07 | 457803                  | CC                              | TT              | 1946878492               |
| SNP_P4_90178_457805 | NC_021166.1    | Ca_kabuli_chr07 | 457805                  | TT                              | AA              | 1946878494               |
| SNP_P4_90179_457813 | NC_021166.1    | Ca_kabuli_chr07 | 457813                  | TT                              | CC              | 1946878495               |
| SNP_P4_90180_457886 | NC_021166.1    | Ca_kabuli_chr07 | 457886                  | TT                              | GG              | 1946878498               |
| SNP_P4_90181_496615 | NC_021166.1    | Ca_kabuli_chr07 | 496615                  | AA                              | TT              | 1946878500               |
| SNP_P4_90182_496705 | NC_021166.1    | Ca_kabuli_chr07 | 496705                  | TT                              | CC              | 1946878502               |
| SNP_P4_90183_496822 | NC_021166.1    | Ca_kabuli_chr07 | 496822                  | AA                              | GG              | 1946878504               |
| SNP_P4_90184_496864 | NC_021166.1    | Ca_kabuli_chr07 | 496864                  | CC                              | AA              | 1946878506               |
| SNP_P4_90185_496944 | NC_021166.1    | Ca_kabuli_chr07 | 496944                  | AA                              | TT              | 1946878508               |
| SNP_P4_90186_496958 | NC_021166.1    | Ca_kabuli_chr07 | 496958                  | AA                              | CC              | 1946878510               |
| SNP_P4_90187_496996 | NC_021166.1    | Ca_kabuli_chr07 | 496996                  | AA                              | GG              | 1946878512               |
| SNP_P4_90188_498548 | NC_021166.1    | Ca_kabuli_chr07 | 498548                  | CC                              | TT              | 1946878514               |
| SNP_P4_90189_503257 | NC_021166.1    | Ca_kabuli_chr07 | 503257                  | CC                              | TT              | 1946878516               |
| SNP_P4_90190_503277 | NC_021166.1    | Ca_kabuli_chr07 | 503277                  | CC                              | AA              | 1946878518               |
| SNP_P4_90191_510394 | NC_021166.1    | Ca_kabuli_chr07 | 510394                  | CC                              | TT              | 1946878520               |

| SNPs IDs            | Chromosome IDs | Chromosomes     | Physical positions (bp) | CDC Frontier (Reference genome) | (ILWC46 & LPNB) | NCBI SNPdb Accession IDs |
|---------------------|----------------|-----------------|-------------------------|---------------------------------|-----------------|--------------------------|
| SNP_P4_90192_521278 | NC_021166.1    | Ca_kabuli_chr07 | 521278                  | AA                              | GG              | 1946878522               |
| SNP_P4_90193_542577 | NC_021166.1    | Ca_kabuli_chr07 | 542577                  | CC                              | AA              | 1946878524               |
| SNP_P4_90194_543456 | NC_021166.1    | Ca_kabuli_chr07 | 543456                  | AA                              | GG              | 1946878526               |
| SNP_P4_90195_543781 | NC_021166.1    | Ca_kabuli_chr07 | 543781                  | TT                              | AA              | 1946878528               |
| SNP_P4_90196_560488 | NC_021166.1    | Ca_kabuli_chr07 | 560488                  | TT                              | GG              | 1946878530               |
| SNP_P4_90197_560527 | NC_021166.1    | Ca_kabuli_chr07 | 560527                  | GG                              | AA              | 1946878532               |
| SNP_P4_90198_560539 | NC_021166.1    | Ca_kabuli_chr07 | 560539                  | GG                              | AA              | 1946878534               |
| SNP_P4_90199_564795 | NC_021166.1    | Ca_kabuli_chr07 | 564795                  | AA                              | GG              | 1946878536               |
| SNP_P4_90200_570669 | NC_021166.1    | Ca_kabuli_chr07 | 570669                  | AA                              | TT              | 1946878538               |
| SNP_P4_90201_570748 | NC_021166.1    | Ca_kabuli_chr07 | 570748                  | AA                              | TT              | 1946878540               |
| SNP_P4_90202_570802 | NC_021166.1    | Ca_kabuli_chr07 | 570802                  | GG                              | AA              | 1946878542               |
| SNP_P4_90203_570822 | NC_021166.1    | Ca_kabuli_chr07 | 570822                  | TT                              | GG              | 1946878544               |
| SNP_P4_90204_585024 | NC_021166.1    | Ca_kabuli_chr07 | 585024                  | TT                              | AA              | 1946878546               |
| SNP_P4_90206_585071 | NC_021166.1    | Ca_kabuli_chr07 | 585071                  | GG                              | TT              | 1946878548               |
| SNP_P4_90207_585483 | NC_021166.1    | Ca_kabuli_chr07 | 585483                  | AA                              | GG              | 1946878549               |
| SNP_P4_90208_585491 | NC_021166.1    | Ca_kabuli_chr07 | 585491                  | TT                              | GG              | 1946878551               |
| SNP_P4_90209_585500 | NC_021166.1    | Ca_kabuli_chr07 | 585500                  | CC                              | TT              | 1946878553               |
| SNP_P4_90210_585517 | NC_021166.1    | Ca_kabuli_chr07 | 585517                  | TT                              | CC              | 1946878555               |
| SNP_P4_90211_585535 | NC_021166.1    | Ca_kabuli_chr07 | 585535                  | CC                              | TT              | 1946878557               |
| SNP_P4_90212_585538 | NC_021166.1    | Ca_kabuli_chr07 | 585538                  | CC                              | TT              | 1946878559               |
| SNP_P4_90213_586413 | NC_021166.1    | Ca_kabuli_chr07 | 586413                  | TT                              | AA              | 1946878561               |
| SNP_P4_90214_586484 | NC_021166.1    | Ca_kabuli_chr07 | 586484                  | TT                              | GG              | 1946878563               |
| SNP_P4_90215_586487 | NC_021166.1    | Ca_kabuli_chr07 | 586487                  | CC                              | GG              | 1946878565               |
| SNP_P4_90216_586496 | NC_021166.1    | Ca_kabuli_chr07 | 586496                  | AA                              | GG              | 1946878566               |
| SNP_P4_90217_586900 | NC_021166.1    | Ca_kabuli_chr07 | 586900                  | TT                              | GG              | 1946878568               |
| SNP_P4_90218_586925 | NC_021166.1    | Ca_kabuli_chr07 | 586925                  | AA                              | GG              | 1946878570               |
| SNP_P4_90219_586963 | NC_021166.1    | Ca_kabuli_chr07 | 586963                  | CC                              | TT              | 1946878572               |
| SNP_P4_90221_599200 | NC_021166.1    | Ca_kabuli_chr07 | 599200                  | GG                              | AA              | 1946878574               |
| SNP_P4_90222_599240 | NC_021166.1    | Ca_kabuli_chr07 | 599240                  | AA                              | GG              | 1946878576               |
| SNP_P4_90223_599378 | NC_021166.1    | Ca_kabuli_chr07 | 599378                  | TT                              | CC              | 1946878578               |
| SNP_P4_90224_599426 | NC_021166.1    | Ca_kabuli_chr07 | 599426                  | AA                              | TT              | 1946878580               |
| SNP_P4_90225_599513 | NC_021166.1    | Ca_kabuli_chr07 | 599513                  | AA                              | GG              | 1946878582               |
| SNP_P4_90226_599531 | NC_021166.1    | Ca_kabuli_chr07 | 599531                  | GG                              | AA              | 1946878584               |
| SNP_P4_90227_599578 | NC_021166.1    | Ca_kabuli_chr07 | 599578                  | TT                              | CC              | 1946878586               |
| SNP_P4_90228_599600 | NC_021166.1    | Ca_kabuli_chr07 | 599600                  | CC                              | TT              | 1946878588               |
| SNP_P4_90229_599624 | NC_021166.1    | Ca_kabuli_chr07 | 599624                  | TT                              | CC              | 1946878590               |
| SNP_P4_90230_599689 | NC_021166.1    | Ca_kabuli_chr07 | 599689                  | GG                              | AA              | 1946878592               |
| SNP_P4_90231_639460 | NC_021166.1    | Ca_kabuli_chr07 | 639460                  | TT                              | CC              | 1946878594               |
| SNP_P4_90232_639494 | NC_021166.1    | Ca_kabuli_chr07 | 639494                  | TT                              | AA              | 1946878596               |
| SNP_P4_90234_654964 | NC_021166.1    | Ca_kabuli_chr07 | 654964                  | AA                              | TT              | 1946878598               |
| SNP_P4_90235_654967 | NC_021166.1    | Ca_kabuli_chr07 | 654967                  | TT                              | AA              | 1946878599               |
| SNP_P4_90236_660874 | NC_021166.1    | Ca_kabuli_chr07 | 660874                  | TT                              | CC              | 1946878601               |

| SNPs IDs            | Chromosome IDs | Chromosomes     | Physical positions (bp) | CDC Frontier (Reference genome) | (ILWC46 & LPNB) | NCBI SNPdb Accession IDs |
|---------------------|----------------|-----------------|-------------------------|---------------------------------|-----------------|--------------------------|
| SNP_P4_90237_666147 | NC_021166.1    | Ca_kabuli_chr07 | 666147                  | AA                              | GG              | 1946878603               |
| SNP_P4_90238_666151 | NC_021166.1    | Ca_kabuli_chr07 | 666151                  | AA                              | CC              | 1946878605               |
| SNP_P4_90240_687295 | NC_021166.1    | Ca_kabuli_chr07 | 687295                  | GG                              | AA              | 1946878607               |
| SNP_P4_90241_687790 | NC_021166.1    | Ca_kabuli_chr07 | 687790                  | AA                              | CC              | 1946878609               |
| SNP_P4_90243_752537 | NC_021166.1    | Ca_kabuli_chr07 | 752537                  | CC                              | TT              | 1946878611               |
| SNP_P4_90245_760433 | NC_021166.1    | Ca_kabuli_chr07 | 760433                  | TT                              | CC              | 1946878613               |
| SNP_P4_90246_760463 | NC_021166.1    | Ca_kabuli_chr07 | 760463                  | CC                              | GG              | 1946878614               |
| SNP_P4_90247_760480 | NC_021166.1    | Ca_kabuli_chr07 | 760480                  | GG                              | AA              | 1946878615               |
| SNP_P4_90248_760488 | NC_021166.1    | Ca_kabuli_chr07 | 760488                  | TT                              | CC              | 1946878616               |
| SNP_P4_90249_760503 | NC_021166.1    | Ca_kabuli_chr07 | 760503                  | CC                              | AA              | 1946878618               |
| SNP_P4_90250_760510 | NC_021166.1    | Ca_kabuli_chr07 | 760510                  | CC                              | TT              | 1946878620               |
| SNP_P4_90251_760528 | NC_021166.1    | Ca_kabuli_chr07 | 760528                  | TT                              | CC              | 1946878622               |
| SNP_P4_90252_760533 | NC_021166.1    | Ca_kabuli_chr07 | 760533                  | CC                              | AA              | 1946878624               |
| SNP_P4_90253_760557 | NC_021166.1    | Ca_kabuli_chr07 | 760557                  | CC                              | TT              | 1946878626               |
| SNP_P4_90254_760568 | NC_021166.1    | Ca_kabuli_chr07 | 760568                  | GG                              | TT              | 1946878628               |
| SNP_P4_90255_760705 | NC_021166.1    | Ca_kabuli_chr07 | 760705                  | CC                              | GG              | 1946878630               |
| SNP_P4_90257_773352 | NC_021166.1    | Ca_kabuli_chr07 | 773352                  | AA                              | TT              | 1946878632               |
| SNP_P4_90258_773353 | NC_021166.1    | Ca_kabuli_chr07 | 773353                  | TT                              | AA              | 1946878634               |
| SNP_P4_90259_773354 | NC_021166.1    | Ca_kabuli_chr07 | 773354                  | AA                              | TT              | 1946878636               |
| SNP_P4_90260_786782 | NC_021166.1    | Ca_kabuli_chr07 | 786782                  | TT                              | AA              | 1946878637               |
| SNP_P4_90261_816670 | NC_021166.1    | Ca_kabuli_chr07 | 816670                  | AA                              | GG              | 1946878639               |
| SNP_P4_90263_817329 | NC_021166.1    | Ca_kabuli_chr07 | 817329                  | GG                              | AA              | 1946878641               |
| SNP_P4_90264_819068 | NC_021166.1    | Ca_kabuli_chr07 | 819068                  | TT                              | CC              | 1946878643               |
| SNP_P4_90265_819073 | NC_021166.1    | Ca_kabuli_chr07 | 819073                  | TT                              | CC              | 1946878645               |
| SNP_P4_90266_819100 | NC_021166.1    | Ca_kabuli_chr07 | 819100                  | AA                              | TT              | 1946878647               |
| SNP_P4_90267_819130 | NC_021166.1    | Ca_kabuli_chr07 | 819130                  | TT                              | CC              | 1946878649               |
| SNP_P4_90268_819178 | NC_021166.1    | Ca_kabuli_chr07 | 819178                  | GG                              | AA              | 1946878651               |
| SNP_P4_90269_819220 | NC_021166.1    | Ca_kabuli_chr07 | 819220                  | AA                              | CC              | 1946878653               |
| SNP_P4_90270_819261 | NC_021166.1    | Ca_kabuli_chr07 | 819261                  | GG                              | AA              | 1946878655               |
| SNP_P4_90271_819270 | NC_021166.1    | Ca_kabuli_chr07 | 819270                  | TT                              | CC              | 1946878657               |
| SNP_P4_90272_819310 | NC_021166.1    | Ca_kabuli_chr07 | 819310                  | AA                              | GG              | 1946878659               |
| SNP_P4_90273_819319 | NC_021166.1    | Ca_kabuli_chr07 | 819319                  | AA                              | TT              | 1946878661               |
| SNP_P4_90274_819325 | NC_021166.1    | Ca_kabuli_chr07 | 819325                  | AA                              | CC              | 1946878663               |
| SNP_P4_90275_819332 | NC_021166.1    | Ca_kabuli_chr07 | 819332                  | CC                              | TT              | 1946878665               |
| SNP_P4_90276_819333 | NC_021166.1    | Ca_kabuli_chr07 | 819333                  | TT                              | AA              | 1946878668               |
| SNP_P4_90277_819352 | NC_021166.1    | Ca_kabuli_chr07 | 819352                  | AA                              | GG              | 1946878670               |
| SNP_P4_90278_819367 | NC_021166.1    | Ca_kabuli_chr07 | 819367                  | GG                              | AA              | 1946878672               |
| SNP_P4_90279_819513 | NC_021166.1    | Ca_kabuli_chr07 | 819513                  | TT                              | CC              | 1946878674               |
| SNP_P4_90280_819663 | NC_021166.1    | Ca_kabuli_chr07 | 819663                  | AA                              | GG              | 1946878676               |
| SNP_P4_90281_819693 | NC_021166.1    | Ca_kabuli_chr07 | 819693                  | CC                              | TT              | 1946878678               |
| SNP_P4_90282_819694 | NC_021166.1    | Ca_kabuli_chr07 | 819694                  | GG                              | TT              | 1946878679               |
| SNP_P4_90284_823628 | NC_021166.1    | Ca_kabuli_chr07 | 823628                  | TT                              | AA              | 1946878681               |

| SNPs IDs             | Chromosome IDs | Chromosomes     | Physical positions (bp) | CDC Frontier (Reference genome) | (ILWC46 & LPNB) | NCBI SNPdb Accession IDs |
|----------------------|----------------|-----------------|-------------------------|---------------------------------|-----------------|--------------------------|
| SNP_P4_90286_905517  | NC_021166.1    | Ca_kabuli_chr07 | 905517                  | GG                              | TT              | 1946878683               |
| SNP_P4_90287_913252  | NC_021166.1    | Ca_kabuli_chr07 | 913252                  | AA                              | CC              | 1946878685               |
| SNP_P4_90288_914080  | NC_021166.1    | Ca_kabuli_chr07 | 914080                  | TT                              | CC              | 1946878687               |
| SNP_P4_90289_914690  | NC_021166.1    | Ca_kabuli_chr07 | 914690                  | GG                              | AA              | 1946878689               |
| SNP_P4_90291_946627  | NC_021166.1    | Ca_kabuli_chr07 | 946627                  | CC                              | AA              | 1946878691               |
| SNP_P4_90294_1000745 | NC_021166.1    | Ca_kabuli_chr07 | 1000745                 | TT                              | CC              | 1946878693               |
| SNP_P4_90295_1000747 | NC_021166.1    | Ca_kabuli_chr07 | 1000747                 | TT                              | CC              | 1946878695               |
| SNP_P4_90296_1018531 | NC_021166.1    | Ca_kabuli_chr07 | 1018531                 | TT                              | CC              | 1946878697               |
| SNP_P4_90297_1018540 | NC_021166.1    | Ca_kabuli_chr07 | 1018540                 | TT                              | CC              | 1946878699               |
| SNP_P4_90298_1018557 | NC_021166.1    | Ca_kabuli_chr07 | 1018557                 | AA                              | TT              | 1946878702               |
| SNP_P4_90299_1018676 | NC_021166.1    | Ca_kabuli_chr07 | 1018676                 | AA                              | GG              | 1946878704               |
| SNP_P4_90301_1018756 | NC_021166.1    | Ca_kabuli_chr07 | 1018756                 | GG                              | AA              | 1946878706               |
| SNP_P4_90303_1018840 | NC_021166.1    | Ca_kabuli_chr07 | 1018840                 | CC                              | AA              | 1946878708               |
| SNP_P4_90304_1018959 | NC_021166.1    | Ca_kabuli_chr07 | 1018959                 | CC                              | TT              | 1946878710               |
| SNP_P4_90305_1019099 | NC_021166.1    | Ca_kabuli_chr07 | 1019099                 | TT                              | AA              | 1946878712               |
| SNP_P4_90306_1019156 | NC_021166.1    | Ca_kabuli_chr07 | 1019156                 | AA                              | GG              | 1946878714               |
| SNP_P4_90307_1019410 | NC_021166.1    | Ca_kabuli_chr07 | 1019410                 | AA                              | GG              | 1946878716               |
| SNP_P4_90308_1019455 | NC_021166.1    | Ca_kabuli_chr07 | 1019455                 | AA                              | GG              | 1946878718               |
| SNP_P4_90309_1019477 | NC_021166.1    | Ca_kabuli_chr07 | 1019477                 | TT                              | CC              | 1946878720               |
| SNP_P4_90310_1019510 | NC_021166.1    | Ca_kabuli_chr07 | 1019510                 | AA                              | GG              | 1946878722               |
| SNP_P4_90311_1019568 | NC_021166.1    | Ca_kabuli_chr07 | 1019568                 | GG                              | AA              | 1946878724               |
| SNP_P4_90312_1019572 | NC_021166.1    | Ca_kabuli_chr07 | 1019572                 | TT                              | CC              | 1946878726               |
| SNP_P4_90313_1019589 | NC_021166.1    | Ca_kabuli_chr07 | 1019589                 | AA                              | GG              | 1946878728               |
| SNP_P4_90314_1019698 | NC_021166.1    | Ca_kabuli_chr07 | 1019698                 | AA                              | GG              | 1946878730               |
| SNP_P4_90315_1019724 | NC_021166.1    | Ca_kabuli_chr07 | 1019724                 | AA                              | TT              | 1946878732               |
| SNP_P4_90316_1019764 | NC_021166.1    | Ca_kabuli_chr07 | 1019764                 | GG                              | AA              | 1946878734               |
| SNP_P4_90317_1019768 | NC_021166.1    | Ca_kabuli_chr07 | 1019768                 | GG                              | CC              | 1946878736               |
| SNP_P4_90318_1019770 | NC_021166.1    | Ca_kabuli_chr07 | 1019770                 | AA                              | TT              | 1946878738               |
| SNP_P4_90319_1019780 | NC_021166.1    | Ca_kabuli_chr07 | 1019780                 | GG                              | AA              | 1946878740               |
| SNP_P4_90320_1019781 | NC_021166.1    | Ca_kabuli_chr07 | 1019781                 | TT                              | GG              | 1946878742               |
| SNP_P4_90321_1019788 | NC_021166.1    | Ca_kabuli_chr07 | 1019788                 | CC                              | AA              | 1946878744               |
| SNP_P4_90322_1019808 | NC_021166.1    | Ca_kabuli_chr07 | 1019808                 | CC                              | TT              | 1946878746               |
| SNP_P4_90323_1021390 | NC_021166.1    | Ca_kabuli_chr07 | 1021390                 | CC                              | TT              | 1946878748               |
| SNP_P4_90324_1037138 | NC_021166.1    | Ca_kabuli_chr07 | 1037138                 | GG                              | CC              | 1946878750               |
| SNP_P4_90326_1042316 | NC_021166.1    | Ca_kabuli_chr07 | 1042316                 | CC                              | TT              | 1946878752               |
| SNP_P4_90327_1042320 | NC_021166.1    | Ca_kabuli_chr07 | 1042320                 | TT                              | AA              | 1946878754               |
| SNP_P4_90328_1064978 | NC_021166.1    | Ca_kabuli_chr07 | 1064978                 | CC                              | AA              | 1946878756               |
| SNP_P4_90329_1065188 | NC_021166.1    | Ca_kabuli_chr07 | 1065188                 | GG                              | AA              | 1946878758               |
| SNP_P4_90330_1179666 | NC_021166.1    | Ca_kabuli_chr07 | 1179666                 | GG                              | CC              | 1946878760               |
| SNP_P4_90331_1184849 | NC_021166.1    | Ca_kabuli_chr07 | 1184849                 | AA                              | GG              | 1946878762               |
| SNP_P4_90332_1184887 | NC_021166.1    | Ca_kabuli_chr07 | 1184887                 | TT                              | AA              | 1946878764               |
| SNP_P4_90333_1218285 | NC_021166.1    | Ca_kabuli_chr07 | 1218285                 | TT                              | AA              | 1946878766               |

| SNPs IDs             | Chromosome IDs | Chromosomes     | Physical positions (bp) | CDC Frontier (Reference genome) | (ILWC46 & LPNB) | NCBI SNPdb Accession IDs |
|----------------------|----------------|-----------------|-------------------------|---------------------------------|-----------------|--------------------------|
| SNP_P4_90334_1239181 | NC_021166.1    | Ca_kabuli_chr07 | 1239181                 | AA                              | GG              | 1946878768               |
| SNP_P4_90335_1240398 | NC_021166.1    | Ca_kabuli_chr07 | 1240398                 | GG                              | CC              | 1946878770               |
| SNP_P4_90336_1243444 | NC_021166.1    | Ca_kabuli_chr07 | 1243444                 | CC                              | TT              | 1946878772               |
| SNP_P4_90337_1244387 | NC_021166.1    | Ca_kabuli_chr07 | 1244387                 | TT                              | CC              | 1946878774               |
| SNP_P4_90338_1244943 | NC_021166.1    | Ca_kabuli_chr07 | 1244943                 | AA                              | GG              | 1946878776               |
| SNP_P4_90340_1254994 | NC_021166.1    | Ca_kabuli_chr07 | 1254994                 | TT                              | AA              | 1946878778               |
| SNP_P4_90341_1255759 | NC_021166.1    | Ca_kabuli_chr07 | 1255759                 | CC                              | AA              | 1946878780               |
| SNP_P4_90342_1274605 | NC_021166.1    | Ca_kabuli_chr07 | 1274605                 | GG                              | AA              | 1946878783               |
| SNP_P4_90343_1292609 | NC_021166.1    | Ca_kabuli_chr07 | 1292609                 | AA                              | GG              | 1946878785               |
| SNP_P4_90345_1307243 | NC_021166.1    | Ca_kabuli_chr07 | 1307243                 | TT                              | CC              | 1946878787               |
| SNP_P4_90346_1307405 | NC_021166.1    | Ca_kabuli_chr07 | 1307405                 | CC                              | TT              | 1946878789               |
| SNP_P4_90347_1307408 | NC_021166.1    | Ca_kabuli_chr07 | 1307408                 | GG                              | AA              | 1946878791               |
| SNP_P4_90348_1307863 | NC_021166.1    | Ca_kabuli_chr07 | 1307863                 | TT                              | AA              | 1946878793               |
| SNP_P4_90349_1307928 | NC_021166.1    | Ca_kabuli_chr07 | 1307928                 | GG                              | AA              | 1946878795               |
| SNP_P4_90350_1311667 | NC_021166.1    | Ca_kabuli_chr07 | 1311667                 | GG                              | CC              | 1946878797               |
| SNP_P4_90352_1326843 | NC_021166.1    | Ca_kabuli_chr07 | 1326843                 | AA                              | GG              | 1946878799               |
| SNP_P4_90354_1347821 | NC_021166.1    | Ca_kabuli_chr07 | 1347821                 | CC                              | TT              | 1946878801               |
| SNP_P4_90355_1351594 | NC_021166.1    | Ca_kabuli_chr07 | 1351594                 | GG                              | TT              | 1946878803               |
| SNP_P4_90358_1418056 | NC_021166.1    | Ca_kabuli_chr07 | 1418056                 | CC                              | TT              | 1946878805               |
| SNP_P4_90359_1418057 | NC_021166.1    | Ca_kabuli_chr07 | 1418057                 | CC                              | TT              | 1946878807               |
| SNP_P4_90360_1418114 | NC_021166.1    | Ca_kabuli_chr07 | 1418114                 | GG                              | AA              | 1946878809               |
| SNP_P4_90366_1425909 | NC_021166.1    | Ca_kabuli_chr07 | 1425909                 | AA                              | TT              | 1946878811               |
| SNP_P4_90367_1425911 | NC_021166.1    | Ca_kabuli_chr07 | 1425911                 | AA                              | TT              | 1946878813               |
| SNP_P4_90368_1447635 | NC_021166.1    | Ca_kabuli_chr07 | 1447635                 | AA                              | CC              | 1946878815               |
| SNP_P4_90369_1465830 | NC_021166.1    | Ca_kabuli_chr07 | 1465830                 | CC                              | TT              | 1946878817               |
| SNP_P4_90370_1469760 | NC_021166.1    | Ca_kabuli_chr07 | 1469760                 | CC                              | TT              | 1946878819               |
| SNP_P4_90371_1530566 | NC_021166.1    | Ca_kabuli_chr07 | 1530566                 | AA                              | TT              | 1946878821               |
| SNP_P4_90373_1534512 | NC_021166.1    | Ca_kabuli_chr07 | 1534512                 | GG                              | AA              | 1946878823               |
| SNP_P4_90374_1534610 | NC_021166.1    | Ca_kabuli_chr07 | 1534610                 | AA                              | GG              | 1946878825               |
| SNP_P4_90375_1559221 | NC_021166.1    | Ca_kabuli_chr07 | 1559221                 | TT                              | CC              | 1946878827               |
| SNP_P4_90376_1559222 | NC_021166.1    | Ca_kabuli_chr07 | 1559222                 | GG                              | TT              | 1946878829               |
| SNP_P4_90377_1583119 | NC_021166.1    | Ca_kabuli_chr07 | 1583119                 | GG                              | TT              | 1946878831               |
| SNP_P4_90379_1617991 | NC_021166.1    | Ca_kabuli_chr07 | 1617991                 | TT                              | CC              | 1946878833               |
| SNP_P4_90381_1683733 | NC_021166.1    | Ca_kabuli_chr07 | 1683733                 | AA                              | TT              | 1946878835               |
| SNP_P4_90383_1691943 | NC_021166.1    | Ca_kabuli_chr07 | 1691943                 | TT                              | AA              | 1946878837               |
| SNP_P4_90384_1692007 | NC_021166.1    | Ca_kabuli_chr07 | 1692007                 | TT                              | AA              | 1946878839               |
| SNP_P4_90385_1698538 | NC_021166.1    | Ca_kabuli_chr07 | 1698538                 | GG                              | CC              | 1946878841               |
| SNP_P4_90386_1748402 | NC_021166.1    | Ca_kabuli_chr07 | 1748402                 | TT                              | CC              | 1946878844               |
| SNP_P4_90388_1778082 | NC_021166.1    | Ca_kabuli_chr07 | 1778082                 | TT                              | GG              | 1946878846               |
| SNP_P4_90391_1834474 | NC_021166.1    | Ca_kabuli_chr07 | 1834474                 | AA                              | TT              | 1946878848               |
| SNP_P4_90393_1852449 | NC_021166.1    | Ca_kabuli_chr07 | 1852449                 | CC                              | AA              | 1946878850               |
| SNP_P4_90394_1879938 | NC_021166.1    | Ca_kabuli_chr07 | 1879938                 | CC                              | TT              | 1946878852               |

| SNPs IDs             | Chromosome IDs | Chromosomes     | Physical positions (bp) | CDC Frontier (Reference genome) | (ILWC46 & LPNB) | NCBI SNPdb Accession IDs |
|----------------------|----------------|-----------------|-------------------------|---------------------------------|-----------------|--------------------------|
| SNP_P4_90395_1893007 | NC_021166.1    | Ca_kabuli_chr07 | 1893007                 | CC                              | AA              | 1946878854               |
| SNP_P4_90397_1906413 | NC_021166.1    | Ca_kabuli_chr07 | 1906413                 | TT                              | AA              | 1946878856               |
| SNP_P4_90398_1913416 | NC_021166.1    | Ca_kabuli_chr07 | 1913416                 | CC                              | AA              | 1946878858               |
| SNP_P4_90399_1914908 | NC_021166.1    | Ca_kabuli_chr07 | 1914908                 | CC                              | AA              | 1946878860               |
| SNP_P4_90401_1952888 | NC_021166.1    | Ca_kabuli_chr07 | 1952888                 | TT                              | AA              | 1946878862               |
| SNP_P4_90403_1966667 | NC_021166.1    | Ca_kabuli_chr07 | 1966667                 | GG                              | AA              | 1946878864               |
| SNP_P4_90404_1994208 | NC_021166.1    | Ca_kabuli_chr07 | 1994208                 | AA                              | GG              | 1946878866               |
| SNP_P4_90405_2018442 | NC_021166.1    | Ca_kabuli_chr07 | 2018442                 | AA                              | TT              | 1946878868               |
| SNP_P4_90406_2018774 | NC_021166.1    | Ca_kabuli_chr07 | 2018774                 | TT                              | AA              | 1946878870               |
| SNP_P4_90408_2055120 | NC_021166.1    | Ca_kabuli_chr07 | 2055120                 | AA                              | GG              | 1946878872               |
| SNP_P4_90410_2104112 | NC_021166.1    | Ca_kabuli_chr07 | 2104112                 | CC                              | AA              | 1946878874               |
| SNP_P4_90411_2126834 | NC_021166.1    | Ca_kabuli_chr07 | 2126834                 | GG                              | TT              | 1946878876               |
| SNP_P4_90413_2133213 | NC_021166.1    | Ca_kabuli_chr07 | 2133213                 | CC                              | TT              | 1946878878               |
| SNP_P4_90414_2139056 | NC_021166.1    | Ca_kabuli_chr07 | 2139056                 | AA                              | CC              | 1946878880               |
| SNP_P4_90415_2144770 | NC_021166.1    | Ca_kabuli_chr07 | 2144770                 | AA                              | CC              | 1946878882               |
| SNP_P4_90416_2146271 | NC_021166.1    | Ca_kabuli_chr07 | 2146271                 | AA                              | TT              | 1946878884               |
| SNP_P4_90417_2146272 | NC_021166.1    | Ca_kabuli_chr07 | 2146272                 | AA                              | TT              | 1946878886               |
| SNP_P4_90418_2146297 | NC_021166.1    | Ca_kabuli_chr07 | 2146297                 | CC                              | TT              | 1946878888               |
| SNP_P4_90419_2168204 | NC_021166.1    | Ca_kabuli_chr07 | 2168204                 | TT                              | CC              | 1946878890               |
| SNP_P4_90421_2168252 | NC_021166.1    | Ca_kabuli_chr07 | 2168252                 | AA                              | CC              | 1946878892               |
| SNP_P4_90422_2168319 | NC_021166.1    | Ca_kabuli_chr07 | 2168319                 | AA                              | CC              | 1946878894               |
| SNP_P4_90423_2168338 | NC_021166.1    | Ca_kabuli_chr07 | 2168338                 | TT                              | CC              | 1946878896               |
| SNP_P4_90424_2168507 | NC_021166.1    | Ca_kabuli_chr07 | 2168507                 | GG                              | AA              | 1946878898               |
| SNP_P4_90425_2168538 | NC_021166.1    | Ca_kabuli_chr07 | 2168538                 | CC                              | TT              | 1946878900               |
| SNP_P4_90426_2169580 | NC_021166.1    | Ca_kabuli_chr07 | 2169580                 | CC                              | TT              | 1946878902               |
| SNP_P4_90427_2169630 | NC_021166.1    | Ca_kabuli_chr07 | 2169630                 | AA                              | GG              | 1946878905               |
| SNP_P4_90428_2169661 | NC_021166.1    | Ca_kabuli_chr07 | 2169661                 | AA                              | CC              | 1946878907               |
| SNP_P4_90429_2169860 | NC_021166.1    | Ca_kabuli_chr07 | 2169860                 | CC                              | TT              | 1946878908               |
| SNP_P4_90430_2169893 | NC_021166.1    | Ca_kabuli_chr07 | 2169893                 | CC                              | TT              | 1946878910               |
| SNP_P4_90432_2169907 | NC_021166.1    | Ca_kabuli_chr07 | 2169907                 | GG                              | CC              | 1946878912               |
| SNP_P4_90433_2169981 | NC_021166.1    | Ca_kabuli_chr07 | 2169981                 | AA                              | CC              | 1946878914               |
| SNP_P4_90434_2170031 | NC_021166.1    | Ca_kabuli_chr07 | 2170031                 | CC                              | TT              | 1946878916               |
| SNP_P4_90435_2219565 | NC_021166.1    | Ca_kabuli_chr07 | 2219565                 | CC                              | AA              | 1946878918               |
| SNP_P4_90436_2296280 | NC_021166.1    | Ca_kabuli_chr07 | 2296280                 | GG                              | AA              | 1946878920               |
| SNP_P4_90437_2316573 | NC_021166.1    | Ca_kabuli_chr07 | 2316573                 | TT                              | CC              | 1946878922               |
| SNP_P4_90438_2326915 | NC_021166.1    | Ca_kabuli_chr07 | 2326915                 | CC                              | TT              | 1946878924               |
| SNP_P4_90440_2327126 | NC_021166.1    | Ca_kabuli_chr07 | 2327126                 | CC                              | TT              | 1946878926               |
| SNP_P4_90441_2327154 | NC_021166.1    | Ca_kabuli_chr07 | 2327154                 | TT                              | CC              | 1946878928               |
| SNP_P4_90443_2355809 | NC_021166.1    | Ca_kabuli_chr07 | 2355809                 | GG                              | AA              | 1946878930               |
| SNP_P4_90444_2355833 | NC_021166.1    | Ca_kabuli_chr07 | 2355833                 | AA                              | GG              | 1946878932               |
| SNP_P4_90446_2426591 | NC_021166.1    | Ca_kabuli_chr07 | 2426591                 | AA                              | CC              | 1946878934               |
| SNP_P4_90449_2438391 | NC_021166.1    | Ca_kabuli_chr07 | 2438391                 | AA                              | GG              | 1946878936               |

| SNPs IDs             | Chromosome IDs | Chromosomes     | Physical positions (bp) | CDC Frontier (Reference genome) | (ILWC46 & LPNB) | NCBI SNPdb Accession IDs |
|----------------------|----------------|-----------------|-------------------------|---------------------------------|-----------------|--------------------------|
| SNP_P4_90450_2443614 | NC_021166.1    | Ca_kabuli_chr07 | 2443614                 | CC                              | AA              | 1946878938               |
| SNP_P4_90453_2595101 | NC_021166.1    | Ca_kabuli_chr07 | 2595101                 | GG                              | AA              | 1946878940               |
| SNP_P4_90454_2596215 | NC_021166.1    | Ca_kabuli_chr07 | 2596215                 | AA                              | GG              | 1946878942               |
| SNP_P4_90455_2615425 | NC_021166.1    | Ca_kabuli_chr07 | 2615425                 | GG                              | CC              | 1946878944               |
| SNP_P4_90456_2635726 | NC_021166.1    | Ca_kabuli_chr07 | 2635726                 | CC                              | AA              | 1946878946               |
| SNP_P4_90457_2642358 | NC_021166.1    | Ca_kabuli_chr07 | 2642358                 | TT                              | GG              | 1946878948               |
| SNP_P4_90458_2680358 | NC_021166.1    | Ca_kabuli_chr07 | 2680358                 | TT                              | CC              | 1946878950               |
| SNP_P4_90459_2726305 | NC_021166.1    | Ca_kabuli_chr07 | 2726305                 | AA                              | TT              | 1946878952               |
| SNP_P4_90460_2768530 | NC_021166.1    | Ca_kabuli_chr07 | 2768530                 | GG                              | TT              | 1946878953               |
| SNP_P4_90462_2790986 | NC_021166.1    | Ca_kabuli_chr07 | 2790986                 | TT                              | GG              | 1946878955               |
| SNP_P4_90463_2806781 | NC_021166.1    | Ca_kabuli_chr07 | 2806781                 | CC                              | TT              | 1946878957               |
| SNP_P4_90465_2817875 | NC_021166.1    | Ca_kabuli_chr07 | 2817875                 | AA                              | GG              | 1946878959               |
| SNP_P4_90467_2837806 | NC_021166.1    | Ca_kabuli_chr07 | 2837806                 | CC                              | TT              | 1946878961               |
| SNP_P4_90468_2838780 | NC_021166.1    | Ca_kabuli_chr07 | 2838780                 | TT                              | GG              | 1946878963               |
| SNP_P4_90469_2843991 | NC_021166.1    | Ca_kabuli_chr07 | 2843991                 | CC                              | TT              | 1946878965               |
| SNP_P4_90470_2987311 | NC_021166.1    | Ca_kabuli_chr07 | 2987311                 | AA                              | CC              | 1946878967               |
| SNP_P4_90471_2988039 | NC_021166.1    | Ca_kabuli_chr07 | 2988039                 | AA                              | TT              | 1946878969               |
| SNP_P4_90472_3001151 | NC_021166.1    | Ca_kabuli_chr07 | 3001151                 | GG                              | AA              | 1946878971               |
| SNP_P4_90473_3007497 | NC_021166.1    | Ca_kabuli_chr07 | 3007497                 | AA                              | GG              | 1946878973               |
| SNP_P4_90476_3046598 | NC_021166.1    | Ca_kabuli_chr07 | 3046598                 | AA                              | CC              | 1946878974               |
| SNP_P4_90477_3049702 | NC_021166.1    | Ca_kabuli_chr07 | 3049702                 | GG                              | AA              | 1946878976               |
| SNP_P4_90479_3077351 | NC_021166.1    | Ca_kabuli_chr07 | 3077351                 | GG                              | AA              | 1946878978               |
| SNP_P4_90480_3080461 | NC_021166.1    | Ca_kabuli_chr07 | 3080461                 | AA                              | GG              | 1946878980               |
| SNP_P4_90481_3083622 | NC_021166.1    | Ca_kabuli_chr07 | 3083622                 | CC                              | GG              | 1946878982               |
| SNP_P4_90482_3105098 | NC_021166.1    | Ca_kabuli_chr07 | 3105098                 | GG                              | CC              | 1946878984               |
| SNP_P4_90483_3105328 | NC_021166.1    | Ca_kabuli_chr07 | 3105328                 | TT                              | AA              | 1946878986               |
| SNP_P4_90487_3138969 | NC_021166.1    | Ca_kabuli_chr07 | 3138969                 | CC                              | TT              | 1946878988               |
| SNP_P4_90488_3145614 | NC_021166.1    | Ca_kabuli_chr07 | 3145614                 | CC                              | TT              | 1946878990               |
| SNP_P4_90489_3156286 | NC_021166.1    | Ca_kabuli_chr07 | 3156286                 | CC                              | AA              | 1946878992               |
| SNP_P4_90491_3214577 | NC_021166.1    | Ca_kabuli_chr07 | 3214577                 | TT                              | CC              | 1946878994               |
| SNP_P4_90492_3216893 | NC_021166.1    | Ca_kabuli_chr07 | 3216893                 | CC                              | TT              | 1946878996               |
| SNP_P4_90493_3216924 | NC_021166.1    | Ca_kabuli_chr07 | 3216924                 | TT                              | CC              | 1946878998               |
| SNP_P4_90494_3231361 | NC_021166.1    | Ca_kabuli_chr07 | 3231361                 | TT                              | AA              | 1946879000               |
| SNP_P4_90495_3231604 | NC_021166.1    | Ca_kabuli_chr07 | 3231604                 | CC                              | TT              | 1946879002               |
| SNP_P4_90496_3233749 | NC_021166.1    | Ca_kabuli_chr07 | 3233749                 | CC                              | AA              | 1946879003               |
| SNP_P4_90499_3248343 | NC_021166.1    | Ca_kabuli_chr07 | 3248343                 | GG                              | TT              | 1946879005               |
| SNP_P4_90500_3248387 | NC_021166.1    | Ca_kabuli_chr07 | 3248387                 | CC                              | TT              | 1946879007               |
| SNP_P4_90501_3248513 | NC_021166.1    | Ca_kabuli_chr07 | 3248513                 | AA                              | TT              | 1946879009               |
| SNP_P4_90502_3248800 | NC_021166.1    | Ca_kabuli_chr07 | 3248800                 | AA                              | CC              | 1946879011               |
| SNP_P4_90503_3248802 | NC_021166.1    | Ca_kabuli_chr07 | 3248802                 | TT                              | AA              | 1946879013               |
| SNP_P4_90504_3248804 | NC_021166.1    | Ca_kabuli_chr07 | 3248804                 | GG                              | TT              | 1946879015               |
| SNP_P4_90505_3248806 | NC_021166.1    | Ca_kabuli_chr07 | 3248806                 | TT                              | AA              | 1946879017               |

| SNPs IDs             | Chromosome IDs | Chromosomes     | Physical positions (bp) | CDC Frontier (Reference genome) | (ILWC46 & LPNB) | NCBI SNPdb Accession IDs |
|----------------------|----------------|-----------------|-------------------------|---------------------------------|-----------------|--------------------------|
| SNP_P4_90506_3248807 | NC_021166.1    | Ca_kabuli_chr07 | 3248807                 | AA                              | GG              | 1946879019               |
| SNP_P4_90507_3248808 | NC_021166.1    | Ca_kabuli_chr07 | 3248808                 | CC                              | TT              | 1946879021               |
| SNP_P4_90509_3272435 | NC_021166.1    | Ca_kabuli_chr07 | 3272435                 | AA                              | GG              | 1946879023               |
| SNP_P4_90511_3281150 | NC_021166.1    | Ca_kabuli_chr07 | 3281150                 | AA                              | TT              | 1946879025               |
| SNP_P4_90512_3281555 | NC_021166.1    | Ca_kabuli_chr07 | 3281555                 | GG                              | AA              | 1946879027               |
| SNP_P4_90515_3301488 | NC_021166.1    | Ca_kabuli_chr07 | 3301488                 | GG                              | TT              | 1946879029               |
| SNP_P4_90517_3326784 | NC_021166.1    | Ca_kabuli_chr07 | 3326784                 | TT                              | CC              | 1946879031               |
| SNP_P4_90518_3346233 | NC_021166.1    | Ca_kabuli_chr07 | 3346233                 | GG                              | AA              | 1946879033               |
| SNP_P4_90519_3353422 | NC_021166.1    | Ca_kabuli_chr07 | 3353422                 | TT                              | CC              | 1946879035               |
| SNP_P4_90520_3368777 | NC_021166.1    | Ca_kabuli_chr07 | 3368777                 | GG                              | AA              | 1946879037               |
| SNP_P4_90521_3372444 | NC_021166.1    | Ca_kabuli_chr07 | 3372444                 | AA                              | GG              | 1946879039               |
| SNP_P4_90522_3372451 | NC_021166.1    | Ca_kabuli_chr07 | 3372451                 | TT                              | AA              | 1946879041               |
| SNP_P4_90525_3380808 | NC_021166.1    | Ca_kabuli_chr07 | 3380808                 | GG                              | CC              | 1946879043               |
| SNP_P4_90526_3385014 | NC_021166.1    | Ca_kabuli_chr07 | 3385014                 | CC                              | TT              | 1946879045               |
| SNP_P4_90527_3387583 | NC_021166.1    | Ca_kabuli_chr07 | 3387583                 | GG                              | AA              | 1946879047               |
| SNP_P4_90528_3404164 | NC_021166.1    | Ca_kabuli_chr07 | 3404164                 | GG                              | TT              | 1946879049               |
| SNP_P4_90529_3409827 | NC_021166.1    | Ca_kabuli_chr07 | 3409827                 | AA                              | GG              | 1946879051               |
| SNP_P4_90530_3440476 | NC_021166.1    | Ca_kabuli_chr07 | 3440476                 | TT                              | CC              | 1946879053               |
| SNP_P4_90531_3441018 | NC_021166.1    | Ca_kabuli_chr07 | 3441018                 | AA                              | GG              | 1946879055               |
| SNP_P4_90532_3447698 | NC_021166.1    | Ca_kabuli_chr07 | 3447698                 | GG                              | CC              | 1946879057               |
| SNP_P4_90533_3448446 | NC_021166.1    | Ca_kabuli_chr07 | 3448446                 | GG                              | CC              | 1946879059               |
| SNP_P4_90535_3461320 | NC_021166.1    | Ca_kabuli_chr07 | 3461320                 | AA                              | TT              | 1946879061               |
| SNP_P4_90536_3495705 | NC_021166.1    | Ca_kabuli_chr07 | 3495705                 | CC                              | TT              | 1946879063               |
| SNP_P4_90537_3500950 | NC_021166.1    | Ca_kabuli_chr07 | 3500950                 | TT                              | CC              | 1946879065               |
| SNP_P4_90538_3503183 | NC_021166.1    | Ca_kabuli_chr07 | 3503183                 | TT                              | CC              | 1946879067               |
| SNP_P4_90539_3503184 | NC_021166.1    | Ca_kabuli_chr07 | 3503184                 | AA                              | CC              | 1946879069               |
| SNP_P4_90540_3503495 | NC_021166.1    | Ca_kabuli_chr07 | 3503495                 | CC                              | AA              | 1946879071               |
| SNP_P4_90541_3503802 | NC_021166.1    | Ca_kabuli_chr07 | 3503802                 | TT                              | CC              | 1946879073               |
| SNP_P4_90542_3503896 | NC_021166.1    | Ca_kabuli_chr07 | 3503896                 | TT                              | CC              | 1946879075               |
| SNP_P4_90543_3504847 | NC_021166.1    | Ca_kabuli_chr07 | 3504847                 | GG                              | AA              | 1946879077               |
| SNP_P4_90544_3504900 | NC_021166.1    | Ca_kabuli_chr07 | 3504900                 | GG                              | AA              | 1946879079               |
| SNP_P4_90545_3506393 | NC_021166.1    | Ca_kabuli_chr07 | 3506393                 | GG                              | AA              | 1946879081               |
| SNP_P4_90546_3506580 | NC_021166.1    | Ca_kabuli_chr07 | 3506580                 | GG                              | TT              | 1946879083               |
| SNP_P4_90547_3507377 | NC_021166.1    | Ca_kabuli_chr07 | 3507377                 | GG                              | AA              | 1946879085               |
| SNP_P4_90549_3508705 | NC_021166.1    | Ca_kabuli_chr07 | 3508705                 | GG                              | TT              | 1946879086               |
| SNP_P4_90550_3509967 | NC_021166.1    | Ca_kabuli_chr07 | 3509967                 | CC                              | GG              | 1946879088               |
| SNP_P4_90551_3509969 | NC_021166.1    | Ca_kabuli_chr07 | 3509969                 | AA                              | CC              | 1946879090               |
| SNP_P4_90552_3510125 | NC_021166.1    | Ca_kabuli_chr07 | 3510125                 | GG                              | CC              | 1946879092               |
| SNP_P4_90553_3510414 | NC_021166.1    | Ca_kabuli_chr07 | 3510414                 | AA                              | GG              | 1946879094               |
| SNP_P4_90554_3510642 | NC_021166.1    | Ca_kabuli_chr07 | 3510642                 | CC                              | TT              | 1946879096               |
| SNP_P4_90555_3510655 | NC_021166.1    | Ca_kabuli_chr07 | 3510655                 | CC                              | TT              | 1946879098               |
| SNP_P4_90556_3510686 | NC_021166.1    | Ca_kabuli_chr07 | 3510686                 | CC                              | TT              | 1946879100               |



| SNPs IDs             | Chromosome IDs | Chromosomes     | Physical positions (bp) | CDC Frontier (Reference genome) | (ILWC46 & LPNB) | NCBI SNPdb Accession IDs |
|----------------------|----------------|-----------------|-------------------------|---------------------------------|-----------------|--------------------------|
| SNP_P4_90557_3510687 | NC_021166.1    | Ca_kabuli_chr07 | 3510687                 | AA                              | GG              | 1946879102               |
| SNP_P4_90558_3510698 | NC_021166.1    | Ca_kabuli_chr07 | 3510698                 | TT                              | CC              | 1946879103               |
| SNP_P4_90559_3510726 | NC_021166.1    | Ca_kabuli_chr07 | 3510726                 | GG                              | AA              | 1946879105               |
| SNP_P4_90560_3511771 | NC_021166.1    | Ca_kabuli_chr07 | 3511771                 | GG                              | TT              | 1946879107               |
| SNP_P4_90561_3511847 | NC_021166.1    | Ca_kabuli_chr07 | 3511847                 | AA                              | GG              | 1946879109               |
| SNP_P4_90562_3512153 | NC_021166.1    | Ca_kabuli_chr07 | 3512153                 | CC                              | TT              | 1946879111               |
| SNP_P4_90564_3514518 | NC_021166.1    | Ca_kabuli_chr07 | 3514518                 | TT                              | GG              | 1946879113               |
| SNP_P4_90566_3515827 | NC_021166.1    | Ca_kabuli_chr07 | 3515827                 | CC                              | TT              | 1946879115               |
| SNP_P4_90567_3515960 | NC_021166.1    | Ca_kabuli_chr07 | 3515960                 | AA                              | GG              | 1946879117               |
| SNP_P4_90568_3515976 | NC_021166.1    | Ca_kabuli_chr07 | 3515976                 | CC                              | TT              | 1946879119               |
| SNP_P4_90569_3516028 | NC_021166.1    | Ca_kabuli_chr07 | 3516028                 | AA                              | GG              | 1946879120               |
| SNP_P4_90570_3516029 | NC_021166.1    | Ca_kabuli_chr07 | 3516029                 | AA                              | TT              | 1946879122               |
| SNP_P4_90571_3516038 | NC_021166.1    | Ca_kabuli_chr07 | 3516038                 | CC                              | TT              | 1946879124               |
| SNP_P4_90572_3516068 | NC_021166.1    | Ca_kabuli_chr07 | 3516068                 | TT                              | AA              | 1946879126               |
| SNP_P4_90573_3516080 | NC_021166.1    | Ca_kabuli_chr07 | 3516080                 | CC                              | TT              | 1946879128               |
| SNP_P4_90574_3517375 | NC_021166.1    | Ca_kabuli_chr07 | 3517375                 | TT                              | CC              | 1946879130               |
| SNP_P4_90575_3517436 | NC_021166.1    | Ca_kabuli_chr07 | 3517436                 | TT                              | CC              | 1946879132               |
| SNP_P4_90576_3517523 | NC_021166.1    | Ca_kabuli_chr07 | 3517523                 | AA                              | TT              | 1946879134               |
| SNP_P4_90577_3517847 | NC_021166.1    | Ca_kabuli_chr07 | 3517847                 | AA                              | CC              | 1946879136               |
| SNP_P4_90578_3517851 | NC_021166.1    | Ca_kabuli_chr07 | 3517851                 | GG                              | AA              | 1946879138               |
| SNP_P4_90579_3519084 | NC_021166.1    | Ca_kabuli_chr07 | 3519084                 | CC                              | TT              | 1946879140               |
| SNP_P4_90580_3519094 | NC_021166.1    | Ca_kabuli_chr07 | 3519094                 | GG                              | TT              | 1946879142               |
| SNP_P4_90581_3519336 | NC_021166.1    | Ca_kabuli_chr07 | 3519336                 | TT                              | GG              | 1946879144               |
| SNP_P4_90582_3519471 | NC_021166.1    | Ca_kabuli_chr07 | 3519471                 | AA                              | TT              | 1946879146               |
| SNP_P4_90583_3519510 | NC_021166.1    | Ca_kabuli_chr07 | 3519510                 | AA                              | GG              | 1946879148               |
| SNP_P4_90584_3519746 | NC_021166.1    | Ca_kabuli_chr07 | 3519746                 | AA                              | GG              | 1946879150               |
| SNP_P4_90585_3520643 | NC_021166.1    | Ca_kabuli_chr07 | 3520643                 | CC                              | TT              | 1946879152               |
| SNP_P4_90586_3520644 | NC_021166.1    | Ca_kabuli_chr07 | 3520644                 | AA                              | GG              | 1946879154               |
| SNP_P4_90588_3520966 | NC_021166.1    | Ca_kabuli_chr07 | 3520966                 | GG                              | TT              | 1946879156               |
| SNP_P4_90589_3520976 | NC_021166.1    | Ca_kabuli_chr07 | 3520976                 | GG                              | AA              | 1946879158               |
| SNP_P4_90590_3521013 | NC_021166.1    | Ca_kabuli_chr07 | 3521013                 | TT                              | CC              | 1946879160               |
| SNP_P4_90591_3521192 | NC_021166.1    | Ca_kabuli_chr07 | 3521192                 | CC                              | AA              | 1946879162               |
| SNP_P4_90593_3523032 | NC_021166.1    | Ca_kabuli_chr07 | 3523032                 | CC                              | AA              | 1946879164               |
| SNP_P4_90594_3523762 | NC_021166.1    | Ca_kabuli_chr07 | 3523762                 | AA                              | GG              | 1946879166               |
| SNP_P4_90595_3523887 | NC_021166.1    | Ca_kabuli_chr07 | 3523887                 | AA                              | GG              | 1946879168               |
| SNP_P4_90596_3523961 | NC_021166.1    | Ca_kabuli_chr07 | 3523961                 | GG                              | AA              | 1946879170               |
| SNP_P4_90597_3524251 | NC_021166.1    | Ca_kabuli_chr07 | 3524251                 | TT                              | CC              | 1946879172               |
| SNP_P4_90598_3525023 | NC_021166.1    | Ca_kabuli_chr07 | 3525023                 | GG                              | CC              | 1946879174               |
| SNP_P4_90599_3527104 | NC_021166.1    | Ca_kabuli_chr07 | 3527104                 | AA                              | GG              | 1946879176               |
| SNP_P4_90600_3530011 | NC_021166.1    | Ca_kabuli_chr07 | 3530011                 | GG                              | AA              | 1946879178               |
| SNP_P4_90601_3530094 | NC_021166.1    | Ca_kabuli_chr07 | 3530094                 | TT                              | AA              | 1946879180               |
| SNP_P4_90602_3530682 | NC_021166.1    | Ca_kabuli_chr07 | 3530682                 | TT                              | AA              | 1946879182               |

| SNPs IDs             | Chromosome IDs | Chromosomes     | Physical positions (bp) | CDC Frontier (Reference genome) | (ILWC46 & LPNB) | NCBI SNPdb Accession IDs |
|----------------------|----------------|-----------------|-------------------------|---------------------------------|-----------------|--------------------------|
| SNP_P4_90603_3531024 | NC_021166.1    | Ca_kabuli_chr07 | 3531024                 | GG                              | AA              | 1946879184               |
| SNP_P4_90604_3531790 | NC_021166.1    | Ca_kabuli_chr07 | 3531790                 | TT                              | AA              | 1946879186               |
| SNP_P4_90605_3532234 | NC_021166.1    | Ca_kabuli_chr07 | 3532234                 | GG                              | CC              | 1946879187               |
| SNP_P4_90606_3532532 | NC_021166.1    | Ca_kabuli_chr07 | 3532532                 | AA                              | CC              | 1946879189               |
| SNP_P4_90607_3532549 | NC_021166.1    | Ca_kabuli_chr07 | 3532549                 | CC                              | TT              | 1946879191               |
| SNP_P4_90608_3532553 | NC_021166.1    | Ca_kabuli_chr07 | 3532553                 | TT                              | AA              | 1946879193               |
| SNP_P4_90610_3536166 | NC_021166.1    | Ca_kabuli_chr07 | 3536166                 | CC                              | TT              | 1946879195               |
| SNP_P4_90611_3536168 | NC_021166.1    | Ca_kabuli_chr07 | 3536168                 | GG                              | CC              | 1946879197               |
| SNP_P4_90612_3536194 | NC_021166.1    | Ca_kabuli_chr07 | 3536194                 | CC                              | TT              | 1946879199               |
| SNP_P4_90613_3536574 | NC_021166.1    | Ca_kabuli_chr07 | 3536574                 | CC                              | TT              | 1946879200               |
| SNP_P4_90614_3536946 | NC_021166.1    | Ca_kabuli_chr07 | 3536946                 | TT                              | CC              | 1946879202               |
| SNP_P4_90615_3539189 | NC_021166.1    | Ca_kabuli_chr07 | 3539189                 | CC                              | GG              | 1946879204               |
| SNP_P4_90616_3539314 | NC_021166.1    | Ca_kabuli_chr07 | 3539314                 | AA                              | GG              | 1946879206               |
| SNP_P4_90617_3539335 | NC_021166.1    | Ca_kabuli_chr07 | 3539335                 | CC                              | AA              | 1946879208               |
| SNP_P4_90618_3539438 | NC_021166.1    | Ca_kabuli_chr07 | 3539438                 | AA                              | GG              | 1946879210               |
| SNP_P4_90619_3539481 | NC_021166.1    | Ca_kabuli_chr07 | 3539481                 | AA                              | TT              | 1946879212               |
| SNP_P4_90620_3539489 | NC_021166.1    | Ca_kabuli_chr07 | 3539489                 | GG                              | AA              | 1946879214               |
| SNP_P4_90621_3539492 | NC_021166.1    | Ca_kabuli_chr07 | 3539492                 | GG                              | AA              | 1946879216               |
| SNP_P4_90622_3539513 | NC_021166.1    | Ca_kabuli_chr07 | 3539513                 | TT                              | CC              | 1946879218               |
| SNP_P4_90623_3539775 | NC_021166.1    | Ca_kabuli_chr07 | 3539775                 | AA                              | GG              | 1946879220               |
| SNP_P4_90624_3539778 | NC_021166.1    | Ca_kabuli_chr07 | 3539778                 | AA                              | TT              | 1946879222               |
| SNP_P4_90625_3540114 | NC_021166.1    | Ca_kabuli_chr07 | 3540114                 | GG                              | TT              | 1946879224               |
| SNP_P4_90627_3540149 | NC_021166.1    | Ca_kabuli_chr07 | 3540149                 | AA                              | TT              | 1946879226               |
| SNP_P4_90630_3540728 | NC_021166.1    | Ca_kabuli_chr07 | 3540728                 | CC                              | TT              | 1946879227               |
| SNP_P4_90631_3540743 | NC_021166.1    | Ca_kabuli_chr07 | 3540743                 | TT                              | AA              | 1946879229               |
| SNP_P4_90632_3540884 | NC_021166.1    | Ca_kabuli_chr07 | 3540884                 | GG                              | AA              | 1946879231               |
| SNP_P4_90633_3540918 | NC_021166.1    | Ca_kabuli_chr07 | 3540918                 | AA                              | CC              | 1946879233               |
| SNP_P4_90634_3542393 | NC_021166.1    | Ca_kabuli_chr07 | 3542393                 | GG                              | TT              | 1946879235               |
| SNP_P4_90635_3542482 | NC_021166.1    | Ca_kabuli_chr07 | 3542482                 | GG                              | TT              | 1946879237               |
| SNP_P4_90636_3542514 | NC_021166.1    | Ca_kabuli_chr07 | 3542514                 | AA                              | CC              | 1946879238               |
| SNP_P4_90637_3542529 | NC_021166.1    | Ca_kabuli_chr07 | 3542529                 | TT                              | CC              | 1946879239               |
| SNP_P4_90638_3544116 | NC_021166.1    | Ca_kabuli_chr07 | 3544116                 | GG                              | TT              | 1946879240               |
| SNP_P4_90639_3544183 | NC_021166.1    | Ca_kabuli_chr07 | 3544183                 | AA                              | GG              | 1946879241               |
| SNP_P4_90640_3544190 | NC_021166.1    | Ca_kabuli_chr07 | 3544190                 | TT                              | GG              | 1946879242               |
| SNP_P4_90641_3544358 | NC_021166.1    | Ca_kabuli_chr07 | 3544358                 | GG                              | CC              | 1946879243               |
| SNP_P4_90643_3544456 | NC_021166.1    | Ca_kabuli_chr07 | 3544456                 | GG                              | TT              | 1946879244               |
| SNP_P4_90644_3544511 | NC_021166.1    | Ca_kabuli_chr07 | 3544511                 | CC                              | GG              | 1946879245               |
| SNP_P4_90645_3544577 | NC_021166.1    | Ca_kabuli_chr07 | 3544577                 | AA                              | CC              | 1946879246               |
| SNP_P4_90646_3545093 | NC_021166.1    | Ca_kabuli_chr07 | 3545093                 | GG                              | TT              | 1946879247               |
| SNP_P4_90647_3545118 | NC_021166.1    | Ca_kabuli_chr07 | 3545118                 | GG                              | CC              | 1946879248               |
| SNP_P4_90648_3546246 | NC_021166.1    | Ca_kabuli_chr07 | 3546246                 | TT                              | CC              | 1946879250               |
| SNP_P4_90649_3546849 | NC_021166.1    | Ca_kabuli_chr07 | 3546849                 | CC                              | TT              | 1946879252               |

| SNPs IDs             | Chromosome IDs | Chromosomes     | Physical positions (bp) | CDC Frontier (Reference genome) | (ILWC46 & LPNB) | NCBI SNPdb Accession IDs |
|----------------------|----------------|-----------------|-------------------------|---------------------------------|-----------------|--------------------------|
| SNP_P4_90650_3547074 | NC_021166.1    | Ca_kabuli_chr07 | 3547074                 | GG                              | AA              | 1946879254               |
| SNP_P4_90651_3550546 | NC_021166.1    | Ca_kabuli_chr07 | 3550546                 | AA                              | CC              | 1946879256               |
| SNP_P4_90652_3550584 | NC_021166.1    | Ca_kabuli_chr07 | 3550584                 | CC                              | TT              | 1946879258               |
| SNP_P4_90653_3550811 | NC_021166.1    | Ca_kabuli_chr07 | 3550811                 | GG                              | AA              | 1946879260               |
| SNP_P4_90654_3550836 | NC_021166.1    | Ca_kabuli_chr07 | 3550836                 | GG                              | AA              | 1946879262               |
| SNP_P4_90655_3550944 | NC_021166.1    | Ca_kabuli_chr07 | 3550944                 | CC                              | TT              | 1946879264               |
| SNP_P4_90656_3550946 | NC_021166.1    | Ca_kabuli_chr07 | 3550946                 | TT                              | CC              | 1946879266               |
| SNP_P4_90657_3550965 | NC_021166.1    | Ca_kabuli_chr07 | 3550965                 | TT                              | CC              | 1946879268               |
| SNP_P4_90658_3551421 | NC_021166.1    | Ca_kabuli_chr07 | 3551421                 | AA                              | TT              | 1946879270               |
| SNP_P4_90659_3551762 | NC_021166.1    | Ca_kabuli_chr07 | 3551762                 | GG                              | AA              | 1946879272               |
| SNP_P4_90660_3551766 | NC_021166.1    | Ca_kabuli_chr07 | 3551766                 | GG                              | AA              | 1946879274               |
| SNP_P4_90661_3551785 | NC_021166.1    | Ca_kabuli_chr07 | 3551785                 | TT                              | GG              | 1946879276               |
| SNP_P4_90662_3551786 | NC_021166.1    | Ca_kabuli_chr07 | 3551786                 | TT                              | AA              | 1946879278               |
| SNP_P4_90663_3551789 | NC_021166.1    | Ca_kabuli_chr07 | 3551789                 | TT                              | AA              | 1946879280               |
| SNP_P4_90664_3551856 | NC_021166.1    | Ca_kabuli_chr07 | 3551856                 | CC                              | TT              | 1946879282               |
| SNP_P4_90665_3551878 | NC_021166.1    | Ca_kabuli_chr07 | 3551878                 | AA                              | TT              | 1946879284               |
| SNP_P4_90666_3551911 | NC_021166.1    | Ca_kabuli_chr07 | 3551911                 | CC                              | TT              | 1946879286               |
| SNP_P4_90667_3551920 | NC_021166.1    | Ca_kabuli_chr07 | 3551920                 | CC                              | TT              | 1946879288               |
| SNP_P4_90668_3551951 | NC_021166.1    | Ca_kabuli_chr07 | 3551951                 | AA                              | CC              | 1946879290               |
| SNP_P4_90669_3551954 | NC_021166.1    | Ca_kabuli_chr07 | 3551954                 | AA                              | CC              | 1946879292               |
| SNP_P4_90671_3553014 | NC_021166.1    | Ca_kabuli_chr07 | 3553014                 | TT                              | CC              | 1946879294               |
| SNP_P4_90672_3553091 | NC_021166.1    | Ca_kabuli_chr07 | 3553091                 | CC                              | TT              | 1946879296               |
| SNP_P4_90673_3553326 | NC_021166.1    | Ca_kabuli_chr07 | 3553326                 | TT                              | GG              | 1946879298               |
| SNP_P4_90675_3553357 | NC_021166.1    | Ca_kabuli_chr07 | 3553357                 | TT                              | CC              | 1946879300               |
| SNP_P4_90676_3554567 | NC_021166.1    | Ca_kabuli_chr07 | 3554567                 | CC                              | AA              | 1946879301               |
| SNP_P4_90677_3556801 | NC_021166.1    | Ca_kabuli_chr07 | 3556801                 | TT                              | CC              | 1946879303               |
| SNP_P4_90678_3558443 | NC_021166.1    | Ca_kabuli_chr07 | 3558443                 | AA                              | GG              | 1946879305               |
| SNP_P4_90679_3560423 | NC_021166.1    | Ca_kabuli_chr07 | 3560423                 | GG                              | CC              | 1946879307               |
| SNP_P4_90680_3563520 | NC_021166.1    | Ca_kabuli_chr07 | 3563520                 | AA                              | GG              | 1946879309               |
| SNP_P4_90681_3563528 | NC_021166.1    | Ca_kabuli_chr07 | 3563528                 | TT                              | GG              | 1946879311               |
| SNP_P4_90682_3563531 | NC_021166.1    | Ca_kabuli_chr07 | 3563531                 | AA                              | TT              | 1946879313               |
| SNP_P4_90683_3565261 | NC_021166.1    | Ca_kabuli_chr07 | 3565261                 | AA                              | CC              | 1946879315               |
| SNP_P4_90684_3565269 | NC_021166.1    | Ca_kabuli_chr07 | 3565269                 | AA                              | GG              | 1946879317               |
| SNP_P4_90685_3566132 | NC_021166.1    | Ca_kabuli_chr07 | 3566132                 | TT                              | GG              | 1946879319               |
| SNP_P4_90686_3567816 | NC_021166.1    | Ca_kabuli_chr07 | 3567816                 | AA                              | GG              | 1946879321               |
| SNP_P4_90688_3567911 | NC_021166.1    | Ca_kabuli_chr07 | 3567911                 | CC                              | TT              | 1946879323               |
| SNP_P4_90689_3569432 | NC_021166.1    | Ca_kabuli_chr07 | 3569432                 | GG                              | AA              | 1946879325               |
| SNP_P4_90692_3571787 | NC_021166.1    | Ca_kabuli_chr07 | 3571787                 | GG                              | AA              | 1946879327               |
| SNP_P4_90694_3572058 | NC_021166.1    | Ca_kabuli_chr07 | 3572058                 | TT                              | CC              | 1946879329               |
| SNP_P4_90695_3575574 | NC_021166.1    | Ca_kabuli_chr07 | 3575574                 | GG                              | TT              | 1946879331               |
| SNP_P4_90696_3577101 | NC_021166.1    | Ca_kabuli_chr07 | 3577101                 | CC                              | AA              | 1946879334               |
| SNP_P4_90697_3577144 | NC_021166.1    | Ca_kabuli_chr07 | 3577144                 | CC                              | GG              | 1946879336               |

| SNPs IDs             | Chromosome IDs | Chromosomes     | Physical positions (bp) | CDC Frontier (Reference genome) | (ILWC46 & LPNB) | NCBI SNPdb Accession IDs |
|----------------------|----------------|-----------------|-------------------------|---------------------------------|-----------------|--------------------------|
| SNP_P4_90698_3577976 | NC_021166.1    | Ca_kabuli_chr07 | 3577976                 | GG                              | CC              | 1946879338               |
| SNP_P4_90699_3578018 | NC_021166.1    | Ca_kabuli_chr07 | 3578018                 | TT                              | CC              | 1946879340               |
| SNP_P4_90700_3579780 | NC_021166.1    | Ca_kabuli_chr07 | 3579780                 | TT                              | GG              | 1946879342               |
| SNP_P4_90701_3580090 | NC_021166.1    | Ca_kabuli_chr07 | 3580090                 | CC                              | TT              | 1946879344               |
| SNP_P4_90702_3580147 | NC_021166.1    | Ca_kabuli_chr07 | 3580147                 | AA                              | TT              | 1946879346               |
| SNP_P4_90704_3580431 | NC_021166.1    | Ca_kabuli_chr07 | 3580431                 | CC                              | TT              | 1946879348               |
| SNP_P4_90705_3580487 | NC_021166.1    | Ca_kabuli_chr07 | 3580487                 | TT                              | CC              | 1946879350               |
| SNP_P4_90707_3581533 | NC_021166.1    | Ca_kabuli_chr07 | 3581533                 | CC                              | GG              | 1946879352               |
| SNP_P4_90709_3582862 | NC_021166.1    | Ca_kabuli_chr07 | 3582862                 | GG                              | AA              | 1946879354               |
| SNP_P4_90711_3583058 | NC_021166.1    | Ca_kabuli_chr07 | 3583058                 | CC                              | TT              | 1946879356               |
| SNP_P4_90712_3583932 | NC_021166.1    | Ca_kabuli_chr07 | 3583932                 | GG                              | AA              | 1946879358               |
| SNP_P4_90713_3585994 | NC_021166.1    | Ca_kabuli_chr07 | 3585994                 | AA                              | GG              | 1946879360               |
| SNP_P4_90714_3586433 | NC_021166.1    | Ca_kabuli_chr07 | 3586433                 | CC                              | TT              | 1946879362               |
| SNP_P4_90715_3587323 | NC_021166.1    | Ca_kabuli_chr07 | 3587323                 | TT                              | GG              | 1946879364               |
| SNP_P4_90716_3587974 | NC_021166.1    | Ca_kabuli_chr07 | 3587974                 | AA                              | GG              | 1946879366               |
| SNP_P4_90719_3588479 | NC_021166.1    | Ca_kabuli_chr07 | 3588479                 | AA                              | TT              | 1946879368               |
| SNP_P4_90720_3589129 | NC_021166.1    | Ca_kabuli_chr07 | 3589129                 | TT                              | CC              | 1946879463               |
| SNP_P4_90721_3590196 | NC_021166.1    | Ca_kabuli_chr07 | 3590196                 | TT                              | GG              | 1946879465               |
| SNP_P4_90722_3590713 | NC_021166.1    | Ca_kabuli_chr07 | 3590713                 | AA                              | CC              | 1946879467               |
| SNP_P4_90723_3592870 | NC_021166.1    | Ca_kabuli_chr07 | 3592870                 | CC                              | AA              | 1946879469               |
| SNP_P4_90725_3593800 | NC_021166.1    | Ca_kabuli_chr07 | 3593800                 | GG                              | AA              | 1946879471               |
| SNP_P4_90726_3594282 | NC_021166.1    | Ca_kabuli_chr07 | 3594282                 | TT                              | CC              | 1946879473               |
| SNP_P4_90727_3594699 | NC_021166.1    | Ca_kabuli_chr07 | 3594699                 | AA                              | TT              | 1946879475               |
| SNP_P4_90728_3595935 | NC_021166.1    | Ca_kabuli_chr07 | 3595935                 | TT                              | CC              | 1946879477               |
| SNP_P4_90729_3596676 | NC_021166.1    | Ca_kabuli_chr07 | 3596676                 | CC                              | AA              | 1946879479               |
| SNP_P4_90730_3598926 | NC_021166.1    | Ca_kabuli_chr07 | 3598926                 | GG                              | AA              | 1946879482               |
| SNP_P4_90732_3599352 | NC_021166.1    | Ca_kabuli_chr07 | 3599352                 | CC                              | TT              | 1946879484               |
| SNP_P4_90733_3599379 | NC_021166.1    | Ca_kabuli_chr07 | 3599379                 | TT                              | CC              | 1946879486               |
| SNP_P4_90734_3599709 | NC_021166.1    | Ca_kabuli_chr07 | 3599709                 | AA                              | CC              | 1946879488               |
| SNP_P4_90735_3599947 | NC_021166.1    | Ca_kabuli_chr07 | 3599947                 | GG                              | CC              | 1946879490               |
| SNP_P4_90736_3600016 | NC_021166.1    | Ca_kabuli_chr07 | 3600016                 | TT                              | AA              | 1946879492               |
| SNP_P4_90737_3601454 | NC_021166.1    | Ca_kabuli_chr07 | 3601454                 | CC                              | GG              | 1946879494               |
| SNP_P4_90738_3601804 | NC_021166.1    | Ca_kabuli_chr07 | 3601804                 | GG                              | AA              | 1946879496               |
| SNP_P4_90739_3601818 | NC_021166.1    | Ca_kabuli_chr07 | 3601818                 | GG                              | AA              | 1946879498               |
| SNP_P4_90740_3601870 | NC_021166.1    | Ca_kabuli_chr07 | 3601870                 | TT                              | AA              | 1946879500               |
| SNP_P4_90741_3601982 | NC_021166.1    | Ca_kabuli_chr07 | 3601982                 | TT                              | CC              | 1946879502               |
| SNP_P4_90742_3602270 | NC_021166.1    | Ca_kabuli_chr07 | 3602270                 | CC                              | TT              | 1946879504               |
| SNP_P4_90743_3603986 | NC_021166.1    | Ca_kabuli_chr07 | 3603986                 | TT                              | AA              | 1946879506               |
| SNP_P4_90744_3603988 | NC_021166.1    | Ca_kabuli_chr07 | 3603988                 | TT                              | AA              | 1946879508               |
| SNP_P4_90745_3603998 | NC_021166.1    | Ca_kabuli_chr07 | 3603998                 | GG                              | AA              | 1946879510               |
| SNP_P4_90746_3604018 | NC_021166.1    | Ca_kabuli_chr07 | 3604018                 | TT                              | CC              | 1946879512               |
| SNP_P4_90747_3604157 | NC_021166.1    | Ca_kabuli_chr07 | 3604157                 | GG                              | CC              | 1946879514               |

| SNPs IDs             | Chromosome IDs | Chromosomes     | Physical positions (bp) | CDC Frontier (Reference genome) | (ILWC46 & LPNB) | NCBI SNPdb Accession IDs |
|----------------------|----------------|-----------------|-------------------------|---------------------------------|-----------------|--------------------------|
| SNP_P4_90748_3604178 | NC_021166.1    | Ca_kabuli_chr07 | 3604178                 | AA                              | GG              | 1946879516               |
| SNP_P4_90749_3604179 | NC_021166.1    | Ca_kabuli_chr07 | 3604179                 | GG                              | AA              | 1946879518               |
| SNP_P4_90750_3604194 | NC_021166.1    | Ca_kabuli_chr07 | 3604194                 | TT                              | GG              | 1946879521               |
| SNP_P4_90751_3604197 | NC_021166.1    | Ca_kabuli_chr07 | 3604197                 | CC                              | TT              | 1946879523               |
| SNP_P4_90752_3604243 | NC_021166.1    | Ca_kabuli_chr07 | 3604243                 | GG                              | AA              | 1946879525               |
| SNP_P4_90753_3604321 | NC_021166.1    | Ca_kabuli_chr07 | 3604321                 | TT                              | CC              | 1946879527               |
| SNP_P4_90754_3604727 | NC_021166.1    | Ca_kabuli_chr07 | 3604727                 | CC                              | TT              | 1946879529               |
| SNP_P4_90755_3605024 | NC_021166.1    | Ca_kabuli_chr07 | 3605024                 | AA                              | GG              | 1946879531               |
| SNP_P4_90756_3605174 | NC_021166.1    | Ca_kabuli_chr07 | 3605174                 | AA                              | GG              | 1946879533               |
| SNP_P4_90757_3605260 | NC_021166.1    | Ca_kabuli_chr07 | 3605260                 | AA                              | TT              | 1946879535               |
| SNP_P4_90758_3606679 | NC_021166.1    | Ca_kabuli_chr07 | 3606679                 | CC                              | TT              | 1946879537               |
| SNP_P4_90759_3607738 | NC_021166.1    | Ca_kabuli_chr07 | 3607738                 | CC                              | TT              | 1946879539               |
| SNP_P4_90760_3607740 | NC_021166.1    | Ca_kabuli_chr07 | 3607740                 | CC                              | GG              | 1946879541               |
| SNP_P4_90761_3607796 | NC_021166.1    | Ca_kabuli_chr07 | 3607796                 | AA                              | TT              | 1946879543               |
| SNP_P4_90762_3608131 | NC_021166.1    | Ca_kabuli_chr07 | 3608131                 | TT                              | AA              | 1946879545               |
| SNP_P4_90765_3608427 | NC_021166.1    | Ca_kabuli_chr07 | 3608427                 | AA                              | CC              | 1946879547               |
| SNP_P4_90766_3608522 | NC_021166.1    | Ca_kabuli_chr07 | 3608522                 | GG                              | CC              | 1946879549               |
| SNP_P4_90767_3608546 | NC_021166.1    | Ca_kabuli_chr07 | 3608546                 | CC                              | TT              | 1946879551               |
| SNP_P4_90768_3608589 | NC_021166.1    | Ca_kabuli_chr07 | 3608589                 | CC                              | GG              | 1946879553               |
| SNP_P4_90769_3608858 | NC_021166.1    | Ca_kabuli_chr07 | 3608858                 | TT                              | CC              | 1946879555               |
| SNP_P4_90770_3608914 | NC_021166.1    | Ca_kabuli_chr07 | 3608914                 | CC                              | GG              | 1946879557               |
| SNP_P4_90772_3609437 | NC_021166.1    | Ca_kabuli_chr07 | 3609437                 | GG                              | AA              | 1946879559               |
| SNP_P4_90773_3610314 | NC_021166.1    | Ca_kabuli_chr07 | 3610314                 | AA                              | GG              | 1946879561               |
| SNP_P4_90775_3611253 | NC_021166.1    | Ca_kabuli_chr07 | 3611253                 | AA                              | GG              | 1946879563               |
| SNP_P4_90776_3611542 | NC_021166.1    | Ca_kabuli_chr07 | 3611542                 | AA                              | GG              | 1946879565               |
| SNP_P4_90777_3611942 | NC_021166.1    | Ca_kabuli_chr07 | 3611942                 | TT                              | CC              | 1946879567               |
| SNP_P4_90778_3612205 | NC_021166.1    | Ca_kabuli_chr07 | 3612205                 | AA                              | GG              | 1946879569               |
| SNP_P4_90779_3612412 | NC_021166.1    | Ca_kabuli_chr07 | 3612412                 | AA                              | CC              | 1946879571               |
| SNP_P4_90780_3612426 | NC_021166.1    | Ca_kabuli_chr07 | 3612426                 | GG                              | CC              | 1946879573               |
| SNP_P4_90781_3612432 | NC_021166.1    | Ca_kabuli_chr07 | 3612432                 | GG                              | AA              | 1946879575               |
| SNP_P4_90782_3612435 | NC_021166.1    | Ca_kabuli_chr07 | 3612435                 | AA                              | TT              | 1946879577               |
| SNP_P4_90783_3612471 | NC_021166.1    | Ca_kabuli_chr07 | 3612471                 | AA                              | GG              | 1946879579               |
| SNP_P4_90784_3612582 | NC_021166.1    | Ca_kabuli_chr07 | 3612582                 | GG                              | AA              | 1946879581               |
| SNP_P4_90786_3612825 | NC_021166.1    | Ca_kabuli_chr07 | 3612825                 | AA                              | TT              | 1946879583               |
| SNP_P4_90787_3612954 | NC_021166.1    | Ca_kabuli_chr07 | 3612954                 | AA                              | GG              | 1946879585               |
| SNP_P4_90789_3613014 | NC_021166.1    | Ca_kabuli_chr07 | 3613014                 | GG                              | CC              | 1946879586               |
| SNP_P4_90791_3613300 | NC_021166.1    | Ca_kabuli_chr07 | 3613300                 | TT                              | AA              | 1946879588               |
| SNP_P4_90792_3613399 | NC_021166.1    | Ca_kabuli_chr07 | 3613399                 | AA                              | GG              | 1946879590               |
| SNP_P4_90793_3613455 | NC_021166.1    | Ca_kabuli_chr07 | 3613455                 | GG                              | AA              | 1946879593               |
| SNP_P4_90794_3613582 | NC_021166.1    | Ca_kabuli_chr07 | 3613582                 | GG                              | TT              | 1946879595               |
| SNP_P4_90797_3614338 | NC_021166.1    | Ca_kabuli_chr07 | 3614338                 | CC                              | AA              | 1946879597               |
| SNP_P4_90798_3614474 | NC_021166.1    | Ca_kabuli_chr07 | 3614474                 | GG                              | TT              | 1946879599               |

| SNPs IDs             | Chromosome IDs | Chromosomes     | Physical positions (bp) | CDC Frontier (Reference genome) | (ILWC46 & LPNB) | NCBI SNPdb Accession IDs |
|----------------------|----------------|-----------------|-------------------------|---------------------------------|-----------------|--------------------------|
| SNP_P4_90799_3614476 | NC_021166.1    | Ca_kabuli_chr07 | 3614476                 | AA                              | GG              | 1946879601               |
| SNP_P4_90800_3614966 | NC_021166.1    | Ca_kabuli_chr07 | 3614966                 | CC                              | GG              | 1946879603               |
| SNP_P4_90801_3614998 | NC_021166.1    | Ca_kabuli_chr07 | 3614998                 | AA                              | GG              | 1946879605               |
| SNP_P4_90802_3615111 | NC_021166.1    | Ca_kabuli_chr07 | 3615111                 | GG                              | CC              | 1946879607               |
| SNP_P4_90803_3615240 | NC_021166.1    | Ca_kabuli_chr07 | 3615240                 | AA                              | GG              | 1946879609               |
| SNP_P4_90804_3615304 | NC_021166.1    | Ca_kabuli_chr07 | 3615304                 | AA                              | CC              | 1946879611               |
| SNP_P4_90805_3615378 | NC_021166.1    | Ca_kabuli_chr07 | 3615378                 | CC                              | AA              | 1946879613               |
| SNP_P4_90806_3615574 | NC_021166.1    | Ca_kabuli_chr07 | 3615574                 | TT                              | AA              | 1946879615               |
| SNP_P4_90807_3615632 | NC_021166.1    | Ca_kabuli_chr07 | 3615632                 | AA                              | GG              | 1946879617               |
| SNP_P4_90808_3615642 | NC_021166.1    | Ca_kabuli_chr07 | 3615642                 | TT                              | CC              | 1946879619               |
| SNP_P4_90809_3615938 | NC_021166.1    | Ca_kabuli_chr07 | 3615938                 | AA                              | GG              | 1946879620               |
| SNP_P4_90810_3616131 | NC_021166.1    | Ca_kabuli_chr07 | 3616131                 | CC                              | TT              | 1946879622               |
| SNP_P4_90811_3616145 | NC_021166.1    | Ca_kabuli_chr07 | 3616145                 | TT                              | GG              | 1946879624               |
| SNP_P4_90812_3616275 | NC_021166.1    | Ca_kabuli_chr07 | 3616275                 | CC                              | TT              | 1946879626               |
| SNP_P4_90813_3616415 | NC_021166.1    | Ca_kabuli_chr07 | 3616415                 | CC                              | GG              | 1946879628               |
| SNP_P4_90814_3616758 | NC_021166.1    | Ca_kabuli_chr07 | 3616758                 | GG                              | AA              | 1946879630               |
| SNP_P4_90815_3617367 | NC_021166.1    | Ca_kabuli_chr07 | 3617367                 | AA                              | TT              | 1946879632               |
| SNP_P4_90817_3618166 | NC_021166.1    | Ca_kabuli_chr07 | 3618166                 | TT                              | CC              | 1946879634               |
| SNP_P4_90818_3618170 | NC_021166.1    | Ca_kabuli_chr07 | 3618170                 | GG                              | AA              | 1946879636               |
| SNP_P4_90819_3618242 | NC_021166.1    | Ca_kabuli_chr07 | 3618242                 | TT                              | CC              | 1946879638               |
| SNP_P4_90820_3618278 | NC_021166.1    | Ca_kabuli_chr07 | 3618278                 | TT                              | CC              | 1946879640               |
| SNP_P4_90821_3618310 | NC_021166.1    | Ca_kabuli_chr07 | 3618310                 | GG                              | AA              | 1946879642               |
| SNP_P4_90822_3618702 | NC_021166.1    | Ca_kabuli_chr07 | 3618702                 | TT                              | CC              | 1946879643               |
| SNP_P4_90823_3618839 | NC_021166.1    | Ca_kabuli_chr07 | 3618839                 | TT                              | GG              | 1946879645               |
| SNP_P4_90824_3619792 | NC_021166.1    | Ca_kabuli_chr07 | 3619792                 | TT                              | GG              | 1946879647               |
| SNP_P4_90825_3620593 | NC_021166.1    | Ca_kabuli_chr07 | 3620593                 | AA                              | CC              | 1946879649               |
| SNP_P4_90827_3621075 | NC_021166.1    | Ca_kabuli_chr07 | 3621075                 | CC                              | TT              | 1946879651               |
| SNP_P4_90828_3621102 | NC_021166.1    | Ca_kabuli_chr07 | 3621102                 | TT                              | CC              | 1946879653               |
| SNP_P4_90829_3621274 | NC_021166.1    | Ca_kabuli_chr07 | 3621274                 | TT                              | CC              | 1946879655               |
| SNP_P4_90831_3621451 | NC_021166.1    | Ca_kabuli_chr07 | 3621451                 | TT                              | CC              | 1946879657               |
| SNP_P4_90832_3621482 | NC_021166.1    | Ca_kabuli_chr07 | 3621482                 | CC                              | AA              | 1946879659               |
| SNP_P4_90833_3621529 | NC_021166.1    | Ca_kabuli_chr07 | 3621529                 | CC                              | TT              | 1946879661               |
| SNP_P4_90836_3622175 | NC_021166.1    | Ca_kabuli_chr07 | 3622175                 | TT                              | AA              | 1946879663               |
| SNP_P4_90837_3622237 | NC_021166.1    | Ca_kabuli_chr07 | 3622237                 | AA                              | GG              | 1946879665               |
| SNP_P4_90838_3622346 | NC_021166.1    | Ca_kabuli_chr07 | 3622346                 | TT                              | CC              | 1946879667               |
| SNP_P4_90839_3622509 | NC_021166.1    | Ca_kabuli_chr07 | 3622509                 | CC                              | TT              | 1946879669               |
| SNP_P4_90840_3622511 | NC_021166.1    | Ca_kabuli_chr07 | 3622511                 | AA                              | TT              | 1946879671               |
| SNP_P4_90842_3622687 | NC_021166.1    | Ca_kabuli_chr07 | 3622687                 | TT                              | AA              | 1946879673               |
| SNP_P4_90843_3622766 | NC_021166.1    | Ca_kabuli_chr07 | 3622766                 | GG                              | AA              | 1946879675               |
| SNP_P4_90845_3622962 | NC_021166.1    | Ca_kabuli_chr07 | 3622962                 | GG                              | AA              | 1946879677               |
| SNP_P4_90846_3624928 | NC_021166.1    | Ca_kabuli_chr07 | 3624928                 | TT                              | AA              | 1946879679               |
| SNP_P4_90847_3626303 | NC_021166.1    | Ca_kabuli_chr07 | 3626303                 | TT                              | AA              | 1946879681               |

| SNPs IDs             | Chromosome IDs | Chromosomes     | Physical positions (bp) | CDC Frontier (Reference genome) | (ILWC46 & LPNB) | NCBI SNPdb Accession IDs |
|----------------------|----------------|-----------------|-------------------------|---------------------------------|-----------------|--------------------------|
| SNP_P4_90849_3629987 | NC_021166.1    | Ca_kabuli_chr07 | 3629987                 | AA                              | GG              | 1946879683               |
| SNP_P4_90850_3630219 | NC_021166.1    | Ca_kabuli_chr07 | 3630219                 | GG                              | AA              | 1946879685               |
| SNP_P4_90851_3631107 | NC_021166.1    | Ca_kabuli_chr07 | 3631107                 | CC                              | GG              | 1946879687               |
| SNP_P4_90852_3631661 | NC_021166.1    | Ca_kabuli_chr07 | 3631661                 | TT                              | GG              | 1946879690               |
| SNP_P4_90853_3631945 | NC_021166.1    | Ca_kabuli_chr07 | 3631945                 | GG                              | AA              | 1946879692               |
| SNP_P4_90855_3632930 | NC_021166.1    | Ca_kabuli_chr07 | 3632930                 | GG                              | CC              | 1946879694               |
| SNP_P4_90856_3633555 | NC_021166.1    | Ca_kabuli_chr07 | 3633555                 | GG                              | TT              | 1946879696               |
| SNP_P4_90857_3633679 | NC_021166.1    | Ca_kabuli_chr07 | 3633679                 | AA                              | GG              | 1946879698               |
| SNP_P4_90858_3633912 | NC_021166.1    | Ca_kabuli_chr07 | 3633912                 | TT                              | CC              | 1946879700               |
| SNP_P4_90859_3635713 | NC_021166.1    | Ca_kabuli_chr07 | 3635713                 | GG                              | TT              | 1946879702               |
| SNP_P4_90860_3637802 | NC_021166.1    | Ca_kabuli_chr07 | 3637802                 | GG                              | AA              | 1946879704               |
| SNP_P4_90861_3638391 | NC_021166.1    | Ca_kabuli_chr07 | 3638391                 | TT                              | CC              | 1946879706               |
| SNP_P4_90864_3639525 | NC_021166.1    | Ca_kabuli_chr07 | 3639525                 | TT                              | CC              | 1946879708               |
| SNP_P4_90865_3639550 | NC_021166.1    | Ca_kabuli_chr07 | 3639550                 | TT                              | CC              | 1946879710               |
| SNP_P4_90866_3640541 | NC_021166.1    | Ca_kabuli_chr07 | 3640541                 | TT                              | AA              | 1946879712               |
| SNP_P4_90867_3641534 | NC_021166.1    | Ca_kabuli_chr07 | 3641534                 | TT                              | AA              | 1946879714               |
| SNP_P4_90869_3643417 | NC_021166.1    | Ca_kabuli_chr07 | 3643417                 | CC                              | TT              | 1946879716               |
| SNP_P4_90870_3643528 | NC_021166.1    | Ca_kabuli_chr07 | 3643528                 | AA                              | GG              | 1946879718               |
| SNP_P4_90871_3643534 | NC_021166.1    | Ca_kabuli_chr07 | 3643534                 | GG                              | TT              | 1946879721               |
| SNP_P4_90872_3644241 | NC_021166.1    | Ca_kabuli_chr07 | 3644241                 | TT                              | CC              | 1946879723               |
| SNP_P4_90873_3644590 | NC_021166.1    | Ca_kabuli_chr07 | 3644590                 | TT                              | CC              | 1946879725               |
| SNP_P4_90874_3646320 | NC_021166.1    | Ca_kabuli_chr07 | 3646320                 | CC                              | TT              | 1946879727               |
| SNP_P4_90875_3648179 | NC_021166.1    | Ca_kabuli_chr07 | 3648179                 | TT                              | CC              | 1946879729               |
| SNP_P4_90876_3648183 | NC_021166.1    | Ca_kabuli_chr07 | 3648183                 | TT                              | CC              | 1946879731               |
| SNP_P4_90877_3648184 | NC_021166.1    | Ca_kabuli_chr07 | 3648184                 | GG                              | AA              | 1946879733               |
| SNP_P4_90878_3648194 | NC_021166.1    | Ca_kabuli_chr07 | 3648194                 | AA                              | GG              | 1946879735               |
| SNP_P4_90879_3648232 | NC_021166.1    | Ca_kabuli_chr07 | 3648232                 | AA                              | GG              | 1946879737               |
| SNP_P4_90880_3648234 | NC_021166.1    | Ca_kabuli_chr07 | 3648234                 | TT                              | CC              | 1946879739               |
| SNP_P4_90881_3648237 | NC_021166.1    | Ca_kabuli_chr07 | 3648237                 | TT                              | CC              | 1946879741               |
| SNP_P4_90882_3648253 | NC_021166.1    | Ca_kabuli_chr07 | 3648253                 | AA                              | GG              | 1946879743               |
| SNP_P4_90883_3648259 | NC_021166.1    | Ca_kabuli_chr07 | 3648259                 | TT                              | CC              | 1946879745               |
| SNP_P4_90884_3648262 | NC_021166.1    | Ca_kabuli_chr07 | 3648262                 | TT                              | CC              | 1946879747               |
| SNP_P4_90885_3648266 | NC_021166.1    | Ca_kabuli_chr07 | 3648266                 | GG                              | AA              | 1946879749               |
| SNP_P4_90886_3648269 | NC_021166.1    | Ca_kabuli_chr07 | 3648269                 | GG                              | AA              | 1946879751               |
| SNP_P4_90887_3648469 | NC_021166.1    | Ca_kabuli_chr07 | 3648469                 | AA                              | CC              | 1946879754               |
| SNP_P4_90888_3649013 | NC_021166.1    | Ca_kabuli_chr07 | 3649013                 | TT                              | CC              | 1946879756               |
| SNP_P4_90890_3650612 | NC_021166.1    | Ca_kabuli_chr07 | 3650612                 | TT                              | CC              | 1946879758               |
| SNP_P4_90891_3650667 | NC_021166.1    | Ca_kabuli_chr07 | 3650667                 | TT                              | GG              | 1946879759               |
| SNP_P4_90892_3650840 | NC_021166.1    | Ca_kabuli_chr07 | 3650840                 | TT                              | CC              | 1946879760               |
| SNP_P4_90893_3650855 | NC_021166.1    | Ca_kabuli_chr07 | 3650855                 | AA                              | GG              | 1946879761               |
| SNP_P4_90894_3651051 | NC_021166.1    | Ca_kabuli_chr07 | 3651051                 | TT                              | CC              | 1946879762               |
| SNP_P4_90895_3652399 | NC_021166.1    | Ca_kabuli_chr07 | 3652399                 | GG                              | AA              | 1946879763               |

| SNPs IDs             | Chromosome IDs | Chromosomes     | Physical positions (bp) | CDC Frontier (Reference genome) | (ILWC46 & LPNB) | NCBI SNPdb Accession IDs |
|----------------------|----------------|-----------------|-------------------------|---------------------------------|-----------------|--------------------------|
| SNP_P4_90896_3652753 | NC_021166.1    | Ca_kabuli_chr07 | 3652753                 | GG                              | AA              | 1946879764               |
| SNP_P4_90898_3654516 | NC_021166.1    | Ca_kabuli_chr07 | 3654516                 | TT                              | CC              | 1946879766               |
| SNP_P4_90900_3654907 | NC_021166.1    | Ca_kabuli_chr07 | 3654907                 | TT                              | AA              | 1946879768               |
| SNP_P4_90901_3654914 | NC_021166.1    | Ca_kabuli_chr07 | 3654914                 | GG                              | AA              | 1946879770               |
| SNP_P4_90902_3655218 | NC_021166.1    | Ca_kabuli_chr07 | 3655218                 | AA                              | TT              | 1946879772               |
| SNP_P4_90903_3655225 | NC_021166.1    | Ca_kabuli_chr07 | 3655225                 | GG                              | AA              | 1946879774               |
| SNP_P4_90904_3655278 | NC_021166.1    | Ca_kabuli_chr07 | 3655278                 | GG                              | TT              | 1946879776               |
| SNP_P4_90905_3655304 | NC_021166.1    | Ca_kabuli_chr07 | 3655304                 | TT                              | CC              | 1946879778               |
| SNP_P4_90906_3656594 | NC_021166.1    | Ca_kabuli_chr07 | 3656594                 | GG                              | AA              | 1946879780               |
| SNP_P4_90907_3658356 | NC_021166.1    | Ca_kabuli_chr07 | 3658356                 | TT                              | AA              | 1946879782               |
| SNP_P4_90908_3659759 | NC_021166.1    | Ca_kabuli_chr07 | 3659759                 | AA                              | GG              | 1946879784               |
| SNP_P4_90909_3662033 | NC_021166.1    | Ca_kabuli_chr07 | 3662033                 | CC                              | TT              | 1946879786               |
| SNP_P4_90910_3663817 | NC_021166.1    | Ca_kabuli_chr07 | 3663817                 | TT                              | AA              | 1946879788               |
| SNP_P4_90911_3663855 | NC_021166.1    | Ca_kabuli_chr07 | 3663855                 | TT                              | CC              | 1946879790               |
| SNP_P4_90912_3665344 | NC_021166.1    | Ca_kabuli_chr07 | 3665344                 | TT                              | CC              | 1946879792               |
| SNP_P4_90913_3665445 | NC_021166.1    | Ca_kabuli_chr07 | 3665445                 | AA                              | GG              | 1946879794               |
| SNP_P4_90914_3665915 | NC_021166.1    | Ca_kabuli_chr07 | 3665915                 | CC                              | AA              | 1946879796               |
| SNP_P4_90915_3666818 | NC_021166.1    | Ca_kabuli_chr07 | 3666818                 | AA                              | CC              | 1946879798               |
| SNP_P4_90916_3668142 | NC_021166.1    | Ca_kabuli_chr07 | 3668142                 | TT                              | GG              | 1946879800               |
| SNP_P4_90918_3669315 | NC_021166.1    | Ca_kabuli_chr07 | 3669315                 | TT                              | CC              | 1946879802               |
| SNP_P4_90919_3669665 | NC_021166.1    | Ca_kabuli_chr07 | 3669665                 | TT                              | CC              | 1946879805               |
| SNP_P4_90920_3670183 | NC_021166.1    | Ca_kabuli_chr07 | 3670183                 | AA                              | TT              | 1946879807               |
| SNP_P4_90922_3670779 | NC_021166.1    | Ca_kabuli_chr07 | 3670779                 | TT                              | CC              | 1946879809               |
| SNP_P4_90923_3670964 | NC_021166.1    | Ca_kabuli_chr07 | 3670964                 | TT                              | AA              | 1946879811               |
| SNP_P4_90924_3671055 | NC_021166.1    | Ca_kabuli_chr07 | 3671055                 | CC                              | TT              | 1946879813               |
| SNP_P4_90925_3671092 | NC_021166.1    | Ca_kabuli_chr07 | 3671092                 | TT                              | CC              | 1946879815               |
| SNP_P4_90926_3671095 | NC_021166.1    | Ca_kabuli_chr07 | 3671095                 | AA                              | GG              | 1946879817               |
| SNP_P4_90927_3671846 | NC_021166.1    | Ca_kabuli_chr07 | 3671846                 | CC                              | TT              | 1946879819               |
| SNP_P4_90929_3672192 | NC_021166.1    | Ca_kabuli_chr07 | 3672192                 | TT                              | CC              | 1946879821               |
| SNP_P4_90930_3672944 | NC_021166.1    | Ca_kabuli_chr07 | 3672944                 | GG                              | AA              | 1946879823               |
| SNP_P4_90931_3673197 | NC_021166.1    | Ca_kabuli_chr07 | 3673197                 | TT                              | GG              | 1946879825               |
| SNP_P4_90932_3674075 | NC_021166.1    | Ca_kabuli_chr07 | 3674075                 | AA                              | GG              | 1946879827               |
| SNP_P4_90933_3674133 | NC_021166.1    | Ca_kabuli_chr07 | 3674133                 | TT                              | CC              | 1946879829               |
| SNP_P4_90934_3674396 | NC_021166.1    | Ca_kabuli_chr07 | 3674396                 | TT                              | GG              | 1946879831               |
| SNP_P4_90935_3675539 | NC_021166.1    | Ca_kabuli_chr07 | 3675539                 | AA                              | GG              | 1946879833               |
| SNP_P4_90936_3675615 | NC_021166.1    | Ca_kabuli_chr07 | 3675615                 | GG                              | AA              | 1946879835               |
| SNP_P4_90937_3676807 | NC_021166.1    | Ca_kabuli_chr07 | 3676807                 | AA                              | TT              | 1946879837               |
| SNP_P4_90938_3676808 | NC_021166.1    | Ca_kabuli_chr07 | 3676808                 | TT                              | AA              | 1946879839               |
| SNP_P4_90940_3677457 | NC_021166.1    | Ca_kabuli_chr07 | 3677457                 | GG                              | AA              | 1946879841               |
| SNP_P4_90941_3677839 | NC_021166.1    | Ca_kabuli_chr07 | 3677839                 | AA                              | GG              | 1946879843               |
| SNP_P4_90942_3678793 | NC_021166.1    | Ca_kabuli_chr07 | 3678793                 | TT                              | CC              | 1946879845               |
| SNP_P4_90943_3678797 | NC_021166.1    | Ca_kabuli_chr07 | 3678797                 | AA                              | GG              | 1946879847               |



| SNPs IDs             | Chromosome IDs | Chromosomes     | Physical positions (bp) | CDC Frontier (Reference genome) | (ILWC46 & LPNB) | NCBI SNPdb Accession IDs |
|----------------------|----------------|-----------------|-------------------------|---------------------------------|-----------------|--------------------------|
| SNP_P4_90944_3678972 | NC_021166.1    | Ca_kabuli_chr07 | 3678972                 | CC                              | AA              | 1946879849               |
| SNP_P4_90945_3679001 | NC_021166.1    | Ca_kabuli_chr07 | 3679001                 | GG                              | AA              | 1946879851               |
| SNP_P4_90946_3679084 | NC_021166.1    | Ca_kabuli_chr07 | 3679084                 | GG                              | AA              | 1946879853               |
| SNP_P4_90947_3679217 | NC_021166.1    | Ca_kabuli_chr07 | 3679217                 | TT                              | CC              | 1946879855               |
| SNP_P4_90948_3679222 | NC_021166.1    | Ca_kabuli_chr07 | 3679222                 | TT                              | CC              | 1946879857               |
| SNP_P4_90949_3682059 | NC_021166.1    | Ca_kabuli_chr07 | 3682059                 | TT                              | GG              | 1946879859               |
| SNP_P4_90951_3682258 | NC_021166.1    | Ca_kabuli_chr07 | 3682258                 | TT                              | CC              | 1946879861               |
| SNP_P4_90952_3682345 | NC_021166.1    | Ca_kabuli_chr07 | 3682345                 | AA                              | GG              | 1946879863               |
| SNP_P4_90953_3682751 | NC_021166.1    | Ca_kabuli_chr07 | 3682751                 | CC                              | TT              | 1946879865               |
| SNP_P4_90954_3682764 | NC_021166.1    | Ca_kabuli_chr07 | 3682764                 | AA                              | GG              | 1946879867               |
| SNP_P4_90955_3682792 | NC_021166.1    | Ca_kabuli_chr07 | 3682792                 | AA                              | CC              | 1946879869               |
| SNP_P4_90957_3683054 | NC_021166.1    | Ca_kabuli_chr07 | 3683054                 | CC                              | AA              | 1946879871               |
| SNP_P4_90959_3683327 | NC_021166.1    | Ca_kabuli_chr07 | 3683327                 | TT                              | CC              | 1946879873               |
| SNP_P4_90960_3683683 | NC_021166.1    | Ca_kabuli_chr07 | 3683683                 | TT                              | CC              | 1946879875               |
| SNP_P4_90964_3684725 | NC_021166.1    | Ca_kabuli_chr07 | 3684725                 | CC                              | TT              | 1946879877               |
| SNP_P4_90965_3684742 | NC_021166.1    | Ca_kabuli_chr07 | 3684742                 | CC                              | TT              | 1946879879               |
| SNP_P4_90967_3685040 | NC_021166.1    | Ca_kabuli_chr07 | 3685040                 | TT                              | AA              | 1946879881               |
| SNP_P4_90968_3685041 | NC_021166.1    | Ca_kabuli_chr07 | 3685041                 | AA                              | TT              | 1946879882               |
| SNP_P4_90970_3685111 | NC_021166.1    | Ca_kabuli_chr07 | 3685111                 | AA                              | TT              | 1946879884               |
| SNP_P4_90971_3686716 | NC_021166.1    | Ca_kabuli_chr07 | 3686716                 | CC                              | TT              | 1946879886               |
| SNP_P4_90972_3686763 | NC_021166.1    | Ca_kabuli_chr07 | 3686763                 | AA                              | TT              | 1946879888               |
| SNP_P4_90973_3686776 | NC_021166.1    | Ca_kabuli_chr07 | 3686776                 | CC                              | AA              | 1946879891               |
| SNP_P4_90974_3686787 | NC_021166.1    | Ca_kabuli_chr07 | 3686787                 | TT                              | CC              | 1946879893               |
| SNP_P4_90975_3686792 | NC_021166.1    | Ca_kabuli_chr07 | 3686792                 | CC                              | TT              | 1946879895               |
| SNP_P4_90976_3686999 | NC_021166.1    | Ca_kabuli_chr07 | 3686999                 | CC                              | TT              | 1946879897               |
| SNP_P4_90977_3687028 | NC_021166.1    | Ca_kabuli_chr07 | 3687028                 | AA                              | GG              | 1946879899               |
| SNP_P4_90979_3687144 | NC_021166.1    | Ca_kabuli_chr07 | 3687144                 | TT                              | GG              | 1946879901               |
| SNP_P4_90980_3687147 | NC_021166.1    | Ca_kabuli_chr07 | 3687147                 | TT                              | CC              | 1946879903               |
| SNP_P4_90981_3688909 | NC_021166.1    | Ca_kabuli_chr07 | 3688909                 | CC                              | TT              | 1946879905               |
| SNP_P4_90984_3689269 | NC_021166.1    | Ca_kabuli_chr07 | 3689269                 | TT                              | AA              | 1946879907               |
| SNP_P4_90985_3689297 | NC_021166.1    | Ca_kabuli_chr07 | 3689297                 | GG                              | TT              | 1946879909               |
| SNP_P4_90987_3689581 | NC_021166.1    | Ca_kabuli_chr07 | 3689581                 | CC                              | AA              | 1946879911               |
| SNP_P4_90988_3689590 | NC_021166.1    | Ca_kabuli_chr07 | 3689590                 | GG                              | AA              | 1946879913               |
| SNP_P4_90989_3689667 | NC_021166.1    | Ca_kabuli_chr07 | 3689667                 | TT                              | AA              | 1946879915               |
| SNP_P4_90991_3690098 | NC_021166.1    | Ca_kabuli_chr07 | 3690098                 | CC                              | AA              | 1946879917               |
| SNP_P4_90992_3690114 | NC_021166.1    | Ca_kabuli_chr07 | 3690114                 | GG                              | TT              | 1946879919               |
| SNP_P4_90993_3690142 | NC_021166.1    | Ca_kabuli_chr07 | 3690142                 | TT                              | CC              | 1946879921               |
| SNP_P4_90994_3690917 | NC_021166.1    | Ca_kabuli_chr07 | 3690917                 | CC                              | GG              | 1946879923               |
| SNP_P4_90995_3690921 | NC_021166.1    | Ca_kabuli_chr07 | 3690921                 | TT                              | CC              | 1946879925               |
| SNP_P4_90996_3691425 | NC_021166.1    | Ca_kabuli_chr07 | 3691425                 | AA                              | TT              | 1946879927               |
| SNP_P4_90997_3691426 | NC_021166.1    | Ca_kabuli_chr07 | 3691426                 | TT                              | GG              | 1946879929               |
| SNP_P4_90998_3691441 | NC_021166.1    | Ca_kabuli_chr07 | 3691441                 | CC                              | TT              | 1946879931               |

| SNPs IDs             | Chromosome IDs | Chromosomes     | Physical positions (bp) | CDC Frontier (Reference genome) | (ILWC46 & LPNB) | NCBI SNPdb Accession IDs |
|----------------------|----------------|-----------------|-------------------------|---------------------------------|-----------------|--------------------------|
| SNP_P4_90999_3691470 | NC_021166.1    | Ca_kabuli_chr07 | 3691470                 | GG                              | TT              | 1946879933               |
| SNP_P4_91000_3694084 | NC_021166.1    | Ca_kabuli_chr07 | 3694084                 | TT                              | AA              | 1946879935               |
| SNP_P4_91001_3695446 | NC_021166.1    | Ca_kabuli_chr07 | 3695446                 | GG                              | AA              | 1946879937               |
| SNP_P4_91003_3712898 | NC_021166.1    | Ca_kabuli_chr07 | 3712898                 | AA                              | TT              | 1946879939               |
| SNP_P4_91004_3721492 | NC_021166.1    | Ca_kabuli_chr07 | 3721492                 | TT                              | CC              | 1946879941               |
| SNP_P4_91005_3721866 | NC_021166.1    | Ca_kabuli_chr07 | 3721866                 | AA                              | GG              | 1946879943               |
| SNP_P4_91006_3731853 | NC_021166.1    | Ca_kabuli_chr07 | 3731853                 | GG                              | CC              | 1946879945               |
| SNP_P4_91009_3755133 | NC_021166.1    | Ca_kabuli_chr07 | 3755133                 | TT                              | CC              | 1946879947               |
| SNP_P4_91010_3772068 | NC_021166.1    | Ca_kabuli_chr07 | 3772068                 | TT                              | CC              | 1946879949               |
| SNP_P4_91011_3779212 | NC_021166.1    | Ca_kabuli_chr07 | 3779212                 | TT                              | AA              | 1946879951               |
| SNP_P4_91012_3779213 | NC_021166.1    | Ca_kabuli_chr07 | 3779213                 | TT                              | AA              | 1946879953               |
| SNP_P4_91015_3836581 | NC_021166.1    | Ca_kabuli_chr07 | 3836581                 | TT                              | CC              | 1946879955               |
| SNP_P4_91016_3843855 | NC_021166.1    | Ca_kabuli_chr07 | 3843855                 | CC                              | TT              | 1946879957               |
| SNP_P4_91017_3848017 | NC_021166.1    | Ca_kabuli_chr07 | 3848017                 | GG                              | AA              | 1946879959               |
| SNP_P4_91018_3885197 | NC_021166.1    | Ca_kabuli_chr07 | 3885197                 | AA                              | TT              | 1946879961               |
| SNP_P4_91019_3902770 | NC_021166.1    | Ca_kabuli_chr07 | 3902770                 | CC                              | TT              | 1946879963               |
| SNP_P4_91021_3915201 | NC_021166.1    | Ca_kabuli_chr07 | 3915201                 | GG                              | TT              | 1946879965               |
| SNP_P4_91024_3976545 | NC_021166.1    | Ca_kabuli_chr07 | 3976545                 | GG                              | AA              | 1946879967               |
| SNP_P4_91025_3977186 | NC_021166.1    | Ca_kabuli_chr07 | 3977186                 | CC                              | TT              | 1946879969               |
| SNP_P4_91026_3992139 | NC_021166.1    | Ca_kabuli_chr07 | 3992139                 | AA                              | GG              | 1946879971               |
| SNP_P4_91027_4012081 | NC_021166.1    | Ca_kabuli_chr07 | 4012081                 | GG                              | CC              | 1946879973               |
| SNP_P4_91028_4026427 | NC_021166.1    | Ca_kabuli_chr07 | 4026427                 | CC                              | TT              | 1946879975               |
| SNP_P4_91029_4032224 | NC_021166.1    | Ca_kabuli_chr07 | 4032224                 | AA                              | GG              | 1946879977               |
| SNP_P4_91030_4032251 | NC_021166.1    | Ca_kabuli_chr07 | 4032251                 | AA                              | GG              | 1946879979               |
| SNP_P4_91031_4091509 | NC_021166.1    | Ca_kabuli_chr07 | 4091509                 | CC                              | TT              | 1946879981               |
| SNP_P4_91032_4091585 | NC_021166.1    | Ca_kabuli_chr07 | 4091585                 | TT                              | CC              | 1946879983               |
| SNP_P4_91033_4091622 | NC_021166.1    | Ca_kabuli_chr07 | 4091622                 | AA                              | CC              | 1946879985               |
| SNP_P4_91034_4091624 | NC_021166.1    | Ca_kabuli_chr07 | 4091624                 | AA                              | TT              | 1946879987               |
| SNP_P4_91035_4091631 | NC_021166.1    | Ca_kabuli_chr07 | 4091631                 | AA                              | GG              | 1946879989               |
| SNP_P4_91036_4091647 | NC_021166.1    | Ca_kabuli_chr07 | 4091647                 | AA                              | GG              | 1946879991               |
| SNP_P4_91037_4091673 | NC_021166.1    | Ca_kabuli_chr07 | 4091673                 | TT                              | CC              | 1946879994               |
| SNP_P4_91038_4092122 | NC_021166.1    | Ca_kabuli_chr07 | 4092122                 | GG                              | CC              | 1946879996               |
| SNP_P4_91039_4109085 | NC_021166.1    | Ca_kabuli_chr07 | 4109085                 | AA                              | CC              | 1946879998               |
| SNP_P4_91040_4109087 | NC_021166.1    | Ca_kabuli_chr07 | 4109087                 | AA                              | CC              | 1946880000               |
| SNP_P4_91043_4127083 | NC_021166.1    | Ca_kabuli_chr07 | 4127083                 | AA                              | TT              | 1946880002               |
| SNP_P4_91044_4161166 | NC_021166.1    | Ca_kabuli_chr07 | 4161166                 | AA                              | TT              | 1946880004               |
| SNP_P4_91045_4192522 | NC_021166.1    | Ca_kabuli_chr07 | 4192522                 | AA                              | GG              | 1946880006               |
| SNP_P4_91046_4211825 | NC_021166.1    | Ca_kabuli_chr07 | 4211825                 | TT                              | CC              | 1946880008               |
| SNP_P4_91047_4223579 | NC_021166.1    | Ca_kabuli_chr07 | 4223579                 | CC                              | TT              | 1946880010               |
| SNP_P4_91049_4224881 | NC_021166.1    | Ca_kabuli_chr07 | 4224881                 | CC                              | TT              | 1946880012               |
| SNP_P4_91050_4225016 | NC_021166.1    | Ca_kabuli_chr07 | 4225016                 | TT                              | CC              | 1946880014               |
| SNP_P4_91051_4225306 | NC_021166.1    | Ca_kabuli_chr07 | 4225306                 | CC                              | TT              | 1946880016               |

| SNPs IDs             | Chromosome IDs | Chromosomes     | Physical positions (bp) | CDC Frontier (Reference genome) | (ILWC46 & LPNB) | NCBI SNPdb Accession IDs |
|----------------------|----------------|-----------------|-------------------------|---------------------------------|-----------------|--------------------------|
| SNP_P4_91054_4258809 | NC_021166.1    | Ca_kabuli_chr07 | 4258809                 | TT                              | AA              | 1946880018               |
| SNP_P4_91057_4348939 | NC_021166.1    | Ca_kabuli_chr07 | 4348939                 | GG                              | AA              | 1946880020               |
| SNP_P4_91060_4396763 | NC_021166.1    | Ca_kabuli_chr07 | 4396763                 | AA                              | GG              | 1946880023               |
| SNP_P4_91061_4405186 | NC_021166.1    | Ca_kabuli_chr07 | 4405186                 | TT                              | GG              | 1946880025               |
| SNP_P4_91062_4405193 | NC_021166.1    | Ca_kabuli_chr07 | 4405193                 | AA                              | TT              | 1946880027               |
| SNP_P4_91063_4407746 | NC_021166.1    | Ca_kabuli_chr07 | 4407746                 | CC                              | AA              | 1946880029               |
| SNP_P4_91064_4411515 | NC_021166.1    | Ca_kabuli_chr07 | 4411515                 | AA                              | CC              | 1946880031               |
| SNP_P4_91065_4412829 | NC_021166.1    | Ca_kabuli_chr07 | 4412829                 | GG                              | AA              | 1946880033               |
| SNP_P4_91066_4412835 | NC_021166.1    | Ca_kabuli_chr07 | 4412835                 | TT                              | CC              | 1946880035               |
| SNP_P4_91068_4415889 | NC_021166.1    | Ca_kabuli_chr07 | 4415889                 | AA                              | GG              | 1946880037               |
| SNP_P4_91069_4417766 | NC_021166.1    | Ca_kabuli_chr07 | 4417766                 | AA                              | CC              | 1946880039               |
| SNP_P4_91070_4417786 | NC_021166.1    | Ca_kabuli_chr07 | 4417786                 | AA                              | GG              | 1946880041               |
| SNP_P4_91071_4417809 | NC_021166.1    | Ca_kabuli_chr07 | 4417809                 | AA                              | GG              | 1946880043               |
| SNP_P4_91072_4417932 | NC_021166.1    | Ca_kabuli_chr07 | 4417932                 | GG                              | CC              | 1946880045               |
| SNP_P4_91073_4417940 | NC_021166.1    | Ca_kabuli_chr07 | 4417940                 | CC                              | TT              | 1946880047               |
| SNP_P4_91074_4418072 | NC_021166.1    | Ca_kabuli_chr07 | 4418072                 | AA                              | GG              | 1946880049               |
| SNP_P4_91075_4418083 | NC_021166.1    | Ca_kabuli_chr07 | 4418083                 | TT                              | AA              | 1946880051               |
| SNP_P4_91076_4418090 | NC_021166.1    | Ca_kabuli_chr07 | 4418090                 | AA                              | GG              | 1946880053               |
| SNP_P4_91077_4418103 | NC_021166.1    | Ca_kabuli_chr07 | 4418103                 | AA                              | CC              | 1946880055               |
| SNP_P4_91079_4422920 | NC_021166.1    | Ca_kabuli_chr07 | 4422920                 | GG                              | TT              | 1946880057               |
| SNP_P4_91083_4450153 | NC_021166.1    | Ca_kabuli_chr07 | 4450153                 | GG                              | TT              | 1946880059               |
| SNP_P4_91084_4450154 | NC_021166.1    | Ca_kabuli_chr07 | 4450154                 | AA                              | TT              | 1946880061               |
| SNP_P4_91086_4450309 | NC_021166.1    | Ca_kabuli_chr07 | 4450309                 | GG                              | TT              | 1946880063               |
| SNP_P4_91087_4450467 | NC_021166.1    | Ca_kabuli_chr07 | 4450467                 | AA                              | GG              | 1946880065               |
| SNP_P4_91088_4452999 | NC_021166.1    | Ca_kabuli_chr07 | 4452999                 | GG                              | TT              | 1946880067               |
| SNP_P4_91089_4453052 | NC_021166.1    | Ca_kabuli_chr07 | 4453052                 | AA                              | GG              | 1946880069               |
| SNP_P4_91091_4501678 | NC_021166.1    | Ca_kabuli_chr07 | 4501678                 | CC                              | TT              | 1946880071               |
| SNP_P4_91093_4534453 | NC_021166.1    | Ca_kabuli_chr07 | 4534453                 | CC                              | GG              | 1946880073               |
| SNP_P4_91094_4534501 | NC_021166.1    | Ca_kabuli_chr07 | 4534501                 | CC                              | TT              | 1946880075               |
| SNP_P4_91095_4534521 | NC_021166.1    | Ca_kabuli_chr07 | 4534521                 | TT                              | GG              | 1946880077               |
| SNP_P4_91096_4534562 | NC_021166.1    | Ca_kabuli_chr07 | 4534562                 | TT                              | AA              | 1946880080               |
| SNP_P4_91097_4537954 | NC_021166.1    | Ca_kabuli_chr07 | 4537954                 | GG                              | AA              | 1946880082               |
| SNP_P4_91098_4559876 | NC_021166.1    | Ca_kabuli_chr07 | 4559876                 | TT                              | CC              | 1946880084               |
| SNP_P4_91100_4564019 | NC_021166.1    | Ca_kabuli_chr07 | 4564019                 | CC                              | TT              | 1946880086               |
| SNP_P4_91101_4567373 | NC_021166.1    | Ca_kabuli_chr07 | 4567373                 | CC                              | TT              | 1946880088               |
| SNP_P4_91103_4606218 | NC_021166.1    | Ca_kabuli_chr07 | 4606218                 | CC                              | AA              | 1946880090               |
| SNP_P4_91106_4646043 | NC_021166.1    | Ca_kabuli_chr07 | 4646043                 | TT                              | CC              | 1946880092               |
| SNP_P4_91109_4664419 | NC_021166.1    | Ca_kabuli_chr07 | 4664419                 | TT                              | AA              | 1946880094               |
| SNP_P4_91112_4694320 | NC_021166.1    | Ca_kabuli_chr07 | 4694320                 | CC                              | AA              | 1946880096               |
| SNP_P4_91113_4710476 | NC_021166.1    | Ca_kabuli_chr07 | 4710476                 | AA                              | GG              | 1946880098               |
| SNP_P4_91114_4719064 | NC_021166.1    | Ca_kabuli_chr07 | 4719064                 | TT                              | CC              | 1946880100               |
| SNP_P4_91115_4755216 | NC_021166.1    | Ca_kabuli_chr07 | 4755216                 | CC                              | AA              | 1946880102               |

| SNPs IDs             | Chromosome IDs | Chromosomes     | Physical positions (bp) | CDC Frontier (Reference genome) | (ILWC46 & LPNB) | NCBI SNPdb Accession IDs |
|----------------------|----------------|-----------------|-------------------------|---------------------------------|-----------------|--------------------------|
| SNP_P4_91116_4764441 | NC_021166.1    | Ca_kabuli_chr07 | 4764441                 | CC                              | TT              | 1946880104               |
| SNP_P4_91118_4790871 | NC_021166.1    | Ca_kabuli_chr07 | 4790871                 | AA                              | GG              | 1946880106               |
| SNP_P4_91119_4795115 | NC_021166.1    | Ca_kabuli_chr07 | 4795115                 | AA                              | TT              | 1946880108               |
| SNP_P4_91120_4799389 | NC_021166.1    | Ca_kabuli_chr07 | 4799389                 | CC                              | TT              | 1946880110               |
| SNP_P4_91122_4883504 | NC_021166.1    | Ca_kabuli_chr07 | 4883504                 | GG                              | AA              | 1946880112               |
| SNP_P4_91124_4908502 | NC_021166.1    | Ca_kabuli_chr07 | 4908502                 | AA                              | GG              | 1946880200               |
| SNP_P4_91125_4908505 | NC_021166.1    | Ca_kabuli_chr07 | 4908505                 | AA                              | CC              | 1946880203               |
| SNP_P4_91126_4914130 | NC_021166.1    | Ca_kabuli_chr07 | 4914130                 | TT                              | GG              | 1946880205               |
| SNP_P4_91127_4915246 | NC_021166.1    | Ca_kabuli_chr07 | 4915246                 | TT                              | GG              | 1946880207               |
| SNP_P4_91128_4924418 | NC_021166.1    | Ca_kabuli_chr07 | 4924418                 | GG                              | AA              | 1946880209               |
| SNP_P4_91129_4925338 | NC_021166.1    | Ca_kabuli_chr07 | 4925338                 | TT                              | CC              | 1946880211               |
| SNP_P4_91130_4927138 | NC_021166.1    | Ca_kabuli_chr07 | 4927138                 | GG                              | AA              | 1946880213               |
| SNP_P4_91131_4927408 | NC_021166.1    | Ca_kabuli_chr07 | 4927408                 | AA                              | GG              | 1946880215               |
| SNP_P4_91132_4928825 | NC_021166.1    | Ca_kabuli_chr07 | 4928825                 | AA                              | GG              | 1946880217               |
| SNP_P4_91133_4928854 | NC_021166.1    | Ca_kabuli_chr07 | 4928854                 | CC                              | AA              | 1946880220               |
| SNP_P4_91134_4953972 | NC_021166.1    | Ca_kabuli_chr07 | 4953972                 | CC                              | TT              | 1946880221               |
| SNP_P4_91135_4973142 | NC_021166.1    | Ca_kabuli_chr07 | 4973142                 | TT                              | CC              | 1946880223               |
| SNP_P4_91136_4973183 | NC_021166.1    | Ca_kabuli_chr07 | 4973183                 | CC                              | TT              | 1946880225               |
| SNP_P4_91137_4973768 | NC_021166.1    | Ca_kabuli_chr07 | 4973768                 | TT                              | AA              | 1946880227               |
| SNP_P4_91138_4973779 | NC_021166.1    | Ca_kabuli_chr07 | 4973779                 | AA                              | CC              | 1946880229               |
| SNP_P4_91140_4974115 | NC_021166.1    | Ca_kabuli_chr07 | 4974115                 | GG                              | AA              | 1946880231               |
| SNP_P4_91141_4977601 | NC_021166.1    | Ca_kabuli_chr07 | 4977601                 | GG                              | AA              | 1946880233               |
| SNP_P4_91142_4986509 | NC_021166.1    | Ca_kabuli_chr07 | 4986509                 | AA                              | GG              | 1946880235               |
| SNP_P4_91143_4989877 | NC_021166.1    | Ca_kabuli_chr07 | 4989877                 | CC                              | TT              | 1946880237               |
| SNP_P4_91144_4994680 | NC_021166.1    | Ca_kabuli_chr07 | 4994680                 | GG                              | AA              | 1946880239               |
| SNP_P4_91145_5001255 | NC_021166.1    | Ca_kabuli_chr07 | 5001255                 | TT                              | CC              | 1946880241               |
| SNP_P4_91146_5002226 | NC_021166.1    | Ca_kabuli_chr07 | 5002226                 | AA                              | CC              | 1946880243               |
| SNP_P4_91147_5002253 | NC_021166.1    | Ca_kabuli_chr07 | 5002253                 | TT                              | CC              | 1946880245               |
| SNP_P4_91148_5009196 | NC_021166.1    | Ca_kabuli_chr07 | 5009196                 | GG                              | TT              | 1946880247               |
| SNP_P4_91149_5009451 | NC_021166.1    | Ca_kabuli_chr07 | 5009451                 | CC                              | TT              | 1946880249               |
| SNP_P4_91151_5010230 | NC_021166.1    | Ca_kabuli_chr07 | 5010230                 | AA                              | GG              | 1946880251               |
| SNP_P4_91152_5010265 | NC_021166.1    | Ca_kabuli_chr07 | 5010265                 | AA                              | GG              | 1946880253               |
| SNP_P4_91153_5010658 | NC_021166.1    | Ca_kabuli_chr07 | 5010658                 | GG                              | TT              | 1946880255               |
| SNP_P4_91156_5016197 | NC_021166.1    | Ca_kabuli_chr07 | 5016197                 | GG                              | AA              | 1946880257               |
| SNP_P4_91157_5018159 | NC_021166.1    | Ca_kabuli_chr07 | 5018159                 | AA                              | CC              | 1946880259               |
| SNP_P4_91158_5024388 | NC_021166.1    | Ca_kabuli_chr07 | 5024388                 | TT                              | CC              | 1946880261               |
| SNP_P4_91159_5025967 | NC_021166.1    | Ca_kabuli_chr07 | 5025967                 | AA                              | CC              | 1946880263               |
| SNP_P4_91160_5026069 | NC_021166.1    | Ca_kabuli_chr07 | 5026069                 | GG                              | TT              | 1946880265               |
| SNP_P4_91162_5026371 | NC_021166.1    | Ca_kabuli_chr07 | 5026371                 | GG                              | AA              | 1946880267               |
| SNP_P4_91163_5026372 | NC_021166.1    | Ca_kabuli_chr07 | 5026372                 | GG                              | TT              | 1946880269               |
| SNP_P4_91164_5028206 | NC_021166.1    | Ca_kabuli_chr07 | 5028206                 | CC                              | TT              | 1946880271               |
| SNP_P4_91165_5028892 | NC_021166.1    | Ca_kabuli_chr07 | 5028892                 | TT                              | AA              | 1946880273               |

| SNPs IDs             | Chromosome IDs | Chromosomes     | Physical positions (bp) | CDC Frontier (Reference genome) | (ILWC46 & LPNB) | NCBI SNPdb Accession IDs |
|----------------------|----------------|-----------------|-------------------------|---------------------------------|-----------------|--------------------------|
| SNP_P4_91168_5031310 | NC_021166.1    | Ca_kabuli_chr07 | 5031310                 | CC                              | AA              | 1946880275               |
| SNP_P4_91170_5039520 | NC_021166.1    | Ca_kabuli_chr07 | 5039520                 | AA                              | CC              | 1946880276               |
| SNP_P4_91171_5040534 | NC_021166.1    | Ca_kabuli_chr07 | 5040534                 | CC                              | TT              | 1946880278               |
| SNP_P4_91172_5042316 | NC_021166.1    | Ca_kabuli_chr07 | 5042316                 | AA                              | GG              | 1946880280               |
| SNP_P4_91173_5042850 | NC_021166.1    | Ca_kabuli_chr07 | 5042850                 | CC                              | TT              | 1946880282               |
| SNP_P4_91175_5047064 | NC_021166.1    | Ca_kabuli_chr07 | 5047064                 | TT                              | CC              | 1946880285               |
| SNP_P4_91176_5051530 | NC_021166.1    | Ca_kabuli_chr07 | 5051530                 | TT                              | CC              | 1946880286               |
| SNP_P4_91177_5053564 | NC_021166.1    | Ca_kabuli_chr07 | 5053564                 | TT                              | CC              | 1946880288               |
| SNP_P4_91178_5053658 | NC_021166.1    | Ca_kabuli_chr07 | 5053658                 | CC                              | TT              | 1946880290               |
| SNP_P4_91179_5053695 | NC_021166.1    | Ca_kabuli_chr07 | 5053695                 | TT                              | GG              | 1946880292               |
| SNP_P4_91180_5053815 | NC_021166.1    | Ca_kabuli_chr07 | 5053815                 | GG                              | TT              | 1946880294               |
| SNP_P4_91181_5073989 | NC_021166.1    | Ca_kabuli_chr07 | 5073989                 | AA                              | GG              | 1946880296               |
| SNP_P4_91182_5076200 | NC_021166.1    | Ca_kabuli_chr07 | 5076200                 | TT                              | CC              | 1946880299               |
| SNP_P4_91184_5076962 | NC_021166.1    | Ca_kabuli_chr07 | 5076962                 | AA                              | GG              | 1946880301               |
| SNP_P4_91185_5078047 | NC_021166.1    | Ca_kabuli_chr07 | 5078047                 | GG                              | AA              | 1946880303               |
| SNP_P4_91187_5081665 | NC_021166.1    | Ca_kabuli_chr07 | 5081665                 | AA                              | GG              | 1946880305               |
| SNP_P4_91189_5082316 | NC_021166.1    | Ca_kabuli_chr07 | 5082316                 | AA                              | GG              | 1946880306               |
| SNP_P4_91190_5084300 | NC_021166.1    | Ca_kabuli_chr07 | 5084300                 | TT                              | CC              | 1946880308               |
| SNP_P4_91191_5084834 | NC_021166.1    | Ca_kabuli_chr07 | 5084834                 | TT                              | AA              | 1946880310               |
| SNP_P4_91192_5089091 | NC_021166.1    | Ca_kabuli_chr07 | 5089091                 | AA                              | TT              | 1946880312               |
| SNP_P4_91193_5089820 | NC_021166.1    | Ca_kabuli_chr07 | 5089820                 | TT                              | CC              | 1946880314               |
| SNP_P4_91194_5091817 | NC_021166.1    | Ca_kabuli_chr07 | 5091817                 | AA                              | GG              | 1946880316               |
| SNP_P4_91195_5093248 | NC_021166.1    | Ca_kabuli_chr07 | 5093248                 | AA                              | GG              | 1946880318               |
| SNP_P4_91196_5095856 | NC_021166.1    | Ca_kabuli_chr07 | 5095856                 | GG                              | AA              | 1946880320               |
| SNP_P4_91197_5106353 | NC_021166.1    | Ca_kabuli_chr07 | 5106353                 | CC                              | GG              | 1946880322               |
| SNP_P4_91198_5118909 | NC_021166.1    | Ca_kabuli_chr07 | 5118909                 | AA                              | CC              | 1946880324               |
| SNP_P4_91199_5121743 | NC_021166.1    | Ca_kabuli_chr07 | 5121743                 | GG                              | CC              | 1946880326               |
| SNP_P4_91200_5127699 | NC_021166.1    | Ca_kabuli_chr07 | 5127699                 | GG                              | AA              | 1946880328               |
| SNP_P4_91201_5132923 | NC_021166.1    | Ca_kabuli_chr07 | 5132923                 | CC                              | AA              | 1946880329               |
| SNP_P4_91203_5137232 | NC_021166.1    | Ca_kabuli_chr07 | 5137232                 | AA                              | CC              | 1946880331               |
| SNP_P4_91204_5140331 | NC_021166.1    | Ca_kabuli_chr07 | 5140331                 | CC                              | TT              | 1946880333               |
| SNP_P4_91205_5140579 | NC_021166.1    | Ca_kabuli_chr07 | 5140579                 | TT                              | CC              | 1946880335               |
| SNP_P4_91206_5143462 | NC_021166.1    | Ca_kabuli_chr07 | 5143462                 | AA                              | TT              | 1946880337               |
| SNP_P4_91207_5143656 | NC_021166.1    | Ca_kabuli_chr07 | 5143656                 | CC                              | TT              | 1946880339               |
| SNP_P4_91208_5144787 | NC_021166.1    | Ca_kabuli_chr07 | 5144787                 | AA                              | GG              | 1946880341               |
| SNP_P4_91209_5144803 | NC_021166.1    | Ca_kabuli_chr07 | 5144803                 | AA                              | GG              | 1946880343               |
| SNP_P4_91210_5150004 | NC_021166.1    | Ca_kabuli_chr07 | 5150004                 | GG                              | TT              | 1946880345               |
| SNP_P4_91211_5152976 | NC_021166.1    | Ca_kabuli_chr07 | 5152976                 | GG                              | AA              | 1946880347               |
| SNP_P4_91213_5157784 | NC_021166.1    | Ca_kabuli_chr07 | 5157784                 | CC                              | AA              | 1946880348               |
| SNP_P4_91214_5159477 | NC_021166.1    | Ca_kabuli_chr07 | 5159477                 | TT                              | GG              | 1946880350               |
| SNP_P4_91215_5169193 | NC_021166.1    | Ca_kabuli_chr07 | 5169193                 | CC                              | TT              | 1946880352               |
| SNP_P4_91216_5169223 | NC_021166.1    | Ca_kabuli_chr07 | 5169223                 | TT                              | CC              | 1946880354               |

| SNPs IDs             | Chromosome IDs | Chromosomes     | Physical positions (bp) | CDC Frontier (Reference genome) | (ILWC46 & LPNB) | NCBI SNPdb Accession IDs |
|----------------------|----------------|-----------------|-------------------------|---------------------------------|-----------------|--------------------------|
| SNP_P4_91217_5174279 | NC_021166.1    | Ca_kabuli_chr07 | 5174279                 | AA                              | TT              | 1946880356               |
| SNP_P4_91218_5177956 | NC_021166.1    | Ca_kabuli_chr07 | 5177956                 | AA                              | CC              | 1946880358               |
| SNP_P4_91219_5178127 | NC_021166.1    | Ca_kabuli_chr07 | 5178127                 | GG                              | AA              | 1946880360               |
| SNP_P4_91222_5181615 | NC_021166.1    | Ca_kabuli_chr07 | 5181615                 | CC                              | TT              | 1946880362               |
| SNP_P4_91223_5183653 | NC_021166.1    | Ca_kabuli_chr07 | 5183653                 | TT                              | AA              | 1946880364               |
| SNP_P4_91224_5185109 | NC_021166.1    | Ca_kabuli_chr07 | 5185109                 | GG                              | TT              | 1946880366               |
| SNP_P4_91225_5185921 | NC_021166.1    | Ca_kabuli_chr07 | 5185921                 | AA                              | TT              | 1946880368               |
| SNP_P4_91226_5186106 | NC_021166.1    | Ca_kabuli_chr07 | 5186106                 | GG                              | AA              | 1946880369               |
| SNP_P4_91227_5186218 | NC_021166.1    | Ca_kabuli_chr07 | 5186218                 | GG                              | CC              | 1946880371               |
| SNP_P4_91229_5187582 | NC_021166.1    | Ca_kabuli_chr07 | 5187582                 | CC                              | AA              | 1946880373               |
| SNP_P4_91230_5190061 | NC_021166.1    | Ca_kabuli_chr07 | 5190061                 | CC                              | TT              | 1946880375               |
| SNP_P4_91232_5192661 | NC_021166.1    | Ca_kabuli_chr07 | 5192661                 | CC                              | TT              | 1946880377               |
| SNP_P4_91233_5192935 | NC_021166.1    | Ca_kabuli_chr07 | 5192935                 | TT                              | AA              | 1946880379               |
| SNP_P4_91234_5193570 | NC_021166.1    | Ca_kabuli_chr07 | 5193570                 | AA                              | GG              | 1946880381               |
| SNP_P4_91235_5193596 | NC_021166.1    | Ca_kabuli_chr07 | 5193596                 | TT                              | AA              | 1946880383               |
| SNP_P4_91236_5193628 | NC_021166.1    | Ca_kabuli_chr07 | 5193628                 | TT                              | AA              | 1946880385               |
| SNP_P4_91237_5193633 | NC_021166.1    | Ca_kabuli_chr07 | 5193633                 | GG                              | TT              | 1946880387               |
| SNP_P4_91238_5193634 | NC_021166.1    | Ca_kabuli_chr07 | 5193634                 | GG                              | TT              | 1946880389               |
| SNP_P4_91239_5193713 | NC_021166.1    | Ca_kabuli_chr07 | 5193713                 | CC                              | TT              | 1946880391               |
| SNP_P4_91240_5193729 | NC_021166.1    | Ca_kabuli_chr07 | 5193729                 | GG                              | AA              | 1946880393               |
| SNP_P4_91241_5193850 | NC_021166.1    | Ca_kabuli_chr07 | 5193850                 | GG                              | AA              | 1946880395               |
| SNP_P4_91242_5193856 | NC_021166.1    | Ca_kabuli_chr07 | 5193856                 | TT                              | CC              | 1946880397               |
| SNP_P4_91243_5193897 | NC_021166.1    | Ca_kabuli_chr07 | 5193897                 | GG                              | AA              | 1946880398               |
| SNP_P4_91245_5225876 | NC_021166.1    | Ca_kabuli_chr07 | 5225876                 | CC                              | TT              | 1946880400               |
| SNP_P4_91246_5225878 | NC_021166.1    | Ca_kabuli_chr07 | 5225878                 | AA                              | TT              | 1946880402               |
| SNP_P4_91248_5265319 | NC_021166.1    | Ca_kabuli_chr07 | 5265319                 | GG                              | AA              | 1946880404               |
| SNP_P4_91249_5265506 | NC_021166.1    | Ca_kabuli_chr07 | 5265506                 | TT                              | AA              | 1946880406               |
| SNP_P4_91250_5265507 | NC_021166.1    | Ca_kabuli_chr07 | 5265507                 | TT                              | CC              | 1946880408               |
| SNP_P4_91251_5266392 | NC_021166.1    | Ca_kabuli_chr07 | 5266392                 | TT                              | AA              | 1946880410               |
| SNP_P4_91252_5270688 | NC_021166.1    | Ca_kabuli_chr07 | 5270688                 | TT                              | AA              | 1946880412               |
| SNP_P4_91253_5273381 | NC_021166.1    | Ca_kabuli_chr07 | 5273381                 | CC                              | TT              | 1946880414               |
| SNP_P4_91254_5275888 | NC_021166.1    | Ca_kabuli_chr07 | 5275888                 | CC                              | TT              | 1946880416               |
| SNP_P4_91255_5284314 | NC_021166.1    | Ca_kabuli_chr07 | 5284314                 | AA                              | GG              | 1946880418               |
| SNP_P4_91256_5297311 | NC_021166.1    | Ca_kabuli_chr07 | 5297311                 | TT                              | CC              | 1946880419               |
| SNP_P4_91257_5297775 | NC_021166.1    | Ca_kabuli_chr07 | 5297775                 | GG                              | TT              | 1946880421               |
| SNP_P4_91258_5298736 | NC_021166.1    | Ca_kabuli_chr07 | 5298736                 | TT                              | GG              | 1946880423               |
| SNP_P4_91261_5358710 | NC_021166.1    | Ca_kabuli_chr07 | 5358710                 | TT                              | CC              | 1946880425               |
| SNP_P4_91262_5367477 | NC_021166.1    | Ca_kabuli_chr07 | 5367477                 | TT                              | AA              | 1946880427               |
| SNP_P4_91263_5373164 | NC_021166.1    | Ca_kabuli_chr07 | 5373164                 | GG                              | TT              | 1946880429               |
| SNP_P4_91264_5375166 | NC_021166.1    | Ca_kabuli_chr07 | 5375166                 | CC                              | TT              | 1946880431               |
| SNP_P4_91265_5375276 | NC_021166.1    | Ca_kabuli_chr07 | 5375276                 | GG                              | TT              | 1946880433               |
| SNP_P4_91266_5376266 | NC_021166.1    | Ca_kabuli_chr07 | 5376266                 | TT                              | GG              | 1946880435               |

| SNPs IDs             | Chromosome IDs | Chromosomes     | Physical positions (bp) | CDC Frontier (Reference genome) | (ILWC46 & LPNB) | NCBI SNPdb Accession IDs |
|----------------------|----------------|-----------------|-------------------------|---------------------------------|-----------------|--------------------------|
| SNP_P4_91269_5380136 | NC_021166.1    | Ca_kabuli_chr07 | 5380136                 | GG                              | TT              | 1946880436               |
| SNP_P4_91270_5380139 | NC_021166.1    | Ca_kabuli_chr07 | 5380139                 | TT                              | AA              | 1946880438               |
| SNP_P4_91271_5380140 | NC_021166.1    | Ca_kabuli_chr07 | 5380140                 | TT                              | AA              | 1946880440               |
| SNP_P4_91272_5380142 | NC_021166.1    | Ca_kabuli_chr07 | 5380142                 | AA                              | TT              | 1946880442               |
| SNP_P4_91273_5380165 | NC_021166.1    | Ca_kabuli_chr07 | 5380165                 | TT                              | GG              | 1946880444               |
| SNP_P4_91275_5380260 | NC_021166.1    | Ca_kabuli_chr07 | 5380260                 | TT                              | CC              | 1946880446               |
| SNP_P4_91276_5386501 | NC_021166.1    | Ca_kabuli_chr07 | 5386501                 | CC                              | GG              | 1946880448               |
| SNP_P4_91277_5386620 | NC_021166.1    | Ca_kabuli_chr07 | 5386620                 | GG                              | AA              | 1946880450               |
| SNP_P4_91278_5387691 | NC_021166.1    | Ca_kabuli_chr07 | 5387691                 | GG                              | AA              | 1946880452               |
| SNP_P4_91280_5388242 | NC_021166.1    | Ca_kabuli_chr07 | 5388242                 | CC                              | GG              | 1946880454               |
| SNP_P4_91281_5388278 | NC_021166.1    | Ca_kabuli_chr07 | 5388278                 | CC                              | TT              | 1946880456               |
| SNP_P4_91283_5389039 | NC_021166.1    | Ca_kabuli_chr07 | 5389039                 | TT                              | AA              | 1946880458               |
| SNP_P4_91284_5389048 | NC_021166.1    | Ca_kabuli_chr07 | 5389048                 | CC                              | TT              | 1946880460               |
| SNP_P4_91285_5389190 | NC_021166.1    | Ca_kabuli_chr07 | 5389190                 | AA                              | CC              | 1946880462               |
| SNP_P4_91286_5390956 | NC_021166.1    | Ca_kabuli_chr07 | 5390956                 | TT                              | AA              | 1946880464               |
| SNP_P4_91287_5391915 | NC_021166.1    | Ca_kabuli_chr07 | 5391915                 | GG                              | TT              | 1946880466               |
| SNP_P4_91288_5391921 | NC_021166.1    | Ca_kabuli_chr07 | 5391921                 | CC                              | AA              | 1946880468               |
| SNP_P4_91290_5397261 | NC_021166.1    | Ca_kabuli_chr07 | 5397261                 | TT                              | CC              | 1946880470               |
| SNP_P4_91291_5397272 | NC_021166.1    | Ca_kabuli_chr07 | 5397272                 | CC                              | AA              | 1946880472               |
| SNP_P4_91292_5397274 | NC_021166.1    | Ca_kabuli_chr07 | 5397274                 | GG                              | TT              | 1946880474               |
| SNP_P4_91293_5397487 | NC_021166.1    | Ca_kabuli_chr07 | 5397487                 | TT                              | GG              | 1946880476               |
| SNP_P4_91294_5398110 | NC_021166.1    | Ca_kabuli_chr07 | 5398110                 | AA                              | GG              | 1946880478               |
| SNP_P4_91297_5400500 | NC_021166.1    | Ca_kabuli_chr07 | 5400500                 | CC                              | GG              | 1946880480               |
| SNP_P4_91299_5402179 | NC_021166.1    | Ca_kabuli_chr07 | 5402179                 | CC                              | AA              | 1946880482               |
| SNP_P4_91300_5402186 | NC_021166.1    | Ca_kabuli_chr07 | 5402186                 | TT                              | AA              | 1946880484               |
| SNP_P4_91301_5402247 | NC_021166.1    | Ca_kabuli_chr07 | 5402247                 | TT                              | AA              | 1946880486               |
| SNP_P4_91302_5402291 | NC_021166.1    | Ca_kabuli_chr07 | 5402291                 | TT                              | CC              | 1946880488               |
| SNP_P4_91303_5402423 | NC_021166.1    | Ca_kabuli_chr07 | 5402423                 | TT                              | GG              | 1946880490               |
| SNP_P4_91304_5402444 | NC_021166.1    | Ca_kabuli_chr07 | 5402444                 | TT                              | AA              | 1946880492               |
| SNP_P4_91305_5402445 | NC_021166.1    | Ca_kabuli_chr07 | 5402445                 | TT                              | AA              | 1946880494               |
| SNP_P4_91306_5402472 | NC_021166.1    | Ca_kabuli_chr07 | 5402472                 | AA                              | GG              | 1946880496               |
| SNP_P4_91307_5403825 | NC_021166.1    | Ca_kabuli_chr07 | 5403825                 | TT                              | AA              | 1946880498               |
| SNP_P4_91308_5404004 | NC_021166.1    | Ca_kabuli_chr07 | 5404004                 | AA                              | CC              | 1946880500               |
| SNP_P4_91309_5405002 | NC_021166.1    | Ca_kabuli_chr07 | 5405002                 | GG                              | CC              | 1946880502               |
| SNP_P4_91310_5405293 | NC_021166.1    | Ca_kabuli_chr07 | 5405293                 | TT                              | AA              | 1946880504               |
| SNP_P4_91311_5405356 | NC_021166.1    | Ca_kabuli_chr07 | 5405356                 | AA                              | CC              | 1946880506               |
| SNP_P4_91313_5406524 | NC_021166.1    | Ca_kabuli_chr07 | 5406524                 | TT                              | GG              | 1946880508               |
| SNP_P4_91314_5407042 | NC_021166.1    | Ca_kabuli_chr07 | 5407042                 | GG                              | CC              | 1946880510               |
| SNP_P4_91315_5407050 | NC_021166.1    | Ca_kabuli_chr07 | 5407050                 | AA                              | CC              | 1946880512               |
| SNP_P4_91317_5407336 | NC_021166.1    | Ca_kabuli_chr07 | 5407336                 | TT                              | AA              | 1946880514               |
| SNP_P4_91318_5407381 | NC_021166.1    | Ca_kabuli_chr07 | 5407381                 | TT                              | CC              | 1946880516               |
| SNP_P4_91319_5407411 | NC_021166.1    | Ca_kabuli_chr07 | 5407411                 | GG                              | AA              | 1946880518               |

| SNPs IDs             | Chromosome IDs | Chromosomes     | Physical positions (bp) | CDC Frontier (Reference genome) | (ILWC46 & LPNB) | NCBI SNPdb Accession IDs |
|----------------------|----------------|-----------------|-------------------------|---------------------------------|-----------------|--------------------------|
| SNP_P4_91320_5407449 | NC_021166.1    | Ca_kabuli_chr07 | 5407449                 | TT                              | AA              | 1946880519               |
| SNP_P4_91322_5407923 | NC_021166.1    | Ca_kabuli_chr07 | 5407923                 | TT                              | GG              | 1946880521               |
| SNP_P4_91323_5407945 | NC_021166.1    | Ca_kabuli_chr07 | 5407945                 | TT                              | GG              | 1946880523               |
| SNP_P4_91324_5408169 | NC_021166.1    | Ca_kabuli_chr07 | 5408169                 | GG                              | AA              | 1946880525               |
| SNP_P4_91325_5408951 | NC_021166.1    | Ca_kabuli_chr07 | 5408951                 | CC                              | TT              | 1946880527               |
| SNP_P4_91326_5409006 | NC_021166.1    | Ca_kabuli_chr07 | 5409006                 | AA                              | GG              | 1946880529               |
| SNP_P4_91327_5409010 | NC_021166.1    | Ca_kabuli_chr07 | 5409010                 | GG                              | AA              | 1946880531               |
| SNP_P4_91328_5409013 | NC_021166.1    | Ca_kabuli_chr07 | 5409013                 | AA                              | TT              | 1946880533               |
| SNP_P4_91329_5409016 | NC_021166.1    | Ca_kabuli_chr07 | 5409016                 | AA                              | TT              | 1946880535               |
| SNP_P4_91330_5409017 | NC_021166.1    | Ca_kabuli_chr07 | 5409017                 | AA                              | TT              | 1946880537               |
| SNP_P4_91331_5409018 | NC_021166.1    | Ca_kabuli_chr07 | 5409018                 | AA                              | TT              | 1946880539               |
| SNP_P4_91332_5409057 | NC_021166.1    | Ca_kabuli_chr07 | 5409057                 | GG                              | AA              | 1946880541               |
| SNP_P4_91333_5409064 | NC_021166.1    | Ca_kabuli_chr07 | 5409064                 | AA                              | GG              | 1946880543               |
| SNP_P4_91334_5409065 | NC_021166.1    | Ca_kabuli_chr07 | 5409065                 | AA                              | GG              | 1946880545               |
| SNP_P4_91335_5409087 | NC_021166.1    | Ca_kabuli_chr07 | 5409087                 | CC                              | TT              | 1946880547               |
| SNP_P4_91336_5409841 | NC_021166.1    | Ca_kabuli_chr07 | 5409841                 | GG                              | CC              | 1946880549               |
| SNP_P4_91337_5409908 | NC_021166.1    | Ca_kabuli_chr07 | 5409908                 | CC                              | GG              | 1946880551               |
| SNP_P4_91338_5409917 | NC_021166.1    | Ca_kabuli_chr07 | 5409917                 | TT                              | CC              | 1946880553               |
| SNP_P4_91339_5410166 | NC_021166.1    | Ca_kabuli_chr07 | 5410166                 | TT                              | CC              | 1946880554               |
| SNP_P4_91340_5411259 | NC_021166.1    | Ca_kabuli_chr07 | 5411259                 | GG                              | TT              | 1946880556               |
| SNP_P4_91341_5411467 | NC_021166.1    | Ca_kabuli_chr07 | 5411467                 | GG                              | CC              | 1946880558               |
| SNP_P4_91342_5411482 | NC_021166.1    | Ca_kabuli_chr07 | 5411482                 | CC                              | TT              | 1946880560               |
| SNP_P4_91343_5411511 | NC_021166.1    | Ca_kabuli_chr07 | 5411511                 | GG                              | AA              | 1946880562               |
| SNP_P4_91344_5411522 | NC_021166.1    | Ca_kabuli_chr07 | 5411522                 | TT                              | CC              | 1946880564               |
| SNP_P4_91345_5411539 | NC_021166.1    | Ca_kabuli_chr07 | 5411539                 | GG                              | AA              | 1946880566               |
| SNP_P4_91346_5411582 | NC_021166.1    | Ca_kabuli_chr07 | 5411582                 | AA                              | GG              | 1946880568               |
| SNP_P4_91347_5413820 | NC_021166.1    | Ca_kabuli_chr07 | 5413820                 | AA                              | TT              | 1946880570               |
| SNP_P4_91348_5413833 | NC_021166.1    | Ca_kabuli_chr07 | 5413833                 | AA                              | TT              | 1946880572               |
| SNP_P4_91350_5414103 | NC_021166.1    | Ca_kabuli_chr07 | 5414103                 | AA                              | GG              | 1946880574               |
| SNP_P4_91351_5414627 | NC_021166.1    | Ca_kabuli_chr07 | 5414627                 | TT                              | CC              | 1946880576               |
| SNP_P4_91352_5414918 | NC_021166.1    | Ca_kabuli_chr07 | 5414918                 | GG                              | AA              | 1946880578               |
| SNP_P4_91353_5415011 | NC_021166.1    | Ca_kabuli_chr07 | 5415011                 | GG                              | AA              | 1946880580               |
| SNP_P4_91354_5415045 | NC_021166.1    | Ca_kabuli_chr07 | 5415045                 | AA                              | GG              | 1946880582               |
| SNP_P4_91356_5415200 | NC_021166.1    | Ca_kabuli_chr07 | 5415200                 | AA                              | GG              | 1946880584               |
| SNP_P4_91357_5415211 | NC_021166.1    | Ca_kabuli_chr07 | 5415211                 | AA                              | GG              | 1946880586               |
| SNP_P4_91358_5415539 | NC_021166.1    | Ca_kabuli_chr07 | 5415539                 | CC                              | TT              | 1946880588               |
| SNP_P4_91359_5415650 | NC_021166.1    | Ca_kabuli_chr07 | 5415650                 | AA                              | TT              | 1946880590               |
| SNP_P4_91360_5416105 | NC_021166.1    | Ca_kabuli_chr07 | 5416105                 | GG                              | TT              | 1946880592               |
| SNP_P4_91362_5417085 | NC_021166.1    | Ca_kabuli_chr07 | 5417085                 | TT                              | CC              | 1946880594               |
| SNP_P4_91364_5420968 | NC_021166.1    | Ca_kabuli_chr07 | 5420968                 | GG                              | AA              | 1946880596               |
| SNP_P4_91367_5425407 | NC_021166.1    | Ca_kabuli_chr07 | 5425407                 | GG                              | TT              | 1946880598               |
| SNP_P4_91368_5425438 | NC_021166.1    | Ca_kabuli_chr07 | 5425438                 | GG                              | AA              | 1946880600               |



| SNPs IDs             | Chromosome IDs | Chromosomes     | Physical positions (bp) | CDC Frontier (Reference genome) | (ILWC46 & LPNB) | NCBI SNPdb Accession IDs |
|----------------------|----------------|-----------------|-------------------------|---------------------------------|-----------------|--------------------------|
| SNP_P4_91370_5427380 | NC_021166.1    | Ca_kabuli_chr07 | 5427380                 | TT                              | GG              | 1946880602               |
| SNP_P4_91371_5427528 | NC_021166.1    | Ca_kabuli_chr07 | 5427528                 | AA                              | CC              | 1946880604               |
| SNP_P4_91372_5427537 | NC_021166.1    | Ca_kabuli_chr07 | 5427537                 | CC                              | TT              | 1946880606               |
| SNP_P4_91373_5428123 | NC_021166.1    | Ca_kabuli_chr07 | 5428123                 | GG                              | TT              | 1946880608               |
| SNP_P4_91374_5429350 | NC_021166.1    | Ca_kabuli_chr07 | 5429350                 | AA                              | GG              | 1946880610               |
| SNP_P4_91376_5429833 | NC_021166.1    | Ca_kabuli_chr07 | 5429833                 | AA                              | GG              | 1946880612               |
| SNP_P4_91377_5434164 | NC_021166.1    | Ca_kabuli_chr07 | 5434164                 | AA                              | TT              | 1946880614               |
| SNP_P4_91379_5434494 | NC_021166.1    | Ca_kabuli_chr07 | 5434494                 | CC                              | GG              | 1946880616               |
| SNP_P4_91380_5434497 | NC_021166.1    | Ca_kabuli_chr07 | 5434497                 | TT                              | CC              | 1946880618               |
| SNP_P4_91381_5434598 | NC_021166.1    | Ca_kabuli_chr07 | 5434598                 | AA                              | CC              | 1946880620               |
| SNP_P4_91383_5434838 | NC_021166.1    | Ca_kabuli_chr07 | 5434838                 | AA                              | GG              | 1946880622               |
| SNP_P4_91385_5436418 | NC_021166.1    | Ca_kabuli_chr07 | 5436418                 | CC                              | TT              | 1946880624               |
| SNP_P4_91386_5438232 | NC_021166.1    | Ca_kabuli_chr07 | 5438232                 | AA                              | GG              | 1946880626               |
| SNP_P4_91387_5438345 | NC_021166.1    | Ca_kabuli_chr07 | 5438345                 | TT                              | CC              | 1946880627               |
| SNP_P4_91388_5438371 | NC_021166.1    | Ca_kabuli_chr07 | 5438371                 | CC                              | AA              | 1946880629               |
| SNP_P4_91389_5438396 | NC_021166.1    | Ca_kabuli_chr07 | 5438396                 | GG                              | AA              | 1946880631               |
| SNP_P4_91391_5440461 | NC_021166.1    | Ca_kabuli_chr07 | 5440461                 | TT                              | AA              | 1946880633               |
| SNP_P4_91392_5442234 | NC_021166.1    | Ca_kabuli_chr07 | 5442234                 | GG                              | AA              | 1946880635               |
| SNP_P4_91393_5442253 | NC_021166.1    | Ca_kabuli_chr07 | 5442253                 | CC                              | GG              | 1946880637               |
| SNP_P4_91394_5442267 | NC_021166.1    | Ca_kabuli_chr07 | 5442267                 | AA                              | TT              | 1946880639               |
| SNP_P4_91395_5442268 | NC_021166.1    | Ca_kabuli_chr07 | 5442268                 | TT                              | CC              | 1946880642               |
| SNP_P4_91396_5442281 | NC_021166.1    | Ca_kabuli_chr07 | 5442281                 | CC                              | AA              | 1946880644               |
| SNP_P4_91397_5442289 | NC_021166.1    | Ca_kabuli_chr07 | 5442289                 | TT                              | CC              | 1946880646               |
| SNP_P4_91398_5442344 | NC_021166.1    | Ca_kabuli_chr07 | 5442344                 | CC                              | AA              | 1946880648               |
| SNP_P4_91399_5442627 | NC_021166.1    | Ca_kabuli_chr07 | 5442627                 | AA                              | CC              | 1946880650               |
| SNP_P4_91400_5443283 | NC_021166.1    | Ca_kabuli_chr07 | 5443283                 | TT                              | GG              | 1946880652               |
| SNP_P4_91401_5443286 | NC_021166.1    | Ca_kabuli_chr07 | 5443286                 | AA                              | TT              | 1946880654               |
| SNP_P4_91402_5443295 | NC_021166.1    | Ca_kabuli_chr07 | 5443295                 | AA                              | GG              | 1946880656               |
| SNP_P4_91403_5443300 | NC_021166.1    | Ca_kabuli_chr07 | 5443300                 | AA                              | GG              | 1946880658               |
| SNP_P4_91404_5443657 | NC_021166.1    | Ca_kabuli_chr07 | 5443657                 | AA                              | GG              | 1946880660               |
| SNP_P4_91406_5443854 | NC_021166.1    | Ca_kabuli_chr07 | 5443854                 | CC                              | AA              | 1946880662               |
| SNP_P4_91407_5444652 | NC_021166.1    | Ca_kabuli_chr07 | 5444652                 | GG                              | CC              | 1946880664               |
| SNP_P4_91408_5445027 | NC_021166.1    | Ca_kabuli_chr07 | 5445027                 | GG                              | AA              | 1946880666               |
| SNP_P4_91409_5445065 | NC_021166.1    | Ca_kabuli_chr07 | 5445065                 | CC                              | TT              | 1946880667               |
| SNP_P4_91410_5445150 | NC_021166.1    | Ca_kabuli_chr07 | 5445150                 | TT                              | CC              | 1946880669               |
| SNP_P4_91411_5445151 | NC_021166.1    | Ca_kabuli_chr07 | 5445151                 | AA                              | GG              | 1946880671               |
| SNP_P4_91412_5445204 | NC_021166.1    | Ca_kabuli_chr07 | 5445204                 | CC                              | TT              | 1946880673               |
| SNP_P4_91413_5445208 | NC_021166.1    | Ca_kabuli_chr07 | 5445208                 | TT                              | CC              | 1946880675               |
| SNP_P4_91415_5445465 | NC_021166.1    | Ca_kabuli_chr07 | 5445465                 | TT                              | CC              | 1946880677               |
| SNP_P4_91416_5445471 | NC_021166.1    | Ca_kabuli_chr07 | 5445471                 | AA                              | GG              | 1946880679               |
| SNP_P4_91417_5445482 | NC_021166.1    | Ca_kabuli_chr07 | 5445482                 | AA                              | GG              | 1946880681               |
| SNP_P4_91418_5445499 | NC_021166.1    | Ca_kabuli_chr07 | 5445499                 | AA                              | GG              | 1946880683               |

| SNPs IDs             | Chromosome IDs | Chromosomes     | Physical positions (bp) | CDC Frontier (Reference genome) | (ILWC46 & LPNB) | NCBI SNPdb Accession IDs |
|----------------------|----------------|-----------------|-------------------------|---------------------------------|-----------------|--------------------------|
| SNP_P4_91421_5446071 | NC_021166.1    | Ca_kabuli_chr07 | 5446071                 | AA                              | GG              | 1946880685               |
| SNP_P4_91422_5452369 | NC_021166.1    | Ca_kabuli_chr07 | 5452369                 | TT                              | CC              | 1946880687               |
| SNP_P4_91423_5455421 | NC_021166.1    | Ca_kabuli_chr07 | 5455421                 | TT                              | AA              | 1946880689               |
| SNP_P4_91424_5456470 | NC_021166.1    | Ca_kabuli_chr07 | 5456470                 | TT                              | CC              | 1946880691               |
| SNP_P4_91425_5456478 | NC_021166.1    | Ca_kabuli_chr07 | 5456478                 | AA                              | CC              | 1946880693               |
| SNP_P4_91426_5456480 | NC_021166.1    | Ca_kabuli_chr07 | 5456480                 | AA                              | GG              | 1946880695               |
| SNP_P4_91427_5456793 | NC_021166.1    | Ca_kabuli_chr07 | 5456793                 | TT                              | AA              | 1946880697               |
| SNP_P4_91430_5461360 | NC_021166.1    | Ca_kabuli_chr07 | 5461360                 | CC                              | TT              | 1946880699               |
| SNP_P4_91434_5461990 | NC_021166.1    | Ca_kabuli_chr07 | 5461990                 | CC                              | TT              | 1946880701               |
| SNP_P4_91435_5463069 | NC_021166.1    | Ca_kabuli_chr07 | 5463069                 | CC                              | TT              | 1946880703               |
| SNP_P4_91436_5463560 | NC_021166.1    | Ca_kabuli_chr07 | 5463560                 | TT                              | AA              | 1946880705               |
| SNP_P4_91437_5463568 | NC_021166.1    | Ca_kabuli_chr07 | 5463568                 | TT                              | GG              | 1946880707               |
| SNP_P4_91439_5465434 | NC_021166.1    | Ca_kabuli_chr07 | 5465434                 | GG                              | CC              | 1946880709               |
| SNP_P4_91440_5466665 | NC_021166.1    | Ca_kabuli_chr07 | 5466665                 | AA                              | CC              | 1946880711               |
| SNP_P4_91441_5466832 | NC_021166.1    | Ca_kabuli_chr07 | 5466832                 | CC                              | AA              | 1946880713               |
| SNP_P4_91442_5466923 | NC_021166.1    | Ca_kabuli_chr07 | 5466923                 | TT                              | GG              | 1946880715               |
| SNP_P4_91443_5466964 | NC_021166.1    | Ca_kabuli_chr07 | 5466964                 | GG                              | AA              | 1946880717               |
| SNP_P4_91444_5467645 | NC_021166.1    | Ca_kabuli_chr07 | 5467645                 | GG                              | AA              | 1946880719               |
| SNP_P4_91446_5467821 | NC_021166.1    | Ca_kabuli_chr07 | 5467821                 | GG                              | CC              | 1946880721               |
| SNP_P4_91449_5468464 | NC_021166.1    | Ca_kabuli_chr07 | 5468464                 | AA                              | GG              | 1946880723               |
| SNP_P4_91450_5468477 | NC_021166.1    | Ca_kabuli_chr07 | 5468477                 | AA                              | GG              | 1946880725               |
| SNP_P4_91451_5468726 | NC_021166.1    | Ca_kabuli_chr07 | 5468726                 | TT                              | GG              | 1946880727               |
| SNP_P4_91452_5468795 | NC_021166.1    | Ca_kabuli_chr07 | 5468795                 | CC                              | AA              | 1946880730               |
| SNP_P4_91453_5469663 | NC_021166.1    | Ca_kabuli_chr07 | 5469663                 | AA                              | TT              | 1946880732               |
| SNP_P4_91454_5469677 | NC_021166.1    | Ca_kabuli_chr07 | 5469677                 | TT                              | CC              | 1946880734               |
| SNP_P4_91455_5469949 | NC_021166.1    | Ca_kabuli_chr07 | 5469949                 | TT                              | CC              | 1946880736               |
| SNP_P4_91456_5469954 | NC_021166.1    | Ca_kabuli_chr07 | 5469954                 | TT                              | AA              | 1946880738               |
| SNP_P4_91458_5470060 | NC_021166.1    | Ca_kabuli_chr07 | 5470060                 | TT                              | CC              | 1946880740               |
| SNP_P4_91460_5470447 | NC_021166.1    | Ca_kabuli_chr07 | 5470447                 | GG                              | AA              | 1946880742               |
| SNP_P4_91461_5470980 | NC_021166.1    | Ca_kabuli_chr07 | 5470980                 | GG                              | AA              | 1946880744               |
| SNP_P4_91462_5471112 | NC_021166.1    | Ca_kabuli_chr07 | 5471112                 | CC                              | AA              | 1946880746               |
| SNP_P4_91463_5471193 | NC_021166.1    | Ca_kabuli_chr07 | 5471193                 | CC                              | TT              | 1946880748               |
| SNP_P4_91464_5471207 | NC_021166.1    | Ca_kabuli_chr07 | 5471207                 | GG                              | CC              | 1946880750               |
| SNP_P4_91465_5471210 | NC_021166.1    | Ca_kabuli_chr07 | 5471210                 | TT                              | AA              | 1946880752               |
| SNP_P4_91466_5471249 | NC_021166.1    | Ca_kabuli_chr07 | 5471249                 | CC                              | TT              | 1946880754               |
| SNP_P4_91467_5471281 | NC_021166.1    | Ca_kabuli_chr07 | 5471281                 | CC                              | GG              | 1946880756               |
| SNP_P4_91468_5471301 | NC_021166.1    | Ca_kabuli_chr07 | 5471301                 | TT                              | GG              | 1946880758               |
| SNP_P4_91469_5471605 | NC_021166.1    | Ca_kabuli_chr07 | 5471605                 | TT                              | CC              | 1946880760               |
| SNP_P4_91470_5471638 | NC_021166.1    | Ca_kabuli_chr07 | 5471638                 | TT                              | GG              | 1946880762               |
| SNP_P4_91471_5471658 | NC_021166.1    | Ca_kabuli_chr07 | 5471658                 | CC                              | TT              | 1946880764               |
| SNP_P4_91472_5471664 | NC_021166.1    | Ca_kabuli_chr07 | 5471664                 | GG                              | AA              | 1946880766               |
| SNP_P4_91473_5471669 | NC_021166.1    | Ca_kabuli_chr07 | 5471669                 | AA                              | GG              | 1946880768               |

| SNPs IDs             | Chromosome IDs | Chromosomes     | Physical positions (bp) | CDC Frontier (Reference genome) | (ILWC46 & LPNB) | NCBI SNPdb Accession IDs |
|----------------------|----------------|-----------------|-------------------------|---------------------------------|-----------------|--------------------------|
| SNP_P4_91474_5471694 | NC_021166.1    | Ca_kabuli_chr07 | 5471694                 | CC                              | AA              | 1946880770               |
| SNP_P4_91477_5473233 | NC_021166.1    | Ca_kabuli_chr07 | 5473233                 | TT                              | CC              | 1946880772               |
| SNP_P4_91478_5474783 | NC_021166.1    | Ca_kabuli_chr07 | 5474783                 | CC                              | TT              | 1946880774               |
| SNP_P4_91479_5478183 | NC_021166.1    | Ca_kabuli_chr07 | 5478183                 | TT                              | CC              | 1946880776               |
| SNP_P4_91480_5479717 | NC_021166.1    | Ca_kabuli_chr07 | 5479717                 | GG                              | AA              | 1946880778               |
| SNP_P4_91482_5480083 | NC_021166.1    | Ca_kabuli_chr07 | 5480083                 | GG                              | AA              | 1946880780               |
| SNP_P4_91483_5480100 | NC_021166.1    | Ca_kabuli_chr07 | 5480100                 | TT                              | CC              | 1946880782               |
| SNP_P4_91484_5481662 | NC_021166.1    | Ca_kabuli_chr07 | 5481662                 | GG                              | AA              | 1946880784               |
| SNP_P4_91486_5482203 | NC_021166.1    | Ca_kabuli_chr07 | 5482203                 | AA                              | TT              | 1946880786               |
| SNP_P4_91489_5482749 | NC_021166.1    | Ca_kabuli_chr07 | 5482749                 | TT                              | AA              | 1946880788               |
| SNP_P4_91490_5483491 | NC_021166.1    | Ca_kabuli_chr07 | 5483491                 | GG                              | TT              | 1946880790               |
| SNP_P4_91491_5483499 | NC_021166.1    | Ca_kabuli_chr07 | 5483499                 | CC                              | AA              | 1946880792               |
| SNP_P4_91492_5483660 | NC_021166.1    | Ca_kabuli_chr07 | 5483660                 | GG                              | AA              | 1946880794               |
| SNP_P4_91493_5483663 | NC_021166.1    | Ca_kabuli_chr07 | 5483663                 | CC                              | GG              | 1946880796               |
| SNP_P4_91494_5483688 | NC_021166.1    | Ca_kabuli_chr07 | 5483688                 | AA                              | GG              | 1946880798               |
| SNP_P4_91495_5483902 | NC_021166.1    | Ca_kabuli_chr07 | 5483902                 | GG                              | AA              | 1946880800               |
| SNP_P4_91496_5484183 | NC_021166.1    | Ca_kabuli_chr07 | 5484183                 | AA                              | GG              | 1946880801               |
| SNP_P4_91497_5484341 | NC_021166.1    | Ca_kabuli_chr07 | 5484341                 | TT                              | GG              | 1946880803               |
| SNP_P4_91499_5484559 | NC_021166.1    | Ca_kabuli_chr07 | 5484559                 | GG                              | TT              | 1946880805               |
| SNP_P4_91500_5484628 | NC_021166.1    | Ca_kabuli_chr07 | 5484628                 | CC                              | TT              | 1946880807               |
| SNP_P4_91502_5486738 | NC_021166.1    | Ca_kabuli_chr07 | 5486738                 | GG                              | AA              | 1946880809               |
| SNP_P4_91503_5486757 | NC_021166.1    | Ca_kabuli_chr07 | 5486757                 | AA                              | GG              | 1946880811               |
| SNP_P4_91504_5486760 | NC_021166.1    | Ca_kabuli_chr07 | 5486760                 | TT                              | GG              | 1946880813               |
| SNP_P4_91505_5486937 | NC_021166.1    | Ca_kabuli_chr07 | 5486937                 | CC                              | TT              | 1946880816               |
| SNP_P4_91507_5487866 | NC_021166.1    | Ca_kabuli_chr07 | 5487866                 | TT                              | CC              | 1946880817               |
| SNP_P4_91509_5488883 | NC_021166.1    | Ca_kabuli_chr07 | 5488883                 | TT                              | CC              | 1946880818               |
| SNP_P4_91510_5488942 | NC_021166.1    | Ca_kabuli_chr07 | 5488942                 | GG                              | AA              | 1946880819               |
| SNP_P4_91512_5500875 | NC_021166.1    | Ca_kabuli_chr07 | 5500875                 | CC                              | AA              | 1946880820               |
| SNP_P4_91513_5504057 | NC_021166.1    | Ca_kabuli_chr07 | 5504057                 | TT                              | CC              | 1946880821               |
| SNP_P4_91514_5506116 | NC_021166.1    | Ca_kabuli_chr07 | 5506116                 | CC                              | TT              | 1946880822               |
| SNP_P4_91515_5511182 | NC_021166.1    | Ca_kabuli_chr07 | 5511182                 | AA                              | TT              | 1946880824               |
| SNP_P4_91516_5511690 | NC_021166.1    | Ca_kabuli_chr07 | 5511690                 | AA                              | GG              | 1946880826               |
| SNP_P4_91517_5512242 | NC_021166.1    | Ca_kabuli_chr07 | 5512242                 | AA                              | GG              | 1946880828               |
| SNP_P4_91518_5512499 | NC_021166.1    | Ca_kabuli_chr07 | 5512499                 | TT                              | CC              | 1946880831               |
| SNP_P4_91520_5513912 | NC_021166.1    | Ca_kabuli_chr07 | 5513912                 | TT                              | CC              | 1946880833               |
| SNP_P4_91521_5513976 | NC_021166.1    | Ca_kabuli_chr07 | 5513976                 | AA                              | GG              | 1946880835               |
| SNP_P4_91522_5514148 | NC_021166.1    | Ca_kabuli_chr07 | 5514148                 | AA                              | GG              | 1946880837               |
| SNP_P4_91523_5514149 | NC_021166.1    | Ca_kabuli_chr07 | 5514149                 | GG                              | TT              | 1946880839               |
| SNP_P4_91524_5514185 | NC_021166.1    | Ca_kabuli_chr07 | 5514185                 | TT                              | GG              | 1946880841               |
| SNP_P4_91525_5514243 | NC_021166.1    | Ca_kabuli_chr07 | 5514243                 | CC                              | TT              | 1946880843               |
| SNP_P4_91526_5514256 | NC_021166.1    | Ca_kabuli_chr07 | 5514256                 | AA                              | GG              | 1946880845               |
| SNP_P4_91527_5514418 | NC_021166.1    | Ca_kabuli_chr07 | 5514418                 | TT                              | CC              | 1946880847               |

| SNPs IDs             | Chromosome IDs | Chromosomes     | Physical positions (bp) | CDC Frontier (Reference genome) | (ILWC46 & LPNB) | NCBI SNPdb Accession IDs |
|----------------------|----------------|-----------------|-------------------------|---------------------------------|-----------------|--------------------------|
| SNP_P4_91528_5516515 | NC_021166.1    | Ca_kabuli_chr07 | 5516515                 | TT                              | AA              | 1946880849               |
| SNP_P4_91529_5516833 | NC_021166.1    | Ca_kabuli_chr07 | 5516833                 | TT                              | AA              | 1946880851               |
| SNP_P4_91530_5516928 | NC_021166.1    | Ca_kabuli_chr07 | 5516928                 | TT                              | CC              | 1946880853               |
| SNP_P4_91531_5517188 | NC_021166.1    | Ca_kabuli_chr07 | 5517188                 | CC                              | AA              | 1946880855               |
| SNP_P4_91533_5517552 | NC_021166.1    | Ca_kabuli_chr07 | 5517552                 | TT                              | CC              | 1946880857               |
| SNP_P4_91534_5517554 | NC_021166.1    | Ca_kabuli_chr07 | 5517554                 | TT                              | CC              | 1946880859               |
| SNP_P4_91535_5517585 | NC_021166.1    | Ca_kabuli_chr07 | 5517585                 | AA                              | GG              | 1946880861               |
| SNP_P4_91536_5518690 | NC_021166.1    | Ca_kabuli_chr07 | 5518690                 | CC                              | TT              | 1946880863               |
| SNP_P4_91538_5521596 | NC_021166.1    | Ca_kabuli_chr07 | 5521596                 | TT                              | CC              | 1946880865               |
| SNP_P4_91540_5524251 | NC_021166.1    | Ca_kabuli_chr07 | 5524251                 | AA                              | GG              | 1946880867               |
| SNP_P4_91542_5525461 | NC_021166.1    | Ca_kabuli_chr07 | 5525461                 | AA                              | TT              | 1946880869               |
| SNP_P4_91545_5525782 | NC_021166.1    | Ca_kabuli_chr07 | 5525782                 | TT                              | AA              | 1946880871               |
| SNP_P4_91546_5525783 | NC_021166.1    | Ca_kabuli_chr07 | 5525783                 | CC                              | TT              | 1946880873               |
| SNP_P4_91547_5525793 | NC_021166.1    | Ca_kabuli_chr07 | 5525793                 | TT                              | CC              | 1946880875               |
| SNP_P4_91549_5529729 | NC_021166.1    | Ca_kabuli_chr07 | 5529729                 | AA                              | GG              | 1946880877               |
| SNP_P4_91550_5529844 | NC_021166.1    | Ca_kabuli_chr07 | 5529844                 | CC                              | AA              | 1946880879               |
| SNP_P4_91551_5529888 | NC_021166.1    | Ca_kabuli_chr07 | 5529888                 | AA                              | GG              | 1946880881               |
| SNP_P4_91554_5532922 | NC_021166.1    | Ca_kabuli_chr07 | 5532922                 | AA                              | TT              | 1946880883               |
| SNP_P4_91555_5533124 | NC_021166.1    | Ca_kabuli_chr07 | 5533124                 | TT                              | CC              | 1946880885               |
| SNP_P4_91556_5537851 | NC_021166.1    | Ca_kabuli_chr07 | 5537851                 | GG                              | CC              | 1946880887               |
| SNP_P4_91557_5537880 | NC_021166.1    | Ca_kabuli_chr07 | 5537880                 | GG                              | TT              | 1946880889               |
| SNP_P4_91560_5540679 | NC_021166.1    | Ca_kabuli_chr07 | 5540679                 | AA                              | GG              | 1946880891               |
| SNP_P4_91561_5540707 | NC_021166.1    | Ca_kabuli_chr07 | 5540707                 | GG                              | TT              | 1946880893               |
| SNP_P4_91563_5541009 | NC_021166.1    | Ca_kabuli_chr07 | 5541009                 | GG                              | TT              | 1946880895               |
| SNP_P4_91564_5541062 | NC_021166.1    | Ca_kabuli_chr07 | 5541062                 | GG                              | CC              | 1946880898               |
| SNP_P4_91565_5543691 | NC_021166.1    | Ca_kabuli_chr07 | 5543691                 | GG                              | TT              | 1946880900               |
| SNP_P4_91566_5543692 | NC_021166.1    | Ca_kabuli_chr07 | 5543692                 | TT                              | AA              | 1946880902               |
| SNP_P4_91567_5544036 | NC_021166.1    | Ca_kabuli_chr07 | 5544036                 | CC                              | TT              | 1946880904               |
| SNP_P4_91568_5544074 | NC_021166.1    | Ca_kabuli_chr07 | 5544074                 | CC                              | GG              | 1946880906               |
| SNP_P4_91569_5545450 | NC_021166.1    | Ca_kabuli_chr07 | 5545450                 | TT                              | AA              | 1946880908               |
| SNP_P4_91570_5546523 | NC_021166.1    | Ca_kabuli_chr07 | 5546523                 | CC                              | TT              | 1946880910               |
| SNP_P4_91571_5546557 | NC_021166.1    | Ca_kabuli_chr07 | 5546557                 | GG                              | AA              | 1946880911               |
| SNP_P4_91572_5546812 | NC_021166.1    | Ca_kabuli_chr07 | 5546812                 | GG                              | AA              | 1946880913               |
| SNP_P4_91573_5546819 | NC_021166.1    | Ca_kabuli_chr07 | 5546819                 | GG                              | AA              | 1946880915               |
| SNP_P4_91574_5546823 | NC_021166.1    | Ca_kabuli_chr07 | 5546823                 | GG                              | AA              | 1946880917               |
| SNP_P4_91575_5546838 | NC_021166.1    | Ca_kabuli_chr07 | 5546838                 | AA                              | GG              | 1946880919               |
| SNP_P4_91576_5546843 | NC_021166.1    | Ca_kabuli_chr07 | 5546843                 | AA                              | GG              | 1946880921               |
| SNP_P4_91577_5546844 | NC_021166.1    | Ca_kabuli_chr07 | 5546844                 | TT                              | CC              | 1946880923               |
| SNP_P4_91578_5546858 | NC_021166.1    | Ca_kabuli_chr07 | 5546858                 | AA                              | GG              | 1946880925               |
| SNP_P4_91579_5546895 | NC_021166.1    | Ca_kabuli_chr07 | 5546895                 | GG                              | AA              | 1946880927               |
| SNP_P4_91580_5549428 | NC_021166.1    | Ca_kabuli_chr07 | 5549428                 | CC                              | TT              | 1946880929               |
| SNP_P4_91582_5555089 | NC_021166.1    | Ca_kabuli_chr07 | 5555089                 | GG                              | AA              | 1946880931               |

| SNPs IDs             | Chromosome IDs | Chromosomes     | Physical positions (bp) | CDC Frontier (Reference genome) | (ILWC46 & LPNB) | NCBI SNPdb Accession IDs |
|----------------------|----------------|-----------------|-------------------------|---------------------------------|-----------------|--------------------------|
| SNP_P4_91583_5556885 | NC_021166.1    | Ca_kabuli_chr07 | 5556885                 | CC                              | TT              | 1946880933               |
| SNP_P4_91584_5557765 | NC_021166.1    | Ca_kabuli_chr07 | 5557765                 | TT                              | CC              | 1946880935               |
| SNP_P4_91585_5558303 | NC_021166.1    | Ca_kabuli_chr07 | 5558303                 | TT                              | GG              | 1946880937               |
| SNP_P4_91586_5558867 | NC_021166.1    | Ca_kabuli_chr07 | 5558867                 | AA                              | GG              | 1946880939               |
| SNP_P4_91587_5559560 | NC_021166.1    | Ca_kabuli_chr07 | 5559560                 | GG                              | TT              | 1946880941               |
| SNP_P4_91588_5559695 | NC_021166.1    | Ca_kabuli_chr07 | 5559695                 | TT                              | CC              | 1946880943               |
| SNP_P4_91589_5559696 | NC_021166.1    | Ca_kabuli_chr07 | 5559696                 | GG                              | TT              | 1946880945               |
| SNP_P4_91590_5559767 | NC_021166.1    | Ca_kabuli_chr07 | 5559767                 | CC                              | AA              | 1946880947               |
| SNP_P4_91591_5559848 | NC_021166.1    | Ca_kabuli_chr07 | 5559848                 | TT                              | CC              | 1946880949               |
| SNP_P4_91592_5559953 | NC_021166.1    | Ca_kabuli_chr07 | 5559953                 | AA                              | GG              | 1946880951               |
| SNP_P4_91593_5560122 | NC_021166.1    | Ca_kabuli_chr07 | 5560122                 | CC                              | TT              | 1946880953               |
| SNP_P4_91594_5562133 | NC_021166.1    | Ca_kabuli_chr07 | 5562133                 | GG                              | CC              | 1946880955               |
| SNP_P4_91595_5562180 | NC_021166.1    | Ca_kabuli_chr07 | 5562180                 | GG                              | TT              | 1946880957               |
| SNP_P4_91597_5562379 | NC_021166.1    | Ca_kabuli_chr07 | 5562379                 | AA                              | GG              | 1946880959               |
| SNP_P4_91598_5562401 | NC_021166.1    | Ca_kabuli_chr07 | 5562401                 | CC                              | TT              | 1946880961               |
| SNP_P4_91599_5562446 | NC_021166.1    | Ca_kabuli_chr07 | 5562446                 | GG                              | AA              | 1946880963               |
| SNP_P4_91600_5563288 | NC_021166.1    | Ca_kabuli_chr07 | 5563288                 | GG                              | AA              | 1946880965               |
| SNP_P4_91601_5563705 | NC_021166.1    | Ca_kabuli_chr07 | 5563705                 | CC                              | AA              | 1946880967               |
| SNP_P4_91602_5565209 | NC_021166.1    | Ca_kabuli_chr07 | 5565209                 | AA                              | GG              | 1946880969               |
| SNP_P4_91604_5567325 | NC_021166.1    | Ca_kabuli_chr07 | 5567325                 | TT                              | AA              | 1946880971               |
| SNP_P4_91605_5567334 | NC_021166.1    | Ca_kabuli_chr07 | 5567334                 | GG                              | AA              | 1946880973               |
| SNP_P4_91607_5567558 | NC_021166.1    | Ca_kabuli_chr07 | 5567558                 | GG                              | AA              | 1946880975               |
| SNP_P4_91608_5567949 | NC_021166.1    | Ca_kabuli_chr07 | 5567949                 | GG                              | CC              | 1946880977               |
| SNP_P4_91609_5568114 | NC_021166.1    | Ca_kabuli_chr07 | 5568114                 | CC                              | AA              | 1946880979               |
| SNP_P4_91610_5569044 | NC_021166.1    | Ca_kabuli_chr07 | 5569044                 | GG                              | TT              | 1946880981               |
| SNP_P4_91611_5569357 | NC_021166.1    | Ca_kabuli_chr07 | 5569357                 | AA                              | TT              | 1946880983               |
| SNP_P4_91612_5569410 | NC_021166.1    | Ca_kabuli_chr07 | 5569410                 | TT                              | CC              | 1946880985               |
| SNP_P4_91613_5569610 | NC_021166.1    | Ca_kabuli_chr07 | 5569610                 | TT                              | CC              | 1946880987               |
| SNP_P4_91615_5569662 | NC_021166.1    | Ca_kabuli_chr07 | 5569662                 | TT                              | CC              | 1946880989               |
| SNP_P4_91616_5569926 | NC_021166.1    | Ca_kabuli_chr07 | 5569926                 | AA                              | GG              | 1946880991               |
| SNP_P4_91619_5572439 | NC_021166.1    | Ca_kabuli_chr07 | 5572439                 | TT                              | CC              | 1946880993               |
| SNP_P4_91620_5572467 | NC_021166.1    | Ca_kabuli_chr07 | 5572467                 | TT                              | AA              | 1946880995               |
| SNP_P4_91622_5572667 | NC_021166.1    | Ca_kabuli_chr07 | 5572667                 | GG                              | CC              | 1946880997               |
| SNP_P4_91624_5573043 | NC_021166.1    | Ca_kabuli_chr07 | 5573043                 | TT                              | AA              | 1946880999               |
| SNP_P4_91625_5574182 | NC_021166.1    | Ca_kabuli_chr07 | 5574182                 | CC                              | AA              | 1946881001               |
| SNP_P4_91626_5574241 | NC_021166.1    | Ca_kabuli_chr07 | 5574241                 | TT                              | GG              | 1946881003               |
| SNP_P4_91627_5574494 | NC_021166.1    | Ca_kabuli_chr07 | 5574494                 | GG                              | AA              | 1946881005               |
| SNP_P4_91628_5574604 | NC_021166.1    | Ca_kabuli_chr07 | 5574604                 | CC                              | TT              | 1946881007               |
| SNP_P4_91629_5576390 | NC_021166.1    | Ca_kabuli_chr07 | 5576390                 | TT                              | CC              | 1946881009               |
| SNP_P4_91630_5576428 | NC_021166.1    | Ca_kabuli_chr07 | 5576428                 | AA                              | GG              | 1946881011               |
| SNP_P4_91632_5576634 | NC_021166.1    | Ca_kabuli_chr07 | 5576634                 | TT                              | CC              | 1946881013               |
| SNP_P4_91634_5578709 | NC_021166.1    | Ca_kabuli_chr07 | 5578709                 | CC                              | AA              | 1946881015               |

| SNPs IDs             | Chromosome IDs | Chromosomes     | Physical positions (bp) | CDC Frontier (Reference genome) | (ILWC46 & LPNB) | NCBI SNPdb Accession IDs |
|----------------------|----------------|-----------------|-------------------------|---------------------------------|-----------------|--------------------------|
| SNP_P4_91635_5579013 | NC_021166.1    | Ca_kabuli_chr07 | 5579013                 | AA                              | CC              | 1946881017               |
| SNP_P4_91636_5579652 | NC_021166.1    | Ca_kabuli_chr07 | 5579652                 | AA                              | GG              | 1946881019               |
| SNP_P4_91637_5579837 | NC_021166.1    | Ca_kabuli_chr07 | 5579837                 | AA                              | GG              | 1946881021               |
| SNP_P4_91638_5585868 | NC_021166.1    | Ca_kabuli_chr07 | 5585868                 | TT                              | CC              | 1946881023               |
| SNP_P4_91639_5614372 | NC_021166.1    | Ca_kabuli_chr07 | 5614372                 | CC                              | TT              | 1946881025               |
| SNP_P4_91640_5614527 | NC_021166.1    | Ca_kabuli_chr07 | 5614527                 | AA                              | TT              | 1946881027               |
| SNP_P4_91641_5626057 | NC_021166.1    | Ca_kabuli_chr07 | 5626057                 | AA                              | CC              | 1946881029               |
| SNP_P4_91642_5626314 | NC_021166.1    | Ca_kabuli_chr07 | 5626314                 | AA                              | GG              | 1946881031               |
| SNP_P4_91645_5628101 | NC_021166.1    | Ca_kabuli_chr07 | 5628101                 | AA                              | TT              | 1946881033               |
| SNP_P4_91646_5628123 | NC_021166.1    | Ca_kabuli_chr07 | 5628123                 | CC                              | TT              | 1946881035               |
| SNP_P4_91647_5628132 | NC_021166.1    | Ca_kabuli_chr07 | 5628132                 | AA                              | TT              | 1946881037               |
| SNP_P4_91648_5628156 | NC_021166.1    | Ca_kabuli_chr07 | 5628156                 | AA                              | TT              | 1946881039               |
| SNP_P4_91652_5629464 | NC_021166.1    | Ca_kabuli_chr07 | 5629464                 | AA                              | CC              | 1946881041               |
| SNP_P4_91653_5630786 | NC_021166.1    | Ca_kabuli_chr07 | 5630786                 | AA                              | TT              | 1946881043               |
| SNP_P4_91654_5630820 | NC_021166.1    | Ca_kabuli_chr07 | 5630820                 | GG                              | AA              | 1946881045               |
| SNP_P4_91655_5631039 | NC_021166.1    | Ca_kabuli_chr07 | 5631039                 | CC                              | AA              | 1946881047               |
| SNP_P4_91656_5631075 | NC_021166.1    | Ca_kabuli_chr07 | 5631075                 | GG                              | CC              | 1946881049               |
| SNP_P4_91657_5631890 | NC_021166.1    | Ca_kabuli_chr07 | 5631890                 | GG                              | AA              | 1946881052               |
| SNP_P4_91658_5632919 | NC_021166.1    | Ca_kabuli_chr07 | 5632919                 | AA                              | GG              | 1946881054               |
| SNP_P4_91659_5633053 | NC_021166.1    | Ca_kabuli_chr07 | 5633053                 | AA                              | GG              | 1946881056               |
| SNP_P4_91661_5634121 | NC_021166.1    | Ca_kabuli_chr07 | 5634121                 | TT                              | CC              | 1946881058               |
| SNP_P4_91662_5648170 | NC_021166.1    | Ca_kabuli_chr07 | 5648170                 | AA                              | GG              | 1946881060               |
| SNP_P4_91663_5648227 | NC_021166.1    | Ca_kabuli_chr07 | 5648227                 | GG                              | AA              | 1946881062               |
| SNP_P4_91665_5649562 | NC_021166.1    | Ca_kabuli_chr07 | 5649562                 | TT                              | CC              | 1946881064               |
| SNP_P4_91667_5649888 | NC_021166.1    | Ca_kabuli_chr07 | 5649888                 | TT                              | AA              | 1946881066               |
| SNP_P4_91668_5649934 | NC_021166.1    | Ca_kabuli_chr07 | 5649934                 | CC                              | AA              | 1946881068               |
| SNP_P4_91670_5650538 | NC_021166.1    | Ca_kabuli_chr07 | 5650538                 | TT                              | GG              | 1946881070               |
| SNP_P4_91671_5650873 | NC_021166.1    | Ca_kabuli_chr07 | 5650873                 | CC                              | GG              | 1946881072               |
| SNP_P4_91672_5651102 | NC_021166.1    | Ca_kabuli_chr07 | 5651102                 | AA                              | TT              | 1946881074               |
| SNP_P4_91673_5651137 | NC_021166.1    | Ca_kabuli_chr07 | 5651137                 | AA                              | TT              | 1946881076               |
| SNP_P4_91675_5652778 | NC_021166.1    | Ca_kabuli_chr07 | 5652778                 | TT                              | CC              | 1946881078               |
| SNP_P4_91676_5653554 | NC_021166.1    | Ca_kabuli_chr07 | 5653554                 | TT                              | GG              | 1946881080               |
| SNP_P4_91677_5655877 | NC_021166.1    | Ca_kabuli_chr07 | 5655877                 | CC                              | GG              | 1946881082               |
| SNP_P4_91678_5655878 | NC_021166.1    | Ca_kabuli_chr07 | 5655878                 | GG                              | AA              | 1946881084               |
| SNP_P4_91679_5656723 | NC_021166.1    | Ca_kabuli_chr07 | 5656723                 | GG                              | TT              | 1946881086               |
| SNP_P4_91680_5658111 | NC_021166.1    | Ca_kabuli_chr07 | 5658111                 | CC                              | TT              | 1946881088               |
| SNP_P4_91682_5658617 | NC_021166.1    | Ca_kabuli_chr07 | 5658617                 | TT                              | AA              | 1946881090               |
| SNP_P4_91683_5658628 | NC_021166.1    | Ca_kabuli_chr07 | 5658628                 | GG                              | AA              | 1946881092               |
| SNP_P4_91684_5658648 | NC_021166.1    | Ca_kabuli_chr07 | 5658648                 | CC                              | AA              | 1946881094               |
| SNP_P4_91685_5658717 | NC_021166.1    | Ca_kabuli_chr07 | 5658717                 | CC                              | TT              | 1946881096               |
| SNP_P4_91686_5658718 | NC_021166.1    | Ca_kabuli_chr07 | 5658718                 | GG                              | AA              | 1946881098               |
| SNP_P4_91687_5658730 | NC_021166.1    | Ca_kabuli_chr07 | 5658730                 | CC                              | TT              | 1946881100               |

| SNPs IDs             | Chromosome IDs | Chromosomes     | Physical positions (bp) | CDC Frontier (Reference genome) | (ILWC46 & LPNB) | NCBI SNPdb Accession IDs |
|----------------------|----------------|-----------------|-------------------------|---------------------------------|-----------------|--------------------------|
| SNP_P4_91689_5658830 | NC_021166.1    | Ca_kabuli_chr07 | 5658830                 | AA                              | TT              | 1946881102               |
| SNP_P4_91690_5659038 | NC_021166.1    | Ca_kabuli_chr07 | 5659038                 | GG                              | AA              | 1946881104               |
| SNP_P4_91691_5659097 | NC_021166.1    | Ca_kabuli_chr07 | 5659097                 | GG                              | AA              | 1946881106               |
| SNP_P4_91692_5659183 | NC_021166.1    | Ca_kabuli_chr07 | 5659183                 | AA                              | GG              | 1946881108               |
| SNP_P4_91693_5659206 | NC_021166.1    | Ca_kabuli_chr07 | 5659206                 | TT                              | CC              | 1946881110               |
| SNP_P4_91694_5659313 | NC_021166.1    | Ca_kabuli_chr07 | 5659313                 | AA                              | GG              | 1946881112               |
| SNP_P4_91695_5661884 | NC_021166.1    | Ca_kabuli_chr07 | 5661884                 | GG                              | AA              | 1946881114               |
| SNP_P4_91696_5661927 | NC_021166.1    | Ca_kabuli_chr07 | 5661927                 | AA                              | GG              | 1946881116               |
| SNP_P4_91697_5661942 | NC_021166.1    | Ca_kabuli_chr07 | 5661942                 | CC                              | TT              | 1946881117               |
| SNP_P4_91698_5662312 | NC_021166.1    | Ca_kabuli_chr07 | 5662312                 | CC                              | TT              | 1946881118               |
| SNP_P4_91699_5662414 | NC_021166.1    | Ca_kabuli_chr07 | 5662414                 | CC                              | TT              | 1946881119               |
| SNP_P4_91700_5662417 | NC_021166.1    | Ca_kabuli_chr07 | 5662417                 | GG                              | CC              | 1946881120               |
| SNP_P4_91701_5662910 | NC_021166.1    | Ca_kabuli_chr07 | 5662910                 | GG                              | AA              | 1946881122               |
| SNP_P4_91702_5663131 | NC_021166.1    | Ca_kabuli_chr07 | 5663131                 | AA                              | TT              | 1946881124               |
| SNP_P4_91703_5663271 | NC_021166.1    | Ca_kabuli_chr07 | 5663271                 | GG                              | TT              | 1946881126               |
| SNP_P4_91705_5663335 | NC_021166.1    | Ca_kabuli_chr07 | 5663335                 | CC                              | AA              | 1946881128               |
| SNP_P4_91706_5663337 | NC_021166.1    | Ca_kabuli_chr07 | 5663337                 | CC                              | AA              | 1946881130               |
| SNP_P4_91707_5663340 | NC_021166.1    | Ca_kabuli_chr07 | 5663340                 | GG                              | AA              | 1946881132               |
| SNP_P4_91708_5663384 | NC_021166.1    | Ca_kabuli_chr07 | 5663384                 | CC                              | TT              | 1946881134               |
| SNP_P4_91710_5666454 | NC_021166.1    | Ca_kabuli_chr07 | 5666454                 | AA                              | CC              | 1946881137               |
| SNP_P4_91711_5666593 | NC_021166.1    | Ca_kabuli_chr07 | 5666593                 | AA                              | GG              | 1946881139               |
| SNP_P4_91712_5666705 | NC_021166.1    | Ca_kabuli_chr07 | 5666705                 | TT                              | CC              | 1946881141               |
| SNP_P4_91713_5666810 | NC_021166.1    | Ca_kabuli_chr07 | 5666810                 | AA                              | CC              | 1946881143               |
| SNP_P4_91714_5667013 | NC_021166.1    | Ca_kabuli_chr07 | 5667013                 | GG                              | AA              | 1946881145               |
| SNP_P4_91716_5668076 | NC_021166.1    | Ca_kabuli_chr07 | 5668076                 | GG                              | AA              | 1946881147               |
| SNP_P4_91717_5668128 | NC_021166.1    | Ca_kabuli_chr07 | 5668128                 | GG                              | AA              | 1946881149               |
| SNP_P4_91718_5669601 | NC_021166.1    | Ca_kabuli_chr07 | 5669601                 | CC                              | AA              | 1946881151               |
| SNP_P4_91719_5670868 | NC_021166.1    | Ca_kabuli_chr07 | 5670868                 | TT                              | CC              | 1946881153               |
| SNP_P4_91720_5670895 | NC_021166.1    | Ca_kabuli_chr07 | 5670895                 | CC                              | GG              | 1946881155               |
| SNP_P4_91721_5671529 | NC_021166.1    | Ca_kabuli_chr07 | 5671529                 | AA                              | CC              | 1946881157               |
| SNP_P4_91723_5671735 | NC_021166.1    | Ca_kabuli_chr07 | 5671735                 | CC                              | TT              | 1946881159               |
| SNP_P4_91725_5671807 | NC_021166.1    | Ca_kabuli_chr07 | 5671807                 | TT                              | CC              | 1946881161               |
| SNP_P4_91726_5671902 | NC_021166.1    | Ca_kabuli_chr07 | 5671902                 | GG                              | TT              | 1946881163               |
| SNP_P4_91727_5672245 | NC_021166.1    | Ca_kabuli_chr07 | 5672245                 | CC                              | AA              | 1946881165               |
| SNP_P4_91728_5672612 | NC_021166.1    | Ca_kabuli_chr07 | 5672612                 | AA                              | GG              | 1946881167               |
| SNP_P4_91729_5672770 | NC_021166.1    | Ca_kabuli_chr07 | 5672770                 | CC                              | TT              | 1946881169               |
| SNP_P4_91730_5672782 | NC_021166.1    | Ca_kabuli_chr07 | 5672782                 | CC                              | GG              | 1946881171               |
| SNP_P4_91731_5673917 | NC_021166.1    | Ca_kabuli_chr07 | 5673917                 | GG                              | TT              | 1946881173               |
| SNP_P4_91732_5675197 | NC_021166.1    | Ca_kabuli_chr07 | 5675197                 | CC                              | TT              | 1946881175               |
| SNP_P4_91733_5675211 | NC_021166.1    | Ca_kabuli_chr07 | 5675211                 | CC                              | TT              | 1946881177               |
| SNP_P4_91734_5678094 | NC_021166.1    | Ca_kabuli_chr07 | 5678094                 | AA                              | GG              | 1946881179               |
| SNP_P4_91735_5679892 | NC_021166.1    | Ca_kabuli_chr07 | 5679892                 | CC                              | TT              | 1946881181               |

| SNPs IDs             | Chromosome IDs | Chromosomes     | Physical positions (bp) | CDC Frontier (Reference genome) | (ILWC46 & LPNB) | NCBI SNPdb Accession IDs |
|----------------------|----------------|-----------------|-------------------------|---------------------------------|-----------------|--------------------------|
| SNP_P4_91736_5680824 | NC_021166.1    | Ca_kabuli_chr07 | 5680824                 | GG                              | AA              | 1946881183               |
| SNP_P4_91737_5680890 | NC_021166.1    | Ca_kabuli_chr07 | 5680890                 | AA                              | GG              | 1946881185               |
| SNP_P4_91739_5683352 | NC_021166.1    | Ca_kabuli_chr07 | 5683352                 | TT                              | AA              | 1946881187               |
| SNP_P4_91740_5683412 | NC_021166.1    | Ca_kabuli_chr07 | 5683412                 | TT                              | AA              | 1946881189               |
| SNP_P4_91741_5683635 | NC_021166.1    | Ca_kabuli_chr07 | 5683635                 | GG                              | CC              | 1946881191               |
| SNP_P4_91742_5683708 | NC_021166.1    | Ca_kabuli_chr07 | 5683708                 | TT                              | GG              | 1946881193               |
| SNP_P4_91743_5683709 | NC_021166.1    | Ca_kabuli_chr07 | 5683709                 | TT                              | AA              | 1946881195               |
| SNP_P4_91744_5684249 | NC_021166.1    | Ca_kabuli_chr07 | 5684249                 | CC                              | TT              | 1946881197               |
| SNP_P4_91746_5685270 | NC_021166.1    | Ca_kabuli_chr07 | 5685270                 | GG                              | AA              | 1946881199               |
| SNP_P4_91750_5686621 | NC_021166.1    | Ca_kabuli_chr07 | 5686621                 | GG                              | TT              | 1946881201               |
| SNP_P4_91752_5686696 | NC_021166.1    | Ca_kabuli_chr07 | 5686696                 | TT                              | AA              | 1946881203               |
| SNP_P4_91754_5686731 | NC_021166.1    | Ca_kabuli_chr07 | 5686731                 | AA                              | TT              | 1946881205               |
| SNP_P4_91755_5686804 | NC_021166.1    | Ca_kabuli_chr07 | 5686804                 | TT                              | AA              | 1946881207               |
| SNP_P4_91757_5688892 | NC_021166.1    | Ca_kabuli_chr07 | 5688892                 | CC                              | TT              | 1946881209               |
| SNP_P4_91758_5688895 | NC_021166.1    | Ca_kabuli_chr07 | 5688895                 | GG                              | TT              | 1946881211               |
| SNP_P4_91759_5688899 | NC_021166.1    | Ca_kabuli_chr07 | 5688899                 | TT                              | CC              | 1946881213               |
| SNP_P4_91760_5688907 | NC_021166.1    | Ca_kabuli_chr07 | 5688907                 | AA                              | GG              | 1946881215               |
| SNP_P4_91761_5688922 | NC_021166.1    | Ca_kabuli_chr07 | 5688922                 | TT                              | CC              | 1946881217               |
| SNP_P4_91762_5688936 | NC_021166.1    | Ca_kabuli_chr07 | 5688936                 | TT                              | CC              | 1946881219               |
| SNP_P4_91763_5689225 | NC_021166.1    | Ca_kabuli_chr07 | 5689225                 | TT                              | CC              | 1946881221               |
| SNP_P4_91764_5689280 | NC_021166.1    | Ca_kabuli_chr07 | 5689280                 | TT                              | CC              | 1946881223               |
| SNP_P4_91766_5689391 | NC_021166.1    | Ca_kabuli_chr07 | 5689391                 | CC                              | TT              | 1946881224               |
| SNP_P4_91767_5689417 | NC_021166.1    | Ca_kabuli_chr07 | 5689417                 | CC                              | TT              | 1946881226               |
| SNP_P4_91768_5689551 | NC_021166.1    | Ca_kabuli_chr07 | 5689551                 | TT                              | GG              | 1946881228               |
| SNP_P4_91769_5689555 | NC_021166.1    | Ca_kabuli_chr07 | 5689555                 | CC                              | TT              | 1946881230               |
| SNP_P4_91770_5689648 | NC_021166.1    | Ca_kabuli_chr07 | 5689648                 | TT                              | CC              | 1946881232               |
| SNP_P4_91771_5689658 | NC_021166.1    | Ca_kabuli_chr07 | 5689658                 | AA                              | TT              | 1946881234               |
| SNP_P4_91772_5692148 | NC_021166.1    | Ca_kabuli_chr07 | 5692148                 | AA                              | GG              | 1946881236               |
| SNP_P4_91773_5692272 | NC_021166.1    | Ca_kabuli_chr07 | 5692272                 | CC                              | TT              | 1946881238               |
| SNP_P4_91774_5693990 | NC_021166.1    | Ca_kabuli_chr07 | 5693990                 | GG                              | TT              | 1946881240               |
| SNP_P4_91775_5694253 | NC_021166.1    | Ca_kabuli_chr07 | 5694253                 | AA                              | CC              | 1946881242               |
| SNP_P4_91776_5694270 | NC_021166.1    | Ca_kabuli_chr07 | 5694270                 | CC                              | AA              | 1946881244               |
| SNP_P4_91778_5695638 | NC_021166.1    | Ca_kabuli_chr07 | 5695638                 | TT                              | CC              | 1946881246               |
| SNP_P4_91779_5695644 | NC_021166.1    | Ca_kabuli_chr07 | 5695644                 | AA                              | GG              | 1946881248               |
| SNP_P4_91780_5695647 | NC_021166.1    | Ca_kabuli_chr07 | 5695647                 | CC                              | TT              | 1946881250               |
| SNP_P4_91781_5696141 | NC_021166.1    | Ca_kabuli_chr07 | 5696141                 | CC                              | TT              | 1946881252               |
| SNP_P4_91782_5696164 | NC_021166.1    | Ca_kabuli_chr07 | 5696164                 | CC                              | TT              | 1946881254               |
| SNP_P4_91783_5696184 | NC_021166.1    | Ca_kabuli_chr07 | 5696184                 | AA                              | GG              | 1946881256               |
| SNP_P4_91784_5697070 | NC_021166.1    | Ca_kabuli_chr07 | 5697070                 | AA                              | GG              | 1946881258               |
| SNP_P4_91785_5697226 | NC_021166.1    | Ca_kabuli_chr07 | 5697226                 | TT                              | CC              | 1946881260               |
| SNP_P4_91786_5697330 | NC_021166.1    | Ca_kabuli_chr07 | 5697330                 | TT                              | GG              | 1946881262               |
| SNP_P4_91788_5697480 | NC_021166.1    | Ca_kabuli_chr07 | 5697480                 | TT                              | CC              | 1946881264               |



| SNPs IDs             | Chromosome IDs | Chromosomes     | Physical positions (bp) | CDC Frontier (Reference genome) | (ILWC46 & LPNB) | NCBI SNPdb Accession IDs |
|----------------------|----------------|-----------------|-------------------------|---------------------------------|-----------------|--------------------------|
| SNP_P4_91789_5697569 | NC_021166.1    | Ca_kabuli_chr07 | 5697569                 | CC                              | TT              | 1946881266               |
| SNP_P4_91792_5699934 | NC_021166.1    | Ca_kabuli_chr07 | 5699934                 | GG                              | AA              | 1946881268               |
| SNP_P4_91793_5700144 | NC_021166.1    | Ca_kabuli_chr07 | 5700144                 | GG                              | AA              | 1946881270               |
| SNP_P4_91794_5701330 | NC_021166.1    | Ca_kabuli_chr07 | 5701330                 | TT                              | GG              | 1946881272               |
| SNP_P4_91795_5702568 | NC_021166.1    | Ca_kabuli_chr07 | 5702568                 | CC                              | TT              | 1946881273               |
| SNP_P4_91796_5702574 | NC_021166.1    | Ca_kabuli_chr07 | 5702574                 | CC                              | TT              | 1946881275               |
| SNP_P4_91798_5703700 | NC_021166.1    | Ca_kabuli_chr07 | 5703700                 | AA                              | GG              | 1946881277               |
| SNP_P4_91799_5703985 | NC_021166.1    | Ca_kabuli_chr07 | 5703985                 | AA                              | GG              | 1946881279               |
| SNP_P4_91801_5704996 | NC_021166.1    | Ca_kabuli_chr07 | 5704996                 | AA                              | GG              | 1946881281               |
| SNP_P4_91802_5704998 | NC_021166.1    | Ca_kabuli_chr07 | 5704998                 | TT                              | GG              | 1946881283               |
| SNP_P4_91803_5706083 | NC_021166.1    | Ca_kabuli_chr07 | 5706083                 | CC                              | TT              | 1946881285               |
| SNP_P4_91804_5706472 | NC_021166.1    | Ca_kabuli_chr07 | 5706472                 | GG                              | AA              | 1946881287               |
| SNP_P4_91805_5707216 | NC_021166.1    | Ca_kabuli_chr07 | 5707216                 | TT                              | CC              | 1946881289               |
| SNP_P4_91806_5707391 | NC_021166.1    | Ca_kabuli_chr07 | 5707391                 | AA                              | CC              | 1946881291               |
| SNP_P4_91807_5707405 | NC_021166.1    | Ca_kabuli_chr07 | 5707405                 | GG                              | CC              | 1946881293               |
| SNP_P4_91808_5708834 | NC_021166.1    | Ca_kabuli_chr07 | 5708834                 | AA                              | TT              | 1946881295               |
| SNP_P4_91809_5708851 | NC_021166.1    | Ca_kabuli_chr07 | 5708851                 | CC                              | GG              | 1946881297               |
| SNP_P4_91810_5709137 | NC_021166.1    | Ca_kabuli_chr07 | 5709137                 | TT                              | AA              | 1946881299               |
| SNP_P4_91811_5711421 | NC_021166.1    | Ca_kabuli_chr07 | 5711421                 | CC                              | TT              | 1946881301               |
| SNP_P4_91812_5712908 | NC_021166.1    | Ca_kabuli_chr07 | 5712908                 | GG                              | AA              | 1946881303               |
| SNP_P4_91813_5712945 | NC_021166.1    | Ca_kabuli_chr07 | 5712945                 | CC                              | GG              | 1946881305               |
| SNP_P4_91814_5713134 | NC_021166.1    | Ca_kabuli_chr07 | 5713134                 | TT                              | CC              | 1946881307               |
| SNP_P4_91815_5713212 | NC_021166.1    | Ca_kabuli_chr07 | 5713212                 | CC                              | TT              | 1946881309               |
| SNP_P4_91816_5713265 | NC_021166.1    | Ca_kabuli_chr07 | 5713265                 | CC                              | GG              | 1946881311               |
| SNP_P4_91818_5713495 | NC_021166.1    | Ca_kabuli_chr07 | 5713495                 | AA                              | GG              | 1946881313               |
| SNP_P4_91819_5713602 | NC_021166.1    | Ca_kabuli_chr07 | 5713602                 | AA                              | CC              | 1946881316               |
| SNP_P4_91820_5713620 | NC_021166.1    | Ca_kabuli_chr07 | 5713620                 | AA                              | CC              | 1946881318               |
| SNP_P4_91821_5713977 | NC_021166.1    | Ca_kabuli_chr07 | 5713977                 | TT                              | CC              | 1946881320               |
| SNP_P4_91822_5714715 | NC_021166.1    | Ca_kabuli_chr07 | 5714715                 | CC                              | TT              | 1946881322               |
| SNP_P4_91823_5714768 | NC_021166.1    | Ca_kabuli_chr07 | 5714768                 | TT                              | AA              | 1946881324               |
| SNP_P4_91824_5715071 | NC_021166.1    | Ca_kabuli_chr07 | 5715071                 | GG                              | AA              | 1946881326               |
| SNP_P4_91825_5715073 | NC_021166.1    | Ca_kabuli_chr07 | 5715073                 | TT                              | AA              | 1946881328               |
| SNP_P4_91826_5715140 | NC_021166.1    | Ca_kabuli_chr07 | 5715140                 | AA                              | GG              | 1946881330               |
| SNP_P4_91827_5715156 | NC_021166.1    | Ca_kabuli_chr07 | 5715156                 | TT                              | CC              | 1946881333               |
| SNP_P4_91829_5715456 | NC_021166.1    | Ca_kabuli_chr07 | 5715456                 | AA                              | TT              | 1946881335               |
| SNP_P4_91830_5715476 | NC_021166.1    | Ca_kabuli_chr07 | 5715476                 | TT                              | CC              | 1946881337               |
| SNP_P4_91831_5715477 | NC_021166.1    | Ca_kabuli_chr07 | 5715477                 | TT                              | AA              | 1946881339               |
| SNP_P4_91832_5715624 | NC_021166.1    | Ca_kabuli_chr07 | 5715624                 | CC                              | GG              | 1946881341               |
| SNP_P4_91833_5715630 | NC_021166.1    | Ca_kabuli_chr07 | 5715630                 | TT                              | AA              | 1946881343               |
| SNP_P4_91834_5715670 | NC_021166.1    | Ca_kabuli_chr07 | 5715670                 | AA                              | CC              | 1946881345               |
| SNP_P4_91835_5716209 | NC_021166.1    | Ca_kabuli_chr07 | 5716209                 | CC                              | TT              | 1946881347               |
| SNP_P4_91836_5716210 | NC_021166.1    | Ca_kabuli_chr07 | 5716210                 | AA                              | TT              | 1946881349               |

| SNPs IDs             | Chromosome IDs | Chromosomes     | Physical positions (bp) | CDC Frontier (Reference genome) | (ILWC46 & LPNB) | NCBI SNPdb Accession IDs |
|----------------------|----------------|-----------------|-------------------------|---------------------------------|-----------------|--------------------------|
| SNP_P4_91837_5716211 | NC_021166.1    | Ca_kabuli_chr07 | 5716211                 | CC                              | AA              | 1946881351               |
| SNP_P4_91838_5716601 | NC_021166.1    | Ca_kabuli_chr07 | 5716601                 | CC                              | TT              | 1946881353               |
| SNP_P4_91839_5716837 | NC_021166.1    | Ca_kabuli_chr07 | 5716837                 | AA                              | TT              | 1946881355               |
| SNP_P4_91842_5717141 | NC_021166.1    | Ca_kabuli_chr07 | 5717141                 | CC                              | TT              | 1946881357               |
| SNP_P4_91843_5717158 | NC_021166.1    | Ca_kabuli_chr07 | 5717158                 | GG                              | AA              | 1946881359               |
| SNP_P4_91845_5717240 | NC_021166.1    | Ca_kabuli_chr07 | 5717240                 | CC                              | TT              | 1946881361               |
| SNP_P4_91846_5717373 | NC_021166.1    | Ca_kabuli_chr07 | 5717373                 | CC                              | AA              | 1946881363               |
| SNP_P4_91849_5718036 | NC_021166.1    | Ca_kabuli_chr07 | 5718036                 | AA                              | TT              | 1946881366               |
| SNP_P4_91850_5718921 | NC_021166.1    | Ca_kabuli_chr07 | 5718921                 | AA                              | GG              | 1946881368               |
| SNP_P4_91851_5718931 | NC_021166.1    | Ca_kabuli_chr07 | 5718931                 | GG                              | AA              | 1946881370               |
| SNP_P4_91852_5718958 | NC_021166.1    | Ca_kabuli_chr07 | 5718958                 | CC                              | AA              | 1946881372               |
| SNP_P4_91854_5719640 | NC_021166.1    | Ca_kabuli_chr07 | 5719640                 | AA                              | CC              | 1946881374               |
| SNP_P4_91856_5722623 | NC_021166.1    | Ca_kabuli_chr07 | 5722623                 | GG                              | AA              | 1946881376               |
| SNP_P4_91858_5723107 | NC_021166.1    | Ca_kabuli_chr07 | 5723107                 | CC                              | TT              | 1946881378               |
| SNP_P4_91859_5723992 | NC_021166.1    | Ca_kabuli_chr07 | 5723992                 | CC                              | GG              | 1946881380               |
| SNP_P4_91862_5725797 | NC_021166.1    | Ca_kabuli_chr07 | 5725797                 | AA                              | GG              | 1946881382               |
| SNP_P4_91863_5726462 | NC_021166.1    | Ca_kabuli_chr07 | 5726462                 | CC                              | GG              | 1946881384               |
| SNP_P4_91864_5726764 | NC_021166.1    | Ca_kabuli_chr07 | 5726764                 | AA                              | GG              | 1946881386               |
| SNP_P4_91865_5728003 | NC_021166.1    | Ca_kabuli_chr07 | 5728003                 | TT                              | CC              | 1946881388               |
| SNP_P4_91867_5732068 | NC_021166.1    | Ca_kabuli_chr07 | 5732068                 | TT                              | CC              | 1946881390               |
| SNP_P4_91868_5732072 | NC_021166.1    | Ca_kabuli_chr07 | 5732072                 | CC                              | TT              | 1946881392               |
| SNP_P4_91870_5733412 | NC_021166.1    | Ca_kabuli_chr07 | 5733412                 | TT                              | GG              | 1946881394               |
| SNP_P4_91871_5734720 | NC_021166.1    | Ca_kabuli_chr07 | 5734720                 | TT                              | CC              | 1946881396               |
| SNP_P4_91872_5735621 | NC_021166.1    | Ca_kabuli_chr07 | 5735621                 | AA                              | GG              | 1946881398               |
| SNP_P4_91873_5735893 | NC_021166.1    | Ca_kabuli_chr07 | 5735893                 | GG                              | CC              | 1946881400               |
| SNP_P4_91874_5735906 | NC_021166.1    | Ca_kabuli_chr07 | 5735906                 | TT                              | GG              | 1946881402               |
| SNP_P4_91875_5737731 | NC_021166.1    | Ca_kabuli_chr07 | 5737731                 | TT                              | CC              | 1946881404               |
| SNP_P4_91877_5740948 | NC_021166.1    | Ca_kabuli_chr07 | 5740948                 | AA                              | GG              | 1946881406               |
| SNP_P4_91878_5741175 | NC_021166.1    | Ca_kabuli_chr07 | 5741175                 | CC                              | TT              | 1946881408               |
| SNP_P4_91879_5742872 | NC_021166.1    | Ca_kabuli_chr07 | 5742872                 | AA                              | GG              | 1946881410               |
| SNP_P4_91880_5745152 | NC_021166.1    | Ca_kabuli_chr07 | 5745152                 | AA                              | GG              | 1946881412               |
| SNP_P4_91881_5745158 | NC_021166.1    | Ca_kabuli_chr07 | 5745158                 | GG                              | AA              | 1946881414               |
| SNP_P4_91882_5745169 | NC_021166.1    | Ca_kabuli_chr07 | 5745169                 | AA                              | GG              | 1946881416               |
| SNP_P4_91883_5745173 | NC_021166.1    | Ca_kabuli_chr07 | 5745173                 | GG                              | AA              | 1946881418               |
| SNP_P4_91884_5745302 | NC_021166.1    | Ca_kabuli_chr07 | 5745302                 | TT                              | GG              | 1946881420               |
| SNP_P4_91885_5745308 | NC_021166.1    | Ca_kabuli_chr07 | 5745308                 | CC                              | TT              | 1946881423               |
| SNP_P4_91886_5745329 | NC_021166.1    | Ca_kabuli_chr07 | 5745329                 | AA                              | TT              | 1946881425               |
| SNP_P4_91887_5745338 | NC_021166.1    | Ca_kabuli_chr07 | 5745338                 | TT                              | GG              | 1946881427               |
| SNP_P4_91888_5745451 | NC_021166.1    | Ca_kabuli_chr07 | 5745451                 | GG                              | AA              | 1946881429               |
| SNP_P4_91889_5745481 | NC_021166.1    | Ca_kabuli_chr07 | 5745481                 | GG                              | TT              | 1946881431               |
| SNP_P4_91890_5745520 | NC_021166.1    | Ca_kabuli_chr07 | 5745520                 | TT                              | AA              | 1946881433               |
| SNP_P4_91891_5745526 | NC_021166.1    | Ca_kabuli_chr07 | 5745526                 | AA                              | GG              | 1946881435               |

| SNPs IDs             | Chromosome IDs | Chromosomes     | Physical positions (bp) | CDC Frontier (Reference genome) | (ILWC46 & LPNB) | NCBI SNPdb Accession IDs |
|----------------------|----------------|-----------------|-------------------------|---------------------------------|-----------------|--------------------------|
| SNP_P4_91892_5745538 | NC_021166.1    | Ca_kabuli_chr07 | 5745538                 | AA                              | GG              | 1946881437               |
| SNP_P4_91893_5745562 | NC_021166.1    | Ca_kabuli_chr07 | 5745562                 | AA                              | TT              | 1946881439               |
| SNP_P4_91894_5745567 | NC_021166.1    | Ca_kabuli_chr07 | 5745567                 | AA                              | GG              | 1946881441               |
| SNP_P4_91895_5745569 | NC_021166.1    | Ca_kabuli_chr07 | 5745569                 | CC                              | TT              | 1946881443               |
| SNP_P4_91896_5745583 | NC_021166.1    | Ca_kabuli_chr07 | 5745583                 | AA                              | TT              | 1946881445               |
| SNP_P4_91897_5745587 | NC_021166.1    | Ca_kabuli_chr07 | 5745587                 | TT                              | CC              | 1946881447               |
| SNP_P4_91898_5745589 | NC_021166.1    | Ca_kabuli_chr07 | 5745589                 | GG                              | AA              | 1946881449               |
| SNP_P4_91899_5745594 | NC_021166.1    | Ca_kabuli_chr07 | 5745594                 | TT                              | AA              | 1946881451               |
| SNP_P4_91900_5747376 | NC_021166.1    | Ca_kabuli_chr07 | 5747376                 | TT                              | CC              | 1946881453               |
| SNP_P4_91901_5747618 | NC_021166.1    | Ca_kabuli_chr07 | 5747618                 | GG                              | TT              | 1946881455               |
| SNP_P4_91902_5747619 | NC_021166.1    | Ca_kabuli_chr07 | 5747619                 | GG                              | AA              | 1946881457               |
| SNP_P4_91903_5756269 | NC_021166.1    | Ca_kabuli_chr07 | 5756269                 | CC                              | TT              | 1946881459               |
| SNP_P4_91904_5757339 | NC_021166.1    | Ca_kabuli_chr07 | 5757339                 | CC                              | GG              | 1946881461               |
| SNP_P4_91905_5759875 | NC_021166.1    | Ca_kabuli_chr07 | 5759875                 | AA                              | GG              | 1946881463               |
| SNP_P4_91906_5759877 | NC_021166.1    | Ca_kabuli_chr07 | 5759877                 | TT                              | CC              | 1946881465               |
| SNP_P4_91908_5761360 | NC_021166.1    | Ca_kabuli_chr07 | 5761360                 | AA                              | CC              | 1946881467               |
| SNP_P4_91909_5761555 | NC_021166.1    | Ca_kabuli_chr07 | 5761555                 | CC                              | GG              | 1946881469               |
| SNP_P4_91910_5761572 | NC_021166.1    | Ca_kabuli_chr07 | 5761572                 | GG                              | TT              | 1946881471               |
| SNP_P4_91911_5761637 | NC_021166.1    | Ca_kabuli_chr07 | 5761637                 | AA                              | TT              | 1946881473               |
| SNP_P4_91912_5764084 | NC_021166.1    | Ca_kabuli_chr07 | 5764084                 | TT                              | CC              | 1946881475               |
| SNP_P4_91913_5764117 | NC_021166.1    | Ca_kabuli_chr07 | 5764117                 | CC                              | TT              | 1946881477               |
| SNP_P4_91914_5764138 | NC_021166.1    | Ca_kabuli_chr07 | 5764138                 | TT                              | GG              | 1946881479               |
| SNP_P4_91915_5764141 | NC_021166.1    | Ca_kabuli_chr07 | 5764141                 | CC                              | TT              | 1946881481               |
| SNP_P4_91916_5767805 | NC_021166.1    | Ca_kabuli_chr07 | 5767805                 | GG                              | AA              | 1946881483               |
| SNP_P4_91917_5767841 | NC_021166.1    | Ca_kabuli_chr07 | 5767841                 | TT                              | AA              | 1946881485               |
| SNP_P4_91918_5767842 | NC_021166.1    | Ca_kabuli_chr07 | 5767842                 | TT                              | AA              | 1946881487               |
| SNP_P4_91920_5767903 | NC_021166.1    | Ca_kabuli_chr07 | 5767903                 | CC                              | TT              | 1946881489               |
| SNP_P4_91921_5767982 | NC_021166.1    | Ca_kabuli_chr07 | 5767982                 | AA                              | GG              | 1946881491               |
| SNP_P4_91922_5769021 | NC_021166.1    | Ca_kabuli_chr07 | 5769021                 | TT                              | CC              | 1946881492               |
| SNP_P4_91923_5769279 | NC_021166.1    | Ca_kabuli_chr07 | 5769279                 | AA                              | CC              | 1946881494               |
| SNP_P4_91924_5769392 | NC_021166.1    | Ca_kabuli_chr07 | 5769392                 | TT                              | AA              | 1946881496               |
| SNP_P4_91925_5769421 | NC_021166.1    | Ca_kabuli_chr07 | 5769421                 | CC                              | TT              | 1946881498               |
| SNP_P4_91926_5769450 | NC_021166.1    | Ca_kabuli_chr07 | 5769450                 | CC                              | TT              | 1946881500               |
| SNP_P4_91927_5769569 | NC_021166.1    | Ca_kabuli_chr07 | 5769569                 | GG                              | AA              | 1946881502               |
| SNP_P4_91928_5769645 | NC_021166.1    | Ca_kabuli_chr07 | 5769645                 | GG                              | TT              | 1946881504               |
| SNP_P4_91929_5772722 | NC_021166.1    | Ca_kabuli_chr07 | 5772722                 | TT                              | CC              | 1946881506               |
| SNP_P4_91930_5773123 | NC_021166.1    | Ca_kabuli_chr07 | 5773123                 | AA                              | GG              | 1946881508               |
| SNP_P4_91931_5773348 | NC_021166.1    | Ca_kabuli_chr07 | 5773348                 | AA                              | TT              | 1946881510               |
| SNP_P4_91932_5773444 | NC_021166.1    | Ca_kabuli_chr07 | 5773444                 | GG                              | AA              | 1946881512               |
| SNP_P4_91933_5774491 | NC_021166.1    | Ca_kabuli_chr07 | 5774491                 | GG                              | AA              | 1946881514               |
| SNP_P4_91934_5774885 | NC_021166.1    | Ca_kabuli_chr07 | 5774885                 | AA                              | CC              | 1946881516               |
| SNP_P4_91935_5774887 | NC_021166.1    | Ca_kabuli_chr07 | 5774887                 | TT                              | AA              | 1946881518               |

| SNPs IDs             | Chromosome IDs | Chromosomes     | Physical positions (bp) | CDC Frontier (Reference genome) | (ILWC46 & LPNB) | NCBI SNPdb Accession IDs |
|----------------------|----------------|-----------------|-------------------------|---------------------------------|-----------------|--------------------------|
| SNP_P4_91938_5775614 | NC_021166.1    | Ca_kabuli_chr07 | 5775614                 | AA                              | GG              | 1946881520               |
| SNP_P4_91939_5775908 | NC_021166.1    | Ca_kabuli_chr07 | 5775908                 | GG                              | AA              | 1946881521               |
| SNP_P4_91941_5778882 | NC_021166.1    | Ca_kabuli_chr07 | 5778882                 | TT                              | AA              | 1946881523               |
| SNP_P4_91943_5778956 | NC_021166.1    | Ca_kabuli_chr07 | 5778956                 | CC                              | TT              | 1946881525               |
| SNP_P4_91945_5779248 | NC_021166.1    | Ca_kabuli_chr07 | 5779248                 | GG                              | AA              | 1946881527               |
| SNP_P4_91946_5779307 | NC_021166.1    | Ca_kabuli_chr07 | 5779307                 | GG                              | AA              | 1946881529               |
| SNP_P4_91947_5779321 | NC_021166.1    | Ca_kabuli_chr07 | 5779321                 | GG                              | TT              | 1946881531               |
| SNP_P4_91948_5779374 | NC_021166.1    | Ca_kabuli_chr07 | 5779374                 | CC                              | AA              | 1946881533               |
| SNP_P4_91949_5779421 | NC_021166.1    | Ca_kabuli_chr07 | 5779421                 | TT                              | CC              | 1946881535               |
| SNP_P4_91950_5779424 | NC_021166.1    | Ca_kabuli_chr07 | 5779424                 | CC                              | AA              | 1946881537               |
| SNP_P4_91951_5779460 | NC_021166.1    | Ca_kabuli_chr07 | 5779460                 | AA                              | TT              | 1946881539               |
| SNP_P4_91952_5779507 | NC_021166.1    | Ca_kabuli_chr07 | 5779507                 | GG                              | TT              | 1946881541               |
| SNP_P4_91953_5781825 | NC_021166.1    | Ca_kabuli_chr07 | 5781825                 | CC                              | TT              | 1946881544               |
| SNP_P4_91954_5782051 | NC_021166.1    | Ca_kabuli_chr07 | 5782051                 | CC                              | TT              | 1946881546               |
| SNP_P4_91955_5783586 | NC_021166.1    | Ca_kabuli_chr07 | 5783586                 | GG                              | AA              | 1946881548               |
| SNP_P4_91956_5784077 | NC_021166.1    | Ca_kabuli_chr07 | 5784077                 | TT                              | AA              | 1946881550               |
| SNP_P4_91957_5784392 | NC_021166.1    | Ca_kabuli_chr07 | 5784392                 | AA                              | GG              | 1946881552               |
| SNP_P4_91958_5784399 | NC_021166.1    | Ca_kabuli_chr07 | 5784399                 | CC                              | TT              | 1946881554               |
| SNP_P4_91959_5784630 | NC_021166.1    | Ca_kabuli_chr07 | 5784630                 | CC                              | TT              | 1946881556               |
| SNP_P4_91960_5784641 | NC_021166.1    | Ca_kabuli_chr07 | 5784641                 | TT                              | CC              | 1946881558               |
| SNP_P4_91963_5786326 | NC_021166.1    | Ca_kabuli_chr07 | 5786326                 | AA                              | TT              | 1946881560               |
| SNP_P4_91964_5786640 | NC_021166.1    | Ca_kabuli_chr07 | 5786640                 | GG                              | AA              | 1946881562               |
| SNP_P4_91965_5786955 | NC_021166.1    | Ca_kabuli_chr07 | 5786955                 | CC                              | AA              | 1946881564               |
| SNP_P4_91966_5787042 | NC_021166.1    | Ca_kabuli_chr07 | 5787042                 | GG                              | CC              | 1946881566               |
| SNP_P4_91968_5787087 | NC_021166.1    | Ca_kabuli_chr07 | 5787087                 | AA                              | GG              | 1946881568               |
| SNP_P4_91969_5787188 | NC_021166.1    | Ca_kabuli_chr07 | 5787188                 | AA                              | CC              | 1946881570               |
| SNP_P4_91970_5787860 | NC_021166.1    | Ca_kabuli_chr07 | 5787860                 | AA                              | CC              | 1946881572               |
| SNP_P4_91971_5790666 | NC_021166.1    | Ca_kabuli_chr07 | 5790666                 | AA                              | CC              | 1946881574               |
| SNP_P4_91974_5791113 | NC_021166.1    | Ca_kabuli_chr07 | 5791113                 | TT                              | AA              | 1946881576               |
| SNP_P4_91976_5791242 | NC_021166.1    | Ca_kabuli_chr07 | 5791242                 | TT                              | AA              | 1946881578               |
| SNP_P4_91977_5791275 | NC_021166.1    | Ca_kabuli_chr07 | 5791275                 | GG                              | AA              | 1946881580               |
| SNP_P4_91978_5794165 | NC_021166.1    | Ca_kabuli_chr07 | 5794165                 | TT                              | CC              | 1946881582               |
| SNP_P4_91979_5794361 | NC_021166.1    | Ca_kabuli_chr07 | 5794361                 | AA                              | GG              | 1946881584               |
| SNP_P4_91980_5794745 | NC_021166.1    | Ca_kabuli_chr07 | 5794745                 | AA                              | TT              | 1946881586               |
| SNP_P4_91981_5796812 | NC_021166.1    | Ca_kabuli_chr07 | 5796812                 | TT                              | AA              | 1946881588               |
| SNP_P4_91982_5797028 | NC_021166.1    | Ca_kabuli_chr07 | 5797028                 | GG                              | AA              | 1946881590               |
| SNP_P4_91984_5798071 | NC_021166.1    | Ca_kabuli_chr07 | 5798071                 | CC                              | AA              | 1946881592               |
| SNP_P4_91985_5798090 | NC_021166.1    | Ca_kabuli_chr07 | 5798090                 | CC                              | TT              | 1946881594               |
| SNP_P4_91986_5798177 | NC_021166.1    | Ca_kabuli_chr07 | 5798177                 | TT                              | CC              | 1946881596               |
| SNP_P4_91987_5798282 | NC_021166.1    | Ca_kabuli_chr07 | 5798282                 | TT                              | AA              | 1946881598               |
| SNP_P4_91988_5798461 | NC_021166.1    | Ca_kabuli_chr07 | 5798461                 | TT                              | CC              | 1946881600               |
| SNP_P4_91989_5798553 | NC_021166.1    | Ca_kabuli_chr07 | 5798553                 | GG                              | CC              | 1946881602               |

| SNPs IDs             | Chromosome IDs | Chromosomes     | Physical positions (bp) | CDC Frontier (Reference genome) | (ILWC46 & LPNB) | NCBI SNPdb Accession IDs |
|----------------------|----------------|-----------------|-------------------------|---------------------------------|-----------------|--------------------------|
| SNP_P4_91990_5798670 | NC_021166.1    | Ca_kabuli_chr07 | 5798670                 | GG                              | AA              | 1946881604               |
| SNP_P4_91991_5799174 | NC_021166.1    | Ca_kabuli_chr07 | 5799174                 | CC                              | TT              | 1946881606               |
| SNP_P4_91994_5800000 | NC_021166.1    | Ca_kabuli_chr07 | 5800000                 | AA                              | GG              | 1946881608               |
| SNP_P4_91995_5800032 | NC_021166.1    | Ca_kabuli_chr07 | 5800032                 | CC                              | AA              | 1946881610               |
| SNP_P4_91996_5800081 | NC_021166.1    | Ca_kabuli_chr07 | 5800081                 | TT                              | CC              | 1946881612               |
| SNP_P4_91997_5800463 | NC_021166.1    | Ca_kabuli_chr07 | 5800463                 | TT                              | CC              | 1946881614               |
| SNP_P4_92000_5802355 | NC_021166.1    | Ca_kabuli_chr07 | 5802355                 | CC                              | GG              | 1946881616               |
| SNP_P4_92001_5802363 | NC_021166.1    | Ca_kabuli_chr07 | 5802363                 | CC                              | AA              | 1946881618               |
| SNP_P4_92002_5803525 | NC_021166.1    | Ca_kabuli_chr07 | 5803525                 | AA                              | CC              | 1946881620               |
| SNP_P4_92004_5803551 | NC_021166.1    | Ca_kabuli_chr07 | 5803551                 | GG                              | AA              | 1946881622               |
| SNP_P4_92005_5803735 | NC_021166.1    | Ca_kabuli_chr07 | 5803735                 | TT                              | AA              | 1946881624               |
| SNP_P4_92007_5804060 | NC_021166.1    | Ca_kabuli_chr07 | 5804060                 | AA                              | GG              | 1946881626               |
| SNP_P4_92008_5804078 | NC_021166.1    | Ca_kabuli_chr07 | 5804078                 | TT                              | CC              | 1946881628               |
| SNP_P4_92009_5804472 | NC_021166.1    | Ca_kabuli_chr07 | 5804472                 | CC                              | TT              | 1946881630               |
| SNP_P4_92010_5804836 | NC_021166.1    | Ca_kabuli_chr07 | 5804836                 | GG                              | AA              | 1946881632               |
| SNP_P4_92011_5804896 | NC_021166.1    | Ca_kabuli_chr07 | 5804896                 | TT                              | AA              | 1946881634               |
| SNP_P4_92012_5805258 | NC_021166.1    | Ca_kabuli_chr07 | 5805258                 | GG                              | AA              | 1946881636               |
| SNP_P4_92013_5805415 | NC_021166.1    | Ca_kabuli_chr07 | 5805415                 | GG                              | CC              | 1946881638               |
| SNP_P4_92014_5805733 | NC_021166.1    | Ca_kabuli_chr07 | 5805733                 | GG                              | AA              | 1946881640               |
| SNP_P4_92015_5806292 | NC_021166.1    | Ca_kabuli_chr07 | 5806292                 | AA                              | GG              | 1946881642               |
| SNP_P4_92016_5806293 | NC_021166.1    | Ca_kabuli_chr07 | 5806293                 | GG                              | AA              | 1946881644               |
| SNP_P4_92017_5806308 | NC_021166.1    | Ca_kabuli_chr07 | 5806308                 | CC                              | TT              | 1946881646               |
| SNP_P4_92018_5806323 | NC_021166.1    | Ca_kabuli_chr07 | 5806323                 | AA                              | TT              | 1946881648               |
| SNP_P4_92019_5806337 | NC_021166.1    | Ca_kabuli_chr07 | 5806337                 | AA                              | GG              | 1946881650               |
| SNP_P4_92020_5806668 | NC_021166.1    | Ca_kabuli_chr07 | 5806668                 | AA                              | GG              | 1946881652               |
| SNP_P4_92022_5807848 | NC_021166.1    | Ca_kabuli_chr07 | 5807848                 | AA                              | CC              | 1946881654               |
| SNP_P4_92023_5809085 | NC_021166.1    | Ca_kabuli_chr07 | 5809085                 | TT                              | GG              | 1946881655               |
| SNP_P4_92024_5810315 | NC_021166.1    | Ca_kabuli_chr07 | 5810315                 | CC                              | TT              | 1946881657               |
| SNP_P4_92025_5811251 | NC_021166.1    | Ca_kabuli_chr07 | 5811251                 | AA                              | CC              | 1946881659               |
| SNP_P4_92026_5812505 | NC_021166.1    | Ca_kabuli_chr07 | 5812505                 | AA                              | TT              | 1946881661               |
| SNP_P4_92027_5813338 | NC_021166.1    | Ca_kabuli_chr07 | 5813338                 | CC                              | TT              | 1946881663               |
| SNP_P4_92029_5813860 | NC_021166.1    | Ca_kabuli_chr07 | 5813860                 | CC                              | TT              | 1946881665               |
| SNP_P4_92030_5813885 | NC_021166.1    | Ca_kabuli_chr07 | 5813885                 | TT                              | CC              | 1946881667               |
| SNP_P4_92031_5817057 | NC_021166.1    | Ca_kabuli_chr07 | 5817057                 | CC                              | GG              | 1946881669               |
| SNP_P4_92032_5817077 | NC_021166.1    | Ca_kabuli_chr07 | 5817077                 | CC                              | GG              | 1946881671               |
| SNP_P4_92033_5817100 | NC_021166.1    | Ca_kabuli_chr07 | 5817100                 | AA                              | GG              | 1946881673               |
| SNP_P4_92034_5817354 | NC_021166.1    | Ca_kabuli_chr07 | 5817354                 | CC                              | AA              | 1946881675               |
| SNP_P4_92036_5817705 | NC_021166.1    | Ca_kabuli_chr07 | 5817705                 | TT                              | CC              | 1946881677               |
| SNP_P4_92037_5817761 | NC_021166.1    | Ca_kabuli_chr07 | 5817761                 | CC                              | TT              | 1946881679               |
| SNP_P4_92038_5817773 | NC_021166.1    | Ca_kabuli_chr07 | 5817773                 | AA                              | GG              | 1946881680               |
| SNP_P4_92039_5817780 | NC_021166.1    | Ca_kabuli_chr07 | 5817780                 | CC                              | TT              | 1946881682               |
| SNP_P4_92040_5817804 | NC_021166.1    | Ca_kabuli_chr07 | 5817804                 | AA                              | GG              | 1946881684               |

| SNPs IDs             | Chromosome IDs | Chromosomes     | Physical positions (bp) | CDC Frontier (Reference genome) | (ILWC46 & LPNB) | NCBI SNPdb Accession IDs |
|----------------------|----------------|-----------------|-------------------------|---------------------------------|-----------------|--------------------------|
| SNP_P4_92041_5818101 | NC_021166.1    | Ca_kabuli_chr07 | 5818101                 | AA                              | GG              | 1946881686               |
| SNP_P4_92042_5818391 | NC_021166.1    | Ca_kabuli_chr07 | 5818391                 | AA                              | GG              | 1946881688               |
| SNP_P4_92043_5818407 | NC_021166.1    | Ca_kabuli_chr07 | 5818407                 | GG                              | CC              | 1946881690               |
| SNP_P4_92044_5818416 | NC_021166.1    | Ca_kabuli_chr07 | 5818416                 | TT                              | CC              | 1946881692               |
| SNP_P4_92045_5818450 | NC_021166.1    | Ca_kabuli_chr07 | 5818450                 | GG                              | AA              | 1946881694               |
| SNP_P4_92046_5818595 | NC_021166.1    | Ca_kabuli_chr07 | 5818595                 | AA                              | GG              | 1946881696               |
| SNP_P4_92047_5818610 | NC_021166.1    | Ca_kabuli_chr07 | 5818610                 | CC                              | TT              | 1946881698               |
| SNP_P4_92048_5818674 | NC_021166.1    | Ca_kabuli_chr07 | 5818674                 | CC                              | TT              | 1946881700               |
| SNP_P4_92051_5819025 | NC_021166.1    | Ca_kabuli_chr07 | 5819025                 | CC                              | GG              | 1946881702               |
| SNP_P4_92052_5819204 | NC_021166.1    | Ca_kabuli_chr07 | 5819204                 | AA                              | CC              | 1946881704               |
| SNP_P4_92054_5819234 | NC_021166.1    | Ca_kabuli_chr07 | 5819234                 | GG                              | AA              | 1946881706               |
| SNP_P4_92055_5820118 | NC_021166.1    | Ca_kabuli_chr07 | 5820118                 | TT                              | AA              | 1946881708               |
| SNP_P4_92056_5820281 | NC_021166.1    | Ca_kabuli_chr07 | 5820281                 | GG                              | AA              | 1946881710               |
| SNP_P4_92057_5820302 | NC_021166.1    | Ca_kabuli_chr07 | 5820302                 | AA                              | TT              | 1946881712               |
| SNP_P4_92058_5820303 | NC_021166.1    | Ca_kabuli_chr07 | 5820303                 | TT                              | GG              | 1946881715               |
| SNP_P4_92059_5820738 | NC_021166.1    | Ca_kabuli_chr07 | 5820738                 | GG                              | CC              | 1946881717               |
| SNP_P4_92061_5821923 | NC_021166.1    | Ca_kabuli_chr07 | 5821923                 | AA                              | CC              | 1946881719               |
| SNP_P4_92062_5822257 | NC_021166.1    | Ca_kabuli_chr07 | 5822257                 | TT                              | AA              | 1946881721               |
| SNP_P4_92063_5822787 | NC_021166.1    | Ca_kabuli_chr07 | 5822787                 | CC                              | GG              | 1946881723               |
| SNP_P4_92064_5822812 | NC_021166.1    | Ca_kabuli_chr07 | 5822812                 | CC                              | TT              | 1946881725               |
| SNP_P4_92065_5826000 | NC_021166.1    | Ca_kabuli_chr07 | 5826000                 | TT                              | AA              | 1946881727               |
| SNP_P4_92066_5826270 | NC_021166.1    | Ca_kabuli_chr07 | 5826270                 | CC                              | TT              | 1946881729               |
| SNP_P4_92067_5826321 | NC_021166.1    | Ca_kabuli_chr07 | 5826321                 | CC                              | TT              | 1946881731               |
| SNP_P4_92068_5826327 | NC_021166.1    | Ca_kabuli_chr07 | 5826327                 | GG                              | AA              | 1946881733               |
| SNP_P4_92069_5826332 | NC_021166.1    | Ca_kabuli_chr07 | 5826332                 | AA                              | TT              | 1946881735               |
| SNP_P4_92070_5827537 | NC_021166.1    | Ca_kabuli_chr07 | 5827537                 | GG                              | AA              | 1946881737               |
| SNP_P4_92071_5827580 | NC_021166.1    | Ca_kabuli_chr07 | 5827580                 | GG                              | AA              | 1946881739               |
| SNP_P4_92072_5827729 | NC_021166.1    | Ca_kabuli_chr07 | 5827729                 | AA                              | TT              | 1946881741               |
| SNP_P4_92073_5827890 | NC_021166.1    | Ca_kabuli_chr07 | 5827890                 | TT                              | CC              | 1946881743               |
| SNP_P4_92074_5827898 | NC_021166.1    | Ca_kabuli_chr07 | 5827898                 | CC                              | TT              | 1946881745               |
| SNP_P4_92075_5827926 | NC_021166.1    | Ca_kabuli_chr07 | 5827926                 | CC                              | AA              | 1946881747               |
| SNP_P4_92076_5827967 | NC_021166.1    | Ca_kabuli_chr07 | 5827967                 | TT                              | CC              | 1946881749               |
| SNP_P4_92077_5828022 | NC_021166.1    | Ca_kabuli_chr07 | 5828022                 | TT                              | CC              | 1946881751               |
| SNP_P4_92078_5828025 | NC_021166.1    | Ca_kabuli_chr07 | 5828025                 | CC                              | TT              | 1946881753               |
| SNP_P4_92079_5828027 | NC_021166.1    | Ca_kabuli_chr07 | 5828027                 | AA                              | TT              | 1946881755               |
| SNP_P4_92080_5828040 | NC_021166.1    | Ca_kabuli_chr07 | 5828040                 | TT                              | CC              | 1946881757               |
| SNP_P4_92081_5828045 | NC_021166.1    | Ca_kabuli_chr07 | 5828045                 | CC                              | TT              | 1946881759               |
| SNP_P4_92082_5828200 | NC_021166.1    | Ca_kabuli_chr07 | 5828200                 | AA                              | TT              | 1946881761               |
| SNP_P4_92083_5828245 | NC_021166.1    | Ca_kabuli_chr07 | 5828245                 | CC                              | AA              | 1946881763               |
| SNP_P4_92084_5828250 | NC_021166.1    | Ca_kabuli_chr07 | 5828250                 | GG                              | CC              | 1946881765               |
| SNP_P4_92085_5830865 | NC_021166.1    | Ca_kabuli_chr07 | 5830865                 | CC                              | TT              | 1946881767               |
| SNP_P4_92088_5836534 | NC_021166.1    | Ca_kabuli_chr07 | 5836534                 | TT                              | CC              | 1946881769               |

| SNPs IDs             | Chromosome IDs | Chromosomes     | Physical positions (bp) | CDC Frontier (Reference genome) | (ILWC46 & LPNB) | NCBI SNPdb Accession IDs |
|----------------------|----------------|-----------------|-------------------------|---------------------------------|-----------------|--------------------------|
| SNP_P4_92089_5836787 | NC_021166.1    | Ca_kabuli_chr07 | 5836787                 | CC                              | AA              | 1946881771               |
| SNP_P4_92090_5836796 | NC_021166.1    | Ca_kabuli_chr07 | 5836796                 | CC                              | GG              | 1946881773               |
| SNP_P4_92091_5836819 | NC_021166.1    | Ca_kabuli_chr07 | 5836819                 | CC                              | TT              | 1946881775               |
| SNP_P4_92092_5836849 | NC_021166.1    | Ca_kabuli_chr07 | 5836849                 | GG                              | AA              | 1946881777               |
| SNP_P4_92093_5837145 | NC_021166.1    | Ca_kabuli_chr07 | 5837145                 | AA                              | GG              | 1946881779               |
| SNP_P4_92094_5837220 | NC_021166.1    | Ca_kabuli_chr07 | 5837220                 | GG                              | TT              | 1946881781               |
| SNP_P4_92095_5837643 | NC_021166.1    | Ca_kabuli_chr07 | 5837643                 | TT                              | CC              | 1946881783               |
| SNP_P4_92096_5838151 | NC_021166.1    | Ca_kabuli_chr07 | 5838151                 | CC                              | TT              | 1946881785               |
| SNP_P4_92097_5838449 | NC_021166.1    | Ca_kabuli_chr07 | 5838449                 | CC                              | TT              | 1946881787               |
| SNP_P4_92098_5838471 | NC_021166.1    | Ca_kabuli_chr07 | 5838471                 | TT                              | CC              | 1946881789               |
| SNP_P4_92099_5838531 | NC_021166.1    | Ca_kabuli_chr07 | 5838531                 | AA                              | GG              | 1946881791               |
| SNP_P4_92100_5838532 | NC_021166.1    | Ca_kabuli_chr07 | 5838532                 | GG                              | AA              | 1946881793               |
| SNP_P4_92102_5838917 | NC_021166.1    | Ca_kabuli_chr07 | 5838917                 | TT                              | CC              | 1946881795               |
| SNP_P4_92103_5838969 | NC_021166.1    | Ca_kabuli_chr07 | 5838969                 | GG                              | AA              | 1946881797               |
| SNP_P4_92105_5841649 | NC_021166.1    | Ca_kabuli_chr07 | 5841649                 | TT                              | GG              | 1946881799               |
| SNP_P4_92106_5841650 | NC_021166.1    | Ca_kabuli_chr07 | 5841650                 | TT                              | CC              | 1946881801               |
| SNP_P4_92108_5841723 | NC_021166.1    | Ca_kabuli_chr07 | 5841723                 | TT                              | CC              | 1946881803               |
| SNP_P4_92109_5841763 | NC_021166.1    | Ca_kabuli_chr07 | 5841763                 | TT                              | CC              | 1946881805               |
| SNP_P4_92111_5841927 | NC_021166.1    | Ca_kabuli_chr07 | 5841927                 | CC                              | GG              | 1946881807               |
| SNP_P4_92113_5842487 | NC_021166.1    | Ca_kabuli_chr07 | 5842487                 | GG                              | TT              | 1946881809               |
| SNP_P4_92114_5842506 | NC_021166.1    | Ca_kabuli_chr07 | 5842506                 | CC                              | AA              | 1946881811               |
| SNP_P4_92116_5842781 | NC_021166.1    | Ca_kabuli_chr07 | 5842781                 | AA                              | CC              | 1946881813               |
| SNP_P4_92117_5842819 | NC_021166.1    | Ca_kabuli_chr07 | 5842819                 | GG                              | TT              | 1946881815               |
| SNP_P4_92118_5842823 | NC_021166.1    | Ca_kabuli_chr07 | 5842823                 | GG                              | AA              | 1946881817               |
| SNP_P4_92120_5843231 | NC_021166.1    | Ca_kabuli_chr07 | 5843231                 | GG                              | AA              | 1946881819               |
| SNP_P4_92122_5843968 | NC_021166.1    | Ca_kabuli_chr07 | 5843968                 | CC                              | TT              | 1946881821               |
| SNP_P4_92123_5846477 | NC_021166.1    | Ca_kabuli_chr07 | 5846477                 | AA                              | GG              | 1946881823               |
| SNP_P4_92124_5846953 | NC_021166.1    | Ca_kabuli_chr07 | 5846953                 | GG                              | AA              | 1946881825               |
| SNP_P4_92125_5847957 | NC_021166.1    | Ca_kabuli_chr07 | 5847957                 | AA                              | CC              | 1946881827               |
| SNP_P4_92126_5850325 | NC_021166.1    | Ca_kabuli_chr07 | 5850325                 | GG                              | AA              | 1946881829               |
| SNP_P4_92127_5850341 | NC_021166.1    | Ca_kabuli_chr07 | 5850341                 | AA                              | GG              | 1946881831               |
| SNP_P4_92128_5850620 | NC_021166.1    | Ca_kabuli_chr07 | 5850620                 | TT                              | GG              | 1946881833               |
| SNP_P4_92130_5850658 | NC_021166.1    | Ca_kabuli_chr07 | 5850658                 | AA                              | GG              | 1946881835               |
| SNP_P4_92133_5851590 | NC_021166.1    | Ca_kabuli_chr07 | 5851590                 | TT                              | AA              | 1946881838               |
| SNP_P4_92134_5851591 | NC_021166.1    | Ca_kabuli_chr07 | 5851591                 | AA                              | GG              | 1946881840               |
| SNP_P4_92135_5851594 | NC_021166.1    | Ca_kabuli_chr07 | 5851594                 | CC                              | AA              | 1946881842               |
| SNP_P4_92136_5851596 | NC_021166.1    | Ca_kabuli_chr07 | 5851596                 | TT                              | CC              | 1946881844               |
| SNP_P4_92137_5851598 | NC_021166.1    | Ca_kabuli_chr07 | 5851598                 | TT                              | CC              | 1946881846               |
| SNP_P4_92138_5851616 | NC_021166.1    | Ca_kabuli_chr07 | 5851616                 | GG                              | AA              | 1946881848               |
| SNP_P4_92139_5851788 | NC_021166.1    | Ca_kabuli_chr07 | 5851788                 | AA                              | GG              | 1946881850               |
| SNP_P4_92140_5851879 | NC_021166.1    | Ca_kabuli_chr07 | 5851879                 | AA                              | GG              | 1946881852               |
| SNP_P4_92141_5851904 | NC_021166.1    | Ca_kabuli_chr07 | 5851904                 | CC                              | TT              | 1946881854               |

| SNPs IDs             | Chromosome IDs | Chromosomes     | Physical positions (bp) | CDC Frontier (Reference genome) | (ILWC46 & LPNB) | NCBI SNPdb Accession IDs |
|----------------------|----------------|-----------------|-------------------------|---------------------------------|-----------------|--------------------------|
| SNP_P4_92143_5852297 | NC_021166.1    | Ca_kabuli_chr07 | 5852297                 | AA                              | GG              | 1946881856               |
| SNP_P4_92144_5852978 | NC_021166.1    | Ca_kabuli_chr07 | 5852978                 | AA                              | GG              | 1946881858               |
| SNP_P4_92145_5853254 | NC_021166.1    | Ca_kabuli_chr07 | 5853254                 | CC                              | GG              | 1946881860               |
| SNP_P4_92146_5853545 | NC_021166.1    | Ca_kabuli_chr07 | 5853545                 | TT                              | CC              | 1946881862               |
| SNP_P4_92148_5857704 | NC_021166.1    | Ca_kabuli_chr07 | 5857704                 | TT                              | CC              | 1946881864               |
| SNP_P4_92149_5858345 | NC_021166.1    | Ca_kabuli_chr07 | 5858345                 | AA                              | GG              | 1946881866               |
| SNP_P4_92150_5858513 | NC_021166.1    | Ca_kabuli_chr07 | 5858513                 | CC                              | TT              | 1946881868               |
| SNP_P4_92152_5861237 | NC_021166.1    | Ca_kabuli_chr07 | 5861237                 | CC                              | TT              | 1946881870               |
| SNP_P4_92153_5861804 | NC_021166.1    | Ca_kabuli_chr07 | 5861804                 | AA                              | GG              | 1946881872               |
| SNP_P4_92156_5865548 | NC_021166.1    | Ca_kabuli_chr07 | 5865548                 | AA                              | CC              | 1946881875               |
| SNP_P4_92159_5867287 | NC_021166.1    | Ca_kabuli_chr07 | 5867287                 | CC                              | GG              | 1946881877               |
| SNP_P4_92161_5868088 | NC_021166.1    | Ca_kabuli_chr07 | 5868088                 | GG                              | AA              | 1946881879               |
| SNP_P4_92162_5868384 | NC_021166.1    | Ca_kabuli_chr07 | 5868384                 | TT                              | GG              | 1946881881               |
| SNP_P4_92163_5868392 | NC_021166.1    | Ca_kabuli_chr07 | 5868392                 | CC                              | TT              | 1946881883               |
| SNP_P4_92165_5868433 | NC_021166.1    | Ca_kabuli_chr07 | 5868433                 | AA                              | GG              | 1946881885               |
| SNP_P4_92166_5868452 | NC_021166.1    | Ca_kabuli_chr07 | 5868452                 | GG                              | TT              | 1946881887               |
| SNP_P4_92167_5868473 | NC_021166.1    | Ca_kabuli_chr07 | 5868473                 | CC                              | TT              | 1946881889               |
| SNP_P4_92168_5868478 | NC_021166.1    | Ca_kabuli_chr07 | 5868478                 | CC                              | TT              | 1946881891               |
| SNP_P4_92169_5868480 | NC_021166.1    | Ca_kabuli_chr07 | 5868480                 | CC                              | TT              | 1946881893               |
| SNP_P4_92170_5868490 | NC_021166.1    | Ca_kabuli_chr07 | 5868490                 | CC                              | TT              | 1946881895               |
| SNP_P4_92171_5868492 | NC_021166.1    | Ca_kabuli_chr07 | 5868492                 | CC                              | TT              | 1946881897               |
| SNP_P4_92172_5868737 | NC_021166.1    | Ca_kabuli_chr07 | 5868737                 | AA                              | CC              | 1946881899               |
| SNP_P4_92173_5868961 | NC_021166.1    | Ca_kabuli_chr07 | 5868961                 | GG                              | AA              | 1946881901               |
| SNP_P4_92174_5869383 | NC_021166.1    | Ca_kabuli_chr07 | 5869383                 | CC                              | GG              | 1946881903               |
| SNP_P4_92175_5869429 | NC_021166.1    | Ca_kabuli_chr07 | 5869429                 | GG                              | TT              | 1946881905               |
| SNP_P4_92176_5869444 | NC_021166.1    | Ca_kabuli_chr07 | 5869444                 | AA                              | TT              | 1946881907               |
| SNP_P4_92177_5869445 | NC_021166.1    | Ca_kabuli_chr07 | 5869445                 | TT                              | GG              | 1946881909               |
| SNP_P4_92178_5869459 | NC_021166.1    | Ca_kabuli_chr07 | 5869459                 | AA                              | GG              | 1946881911               |
| SNP_P4_92179_5869692 | NC_021166.1    | Ca_kabuli_chr07 | 5869692                 | AA                              | TT              | 1946881913               |
| SNP_P4_92180_5870604 | NC_021166.1    | Ca_kabuli_chr07 | 5870604                 | GG                              | TT              | 1946881915               |
| SNP_P4_92181_5870621 | NC_021166.1    | Ca_kabuli_chr07 | 5870621                 | AA                              | CC              | 1946881917               |
| SNP_P4_92182_5870685 | NC_021166.1    | Ca_kabuli_chr07 | 5870685                 | TT                              | CC              | 1946881919               |
| SNP_P4_92184_5870722 | NC_021166.1    | Ca_kabuli_chr07 | 5870722                 | TT                              | GG              | 1946881921               |
| SNP_P4_92185_5870768 | NC_021166.1    | Ca_kabuli_chr07 | 5870768                 | GG                              | TT              | 1946881923               |
| SNP_P4_92186_5870796 | NC_021166.1    | Ca_kabuli_chr07 | 5870796                 | CC                              | TT              | 1946881925               |
| SNP_P4_92187_5870798 | NC_021166.1    | Ca_kabuli_chr07 | 5870798                 | AA                              | GG              | 1946881927               |
| SNP_P4_92189_5871597 | NC_021166.1    | Ca_kabuli_chr07 | 5871597                 | GG                              | AA              | 1946881929               |
| SNP_P4_92190_5871659 | NC_021166.1    | Ca_kabuli_chr07 | 5871659                 | TT                              | CC              | 1946881931               |
| SNP_P4_92191_5871660 | NC_021166.1    | Ca_kabuli_chr07 | 5871660                 | GG                              | AA              | 1946881933               |
| SNP_P4_92192_5871678 | NC_021166.1    | Ca_kabuli_chr07 | 5871678                 | GG                              | AA              | 1946881935               |
| SNP_P4_92193_5872303 | NC_021166.1    | Ca_kabuli_chr07 | 5872303                 | AA                              | GG              | 1946881937               |
| SNP_P4_92194_5872307 | NC_021166.1    | Ca_kabuli_chr07 | 5872307                 | AA                              | TT              | 1946881939               |



| SNPs IDs             | Chromosome IDs | Chromosomes     | Physical positions (bp) | CDC Frontier (Reference genome) | (ILWC46 & LPNB) | NCBI SNPdb Accession IDs |
|----------------------|----------------|-----------------|-------------------------|---------------------------------|-----------------|--------------------------|
| SNP_P4_92195_5872320 | NC_021166.1    | Ca_kabuli_chr07 | 5872320                 | TT                              | AA              | 1946881941               |
| SNP_P4_92196_5872333 | NC_021166.1    | Ca_kabuli_chr07 | 5872333                 | TT                              | CC              | 1946881943               |
| SNP_P4_92197_5872349 | NC_021166.1    | Ca_kabuli_chr07 | 5872349                 | TT                              | CC              | 1946881945               |
| SNP_P4_92198_5872363 | NC_021166.1    | Ca_kabuli_chr07 | 5872363                 | TT                              | AA              | 1946881947               |
| SNP_P4_92199_5872376 | NC_021166.1    | Ca_kabuli_chr07 | 5872376                 | AA                              | TT              | 1946881949               |
| SNP_P4_92200_5872380 | NC_021166.1    | Ca_kabuli_chr07 | 5872380                 | TT                              | CC              | 1946881951               |
| SNP_P4_92201_5872535 | NC_021166.1    | Ca_kabuli_chr07 | 5872535                 | AA                              | GG              | 1946881953               |
| SNP_P4_92202_5872546 | NC_021166.1    | Ca_kabuli_chr07 | 5872546                 | GG                              | AA              | 1946881955               |
| SNP_P4_92203_5872574 | NC_021166.1    | Ca_kabuli_chr07 | 5872574                 | AA                              | GG              | 1946881958               |
| SNP_P4_92204_5872621 | NC_021166.1    | Ca_kabuli_chr07 | 5872621                 | TT                              | GG              | 1946881960               |
| SNP_P4_92205_5873153 | NC_021166.1    | Ca_kabuli_chr07 | 5873153                 | TT                              | CC              | 1946881962               |
| SNP_P4_92206_5873327 | NC_021166.1    | Ca_kabuli_chr07 | 5873327                 | AA                              | TT              | 1946881964               |
| SNP_P4_92207_5873329 | NC_021166.1    | Ca_kabuli_chr07 | 5873329                 | CC                              | TT              | 1946881966               |
| SNP_P4_92208_5873354 | NC_021166.1    | Ca_kabuli_chr07 | 5873354                 | CC                              | TT              | 1946881968               |
| SNP_P4_92209_5873714 | NC_021166.1    | Ca_kabuli_chr07 | 5873714                 | CC                              | TT              | 1946881970               |
| SNP_P4_92210_5874265 | NC_021166.1    | Ca_kabuli_chr07 | 5874265                 | CC                              | TT              | 1946881972               |
| SNP_P4_92211_5874275 | NC_021166.1    | Ca_kabuli_chr07 | 5874275                 | CC                              | AA              | 1946881974               |
| SNP_P4_92212_5874285 | NC_021166.1    | Ca_kabuli_chr07 | 5874285                 | AA                              | GG              | 1946881976               |
| SNP_P4_92213_5874294 | NC_021166.1    | Ca_kabuli_chr07 | 5874294                 | AA                              | TT              | 1946881978               |
| SNP_P4_92215_5874610 | NC_021166.1    | Ca_kabuli_chr07 | 5874610                 | TT                              | CC              | 1946881980               |
| SNP_P4_92216_5874638 | NC_021166.1    | Ca_kabuli_chr07 | 5874638                 | GG                              | TT              | 1946881982               |
| SNP_P4_92218_5875001 | NC_021166.1    | Ca_kabuli_chr07 | 5875001                 | AA                              | TT              | 1946881984               |
| SNP_P4_92219_5875004 | NC_021166.1    | Ca_kabuli_chr07 | 5875004                 | CC                              | GG              | 1946881986               |
| SNP_P4_92220_5875012 | NC_021166.1    | Ca_kabuli_chr07 | 5875012                 | AA                              | GG              | 1946881989               |
| SNP_P4_92222_5875179 | NC_021166.1    | Ca_kabuli_chr07 | 5875179                 | CC                              | TT              | 1946881990               |
| SNP_P4_92224_5875200 | NC_021166.1    | Ca_kabuli_chr07 | 5875200                 | GG                              | AA              | 1946881993               |
| SNP_P4_92226_5875331 | NC_021166.1    | Ca_kabuli_chr07 | 5875331                 | TT                              | GG              | 1946881995               |
| SNP_P4_92227_5875365 | NC_021166.1    | Ca_kabuli_chr07 | 5875365                 | AA                              | TT              | 1946881997               |
| SNP_P4_92228_5875533 | NC_021166.1    | Ca_kabuli_chr07 | 5875533                 | AA                              | TT              | 1946881999               |
| SNP_P4_92229_5876172 | NC_021166.1    | Ca_kabuli_chr07 | 5876172                 | AA                              | TT              | 1946882001               |
| SNP_P4_92230_5876256 | NC_021166.1    | Ca_kabuli_chr07 | 5876256                 | GG                              | AA              | 1946882003               |
| SNP_P4_92232_5876408 | NC_021166.1    | Ca_kabuli_chr07 | 5876408                 | GG                              | CC              | 1946882005               |
| SNP_P4_92233_5876417 | NC_021166.1    | Ca_kabuli_chr07 | 5876417                 | GG                              | AA              | 1946882007               |
| SNP_P4_92234_5876433 | NC_021166.1    | Ca_kabuli_chr07 | 5876433                 | GG                              | CC              | 1946882009               |
| SNP_P4_92235_5876630 | NC_021166.1    | Ca_kabuli_chr07 | 5876630                 | GG                              | AA              | 1946882011               |
| SNP_P4_92236_5876670 | NC_021166.1    | Ca_kabuli_chr07 | 5876670                 | CC                              | TT              | 1946882013               |
| SNP_P4_92238_5877626 | NC_021166.1    | Ca_kabuli_chr07 | 5877626                 | CC                              | TT              | 1946882015               |
| SNP_P4_92239_5878053 | NC_021166.1    | Ca_kabuli_chr07 | 5878053                 | CC                              | TT              | 1946882017               |
| SNP_P4_92240_5878063 | NC_021166.1    | Ca_kabuli_chr07 | 5878063                 | CC                              | TT              | 1946882019               |
| SNP_P4_92241_5878080 | NC_021166.1    | Ca_kabuli_chr07 | 5878080                 | CC                              | TT              | 1946882021               |
| SNP_P4_92242_5878099 | NC_021166.1    | Ca_kabuli_chr07 | 5878099                 | TT                              | AA              | 1946882023               |
| SNP_P4_92243_5878102 | NC_021166.1    | Ca_kabuli_chr07 | 5878102                 | TT                              | CC              | 1946882025               |

| SNPs IDs             | Chromosome IDs | Chromosomes     | Physical positions (bp) | CDC Frontier (Reference genome) | (ILWC46 & LPNB) | NCBI SNPdb Accession IDs |
|----------------------|----------------|-----------------|-------------------------|---------------------------------|-----------------|--------------------------|
| SNP_P4_92244_5882248 | NC_021166.1    | Ca_kabuli_chr07 | 5882248                 | GG                              | AA              | 1946882027               |
| SNP_P4_92245_5882674 | NC_021166.1    | Ca_kabuli_chr07 | 5882674                 | CC                              | AA              | 1946882029               |
| SNP_P4_92246_5882974 | NC_021166.1    | Ca_kabuli_chr07 | 5882974                 | TT                              | CC              | 1946882031               |
| SNP_P4_92247_5883991 | NC_021166.1    | Ca_kabuli_chr07 | 5883991                 | AA                              | GG              | 1946882033               |
| SNP_P4_92248_5884593 | NC_021166.1    | Ca_kabuli_chr07 | 5884593                 | TT                              | CC              | 1946882035               |
| SNP_P4_92250_5884725 | NC_021166.1    | Ca_kabuli_chr07 | 5884725                 | AA                              | GG              | 1946882037               |
| SNP_P4_92253_5884974 | NC_021166.1    | Ca_kabuli_chr07 | 5884974                 | TT                              | GG              | 1946882039               |
| SNP_P4_92254_5884999 | NC_021166.1    | Ca_kabuli_chr07 | 5884999                 | AA                              | TT              | 1946882041               |
| SNP_P4_92256_5886692 | NC_021166.1    | Ca_kabuli_chr07 | 5886692                 | AA                              | TT              | 1946882043               |
| SNP_P4_92258_5887011 | NC_021166.1    | Ca_kabuli_chr07 | 5887011                 | AA                              | TT              | 1946882045               |
| SNP_P4_92259_5888561 | NC_021166.1    | Ca_kabuli_chr07 | 5888561                 | AA                              | TT              | 1946882047               |
| SNP_P4_92260_5888566 | NC_021166.1    | Ca_kabuli_chr07 | 5888566                 | AA                              | GG              | 1946882049               |
| SNP_P4_92262_5889257 | NC_021166.1    | Ca_kabuli_chr07 | 5889257                 | AA                              | GG              | 1946882051               |
| SNP_P4_92263_5889274 | NC_021166.1    | Ca_kabuli_chr07 | 5889274                 | AA                              | TT              | 1946882053               |
| SNP_P4_92264_5889288 | NC_021166.1    | Ca_kabuli_chr07 | 5889288                 | GG                              | TT              | 1946882055               |
| SNP_P4_92265_5889293 | NC_021166.1    | Ca_kabuli_chr07 | 5889293                 | TT                              | CC              | 1946882057               |
| SNP_P4_92266_5889486 | NC_021166.1    | Ca_kabuli_chr07 | 5889486                 | TT                              | CC              | 1946882059               |
| SNP_P4_92267_5889770 | NC_021166.1    | Ca_kabuli_chr07 | 5889770                 | TT                              | AA              | 1946882061               |
| SNP_P4_92268_5889955 | NC_021166.1    | Ca_kabuli_chr07 | 5889955                 | GG                              | AA              | 1946882063               |
| SNP_P4_92269_5890074 | NC_021166.1    | Ca_kabuli_chr07 | 5890074                 | TT                              | AA              | 1946882065               |
| SNP_P4_92270_5890197 | NC_021166.1    | Ca_kabuli_chr07 | 5890197                 | TT                              | AA              | 1946882067               |
| SNP_P4_92272_5890427 | NC_021166.1    | Ca_kabuli_chr07 | 5890427                 | TT                              | CC              | 1946882069               |
| SNP_P4_92273_5890998 | NC_021166.1    | Ca_kabuli_chr07 | 5890998                 | CC                              | AA              | 1946882071               |
| SNP_P4_92275_5891850 | NC_021166.1    | Ca_kabuli_chr07 | 5891850                 | GG                              | TT              | 1946882073               |
| SNP_P4_92279_5894137 | NC_021166.1    | Ca_kabuli_chr07 | 5894137                 | GG                              | AA              | 1946882074               |
| SNP_P4_92280_5894152 | NC_021166.1    | Ca_kabuli_chr07 | 5894152                 | AA                              | CC              | 1946882076               |
| SNP_P4_92281_5894155 | NC_021166.1    | Ca_kabuli_chr07 | 5894155                 | GG                              | CC              | 1946882078               |
| SNP_P4_92282_5894384 | NC_021166.1    | Ca_kabuli_chr07 | 5894384                 | GG                              | TT              | 1946882080               |
| SNP_P4_92283_5894385 | NC_021166.1    | Ca_kabuli_chr07 | 5894385                 | CC                              | TT              | 1946882082               |
| SNP_P4_92284_5894405 | NC_021166.1    | Ca_kabuli_chr07 | 5894405                 | CC                              | TT              | 1946882084               |
| SNP_P4_92286_5894515 | NC_021166.1    | Ca_kabuli_chr07 | 5894515                 | TT                              | CC              | 1946882086               |
| SNP_P4_92287_5894516 | NC_021166.1    | Ca_kabuli_chr07 | 5894516                 | GG                              | AA              | 1946882088               |
| SNP_P4_92288_5894520 | NC_021166.1    | Ca_kabuli_chr07 | 5894520                 | AA                              | TT              | 1946882090               |
| SNP_P4_92289_5894569 | NC_021166.1    | Ca_kabuli_chr07 | 5894569                 | TT                              | GG              | 1946882092               |
| SNP_P4_92291_5895934 | NC_021166.1    | Ca_kabuli_chr07 | 5895934                 | TT                              | AA              | 1946882094               |
| SNP_P4_92293_5896471 | NC_021166.1    | Ca_kabuli_chr07 | 5896471                 | AA                              | TT              | 1946882096               |
| SNP_P4_92295_5896498 | NC_021166.1    | Ca_kabuli_chr07 | 5896498                 | TT                              | AA              | 1946882098               |
| SNP_P4_92296_5896634 | NC_021166.1    | Ca_kabuli_chr07 | 5896634                 | GG                              | TT              | 1946882100               |
| SNP_P4_92297_5896900 | NC_021166.1    | Ca_kabuli_chr07 | 5896900                 | TT                              | AA              | 1946882102               |
| SNP_P4_92298_5896923 | NC_021166.1    | Ca_kabuli_chr07 | 5896923                 | CC                              | TT              | 1946882104               |
| SNP_P4_92299_5896925 | NC_021166.1    | Ca_kabuli_chr07 | 5896925                 | CC                              | AA              | 1946882106               |
| SNP_P4_92301_5897240 | NC_021166.1    | Ca_kabuli_chr07 | 5897240                 | AA                              | TT              | 1946882108               |

| SNPs IDs             | Chromosome IDs | Chromosomes     | Physical positions (bp) | CDC Frontier (Reference genome) | (ILWC46 & LPNB) | NCBI SNPdb Accession IDs |
|----------------------|----------------|-----------------|-------------------------|---------------------------------|-----------------|--------------------------|
| SNP_P4_92302_5899676 | NC_021166.1    | Ca_kabuli_chr07 | 5899676                 | CC                              | GG              | 1946882110               |
| SNP_P4_92304_5899936 | NC_021166.1    | Ca_kabuli_chr07 | 5899936                 | CC                              | TT              | 1946882112               |
| SNP_P4_92305_5899978 | NC_021166.1    | Ca_kabuli_chr07 | 5899978                 | AA                              | GG              | 1946882114               |
| SNP_P4_92306_5899982 | NC_021166.1    | Ca_kabuli_chr07 | 5899982                 | AA                              | GG              | 1946882116               |
| SNP_P4_92308_5900195 | NC_021166.1    | Ca_kabuli_chr07 | 5900195                 | AA                              | GG              | 1946882118               |
| SNP_P4_92309_5900306 | NC_021166.1    | Ca_kabuli_chr07 | 5900306                 | CC                              | TT              | 1946882121               |
| SNP_P4_92310_5900635 | NC_021166.1    | Ca_kabuli_chr07 | 5900635                 | TT                              | AA              | 1946882123               |
| SNP_P4_92312_5900839 | NC_021166.1    | Ca_kabuli_chr07 | 5900839                 | CC                              | TT              | 1946882125               |
| SNP_P4_92313_5900840 | NC_021166.1    | Ca_kabuli_chr07 | 5900840                 | CC                              | GG              | 1946882127               |
| SNP_P4_92314_5900872 | NC_021166.1    | Ca_kabuli_chr07 | 5900872                 | CC                              | AA              | 1946882129               |
| SNP_P4_92315_5901006 | NC_021166.1    | Ca_kabuli_chr07 | 5901006                 | TT                              | CC              | 1946882131               |
| SNP_P4_92317_5901083 | NC_021166.1    | Ca_kabuli_chr07 | 5901083                 | GG                              | AA              | 1946882133               |
| SNP_P4_92319_5901537 | NC_021166.1    | Ca_kabuli_chr07 | 5901537                 | TT                              | AA              | 1946882135               |
| SNP_P4_92320_5901743 | NC_021166.1    | Ca_kabuli_chr07 | 5901743                 | AA                              | CC              | 1946882137               |
| SNP_P4_92321_5901757 | NC_021166.1    | Ca_kabuli_chr07 | 5901757                 | AA                              | GG              | 1946882139               |
| SNP_P4_92322_5901834 | NC_021166.1    | Ca_kabuli_chr07 | 5901834                 | TT                              | GG              | 1946882141               |
| SNP_P4_92323_5901919 | NC_021166.1    | Ca_kabuli_chr07 | 5901919                 | GG                              | AA              | 1946882143               |
| SNP_P4_92326_5902227 | NC_021166.1    | Ca_kabuli_chr07 | 5902227                 | CC                              | TT              | 1946882145               |
| SNP_P4_92327_5902251 | NC_021166.1    | Ca_kabuli_chr07 | 5902251                 | TT                              | CC              | 1946882147               |
| SNP_P4_92328_5902289 | NC_021166.1    | Ca_kabuli_chr07 | 5902289                 | TT                              | CC              | 1946882149               |
| SNP_P4_92329_5902305 | NC_021166.1    | Ca_kabuli_chr07 | 5902305                 | AA                              | TT              | 1946882151               |
| SNP_P4_92330_5902445 | NC_021166.1    | Ca_kabuli_chr07 | 5902445                 | AA                              | CC              | 1946882153               |
| SNP_P4_92331_5902676 | NC_021166.1    | Ca_kabuli_chr07 | 5902676                 | AA                              | TT              | 1946882155               |
| SNP_P4_92332_5902697 | NC_021166.1    | Ca_kabuli_chr07 | 5902697                 | TT                              | AA              | 1946882157               |
| SNP_P4_92333_5902793 | NC_021166.1    | Ca_kabuli_chr07 | 5902793                 | GG                              | TT              | 1946882159               |
| SNP_P4_92334_5905612 | NC_021166.1    | Ca_kabuli_chr07 | 5905612                 | GG                              | AA              | 1946882161               |
| SNP_P4_92336_5906579 | NC_021166.1    | Ca_kabuli_chr07 | 5906579                 | TT                              | GG              | 1946882163               |
| SNP_P4_92337_5907578 | NC_021166.1    | Ca_kabuli_chr07 | 5907578                 | CC                              | GG              | 1946882165               |
| SNP_P4_92339_5909050 | NC_021166.1    | Ca_kabuli_chr07 | 5909050                 | GG                              | AA              | 1946882166               |
| SNP_P4_92340_5909604 | NC_021166.1    | Ca_kabuli_chr07 | 5909604                 | AA                              | GG              | 1946882168               |
| SNP_P4_92341_5909630 | NC_021166.1    | Ca_kabuli_chr07 | 5909630                 | AA                              | GG              | 1946882170               |
| SNP_P4_92342_5909650 | NC_021166.1    | Ca_kabuli_chr07 | 5909650                 | CC                              | GG              | 1946882172               |
| SNP_P4_92343_5909981 | NC_021166.1    | Ca_kabuli_chr07 | 5909981                 | CC                              | GG              | 1946882175               |
| SNP_P4_92344_5910175 | NC_021166.1    | Ca_kabuli_chr07 | 5910175                 | AA                              | CC              | 1946882177               |
| SNP_P4_92345_5910358 | NC_021166.1    | Ca_kabuli_chr07 | 5910358                 | TT                              | GG              | 1946882179               |
| SNP_P4_92347_5911899 | NC_021166.1    | Ca_kabuli_chr07 | 5911899                 | CC                              | TT              | 1946882181               |
| SNP_P4_92348_5911930 | NC_021166.1    | Ca_kabuli_chr07 | 5911930                 | AA                              | GG              | 1946882183               |
| SNP_P4_92349_5912780 | NC_021166.1    | Ca_kabuli_chr07 | 5912780                 | GG                              | AA              | 1946882185               |
| SNP_P4_92350_5912966 | NC_021166.1    | Ca_kabuli_chr07 | 5912966                 | GG                              | AA              | 1946882187               |
| SNP_P4_92351_5912967 | NC_021166.1    | Ca_kabuli_chr07 | 5912967                 | CC                              | AA              | 1946882189               |
| SNP_P4_92352_5915822 | NC_021166.1    | Ca_kabuli_chr07 | 5915822                 | AA                              | CC              | 1946882191               |
| SNP_P4_92353_5917508 | NC_021166.1    | Ca_kabuli_chr07 | 5917508                 | CC                              | AA              | 1946882193               |

| SNPs IDs             | Chromosome IDs | Chromosomes     | Physical positions (bp) | CDC Frontier (Reference genome) | (ILWC46 & LPNB) | NCBI SNPdb Accession IDs |
|----------------------|----------------|-----------------|-------------------------|---------------------------------|-----------------|--------------------------|
| SNP_P4_92354_5917537 | NC_021166.1    | Ca_kabuli_chr07 | 5917537                 | TT                              | AA              | 1946882195               |
| SNP_P4_92355_5917575 | NC_021166.1    | Ca_kabuli_chr07 | 5917575                 | AA                              | GG              | 1946882197               |
| SNP_P4_92356_5917583 | NC_021166.1    | Ca_kabuli_chr07 | 5917583                 | TT                              | CC              | 1946882199               |
| SNP_P4_92357_5919487 | NC_021166.1    | Ca_kabuli_chr07 | 5919487                 | AA                              | GG              | 1946882201               |
| SNP_P4_92358_5919488 | NC_021166.1    | Ca_kabuli_chr07 | 5919488                 | AA                              | TT              | 1946882203               |
| SNP_P4_92359_5919518 | NC_021166.1    | Ca_kabuli_chr07 | 5919518                 | TT                              | AA              | 1946882205               |
| SNP_P4_92361_5925751 | NC_021166.1    | Ca_kabuli_chr07 | 5925751                 | TT                              | CC              | 1946882207               |
| SNP_P4_92362_5925923 | NC_021166.1    | Ca_kabuli_chr07 | 5925923                 | GG                              | AA              | 1946882209               |
| SNP_P4_92363_5925933 | NC_021166.1    | Ca_kabuli_chr07 | 5925933                 | TT                              | CC              | 1946882211               |
| SNP_P4_92365_5930778 | NC_021166.1    | Ca_kabuli_chr07 | 5930778                 | TT                              | AA              | 1946882213               |
| SNP_P4_92366_5931665 | NC_021166.1    | Ca_kabuli_chr07 | 5931665                 | CC                              | TT              | 1946882215               |
| SNP_P4_92367_5931691 | NC_021166.1    | Ca_kabuli_chr07 | 5931691                 | TT                              | AA              | 1946882217               |
| SNP_P4_92369_5931761 | NC_021166.1    | Ca_kabuli_chr07 | 5931761                 | AA                              | CC              | 1946882219               |
| SNP_P4_92370_5935704 | NC_021166.1    | Ca_kabuli_chr07 | 5935704                 | AA                              | CC              | 1946882221               |
| SNP_P4_92371_5935998 | NC_021166.1    | Ca_kabuli_chr07 | 5935998                 | AA                              | GG              | 1946882223               |
| SNP_P4_92372_5936000 | NC_021166.1    | Ca_kabuli_chr07 | 5936000                 | GG                              | TT              | 1946882225               |
| SNP_P4_92373_5936213 | NC_021166.1    | Ca_kabuli_chr07 | 5936213                 | GG                              | AA              | 1946882227               |
| SNP_P4_92375_5936243 | NC_021166.1    | Ca_kabuli_chr07 | 5936243                 | AA                              | GG              | 1946882229               |
| SNP_P4_92377_5936328 | NC_021166.1    | Ca_kabuli_chr07 | 5936328                 | TT                              | CC              | 1946882231               |
| SNP_P4_92379_5936499 | NC_021166.1    | Ca_kabuli_chr07 | 5936499                 | GG                              | TT              | 1946882233               |
| SNP_P4_92381_5936558 | NC_021166.1    | Ca_kabuli_chr07 | 5936558                 | TT                              | CC              | 1946882235               |
| SNP_P4_92382_5936587 | NC_021166.1    | Ca_kabuli_chr07 | 5936587                 | TT                              | CC              | 1946882237               |
| SNP_P4_92384_5936715 | NC_021166.1    | Ca_kabuli_chr07 | 5936715                 | AA                              | GG              | 1946882239               |
| SNP_P4_92386_5936849 | NC_021166.1    | Ca_kabuli_chr07 | 5936849                 | GG                              | AA              | 1946882241               |
| SNP_P4_92387_5936918 | NC_021166.1    | Ca_kabuli_chr07 | 5936918                 | AA                              | GG              | 1946882243               |
| SNP_P4_92388_5936936 | NC_021166.1    | Ca_kabuli_chr07 | 5936936                 | AA                              | TT              | 1946882245               |
| SNP_P4_92389_5936939 | NC_021166.1    | Ca_kabuli_chr07 | 5936939                 | GG                              | AA              | 1946882247               |
| SNP_P4_92390_5937022 | NC_021166.1    | Ca_kabuli_chr07 | 5937022                 | GG                              | AA              | 1946882249               |
| SNP_P4_92391_5937026 | NC_021166.1    | Ca_kabuli_chr07 | 5937026                 | AA                              | TT              | 1946882251               |
| SNP_P4_92392_5937052 | NC_021166.1    | Ca_kabuli_chr07 | 5937052                 | AA                              | CC              | 1946882253               |
| SNP_P4_92393_5937073 | NC_021166.1    | Ca_kabuli_chr07 | 5937073                 | CC                              | TT              | 1946882255               |
| SNP_P4_92394_5937075 | NC_021166.1    | Ca_kabuli_chr07 | 5937075                 | AA                              | GG              | 1946882257               |
| SNP_P4_92395_5937078 | NC_021166.1    | Ca_kabuli_chr07 | 5937078                 | CC                              | TT              | 1946882259               |
| SNP_P4_92396_5937134 | NC_021166.1    | Ca_kabuli_chr07 | 5937134                 | TT                              | CC              | 1946882261               |
| SNP_P4_92397_5937140 | NC_021166.1    | Ca_kabuli_chr07 | 5937140                 | AA                              | CC              | 1946882263               |
| SNP_P4_92398_5937172 | NC_021166.1    | Ca_kabuli_chr07 | 5937172                 | CC                              | TT              | 1946882265               |
| SNP_P4_92399_5937314 | NC_021166.1    | Ca_kabuli_chr07 | 5937314                 | AA                              | GG              | 1946882267               |
| SNP_P4_92400_5937336 | NC_021166.1    | Ca_kabuli_chr07 | 5937336                 | TT                              | AA              | 1946882269               |
| SNP_P4_92401_5937372 | NC_021166.1    | Ca_kabuli_chr07 | 5937372                 | CC                              | TT              | 1946882271               |
| SNP_P4_92402_5937430 | NC_021166.1    | Ca_kabuli_chr07 | 5937430                 | CC                              | TT              | 1946882273               |
| SNP_P4_92403_5937478 | NC_021166.1    | Ca_kabuli_chr07 | 5937478                 | GG                              | AA              | 1946882275               |
| SNP_P4_92404_5937498 | NC_021166.1    | Ca_kabuli_chr07 | 5937498                 | CC                              | AA              | 1946882277               |

| SNPs IDs             | Chromosome IDs | Chromosomes     | Physical positions (bp) | CDC Frontier (Reference genome) | (ILWC46 & LPNB) | NCBI SNPdb Accession IDs |
|----------------------|----------------|-----------------|-------------------------|---------------------------------|-----------------|--------------------------|
| SNP_P4_92406_5937738 | NC_021166.1    | Ca_kabuli_chr07 | 5937738                 | TT                              | GG              | 1946882279               |
| SNP_P4_92407_5937758 | NC_021166.1    | Ca_kabuli_chr07 | 5937758                 | CC                              | AA              | 1946882281               |
| SNP_P4_92408_5937761 | NC_021166.1    | Ca_kabuli_chr07 | 5937761                 | TT                              | CC              | 1946882283               |
| SNP_P4_92409_5937769 | NC_021166.1    | Ca_kabuli_chr07 | 5937769                 | GG                              | AA              | 1946882285               |
| SNP_P4_92410_5937773 | NC_021166.1    | Ca_kabuli_chr07 | 5937773                 | CC                              | AA              | 1946882287               |
| SNP_P4_92411_5938005 | NC_021166.1    | Ca_kabuli_chr07 | 5938005                 | TT                              | CC              | 1946882289               |
| SNP_P4_92413_5938051 | NC_021166.1    | Ca_kabuli_chr07 | 5938051                 | GG                              | AA              | 1946882291               |
| SNP_P4_92414_5938083 | NC_021166.1    | Ca_kabuli_chr07 | 5938083                 | AA                              | CC              | 1946882293               |
| SNP_P4_92415_5938091 | NC_021166.1    | Ca_kabuli_chr07 | 5938091                 | AA                              | CC              | 1946882295               |
| SNP_P4_92416_5938096 | NC_021166.1    | Ca_kabuli_chr07 | 5938096                 | TT                              | AA              | 1946882296               |
| SNP_P4_92417_5938170 | NC_021166.1    | Ca_kabuli_chr07 | 5938170                 | CC                              | TT              | 1946882298               |
| SNP_P4_92418_5938600 | NC_021166.1    | Ca_kabuli_chr07 | 5938600                 | AA                              | GG              | 1946882300               |
| SNP_P4_92419_5938605 | NC_021166.1    | Ca_kabuli_chr07 | 5938605                 | GG                              | AA              | 1946882302               |
| SNP_P4_92420_5942048 | NC_021166.1    | Ca_kabuli_chr07 | 5942048                 | AA                              | CC              | 1946882304               |
| SNP_P4_92421_5942080 | NC_021166.1    | Ca_kabuli_chr07 | 5942080                 | CC                              | AA              | 1946882306               |
| SNP_P4_92422_5942139 | NC_021166.1    | Ca_kabuli_chr07 | 5942139                 | TT                              | AA              | 1946882308               |
| SNP_P4_92423_5942361 | NC_021166.1    | Ca_kabuli_chr07 | 5942361                 | TT                              | CC              | 1946882310               |
| SNP_P4_92424_5942418 | NC_021166.1    | Ca_kabuli_chr07 | 5942418                 | TT                              | CC              | 1946882312               |
| SNP_P4_92425_5945024 | NC_021166.1    | Ca_kabuli_chr07 | 5945024                 | TT                              | GG              | 1946882314               |
| SNP_P4_92426_5945169 | NC_021166.1    | Ca_kabuli_chr07 | 5945169                 | GG                              | CC              | 1946882316               |
| SNP_P4_92428_5945649 | NC_021166.1    | Ca_kabuli_chr07 | 5945649                 | TT                              | CC              | 1946882318               |
| SNP_P4_92430_5950352 | NC_021166.1    | Ca_kabuli_chr07 | 5950352                 | TT                              | AA              | 1946882320               |
| SNP_P4_92432_5951029 | NC_021166.1    | Ca_kabuli_chr07 | 5951029                 | CC                              | TT              | 1946882322               |
| SNP_P4_92434_5953828 | NC_021166.1    | Ca_kabuli_chr07 | 5953828                 | TT                              | GG              | 1946882324               |
| SNP_P4_92435_5954778 | NC_021166.1    | Ca_kabuli_chr07 | 5954778                 | AA                              | GG              | 1946882326               |
| SNP_P4_92436_5955090 | NC_021166.1    | Ca_kabuli_chr07 | 5955090                 | AA                              | GG              | 1946882328               |
| SNP_P4_92437_5955414 | NC_021166.1    | Ca_kabuli_chr07 | 5955414                 | GG                              | AA              | 1946882330               |
| SNP_P4_92439_5956317 | NC_021166.1    | Ca_kabuli_chr07 | 5956317                 | CC                              | GG              | 1946882332               |
| SNP_P4_92440_5956696 | NC_021166.1    | Ca_kabuli_chr07 | 5956696                 | AA                              | GG              | 1946882334               |
| SNP_P4_92441_5956993 | NC_021166.1    | Ca_kabuli_chr07 | 5956993                 | GG                              | AA              | 1946882336               |
| SNP_P4_92442_5957379 | NC_021166.1    | Ca_kabuli_chr07 | 5957379                 | GG                              | AA              | 1946882338               |
| SNP_P4_92443_5958073 | NC_021166.1    | Ca_kabuli_chr07 | 5958073                 | GG                              | AA              | 1946882340               |
| SNP_P4_92444_5958840 | NC_021166.1    | Ca_kabuli_chr07 | 5958840                 | TT                              | CC              | 1946882342               |
| SNP_P4_92445_5960035 | NC_021166.1    | Ca_kabuli_chr07 | 5960035                 | CC                              | AA              | 1946882344               |
| SNP_P4_92446_5960041 | NC_021166.1    | Ca_kabuli_chr07 | 5960041                 | CC                              | TT              | 1946882346               |
| SNP_P4_92447_5960334 | NC_021166.1    | Ca_kabuli_chr07 | 5960334                 | AA                              | GG              | 1946882348               |
| SNP_P4_92448_5960368 | NC_021166.1    | Ca_kabuli_chr07 | 5960368                 | CC                              | TT              | 1946882350               |
| SNP_P4_92449_5960379 | NC_021166.1    | Ca_kabuli_chr07 | 5960379                 | CC                              | TT              | 1946882352               |
| SNP_P4_92450_5976087 | NC_021166.1    | Ca_kabuli_chr07 | 5976087                 | AA                              | TT              | 1946882354               |
| SNP_P4_92451_5976864 | NC_021166.1    | Ca_kabuli_chr07 | 5976864                 | AA                              | GG              | 1946882356               |
| SNP_P4_92452_5977296 | NC_021166.1    | Ca_kabuli_chr07 | 5977296                 | AA                              | GG              | 1946882358               |
| SNP_P4_92453_5977316 | NC_021166.1    | Ca_kabuli_chr07 | 5977316                 | CC                              | TT              | 1946882360               |

| SNPs IDs             | Chromosome IDs | Chromosomes     | Physical positions (bp) | CDC Frontier (Reference genome) | (ILWC46 & LPNB) | NCBI SNPdb Accession IDs |
|----------------------|----------------|-----------------|-------------------------|---------------------------------|-----------------|--------------------------|
| SNP_P4_92454_5977327 | NC_021166.1    | Ca_kabuli_chr07 | 5977327                 | GG                              | AA              | 1946882362               |
| SNP_P4_92456_5979273 | NC_021166.1    | Ca_kabuli_chr07 | 5979273                 | CC                              | AA              | 1946882364               |
| SNP_P4_92458_5980168 | NC_021166.1    | Ca_kabuli_chr07 | 5980168                 | AA                              | CC              | 1946882366               |
| SNP_P4_92459_5980178 | NC_021166.1    | Ca_kabuli_chr07 | 5980178                 | TT                              | CC              | 1946882368               |
| SNP_P4_92460_5980482 | NC_021166.1    | Ca_kabuli_chr07 | 5980482                 | CC                              | AA              | 1946882370               |
| SNP_P4_92461_5982481 | NC_021166.1    | Ca_kabuli_chr07 | 5982481                 | AA                              | GG              | 1946882372               |
| SNP_P4_92463_5983847 | NC_021166.1    | Ca_kabuli_chr07 | 5983847                 | GG                              | AA              | 1946882374               |
| SNP_P4_92464_5984079 | NC_021166.1    | Ca_kabuli_chr07 | 5984079                 | AA                              | GG              | 1946882377               |
| SNP_P4_92465_5985437 | NC_021166.1    | Ca_kabuli_chr07 | 5985437                 | AA                              | GG              | 1946882379               |
| SNP_P4_92466_5987333 | NC_021166.1    | Ca_kabuli_chr07 | 5987333                 | TT                              | GG              | 1946882381               |
| SNP_P4_92467_5987366 | NC_021166.1    | Ca_kabuli_chr07 | 5987366                 | TT                              | AA              | 1946882383               |
| SNP_P4_92468_5987430 | NC_021166.1    | Ca_kabuli_chr07 | 5987430                 | AA                              | GG              | 1946882385               |
| SNP_P4_92469_5988875 | NC_021166.1    | Ca_kabuli_chr07 | 5988875                 | GG                              | CC              | 1946882387               |
| SNP_P4_92470_5989143 | NC_021166.1    | Ca_kabuli_chr07 | 5989143                 | CC                              | TT              | 1946882389               |
| SNP_P4_92473_5990995 | NC_021166.1    | Ca_kabuli_chr07 | 5990995                 | CC                              | TT              | 1946882391               |
| SNP_P4_92474_5991110 | NC_021166.1    | Ca_kabuli_chr07 | 5991110                 | AA                              | GG              | 1946882393               |
| SNP_P4_92477_5994279 | NC_021166.1    | Ca_kabuli_chr07 | 5994279                 | GG                              | AA              | 1946882395               |
| SNP_P4_92478_5995646 | NC_021166.1    | Ca_kabuli_chr07 | 5995646                 | TT                              | GG              | 1946882397               |
| SNP_P4_92479_5996051 | NC_021166.1    | Ca_kabuli_chr07 | 5996051                 | CC                              | TT              | 1946882399               |
| SNP_P4_92480_5996156 | NC_021166.1    | Ca_kabuli_chr07 | 5996156                 | CC                              | TT              | 1946882401               |
| SNP_P4_92482_5996437 | NC_021166.1    | Ca_kabuli_chr07 | 5996437                 | AA                              | GG              | 1946882403               |
| SNP_P4_92483_5996648 | NC_021166.1    | Ca_kabuli_chr07 | 5996648                 | CC                              | GG              | 1946882405               |
| SNP_P4_92484_5998419 | NC_021166.1    | Ca_kabuli_chr07 | 5998419                 | CC                              | AA              | 1946882407               |
| SNP_P4_92485_5998659 | NC_021166.1    | Ca_kabuli_chr07 | 5998659                 | AA                              | GG              | 1946882409               |
| SNP_P4_92486_5998673 | NC_021166.1    | Ca_kabuli_chr07 | 5998673                 | TT                              | CC              | 1946882411               |
| SNP_P4_92487_5998726 | NC_021166.1    | Ca_kabuli_chr07 | 5998726                 | TT                              | CC              | 1946882413               |
| SNP_P4_92488_5998952 | NC_021166.1    | Ca_kabuli_chr07 | 5998952                 | TT                              | CC              | 1946882415               |
| SNP_P4_92490_6000294 | NC_021166.1    | Ca_kabuli_chr07 | 6000294                 | TT                              | CC              | 1946882417               |
| SNP_P4_92491_6001241 | NC_021166.1    | Ca_kabuli_chr07 | 6001241                 | GG                              | TT              | 1946882419               |
| SNP_P4_92492_6002185 | NC_021166.1    | Ca_kabuli_chr07 | 6002185                 | AA                              | TT              | 1946882421               |
| SNP_P4_92493_6002624 | NC_021166.1    | Ca_kabuli_chr07 | 6002624                 | CC                              | GG              | 1946882423               |
| SNP_P4_92494_6002656 | NC_021166.1    | Ca_kabuli_chr07 | 6002656                 | AA                              | GG              | 1946882425               |
| SNP_P4_92495_6002657 | NC_021166.1    | Ca_kabuli_chr07 | 6002657                 | GG                              | AA              | 1946882427               |
| SNP_P4_92496_6002690 | NC_021166.1    | Ca_kabuli_chr07 | 6002690                 | CC                              | TT              | 1946882429               |
| SNP_P4_92498_6002893 | NC_021166.1    | Ca_kabuli_chr07 | 6002893                 | TT                              | CC              | 1946882431               |
| SNP_P4_92499_6003000 | NC_021166.1    | Ca_kabuli_chr07 | 6003000                 | TT                              | AA              | 1946882433               |
| SNP_P4_92500_6005516 | NC_021166.1    | Ca_kabuli_chr07 | 6005516                 | CC                              | TT              | 1946882435               |
| SNP_P4_92501_6005526 | NC_021166.1    | Ca_kabuli_chr07 | 6005526                 | CC                              | AA              | 1946882437               |
| SNP_P4_92504_6006398 | NC_021166.1    | Ca_kabuli_chr07 | 6006398                 | TT                              | CC              | 1946882439               |
| SNP_P4_92505_6006890 | NC_021166.1    | Ca_kabuli_chr07 | 6006890                 | AA                              | CC              | 1946882441               |
| SNP_P4_92506_6007237 | NC_021166.1    | Ca_kabuli_chr07 | 6007237                 | TT                              | CC              | 1946882443               |
| SNP_P4_92508_6008953 | NC_021166.1    | Ca_kabuli_chr07 | 6008953                 | CC                              | AA              | 1946882445               |

| SNPs IDs             | Chromosome IDs | Chromosomes     | Physical positions (bp) | CDC Frontier (Reference genome) | (ILWC46 & LPNB) | NCBI SNPdb Accession IDs |
|----------------------|----------------|-----------------|-------------------------|---------------------------------|-----------------|--------------------------|
| SNP_P4_92509_6009671 | NC_021166.1    | Ca_kabuli_chr07 | 6009671                 | AA                              | TT              | 1946882447               |
| SNP_P4_92510_6009876 | NC_021166.1    | Ca_kabuli_chr07 | 6009876                 | GG                              | AA              | 1946882449               |
| SNP_P4_92512_6010207 | NC_021166.1    | Ca_kabuli_chr07 | 6010207                 | GG                              | AA              | 1946882451               |
| SNP_P4_92513_6010209 | NC_021166.1    | Ca_kabuli_chr07 | 6010209                 | GG                              | AA              | 1946882453               |
| SNP_P4_92514_6013221 | NC_021166.1    | Ca_kabuli_chr07 | 6013221                 | GG                              | AA              | 1946882455               |
| SNP_P4_92515_6013585 | NC_021166.1    | Ca_kabuli_chr07 | 6013585                 | CC                              | TT              | 1946882457               |
| SNP_P4_92517_6013927 | NC_021166.1    | Ca_kabuli_chr07 | 6013927                 | TT                              | GG              | 1946882459               |
| SNP_P4_92518_6013975 | NC_021166.1    | Ca_kabuli_chr07 | 6013975                 | GG                              | TT              | 1946882461               |
| SNP_P4_92519_6013983 | NC_021166.1    | Ca_kabuli_chr07 | 6013983                 | TT                              | CC              | 1946882463               |
| SNP_P4_92520_6014015 | NC_021166.1    | Ca_kabuli_chr07 | 6014015                 | TT                              | AA              | 1946882465               |
| SNP_P4_92522_6014520 | NC_021166.1    | Ca_kabuli_chr07 | 6014520                 | GG                              | AA              | 1946882467               |
| SNP_P4_92523_6014529 | NC_021166.1    | Ca_kabuli_chr07 | 6014529                 | GG                              | AA              | 1946882469               |
| SNP_P4_92526_6015214 | NC_021166.1    | Ca_kabuli_chr07 | 6015214                 | GG                              | AA              | 1946882471               |
| SNP_P4_92527_6015245 | NC_021166.1    | Ca_kabuli_chr07 | 6015245                 | GG                              | AA              | 1946882473               |
| SNP_P4_92528_6015281 | NC_021166.1    | Ca_kabuli_chr07 | 6015281                 | CC                              | TT              | 1946882475               |
| SNP_P4_92529_6015478 | NC_021166.1    | Ca_kabuli_chr07 | 6015478                 | CC                              | TT              | 1946882477               |
| SNP_P4_92530_6015503 | NC_021166.1    | Ca_kabuli_chr07 | 6015503                 | CC                              | TT              | 1946882479               |
| SNP_P4_92532_6015737 | NC_021166.1    | Ca_kabuli_chr07 | 6015737                 | AA                              | GG              | 1946882481               |
| SNP_P4_92533_6016908 | NC_021166.1    | Ca_kabuli_chr07 | 6016908                 | TT                              | AA              | 1946882483               |
| SNP_P4_92534_6016909 | NC_021166.1    | Ca_kabuli_chr07 | 6016909                 | GG                              | AA              | 1946882485               |
| SNP_P4_92535_6017113 | NC_021166.1    | Ca_kabuli_chr07 | 6017113                 | TT                              | CC              | 1946882487               |
| SNP_P4_92536_6017123 | NC_021166.1    | Ca_kabuli_chr07 | 6017123                 | TT                              | CC              | 1946882490               |
| SNP_P4_92537_6017165 | NC_021166.1    | Ca_kabuli_chr07 | 6017165                 | GG                              | AA              | 1946882492               |
| SNP_P4_92539_6017201 | NC_021166.1    | Ca_kabuli_chr07 | 6017201                 | AA                              | GG              | 1946882494               |
| SNP_P4_92540_6017213 | NC_021166.1    | Ca_kabuli_chr07 | 6017213                 | TT                              | AA              | 1946882496               |
| SNP_P4_92541_6017216 | NC_021166.1    | Ca_kabuli_chr07 | 6017216                 | AA                              | CC              | 1946882498               |
| SNP_P4_92542_6017557 | NC_021166.1    | Ca_kabuli_chr07 | 6017557                 | CC                              | TT              | 1946882500               |
| SNP_P4_92543_6018348 | NC_021166.1    | Ca_kabuli_chr07 | 6018348                 | GG                              | AA              | 1946882502               |
| SNP_P4_92544_6018372 | NC_021166.1    | Ca_kabuli_chr07 | 6018372                 | TT                              | GG              | 1946882504               |
| SNP_P4_92546_6018387 | NC_021166.1    | Ca_kabuli_chr07 | 6018387                 | CC                              | TT              | 1946882506               |
| SNP_P4_92547_6018745 | NC_021166.1    | Ca_kabuli_chr07 | 6018745                 | AA                              | CC              | 1946882508               |
| SNP_P4_92548_6019281 | NC_021166.1    | Ca_kabuli_chr07 | 6019281                 | GG                              | CC              | 1946882510               |
| SNP_P4_92549_6019957 | NC_021166.1    | Ca_kabuli_chr07 | 6019957                 | CC                              | TT              | 1946882512               |
| SNP_P4_92551_6020361 | NC_021166.1    | Ca_kabuli_chr07 | 6020361                 | CC                              | GG              | 1946882514               |
| SNP_P4_92553_6020452 | NC_021166.1    | Ca_kabuli_chr07 | 6020452                 | AA                              | GG              | 1946882516               |
| SNP_P4_92554_6020512 | NC_021166.1    | Ca_kabuli_chr07 | 6020512                 | GG                              | CC              | 1946882518               |
| SNP_P4_92555_6020519 | NC_021166.1    | Ca_kabuli_chr07 | 6020519                 | GG                              | CC              | 1946882520               |
| SNP_P4_92556_6020529 | NC_021166.1    | Ca_kabuli_chr07 | 6020529                 | GG                              | AA              | 1946882522               |
| SNP_P4_92557_6020533 | NC_021166.1    | Ca_kabuli_chr07 | 6020533                 | GG                              | AA              | 1946882524               |
| SNP_P4_92558_6020546 | NC_021166.1    | Ca_kabuli_chr07 | 6020546                 | CC                              | TT              | 1946882526               |
| SNP_P4_92559_6020598 | NC_021166.1    | Ca_kabuli_chr07 | 6020598                 | CC                              | AA              | 1946882528               |
| SNP_P4_92560_6020601 | NC_021166.1    | Ca_kabuli_chr07 | 6020601                 | GG                              | AA              | 1946882530               |

| SNPs IDs             | Chromosome IDs | Chromosomes     | Physical positions (bp) | CDC Frontier (Reference genome) | (ILWC46 & LPNB) | NCBI SNPdb Accession IDs |
|----------------------|----------------|-----------------|-------------------------|---------------------------------|-----------------|--------------------------|
| SNP_P4_92561_6020609 | NC_021166.1    | Ca_kabuli_chr07 | 6020609                 | GG                              | AA              | 1946882532               |
| SNP_P4_92562_6021886 | NC_021166.1    | Ca_kabuli_chr07 | 6021886                 | AA                              | TT              | 1946882534               |
| SNP_P4_92563_6021944 | NC_021166.1    | Ca_kabuli_chr07 | 6021944                 | TT                              | CC              | 1946882536               |
| SNP_P4_92564_6021946 | NC_021166.1    | Ca_kabuli_chr07 | 6021946                 | AA                              | GG              | 1946882538               |
| SNP_P4_92565_6022262 | NC_021166.1    | Ca_kabuli_chr07 | 6022262                 | GG                              | AA              | 1946882540               |
| SNP_P4_92566_6022282 | NC_021166.1    | Ca_kabuli_chr07 | 6022282                 | TT                              | CC              | 1946882542               |
| SNP_P4_92567_6022329 | NC_021166.1    | Ca_kabuli_chr07 | 6022329                 | TT                              | GG              | 1946882544               |
| SNP_P4_92568_6023001 | NC_021166.1    | Ca_kabuli_chr07 | 6023001                 | AA                              | TT              | 1946882546               |
| SNP_P4_92569_6023470 | NC_021166.1    | Ca_kabuli_chr07 | 6023470                 | AA                              | GG              | 1946882548               |
| SNP_P4_92570_6023569 | NC_021166.1    | Ca_kabuli_chr07 | 6023569                 | GG                              | AA              | 1946882550               |
| SNP_P4_92571_6024476 | NC_021166.1    | Ca_kabuli_chr07 | 6024476                 | TT                              | CC              | 1946882552               |
| SNP_P4_92572_6024519 | NC_021166.1    | Ca_kabuli_chr07 | 6024519                 | TT                              | CC              | 1946882554               |
| SNP_P4_92573_6024522 | NC_021166.1    | Ca_kabuli_chr07 | 6024522                 | TT                              | GG              | 1946882556               |
| SNP_P4_92574_6024772 | NC_021166.1    | Ca_kabuli_chr07 | 6024772                 | AA                              | TT              | 1946882558               |
| SNP_P4_92576_6024821 | NC_021166.1    | Ca_kabuli_chr07 | 6024821                 | AA                              | GG              | 1946882560               |
| SNP_P4_92577_6024858 | NC_021166.1    | Ca_kabuli_chr07 | 6024858                 | AA                              | TT              | 1946882562               |
| SNP_P4_92578_6024863 | NC_021166.1    | Ca_kabuli_chr07 | 6024863                 | GG                              | AA              | 1946882564               |
| SNP_P4_92579_6024890 | NC_021166.1    | Ca_kabuli_chr07 | 6024890                 | TT                              | CC              | 1946882566               |
| SNP_P4_92580_6024972 | NC_021166.1    | Ca_kabuli_chr07 | 6024972                 | TT                              | GG              | 1946882568               |
| SNP_P4_92581_6024976 | NC_021166.1    | Ca_kabuli_chr07 | 6024976                 | AA                              | CC              | 1946882570               |
| SNP_P4_92582_6025008 | NC_021166.1    | Ca_kabuli_chr07 | 6025008                 | CC                              | TT              | 1946882572               |
| SNP_P4_92583_6025012 | NC_021166.1    | Ca_kabuli_chr07 | 6025012                 | CC                              | TT              | 1946882574               |
| SNP_P4_92584_6025131 | NC_021166.1    | Ca_kabuli_chr07 | 6025131                 | CC                              | TT              | 1946882576               |
| SNP_P4_92586_6025561 | NC_021166.1    | Ca_kabuli_chr07 | 6025561                 | AA                              | CC              | 1946882578               |
| SNP_P4_92587_6025722 | NC_021166.1    | Ca_kabuli_chr07 | 6025722                 | TT                              | GG              | 1946882580               |
| SNP_P4_92588_6028640 | NC_021166.1    | Ca_kabuli_chr07 | 6028640                 | CC                              | AA              | 1946882581               |
| SNP_P4_92589_6031047 | NC_021166.1    | Ca_kabuli_chr07 | 6031047                 | CC                              | TT              | 1946882583               |
| SNP_P4_92590_6031080 | NC_021166.1    | Ca_kabuli_chr07 | 6031080                 | AA                              | GG              | 1946882585               |
| SNP_P4_92591_6031181 | NC_021166.1    | Ca_kabuli_chr07 | 6031181                 | GG                              | TT              | 1946882587               |
| SNP_P4_92592_6031187 | NC_021166.1    | Ca_kabuli_chr07 | 6031187                 | GG                              | TT              | 1946882589               |
| SNP_P4_92593_6031301 | NC_021166.1    | Ca_kabuli_chr07 | 6031301                 | TT                              | CC              | 1946882591               |
| SNP_P4_92594_6032180 | NC_021166.1    | Ca_kabuli_chr07 | 6032180                 | GG                              | AA              | 1946882593               |
| SNP_P4_92595_6032204 | NC_021166.1    | Ca_kabuli_chr07 | 6032204                 | GG                              | AA              | 1946882595               |
| SNP_P4_92596_6032242 | NC_021166.1    | Ca_kabuli_chr07 | 6032242                 | TT                              | AA              | 1946882597               |
| SNP_P4_92597_6032247 | NC_021166.1    | Ca_kabuli_chr07 | 6032247                 | AA                              | GG              | 1946882599               |
| SNP_P4_92598_6032252 | NC_021166.1    | Ca_kabuli_chr07 | 6032252                 | TT                              | CC              | 1946882601               |
| SNP_P4_92599_6032264 | NC_021166.1    | Ca_kabuli_chr07 | 6032264                 | CC                              | TT              | 1946882603               |
| SNP_P4_92600_6032267 | NC_021166.1    | Ca_kabuli_chr07 | 6032267                 | TT                              | CC              | 1946882605               |
| SNP_P4_92601_6032354 | NC_021166.1    | Ca_kabuli_chr07 | 6032354                 | TT                              | AA              | 1946882607               |
| SNP_P4_92602_6032395 | NC_021166.1    | Ca_kabuli_chr07 | 6032395                 | TT                              | CC              | 1946882609               |
| SNP_P4_92603_6032483 | NC_021166.1    | Ca_kabuli_chr07 | 6032483                 | CC                              | AA              | 1946882611               |
| SNP_P4_92604_6032825 | NC_021166.1    | Ca_kabuli_chr07 | 6032825                 | TT                              | CC              | 1946882613               |



| SNPs IDs             | Chromosome IDs | Chromosomes     | Physical positions (bp) | CDC Frontier (Reference genome) | (ILWC46 & LPNB) | NCBI SNPdb Accession IDs |
|----------------------|----------------|-----------------|-------------------------|---------------------------------|-----------------|--------------------------|
| SNP_P4_92605_6032827 | NC_021166.1    | Ca_kabuli_chr07 | 6032827                 | GG                              | AA              | 1946882615               |
| SNP_P4_92606_6032906 | NC_021166.1    | Ca_kabuli_chr07 | 6032906                 | CC                              | TT              | 1946882617               |
| SNP_P4_92607_6032922 | NC_021166.1    | Ca_kabuli_chr07 | 6032922                 | CC                              | TT              | 1946882619               |
| SNP_P4_92608_6032935 | NC_021166.1    | Ca_kabuli_chr07 | 6032935                 | TT                              | CC              | 1946882621               |
| SNP_P4_92609_6032966 | NC_021166.1    | Ca_kabuli_chr07 | 6032966                 | GG                              | CC              | 1946882623               |
| SNP_P4_92612_6033145 | NC_021166.1    | Ca_kabuli_chr07 | 6033145                 | GG                              | CC              | 1946882625               |
| SNP_P4_92613_6033464 | NC_021166.1    | Ca_kabuli_chr07 | 6033464                 | TT                              | CC              | 1946882627               |
| SNP_P4_92614_6033480 | NC_021166.1    | Ca_kabuli_chr07 | 6033480                 | GG                              | AA              | 1946882629               |
| SNP_P4_92615_6033511 | NC_021166.1    | Ca_kabuli_chr07 | 6033511                 | TT                              | CC              | 1946882631               |
| SNP_P4_92616_6033983 | NC_021166.1    | Ca_kabuli_chr07 | 6033983                 | TT                              | CC              | 1946882633               |
| SNP_P4_92617_6034093 | NC_021166.1    | Ca_kabuli_chr07 | 6034093                 | CC                              | TT              | 1946882635               |
| SNP_P4_92619_6036561 | NC_021166.1    | Ca_kabuli_chr07 | 6036561                 | AA                              | GG              | 1946882637               |
| SNP_P4_92620_6036935 | NC_021166.1    | Ca_kabuli_chr07 | 6036935                 | CC                              | AA              | 1946882639               |
| SNP_P4_92621_6037043 | NC_021166.1    | Ca_kabuli_chr07 | 6037043                 | GG                              | AA              | 1946882641               |
| SNP_P4_92623_6037332 | NC_021166.1    | Ca_kabuli_chr07 | 6037332                 | TT                              | AA              | 1946882643               |
| SNP_P4_92624_6037444 | NC_021166.1    | Ca_kabuli_chr07 | 6037444                 | TT                              | AA              | 1946882645               |
| SNP_P4_92625_6037478 | NC_021166.1    | Ca_kabuli_chr07 | 6037478                 | AA                              | GG              | 1946882647               |
| SNP_P4_92626_6037488 | NC_021166.1    | Ca_kabuli_chr07 | 6037488                 | CC                              | TT              | 1946882649               |
| SNP_P4_92627_6037589 | NC_021166.1    | Ca_kabuli_chr07 | 6037589                 | CC                              | TT              | 1946882651               |
| SNP_P4_92628_6037614 | NC_021166.1    | Ca_kabuli_chr07 | 6037614                 | TT                              | CC              | 1946882653               |
| SNP_P4_92629_6038010 | NC_021166.1    | Ca_kabuli_chr07 | 6038010                 | TT                              | CC              | 1946882655               |
| SNP_P4_92631_6040981 | NC_021166.1    | Ca_kabuli_chr07 | 6040981                 | TT                              | CC              | 1946882657               |
| SNP_P4_92632_6041193 | NC_021166.1    | Ca_kabuli_chr07 | 6041193                 | AA                              | CC              | 1946882658               |
| SNP_P4_92633_6041323 | NC_021166.1    | Ca_kabuli_chr07 | 6041323                 | TT                              | CC              | 1946882660               |
| SNP_P4_92634_6041338 | NC_021166.1    | Ca_kabuli_chr07 | 6041338                 | AA                              | TT              | 1946882662               |
| SNP_P4_92635_6043825 | NC_021166.1    | Ca_kabuli_chr07 | 6043825                 | GG                              | AA              | 1946882664               |
| SNP_P4_92636_6044848 | NC_021166.1    | Ca_kabuli_chr07 | 6044848                 | CC                              | TT              | 1946882666               |
| SNP_P4_92637_6044884 | NC_021166.1    | Ca_kabuli_chr07 | 6044884                 | AA                              | CC              | 1946882668               |
| SNP_P4_92638_6044897 | NC_021166.1    | Ca_kabuli_chr07 | 6044897                 | TT                              | AA              | 1946882670               |
| SNP_P4_92640_6046608 | NC_021166.1    | Ca_kabuli_chr07 | 6046608                 | CC                              | TT              | 1946882672               |
| SNP_P4_92641_6046625 | NC_021166.1    | Ca_kabuli_chr07 | 6046625                 | AA                              | GG              | 1946882674               |
| SNP_P4_92644_6049406 | NC_021166.1    | Ca_kabuli_chr07 | 6049406                 | TT                              | CC              | 1946882676               |
| SNP_P4_92645_6049734 | NC_021166.1    | Ca_kabuli_chr07 | 6049734                 | AA                              | GG              | 1946882678               |
| SNP_P4_92646_6049759 | NC_021166.1    | Ca_kabuli_chr07 | 6049759                 | TT                              | CC              | 1946882679               |
| SNP_P4_92647_6049792 | NC_021166.1    | Ca_kabuli_chr07 | 6049792                 | AA                              | CC              | 1946882681               |
| SNP_P4_92650_6050107 | NC_021166.1    | Ca_kabuli_chr07 | 6050107                 | CC                              | GG              | 1946882683               |
| SNP_P4_92651_6050159 | NC_021166.1    | Ca_kabuli_chr07 | 6050159                 | TT                              | CC              | 1946882685               |
| SNP_P4_92652_6052295 | NC_021166.1    | Ca_kabuli_chr07 | 6052295                 | AA                              | GG              | 1946882687               |
| SNP_P4_92653_6052585 | NC_021166.1    | Ca_kabuli_chr07 | 6052585                 | GG                              | CC              | 1946882689               |
| SNP_P4_92655_6053844 | NC_021166.1    | Ca_kabuli_chr07 | 6053844                 | AA                              | GG              | 1946882691               |
| SNP_P4_92656_6053858 | NC_021166.1    | Ca_kabuli_chr07 | 6053858                 | TT                              | CC              | 1946882693               |
| SNP_P4_92657_6054081 | NC_021166.1    | Ca_kabuli_chr07 | 6054081                 | CC                              | TT              | 1946882695               |

| SNPs IDs             | Chromosome IDs | Chromosomes     | Physical positions (bp) | CDC Frontier (Reference genome) | (ILWC46 & LPNB) | NCBI SNPdb Accession IDs |
|----------------------|----------------|-----------------|-------------------------|---------------------------------|-----------------|--------------------------|
| SNP_P4_92658_6054299 | NC_021166.1    | Ca_kabuli_chr07 | 6054299                 | TT                              | CC              | 1946882697               |
| SNP_P4_92661_6055723 | NC_021166.1    | Ca_kabuli_chr07 | 6055723                 | AA                              | GG              | 1946882699               |
| SNP_P4_92662_6055798 | NC_021166.1    | Ca_kabuli_chr07 | 6055798                 | CC                              | TT              | 1946882701               |
| SNP_P4_92663_6055994 | NC_021166.1    | Ca_kabuli_chr07 | 6055994                 | GG                              | AA              | 1946882703               |
| SNP_P4_92664_6056040 | NC_021166.1    | Ca_kabuli_chr07 | 6056040                 | AA                              | TT              | 1946882704               |
| SNP_P4_92665_6056088 | NC_021166.1    | Ca_kabuli_chr07 | 6056088                 | AA                              | GG              | 1946882706               |
| SNP_P4_92666_6056134 | NC_021166.1    | Ca_kabuli_chr07 | 6056134                 | TT                              | CC              | 1946882708               |
| SNP_P4_92667_6056181 | NC_021166.1    | Ca_kabuli_chr07 | 6056181                 | AA                              | TT              | 1946882710               |
| SNP_P4_92668_6056492 | NC_021166.1    | Ca_kabuli_chr07 | 6056492                 | GG                              | AA              | 1946882712               |
| SNP_P4_92669_6056508 | NC_021166.1    | Ca_kabuli_chr07 | 6056508                 | CC                              | TT              | 1946882714               |
| SNP_P4_92670_6057001 | NC_021166.1    | Ca_kabuli_chr07 | 6057001                 | TT                              | GG              | 1946882716               |
| SNP_P4_92671_6057243 | NC_021166.1    | Ca_kabuli_chr07 | 6057243                 | CC                              | TT              | 1946882718               |
| SNP_P4_92673_6057445 | NC_021166.1    | Ca_kabuli_chr07 | 6057445                 | AA                              | CC              | 1946882720               |
| SNP_P4_92674_6057678 | NC_021166.1    | Ca_kabuli_chr07 | 6057678                 | CC                              | TT              | 1946882722               |
| SNP_P4_92675_6058973 | NC_021166.1    | Ca_kabuli_chr07 | 6058973                 | GG                              | AA              | 1946882724               |
| SNP_P4_92676_6059002 | NC_021166.1    | Ca_kabuli_chr07 | 6059002                 | CC                              | GG              | 1946882726               |
| SNP_P4_92677_6059274 | NC_021166.1    | Ca_kabuli_chr07 | 6059274                 | AA                              | GG              | 1946882728               |
| SNP_P4_92678_6060518 | NC_021166.1    | Ca_kabuli_chr07 | 6060518                 | TT                              | CC              | 1946882730               |
| SNP_P4_92679_6061068 | NC_021166.1    | Ca_kabuli_chr07 | 6061068                 | GG                              | AA              | 1946882732               |
| SNP_P4_92680_6061115 | NC_021166.1    | Ca_kabuli_chr07 | 6061115                 | AA                              | TT              | 1946882733               |
| SNP_P4_92681_6061126 | NC_021166.1    | Ca_kabuli_chr07 | 6061126                 | TT                              | CC              | 1946882735               |
| SNP_P4_92682_6062912 | NC_021166.1    | Ca_kabuli_chr07 | 6062912                 | TT                              | GG              | 1946882737               |
| SNP_P4_92683_6063503 | NC_021166.1    | Ca_kabuli_chr07 | 6063503                 | CC                              | TT              | 1946882739               |
| SNP_P4_92685_6063819 | NC_021166.1    | Ca_kabuli_chr07 | 6063819                 | GG                              | AA              | 1946882741               |
| SNP_P4_92686_6065043 | NC_021166.1    | Ca_kabuli_chr07 | 6065043                 | AA                              | CC              | 1946882743               |
| SNP_P4_92687_6065092 | NC_021166.1    | Ca_kabuli_chr07 | 6065092                 | AA                              | GG              | 1946882745               |
| SNP_P4_92691_6065915 | NC_021166.1    | Ca_kabuli_chr07 | 6065915                 | TT                              | CC              | 1946882747               |
| SNP_P4_92692_6069748 | NC_021166.1    | Ca_kabuli_chr07 | 6069748                 | TT                              | GG              | 1946882749               |
| SNP_P4_92694_6071113 | NC_021166.1    | Ca_kabuli_chr07 | 6071113                 | CC                              | AA              | 1946882751               |
| SNP_P4_92695_6078557 | NC_021166.1    | Ca_kabuli_chr07 | 6078557                 | GG                              | AA              | 1946882753               |
| SNP_P4_92696_6078587 | NC_021166.1    | Ca_kabuli_chr07 | 6078587                 | CC                              | TT              | 1946882755               |
| SNP_P4_92697_6078622 | NC_021166.1    | Ca_kabuli_chr07 | 6078622                 | AA                              | GG              | 1946882757               |
| SNP_P4_92698_6078701 | NC_021166.1    | Ca_kabuli_chr07 | 6078701                 | GG                              | AA              | 1946882759               |
| SNP_P4_92699_6078853 | NC_021166.1    | Ca_kabuli_chr07 | 6078853                 | AA                              | GG              | 1946882761               |
| SNP_P4_92700_6078863 | NC_021166.1    | Ca_kabuli_chr07 | 6078863                 | CC                              | AA              | 1946882763               |
| SNP_P4_92701_6078868 | NC_021166.1    | Ca_kabuli_chr07 | 6078868                 | TT                              | CC              | 1946882765               |
| SNP_P4_92702_6079444 | NC_021166.1    | Ca_kabuli_chr07 | 6079444                 | GG                              | AA              | 1946882766               |
| SNP_P4_92704_6080876 | NC_021166.1    | Ca_kabuli_chr07 | 6080876                 | TT                              | AA              | 1946882768               |
| SNP_P4_92706_6081504 | NC_021166.1    | Ca_kabuli_chr07 | 6081504                 | GG                              | AA              | 1946882770               |
| SNP_P4_92707_6082783 | NC_021166.1    | Ca_kabuli_chr07 | 6082783                 | GG                              | AA              | 1946882772               |
| SNP_P4_92709_6083237 | NC_021166.1    | Ca_kabuli_chr07 | 6083237                 | AA                              | CC              | 1946882774               |
| SNP_P4_92710_6083571 | NC_021166.1    | Ca_kabuli_chr07 | 6083571                 | AA                              | CC              | 1946882776               |

| SNPs IDs             | Chromosome IDs | Chromosomes     | Physical positions (bp) | CDC Frontier (Reference genome) | (ILWC46 & LPNB) | NCBI SNPdb Accession IDs |
|----------------------|----------------|-----------------|-------------------------|---------------------------------|-----------------|--------------------------|
| SNP_P4_92711_6083573 | NC_021166.1    | Ca_kabuli_chr07 | 6083573                 | AA                              | GG              | 1946882778               |
| SNP_P4_92713_6083604 | NC_021166.1    | Ca_kabuli_chr07 | 6083604                 | CC                              | TT              | 1946882780               |
| SNP_P4_92714_6084082 | NC_021166.1    | Ca_kabuli_chr07 | 6084082                 | GG                              | AA              | 1946882782               |
| SNP_P4_92715_6084091 | NC_021166.1    | Ca_kabuli_chr07 | 6084091                 | TT                              | GG              | 1946882783               |
| SNP_P4_92716_6084491 | NC_021166.1    | Ca_kabuli_chr07 | 6084491                 | AA                              | CC              | 1946882785               |
| SNP_P4_92717_6084508 | NC_021166.1    | Ca_kabuli_chr07 | 6084508                 | GG                              | TT              | 1946882787               |
| SNP_P4_92718_6086003 | NC_021166.1    | Ca_kabuli_chr07 | 6086003                 | AA                              | GG              | 1946882789               |
| SNP_P4_92719_6086188 | NC_021166.1    | Ca_kabuli_chr07 | 6086188                 | AA                              | CC              | 1946882791               |
| SNP_P4_92720_6086195 | NC_021166.1    | Ca_kabuli_chr07 | 6086195                 | TT                              | CC              | 1946882793               |
| SNP_P4_92722_6087573 | NC_021166.1    | Ca_kabuli_chr07 | 6087573                 | AA                              | GG              | 1946882795               |
| SNP_P4_92723_6087609 | NC_021166.1    | Ca_kabuli_chr07 | 6087609                 | GG                              | AA              | 1946882797               |
| SNP_P4_92724_6087631 | NC_021166.1    | Ca_kabuli_chr07 | 6087631                 | TT                              | CC              | 1946882799               |
| SNP_P4_92726_6087845 | NC_021166.1    | Ca_kabuli_chr07 | 6087845                 | AA                              | GG              | 1946882801               |
| SNP_P4_92727_6087889 | NC_021166.1    | Ca_kabuli_chr07 | 6087889                 | CC                              | AA              | 1946882803               |
| SNP_P4_92728_6088237 | NC_021166.1    | Ca_kabuli_chr07 | 6088237                 | TT                              | CC              | 1946882805               |
| SNP_P4_92729_6088477 | NC_021166.1    | Ca_kabuli_chr07 | 6088477                 | AA                              | CC              | 1946882807               |
| SNP_P4_92732_6089284 | NC_021166.1    | Ca_kabuli_chr07 | 6089284                 | CC                              | TT              | 1946882809               |
| SNP_P4_92735_6089466 | NC_021166.1    | Ca_kabuli_chr07 | 6089466                 | TT                              | AA              | 1946882810               |
| SNP_P4_92737_6090652 | NC_021166.1    | Ca_kabuli_chr07 | 6090652                 | AA                              | CC              | 1946882812               |
| SNP_P4_92738_6090653 | NC_021166.1    | Ca_kabuli_chr07 | 6090653                 | GG                              | TT              | 1946882814               |
| SNP_P4_92739_6090655 | NC_021166.1    | Ca_kabuli_chr07 | 6090655                 | CC                              | TT              | 1946882816               |
| SNP_P4_92740_6090682 | NC_021166.1    | Ca_kabuli_chr07 | 6090682                 | TT                              | CC              | 1946882818               |
| SNP_P4_92741_6090684 | NC_021166.1    | Ca_kabuli_chr07 | 6090684                 | GG                              | AA              | 1946882819               |
| SNP_P4_92742_6091239 | NC_021166.1    | Ca_kabuli_chr07 | 6091239                 | TT                              | AA              | 1946882820               |
| SNP_P4_92743_6091301 | NC_021166.1    | Ca_kabuli_chr07 | 6091301                 | AA                              | GG              | 1946882821               |
| SNP_P4_92744_6091312 | NC_021166.1    | Ca_kabuli_chr07 | 6091312                 | GG                              | AA              | 1946882822               |
| SNP_P4_92745_6091431 | NC_021166.1    | Ca_kabuli_chr07 | 6091431                 | GG                              | AA              | 1946882824               |
| SNP_P4_92746_6091474 | NC_021166.1    | Ca_kabuli_chr07 | 6091474                 | TT                              | CC              | 1946882826               |
| SNP_P4_92747_6091475 | NC_021166.1    | Ca_kabuli_chr07 | 6091475                 | AA                              | GG              | 1946882828               |
| SNP_P4_92748_6091476 | NC_021166.1    | Ca_kabuli_chr07 | 6091476                 | GG                              | AA              | 1946882830               |
| SNP_P4_92749_6091529 | NC_021166.1    | Ca_kabuli_chr07 | 6091529                 | CC                              | TT              | 1946882832               |
| SNP_P4_92750_6091578 | NC_021166.1    | Ca_kabuli_chr07 | 6091578                 | GG                              | TT              | 1946882834               |
| SNP_P4_92751_6091782 | NC_021166.1    | Ca_kabuli_chr07 | 6091782                 | TT                              | CC              | 1946882836               |
| SNP_P4_92752_6091808 | NC_021166.1    | Ca_kabuli_chr07 | 6091808                 | TT                              | CC              | 1946882838               |
| SNP_P4_92753_6091824 | NC_021166.1    | Ca_kabuli_chr07 | 6091824                 | TT                              | CC              | 1946882840               |
| SNP_P4_92754_6091827 | NC_021166.1    | Ca_kabuli_chr07 | 6091827                 | AA                              | TT              | 1946882842               |
| SNP_P4_92755_6091848 | NC_021166.1    | Ca_kabuli_chr07 | 6091848                 | AA                              | TT              | 1946882843               |
| SNP_P4_92756_6091849 | NC_021166.1    | Ca_kabuli_chr07 | 6091849                 | TT                              | GG              | 1946882845               |
| SNP_P4_92757_6091878 | NC_021166.1    | Ca_kabuli_chr07 | 6091878                 | AA                              | GG              | 1946882847               |
| SNP_P4_92758_6091967 | NC_021166.1    | Ca_kabuli_chr07 | 6091967                 | CC                              | TT              | 1946882849               |
| SNP_P4_92759_6091994 | NC_021166.1    | Ca_kabuli_chr07 | 6091994                 | CC                              | TT              | 1946882851               |
| SNP_P4_92760_6092006 | NC_021166.1    | Ca_kabuli_chr07 | 6092006                 | AA                              | GG              | 1946882853               |

| SNPs IDs             | Chromosome IDs | Chromosomes     | Physical positions (bp) | CDC Frontier (Reference genome) | (ILWC46 & LPNB) | NCBI SNPdb Accession IDs |
|----------------------|----------------|-----------------|-------------------------|---------------------------------|-----------------|--------------------------|
| SNP_P4_92761_6092030 | NC_021166.1    | Ca_kabuli_chr07 | 6092030                 | TT                              | GG              | 1946882855               |
| SNP_P4_92762_6092161 | NC_021166.1    | Ca_kabuli_chr07 | 6092161                 | CC                              | AA              | 1946882857               |
| SNP_P4_92763_6092185 | NC_021166.1    | Ca_kabuli_chr07 | 6092185                 | TT                              | GG              | 1946882859               |
| SNP_P4_92764_6094024 | NC_021166.1    | Ca_kabuli_chr07 | 6094024                 | CC                              | TT              | 1946882863               |
| SNP_P4_92765_6094060 | NC_021166.1    | Ca_kabuli_chr07 | 6094060                 | AA                              | GG              | 1946882865               |
| SNP_P4_92766_6094070 | NC_021166.1    | Ca_kabuli_chr07 | 6094070                 | AA                              | GG              | 1946882867               |
| SNP_P4_92767_6094075 | NC_021166.1    | Ca_kabuli_chr07 | 6094075                 | TT                              | GG              | 1946882869               |
| SNP_P4_92768_6094346 | NC_021166.1    | Ca_kabuli_chr07 | 6094346                 | CC                              | TT              | 1946882871               |
| SNP_P4_92769_6094385 | NC_021166.1    | Ca_kabuli_chr07 | 6094385                 | TT                              | CC              | 1946882873               |
| SNP_P4_92770_6094655 | NC_021166.1    | Ca_kabuli_chr07 | 6094655                 | GG                              | AA              | 1946882875               |
| SNP_P4_92772_6094937 | NC_021166.1    | Ca_kabuli_chr07 | 6094937                 | CC                              | TT              | 1946882877               |
| SNP_P4_92773_6094975 | NC_021166.1    | Ca_kabuli_chr07 | 6094975                 | AA                              | CC              | 1946882879               |
| SNP_P4_92774_6095200 | NC_021166.1    | Ca_kabuli_chr07 | 6095200                 | AA                              | GG              | 1946882881               |
| SNP_P4_92775_6095283 | NC_021166.1    | Ca_kabuli_chr07 | 6095283                 | AA                              | CC              | 1946882883               |
| SNP_P4_92776_6095545 | NC_021166.1    | Ca_kabuli_chr07 | 6095545                 | TT                              | GG              | 1946882885               |
| SNP_P4_92777_6096047 | NC_021166.1    | Ca_kabuli_chr07 | 6096047                 | TT                              | AA              | 1946882887               |
| SNP_P4_92778_6097281 | NC_021166.1    | Ca_kabuli_chr07 | 6097281                 | TT                              | CC              | 1946882889               |
| SNP_P4_92779_6098192 | NC_021166.1    | Ca_kabuli_chr07 | 6098192                 | AA                              | GG              | 1946882891               |
| SNP_P4_92780_6100928 | NC_021166.1    | Ca_kabuli_chr07 | 6100928                 | TT                              | CC              | 1946882893               |
| SNP_P4_92781_6100931 | NC_021166.1    | Ca_kabuli_chr07 | 6100931                 | TT                              | CC              | 1946882895               |
| SNP_P4_92782_6100946 | NC_021166.1    | Ca_kabuli_chr07 | 6100946                 | TT                              | CC              | 1946882897               |
| SNP_P4_92784_6101449 | NC_021166.1    | Ca_kabuli_chr07 | 6101449                 | TT                              | CC              | 1946882899               |
| SNP_P4_92785_6101484 | NC_021166.1    | Ca_kabuli_chr07 | 6101484                 | GG                              | AA              | 1946882901               |
| SNP_P4_92786_6102124 | NC_021166.1    | Ca_kabuli_chr07 | 6102124                 | GG                              | AA              | 1946882903               |
| SNP_P4_92787_6102134 | NC_021166.1    | Ca_kabuli_chr07 | 6102134                 | TT                              | CC              | 1946882905               |
| SNP_P4_92788_6102140 | NC_021166.1    | Ca_kabuli_chr07 | 6102140                 | AA                              | TT              | 1946882907               |
| SNP_P4_92789_6102142 | NC_021166.1    | Ca_kabuli_chr07 | 6102142                 | CC                              | TT              | 1946882909               |
| SNP_P4_92790_6102143 | NC_021166.1    | Ca_kabuli_chr07 | 6102143                 | GG                              | CC              | 1946882911               |
| SNP_P4_92791_6102160 | NC_021166.1    | Ca_kabuli_chr07 | 6102160                 | CC                              | TT              | 1946882913               |
| SNP_P4_92792_6102168 | NC_021166.1    | Ca_kabuli_chr07 | 6102168                 | TT                              | GG              | 1946882915               |
| SNP_P4_92794_6102408 | NC_021166.1    | Ca_kabuli_chr07 | 6102408                 | GG                              | AA              | 1946882917               |
| SNP_P4_92795_6102437 | NC_021166.1    | Ca_kabuli_chr07 | 6102437                 | TT                              | CC              | 1946882919               |
| SNP_P4_92798_6102513 | NC_021166.1    | Ca_kabuli_chr07 | 6102513                 | CC                              | TT              | 1946882921               |
| SNP_P4_92799_6102872 | NC_021166.1    | Ca_kabuli_chr07 | 6102872                 | TT                              | CC              | 1946882923               |
| SNP_P4_92800_6102876 | NC_021166.1    | Ca_kabuli_chr07 | 6102876                 | TT                              | GG              | 1946882925               |
| SNP_P4_92801_6102898 | NC_021166.1    | Ca_kabuli_chr07 | 6102898                 | GG                              | TT              | 1946882927               |
| SNP_P4_92802_6102902 | NC_021166.1    | Ca_kabuli_chr07 | 6102902                 | AA                              | CC              | 1946882929               |
| SNP_P4_92803_6102915 | NC_021166.1    | Ca_kabuli_chr07 | 6102915                 | GG                              | AA              | 1946882931               |
| SNP_P4_92804_6103154 | NC_021166.1    | Ca_kabuli_chr07 | 6103154                 | TT                              | AA              | 1946882933               |
| SNP_P4_92805_6103158 | NC_021166.1    | Ca_kabuli_chr07 | 6103158                 | AA                              | TT              | 1946882935               |
| SNP_P4_92806_6103159 | NC_021166.1    | Ca_kabuli_chr07 | 6103159                 | AA                              | TT              | 1946882937               |
| SNP_P4_92807_6103160 | NC_021166.1    | Ca_kabuli_chr07 | 6103160                 | AA                              | TT              | 1946882939               |

| SNPs IDs             | Chromosome IDs | Chromosomes     | Physical positions (bp) | CDC Frontier (Reference genome) | (ILWC46 & LPNB) | NCBI SNPdb Accession IDs |
|----------------------|----------------|-----------------|-------------------------|---------------------------------|-----------------|--------------------------|
| SNP_P4_92808_6103161 | NC_021166.1    | Ca_kabuli_chr07 | 6103161                 | AA                              | TT              | 1946882941               |
| SNP_P4_92810_6104304 | NC_021166.1    | Ca_kabuli_chr07 | 6104304                 | GG                              | AA              | 1946882943               |
| SNP_P4_92811_6104509 | NC_021166.1    | Ca_kabuli_chr07 | 6104509                 | GG                              | AA              | 1946882945               |
| SNP_P4_92812_6104715 | NC_021166.1    | Ca_kabuli_chr07 | 6104715                 | CC                              | AA              | 1946882947               |
| SNP_P4_92813_6104741 | NC_021166.1    | Ca_kabuli_chr07 | 6104741                 | GG                              | TT              | 1946882949               |
| SNP_P4_92814_6106043 | NC_021166.1    | Ca_kabuli_chr07 | 6106043                 | AA                              | TT              | 1946882951               |
| SNP_P4_92815_6106546 | NC_021166.1    | Ca_kabuli_chr07 | 6106546                 | AA                              | GG              | 1946882953               |
| SNP_P4_92816_6106561 | NC_021166.1    | Ca_kabuli_chr07 | 6106561                 | GG                              | AA              | 1946882955               |
| SNP_P4_92817_6106580 | NC_021166.1    | Ca_kabuli_chr07 | 6106580                 | GG                              | AA              | 1946882957               |
| SNP_P4_92818_6106610 | NC_021166.1    | Ca_kabuli_chr07 | 6106610                 | TT                              | AA              | 1946882959               |
| SNP_P4_92820_6106927 | NC_021166.1    | Ca_kabuli_chr07 | 6106927                 | AA                              | CC              | 1946882961               |
| SNP_P4_92821_6106942 | NC_021166.1    | Ca_kabuli_chr07 | 6106942                 | TT                              | CC              | 1946882963               |
| SNP_P4_92823_6107492 | NC_021166.1    | Ca_kabuli_chr07 | 6107492                 | GG                              | CC              | 1946882965               |
| SNP_P4_92824_6107573 | NC_021166.1    | Ca_kabuli_chr07 | 6107573                 | TT                              | CC              | 1946882967               |
| SNP_P4_92825_6110805 | NC_021166.1    | Ca_kabuli_chr07 | 6110805                 | TT                              | CC              | 1946882969               |
| SNP_P4_92826_6110810 | NC_021166.1    | Ca_kabuli_chr07 | 6110810                 | CC                              | TT              | 1946882971               |
| SNP_P4_92827_6112979 | NC_021166.1    | Ca_kabuli_chr07 | 6112979                 | TT                              | GG              | 1946882973               |
| SNP_P4_92828_6113319 | NC_021166.1    | Ca_kabuli_chr07 | 6113319                 | CC                              | TT              | 1946882975               |
| SNP_P4_92830_6116829 | NC_021166.1    | Ca_kabuli_chr07 | 6116829                 | GG                              | AA              | 1946882977               |
| SNP_P4_92831_6118484 | NC_021166.1    | Ca_kabuli_chr07 | 6118484                 | TT                              | AA              | 1946882979               |
| SNP_P4_92832_6118512 | NC_021166.1    | Ca_kabuli_chr07 | 6118512                 | AA                              | TT              | 1946882981               |
| SNP_P4_92833_6119476 | NC_021166.1    | Ca_kabuli_chr07 | 6119476                 | AA                              | TT              | 1946882983               |
| SNP_P4_92834_6120643 | NC_021166.1    | Ca_kabuli_chr07 | 6120643                 | TT                              | CC              | 1946882985               |
| SNP_P4_92835_6120684 | NC_021166.1    | Ca_kabuli_chr07 | 6120684                 | GG                              | AA              | 1946882987               |
| SNP_P4_92836_6120696 | NC_021166.1    | Ca_kabuli_chr07 | 6120696                 | AA                              | TT              | 1946882989               |
| SNP_P4_92837_6120739 | NC_021166.1    | Ca_kabuli_chr07 | 6120739                 | CC                              | TT              | 1946882991               |
| SNP_P4_92838_6120745 | NC_021166.1    | Ca_kabuli_chr07 | 6120745                 | AA                              | GG              | 1946882993               |
| SNP_P4_92839_6120752 | NC_021166.1    | Ca_kabuli_chr07 | 6120752                 | AA                              | GG              | 1946882995               |
| SNP_P4_92840_6120871 | NC_021166.1    | Ca_kabuli_chr07 | 6120871                 | AA                              | TT              | 1946882997               |
| SNP_P4_92841_6121150 | NC_021166.1    | Ca_kabuli_chr07 | 6121150                 | GG                              | TT              | 1946882999               |
| SNP_P4_92843_6121186 | NC_021166.1    | Ca_kabuli_chr07 | 6121186                 | TT                              | CC              | 1946883001               |
| SNP_P4_92844_6121372 | NC_021166.1    | Ca_kabuli_chr07 | 6121372                 | GG                              | AA              | 1946883003               |
| SNP_P4_92846_6122331 | NC_021166.1    | Ca_kabuli_chr07 | 6122331                 | AA                              | GG              | 1946883005               |
| SNP_P4_92847_6122340 | NC_021166.1    | Ca_kabuli_chr07 | 6122340                 | AA                              | TT              | 1946883007               |
| SNP_P4_92848_6122365 | NC_021166.1    | Ca_kabuli_chr07 | 6122365                 | AA                              | GG              | 1946883009               |
| SNP_P4_92849_6122392 | NC_021166.1    | Ca_kabuli_chr07 | 6122392                 | GG                              | CC              | 1946883011               |
| SNP_P4_92850_6123006 | NC_021166.1    | Ca_kabuli_chr07 | 6123006                 | AA                              | GG              | 1946883013               |
| SNP_P4_92851_6123716 | NC_021166.1    | Ca_kabuli_chr07 | 6123716                 | TT                              | GG              | 1946883015               |
| SNP_P4_92852_6124439 | NC_021166.1    | Ca_kabuli_chr07 | 6124439                 | TT                              | CC              | 1946883017               |
| SNP_P4_92854_6125631 | NC_021166.1    | Ca_kabuli_chr07 | 6125631                 | AA                              | TT              | 1946883019               |
| SNP_P4_92855_6125638 | NC_021166.1    | Ca_kabuli_chr07 | 6125638                 | AA                              | GG              | 1946883021               |
| SNP_P4_92856_6125663 | NC_021166.1    | Ca_kabuli_chr07 | 6125663                 | GG                              | AA              | 1946883023               |

| SNPs IDs             | Chromosome IDs | Chromosomes     | Physical positions (bp) | CDC Frontier (Reference genome) | (ILWC46 & LPNB) | NCBI SNPdb Accession IDs |
|----------------------|----------------|-----------------|-------------------------|---------------------------------|-----------------|--------------------------|
| SNP_P4_92857_6126031 | NC_021166.1    | Ca_kabuli_chr07 | 6126031                 | AA                              | GG              | 1946883025               |
| SNP_P4_92859_6126308 | NC_021166.1    | Ca_kabuli_chr07 | 6126308                 | AA                              | GG              | 1946883027               |
| SNP_P4_92860_6126333 | NC_021166.1    | Ca_kabuli_chr07 | 6126333                 | TT                              | AA              | 1946883029               |
| SNP_P4_92861_6126356 | NC_021166.1    | Ca_kabuli_chr07 | 6126356                 | CC                              | TT              | 1946883031               |
| SNP_P4_92863_6126469 | NC_021166.1    | Ca_kabuli_chr07 | 6126469                 | AA                              | GG              | 1946883033               |
| SNP_P4_92864_6126831 | NC_021166.1    | Ca_kabuli_chr07 | 6126831                 | CC                              | TT              | 1946883035               |
| SNP_P4_92865_6126843 | NC_021166.1    | Ca_kabuli_chr07 | 6126843                 | TT                              | AA              | 1946883037               |
| SNP_P4_92866_6127667 | NC_021166.1    | Ca_kabuli_chr07 | 6127667                 | AA                              | GG              | 1946883039               |
| SNP_P4_92867_6133957 | NC_021166.1    | Ca_kabuli_chr07 | 6133957                 | CC                              | TT              | 1946883041               |
| SNP_P4_92868_6135003 | NC_021166.1    | Ca_kabuli_chr07 | 6135003                 | TT                              | GG              | 1946883043               |
| SNP_P4_92869_6140952 | NC_021166.1    | Ca_kabuli_chr07 | 6140952                 | CC                              | AA              | 1946883045               |
| SNP_P4_92871_6142269 | NC_021166.1    | Ca_kabuli_chr07 | 6142269                 | CC                              | TT              | 1946883047               |
| SNP_P4_92872_6142321 | NC_021166.1    | Ca_kabuli_chr07 | 6142321                 | GG                              | CC              | 1946883049               |
| SNP_P4_92873_6142517 | NC_021166.1    | Ca_kabuli_chr07 | 6142517                 | GG                              | AA              | 1946883051               |
| SNP_P4_92874_6142526 | NC_021166.1    | Ca_kabuli_chr07 | 6142526                 | GG                              | AA              | 1946883053               |
| SNP_P4_92875_6142690 | NC_021166.1    | Ca_kabuli_chr07 | 6142690                 | CC                              | TT              | 1946883055               |
| SNP_P4_92876_6142740 | NC_021166.1    | Ca_kabuli_chr07 | 6142740                 | CC                              | GG              | 1946883057               |
| SNP_P4_92877_6142785 | NC_021166.1    | Ca_kabuli_chr07 | 6142785                 | TT                              | CC              | 1946883059               |
| SNP_P4_92878_6142967 | NC_021166.1    | Ca_kabuli_chr07 | 6142967                 | GG                              | AA              | 1946883061               |
| SNP_P4_92879_6142971 | NC_021166.1    | Ca_kabuli_chr07 | 6142971                 | GG                              | TT              | 1946883063               |
| SNP_P4_92881_6143400 | NC_021166.1    | Ca_kabuli_chr07 | 6143400                 | AA                              | GG              | 1946883065               |
| SNP_P4_92882_6144075 | NC_021166.1    | Ca_kabuli_chr07 | 6144075                 | AA                              | GG              | 1946883067               |
| SNP_P4_92883_6144155 | NC_021166.1    | Ca_kabuli_chr07 | 6144155                 | TT                              | GG              | 1946883069               |
| SNP_P4_92884_6144928 | NC_021166.1    | Ca_kabuli_chr07 | 6144928                 | TT                              | CC              | 1946883071               |
| SNP_P4_92885_6145550 | NC_021166.1    | Ca_kabuli_chr07 | 6145550                 | TT                              | CC              | 1946883073               |
| SNP_P4_92886_6145565 | NC_021166.1    | Ca_kabuli_chr07 | 6145565                 | TT                              | CC              | 1946883075               |
| SNP_P4_92887_6145577 | NC_021166.1    | Ca_kabuli_chr07 | 6145577                 | AA                              | CC              | 1946883077               |
| SNP_P4_92889_6145792 | NC_021166.1    | Ca_kabuli_chr07 | 6145792                 | TT                              | CC              | 1946883079               |
| SNP_P4_92890_6145795 | NC_021166.1    | Ca_kabuli_chr07 | 6145795                 | AA                              | GG              | 1946883081               |
| SNP_P4_92891_6146018 | NC_021166.1    | Ca_kabuli_chr07 | 6146018                 | TT                              | GG              | 1946883083               |
| SNP_P4_92894_6148045 | NC_021166.1    | Ca_kabuli_chr07 | 6148045                 | AA                              | GG              | 1946883085               |
| SNP_P4_92896_6148888 | NC_021166.1    | Ca_kabuli_chr07 | 6148888                 | GG                              | CC              | 1946883087               |
| SNP_P4_92897_6150749 | NC_021166.1    | Ca_kabuli_chr07 | 6150749                 | AA                              | TT              | 1946883089               |
| SNP_P4_92898_6153553 | NC_021166.1    | Ca_kabuli_chr07 | 6153553                 | AA                              | CC              | 1946883091               |
| SNP_P4_92899_6153592 | NC_021166.1    | Ca_kabuli_chr07 | 6153592                 | AA                              | GG              | 1946883093               |
| SNP_P4_92900_6153593 | NC_021166.1    | Ca_kabuli_chr07 | 6153593                 | AA                              | GG              | 1946883095               |
| SNP_P4_92901_6153813 | NC_021166.1    | Ca_kabuli_chr07 | 6153813                 | CC                              | TT              | 1946883097               |
| SNP_P4_92902_6153840 | NC_021166.1    | Ca_kabuli_chr07 | 6153840                 | CC                              | GG              | 1946883099               |
| SNP_P4_92903_6153849 | NC_021166.1    | Ca_kabuli_chr07 | 6153849                 | AA                              | TT              | 1946883101               |
| SNP_P4_92904_6153897 | NC_021166.1    | Ca_kabuli_chr07 | 6153897                 | GG                              | AA              | 1946883103               |
| SNP_P4_92905_6154477 | NC_021166.1    | Ca_kabuli_chr07 | 6154477                 | AA                              | GG              | 1946883105               |
| SNP_P4_92906_6154529 | NC_021166.1    | Ca_kabuli_chr07 | 6154529                 | AA                              | TT              | 1946883107               |

| SNPs IDs             | Chromosome IDs | Chromosomes     | Physical positions (bp) | CDC Frontier (Reference genome) | (ILWC46 & LPNB) | NCBI SNPdb Accession IDs |
|----------------------|----------------|-----------------|-------------------------|---------------------------------|-----------------|--------------------------|
| SNP_P4_92907_6154554 | NC_021166.1    | Ca_kabuli_chr07 | 6154554                 | TT                              | CC              | 1946883109               |
| SNP_P4_92908_6154568 | NC_021166.1    | Ca_kabuli_chr07 | 6154568                 | AA                              | GG              | 1946883111               |
| SNP_P4_92909_6154794 | NC_021166.1    | Ca_kabuli_chr07 | 6154794                 | AA                              | GG              | 1946883114               |
| SNP_P4_92910_6154803 | NC_021166.1    | Ca_kabuli_chr07 | 6154803                 | GG                              | AA              | 1946883116               |
| SNP_P4_92911_6154815 | NC_021166.1    | Ca_kabuli_chr07 | 6154815                 | GG                              | AA              | 1946883118               |
| SNP_P4_92912_6154817 | NC_021166.1    | Ca_kabuli_chr07 | 6154817                 | GG                              | AA              | 1946883120               |
| SNP_P4_92914_6156279 | NC_021166.1    | Ca_kabuli_chr07 | 6156279                 | CC                              | TT              | 1946883122               |
| SNP_P4_92916_6157051 | NC_021166.1    | Ca_kabuli_chr07 | 6157051                 | CC                              | AA              | 1946883124               |
| SNP_P4_92917_6157058 | NC_021166.1    | Ca_kabuli_chr07 | 6157058                 | CC                              | TT              | 1946883126               |
| SNP_P4_92918_6157066 | NC_021166.1    | Ca_kabuli_chr07 | 6157066                 | CC                              | TT              | 1946883128               |
| SNP_P4_92919_6157276 | NC_021166.1    | Ca_kabuli_chr07 | 6157276                 | AA                              | GG              | 1946883130               |
| SNP_P4_92920_6157311 | NC_021166.1    | Ca_kabuli_chr07 | 6157311                 | CC                              | AA              | 1946883132               |
| SNP_P4_92921_6157317 | NC_021166.1    | Ca_kabuli_chr07 | 6157317                 | GG                              | CC              | 1946883134               |
| SNP_P4_92922_6157324 | NC_021166.1    | Ca_kabuli_chr07 | 6157324                 | CC                              | TT              | 1946883136               |
| SNP_P4_92923_6157333 | NC_021166.1    | Ca_kabuli_chr07 | 6157333                 | TT                              | GG              | 1946883138               |
| SNP_P4_92924_6157335 | NC_021166.1    | Ca_kabuli_chr07 | 6157335                 | GG                              | AA              | 1946883140               |
| SNP_P4_92925_6157994 | NC_021166.1    | Ca_kabuli_chr07 | 6157994                 | GG                              | AA              | 1946883142               |
| SNP_P4_92926_6158023 | NC_021166.1    | Ca_kabuli_chr07 | 6158023                 | GG                              | AA              | 1946883144               |
| SNP_P4_92927_6158097 | NC_021166.1    | Ca_kabuli_chr07 | 6158097                 | GG                              | TT              | 1946883146               |
| SNP_P4_92928_6158105 | NC_021166.1    | Ca_kabuli_chr07 | 6158105                 | AA                              | GG              | 1946883148               |
| SNP_P4_92929_6158363 | NC_021166.1    | Ca_kabuli_chr07 | 6158363                 | GG                              | AA              | 1946883150               |
| SNP_P4_92930_6159419 | NC_021166.1    | Ca_kabuli_chr07 | 6159419                 | GG                              | AA              | 1946883152               |
| SNP_P4_92933_6159787 | NC_021166.1    | Ca_kabuli_chr07 | 6159787                 | TT                              | CC              | 1946883154               |
| SNP_P4_92935_6159810 | NC_021166.1    | Ca_kabuli_chr07 | 6159810                 | TT                              | CC              | 1946883156               |
| SNP_P4_92936_6159825 | NC_021166.1    | Ca_kabuli_chr07 | 6159825                 | AA                              | CC              | 1946883158               |
| SNP_P4_92937_6160020 | NC_021166.1    | Ca_kabuli_chr07 | 6160020                 | CC                              | TT              | 1946883160               |
| SNP_P4_92938_6160038 | NC_021166.1    | Ca_kabuli_chr07 | 6160038                 | TT                              | AA              | 1946883162               |
| SNP_P4_92939_6160054 | NC_021166.1    | Ca_kabuli_chr07 | 6160054                 | CC                              | TT              | 1946883164               |
| SNP_P4_92940_6160604 | NC_021166.1    | Ca_kabuli_chr07 | 6160604                 | AA                              | CC              | 1946883166               |
| SNP_P4_92941_6160852 | NC_021166.1    | Ca_kabuli_chr07 | 6160852                 | AA                              | GG              | 1946883168               |
| SNP_P4_92942_6160909 | NC_021166.1    | Ca_kabuli_chr07 | 6160909                 | AA                              | TT              | 1946883171               |
| SNP_P4_92943_6160972 | NC_021166.1    | Ca_kabuli_chr07 | 6160972                 | CC                              | TT              | 1946883173               |
| SNP_P4_92944_6161020 | NC_021166.1    | Ca_kabuli_chr07 | 6161020                 | AA                              | GG              | 1946883175               |
| SNP_P4_92945_6161052 | NC_021166.1    | Ca_kabuli_chr07 | 6161052                 | TT                              | CC              | 1946883177               |
| SNP_P4_92946_6161055 | NC_021166.1    | Ca_kabuli_chr07 | 6161055                 | TT                              | CC              | 1946883179               |
| SNP_P4_92947_6161067 | NC_021166.1    | Ca_kabuli_chr07 | 6161067                 | AA                              | GG              | 1946883181               |
| SNP_P4_92948_6161069 | NC_021166.1    | Ca_kabuli_chr07 | 6161069                 | CC                              | GG              | 1946883183               |
| SNP_P4_92949_6161099 | NC_021166.1    | Ca_kabuli_chr07 | 6161099                 | GG                              | AA              | 1946883185               |
| SNP_P4_92950_6161171 | NC_021166.1    | Ca_kabuli_chr07 | 6161171                 | TT                              | CC              | 1946883187               |
| SNP_P4_92951_6161185 | NC_021166.1    | Ca_kabuli_chr07 | 6161185                 | CC                              | TT              | 1946883189               |
| SNP_P4_92952_6162913 | NC_021166.1    | Ca_kabuli_chr07 | 6162913                 | CC                              | AA              | 1946883191               |
| SNP_P4_92953_6163779 | NC_021166.1    | Ca_kabuli_chr07 | 6163779                 | AA                              | TT              | 1946883193               |

| SNPs IDs             | Chromosome IDs | Chromosomes     | Physical positions (bp) | CDC Frontier (Reference genome) | (ILWC46 & LPNB) | NCBI SNPdb Accession IDs |
|----------------------|----------------|-----------------|-------------------------|---------------------------------|-----------------|--------------------------|
| SNP_P4_92954_6163903 | NC_021166.1    | Ca_kabuli_chr07 | 6163903                 | GG                              | AA              | 1946883195               |
| SNP_P4_92955_6164093 | NC_021166.1    | Ca_kabuli_chr07 | 6164093                 | CC                              | TT              | 1946883197               |
| SNP_P4_92956_6164099 | NC_021166.1    | Ca_kabuli_chr07 | 6164099                 | CC                              | GG              | 1946883199               |
| SNP_P4_92957_6164141 | NC_021166.1    | Ca_kabuli_chr07 | 6164141                 | TT                              | CC              | 1946883201               |
| SNP_P4_92958_6164370 | NC_021166.1    | Ca_kabuli_chr07 | 6164370                 | CC                              | TT              | 1946883203               |
| SNP_P4_92959_6164398 | NC_021166.1    | Ca_kabuli_chr07 | 6164398                 | CC                              | TT              | 1946883205               |
| SNP_P4_92960_6164404 | NC_021166.1    | Ca_kabuli_chr07 | 6164404                 | CC                              | TT              | 1946883207               |
| SNP_P4_92962_6166008 | NC_021166.1    | Ca_kabuli_chr07 | 6166008                 | AA                              | CC              | 1946883209               |
| SNP_P4_92964_6166075 | NC_021166.1    | Ca_kabuli_chr07 | 6166075                 | GG                              | AA              | 1946883211               |
| SNP_P4_92966_6176432 | NC_021166.1    | Ca_kabuli_chr07 | 6176432                 | TT                              | CC              | 1946883213               |
| SNP_P4_92967_6177850 | NC_021166.1    | Ca_kabuli_chr07 | 6177850                 | AA                              | GG              | 1946883215               |
| SNP_P4_92968_6177852 | NC_021166.1    | Ca_kabuli_chr07 | 6177852                 | AA                              | TT              | 1946883217               |
| SNP_P4_92969_6188280 | NC_021166.1    | Ca_kabuli_chr07 | 6188280                 | CC                              | AA              | 1946883219               |
| SNP_P4_92971_6223832 | NC_021166.1    | Ca_kabuli_chr07 | 6223832                 | TT                              | AA              | 1946883221               |
| SNP_P4_92974_6276839 | NC_021166.1    | Ca_kabuli_chr07 | 6276839                 | CC                              | TT              | 1946883223               |
| SNP_P4_92975_6279285 | NC_021166.1    | Ca_kabuli_chr07 | 6279285                 | AA                              | GG              | 1946883225               |
| SNP_P4_92976_6298953 | NC_021166.1    | Ca_kabuli_chr07 | 6298953                 | TT                              | GG              | 1946883227               |
| SNP_P4_92978_6304255 | NC_021166.1    | Ca_kabuli_chr07 | 6304255                 | CC                              | TT              | 1946883229               |
| SNP_P4_92980_6313528 | NC_021166.1    | Ca_kabuli_chr07 | 6313528                 | TT                              | CC              | 1946883231               |
| SNP_P4_92981_6339958 | NC_021166.1    | Ca_kabuli_chr07 | 6339958                 | TT                              | AA              | 1946883233               |
| SNP_P4_92982_6344821 | NC_021166.1    | Ca_kabuli_chr07 | 6344821                 | GG                              | AA              | 1946883235               |
| SNP_P4_92983_6355825 | NC_021166.1    | Ca_kabuli_chr07 | 6355825                 | AA                              | CC              | 1946883237               |
| SNP_P4_92985_6404205 | NC_021166.1    | Ca_kabuli_chr07 | 6404205                 | GG                              | AA              | 1946883239               |
| SNP_P4_92986_6405207 | NC_021166.1    | Ca_kabuli_chr07 | 6405207                 | TT                              | AA              | 1946883241               |
| SNP_P4_92987_6409084 | NC_021166.1    | Ca_kabuli_chr07 | 6409084                 | CC                              | TT              | 1946883243               |
| SNP_P4_92988_6434182 | NC_021166.1    | Ca_kabuli_chr07 | 6434182                 | TT                              | CC              | 1946883245               |
| SNP_P4_92989_6435046 | NC_021166.1    | Ca_kabuli_chr07 | 6435046                 | TT                              | AA              | 1946883247               |
| SNP_P4_92990_6435047 | NC_021166.1    | Ca_kabuli_chr07 | 6435047                 | TT                              | AA              | 1946883249               |
| SNP_P4_92991_6441768 | NC_021166.1    | Ca_kabuli_chr07 | 6441768                 | AA                              | TT              | 1946883251               |
| SNP_P4_92992_6442573 | NC_021166.1    | Ca_kabuli_chr07 | 6442573                 | GG                              | AA              | 1946883253               |
| SNP_P4_92993_6443123 | NC_021166.1    | Ca_kabuli_chr07 | 6443123                 | AA                              | GG              | 1946883255               |
| SNP_P4_92994_6443145 | NC_021166.1    | Ca_kabuli_chr07 | 6443145                 | GG                              | AA              | 1946883257               |
| SNP_P4_92995_6452358 | NC_021166.1    | Ca_kabuli_chr07 | 6452358                 | AA                              | GG              | 1946883259               |
| SNP_P4_92996_6453389 | NC_021166.1    | Ca_kabuli_chr07 | 6453389                 | GG                              | AA              | 1946883261               |
| SNP_P4_92997_6464477 | NC_021166.1    | Ca_kabuli_chr07 | 6464477                 | AA                              | GG              | 1946883263               |
| SNP_P4_92998_6487058 | NC_021166.1    | Ca_kabuli_chr07 | 6487058                 | TT                              | AA              | 1946883265               |
| SNP_P4_92999_6506711 | NC_021166.1    | Ca_kabuli_chr07 | 6506711                 | GG                              | TT              | 1946883267               |
| SNP_P4_93000_6570065 | NC_021166.1    | Ca_kabuli_chr07 | 6570065                 | CC                              | TT              | 1946883269               |
| SNP_P4_93001_6587004 | NC_021166.1    | Ca_kabuli_chr07 | 6587004                 | CC                              | TT              | 1946883271               |
| SNP_P4_93002_6599743 | NC_021166.1    | Ca_kabuli_chr07 | 6599743                 | TT                              | CC              | 1946883274               |
| SNP_P4_93005_6629077 | NC_021166.1    | Ca_kabuli_chr07 | 6629077                 | CC                              | TT              | 1946883276               |
| SNP_P4_93006_6629117 | NC_021166.1    | Ca_kabuli_chr07 | 6629117                 | TT                              | CC              | 1946883278               |



| SNPs IDs             | Chromosome IDs | Chromosomes     | Physical positions (bp) | CDC Frontier (Reference genome) | (ILWC46 & LPNB) | NCBI SNPdb Accession IDs |
|----------------------|----------------|-----------------|-------------------------|---------------------------------|-----------------|--------------------------|
| SNP_P4_93008_6718341 | NC_021166.1    | Ca_kabuli_chr07 | 6718341                 | GG                              | AA              | 1946883280               |
| SNP_P4_93009_6719148 | NC_021166.1    | Ca_kabuli_chr07 | 6719148                 | TT                              | CC              | 1946883282               |
| SNP_P4_93014_6802424 | NC_021166.1    | Ca_kabuli_chr07 | 6802424                 | AA                              | GG              | 1946883284               |
| SNP_P4_93015_6812350 | NC_021166.1    | Ca_kabuli_chr07 | 6812350                 | TT                              | GG              | 1946883286               |
| SNP_P4_93016_6832606 | NC_021166.1    | Ca_kabuli_chr07 | 6832606                 | GG                              | AA              | 1946883288               |
| SNP_P4_93017_6850948 | NC_021166.1    | Ca_kabuli_chr07 | 6850948                 | TT                              | GG              | 1946883290               |
| SNP_P4_93018_6875673 | NC_021166.1    | Ca_kabuli_chr07 | 6875673                 | CC                              | TT              | 1946883292               |
| SNP_P4_93020_6884304 | NC_021166.1    | Ca_kabuli_chr07 | 6884304                 | AA                              | TT              | 1946883294               |
| SNP_P4_93021_6885653 | NC_021166.1    | Ca_kabuli_chr07 | 6885653                 | AA                              | GG              | 1946883296               |
| SNP_P4_93023_6906490 | NC_021166.1    | Ca_kabuli_chr07 | 6906490                 | AA                              | GG              | 1946883298               |
| SNP_P4_93025_6925283 | NC_021166.1    | Ca_kabuli_chr07 | 6925283                 | AA                              | GG              | 1946883300               |
| SNP_P4_93027_6937693 | NC_021166.1    | Ca_kabuli_chr07 | 6937693                 | CC                              | TT              | 1946883302               |
| SNP_P4_93028_6959707 | NC_021166.1    | Ca_kabuli_chr07 | 6959707                 | TT                              | CC              | 1946883304               |
| SNP_P4_93029_6966243 | NC_021166.1    | Ca_kabuli_chr07 | 6966243                 | CC                              | TT              | 1946883306               |
| SNP_P4_93031_6987271 | NC_021166.1    | Ca_kabuli_chr07 | 6987271                 | AA                              | TT              | 1946883308               |
| SNP_P4_93032_7020359 | NC_021166.1    | Ca_kabuli_chr07 | 7020359                 | AA                              | GG              | 1946883310               |
| SNP_P4_93035_7034525 | NC_021166.1    | Ca_kabuli_chr07 | 7034525                 | GG                              | AA              | 1946883312               |
| SNP_P4_93036_7034528 | NC_021166.1    | Ca_kabuli_chr07 | 7034528                 | TT                              | AA              | 1946883314               |
| SNP_P4_93037_7035806 | NC_021166.1    | Ca_kabuli_chr07 | 7035806                 | GG                              | CC              | 1946883316               |
| SNP_P4_93038_7036370 | NC_021166.1    | Ca_kabuli_chr07 | 7036370                 | CC                              | TT              | 1946883318               |
| SNP_P4_93039_7037528 | NC_021166.1    | Ca_kabuli_chr07 | 7037528                 | AA                              | TT              | 1946883320               |
| SNP_P4_93040_7047439 | NC_021166.1    | Ca_kabuli_chr07 | 7047439                 | GG                              | TT              | 1946883322               |
| SNP_P4_93041_7047466 | NC_021166.1    | Ca_kabuli_chr07 | 7047466                 | GG                              | CC              | 1946883324               |
| SNP_P4_93042_7078820 | NC_021166.1    | Ca_kabuli_chr07 | 7078820                 | AA                              | GG              | 1946883326               |
| SNP_P4_93043_7097120 | NC_021166.1    | Ca_kabuli_chr07 | 7097120                 | TT                              | CC              | 1946883328               |
| SNP_P4_93044_7112494 | NC_021166.1    | Ca_kabuli_chr07 | 7112494                 | CC                              | TT              | 1946883330               |
| SNP_P4_93045_7135917 | NC_021166.1    | Ca_kabuli_chr07 | 7135917                 | TT                              | CC              | 1946883332               |
| SNP_P4_93047_7158506 | NC_021166.1    | Ca_kabuli_chr07 | 7158506                 | AA                              | GG              | 1946883334               |
| SNP_P4_93048_7167643 | NC_021166.1    | Ca_kabuli_chr07 | 7167643                 | AA                              | GG              | 1946883335               |
| SNP_P4_93049_7169563 | NC_021166.1    | Ca_kabuli_chr07 | 7169563                 | CC                              | TT              | 1946883336               |
| SNP_P4_93050_7176979 | NC_021166.1    | Ca_kabuli_chr07 | 7176979                 | GG                              | CC              | 1946883337               |
| SNP_P4_93051_7184440 | NC_021166.1    | Ca_kabuli_chr07 | 7184440                 | TT                              | AA              | 1946883339               |
| SNP_P4_93052_7184712 | NC_021166.1    | Ca_kabuli_chr07 | 7184712                 | AA                              | CC              | 1946883341               |
| SNP_P4_93053_7208803 | NC_021166.1    | Ca_kabuli_chr07 | 7208803                 | AA                              | TT              | 1946883343               |
| SNP_P4_93054_7209131 | NC_021166.1    | Ca_kabuli_chr07 | 7209131                 | CC                              | GG              | 1946883345               |
| SNP_P4_93055_7240233 | NC_021166.1    | Ca_kabuli_chr07 | 7240233                 | CC                              | TT              | 1946883347               |
| SNP_P4_93056_7240253 | NC_021166.1    | Ca_kabuli_chr07 | 7240253                 | GG                              | AA              | 1946883349               |
| SNP_P4_93057_7241923 | NC_021166.1    | Ca_kabuli_chr07 | 7241923                 | CC                              | TT              | 1946883351               |
| SNP_P4_93058_7244195 | NC_021166.1    | Ca_kabuli_chr07 | 7244195                 | TT                              | AA              | 1946883352               |
| SNP_P4_93059_7249289 | NC_021166.1    | Ca_kabuli_chr07 | 7249289                 | TT                              | AA              | 1946883353               |
| SNP_P4_93060_7273292 | NC_021166.1    | Ca_kabuli_chr07 | 7273292                 | TT                              | GG              | 1946883354               |
| SNP_P4_93061_7288245 | NC_021166.1    | Ca_kabuli_chr07 | 7288245                 | GG                              | CC              | 1946883355               |

| SNPs IDs             | Chromosome IDs | Chromosomes     | Physical positions (bp) | CDC Frontier (Reference genome) | (ILWC46 & LPNB) | NCBI SNPdb Accession IDs |
|----------------------|----------------|-----------------|-------------------------|---------------------------------|-----------------|--------------------------|
| SNP_P4_93062_7290246 | NC_021166.1    | Ca_kabuli_chr07 | 7290246                 | TT                              | CC              | 1946883356               |
| SNP_P4_93063_7298884 | NC_021166.1    | Ca_kabuli_chr07 | 7298884                 | TT                              | AA              | 1946883358               |
| SNP_P4_93064_7310224 | NC_021166.1    | Ca_kabuli_chr07 | 7310224                 | CC                              | TT              | 1946883360               |
| SNP_P4_93065_7314066 | NC_021166.1    | Ca_kabuli_chr07 | 7314066                 | AA                              | GG              | 1946883362               |
| SNP_P4_93066_7331445 | NC_021166.1    | Ca_kabuli_chr07 | 7331445                 | TT                              | CC              | 1946883364               |
| SNP_P4_93067_7336470 | NC_021166.1    | Ca_kabuli_chr07 | 7336470                 | TT                              | CC              | 1946883366               |
| SNP_P4_93068_7360723 | NC_021166.1    | Ca_kabuli_chr07 | 7360723                 | CC                              | TT              | 1946883368               |
| SNP_P4_93072_7507599 | NC_021166.1    | Ca_kabuli_chr07 | 7507599                 | CC                              | TT              | 1946883370               |
| SNP_P4_93074_7531485 | NC_021166.1    | Ca_kabuli_chr07 | 7531485                 | AA                              | TT              | 1946883372               |
| SNP_P4_93075_7532236 | NC_021166.1    | Ca_kabuli_chr07 | 7532236                 | CC                              | TT              | 1946883374               |
| SNP_P4_93076_7535138 | NC_021166.1    | Ca_kabuli_chr07 | 7535138                 | AA                              | GG              | 1946883376               |
| SNP_P4_93078_7552710 | NC_021166.1    | Ca_kabuli_chr07 | 7552710                 | TT                              | GG              | 1946883378               |
| SNP_P4_93079_7553246 | NC_021166.1    | Ca_kabuli_chr07 | 7553246                 | CC                              | TT              | 1946883380               |
| SNP_P4_93080_7558382 | NC_021166.1    | Ca_kabuli_chr07 | 7558382                 | TT                              | AA              | 1946883382               |
| SNP_P4_93082_7563062 | NC_021166.1    | Ca_kabuli_chr07 | 7563062                 | AA                              | TT              | 1946883384               |
| SNP_P4_93084_7608939 | NC_021166.1    | Ca_kabuli_chr07 | 7608939                 | GG                              | CC              | 1946883386               |
| SNP_P4_93085_7613835 | NC_021166.1    | Ca_kabuli_chr07 | 7613835                 | CC                              | TT              | 1946883388               |
| SNP_P4_93086_7617865 | NC_021166.1    | Ca_kabuli_chr07 | 7617865                 | CC                              | GG              | 1946883390               |
| SNP_P4_93087_7619177 | NC_021166.1    | Ca_kabuli_chr07 | 7619177                 | GG                              | AA              | 1946883392               |
| SNP_P4_93089_7628726 | NC_021166.1    | Ca_kabuli_chr07 | 7628726                 | CC                              | TT              | 1946883394               |
| SNP_P4_93090_7637903 | NC_021166.1    | Ca_kabuli_chr07 | 7637903                 | AA                              | GG              | 1946883396               |
| SNP_P4_93092_7668782 | NC_021166.1    | Ca_kabuli_chr07 | 7668782                 | TT                              | CC              | 1946883398               |
| SNP_P4_93093_7673193 | NC_021166.1    | Ca_kabuli_chr07 | 7673193                 | TT                              | CC              | 1946883400               |
| SNP_P4_93095_7695385 | NC_021166.1    | Ca_kabuli_chr07 | 7695385                 | CC                              | GG              | 1946883402               |
| SNP_P4_93096_7695415 | NC_021166.1    | Ca_kabuli_chr07 | 7695415                 | AA                              | CC              | 1946883404               |
| SNP_P4_93097_7698837 | NC_021166.1    | Ca_kabuli_chr07 | 7698837                 | GG                              | TT              | 1946883406               |
| SNP_P4_93098_7721853 | NC_021166.1    | Ca_kabuli_chr07 | 7721853                 | AA                              | TT              | 1946883408               |
| SNP_P4_93099_7737501 | NC_021166.1    | Ca_kabuli_chr07 | 7737501                 | GG                              | AA              | 1946883410               |
| SNP_P4_93100_7737645 | NC_021166.1    | Ca_kabuli_chr07 | 7737645                 | GG                              | AA              | 1946883412               |
| SNP_P4_93101_7737855 | NC_021166.1    | Ca_kabuli_chr07 | 7737855                 | TT                              | CC              | 1946883414               |
| SNP_P4_93102_7737899 | NC_021166.1    | Ca_kabuli_chr07 | 7737899                 | CC                              | TT              | 1946883416               |
| SNP_P4_93103_7737942 | NC_021166.1    | Ca_kabuli_chr07 | 7737942                 | AA                              | TT              | 1946883418               |
| SNP_P4_93104_7737963 | NC_021166.1    | Ca_kabuli_chr07 | 7737963                 | TT                              | GG              | 1946883420               |
| SNP_P4_93105_7737970 | NC_021166.1    | Ca_kabuli_chr07 | 7737970                 | TT                              | GG              | 1946883422               |
| SNP_P4_93106_7737997 | NC_021166.1    | Ca_kabuli_chr07 | 7737997                 | TT                              | CC              | 1946883424               |
| SNP_P4_93108_7738128 | NC_021166.1    | Ca_kabuli_chr07 | 7738128                 | TT                              | GG              | 1946883426               |
| SNP_P4_93109_7738138 | NC_021166.1    | Ca_kabuli_chr07 | 7738138                 | AA                              | GG              | 1946883428               |
| SNP_P4_93111_7738245 | NC_021166.1    | Ca_kabuli_chr07 | 7738245                 | AA                              | GG              | 1946883430               |
| SNP_P4_93112_7738483 | NC_021166.1    | Ca_kabuli_chr07 | 7738483                 | AA                              | GG              | 1946883432               |
| SNP_P4_93113_7738508 | NC_021166.1    | Ca_kabuli_chr07 | 7738508                 | AA                              | GG              | 1946883434               |
| SNP_P4_93115_7738695 | NC_021166.1    | Ca_kabuli_chr07 | 7738695                 | TT                              | GG              | 1946883436               |
| SNP_P4_93116_7738708 | NC_021166.1    | Ca_kabuli_chr07 | 7738708                 | AA                              | GG              | 1946883438               |

| SNPs IDs             | Chromosome IDs | Chromosomes     | Physical positions (bp) | CDC Frontier (Reference genome) | (ILWC46 & LPNB) | NCBI SNPdb Accession IDs |
|----------------------|----------------|-----------------|-------------------------|---------------------------------|-----------------|--------------------------|
| SNP_P4_93117_7738854 | NC_021166.1    | Ca_kabuli_chr07 | 7738854                 | GG                              | AA              | 1946883440               |
| SNP_P4_93118_7738943 | NC_021166.1    | Ca_kabuli_chr07 | 7738943                 | AA                              | GG              | 1946883442               |
| SNP_P4_93119_7738949 | NC_021166.1    | Ca_kabuli_chr07 | 7738949                 | TT                              | CC              | 1946883444               |
| SNP_P4_93120_7738965 | NC_021166.1    | Ca_kabuli_chr07 | 7738965                 | TT                              | CC              | 1946883446               |
| SNP_P4_93121_7738970 | NC_021166.1    | Ca_kabuli_chr07 | 7738970                 | AA                              | GG              | 1946883448               |
| SNP_P4_93122_7738985 | NC_021166.1    | Ca_kabuli_chr07 | 7738985                 | AA                              | GG              | 1946883450               |
| SNP_P4_93123_7738991 | NC_021166.1    | Ca_kabuli_chr07 | 7738991                 | TT                              | CC              | 1946883452               |
| SNP_P4_93124_7738998 | NC_021166.1    | Ca_kabuli_chr07 | 7738998                 | GG                              | TT              | 1946883454               |
| SNP_P4_93125_7739000 | NC_021166.1    | Ca_kabuli_chr07 | 7739000                 | CC                              | TT              | 1946883456               |
| SNP_P4_93126_7739021 | NC_021166.1    | Ca_kabuli_chr07 | 7739021                 | TT                              | CC              | 1946883458               |
| SNP_P4_93127_7739056 | NC_021166.1    | Ca_kabuli_chr07 | 7739056                 | CC                              | TT              | 1946883460               |
| SNP_P4_93128_7739157 | NC_021166.1    | Ca_kabuli_chr07 | 7739157                 | TT                              | CC              | 1946883462               |
| SNP_P4_93129_7739184 | NC_021166.1    | Ca_kabuli_chr07 | 7739184                 | TT                              | AA              | 1946883464               |
| SNP_P4_93130_7739201 | NC_021166.1    | Ca_kabuli_chr07 | 7739201                 | CC                              | TT              | 1946883466               |
| SNP_P4_93131_7739222 | NC_021166.1    | Ca_kabuli_chr07 | 7739222                 | TT                              | AA              | 1946883468               |
| SNP_P4_93132_7739223 | NC_021166.1    | Ca_kabuli_chr07 | 7739223                 | TT                              | CC              | 1946883470               |
| SNP_P4_93134_7739380 | NC_021166.1    | Ca_kabuli_chr07 | 7739380                 | TT                              | AA              | 1946883472               |
| SNP_P4_93135_7739407 | NC_021166.1    | Ca_kabuli_chr07 | 7739407                 | AA                              | GG              | 1946883474               |
| SNP_P4_93136_7751857 | NC_021166.1    | Ca_kabuli_chr07 | 7751857                 | CC                              | AA              | 1946883476               |
| SNP_P4_93138_7776491 | NC_021166.1    | Ca_kabuli_chr07 | 7776491                 | TT                              | CC              | 1946883478               |
| SNP_P4_93139_7776766 | NC_021166.1    | Ca_kabuli_chr07 | 7776766                 | CC                              | AA              | 1946883480               |
| SNP_P4_93140_7777314 | NC_021166.1    | Ca_kabuli_chr07 | 7777314                 | TT                              | CC              | 1946883482               |
| SNP_P4_93141_7777333 | NC_021166.1    | Ca_kabuli_chr07 | 7777333                 | CC                              | TT              | 1946883484               |
| SNP_P4_93142_7781961 | NC_021166.1    | Ca_kabuli_chr07 | 7781961                 | TT                              | CC              | 1946883486               |
| SNP_P4_93143_7800005 | NC_021166.1    | Ca_kabuli_chr07 | 7800005                 | TT                              | CC              | 1946883488               |
| SNP_P4_93144_7882536 | NC_021166.1    | Ca_kabuli_chr07 | 7882536                 | AA                              | TT              | 1946883490               |
| SNP_P4_93145_7882538 | NC_021166.1    | Ca_kabuli_chr07 | 7882538                 | TT                              | GG              | 1946883492               |
| SNP_P4_93146_7882550 | NC_021166.1    | Ca_kabuli_chr07 | 7882550                 | AA                              | CC              | 1946883494               |
| SNP_P4_93147_7882554 | NC_021166.1    | Ca_kabuli_chr07 | 7882554                 | TT                              | CC              | 1946883496               |
| SNP_P4_93148_7902125 | NC_021166.1    | Ca_kabuli_chr07 | 7902125                 | AA                              | CC              | 1946883498               |
| SNP_P4_93149_7904122 | NC_021166.1    | Ca_kabuli_chr07 | 7904122                 | TT                              | AA              | 1946883500               |
| SNP_P4_93150_7910341 | NC_021166.1    | Ca_kabuli_chr07 | 7910341                 | TT                              | AA              | 1946883502               |
| SNP_P4_93151_7922051 | NC_021166.1    | Ca_kabuli_chr07 | 7922051                 | AA                              | GG              | 1946883504               |
| SNP_P4_93153_7942318 | NC_021166.1    | Ca_kabuli_chr07 | 7942318                 | TT                              | GG              | 1946883506               |
| SNP_P4_93154_7942319 | NC_021166.1    | Ca_kabuli_chr07 | 7942319                 | AA                              | GG              | 1946883508               |
| SNP_P4_93157_7963385 | NC_021166.1    | Ca_kabuli_chr07 | 7963385                 | GG                              | TT              | 1946883510               |
| SNP_P4_93159_7975901 | NC_021166.1    | Ca_kabuli_chr07 | 7975901                 | AA                              | TT              | 1946883513               |
| SNP_P4_93161_7979794 | NC_021166.1    | Ca_kabuli_chr07 | 7979794                 | TT                              | AA              | 1946883515               |
| SNP_P4_93162_7998303 | NC_021166.1    | Ca_kabuli_chr07 | 7998303                 | AA                              | GG              | 1946883517               |
| SNP_P4_93163_7998666 | NC_021166.1    | Ca_kabuli_chr07 | 7998666                 | GG                              | TT              | 1946883519               |
| SNP_P4_93164_7998691 | NC_021166.1    | Ca_kabuli_chr07 | 7998691                 | AA                              | GG              | 1946883521               |
| SNP_P4_93165_7998692 | NC_021166.1    | Ca_kabuli_chr07 | 7998692                 | AA                              | GG              | 1946883522               |

| SNPs IDs             | Chromosome IDs | Chromosomes     | Physical positions (bp) | CDC Frontier (Reference genome) | (ILWC46 & LPNB) | NCBI SNPdb Accession IDs |
|----------------------|----------------|-----------------|-------------------------|---------------------------------|-----------------|--------------------------|
| SNP_P4_93166_7998696 | NC_021166.1    | Ca_kabuli_chr07 | 7998696                 | CC                              | TT              | 1946883524               |
| SNP_P4_93167_7998701 | NC_021166.1    | Ca_kabuli_chr07 | 7998701                 | GG                              | AA              | 1946883526               |
| SNP_P4_93168_7998709 | NC_021166.1    | Ca_kabuli_chr07 | 7998709                 | TT                              | AA              | 1946883528               |
| SNP_P4_93169_7998861 | NC_021166.1    | Ca_kabuli_chr07 | 7998861                 | TT                              | CC              | 1946883530               |
| SNP_P4_93170_8077659 | NC_021166.1    | Ca_kabuli_chr07 | 8077659                 | CC                              | TT              | 1946883533               |
| SNP_P4_93171_8085222 | NC_021166.1    | Ca_kabuli_chr07 | 8085222                 | TT                              | AA              | 1946883535               |
| SNP_P4_93174_8100998 | NC_021166.1    | Ca_kabuli_chr07 | 8100998                 | TT                              | GG              | 1946883537               |
| SNP_P4_93175_8107267 | NC_021166.1    | Ca_kabuli_chr07 | 8107267                 | TT                              | CC              | 1946883539               |
| SNP_P4_93176_8128139 | NC_021166.1    | Ca_kabuli_chr07 | 8128139                 | AA                              | CC              | 1946883541               |
| SNP_P4_93177_8148038 | NC_021166.1    | Ca_kabuli_chr07 | 8148038                 | AA                              | GG              | 1946883543               |
| SNP_P4_93179_8152046 | NC_021166.1    | Ca_kabuli_chr07 | 8152046                 | TT                              | AA              | 1946883545               |
| SNP_P4_93180_8160816 | NC_021166.1    | Ca_kabuli_chr07 | 8160816                 | TT                              | CC              | 1946883547               |
| SNP_P4_93183_8192654 | NC_021166.1    | Ca_kabuli_chr07 | 8192654                 | TT                              | AA              | 1946883549               |
| SNP_P4_93184_8192723 | NC_021166.1    | Ca_kabuli_chr07 | 8192723                 | CC                              | TT              | 1946883551               |
| SNP_P4_93185_8192869 | NC_021166.1    | Ca_kabuli_chr07 | 8192869                 | GG                              | CC              | 1946883553               |
| SNP_P4_93186_8192923 | NC_021166.1    | Ca_kabuli_chr07 | 8192923                 | AA                              | GG              | 1946883555               |
| SNP_P4_93187_8193470 | NC_021166.1    | Ca_kabuli_chr07 | 8193470                 | GG                              | CC              | 1946883557               |
| SNP_P4_93188_8193525 | NC_021166.1    | Ca_kabuli_chr07 | 8193525                 | TT                              | CC              | 1946883559               |
| SNP_P4_93189_8204204 | NC_021166.1    | Ca_kabuli_chr07 | 8204204                 | AA                              | GG              | 1946883560               |
| SNP_P4_93190_8222749 | NC_021166.1    | Ca_kabuli_chr07 | 8222749                 | AA                              | TT              | 1946883562               |
| SNP_P4_93191_8224440 | NC_021166.1    | Ca_kabuli_chr07 | 8224440                 | AA                              | GG              | 1946883564               |
| SNP_P4_93192_8224442 | NC_021166.1    | Ca_kabuli_chr07 | 8224442                 | AA                              | TT              | 1946883566               |
| SNP_P4_93193_8236044 | NC_021166.1    | Ca_kabuli_chr07 | 8236044                 | GG                              | TT              | 1946883568               |
| SNP_P4_93194_8239016 | NC_021166.1    | Ca_kabuli_chr07 | 8239016                 | CC                              | TT              | 1946883570               |
| SNP_P4_93195_8241616 | NC_021166.1    | Ca_kabuli_chr07 | 8241616                 | AA                              | TT              | 1946883572               |
| SNP_P4_93197_8262451 | NC_021166.1    | Ca_kabuli_chr07 | 8262451                 | GG                              | AA              | 1946883574               |
| SNP_P4_93199_8273582 | NC_021166.1    | Ca_kabuli_chr07 | 8273582                 | CC                              | TT              | 1946883576               |
| SNP_P4_93200_8327369 | NC_021166.1    | Ca_kabuli_chr07 | 8327369                 | AA                              | TT              | 1946883578               |
| SNP_P4_93201_8327387 | NC_021166.1    | Ca_kabuli_chr07 | 8327387                 | GG                              | AA              | 1946883580               |
| SNP_P4_93202_8327398 | NC_021166.1    | Ca_kabuli_chr07 | 8327398                 | TT                              | GG              | 1946883582               |
| SNP_P4_93203_8336810 | NC_021166.1    | Ca_kabuli_chr07 | 8336810                 | AA                              | TT              | 1946883584               |
| SNP_P4_93205_8373531 | NC_021166.1    | Ca_kabuli_chr07 | 8373531                 | TT                              | CC              | 1946883586               |
| SNP_P4_93206_8502029 | NC_021166.1    | Ca_kabuli_chr07 | 8502029                 | CC                              | TT              | 1946883588               |
| SNP_P4_93208_8513470 | NC_021166.1    | Ca_kabuli_chr07 | 8513470                 | AA                              | TT              | 1946883590               |
| SNP_P4_93209_8522290 | NC_021166.1    | Ca_kabuli_chr07 | 8522290                 | CC                              | TT              | 1946883592               |
| SNP_P4_93211_8522538 | NC_021166.1    | Ca_kabuli_chr07 | 8522538                 | GG                              | TT              | 1946883594               |
| SNP_P4_93212_8522548 | NC_021166.1    | Ca_kabuli_chr07 | 8522548                 | GG                              | AA              | 1946883596               |
| SNP_P4_93213_8522562 | NC_021166.1    | Ca_kabuli_chr07 | 8522562                 | AA                              | GG              | 1946883598               |
| SNP_P4_93214_8523347 | NC_021166.1    | Ca_kabuli_chr07 | 8523347                 | AA                              | TT              | 1946883600               |
| SNP_P4_93215_8539904 | NC_021166.1    | Ca_kabuli_chr07 | 8539904                 | GG                              | AA              | 1946883602               |
| SNP_P4_93216_8561263 | NC_021166.1    | Ca_kabuli_chr07 | 8561263                 | TT                              | CC              | 1946883604               |
| SNP_P4_93217_8578518 | NC_021166.1    | Ca_kabuli_chr07 | 8578518                 | TT                              | AA              | 1946883606               |

| SNPs IDs             | Chromosome IDs | Chromosomes     | Physical positions (bp) | CDC Frontier (Reference genome) | (ILWC46 & LPNB) | NCBI SNPdb Accession IDs |
|----------------------|----------------|-----------------|-------------------------|---------------------------------|-----------------|--------------------------|
| SNP_P4_93219_8579246 | NC_021166.1    | Ca_kabuli_chr07 | 8579246                 | GG                              | TT              | 1946883608               |
| SNP_P4_93220_8579350 | NC_021166.1    | Ca_kabuli_chr07 | 8579350                 | AA                              | GG              | 1946883610               |
| SNP_P4_93221_8581250 | NC_021166.1    | Ca_kabuli_chr07 | 8581250                 | GG                              | AA              | 1946883612               |
| SNP_P4_93222_8606249 | NC_021166.1    | Ca_kabuli_chr07 | 8606249                 | AA                              | TT              | 1946883615               |
| SNP_P4_93223_8607899 | NC_021166.1    | Ca_kabuli_chr07 | 8607899                 | TT                              | CC              | 1946883617               |
| SNP_P4_93224_8608039 | NC_021166.1    | Ca_kabuli_chr07 | 8608039                 | TT                              | AA              | 1946883619               |
| SNP_P4_93225_8613467 | NC_021166.1    | Ca_kabuli_chr07 | 8613467                 | TT                              | AA              | 1946883621               |
| SNP_P4_93226_8644785 | NC_021166.1    | Ca_kabuli_chr07 | 8644785                 | GG                              | AA              | 1946883623               |
| SNP_P4_93227_8664691 | NC_021166.1    | Ca_kabuli_chr07 | 8664691                 | CC                              | TT              | 1946883626               |
| SNP_P4_93228_8667494 | NC_021166.1    | Ca_kabuli_chr07 | 8667494                 | AA                              | GG              | 1946883628               |
| SNP_P4_93229_8674247 | NC_021166.1    | Ca_kabuli_chr07 | 8674247                 | GG                              | AA              | 1946883630               |
| SNP_P4_93230_8674355 | NC_021166.1    | Ca_kabuli_chr07 | 8674355                 | CC                              | TT              | 1946883632               |
| SNP_P4_93231_8689148 | NC_021166.1    | Ca_kabuli_chr07 | 8689148                 | TT                              | CC              | 1946883634               |
| SNP_P4_93232_8732762 | NC_021166.1    | Ca_kabuli_chr07 | 8732762                 | TT                              | CC              | 1946883636               |
| SNP_P4_93233_8734547 | NC_021166.1    | Ca_kabuli_chr07 | 8734547                 | AA                              | TT              | 1946883638               |
| SNP_P4_93234_8763247 | NC_021166.1    | Ca_kabuli_chr07 | 8763247                 | AA                              | GG              | 1946883640               |
| SNP_P4_93235_8791298 | NC_021166.1    | Ca_kabuli_chr07 | 8791298                 | TT                              | AA              | 1946883642               |
| SNP_P4_93236_8798209 | NC_021166.1    | Ca_kabuli_chr07 | 8798209                 | AA                              | TT              | 1946883644               |
| SNP_P4_93237_8832677 | NC_021166.1    | Ca_kabuli_chr07 | 8832677                 | CC                              | TT              | 1946883646               |
| SNP_P4_93238_8832920 | NC_021166.1    | Ca_kabuli_chr07 | 8832920                 | AA                              | TT              | 1946883648               |
| SNP_P4_93239_8832947 | NC_021166.1    | Ca_kabuli_chr07 | 8832947                 | AA                              | GG              | 1946883650               |
| SNP_P4_93240_8834454 | NC_021166.1    | Ca_kabuli_chr07 | 8834454                 | TT                              | AA              | 1946883652               |
| SNP_P4_93241_8835783 | NC_021166.1    | Ca_kabuli_chr07 | 8835783                 | CC                              | TT              | 1946883654               |
| SNP_P4_93242_8851451 | NC_021166.1    | Ca_kabuli_chr07 | 8851451                 | AA                              | TT              | 1946883656               |
| SNP_P4_93244_8967693 | NC_021166.1    | Ca_kabuli_chr07 | 8967693                 | CC                              | TT              | 1946883658               |
| SNP_P4_93246_8988833 | NC_021166.1    | Ca_kabuli_chr07 | 8988833                 | AA                              | GG              | 1946883660               |
| SNP_P4_93247_8990037 | NC_021166.1    | Ca_kabuli_chr07 | 8990037                 | TT                              | AA              | 1946883662               |
| SNP_P4_93250_8996186 | NC_021166.1    | Ca_kabuli_chr07 | 8996186                 | AA                              | CC              | 1946883664               |
| SNP_P4_93251_9011339 | NC_021166.1    | Ca_kabuli_chr07 | 9011339                 | AA                              | GG              | 1946883666               |
| SNP_P4_93252_9016114 | NC_021166.1    | Ca_kabuli_chr07 | 9016114                 | TT                              | CC              | 1946883668               |
| SNP_P4_93253_9029283 | NC_021166.1    | Ca_kabuli_chr07 | 9029283                 | TT                              | CC              | 1946883670               |
| SNP_P4_93254_9037787 | NC_021166.1    | Ca_kabuli_chr07 | 9037787                 | TT                              | GG              | 1946883672               |
| SNP_P4_93255_9054371 | NC_021166.1    | Ca_kabuli_chr07 | 9054371                 | AA                              | CC              | 1946883674               |
| SNP_P4_93256_9060674 | NC_021166.1    | Ca_kabuli_chr07 | 9060674                 | GG                              | AA              | 1946883676               |
| SNP_P4_93257_9071654 | NC_021166.1    | Ca_kabuli_chr07 | 9071654                 | GG                              | AA              | 1946883678               |
| SNP_P4_93258_9076364 | NC_021166.1    | Ca_kabuli_chr07 | 9076364                 | AA                              | GG              | 1946883680               |
| SNP_P4_93259_9076370 | NC_021166.1    | Ca_kabuli_chr07 | 9076370                 | TT                              | CC              | 1946883682               |
| SNP_P4_93260_9090592 | NC_021166.1    | Ca_kabuli_chr07 | 9090592                 | TT                              | CC              | 1946883684               |
| SNP_P4_93262_9110950 | NC_021166.1    | Ca_kabuli_chr07 | 9110950                 | TT                              | CC              | 1946883686               |
| SNP_P4_93263_9129977 | NC_021166.1    | Ca_kabuli_chr07 | 9129977                 | TT                              | AA              | 1946883688               |
| SNP_P4_93265_9158472 | NC_021166.1    | Ca_kabuli_chr07 | 9158472                 | CC                              | TT              | 1946883690               |
| SNP_P4_93266_9180447 | NC_021166.1    | Ca_kabuli_chr07 | 9180447                 | TT                              | CC              | 1946883692               |

| SNPs IDs             | Chromosome IDs | Chromosomes     | Physical positions (bp) | CDC Frontier (Reference genome) | (ILWC46 & LPNB) | NCBI SNPdb Accession IDs |
|----------------------|----------------|-----------------|-------------------------|---------------------------------|-----------------|--------------------------|
| SNP_P4_93267_9180550 | NC_021166.1    | Ca_kabuli_chr07 | 9180550                 | AA                              | GG              | 1946883694               |
| SNP_P4_93268_9180650 | NC_021166.1    | Ca_kabuli_chr07 | 9180650                 | GG                              | AA              | 1946883696               |
| SNP_P4_93269_9180839 | NC_021166.1    | Ca_kabuli_chr07 | 9180839                 | GG                              | AA              | 1946883698               |
| SNP_P4_93271_9181568 | NC_021166.1    | Ca_kabuli_chr07 | 9181568                 | GG                              | AA              | 1946883700               |
| SNP_P4_93273_9181880 | NC_021166.1    | Ca_kabuli_chr07 | 9181880                 | AA                              | TT              | 1946883702               |
| SNP_P4_93274_9182567 | NC_021166.1    | Ca_kabuli_chr07 | 9182567                 | GG                              | AA              | 1946883704               |
| SNP_P4_93276_9182913 | NC_021166.1    | Ca_kabuli_chr07 | 9182913                 | GG                              | AA              | 1946883706               |
| SNP_P4_93277_9183167 | NC_021166.1    | Ca_kabuli_chr07 | 9183167                 | TT                              | GG              | 1946883708               |
| SNP_P4_93278_9200800 | NC_021166.1    | Ca_kabuli_chr07 | 9200800                 | AA                              | GG              | 1946883710               |
| SNP_P4_93279_9200805 | NC_021166.1    | Ca_kabuli_chr07 | 9200805                 | CC                              | AA              | 1946883712               |
| SNP_P4_93280_9203766 | NC_021166.1    | Ca_kabuli_chr07 | 9203766                 | CC                              | AA              | 1946883714               |
| SNP_P4_93281_9204528 | NC_021166.1    | Ca_kabuli_chr07 | 9204528                 | CC                              | TT              | 1946883716               |
| SNP_P4_93282_9206898 | NC_021166.1    | Ca_kabuli_chr07 | 9206898                 | CC                              | AA              | 1946883718               |
| SNP_P4_93283_9210796 | NC_021166.1    | Ca_kabuli_chr07 | 9210796                 | TT                              | CC              | 1946883720               |
| SNP_P4_93284_9214457 | NC_021166.1    | Ca_kabuli_chr07 | 9214457                 | TT                              | AA              | 1946883722               |
| SNP_P4_93285_9216436 | NC_021166.1    | Ca_kabuli_chr07 | 9216436                 | AA                              | CC              | 1946883724               |
| SNP_P4_93286_9232488 | NC_021166.1    | Ca_kabuli_chr07 | 9232488                 | CC                              | TT              | 1946883726               |
| SNP_P4_93287_9255116 | NC_021166.1    | Ca_kabuli_chr07 | 9255116                 | GG                              | CC              | 1946883728               |
| SNP_P4_93288_9255117 | NC_021166.1    | Ca_kabuli_chr07 | 9255117                 | TT                              | AA              | 1946883730               |
| SNP_P4_93289_9260551 | NC_021166.1    | Ca_kabuli_chr07 | 9260551                 | CC                              | TT              | 1946883732               |
| SNP_P4_93291_9269668 | NC_021166.1    | Ca_kabuli_chr07 | 9269668                 | GG                              | AA              | 1946883734               |
| SNP_P4_93292_9269879 | NC_021166.1    | Ca_kabuli_chr07 | 9269879                 | GG                              | AA              | 1946883736               |
| SNP_P4_93293_9269914 | NC_021166.1    | Ca_kabuli_chr07 | 9269914                 | CC                              | TT              | 1946883738               |
| SNP_P4_93294_9277856 | NC_021166.1    | Ca_kabuli_chr07 | 9277856                 | TT                              | AA              | 1946883740               |
| SNP_P4_93297_9336116 | NC_021166.1    | Ca_kabuli_chr07 | 9336116                 | GG                              | AA              | 1946883742               |
| SNP_P4_93299_9339945 | NC_021166.1    | Ca_kabuli_chr07 | 9339945                 | GG                              | AA              | 1946883744               |
| SNP_P4_93300_9340085 | NC_021166.1    | Ca_kabuli_chr07 | 9340085                 | CC                              | TT              | 1946883746               |
| SNP_P4_93301_9340130 | NC_021166.1    | Ca_kabuli_chr07 | 9340130                 | AA                              | GG              | 1946883748               |
| SNP_P4_93302_9340267 | NC_021166.1    | Ca_kabuli_chr07 | 9340267                 | GG                              | AA              | 1946883750               |
| SNP_P4_93303_9340323 | NC_021166.1    | Ca_kabuli_chr07 | 9340323                 | TT                              | AA              | 1946883752               |
| SNP_P4_93304_9340357 | NC_021166.1    | Ca_kabuli_chr07 | 9340357                 | AA                              | CC              | 1946883754               |
| SNP_P4_93305_9340450 | NC_021166.1    | Ca_kabuli_chr07 | 9340450                 | AA                              | CC              | 1946883756               |
| SNP_P4_93307_9358711 | NC_021166.1    | Ca_kabuli_chr07 | 9358711                 | TT                              | AA              | 1946883758               |
| SNP_P4_93308_9369225 | NC_021166.1    | Ca_kabuli_chr07 | 9369225                 | CC                              | TT              | 1946883760               |
| SNP_P4_93309_9381242 | NC_021166.1    | Ca_kabuli_chr07 | 9381242                 | TT                              | CC              | 1946883762               |
| SNP_P4_93310_9402421 | NC_021166.1    | Ca_kabuli_chr07 | 9402421                 | GG                              | TT              | 1946883764               |
| SNP_P4_93313_9425581 | NC_021166.1    | Ca_kabuli_chr07 | 9425581                 | TT                              | CC              | 1946883766               |
| SNP_P4_93315_9434908 | NC_021166.1    | Ca_kabuli_chr07 | 9434908                 | GG                              | AA              | 1946883768               |
| SNP_P4_93316_9452502 | NC_021166.1    | Ca_kabuli_chr07 | 9452502                 | AA                              | GG              | 1946883770               |
| SNP_P4_93317_9458260 | NC_021166.1    | Ca_kabuli_chr07 | 9458260                 | GG                              | TT              | 1946883772               |
| SNP_P4_93318_9462322 | NC_021166.1    | Ca_kabuli_chr07 | 9462322                 | TT                              | GG              | 1946883774               |
| SNP_P4_93319_9474546 | NC_021166.1    | Ca_kabuli_chr07 | 9474546                 | TT                              | CC              | 1946883776               |

| SNPs IDs             | Chromosome IDs | Chromosomes     | Physical positions (bp) | CDC Frontier (Reference genome) | (ILWC46 & LPNB) | NCBI SNPdb Accession IDs |
|----------------------|----------------|-----------------|-------------------------|---------------------------------|-----------------|--------------------------|
| SNP_P4_93320_9503769 | NC_021166.1    | Ca_kabuli_chr07 | 9503769                 | CC                              | TT              | 1946883778               |
| SNP_P4_93321_9545064 | NC_021166.1    | Ca_kabuli_chr07 | 9545064                 | TT                              | CC              | 1946883780               |
| SNP_P4_93323_9581429 | NC_021166.1    | Ca_kabuli_chr07 | 9581429                 | AA                              | GG              | 1946883782               |
| SNP_P4_93324_9587888 | NC_021166.1    | Ca_kabuli_chr07 | 9587888                 | CC                              | AA              | 1946883784               |
| SNP_P4_93326_9595602 | NC_021166.1    | Ca_kabuli_chr07 | 9595602                 | AA                              | GG              | 1946883786               |
| SNP_P4_93327_9627518 | NC_021166.1    | Ca_kabuli_chr07 | 9627518                 | AA                              | GG              | 1946883788               |
| SNP_P4_93328_9627521 | NC_021166.1    | Ca_kabuli_chr07 | 9627521                 | TT                              | CC              | 1946883789               |
| SNP_P4_93329_9632417 | NC_021166.1    | Ca_kabuli_chr07 | 9632417                 | TT                              | AA              | 1946883791               |
| SNP_P4_93330_9632418 | NC_021166.1    | Ca_kabuli_chr07 | 9632418                 | AA                              | CC              | 1946883793               |
| SNP_P4_93331_9632434 | NC_021166.1    | Ca_kabuli_chr07 | 9632434                 | TT                              | AA              | 1946883795               |
| SNP_P4_93332_9639480 | NC_021166.1    | Ca_kabuli_chr07 | 9639480                 | AA                              | GG              | 1946883797               |
| SNP_P4_93333_9645732 | NC_021166.1    | Ca_kabuli_chr07 | 9645732                 | GG                              | TT              | 1946883799               |
| SNP_P4_93334_9707334 | NC_021166.1    | Ca_kabuli_chr07 | 9707334                 | AA                              | GG              | 1946883801               |
| SNP_P4_93335_9714408 | NC_021166.1    | Ca_kabuli_chr07 | 9714408                 | CC                              | AA              | 1946883803               |
| SNP_P4_93336_9715137 | NC_021166.1    | Ca_kabuli_chr07 | 9715137                 | AA                              | GG              | 1946883805               |
| SNP_P4_93337_9715141 | NC_021166.1    | Ca_kabuli_chr07 | 9715141                 | AA                              | CC              | 1946883807               |
| SNP_P4_93338_9749850 | NC_021166.1    | Ca_kabuli_chr07 | 9749850                 | CC                              | GG              | 1946883809               |
| SNP_P4_93339_9774219 | NC_021166.1    | Ca_kabuli_chr07 | 9774219                 | TT                              | CC              | 1946883811               |
| SNP_P4_93340_9774737 | NC_021166.1    | Ca_kabuli_chr07 | 9774737                 | AA                              | GG              | 1946883813               |
| SNP_P4_93341_9776225 | NC_021166.1    | Ca_kabuli_chr07 | 9776225                 | TT                              | GG              | 1946883815               |
| SNP_P4_93342_9776593 | NC_021166.1    | Ca_kabuli_chr07 | 9776593                 | GG                              | TT              | 1946883817               |
| SNP_P4_93343_9802502 | NC_021166.1    | Ca_kabuli_chr07 | 9802502                 | TT                              | AA              | 1946883819               |
| SNP_P4_93344_9802508 | NC_021166.1    | Ca_kabuli_chr07 | 9802508                 | AA                              | GG              | 1946883821               |
| SNP_P4_93345_9802527 | NC_021166.1    | Ca_kabuli_chr07 | 9802527                 | TT                              | CC              | 1946883823               |
| SNP_P4_93346_9802541 | NC_021166.1    | Ca_kabuli_chr07 | 9802541                 | TT                              | CC              | 1946883825               |
| SNP_P4_93347_9802551 | NC_021166.1    | Ca_kabuli_chr07 | 9802551                 | TT                              | CC              | 1946883827               |
| SNP_P4_93348_9802587 | NC_021166.1    | Ca_kabuli_chr07 | 9802587                 | AA                              | GG              | 1946883829               |
| SNP_P4_93349_9802753 | NC_021166.1    | Ca_kabuli_chr07 | 9802753                 | CC                              | TT              | 1946883831               |
| SNP_P4_93350_9802763 | NC_021166.1    | Ca_kabuli_chr07 | 9802763                 | TT                              | CC              | 1946883833               |
| SNP_P4_93351_9802804 | NC_021166.1    | Ca_kabuli_chr07 | 9802804                 | CC                              | TT              | 1946883835               |
| SNP_P4_93354_9880123 | NC_021166.1    | Ca_kabuli_chr07 | 9880123                 | TT                              | AA              | 1946883837               |
| SNP_P4_93356_9940095 | NC_021166.1    | Ca_kabuli_chr07 | 9940095                 | TT                              | AA              | 1946883839               |
| SNP_P4_93357_9954642 | NC_021166.1    | Ca_kabuli_chr07 | 9954642                 | AA                              | GG              | 1946883841               |
| SNP_P4_93358_9976838 | NC_021166.1    | Ca_kabuli_chr07 | 9976838                 | AA                              | GG              | 1946883843               |
| SNP_P4_93359_9997208 | NC_021166.1    | Ca_kabuli_chr07 | 9997208                 | AA                              | GG              | 1946883845               |
| SNP_P4_93360_9997298 | NC_021166.1    | Ca_kabuli_chr07 | 9997298                 | TT                              | CC              | 1946883847               |
| SNP_P4_93361_9997311 | NC_021166.1    | Ca_kabuli_chr07 | 9997311                 | GG                              | AA              | 1946883849               |
| SNP_P4_93362_9997330 | NC_021166.1    | Ca_kabuli_chr07 | 9997330                 | TT                              | CC              | 1946883851               |
| SNP_P4_93363_9997332 | NC_021166.1    | Ca_kabuli_chr07 | 9997332                 | CC                              | TT              | 1946883853               |
| SNP_P4_93364_9997352 | NC_021166.1    | Ca_kabuli_chr07 | 9997352                 | TT                              | CC              | 1946883855               |
| SNP_P4_93365_9997457 | NC_021166.1    | Ca_kabuli_chr07 | 9997457                 | AA                              | GG              | 1946883857               |
| SNP_P4_93366_9997503 | NC_021166.1    | Ca_kabuli_chr07 | 9997503                 | CC                              | TT              | 1946883859               |

| SNPs IDs              | Chromosome IDs | Chromosomes     | Physical positions (bp) | CDC Frontier (Reference genome) | (ILWC46 & LPNB) | NCBI SNPdb Accession IDs |
|-----------------------|----------------|-----------------|-------------------------|---------------------------------|-----------------|--------------------------|
| SNP_P4_93367_10026638 | NC_021166.1    | Ca_kabuli_chr07 | 10026638                | GG                              | TT              | 1946883861               |
| SNP_P4_93369_10052479 | NC_021166.1    | Ca_kabuli_chr07 | 10052479                | AA                              | GG              | 1946883863               |
| SNP_P4_93372_10088402 | NC_021166.1    | Ca_kabuli_chr07 | 10088402                | CC                              | TT              | 1946883865               |
| SNP_P4_93373_10100160 | NC_021166.1    | Ca_kabuli_chr07 | 10100160                | TT                              | AA              | 1946883867               |
| SNP_P4_93374_10101009 | NC_021166.1    | Ca_kabuli_chr07 | 10101009                | TT                              | CC              | 1946883869               |
| SNP_P4_93375_10101973 | NC_021166.1    | Ca_kabuli_chr07 | 10101973                | GG                              | AA              | 1946883871               |
| SNP_P4_93376_10111565 | NC_021166.1    | Ca_kabuli_chr07 | 10111565                | TT                              | AA              | 1946883873               |
| SNP_P4_93378_10176468 | NC_021166.1    | Ca_kabuli_chr07 | 10176468                | GG                              | AA              | 1946883875               |
| SNP_P4_93379_10186355 | NC_021166.1    | Ca_kabuli_chr07 | 10186355                | TT                              | GG              | 1946883877               |
| SNP_P4_93381_10204859 | NC_021166.1    | Ca_kabuli_chr07 | 10204859                | AA                              | TT              | 1946883879               |
| SNP_P4_93383_10238310 | NC_021166.1    | Ca_kabuli_chr07 | 10238310                | CC                              | TT              | 1946883881               |
| SNP_P4_93384_10238318 | NC_021166.1    | Ca_kabuli_chr07 | 10238318                | AA                              | GG              | 1946883883               |
| SNP_P4_93387_10248820 | NC_021166.1    | Ca_kabuli_chr07 | 10248820                | AA                              | CC              | 1946883885               |
| SNP_P4_93388_10248821 | NC_021166.1    | Ca_kabuli_chr07 | 10248821                | AA                              | GG              | 1946883887               |
| SNP_P4_93390_10297837 | NC_021166.1    | Ca_kabuli_chr07 | 10297837                | GG                              | TT              | 1946883889               |
| SNP_P4_93391_10299432 | NC_021166.1    | Ca_kabuli_chr07 | 10299432                | CC                              | TT              | 1946883891               |
| SNP_P4_93392_10304478 | NC_021166.1    | Ca_kabuli_chr07 | 10304478                | GG                              | CC              | 1946883893               |
| SNP_P4_93393_10323209 | NC_021166.1    | Ca_kabuli_chr07 | 10323209                | TT                              | CC              | 1946883895               |
| SNP_P4_93394_10358425 | NC_021166.1    | Ca_kabuli_chr07 | 10358425                | CC                              | TT              | 1946883897               |
| SNP_P4_93395_10359560 | NC_021166.1    | Ca_kabuli_chr07 | 10359560                | TT                              | CC              | 1946883899               |
| SNP_P4_93396_10362579 | NC_021166.1    | Ca_kabuli_chr07 | 10362579                | TT                              | CC              | 1946883901               |
| SNP_P4_93397_10369190 | NC_021166.1    | Ca_kabuli_chr07 | 10369190                | CC                              | TT              | 1946883903               |
| SNP_P4_93398_10372327 | NC_021166.1    | Ca_kabuli_chr07 | 10372327                | TT                              | CC              | 1946883905               |
| SNP_P4_93400_10376447 | NC_021166.1    | Ca_kabuli_chr07 | 10376447                | AA                              | GG              | 1946883907               |
| SNP_P4_93401_10378334 | NC_021166.1    | Ca_kabuli_chr07 | 10378334                | TT                              | GG              | 1946883909               |
| SNP_P4_93402_10378338 | NC_021166.1    | Ca_kabuli_chr07 | 10378338                | AA                              | CC              | 1946883911               |
| SNP_P4_93403_10378352 | NC_021166.1    | Ca_kabuli_chr07 | 10378352                | AA                              | TT              | 1946883913               |
| SNP_P4_93404_10380755 | NC_021166.1    | Ca_kabuli_chr07 | 10380755                | TT                              | CC              | 1946883915               |
| SNP_P4_93405_10393851 | NC_021166.1    | Ca_kabuli_chr07 | 10393851                | CC                              | TT              | 1946883917               |
| SNP_P4_93406_10398194 | NC_021166.1    | Ca_kabuli_chr07 | 10398194                | TT                              | CC              | 1946883919               |
| SNP_P4_93407_10403390 | NC_021166.1    | Ca_kabuli_chr07 | 10403390                | TT                              | CC              | 1946883921               |
| SNP_P4_93408_10407271 | NC_021166.1    | Ca_kabuli_chr07 | 10407271                | AA                              | GG              | 1946883923               |
| SNP_P4_93409_10424045 | NC_021166.1    | Ca_kabuli_chr07 | 10424045                | TT                              | GG              | 1946883925               |
| SNP_P4_93412_10496025 | NC_021166.1    | Ca_kabuli_chr07 | 10496025                | AA                              | TT              | 1946883927               |
| SNP_P4_93413_10502292 | NC_021166.1    | Ca_kabuli_chr07 | 10502292                | TT                              | GG              | 1946883929               |
| SNP_P4_93414_10534420 | NC_021166.1    | Ca_kabuli_chr07 | 10534420                | CC                              | TT              | 1946883931               |
| SNP_P4_93415_10535788 | NC_021166.1    | Ca_kabuli_chr07 | 10535788                | AA                              | GG              | 1946883933               |
| SNP_P4_93416_10535805 | NC_021166.1    | Ca_kabuli_chr07 | 10535805                | GG                              | AA              | 1946883935               |
| SNP_P4_93417_10535813 | NC_021166.1    | Ca_kabuli_chr07 | 10535813                | TT                              | AA              | 1946883937               |
| SNP_P4_93418_10536192 | NC_021166.1    | Ca_kabuli_chr07 | 10536192                | CC                              | TT              | 1946883939               |
| SNP_P4_93419_10536209 | NC_021166.1    | Ca_kabuli_chr07 | 10536209                | GG                              | AA              | 1946883941               |
| SNP_P4_93420_10536223 | NC_021166.1    | Ca_kabuli_chr07 | 10536223                | GG                              | AA              | 1946883943               |



| SNPs IDs              | Chromosome IDs | Chromosomes     | Physical positions (bp) | CDC Frontier (Reference genome) | (ILWC46 & LPNB) | NCBI SNPdb Accession IDs |
|-----------------------|----------------|-----------------|-------------------------|---------------------------------|-----------------|--------------------------|
| SNP_P4_93421_10536233 | NC_021166.1    | Ca_kabuli_chr07 | 10536233                | GG                              | AA              | 1946883945               |
| SNP_P4_93422_10538852 | NC_021166.1    | Ca_kabuli_chr07 | 10538852                | CC                              | TT              | 1946883947               |
| SNP_P4_93423_10538864 | NC_021166.1    | Ca_kabuli_chr07 | 10538864                | GG                              | TT              | 1946883949               |
| SNP_P4_93424_10542831 | NC_021166.1    | Ca_kabuli_chr07 | 10542831                | TT                              | CC              | 1946883951               |
| SNP_P4_93425_10543245 | NC_021166.1    | Ca_kabuli_chr07 | 10543245                | TT                              | GG              | 1946883953               |
| SNP_P4_93426_10543877 | NC_021166.1    | Ca_kabuli_chr07 | 10543877                | GG                              | AA              | 1946883955               |
| SNP_P4_93427_10543912 | NC_021166.1    | Ca_kabuli_chr07 | 10543912                | AA                              | GG              | 1946883957               |
| SNP_P4_93428_10550227 | NC_021166.1    | Ca_kabuli_chr07 | 10550227                | CC                              | TT              | 1946883959               |
| SNP_P4_93430_10584729 | NC_021166.1    | Ca_kabuli_chr07 | 10584729                | TT                              | GG              | 1946883961               |
| SNP_P4_93431_10592049 | NC_021166.1    | Ca_kabuli_chr07 | 10592049                | GG                              | AA              | 1946883963               |
| SNP_P4_93432_10592089 | NC_021166.1    | Ca_kabuli_chr07 | 10592089                | CC                              | TT              | 1946883965               |
| SNP_P4_93433_10592163 | NC_021166.1    | Ca_kabuli_chr07 | 10592163                | GG                              | AA              | 1946883967               |
| SNP_P4_93434_10592168 | NC_021166.1    | Ca_kabuli_chr07 | 10592168                | GG                              | AA              | 1946883969               |
| SNP_P4_93435_10592199 | NC_021166.1    | Ca_kabuli_chr07 | 10592199                | CC                              | TT              | 1946883971               |
| SNP_P4_93436_10592223 | NC_021166.1    | Ca_kabuli_chr07 | 10592223                | AA                              | GG              | 1946883973               |
| SNP_P4_93437_10592559 | NC_021166.1    | Ca_kabuli_chr07 | 10592559                | AA                              | GG              | 1946883975               |
| SNP_P4_93438_10592589 | NC_021166.1    | Ca_kabuli_chr07 | 10592589                | TT                              | CC              | 1946883977               |
| SNP_P4_93439_10592620 | NC_021166.1    | Ca_kabuli_chr07 | 10592620                | TT                              | CC              | 1946883979               |
| SNP_P4_93440_10592666 | NC_021166.1    | Ca_kabuli_chr07 | 10592666                | AA                              | GG              | 1946883981               |
| SNP_P4_93441_10592693 | NC_021166.1    | Ca_kabuli_chr07 | 10592693                | TT                              | CC              | 1946883983               |
| SNP_P4_93443_10620191 | NC_021166.1    | Ca_kabuli_chr07 | 10620191                | AA                              | GG              | 1946883985               |
| SNP_P4_93444_10621989 | NC_021166.1    | Ca_kabuli_chr07 | 10621989                | AA                              | GG              | 1946883987               |
| SNP_P4_93447_10664481 | NC_021166.1    | Ca_kabuli_chr07 | 10664481                | AA                              | GG              | 1946883989               |
| SNP_P4_93450_10715182 | NC_021166.1    | Ca_kabuli_chr07 | 10715182                | GG                              | AA              | 1946883991               |
| SNP_P4_93451_10730287 | NC_021166.1    | Ca_kabuli_chr07 | 10730287                | TT                              | GG              | 1946883993               |
| SNP_P4_93452_10731941 | NC_021166.1    | Ca_kabuli_chr07 | 10731941                | GG                              | AA              | 1946883995               |
| SNP_P4_93453_10735446 | NC_021166.1    | Ca_kabuli_chr07 | 10735446                | AA                              | GG              | 1946883997               |
| SNP_P4_93454_10739359 | NC_021166.1    | Ca_kabuli_chr07 | 10739359                | GG                              | AA              | 1946883999               |
| SNP_P4_93456_10749577 | NC_021166.1    | Ca_kabuli_chr07 | 10749577                | TT                              | CC              | 1946884001               |
| SNP_P4_93457_10749579 | NC_021166.1    | Ca_kabuli_chr07 | 10749579                | TT                              | CC              | 1946884003               |
| SNP_P4_93458_10751435 | NC_021166.1    | Ca_kabuli_chr07 | 10751435                | GG                              | CC              | 1946884005               |
| SNP_P4_93459_10755095 | NC_021166.1    | Ca_kabuli_chr07 | 10755095                | AA                              | GG              | 1946884007               |
| SNP_P4_93461_10761432 | NC_021166.1    | Ca_kabuli_chr07 | 10761432                | CC                              | TT              | 1946884009               |
| SNP_P4_93464_10782468 | NC_021166.1    | Ca_kabuli_chr07 | 10782468                | AA                              | TT              | 1946884011               |
| SNP_P4_93467_10789281 | NC_021166.1    | Ca_kabuli_chr07 | 10789281                | GG                              | AA              | 1946884013               |
| SNP_P4_93471_10813461 | NC_021166.1    | Ca_kabuli_chr07 | 10813461                | GG                              | AA              | 1946884015               |
| SNP_P4_93472_10813680 | NC_021166.1    | Ca_kabuli_chr07 | 10813680                | GG                              | AA              | 1946884017               |
| SNP_P4_93475_10827036 | NC_021166.1    | Ca_kabuli_chr07 | 10827036                | CC                              | TT              | 1946884019               |
| SNP_P4_93477_10837562 | NC_021166.1    | Ca_kabuli_chr07 | 10837562                | AA                              | TT              | 1946884021               |
| SNP_P4_93478_10837769 | NC_021166.1    | Ca_kabuli_chr07 | 10837769                | TT                              | AA              | 1946884023               |
| SNP_P4_93479_10843834 | NC_021166.1    | Ca_kabuli_chr07 | 10843834                | CC                              | TT              | 1946884025               |
| SNP_P4_93480_10844061 | NC_021166.1    | Ca_kabuli_chr07 | 10844061                | TT                              | CC              | 1946884027               |

| SNPs IDs              | Chromosome IDs | Chromosomes     | Physical positions (bp) | CDC Frontier (Reference genome) | (ILWC46 & LPNB) | NCBI SNPdb Accession IDs |
|-----------------------|----------------|-----------------|-------------------------|---------------------------------|-----------------|--------------------------|
| SNP_P4_93482_10872406 | NC_021166.1    | Ca_kabuli_chr07 | 10872406                | TT                              | CC              | 1946884029               |
| SNP_P4_93484_10888742 | NC_021166.1    | Ca_kabuli_chr07 | 10888742                | CC                              | TT              | 1946884031               |
| SNP_P4_93485_10909859 | NC_021166.1    | Ca_kabuli_chr07 | 10909859                | AA                              | GG              | 1946884033               |
| SNP_P4_93487_10922010 | NC_021166.1    | Ca_kabuli_chr07 | 10922010                | TT                              | AA              | 1946884035               |
| SNP_P4_93488_10932273 | NC_021166.1    | Ca_kabuli_chr07 | 10932273                | GG                              | AA              | 1946884037               |
| SNP_P4_93489_10938734 | NC_021166.1    | Ca_kabuli_chr07 | 10938734                | TT                              | CC              | 1946884039               |
| SNP_P4_93491_10961214 | NC_021166.1    | Ca_kabuli_chr07 | 10961214                | TT                              | CC              | 1946884041               |
| SNP_P4_93492_10961229 | NC_021166.1    | Ca_kabuli_chr07 | 10961229                | CC                              | AA              | 1946884043               |
| SNP_P4_93493_10961510 | NC_021166.1    | Ca_kabuli_chr07 | 10961510                | TT                              | CC              | 1946884045               |
| SNP_P4_93494_10961546 | NC_021166.1    | Ca_kabuli_chr07 | 10961546                | GG                              | AA              | 1946884047               |
| SNP_P4_93495_10961551 | NC_021166.1    | Ca_kabuli_chr07 | 10961551                | AA                              | GG              | 1946884049               |
| SNP_P4_93496_10961570 | NC_021166.1    | Ca_kabuli_chr07 | 10961570                | TT                              | CC              | 1946884051               |
| SNP_P4_93497_10961602 | NC_021166.1    | Ca_kabuli_chr07 | 10961602                | CC                              | TT              | 1946884053               |
| SNP_P4_93498_10964515 | NC_021166.1    | Ca_kabuli_chr07 | 10964515                | AA                              | GG              | 1946884055               |
| SNP_P4_93500_10974261 | NC_021166.1    | Ca_kabuli_chr07 | 10974261                | GG                              | AA              | 1946884057               |
| SNP_P4_93501_10990730 | NC_021166.1    | Ca_kabuli_chr07 | 10990730                | TT                              | CC              | 1946884059               |
| SNP_P4_93505_11053660 | NC_021166.1    | Ca_kabuli_chr07 | 11053660                | CC                              | TT              | 1946884061               |
| SNP_P4_93506_11053713 | NC_021166.1    | Ca_kabuli_chr07 | 11053713                | TT                              | AA              | 1946884063               |
| SNP_P4_93507_11053714 | NC_021166.1    | Ca_kabuli_chr07 | 11053714                | TT                              | GG              | 1946884065               |
| SNP_P4_93508_11063244 | NC_021166.1    | Ca_kabuli_chr07 | 11063244                | TT                              | GG              | 1946884067               |
| SNP_P4_93509_11063252 | NC_021166.1    | Ca_kabuli_chr07 | 11063252                | TT                              | AA              | 1946884069               |
| SNP_P4_93512_11075671 | NC_021166.1    | Ca_kabuli_chr07 | 11075671                | AA                              | GG              | 1946884071               |
| SNP_P4_93514_11094257 | NC_021166.1    | Ca_kabuli_chr07 | 11094257                | AA                              | GG              | 1946884073               |
| SNP_P4_93515_11096032 | NC_021166.1    | Ca_kabuli_chr07 | 11096032                | AA                              | GG              | 1946884075               |
| SNP_P4_93517_11128395 | NC_021166.1    | Ca_kabuli_chr07 | 11128395                | AA                              | GG              | 1946884077               |
| SNP_P4_93518_11128399 | NC_021166.1    | Ca_kabuli_chr07 | 11128399                | GG                              | AA              | 1946884079               |
| SNP_P4_93519_11128417 | NC_021166.1    | Ca_kabuli_chr07 | 11128417                | AA                              | CC              | 1946884081               |
| SNP_P4_93520_11128435 | NC_021166.1    | Ca_kabuli_chr07 | 11128435                | GG                              | AA              | 1946884083               |
| SNP_P4_93521_11128444 | NC_021166.1    | Ca_kabuli_chr07 | 11128444                | TT                              | CC              | 1946884085               |
| SNP_P4_93522_11145149 | NC_021166.1    | Ca_kabuli_chr07 | 11145149                | GG                              | AA              | 1946884087               |
| SNP_P4_93523_11151774 | NC_021166.1    | Ca_kabuli_chr07 | 11151774                | GG                              | AA              | 1946884089               |
| SNP_P4_93524_11151799 | NC_021166.1    | Ca_kabuli_chr07 | 11151799                | CC                              | AA              | 1946884091               |
| SNP_P4_93525_11152894 | NC_021166.1    | Ca_kabuli_chr07 | 11152894                | GG                              | AA              | 1946884093               |
| SNP_P4_93526_11154191 | NC_021166.1    | Ca_kabuli_chr07 | 11154191                | AA                              | GG              | 1946884095               |
| SNP_P4_93527_11168722 | NC_021166.1    | Ca_kabuli_chr07 | 11168722                | AA                              | TT              | 1946884097               |
| SNP_P4_93528_11172679 | NC_021166.1    | Ca_kabuli_chr07 | 11172679                | TT                              | AA              | 1946884099               |
| SNP_P4_93529_11176407 | NC_021166.1    | Ca_kabuli_chr07 | 11176407                | AA                              | GG              | 1946884101               |
| SNP_P4_93530_11218612 | NC_021166.1    | Ca_kabuli_chr07 | 11218612                | GG                              | AA              | 1946884104               |
| SNP_P4_93531_11279721 | NC_021166.1    | Ca_kabuli_chr07 | 11279721                | AA                              | GG              | 1946884106               |
| SNP_P4_93532_11305184 | NC_021166.1    | Ca_kabuli_chr07 | 11305184                | GG                              | AA              | 1946884108               |
| SNP_P4_93534_11343966 | NC_021166.1    | Ca_kabuli_chr07 | 11343966                | AA                              | TT              | 1946884110               |
| SNP_P4_93535_11360559 | NC_021166.1    | Ca_kabuli_chr07 | 11360559                | GG                              | AA              | 1946884112               |

| SNPs IDs              | Chromosome IDs | Chromosomes     | Physical positions (bp) | CDC Frontier (Reference genome) | (ILWC46 & LPNB) | NCBI SNPdb Accession IDs |
|-----------------------|----------------|-----------------|-------------------------|---------------------------------|-----------------|--------------------------|
| SNP_P4_93536_11360972 | NC_021166.1    | Ca_kabuli_chr07 | 11360972                | GG                              | AA              | 1946884114               |
| SNP_P4_93538_11361024 | NC_021166.1    | Ca_kabuli_chr07 | 11361024                | GG                              | AA              | 1946884116               |
| SNP_P4_93539_11366405 | NC_021166.1    | Ca_kabuli_chr07 | 11366405                | CC                              | TT              | 1946884118               |
| SNP_P4_93542_11430771 | NC_021166.1    | Ca_kabuli_chr07 | 11430771                | GG                              | CC              | 1946884120               |
| SNP_P4_93543_11433428 | NC_021166.1    | Ca_kabuli_chr07 | 11433428                | AA                              | TT              | 1946884122               |
| SNP_P4_93544_11433454 | NC_021166.1    | Ca_kabuli_chr07 | 11433454                | TT                              | AA              | 1946884124               |
| SNP_P4_93545_11458264 | NC_021166.1    | Ca_kabuli_chr07 | 11458264                | TT                              | CC              | 1946884127               |
| SNP_P4_93546_11483502 | NC_021166.1    | Ca_kabuli_chr07 | 11483502                | AA                              | CC              | 1946884129               |
| SNP_P4_93547_11483503 | NC_021166.1    | Ca_kabuli_chr07 | 11483503                | AA                              | GG              | 1946884131               |
| SNP_P4_93548_11513486 | NC_021166.1    | Ca_kabuli_chr07 | 11513486                | TT                              | CC              | 1946884133               |
| SNP_P4_93550_11514071 | NC_021166.1    | Ca_kabuli_chr07 | 11514071                | TT                              | CC              | 1946884135               |
| SNP_P4_93551_11529429 | NC_021166.1    | Ca_kabuli_chr07 | 11529429                | GG                              | AA              | 1946884137               |
| SNP_P4_93553_11541618 | NC_021166.1    | Ca_kabuli_chr07 | 11541618                | TT                              | CC              | 1946884139               |
| SNP_P4_93554_11555671 | NC_021166.1    | Ca_kabuli_chr07 | 11555671                | AA                              | TT              | 1946884141               |
| SNP_P4_93556_11594652 | NC_021166.1    | Ca_kabuli_chr07 | 11594652                | CC                              | TT              | 1946884143               |
| SNP_P4_93557_11597962 | NC_021166.1    | Ca_kabuli_chr07 | 11597962                | TT                              | AA              | 1946884145               |
| SNP_P4_93558_11606244 | NC_021166.1    | Ca_kabuli_chr07 | 11606244                | CC                              | TT              | 1946884147               |
| SNP_P4_93559_11637998 | NC_021166.1    | Ca_kabuli_chr07 | 11637998                | CC                              | TT              | 1946884150               |
| SNP_P4_93560_11646813 | NC_021166.1    | Ca_kabuli_chr07 | 11646813                | CC                              | TT              | 1946884152               |
| SNP_P4_93562_11678377 | NC_021166.1    | Ca_kabuli_chr07 | 11678377                | TT                              | CC              | 1946884154               |
| SNP_P4_93563_11679090 | NC_021166.1    | Ca_kabuli_chr07 | 11679090                | TT                              | CC              | 1946884156               |
| SNP_P4_93564_11682674 | NC_021166.1    | Ca_kabuli_chr07 | 11682674                | GG                              | AA              | 1946884158               |
| SNP_P4_93565_11697451 | NC_021166.1    | Ca_kabuli_chr07 | 11697451                | GG                              | TT              | 1946884160               |
| SNP_P4_93567_11697602 | NC_021166.1    | Ca_kabuli_chr07 | 11697602                | AA                              | CC              | 1946884162               |
| SNP_P4_93569_11737752 | NC_021166.1    | Ca_kabuli_chr07 | 11737752                | AA                              | GG              | 1946884164               |
| SNP_P4_93570_11747097 | NC_021166.1    | Ca_kabuli_chr07 | 11747097                | CC                              | TT              | 1946884167               |
| SNP_P4_93571_11750740 | NC_021166.1    | Ca_kabuli_chr07 | 11750740                | CC                              | TT              | 1946884169               |
| SNP_P4_93572_11756139 | NC_021166.1    | Ca_kabuli_chr07 | 11756139                | CC                              | AA              | 1946884171               |
| SNP_P4_93573_11807278 | NC_021166.1    | Ca_kabuli_chr07 | 11807278                | AA                              | TT              | 1946884173               |
| SNP_P4_93574_11820201 | NC_021166.1    | Ca_kabuli_chr07 | 11820201                | TT                              | GG              | 1946884175               |
| SNP_P4_93575_11828022 | NC_021166.1    | Ca_kabuli_chr07 | 11828022                | TT                              | GG              | 1946884177               |
| SNP_P4_93576_11835666 | NC_021166.1    | Ca_kabuli_chr07 | 11835666                | TT                              | AA              | 1946884179               |
| SNP_P4_93577_11870668 | NC_021166.1    | Ca_kabuli_chr07 | 11870668                | CC                              | TT              | 1946884181               |
| SNP_P4_93578_11895919 | NC_021166.1    | Ca_kabuli_chr07 | 11895919                | GG                              | AA              | 1946884183               |
| SNP_P4_93579_11901770 | NC_021166.1    | Ca_kabuli_chr07 | 11901770                | AA                              | TT              | 1946884185               |
| SNP_P4_93580_11901771 | NC_021166.1    | Ca_kabuli_chr07 | 11901771                | AA                              | TT              | 1946884188               |
| SNP_P4_93581_11922953 | NC_021166.1    | Ca_kabuli_chr07 | 11922953                | AA                              | CC              | 1946884190               |
| SNP_P4_93582_11922968 | NC_021166.1    | Ca_kabuli_chr07 | 11922968                | AA                              | TT              | 1946884192               |
| SNP_P4_93583_11927651 | NC_021166.1    | Ca_kabuli_chr07 | 11927651                | AA                              | CC              | 1946884194               |
| SNP_P4_93584_11943706 | NC_021166.1    | Ca_kabuli_chr07 | 11943706                | AA                              | GG              | 1946884196               |
| SNP_P4_93586_11967553 | NC_021166.1    | Ca_kabuli_chr07 | 11967553                | GG                              | AA              | 1946884198               |
| SNP_P4_93588_12001822 | NC_021166.1    | Ca_kabuli_chr07 | 12001822                | AA                              | GG              | 1946884200               |

| SNPs IDs              | Chromosome IDs | Chromosomes     | Physical positions (bp) | CDC Frontier (Reference genome) | (ILWC46 & LPNB) | NCBI SNPdb Accession IDs |
|-----------------------|----------------|-----------------|-------------------------|---------------------------------|-----------------|--------------------------|
| SNP_P4_93589_12001824 | NC_021166.1    | Ca_kabuli_chr07 | 12001824                | AA                              | CC              | 1946884202               |
| SNP_P4_93591_12003815 | NC_021166.1    | Ca_kabuli_chr07 | 12003815                | AA                              | GG              | 1946884204               |
| SNP_P4_93592_12008423 | NC_021166.1    | Ca_kabuli_chr07 | 12008423                | CC                              | TT              | 1946884207               |
| SNP_P4_93593_12008424 | NC_021166.1    | Ca_kabuli_chr07 | 12008424                | AA                              | TT              | 1946884209               |
| SNP_P4_93594_12008719 | NC_021166.1    | Ca_kabuli_chr07 | 12008719                | GG                              | AA              | 1946884211               |
| SNP_P4_93595_12009385 | NC_021166.1    | Ca_kabuli_chr07 | 12009385                | CC                              | TT              | 1946884213               |
| SNP_P4_93597_12010567 | NC_021166.1    | Ca_kabuli_chr07 | 12010567                | TT                              | CC              | 1946884215               |
| SNP_P4_93599_12072083 | NC_021166.1    | Ca_kabuli_chr07 | 12072083                | AA                              | TT              | 1946884217               |
| SNP_P4_93601_12085518 | NC_021166.1    | Ca_kabuli_chr07 | 12085518                | AA                              | CC              | 1946884220               |
| SNP_P4_93602_12103954 | NC_021166.1    | Ca_kabuli_chr07 | 12103954                | CC                              | TT              | 1946884222               |
| SNP_P4_93603_12124109 | NC_021166.1    | Ca_kabuli_chr07 | 12124109                | CC                              | TT              | 1946884224               |
| SNP_P4_93604_12155733 | NC_021166.1    | Ca_kabuli_chr07 | 12155733                | CC                              | AA              | 1946884226               |
| SNP_P4_93605_12163905 | NC_021166.1    | Ca_kabuli_chr07 | 12163905                | GG                              | AA              | 1946884228               |
| SNP_P4_93606_12165408 | NC_021166.1    | Ca_kabuli_chr07 | 12165408                | TT                              | CC              | 1946884230               |
| SNP_P4_93607_12181441 | NC_021166.1    | Ca_kabuli_chr07 | 12181441                | AA                              | TT              | 1946884232               |
| SNP_P4_93608_12181468 | NC_021166.1    | Ca_kabuli_chr07 | 12181468                | CC                              | GG              | 1946884234               |
| SNP_P4_93609_12181469 | NC_021166.1    | Ca_kabuli_chr07 | 12181469                | CC                              | TT              | 1946884236               |
| SNP_P4_93612_12215919 | NC_021166.1    | Ca_kabuli_chr07 | 12215919                | TT                              | CC              | 1946884238               |
| SNP_P4_93613_12244052 | NC_021166.1    | Ca_kabuli_chr07 | 12244052                | CC                              | TT              | 1946884240               |
| SNP_P4_93614_12257745 | NC_021166.1    | Ca_kabuli_chr07 | 12257745                | AA                              | GG              | 1946884242               |
| SNP_P4_93618_12326699 | NC_021166.1    | Ca_kabuli_chr07 | 12326699                | AA                              | CC              | 1946884244               |
| SNP_P4_93619_12359391 | NC_021166.1    | Ca_kabuli_chr07 | 12359391                | AA                              | TT              | 1946884246               |
| SNP_P4_93621_12396253 | NC_021166.1    | Ca_kabuli_chr07 | 12396253                | GG                              | AA              | 1946884248               |
| SNP_P4_93622_12413433 | NC_021166.1    | Ca_kabuli_chr07 | 12413433                | TT                              | GG              | 1946884250               |
| SNP_P4_93624_12441532 | NC_021166.1    | Ca_kabuli_chr07 | 12441532                | GG                              | TT              | 1946884252               |
| SNP_P4_93629_12483270 | NC_021166.1    | Ca_kabuli_chr07 | 12483270                | TT                              | CC              | 1946884254               |
| SNP_P4_93630_12483290 | NC_021166.1    | Ca_kabuli_chr07 | 12483290                | AA                              | CC              | 1946884256               |
| SNP_P4_93631_12483328 | NC_021166.1    | Ca_kabuli_chr07 | 12483328                | AA                              | GG              | 1946884258               |
| SNP_P4_93632_12483348 | NC_021166.1    | Ca_kabuli_chr07 | 12483348                | AA                              | GG              | 1946884260               |
| SNP_P4_93633_12483357 | NC_021166.1    | Ca_kabuli_chr07 | 12483357                | AA                              | CC              | 1946884262               |
| SNP_P4_93634_12483399 | NC_021166.1    | Ca_kabuli_chr07 | 12483399                | GG                              | TT              | 1946884264               |
| SNP_P4_93635_12483449 | NC_021166.1    | Ca_kabuli_chr07 | 12483449                | CC                              | TT              | 1946884267               |
| SNP_P4_93637_12489767 | NC_021166.1    | Ca_kabuli_chr07 | 12489767                | TT                              | AA              | 1946884269               |
| SNP_P4_93638_12489772 | NC_021166.1    | Ca_kabuli_chr07 | 12489772                | CC                              | TT              | 1946884271               |
| SNP_P4_93639_12500404 | NC_021166.1    | Ca_kabuli_chr07 | 12500404                | CC                              | AA              | 1946884273               |
| SNP_P4_93640_12502260 | NC_021166.1    | Ca_kabuli_chr07 | 12502260                | AA                              | GG              | 1946884275               |
| SNP_P4_93642_12509561 | NC_021166.1    | Ca_kabuli_chr07 | 12509561                | AA                              | CC              | 1946884277               |
| SNP_P4_93643_12535151 | NC_021166.1    | Ca_kabuli_chr07 | 12535151                | CC                              | TT              | 1946884279               |
| SNP_P4_93645_12540025 | NC_021166.1    | Ca_kabuli_chr07 | 12540025                | AA                              | GG              | 1946884281               |
| SNP_P4_93646_12540152 | NC_021166.1    | Ca_kabuli_chr07 | 12540152                | TT                              | CC              | 1946884283               |
| SNP_P4_93647_12555919 | NC_021166.1    | Ca_kabuli_chr07 | 12555919                | CC                              | TT              | 1946884285               |
| SNP_P4_93648_12571529 | NC_021166.1    | Ca_kabuli_chr07 | 12571529                | TT                              | GG              | 1946884287               |

| SNPs IDs              | Chromosome IDs | Chromosomes     | Physical positions (bp) | CDC Frontier (Reference genome) | (ILWC46 & LPNB) | NCBI SNPdb Accession IDs |
|-----------------------|----------------|-----------------|-------------------------|---------------------------------|-----------------|--------------------------|
| SNP_P4_93649_12575687 | NC_021166.1    | Ca_kabuli_chr07 | 12575687                | TT                              | CC              | 1946884289               |
| SNP_P4_93650_12575800 | NC_021166.1    | Ca_kabuli_chr07 | 12575800                | CC                              | TT              | 1946884291               |
| SNP_P4_93651_12575886 | NC_021166.1    | Ca_kabuli_chr07 | 12575886                | TT                              | AA              | 1946884294               |
| SNP_P4_93652_12576060 | NC_021166.1    | Ca_kabuli_chr07 | 12576060                | CC                              | TT              | 1946884296               |
| SNP_P4_93653_12576088 | NC_021166.1    | Ca_kabuli_chr07 | 12576088                | TT                              | GG              | 1946884298               |
| SNP_P4_93655_12581108 | NC_021166.1    | Ca_kabuli_chr07 | 12581108                | TT                              | AA              | 1946884300               |
| SNP_P4_93657_12611962 | NC_021166.1    | Ca_kabuli_chr07 | 12611962                | TT                              | CC              | 1946884302               |
| SNP_P4_93658_12645719 | NC_021166.1    | Ca_kabuli_chr07 | 12645719                | TT                              | CC              | 1946884305               |
| SNP_P4_93660_12655043 | NC_021166.1    | Ca_kabuli_chr07 | 12655043                | GG                              | AA              | 1946884307               |
| SNP_P4_93661_12680537 | NC_021166.1    | Ca_kabuli_chr07 | 12680537                | GG                              | CC              | 1946884309               |
| SNP_P4_93663_12695579 | NC_021166.1    | Ca_kabuli_chr07 | 12695579                | CC                              | TT              | 1946884311               |
| SNP_P4_93664_12702193 | NC_021166.1    | Ca_kabuli_chr07 | 12702193                | AA                              | TT              | 1946884313               |
| SNP_P4_93666_12760875 | NC_021166.1    | Ca_kabuli_chr07 | 12760875                | GG                              | AA              | 1946884315               |
| SNP_P4_93667_12760912 | NC_021166.1    | Ca_kabuli_chr07 | 12760912                | GG                              | AA              | 1946884317               |
| SNP_P4_93668_12797448 | NC_021166.1    | Ca_kabuli_chr07 | 12797448                | TT                              | CC              | 1946884319               |
| SNP_P4_93669_12799955 | NC_021166.1    | Ca_kabuli_chr07 | 12799955                | TT                              | AA              | 1946884321               |
| SNP_P4_93670_12813936 | NC_021166.1    | Ca_kabuli_chr07 | 12813936                | AA                              | GG              | 1946884323               |
| SNP_P4_93671_12822480 | NC_021166.1    | Ca_kabuli_chr07 | 12822480                | AA                              | TT              | 1946884325               |
| SNP_P4_93672_12822501 | NC_021166.1    | Ca_kabuli_chr07 | 12822501                | AA                              | TT              | 1946884327               |
| SNP_P4_93673_12822513 | NC_021166.1    | Ca_kabuli_chr07 | 12822513                | TT                              | CC              | 1946884329               |
| SNP_P4_93674_12822514 | NC_021166.1    | Ca_kabuli_chr07 | 12822514                | TT                              | AA              | 1946884331               |
| SNP_P4_93675_12837794 | NC_021166.1    | Ca_kabuli_chr07 | 12837794                | AA                              | CC              | 1946884333               |
| SNP_P4_93676_12846027 | NC_021166.1    | Ca_kabuli_chr07 | 12846027                | AA                              | TT              | 1946884335               |
| SNP_P4_93677_12853075 | NC_021166.1    | Ca_kabuli_chr07 | 12853075                | AA                              | GG              | 1946884337               |
| SNP_P4_93679_12857900 | NC_021166.1    | Ca_kabuli_chr07 | 12857900                | TT                              | CC              | 1946884339               |
| SNP_P4_93680_12861030 | NC_021166.1    | Ca_kabuli_chr07 | 12861030                | GG                              | TT              | 1946884341               |
| SNP_P4_93681_12864550 | NC_021166.1    | Ca_kabuli_chr07 | 12864550                | TT                              | CC              | 1946884343               |
| SNP_P4_93682_12890883 | NC_021166.1    | Ca_kabuli_chr07 | 12890883                | AA                              | GG              | 1946884345               |
| SNP_P4_93684_12925198 | NC_021166.1    | Ca_kabuli_chr07 | 12925198                | CC                              | AA              | 1946884347               |
| SNP_P4_93685_12925199 | NC_021166.1    | Ca_kabuli_chr07 | 12925199                | CC                              | TT              | 1946884350               |
| SNP_P4_93687_13008729 | NC_021166.1    | Ca_kabuli_chr07 | 13008729                | AA                              | GG              | 1946884352               |
| SNP_P4_93688_13030133 | NC_021166.1    | Ca_kabuli_chr07 | 13030133                | CC                              | TT              | 1946884354               |
| SNP_P4_93689_13033971 | NC_021166.1    | Ca_kabuli_chr07 | 13033971                | AA                              | GG              | 1946884356               |
| SNP_P4_93690_13053150 | NC_021166.1    | Ca_kabuli_chr07 | 13053150                | GG                              | CC              | 1946884358               |
| SNP_P4_93691_13056875 | NC_021166.1    | Ca_kabuli_chr07 | 13056875                | CC                              | TT              | 1946884360               |
| SNP_P4_93693_13110848 | NC_021166.1    | Ca_kabuli_chr07 | 13110848                | TT                              | CC              | 1946884362               |
| SNP_P4_93694_13116391 | NC_021166.1    | Ca_kabuli_chr07 | 13116391                | AA                              | CC              | 1946884364               |
| SNP_P4_93695_13138094 | NC_021166.1    | Ca_kabuli_chr07 | 13138094                | TT                              | CC              | 1946884366               |
| SNP_P4_93696_13140733 | NC_021166.1    | Ca_kabuli_chr07 | 13140733                | CC                              | GG              | 1946884368               |
| SNP_P4_93697_13141596 | NC_021166.1    | Ca_kabuli_chr07 | 13141596                | TT                              | CC              | 1946884370               |
| SNP_P4_93698_13162366 | NC_021166.1    | Ca_kabuli_chr07 | 13162366                | GG                              | CC              | 1946884372               |
| SNP_P4_93699_13181530 | NC_021166.1    | Ca_kabuli_chr07 | 13181530                | CC                              | TT              | 1946884374               |

| SNPs IDs              | Chromosome IDs | Chromosomes     | Physical positions (bp) | CDC Frontier (Reference genome) | (ILWC46 & LPNB) | NCBI SNPdb Accession IDs |
|-----------------------|----------------|-----------------|-------------------------|---------------------------------|-----------------|--------------------------|
| SNP_P4_93701_13198811 | NC_021166.1    | Ca_kabuli_chr07 | 13198811                | AA                              | TT              | 1946884376               |
| SNP_P4_93702_13202447 | NC_021166.1    | Ca_kabuli_chr07 | 13202447                | GG                              | AA              | 1946884378               |
| SNP_P4_93703_13219271 | NC_021166.1    | Ca_kabuli_chr07 | 13219271                | GG                              | AA              | 1946884380               |
| SNP_P4_93704_13282571 | NC_021166.1    | Ca_kabuli_chr07 | 13282571                | TT                              | CC              | 1946884382               |
| SNP_P4_93705_13292200 | NC_021166.1    | Ca_kabuli_chr07 | 13292200                | TT                              | GG              | 1946884384               |
| SNP_P4_93706_13292213 | NC_021166.1    | Ca_kabuli_chr07 | 13292213                | CC                              | TT              | 1946884386               |
| SNP_P4_93707_13292394 | NC_021166.1    | Ca_kabuli_chr07 | 13292394                | AA                              | TT              | 1946884388               |
| SNP_P4_93708_13292597 | NC_021166.1    | Ca_kabuli_chr07 | 13292597                | TT                              | CC              | 1946884390               |
| SNP_P4_93710_13350040 | NC_021166.1    | Ca_kabuli_chr07 | 13350040                | TT                              | CC              | 1946884393               |
| SNP_P4_93711_13350041 | NC_021166.1    | Ca_kabuli_chr07 | 13350041                | TT                              | GG              | 1946884395               |
| SNP_P4_93712_13354990 | NC_021166.1    | Ca_kabuli_chr07 | 13354990                | AA                              | TT              | 1946884397               |
| SNP_P4_93714_13408751 | NC_021166.1    | Ca_kabuli_chr07 | 13408751                | AA                              | CC              | 1946884399               |
| SNP_P4_93715_13473792 | NC_021166.1    | Ca_kabuli_chr07 | 13473792                | TT                              | CC              | 1946884401               |
| SNP_P4_93716_13474074 | NC_021166.1    | Ca_kabuli_chr07 | 13474074                | AA                              | GG              | 1946884403               |
| SNP_P4_93718_13476725 | NC_021166.1    | Ca_kabuli_chr07 | 13476725                | AA                              | GG              | 1946884405               |
| SNP_P4_93719_13476745 | NC_021166.1    | Ca_kabuli_chr07 | 13476745                | CC                              | AA              | 1946884407               |
| SNP_P4_93720_13476762 | NC_021166.1    | Ca_kabuli_chr07 | 13476762                | CC                              | TT              | 1946884409               |
| SNP_P4_93721_13476766 | NC_021166.1    | Ca_kabuli_chr07 | 13476766                | AA                              | GG              | 1946884411               |
| SNP_P4_93722_13485409 | NC_021166.1    | Ca_kabuli_chr07 | 13485409                | TT                              | AA              | 1946884413               |
| SNP_P4_93723_13485411 | NC_021166.1    | Ca_kabuli_chr07 | 13485411                | TT                              | CC              | 1946884415               |
| SNP_P4_93724_13494827 | NC_021166.1    | Ca_kabuli_chr07 | 13494827                | AA                              | CC              | 1946884417               |
| SNP_P4_93725_13501493 | NC_021166.1    | Ca_kabuli_chr07 | 13501493                | CC                              | AA              | 1946884419               |
| SNP_P4_93726_13504367 | NC_021166.1    | Ca_kabuli_chr07 | 13504367                | TT                              | CC              | 1946884421               |
| SNP_P4_93727_13510479 | NC_021166.1    | Ca_kabuli_chr07 | 13510479                | AA                              | GG              | 1946884423               |
| SNP_P4_93728_13519194 | NC_021166.1    | Ca_kabuli_chr07 | 13519194                | TT                              | GG              | 1946884425               |
| SNP_P4_93730_13533020 | NC_021166.1    | Ca_kabuli_chr07 | 13533020                | TT                              | AA              | 1946884427               |
| SNP_P4_93731_13533021 | NC_021166.1    | Ca_kabuli_chr07 | 13533021                | AA                              | TT              | 1946884429               |
| SNP_P4_93732_13533248 | NC_021166.1    | Ca_kabuli_chr07 | 13533248                | AA                              | GG              | 1946884431               |
| SNP_P4_93733_13533316 | NC_021166.1    | Ca_kabuli_chr07 | 13533316                | GG                              | AA              | 1946884433               |
| SNP_P4_93734_13533423 | NC_021166.1    | Ca_kabuli_chr07 | 13533423                | TT                              | AA              | 1946884435               |
| SNP_P4_93735_13551467 | NC_021166.1    | Ca_kabuli_chr07 | 13551467                | CC                              | TT              | 1946884437               |
| SNP_P4_93737_13556146 | NC_021166.1    | Ca_kabuli_chr07 | 13556146                | GG                              | AA              | 1946884439               |
| SNP_P4_93738_13556607 | NC_021166.1    | Ca_kabuli_chr07 | 13556607                | AA                              | GG              | 1946884441               |
| SNP_P4_93739_13558955 | NC_021166.1    | Ca_kabuli_chr07 | 13558955                | GG                              | AA              | 1946884443               |
| SNP_P4_93740_13559134 | NC_021166.1    | Ca_kabuli_chr07 | 13559134                | TT                              | CC              | 1946884446               |
| SNP_P4_93741_13559164 | NC_021166.1    | Ca_kabuli_chr07 | 13559164                | TT                              | CC              | 1946884448               |
| SNP_P4_93743_13559317 | NC_021166.1    | Ca_kabuli_chr07 | 13559317                | CC                              | TT              | 1946884450               |
| SNP_P4_93744_13559321 | NC_021166.1    | Ca_kabuli_chr07 | 13559321                | CC                              | TT              | 1946884452               |
| SNP_P4_93745_13560585 | NC_021166.1    | Ca_kabuli_chr07 | 13560585                | AA                              | TT              | 1946884454               |
| SNP_P4_93746_13567440 | NC_021166.1    | Ca_kabuli_chr07 | 13567440                | AA                              | TT              | 1946884456               |
| SNP_P4_93747_13569924 | NC_021166.1    | Ca_kabuli_chr07 | 13569924                | TT                              | CC              | 1946884458               |
| SNP_P4_93748_13569968 | NC_021166.1    | Ca_kabuli_chr07 | 13569968                | CC                              | TT              | 1946884460               |

| SNPs IDs              | Chromosome IDs | Chromosomes     | Physical positions (bp) | CDC Frontier (Reference genome) | (ILWC46 & LPNB) | NCBI SNPdb Accession IDs |
|-----------------------|----------------|-----------------|-------------------------|---------------------------------|-----------------|--------------------------|
| SNP_P4_93749_13571582 | NC_021166.1    | Ca_kabuli_chr07 | 13571582                | GG                              | TT              | 1946884462               |
| SNP_P4_93750_13578914 | NC_021166.1    | Ca_kabuli_chr07 | 13578914                | AA                              | TT              | 1946884464               |
| SNP_P4_93751_13585348 | NC_021166.1    | Ca_kabuli_chr07 | 13585348                | GG                              | AA              | 1946884466               |
| SNP_P4_93752_13587693 | NC_021166.1    | Ca_kabuli_chr07 | 13587693                | CC                              | TT              | 1946884468               |
| SNP_P4_93754_13587716 | NC_021166.1    | Ca_kabuli_chr07 | 13587716                | AA                              | GG              | 1946884470               |
| SNP_P4_93755_13588041 | NC_021166.1    | Ca_kabuli_chr07 | 13588041                | TT                              | CC              | 1946884472               |
| SNP_P4_93756_13588945 | NC_021166.1    | Ca_kabuli_chr07 | 13588945                | GG                              | AA              | 1946884474               |
| SNP_P4_93758_13592818 | NC_021166.1    | Ca_kabuli_chr07 | 13592818                | CC                              | TT              | 1946884476               |
| SNP_P4_93760_13610022 | NC_021166.1    | Ca_kabuli_chr07 | 13610022                | CC                              | GG              | 1946884478               |
| SNP_P4_93761_13617578 | NC_021166.1    | Ca_kabuli_chr07 | 13617578                | AA                              | TT              | 1946884480               |
| SNP_P4_93762_13619076 | NC_021166.1    | Ca_kabuli_chr07 | 13619076                | TT                              | GG              | 1946884482               |
| SNP_P4_93763_13631303 | NC_021166.1    | Ca_kabuli_chr07 | 13631303                | GG                              | AA              | 1946884484               |
| SNP_P4_93764_13647767 | NC_021166.1    | Ca_kabuli_chr07 | 13647767                | TT                              | AA              | 1946884486               |
| SNP_P4_93765_13647794 | NC_021166.1    | Ca_kabuli_chr07 | 13647794                | AA                              | GG              | 1946884488               |
| SNP_P4_93766_13648345 | NC_021166.1    | Ca_kabuli_chr07 | 13648345                | AA                              | GG              | 1946884490               |
| SNP_P4_93767_13650517 | NC_021166.1    | Ca_kabuli_chr07 | 13650517                | GG                              | AA              | 1946884492               |
| SNP_P4_93768_13657390 | NC_021166.1    | Ca_kabuli_chr07 | 13657390                | CC                              | GG              | 1946884494               |
| SNP_P4_93769_13672863 | NC_021166.1    | Ca_kabuli_chr07 | 13672863                | AA                              | TT              | 1946884496               |
| SNP_P4_93770_13688493 | NC_021166.1    | Ca_kabuli_chr07 | 13688493                | TT                              | AA              | 1946884498               |
| SNP_P4_93771_13690531 | NC_021166.1    | Ca_kabuli_chr07 | 13690531                | CC                              | TT              | 1946884500               |
| SNP_P4_93772_13700740 | NC_021166.1    | Ca_kabuli_chr07 | 13700740                | TT                              | CC              | 1946884502               |
| SNP_P4_93773_13700952 | NC_021166.1    | Ca_kabuli_chr07 | 13700952                | TT                              | AA              | 1946884504               |
| SNP_P4_93774_13735163 | NC_021166.1    | Ca_kabuli_chr07 | 13735163                | GG                              | TT              | 1946884506               |
| SNP_P4_93775_13737680 | NC_021166.1    | Ca_kabuli_chr07 | 13737680                | CC                              | TT              | 1946884508               |
| SNP_P4_93777_13763095 | NC_021166.1    | Ca_kabuli_chr07 | 13763095                | GG                              | AA              | 1946884510               |
| SNP_P4_93778_13778165 | NC_021166.1    | Ca_kabuli_chr07 | 13778165                | CC                              | TT              | 1946884512               |
| SNP_P4_93779_13823669 | NC_021166.1    | Ca_kabuli_chr07 | 13823669                | GG                              | AA              | 1946884514               |
| SNP_P4_93780_13823683 | NC_021166.1    | Ca_kabuli_chr07 | 13823683                | CC                              | TT              | 1946884516               |
| SNP_P4_93783_13852947 | NC_021166.1    | Ca_kabuli_chr07 | 13852947                | TT                              | GG              | 1946884518               |
| SNP_P4_93785_13871461 | NC_021166.1    | Ca_kabuli_chr07 | 13871461                | AA                              | TT              | 1946884520               |
| SNP_P4_93787_13905107 | NC_021166.1    | Ca_kabuli_chr07 | 13905107                | CC                              | TT              | 1946884522               |
| SNP_P4_93788_13910790 | NC_021166.1    | Ca_kabuli_chr07 | 13910790                | TT                              | GG              | 1946884524               |
| SNP_P4_93791_13995161 | NC_021166.1    | Ca_kabuli_chr07 | 13995161                | GG                              | AA              | 1946884527               |
| SNP_P4_93792_13995868 | NC_021166.1    | Ca_kabuli_chr07 | 13995868                | TT                              | CC              | 1946884529               |
| SNP_P4_93793_13997813 | NC_021166.1    | Ca_kabuli_chr07 | 13997813                | CC                              | TT              | 1946884531               |
| SNP_P4_93794_14003536 | NC_021166.1    | Ca_kabuli_chr07 | 14003536                | CC                              | TT              | 1946884533               |
| SNP_P4_93795_14012607 | NC_021166.1    | Ca_kabuli_chr07 | 14012607                | CC                              | AA              | 1946884535               |
| SNP_P4_93796_14016177 | NC_021166.1    | Ca_kabuli_chr07 | 14016177                | TT                              | AA              | 1946884537               |
| SNP_P4_93797_14022362 | NC_021166.1    | Ca_kabuli_chr07 | 14022362                | TT                              | CC              | 1946884539               |
| SNP_P4_93798_14028626 | NC_021166.1    | Ca_kabuli_chr07 | 14028626                | AA                              | CC              | 1946884541               |
| SNP_P4_93799_14042764 | NC_021166.1    | Ca_kabuli_chr07 | 14042764                | AA                              | GG              | 1946884543               |
| SNP_P4_93800_14053021 | NC_021166.1    | Ca_kabuli_chr07 | 14053021                | TT                              | CC              | 1946884545               |

| SNPs IDs              | Chromosome IDs | Chromosomes     | Physical positions (bp) | CDC Frontier (Reference genome) | (ILWC46 & LPNB) | NCBI SNPdb Accession IDs |
|-----------------------|----------------|-----------------|-------------------------|---------------------------------|-----------------|--------------------------|
| SNP_P4_93801_14061928 | NC_021166.1    | Ca_kabuli_chr07 | 14061928                | GG                              | AA              | 1946884547               |
| SNP_P4_93802_14062251 | NC_021166.1    | Ca_kabuli_chr07 | 14062251                | GG                              | TT              | 1946884549               |
| SNP_P4_93803_14066111 | NC_021166.1    | Ca_kabuli_chr07 | 14066111                | TT                              | AA              | 1946884551               |
| SNP_P4_93806_14071991 | NC_021166.1    | Ca_kabuli_chr07 | 14071991                | CC                              | TT              | 1946884553               |
| SNP_P4_93807_14072742 | NC_021166.1    | Ca_kabuli_chr07 | 14072742                | AA                              | GG              | 1946884555               |
| SNP_P4_93808_14073197 | NC_021166.1    | Ca_kabuli_chr07 | 14073197                | TT                              | GG              | 1946884557               |
| SNP_P4_93810_14081225 | NC_021166.1    | Ca_kabuli_chr07 | 14081225                | CC                              | TT              | 1946884559               |
| SNP_P4_93811_14081273 | NC_021166.1    | Ca_kabuli_chr07 | 14081273                | AA                              | GG              | 1946884561               |
| SNP_P4_93812_14083319 | NC_021166.1    | Ca_kabuli_chr07 | 14083319                | TT                              | CC              | 1946884563               |
| SNP_P4_93813_14083369 | NC_021166.1    | Ca_kabuli_chr07 | 14083369                | TT                              | CC              | 1946884565               |
| SNP_P4_93815_14083444 | NC_021166.1    | Ca_kabuli_chr07 | 14083444                | AA                              | TT              | 1946884567               |
| SNP_P4_93816_14083843 | NC_021166.1    | Ca_kabuli_chr07 | 14083843                | AA                              | GG              | 1946884569               |
| SNP_P4_93817_14089080 | NC_021166.1    | Ca_kabuli_chr07 | 14089080                | CC                              | AA              | 1946884571               |
| SNP_P4_93818_14089222 | NC_021166.1    | Ca_kabuli_chr07 | 14089222                | GG                              | AA              | 1946884573               |
| SNP_P4_93819_14089667 | NC_021166.1    | Ca_kabuli_chr07 | 14089667                | TT                              | AA              | 1946884575               |
| SNP_P4_93820_14091426 | NC_021166.1    | Ca_kabuli_chr07 | 14091426                | AA                              | CC              | 1946884577               |
| SNP_P4_93821_14091733 | NC_021166.1    | Ca_kabuli_chr07 | 14091733                | GG                              | AA              | 1946884579               |
| SNP_P4_93822_14091820 | NC_021166.1    | Ca_kabuli_chr07 | 14091820                | AA                              | TT              | 1946884581               |
| SNP_P4_93823_14094779 | NC_021166.1    | Ca_kabuli_chr07 | 14094779                | AA                              | CC              | 1946884583               |
| SNP_P4_93824_14106726 | NC_021166.1    | Ca_kabuli_chr07 | 14106726                | GG                              | AA              | 1946884585               |
| SNP_P4_93825_14110463 | NC_021166.1    | Ca_kabuli_chr07 | 14110463                | GG                              | TT              | 1946884587               |
| SNP_P4_93826_14138444 | NC_021166.1    | Ca_kabuli_chr07 | 14138444                | TT                              | CC              | 1946884589               |
| SNP_P4_93827_14140631 | NC_021166.1    | Ca_kabuli_chr07 | 14140631                | TT                              | CC              | 1946884591               |
| SNP_P4_93828_14151901 | NC_021166.1    | Ca_kabuli_chr07 | 14151901                | CC                              | GG              | 1946884593               |
| SNP_P4_93829_14217358 | NC_021166.1    | Ca_kabuli_chr07 | 14217358                | AA                              | CC              | 1946884595               |
| SNP_P4_93830_14217958 | NC_021166.1    | Ca_kabuli_chr07 | 14217958                | TT                              | GG              | 1946884597               |
| SNP_P4_93831_14217960 | NC_021166.1    | Ca_kabuli_chr07 | 14217960                | GG                              | AA              | 1946884599               |
| SNP_P4_93832_14228098 | NC_021166.1    | Ca_kabuli_chr07 | 14228098                | GG                              | TT              | 1946884601               |
| SNP_P4_93834_14244768 | NC_021166.1    | Ca_kabuli_chr07 | 14244768                | AA                              | GG              | 1946884603               |
| SNP_P4_93835_14256039 | NC_021166.1    | Ca_kabuli_chr07 | 14256039                | AA                              | TT              | 1946884605               |
| SNP_P4_93836_14260178 | NC_021166.1    | Ca_kabuli_chr07 | 14260178                | CC                              | TT              | 1946884607               |
| SNP_P4_93837_14270815 | NC_021166.1    | Ca_kabuli_chr07 | 14270815                | TT                              | GG              | 1946884609               |
| SNP_P4_93838_14270840 | NC_021166.1    | Ca_kabuli_chr07 | 14270840                | AA                              | GG              | 1946884611               |
| SNP_P4_93839_14270853 | NC_021166.1    | Ca_kabuli_chr07 | 14270853                | AA                              | GG              | 1946884613               |
| SNP_P4_93840_14270903 | NC_021166.1    | Ca_kabuli_chr07 | 14270903                | GG                              | AA              | 1946884615               |
| SNP_P4_93841_14270911 | NC_021166.1    | Ca_kabuli_chr07 | 14270911                | GG                              | AA              | 1946884617               |
| SNP_P4_93842_14272502 | NC_021166.1    | Ca_kabuli_chr07 | 14272502                | AA                              | GG              | 1946884619               |
| SNP_P4_93843_14369772 | NC_021166.1    | Ca_kabuli_chr07 | 14369772                | TT                              | AA              | 1946884621               |
| SNP_P4_93844_14370003 | NC_021166.1    | Ca_kabuli_chr07 | 14370003                | TT                              | CC              | 1946884624               |
| SNP_P4_93845_14370038 | NC_021166.1    | Ca_kabuli_chr07 | 14370038                | CC                              | TT              | 1946884626               |
| SNP_P4_93846_14370990 | NC_021166.1    | Ca_kabuli_chr07 | 14370990                | CC                              | TT              | 1946884628               |
| SNP_P4_93847_14371073 | NC_021166.1    | Ca_kabuli_chr07 | 14371073                | TT                              | CC              | 1946884630               |



| SNPs IDs              | Chromosome IDs | Chromosomes     | Physical positions (bp) | CDC Frontier (Reference genome) | (ILWC46 & LPNB) | NCBI SNPdb Accession IDs |
|-----------------------|----------------|-----------------|-------------------------|---------------------------------|-----------------|--------------------------|
| SNP_P4_93848_14371279 | NC_021166.1    | Ca_kabuli_chr07 | 14371279                | TT                              | CC              | 1946884632               |
| SNP_P4_93849_14371444 | NC_021166.1    | Ca_kabuli_chr07 | 14371444                | AA                              | CC              | 1946884634               |
| SNP_P4_93850_14371480 | NC_021166.1    | Ca_kabuli_chr07 | 14371480                | AA                              | GG              | 1946884636               |
| SNP_P4_93851_14380841 | NC_021166.1    | Ca_kabuli_chr07 | 14380841                | GG                              | CC              | 1946884638               |
| SNP_P4_93852_14383264 | NC_021166.1    | Ca_kabuli_chr07 | 14383264                | AA                              | CC              | 1946884640               |
| SNP_P4_93853_14393089 | NC_021166.1    | Ca_kabuli_chr07 | 14393089                | GG                              | AA              | 1946884642               |
| SNP_P4_93855_14404670 | NC_021166.1    | Ca_kabuli_chr07 | 14404670                | CC                              | TT              | 1946884644               |
| SNP_P4_93856_14435616 | NC_021166.1    | Ca_kabuli_chr07 | 14435616                | TT                              | CC              | 1946884646               |
| SNP_P4_93859_14459732 | NC_021166.1    | Ca_kabuli_chr07 | 14459732                | CC                              | AA              | 1946884648               |
| SNP_P4_93860_14475812 | NC_021166.1    | Ca_kabuli_chr07 | 14475812                | GG                              | AA              | 1946884650               |
| SNP_P4_93862_14497340 | NC_021166.1    | Ca_kabuli_chr07 | 14497340                | CC                              | TT              | 1946884652               |
| SNP_P4_93863_14499952 | NC_021166.1    | Ca_kabuli_chr07 | 14499952                | CC                              | TT              | 1946884654               |
| SNP_P4_93864_14499982 | NC_021166.1    | Ca_kabuli_chr07 | 14499982                | TT                              | CC              | 1946884656               |
| SNP_P4_93865_14515040 | NC_021166.1    | Ca_kabuli_chr07 | 14515040                | AA                              | GG              | 1946884658               |
| SNP_P4_93867_14582649 | NC_021166.1    | Ca_kabuli_chr07 | 14582649                | TT                              | GG              | 1946884660               |
| SNP_P4_93868_14585588 | NC_021166.1    | Ca_kabuli_chr07 | 14585588                | GG                              | TT              | 1946884662               |
| SNP_P4_93869_14585851 | NC_021166.1    | Ca_kabuli_chr07 | 14585851                | CC                              | AA              | 1946884664               |
| SNP_P4_93870_14603555 | NC_021166.1    | Ca_kabuli_chr07 | 14603555                | GG                              | AA              | 1946884666               |
| SNP_P4_93871_14632310 | NC_021166.1    | Ca_kabuli_chr07 | 14632310                | TT                              | AA              | 1946884668               |
| SNP_P4_93872_14650995 | NC_021166.1    | Ca_kabuli_chr07 | 14650995                | GG                              | AA              | 1946884670               |
| SNP_P4_93873_14653921 | NC_021166.1    | Ca_kabuli_chr07 | 14653921                | CC                              | AA              | 1946884672               |
| SNP_P4_93877_14688907 | NC_021166.1    | Ca_kabuli_chr07 | 14688907                | TT                              | GG              | 1946884674               |
| SNP_P4_93878_14692963 | NC_021166.1    | Ca_kabuli_chr07 | 14692963                | GG                              | CC              | 1946884676               |
| SNP_P4_93879_14724501 | NC_021166.1    | Ca_kabuli_chr07 | 14724501                | TT                              | AA              | 1946884678               |
| SNP_P4_93880_14725591 | NC_021166.1    | Ca_kabuli_chr07 | 14725591                | CC                              | TT              | 1946884680               |
| SNP_P4_93881_14737215 | NC_021166.1    | Ca_kabuli_chr07 | 14737215                | CC                              | TT              | 1946884682               |
| SNP_P4_93882_14754789 | NC_021166.1    | Ca_kabuli_chr07 | 14754789                | GG                              | AA              | 1946884684               |
| SNP_P4_93883_14768625 | NC_021166.1    | Ca_kabuli_chr07 | 14768625                | AA                              | GG              | 1946884686               |
| SNP_P4_93884_14784055 | NC_021166.1    | Ca_kabuli_chr07 | 14784055                | GG                              | AA              | 1946884688               |
| SNP_P4_93885_14806758 | NC_021166.1    | Ca_kabuli_chr07 | 14806758                | AA                              | GG              | 1946884690               |
| SNP_P4_93886_14806767 | NC_021166.1    | Ca_kabuli_chr07 | 14806767                | CC                              | TT              | 1946884692               |
| SNP_P4_93887_14806792 | NC_021166.1    | Ca_kabuli_chr07 | 14806792                | GG                              | TT              | 1946884694               |
| SNP_P4_93888_14811699 | NC_021166.1    | Ca_kabuli_chr07 | 14811699                | AA                              | GG              | 1946884696               |
| SNP_P4_93889_14811732 | NC_021166.1    | Ca_kabuli_chr07 | 14811732                | TT                              | CC              | 1946884698               |
| SNP_P4_93890_14816408 | NC_021166.1    | Ca_kabuli_chr07 | 14816408                | AA                              | TT              | 1946884700               |
| SNP_P4_93891_14821267 | NC_021166.1    | Ca_kabuli_chr07 | 14821267                | CC                              | TT              | 1946884702               |
| SNP_P4_93892_14821293 | NC_021166.1    | Ca_kabuli_chr07 | 14821293                | AA                              | GG              | 1946884704               |
| SNP_P4_93893_14830701 | NC_021166.1    | Ca_kabuli_chr07 | 14830701                | AA                              | TT              | 1946884706               |
| SNP_P4_93895_14858045 | NC_021166.1    | Ca_kabuli_chr07 | 14858045                | AA                              | TT              | 1946884708               |
| SNP_P4_93896_14866953 | NC_021166.1    | Ca_kabuli_chr07 | 14866953                | TT                              | CC              | 1946884710               |
| SNP_P4_93897_14881323 | NC_021166.1    | Ca_kabuli_chr07 | 14881323                | CC                              | AA              | 1946884712               |
| SNP_P4_93898_14882085 | NC_021166.1    | Ca_kabuli_chr07 | 14882085                | CC                              | TT              | 1946884714               |

| SNPs IDs              | Chromosome IDs | Chromosomes     | Physical positions (bp) | CDC Frontier (Reference genome) | (ILWC46 & LPNB) | NCBI SNPdb Accession IDs |
|-----------------------|----------------|-----------------|-------------------------|---------------------------------|-----------------|--------------------------|
| SNP_P4_93900_14895954 | NC_021166.1    | Ca_kabuli_chr07 | 14895954                | GG                              | AA              | 1946884716               |
| SNP_P4_93902_14905373 | NC_021166.1    | Ca_kabuli_chr07 | 14905373                | AA                              | TT              | 1946884718               |
| SNP_P4_93903_14924991 | NC_021166.1    | Ca_kabuli_chr07 | 14924991                | TT                              | CC              | 1946884720               |
| SNP_P4_93904_14966046 | NC_021166.1    | Ca_kabuli_chr07 | 14966046                | AA                              | TT              | 1946884722               |
| SNP_P4_93905_14968180 | NC_021166.1    | Ca_kabuli_chr07 | 14968180                | GG                              | AA              | 1946884724               |
| SNP_P4_93906_14988950 | NC_021166.1    | Ca_kabuli_chr07 | 14988950                | AA                              | GG              | 1946884726               |
| SNP_P4_93907_15005847 | NC_021166.1    | Ca_kabuli_chr07 | 15005847                | AA                              | GG              | 1946884728               |
| SNP_P4_93908_15012255 | NC_021166.1    | Ca_kabuli_chr07 | 15012255                | TT                              | AA              | 1946884730               |
| SNP_P4_93909_15012256 | NC_021166.1    | Ca_kabuli_chr07 | 15012256                | CC                              | AA              | 1946884732               |
| SNP_P4_93910_15037194 | NC_021166.1    | Ca_kabuli_chr07 | 15037194                | GG                              | AA              | 1946884734               |
| SNP_P4_93911_15037628 | NC_021166.1    | Ca_kabuli_chr07 | 15037628                | AA                              | GG              | 1946884736               |
| SNP_P4_93912_15037796 | NC_021166.1    | Ca_kabuli_chr07 | 15037796                | AA                              | CC              | 1946884738               |
| SNP_P4_93913_15037814 | NC_021166.1    | Ca_kabuli_chr07 | 15037814                | AA                              | GG              | 1946884740               |
| SNP_P4_93914_15037821 | NC_021166.1    | Ca_kabuli_chr07 | 15037821                | CC                              | TT              | 1946884742               |
| SNP_P4_93915_15060399 | NC_021166.1    | Ca_kabuli_chr07 | 15060399                | CC                              | TT              | 1946884744               |
| SNP_P4_93917_15060733 | NC_021166.1    | Ca_kabuli_chr07 | 15060733                | TT                              | CC              | 1946884746               |
| SNP_P4_93918_15060735 | NC_021166.1    | Ca_kabuli_chr07 | 15060735                | TT                              | CC              | 1946884748               |
| SNP_P4_93919_15060806 | NC_021166.1    | Ca_kabuli_chr07 | 15060806                | AA                              | GG              | 1946884750               |
| SNP_P4_93920_15060840 | NC_021166.1    | Ca_kabuli_chr07 | 15060840                | TT                              | CC              | 1946884752               |
| SNP_P4_93921_15069071 | NC_021166.1    | Ca_kabuli_chr07 | 15069071                | GG                              | TT              | 1946884754               |
| SNP_P4_93922_15071515 | NC_021166.1    | Ca_kabuli_chr07 | 15071515                | AA                              | GG              | 1946884756               |
| SNP_P4_93923_15071533 | NC_021166.1    | Ca_kabuli_chr07 | 15071533                | AA                              | GG              | 1946884758               |
| SNP_P4_93924_15071730 | NC_021166.1    | Ca_kabuli_chr07 | 15071730                | TT                              | GG              | 1946884760               |
| SNP_P4_93925_15071751 | NC_021166.1    | Ca_kabuli_chr07 | 15071751                | CC                              | TT              | 1946884762               |
| SNP_P4_93926_15092169 | NC_021166.1    | Ca_kabuli_chr07 | 15092169                | TT                              | CC              | 1946884764               |
| SNP_P4_93927_15140920 | NC_021166.1    | Ca_kabuli_chr07 | 15140920                | GG                              | AA              | 1946884766               |
| SNP_P4_93928_15168191 | NC_021166.1    | Ca_kabuli_chr07 | 15168191                | GG                              | AA              | 1946884768               |
| SNP_P4_93929_15175393 | NC_021166.1    | Ca_kabuli_chr07 | 15175393                | TT                              | GG              | 1946884770               |
| SNP_P4_93930_15176435 | NC_021166.1    | Ca_kabuli_chr07 | 15176435                | TT                              | GG              | 1946884772               |
| SNP_P4_93931_15176436 | NC_021166.1    | Ca_kabuli_chr07 | 15176436                | TT                              | AA              | 1946884774               |
| SNP_P4_93933_15226708 | NC_021166.1    | Ca_kabuli_chr07 | 15226708                | TT                              | CC              | 1946884776               |
| SNP_P4_93934_15245946 | NC_021166.1    | Ca_kabuli_chr07 | 15245946                | AA                              | GG              | 1946884778               |
| SNP_P4_93935_15258892 | NC_021166.1    | Ca_kabuli_chr07 | 15258892                | GG                              | AA              | 1946884780               |
| SNP_P4_93936_15278316 | NC_021166.1    | Ca_kabuli_chr07 | 15278316                | GG                              | AA              | 1946884782               |
| SNP_P4_93937_15278334 | NC_021166.1    | Ca_kabuli_chr07 | 15278334                | CC                              | TT              | 1946884784               |
| SNP_P4_93938_15278355 | NC_021166.1    | Ca_kabuli_chr07 | 15278355                | AA                              | GG              | 1946884786               |
| SNP_P4_93939_15278397 | NC_021166.1    | Ca_kabuli_chr07 | 15278397                | AA                              | GG              | 1946884788               |
| SNP_P4_93940_15278407 | NC_021166.1    | Ca_kabuli_chr07 | 15278407                | GG                              | TT              | 1946884791               |
| SNP_P4_93941_15279727 | NC_021166.1    | Ca_kabuli_chr07 | 15279727                | CC                              | GG              | 1946884793               |
| SNP_P4_93942_15289598 | NC_021166.1    | Ca_kabuli_chr07 | 15289598                | GG                              | AA              | 1946884795               |
| SNP_P4_93943_15292766 | NC_021166.1    | Ca_kabuli_chr07 | 15292766                | AA                              | CC              | 1946884797               |
| SNP_P4_93944_15296440 | NC_021166.1    | Ca_kabuli_chr07 | 15296440                | AA                              | GG              | 1946884799               |

| SNPs IDs              | Chromosome IDs | Chromosomes     | Physical positions (bp) | CDC Frontier (Reference genome) | (ILWC46 & LPNB) | NCBI SNPdb Accession IDs |
|-----------------------|----------------|-----------------|-------------------------|---------------------------------|-----------------|--------------------------|
| SNP_P4_93945_15302478 | NC_021166.1    | Ca_kabuli_chr07 | 15302478                | AA                              | GG              | 1946884801               |
| SNP_P4_93946_15303037 | NC_021166.1    | Ca_kabuli_chr07 | 15303037                | TT                              | CC              | 1946884803               |
| SNP_P4_93947_15303058 | NC_021166.1    | Ca_kabuli_chr07 | 15303058                | TT                              | CC              | 1946884805               |
| SNP_P4_93948_15304957 | NC_021166.1    | Ca_kabuli_chr07 | 15304957                | AA                              | GG              | 1946884806               |
| SNP_P4_93949_15305091 | NC_021166.1    | Ca_kabuli_chr07 | 15305091                | TT                              | GG              | 1946884808               |
| SNP_P4_93950_15305116 | NC_021166.1    | Ca_kabuli_chr07 | 15305116                | AA                              | GG              | 1946884810               |
| SNP_P4_93951_15305126 | NC_021166.1    | Ca_kabuli_chr07 | 15305126                | AA                              | GG              | 1946884812               |
| SNP_P4_93952_15305140 | NC_021166.1    | Ca_kabuli_chr07 | 15305140                | TT                              | CC              | 1946884814               |
| SNP_P4_93953_15305188 | NC_021166.1    | Ca_kabuli_chr07 | 15305188                | CC                              | TT              | 1946884816               |
| SNP_P4_93955_15305202 | NC_021166.1    | Ca_kabuli_chr07 | 15305202                | CC                              | TT              | 1946884818               |
| SNP_P4_93956_15305213 | NC_021166.1    | Ca_kabuli_chr07 | 15305213                | CC                              | AA              | 1946884820               |
| SNP_P4_93957_15313236 | NC_021166.1    | Ca_kabuli_chr07 | 15313236                | TT                              | CC              | 1946884822               |
| SNP_P4_93958_15325389 | NC_021166.1    | Ca_kabuli_chr07 | 15325389                | AA                              | GG              | 1946884824               |
| SNP_P4_93959_15325568 | NC_021166.1    | Ca_kabuli_chr07 | 15325568                | AA                              | GG              | 1946884826               |
| SNP_P4_93960_15325858 | NC_021166.1    | Ca_kabuli_chr07 | 15325858                | GG                              | AA              | 1946884828               |
| SNP_P4_93962_15325879 | NC_021166.1    | Ca_kabuli_chr07 | 15325879                | TT                              | AA              | 1946884830               |
| SNP_P4_93963_15325894 | NC_021166.1    | Ca_kabuli_chr07 | 15325894                | AA                              | GG              | 1946884832               |
| SNP_P4_93964_15325907 | NC_021166.1    | Ca_kabuli_chr07 | 15325907                | CC                              | TT              | 1946884834               |
| SNP_P4_93965_15325909 | NC_021166.1    | Ca_kabuli_chr07 | 15325909                | TT                              | GG              | 1946884836               |
| SNP_P4_93966_15325913 | NC_021166.1    | Ca_kabuli_chr07 | 15325913                | AA                              | GG              | 1946884838               |
| SNP_P4_93967_15325918 | NC_021166.1    | Ca_kabuli_chr07 | 15325918                | AA                              | GG              | 1946884839               |
| SNP_P4_93968_15325921 | NC_021166.1    | Ca_kabuli_chr07 | 15325921                | AA                              | GG              | 1946884840               |
| SNP_P4_93969_15325933 | NC_021166.1    | Ca_kabuli_chr07 | 15325933                | TT                              | CC              | 1946884841               |
| SNP_P4_93970_15327958 | NC_021166.1    | Ca_kabuli_chr07 | 15327958                | CC                              | GG              | 1946884842               |
| SNP_P4_93972_15328844 | NC_021166.1    | Ca_kabuli_chr07 | 15328844                | TT                              | CC              | 1946884843               |
| SNP_P4_93973_15341094 | NC_021166.1    | Ca_kabuli_chr07 | 15341094                | CC                              | AA              | 1946884845               |
| SNP_P4_93974_15341716 | NC_021166.1    | Ca_kabuli_chr07 | 15341716                | AA                              | GG              | 1946884847               |
| SNP_P4_93975_15341717 | NC_021166.1    | Ca_kabuli_chr07 | 15341717                | GG                              | TT              | 1946884849               |
| SNP_P4_93976_15425146 | NC_021166.1    | Ca_kabuli_chr07 | 15425146                | AA                              | CC              | 1946884851               |
| SNP_P4_93977_15425478 | NC_021166.1    | Ca_kabuli_chr07 | 15425478                | TT                              | CC              | 1946884853               |
| SNP_P4_93978_15425567 | NC_021166.1    | Ca_kabuli_chr07 | 15425567                | TT                              | GG              | 1946884855               |
| SNP_P4_93979_15425586 | NC_021166.1    | Ca_kabuli_chr07 | 15425586                | AA                              | GG              | 1946884857               |
| SNP_P4_93980_15461551 | NC_021166.1    | Ca_kabuli_chr07 | 15461551                | CC                              | TT              | 1946884859               |
| SNP_P4_93981_15463343 | NC_021166.1    | Ca_kabuli_chr07 | 15463343                | GG                              | AA              | 1946884861               |
| SNP_P4_93983_15487963 | NC_021166.1    | Ca_kabuli_chr07 | 15487963                | GG                              | CC              | 1946884863               |
| SNP_P4_93984_15487979 | NC_021166.1    | Ca_kabuli_chr07 | 15487979                | TT                              | GG              | 1946884865               |
| SNP_P4_93985_15488424 | NC_021166.1    | Ca_kabuli_chr07 | 15488424                | GG                              | AA              | 1946884867               |
| SNP_P4_93986_15488426 | NC_021166.1    | Ca_kabuli_chr07 | 15488426                | CC                              | TT              | 1946884869               |
| SNP_P4_93987_15488445 | NC_021166.1    | Ca_kabuli_chr07 | 15488445                | GG                              | AA              | 1946884871               |
| SNP_P4_93988_15488533 | NC_021166.1    | Ca_kabuli_chr07 | 15488533                | GG                              | AA              | 1946884873               |
| SNP_P4_93989_15488789 | NC_021166.1    | Ca_kabuli_chr07 | 15488789                | AA                              | GG              | 1946884875               |
| SNP_P4_93990_15488791 | NC_021166.1    | Ca_kabuli_chr07 | 15488791                | GG                              | AA              | 1946884877               |

| SNPs IDs              | Chromosome IDs | Chromosomes     | Physical positions (bp) | CDC Frontier (Reference genome) | (ILWC46 & LPNB) | NCBI SNPdb Accession IDs |
|-----------------------|----------------|-----------------|-------------------------|---------------------------------|-----------------|--------------------------|
| SNP_P4_93991_15488828 | NC_021166.1    | Ca_kabuli_chr07 | 15488828                | AA                              | CC              | 1946884879               |
| SNP_P4_93992_15488875 | NC_021166.1    | Ca_kabuli_chr07 | 15488875                | AA                              | TT              | 1946884881               |
| SNP_P4_93993_15495383 | NC_021166.1    | Ca_kabuli_chr07 | 15495383                | GG                              | AA              | 1946884883               |
| SNP_P4_93995_15509029 | NC_021166.1    | Ca_kabuli_chr07 | 15509029                | GG                              | CC              | 1946884885               |
| SNP_P4_93996_15516097 | NC_021166.1    | Ca_kabuli_chr07 | 15516097                | TT                              | CC              | 1946884887               |
| SNP_P4_93997_15520942 | NC_021166.1    | Ca_kabuli_chr07 | 15520942                | TT                              | CC              | 1946884889               |
| SNP_P4_93998_15521031 | NC_021166.1    | Ca_kabuli_chr07 | 15521031                | AA                              | GG              | 1946884891               |
| SNP_P4_93999_15521043 | NC_021166.1    | Ca_kabuli_chr07 | 15521043                | TT                              | CC              | 1946884893               |
| SNP_P4_94000_15521137 | NC_021166.1    | Ca_kabuli_chr07 | 15521137                | CC                              | TT              | 1946884895               |
| SNP_P4_94001_15521191 | NC_021166.1    | Ca_kabuli_chr07 | 15521191                | TT                              | CC              | 1946884897               |
| SNP_P4_94002_15521198 | NC_021166.1    | Ca_kabuli_chr07 | 15521198                | GG                              | CC              | 1946884899               |
| SNP_P4_94003_15521208 | NC_021166.1    | Ca_kabuli_chr07 | 15521208                | TT                              | CC              | 1946884901               |
| SNP_P4_94004_15521224 | NC_021166.1    | Ca_kabuli_chr07 | 15521224                | AA                              | GG              | 1946884903               |
| SNP_P4_94005_15521256 | NC_021166.1    | Ca_kabuli_chr07 | 15521256                | AA                              | GG              | 1946884905               |
| SNP_P4_94007_15573013 | NC_021166.1    | Ca_kabuli_chr07 | 15573013                | AA                              | CC              | 1946884908               |
| SNP_P4_94008_15580193 | NC_021166.1    | Ca_kabuli_chr07 | 15580193                | TT                              | CC              | 1946884910               |
| SNP_P4_94009_15594725 | NC_021166.1    | Ca_kabuli_chr07 | 15594725                | TT                              | GG              | 1946884912               |
| SNP_P4_94010_15597773 | NC_021166.1    | Ca_kabuli_chr07 | 15597773                | TT                              | AA              | 1946884914               |
| SNP_P4_94011_15605567 | NC_021166.1    | Ca_kabuli_chr07 | 15605567                | CC                              | TT              | 1946884916               |
| SNP_P4_94012_15613420 | NC_021166.1    | Ca_kabuli_chr07 | 15613420                | TT                              | CC              | 1946884918               |
| SNP_P4_94013_15626861 | NC_021166.1    | Ca_kabuli_chr07 | 15626861                | CC                              | TT              | 1946884920               |
| SNP_P4_94015_15646067 | NC_021166.1    | Ca_kabuli_chr07 | 15646067                | AA                              | GG              | 1946884922               |
| SNP_P4_94016_15646092 | NC_021166.1    | Ca_kabuli_chr07 | 15646092                | CC                              | TT              | 1946884924               |
| SNP_P4_94017_15646109 | NC_021166.1    | Ca_kabuli_chr07 | 15646109                | AA                              | CC              | 1946884926               |
| SNP_P4_94018_15646500 | NC_021166.1    | Ca_kabuli_chr07 | 15646500                | TT                              | CC              | 1946884928               |
| SNP_P4_94019_15649231 | NC_021166.1    | Ca_kabuli_chr07 | 15649231                | TT                              | AA              | 1946884930               |
| SNP_P4_94021_15665914 | NC_021166.1    | Ca_kabuli_chr07 | 15665914                | CC                              | AA              | 1946884932               |
| SNP_P4_94023_15687987 | NC_021166.1    | Ca_kabuli_chr07 | 15687987                | AA                              | CC              | 1946884934               |
| SNP_P4_94027_15709771 | NC_021166.1    | Ca_kabuli_chr07 | 15709771                | GG                              | AA              | 1946884936               |
| SNP_P4_94028_15710379 | NC_021166.1    | Ca_kabuli_chr07 | 15710379                | TT                              | GG              | 1946884938               |
| SNP_P4_94029_15734930 | NC_021166.1    | Ca_kabuli_chr07 | 15734930                | CC                              | TT              | 1946884940               |
| SNP_P4_94031_15769131 | NC_021166.1    | Ca_kabuli_chr07 | 15769131                | GG                              | AA              | 1946884942               |
| SNP_P4_94032_15769582 | NC_021166.1    | Ca_kabuli_chr07 | 15769582                | TT                              | CC              | 1946884944               |
| SNP_P4_94033_15774250 | NC_021166.1    | Ca_kabuli_chr07 | 15774250                | AA                              | GG              | 1946884946               |
| SNP_P4_94035_15808273 | NC_021166.1    | Ca_kabuli_chr07 | 15808273                | TT                              | AA              | 1946884949               |
| SNP_P4_94036_15820572 | NC_021166.1    | Ca_kabuli_chr07 | 15820572                | AA                              | TT              | 1946884951               |
| SNP_P4_94037_15821503 | NC_021166.1    | Ca_kabuli_chr07 | 15821503                | TT                              | CC              | 1946884953               |
| SNP_P4_94038_15828080 | NC_021166.1    | Ca_kabuli_chr07 | 15828080                | AA                              | CC              | 1946884955               |
| SNP_P4_94039_15841195 | NC_021166.1    | Ca_kabuli_chr07 | 15841195                | CC                              | GG              | 1946884957               |
| SNP_P4_94040_15841293 | NC_021166.1    | Ca_kabuli_chr07 | 15841293                | TT                              | CC              | 1946884959               |
| SNP_P4_94041_15841396 | NC_021166.1    | Ca_kabuli_chr07 | 15841396                | TT                              | GG              | 1946884961               |
| SNP_P4_94042_15841442 | NC_021166.1    | Ca_kabuli_chr07 | 15841442                | TT                              | AA              | 1946884963               |

| SNPs IDs              | Chromosome IDs | Chromosomes     | Physical positions (bp) | CDC Frontier (Reference genome) | (ILWC46 & LPNB) | NCBI SNPdb Accession IDs |
|-----------------------|----------------|-----------------|-------------------------|---------------------------------|-----------------|--------------------------|
| SNP_P4_94043_15842562 | NC_021166.1    | Ca_kabuli_chr07 | 15842562                | TT                              | AA              | 1946884965               |
| SNP_P4_94044_15850902 | NC_021166.1    | Ca_kabuli_chr07 | 15850902                | CC                              | TT              | 1946884967               |
| SNP_P4_94045_15850903 | NC_021166.1    | Ca_kabuli_chr07 | 15850903                | TT                              | AA              | 1946884969               |
| SNP_P4_94047_15873812 | NC_021166.1    | Ca_kabuli_chr07 | 15873812                | TT                              | CC              | 1946884971               |
| SNP_P4_94048_15878937 | NC_021166.1    | Ca_kabuli_chr07 | 15878937                | GG                              | AA              | 1946884973               |
| SNP_P4_94049_15896962 | NC_021166.1    | Ca_kabuli_chr07 | 15896962                | AA                              | TT              | 1946884975               |
| SNP_P4_94050_15896977 | NC_021166.1    | Ca_kabuli_chr07 | 15896977                | TT                              | AA              | 1946884977               |
| SNP_P4_94051_15899548 | NC_021166.1    | Ca_kabuli_chr07 | 15899548                | GG                              | AA              | 1946884979               |
| SNP_P4_94052_15899760 | NC_021166.1    | Ca_kabuli_chr07 | 15899760                | TT                              | CC              | 1946884982               |
| SNP_P4_94053_15903615 | NC_021166.1    | Ca_kabuli_chr07 | 15903615                | AA                              | GG              | 1946884984               |
| SNP_P4_94054_15907108 | NC_021166.1    | Ca_kabuli_chr07 | 15907108                | GG                              | AA              | 1946884986               |
| SNP_P4_94055_15918813 | NC_021166.1    | Ca_kabuli_chr07 | 15918813                | CC                              | TT              | 1946884988               |
| SNP_P4_94056_15922053 | NC_021166.1    | Ca_kabuli_chr07 | 15922053                | AA                              | GG              | 1946884990               |
| SNP_P4_94057_15929893 | NC_021166.1    | Ca_kabuli_chr07 | 15929893                | TT                              | CC              | 1946884992               |
| SNP_P4_94059_15952968 | NC_021166.1    | Ca_kabuli_chr07 | 15952968                | CC                              | TT              | 1946884994               |
| SNP_P4_94060_15969547 | NC_021166.1    | Ca_kabuli_chr07 | 15969547                | TT                              | CC              | 1946884997               |
| SNP_P4_94061_15969607 | NC_021166.1    | Ca_kabuli_chr07 | 15969607                | GG                              | TT              | 1946884999               |
| SNP_P4_94062_15969929 | NC_021166.1    | Ca_kabuli_chr07 | 15969929                | CC                              | TT              | 1946885000               |
| SNP_P4_94065_16067673 | NC_021166.1    | Ca_kabuli_chr07 | 16067673                | AA                              | TT              | 1946885002               |
| SNP_P4_94066_16067674 | NC_021166.1    | Ca_kabuli_chr07 | 16067674                | TT                              | CC              | 1946885004               |
| SNP_P4_94067_16080616 | NC_021166.1    | Ca_kabuli_chr07 | 16080616                | TT                              | CC              | 1946885007               |
| SNP_P4_94068_16080778 | NC_021166.1    | Ca_kabuli_chr07 | 16080778                | AA                              | CC              | 1946885009               |
| SNP_P4_94069_16080818 | NC_021166.1    | Ca_kabuli_chr07 | 16080818                | CC                              | AA              | 1946885011               |
| SNP_P4_94070_16080819 | NC_021166.1    | Ca_kabuli_chr07 | 16080819                | CC                              | GG              | 1946885013               |
| SNP_P4_94071_16080874 | NC_021166.1    | Ca_kabuli_chr07 | 16080874                | GG                              | TT              | 1946885015               |
| SNP_P4_94072_16080887 | NC_021166.1    | Ca_kabuli_chr07 | 16080887                | GG                              | TT              | 1946885017               |
| SNP_P4_94073_16080957 | NC_021166.1    | Ca_kabuli_chr07 | 16080957                | AA                              | GG              | 1946885019               |
| SNP_P4_94074_16081791 | NC_021166.1    | Ca_kabuli_chr07 | 16081791                | TT                              | CC              | 1946885021               |
| SNP_P4_94075_16081843 | NC_021166.1    | Ca_kabuli_chr07 | 16081843                | CC                              | TT              | 1946885023               |
| SNP_P4_94076_16081899 | NC_021166.1    | Ca_kabuli_chr07 | 16081899                | CC                              | TT              | 1946885025               |
| SNP_P4_94077_16082044 | NC_021166.1    | Ca_kabuli_chr07 | 16082044                | AA                              | GG              | 1946885027               |
| SNP_P4_94078_16082159 | NC_021166.1    | Ca_kabuli_chr07 | 16082159                | AA                              | GG              | 1946885029               |
| SNP_P4_94079_16082201 | NC_021166.1    | Ca_kabuli_chr07 | 16082201                | CC                              | GG              | 1946885031               |
| SNP_P4_94080_16082243 | NC_021166.1    | Ca_kabuli_chr07 | 16082243                | AA                              | GG              | 1946885033               |
| SNP_P4_94081_16082251 | NC_021166.1    | Ca_kabuli_chr07 | 16082251                | TT                              | CC              | 1946885035               |
| SNP_P4_94082_16082331 | NC_021166.1    | Ca_kabuli_chr07 | 16082331                | TT                              | GG              | 1946885037               |
| SNP_P4_94083_16082332 | NC_021166.1    | Ca_kabuli_chr07 | 16082332                | GG                              | AA              | 1946885038               |
| SNP_P4_94084_16082345 | NC_021166.1    | Ca_kabuli_chr07 | 16082345                | GG                              | AA              | 1946885040               |
| SNP_P4_94085_16082356 | NC_021166.1    | Ca_kabuli_chr07 | 16082356                | TT                              | CC              | 1946885042               |
| SNP_P4_94086_16089320 | NC_021166.1    | Ca_kabuli_chr07 | 16089320                | TT                              | CC              | 1946885044               |
| SNP_P4_94087_16099663 | NC_021166.1    | Ca_kabuli_chr07 | 16099663                | AA                              | GG              | 1946885046               |
| SNP_P4_94088_16099764 | NC_021166.1    | Ca_kabuli_chr07 | 16099764                | TT                              | CC              | 1946885048               |

| SNPs IDs              | Chromosome IDs | Chromosomes     | Physical positions (bp) | CDC Frontier (Reference genome) | (ILWC46 & LPNB) | NCBI SNPdb Accession IDs |
|-----------------------|----------------|-----------------|-------------------------|---------------------------------|-----------------|--------------------------|
| SNP_P4_94089_16100593 | NC_021166.1    | Ca_kabuli_chr07 | 16100593                | GG                              | AA              | 1946885050               |
| SNP_P4_94090_16100601 | NC_021166.1    | Ca_kabuli_chr07 | 16100601                | AA                              | CC              | 1946885052               |
| SNP_P4_94092_16126896 | NC_021166.1    | Ca_kabuli_chr07 | 16126896                | GG                              | AA              | 1946885054               |
| SNP_P4_94094_16162358 | NC_021166.1    | Ca_kabuli_chr07 | 16162358                | TT                              | AA              | 1946885056               |
| SNP_P4_94095_16162374 | NC_021166.1    | Ca_kabuli_chr07 | 16162374                | GG                              | TT              | 1946885058               |
| SNP_P4_94096_16162499 | NC_021166.1    | Ca_kabuli_chr07 | 16162499                | TT                              | CC              | 1946885060               |
| SNP_P4_94097_16162504 | NC_021166.1    | Ca_kabuli_chr07 | 16162504                | TT                              | CC              | 1946885062               |
| SNP_P4_94098_16162542 | NC_021166.1    | Ca_kabuli_chr07 | 16162542                | AA                              | CC              | 1946885064               |
| SNP_P4_94099_16162842 | NC_021166.1    | Ca_kabuli_chr07 | 16162842                | AA                              | CC              | 1946885066               |
| SNP_P4_94100_16163090 | NC_021166.1    | Ca_kabuli_chr07 | 16163090                | TT                              | AA              | 1946885068               |
| SNP_P4_94101_16173732 | NC_021166.1    | Ca_kabuli_chr07 | 16173732                | GG                              | AA              | 1946885070               |
| SNP_P4_94102_16174234 | NC_021166.1    | Ca_kabuli_chr07 | 16174234                | TT                              | GG              | 1946885072               |
| SNP_P4_94103_16195463 | NC_021166.1    | Ca_kabuli_chr07 | 16195463                | GG                              | AA              | 1946885074               |
| SNP_P4_94104_16225483 | NC_021166.1    | Ca_kabuli_chr07 | 16225483                | AA                              | TT              | 1946885076               |
| SNP_P4_94105_16234869 | NC_021166.1    | Ca_kabuli_chr07 | 16234869                | AA                              | GG              | 1946885077               |
| SNP_P4_94106_16236849 | NC_021166.1    | Ca_kabuli_chr07 | 16236849                | GG                              | AA              | 1946885079               |
| SNP_P4_94107_16242125 | NC_021166.1    | Ca_kabuli_chr07 | 16242125                | CC                              | TT              | 1946885081               |
| SNP_P4_94108_16242129 | NC_021166.1    | Ca_kabuli_chr07 | 16242129                | AA                              | CC              | 1946885083               |
| SNP_P4_94109_16248113 | NC_021166.1    | Ca_kabuli_chr07 | 16248113                | TT                              | CC              | 1946885085               |
| SNP_P4_94111_16253977 | NC_021166.1    | Ca_kabuli_chr07 | 16253977                | AA                              | TT              | 1946885087               |
| SNP_P4_94112_16269718 | NC_021166.1    | Ca_kabuli_chr07 | 16269718                | AA                              | CC              | 1946885089               |
| SNP_P4_94113_16274244 | NC_021166.1    | Ca_kabuli_chr07 | 16274244                | AA                              | CC              | 1946885091               |
| SNP_P4_94114_16281648 | NC_021166.1    | Ca_kabuli_chr07 | 16281648                | AA                              | GG              | 1946885093               |
| SNP_P4_94115_16290382 | NC_021166.1    | Ca_kabuli_chr07 | 16290382                | CC                              | TT              | 1946885095               |
| SNP_P4_94117_16298428 | NC_021166.1    | Ca_kabuli_chr07 | 16298428                | AA                              | GG              | 1946885097               |
| SNP_P4_94118_16308507 | NC_021166.1    | Ca_kabuli_chr07 | 16308507                | CC                              | GG              | 1946885099               |
| SNP_P4_94119_16313537 | NC_021166.1    | Ca_kabuli_chr07 | 16313537                | TT                              | CC              | 1946885100               |
| SNP_P4_94120_16318107 | NC_021166.1    | Ca_kabuli_chr07 | 16318107                | TT                              | AA              | 1946885102               |
| SNP_P4_94122_16335011 | NC_021166.1    | Ca_kabuli_chr07 | 16335011                | TT                              | CC              | 1946885104               |
| SNP_P4_94124_16361536 | NC_021166.1    | Ca_kabuli_chr07 | 16361536                | GG                              | AA              | 1946885106               |
| SNP_P4_94125_16376773 | NC_021166.1    | Ca_kabuli_chr07 | 16376773                | GG                              | CC              | 1946885108               |
| SNP_P4_94126_16378225 | NC_021166.1    | Ca_kabuli_chr07 | 16378225                | TT                              | AA              | 1946885110               |
| SNP_P4_94127_16395475 | NC_021166.1    | Ca_kabuli_chr07 | 16395475                | GG                              | AA              | 1946885112               |
| SNP_P4_94129_16429556 | NC_021166.1    | Ca_kabuli_chr07 | 16429556                | GG                              | AA              | 1946885114               |
| SNP_P4_94130_16445242 | NC_021166.1    | Ca_kabuli_chr07 | 16445242                | CC                              | TT              | 1946885116               |
| SNP_P4_94131_16450125 | NC_021166.1    | Ca_kabuli_chr07 | 16450125                | TT                              | CC              | 1946885118               |
| SNP_P4_94132_16456979 | NC_021166.1    | Ca_kabuli_chr07 | 16456979                | GG                              | AA              | 1946885120               |
| SNP_P4_94133_16468496 | NC_021166.1    | Ca_kabuli_chr07 | 16468496                | AA                              | GG              | 1946885122               |
| SNP_P4_94134_16472766 | NC_021166.1    | Ca_kabuli_chr07 | 16472766                | CC                              | TT              | 1946885123               |
| SNP_P4_94135_16475361 | NC_021166.1    | Ca_kabuli_chr07 | 16475361                | TT                              | CC              | 1946885125               |
| SNP_P4_94136_16475373 | NC_021166.1    | Ca_kabuli_chr07 | 16475373                | GG                              | AA              | 1946885127               |
| SNP_P4_94137_16475464 | NC_021166.1    | Ca_kabuli_chr07 | 16475464                | AA                              | TT              | 1946885129               |

| SNPs IDs              | Chromosome IDs | Chromosomes     | Physical positions (bp) | CDC Frontier (Reference genome) | (ILWC46 & LPNB) | NCBI SNPdb Accession IDs |
|-----------------------|----------------|-----------------|-------------------------|---------------------------------|-----------------|--------------------------|
| SNP_P4_94138_16475465 | NC_021166.1    | Ca_kabuli_chr07 | 16475465                | AA                              | GG              | 1946885131               |
| SNP_P4_94139_16475600 | NC_021166.1    | Ca_kabuli_chr07 | 16475600                | GG                              | TT              | 1946885133               |
| SNP_P4_94140_16475792 | NC_021166.1    | Ca_kabuli_chr07 | 16475792                | TT                              | CC              | 1946885135               |
| SNP_P4_94141_16499823 | NC_021166.1    | Ca_kabuli_chr07 | 16499823                | TT                              | CC              | 1946885137               |
| SNP_P4_94142_16499838 | NC_021166.1    | Ca_kabuli_chr07 | 16499838                | CC                              | TT              | 1946885139               |
| SNP_P4_94143_16503335 | NC_021166.1    | Ca_kabuli_chr07 | 16503335                | AA                              | CC              | 1946885141               |
| SNP_P4_94144_16503553 | NC_021166.1    | Ca_kabuli_chr07 | 16503553                | GG                              | AA              | 1946885143               |
| SNP_P4_94145_16518286 | NC_021166.1    | Ca_kabuli_chr07 | 16518286                | AA                              | TT              | 1946885145               |
| SNP_P4_94146_16523096 | NC_021166.1    | Ca_kabuli_chr07 | 16523096                | CC                              | TT              | 1946885147               |
| SNP_P4_94147_16523757 | NC_021166.1    | Ca_kabuli_chr07 | 16523757                | CC                              | TT              | 1946885149               |
| SNP_P4_94148_16524080 | NC_021166.1    | Ca_kabuli_chr07 | 16524080                | CC                              | TT              | 1946885150               |
| SNP_P4_94149_16524160 | NC_021166.1    | Ca_kabuli_chr07 | 16524160                | CC                              | TT              | 1946885152               |
| SNP_P4_94150_16524165 | NC_021166.1    | Ca_kabuli_chr07 | 16524165                | AA                              | GG              | 1946885154               |
| SNP_P4_94151_16524254 | NC_021166.1    | Ca_kabuli_chr07 | 16524254                | GG                              | TT              | 1946885156               |
| SNP_P4_94152_16524366 | NC_021166.1    | Ca_kabuli_chr07 | 16524366                | GG                              | TT              | 1946885158               |
| SNP_P4_94153_16524383 | NC_021166.1    | Ca_kabuli_chr07 | 16524383                | AA                              | GG              | 1946885160               |
| SNP_P4_94154_16524388 | NC_021166.1    | Ca_kabuli_chr07 | 16524388                | TT                              | GG              | 1946885162               |
| SNP_P4_94155_16524489 | NC_021166.1    | Ca_kabuli_chr07 | 16524489                | GG                              | AA              | 1946885164               |
| SNP_P4_94156_16543631 | NC_021166.1    | Ca_kabuli_chr07 | 16543631                | TT                              | CC              | 1946885166               |
| SNP_P4_94157_16543874 | NC_021166.1    | Ca_kabuli_chr07 | 16543874                | TT                              | CC              | 1946885168               |
| SNP_P4_94158_16544037 | NC_021166.1    | Ca_kabuli_chr07 | 16544037                | GG                              | CC              | 1946885170               |
| SNP_P4_94159_16544043 | NC_021166.1    | Ca_kabuli_chr07 | 16544043                | CC                              | TT              | 1946885172               |
| SNP_P4_94160_16544169 | NC_021166.1    | Ca_kabuli_chr07 | 16544169                | AA                              | GG              | 1946885174               |
| SNP_P4_94161_16544264 | NC_021166.1    | Ca_kabuli_chr07 | 16544264                | GG                              | AA              | 1946885176               |
| SNP_P4_94162_16544269 | NC_021166.1    | Ca_kabuli_chr07 | 16544269                | TT                              | CC              | 1946885178               |
| SNP_P4_94163_16544309 | NC_021166.1    | Ca_kabuli_chr07 | 16544309                | CC                              | TT              | 1946885180               |
| SNP_P4_94164_16548505 | NC_021166.1    | Ca_kabuli_chr07 | 16548505                | CC                              | AA              | 1946885182               |
| SNP_P4_94165_16548568 | NC_021166.1    | Ca_kabuli_chr07 | 16548568                | AA                              | TT              | 1946885184               |
| SNP_P4_94166_16548652 | NC_021166.1    | Ca_kabuli_chr07 | 16548652                | CC                              | AA              | 1946885186               |
| SNP_P4_94168_16548696 | NC_021166.1    | Ca_kabuli_chr07 | 16548696                | GG                              | AA              | 1946885188               |
| SNP_P4_94170_16560929 | NC_021166.1    | Ca_kabuli_chr07 | 16560929                | CC                              | TT              | 1946885190               |
| SNP_P4_94171_16564310 | NC_021166.1    | Ca_kabuli_chr07 | 16564310                | GG                              | AA              | 1946885192               |
| SNP_P4_94172_16568702 | NC_021166.1    | Ca_kabuli_chr07 | 16568702                | GG                              | AA              | 1946885194               |
| SNP_P4_94174_16615940 | NC_021166.1    | Ca_kabuli_chr07 | 16615940                | GG                              | AA              | 1946885196               |
| SNP_P4_94175_16632709 | NC_021166.1    | Ca_kabuli_chr07 | 16632709                | TT                              | AA              | 1946885198               |
| SNP_P4_94176_16635503 | NC_021166.1    | Ca_kabuli_chr07 | 16635503                | TT                              | AA              | 1946885200               |
| SNP_P4_94177_16656674 | NC_021166.1    | Ca_kabuli_chr07 | 16656674                | GG                              | AA              | 1946885202               |
| SNP_P4_94179_16700006 | NC_021166.1    | Ca_kabuli_chr07 | 16700006                | TT                              | CC              | 1946885204               |
| SNP_P4_94180_16709168 | NC_021166.1    | Ca_kabuli_chr07 | 16709168                | GG                              | AA              | 1946885206               |
| SNP_P4_94181_16710255 | NC_021166.1    | Ca_kabuli_chr07 | 16710255                | TT                              | GG              | 1946885208               |
| SNP_P4_94183_16751005 | NC_021166.1    | Ca_kabuli_chr07 | 16751005                | AA                              | TT              | 1946885210               |
| SNP_P4_94184_16753114 | NC_021166.1    | Ca_kabuli_chr07 | 16753114                | TT                              | CC              | 1946885212               |

| SNPs IDs              | Chromosome IDs | Chromosomes     | Physical positions (bp) | CDC Frontier (Reference genome) | (ILWC46 & LPNB) | NCBI SNPdb Accession IDs |
|-----------------------|----------------|-----------------|-------------------------|---------------------------------|-----------------|--------------------------|
| SNP_P4_94185_16753130 | NC_021166.1    | Ca_kabuli_chr07 | 16753130                | AA                              | GG              | 1946885214               |
| SNP_P4_94186_16753132 | NC_021166.1    | Ca_kabuli_chr07 | 16753132                | TT                              | CC              | 1946885216               |
| SNP_P4_94187_16767595 | NC_021166.1    | Ca_kabuli_chr07 | 16767595                | GG                              | AA              | 1946885218               |
| SNP_P4_94188_16767667 | NC_021166.1    | Ca_kabuli_chr07 | 16767667                | GG                              | AA              | 1946885220               |
| SNP_P4_94189_16840472 | NC_021166.1    | Ca_kabuli_chr07 | 16840472                | GG                              | TT              | 1946885222               |
| SNP_P4_94190_16840793 | NC_021166.1    | Ca_kabuli_chr07 | 16840793                | TT                              | CC              | 1946885224               |
| SNP_P4_94191_16841083 | NC_021166.1    | Ca_kabuli_chr07 | 16841083                | CC                              | TT              | 1946885226               |
| SNP_P4_94192_16841114 | NC_021166.1    | Ca_kabuli_chr07 | 16841114                | TT                              | CC              | 1946885228               |
| SNP_P4_94193_16841146 | NC_021166.1    | Ca_kabuli_chr07 | 16841146                | AA                              | GG              | 1946885230               |
| SNP_P4_94196_16885581 | NC_021166.1    | Ca_kabuli_chr07 | 16885581                | TT                              | CC              | 1946885232               |
| SNP_P4_94197_16885584 | NC_021166.1    | Ca_kabuli_chr07 | 16885584                | AA                              | CC              | 1946885234               |
| SNP_P4_94198_16895464 | NC_021166.1    | Ca_kabuli_chr07 | 16895464                | CC                              | TT              | 1946885236               |
| SNP_P4_94199_16895522 | NC_021166.1    | Ca_kabuli_chr07 | 16895522                | TT                              | CC              | 1946885238               |
| SNP_P4_94200_16895523 | NC_021166.1    | Ca_kabuli_chr07 | 16895523                | AA                              | GG              | 1946885240               |
| SNP_P4_94201_16895528 | NC_021166.1    | Ca_kabuli_chr07 | 16895528                | GG                              | CC              | 1946885242               |
| SNP_P4_94202_16895539 | NC_021166.1    | Ca_kabuli_chr07 | 16895539                | AA                              | GG              | 1946885244               |
| SNP_P4_94203_16895961 | NC_021166.1    | Ca_kabuli_chr07 | 16895961                | AA                              | GG              | 1946885246               |
| SNP_P4_94205_16925310 | NC_021166.1    | Ca_kabuli_chr07 | 16925310                | TT                              | CC              | 1946885248               |
| SNP_P4_94206_16939881 | NC_021166.1    | Ca_kabuli_chr07 | 16939881                | GG                              | AA              | 1946885250               |
| SNP_P4_94207_16940265 | NC_021166.1    | Ca_kabuli_chr07 | 16940265                | CC                              | TT              | 1946885252               |
| SNP_P4_94208_16941496 | NC_021166.1    | Ca_kabuli_chr07 | 16941496                | CC                              | TT              | 1946885254               |
| SNP_P4_94209_16941505 | NC_021166.1    | Ca_kabuli_chr07 | 16941505                | TT                              | CC              | 1946885256               |
| SNP_P4_94210_16941555 | NC_021166.1    | Ca_kabuli_chr07 | 16941555                | AA                              | CC              | 1946885258               |
| SNP_P4_94211_16941559 | NC_021166.1    | Ca_kabuli_chr07 | 16941559                | GG                              | CC              | 1946885259               |
| SNP_P4_94213_16941733 | NC_021166.1    | Ca_kabuli_chr07 | 16941733                | AA                              | GG              | 1946885261               |
| SNP_P4_94214_16941742 | NC_021166.1    | Ca_kabuli_chr07 | 16941742                | TT                              | GG              | 1946885263               |
| SNP_P4_94215_16941767 | NC_021166.1    | Ca_kabuli_chr07 | 16941767                | AA                              | CC              | 1946885265               |
| SNP_P4_94216_16941873 | NC_021166.1    | Ca_kabuli_chr07 | 16941873                | AA                              | CC              | 1946885267               |
| SNP_P4_94217_16942040 | NC_021166.1    | Ca_kabuli_chr07 | 16942040                | CC                              | TT              | 1946885269               |
| SNP_P4_94218_16954726 | NC_021166.1    | Ca_kabuli_chr07 | 16954726                | AA                              | CC              | 1946885271               |
| SNP_P4_94219_16954727 | NC_021166.1    | Ca_kabuli_chr07 | 16954727                | TT                              | CC              | 1946885273               |
| SNP_P4_94221_16988045 | NC_021166.1    | Ca_kabuli_chr07 | 16988045                | AA                              | TT              | 1946885275               |
| SNP_P4_94222_16988089 | NC_021166.1    | Ca_kabuli_chr07 | 16988089                | CC                              | GG              | 1946885277               |
| SNP_P4_94223_16988427 | NC_021166.1    | Ca_kabuli_chr07 | 16988427                | GG                              | TT              | 1946885279               |
| SNP_P4_94224_16988432 | NC_021166.1    | Ca_kabuli_chr07 | 16988432                | TT                              | CC              | 1946885281               |
| SNP_P4_94225_16988474 | NC_021166.1    | Ca_kabuli_chr07 | 16988474                | CC                              | TT              | 1946885283               |
| SNP_P4_94226_16988487 | NC_021166.1    | Ca_kabuli_chr07 | 16988487                | AA                              | GG              | 1946885285               |
| SNP_P4_94227_16990299 | NC_021166.1    | Ca_kabuli_chr07 | 16990299                | CC                              | TT              | 1946885287               |
| SNP_P4_94228_17006032 | NC_021166.1    | Ca_kabuli_chr07 | 17006032                | AA                              | GG              | 1946885289               |
| SNP_P4_94229_17048927 | NC_021166.1    | Ca_kabuli_chr07 | 17048927                | AA                              | GG              | 1946885291               |
| SNP_P4_94230_17048928 | NC_021166.1    | Ca_kabuli_chr07 | 17048928                | GG                              | AA              | 1946885293               |
| SNP_P4_94232_17113745 | NC_021166.1    | Ca_kabuli_chr07 | 17113745                | TT                              | GG              | 1946885295               |



| SNPs IDs              | Chromosome IDs | Chromosomes     | Physical positions (bp) | CDC Frontier (Reference genome) | (ILWC46 & LPNB) | NCBI SNPdb Accession IDs |
|-----------------------|----------------|-----------------|-------------------------|---------------------------------|-----------------|--------------------------|
| SNP_P4_94233_17113842 | NC_021166.1    | Ca_kabuli_chr07 | 17113842                | TT                              | CC              | 1946885297               |
| SNP_P4_94234_17114027 | NC_021166.1    | Ca_kabuli_chr07 | 17114027                | TT                              | AA              | 1946885300               |
| SNP_P4_94235_17114061 | NC_021166.1    | Ca_kabuli_chr07 | 17114061                | GG                              | AA              | 1946885302               |
| SNP_P4_94236_17114170 | NC_021166.1    | Ca_kabuli_chr07 | 17114170                | TT                              | GG              | 1946885304               |
| SNP_P4_94237_17133012 | NC_021166.1    | Ca_kabuli_chr07 | 17133012                | AA                              | TT              | 1946885306               |
| SNP_P4_94239_17137193 | NC_021166.1    | Ca_kabuli_chr07 | 17137193                | TT                              | CC              | 1946885308               |
| SNP_P4_94242_17194338 | NC_021166.1    | Ca_kabuli_chr07 | 17194338                | CC                              | AA              | 1946885310               |
| SNP_P4_94243_17203637 | NC_021166.1    | Ca_kabuli_chr07 | 17203637                | TT                              | CC              | 1946885312               |
| SNP_P4_94244_17207120 | NC_021166.1    | Ca_kabuli_chr07 | 17207120                | CC                              | AA              | 1946885314               |
| SNP_P4_94245_17207154 | NC_021166.1    | Ca_kabuli_chr07 | 17207154                | TT                              | CC              | 1946885316               |
| SNP_P4_94246_17207268 | NC_021166.1    | Ca_kabuli_chr07 | 17207268                | AA                              | GG              | 1946885318               |
| SNP_P4_94247_17211740 | NC_021166.1    | Ca_kabuli_chr07 | 17211740                | AA                              | GG              | 1946885320               |
| SNP_P4_94248_17218981 | NC_021166.1    | Ca_kabuli_chr07 | 17218981                | AA                              | TT              | 1946885322               |
| SNP_P4_94249_17220013 | NC_021166.1    | Ca_kabuli_chr07 | 17220013                | AA                              | CC              | 1946885324               |
| SNP_P4_94250_17237702 | NC_021166.1    | Ca_kabuli_chr07 | 17237702                | TT                              | AA              | 1946885326               |
| SNP_P4_94251_17265960 | NC_021166.1    | Ca_kabuli_chr07 | 17265960                | GG                              | AA              | 1946885328               |
| SNP_P4_94252_17269265 | NC_021166.1    | Ca_kabuli_chr07 | 17269265                | CC                              | TT              | 1946885330               |
| SNP_P4_94253_17269357 | NC_021166.1    | Ca_kabuli_chr07 | 17269357                | GG                              | CC              | 1946885332               |
| SNP_P4_94254_17269528 | NC_021166.1    | Ca_kabuli_chr07 | 17269528                | GG                              | AA              | 1946885334               |
| SNP_P4_94255_17269539 | NC_021166.1    | Ca_kabuli_chr07 | 17269539                | GG                              | AA              | 1946885336               |
| SNP_P4_94256_17269541 | NC_021166.1    | Ca_kabuli_chr07 | 17269541                | GG                              | AA              | 1946885338               |
| SNP_P4_94257_17269603 | NC_021166.1    | Ca_kabuli_chr07 | 17269603                | AA                              | GG              | 1946885340               |
| SNP_P4_94258_17276016 | NC_021166.1    | Ca_kabuli_chr07 | 17276016                | AA                              | GG              | 1946885342               |
| SNP_P4_94259_17293132 | NC_021166.1    | Ca_kabuli_chr07 | 17293132                | GG                              | AA              | 1946885344               |
| SNP_P4_94260_17295386 | NC_021166.1    | Ca_kabuli_chr07 | 17295386                | CC                              | TT              | 1946885346               |
| SNP_P4_94261_17352753 | NC_021166.1    | Ca_kabuli_chr07 | 17352753                | AA                              | GG              | 1946885348               |
| SNP_P4_94264_17358356 | NC_021166.1    | Ca_kabuli_chr07 | 17358356                | CC                              | TT              | 1946885350               |
| SNP_P4_94265_17358393 | NC_021166.1    | Ca_kabuli_chr07 | 17358393                | CC                              | TT              | 1946885352               |
| SNP_P4_94266_17358405 | NC_021166.1    | Ca_kabuli_chr07 | 17358405                | GG                              | AA              | 1946885354               |
| SNP_P4_94267_17372032 | NC_021166.1    | Ca_kabuli_chr07 | 17372032                | CC                              | AA              | 1946885356               |
| SNP_P4_94268_17372125 | NC_021166.1    | Ca_kabuli_chr07 | 17372125                | TT                              | AA              | 1946885358               |
| SNP_P4_94269_17372660 | NC_021166.1    | Ca_kabuli_chr07 | 17372660                | TT                              | AA              | 1946885360               |
| SNP_P4_94270_17374501 | NC_021166.1    | Ca_kabuli_chr07 | 17374501                | AA                              | GG              | 1946885362               |
| SNP_P4_94271_17374519 | NC_021166.1    | Ca_kabuli_chr07 | 17374519                | CC                              | TT              | 1946885364               |
| SNP_P4_94272_17374585 | NC_021166.1    | Ca_kabuli_chr07 | 17374585                | CC                              | AA              | 1946885366               |
| SNP_P4_94274_17375095 | NC_021166.1    | Ca_kabuli_chr07 | 17375095                | TT                              | GG              | 1946885368               |
| SNP_P4_94275_17375121 | NC_021166.1    | Ca_kabuli_chr07 | 17375121                | TT                              | GG              | 1946885370               |
| SNP_P4_94276_17385377 | NC_021166.1    | Ca_kabuli_chr07 | 17385377                | AA                              | TT              | 1946885372               |
| SNP_P4_94277_17395746 | NC_021166.1    | Ca_kabuli_chr07 | 17395746                | CC                              | TT              | 1946885374               |
| SNP_P4_94278_17411022 | NC_021166.1    | Ca_kabuli_chr07 | 17411022                | TT                              | CC              | 1946885376               |
| SNP_P4_94279_17412133 | NC_021166.1    | Ca_kabuli_chr07 | 17412133                | AA                              | GG              | 1946885378               |
| SNP_P4_94280_17421596 | NC_021166.1    | Ca_kabuli_chr07 | 17421596                | AA                              | TT              | 1946885380               |

| SNPs IDs              | Chromosome IDs | Chromosomes     | Physical positions (bp) | CDC Frontier (Reference genome) | (ILWC46 & LPNB) | NCBI SNPdb Accession IDs |
|-----------------------|----------------|-----------------|-------------------------|---------------------------------|-----------------|--------------------------|
| SNP_P4_94281_17421842 | NC_021166.1    | Ca_kabuli_chr07 | 17421842                | GG                              | AA              | 1946885383               |
| SNP_P4_94282_17421882 | NC_021166.1    | Ca_kabuli_chr07 | 17421882                | AA                              | GG              | 1946885385               |
| SNP_P4_94283_17434430 | NC_021166.1    | Ca_kabuli_chr07 | 17434430                | GG                              | AA              | 1946885387               |
| SNP_P4_94284_17434708 | NC_021166.1    | Ca_kabuli_chr07 | 17434708                | TT                              | AA              | 1946885389               |
| SNP_P4_94285_17454712 | NC_021166.1    | Ca_kabuli_chr07 | 17454712                | AA                              | GG              | 1946885391               |
| SNP_P4_94286_17454918 | NC_021166.1    | Ca_kabuli_chr07 | 17454918                | GG                              | AA              | 1946885393               |
| SNP_P4_94287_17473180 | NC_021166.1    | Ca_kabuli_chr07 | 17473180                | TT                              | GG              | 1946885395               |
| SNP_P4_94288_17497462 | NC_021166.1    | Ca_kabuli_chr07 | 17497462                | GG                              | AA              | 1946885397               |
| SNP_P4_94289_17498211 | NC_021166.1    | Ca_kabuli_chr07 | 17498211                | AA                              | TT              | 1946885399               |
| SNP_P4_94290_17504847 | NC_021166.1    | Ca_kabuli_chr07 | 17504847                | GG                              | AA              | 1946885401               |
| SNP_P4_94291_17517254 | NC_021166.1    | Ca_kabuli_chr07 | 17517254                | GG                              | AA              | 1946885403               |
| SNP_P4_94292_17521138 | NC_021166.1    | Ca_kabuli_chr07 | 17521138                | CC                              | TT              | 1946885405               |
| SNP_P4_94293_17543823 | NC_021166.1    | Ca_kabuli_chr07 | 17543823                | GG                              | CC              | 1946885407               |
| SNP_P4_94294_17544601 | NC_021166.1    | Ca_kabuli_chr07 | 17544601                | AA                              | TT              | 1946885409               |
| SNP_P4_94295_17544602 | NC_021166.1    | Ca_kabuli_chr07 | 17544602                | TT                              | AA              | 1946885411               |
| SNP_P4_94299_17574978 | NC_021166.1    | Ca_kabuli_chr07 | 17574978                | CC                              | TT              | 1946885413               |
| SNP_P4_94302_17612207 | NC_021166.1    | Ca_kabuli_chr07 | 17612207                | GG                              | AA              | 1946885415               |
| SNP_P4_94303_17622889 | NC_021166.1    | Ca_kabuli_chr07 | 17622889                | GG                              | AA              | 1946885417               |
| SNP_P4_94304_17623907 | NC_021166.1    | Ca_kabuli_chr07 | 17623907                | CC                              | TT              | 1946885419               |
| SNP_P4_94305_17652502 | NC_021166.1    | Ca_kabuli_chr07 | 17652502                | GG                              | AA              | 1946885421               |
| SNP_P4_94306_17676582 | NC_021166.1    | Ca_kabuli_chr07 | 17676582                | CC                              | TT              | 1946885423               |
| SNP_P4_94308_17702824 | NC_021166.1    | Ca_kabuli_chr07 | 17702824                | CC                              | GG              | 1946885425               |
| SNP_P4_94309_17735936 | NC_021166.1    | Ca_kabuli_chr07 | 17735936                | TT                              | CC              | 1946885427               |
| SNP_P4_94310_17746554 | NC_021166.1    | Ca_kabuli_chr07 | 17746554                | GG                              | AA              | 1946885429               |
| SNP_P4_94311_17752883 | NC_021166.1    | Ca_kabuli_chr07 | 17752883                | TT                              | CC              | 1946885431               |
| SNP_P4_94312_17790621 | NC_021166.1    | Ca_kabuli_chr07 | 17790621                | CC                              | TT              | 1946885433               |
| SNP_P4_94313_17792122 | NC_021166.1    | Ca_kabuli_chr07 | 17792122                | GG                              | AA              | 1946885435               |
| SNP_P4_94314_17795030 | NC_021166.1    | Ca_kabuli_chr07 | 17795030                | TT                              | CC              | 1946885437               |
| SNP_P4_94315_17807570 | NC_021166.1    | Ca_kabuli_chr07 | 17807570                | TT                              | CC              | 1946885439               |
| SNP_P4_94316_17816102 | NC_021166.1    | Ca_kabuli_chr07 | 17816102                | GG                              | TT              | 1946885441               |
| SNP_P4_94317_17829493 | NC_021166.1    | Ca_kabuli_chr07 | 17829493                | CC                              | TT              | 1946885443               |
| SNP_P4_94318_17829522 | NC_021166.1    | Ca_kabuli_chr07 | 17829522                | TT                              | CC              | 1946885445               |
| SNP_P4_94319_17834680 | NC_021166.1    | Ca_kabuli_chr07 | 17834680                | GG                              | AA              | 1946885447               |
| SNP_P4_94320_17835058 | NC_021166.1    | Ca_kabuli_chr07 | 17835058                | GG                              | CC              | 1946885450               |
| SNP_P4_94321_17835112 | NC_021166.1    | Ca_kabuli_chr07 | 17835112                | AA                              | CC              | 1946885452               |
| SNP_P4_94322_17835113 | NC_021166.1    | Ca_kabuli_chr07 | 17835113                | TT                              | AA              | 1946885454               |
| SNP_P4_94324_17841610 | NC_021166.1    | Ca_kabuli_chr07 | 17841610                | CC                              | TT              | 1946885456               |
| SNP_P4_94325_17858807 | NC_021166.1    | Ca_kabuli_chr07 | 17858807                | GG                              | AA              | 1946885458               |
| SNP_P4_94326_17864421 | NC_021166.1    | Ca_kabuli_chr07 | 17864421                | CC                              | TT              | 1946885460               |
| SNP_P4_94327_17866384 | NC_021166.1    | Ca_kabuli_chr07 | 17866384                | GG                              | AA              | 1946885462               |
| SNP_P4_94328_17866725 | NC_021166.1    | Ca_kabuli_chr07 | 17866725                | GG                              | CC              | 1946885464               |
| SNP_P4_94329_17869124 | NC_021166.1    | Ca_kabuli_chr07 | 17869124                | CC                              | AA              | 1946885466               |

| SNPs IDs              | Chromosome IDs | Chromosomes     | Physical positions (bp) | CDC Frontier (Reference genome) | (ILWC46 & LPNB) | NCBI SNPdb Accession IDs |
|-----------------------|----------------|-----------------|-------------------------|---------------------------------|-----------------|--------------------------|
| SNP_P4_94330_17869125 | NC_021166.1    | Ca_kabuli_chr07 | 17869125                | AA                              | GG              | 1946885468               |
| SNP_P4_94331_17869145 | NC_021166.1    | Ca_kabuli_chr07 | 17869145                | CC                              | TT              | 1946885470               |
| SNP_P4_94332_17869189 | NC_021166.1    | Ca_kabuli_chr07 | 17869189                | TT                              | CC              | 1946885472               |
| SNP_P4_94333_17869299 | NC_021166.1    | Ca_kabuli_chr07 | 17869299                | TT                              | CC              | 1946885474               |
| SNP_P4_94334_17869631 | NC_021166.1    | Ca_kabuli_chr07 | 17869631                | AA                              | TT              | 1946885476               |
| SNP_P4_94335_17869634 | NC_021166.1    | Ca_kabuli_chr07 | 17869634                | TT                              | CC              | 1946885478               |
| SNP_P4_94336_17874951 | NC_021166.1    | Ca_kabuli_chr07 | 17874951                | GG                              | TT              | 1946885480               |
| SNP_P4_94337_17874959 | NC_021166.1    | Ca_kabuli_chr07 | 17874959                | CC                              | GG              | 1946885482               |
| SNP_P4_94338_17875009 | NC_021166.1    | Ca_kabuli_chr07 | 17875009                | TT                              | CC              | 1946885484               |
| SNP_P4_94339_17875240 | NC_021166.1    | Ca_kabuli_chr07 | 17875240                | GG                              | AA              | 1946885486               |
| SNP_P4_94340_17875325 | NC_021166.1    | Ca_kabuli_chr07 | 17875325                | AA                              | GG              | 1946885488               |
| SNP_P4_94341_17875660 | NC_021166.1    | Ca_kabuli_chr07 | 17875660                | CC                              | TT              | 1946885490               |
| SNP_P4_94342_17879998 | NC_021166.1    | Ca_kabuli_chr07 | 17879998                | AA                              | GG              | 1946885492               |
| SNP_P4_94343_17880009 | NC_021166.1    | Ca_kabuli_chr07 | 17880009                | GG                              | AA              | 1946885494               |
| SNP_P4_94344_17880108 | NC_021166.1    | Ca_kabuli_chr07 | 17880108                | AA                              | TT              | 1946885496               |
| SNP_P4_94345_17880234 | NC_021166.1    | Ca_kabuli_chr07 | 17880234                | TT                              | CC              | 1946885498               |
| SNP_P4_94346_17880237 | NC_021166.1    | Ca_kabuli_chr07 | 17880237                | GG                              | AA              | 1946885499               |
| SNP_P4_94347_17893528 | NC_021166.1    | Ca_kabuli_chr07 | 17893528                | GG                              | AA              | 1946885501               |
| SNP_P4_94348_17894265 | NC_021166.1    | Ca_kabuli_chr07 | 17894265                | TT                              | AA              | 1946885503               |
| SNP_P4_94349_17897529 | NC_021166.1    | Ca_kabuli_chr07 | 17897529                | CC                              | TT              | 1946885505               |
| SNP_P4_94350_17897597 | NC_021166.1    | Ca_kabuli_chr07 | 17897597                | CC                              | AA              | 1946885507               |
| SNP_P4_94351_17897724 | NC_021166.1    | Ca_kabuli_chr07 | 17897724                | TT                              | CC              | 1946885509               |
| SNP_P4_94352_17897790 | NC_021166.1    | Ca_kabuli_chr07 | 17897790                | TT                              | AA              | 1946885511               |
| SNP_P4_94353_17897917 | NC_021166.1    | Ca_kabuli_chr07 | 17897917                | TT                              | CC              | 1946885513               |
| SNP_P4_94354_17898460 | NC_021166.1    | Ca_kabuli_chr07 | 17898460                | AA                              | CC              | 1946885515               |
| SNP_P4_94355_17902126 | NC_021166.1    | Ca_kabuli_chr07 | 17902126                | GG                              | AA              | 1946885517               |
| SNP_P4_94356_17922195 | NC_021166.1    | Ca_kabuli_chr07 | 17922195                | AA                              | CC              | 1946885519               |
| SNP_P4_94357_17922254 | NC_021166.1    | Ca_kabuli_chr07 | 17922254                | AA                              | GG              | 1946885521               |
| SNP_P4_94358_17922262 | NC_021166.1    | Ca_kabuli_chr07 | 17922262                | GG                              | CC              | 1946885523               |
| SNP_P4_94359_17922296 | NC_021166.1    | Ca_kabuli_chr07 | 17922296                | AA                              | CC              | 1946885525               |
| SNP_P4_94360_17922516 | NC_021166.1    | Ca_kabuli_chr07 | 17922516                | CC                              | TT              | 1946885527               |
| SNP_P4_94361_17922561 | NC_021166.1    | Ca_kabuli_chr07 | 17922561                | AA                              | GG              | 1946885529               |
| SNP_P4_94362_17922608 | NC_021166.1    | Ca_kabuli_chr07 | 17922608                | AA                              | GG              | 1946885531               |
| SNP_P4_94364_17923043 | NC_021166.1    | Ca_kabuli_chr07 | 17923043                | AA                              | GG              | 1946885533               |
| SNP_P4_94365_17923057 | NC_021166.1    | Ca_kabuli_chr07 | 17923057                | TT                              | CC              | 1946885535               |
| SNP_P4_94366_17923075 | NC_021166.1    | Ca_kabuli_chr07 | 17923075                | GG                              | AA              | 1946885537               |
| SNP_P4_94367_17923085 | NC_021166.1    | Ca_kabuli_chr07 | 17923085                | TT                              | GG              | 1946885539               |
| SNP_P4_94368_17923860 | NC_021166.1    | Ca_kabuli_chr07 | 17923860                | GG                              | TT              | 1946885541               |
| SNP_P4_94369_17923922 | NC_021166.1    | Ca_kabuli_chr07 | 17923922                | CC                              | TT              | 1946885543               |
| SNP_P4_94370_17924302 | NC_021166.1    | Ca_kabuli_chr07 | 17924302                | AA                              | TT              | 1946885545               |
| SNP_P4_94371_17935070 | NC_021166.1    | Ca_kabuli_chr07 | 17935070                | GG                              | TT              | 1946885547               |
| SNP_P4_94372_17952272 | NC_021166.1    | Ca_kabuli_chr07 | 17952272                | AA                              | GG              | 1946885549               |

| SNPs IDs              | Chromosome IDs | Chromosomes     | Physical positions (bp) | CDC Frontier (Reference genome) | (ILWC46 & LPNB) | NCBI SNPdb Accession IDs |
|-----------------------|----------------|-----------------|-------------------------|---------------------------------|-----------------|--------------------------|
| SNP_P4_94374_17983745 | NC_021166.1    | Ca_kabuli_chr07 | 17983745                | CC                              | GG              | 1946885551               |
| SNP_P4_94375_17983808 | NC_021166.1    | Ca_kabuli_chr07 | 17983808                | GG                              | AA              | 1946885553               |
| SNP_P4_94376_18006040 | NC_021166.1    | Ca_kabuli_chr07 | 18006040                | CC                              | TT              | 1946885555               |
| SNP_P4_94377_18006042 | NC_021166.1    | Ca_kabuli_chr07 | 18006042                | TT                              | GG              | 1946885557               |
| SNP_P4_94378_18006797 | NC_021166.1    | Ca_kabuli_chr07 | 18006797                | CC                              | TT              | 1946885559               |
| SNP_P4_94379_18007004 | NC_021166.1    | Ca_kabuli_chr07 | 18007004                | AA                              | TT              | 1946885561               |
| SNP_P4_94380_18007182 | NC_021166.1    | Ca_kabuli_chr07 | 18007182                | GG                              | AA              | 1946885563               |
| SNP_P4_94382_18007302 | NC_021166.1    | Ca_kabuli_chr07 | 18007302                | AA                              | GG              | 1946885565               |
| SNP_P4_94383_18007484 | NC_021166.1    | Ca_kabuli_chr07 | 18007484                | AA                              | GG              | 1946885567               |
| SNP_P4_94384_18007509 | NC_021166.1    | Ca_kabuli_chr07 | 18007509                | GG                              | AA              | 1946885569               |
| SNP_P4_94385_18007525 | NC_021166.1    | Ca_kabuli_chr07 | 18007525                | TT                              | CC              | 1946885571               |
| SNP_P4_94386_18007537 | NC_021166.1    | Ca_kabuli_chr07 | 18007537                | TT                              | CC              | 1946885573               |
| SNP_P4_94388_18007798 | NC_021166.1    | Ca_kabuli_chr07 | 18007798                | CC                              | TT              | 1946885575               |
| SNP_P4_94389_18007936 | NC_021166.1    | Ca_kabuli_chr07 | 18007936                | TT                              | CC              | 1946885577               |
| SNP_P4_94390_18009246 | NC_021166.1    | Ca_kabuli_chr07 | 18009246                | CC                              | GG              | 1946885579               |
| SNP_P4_94391_18009259 | NC_021166.1    | Ca_kabuli_chr07 | 18009259                | CC                              | TT              | 1946885581               |
| SNP_P4_94392_18009265 | NC_021166.1    | Ca_kabuli_chr07 | 18009265                | AA                              | TT              | 1946885583               |
| SNP_P4_94393_18024864 | NC_021166.1    | Ca_kabuli_chr07 | 18024864                | AA                              | CC              | 1946885585               |
| SNP_P4_94394_18038540 | NC_021166.1    | Ca_kabuli_chr07 | 18038540                | GG                              | TT              | 1946885587               |
| SNP_P4_94396_18038552 | NC_021166.1    | Ca_kabuli_chr07 | 18038552                | CC                              | GG              | 1946885589               |
| SNP_P4_94397_18041876 | NC_021166.1    | Ca_kabuli_chr07 | 18041876                | CC                              | TT              | 1946885591               |
| SNP_P4_94399_18045441 | NC_021166.1    | Ca_kabuli_chr07 | 18045441                | TT                              | CC              | 1946885593               |
| SNP_P4_94400_18050162 | NC_021166.1    | Ca_kabuli_chr07 | 18050162                | CC                              | TT              | 1946885595               |
| SNP_P4_94401_18050211 | NC_021166.1    | Ca_kabuli_chr07 | 18050211                | TT                              | GG              | 1946885597               |
| SNP_P4_94402_18050286 | NC_021166.1    | Ca_kabuli_chr07 | 18050286                | CC                              | TT              | 1946885599               |
| SNP_P4_94403_18070984 | NC_021166.1    | Ca_kabuli_chr07 | 18070984                | TT                              | GG              | 1946885601               |
| SNP_P4_94404_18070993 | NC_021166.1    | Ca_kabuli_chr07 | 18070993                | AA                              | TT              | 1946885603               |
| SNP_P4_94405_18070997 | NC_021166.1    | Ca_kabuli_chr07 | 18070997                | GG                              | TT              | 1946885605               |
| SNP_P4_94406_18071005 | NC_021166.1    | Ca_kabuli_chr07 | 18071005                | GG                              | TT              | 1946885607               |
| SNP_P4_94407_18071028 | NC_021166.1    | Ca_kabuli_chr07 | 18071028                | AA                              | GG              | 1946885609               |
| SNP_P4_94408_18071036 | NC_021166.1    | Ca_kabuli_chr07 | 18071036                | TT                              | AA              | 1946885611               |
| SNP_P4_94409_18071037 | NC_021166.1    | Ca_kabuli_chr07 | 18071037                | AA                              | TT              | 1946885613               |
| SNP_P4_94410_18071121 | NC_021166.1    | Ca_kabuli_chr07 | 18071121                | TT                              | GG              | 1946885615               |
| SNP_P4_94411_18071159 | NC_021166.1    | Ca_kabuli_chr07 | 18071159                | AA                              | TT              | 1946885618               |
| SNP_P4_94412_18071188 | NC_021166.1    | Ca_kabuli_chr07 | 18071188                | TT                              | CC              | 1946885620               |
| SNP_P4_94413_18071197 | NC_021166.1    | Ca_kabuli_chr07 | 18071197                | TT                              | CC              | 1946885622               |
| SNP_P4_94414_18071216 | NC_021166.1    | Ca_kabuli_chr07 | 18071216                | AA                              | TT              | 1946885624               |
| SNP_P4_94415_18071401 | NC_021166.1    | Ca_kabuli_chr07 | 18071401                | CC                              | AA              | 1946885626               |
| SNP_P4_94416_18084750 | NC_021166.1    | Ca_kabuli_chr07 | 18084750                | CC                              | TT              | 1946885628               |
| SNP_P4_94417_18088218 | NC_021166.1    | Ca_kabuli_chr07 | 18088218                | TT                              | AA              | 1946885630               |
| SNP_P4_94418_18093294 | NC_021166.1    | Ca_kabuli_chr07 | 18093294                | GG                              | AA              | 1946885632               |
| SNP_P4_94419_18093295 | NC_021166.1    | Ca_kabuli_chr07 | 18093295                | CC                              | GG              | 1946885634               |

| SNPs IDs              | Chromosome IDs | Chromosomes     | Physical positions (bp) | CDC Frontier (Reference genome) | (ILWC46 & LPNB) | NCBI SNPdb Accession IDs |
|-----------------------|----------------|-----------------|-------------------------|---------------------------------|-----------------|--------------------------|
| SNP_P4_94420_18094967 | NC_021166.1    | Ca_kabuli_chr07 | 18094967                | AA                              | TT              | 1946885636               |
| SNP_P4_94421_18106606 | NC_021166.1    | Ca_kabuli_chr07 | 18106606                | AA                              | TT              | 1946885638               |
| SNP_P4_94422_18106622 | NC_021166.1    | Ca_kabuli_chr07 | 18106622                | TT                              | AA              | 1946885640               |
| SNP_P4_94423_18110103 | NC_021166.1    | Ca_kabuli_chr07 | 18110103                | AA                              | GG              | 1946885642               |
| SNP_P4_94424_18110111 | NC_021166.1    | Ca_kabuli_chr07 | 18110111                | TT                              | CC              | 1946885644               |
| SNP_P4_94425_18110130 | NC_021166.1    | Ca_kabuli_chr07 | 18110130                | AA                              | GG              | 1946885646               |
| SNP_P4_94426_18110142 | NC_021166.1    | Ca_kabuli_chr07 | 18110142                | GG                              | AA              | 1946885648               |
| SNP_P4_94427_18110178 | NC_021166.1    | Ca_kabuli_chr07 | 18110178                | AA                              | TT              | 1946885650               |
| SNP_P4_94428_18122812 | NC_021166.1    | Ca_kabuli_chr07 | 18122812                | CC                              | TT              | 1946885652               |
| SNP_P4_94429_18125367 | NC_021166.1    | Ca_kabuli_chr07 | 18125367                | CC                              | TT              | 1946885654               |
| SNP_P4_94430_18125422 | NC_021166.1    | Ca_kabuli_chr07 | 18125422                | TT                              | AA              | 1946885656               |
| SNP_P4_94431_18125863 | NC_021166.1    | Ca_kabuli_chr07 | 18125863                | TT                              | CC              | 1946885658               |
| SNP_P4_94432_18125921 | NC_021166.1    | Ca_kabuli_chr07 | 18125921                | CC                              | TT              | 1946885660               |
| SNP_P4_94434_18151654 | NC_021166.1    | Ca_kabuli_chr07 | 18151654                | AA                              | GG              | 1946885662               |
| SNP_P4_94438_18165111 | NC_021166.1    | Ca_kabuli_chr07 | 18165111                | GG                              | AA              | 1946885664               |
| SNP_P4_94439_18168082 | NC_021166.1    | Ca_kabuli_chr07 | 18168082                | CC                              | TT              | 1946885666               |
| SNP_P4_94441_18188451 | NC_021166.1    | Ca_kabuli_chr07 | 18188451                | AA                              | CC              | 1946885668               |
| SNP_P4_94443_18198990 | NC_021166.1    | Ca_kabuli_chr07 | 18198990                | GG                              | AA              | 1946885670               |
| SNP_P4_94444_18198998 | NC_021166.1    | Ca_kabuli_chr07 | 18198998                | GG                              | TT              | 1946885672               |
| SNP_P4_94445_18199007 | NC_021166.1    | Ca_kabuli_chr07 | 18199007                | GG                              | TT              | 1946885674               |
| SNP_P4_94446_18199059 | NC_021166.1    | Ca_kabuli_chr07 | 18199059                | GG                              | AA              | 1946885676               |
| SNP_P4_94447_18199084 | NC_021166.1    | Ca_kabuli_chr07 | 18199084                | TT                              | CC              | 1946885677               |
| SNP_P4_94448_18199086 | NC_021166.1    | Ca_kabuli_chr07 | 18199086                | AA                              | TT              | 1946885679               |
| SNP_P4_94449_18199434 | NC_021166.1    | Ca_kabuli_chr07 | 18199434                | TT                              | AA              | 1946885681               |
| SNP_P4_94450_18199484 | NC_021166.1    | Ca_kabuli_chr07 | 18199484                | GG                              | AA              | 1946885683               |
| SNP_P4_94451_18199485 | NC_021166.1    | Ca_kabuli_chr07 | 18199485                | GG                              | AA              | 1946885685               |
| SNP_P4_94452_18199523 | NC_021166.1    | Ca_kabuli_chr07 | 18199523                | GG                              | AA              | 1946885687               |
| SNP_P4_94453_18199524 | NC_021166.1    | Ca_kabuli_chr07 | 18199524                | TT                              | GG              | 1946885689               |
| SNP_P4_94454_18199539 | NC_021166.1    | Ca_kabuli_chr07 | 18199539                | TT                              | AA              | 1946885691               |
| SNP_P4_94455_18199549 | NC_021166.1    | Ca_kabuli_chr07 | 18199549                | AA                              | GG              | 1946885693               |
| SNP_P4_94456_18199566 | NC_021166.1    | Ca_kabuli_chr07 | 18199566                | TT                              | AA              | 1946885695               |
| SNP_P4_94457_18211303 | NC_021166.1    | Ca_kabuli_chr07 | 18211303                | GG                              | AA              | 1946885697               |
| SNP_P4_94458_18211555 | NC_021166.1    | Ca_kabuli_chr07 | 18211555                | TT                              | GG              | 1946885699               |
| SNP_P4_94459_18213290 | NC_021166.1    | Ca_kabuli_chr07 | 18213290                | GG                              | AA              | 1946885701               |
| SNP_P4_94460_18221628 | NC_021166.1    | Ca_kabuli_chr07 | 18221628                | GG                              | AA              | 1946885703               |
| SNP_P4_94461_18231042 | NC_021166.1    | Ca_kabuli_chr07 | 18231042                | TT                              | GG              | 1946885705               |
| SNP_P4_94462_18234962 | NC_021166.1    | Ca_kabuli_chr07 | 18234962                | CC                              | TT              | 1946885707               |
| SNP_P4_94463_18235004 | NC_021166.1    | Ca_kabuli_chr07 | 18235004                | AA                              | GG              | 1946885709               |
| SNP_P4_94464_18237462 | NC_021166.1    | Ca_kabuli_chr07 | 18237462                | TT                              | CC              | 1946885711               |
| SNP_P4_94465_18244444 | NC_021166.1    | Ca_kabuli_chr07 | 18244444                | AA                              | GG              | 1946885713               |
| SNP_P4_94466_18282177 | NC_021166.1    | Ca_kabuli_chr07 | 18282177                | TT                              | CC              | 1946885715               |
| SNP_P4_94467_18300588 | NC_021166.1    | Ca_kabuli_chr07 | 18300588                | CC                              | AA              | 1946885717               |

| SNPs IDs              | Chromosome IDs | Chromosomes     | Physical positions (bp) | CDC Frontier (Reference genome) | (ILWC46 & LPNB) | NCBI SNPdb Accession IDs |
|-----------------------|----------------|-----------------|-------------------------|---------------------------------|-----------------|--------------------------|
| SNP_P4_94469_18308330 | NC_021166.1    | Ca_kabuli_chr07 | 18308330                | AA                              | GG              | 1946885719               |
| SNP_P4_94470_18326373 | NC_021166.1    | Ca_kabuli_chr07 | 18326373                | AA                              | GG              | 1946885721               |
| SNP_P4_94471_18328300 | NC_021166.1    | Ca_kabuli_chr07 | 18328300                | GG                              | AA              | 1946885723               |
| SNP_P4_94472_18332778 | NC_021166.1    | Ca_kabuli_chr07 | 18332778                | CC                              | TT              | 1946885725               |
| SNP_P4_94473_18332792 | NC_021166.1    | Ca_kabuli_chr07 | 18332792                | CC                              | AA              | 1946885727               |
| SNP_P4_94474_18332816 | NC_021166.1    | Ca_kabuli_chr07 | 18332816                | CC                              | TT              | 1946885729               |
| SNP_P4_94475_18332822 | NC_021166.1    | Ca_kabuli_chr07 | 18332822                | CC                              | TT              | 1946885731               |
| SNP_P4_94476_18332825 | NC_021166.1    | Ca_kabuli_chr07 | 18332825                | CC                              | TT              | 1946885733               |
| SNP_P4_94478_18332831 | NC_021166.1    | Ca_kabuli_chr07 | 18332831                | TT                              | CC              | 1946885735               |
| SNP_P4_94479_18332915 | NC_021166.1    | Ca_kabuli_chr07 | 18332915                | GG                              | AA              | 1946885737               |
| SNP_P4_94480_18333209 | NC_021166.1    | Ca_kabuli_chr07 | 18333209                | CC                              | TT              | 1946885738               |
| SNP_P4_94482_18333290 | NC_021166.1    | Ca_kabuli_chr07 | 18333290                | TT                              | GG              | 1946885740               |
| SNP_P4_94483_18339203 | NC_021166.1    | Ca_kabuli_chr07 | 18339203                | GG                              | AA              | 1946885742               |
| SNP_P4_94484_18339219 | NC_021166.1    | Ca_kabuli_chr07 | 18339219                | AA                              | CC              | 1946885744               |
| SNP_P4_94485_18339349 | NC_021166.1    | Ca_kabuli_chr07 | 18339349                | GG                              | CC              | 1946885746               |
| SNP_P4_94486_18339365 | NC_021166.1    | Ca_kabuli_chr07 | 18339365                | GG                              | AA              | 1946885748               |
| SNP_P4_94487_18343400 | NC_021166.1    | Ca_kabuli_chr07 | 18343400                | TT                              | GG              | 1946885750               |
| SNP_P4_94489_18362444 | NC_021166.1    | Ca_kabuli_chr07 | 18362444                | TT                              | CC              | 1946885752               |
| SNP_P4_94490_18362449 | NC_021166.1    | Ca_kabuli_chr07 | 18362449                | AA                              | GG              | 1946885754               |
| SNP_P4_94491_18362477 | NC_021166.1    | Ca_kabuli_chr07 | 18362477                | AA                              | GG              | 1946885756               |
| SNP_P4_94492_18362523 | NC_021166.1    | Ca_kabuli_chr07 | 18362523                | TT                              | AA              | 1946885758               |
| SNP_P4_94493_18362532 | NC_021166.1    | Ca_kabuli_chr07 | 18362532                | CC                              | TT              | 1946885760               |
| SNP_P4_94494_18362891 | NC_021166.1    | Ca_kabuli_chr07 | 18362891                | CC                              | TT              | 1946885762               |
| SNP_P4_94495_18363240 | NC_021166.1    | Ca_kabuli_chr07 | 18363240                | AA                              | GG              | 1946885764               |
| SNP_P4_94496_18363522 | NC_021166.1    | Ca_kabuli_chr07 | 18363522                | CC                              | GG              | 1946885766               |
| SNP_P4_94497_18363569 | NC_021166.1    | Ca_kabuli_chr07 | 18363569                | TT                              | CC              | 1946885768               |
| SNP_P4_94498_18372657 | NC_021166.1    | Ca_kabuli_chr07 | 18372657                | TT                              | CC              | 1946885770               |
| SNP_P4_94499_18391390 | NC_021166.1    | Ca_kabuli_chr07 | 18391390                | CC                              | TT              | 1946885772               |
| SNP_P4_94500_18405681 | NC_021166.1    | Ca_kabuli_chr07 | 18405681                | GG                              | AA              | 1946885774               |
| SNP_P4_94501_18408754 | NC_021166.1    | Ca_kabuli_chr07 | 18408754                | GG                              | AA              | 1946885776               |
| SNP_P4_94502_18408758 | NC_021166.1    | Ca_kabuli_chr07 | 18408758                | CC                              | TT              | 1946885778               |
| SNP_P4_94503_18409488 | NC_021166.1    | Ca_kabuli_chr07 | 18409488                | AA                              | GG              | 1946885780               |
| SNP_P4_94504_18409517 | NC_021166.1    | Ca_kabuli_chr07 | 18409517                | AA                              | GG              | 1946885782               |
| SNP_P4_94505_18409533 | NC_021166.1    | Ca_kabuli_chr07 | 18409533                | CC                              | TT              | 1946885784               |
| SNP_P4_94506_18409534 | NC_021166.1    | Ca_kabuli_chr07 | 18409534                | TT                              | CC              | 1946885786               |
| SNP_P4_94507_18409553 | NC_021166.1    | Ca_kabuli_chr07 | 18409553                | AA                              | GG              | 1946885788               |
| SNP_P4_94508_18409577 | NC_021166.1    | Ca_kabuli_chr07 | 18409577                | AA                              | CC              | 1946885789               |
| SNP_P4_94509_18410529 | NC_021166.1    | Ca_kabuli_chr07 | 18410529                | AA                              | GG              | 1946885791               |
| SNP_P4_94510_18411982 | NC_021166.1    | Ca_kabuli_chr07 | 18411982                | CC                              | AA              | 1946885793               |
| SNP_P4_94511_18414301 | NC_021166.1    | Ca_kabuli_chr07 | 18414301                | TT                              | AA              | 1946885795               |
| SNP_P4_94512_18418346 | NC_021166.1    | Ca_kabuli_chr07 | 18418346                | TT                              | CC              | 1946885797               |
| SNP_P4_94513_18434818 | NC_021166.1    | Ca_kabuli_chr07 | 18434818                | CC                              | AA              | 1946885799               |

| SNPs IDs              | Chromosome IDs | Chromosomes     | Physical positions (bp) | CDC Frontier (Reference genome) | (ILWC46 & LPNB) | NCBI SNPdb Accession IDs |
|-----------------------|----------------|-----------------|-------------------------|---------------------------------|-----------------|--------------------------|
| SNP_P4_94516_18447328 | NC_021166.1    | Ca_kabuli_chr07 | 18447328                | CC                              | TT              | 1946885801               |
| SNP_P4_94517_18449308 | NC_021166.1    | Ca_kabuli_chr07 | 18449308                | TT                              | AA              | 1946885803               |
| SNP_P4_94518_18449313 | NC_021166.1    | Ca_kabuli_chr07 | 18449313                | AA                              | CC              | 1946885805               |
| SNP_P4_94519_18459289 | NC_021166.1    | Ca_kabuli_chr07 | 18459289                | TT                              | GG              | 1946885807               |
| SNP_P4_94520_18491360 | NC_021166.1    | Ca_kabuli_chr07 | 18491360                | AA                              | CC              | 1946885809               |
| SNP_P4_94521_18516089 | NC_021166.1    | Ca_kabuli_chr07 | 18516089                | AA                              | TT              | 1946885811               |
| SNP_P4_94522_18519252 | NC_021166.1    | Ca_kabuli_chr07 | 18519252                | TT                              | AA              | 1946885813               |
| SNP_P4_94523_18533812 | NC_021166.1    | Ca_kabuli_chr07 | 18533812                | AA                              | CC              | 1946885815               |
| SNP_P4_94524_18539501 | NC_021166.1    | Ca_kabuli_chr07 | 18539501                | CC                              | TT              | 1946885817               |
| SNP_P4_94525_18539507 | NC_021166.1    | Ca_kabuli_chr07 | 18539507                | CC                              | TT              | 1946885818               |
| SNP_P4_94526_18539621 | NC_021166.1    | Ca_kabuli_chr07 | 18539621                | AA                              | GG              | 1946885820               |
| SNP_P4_94527_18539674 | NC_021166.1    | Ca_kabuli_chr07 | 18539674                | GG                              | TT              | 1946885822               |
| SNP_P4_94528_18539689 | NC_021166.1    | Ca_kabuli_chr07 | 18539689                | AA                              | GG              | 1946885824               |
| SNP_P4_94529_18539713 | NC_021166.1    | Ca_kabuli_chr07 | 18539713                | TT                              | CC              | 1946885826               |
| SNP_P4_94530_18539756 | NC_021166.1    | Ca_kabuli_chr07 | 18539756                | AA                              | GG              | 1946885828               |
| SNP_P4_94531_18539789 | NC_021166.1    | Ca_kabuli_chr07 | 18539789                | AA                              | TT              | 1946885830               |
| SNP_P4_94532_18540089 | NC_021166.1    | Ca_kabuli_chr07 | 18540089                | CC                              | TT              | 1946885832               |
| SNP_P4_94533_18540122 | NC_021166.1    | Ca_kabuli_chr07 | 18540122                | AA                              | GG              | 1946885834               |
| SNP_P4_94534_18574447 | NC_021166.1    | Ca_kabuli_chr07 | 18574447                | TT                              | AA              | 1946885836               |
| SNP_P4_94535_18587157 | NC_021166.1    | Ca_kabuli_chr07 | 18587157                | AA                              | GG              | 1946885838               |
| SNP_P4_94536_18587182 | NC_021166.1    | Ca_kabuli_chr07 | 18587182                | GG                              | CC              | 1946885839               |
| SNP_P4_94537_18587223 | NC_021166.1    | Ca_kabuli_chr07 | 18587223                | CC                              | AA              | 1946885841               |
| SNP_P4_94538_18587404 | NC_021166.1    | Ca_kabuli_chr07 | 18587404                | GG                              | AA              | 1946885843               |
| SNP_P4_94539_18587448 | NC_021166.1    | Ca_kabuli_chr07 | 18587448                | CC                              | TT              | 1946885845               |
| SNP_P4_94540_18587466 | NC_021166.1    | Ca_kabuli_chr07 | 18587466                | AA                              | TT              | 1946885847               |
| SNP_P4_94541_18587495 | NC_021166.1    | Ca_kabuli_chr07 | 18587495                | TT                              | GG              | 1946885849               |
| SNP_P4_94542_18587510 | NC_021166.1    | Ca_kabuli_chr07 | 18587510                | TT                              | CC              | 1946885851               |
| SNP_P4_94543_18587524 | NC_021166.1    | Ca_kabuli_chr07 | 18587524                | CC                              | TT              | 1946885853               |
| SNP_P4_94544_18587533 | NC_021166.1    | Ca_kabuli_chr07 | 18587533                | TT                              | CC              | 1946885855               |
| SNP_P4_94545_18587546 | NC_021166.1    | Ca_kabuli_chr07 | 18587546                | AA                              | TT              | 1946885857               |
| SNP_P4_94546_18587563 | NC_021166.1    | Ca_kabuli_chr07 | 18587563                | TT                              | CC              | 1946885859               |
| SNP_P4_94547_18587603 | NC_021166.1    | Ca_kabuli_chr07 | 18587603                | CC                              | TT              | 1946885861               |
| SNP_P4_94548_18587607 | NC_021166.1    | Ca_kabuli_chr07 | 18587607                | CC                              | TT              | 1946885863               |
| SNP_P4_94550_18587706 | NC_021166.1    | Ca_kabuli_chr07 | 18587706                | GG                              | AA              | 1946885865               |
| SNP_P4_94551_18587760 | NC_021166.1    | Ca_kabuli_chr07 | 18587760                | AA                              | GG              | 1946885867               |
| SNP_P4_94552_18587763 | NC_021166.1    | Ca_kabuli_chr07 | 18587763                | TT                              | CC              | 1946885869               |
| SNP_P4_94553_18587764 | NC_021166.1    | Ca_kabuli_chr07 | 18587764                | GG                              | CC              | 1946885871               |
| SNP_P4_94554_18587772 | NC_021166.1    | Ca_kabuli_chr07 | 18587772                | AA                              | GG              | 1946885873               |
| SNP_P4_94555_18587853 | NC_021166.1    | Ca_kabuli_chr07 | 18587853                | GG                              | AA              | 1946885875               |
| SNP_P4_94556_18588046 | NC_021166.1    | Ca_kabuli_chr07 | 18588046                | GG                              | TT              | 1946885877               |
| SNP_P4_94557_18588091 | NC_021166.1    | Ca_kabuli_chr07 | 18588091                | AA                              | GG              | 1946885879               |
| SNP_P4_94558_18588184 | NC_021166.1    | Ca_kabuli_chr07 | 18588184                | AA                              | TT              | 1946885881               |

| SNPs IDs              | Chromosome IDs | Chromosomes     | Physical positions (bp) | CDC Frontier (Reference genome) | (ILWC46 & LPNB) | NCBI SNPdb Accession IDs |
|-----------------------|----------------|-----------------|-------------------------|---------------------------------|-----------------|--------------------------|
| SNP_P4_94559_18588221 | NC_021166.1    | Ca_kabuli_chr07 | 18588221                | AA                              | TT              | 1946885883               |
| SNP_P4_94560_18588341 | NC_021166.1    | Ca_kabuli_chr07 | 18588341                | TT                              | AA              | 1946885885               |
| SNP_P4_94561_18588411 | NC_021166.1    | Ca_kabuli_chr07 | 18588411                | TT                              | AA              | 1946885887               |
| SNP_P4_94562_18588443 | NC_021166.1    | Ca_kabuli_chr07 | 18588443                | CC                              | AA              | 1946885889               |
| SNP_P4_94563_18588451 | NC_021166.1    | Ca_kabuli_chr07 | 18588451                | TT                              | CC              | 1946885891               |
| SNP_P4_94564_18588488 | NC_021166.1    | Ca_kabuli_chr07 | 18588488                | AA                              | CC              | 1946885893               |
| SNP_P4_94565_18588599 | NC_021166.1    | Ca_kabuli_chr07 | 18588599                | TT                              | CC              | 1946885895               |
| SNP_P4_94566_18588642 | NC_021166.1    | Ca_kabuli_chr07 | 18588642                | TT                              | CC              | 1946885896               |
| SNP_P4_94568_18588689 | NC_021166.1    | Ca_kabuli_chr07 | 18588689                | AA                              | GG              | 1946885898               |
| SNP_P4_94569_18588743 | NC_021166.1    | Ca_kabuli_chr07 | 18588743                | CC                              | TT              | 1946885900               |
| SNP_P4_94570_18588753 | NC_021166.1    | Ca_kabuli_chr07 | 18588753                | TT                              | CC              | 1946885902               |
| SNP_P4_94571_18588761 | NC_021166.1    | Ca_kabuli_chr07 | 18588761                | TT                              | CC              | 1946885904               |
| SNP_P4_94572_18588812 | NC_021166.1    | Ca_kabuli_chr07 | 18588812                | CC                              | AA              | 1946885906               |
| SNP_P4_94574_18589037 | NC_021166.1    | Ca_kabuli_chr07 | 18589037                | AA                              | CC              | 1946885908               |
| SNP_P4_94575_18589563 | NC_021166.1    | Ca_kabuli_chr07 | 18589563                | CC                              | TT              | 1946885910               |
| SNP_P4_94576_18589688 | NC_021166.1    | Ca_kabuli_chr07 | 18589688                | TT                              | AA              | 1946885912               |
| SNP_P4_94577_18589701 | NC_021166.1    | Ca_kabuli_chr07 | 18589701                | GG                              | AA              | 1946885914               |
| SNP_P4_94578_18589743 | NC_021166.1    | Ca_kabuli_chr07 | 18589743                | GG                              | AA              | 1946885916               |
| SNP_P4_94579_18589762 | NC_021166.1    | Ca_kabuli_chr07 | 18589762                | AA                              | GG              | 1946885918               |
| SNP_P4_94580_18589764 | NC_021166.1    | Ca_kabuli_chr07 | 18589764                | GG                              | AA              | 1946885920               |
| SNP_P4_94581_18589787 | NC_021166.1    | Ca_kabuli_chr07 | 18589787                | TT                              | CC              | 1946885922               |
| SNP_P4_94582_18589838 | NC_021166.1    | Ca_kabuli_chr07 | 18589838                | GG                              | AA              | 1946885924               |
| SNP_P4_94583_18589912 | NC_021166.1    | Ca_kabuli_chr07 | 18589912                | AA                              | GG              | 1946885926               |
| SNP_P4_94584_18590096 | NC_021166.1    | Ca_kabuli_chr07 | 18590096                | TT                              | GG              | 1946885928               |
| SNP_P4_94585_18622104 | NC_021166.1    | Ca_kabuli_chr07 | 18622104                | CC                              | TT              | 1946885930               |
| SNP_P4_94586_18653754 | NC_021166.1    | Ca_kabuli_chr07 | 18653754                | AA                              | TT              | 1946885932               |
| SNP_P4_94587_18672449 | NC_021166.1    | Ca_kabuli_chr07 | 18672449                | TT                              | CC              | 1946885935               |
| SNP_P4_94588_18690843 | NC_021166.1    | Ca_kabuli_chr07 | 18690843                | AA                              | GG              | 1946885937               |
| SNP_P4_94589_18694132 | NC_021166.1    | Ca_kabuli_chr07 | 18694132                | TT                              | CC              | 1946885939               |
| SNP_P4_94590_18706998 | NC_021166.1    | Ca_kabuli_chr07 | 18706998                | GG                              | AA              | 1946885941               |
| SNP_P4_94591_18710958 | NC_021166.1    | Ca_kabuli_chr07 | 18710958                | AA                              | GG              | 1946885943               |
| SNP_P4_94592_18722386 | NC_021166.1    | Ca_kabuli_chr07 | 18722386                | TT                              | CC              | 1946885945               |
| SNP_P4_94593_18739595 | NC_021166.1    | Ca_kabuli_chr07 | 18739595                | GG                              | AA              | 1946885947               |
| SNP_P4_94595_18760487 | NC_021166.1    | Ca_kabuli_chr07 | 18760487                | GG                              | TT              | 1946885949               |
| SNP_P4_94596_18764577 | NC_021166.1    | Ca_kabuli_chr07 | 18764577                | CC                              | TT              | 1946885951               |
| SNP_P4_94597_18765173 | NC_021166.1    | Ca_kabuli_chr07 | 18765173                | CC                              | TT              | 1946885953               |
| SNP_P4_94598_18765186 | NC_021166.1    | Ca_kabuli_chr07 | 18765186                | GG                              | AA              | 1946885955               |
| SNP_P4_94599_18765696 | NC_021166.1    | Ca_kabuli_chr07 | 18765696                | TT                              | CC              | 1946885958               |
| SNP_P4_94600_18769670 | NC_021166.1    | Ca_kabuli_chr07 | 18769670                | AA                              | GG              | 1946885960               |
| SNP_P4_94605_18780512 | NC_021166.1    | Ca_kabuli_chr07 | 18780512                | CC                              | TT              | 1946885962               |
| SNP_P4_94606_18792254 | NC_021166.1    | Ca_kabuli_chr07 | 18792254                | TT                              | CC              | 1946885964               |
| SNP_P4_94608_18820718 | NC_021166.1    | Ca_kabuli_chr07 | 18820718                | AA                              | CC              | 1946885966               |



| SNPs IDs              | Chromosome IDs | Chromosomes     | Physical positions (bp) | CDC Frontier (Reference genome) | (ILWC46 & LPNB) | NCBI SNPdb Accession IDs |
|-----------------------|----------------|-----------------|-------------------------|---------------------------------|-----------------|--------------------------|
| SNP_P4_94609_18820719 | NC_021166.1    | Ca_kabuli_chr07 | 18820719                | AA                              | GG              | 1946885968               |
| SNP_P4_94610_18821546 | NC_021166.1    | Ca_kabuli_chr07 | 18821546                | TT                              | GG              | 1946885971               |
| SNP_P4_94611_18821548 | NC_021166.1    | Ca_kabuli_chr07 | 18821548                | TT                              | CC              | 1946885974               |
| SNP_P4_94612_18821560 | NC_021166.1    | Ca_kabuli_chr07 | 18821560                | TT                              | CC              | 1946885976               |
| SNP_P4_94613_18866718 | NC_021166.1    | Ca_kabuli_chr07 | 18866718                | AA                              | CC              | 1946885978               |
| SNP_P4_94614_18877964 | NC_021166.1    | Ca_kabuli_chr07 | 18877964                | TT                              | GG              | 1946885980               |
| SNP_P4_94616_18904509 | NC_021166.1    | Ca_kabuli_chr07 | 18904509                | AA                              | GG              | 1946885982               |
| SNP_P4_94617_18904524 | NC_021166.1    | Ca_kabuli_chr07 | 18904524                | CC                              | TT              | 1946885984               |
| SNP_P4_94618_18904580 | NC_021166.1    | Ca_kabuli_chr07 | 18904580                | TT                              | GG              | 1946885985               |
| SNP_P4_94619_18904699 | NC_021166.1    | Ca_kabuli_chr07 | 18904699                | GG                              | AA              | 1946885986               |
| SNP_P4_94620_18904858 | NC_021166.1    | Ca_kabuli_chr07 | 18904858                | TT                              | AA              | 1946885987               |
| SNP_P4_94622_18917924 | NC_021166.1    | Ca_kabuli_chr07 | 18917924                | TT                              | CC              | 1946885989               |
| SNP_P4_94623_18918206 | NC_021166.1    | Ca_kabuli_chr07 | 18918206                | AA                              | CC              | 1946885992               |
| SNP_P4_94624_18918339 | NC_021166.1    | Ca_kabuli_chr07 | 18918339                | AA                              | TT              | 1946885994               |
| SNP_P4_94625_18918410 | NC_021166.1    | Ca_kabuli_chr07 | 18918410                | TT                              | AA              | 1946885996               |
| SNP_P4_94626_18918812 | NC_021166.1    | Ca_kabuli_chr07 | 18918812                | CC                              | TT              | 1946885998               |
| SNP_P4_94628_18934159 | NC_021166.1    | Ca_kabuli_chr07 | 18934159                | GG                              | AA              | 1946886000               |
| SNP_P4_94629_18935285 | NC_021166.1    | Ca_kabuli_chr07 | 18935285                | AA                              | TT              | 1946886003               |
| SNP_P4_94630_18935286 | NC_021166.1    | Ca_kabuli_chr07 | 18935286                | GG                              | AA              | 1946886005               |
| SNP_P4_94631_18935288 | NC_021166.1    | Ca_kabuli_chr07 | 18935288                | GG                              | AA              | 1946886007               |
| SNP_P4_94632_18935363 | NC_021166.1    | Ca_kabuli_chr07 | 18935363                | GG                              | AA              | 1946886010               |
| SNP_P4_94633_18935382 | NC_021166.1    | Ca_kabuli_chr07 | 18935382                | GG                              | AA              | 1946886012               |
| SNP_P4_94634_18935480 | NC_021166.1    | Ca_kabuli_chr07 | 18935480                | AA                              | TT              | 1946886015               |
| SNP_P4_94635_18935486 | NC_021166.1    | Ca_kabuli_chr07 | 18935486                | TT                              | AA              | 1946886017               |
| SNP_P4_94636_18935507 | NC_021166.1    | Ca_kabuli_chr07 | 18935507                | TT                              | CC              | 1946886019               |
| SNP_P4_94637_18939049 | NC_021166.1    | Ca_kabuli_chr07 | 18939049                | AA                              | CC              | 1946886021               |
| SNP_P4_94638_18940916 | NC_021166.1    | Ca_kabuli_chr07 | 18940916                | TT                              | CC              | 1946886023               |
| SNP_P4_94639_18974796 | NC_021166.1    | Ca_kabuli_chr07 | 18974796                | GG                              | AA              | 1946886025               |
| SNP_P4_94640_18975081 | NC_021166.1    | Ca_kabuli_chr07 | 18975081                | AA                              | TT              | 1946886027               |
| SNP_P4_94641_18982757 | NC_021166.1    | Ca_kabuli_chr07 | 18982757                | TT                              | CC              | 1946886030               |
| SNP_P4_94642_18984450 | NC_021166.1    | Ca_kabuli_chr07 | 18984450                | AA                              | GG              | 1946886032               |
| SNP_P4_94643_18984637 | NC_021166.1    | Ca_kabuli_chr07 | 18984637                | TT                              | CC              | 1946886034               |
| SNP_P4_94645_18984905 | NC_021166.1    | Ca_kabuli_chr07 | 18984905                | TT                              | GG              | 1946886036               |
| SNP_P4_94646_18985978 | NC_021166.1    | Ca_kabuli_chr07 | 18985978                | GG                              | AA              | 1946886038               |
| SNP_P4_94647_19004903 | NC_021166.1    | Ca_kabuli_chr07 | 19004903                | TT                              | AA              | 1946886040               |
| SNP_P4_94650_19011693 | NC_021166.1    | Ca_kabuli_chr07 | 19011693                | AA                              | GG              | 1946886042               |
| SNP_P4_94651_19025132 | NC_021166.1    | Ca_kabuli_chr07 | 19025132                | TT                              | CC              | 1946886044               |
| SNP_P4_94652_19025144 | NC_021166.1    | Ca_kabuli_chr07 | 19025144                | GG                              | AA              | 1946886046               |
| SNP_P4_94653_19025503 | NC_021166.1    | Ca_kabuli_chr07 | 19025503                | GG                              | AA              | 1946886048               |
| SNP_P4_94654_19025533 | NC_021166.1    | Ca_kabuli_chr07 | 19025533                | GG                              | AA              | 1946886050               |
| SNP_P4_94655_19052776 | NC_021166.1    | Ca_kabuli_chr07 | 19052776                | GG                              | AA              | 1946886052               |
| SNP_P4_94656_19054214 | NC_021166.1    | Ca_kabuli_chr07 | 19054214                | GG                              | TT              | 1946886054               |

| SNPs IDs              | Chromosome IDs | Chromosomes     | Physical positions (bp) | CDC Frontier (Reference genome) | (ILWC46 & LPNB) | NCBI SNPdb Accession IDs |
|-----------------------|----------------|-----------------|-------------------------|---------------------------------|-----------------|--------------------------|
| SNP_P4_94657_19058111 | NC_021166.1    | Ca_kabuli_chr07 | 19058111                | AA                              | GG              | 1946886056               |
| SNP_P4_94658_19073947 | NC_021166.1    | Ca_kabuli_chr07 | 19073947                | CC                              | TT              | 1946886058               |
| SNP_P4_94659_19076107 | NC_021166.1    | Ca_kabuli_chr07 | 19076107                | CC                              | TT              | 1946886060               |
| SNP_P4_94661_19083950 | NC_021166.1    | Ca_kabuli_chr07 | 19083950                | GG                              | AA              | 1946886062               |
| SNP_P4_94662_19084287 | NC_021166.1    | Ca_kabuli_chr07 | 19084287                | AA                              | GG              | 1946886064               |
| SNP_P4_94663_19084306 | NC_021166.1    | Ca_kabuli_chr07 | 19084306                | TT                              | CC              | 1946886066               |
| SNP_P4_94664_19091963 | NC_021166.1    | Ca_kabuli_chr07 | 19091963                | TT                              | CC              | 1946886068               |
| SNP_P4_94666_19116980 | NC_021166.1    | Ca_kabuli_chr07 | 19116980                | GG                              | AA              | 1946886070               |
| SNP_P4_94667_19117043 | NC_021166.1    | Ca_kabuli_chr07 | 19117043                | TT                              | CC              | 1946886072               |
| SNP_P4_94668_19117082 | NC_021166.1    | Ca_kabuli_chr07 | 19117082                | CC                              | AA              | 1946886074               |
| SNP_P4_94669_19117123 | NC_021166.1    | Ca_kabuli_chr07 | 19117123                | TT                              | GG              | 1946886076               |
| SNP_P4_94670_19117173 | NC_021166.1    | Ca_kabuli_chr07 | 19117173                | AA                              | GG              | 1946886078               |
| SNP_P4_94671_19126760 | NC_021166.1    | Ca_kabuli_chr07 | 19126760                | CC                              | TT              | 1946886081               |
| SNP_P4_94672_19126833 | NC_021166.1    | Ca_kabuli_chr07 | 19126833                | TT                              | CC              | 1946886083               |
| SNP_P4_94674_19149854 | NC_021166.1    | Ca_kabuli_chr07 | 19149854                | TT                              | CC              | 1946886085               |
| SNP_P4_94675_19157390 | NC_021166.1    | Ca_kabuli_chr07 | 19157390                | GG                              | AA              | 1946886087               |
| SNP_P4_94676_19160537 | NC_021166.1    | Ca_kabuli_chr07 | 19160537                | TT                              | CC              | 1946886089               |
| SNP_P4_94678_19176986 | NC_021166.1    | Ca_kabuli_chr07 | 19176986                | AA                              | GG              | 1946886091               |
| SNP_P4_94679_19219614 | NC_021166.1    | Ca_kabuli_chr07 | 19219614                | CC                              | TT              | 1946886093               |
| SNP_P4_94680_19220529 | NC_021166.1    | Ca_kabuli_chr07 | 19220529                | CC                              | TT              | 1946886095               |
| SNP_P4_94683_19284372 | NC_021166.1    | Ca_kabuli_chr07 | 19284372                | GG                              | AA              | 1946886097               |
| SNP_P4_94684_19289322 | NC_021166.1    | Ca_kabuli_chr07 | 19289322                | GG                              | AA              | 1946886099               |
| SNP_P4_94685_19296559 | NC_021166.1    | Ca_kabuli_chr07 | 19296559                | CC                              | GG              | 1946886101               |
| SNP_P4_94686_19296571 | NC_021166.1    | Ca_kabuli_chr07 | 19296571                | GG                              | AA              | 1946886103               |
| SNP_P4_94687_19299823 | NC_021166.1    | Ca_kabuli_chr07 | 19299823                | AA                              | GG              | 1946886105               |
| SNP_P4_94688_19300639 | NC_021166.1    | Ca_kabuli_chr07 | 19300639                | AA                              | TT              | 1946886107               |
| SNP_P4_94689_19301865 | NC_021166.1    | Ca_kabuli_chr07 | 19301865                | GG                              | TT              | 1946886109               |
| SNP_P4_94691_19359983 | NC_021166.1    | Ca_kabuli_chr07 | 19359983                | TT                              | CC              | 1946886111               |
| SNP_P4_94692_19360192 | NC_021166.1    | Ca_kabuli_chr07 | 19360192                | AA                              | GG              | 1946886113               |
| SNP_P4_94693_19360215 | NC_021166.1    | Ca_kabuli_chr07 | 19360215                | TT                              | AA              | 1946886115               |
| SNP_P4_94694_19360226 | NC_021166.1    | Ca_kabuli_chr07 | 19360226                | CC                              | AA              | 1946886117               |
| SNP_P4_94695_19360291 | NC_021166.1    | Ca_kabuli_chr07 | 19360291                | AA                              | GG              | 1946886119               |
| SNP_P4_94696_19360296 | NC_021166.1    | Ca_kabuli_chr07 | 19360296                | GG                              | AA              | 1946886121               |
| SNP_P4_94697_19360339 | NC_021166.1    | Ca_kabuli_chr07 | 19360339                | AA                              | CC              | 1946886123               |
| SNP_P4_94698_19360519 | NC_021166.1    | Ca_kabuli_chr07 | 19360519                | AA                              | GG              | 1946886125               |
| SNP_P4_94699_19360608 | NC_021166.1    | Ca_kabuli_chr07 | 19360608                | TT                              | AA              | 1946886127               |
| SNP_P4_94700_19362434 | NC_021166.1    | Ca_kabuli_chr07 | 19362434                | AA                              | GG              | 1946886129               |
| SNP_P4_94701_19362444 | NC_021166.1    | Ca_kabuli_chr07 | 19362444                | TT                              | CC              | 1946886131               |
| SNP_P4_94702_19362457 | NC_021166.1    | Ca_kabuli_chr07 | 19362457                | AA                              | GG              | 1946886133               |
| SNP_P4_94703_19406086 | NC_021166.1    | Ca_kabuli_chr07 | 19406086                | TT                              | CC              | 1946886135               |
| SNP_P4_94704_19406089 | NC_021166.1    | Ca_kabuli_chr07 | 19406089                | TT                              | GG              | 1946886137               |
| SNP_P4_94705_19408645 | NC_021166.1    | Ca_kabuli_chr07 | 19408645                | GG                              | AA              | 1946886139               |

| SNPs IDs              | Chromosome IDs | Chromosomes     | Physical positions (bp) | CDC Frontier (Reference genome) | (ILWC46 & LPNB) | NCBI SNPdb Accession IDs |
|-----------------------|----------------|-----------------|-------------------------|---------------------------------|-----------------|--------------------------|
| SNP_P4_94706_19440575 | NC_021166.1    | Ca_kabuli_chr07 | 19440575                | CC                              | TT              | 1946886141               |
| SNP_P4_94708_19446948 | NC_021166.1    | Ca_kabuli_chr07 | 19446948                | GG                              | TT              | 1946886143               |
| SNP_P4_94709_19485826 | NC_021166.1    | Ca_kabuli_chr07 | 19485826                | AA                              | GG              | 1946886145               |
| SNP_P4_94710_19505591 | NC_021166.1    | Ca_kabuli_chr07 | 19505591                | CC                              | AA              | 1946886147               |
| SNP_P4_94711_19510905 | NC_021166.1    | Ca_kabuli_chr07 | 19510905                | AA                              | CC              | 1946886149               |
| SNP_P4_94712_19510961 | NC_021166.1    | Ca_kabuli_chr07 | 19510961                | AA                              | GG              | 1946886151               |
| SNP_P4_94713_19510966 | NC_021166.1    | Ca_kabuli_chr07 | 19510966                | TT                              | GG              | 1946886153               |
| SNP_P4_94714_19510980 | NC_021166.1    | Ca_kabuli_chr07 | 19510980                | TT                              | AA              | 1946886155               |
| SNP_P4_94715_19511327 | NC_021166.1    | Ca_kabuli_chr07 | 19511327                | TT                              | CC              | 1946886157               |
| SNP_P4_94716_19511334 | NC_021166.1    | Ca_kabuli_chr07 | 19511334                | AA                              | CC              | 1946886159               |
| SNP_P4_94717_19516713 | NC_021166.1    | Ca_kabuli_chr07 | 19516713                | GG                              | TT              | 1946886161               |
| SNP_P4_94718_19516961 | NC_021166.1    | Ca_kabuli_chr07 | 19516961                | AA                              | GG              | 1946886163               |
| SNP_P4_94719_19517004 | NC_021166.1    | Ca_kabuli_chr07 | 19517004                | GG                              | AA              | 1946886165               |
| SNP_P4_94720_19517031 | NC_021166.1    | Ca_kabuli_chr07 | 19517031                | TT                              | CC              | 1946886167               |
| SNP_P4_94721_19517105 | NC_021166.1    | Ca_kabuli_chr07 | 19517105                | CC                              | AA              | 1946886169               |
| SNP_P4_94722_19528928 | NC_021166.1    | Ca_kabuli_chr07 | 19528928                | AA                              | TT              | 1946886171               |
| SNP_P4_94723_19530217 | NC_021166.1    | Ca_kabuli_chr07 | 19530217                | AA                              | TT              | 1946886173               |
| SNP_P4_94725_19535591 | NC_021166.1    | Ca_kabuli_chr07 | 19535591                | TT                              | CC              | 1946886175               |
| SNP_P4_94726_19547548 | NC_021166.1    | Ca_kabuli_chr07 | 19547548                | CC                              | TT              | 1946886177               |
| SNP_P4_94727_19553948 | NC_021166.1    | Ca_kabuli_chr07 | 19553948                | GG                              | AA              | 1946886179               |
| SNP_P4_94730_19573264 | NC_021166.1    | Ca_kabuli_chr07 | 19573264                | TT                              | GG              | 1946886181               |
| SNP_P4_94731_19580860 | NC_021166.1    | Ca_kabuli_chr07 | 19580860                | AA                              | GG              | 1946886183               |
| SNP_P4_94733_19583079 | NC_021166.1    | Ca_kabuli_chr07 | 19583079                | GG                              | CC              | 1946886185               |
| SNP_P4_94734_19583917 | NC_021166.1    | Ca_kabuli_chr07 | 19583917                | TT                              | CC              | 1946886187               |
| SNP_P4_94735_19584564 | NC_021166.1    | Ca_kabuli_chr07 | 19584564                | CC                              | TT              | 1946886189               |
| SNP_P4_94736_19584566 | NC_021166.1    | Ca_kabuli_chr07 | 19584566                | CC                              | TT              | 1946886192               |
| SNP_P4_94737_19584595 | NC_021166.1    | Ca_kabuli_chr07 | 19584595                | TT                              | AA              | 1946886194               |
| SNP_P4_94738_19584596 | NC_021166.1    | Ca_kabuli_chr07 | 19584596                | TT                              | CC              | 1946886196               |
| SNP_P4_94739_19584613 | NC_021166.1    | Ca_kabuli_chr07 | 19584613                | AA                              | GG              | 1946886198               |
| SNP_P4_94740_19584619 | NC_021166.1    | Ca_kabuli_chr07 | 19584619                | AA                              | GG              | 1946886200               |
| SNP_P4_94741_19584623 | NC_021166.1    | Ca_kabuli_chr07 | 19584623                | AA                              | CC              | 1946886202               |
| SNP_P4_94742_19584628 | NC_021166.1    | Ca_kabuli_chr07 | 19584628                | AA                              | GG              | 1946886204               |
| SNP_P4_94743_19584632 | NC_021166.1    | Ca_kabuli_chr07 | 19584632                | TT                              | GG              | 1946886206               |
| SNP_P4_94744_19584633 | NC_021166.1    | Ca_kabuli_chr07 | 19584633                | AA                              | TT              | 1946886208               |
| SNP_P4_94745_19584679 | NC_021166.1    | Ca_kabuli_chr07 | 19584679                | AA                              | TT              | 1946886210               |
| SNP_P4_94746_19584680 | NC_021166.1    | Ca_kabuli_chr07 | 19584680                | GG                              | AA              | 1946886212               |
| SNP_P4_94747_19584726 | NC_021166.1    | Ca_kabuli_chr07 | 19584726                | AA                              | TT              | 1946886214               |
| SNP_P4_94748_19584747 | NC_021166.1    | Ca_kabuli_chr07 | 19584747                | AA                              | TT              | 1946886216               |
| SNP_P4_94749_19584767 | NC_021166.1    | Ca_kabuli_chr07 | 19584767                | CC                              | GG              | 1946886218               |
| SNP_P4_94750_19584768 | NC_021166.1    | Ca_kabuli_chr07 | 19584768                | CC                              | TT              | 1946886220               |
| SNP_P4_94751_19584774 | NC_021166.1    | Ca_kabuli_chr07 | 19584774                | GG                              | AA              | 1946886222               |
| SNP_P4_94752_19586397 | NC_021166.1    | Ca_kabuli_chr07 | 19586397                | AA                              | TT              | 1946886224               |

| SNPs IDs              | Chromosome IDs | Chromosomes     | Physical positions (bp) | CDC Frontier (Reference genome) | (ILWC46 & LPNB) | NCBI SNPdb Accession IDs |
|-----------------------|----------------|-----------------|-------------------------|---------------------------------|-----------------|--------------------------|
| SNP_P4_94753_19586432 | NC_021166.1    | Ca_kabuli_chr07 | 19586432                | CC                              | TT              | 1946886226               |
| SNP_P4_94757_19619016 | NC_021166.1    | Ca_kabuli_chr07 | 19619016                | GG                              | TT              | 1946886228               |
| SNP_P4_94758_19622474 | NC_021166.1    | Ca_kabuli_chr07 | 19622474                | GG                              | AA              | 1946886230               |
| SNP_P4_94759_19625491 | NC_021166.1    | Ca_kabuli_chr07 | 19625491                | TT                              | CC              | 1946886232               |
| SNP_P4_94760_19625691 | NC_021166.1    | Ca_kabuli_chr07 | 19625691                | TT                              | CC              | 1946886234               |
| SNP_P4_94761_19629058 | NC_021166.1    | Ca_kabuli_chr07 | 19629058                | GG                              | AA              | 1946886236               |
| SNP_P4_94762_19629119 | NC_021166.1    | Ca_kabuli_chr07 | 19629119                | AA                              | CC              | 1946886238               |
| SNP_P4_94763_19629507 | NC_021166.1    | Ca_kabuli_chr07 | 19629507                | AA                              | GG              | 1946886240               |
| SNP_P4_94764_19629514 | NC_021166.1    | Ca_kabuli_chr07 | 19629514                | TT                              | CC              | 1946886242               |
| SNP_P4_94765_19629519 | NC_021166.1    | Ca_kabuli_chr07 | 19629519                | CC                              | GG              | 1946886244               |
| SNP_P4_94766_19645923 | NC_021166.1    | Ca_kabuli_chr07 | 19645923                | TT                              | CC              | 1946886246               |
| SNP_P4_94767_19646854 | NC_021166.1    | Ca_kabuli_chr07 | 19646854                | TT                              | GG              | 1946886248               |
| SNP_P4_94768_19646955 | NC_021166.1    | Ca_kabuli_chr07 | 19646955                | TT                              | AA              | 1946886250               |
| SNP_P4_94769_19647299 | NC_021166.1    | Ca_kabuli_chr07 | 19647299                | GG                              | AA              | 1946886252               |
| SNP_P4_94770_19673042 | NC_021166.1    | Ca_kabuli_chr07 | 19673042                | CC                              | GG              | 1946886254               |
| SNP_P4_94771_19673232 | NC_021166.1    | Ca_kabuli_chr07 | 19673232                | GG                              | AA              | 1946886256               |
| SNP_P4_94772_19696220 | NC_021166.1    | Ca_kabuli_chr07 | 19696220                | GG                              | CC              | 1946886258               |
| SNP_P4_94773_19696221 | NC_021166.1    | Ca_kabuli_chr07 | 19696221                | AA                              | CC              | 1946886260               |
| SNP_P4_94774_19696235 | NC_021166.1    | Ca_kabuli_chr07 | 19696235                | CC                              | AA              | 1946886262               |
| SNP_P4_94775_19702869 | NC_021166.1    | Ca_kabuli_chr07 | 19702869                | AA                              | TT              | 1946886264               |
| SNP_P4_94776_19703397 | NC_021166.1    | Ca_kabuli_chr07 | 19703397                | CC                              | TT              | 1946886266               |
| SNP_P4_94777_19704841 | NC_021166.1    | Ca_kabuli_chr07 | 19704841                | CC                              | TT              | 1946886268               |
| SNP_P4_94779_19713216 | NC_021166.1    | Ca_kabuli_chr07 | 19713216                | TT                              | CC              | 1946886270               |
| SNP_P4_94782_19731801 | NC_021166.1    | Ca_kabuli_chr07 | 19731801                | CC                              | TT              | 1946886272               |
| SNP_P4_94783_19732025 | NC_021166.1    | Ca_kabuli_chr07 | 19732025                | GG                              | AA              | 1946886274               |
| SNP_P4_94784_19732045 | NC_021166.1    | Ca_kabuli_chr07 | 19732045                | CC                              | GG              | 1946886276               |
| SNP_P4_94785_19732089 | NC_021166.1    | Ca_kabuli_chr07 | 19732089                | TT                              | CC              | 1946886278               |
| SNP_P4_94786_19732117 | NC_021166.1    | Ca_kabuli_chr07 | 19732117                | TT                              | CC              | 1946886280               |
| SNP_P4_94787_19732168 | NC_021166.1    | Ca_kabuli_chr07 | 19732168                | GG                              | AA              | 1946886282               |
| SNP_P4_94788_19732182 | NC_021166.1    | Ca_kabuli_chr07 | 19732182                | CC                              | TT              | 1946886284               |
| SNP_P4_94789_19761229 | NC_021166.1    | Ca_kabuli_chr07 | 19761229                | TT                              | CC              | 1946886286               |
| SNP_P4_94790_19766454 | NC_021166.1    | Ca_kabuli_chr07 | 19766454                | AA                              | GG              | 1946886288               |
| SNP_P4_94791_19783191 | NC_021166.1    | Ca_kabuli_chr07 | 19783191                | GG                              | AA              | 1946886290               |
| SNP_P4_94792_19784982 | NC_021166.1    | Ca_kabuli_chr07 | 19784982                | CC                              | AA              | 1946886292               |
| SNP_P4_94793_19785008 | NC_021166.1    | Ca_kabuli_chr07 | 19785008                | CC                              | TT              | 1946886294               |
| SNP_P4_94794_19786156 | NC_021166.1    | Ca_kabuli_chr07 | 19786156                | GG                              | CC              | 1946886296               |
| SNP_P4_94796_19786413 | NC_021166.1    | Ca_kabuli_chr07 | 19786413                | AA                              | GG              | 1946886298               |
| SNP_P4_94798_19786603 | NC_021166.1    | Ca_kabuli_chr07 | 19786603                | CC                              | AA              | 1946886300               |
| SNP_P4_94799_19786609 | NC_021166.1    | Ca_kabuli_chr07 | 19786609                | AA                              | TT              | 1946886302               |
| SNP_P4_94800_19786645 | NC_021166.1    | Ca_kabuli_chr07 | 19786645                | CC                              | AA              | 1946886304               |
| SNP_P4_94801_19811962 | NC_021166.1    | Ca_kabuli_chr07 | 19811962                | TT                              | CC              | 1946886306               |
| SNP_P4_94802_19823137 | NC_021166.1    | Ca_kabuli_chr07 | 19823137                | TT                              | CC              | 1946886308               |

| SNPs IDs              | Chromosome IDs | Chromosomes     | Physical positions (bp) | CDC Frontier (Reference genome) | (ILWC46 & LPNB) | NCBI SNPdb Accession IDs |
|-----------------------|----------------|-----------------|-------------------------|---------------------------------|-----------------|--------------------------|
| SNP_P4_94803_19823250 | NC_021166.1    | Ca_kabuli_chr07 | 19823250                | TT                              | CC              | 1946886310               |
| SNP_P4_94804_19823562 | NC_021166.1    | Ca_kabuli_chr07 | 19823562                | GG                              | TT              | 1946886312               |
| SNP_P4_94805_19830253 | NC_021166.1    | Ca_kabuli_chr07 | 19830253                | AA                              | GG              | 1946886314               |
| SNP_P4_94806_19841799 | NC_021166.1    | Ca_kabuli_chr07 | 19841799                | TT                              | GG              | 1946886316               |
| SNP_P4_94807_19846931 | NC_021166.1    | Ca_kabuli_chr07 | 19846931                | TT                              | CC              | 1946886318               |
| SNP_P4_94808_19848478 | NC_021166.1    | Ca_kabuli_chr07 | 19848478                | CC                              | TT              | 1946886320               |
| SNP_P4_94812_19860604 | NC_021166.1    | Ca_kabuli_chr07 | 19860604                | TT                              | AA              | 1946886323               |
| SNP_P4_94813_19860614 | NC_021166.1    | Ca_kabuli_chr07 | 19860614                | CC                              | TT              | 1946886325               |
| SNP_P4_94814_19860852 | NC_021166.1    | Ca_kabuli_chr07 | 19860852                | TT                              | CC              | 1946886327               |
| SNP_P4_94815_19860885 | NC_021166.1    | Ca_kabuli_chr07 | 19860885                | CC                              | AA              | 1946886329               |
| SNP_P4_94817_19863690 | NC_021166.1    | Ca_kabuli_chr07 | 19863690                | TT                              | AA              | 1946886331               |
| SNP_P4_94818_19866891 | NC_021166.1    | Ca_kabuli_chr07 | 19866891                | TT                              | CC              | 1946886333               |
| SNP_P4_94819_19866966 | NC_021166.1    | Ca_kabuli_chr07 | 19866966                | AA                              | GG              | 1946886335               |
| SNP_P4_94820_19867239 | NC_021166.1    | Ca_kabuli_chr07 | 19867239                | GG                              | AA              | 1946886337               |
| SNP_P4_94821_19872606 | NC_021166.1    | Ca_kabuli_chr07 | 19872606                | TT                              | CC              | 1946886339               |
| SNP_P4_94822_19874240 | NC_021166.1    | Ca_kabuli_chr07 | 19874240                | GG                              | TT              | 1946886341               |
| SNP_P4_94823_19884182 | NC_021166.1    | Ca_kabuli_chr07 | 19884182                | CC                              | TT              | 1946886343               |
| SNP_P4_94824_19886031 | NC_021166.1    | Ca_kabuli_chr07 | 19886031                | AA                              | GG              | 1946886345               |
| SNP_P4_94825_19886275 | NC_021166.1    | Ca_kabuli_chr07 | 19886275                | AA                              | GG              | 1946886347               |
| SNP_P4_94826_19889509 | NC_021166.1    | Ca_kabuli_chr07 | 19889509                | CC                              | TT              | 1946886349               |
| SNP_P4_94827_19927901 | NC_021166.1    | Ca_kabuli_chr07 | 19927901                | AA                              | TT              | 1946886351               |
| SNP_P4_94828_19957318 | NC_021166.1    | Ca_kabuli_chr07 | 19957318                | GG                              | TT              | 1946886353               |
| SNP_P4_94829_19959346 | NC_021166.1    | Ca_kabuli_chr07 | 19959346                | AA                              | TT              | 1946886355               |
| SNP_P4_94830_19977319 | NC_021166.1    | Ca_kabuli_chr07 | 19977319                | AA                              | GG              | 1946886357               |
| SNP_P4_94831_19977357 | NC_021166.1    | Ca_kabuli_chr07 | 19977357                | TT                              | CC              | 1946886359               |
| SNP_P4_94832_19977516 | NC_021166.1    | Ca_kabuli_chr07 | 19977516                | AA                              | GG              | 1946886361               |
| SNP_P4_94833_19977803 | NC_021166.1    | Ca_kabuli_chr07 | 19977803                | AA                              | GG              | 1946886363               |
| SNP_P4_94835_19995031 | NC_021166.1    | Ca_kabuli_chr07 | 19995031                | GG                              | AA              | 1946886365               |
| SNP_P4_94836_20029044 | NC_021166.1    | Ca_kabuli_chr07 | 20029044                | AA                              | TT              | 1946886367               |
| SNP_P4_94837_20032644 | NC_021166.1    | Ca_kabuli_chr07 | 20032644                | CC                              | AA              | 1946886369               |
| SNP_P4_94838_20032645 | NC_021166.1    | Ca_kabuli_chr07 | 20032645                | TT                              | AA              | 1946886371               |
| SNP_P4_94841_20032703 | NC_021166.1    | Ca_kabuli_chr07 | 20032703                | TT                              | AA              | 1946886373               |
| SNP_P4_94842_20032827 | NC_021166.1    | Ca_kabuli_chr07 | 20032827                | TT                              | AA              | 1946886375               |
| SNP_P4_94843_20032934 | NC_021166.1    | Ca_kabuli_chr07 | 20032934                | TT                              | CC              | 1946886377               |
| SNP_P4_94844_20034968 | NC_021166.1    | Ca_kabuli_chr07 | 20034968                | CC                              | TT              | 1946886379               |
| SNP_P4_94845_20035522 | NC_021166.1    | Ca_kabuli_chr07 | 20035522                | AA                              | TT              | 1946886381               |
| SNP_P4_94846_20035540 | NC_021166.1    | Ca_kabuli_chr07 | 20035540                | GG                              | AA              | 1946886383               |
| SNP_P4_94847_20036653 | NC_021166.1    | Ca_kabuli_chr07 | 20036653                | GG                              | CC              | 1946886385               |
| SNP_P4_94848_20036858 | NC_021166.1    | Ca_kabuli_chr07 | 20036858                | GG                              | AA              | 1946886387               |
| SNP_P4_94851_20060126 | NC_021166.1    | Ca_kabuli_chr07 | 20060126                | AA                              | GG              | 1946886389               |
| SNP_P4_94852_20060186 | NC_021166.1    | Ca_kabuli_chr07 | 20060186                | CC                              | AA              | 1946886391               |
| SNP_P4_94853_20060227 | NC_021166.1    | Ca_kabuli_chr07 | 20060227                | CC                              | TT              | 1946886393               |

| SNPs IDs              | Chromosome IDs | Chromosomes     | Physical positions (bp) | CDC Frontier (Reference genome) | (ILWC46 & LPNB) | NCBI SNPdb Accession IDs |
|-----------------------|----------------|-----------------|-------------------------|---------------------------------|-----------------|--------------------------|
| SNP_P4_94854_20060431 | NC_021166.1    | Ca_kabuli_chr07 | 20060431                | AA                              | TT              | 1946886395               |
| SNP_P4_94855_20060484 | NC_021166.1    | Ca_kabuli_chr07 | 20060484                | GG                              | AA              | 1946886397               |
| SNP_P4_94856_20060526 | NC_021166.1    | Ca_kabuli_chr07 | 20060526                | CC                              | TT              | 1946886399               |
| SNP_P4_94857_20061081 | NC_021166.1    | Ca_kabuli_chr07 | 20061081                | TT                              | CC              | 1946886401               |
| SNP_P4_94858_20077992 | NC_021166.1    | Ca_kabuli_chr07 | 20077992                | GG                              | CC              | 1946886403               |
| SNP_P4_94859_20077996 | NC_021166.1    | Ca_kabuli_chr07 | 20077996                | AA                              | GG              | 1946886405               |
| SNP_P4_94860_20077997 | NC_021166.1    | Ca_kabuli_chr07 | 20077997                | TT                              | GG              | 1946886407               |
| SNP_P4_94861_20078378 | NC_021166.1    | Ca_kabuli_chr07 | 20078378                | TT                              | CC              | 1946886409               |
| SNP_P4_94862_20078442 | NC_021166.1    | Ca_kabuli_chr07 | 20078442                | GG                              | AA              | 1946886411               |
| SNP_P4_94863_20119198 | NC_021166.1    | Ca_kabuli_chr07 | 20119198                | AA                              | GG              | 1946886413               |
| SNP_P4_94864_20144141 | NC_021166.1    | Ca_kabuli_chr07 | 20144141                | GG                              | TT              | 1946886415               |
| SNP_P4_94865_20149743 | NC_021166.1    | Ca_kabuli_chr07 | 20149743                | AA                              | TT              | 1946886417               |
| SNP_P4_94866_20149744 | NC_021166.1    | Ca_kabuli_chr07 | 20149744                | TT                              | GG              | 1946886419               |
| SNP_P4_94869_20164007 | NC_021166.1    | Ca_kabuli_chr07 | 20164007                | TT                              | CC              | 1946886421               |
| SNP_P4_94870_20164010 | NC_021166.1    | Ca_kabuli_chr07 | 20164010                | AA                              | TT              | 1946886424               |
| SNP_P4_94872_20172194 | NC_021166.1    | Ca_kabuli_chr07 | 20172194                | TT                              | AA              | 1946886426               |
| SNP_P4_94873_20172199 | NC_021166.1    | Ca_kabuli_chr07 | 20172199                | TT                              | CC              | 1946886428               |
| SNP_P4_94874_20172527 | NC_021166.1    | Ca_kabuli_chr07 | 20172527                | AA                              | GG              | 1946886430               |
| SNP_P4_94875_20172548 | NC_021166.1    | Ca_kabuli_chr07 | 20172548                | CC                              | TT              | 1946886432               |
| SNP_P4_94876_20172574 | NC_021166.1    | Ca_kabuli_chr07 | 20172574                | TT                              | GG              | 1946886434               |
| SNP_P4_94877_20172583 | NC_021166.1    | Ca_kabuli_chr07 | 20172583                | AA                              | GG              | 1946886436               |
| SNP_P4_94878_20211778 | NC_021166.1    | Ca_kabuli_chr07 | 20211778                | CC                              | TT              | 1946886438               |
| SNP_P4_94879_20215954 | NC_021166.1    | Ca_kabuli_chr07 | 20215954                | TT                              | GG              | 1946886440               |
| SNP_P4_94880_20217423 | NC_021166.1    | Ca_kabuli_chr07 | 20217423                | AA                              | GG              | 1946886442               |
| SNP_P4_94881_20217434 | NC_021166.1    | Ca_kabuli_chr07 | 20217434                | TT                              | AA              | 1946886444               |
| SNP_P4_94882_20217532 | NC_021166.1    | Ca_kabuli_chr07 | 20217532                | CC                              | GG              | 1946886446               |
| SNP_P4_94883_20217636 | NC_021166.1    | Ca_kabuli_chr07 | 20217636                | TT                              | GG              | 1946886448               |
| SNP_P4_94884_20217654 | NC_021166.1    | Ca_kabuli_chr07 | 20217654                | AA                              | GG              | 1946886450               |
| SNP_P4_94885_20217901 | NC_021166.1    | Ca_kabuli_chr07 | 20217901                | TT                              | CC              | 1946886452               |
| SNP_P4_94886_20217919 | NC_021166.1    | Ca_kabuli_chr07 | 20217919                | AA                              | GG              | 1946886454               |
| SNP_P4_94887_20217931 | NC_021166.1    | Ca_kabuli_chr07 | 20217931                | TT                              | CC              | 1946886456               |
| SNP_P4_94888_20217966 | NC_021166.1    | Ca_kabuli_chr07 | 20217966                | TT                              | CC              | 1946886458               |
| SNP_P4_94889_20217972 | NC_021166.1    | Ca_kabuli_chr07 | 20217972                | CC                              | TT              | 1946886460               |
| SNP_P4_94890_20217980 | NC_021166.1    | Ca_kabuli_chr07 | 20217980                | TT                              | AA              | 1946886462               |
| SNP_P4_94891_20217994 | NC_021166.1    | Ca_kabuli_chr07 | 20217994                | TT                              | CC              | 1946886464               |
| SNP_P4_94892_20221313 | NC_021166.1    | Ca_kabuli_chr07 | 20221313                | GG                              | AA              | 1946886466               |
| SNP_P4_94893_20225429 | NC_021166.1    | Ca_kabuli_chr07 | 20225429                | CC                              | AA              | 1946886468               |
| SNP_P4_94894_20225430 | NC_021166.1    | Ca_kabuli_chr07 | 20225430                | TT                              | CC              | 1946886470               |
| SNP_P4_94895_20251949 | NC_021166.1    | Ca_kabuli_chr07 | 20251949                | AA                              | GG              | 1946886472               |
| SNP_P4_94896_20251950 | NC_021166.1    | Ca_kabuli_chr07 | 20251950                | TT                              | GG              | 1946886473               |
| SNP_P4_94897_20251960 | NC_021166.1    | Ca_kabuli_chr07 | 20251960                | GG                              | AA              | 1946886475               |
| SNP_P4_94898_20251970 | NC_021166.1    | Ca_kabuli_chr07 | 20251970                | GG                              | AA              | 1946886478               |

| SNPs IDs              | Chromosome IDs | Chromosomes     | Physical positions (bp) | CDC Frontier (Reference genome) | (ILWC46 & LPNB) | NCBI SNPdb Accession IDs |
|-----------------------|----------------|-----------------|-------------------------|---------------------------------|-----------------|--------------------------|
| SNP_P4_94899_20251982 | NC_021166.1    | Ca_kabuli_chr07 | 20251982                | TT                              | AA              | 1946886480               |
| SNP_P4_94900_20252334 | NC_021166.1    | Ca_kabuli_chr07 | 20252334                | TT                              | AA              | 1946886482               |
| SNP_P4_94901_20252340 | NC_021166.1    | Ca_kabuli_chr07 | 20252340                | GG                              | AA              | 1946886484               |
| SNP_P4_94902_20252376 | NC_021166.1    | Ca_kabuli_chr07 | 20252376                | GG                              | AA              | 1946886486               |
| SNP_P4_94903_20252392 | NC_021166.1    | Ca_kabuli_chr07 | 20252392                | TT                              | CC              | 1946886488               |
| SNP_P4_94905_20252613 | NC_021166.1    | Ca_kabuli_chr07 | 20252613                | AA                              | GG              | 1946886490               |
| SNP_P4_94906_20252782 | NC_021166.1    | Ca_kabuli_chr07 | 20252782                | AA                              | GG              | 1946886492               |
| SNP_P4_94908_20331829 | NC_021166.1    | Ca_kabuli_chr07 | 20331829                | CC                              | AA              | 1946886494               |
| SNP_P4_94909_20332085 | NC_021166.1    | Ca_kabuli_chr07 | 20332085                | TT                              | CC              | 1946886496               |
| SNP_P4_94912_20358954 | NC_021166.1    | Ca_kabuli_chr07 | 20358954                | TT                              | CC              | 1946886498               |
| SNP_P4_94913_20363219 | NC_021166.1    | Ca_kabuli_chr07 | 20363219                | GG                              | AA              | 1946886500               |
| SNP_P4_94914_20369857 | NC_021166.1    | Ca_kabuli_chr07 | 20369857                | CC                              | TT              | 1946886502               |
| SNP_P4_94915_20371532 | NC_021166.1    | Ca_kabuli_chr07 | 20371532                | CC                              | AA              | 1946886505               |
| SNP_P4_94916_20387544 | NC_021166.1    | Ca_kabuli_chr07 | 20387544                | TT                              | GG              | 1946886507               |
| SNP_P4_94917_20390273 | NC_021166.1    | Ca_kabuli_chr07 | 20390273                | TT                              | CC              | 1946886509               |
| SNP_P4_94918_20390284 | NC_021166.1    | Ca_kabuli_chr07 | 20390284                | CC                              | TT              | 1946886511               |
| SNP_P4_94919_20406078 | NC_021166.1    | Ca_kabuli_chr07 | 20406078                | AA                              | CC              | 1946886513               |
| SNP_P4_94920_20419103 | NC_021166.1    | Ca_kabuli_chr07 | 20419103                | CC                              | TT              | 1946886515               |
| SNP_P4_94921_20422960 | NC_021166.1    | Ca_kabuli_chr07 | 20422960                | CC                              | AA              | 1946886518               |
| SNP_P4_94922_20434892 | NC_021166.1    | Ca_kabuli_chr07 | 20434892                | GG                              | AA              | 1946886520               |
| SNP_P4_94923_20435694 | NC_021166.1    | Ca_kabuli_chr07 | 20435694                | GG                              | AA              | 1946886522               |
| SNP_P4_94924_20443388 | NC_021166.1    | Ca_kabuli_chr07 | 20443388                | TT                              | CC              | 1946886524               |
| SNP_P4_94925_20443420 | NC_021166.1    | Ca_kabuli_chr07 | 20443420                | CC                              | GG              | 1946886526               |
| SNP_P4_94926_20449853 | NC_021166.1    | Ca_kabuli_chr07 | 20449853                | GG                              | TT              | 1946886528               |
| SNP_P4_94927_20450020 | NC_021166.1    | Ca_kabuli_chr07 | 20450020                | GG                              | AA              | 1946886530               |
| SNP_P4_94928_20450245 | NC_021166.1    | Ca_kabuli_chr07 | 20450245                | GG                              | AA              | 1946886532               |
| SNP_P4_94929_20450248 | NC_021166.1    | Ca_kabuli_chr07 | 20450248                | GG                              | AA              | 1946886534               |
| SNP_P4_94930_20450586 | NC_021166.1    | Ca_kabuli_chr07 | 20450586                | TT                              | AA              | 1946886536               |
| SNP_P4_94931_20450908 | NC_021166.1    | Ca_kabuli_chr07 | 20450908                | AA                              | GG              | 1946886538               |
| SNP_P4_94932_20455488 | NC_021166.1    | Ca_kabuli_chr07 | 20455488                | AA                              | GG              | 1946886540               |
| SNP_P4_94933_20455494 | NC_021166.1    | Ca_kabuli_chr07 | 20455494                | GG                              | AA              | 1946886542               |
| SNP_P4_94934_20456736 | NC_021166.1    | Ca_kabuli_chr07 | 20456736                | CC                              | TT              | 1946886544               |
| SNP_P4_94935_20456850 | NC_021166.1    | Ca_kabuli_chr07 | 20456850                | CC                              | GG              | 1946886546               |
| SNP_P4_94936_20457397 | NC_021166.1    | Ca_kabuli_chr07 | 20457397                | GG                              | AA              | 1946886548               |
| SNP_P4_94937_20457563 | NC_021166.1    | Ca_kabuli_chr07 | 20457563                | AA                              | TT              | 1946886550               |
| SNP_P4_94938_20458155 | NC_021166.1    | Ca_kabuli_chr07 | 20458155                | TT                              | CC              | 1946886552               |
| SNP_P4_94939_20463232 | NC_021166.1    | Ca_kabuli_chr07 | 20463232                | TT                              | AA              | 1946886554               |
| SNP_P4_94940_20463294 | NC_021166.1    | Ca_kabuli_chr07 | 20463294                | CC                              | TT              | 1946886556               |
| SNP_P4_94941_20463398 | NC_021166.1    | Ca_kabuli_chr07 | 20463398                | AA                              | GG              | 1946886558               |
| SNP_P4_94942_20463456 | NC_021166.1    | Ca_kabuli_chr07 | 20463456                | TT                              | GG              | 1946886560               |
| SNP_P4_94943_20463608 | NC_021166.1    | Ca_kabuli_chr07 | 20463608                | CC                              | GG              | 1946886562               |
| SNP_P4_94944_20463806 | NC_021166.1    | Ca_kabuli_chr07 | 20463806                | CC                              | GG              | 1946886564               |

| SNPs IDs              | Chromosome IDs | Chromosomes     | Physical positions (bp) | CDC Frontier (Reference genome) | (ILWC46 & LPNB) | NCBI SNPdb Accession IDs |
|-----------------------|----------------|-----------------|-------------------------|---------------------------------|-----------------|--------------------------|
| SNP_P4_94945_20463810 | NC_021166.1    | Ca_kabuli_chr07 | 20463810                | CC                              | TT              | 1946886566               |
| SNP_P4_94946_20463874 | NC_021166.1    | Ca_kabuli_chr07 | 20463874                | CC                              | TT              | 1946886568               |
| SNP_P4_94947_20464013 | NC_021166.1    | Ca_kabuli_chr07 | 20464013                | GG                              | AA              | 1946886570               |
| SNP_P4_94948_20464228 | NC_021166.1    | Ca_kabuli_chr07 | 20464228                | AA                              | TT              | 1946886572               |
| SNP_P4_94949_20474985 | NC_021166.1    | Ca_kabuli_chr07 | 20474985                | TT                              | CC              | 1946886574               |
| SNP_P4_94950_20475305 | NC_021166.1    | Ca_kabuli_chr07 | 20475305                | TT                              | CC              | 1946886576               |
| SNP_P4_94951_20475319 | NC_021166.1    | Ca_kabuli_chr07 | 20475319                | AA                              | GG              | 1946886578               |
| SNP_P4_94952_20475361 | NC_021166.1    | Ca_kabuli_chr07 | 20475361                | GG                              | CC              | 1946886580               |
| SNP_P4_94953_20475383 | NC_021166.1    | Ca_kabuli_chr07 | 20475383                | AA                              | CC              | 1946886582               |
| SNP_P4_94954_20475442 | NC_021166.1    | Ca_kabuli_chr07 | 20475442                | AA                              | CC              | 1946886584               |
| SNP_P4_94955_20475529 | NC_021166.1    | Ca_kabuli_chr07 | 20475529                | CC                              | AA              | 1946886586               |
| SNP_P4_94956_20476776 | NC_021166.1    | Ca_kabuli_chr07 | 20476776                | TT                              | CC              | 1946886588               |
| SNP_P4_94957_20476952 | NC_021166.1    | Ca_kabuli_chr07 | 20476952                | GG                              | AA              | 1946886590               |
| SNP_P4_94958_20480450 | NC_021166.1    | Ca_kabuli_chr07 | 20480450                | GG                              | CC              | 1946886592               |
| SNP_P4_94959_20480473 | NC_021166.1    | Ca_kabuli_chr07 | 20480473                | AA                              | TT              | 1946886594               |
| SNP_P4_94960_20480594 | NC_021166.1    | Ca_kabuli_chr07 | 20480594                | AA                              | CC              | 1946886596               |
| SNP_P4_94961_20480621 | NC_021166.1    | Ca_kabuli_chr07 | 20480621                | AA                              | GG              | 1946886598               |
| SNP_P4_94962_20480664 | NC_021166.1    | Ca_kabuli_chr07 | 20480664                | GG                              | AA              | 1946886600               |
| SNP_P4_94963_20480689 | NC_021166.1    | Ca_kabuli_chr07 | 20480689                | TT                              | CC              | 1946886602               |
| SNP_P4_94964_20480800 | NC_021166.1    | Ca_kabuli_chr07 | 20480800                | CC                              | TT              | 1946886604               |
| SNP_P4_94965_20480804 | NC_021166.1    | Ca_kabuli_chr07 | 20480804                | AA                              | TT              | 1946886606               |
| SNP_P4_94966_20480901 | NC_021166.1    | Ca_kabuli_chr07 | 20480901                | GG                              | AA              | 1946886608               |
| SNP_P4_94967_20480989 | NC_021166.1    | Ca_kabuli_chr07 | 20480989                | AA                              | CC              | 1946886610               |
| SNP_P4_94968_20481891 | NC_021166.1    | Ca_kabuli_chr07 | 20481891                | AA                              | GG              | 1946886612               |
| SNP_P4_94969_20482201 | NC_021166.1    | Ca_kabuli_chr07 | 20482201                | TT                              | CC              | 1946886614               |
| SNP_P4_94970_20482203 | NC_021166.1    | Ca_kabuli_chr07 | 20482203                | CC                              | TT              | 1946886616               |
| SNP_P4_94971_20482213 | NC_021166.1    | Ca_kabuli_chr07 | 20482213                | AA                              | TT              | 1946886618               |
| SNP_P4_94972_20482229 | NC_021166.1    | Ca_kabuli_chr07 | 20482229                | CC                              | TT              | 1946886620               |
| SNP_P4_94973_20482261 | NC_021166.1    | Ca_kabuli_chr07 | 20482261                | GG                              | AA              | 1946886622               |
| SNP_P4_94974_20482660 | NC_021166.1    | Ca_kabuli_chr07 | 20482660                | TT                              | AA              | 1946886624               |
| SNP_P4_94975_20484983 | NC_021166.1    | Ca_kabuli_chr07 | 20484983                | AA                              | GG              | 1946886626               |
| SNP_P4_94976_20485171 | NC_021166.1    | Ca_kabuli_chr07 | 20485171                | GG                              | TT              | 1946886628               |
| SNP_P4_94978_20485824 | NC_021166.1    | Ca_kabuli_chr07 | 20485824                | CC                              | TT              | 1946886630               |
| SNP_P4_94979_20485957 | NC_021166.1    | Ca_kabuli_chr07 | 20485957                | TT                              | CC              | 1946886632               |
| SNP_P4_94981_20489152 | NC_021166.1    | Ca_kabuli_chr07 | 20489152                | CC                              | TT              | 1946886634               |
| SNP_P4_94982_20490775 | NC_021166.1    | Ca_kabuli_chr07 | 20490775                | TT                              | CC              | 1946886636               |
| SNP_P4_94983_20493285 | NC_021166.1    | Ca_kabuli_chr07 | 20493285                | CC                              | TT              | 1946886638               |
| SNP_P4_94985_20494391 | NC_021166.1    | Ca_kabuli_chr07 | 20494391                | GG                              | AA              | 1946886640               |
| SNP_P4_94986_20494410 | NC_021166.1    | Ca_kabuli_chr07 | 20494410                | CC                              | TT              | 1946886642               |
| SNP_P4_94987_20495376 | NC_021166.1    | Ca_kabuli_chr07 | 20495376                | CC                              | TT              | 1946886644               |
| SNP_P4_94988_20496378 | NC_021166.1    | Ca_kabuli_chr07 | 20496378                | AA                              | GG              | 1946886646               |
| SNP_P4_94989_20496513 | NC_021166.1    | Ca_kabuli_chr07 | 20496513                | AA                              | GG              | 1946886648               |



| SNPs IDs              | Chromosome IDs | Chromosomes     | Physical positions (bp) | CDC Frontier (Reference genome) | (ILWC46 & LPNB) | NCBI SNPdb Accession IDs |
|-----------------------|----------------|-----------------|-------------------------|---------------------------------|-----------------|--------------------------|
| SNP_P4_94990_20497039 | NC_021166.1    | Ca_kabuli_chr07 | 20497039                | AA                              | CC              | 1946886650               |
| SNP_P4_94991_20497126 | NC_021166.1    | Ca_kabuli_chr07 | 20497126                | TT                              | AA              | 1946886652               |
| SNP_P4_94992_20498552 | NC_021166.1    | Ca_kabuli_chr07 | 20498552                | CC                              | TT              | 1946886654               |
| SNP_P4_94993_20498855 | NC_021166.1    | Ca_kabuli_chr07 | 20498855                | CC                              | AA              | 1946886656               |
| SNP_P4_94996_20500138 | NC_021166.1    | Ca_kabuli_chr07 | 20500138                | AA                              | GG              | 1946886658               |
| SNP_P4_94997_20501378 | NC_021166.1    | Ca_kabuli_chr07 | 20501378                | AA                              | TT              | 1946886660               |
| SNP_P4_94998_20501379 | NC_021166.1    | Ca_kabuli_chr07 | 20501379                | TT                              | AA              | 1946886662               |
| SNP_P4_94999_20501697 | NC_021166.1    | Ca_kabuli_chr07 | 20501697                | TT                              | CC              | 1946886664               |
| SNP_P4_95000_20501729 | NC_021166.1    | Ca_kabuli_chr07 | 20501729                | TT                              | CC              | 1946886666               |
| SNP_P4_95002_20502331 | NC_021166.1    | Ca_kabuli_chr07 | 20502331                | TT                              | CC              | 1946886668               |
| SNP_P4_95004_20503340 | NC_021166.1    | Ca_kabuli_chr07 | 20503340                | CC                              | AA              | 1946886670               |
| SNP_P4_95005_20503371 | NC_021166.1    | Ca_kabuli_chr07 | 20503371                | CC                              | AA              | 1946886672               |
| SNP_P4_95006_20503753 | NC_021166.1    | Ca_kabuli_chr07 | 20503753                | CC                              | GG              | 1946886674               |
| SNP_P4_95009_20505874 | NC_021166.1    | Ca_kabuli_chr07 | 20505874                | AA                              | GG              | 1946886676               |
| SNP_P4_95012_20506171 | NC_021166.1    | Ca_kabuli_chr07 | 20506171                | AA                              | CC              | 1946886678               |
| SNP_P4_95013_20506286 | NC_021166.1    | Ca_kabuli_chr07 | 20506286                | CC                              | TT              | 1946886680               |
| SNP_P4_95014_20506353 | NC_021166.1    | Ca_kabuli_chr07 | 20506353                | CC                              | TT              | 1946886682               |
| SNP_P4_95015_20508004 | NC_021166.1    | Ca_kabuli_chr07 | 20508004                | AA                              | GG              | 1946886684               |
| SNP_P4_95017_20509143 | NC_021166.1    | Ca_kabuli_chr07 | 20509143                | GG                              | CC              | 1946886686               |
| SNP_P4_95018_20509156 | NC_021166.1    | Ca_kabuli_chr07 | 20509156                | GG                              | AA              | 1946886688               |
| SNP_P4_95019_20510195 | NC_021166.1    | Ca_kabuli_chr07 | 20510195                | AA                              | CC              | 1946886691               |
| SNP_P4_95023_20514426 | NC_021166.1    | Ca_kabuli_chr07 | 20514426                | CC                              | TT              | 1946886693               |
| SNP_P4_95024_20514660 | NC_021166.1    | Ca_kabuli_chr07 | 20514660                | AA                              | TT              | 1946886695               |
| SNP_P4_95025_20517119 | NC_021166.1    | Ca_kabuli_chr07 | 20517119                | TT                              | CC              | 1946886697               |
| SNP_P4_95026_20518523 | NC_021166.1    | Ca_kabuli_chr07 | 20518523                | TT                              | CC              | 1946886699               |
| SNP_P4_95027_20519691 | NC_021166.1    | Ca_kabuli_chr07 | 20519691                | AA                              | GG              | 1946886701               |
| SNP_P4_95028_20519733 | NC_021166.1    | Ca_kabuli_chr07 | 20519733                | AA                              | GG              | 1946886703               |
| SNP_P4_95030_20520151 | NC_021166.1    | Ca_kabuli_chr07 | 20520151                | TT                              | CC              | 1946886705               |
| SNP_P4_95031_20520432 | NC_021166.1    | Ca_kabuli_chr07 | 20520432                | AA                              | GG              | 1946886707               |
| SNP_P4_95032_20523797 | NC_021166.1    | Ca_kabuli_chr07 | 20523797                | TT                              | CC              | 1946886709               |
| SNP_P4_95033_20524920 | NC_021166.1    | Ca_kabuli_chr07 | 20524920                | AA                              | GG              | 1946886711               |
| SNP_P4_95035_20529180 | NC_021166.1    | Ca_kabuli_chr07 | 20529180                | CC                              | AA              | 1946886713               |
| SNP_P4_95037_20533938 | NC_021166.1    | Ca_kabuli_chr07 | 20533938                | GG                              | CC              | 1946886715               |
| SNP_P4_95038_20534300 | NC_021166.1    | Ca_kabuli_chr07 | 20534300                | CC                              | TT              | 1946886718               |
| SNP_P4_95039_20534365 | NC_021166.1    | Ca_kabuli_chr07 | 20534365                | TT                              | CC              | 1946886720               |
| SNP_P4_95040_20534371 | NC_021166.1    | Ca_kabuli_chr07 | 20534371                | CC                              | TT              | 1946886722               |
| SNP_P4_95041_20534868 | NC_021166.1    | Ca_kabuli_chr07 | 20534868                | CC                              | TT              | 1946886724               |
| SNP_P4_95042_20536283 | NC_021166.1    | Ca_kabuli_chr07 | 20536283                | CC                              | TT              | 1946886726               |
| SNP_P4_95043_20536317 | NC_021166.1    | Ca_kabuli_chr07 | 20536317                | TT                              | CC              | 1946886728               |
| SNP_P4_95044_20536318 | NC_021166.1    | Ca_kabuli_chr07 | 20536318                | GG                              | AA              | 1946886730               |
| SNP_P4_95045_20536606 | NC_021166.1    | Ca_kabuli_chr07 | 20536606                | CC                              | TT              | 1946886733               |
| SNP_P4_95046_20536621 | NC_021166.1    | Ca_kabuli_chr07 | 20536621                | TT                              | CC              | 1946886735               |

| SNPs IDs              | Chromosome IDs | Chromosomes     | Physical positions (bp) | CDC Frontier (Reference genome) | (ILWC46 & LPNB) | NCBI SNPdb Accession IDs |
|-----------------------|----------------|-----------------|-------------------------|---------------------------------|-----------------|--------------------------|
| SNP_P4_95048_20538938 | NC_021166.1    | Ca_kabuli_chr07 | 20538938                | AA                              | GG              | 1946886737               |
| SNP_P4_95049_20539290 | NC_021166.1    | Ca_kabuli_chr07 | 20539290                | TT                              | CC              | 1946886739               |
| SNP_P4_95050_20539373 | NC_021166.1    | Ca_kabuli_chr07 | 20539373                | AA                              | GG              | 1946886741               |
| SNP_P4_95052_20540111 | NC_021166.1    | Ca_kabuli_chr07 | 20540111                | AA                              | GG              | 1946886743               |
| SNP_P4_95053_20540570 | NC_021166.1    | Ca_kabuli_chr07 | 20540570                | AA                              | TT              | 1946886745               |
| SNP_P4_95054_20540780 | NC_021166.1    | Ca_kabuli_chr07 | 20540780                | CC                              | TT              | 1946886747               |
| SNP_P4_95055_20544403 | NC_021166.1    | Ca_kabuli_chr07 | 20544403                | GG                              | AA              | 1946886749               |
| SNP_P4_95056_20544515 | NC_021166.1    | Ca_kabuli_chr07 | 20544515                | AA                              | GG              | 1946886751               |
| SNP_P4_95057_20544707 | NC_021166.1    | Ca_kabuli_chr07 | 20544707                | AA                              | TT              | 1946886753               |
| SNP_P4_95058_20544711 | NC_021166.1    | Ca_kabuli_chr07 | 20544711                | AA                              | GG              | 1946886755               |
| SNP_P4_95059_20545373 | NC_021166.1    | Ca_kabuli_chr07 | 20545373                | TT                              | GG              | 1946886757               |
| SNP_P4_95060_20545520 | NC_021166.1    | Ca_kabuli_chr07 | 20545520                | GG                              | AA              | 1946886759               |
| SNP_P4_95061_20545541 | NC_021166.1    | Ca_kabuli_chr07 | 20545541                | AA                              | TT              | 1946886761               |
| SNP_P4_95062_20548010 | NC_021166.1    | Ca_kabuli_chr07 | 20548010                | GG                              | AA              | 1946886763               |
| SNP_P4_95063_20548023 | NC_021166.1    | Ca_kabuli_chr07 | 20548023                | TT                              | GG              | 1946886765               |
| SNP_P4_95064_20548029 | NC_021166.1    | Ca_kabuli_chr07 | 20548029                | CC                              | TT              | 1946886767               |
| SNP_P4_95065_20548083 | NC_021166.1    | Ca_kabuli_chr07 | 20548083                | CC                              | TT              | 1946886769               |
| SNP_P4_95066_20553483 | NC_021166.1    | Ca_kabuli_chr07 | 20553483                | TT                              | CC              | 1946886771               |
| SNP_P4_95067_20553503 | NC_021166.1    | Ca_kabuli_chr07 | 20553503                | CC                              | TT              | 1946886773               |
| SNP_P4_95068_20553528 | NC_021166.1    | Ca_kabuli_chr07 | 20553528                | AA                              | GG              | 1946886775               |
| SNP_P4_95070_20554376 | NC_021166.1    | Ca_kabuli_chr07 | 20554376                | TT                              | GG              | 1946886777               |
| SNP_P4_95071_20555988 | NC_021166.1    | Ca_kabuli_chr07 | 20555988                | CC                              | TT              | 1946886779               |
| SNP_P4_95072_20557032 | NC_021166.1    | Ca_kabuli_chr07 | 20557032                | TT                              | CC              | 1946886781               |
| SNP_P4_95074_20557295 | NC_021166.1    | Ca_kabuli_chr07 | 20557295                | GG                              | AA              | 1946886782               |
| SNP_P4_95075_20557324 | NC_021166.1    | Ca_kabuli_chr07 | 20557324                | GG                              | TT              | 1946886784               |
| SNP_P4_95076_20557365 | NC_021166.1    | Ca_kabuli_chr07 | 20557365                | CC                              | AA              | 1946886786               |
| SNP_P4_95078_20558696 | NC_021166.1    | Ca_kabuli_chr07 | 20558696                | TT                              | GG              | 1946886788               |
| SNP_P4_95079_20558700 | NC_021166.1    | Ca_kabuli_chr07 | 20558700                | TT                              | CC              | 1946886790               |
| SNP_P4_95080_20558745 | NC_021166.1    | Ca_kabuli_chr07 | 20558745                | TT                              | CC              | 1946886792               |
| SNP_P4_95083_20558972 | NC_021166.1    | Ca_kabuli_chr07 | 20558972                | TT                              | GG              | 1946886794               |
| SNP_P4_95084_20559506 | NC_021166.1    | Ca_kabuli_chr07 | 20559506                | GG                              | TT              | 1946886796               |
| SNP_P4_95085_20559652 | NC_021166.1    | Ca_kabuli_chr07 | 20559652                | GG                              | TT              | 1946886798               |
| SNP_P4_95087_20559706 | NC_021166.1    | Ca_kabuli_chr07 | 20559706                | TT                              | CC              | 1946886800               |
| SNP_P4_95088_20559775 | NC_021166.1    | Ca_kabuli_chr07 | 20559775                | TT                              | AA              | 1946886802               |
| SNP_P4_95089_20559813 | NC_021166.1    | Ca_kabuli_chr07 | 20559813                | AA                              | CC              | 1946886804               |
| SNP_P4_95090_20559846 | NC_021166.1    | Ca_kabuli_chr07 | 20559846                | TT                              | CC              | 1946886806               |
| SNP_P4_95091_20559886 | NC_021166.1    | Ca_kabuli_chr07 | 20559886                | GG                              | AA              | 1946886807               |
| SNP_P4_95092_20559935 | NC_021166.1    | Ca_kabuli_chr07 | 20559935                | GG                              | TT              | 1946886809               |
| SNP_P4_95093_20559943 | NC_021166.1    | Ca_kabuli_chr07 | 20559943                | CC                              | TT              | 1946886811               |
| SNP_P4_95094_20559950 | NC_021166.1    | Ca_kabuli_chr07 | 20559950                | TT                              | AA              | 1946886813               |
| SNP_P4_95095_20560385 | NC_021166.1    | Ca_kabuli_chr07 | 20560385                | CC                              | AA              | 1946886815               |
| SNP_P4_95096_20560418 | NC_021166.1    | Ca_kabuli_chr07 | 20560418                | GG                              | AA              | 1946886817               |

| SNPs IDs              | Chromosome IDs | Chromosomes     | Physical positions (bp) | CDC Frontier (Reference genome) | (ILWC46 & LPNB) | NCBI SNPdb Accession IDs |
|-----------------------|----------------|-----------------|-------------------------|---------------------------------|-----------------|--------------------------|
| SNP_P4_95097_20560437 | NC_021166.1    | Ca_kabuli_chr07 | 20560437                | CC                              | TT              | 1946886819               |
| SNP_P4_95098_20560439 | NC_021166.1    | Ca_kabuli_chr07 | 20560439                | TT                              | AA              | 1946886821               |
| SNP_P4_95099_20560448 | NC_021166.1    | Ca_kabuli_chr07 | 20560448                | AA                              | CC              | 1946886823               |
| SNP_P4_95100_20560457 | NC_021166.1    | Ca_kabuli_chr07 | 20560457                | GG                              | AA              | 1946886825               |
| SNP_P4_95101_20561128 | NC_021166.1    | Ca_kabuli_chr07 | 20561128                | AA                              | GG              | 1946886827               |
| SNP_P4_95102_20561145 | NC_021166.1    | Ca_kabuli_chr07 | 20561145                | GG                              | AA              | 1946886829               |
| SNP_P4_95104_20563982 | NC_021166.1    | Ca_kabuli_chr07 | 20563982                | GG                              | AA              | 1946886831               |
| SNP_P4_95105_20564024 | NC_021166.1    | Ca_kabuli_chr07 | 20564024                | GG                              | AA              | 1946886833               |
| SNP_P4_95106_20564266 | NC_021166.1    | Ca_kabuli_chr07 | 20564266                | GG                              | AA              | 1946886835               |
| SNP_P4_95107_20564269 | NC_021166.1    | Ca_kabuli_chr07 | 20564269                | CC                              | TT              | 1946886837               |
| SNP_P4_95108_20564297 | NC_021166.1    | Ca_kabuli_chr07 | 20564297                | AA                              | GG              | 1946886839               |
| SNP_P4_95109_20564968 | NC_021166.1    | Ca_kabuli_chr07 | 20564968                | GG                              | CC              | 1946886841               |
| SNP_P4_95110_20565999 | NC_021166.1    | Ca_kabuli_chr07 | 20565999                | AA                              | GG              | 1946886843               |
| SNP_P4_95111_20566033 | NC_021166.1    | Ca_kabuli_chr07 | 20566033                | GG                              | CC              | 1946886845               |
| SNP_P4_95112_20566034 | NC_021166.1    | Ca_kabuli_chr07 | 20566034                | AA                              | TT              | 1946886847               |
| SNP_P4_95116_20566434 | NC_021166.1    | Ca_kabuli_chr07 | 20566434                | TT                              | CC              | 1946886849               |
| SNP_P4_95117_20566435 | NC_021166.1    | Ca_kabuli_chr07 | 20566435                | TT                              | CC              | 1946886851               |
| SNP_P4_95118_20566441 | NC_021166.1    | Ca_kabuli_chr07 | 20566441                | TT                              | AA              | 1946886853               |
| SNP_P4_95119_20566484 | NC_021166.1    | Ca_kabuli_chr07 | 20566484                | GG                              | AA              | 1946886855               |
| SNP_P4_95123_20567034 | NC_021166.1    | Ca_kabuli_chr07 | 20567034                | GG                              | TT              | 1946886857               |
| SNP_P4_95124_20567053 | NC_021166.1    | Ca_kabuli_chr07 | 20567053                | CC                              | TT              | 1946886859               |
| SNP_P4_95125_20567091 | NC_021166.1    | Ca_kabuli_chr07 | 20567091                | AA                              | TT              | 1946886861               |
| SNP_P4_95126_20567536 | NC_021166.1    | Ca_kabuli_chr07 | 20567536                | TT                              | CC              | 1946886863               |
| SNP_P4_95127_20571077 | NC_021166.1    | Ca_kabuli_chr07 | 20571077                | AA                              | TT              | 1946886865               |
| SNP_P4_95130_20573916 | NC_021166.1    | Ca_kabuli_chr07 | 20573916                | GG                              | TT              | 1946886867               |
| SNP_P4_95131_20574691 | NC_021166.1    | Ca_kabuli_chr07 | 20574691                | GG                              | TT              | 1946886869               |
| SNP_P4_95133_20575014 | NC_021166.1    | Ca_kabuli_chr07 | 20575014                | AA                              | TT              | 1946886871               |
| SNP_P4_95134_20575290 | NC_021166.1    | Ca_kabuli_chr07 | 20575290                | TT                              | CC              | 1946886873               |
| SNP_P4_95135_20575493 | NC_021166.1    | Ca_kabuli_chr07 | 20575493                | AA                              | GG              | 1946886875               |
| SNP_P4_95136_20577119 | NC_021166.1    | Ca_kabuli_chr07 | 20577119                | AA                              | GG              | 1946886877               |
| SNP_P4_95137_20578245 | NC_021166.1    | Ca_kabuli_chr07 | 20578245                | AA                              | GG              | 1946886879               |
| SNP_P4_95138_20578274 | NC_021166.1    | Ca_kabuli_chr07 | 20578274                | GG                              | AA              | 1946886881               |
| SNP_P4_95139_20578293 | NC_021166.1    | Ca_kabuli_chr07 | 20578293                | GG                              | AA              | 1946886883               |
| SNP_P4_95140_20578296 | NC_021166.1    | Ca_kabuli_chr07 | 20578296                | GG                              | CC              | 1946886885               |
| SNP_P4_95141_20578299 | NC_021166.1    | Ca_kabuli_chr07 | 20578299                | GG                              | AA              | 1946886887               |
| SNP_P4_95142_20578305 | NC_021166.1    | Ca_kabuli_chr07 | 20578305                | GG                              | TT              | 1946886889               |
| SNP_P4_95143_20578372 | NC_021166.1    | Ca_kabuli_chr07 | 20578372                | CC                              | TT              | 1946886891               |
| SNP_P4_95144_20578393 | NC_021166.1    | Ca_kabuli_chr07 | 20578393                | AA                              | CC              | 1946886893               |
| SNP_P4_95145_20578424 | NC_021166.1    | Ca_kabuli_chr07 | 20578424                | GG                              | AA              | 1946886895               |
| SNP_P4_95146_20578436 | NC_021166.1    | Ca_kabuli_chr07 | 20578436                | TT                              | CC              | 1946886897               |
| SNP_P4_95147_20578450 | NC_021166.1    | Ca_kabuli_chr07 | 20578450                | AA                              | GG              | 1946886899               |
| SNP_P4_95148_20593489 | NC_021166.1    | Ca_kabuli_chr07 | 20593489                | CC                              | TT              | 1946886901               |

| SNPs IDs              | Chromosome IDs | Chromosomes     | Physical positions (bp) | CDC Frontier (Reference genome) | (ILWC46 & LPNB) | NCBI SNPdb Accession IDs |
|-----------------------|----------------|-----------------|-------------------------|---------------------------------|-----------------|--------------------------|
| SNP_P4_95149_20595724 | NC_021166.1    | Ca_kabuli_chr07 | 20595724                | GG                              | CC              | 1946886903               |
| SNP_P4_95150_20597619 | NC_021166.1    | Ca_kabuli_chr07 | 20597619                | AA                              | GG              | 1946886905               |
| SNP_P4_95151_20597652 | NC_021166.1    | Ca_kabuli_chr07 | 20597652                | TT                              | CC              | 1946886907               |
| SNP_P4_95153_20603334 | NC_021166.1    | Ca_kabuli_chr07 | 20603334                | CC                              | TT              | 1946886909               |
| SNP_P4_95154_20604104 | NC_021166.1    | Ca_kabuli_chr07 | 20604104                | TT                              | CC              | 1946886911               |
| SNP_P4_95156_20606889 | NC_021166.1    | Ca_kabuli_chr07 | 20606889                | AA                              | CC              | 1946886913               |
| SNP_P4_95157_20609035 | NC_021166.1    | Ca_kabuli_chr07 | 20609035                | TT                              | CC              | 1946886915               |
| SNP_P4_95159_20615180 | NC_021166.1    | Ca_kabuli_chr07 | 20615180                | AA                              | CC              | 1946886916               |
| SNP_P4_95160_20615515 | NC_021166.1    | Ca_kabuli_chr07 | 20615515                | GG                              | AA              | 1946886918               |
| SNP_P4_95162_20616625 | NC_021166.1    | Ca_kabuli_chr07 | 20616625                | AA                              | TT              | 1946886920               |
| SNP_P4_95163_20617280 | NC_021166.1    | Ca_kabuli_chr07 | 20617280                | TT                              | GG              | 1946886922               |
| SNP_P4_95164_20617324 | NC_021166.1    | Ca_kabuli_chr07 | 20617324                | AA                              | GG              | 1946886924               |
| SNP_P4_95165_20617446 | NC_021166.1    | Ca_kabuli_chr07 | 20617446                | CC                              | TT              | 1946886926               |
| SNP_P4_95166_20617458 | NC_021166.1    | Ca_kabuli_chr07 | 20617458                | TT                              | CC              | 1946886928               |
| SNP_P4_95167_20617460 | NC_021166.1    | Ca_kabuli_chr07 | 20617460                | TT                              | CC              | 1946886930               |
| SNP_P4_95169_20619442 | NC_021166.1    | Ca_kabuli_chr07 | 20619442                | GG                              | AA              | 1946886932               |
| SNP_P4_95170_20619746 | NC_021166.1    | Ca_kabuli_chr07 | 20619746                | TT                              | CC              | 1946886934               |
| SNP_P4_95171_20621295 | NC_021166.1    | Ca_kabuli_chr07 | 20621295                | AA                              | GG              | 1946886936               |
| SNP_P4_95172_20621325 | NC_021166.1    | Ca_kabuli_chr07 | 20621325                | AA                              | GG              | 1946886938               |
| SNP_P4_95173_20621730 | NC_021166.1    | Ca_kabuli_chr07 | 20621730                | AA                              | GG              | 1946886940               |
| SNP_P4_95174_20623152 | NC_021166.1    | Ca_kabuli_chr07 | 20623152                | CC                              | AA              | 1946886942               |
| SNP_P4_95177_20623795 | NC_021166.1    | Ca_kabuli_chr07 | 20623795                | AA                              | CC              | 1946886944               |
| SNP_P4_95179_20625442 | NC_021166.1    | Ca_kabuli_chr07 | 20625442                | CC                              | TT              | 1946886946               |
| SNP_P4_95180_20625945 | NC_021166.1    | Ca_kabuli_chr07 | 20625945                | GG                              | AA              | 1946886948               |
| SNP_P4_95181_20626261 | NC_021166.1    | Ca_kabuli_chr07 | 20626261                | GG                              | AA              | 1946886950               |
| SNP_P4_95184_20629025 | NC_021166.1    | Ca_kabuli_chr07 | 20629025                | TT                              | CC              | 1946886952               |
| SNP_P4_95185_20629358 | NC_021166.1    | Ca_kabuli_chr07 | 20629358                | CC                              | AA              | 1946886954               |
| SNP_P4_95186_20629371 | NC_021166.1    | Ca_kabuli_chr07 | 20629371                | TT                              | GG              | 1946886956               |
| SNP_P4_95187_20629489 | NC_021166.1    | Ca_kabuli_chr07 | 20629489                | GG                              | TT              | 1946886958               |
| SNP_P4_95189_20632481 | NC_021166.1    | Ca_kabuli_chr07 | 20632481                | TT                              | AA              | 1946886960               |
| SNP_P4_95190_20654066 | NC_021166.1    | Ca_kabuli_chr07 | 20654066                | AA                              | GG              | 1946886962               |
| SNP_P4_95191_20654162 | NC_021166.1    | Ca_kabuli_chr07 | 20654162                | GG                              | AA              | 1946886964               |
| SNP_P4_95192_20654170 | NC_021166.1    | Ca_kabuli_chr07 | 20654170                | AA                              | TT              | 1946886966               |
| SNP_P4_95193_20897876 | NC_021166.1    | Ca_kabuli_chr07 | 20897876                | CC                              | GG              | 1946886968               |
| SNP_P4_95194_20897936 | NC_021166.1    | Ca_kabuli_chr07 | 20897936                | GG                              | AA              | 1946886970               |
| SNP_P4_95195_20911032 | NC_021166.1    | Ca_kabuli_chr07 | 20911032                | AA                              | TT              | 1946886972               |
| SNP_P4_95196_20911312 | NC_021166.1    | Ca_kabuli_chr07 | 20911312                | CC                              | TT              | 1946886974               |
| SNP_P4_95197_20911341 | NC_021166.1    | Ca_kabuli_chr07 | 20911341                | GG                              | AA              | 1946886976               |
| SNP_P4_95198_20911355 | NC_021166.1    | Ca_kabuli_chr07 | 20911355                | AA                              | CC              | 1946886978               |
| SNP_P4_95199_20911365 | NC_021166.1    | Ca_kabuli_chr07 | 20911365                | TT                              | CC              | 1946886980               |
| SNP_P4_95200_20911372 | NC_021166.1    | Ca_kabuli_chr07 | 20911372                | TT                              | CC              | 1946886982               |
| SNP_P4_95201_20911391 | NC_021166.1    | Ca_kabuli_chr07 | 20911391                | CC                              | TT              | 1946886984               |

| SNPs IDs              | Chromosome IDs | Chromosomes     | Physical positions (bp) | CDC Frontier (Reference genome) | (ILWC46 & LPNB) | NCBI SNPdb Accession IDs |
|-----------------------|----------------|-----------------|-------------------------|---------------------------------|-----------------|--------------------------|
| SNP_P4_95202_20911420 | NC_021166.1    | Ca_kabuli_chr07 | 20911420                | CC                              | TT              | 1946886986               |
| SNP_P4_95203_20931487 | NC_021166.1    | Ca_kabuli_chr07 | 20931487                | GG                              | AA              | 1946886988               |
| SNP_P4_95204_20933880 | NC_021166.1    | Ca_kabuli_chr07 | 20933880                | CC                              | AA              | 1946886990               |
| SNP_P4_95205_20934755 | NC_021166.1    | Ca_kabuli_chr07 | 20934755                | AA                              | CC              | 1946886992               |
| SNP_P4_95206_20934756 | NC_021166.1    | Ca_kabuli_chr07 | 20934756                | TT                              | AA              | 1946886994               |
| SNP_P4_95207_20934785 | NC_021166.1    | Ca_kabuli_chr07 | 20934785                | TT                              | GG              | 1946886996               |
| SNP_P4_95208_20934890 | NC_021166.1    | Ca_kabuli_chr07 | 20934890                | TT                              | CC              | 1946886998               |
| SNP_P4_95209_20934900 | NC_021166.1    | Ca_kabuli_chr07 | 20934900                | TT                              | CC              | 1946887000               |
| SNP_P4_95210_20935186 | NC_021166.1    | Ca_kabuli_chr07 | 20935186                | TT                              | AA              | 1946887002               |
| SNP_P4_95211_20935245 | NC_021166.1    | Ca_kabuli_chr07 | 20935245                | TT                              | GG              | 1946887004               |
| SNP_P4_95212_20935588 | NC_021166.1    | Ca_kabuli_chr07 | 20935588                | CC                              | TT              | 1946887006               |
| SNP_P4_95213_20938075 | NC_021166.1    | Ca_kabuli_chr07 | 20938075                | GG                              | TT              | 1946887008               |
| SNP_P4_95215_20975641 | NC_021166.1    | Ca_kabuli_chr07 | 20975641                | CC                              | TT              | 1946887010               |
| SNP_P4_95216_20975646 | NC_021166.1    | Ca_kabuli_chr07 | 20975646                | TT                              | CC              | 1946887012               |
| SNP_P4_95217_20975650 | NC_021166.1    | Ca_kabuli_chr07 | 20975650                | AA                              | TT              | 1946887014               |
| SNP_P4_95218_20979446 | NC_021166.1    | Ca_kabuli_chr07 | 20979446                | TT                              | AA              | 1946887016               |
| SNP_P4_95219_20983134 | NC_021166.1    | Ca_kabuli_chr07 | 20983134                | GG                              | AA              | 1946887018               |
| SNP_P4_95220_20985359 | NC_021166.1    | Ca_kabuli_chr07 | 20985359                | TT                              | CC              | 1946887020               |
| SNP_P4_95221_20985389 | NC_021166.1    | Ca_kabuli_chr07 | 20985389                | GG                              | CC              | 1946887022               |
| SNP_P4_95222_20985391 | NC_021166.1    | Ca_kabuli_chr07 | 20985391                | GG                              | AA              | 1946887024               |
| SNP_P4_95223_20985406 | NC_021166.1    | Ca_kabuli_chr07 | 20985406                | GG                              | AA              | 1946887026               |
| SNP_P4_95224_20985426 | NC_021166.1    | Ca_kabuli_chr07 | 20985426                | GG                              | AA              | 1946887028               |
| SNP_P4_95225_20985451 | NC_021166.1    | Ca_kabuli_chr07 | 20985451                | TT                              | AA              | 1946887030               |
| SNP_P4_95226_20985460 | NC_021166.1    | Ca_kabuli_chr07 | 20985460                | AA                              | GG              | 1946887032               |
| SNP_P4_95227_20985464 | NC_021166.1    | Ca_kabuli_chr07 | 20985464                | GG                              | AA              | 1946887034               |
| SNP_P4_95228_20985467 | NC_021166.1    | Ca_kabuli_chr07 | 20985467                | GG                              | AA              | 1946887036               |
| SNP_P4_95229_20985482 | NC_021166.1    | Ca_kabuli_chr07 | 20985482                | CC                              | TT              | 1946887038               |
| SNP_P4_95230_20985497 | NC_021166.1    | Ca_kabuli_chr07 | 20985497                | GG                              | AA              | 1946887040               |
| SNP_P4_95231_20985582 | NC_021166.1    | Ca_kabuli_chr07 | 20985582                | TT                              | CC              | 1946887042               |
| SNP_P4_95232_20985726 | NC_021166.1    | Ca_kabuli_chr07 | 20985726                | GG                              | TT              | 1946887044               |
| SNP_P4_95233_20985872 | NC_021166.1    | Ca_kabuli_chr07 | 20985872                | CC                              | GG              | 1946887046               |
| SNP_P4_95234_20985893 | NC_021166.1    | Ca_kabuli_chr07 | 20985893                | AA                              | GG              | 1946887048               |
| SNP_P4_95235_20985906 | NC_021166.1    | Ca_kabuli_chr07 | 20985906                | AA                              | GG              | 1946887050               |
| SNP_P4_95236_20985921 | NC_021166.1    | Ca_kabuli_chr07 | 20985921                | CC                              | TT              | 1946887052               |
| SNP_P4_95237_21000376 | NC_021166.1    | Ca_kabuli_chr07 | 21000376                | TT                              | CC              | 1946887054               |
| SNP_P4_95238_21011356 | NC_021166.1    | Ca_kabuli_chr07 | 21011356                | CC                              | TT              | 1946887056               |
| SNP_P4_95239_21012942 | NC_021166.1    | Ca_kabuli_chr07 | 21012942                | TT                              | CC              | 1946887058               |
| SNP_P4_95240_21013550 | NC_021166.1    | Ca_kabuli_chr07 | 21013550                | CC                              | TT              | 1946887060               |
| SNP_P4_95241_21023585 | NC_021166.1    | Ca_kabuli_chr07 | 21023585                | GG                              | AA              | 1946887062               |
| SNP_P4_95242_21025606 | NC_021166.1    | Ca_kabuli_chr07 | 21025606                | GG                              | CC              | 1946887064               |
| SNP_P4_95243_21032333 | NC_021166.1    | Ca_kabuli_chr07 | 21032333                | GG                              | AA              | 1946887066               |
| SNP_P4_95244_21059752 | NC_021166.1    | Ca_kabuli_chr07 | 21059752                | GG                              | AA              | 1946887068               |

| SNPs IDs              | Chromosome IDs | Chromosomes     | Physical positions (bp) | CDC Frontier (Reference genome) | (ILWC46 & LPNB) | NCBI SNPdb Accession IDs |
|-----------------------|----------------|-----------------|-------------------------|---------------------------------|-----------------|--------------------------|
| SNP_P4_95245_21075057 | NC_021166.1    | Ca_kabuli_chr07 | 21075057                | AA                              | TT              | 1946887070               |
| SNP_P4_95246_21077216 | NC_021166.1    | Ca_kabuli_chr07 | 21077216                | AA                              | GG              | 1946887072               |
| SNP_P4_95247_21078694 | NC_021166.1    | Ca_kabuli_chr07 | 21078694                | TT                              | GG              | 1946887074               |
| SNP_P4_95248_21099495 | NC_021166.1    | Ca_kabuli_chr07 | 21099495                | TT                              | AA              | 1946887075               |
| SNP_P4_95249_21099497 | NC_021166.1    | Ca_kabuli_chr07 | 21099497                | TT                              | CC              | 1946887077               |
| SNP_P4_95250_21099505 | NC_021166.1    | Ca_kabuli_chr07 | 21099505                | AA                              | CC              | 1946887080               |
| SNP_P4_95251_21099515 | NC_021166.1    | Ca_kabuli_chr07 | 21099515                | GG                              | TT              | 1946887082               |
| SNP_P4_95252_21099519 | NC_021166.1    | Ca_kabuli_chr07 | 21099519                | CC                              | TT              | 1946887084               |
| SNP_P4_95253_21099528 | NC_021166.1    | Ca_kabuli_chr07 | 21099528                | AA                              | GG              | 1946887086               |
| SNP_P4_95254_21099591 | NC_021166.1    | Ca_kabuli_chr07 | 21099591                | AA                              | GG              | 1946887088               |
| SNP_P4_95255_21099683 | NC_021166.1    | Ca_kabuli_chr07 | 21099683                | CC                              | TT              | 1946887090               |
| SNP_P4_95257_21103257 | NC_021166.1    | Ca_kabuli_chr07 | 21103257                | TT                              | CC              | 1946887092               |
| SNP_P4_95258_21103362 | NC_021166.1    | Ca_kabuli_chr07 | 21103362                | TT                              | AA              | 1946887094               |
| SNP_P4_95259_21104850 | NC_021166.1    | Ca_kabuli_chr07 | 21104850                | TT                              | GG              | 1946887096               |
| SNP_P4_95260_21115307 | NC_021166.1    | Ca_kabuli_chr07 | 21115307                | CC                              | AA              | 1946887098               |
| SNP_P4_95261_21115394 | NC_021166.1    | Ca_kabuli_chr07 | 21115394                | AA                              | GG              | 1946887100               |
| SNP_P4_95262_21116400 | NC_021166.1    | Ca_kabuli_chr07 | 21116400                | GG                              | AA              | 1946887102               |
| SNP_P4_95263_21116478 | NC_021166.1    | Ca_kabuli_chr07 | 21116478                | GG                              | TT              | 1946887104               |
| SNP_P4_95266_21181493 | NC_021166.1    | Ca_kabuli_chr07 | 21181493                | CC                              | TT              | 1946887106               |
| SNP_P4_95267_21196881 | NC_021166.1    | Ca_kabuli_chr07 | 21196881                | TT                              | GG              | 1946887108               |
| SNP_P4_95268_21196885 | NC_021166.1    | Ca_kabuli_chr07 | 21196885                | AA                              | CC              | 1946887110               |
| SNP_P4_95269_21199824 | NC_021166.1    | Ca_kabuli_chr07 | 21199824                | GG                              | AA              | 1946887112               |
| SNP_P4_95270_21202743 | NC_021166.1    | Ca_kabuli_chr07 | 21202743                | CC                              | TT              | 1946887114               |
| SNP_P4_95272_21254707 | NC_021166.1    | Ca_kabuli_chr07 | 21254707                | GG                              | CC              | 1946887116               |
| SNP_P4_95273_21257398 | NC_021166.1    | Ca_kabuli_chr07 | 21257398                | TT                              | AA              | 1946887118               |
| SNP_P4_95274_21257475 | NC_021166.1    | Ca_kabuli_chr07 | 21257475                | TT                              | GG              | 1946887120               |
| SNP_P4_95275_21257668 | NC_021166.1    | Ca_kabuli_chr07 | 21257668                | GG                              | AA              | 1946887122               |
| SNP_P4_95276_21257706 | NC_021166.1    | Ca_kabuli_chr07 | 21257706                | TT                              | CC              | 1946887124               |
| SNP_P4_95277_21257723 | NC_021166.1    | Ca_kabuli_chr07 | 21257723                | AA                              | GG              | 1946887126               |
| SNP_P4_95278_21257724 | NC_021166.1    | Ca_kabuli_chr07 | 21257724                | TT                              | CC              | 1946887128               |
| SNP_P4_95279_21257740 | NC_021166.1    | Ca_kabuli_chr07 | 21257740                | CC                              | AA              | 1946887130               |
| SNP_P4_95280_21257748 | NC_021166.1    | Ca_kabuli_chr07 | 21257748                | TT                              | CC              | 1946887132               |
| SNP_P4_95281_21257809 | NC_021166.1    | Ca_kabuli_chr07 | 21257809                | GG                              | AA              | 1946887134               |
| SNP_P4_95282_21257853 | NC_021166.1    | Ca_kabuli_chr07 | 21257853                | AA                              | GG              | 1946887136               |
| SNP_P4_95283_21257963 | NC_021166.1    | Ca_kabuli_chr07 | 21257963                | CC                              | TT              | 1946887138               |
| SNP_P4_95285_21299408 | NC_021166.1    | Ca_kabuli_chr07 | 21299408                | TT                              | CC              | 1946887140               |
| SNP_P4_95286_21307327 | NC_021166.1    | Ca_kabuli_chr07 | 21307327                | GG                              | CC              | 1946887142               |
| SNP_P4_95287_21341138 | NC_021166.1    | Ca_kabuli_chr07 | 21341138                | TT                              | CC              | 1946887144               |
| SNP_P4_95288_21341261 | NC_021166.1    | Ca_kabuli_chr07 | 21341261                | GG                              | AA              | 1946887146               |
| SNP_P4_95289_21354328 | NC_021166.1    | Ca_kabuli_chr07 | 21354328                | AA                              | GG              | 1946887148               |
| SNP_P4_95292_21415227 | NC_021166.1    | Ca_kabuli_chr07 | 21415227                | AA                              | GG              | 1946887150               |
| SNP_P4_95293_21415259 | NC_021166.1    | Ca_kabuli_chr07 | 21415259                | TT                              | CC              | 1946887152               |

| SNPs IDs              | Chromosome IDs | Chromosomes     | Physical positions (bp) | CDC Frontier (Reference genome) | (ILWC46 & LPNB) | NCBI SNPdb Accession IDs |
|-----------------------|----------------|-----------------|-------------------------|---------------------------------|-----------------|--------------------------|
| SNP_P4_95294_21415292 | NC_021166.1    | Ca_kabuli_chr07 | 21415292                | GG                              | CC              | 1946887154               |
| SNP_P4_95295_21415405 | NC_021166.1    | Ca_kabuli_chr07 | 21415405                | TT                              | GG              | 1946887156               |
| SNP_P4_95296_21415430 | NC_021166.1    | Ca_kabuli_chr07 | 21415430                | GG                              | CC              | 1946887159               |
| SNP_P4_95297_21415513 | NC_021166.1    | Ca_kabuli_chr07 | 21415513                | AA                              | GG              | 1946887161               |
| SNP_P4_95298_21418800 | NC_021166.1    | Ca_kabuli_chr07 | 21418800                | AA                              | CC              | 1946887163               |
| SNP_P4_95301_21465151 | NC_021166.1    | Ca_kabuli_chr07 | 21465151                | CC                              | AA              | 1946887165               |
| SNP_P4_95302_21473950 | NC_021166.1    | Ca_kabuli_chr07 | 21473950                | CC                              | TT              | 1946887168               |
| SNP_P4_95303_21510487 | NC_021166.1    | Ca_kabuli_chr07 | 21510487                | TT                              | AA              | 1946887170               |
| SNP_P4_95305_21542314 | NC_021166.1    | Ca_kabuli_chr07 | 21542314                | TT                              | GG              | 1946887172               |
| SNP_P4_95307_21602434 | NC_021166.1    | Ca_kabuli_chr07 | 21602434                | TT                              | CC              | 1946887174               |
| SNP_P4_95309_21644342 | NC_021166.1    | Ca_kabuli_chr07 | 21644342                | AA                              | GG              | 1946887176               |
| SNP_P4_95310_21648130 | NC_021166.1    | Ca_kabuli_chr07 | 21648130                | TT                              | CC              | 1946887178               |
| SNP_P4_95311_21648133 | NC_021166.1    | Ca_kabuli_chr07 | 21648133                | GG                              | AA              | 1946887180               |
| SNP_P4_95312_21648135 | NC_021166.1    | Ca_kabuli_chr07 | 21648135                | CC                              | TT              | 1946887182               |
| SNP_P4_95313_21648146 | NC_021166.1    | Ca_kabuli_chr07 | 21648146                | TT                              | CC              | 1946887184               |
| SNP_P4_95314_21658942 | NC_021166.1    | Ca_kabuli_chr07 | 21658942                | AA                              | TT              | 1946887186               |
| SNP_P4_95315_21665375 | NC_021166.1    | Ca_kabuli_chr07 | 21665375                | AA                              | CC              | 1946887188               |
| SNP_P4_95316_21665396 | NC_021166.1    | Ca_kabuli_chr07 | 21665396                | AA                              | GG              | 1946887190               |
| SNP_P4_95317_21665438 | NC_021166.1    | Ca_kabuli_chr07 | 21665438                | TT                              | AA              | 1946887192               |
| SNP_P4_95318_21666368 | NC_021166.1    | Ca_kabuli_chr07 | 21666368                | CC                              | TT              | 1946887195               |
| SNP_P4_95319_21666382 | NC_021166.1    | Ca_kabuli_chr07 | 21666382                | CC                              | TT              | 1946887196               |
| SNP_P4_95320_21666407 | NC_021166.1    | Ca_kabuli_chr07 | 21666407                | GG                              | AA              | 1946887198               |
| SNP_P4_95321_21666427 | NC_021166.1    | Ca_kabuli_chr07 | 21666427                | AA                              | GG              | 1946887200               |
| SNP_P4_95322_21666450 | NC_021166.1    | Ca_kabuli_chr07 | 21666450                | GG                              | AA              | 1946887202               |
| SNP_P4_95323_21666597 | NC_021166.1    | Ca_kabuli_chr07 | 21666597                | AA                              | GG              | 1946887204               |
| SNP_P4_95324_21666903 | NC_021166.1    | Ca_kabuli_chr07 | 21666903                | AA                              | CC              | 1946887206               |
| SNP_P4_95325_21666949 | NC_021166.1    | Ca_kabuli_chr07 | 21666949                | CC                              | TT              | 1946887208               |
| SNP_P4_95326_21667161 | NC_021166.1    | Ca_kabuli_chr07 | 21667161                | TT                              | CC              | 1946887210               |
| SNP_P4_95327_21670585 | NC_021166.1    | Ca_kabuli_chr07 | 21670585                | CC                              | TT              | 1946887212               |
| SNP_P4_95328_21670592 | NC_021166.1    | Ca_kabuli_chr07 | 21670592                | TT                              | CC              | 1946887214               |
| SNP_P4_95330_21671426 | NC_021166.1    | Ca_kabuli_chr07 | 21671426                | TT                              | CC              | 1946887216               |
| SNP_P4_95331_21674109 | NC_021166.1    | Ca_kabuli_chr07 | 21674109                | TT                              | GG              | 1946887218               |
| SNP_P4_95332_21674134 | NC_021166.1    | Ca_kabuli_chr07 | 21674134                | GG                              | AA              | 1946887220               |
| SNP_P4_95334_21674193 | NC_021166.1    | Ca_kabuli_chr07 | 21674193                | GG                              | AA              | 1946887222               |
| SNP_P4_95335_21674829 | NC_021166.1    | Ca_kabuli_chr07 | 21674829                | CC                              | TT              | 1946887224               |
| SNP_P4_95336_21674884 | NC_021166.1    | Ca_kabuli_chr07 | 21674884                | GG                              | AA              | 1946887226               |
| SNP_P4_95337_21674972 | NC_021166.1    | Ca_kabuli_chr07 | 21674972                | TT                              | CC              | 1946887228               |
| SNP_P4_95339_21675381 | NC_021166.1    | Ca_kabuli_chr07 | 21675381                | AA                              | TT              | 1946887230               |
| SNP_P4_95340_21675387 | NC_021166.1    | Ca_kabuli_chr07 | 21675387                | CC                              | TT              | 1946887232               |
| SNP_P4_95341_21675491 | NC_021166.1    | Ca_kabuli_chr07 | 21675491                | TT                              | CC              | 1946887234               |
| SNP_P4_95342_21677641 | NC_021166.1    | Ca_kabuli_chr07 | 21677641                | CC                              | AA              | 1946887236               |
| SNP_P4_95343_21677682 | NC_021166.1    | Ca_kabuli_chr07 | 21677682                | AA                              | TT              | 1946887238               |

| SNPs IDs              | Chromosome IDs | Chromosomes     | Physical positions (bp) | CDC Frontier (Reference genome) | (ILWC46 & LPNB) | NCBI SNPdb Accession IDs |
|-----------------------|----------------|-----------------|-------------------------|---------------------------------|-----------------|--------------------------|
| SNP_P4_95344_21677695 | NC_021166.1    | Ca_kabuli_chr07 | 21677695                | TT                              | AA              | 1946887240               |
| SNP_P4_95345_21677742 | NC_021166.1    | Ca_kabuli_chr07 | 21677742                | AA                              | TT              | 1946887242               |
| SNP_P4_95346_21677943 | NC_021166.1    | Ca_kabuli_chr07 | 21677943                | AA                              | CC              | 1946887244               |
| SNP_P4_95348_21678768 | NC_021166.1    | Ca_kabuli_chr07 | 21678768                | CC                              | AA              | 1946887246               |
| SNP_P4_95349_21679017 | NC_021166.1    | Ca_kabuli_chr07 | 21679017                | CC                              | TT              | 1946887248               |
| SNP_P4_95350_21679984 | NC_021166.1    | Ca_kabuli_chr07 | 21679984                | GG                              | AA              | 1946887250               |
| SNP_P4_95351_21680130 | NC_021166.1    | Ca_kabuli_chr07 | 21680130                | AA                              | GG              | 1946887252               |
| SNP_P4_95352_21680289 | NC_021166.1    | Ca_kabuli_chr07 | 21680289                | GG                              | AA              | 1946887254               |
| SNP_P4_95353_21681018 | NC_021166.1    | Ca_kabuli_chr07 | 21681018                | GG                              | AA              | 1946887256               |
| SNP_P4_95354_21681195 | NC_021166.1    | Ca_kabuli_chr07 | 21681195                | GG                              | AA              | 1946887258               |
| SNP_P4_95355_21681323 | NC_021166.1    | Ca_kabuli_chr07 | 21681323                | AA                              | GG              | 1946887260               |
| SNP_P4_95356_21681439 | NC_021166.1    | Ca_kabuli_chr07 | 21681439                | AA                              | GG              | 1946887262               |
| SNP_P4_95357_21681446 | NC_021166.1    | Ca_kabuli_chr07 | 21681446                | AA                              | GG              | 1946887264               |
| SNP_P4_95358_21681488 | NC_021166.1    | Ca_kabuli_chr07 | 21681488                | AA                              | GG              | 1946887266               |
| SNP_P4_95359_21681507 | NC_021166.1    | Ca_kabuli_chr07 | 21681507                | AA                              | GG              | 1946887268               |
| SNP_P4_95360_21681509 | NC_021166.1    | Ca_kabuli_chr07 | 21681509                | AA                              | GG              | 1946887270               |
| SNP_P4_95361_21681544 | NC_021166.1    | Ca_kabuli_chr07 | 21681544                | CC                              | TT              | 1946887272               |
| SNP_P4_95362_21681699 | NC_021166.1    | Ca_kabuli_chr07 | 21681699                | TT                              | CC              | 1946887274               |
| SNP_P4_95363_21681709 | NC_021166.1    | Ca_kabuli_chr07 | 21681709                | CC                              | AA              | 1946887276               |
| SNP_P4_95364_21681782 | NC_021166.1    | Ca_kabuli_chr07 | 21681782                | GG                              | AA              | 1946887278               |
| SNP_P4_95365_21681819 | NC_021166.1    | Ca_kabuli_chr07 | 21681819                | CC                              | TT              | 1946887280               |
| SNP_P4_95366_21681834 | NC_021166.1    | Ca_kabuli_chr07 | 21681834                | AA                              | CC              | 1946887282               |
| SNP_P4_95367_21681835 | NC_021166.1    | Ca_kabuli_chr07 | 21681835                | GG                              | CC              | 1946887284               |
| SNP_P4_95368_21681860 | NC_021166.1    | Ca_kabuli_chr07 | 21681860                | TT                              | AA              | 1946887286               |
| SNP_P4_95369_21681865 | NC_021166.1    | Ca_kabuli_chr07 | 21681865                | GG                              | TT              | 1946887288               |
| SNP_P4_95370_21681875 | NC_021166.1    | Ca_kabuli_chr07 | 21681875                | AA                              | GG              | 1946887290               |
| SNP_P4_95371_21681881 | NC_021166.1    | Ca_kabuli_chr07 | 21681881                | GG                              | AA              | 1946887292               |
| SNP_P4_95372_21681884 | NC_021166.1    | Ca_kabuli_chr07 | 21681884                | CC                              | TT              | 1946887294               |
| SNP_P4_95373_21681890 | NC_021166.1    | Ca_kabuli_chr07 | 21681890                | AA                              | GG              | 1946887296               |
| SNP_P4_95374_21681916 | NC_021166.1    | Ca_kabuli_chr07 | 21681916                | CC                              | TT              | 1946887298               |
| SNP_P4_95375_21681937 | NC_021166.1    | Ca_kabuli_chr07 | 21681937                | GG                              | AA              | 1946887300               |
| SNP_P4_95376_21682215 | NC_021166.1    | Ca_kabuli_chr07 | 21682215                | GG                              | TT              | 1946887302               |
| SNP_P4_95377_21682238 | NC_021166.1    | Ca_kabuli_chr07 | 21682238                | CC                              | TT              | 1946887304               |
| SNP_P4_95378_21682244 | NC_021166.1    | Ca_kabuli_chr07 | 21682244                | TT                              | CC              | 1946887306               |
| SNP_P4_95379_21682563 | NC_021166.1    | Ca_kabuli_chr07 | 21682563                | CC                              | TT              | 1946887308               |
| SNP_P4_95380_21682646 | NC_021166.1    | Ca_kabuli_chr07 | 21682646                | GG                              | TT              | 1946887310               |
| SNP_P4_95381_21682888 | NC_021166.1    | Ca_kabuli_chr07 | 21682888                | GG                              | AA              | 1946887312               |
| SNP_P4_95382_21683620 | NC_021166.1    | Ca_kabuli_chr07 | 21683620                | GG                              | TT              | 1946887314               |
| SNP_P4_95383_21684632 | NC_021166.1    | Ca_kabuli_chr07 | 21684632                | CC                              | TT              | 1946887316               |
| SNP_P4_95384_21684701 | NC_021166.1    | Ca_kabuli_chr07 | 21684701                | TT                              | CC              | 1946887318               |
| SNP_P4_95385_21684966 | NC_021166.1    | Ca_kabuli_chr07 | 21684966                | CC                              | AA              | 1946887320               |
| SNP_P4_95386_21685053 | NC_021166.1    | Ca_kabuli_chr07 | 21685053                | GG                              | CC              | 1946887322               |



| SNPs IDs              | Chromosome IDs | Chromosomes     | Physical positions (bp) | CDC Frontier (Reference genome) | (ILWC46 & LPNB) | NCBI SNPdb Accession IDs |
|-----------------------|----------------|-----------------|-------------------------|---------------------------------|-----------------|--------------------------|
| SNP_P4_95388_21686729 | NC_021166.1    | Ca_kabuli_chr07 | 21686729                | GG                              | AA              | 1946887324               |
| SNP_P4_95389_21687286 | NC_021166.1    | Ca_kabuli_chr07 | 21687286                | GG                              | AA              | 1946887326               |
| SNP_P4_95390_21687304 | NC_021166.1    | Ca_kabuli_chr07 | 21687304                | CC                              | TT              | 1946887328               |
| SNP_P4_95391_21688110 | NC_021166.1    | Ca_kabuli_chr07 | 21688110                | AA                              | GG              | 1946887330               |
| SNP_P4_95393_21709914 | NC_021166.1    | Ca_kabuli_chr07 | 21709914                | CC                              | TT              | 1946887332               |
| SNP_P4_95394_21711003 | NC_021166.1    | Ca_kabuli_chr07 | 21711003                | CC                              | TT              | 1946887334               |
| SNP_P4_95396_21728028 | NC_021166.1    | Ca_kabuli_chr07 | 21728028                | GG                              | TT              | 1946887336               |
| SNP_P4_95397_21728036 | NC_021166.1    | Ca_kabuli_chr07 | 21728036                | CC                              | TT              | 1946887338               |
| SNP_P4_95398_21728040 | NC_021166.1    | Ca_kabuli_chr07 | 21728040                | AA                              | GG              | 1946887340               |
| SNP_P4_95399_21728076 | NC_021166.1    | Ca_kabuli_chr07 | 21728076                | GG                              | TT              | 1946887342               |
| SNP_P4_95400_21728099 | NC_021166.1    | Ca_kabuli_chr07 | 21728099                | CC                              | AA              | 1946887344               |
| SNP_P4_95401_21728301 | NC_021166.1    | Ca_kabuli_chr07 | 21728301                | CC                              | GG              | 1946887346               |
| SNP_P4_95402_21728328 | NC_021166.1    | Ca_kabuli_chr07 | 21728328                | TT                              | CC              | 1946887348               |
| SNP_P4_95403_21728332 | NC_021166.1    | Ca_kabuli_chr07 | 21728332                | AA                              | GG              | 1946887350               |
| SNP_P4_95404_21728372 | NC_021166.1    | Ca_kabuli_chr07 | 21728372                | AA                              | GG              | 1946887352               |
| SNP_P4_95406_21728437 | NC_021166.1    | Ca_kabuli_chr07 | 21728437                | AA                              | CC              | 1946887354               |
| SNP_P4_95407_21728439 | NC_021166.1    | Ca_kabuli_chr07 | 21728439                | CC                              | TT              | 1946887356               |
| SNP_P4_95408_21728485 | NC_021166.1    | Ca_kabuli_chr07 | 21728485                | TT                              | CC              | 1946887358               |
| SNP_P4_95409_21728486 | NC_021166.1    | Ca_kabuli_chr07 | 21728486                | GG                              | AA              | 1946887360               |
| SNP_P4_95410_21728570 | NC_021166.1    | Ca_kabuli_chr07 | 21728570                | TT                              | GG              | 1946887362               |
| SNP_P4_95411_21728581 | NC_021166.1    | Ca_kabuli_chr07 | 21728581                | GG                              | AA              | 1946887364               |
| SNP_P4_95412_21728728 | NC_021166.1    | Ca_kabuli_chr07 | 21728728                | TT                              | CC              | 1946887366               |
| SNP_P4_95413_21728731 | NC_021166.1    | Ca_kabuli_chr07 | 21728731                | GG                              | AA              | 1946887368               |
| SNP_P4_95414_21728821 | NC_021166.1    | Ca_kabuli_chr07 | 21728821                | AA                              | CC              | 1946887370               |
| SNP_P4_95415_21728904 | NC_021166.1    | Ca_kabuli_chr07 | 21728904                | CC                              | GG              | 1946887372               |
| SNP_P4_95416_21728928 | NC_021166.1    | Ca_kabuli_chr07 | 21728928                | CC                              | TT              | 1946887374               |
| SNP_P4_95417_21728935 | NC_021166.1    | Ca_kabuli_chr07 | 21728935                | GG                              | AA              | 1946887376               |
| SNP_P4_95418_21728966 | NC_021166.1    | Ca_kabuli_chr07 | 21728966                | TT                              | CC              | 1946887378               |
| SNP_P4_95420_21729239 | NC_021166.1    | Ca_kabuli_chr07 | 21729239                | AA                              | GG              | 1946887380               |
| SNP_P4_95422_21729493 | NC_021166.1    | Ca_kabuli_chr07 | 21729493                | TT                              | AA              | 1946887382               |
| SNP_P4_95423_21729580 | NC_021166.1    | Ca_kabuli_chr07 | 21729580                | AA                              | TT              | 1946887384               |
| SNP_P4_95424_21729657 | NC_021166.1    | Ca_kabuli_chr07 | 21729657                | TT                              | AA              | 1946887386               |
| SNP_P4_95425_21729819 | NC_021166.1    | Ca_kabuli_chr07 | 21729819                | AA                              | GG              | 1946887388               |
| SNP_P4_95426_21729872 | NC_021166.1    | Ca_kabuli_chr07 | 21729872                | AA                              | CC              | 1946887390               |
| SNP_P4_95427_21729892 | NC_021166.1    | Ca_kabuli_chr07 | 21729892                | TT                              | AA              | 1946887393               |
| SNP_P4_95428_21729893 | NC_021166.1    | Ca_kabuli_chr07 | 21729893                | GG                              | AA              | 1946887395               |
| SNP_P4_95429_21730106 | NC_021166.1    | Ca_kabuli_chr07 | 21730106                | CC                              | GG              | 1946887397               |
| SNP_P4_95430_21730144 | NC_021166.1    | Ca_kabuli_chr07 | 21730144                | CC                              | TT              | 1946887399               |
| SNP_P4_95431_21730147 | NC_021166.1    | Ca_kabuli_chr07 | 21730147                | TT                              | CC              | 1946887401               |
| SNP_P4_95432_21730302 | NC_021166.1    | Ca_kabuli_chr07 | 21730302                | AA                              | TT              | 1946887403               |
| SNP_P4_95433_21730308 | NC_021166.1    | Ca_kabuli_chr07 | 21730308                | AA                              | TT              | 1946887405               |
| SNP_P4_95434_21730497 | NC_021166.1    | Ca_kabuli_chr07 | 21730497                | CC                              | TT              | 1946887407               |

| SNPs IDs              | Chromosome IDs | Chromosomes     | Physical positions (bp) | CDC Frontier (Reference genome) | (ILWC46 & LPNB) | NCBI SNPdb Accession IDs |
|-----------------------|----------------|-----------------|-------------------------|---------------------------------|-----------------|--------------------------|
| SNP_P4_95435_21730501 | NC_021166.1    | Ca_kabuli_chr07 | 21730501                | GG                              | AA              | 1946887409               |
| SNP_P4_95436_21730540 | NC_021166.1    | Ca_kabuli_chr07 | 21730540                | GG                              | TT              | 1946887411               |
| SNP_P4_95437_21730605 | NC_021166.1    | Ca_kabuli_chr07 | 21730605                | TT                              | CC              | 1946887413               |
| SNP_P4_95438_21730608 | NC_021166.1    | Ca_kabuli_chr07 | 21730608                | CC                              | GG              | 1946887415               |
| SNP_P4_95439_21730619 | NC_021166.1    | Ca_kabuli_chr07 | 21730619                | CC                              | TT              | 1946887417               |
| SNP_P4_95440_21730625 | NC_021166.1    | Ca_kabuli_chr07 | 21730625                | TT                              | GG              | 1946887419               |
| SNP_P4_95441_21730669 | NC_021166.1    | Ca_kabuli_chr07 | 21730669                | TT                              | CC              | 1946887421               |
| SNP_P4_95442_21730744 | NC_021166.1    | Ca_kabuli_chr07 | 21730744                | CC                              | AA              | 1946887423               |
| SNP_P4_95443_21730757 | NC_021166.1    | Ca_kabuli_chr07 | 21730757                | CC                              | AA              | 1946887425               |
| SNP_P4_95444_21730794 | NC_021166.1    | Ca_kabuli_chr07 | 21730794                | TT                              | CC              | 1946887427               |
| SNP_P4_95445_21730842 | NC_021166.1    | Ca_kabuli_chr07 | 21730842                | AA                              | TT              | 1946887430               |
| SNP_P4_95446_21730845 | NC_021166.1    | Ca_kabuli_chr07 | 21730845                | AA                              | TT              | 1946887432               |
| SNP_P4_95447_21730868 | NC_021166.1    | Ca_kabuli_chr07 | 21730868                | CC                              | AA              | 1946887434               |
| SNP_P4_95448_21730900 | NC_021166.1    | Ca_kabuli_chr07 | 21730900                | CC                              | TT              | 1946887436               |
| SNP_P4_95449_21730905 | NC_021166.1    | Ca_kabuli_chr07 | 21730905                | TT                              | CC              | 1946887438               |
| SNP_P4_95450_21730915 | NC_021166.1    | Ca_kabuli_chr07 | 21730915                | GG                              | AA              | 1946887440               |
| SNP_P4_95451_21731038 | NC_021166.1    | Ca_kabuli_chr07 | 21731038                | TT                              | CC              | 1946887442               |
| SNP_P4_95452_21731046 | NC_021166.1    | Ca_kabuli_chr07 | 21731046                | AA                              | GG              | 1946887444               |
| SNP_P4_95453_21731118 | NC_021166.1    | Ca_kabuli_chr07 | 21731118                | GG                              | TT              | 1946887446               |
| SNP_P4_95454_21731149 | NC_021166.1    | Ca_kabuli_chr07 | 21731149                | AA                              | CC              | 1946887448               |
| SNP_P4_95456_21731209 | NC_021166.1    | Ca_kabuli_chr07 | 21731209                | AA                              | CC              | 1946887450               |
| SNP_P4_95457_21731263 | NC_021166.1    | Ca_kabuli_chr07 | 21731263                | TT                              | CC              | 1946887452               |
| SNP_P4_95458_21731266 | NC_021166.1    | Ca_kabuli_chr07 | 21731266                | AA                              | TT              | 1946887454               |
| SNP_P4_95459_21731273 | NC_021166.1    | Ca_kabuli_chr07 | 21731273                | TT                              | CC              | 1946887456               |
| SNP_P4_95460_21731274 | NC_021166.1    | Ca_kabuli_chr07 | 21731274                | CC                              | GG              | 1946887458               |
| SNP_P4_95461_21731338 | NC_021166.1    | Ca_kabuli_chr07 | 21731338                | TT                              | CC              | 1946887461               |
| SNP_P4_95462_21731395 | NC_021166.1    | Ca_kabuli_chr07 | 21731395                | TT                              | CC              | 1946887463               |
| SNP_P4_95463_21731428 | NC_021166.1    | Ca_kabuli_chr07 | 21731428                | TT                              | AA              | 1946887465               |
| SNP_P4_95464_21731558 | NC_021166.1    | Ca_kabuli_chr07 | 21731558                | CC                              | TT              | 1946887467               |
| SNP_P4_95465_21731916 | NC_021166.1    | Ca_kabuli_chr07 | 21731916                | AA                              | GG              | 1946887469               |
| SNP_P4_95466_21732430 | NC_021166.1    | Ca_kabuli_chr07 | 21732430                | GG                              | CC              | 1946887471               |
| SNP_P4_95468_21743385 | NC_021166.1    | Ca_kabuli_chr07 | 21743385                | TT                              | AA              | 1946887473               |
| SNP_P4_95469_21743393 | NC_021166.1    | Ca_kabuli_chr07 | 21743393                | TT                              | CC              | 1946887475               |
| SNP_P4_95470_21743428 | NC_021166.1    | Ca_kabuli_chr07 | 21743428                | GG                              | CC              | 1946887477               |
| SNP_P4_95471_21743431 | NC_021166.1    | Ca_kabuli_chr07 | 21743431                | TT                              | GG              | 1946887479               |
| SNP_P4_95472_21743435 | NC_021166.1    | Ca_kabuli_chr07 | 21743435                | TT                              | AA              | 1946887481               |
| SNP_P4_95474_21743528 | NC_021166.1    | Ca_kabuli_chr07 | 21743528                | TT                              | GG              | 1946887483               |
| SNP_P4_95475_21743540 | NC_021166.1    | Ca_kabuli_chr07 | 21743540                | GG                              | AA              | 1946887485               |
| SNP_P4_95476_21743592 | NC_021166.1    | Ca_kabuli_chr07 | 21743592                | TT                              | GG              | 1946887487               |
| SNP_P4_95478_21743638 | NC_021166.1    | Ca_kabuli_chr07 | 21743638                | TT                              | CC              | 1946887489               |
| SNP_P4_95479_21743676 | NC_021166.1    | Ca_kabuli_chr07 | 21743676                | GG                              | AA              | 1946887491               |
| SNP_P4_95480_21743739 | NC_021166.1    | Ca_kabuli_chr07 | 21743739                | TT                              | CC              | 1946887493               |

| SNPs IDs              | Chromosome IDs | Chromosomes     | Physical positions (bp) | CDC Frontier (Reference genome) | (ILWC46 & LPNB) | NCBI SNPdb Accession IDs |
|-----------------------|----------------|-----------------|-------------------------|---------------------------------|-----------------|--------------------------|
| SNP_P4_95481_21743840 | NC_021166.1    | Ca_kabuli_chr07 | 21743840                | CC                              | AA              | 1946887495               |
| SNP_P4_95482_21743843 | NC_021166.1    | Ca_kabuli_chr07 | 21743843                | GG                              | AA              | 1946887497               |
| SNP_P4_95483_21743845 | NC_021166.1    | Ca_kabuli_chr07 | 21743845                | TT                              | GG              | 1946887499               |
| SNP_P4_95484_21743929 | NC_021166.1    | Ca_kabuli_chr07 | 21743929                | AA                              | GG              | 1946887501               |
| SNP_P4_95486_21744003 | NC_021166.1    | Ca_kabuli_chr07 | 21744003                | AA                              | CC              | 1946887503               |
| SNP_P4_95487_21744048 | NC_021166.1    | Ca_kabuli_chr07 | 21744048                | AA                              | CC              | 1946887505               |
| SNP_P4_95488_21744065 | NC_021166.1    | Ca_kabuli_chr07 | 21744065                | TT                              | CC              | 1946887507               |
| SNP_P4_95489_21744082 | NC_021166.1    | Ca_kabuli_chr07 | 21744082                | TT                              | CC              | 1946887509               |
| SNP_P4_95490_21744273 | NC_021166.1    | Ca_kabuli_chr07 | 21744273                | CC                              | TT              | 1946887511               |
| SNP_P4_95491_21744355 | NC_021166.1    | Ca_kabuli_chr07 | 21744355                | GG                              | AA              | 1946887513               |
| SNP_P4_95492_21744514 | NC_021166.1    | Ca_kabuli_chr07 | 21744514                | TT                              | CC              | 1946887515               |
| SNP_P4_95493_21744821 | NC_021166.1    | Ca_kabuli_chr07 | 21744821                | AA                              | GG              | 1946887517               |
| SNP_P4_95494_21744856 | NC_021166.1    | Ca_kabuli_chr07 | 21744856                | GG                              | AA              | 1946887519               |
| SNP_P4_95496_21745657 | NC_021166.1    | Ca_kabuli_chr07 | 21745657                | GG                              | AA              | 1946887521               |
| SNP_P4_95497_21746578 | NC_021166.1    | Ca_kabuli_chr07 | 21746578                | CC                              | TT              | 1946887523               |
| SNP_P4_95498_21751146 | NC_021166.1    | Ca_kabuli_chr07 | 21751146                | TT                              | CC              | 1946887526               |
| SNP_P4_95499_21753613 | NC_021166.1    | Ca_kabuli_chr07 | 21753613                | AA                              | CC              | 1946887528               |
| SNP_P4_95500_21754024 | NC_021166.1    | Ca_kabuli_chr07 | 21754024                | CC                              | TT              | 1946887530               |
| SNP_P4_95501_21754168 | NC_021166.1    | Ca_kabuli_chr07 | 21754168                | AA                              | GG              | 1946887532               |
| SNP_P4_95502_21754176 | NC_021166.1    | Ca_kabuli_chr07 | 21754176                | AA                              | GG              | 1946887534               |
| SNP_P4_95503_21756455 | NC_021166.1    | Ca_kabuli_chr07 | 21756455                | AA                              | GG              | 1946887536               |
| SNP_P4_95504_21756471 | NC_021166.1    | Ca_kabuli_chr07 | 21756471                | CC                              | TT              | 1946887538               |
| SNP_P4_95505_21766124 | NC_021166.1    | Ca_kabuli_chr07 | 21766124                | CC                              | TT              | 1946887540               |
| SNP_P4_95506_21766316 | NC_021166.1    | Ca_kabuli_chr07 | 21766316                | CC                              | TT              | 1946887542               |
| SNP_P4_95507_21766368 | NC_021166.1    | Ca_kabuli_chr07 | 21766368                | AA                              | GG              | 1946887544               |
| SNP_P4_95508_21766436 | NC_021166.1    | Ca_kabuli_chr07 | 21766436                | TT                              | GG              | 1946887546               |
| SNP_P4_95509_21766439 | NC_021166.1    | Ca_kabuli_chr07 | 21766439                | CC                              | TT              | 1946887549               |
| SNP_P4_95510_21771031 | NC_021166.1    | Ca_kabuli_chr07 | 21771031                | GG                              | AA              | 1946887551               |
| SNP_P4_95512_21784541 | NC_021166.1    | Ca_kabuli_chr07 | 21784541                | GG                              | AA              | 1946887553               |
| SNP_P4_95514_21788045 | NC_021166.1    | Ca_kabuli_chr07 | 21788045                | CC                              | AA              | 1946887555               |
| SNP_P4_95515_21788282 | NC_021166.1    | Ca_kabuli_chr07 | 21788282                | AA                              | GG              | 1946887557               |
| SNP_P4_95517_21810873 | NC_021166.1    | Ca_kabuli_chr07 | 21810873                | CC                              | TT              | 1946887559               |
| SNP_P4_95518_21817869 | NC_021166.1    | Ca_kabuli_chr07 | 21817869                | CC                              | TT              | 1946887561               |
| SNP_P4_95519_21818285 | NC_021166.1    | Ca_kabuli_chr07 | 21818285                | AA                              | TT              | 1946887563               |
| SNP_P4_95520_21818314 | NC_021166.1    | Ca_kabuli_chr07 | 21818314                | AA                              | TT              | 1946887565               |
| SNP_P4_95521_21818410 | NC_021166.1    | Ca_kabuli_chr07 | 21818410                | TT                              | CC              | 1946887567               |
| SNP_P4_95522_21818451 | NC_021166.1    | Ca_kabuli_chr07 | 21818451                | AA                              | GG              | 1946887569               |
| SNP_P4_95523_21818459 | NC_021166.1    | Ca_kabuli_chr07 | 21818459                | TT                              | CC              | 1946887571               |
| SNP_P4_95524_21818483 | NC_021166.1    | Ca_kabuli_chr07 | 21818483                | TT                              | GG              | 1946887573               |
| SNP_P4_95526_21818653 | NC_021166.1    | Ca_kabuli_chr07 | 21818653                | AA                              | TT              | 1946887575               |
| SNP_P4_95527_21818654 | NC_021166.1    | Ca_kabuli_chr07 | 21818654                | TT                              | AA              | 1946887577               |
| SNP_P4_95528_21818665 | NC_021166.1    | Ca_kabuli_chr07 | 21818665                | CC                              | AA              | 1946887579               |

| SNPs IDs              | Chromosome IDs | Chromosomes     | Physical positions (bp) | CDC Frontier (Reference genome) | (ILWC46 & LPNB) | NCBI SNPdb Accession IDs |
|-----------------------|----------------|-----------------|-------------------------|---------------------------------|-----------------|--------------------------|
| SNP_P4_95529_21818769 | NC_021166.1    | Ca_kabuli_chr07 | 21818769                | GG                              | TT              | 1946887581               |
| SNP_P4_95530_21818794 | NC_021166.1    | Ca_kabuli_chr07 | 21818794                | CC                              | TT              | 1946887583               |
| SNP_P4_95531_21818806 | NC_021166.1    | Ca_kabuli_chr07 | 21818806                | GG                              | AA              | 1946887585               |
| SNP_P4_95532_21829279 | NC_021166.1    | Ca_kabuli_chr07 | 21829279                | CC                              | TT              | 1946887587               |
| SNP_P4_95533_21835118 | NC_021166.1    | Ca_kabuli_chr07 | 21835118                | TT                              | CC              | 1946887589               |
| SNP_P4_95534_21844399 | NC_021166.1    | Ca_kabuli_chr07 | 21844399                | AA                              | GG              | 1946887591               |
| SNP_P4_95536_21888060 | NC_021166.1    | Ca_kabuli_chr07 | 21888060                | TT                              | AA              | 1946887593               |
| SNP_P4_95537_21895584 | NC_021166.1    | Ca_kabuli_chr07 | 21895584                | CC                              | AA              | 1946887595               |
| SNP_P4_95538_21921933 | NC_021166.1    | Ca_kabuli_chr07 | 21921933                | TT                              | GG              | 1946887597               |
| SNP_P4_95539_21924074 | NC_021166.1    | Ca_kabuli_chr07 | 21924074                | AA                              | CC              | 1946887599               |
| SNP_P4_95540_21924128 | NC_021166.1    | Ca_kabuli_chr07 | 21924128                | CC                              | TT              | 1946887601               |
| SNP_P4_95541_21942278 | NC_021166.1    | Ca_kabuli_chr07 | 21942278                | CC                              | TT              | 1946887603               |
| SNP_P4_95542_21942281 | NC_021166.1    | Ca_kabuli_chr07 | 21942281                | AA                              | GG              | 1946887605               |
| SNP_P4_95543_21949806 | NC_021166.1    | Ca_kabuli_chr07 | 21949806                | GG                              | AA              | 1946887608               |
| SNP_P4_95544_21955129 | NC_021166.1    | Ca_kabuli_chr07 | 21955129                | AA                              | GG              | 1946887610               |
| SNP_P4_95545_21955543 | NC_021166.1    | Ca_kabuli_chr07 | 21955543                | CC                              | TT              | 1946887612               |
| SNP_P4_95546_21955650 | NC_021166.1    | Ca_kabuli_chr07 | 21955650                | GG                              | AA              | 1946887614               |
| SNP_P4_95547_21994249 | NC_021166.1    | Ca_kabuli_chr07 | 21994249                | AA                              | GG              | 1946887616               |
| SNP_P4_95548_21994599 | NC_021166.1    | Ca_kabuli_chr07 | 21994599                | TT                              | CC              | 1946887618               |
| SNP_P4_95549_21994636 | NC_021166.1    | Ca_kabuli_chr07 | 21994636                | TT                              | GG              | 1946887620               |
| SNP_P4_95550_21994637 | NC_021166.1    | Ca_kabuli_chr07 | 21994637                | AA                              | TT              | 1946887622               |
| SNP_P4_95551_21994650 | NC_021166.1    | Ca_kabuli_chr07 | 21994650                | TT                              | CC              | 1946887623               |
| SNP_P4_95552_21994651 | NC_021166.1    | Ca_kabuli_chr07 | 21994651                | CC                              | TT              | 1946887625               |
| SNP_P4_95554_22023665 | NC_021166.1    | Ca_kabuli_chr07 | 22023665                | AA                              | CC              | 1946887627               |
| SNP_P4_95555_22027566 | NC_021166.1    | Ca_kabuli_chr07 | 22027566                | TT                              | AA              | 1946887629               |
| SNP_P4_95556_22027615 | NC_021166.1    | Ca_kabuli_chr07 | 22027615                | TT                              | CC              | 1946887631               |
| SNP_P4_95557_22034889 | NC_021166.1    | Ca_kabuli_chr07 | 22034889                | TT                              | GG              | 1946887633               |
| SNP_P4_95558_22034999 | NC_021166.1    | Ca_kabuli_chr07 | 22034999                | CC                              | TT              | 1946887635               |
| SNP_P4_95559_22035553 | NC_021166.1    | Ca_kabuli_chr07 | 22035553                | AA                              | GG              | 1946887637               |
| SNP_P4_95560_22035657 | NC_021166.1    | Ca_kabuli_chr07 | 22035657                | AA                              | GG              | 1946887639               |
| SNP_P4_95561_22036213 | NC_021166.1    | Ca_kabuli_chr07 | 22036213                | GG                              | AA              | 1946887641               |
| SNP_P4_95563_22036380 | NC_021166.1    | Ca_kabuli_chr07 | 22036380                | GG                              | AA              | 1946887643               |
| SNP_P4_95565_22037366 | NC_021166.1    | Ca_kabuli_chr07 | 22037366                | CC                              | TT              | 1946887645               |
| SNP_P4_95567_22038167 | NC_021166.1    | Ca_kabuli_chr07 | 22038167                | AA                              | CC              | 1946887647               |
| SNP_P4_95568_22038776 | NC_021166.1    | Ca_kabuli_chr07 | 22038776                | AA                              | GG              | 1946887650               |
| SNP_P4_95570_22039682 | NC_021166.1    | Ca_kabuli_chr07 | 22039682                | TT                              | CC              | 1946887652               |
| SNP_P4_95571_22040905 | NC_021166.1    | Ca_kabuli_chr07 | 22040905                | GG                              | AA              | 1946887654               |
| SNP_P4_95572_22042181 | NC_021166.1    | Ca_kabuli_chr07 | 22042181                | TT                              | GG              | 1946887656               |
| SNP_P4_95573_22042916 | NC_021166.1    | Ca_kabuli_chr07 | 22042916                | CC                              | AA              | 1946887658               |
| SNP_P4_95575_22044990 | NC_021166.1    | Ca_kabuli_chr07 | 22044990                | CC                              | AA              | 1946887660               |
| SNP_P4_95577_22046351 | NC_021166.1    | Ca_kabuli_chr07 | 22046351                | CC                              | TT              | 1946887662               |
| SNP_P4_95578_22046592 | NC_021166.1    | Ca_kabuli_chr07 | 22046592                | CC                              | TT              | 1946887664               |

| SNPs IDs              | Chromosome IDs | Chromosomes     | Physical positions (bp) | CDC Frontier (Reference genome) | (ILWC46 & LPNB) | NCBI SNPdb Accession IDs |
|-----------------------|----------------|-----------------|-------------------------|---------------------------------|-----------------|--------------------------|
| SNP_P4_95582_22047792 | NC_021166.1    | Ca_kabuli_chr07 | 22047792                | TT                              | GG              | 1946887666               |
| SNP_P4_95583_22048306 | NC_021166.1    | Ca_kabuli_chr07 | 22048306                | CC                              | TT              | 1946887668               |
| SNP_P4_95584_22048847 | NC_021166.1    | Ca_kabuli_chr07 | 22048847                | AA                              | GG              | 1946887671               |
| SNP_P4_95585_22049336 | NC_021166.1    | Ca_kabuli_chr07 | 22049336                | AA                              | TT              | 1946887673               |
| SNP_P4_95586_22049920 | NC_021166.1    | Ca_kabuli_chr07 | 22049920                | TT                              | GG              | 1946887675               |
| SNP_P4_95587_22058011 | NC_021166.1    | Ca_kabuli_chr07 | 22058011                | TT                              | AA              | 1946887677               |
| SNP_P4_95588_22058012 | NC_021166.1    | Ca_kabuli_chr07 | 22058012                | TT                              | AA              | 1946887679               |
| SNP_P4_95589_22069260 | NC_021166.1    | Ca_kabuli_chr07 | 22069260                | AA                              | CC              | 1946887681               |
| SNP_P4_95590_22085563 | NC_021166.1    | Ca_kabuli_chr07 | 22085563                | TT                              | CC              | 1946887683               |
| SNP_P4_95591_22090966 | NC_021166.1    | Ca_kabuli_chr07 | 22090966                | CC                              | TT              | 1946887685               |
| SNP_P4_95593_22101290 | NC_021166.1    | Ca_kabuli_chr07 | 22101290                | AA                              | TT              | 1946887687               |
| SNP_P4_95594_22101299 | NC_021166.1    | Ca_kabuli_chr07 | 22101299                | CC                              | TT              | 1946887689               |
| SNP_P4_95596_22101671 | NC_021166.1    | Ca_kabuli_chr07 | 22101671                | GG                              | AA              | 1946887691               |
| SNP_P4_95597_22101683 | NC_021166.1    | Ca_kabuli_chr07 | 22101683                | CC                              | TT              | 1946887694               |
| SNP_P4_95598_22115081 | NC_021166.1    | Ca_kabuli_chr07 | 22115081                | GG                              | AA              | 1946887696               |
| SNP_P4_95600_22126059 | NC_021166.1    | Ca_kabuli_chr07 | 22126059                | CC                              | GG              | 1946887698               |
| SNP_P4_95601_22143092 | NC_021166.1    | Ca_kabuli_chr07 | 22143092                | CC                              | TT              | 1946887700               |
| SNP_P4_95602_22143479 | NC_021166.1    | Ca_kabuli_chr07 | 22143479                | GG                              | AA              | 1946887702               |
| SNP_P4_95603_22143658 | NC_021166.1    | Ca_kabuli_chr07 | 22143658                | CC                              | TT              | 1946887704               |
| SNP_P4_95604_22143678 | NC_021166.1    | Ca_kabuli_chr07 | 22143678                | TT                              | GG              | 1946887706               |
| SNP_P4_95605_22143684 | NC_021166.1    | Ca_kabuli_chr07 | 22143684                | GG                              | AA              | 1946887708               |
| SNP_P4_95606_22143688 | NC_021166.1    | Ca_kabuli_chr07 | 22143688                | GG                              | TT              | 1946887710               |
| SNP_P4_95607_22146422 | NC_021166.1    | Ca_kabuli_chr07 | 22146422                | GG                              | AA              | 1946887713               |
| SNP_P4_95608_22146457 | NC_021166.1    | Ca_kabuli_chr07 | 22146457                | GG                              | TT              | 1946887715               |
| SNP_P4_95609_22146522 | NC_021166.1    | Ca_kabuli_chr07 | 22146522                | GG                              | AA              | 1946887717               |
| SNP_P4_95611_22146668 | NC_021166.1    | Ca_kabuli_chr07 | 22146668                | TT                              | AA              | 1946887719               |
| SNP_P4_95612_22146698 | NC_021166.1    | Ca_kabuli_chr07 | 22146698                | CC                              | TT              | 1946887721               |
| SNP_P4_95613_22146706 | NC_021166.1    | Ca_kabuli_chr07 | 22146706                | AA                              | GG              | 1946887723               |
| SNP_P4_95614_22146740 | NC_021166.1    | Ca_kabuli_chr07 | 22146740                | AA                              | GG              | 1946887725               |
| SNP_P4_95615_22152507 | NC_021166.1    | Ca_kabuli_chr07 | 22152507                | AA                              | GG              | 1946887727               |
| SNP_P4_95616_22157475 | NC_021166.1    | Ca_kabuli_chr07 | 22157475                | AA                              | TT              | 1946887730               |
| SNP_P4_95617_22174122 | NC_021166.1    | Ca_kabuli_chr07 | 22174122                | GG                              | AA              | 1946887732               |
| SNP_P4_95618_22187034 | NC_021166.1    | Ca_kabuli_chr07 | 22187034                | CC                              | AA              | 1946887734               |
| SNP_P4_95619_22187228 | NC_021166.1    | Ca_kabuli_chr07 | 22187228                | TT                              | AA              | 1946887736               |
| SNP_P4_95620_22205859 | NC_021166.1    | Ca_kabuli_chr07 | 22205859                | CC                              | TT              | 1946887738               |
| SNP_P4_95621_22206661 | NC_021166.1    | Ca_kabuli_chr07 | 22206661                | CC                              | TT              | 1946887740               |
| SNP_P4_95622_22206672 | NC_021166.1    | Ca_kabuli_chr07 | 22206672                | CC                              | TT              | 1946887742               |
| SNP_P4_95623_22206686 | NC_021166.1    | Ca_kabuli_chr07 | 22206686                | CC                              | TT              | 1946887744               |
| SNP_P4_95624_22206712 | NC_021166.1    | Ca_kabuli_chr07 | 22206712                | AA                              | GG              | 1946887746               |
| SNP_P4_95625_22206804 | NC_021166.1    | Ca_kabuli_chr07 | 22206804                | CC                              | TT              | 1946887748               |
| SNP_P4_95626_22206807 | NC_021166.1    | Ca_kabuli_chr07 | 22206807                | TT                              | AA              | 1946887750               |
| SNP_P4_95627_22206811 | NC_021166.1    | Ca_kabuli_chr07 | 22206811                | GG                              | AA              | 1946887752               |

| SNPs IDs              | Chromosome IDs | Chromosomes     | Physical positions (bp) | CDC Frontier (Reference genome) | (ILWC46 & LPNB) | NCBI SNPdb Accession IDs |
|-----------------------|----------------|-----------------|-------------------------|---------------------------------|-----------------|--------------------------|
| SNP_P4_95628_22229601 | NC_021166.1    | Ca_kabuli_chr07 | 22229601                | GG                              | TT              | 1946887754               |
| SNP_P4_95629_22229612 | NC_021166.1    | Ca_kabuli_chr07 | 22229612                | GG                              | AA              | 1946887756               |
| SNP_P4_95630_22229635 | NC_021166.1    | Ca_kabuli_chr07 | 22229635                | CC                              | TT              | 1946887758               |
| SNP_P4_95631_22248146 | NC_021166.1    | Ca_kabuli_chr07 | 22248146                | TT                              | CC              | 1946887760               |
| SNP_P4_95632_22296991 | NC_021166.1    | Ca_kabuli_chr07 | 22296991                | CC                              | TT              | 1946887762               |
| SNP_P4_95634_22323826 | NC_021166.1    | Ca_kabuli_chr07 | 22323826                | AA                              | TT              | 1946887764               |
| SNP_P4_95636_22327210 | NC_021166.1    | Ca_kabuli_chr07 | 22327210                | CC                              | TT              | 1946887766               |
| SNP_P4_95637_22327215 | NC_021166.1    | Ca_kabuli_chr07 | 22327215                | TT                              | CC              | 1946887768               |
| SNP_P4_95639_22327632 | NC_021166.1    | Ca_kabuli_chr07 | 22327632                | CC                              | AA              | 1946887770               |
| SNP_P4_95640_22330596 | NC_021166.1    | Ca_kabuli_chr07 | 22330596                | TT                              | AA              | 1946887772               |
| SNP_P4_95641_22330597 | NC_021166.1    | Ca_kabuli_chr07 | 22330597                | GG                              | TT              | 1946887774               |
| SNP_P4_95642_22330680 | NC_021166.1    | Ca_kabuli_chr07 | 22330680                | GG                              | CC              | 1946887776               |
| SNP_P4_95643_22330997 | NC_021166.1    | Ca_kabuli_chr07 | 22330997                | GG                              | AA              | 1946887778               |
| SNP_P4_95644_22331017 | NC_021166.1    | Ca_kabuli_chr07 | 22331017                | GG                              | AA              | 1946887780               |
| SNP_P4_95645_22333113 | NC_021166.1    | Ca_kabuli_chr07 | 22333113                | AA                              | TT              | 1946887782               |
| SNP_P4_95646_22333203 | NC_021166.1    | Ca_kabuli_chr07 | 22333203                | AA                              | TT              | 1946887784               |
| SNP_P4_95647_22333221 | NC_021166.1    | Ca_kabuli_chr07 | 22333221                | GG                              | AA              | 1946887786               |
| SNP_P4_95648_22335859 | NC_021166.1    | Ca_kabuli_chr07 | 22335859                | CC                              | TT              | 1946887788               |
| SNP_P4_95649_22338485 | NC_021166.1    | Ca_kabuli_chr07 | 22338485                | TT                              | GG              | 1946887790               |
| SNP_P4_95650_22342233 | NC_021166.1    | Ca_kabuli_chr07 | 22342233                | CC                              | TT              | 1946887792               |
| SNP_P4_95651_22354410 | NC_021166.1    | Ca_kabuli_chr07 | 22354410                | AA                              | GG              | 1946887794               |
| SNP_P4_95653_22373356 | NC_021166.1    | Ca_kabuli_chr07 | 22373356                | AA                              | GG              | 1946887796               |
| SNP_P4_95654_22380548 | NC_021166.1    | Ca_kabuli_chr07 | 22380548                | CC                              | AA              | 1946887798               |
| SNP_P4_95655_22405733 | NC_021166.1    | Ca_kabuli_chr07 | 22405733                | CC                              | TT              | 1946887800               |
| SNP_P4_95656_22405750 | NC_021166.1    | Ca_kabuli_chr07 | 22405750                | CC                              | TT              | 1946887802               |
| SNP_P4_95657_22405752 | NC_021166.1    | Ca_kabuli_chr07 | 22405752                | GG                              | TT              | 1946887804               |
| SNP_P4_95659_22412729 | NC_021166.1    | Ca_kabuli_chr07 | 22412729                | CC                              | TT              | 1946887806               |
| SNP_P4_95660_22435403 | NC_021166.1    | Ca_kabuli_chr07 | 22435403                | TT                              | GG              | 1946887808               |
| SNP_P4_95661_22456181 | NC_021166.1    | Ca_kabuli_chr07 | 22456181                | TT                              | GG              | 1946887810               |
| SNP_P4_95662_22456194 | NC_021166.1    | Ca_kabuli_chr07 | 22456194                | TT                              | CC              | 1946887812               |
| SNP_P4_95663_22456672 | NC_021166.1    | Ca_kabuli_chr07 | 22456672                | CC                              | TT              | 1946887814               |
| SNP_P4_95664_22467876 | NC_021166.1    | Ca_kabuli_chr07 | 22467876                | AA                              | GG              | 1946887816               |
| SNP_P4_95665_22473841 | NC_021166.1    | Ca_kabuli_chr07 | 22473841                | AA                              | CC              | 1946887818               |
| SNP_P4_95666_22473843 | NC_021166.1    | Ca_kabuli_chr07 | 22473843                | GG                              | AA              | 1946887820               |
| SNP_P4_95669_22527751 | NC_021166.1    | Ca_kabuli_chr07 | 22527751                | GG                              | AA              | 1946887822               |
| SNP_P4_95670_22534232 | NC_021166.1    | Ca_kabuli_chr07 | 22534232                | AA                              | GG              | 1946887824               |
| SNP_P4_95671_22541001 | NC_021166.1    | Ca_kabuli_chr07 | 22541001                | AA                              | GG              | 1946887826               |
| SNP_P4_95672_22541261 | NC_021166.1    | Ca_kabuli_chr07 | 22541261                | GG                              | AA              | 1946887828               |
| SNP_P4_95675_22564792 | NC_021166.1    | Ca_kabuli_chr07 | 22564792                | GG                              | AA              | 1946887830               |
| SNP_P4_95676_22564829 | NC_021166.1    | Ca_kabuli_chr07 | 22564829                | AA                              | TT              | 1946887832               |
| SNP_P4_95677_22564852 | NC_021166.1    | Ca_kabuli_chr07 | 22564852                | TT                              | GG              | 1946887834               |
| SNP_P4_95678_22565175 | NC_021166.1    | Ca_kabuli_chr07 | 22565175                | GG                              | AA              | 1946887836               |

| SNPs IDs              | Chromosome IDs | Chromosomes     | Physical positions (bp) | CDC Frontier (Reference genome) | (ILWC46 & LPNB) | NCBI SNPdb Accession IDs |
|-----------------------|----------------|-----------------|-------------------------|---------------------------------|-----------------|--------------------------|
| SNP_P4_95679_22565198 | NC_021166.1    | Ca_kabuli_chr07 | 22565198                | AA                              | TT              | 1946887838               |
| SNP_P4_95682_22587551 | NC_021166.1    | Ca_kabuli_chr07 | 22587551                | CC                              | AA              | 1946887840               |
| SNP_P4_95683_22593003 | NC_021166.1    | Ca_kabuli_chr07 | 22593003                | AA                              | GG              | 1946887842               |
| SNP_P4_95684_22597432 | NC_021166.1    | Ca_kabuli_chr07 | 22597432                | TT                              | CC              | 1946887844               |
| SNP_P4_95685_22597433 | NC_021166.1    | Ca_kabuli_chr07 | 22597433                | GG                              | TT              | 1946887846               |
| SNP_P4_95686_22597798 | NC_021166.1    | Ca_kabuli_chr07 | 22597798                | TT                              | AA              | 1946887848               |
| SNP_P4_95687_22597821 | NC_021166.1    | Ca_kabuli_chr07 | 22597821                | TT                              | CC              | 1946887850               |
| SNP_P4_95688_22598081 | NC_021166.1    | Ca_kabuli_chr07 | 22598081                | TT                              | CC              | 1946887852               |
| SNP_P4_95689_22664223 | NC_021166.1    | Ca_kabuli_chr07 | 22664223                | CC                              | GG              | 1946887854               |
| SNP_P4_95690_22664233 | NC_021166.1    | Ca_kabuli_chr07 | 22664233                | GG                              | AA              | 1946887856               |
| SNP_P4_95691_22664292 | NC_021166.1    | Ca_kabuli_chr07 | 22664292                | AA                              | GG              | 1946887858               |
| SNP_P4_95692_22664298 | NC_021166.1    | Ca_kabuli_chr07 | 22664298                | AA                              | GG              | 1946887860               |
| SNP_P4_95693_22699750 | NC_021166.1    | Ca_kabuli_chr07 | 22699750                | AA                              | CC              | 1946887862               |
| SNP_P4_95694_22699759 | NC_021166.1    | Ca_kabuli_chr07 | 22699759                | GG                              | TT              | 1946887864               |
| SNP_P4_95695_22700549 | NC_021166.1    | Ca_kabuli_chr07 | 22700549                | CC                              | TT              | 1946887866               |
| SNP_P4_95696_22700880 | NC_021166.1    | Ca_kabuli_chr07 | 22700880                | GG                              | AA              | 1946887868               |
| SNP_P4_95697_22700892 | NC_021166.1    | Ca_kabuli_chr07 | 22700892                | AA                              | CC              | 1946887870               |
| SNP_P4_95698_22700896 | NC_021166.1    | Ca_kabuli_chr07 | 22700896                | AA                              | GG              | 1946887872               |
| SNP_P4_95699_22700898 | NC_021166.1    | Ca_kabuli_chr07 | 22700898                | AA                              | GG              | 1946887874               |
| SNP_P4_95700_22700903 | NC_021166.1    | Ca_kabuli_chr07 | 22700903                | CC                              | TT              | 1946887876               |
| SNP_P4_95701_22700913 | NC_021166.1    | Ca_kabuli_chr07 | 22700913                | GG                              | TT              | 1946887878               |
| SNP_P4_95702_22700917 | NC_021166.1    | Ca_kabuli_chr07 | 22700917                | GG                              | AA              | 1946887880               |
| SNP_P4_95703_22700918 | NC_021166.1    | Ca_kabuli_chr07 | 22700918                | AA                              | GG              | 1946887882               |
| SNP_P4_95705_22718942 | NC_021166.1    | Ca_kabuli_chr07 | 22718942                | CC                              | AA              | 1946887884               |
| SNP_P4_95706_22753944 | NC_021166.1    | Ca_kabuli_chr07 | 22753944                | AA                              | GG              | 1946887886               |
| SNP_P4_95707_22761942 | NC_021166.1    | Ca_kabuli_chr07 | 22761942                | TT                              | AA              | 1946887888               |
| SNP_P4_95708_22808643 | NC_021166.1    | Ca_kabuli_chr07 | 22808643                | AA                              | GG              | 1946887890               |
| SNP_P4_95709_22858274 | NC_021166.1    | Ca_kabuli_chr07 | 22858274                | GG                              | TT              | 1946887892               |
| SNP_P4_95710_22858737 | NC_021166.1    | Ca_kabuli_chr07 | 22858737                | CC                              | TT              | 1946887894               |
| SNP_P4_95711_22861403 | NC_021166.1    | Ca_kabuli_chr07 | 22861403                | TT                              | GG              | 1946887896               |
| SNP_P4_95712_22861427 | NC_021166.1    | Ca_kabuli_chr07 | 22861427                | TT                              | CC              | 1946887898               |
| SNP_P4_95713_22861445 | NC_021166.1    | Ca_kabuli_chr07 | 22861445                | AA                              | GG              | 1946887900               |
| SNP_P4_95714_22861446 | NC_021166.1    | Ca_kabuli_chr07 | 22861446                | GG                              | AA              | 1946887902               |
| SNP_P4_95715_22861448 | NC_021166.1    | Ca_kabuli_chr07 | 22861448                | GG                              | TT              | 1946887904               |
| SNP_P4_95716_22863637 | NC_021166.1    | Ca_kabuli_chr07 | 22863637                | GG                              | AA              | 1946887906               |
| SNP_P4_95717_22863664 | NC_021166.1    | Ca_kabuli_chr07 | 22863664                | CC                              | AA              | 1946887908               |
| SNP_P4_95718_22864237 | NC_021166.1    | Ca_kabuli_chr07 | 22864237                | TT                              | AA              | 1946887910               |
| SNP_P4_95719_22864273 | NC_021166.1    | Ca_kabuli_chr07 | 22864273                | TT                              | CC              | 1946887912               |
| SNP_P4_95720_22864289 | NC_021166.1    | Ca_kabuli_chr07 | 22864289                | CC                              | TT              | 1946887914               |
| SNP_P4_95721_22864330 | NC_021166.1    | Ca_kabuli_chr07 | 22864330                | GG                              | AA              | 1946887916               |
| SNP_P4_95722_22870772 | NC_021166.1    | Ca_kabuli_chr07 | 22870772                | AA                              | GG              | 1946887919               |
| SNP_P4_95724_22911950 | NC_021166.1    | Ca_kabuli_chr07 | 22911950                | TT                              | CC              | 1946887921               |

| SNPs IDs              | Chromosome IDs | Chromosomes     | Physical positions (bp) | CDC Frontier (Reference genome) | (ILWC46 & LPNB) | NCBI SNPdb Accession IDs |
|-----------------------|----------------|-----------------|-------------------------|---------------------------------|-----------------|--------------------------|
| SNP_P4_95725_22911952 | NC_021166.1    | Ca_kabuli_chr07 | 22911952                | GG                              | TT              | 1946887923               |
| SNP_P4_95726_22911961 | NC_021166.1    | Ca_kabuli_chr07 | 22911961                | AA                              | CC              | 1946887925               |
| SNP_P4_95727_22911971 | NC_021166.1    | Ca_kabuli_chr07 | 22911971                | CC                              | TT              | 1946887927               |
| SNP_P4_95728_22912885 | NC_021166.1    | Ca_kabuli_chr07 | 22912885                | CC                              | TT              | 1946887929               |
| SNP_P4_95729_22914542 | NC_021166.1    | Ca_kabuli_chr07 | 22914542                | CC                              | TT              | 1946887931               |
| SNP_P4_95730_22921638 | NC_021166.1    | Ca_kabuli_chr07 | 22921638                | TT                              | AA              | 1946887934               |
| SNP_P4_95731_22921664 | NC_021166.1    | Ca_kabuli_chr07 | 22921664                | AA                              | GG              | 1946887936               |
| SNP_P4_95732_22921689 | NC_021166.1    | Ca_kabuli_chr07 | 22921689                | CC                              | GG              | 1946887938               |
| SNP_P4_95733_22921719 | NC_021166.1    | Ca_kabuli_chr07 | 22921719                | CC                              | TT              | 1946887940               |
| SNP_P4_95734_22921909 | NC_021166.1    | Ca_kabuli_chr07 | 22921909                | GG                              | CC              | 1946887942               |
| SNP_P4_95735_22921932 | NC_021166.1    | Ca_kabuli_chr07 | 22921932                | AA                              | GG              | 1946887944               |
| SNP_P4_95736_22921952 | NC_021166.1    | Ca_kabuli_chr07 | 22921952                | AA                              | CC              | 1946887946               |
| SNP_P4_95737_22921965 | NC_021166.1    | Ca_kabuli_chr07 | 22921965                | TT                              | CC              | 1946887948               |
| SNP_P4_95738_22921976 | NC_021166.1    | Ca_kabuli_chr07 | 22921976                | AA                              | GG              | 1946887950               |
| SNP_P4_95739_22922025 | NC_021166.1    | Ca_kabuli_chr07 | 22922025                | AA                              | GG              | 1946887952               |
| SNP_P4_95740_22922128 | NC_021166.1    | Ca_kabuli_chr07 | 22922128                | GG                              | TT              | 1946887954               |
| SNP_P4_95741_22924871 | NC_021166.1    | Ca_kabuli_chr07 | 22924871                | GG                              | AA              | 1946887956               |
| SNP_P4_95742_22941545 | NC_021166.1    | Ca_kabuli_chr07 | 22941545                | CC                              | TT              | 1946887958               |
| SNP_P4_95743_22947030 | NC_021166.1    | Ca_kabuli_chr07 | 22947030                | TT                              | CC              | 1946887960               |
| SNP_P4_95744_22947951 | NC_021166.1    | Ca_kabuli_chr07 | 22947951                | GG                              | AA              | 1946887962               |
| SNP_P4_95745_22953449 | NC_021166.1    | Ca_kabuli_chr07 | 22953449                | AA                              | TT              | 1946887964               |
| SNP_P4_95747_22960583 | NC_021166.1    | Ca_kabuli_chr07 | 22960583                | AA                              | CC              | 1946887966               |
| SNP_P4_95748_22969763 | NC_021166.1    | Ca_kabuli_chr07 | 22969763                | TT                              | CC              | 1946887968               |
| SNP_P4_95749_22969857 | NC_021166.1    | Ca_kabuli_chr07 | 22969857                | CC                              | TT              | 1946887970               |
| SNP_P4_95750_22969875 | NC_021166.1    | Ca_kabuli_chr07 | 22969875                | TT                              | CC              | 1946887972               |
| SNP_P4_95751_22969878 | NC_021166.1    | Ca_kabuli_chr07 | 22969878                | GG                              | TT              | 1946887973               |
| SNP_P4_95753_22969944 | NC_021166.1    | Ca_kabuli_chr07 | 22969944                | AA                              | GG              | 1946887975               |
| SNP_P4_95754_22977294 | NC_021166.1    | Ca_kabuli_chr07 | 22977294                | TT                              | AA              | 1946887977               |
| SNP_P4_95755_22980318 | NC_021166.1    | Ca_kabuli_chr07 | 22980318                | CC                              | TT              | 1946887979               |
| SNP_P4_95756_22987601 | NC_021166.1    | Ca_kabuli_chr07 | 22987601                | TT                              | CC              | 1946887981               |
| SNP_P4_95757_22992416 | NC_021166.1    | Ca_kabuli_chr07 | 22992416                | AA                              | CC              | 1946887983               |
| SNP_P4_95758_22992474 | NC_021166.1    | Ca_kabuli_chr07 | 22992474                | AA                              | GG              | 1946887985               |
| SNP_P4_95759_22992492 | NC_021166.1    | Ca_kabuli_chr07 | 22992492                | GG                              | AA              | 1946887987               |
| SNP_P4_95760_22992561 | NC_021166.1    | Ca_kabuli_chr07 | 22992561                | CC                              | TT              | 1946887989               |
| SNP_P4_95761_22992570 | NC_021166.1    | Ca_kabuli_chr07 | 22992570                | TT                              | GG              | 1946887991               |
| SNP_P4_95764_22992765 | NC_021166.1    | Ca_kabuli_chr07 | 22992765                | CC                              | TT              | 1946887993               |
| SNP_P4_95765_22992802 | NC_021166.1    | Ca_kabuli_chr07 | 22992802                | AA                              | CC              | 1946887995               |
| SNP_P4_95766_22992867 | NC_021166.1    | Ca_kabuli_chr07 | 22992867                | TT                              | CC              | 1946887997               |
| SNP_P4_95767_22992878 | NC_021166.1    | Ca_kabuli_chr07 | 22992878                | AA                              | GG              | 1946888000               |
| SNP_P4_95768_22992915 | NC_021166.1    | Ca_kabuli_chr07 | 22992915                | CC                              | TT              | 1946888002               |
| SNP_P4_95769_22992985 | NC_021166.1    | Ca_kabuli_chr07 | 22992985                | CC                              | AA              | 1946888004               |
| SNP_P4_95770_22993077 | NC_021166.1    | Ca_kabuli_chr07 | 22993077                | GG                              | AA              | 1946888006               |



| SNPs IDs              | Chromosome IDs | Chromosomes     | Physical positions (bp) | CDC Frontier (Reference genome) | (ILWC46 & LPNB) | NCBI SNPdb Accession IDs |
|-----------------------|----------------|-----------------|-------------------------|---------------------------------|-----------------|--------------------------|
| SNP_P4_95771_22995814 | NC_021166.1    | Ca_kabuli_chr07 | 22995814                | CC                              | TT              | 1946888008               |
| SNP_P4_95772_22996031 | NC_021166.1    | Ca_kabuli_chr07 | 22996031                | AA                              | TT              | 1946888010               |
| SNP_P4_95773_22996032 | NC_021166.1    | Ca_kabuli_chr07 | 22996032                | TT                              | AA              | 1946888012               |
| SNP_P4_95774_23037456 | NC_021166.1    | Ca_kabuli_chr07 | 23037456                | GG                              | TT              | 1946888014               |
| SNP_P4_95775_23037469 | NC_021166.1    | Ca_kabuli_chr07 | 23037469                | CC                              | TT              | 1946888016               |
| SNP_P4_95776_23037533 | NC_021166.1    | Ca_kabuli_chr07 | 23037533                | CC                              | TT              | 1946888019               |
| SNP_P4_95778_23037800 | NC_021166.1    | Ca_kabuli_chr07 | 23037800                | GG                              | AA              | 1946888021               |
| SNP_P4_95779_23038213 | NC_021166.1    | Ca_kabuli_chr07 | 23038213                | GG                              | AA              | 1946888023               |
| SNP_P4_95780_23038380 | NC_021166.1    | Ca_kabuli_chr07 | 23038380                | AA                              | GG              | 1946888025               |
| SNP_P4_95781_23038537 | NC_021166.1    | Ca_kabuli_chr07 | 23038537                | AA                              | TT              | 1946888027               |
| SNP_P4_95782_23040601 | NC_021166.1    | Ca_kabuli_chr07 | 23040601                | TT                              | CC              | 1946888029               |
| SNP_P4_95783_23040869 | NC_021166.1    | Ca_kabuli_chr07 | 23040869                | TT                              | AA              | 1946888031               |
| SNP_P4_95785_23056566 | NC_021166.1    | Ca_kabuli_chr07 | 23056566                | CC                              | TT              | 1946888033               |
| SNP_P4_95786_23056601 | NC_021166.1    | Ca_kabuli_chr07 | 23056601                | TT                              | AA              | 1946888035               |
| SNP_P4_95788_23085664 | NC_021166.1    | Ca_kabuli_chr07 | 23085664                | GG                              | AA              | 1946888037               |
| SNP_P4_95789_23089125 | NC_021166.1    | Ca_kabuli_chr07 | 23089125                | GG                              | AA              | 1946888039               |
| SNP_P4_95790_23092894 | NC_021166.1    | Ca_kabuli_chr07 | 23092894                | GG                              | AA              | 1946888041               |
| SNP_P4_95791_23126448 | NC_021166.1    | Ca_kabuli_chr07 | 23126448                | CC                              | TT              | 1946888043               |
| SNP_P4_95792_23127613 | NC_021166.1    | Ca_kabuli_chr07 | 23127613                | GG                              | AA              | 1946888045               |
| SNP_P4_95793_23146290 | NC_021166.1    | Ca_kabuli_chr07 | 23146290                | CC                              | TT              | 1946888047               |
| SNP_P4_95794_23162239 | NC_021166.1    | Ca_kabuli_chr07 | 23162239                | GG                              | TT              | 1946888050               |
| SNP_P4_95795_23163580 | NC_021166.1    | Ca_kabuli_chr07 | 23163580                | CC                              | TT              | 1946888052               |
| SNP_P4_95796_23168674 | NC_021166.1    | Ca_kabuli_chr07 | 23168674                | AA                              | GG              | 1946888055               |
| SNP_P4_95798_23193340 | NC_021166.1    | Ca_kabuli_chr07 | 23193340                | AA                              | GG              | 1946888057               |
| SNP_P4_95799_23193376 | NC_021166.1    | Ca_kabuli_chr07 | 23193376                | GG                              | AA              | 1946888059               |
| SNP_P4_95800_23193557 | NC_021166.1    | Ca_kabuli_chr07 | 23193557                | CC                              | TT              | 1946888061               |
| SNP_P4_95801_23193576 | NC_021166.1    | Ca_kabuli_chr07 | 23193576                | AA                              | GG              | 1946888063               |
| SNP_P4_95802_23193577 | NC_021166.1    | Ca_kabuli_chr07 | 23193577                | TT                              | CC              | 1946888065               |
| SNP_P4_95803_23193594 | NC_021166.1    | Ca_kabuli_chr07 | 23193594                | TT                              | CC              | 1946888067               |
| SNP_P4_95804_23193619 | NC_021166.1    | Ca_kabuli_chr07 | 23193619                | TT                              | GG              | 1946888069               |
| SNP_P4_95805_23193706 | NC_021166.1    | Ca_kabuli_chr07 | 23193706                | AA                              | GG              | 1946888071               |
| SNP_P4_95806_23193707 | NC_021166.1    | Ca_kabuli_chr07 | 23193707                | AA                              | GG              | 1946888074               |
| SNP_P4_95808_23201499 | NC_021166.1    | Ca_kabuli_chr07 | 23201499                | TT                              | AA              | 1946888076               |
| SNP_P4_95809_23230420 | NC_021166.1    | Ca_kabuli_chr07 | 23230420                | TT                              | GG              | 1946888078               |
| SNP_P4_95810_23241247 | NC_021166.1    | Ca_kabuli_chr07 | 23241247                | AA                              | CC              | 1946888080               |
| SNP_P4_95811_23241335 | NC_021166.1    | Ca_kabuli_chr07 | 23241335                | GG                              | AA              | 1946888082               |
| SNP_P4_95812_23241701 | NC_021166.1    | Ca_kabuli_chr07 | 23241701                | AA                              | CC              | 1946888084               |
| SNP_P4_95813_23246774 | NC_021166.1    | Ca_kabuli_chr07 | 23246774                | TT                              | CC              | 1946888086               |
| SNP_P4_95814_23247163 | NC_021166.1    | Ca_kabuli_chr07 | 23247163                | GG                              | AA              | 1946888089               |
| SNP_P4_95815_23247180 | NC_021166.1    | Ca_kabuli_chr07 | 23247180                | CC                              | TT              | 1946888091               |
| SNP_P4_95816_23247187 | NC_021166.1    | Ca_kabuli_chr07 | 23247187                | CC                              | TT              | 1946888093               |
| SNP_P4_95817_23247189 | NC_021166.1    | Ca_kabuli_chr07 | 23247189                | GG                              | AA              | 1946888095               |

| SNPs IDs              | Chromosome IDs | Chromosomes     | Physical positions (bp) | CDC Frontier (Reference genome) | (ILWC46 & LPNB) | NCBI SNPdb Accession IDs |
|-----------------------|----------------|-----------------|-------------------------|---------------------------------|-----------------|--------------------------|
| SNP_P4_95818_23247202 | NC_021166.1    | Ca_kabuli_chr07 | 23247202                | CC                              | TT              | 1946888097               |
| SNP_P4_95819_23247215 | NC_021166.1    | Ca_kabuli_chr07 | 23247215                | TT                              | CC              | 1946888099               |
| SNP_P4_95820_23247218 | NC_021166.1    | Ca_kabuli_chr07 | 23247218                | GG                              | AA              | 1946888102               |
| SNP_P4_95821_23247380 | NC_021166.1    | Ca_kabuli_chr07 | 23247380                | GG                              | AA              | 1946888104               |
| SNP_P4_95822_23250657 | NC_021166.1    | Ca_kabuli_chr07 | 23250657                | AA                              | CC              | 1946888106               |
| SNP_P4_95825_23266551 | NC_021166.1    | Ca_kabuli_chr07 | 23266551                | TT                              | CC              | 1946888108               |
| SNP_P4_95826_23279617 | NC_021166.1    | Ca_kabuli_chr07 | 23279617                | AA                              | GG              | 1946888110               |
| SNP_P4_95827_23280661 | NC_021166.1    | Ca_kabuli_chr07 | 23280661                | AA                              | GG              | 1946888112               |
| SNP_P4_95828_23285224 | NC_021166.1    | Ca_kabuli_chr07 | 23285224                | AA                              | GG              | 1946888114               |
| SNP_P4_95829_23285421 | NC_021166.1    | Ca_kabuli_chr07 | 23285421                | AA                              | TT              | 1946888116               |
| SNP_P4_95830_23285474 | NC_021166.1    | Ca_kabuli_chr07 | 23285474                | AA                              | CC              | 1946888118               |
| SNP_P4_95831_23285519 | NC_021166.1    | Ca_kabuli_chr07 | 23285519                | CC                              | AA              | 1946888120               |
| SNP_P4_95832_23293813 | NC_021166.1    | Ca_kabuli_chr07 | 23293813                | GG                              | CC              | 1946888122               |
| SNP_P4_95833_23294023 | NC_021166.1    | Ca_kabuli_chr07 | 23294023                | CC                              | TT              | 1946888124               |
| SNP_P4_95834_23294211 | NC_021166.1    | Ca_kabuli_chr07 | 23294211                | AA                              | GG              | 1946888126               |
| SNP_P4_95835_23299940 | NC_021166.1    | Ca_kabuli_chr07 | 23299940                | CC                              | TT              | 1946888128               |
| SNP_P4_95836_23333000 | NC_021166.1    | Ca_kabuli_chr07 | 23333000                | AA                              | GG              | 1946888130               |
| SNP_P4_95837_23333086 | NC_021166.1    | Ca_kabuli_chr07 | 23333086                | TT                              | AA              | 1946888132               |
| SNP_P4_95838_23342375 | NC_021166.1    | Ca_kabuli_chr07 | 23342375                | TT                              | GG              | 1946888135               |
| SNP_P4_95839_23361269 | NC_021166.1    | Ca_kabuli_chr07 | 23361269                | TT                              | CC              | 1946888137               |
| SNP_P4_95840_23361450 | NC_021166.1    | Ca_kabuli_chr07 | 23361450                | GG                              | AA              | 1946888139               |
| SNP_P4_95841_23361677 | NC_021166.1    | Ca_kabuli_chr07 | 23361677                | GG                              | AA              | 1946888141               |
| SNP_P4_95842_23361706 | NC_021166.1    | Ca_kabuli_chr07 | 23361706                | CC                              | GG              | 1946888143               |
| SNP_P4_95843_23380552 | NC_021166.1    | Ca_kabuli_chr07 | 23380552                | AA                              | GG              | 1946888145               |
| SNP_P4_95844_23383125 | NC_021166.1    | Ca_kabuli_chr07 | 23383125                | CC                              | TT              | 1946888147               |
| SNP_P4_95845_23385216 | NC_021166.1    | Ca_kabuli_chr07 | 23385216                | GG                              | CC              | 1946888149               |
| SNP_P4_95846_23390104 | NC_021166.1    | Ca_kabuli_chr07 | 23390104                | CC                              | TT              | 1946888151               |
| SNP_P4_95848_23457276 | NC_021166.1    | Ca_kabuli_chr07 | 23457276                | CC                              | TT              | 1946888153               |
| SNP_P4_95849_23484684 | NC_021166.1    | Ca_kabuli_chr07 | 23484684                | GG                              | AA              | 1946888155               |
| SNP_P4_95850_23497110 | NC_021166.1    | Ca_kabuli_chr07 | 23497110                | TT                              | AA              | 1946888157               |
| SNP_P4_95851_23550107 | NC_021166.1    | Ca_kabuli_chr07 | 23550107                | GG                              | AA              | 1946888159               |
| SNP_P4_95852_23553584 | NC_021166.1    | Ca_kabuli_chr07 | 23553584                | CC                              | TT              | 1946888161               |
| SNP_P4_95854_23596130 | NC_021166.1    | Ca_kabuli_chr07 | 23596130                | CC                              | TT              | 1946888163               |
| SNP_P4_95855_23603064 | NC_021166.1    | Ca_kabuli_chr07 | 23603064                | GG                              | TT              | 1946888165               |
| SNP_P4_95856_23627127 | NC_021166.1    | Ca_kabuli_chr07 | 23627127                | AA                              | GG              | 1946888167               |
| SNP_P4_95857_23627458 | NC_021166.1    | Ca_kabuli_chr07 | 23627458                | AA                              | GG              | 1946888170               |
| SNP_P4_95858_23627473 | NC_021166.1    | Ca_kabuli_chr07 | 23627473                | AA                              | GG              | 1946888172               |
| SNP_P4_95859_23627488 | NC_021166.1    | Ca_kabuli_chr07 | 23627488                | AA                              | CC              | 1946888174               |
| SNP_P4_95860_23627514 | NC_021166.1    | Ca_kabuli_chr07 | 23627514                | GG                              | AA              | 1946888176               |
| SNP_P4_95861_23632289 | NC_021166.1    | Ca_kabuli_chr07 | 23632289                | TT                              | CC              | 1946888178               |
| SNP_P4_95862_23656392 | NC_021166.1    | Ca_kabuli_chr07 | 23656392                | CC                              | TT              | 1946888180               |
| SNP_P4_95863_23656788 | NC_021166.1    | Ca_kabuli_chr07 | 23656788                | TT                              | CC              | 1946888182               |

| SNPs IDs              | Chromosome IDs | Chromosomes     | Physical positions (bp) | CDC Frontier (Reference genome) | (ILWC46 & LPNB) | NCBI SNPdb Accession IDs |
|-----------------------|----------------|-----------------|-------------------------|---------------------------------|-----------------|--------------------------|
| SNP_P4_95864_23658567 | NC_021166.1    | Ca_kabuli_chr07 | 23658567                | AA                              | TT              | 1946888184               |
| SNP_P4_95865_23658590 | NC_021166.1    | Ca_kabuli_chr07 | 23658590                | GG                              | AA              | 1946888186               |
| SNP_P4_95866_23658667 | NC_021166.1    | Ca_kabuli_chr07 | 23658667                | TT                              | CC              | 1946888188               |
| SNP_P4_95867_23661573 | NC_021166.1    | Ca_kabuli_chr07 | 23661573                | AA                              | CC              | 1946888190               |
| SNP_P4_95868_23661579 | NC_021166.1    | Ca_kabuli_chr07 | 23661579                | AA                              | GG              | 1946888192               |
| SNP_P4_95870_23667863 | NC_021166.1    | Ca_kabuli_chr07 | 23667863                | CC                              | TT              | 1946888194               |
| SNP_P4_95871_23667867 | NC_021166.1    | Ca_kabuli_chr07 | 23667867                | AA                              | GG              | 1946888196               |
| SNP_P4_95872_23667882 | NC_021166.1    | Ca_kabuli_chr07 | 23667882                | CC                              | TT              | 1946888198               |
| SNP_P4_95873_23667970 | NC_021166.1    | Ca_kabuli_chr07 | 23667970                | CC                              | AA              | 1946888200               |
| SNP_P4_95874_23668019 | NC_021166.1    | Ca_kabuli_chr07 | 23668019                | CC                              | AA              | 1946888202               |
| SNP_P4_95875_23670250 | NC_021166.1    | Ca_kabuli_chr07 | 23670250                | GG                              | AA              | 1946888204               |
| SNP_P4_95876_23672093 | NC_021166.1    | Ca_kabuli_chr07 | 23672093                | CC                              | TT              | 1946888206               |
| SNP_P4_95877_23691041 | NC_021166.1    | Ca_kabuli_chr07 | 23691041                | AA                              | GG              | 1946888208               |
| SNP_P4_95878_23707537 | NC_021166.1    | Ca_kabuli_chr07 | 23707537                | AA                              | TT              | 1946888210               |
| SNP_P4_95879_23707651 | NC_021166.1    | Ca_kabuli_chr07 | 23707651                | TT                              | AA              | 1946888212               |
| SNP_P4_95880_23707883 | NC_021166.1    | Ca_kabuli_chr07 | 23707883                | AA                              | GG              | 1946888214               |
| SNP_P4_95881_23707911 | NC_021166.1    | Ca_kabuli_chr07 | 23707911                | TT                              | CC              | 1946888216               |
| SNP_P4_95882_23707932 | NC_021166.1    | Ca_kabuli_chr07 | 23707932                | GG                              | AA              | 1946888218               |
| SNP_P4_95883_23707935 | NC_021166.1    | Ca_kabuli_chr07 | 23707935                | AA                              | CC              | 1946888220               |
| SNP_P4_95884_23707981 | NC_021166.1    | Ca_kabuli_chr07 | 23707981                | AA                              | GG              | 1946888222               |
| SNP_P4_95885_23708019 | NC_021166.1    | Ca_kabuli_chr07 | 23708019                | CC                              | TT              | 1946888224               |
| SNP_P4_95886_23718396 | NC_021166.1    | Ca_kabuli_chr07 | 23718396                | TT                              | AA              | 1946888226               |
| SNP_P4_95887_23724126 | NC_021166.1    | Ca_kabuli_chr07 | 23724126                | GG                              | CC              | 1946888228               |
| SNP_P4_95888_23724466 | NC_021166.1    | Ca_kabuli_chr07 | 23724466                | AA                              | TT              | 1946888230               |
| SNP_P4_95889_23724477 | NC_021166.1    | Ca_kabuli_chr07 | 23724477                | GG                              | AA              | 1946888232               |
| SNP_P4_95890_23728336 | NC_021166.1    | Ca_kabuli_chr07 | 23728336                | GG                              | TT              | 1946888234               |
| SNP_P4_95891_23728337 | NC_021166.1    | Ca_kabuli_chr07 | 23728337                | AA                              | GG              | 1946888236               |
| SNP_P4_95892_23728347 | NC_021166.1    | Ca_kabuli_chr07 | 23728347                | CC                              | TT              | 1946888238               |
| SNP_P4_95893_23728355 | NC_021166.1    | Ca_kabuli_chr07 | 23728355                | CC                              | TT              | 1946888241               |
| SNP_P4_95894_23751486 | NC_021166.1    | Ca_kabuli_chr07 | 23751486                | GG                              | AA              | 1946888243               |
| SNP_P4_95895_23766530 | NC_021166.1    | Ca_kabuli_chr07 | 23766530                | GG                              | CC              | 1946888245               |
| SNP_P4_95896_23766816 | NC_021166.1    | Ca_kabuli_chr07 | 23766816                | AA                              | TT              | 1946888247               |
| SNP_P4_95897_23766818 | NC_021166.1    | Ca_kabuli_chr07 | 23766818                | CC                              | AA              | 1946888249               |
| SNP_P4_95898_23775403 | NC_021166.1    | Ca_kabuli_chr07 | 23775403                | AA                              | GG              | 1946888251               |
| SNP_P4_95901_23798634 | NC_021166.1    | Ca_kabuli_chr07 | 23798634                | AA                              | TT              | 1946888253               |
| SNP_P4_95903_23807157 | NC_021166.1    | Ca_kabuli_chr07 | 23807157                | AA                              | GG              | 1946888256               |
| SNP_P4_95904_23807168 | NC_021166.1    | Ca_kabuli_chr07 | 23807168                | AA                              | GG              | 1946888258               |
| SNP_P4_95905_23807184 | NC_021166.1    | Ca_kabuli_chr07 | 23807184                | CC                              | TT              | 1946888260               |
| SNP_P4_95906_23807199 | NC_021166.1    | Ca_kabuli_chr07 | 23807199                | GG                              | CC              | 1946888262               |
| SNP_P4_95907_23807208 | NC_021166.1    | Ca_kabuli_chr07 | 23807208                | TT                              | GG              | 1946888264               |
| SNP_P4_95908_23807367 | NC_021166.1    | Ca_kabuli_chr07 | 23807367                | AA                              | TT              | 1946888266               |
| SNP_P4_95909_23807396 | NC_021166.1    | Ca_kabuli_chr07 | 23807396                | AA                              | GG              | 1946888268               |

| SNPs IDs              | Chromosome IDs | Chromosomes     | Physical positions (bp) | CDC Frontier (Reference genome) | (ILWC46 & LPNB) | NCBI SNPdb Accession IDs |
|-----------------------|----------------|-----------------|-------------------------|---------------------------------|-----------------|--------------------------|
| SNP_P4_95910_23807402 | NC_021166.1    | Ca_kabuli_chr07 | 23807402                | CC                              | TT              | 1946888270               |
| SNP_P4_95912_23807450 | NC_021166.1    | Ca_kabuli_chr07 | 23807450                | AA                              | TT              | 1946888272               |
| SNP_P4_95913_23807528 | NC_021166.1    | Ca_kabuli_chr07 | 23807528                | GG                              | AA              | 1946888275               |
| SNP_P4_95914_23808121 | NC_021166.1    | Ca_kabuli_chr07 | 23808121                | CC                              | TT              | 1946888277               |
| SNP_P4_95915_23808155 | NC_021166.1    | Ca_kabuli_chr07 | 23808155                | AA                              | TT              | 1946888279               |
| SNP_P4_95916_23808562 | NC_021166.1    | Ca_kabuli_chr07 | 23808562                | AA                              | GG              | 1946888281               |
| SNP_P4_95917_23811810 | NC_021166.1    | Ca_kabuli_chr07 | 23811810                | GG                              | TT              | 1946888283               |
| SNP_P4_95918_23815462 | NC_021166.1    | Ca_kabuli_chr07 | 23815462                | TT                              | AA              | 1946888285               |
| SNP_P4_95919_23820032 | NC_021166.1    | Ca_kabuli_chr07 | 23820032                | TT                              | AA              | 1946888287               |
| SNP_P4_95920_23824521 | NC_021166.1    | Ca_kabuli_chr07 | 23824521                | TT                              | CC              | 1946888289               |
| SNP_P4_95921_23826428 | NC_021166.1    | Ca_kabuli_chr07 | 23826428                | GG                              | AA              | 1946888291               |
| SNP_P4_95922_23829231 | NC_021166.1    | Ca_kabuli_chr07 | 23829231                | AA                              | TT              | 1946888294               |
| SNP_P4_95923_23834881 | NC_021166.1    | Ca_kabuli_chr07 | 23834881                | TT                              | CC              | 1946888296               |
| SNP_P4_95924_23847620 | NC_021166.1    | Ca_kabuli_chr07 | 23847620                | AA                              | GG              | 1946888298               |
| SNP_P4_95925_23850788 | NC_021166.1    | Ca_kabuli_chr07 | 23850788                | TT                              | AA              | 1946888300               |
| SNP_P4_95927_23853389 | NC_021166.1    | Ca_kabuli_chr07 | 23853389                | TT                              | CC              | 1946888302               |
| SNP_P4_95929_23879151 | NC_021166.1    | Ca_kabuli_chr07 | 23879151                | GG                              | TT              | 1946888304               |
| SNP_P4_95930_23879255 | NC_021166.1    | Ca_kabuli_chr07 | 23879255                | AA                              | GG              | 1946888306               |
| SNP_P4_95931_23879372 | NC_021166.1    | Ca_kabuli_chr07 | 23879372                | GG                              | TT              | 1946888308               |
| SNP_P4_95932_23879380 | NC_021166.1    | Ca_kabuli_chr07 | 23879380                | CC                              | TT              | 1946888310               |
| SNP_P4_95933_23879436 | NC_021166.1    | Ca_kabuli_chr07 | 23879436                | CC                              | AA              | 1946888312               |
| SNP_P4_95934_23879451 | NC_021166.1    | Ca_kabuli_chr07 | 23879451                | TT                              | AA              | 1946888314               |
| SNP_P4_95935_23879455 | NC_021166.1    | Ca_kabuli_chr07 | 23879455                | TT                              | CC              | 1946888316               |
| SNP_P4_95936_23879477 | NC_021166.1    | Ca_kabuli_chr07 | 23879477                | CC                              | TT              | 1946888318               |
| SNP_P4_95937_23879482 | NC_021166.1    | Ca_kabuli_chr07 | 23879482                | TT                              | AA              | 1946888320               |
| SNP_P4_95938_23879513 | NC_021166.1    | Ca_kabuli_chr07 | 23879513                | AA                              | TT              | 1946888322               |
| SNP_P4_95939_23879530 | NC_021166.1    | Ca_kabuli_chr07 | 23879530                | AA                              | CC              | 1946888324               |
| SNP_P4_95940_23879531 | NC_021166.1    | Ca_kabuli_chr07 | 23879531                | CC                              | AA              | 1946888326               |
| SNP_P4_95941_23879560 | NC_021166.1    | Ca_kabuli_chr07 | 23879560                | TT                              | AA              | 1946888328               |
| SNP_P4_95942_23879576 | NC_021166.1    | Ca_kabuli_chr07 | 23879576                | GG                              | CC              | 1946888330               |
| SNP_P4_95943_23879594 | NC_021166.1    | Ca_kabuli_chr07 | 23879594                | AA                              | GG              | 1946888332               |
| SNP_P4_95944_23879615 | NC_021166.1    | Ca_kabuli_chr07 | 23879615                | TT                              | CC              | 1946888334               |
| SNP_P4_95945_23879684 | NC_021166.1    | Ca_kabuli_chr07 | 23879684                | GG                              | AA              | 1946888336               |
| SNP_P4_95946_23879685 | NC_021166.1    | Ca_kabuli_chr07 | 23879685                | CC                              | AA              | 1946888338               |
| SNP_P4_95947_23879690 | NC_021166.1    | Ca_kabuli_chr07 | 23879690                | GG                              | AA              | 1946888340               |
| SNP_P4_95948_23879728 | NC_021166.1    | Ca_kabuli_chr07 | 23879728                | AA                              | GG              | 1946888342               |
| SNP_P4_95950_23894186 | NC_021166.1    | Ca_kabuli_chr07 | 23894186                | GG                              | AA              | 1946888344               |
| SNP_P4_95951_23899148 | NC_021166.1    | Ca_kabuli_chr07 | 23899148                | CC                              | GG              | 1946888346               |
| SNP_P4_95952_23900962 | NC_021166.1    | Ca_kabuli_chr07 | 23900962                | CC                              | TT              | 1946888348               |
| SNP_P4_95953_23902081 | NC_021166.1    | Ca_kabuli_chr07 | 23902081                | TT                              | CC              | 1946888350               |
| SNP_P4_95954_23902427 | NC_021166.1    | Ca_kabuli_chr07 | 23902427                | AA                              | GG              | 1946888352               |
| SNP_P4_95955_23902457 | NC_021166.1    | Ca_kabuli_chr07 | 23902457                | GG                              | TT              | 1946888354               |

| SNPs IDs              | Chromosome IDs | Chromosomes     | Physical positions (bp) | CDC Frontier (Reference genome) | (ILWC46 & LPNB) | NCBI SNPdb Accession IDs |
|-----------------------|----------------|-----------------|-------------------------|---------------------------------|-----------------|--------------------------|
| SNP_P4_95956_23902496 | NC_021166.1    | Ca_kabuli_chr07 | 23902496                | GG                              | TT              | 1946888356               |
| SNP_P4_95957_23902717 | NC_021166.1    | Ca_kabuli_chr07 | 23902717                | AA                              | GG              | 1946888358               |
| SNP_P4_95958_23903545 | NC_021166.1    | Ca_kabuli_chr07 | 23903545                | GG                              | AA              | 1946888360               |
| SNP_P4_95960_23905788 | NC_021166.1    | Ca_kabuli_chr07 | 23905788                | CC                              | TT              | 1946888362               |
| SNP_P4_95961_23907246 | NC_021166.1    | Ca_kabuli_chr07 | 23907246                | GG                              | TT              | 1946888364               |
| SNP_P4_95963_23912076 | NC_021166.1    | Ca_kabuli_chr07 | 23912076                | GG                              | AA              | 1946888366               |
| SNP_P4_95964_23917858 | NC_021166.1    | Ca_kabuli_chr07 | 23917858                | GG                              | TT              | 1946888368               |
| SNP_P4_95965_23930939 | NC_021166.1    | Ca_kabuli_chr07 | 23930939                | TT                              | CC              | 1946888370               |
| SNP_P4_95966_23976352 | NC_021166.1    | Ca_kabuli_chr07 | 23976352                | CC                              | AA              | 1946888372               |
| SNP_P4_95967_23978678 | NC_021166.1    | Ca_kabuli_chr07 | 23978678                | TT                              | CC              | 1946888374               |
| SNP_P4_95968_23978727 | NC_021166.1    | Ca_kabuli_chr07 | 23978727                | AA                              | GG              | 1946888376               |
| SNP_P4_95969_23979091 | NC_021166.1    | Ca_kabuli_chr07 | 23979091                | TT                              | CC              | 1946888378               |
| SNP_P4_95970_23979117 | NC_021166.1    | Ca_kabuli_chr07 | 23979117                | AA                              | GG              | 1946888380               |
| SNP_P4_95971_23979127 | NC_021166.1    | Ca_kabuli_chr07 | 23979127                | TT                              | CC              | 1946888381               |
| SNP_P4_95972_23985001 | NC_021166.1    | Ca_kabuli_chr07 | 23985001                | CC                              | TT              | 1946888383               |
| SNP_P4_95973_24000684 | NC_021166.1    | Ca_kabuli_chr07 | 24000684                | AA                              | CC              | 1946888385               |
| SNP_P4_95974_24000685 | NC_021166.1    | Ca_kabuli_chr07 | 24000685                | CC                              | TT              | 1946888387               |
| SNP_P4_95975_24000723 | NC_021166.1    | Ca_kabuli_chr07 | 24000723                | TT                              | CC              | 1946888389               |
| SNP_P4_95976_24000726 | NC_021166.1    | Ca_kabuli_chr07 | 24000726                | TT                              | CC              | 1946888391               |
| SNP_P4_95977_24000735 | NC_021166.1    | Ca_kabuli_chr07 | 24000735                | CC                              | TT              | 1946888393               |
| SNP_P4_95978_24000738 | NC_021166.1    | Ca_kabuli_chr07 | 24000738                | TT                              | CC              | 1946888395               |
| SNP_P4_95979_24001315 | NC_021166.1    | Ca_kabuli_chr07 | 24001315                | AA                              | GG              | 1946888397               |
| SNP_P4_95980_24001324 | NC_021166.1    | Ca_kabuli_chr07 | 24001324                | TT                              | GG              | 1946888399               |
| SNP_P4_95981_24001338 | NC_021166.1    | Ca_kabuli_chr07 | 24001338                | CC                              | TT              | 1946888401               |
| SNP_P4_95982_24001343 | NC_021166.1    | Ca_kabuli_chr07 | 24001343                | TT                              | CC              | 1946888403               |
| SNP_P4_95983_24002208 | NC_021166.1    | Ca_kabuli_chr07 | 24002208                | TT                              | CC              | 1946888405               |
| SNP_P4_95984_24002233 | NC_021166.1    | Ca_kabuli_chr07 | 24002233                | GG                              | TT              | 1946888407               |
| SNP_P4_95985_24002394 | NC_021166.1    | Ca_kabuli_chr07 | 24002394                | CC                              | AA              | 1946888408               |
| SNP_P4_95986_24002563 | NC_021166.1    | Ca_kabuli_chr07 | 24002563                | CC                              | TT              | 1946888410               |
| SNP_P4_95987_24002566 | NC_021166.1    | Ca_kabuli_chr07 | 24002566                | CC                              | TT              | 1946888412               |
| SNP_P4_95989_24027849 | NC_021166.1    | Ca_kabuli_chr07 | 24027849                | AA                              | GG              | 1946888414               |
| SNP_P4_95990_24035561 | NC_021166.1    | Ca_kabuli_chr07 | 24035561                | GG                              | CC              | 1946888416               |
| SNP_P4_95991_24037098 | NC_021166.1    | Ca_kabuli_chr07 | 24037098                | TT                              | CC              | 1946888418               |
| SNP_P4_95992_24037426 | NC_021166.1    | Ca_kabuli_chr07 | 24037426                | AA                              | GG              | 1946888420               |
| SNP_P4_95994_24081314 | NC_021166.1    | Ca_kabuli_chr07 | 24081314                | GG                              | AA              | 1946888422               |
| SNP_P4_95995_24098257 | NC_021166.1    | Ca_kabuli_chr07 | 24098257                | TT                              | CC              | 1946888424               |
| SNP_P4_95996_24098572 | NC_021166.1    | Ca_kabuli_chr07 | 24098572                | TT                              | CC              | 1946888426               |
| SNP_P4_95997_24098589 | NC_021166.1    | Ca_kabuli_chr07 | 24098589                | AA                              | CC              | 1946888428               |
| SNP_P4_95998_24098616 | NC_021166.1    | Ca_kabuli_chr07 | 24098616                | AA                              | GG              | 1946888430               |
| SNP_P4_95999_24098653 | NC_021166.1    | Ca_kabuli_chr07 | 24098653                | TT                              | CC              | 1946888432               |
| SNP_P4_96000_24098658 | NC_021166.1    | Ca_kabuli_chr07 | 24098658                | TT                              | CC              | 1946888434               |
| SNP_P4_96002_24103812 | NC_021166.1    | Ca_kabuli_chr07 | 24103812                | GG                              | AA              | 1946888436               |

| SNPs IDs              | Chromosome IDs | Chromosomes     | Physical positions (bp) | CDC Frontier (Reference genome) | (ILWC46 & LPNB) | NCBI SNPdb Accession IDs |
|-----------------------|----------------|-----------------|-------------------------|---------------------------------|-----------------|--------------------------|
| SNP_P4_96003_24108343 | NC_021166.1    | Ca_kabuli_chr07 | 24108343                | AA                              | GG              | 1946888438               |
| SNP_P4_96004_24139068 | NC_021166.1    | Ca_kabuli_chr07 | 24139068                | TT                              | GG              | 1946888440               |
| SNP_P4_96005_24149903 | NC_021166.1    | Ca_kabuli_chr07 | 24149903                | AA                              | GG              | 1946888442               |
| SNP_P4_96006_24190845 | NC_021166.1    | Ca_kabuli_chr07 | 24190845                | AA                              | CC              | 1946888445               |
| SNP_P4_96007_24198589 | NC_021166.1    | Ca_kabuli_chr07 | 24198589                | TT                              | CC              | 1946888447               |
| SNP_P4_96008_24205821 | NC_021166.1    | Ca_kabuli_chr07 | 24205821                | GG                              | AA              | 1946888449               |
| SNP_P4_96010_24215025 | NC_021166.1    | Ca_kabuli_chr07 | 24215025                | CC                              | TT              | 1946888451               |
| SNP_P4_96011_24259061 | NC_021166.1    | Ca_kabuli_chr07 | 24259061                | TT                              | GG              | 1946888453               |
| SNP_P4_96012_24259494 | NC_021166.1    | Ca_kabuli_chr07 | 24259494                | GG                              | AA              | 1946888455               |
| SNP_P4_96013_24260137 | NC_021166.1    | Ca_kabuli_chr07 | 24260137                | TT                              | GG              | 1946888457               |
| SNP_P4_96014_24260172 | NC_021166.1    | Ca_kabuli_chr07 | 24260172                | CC                              | AA              | 1946888459               |
| SNP_P4_96016_24270234 | NC_021166.1    | Ca_kabuli_chr07 | 24270234                | GG                              | AA              | 1946888461               |
| SNP_P4_96019_24283257 | NC_021166.1    | Ca_kabuli_chr07 | 24283257                | AA                              | GG              | 1946888463               |
| SNP_P4_96020_24283925 | NC_021166.1    | Ca_kabuli_chr07 | 24283925                | TT                              | AA              | 1946888465               |
| SNP_P4_96021_24284079 | NC_021166.1    | Ca_kabuli_chr07 | 24284079                | TT                              | AA              | 1946888467               |
| SNP_P4_96023_24284992 | NC_021166.1    | Ca_kabuli_chr07 | 24284992                | TT                              | CC              | 1946888469               |
| SNP_P4_96024_24290899 | NC_021166.1    | Ca_kabuli_chr07 | 24290899                | GG                              | AA              | 1946888471               |
| SNP_P4_96025_24290906 | NC_021166.1    | Ca_kabuli_chr07 | 24290906                | CC                              | TT              | 1946888473               |
| SNP_P4_96026_24290913 | NC_021166.1    | Ca_kabuli_chr07 | 24290913                | TT                              | CC              | 1946888475               |
| SNP_P4_96027_24290915 | NC_021166.1    | Ca_kabuli_chr07 | 24290915                | GG                              | AA              | 1946888477               |
| SNP_P4_96028_24290974 | NC_021166.1    | Ca_kabuli_chr07 | 24290974                | CC                              | TT              | 1946888479               |
| SNP_P4_96029_24311321 | NC_021166.1    | Ca_kabuli_chr07 | 24311321                | CC                              | TT              | 1946888481               |
| SNP_P4_96030_24329591 | NC_021166.1    | Ca_kabuli_chr07 | 24329591                | AA                              | GG              | 1946888483               |
| SNP_P4_96031_24335219 | NC_021166.1    | Ca_kabuli_chr07 | 24335219                | TT                              | AA              | 1946888485               |
| SNP_P4_96032_24335225 | NC_021166.1    | Ca_kabuli_chr07 | 24335225                | AA                              | GG              | 1946888487               |
| SNP_P4_96033_24335283 | NC_021166.1    | Ca_kabuli_chr07 | 24335283                | TT                              | GG              | 1946888489               |
| SNP_P4_96034_24335312 | NC_021166.1    | Ca_kabuli_chr07 | 24335312                | TT                              | GG              | 1946888490               |
| SNP_P4_96035_24335618 | NC_021166.1    | Ca_kabuli_chr07 | 24335618                | GG                              | AA              | 1946888492               |
| SNP_P4_96036_24344572 | NC_021166.1    | Ca_kabuli_chr07 | 24344572                | CC                              | TT              | 1946888494               |
| SNP_P4_96037_24344588 | NC_021166.1    | Ca_kabuli_chr07 | 24344588                | GG                              | AA              | 1946888496               |
| SNP_P4_96039_24348159 | NC_021166.1    | Ca_kabuli_chr07 | 24348159                | TT                              | CC              | 1946888498               |
| SNP_P4_96040_24348315 | NC_021166.1    | Ca_kabuli_chr07 | 24348315                | CC                              | TT              | 1946888500               |
| SNP_P4_96042_24348384 | NC_021166.1    | Ca_kabuli_chr07 | 24348384                | TT                              | CC              | 1946888502               |
| SNP_P4_96043_24348439 | NC_021166.1    | Ca_kabuli_chr07 | 24348439                | AA                              | GG              | 1946888504               |
| SNP_P4_96045_24348544 | NC_021166.1    | Ca_kabuli_chr07 | 24348544                | CC                              | TT              | 1946888506               |
| SNP_P4_96046_24348562 | NC_021166.1    | Ca_kabuli_chr07 | 24348562                | TT                              | CC              | 1946888508               |
| SNP_P4_96047_24348563 | NC_021166.1    | Ca_kabuli_chr07 | 24348563                | GG                              | AA              | 1946888510               |
| SNP_P4_96048_24348657 | NC_021166.1    | Ca_kabuli_chr07 | 24348657                | AA                              | TT              | 1946888512               |
| SNP_P4_96049_24348786 | NC_021166.1    | Ca_kabuli_chr07 | 24348786                | GG                              | AA              | 1946888515               |
| SNP_P4_96050_24348812 | NC_021166.1    | Ca_kabuli_chr07 | 24348812                | CC                              | TT              | 1946888517               |
| SNP_P4_96051_24350050 | NC_021166.1    | Ca_kabuli_chr07 | 24350050                | CC                              | TT              | 1946888519               |
| SNP_P4_96053_24363825 | NC_021166.1    | Ca_kabuli_chr07 | 24363825                | TT                              | CC              | 1946888521               |

| SNPs IDs              | Chromosome IDs | Chromosomes     | Physical positions (bp) | CDC Frontier (Reference genome) | (ILWC46 & LPNB) | NCBI SNPdb Accession IDs |
|-----------------------|----------------|-----------------|-------------------------|---------------------------------|-----------------|--------------------------|
| SNP_P4_96054_24363947 | NC_021166.1    | Ca_kabuli_chr07 | 24363947                | CC                              | AA              | 1946888523               |
| SNP_P4_96055_24365838 | NC_021166.1    | Ca_kabuli_chr07 | 24365838                | TT                              | AA              | 1946888525               |
| SNP_P4_96056_24365851 | NC_021166.1    | Ca_kabuli_chr07 | 24365851                | GG                              | AA              | 1946888527               |
| SNP_P4_96057_24365880 | NC_021166.1    | Ca_kabuli_chr07 | 24365880                | AA                              | GG              | 1946888529               |
| SNP_P4_96058_24365906 | NC_021166.1    | Ca_kabuli_chr07 | 24365906                | CC                              | TT              | 1946888531               |
| SNP_P4_96059_24365928 | NC_021166.1    | Ca_kabuli_chr07 | 24365928                | GG                              | AA              | 1946888533               |
| SNP_P4_96060_24365969 | NC_021166.1    | Ca_kabuli_chr07 | 24365969                | TT                              | GG              | 1946888535               |
| SNP_P4_96061_24365970 | NC_021166.1    | Ca_kabuli_chr07 | 24365970                | TT                              | GG              | 1946888537               |
| SNP_P4_96062_24366144 | NC_021166.1    | Ca_kabuli_chr07 | 24366144                | TT                              | AA              | 1946888539               |
| SNP_P4_96063_24366275 | NC_021166.1    | Ca_kabuli_chr07 | 24366275                | GG                              | AA              | 1946888541               |
| SNP_P4_96064_24399010 | NC_021166.1    | Ca_kabuli_chr07 | 24399010                | AA                              | GG              | 1946888543               |
| SNP_P4_96065_24399051 | NC_021166.1    | Ca_kabuli_chr07 | 24399051                | AA                              | GG              | 1946888545               |
| SNP_P4_96066_24399215 | NC_021166.1    | Ca_kabuli_chr07 | 24399215                | TT                              | AA              | 1946888547               |
| SNP_P4_96067_24408991 | NC_021166.1    | Ca_kabuli_chr07 | 24408991                | TT                              | CC              | 1946888549               |
| SNP_P4_96068_24420621 | NC_021166.1    | Ca_kabuli_chr07 | 24420621                | TT                              | GG              | 1946888551               |
| SNP_P4_96070_24428299 | NC_021166.1    | Ca_kabuli_chr07 | 24428299                | CC                              | TT              | 1946888553               |
| SNP_P4_96072_24436536 | NC_021166.1    | Ca_kabuli_chr07 | 24436536                | TT                              | GG              | 1946888555               |
| SNP_P4_96074_24453864 | NC_021166.1    | Ca_kabuli_chr07 | 24453864                | AA                              | GG              | 1946888557               |
| SNP_P4_96075_24454901 | NC_021166.1    | Ca_kabuli_chr07 | 24454901                | GG                              | AA              | 1946888559               |
| SNP_P4_96076_24454999 | NC_021166.1    | Ca_kabuli_chr07 | 24454999                | TT                              | GG              | 1946888561               |
| SNP_P4_96077_24456676 | NC_021166.1    | Ca_kabuli_chr07 | 24456676                | CC                              | TT              | 1946888563               |
| SNP_P4_96078_24456690 | NC_021166.1    | Ca_kabuli_chr07 | 24456690                | AA                              | GG              | 1946888565               |
| SNP_P4_96079_24456728 | NC_021166.1    | Ca_kabuli_chr07 | 24456728                | GG                              | CC              | 1946888567               |
| SNP_P4_96080_24456737 | NC_021166.1    | Ca_kabuli_chr07 | 24456737                | AA                              | GG              | 1946888569               |
| SNP_P4_96081_24456758 | NC_021166.1    | Ca_kabuli_chr07 | 24456758                | AA                              | CC              | 1946888571               |
| SNP_P4_96082_24457095 | NC_021166.1    | Ca_kabuli_chr07 | 24457095                | TT                              | CC              | 1946888574               |
| SNP_P4_96083_24457164 | NC_021166.1    | Ca_kabuli_chr07 | 24457164                | AA                              | CC              | 1946888576               |
| SNP_P4_96084_24457175 | NC_021166.1    | Ca_kabuli_chr07 | 24457175                | TT                              | CC              | 1946888578               |
| SNP_P4_96085_24457176 | NC_021166.1    | Ca_kabuli_chr07 | 24457176                | TT                              | CC              | 1946888580               |
| SNP_P4_96086_24462676 | NC_021166.1    | Ca_kabuli_chr07 | 24462676                | AA                              | GG              | 1946888582               |
| SNP_P4_96087_24463083 | NC_021166.1    | Ca_kabuli_chr07 | 24463083                | GG                              | AA              | 1946888584               |
| SNP_P4_96088_24467422 | NC_021166.1    | Ca_kabuli_chr07 | 24467422                | TT                              | CC              | 1946888586               |
| SNP_P4_96089_24467742 | NC_021166.1    | Ca_kabuli_chr07 | 24467742                | GG                              | AA              | 1946888588               |
| SNP_P4_96091_24484911 | NC_021166.1    | Ca_kabuli_chr07 | 24484911                | TT                              | CC              | 1946888590               |
| SNP_P4_96092_24485163 | NC_021166.1    | Ca_kabuli_chr07 | 24485163                | GG                              | AA              | 1946888592               |
| SNP_P4_96093_24485165 | NC_021166.1    | Ca_kabuli_chr07 | 24485165                | TT                              | AA              | 1946888594               |
| SNP_P4_96094_24485195 | NC_021166.1    | Ca_kabuli_chr07 | 24485195                | TT                              | CC              | 1946888596               |
| SNP_P4_96095_24485201 | NC_021166.1    | Ca_kabuli_chr07 | 24485201                | TT                              | CC              | 1946888598               |
| SNP_P4_96096_24485232 | NC_021166.1    | Ca_kabuli_chr07 | 24485232                | AA                              | TT              | 1946888600               |
| SNP_P4_96098_24485283 | NC_021166.1    | Ca_kabuli_chr07 | 24485283                | TT                              | CC              | 1946888602               |
| SNP_P4_96099_24485309 | NC_021166.1    | Ca_kabuli_chr07 | 24485309                | CC                              | TT              | 1946888604               |
| SNP_P4_96100_24485316 | NC_021166.1    | Ca_kabuli_chr07 | 24485316                | TT                              | CC              | 1946888606               |

| SNPs IDs              | Chromosome IDs | Chromosomes     | Physical positions (bp) | CDC Frontier (Reference genome) | (ILWC46 & LPNB) | NCBI SNPdb Accession IDs |
|-----------------------|----------------|-----------------|-------------------------|---------------------------------|-----------------|--------------------------|
| SNP_P4_96101_24485448 | NC_021166.1    | Ca_kabuli_chr07 | 24485448                | CC                              | AA              | 1946888608               |
| SNP_P4_96102_24485635 | NC_021166.1    | Ca_kabuli_chr07 | 24485635                | CC                              | GG              | 1946888610               |
| SNP_P4_96103_24485737 | NC_021166.1    | Ca_kabuli_chr07 | 24485737                | CC                              | AA              | 1946888612               |
| SNP_P4_96104_24485766 | NC_021166.1    | Ca_kabuli_chr07 | 24485766                | GG                              | CC              | 1946888614               |
| SNP_P4_96105_24485890 | NC_021166.1    | Ca_kabuli_chr07 | 24485890                | AA                              | CC              | 1946888616               |
| SNP_P4_96107_24486013 | NC_021166.1    | Ca_kabuli_chr07 | 24486013                | TT                              | GG              | 1946888618               |
| SNP_P4_96108_24486034 | NC_021166.1    | Ca_kabuli_chr07 | 24486034                | CC                              | TT              | 1946888620               |
| SNP_P4_96109_24486227 | NC_021166.1    | Ca_kabuli_chr07 | 24486227                | AA                              | GG              | 1946888622               |
| SNP_P4_96110_24486229 | NC_021166.1    | Ca_kabuli_chr07 | 24486229                | AA                              | GG              | 1946888624               |
| SNP_P4_96112_24488070 | NC_021166.1    | Ca_kabuli_chr07 | 24488070                | AA                              | GG              | 1946888626               |
| SNP_P4_96113_24490965 | NC_021166.1    | Ca_kabuli_chr07 | 24490965                | AA                              | GG              | 1946888628               |
| SNP_P4_96114_24492493 | NC_021166.1    | Ca_kabuli_chr07 | 24492493                | GG                              | AA              | 1946888630               |
| SNP_P4_96115_24492693 | NC_021166.1    | Ca_kabuli_chr07 | 24492693                | CC                              | TT              | 1946888632               |
| SNP_P4_96116_24492789 | NC_021166.1    | Ca_kabuli_chr07 | 24492789                | GG                              | AA              | 1946888634               |
| SNP_P4_96117_24492833 | NC_021166.1    | Ca_kabuli_chr07 | 24492833                | GG                              | CC              | 1946888636               |
| SNP_P4_96118_24492979 | NC_021166.1    | Ca_kabuli_chr07 | 24492979                | AA                              | GG              | 1946888638               |
| SNP_P4_96119_24493091 | NC_021166.1    | Ca_kabuli_chr07 | 24493091                | TT                              | AA              | 1946888640               |
| SNP_P4_96120_24493421 | NC_021166.1    | Ca_kabuli_chr07 | 24493421                | AA                              | TT              | 1946888642               |
| SNP_P4_96121_24493437 | NC_021166.1    | Ca_kabuli_chr07 | 24493437                | GG                              | CC              | 1946888644               |
| SNP_P4_96122_24493460 | NC_021166.1    | Ca_kabuli_chr07 | 24493460                | AA                              | TT              | 1946888646               |
| SNP_P4_96123_24493576 | NC_021166.1    | Ca_kabuli_chr07 | 24493576                | CC                              | AA              | 1946888648               |
| SNP_P4_96124_24494137 | NC_021166.1    | Ca_kabuli_chr07 | 24494137                | CC                              | TT              | 1946888650               |
| SNP_P4_96125_24494331 | NC_021166.1    | Ca_kabuli_chr07 | 24494331                | AA                              | CC              | 1946888652               |
| SNP_P4_96126_24494491 | NC_021166.1    | Ca_kabuli_chr07 | 24494491                | CC                              | TT              | 1946888654               |
| SNP_P4_96127_24494498 | NC_021166.1    | Ca_kabuli_chr07 | 24494498                | AA                              | CC              | 1946888657               |
| SNP_P4_96128_24494714 | NC_021166.1    | Ca_kabuli_chr07 | 24494714                | CC                              | TT              | 1946888659               |
| SNP_P4_96129_24494715 | NC_021166.1    | Ca_kabuli_chr07 | 24494715                | TT                              | CC              | 1946888661               |
| SNP_P4_96130_24494831 | NC_021166.1    | Ca_kabuli_chr07 | 24494831                | TT                              | CC              | 1946888663               |
| SNP_P4_96131_24495864 | NC_021166.1    | Ca_kabuli_chr07 | 24495864                | CC                              | TT              | 1946888665               |
| SNP_P4_96132_24495920 | NC_021166.1    | Ca_kabuli_chr07 | 24495920                | CC                              | TT              | 1946888667               |
| SNP_P4_96133_24496292 | NC_021166.1    | Ca_kabuli_chr07 | 24496292                | AA                              | GG              | 1946888669               |
| SNP_P4_96134_24496524 | NC_021166.1    | Ca_kabuli_chr07 | 24496524                | TT                              | AA              | 1946888671               |
| SNP_P4_96135_24496618 | NC_021166.1    | Ca_kabuli_chr07 | 24496618                | GG                              | AA              | 1946888673               |
| SNP_P4_96136_24496712 | NC_021166.1    | Ca_kabuli_chr07 | 24496712                | CC                              | TT              | 1946888676               |
| SNP_P4_96137_24497096 | NC_021166.1    | Ca_kabuli_chr07 | 24497096                | CC                              | TT              | 1946888678               |
| SNP_P4_96138_24501707 | NC_021166.1    | Ca_kabuli_chr07 | 24501707                | CC                              | AA              | 1946888680               |
| SNP_P4_96139_24501847 | NC_021166.1    | Ca_kabuli_chr07 | 24501847                | GG                              | AA              | 1946888682               |
| SNP_P4_96140_24502013 | NC_021166.1    | Ca_kabuli_chr07 | 24502013                | GG                              | AA              | 1946888684               |
| SNP_P4_96141_24502190 | NC_021166.1    | Ca_kabuli_chr07 | 24502190                | CC                              | TT              | 1946888686               |
| SNP_P4_96142_24502193 | NC_021166.1    | Ca_kabuli_chr07 | 24502193                | GG                              | AA              | 1946888688               |
| SNP_P4_96143_24502258 | NC_021166.1    | Ca_kabuli_chr07 | 24502258                | GG                              | CC              | 1946888690               |
| SNP_P4_96145_24502298 | NC_021166.1    | Ca_kabuli_chr07 | 24502298                | CC                              | AA              | 1946888692               |



| SNPs IDs              | Chromosome IDs | Chromosomes     | Physical positions (bp) | CDC Frontier (Reference genome) | (ILWC46 & LPNB) | NCBI SNPdb Accession IDs |
|-----------------------|----------------|-----------------|-------------------------|---------------------------------|-----------------|--------------------------|
| SNP_P4_96146_24503289 | NC_021166.1    | Ca_kabuli_chr07 | 24503289                | GG                              | AA              | 1946888694               |
| SNP_P4_96147_24503296 | NC_021166.1    | Ca_kabuli_chr07 | 24503296                | CC                              | TT              | 1946888696               |
| SNP_P4_96148_24503372 | NC_021166.1    | Ca_kabuli_chr07 | 24503372                | GG                              | AA              | 1946888699               |
| SNP_P4_96149_24504212 | NC_021166.1    | Ca_kabuli_chr07 | 24504212                | GG                              | CC              | 1946888701               |
| SNP_P4_96150_24504220 | NC_021166.1    | Ca_kabuli_chr07 | 24504220                | CC                              | TT              | 1946888703               |
| SNP_P4_96151_24505226 | NC_021166.1    | Ca_kabuli_chr07 | 24505226                | TT                              | CC              | 1946888705               |
| SNP_P4_96152_24505288 | NC_021166.1    | Ca_kabuli_chr07 | 24505288                | TT                              | AA              | 1946888707               |
| SNP_P4_96153_24508766 | NC_021166.1    | Ca_kabuli_chr07 | 24508766                | GG                              | AA              | 1946888709               |
| SNP_P4_96154_24525755 | NC_021166.1    | Ca_kabuli_chr07 | 24525755                | TT                              | CC              | 1946888711               |
| SNP_P4_96155_24526087 | NC_021166.1    | Ca_kabuli_chr07 | 24526087                | AA                              | GG              | 1946888713               |
| SNP_P4_96156_24526108 | NC_021166.1    | Ca_kabuli_chr07 | 24526108                | GG                              | TT              | 1946888715               |
| SNP_P4_96157_24526131 | NC_021166.1    | Ca_kabuli_chr07 | 24526131                | AA                              | GG              | 1946888717               |
| SNP_P4_96158_24526145 | NC_021166.1    | Ca_kabuli_chr07 | 24526145                | AA                              | GG              | 1946888719               |
| SNP_P4_96160_24550955 | NC_021166.1    | Ca_kabuli_chr07 | 24550955                | CC                              | GG              | 1946888721               |
| SNP_P4_96161_24556525 | NC_021166.1    | Ca_kabuli_chr07 | 24556525                | AA                              | TT              | 1946888723               |
| SNP_P4_96162_24556546 | NC_021166.1    | Ca_kabuli_chr07 | 24556546                | AA                              | TT              | 1946888725               |
| SNP_P4_96163_24556593 | NC_021166.1    | Ca_kabuli_chr07 | 24556593                | GG                              | AA              | 1946888727               |
| SNP_P4_96164_24577696 | NC_021166.1    | Ca_kabuli_chr07 | 24577696                | TT                              | CC              | 1946888729               |
| SNP_P4_96165_24593872 | NC_021166.1    | Ca_kabuli_chr07 | 24593872                | AA                              | TT              | 1946888731               |
| SNP_P4_96166_24602193 | NC_021166.1    | Ca_kabuli_chr07 | 24602193                | AA                              | CC              | 1946888733               |
| SNP_P4_96167_24604790 | NC_021166.1    | Ca_kabuli_chr07 | 24604790                | CC                              | GG              | 1946888735               |
| SNP_P4_96168_24607578 | NC_021166.1    | Ca_kabuli_chr07 | 24607578                | AA                              | CC              | 1946888737               |
| SNP_P4_96169_24616734 | NC_021166.1    | Ca_kabuli_chr07 | 24616734                | CC                              | AA              | 1946888739               |
| SNP_P4_96170_24616744 | NC_021166.1    | Ca_kabuli_chr07 | 24616744                | GG                              | AA              | 1946888741               |
| SNP_P4_96171_24616828 | NC_021166.1    | Ca_kabuli_chr07 | 24616828                | AA                              | GG              | 1946888743               |
| SNP_P4_96172_24616856 | NC_021166.1    | Ca_kabuli_chr07 | 24616856                | AA                              | TT              | 1946888745               |
| SNP_P4_96173_24616857 | NC_021166.1    | Ca_kabuli_chr07 | 24616857                | AA                              | GG              | 1946888747               |
| SNP_P4_96174_24625968 | NC_021166.1    | Ca_kabuli_chr07 | 24625968                | CC                              | GG              | 1946888749               |
| SNP_P4_96175_24626348 | NC_021166.1    | Ca_kabuli_chr07 | 24626348                | TT                              | CC              | 1946888751               |
| SNP_P4_96176_24633665 | NC_021166.1    | Ca_kabuli_chr07 | 24633665                | CC                              | TT              | 1946888753               |
| SNP_P4_96178_24652597 | NC_021166.1    | Ca_kabuli_chr07 | 24652597                | GG                              | TT              | 1946888755               |
| SNP_P4_96179_24661072 | NC_021166.1    | Ca_kabuli_chr07 | 24661072                | GG                              | AA              | 1946888757               |
| SNP_P4_96180_24700582 | NC_021166.1    | Ca_kabuli_chr07 | 24700582                | CC                              | GG              | 1946888759               |
| SNP_P4_96181_24700752 | NC_021166.1    | Ca_kabuli_chr07 | 24700752                | AA                              | GG              | 1946888761               |
| SNP_P4_96182_24710082 | NC_021166.1    | Ca_kabuli_chr07 | 24710082                | TT                              | CC              | 1946888763               |
| SNP_P4_96183_24710113 | NC_021166.1    | Ca_kabuli_chr07 | 24710113                | TT                              | CC              | 1946888765               |
| SNP_P4_96184_24710120 | NC_021166.1    | Ca_kabuli_chr07 | 24710120                | GG                              | TT              | 1946888767               |
| SNP_P4_96185_24710236 | NC_021166.1    | Ca_kabuli_chr07 | 24710236                | TT                              | CC              | 1946888769               |
| SNP_P4_96186_24710246 | NC_021166.1    | Ca_kabuli_chr07 | 24710246                | AA                              | GG              | 1946888771               |
| SNP_P4_96187_24710270 | NC_021166.1    | Ca_kabuli_chr07 | 24710270                | AA                              | GG              | 1946888773               |
| SNP_P4_96188_24710273 | NC_021166.1    | Ca_kabuli_chr07 | 24710273                | GG                              | AA              | 1946888775               |
| SNP_P4_96189_24710541 | NC_021166.1    | Ca_kabuli_chr07 | 24710541                | CC                              | TT              | 1946888777               |

| SNPs IDs              | Chromosome IDs | Chromosomes     | Physical positions (bp) | CDC Frontier (Reference genome) | (ILWC46 & LPNB) | NCBI SNPdb Accession IDs |
|-----------------------|----------------|-----------------|-------------------------|---------------------------------|-----------------|--------------------------|
| SNP_P4_96190_24710553 | NC_021166.1    | Ca_kabuli_chr07 | 24710553                | TT                              | GG              | 1946888779               |
| SNP_P4_96191_24710585 | NC_021166.1    | Ca_kabuli_chr07 | 24710585                | AA                              | GG              | 1946888781               |
| SNP_P4_96192_24721830 | NC_021166.1    | Ca_kabuli_chr07 | 24721830                | TT                              | CC              | 1946888783               |
| SNP_P4_96194_24750590 | NC_021166.1    | Ca_kabuli_chr07 | 24750590                | AA                              | GG              | 1946888785               |
| SNP_P4_96195_24750617 | NC_021166.1    | Ca_kabuli_chr07 | 24750617                | CC                              | TT              | 1946888787               |
| SNP_P4_96196_24750633 | NC_021166.1    | Ca_kabuli_chr07 | 24750633                | TT                              | GG              | 1946888789               |
| SNP_P4_96197_24750635 | NC_021166.1    | Ca_kabuli_chr07 | 24750635                | TT                              | CC              | 1946888791               |
| SNP_P4_96198_24750649 | NC_021166.1    | Ca_kabuli_chr07 | 24750649                | AA                              | GG              | 1946888793               |
| SNP_P4_96199_24750701 | NC_021166.1    | Ca_kabuli_chr07 | 24750701                | CC                              | AA              | 1946888795               |
| SNP_P4_96200_24751381 | NC_021166.1    | Ca_kabuli_chr07 | 24751381                | TT                              | CC              | 1946888797               |
| SNP_P4_96201_24774777 | NC_021166.1    | Ca_kabuli_chr07 | 24774777                | AA                              | TT              | 1946888799               |
| SNP_P4_96202_24774916 | NC_021166.1    | Ca_kabuli_chr07 | 24774916                | TT                              | CC              | 1946888801               |
| SNP_P4_96203_24777799 | NC_021166.1    | Ca_kabuli_chr07 | 24777799                | CC                              | AA              | 1946888803               |
| SNP_P4_96204_24780845 | NC_021166.1    | Ca_kabuli_chr07 | 24780845                | CC                              | TT              | 1946888805               |
| SNP_P4_96206_24796010 | NC_021166.1    | Ca_kabuli_chr07 | 24796010                | TT                              | CC              | 1946888807               |
| SNP_P4_96207_24800434 | NC_021166.1    | Ca_kabuli_chr07 | 24800434                | GG                              | AA              | 1946888809               |
| SNP_P4_96208_24800507 | NC_021166.1    | Ca_kabuli_chr07 | 24800507                | TT                              | AA              | 1946888811               |
| SNP_P4_96209_24829588 | NC_021166.1    | Ca_kabuli_chr07 | 24829588                | AA                              | GG              | 1946888813               |
| SNP_P4_96210_24844997 | NC_021166.1    | Ca_kabuli_chr07 | 24844997                | TT                              | CC              | 1946888815               |
| SNP_P4_96211_24845132 | NC_021166.1    | Ca_kabuli_chr07 | 24845132                | GG                              | TT              | 1946888817               |
| SNP_P4_96212_24845183 | NC_021166.1    | Ca_kabuli_chr07 | 24845183                | CC                              | TT              | 1946888819               |
| SNP_P4_96213_24845352 | NC_021166.1    | Ca_kabuli_chr07 | 24845352                | GG                              | AA              | 1946888821               |
| SNP_P4_96214_24845357 | NC_021166.1    | Ca_kabuli_chr07 | 24845357                | TT                              | GG              | 1946888823               |
| SNP_P4_96215_24845362 | NC_021166.1    | Ca_kabuli_chr07 | 24845362                | TT                              | CC              | 1946888825               |
| SNP_P4_96216_24845388 | NC_021166.1    | Ca_kabuli_chr07 | 24845388                | CC                              | TT              | 1946888827               |
| SNP_P4_96217_24845389 | NC_021166.1    | Ca_kabuli_chr07 | 24845389                | CC                              | TT              | 1946888830               |
| SNP_P4_96218_24845487 | NC_021166.1    | Ca_kabuli_chr07 | 24845487                | GG                              | AA              | 1946888832               |
| SNP_P4_96219_24845514 | NC_021166.1    | Ca_kabuli_chr07 | 24845514                | AA                              | TT              | 1946888834               |
| SNP_P4_96220_24851261 | NC_021166.1    | Ca_kabuli_chr07 | 24851261                | TT                              | CC              | 1946888836               |
| SNP_P4_96221_24851266 | NC_021166.1    | Ca_kabuli_chr07 | 24851266                | TT                              | CC              | 1946888838               |
| SNP_P4_96222_24851322 | NC_021166.1    | Ca_kabuli_chr07 | 24851322                | TT                              | CC              | 1946888840               |
| SNP_P4_96223_24851326 | NC_021166.1    | Ca_kabuli_chr07 | 24851326                | GG                              | AA              | 1946888842               |
| SNP_P4_96224_24851343 | NC_021166.1    | Ca_kabuli_chr07 | 24851343                | GG                              | AA              | 1946888844               |
| SNP_P4_96225_24856523 | NC_021166.1    | Ca_kabuli_chr07 | 24856523                | CC                              | GG              | 1946888847               |
| SNP_P4_96226_24856530 | NC_021166.1    | Ca_kabuli_chr07 | 24856530                | TT                              | GG              | 1946888849               |
| SNP_P4_96227_24856545 | NC_021166.1    | Ca_kabuli_chr07 | 24856545                | CC                              | AA              | 1946888851               |
| SNP_P4_96228_24856552 | NC_021166.1    | Ca_kabuli_chr07 | 24856552                | CC                              | TT              | 1946888853               |
| SNP_P4_96229_24856563 | NC_021166.1    | Ca_kabuli_chr07 | 24856563                | CC                              | GG              | 1946888855               |
| SNP_P4_96230_24856896 | NC_021166.1    | Ca_kabuli_chr07 | 24856896                | AA                              | GG              | 1946888857               |
| SNP_P4_96232_24863170 | NC_021166.1    | Ca_kabuli_chr07 | 24863170                | CC                              | TT              | 1946888859               |
| SNP_P4_96234_24875409 | NC_021166.1    | Ca_kabuli_chr07 | 24875409                | AA                              | GG              | 1946888862               |
| SNP_P4_96235_24883123 | NC_021166.1    | Ca_kabuli_chr07 | 24883123                | CC                              | TT              | 1946888864               |

| SNPs IDs              | Chromosome IDs | Chromosomes     | Physical positions (bp) | CDC Frontier (Reference genome) | (ILWC46 & LPNB) | NCBI SNPdb Accession IDs |
|-----------------------|----------------|-----------------|-------------------------|---------------------------------|-----------------|--------------------------|
| SNP_P4_96236_24885043 | NC_021166.1    | Ca_kabuli_chr07 | 24885043                | TT                              | AA              | 1946888866               |
| SNP_P4_96237_24886889 | NC_021166.1    | Ca_kabuli_chr07 | 24886889                | GG                              | AA              | 1946888868               |
| SNP_P4_96238_24941455 | NC_021166.1    | Ca_kabuli_chr07 | 24941455                | TT                              | CC              | 1946888870               |
| SNP_P4_96239_24949904 | NC_021166.1    | Ca_kabuli_chr07 | 24949904                | AA                              | GG              | 1946888872               |
| SNP_P4_96240_24983611 | NC_021166.1    | Ca_kabuli_chr07 | 24983611                | GG                              | AA              | 1946888874               |
| SNP_P4_96241_24990953 | NC_021166.1    | Ca_kabuli_chr07 | 24990953                | CC                              | TT              | 1946888876               |
| SNP_P4_96242_24991047 | NC_021166.1    | Ca_kabuli_chr07 | 24991047                | CC                              | TT              | 1946888878               |
| SNP_P4_96243_24992003 | NC_021166.1    | Ca_kabuli_chr07 | 24992003                | CC                              | GG              | 1946888880               |
| SNP_P4_96244_24992004 | NC_021166.1    | Ca_kabuli_chr07 | 24992004                | AA                              | CC              | 1946888882               |
| SNP_P4_96245_24992012 | NC_021166.1    | Ca_kabuli_chr07 | 24992012                | TT                              | CC              | 1946888884               |
| SNP_P4_96246_24992269 | NC_021166.1    | Ca_kabuli_chr07 | 24992269                | AA                              | GG              | 1946888886               |
| SNP_P4_96247_24992277 | NC_021166.1    | Ca_kabuli_chr07 | 24992277                | AA                              | GG              | 1946888888               |
| SNP_P4_96248_24992338 | NC_021166.1    | Ca_kabuli_chr07 | 24992338                | GG                              | AA              | 1946888890               |
| SNP_P4_96249_25013941 | NC_021166.1    | Ca_kabuli_chr07 | 25013941                | GG                              | TT              | 1946888892               |
| SNP_P4_96250_25028871 | NC_021166.1    | Ca_kabuli_chr07 | 25028871                | GG                              | CC              | 1946888894               |
| SNP_P4_96251_25030545 | NC_021166.1    | Ca_kabuli_chr07 | 25030545                | CC                              | TT              | 1946888896               |
| SNP_P4_96252_25030701 | NC_021166.1    | Ca_kabuli_chr07 | 25030701                | GG                              | AA              | 1946888898               |
| SNP_P4_96253_25030818 | NC_021166.1    | Ca_kabuli_chr07 | 25030818                | TT                              | GG              | 1946888900               |
| SNP_P4_96254_25030914 | NC_021166.1    | Ca_kabuli_chr07 | 25030914                | TT                              | CC              | 1946888902               |
| SNP_P4_96255_25030915 | NC_021166.1    | Ca_kabuli_chr07 | 25030915                | CC                              | TT              | 1946888904               |
| SNP_P4_96256_25031000 | NC_021166.1    | Ca_kabuli_chr07 | 25031000                | AA                              | GG              | 1946888906               |
| SNP_P4_96257_25031112 | NC_021166.1    | Ca_kabuli_chr07 | 25031112                | GG                              | AA              | 1946888908               |
| SNP_P4_96258_25031257 | NC_021166.1    | Ca_kabuli_chr07 | 25031257                | AA                              | TT              | 1946888910               |
| SNP_P4_96259_25031269 | NC_021166.1    | Ca_kabuli_chr07 | 25031269                | AA                              | CC              | 1946888912               |
| SNP_P4_96260_25031703 | NC_021166.1    | Ca_kabuli_chr07 | 25031703                | CC                              | TT              | 1946888914               |
| SNP_P4_96261_25031719 | NC_021166.1    | Ca_kabuli_chr07 | 25031719                | AA                              | GG              | 1946888916               |
| SNP_P4_96262_25031752 | NC_021166.1    | Ca_kabuli_chr07 | 25031752                | AA                              | GG              | 1946888918               |
| SNP_P4_96263_25050897 | NC_021166.1    | Ca_kabuli_chr07 | 25050897                | AA                              | CC              | 1946888920               |
| SNP_P4_96264_25050921 | NC_021166.1    | Ca_kabuli_chr07 | 25050921                | CC                              | AA              | 1946888923               |
| SNP_P4_96265_25052939 | NC_021166.1    | Ca_kabuli_chr07 | 25052939                | GG                              | AA              | 1946888925               |
| SNP_P4_96266_25053172 | NC_021166.1    | Ca_kabuli_chr07 | 25053172                | AA                              | GG              | 1946888927               |
| SNP_P4_96268_25077197 | NC_021166.1    | Ca_kabuli_chr07 | 25077197                | TT                              | AA              | 1946888929               |
| SNP_P4_96269_25078586 | NC_021166.1    | Ca_kabuli_chr07 | 25078586                | AA                              | GG              | 1946888931               |
| SNP_P4_96270_25078600 | NC_021166.1    | Ca_kabuli_chr07 | 25078600                | AA                              | TT              | 1946888933               |
| SNP_P4_96271_25078631 | NC_021166.1    | Ca_kabuli_chr07 | 25078631                | CC                              | TT              | 1946888935               |
| SNP_P4_96272_25078660 | NC_021166.1    | Ca_kabuli_chr07 | 25078660                | AA                              | TT              | 1946888937               |
| SNP_P4_96273_25078666 | NC_021166.1    | Ca_kabuli_chr07 | 25078666                | AA                              | TT              | 1946888939               |
| SNP_P4_96274_25078936 | NC_021166.1    | Ca_kabuli_chr07 | 25078936                | CC                              | TT              | 1946888941               |
| SNP_P4_96276_25080193 | NC_021166.1    | Ca_kabuli_chr07 | 25080193                | GG                              | TT              | 1946888943               |
| SNP_P4_96277_25080452 | NC_021166.1    | Ca_kabuli_chr07 | 25080452                | GG                              | TT              | 1946888945               |
| SNP_P4_96278_25104655 | NC_021166.1    | Ca_kabuli_chr07 | 25104655                | GG                              | AA              | 1946888947               |
| SNP_P4_96279_25104706 | NC_021166.1    | Ca_kabuli_chr07 | 25104706                | AA                              | GG              | 1946888949               |

| SNPs IDs              | Chromosome IDs | Chromosomes     | Physical positions (bp) | CDC Frontier (Reference genome) | (ILWC46 & LPNB) | NCBI SNPdb Accession IDs |
|-----------------------|----------------|-----------------|-------------------------|---------------------------------|-----------------|--------------------------|
| SNP_P4_96280_25104738 | NC_021166.1    | Ca_kabuli_chr07 | 25104738                | AA                              | GG              | 1946888951               |
| SNP_P4_96283_25118828 | NC_021166.1    | Ca_kabuli_chr07 | 25118828                | TT                              | CC              | 1946888953               |
| SNP_P4_96284_25118841 | NC_021166.1    | Ca_kabuli_chr07 | 25118841                | TT                              | CC              | 1946888955               |
| SNP_P4_96285_25118861 | NC_021166.1    | Ca_kabuli_chr07 | 25118861                | AA                              | GG              | 1946888957               |
| SNP_P4_96286_25118908 | NC_021166.1    | Ca_kabuli_chr07 | 25118908                | CC                              | TT              | 1946888959               |
| SNP_P4_96287_25127915 | NC_021166.1    | Ca_kabuli_chr07 | 25127915                | GG                              | AA              | 1946888961               |
| SNP_P4_96288_25128350 | NC_021166.1    | Ca_kabuli_chr07 | 25128350                | TT                              | GG              | 1946888963               |
| SNP_P4_96290_25133391 | NC_021166.1    | Ca_kabuli_chr07 | 25133391                | CC                              | GG              | 1946888965               |
| SNP_P4_96291_25142690 | NC_021166.1    | Ca_kabuli_chr07 | 25142690                | TT                              | GG              | 1946888967               |
| SNP_P4_96292_25144302 | NC_021166.1    | Ca_kabuli_chr07 | 25144302                | AA                              | GG              | 1946888969               |
| SNP_P4_96293_25144616 | NC_021166.1    | Ca_kabuli_chr07 | 25144616                | TT                              | CC              | 1946888971               |
| SNP_P4_96294_25144620 | NC_021166.1    | Ca_kabuli_chr07 | 25144620                | TT                              | CC              | 1946888973               |
| SNP_P4_96295_25147976 | NC_021166.1    | Ca_kabuli_chr07 | 25147976                | CC                              | TT              | 1946888975               |
| SNP_P4_96296_25151287 | NC_021166.1    | Ca_kabuli_chr07 | 25151287                | GG                              | TT              | 1946888977               |
| SNP_P4_96297_25151338 | NC_021166.1    | Ca_kabuli_chr07 | 25151338                | TT                              | AA              | 1946888979               |
| SNP_P4_96298_25151347 | NC_021166.1    | Ca_kabuli_chr07 | 25151347                | GG                              | AA              | 1946888981               |
| SNP_P4_96300_25202258 | NC_021166.1    | Ca_kabuli_chr07 | 25202258                | GG                              | AA              | 1946888983               |
| SNP_P4_96301_25206028 | NC_021166.1    | Ca_kabuli_chr07 | 25206028                | AA                              | GG              | 1946888985               |
| SNP_P4_96302_25206093 | NC_021166.1    | Ca_kabuli_chr07 | 25206093                | AA                              | GG              | 1946888987               |
| SNP_P4_96303_25206440 | NC_021166.1    | Ca_kabuli_chr07 | 25206440                | AA                              | GG              | 1946888989               |
| SNP_P4_96304_25206666 | NC_021166.1    | Ca_kabuli_chr07 | 25206666                | TT                              | CC              | 1946888991               |
| SNP_P4_96305_25207052 | NC_021166.1    | Ca_kabuli_chr07 | 25207052                | TT                              | CC              | 1946888993               |
| SNP_P4_96306_25213563 | NC_021166.1    | Ca_kabuli_chr07 | 25213563                | GG                              | AA              | 1946888995               |
| SNP_P4_96307_25216684 | NC_021166.1    | Ca_kabuli_chr07 | 25216684                | GG                              | AA              | 1946888997               |
| SNP_P4_96308_25218219 | NC_021166.1    | Ca_kabuli_chr07 | 25218219                | CC                              | TT              | 1946888999               |
| SNP_P4_96310_25219455 | NC_021166.1    | Ca_kabuli_chr07 | 25219455                | GG                              | AA              | 1946889001               |
| SNP_P4_96311_25236842 | NC_021166.1    | Ca_kabuli_chr07 | 25236842                | CC                              | GG              | 1946889003               |
| SNP_P4_96312_25245212 | NC_021166.1    | Ca_kabuli_chr07 | 25245212                | TT                              | CC              | 1946889005               |
| SNP_P4_96313_25247259 | NC_021166.1    | Ca_kabuli_chr07 | 25247259                | GG                              | TT              | 1946889007               |
| SNP_P4_96314_25247261 | NC_021166.1    | Ca_kabuli_chr07 | 25247261                | GG                              | AA              | 1946889009               |
| SNP_P4_96315_25247292 | NC_021166.1    | Ca_kabuli_chr07 | 25247292                | TT                              | GG              | 1946889011               |
| SNP_P4_96316_25247320 | NC_021166.1    | Ca_kabuli_chr07 | 25247320                | GG                              | CC              | 1946889013               |
| SNP_P4_96318_25264536 | NC_021166.1    | Ca_kabuli_chr07 | 25264536                | AA                              | CC              | 1946889015               |
| SNP_P4_96319_25278182 | NC_021166.1    | Ca_kabuli_chr07 | 25278182                | TT                              | GG              | 1946889017               |
| SNP_P4_96320_25278207 | NC_021166.1    | Ca_kabuli_chr07 | 25278207                | GG                              | TT              | 1946889019               |
| SNP_P4_96321_25278216 | NC_021166.1    | Ca_kabuli_chr07 | 25278216                | CC                              | AA              | 1946889021               |
| SNP_P4_96322_25278437 | NC_021166.1    | Ca_kabuli_chr07 | 25278437                | AA                              | GG              | 1946889024               |
| SNP_P4_96323_25278440 | NC_021166.1    | Ca_kabuli_chr07 | 25278440                | TT                              | AA              | 1946889026               |
| SNP_P4_96324_25278446 | NC_021166.1    | Ca_kabuli_chr07 | 25278446                | TT                              | GG              | 1946889028               |
| SNP_P4_96325_25278492 | NC_021166.1    | Ca_kabuli_chr07 | 25278492                | CC                              | AA              | 1946889030               |
| SNP_P4_96326_25278517 | NC_021166.1    | Ca_kabuli_chr07 | 25278517                | CC                              | TT              | 1946889032               |
| SNP_P4_96327_25278567 | NC_021166.1    | Ca_kabuli_chr07 | 25278567                | CC                              | TT              | 1946889034               |

| SNPs IDs              | Chromosome IDs | Chromosomes     | Physical positions (bp) | CDC Frontier (Reference genome) | (ILWC46 & LPNB) | NCBI SNPdb Accession IDs |
|-----------------------|----------------|-----------------|-------------------------|---------------------------------|-----------------|--------------------------|
| SNP_P4_96328_25278745 | NC_021166.1    | Ca_kabuli_chr07 | 25278745                | TT                              | CC              | 1946889036               |
| SNP_P4_96329_25278845 | NC_021166.1    | Ca_kabuli_chr07 | 25278845                | CC                              | TT              | 1946889039               |
| SNP_P4_96330_25278914 | NC_021166.1    | Ca_kabuli_chr07 | 25278914                | AA                              | CC              | 1946889041               |
| SNP_P4_96331_25278915 | NC_021166.1    | Ca_kabuli_chr07 | 25278915                | AA                              | GG              | 1946889043               |
| SNP_P4_96332_25278918 | NC_021166.1    | Ca_kabuli_chr07 | 25278918                | TT                              | AA              | 1946889045               |
| SNP_P4_96333_25278951 | NC_021166.1    | Ca_kabuli_chr07 | 25278951                | AA                              | TT              | 1946889047               |
| SNP_P4_96334_25282385 | NC_021166.1    | Ca_kabuli_chr07 | 25282385                | CC                              | TT              | 1946889049               |
| SNP_P4_96335_25286716 | NC_021166.1    | Ca_kabuli_chr07 | 25286716                | GG                              | AA              | 1946889051               |
| SNP_P4_96336_25295783 | NC_021166.1    | Ca_kabuli_chr07 | 25295783                | AA                              | GG              | 1946889053               |
| SNP_P4_96337_25295856 | NC_021166.1    | Ca_kabuli_chr07 | 25295856                | CC                              | TT              | 1946889055               |
| SNP_P4_96338_25297373 | NC_021166.1    | Ca_kabuli_chr07 | 25297373                | TT                              | CC              | 1946889057               |
| SNP_P4_96339_25316062 | NC_021166.1    | Ca_kabuli_chr07 | 25316062                | CC                              | GG              | 1946889060               |
| SNP_P4_96340_25328594 | NC_021166.1    | Ca_kabuli_chr07 | 25328594                | GG                              | AA              | 1946889062               |
| SNP_P4_96342_25346088 | NC_021166.1    | Ca_kabuli_chr07 | 25346088                | GG                              | TT              | 1946889064               |
| SNP_P4_96344_25348122 | NC_021166.1    | Ca_kabuli_chr07 | 25348122                | GG                              | AA              | 1946889066               |
| SNP_P4_96345_25357635 | NC_021166.1    | Ca_kabuli_chr07 | 25357635                | AA                              | GG              | 1946889068               |
| SNP_P4_96346_25359378 | NC_021166.1    | Ca_kabuli_chr07 | 25359378                | GG                              | AA              | 1946889070               |
| SNP_P4_96347_25359398 | NC_021166.1    | Ca_kabuli_chr07 | 25359398                | TT                              | AA              | 1946889072               |
| SNP_P4_96348_25398479 | NC_021166.1    | Ca_kabuli_chr07 | 25398479                | CC                              | GG              | 1946889074               |
| SNP_P4_96349_25405303 | NC_021166.1    | Ca_kabuli_chr07 | 25405303                | GG                              | AA              | 1946889076               |
| SNP_P4_96351_25416924 | NC_021166.1    | Ca_kabuli_chr07 | 25416924                | CC                              | TT              | 1946889078               |
| SNP_P4_96352_25418271 | NC_021166.1    | Ca_kabuli_chr07 | 25418271                | AA                              | GG              | 1946889080               |
| SNP_P4_96354_25437981 | NC_021166.1    | Ca_kabuli_chr07 | 25437981                | TT                              | CC              | 1946889082               |
| SNP_P4_96355_25438220 | NC_021166.1    | Ca_kabuli_chr07 | 25438220                | TT                              | CC              | 1946889084               |
| SNP_P4_96356_25438506 | NC_021166.1    | Ca_kabuli_chr07 | 25438506                | TT                              | AA              | 1946889086               |
| SNP_P4_96357_25449213 | NC_021166.1    | Ca_kabuli_chr07 | 25449213                | GG                              | TT              | 1946889088               |
| SNP_P4_96358_25466148 | NC_021166.1    | Ca_kabuli_chr07 | 25466148                | TT                              | CC              | 1946889090               |
| SNP_P4_96359_25466150 | NC_021166.1    | Ca_kabuli_chr07 | 25466150                | AA                              | TT              | 1946889092               |
| SNP_P4_96360_25466876 | NC_021166.1    | Ca_kabuli_chr07 | 25466876                | TT                              | CC              | 1946889094               |
| SNP_P4_96361_25466885 | NC_021166.1    | Ca_kabuli_chr07 | 25466885                | TT                              | CC              | 1946889096               |
| SNP_P4_96362_25467016 | NC_021166.1    | Ca_kabuli_chr07 | 25467016                | CC                              | TT              | 1946889098               |
| SNP_P4_96363_25467047 | NC_021166.1    | Ca_kabuli_chr07 | 25467047                | AA                              | GG              | 1946889100               |
| SNP_P4_96364_25467065 | NC_021166.1    | Ca_kabuli_chr07 | 25467065                | AA                              | TT              | 1946889102               |
| SNP_P4_96365_25467251 | NC_021166.1    | Ca_kabuli_chr07 | 25467251                | AA                              | CC              | 1946889104               |
| SNP_P4_96366_25467360 | NC_021166.1    | Ca_kabuli_chr07 | 25467360                | TT                              | GG              | 1946889106               |
| SNP_P4_96367_25481681 | NC_021166.1    | Ca_kabuli_chr07 | 25481681                | TT                              | CC              | 1946889108               |
| SNP_P4_96368_25489488 | NC_021166.1    | Ca_kabuli_chr07 | 25489488                | TT                              | CC              | 1946889110               |
| SNP_P4_96369_25490527 | NC_021166.1    | Ca_kabuli_chr07 | 25490527                | GG                              | AA              | 1946889113               |
| SNP_P4_96370_25509802 | NC_021166.1    | Ca_kabuli_chr07 | 25509802                | AA                              | CC              | 1946889115               |
| SNP_P4_96371_25511590 | NC_021166.1    | Ca_kabuli_chr07 | 25511590                | AA                              | GG              | 1946889117               |
| SNP_P4_96372_25530389 | NC_021166.1    | Ca_kabuli_chr07 | 25530389                | AA                              | TT              | 1946889119               |
| SNP_P4_96373_25538601 | NC_021166.1    | Ca_kabuli_chr07 | 25538601                | CC                              | TT              | 1946889121               |

| SNPs IDs              | Chromosome IDs | Chromosomes     | Physical positions (bp) | CDC Frontier (Reference genome) | (ILWC46 & LPNB) | NCBI SNPdb Accession IDs |
|-----------------------|----------------|-----------------|-------------------------|---------------------------------|-----------------|--------------------------|
| SNP_P4_96374_25539595 | NC_021166.1    | Ca_kabuli_chr07 | 25539595                | GG                              | TT              | 1946889123               |
| SNP_P4_96375_25539623 | NC_021166.1    | Ca_kabuli_chr07 | 25539623                | TT                              | GG              | 1946889125               |
| SNP_P4_96376_25539642 | NC_021166.1    | Ca_kabuli_chr07 | 25539642                | GG                              | AA              | 1946889127               |
| SNP_P4_96378_25540325 | NC_021166.1    | Ca_kabuli_chr07 | 25540325                | TT                              | AA              | 1946889129               |
| SNP_P4_96379_25543295 | NC_021166.1    | Ca_kabuli_chr07 | 25543295                | AA                              | GG              | 1946889131               |
| SNP_P4_96380_25543337 | NC_021166.1    | Ca_kabuli_chr07 | 25543337                | AA                              | CC              | 1946889133               |
| SNP_P4_96383_25570979 | NC_021166.1    | Ca_kabuli_chr07 | 25570979                | TT                              | CC              | 1946889135               |
| SNP_P4_96384_25617359 | NC_021166.1    | Ca_kabuli_chr07 | 25617359                | TT                              | CC              | 1946889137               |
| SNP_P4_96385_25617939 | NC_021166.1    | Ca_kabuli_chr07 | 25617939                | TT                              | CC              | 1946889139               |
| SNP_P4_96386_25626887 | NC_021166.1    | Ca_kabuli_chr07 | 25626887                | CC                              | TT              | 1946889141               |
| SNP_P4_96388_25626902 | NC_021166.1    | Ca_kabuli_chr07 | 25626902                | AA                              | GG              | 1946889143               |
| SNP_P4_96389_25665885 | NC_021166.1    | Ca_kabuli_chr07 | 25665885                | CC                              | TT              | 1946889145               |
| SNP_P4_96390_25675563 | NC_021166.1    | Ca_kabuli_chr07 | 25675563                | GG                              | AA              | 1946889147               |
| SNP_P4_96391_25683396 | NC_021166.1    | Ca_kabuli_chr07 | 25683396                | TT                              | CC              | 1946889149               |
| SNP_P4_96392_25683409 | NC_021166.1    | Ca_kabuli_chr07 | 25683409                | CC                              | GG              | 1946889151               |
| SNP_P4_96394_25721420 | NC_021166.1    | Ca_kabuli_chr07 | 25721420                | CC                              | TT              | 1946889153               |
| SNP_P4_96395_25746708 | NC_021166.1    | Ca_kabuli_chr07 | 25746708                | AA                              | GG              | 1946889155               |
| SNP_P4_96396_25755202 | NC_021166.1    | Ca_kabuli_chr07 | 25755202                | TT                              | CC              | 1946889157               |
| SNP_P4_96397_25768327 | NC_021166.1    | Ca_kabuli_chr07 | 25768327                | AA                              | CC              | 1946889159               |
| SNP_P4_96398_25773353 | NC_021166.1    | Ca_kabuli_chr07 | 25773353                | TT                              | CC              | 1946889161               |
| SNP_P4_96399_25774367 | NC_021166.1    | Ca_kabuli_chr07 | 25774367                | GG                              | AA              | 1946889163               |
| SNP_P4_96400_25774828 | NC_021166.1    | Ca_kabuli_chr07 | 25774828                | TT                              | CC              | 1946889165               |
| SNP_P4_96401_25810785 | NC_021166.1    | Ca_kabuli_chr07 | 25810785                | CC                              | TT              | 1946889167               |
| SNP_P4_96402_25816205 | NC_021166.1    | Ca_kabuli_chr07 | 25816205                | TT                              | AA              | 1946889169               |
| SNP_P4_96403_25816207 | NC_021166.1    | Ca_kabuli_chr07 | 25816207                | AA                              | TT              | 1946889171               |
| SNP_P4_96404_25816239 | NC_021166.1    | Ca_kabuli_chr07 | 25816239                | AA                              | CC              | 1946889173               |
| SNP_P4_96405_25816240 | NC_021166.1    | Ca_kabuli_chr07 | 25816240                | CC                              | AA              | 1946889175               |
| SNP_P4_96406_25833163 | NC_021166.1    | Ca_kabuli_chr07 | 25833163                | TT                              | CC              | 1946889177               |
| SNP_P4_96407_25833222 | NC_021166.1    | Ca_kabuli_chr07 | 25833222                | TT                              | CC              | 1946889179               |
| SNP_P4_96408_25833385 | NC_021166.1    | Ca_kabuli_chr07 | 25833385                | TT                              | CC              | 1946889181               |
| SNP_P4_96409_25833789 | NC_021166.1    | Ca_kabuli_chr07 | 25833789                | TT                              | GG              | 1946889183               |
| SNP_P4_96410_25834027 | NC_021166.1    | Ca_kabuli_chr07 | 25834027                | GG                              | AA              | 1946889185               |
| SNP_P4_96411_25834136 | NC_021166.1    | Ca_kabuli_chr07 | 25834136                | GG                              | TT              | 1946889187               |
| SNP_P4_96412_25834199 | NC_021166.1    | Ca_kabuli_chr07 | 25834199                | CC                              | TT              | 1946889189               |
| SNP_P4_96413_25834413 | NC_021166.1    | Ca_kabuli_chr07 | 25834413                | AA                              | TT              | 1946889191               |
| SNP_P4_96414_25862052 | NC_021166.1    | Ca_kabuli_chr07 | 25862052                | GG                              | AA              | 1946889193               |
| SNP_P4_96415_25862117 | NC_021166.1    | Ca_kabuli_chr07 | 25862117                | TT                              | CC              | 1946889195               |
| SNP_P4_96416_25862137 | NC_021166.1    | Ca_kabuli_chr07 | 25862137                | AA                              | CC              | 1946889197               |
| SNP_P4_96417_25862216 | NC_021166.1    | Ca_kabuli_chr07 | 25862216                | AA                              | TT              | 1946889200               |
| SNP_P4_96418_25862462 | NC_021166.1    | Ca_kabuli_chr07 | 25862462                | AA                              | GG              | 1946889202               |
| SNP_P4_96419_25862496 | NC_021166.1    | Ca_kabuli_chr07 | 25862496                | AA                              | TT              | 1946889204               |
| SNP_P4_96420_25862531 | NC_021166.1    | Ca_kabuli_chr07 | 25862531                | AA                              | GG              | 1946889206               |

| SNPs IDs              | Chromosome IDs | Chromosomes     | Physical positions (bp) | CDC Frontier (Reference genome) | (ILWC46 & LPNB) | NCBI SNPdb Accession IDs |
|-----------------------|----------------|-----------------|-------------------------|---------------------------------|-----------------|--------------------------|
| SNP_P4_96421_25862577 | NC_021166.1    | Ca_kabuli_chr07 | 25862577                | TT                              | GG              | 1946889208               |
| SNP_P4_96422_25863321 | NC_021166.1    | Ca_kabuli_chr07 | 25863321                | CC                              | TT              | 1946889210               |
| SNP_P4_96423_25871931 | NC_021166.1    | Ca_kabuli_chr07 | 25871931                | CC                              | TT              | 1946889212               |
| SNP_P4_96424_25871997 | NC_021166.1    | Ca_kabuli_chr07 | 25871997                | AA                              | TT              | 1946889214               |
| SNP_P4_96425_25872026 | NC_021166.1    | Ca_kabuli_chr07 | 25872026                | GG                              | TT              | 1946889216               |
| SNP_P4_96426_25872075 | NC_021166.1    | Ca_kabuli_chr07 | 25872075                | GG                              | AA              | 1946889218               |
| SNP_P4_96427_25872279 | NC_021166.1    | Ca_kabuli_chr07 | 25872279                | GG                              | AA              | 1946889221               |
| SNP_P4_96428_25891043 | NC_021166.1    | Ca_kabuli_chr07 | 25891043                | GG                              | TT              | 1946889223               |
| SNP_P4_96429_25899884 | NC_021166.1    | Ca_kabuli_chr07 | 25899884                | TT                              | CC              | 1946889225               |
| SNP_P4_96430_25900290 | NC_021166.1    | Ca_kabuli_chr07 | 25900290                | CC                              | AA              | 1946889227               |
| SNP_P4_96431_25900376 | NC_021166.1    | Ca_kabuli_chr07 | 25900376                | GG                              | AA              | 1946889229               |
| SNP_P4_96432_25904911 | NC_021166.1    | Ca_kabuli_chr07 | 25904911                | TT                              | CC              | 1946889231               |
| SNP_P4_96433_25905824 | NC_021166.1    | Ca_kabuli_chr07 | 25905824                | CC                              | AA              | 1946889233               |
| SNP_P4_96434_25906057 | NC_021166.1    | Ca_kabuli_chr07 | 25906057                | AA                              | CC              | 1946889235               |
| SNP_P4_96435_25911418 | NC_021166.1    | Ca_kabuli_chr07 | 25911418                | TT                              | CC              | 1946889238               |
| SNP_P4_96437_25918813 | NC_021166.1    | Ca_kabuli_chr07 | 25918813                | GG                              | TT              | 1946889240               |
| SNP_P4_96438_25920040 | NC_021166.1    | Ca_kabuli_chr07 | 25920040                | TT                              | CC              | 1946889242               |
| SNP_P4_96439_25976221 | NC_021166.1    | Ca_kabuli_chr07 | 25976221                | CC                              | AA              | 1946889244               |
| SNP_P4_96441_25990379 | NC_021166.1    | Ca_kabuli_chr07 | 25990379                | TT                              | CC              | 1946889246               |
| SNP_P4_96442_25990551 | NC_021166.1    | Ca_kabuli_chr07 | 25990551                | AA                              | TT              | 1946889248               |
| SNP_P4_96443_25990775 | NC_021166.1    | Ca_kabuli_chr07 | 25990775                | GG                              | AA              | 1946889250               |
| SNP_P4_96444_25992521 | NC_021166.1    | Ca_kabuli_chr07 | 25992521                | AA                              | GG              | 1946889252               |
| SNP_P4_96445_26001365 | NC_021166.1    | Ca_kabuli_chr07 | 26001365                | TT                              | AA              | 1946889254               |
| SNP_P4_96447_26001890 | NC_021166.1    | Ca_kabuli_chr07 | 26001890                | CC                              | GG              | 1946889257               |
| SNP_P4_96448_26010536 | NC_021166.1    | Ca_kabuli_chr07 | 26010536                | AA                              | GG              | 1946889259               |
| SNP_P4_96449_26011616 | NC_021166.1    | Ca_kabuli_chr07 | 26011616                | TT                              | CC              | 1946889261               |
| SNP_P4_96450_26013176 | NC_021166.1    | Ca_kabuli_chr07 | 26013176                | TT                              | GG              | 1946889263               |
| SNP_P4_96451_26020972 | NC_021166.1    | Ca_kabuli_chr07 | 26020972                | AA                              | GG              | 1946889265               |
| SNP_P4_96452_26025134 | NC_021166.1    | Ca_kabuli_chr07 | 26025134                | TT                              | AA              | 1946889267               |
| SNP_P4_96453_26028080 | NC_021166.1    | Ca_kabuli_chr07 | 26028080                | TT                              | GG              | 1946889269               |
| SNP_P4_96454_26028091 | NC_021166.1    | Ca_kabuli_chr07 | 26028091                | GG                              | AA              | 1946889271               |
| SNP_P4_96455_26029738 | NC_021166.1    | Ca_kabuli_chr07 | 26029738                | AA                              | TT              | 1946889273               |
| SNP_P4_96456_26029898 | NC_021166.1    | Ca_kabuli_chr07 | 26029898                | GG                              | AA              | 1946889275               |
| SNP_P4_96458_26038075 | NC_021166.1    | Ca_kabuli_chr07 | 26038075                | TT                              | CC              | 1946889277               |
| SNP_P4_96459_26050533 | NC_021166.1    | Ca_kabuli_chr07 | 26050533                | AA                              | GG              | 1946889279               |
| SNP_P4_96460_26069614 | NC_021166.1    | Ca_kabuli_chr07 | 26069614                | AA                              | GG              | 1946889281               |
| SNP_P4_96461_26069635 | NC_021166.1    | Ca_kabuli_chr07 | 26069635                | CC                              | TT              | 1946889283               |
| SNP_P4_96462_26069636 | NC_021166.1    | Ca_kabuli_chr07 | 26069636                | GG                              | AA              | 1946889286               |
| SNP_P4_96464_26075635 | NC_021166.1    | Ca_kabuli_chr07 | 26075635                | AA                              | GG              | 1946889288               |
| SNP_P4_96466_26093994 | NC_021166.1    | Ca_kabuli_chr07 | 26093994                | AA                              | CC              | 1946889290               |
| SNP_P4_96468_26099329 | NC_021166.1    | Ca_kabuli_chr07 | 26099329                | GG                              | TT              | 1946889292               |
| SNP_P4_96469_26156596 | NC_021166.1    | Ca_kabuli_chr07 | 26156596                | CC                              | AA              | 1946889294               |

| SNPs IDs              | Chromosome IDs | Chromosomes     | Physical positions (bp) | CDC Frontier (Reference genome) | (ILWC46 & LPNB) | NCBI SNPdb Accession IDs |
|-----------------------|----------------|-----------------|-------------------------|---------------------------------|-----------------|--------------------------|
| SNP_P4_96471_26160119 | NC_021166.1    | Ca_kabuli_chr07 | 26160119                | GG                              | AA              | 1946889296               |
| SNP_P4_96472_26160123 | NC_021166.1    | Ca_kabuli_chr07 | 26160123                | AA                              | CC              | 1946889298               |
| SNP_P4_96474_26160203 | NC_021166.1    | Ca_kabuli_chr07 | 26160203                | CC                              | GG              | 1946889300               |
| SNP_P4_96475_26160404 | NC_021166.1    | Ca_kabuli_chr07 | 26160404                | CC                              | AA              | 1946889302               |
| SNP_P4_96476_26160479 | NC_021166.1    | Ca_kabuli_chr07 | 26160479                | CC                              | TT              | 1946889304               |
| SNP_P4_96477_26160486 | NC_021166.1    | Ca_kabuli_chr07 | 26160486                | AA                              | GG              | 1946889306               |
| SNP_P4_96478_26160491 | NC_021166.1    | Ca_kabuli_chr07 | 26160491                | CC                              | TT              | 1946889308               |
| SNP_P4_96479_26160508 | NC_021166.1    | Ca_kabuli_chr07 | 26160508                | AA                              | GG              | 1946889310               |
| SNP_P4_96480_26160566 | NC_021166.1    | Ca_kabuli_chr07 | 26160566                | CC                              | TT              | 1946889313               |
| SNP_P4_96481_26160579 | NC_021166.1    | Ca_kabuli_chr07 | 26160579                | TT                              | AA              | 1946889315               |
| SNP_P4_96482_26160985 | NC_021166.1    | Ca_kabuli_chr07 | 26160985                | TT                              | CC              | 1946889317               |
| SNP_P4_96483_26168089 | NC_021166.1    | Ca_kabuli_chr07 | 26168089                | GG                              | TT              | 1946889319               |
| SNP_P4_96484_26168155 | NC_021166.1    | Ca_kabuli_chr07 | 26168155                | CC                              | AA              | 1946889321               |
| SNP_P4_96485_26168246 | NC_021166.1    | Ca_kabuli_chr07 | 26168246                | AA                              | GG              | 1946889323               |
| SNP_P4_96486_26168509 | NC_021166.1    | Ca_kabuli_chr07 | 26168509                | AA                              | GG              | 1946889325               |
| SNP_P4_96487_26168556 | NC_021166.1    | Ca_kabuli_chr07 | 26168556                | GG                              | AA              | 1946889327               |
| SNP_P4_96488_26168560 | NC_021166.1    | Ca_kabuli_chr07 | 26168560                | TT                              | CC              | 1946889329               |
| SNP_P4_96489_26171147 | NC_021166.1    | Ca_kabuli_chr07 | 26171147                | AA                              | CC              | 1946889331               |
| SNP_P4_96490_26171161 | NC_021166.1    | Ca_kabuli_chr07 | 26171161                | CC                              | TT              | 1946889333               |
| SNP_P4_96491_26171343 | NC_021166.1    | Ca_kabuli_chr07 | 26171343                | AA                              | TT              | 1946889335               |
| SNP_P4_96492_26171352 | NC_021166.1    | Ca_kabuli_chr07 | 26171352                | GG                              | AA              | 1946889337               |
| SNP_P4_96493_26171501 | NC_021166.1    | Ca_kabuli_chr07 | 26171501                | TT                              | AA              | 1946889339               |
| SNP_P4_96494_26171533 | NC_021166.1    | Ca_kabuli_chr07 | 26171533                | AA                              | TT              | 1946889341               |
| SNP_P4_96495_26171549 | NC_021166.1    | Ca_kabuli_chr07 | 26171549                | CC                              | TT              | 1946889343               |
| SNP_P4_96496_26171577 | NC_021166.1    | Ca_kabuli_chr07 | 26171577                | GG                              | AA              | 1946889345               |
| SNP_P4_96497_26171590 | NC_021166.1    | Ca_kabuli_chr07 | 26171590                | AA                              | GG              | 1946889347               |
| SNP_P4_96499_26171676 | NC_021166.1    | Ca_kabuli_chr07 | 26171676                | TT                              | AA              | 1946889349               |
| SNP_P4_96500_26172006 | NC_021166.1    | Ca_kabuli_chr07 | 26172006                | AA                              | GG              | 1946889350               |
| SNP_P4_96501_26176884 | NC_021166.1    | Ca_kabuli_chr07 | 26176884                | TT                              | GG              | 1946889351               |
| SNP_P4_96503_26176960 | NC_021166.1    | Ca_kabuli_chr07 | 26176960                | CC                              | TT              | 1946889353               |
| SNP_P4_96504_26176961 | NC_021166.1    | Ca_kabuli_chr07 | 26176961                | TT                              | AA              | 1946889355               |
| SNP_P4_96505_26177011 | NC_021166.1    | Ca_kabuli_chr07 | 26177011                | TT                              | CC              | 1946889357               |
| SNP_P4_96506_26177014 | NC_021166.1    | Ca_kabuli_chr07 | 26177014                | TT                              | AA              | 1946889359               |
| SNP_P4_96507_26177031 | NC_021166.1    | Ca_kabuli_chr07 | 26177031                | GG                              | AA              | 1946889361               |
| SNP_P4_96508_26177067 | NC_021166.1    | Ca_kabuli_chr07 | 26177067                | AA                              | CC              | 1946889363               |
| SNP_P4_96509_26177359 | NC_021166.1    | Ca_kabuli_chr07 | 26177359                | TT                              | CC              | 1946889365               |
| SNP_P4_96510_26177410 | NC_021166.1    | Ca_kabuli_chr07 | 26177410                | GG                              | TT              | 1946889367               |
| SNP_P4_96511_26177478 | NC_021166.1    | Ca_kabuli_chr07 | 26177478                | CC                              | TT              | 1946889369               |
| SNP_P4_96512_26177549 | NC_021166.1    | Ca_kabuli_chr07 | 26177549                | TT                              | CC              | 1946889371               |
| SNP_P4_96513_26177662 | NC_021166.1    | Ca_kabuli_chr07 | 26177662                | TT                              | CC              | 1946889373               |
| SNP_P4_96514_26177664 | NC_021166.1    | Ca_kabuli_chr07 | 26177664                | AA                              | GG              | 1946889375               |
| SNP_P4_96516_26177835 | NC_021166.1    | Ca_kabuli_chr07 | 26177835                | GG                              | TT              | 1946889377               |



| SNPs IDs              | Chromosome IDs | Chromosomes     | Physical positions (bp) | CDC Frontier (Reference genome) | (ILWC46 & LPNB) | NCBI SNPdb Accession IDs |
|-----------------------|----------------|-----------------|-------------------------|---------------------------------|-----------------|--------------------------|
| SNP_P4_96517_26177841 | NC_021166.1    | Ca_kabuli_chr07 | 26177841                | GG                              | AA              | 1946889379               |
| SNP_P4_96518_26177894 | NC_021166.1    | Ca_kabuli_chr07 | 26177894                | GG                              | AA              | 1946889381               |
| SNP_P4_96519_26177896 | NC_021166.1    | Ca_kabuli_chr07 | 26177896                | AA                              | GG              | 1946889383               |
| SNP_P4_96520_26177954 | NC_021166.1    | Ca_kabuli_chr07 | 26177954                | CC                              | TT              | 1946889385               |
| SNP_P4_96521_26179650 | NC_021166.1    | Ca_kabuli_chr07 | 26179650                | CC                              | TT              | 1946889387               |
| SNP_P4_96522_26179690 | NC_021166.1    | Ca_kabuli_chr07 | 26179690                | GG                              | TT              | 1946889389               |
| SNP_P4_96523_26179710 | NC_021166.1    | Ca_kabuli_chr07 | 26179710                | GG                              | TT              | 1946889391               |
| SNP_P4_96524_26181672 | NC_021166.1    | Ca_kabuli_chr07 | 26181672                | AA                              | GG              | 1946889393               |
| SNP_P4_96525_26181684 | NC_021166.1    | Ca_kabuli_chr07 | 26181684                | CC                              | AA              | 1946889396               |
| SNP_P4_96526_26181702 | NC_021166.1    | Ca_kabuli_chr07 | 26181702                | AA                              | TT              | 1946889398               |
| SNP_P4_96527_26181735 | NC_021166.1    | Ca_kabuli_chr07 | 26181735                | CC                              | TT              | 1946889400               |
| SNP_P4_96528_26189911 | NC_021166.1    | Ca_kabuli_chr07 | 26189911                | TT                              | AA              | 1946889402               |
| SNP_P4_96529_26190163 | NC_021166.1    | Ca_kabuli_chr07 | 26190163                | TT                              | CC              | 1946889404               |
| SNP_P4_96530_26218453 | NC_021166.1    | Ca_kabuli_chr07 | 26218453                | GG                              | AA              | 1946889406               |
| SNP_P4_96531_26218527 | NC_021166.1    | Ca_kabuli_chr07 | 26218527                | CC                              | TT              | 1946889408               |
| SNP_P4_96532_26218604 | NC_021166.1    | Ca_kabuli_chr07 | 26218604                | GG                              | TT              | 1946889410               |
| SNP_P4_96533_26218731 | NC_021166.1    | Ca_kabuli_chr07 | 26218731                | CC                              | AA              | 1946889412               |
| SNP_P4_96534_26218746 | NC_021166.1    | Ca_kabuli_chr07 | 26218746                | CC                              | GG              | 1946889414               |
| SNP_P4_96535_26219927 | NC_021166.1    | Ca_kabuli_chr07 | 26219927                | AA                              | CC              | 1946889417               |
| SNP_P4_96536_26220217 | NC_021166.1    | Ca_kabuli_chr07 | 26220217                | AA                              | TT              | 1946889419               |
| SNP_P4_96537_26220952 | NC_021166.1    | Ca_kabuli_chr07 | 26220952                | GG                              | AA              | 1946889421               |
| SNP_P4_96538_26221444 | NC_021166.1    | Ca_kabuli_chr07 | 26221444                | AA                              | CC              | 1946889423               |
| SNP_P4_96540_26221892 | NC_021166.1    | Ca_kabuli_chr07 | 26221892                | AA                              | CC              | 1946889425               |
| SNP_P4_96541_26221901 | NC_021166.1    | Ca_kabuli_chr07 | 26221901                | CC                              | AA              | 1946889427               |
| SNP_P4_96542_26222025 | NC_021166.1    | Ca_kabuli_chr07 | 26222025                | CC                              | TT              | 1946889429               |
| SNP_P4_96543_26222145 | NC_021166.1    | Ca_kabuli_chr07 | 26222145                | AA                              | GG              | 1946889431               |
| SNP_P4_96544_26222902 | NC_021166.1    | Ca_kabuli_chr07 | 26222902                | TT                              | CC              | 1946889433               |
| SNP_P4_96545_26222961 | NC_021166.1    | Ca_kabuli_chr07 | 26222961                | TT                              | CC              | 1946889435               |
| SNP_P4_96546_26223479 | NC_021166.1    | Ca_kabuli_chr07 | 26223479                | AA                              | GG              | 1946889437               |
| SNP_P4_96547_26223931 | NC_021166.1    | Ca_kabuli_chr07 | 26223931                | AA                              | CC              | 1946889439               |
| SNP_P4_96548_26224664 | NC_021166.1    | Ca_kabuli_chr07 | 26224664                | AA                              | GG              | 1946889441               |
| SNP_P4_96549_26224815 | NC_021166.1    | Ca_kabuli_chr07 | 26224815                | AA                              | TT              | 1946889443               |
| SNP_P4_96550_26225610 | NC_021166.1    | Ca_kabuli_chr07 | 26225610                | AA                              | CC              | 1946889445               |
| SNP_P4_96551_26226146 | NC_021166.1    | Ca_kabuli_chr07 | 26226146                | GG                              | CC              | 1946889447               |
| SNP_P4_96552_26226400 | NC_021166.1    | Ca_kabuli_chr07 | 26226400                | AA                              | CC              | 1946889449               |
| SNP_P4_96553_26226779 | NC_021166.1    | Ca_kabuli_chr07 | 26226779                | CC                              | TT              | 1946889451               |
| SNP_P4_96554_26227566 | NC_021166.1    | Ca_kabuli_chr07 | 26227566                | CC                              | TT              | 1946889453               |
| SNP_P4_96555_26228010 | NC_021166.1    | Ca_kabuli_chr07 | 26228010                | AA                              | CC              | 1946889455               |
| SNP_P4_96556_26228014 | NC_021166.1    | Ca_kabuli_chr07 | 26228014                | GG                              | AA              | 1946889457               |
| SNP_P4_96558_26228664 | NC_021166.1    | Ca_kabuli_chr07 | 26228664                | CC                              | TT              | 1946889459               |
| SNP_P4_96559_26228984 | NC_021166.1    | Ca_kabuli_chr07 | 26228984                | GG                              | TT              | 1946889461               |
| SNP_P4_96560_26228996 | NC_021166.1    | Ca_kabuli_chr07 | 26228996                | CC                              | TT              | 1946889463               |

| SNPs IDs              | Chromosome IDs | Chromosomes     | Physical positions (bp) | CDC Frontier (Reference genome) | (ILWC46 & LPNB) | NCBI SNPdb Accession IDs |
|-----------------------|----------------|-----------------|-------------------------|---------------------------------|-----------------|--------------------------|
| SNP_P4_96561_26229150 | NC_021166.1    | Ca_kabuli_chr07 | 26229150                | GG                              | TT              | 1946889465               |
| SNP_P4_96562_26229429 | NC_021166.1    | Ca_kabuli_chr07 | 26229429                | CC                              | TT              | 1946889467               |
| SNP_P4_96563_26229459 | NC_021166.1    | Ca_kabuli_chr07 | 26229459                | TT                              | GG              | 1946889469               |
| SNP_P4_96564_26229510 | NC_021166.1    | Ca_kabuli_chr07 | 26229510                | GG                              | AA              | 1946889471               |
| SNP_P4_96565_26229614 | NC_021166.1    | Ca_kabuli_chr07 | 26229614                | GG                              | AA              | 1946889473               |
| SNP_P4_96566_26229793 | NC_021166.1    | Ca_kabuli_chr07 | 26229793                | CC                              | TT              | 1946889475               |
| SNP_P4_96567_26229799 | NC_021166.1    | Ca_kabuli_chr07 | 26229799                | AA                              | GG              | 1946889477               |
| SNP_P4_96568_26229817 | NC_021166.1    | Ca_kabuli_chr07 | 26229817                | AA                              | CC              | 1946889479               |
| SNP_P4_96569_26230403 | NC_021166.1    | Ca_kabuli_chr07 | 26230403                | CC                              | TT              | 1946889481               |
| SNP_P4_96570_26230811 | NC_021166.1    | Ca_kabuli_chr07 | 26230811                | TT                              | CC              | 1946889483               |
| SNP_P4_96571_26230922 | NC_021166.1    | Ca_kabuli_chr07 | 26230922                | GG                              | AA              | 1946889485               |
| SNP_P4_96572_26231034 | NC_021166.1    | Ca_kabuli_chr07 | 26231034                | CC                              | AA              | 1946889487               |
| SNP_P4_96573_26231717 | NC_021166.1    | Ca_kabuli_chr07 | 26231717                | CC                              | TT              | 1946889489               |
| SNP_P4_96574_26232059 | NC_021166.1    | Ca_kabuli_chr07 | 26232059                | TT                              | AA              | 1946889491               |
| SNP_P4_96575_26232248 | NC_021166.1    | Ca_kabuli_chr07 | 26232248                | TT                              | AA              | 1946889493               |
| SNP_P4_96576_26232464 | NC_021166.1    | Ca_kabuli_chr07 | 26232464                | AA                              | CC              | 1946889495               |
| SNP_P4_96577_26232640 | NC_021166.1    | Ca_kabuli_chr07 | 26232640                | AA                              | GG              | 1946889497               |
| SNP_P4_96578_26232919 | NC_021166.1    | Ca_kabuli_chr07 | 26232919                | AA                              | TT              | 1946889499               |
| SNP_P4_96580_26234078 | NC_021166.1    | Ca_kabuli_chr07 | 26234078                | GG                              | TT              | 1946889501               |
| SNP_P4_96581_26234109 | NC_021166.1    | Ca_kabuli_chr07 | 26234109                | AA                              | CC              | 1946889503               |
| SNP_P4_96582_26234682 | NC_021166.1    | Ca_kabuli_chr07 | 26234682                | CC                              | TT              | 1946889505               |
| SNP_P4_96583_26234774 | NC_021166.1    | Ca_kabuli_chr07 | 26234774                | CC                              | TT              | 1946889507               |
| SNP_P4_96584_26235069 | NC_021166.1    | Ca_kabuli_chr07 | 26235069                | TT                              | CC              | 1946889509               |
| SNP_P4_96586_26235896 | NC_021166.1    | Ca_kabuli_chr07 | 26235896                | AA                              | GG              | 1946889511               |
| SNP_P4_96587_26236167 | NC_021166.1    | Ca_kabuli_chr07 | 26236167                | GG                              | TT              | 1946889513               |
| SNP_P4_96588_26236327 | NC_021166.1    | Ca_kabuli_chr07 | 26236327                | GG                              | AA              | 1946889515               |
| SNP_P4_96589_26236362 | NC_021166.1    | Ca_kabuli_chr07 | 26236362                | TT                              | AA              | 1946889517               |
| SNP_P4_96590_26236447 | NC_021166.1    | Ca_kabuli_chr07 | 26236447                | AA                              | CC              | 1946889519               |
| SNP_P4_96591_26237245 | NC_021166.1    | Ca_kabuli_chr07 | 26237245                | CC                              | TT              | 1946889521               |
| SNP_P4_96592_26237262 | NC_021166.1    | Ca_kabuli_chr07 | 26237262                | GG                              | AA              | 1946889523               |
| SNP_P4_96593_26237312 | NC_021166.1    | Ca_kabuli_chr07 | 26237312                | GG                              | TT              | 1946889525               |
| SNP_P4_96594_26237567 | NC_021166.1    | Ca_kabuli_chr07 | 26237567                | CC                              | AA              | 1946889527               |
| SNP_P4_96595_26237697 | NC_021166.1    | Ca_kabuli_chr07 | 26237697                | TT                              | AA              | 1946889529               |
| SNP_P4_96596_26238151 | NC_021166.1    | Ca_kabuli_chr07 | 26238151                | CC                              | TT              | 1946889531               |
| SNP_P4_96597_26238516 | NC_021166.1    | Ca_kabuli_chr07 | 26238516                | TT                              | CC              | 1946889533               |
| SNP_P4_96598_26239336 | NC_021166.1    | Ca_kabuli_chr07 | 26239336                | GG                              | AA              | 1946889535               |
| SNP_P4_96599_26239860 | NC_021166.1    | Ca_kabuli_chr07 | 26239860                | GG                              | AA              | 1946889537               |
| SNP_P4_96600_26240179 | NC_021166.1    | Ca_kabuli_chr07 | 26240179                | AA                              | GG              | 1946889539               |
| SNP_P4_96601_26240589 | NC_021166.1    | Ca_kabuli_chr07 | 26240589                | AA                              | TT              | 1946889541               |
| SNP_P4_96602_26240592 | NC_021166.1    | Ca_kabuli_chr07 | 26240592                | AA                              | TT              | 1946889543               |
| SNP_P4_96603_26240695 | NC_021166.1    | Ca_kabuli_chr07 | 26240695                | TT                              | AA              | 1946889545               |
| SNP_P4_96604_26245030 | NC_021166.1    | Ca_kabuli_chr07 | 26245030                | AA                              | CC              | 1946889547               |

| SNPs IDs              | Chromosome IDs | Chromosomes     | Physical positions (bp) | CDC Frontier (Reference genome) | (ILWC46 & LPNB) | NCBI SNPdb Accession IDs |
|-----------------------|----------------|-----------------|-------------------------|---------------------------------|-----------------|--------------------------|
| SNP_P4_96605_26245432 | NC_021166.1    | Ca_kabuli_chr07 | 26245432                | CC                              | AA              | 1946889549               |
| SNP_P4_96606_26245715 | NC_021166.1    | Ca_kabuli_chr07 | 26245715                | AA                              | GG              | 1946889551               |
| SNP_P4_96607_26248225 | NC_021166.1    | Ca_kabuli_chr07 | 26248225                | GG                              | AA              | 1946889553               |
| SNP_P4_96608_26258803 | NC_021166.1    | Ca_kabuli_chr07 | 26258803                | GG                              | TT              | 1946889555               |
| SNP_P4_96609_26259873 | NC_021166.1    | Ca_kabuli_chr07 | 26259873                | GG                              | AA              | 1946889557               |
| SNP_P4_96610_26260112 | NC_021166.1    | Ca_kabuli_chr07 | 26260112                | GG                              | AA              | 1946889559               |
| SNP_P4_96611_26260197 | NC_021166.1    | Ca_kabuli_chr07 | 26260197                | TT                              | CC              | 1946889561               |
| SNP_P4_96612_26260372 | NC_021166.1    | Ca_kabuli_chr07 | 26260372                | CC                              | TT              | 1946889563               |
| SNP_P4_96613_26260952 | NC_021166.1    | Ca_kabuli_chr07 | 26260952                | TT                              | AA              | 1946889565               |
| SNP_P4_96614_26261404 | NC_021166.1    | Ca_kabuli_chr07 | 26261404                | GG                              | AA              | 1946889567               |
| SNP_P4_96615_26263500 | NC_021166.1    | Ca_kabuli_chr07 | 26263500                | AA                              | GG              | 1946889570               |
| SNP_P4_96616_26263664 | NC_021166.1    | Ca_kabuli_chr07 | 26263664                | GG                              | AA              | 1946889572               |
| SNP_P4_96617_26264506 | NC_021166.1    | Ca_kabuli_chr07 | 26264506                | CC                              | TT              | 1946889574               |
| SNP_P4_96618_26264697 | NC_021166.1    | Ca_kabuli_chr07 | 26264697                | GG                              | TT              | 1946889576               |
| SNP_P4_96619_26265483 | NC_021166.1    | Ca_kabuli_chr07 | 26265483                | GG                              | AA              | 1946889578               |
| SNP_P4_96620_26266063 | NC_021166.1    | Ca_kabuli_chr07 | 26266063                | TT                              | CC              | 1946889580               |
| SNP_P4_96621_26266678 | NC_021166.1    | Ca_kabuli_chr07 | 26266678                | TT                              | CC              | 1946889582               |
| SNP_P4_96622_26267033 | NC_021166.1    | Ca_kabuli_chr07 | 26267033                | AA                              | GG              | 1946889584               |
| SNP_P4_96623_26268053 | NC_021166.1    | Ca_kabuli_chr07 | 26268053                | TT                              | CC              | 1946889586               |
| SNP_P4_96624_26268529 | NC_021166.1    | Ca_kabuli_chr07 | 26268529                | AA                              | GG              | 1946889588               |
| SNP_P4_96625_26268751 | NC_021166.1    | Ca_kabuli_chr07 | 26268751                | AA                              | GG              | 1946889590               |
| SNP_P4_96626_26269623 | NC_021166.1    | Ca_kabuli_chr07 | 26269623                | AA                              | GG              | 1946889592               |
| SNP_P4_96627_26269949 | NC_021166.1    | Ca_kabuli_chr07 | 26269949                | CC                              | AA              | 1946889594               |
| SNP_P4_96628_26269978 | NC_021166.1    | Ca_kabuli_chr07 | 26269978                | AA                              | GG              | 1946889596               |
| SNP_P4_96629_26269997 | NC_021166.1    | Ca_kabuli_chr07 | 26269997                | AA                              | TT              | 1946889598               |
| SNP_P4_96630_26270000 | NC_021166.1    | Ca_kabuli_chr07 | 26270000                | TT                              | AA              | 1946889600               |
| SNP_P4_96631_26271232 | NC_021166.1    | Ca_kabuli_chr07 | 26271232                | CC                              | TT              | 1946889603               |
| SNP_P4_96632_26271694 | NC_021166.1    | Ca_kabuli_chr07 | 26271694                | TT                              | GG              | 1946889605               |
| SNP_P4_96633_26273220 | NC_021166.1    | Ca_kabuli_chr07 | 26273220                | TT                              | AA              | 1946889607               |
| SNP_P4_96634_26277458 | NC_021166.1    | Ca_kabuli_chr07 | 26277458                | TT                              | AA              | 1946889609               |
| SNP_P4_96635_26277508 | NC_021166.1    | Ca_kabuli_chr07 | 26277508                | GG                              | AA              | 1946889611               |
| SNP_P4_96637_26277650 | NC_021166.1    | Ca_kabuli_chr07 | 26277650                | GG                              | TT              | 1946889613               |
| SNP_P4_96638_26277672 | NC_021166.1    | Ca_kabuli_chr07 | 26277672                | GG                              | AA              | 1946889615               |
| SNP_P4_96639_26277897 | NC_021166.1    | Ca_kabuli_chr07 | 26277897                | TT                              | AA              | 1946889617               |
| SNP_P4_96640_26296999 | NC_021166.1    | Ca_kabuli_chr07 | 26296999                | CC                              | TT              | 1946889619               |
| SNP_P4_96641_26312118 | NC_021166.1    | Ca_kabuli_chr07 | 26312118                | TT                              | CC              | 1946889621               |
| SNP_P4_96642_26319085 | NC_021166.1    | Ca_kabuli_chr07 | 26319085                | GG                              | AA              | 1946889623               |
| SNP_P4_96643_26326262 | NC_021166.1    | Ca_kabuli_chr07 | 26326262                | TT                              | AA              | 1946889625               |
| SNP_P4_96644_26326541 | NC_021166.1    | Ca_kabuli_chr07 | 26326541                | AA                              | TT              | 1946889628               |
| SNP_P4_96646_26346585 | NC_021166.1    | Ca_kabuli_chr07 | 26346585                | GG                              | AA              | 1946889630               |
| SNP_P4_96647_26363672 | NC_021166.1    | Ca_kabuli_chr07 | 26363672                | TT                              | CC              | 1946889632               |
| SNP_P4_96649_26375740 | NC_021166.1    | Ca_kabuli_chr07 | 26375740                | GG                              | AA              | 1946889634               |

| SNPs IDs              | Chromosome IDs | Chromosomes     | Physical positions (bp) | CDC Frontier (Reference genome) | (ILWC46 & LPNB) | NCBI SNPdb Accession IDs |
|-----------------------|----------------|-----------------|-------------------------|---------------------------------|-----------------|--------------------------|
| SNP_P4_96650_26375744 | NC_021166.1    | Ca_kabuli_chr07 | 26375744                | AA                              | TT              | 1946889636               |
| SNP_P4_96651_26375816 | NC_021166.1    | Ca_kabuli_chr07 | 26375816                | TT                              | CC              | 1946889638               |
| SNP_P4_96652_26375906 | NC_021166.1    | Ca_kabuli_chr07 | 26375906                | CC                              | TT              | 1946889640               |
| SNP_P4_96653_26375946 | NC_021166.1    | Ca_kabuli_chr07 | 26375946                | AA                              | CC              | 1946889642               |
| SNP_P4_96654_26375977 | NC_021166.1    | Ca_kabuli_chr07 | 26375977                | GG                              | AA              | 1946889644               |
| SNP_P4_96655_26375984 | NC_021166.1    | Ca_kabuli_chr07 | 26375984                | AA                              | GG              | 1946889647               |
| SNP_P4_96656_26376213 | NC_021166.1    | Ca_kabuli_chr07 | 26376213                | CC                              | GG              | 1946889649               |
| SNP_P4_96657_26410371 | NC_021166.1    | Ca_kabuli_chr07 | 26410371                | CC                              | TT              | 1946889651               |
| SNP_P4_96658_26412618 | NC_021166.1    | Ca_kabuli_chr07 | 26412618                | CC                              | TT              | 1946889653               |
| SNP_P4_96659_26420812 | NC_021166.1    | Ca_kabuli_chr07 | 26420812                | GG                              | CC              | 1946889655               |
| SNP_P4_96661_26432792 | NC_021166.1    | Ca_kabuli_chr07 | 26432792                | GG                              | AA              | 1946889657               |
| SNP_P4_96662_26436789 | NC_021166.1    | Ca_kabuli_chr07 | 26436789                | TT                              | AA              | 1946889659               |
| SNP_P4_96663_26437256 | NC_021166.1    | Ca_kabuli_chr07 | 26437256                | GG                              | TT              | 1946889661               |
| SNP_P4_96664_26437266 | NC_021166.1    | Ca_kabuli_chr07 | 26437266                | AA                              | GG              | 1946889663               |
| SNP_P4_96665_26437452 | NC_021166.1    | Ca_kabuli_chr07 | 26437452                | GG                              | AA              | 1946889665               |
| SNP_P4_96666_26437453 | NC_021166.1    | Ca_kabuli_chr07 | 26437453                | TT                              | CC              | 1946889668               |
| SNP_P4_96667_26439317 | NC_021166.1    | Ca_kabuli_chr07 | 26439317                | GG                              | AA              | 1946889670               |
| SNP_P4_96668_26442993 | NC_021166.1    | Ca_kabuli_chr07 | 26442993                | GG                              | AA              | 1946889672               |
| SNP_P4_96669_26450095 | NC_021166.1    | Ca_kabuli_chr07 | 26450095                | AA                              | GG              | 1946889674               |
| SNP_P4_96670_26450444 | NC_021166.1    | Ca_kabuli_chr07 | 26450444                | AA                              | GG              | 1946889676               |
| SNP_P4_96671_26450489 | NC_021166.1    | Ca_kabuli_chr07 | 26450489                | AA                              | GG              | 1946889678               |
| SNP_P4_96672_26450608 | NC_021166.1    | Ca_kabuli_chr07 | 26450608                | GG                              | AA              | 1946889680               |
| SNP_P4_96673_26471460 | NC_021166.1    | Ca_kabuli_chr07 | 26471460                | CC                              | GG              | 1946889682               |
| SNP_P4_96674_26475565 | NC_021166.1    | Ca_kabuli_chr07 | 26475565                | CC                              | TT              | 1946889684               |
| SNP_P4_96675_26475608 | NC_021166.1    | Ca_kabuli_chr07 | 26475608                | CC                              | AA              | 1946889686               |
| SNP_P4_96676_26475632 | NC_021166.1    | Ca_kabuli_chr07 | 26475632                | GG                              | AA              | 1946889688               |
| SNP_P4_96677_26475913 | NC_021166.1    | Ca_kabuli_chr07 | 26475913                | AA                              | TT              | 1946889690               |
| SNP_P4_96678_26475938 | NC_021166.1    | Ca_kabuli_chr07 | 26475938                | CC                              | TT              | 1946889692               |
| SNP_P4_96679_26475939 | NC_021166.1    | Ca_kabuli_chr07 | 26475939                | GG                              | CC              | 1946889694               |
| SNP_P4_96680_26476004 | NC_021166.1    | Ca_kabuli_chr07 | 26476004                | GG                              | TT              | 1946889696               |
| SNP_P4_96681_26476644 | NC_021166.1    | Ca_kabuli_chr07 | 26476644                | CC                              | TT              | 1946889698               |
| SNP_P4_96682_26477871 | NC_021166.1    | Ca_kabuli_chr07 | 26477871                | GG                              | CC              | 1946889700               |
| SNP_P4_96683_26478286 | NC_021166.1    | Ca_kabuli_chr07 | 26478286                | AA                              | TT              | 1946889702               |
| SNP_P4_96684_26478290 | NC_021166.1    | Ca_kabuli_chr07 | 26478290                | AA                              | GG              | 1946889704               |
| SNP_P4_96685_26478292 | NC_021166.1    | Ca_kabuli_chr07 | 26478292                | AA                              | TT              | 1946889706               |
| SNP_P4_96686_26478319 | NC_021166.1    | Ca_kabuli_chr07 | 26478319                | GG                              | AA              | 1946889708               |
| SNP_P4_96687_26480002 | NC_021166.1    | Ca_kabuli_chr07 | 26480002                | GG                              | AA              | 1946889710               |
| SNP_P4_96688_26525125 | NC_021166.1    | Ca_kabuli_chr07 | 26525125                | GG                              | AA              | 1946889712               |
| SNP_P4_96689_26548688 | NC_021166.1    | Ca_kabuli_chr07 | 26548688                | GG                              | AA              | 1946889714               |
| SNP_P4_96690_26565142 | NC_021166.1    | Ca_kabuli_chr07 | 26565142                | TT                              | CC              | 1946889716               |
| SNP_P4_96691_26573018 | NC_021166.1    | Ca_kabuli_chr07 | 26573018                | TT                              | CC              | 1946889718               |
| SNP_P4_96692_26575175 | NC_021166.1    | Ca_kabuli_chr07 | 26575175                | TT                              | CC              | 1946889720               |

| SNPs IDs              | Chromosome IDs | Chromosomes     | Physical positions (bp) | CDC Frontier (Reference genome) | (ILWC46 & LPNB) | NCBI SNPdb Accession IDs |
|-----------------------|----------------|-----------------|-------------------------|---------------------------------|-----------------|--------------------------|
| SNP_P4_96693_26575490 | NC_021166.1    | Ca_kabuli_chr07 | 26575490                | AA                              | GG              | 1946889722               |
| SNP_P4_96694_26575496 | NC_021166.1    | Ca_kabuli_chr07 | 26575496                | TT                              | CC              | 1946889724               |
| SNP_P4_96695_26575547 | NC_021166.1    | Ca_kabuli_chr07 | 26575547                | AA                              | GG              | 1946889726               |
| SNP_P4_96696_26575822 | NC_021166.1    | Ca_kabuli_chr07 | 26575822                | AA                              | GG              | 1946889728               |
| SNP_P4_96697_26575840 | NC_021166.1    | Ca_kabuli_chr07 | 26575840                | GG                              | AA              | 1946889730               |
| SNP_P4_96698_26575856 | NC_021166.1    | Ca_kabuli_chr07 | 26575856                | CC                              | AA              | 1946889732               |
| SNP_P4_96699_26575862 | NC_021166.1    | Ca_kabuli_chr07 | 26575862                | AA                              | CC              | 1946889734               |
| SNP_P4_96700_26643361 | NC_021166.1    | Ca_kabuli_chr07 | 26643361                | AA                              | TT              | 1946889736               |
| SNP_P4_96701_26648613 | NC_021166.1    | Ca_kabuli_chr07 | 26648613                | AA                              | CC              | 1946889738               |
| SNP_P4_96702_26649724 | NC_021166.1    | Ca_kabuli_chr07 | 26649724                | AA                              | CC              | 1946889740               |
| SNP_P4_96703_26655423 | NC_021166.1    | Ca_kabuli_chr07 | 26655423                | GG                              | AA              | 1946889742               |
| SNP_P4_96705_26672053 | NC_021166.1    | Ca_kabuli_chr07 | 26672053                | CC                              | TT              | 1946889744               |
| SNP_P4_96706_26691926 | NC_021166.1    | Ca_kabuli_chr07 | 26691926                | CC                              | TT              | 1946889746               |
| SNP_P4_96707_26694588 | NC_021166.1    | Ca_kabuli_chr07 | 26694588                | TT                              | CC              | 1946889748               |
| SNP_P4_96709_26694825 | NC_021166.1    | Ca_kabuli_chr07 | 26694825                | CC                              | AA              | 1946889750               |
| SNP_P4_96710_26694829 | NC_021166.1    | Ca_kabuli_chr07 | 26694829                | TT                              | CC              | 1946889752               |
| SNP_P4_96711_26694863 | NC_021166.1    | Ca_kabuli_chr07 | 26694863                | AA                              | CC              | 1946889754               |
| SNP_P4_96712_26695291 | NC_021166.1    | Ca_kabuli_chr07 | 26695291                | TT                              | CC              | 1946889757               |
| SNP_P4_96713_26695924 | NC_021166.1    | Ca_kabuli_chr07 | 26695924                | TT                              | CC              | 1946889759               |
| SNP_P4_96715_26698579 | NC_021166.1    | Ca_kabuli_chr07 | 26698579                | TT                              | CC              | 1946889761               |
| SNP_P4_96716_26698682 | NC_021166.1    | Ca_kabuli_chr07 | 26698682                | AA                              | GG              | 1946889763               |
| SNP_P4_96717_26699275 | NC_021166.1    | Ca_kabuli_chr07 | 26699275                | AA                              | GG              | 1946889765               |
| SNP_P4_96718_26699289 | NC_021166.1    | Ca_kabuli_chr07 | 26699289                | AA                              | GG              | 1946889767               |
| SNP_P4_96719_26699344 | NC_021166.1    | Ca_kabuli_chr07 | 26699344                | CC                              | GG              | 1946889769               |
| SNP_P4_96720_26699346 | NC_021166.1    | Ca_kabuli_chr07 | 26699346                | AA                              | GG              | 1946889771               |
| SNP_P4_96721_26699366 | NC_021166.1    | Ca_kabuli_chr07 | 26699366                | AA                              | GG              | 1946889773               |
| SNP_P4_96722_26699415 | NC_021166.1    | Ca_kabuli_chr07 | 26699415                | CC                              | TT              | 1946889775               |
| SNP_P4_96723_26699765 | NC_021166.1    | Ca_kabuli_chr07 | 26699765                | TT                              | CC              | 1946889777               |
| SNP_P4_96724_26699787 | NC_021166.1    | Ca_kabuli_chr07 | 26699787                | AA                              | GG              | 1946889779               |
| SNP_P4_96725_26699890 | NC_021166.1    | Ca_kabuli_chr07 | 26699890                | TT                              | CC              | 1946889781               |
| SNP_P4_96726_26699899 | NC_021166.1    | Ca_kabuli_chr07 | 26699899                | TT                              | CC              | 1946889783               |
| SNP_P4_96727_26699943 | NC_021166.1    | Ca_kabuli_chr07 | 26699943                | AA                              | GG              | 1946889785               |
| SNP_P4_96728_26700038 | NC_021166.1    | Ca_kabuli_chr07 | 26700038                | TT                              | AA              | 1946889787               |
| SNP_P4_96729_26700316 | NC_021166.1    | Ca_kabuli_chr07 | 26700316                | AA                              | GG              | 1946889789               |
| SNP_P4_96730_26700368 | NC_021166.1    | Ca_kabuli_chr07 | 26700368                | CC                              | GG              | 1946889791               |
| SNP_P4_96731_26700373 | NC_021166.1    | Ca_kabuli_chr07 | 26700373                | TT                              | CC              | 1946889793               |
| SNP_P4_96732_26700382 | NC_021166.1    | Ca_kabuli_chr07 | 26700382                | TT                              | CC              | 1946889796               |
| SNP_P4_96733_26700395 | NC_021166.1    | Ca_kabuli_chr07 | 26700395                | AA                              | GG              | 1946889798               |
| SNP_P4_96734_26700412 | NC_021166.1    | Ca_kabuli_chr07 | 26700412                | AA                              | GG              | 1946889800               |
| SNP_P4_96735_26700803 | NC_021166.1    | Ca_kabuli_chr07 | 26700803                | TT                              | GG              | 1946889802               |
| SNP_P4_96737_26700879 | NC_021166.1    | Ca_kabuli_chr07 | 26700879                | TT                              | CC              | 1946889804               |
| SNP_P4_96738_26700892 | NC_021166.1    | Ca_kabuli_chr07 | 26700892                | CC                              | GG              | 1946889806               |

| SNPs IDs              | Chromosome IDs | Chromosomes     | Physical positions (bp) | CDC Frontier (Reference genome) | (ILWC46 & LPNB) | NCBI SNPdb Accession IDs |
|-----------------------|----------------|-----------------|-------------------------|---------------------------------|-----------------|--------------------------|
| SNP_P4_96739_26700953 | NC_021166.1    | Ca_kabuli_chr07 | 26700953                | AA                              | GG              | 1946889808               |
| SNP_P4_96740_26700955 | NC_021166.1    | Ca_kabuli_chr07 | 26700955                | TT                              | AA              | 1946889810               |
| SNP_P4_96741_26700969 | NC_021166.1    | Ca_kabuli_chr07 | 26700969                | TT                              | CC              | 1946889812               |
| SNP_P4_96743_26701344 | NC_021166.1    | Ca_kabuli_chr07 | 26701344                | TT                              | CC              | 1946889814               |
| SNP_P4_96744_26701396 | NC_021166.1    | Ca_kabuli_chr07 | 26701396                | GG                              | CC              | 1946889816               |
| SNP_P4_96745_26701489 | NC_021166.1    | Ca_kabuli_chr07 | 26701489                | CC                              | AA              | 1946889818               |
| SNP_P4_96747_26701540 | NC_021166.1    | Ca_kabuli_chr07 | 26701540                | AA                              | CC              | 1946889820               |
| SNP_P4_96748_26701579 | NC_021166.1    | Ca_kabuli_chr07 | 26701579                | GG                              | CC              | 1946889822               |
| SNP_P4_96750_26701705 | NC_021166.1    | Ca_kabuli_chr07 | 26701705                | AA                              | GG              | 1946889824               |
| SNP_P4_96751_26702154 | NC_021166.1    | Ca_kabuli_chr07 | 26702154                | GG                              | AA              | 1946889827               |
| SNP_P4_96752_26702313 | NC_021166.1    | Ca_kabuli_chr07 | 26702313                | TT                              | CC              | 1946889829               |
| SNP_P4_96753_26702829 | NC_021166.1    | Ca_kabuli_chr07 | 26702829                | CC                              | TT              | 1946889831               |
| SNP_P4_96754_26702861 | NC_021166.1    | Ca_kabuli_chr07 | 26702861                | AA                              | GG              | 1946889833               |
| SNP_P4_96755_26702914 | NC_021166.1    | Ca_kabuli_chr07 | 26702914                | AA                              | CC              | 1946889836               |
| SNP_P4_96756_26702922 | NC_021166.1    | Ca_kabuli_chr07 | 26702922                | AA                              | CC              | 1946889838               |
| SNP_P4_96757_26702936 | NC_021166.1    | Ca_kabuli_chr07 | 26702936                | CC                              | GG              | 1946889840               |
| SNP_P4_96759_26703209 | NC_021166.1    | Ca_kabuli_chr07 | 26703209                | AA                              | GG              | 1946889842               |
| SNP_P4_96760_26703222 | NC_021166.1    | Ca_kabuli_chr07 | 26703222                | AA                              | GG              | 1946889844               |
| SNP_P4_96761_26703238 | NC_021166.1    | Ca_kabuli_chr07 | 26703238                | GG                              | CC              | 1946889846               |
| SNP_P4_96762_26703250 | NC_021166.1    | Ca_kabuli_chr07 | 26703250                | TT                              | GG              | 1946889848               |
| SNP_P4_96763_26703290 | NC_021166.1    | Ca_kabuli_chr07 | 26703290                | AA                              | GG              | 1946889850               |
| SNP_P4_96764_26717804 | NC_021166.1    | Ca_kabuli_chr07 | 26717804                | CC                              | TT              | 1946889852               |
| SNP_P4_96766_26722381 | NC_021166.1    | Ca_kabuli_chr07 | 26722381                | GG                              | TT              | 1946889854               |
| SNP_P4_96767_26726213 | NC_021166.1    | Ca_kabuli_chr07 | 26726213                | CC                              | TT              | 1946889856               |
| SNP_P4_96768_26730430 | NC_021166.1    | Ca_kabuli_chr07 | 26730430                | TT                              | CC              | 1946889858               |
| SNP_P4_96769_26730446 | NC_021166.1    | Ca_kabuli_chr07 | 26730446                | GG                              | TT              | 1946889860               |
| SNP_P4_96770_26730534 | NC_021166.1    | Ca_kabuli_chr07 | 26730534                | AA                              | GG              | 1946889862               |
| SNP_P4_96771_26738701 | NC_021166.1    | Ca_kabuli_chr07 | 26738701                | TT                              | AA              | 1946889865               |
| SNP_P4_96772_26754795 | NC_021166.1    | Ca_kabuli_chr07 | 26754795                | TT                              | CC              | 1946889867               |
| SNP_P4_96773_26756907 | NC_021166.1    | Ca_kabuli_chr07 | 26756907                | CC                              | TT              | 1946889869               |
| SNP_P4_96774_26758473 | NC_021166.1    | Ca_kabuli_chr07 | 26758473                | TT                              | CC              | 1946889871               |
| SNP_P4_96776_26758780 | NC_021166.1    | Ca_kabuli_chr07 | 26758780                | AA                              | GG              | 1946889873               |
| SNP_P4_96777_26771720 | NC_021166.1    | Ca_kabuli_chr07 | 26771720                | TT                              | AA              | 1946889875               |
| SNP_P4_96779_26799074 | NC_021166.1    | Ca_kabuli_chr07 | 26799074                | CC                              | TT              | 1946889877               |
| SNP_P4_96780_26799087 | NC_021166.1    | Ca_kabuli_chr07 | 26799087                | GG                              | TT              | 1946889879               |
| SNP_P4_96781_26799117 | NC_021166.1    | Ca_kabuli_chr07 | 26799117                | CC                              | TT              | 1946889881               |
| SNP_P4_96782_26799359 | NC_021166.1    | Ca_kabuli_chr07 | 26799359                | AA                              | GG              | 1946889883               |
| SNP_P4_96783_26799370 | NC_021166.1    | Ca_kabuli_chr07 | 26799370                | CC                              | TT              | 1946889885               |
| SNP_P4_96784_26799395 | NC_021166.1    | Ca_kabuli_chr07 | 26799395                | TT                              | GG              | 1946889887               |
| SNP_P4_96785_26799396 | NC_021166.1    | Ca_kabuli_chr07 | 26799396                | TT                              | AA              | 1946889889               |
| SNP_P4_96786_26799430 | NC_021166.1    | Ca_kabuli_chr07 | 26799430                | TT                              | AA              | 1946889891               |
| SNP_P4_96787_26799435 | NC_021166.1    | Ca_kabuli_chr07 | 26799435                | GG                              | AA              | 1946889894               |

| SNPs IDs              | Chromosome IDs | Chromosomes     | Physical positions (bp) | CDC Frontier (Reference genome) | (ILWC46 & LPNB) | NCBI SNPdb Accession IDs |
|-----------------------|----------------|-----------------|-------------------------|---------------------------------|-----------------|--------------------------|
| SNP_P4_96788_26829001 | NC_021166.1    | Ca_kabuli_chr07 | 26829001                | CC                              | TT              | 1946889896               |
| SNP_P4_96789_26833618 | NC_021166.1    | Ca_kabuli_chr07 | 26833618                | GG                              | CC              | 1946889898               |
| SNP_P4_96790_26834244 | NC_021166.1    | Ca_kabuli_chr07 | 26834244                | TT                              | CC              | 1946889900               |
| SNP_P4_96792_26838051 | NC_021166.1    | Ca_kabuli_chr07 | 26838051                | TT                              | CC              | 1946889902               |
| SNP_P4_96793_26838707 | NC_021166.1    | Ca_kabuli_chr07 | 26838707                | TT                              | CC              | 1946889904               |
| SNP_P4_96794_26857250 | NC_021166.1    | Ca_kabuli_chr07 | 26857250                | AA                              | GG              | 1946889906               |
| SNP_P4_96795_26857559 | NC_021166.1    | Ca_kabuli_chr07 | 26857559                | AA                              | CC              | 1946889908               |
| SNP_P4_96796_26857573 | NC_021166.1    | Ca_kabuli_chr07 | 26857573                | GG                              | AA              | 1946889910               |
| SNP_P4_96797_26920713 | NC_021166.1    | Ca_kabuli_chr07 | 26920713                | CC                              | AA              | 1946889912               |
| SNP_P4_96799_26981489 | NC_021166.1    | Ca_kabuli_chr07 | 26981489                | TT                              | GG              | 1946889914               |
| SNP_P4_96800_26982293 | NC_021166.1    | Ca_kabuli_chr07 | 26982293                | CC                              | TT              | 1946889916               |
| SNP_P4_96801_26987520 | NC_021166.1    | Ca_kabuli_chr07 | 26987520                | CC                              | GG              | 1946889918               |
| SNP_P4_96802_26994485 | NC_021166.1    | Ca_kabuli_chr07 | 26994485                | AA                              | TT              | 1946889920               |
| SNP_P4_96803_27009550 | NC_021166.1    | Ca_kabuli_chr07 | 27009550                | CC                              | TT              | 1946889922               |
| SNP_P4_96804_27009595 | NC_021166.1    | Ca_kabuli_chr07 | 27009595                | CC                              | AA              | 1946889924               |
| SNP_P4_96805_27009615 | NC_021166.1    | Ca_kabuli_chr07 | 27009615                | CC                              | TT              | 1946889926               |
| SNP_P4_96806_27009709 | NC_021166.1    | Ca_kabuli_chr07 | 27009709                | AA                              | GG              | 1946889928               |
| SNP_P4_96807_27009735 | NC_021166.1    | Ca_kabuli_chr07 | 27009735                | GG                              | AA              | 1946889930               |
| SNP_P4_96808_27009743 | NC_021166.1    | Ca_kabuli_chr07 | 27009743                | TT                              | CC              | 1946889932               |
| SNP_P4_96809_27022925 | NC_021166.1    | Ca_kabuli_chr07 | 27022925                | GG                              | AA              | 1946889934               |
| SNP_P4_96812_27042857 | NC_021166.1    | Ca_kabuli_chr07 | 27042857                | AA                              | TT              | 1946889936               |
| SNP_P4_96813_27042888 | NC_021166.1    | Ca_kabuli_chr07 | 27042888                | AA                              | CC              | 1946889938               |
| SNP_P4_96814_27043158 | NC_021166.1    | Ca_kabuli_chr07 | 27043158                | TT                              | GG              | 1946889940               |
| SNP_P4_96816_27043289 | NC_021166.1    | Ca_kabuli_chr07 | 27043289                | AA                              | GG              | 1946889942               |
| SNP_P4_96817_27043290 | NC_021166.1    | Ca_kabuli_chr07 | 27043290                | TT                              | GG              | 1946889944               |
| SNP_P4_96818_27043293 | NC_021166.1    | Ca_kabuli_chr07 | 27043293                | CC                              | AA              | 1946889946               |
| SNP_P4_96819_27043427 | NC_021166.1    | Ca_kabuli_chr07 | 27043427                | AA                              | GG              | 1946889948               |
| SNP_P4_96820_27046102 | NC_021166.1    | Ca_kabuli_chr07 | 27046102                | CC                              | TT              | 1946889950               |
| SNP_P4_96821_27070100 | NC_021166.1    | Ca_kabuli_chr07 | 27070100                | CC                              | TT              | 1946889953               |
| SNP_P4_96822_27070162 | NC_021166.1    | Ca_kabuli_chr07 | 27070162                | GG                              | AA              | 1946889955               |
| SNP_P4_96823_27070179 | NC_021166.1    | Ca_kabuli_chr07 | 27070179                | AA                              | TT              | 1946889957               |
| SNP_P4_96824_27070190 | NC_021166.1    | Ca_kabuli_chr07 | 27070190                | GG                              | TT              | 1946889960               |
| SNP_P4_96825_27070219 | NC_021166.1    | Ca_kabuli_chr07 | 27070219                | AA                              | GG              | 1946889962               |
| SNP_P4_96826_27077912 | NC_021166.1    | Ca_kabuli_chr07 | 27077912                | AA                              | CC              | 1946889964               |
| SNP_P4_96827_27097401 | NC_021166.1    | Ca_kabuli_chr07 | 27097401                | GG                              | AA              | 1946889966               |
| SNP_P4_96829_27115400 | NC_021166.1    | Ca_kabuli_chr07 | 27115400                | CC                              | TT              | 1946889968               |
| SNP_P4_96830_27166078 | NC_021166.1    | Ca_kabuli_chr07 | 27166078                | TT                              | CC              | 1946889970               |
| SNP_P4_96831_27187281 | NC_021166.1    | Ca_kabuli_chr07 | 27187281                | GG                              | AA              | 1946889972               |
| SNP_P4_96832_27187485 | NC_021166.1    | Ca_kabuli_chr07 | 27187485                | GG                              | AA              | 1946889974               |
| SNP_P4_96833_27187582 | NC_021166.1    | Ca_kabuli_chr07 | 27187582                | CC                              | AA              | 1946889976               |
| SNP_P4_96834_27188178 | NC_021166.1    | Ca_kabuli_chr07 | 27188178                | CC                              | GG              | 1946889978               |
| SNP_P4_96835_27188181 | NC_021166.1    | Ca_kabuli_chr07 | 27188181                | AA                              | GG              | 1946889980               |

| SNPs IDs              | Chromosome IDs | Chromosomes     | Physical positions (bp) | CDC Frontier (Reference genome) | (ILWC46 & LPNB) | NCBI SNPdb Accession IDs |
|-----------------------|----------------|-----------------|-------------------------|---------------------------------|-----------------|--------------------------|
| SNP_P4_96836_27190462 | NC_021166.1    | Ca_kabuli_chr07 | 27190462                | TT                              | CC              | 1946889982               |
| SNP_P4_96837_27216180 | NC_021166.1    | Ca_kabuli_chr07 | 27216180                | CC                              | TT              | 1946889984               |
| SNP_P4_96838_27255804 | NC_021166.1    | Ca_kabuli_chr07 | 27255804                | AA                              | GG              | 1946889986               |
| SNP_P4_96839_27332393 | NC_021166.1    | Ca_kabuli_chr07 | 27332393                | AA                              | GG              | 1946889988               |
| SNP_P4_96840_27341222 | NC_021166.1    | Ca_kabuli_chr07 | 27341222                | AA                              | GG              | 1946889990               |
| SNP_P4_96842_27341371 | NC_021166.1    | Ca_kabuli_chr07 | 27341371                | CC                              | TT              | 1946889992               |
| SNP_P4_96843_27341388 | NC_021166.1    | Ca_kabuli_chr07 | 27341388                | AA                              | GG              | 1946889994               |
| SNP_P4_96844_27341391 | NC_021166.1    | Ca_kabuli_chr07 | 27341391                | TT                              | AA              | 1946889996               |
| SNP_P4_96845_27341417 | NC_021166.1    | Ca_kabuli_chr07 | 27341417                | TT                              | AA              | 1946889998               |
| SNP_P4_96846_27342997 | NC_021166.1    | Ca_kabuli_chr07 | 27342997                | CC                              | TT              | 1946890000               |
| SNP_P4_96848_27348707 | NC_021166.1    | Ca_kabuli_chr07 | 27348707                | CC                              | TT              | 1946890002               |
| SNP_P4_96849_27351516 | NC_021166.1    | Ca_kabuli_chr07 | 27351516                | GG                              | AA              | 1946890004               |
| SNP_P4_96850_27351588 | NC_021166.1    | Ca_kabuli_chr07 | 27351588                | GG                              | AA              | 1946890006               |
| SNP_P4_96851_27357312 | NC_021166.1    | Ca_kabuli_chr07 | 27357312                | AA                              | GG              | 1946890008               |
| SNP_P4_96852_27361060 | NC_021166.1    | Ca_kabuli_chr07 | 27361060                | GG                              | TT              | 1946890010               |
| SNP_P4_96854_27373290 | NC_021166.1    | Ca_kabuli_chr07 | 27373290                | GG                              | AA              | 1946890013               |
| SNP_P4_96856_27386555 | NC_021166.1    | Ca_kabuli_chr07 | 27386555                | AA                              | GG              | 1946890015               |
| SNP_P4_96857_27386580 | NC_021166.1    | Ca_kabuli_chr07 | 27386580                | TT                              | CC              | 1946890017               |
| SNP_P4_96858_27390299 | NC_021166.1    | Ca_kabuli_chr07 | 27390299                | TT                              | AA              | 1946890019               |
| SNP_P4_96859_27393847 | NC_021166.1    | Ca_kabuli_chr07 | 27393847                | CC                              | TT              | 1946890021               |
| SNP_P4_96860_27396839 | NC_021166.1    | Ca_kabuli_chr07 | 27396839                | TT                              | AA              | 1946890023               |
| SNP_P4_96862_27396926 | NC_021166.1    | Ca_kabuli_chr07 | 27396926                | AA                              | TT              | 1946890025               |
| SNP_P4_96863_27451547 | NC_021166.1    | Ca_kabuli_chr07 | 27451547                | GG                              | AA              | 1946890027               |
| SNP_P4_96864_27466489 | NC_021166.1    | Ca_kabuli_chr07 | 27466489                | CC                              | TT              | 1946890029               |
| SNP_P4_96865_27487926 | NC_021166.1    | Ca_kabuli_chr07 | 27487926                | CC                              | TT              | 1946890031               |
| SNP_P4_96867_27488046 | NC_021166.1    | Ca_kabuli_chr07 | 27488046                | AA                              | CC              | 1946890033               |
| SNP_P4_96868_27488049 | NC_021166.1    | Ca_kabuli_chr07 | 27488049                | CC                              | TT              | 1946890035               |
| SNP_P4_96869_27488209 | NC_021166.1    | Ca_kabuli_chr07 | 27488209                | TT                              | AA              | 1946890037               |
| SNP_P4_96870_27488260 | NC_021166.1    | Ca_kabuli_chr07 | 27488260                | TT                              | GG              | 1946890039               |
| SNP_P4_96871_27495876 | NC_021166.1    | Ca_kabuli_chr07 | 27495876                | TT                              | CC              | 1946890041               |
| SNP_P4_96872_27495954 | NC_021166.1    | Ca_kabuli_chr07 | 27495954                | CC                              | AA              | 1946890043               |
| SNP_P4_96873_27501253 | NC_021166.1    | Ca_kabuli_chr07 | 27501253                | AA                              | GG              | 1946890046               |
| SNP_P4_96874_27501292 | NC_021166.1    | Ca_kabuli_chr07 | 27501292                | AA                              | CC              | 1946890048               |
| SNP_P4_96875_27501307 | NC_021166.1    | Ca_kabuli_chr07 | 27501307                | GG                              | AA              | 1946890050               |
| SNP_P4_96876_27501707 | NC_021166.1    | Ca_kabuli_chr07 | 27501707                | GG                              | AA              | 1946890052               |
| SNP_P4_96877_27521090 | NC_021166.1    | Ca_kabuli_chr07 | 27521090                | TT                              | CC              | 1946890054               |
| SNP_P4_96878_27521186 | NC_021166.1    | Ca_kabuli_chr07 | 27521186                | TT                              | AA              | 1946890056               |
| SNP_P4_96880_27521573 | NC_021166.1    | Ca_kabuli_chr07 | 27521573                | GG                              | AA              | 1946890058               |
| SNP_P4_96882_27531321 | NC_021166.1    | Ca_kabuli_chr07 | 27531321                | AA                              | GG              | 1946890060               |
| SNP_P4_96883_27531329 | NC_021166.1    | Ca_kabuli_chr07 | 27531329                | AA                              | GG              | 1946890063               |
| SNP_P4_96884_27545456 | NC_021166.1    | Ca_kabuli_chr07 | 27545456                | AA                              | TT              | 1946890065               |
| SNP_P4_96885_27602571 | NC_021166.1    | Ca_kabuli_chr07 | 27602571                | CC                              | TT              | 1946890067               |



| SNPs IDs              | Chromosome IDs | Chromosomes     | Physical positions (bp) | CDC Frontier (Reference genome) | (ILWC46 & LPNB) | NCBI SNPdb Accession IDs |
|-----------------------|----------------|-----------------|-------------------------|---------------------------------|-----------------|--------------------------|
| SNP_P4_96886_27639694 | NC_021166.1    | Ca_kabuli_chr07 | 27639694                | GG                              | AA              | 1946890069               |
| SNP_P4_96887_27647890 | NC_021166.1    | Ca_kabuli_chr07 | 27647890                | TT                              | AA              | 1946890071               |
| SNP_P4_96888_27647944 | NC_021166.1    | Ca_kabuli_chr07 | 27647944                | CC                              | GG              | 1946890073               |
| SNP_P4_96889_27662402 | NC_021166.1    | Ca_kabuli_chr07 | 27662402                | CC                              | TT              | 1946890075               |
| SNP_P4_96890_27703865 | NC_021166.1    | Ca_kabuli_chr07 | 27703865                | TT                              | AA              | 1946890077               |
| SNP_P4_96891_27709318 | NC_021166.1    | Ca_kabuli_chr07 | 27709318                | GG                              | AA              | 1946890079               |
| SNP_P4_96892_27725785 | NC_021166.1    | Ca_kabuli_chr07 | 27725785                | TT                              | AA              | 1946890081               |
| SNP_P4_96893_27731205 | NC_021166.1    | Ca_kabuli_chr07 | 27731205                | AA                              | GG              | 1946890083               |
| SNP_P4_96894_27731292 | NC_021166.1    | Ca_kabuli_chr07 | 27731292                | GG                              | AA              | 1946890085               |
| SNP_P4_96896_27745270 | NC_021166.1    | Ca_kabuli_chr07 | 27745270                | AA                              | GG              | 1946890087               |
| SNP_P4_96897_27761587 | NC_021166.1    | Ca_kabuli_chr07 | 27761587                | CC                              | TT              | 1946890089               |
| SNP_P4_96898_27761603 | NC_021166.1    | Ca_kabuli_chr07 | 27761603                | TT                              | CC              | 1946890091               |
| SNP_P4_96899_27761658 | NC_021166.1    | Ca_kabuli_chr07 | 27761658                | GG                              | AA              | 1946890093               |
| SNP_P4_96901_27775580 | NC_021166.1    | Ca_kabuli_chr07 | 27775580                | CC                              | TT              | 1946890095               |
| SNP_P4_96902_27775589 | NC_021166.1    | Ca_kabuli_chr07 | 27775589                | AA                              | GG              | 1946890098               |
| SNP_P4_96903_27782258 | NC_021166.1    | Ca_kabuli_chr07 | 27782258                | GG                              | AA              | 1946890100               |
| SNP_P4_96904_27794786 | NC_021166.1    | Ca_kabuli_chr07 | 27794786                | TT                              | AA              | 1946890102               |
| SNP_P4_96907_27833556 | NC_021166.1    | Ca_kabuli_chr07 | 27833556                | TT                              | CC              | 1946890104               |
| SNP_P4_96909_27838722 | NC_021166.1    | Ca_kabuli_chr07 | 27838722                | CC                              | TT              | 1946890106               |
| SNP_P4_96910_27840777 | NC_021166.1    | Ca_kabuli_chr07 | 27840777                | TT                              | GG              | 1946890108               |
| SNP_P4_96911_27845044 | NC_021166.1    | Ca_kabuli_chr07 | 27845044                | AA                              | GG              | 1946890110               |
| SNP_P4_96912_27859428 | NC_021166.1    | Ca_kabuli_chr07 | 27859428                | GG                              | TT              | 1946890112               |
| SNP_P4_96913_27859462 | NC_021166.1    | Ca_kabuli_chr07 | 27859462                | GG                              | CC              | 1946890115               |
| SNP_P4_96914_27874205 | NC_021166.1    | Ca_kabuli_chr07 | 27874205                | TT                              | AA              | 1946890117               |
| SNP_P4_96917_27922717 | NC_021166.1    | Ca_kabuli_chr07 | 27922717                | AA                              | GG              | 1946890119               |
| SNP_P4_96918_27922737 | NC_021166.1    | Ca_kabuli_chr07 | 27922737                | TT                              | AA              | 1946890121               |
| SNP_P4_96919_27925495 | NC_021166.1    | Ca_kabuli_chr07 | 27925495                | AA                              | GG              | 1946890123               |
| SNP_P4_96920_27935887 | NC_021166.1    | Ca_kabuli_chr07 | 27935887                | GG                              | AA              | 1946890125               |
| SNP_P4_96921_27939643 | NC_021166.1    | Ca_kabuli_chr07 | 27939643                | TT                              | CC              | 1946890127               |
| SNP_P4_96922_27939690 | NC_021166.1    | Ca_kabuli_chr07 | 27939690                | TT                              | CC              | 1946890129               |
| SNP_P4_96923_27939724 | NC_021166.1    | Ca_kabuli_chr07 | 27939724                | AA                              | GG              | 1946890131               |
| SNP_P4_96924_27939761 | NC_021166.1    | Ca_kabuli_chr07 | 27939761                | AA                              | GG              | 1946890133               |
| SNP_P4_96925_27939768 | NC_021166.1    | Ca_kabuli_chr07 | 27939768                | CC                              | TT              | 1946890135               |
| SNP_P4_96926_27939771 | NC_021166.1    | Ca_kabuli_chr07 | 27939771                | CC                              | TT              | 1946890137               |
| SNP_P4_96927_27939875 | NC_021166.1    | Ca_kabuli_chr07 | 27939875                | AA                              | TT              | 1946890139               |
| SNP_P4_96928_27940056 | NC_021166.1    | Ca_kabuli_chr07 | 27940056                | AA                              | GG              | 1946890141               |
| SNP_P4_96929_27940229 | NC_021166.1    | Ca_kabuli_chr07 | 27940229                | GG                              | CC              | 1946890143               |
| SNP_P4_96930_27944894 | NC_021166.1    | Ca_kabuli_chr07 | 27944894                | CC                              | TT              | 1946890145               |
| SNP_P4_96931_27979595 | NC_021166.1    | Ca_kabuli_chr07 | 27979595                | GG                              | AA              | 1946890147               |
| SNP_P4_96932_27979606 | NC_021166.1    | Ca_kabuli_chr07 | 27979606                | CC                              | TT              | 1946890149               |
| SNP_P4_96933_27979637 | NC_021166.1    | Ca_kabuli_chr07 | 27979637                | GG                              | TT              | 1946890151               |
| SNP_P4_96935_27986971 | NC_021166.1    | Ca_kabuli_chr07 | 27986971                | GG                              | AA              | 1946890153               |

| SNPs IDs              | Chromosome IDs | Chromosomes     | Physical positions (bp) | CDC Frontier (Reference genome) | (ILWC46 & LPNB) | NCBI SNPdb Accession IDs |
|-----------------------|----------------|-----------------|-------------------------|---------------------------------|-----------------|--------------------------|
| SNP_P4_96936_28011041 | NC_021166.1    | Ca_kabuli_chr07 | 28011041                | GG                              | AA              | 1946890155               |
| SNP_P4_96937_28014420 | NC_021166.1    | Ca_kabuli_chr07 | 28014420                | AA                              | TT              | 1946890157               |
| SNP_P4_96938_28018744 | NC_021166.1    | Ca_kabuli_chr07 | 28018744                | TT                              | CC              | 1946890159               |
| SNP_P4_96939_28026954 | NC_021166.1    | Ca_kabuli_chr07 | 28026954                | TT                              | GG              | 1946890161               |
| SNP_P4_96940_28030602 | NC_021166.1    | Ca_kabuli_chr07 | 28030602                | TT                              | CC              | 1946890163               |
| SNP_P4_96941_28045592 | NC_021166.1    | Ca_kabuli_chr07 | 28045592                | AA                              | TT              | 1946890165               |
| SNP_P4_96942_28049353 | NC_021166.1    | Ca_kabuli_chr07 | 28049353                | GG                              | TT              | 1946890167               |
| SNP_P4_96943_28070982 | NC_021166.1    | Ca_kabuli_chr07 | 28070982                | TT                              | AA              | 1946890169               |
| SNP_P4_96944_28071206 | NC_021166.1    | Ca_kabuli_chr07 | 28071206                | AA                              | CC              | 1946890172               |
| SNP_P4_96945_28074925 | NC_021166.1    | Ca_kabuli_chr07 | 28074925                | TT                              | CC              | 1946890174               |
| SNP_P4_96946_28075004 | NC_021166.1    | Ca_kabuli_chr07 | 28075004                | AA                              | TT              | 1946890176               |
| SNP_P4_96947_28075106 | NC_021166.1    | Ca_kabuli_chr07 | 28075106                | GG                              | TT              | 1946890178               |
| SNP_P4_96948_28075293 | NC_021166.1    | Ca_kabuli_chr07 | 28075293                | CC                              | TT              | 1946890180               |
| SNP_P4_96949_28075305 | NC_021166.1    | Ca_kabuli_chr07 | 28075305                | GG                              | AA              | 1946890182               |
| SNP_P4_96950_28075328 | NC_021166.1    | Ca_kabuli_chr07 | 28075328                | AA                              | GG              | 1946890184               |
| SNP_P4_96951_28075355 | NC_021166.1    | Ca_kabuli_chr07 | 28075355                | GG                              | AA              | 1946890186               |
| SNP_P4_96952_28075368 | NC_021166.1    | Ca_kabuli_chr07 | 28075368                | TT                              | CC              | 1946890188               |
| SNP_P4_96953_28075370 | NC_021166.1    | Ca_kabuli_chr07 | 28075370                | AA                              | GG              | 1946890190               |
| SNP_P4_96954_28075382 | NC_021166.1    | Ca_kabuli_chr07 | 28075382                | AA                              | GG              | 1946890192               |
| SNP_P4_96955_28075418 | NC_021166.1    | Ca_kabuli_chr07 | 28075418                | CC                              | GG              | 1946890194               |
| SNP_P4_96956_28075438 | NC_021166.1    | Ca_kabuli_chr07 | 28075438                | AA                              | GG              | 1946890196               |
| SNP_P4_96957_28075441 | NC_021166.1    | Ca_kabuli_chr07 | 28075441                | AA                              | TT              | 1946890198               |
| SNP_P4_96958_28075463 | NC_021166.1    | Ca_kabuli_chr07 | 28075463                | AA                              | GG              | 1946890201               |
| SNP_P4_96959_28075469 | NC_021166.1    | Ca_kabuli_chr07 | 28075469                | CC                              | TT              | 1946890203               |
| SNP_P4_96960_28076335 | NC_021166.1    | Ca_kabuli_chr07 | 28076335                | TT                              | CC              | 1946890205               |
| SNP_P4_96961_28087286 | NC_021166.1    | Ca_kabuli_chr07 | 28087286                | TT                              | CC              | 1946890207               |
| SNP_P4_96962_28089276 | NC_021166.1    | Ca_kabuli_chr07 | 28089276                | CC                              | AA              | 1946890209               |
| SNP_P4_96963_28089287 | NC_021166.1    | Ca_kabuli_chr07 | 28089287                | GG                              | AA              | 1946890211               |
| SNP_P4_96965_28093582 | NC_021166.1    | Ca_kabuli_chr07 | 28093582                | CC                              | GG              | 1946890213               |
| SNP_P4_96966_28093725 | NC_021166.1    | Ca_kabuli_chr07 | 28093725                | CC                              | TT              | 1946890215               |
| SNP_P4_96967_28093745 | NC_021166.1    | Ca_kabuli_chr07 | 28093745                | AA                              | TT              | 1946890217               |
| SNP_P4_96968_28093755 | NC_021166.1    | Ca_kabuli_chr07 | 28093755                | CC                              | TT              | 1946890219               |
| SNP_P4_96969_28094014 | NC_021166.1    | Ca_kabuli_chr07 | 28094014                | CC                              | AA              | 1946890221               |
| SNP_P4_96970_28094158 | NC_021166.1    | Ca_kabuli_chr07 | 28094158                | GG                              | TT              | 1946890223               |
| SNP_P4_96971_28094305 | NC_021166.1    | Ca_kabuli_chr07 | 28094305                | TT                              | AA              | 1946890225               |
| SNP_P4_96972_28094346 | NC_021166.1    | Ca_kabuli_chr07 | 28094346                | CC                              | TT              | 1946890227               |
| SNP_P4_96973_28097961 | NC_021166.1    | Ca_kabuli_chr07 | 28097961                | TT                              | CC              | 1946890229               |
| SNP_P4_96974_28113248 | NC_021166.1    | Ca_kabuli_chr07 | 28113248                | CC                              | AA              | 1946890231               |
| SNP_P4_96975_28113256 | NC_021166.1    | Ca_kabuli_chr07 | 28113256                | TT                              | CC              | 1946890233               |
| SNP_P4_96976_28113262 | NC_021166.1    | Ca_kabuli_chr07 | 28113262                | CC                              | AA              | 1946890235               |
| SNP_P4_96977_28113271 | NC_021166.1    | Ca_kabuli_chr07 | 28113271                | CC                              | TT              | 1946890237               |
| SNP_P4_96978_28113301 | NC_021166.1    | Ca_kabuli_chr07 | 28113301                | GG                              | AA              | 1946890239               |

| SNPs IDs              | Chromosome IDs | Chromosomes     | Physical positions (bp) | CDC Frontier (Reference genome) | (ILWC46 & LPNB) | NCBI SNPdb Accession IDs |
|-----------------------|----------------|-----------------|-------------------------|---------------------------------|-----------------|--------------------------|
| SNP_P4_96979_28119615 | NC_021166.1    | Ca_kabuli_chr07 | 28119615                | TT                              | CC              | 1946890241               |
| SNP_P4_96980_28126419 | NC_021166.1    | Ca_kabuli_chr07 | 28126419                | TT                              | AA              | 1946890243               |
| SNP_P4_96982_28137637 | NC_021166.1    | Ca_kabuli_chr07 | 28137637                | AA                              | GG              | 1946890245               |
| SNP_P4_96983_28137664 | NC_021166.1    | Ca_kabuli_chr07 | 28137664                | TT                              | AA              | 1946890247               |
| SNP_P4_96984_28139307 | NC_021166.1    | Ca_kabuli_chr07 | 28139307                | CC                              | TT              | 1946890249               |
| SNP_P4_96985_28146839 | NC_021166.1    | Ca_kabuli_chr07 | 28146839                | AA                              | CC              | 1946890252               |
| SNP_P4_96986_28164055 | NC_021166.1    | Ca_kabuli_chr07 | 28164055                | GG                              | AA              | 1946890254               |
| SNP_P4_96987_28164078 | NC_021166.1    | Ca_kabuli_chr07 | 28164078                | AA                              | GG              | 1946890256               |
| SNP_P4_96988_28182605 | NC_021166.1    | Ca_kabuli_chr07 | 28182605                | AA                              | GG              | 1946890258               |
| SNP_P4_96989_28185100 | NC_021166.1    | Ca_kabuli_chr07 | 28185100                | AA                              | TT              | 1946890260               |
| SNP_P4_96990_28186022 | NC_021166.1    | Ca_kabuli_chr07 | 28186022                | CC                              | TT              | 1946890262               |
| SNP_P4_96991_28186023 | NC_021166.1    | Ca_kabuli_chr07 | 28186023                | CC                              | TT              | 1946890264               |
| SNP_P4_96994_28190095 | NC_021166.1    | Ca_kabuli_chr07 | 28190095                | AA                              | TT              | 1946890266               |
| SNP_P4_96995_28190186 | NC_021166.1    | Ca_kabuli_chr07 | 28190186                | AA                              | CC              | 1946890268               |
| SNP_P4_96997_28190228 | NC_021166.1    | Ca_kabuli_chr07 | 28190228                | TT                              | CC              | 1946890270               |
| SNP_P4_96998_28219639 | NC_021166.1    | Ca_kabuli_chr07 | 28219639                | GG                              | AA              | 1946890272               |
| SNP_P4_96999_28220285 | NC_021166.1    | Ca_kabuli_chr07 | 28220285                | CC                              | AA              | 1946890274               |
| SNP_P4_97000_28220351 | NC_021166.1    | Ca_kabuli_chr07 | 28220351                | CC                              | TT              | 1946890276               |
| SNP_P4_97001_28220353 | NC_021166.1    | Ca_kabuli_chr07 | 28220353                | CC                              | TT              | 1946890278               |
| SNP_P4_97002_28221217 | NC_021166.1    | Ca_kabuli_chr07 | 28221217                | TT                              | AA              | 1946890280               |
| SNP_P4_97004_28240484 | NC_021166.1    | Ca_kabuli_chr07 | 28240484                | AA                              | CC              | 1946890281               |
| SNP_P4_97005_28240490 | NC_021166.1    | Ca_kabuli_chr07 | 28240490                | AA                              | GG              | 1946890283               |
| SNP_P4_97006_28240501 | NC_021166.1    | Ca_kabuli_chr07 | 28240501                | GG                              | TT              | 1946890285               |
| SNP_P4_97007_28240517 | NC_021166.1    | Ca_kabuli_chr07 | 28240517                | AA                              | GG              | 1946890287               |
| SNP_P4_97008_28240540 | NC_021166.1    | Ca_kabuli_chr07 | 28240540                | TT                              | AA              | 1946890289               |
| SNP_P4_97009_28240545 | NC_021166.1    | Ca_kabuli_chr07 | 28240545                | CC                              | AA              | 1946890291               |
| SNP_P4_97010_28240603 | NC_021166.1    | Ca_kabuli_chr07 | 28240603                | GG                              | TT              | 1946890294               |
| SNP_P4_97011_28240611 | NC_021166.1    | Ca_kabuli_chr07 | 28240611                | TT                              | CC              | 1946890296               |
| SNP_P4_97012_28240620 | NC_021166.1    | Ca_kabuli_chr07 | 28240620                | AA                              | GG              | 1946890298               |
| SNP_P4_97013_28240810 | NC_021166.1    | Ca_kabuli_chr07 | 28240810                | TT                              | GG              | 1946890300               |
| SNP_P4_97014_28240834 | NC_021166.1    | Ca_kabuli_chr07 | 28240834                | TT                              | CC              | 1946890302               |
| SNP_P4_97015_28240887 | NC_021166.1    | Ca_kabuli_chr07 | 28240887                | CC                              | TT              | 1946890304               |
| SNP_P4_97016_28240895 | NC_021166.1    | Ca_kabuli_chr07 | 28240895                | CC                              | GG              | 1946890306               |
| SNP_P4_97017_28240905 | NC_021166.1    | Ca_kabuli_chr07 | 28240905                | CC                              | TT              | 1946890308               |
| SNP_P4_97018_28246091 | NC_021166.1    | Ca_kabuli_chr07 | 28246091                | CC                              | TT              | 1946890310               |
| SNP_P4_97019_28254964 | NC_021166.1    | Ca_kabuli_chr07 | 28254964                | AA                              | GG              | 1946890312               |
| SNP_P4_97020_28254965 | NC_021166.1    | Ca_kabuli_chr07 | 28254965                | AA                              | GG              | 1946890314               |
| SNP_P4_97021_28257074 | NC_021166.1    | Ca_kabuli_chr07 | 28257074                | CC                              | AA              | 1946890316               |
| SNP_P4_97022_28286981 | NC_021166.1    | Ca_kabuli_chr07 | 28286981                | AA                              | CC              | 1946890318               |
| SNP_P4_97023_28286990 | NC_021166.1    | Ca_kabuli_chr07 | 28286990                | CC                              | AA              | 1946890320               |
| SNP_P4_97024_28286997 | NC_021166.1    | Ca_kabuli_chr07 | 28286997                | CC                              | AA              | 1946890322               |
| SNP_P4_97026_28321761 | NC_021166.1    | Ca_kabuli_chr07 | 28321761                | CC                              | TT              | 1946890324               |

| SNPs IDs              | Chromosome IDs | Chromosomes     | Physical positions (bp) | CDC Frontier (Reference genome) | (ILWC46 & LPNB) | NCBI SNPdb Accession IDs |
|-----------------------|----------------|-----------------|-------------------------|---------------------------------|-----------------|--------------------------|
| SNP_P4_97027_28325025 | NC_021166.1    | Ca_kabuli_chr07 | 28325025                | CC                              | AA              | 1946890326               |
| SNP_P4_97028_28328838 | NC_021166.1    | Ca_kabuli_chr07 | 28328838                | CC                              | TT              | 1946890328               |
| SNP_P4_97029_28335039 | NC_021166.1    | Ca_kabuli_chr07 | 28335039                | CC                              | TT              | 1946890330               |
| SNP_P4_97031_28336461 | NC_021166.1    | Ca_kabuli_chr07 | 28336461                | AA                              | GG              | 1946890332               |
| SNP_P4_97033_28351619 | NC_021166.1    | Ca_kabuli_chr07 | 28351619                | TT                              | GG              | 1946890334               |
| SNP_P4_97035_28352872 | NC_021166.1    | Ca_kabuli_chr07 | 28352872                | TT                              | CC              | 1946890336               |
| SNP_P4_97036_28353550 | NC_021166.1    | Ca_kabuli_chr07 | 28353550                | TT                              | AA              | 1946890338               |
| SNP_P4_97037_28372355 | NC_021166.1    | Ca_kabuli_chr07 | 28372355                | GG                              | AA              | 1946890340               |
| SNP_P4_97038_28381212 | NC_021166.1    | Ca_kabuli_chr07 | 28381212                | GG                              | AA              | 1946890342               |
| SNP_P4_97039_28387885 | NC_021166.1    | Ca_kabuli_chr07 | 28387885                | GG                              | TT              | 1946890344               |
| SNP_P4_97040_28396341 | NC_021166.1    | Ca_kabuli_chr07 | 28396341                | CC                              | TT              | 1946890346               |
| SNP_P4_97041_28401444 | NC_021166.1    | Ca_kabuli_chr07 | 28401444                | CC                              | TT              | 1946890348               |
| SNP_P4_97042_28436160 | NC_021166.1    | Ca_kabuli_chr07 | 28436160                | AA                              | GG              | 1946890350               |
| SNP_P4_97044_28486610 | NC_021166.1    | Ca_kabuli_chr07 | 28486610                | CC                              | TT              | 1946890352               |
| SNP_P4_97045_28495348 | NC_021166.1    | Ca_kabuli_chr07 | 28495348                | GG                              | AA              | 1946890355               |
| SNP_P4_97046_28498717 | NC_021166.1    | Ca_kabuli_chr07 | 28498717                | TT                              | CC              | 1946890357               |
| SNP_P4_97047_28498726 | NC_021166.1    | Ca_kabuli_chr07 | 28498726                | TT                              | AA              | 1946890359               |
| SNP_P4_97048_28499558 | NC_021166.1    | Ca_kabuli_chr07 | 28499558                | CC                              | TT              | 1946890361               |
| SNP_P4_97050_28517980 | NC_021166.1    | Ca_kabuli_chr07 | 28517980                | AA                              | GG              | 1946890363               |
| SNP_P4_97051_28529061 | NC_021166.1    | Ca_kabuli_chr07 | 28529061                | GG                              | AA              | 1946890366               |
| SNP_P4_97052_28529062 | NC_021166.1    | Ca_kabuli_chr07 | 28529062                | AA                              | TT              | 1946890368               |
| SNP_P4_97054_28529866 | NC_021166.1    | Ca_kabuli_chr07 | 28529866                | AA                              | CC              | 1946890370               |
| SNP_P4_97056_28556902 | NC_021166.1    | Ca_kabuli_chr07 | 28556902                | AA                              | CC              | 1946890372               |
| SNP_P4_97057_28556933 | NC_021166.1    | Ca_kabuli_chr07 | 28556933                | AA                              | TT              | 1946890374               |
| SNP_P4_97058_28556974 | NC_021166.1    | Ca_kabuli_chr07 | 28556974                | TT                              | CC              | 1946890376               |
| SNP_P4_97059_28557139 | NC_021166.1    | Ca_kabuli_chr07 | 28557139                | CC                              | TT              | 1946890378               |
| SNP_P4_97060_28557203 | NC_021166.1    | Ca_kabuli_chr07 | 28557203                | GG                              | AA              | 1946890381               |
| SNP_P4_97062_28557249 | NC_021166.1    | Ca_kabuli_chr07 | 28557249                | GG                              | TT              | 1946890383               |
| SNP_P4_97063_28561207 | NC_021166.1    | Ca_kabuli_chr07 | 28561207                | TT                              | CC              | 1946890385               |
| SNP_P4_97064_28561217 | NC_021166.1    | Ca_kabuli_chr07 | 28561217                | GG                              | TT              | 1946890387               |
| SNP_P4_97065_28561337 | NC_021166.1    | Ca_kabuli_chr07 | 28561337                | CC                              | TT              | 1946890389               |
| SNP_P4_97066_28561376 | NC_021166.1    | Ca_kabuli_chr07 | 28561376                | GG                              | CC              | 1946890391               |
| SNP_P4_97067_28561399 | NC_021166.1    | Ca_kabuli_chr07 | 28561399                | GG                              | AA              | 1946890393               |
| SNP_P4_97068_28561428 | NC_021166.1    | Ca_kabuli_chr07 | 28561428                | TT                              | CC              | 1946890395               |
| SNP_P4_97071_28589780 | NC_021166.1    | Ca_kabuli_chr07 | 28589780                | AA                              | GG              | 1946890397               |
| SNP_P4_97072_28591551 | NC_021166.1    | Ca_kabuli_chr07 | 28591551                | CC                              | TT              | 1946890399               |
| SNP_P4_97073_28606804 | NC_021166.1    | Ca_kabuli_chr07 | 28606804                | TT                              | GG              | 1946890401               |
| SNP_P4_97075_28638938 | NC_021166.1    | Ca_kabuli_chr07 | 28638938                | CC                              | AA              | 1946890403               |
| SNP_P4_97077_28656014 | NC_021166.1    | Ca_kabuli_chr07 | 28656014                | CC                              | GG              | 1946890405               |
| SNP_P4_97078_28695614 | NC_021166.1    | Ca_kabuli_chr07 | 28695614                | GG                              | AA              | 1946890407               |
| SNP_P4_97080_28700544 | NC_021166.1    | Ca_kabuli_chr07 | 28700544                | TT                              | AA              | 1946890409               |
| SNP_P4_97081_28702221 | NC_021166.1    | Ca_kabuli_chr07 | 28702221                | GG                              | AA              | 1946890411               |

| SNPs IDs              | Chromosome IDs | Chromosomes     | Physical positions (bp) | CDC Frontier (Reference genome) | (ILWC46 & LPNB) | NCBI SNPdb Accession IDs |
|-----------------------|----------------|-----------------|-------------------------|---------------------------------|-----------------|--------------------------|
| SNP_P4_97082_28702615 | NC_021166.1    | Ca_kabuli_chr07 | 28702615                | TT                              | CC              | 1946890413               |
| SNP_P4_97084_28703571 | NC_021166.1    | Ca_kabuli_chr07 | 28703571                | CC                              | AA              | 1946890415               |
| SNP_P4_97085_28705776 | NC_021166.1    | Ca_kabuli_chr07 | 28705776                | AA                              | GG              | 1946890417               |
| SNP_P4_97086_28705945 | NC_021166.1    | Ca_kabuli_chr07 | 28705945                | TT                              | CC              | 1946890419               |
| SNP_P4_97088_28707131 | NC_021166.1    | Ca_kabuli_chr07 | 28707131                | CC                              | TT              | 1946890421               |
| SNP_P4_97089_28707198 | NC_021166.1    | Ca_kabuli_chr07 | 28707198                | CC                              | AA              | 1946890423               |
| SNP_P4_97091_28707268 | NC_021166.1    | Ca_kabuli_chr07 | 28707268                | GG                              | AA              | 1946890425               |
| SNP_P4_97092_28707394 | NC_021166.1    | Ca_kabuli_chr07 | 28707394                | TT                              | CC              | 1946890427               |
| SNP_P4_97094_28707467 | NC_021166.1    | Ca_kabuli_chr07 | 28707467                | AA                              | GG              | 1946890429               |
| SNP_P4_97095_28707595 | NC_021166.1    | Ca_kabuli_chr07 | 28707595                | CC                              | TT              | 1946890431               |
| SNP_P4_97096_28707603 | NC_021166.1    | Ca_kabuli_chr07 | 28707603                | GG                              | CC              | 1946890434               |
| SNP_P4_97097_28707652 | NC_021166.1    | Ca_kabuli_chr07 | 28707652                | GG                              | AA              | 1946890436               |
| SNP_P4_97098_28707905 | NC_021166.1    | Ca_kabuli_chr07 | 28707905                | GG                              | CC              | 1946890438               |
| SNP_P4_97099_28708008 | NC_021166.1    | Ca_kabuli_chr07 | 28708008                | GG                              | CC              | 1946890440               |
| SNP_P4_97100_28875858 | NC_021166.1    | Ca_kabuli_chr07 | 28875858                | TT                              | AA              | 1946890442               |
| SNP_P4_97101_28875900 | NC_021166.1    | Ca_kabuli_chr07 | 28875900                | TT                              | CC              | 1946890444               |
| SNP_P4_97102_28876231 | NC_021166.1    | Ca_kabuli_chr07 | 28876231                | CC                              | AA              | 1946890446               |
| SNP_P4_97103_28880572 | NC_021166.1    | Ca_kabuli_chr07 | 28880572                | TT                              | CC              | 1946890448               |
| SNP_P4_97105_28881837 | NC_021166.1    | Ca_kabuli_chr07 | 28881837                | AA                              | GG              | 1946890451               |
| SNP_P4_97106_28888169 | NC_021166.1    | Ca_kabuli_chr07 | 28888169                | GG                              | AA              | 1946890453               |
| SNP_P4_97107_28892076 | NC_021166.1    | Ca_kabuli_chr07 | 28892076                | GG                              | CC              | 1946890455               |
| SNP_P4_97108_28892190 | NC_021166.1    | Ca_kabuli_chr07 | 28892190                | CC                              | AA              | 1946890457               |
| SNP_P4_97109_28892242 | NC_021166.1    | Ca_kabuli_chr07 | 28892242                | GG                              | AA              | 1946890458               |
| SNP_P4_97110_28892250 | NC_021166.1    | Ca_kabuli_chr07 | 28892250                | AA                              | CC              | 1946890459               |
| SNP_P4_97111_28892328 | NC_021166.1    | Ca_kabuli_chr07 | 28892328                | GG                              | TT              | 1946890460               |
| SNP_P4_97112_28909177 | NC_021166.1    | Ca_kabuli_chr07 | 28909177                | CC                              | TT              | 1946890461               |
| SNP_P4_97113_28909440 | NC_021166.1    | Ca_kabuli_chr07 | 28909440                | AA                              | GG              | 1946890463               |
| SNP_P4_97115_28957010 | NC_021166.1    | Ca_kabuli_chr07 | 28957010                | AA                              | TT              | 1946890465               |
| SNP_P4_97116_28965744 | NC_021166.1    | Ca_kabuli_chr07 | 28965744                | AA                              | CC              | 1946890467               |
| SNP_P4_97117_28990874 | NC_021166.1    | Ca_kabuli_chr07 | 28990874                | CC                              | AA              | 1946890470               |
| SNP_P4_97118_28995804 | NC_021166.1    | Ca_kabuli_chr07 | 28995804                | TT                              | CC              | 1946890472               |
| SNP_P4_97121_29038405 | NC_021166.1    | Ca_kabuli_chr07 | 29038405                | AA                              | TT              | 1946890474               |
| SNP_P4_97122_29089133 | NC_021166.1    | Ca_kabuli_chr07 | 29089133                | CC                              | TT              | 1946890476               |
| SNP_P4_97123_29089146 | NC_021166.1    | Ca_kabuli_chr07 | 29089146                | AA                              | GG              | 1946890478               |
| SNP_P4_97124_29089147 | NC_021166.1    | Ca_kabuli_chr07 | 29089147                | TT                              | AA              | 1946890480               |
| SNP_P4_97125_29161206 | NC_021166.1    | Ca_kabuli_chr07 | 29161206                | TT                              | GG              | 1946890482               |
| SNP_P4_97126_29161557 | NC_021166.1    | Ca_kabuli_chr07 | 29161557                | AA                              | GG              | 1946890484               |
| SNP_P4_97127_29163506 | NC_021166.1    | Ca_kabuli_chr07 | 29163506                | CC                              | AA              | 1946890486               |
| SNP_P4_97129_29175468 | NC_021166.1    | Ca_kabuli_chr07 | 29175468                | AA                              | TT              | 1946890488               |
| SNP_P4_97130_29196781 | NC_021166.1    | Ca_kabuli_chr07 | 29196781                | CC                              | TT              | 1946890490               |
| SNP_P4_97131_29211452 | NC_021166.1    | Ca_kabuli_chr07 | 29211452                | TT                              | AA              | 1946890493               |
| SNP_P4_97132_29212023 | NC_021166.1    | Ca_kabuli_chr07 | 29212023                | AA                              | TT              | 1946890495               |

| SNPs IDs              | Chromosome IDs | Chromosomes     | Physical positions (bp) | CDC Frontier (Reference genome) | (ILWC46 & LPNB) | NCBI SNPdb Accession IDs |
|-----------------------|----------------|-----------------|-------------------------|---------------------------------|-----------------|--------------------------|
| SNP_P4_97133_29212025 | NC_021166.1    | Ca_kabuli_chr07 | 29212025                | CC                              | AA              | 1946890497               |
| SNP_P4_97134_29212026 | NC_021166.1    | Ca_kabuli_chr07 | 29212026                | AA                              | TT              | 1946890499               |
| SNP_P4_97135_29212027 | NC_021166.1    | Ca_kabuli_chr07 | 29212027                | GG                              | TT              | 1946890501               |
| SNP_P4_97136_29212028 | NC_021166.1    | Ca_kabuli_chr07 | 29212028                | GG                              | CC              | 1946890503               |
| SNP_P4_97137_29234560 | NC_021166.1    | Ca_kabuli_chr07 | 29234560                | CC                              | TT              | 1946890505               |
| SNP_P4_97138_29240077 | NC_021166.1    | Ca_kabuli_chr07 | 29240077                | CC                              | AA              | 1946890507               |
| SNP_P4_97140_29252496 | NC_021166.1    | Ca_kabuli_chr07 | 29252496                | GG                              | AA              | 1946890509               |
| SNP_P4_97141_29294255 | NC_021166.1    | Ca_kabuli_chr07 | 29294255                | AA                              | TT              | 1946890511               |
| SNP_P4_97142_29307574 | NC_021166.1    | Ca_kabuli_chr07 | 29307574                | AA                              | GG              | 1946890513               |
| SNP_P4_97143_29309259 | NC_021166.1    | Ca_kabuli_chr07 | 29309259                | AA                              | GG              | 1946890516               |
| SNP_P4_97146_29327180 | NC_021166.1    | Ca_kabuli_chr07 | 29327180                | CC                              | TT              | 1946890518               |
| SNP_P4_97148_29360236 | NC_021166.1    | Ca_kabuli_chr07 | 29360236                | CC                              | TT              | 1946890520               |
| SNP_P4_97149_29384107 | NC_021166.1    | Ca_kabuli_chr07 | 29384107                | GG                              | AA              | 1946890522               |
| SNP_P4_97150_29391177 | NC_021166.1    | Ca_kabuli_chr07 | 29391177                | TT                              | AA              | 1946890524               |
| SNP_P4_97151_29395476 | NC_021166.1    | Ca_kabuli_chr07 | 29395476                | TT                              | GG              | 1946890526               |
| SNP_P4_97152_29399219 | NC_021166.1    | Ca_kabuli_chr07 | 29399219                | TT                              | AA              | 1946890528               |
| SNP_P4_97153_29416172 | NC_021166.1    | Ca_kabuli_chr07 | 29416172                | AA                              | TT              | 1946890530               |
| SNP_P4_97155_29416464 | NC_021166.1    | Ca_kabuli_chr07 | 29416464                | AA                              | GG              | 1946890532               |
| SNP_P4_97157_29416577 | NC_021166.1    | Ca_kabuli_chr07 | 29416577                | TT                              | CC              | 1946890534               |
| SNP_P4_97158_29416714 | NC_021166.1    | Ca_kabuli_chr07 | 29416714                | AA                              | GG              | 1946890536               |
| SNP_P4_97160_29416892 | NC_021166.1    | Ca_kabuli_chr07 | 29416892                | GG                              | AA              | 1946890538               |
| SNP_P4_97161_29416893 | NC_021166.1    | Ca_kabuli_chr07 | 29416893                | GG                              | AA              | 1946890540               |
| SNP_P4_97162_29417586 | NC_021166.1    | Ca_kabuli_chr07 | 29417586                | TT                              | AA              | 1946890542               |
| SNP_P4_97163_29417645 | NC_021166.1    | Ca_kabuli_chr07 | 29417645                | AA                              | GG              | 1946890544               |
| SNP_P4_97164_29417693 | NC_021166.1    | Ca_kabuli_chr07 | 29417693                | GG                              | CC              | 1946890546               |
| SNP_P4_97165_29417733 | NC_021166.1    | Ca_kabuli_chr07 | 29417733                | TT                              | CC              | 1946890548               |
| SNP_P4_97166_29417759 | NC_021166.1    | Ca_kabuli_chr07 | 29417759                | AA                              | CC              | 1946890550               |
| SNP_P4_97168_29417970 | NC_021166.1    | Ca_kabuli_chr07 | 29417970                | GG                              | AA              | 1946890552               |
| SNP_P4_97169_29417985 | NC_021166.1    | Ca_kabuli_chr07 | 29417985                | AA                              | GG              | 1946890554               |
| SNP_P4_97171_29419100 | NC_021166.1    | Ca_kabuli_chr07 | 29419100                | GG                              | CC              | 1946890556               |
| SNP_P4_97172_29419846 | NC_021166.1    | Ca_kabuli_chr07 | 29419846                | GG                              | TT              | 1946890558               |
| SNP_P4_97173_29428389 | NC_021166.1    | Ca_kabuli_chr07 | 29428389                | GG                              | AA              | 1946890560               |
| SNP_P4_97174_29433171 | NC_021166.1    | Ca_kabuli_chr07 | 29433171                | GG                              | CC              | 1946890562               |
| SNP_P4_97175_29433179 | NC_021166.1    | Ca_kabuli_chr07 | 29433179                | CC                              | TT              | 1946890565               |
| SNP_P4_97176_29433206 | NC_021166.1    | Ca_kabuli_chr07 | 29433206                | TT                              | CC              | 1946890567               |
| SNP_P4_97177_29433295 | NC_021166.1    | Ca_kabuli_chr07 | 29433295                | CC                              | AA              | 1946890569               |
| SNP_P4_97178_29433354 | NC_021166.1    | Ca_kabuli_chr07 | 29433354                | TT                              | CC              | 1946890571               |
| SNP_P4_97179_29433372 | NC_021166.1    | Ca_kabuli_chr07 | 29433372                | CC                              | TT              | 1946890573               |
| SNP_P4_97180_29433448 | NC_021166.1    | Ca_kabuli_chr07 | 29433448                | TT                              | AA              | 1946890575               |
| SNP_P4_97182_29433644 | NC_021166.1    | Ca_kabuli_chr07 | 29433644                | CC                              | GG              | 1946890577               |
| SNP_P4_97183_29433738 | NC_021166.1    | Ca_kabuli_chr07 | 29433738                | CC                              | TT              | 1946890579               |
| SNP_P4_97184_29436314 | NC_021166.1    | Ca_kabuli_chr07 | 29436314                | TT                              | CC              | 1946890581               |

| SNPs IDs              | Chromosome IDs | Chromosomes     | Physical positions (bp) | CDC Frontier (Reference genome) | (ILWC46 & LPNB) | NCBI SNPdb Accession IDs |
|-----------------------|----------------|-----------------|-------------------------|---------------------------------|-----------------|--------------------------|
| SNP_P4_97185_29436356 | NC_021166.1    | Ca_kabuli_chr07 | 29436356                | TT                              | CC              | 1946890583               |
| SNP_P4_97186_29436359 | NC_021166.1    | Ca_kabuli_chr07 | 29436359                | TT                              | CC              | 1946890585               |
| SNP_P4_97187_29436388 | NC_021166.1    | Ca_kabuli_chr07 | 29436388                | CC                              | TT              | 1946890588               |
| SNP_P4_97188_29436396 | NC_021166.1    | Ca_kabuli_chr07 | 29436396                | TT                              | GG              | 1946890590               |
| SNP_P4_97189_29436397 | NC_021166.1    | Ca_kabuli_chr07 | 29436397                | TT                              | GG              | 1946890592               |
| SNP_P4_97190_29439185 | NC_021166.1    | Ca_kabuli_chr07 | 29439185                | AA                              | TT              | 1946890594               |
| SNP_P4_97193_29461297 | NC_021166.1    | Ca_kabuli_chr07 | 29461297                | AA                              | CC              | 1946890596               |
| SNP_P4_97194_29461319 | NC_021166.1    | Ca_kabuli_chr07 | 29461319                | TT                              | AA              | 1946890598               |
| SNP_P4_97195_29461326 | NC_021166.1    | Ca_kabuli_chr07 | 29461326                | CC                              | TT              | 1946890600               |
| SNP_P4_97197_29504802 | NC_021166.1    | Ca_kabuli_chr07 | 29504802                | TT                              | CC              | 1946890602               |
| SNP_P4_97198_29504812 | NC_021166.1    | Ca_kabuli_chr07 | 29504812                | CC                              | TT              | 1946890604               |
| SNP_P4_97199_29504824 | NC_021166.1    | Ca_kabuli_chr07 | 29504824                | TT                              | CC              | 1946890606               |
| SNP_P4_97200_29504829 | NC_021166.1    | Ca_kabuli_chr07 | 29504829                | AA                              | GG              | 1946890608               |
| SNP_P4_97201_29504889 | NC_021166.1    | Ca_kabuli_chr07 | 29504889                | TT                              | AA              | 1946890610               |
| SNP_P4_97202_29504966 | NC_021166.1    | Ca_kabuli_chr07 | 29504966                | CC                              | GG              | 1946890612               |
| SNP_P4_97203_29504993 | NC_021166.1    | Ca_kabuli_chr07 | 29504993                | GG                              | AA              | 1946890615               |
| SNP_P4_97204_29505110 | NC_021166.1    | Ca_kabuli_chr07 | 29505110                | AA                              | GG              | 1946890617               |
| SNP_P4_97205_29511138 | NC_021166.1    | Ca_kabuli_chr07 | 29511138                | AA                              | CC              | 1946890619               |
| SNP_P4_97206_29534169 | NC_021166.1    | Ca_kabuli_chr07 | 29534169                | TT                              | AA              | 1946890621               |
| SNP_P4_97208_29540787 | NC_021166.1    | Ca_kabuli_chr07 | 29540787                | CC                              | AA              | 1946890623               |
| SNP_P4_97209_29547429 | NC_021166.1    | Ca_kabuli_chr07 | 29547429                | CC                              | TT              | 1946890625               |
| SNP_P4_97210_29547769 | NC_021166.1    | Ca_kabuli_chr07 | 29547769                | TT                              | AA              | 1946890627               |
| SNP_P4_97211_29547840 | NC_021166.1    | Ca_kabuli_chr07 | 29547840                | GG                              | AA              | 1946890629               |
| SNP_P4_97212_29548067 | NC_021166.1    | Ca_kabuli_chr07 | 29548067                | AA                              | GG              | 1946890631               |
| SNP_P4_97213_29548094 | NC_021166.1    | Ca_kabuli_chr07 | 29548094                | AA                              | CC              | 1946890633               |
| SNP_P4_97214_29548434 | NC_021166.1    | Ca_kabuli_chr07 | 29548434                | CC                              | TT              | 1946890635               |
| SNP_P4_97215_29553040 | NC_021166.1    | Ca_kabuli_chr07 | 29553040                | CC                              | TT              | 1946890637               |
| SNP_P4_97217_29593086 | NC_021166.1    | Ca_kabuli_chr07 | 29593086                | GG                              | AA              | 1946890639               |
| SNP_P4_97218_29605369 | NC_021166.1    | Ca_kabuli_chr07 | 29605369                | AA                              | TT              | 1946890641               |
| SNP_P4_97219_29605734 | NC_021166.1    | Ca_kabuli_chr07 | 29605734                | TT                              | AA              | 1946890643               |
| SNP_P4_97220_29610046 | NC_021166.1    | Ca_kabuli_chr07 | 29610046                | AA                              | GG              | 1946890645               |
| SNP_P4_97223_29631709 | NC_021166.1    | Ca_kabuli_chr07 | 29631709                | CC                              | TT              | 1946890647               |
| SNP_P4_97224_29656004 | NC_021166.1    | Ca_kabuli_chr07 | 29656004                | CC                              | AA              | 1946890649               |
| SNP_P4_97227_29674797 | NC_021166.1    | Ca_kabuli_chr07 | 29674797                | GG                              | AA              | 1946890651               |
| SNP_P4_97228_29676413 | NC_021166.1    | Ca_kabuli_chr07 | 29676413                | CC                              | TT              | 1946890653               |
| SNP_P4_97229_29695025 | NC_021166.1    | Ca_kabuli_chr07 | 29695025                | TT                              | CC              | 1946890655               |
| SNP_P4_97230_29743462 | NC_021166.1    | Ca_kabuli_chr07 | 29743462                | GG                              | AA              | 1946890657               |
| SNP_P4_97232_29753839 | NC_021166.1    | Ca_kabuli_chr07 | 29753839                | TT                              | CC              | 1946890659               |
| SNP_P4_97233_29763495 | NC_021166.1    | Ca_kabuli_chr07 | 29763495                | GG                              | AA              | 1946890661               |
| SNP_P4_97236_29787478 | NC_021166.1    | Ca_kabuli_chr07 | 29787478                | AA                              | GG              | 1946890663               |
| SNP_P4_97237_29790248 | NC_021166.1    | Ca_kabuli_chr07 | 29790248                | AA                              | TT              | 1946890665               |
| SNP_P4_97238_29810276 | NC_021166.1    | Ca_kabuli_chr07 | 29810276                | AA                              | GG              | 1946890667               |

| SNPs IDs              | Chromosome IDs | Chromosomes     | Physical positions (bp) | CDC Frontier (Reference genome) | (ILWC46 & LPNB) | NCBI SNPdb Accession IDs |
|-----------------------|----------------|-----------------|-------------------------|---------------------------------|-----------------|--------------------------|
| SNP_P4_97240_29877400 | NC_021166.1    | Ca_kabuli_chr07 | 29877400                | GG                              | AA              | 1946890669               |
| SNP_P4_97241_29895501 | NC_021166.1    | Ca_kabuli_chr07 | 29895501                | CC                              | TT              | 1946890671               |
| SNP_P4_97242_29902971 | NC_021166.1    | Ca_kabuli_chr07 | 29902971                | AA                              | GG              | 1946890673               |
| SNP_P4_97243_29908766 | NC_021166.1    | Ca_kabuli_chr07 | 29908766                | GG                              | AA              | 1946890675               |
| SNP_P4_97244_29909222 | NC_021166.1    | Ca_kabuli_chr07 | 29909222                | TT                              | GG              | 1946890677               |
| SNP_P4_97245_29910689 | NC_021166.1    | Ca_kabuli_chr07 | 29910689                | GG                              | AA              | 1946890680               |
| SNP_P4_97246_29910933 | NC_021166.1    | Ca_kabuli_chr07 | 29910933                | GG                              | AA              | 1946890682               |
| SNP_P4_97247_29924521 | NC_021166.1    | Ca_kabuli_chr07 | 29924521                | GG                              | AA              | 1946890684               |
| SNP_P4_97248_29924747 | NC_021166.1    | Ca_kabuli_chr07 | 29924747                | GG                              | AA              | 1946890686               |
| SNP_P4_97249_29925020 | NC_021166.1    | Ca_kabuli_chr07 | 29925020                | CC                              | AA              | 1946890688               |
| SNP_P4_97250_29925322 | NC_021166.1    | Ca_kabuli_chr07 | 29925322                | TT                              | CC              | 1946890690               |
| SNP_P4_97251_29925325 | NC_021166.1    | Ca_kabuli_chr07 | 29925325                | TT                              | CC              | 1946890692               |
| SNP_P4_97252_29925368 | NC_021166.1    | Ca_kabuli_chr07 | 29925368                | AA                              | TT              | 1946890694               |
| SNP_P4_97253_29929735 | NC_021166.1    | Ca_kabuli_chr07 | 29929735                | CC                              | GG              | 1946890696               |
| SNP_P4_97254_29929745 | NC_021166.1    | Ca_kabuli_chr07 | 29929745                | CC                              | AA              | 1946890698               |
| SNP_P4_97255_29929783 | NC_021166.1    | Ca_kabuli_chr07 | 29929783                | GG                              | AA              | 1946890700               |
| SNP_P4_97256_29930053 | NC_021166.1    | Ca_kabuli_chr07 | 29930053                | GG                              | AA              | 1946890702               |
| SNP_P4_97257_29935583 | NC_021166.1    | Ca_kabuli_chr07 | 29935583                | AA                              | GG              | 1946890704               |
| SNP_P4_97259_29940193 | NC_021166.1    | Ca_kabuli_chr07 | 29940193                | TT                              | CC              | 1946890706               |
| SNP_P4_97260_29941473 | NC_021166.1    | Ca_kabuli_chr07 | 29941473                | AA                              | GG              | 1946890708               |
| SNP_P4_97261_29943162 | NC_021166.1    | Ca_kabuli_chr07 | 29943162                | CC                              | TT              | 1946890710               |
| SNP_P4_97264_29995425 | NC_021166.1    | Ca_kabuli_chr07 | 29995425                | AA                              | GG              | 1946890712               |
| SNP_P4_97265_29996304 | NC_021166.1    | Ca_kabuli_chr07 | 29996304                | AA                              | CC              | 1946890714               |
| SNP_P4_97266_29996331 | NC_021166.1    | Ca_kabuli_chr07 | 29996331                | CC                              | TT              | 1946890716               |
| SNP_P4_97267_29997771 | NC_021166.1    | Ca_kabuli_chr07 | 29997771                | AA                              | TT              | 1946890718               |
| SNP_P4_97268_29997911 | NC_021166.1    | Ca_kabuli_chr07 | 29997911                | TT                              | CC              | 1946890720               |
| SNP_P4_97269_29997912 | NC_021166.1    | Ca_kabuli_chr07 | 29997912                | CC                              | AA              | 1946890722               |
| SNP_P4_97270_29999987 | NC_021166.1    | Ca_kabuli_chr07 | 29999987                | AA                              | GG              | 1946890725               |
| SNP_P4_97271_30000041 | NC_021166.1    | Ca_kabuli_chr07 | 30000041                | CC                              | AA              | 1946890727               |
| SNP_P4_97272_30000045 | NC_021166.1    | Ca_kabuli_chr07 | 30000045                | GG                              | AA              | 1946890729               |
| SNP_P4_97273_30000048 | NC_021166.1    | Ca_kabuli_chr07 | 30000048                | TT                              | AA              | 1946890731               |
| SNP_P4_97274_30000050 | NC_021166.1    | Ca_kabuli_chr07 | 30000050                | AA                              | TT              | 1946890733               |
| SNP_P4_97275_30000311 | NC_021166.1    | Ca_kabuli_chr07 | 30000311                | AA                              | GG              | 1946890735               |
| SNP_P4_97276_30000601 | NC_021166.1    | Ca_kabuli_chr07 | 30000601                | TT                              | AA              | 1946890737               |
| SNP_P4_97277_30000681 | NC_021166.1    | Ca_kabuli_chr07 | 30000681                | TT                              | GG              | 1946890739               |
| SNP_P4_97278_30000719 | NC_021166.1    | Ca_kabuli_chr07 | 30000719                | AA                              | GG              | 1946890741               |
| SNP_P4_97279_30000728 | NC_021166.1    | Ca_kabuli_chr07 | 30000728                | CC                              | TT              | 1946890744               |
| SNP_P4_97280_30001696 | NC_021166.1    | Ca_kabuli_chr07 | 30001696                | CC                              | AA              | 1946890746               |
| SNP_P4_97281_30002778 | NC_021166.1    | Ca_kabuli_chr07 | 30002778                | AA                              | CC              | 1946890748               |
| SNP_P4_97282_30003194 | NC_021166.1    | Ca_kabuli_chr07 | 30003194                | TT                              | CC              | 1946890750               |
| SNP_P4_97283_30003722 | NC_021166.1    | Ca_kabuli_chr07 | 30003722                | TT                              | CC              | 1946890752               |
| SNP_P4_97284_30003732 | NC_021166.1    | Ca_kabuli_chr07 | 30003732                | GG                              | AA              | 1946890754               |



| SNPs IDs              | Chromosome IDs | Chromosomes     | Physical positions (bp) | CDC Frontier (Reference genome) | (ILWC46 & LPNB) | NCBI SNPdb Accession IDs |
|-----------------------|----------------|-----------------|-------------------------|---------------------------------|-----------------|--------------------------|
| SNP_P4_97286_30003947 | NC_021166.1    | Ca_kabuli_chr07 | 30003947                | CC                              | TT              | 1946890756               |
| SNP_P4_97287_30003999 | NC_021166.1    | Ca_kabuli_chr07 | 30003999                | TT                              | CC              | 1946890758               |
| SNP_P4_97288_30004141 | NC_021166.1    | Ca_kabuli_chr07 | 30004141                | AA                              | GG              | 1946890760               |
| SNP_P4_97289_30004173 | NC_021166.1    | Ca_kabuli_chr07 | 30004173                | TT                              | CC              | 1946890762               |
| SNP_P4_97290_30004213 | NC_021166.1    | Ca_kabuli_chr07 | 30004213                | GG                              | AA              | 1946890764               |
| SNP_P4_97291_30008079 | NC_021166.1    | Ca_kabuli_chr07 | 30008079                | CC                              | GG              | 1946890766               |
| SNP_P4_97292_30008139 | NC_021166.1    | Ca_kabuli_chr07 | 30008139                | AA                              | GG              | 1946890768               |
| SNP_P4_97293_30008216 | NC_021166.1    | Ca_kabuli_chr07 | 30008216                | CC                              | TT              | 1946890771               |
| SNP_P4_97294_30008357 | NC_021166.1    | Ca_kabuli_chr07 | 30008357                | CC                              | TT              | 1946890773               |
| SNP_P4_97295_30008763 | NC_021166.1    | Ca_kabuli_chr07 | 30008763                | TT                              | CC              | 1946890775               |
| SNP_P4_97296_30010690 | NC_021166.1    | Ca_kabuli_chr07 | 30010690                | CC                              | TT              | 1946890777               |
| SNP_P4_97297_30010774 | NC_021166.1    | Ca_kabuli_chr07 | 30010774                | AA                              | GG              | 1946890779               |
| SNP_P4_97299_30011236 | NC_021166.1    | Ca_kabuli_chr07 | 30011236                | TT                              | GG              | 1946890781               |
| SNP_P4_97300_30011269 | NC_021166.1    | Ca_kabuli_chr07 | 30011269                | CC                              | TT              | 1946890783               |
| SNP_P4_97301_30012213 | NC_021166.1    | Ca_kabuli_chr07 | 30012213                | GG                              | AA              | 1946890785               |
| SNP_P4_97302_30012672 | NC_021166.1    | Ca_kabuli_chr07 | 30012672                | GG                              | AA              | 1946890787               |
| SNP_P4_97303_30016477 | NC_021166.1    | Ca_kabuli_chr07 | 30016477                | CC                              | GG              | 1946890789               |
| SNP_P4_97306_30017515 | NC_021166.1    | Ca_kabuli_chr07 | 30017515                | GG                              | AA              | 1946890791               |
| SNP_P4_97307_30017590 | NC_021166.1    | Ca_kabuli_chr07 | 30017590                | GG                              | CC              | 1946890793               |
| SNP_P4_97308_30017601 | NC_021166.1    | Ca_kabuli_chr07 | 30017601                | AA                              | GG              | 1946890796               |
| SNP_P4_97309_30018189 | NC_021166.1    | Ca_kabuli_chr07 | 30018189                | CC                              | TT              | 1946890798               |
| SNP_P4_97310_30018279 | NC_021166.1    | Ca_kabuli_chr07 | 30018279                | AA                              | GG              | 1946890800               |
| SNP_P4_97311_30018283 | NC_021166.1    | Ca_kabuli_chr07 | 30018283                | AA                              | TT              | 1946890802               |
| SNP_P4_97312_30018509 | NC_021166.1    | Ca_kabuli_chr07 | 30018509                | AA                              | GG              | 1946890804               |
| SNP_P4_97313_30020448 | NC_021166.1    | Ca_kabuli_chr07 | 30020448                | AA                              | TT              | 1946890806               |
| SNP_P4_97314_30020449 | NC_021166.1    | Ca_kabuli_chr07 | 30020449                | AA                              | TT              | 1946890808               |
| SNP_P4_97315_30020450 | NC_021166.1    | Ca_kabuli_chr07 | 30020450                | GG                              | TT              | 1946890810               |
| SNP_P4_97316_30020478 | NC_021166.1    | Ca_kabuli_chr07 | 30020478                | GG                              | AA              | 1946890812               |
| SNP_P4_97317_30020515 | NC_021166.1    | Ca_kabuli_chr07 | 30020515                | AA                              | GG              | 1946890814               |
| SNP_P4_97318_30020726 | NC_021166.1    | Ca_kabuli_chr07 | 30020726                | CC                              | GG              | 1946890816               |
| SNP_P4_97319_30020845 | NC_021166.1    | Ca_kabuli_chr07 | 30020845                | CC                              | GG              | 1946890818               |
| SNP_P4_97320_30021013 | NC_021166.1    | Ca_kabuli_chr07 | 30021013                | AA                              | GG              | 1946890821               |
| SNP_P4_97321_30021039 | NC_021166.1    | Ca_kabuli_chr07 | 30021039                | GG                              | AA              | 1946890823               |
| SNP_P4_97323_30021382 | NC_021166.1    | Ca_kabuli_chr07 | 30021382                | GG                              | AA              | 1946890825               |
| SNP_P4_97324_30024711 | NC_021166.1    | Ca_kabuli_chr07 | 30024711                | GG                              | TT              | 1946890827               |
| SNP_P4_97325_30026017 | NC_021166.1    | Ca_kabuli_chr07 | 30026017                | TT                              | CC              | 1946890829               |
| SNP_P4_97326_30026039 | NC_021166.1    | Ca_kabuli_chr07 | 30026039                | GG                              | TT              | 1946890831               |
| SNP_P4_97327_30027820 | NC_021166.1    | Ca_kabuli_chr07 | 30027820                | GG                              | CC              | 1946890833               |
| SNP_P4_97328_30027833 | NC_021166.1    | Ca_kabuli_chr07 | 30027833                | GG                              | CC              | 1946890835               |
| SNP_P4_97329_30028101 | NC_021166.1    | Ca_kabuli_chr07 | 30028101                | GG                              | AA              | 1946890837               |
| SNP_P4_97330_30028345 | NC_021166.1    | Ca_kabuli_chr07 | 30028345                | AA                              | TT              | 1946890839               |
| SNP_P4_97331_30028347 | NC_021166.1    | Ca_kabuli_chr07 | 30028347                | AA                              | CC              | 1946890841               |

| SNPs IDs              | Chromosome IDs | Chromosomes     | Physical positions (bp) | CDC Frontier (Reference genome) | (ILWC46 & LPNB) | NCBI SNPdb Accession IDs |
|-----------------------|----------------|-----------------|-------------------------|---------------------------------|-----------------|--------------------------|
| SNP_P4_97332_30028394 | NC_021166.1    | Ca_kabuli_chr07 | 30028394                | AA                              | GG              | 1946890843               |
| SNP_P4_97333_30028399 | NC_021166.1    | Ca_kabuli_chr07 | 30028399                | CC                              | AA              | 1946890845               |
| SNP_P4_97334_30028654 | NC_021166.1    | Ca_kabuli_chr07 | 30028654                | CC                              | TT              | 1946890847               |
| SNP_P4_97335_30028681 | NC_021166.1    | Ca_kabuli_chr07 | 30028681                | CC                              | TT              | 1946890849               |
| SNP_P4_97336_30028706 | NC_021166.1    | Ca_kabuli_chr07 | 30028706                | CC                              | TT              | 1946890851               |
| SNP_P4_97337_30029296 | NC_021166.1    | Ca_kabuli_chr07 | 30029296                | AA                              | TT              | 1946890853               |
| SNP_P4_97338_30029313 | NC_021166.1    | Ca_kabuli_chr07 | 30029313                | AA                              | GG              | 1946890855               |
| SNP_P4_97339_30029525 | NC_021166.1    | Ca_kabuli_chr07 | 30029525                | TT                              | AA              | 1946890857               |
| SNP_P4_97340_30029543 | NC_021166.1    | Ca_kabuli_chr07 | 30029543                | TT                              | AA              | 1946890859               |
| SNP_P4_97341_30029590 | NC_021166.1    | Ca_kabuli_chr07 | 30029590                | TT                              | CC              | 1946890861               |
| SNP_P4_97342_30029635 | NC_021166.1    | Ca_kabuli_chr07 | 30029635                | TT                              | AA              | 1946890863               |
| SNP_P4_97343_30029684 | NC_021166.1    | Ca_kabuli_chr07 | 30029684                | TT                              | AA              | 1946890865               |
| SNP_P4_97344_30030067 | NC_021166.1    | Ca_kabuli_chr07 | 30030067                | CC                              | AA              | 1946890867               |
| SNP_P4_97346_30034926 | NC_021166.1    | Ca_kabuli_chr07 | 30034926                | AA                              | GG              | 1946890869               |
| SNP_P4_97347_30036222 | NC_021166.1    | Ca_kabuli_chr07 | 30036222                | AA                              | GG              | 1946890871               |
| SNP_P4_97348_30036271 | NC_021166.1    | Ca_kabuli_chr07 | 30036271                | AA                              | TT              | 1946890873               |
| SNP_P4_97349_30036695 | NC_021166.1    | Ca_kabuli_chr07 | 30036695                | GG                              | AA              | 1946890875               |
| SNP_P4_97351_30037585 | NC_021166.1    | Ca_kabuli_chr07 | 30037585                | CC                              | TT              | 1946890877               |
| SNP_P4_97352_30037758 | NC_021166.1    | Ca_kabuli_chr07 | 30037758                | GG                              | CC              | 1946890879               |
| SNP_P4_97353_30038719 | NC_021166.1    | Ca_kabuli_chr07 | 30038719                | CC                              | AA              | 1946890882               |
| SNP_P4_97354_30040274 | NC_021166.1    | Ca_kabuli_chr07 | 30040274                | GG                              | TT              | 1946890884               |
| SNP_P4_97355_30040303 | NC_021166.1    | Ca_kabuli_chr07 | 30040303                | GG                              | AA              | 1946890886               |
| SNP_P4_97356_30041810 | NC_021166.1    | Ca_kabuli_chr07 | 30041810                | TT                              | GG              | 1946890888               |
| SNP_P4_97357_30042133 | NC_021166.1    | Ca_kabuli_chr07 | 30042133                | AA                              | GG              | 1946890890               |
| SNP_P4_97358_30042331 | NC_021166.1    | Ca_kabuli_chr07 | 30042331                | AA                              | GG              | 1946890892               |
| SNP_P4_97359_30042335 | NC_021166.1    | Ca_kabuli_chr07 | 30042335                | CC                              | GG              | 1946890894               |
| SNP_P4_97360_30042539 | NC_021166.1    | Ca_kabuli_chr07 | 30042539                | AA                              | GG              | 1946890896               |
| SNP_P4_97361_30042553 | NC_021166.1    | Ca_kabuli_chr07 | 30042553                | AA                              | GG              | 1946890898               |
| SNP_P4_97362_30042569 | NC_021166.1    | Ca_kabuli_chr07 | 30042569                | GG                              | CC              | 1946890900               |
| SNP_P4_97363_30042728 | NC_021166.1    | Ca_kabuli_chr07 | 30042728                | TT                              | CC              | 1946890903               |
| SNP_P4_97364_30042875 | NC_021166.1    | Ca_kabuli_chr07 | 30042875                | TT                              | CC              | 1946890905               |
| SNP_P4_97365_30042891 | NC_021166.1    | Ca_kabuli_chr07 | 30042891                | AA                              | GG              | 1946890907               |
| SNP_P4_97366_30043068 | NC_021166.1    | Ca_kabuli_chr07 | 30043068                | CC                              | TT              | 1946890909               |
| SNP_P4_97367_30043099 | NC_021166.1    | Ca_kabuli_chr07 | 30043099                | CC                              | TT              | 1946890911               |
| SNP_P4_97368_30043108 | NC_021166.1    | Ca_kabuli_chr07 | 30043108                | AA                              | CC              | 1946890913               |
| SNP_P4_97369_30043112 | NC_021166.1    | Ca_kabuli_chr07 | 30043112                | AA                              | GG              | 1946890915               |
| SNP_P4_97370_30043329 | NC_021166.1    | Ca_kabuli_chr07 | 30043329                | AA                              | GG              | 1946890917               |
| SNP_P4_97371_30043362 | NC_021166.1    | Ca_kabuli_chr07 | 30043362                | AA                              | GG              | 1946890919               |
| SNP_P4_97372_30043390 | NC_021166.1    | Ca_kabuli_chr07 | 30043390                | CC                              | TT              | 1946890921               |
| SNP_P4_97373_30043407 | NC_021166.1    | Ca_kabuli_chr07 | 30043407                | AA                              | CC              | 1946890923               |
| SNP_P4_97374_30043435 | NC_021166.1    | Ca_kabuli_chr07 | 30043435                | TT                              | AA              | 1946890925               |
| SNP_P4_97375_30043712 | NC_021166.1    | Ca_kabuli_chr07 | 30043712                | AA                              | GG              | 1946890927               |

| SNPs IDs              | Chromosome IDs | Chromosomes     | Physical positions (bp) | CDC Frontier (Reference genome) | (ILWC46 & LPNB) | NCBI SNPdb Accession IDs |
|-----------------------|----------------|-----------------|-------------------------|---------------------------------|-----------------|--------------------------|
| SNP_P4_97376_30044573 | NC_021166.1    | Ca_kabuli_chr07 | 30044573                | CC                              | TT              | 1946890929               |
| SNP_P4_97377_30044750 | NC_021166.1    | Ca_kabuli_chr07 | 30044750                | GG                              | AA              | 1946890931               |
| SNP_P4_97378_30044800 | NC_021166.1    | Ca_kabuli_chr07 | 30044800                | AA                              | GG              | 1946890933               |
| SNP_P4_97379_30046054 | NC_021166.1    | Ca_kabuli_chr07 | 30046054                | GG                              | AA              | 1946890935               |
| SNP_P4_97380_30046107 | NC_021166.1    | Ca_kabuli_chr07 | 30046107                | GG                              | AA              | 1946890937               |
| SNP_P4_97381_30046414 | NC_021166.1    | Ca_kabuli_chr07 | 30046414                | TT                              | CC              | 1946890939               |
| SNP_P4_97382_30046416 | NC_021166.1    | Ca_kabuli_chr07 | 30046416                | AA                              | CC              | 1946890941               |
| SNP_P4_97383_30046524 | NC_021166.1    | Ca_kabuli_chr07 | 30046524                | AA                              | CC              | 1946890943               |
| SNP_P4_97384_30046700 | NC_021166.1    | Ca_kabuli_chr07 | 30046700                | CC                              | TT              | 1946890946               |
| SNP_P4_97385_30046723 | NC_021166.1    | Ca_kabuli_chr07 | 30046723                | CC                              | GG              | 1946890948               |
| SNP_P4_97386_30047816 | NC_021166.1    | Ca_kabuli_chr07 | 30047816                | GG                              | AA              | 1946890950               |
| SNP_P4_97387_30047836 | NC_021166.1    | Ca_kabuli_chr07 | 30047836                | TT                              | CC              | 1946890952               |
| SNP_P4_97388_30048811 | NC_021166.1    | Ca_kabuli_chr07 | 30048811                | CC                              | TT              | 1946890954               |
| SNP_P4_97389_30048827 | NC_021166.1    | Ca_kabuli_chr07 | 30048827                | CC                              | AA              | 1946890956               |
| SNP_P4_97390_30048852 | NC_021166.1    | Ca_kabuli_chr07 | 30048852                | CC                              | TT              | 1946890958               |
| SNP_P4_97391_30048871 | NC_021166.1    | Ca_kabuli_chr07 | 30048871                | AA                              | GG              | 1946890960               |
| SNP_P4_97392_30048902 | NC_021166.1    | Ca_kabuli_chr07 | 30048902                | CC                              | AA              | 1946890962               |
| SNP_P4_97393_30048906 | NC_021166.1    | Ca_kabuli_chr07 | 30048906                | AA                              | GG              | 1946890964               |
| SNP_P4_97394_30052153 | NC_021166.1    | Ca_kabuli_chr07 | 30052153                | AA                              | GG              | 1946890967               |
| SNP_P4_97395_30052513 | NC_021166.1    | Ca_kabuli_chr07 | 30052513                | TT                              | CC              | 1946890969               |
| SNP_P4_97396_30053380 | NC_021166.1    | Ca_kabuli_chr07 | 30053380                | TT                              | GG              | 1946890971               |
| SNP_P4_97398_30053703 | NC_021166.1    | Ca_kabuli_chr07 | 30053703                | AA                              | CC              | 1946890973               |
| SNP_P4_97399_30054006 | NC_021166.1    | Ca_kabuli_chr07 | 30054006                | GG                              | AA              | 1946890975               |
| SNP_P4_97400_30054017 | NC_021166.1    | Ca_kabuli_chr07 | 30054017                | TT                              | AA              | 1946890977               |
| SNP_P4_97401_30055020 | NC_021166.1    | Ca_kabuli_chr07 | 30055020                | AA                              | TT              | 1946890979               |
| SNP_P4_97402_30055301 | NC_021166.1    | Ca_kabuli_chr07 | 30055301                | GG                              | AA              | 1946890982               |
| SNP_P4_97403_30056750 | NC_021166.1    | Ca_kabuli_chr07 | 30056750                | GG                              | AA              | 1946890984               |
| SNP_P4_97404_30057816 | NC_021166.1    | Ca_kabuli_chr07 | 30057816                | AA                              | GG              | 1946890986               |
| SNP_P4_97405_30057823 | NC_021166.1    | Ca_kabuli_chr07 | 30057823                | CC                              | GG              | 1946890988               |
| SNP_P4_97407_30059507 | NC_021166.1    | Ca_kabuli_chr07 | 30059507                | CC                              | TT              | 1946890990               |
| SNP_P4_97408_30060299 | NC_021166.1    | Ca_kabuli_chr07 | 30060299                | AA                              | CC              | 1946890992               |
| SNP_P4_97409_30060602 | NC_021166.1    | Ca_kabuli_chr07 | 30060602                | AA                              | TT              | 1946890994               |
| SNP_P4_97410_30060653 | NC_021166.1    | Ca_kabuli_chr07 | 30060653                | TT                              | CC              | 1946890996               |
| SNP_P4_97411_30060731 | NC_021166.1    | Ca_kabuli_chr07 | 30060731                | CC                              | GG              | 1946890998               |
| SNP_P4_97412_30060745 | NC_021166.1    | Ca_kabuli_chr07 | 30060745                | TT                              | GG              | 1946891001               |
| SNP_P4_97413_30060905 | NC_021166.1    | Ca_kabuli_chr07 | 30060905                | GG                              | AA              | 1946891003               |
| SNP_P4_97414_30062171 | NC_021166.1    | Ca_kabuli_chr07 | 30062171                | CC                              | TT              | 1946891005               |
| SNP_P4_97415_30062184 | NC_021166.1    | Ca_kabuli_chr07 | 30062184                | GG                              | AA              | 1946891007               |
| SNP_P4_97416_30062217 | NC_021166.1    | Ca_kabuli_chr07 | 30062217                | TT                              | CC              | 1946891009               |
| SNP_P4_97417_30062235 | NC_021166.1    | Ca_kabuli_chr07 | 30062235                | GG                              | AA              | 1946891011               |
| SNP_P4_97418_30063097 | NC_021166.1    | Ca_kabuli_chr07 | 30063097                | TT                              | CC              | 1946891013               |
| SNP_P4_97419_30063485 | NC_021166.1    | Ca_kabuli_chr07 | 30063485                | TT                              | GG              | 1946891015               |

| SNPs IDs              | Chromosome IDs | Chromosomes     | Physical positions (bp) | CDC Frontier (Reference genome) | (ILWC46 & LPNB) | NCBI SNPdb Accession IDs |
|-----------------------|----------------|-----------------|-------------------------|---------------------------------|-----------------|--------------------------|
| SNP_P4_97420_30063550 | NC_021166.1    | Ca_kabuli_chr07 | 30063550                | AA                              | GG              | 1946891018               |
| SNP_P4_97421_30068434 | NC_021166.1    | Ca_kabuli_chr07 | 30068434                | CC                              | AA              | 1946891020               |
| SNP_P4_97422_30068504 | NC_021166.1    | Ca_kabuli_chr07 | 30068504                | CC                              | AA              | 1946891022               |
| SNP_P4_97423_30069030 | NC_021166.1    | Ca_kabuli_chr07 | 30069030                | GG                              | CC              | 1946891024               |
| SNP_P4_97424_30069234 | NC_021166.1    | Ca_kabuli_chr07 | 30069234                | AA                              | CC              | 1946891026               |
| SNP_P4_97426_30069590 | NC_021166.1    | Ca_kabuli_chr07 | 30069590                | AA                              | GG              | 1946891029               |
| SNP_P4_97427_30069628 | NC_021166.1    | Ca_kabuli_chr07 | 30069628                | AA                              | CC              | 1946891031               |
| SNP_P4_97428_30069631 | NC_021166.1    | Ca_kabuli_chr07 | 30069631                | AA                              | CC              | 1946891033               |
| SNP_P4_97429_30069668 | NC_021166.1    | Ca_kabuli_chr07 | 30069668                | CC                              | AA              | 1946891035               |
| SNP_P4_97430_30069705 | NC_021166.1    | Ca_kabuli_chr07 | 30069705                | AA                              | GG              | 1946891037               |
| SNP_P4_97431_30069850 | NC_021166.1    | Ca_kabuli_chr07 | 30069850                | TT                              | AA              | 1946891039               |
| SNP_P4_97432_30069857 | NC_021166.1    | Ca_kabuli_chr07 | 30069857                | GG                              | TT              | 1946891041               |
| SNP_P4_97433_30069902 | NC_021166.1    | Ca_kabuli_chr07 | 30069902                | TT                              | CC              | 1946891044               |
| SNP_P4_97434_30070146 | NC_021166.1    | Ca_kabuli_chr07 | 30070146                | GG                              | TT              | 1946891046               |
| SNP_P4_97435_30070183 | NC_021166.1    | Ca_kabuli_chr07 | 30070183                | CC                              | TT              | 1946891048               |
| SNP_P4_97436_30070404 | NC_021166.1    | Ca_kabuli_chr07 | 30070404                | TT                              | AA              | 1946891050               |
| SNP_P4_97437_30070406 | NC_021166.1    | Ca_kabuli_chr07 | 30070406                | TT                              | AA              | 1946891052               |
| SNP_P4_97438_30070413 | NC_021166.1    | Ca_kabuli_chr07 | 30070413                | CC                              | TT              | 1946891055               |
| SNP_P4_97439_30070415 | NC_021166.1    | Ca_kabuli_chr07 | 30070415                | AA                              | CC              | 1946891057               |
| SNP_P4_97440_30070458 | NC_021166.1    | Ca_kabuli_chr07 | 30070458                | GG                              | AA              | 1946891059               |
| SNP_P4_97441_30070486 | NC_021166.1    | Ca_kabuli_chr07 | 30070486                | TT                              | GG              | 1946891061               |
| SNP_P4_97442_30070501 | NC_021166.1    | Ca_kabuli_chr07 | 30070501                | TT                              | AA              | 1946891063               |
| SNP_P4_97443_30070531 | NC_021166.1    | Ca_kabuli_chr07 | 30070531                | TT                              | AA              | 1946891065               |
| SNP_P4_97444_30072035 | NC_021166.1    | Ca_kabuli_chr07 | 30072035                | GG                              | TT              | 1946891067               |
| SNP_P4_97445_30072538 | NC_021166.1    | Ca_kabuli_chr07 | 30072538                | GG                              | AA              | 1946891069               |
| SNP_P4_97446_30072939 | NC_021166.1    | Ca_kabuli_chr07 | 30072939                | AA                              | GG              | 1946891071               |
| SNP_P4_97447_30072942 | NC_021166.1    | Ca_kabuli_chr07 | 30072942                | CC                              | AA              | 1946891074               |
| SNP_P4_97448_30072989 | NC_021166.1    | Ca_kabuli_chr07 | 30072989                | GG                              | AA              | 1946891076               |
| SNP_P4_97449_30074195 | NC_021166.1    | Ca_kabuli_chr07 | 30074195                | AA                              | GG              | 1946891078               |
| SNP_P4_97450_30075744 | NC_021166.1    | Ca_kabuli_chr07 | 30075744                | TT                              | CC              | 1946891080               |
| SNP_P4_97451_30075754 | NC_021166.1    | Ca_kabuli_chr07 | 30075754                | GG                              | AA              | 1946891082               |
| SNP_P4_97452_30075809 | NC_021166.1    | Ca_kabuli_chr07 | 30075809                | GG                              | AA              | 1946891084               |
| SNP_P4_97453_30077383 | NC_021166.1    | Ca_kabuli_chr07 | 30077383                | TT                              | CC              | 1946891086               |
| SNP_P4_97454_30078646 | NC_021166.1    | Ca_kabuli_chr07 | 30078646                | TT                              | CC              | 1946891088               |
| SNP_P4_97457_30081565 | NC_021166.1    | Ca_kabuli_chr07 | 30081565                | CC                              | TT              | 1946891090               |
| SNP_P4_97458_30082138 | NC_021166.1    | Ca_kabuli_chr07 | 30082138                | AA                              | GG              | 1946891092               |
| SNP_P4_97459_30083026 | NC_021166.1    | Ca_kabuli_chr07 | 30083026                | GG                              | AA              | 1946891094               |
| SNP_P4_97460_30083035 | NC_021166.1    | Ca_kabuli_chr07 | 30083035                | TT                              | AA              | 1946891096               |
| SNP_P4_97461_30083526 | NC_021166.1    | Ca_kabuli_chr07 | 30083526                | TT                              | CC              | 1946891099               |
| SNP_P4_97462_30083532 | NC_021166.1    | Ca_kabuli_chr07 | 30083532                | AA                              | GG              | 1946891101               |
| SNP_P4_97463_30083550 | NC_021166.1    | Ca_kabuli_chr07 | 30083550                | TT                              | AA              | 1946891103               |
| SNP_P4_97464_30087419 | NC_021166.1    | Ca_kabuli_chr07 | 30087419                | TT                              | CC              | 1946891105               |

| SNPs IDs              | Chromosome IDs | Chromosomes     | Physical positions (bp) | CDC Frontier (Reference genome) | (ILWC46 & LPNB) | NCBI SNPdb Accession IDs |
|-----------------------|----------------|-----------------|-------------------------|---------------------------------|-----------------|--------------------------|
| SNP_P4_97465_30088164 | NC_021166.1    | Ca_kabuli_chr07 | 30088164                | AA                              | GG              | 1946891107               |
| SNP_P4_97466_30088490 | NC_021166.1    | Ca_kabuli_chr07 | 30088490                | CC                              | TT              | 1946891109               |
| SNP_P4_97467_30089328 | NC_021166.1    | Ca_kabuli_chr07 | 30089328                | GG                              | AA              | 1946891111               |
| SNP_P4_97468_30089332 | NC_021166.1    | Ca_kabuli_chr07 | 30089332                | CC                              | TT              | 1946891113               |
| SNP_P4_97469_30089514 | NC_021166.1    | Ca_kabuli_chr07 | 30089514                | AA                              | GG              | 1946891116               |
| SNP_P4_97470_30089515 | NC_021166.1    | Ca_kabuli_chr07 | 30089515                | CC                              | GG              | 1946891118               |
| SNP_P4_97471_30089579 | NC_021166.1    | Ca_kabuli_chr07 | 30089579                | CC                              | TT              | 1946891120               |
| SNP_P4_97472_30089624 | NC_021166.1    | Ca_kabuli_chr07 | 30089624                | TT                              | CC              | 1946891122               |
| SNP_P4_97473_30089654 | NC_021166.1    | Ca_kabuli_chr07 | 30089654                | CC                              | AA              | 1946891124               |
| SNP_P4_97474_30089676 | NC_021166.1    | Ca_kabuli_chr07 | 30089676                | GG                              | AA              | 1946891127               |
| SNP_P4_97475_30089704 | NC_021166.1    | Ca_kabuli_chr07 | 30089704                | CC                              | TT              | 1946891129               |
| SNP_P4_97476_30089706 | NC_021166.1    | Ca_kabuli_chr07 | 30089706                | GG                              | AA              | 1946891131               |
| SNP_P4_97477_30089741 | NC_021166.1    | Ca_kabuli_chr07 | 30089741                | GG                              | AA              | 1946891133               |
| SNP_P4_97478_30089762 | NC_021166.1    | Ca_kabuli_chr07 | 30089762                | GG                              | AA              | 1946891135               |
| SNP_P4_97479_30089770 | NC_021166.1    | Ca_kabuli_chr07 | 30089770                | TT                              | CC              | 1946891137               |
| SNP_P4_97480_30089869 | NC_021166.1    | Ca_kabuli_chr07 | 30089869                | CC                              | TT              | 1946891139               |
| SNP_P4_97481_30089890 | NC_021166.1    | Ca_kabuli_chr07 | 30089890                | GG                              | AA              | 1946891141               |
| SNP_P4_97482_30089895 | NC_021166.1    | Ca_kabuli_chr07 | 30089895                | AA                              | GG              | 1946891143               |
| SNP_P4_97483_30090466 | NC_021166.1    | Ca_kabuli_chr07 | 30090466                | GG                              | AA              | 1946891144               |
| SNP_P4_97484_30090624 | NC_021166.1    | Ca_kabuli_chr07 | 30090624                | GG                              | AA              | 1946891146               |
| SNP_P4_97485_30090629 | NC_021166.1    | Ca_kabuli_chr07 | 30090629                | GG                              | AA              | 1946891148               |
| SNP_P4_97486_30090660 | NC_021166.1    | Ca_kabuli_chr07 | 30090660                | CC                              | TT              | 1946891150               |
| SNP_P4_97487_30090776 | NC_021166.1    | Ca_kabuli_chr07 | 30090776                | AA                              | GG              | 1946891152               |
| SNP_P4_97488_30090777 | NC_021166.1    | Ca_kabuli_chr07 | 30090777                | CC                              | TT              | 1946891154               |
| SNP_P4_97490_30090849 | NC_021166.1    | Ca_kabuli_chr07 | 30090849                | CC                              | GG              | 1946891156               |
| SNP_P4_97491_30090884 | NC_021166.1    | Ca_kabuli_chr07 | 30090884                | CC                              | TT              | 1946891158               |
| SNP_P4_97492_30091002 | NC_021166.1    | Ca_kabuli_chr07 | 30091002                | TT                              | CC              | 1946891160               |
| SNP_P4_97493_30091013 | NC_021166.1    | Ca_kabuli_chr07 | 30091013                | TT                              | CC              | 1946891162               |
| SNP_P4_97494_30091022 | NC_021166.1    | Ca_kabuli_chr07 | 30091022                | CC                              | AA              | 1946891164               |
| SNP_P4_97495_30091074 | NC_021166.1    | Ca_kabuli_chr07 | 30091074                | GG                              | AA              | 1946891166               |
| SNP_P4_97496_30091083 | NC_021166.1    | Ca_kabuli_chr07 | 30091083                | CC                              | TT              | 1946891168               |
| SNP_P4_97497_30091118 | NC_021166.1    | Ca_kabuli_chr07 | 30091118                | TT                              | AA              | 1946891170               |
| SNP_P4_97498_30091383 | NC_021166.1    | Ca_kabuli_chr07 | 30091383                | TT                              | AA              | 1946891173               |
| SNP_P4_97499_30091550 | NC_021166.1    | Ca_kabuli_chr07 | 30091550                | TT                              | CC              | 1946891175               |
| SNP_P4_97500_30091551 | NC_021166.1    | Ca_kabuli_chr07 | 30091551                | GG                              | CC              | 1946891177               |
| SNP_P4_97501_30092760 | NC_021166.1    | Ca_kabuli_chr07 | 30092760                | GG                              | AA              | 1946891179               |
| SNP_P4_97502_30092786 | NC_021166.1    | Ca_kabuli_chr07 | 30092786                | GG                              | AA              | 1946891181               |
| SNP_P4_97504_30093206 | NC_021166.1    | Ca_kabuli_chr07 | 30093206                | TT                              | CC              | 1946891183               |
| SNP_P4_97505_30093230 | NC_021166.1    | Ca_kabuli_chr07 | 30093230                | GG                              | CC              | 1946891185               |
| SNP_P4_97506_30093270 | NC_021166.1    | Ca_kabuli_chr07 | 30093270                | GG                              | AA              | 1946891187               |
| SNP_P4_97507_30093438 | NC_021166.1    | Ca_kabuli_chr07 | 30093438                | CC                              | TT              | 1946891189               |
| SNP_P4_97508_30093499 | NC_021166.1    | Ca_kabuli_chr07 | 30093499                | TT                              | GG              | 1946891191               |

| SNPs IDs              | Chromosome IDs | Chromosomes     | Physical positions (bp) | CDC Frontier (Reference genome) | (ILWC46 & LPNB) | NCBI SNPdb Accession IDs |
|-----------------------|----------------|-----------------|-------------------------|---------------------------------|-----------------|--------------------------|
| SNP_P4_97509_30093507 | NC_021166.1    | Ca_kabuli_chr07 | 30093507                | GG                              | AA              | 1946891193               |
| SNP_P4_97510_30094887 | NC_021166.1    | Ca_kabuli_chr07 | 30094887                | TT                              | CC              | 1946891195               |
| SNP_P4_97511_30095275 | NC_021166.1    | Ca_kabuli_chr07 | 30095275                | AA                              | CC              | 1946891197               |
| SNP_P4_97512_30095330 | NC_021166.1    | Ca_kabuli_chr07 | 30095330                | TT                              | CC              | 1946891199               |
| SNP_P4_97514_30097171 | NC_021166.1    | Ca_kabuli_chr07 | 30097171                | CC                              | TT              | 1946891201               |
| SNP_P4_97515_30097333 | NC_021166.1    | Ca_kabuli_chr07 | 30097333                | GG                              | TT              | 1946891203               |
| SNP_P4_97516_30097730 | NC_021166.1    | Ca_kabuli_chr07 | 30097730                | CC                              | TT              | 1946891205               |
| SNP_P4_97517_30098208 | NC_021166.1    | Ca_kabuli_chr07 | 30098208                | CC                              | TT              | 1946891207               |
| SNP_P4_97518_30098209 | NC_021166.1    | Ca_kabuli_chr07 | 30098209                | TT                              | CC              | 1946891209               |
| SNP_P4_97519_30098226 | NC_021166.1    | Ca_kabuli_chr07 | 30098226                | CC                              | TT              | 1946891211               |
| SNP_P4_97520_30098245 | NC_021166.1    | Ca_kabuli_chr07 | 30098245                | AA                              | GG              | 1946891213               |
| SNP_P4_97521_30098532 | NC_021166.1    | Ca_kabuli_chr07 | 30098532                | TT                              | CC              | 1946891215               |
| SNP_P4_97522_30098592 | NC_021166.1    | Ca_kabuli_chr07 | 30098592                | GG                              | AA              | 1946891217               |
| SNP_P4_97523_30099003 | NC_021166.1    | Ca_kabuli_chr07 | 30099003                | CC                              | TT              | 1946891219               |
| SNP_P4_97524_30099046 | NC_021166.1    | Ca_kabuli_chr07 | 30099046                | AA                              | GG              | 1946891221               |
| SNP_P4_97525_30099050 | NC_021166.1    | Ca_kabuli_chr07 | 30099050                | TT                              | CC              | 1946891223               |
| SNP_P4_97526_30099083 | NC_021166.1    | Ca_kabuli_chr07 | 30099083                | AA                              | GG              | 1946891225               |
| SNP_P4_97527_30099234 | NC_021166.1    | Ca_kabuli_chr07 | 30099234                | GG                              | CC              | 1946891227               |
| SNP_P4_97528_30099267 | NC_021166.1    | Ca_kabuli_chr07 | 30099267                | GG                              | CC              | 1946891229               |
| SNP_P4_97529_30099291 | NC_021166.1    | Ca_kabuli_chr07 | 30099291                | GG                              | CC              | 1946891231               |
| SNP_P4_97531_30100935 | NC_021166.1    | Ca_kabuli_chr07 | 30100935                | AA                              | GG              | 1946891233               |
| SNP_P4_97532_30101110 | NC_021166.1    | Ca_kabuli_chr07 | 30101110                | CC                              | TT              | 1946891235               |
| SNP_P4_97533_30101120 | NC_021166.1    | Ca_kabuli_chr07 | 30101120                | AA                              | GG              | 1946891237               |
| SNP_P4_97534_30101121 | NC_021166.1    | Ca_kabuli_chr07 | 30101121                | TT                              | CC              | 1946891239               |
| SNP_P4_97535_30101191 | NC_021166.1    | Ca_kabuli_chr07 | 30101191                | CC                              | TT              | 1946891241               |
| SNP_P4_97536_30102456 | NC_021166.1    | Ca_kabuli_chr07 | 30102456                | AA                              | TT              | 1946891243               |
| SNP_P4_97537_30102549 | NC_021166.1    | Ca_kabuli_chr07 | 30102549                | TT                              | CC              | 1946891245               |
| SNP_P4_97539_30103195 | NC_021166.1    | Ca_kabuli_chr07 | 30103195                | AA                              | TT              | 1946891247               |
| SNP_P4_97540_30103221 | NC_021166.1    | Ca_kabuli_chr07 | 30103221                | TT                              | CC              | 1946891249               |
| SNP_P4_97541_30103561 | NC_021166.1    | Ca_kabuli_chr07 | 30103561                | CC                              | AA              | 1946891251               |
| SNP_P4_97543_30105915 | NC_021166.1    | Ca_kabuli_chr07 | 30105915                | AA                              | GG              | 1946891253               |
| SNP_P4_97544_30106927 | NC_021166.1    | Ca_kabuli_chr07 | 30106927                | CC                              | TT              | 1946891255               |
| SNP_P4_97545_30107340 | NC_021166.1    | Ca_kabuli_chr07 | 30107340                | AA                              | GG              | 1946891257               |
| SNP_P4_97546_30108717 | NC_021166.1    | Ca_kabuli_chr07 | 30108717                | CC                              | TT              | 1946891259               |
| SNP_P4_97547_30109625 | NC_021166.1    | Ca_kabuli_chr07 | 30109625                | AA                              | GG              | 1946891261               |
| SNP_P4_97548_30111076 | NC_021166.1    | Ca_kabuli_chr07 | 30111076                | CC                              | TT              | 1946891263               |
| SNP_P4_97549_30112239 | NC_021166.1    | Ca_kabuli_chr07 | 30112239                | GG                              | TT              | 1946891265               |
| SNP_P4_97550_30112245 | NC_021166.1    | Ca_kabuli_chr07 | 30112245                | AA                              | GG              | 1946891267               |
| SNP_P4_97551_30115963 | NC_021166.1    | Ca_kabuli_chr07 | 30115963                | TT                              | CC              | 1946891269               |
| SNP_P4_97553_30117353 | NC_021166.1    | Ca_kabuli_chr07 | 30117353                | AA                              | GG              | 1946891271               |
| SNP_P4_97554_30117362 | NC_021166.1    | Ca_kabuli_chr07 | 30117362                | AA                              | GG              | 1946891273               |
| SNP_P4_97555_30120387 | NC_021166.1    | Ca_kabuli_chr07 | 30120387                | AA                              | GG              | 1946891275               |

| SNPs IDs              | Chromosome IDs | Chromosomes     | Physical positions (bp) | CDC Frontier (Reference genome) | (ILWC46 & LPNB) | NCBI SNPdb Accession IDs |
|-----------------------|----------------|-----------------|-------------------------|---------------------------------|-----------------|--------------------------|
| SNP_P4_97556_30121452 | NC_021166.1    | Ca_kabuli_chr07 | 30121452                | CC                              | TT              | 1946891277               |
| SNP_P4_97557_30129561 | NC_021166.1    | Ca_kabuli_chr07 | 30129561                | GG                              | TT              | 1946891279               |
| SNP_P4_97558_30129562 | NC_021166.1    | Ca_kabuli_chr07 | 30129562                | CC                              | GG              | 1946891281               |
| SNP_P4_97559_30129616 | NC_021166.1    | Ca_kabuli_chr07 | 30129616                | TT                              | CC              | 1946891283               |
| SNP_P4_97561_30130322 | NC_021166.1    | Ca_kabuli_chr07 | 30130322                | CC                              | TT              | 1946891285               |
| SNP_P4_97562_30130324 | NC_021166.1    | Ca_kabuli_chr07 | 30130324                | TT                              | CC              | 1946891287               |
| SNP_P4_97564_30130366 | NC_021166.1    | Ca_kabuli_chr07 | 30130366                | GG                              | AA              | 1946891289               |
| SNP_P4_97565_30130532 | NC_021166.1    | Ca_kabuli_chr07 | 30130532                | TT                              | CC              | 1946891291               |
| SNP_P4_97566_30130562 | NC_021166.1    | Ca_kabuli_chr07 | 30130562                | CC                              | AA              | 1946891293               |
| SNP_P4_97567_30130655 | NC_021166.1    | Ca_kabuli_chr07 | 30130655                | GG                              | AA              | 1946891295               |
| SNP_P4_97568_30130661 | NC_021166.1    | Ca_kabuli_chr07 | 30130661                | AA                              | GG              | 1946891297               |
| SNP_P4_97570_30130769 | NC_021166.1    | Ca_kabuli_chr07 | 30130769                | GG                              | AA              | 1946891300               |
| SNP_P4_97571_30130799 | NC_021166.1    | Ca_kabuli_chr07 | 30130799                | AA                              | GG              | 1946891302               |
| SNP_P4_97572_30130869 | NC_021166.1    | Ca_kabuli_chr07 | 30130869                | CC                              | TT              | 1946891304               |
| SNP_P4_97573_30130924 | NC_021166.1    | Ca_kabuli_chr07 | 30130924                | GG                              | AA              | 1946891306               |
| SNP_P4_97575_30131836 | NC_021166.1    | Ca_kabuli_chr07 | 30131836                | CC                              | TT              | 1946891308               |
| SNP_P4_97576_30132105 | NC_021166.1    | Ca_kabuli_chr07 | 30132105                | AA                              | GG              | 1946891310               |
| SNP_P4_97577_30132112 | NC_021166.1    | Ca_kabuli_chr07 | 30132112                | CC                              | TT              | 1946891312               |
| SNP_P4_97580_30132723 | NC_021166.1    | Ca_kabuli_chr07 | 30132723                | AA                              | CC              | 1946891314               |
| SNP_P4_97581_30132985 | NC_021166.1    | Ca_kabuli_chr07 | 30132985                | AA                              | TT              | 1946891316               |
| SNP_P4_97582_30132990 | NC_021166.1    | Ca_kabuli_chr07 | 30132990                | GG                              | CC              | 1946891318               |
| SNP_P4_97583_30134752 | NC_021166.1    | Ca_kabuli_chr07 | 30134752                | AA                              | GG              | 1946891321               |
| SNP_P4_97584_30135737 | NC_021166.1    | Ca_kabuli_chr07 | 30135737                | AA                              | TT              | 1946891323               |
| SNP_P4_97585_30136300 | NC_021166.1    | Ca_kabuli_chr07 | 30136300                | TT                              | AA              | 1946891325               |
| SNP_P4_97586_30136301 | NC_021166.1    | Ca_kabuli_chr07 | 30136301                | TT                              | CC              | 1946891327               |
| SNP_P4_97587_30136328 | NC_021166.1    | Ca_kabuli_chr07 | 30136328                | GG                              | AA              | 1946891329               |
| SNP_P4_97588_30138842 | NC_021166.1    | Ca_kabuli_chr07 | 30138842                | CC                              | AA              | 1946891331               |
| SNP_P4_97589_30138897 | NC_021166.1    | Ca_kabuli_chr07 | 30138897                | CC                              | GG              | 1946891333               |
| SNP_P4_97590_30145669 | NC_021166.1    | Ca_kabuli_chr07 | 30145669                | AA                              | GG              | 1946891335               |
| SNP_P4_97591_30146149 | NC_021166.1    | Ca_kabuli_chr07 | 30146149                | TT                              | CC              | 1946891337               |
| SNP_P4_97593_30146530 | NC_021166.1    | Ca_kabuli_chr07 | 30146530                | TT                              | CC              | 1946891339               |
| SNP_P4_97594_30146566 | NC_021166.1    | Ca_kabuli_chr07 | 30146566                | TT                              | CC              | 1946891341               |
| SNP_P4_97595_30146737 | NC_021166.1    | Ca_kabuli_chr07 | 30146737                | GG                              | AA              | 1946891343               |
| SNP_P4_97596_30146912 | NC_021166.1    | Ca_kabuli_chr07 | 30146912                | TT                              | CC              | 1946891346               |
| SNP_P4_97597_30147056 | NC_021166.1    | Ca_kabuli_chr07 | 30147056                | GG                              | TT              | 1946891348               |
| SNP_P4_97598_30147215 | NC_021166.1    | Ca_kabuli_chr07 | 30147215                | CC                              | GG              | 1946891350               |
| SNP_P4_97599_30147229 | NC_021166.1    | Ca_kabuli_chr07 | 30147229                | GG                              | AA              | 1946891352               |
| SNP_P4_97600_30148826 | NC_021166.1    | Ca_kabuli_chr07 | 30148826                | TT                              | CC              | 1946891354               |
| SNP_P4_97601_30148843 | NC_021166.1    | Ca_kabuli_chr07 | 30148843                | TT                              | CC              | 1946891356               |
| SNP_P4_97602_30148858 | NC_021166.1    | Ca_kabuli_chr07 | 30148858                | TT                              | CC              | 1946891358               |
| SNP_P4_97603_30148943 | NC_021166.1    | Ca_kabuli_chr07 | 30148943                | TT                              | CC              | 1946891360               |
| SNP_P4_97604_30148946 | NC_021166.1    | Ca_kabuli_chr07 | 30148946                | GG                              | TT              | 1946891362               |

| SNPs IDs              | Chromosome IDs | Chromosomes     | Physical positions (bp) | CDC Frontier (Reference genome) | (ILWC46 & LPNB) | NCBI SNPdb Accession IDs |
|-----------------------|----------------|-----------------|-------------------------|---------------------------------|-----------------|--------------------------|
| SNP_P4_97605_30150005 | NC_021166.1    | Ca_kabuli_chr07 | 30150005                | CC                              | TT              | 1946891364               |
| SNP_P4_97606_30150194 | NC_021166.1    | Ca_kabuli_chr07 | 30150194                | GG                              | TT              | 1946891366               |
| SNP_P4_97607_30152147 | NC_021166.1    | Ca_kabuli_chr07 | 30152147                | TT                              | AA              | 1946891368               |
| SNP_P4_97608_30152246 | NC_021166.1    | Ca_kabuli_chr07 | 30152246                | TT                              | CC              | 1946891370               |
| SNP_P4_97609_30153413 | NC_021166.1    | Ca_kabuli_chr07 | 30153413                | GG                              | CC              | 1946891373               |
| SNP_P4_97610_30154478 | NC_021166.1    | Ca_kabuli_chr07 | 30154478                | TT                              | AA              | 1946891375               |
| SNP_P4_97611_30154801 | NC_021166.1    | Ca_kabuli_chr07 | 30154801                | GG                              | AA              | 1946891377               |
| SNP_P4_97613_30155503 | NC_021166.1    | Ca_kabuli_chr07 | 30155503                | AA                              | TT              | 1946891379               |
| SNP_P4_97614_30155798 | NC_021166.1    | Ca_kabuli_chr07 | 30155798                | AA                              | CC              | 1946891381               |
| SNP_P4_97615_30156612 | NC_021166.1    | Ca_kabuli_chr07 | 30156612                | CC                              | TT              | 1946891383               |
| SNP_P4_97617_30156907 | NC_021166.1    | Ca_kabuli_chr07 | 30156907                | CC                              | TT              | 1946891385               |
| SNP_P4_97618_30157079 | NC_021166.1    | Ca_kabuli_chr07 | 30157079                | AA                              | CC              | 1946891387               |
| SNP_P4_97619_30157366 | NC_021166.1    | Ca_kabuli_chr07 | 30157366                | CC                              | TT              | 1946891389               |
| SNP_P4_97620_30157578 | NC_021166.1    | Ca_kabuli_chr07 | 30157578                | TT                              | AA              | 1946891391               |
| SNP_P4_97621_30157582 | NC_021166.1    | Ca_kabuli_chr07 | 30157582                | TT                              | AA              | 1946891393               |
| SNP_P4_97622_30158016 | NC_021166.1    | Ca_kabuli_chr07 | 30158016                | TT                              | CC              | 1946891395               |
| SNP_P4_97623_30158357 | NC_021166.1    | Ca_kabuli_chr07 | 30158357                | CC                              | GG              | 1946891397               |
| SNP_P4_97624_30158363 | NC_021166.1    | Ca_kabuli_chr07 | 30158363                | CC                              | TT              | 1946891399               |
| SNP_P4_97625_30159084 | NC_021166.1    | Ca_kabuli_chr07 | 30159084                | CC                              | TT              | 1946891401               |
| SNP_P4_97626_30160484 | NC_021166.1    | Ca_kabuli_chr07 | 30160484                | AA                              | GG              | 1946891403               |
| SNP_P4_97627_30160488 | NC_021166.1    | Ca_kabuli_chr07 | 30160488                | CC                              | AA              | 1946891405               |
| SNP_P4_97628_30160947 | NC_021166.1    | Ca_kabuli_chr07 | 30160947                | AA                              | GG              | 1946891407               |
| SNP_P4_97629_30160986 | NC_021166.1    | Ca_kabuli_chr07 | 30160986                | TT                              | CC              | 1946891409               |
| SNP_P4_97630_30161179 | NC_021166.1    | Ca_kabuli_chr07 | 30161179                | GG                              | AA              | 1946891411               |
| SNP_P4_97632_30161316 | NC_021166.1    | Ca_kabuli_chr07 | 30161316                | AA                              | GG              | 1946891413               |
| SNP_P4_97634_30168371 | NC_021166.1    | Ca_kabuli_chr07 | 30168371                | TT                              | CC              | 1946891415               |
| SNP_P4_97635_30169867 | NC_021166.1    | Ca_kabuli_chr07 | 30169867                | AA                              | GG              | 1946891417               |
| SNP_P4_97637_30173185 | NC_021166.1    | Ca_kabuli_chr07 | 30173185                | TT                              | CC              | 1946891419               |
| SNP_P4_97638_30185355 | NC_021166.1    | Ca_kabuli_chr07 | 30185355                | GG                              | AA              | 1946891421               |
| SNP_P4_97640_30187488 | NC_021166.1    | Ca_kabuli_chr07 | 30187488                | CC                              | TT              | 1946891423               |
| SNP_P4_97641_30187524 | NC_021166.1    | Ca_kabuli_chr07 | 30187524                | TT                              | AA              | 1946891425               |
| SNP_P4_97642_30187705 | NC_021166.1    | Ca_kabuli_chr07 | 30187705                | GG                              | AA              | 1946891427               |
| SNP_P4_97643_30187788 | NC_021166.1    | Ca_kabuli_chr07 | 30187788                | AA                              | TT              | 1946891429               |
| SNP_P4_97644_30187810 | NC_021166.1    | Ca_kabuli_chr07 | 30187810                | CC                              | AA              | 1946891431               |
| SNP_P4_97645_30187827 | NC_021166.1    | Ca_kabuli_chr07 | 30187827                | GG                              | AA              | 1946891433               |
| SNP_P4_97646_30188121 | NC_021166.1    | Ca_kabuli_chr07 | 30188121                | AA                              | GG              | 1946891435               |
| SNP_P4_97647_30188306 | NC_021166.1    | Ca_kabuli_chr07 | 30188306                | AA                              | GG              | 1946891437               |
| SNP_P4_97648_30188441 | NC_021166.1    | Ca_kabuli_chr07 | 30188441                | GG                              | AA              | 1946891439               |
| SNP_P4_97649_30189401 | NC_021166.1    | Ca_kabuli_chr07 | 30189401                | GG                              | CC              | 1946891441               |
| SNP_P4_97650_30189832 | NC_021166.1    | Ca_kabuli_chr07 | 30189832                | CC                              | AA              | 1946891443               |
| SNP_P4_97651_30189861 | NC_021166.1    | Ca_kabuli_chr07 | 30189861                | AA                              | TT              | 1946891445               |
| SNP_P4_97653_30191026 | NC_021166.1    | Ca_kabuli_chr07 | 30191026                | GG                              | TT              | 1946891447               |



| SNPs IDs              | Chromosome IDs | Chromosomes     | Physical positions (bp) | CDC Frontier (Reference genome) | (ILWC46 & LPNB) | NCBI SNPdb Accession IDs |
|-----------------------|----------------|-----------------|-------------------------|---------------------------------|-----------------|--------------------------|
| SNP_P4_97654_30191768 | NC_021166.1    | Ca_kabuli_chr07 | 30191768                | GG                              | TT              | 1946891449               |
| SNP_P4_97657_30196341 | NC_021166.1    | Ca_kabuli_chr07 | 30196341                | GG                              | AA              | 1946891451               |
| SNP_P4_97658_30196382 | NC_021166.1    | Ca_kabuli_chr07 | 30196382                | AA                              | GG              | 1946891453               |
| SNP_P4_97659_30201618 | NC_021166.1    | Ca_kabuli_chr07 | 30201618                | TT                              | CC              | 1946891455               |
| SNP_P4_97660_30201931 | NC_021166.1    | Ca_kabuli_chr07 | 30201931                | CC                              | TT              | 1946891457               |
| SNP_P4_97661_30203266 | NC_021166.1    | Ca_kabuli_chr07 | 30203266                | AA                              | GG              | 1946891459               |
| SNP_P4_97662_30203315 | NC_021166.1    | Ca_kabuli_chr07 | 30203315                | GG                              | AA              | 1946891461               |
| SNP_P4_97663_30203915 | NC_021166.1    | Ca_kabuli_chr07 | 30203915                | TT                              | CC              | 1946891463               |
| SNP_P4_97664_30204082 | NC_021166.1    | Ca_kabuli_chr07 | 30204082                | GG                              | AA              | 1946891465               |
| SNP_P4_97665_30205152 | NC_021166.1    | Ca_kabuli_chr07 | 30205152                | CC                              | AA              | 1946891467               |
| SNP_P4_97666_30206786 | NC_021166.1    | Ca_kabuli_chr07 | 30206786                | CC                              | GG              | 1946891469               |
| SNP_P4_97667_30206811 | NC_021166.1    | Ca_kabuli_chr07 | 30206811                | GG                              | CC              | 1946891471               |
| SNP_P4_97668_30206935 | NC_021166.1    | Ca_kabuli_chr07 | 30206935                | TT                              | CC              | 1946891473               |
| SNP_P4_97669_30207106 | NC_021166.1    | Ca_kabuli_chr07 | 30207106                | CC                              | TT              | 1946891475               |
| SNP_P4_97671_30207185 | NC_021166.1    | Ca_kabuli_chr07 | 30207185                | CC                              | GG              | 1946891477               |
| SNP_P4_97672_30207246 | NC_021166.1    | Ca_kabuli_chr07 | 30207246                | AA                              | GG              | 1946891479               |
| SNP_P4_97673_30207267 | NC_021166.1    | Ca_kabuli_chr07 | 30207267                | TT                              | CC              | 1946891481               |
| SNP_P4_97675_30207704 | NC_021166.1    | Ca_kabuli_chr07 | 30207704                | GG                              | AA              | 1946891483               |
| SNP_P4_97676_30207849 | NC_021166.1    | Ca_kabuli_chr07 | 30207849                | GG                              | TT              | 1946891485               |
| SNP_P4_97677_30207937 | NC_021166.1    | Ca_kabuli_chr07 | 30207937                | TT                              | AA              | 1946891487               |
| SNP_P4_97678_30207941 | NC_021166.1    | Ca_kabuli_chr07 | 30207941                | TT                              | AA              | 1946891489               |
| SNP_P4_97679_30207961 | NC_021166.1    | Ca_kabuli_chr07 | 30207961                | GG                              | AA              | 1946891491               |
| SNP_P4_97680_30207981 | NC_021166.1    | Ca_kabuli_chr07 | 30207981                | AA                              | CC              | 1946891493               |
| SNP_P4_97681_30207992 | NC_021166.1    | Ca_kabuli_chr07 | 30207992                | GG                              | CC              | 1946891495               |
| SNP_P4_97682_30208010 | NC_021166.1    | Ca_kabuli_chr07 | 30208010                | AA                              | CC              | 1946891497               |
| SNP_P4_97683_30208018 | NC_021166.1    | Ca_kabuli_chr07 | 30208018                | TT                              | CC              | 1946891499               |
| SNP_P4_97684_30208029 | NC_021166.1    | Ca_kabuli_chr07 | 30208029                | AA                              | GG              | 1946891502               |
| SNP_P4_97685_30208075 | NC_021166.1    | Ca_kabuli_chr07 | 30208075                | CC                              | TT              | 1946891504               |
| SNP_P4_97686_30208123 | NC_021166.1    | Ca_kabuli_chr07 | 30208123                | AA                              | CC              | 1946891506               |
| SNP_P4_97687_30208132 | NC_021166.1    | Ca_kabuli_chr07 | 30208132                | AA                              | GG              | 1946891508               |
| SNP_P4_97688_30208139 | NC_021166.1    | Ca_kabuli_chr07 | 30208139                | GG                              | TT              | 1946891510               |
| SNP_P4_97689_30208157 | NC_021166.1    | Ca_kabuli_chr07 | 30208157                | TT                              | CC              | 1946891512               |
| SNP_P4_97691_30208185 | NC_021166.1    | Ca_kabuli_chr07 | 30208185                | GG                              | CC              | 1946891514               |
| SNP_P4_97692_30208193 | NC_021166.1    | Ca_kabuli_chr07 | 30208193                | GG                              | CC              | 1946891516               |
| SNP_P4_97693_30208204 | NC_021166.1    | Ca_kabuli_chr07 | 30208204                | TT                              | AA              | 1946891518               |
| SNP_P4_97694_30208214 | NC_021166.1    | Ca_kabuli_chr07 | 30208214                | GG                              | AA              | 1946891520               |
| SNP_P4_97695_30208223 | NC_021166.1    | Ca_kabuli_chr07 | 30208223                | AA                              | GG              | 1946891522               |
| SNP_P4_97696_30208257 | NC_021166.1    | Ca_kabuli_chr07 | 30208257                | AA                              | TT              | 1946891524               |
| SNP_P4_97697_30208272 | NC_021166.1    | Ca_kabuli_chr07 | 30208272                | AA                              | CC              | 1946891526               |
| SNP_P4_97699_30208313 | NC_021166.1    | Ca_kabuli_chr07 | 30208313                | TT                              | CC              | 1946891528               |
| SNP_P4_97700_30208318 | NC_021166.1    | Ca_kabuli_chr07 | 30208318                | AA                              | GG              | 1946891530               |
| SNP_P4_97701_30208334 | NC_021166.1    | Ca_kabuli_chr07 | 30208334                | CC                              | TT              | 1946891532               |

| SNPs IDs              | Chromosome IDs | Chromosomes     | Physical positions (bp) | CDC Frontier (Reference genome) | (ILWC46 & LPNB) | NCBI SNPdb Accession IDs |
|-----------------------|----------------|-----------------|-------------------------|---------------------------------|-----------------|--------------------------|
| SNP_P4_97702_30208429 | NC_021166.1    | Ca_kabuli_chr07 | 30208429                | TT                              | GG              | 1946891533               |
| SNP_P4_97703_30208448 | NC_021166.1    | Ca_kabuli_chr07 | 30208448                | AA                              | GG              | 1946891534               |
| SNP_P4_97704_30208536 | NC_021166.1    | Ca_kabuli_chr07 | 30208536                | TT                              | CC              | 1946891536               |
| SNP_P4_97705_30208549 | NC_021166.1    | Ca_kabuli_chr07 | 30208549                | AA                              | CC              | 1946891538               |
| SNP_P4_97706_30208695 | NC_021166.1    | Ca_kabuli_chr07 | 30208695                | TT                              | CC              | 1946891540               |
| SNP_P4_97707_30208747 | NC_021166.1    | Ca_kabuli_chr07 | 30208747                | TT                              | GG              | 1946891542               |
| SNP_P4_97709_30208789 | NC_021166.1    | Ca_kabuli_chr07 | 30208789                | TT                              | GG              | 1946891544               |
| SNP_P4_97710_30208827 | NC_021166.1    | Ca_kabuli_chr07 | 30208827                | TT                              | CC              | 1946891546               |
| SNP_P4_97711_30216086 | NC_021166.1    | Ca_kabuli_chr07 | 30216086                | AA                              | GG              | 1946891548               |
| SNP_P4_97712_30216159 | NC_021166.1    | Ca_kabuli_chr07 | 30216159                | AA                              | TT              | 1946891550               |
| SNP_P4_97713_30216167 | NC_021166.1    | Ca_kabuli_chr07 | 30216167                | CC                              | TT              | 1946891552               |
| SNP_P4_97714_30216170 | NC_021166.1    | Ca_kabuli_chr07 | 30216170                | AA                              | CC              | 1946891554               |
| SNP_P4_97715_30216484 | NC_021166.1    | Ca_kabuli_chr07 | 30216484                | AA                              | TT              | 1946891556               |
| SNP_P4_97716_30216756 | NC_021166.1    | Ca_kabuli_chr07 | 30216756                | GG                              | TT              | 1946891558               |
| SNP_P4_97717_30216848 | NC_021166.1    | Ca_kabuli_chr07 | 30216848                | AA                              | GG              | 1946891560               |
| SNP_P4_97718_30217624 | NC_021166.1    | Ca_kabuli_chr07 | 30217624                | AA                              | GG              | 1946891562               |
| SNP_P4_97719_30218326 | NC_021166.1    | Ca_kabuli_chr07 | 30218326                | AA                              | GG              | 1946891564               |
| SNP_P4_97721_30220054 | NC_021166.1    | Ca_kabuli_chr07 | 30220054                | TT                              | CC              | 1946891566               |
| SNP_P4_97722_30220143 | NC_021166.1    | Ca_kabuli_chr07 | 30220143                | GG                              | AA              | 1946891568               |
| SNP_P4_97723_30220432 | NC_021166.1    | Ca_kabuli_chr07 | 30220432                | CC                              | TT              | 1946891570               |
| SNP_P4_97724_30221438 | NC_021166.1    | Ca_kabuli_chr07 | 30221438                | CC                              | TT              | 1946891572               |
| SNP_P4_97727_30225818 | NC_021166.1    | Ca_kabuli_chr07 | 30225818                | CC                              | TT              | 1946891574               |
| SNP_P4_97728_30225856 | NC_021166.1    | Ca_kabuli_chr07 | 30225856                | TT                              | CC              | 1946891576               |
| SNP_P4_97729_30226567 | NC_021166.1    | Ca_kabuli_chr07 | 30226567                | TT                              | GG              | 1946891578               |
| SNP_P4_97730_30226866 | NC_021166.1    | Ca_kabuli_chr07 | 30226866                | AA                              | GG              | 1946891580               |
| SNP_P4_97731_30226874 | NC_021166.1    | Ca_kabuli_chr07 | 30226874                | AA                              | CC              | 1946891582               |
| SNP_P4_97732_30227065 | NC_021166.1    | Ca_kabuli_chr07 | 30227065                | TT                              | GG              | 1946891584               |
| SNP_P4_97733_30227416 | NC_021166.1    | Ca_kabuli_chr07 | 30227416                | AA                              | CC              | 1946891586               |
| SNP_P4_97735_30228810 | NC_021166.1    | Ca_kabuli_chr07 | 30228810                | AA                              | TT              | 1946891588               |
| SNP_P4_97736_30229537 | NC_021166.1    | Ca_kabuli_chr07 | 30229537                | CC                              | TT              | 1946891590               |
| SNP_P4_97737_30229689 | NC_021166.1    | Ca_kabuli_chr07 | 30229689                | GG                              | AA              | 1946891592               |
| SNP_P4_97738_30229735 | NC_021166.1    | Ca_kabuli_chr07 | 30229735                | TT                              | GG              | 1946891594               |
| SNP_P4_97739_30229739 | NC_021166.1    | Ca_kabuli_chr07 | 30229739                | AA                              | GG              | 1946891596               |
| SNP_P4_97741_30230137 | NC_021166.1    | Ca_kabuli_chr07 | 30230137                | AA                              | GG              | 1946891598               |
| SNP_P4_97742_30230231 | NC_021166.1    | Ca_kabuli_chr07 | 30230231                | TT                              | CC              | 1946891600               |
| SNP_P4_97743_30230239 | NC_021166.1    | Ca_kabuli_chr07 | 30230239                | AA                              | GG              | 1946891602               |
| SNP_P4_97744_30230280 | NC_021166.1    | Ca_kabuli_chr07 | 30230280                | CC                              | AA              | 1946891604               |
| SNP_P4_97745_30231718 | NC_021166.1    | Ca_kabuli_chr07 | 30231718                | AA                              | GG              | 1946891606               |
| SNP_P4_97746_30231762 | NC_021166.1    | Ca_kabuli_chr07 | 30231762                | CC                              | TT              | 1946891608               |
| SNP_P4_97747_30231943 | NC_021166.1    | Ca_kabuli_chr07 | 30231943                | AA                              | TT              | 1946891610               |
| SNP_P4_97748_30231945 | NC_021166.1    | Ca_kabuli_chr07 | 30231945                | AA                              | GG              | 1946891612               |
| SNP_P4_97749_30231974 | NC_021166.1    | Ca_kabuli_chr07 | 30231974                | AA                              | CC              | 1946891614               |

| SNPs IDs              | Chromosome IDs | Chromosomes     | Physical positions (bp) | CDC Frontier (Reference genome) | (ILWC46 & LPNB) | NCBI SNPdb Accession IDs |
|-----------------------|----------------|-----------------|-------------------------|---------------------------------|-----------------|--------------------------|
| SNP_P4_97750_30231995 | NC_021166.1    | Ca_kabuli_chr07 | 30231995                | GG                              | AA              | 1946891616               |
| SNP_P4_97751_30232031 | NC_021166.1    | Ca_kabuli_chr07 | 30232031                | TT                              | AA              | 1946891618               |
| SNP_P4_97752_30232049 | NC_021166.1    | Ca_kabuli_chr07 | 30232049                | AA                              | CC              | 1946891620               |
| SNP_P4_97753_30232062 | NC_021166.1    | Ca_kabuli_chr07 | 30232062                | TT                              | GG              | 1946891622               |
| SNP_P4_97754_30232252 | NC_021166.1    | Ca_kabuli_chr07 | 30232252                | CC                              | TT              | 1946891624               |
| SNP_P4_97755_30232277 | NC_021166.1    | Ca_kabuli_chr07 | 30232277                | CC                              | TT              | 1946891626               |
| SNP_P4_97756_30232289 | NC_021166.1    | Ca_kabuli_chr07 | 30232289                | CC                              | TT              | 1946891628               |
| SNP_P4_97758_30232377 | NC_021166.1    | Ca_kabuli_chr07 | 30232377                | GG                              | AA              | 1946891630               |
| SNP_P4_97759_30232387 | NC_021166.1    | Ca_kabuli_chr07 | 30232387                | CC                              | TT              | 1946891631               |
| SNP_P4_97760_30232419 | NC_021166.1    | Ca_kabuli_chr07 | 30232419                | CC                              | AA              | 1946891633               |
| SNP_P4_97761_30232627 | NC_021166.1    | Ca_kabuli_chr07 | 30232627                | CC                              | TT              | 1946891635               |
| SNP_P4_97762_30232631 | NC_021166.1    | Ca_kabuli_chr07 | 30232631                | GG                              | AA              | 1946891637               |
| SNP_P4_97763_30232637 | NC_021166.1    | Ca_kabuli_chr07 | 30232637                | AA                              | GG              | 1946891639               |
| SNP_P4_97764_30232648 | NC_021166.1    | Ca_kabuli_chr07 | 30232648                | TT                              | CC              | 1946891641               |
| SNP_P4_97765_30232677 | NC_021166.1    | Ca_kabuli_chr07 | 30232677                | TT                              | AA              | 1946891643               |
| SNP_P4_97766_30233233 | NC_021166.1    | Ca_kabuli_chr07 | 30233233                | CC                              | GG              | 1946891645               |
| SNP_P4_97767_30233269 | NC_021166.1    | Ca_kabuli_chr07 | 30233269                | AA                              | TT              | 1946891647               |
| SNP_P4_97769_30234159 | NC_021166.1    | Ca_kabuli_chr07 | 30234159                | TT                              | CC              | 1946891649               |
| SNP_P4_97771_30234756 | NC_021166.1    | Ca_kabuli_chr07 | 30234756                | TT                              | AA              | 1946891651               |
| SNP_P4_97774_30255285 | NC_021166.1    | Ca_kabuli_chr07 | 30255285                | CC                              | TT              | 1946891653               |
| SNP_P4_97775_30265638 | NC_021166.1    | Ca_kabuli_chr07 | 30265638                | CC                              | TT              | 1946891655               |
| SNP_P4_97776_30265639 | NC_021166.1    | Ca_kabuli_chr07 | 30265639                | AA                              | TT              | 1946891657               |
| SNP_P4_97777_30268732 | NC_021166.1    | Ca_kabuli_chr07 | 30268732                | AA                              | CC              | 1946891659               |
| SNP_P4_97778_30302528 | NC_021166.1    | Ca_kabuli_chr07 | 30302528                | CC                              | GG              | 1946891661               |
| SNP_P4_97779_30322431 | NC_021166.1    | Ca_kabuli_chr07 | 30322431                | TT                              | GG              | 1946891663               |
| SNP_P4_97780_30328330 | NC_021166.1    | Ca_kabuli_chr07 | 30328330                | TT                              | GG              | 1946891665               |
| SNP_P4_97781_30339877 | NC_021166.1    | Ca_kabuli_chr07 | 30339877                | TT                              | CC              | 1946891667               |
| SNP_P4_97782_30339878 | NC_021166.1    | Ca_kabuli_chr07 | 30339878                | CC                              | AA              | 1946891669               |
| SNP_P4_97783_30344846 | NC_021166.1    | Ca_kabuli_chr07 | 30344846                | AA                              | TT              | 1946891672               |
| SNP_P4_97785_30345677 | NC_021166.1    | Ca_kabuli_chr07 | 30345677                | CC                              | GG              | 1946891674               |
| SNP_P4_97786_30363903 | NC_021166.1    | Ca_kabuli_chr07 | 30363903                | TT                              | GG              | 1946891676               |
| SNP_P4_97787_30393827 | NC_021166.1    | Ca_kabuli_chr07 | 30393827                | AA                              | GG              | 1946891678               |
| SNP_P4_97789_30395977 | NC_021166.1    | Ca_kabuli_chr07 | 30395977                | TT                              | CC              | 1946891680               |
| SNP_P4_97790_30411574 | NC_021166.1    | Ca_kabuli_chr07 | 30411574                | CC                              | TT              | 1946891682               |
| SNP_P4_97791_30412951 | NC_021166.1    | Ca_kabuli_chr07 | 30412951                | AA                              | GG              | 1946891684               |
| SNP_P4_97792_30414645 | NC_021166.1    | Ca_kabuli_chr07 | 30414645                | GG                              | AA              | 1946891686               |
| SNP_P4_97793_30414809 | NC_021166.1    | Ca_kabuli_chr07 | 30414809                | GG                              | TT              | 1946891688               |
| SNP_P4_97794_30414863 | NC_021166.1    | Ca_kabuli_chr07 | 30414863                | AA                              | GG              | 1946891690               |
| SNP_P4_97795_30414867 | NC_021166.1    | Ca_kabuli_chr07 | 30414867                | TT                              | CC              | 1946891692               |
| SNP_P4_97796_30414886 | NC_021166.1    | Ca_kabuli_chr07 | 30414886                | AA                              | GG              | 1946891694               |
| SNP_P4_97797_30414911 | NC_021166.1    | Ca_kabuli_chr07 | 30414911                | TT                              | CC              | 1946891696               |
| SNP_P4_97798_30414914 | NC_021166.1    | Ca_kabuli_chr07 | 30414914                | GG                              | TT              | 1946891698               |

| SNPs IDs              | Chromosome IDs | Chromosomes     | Physical positions (bp) | CDC Frontier (Reference genome) | (ILWC46 & LPNB) | NCBI SNPdb Accession IDs |
|-----------------------|----------------|-----------------|-------------------------|---------------------------------|-----------------|--------------------------|
| SNP_P4_97799_30415132 | NC_021166.1    | Ca_kabuli_chr07 | 30415132                | AA                              | GG              | 1946891700               |
| SNP_P4_97800_30415187 | NC_021166.1    | Ca_kabuli_chr07 | 30415187                | TT                              | CC              | 1946891703               |
| SNP_P4_97802_30415206 | NC_021166.1    | Ca_kabuli_chr07 | 30415206                | CC                              | AA              | 1946891705               |
| SNP_P4_97803_30415321 | NC_021166.1    | Ca_kabuli_chr07 | 30415321                | CC                              | TT              | 1946891707               |
| SNP_P4_97804_30415327 | NC_021166.1    | Ca_kabuli_chr07 | 30415327                | TT                              | GG              | 1946891709               |
| SNP_P4_97805_30415350 | NC_021166.1    | Ca_kabuli_chr07 | 30415350                | TT                              | AA              | 1946891712               |
| SNP_P4_97807_30415408 | NC_021166.1    | Ca_kabuli_chr07 | 30415408                | TT                              | CC              | 1946891714               |
| SNP_P4_97808_30415435 | NC_021166.1    | Ca_kabuli_chr07 | 30415435                | CC                              | TT              | 1946891716               |
| SNP_P4_97809_30415436 | NC_021166.1    | Ca_kabuli_chr07 | 30415436                | TT                              | CC              | 1946891718               |
| SNP_P4_97810_30415437 | NC_021166.1    | Ca_kabuli_chr07 | 30415437                | AA                              | GG              | 1946891720               |
| SNP_P4_97811_30415444 | NC_021166.1    | Ca_kabuli_chr07 | 30415444                | CC                              | TT              | 1946891722               |
| SNP_P4_97812_30415449 | NC_021166.1    | Ca_kabuli_chr07 | 30415449                | GG                              | AA              | 1946891724               |
| SNP_P4_97813_30415643 | NC_021166.1    | Ca_kabuli_chr07 | 30415643                | TT                              | CC              | 1946891726               |
| SNP_P4_97814_30415670 | NC_021166.1    | Ca_kabuli_chr07 | 30415670                | AA                              | GG              | 1946891728               |
| SNP_P4_97815_30415775 | NC_021166.1    | Ca_kabuli_chr07 | 30415775                | AA                              | GG              | 1946891730               |
| SNP_P4_97816_30422872 | NC_021166.1    | Ca_kabuli_chr07 | 30422872                | CC                              | TT              | 1946891732               |
| SNP_P4_97817_30424026 | NC_021166.1    | Ca_kabuli_chr07 | 30424026                | AA                              | GG              | 1946891734               |
| SNP_P4_97818_30424122 | NC_021166.1    | Ca_kabuli_chr07 | 30424122                | AA                              | GG              | 1946891736               |
| SNP_P4_97820_30424498 | NC_021166.1    | Ca_kabuli_chr07 | 30424498                | CC                              | TT              | 1946891738               |
| SNP_P4_97821_30424740 | NC_021166.1    | Ca_kabuli_chr07 | 30424740                | TT                              | AA              | 1946891740               |
| SNP_P4_97822_30426685 | NC_021166.1    | Ca_kabuli_chr07 | 30426685                | TT                              | CC              | 1946891742               |
| SNP_P4_97823_30426775 | NC_021166.1    | Ca_kabuli_chr07 | 30426775                | GG                              | TT              | 1946891744               |
| SNP_P4_97824_30617045 | NC_021166.1    | Ca_kabuli_chr07 | 30617045                | AA                              | GG              | 1946891746               |
| SNP_P4_97825_30617443 | NC_021166.1    | Ca_kabuli_chr07 | 30617443                | TT                              | CC              | 1946891748               |
| SNP_P4_97826_30627155 | NC_021166.1    | Ca_kabuli_chr07 | 30627155                | CC                              | AA              | 1946891750               |
| SNP_P4_97827_30627158 | NC_021166.1    | Ca_kabuli_chr07 | 30627158                | AA                              | TT              | 1946891753               |
| SNP_P4_97828_30632440 | NC_021166.1    | Ca_kabuli_chr07 | 30632440                | AA                              | GG              | 1946891755               |
| SNP_P4_97830_30646425 | NC_021166.1    | Ca_kabuli_chr07 | 30646425                | AA                              | CC              | 1946891757               |
| SNP_P4_97831_30653738 | NC_021166.1    | Ca_kabuli_chr07 | 30653738                | CC                              | TT              | 1946891759               |
| SNP_P4_97832_30657587 | NC_021166.1    | Ca_kabuli_chr07 | 30657587                | TT                              | CC              | 1946891761               |
| SNP_P4_97833_30661407 | NC_021166.1    | Ca_kabuli_chr07 | 30661407                | AA                              | CC              | 1946891763               |
| SNP_P4_97834_30661557 | NC_021166.1    | Ca_kabuli_chr07 | 30661557                | GG                              | AA              | 1946891765               |
| SNP_P4_97835_30661920 | NC_021166.1    | Ca_kabuli_chr07 | 30661920                | GG                              | AA              | 1946891767               |
| SNP_P4_97837_30681397 | NC_021166.1    | Ca_kabuli_chr07 | 30681397                | GG                              | AA              | 1946891769               |
| SNP_P4_97838_30720852 | NC_021166.1    | Ca_kabuli_chr07 | 30720852                | TT                              | CC              | 1946891771               |
| SNP_P4_97839_30721008 | NC_021166.1    | Ca_kabuli_chr07 | 30721008                | GG                              | AA              | 1946891773               |
| SNP_P4_97840_30721052 | NC_021166.1    | Ca_kabuli_chr07 | 30721052                | TT                              | GG              | 1946891775               |
| SNP_P4_97842_30749636 | NC_021166.1    | Ca_kabuli_chr07 | 30749636                | AA                              | TT              | 1946891777               |
| SNP_P4_97843_30749637 | NC_021166.1    | Ca_kabuli_chr07 | 30749637                | AA                              | TT              | 1946891779               |
| SNP_P4_97844_30780499 | NC_021166.1    | Ca_kabuli_chr07 | 30780499                | TT                              | AA              | 1946891781               |
| SNP_P4_97845_30801643 | NC_021166.1    | Ca_kabuli_chr07 | 30801643                | GG                              | AA              | 1946891783               |
| SNP_P4_97849_30845598 | NC_021166.1    | Ca_kabuli_chr07 | 30845598                | AA                              | TT              | 1946891785               |

| SNPs IDs              | Chromosome IDs | Chromosomes     | Physical positions (bp) | CDC Frontier (Reference genome) | (ILWC46 & LPNB) | NCBI SNPdb Accession IDs |
|-----------------------|----------------|-----------------|-------------------------|---------------------------------|-----------------|--------------------------|
| SNP_P4_97850_30845600 | NC_021166.1    | Ca_kabuli_chr07 | 30845600                | TT                              | AA              | 1946891787               |
| SNP_P4_97851_30874265 | NC_021166.1    | Ca_kabuli_chr07 | 30874265                | GG                              | AA              | 1946891789               |
| SNP_P4_97852_30874266 | NC_021166.1    | Ca_kabuli_chr07 | 30874266                | AA                              | GG              | 1946891791               |
| SNP_P4_97854_30874315 | NC_021166.1    | Ca_kabuli_chr07 | 30874315                | CC                              | TT              | 1946891793               |
| SNP_P4_97855_30874335 | NC_021166.1    | Ca_kabuli_chr07 | 30874335                | GG                              | AA              | 1946891795               |
| SNP_P4_97856_30874372 | NC_021166.1    | Ca_kabuli_chr07 | 30874372                | AA                              | GG              | 1946891797               |
| SNP_P4_97857_30874380 | NC_021166.1    | Ca_kabuli_chr07 | 30874380                | TT                              | CC              | 1946891799               |
| SNP_P4_97858_30874646 | NC_021166.1    | Ca_kabuli_chr07 | 30874646                | TT                              | CC              | 1946891801               |
| SNP_P4_97859_30874652 | NC_021166.1    | Ca_kabuli_chr07 | 30874652                | GG                              | AA              | 1946891803               |
| SNP_P4_97860_30874725 | NC_021166.1    | Ca_kabuli_chr07 | 30874725                | GG                              | AA              | 1946891805               |
| SNP_P4_97861_30874745 | NC_021166.1    | Ca_kabuli_chr07 | 30874745                | GG                              | AA              | 1946891807               |
| SNP_P4_97862_30911990 | NC_021166.1    | Ca_kabuli_chr07 | 30911990                | TT                              | CC              | 1946891809               |
| SNP_P4_97863_30912820 | NC_021166.1    | Ca_kabuli_chr07 | 30912820                | GG                              | CC              | 1946891811               |
| SNP_P4_97864_30930435 | NC_021166.1    | Ca_kabuli_chr07 | 30930435                | CC                              | TT              | 1946891813               |
| SNP_P4_97865_30930489 | NC_021166.1    | Ca_kabuli_chr07 | 30930489                | CC                              | TT              | 1946891815               |
| SNP_P4_97866_30930524 | NC_021166.1    | Ca_kabuli_chr07 | 30930524                | GG                              | AA              | 1946891817               |
| SNP_P4_97867_30930561 | NC_021166.1    | Ca_kabuli_chr07 | 30930561                | TT                              | AA              | 1946891819               |
| SNP_P4_97868_30930573 | NC_021166.1    | Ca_kabuli_chr07 | 30930573                | AA                              | GG              | 1946891821               |
| SNP_P4_97869_30930587 | NC_021166.1    | Ca_kabuli_chr07 | 30930587                | CC                              | GG              | 1946891823               |
| SNP_P4_97871_30930689 | NC_021166.1    | Ca_kabuli_chr07 | 30930689                | GG                              | CC              | 1946891825               |
| SNP_P4_97872_30930711 | NC_021166.1    | Ca_kabuli_chr07 | 30930711                | TT                              | GG              | 1946891827               |
| SNP_P4_97873_30930834 | NC_021166.1    | Ca_kabuli_chr07 | 30930834                | CC                              | TT              | 1946891829               |
| SNP_P4_97874_30930847 | NC_021166.1    | Ca_kabuli_chr07 | 30930847                | GG                              | AA              | 1946891831               |
| SNP_P4_97875_30930848 | NC_021166.1    | Ca_kabuli_chr07 | 30930848                | CC                              | TT              | 1946891833               |
| SNP_P4_97876_30930878 | NC_021166.1    | Ca_kabuli_chr07 | 30930878                | CC                              | GG              | 1946891835               |
| SNP_P4_97877_30930899 | NC_021166.1    | Ca_kabuli_chr07 | 30930899                | GG                              | AA              | 1946891837               |
| SNP_P4_97878_30933505 | NC_021166.1    | Ca_kabuli_chr07 | 30933505                | AA                              | GG              | 1946891839               |
| SNP_P4_97880_30966101 | NC_021166.1    | Ca_kabuli_chr07 | 30966101                | AA                              | TT              | 1946891841               |
| SNP_P4_97881_30966130 | NC_021166.1    | Ca_kabuli_chr07 | 30966130                | AA                              | GG              | 1946891843               |
| SNP_P4_97882_30966484 | NC_021166.1    | Ca_kabuli_chr07 | 30966484                | AA                              | TT              | 1946891845               |
| SNP_P4_97885_30987856 | NC_021166.1    | Ca_kabuli_chr07 | 30987856                | CC                              | GG              | 1946891847               |
| SNP_P4_97887_30988099 | NC_021166.1    | Ca_kabuli_chr07 | 30988099                | AA                              | CC              | 1946891849               |
| SNP_P4_97888_30988256 | NC_021166.1    | Ca_kabuli_chr07 | 30988256                | CC                              | TT              | 1946891851               |
| SNP_P4_97889_30988266 | NC_021166.1    | Ca_kabuli_chr07 | 30988266                | CC                              | GG              | 1946891853               |
| SNP_P4_97891_30998321 | NC_021166.1    | Ca_kabuli_chr07 | 30998321                | TT                              | CC              | 1946891855               |
| SNP_P4_97892_30998667 | NC_021166.1    | Ca_kabuli_chr07 | 30998667                | AA                              | TT              | 1946891857               |
| SNP_P4_97893_30998731 | NC_021166.1    | Ca_kabuli_chr07 | 30998731                | TT                              | GG              | 1946891859               |
| SNP_P4_97894_30999506 | NC_021166.1    | Ca_kabuli_chr07 | 30999506                | AA                              | GG              | 1946891862               |
| SNP_P4_97896_30999587 | NC_021166.1    | Ca_kabuli_chr07 | 30999587                | CC                              | TT              | 1946891864               |
| SNP_P4_97897_31005234 | NC_021166.1    | Ca_kabuli_chr07 | 31005234                | GG                              | TT              | 1946891866               |
| SNP_P4_97898_31005628 | NC_021166.1    | Ca_kabuli_chr07 | 31005628                | TT                              | CC              | 1946891868               |
| SNP_P4_97901_31047268 | NC_021166.1    | Ca_kabuli_chr07 | 31047268                | CC                              | TT              | 1946891870               |

| SNPs IDs              | Chromosome IDs | Chromosomes     | Physical positions (bp) | CDC Frontier (Reference genome) | (ILWC46 & LPNB) | NCBI SNPdb Accession IDs |
|-----------------------|----------------|-----------------|-------------------------|---------------------------------|-----------------|--------------------------|
| SNP_P4_97902_31047312 | NC_021166.1    | Ca_kabuli_chr07 | 31047312                | CC                              | AA              | 1946891872               |
| SNP_P4_97903_31047314 | NC_021166.1    | Ca_kabuli_chr07 | 31047314                | AA                              | TT              | 1946891875               |
| SNP_P4_97904_31048626 | NC_021166.1    | Ca_kabuli_chr07 | 31048626                | CC                              | TT              | 1946891877               |
| SNP_P4_97905_31048637 | NC_021166.1    | Ca_kabuli_chr07 | 31048637                | GG                              | AA              | 1946891879               |
| SNP_P4_97906_31060103 | NC_021166.1    | Ca_kabuli_chr07 | 31060103                | TT                              | CC              | 1946891881               |
| SNP_P4_97907_31064466 | NC_021166.1    | Ca_kabuli_chr07 | 31064466                | CC                              | TT              | 1946891883               |
| SNP_P4_97908_31065191 | NC_021166.1    | Ca_kabuli_chr07 | 31065191                | TT                              | AA              | 1946891885               |
| SNP_P4_97909_31065204 | NC_021166.1    | Ca_kabuli_chr07 | 31065204                | CC                              | TT              | 1946891888               |
| SNP_P4_97910_31073467 | NC_021166.1    | Ca_kabuli_chr07 | 31073467                | AA                              | CC              | 1946891890               |
| SNP_P4_97911_31073482 | NC_021166.1    | Ca_kabuli_chr07 | 31073482                | TT                              | CC              | 1946891892               |
| SNP_P4_97912_31073537 | NC_021166.1    | Ca_kabuli_chr07 | 31073537                | GG                              | AA              | 1946891894               |
| SNP_P4_97913_31073974 | NC_021166.1    | Ca_kabuli_chr07 | 31073974                | CC                              | TT              | 1946891896               |
| SNP_P4_97914_31074176 | NC_021166.1    | Ca_kabuli_chr07 | 31074176                | AA                              | GG              | 1946891898               |
| SNP_P4_97915_31074192 | NC_021166.1    | Ca_kabuli_chr07 | 31074192                | AA                              | CC              | 1946891900               |
| SNP_P4_97916_31074195 | NC_021166.1    | Ca_kabuli_chr07 | 31074195                | CC                              | TT              | 1946891902               |
| SNP_P4_97917_31074202 | NC_021166.1    | Ca_kabuli_chr07 | 31074202                | AA                              | GG              | 1946891905               |
| SNP_P4_97918_31074242 | NC_021166.1    | Ca_kabuli_chr07 | 31074242                | TT                              | CC              | 1946891907               |
| SNP_P4_97919_31074339 | NC_021166.1    | Ca_kabuli_chr07 | 31074339                | CC                              | TT              | 1946891909               |
| SNP_P4_97920_31074371 | NC_021166.1    | Ca_kabuli_chr07 | 31074371                | TT                              | CC              | 1946891911               |
| SNP_P4_97921_31074426 | NC_021166.1    | Ca_kabuli_chr07 | 31074426                | AA                              | GG              | 1946891913               |
| SNP_P4_97922_31074441 | NC_021166.1    | Ca_kabuli_chr07 | 31074441                | TT                              | CC              | 1946891915               |
| SNP_P4_97923_31074463 | NC_021166.1    | Ca_kabuli_chr07 | 31074463                | TT                              | GG              | 1946891917               |
| SNP_P4_97924_31074495 | NC_021166.1    | Ca_kabuli_chr07 | 31074495                | TT                              | CC              | 1946891920               |
| SNP_P4_97925_31074771 | NC_021166.1    | Ca_kabuli_chr07 | 31074771                | TT                              | CC              | 1946891922               |
| SNP_P4_97926_31074814 | NC_021166.1    | Ca_kabuli_chr07 | 31074814                | AA                              | GG              | 1946891924               |
| SNP_P4_97927_31074871 | NC_021166.1    | Ca_kabuli_chr07 | 31074871                | GG                              | TT              | 1946891926               |
| SNP_P4_97928_31074877 | NC_021166.1    | Ca_kabuli_chr07 | 31074877                | CC                              | TT              | 1946891928               |
| SNP_P4_97929_31074889 | NC_021166.1    | Ca_kabuli_chr07 | 31074889                | TT                              | CC              | 1946891930               |
| SNP_P4_97930_31074896 | NC_021166.1    | Ca_kabuli_chr07 | 31074896                | AA                              | GG              | 1946891932               |
| SNP_P4_97931_31075140 | NC_021166.1    | Ca_kabuli_chr07 | 31075140                | CC                              | TT              | 1946891934               |
| SNP_P4_97932_31081858 | NC_021166.1    | Ca_kabuli_chr07 | 31081858                | CC                              | TT              | 1946891936               |
| SNP_P4_97933_31084293 | NC_021166.1    | Ca_kabuli_chr07 | 31084293                | AA                              | GG              | 1946891938               |
| SNP_P4_97934_31094043 | NC_021166.1    | Ca_kabuli_chr07 | 31094043                | TT                              | GG              | 1946891940               |
| SNP_P4_97935_31105108 | NC_021166.1    | Ca_kabuli_chr07 | 31105108                | GG                              | AA              | 1946891942               |
| SNP_P4_97936_31111624 | NC_021166.1    | Ca_kabuli_chr07 | 31111624                | AA                              | CC              | 1946891944               |
| SNP_P4_97937_31111705 | NC_021166.1    | Ca_kabuli_chr07 | 31111705                | GG                              | AA              | 1946891946               |
| SNP_P4_97938_31111839 | NC_021166.1    | Ca_kabuli_chr07 | 31111839                | AA                              | GG              | 1946891948               |
| SNP_P4_97939_31111875 | NC_021166.1    | Ca_kabuli_chr07 | 31111875                | AA                              | TT              | 1946891950               |
| SNP_P4_97940_31111876 | NC_021166.1    | Ca_kabuli_chr07 | 31111876                | AA                              | TT              | 1946891952               |
| SNP_P4_97941_31111898 | NC_021166.1    | Ca_kabuli_chr07 | 31111898                | CC                              | TT              | 1946891954               |
| SNP_P4_97942_31111913 | NC_021166.1    | Ca_kabuli_chr07 | 31111913                | GG                              | TT              | 1946891956               |
| SNP_P4_97943_31111937 | NC_021166.1    | Ca_kabuli_chr07 | 31111937                | CC                              | TT              | 1946891958               |

| SNPs IDs              | Chromosome IDs | Chromosomes     | Physical positions (bp) | CDC Frontier (Reference genome) | (ILWC46 & LPNB) | NCBI SNPdb Accession IDs |
|-----------------------|----------------|-----------------|-------------------------|---------------------------------|-----------------|--------------------------|
| SNP_P4_97944_31112256 | NC_021166.1    | Ca_kabuli_chr07 | 31112256                | AA                              | TT              | 1946891960               |
| SNP_P4_97945_31112388 | NC_021166.1    | Ca_kabuli_chr07 | 31112388                | CC                              | AA              | 1946891962               |
| SNP_P4_97946_31112426 | NC_021166.1    | Ca_kabuli_chr07 | 31112426                | AA                              | CC              | 1946891964               |
| SNP_P4_97948_31112497 | NC_021166.1    | Ca_kabuli_chr07 | 31112497                | GG                              | TT              | 1946891966               |
| SNP_P4_97949_31112514 | NC_021166.1    | Ca_kabuli_chr07 | 31112514                | GG                              | AA              | 1946891968               |
| SNP_P4_97950_31112746 | NC_021166.1    | Ca_kabuli_chr07 | 31112746                | AA                              | TT              | 1946891970               |
| SNP_P4_97951_31112766 | NC_021166.1    | Ca_kabuli_chr07 | 31112766                | AA                              | GG              | 1946891972               |
| SNP_P4_97952_31134451 | NC_021166.1    | Ca_kabuli_chr07 | 31134451                | AA                              | GG              | 1946891974               |
| SNP_P4_97953_31138157 | NC_021166.1    | Ca_kabuli_chr07 | 31138157                | GG                              | AA              | 1946891976               |
| SNP_P4_97954_31142674 | NC_021166.1    | Ca_kabuli_chr07 | 31142674                | GG                              | TT              | 1946891978               |
| SNP_P4_97955_31151276 | NC_021166.1    | Ca_kabuli_chr07 | 31151276                | AA                              | GG              | 1946891980               |
| SNP_P4_97956_31185445 | NC_021166.1    | Ca_kabuli_chr07 | 31185445                | CC                              | TT              | 1946891982               |
| SNP_P4_97957_31186006 | NC_021166.1    | Ca_kabuli_chr07 | 31186006                | CC                              | TT              | 1946891984               |
| SNP_P4_97958_31186038 | NC_021166.1    | Ca_kabuli_chr07 | 31186038                | GG                              | TT              | 1946891986               |
| SNP_P4_97959_31186050 | NC_021166.1    | Ca_kabuli_chr07 | 31186050                | AA                              | CC              | 1946891988               |
| SNP_P4_97961_31186578 | NC_021166.1    | Ca_kabuli_chr07 | 31186578                | TT                              | GG              | 1946891990               |
| SNP_P4_97962_31188392 | NC_021166.1    | Ca_kabuli_chr07 | 31188392                | GG                              | AA              | 1946891992               |
| SNP_P4_97963_31189012 | NC_021166.1    | Ca_kabuli_chr07 | 31189012                | AA                              | TT              | 1946891994               |
| SNP_P4_97964_31189014 | NC_021166.1    | Ca_kabuli_chr07 | 31189014                | AA                              | TT              | 1946891996               |
| SNP_P4_97965_31189015 | NC_021166.1    | Ca_kabuli_chr07 | 31189015                | AA                              | TT              | 1946891998               |
| SNP_P4_97966_31193917 | NC_021166.1    | Ca_kabuli_chr07 | 31193917                | TT                              | CC              | 1946892000               |
| SNP_P4_97967_31196014 | NC_021166.1    | Ca_kabuli_chr07 | 31196014                | TT                              | CC              | 1946892002               |
| SNP_P4_97969_31196196 | NC_021166.1    | Ca_kabuli_chr07 | 31196196                | GG                              | AA              | 1946892004               |
| SNP_P4_97970_31196226 | NC_021166.1    | Ca_kabuli_chr07 | 31196226                | CC                              | TT              | 1946892006               |
| SNP_P4_97971_31196249 | NC_021166.1    | Ca_kabuli_chr07 | 31196249                | TT                              | AA              | 1946892008               |
| SNP_P4_97972_31196252 | NC_021166.1    | Ca_kabuli_chr07 | 31196252                | AA                              | TT              | 1946892010               |
| SNP_P4_97974_31196933 | NC_021166.1    | Ca_kabuli_chr07 | 31196933                | CC                              | TT              | 1946892012               |
| SNP_P4_97975_31197004 | NC_021166.1    | Ca_kabuli_chr07 | 31197004                | AA                              | CC              | 1946892014               |
| SNP_P4_97976_31197497 | NC_021166.1    | Ca_kabuli_chr07 | 31197497                | CC                              | AA              | 1946892016               |
| SNP_P4_97977_31197506 | NC_021166.1    | Ca_kabuli_chr07 | 31197506                | CC                              | AA              | 1946892018               |
| SNP_P4_97979_31199053 | NC_021166.1    | Ca_kabuli_chr07 | 31199053                | TT                              | AA              | 1946892020               |
| SNP_P4_97980_31199084 | NC_021166.1    | Ca_kabuli_chr07 | 31199084                | CC                              | GG              | 1946892022               |
| SNP_P4_97981_31201190 | NC_021166.1    | Ca_kabuli_chr07 | 31201190                | CC                              | AA              | 1946892024               |
| SNP_P4_97982_31201561 | NC_021166.1    | Ca_kabuli_chr07 | 31201561                | AA                              | GG              | 1946892026               |
| SNP_P4_97983_31201566 | NC_021166.1    | Ca_kabuli_chr07 | 31201566                | GG                              | AA              | 1946892028               |
| SNP_P4_97985_31201811 | NC_021166.1    | Ca_kabuli_chr07 | 31201811                | GG                              | AA              | 1946892030               |
| SNP_P4_97988_31206551 | NC_021166.1    | Ca_kabuli_chr07 | 31206551                | CC                              | AA              | 1946892032               |
| SNP_P4_97989_31206595 | NC_021166.1    | Ca_kabuli_chr07 | 31206595                | AA                              | GG              | 1946892034               |
| SNP_P4_97990_31206610 | NC_021166.1    | Ca_kabuli_chr07 | 31206610                | CC                              | TT              | 1946892036               |
| SNP_P4_97991_31206626 | NC_021166.1    | Ca_kabuli_chr07 | 31206626                | TT                              | CC              | 1946892038               |
| SNP_P4_97992_31206638 | NC_021166.1    | Ca_kabuli_chr07 | 31206638                | AA                              | GG              | 1946892040               |
| SNP_P4_97993_31206759 | NC_021166.1    | Ca_kabuli_chr07 | 31206759                | CC                              | TT              | 1946892042               |

| SNPs IDs              | Chromosome IDs | Chromosomes     | Physical positions (bp) | CDC Frontier (Reference genome) | (ILWC46 & LPNB) | NCBI SNPdb Accession IDs |
|-----------------------|----------------|-----------------|-------------------------|---------------------------------|-----------------|--------------------------|
| SNP_P4_97994_31206763 | NC_021166.1    | Ca_kabuli_chr07 | 31206763                | GG                              | AA              | 1946892044               |
| SNP_P4_97995_31206793 | NC_021166.1    | Ca_kabuli_chr07 | 31206793                | TT                              | CC              | 1946892046               |
| SNP_P4_97997_31207398 | NC_021166.1    | Ca_kabuli_chr07 | 31207398                | GG                              | TT              | 1946892048               |
| SNP_P4_97998_31207400 | NC_021166.1    | Ca_kabuli_chr07 | 31207400                | TT                              | AA              | 1946892050               |
| SNP_P4_97999_31207401 | NC_021166.1    | Ca_kabuli_chr07 | 31207401                | CC                              | AA              | 1946892052               |
| SNP_P4_98000_31207550 | NC_021166.1    | Ca_kabuli_chr07 | 31207550                | TT                              | AA              | 1946892054               |
| SNP_P4_98001_31207576 | NC_021166.1    | Ca_kabuli_chr07 | 31207576                | AA                              | CC              | 1946892056               |
| SNP_P4_98002_31208013 | NC_021166.1    | Ca_kabuli_chr07 | 31208013                | CC                              | TT              | 1946892059               |
| SNP_P4_98003_31209187 | NC_021166.1    | Ca_kabuli_chr07 | 31209187                | CC                              | TT              | 1946892061               |
| SNP_P4_98004_31209233 | NC_021166.1    | Ca_kabuli_chr07 | 31209233                | GG                              | CC              | 1946892063               |
| SNP_P4_98006_31209887 | NC_021166.1    | Ca_kabuli_chr07 | 31209887                | AA                              | GG              | 1946892065               |
| SNP_P4_98007_31210075 | NC_021166.1    | Ca_kabuli_chr07 | 31210075                | AA                              | GG              | 1946892067               |
| SNP_P4_98008_31210921 | NC_021166.1    | Ca_kabuli_chr07 | 31210921                | GG                              | AA              | 1946892069               |
| SNP_P4_98010_31211471 | NC_021166.1    | Ca_kabuli_chr07 | 31211471                | CC                              | TT              | 1946892071               |
| SNP_P4_98011_31214342 | NC_021166.1    | Ca_kabuli_chr07 | 31214342                | GG                              | AA              | 1946892073               |
| SNP_P4_98014_31216513 | NC_021166.1    | Ca_kabuli_chr07 | 31216513                | TT                              | AA              | 1946892075               |
| SNP_P4_98016_31216602 | NC_021166.1    | Ca_kabuli_chr07 | 31216602                | TT                              | CC              | 1946892078               |
| SNP_P4_98017_31217131 | NC_021166.1    | Ca_kabuli_chr07 | 31217131                | AA                              | GG              | 1946892080               |
| SNP_P4_98020_31217577 | NC_021166.1    | Ca_kabuli_chr07 | 31217577                | GG                              | TT              | 1946892082               |
| SNP_P4_98021_31217749 | NC_021166.1    | Ca_kabuli_chr07 | 31217749                | TT                              | AA              | 1946892084               |
| SNP_P4_98022_31218734 | NC_021166.1    | Ca_kabuli_chr07 | 31218734                | GG                              | AA              | 1946892086               |
| SNP_P4_98023_31218735 | NC_021166.1    | Ca_kabuli_chr07 | 31218735                | AA                              | GG              | 1946892088               |
| SNP_P4_98024_31219631 | NC_021166.1    | Ca_kabuli_chr07 | 31219631                | CC                              | AA              | 1946892090               |
| SNP_P4_98025_31219640 | NC_021166.1    | Ca_kabuli_chr07 | 31219640                | CC                              | GG              | 1946892092               |
| SNP_P4_98026_31219646 | NC_021166.1    | Ca_kabuli_chr07 | 31219646                | TT                              | CC              | 1946892094               |
| SNP_P4_98027_31219651 | NC_021166.1    | Ca_kabuli_chr07 | 31219651                | TT                              | GG              | 1946892096               |
| SNP_P4_98028_31219660 | NC_021166.1    | Ca_kabuli_chr07 | 31219660                | AA                              | TT              | 1946892098               |
| SNP_P4_98029_31219672 | NC_021166.1    | Ca_kabuli_chr07 | 31219672                | TT                              | AA              | 1946892100               |
| SNP_P4_98030_31219696 | NC_021166.1    | Ca_kabuli_chr07 | 31219696                | GG                              | AA              | 1946892102               |
| SNP_P4_98031_31221747 | NC_021166.1    | Ca_kabuli_chr07 | 31221747                | CC                              | TT              | 1946892104               |
| SNP_P4_98032_31224932 | NC_021166.1    | Ca_kabuli_chr07 | 31224932                | TT                              | GG              | 1946892106               |
| SNP_P4_98033_31224962 | NC_021166.1    | Ca_kabuli_chr07 | 31224962                | AA                              | GG              | 1946892108               |
| SNP_P4_98034_31225171 | NC_021166.1    | Ca_kabuli_chr07 | 31225171                | AA                              | TT              | 1946892111               |
| SNP_P4_98035_31225914 | NC_021166.1    | Ca_kabuli_chr07 | 31225914                | CC                              | AA              | 1946892113               |
| SNP_P4_98036_31228153 | NC_021166.1    | Ca_kabuli_chr07 | 31228153                | AA                              | GG              | 1946892115               |
| SNP_P4_98037_31228352 | NC_021166.1    | Ca_kabuli_chr07 | 31228352                | GG                              | AA              | 1946892117               |
| SNP_P4_98038_31229109 | NC_021166.1    | Ca_kabuli_chr07 | 31229109                | CC                              | TT              | 1946892119               |
| SNP_P4_98039_31229973 | NC_021166.1    | Ca_kabuli_chr07 | 31229973                | AA                              | TT              | 1946892121               |
| SNP_P4_98040_31230295 | NC_021166.1    | Ca_kabuli_chr07 | 31230295                | GG                              | TT              | 1946892123               |
| SNP_P4_98041_31232100 | NC_021166.1    | Ca_kabuli_chr07 | 31232100                | CC                              | TT              | 1946892125               |
| SNP_P4_98043_31233150 | NC_021166.1    | Ca_kabuli_chr07 | 31233150                | GG                              | AA              | 1946892127               |
| SNP_P4_98044_31233607 | NC_021166.1    | Ca_kabuli_chr07 | 31233607                | TT                              | CC              | 1946892129               |



| SNPs IDs              | Chromosome IDs | Chromosomes     | Physical positions (bp) | CDC Frontier (Reference genome) | (ILWC46 & LPNB) | NCBI SNPdb Accession IDs |
|-----------------------|----------------|-----------------|-------------------------|---------------------------------|-----------------|--------------------------|
| SNP_P4_98045_31234080 | NC_021166.1    | Ca_kabuli_chr07 | 31234080                | TT                              | CC              | 1946892131               |
| SNP_P4_98046_31235345 | NC_021166.1    | Ca_kabuli_chr07 | 31235345                | TT                              | CC              | 1946892133               |
| SNP_P4_98047_31235553 | NC_021166.1    | Ca_kabuli_chr07 | 31235553                | AA                              | GG              | 1946892135               |
| SNP_P4_98048_31235572 | NC_021166.1    | Ca_kabuli_chr07 | 31235572                | GG                              | TT              | 1946892137               |
| SNP_P4_98049_31235606 | NC_021166.1    | Ca_kabuli_chr07 | 31235606                | CC                              | TT              | 1946892139               |
| SNP_P4_98050_31237839 | NC_021166.1    | Ca_kabuli_chr07 | 31237839                | GG                              | TT              | 1946892141               |
| SNP_P4_98051_31240077 | NC_021166.1    | Ca_kabuli_chr07 | 31240077                | TT                              | CC              | 1946892143               |
| SNP_P4_98052_31240495 | NC_021166.1    | Ca_kabuli_chr07 | 31240495                | TT                              | CC              | 1946892145               |
| SNP_P4_98053_31240931 | NC_021166.1    | Ca_kabuli_chr07 | 31240931                | CC                              | AA              | 1946892147               |
| SNP_P4_98055_31244917 | NC_021166.1    | Ca_kabuli_chr07 | 31244917                | GG                              | AA              | 1946892149               |
| SNP_P4_98057_31247144 | NC_021166.1    | Ca_kabuli_chr07 | 31247144                | TT                              | GG              | 1946892151               |
| SNP_P4_98058_31247168 | NC_021166.1    | Ca_kabuli_chr07 | 31247168                | GG                              | AA              | 1946892152               |
| SNP_P4_98061_31247574 | NC_021166.1    | Ca_kabuli_chr07 | 31247574                | TT                              | CC              | 1946892154               |
| SNP_P4_98062_31247742 | NC_021166.1    | Ca_kabuli_chr07 | 31247742                | GG                              | AA              | 1946892156               |
| SNP_P4_98063_31247752 | NC_021166.1    | Ca_kabuli_chr07 | 31247752                | CC                              | TT              | 1946892158               |
| SNP_P4_98064_31247755 | NC_021166.1    | Ca_kabuli_chr07 | 31247755                | CC                              | TT              | 1946892160               |
| SNP_P4_98065_31247785 | NC_021166.1    | Ca_kabuli_chr07 | 31247785                | AA                              | GG              | 1946892162               |
| SNP_P4_98066_31248563 | NC_021166.1    | Ca_kabuli_chr07 | 31248563                | CC                              | TT              | 1946892164               |
| SNP_P4_98067_31248614 | NC_021166.1    | Ca_kabuli_chr07 | 31248614                | GG                              | AA              | 1946892166               |
| SNP_P4_98068_31248638 | NC_021166.1    | Ca_kabuli_chr07 | 31248638                | AA                              | CC              | 1946892168               |
| SNP_P4_98069_31248750 | NC_021166.1    | Ca_kabuli_chr07 | 31248750                | TT                              | AA              | 1946892171               |
| SNP_P4_98070_31250222 | NC_021166.1    | Ca_kabuli_chr07 | 31250222                | CC                              | TT              | 1946892173               |
| SNP_P4_98072_31251366 | NC_021166.1    | Ca_kabuli_chr07 | 31251366                | TT                              | CC              | 1946892175               |
| SNP_P4_98074_31255525 | NC_021166.1    | Ca_kabuli_chr07 | 31255525                | CC                              | TT              | 1946892177               |
| SNP_P4_98075_31255874 | NC_021166.1    | Ca_kabuli_chr07 | 31255874                | TT                              | CC              | 1946892179               |
| SNP_P4_98076_31255921 | NC_021166.1    | Ca_kabuli_chr07 | 31255921                | CC                              | AA              | 1946892181               |
| SNP_P4_98077_31255922 | NC_021166.1    | Ca_kabuli_chr07 | 31255922                | TT                              | GG              | 1946892183               |
| SNP_P4_98078_31255938 | NC_021166.1    | Ca_kabuli_chr07 | 31255938                | GG                              | AA              | 1946892185               |
| SNP_P4_98079_31279025 | NC_021166.1    | Ca_kabuli_chr07 | 31279025                | TT                              | CC              | 1946892187               |
| SNP_P4_98080_31285434 | NC_021166.1    | Ca_kabuli_chr07 | 31285434                | GG                              | TT              | 1946892189               |
| SNP_P4_98081_31331060 | NC_021166.1    | Ca_kabuli_chr07 | 31331060                | GG                              | AA              | 1946892191               |
| SNP_P4_98082_31342447 | NC_021166.1    | Ca_kabuli_chr07 | 31342447                | TT                              | CC              | 1946892193               |
| SNP_P4_98084_31395576 | NC_021166.1    | Ca_kabuli_chr07 | 31395576                | CC                              | TT              | 1946892195               |
| SNP_P4_98086_31408457 | NC_021166.1    | Ca_kabuli_chr07 | 31408457                | AA                              | GG              | 1946892197               |
| SNP_P4_98087_31425261 | NC_021166.1    | Ca_kabuli_chr07 | 31425261                | TT                              | CC              | 1946892199               |
| SNP_P4_98088_31465405 | NC_021166.1    | Ca_kabuli_chr07 | 31465405                | AA                              | TT              | 1946892201               |
| SNP_P4_98089_31474333 | NC_021166.1    | Ca_kabuli_chr07 | 31474333                | GG                              | AA              | 1946892204               |
| SNP_P4_98090_31477031 | NC_021166.1    | Ca_kabuli_chr07 | 31477031                | GG                              | AA              | 1946892206               |
| SNP_P4_98091_31490677 | NC_021166.1    | Ca_kabuli_chr07 | 31490677                | CC                              | TT              | 1946892208               |
| SNP_P4_98094_31521406 | NC_021166.1    | Ca_kabuli_chr07 | 31521406                | AA                              | GG              | 1946892210               |
| SNP_P4_98095_31534038 | NC_021166.1    | Ca_kabuli_chr07 | 31534038                | AA                              | CC              | 1946892212               |
| SNP_P4_98096_31534093 | NC_021166.1    | Ca_kabuli_chr07 | 31534093                | TT                              | GG              | 1946892214               |

| SNPs IDs              | Chromosome IDs | Chromosomes     | Physical positions (bp) | CDC Frontier (Reference genome) | (ILWC46 & LPNB) | NCBI SNPdb Accession IDs |
|-----------------------|----------------|-----------------|-------------------------|---------------------------------|-----------------|--------------------------|
| SNP_P4_98098_31542005 | NC_021166.1    | Ca_kabuli_chr07 | 31542005                | TT                              | GG              | 1946892216               |
| SNP_P4_98100_31561011 | NC_021166.1    | Ca_kabuli_chr07 | 31561011                | AA                              | GG              | 1946892218               |
| SNP_P4_98101_31582240 | NC_021166.1    | Ca_kabuli_chr07 | 31582240                | TT                              | AA              | 1946892220               |
| SNP_P4_98102_31594255 | NC_021166.1    | Ca_kabuli_chr07 | 31594255                | TT                              | CC              | 1946892221               |
| SNP_P4_98103_31594286 | NC_021166.1    | Ca_kabuli_chr07 | 31594286                | AA                              | CC              | 1946892223               |
| SNP_P4_98104_31594290 | NC_021166.1    | Ca_kabuli_chr07 | 31594290                | GG                              | AA              | 1946892225               |
| SNP_P4_98105_31594308 | NC_021166.1    | Ca_kabuli_chr07 | 31594308                | TT                              | GG              | 1946892227               |
| SNP_P4_98106_31614024 | NC_021166.1    | Ca_kabuli_chr07 | 31614024                | CC                              | TT              | 1946892229               |
| SNP_P4_98107_31636605 | NC_021166.1    | Ca_kabuli_chr07 | 31636605                | TT                              | GG              | 1946892231               |
| SNP_P4_98108_31639032 | NC_021166.1    | Ca_kabuli_chr07 | 31639032                | TT                              | CC              | 1946892233               |
| SNP_P4_98109_31654447 | NC_021166.1    | Ca_kabuli_chr07 | 31654447                | AA                              | GG              | 1946892235               |
| SNP_P4_98110_31661241 | NC_021166.1    | Ca_kabuli_chr07 | 31661241                | AA                              | TT              | 1946892237               |
| SNP_P4_98111_31665230 | NC_021166.1    | Ca_kabuli_chr07 | 31665230                | TT                              | AA              | 1946892239               |
| SNP_P4_98112_31670790 | NC_021166.1    | Ca_kabuli_chr07 | 31670790                | CC                              | TT              | 1946892240               |
| SNP_P4_98113_31683755 | NC_021166.1    | Ca_kabuli_chr07 | 31683755                | CC                              | AA              | 1946892242               |
| SNP_P4_98114_31683759 | NC_021166.1    | Ca_kabuli_chr07 | 31683759                | TT                              | AA              | 1946892244               |
| SNP_P4_98115_31685386 | NC_021166.1    | Ca_kabuli_chr07 | 31685386                | AA                              | TT              | 1946892246               |
| SNP_P4_98116_31696431 | NC_021166.1    | Ca_kabuli_chr07 | 31696431                | GG                              | AA              | 1946892248               |
| SNP_P4_98117_31700508 | NC_021166.1    | Ca_kabuli_chr07 | 31700508                | AA                              | TT              | 1946892250               |
| SNP_P4_98118_31722740 | NC_021166.1    | Ca_kabuli_chr07 | 31722740                | TT                              | CC              | 1946892252               |
| SNP_P4_98119_31728629 | NC_021166.1    | Ca_kabuli_chr07 | 31728629                | TT                              | CC              | 1946892254               |
| SNP_P4_98120_31745474 | NC_021166.1    | Ca_kabuli_chr07 | 31745474                | AA                              | GG              | 1946892256               |
| SNP_P4_98121_31745600 | NC_021166.1    | Ca_kabuli_chr07 | 31745600                | GG                              | AA              | 1946892258               |
| SNP_P4_98122_31745713 | NC_021166.1    | Ca_kabuli_chr07 | 31745713                | AA                              | GG              | 1946892260               |
| SNP_P4_98124_31746065 | NC_021166.1    | Ca_kabuli_chr07 | 31746065                | GG                              | CC              | 1946892263               |
| SNP_P4_98125_31746103 | NC_021166.1    | Ca_kabuli_chr07 | 31746103                | AA                              | TT              | 1946892265               |
| SNP_P4_98126_31746106 | NC_021166.1    | Ca_kabuli_chr07 | 31746106                | TT                              | AA              | 1946892267               |
| SNP_P4_98127_31746108 | NC_021166.1    | Ca_kabuli_chr07 | 31746108                | AA                              | TT              | 1946892269               |
| SNP_P4_98128_31746123 | NC_021166.1    | Ca_kabuli_chr07 | 31746123                | GG                              | AA              | 1946892271               |
| SNP_P4_98129_31809388 | NC_021166.1    | Ca_kabuli_chr07 | 31809388                | CC                              | AA              | 1946892273               |
| SNP_P4_98130_31813079 | NC_021166.1    | Ca_kabuli_chr07 | 31813079                | AA                              | GG              | 1946892275               |
| SNP_P4_98131_31819211 | NC_021166.1    | Ca_kabuli_chr07 | 31819211                | AA                              | CC              | 1946892277               |
| SNP_P4_98132_31838269 | NC_021166.1    | Ca_kabuli_chr07 | 31838269                | TT                              | GG              | 1946892280               |
| SNP_P4_98133_31852085 | NC_021166.1    | Ca_kabuli_chr07 | 31852085                | GG                              | AA              | 1946892282               |
| SNP_P4_98134_31915945 | NC_021166.1    | Ca_kabuli_chr07 | 31915945                | GG                              | TT              | 1946892284               |
| SNP_P4_98135_31915954 | NC_021166.1    | Ca_kabuli_chr07 | 31915954                | GG                              | AA              | 1946892286               |
| SNP_P4_98136_31915973 | NC_021166.1    | Ca_kabuli_chr07 | 31915973                | TT                              | GG              | 1946892288               |
| SNP_P4_98137_31915982 | NC_021166.1    | Ca_kabuli_chr07 | 31915982                | GG                              | AA              | 1946892290               |
| SNP_P4_98138_31917245 | NC_021166.1    | Ca_kabuli_chr07 | 31917245                | CC                              | TT              | 1946892292               |
| SNP_P4_98139_31917297 | NC_021166.1    | Ca_kabuli_chr07 | 31917297                | AA                              | TT              | 1946892294               |
| SNP_P4_98140_31917305 | NC_021166.1    | Ca_kabuli_chr07 | 31917305                | AA                              | CC              | 1946892296               |
| SNP_P4_98141_31942799 | NC_021166.1    | Ca_kabuli_chr07 | 31942799                | TT                              | AA              | 1946892298               |

| SNPs IDs              | Chromosome IDs | Chromosomes     | Physical positions (bp) | CDC Frontier (Reference genome) | (ILWC46 & LPNB) | NCBI SNPdb Accession IDs |
|-----------------------|----------------|-----------------|-------------------------|---------------------------------|-----------------|--------------------------|
| SNP_P4_98142_31957785 | NC_021166.1    | Ca_kabuli_chr07 | 31957785                | AA                              | GG              | 1946892300               |
| SNP_P4_98143_31968224 | NC_021166.1    | Ca_kabuli_chr07 | 31968224                | TT                              | GG              | 1946892302               |
| SNP_P4_98144_31968263 | NC_021166.1    | Ca_kabuli_chr07 | 31968263                | TT                              | AA              | 1946892304               |
| SNP_P4_98146_31984504 | NC_021166.1    | Ca_kabuli_chr07 | 31984504                | AA                              | TT              | 1946892306               |
| SNP_P4_98147_31984511 | NC_021166.1    | Ca_kabuli_chr07 | 31984511                | GG                              | TT              | 1946892308               |
| SNP_P4_98148_31999008 | NC_021166.1    | Ca_kabuli_chr07 | 31999008                | CC                              | TT              | 1946892310               |
| SNP_P4_98149_32026491 | NC_021166.1    | Ca_kabuli_chr07 | 32026491                | GG                              | AA              | 1946892312               |
| SNP_P4_98150_32030566 | NC_021166.1    | Ca_kabuli_chr07 | 32030566                | CC                              | TT              | 1946892313               |
| SNP_P4_98151_32035060 | NC_021166.1    | Ca_kabuli_chr07 | 32035060                | AA                              | GG              | 1946892315               |
| SNP_P4_98152_32035061 | NC_021166.1    | Ca_kabuli_chr07 | 32035061                | GG                              | AA              | 1946892317               |
| SNP_P4_98153_32047496 | NC_021166.1    | Ca_kabuli_chr07 | 32047496                | GG                              | TT              | 1946892319               |
| SNP_P4_98154_32066332 | NC_021166.1    | Ca_kabuli_chr07 | 32066332                | GG                              | AA              | 1946892321               |
| SNP_P4_98155_32102178 | NC_021166.1    | Ca_kabuli_chr07 | 32102178                | AA                              | GG              | 1946892323               |
| SNP_P4_98156_32102470 | NC_021166.1    | Ca_kabuli_chr07 | 32102470                | TT                              | CC              | 1946892325               |
| SNP_P4_98157_32102496 | NC_021166.1    | Ca_kabuli_chr07 | 32102496                | GG                              | TT              | 1946892327               |
| SNP_P4_98158_32102624 | NC_021166.1    | Ca_kabuli_chr07 | 32102624                | CC                              | TT              | 1946892329               |
| SNP_P4_98159_32102625 | NC_021166.1    | Ca_kabuli_chr07 | 32102625                | AA                              | GG              | 1946892331               |
| SNP_P4_98160_32102767 | NC_021166.1    | Ca_kabuli_chr07 | 32102767                | AA                              | GG              | 1946892333               |
| SNP_P4_98162_32104301 | NC_021166.1    | Ca_kabuli_chr07 | 32104301                | TT                              | CC              | 1946892335               |
| SNP_P4_98163_32114401 | NC_021166.1    | Ca_kabuli_chr07 | 32114401                | TT                              | GG              | 1946892337               |
| SNP_P4_98164_32137901 | NC_021166.1    | Ca_kabuli_chr07 | 32137901                | GG                              | TT              | 1946892339               |
| SNP_P4_98165_32137915 | NC_021166.1    | Ca_kabuli_chr07 | 32137915                | CC                              | TT              | 1946892341               |
| SNP_P4_98166_32137923 | NC_021166.1    | Ca_kabuli_chr07 | 32137923                | AA                              | GG              | 1946892343               |
| SNP_P4_98167_32137935 | NC_021166.1    | Ca_kabuli_chr07 | 32137935                | GG                              | TT              | 1946892345               |
| SNP_P4_98168_32156962 | NC_021166.1    | Ca_kabuli_chr07 | 32156962                | AA                              | GG              | 1946892347               |
| SNP_P4_98170_32204673 | NC_021166.1    | Ca_kabuli_chr07 | 32204673                | GG                              | AA              | 1946892349               |
| SNP_P4_98172_32231171 | NC_021166.1    | Ca_kabuli_chr07 | 32231171                | TT                              | AA              | 1946892351               |
| SNP_P4_98173_32231175 | NC_021166.1    | Ca_kabuli_chr07 | 32231175                | TT                              | CC              | 1946892352               |
| SNP_P4_98174_32231177 | NC_021166.1    | Ca_kabuli_chr07 | 32231177                | CC                              | GG              | 1946892354               |
| SNP_P4_98175_32231178 | NC_021166.1    | Ca_kabuli_chr07 | 32231178                | GG                              | AA              | 1946892356               |
| SNP_P4_98176_32231205 | NC_021166.1    | Ca_kabuli_chr07 | 32231205                | AA                              | TT              | 1946892358               |
| SNP_P4_98177_32295822 | NC_021166.1    | Ca_kabuli_chr07 | 32295822                | CC                              | TT              | 1946892360               |
| SNP_P4_98178_32337594 | NC_021166.1    | Ca_kabuli_chr07 | 32337594                | CC                              | TT              | 1946892362               |
| SNP_P4_98179_32355222 | NC_021166.1    | Ca_kabuli_chr07 | 32355222                | CC                              | AA              | 1946892364               |
| SNP_P4_98180_32355227 | NC_021166.1    | Ca_kabuli_chr07 | 32355227                | AA                              | CC              | 1946892366               |
| SNP_P4_98181_32357400 | NC_021166.1    | Ca_kabuli_chr07 | 32357400                | CC                              | TT              | 1946892368               |
| SNP_P4_98182_32357402 | NC_021166.1    | Ca_kabuli_chr07 | 32357402                | GG                              | CC              | 1946892370               |
| SNP_P4_98183_32357672 | NC_021166.1    | Ca_kabuli_chr07 | 32357672                | TT                              | GG              | 1946892372               |
| SNP_P4_98184_32357684 | NC_021166.1    | Ca_kabuli_chr07 | 32357684                | CC                              | AA              | 1946892374               |
| SNP_P4_98185_32357857 | NC_021166.1    | Ca_kabuli_chr07 | 32357857                | AA                              | GG              | 1946892376               |
| SNP_P4_98186_32358064 | NC_021166.1    | Ca_kabuli_chr07 | 32358064                | GG                              | AA              | 1946892378               |
| SNP_P4_98187_32358072 | NC_021166.1    | Ca_kabuli_chr07 | 32358072                | TT                              | CC              | 1946892379               |

| SNPs IDs              | Chromosome IDs | Chromosomes     | Physical positions (bp) | CDC Frontier (Reference genome) | (ILWC46 & LPNB) | NCBI SNPdb Accession IDs |
|-----------------------|----------------|-----------------|-------------------------|---------------------------------|-----------------|--------------------------|
| SNP_P4_98188_32358110 | NC_021166.1    | Ca_kabuli_chr07 | 32358110                | CC                              | TT              | 1946892381               |
| SNP_P4_98190_32358488 | NC_021166.1    | Ca_kabuli_chr07 | 32358488                | TT                              | CC              | 1946892383               |
| SNP_P4_98191_32359440 | NC_021166.1    | Ca_kabuli_chr07 | 32359440                | AA                              | GG              | 1946892385               |
| SNP_P4_98192_32359461 | NC_021166.1    | Ca_kabuli_chr07 | 32359461                | TT                              | GG              | 1946892387               |
| SNP_P4_98193_32359491 | NC_021166.1    | Ca_kabuli_chr07 | 32359491                | TT                              | CC              | 1946892389               |
| SNP_P4_98194_32359497 | NC_021166.1    | Ca_kabuli_chr07 | 32359497                | GG                              | AA              | 1946892391               |
| SNP_P4_98195_32359509 | NC_021166.1    | Ca_kabuli_chr07 | 32359509                | AA                              | GG              | 1946892393               |
| SNP_P4_98196_32359512 | NC_021166.1    | Ca_kabuli_chr07 | 32359512                | CC                              | TT              | 1946892395               |
| SNP_P4_98197_32359521 | NC_021166.1    | Ca_kabuli_chr07 | 32359521                | CC                              | TT              | 1946892397               |
| SNP_P4_98199_32418722 | NC_021166.1    | Ca_kabuli_chr07 | 32418722                | TT                              | GG              | 1946892399               |
| SNP_P4_98201_32425923 | NC_021166.1    | Ca_kabuli_chr07 | 32425923                | TT                              | CC              | 1946892400               |
| SNP_P4_98202_32429218 | NC_021166.1    | Ca_kabuli_chr07 | 32429218                | AA                              | GG              | 1946892402               |
| SNP_P4_98203_32431559 | NC_021166.1    | Ca_kabuli_chr07 | 32431559                | GG                              | AA              | 1946892404               |
| SNP_P4_98204_32434364 | NC_021166.1    | Ca_kabuli_chr07 | 32434364                | TT                              | CC              | 1946892406               |
| SNP_P4_98207_32455319 | NC_021166.1    | Ca_kabuli_chr07 | 32455319                | TT                              | CC              | 1946892408               |
| SNP_P4_98208_32455349 | NC_021166.1    | Ca_kabuli_chr07 | 32455349                | AA                              | GG              | 1946892410               |
| SNP_P4_98209_32455352 | NC_021166.1    | Ca_kabuli_chr07 | 32455352                | AA                              | GG              | 1946892412               |
| SNP_P4_98210_32455395 | NC_021166.1    | Ca_kabuli_chr07 | 32455395                | TT                              | CC              | 1946892414               |
| SNP_P4_98211_32461973 | NC_021166.1    | Ca_kabuli_chr07 | 32461973                | AA                              | GG              | 1946892416               |
| SNP_P4_98212_32462519 | NC_021166.1    | Ca_kabuli_chr07 | 32462519                | AA                              | GG              | 1946892418               |
| SNP_P4_98214_32484468 | NC_021166.1    | Ca_kabuli_chr07 | 32484468                | CC                              | TT              | 1946892420               |
| SNP_P4_98215_32490545 | NC_021166.1    | Ca_kabuli_chr07 | 32490545                | GG                              | CC              | 1946892422               |
| SNP_P4_98216_32490547 | NC_021166.1    | Ca_kabuli_chr07 | 32490547                | GG                              | AA              | 1946892424               |
| SNP_P4_98217_32490764 | NC_021166.1    | Ca_kabuli_chr07 | 32490764                | AA                              | CC              | 1946892426               |
| SNP_P4_98218_32490770 | NC_021166.1    | Ca_kabuli_chr07 | 32490770                | AA                              | GG              | 1946892428               |
| SNP_P4_98219_32490942 | NC_021166.1    | Ca_kabuli_chr07 | 32490942                | TT                              | CC              | 1946892430               |
| SNP_P4_98220_32491112 | NC_021166.1    | Ca_kabuli_chr07 | 32491112                | AA                              | CC              | 1946892432               |
| SNP_P4_98221_32492796 | NC_021166.1    | Ca_kabuli_chr07 | 32492796                | CC                              | TT              | 1946892434               |
| SNP_P4_98222_32508063 | NC_021166.1    | Ca_kabuli_chr07 | 32508063                | TT                              | CC              | 1946892435               |
| SNP_P4_98223_32515131 | NC_021166.1    | Ca_kabuli_chr07 | 32515131                | CC                              | GG              | 1946892437               |
| SNP_P4_98225_32524266 | NC_021166.1    | Ca_kabuli_chr07 | 32524266                | AA                              | TT              | 1946892439               |
| SNP_P4_98226_32529360 | NC_021166.1    | Ca_kabuli_chr07 | 32529360                | GG                              | AA              | 1946892441               |
| SNP_P4_98227_32529371 | NC_021166.1    | Ca_kabuli_chr07 | 32529371                | TT                              | CC              | 1946892443               |
| SNP_P4_98228_32534512 | NC_021166.1    | Ca_kabuli_chr07 | 32534512                | TT                              | GG              | 1946892445               |
| SNP_P4_98229_32534546 | NC_021166.1    | Ca_kabuli_chr07 | 32534546                | AA                              | TT              | 1946892447               |
| SNP_P4_98230_32534574 | NC_021166.1    | Ca_kabuli_chr07 | 32534574                | TT                              | AA              | 1946892449               |
| SNP_P4_98231_32534576 | NC_021166.1    | Ca_kabuli_chr07 | 32534576                | TT                              | GG              | 1946892451               |
| SNP_P4_98232_32536663 | NC_021166.1    | Ca_kabuli_chr07 | 32536663                | AA                              | TT              | 1946892453               |
| SNP_P4_98233_32567949 | NC_021166.1    | Ca_kabuli_chr07 | 32567949                | AA                              | CC              | 1946892455               |
| SNP_P4_98234_32568362 | NC_021166.1    | Ca_kabuli_chr07 | 32568362                | AA                              | GG              | 1946892457               |
| SNP_P4_98236_32572788 | NC_021166.1    | Ca_kabuli_chr07 | 32572788                | CC                              | TT              | 1946892459               |
| SNP_P4_98237_32578844 | NC_021166.1    | Ca_kabuli_chr07 | 32578844                | CC                              | GG              | 1946892461               |

| SNPs IDs              | Chromosome IDs | Chromosomes     | Physical positions (bp) | CDC Frontier (Reference genome) | (ILWC46 & LPNB) | NCBI SNPdb Accession IDs |
|-----------------------|----------------|-----------------|-------------------------|---------------------------------|-----------------|--------------------------|
| SNP_P4_98238_32579214 | NC_021166.1    | Ca_kabuli_chr07 | 32579214                | AA                              | GG              | 1946892463               |
| SNP_P4_98241_32596357 | NC_021166.1    | Ca_kabuli_chr07 | 32596357                | TT                              | AA              | 1946892465               |
| SNP_P4_98244_32601682 | NC_021166.1    | Ca_kabuli_chr07 | 32601682                | GG                              | AA              | 1946892467               |
| SNP_P4_98245_32601717 | NC_021166.1    | Ca_kabuli_chr07 | 32601717                | AA                              | GG              | 1946892469               |
| SNP_P4_98246_32601752 | NC_021166.1    | Ca_kabuli_chr07 | 32601752                | AA                              | GG              | 1946892471               |
| SNP_P4_98247_32606876 | NC_021166.1    | Ca_kabuli_chr07 | 32606876                | TT                              | AA              | 1946892473               |
| SNP_P4_98248_32613857 | NC_021166.1    | Ca_kabuli_chr07 | 32613857                | AA                              | GG              | 1946892475               |
| SNP_P4_98250_32613889 | NC_021166.1    | Ca_kabuli_chr07 | 32613889                | TT                              | AA              | 1946892477               |
| SNP_P4_98251_32613892 | NC_021166.1    | Ca_kabuli_chr07 | 32613892                | GG                              | AA              | 1946892479               |
| SNP_P4_98252_32614128 | NC_021166.1    | Ca_kabuli_chr07 | 32614128                | TT                              | GG              | 1946892481               |
| SNP_P4_98253_32614132 | NC_021166.1    | Ca_kabuli_chr07 | 32614132                | AA                              | GG              | 1946892483               |
| SNP_P4_98254_32614135 | NC_021166.1    | Ca_kabuli_chr07 | 32614135                | CC                              | TT              | 1946892486               |
| SNP_P4_98255_32614153 | NC_021166.1    | Ca_kabuli_chr07 | 32614153                | TT                              | AA              | 1946892488               |
| SNP_P4_98256_32614174 | NC_021166.1    | Ca_kabuli_chr07 | 32614174                | CC                              | AA              | 1946892489               |
| SNP_P4_98258_32614263 | NC_021166.1    | Ca_kabuli_chr07 | 32614263                | GG                              | TT              | 1946892491               |
| SNP_P4_98259_32620962 | NC_021166.1    | Ca_kabuli_chr07 | 32620962                | AA                              | TT              | 1946892493               |
| SNP_P4_98260_32628591 | NC_021166.1    | Ca_kabuli_chr07 | 32628591                | TT                              | CC              | 1946892495               |
| SNP_P4_98261_32632415 | NC_021166.1    | Ca_kabuli_chr07 | 32632415                | GG                              | AA              | 1946892497               |
| SNP_P4_98262_32632959 | NC_021166.1    | Ca_kabuli_chr07 | 32632959                | TT                              | GG              | 1946892499               |
| SNP_P4_98263_32633865 | NC_021166.1    | Ca_kabuli_chr07 | 32633865                | GG                              | CC              | 1946892501               |
| SNP_P4_98264_32635134 | NC_021166.1    | Ca_kabuli_chr07 | 32635134                | CC                              | TT              | 1946892503               |
| SNP_P4_98265_32635356 | NC_021166.1    | Ca_kabuli_chr07 | 32635356                | GG                              | TT              | 1946892505               |
| SNP_P4_98266_32635668 | NC_021166.1    | Ca_kabuli_chr07 | 32635668                | AA                              | TT              | 1946892507               |
| SNP_P4_98267_32635829 | NC_021166.1    | Ca_kabuli_chr07 | 32635829                | AA                              | CC              | 1946892509               |
| SNP_P4_98268_32635848 | NC_021166.1    | Ca_kabuli_chr07 | 32635848                | GG                              | TT              | 1946892511               |
| SNP_P4_98269_32636223 | NC_021166.1    | Ca_kabuli_chr07 | 32636223                | TT                              | AA              | 1946892513               |
| SNP_P4_98270_32636988 | NC_021166.1    | Ca_kabuli_chr07 | 32636988                | CC                              | AA              | 1946892515               |
| SNP_P4_98271_32638645 | NC_021166.1    | Ca_kabuli_chr07 | 32638645                | TT                              | AA              | 1946892517               |
| SNP_P4_98272_32639812 | NC_021166.1    | Ca_kabuli_chr07 | 32639812                | CC                              | TT              | 1946892519               |
| SNP_P4_98273_32639845 | NC_021166.1    | Ca_kabuli_chr07 | 32639845                | AA                              | TT              | 1946892521               |
| SNP_P4_98274_32639858 | NC_021166.1    | Ca_kabuli_chr07 | 32639858                | AA                              | GG              | 1946892523               |
| SNP_P4_98275_32639871 | NC_021166.1    | Ca_kabuli_chr07 | 32639871                | AA                              | GG              | 1946892525               |
| SNP_P4_98277_32649733 | NC_021166.1    | Ca_kabuli_chr07 | 32649733                | GG                              | AA              | 1946892527               |
| SNP_P4_98279_32650629 | NC_021166.1    | Ca_kabuli_chr07 | 32650629                | GG                              | AA              | 1946892529               |
| SNP_P4_98280_32653178 | NC_021166.1    | Ca_kabuli_chr07 | 32653178                | CC                              | TT              | 1946892531               |
| SNP_P4_98282_32653204 | NC_021166.1    | Ca_kabuli_chr07 | 32653204                | GG                              | AA              | 1946892533               |
| SNP_P4_98283_32654139 | NC_021166.1    | Ca_kabuli_chr07 | 32654139                | AA                              | CC              | 1946892535               |
| SNP_P4_98284_32654357 | NC_021166.1    | Ca_kabuli_chr07 | 32654357                | AA                              | TT              | 1946892536               |
| SNP_P4_98285_32654825 | NC_021166.1    | Ca_kabuli_chr07 | 32654825                | GG                              | AA              | 1946892538               |
| SNP_P4_98289_32656090 | NC_021166.1    | Ca_kabuli_chr07 | 32656090                | TT                              | CC              | 1946892540               |
| SNP_P4_98290_32658337 | NC_021166.1    | Ca_kabuli_chr07 | 32658337                | GG                              | AA              | 1946892542               |
| SNP_P4_98291_32671458 | NC_021166.1    | Ca_kabuli_chr07 | 32671458                | TT                              | CC              | 1946892544               |

| SNPs IDs              | Chromosome IDs | Chromosomes     | Physical positions (bp) | CDC Frontier (Reference genome) | (ILWC46 & LPNB) | NCBI SNPdb Accession IDs |
|-----------------------|----------------|-----------------|-------------------------|---------------------------------|-----------------|--------------------------|
| SNP_P4_98293_32677036 | NC_021166.1    | Ca_kabuli_chr07 | 32677036                | AA                              | CC              | 1946892546               |
| SNP_P4_98294_32683204 | NC_021166.1    | Ca_kabuli_chr07 | 32683204                | AA                              | GG              | 1946892548               |
| SNP_P4_98295_32683206 | NC_021166.1    | Ca_kabuli_chr07 | 32683206                | GG                              | AA              | 1946892550               |
| SNP_P4_98296_32683208 | NC_021166.1    | Ca_kabuli_chr07 | 32683208                | AA                              | TT              | 1946892552               |
| SNP_P4_98297_32683213 | NC_021166.1    | Ca_kabuli_chr07 | 32683213                | CC                              | AA              | 1946892554               |
| SNP_P4_98298_32692609 | NC_021166.1    | Ca_kabuli_chr07 | 32692609                | AA                              | GG              | 1946892556               |
| SNP_P4_98299_32693386 | NC_021166.1    | Ca_kabuli_chr07 | 32693386                | AA                              | TT              | 1946892558               |
| SNP_P4_98300_32693444 | NC_021166.1    | Ca_kabuli_chr07 | 32693444                | TT                              | CC              | 1946892560               |
| SNP_P4_98301_32694518 | NC_021166.1    | Ca_kabuli_chr07 | 32694518                | TT                              | CC              | 1946892561               |
| SNP_P4_98302_32694966 | NC_021166.1    | Ca_kabuli_chr07 | 32694966                | CC                              | TT              | 1946892563               |
| SNP_P4_98303_32694992 | NC_021166.1    | Ca_kabuli_chr07 | 32694992                | TT                              | CC              | 1946892565               |
| SNP_P4_98304_32694995 | NC_021166.1    | Ca_kabuli_chr07 | 32694995                | GG                              | TT              | 1946892567               |
| SNP_P4_98305_32694996 | NC_021166.1    | Ca_kabuli_chr07 | 32694996                | AA                              | GG              | 1946892569               |
| SNP_P4_98306_32695018 | NC_021166.1    | Ca_kabuli_chr07 | 32695018                | CC                              | TT              | 1946892571               |
| SNP_P4_98307_32704655 | NC_021166.1    | Ca_kabuli_chr07 | 32704655                | AA                              | GG              | 1946892573               |
| SNP_P4_98308_32704674 | NC_021166.1    | Ca_kabuli_chr07 | 32704674                | GG                              | AA              | 1946892575               |
| SNP_P4_98309_32712153 | NC_021166.1    | Ca_kabuli_chr07 | 32712153                | GG                              | AA              | 1946892577               |
| SNP_P4_98310_32805188 | NC_021166.1    | Ca_kabuli_chr07 | 32805188                | CC                              | GG              | 1946892579               |
| SNP_P4_98311_32836007 | NC_021166.1    | Ca_kabuli_chr07 | 32836007                | TT                              | GG              | 1946892581               |
| SNP_P4_98312_32852068 | NC_021166.1    | Ca_kabuli_chr07 | 32852068                | AA                              | TT              | 1946892583               |
| SNP_P4_98313_32860360 | NC_021166.1    | Ca_kabuli_chr07 | 32860360                | AA                              | GG              | 1946892585               |
| SNP_P4_98314_32860363 | NC_021166.1    | Ca_kabuli_chr07 | 32860363                | AA                              | TT              | 1946892587               |
| SNP_P4_98315_32862219 | NC_021166.1    | Ca_kabuli_chr07 | 32862219                | AA                              | TT              | 1946892589               |
| SNP_P4_98316_32870863 | NC_021166.1    | Ca_kabuli_chr07 | 32870863                | AA                              | TT              | 1946892591               |
| SNP_P4_98317_32870867 | NC_021166.1    | Ca_kabuli_chr07 | 32870867                | TT                              | GG              | 1946892593               |
| SNP_P4_98318_32870870 | NC_021166.1    | Ca_kabuli_chr07 | 32870870                | AA                              | TT              | 1946892595               |
| SNP_P4_98320_32891007 | NC_021166.1    | Ca_kabuli_chr07 | 32891007                | CC                              | TT              | 1946892597               |
| SNP_P4_98321_32896776 | NC_021166.1    | Ca_kabuli_chr07 | 32896776                | GG                              | AA              | 1946892599               |
| SNP_P4_98323_32904234 | NC_021166.1    | Ca_kabuli_chr07 | 32904234                | TT                              | CC              | 1946892601               |
| SNP_P4_98324_32904288 | NC_021166.1    | Ca_kabuli_chr07 | 32904288                | AA                              | GG              | 1946892603               |
| SNP_P4_98325_32921603 | NC_021166.1    | Ca_kabuli_chr07 | 32921603                | AA                              | GG              | 1946892604               |
| SNP_P4_98326_32939947 | NC_021166.1    | Ca_kabuli_chr07 | 32939947                | GG                              | AA              | 1946892606               |
| SNP_P4_98327_32968632 | NC_021166.1    | Ca_kabuli_chr07 | 32968632                | AA                              | GG              | 1946892608               |
| SNP_P4_98329_32970257 | NC_021166.1    | Ca_kabuli_chr07 | 32970257                | TT                              | CC              | 1946892611               |
| SNP_P4_98330_32970259 | NC_021166.1    | Ca_kabuli_chr07 | 32970259                | TT                              | CC              | 1946892612               |
| SNP_P4_98331_32972327 | NC_021166.1    | Ca_kabuli_chr07 | 32972327                | CC                              | AA              | 1946892614               |
| SNP_P4_98332_32974415 | NC_021166.1    | Ca_kabuli_chr07 | 32974415                | AA                              | GG              | 1946892616               |
| SNP_P4_98333_32974450 | NC_021166.1    | Ca_kabuli_chr07 | 32974450                | AA                              | GG              | 1946892618               |
| SNP_P4_98334_32974726 | NC_021166.1    | Ca_kabuli_chr07 | 32974726                | GG                              | AA              | 1946892620               |
| SNP_P4_98336_33017461 | NC_021166.1    | Ca_kabuli_chr07 | 33017461                | GG                              | AA              | 1946892623               |
| SNP_P4_98337_33044855 | NC_021166.1    | Ca_kabuli_chr07 | 33044855                | TT                              | CC              | 1946892625               |
| SNP_P4_98338_33045035 | NC_021166.1    | Ca_kabuli_chr07 | 33045035                | TT                              | CC              | 1946892627               |

| SNPs IDs              | Chromosome IDs | Chromosomes     | Physical positions (bp) | CDC Frontier (Reference genome) | (ILWC46 & LPNB) | NCBI SNPdb Accession IDs |
|-----------------------|----------------|-----------------|-------------------------|---------------------------------|-----------------|--------------------------|
| SNP_P4_98339_33045079 | NC_021166.1    | Ca_kabuli_chr07 | 33045079                | TT                              | AA              | 1946892629               |
| SNP_P4_98340_33045110 | NC_021166.1    | Ca_kabuli_chr07 | 33045110                | AA                              | GG              | 1946892631               |
| SNP_P4_98341_33045188 | NC_021166.1    | Ca_kabuli_chr07 | 33045188                | AA                              | CC              | 1946892633               |
| SNP_P4_98342_33045908 | NC_021166.1    | Ca_kabuli_chr07 | 33045908                | TT                              | CC              | 1946892635               |
| SNP_P4_98343_33045938 | NC_021166.1    | Ca_kabuli_chr07 | 33045938                | TT                              | AA              | 1946892637               |
| SNP_P4_98344_33045939 | NC_021166.1    | Ca_kabuli_chr07 | 33045939                | TT                              | AA              | 1946892639               |
| SNP_P4_98345_33045955 | NC_021166.1    | Ca_kabuli_chr07 | 33045955                | GG                              | TT              | 1946892641               |
| SNP_P4_98346_33049345 | NC_021166.1    | Ca_kabuli_chr07 | 33049345                | AA                              | CC              | 1946892643               |
| SNP_P4_98348_33049427 | NC_021166.1    | Ca_kabuli_chr07 | 33049427                | GG                              | AA              | 1946892645               |
| SNP_P4_98349_33049636 | NC_021166.1    | Ca_kabuli_chr07 | 33049636                | AA                              | TT              | 1946892647               |
| SNP_P4_98350_33049734 | NC_021166.1    | Ca_kabuli_chr07 | 33049734                | CC                              | GG              | 1946892649               |
| SNP_P4_98351_33049980 | NC_021166.1    | Ca_kabuli_chr07 | 33049980                | GG                              | CC              | 1946892651               |
| SNP_P4_98352_33049997 | NC_021166.1    | Ca_kabuli_chr07 | 33049997                | AA                              | GG              | 1946892653               |
| SNP_P4_98353_33050004 | NC_021166.1    | Ca_kabuli_chr07 | 33050004                | AA                              | GG              | 1946892655               |
| SNP_P4_98354_33050238 | NC_021166.1    | Ca_kabuli_chr07 | 33050238                | CC                              | TT              | 1946892657               |
| SNP_P4_98355_33050502 | NC_021166.1    | Ca_kabuli_chr07 | 33050502                | AA                              | TT              | 1946892659               |
| SNP_P4_98356_33050707 | NC_021166.1    | Ca_kabuli_chr07 | 33050707                | AA                              | GG              | 1946892661               |
| SNP_P4_98357_33050731 | NC_021166.1    | Ca_kabuli_chr07 | 33050731                | CC                              | TT              | 1946892663               |
| SNP_P4_98358_33051037 | NC_021166.1    | Ca_kabuli_chr07 | 33051037                | TT                              | AA              | 1946892665               |
| SNP_P4_98360_33054004 | NC_021166.1    | Ca_kabuli_chr07 | 33054004                | CC                              | GG              | 1946892667               |
| SNP_P4_98361_33054054 | NC_021166.1    | Ca_kabuli_chr07 | 33054054                | GG                              | CC              | 1946892669               |
| SNP_P4_98362_33054085 | NC_021166.1    | Ca_kabuli_chr07 | 33054085                | CC                              | AA              | 1946892671               |
| SNP_P4_98363_33054217 | NC_021166.1    | Ca_kabuli_chr07 | 33054217                | AA                              | GG              | 1946892673               |
| SNP_P4_98364_33054252 | NC_021166.1    | Ca_kabuli_chr07 | 33054252                | AA                              | TT              | 1946892675               |
| SNP_P4_98365_33054373 | NC_021166.1    | Ca_kabuli_chr07 | 33054373                | TT                              | AA              | 1946892677               |
| SNP_P4_98366_33054400 | NC_021166.1    | Ca_kabuli_chr07 | 33054400                | AA                              | GG              | 1946892679               |
| SNP_P4_98367_33054924 | NC_021166.1    | Ca_kabuli_chr07 | 33054924                | AA                              | GG              | 1946892681               |
| SNP_P4_98369_33056614 | NC_021166.1    | Ca_kabuli_chr07 | 33056614                | TT                              | CC              | 1946892683               |
| SNP_P4_98371_33057268 | NC_021166.1    | Ca_kabuli_chr07 | 33057268                | TT                              | GG              | 1946892685               |
| SNP_P4_98372_33057300 | NC_021166.1    | Ca_kabuli_chr07 | 33057300                | CC                              | AA              | 1946892687               |
| SNP_P4_98373_33058477 | NC_021166.1    | Ca_kabuli_chr07 | 33058477                | TT                              | AA              | 1946892689               |
| SNP_P4_98374_33058497 | NC_021166.1    | Ca_kabuli_chr07 | 33058497                | GG                              | AA              | 1946892690               |
| SNP_P4_98375_33059275 | NC_021166.1    | Ca_kabuli_chr07 | 33059275                | TT                              | CC              | 1946892691               |
| SNP_P4_98376_33059322 | NC_021166.1    | Ca_kabuli_chr07 | 33059322                | TT                              | AA              | 1946892692               |
| SNP_P4_98377_33059344 | NC_021166.1    | Ca_kabuli_chr07 | 33059344                | GG                              | TT              | 1946892693               |
| SNP_P4_98378_33059402 | NC_021166.1    | Ca_kabuli_chr07 | 33059402                | TT                              | CC              | 1946892694               |
| SNP_P4_98379_33059410 | NC_021166.1    | Ca_kabuli_chr07 | 33059410                | AA                              | GG              | 1946892696               |
| SNP_P4_98380_33059563 | NC_021166.1    | Ca_kabuli_chr07 | 33059563                | CC                              | AA              | 1946892698               |
| SNP_P4_98381_33059574 | NC_021166.1    | Ca_kabuli_chr07 | 33059574                | CC                              | AA              | 1946892700               |
| SNP_P4_98382_33059619 | NC_021166.1    | Ca_kabuli_chr07 | 33059619                | CC                              | AA              | 1946892702               |
| SNP_P4_98383_33059738 | NC_021166.1    | Ca_kabuli_chr07 | 33059738                | GG                              | AA              | 1946892704               |
| SNP_P4_98384_33059768 | NC_021166.1    | Ca_kabuli_chr07 | 33059768                | AA                              | CC              | 1946892706               |

| SNPs IDs              | Chromosome IDs | Chromosomes     | Physical positions (bp) | CDC Frontier (Reference genome) | (ILWC46 & LPNB) | NCBI SNPdb Accession IDs |
|-----------------------|----------------|-----------------|-------------------------|---------------------------------|-----------------|--------------------------|
| SNP_P4_98385_33059778 | NC_021166.1    | Ca_kabuli_chr07 | 33059778                | CC                              | TT              | 1946892708               |
| SNP_P4_98386_33059790 | NC_021166.1    | Ca_kabuli_chr07 | 33059790                | GG                              | TT              | 1946892710               |
| SNP_P4_98387_33059815 | NC_021166.1    | Ca_kabuli_chr07 | 33059815                | GG                              | TT              | 1946892712               |
| SNP_P4_98388_33059829 | NC_021166.1    | Ca_kabuli_chr07 | 33059829                | GG                              | AA              | 1946892714               |
| SNP_P4_98390_33060207 | NC_021166.1    | Ca_kabuli_chr07 | 33060207                | GG                              | TT              | 1946892717               |
| SNP_P4_98392_33060249 | NC_021166.1    | Ca_kabuli_chr07 | 33060249                | TT                              | CC              | 1946892719               |
| SNP_P4_98393_33060585 | NC_021166.1    | Ca_kabuli_chr07 | 33060585                | TT                              | AA              | 1946892721               |
| SNP_P4_98394_33060597 | NC_021166.1    | Ca_kabuli_chr07 | 33060597                | AA                              | GG              | 1946892723               |
| SNP_P4_98395_33061254 | NC_021166.1    | Ca_kabuli_chr07 | 33061254                | TT                              | CC              | 1946892725               |
| SNP_P4_98396_33061547 | NC_021166.1    | Ca_kabuli_chr07 | 33061547                | AA                              | GG              | 1946892727               |
| SNP_P4_98397_33061651 | NC_021166.1    | Ca_kabuli_chr07 | 33061651                | AA                              | TT              | 1946892729               |
| SNP_P4_98398_33061912 | NC_021166.1    | Ca_kabuli_chr07 | 33061912                | CC                              | AA              | 1946892731               |
| SNP_P4_98400_33062226 | NC_021166.1    | Ca_kabuli_chr07 | 33062226                | TT                              | GG              | 1946892733               |
| SNP_P4_98401_33062886 | NC_021166.1    | Ca_kabuli_chr07 | 33062886                | CC                              | TT              | 1946892735               |
| SNP_P4_98402_33062907 | NC_021166.1    | Ca_kabuli_chr07 | 33062907                | CC                              | TT              | 1946892737               |
| SNP_P4_98403_33063638 | NC_021166.1    | Ca_kabuli_chr07 | 33063638                | TT                              | CC              | 1946892739               |
| SNP_P4_98404_33063641 | NC_021166.1    | Ca_kabuli_chr07 | 33063641                | TT                              | CC              | 1946892741               |
| SNP_P4_98405_33063732 | NC_021166.1    | Ca_kabuli_chr07 | 33063732                | GG                              | TT              | 1946892743               |
| SNP_P4_98406_33063794 | NC_021166.1    | Ca_kabuli_chr07 | 33063794                | GG                              | AA              | 1946892745               |
| SNP_P4_98407_33063801 | NC_021166.1    | Ca_kabuli_chr07 | 33063801                | CC                              | TT              | 1946892747               |
| SNP_P4_98408_33064167 | NC_021166.1    | Ca_kabuli_chr07 | 33064167                | CC                              | TT              | 1946892749               |
| SNP_P4_98409_33064234 | NC_021166.1    | Ca_kabuli_chr07 | 33064234                | CC                              | TT              | 1946892751               |
| SNP_P4_98410_33064533 | NC_021166.1    | Ca_kabuli_chr07 | 33064533                | GG                              | AA              | 1946892753               |
| SNP_P4_98411_33064536 | NC_021166.1    | Ca_kabuli_chr07 | 33064536                | TT                              | AA              | 1946892755               |
| SNP_P4_98412_33065334 | NC_021166.1    | Ca_kabuli_chr07 | 33065334                | AA                              | GG              | 1946892757               |
| SNP_P4_98413_33065357 | NC_021166.1    | Ca_kabuli_chr07 | 33065357                | CC                              | AA              | 1946892759               |
| SNP_P4_98414_33065375 | NC_021166.1    | Ca_kabuli_chr07 | 33065375                | CC                              | TT              | 1946892761               |
| SNP_P4_98415_33065376 | NC_021166.1    | Ca_kabuli_chr07 | 33065376                | GG                              | AA              | 1946892763               |
| SNP_P4_98416_33066108 | NC_021166.1    | Ca_kabuli_chr07 | 33066108                | CC                              | TT              | 1946892765               |
| SNP_P4_98417_33066193 | NC_021166.1    | Ca_kabuli_chr07 | 33066193                | TT                              | AA              | 1946892767               |
| SNP_P4_98418_33066375 | NC_021166.1    | Ca_kabuli_chr07 | 33066375                | TT                              | GG              | 1946892770               |
| SNP_P4_98419_33066631 | NC_021166.1    | Ca_kabuli_chr07 | 33066631                | AA                              | GG              | 1946892772               |
| SNP_P4_98420_33066722 | NC_021166.1    | Ca_kabuli_chr07 | 33066722                | TT                              | CC              | 1946892774               |
| SNP_P4_98421_33066824 | NC_021166.1    | Ca_kabuli_chr07 | 33066824                | TT                              | GG              | 1946892776               |
| SNP_P4_98422_33066831 | NC_021166.1    | Ca_kabuli_chr07 | 33066831                | AA                              | GG              | 1946892778               |
| SNP_P4_98423_33066834 | NC_021166.1    | Ca_kabuli_chr07 | 33066834                | GG                              | AA              | 1946892780               |
| SNP_P4_98424_33066861 | NC_021166.1    | Ca_kabuli_chr07 | 33066861                | GG                              | AA              | 1946892782               |
| SNP_P4_98425_33066877 | NC_021166.1    | Ca_kabuli_chr07 | 33066877                | CC                              | TT              | 1946892784               |
| SNP_P4_98426_33066911 | NC_021166.1    | Ca_kabuli_chr07 | 33066911                | GG                              | AA              | 1946892786               |
| SNP_P4_98427_33066921 | NC_021166.1    | Ca_kabuli_chr07 | 33066921                | GG                              | AA              | 1946892788               |
| SNP_P4_98428_33066961 | NC_021166.1    | Ca_kabuli_chr07 | 33066961                | CC                              | TT              | 1946892790               |
| SNP_P4_98429_33067033 | NC_021166.1    | Ca_kabuli_chr07 | 33067033                | GG                              | AA              | 1946892792               |



| SNPs IDs              | Chromosome IDs | Chromosomes     | Physical positions (bp) | CDC Frontier (Reference genome) | (ILWC46 & LPNB) | NCBI SNPdb Accession IDs |
|-----------------------|----------------|-----------------|-------------------------|---------------------------------|-----------------|--------------------------|
| SNP_P4_98430_33067355 | NC_021166.1    | Ca_kabuli_chr07 | 33067355                | CC                              | TT              | 1946892794               |
| SNP_P4_98431_33067366 | NC_021166.1    | Ca_kabuli_chr07 | 33067366                | TT                              | CC              | 1946892796               |
| SNP_P4_98432_33067399 | NC_021166.1    | Ca_kabuli_chr07 | 33067399                | AA                              | GG              | 1946892798               |
| SNP_P4_98433_33067879 | NC_021166.1    | Ca_kabuli_chr07 | 33067879                | AA                              | CC              | 1946892800               |
| SNP_P4_98434_33067955 | NC_021166.1    | Ca_kabuli_chr07 | 33067955                | AA                              | GG              | 1946892802               |
| SNP_P4_98435_33068101 | NC_021166.1    | Ca_kabuli_chr07 | 33068101                | CC                              | TT              | 1946892804               |
| SNP_P4_98436_33071099 | NC_021166.1    | Ca_kabuli_chr07 | 33071099                | GG                              | TT              | 1946892806               |
| SNP_P4_98437_33071319 | NC_021166.1    | Ca_kabuli_chr07 | 33071319                | CC                              | TT              | 1946892808               |
| SNP_P4_98438_33071344 | NC_021166.1    | Ca_kabuli_chr07 | 33071344                | CC                              | TT              | 1946892810               |
| SNP_P4_98439_33071396 | NC_021166.1    | Ca_kabuli_chr07 | 33071396                | TT                              | AA              | 1946892812               |
| SNP_P4_98440_33071929 | NC_021166.1    | Ca_kabuli_chr07 | 33071929                | GG                              | AA              | 1946892814               |
| SNP_P4_98441_33072640 | NC_021166.1    | Ca_kabuli_chr07 | 33072640                | GG                              | AA              | 1946892816               |
| SNP_P4_98442_33073022 | NC_021166.1    | Ca_kabuli_chr07 | 33073022                | GG                              | AA              | 1946892818               |
| SNP_P4_98443_33073052 | NC_021166.1    | Ca_kabuli_chr07 | 33073052                | AA                              | GG              | 1946892820               |
| SNP_P4_98444_33073063 | NC_021166.1    | Ca_kabuli_chr07 | 33073063                | CC                              | AA              | 1946892822               |
| SNP_P4_98445_33073670 | NC_021166.1    | Ca_kabuli_chr07 | 33073670                | AA                              | GG              | 1946892824               |
| SNP_P4_98446_33075442 | NC_021166.1    | Ca_kabuli_chr07 | 33075442                | GG                              | AA              | 1946892826               |
| SNP_P4_98447_33099194 | NC_021166.1    | Ca_kabuli_chr07 | 33099194                | GG                              | TT              | 1946892828               |
| SNP_P4_98448_33103541 | NC_021166.1    | Ca_kabuli_chr07 | 33103541                | GG                              | TT              | 1946892830               |
| SNP_P4_98449_33103910 | NC_021166.1    | Ca_kabuli_chr07 | 33103910                | CC                              | TT              | 1946892832               |
| SNP_P4_98450_33103916 | NC_021166.1    | Ca_kabuli_chr07 | 33103916                | TT                              | CC              | 1946892834               |
| SNP_P4_98451_33104286 | NC_021166.1    | Ca_kabuli_chr07 | 33104286                | CC                              | TT              | 1946892836               |
| SNP_P4_98452_33104325 | NC_021166.1    | Ca_kabuli_chr07 | 33104325                | GG                              | AA              | 1946892838               |
| SNP_P4_98453_33107162 | NC_021166.1    | Ca_kabuli_chr07 | 33107162                | GG                              | AA              | 1946892840               |
| SNP_P4_98454_33107249 | NC_021166.1    | Ca_kabuli_chr07 | 33107249                | AA                              | CC              | 1946892842               |
| SNP_P4_98455_33107278 | NC_021166.1    | Ca_kabuli_chr07 | 33107278                | AA                              | GG              | 1946892844               |
| SNP_P4_98456_33107281 | NC_021166.1    | Ca_kabuli_chr07 | 33107281                | TT                              | CC              | 1946892846               |
| SNP_P4_98457_33107333 | NC_021166.1    | Ca_kabuli_chr07 | 33107333                | CC                              | TT              | 1946892848               |
| SNP_P4_98458_33107334 | NC_021166.1    | Ca_kabuli_chr07 | 33107334                | GG                              | AA              | 1946892850               |
| SNP_P4_98459_33107463 | NC_021166.1    | Ca_kabuli_chr07 | 33107463                | TT                              | CC              | 1946892852               |
| SNP_P4_98460_33107498 | NC_021166.1    | Ca_kabuli_chr07 | 33107498                | CC                              | TT              | 1946892854               |
| SNP_P4_98461_33108999 | NC_021166.1    | Ca_kabuli_chr07 | 33108999                | TT                              | GG              | 1946892856               |
| SNP_P4_98462_33109025 | NC_021166.1    | Ca_kabuli_chr07 | 33109025                | CC                              | TT              | 1946892858               |
| SNP_P4_98463_33109031 | NC_021166.1    | Ca_kabuli_chr07 | 33109031                | GG                              | AA              | 1946892860               |
| SNP_P4_98464_33109073 | NC_021166.1    | Ca_kabuli_chr07 | 33109073                | CC                              | AA              | 1946892862               |
| SNP_P4_98465_33109226 | NC_021166.1    | Ca_kabuli_chr07 | 33109226                | AA                              | TT              | 1946892865               |
| SNP_P4_98466_33111829 | NC_021166.1    | Ca_kabuli_chr07 | 33111829                | AA                              | TT              | 1946892867               |
| SNP_P4_98467_33112090 | NC_021166.1    | Ca_kabuli_chr07 | 33112090                | CC                              | AA              | 1946892869               |
| SNP_P4_98468_33112123 | NC_021166.1    | Ca_kabuli_chr07 | 33112123                | AA                              | GG              | 1946892871               |
| SNP_P4_98469_33112185 | NC_021166.1    | Ca_kabuli_chr07 | 33112185                | GG                              | AA              | 1946892874               |
| SNP_P4_98470_33113027 | NC_021166.1    | Ca_kabuli_chr07 | 33113027                | GG                              | AA              | 1946892876               |
| SNP_P4_98471_33113031 | NC_021166.1    | Ca_kabuli_chr07 | 33113031                | AA                              | CC              | 1946892878               |

| SNPs IDs              | Chromosome IDs | Chromosomes     | Physical positions (bp) | CDC Frontier (Reference genome) | (ILWC46 & LPNB) | NCBI SNPdb Accession IDs |
|-----------------------|----------------|-----------------|-------------------------|---------------------------------|-----------------|--------------------------|
| SNP_P4_98472_33114950 | NC_021166.1    | Ca_kabuli_chr07 | 33114950                | GG                              | TT              | 1946892880               |
| SNP_P4_98473_33115408 | NC_021166.1    | Ca_kabuli_chr07 | 33115408                | TT                              | CC              | 1946892882               |
| SNP_P4_98474_33115488 | NC_021166.1    | Ca_kabuli_chr07 | 33115488                | GG                              | CC              | 1946892884               |
| SNP_P4_98475_33115640 | NC_021166.1    | Ca_kabuli_chr07 | 33115640                | CC                              | TT              | 1946892886               |
| SNP_P4_98476_33117176 | NC_021166.1    | Ca_kabuli_chr07 | 33117176                | CC                              | TT              | 1946892888               |
| SNP_P4_98477_33117179 | NC_021166.1    | Ca_kabuli_chr07 | 33117179                | TT                              | GG              | 1946892890               |
| SNP_P4_98478_33118327 | NC_021166.1    | Ca_kabuli_chr07 | 33118327                | CC                              | GG              | 1946892892               |
| SNP_P4_98479_33118352 | NC_021166.1    | Ca_kabuli_chr07 | 33118352                | CC                              | AA              | 1946892894               |
| SNP_P4_98480_33118585 | NC_021166.1    | Ca_kabuli_chr07 | 33118585                | CC                              | TT              | 1946892896               |
| SNP_P4_98481_33118975 | NC_021166.1    | Ca_kabuli_chr07 | 33118975                | AA                              | TT              | 1946892898               |
| SNP_P4_98482_33119885 | NC_021166.1    | Ca_kabuli_chr07 | 33119885                | GG                              | AA              | 1946892900               |
| SNP_P4_98483_33123683 | NC_021166.1    | Ca_kabuli_chr07 | 33123683                | AA                              | CC              | 1946892902               |
| SNP_P4_98484_33123691 | NC_021166.1    | Ca_kabuli_chr07 | 33123691                | CC                              | TT              | 1946892904               |
| SNP_P4_98485_33124438 | NC_021166.1    | Ca_kabuli_chr07 | 33124438                | AA                              | TT              | 1946892906               |
| SNP_P4_98486_33124713 | NC_021166.1    | Ca_kabuli_chr07 | 33124713                | GG                              | AA              | 1946892908               |
| SNP_P4_98487_33125592 | NC_021166.1    | Ca_kabuli_chr07 | 33125592                | TT                              | CC              | 1946892910               |
| SNP_P4_98488_33125613 | NC_021166.1    | Ca_kabuli_chr07 | 33125613                | CC                              | AA              | 1946892912               |
| SNP_P4_98489_33125956 | NC_021166.1    | Ca_kabuli_chr07 | 33125956                | TT                              | GG              | 1946892914               |
| SNP_P4_98491_33127743 | NC_021166.1    | Ca_kabuli_chr07 | 33127743                | GG                              | AA              | 1946892916               |
| SNP_P4_98492_33127909 | NC_021166.1    | Ca_kabuli_chr07 | 33127909                | TT                              | GG              | 1946892918               |
| SNP_P4_98494_33130768 | NC_021166.1    | Ca_kabuli_chr07 | 33130768                | TT                              | CC              | 1946892920               |
| SNP_P4_98495_33130769 | NC_021166.1    | Ca_kabuli_chr07 | 33130769                | TT                              | CC              | 1946892922               |
| SNP_P4_98496_33132417 | NC_021166.1    | Ca_kabuli_chr07 | 33132417                | GG                              | AA              | 1946892924               |
| SNP_P4_98497_33132503 | NC_021166.1    | Ca_kabuli_chr07 | 33132503                | CC                              | TT              | 1946892926               |
| SNP_P4_98498_33132532 | NC_021166.1    | Ca_kabuli_chr07 | 33132532                | TT                              | AA              | 1946892928               |
| SNP_P4_98499_33132880 | NC_021166.1    | Ca_kabuli_chr07 | 33132880                | GG                              | AA              | 1946892930               |
| SNP_P4_98500_33133763 | NC_021166.1    | Ca_kabuli_chr07 | 33133763                | AA                              | GG              | 1946892932               |
| SNP_P4_98501_33133769 | NC_021166.1    | Ca_kabuli_chr07 | 33133769                | CC                              | TT              | 1946892934               |
| SNP_P4_98502_33134144 | NC_021166.1    | Ca_kabuli_chr07 | 33134144                | GG                              | AA              | 1946892937               |
| SNP_P4_98503_33134151 | NC_021166.1    | Ca_kabuli_chr07 | 33134151                | AA                              | CC              | 1946892939               |
| SNP_P4_98504_33134179 | NC_021166.1    | Ca_kabuli_chr07 | 33134179                | CC                              | TT              | 1946892941               |
| SNP_P4_98505_33136079 | NC_021166.1    | Ca_kabuli_chr07 | 33136079                | GG                              | AA              | 1946892943               |
| SNP_P4_98506_33136330 | NC_021166.1    | Ca_kabuli_chr07 | 33136330                | GG                              | TT              | 1946892945               |
| SNP_P4_98507_33137952 | NC_021166.1    | Ca_kabuli_chr07 | 33137952                | TT                              | CC              | 1946892947               |
| SNP_P4_98508_33138014 | NC_021166.1    | Ca_kabuli_chr07 | 33138014                | TT                              | GG              | 1946892949               |
| SNP_P4_98509_33138190 | NC_021166.1    | Ca_kabuli_chr07 | 33138190                | AA                              | GG              | 1946892951               |
| SNP_P4_98510_33138239 | NC_021166.1    | Ca_kabuli_chr07 | 33138239                | CC                              | TT              | 1946892953               |
| SNP_P4_98511_33142523 | NC_021166.1    | Ca_kabuli_chr07 | 33142523                | CC                              | TT              | 1946892955               |
| SNP_P4_98512_33142701 | NC_021166.1    | Ca_kabuli_chr07 | 33142701                | GG                              | AA              | 1946892957               |
| SNP_P4_98513_33142888 | NC_021166.1    | Ca_kabuli_chr07 | 33142888                | AA                              | CC              | 1946892959               |
| SNP_P4_98514_33143206 | NC_021166.1    | Ca_kabuli_chr07 | 33143206                | CC                              | TT              | 1946892961               |
| SNP_P4_98515_33144321 | NC_021166.1    | Ca_kabuli_chr07 | 33144321                | GG                              | AA              | 1946892963               |

| SNPs IDs              | Chromosome IDs | Chromosomes     | Physical positions (bp) | CDC Frontier (Reference genome) | (ILWC46 & LPNB) | NCBI SNPdb Accession IDs |
|-----------------------|----------------|-----------------|-------------------------|---------------------------------|-----------------|--------------------------|
| SNP_P4_98516_33146210 | NC_021166.1    | Ca_kabuli_chr07 | 33146210                | AA                              | GG              | 1946892965               |
| SNP_P4_98517_33146225 | NC_021166.1    | Ca_kabuli_chr07 | 33146225                | TT                              | CC              | 1946892967               |
| SNP_P4_98518_33146281 | NC_021166.1    | Ca_kabuli_chr07 | 33146281                | CC                              | TT              | 1946892969               |
| SNP_P4_98519_33146284 | NC_021166.1    | Ca_kabuli_chr07 | 33146284                | AA                              | GG              | 1946892971               |
| SNP_P4_98520_33146317 | NC_021166.1    | Ca_kabuli_chr07 | 33146317                | AA                              | TT              | 1946892973               |
| SNP_P4_98521_33146336 | NC_021166.1    | Ca_kabuli_chr07 | 33146336                | TT                              | CC              | 1946892975               |
| SNP_P4_98522_33146574 | NC_021166.1    | Ca_kabuli_chr07 | 33146574                | TT                              | AA              | 1946892977               |
| SNP_P4_98523_33146583 | NC_021166.1    | Ca_kabuli_chr07 | 33146583                | CC                              | AA              | 1946892979               |
| SNP_P4_98524_33146592 | NC_021166.1    | Ca_kabuli_chr07 | 33146592                | AA                              | GG              | 1946892981               |
| SNP_P4_98525_33146651 | NC_021166.1    | Ca_kabuli_chr07 | 33146651                | AA                              | GG              | 1946892983               |
| SNP_P4_98526_33147215 | NC_021166.1    | Ca_kabuli_chr07 | 33147215                | AA                              | GG              | 1946892985               |
| SNP_P4_98527_33147436 | NC_021166.1    | Ca_kabuli_chr07 | 33147436                | TT                              | CC              | 1946892987               |
| SNP_P4_98528_33148768 | NC_021166.1    | Ca_kabuli_chr07 | 33148768                | TT                              | CC              | 1946892989               |
| SNP_P4_98529_33149613 | NC_021166.1    | Ca_kabuli_chr07 | 33149613                | GG                              | AA              | 1946892991               |
| SNP_P4_98530_33150081 | NC_021166.1    | Ca_kabuli_chr07 | 33150081                | TT                              | CC              | 1946892993               |
| SNP_P4_98531_33150340 | NC_021166.1    | Ca_kabuli_chr07 | 33150340                | CC                              | AA              | 1946892995               |
| SNP_P4_98532_33150523 | NC_021166.1    | Ca_kabuli_chr07 | 33150523                | CC                              | TT              | 1946892997               |
| SNP_P4_98533_33150895 | NC_021166.1    | Ca_kabuli_chr07 | 33150895                | TT                              | CC              | 1946892999               |
| SNP_P4_98534_33153114 | NC_021166.1    | Ca_kabuli_chr07 | 33153114                | GG                              | AA              | 1946893001               |
| SNP_P4_98535_33153162 | NC_021166.1    | Ca_kabuli_chr07 | 33153162                | GG                              | AA              | 1946893003               |
| SNP_P4_98536_33155232 | NC_021166.1    | Ca_kabuli_chr07 | 33155232                | AA                              | GG              | 1946893005               |
| SNP_P4_98537_33155579 | NC_021166.1    | Ca_kabuli_chr07 | 33155579                | TT                              | CC              | 1946893007               |
| SNP_P4_98538_33156270 | NC_021166.1    | Ca_kabuli_chr07 | 33156270                | AA                              | TT              | 1946893009               |
| SNP_P4_98539_33156277 | NC_021166.1    | Ca_kabuli_chr07 | 33156277                | AA                              | GG              | 1946893011               |
| SNP_P4_98540_33157449 | NC_021166.1    | Ca_kabuli_chr07 | 33157449                | CC                              | TT              | 1946893013               |
| SNP_P4_98541_33157476 | NC_021166.1    | Ca_kabuli_chr07 | 33157476                | GG                              | CC              | 1946893015               |
| SNP_P4_98542_33157488 | NC_021166.1    | Ca_kabuli_chr07 | 33157488                | TT                              | CC              | 1946893017               |
| SNP_P4_98543_33157495 | NC_021166.1    | Ca_kabuli_chr07 | 33157495                | TT                              | AA              | 1946893020               |
| SNP_P4_98544_33157550 | NC_021166.1    | Ca_kabuli_chr07 | 33157550                | AA                              | GG              | 1946893022               |
| SNP_P4_98545_33157731 | NC_021166.1    | Ca_kabuli_chr07 | 33157731                | TT                              | CC              | 1946893024               |
| SNP_P4_98546_33157841 | NC_021166.1    | Ca_kabuli_chr07 | 33157841                | AA                              | GG              | 1946893026               |
| SNP_P4_98547_33158034 | NC_021166.1    | Ca_kabuli_chr07 | 33158034                | CC                              | TT              | 1946893028               |
| SNP_P4_98548_33158035 | NC_021166.1    | Ca_kabuli_chr07 | 33158035                | CC                              | TT              | 1946893030               |
| SNP_P4_98549_33158097 | NC_021166.1    | Ca_kabuli_chr07 | 33158097                | GG                              | CC              | 1946893032               |
| SNP_P4_98550_33158445 | NC_021166.1    | Ca_kabuli_chr07 | 33158445                | GG                              | TT              | 1946893034               |
| SNP_P4_98551_33158458 | NC_021166.1    | Ca_kabuli_chr07 | 33158458                | CC                              | TT              | 1946893036               |
| SNP_P4_98552_33159053 | NC_021166.1    | Ca_kabuli_chr07 | 33159053                | AA                              | GG              | 1946893039               |
| SNP_P4_98554_33159786 | NC_021166.1    | Ca_kabuli_chr07 | 33159786                | GG                              | CC              | 1946893041               |
| SNP_P4_98555_33159942 | NC_021166.1    | Ca_kabuli_chr07 | 33159942                | AA                              | GG              | 1946893043               |
| SNP_P4_98556_33159984 | NC_021166.1    | Ca_kabuli_chr07 | 33159984                | TT                              | GG              | 1946893045               |
| SNP_P4_98557_33159985 | NC_021166.1    | Ca_kabuli_chr07 | 33159985                | GG                              | AA              | 1946893047               |
| SNP_P4_98558_33159995 | NC_021166.1    | Ca_kabuli_chr07 | 33159995                | TT                              | AA              | 1946893049               |

| SNPs IDs              | Chromosome IDs | Chromosomes     | Physical positions (bp) | CDC Frontier (Reference genome) | (ILWC46 & LPNB) | NCBI SNPdb Accession IDs |
|-----------------------|----------------|-----------------|-------------------------|---------------------------------|-----------------|--------------------------|
| SNP_P4_98559_33160245 | NC_021166.1    | Ca_kabuli_chr07 | 33160245                | CC                              | AA              | 1946893051               |
| SNP_P4_98560_33160620 | NC_021166.1    | Ca_kabuli_chr07 | 33160620                | CC                              | GG              | 1946893053               |
| SNP_P4_98561_33160906 | NC_021166.1    | Ca_kabuli_chr07 | 33160906                | GG                              | AA              | 1946893055               |
| SNP_P4_98564_33162862 | NC_021166.1    | Ca_kabuli_chr07 | 33162862                | CC                              | TT              | 1946893057               |
| SNP_P4_98565_33163367 | NC_021166.1    | Ca_kabuli_chr07 | 33163367                | AA                              | TT              | 1946893060               |
| SNP_P4_98566_33163406 | NC_021166.1    | Ca_kabuli_chr07 | 33163406                | AA                              | TT              | 1946893062               |
| SNP_P4_98567_33163669 | NC_021166.1    | Ca_kabuli_chr07 | 33163669                | GG                              | AA              | 1946893064               |
| SNP_P4_98568_33163699 | NC_021166.1    | Ca_kabuli_chr07 | 33163699                | AA                              | CC              | 1946893066               |
| SNP_P4_98569_33163709 | NC_021166.1    | Ca_kabuli_chr07 | 33163709                | CC                              | TT              | 1946893068               |
| SNP_P4_98570_33163748 | NC_021166.1    | Ca_kabuli_chr07 | 33163748                | CC                              | AA              | 1946893070               |
| SNP_P4_98571_33164343 | NC_021166.1    | Ca_kabuli_chr07 | 33164343                | TT                              | CC              | 1946893072               |
| SNP_P4_98572_33164344 | NC_021166.1    | Ca_kabuli_chr07 | 33164344                | CC                              | AA              | 1946893074               |
| SNP_P4_98573_33165858 | NC_021166.1    | Ca_kabuli_chr07 | 33165858                | TT                              | CC              | 1946893076               |
| SNP_P4_98574_33165884 | NC_021166.1    | Ca_kabuli_chr07 | 33165884                | CC                              | AA              | 1946893078               |
| SNP_P4_98575_33166552 | NC_021166.1    | Ca_kabuli_chr07 | 33166552                | TT                              | CC              | 1946893080               |
| SNP_P4_98576_33168307 | NC_021166.1    | Ca_kabuli_chr07 | 33168307                | CC                              | TT              | 1946893082               |
| SNP_P4_98577_33168331 | NC_021166.1    | Ca_kabuli_chr07 | 33168331                | AA                              | CC              | 1946893084               |
| SNP_P4_98578_33168394 | NC_021166.1    | Ca_kabuli_chr07 | 33168394                | AA                              | GG              | 1946893086               |
| SNP_P4_98579_33168545 | NC_021166.1    | Ca_kabuli_chr07 | 33168545                | GG                              | AA              | 1946893088               |
| SNP_P4_98580_33168601 | NC_021166.1    | Ca_kabuli_chr07 | 33168601                | CC                              | AA              | 1946893091               |
| SNP_P4_98581_33168610 | NC_021166.1    | Ca_kabuli_chr07 | 33168610                | GG                              | AA              | 1946893093               |
| SNP_P4_98582_33169317 | NC_021166.1    | Ca_kabuli_chr07 | 33169317                | TT                              | AA              | 1946893095               |
| SNP_P4_98584_33169534 | NC_021166.1    | Ca_kabuli_chr07 | 33169534                | TT                              | CC              | 1946893097               |
| SNP_P4_98585_33169535 | NC_021166.1    | Ca_kabuli_chr07 | 33169535                | TT                              | AA              | 1946893099               |
| SNP_P4_98586_33169576 | NC_021166.1    | Ca_kabuli_chr07 | 33169576                | TT                              | AA              | 1946893101               |
| SNP_P4_98587_33169952 | NC_021166.1    | Ca_kabuli_chr07 | 33169952                | TT                              | CC              | 1946893103               |
| SNP_P4_98588_33171236 | NC_021166.1    | Ca_kabuli_chr07 | 33171236                | GG                              | TT              | 1946893105               |
| SNP_P4_98589_33171355 | NC_021166.1    | Ca_kabuli_chr07 | 33171355                | GG                              | AA              | 1946893107               |
| SNP_P4_98590_33171359 | NC_021166.1    | Ca_kabuli_chr07 | 33171359                | GG                              | AA              | 1946893109               |
| SNP_P4_98591_33171371 | NC_021166.1    | Ca_kabuli_chr07 | 33171371                | TT                              | CC              | 1946893111               |
| SNP_P4_98592_33171443 | NC_021166.1    | Ca_kabuli_chr07 | 33171443                | AA                              | TT              | 1946893113               |
| SNP_P4_98594_33171810 | NC_021166.1    | Ca_kabuli_chr07 | 33171810                | TT                              | CC              | 1946893115               |
| SNP_P4_98595_33171834 | NC_021166.1    | Ca_kabuli_chr07 | 33171834                | AA                              | GG              | 1946893117               |
| SNP_P4_98596_33171949 | NC_021166.1    | Ca_kabuli_chr07 | 33171949                | CC                              | TT              | 1946893119               |
| SNP_P4_98597_33172111 | NC_021166.1    | Ca_kabuli_chr07 | 33172111                | CC                              | GG              | 1946893121               |
| SNP_P4_98598_33172136 | NC_021166.1    | Ca_kabuli_chr07 | 33172136                | TT                              | CC              | 1946893123               |
| SNP_P4_98599_33172141 | NC_021166.1    | Ca_kabuli_chr07 | 33172141                | CC                              | TT              | 1946893125               |
| SNP_P4_98600_33172847 | NC_021166.1    | Ca_kabuli_chr07 | 33172847                | AA                              | TT              | 1946893127               |
| SNP_P4_98601_33172861 | NC_021166.1    | Ca_kabuli_chr07 | 33172861                | AA                              | GG              | 1946893129               |
| SNP_P4_98602_33174267 | NC_021166.1    | Ca_kabuli_chr07 | 33174267                | TT                              | GG              | 1946893131               |
| SNP_P4_98603_33174940 | NC_021166.1    | Ca_kabuli_chr07 | 33174940                | TT                              | CC              | 1946893133               |
| SNP_P4_98604_33174981 | NC_021166.1    | Ca_kabuli_chr07 | 33174981                | TT                              | GG              | 1946893135               |

| SNPs IDs              | Chromosome IDs | Chromosomes     | Physical positions (bp) | CDC Frontier (Reference genome) | (ILWC46 & LPNB) | NCBI SNPdb Accession IDs |
|-----------------------|----------------|-----------------|-------------------------|---------------------------------|-----------------|--------------------------|
| SNP_P4_98605_33174997 | NC_021166.1    | Ca_kabuli_chr07 | 33174997                | CC                              | TT              | 1946893137               |
| SNP_P4_98606_33175021 | NC_021166.1    | Ca_kabuli_chr07 | 33175021                | TT                              | CC              | 1946893139               |
| SNP_P4_98607_33175041 | NC_021166.1    | Ca_kabuli_chr07 | 33175041                | AA                              | CC              | 1946893141               |
| SNP_P4_98609_33175133 | NC_021166.1    | Ca_kabuli_chr07 | 33175133                | TT                              | CC              | 1946893143               |
| SNP_P4_98610_33177415 | NC_021166.1    | Ca_kabuli_chr07 | 33177415                | GG                              | AA              | 1946893145               |
| SNP_P4_98611_33177479 | NC_021166.1    | Ca_kabuli_chr07 | 33177479                | CC                              | AA              | 1946893147               |
| SNP_P4_98612_33177483 | NC_021166.1    | Ca_kabuli_chr07 | 33177483                | AA                              | TT              | 1946893149               |
| SNP_P4_98613_33177750 | NC_021166.1    | Ca_kabuli_chr07 | 33177750                | GG                              | AA              | 1946893151               |
| SNP_P4_98614_33177766 | NC_021166.1    | Ca_kabuli_chr07 | 33177766                | TT                              | CC              | 1946893153               |
| SNP_P4_98615_33187147 | NC_021166.1    | Ca_kabuli_chr07 | 33187147                | CC                              | AA              | 1946893155               |
| SNP_P4_98616_33188196 | NC_021166.1    | Ca_kabuli_chr07 | 33188196                | GG                              | AA              | 1946893157               |
| SNP_P4_98617_33188243 | NC_021166.1    | Ca_kabuli_chr07 | 33188243                | CC                              | TT              | 1946893159               |
| SNP_P4_98618_33188263 | NC_021166.1    | Ca_kabuli_chr07 | 33188263                | GG                              | TT              | 1946893161               |
| SNP_P4_98620_33188936 | NC_021166.1    | Ca_kabuli_chr07 | 33188936                | AA                              | GG              | 1946893163               |
| SNP_P4_98621_33188993 | NC_021166.1    | Ca_kabuli_chr07 | 33188993                | GG                              | AA              | 1946893165               |
| SNP_P4_98622_33189010 | NC_021166.1    | Ca_kabuli_chr07 | 33189010                | GG                              | AA              | 1946893167               |
| SNP_P4_98623_33189083 | NC_021166.1    | Ca_kabuli_chr07 | 33189083                | AA                              | GG              | 1946893169               |
| SNP_P4_98624_33189114 | NC_021166.1    | Ca_kabuli_chr07 | 33189114                | AA                              | TT              | 1946893171               |
| SNP_P4_98626_33189541 | NC_021166.1    | Ca_kabuli_chr07 | 33189541                | AA                              | GG              | 1946893173               |
| SNP_P4_98627_33189666 | NC_021166.1    | Ca_kabuli_chr07 | 33189666                | AA                              | TT              | 1946893175               |
| SNP_P4_98628_33189690 | NC_021166.1    | Ca_kabuli_chr07 | 33189690                | AA                              | CC              | 1946893177               |
| SNP_P4_98629_33189766 | NC_021166.1    | Ca_kabuli_chr07 | 33189766                | CC                              | TT              | 1946893179               |
| SNP_P4_98630_33189791 | NC_021166.1    | Ca_kabuli_chr07 | 33189791                | AA                              | GG              | 1946893181               |
| SNP_P4_98631_33189893 | NC_021166.1    | Ca_kabuli_chr07 | 33189893                | GG                              | AA              | 1946893183               |
| SNP_P4_98632_33190221 | NC_021166.1    | Ca_kabuli_chr07 | 33190221                | GG                              | AA              | 1946893186               |
| SNP_P4_98633_33190295 | NC_021166.1    | Ca_kabuli_chr07 | 33190295                | AA                              | GG              | 1946893188               |
| SNP_P4_98634_33190812 | NC_021166.1    | Ca_kabuli_chr07 | 33190812                | AA                              | CC              | 1946893190               |
| SNP_P4_98635_33190860 | NC_021166.1    | Ca_kabuli_chr07 | 33190860                | AA                              | TT              | 1946893192               |
| SNP_P4_98636_33190861 | NC_021166.1    | Ca_kabuli_chr07 | 33190861                | TT                              | AA              | 1946893194               |
| SNP_P4_98637_33190910 | NC_021166.1    | Ca_kabuli_chr07 | 33190910                | AA                              | TT              | 1946893196               |
| SNP_P4_98638_33190942 | NC_021166.1    | Ca_kabuli_chr07 | 33190942                | CC                              | TT              | 1946893198               |
| SNP_P4_98639_33190957 | NC_021166.1    | Ca_kabuli_chr07 | 33190957                | TT                              | AA              | 1946893200               |
| SNP_P4_98640_33190963 | NC_021166.1    | Ca_kabuli_chr07 | 33190963                | GG                              | AA              | 1946893202               |
| SNP_P4_98641_33191084 | NC_021166.1    | Ca_kabuli_chr07 | 33191084                | TT                              | CC              | 1946893204               |
| SNP_P4_98642_33191659 | NC_021166.1    | Ca_kabuli_chr07 | 33191659                | AA                              | TT              | 1946893207               |
| SNP_P4_98643_33191709 | NC_021166.1    | Ca_kabuli_chr07 | 33191709                | GG                              | AA              | 1946893209               |
| SNP_P4_98644_33191743 | NC_021166.1    | Ca_kabuli_chr07 | 33191743                | GG                              | TT              | 1946893211               |
| SNP_P4_98645_33191769 | NC_021166.1    | Ca_kabuli_chr07 | 33191769                | GG                              | CC              | 1946893213               |
| SNP_P4_98646_33191793 | NC_021166.1    | Ca_kabuli_chr07 | 33191793                | CC                              | TT              | 1946893215               |
| SNP_P4_98647_33191973 | NC_021166.1    | Ca_kabuli_chr07 | 33191973                | CC                              | AA              | 1946893217               |
| SNP_P4_98648_33192162 | NC_021166.1    | Ca_kabuli_chr07 | 33192162                | TT                              | AA              | 1946893219               |
| SNP_P4_98649_33192185 | NC_021166.1    | Ca_kabuli_chr07 | 33192185                | TT                              | CC              | 1946893221               |

| SNPs IDs              | Chromosome IDs | Chromosomes     | Physical positions (bp) | CDC Frontier (Reference genome) | (ILWC46 & LPNB) | NCBI SNPdb Accession IDs |
|-----------------------|----------------|-----------------|-------------------------|---------------------------------|-----------------|--------------------------|
| SNP_P4_98650_33192545 | NC_021166.1    | Ca_kabuli_chr07 | 33192545                | CC                              | TT              | 1946893223               |
| SNP_P4_98651_33192833 | NC_021166.1    | Ca_kabuli_chr07 | 33192833                | GG                              | AA              | 1946893225               |
| SNP_P4_98652_33192889 | NC_021166.1    | Ca_kabuli_chr07 | 33192889                | CC                              | TT              | 1946893227               |
| SNP_P4_98653_33193057 | NC_021166.1    | Ca_kabuli_chr07 | 33193057                | CC                              | TT              | 1946893229               |
| SNP_P4_98654_33193063 | NC_021166.1    | Ca_kabuli_chr07 | 33193063                | GG                              | AA              | 1946893231               |
| SNP_P4_98655_33193486 | NC_021166.1    | Ca_kabuli_chr07 | 33193486                | AA                              | CC              | 1946893233               |
| SNP_P4_98656_33193496 | NC_021166.1    | Ca_kabuli_chr07 | 33193496                | GG                              | TT              | 1946893235               |
| SNP_P4_98658_33194095 | NC_021166.1    | Ca_kabuli_chr07 | 33194095                | CC                              | TT              | 1946893237               |
| SNP_P4_98660_33194361 | NC_021166.1    | Ca_kabuli_chr07 | 33194361                | AA                              | TT              | 1946893239               |
| SNP_P4_98662_33194583 | NC_021166.1    | Ca_kabuli_chr07 | 33194583                | TT                              | CC              | 1946893241               |
| SNP_P4_98664_33194762 | NC_021166.1    | Ca_kabuli_chr07 | 33194762                | CC                              | TT              | 1946893243               |
| SNP_P4_98665_33194772 | NC_021166.1    | Ca_kabuli_chr07 | 33194772                | TT                              | CC              | 1946893245               |
| SNP_P4_98666_33194829 | NC_021166.1    | Ca_kabuli_chr07 | 33194829                | CC                              | TT              | 1946893247               |
| SNP_P4_98667_33194916 | NC_021166.1    | Ca_kabuli_chr07 | 33194916                | TT                              | CC              | 1946893249               |
| SNP_P4_98668_33194953 | NC_021166.1    | Ca_kabuli_chr07 | 33194953                | GG                              | TT              | 1946893251               |
| SNP_P4_98669_33194980 | NC_021166.1    | Ca_kabuli_chr07 | 33194980                | AA                              | TT              | 1946893254               |
| SNP_P4_98671_33195643 | NC_021166.1    | Ca_kabuli_chr07 | 33195643                | TT                              | CC              | 1946893256               |
| SNP_P4_98672_33195657 | NC_021166.1    | Ca_kabuli_chr07 | 33195657                | AA                              | CC              | 1946893258               |
| SNP_P4_98673_33195743 | NC_021166.1    | Ca_kabuli_chr07 | 33195743                | AA                              | TT              | 1946893260               |
| SNP_P4_98674_33207155 | NC_021166.1    | Ca_kabuli_chr07 | 33207155                | TT                              | CC              | 1946893262               |
| SNP_P4_98675_33207160 | NC_021166.1    | Ca_kabuli_chr07 | 33207160                | TT                              | CC              | 1946893264               |
| SNP_P4_98676_33207193 | NC_021166.1    | Ca_kabuli_chr07 | 33207193                | GG                              | AA              | 1946893266               |
| SNP_P4_98677_33207200 | NC_021166.1    | Ca_kabuli_chr07 | 33207200                | TT                              | GG              | 1946893268               |
| SNP_P4_98678_33207327 | NC_021166.1    | Ca_kabuli_chr07 | 33207327                | AA                              | GG              | 1946893270               |
| SNP_P4_98679_33207353 | NC_021166.1    | Ca_kabuli_chr07 | 33207353                | AA                              | CC              | 1946893272               |
| SNP_P4_98680_33207381 | NC_021166.1    | Ca_kabuli_chr07 | 33207381                | AA                              | GG              | 1946893274               |
| SNP_P4_98682_33209087 | NC_021166.1    | Ca_kabuli_chr07 | 33209087                | TT                              | CC              | 1946893276               |
| SNP_P4_98683_33209235 | NC_021166.1    | Ca_kabuli_chr07 | 33209235                | TT                              | AA              | 1946893278               |
| SNP_P4_98684_33209295 | NC_021166.1    | Ca_kabuli_chr07 | 33209295                | CC                              | TT              | 1946893280               |
| SNP_P4_98685_33209350 | NC_021166.1    | Ca_kabuli_chr07 | 33209350                | TT                              | CC              | 1946893282               |
| SNP_P4_98686_33209484 | NC_021166.1    | Ca_kabuli_chr07 | 33209484                | CC                              | TT              | 1946893284               |
| SNP_P4_98687_33209521 | NC_021166.1    | Ca_kabuli_chr07 | 33209521                | AA                              | CC              | 1946893286               |
| SNP_P4_98688_33209539 | NC_021166.1    | Ca_kabuli_chr07 | 33209539                | TT                              | CC              | 1946893288               |
| SNP_P4_98689_33210703 | NC_021166.1    | Ca_kabuli_chr07 | 33210703                | TT                              | AA              | 1946893290               |
| SNP_P4_98690_33210752 | NC_021166.1    | Ca_kabuli_chr07 | 33210752                | GG                              | AA              | 1946893292               |
| SNP_P4_98691_33211030 | NC_021166.1    | Ca_kabuli_chr07 | 33211030                | GG                              | CC              | 1946893294               |
| SNP_P4_98692_33211033 | NC_021166.1    | Ca_kabuli_chr07 | 33211033                | AA                              | GG              | 1946893296               |
| SNP_P4_98694_33211105 | NC_021166.1    | Ca_kabuli_chr07 | 33211105                | GG                              | AA              | 1946893298               |
| SNP_P4_98695_33211262 | NC_021166.1    | Ca_kabuli_chr07 | 33211262                | CC                              | TT              | 1946893300               |
| SNP_P4_98696_33211315 | NC_021166.1    | Ca_kabuli_chr07 | 33211315                | TT                              | CC              | 1946893302               |
| SNP_P4_98697_33211643 | NC_021166.1    | Ca_kabuli_chr07 | 33211643                | GG                              | AA              | 1946893304               |
| SNP_P4_98699_33212519 | NC_021166.1    | Ca_kabuli_chr07 | 33212519                | AA                              | GG              | 1946893306               |

| SNPs IDs              | Chromosome IDs | Chromosomes     | Physical positions (bp) | CDC Frontier (Reference genome) | (ILWC46 & LPNB) | NCBI SNPdb Accession IDs |
|-----------------------|----------------|-----------------|-------------------------|---------------------------------|-----------------|--------------------------|
| SNP_P4_98701_33212579 | NC_021166.1    | Ca_kabuli_chr07 | 33212579                | AA                              | TT              | 1946893308               |
| SNP_P4_98702_33213124 | NC_021166.1    | Ca_kabuli_chr07 | 33213124                | AA                              | GG              | 1946893310               |
| SNP_P4_98703_33213161 | NC_021166.1    | Ca_kabuli_chr07 | 33213161                | TT                              | CC              | 1946893312               |
| SNP_P4_98704_33213219 | NC_021166.1    | Ca_kabuli_chr07 | 33213219                | TT                              | AA              | 1946893314               |
| SNP_P4_98705_33213702 | NC_021166.1    | Ca_kabuli_chr07 | 33213702                | TT                              | CC              | 1946893316               |
| SNP_P4_98706_33213704 | NC_021166.1    | Ca_kabuli_chr07 | 33213704                | GG                              | AA              | 1946893318               |
| SNP_P4_98707_33217395 | NC_021166.1    | Ca_kabuli_chr07 | 33217395                | TT                              | GG              | 1946893320               |
| SNP_P4_98708_33217408 | NC_021166.1    | Ca_kabuli_chr07 | 33217408                | GG                              | AA              | 1946893322               |
| SNP_P4_98711_33219854 | NC_021166.1    | Ca_kabuli_chr07 | 33219854                | TT                              | CC              | 1946893324               |
| SNP_P4_98712_33219887 | NC_021166.1    | Ca_kabuli_chr07 | 33219887                | TT                              | CC              | 1946893326               |
| SNP_P4_98713_33221837 | NC_021166.1    | Ca_kabuli_chr07 | 33221837                | AA                              | CC              | 1946893328               |
| SNP_P4_98714_33221909 | NC_021166.1    | Ca_kabuli_chr07 | 33221909                | AA                              | GG              | 1946893330               |
| SNP_P4_98715_33222091 | NC_021166.1    | Ca_kabuli_chr07 | 33222091                | TT                              | AA              | 1946893332               |
| SNP_P4_98716_33222096 | NC_021166.1    | Ca_kabuli_chr07 | 33222096                | GG                              | CC              | 1946893334               |
| SNP_P4_98717_33222145 | NC_021166.1    | Ca_kabuli_chr07 | 33222145                | CC                              | AA              | 1946893336               |
| SNP_P4_98718_33222380 | NC_021166.1    | Ca_kabuli_chr07 | 33222380                | AA                              | GG              | 1946893338               |
| SNP_P4_98719_33225460 | NC_021166.1    | Ca_kabuli_chr07 | 33225460                | CC                              | AA              | 1946893340               |
| SNP_P4_98720_33228712 | NC_021166.1    | Ca_kabuli_chr07 | 33228712                | CC                              | TT              | 1946893342               |
| SNP_P4_98721_33229115 | NC_021166.1    | Ca_kabuli_chr07 | 33229115                | CC                              | TT              | 1946893344               |
| SNP_P4_98722_33229131 | NC_021166.1    | Ca_kabuli_chr07 | 33229131                | AA                              | CC              | 1946893346               |
| SNP_P4_98723_33229167 | NC_021166.1    | Ca_kabuli_chr07 | 33229167                | CC                              | TT              | 1946893348               |
| SNP_P4_98724_33229424 | NC_021166.1    | Ca_kabuli_chr07 | 33229424                | AA                              | TT              | 1946893350               |
| SNP_P4_98725_33229431 | NC_021166.1    | Ca_kabuli_chr07 | 33229431                | AA                              | TT              | 1946893353               |
| SNP_P4_98726_33229486 | NC_021166.1    | Ca_kabuli_chr07 | 33229486                | TT                              | CC              | 1946893355               |
| SNP_P4_98727_33230049 | NC_021166.1    | Ca_kabuli_chr07 | 33230049                | GG                              | AA              | 1946893357               |
| SNP_P4_98728_33230582 | NC_021166.1    | Ca_kabuli_chr07 | 33230582                | TT                              | AA              | 1946893359               |
| SNP_P4_98729_33230602 | NC_021166.1    | Ca_kabuli_chr07 | 33230602                | AA                              | TT              | 1946893361               |
| SNP_P4_98730_33230603 | NC_021166.1    | Ca_kabuli_chr07 | 33230603                | TT                              | AA              | 1946893363               |
| SNP_P4_98731_33230605 | NC_021166.1    | Ca_kabuli_chr07 | 33230605                | AA                              | TT              | 1946893365               |
| SNP_P4_98733_33234068 | NC_021166.1    | Ca_kabuli_chr07 | 33234068                | AA                              | GG              | 1946893367               |
| SNP_P4_98734_33234069 | NC_021166.1    | Ca_kabuli_chr07 | 33234069                | GG                              | AA              | 1946893369               |
| SNP_P4_98735_33234370 | NC_021166.1    | Ca_kabuli_chr07 | 33234370                | TT                              | GG              | 1946893371               |
| SNP_P4_98736_33234474 | NC_021166.1    | Ca_kabuli_chr07 | 33234474                | TT                              | GG              | 1946893373               |
| SNP_P4_98737_33234549 | NC_021166.1    | Ca_kabuli_chr07 | 33234549                | GG                              | AA              | 1946893375               |
| SNP_P4_98738_33234616 | NC_021166.1    | Ca_kabuli_chr07 | 33234616                | AA                              | GG              | 1946893377               |
| SNP_P4_98740_33236371 | NC_021166.1    | Ca_kabuli_chr07 | 33236371                | AA                              | GG              | 1946893379               |
| SNP_P4_98741_33236391 | NC_021166.1    | Ca_kabuli_chr07 | 33236391                | AA                              | GG              | 1946893381               |
| SNP_P4_98742_33236405 | NC_021166.1    | Ca_kabuli_chr07 | 33236405                | AA                              | GG              | 1946893383               |
| SNP_P4_98743_33236411 | NC_021166.1    | Ca_kabuli_chr07 | 33236411                | AA                              | GG              | 1946893385               |
| SNP_P4_98744_33236582 | NC_021166.1    | Ca_kabuli_chr07 | 33236582                | AA                              | GG              | 1946893387               |
| SNP_P4_98745_33236592 | NC_021166.1    | Ca_kabuli_chr07 | 33236592                | AA                              | GG              | 1946893389               |
| SNP_P4_98746_33236623 | NC_021166.1    | Ca_kabuli_chr07 | 33236623                | AA                              | GG              | 1946893391               |

| SNPs IDs              | Chromosome IDs | Chromosomes     | Physical positions (bp) | CDC Frontier (Reference genome) | (ILWC46 & LPNB) | NCBI SNPdb Accession IDs |
|-----------------------|----------------|-----------------|-------------------------|---------------------------------|-----------------|--------------------------|
| SNP_P4_98747_33236660 | NC_021166.1    | Ca_kabuli_chr07 | 33236660                | AA                              | TT              | 1946893393               |
| SNP_P4_98748_33236665 | NC_021166.1    | Ca_kabuli_chr07 | 33236665                | CC                              | TT              | 1946893395               |
| SNP_P4_98749_33236690 | NC_021166.1    | Ca_kabuli_chr07 | 33236690                | AA                              | GG              | 1946893397               |
| SNP_P4_98750_33236790 | NC_021166.1    | Ca_kabuli_chr07 | 33236790                | TT                              | GG              | 1946893399               |
| SNP_P4_98751_33236792 | NC_021166.1    | Ca_kabuli_chr07 | 33236792                | CC                              | TT              | 1946893401               |
| SNP_P4_98752_33236796 | NC_021166.1    | Ca_kabuli_chr07 | 33236796                | CC                              | TT              | 1946893403               |
| SNP_P4_98753_33236899 | NC_021166.1    | Ca_kabuli_chr07 | 33236899                | TT                              | CC              | 1946893405               |
| SNP_P4_98754_33236906 | NC_021166.1    | Ca_kabuli_chr07 | 33236906                | GG                              | TT              | 1946893407               |
| SNP_P4_98755_33236920 | NC_021166.1    | Ca_kabuli_chr07 | 33236920                | AA                              | GG              | 1946893409               |
| SNP_P4_98756_33236921 | NC_021166.1    | Ca_kabuli_chr07 | 33236921                | TT                              | CC              | 1946893411               |
| SNP_P4_98757_33236946 | NC_021166.1    | Ca_kabuli_chr07 | 33236946                | AA                              | GG              | 1946893413               |
| SNP_P4_98758_33236947 | NC_021166.1    | Ca_kabuli_chr07 | 33236947                | GG                              | AA              | 1946893415               |
| SNP_P4_98759_33237009 | NC_021166.1    | Ca_kabuli_chr07 | 33237009                | TT                              | CC              | 1946893418               |
| SNP_P4_98760_33237240 | NC_021166.1    | Ca_kabuli_chr07 | 33237240                | TT                              | CC              | 1946893420               |
| SNP_P4_98761_33237254 | NC_021166.1    | Ca_kabuli_chr07 | 33237254                | TT                              | CC              | 1946893422               |
| SNP_P4_98762_33237260 | NC_021166.1    | Ca_kabuli_chr07 | 33237260                | CC                              | AA              | 1946893424               |
| SNP_P4_98763_33237267 | NC_021166.1    | Ca_kabuli_chr07 | 33237267                | GG                              | AA              | 1946893426               |
| SNP_P4_98764_33237289 | NC_021166.1    | Ca_kabuli_chr07 | 33237289                | GG                              | AA              | 1946893428               |
| SNP_P4_98765_33237300 | NC_021166.1    | Ca_kabuli_chr07 | 33237300                | CC                              | TT              | 1946893430               |
| SNP_P4_98766_33237334 | NC_021166.1    | Ca_kabuli_chr07 | 33237334                | GG                              | CC              | 1946893432               |
| SNP_P4_98768_33237395 | NC_021166.1    | Ca_kabuli_chr07 | 33237395                | GG                              | AA              | 1946893434               |
| SNP_P4_98769_33237397 | NC_021166.1    | Ca_kabuli_chr07 | 33237397                | GG                              | TT              | 1946893436               |
| SNP_P4_98770_33237464 | NC_021166.1    | Ca_kabuli_chr07 | 33237464                | GG                              | AA              | 1946893438               |
| SNP_P4_98771_33237493 | NC_021166.1    | Ca_kabuli_chr07 | 33237493                | CC                              | AA              | 1946893440               |
| SNP_P4_98773_33238191 | NC_021166.1    | Ca_kabuli_chr07 | 33238191                | CC                              | AA              | 1946893442               |
| SNP_P4_98774_33238492 | NC_021166.1    | Ca_kabuli_chr07 | 33238492                | GG                              | AA              | 1946893445               |
| SNP_P4_98776_33239458 | NC_021166.1    | Ca_kabuli_chr07 | 33239458                | AA                              | GG              | 1946893447               |
| SNP_P4_98777_33240582 | NC_021166.1    | Ca_kabuli_chr07 | 33240582                | TT                              | CC              | 1946893449               |
| SNP_P4_98778_33240631 | NC_021166.1    | Ca_kabuli_chr07 | 33240631                | CC                              | TT              | 1946893451               |
| SNP_P4_98779_33240648 | NC_021166.1    | Ca_kabuli_chr07 | 33240648                | CC                              | TT              | 1946893453               |
| SNP_P4_98780_33240662 | NC_021166.1    | Ca_kabuli_chr07 | 33240662                | TT                              | CC              | 1946893455               |
| SNP_P4_98781_33240664 | NC_021166.1    | Ca_kabuli_chr07 | 33240664                | GG                              | AA              | 1946893456               |
| SNP_P4_98782_33240688 | NC_021166.1    | Ca_kabuli_chr07 | 33240688                | CC                              | GG              | 1946893458               |
| SNP_P4_98783_33240693 | NC_021166.1    | Ca_kabuli_chr07 | 33240693                | TT                              | CC              | 1946893460               |
| SNP_P4_98784_33240694 | NC_021166.1    | Ca_kabuli_chr07 | 33240694                | GG                              | AA              | 1946893463               |
| SNP_P4_98785_33240737 | NC_021166.1    | Ca_kabuli_chr07 | 33240737                | TT                              | GG              | 1946893465               |
| SNP_P4_98786_33240748 | NC_021166.1    | Ca_kabuli_chr07 | 33240748                | CC                              | TT              | 1946893467               |
| SNP_P4_98787_33240796 | NC_021166.1    | Ca_kabuli_chr07 | 33240796                | CC                              | AA              | 1946893469               |
| SNP_P4_98788_33240890 | NC_021166.1    | Ca_kabuli_chr07 | 33240890                | AA                              | GG              | 1946893471               |
| SNP_P4_98789_33240944 | NC_021166.1    | Ca_kabuli_chr07 | 33240944                | GG                              | CC              | 1946893473               |
| SNP_P4_98790_33240980 | NC_021166.1    | Ca_kabuli_chr07 | 33240980                | CC                              | TT              | 1946893475               |
| SNP_P4_98791_33241199 | NC_021166.1    | Ca_kabuli_chr07 | 33241199                | TT                              | CC              | 1946893477               |



| SNPs IDs              | Chromosome IDs | Chromosomes     | Physical positions (bp) | CDC Frontier (Reference genome) | (ILWC46 & LPNB) | NCBI SNPdb Accession IDs |
|-----------------------|----------------|-----------------|-------------------------|---------------------------------|-----------------|--------------------------|
| SNP_P4_98792_33241367 | NC_021166.1    | Ca_kabuli_chr07 | 33241367                | TT                              | CC              | 1946893479               |
| SNP_P4_98793_33243955 | NC_021166.1    | Ca_kabuli_chr07 | 33243955                | CC                              | AA              | 1946893481               |
| SNP_P4_98796_33244191 | NC_021166.1    | Ca_kabuli_chr07 | 33244191                | AA                              | GG              | 1946893483               |
| SNP_P4_98797_33244542 | NC_021166.1    | Ca_kabuli_chr07 | 33244542                | TT                              | CC              | 1946893485               |
| SNP_P4_98798_33245942 | NC_021166.1    | Ca_kabuli_chr07 | 33245942                | GG                              | TT              | 1946893487               |
| SNP_P4_98799_33246274 | NC_021166.1    | Ca_kabuli_chr07 | 33246274                | TT                              | AA              | 1946893489               |
| SNP_P4_98800_33246295 | NC_021166.1    | Ca_kabuli_chr07 | 33246295                | TT                              | GG              | 1946893491               |
| SNP_P4_98801_33246354 | NC_021166.1    | Ca_kabuli_chr07 | 33246354                | AA                              | TT              | 1946893493               |
| SNP_P4_98803_33246999 | NC_021166.1    | Ca_kabuli_chr07 | 33246999                | CC                              | AA              | 1946893495               |
| SNP_P4_98804_33247391 | NC_021166.1    | Ca_kabuli_chr07 | 33247391                | CC                              | TT              | 1946893497               |
| SNP_P4_98805_33247404 | NC_021166.1    | Ca_kabuli_chr07 | 33247404                | AA                              | GG              | 1946893499               |
| SNP_P4_98806_33247433 | NC_021166.1    | Ca_kabuli_chr07 | 33247433                | GG                              | AA              | 1946893501               |
| SNP_P4_98808_33247942 | NC_021166.1    | Ca_kabuli_chr07 | 33247942                | AA                              | CC              | 1946893503               |
| SNP_P4_98809_33247968 | NC_021166.1    | Ca_kabuli_chr07 | 33247968                | TT                              | CC              | 1946893505               |
| SNP_P4_98810_33247972 | NC_021166.1    | Ca_kabuli_chr07 | 33247972                | TT                              | CC              | 1946893507               |
| SNP_P4_98811_33248616 | NC_021166.1    | Ca_kabuli_chr07 | 33248616                | TT                              | GG              | 1946893509               |
| SNP_P4_98812_33248638 | NC_021166.1    | Ca_kabuli_chr07 | 33248638                | AA                              | GG              | 1946893511               |
| SNP_P4_98813_33249006 | NC_021166.1    | Ca_kabuli_chr07 | 33249006                | TT                              | CC              | 1946893513               |
| SNP_P4_98814_33249448 | NC_021166.1    | Ca_kabuli_chr07 | 33249448                | GG                              | TT              | 1946893515               |
| SNP_P4_98815_33249530 | NC_021166.1    | Ca_kabuli_chr07 | 33249530                | TT                              | AA              | 1946893517               |
| SNP_P4_98816_33251088 | NC_021166.1    | Ca_kabuli_chr07 | 33251088                | AA                              | GG              | 1946893519               |
| SNP_P4_98817_33252337 | NC_021166.1    | Ca_kabuli_chr07 | 33252337                | TT                              | AA              | 1946893521               |
| SNP_P4_98818_33252757 | NC_021166.1    | Ca_kabuli_chr07 | 33252757                | CC                              | AA              | 1946893523               |
| SNP_P4_98819_33253041 | NC_021166.1    | Ca_kabuli_chr07 | 33253041                | TT                              | AA              | 1946893525               |
| SNP_P4_98820_33253630 | NC_021166.1    | Ca_kabuli_chr07 | 33253630                | AA                              | TT              | 1946893527               |
| SNP_P4_98821_33253814 | NC_021166.1    | Ca_kabuli_chr07 | 33253814                | CC                              | TT              | 1946893529               |
| SNP_P4_98823_33256360 | NC_021166.1    | Ca_kabuli_chr07 | 33256360                | AA                              | GG              | 1946893531               |
| SNP_P4_98824_33256392 | NC_021166.1    | Ca_kabuli_chr07 | 33256392                | CC                              | TT              | 1946893533               |
| SNP_P4_98825_33256393 | NC_021166.1    | Ca_kabuli_chr07 | 33256393                | GG                              | AA              | 1946893535               |
| SNP_P4_98826_33257109 | NC_021166.1    | Ca_kabuli_chr07 | 33257109                | CC                              | TT              | 1946893537               |
| SNP_P4_98827_33257433 | NC_021166.1    | Ca_kabuli_chr07 | 33257433                | TT                              | CC              | 1946893539               |
| SNP_P4_98828_33257764 | NC_021166.1    | Ca_kabuli_chr07 | 33257764                | AA                              | GG              | 1946893541               |
| SNP_P4_98829_33257775 | NC_021166.1    | Ca_kabuli_chr07 | 33257775                | TT                              | CC              | 1946893543               |
| SNP_P4_98831_33258145 | NC_021166.1    | Ca_kabuli_chr07 | 33258145                | TT                              | AA              | 1946893545               |
| SNP_P4_98834_33265727 | NC_021166.1    | Ca_kabuli_chr07 | 33265727                | TT                              | CC              | 1946893547               |
| SNP_P4_98835_33265734 | NC_021166.1    | Ca_kabuli_chr07 | 33265734                | AA                              | GG              | 1946893549               |
| SNP_P4_98837_33267401 | NC_021166.1    | Ca_kabuli_chr07 | 33267401                | GG                              | CC              | 1946893551               |
| SNP_P4_98838_33267461 | NC_021166.1    | Ca_kabuli_chr07 | 33267461                | GG                              | TT              | 1946893553               |
| SNP_P4_98839_33267485 | NC_021166.1    | Ca_kabuli_chr07 | 33267485                | TT                              | CC              | 1946893555               |
| SNP_P4_98840_33267496 | NC_021166.1    | Ca_kabuli_chr07 | 33267496                | TT                              | AA              | 1946893557               |
| SNP_P4_98842_33267836 | NC_021166.1    | Ca_kabuli_chr07 | 33267836                | TT                              | CC              | 1946893559               |
| SNP_P4_98843_33268103 | NC_021166.1    | Ca_kabuli_chr07 | 33268103                | GG                              | TT              | 1946893561               |

| SNPs IDs              | Chromosome IDs | Chromosomes     | Physical positions (bp) | CDC Frontier (Reference genome) | (ILWC46 & LPNB) | NCBI SNPdb Accession IDs |
|-----------------------|----------------|-----------------|-------------------------|---------------------------------|-----------------|--------------------------|
| SNP_P4_98844_33268375 | NC_021166.1    | Ca_kabuli_chr07 | 33268375                | GG                              | TT              | 1946893563               |
| SNP_P4_98845_33268416 | NC_021166.1    | Ca_kabuli_chr07 | 33268416                | CC                              | GG              | 1946893565               |
| SNP_P4_98846_33268509 | NC_021166.1    | Ca_kabuli_chr07 | 33268509                | AA                              | TT              | 1946893567               |
| SNP_P4_98847_33268556 | NC_021166.1    | Ca_kabuli_chr07 | 33268556                | TT                              | CC              | 1946893569               |
| SNP_P4_98848_33268701 | NC_021166.1    | Ca_kabuli_chr07 | 33268701                | AA                              | GG              | 1946893571               |
| SNP_P4_98849_33268745 | NC_021166.1    | Ca_kabuli_chr07 | 33268745                | AA                              | GG              | 1946893573               |
| SNP_P4_98850_33268785 | NC_021166.1    | Ca_kabuli_chr07 | 33268785                | GG                              | AA              | 1946893575               |
| SNP_P4_98851_33268803 | NC_021166.1    | Ca_kabuli_chr07 | 33268803                | TT                              | CC              | 1946893577               |
| SNP_P4_98852_33269148 | NC_021166.1    | Ca_kabuli_chr07 | 33269148                | TT                              | CC              | 1946893579               |
| SNP_P4_98853_33269149 | NC_021166.1    | Ca_kabuli_chr07 | 33269149                | GG                              | AA              | 1946893581               |
| SNP_P4_98854_33269829 | NC_021166.1    | Ca_kabuli_chr07 | 33269829                | TT                              | AA              | 1946893583               |
| SNP_P4_98855_33270023 | NC_021166.1    | Ca_kabuli_chr07 | 33270023                | AA                              | GG              | 1946893585               |
| SNP_P4_98856_33270426 | NC_021166.1    | Ca_kabuli_chr07 | 33270426                | GG                              | TT              | 1946893587               |
| SNP_P4_98857_33270484 | NC_021166.1    | Ca_kabuli_chr07 | 33270484                | AA                              | GG              | 1946893589               |
| SNP_P4_98858_33270485 | NC_021166.1    | Ca_kabuli_chr07 | 33270485                | TT                              | AA              | 1946893591               |
| SNP_P4_98859_33270498 | NC_021166.1    | Ca_kabuli_chr07 | 33270498                | CC                              | AA              | 1946893593               |
| SNP_P4_98860_33272232 | NC_021166.1    | Ca_kabuli_chr07 | 33272232                | TT                              | GG              | 1946893595               |
| SNP_P4_98861_33272239 | NC_021166.1    | Ca_kabuli_chr07 | 33272239                | GG                              | TT              | 1946893597               |
| SNP_P4_98862_33273084 | NC_021166.1    | Ca_kabuli_chr07 | 33273084                | CC                              | TT              | 1946893599               |
| SNP_P4_98863_33274635 | NC_021166.1    | Ca_kabuli_chr07 | 33274635                | GG                              | AA              | 1946893601               |
| SNP_P4_98865_33274865 | NC_021166.1    | Ca_kabuli_chr07 | 33274865                | AA                              | GG              | 1946893603               |
| SNP_P4_98866_33275016 | NC_021166.1    | Ca_kabuli_chr07 | 33275016                | AA                              | TT              | 1946893605               |
| SNP_P4_98867_33275299 | NC_021166.1    | Ca_kabuli_chr07 | 33275299                | AA                              | CC              | 1946893607               |
| SNP_P4_98868_33277366 | NC_021166.1    | Ca_kabuli_chr07 | 33277366                | AA                              | GG              | 1946893609               |
| SNP_P4_98869_33277408 | NC_021166.1    | Ca_kabuli_chr07 | 33277408                | GG                              | AA              | 1946893611               |
| SNP_P4_98870_33277416 | NC_021166.1    | Ca_kabuli_chr07 | 33277416                | CC                              | TT              | 1946893613               |
| SNP_P4_98871_33277536 | NC_021166.1    | Ca_kabuli_chr07 | 33277536                | GG                              | AA              | 1946893615               |
| SNP_P4_98873_33279758 | NC_021166.1    | Ca_kabuli_chr07 | 33279758                | TT                              | CC              | 1946893617               |
| SNP_P4_98874_33280589 | NC_021166.1    | Ca_kabuli_chr07 | 33280589                | TT                              | CC              | 1946893619               |
| SNP_P4_98875_33282413 | NC_021166.1    | Ca_kabuli_chr07 | 33282413                | TT                              | CC              | 1946893621               |
| SNP_P4_98876_33282918 | NC_021166.1    | Ca_kabuli_chr07 | 33282918                | GG                              | AA              | 1946893623               |
| SNP_P4_98877_33282936 | NC_021166.1    | Ca_kabuli_chr07 | 33282936                | AA                              | TT              | 1946893625               |
| SNP_P4_98878_33283535 | NC_021166.1    | Ca_kabuli_chr07 | 33283535                | AA                              | GG              | 1946893627               |
| SNP_P4_98879_33283711 | NC_021166.1    | Ca_kabuli_chr07 | 33283711                | GG                              | TT              | 1946893629               |
| SNP_P4_98880_33286996 | NC_021166.1    | Ca_kabuli_chr07 | 33286996                | TT                              | AA              | 1946893631               |
| SNP_P4_98881_33287011 | NC_021166.1    | Ca_kabuli_chr07 | 33287011                | TT                              | CC              | 1946893632               |
| SNP_P4_98882_33287360 | NC_021166.1    | Ca_kabuli_chr07 | 33287360                | TT                              | CC              | 1946893633               |
| SNP_P4_98883_33287395 | NC_021166.1    | Ca_kabuli_chr07 | 33287395                | AA                              | GG              | 1946893634               |
| SNP_P4_98885_33287773 | NC_021166.1    | Ca_kabuli_chr07 | 33287773                | TT                              | AA              | 1946893635               |
| SNP_P4_98886_33287790 | NC_021166.1    | Ca_kabuli_chr07 | 33287790                | AA                              | GG              | 1946893636               |
| SNP_P4_98887_33287825 | NC_021166.1    | Ca_kabuli_chr07 | 33287825                | TT                              | CC              | 1946893637               |
| SNP_P4_98888_33287863 | NC_021166.1    | Ca_kabuli_chr07 | 33287863                | GG                              | TT              | 1946893639               |

| SNPs IDs              | Chromosome IDs | Chromosomes     | Physical positions (bp) | CDC Frontier (Reference genome) | (ILWC46 & LPNB) | NCBI SNPdb Accession IDs |
|-----------------------|----------------|-----------------|-------------------------|---------------------------------|-----------------|--------------------------|
| SNP_P4_98889_33287866 | NC_021166.1    | Ca_kabuli_chr07 | 33287866                | CC                              | AA              | 1946893642               |
| SNP_P4_98890_33288040 | NC_021166.1    | Ca_kabuli_chr07 | 33288040                | CC                              | TT              | 1946893644               |
| SNP_P4_98891_33288044 | NC_021166.1    | Ca_kabuli_chr07 | 33288044                | GG                              | TT              | 1946893646               |
| SNP_P4_98892_33288054 | NC_021166.1    | Ca_kabuli_chr07 | 33288054                | AA                              | GG              | 1946893648               |
| SNP_P4_98893_33288061 | NC_021166.1    | Ca_kabuli_chr07 | 33288061                | TT                              | CC              | 1946893650               |
| SNP_P4_98894_33288100 | NC_021166.1    | Ca_kabuli_chr07 | 33288100                | AA                              | GG              | 1946893652               |
| SNP_P4_98895_33288103 | NC_021166.1    | Ca_kabuli_chr07 | 33288103                | AA                              | CC              | 1946893654               |
| SNP_P4_98896_33288105 | NC_021166.1    | Ca_kabuli_chr07 | 33288105                | GG                              | TT              | 1946893656               |
| SNP_P4_98897_33288217 | NC_021166.1    | Ca_kabuli_chr07 | 33288217                | GG                              | TT              | 1946893658               |
| SNP_P4_98898_33288224 | NC_021166.1    | Ca_kabuli_chr07 | 33288224                | GG                              | AA              | 1946893660               |
| SNP_P4_98899_33288351 | NC_021166.1    | Ca_kabuli_chr07 | 33288351                | CC                              | TT              | 1946893662               |
| SNP_P4_98900_33288359 | NC_021166.1    | Ca_kabuli_chr07 | 33288359                | AA                              | GG              | 1946893664               |
| SNP_P4_98901_33288385 | NC_021166.1    | Ca_kabuli_chr07 | 33288385                | CC                              | AA              | 1946893666               |
| SNP_P4_98902_33288454 | NC_021166.1    | Ca_kabuli_chr07 | 33288454                | AA                              | GG              | 1946893668               |
| SNP_P4_98903_33289156 | NC_021166.1    | Ca_kabuli_chr07 | 33289156                | AA                              | CC              | 1946893670               |
| SNP_P4_98904_33289166 | NC_021166.1    | Ca_kabuli_chr07 | 33289166                | AA                              | GG              | 1946893672               |
| SNP_P4_98905_33289824 | NC_021166.1    | Ca_kabuli_chr07 | 33289824                | TT                              | AA              | 1946893674               |
| SNP_P4_98906_33290503 | NC_021166.1    | Ca_kabuli_chr07 | 33290503                | TT                              | GG              | 1946893676               |
| SNP_P4_98907_33290611 | NC_021166.1    | Ca_kabuli_chr07 | 33290611                | CC                              | TT              | 1946893679               |
| SNP_P4_98908_33290616 | NC_021166.1    | Ca_kabuli_chr07 | 33290616                | CC                              | TT              | 1946893681               |
| SNP_P4_98909_33290741 | NC_021166.1    | Ca_kabuli_chr07 | 33290741                | AA                              | GG              | 1946893683               |
| SNP_P4_98910_33290764 | NC_021166.1    | Ca_kabuli_chr07 | 33290764                | CC                              | TT              | 1946893685               |
| SNP_P4_98911_33290785 | NC_021166.1    | Ca_kabuli_chr07 | 33290785                | GG                              | CC              | 1946893687               |
| SNP_P4_98912_33290803 | NC_021166.1    | Ca_kabuli_chr07 | 33290803                | AA                              | TT              | 1946893689               |
| SNP_P4_98913_33290819 | NC_021166.1    | Ca_kabuli_chr07 | 33290819                | AA                              | TT              | 1946893691               |
| SNP_P4_98914_33290820 | NC_021166.1    | Ca_kabuli_chr07 | 33290820                | GG                              | AA              | 1946893693               |
| SNP_P4_98915_33290844 | NC_021166.1    | Ca_kabuli_chr07 | 33290844                | CC                              | TT              | 1946893695               |
| SNP_P4_98916_33292914 | NC_021166.1    | Ca_kabuli_chr07 | 33292914                | TT                              | CC              | 1946893697               |
| SNP_P4_98917_33293350 | NC_021166.1    | Ca_kabuli_chr07 | 33293350                | GG                              | TT              | 1946893699               |
| SNP_P4_98918_33293354 | NC_021166.1    | Ca_kabuli_chr07 | 33293354                | GG                              | AA              | 1946893701               |
| SNP_P4_98919_33293407 | NC_021166.1    | Ca_kabuli_chr07 | 33293407                | CC                              | TT              | 1946893703               |
| SNP_P4_98920_33294222 | NC_021166.1    | Ca_kabuli_chr07 | 33294222                | CC                              | AA              | 1946893705               |
| SNP_P4_98921_33294267 | NC_021166.1    | Ca_kabuli_chr07 | 33294267                | CC                              | TT              | 1946893707               |
| SNP_P4_98922_33294290 | NC_021166.1    | Ca_kabuli_chr07 | 33294290                | GG                              | TT              | 1946893709               |
| SNP_P4_98923_33294460 | NC_021166.1    | Ca_kabuli_chr07 | 33294460                | AA                              | GG              | 1946893711               |
| SNP_P4_98924_33294473 | NC_021166.1    | Ca_kabuli_chr07 | 33294473                | AA                              | GG              | 1946893713               |
| SNP_P4_98926_33295279 | NC_021166.1    | Ca_kabuli_chr07 | 33295279                | TT                              | AA              | 1946893715               |
| SNP_P4_98927_33295705 | NC_021166.1    | Ca_kabuli_chr07 | 33295705                | AA                              | CC              | 1946893717               |
| SNP_P4_98929_33296088 | NC_021166.1    | Ca_kabuli_chr07 | 33296088                | AA                              | GG              | 1946893719               |
| SNP_P4_98930_33296091 | NC_021166.1    | Ca_kabuli_chr07 | 33296091                | GG                              | AA              | 1946893721               |
| SNP_P4_98931_33296153 | NC_021166.1    | Ca_kabuli_chr07 | 33296153                | CC                              | TT              | 1946893723               |
| SNP_P4_98932_33296280 | NC_021166.1    | Ca_kabuli_chr07 | 33296280                | TT                              | AA              | 1946893725               |

| SNPs IDs              | Chromosome IDs | Chromosomes     | Physical positions (bp) | CDC Frontier (Reference genome) | (ILWC46 & LPNB) | NCBI SNPdb Accession IDs |
|-----------------------|----------------|-----------------|-------------------------|---------------------------------|-----------------|--------------------------|
| SNP_P4_98933_33296317 | NC_021166.1    | Ca_kabuli_chr07 | 33296317                | TT                              | GG              | 1946893727               |
| SNP_P4_98934_33296322 | NC_021166.1    | Ca_kabuli_chr07 | 33296322                | TT                              | CC              | 1946893729               |
| SNP_P4_98935_33297142 | NC_021166.1    | Ca_kabuli_chr07 | 33297142                | GG                              | TT              | 1946893731               |
| SNP_P4_98936_33297170 | NC_021166.1    | Ca_kabuli_chr07 | 33297170                | GG                              | AA              | 1946893733               |
| SNP_P4_98937_33297188 | NC_021166.1    | Ca_kabuli_chr07 | 33297188                | TT                              | CC              | 1946893735               |
| SNP_P4_98938_33297356 | NC_021166.1    | Ca_kabuli_chr07 | 33297356                | GG                              | AA              | 1946893737               |
| SNP_P4_98939_33297580 | NC_021166.1    | Ca_kabuli_chr07 | 33297580                | AA                              | TT              | 1946893739               |
| SNP_P4_98940_33297581 | NC_021166.1    | Ca_kabuli_chr07 | 33297581                | GG                              | TT              | 1946893741               |
| SNP_P4_98941_33297732 | NC_021166.1    | Ca_kabuli_chr07 | 33297732                | TT                              | AA              | 1946893743               |
| SNP_P4_98942_33297756 | NC_021166.1    | Ca_kabuli_chr07 | 33297756                | CC                              | GG              | 1946893745               |
| SNP_P4_98943_33299836 | NC_021166.1    | Ca_kabuli_chr07 | 33299836                | AA                              | GG              | 1946893747               |
| SNP_P4_98944_33299848 | NC_021166.1    | Ca_kabuli_chr07 | 33299848                | CC                              | TT              | 1946893749               |
| SNP_P4_98945_33302273 | NC_021166.1    | Ca_kabuli_chr07 | 33302273                | TT                              | AA              | 1946893751               |
| SNP_P4_98946_33303458 | NC_021166.1    | Ca_kabuli_chr07 | 33303458                | CC                              | AA              | 1946893753               |
| SNP_P4_98947_33307265 | NC_021166.1    | Ca_kabuli_chr07 | 33307265                | TT                              | CC              | 1946893755               |
| SNP_P4_98948_33307277 | NC_021166.1    | Ca_kabuli_chr07 | 33307277                | GG                              | AA              | 1946893757               |
| SNP_P4_98949_33307320 | NC_021166.1    | Ca_kabuli_chr07 | 33307320                | CC                              | TT              | 1946893759               |
| SNP_P4_98950_33307327 | NC_021166.1    | Ca_kabuli_chr07 | 33307327                | GG                              | AA              | 1946893761               |
| SNP_P4_98951_33307330 | NC_021166.1    | Ca_kabuli_chr07 | 33307330                | TT                              | AA              | 1946893763               |
| SNP_P4_98952_33307331 | NC_021166.1    | Ca_kabuli_chr07 | 33307331                | TT                              | GG              | 1946893765               |
| SNP_P4_98953_33307335 | NC_021166.1    | Ca_kabuli_chr07 | 33307335                | TT                              | CC              | 1946893767               |
| SNP_P4_98954_33307380 | NC_021166.1    | Ca_kabuli_chr07 | 33307380                | GG                              | AA              | 1946893769               |
| SNP_P4_98955_33307589 | NC_021166.1    | Ca_kabuli_chr07 | 33307589                | TT                              | CC              | 1946893771               |
| SNP_P4_98956_33307603 | NC_021166.1    | Ca_kabuli_chr07 | 33307603                | AA                              | TT              | 1946893773               |
| SNP_P4_98957_33308029 | NC_021166.1    | Ca_kabuli_chr07 | 33308029                | GG                              | TT              | 1946893775               |
| SNP_P4_98958_33308044 | NC_021166.1    | Ca_kabuli_chr07 | 33308044                | CC                              | TT              | 1946893778               |
| SNP_P4_98959_33308255 | NC_021166.1    | Ca_kabuli_chr07 | 33308255                | GG                              | AA              | 1946893780               |
| SNP_P4_98960_33308444 | NC_021166.1    | Ca_kabuli_chr07 | 33308444                | TT                              | CC              | 1946893782               |
| SNP_P4_98962_33309092 | NC_021166.1    | Ca_kabuli_chr07 | 33309092                | GG                              | AA              | 1946893784               |
| SNP_P4_98963_33320448 | NC_021166.1    | Ca_kabuli_chr07 | 33320448                | CC                              | TT              | 1946893786               |
| SNP_P4_98964_33320453 | NC_021166.1    | Ca_kabuli_chr07 | 33320453                | AA                              | GG              | 1946893788               |
| SNP_P4_98965_33324755 | NC_021166.1    | Ca_kabuli_chr07 | 33324755                | TT                              | AA              | 1946893790               |
| SNP_P4_98967_33324840 | NC_021166.1    | Ca_kabuli_chr07 | 33324840                | AA                              | GG              | 1946893792               |
| SNP_P4_98968_33324880 | NC_021166.1    | Ca_kabuli_chr07 | 33324880                | GG                              | AA              | 1946893794               |
| SNP_P4_98969_33324902 | NC_021166.1    | Ca_kabuli_chr07 | 33324902                | TT                              | CC              | 1946893796               |
| SNP_P4_98970_33325179 | NC_021166.1    | Ca_kabuli_chr07 | 33325179                | CC                              | TT              | 1946893798               |
| SNP_P4_98971_33325202 | NC_021166.1    | Ca_kabuli_chr07 | 33325202                | CC                              | TT              | 1946893800               |
| SNP_P4_98972_33325440 | NC_021166.1    | Ca_kabuli_chr07 | 33325440                | AA                              | GG              | 1946893802               |
| SNP_P4_98973_33325911 | NC_021166.1    | Ca_kabuli_chr07 | 33325911                | TT                              | CC              | 1946893804               |
| SNP_P4_98974_33325913 | NC_021166.1    | Ca_kabuli_chr07 | 33325913                | AA                              | GG              | 1946893806               |
| SNP_P4_98975_33326081 | NC_021166.1    | Ca_kabuli_chr07 | 33326081                | GG                              | TT              | 1946893808               |
| SNP_P4_98976_33326090 | NC_021166.1    | Ca_kabuli_chr07 | 33326090                | CC                              | AA              | 1946893810               |

| SNPs IDs              | Chromosome IDs | Chromosomes     | Physical positions (bp) | CDC Frontier (Reference genome) | (ILWC46 & LPNB) | NCBI SNPdb Accession IDs |
|-----------------------|----------------|-----------------|-------------------------|---------------------------------|-----------------|--------------------------|
| SNP_P4_98977_33326573 | NC_021166.1    | Ca_kabuli_chr07 | 33326573                | TT                              | CC              | 1946893812               |
| SNP_P4_98978_33326574 | NC_021166.1    | Ca_kabuli_chr07 | 33326574                | CC                              | TT              | 1946893814               |
| SNP_P4_98979_33326667 | NC_021166.1    | Ca_kabuli_chr07 | 33326667                | GG                              | AA              | 1946893816               |
| SNP_P4_98980_33326694 | NC_021166.1    | Ca_kabuli_chr07 | 33326694                | AA                              | GG              | 1946893818               |
| SNP_P4_98981_33326748 | NC_021166.1    | Ca_kabuli_chr07 | 33326748                | AA                              | GG              | 1946893820               |
| SNP_P4_98982_33326749 | NC_021166.1    | Ca_kabuli_chr07 | 33326749                | GG                              | AA              | 1946893822               |
| SNP_P4_98983_33326753 | NC_021166.1    | Ca_kabuli_chr07 | 33326753                | CC                              | GG              | 1946893824               |
| SNP_P4_98984_33326797 | NC_021166.1    | Ca_kabuli_chr07 | 33326797                | GG                              | AA              | 1946893827               |
| SNP_P4_98985_33326820 | NC_021166.1    | Ca_kabuli_chr07 | 33326820                | CC                              | TT              | 1946893829               |
| SNP_P4_98986_33326970 | NC_021166.1    | Ca_kabuli_chr07 | 33326970                | AA                              | GG              | 1946893831               |
| SNP_P4_98987_33326995 | NC_021166.1    | Ca_kabuli_chr07 | 33326995                | AA                              | GG              | 1946893833               |
| SNP_P4_98988_33327022 | NC_021166.1    | Ca_kabuli_chr07 | 33327022                | AA                              | GG              | 1946893835               |
| SNP_P4_98990_33327313 | NC_021166.1    | Ca_kabuli_chr07 | 33327313                | GG                              | AA              | 1946893837               |
| SNP_P4_98991_33327581 | NC_021166.1    | Ca_kabuli_chr07 | 33327581                | AA                              | CC              | 1946893839               |
| SNP_P4_98993_33328808 | NC_021166.1    | Ca_kabuli_chr07 | 33328808                | AA                              | TT              | 1946893841               |
| SNP_P4_98994_33328902 | NC_021166.1    | Ca_kabuli_chr07 | 33328902                | GG                              | AA              | 1946893843               |
| SNP_P4_98995_33329162 | NC_021166.1    | Ca_kabuli_chr07 | 33329162                | GG                              | TT              | 1946893845               |
| SNP_P4_98996_33329172 | NC_021166.1    | Ca_kabuli_chr07 | 33329172                | GG                              | AA              | 1946893847               |
| SNP_P4_98998_33329529 | NC_021166.1    | Ca_kabuli_chr07 | 33329529                | CC                              | TT              | 1946893849               |
| SNP_P4_98999_33329576 | NC_021166.1    | Ca_kabuli_chr07 | 33329576                | CC                              | AA              | 1946893851               |
| SNP_P4_99000_33330130 | NC_021166.1    | Ca_kabuli_chr07 | 33330130                | GG                              | TT              | 1946893853               |
| SNP_P4_99001_33330153 | NC_021166.1    | Ca_kabuli_chr07 | 33330153                | TT                              | CC              | 1946893855               |
| SNP_P4_99002_33330173 | NC_021166.1    | Ca_kabuli_chr07 | 33330173                | CC                              | AA              | 1946893857               |
| SNP_P4_99003_33331008 | NC_021166.1    | Ca_kabuli_chr07 | 33331008                | CC                              | TT              | 1946893859               |
| SNP_P4_99004_33331093 | NC_021166.1    | Ca_kabuli_chr07 | 33331093                | TT                              | CC              | 1946893861               |
| SNP_P4_99005_33331414 | NC_021166.1    | Ca_kabuli_chr07 | 33331414                | GG                              | TT              | 1946893863               |
| SNP_P4_99006_33334613 | NC_021166.1    | Ca_kabuli_chr07 | 33334613                | GG                              | AA              | 1946893865               |
| SNP_P4_99007_33335353 | NC_021166.1    | Ca_kabuli_chr07 | 33335353                | TT                              | GG              | 1946893867               |
| SNP_P4_99010_33336653 | NC_021166.1    | Ca_kabuli_chr07 | 33336653                | TT                              | CC              | 1946893870               |
| SNP_P4_99011_33338337 | NC_021166.1    | Ca_kabuli_chr07 | 33338337                | CC                              | AA              | 1946893872               |
| SNP_P4_99012_33338359 | NC_021166.1    | Ca_kabuli_chr07 | 33338359                | TT                              | GG              | 1946893874               |
| SNP_P4_99013_33338385 | NC_021166.1    | Ca_kabuli_chr07 | 33338385                | TT                              | AA              | 1946893876               |
| SNP_P4_99014_33338390 | NC_021166.1    | Ca_kabuli_chr07 | 33338390                | CC                              | GG              | 1946893878               |
| SNP_P4_99015_33338405 | NC_021166.1    | Ca_kabuli_chr07 | 33338405                | AA                              | GG              | 1946893880               |
| SNP_P4_99016_33338982 | NC_021166.1    | Ca_kabuli_chr07 | 33338982                | CC                              | GG              | 1946893882               |
| SNP_P4_99017_33342246 | NC_021166.1    | Ca_kabuli_chr07 | 33342246                | GG                              | AA              | 1946893884               |
| SNP_P4_99018_33342502 | NC_021166.1    | Ca_kabuli_chr07 | 33342502                | GG                              | TT              | 1946893886               |
| SNP_P4_99019_33342661 | NC_021166.1    | Ca_kabuli_chr07 | 33342661                | TT                              | CC              | 1946893888               |
| SNP_P4_99020_33342663 | NC_021166.1    | Ca_kabuli_chr07 | 33342663                | CC                              | GG              | 1946893890               |
| SNP_P4_99022_33345862 | NC_021166.1    | Ca_kabuli_chr07 | 33345862                | AA                              | GG              | 1946893892               |
| SNP_P4_99023_33346008 | NC_021166.1    | Ca_kabuli_chr07 | 33346008                | CC                              | AA              | 1946893894               |
| SNP_P4_99024_33347708 | NC_021166.1    | Ca_kabuli_chr07 | 33347708                | TT                              | CC              | 1946893896               |

| SNPs IDs              | Chromosome IDs | Chromosomes     | Physical positions (bp) | CDC Frontier (Reference genome) | (ILWC46 & LPNB) | NCBI SNPdb Accession IDs |
|-----------------------|----------------|-----------------|-------------------------|---------------------------------|-----------------|--------------------------|
| SNP_P4_99025_33348084 | NC_021166.1    | Ca_kabuli_chr07 | 33348084                | CC                              | TT              | 1946893898               |
| SNP_P4_99026_33349645 | NC_021166.1    | Ca_kabuli_chr07 | 33349645                | GG                              | AA              | 1946893900               |
| SNP_P4_99027_33351069 | NC_021166.1    | Ca_kabuli_chr07 | 33351069                | CC                              | TT              | 1946893902               |
| SNP_P4_99028_33357973 | NC_021166.1    | Ca_kabuli_chr07 | 33357973                | AA                              | TT              | 1946893904               |
| SNP_P4_99029_33357979 | NC_021166.1    | Ca_kabuli_chr07 | 33357979                | TT                              | AA              | 1946893906               |
| SNP_P4_99030_33359534 | NC_021166.1    | Ca_kabuli_chr07 | 33359534                | AA                              | CC              | 1946893908               |
| SNP_P4_99031_33360828 | NC_021166.1    | Ca_kabuli_chr07 | 33360828                | GG                              | AA              | 1946893910               |
| SNP_P4_99032_33360846 | NC_021166.1    | Ca_kabuli_chr07 | 33360846                | AA                              | TT              | 1946893912               |
| SNP_P4_99033_33360854 | NC_021166.1    | Ca_kabuli_chr07 | 33360854                | AA                              | CC              | 1946893915               |
| SNP_P4_99034_33360859 | NC_021166.1    | Ca_kabuli_chr07 | 33360859                | TT                              | CC              | 1946893917               |
| SNP_P4_99035_33360959 | NC_021166.1    | Ca_kabuli_chr07 | 33360959                | CC                              | TT              | 1946893919               |
| SNP_P4_99036_33361024 | NC_021166.1    | Ca_kabuli_chr07 | 33361024                | AA                              | GG              | 1946893921               |
| SNP_P4_99038_33361262 | NC_021166.1    | Ca_kabuli_chr07 | 33361262                | CC                              | TT              | 1946893923               |
| SNP_P4_99039_33361345 | NC_021166.1    | Ca_kabuli_chr07 | 33361345                | TT                              | GG              | 1946893925               |
| SNP_P4_99040_33361499 | NC_021166.1    | Ca_kabuli_chr07 | 33361499                | AA                              | TT              | 1946893927               |
| SNP_P4_99042_33363988 | NC_021166.1    | Ca_kabuli_chr07 | 33363988                | AA                              | GG              | 1946893929               |
| SNP_P4_99043_33365916 | NC_021166.1    | Ca_kabuli_chr07 | 33365916                | CC                              | TT              | 1946893931               |
| SNP_P4_99046_33367487 | NC_021166.1    | Ca_kabuli_chr07 | 33367487                | CC                              | TT              | 1946893933               |
| SNP_P4_99047_33367509 | NC_021166.1    | Ca_kabuli_chr07 | 33367509                | AA                              | CC              | 1946893935               |
| SNP_P4_99048_33367536 | NC_021166.1    | Ca_kabuli_chr07 | 33367536                | AA                              | CC              | 1946893937               |
| SNP_P4_99051_33367750 | NC_021166.1    | Ca_kabuli_chr07 | 33367750                | TT                              | GG              | 1946893939               |
| SNP_P4_99052_33367755 | NC_021166.1    | Ca_kabuli_chr07 | 33367755                | GG                              | AA              | 1946893941               |
| SNP_P4_99053_33367778 | NC_021166.1    | Ca_kabuli_chr07 | 33367778                | GG                              | TT              | 1946893943               |
| SNP_P4_99054_33368617 | NC_021166.1    | Ca_kabuli_chr07 | 33368617                | GG                              | AA              | 1946893945               |
| SNP_P4_99055_33368633 | NC_021166.1    | Ca_kabuli_chr07 | 33368633                | AA                              | GG              | 1946893947               |
| SNP_P4_99056_33369369 | NC_021166.1    | Ca_kabuli_chr07 | 33369369                | TT                              | CC              | 1946893949               |
| SNP_P4_99057_33369572 | NC_021166.1    | Ca_kabuli_chr07 | 33369572                | GG                              | AA              | 1946893951               |
| SNP_P4_99058_33369586 | NC_021166.1    | Ca_kabuli_chr07 | 33369586                | GG                              | AA              | 1946893953               |
| SNP_P4_99059_33369685 | NC_021166.1    | Ca_kabuli_chr07 | 33369685                | GG                              | TT              | 1946893955               |
| SNP_P4_99060_33370079 | NC_021166.1    | Ca_kabuli_chr07 | 33370079                | CC                              | TT              | 1946893957               |
| SNP_P4_99061_33370550 | NC_021166.1    | Ca_kabuli_chr07 | 33370550                | TT                              | CC              | 1946893959               |
| SNP_P4_99063_33370778 | NC_021166.1    | Ca_kabuli_chr07 | 33370778                | TT                              | CC              | 1946893962               |
| SNP_P4_99064_33370797 | NC_021166.1    | Ca_kabuli_chr07 | 33370797                | AA                              | GG              | 1946893964               |
| SNP_P4_99065_33370896 | NC_021166.1    | Ca_kabuli_chr07 | 33370896                | GG                              | AA              | 1946893966               |
| SNP_P4_99066_33370914 | NC_021166.1    | Ca_kabuli_chr07 | 33370914                | GG                              | AA              | 1946893968               |
| SNP_P4_99067_33370918 | NC_021166.1    | Ca_kabuli_chr07 | 33370918                | GG                              | AA              | 1946893970               |
| SNP_P4_99068_33370948 | NC_021166.1    | Ca_kabuli_chr07 | 33370948                | GG                              | AA              | 1946893972               |
| SNP_P4_99069_33371044 | NC_021166.1    | Ca_kabuli_chr07 | 33371044                | CC                              | GG              | 1946893974               |
| SNP_P4_99070_33371053 | NC_021166.1    | Ca_kabuli_chr07 | 33371053                | TT                              | CC              | 1946893976               |
| SNP_P4_99071_33371243 | NC_021166.1    | Ca_kabuli_chr07 | 33371243                | TT                              | CC              | 1946893978               |
| SNP_P4_99072_33371492 | NC_021166.1    | Ca_kabuli_chr07 | 33371492                | GG                              | TT              | 1946893980               |
| SNP_P4_99073_33371493 | NC_021166.1    | Ca_kabuli_chr07 | 33371493                | TT                              | AA              | 1946893982               |

| SNPs IDs              | Chromosome IDs | Chromosomes     | Physical positions (bp) | CDC Frontier (Reference genome) | (ILWC46 & LPNB) | NCBI SNPdb Accession IDs |
|-----------------------|----------------|-----------------|-------------------------|---------------------------------|-----------------|--------------------------|
| SNP_P4_99074_33371496 | NC_021166.1    | Ca_kabuli_chr07 | 33371496                | TT                              | AA              | 1946893984               |
| SNP_P4_99075_33371498 | NC_021166.1    | Ca_kabuli_chr07 | 33371498                | AA                              | TT              | 1946893986               |
| SNP_P4_99076_33371885 | NC_021166.1    | Ca_kabuli_chr07 | 33371885                | CC                              | AA              | 1946893988               |
| SNP_P4_99077_33372969 | NC_021166.1    | Ca_kabuli_chr07 | 33372969                | CC                              | TT              | 1946893990               |
| SNP_P4_99078_33374095 | NC_021166.1    | Ca_kabuli_chr07 | 33374095                | CC                              | TT              | 1946893992               |
| SNP_P4_99080_33378114 | NC_021166.1    | Ca_kabuli_chr07 | 33378114                | CC                              | TT              | 1946893994               |
| SNP_P4_99082_33378152 | NC_021166.1    | Ca_kabuli_chr07 | 33378152                | GG                              | TT              | 1946893996               |
| SNP_P4_99084_33379038 | NC_021166.1    | Ca_kabuli_chr07 | 33379038                | CC                              | TT              | 1946893998               |
| SNP_P4_99085_33381739 | NC_021166.1    | Ca_kabuli_chr07 | 33381739                | AA                              | GG              | 1946894000               |
| SNP_P4_99086_33381742 | NC_021166.1    | Ca_kabuli_chr07 | 33381742                | TT                              | AA              | 1946894002               |
| SNP_P4_99087_33381749 | NC_021166.1    | Ca_kabuli_chr07 | 33381749                | TT                              | GG              | 1946894004               |
| SNP_P4_99088_33382331 | NC_021166.1    | Ca_kabuli_chr07 | 33382331                | GG                              | AA              | 1946894006               |
| SNP_P4_99089_33382816 | NC_021166.1    | Ca_kabuli_chr07 | 33382816                | CC                              | TT              | 1946894008               |
| SNP_P4_99091_33382922 | NC_021166.1    | Ca_kabuli_chr07 | 33382922                | AA                              | TT              | 1946894010               |
| SNP_P4_99092_33382992 | NC_021166.1    | Ca_kabuli_chr07 | 33382992                | TT                              | GG              | 1946894012               |
| SNP_P4_99093_33383240 | NC_021166.1    | Ca_kabuli_chr07 | 33383240                | TT                              | CC              | 1946894014               |
| SNP_P4_99094_33383246 | NC_021166.1    | Ca_kabuli_chr07 | 33383246                | CC                              | TT              | 1946894016               |
| SNP_P4_99095_33383306 | NC_021166.1    | Ca_kabuli_chr07 | 33383306                | AA                              | GG              | 1946894018               |
| SNP_P4_99096_33383400 | NC_021166.1    | Ca_kabuli_chr07 | 33383400                | GG                              | TT              | 1946894020               |
| SNP_P4_99097_33383408 | NC_021166.1    | Ca_kabuli_chr07 | 33383408                | AA                              | CC              | 1946894022               |
| SNP_P4_99098_33383414 | NC_021166.1    | Ca_kabuli_chr07 | 33383414                | CC                              | TT              | 1946894024               |
| SNP_P4_99099_33383864 | NC_021166.1    | Ca_kabuli_chr07 | 33383864                | AA                              | GG              | 1946894026               |
| SNP_P4_99101_33384918 | NC_021166.1    | Ca_kabuli_chr07 | 33384918                | CC                              | AA              | 1946894028               |
| SNP_P4_99102_33385243 | NC_021166.1    | Ca_kabuli_chr07 | 33385243                | GG                              | AA              | 1946894030               |
| SNP_P4_99103_33385285 | NC_021166.1    | Ca_kabuli_chr07 | 33385285                | TT                              | CC              | 1946894032               |
| SNP_P4_99105_33385487 | NC_021166.1    | Ca_kabuli_chr07 | 33385487                | AA                              | GG              | 1946894034               |
| SNP_P4_99106_33387794 | NC_021166.1    | Ca_kabuli_chr07 | 33387794                | GG                              | AA              | 1946894036               |
| SNP_P4_99107_33401409 | NC_021166.1    | Ca_kabuli_chr07 | 33401409                | AA                              | GG              | 1946894038               |
| SNP_P4_99108_33401905 | NC_021166.1    | Ca_kabuli_chr07 | 33401905                | TT                              | AA              | 1946894040               |
| SNP_P4_99109_33405352 | NC_021166.1    | Ca_kabuli_chr07 | 33405352                | GG                              | AA              | 1946894042               |
| SNP_P4_99110_33405409 | NC_021166.1    | Ca_kabuli_chr07 | 33405409                | CC                              | TT              | 1946894044               |
| SNP_P4_99111_33405662 | NC_021166.1    | Ca_kabuli_chr07 | 33405662                | AA                              | CC              | 1946894046               |
| SNP_P4_99112_33408671 | NC_021166.1    | Ca_kabuli_chr07 | 33408671                | AA                              | CC              | 1946894048               |
| SNP_P4_99113_33408677 | NC_021166.1    | Ca_kabuli_chr07 | 33408677                | TT                              | CC              | 1946894050               |
| SNP_P4_99114_33408863 | NC_021166.1    | Ca_kabuli_chr07 | 33408863                | CC                              | TT              | 1946894052               |
| SNP_P4_99115_33408885 | NC_021166.1    | Ca_kabuli_chr07 | 33408885                | CC                              | TT              | 1946894054               |
| SNP_P4_99117_33409186 | NC_021166.1    | Ca_kabuli_chr07 | 33409186                | TT                              | AA              | 1946894056               |
| SNP_P4_99118_33409187 | NC_021166.1    | Ca_kabuli_chr07 | 33409187                | TT                              | AA              | 1946894058               |
| SNP_P4_99120_33409950 | NC_021166.1    | Ca_kabuli_chr07 | 33409950                | GG                              | AA              | 1946894060               |
| SNP_P4_99121_33410214 | NC_021166.1    | Ca_kabuli_chr07 | 33410214                | TT                              | GG              | 1946894067               |
| SNP_P4_99122_33410220 | NC_021166.1    | Ca_kabuli_chr07 | 33410220                | CC                              | TT              | 1946894069               |
| SNP_P4_99123_33411355 | NC_021166.1    | Ca_kabuli_chr07 | 33411355                | GG                              | TT              | 1946894071               |

| SNPs IDs              | Chromosome IDs | Chromosomes     | Physical positions (bp) | CDC Frontier (Reference genome) | (ILWC46 & LPNB) | NCBI SNPdb Accession IDs |
|-----------------------|----------------|-----------------|-------------------------|---------------------------------|-----------------|--------------------------|
| SNP_P4_99124_33412478 | NC_021166.1    | Ca_kabuli_chr07 | 33412478                | TT                              | CC              | 1946894073               |
| SNP_P4_99125_33413568 | NC_021166.1    | Ca_kabuli_chr07 | 33413568                | AA                              | TT              | 1946894075               |
| SNP_P4_99126_33413599 | NC_021166.1    | Ca_kabuli_chr07 | 33413599                | CC                              | AA              | 1946894077               |
| SNP_P4_99127_33416039 | NC_021166.1    | Ca_kabuli_chr07 | 33416039                | GG                              | TT              | 1946894079               |
| SNP_P4_99128_33416195 | NC_021166.1    | Ca_kabuli_chr07 | 33416195                | TT                              | CC              | 1946894081               |
| SNP_P4_99129_33418145 | NC_021166.1    | Ca_kabuli_chr07 | 33418145                | GG                              | AA              | 1946894083               |
| SNP_P4_99130_33418615 | NC_021166.1    | Ca_kabuli_chr07 | 33418615                | GG                              | AA              | 1946894085               |
| SNP_P4_99131_33418652 | NC_021166.1    | Ca_kabuli_chr07 | 33418652                | GG                              | TT              | 1946894087               |
| SNP_P4_99132_33419869 | NC_021166.1    | Ca_kabuli_chr07 | 33419869                | TT                              | CC              | 1946894090               |
| SNP_P4_99133_33419894 | NC_021166.1    | Ca_kabuli_chr07 | 33419894                | GG                              | TT              | 1946894092               |
| SNP_P4_99134_33421172 | NC_021166.1    | Ca_kabuli_chr07 | 33421172                | AA                              | CC              | 1946894094               |
| SNP_P4_99135_33421304 | NC_021166.1    | Ca_kabuli_chr07 | 33421304                | TT                              | CC              | 1946894096               |
| SNP_P4_99136_33421364 | NC_021166.1    | Ca_kabuli_chr07 | 33421364                | AA                              | GG              | 1946894098               |
| SNP_P4_99138_33421895 | NC_021166.1    | Ca_kabuli_chr07 | 33421895                | GG                              | TT              | 1946894100               |
| SNP_P4_99139_33421896 | NC_021166.1    | Ca_kabuli_chr07 | 33421896                | TT                              | CC              | 1946894102               |
| SNP_P4_99140_33421960 | NC_021166.1    | Ca_kabuli_chr07 | 33421960                | CC                              | TT              | 1946894104               |
| SNP_P4_99141_33422688 | NC_021166.1    | Ca_kabuli_chr07 | 33422688                | TT                              | CC              | 1946894106               |
| SNP_P4_99142_33422800 | NC_021166.1    | Ca_kabuli_chr07 | 33422800                | AA                              | GG              | 1946894108               |
| SNP_P4_99143_33422801 | NC_021166.1    | Ca_kabuli_chr07 | 33422801                | TT                              | GG              | 1946894110               |
| SNP_P4_99144_33422953 | NC_021166.1    | Ca_kabuli_chr07 | 33422953                | GG                              | AA              | 1946894112               |
| SNP_P4_99145_33423077 | NC_021166.1    | Ca_kabuli_chr07 | 33423077                | CC                              | AA              | 1946894114               |
| SNP_P4_99146_33423085 | NC_021166.1    | Ca_kabuli_chr07 | 33423085                | AA                              | GG              | 1946894116               |
| SNP_P4_99147_33426028 | NC_021166.1    | Ca_kabuli_chr07 | 33426028                | AA                              | TT              | 1946894118               |
| SNP_P4_99149_33428457 | NC_021166.1    | Ca_kabuli_chr07 | 33428457                | TT                              | CC              | 1946894120               |
| SNP_P4_99150_33428552 | NC_021166.1    | Ca_kabuli_chr07 | 33428552                | TT                              | CC              | 1946894121               |
| SNP_P4_99151_33428591 | NC_021166.1    | Ca_kabuli_chr07 | 33428591                | CC                              | GG              | 1946894123               |
| SNP_P4_99152_33428853 | NC_021166.1    | Ca_kabuli_chr07 | 33428853                | GG                              | CC              | 1946894125               |
| SNP_P4_99153_33428874 | NC_021166.1    | Ca_kabuli_chr07 | 33428874                | GG                              | TT              | 1946894127               |
| SNP_P4_99154_33428899 | NC_021166.1    | Ca_kabuli_chr07 | 33428899                | GG                              | TT              | 1946894129               |
| SNP_P4_99156_33431302 | NC_021166.1    | Ca_kabuli_chr07 | 33431302                | AA                              | GG              | 1946894131               |
| SNP_P4_99157_33431307 | NC_021166.1    | Ca_kabuli_chr07 | 33431307                | AA                              | GG              | 1946894133               |
| SNP_P4_99158_33431310 | NC_021166.1    | Ca_kabuli_chr07 | 33431310                | GG                              | AA              | 1946894135               |
| SNP_P4_99159_33431414 | NC_021166.1    | Ca_kabuli_chr07 | 33431414                | TT                              | GG              | 1946894137               |
| SNP_P4_99160_33431544 | NC_021166.1    | Ca_kabuli_chr07 | 33431544                | AA                              | TT              | 1946894139               |
| SNP_P4_99161_33431545 | NC_021166.1    | Ca_kabuli_chr07 | 33431545                | CC                              | TT              | 1946894141               |
| SNP_P4_99162_33431596 | NC_021166.1    | Ca_kabuli_chr07 | 33431596                | TT                              | GG              | 1946894143               |
| SNP_P4_99163_33431641 | NC_021166.1    | Ca_kabuli_chr07 | 33431641                | AA                              | GG              | 1946894145               |
| SNP_P4_99164_33431865 | NC_021166.1    | Ca_kabuli_chr07 | 33431865                | CC                              | GG              | 1946894147               |
| SNP_P4_99165_33431912 | NC_021166.1    | Ca_kabuli_chr07 | 33431912                | GG                              | AA              | 1946894149               |
| SNP_P4_99166_33436051 | NC_021166.1    | Ca_kabuli_chr07 | 33436051                | AA                              | CC              | 1946894151               |
| SNP_P4_99167_33436097 | NC_021166.1    | Ca_kabuli_chr07 | 33436097                | AA                              | GG              | 1946894153               |
| SNP_P4_99168_33436479 | NC_021166.1    | Ca_kabuli_chr07 | 33436479                | CC                              | TT              | 1946894155               |



| SNPs IDs              | Chromosome IDs | Chromosomes     | Physical positions (bp) | CDC Frontier (Reference genome) | (ILWC46 & LPNB) | NCBI SNPdb Accession IDs |
|-----------------------|----------------|-----------------|-------------------------|---------------------------------|-----------------|--------------------------|
| SNP_P4_99169_33436760 | NC_021166.1    | Ca_kabuli_chr07 | 33436760                | AA                              | CC              | 1946894157               |
| SNP_P4_99170_33436772 | NC_021166.1    | Ca_kabuli_chr07 | 33436772                | TT                              | CC              | 1946894159               |
| SNP_P4_99171_33441706 | NC_021166.1    | Ca_kabuli_chr07 | 33441706                | CC                              | TT              | 1946894161               |
| SNP_P4_99172_33442065 | NC_021166.1    | Ca_kabuli_chr07 | 33442065                | AA                              | GG              | 1946894163               |
| SNP_P4_99173_33443000 | NC_021166.1    | Ca_kabuli_chr07 | 33443000                | CC                              | TT              | 1946894165               |
| SNP_P4_99174_33443010 | NC_021166.1    | Ca_kabuli_chr07 | 33443010                | CC                              | TT              | 1946894166               |
| SNP_P4_99175_33443023 | NC_021166.1    | Ca_kabuli_chr07 | 33443023                | CC                              | TT              | 1946894168               |
| SNP_P4_99176_33443276 | NC_021166.1    | Ca_kabuli_chr07 | 33443276                | TT                              | GG              | 1946894170               |
| SNP_P4_99177_33443385 | NC_021166.1    | Ca_kabuli_chr07 | 33443385                | TT                              | CC              | 1946894172               |
| SNP_P4_99178_33443405 | NC_021166.1    | Ca_kabuli_chr07 | 33443405                | GG                              | AA              | 1946894174               |
| SNP_P4_99180_33443603 | NC_021166.1    | Ca_kabuli_chr07 | 33443603                | GG                              | AA              | 1946894176               |
| SNP_P4_99181_33443659 | NC_021166.1    | Ca_kabuli_chr07 | 33443659                | AA                              | GG              | 1946894178               |
| SNP_P4_99182_33446758 | NC_021166.1    | Ca_kabuli_chr07 | 33446758                | GG                              | TT              | 1946894180               |
| SNP_P4_99183_33451297 | NC_021166.1    | Ca_kabuli_chr07 | 33451297                | TT                              | CC              | 1946894182               |
| SNP_P4_99184_33452220 | NC_021166.1    | Ca_kabuli_chr07 | 33452220                | TT                              | CC              | 1946894184               |
| SNP_P4_99185_33456291 | NC_021166.1    | Ca_kabuli_chr07 | 33456291                | AA                              | CC              | 1946894186               |
| SNP_P4_99186_33456645 | NC_021166.1    | Ca_kabuli_chr07 | 33456645                | GG                              | AA              | 1946894188               |
| SNP_P4_99187_33457047 | NC_021166.1    | Ca_kabuli_chr07 | 33457047                | TT                              | CC              | 1946894191               |
| SNP_P4_99188_33457162 | NC_021166.1    | Ca_kabuli_chr07 | 33457162                | GG                              | TT              | 1946894193               |
| SNP_P4_99189_33457172 | NC_021166.1    | Ca_kabuli_chr07 | 33457172                | AA                              | GG              | 1946894195               |
| SNP_P4_99190_33457229 | NC_021166.1    | Ca_kabuli_chr07 | 33457229                | GG                              | AA              | 1946894197               |
| SNP_P4_99191_33457287 | NC_021166.1    | Ca_kabuli_chr07 | 33457287                | TT                              | AA              | 1946894199               |
| SNP_P4_99193_33457362 | NC_021166.1    | Ca_kabuli_chr07 | 33457362                | TT                              | CC              | 1946894201               |
| SNP_P4_99194_33457698 | NC_021166.1    | Ca_kabuli_chr07 | 33457698                | CC                              | TT              | 1946894203               |
| SNP_P4_99195_33458527 | NC_021166.1    | Ca_kabuli_chr07 | 33458527                | TT                              | CC              | 1946894205               |
| SNP_P4_99196_33466927 | NC_021166.1    | Ca_kabuli_chr07 | 33466927                | GG                              | CC              | 1946894207               |
| SNP_P4_99198_33468252 | NC_021166.1    | Ca_kabuli_chr07 | 33468252                | AA                              | GG              | 1946894209               |
| SNP_P4_99199_33470521 | NC_021166.1    | Ca_kabuli_chr07 | 33470521                | CC                              | AA              | 1946894211               |
| SNP_P4_99200_33471086 | NC_021166.1    | Ca_kabuli_chr07 | 33471086                | AA                              | CC              | 1946894213               |
| SNP_P4_99201_33472184 | NC_021166.1    | Ca_kabuli_chr07 | 33472184                | GG                              | TT              | 1946894215               |
| SNP_P4_99202_33472258 | NC_021166.1    | Ca_kabuli_chr07 | 33472258                | TT                              | CC              | 1946894217               |
| SNP_P4_99203_33472260 | NC_021166.1    | Ca_kabuli_chr07 | 33472260                | TT                              | CC              | 1946894219               |
| SNP_P4_99205_33472822 | NC_021166.1    | Ca_kabuli_chr07 | 33472822                | AA                              | TT              | 1946894221               |
| SNP_P4_99206_33472839 | NC_021166.1    | Ca_kabuli_chr07 | 33472839                | TT                              | AA              | 1946894223               |
| SNP_P4_99207_33472841 | NC_021166.1    | Ca_kabuli_chr07 | 33472841                | TT                              | CC              | 1946894225               |
| SNP_P4_99208_33472842 | NC_021166.1    | Ca_kabuli_chr07 | 33472842                | GG                              | AA              | 1946894227               |
| SNP_P4_99209_33472847 | NC_021166.1    | Ca_kabuli_chr07 | 33472847                | TT                              | AA              | 1946894229               |
| SNP_P4_99210_33472855 | NC_021166.1    | Ca_kabuli_chr07 | 33472855                | CC                              | TT              | 1946894231               |
| SNP_P4_99212_33473227 | NC_021166.1    | Ca_kabuli_chr07 | 33473227                | TT                              | AA              | 1946894233               |
| SNP_P4_99213_33473266 | NC_021166.1    | Ca_kabuli_chr07 | 33473266                | CC                              | GG              | 1946894235               |
| SNP_P4_99214_33474923 | NC_021166.1    | Ca_kabuli_chr07 | 33474923                | TT                              | AA              | 1946894237               |
| SNP_P4_99215_33475156 | NC_021166.1    | Ca_kabuli_chr07 | 33475156                | CC                              | TT              | 1946894239               |

| SNPs IDs              | Chromosome IDs | Chromosomes     | Physical positions (bp) | CDC Frontier (Reference genome) | (ILWC46 & LPNB) | NCBI SNPdb Accession IDs |
|-----------------------|----------------|-----------------|-------------------------|---------------------------------|-----------------|--------------------------|
| SNP_P4_99216_33475211 | NC_021166.1    | Ca_kabuli_chr07 | 33475211                | GG                              | TT              | 1946894241               |
| SNP_P4_99218_33475276 | NC_021166.1    | Ca_kabuli_chr07 | 33475276                | GG                              | AA              | 1946894243               |
| SNP_P4_99219_33475417 | NC_021166.1    | Ca_kabuli_chr07 | 33475417                | GG                              | AA              | 1946894245               |
| SNP_P4_99220_33475474 | NC_021166.1    | Ca_kabuli_chr07 | 33475474                | CC                              | TT              | 1946894247               |
| SNP_P4_99221_33477325 | NC_021166.1    | Ca_kabuli_chr07 | 33477325                | AA                              | GG              | 1946894249               |
| SNP_P4_99222_33477590 | NC_021166.1    | Ca_kabuli_chr07 | 33477590                | GG                              | AA              | 1946894251               |
| SNP_P4_99223_33477599 | NC_021166.1    | Ca_kabuli_chr07 | 33477599                | TT                              | CC              | 1946894253               |
| SNP_P4_99224_33478014 | NC_021166.1    | Ca_kabuli_chr07 | 33478014                | AA                              | GG              | 1946894255               |
| SNP_P4_99225_33478020 | NC_021166.1    | Ca_kabuli_chr07 | 33478020                | GG                              | AA              | 1946894258               |
| SNP_P4_99226_33478027 | NC_021166.1    | Ca_kabuli_chr07 | 33478027                | TT                              | AA              | 1946894260               |
| SNP_P4_99227_33478044 | NC_021166.1    | Ca_kabuli_chr07 | 33478044                | CC                              | TT              | 1946894262               |
| SNP_P4_99228_33478200 | NC_021166.1    | Ca_kabuli_chr07 | 33478200                | CC                              | TT              | 1946894264               |
| SNP_P4_99229_33478257 | NC_021166.1    | Ca_kabuli_chr07 | 33478257                | GG                              | AA              | 1946894266               |
| SNP_P4_99230_33478259 | NC_021166.1    | Ca_kabuli_chr07 | 33478259                | AA                              | GG              | 1946894268               |
| SNP_P4_99231_33478405 | NC_021166.1    | Ca_kabuli_chr07 | 33478405                | GG                              | AA              | 1946894270               |
| SNP_P4_99232_33478435 | NC_021166.1    | Ca_kabuli_chr07 | 33478435                | GG                              | AA              | 1946894272               |
| SNP_P4_99233_33478550 | NC_021166.1    | Ca_kabuli_chr07 | 33478550                | TT                              | AA              | 1946894274               |
| SNP_P4_99235_33478870 | NC_021166.1    | Ca_kabuli_chr07 | 33478870                | AA                              | TT              | 1946894276               |
| SNP_P4_99237_33479503 | NC_021166.1    | Ca_kabuli_chr07 | 33479503                | TT                              | CC              | 1946894278               |
| SNP_P4_99238_33479510 | NC_021166.1    | Ca_kabuli_chr07 | 33479510                | TT                              | GG              | 1946894280               |
| SNP_P4_99240_33479849 | NC_021166.1    | Ca_kabuli_chr07 | 33479849                | TT                              | CC              | 1946894283               |
| SNP_P4_99241_33482313 | NC_021166.1    | Ca_kabuli_chr07 | 33482313                | CC                              | TT              | 1946894285               |
| SNP_P4_99242_33482321 | NC_021166.1    | Ca_kabuli_chr07 | 33482321                | AA                              | TT              | 1946894287               |
| SNP_P4_99243_33482383 | NC_021166.1    | Ca_kabuli_chr07 | 33482383                | AA                              | CC              | 1946894289               |
| SNP_P4_99244_33482409 | NC_021166.1    | Ca_kabuli_chr07 | 33482409                | AA                              | TT              | 1946894291               |
| SNP_P4_99245_33482438 | NC_021166.1    | Ca_kabuli_chr07 | 33482438                | CC                              | GG              | 1946894293               |
| SNP_P4_99246_33482664 | NC_021166.1    | Ca_kabuli_chr07 | 33482664                | TT                              | GG              | 1946894295               |
| SNP_P4_99247_33482689 | NC_021166.1    | Ca_kabuli_chr07 | 33482689                | GG                              | TT              | 1946894297               |
| SNP_P4_99248_33483594 | NC_021166.1    | Ca_kabuli_chr07 | 33483594                | CC                              | TT              | 1946894299               |
| SNP_P4_99249_33483610 | NC_021166.1    | Ca_kabuli_chr07 | 33483610                | TT                              | CC              | 1946894301               |
| SNP_P4_99250_33483657 | NC_021166.1    | Ca_kabuli_chr07 | 33483657                | AA                              | TT              | 1946894303               |
| SNP_P4_99251_33483659 | NC_021166.1    | Ca_kabuli_chr07 | 33483659                | TT                              | AA              | 1946894305               |
| SNP_P4_99253_33483687 | NC_021166.1    | Ca_kabuli_chr07 | 33483687                | GG                              | TT              | 1946894307               |
| SNP_P4_99254_33485624 | NC_021166.1    | Ca_kabuli_chr07 | 33485624                | TT                              | GG              | 1946894309               |
| SNP_P4_99257_33489799 | NC_021166.1    | Ca_kabuli_chr07 | 33489799                | CC                              | TT              | 1946894311               |
| SNP_P4_99258_33489836 | NC_021166.1    | Ca_kabuli_chr07 | 33489836                | GG                              | CC              | 1946894313               |
| SNP_P4_99259_33489839 | NC_021166.1    | Ca_kabuli_chr07 | 33489839                | GG                              | AA              | 1946894315               |
| SNP_P4_99261_33490105 | NC_021166.1    | Ca_kabuli_chr07 | 33490105                | CC                              | TT              | 1946894317               |
| SNP_P4_99264_33490488 | NC_021166.1    | Ca_kabuli_chr07 | 33490488                | CC                              | TT              | 1946894319               |
| SNP_P4_99266_33490724 | NC_021166.1    | Ca_kabuli_chr07 | 33490724                | CC                              | TT              | 1946894321               |
| SNP_P4_99267_33490783 | NC_021166.1    | Ca_kabuli_chr07 | 33490783                | AA                              | GG              | 1946894323               |
| SNP_P4_99268_33518078 | NC_021166.1    | Ca_kabuli_chr07 | 33518078                | AA                              | GG              | 1946894326               |

| SNPs IDs              | Chromosome IDs | Chromosomes     | Physical positions (bp) | CDC Frontier (Reference genome) | (ILWC46 & LPNB) | NCBI SNPdb Accession IDs |
|-----------------------|----------------|-----------------|-------------------------|---------------------------------|-----------------|--------------------------|
| SNP_P4_99269_33518311 | NC_021166.1    | Ca_kabuli_chr07 | 33518311                | AA                              | GG              | 1946894328               |
| SNP_P4_99270_33518325 | NC_021166.1    | Ca_kabuli_chr07 | 33518325                | AA                              | GG              | 1946894330               |
| SNP_P4_99271_33519913 | NC_021166.1    | Ca_kabuli_chr07 | 33519913                | GG                              | CC              | 1946894332               |
| SNP_P4_99273_33520488 | NC_021166.1    | Ca_kabuli_chr07 | 33520488                | AA                              | GG              | 1946894334               |
| SNP_P4_99274_33520540 | NC_021166.1    | Ca_kabuli_chr07 | 33520540                | AA                              | CC              | 1946894336               |
| SNP_P4_99275_33520541 | NC_021166.1    | Ca_kabuli_chr07 | 33520541                | CC                              | TT              | 1946894338               |
| SNP_P4_99277_33521440 | NC_021166.1    | Ca_kabuli_chr07 | 33521440                | GG                              | TT              | 1946894340               |
| SNP_P4_99278_33521607 | NC_021166.1    | Ca_kabuli_chr07 | 33521607                | TT                              | CC              | 1946894342               |
| SNP_P4_99279_33521631 | NC_021166.1    | Ca_kabuli_chr07 | 33521631                | TT                              | GG              | 1946894344               |
| SNP_P4_99280_33521800 | NC_021166.1    | Ca_kabuli_chr07 | 33521800                | TT                              | GG              | 1946894346               |
| SNP_P4_99281_33521951 | NC_021166.1    | Ca_kabuli_chr07 | 33521951                | AA                              | GG              | 1946894348               |
| SNP_P4_99282_33522028 | NC_021166.1    | Ca_kabuli_chr07 | 33522028                | CC                              | TT              | 1946894350               |
| SNP_P4_99283_33523353 | NC_021166.1    | Ca_kabuli_chr07 | 33523353                | TT                              | CC              | 1946894351               |
| SNP_P4_99284_33524405 | NC_021166.1    | Ca_kabuli_chr07 | 33524405                | CC                              | AA              | 1946894353               |
| SNP_P4_99285_33524733 | NC_021166.1    | Ca_kabuli_chr07 | 33524733                | AA                              | GG              | 1946894355               |
| SNP_P4_99286_33524820 | NC_021166.1    | Ca_kabuli_chr07 | 33524820                | AA                              | TT              | 1946894357               |
| SNP_P4_99288_33525489 | NC_021166.1    | Ca_kabuli_chr07 | 33525489                | GG                              | AA              | 1946894359               |
| SNP_P4_99289_33525818 | NC_021166.1    | Ca_kabuli_chr07 | 33525818                | GG                              | TT              | 1946894361               |
| SNP_P4_99290_33526389 | NC_021166.1    | Ca_kabuli_chr07 | 33526389                | AA                              | CC              | 1946894363               |
| SNP_P4_99291_33526651 | NC_021166.1    | Ca_kabuli_chr07 | 33526651                | AA                              | GG              | 1946894365               |
| SNP_P4_99293_33526963 | NC_021166.1    | Ca_kabuli_chr07 | 33526963                | AA                              | GG              | 1946894367               |
| SNP_P4_99296_33527948 | NC_021166.1    | Ca_kabuli_chr07 | 33527948                | TT                              | AA              | 1946894368               |
| SNP_P4_99297_33527955 | NC_021166.1    | Ca_kabuli_chr07 | 33527955                | CC                              | TT              | 1946894370               |
| SNP_P4_99298_33527960 | NC_021166.1    | Ca_kabuli_chr07 | 33527960                | AA                              | TT              | 1946894372               |
| SNP_P4_99299_33528151 | NC_021166.1    | Ca_kabuli_chr07 | 33528151                | GG                              | AA              | 1946894374               |
| SNP_P4_99300_33528172 | NC_021166.1    | Ca_kabuli_chr07 | 33528172                | AA                              | GG              | 1946894376               |
| SNP_P4_99301_33528173 | NC_021166.1    | Ca_kabuli_chr07 | 33528173                | AA                              | GG              | 1946894378               |
| SNP_P4_99302_33528181 | NC_021166.1    | Ca_kabuli_chr07 | 33528181                | AA                              | GG              | 1946894380               |
| SNP_P4_99303_33528194 | NC_021166.1    | Ca_kabuli_chr07 | 33528194                | GG                              | AA              | 1946894382               |
| SNP_P4_99304_33528200 | NC_021166.1    | Ca_kabuli_chr07 | 33528200                | AA                              | GG              | 1946894384               |
| SNP_P4_99305_33528228 | NC_021166.1    | Ca_kabuli_chr07 | 33528228                | AA                              | TT              | 1946894386               |
| SNP_P4_99307_33528566 | NC_021166.1    | Ca_kabuli_chr07 | 33528566                | AA                              | CC              | 1946894388               |
| SNP_P4_99308_33529236 | NC_021166.1    | Ca_kabuli_chr07 | 33529236                | TT                              | CC              | 1946894390               |
| SNP_P4_99309_33529556 | NC_021166.1    | Ca_kabuli_chr07 | 33529556                | GG                              | TT              | 1946894392               |
| SNP_P4_99310_33531092 | NC_021166.1    | Ca_kabuli_chr07 | 33531092                | TT                              | GG              | 1946894394               |
| SNP_P4_99311_33531093 | NC_021166.1    | Ca_kabuli_chr07 | 33531093                | AA                              | TT              | 1946894396               |
| SNP_P4_99313_33532267 | NC_021166.1    | Ca_kabuli_chr07 | 33532267                | AA                              | TT              | 1946894398               |
| SNP_P4_99314_33532268 | NC_021166.1    | Ca_kabuli_chr07 | 33532268                | AA                              | TT              | 1946894400               |
| SNP_P4_99315_33533666 | NC_021166.1    | Ca_kabuli_chr07 | 33533666                | TT                              | GG              | 1946894402               |
| SNP_P4_99316_33533907 | NC_021166.1    | Ca_kabuli_chr07 | 33533907                | AA                              | TT              | 1946894404               |
| SNP_P4_99317_33534400 | NC_021166.1    | Ca_kabuli_chr07 | 33534400                | TT                              | AA              | 1946894407               |
| SNP_P4_99318_33534402 | NC_021166.1    | Ca_kabuli_chr07 | 33534402                | TT                              | CC              | 1946894409               |

| SNPs IDs              | Chromosome IDs | Chromosomes     | Physical positions (bp) | CDC Frontier (Reference genome) | (ILWC46 & LPNB) | NCBI SNPdb Accession IDs |
|-----------------------|----------------|-----------------|-------------------------|---------------------------------|-----------------|--------------------------|
| SNP_P4_99319_33535550 | NC_021166.1    | Ca_kabuli_chr07 | 33535550                | CC                              | TT              | 1946894411               |
| SNP_P4_99321_33535588 | NC_021166.1    | Ca_kabuli_chr07 | 33535588                | TT                              | AA              | 1946894414               |
| SNP_P4_99322_33535593 | NC_021166.1    | Ca_kabuli_chr07 | 33535593                | CC                              | TT              | 1946894416               |
| SNP_P4_99323_33535626 | NC_021166.1    | Ca_kabuli_chr07 | 33535626                | CC                              | GG              | 1946894418               |
| SNP_P4_99324_33535639 | NC_021166.1    | Ca_kabuli_chr07 | 33535639                | TT                              | CC              | 1946894420               |
| SNP_P4_99325_33535655 | NC_021166.1    | Ca_kabuli_chr07 | 33535655                | CC                              | TT              | 1946894422               |
| SNP_P4_99326_33535665 | NC_021166.1    | Ca_kabuli_chr07 | 33535665                | TT                              | AA              | 1946894424               |
| SNP_P4_99327_33535674 | NC_021166.1    | Ca_kabuli_chr07 | 33535674                | TT                              | CC              | 1946894426               |
| SNP_P4_99328_33535681 | NC_021166.1    | Ca_kabuli_chr07 | 33535681                | TT                              | CC              | 1946894428               |
| SNP_P4_99329_33535689 | NC_021166.1    | Ca_kabuli_chr07 | 33535689                | CC                              | GG              | 1946894430               |
| SNP_P4_99330_33535923 | NC_021166.1    | Ca_kabuli_chr07 | 33535923                | AA                              | TT              | 1946894432               |
| SNP_P4_99332_33535995 | NC_021166.1    | Ca_kabuli_chr07 | 33535995                | AA                              | GG              | 1946894434               |
| SNP_P4_99333_33535999 | NC_021166.1    | Ca_kabuli_chr07 | 33535999                | CC                              | TT              | 1946894436               |
| SNP_P4_99334_33536013 | NC_021166.1    | Ca_kabuli_chr07 | 33536013                | CC                              | GG              | 1946894438               |
| SNP_P4_99336_33536243 | NC_021166.1    | Ca_kabuli_chr07 | 33536243                | GG                              | AA              | 1946894440               |
| SNP_P4_99337_33536255 | NC_021166.1    | Ca_kabuli_chr07 | 33536255                | AA                              | CC              | 1946894442               |
| SNP_P4_99338_33536328 | NC_021166.1    | Ca_kabuli_chr07 | 33536328                | TT                              | CC              | 1946894444               |
| SNP_P4_99339_33536967 | NC_021166.1    | Ca_kabuli_chr07 | 33536967                | CC                              | TT              | 1946894446               |
| SNP_P4_99340_33537414 | NC_021166.1    | Ca_kabuli_chr07 | 33537414                | AA                              | GG              | 1946894448               |
| SNP_P4_99342_33537698 | NC_021166.1    | Ca_kabuli_chr07 | 33537698                | GG                              | AA              | 1946894450               |
| SNP_P4_99343_33537871 | NC_021166.1    | Ca_kabuli_chr07 | 33537871                | TT                              | AA              | 1946894452               |
| SNP_P4_99345_33538183 | NC_021166.1    | Ca_kabuli_chr07 | 33538183                | CC                              | AA              | 1946894454               |
| SNP_P4_99346_33538187 | NC_021166.1    | Ca_kabuli_chr07 | 33538187                | TT                              | AA              | 1946894456               |
| SNP_P4_99347_33538447 | NC_021166.1    | Ca_kabuli_chr07 | 33538447                | TT                              | CC              | 1946894458               |
| SNP_P4_99349_33539142 | NC_021166.1    | Ca_kabuli_chr07 | 33539142                | AA                              | CC              | 1946894460               |
| SNP_P4_99350_33539495 | NC_021166.1    | Ca_kabuli_chr07 | 33539495                | GG                              | AA              | 1946894462               |
| SNP_P4_99353_33539804 | NC_021166.1    | Ca_kabuli_chr07 | 33539804                | GG                              | CC              | 1946894464               |
| SNP_P4_99354_33540960 | NC_021166.1    | Ca_kabuli_chr07 | 33540960                | TT                              | CC              | 1946894466               |
| SNP_P4_99355_33540961 | NC_021166.1    | Ca_kabuli_chr07 | 33540961                | AA                              | GG              | 1946894468               |
| SNP_P4_99356_33541005 | NC_021166.1    | Ca_kabuli_chr07 | 33541005                | AA                              | GG              | 1946894470               |
| SNP_P4_99357_33542021 | NC_021166.1    | Ca_kabuli_chr07 | 33542021                | AA                              | CC              | 1946894472               |
| SNP_P4_99358_33542026 | NC_021166.1    | Ca_kabuli_chr07 | 33542026                | GG                              | TT              | 1946894474               |
| SNP_P4_99359_33542123 | NC_021166.1    | Ca_kabuli_chr07 | 33542123                | AA                              | TT              | 1946894476               |
| SNP_P4_99360_33542241 | NC_021166.1    | Ca_kabuli_chr07 | 33542241                | GG                              | CC              | 1946894478               |
| SNP_P4_99361_33545163 | NC_021166.1    | Ca_kabuli_chr07 | 33545163                | GG                              | AA              | 1946894480               |
| SNP_P4_99362_33545204 | NC_021166.1    | Ca_kabuli_chr07 | 33545204                | TT                              | CC              | 1946894482               |
| SNP_P4_99364_33548240 | NC_021166.1    | Ca_kabuli_chr07 | 33548240                | AA                              | GG              | 1946894484               |
| SNP_P4_99365_33554433 | NC_021166.1    | Ca_kabuli_chr07 | 33554433                | GG                              | AA              | 1946894486               |
| SNP_P4_99366_33554476 | NC_021166.1    | Ca_kabuli_chr07 | 33554476                | CC                              | TT              | 1946894488               |
| SNP_P4_99369_33557237 | NC_021166.1    | Ca_kabuli_chr07 | 33557237                | TT                              | CC              | 1946894490               |
| SNP_P4_99371_33557531 | NC_021166.1    | Ca_kabuli_chr07 | 33557531                | CC                              | TT              | 1946894492               |
| SNP_P4_99373_33558484 | NC_021166.1    | Ca_kabuli_chr07 | 33558484                | TT                              | CC              | 1946894494               |

| SNPs IDs              | Chromosome IDs | Chromosomes     | Physical positions (bp) | CDC Frontier (Reference genome) | (ILWC46 & LPNB) | NCBI SNPdb Accession IDs |
|-----------------------|----------------|-----------------|-------------------------|---------------------------------|-----------------|--------------------------|
| SNP_P4_99374_33558528 | NC_021166.1    | Ca_kabuli_chr07 | 33558528                | GG                              | TT              | 1946894496               |
| SNP_P4_99375_33558530 | NC_021166.1    | Ca_kabuli_chr07 | 33558530                | TT                              | CC              | 1946894498               |
| SNP_P4_99376_33559608 | NC_021166.1    | Ca_kabuli_chr07 | 33559608                | AA                              | CC              | 1946894500               |
| SNP_P4_99377_33559908 | NC_021166.1    | Ca_kabuli_chr07 | 33559908                | CC                              | TT              | 1946894502               |
| SNP_P4_99378_33559939 | NC_021166.1    | Ca_kabuli_chr07 | 33559939                | GG                              | TT              | 1946894504               |
| SNP_P4_99379_33560203 | NC_021166.1    | Ca_kabuli_chr07 | 33560203                | TT                              | CC              | 1946894506               |
| SNP_P4_99380_33560263 | NC_021166.1    | Ca_kabuli_chr07 | 33560263                | AA                              | CC              | 1946894508               |
| SNP_P4_99382_33560736 | NC_021166.1    | Ca_kabuli_chr07 | 33560736                | TT                              | CC              | 1946894510               |
| SNP_P4_99383_33560741 | NC_021166.1    | Ca_kabuli_chr07 | 33560741                | GG                              | AA              | 1946894512               |
| SNP_P4_99384_33560745 | NC_021166.1    | Ca_kabuli_chr07 | 33560745                | GG                              | CC              | 1946894514               |
| SNP_P4_99385_33560817 | NC_021166.1    | Ca_kabuli_chr07 | 33560817                | CC                              | TT              | 1946894516               |
| SNP_P4_99387_33561604 | NC_021166.1    | Ca_kabuli_chr07 | 33561604                | GG                              | AA              | 1946894518               |
| SNP_P4_99388_33562079 | NC_021166.1    | Ca_kabuli_chr07 | 33562079                | TT                              | CC              | 1946894520               |
| SNP_P4_99389_33562113 | NC_021166.1    | Ca_kabuli_chr07 | 33562113                | TT                              | CC              | 1946894522               |
| SNP_P4_99391_33564945 | NC_021166.1    | Ca_kabuli_chr07 | 33564945                | CC                              | AA              | 1946894524               |
| SNP_P4_99392_33565585 | NC_021166.1    | Ca_kabuli_chr07 | 33565585                | GG                              | CC              | 1946894526               |
| SNP_P4_99393_33565962 | NC_021166.1    | Ca_kabuli_chr07 | 33565962                | GG                              | AA              | 1946894528               |
| SNP_P4_99394_33566257 | NC_021166.1    | Ca_kabuli_chr07 | 33566257                | AA                              | TT              | 1946894530               |
| SNP_P4_99395_33567937 | NC_021166.1    | Ca_kabuli_chr07 | 33567937                | CC                              | TT              | 1946894532               |
| SNP_P4_99396_33567965 | NC_021166.1    | Ca_kabuli_chr07 | 33567965                | GG                              | AA              | 1946894534               |
| SNP_P4_99397_33568869 | NC_021166.1    | Ca_kabuli_chr07 | 33568869                | TT                              | AA              | 1946894536               |
| SNP_P4_99398_33569677 | NC_021166.1    | Ca_kabuli_chr07 | 33569677                | CC                              | AA              | 1946894538               |
| SNP_P4_99399_33573467 | NC_021166.1    | Ca_kabuli_chr07 | 33573467                | TT                              | CC              | 1946894540               |
| SNP_P4_99400_33573575 | NC_021166.1    | Ca_kabuli_chr07 | 33573575                | TT                              | CC              | 1946894542               |
| SNP_P4_99401_33574938 | NC_021166.1    | Ca_kabuli_chr07 | 33574938                | TT                              | AA              | 1946894544               |
| SNP_P4_99402_33574992 | NC_021166.1    | Ca_kabuli_chr07 | 33574992                | CC                              | TT              | 1946894546               |
| SNP_P4_99403_33575039 | NC_021166.1    | Ca_kabuli_chr07 | 33575039                | CC                              | GG              | 1946894548               |
| SNP_P4_99404_33575054 | NC_021166.1    | Ca_kabuli_chr07 | 33575054                | AA                              | GG              | 1946894550               |
| SNP_P4_99405_33575172 | NC_021166.1    | Ca_kabuli_chr07 | 33575172                | GG                              | AA              | 1946894552               |
| SNP_P4_99407_33575297 | NC_021166.1    | Ca_kabuli_chr07 | 33575297                | GG                              | CC              | 1946894554               |
| SNP_P4_99408_33575760 | NC_021166.1    | Ca_kabuli_chr07 | 33575760                | TT                              | CC              | 1946894556               |
| SNP_P4_99409_33575761 | NC_021166.1    | Ca_kabuli_chr07 | 33575761                | GG                              | AA              | 1946894558               |
| SNP_P4_99410_33575858 | NC_021166.1    | Ca_kabuli_chr07 | 33575858                | GG                              | AA              | 1946894560               |
| SNP_P4_99411_33575862 | NC_021166.1    | Ca_kabuli_chr07 | 33575862                | GG                              | AA              | 1946894562               |
| SNP_P4_99413_33576391 | NC_021166.1    | Ca_kabuli_chr07 | 33576391                | GG                              | CC              | 1946894564               |
| SNP_P4_99414_33576486 | NC_021166.1    | Ca_kabuli_chr07 | 33576486                | TT                              | GG              | 1946894566               |
| SNP_P4_99415_33576487 | NC_021166.1    | Ca_kabuli_chr07 | 33576487                | CC                              | TT              | 1946894568               |
| SNP_P4_99416_33576524 | NC_021166.1    | Ca_kabuli_chr07 | 33576524                | AA                              | GG              | 1946894570               |
| SNP_P4_99417_33578643 | NC_021166.1    | Ca_kabuli_chr07 | 33578643                | TT                              | AA              | 1946894572               |
| SNP_P4_99418_33578898 | NC_021166.1    | Ca_kabuli_chr07 | 33578898                | AA                              | GG              | 1946894574               |
| SNP_P4_99419_33579079 | NC_021166.1    | Ca_kabuli_chr07 | 33579079                | CC                              | GG              | 1946894576               |
| SNP_P4_99420_33579300 | NC_021166.1    | Ca_kabuli_chr07 | 33579300                | TT                              | CC              | 1946894578               |

| SNPs IDs              | Chromosome IDs | Chromosomes     | Physical positions (bp) | CDC Frontier (Reference genome) | (ILWC46 & LPNB) | NCBI SNPdb Accession IDs |
|-----------------------|----------------|-----------------|-------------------------|---------------------------------|-----------------|--------------------------|
| SNP_P4_99421_33579666 | NC_021166.1    | Ca_kabuli_chr07 | 33579666                | TT                              | CC              | 1946894580               |
| SNP_P4_99422_33580881 | NC_021166.1    | Ca_kabuli_chr07 | 33580881                | GG                              | AA              | 1946894583               |
| SNP_P4_99423_33582804 | NC_021166.1    | Ca_kabuli_chr07 | 33582804                | TT                              | GG              | 1946894585               |
| SNP_P4_99424_33585001 | NC_021166.1    | Ca_kabuli_chr07 | 33585001                | AA                              | TT              | 1946894587               |
| SNP_P4_99428_33586799 | NC_021166.1    | Ca_kabuli_chr07 | 33586799                | AA                              | GG              | 1946894589               |
| SNP_P4_99429_33586828 | NC_021166.1    | Ca_kabuli_chr07 | 33586828                | AA                              | TT              | 1946894591               |
| SNP_P4_99431_33587877 | NC_021166.1    | Ca_kabuli_chr07 | 33587877                | GG                              | AA              | 1946894593               |
| SNP_P4_99432_33588837 | NC_021166.1    | Ca_kabuli_chr07 | 33588837                | GG                              | AA              | 1946894595               |
| SNP_P4_99433_33591890 | NC_021166.1    | Ca_kabuli_chr07 | 33591890                | AA                              | TT              | 1946894597               |
| SNP_P4_99434_33592469 | NC_021166.1    | Ca_kabuli_chr07 | 33592469                | AA                              | TT              | 1946894599               |
| SNP_P4_99435_33592497 | NC_021166.1    | Ca_kabuli_chr07 | 33592497                | AA                              | GG              | 1946894601               |
| SNP_P4_99436_33593688 | NC_021166.1    | Ca_kabuli_chr07 | 33593688                | AA                              | GG              | 1946894603               |
| SNP_P4_99437_33593970 | NC_021166.1    | Ca_kabuli_chr07 | 33593970                | CC                              | GG              | 1946894605               |
| SNP_P4_99438_33593985 | NC_021166.1    | Ca_kabuli_chr07 | 33593985                | TT                              | CC              | 1946894607               |
| SNP_P4_99439_33594036 | NC_021166.1    | Ca_kabuli_chr07 | 33594036                | CC                              | TT              | 1946894609               |
| SNP_P4_99440_33594199 | NC_021166.1    | Ca_kabuli_chr07 | 33594199                | AA                              | CC              | 1946894611               |
| SNP_P4_99441_33596382 | NC_021166.1    | Ca_kabuli_chr07 | 33596382                | CC                              | TT              | 1946894613               |
| SNP_P4_99442_33596731 | NC_021166.1    | Ca_kabuli_chr07 | 33596731                | AA                              | TT              | 1946894615               |
| SNP_P4_99443_33596785 | NC_021166.1    | Ca_kabuli_chr07 | 33596785                | AA                              | GG              | 1946894617               |
| SNP_P4_99444_33597282 | NC_021166.1    | Ca_kabuli_chr07 | 33597282                | TT                              | AA              | 1946894619               |
| SNP_P4_99445_33597324 | NC_021166.1    | Ca_kabuli_chr07 | 33597324                | GG                              | CC              | 1946894621               |
| SNP_P4_99447_33597403 | NC_021166.1    | Ca_kabuli_chr07 | 33597403                | AA                              | GG              | 1946894623               |
| SNP_P4_99451_33597778 | NC_021166.1    | Ca_kabuli_chr07 | 33597778                | AA                              | TT              | 1946894625               |
| SNP_P4_99452_33597833 | NC_021166.1    | Ca_kabuli_chr07 | 33597833                | CC                              | TT              | 1946894627               |
| SNP_P4_99453_33597890 | NC_021166.1    | Ca_kabuli_chr07 | 33597890                | TT                              | AA              | 1946894629               |
| SNP_P4_99455_33605611 | NC_021166.1    | Ca_kabuli_chr07 | 33605611                | AA                              | CC              | 1946894631               |
| SNP_P4_99456_33605646 | NC_021166.1    | Ca_kabuli_chr07 | 33605646                | AA                              | TT              | 1946894633               |
| SNP_P4_99458_33605881 | NC_021166.1    | Ca_kabuli_chr07 | 33605881                | TT                              | GG              | 1946894635               |
| SNP_P4_99459_33605888 | NC_021166.1    | Ca_kabuli_chr07 | 33605888                | AA                              | GG              | 1946894637               |
| SNP_P4_99461_33606481 | NC_021166.1    | Ca_kabuli_chr07 | 33606481                | CC                              | GG              | 1946894639               |
| SNP_P4_99463_33606659 | NC_021166.1    | Ca_kabuli_chr07 | 33606659                | AA                              | CC              | 1946894641               |
| SNP_P4_99464_33606685 | NC_021166.1    | Ca_kabuli_chr07 | 33606685                | GG                              | TT              | 1946894643               |
| SNP_P4_99466_33606936 | NC_021166.1    | Ca_kabuli_chr07 | 33606936                | CC                              | AA              | 1946894645               |
| SNP_P4_99467_33606971 | NC_021166.1    | Ca_kabuli_chr07 | 33606971                | GG                              | AA              | 1946894647               |
| SNP_P4_99468_33607268 | NC_021166.1    | Ca_kabuli_chr07 | 33607268                | CC                              | AA              | 1946894649               |
| SNP_P4_99469_33608012 | NC_021166.1    | Ca_kabuli_chr07 | 33608012                | TT                              | CC              | 1946894651               |
| SNP_P4_99470_33608024 | NC_021166.1    | Ca_kabuli_chr07 | 33608024                | GG                              | AA              | 1946894653               |
| SNP_P4_99471_33608098 | NC_021166.1    | Ca_kabuli_chr07 | 33608098                | TT                              | CC              | 1946894655               |
| SNP_P4_99472_33608133 | NC_021166.1    | Ca_kabuli_chr07 | 33608133                | CC                              | AA              | 1946894657               |
| SNP_P4_99473_33608252 | NC_021166.1    | Ca_kabuli_chr07 | 33608252                | AA                              | CC              | 1946894659               |
| SNP_P4_99475_33608390 | NC_021166.1    | Ca_kabuli_chr07 | 33608390                | TT                              | GG              | 1946894661               |
| SNP_P4_99477_33612737 | NC_021166.1    | Ca_kabuli_chr07 | 33612737                | GG                              | AA              | 1946894663               |

| SNPs IDs              | Chromosome IDs | Chromosomes     | Physical positions (bp) | CDC Frontier (Reference genome) | (ILWC46 & LPNB) | NCBI SNPdb Accession IDs |
|-----------------------|----------------|-----------------|-------------------------|---------------------------------|-----------------|--------------------------|
| SNP_P4_99478_33612990 | NC_021166.1    | Ca_kabuli_chr07 | 33612990                | AA                              | GG              | 1946894665               |
| SNP_P4_99479_33613328 | NC_021166.1    | Ca_kabuli_chr07 | 33613328                | AA                              | GG              | 1946894667               |
| SNP_P4_99480_33614130 | NC_021166.1    | Ca_kabuli_chr07 | 33614130                | TT                              | GG              | 1946894669               |
| SNP_P4_99481_33614288 | NC_021166.1    | Ca_kabuli_chr07 | 33614288                | TT                              | CC              | 1946894671               |
| SNP_P4_99482_33614289 | NC_021166.1    | Ca_kabuli_chr07 | 33614289                | TT                              | CC              | 1946894673               |
| SNP_P4_99483_33614387 | NC_021166.1    | Ca_kabuli_chr07 | 33614387                | GG                              | AA              | 1946894675               |
| SNP_P4_99484_33618013 | NC_021166.1    | Ca_kabuli_chr07 | 33618013                | TT                              | GG              | 1946894677               |
| SNP_P4_99486_33618061 | NC_021166.1    | Ca_kabuli_chr07 | 33618061                | GG                              | TT              | 1946894679               |
| SNP_P4_99487_33621869 | NC_021166.1    | Ca_kabuli_chr07 | 33621869                | AA                              | GG              | 1946894681               |
| SNP_P4_99488_33622081 | NC_021166.1    | Ca_kabuli_chr07 | 33622081                | TT                              | CC              | 1946894683               |
| SNP_P4_99489_33622096 | NC_021166.1    | Ca_kabuli_chr07 | 33622096                | AA                              | GG              | 1946894685               |
| SNP_P4_99490_33622220 | NC_021166.1    | Ca_kabuli_chr07 | 33622220                | CC                              | AA              | 1946894687               |
| SNP_P4_99492_33622412 | NC_021166.1    | Ca_kabuli_chr07 | 33622412                | TT                              | GG              | 1946894689               |
| SNP_P4_99493_33624596 | NC_021166.1    | Ca_kabuli_chr07 | 33624596                | AA                              | GG              | 1946894691               |
| SNP_P4_99494_33625075 | NC_021166.1    | Ca_kabuli_chr07 | 33625075                | TT                              | AA              | 1946894693               |
| SNP_P4_99495_33625348 | NC_021166.1    | Ca_kabuli_chr07 | 33625348                | CC                              | GG              | 1946894695               |
| SNP_P4_99496_33625689 | NC_021166.1    | Ca_kabuli_chr07 | 33625689                | AA                              | GG              | 1946894697               |
| SNP_P4_99497_33625697 | NC_021166.1    | Ca_kabuli_chr07 | 33625697                | AA                              | CC              | 1946894699               |
| SNP_P4_99498_33626527 | NC_021166.1    | Ca_kabuli_chr07 | 33626527                | CC                              | TT              | 1946894701               |
| SNP_P4_99499_33626914 | NC_021166.1    | Ca_kabuli_chr07 | 33626914                | GG                              | TT              | 1946894703               |
| SNP_P4_99500_33626916 | NC_021166.1    | Ca_kabuli_chr07 | 33626916                | CC                              | AA              | 1946894705               |
| SNP_P4_99501_33627254 | NC_021166.1    | Ca_kabuli_chr07 | 33627254                | GG                              | AA              | 1946894707               |
| SNP_P4_99502_33627314 | NC_021166.1    | Ca_kabuli_chr07 | 33627314                | CC                              | TT              | 1946894709               |
| SNP_P4_99503_33630268 | NC_021166.1    | Ca_kabuli_chr07 | 33630268                | CC                              | GG              | 1946894711               |
| SNP_P4_99504_33630302 | NC_021166.1    | Ca_kabuli_chr07 | 33630302                | TT                              | AA              | 1946894713               |
| SNP_P4_99505_33630524 | NC_021166.1    | Ca_kabuli_chr07 | 33630524                | CC                              | TT              | 1946894715               |
| SNP_P4_99507_33630584 | NC_021166.1    | Ca_kabuli_chr07 | 33630584                | CC                              | GG              | 1946894717               |
| SNP_P4_99508_33630632 | NC_021166.1    | Ca_kabuli_chr07 | 33630632                | GG                              | TT              | 1946894719               |
| SNP_P4_99509_33630643 | NC_021166.1    | Ca_kabuli_chr07 | 33630643                | AA                              | TT              | 1946894721               |
| SNP_P4_99511_33631155 | NC_021166.1    | Ca_kabuli_chr07 | 33631155                | TT                              | CC              | 1946894723               |
| SNP_P4_99512_33631160 | NC_021166.1    | Ca_kabuli_chr07 | 33631160                | CC                              | TT              | 1946894725               |
| SNP_P4_99513_33631462 | NC_021166.1    | Ca_kabuli_chr07 | 33631462                | GG                              | AA              | 1946894727               |
| SNP_P4_99514_33631485 | NC_021166.1    | Ca_kabuli_chr07 | 33631485                | AA                              | GG              | 1946894729               |
| SNP_P4_99515_33631498 | NC_021166.1    | Ca_kabuli_chr07 | 33631498                | CC                              | TT              | 1946894731               |
| SNP_P4_99516_33631501 | NC_021166.1    | Ca_kabuli_chr07 | 33631501                | GG                              | AA              | 1946894733               |
| SNP_P4_99518_33633720 | NC_021166.1    | Ca_kabuli_chr07 | 33633720                | TT                              | CC              | 1946894735               |
| SNP_P4_99519_33633794 | NC_021166.1    | Ca_kabuli_chr07 | 33633794                | GG                              | CC              | 1946894737               |
| SNP_P4_99520_33633859 | NC_021166.1    | Ca_kabuli_chr07 | 33633859                | GG                              | AA              | 1946894739               |
| SNP_P4_99521_33634068 | NC_021166.1    | Ca_kabuli_chr07 | 33634068                | CC                              | TT              | 1946894741               |
| SNP_P4_99522_33634088 | NC_021166.1    | Ca_kabuli_chr07 | 33634088                | CC                              | TT              | 1946894743               |
| SNP_P4_99523_33636700 | NC_021166.1    | Ca_kabuli_chr07 | 33636700                | AA                              | GG              | 1946894746               |
| SNP_P4_99524_33636706 | NC_021166.1    | Ca_kabuli_chr07 | 33636706                | CC                              | TT              | 1946894748               |

| SNPs IDs              | Chromosome IDs | Chromosomes     | Physical positions (bp) | CDC Frontier (Reference genome) | (ILWC46 & LPNB) | NCBI SNPdb Accession IDs |
|-----------------------|----------------|-----------------|-------------------------|---------------------------------|-----------------|--------------------------|
| SNP_P4_99525_33636714 | NC_021166.1    | Ca_kabuli_chr07 | 33636714                | TT                              | GG              | 1946894750               |
| SNP_P4_99527_33637517 | NC_021166.1    | Ca_kabuli_chr07 | 33637517                | TT                              | CC              | 1946894752               |
| SNP_P4_99529_33638798 | NC_021166.1    | Ca_kabuli_chr07 | 33638798                | TT                              | AA              | 1946894754               |
| SNP_P4_99531_33639271 | NC_021166.1    | Ca_kabuli_chr07 | 33639271                | AA                              | TT              | 1946894756               |
| SNP_P4_99532_33640019 | NC_021166.1    | Ca_kabuli_chr07 | 33640019                | AA                              | TT              | 1946894758               |
| SNP_P4_99536_33640168 | NC_021166.1    | Ca_kabuli_chr07 | 33640168                | AA                              | TT              | 1946894760               |
| SNP_P4_99537_33640263 | NC_021166.1    | Ca_kabuli_chr07 | 33640263                | TT                              | CC              | 1946894762               |
| SNP_P4_99538_33640280 | NC_021166.1    | Ca_kabuli_chr07 | 33640280                | AA                              | TT              | 1946894764               |
| SNP_P4_99539_33640295 | NC_021166.1    | Ca_kabuli_chr07 | 33640295                | AA                              | TT              | 1946894766               |
| SNP_P4_99540_33640340 | NC_021166.1    | Ca_kabuli_chr07 | 33640340                | AA                              | TT              | 1946894768               |
| SNP_P4_99541_33640397 | NC_021166.1    | Ca_kabuli_chr07 | 33640397                | TT                              | CC              | 1946894771               |
| SNP_P4_99542_33640556 | NC_021166.1    | Ca_kabuli_chr07 | 33640556                | GG                              | CC              | 1946894773               |
| SNP_P4_99545_33642965 | NC_021166.1    | Ca_kabuli_chr07 | 33642965                | GG                              | AA              | 1946894775               |
| SNP_P4_99548_33644693 | NC_021166.1    | Ca_kabuli_chr07 | 33644693                | GG                              | CC              | 1946894777               |
| SNP_P4_99549_33644697 | NC_021166.1    | Ca_kabuli_chr07 | 33644697                | CC                              | TT              | 1946894779               |
| SNP_P4_99550_33644910 | NC_021166.1    | Ca_kabuli_chr07 | 33644910                | TT                              | AA              | 1946894781               |
| SNP_P4_99551_33644967 | NC_021166.1    | Ca_kabuli_chr07 | 33644967                | AA                              | GG              | 1946894783               |
| SNP_P4_99553_33645104 | NC_021166.1    | Ca_kabuli_chr07 | 33645104                | GG                              | AA              | 1946894785               |
| SNP_P4_99554_33645150 | NC_021166.1    | Ca_kabuli_chr07 | 33645150                | AA                              | CC              | 1946894787               |
| SNP_P4_99557_33645486 | NC_021166.1    | Ca_kabuli_chr07 | 33645486                | CC                              | TT              | 1946894789               |
| SNP_P4_99558_33647278 | NC_021166.1    | Ca_kabuli_chr07 | 33647278                | CC                              | TT              | 1946894791               |
| SNP_P4_99564_33649683 | NC_021166.1    | Ca_kabuli_chr07 | 33649683                | CC                              | TT              | 1946894793               |
| SNP_P4_99565_33649688 | NC_021166.1    | Ca_kabuli_chr07 | 33649688                | CC                              | TT              | 1946894795               |
| SNP_P4_99566_33649702 | NC_021166.1    | Ca_kabuli_chr07 | 33649702                | AA                              | CC              | 1946894797               |
| SNP_P4_99567_33649745 | NC_021166.1    | Ca_kabuli_chr07 | 33649745                | TT                              | AA              | 1946894799               |
| SNP_P4_99568_33649746 | NC_021166.1    | Ca_kabuli_chr07 | 33649746                | TT                              | AA              | 1946894801               |
| SNP_P4_99569_33649757 | NC_021166.1    | Ca_kabuli_chr07 | 33649757                | CC                              | TT              | 1946894802               |
| SNP_P4_99570_33650078 | NC_021166.1    | Ca_kabuli_chr07 | 33650078                | TT                              | GG              | 1946894804               |
| SNP_P4_99571_33650229 | NC_021166.1    | Ca_kabuli_chr07 | 33650229                | CC                              | AA              | 1946894806               |
| SNP_P4_99572_33650556 | NC_021166.1    | Ca_kabuli_chr07 | 33650556                | TT                              | CC              | 1946894808               |
| SNP_P4_99573_33650985 | NC_021166.1    | Ca_kabuli_chr07 | 33650985                | AA                              | GG              | 1946894810               |
| SNP_P4_99574_33651030 | NC_021166.1    | Ca_kabuli_chr07 | 33651030                | TT                              | CC              | 1946894812               |
| SNP_P4_99575_33651309 | NC_021166.1    | Ca_kabuli_chr07 | 33651309                | TT                              | CC              | 1946894814               |
| SNP_P4_99576_33651498 | NC_021166.1    | Ca_kabuli_chr07 | 33651498                | GG                              | AA              | 1946894816               |
| SNP_P4_99577_33651593 | NC_021166.1    | Ca_kabuli_chr07 | 33651593                | AA                              | GG              | 1946894818               |
| SNP_P4_99578_33652061 | NC_021166.1    | Ca_kabuli_chr07 | 33652061                | GG                              | TT              | 1946894820               |
| SNP_P4_99579_33652074 | NC_021166.1    | Ca_kabuli_chr07 | 33652074                | GG                              | TT              | 1946894822               |
| SNP_P4_99580_33652085 | NC_021166.1    | Ca_kabuli_chr07 | 33652085                | CC                              | GG              | 1946894824               |
| SNP_P4_99582_33654086 | NC_021166.1    | Ca_kabuli_chr07 | 33654086                | AA                              | GG              | 1946894826               |
| SNP_P4_99583_33655482 | NC_021166.1    | Ca_kabuli_chr07 | 33655482                | GG                              | AA              | 1946894828               |
| SNP_P4_99584_33655515 | NC_021166.1    | Ca_kabuli_chr07 | 33655515                | GG                              | AA              | 1946894830               |
| SNP_P4_99585_33655777 | NC_021166.1    | Ca_kabuli_chr07 | 33655777                | GG                              | AA              | 1946894832               |



| SNPs IDs              | Chromosome IDs | Chromosomes     | Physical positions (bp) | CDC Frontier (Reference genome) | (ILWC46 & LPNB) | NCBI SNPdb Accession IDs |
|-----------------------|----------------|-----------------|-------------------------|---------------------------------|-----------------|--------------------------|
| SNP_P4_99586_33655871 | NC_021166.1    | Ca_kabuli_chr07 | 33655871                | TT                              | AA              | 1946894834               |
| SNP_P4_99587_33655907 | NC_021166.1    | Ca_kabuli_chr07 | 33655907                | TT                              | AA              | 1946894836               |
| SNP_P4_99589_33656080 | NC_021166.1    | Ca_kabuli_chr07 | 33656080                | TT                              | CC              | 1946894838               |
| SNP_P4_99590_33656469 | NC_021166.1    | Ca_kabuli_chr07 | 33656469                | AA                              | GG              | 1946894840               |
| SNP_P4_99591_33656620 | NC_021166.1    | Ca_kabuli_chr07 | 33656620                | AA                              | CC              | 1946894842               |
| SNP_P4_99592_33657687 | NC_021166.1    | Ca_kabuli_chr07 | 33657687                | GG                              | AA              | 1946894844               |
| SNP_P4_99593_33657688 | NC_021166.1    | Ca_kabuli_chr07 | 33657688                | GG                              | AA              | 1946894846               |
| SNP_P4_99594_33657742 | NC_021166.1    | Ca_kabuli_chr07 | 33657742                | GG                              | TT              | 1946894848               |
| SNP_P4_99595_33659468 | NC_021166.1    | Ca_kabuli_chr07 | 33659468                | AA                              | GG              | 1946894850               |
| SNP_P4_99596_33659749 | NC_021166.1    | Ca_kabuli_chr07 | 33659749                | GG                              | AA              | 1946894852               |
| SNP_P4_99597_33659780 | NC_021166.1    | Ca_kabuli_chr07 | 33659780                | AA                              | TT              | 1946894854               |
| SNP_P4_99598_33660096 | NC_021166.1    | Ca_kabuli_chr07 | 33660096                | CC                              | AA              | 1946894856               |
| SNP_P4_99600_33661659 | NC_021166.1    | Ca_kabuli_chr07 | 33661659                | CC                              | TT              | 1946894858               |
| SNP_P4_99601_33661677 | NC_021166.1    | Ca_kabuli_chr07 | 33661677                | TT                              | CC              | 1946894860               |
| SNP_P4_99603_33661694 | NC_021166.1    | Ca_kabuli_chr07 | 33661694                | TT                              | CC              | 1946894862               |
| SNP_P4_99604_33661751 | NC_021166.1    | Ca_kabuli_chr07 | 33661751                | GG                              | AA              | 1946894864               |
| SNP_P4_99605_33661753 | NC_021166.1    | Ca_kabuli_chr07 | 33661753                | TT                              | CC              | 1946894866               |
| SNP_P4_99606_33661965 | NC_021166.1    | Ca_kabuli_chr07 | 33661965                | TT                              | CC              | 1946894868               |
| SNP_P4_99607_33661967 | NC_021166.1    | Ca_kabuli_chr07 | 33661967                | GG                              | AA              | 1946894870               |
| SNP_P4_99608_33661974 | NC_021166.1    | Ca_kabuli_chr07 | 33661974                | CC                              | TT              | 1946894872               |
| SNP_P4_99609_33661985 | NC_021166.1    | Ca_kabuli_chr07 | 33661985                | TT                              | GG              | 1946894874               |
| SNP_P4_99611_33662049 | NC_021166.1    | Ca_kabuli_chr07 | 33662049                | TT                              | GG              | 1946894876               |
| SNP_P4_99612_33665239 | NC_021166.1    | Ca_kabuli_chr07 | 33665239                | TT                              | CC              | 1946894878               |
| SNP_P4_99613_33665255 | NC_021166.1    | Ca_kabuli_chr07 | 33665255                | AA                              | GG              | 1946894880               |
| SNP_P4_99614_33665287 | NC_021166.1    | Ca_kabuli_chr07 | 33665287                | AA                              | GG              | 1946894882               |
| SNP_P4_99615_33665306 | NC_021166.1    | Ca_kabuli_chr07 | 33665306                | GG                              | AA              | 1946894884               |
| SNP_P4_99616_33665727 | NC_021166.1    | Ca_kabuli_chr07 | 33665727                | CC                              | TT              | 1946894886               |
| SNP_P4_99617_33665739 | NC_021166.1    | Ca_kabuli_chr07 | 33665739                | TT                              | CC              | 1946894888               |
| SNP_P4_99618_33666124 | NC_021166.1    | Ca_kabuli_chr07 | 33666124                | AA                              | GG              | 1946894890               |
| SNP_P4_99619_33666164 | NC_021166.1    | Ca_kabuli_chr07 | 33666164                | GG                              | AA              | 1946894892               |
| SNP_P4_99620_33666175 | NC_021166.1    | Ca_kabuli_chr07 | 33666175                | CC                              | AA              | 1946894894               |
| SNP_P4_99621_33666196 | NC_021166.1    | Ca_kabuli_chr07 | 33666196                | AA                              | GG              | 1946894896               |
| SNP_P4_99622_33666453 | NC_021166.1    | Ca_kabuli_chr07 | 33666453                | CC                              | GG              | 1946894898               |
| SNP_P4_99623_33666819 | NC_021166.1    | Ca_kabuli_chr07 | 33666819                | TT                              | CC              | 1946894900               |
| SNP_P4_99624_33666884 | NC_021166.1    | Ca_kabuli_chr07 | 33666884                | CC                              | AA              | 1946894902               |
| SNP_P4_99625_33666887 | NC_021166.1    | Ca_kabuli_chr07 | 33666887                | GG                              | AA              | 1946894905               |
| SNP_P4_99626_33669639 | NC_021166.1    | Ca_kabuli_chr07 | 33669639                | AA                              | GG              | 1946894907               |
| SNP_P4_99627_33669852 | NC_021166.1    | Ca_kabuli_chr07 | 33669852                | AA                              | CC              | 1946894909               |
| SNP_P4_99628_33669923 | NC_021166.1    | Ca_kabuli_chr07 | 33669923                | AA                              | CC              | 1946894911               |
| SNP_P4_99630_33670485 | NC_021166.1    | Ca_kabuli_chr07 | 33670485                | CC                              | TT              | 1946894913               |
| SNP_P4_99631_33670701 | NC_021166.1    | Ca_kabuli_chr07 | 33670701                | AA                              | CC              | 1946894915               |
| SNP_P4_99632_33670781 | NC_021166.1    | Ca_kabuli_chr07 | 33670781                | AA                              | GG              | 1946894917               |

| SNPs IDs              | Chromosome IDs | Chromosomes     | Physical positions (bp) | CDC Frontier (Reference genome) | (ILWC46 & LPNB) | NCBI SNPdb Accession IDs |
|-----------------------|----------------|-----------------|-------------------------|---------------------------------|-----------------|--------------------------|
| SNP_P4_99633_33670800 | NC_021166.1    | Ca_kabuli_chr07 | 33670800                | TT                              | CC              | 1946894919               |
| SNP_P4_99634_33670801 | NC_021166.1    | Ca_kabuli_chr07 | 33670801                | TT                              | CC              | 1946894921               |
| SNP_P4_99635_33670846 | NC_021166.1    | Ca_kabuli_chr07 | 33670846                | AA                              | CC              | 1946894923               |
| SNP_P4_99636_33670936 | NC_021166.1    | Ca_kabuli_chr07 | 33670936                | GG                              | CC              | 1946894925               |
| SNP_P4_99637_33671150 | NC_021166.1    | Ca_kabuli_chr07 | 33671150                | GG                              | CC              | 1946894927               |
| SNP_P4_99638_33671220 | NC_021166.1    | Ca_kabuli_chr07 | 33671220                | TT                              | CC              | 1946894929               |
| SNP_P4_99642_33671358 | NC_021166.1    | Ca_kabuli_chr07 | 33671358                | GG                              | AA              | 1946894931               |
| SNP_P4_99643_33676469 | NC_021166.1    | Ca_kabuli_chr07 | 33676469                | AA                              | TT              | 1946894933               |
| SNP_P4_99644_33676471 | NC_021166.1    | Ca_kabuli_chr07 | 33676471                | CC                              | AA              | 1946894935               |
| SNP_P4_99645_33676531 | NC_021166.1    | Ca_kabuli_chr07 | 33676531                | TT                              | GG              | 1946894937               |
| SNP_P4_99646_33676532 | NC_021166.1    | Ca_kabuli_chr07 | 33676532                | CC                              | AA              | 1946894939               |
| SNP_P4_99647_33676713 | NC_021166.1    | Ca_kabuli_chr07 | 33676713                | AA                              | GG              | 1946894942               |
| SNP_P4_99648_33676751 | NC_021166.1    | Ca_kabuli_chr07 | 33676751                | AA                              | GG              | 1946894944               |
| SNP_P4_99649_33676799 | NC_021166.1    | Ca_kabuli_chr07 | 33676799                | TT                              | CC              | 1946894946               |
| SNP_P4_99650_33676867 | NC_021166.1    | Ca_kabuli_chr07 | 33676867                | TT                              | AA              | 1946894948               |
| SNP_P4_99652_33682882 | NC_021166.1    | Ca_kabuli_chr07 | 33682882                | CC                              | TT              | 1946894950               |
| SNP_P4_99653_33682890 | NC_021166.1    | Ca_kabuli_chr07 | 33682890                | CC                              | TT              | 1946894952               |
| SNP_P4_99654_33682912 | NC_021166.1    | Ca_kabuli_chr07 | 33682912                | AA                              | TT              | 1946894954               |
| SNP_P4_99655_33683016 | NC_021166.1    | Ca_kabuli_chr07 | 33683016                | CC                              | TT              | 1946894956               |
| SNP_P4_99657_33683153 | NC_021166.1    | Ca_kabuli_chr07 | 33683153                | AA                              | TT              | 1946894958               |
| SNP_P4_99658_33683176 | NC_021166.1    | Ca_kabuli_chr07 | 33683176                | TT                              | AA              | 1946894960               |
| SNP_P4_99660_33683226 | NC_021166.1    | Ca_kabuli_chr07 | 33683226                | AA                              | CC              | 1946894962               |
| SNP_P4_99662_33683312 | NC_021166.1    | Ca_kabuli_chr07 | 33683312                | AA                              | GG              | 1946894964               |
| SNP_P4_99663_33683323 | NC_021166.1    | Ca_kabuli_chr07 | 33683323                | AA                              | CC              | 1946894967               |
| SNP_P4_99664_33683334 | NC_021166.1    | Ca_kabuli_chr07 | 33683334                | TT                              | GG              | 1946894969               |
| SNP_P4_99667_33684276 | NC_021166.1    | Ca_kabuli_chr07 | 33684276                | GG                              | AA              | 1946894971               |
| SNP_P4_99668_33684285 | NC_021166.1    | Ca_kabuli_chr07 | 33684285                | TT                              | AA              | 1946894973               |
| SNP_P4_99669_33684398 | NC_021166.1    | Ca_kabuli_chr07 | 33684398                | CC                              | TT              | 1946894975               |
| SNP_P4_99670_33684415 | NC_021166.1    | Ca_kabuli_chr07 | 33684415                | GG                              | CC              | 1946894977               |
| SNP_P4_99671_33684448 | NC_021166.1    | Ca_kabuli_chr07 | 33684448                | TT                              | CC              | 1946894979               |
| SNP_P4_99672_33697788 | NC_021166.1    | Ca_kabuli_chr07 | 33697788                | TT                              | AA              | 1946894981               |
| SNP_P4_99673_33697823 | NC_021166.1    | Ca_kabuli_chr07 | 33697823                | GG                              | CC              | 1946894983               |
| SNP_P4_99674_33698458 | NC_021166.1    | Ca_kabuli_chr07 | 33698458                | AA                              | CC              | 1946894985               |
| SNP_P4_99675_33698464 | NC_021166.1    | Ca_kabuli_chr07 | 33698464                | AA                              | GG              | 1946894987               |
| SNP_P4_99676_33698756 | NC_021166.1    | Ca_kabuli_chr07 | 33698756                | TT                              | CC              | 1946894989               |
| SNP_P4_99677_33698764 | NC_021166.1    | Ca_kabuli_chr07 | 33698764                | TT                              | CC              | 1946894991               |
| SNP_P4_99678_33698781 | NC_021166.1    | Ca_kabuli_chr07 | 33698781                | CC                              | TT              | 1946894993               |
| SNP_P4_99679_33698784 | NC_021166.1    | Ca_kabuli_chr07 | 33698784                | TT                              | GG              | 1946894995               |
| SNP_P4_99680_33698821 | NC_021166.1    | Ca_kabuli_chr07 | 33698821                | CC                              | TT              | 1946894997               |
| SNP_P4_99681_33699961 | NC_021166.1    | Ca_kabuli_chr07 | 33699961                | GG                              | AA              | 1946894999               |
| SNP_P4_99682_33700511 | NC_021166.1    | Ca_kabuli_chr07 | 33700511                | AA                              | CC              | 1946895001               |
| SNP_P4_99683_33700834 | NC_021166.1    | Ca_kabuli_chr07 | 33700834                | CC                              | TT              | 1946895003               |

| SNPs IDs              | Chromosome IDs | Chromosomes     | Physical positions (bp) | CDC Frontier (Reference genome) | (ILWC46 & LPNB) | NCBI SNPdb Accession IDs |
|-----------------------|----------------|-----------------|-------------------------|---------------------------------|-----------------|--------------------------|
| SNP_P4_99684_33700859 | NC_021166.1    | Ca_kabuli_chr07 | 33700859                | AA                              | TT              | 1946895005               |
| SNP_P4_99685_33700955 | NC_021166.1    | Ca_kabuli_chr07 | 33700955                | CC                              | TT              | 1946895007               |
| SNP_P4_99686_33701162 | NC_021166.1    | Ca_kabuli_chr07 | 33701162                | AA                              | CC              | 1946895009               |
| SNP_P4_99687_33701181 | NC_021166.1    | Ca_kabuli_chr07 | 33701181                | AA                              | GG              | 1946895011               |
| SNP_P4_99688_33701461 | NC_021166.1    | Ca_kabuli_chr07 | 33701461                | TT                              | CC              | 1946895013               |
| SNP_P4_99689_33705047 | NC_021166.1    | Ca_kabuli_chr07 | 33705047                | GG                              | AA              | 1946895015               |
| SNP_P4_99690_33705571 | NC_021166.1    | Ca_kabuli_chr07 | 33705571                | TT                              | CC              | 1946895017               |
| SNP_P4_99691_33705807 | NC_021166.1    | Ca_kabuli_chr07 | 33705807                | CC                              | TT              | 1946895019               |
| SNP_P4_99692_33705854 | NC_021166.1    | Ca_kabuli_chr07 | 33705854                | AA                              | GG              | 1946895021               |
| SNP_P4_99693_33706256 | NC_021166.1    | Ca_kabuli_chr07 | 33706256                | CC                              | TT              | 1946895023               |
| SNP_P4_99694_33707105 | NC_021166.1    | Ca_kabuli_chr07 | 33707105                | CC                              | TT              | 1946895025               |
| SNP_P4_99695_33707126 | NC_021166.1    | Ca_kabuli_chr07 | 33707126                | AA                              | GG              | 1946895027               |
| SNP_P4_99696_33707225 | NC_021166.1    | Ca_kabuli_chr07 | 33707225                | CC                              | TT              | 1946895029               |
| SNP_P4_99697_33707556 | NC_021166.1    | Ca_kabuli_chr07 | 33707556                | GG                              | TT              | 1946895031               |
| SNP_P4_99698_33708132 | NC_021166.1    | Ca_kabuli_chr07 | 33708132                | GG                              | AA              | 1946895033               |
| SNP_P4_99699_33708161 | NC_021166.1    | Ca_kabuli_chr07 | 33708161                | AA                              | GG              | 1946895035               |
| SNP_P4_99700_33709167 | NC_021166.1    | Ca_kabuli_chr07 | 33709167                | GG                              | AA              | 1946895037               |
| SNP_P4_99701_33709507 | NC_021166.1    | Ca_kabuli_chr07 | 33709507                | GG                              | AA              | 1946895039               |
| SNP_P4_99702_33709510 | NC_021166.1    | Ca_kabuli_chr07 | 33709510                | AA                              | CC              | 1946895041               |
| SNP_P4_99703_33709523 | NC_021166.1    | Ca_kabuli_chr07 | 33709523                | CC                              | TT              | 1946895043               |
| SNP_P4_99704_33712683 | NC_021166.1    | Ca_kabuli_chr07 | 33712683                | CC                              | TT              | 1946895045               |
| SNP_P4_99705_33712709 | NC_021166.1    | Ca_kabuli_chr07 | 33712709                | AA                              | CC              | 1946895048               |
| SNP_P4_99706_33712711 | NC_021166.1    | Ca_kabuli_chr07 | 33712711                | GG                              | AA              | 1946895050               |
| SNP_P4_99707_33712754 | NC_021166.1    | Ca_kabuli_chr07 | 33712754                | TT                              | AA              | 1946895052               |
| SNP_P4_99709_33713739 | NC_021166.1    | Ca_kabuli_chr07 | 33713739                | TT                              | GG              | 1946895054               |
| SNP_P4_99711_33714017 | NC_021166.1    | Ca_kabuli_chr07 | 33714017                | CC                              | TT              | 1946895056               |
| SNP_P4_99714_33714253 | NC_021166.1    | Ca_kabuli_chr07 | 33714253                | AA                              | CC              | 1946895058               |
| SNP_P4_99715_33714412 | NC_021166.1    | Ca_kabuli_chr07 | 33714412                | CC                              | AA              | 1946895060               |
| SNP_P4_99716_33714423 | NC_021166.1    | Ca_kabuli_chr07 | 33714423                | GG                              | AA              | 1946895062               |
| SNP_P4_99717_33714434 | NC_021166.1    | Ca_kabuli_chr07 | 33714434                | AA                              | GG              | 1946895064               |
| SNP_P4_99718_33714485 | NC_021166.1    | Ca_kabuli_chr07 | 33714485                | TT                              | AA              | 1946895066               |
| SNP_P4_99719_33714502 | NC_021166.1    | Ca_kabuli_chr07 | 33714502                | CC                              | TT              | 1946895068               |
| SNP_P4_99720_33714543 | NC_021166.1    | Ca_kabuli_chr07 | 33714543                | TT                              | CC              | 1946895070               |
| SNP_P4_99721_33714547 | NC_021166.1    | Ca_kabuli_chr07 | 33714547                | TT                              | AA              | 1946895072               |
| SNP_P4_99722_33714693 | NC_021166.1    | Ca_kabuli_chr07 | 33714693                | AA                              | GG              | 1946895073               |
| SNP_P4_99723_33714698 | NC_021166.1    | Ca_kabuli_chr07 | 33714698                | TT                              | GG              | 1946895074               |
| SNP_P4_99724_33714922 | NC_021166.1    | Ca_kabuli_chr07 | 33714922                | CC                              | TT              | 1946895075               |
| SNP_P4_99725_33714936 | NC_021166.1    | Ca_kabuli_chr07 | 33714936                | TT                              | AA              | 1946895076               |
| SNP_P4_99726_33715003 | NC_021166.1    | Ca_kabuli_chr07 | 33715003                | AA                              | TT              | 1946895077               |
| SNP_P4_99727_33715044 | NC_021166.1    | Ca_kabuli_chr07 | 33715044                | CC                              | AA              | 1946895078               |
| SNP_P4_99728_33715452 | NC_021166.1    | Ca_kabuli_chr07 | 33715452                | AA                              | GG              | 1946895079               |
| SNP_P4_99729_33715727 | NC_021166.1    | Ca_kabuli_chr07 | 33715727                | AA                              | GG              | 1946895081               |

| SNPs IDs              | Chromosome IDs | Chromosomes     | Physical positions (bp) | CDC Frontier (Reference genome) | (ILWC46 & LPNB) | NCBI SNPdb Accession IDs |
|-----------------------|----------------|-----------------|-------------------------|---------------------------------|-----------------|--------------------------|
| SNP_P4_99730_33719337 | NC_021166.1    | Ca_kabuli_chr07 | 33719337                | CC                              | TT              | 1946895083               |
| SNP_P4_99732_33720387 | NC_021166.1    | Ca_kabuli_chr07 | 33720387                | GG                              | AA              | 1946895086               |
| SNP_P4_99733_33720810 | NC_021166.1    | Ca_kabuli_chr07 | 33720810                | GG                              | TT              | 1946895088               |
| SNP_P4_99734_33721779 | NC_021166.1    | Ca_kabuli_chr07 | 33721779                | GG                              | TT              | 1946895090               |
| SNP_P4_99735_33722042 | NC_021166.1    | Ca_kabuli_chr07 | 33722042                | GG                              | AA              | 1946895092               |
| SNP_P4_99736_33722054 | NC_021166.1    | Ca_kabuli_chr07 | 33722054                | GG                              | AA              | 1946895094               |
| SNP_P4_99737_33722066 | NC_021166.1    | Ca_kabuli_chr07 | 33722066                | TT                              | CC              | 1946895096               |
| SNP_P4_99738_33722526 | NC_021166.1    | Ca_kabuli_chr07 | 33722526                | CC                              | GG              | 1946895099               |
| SNP_P4_99739_33722533 | NC_021166.1    | Ca_kabuli_chr07 | 33722533                | GG                              | AA              | 1946895101               |
| SNP_P4_99740_33722880 | NC_021166.1    | Ca_kabuli_chr07 | 33722880                | AA                              | GG              | 1946895103               |
| SNP_P4_99741_33722906 | NC_021166.1    | Ca_kabuli_chr07 | 33722906                | CC                              | TT              | 1946895105               |
| SNP_P4_99742_33722917 | NC_021166.1    | Ca_kabuli_chr07 | 33722917                | TT                              | CC              | 1946895107               |
| SNP_P4_99743_33722924 | NC_021166.1    | Ca_kabuli_chr07 | 33722924                | GG                              | AA              | 1946895109               |
| SNP_P4_99744_33723193 | NC_021166.1    | Ca_kabuli_chr07 | 33723193                | GG                              | AA              | 1946895111               |
| SNP_P4_99745_33723215 | NC_021166.1    | Ca_kabuli_chr07 | 33723215                | CC                              | TT              | 1946895113               |
| SNP_P4_99746_33723280 | NC_021166.1    | Ca_kabuli_chr07 | 33723280                | AA                              | CC              | 1946895115               |
| SNP_P4_99747_33724592 | NC_021166.1    | Ca_kabuli_chr07 | 33724592                | AA                              | TT              | 1946895118               |
| SNP_P4_99749_33724764 | NC_021166.1    | Ca_kabuli_chr07 | 33724764                | TT                              | GG              | 1946895120               |
| SNP_P4_99750_33724798 | NC_021166.1    | Ca_kabuli_chr07 | 33724798                | CC                              | TT              | 1946895122               |
| SNP_P4_99751_33724821 | NC_021166.1    | Ca_kabuli_chr07 | 33724821                | TT                              | CC              | 1946895124               |
| SNP_P4_99752_33724824 | NC_021166.1    | Ca_kabuli_chr07 | 33724824                | CC                              | AA              | 1946895127               |
| SNP_P4_99753_33724834 | NC_021166.1    | Ca_kabuli_chr07 | 33724834                | AA                              | TT              | 1946895129               |
| SNP_P4_99755_33725111 | NC_021166.1    | Ca_kabuli_chr07 | 33725111                | TT                              | CC              | 1946895131               |
| SNP_P4_99756_33725526 | NC_021166.1    | Ca_kabuli_chr07 | 33725526                | AA                              | TT              | 1946895133               |
| SNP_P4_99759_33726451 | NC_021166.1    | Ca_kabuli_chr07 | 33726451                | CC                              | TT              | 1946895135               |
| SNP_P4_99760_33726477 | NC_021166.1    | Ca_kabuli_chr07 | 33726477                | AA                              | GG              | 1946895138               |
| SNP_P4_99761_33727611 | NC_021166.1    | Ca_kabuli_chr07 | 33727611                | CC                              | TT              | 1946895140               |
| SNP_P4_99762_33727640 | NC_021166.1    | Ca_kabuli_chr07 | 33727640                | CC                              | GG              | 1946895142               |
| SNP_P4_99763_33727668 | NC_021166.1    | Ca_kabuli_chr07 | 33727668                | AA                              | GG              | 1946895144               |
| SNP_P4_99764_33727782 | NC_021166.1    | Ca_kabuli_chr07 | 33727782                | CC                              | AA              | 1946895147               |
| SNP_P4_99765_33727836 | NC_021166.1    | Ca_kabuli_chr07 | 33727836                | TT                              | GG              | 1946895149               |
| SNP_P4_99766_33727987 | NC_021166.1    | Ca_kabuli_chr07 | 33727987                | AA                              | TT              | 1946895151               |
| SNP_P4_99767_33727995 | NC_021166.1    | Ca_kabuli_chr07 | 33727995                | GG                              | TT              | 1946895153               |
| SNP_P4_99768_33728964 | NC_021166.1    | Ca_kabuli_chr07 | 33728964                | CC                              | TT              | 1946895155               |
| SNP_P4_99769_33729283 | NC_021166.1    | Ca_kabuli_chr07 | 33729283                | GG                              | AA              | 1946895157               |
| SNP_P4_99770_33729391 | NC_021166.1    | Ca_kabuli_chr07 | 33729391                | AA                              | GG              | 1946895159               |
| SNP_P4_99771_33729478 | NC_021166.1    | Ca_kabuli_chr07 | 33729478                | TT                              | CC              | 1946895161               |
| SNP_P4_99772_33729630 | NC_021166.1    | Ca_kabuli_chr07 | 33729630                | TT                              | GG              | 1946895163               |
| SNP_P4_99773_33729675 | NC_021166.1    | Ca_kabuli_chr07 | 33729675                | CC                              | TT              | 1946895166               |
| SNP_P4_99774_33729866 | NC_021166.1    | Ca_kabuli_chr07 | 33729866                | GG                              | AA              | 1946895168               |
| SNP_P4_99775_33729998 | NC_021166.1    | Ca_kabuli_chr07 | 33729998                | TT                              | CC              | 1946895170               |
| SNP_P4_99776_33730087 | NC_021166.1    | Ca_kabuli_chr07 | 33730087                | TT                              | CC              | 1946895172               |

| SNPs IDs              | Chromosome IDs | Chromosomes     | Physical positions (bp) | CDC Frontier (Reference genome) | (ILWC46 & LPNB) | NCBI SNPdb Accession IDs |
|-----------------------|----------------|-----------------|-------------------------|---------------------------------|-----------------|--------------------------|
| SNP_P4_99777_33730179 | NC_021166.1    | Ca_kabuli_chr07 | 33730179                | TT                              | CC              | 1946895174               |
| SNP_P4_99778_33730217 | NC_021166.1    | Ca_kabuli_chr07 | 33730217                | GG                              | TT              | 1946895177               |
| SNP_P4_99779_33730221 | NC_021166.1    | Ca_kabuli_chr07 | 33730221                | AA                              | TT              | 1946895179               |
| SNP_P4_99780_33730289 | NC_021166.1    | Ca_kabuli_chr07 | 33730289                | GG                              | AA              | 1946895181               |
| SNP_P4_99781_33730526 | NC_021166.1    | Ca_kabuli_chr07 | 33730526                | CC                              | TT              | 1946895183               |
| SNP_P4_99782_33730810 | NC_021166.1    | Ca_kabuli_chr07 | 33730810                | CC                              | TT              | 1946895185               |
| SNP_P4_99783_33730814 | NC_021166.1    | Ca_kabuli_chr07 | 33730814                | GG                              | TT              | 1946895188               |
| SNP_P4_99784_33731604 | NC_021166.1    | Ca_kabuli_chr07 | 33731604                | AA                              | TT              | 1946895190               |
| SNP_P4_99785_33731621 | NC_021166.1    | Ca_kabuli_chr07 | 33731621                | AA                              | GG              | 1946895192               |
| SNP_P4_99788_33732504 | NC_021166.1    | Ca_kabuli_chr07 | 33732504                | TT                              | CC              | 1946895194               |
| SNP_P4_99792_33733162 | NC_021166.1    | Ca_kabuli_chr07 | 33733162                | GG                              | CC              | 1946895196               |
| SNP_P4_99794_33743605 | NC_021166.1    | Ca_kabuli_chr07 | 33743605                | CC                              | TT              | 1946895198               |
| SNP_P4_99795_33743963 | NC_021166.1    | Ca_kabuli_chr07 | 33743963                | GG                              | AA              | 1946895200               |
| SNP_P4_99796_33745693 | NC_021166.1    | Ca_kabuli_chr07 | 33745693                | GG                              | AA              | 1946895202               |
| SNP_P4_99797_33746420 | NC_021166.1    | Ca_kabuli_chr07 | 33746420                | GG                              | AA              | 1946895205               |
| SNP_P4_99799_33747487 | NC_021166.1    | Ca_kabuli_chr07 | 33747487                | TT                              | CC              | 1946895207               |
| SNP_P4_99801_33749095 | NC_021166.1    | Ca_kabuli_chr07 | 33749095                | TT                              | CC              | 1946895209               |
| SNP_P4_99802_33749112 | NC_021166.1    | Ca_kabuli_chr07 | 33749112                | GG                              | TT              | 1946895211               |
| SNP_P4_99803_33750773 | NC_021166.1    | Ca_kabuli_chr07 | 33750773                | AA                              | TT              | 1946895213               |
| SNP_P4_99804_33750990 | NC_021166.1    | Ca_kabuli_chr07 | 33750990                | CC                              | AA              | 1946895215               |
| SNP_P4_99805_33753794 | NC_021166.1    | Ca_kabuli_chr07 | 33753794                | GG                              | CC              | 1946895217               |
| SNP_P4_99806_33753795 | NC_021166.1    | Ca_kabuli_chr07 | 33753795                | CC                              | GG              | 1946895220               |
| SNP_P4_99807_33753809 | NC_021166.1    | Ca_kabuli_chr07 | 33753809                | CC                              | GG              | 1946895222               |
| SNP_P4_99808_33757416 | NC_021166.1    | Ca_kabuli_chr07 | 33757416                | GG                              | TT              | 1946895224               |
| SNP_P4_99809_33757581 | NC_021166.1    | Ca_kabuli_chr07 | 33757581                | AA                              | GG              | 1946895226               |
| SNP_P4_99810_33757655 | NC_021166.1    | Ca_kabuli_chr07 | 33757655                | CC                              | GG              | 1946895229               |
| SNP_P4_99812_33758978 | NC_021166.1    | Ca_kabuli_chr07 | 33758978                | CC                              | TT              | 1946895231               |
| SNP_P4_99813_33759182 | NC_021166.1    | Ca_kabuli_chr07 | 33759182                | AA                              | CC              | 1946895233               |
| SNP_P4_99814_33759270 | NC_021166.1    | Ca_kabuli_chr07 | 33759270                | CC                              | GG              | 1946895235               |
| SNP_P4_99815_33759618 | NC_021166.1    | Ca_kabuli_chr07 | 33759618                | TT                              | CC              | 1946895238               |
| SNP_P4_99816_33759619 | NC_021166.1    | Ca_kabuli_chr07 | 33759619                | GG                              | AA              | 1946895240               |
| SNP_P4_99817_33759645 | NC_021166.1    | Ca_kabuli_chr07 | 33759645                | CC                              | TT              | 1946895242               |
| SNP_P4_99818_33759648 | NC_021166.1    | Ca_kabuli_chr07 | 33759648                | CC                              | TT              | 1946895244               |
| SNP_P4_99819_33759855 | NC_021166.1    | Ca_kabuli_chr07 | 33759855                | TT                              | CC              | 1946895246               |
| SNP_P4_99820_33761388 | NC_021166.1    | Ca_kabuli_chr07 | 33761388                | CC                              | TT              | 1946895248               |
| SNP_P4_99821_33765471 | NC_021166.1    | Ca_kabuli_chr07 | 33765471                | TT                              | GG              | 1946895251               |
| SNP_P4_99822_33766264 | NC_021166.1    | Ca_kabuli_chr07 | 33766264                | GG                              | TT              | 1946895253               |
| SNP_P4_99823_33766270 | NC_021166.1    | Ca_kabuli_chr07 | 33766270                | TT                              | CC              | 1946895255               |
| SNP_P4_99825_33766705 | NC_021166.1    | Ca_kabuli_chr07 | 33766705                | GG                              | AA              | 1946895257               |
| SNP_P4_99826_33767516 | NC_021166.1    | Ca_kabuli_chr07 | 33767516                | CC                              | GG              | 1946895260               |
| SNP_P4_99830_33768390 | NC_021166.1    | Ca_kabuli_chr07 | 33768390                | GG                              | AA              | 1946895262               |
| SNP_P4_99832_33768504 | NC_021166.1    | Ca_kabuli_chr07 | 33768504                | GG                              | TT              | 1946895264               |

| SNPs IDs              | Chromosome IDs | Chromosomes     | Physical positions (bp) | CDC Frontier (Reference genome) | (ILWC46 & LPNB) | NCBI SNPdb Accession IDs |
|-----------------------|----------------|-----------------|-------------------------|---------------------------------|-----------------|--------------------------|
| SNP_P4_99833_33768535 | NC_021166.1    | Ca_kabuli_chr07 | 33768535                | GG                              | AA              | 1946895267               |
| SNP_P4_99834_33768554 | NC_021166.1    | Ca_kabuli_chr07 | 33768554                | TT                              | CC              | 1946895269               |
| SNP_P4_99836_33768642 | NC_021166.1    | Ca_kabuli_chr07 | 33768642                | TT                              | CC              | 1946895271               |
| SNP_P4_99837_33768652 | NC_021166.1    | Ca_kabuli_chr07 | 33768652                | CC                              | TT              | 1946895273               |
| SNP_P4_99838_33768679 | NC_021166.1    | Ca_kabuli_chr07 | 33768679                | CC                              | AA              | 1946895275               |
| SNP_P4_99840_33768833 | NC_021166.1    | Ca_kabuli_chr07 | 33768833                | CC                              | TT              | 1946895277               |
| SNP_P4_99841_33768934 | NC_021166.1    | Ca_kabuli_chr07 | 33768934                | AA                              | CC              | 1946895279               |
| SNP_P4_99842_33769238 | NC_021166.1    | Ca_kabuli_chr07 | 33769238                | AA                              | GG              | 1946895281               |
| SNP_P4_99843_33769256 | NC_021166.1    | Ca_kabuli_chr07 | 33769256                | CC                              | TT              | 1946895283               |
| SNP_P4_99844_33769289 | NC_021166.1    | Ca_kabuli_chr07 | 33769289                | GG                              | AA              | 1946895285               |
| SNP_P4_99845_33769839 | NC_021166.1    | Ca_kabuli_chr07 | 33769839                | AA                              | GG              | 1946895287               |
| SNP_P4_99846_33769842 | NC_021166.1    | Ca_kabuli_chr07 | 33769842                | TT                              | CC              | 1946895289               |
| SNP_P4_99847_33769843 | NC_021166.1    | Ca_kabuli_chr07 | 33769843                | TT                              | AA              | 1946895291               |
| SNP_P4_99848_33769852 | NC_021166.1    | Ca_kabuli_chr07 | 33769852                | CC                              | TT              | 1946895293               |
| SNP_P4_99849_33769872 | NC_021166.1    | Ca_kabuli_chr07 | 33769872                | TT                              | CC              | 1946895295               |
| SNP_P4_99850_33769873 | NC_021166.1    | Ca_kabuli_chr07 | 33769873                | TT                              | CC              | 1946895297               |
| SNP_P4_99851_33769874 | NC_021166.1    | Ca_kabuli_chr07 | 33769874                | AA                              | GG              | 1946895300               |
| SNP_P4_99852_33769877 | NC_021166.1    | Ca_kabuli_chr07 | 33769877                | CC                              | TT              | 1946895302               |
| SNP_P4_99853_33770203 | NC_021166.1    | Ca_kabuli_chr07 | 33770203                | GG                              | AA              | 1946895304               |
| SNP_P4_99855_33770856 | NC_021166.1    | Ca_kabuli_chr07 | 33770856                | TT                              | CC              | 1946895306               |
| SNP_P4_99856_33770906 | NC_021166.1    | Ca_kabuli_chr07 | 33770906                | TT                              | CC              | 1946895308               |
| SNP_P4_99857_33771165 | NC_021166.1    | Ca_kabuli_chr07 | 33771165                | AA                              | CC              | 1946895311               |
| SNP_P4_99858_33771169 | NC_021166.1    | Ca_kabuli_chr07 | 33771169                | TT                              | CC              | 1946895313               |
| SNP_P4_99859_33771980 | NC_021166.1    | Ca_kabuli_chr07 | 33771980                | GG                              | AA              | 1946895315               |
| SNP_P4_99860_33772054 | NC_021166.1    | Ca_kabuli_chr07 | 33772054                | GG                              | CC              | 1946895317               |
| SNP_P4_99861_33772227 | NC_021166.1    | Ca_kabuli_chr07 | 33772227                | TT                              | AA              | 1946895319               |
| SNP_P4_99863_33772620 | NC_021166.1    | Ca_kabuli_chr07 | 33772620                | GG                              | TT              | 1946895321               |
| SNP_P4_99865_33773046 | NC_021166.1    | Ca_kabuli_chr07 | 33773046                | TT                              | CC              | 1946895323               |
| SNP_P4_99866_33773056 | NC_021166.1    | Ca_kabuli_chr07 | 33773056                | AA                              | GG              | 1946895325               |
| SNP_P4_99867_33775269 | NC_021166.1    | Ca_kabuli_chr07 | 33775269                | CC                              | TT              | 1946895327               |
| SNP_P4_99869_33775307 | NC_021166.1    | Ca_kabuli_chr07 | 33775307                | GG                              | AA              | 1946895329               |
| SNP_P4_99870_33775320 | NC_021166.1    | Ca_kabuli_chr07 | 33775320                | GG                              | TT              | 1946895331               |
| SNP_P4_99871_33775475 | NC_021166.1    | Ca_kabuli_chr07 | 33775475                | CC                              | TT              | 1946895333               |
| SNP_P4_99872_33777896 | NC_021166.1    | Ca_kabuli_chr07 | 33777896                | AA                              | GG              | 1946895335               |
| SNP_P4_99873_33777899 | NC_021166.1    | Ca_kabuli_chr07 | 33777899                | AA                              | GG              | 1946895337               |
| SNP_P4_99874_33777945 | NC_021166.1    | Ca_kabuli_chr07 | 33777945                | TT                              | GG              | 1946895339               |
| SNP_P4_99875_33779618 | NC_021166.1    | Ca_kabuli_chr07 | 33779618                | TT                              | CC              | 1946895341               |
| SNP_P4_99876_33779636 | NC_021166.1    | Ca_kabuli_chr07 | 33779636                | TT                              | CC              | 1946895343               |
| SNP_P4_99877_33779986 | NC_021166.1    | Ca_kabuli_chr07 | 33779986                | AA                              | TT              | 1946895345               |
| SNP_P4_99878_33780004 | NC_021166.1    | Ca_kabuli_chr07 | 33780004                | AA                              | CC              | 1946895347               |
| SNP_P4_99880_33780228 | NC_021166.1    | Ca_kabuli_chr07 | 33780228                | CC                              | TT              | 1946895349               |
| SNP_P4_99881_33780303 | NC_021166.1    | Ca_kabuli_chr07 | 33780303                | AA                              | CC              | 1946895351               |

| SNPs IDs              | Chromosome IDs | Chromosomes     | Physical positions (bp) | CDC Frontier (Reference genome) | (ILWC46 & LPNB) | NCBI SNPdb Accession IDs |
|-----------------------|----------------|-----------------|-------------------------|---------------------------------|-----------------|--------------------------|
| SNP_P4_99882_33780640 | NC_021166.1    | Ca_kabuli_chr07 | 33780640                | AA                              | GG              | 1946895353               |
| SNP_P4_99883_33780685 | NC_021166.1    | Ca_kabuli_chr07 | 33780685                | AA                              | GG              | 1946895355               |
| SNP_P4_99884_33780826 | NC_021166.1    | Ca_kabuli_chr07 | 33780826                | GG                              | AA              | 1946895357               |
| SNP_P4_99885_33781039 | NC_021166.1    | Ca_kabuli_chr07 | 33781039                | AA                              | TT              | 1946895359               |
| SNP_P4_99887_33781535 | NC_021166.1    | Ca_kabuli_chr07 | 33781535                | AA                              | TT              | 1946895361               |
| SNP_P4_99888_33781575 | NC_021166.1    | Ca_kabuli_chr07 | 33781575                | AA                              | GG              | 1946895363               |
| SNP_P4_99889_33781809 | NC_021166.1    | Ca_kabuli_chr07 | 33781809                | AA                              | TT              | 1946895365               |
| SNP_P4_99890_33781834 | NC_021166.1    | Ca_kabuli_chr07 | 33781834                | TT                              | CC              | 1946895367               |
| SNP_P4_99891_33782461 | NC_021166.1    | Ca_kabuli_chr07 | 33782461                | CC                              | TT              | 1946895369               |
| SNP_P4_99892_33784464 | NC_021166.1    | Ca_kabuli_chr07 | 33784464                | TT                              | CC              | 1946895371               |
| SNP_P4_99893_33784776 | NC_021166.1    | Ca_kabuli_chr07 | 33784776                | GG                              | AA              | 1946895373               |
| SNP_P4_99894_33785662 | NC_021166.1    | Ca_kabuli_chr07 | 33785662                | TT                              | AA              | 1946895375               |
| SNP_P4_99895_33785735 | NC_021166.1    | Ca_kabuli_chr07 | 33785735                | CC                              | GG              | 1946895377               |
| SNP_P4_99896_33789350 | NC_021166.1    | Ca_kabuli_chr07 | 33789350                | GG                              | TT              | 1946895379               |
| SNP_P4_99897_33793581 | NC_021166.1    | Ca_kabuli_chr07 | 33793581                | GG                              | TT              | 1946895381               |
| SNP_P4_99898_33793590 | NC_021166.1    | Ca_kabuli_chr07 | 33793590                | AA                              | GG              | 1946895383               |
| SNP_P4_99899_33794007 | NC_021166.1    | Ca_kabuli_chr07 | 33794007                | CC                              | TT              | 1946895385               |
| SNP_P4_99900_33794012 | NC_021166.1    | Ca_kabuli_chr07 | 33794012                | AA                              | GG              | 1946895387               |
| SNP_P4_99901_33794058 | NC_021166.1    | Ca_kabuli_chr07 | 33794058                | AA                              | GG              | 1946895389               |
| SNP_P4_99902_33794063 | NC_021166.1    | Ca_kabuli_chr07 | 33794063                | GG                              | AA              | 1946895392               |
| SNP_P4_99904_33795368 | NC_021166.1    | Ca_kabuli_chr07 | 33795368                | TT                              | CC              | 1946895394               |
| SNP_P4_99906_33797337 | NC_021166.1    | Ca_kabuli_chr07 | 33797337                | AA                              | GG              | 1946895396               |
| SNP_P4_99908_33797614 | NC_021166.1    | Ca_kabuli_chr07 | 33797614                | GG                              | AA              | 1946895398               |
| SNP_P4_99909_33797935 | NC_021166.1    | Ca_kabuli_chr07 | 33797935                | AA                              | GG              | 1946895400               |
| SNP_P4_99910_33798069 | NC_021166.1    | Ca_kabuli_chr07 | 33798069                | TT                              | AA              | 1946895402               |
| SNP_P4_99913_33800061 | NC_021166.1    | Ca_kabuli_chr07 | 33800061                | TT                              | CC              | 1946895404               |
| SNP_P4_99914_33800336 | NC_021166.1    | Ca_kabuli_chr07 | 33800336                | AA                              | GG              | 1946895406               |
| SNP_P4_99915_33802468 | NC_021166.1    | Ca_kabuli_chr07 | 33802468                | CC                              | TT              | 1946895408               |
| SNP_P4_99917_33802672 | NC_021166.1    | Ca_kabuli_chr07 | 33802672                | TT                              | CC              | 1946895410               |
| SNP_P4_99920_33802742 | NC_021166.1    | Ca_kabuli_chr07 | 33802742                | TT                              | AA              | 1946895412               |
| SNP_P4_99921_33802764 | NC_021166.1    | Ca_kabuli_chr07 | 33802764                | AA                              | CC              | 1946895414               |
| SNP_P4_99922_33802793 | NC_021166.1    | Ca_kabuli_chr07 | 33802793                | TT                              | CC              | 1946895416               |
| SNP_P4_99923_33802797 | NC_021166.1    | Ca_kabuli_chr07 | 33802797                | CC                              | GG              | 1946895418               |
| SNP_P4_99924_33803064 | NC_021166.1    | Ca_kabuli_chr07 | 33803064                | TT                              | CC              | 1946895420               |
| SNP_P4_99926_33803209 | NC_021166.1    | Ca_kabuli_chr07 | 33803209                | AA                              | CC              | 1946895422               |
| SNP_P4_99929_33803760 | NC_021166.1    | Ca_kabuli_chr07 | 33803760                | TT                              | CC              | 1946895424               |
| SNP_P4_99930_33803784 | NC_021166.1    | Ca_kabuli_chr07 | 33803784                | GG                              | CC              | 1946895426               |
| SNP_P4_99931_33803943 | NC_021166.1    | Ca_kabuli_chr07 | 33803943                | TT                              | CC              | 1946895428               |
| SNP_P4_99932_33803958 | NC_021166.1    | Ca_kabuli_chr07 | 33803958                | CC                              | TT              | 1946895430               |
| SNP_P4_99933_33804123 | NC_021166.1    | Ca_kabuli_chr07 | 33804123                | GG                              | TT              | 1946895432               |
| SNP_P4_99934_33804129 | NC_021166.1    | Ca_kabuli_chr07 | 33804129                | CC                              | TT              | 1946895434               |
| SNP_P4_99935_33804150 | NC_021166.1    | Ca_kabuli_chr07 | 33804150                | TT                              | CC              | 1946895436               |

| SNPs IDs              | Chromosome IDs | Chromosomes     | Physical positions (bp) | CDC Frontier (Reference genome) | (ILWC46 & LPNB) | NCBI SNPdb Accession IDs |
|-----------------------|----------------|-----------------|-------------------------|---------------------------------|-----------------|--------------------------|
| SNP_P4_99936_33804163 | NC_021166.1    | Ca_kabuli_chr07 | 33804163                | TT                              | CC              | 1946895438               |
| SNP_P4_99937_33804615 | NC_021166.1    | Ca_kabuli_chr07 | 33804615                | AA                              | GG              | 1946895440               |
| SNP_P4_99938_33804762 | NC_021166.1    | Ca_kabuli_chr07 | 33804762                | CC                              | TT              | 1946895442               |
| SNP_P4_99939_33804796 | NC_021166.1    | Ca_kabuli_chr07 | 33804796                | CC                              | TT              | 1946895444               |
| SNP_P4_99940_33805477 | NC_021166.1    | Ca_kabuli_chr07 | 33805477                | AA                              | GG              | 1946895446               |
| SNP_P4_99941_33805483 | NC_021166.1    | Ca_kabuli_chr07 | 33805483                | AA                              | TT              | 1946895447               |
| SNP_P4_99942_33805485 | NC_021166.1    | Ca_kabuli_chr07 | 33805485                | GG                              | AA              | 1946895449               |
| SNP_P4_99943_33805502 | NC_021166.1    | Ca_kabuli_chr07 | 33805502                | GG                              | AA              | 1946895451               |
| SNP_P4_99944_33805512 | NC_021166.1    | Ca_kabuli_chr07 | 33805512                | TT                              | GG              | 1946895453               |
| SNP_P4_99947_33805699 | NC_021166.1    | Ca_kabuli_chr07 | 33805699                | TT                              | CC              | 1946895455               |
| SNP_P4_99948_33806333 | NC_021166.1    | Ca_kabuli_chr07 | 33806333                | GG                              | TT              | 1946895457               |
| SNP_P4_99949_33806649 | NC_021166.1    | Ca_kabuli_chr07 | 33806649                | TT                              | AA              | 1946895459               |
| SNP_P4_99950_33806686 | NC_021166.1    | Ca_kabuli_chr07 | 33806686                | CC                              | TT              | 1946895461               |
| SNP_P4_99952_33807309 | NC_021166.1    | Ca_kabuli_chr07 | 33807309                | GG                              | AA              | 1946895463               |
| SNP_P4_99953_33807792 | NC_021166.1    | Ca_kabuli_chr07 | 33807792                | GG                              | AA              | 1946895465               |
| SNP_P4_99954_33808147 | NC_021166.1    | Ca_kabuli_chr07 | 33808147                | AA                              | TT              | 1946895467               |
| SNP_P4_99955_33808988 | NC_021166.1    | Ca_kabuli_chr07 | 33808988                | GG                              | AA              | 1946895469               |
| SNP_P4_99956_33810932 | NC_021166.1    | Ca_kabuli_chr07 | 33810932                | TT                              | CC              | 1946895471               |
| SNP_P4_99957_33810967 | NC_021166.1    | Ca_kabuli_chr07 | 33810967                | TT                              | CC              | 1946895473               |
| SNP_P4_99960_33812503 | NC_021166.1    | Ca_kabuli_chr07 | 33812503                | GG                              | AA              | 1946895475               |
| SNP_P4_99962_33812584 | NC_021166.1    | Ca_kabuli_chr07 | 33812584                | TT                              | AA              | 1946895477               |
| SNP_P4_99964_33813686 | NC_021166.1    | Ca_kabuli_chr07 | 33813686                | TT                              | CC              | 1946895479               |
| SNP_P4_99965_33815020 | NC_021166.1    | Ca_kabuli_chr07 | 33815020                | CC                              | AA              | 1946895481               |
| SNP_P4_99966_33815322 | NC_021166.1    | Ca_kabuli_chr07 | 33815322                | CC                              | GG              | 1946895483               |
| SNP_P4_99967_33815324 | NC_021166.1    | Ca_kabuli_chr07 | 33815324                | CC                              | TT              | 1946895485               |
| SNP_P4_99969_33815544 | NC_021166.1    | Ca_kabuli_chr07 | 33815544                | AA                              | GG              | 1946895487               |
| SNP_P4_99970_33815731 | NC_021166.1    | Ca_kabuli_chr07 | 33815731                | GG                              | TT              | 1946895489               |
| SNP_P4_99972_33815961 | NC_021166.1    | Ca_kabuli_chr07 | 33815961                | AA                              | CC              | 1946895491               |
| SNP_P4_99973_33817371 | NC_021166.1    | Ca_kabuli_chr07 | 33817371                | CC                              | TT              | 1946895493               |
| SNP_P4_99975_33817419 | NC_021166.1    | Ca_kabuli_chr07 | 33817419                | CC                              | TT              | 1946895495               |
| SNP_P4_99977_33818901 | NC_021166.1    | Ca_kabuli_chr07 | 33818901                | AA                              | GG              | 1946895497               |
| SNP_P4_99978_33819461 | NC_021166.1    | Ca_kabuli_chr07 | 33819461                | GG                              | AA              | 1946895499               |
| SNP_P4_99979_33819495 | NC_021166.1    | Ca_kabuli_chr07 | 33819495                | AA                              | CC              | 1946895501               |
| SNP_P4_99980_33819750 | NC_021166.1    | Ca_kabuli_chr07 | 33819750                | CC                              | TT              | 1946895503               |
| SNP_P4_99982_33821039 | NC_021166.1    | Ca_kabuli_chr07 | 33821039                | AA                              | GG              | 1946895505               |
| SNP_P4_99983_33821288 | NC_021166.1    | Ca_kabuli_chr07 | 33821288                | TT                              | CC              | 1946895507               |
| SNP_P4_99984_33821307 | NC_021166.1    | Ca_kabuli_chr07 | 33821307                | TT                              | GG              | 1946895509               |
| SNP_P4_99985_33821320 | NC_021166.1    | Ca_kabuli_chr07 | 33821320                | TT                              | AA              | 1946895511               |
| SNP_P4_99986_33821678 | NC_021166.1    | Ca_kabuli_chr07 | 33821678                | AA                              | GG              | 1946895513               |
| SNP_P4_99987_33821690 | NC_021166.1    | Ca_kabuli_chr07 | 33821690                | CC                              | AA              | 1946895515               |
| SNP_P4_99988_33821693 | NC_021166.1    | Ca_kabuli_chr07 | 33821693                | TT                              | AA              | 1946895517               |
| SNP_P4_99990_33824975 | NC_021166.1    | Ca_kabuli_chr07 | 33824975                | TT                              | GG              | 1946895519               |



| SNPs IDs               | Chromosome IDs | Chromosomes     | Physical positions (bp) | CDC Frontier (Reference genome) | (ILWC46 & LPNB) | NCBI SNPdb Accession IDs |
|------------------------|----------------|-----------------|-------------------------|---------------------------------|-----------------|--------------------------|
| SNP_P4_99991_33825259  | NC_021166.1    | Ca_kabuli_chr07 | 33825259                | TT                              | GG              | 1946895521               |
| SNP_P4_99992_33825729  | NC_021166.1    | Ca_kabuli_chr07 | 33825729                | CC                              | TT              | 1946895523               |
| SNP_P4_99993_33826180  | NC_021166.1    | Ca_kabuli_chr07 | 33826180                | TT                              | GG              | 1946895525               |
| SNP_P4_99994_33826408  | NC_021166.1    | Ca_kabuli_chr07 | 33826408                | GG                              | AA              | 1946895527               |
| SNP_P4_99995_33827022  | NC_021166.1    | Ca_kabuli_chr07 | 33827022                | CC                              | TT              | 1946895529               |
| SNP_P4_99996_33827036  | NC_021166.1    | Ca_kabuli_chr07 | 33827036                | TT                              | AA              | 1946895530               |
| SNP_P4_99997_33827092  | NC_021166.1    | Ca_kabuli_chr07 | 33827092                | CC                              | TT              | 1946895532               |
| SNP_P4_99998_33827095  | NC_021166.1    | Ca_kabuli_chr07 | 33827095                | CC                              | TT              | 1946895534               |
| SNP_P4_99999_33827109  | NC_021166.1    | Ca_kabuli_chr07 | 33827109                | CC                              | TT              | 1946895536               |
| SNP_P4_100000_33827133 | NC_021166.1    | Ca_kabuli_chr07 | 33827133                | TT                              | AA              | 1946895538               |
| SNP_P4_100001_33827143 | NC_021166.1    | Ca_kabuli_chr07 | 33827143                | GG                              | AA              | 1946895540               |
| SNP_P4_100002_33827295 | NC_021166.1    | Ca_kabuli_chr07 | 33827295                | CC                              | TT              | 1946895542               |
| SNP_P4_100003_33827300 | NC_021166.1    | Ca_kabuli_chr07 | 33827300                | CC                              | TT              | 1946895544               |
| SNP_P4_100004_33827307 | NC_021166.1    | Ca_kabuli_chr07 | 33827307                | CC                              | TT              | 1946895546               |
| SNP_P4_100005_33827317 | NC_021166.1    | Ca_kabuli_chr07 | 33827317                | AA                              | TT              | 1946895549               |
| SNP_P4_100006_33827320 | NC_021166.1    | Ca_kabuli_chr07 | 33827320                | GG                              | AA              | 1946895551               |
| SNP_P4_100007_33827349 | NC_021166.1    | Ca_kabuli_chr07 | 33827349                | CC                              | TT              | 1946895553               |
| SNP_P4_100008_33827426 | NC_021166.1    | Ca_kabuli_chr07 | 33827426                | AA                              | GG              | 1946895555               |
| SNP_P4_100010_33830158 | NC_021166.1    | Ca_kabuli_chr07 | 33830158                | AA                              | GG              | 1946895557               |
| SNP_P4_100011_33830164 | NC_021166.1    | Ca_kabuli_chr07 | 33830164                | GG                              | AA              | 1946895559               |
| SNP_P4_100013_33830460 | NC_021166.1    | Ca_kabuli_chr07 | 33830460                | TT                              | GG              | 1946895561               |
| SNP_P4_100015_33830908 | NC_021166.1    | Ca_kabuli_chr07 | 33830908                | GG                              | TT              | 1946895563               |
| SNP_P4_100017_33830977 | NC_021166.1    | Ca_kabuli_chr07 | 33830977                | AA                              | TT              | 1946895565               |
| SNP_P4_100018_33834616 | NC_021166.1    | Ca_kabuli_chr07 | 33834616                | GG                              | AA              | 1946895567               |
| SNP_P4_100019_33834618 | NC_021166.1    | Ca_kabuli_chr07 | 33834618                | GG                              | AA              | 1946895569               |
| SNP_P4_100020_33834631 | NC_021166.1    | Ca_kabuli_chr07 | 33834631                | TT                              | AA              | 1946895571               |
| SNP_P4_100021_33834632 | NC_021166.1    | Ca_kabuli_chr07 | 33834632                | AA                              | GG              | 1946895573               |
| SNP_P4_100022_33834641 | NC_021166.1    | Ca_kabuli_chr07 | 33834641                | AA                              | GG              | 1946895575               |
| SNP_P4_100023_33834697 | NC_021166.1    | Ca_kabuli_chr07 | 33834697                | TT                              | AA              | 1946895577               |
| SNP_P4_100025_33839867 | NC_021166.1    | Ca_kabuli_chr07 | 33839867                | TT                              | AA              | 1946895579               |
| SNP_P4_100026_33839868 | NC_021166.1    | Ca_kabuli_chr07 | 33839868                | GG                              | AA              | 1946895581               |
| SNP_P4_100027_33839907 | NC_021166.1    | Ca_kabuli_chr07 | 33839907                | TT                              | CC              | 1946895583               |
| SNP_P4_100028_33839908 | NC_021166.1    | Ca_kabuli_chr07 | 33839908                | CC                              | TT              | 1946895585               |
| SNP_P4_100029_33840239 | NC_021166.1    | Ca_kabuli_chr07 | 33840239                | GG                              | AA              | 1946895587               |
| SNP_P4_100030_33842227 | NC_021166.1    | Ca_kabuli_chr07 | 33842227                | TT                              | GG              | 1946895589               |
| SNP_P4_100032_33846485 | NC_021166.1    | Ca_kabuli_chr07 | 33846485                | TT                              | CC              | 1946895592               |
| SNP_P4_100035_33848604 | NC_021166.1    | Ca_kabuli_chr07 | 33848604                | TT                              | CC              | 1946895594               |
| SNP_P4_100037_33851710 | NC_021166.1    | Ca_kabuli_chr07 | 33851710                | AA                              | GG              | 1946895596               |
| SNP_P4_100038_33851721 | NC_021166.1    | Ca_kabuli_chr07 | 33851721                | GG                              | TT              | 1946895598               |
| SNP_P4_100039_33851722 | NC_021166.1    | Ca_kabuli_chr07 | 33851722                | TT                              | AA              | 1946895600               |
| SNP_P4_100040_33851729 | NC_021166.1    | Ca_kabuli_chr07 | 33851729                | AA                              | TT              | 1946895602               |
| SNP_P4_100041_33851923 | NC_021166.1    | Ca_kabuli_chr07 | 33851923                | AA                              | GG              | 1946895604               |

| SNPs IDs               | Chromosome IDs | Chromosomes     | Physical positions (bp) | CDC Frontier (Reference genome) | (ILWC46 & LPNB) | NCBI SNPdb Accession IDs |
|------------------------|----------------|-----------------|-------------------------|---------------------------------|-----------------|--------------------------|
| SNP_P4_100042_33851950 | NC_021166.1    | Ca_kabuli_chr07 | 33851950                | TT                              | CC              | 1946895606               |
| SNP_P4_100044_33852615 | NC_021166.1    | Ca_kabuli_chr07 | 33852615                | TT                              | CC              | 1946895608               |
| SNP_P4_100045_33853212 | NC_021166.1    | Ca_kabuli_chr07 | 33853212                | GG                              | AA              | 1946895610               |
| SNP_P4_100047_33853407 | NC_021166.1    | Ca_kabuli_chr07 | 33853407                | AA                              | GG              | 1946895612               |
| SNP_P4_100048_33853465 | NC_021166.1    | Ca_kabuli_chr07 | 33853465                | TT                              | CC              | 1946895615               |
| SNP_P4_100049_33853475 | NC_021166.1    | Ca_kabuli_chr07 | 33853475                | CC                              | TT              | 1946895617               |
| SNP_P4_100050_33855167 | NC_021166.1    | Ca_kabuli_chr07 | 33855167                | GG                              | AA              | 1946895619               |
| SNP_P4_100051_33855170 | NC_021166.1    | Ca_kabuli_chr07 | 33855170                | TT                              | CC              | 1946895622               |
| SNP_P4_100052_33855314 | NC_021166.1    | Ca_kabuli_chr07 | 33855314                | TT                              | CC              | 1946895624               |
| SNP_P4_100054_33856830 | NC_021166.1    | Ca_kabuli_chr07 | 33856830                | AA                              | GG              | 1946895626               |
| SNP_P4_100056_33857421 | NC_021166.1    | Ca_kabuli_chr07 | 33857421                | AA                              | CC              | 1946895628               |
| SNP_P4_100058_33857587 | NC_021166.1    | Ca_kabuli_chr07 | 33857587                | GG                              | AA              | 1946895630               |
| SNP_P4_100059_33857626 | NC_021166.1    | Ca_kabuli_chr07 | 33857626                | AA                              | GG              | 1946895632               |
| SNP_P4_100060_33857643 | NC_021166.1    | Ca_kabuli_chr07 | 33857643                | AA                              | GG              | 1946895634               |
| SNP_P4_100061_33858753 | NC_021166.1    | Ca_kabuli_chr07 | 33858753                | TT                              | CC              | 1946895637               |
| SNP_P4_100062_33859022 | NC_021166.1    | Ca_kabuli_chr07 | 33859022                | CC                              | TT              | 1946895639               |
| SNP_P4_100063_33859064 | NC_021166.1    | Ca_kabuli_chr07 | 33859064                | CC                              | TT              | 1946895641               |
| SNP_P4_100064_33859100 | NC_021166.1    | Ca_kabuli_chr07 | 33859100                | GG                              | AA              | 1946895643               |
| SNP_P4_100065_33859403 | NC_021166.1    | Ca_kabuli_chr07 | 33859403                | CC                              | TT              | 1946895645               |
| SNP_P4_100066_33859439 | NC_021166.1    | Ca_kabuli_chr07 | 33859439                | TT                              | CC              | 1946895647               |
| SNP_P4_100068_33859467 | NC_021166.1    | Ca_kabuli_chr07 | 33859467                | AA                              | TT              | 1946895649               |
| SNP_P4_100069_33860809 | NC_021166.1    | Ca_kabuli_chr07 | 33860809                | AA                              | GG              | 1946895651               |
| SNP_P4_100070_33861285 | NC_021166.1    | Ca_kabuli_chr07 | 33861285                | TT                              | GG              | 1946895653               |
| SNP_P4_100071_33861713 | NC_021166.1    | Ca_kabuli_chr07 | 33861713                | GG                              | TT              | 1946895655               |
| SNP_P4_100072_33863436 | NC_021166.1    | Ca_kabuli_chr07 | 33863436                | GG                              | AA              | 1946895657               |
| SNP_P4_100073_33863680 | NC_021166.1    | Ca_kabuli_chr07 | 33863680                | CC                              | TT              | 1946895659               |
| SNP_P4_100074_33864341 | NC_021166.1    | Ca_kabuli_chr07 | 33864341                | TT                              | GG              | 1946895661               |
| SNP_P4_100075_33864661 | NC_021166.1    | Ca_kabuli_chr07 | 33864661                | CC                              | TT              | 1946895663               |
| SNP_P4_100076_33864913 | NC_021166.1    | Ca_kabuli_chr07 | 33864913                | AA                              | GG              | 1946895665               |
| SNP_P4_100077_33864975 | NC_021166.1    | Ca_kabuli_chr07 | 33864975                | AA                              | GG              | 1946895667               |
| SNP_P4_100078_33865964 | NC_021166.1    | Ca_kabuli_chr07 | 33865964                | TT                              | AA              | 1946895669               |
| SNP_P4_100079_33865967 | NC_021166.1    | Ca_kabuli_chr07 | 33865967                | GG                              | TT              | 1946895671               |
| SNP_P4_100080_33866897 | NC_021166.1    | Ca_kabuli_chr07 | 33866897                | CC                              | GG              | 1946895673               |
| SNP_P4_100081_33866943 | NC_021166.1    | Ca_kabuli_chr07 | 33866943                | TT                              | GG              | 1946895675               |
| SNP_P4_100082_33868608 | NC_021166.1    | Ca_kabuli_chr07 | 33868608                | CC                              | GG              | 1946895677               |
| SNP_P4_100083_33870276 | NC_021166.1    | Ca_kabuli_chr07 | 33870276                | TT                              | CC              | 1946895679               |
| SNP_P4_100084_33870570 | NC_021166.1    | Ca_kabuli_chr07 | 33870570                | TT                              | AA              | 1946895681               |
| SNP_P4_100085_33870587 | NC_021166.1    | Ca_kabuli_chr07 | 33870587                | AA                              | CC              | 1946895683               |
| SNP_P4_100086_33870598 | NC_021166.1    | Ca_kabuli_chr07 | 33870598                | GG                              | TT              | 1946895685               |
| SNP_P4_100088_33871165 | NC_021166.1    | Ca_kabuli_chr07 | 33871165                | AA                              | GG              | 1946895687               |
| SNP_P4_100089_33871696 | NC_021166.1    | Ca_kabuli_chr07 | 33871696                | GG                              | AA              | 1946895689               |
| SNP_P4_100090_33872854 | NC_021166.1    | Ca_kabuli_chr07 | 33872854                | AA                              | GG              | 1946895691               |

| SNPs IDs               | Chromosome IDs | Chromosomes     | Physical positions (bp) | CDC Frontier (Reference genome) | (ILWC46 & LPNB) | NCBI SNPdb Accession IDs |
|------------------------|----------------|-----------------|-------------------------|---------------------------------|-----------------|--------------------------|
| SNP_P4_100091_33872903 | NC_021166.1    | Ca_kabuli_chr07 | 33872903                | CC                              | AA              | 1946895693               |
| SNP_P4_100092_33873176 | NC_021166.1    | Ca_kabuli_chr07 | 33873176                | GG                              | CC              | 1946895695               |
| SNP_P4_100093_33873741 | NC_021166.1    | Ca_kabuli_chr07 | 33873741                | AA                              | GG              | 1946895697               |
| SNP_P4_100094_33873752 | NC_021166.1    | Ca_kabuli_chr07 | 33873752                | CC                              | TT              | 1946895699               |
| SNP_P4_100095_33873762 | NC_021166.1    | Ca_kabuli_chr07 | 33873762                | CC                              | TT              | 1946895701               |
| SNP_P4_100096_33873779 | NC_021166.1    | Ca_kabuli_chr07 | 33873779                | AA                              | GG              | 1946895703               |
| SNP_P4_100097_33873796 | NC_021166.1    | Ca_kabuli_chr07 | 33873796                | TT                              | CC              | 1946895704               |
| SNP_P4_100099_33873997 | NC_021166.1    | Ca_kabuli_chr07 | 33873997                | TT                              | AA              | 1946895706               |
| SNP_P4_100100_33874011 | NC_021166.1    | Ca_kabuli_chr07 | 33874011                | TT                              | CC              | 1946895708               |
| SNP_P4_100101_33874264 | NC_021166.1    | Ca_kabuli_chr07 | 33874264                | TT                              | AA              | 1946895710               |
| SNP_P4_100102_33874393 | NC_021166.1    | Ca_kabuli_chr07 | 33874393                | AA                              | GG              | 1946895712               |
| SNP_P4_100103_33876967 | NC_021166.1    | Ca_kabuli_chr07 | 33876967                | AA                              | TT              | 1946895714               |
| SNP_P4_100105_33877932 | NC_021166.1    | Ca_kabuli_chr07 | 33877932                | CC                              | TT              | 1946895716               |
| SNP_P4_100106_33879234 | NC_021166.1    | Ca_kabuli_chr07 | 33879234                | AA                              | GG              | 1946895718               |
| SNP_P4_100107_33879303 | NC_021166.1    | Ca_kabuli_chr07 | 33879303                | AA                              | GG              | 1946895720               |
| SNP_P4_100108_33880558 | NC_021166.1    | Ca_kabuli_chr07 | 33880558                | GG                              | AA              | 1946895722               |
| SNP_P4_100109_33880604 | NC_021166.1    | Ca_kabuli_chr07 | 33880604                | TT                              | CC              | 1946895724               |
| SNP_P4_100110_33880874 | NC_021166.1    | Ca_kabuli_chr07 | 33880874                | CC                              | AA              | 1946895726               |
| SNP_P4_100111_33880875 | NC_021166.1    | Ca_kabuli_chr07 | 33880875                | GG                              | TT              | 1946895728               |
| SNP_P4_100112_33880878 | NC_021166.1    | Ca_kabuli_chr07 | 33880878                | GG                              | AA              | 1946895730               |
| SNP_P4_100113_33880993 | NC_021166.1    | Ca_kabuli_chr07 | 33880993                | AA                              | CC              | 1946895732               |
| SNP_P4_100114_33881019 | NC_021166.1    | Ca_kabuli_chr07 | 33881019                | AA                              | GG              | 1946895734               |
| SNP_P4_100116_33885736 | NC_021166.1    | Ca_kabuli_chr07 | 33885736                | AA                              | TT              | 1946895736               |
| SNP_P4_100117_33886131 | NC_021166.1    | Ca_kabuli_chr07 | 33886131                | CC                              | TT              | 1946895738               |
| SNP_P4_100119_33888025 | NC_021166.1    | Ca_kabuli_chr07 | 33888025                | GG                              | AA              | 1946895741               |
| SNP_P4_100120_33888045 | NC_021166.1    | Ca_kabuli_chr07 | 33888045                | CC                              | TT              | 1946895743               |
| SNP_P4_100121_33888137 | NC_021166.1    | Ca_kabuli_chr07 | 33888137                | GG                              | CC              | 1946895745               |
| SNP_P4_100122_33888236 | NC_021166.1    | Ca_kabuli_chr07 | 33888236                | TT                              | CC              | 1946895747               |
| SNP_P4_100123_33888804 | NC_021166.1    | Ca_kabuli_chr07 | 33888804                | GG                              | TT              | 1946895749               |
| SNP_P4_100125_33892382 | NC_021166.1    | Ca_kabuli_chr07 | 33892382                | TT                              | CC              | 1946895751               |
| SNP_P4_100127_33894770 | NC_021166.1    | Ca_kabuli_chr07 | 33894770                | GG                              | AA              | 1946895753               |
| SNP_P4_100129_33895226 | NC_021166.1    | Ca_kabuli_chr07 | 33895226                | TT                              | CC              | 1946895755               |
| SNP_P4_100130_33895247 | NC_021166.1    | Ca_kabuli_chr07 | 33895247                | AA                              | GG              | 1946895757               |
| SNP_P4_100131_33895252 | NC_021166.1    | Ca_kabuli_chr07 | 33895252                | CC                              | TT              | 1946895759               |
| SNP_P4_100133_33895557 | NC_021166.1    | Ca_kabuli_chr07 | 33895557                | CC                              | TT              | 1946895762               |
| SNP_P4_100134_33895559 | NC_021166.1    | Ca_kabuli_chr07 | 33895559                | GG                              | TT              | 1946895764               |
| SNP_P4_100135_33895570 | NC_021166.1    | Ca_kabuli_chr07 | 33895570                | TT                              | GG              | 1946895766               |
| SNP_P4_100136_33902919 | NC_021166.1    | Ca_kabuli_chr07 | 33902919                | AA                              | GG              | 1946895768               |
| SNP_P4_100137_33905411 | NC_021166.1    | Ca_kabuli_chr07 | 33905411                | AA                              | CC              | 1946895770               |
| SNP_P4_100138_33905577 | NC_021166.1    | Ca_kabuli_chr07 | 33905577                | GG                              | AA              | 1946895772               |
| SNP_P4_100139_33905704 | NC_021166.1    | Ca_kabuli_chr07 | 33905704                | TT                              | CC              | 1946895774               |
| SNP_P4_100140_33905713 | NC_021166.1    | Ca_kabuli_chr07 | 33905713                | AA                              | GG              | 1946895776               |

| SNPs IDs               | Chromosome IDs | Chromosomes     | Physical positions (bp) | CDC Frontier (Reference genome) | (ILWC46 & LPNB) | NCBI SNPdb Accession IDs |
|------------------------|----------------|-----------------|-------------------------|---------------------------------|-----------------|--------------------------|
| SNP_P4_100141_33905726 | NC_021166.1    | Ca_kabuli_chr07 | 33905726                | AA                              | GG              | 1946895778               |
| SNP_P4_100142_33906676 | NC_021166.1    | Ca_kabuli_chr07 | 33906676                | CC                              | AA              | 1946895781               |
| SNP_P4_100143_33906708 | NC_021166.1    | Ca_kabuli_chr07 | 33906708                | GG                              | AA              | 1946895783               |
| SNP_P4_100144_33906766 | NC_021166.1    | Ca_kabuli_chr07 | 33906766                | AA                              | GG              | 1946895785               |
| SNP_P4_100145_33906781 | NC_021166.1    | Ca_kabuli_chr07 | 33906781                | GG                              | AA              | 1946895787               |
| SNP_P4_100146_33922710 | NC_021166.1    | Ca_kabuli_chr07 | 33922710                | TT                              | CC              | 1946895789               |
| SNP_P4_100147_33922766 | NC_021166.1    | Ca_kabuli_chr07 | 33922766                | CC                              | TT              | 1946895791               |
| SNP_P4_100148_33923055 | NC_021166.1    | Ca_kabuli_chr07 | 33923055                | TT                              | CC              | 1946895793               |
| SNP_P4_100149_33923069 | NC_021166.1    | Ca_kabuli_chr07 | 33923069                | TT                              | CC              | 1946895795               |
| SNP_P4_100150_33923128 | NC_021166.1    | Ca_kabuli_chr07 | 33923128                | AA                              | GG              | 1946895797               |
| SNP_P4_100151_33937347 | NC_021166.1    | Ca_kabuli_chr07 | 33937347                | GG                              | AA              | 1946895800               |
| SNP_P4_100152_33978556 | NC_021166.1    | Ca_kabuli_chr07 | 33978556                | CC                              | TT              | 1946895802               |
| SNP_P4_100153_33983201 | NC_021166.1    | Ca_kabuli_chr07 | 33983201                | AA                              | GG              | 1946895804               |
| SNP_P4_100154_33983372 | NC_021166.1    | Ca_kabuli_chr07 | 33983372                | AA                              | CC              | 1946895806               |
| SNP_P4_100155_34002695 | NC_021166.1    | Ca_kabuli_chr07 | 34002695                | AA                              | TT              | 1946895808               |
| SNP_P4_100156_34002741 | NC_021166.1    | Ca_kabuli_chr07 | 34002741                | TT                              | CC              | 1946895810               |
| SNP_P4_100157_34002768 | NC_021166.1    | Ca_kabuli_chr07 | 34002768                | TT                              | CC              | 1946895812               |
| SNP_P4_100158_34002775 | NC_021166.1    | Ca_kabuli_chr07 | 34002775                | GG                              | AA              | 1946895815               |
| SNP_P4_100159_34003043 | NC_021166.1    | Ca_kabuli_chr07 | 34003043                | CC                              | TT              | 1946895817               |
| SNP_P4_100160_34031649 | NC_021166.1    | Ca_kabuli_chr07 | 34031649                | AA                              | GG              | 1946895819               |
| SNP_P4_100161_34035265 | NC_021166.1    | Ca_kabuli_chr07 | 34035265                | TT                              | AA              | 1946895821               |
| SNP_P4_100164_34080690 | NC_021166.1    | Ca_kabuli_chr07 | 34080690                | TT                              | CC              | 1946895823               |
| SNP_P4_100165_34080701 | NC_021166.1    | Ca_kabuli_chr07 | 34080701                | CC                              | TT              | 1946895825               |
| SNP_P4_100166_34080882 | NC_021166.1    | Ca_kabuli_chr07 | 34080882                | CC                              | TT              | 1946895827               |
| SNP_P4_100167_34080943 | NC_021166.1    | Ca_kabuli_chr07 | 34080943                | TT                              | CC              | 1946895829               |
| SNP_P4_100168_34080983 | NC_021166.1    | Ca_kabuli_chr07 | 34080983                | AA                              | GG              | 1946895831               |
| SNP_P4_100169_34081024 | NC_021166.1    | Ca_kabuli_chr07 | 34081024                | CC                              | AA              | 1946895833               |
| SNP_P4_100170_34081025 | NC_021166.1    | Ca_kabuli_chr07 | 34081025                | AA                              | TT              | 1946895836               |
| SNP_P4_100171_34081068 | NC_021166.1    | Ca_kabuli_chr07 | 34081068                | TT                              | CC              | 1946895838               |
| SNP_P4_100172_34081140 | NC_021166.1    | Ca_kabuli_chr07 | 34081140                | CC                              | TT              | 1946895840               |
| SNP_P4_100173_34081146 | NC_021166.1    | Ca_kabuli_chr07 | 34081146                | CC                              | AA              | 1946895842               |
| SNP_P4_100174_34085027 | NC_021166.1    | Ca_kabuli_chr07 | 34085027                | GG                              | TT              | 1946895844               |
| SNP_P4_100175_34085289 | NC_021166.1    | Ca_kabuli_chr07 | 34085289                | CC                              | TT              | 1946895846               |
| SNP_P4_100176_34087575 | NC_021166.1    | Ca_kabuli_chr07 | 34087575                | CC                              | GG              | 1946895848               |
| SNP_P4_100177_34087710 | NC_021166.1    | Ca_kabuli_chr07 | 34087710                | TT                              | CC              | 1946895850               |
| SNP_P4_100178_34087768 | NC_021166.1    | Ca_kabuli_chr07 | 34087768                | TT                              | CC              | 1946895852               |
| SNP_P4_100179_34087796 | NC_021166.1    | Ca_kabuli_chr07 | 34087796                | TT                              | GG              | 1946895854               |
| SNP_P4_100181_34087910 | NC_021166.1    | Ca_kabuli_chr07 | 34087910                | TT                              | CC              | 1946895856               |
| SNP_P4_100183_34109092 | NC_021166.1    | Ca_kabuli_chr07 | 34109092                | GG                              | AA              | 1946895858               |
| SNP_P4_100184_34109093 | NC_021166.1    | Ca_kabuli_chr07 | 34109093                | AA                              | GG              | 1946895860               |
| SNP_P4_100185_34109469 | NC_021166.1    | Ca_kabuli_chr07 | 34109469                | TT                              | CC              | 1946895862               |
| SNP_P4_100188_34116823 | NC_021166.1    | Ca_kabuli_chr07 | 34116823                | TT                              | GG              | 1946895864               |

| SNPs IDs               | Chromosome IDs | Chromosomes     | Physical positions (bp) | CDC Frontier (Reference genome) | (ILWC46 & LPNB) | NCBI SNPdb Accession IDs |
|------------------------|----------------|-----------------|-------------------------|---------------------------------|-----------------|--------------------------|
| SNP_P4_100190_34116875 | NC_021166.1    | Ca_kabuli_chr07 | 34116875                | AA                              | CC              | 1946895866               |
| SNP_P4_100191_34117481 | NC_021166.1    | Ca_kabuli_chr07 | 34117481                | TT                              | GG              | 1946895868               |
| SNP_P4_100192_34117659 | NC_021166.1    | Ca_kabuli_chr07 | 34117659                | CC                              | AA              | 1946895870               |
| SNP_P4_100193_34117705 | NC_021166.1    | Ca_kabuli_chr07 | 34117705                | GG                              | AA              | 1946895872               |
| SNP_P4_100194_34117713 | NC_021166.1    | Ca_kabuli_chr07 | 34117713                | AA                              | CC              | 1946895874               |
| SNP_P4_100196_34117802 | NC_021166.1    | Ca_kabuli_chr07 | 34117802                | CC                              | TT              | 1946895876               |
| SNP_P4_100197_34117804 | NC_021166.1    | Ca_kabuli_chr07 | 34117804                | AA                              | CC              | 1946895878               |
| SNP_P4_100198_34118143 | NC_021166.1    | Ca_kabuli_chr07 | 34118143                | AA                              | CC              | 1946895881               |
| SNP_P4_100199_34118418 | NC_021166.1    | Ca_kabuli_chr07 | 34118418                | TT                              | CC              | 1946895883               |
| SNP_P4_100200_34131804 | NC_021166.1    | Ca_kabuli_chr07 | 34131804                | CC                              | TT              | 1946895885               |
| SNP_P4_100201_34131810 | NC_021166.1    | Ca_kabuli_chr07 | 34131810                | TT                              | GG              | 1946895887               |
| SNP_P4_100202_34131818 | NC_021166.1    | Ca_kabuli_chr07 | 34131818                | TT                              | CC              | 1946895889               |
| SNP_P4_100203_34131841 | NC_021166.1    | Ca_kabuli_chr07 | 34131841                | TT                              | CC              | 1946895891               |
| SNP_P4_100205_34132589 | NC_021166.1    | Ca_kabuli_chr07 | 34132589                | TT                              | CC              | 1946895893               |
| SNP_P4_100206_34133780 | NC_021166.1    | Ca_kabuli_chr07 | 34133780                | TT                              | CC              | 1946895895               |
| SNP_P4_100207_34136786 | NC_021166.1    | Ca_kabuli_chr07 | 34136786                | TT                              | GG              | 1946895897               |
| SNP_P4_100209_34137086 | NC_021166.1    | Ca_kabuli_chr07 | 34137086                | GG                              | AA              | 1946895899               |
| SNP_P4_100210_34138673 | NC_021166.1    | Ca_kabuli_chr07 | 34138673                | CC                              | TT              | 1946895901               |
| SNP_P4_100211_34139893 | NC_021166.1    | Ca_kabuli_chr07 | 34139893                | CC                              | TT              | 1946895904               |
| SNP_P4_100212_34141120 | NC_021166.1    | Ca_kabuli_chr07 | 34141120                | CC                              | TT              | 1946895906               |
| SNP_P4_100213_34141472 | NC_021166.1    | Ca_kabuli_chr07 | 34141472                | CC                              | TT              | 1946895908               |
| SNP_P4_100214_34141808 | NC_021166.1    | Ca_kabuli_chr07 | 34141808                | AA                              | GG              | 1946895910               |
| SNP_P4_100217_34144322 | NC_021166.1    | Ca_kabuli_chr07 | 34144322                | GG                              | AA              | 1946895913               |
| SNP_P4_100218_34144564 | NC_021166.1    | Ca_kabuli_chr07 | 34144564                | CC                              | TT              | 1946895915               |
| SNP_P4_100219_34144571 | NC_021166.1    | Ca_kabuli_chr07 | 34144571                | TT                              | CC              | 1946895917               |
| SNP_P4_100221_34147474 | NC_021166.1    | Ca_kabuli_chr07 | 34147474                | TT                              | GG              | 1946895919               |
| SNP_P4_100222_34148725 | NC_021166.1    | Ca_kabuli_chr07 | 34148725                | TT                              | AA              | 1946895921               |
| SNP_P4_100224_34152221 | NC_021166.1    | Ca_kabuli_chr07 | 34152221                | TT                              | AA              | 1946895923               |
| SNP_P4_100226_34152453 | NC_021166.1    | Ca_kabuli_chr07 | 34152453                | TT                              | CC              | 1946895925               |
| SNP_P4_100228_34152720 | NC_021166.1    | Ca_kabuli_chr07 | 34152720                | TT                              | GG              | 1946895927               |
| SNP_P4_100229_34156889 | NC_021166.1    | Ca_kabuli_chr07 | 34156889                | AA                              | GG              | 1946895929               |
| SNP_P4_100230_34157055 | NC_021166.1    | Ca_kabuli_chr07 | 34157055                | GG                              | AA              | 1946895931               |
| SNP_P4_100231_34157331 | NC_021166.1    | Ca_kabuli_chr07 | 34157331                | GG                              | AA              | 1946895934               |
| SNP_P4_100232_34158520 | NC_021166.1    | Ca_kabuli_chr07 | 34158520                | AA                              | GG              | 1946895936               |
| SNP_P4_100233_34158521 | NC_021166.1    | Ca_kabuli_chr07 | 34158521                | AA                              | CC              | 1946895938               |
| SNP_P4_100234_34158622 | NC_021166.1    | Ca_kabuli_chr07 | 34158622                | GG                              | AA              | 1946895940               |
| SNP_P4_100235_34158753 | NC_021166.1    | Ca_kabuli_chr07 | 34158753                | TT                              | GG              | 1946895943               |
| SNP_P4_100236_34158811 | NC_021166.1    | Ca_kabuli_chr07 | 34158811                | GG                              | AA              | 1946895945               |
| SNP_P4_100237_34158828 | NC_021166.1    | Ca_kabuli_chr07 | 34158828                | TT                              | CC              | 1946895947               |
| SNP_P4_100238_34158884 | NC_021166.1    | Ca_kabuli_chr07 | 34158884                | GG                              | AA              | 1946895949               |
| SNP_P4_100239_34158885 | NC_021166.1    | Ca_kabuli_chr07 | 34158885                | AA                              | GG              | 1946895951               |
| SNP_P4_100240_34158914 | NC_021166.1    | Ca_kabuli_chr07 | 34158914                | TT                              | CC              | 1946895953               |

| SNPs IDs               | Chromosome IDs | Chromosomes     | Physical positions (bp) | CDC Frontier (Reference genome) | (ILWC46 & LPNB) | NCBI SNPdb Accession IDs |
|------------------------|----------------|-----------------|-------------------------|---------------------------------|-----------------|--------------------------|
| SNP_P4_100241_34158962 | NC_021166.1    | Ca_kabuli_chr07 | 34158962                | CC                              | TT              | 1946895955               |
| SNP_P4_100242_34159108 | NC_021166.1    | Ca_kabuli_chr07 | 34159108                | TT                              | CC              | 1946895957               |
| SNP_P4_100243_34159159 | NC_021166.1    | Ca_kabuli_chr07 | 34159159                | TT                              | CC              | 1946895959               |
| SNP_P4_100244_34159238 | NC_021166.1    | Ca_kabuli_chr07 | 34159238                | AA                              | GG              | 1946895961               |
| SNP_P4_100245_34159252 | NC_021166.1    | Ca_kabuli_chr07 | 34159252                | CC                              | AA              | 1946895963               |
| SNP_P4_100246_34159291 | NC_021166.1    | Ca_kabuli_chr07 | 34159291                | AA                              | CC              | 1946895965               |
| SNP_P4_100247_34160674 | NC_021166.1    | Ca_kabuli_chr07 | 34160674                | AA                              | CC              | 1946895967               |
| SNP_P4_100248_34160941 | NC_021166.1    | Ca_kabuli_chr07 | 34160941                | AA                              | GG              | 1946895969               |
| SNP_P4_100249_34161026 | NC_021166.1    | Ca_kabuli_chr07 | 34161026                | TT                              | GG              | 1946895971               |
| SNP_P4_100250_34161034 | NC_021166.1    | Ca_kabuli_chr07 | 34161034                | TT                              | GG              | 1946895973               |
| SNP_P4_100251_34161082 | NC_021166.1    | Ca_kabuli_chr07 | 34161082                | TT                              | CC              | 1946895975               |
| SNP_P4_100252_34161120 | NC_021166.1    | Ca_kabuli_chr07 | 34161120                | TT                              | CC              | 1946895977               |
| SNP_P4_100253_34161138 | NC_021166.1    | Ca_kabuli_chr07 | 34161138                | TT                              | CC              | 1946895979               |
| SNP_P4_100254_34161154 | NC_021166.1    | Ca_kabuli_chr07 | 34161154                | TT                              | AA              | 1946895981               |
| SNP_P4_100255_34161242 | NC_021166.1    | Ca_kabuli_chr07 | 34161242                | CC                              | GG              | 1946895984               |
| SNP_P4_100256_34161302 | NC_021166.1    | Ca_kabuli_chr07 | 34161302                | CC                              | TT              | 1946895986               |
| SNP_P4_100257_34161325 | NC_021166.1    | Ca_kabuli_chr07 | 34161325                | GG                              | AA              | 1946895988               |
| SNP_P4_100258_34162592 | NC_021166.1    | Ca_kabuli_chr07 | 34162592                | AA                              | GG              | 1946895990               |
| SNP_P4_100259_34162622 | NC_021166.1    | Ca_kabuli_chr07 | 34162622                | TT                              | CC              | 1946895992               |
| SNP_P4_100260_34162783 | NC_021166.1    | Ca_kabuli_chr07 | 34162783                | GG                              | AA              | 1946895994               |
| SNP_P4_100261_34162806 | NC_021166.1    | Ca_kabuli_chr07 | 34162806                | AA                              | CC              | 1946895996               |
| SNP_P4_100262_34164100 | NC_021166.1    | Ca_kabuli_chr07 | 34164100                | CC                              | AA              | 1946895999               |
| SNP_P4_100263_34165029 | NC_021166.1    | Ca_kabuli_chr07 | 34165029                | GG                              | CC              | 1946896001               |
| SNP_P4_100264_34165285 | NC_021166.1    | Ca_kabuli_chr07 | 34165285                | TT                              | CC              | 1946896003               |
| SNP_P4_100265_34166010 | NC_021166.1    | Ca_kabuli_chr07 | 34166010                | AA                              | TT              | 1946896005               |
| SNP_P4_100267_34168180 | NC_021166.1    | Ca_kabuli_chr07 | 34168180                | GG                              | AA              | 1946896007               |
| SNP_P4_100268_34168236 | NC_021166.1    | Ca_kabuli_chr07 | 34168236                | TT                              | CC              | 1946896009               |
| SNP_P4_100269_34168237 | NC_021166.1    | Ca_kabuli_chr07 | 34168237                | AA                              | TT              | 1946896011               |
| SNP_P4_100270_34169224 | NC_021166.1    | Ca_kabuli_chr07 | 34169224                | TT                              | CC              | 1946896013               |
| SNP_P4_100271_34169251 | NC_021166.1    | Ca_kabuli_chr07 | 34169251                | TT                              | CC              | 1946896015               |
| SNP_P4_100272_34169294 | NC_021166.1    | Ca_kabuli_chr07 | 34169294                | CC                              | TT              | 1946896017               |
| SNP_P4_100273_34169565 | NC_021166.1    | Ca_kabuli_chr07 | 34169565                | GG                              | TT              | 1946896019               |
| SNP_P4_100274_34169722 | NC_021166.1    | Ca_kabuli_chr07 | 34169722                | CC                              | AA              | 1946896021               |
| SNP_P4_100275_34170195 | NC_021166.1    | Ca_kabuli_chr07 | 34170195                | TT                              | CC              | 1946896023               |
| SNP_P4_100276_34170365 | NC_021166.1    | Ca_kabuli_chr07 | 34170365                | CC                              | GG              | 1946896025               |
| SNP_P4_100277_34170370 | NC_021166.1    | Ca_kabuli_chr07 | 34170370                | TT                              | GG              | 1946896027               |
| SNP_P4_100278_34170383 | NC_021166.1    | Ca_kabuli_chr07 | 34170383                | CC                              | AA              | 1946896029               |
| SNP_P4_100279_34170753 | NC_021166.1    | Ca_kabuli_chr07 | 34170753                | AA                              | TT              | 1946896031               |
| SNP_P4_100280_34170814 | NC_021166.1    | Ca_kabuli_chr07 | 34170814                | AA                              | CC              | 1946896033               |
| SNP_P4_100281_34170827 | NC_021166.1    | Ca_kabuli_chr07 | 34170827                | CC                              | TT              | 1946896035               |
| SNP_P4_100282_34170833 | NC_021166.1    | Ca_kabuli_chr07 | 34170833                | CC                              | TT              | 1946896036               |
| SNP_P4_100283_34171193 | NC_021166.1    | Ca_kabuli_chr07 | 34171193                | AA                              | CC              | 1946896038               |

| SNPs IDs               | Chromosome IDs | Chromosomes     | Physical positions (bp) | CDC Frontier (Reference genome) | (ILWC46 & LPNB) | NCBI SNPdb Accession IDs |
|------------------------|----------------|-----------------|-------------------------|---------------------------------|-----------------|--------------------------|
| SNP_P4_100284_34171517 | NC_021166.1    | Ca_kabuli_chr07 | 34171517                | GG                              | TT              | 1946896040               |
| SNP_P4_100285_34171525 | NC_021166.1    | Ca_kabuli_chr07 | 34171525                | CC                              | TT              | 1946896042               |
| SNP_P4_100287_34172042 | NC_021166.1    | Ca_kabuli_chr07 | 34172042                | TT                              | CC              | 1946896044               |
| SNP_P4_100288_34172044 | NC_021166.1    | Ca_kabuli_chr07 | 34172044                | TT                              | CC              | 1946896047               |
| SNP_P4_100289_34172923 | NC_021166.1    | Ca_kabuli_chr07 | 34172923                | GG                              | AA              | 1946896049               |
| SNP_P4_100290_34173214 | NC_021166.1    | Ca_kabuli_chr07 | 34173214                | CC                              | TT              | 1946896051               |
| SNP_P4_100291_34173413 | NC_021166.1    | Ca_kabuli_chr07 | 34173413                | TT                              | AA              | 1946896053               |
| SNP_P4_100292_34173642 | NC_021166.1    | Ca_kabuli_chr07 | 34173642                | AA                              | GG              | 1946896055               |
| SNP_P4_100293_34173677 | NC_021166.1    | Ca_kabuli_chr07 | 34173677                | TT                              | CC              | 1946896057               |
| SNP_P4_100294_34173729 | NC_021166.1    | Ca_kabuli_chr07 | 34173729                | AA                              | GG              | 1946896059               |
| SNP_P4_100295_34173745 | NC_021166.1    | Ca_kabuli_chr07 | 34173745                | GG                              | AA              | 1946896061               |
| SNP_P4_100296_34173929 | NC_021166.1    | Ca_kabuli_chr07 | 34173929                | AA                              | CC              | 1946896063               |
| SNP_P4_100297_34175311 | NC_021166.1    | Ca_kabuli_chr07 | 34175311                | TT                              | GG              | 1946896065               |
| SNP_P4_100298_34175319 | NC_021166.1    | Ca_kabuli_chr07 | 34175319                | TT                              | GG              | 1946896067               |
| SNP_P4_100299_34175323 | NC_021166.1    | Ca_kabuli_chr07 | 34175323                | TT                              | AA              | 1946896069               |
| SNP_P4_100300_34175337 | NC_021166.1    | Ca_kabuli_chr07 | 34175337                | CC                              | AA              | 1946896071               |
| SNP_P4_100301_34175640 | NC_021166.1    | Ca_kabuli_chr07 | 34175640                | GG                              | AA              | 1946896073               |
| SNP_P4_100302_34175707 | NC_021166.1    | Ca_kabuli_chr07 | 34175707                | CC                              | TT              | 1946896075               |
| SNP_P4_100303_34175708 | NC_021166.1    | Ca_kabuli_chr07 | 34175708                | CC                              | TT              | 1946896077               |
| SNP_P4_100304_34175715 | NC_021166.1    | Ca_kabuli_chr07 | 34175715                | AA                              | GG              | 1946896079               |
| SNP_P4_100305_34175999 | NC_021166.1    | Ca_kabuli_chr07 | 34175999                | GG                              | TT              | 1946896081               |
| SNP_P4_100306_34176004 | NC_021166.1    | Ca_kabuli_chr07 | 34176004                | AA                              | GG              | 1946896084               |
| SNP_P4_100307_34176056 | NC_021166.1    | Ca_kabuli_chr07 | 34176056                | GG                              | AA              | 1946896086               |
| SNP_P4_100308_34176303 | NC_021166.1    | Ca_kabuli_chr07 | 34176303                | GG                              | AA              | 1946896088               |
| SNP_P4_100309_34176304 | NC_021166.1    | Ca_kabuli_chr07 | 34176304                | AA                              | CC              | 1946896090               |
| SNP_P4_100310_34176305 | NC_021166.1    | Ca_kabuli_chr07 | 34176305                | TT                              | GG              | 1946896092               |
| SNP_P4_100311_34176327 | NC_021166.1    | Ca_kabuli_chr07 | 34176327                | TT                              | CC              | 1946896094               |
| SNP_P4_100312_34176367 | NC_021166.1    | Ca_kabuli_chr07 | 34176367                | GG                              | TT              | 1946896096               |
| SNP_P4_100313_34176369 | NC_021166.1    | Ca_kabuli_chr07 | 34176369                | TT                              | AA              | 1946896098               |
| SNP_P4_100314_34176385 | NC_021166.1    | Ca_kabuli_chr07 | 34176385                | TT                              | CC              | 1946896100               |
| SNP_P4_100315_34176418 | NC_021166.1    | Ca_kabuli_chr07 | 34176418                | TT                              | CC              | 1946896102               |
| SNP_P4_100316_34176443 | NC_021166.1    | Ca_kabuli_chr07 | 34176443                | AA                              | GG              | 1946896104               |
| SNP_P4_100317_34176495 | NC_021166.1    | Ca_kabuli_chr07 | 34176495                | AA                              | GG              | 1946896106               |
| SNP_P4_100318_34176497 | NC_021166.1    | Ca_kabuli_chr07 | 34176497                | TT                              | CC              | 1946896108               |
| SNP_P4_100319_34176833 | NC_021166.1    | Ca_kabuli_chr07 | 34176833                | TT                              | CC              | 1946896110               |
| SNP_P4_100320_34176858 | NC_021166.1    | Ca_kabuli_chr07 | 34176858                | TT                              | GG              | 1946896112               |
| SNP_P4_100321_34176863 | NC_021166.1    | Ca_kabuli_chr07 | 34176863                | CC                              | TT              | 1946896114               |
| SNP_P4_100322_34177300 | NC_021166.1    | Ca_kabuli_chr07 | 34177300                | CC                              | TT              | 1946896116               |
| SNP_P4_100323_34177309 | NC_021166.1    | Ca_kabuli_chr07 | 34177309                | AA                              | TT              | 1946896119               |
| SNP_P4_100324_34177320 | NC_021166.1    | Ca_kabuli_chr07 | 34177320                | CC                              | TT              | 1946896121               |
| SNP_P4_100325_34177584 | NC_021166.1    | Ca_kabuli_chr07 | 34177584                | AA                              | GG              | 1946896123               |
| SNP_P4_100326_34177629 | NC_021166.1    | Ca_kabuli_chr07 | 34177629                | AA                              | CC              | 1946896125               |

| SNPs IDs               | Chromosome IDs | Chromosomes     | Physical positions (bp) | CDC Frontier (Reference genome) | (ILWC46 & LPNB) | NCBI SNPdb Accession IDs |
|------------------------|----------------|-----------------|-------------------------|---------------------------------|-----------------|--------------------------|
| SNP_P4_100327_34177630 | NC_021166.1    | Ca_kabuli_chr07 | 34177630                | TT                              | CC              | 1946896127               |
| SNP_P4_100328_34177635 | NC_021166.1    | Ca_kabuli_chr07 | 34177635                | TT                              | CC              | 1946896129               |
| SNP_P4_100329_34177661 | NC_021166.1    | Ca_kabuli_chr07 | 34177661                | AA                              | GG              | 1946896131               |
| SNP_P4_100330_34182925 | NC_021166.1    | Ca_kabuli_chr07 | 34182925                | TT                              | CC              | 1946896133               |
| SNP_P4_100331_34182949 | NC_021166.1    | Ca_kabuli_chr07 | 34182949                | TT                              | GG              | 1946896135               |
| SNP_P4_100332_34183347 | NC_021166.1    | Ca_kabuli_chr07 | 34183347                | AA                              | GG              | 1946896137               |
| SNP_P4_100333_34183358 | NC_021166.1    | Ca_kabuli_chr07 | 34183358                | GG                              | AA              | 1946896139               |
| SNP_P4_100334_34183497 | NC_021166.1    | Ca_kabuli_chr07 | 34183497                | TT                              | CC              | 1946896141               |
| SNP_P4_100335_34183514 | NC_021166.1    | Ca_kabuli_chr07 | 34183514                | AA                              | TT              | 1946896143               |
| SNP_P4_100336_34183813 | NC_021166.1    | Ca_kabuli_chr07 | 34183813                | AA                              | GG              | 1946896145               |
| SNP_P4_100338_34183901 | NC_021166.1    | Ca_kabuli_chr07 | 34183901                | CC                              | TT              | 1946896147               |
| SNP_P4_100339_34184207 | NC_021166.1    | Ca_kabuli_chr07 | 34184207                | GG                              | CC              | 1946896149               |
| SNP_P4_100341_34184639 | NC_021166.1    | Ca_kabuli_chr07 | 34184639                | TT                              | CC              | 1946896151               |
| SNP_P4_100342_34184672 | NC_021166.1    | Ca_kabuli_chr07 | 34184672                | CC                              | AA              | 1946896152               |
| SNP_P4_100343_34184711 | NC_021166.1    | Ca_kabuli_chr07 | 34184711                | TT                              | GG              | 1946896153               |
| SNP_P4_100345_34184746 | NC_021166.1    | Ca_kabuli_chr07 | 34184746                | GG                              | AA              | 1946896154               |
| SNP_P4_100346_34184751 | NC_021166.1    | Ca_kabuli_chr07 | 34184751                | AA                              | GG              | 1946896155               |
| SNP_P4_100347_34184902 | NC_021166.1    | Ca_kabuli_chr07 | 34184902                | TT                              | CC              | 1946896156               |
| SNP_P4_100348_34184943 | NC_021166.1    | Ca_kabuli_chr07 | 34184943                | TT                              | GG              | 1946896157               |
| SNP_P4_100349_34185022 | NC_021166.1    | Ca_kabuli_chr07 | 34185022                | GG                              | AA              | 1946896158               |
| SNP_P4_100350_34185196 | NC_021166.1    | Ca_kabuli_chr07 | 34185196                | CC                              | TT              | 1946896160               |
| SNP_P4_100352_34185404 | NC_021166.1    | Ca_kabuli_chr07 | 34185404                | CC                              | TT              | 1946896162               |
| SNP_P4_100354_34186934 | NC_021166.1    | Ca_kabuli_chr07 | 34186934                | GG                              | CC              | 1946896164               |
| SNP_P4_100355_34187202 | NC_021166.1    | Ca_kabuli_chr07 | 34187202                | AA                              | GG              | 1946896166               |
| SNP_P4_100356_34187204 | NC_021166.1    | Ca_kabuli_chr07 | 34187204                | CC                              | TT              | 1946896168               |
| SNP_P4_100359_34187675 | NC_021166.1    | Ca_kabuli_chr07 | 34187675                | GG                              | TT              | 1946896170               |
| SNP_P4_100361_34189894 | NC_021166.1    | Ca_kabuli_chr07 | 34189894                | TT                              | CC              | 1946896172               |
| SNP_P4_100363_34190075 | NC_021166.1    | Ca_kabuli_chr07 | 34190075                | GG                              | CC              | 1946896174               |
| SNP_P4_100364_34190077 | NC_021166.1    | Ca_kabuli_chr07 | 34190077                | CC                              | GG              | 1946896177               |
| SNP_P4_100365_34190080 | NC_021166.1    | Ca_kabuli_chr07 | 34190080                | CC                              | TT              | 1946896179               |
| SNP_P4_100367_34190306 | NC_021166.1    | Ca_kabuli_chr07 | 34190306                | TT                              | CC              | 1946896181               |
| SNP_P4_100370_34191045 | NC_021166.1    | Ca_kabuli_chr07 | 34191045                | TT                              | CC              | 1946896183               |
| SNP_P4_100372_34191186 | NC_021166.1    | Ca_kabuli_chr07 | 34191186                | CC                              | TT              | 1946896185               |
| SNP_P4_100373_34191231 | NC_021166.1    | Ca_kabuli_chr07 | 34191231                | GG                              | AA              | 1946896187               |
| SNP_P4_100374_34191254 | NC_021166.1    | Ca_kabuli_chr07 | 34191254                | GG                              | AA              | 1946896189               |
| SNP_P4_100378_34192278 | NC_021166.1    | Ca_kabuli_chr07 | 34192278                | AA                              | TT              | 1946896190               |
| SNP_P4_100379_34192360 | NC_021166.1    | Ca_kabuli_chr07 | 34192360                | TT                              | CC              | 1946896192               |
| SNP_P4_100380_34192447 | NC_021166.1    | Ca_kabuli_chr07 | 34192447                | CC                              | GG              | 1946896194               |
| SNP_P4_100381_34192494 | NC_021166.1    | Ca_kabuli_chr07 | 34192494                | CC                              | TT              | 1946896196               |
| SNP_P4_100382_34194799 | NC_021166.1    | Ca_kabuli_chr07 | 34194799                | TT                              | CC              | 1946896198               |
| SNP_P4_100383_34195557 | NC_021166.1    | Ca_kabuli_chr07 | 34195557                | AA                              | GG              | 1946896200               |
| SNP_P4_100386_34196003 | NC_021166.1    | Ca_kabuli_chr07 | 34196003                | AA                              | TT              | 1946896202               |



| SNPs IDs               | Chromosome IDs | Chromosomes     | Physical positions (bp) | CDC Frontier (Reference genome) | (ILWC46 & LPNB) | NCBI SNPdb Accession IDs |
|------------------------|----------------|-----------------|-------------------------|---------------------------------|-----------------|--------------------------|
| SNP_P4_100387_34196065 | NC_021166.1    | Ca_kabuli_chr07 | 34196065                | TT                              | AA              | 1946896204               |
| SNP_P4_100389_34196466 | NC_021166.1    | Ca_kabuli_chr07 | 34196466                | TT                              | CC              | 1946896206               |
| SNP_P4_100390_34196535 | NC_021166.1    | Ca_kabuli_chr07 | 34196535                | GG                              | AA              | 1946896208               |
| SNP_P4_100392_34203706 | NC_021166.1    | Ca_kabuli_chr07 | 34203706                | AA                              | TT              | 1946896210               |
| SNP_P4_100393_34203727 | NC_021166.1    | Ca_kabuli_chr07 | 34203727                | AA                              | TT              | 1946896212               |
| SNP_P4_100394_34204483 | NC_021166.1    | Ca_kabuli_chr07 | 34204483                | GG                              | AA              | 1946896214               |
| SNP_P4_100397_34205488 | NC_021166.1    | Ca_kabuli_chr07 | 34205488                | GG                              | AA              | 1946896216               |
| SNP_P4_100398_34206354 | NC_021166.1    | Ca_kabuli_chr07 | 34206354                | GG                              | AA              | 1946896218               |
| SNP_P4_100399_34206409 | NC_021166.1    | Ca_kabuli_chr07 | 34206409                | AA                              | GG              | 1946896220               |
| SNP_P4_100401_34206929 | NC_021166.1    | Ca_kabuli_chr07 | 34206929                | TT                              | CC              | 1946896222               |
| SNP_P4_100402_34207884 | NC_021166.1    | Ca_kabuli_chr07 | 34207884                | CC                              | AA              | 1946896224               |
| SNP_P4_100403_34208028 | NC_021166.1    | Ca_kabuli_chr07 | 34208028                | CC                              | TT              | 1946896226               |
| SNP_P4_100404_34208319 | NC_021166.1    | Ca_kabuli_chr07 | 34208319                | GG                              | AA              | 1946896228               |
| SNP_P4_100405_34209452 | NC_021166.1    | Ca_kabuli_chr07 | 34209452                | GG                              | AA              | 1946896230               |
| SNP_P4_100406_34211456 | NC_021166.1    | Ca_kabuli_chr07 | 34211456                | GG                              | AA              | 1946896232               |
| SNP_P4_100407_34211640 | NC_021166.1    | Ca_kabuli_chr07 | 34211640                | CC                              | AA              | 1946896234               |
| SNP_P4_100408_34213817 | NC_021166.1    | Ca_kabuli_chr07 | 34213817                | AA                              | GG              | 1946896236               |
| SNP_P4_100409_34213955 | NC_021166.1    | Ca_kabuli_chr07 | 34213955                | CC                              | TT              | 1946896238               |
| SNP_P4_100410_34215409 | NC_021166.1    | Ca_kabuli_chr07 | 34215409                | TT                              | CC              | 1946896240               |
| SNP_P4_100411_34215419 | NC_021166.1    | Ca_kabuli_chr07 | 34215419                | AA                              | TT              | 1946896242               |
| SNP_P4_100412_34216009 | NC_021166.1    | Ca_kabuli_chr07 | 34216009                | AA                              | TT              | 1946896244               |
| SNP_P4_100414_34216951 | NC_021166.1    | Ca_kabuli_chr07 | 34216951                | CC                              | TT              | 1946896246               |
| SNP_P4_100415_34218285 | NC_021166.1    | Ca_kabuli_chr07 | 34218285                | TT                              | CC              | 1946896248               |
| SNP_P4_100416_34219380 | NC_021166.1    | Ca_kabuli_chr07 | 34219380                | AA                              | GG              | 1946896250               |
| SNP_P4_100417_34222066 | NC_021166.1    | Ca_kabuli_chr07 | 34222066                | CC                              | TT              | 1946896252               |
| SNP_P4_100418_34222297 | NC_021166.1    | Ca_kabuli_chr07 | 34222297                | TT                              | CC              | 1946896254               |
| SNP_P4_100420_34222638 | NC_021166.1    | Ca_kabuli_chr07 | 34222638                | GG                              | AA              | 1946896256               |
| SNP_P4_100422_34223355 | NC_021166.1    | Ca_kabuli_chr07 | 34223355                | AA                              | GG              | 1946896258               |
| SNP_P4_100423_34224010 | NC_021166.1    | Ca_kabuli_chr07 | 34224010                | CC                              | AA              | 1946896260               |
| SNP_P4_100424_34224368 | NC_021166.1    | Ca_kabuli_chr07 | 34224368                | CC                              | TT              | 1946896262               |
| SNP_P4_100425_34226325 | NC_021166.1    | Ca_kabuli_chr07 | 34226325                | TT                              | CC              | 1946896264               |
| SNP_P4_100427_34226588 | NC_021166.1    | Ca_kabuli_chr07 | 34226588                | CC                              | TT              | 1946896266               |
| SNP_P4_100428_34226619 | NC_021166.1    | Ca_kabuli_chr07 | 34226619                | AA                              | GG              | 1946896268               |
| SNP_P4_100429_34226659 | NC_021166.1    | Ca_kabuli_chr07 | 34226659                | TT                              | CC              | 1946896270               |
| SNP_P4_100430_34226686 | NC_021166.1    | Ca_kabuli_chr07 | 34226686                | GG                              | CC              | 1946896272               |
| SNP_P4_100431_34226776 | NC_021166.1    | Ca_kabuli_chr07 | 34226776                | CC                              | TT              | 1946896274               |
| SNP_P4_100432_34227786 | NC_021166.1    | Ca_kabuli_chr07 | 34227786                | AA                              | GG              | 1946896276               |
| SNP_P4_100434_34229925 | NC_021166.1    | Ca_kabuli_chr07 | 34229925                | CC                              | AA              | 1946896277               |
| SNP_P4_100435_34232457 | NC_021166.1    | Ca_kabuli_chr07 | 34232457                | AA                              | GG              | 1946896279               |
| SNP_P4_100436_34233339 | NC_021166.1    | Ca_kabuli_chr07 | 34233339                | TT                              | CC              | 1946896281               |
| SNP_P4_100437_34233621 | NC_021166.1    | Ca_kabuli_chr07 | 34233621                | GG                              | AA              | 1946896283               |
| SNP_P4_100438_34235012 | NC_021166.1    | Ca_kabuli_chr07 | 34235012                | TT                              | CC              | 1946896285               |

| SNPs IDs               | Chromosome IDs | Chromosomes     | Physical positions (bp) | CDC Frontier (Reference genome) | (ILWC46 & LPNB) | NCBI SNPdb Accession IDs |
|------------------------|----------------|-----------------|-------------------------|---------------------------------|-----------------|--------------------------|
| SNP_P4_100439_34236202 | NC_021166.1    | Ca_kabuli_chr07 | 34236202                | CC                              | TT              | 1946896287               |
| SNP_P4_100440_34237121 | NC_021166.1    | Ca_kabuli_chr07 | 34237121                | AA                              | GG              | 1946896289               |
| SNP_P4_100442_34237314 | NC_021166.1    | Ca_kabuli_chr07 | 34237314                | GG                              | TT              | 1946896291               |
| SNP_P4_100444_34237712 | NC_021166.1    | Ca_kabuli_chr07 | 34237712                | TT                              | GG              | 1946896293               |
| SNP_P4_100445_34237716 | NC_021166.1    | Ca_kabuli_chr07 | 34237716                | GG                              | CC              | 1946896295               |
| SNP_P4_100446_34237729 | NC_021166.1    | Ca_kabuli_chr07 | 34237729                | AA                              | TT              | 1946896297               |
| SNP_P4_100447_34237732 | NC_021166.1    | Ca_kabuli_chr07 | 34237732                | GG                              | TT              | 1946896299               |
| SNP_P4_100449_34237772 | NC_021166.1    | Ca_kabuli_chr07 | 34237772                | TT                              | AA              | 1946896301               |
| SNP_P4_100450_34240727 | NC_021166.1    | Ca_kabuli_chr07 | 34240727                | AA                              | CC              | 1946896302               |
| SNP_P4_100451_34240742 | NC_021166.1    | Ca_kabuli_chr07 | 34240742                | GG                              | AA              | 1946896304               |
| SNP_P4_100453_34241024 | NC_021166.1    | Ca_kabuli_chr07 | 34241024                | TT                              | CC              | 1946896306               |
| SNP_P4_100454_34241076 | NC_021166.1    | Ca_kabuli_chr07 | 34241076                | CC                              | AA              | 1946896308               |
| SNP_P4_100457_34241394 | NC_021166.1    | Ca_kabuli_chr07 | 34241394                | AA                              | CC              | 1946896310               |
| SNP_P4_100458_34241469 | NC_021166.1    | Ca_kabuli_chr07 | 34241469                | GG                              | AA              | 1946896312               |
| SNP_P4_100461_34241523 | NC_021166.1    | Ca_kabuli_chr07 | 34241523                | TT                              | CC              | 1946896315               |
| SNP_P4_100462_34241793 | NC_021166.1    | Ca_kabuli_chr07 | 34241793                | CC                              | TT              | 1946896317               |
| SNP_P4_100463_34241795 | NC_021166.1    | Ca_kabuli_chr07 | 34241795                | TT                              | CC              | 1946896319               |
| SNP_P4_100464_34241836 | NC_021166.1    | Ca_kabuli_chr07 | 34241836                | AA                              | TT              | 1946896321               |
| SNP_P4_100465_34241855 | NC_021166.1    | Ca_kabuli_chr07 | 34241855                | TT                              | CC              | 1946896323               |
| SNP_P4_100466_34241904 | NC_021166.1    | Ca_kabuli_chr07 | 34241904                | CC                              | TT              | 1946896325               |
| SNP_P4_100467_34241918 | NC_021166.1    | Ca_kabuli_chr07 | 34241918                | TT                              | GG              | 1946896327               |
| SNP_P4_100468_34241930 | NC_021166.1    | Ca_kabuli_chr07 | 34241930                | GG                              | CC              | 1946896330               |
| SNP_P4_100469_34242941 | NC_021166.1    | Ca_kabuli_chr07 | 34242941                | CC                              | GG              | 1946896332               |
| SNP_P4_100470_34242963 | NC_021166.1    | Ca_kabuli_chr07 | 34242963                | AA                              | GG              | 1946896334               |
| SNP_P4_100471_34243088 | NC_021166.1    | Ca_kabuli_chr07 | 34243088                | AA                              | TT              | 1946896336               |
| SNP_P4_100472_34243177 | NC_021166.1    | Ca_kabuli_chr07 | 34243177                | TT                              | GG              | 1946896338               |
| SNP_P4_100473_34243203 | NC_021166.1    | Ca_kabuli_chr07 | 34243203                | GG                              | CC              | 1946896340               |
| SNP_P4_100476_34243294 | NC_021166.1    | Ca_kabuli_chr07 | 34243294                | TT                              | GG              | 1946896342               |
| SNP_P4_100477_34243404 | NC_021166.1    | Ca_kabuli_chr07 | 34243404                | AA                              | TT              | 1946896344               |
| SNP_P4_100478_34243489 | NC_021166.1    | Ca_kabuli_chr07 | 34243489                | TT                              | GG              | 1946896346               |
| SNP_P4_100479_34243538 | NC_021166.1    | Ca_kabuli_chr07 | 34243538                | CC                              | TT              | 1946896348               |
| SNP_P4_100480_34243549 | NC_021166.1    | Ca_kabuli_chr07 | 34243549                | GG                              | AA              | 1946896350               |
| SNP_P4_100481_34243617 | NC_021166.1    | Ca_kabuli_chr07 | 34243617                | GG                              | AA              | 1946896352               |
| SNP_P4_100482_34243638 | NC_021166.1    | Ca_kabuli_chr07 | 34243638                | TT                              | CC              | 1946896354               |
| SNP_P4_100483_34243659 | NC_021166.1    | Ca_kabuli_chr07 | 34243659                | TT                              | AA              | 1946896356               |
| SNP_P4_100484_34243677 | NC_021166.1    | Ca_kabuli_chr07 | 34243677                | TT                              | GG              | 1946896358               |
| SNP_P4_100485_34243749 | NC_021166.1    | Ca_kabuli_chr07 | 34243749                | AA                              | GG              | 1946896360               |
| SNP_P4_100486_34243792 | NC_021166.1    | Ca_kabuli_chr07 | 34243792                | CC                              | TT              | 1946896362               |
| SNP_P4_100488_34247820 | NC_021166.1    | Ca_kabuli_chr07 | 34247820                | AA                              | TT              | 1946896364               |
| SNP_P4_100489_34249299 | NC_021166.1    | Ca_kabuli_chr07 | 34249299                | GG                              | TT              | 1946896365               |
| SNP_P4_100491_34249726 | NC_021166.1    | Ca_kabuli_chr07 | 34249726                | AA                              | GG              | 1946896367               |
| SNP_P4_100492_34250417 | NC_021166.1    | Ca_kabuli_chr07 | 34250417                | GG                              | AA              | 1946896369               |

| SNPs IDs               | Chromosome IDs | Chromosomes     | Physical positions (bp) | CDC Frontier (Reference genome) | (ILWC46 & LPNB) | NCBI SNPdb Accession IDs |
|------------------------|----------------|-----------------|-------------------------|---------------------------------|-----------------|--------------------------|
| SNP_P4_100493_34251242 | NC_021166.1    | Ca_kabuli_chr07 | 34251242                | TT                              | CC              | 1946896371               |
| SNP_P4_100494_34251513 | NC_021166.1    | Ca_kabuli_chr07 | 34251513                | CC                              | AA              | 1946896373               |
| SNP_P4_100495_34251544 | NC_021166.1    | Ca_kabuli_chr07 | 34251544                | TT                              | CC              | 1946896375               |
| SNP_P4_100496_34251811 | NC_021166.1    | Ca_kabuli_chr07 | 34251811                | GG                              | CC              | 1946896377               |
| SNP_P4_100497_34251903 | NC_021166.1    | Ca_kabuli_chr07 | 34251903                | GG                              | AA              | 1946896379               |
| SNP_P4_100498_34254608 | NC_021166.1    | Ca_kabuli_chr07 | 34254608                | CC                              | TT              | 1946896381               |
| SNP_P4_100499_34254624 | NC_021166.1    | Ca_kabuli_chr07 | 34254624                | AA                              | GG              | 1946896383               |
| SNP_P4_100500_34254633 | NC_021166.1    | Ca_kabuli_chr07 | 34254633                | CC                              | TT              | 1946896385               |
| SNP_P4_100501_34255063 | NC_021166.1    | Ca_kabuli_chr07 | 34255063                | AA                              | GG              | 1946896387               |
| SNP_P4_100502_34256144 | NC_021166.1    | Ca_kabuli_chr07 | 34256144                | CC                              | TT              | 1946896389               |
| SNP_P4_100503_34256409 | NC_021166.1    | Ca_kabuli_chr07 | 34256409                | TT                              | CC              | 1946896391               |
| SNP_P4_100504_34256585 | NC_021166.1    | Ca_kabuli_chr07 | 34256585                | AA                              | GG              | 1946896393               |
| SNP_P4_100506_34256652 | NC_021166.1    | Ca_kabuli_chr07 | 34256652                | CC                              | TT              | 1946896395               |
| SNP_P4_100507_34256685 | NC_021166.1    | Ca_kabuli_chr07 | 34256685                | AA                              | GG              | 1946896397               |
| SNP_P4_100508_34256708 | NC_021166.1    | Ca_kabuli_chr07 | 34256708                | TT                              | CC              | 1946896399               |
| SNP_P4_100509_34256822 | NC_021166.1    | Ca_kabuli_chr07 | 34256822                | CC                              | TT              | 1946896401               |
| SNP_P4_100510_34256912 | NC_021166.1    | Ca_kabuli_chr07 | 34256912                | CC                              | TT              | 1946896403               |
| SNP_P4_100511_34256914 | NC_021166.1    | Ca_kabuli_chr07 | 34256914                | CC                              | TT              | 1946896405               |
| SNP_P4_100512_34256924 | NC_021166.1    | Ca_kabuli_chr07 | 34256924                | TT                              | CC              | 1946896407               |
| SNP_P4_100513_34256988 | NC_021166.1    | Ca_kabuli_chr07 | 34256988                | CC                              | TT              | 1946896409               |
| SNP_P4_100514_34257247 | NC_021166.1    | Ca_kabuli_chr07 | 34257247                | AA                              | GG              | 1946896411               |
| SNP_P4_100515_34257402 | NC_021166.1    | Ca_kabuli_chr07 | 34257402                | GG                              | TT              | 1946896413               |
| SNP_P4_100516_34259035 | NC_021166.1    | Ca_kabuli_chr07 | 34259035                | AA                              | GG              | 1946896415               |
| SNP_P4_100517_34259750 | NC_021166.1    | Ca_kabuli_chr07 | 34259750                | AA                              | TT              | 1946896417               |
| SNP_P4_100518_34260213 | NC_021166.1    | Ca_kabuli_chr07 | 34260213                | AA                              | GG              | 1946896419               |
| SNP_P4_100519_34260597 | NC_021166.1    | Ca_kabuli_chr07 | 34260597                | AA                              | CC              | 1946896421               |
| SNP_P4_100520_34261215 | NC_021166.1    | Ca_kabuli_chr07 | 34261215                | TT                              | AA              | 1946896423               |
| SNP_P4_100521_34262053 | NC_021166.1    | Ca_kabuli_chr07 | 34262053                | CC                              | TT              | 1946896425               |
| SNP_P4_100522_34264255 | NC_021166.1    | Ca_kabuli_chr07 | 34264255                | GG                              | AA              | 1946896427               |
| SNP_P4_100523_34264263 | NC_021166.1    | Ca_kabuli_chr07 | 34264263                | CC                              | TT              | 1946896429               |
| SNP_P4_100524_34264266 | NC_021166.1    | Ca_kabuli_chr07 | 34264266                | GG                              | AA              | 1946896431               |
| SNP_P4_100525_34264269 | NC_021166.1    | Ca_kabuli_chr07 | 34264269                | GG                              | CC              | 1946896433               |
| SNP_P4_100526_34265070 | NC_021166.1    | Ca_kabuli_chr07 | 34265070                | CC                              | TT              | 1946896435               |
| SNP_P4_100527_34265423 | NC_021166.1    | Ca_kabuli_chr07 | 34265423                | AA                              | GG              | 1946896437               |
| SNP_P4_100528_34265772 | NC_021166.1    | Ca_kabuli_chr07 | 34265772                | TT                              | GG              | 1946896439               |
| SNP_P4_100529_34266858 | NC_021166.1    | Ca_kabuli_chr07 | 34266858                | TT                              | CC              | 1946896441               |
| SNP_P4_100530_34267503 | NC_021166.1    | Ca_kabuli_chr07 | 34267503                | GG                              | CC              | 1946896443               |
| SNP_P4_100531_34267703 | NC_021166.1    | Ca_kabuli_chr07 | 34267703                | CC                              | TT              | 1946896445               |
| SNP_P4_100532_34270248 | NC_021166.1    | Ca_kabuli_chr07 | 34270248                | TT                              | GG              | 1946896447               |
| SNP_P4_100533_34273161 | NC_021166.1    | Ca_kabuli_chr07 | 34273161                | AA                              | CC              | 1946896449               |
| SNP_P4_100535_34275995 | NC_021166.1    | Ca_kabuli_chr07 | 34275995                | CC                              | GG              | 1946896452               |
| SNP_P4_100536_34276050 | NC_021166.1    | Ca_kabuli_chr07 | 34276050                | GG                              | AA              | 1946896454               |

| SNPs IDs               | Chromosome IDs | Chromosomes     | Physical positions (bp) | CDC Frontier (Reference genome) | (ILWC46 & LPNB) | NCBI SNPdb Accession IDs |
|------------------------|----------------|-----------------|-------------------------|---------------------------------|-----------------|--------------------------|
| SNP_P4_100537_34276530 | NC_021166.1    | Ca_kabuli_chr07 | 34276530                | AA                              | GG              | 1946896456               |
| SNP_P4_100538_34276594 | NC_021166.1    | Ca_kabuli_chr07 | 34276594                | TT                              | GG              | 1946896458               |
| SNP_P4_100539_34276965 | NC_021166.1    | Ca_kabuli_chr07 | 34276965                | TT                              | CC              | 1946896460               |
| SNP_P4_100540_34277014 | NC_021166.1    | Ca_kabuli_chr07 | 34277014                | TT                              | GG              | 1946896462               |
| SNP_P4_100541_34277102 | NC_021166.1    | Ca_kabuli_chr07 | 34277102                | CC                              | AA              | 1946896464               |
| SNP_P4_100543_34277733 | NC_021166.1    | Ca_kabuli_chr07 | 34277733                | TT                              | CC              | 1946896466               |
| SNP_P4_100544_34277788 | NC_021166.1    | Ca_kabuli_chr07 | 34277788                | AA                              | GG              | 1946896468               |
| SNP_P4_100545_34277824 | NC_021166.1    | Ca_kabuli_chr07 | 34277824                | GG                              | AA              | 1946896470               |
| SNP_P4_100546_34277961 | NC_021166.1    | Ca_kabuli_chr07 | 34277961                | CC                              | TT              | 1946896472               |
| SNP_P4_100547_34278030 | NC_021166.1    | Ca_kabuli_chr07 | 34278030                | AA                              | GG              | 1946896474               |
| SNP_P4_100549_34278198 | NC_021166.1    | Ca_kabuli_chr07 | 34278198                | AA                              | GG              | 1946896476               |
| SNP_P4_100551_34278246 | NC_021166.1    | Ca_kabuli_chr07 | 34278246                | AA                              | GG              | 1946896478               |
| SNP_P4_100552_34278390 | NC_021166.1    | Ca_kabuli_chr07 | 34278390                | AA                              | GG              | 1946896480               |
| SNP_P4_100553_34278720 | NC_021166.1    | Ca_kabuli_chr07 | 34278720                | TT                              | CC              | 1946896482               |
| SNP_P4_100554_34279442 | NC_021166.1    | Ca_kabuli_chr07 | 34279442                | TT                              | CC              | 1946896484               |
| SNP_P4_100555_34280009 | NC_021166.1    | Ca_kabuli_chr07 | 34280009                | TT                              | CC              | 1946896486               |
| SNP_P4_100556_34282679 | NC_021166.1    | Ca_kabuli_chr07 | 34282679                | AA                              | TT              | 1946896488               |
| SNP_P4_100557_34283707 | NC_021166.1    | Ca_kabuli_chr07 | 34283707                | AA                              | TT              | 1946896490               |
| SNP_P4_100558_34283791 | NC_021166.1    | Ca_kabuli_chr07 | 34283791                | AA                              | TT              | 1946896492               |
| SNP_P4_100560_34283981 | NC_021166.1    | Ca_kabuli_chr07 | 34283981                | GG                              | AA              | 1946896494               |
| SNP_P4_100562_34284017 | NC_021166.1    | Ca_kabuli_chr07 | 34284017                | AA                              | CC              | 1946896496               |
| SNP_P4_100563_34285790 | NC_021166.1    | Ca_kabuli_chr07 | 34285790                | CC                              | TT              | 1946896498               |
| SNP_P4_100564_34285800 | NC_021166.1    | Ca_kabuli_chr07 | 34285800                | CC                              | TT              | 1946896500               |
| SNP_P4_100565_34286306 | NC_021166.1    | Ca_kabuli_chr07 | 34286306                | GG                              | AA              | 1946896502               |
| SNP_P4_100566_34286321 | NC_021166.1    | Ca_kabuli_chr07 | 34286321                | CC                              | TT              | 1946896504               |
| SNP_P4_100568_34286344 | NC_021166.1    | Ca_kabuli_chr07 | 34286344                | TT                              | GG              | 1946896506               |
| SNP_P4_100570_34286622 | NC_021166.1    | Ca_kabuli_chr07 | 34286622                | CC                              | AA              | 1946896508               |
| SNP_P4_100571_34286637 | NC_021166.1    | Ca_kabuli_chr07 | 34286637                | CC                              | TT              | 1946896510               |
| SNP_P4_100573_34287698 | NC_021166.1    | Ca_kabuli_chr07 | 34287698                | GG                              | CC              | 1946896512               |
| SNP_P4_100574_34287699 | NC_021166.1    | Ca_kabuli_chr07 | 34287699                | GG                              | AA              | 1946896514               |
| SNP_P4_100575_34287990 | NC_021166.1    | Ca_kabuli_chr07 | 34287990                | AA                              | TT              | 1946896516               |
| SNP_P4_100577_34288583 | NC_021166.1    | Ca_kabuli_chr07 | 34288583                | GG                              | CC              | 1946896518               |
| SNP_P4_100578_34288884 | NC_021166.1    | Ca_kabuli_chr07 | 34288884                | CC                              | TT              | 1946896520               |
| SNP_P4_100579_34289037 | NC_021166.1    | Ca_kabuli_chr07 | 34289037                | CC                              | TT              | 1946896522               |
| SNP_P4_100580_34289219 | NC_021166.1    | Ca_kabuli_chr07 | 34289219                | AA                              | GG              | 1946896524               |
| SNP_P4_100581_34289220 | NC_021166.1    | Ca_kabuli_chr07 | 34289220                | TT                              | CC              | 1946896526               |
| SNP_P4_100582_34289543 | NC_021166.1    | Ca_kabuli_chr07 | 34289543                | GG                              | AA              | 1946896528               |
| SNP_P4_100583_34289841 | NC_021166.1    | Ca_kabuli_chr07 | 34289841                | CC                              | AA              | 1946896530               |
| SNP_P4_100584_34290106 | NC_021166.1    | Ca_kabuli_chr07 | 34290106                | GG                              | AA              | 1946896532               |
| SNP_P4_100586_34290252 | NC_021166.1    | Ca_kabuli_chr07 | 34290252                | GG                              | AA              | 1946896534               |
| SNP_P4_100587_34291155 | NC_021166.1    | Ca_kabuli_chr07 | 34291155                | GG                              | AA              | 1946896536               |
| SNP_P4_100588_34292749 | NC_021166.1    | Ca_kabuli_chr07 | 34292749                | CC                              | TT              | 1946896538               |

| SNPs IDs               | Chromosome IDs | Chromosomes     | Physical positions (bp) | CDC Frontier (Reference genome) | (ILWC46 & LPNB) | NCBI SNPdb Accession IDs |
|------------------------|----------------|-----------------|-------------------------|---------------------------------|-----------------|--------------------------|
| SNP_P4_100589_34293075 | NC_021166.1    | Ca_kabuli_chr07 | 34293075                | TT                              | CC              | 1946896540               |
| SNP_P4_100590_34293129 | NC_021166.1    | Ca_kabuli_chr07 | 34293129                | TT                              | AA              | 1946896542               |
| SNP_P4_100591_34294138 | NC_021166.1    | Ca_kabuli_chr07 | 34294138                | CC                              | TT              | 1946896544               |
| SNP_P4_100592_34294158 | NC_021166.1    | Ca_kabuli_chr07 | 34294158                | TT                              | AA              | 1946896546               |
| SNP_P4_100593_34294202 | NC_021166.1    | Ca_kabuli_chr07 | 34294202                | GG                              | AA              | 1946896548               |
| SNP_P4_100594_34294390 | NC_021166.1    | Ca_kabuli_chr07 | 34294390                | CC                              | TT              | 1946896550               |
| SNP_P4_100595_34294433 | NC_021166.1    | Ca_kabuli_chr07 | 34294433                | TT                              | GG              | 1946896552               |
| SNP_P4_100596_34294528 | NC_021166.1    | Ca_kabuli_chr07 | 34294528                | GG                              | AA              | 1946896554               |
| SNP_P4_100597_34294529 | NC_021166.1    | Ca_kabuli_chr07 | 34294529                | GG                              | AA              | 1946896557               |
| SNP_P4_100598_34294534 | NC_021166.1    | Ca_kabuli_chr07 | 34294534                | TT                              | CC              | 1946896559               |
| SNP_P4_100599_34294586 | NC_021166.1    | Ca_kabuli_chr07 | 34294586                | AA                              | GG              | 1946896561               |
| SNP_P4_100600_34294587 | NC_021166.1    | Ca_kabuli_chr07 | 34294587                | AA                              | TT              | 1946896563               |
| SNP_P4_100601_34294594 | NC_021166.1    | Ca_kabuli_chr07 | 34294594                | CC                              | TT              | 1946896565               |
| SNP_P4_100602_34294601 | NC_021166.1    | Ca_kabuli_chr07 | 34294601                | GG                              | AA              | 1946896567               |
| SNP_P4_100603_34295580 | NC_021166.1    | Ca_kabuli_chr07 | 34295580                | AA                              | GG              | 1946896569               |
| SNP_P4_100604_34296799 | NC_021166.1    | Ca_kabuli_chr07 | 34296799                | CC                              | TT              | 1946896571               |
| SNP_P4_100605_34297567 | NC_021166.1    | Ca_kabuli_chr07 | 34297567                | GG                              | TT              | 1946896573               |
| SNP_P4_100607_34298700 | NC_021166.1    | Ca_kabuli_chr07 | 34298700                | CC                              | AA              | 1946896575               |
| SNP_P4_100608_34300258 | NC_021166.1    | Ca_kabuli_chr07 | 34300258                | TT                              | AA              | 1946896577               |
| SNP_P4_100610_34300515 | NC_021166.1    | Ca_kabuli_chr07 | 34300515                | AA                              | TT              | 1946896579               |
| SNP_P4_100611_34300863 | NC_021166.1    | Ca_kabuli_chr07 | 34300863                | CC                              | TT              | 1946896581               |
| SNP_P4_100612_34302311 | NC_021166.1    | Ca_kabuli_chr07 | 34302311                | GG                              | CC              | 1946896583               |
| SNP_P4_100613_34302446 | NC_021166.1    | Ca_kabuli_chr07 | 34302446                | GG                              | AA              | 1946896585               |
| SNP_P4_100614_34302473 | NC_021166.1    | Ca_kabuli_chr07 | 34302473                | CC                              | TT              | 1946896587               |
| SNP_P4_100615_34302488 | NC_021166.1    | Ca_kabuli_chr07 | 34302488                | GG                              | AA              | 1946896589               |
| SNP_P4_100616_34302492 | NC_021166.1    | Ca_kabuli_chr07 | 34302492                | CC                              | TT              | 1946896591               |
| SNP_P4_100617_34302504 | NC_021166.1    | Ca_kabuli_chr07 | 34302504                | CC                              | AA              | 1946896593               |
| SNP_P4_100618_34302507 | NC_021166.1    | Ca_kabuli_chr07 | 34302507                | AA                              | TT              | 1946896595               |
| SNP_P4_100619_34302737 | NC_021166.1    | Ca_kabuli_chr07 | 34302737                | CC                              | TT              | 1946896597               |
| SNP_P4_100620_34302989 | NC_021166.1    | Ca_kabuli_chr07 | 34302989                | CC                              | TT              | 1946896599               |
| SNP_P4_100621_34303012 | NC_021166.1    | Ca_kabuli_chr07 | 34303012                | AA                              | GG              | 1946896601               |
| SNP_P4_100622_34303018 | NC_021166.1    | Ca_kabuli_chr07 | 34303018                | GG                              | AA              | 1946896603               |
| SNP_P4_100623_34303029 | NC_021166.1    | Ca_kabuli_chr07 | 34303029                | TT                              | CC              | 1946896605               |
| SNP_P4_100624_34303061 | NC_021166.1    | Ca_kabuli_chr07 | 34303061                | CC                              | TT              | 1946896607               |
| SNP_P4_100625_34303109 | NC_021166.1    | Ca_kabuli_chr07 | 34303109                | TT                              | CC              | 1946896609               |
| SNP_P4_100626_34303112 | NC_021166.1    | Ca_kabuli_chr07 | 34303112                | GG                              | AA              | 1946896611               |
| SNP_P4_100627_34303143 | NC_021166.1    | Ca_kabuli_chr07 | 34303143                | GG                              | AA              | 1946896613               |
| SNP_P4_100628_34303659 | NC_021166.1    | Ca_kabuli_chr07 | 34303659                | AA                              | GG              | 1946896615               |
| SNP_P4_100629_34303675 | NC_021166.1    | Ca_kabuli_chr07 | 34303675                | AA                              | GG              | 1946896617               |
| SNP_P4_100630_34303684 | NC_021166.1    | Ca_kabuli_chr07 | 34303684                | AA                              | GG              | 1946896619               |
| SNP_P4_100631_34303694 | NC_021166.1    | Ca_kabuli_chr07 | 34303694                | AA                              | GG              | 1946896621               |
| SNP_P4_100632_34303695 | NC_021166.1    | Ca_kabuli_chr07 | 34303695                | GG                              | AA              | 1946896623               |

| SNPs IDs               | Chromosome IDs | Chromosomes     | Physical positions (bp) | CDC Frontier (Reference genome) | (ILWC46 & LPNB) | NCBI SNPdb Accession IDs |
|------------------------|----------------|-----------------|-------------------------|---------------------------------|-----------------|--------------------------|
| SNP_P4_100633_34303838 | NC_021166.1    | Ca_kabuli_chr07 | 34303838                | AA                              | GG              | 1946896625               |
| SNP_P4_100635_34304273 | NC_021166.1    | Ca_kabuli_chr07 | 34304273                | TT                              | CC              | 1946896627               |
| SNP_P4_100636_34305656 | NC_021166.1    | Ca_kabuli_chr07 | 34305656                | CC                              | TT              | 1946896629               |
| SNP_P4_100637_34305711 | NC_021166.1    | Ca_kabuli_chr07 | 34305711                | GG                              | CC              | 1946896631               |
| SNP_P4_100638_34305777 | NC_021166.1    | Ca_kabuli_chr07 | 34305777                | GG                              | TT              | 1946896634               |
| SNP_P4_100639_34306114 | NC_021166.1    | Ca_kabuli_chr07 | 34306114                | GG                              | TT              | 1946896636               |
| SNP_P4_100641_34307145 | NC_021166.1    | Ca_kabuli_chr07 | 34307145                | GG                              | CC              | 1946896638               |
| SNP_P4_100642_34307206 | NC_021166.1    | Ca_kabuli_chr07 | 34307206                | TT                              | CC              | 1946896640               |
| SNP_P4_100643_34307692 | NC_021166.1    | Ca_kabuli_chr07 | 34307692                | AA                              | GG              | 1946896642               |
| SNP_P4_100644_34307693 | NC_021166.1    | Ca_kabuli_chr07 | 34307693                | TT                              | CC              | 1946896644               |
| SNP_P4_100645_34307705 | NC_021166.1    | Ca_kabuli_chr07 | 34307705                | GG                              | AA              | 1946896646               |
| SNP_P4_100646_34307741 | NC_021166.1    | Ca_kabuli_chr07 | 34307741                | CC                              | TT              | 1946896648               |
| SNP_P4_100647_34309252 | NC_021166.1    | Ca_kabuli_chr07 | 34309252                | AA                              | TT              | 1946896650               |
| SNP_P4_100648_34309437 | NC_021166.1    | Ca_kabuli_chr07 | 34309437                | CC                              | TT              | 1946896652               |
| SNP_P4_100649_34309492 | NC_021166.1    | Ca_kabuli_chr07 | 34309492                | TT                              | CC              | 1946896654               |
| SNP_P4_100650_34309559 | NC_021166.1    | Ca_kabuli_chr07 | 34309559                | GG                              | TT              | 1946896656               |
| SNP_P4_100652_34310637 | NC_021166.1    | Ca_kabuli_chr07 | 34310637                | CC                              | TT              | 1946896658               |
| SNP_P4_100653_34310638 | NC_021166.1    | Ca_kabuli_chr07 | 34310638                | GG                              | AA              | 1946896660               |
| SNP_P4_100654_34310642 | NC_021166.1    | Ca_kabuli_chr07 | 34310642                | TT                              | GG              | 1946896662               |
| SNP_P4_100655_34310649 | NC_021166.1    | Ca_kabuli_chr07 | 34310649                | GG                              | TT              | 1946896664               |
| SNP_P4_100656_34310684 | NC_021166.1    | Ca_kabuli_chr07 | 34310684                | TT                              | CC              | 1946896666               |
| SNP_P4_100657_34310691 | NC_021166.1    | Ca_kabuli_chr07 | 34310691                | CC                              | TT              | 1946896668               |
| SNP_P4_100658_34310880 | NC_021166.1    | Ca_kabuli_chr07 | 34310880                | GG                              | TT              | 1946896670               |
| SNP_P4_100660_34311158 | NC_021166.1    | Ca_kabuli_chr07 | 34311158                | GG                              | CC              | 1946896672               |
| SNP_P4_100661_34311211 | NC_021166.1    | Ca_kabuli_chr07 | 34311211                | TT                              | CC              | 1946896674               |
| SNP_P4_100662_34311216 | NC_021166.1    | Ca_kabuli_chr07 | 34311216                | TT                              | CC              | 1946896676               |
| SNP_P4_100663_34311217 | NC_021166.1    | Ca_kabuli_chr07 | 34311217                | AA                              | TT              | 1946896679               |
| SNP_P4_100664_34311234 | NC_021166.1    | Ca_kabuli_chr07 | 34311234                | CC                              | TT              | 1946896681               |
| SNP_P4_100665_34311405 | NC_021166.1    | Ca_kabuli_chr07 | 34311405                | TT                              | CC              | 1946896683               |
| SNP_P4_100666_34311453 | NC_021166.1    | Ca_kabuli_chr07 | 34311453                | TT                              | CC              | 1946896685               |
| SNP_P4_100668_34312092 | NC_021166.1    | Ca_kabuli_chr07 | 34312092                | AA                              | GG              | 1946896687               |
| SNP_P4_100670_34312346 | NC_021166.1    | Ca_kabuli_chr07 | 34312346                | CC                              | AA              | 1946896689               |
| SNP_P4_100674_34312608 | NC_021166.1    | Ca_kabuli_chr07 | 34312608                | TT                              | CC              | 1946896691               |
| SNP_P4_100675_34312625 | NC_021166.1    | Ca_kabuli_chr07 | 34312625                | CC                              | GG              | 1946896693               |
| SNP_P4_100677_34313116 | NC_021166.1    | Ca_kabuli_chr07 | 34313116                | TT                              | CC              | 1946896695               |
| SNP_P4_100678_34313322 | NC_021166.1    | Ca_kabuli_chr07 | 34313322                | AA                              | GG              | 1946896697               |
| SNP_P4_100679_34313344 | NC_021166.1    | Ca_kabuli_chr07 | 34313344                | AA                              | GG              | 1946896699               |
| SNP_P4_100680_34313355 | NC_021166.1    | Ca_kabuli_chr07 | 34313355                | CC                              | TT              | 1946896701               |
| SNP_P4_100681_34313455 | NC_021166.1    | Ca_kabuli_chr07 | 34313455                | CC                              | AA              | 1946896703               |
| SNP_P4_100683_34313523 | NC_021166.1    | Ca_kabuli_chr07 | 34313523                | GG                              | AA              | 1946896705               |
| SNP_P4_100684_34314358 | NC_021166.1    | Ca_kabuli_chr07 | 34314358                | GG                              | AA              | 1946896707               |
| SNP_P4_100685_34314947 | NC_021166.1    | Ca_kabuli_chr07 | 34314947                | AA                              | TT              | 1946896709               |

| SNPs IDs               | Chromosome IDs | Chromosomes     | Physical positions (bp) | CDC Frontier (Reference genome) | (ILWC46 & LPNB) | NCBI SNPdb Accession IDs |
|------------------------|----------------|-----------------|-------------------------|---------------------------------|-----------------|--------------------------|
| SNP_P4_100686_34314952 | NC_021166.1    | Ca_kabuli_chr07 | 34314952                | TT                              | CC              | 1946896711               |
| SNP_P4_100688_34315331 | NC_021166.1    | Ca_kabuli_chr07 | 34315331                | GG                              | AA              | 1946896714               |
| SNP_P4_100689_34315723 | NC_021166.1    | Ca_kabuli_chr07 | 34315723                | AA                              | GG              | 1946896716               |
| SNP_P4_100690_34315782 | NC_021166.1    | Ca_kabuli_chr07 | 34315782                | CC                              | TT              | 1946896718               |
| SNP_P4_100691_34316195 | NC_021166.1    | Ca_kabuli_chr07 | 34316195                | TT                              | CC              | 1946896720               |
| SNP_P4_100692_34316255 | NC_021166.1    | Ca_kabuli_chr07 | 34316255                | TT                              | CC              | 1946896722               |
| SNP_P4_100693_34316256 | NC_021166.1    | Ca_kabuli_chr07 | 34316256                | CC                              | TT              | 1946896724               |
| SNP_P4_100694_34316340 | NC_021166.1    | Ca_kabuli_chr07 | 34316340                | AA                              | GG              | 1946896726               |
| SNP_P4_100695_34316346 | NC_021166.1    | Ca_kabuli_chr07 | 34316346                | GG                              | AA              | 1946896728               |
| SNP_P4_100696_34316400 | NC_021166.1    | Ca_kabuli_chr07 | 34316400                | TT                              | CC              | 1946896730               |
| SNP_P4_100699_34317420 | NC_021166.1    | Ca_kabuli_chr07 | 34317420                | GG                              | AA              | 1946896732               |
| SNP_P4_100700_34317435 | NC_021166.1    | Ca_kabuli_chr07 | 34317435                | GG                              | TT              | 1946896734               |
| SNP_P4_100703_34317611 | NC_021166.1    | Ca_kabuli_chr07 | 34317611                | CC                              | AA              | 1946896736               |
| SNP_P4_100705_34318115 | NC_021166.1    | Ca_kabuli_chr07 | 34318115                | AA                              | TT              | 1946896738               |
| SNP_P4_100706_34318376 | NC_021166.1    | Ca_kabuli_chr07 | 34318376                | AA                              | GG              | 1946896740               |
| SNP_P4_100708_34320127 | NC_021166.1    | Ca_kabuli_chr07 | 34320127                | CC                              | AA              | 1946896742               |
| SNP_P4_100710_34321801 | NC_021166.1    | Ca_kabuli_chr07 | 34321801                | AA                              | TT              | 1946896744               |
| SNP_P4_100711_34321802 | NC_021166.1    | Ca_kabuli_chr07 | 34321802                | GG                              | AA              | 1946896746               |
| SNP_P4_100713_34322010 | NC_021166.1    | Ca_kabuli_chr07 | 34322010                | GG                              | AA              | 1946896749               |
| SNP_P4_100714_34322023 | NC_021166.1    | Ca_kabuli_chr07 | 34322023                | GG                              | TT              | 1946896751               |
| SNP_P4_100715_34322579 | NC_021166.1    | Ca_kabuli_chr07 | 34322579                | GG                              | TT              | 1946896753               |
| SNP_P4_100716_34322627 | NC_021166.1    | Ca_kabuli_chr07 | 34322627                | CC                              | TT              | 1946896755               |
| SNP_P4_100717_34322643 | NC_021166.1    | Ca_kabuli_chr07 | 34322643                | AA                              | GG              | 1946896757               |
| SNP_P4_100718_34323379 | NC_021166.1    | Ca_kabuli_chr07 | 34323379                | CC                              | TT              | 1946896759               |
| SNP_P4_100719_34323457 | NC_021166.1    | Ca_kabuli_chr07 | 34323457                | GG                              | AA              | 1946896761               |
| SNP_P4_100720_34323477 | NC_021166.1    | Ca_kabuli_chr07 | 34323477                | GG                              | TT              | 1946896763               |
| SNP_P4_100721_34323488 | NC_021166.1    | Ca_kabuli_chr07 | 34323488                | GG                              | AA              | 1946896765               |
| SNP_P4_100722_34323712 | NC_021166.1    | Ca_kabuli_chr07 | 34323712                | TT                              | CC              | 1946896767               |
| SNP_P4_100723_34323973 | NC_021166.1    | Ca_kabuli_chr07 | 34323973                | GG                              | AA              | 1946896769               |
| SNP_P4_100724_34323985 | NC_021166.1    | Ca_kabuli_chr07 | 34323985                | CC                              | TT              | 1946896771               |
| SNP_P4_100725_34324014 | NC_021166.1    | Ca_kabuli_chr07 | 34324014                | CC                              | TT              | 1946896773               |
| SNP_P4_100726_34324021 | NC_021166.1    | Ca_kabuli_chr07 | 34324021                | AA                              | GG              | 1946896775               |
| SNP_P4_100727_34324024 | NC_021166.1    | Ca_kabuli_chr07 | 34324024                | AA                              | GG              | 1946896777               |
| SNP_P4_100728_34324064 | NC_021166.1    | Ca_kabuli_chr07 | 34324064                | AA                              | GG              | 1946896779               |
| SNP_P4_100729_34324076 | NC_021166.1    | Ca_kabuli_chr07 | 34324076                | AA                              | TT              | 1946896781               |
| SNP_P4_100730_34324324 | NC_021166.1    | Ca_kabuli_chr07 | 34324324                | AA                              | GG              | 1946896783               |
| SNP_P4_100731_34324335 | NC_021166.1    | Ca_kabuli_chr07 | 34324335                | AA                              | TT              | 1946896785               |
| SNP_P4_100733_34328364 | NC_021166.1    | Ca_kabuli_chr07 | 34328364                | AA                              | CC              | 1946896787               |
| SNP_P4_100734_34328586 | NC_021166.1    | Ca_kabuli_chr07 | 34328586                | GG                              | AA              | 1946896789               |
| SNP_P4_100735_34328591 | NC_021166.1    | Ca_kabuli_chr07 | 34328591                | TT                              | CC              | 1946896791               |
| SNP_P4_100736_34328599 | NC_021166.1    | Ca_kabuli_chr07 | 34328599                | TT                              | AA              | 1946896793               |
| SNP_P4_100737_34328610 | NC_021166.1    | Ca_kabuli_chr07 | 34328610                | CC                              | TT              | 1946896795               |

| SNPs IDs               | Chromosome IDs | Chromosomes     | Physical positions (bp) | CDC Frontier (Reference genome) | (ILWC46 & LPNB) | NCBI SNPdb Accession IDs |
|------------------------|----------------|-----------------|-------------------------|---------------------------------|-----------------|--------------------------|
| SNP_P4_100738_34328745 | NC_021166.1    | Ca_kabuli_chr07 | 34328745                | TT                              | CC              | 1946896797               |
| SNP_P4_100739_34328757 | NC_021166.1    | Ca_kabuli_chr07 | 34328757                | AA                              | GG              | 1946896799               |
| SNP_P4_100741_34328877 | NC_021166.1    | Ca_kabuli_chr07 | 34328877                | GG                              | AA              | 1946896801               |
| SNP_P4_100742_34328966 | NC_021166.1    | Ca_kabuli_chr07 | 34328966                | AA                              | GG              | 1946896803               |
| SNP_P4_100743_34329018 | NC_021166.1    | Ca_kabuli_chr07 | 34329018                | CC                              | TT              | 1946896805               |
| SNP_P4_100744_34329040 | NC_021166.1    | Ca_kabuli_chr07 | 34329040                | CC                              | AA              | 1946896807               |
| SNP_P4_100745_34329205 | NC_021166.1    | Ca_kabuli_chr07 | 34329205                | TT                              | GG              | 1946896809               |
| SNP_P4_100747_34329244 | NC_021166.1    | Ca_kabuli_chr07 | 34329244                | GG                              | TT              | 1946896811               |
| SNP_P4_100748_34329253 | NC_021166.1    | Ca_kabuli_chr07 | 34329253                | TT                              | CC              | 1946896813               |
| SNP_P4_100749_34329269 | NC_021166.1    | Ca_kabuli_chr07 | 34329269                | GG                              | TT              | 1946896815               |
| SNP_P4_100750_34329275 | NC_021166.1    | Ca_kabuli_chr07 | 34329275                | CC                              | TT              | 1946896817               |
| SNP_P4_100751_34329426 | NC_021166.1    | Ca_kabuli_chr07 | 34329426                | TT                              | CC              | 1946896819               |
| SNP_P4_100752_34329443 | NC_021166.1    | Ca_kabuli_chr07 | 34329443                | TT                              | CC              | 1946896821               |
| SNP_P4_100753_34329610 | NC_021166.1    | Ca_kabuli_chr07 | 34329610                | AA                              | CC              | 1946896823               |
| SNP_P4_100754_34329639 | NC_021166.1    | Ca_kabuli_chr07 | 34329639                | GG                              | TT              | 1946896825               |
| SNP_P4_100755_34331168 | NC_021166.1    | Ca_kabuli_chr07 | 34331168                | GG                              | AA              | 1946896827               |
| SNP_P4_100756_34331371 | NC_021166.1    | Ca_kabuli_chr07 | 34331371                | AA                              | TT              | 1946896829               |
| SNP_P4_100758_34335111 | NC_021166.1    | Ca_kabuli_chr07 | 34335111                | CC                              | TT              | 1946896831               |
| SNP_P4_100760_34336028 | NC_021166.1    | Ca_kabuli_chr07 | 34336028                | GG                              | AA              | 1946896833               |
| SNP_P4_100761_34336053 | NC_021166.1    | Ca_kabuli_chr07 | 34336053                | AA                              | GG              | 1946896835               |
| SNP_P4_100762_34336075 | NC_021166.1    | Ca_kabuli_chr07 | 34336075                | AA                              | TT              | 1946896838               |
| SNP_P4_100764_34336338 | NC_021166.1    | Ca_kabuli_chr07 | 34336338                | CC                              | AA              | 1946896840               |
| SNP_P4_100765_34336547 | NC_021166.1    | Ca_kabuli_chr07 | 34336547                | AA                              | GG              | 1946896842               |
| SNP_P4_100766_34336611 | NC_021166.1    | Ca_kabuli_chr07 | 34336611                | AA                              | GG              | 1946896844               |
| SNP_P4_100767_34336626 | NC_021166.1    | Ca_kabuli_chr07 | 34336626                | GG                              | AA              | 1946896846               |
| SNP_P4_100768_34336628 | NC_021166.1    | Ca_kabuli_chr07 | 34336628                | AA                              | TT              | 1946896848               |
| SNP_P4_100769_34336845 | NC_021166.1    | Ca_kabuli_chr07 | 34336845                | TT                              | GG              | 1946896850               |
| SNP_P4_100770_34336896 | NC_021166.1    | Ca_kabuli_chr07 | 34336896                | CC                              | TT              | 1946896852               |
| SNP_P4_100772_34337238 | NC_021166.1    | Ca_kabuli_chr07 | 34337238                | AA                              | CC              | 1946896854               |
| SNP_P4_100773_34337335 | NC_021166.1    | Ca_kabuli_chr07 | 34337335                | TT                              | CC              | 1946896856               |
| SNP_P4_100774_34337352 | NC_021166.1    | Ca_kabuli_chr07 | 34337352                | TT                              | AA              | 1946896858               |
| SNP_P4_100775_34337473 | NC_021166.1    | Ca_kabuli_chr07 | 34337473                | GG                              | AA              | 1946896860               |
| SNP_P4_100776_34337474 | NC_021166.1    | Ca_kabuli_chr07 | 34337474                | CC                              | TT              | 1946896862               |
| SNP_P4_100777_34337488 | NC_021166.1    | Ca_kabuli_chr07 | 34337488                | AA                              | GG              | 1946896864               |
| SNP_P4_100778_34337491 | NC_021166.1    | Ca_kabuli_chr07 | 34337491                | GG                              | AA              | 1946896866               |
| SNP_P4_100779_34337520 | NC_021166.1    | Ca_kabuli_chr07 | 34337520                | GG                              | TT              | 1946896868               |
| SNP_P4_100780_34337524 | NC_021166.1    | Ca_kabuli_chr07 | 34337524                | AA                              | GG              | 1946896870               |
| SNP_P4_100781_34337657 | NC_021166.1    | Ca_kabuli_chr07 | 34337657                | GG                              | TT              | 1946896872               |
| SNP_P4_100782_34337693 | NC_021166.1    | Ca_kabuli_chr07 | 34337693                | GG                              | AA              | 1946896874               |
| SNP_P4_100784_34337995 | NC_021166.1    | Ca_kabuli_chr07 | 34337995                | TT                              | CC              | 1946896876               |
| SNP_P4_100785_34338036 | NC_021166.1    | Ca_kabuli_chr07 | 34338036                | AA                              | GG              | 1946896878               |
| SNP_P4_100786_34338056 | NC_021166.1    | Ca_kabuli_chr07 | 34338056                | GG                              | AA              | 1946896881               |



| SNPs IDs               | Chromosome IDs | Chromosomes     | Physical positions (bp) | CDC Frontier (Reference genome) | (ILWC46 & LPNB) | NCBI SNPdb Accession IDs |
|------------------------|----------------|-----------------|-------------------------|---------------------------------|-----------------|--------------------------|
| SNP_P4_100787_34338292 | NC_021166.1    | Ca_kabuli_chr07 | 34338292                | TT                              | CC              | 1946896883               |
| SNP_P4_100789_34339446 | NC_021166.1    | Ca_kabuli_chr07 | 34339446                | CC                              | TT              | 1946896885               |
| SNP_P4_100790_34339456 | NC_021166.1    | Ca_kabuli_chr07 | 34339456                | TT                              | CC              | 1946896887               |
| SNP_P4_100791_34339460 | NC_021166.1    | Ca_kabuli_chr07 | 34339460                | AA                              | CC              | 1946896889               |
| SNP_P4_100792_34339463 | NC_021166.1    | Ca_kabuli_chr07 | 34339463                | CC                              | TT              | 1946896892               |
| SNP_P4_100793_34339470 | NC_021166.1    | Ca_kabuli_chr07 | 34339470                | TT                              | CC              | 1946896893               |
| SNP_P4_100794_34339482 | NC_021166.1    | Ca_kabuli_chr07 | 34339482                | GG                              | AA              | 1946896896               |
| SNP_P4_100795_34339487 | NC_021166.1    | Ca_kabuli_chr07 | 34339487                | AA                              | CC              | 1946896898               |
| SNP_P4_100796_34339645 | NC_021166.1    | Ca_kabuli_chr07 | 34339645                | CC                              | AA              | 1946896900               |
| SNP_P4_100797_34339670 | NC_021166.1    | Ca_kabuli_chr07 | 34339670                | GG                              | TT              | 1946896902               |
| SNP_P4_100798_34339701 | NC_021166.1    | Ca_kabuli_chr07 | 34339701                | TT                              | CC              | 1946896904               |
| SNP_P4_100799_34341149 | NC_021166.1    | Ca_kabuli_chr07 | 34341149                | CC                              | TT              | 1946896906               |
| SNP_P4_100800_34341740 | NC_021166.1    | Ca_kabuli_chr07 | 34341740                | AA                              | GG              | 1946896908               |
| SNP_P4_100801_34342001 | NC_021166.1    | Ca_kabuli_chr07 | 34342001                | CC                              | TT              | 1946896910               |
| SNP_P4_100802_34342017 | NC_021166.1    | Ca_kabuli_chr07 | 34342017                | AA                              | GG              | 1946896912               |
| SNP_P4_100803_34342018 | NC_021166.1    | Ca_kabuli_chr07 | 34342018                | GG                              | TT              | 1946896914               |
| SNP_P4_100804_34342021 | NC_021166.1    | Ca_kabuli_chr07 | 34342021                | AA                              | GG              | 1946896916               |
| SNP_P4_100805_34342022 | NC_021166.1    | Ca_kabuli_chr07 | 34342022                | TT                              | CC              | 1946896918               |
| SNP_P4_100807_34342176 | NC_021166.1    | Ca_kabuli_chr07 | 34342176                | TT                              | AA              | 1946896920               |
| SNP_P4_100808_34342205 | NC_021166.1    | Ca_kabuli_chr07 | 34342205                | TT                              | GG              | 1946896922               |
| SNP_P4_100810_34342381 | NC_021166.1    | Ca_kabuli_chr07 | 34342381                | GG                              | AA              | 1946896924               |
| SNP_P4_100811_34342422 | NC_021166.1    | Ca_kabuli_chr07 | 34342422                | GG                              | AA              | 1946896926               |
| SNP_P4_100812_34342453 | NC_021166.1    | Ca_kabuli_chr07 | 34342453                | CC                              | AA              | 1946896928               |
| SNP_P4_100813_34342462 | NC_021166.1    | Ca_kabuli_chr07 | 34342462                | CC                              | AA              | 1946896930               |
| SNP_P4_100814_34345620 | NC_021166.1    | Ca_kabuli_chr07 | 34345620                | CC                              | TT              | 1946896932               |
| SNP_P4_100815_34345636 | NC_021166.1    | Ca_kabuli_chr07 | 34345636                | AA                              | GG              | 1946896934               |
| SNP_P4_100816_34345645 | NC_021166.1    | Ca_kabuli_chr07 | 34345645                | TT                              | GG              | 1946896936               |
| SNP_P4_100817_34345953 | NC_021166.1    | Ca_kabuli_chr07 | 34345953                | TT                              | AA              | 1946896938               |
| SNP_P4_100818_34347225 | NC_021166.1    | Ca_kabuli_chr07 | 34347225                | CC                              | AA              | 1946896940               |
| SNP_P4_100819_34347234 | NC_021166.1    | Ca_kabuli_chr07 | 34347234                | GG                              | AA              | 1946896942               |
| SNP_P4_100821_34347638 | NC_021166.1    | Ca_kabuli_chr07 | 34347638                | AA                              | GG              | 1946896945               |
| SNP_P4_100823_34348775 | NC_021166.1    | Ca_kabuli_chr07 | 34348775                | CC                              | AA              | 1946896947               |
| SNP_P4_100824_34348776 | NC_021166.1    | Ca_kabuli_chr07 | 34348776                | TT                              | CC              | 1946896949               |
| SNP_P4_100825_34349016 | NC_021166.1    | Ca_kabuli_chr07 | 34349016                | GG                              | AA              | 1946896951               |
| SNP_P4_100827_34349936 | NC_021166.1    | Ca_kabuli_chr07 | 34349936                | GG                              | AA              | 1946896953               |
| SNP_P4_100828_34349957 | NC_021166.1    | Ca_kabuli_chr07 | 34349957                | AA                              | GG              | 1946896955               |
| SNP_P4_100829_34349971 | NC_021166.1    | Ca_kabuli_chr07 | 34349971                | TT                              | CC              | 1946896957               |
| SNP_P4_100830_34350358 | NC_021166.1    | Ca_kabuli_chr07 | 34350358                | AA                              | GG              | 1946896959               |
| SNP_P4_100832_34350408 | NC_021166.1    | Ca_kabuli_chr07 | 34350408                | CC                              | AA              | 1946896961               |
| SNP_P4_100835_34351649 | NC_021166.1    | Ca_kabuli_chr07 | 34351649                | TT                              | GG              | 1946896963               |
| SNP_P4_100836_34351660 | NC_021166.1    | Ca_kabuli_chr07 | 34351660                | GG                              | TT              | 1946896965               |
| SNP_P4_100837_34351705 | NC_021166.1    | Ca_kabuli_chr07 | 34351705                | AA                              | GG              | 1946896967               |

| SNPs IDs               | Chromosome IDs | Chromosomes     | Physical positions (bp) | CDC Frontier (Reference genome) | (ILWC46 & LPNB) | NCBI SNPdb Accession IDs |
|------------------------|----------------|-----------------|-------------------------|---------------------------------|-----------------|--------------------------|
| SNP_P4_100838_34351712 | NC_021166.1    | Ca_kabuli_chr07 | 34351712                | AA                              | TT              | 1946896971               |
| SNP_P4_100839_34351743 | NC_021166.1    | Ca_kabuli_chr07 | 34351743                | TT                              | CC              | 1946896973               |
| SNP_P4_100840_34352056 | NC_021166.1    | Ca_kabuli_chr07 | 34352056                | GG                              | CC              | 1946896975               |
| SNP_P4_100841_34352088 | NC_021166.1    | Ca_kabuli_chr07 | 34352088                | GG                              | TT              | 1946896977               |
| SNP_P4_100842_34352097 | NC_021166.1    | Ca_kabuli_chr07 | 34352097                | GG                              | CC              | 1946896979               |
| SNP_P4_100844_34368421 | NC_021166.1    | Ca_kabuli_chr07 | 34368421                | TT                              | CC              | 1946896981               |
| SNP_P4_100845_34368467 | NC_021166.1    | Ca_kabuli_chr07 | 34368467                | CC                              | GG              | 1946896983               |
| SNP_P4_100846_34368832 | NC_021166.1    | Ca_kabuli_chr07 | 34368832                | GG                              | AA              | 1946896985               |
| SNP_P4_100847_34369004 | NC_021166.1    | Ca_kabuli_chr07 | 34369004                | TT                              | AA              | 1946896987               |
| SNP_P4_100848_34369030 | NC_021166.1    | Ca_kabuli_chr07 | 34369030                | AA                              | TT              | 1946896990               |
| SNP_P4_100849_34369038 | NC_021166.1    | Ca_kabuli_chr07 | 34369038                | TT                              | CC              | 1946896992               |
| SNP_P4_100850_34369054 | NC_021166.1    | Ca_kabuli_chr07 | 34369054                | TT                              | AA              | 1946896994               |
| SNP_P4_100851_34369055 | NC_021166.1    | Ca_kabuli_chr07 | 34369055                | TT                              | GG              | 1946896996               |
| SNP_P4_100852_34369056 | NC_021166.1    | Ca_kabuli_chr07 | 34369056                | TT                              | AA              | 1946896998               |
| SNP_P4_100853_34369632 | NC_021166.1    | Ca_kabuli_chr07 | 34369632                | GG                              | AA              | 1946897000               |
| SNP_P4_100854_34369671 | NC_021166.1    | Ca_kabuli_chr07 | 34369671                | GG                              | TT              | 1946897002               |
| SNP_P4_100855_34370020 | NC_021166.1    | Ca_kabuli_chr07 | 34370020                | TT                              | CC              | 1946897004               |
| SNP_P4_100856_34370503 | NC_021166.1    | Ca_kabuli_chr07 | 34370503                | TT                              | CC              | 1946897006               |
| SNP_P4_100857_34370801 | NC_021166.1    | Ca_kabuli_chr07 | 34370801                | GG                              | AA              | 1946897008               |
| SNP_P4_100858_34371078 | NC_021166.1    | Ca_kabuli_chr07 | 34371078                | CC                              | TT              | 1946897010               |
| SNP_P4_100861_34375374 | NC_021166.1    | Ca_kabuli_chr07 | 34375374                | CC                              | TT              | 1946897012               |
| SNP_P4_100862_34375389 | NC_021166.1    | Ca_kabuli_chr07 | 34375389                | CC                              | AA              | 1946897014               |
| SNP_P4_100864_34379288 | NC_021166.1    | Ca_kabuli_chr07 | 34379288                | GG                              | TT              | 1946897016               |
| SNP_P4_100865_34379313 | NC_021166.1    | Ca_kabuli_chr07 | 34379313                | CC                              | TT              | 1946897018               |
| SNP_P4_100867_34379638 | NC_021166.1    | Ca_kabuli_chr07 | 34379638                | GG                              | AA              | 1946897020               |
| SNP_P4_100868_34379788 | NC_021166.1    | Ca_kabuli_chr07 | 34379788                | CC                              | AA              | 1946897022               |
| SNP_P4_100869_34379878 | NC_021166.1    | Ca_kabuli_chr07 | 34379878                | TT                              | CC              | 1946897024               |
| SNP_P4_100870_34381830 | NC_021166.1    | Ca_kabuli_chr07 | 34381830                | AA                              | GG              | 1946897026               |
| SNP_P4_100871_34382027 | NC_021166.1    | Ca_kabuli_chr07 | 34382027                | AA                              | TT              | 1946897028               |
| SNP_P4_100873_34382088 | NC_021166.1    | Ca_kabuli_chr07 | 34382088                | AA                              | TT              | 1946897030               |
| SNP_P4_100875_34383597 | NC_021166.1    | Ca_kabuli_chr07 | 34383597                | GG                              | AA              | 1946897032               |
| SNP_P4_100876_34383604 | NC_021166.1    | Ca_kabuli_chr07 | 34383604                | CC                              | TT              | 1946897034               |
| SNP_P4_100877_34384346 | NC_021166.1    | Ca_kabuli_chr07 | 34384346                | TT                              | CC              | 1946897036               |
| SNP_P4_100879_34384697 | NC_021166.1    | Ca_kabuli_chr07 | 34384697                | CC                              | TT              | 1946897038               |
| SNP_P4_100880_34384700 | NC_021166.1    | Ca_kabuli_chr07 | 34384700                | CC                              | TT              | 1946897040               |
| SNP_P4_100881_34384739 | NC_021166.1    | Ca_kabuli_chr07 | 34384739                | AA                              | GG              | 1946897042               |
| SNP_P4_100882_34385018 | NC_021166.1    | Ca_kabuli_chr07 | 34385018                | CC                              | GG              | 1946897045               |
| SNP_P4_100883_34385019 | NC_021166.1    | Ca_kabuli_chr07 | 34385019                | TT                              | GG              | 1946897047               |
| SNP_P4_100884_34385387 | NC_021166.1    | Ca_kabuli_chr07 | 34385387                | TT                              | CC              | 1946897049               |
| SNP_P4_100885_34385388 | NC_021166.1    | Ca_kabuli_chr07 | 34385388                | GG                              | TT              | 1946897051               |
| SNP_P4_100886_34385548 | NC_021166.1    | Ca_kabuli_chr07 | 34385548                | TT                              | GG              | 1946897053               |
| SNP_P4_100888_34385677 | NC_021166.1    | Ca_kabuli_chr07 | 34385677                | TT                              | CC              | 1946897055               |

| SNPs IDs               | Chromosome IDs | Chromosomes     | Physical positions (bp) | CDC Frontier (Reference genome) | (ILWC46 & LPNB) | NCBI SNPdb Accession IDs |
|------------------------|----------------|-----------------|-------------------------|---------------------------------|-----------------|--------------------------|
| SNP_P4_100889_34385709 | NC_021166.1    | Ca_kabuli_chr07 | 34385709                | GG                              | TT              | 1946897057               |
| SNP_P4_100890_34388228 | NC_021166.1    | Ca_kabuli_chr07 | 34388228                | TT                              | GG              | 1946897059               |
| SNP_P4_100891_34388249 | NC_021166.1    | Ca_kabuli_chr07 | 34388249                | TT                              | CC              | 1946897061               |
| SNP_P4_100892_34388311 | NC_021166.1    | Ca_kabuli_chr07 | 34388311                | CC                              | TT              | 1946897064               |
| SNP_P4_100893_34389030 | NC_021166.1    | Ca_kabuli_chr07 | 34389030                | AA                              | GG              | 1946897066               |
| SNP_P4_100894_34389071 | NC_021166.1    | Ca_kabuli_chr07 | 34389071                | AA                              | GG              | 1946897068               |
| SNP_P4_100895_34389345 | NC_021166.1    | Ca_kabuli_chr07 | 34389345                | CC                              | AA              | 1946897070               |
| SNP_P4_100896_34389759 | NC_021166.1    | Ca_kabuli_chr07 | 34389759                | AA                              | GG              | 1946897072               |
| SNP_P4_100897_34391462 | NC_021166.1    | Ca_kabuli_chr07 | 34391462                | CC                              | TT              | 1946897074               |
| SNP_P4_100898_34391546 | NC_021166.1    | Ca_kabuli_chr07 | 34391546                | TT                              | CC              | 1946897076               |
| SNP_P4_100899_34391737 | NC_021166.1    | Ca_kabuli_chr07 | 34391737                | CC                              | TT              | 1946897079               |
| SNP_P4_100900_34392028 | NC_021166.1    | Ca_kabuli_chr07 | 34392028                | AA                              | GG              | 1946897081               |
| SNP_P4_100901_34392090 | NC_021166.1    | Ca_kabuli_chr07 | 34392090                | TT                              | GG              | 1946897083               |
| SNP_P4_100903_34392378 | NC_021166.1    | Ca_kabuli_chr07 | 34392378                | AA                              | CC              | 1946897085               |
| SNP_P4_100904_34394303 | NC_021166.1    | Ca_kabuli_chr07 | 34394303                | GG                              | AA              | 1946897087               |
| SNP_P4_100906_34394692 | NC_021166.1    | Ca_kabuli_chr07 | 34394692                | GG                              | AA              | 1946897089               |
| SNP_P4_100907_34395952 | NC_021166.1    | Ca_kabuli_chr07 | 34395952                | AA                              | TT              | 1946897091               |
| SNP_P4_100909_34396169 | NC_021166.1    | Ca_kabuli_chr07 | 34396169                | GG                              | AA              | 1946897093               |
| SNP_P4_100910_34396345 | NC_021166.1    | Ca_kabuli_chr07 | 34396345                | GG                              | CC              | 1946897095               |
| SNP_P4_100911_34396718 | NC_021166.1    | Ca_kabuli_chr07 | 34396718                | CC                              | GG              | 1946897097               |
| SNP_P4_100912_34396758 | NC_021166.1    | Ca_kabuli_chr07 | 34396758                | GG                              | AA              | 1946897099               |
| SNP_P4_100913_34396765 | NC_021166.1    | Ca_kabuli_chr07 | 34396765                | CC                              | TT              | 1946897101               |
| SNP_P4_100914_34396792 | NC_021166.1    | Ca_kabuli_chr07 | 34396792                | CC                              | TT              | 1946897103               |
| SNP_P4_100915_34396794 | NC_021166.1    | Ca_kabuli_chr07 | 34396794                | CC                              | TT              | 1946897105               |
| SNP_P4_100916_34396798 | NC_021166.1    | Ca_kabuli_chr07 | 34396798                | GG                              | AA              | 1946897107               |
| SNP_P4_100917_34396809 | NC_021166.1    | Ca_kabuli_chr07 | 34396809                | TT                              | GG              | 1946897109               |
| SNP_P4_100918_34400295 | NC_021166.1    | Ca_kabuli_chr07 | 34400295                | AA                              | GG              | 1946897111               |
| SNP_P4_100920_34400740 | NC_021166.1    | Ca_kabuli_chr07 | 34400740                | AA                              | CC              | 1946897113               |
| SNP_P4_100924_34405639 | NC_021166.1    | Ca_kabuli_chr07 | 34405639                | AA                              | GG              | 1946897115               |
| SNP_P4_100925_34405709 | NC_021166.1    | Ca_kabuli_chr07 | 34405709                | AA                              | TT              | 1946897117               |
| SNP_P4_100926_34407562 | NC_021166.1    | Ca_kabuli_chr07 | 34407562                | CC                              | TT              | 1946897119               |
| SNP_P4_100927_34407577 | NC_021166.1    | Ca_kabuli_chr07 | 34407577                | TT                              | CC              | 1946897121               |
| SNP_P4_100929_34407619 | NC_021166.1    | Ca_kabuli_chr07 | 34407619                | CC                              | GG              | 1946897123               |
| SNP_P4_100930_34407793 | NC_021166.1    | Ca_kabuli_chr07 | 34407793                | CC                              | TT              | 1946897125               |
| SNP_P4_100931_34407836 | NC_021166.1    | Ca_kabuli_chr07 | 34407836                | AA                              | GG              | 1946897127               |
| SNP_P4_100933_34408124 | NC_021166.1    | Ca_kabuli_chr07 | 34408124                | GG                              | TT              | 1946897129               |
| SNP_P4_100934_34408172 | NC_021166.1    | Ca_kabuli_chr07 | 34408172                | TT                              | CC              | 1946897131               |
| SNP_P4_100935_34408228 | NC_021166.1    | Ca_kabuli_chr07 | 34408228                | TT                              | GG              | 1946897133               |
| SNP_P4_100936_34408534 | NC_021166.1    | Ca_kabuli_chr07 | 34408534                | TT                              | CC              | 1946897135               |
| SNP_P4_100937_34408556 | NC_021166.1    | Ca_kabuli_chr07 | 34408556                | GG                              | CC              | 1946897137               |
| SNP_P4_100938_34408560 | NC_021166.1    | Ca_kabuli_chr07 | 34408560                | AA                              | GG              | 1946897139               |
| SNP_P4_100939_34408929 | NC_021166.1    | Ca_kabuli_chr07 | 34408929                | AA                              | CC              | 1946897141               |

| SNPs IDs               | Chromosome IDs | Chromosomes     | Physical positions (bp) | CDC Frontier (Reference genome) | (ILWC46 & LPNB) | NCBI SNPdb Accession IDs |
|------------------------|----------------|-----------------|-------------------------|---------------------------------|-----------------|--------------------------|
| SNP_P4_100941_34409072 | NC_021166.1    | Ca_kabuli_chr07 | 34409072                | CC                              | TT              | 1946897143               |
| SNP_P4_100942_34412407 | NC_021166.1    | Ca_kabuli_chr07 | 34412407                | GG                              | AA              | 1946897145               |
| SNP_P4_100943_34413486 | NC_021166.1    | Ca_kabuli_chr07 | 34413486                | AA                              | GG              | 1946897147               |
| SNP_P4_100944_34414205 | NC_021166.1    | Ca_kabuli_chr07 | 34414205                | CC                              | GG              | 1946897149               |
| SNP_P4_100945_34414333 | NC_021166.1    | Ca_kabuli_chr07 | 34414333                | TT                              | AA              | 1946897151               |
| SNP_P4_100946_34414517 | NC_021166.1    | Ca_kabuli_chr07 | 34414517                | TT                              | CC              | 1946897153               |
| SNP_P4_100947_34431037 | NC_021166.1    | Ca_kabuli_chr07 | 34431037                | CC                              | GG              | 1946897155               |
| SNP_P4_100948_34433406 | NC_021166.1    | Ca_kabuli_chr07 | 34433406                | GG                              | AA              | 1946897157               |
| SNP_P4_100949_34446533 | NC_021166.1    | Ca_kabuli_chr07 | 34446533                | TT                              | CC              | 1946897159               |
| SNP_P4_100950_34449543 | NC_021166.1    | Ca_kabuli_chr07 | 34449543                | GG                              | AA              | 1946897161               |
| SNP_P4_100951_34451446 | NC_021166.1    | Ca_kabuli_chr07 | 34451446                | AA                              | CC              | 1946897163               |
| SNP_P4_100952_34477053 | NC_021166.1    | Ca_kabuli_chr07 | 34477053                | AA                              | CC              | 1946897165               |
| SNP_P4_100954_34490047 | NC_021166.1    | Ca_kabuli_chr07 | 34490047                | CC                              | TT              | 1946897167               |
| SNP_P4_100956_34531687 | NC_021166.1    | Ca_kabuli_chr07 | 34531687                | GG                              | AA              | 1946897169               |
| SNP_P4_100957_34546216 | NC_021166.1    | Ca_kabuli_chr07 | 34546216                | TT                              | AA              | 1946897172               |
| SNP_P4_100958_34563138 | NC_021166.1    | Ca_kabuli_chr07 | 34563138                | GG                              | TT              | 1946897174               |
| SNP_P4_100959_34563172 | NC_021166.1    | Ca_kabuli_chr07 | 34563172                | GG                              | CC              | 1946897176               |
| SNP_P4_100960_34563176 | NC_021166.1    | Ca_kabuli_chr07 | 34563176                | TT                              | CC              | 1946897178               |
| SNP_P4_100962_34583536 | NC_021166.1    | Ca_kabuli_chr07 | 34583536                | CC                              | TT              | 1946897180               |
| SNP_P4_100963_34586744 | NC_021166.1    | Ca_kabuli_chr07 | 34586744                | GG                              | TT              | 1946897182               |
| SNP_P4_100965_34605927 | NC_021166.1    | Ca_kabuli_chr07 | 34605927                | TT                              | CC              | 1946897184               |
| SNP_P4_100966_34605931 | NC_021166.1    | Ca_kabuli_chr07 | 34605931                | TT                              | AA              | 1946897186               |
| SNP_P4_100967_34640315 | NC_021166.1    | Ca_kabuli_chr07 | 34640315                | AA                              | GG              | 1946897187               |
| SNP_P4_100968_34660431 | NC_021166.1    | Ca_kabuli_chr07 | 34660431                | TT                              | CC              | 1946897189               |
| SNP_P4_100969_34660437 | NC_021166.1    | Ca_kabuli_chr07 | 34660437                | GG                              | CC              | 1946897192               |
| SNP_P4_100970_34660487 | NC_021166.1    | Ca_kabuli_chr07 | 34660487                | TT                              | CC              | 1946897194               |
| SNP_P4_100971_34661699 | NC_021166.1    | Ca_kabuli_chr07 | 34661699                | GG                              | AA              | 1946897196               |
| SNP_P4_100973_34674416 | NC_021166.1    | Ca_kabuli_chr07 | 34674416                | AA                              | GG              | 1946897198               |
| SNP_P4_100974_34733741 | NC_021166.1    | Ca_kabuli_chr07 | 34733741                | CC                              | AA              | 1946897199               |
| SNP_P4_100976_34748227 | NC_021166.1    | Ca_kabuli_chr07 | 34748227                | AA                              | TT              | 1946897201               |
| SNP_P4_100978_34779321 | NC_021166.1    | Ca_kabuli_chr07 | 34779321                | TT                              | CC              | 1946897203               |
| SNP_P4_100979_34786007 | NC_021166.1    | Ca_kabuli_chr07 | 34786007                | GG                              | AA              | 1946897205               |
| SNP_P4_100980_34788738 | NC_021166.1    | Ca_kabuli_chr07 | 34788738                | AA                              | GG              | 1946897207               |
| SNP_P4_100981_34788746 | NC_021166.1    | Ca_kabuli_chr07 | 34788746                | AA                              | TT              | 1946897209               |
| SNP_P4_100982_34790675 | NC_021166.1    | Ca_kabuli_chr07 | 34790675                | AA                              | CC              | 1946897211               |
| SNP_P4_100983_34792673 | NC_021166.1    | Ca_kabuli_chr07 | 34792673                | TT                              | CC              | 1946897213               |
| SNP_P4_100984_34792760 | NC_021166.1    | Ca_kabuli_chr07 | 34792760                | AA                              | CC              | 1946897215               |
| SNP_P4_100985_34792770 | NC_021166.1    | Ca_kabuli_chr07 | 34792770                | TT                              | AA              | 1946897217               |
| SNP_P4_100986_34792795 | NC_021166.1    | Ca_kabuli_chr07 | 34792795                | GG                              | AA              | 1946897219               |
| SNP_P4_100987_34792796 | NC_021166.1    | Ca_kabuli_chr07 | 34792796                | TT                              | CC              | 1946897221               |
| SNP_P4_100988_34792969 | NC_021166.1    | Ca_kabuli_chr07 | 34792969                | GG                              | TT              | 1946897223               |
| SNP_P4_100989_34793092 | NC_021166.1    | Ca_kabuli_chr07 | 34793092                | TT                              | CC              | 1946897225               |

| SNPs IDs               | Chromosome IDs | Chromosomes     | Physical positions (bp) | CDC Frontier (Reference genome) | (ILWC46 & LPNB) | NCBI SNPdb Accession IDs |
|------------------------|----------------|-----------------|-------------------------|---------------------------------|-----------------|--------------------------|
| SNP_P4_100990_34793115 | NC_021166.1    | Ca_kabuli_chr07 | 34793115                | AA                              | TT              | 1946897227               |
| SNP_P4_100991_34800994 | NC_021166.1    | Ca_kabuli_chr07 | 34800994                | TT                              | CC              | 1946897229               |
| SNP_P4_100992_34801301 | NC_021166.1    | Ca_kabuli_chr07 | 34801301                | CC                              | TT              | 1946897231               |
| SNP_P4_100993_34805046 | NC_021166.1    | Ca_kabuli_chr07 | 34805046                | AA                              | GG              | 1946897233               |
| SNP_P4_100994_34805089 | NC_021166.1    | Ca_kabuli_chr07 | 34805089                | AA                              | GG              | 1946897235               |
| SNP_P4_100995_34805104 | NC_021166.1    | Ca_kabuli_chr07 | 34805104                | AA                              | GG              | 1946897237               |
| SNP_P4_100996_34805371 | NC_021166.1    | Ca_kabuli_chr07 | 34805371                | CC                              | GG              | 1946897239               |
| SNP_P4_100997_34805386 | NC_021166.1    | Ca_kabuli_chr07 | 34805386                | GG                              | TT              | 1946897241               |
| SNP_P4_100998_34805388 | NC_021166.1    | Ca_kabuli_chr07 | 34805388                | TT                              | CC              | 1946897243               |
| SNP_P4_100999_34805479 | NC_021166.1    | Ca_kabuli_chr07 | 34805479                | TT                              | CC              | 1946897245               |
| SNP_P4_101000_34807692 | NC_021166.1    | Ca_kabuli_chr07 | 34807692                | TT                              | CC              | 1946897247               |
| SNP_P4_101001_34808007 | NC_021166.1    | Ca_kabuli_chr07 | 34808007                | AA                              | TT              | 1946897249               |
| SNP_P4_101002_34808008 | NC_021166.1    | Ca_kabuli_chr07 | 34808008                | TT                              | AA              | 1946897251               |
| SNP_P4_101003_34808498 | NC_021166.1    | Ca_kabuli_chr07 | 34808498                | GG                              | AA              | 1946897253               |
| SNP_P4_101005_34835347 | NC_021166.1    | Ca_kabuli_chr07 | 34835347                | TT                              | CC              | 1946897255               |
| SNP_P4_101006_34844539 | NC_021166.1    | Ca_kabuli_chr07 | 34844539                | TT                              | GG              | 1946897257               |
| SNP_P4_101007_34849284 | NC_021166.1    | Ca_kabuli_chr07 | 34849284                | TT                              | GG              | 1946897259               |
| SNP_P4_101008_34855322 | NC_021166.1    | Ca_kabuli_chr07 | 34855322                | GG                              | AA              | 1946897261               |
| SNP_P4_101009_34884970 | NC_021166.1    | Ca_kabuli_chr07 | 34884970                | AA                              | GG              | 1946897263               |
| SNP_P4_101010_34890907 | NC_021166.1    | Ca_kabuli_chr07 | 34890907                | TT                              | CC              | 1946897265               |
| SNP_P4_101013_34928191 | NC_021166.1    | Ca_kabuli_chr07 | 34928191                | GG                              | AA              | 1946897267               |
| SNP_P4_101014_34929919 | NC_021166.1    | Ca_kabuli_chr07 | 34929919                | AA                              | GG              | 1946897269               |
| SNP_P4_101015_34981655 | NC_021166.1    | Ca_kabuli_chr07 | 34981655                | AA                              | TT              | 1946897271               |
| SNP_P4_101016_34981788 | NC_021166.1    | Ca_kabuli_chr07 | 34981788                | GG                              | AA              | 1946897273               |
| SNP_P4_101017_35006335 | NC_021166.1    | Ca_kabuli_chr07 | 35006335                | AA                              | GG              | 1946897275               |
| SNP_P4_101019_35037644 | NC_021166.1    | Ca_kabuli_chr07 | 35037644                | TT                              | CC              | 1946897277               |
| SNP_P4_101021_35050081 | NC_021166.1    | Ca_kabuli_chr07 | 35050081                | TT                              | CC              | 1946897279               |
| SNP_P4_101023_35065949 | NC_021166.1    | Ca_kabuli_chr07 | 35065949                | TT                              | GG              | 1946897281               |
| SNP_P4_101024_35071429 | NC_021166.1    | Ca_kabuli_chr07 | 35071429                | TT                              | GG              | 1946897283               |
| SNP_P4_101025_35077084 | NC_021166.1    | Ca_kabuli_chr07 | 35077084                | TT                              | AA              | 1946897284               |
| SNP_P4_101027_35087334 | NC_021166.1    | Ca_kabuli_chr07 | 35087334                | GG                              | CC              | 1946897285               |
| SNP_P4_101029_35093901 | NC_021166.1    | Ca_kabuli_chr07 | 35093901                | AA                              | CC              | 1946897286               |
| SNP_P4_101030_35102656 | NC_021166.1    | Ca_kabuli_chr07 | 35102656                | TT                              | CC              | 1946897287               |
| SNP_P4_101031_35106787 | NC_021166.1    | Ca_kabuli_chr07 | 35106787                | GG                              | AA              | 1946897288               |
| SNP_P4_101032_35108924 | NC_021166.1    | Ca_kabuli_chr07 | 35108924                | TT                              | CC              | 1946897290               |
| SNP_P4_101033_35108997 | NC_021166.1    | Ca_kabuli_chr07 | 35108997                | GG                              | AA              | 1946897292               |
| SNP_P4_101035_35109067 | NC_021166.1    | Ca_kabuli_chr07 | 35109067                | TT                              | CC              | 1946897294               |
| SNP_P4_101036_35109758 | NC_021166.1    | Ca_kabuli_chr07 | 35109758                | AA                              | TT              | 1946897296               |
| SNP_P4_101037_35109759 | NC_021166.1    | Ca_kabuli_chr07 | 35109759                | AA                              | TT              | 1946897298               |
| SNP_P4_101038_35109886 | NC_021166.1    | Ca_kabuli_chr07 | 35109886                | TT                              | CC              | 1946897300               |
| SNP_P4_101039_35111586 | NC_021166.1    | Ca_kabuli_chr07 | 35111586                | AA                              | CC              | 1946897302               |
| SNP_P4_101040_35111604 | NC_021166.1    | Ca_kabuli_chr07 | 35111604                | GG                              | TT              | 1946897304               |

| SNPs IDs               | Chromosome IDs | Chromosomes     | Physical positions (bp) | CDC Frontier (Reference genome) | (ILWC46 & LPNB) | NCBI SNPdb Accession IDs |
|------------------------|----------------|-----------------|-------------------------|---------------------------------|-----------------|--------------------------|
| SNP_P4_101041_35112785 | NC_021166.1    | Ca_kabuli_chr07 | 35112785                | TT                              | CC              | 1946897306               |
| SNP_P4_101042_35114669 | NC_021166.1    | Ca_kabuli_chr07 | 35114669                | CC                              | TT              | 1946897308               |
| SNP_P4_101043_35114892 | NC_021166.1    | Ca_kabuli_chr07 | 35114892                | GG                              | AA              | 1946897310               |
| SNP_P4_101044_35115395 | NC_021166.1    | Ca_kabuli_chr07 | 35115395                | AA                              | GG              | 1946897312               |
| SNP_P4_101045_35115436 | NC_021166.1    | Ca_kabuli_chr07 | 35115436                | AA                              | GG              | 1946897314               |
| SNP_P4_101046_35117561 | NC_021166.1    | Ca_kabuli_chr07 | 35117561                | TT                              | CC              | 1946897316               |
| SNP_P4_101047_35119434 | NC_021166.1    | Ca_kabuli_chr07 | 35119434                | CC                              | TT              | 1946897318               |
| SNP_P4_101048_35119541 | NC_021166.1    | Ca_kabuli_chr07 | 35119541                | CC                              | TT              | 1946897320               |
| SNP_P4_101050_35119782 | NC_021166.1    | Ca_kabuli_chr07 | 35119782                | AA                              | GG              | 1946897322               |
| SNP_P4_101051_35119841 | NC_021166.1    | Ca_kabuli_chr07 | 35119841                | AA                              | CC              | 1946897324               |
| SNP_P4_101052_35119942 | NC_021166.1    | Ca_kabuli_chr07 | 35119942                | CC                              | AA              | 1946897326               |
| SNP_P4_101053_35120081 | NC_021166.1    | Ca_kabuli_chr07 | 35120081                | AA                              | TT              | 1946897328               |
| SNP_P4_101054_35120087 | NC_021166.1    | Ca_kabuli_chr07 | 35120087                | GG                              | TT              | 1946897330               |
| SNP_P4_101056_35120166 | NC_021166.1    | Ca_kabuli_chr07 | 35120166                | AA                              | GG              | 1946897332               |
| SNP_P4_101058_35121335 | NC_021166.1    | Ca_kabuli_chr07 | 35121335                | AA                              | TT              | 1946897334               |
| SNP_P4_101059_35121360 | NC_021166.1    | Ca_kabuli_chr07 | 35121360                | CC                              | TT              | 1946897336               |
| SNP_P4_101060_35121637 | NC_021166.1    | Ca_kabuli_chr07 | 35121637                | AA                              | CC              | 1946897338               |
| SNP_P4_101061_35121648 | NC_021166.1    | Ca_kabuli_chr07 | 35121648                | TT                              | AA              | 1946897340               |
| SNP_P4_101062_35121656 | NC_021166.1    | Ca_kabuli_chr07 | 35121656                | CC                              | TT              | 1946897342               |
| SNP_P4_101063_35121710 | NC_021166.1    | Ca_kabuli_chr07 | 35121710                | TT                              | CC              | 1946897344               |
| SNP_P4_101064_35121736 | NC_021166.1    | Ca_kabuli_chr07 | 35121736                | TT                              | CC              | 1946897346               |
| SNP_P4_101065_35121747 | NC_021166.1    | Ca_kabuli_chr07 | 35121747                | GG                              | TT              | 1946897348               |
| SNP_P4_101066_35121780 | NC_021166.1    | Ca_kabuli_chr07 | 35121780                | TT                              | GG              | 1946897350               |
| SNP_P4_101067_35121805 | NC_021166.1    | Ca_kabuli_chr07 | 35121805                | CC                              | AA              | 1946897352               |
| SNP_P4_101070_35122030 | NC_021166.1    | Ca_kabuli_chr07 | 35122030                | AA                              | GG              | 1946897354               |
| SNP_P4_101071_35122147 | NC_021166.1    | Ca_kabuli_chr07 | 35122147                | AA                              | GG              | 1946897356               |
| SNP_P4_101072_35122246 | NC_021166.1    | Ca_kabuli_chr07 | 35122246                | AA                              | GG              | 1946897357               |
| SNP_P4_101073_35122265 | NC_021166.1    | Ca_kabuli_chr07 | 35122265                | TT                              | GG              | 1946897359               |
| SNP_P4_101074_35122427 | NC_021166.1    | Ca_kabuli_chr07 | 35122427                | TT                              | CC              | 1946897361               |
| SNP_P4_101075_35122463 | NC_021166.1    | Ca_kabuli_chr07 | 35122463                | AA                              | CC              | 1946897363               |
| SNP_P4_101077_35123442 | NC_021166.1    | Ca_kabuli_chr07 | 35123442                | TT                              | CC              | 1946897365               |
| SNP_P4_101078_35123806 | NC_021166.1    | Ca_kabuli_chr07 | 35123806                | TT                              | CC              | 1946897367               |
| SNP_P4_101079_35126600 | NC_021166.1    | Ca_kabuli_chr07 | 35126600                | CC                              | GG              | 1946897369               |
| SNP_P4_101080_35126604 | NC_021166.1    | Ca_kabuli_chr07 | 35126604                | AA                              | GG              | 1946897371               |
| SNP_P4_101081_35126607 | NC_021166.1    | Ca_kabuli_chr07 | 35126607                | AA                              | GG              | 1946897373               |
| SNP_P4_101082_35126829 | NC_021166.1    | Ca_kabuli_chr07 | 35126829                | TT                              | CC              | 1946897376               |
| SNP_P4_101083_35126832 | NC_021166.1    | Ca_kabuli_chr07 | 35126832                | GG                              | TT              | 1946897378               |
| SNP_P4_101084_35126833 | NC_021166.1    | Ca_kabuli_chr07 | 35126833                | GG                              | AA              | 1946897382               |
| SNP_P4_101086_35126907 | NC_021166.1    | Ca_kabuli_chr07 | 35126907                | CC                              | TT              | 1946897384               |
| SNP_P4_101087_35128629 | NC_021166.1    | Ca_kabuli_chr07 | 35128629                | AA                              | TT              | 1946897386               |
| SNP_P4_101088_35129744 | NC_021166.1    | Ca_kabuli_chr07 | 35129744                | CC                              | TT              | 1946897388               |
| SNP_P4_101090_35130017 | NC_021166.1    | Ca_kabuli_chr07 | 35130017                | TT                              | CC              | 1946897390               |

| SNPs IDs               | Chromosome IDs | Chromosomes     | Physical positions (bp) | CDC Frontier (Reference genome) | (ILWC46 & LPNB) | NCBI SNPdb Accession IDs |
|------------------------|----------------|-----------------|-------------------------|---------------------------------|-----------------|--------------------------|
| SNP_P4_101091_35130064 | NC_021166.1    | Ca_kabuli_chr07 | 35130064                | TT                              | AA              | 1946897392               |
| SNP_P4_101092_35130110 | NC_021166.1    | Ca_kabuli_chr07 | 35130110                | CC                              | TT              | 1946897394               |
| SNP_P4_101093_35131404 | NC_021166.1    | Ca_kabuli_chr07 | 35131404                | AA                              | TT              | 1946897396               |
| SNP_P4_101095_35131835 | NC_021166.1    | Ca_kabuli_chr07 | 35131835                | AA                              | GG              | 1946897398               |
| SNP_P4_101096_35132108 | NC_021166.1    | Ca_kabuli_chr07 | 35132108                | TT                              | CC              | 1946897400               |
| SNP_P4_101097_35132111 | NC_021166.1    | Ca_kabuli_chr07 | 35132111                | AA                              | TT              | 1946897402               |
| SNP_P4_101098_35132146 | NC_021166.1    | Ca_kabuli_chr07 | 35132146                | GG                              | CC              | 1946897404               |
| SNP_P4_101099_35132162 | NC_021166.1    | Ca_kabuli_chr07 | 35132162                | GG                              | AA              | 1946897406               |
| SNP_P4_101100_35132172 | NC_021166.1    | Ca_kabuli_chr07 | 35132172                | TT                              | AA              | 1946897408               |
| SNP_P4_101101_35132263 | NC_021166.1    | Ca_kabuli_chr07 | 35132263                | GG                              | TT              | 1946897410               |
| SNP_P4_101102_35132277 | NC_021166.1    | Ca_kabuli_chr07 | 35132277                | TT                              | CC              | 1946897412               |
| SNP_P4_101103_35132298 | NC_021166.1    | Ca_kabuli_chr07 | 35132298                | AA                              | TT              | 1946897414               |
| SNP_P4_101104_35132356 | NC_021166.1    | Ca_kabuli_chr07 | 35132356                | AA                              | GG              | 1946897417               |
| SNP_P4_101105_35132566 | NC_021166.1    | Ca_kabuli_chr07 | 35132566                | GG                              | CC              | 1946897419               |
| SNP_P4_101106_35134113 | NC_021166.1    | Ca_kabuli_chr07 | 35134113                | GG                              | TT              | 1946897421               |
| SNP_P4_101108_35134164 | NC_021166.1    | Ca_kabuli_chr07 | 35134164                | TT                              | CC              | 1946897423               |
| SNP_P4_101109_35135274 | NC_021166.1    | Ca_kabuli_chr07 | 35135274                | GG                              | CC              | 1946897425               |
| SNP_P4_101110_35135279 | NC_021166.1    | Ca_kabuli_chr07 | 35135279                | GG                              | AA              | 1946897427               |
| SNP_P4_101113_35136608 | NC_021166.1    | Ca_kabuli_chr07 | 35136608                | CC                              | TT              | 1946897429               |
| SNP_P4_101114_35136610 | NC_021166.1    | Ca_kabuli_chr07 | 35136610                | AA                              | GG              | 1946897431               |
| SNP_P4_101116_35138437 | NC_021166.1    | Ca_kabuli_chr07 | 35138437                | CC                              | TT              | 1946897433               |
| SNP_P4_101117_35138466 | NC_021166.1    | Ca_kabuli_chr07 | 35138466                | GG                              | AA              | 1946897435               |
| SNP_P4_101118_35138482 | NC_021166.1    | Ca_kabuli_chr07 | 35138482                | TT                              | AA              | 1946897437               |
| SNP_P4_101120_35139262 | NC_021166.1    | Ca_kabuli_chr07 | 35139262                | AA                              | GG              | 1946897439               |
| SNP_P4_101121_35139550 | NC_021166.1    | Ca_kabuli_chr07 | 35139550                | TT                              | CC              | 1946897441               |
| SNP_P4_101122_35139831 | NC_021166.1    | Ca_kabuli_chr07 | 35139831                | AA                              | TT              | 1946897443               |
| SNP_P4_101123_35139877 | NC_021166.1    | Ca_kabuli_chr07 | 35139877                | GG                              | AA              | 1946897445               |
| SNP_P4_101124_35139887 | NC_021166.1    | Ca_kabuli_chr07 | 35139887                | TT                              | CC              | 1946897447               |
| SNP_P4_101125_35140820 | NC_021166.1    | Ca_kabuli_chr07 | 35140820                | AA                              | GG              | 1946897449               |
| SNP_P4_101126_35140821 | NC_021166.1    | Ca_kabuli_chr07 | 35140821                | GG                              | AA              | 1946897451               |
| SNP_P4_101128_35140876 | NC_021166.1    | Ca_kabuli_chr07 | 35140876                | AA                              | GG              | 1946897453               |
| SNP_P4_101129_35140943 | NC_021166.1    | Ca_kabuli_chr07 | 35140943                | GG                              | TT              | 1946897455               |
| SNP_P4_101131_35142782 | NC_021166.1    | Ca_kabuli_chr07 | 35142782                | TT                              | CC              | 1946897457               |
| SNP_P4_101132_35143206 | NC_021166.1    | Ca_kabuli_chr07 | 35143206                | TT                              | AA              | 1946897459               |
| SNP_P4_101133_35143263 | NC_021166.1    | Ca_kabuli_chr07 | 35143263                | CC                              | AA              | 1946897461               |
| SNP_P4_101134_35143856 | NC_021166.1    | Ca_kabuli_chr07 | 35143856                | GG                              | TT              | 1946897464               |
| SNP_P4_101135_35143973 | NC_021166.1    | Ca_kabuli_chr07 | 35143973                | CC                              | TT              | 1946897466               |
| SNP_P4_101136_35144682 | NC_021166.1    | Ca_kabuli_chr07 | 35144682                | CC                              | TT              | 1946897468               |
| SNP_P4_101138_35145005 | NC_021166.1    | Ca_kabuli_chr07 | 35145005                | CC                              | AA              | 1946897470               |
| SNP_P4_101139_35145007 | NC_021166.1    | Ca_kabuli_chr07 | 35145007                | GG                              | AA              | 1946897472               |
| SNP_P4_101140_35145134 | NC_021166.1    | Ca_kabuli_chr07 | 35145134                | CC                              | TT              | 1946897474               |
| SNP_P4_101141_35145202 | NC_021166.1    | Ca_kabuli_chr07 | 35145202                | TT                              | CC              | 1946897476               |

| SNPs IDs               | Chromosome IDs | Chromosomes     | Physical positions (bp) | CDC Frontier (Reference genome) | (ILWC46 & LPNB) | NCBI SNPdb Accession IDs |
|------------------------|----------------|-----------------|-------------------------|---------------------------------|-----------------|--------------------------|
| SNP_P4_101142_35145278 | NC_021166.1    | Ca_kabuli_chr07 | 35145278                | TT                              | CC              | 1946897478               |
| SNP_P4_101143_35145327 | NC_021166.1    | Ca_kabuli_chr07 | 35145327                | CC                              | AA              | 1946897480               |
| SNP_P4_101144_35148187 | NC_021166.1    | Ca_kabuli_chr07 | 35148187                | TT                              | CC              | 1946897482               |
| SNP_P4_101145_35148198 | NC_021166.1    | Ca_kabuli_chr07 | 35148198                | GG                              | AA              | 1946897484               |
| SNP_P4_101148_35148307 | NC_021166.1    | Ca_kabuli_chr07 | 35148307                | AA                              | GG              | 1946897486               |
| SNP_P4_101150_35148726 | NC_021166.1    | Ca_kabuli_chr07 | 35148726                | CC                              | GG              | 1946897488               |
| SNP_P4_101151_35148744 | NC_021166.1    | Ca_kabuli_chr07 | 35148744                | TT                              | CC              | 1946897490               |
| SNP_P4_101152_35148777 | NC_021166.1    | Ca_kabuli_chr07 | 35148777                | CC                              | TT              | 1946897492               |
| SNP_P4_101153_35148778 | NC_021166.1    | Ca_kabuli_chr07 | 35148778                | AA                              | GG              | 1946897494               |
| SNP_P4_101154_35149046 | NC_021166.1    | Ca_kabuli_chr07 | 35149046                | AA                              | CC              | 1946897496               |
| SNP_P4_101155_35149927 | NC_021166.1    | Ca_kabuli_chr07 | 35149927                | TT                              | GG              | 1946897498               |
| SNP_P4_101156_35149964 | NC_021166.1    | Ca_kabuli_chr07 | 35149964                | TT                              | CC              | 1946897501               |
| SNP_P4_101157_35149972 | NC_021166.1    | Ca_kabuli_chr07 | 35149972                | CC                              | GG              | 1946897503               |
| SNP_P4_101158_35150020 | NC_021166.1    | Ca_kabuli_chr07 | 35150020                | TT                              | AA              | 1946897505               |
| SNP_P4_101159_35150066 | NC_021166.1    | Ca_kabuli_chr07 | 35150066                | CC                              | TT              | 1946897507               |
| SNP_P4_101161_35152011 | NC_021166.1    | Ca_kabuli_chr07 | 35152011                | CC                              | TT              | 1946897509               |
| SNP_P4_101162_35152062 | NC_021166.1    | Ca_kabuli_chr07 | 35152062                | GG                              | AA              | 1946897511               |
| SNP_P4_101164_35152739 | NC_021166.1    | Ca_kabuli_chr07 | 35152739                | AA                              | GG              | 1946897513               |
| SNP_P4_101165_35152762 | NC_021166.1    | Ca_kabuli_chr07 | 35152762                | CC                              | TT              | 1946897515               |
| SNP_P4_101166_35152776 | NC_021166.1    | Ca_kabuli_chr07 | 35152776                | GG                              | TT              | 1946897517               |
| SNP_P4_101167_35152777 | NC_021166.1    | Ca_kabuli_chr07 | 35152777                | CC                              | TT              | 1946897519               |
| SNP_P4_101168_35152788 | NC_021166.1    | Ca_kabuli_chr07 | 35152788                | AA                              | GG              | 1946897521               |
| SNP_P4_101169_35152792 | NC_021166.1    | Ca_kabuli_chr07 | 35152792                | TT                              | GG              | 1946897523               |
| SNP_P4_101170_35153081 | NC_021166.1    | Ca_kabuli_chr07 | 35153081                | CC                              | TT              | 1946897525               |
| SNP_P4_101171_35153682 | NC_021166.1    | Ca_kabuli_chr07 | 35153682                | TT                              | CC              | 1946897527               |
| SNP_P4_101172_35154370 | NC_021166.1    | Ca_kabuli_chr07 | 35154370                | AA                              | TT              | 1946897529               |
| SNP_P4_101173_35155021 | NC_021166.1    | Ca_kabuli_chr07 | 35155021                | GG                              | AA              | 1946897531               |
| SNP_P4_101176_35163522 | NC_021166.1    | Ca_kabuli_chr07 | 35163522                | AA                              | GG              | 1946897534               |
| SNP_P4_101177_35165980 | NC_021166.1    | Ca_kabuli_chr07 | 35165980                | AA                              | TT              | 1946897536               |
| SNP_P4_101178_35166268 | NC_021166.1    | Ca_kabuli_chr07 | 35166268                | AA                              | GG              | 1946897538               |
| SNP_P4_101179_35166275 | NC_021166.1    | Ca_kabuli_chr07 | 35166275                | AA                              | GG              | 1946897540               |
| SNP_P4_101180_35166301 | NC_021166.1    | Ca_kabuli_chr07 | 35166301                | GG                              | AA              | 1946897542               |
| SNP_P4_101182_35166527 | NC_021166.1    | Ca_kabuli_chr07 | 35166527                | AA                              | GG              | 1946897544               |
| SNP_P4_101183_35166560 | NC_021166.1    | Ca_kabuli_chr07 | 35166560                | CC                              | TT              | 1946897546               |
| SNP_P4_101184_35166687 | NC_021166.1    | Ca_kabuli_chr07 | 35166687                | TT                              | CC              | 1946897548               |
| SNP_P4_101185_35166700 | NC_021166.1    | Ca_kabuli_chr07 | 35166700                | TT                              | CC              | 1946897550               |
| SNP_P4_101187_35167045 | NC_021166.1    | Ca_kabuli_chr07 | 35167045                | CC                              | GG              | 1946897552               |
| SNP_P4_101188_35168943 | NC_021166.1    | Ca_kabuli_chr07 | 35168943                | CC                              | TT              | 1946897554               |
| SNP_P4_101189_35168953 | NC_021166.1    | Ca_kabuli_chr07 | 35168953                | AA                              | CC              | 1946897556               |
| SNP_P4_101190_35168956 | NC_021166.1    | Ca_kabuli_chr07 | 35168956                | GG                              | AA              | 1946897558               |
| SNP_P4_101191_35168968 | NC_021166.1    | Ca_kabuli_chr07 | 35168968                | TT                              | CC              | 1946897560               |
| SNP_P4_101192_35168974 | NC_021166.1    | Ca_kabuli_chr07 | 35168974                | TT                              | GG              | 1946897562               |



| SNPs IDs               | Chromosome IDs | Chromosomes     | Physical positions (bp) | CDC Frontier (Reference genome) | (ILWC46 & LPNB) | NCBI SNPdb Accession IDs |
|------------------------|----------------|-----------------|-------------------------|---------------------------------|-----------------|--------------------------|
| SNP_P4_101193_35168986 | NC_021166.1    | Ca_kabuli_chr07 | 35168986                | CC                              | TT              | 1946897564               |
| SNP_P4_101194_35168994 | NC_021166.1    | Ca_kabuli_chr07 | 35168994                | AA                              | TT              | 1946897566               |
| SNP_P4_101195_35168996 | NC_021166.1    | Ca_kabuli_chr07 | 35168996                | AA                              | TT              | 1946897568               |
| SNP_P4_101196_35169002 | NC_021166.1    | Ca_kabuli_chr07 | 35169002                | AA                              | GG              | 1946897570               |
| SNP_P4_101197_35170552 | NC_021166.1    | Ca_kabuli_chr07 | 35170552                | CC                              | AA              | 1946897572               |
| SNP_P4_101198_35170558 | NC_021166.1    | Ca_kabuli_chr07 | 35170558                | TT                              | AA              | 1946897574               |
| SNP_P4_101199_35172009 | NC_021166.1    | Ca_kabuli_chr07 | 35172009                | AA                              | CC              | 1946897576               |
| SNP_P4_101200_35172023 | NC_021166.1    | Ca_kabuli_chr07 | 35172023                | CC                              | TT              | 1946897578               |
| SNP_P4_101201_35172041 | NC_021166.1    | Ca_kabuli_chr07 | 35172041                | CC                              | TT              | 1946897580               |
| SNP_P4_101202_35175306 | NC_021166.1    | Ca_kabuli_chr07 | 35175306                | GG                              | AA              | 1946897582               |
| SNP_P4_101203_35175308 | NC_021166.1    | Ca_kabuli_chr07 | 35175308                | AA                              | GG              | 1946897584               |
| SNP_P4_101207_35175930 | NC_021166.1    | Ca_kabuli_chr07 | 35175930                | TT                              | CC              | 1946897586               |
| SNP_P4_101208_35176002 | NC_021166.1    | Ca_kabuli_chr07 | 35176002                | TT                              | CC              | 1946897588               |
| SNP_P4_101209_35176007 | NC_021166.1    | Ca_kabuli_chr07 | 35176007                | GG                              | AA              | 1946897590               |
| SNP_P4_101211_35178286 | NC_021166.1    | Ca_kabuli_chr07 | 35178286                | AA                              | GG              | 1946897592               |
| SNP_P4_101212_35178295 | NC_021166.1    | Ca_kabuli_chr07 | 35178295                | GG                              | AA              | 1946897594               |
| SNP_P4_101213_35178319 | NC_021166.1    | Ca_kabuli_chr07 | 35178319                | GG                              | AA              | 1946897597               |
| SNP_P4_101214_35178471 | NC_021166.1    | Ca_kabuli_chr07 | 35178471                | TT                              | AA              | 1946897599               |
| SNP_P4_101216_35178649 | NC_021166.1    | Ca_kabuli_chr07 | 35178649                | CC                              | AA              | 1946897601               |
| SNP_P4_101217_35178765 | NC_021166.1    | Ca_kabuli_chr07 | 35178765                | GG                              | AA              | 1946897603               |
| SNP_P4_101218_35178768 | NC_021166.1    | Ca_kabuli_chr07 | 35178768                | GG                              | CC              | 1946897605               |
| SNP_P4_101219_35178787 | NC_021166.1    | Ca_kabuli_chr07 | 35178787                | GG                              | AA              | 1946897607               |
| SNP_P4_101220_35178792 | NC_021166.1    | Ca_kabuli_chr07 | 35178792                | AA                              | GG              | 1946897609               |
| SNP_P4_101221_35178793 | NC_021166.1    | Ca_kabuli_chr07 | 35178793                | CC                              | AA              | 1946897611               |
| SNP_P4_101222_35179811 | NC_021166.1    | Ca_kabuli_chr07 | 35179811                | GG                              | TT              | 1946897613               |
| SNP_P4_101223_35181816 | NC_021166.1    | Ca_kabuli_chr07 | 35181816                | TT                              | CC              | 1946897615               |
| SNP_P4_101224_35181824 | NC_021166.1    | Ca_kabuli_chr07 | 35181824                | GG                              | AA              | 1946897618               |
| SNP_P4_101225_35182443 | NC_021166.1    | Ca_kabuli_chr07 | 35182443                | AA                              | TT              | 1946897620               |
| SNP_P4_101226_35182451 | NC_021166.1    | Ca_kabuli_chr07 | 35182451                | CC                              | TT              | 1946897622               |
| SNP_P4_101227_35182452 | NC_021166.1    | Ca_kabuli_chr07 | 35182452                | GG                              | AA              | 1946897625               |
| SNP_P4_101228_35182459 | NC_021166.1    | Ca_kabuli_chr07 | 35182459                | TT                              | AA              | 1946897627               |
| SNP_P4_101229_35182501 | NC_021166.1    | Ca_kabuli_chr07 | 35182501                | GG                              | TT              | 1946897629               |
| SNP_P4_101230_35182505 | NC_021166.1    | Ca_kabuli_chr07 | 35182505                | CC                              | GG              | 1946897631               |
| SNP_P4_101231_35183341 | NC_021166.1    | Ca_kabuli_chr07 | 35183341                | GG                              | TT              | 1946897633               |
| SNP_P4_101232_35183894 | NC_021166.1    | Ca_kabuli_chr07 | 35183894                | GG                              | TT              | 1946897635               |
| SNP_P4_101233_35184326 | NC_021166.1    | Ca_kabuli_chr07 | 35184326                | GG                              | TT              | 1946897637               |
| SNP_P4_101234_35185809 | NC_021166.1    | Ca_kabuli_chr07 | 35185809                | GG                              | AA              | 1946897639               |
| SNP_P4_101235_35186169 | NC_021166.1    | Ca_kabuli_chr07 | 35186169                | TT                              | AA              | 1946897641               |
| SNP_P4_101236_35186175 | NC_021166.1    | Ca_kabuli_chr07 | 35186175                | TT                              | CC              | 1946897643               |
| SNP_P4_101237_35186506 | NC_021166.1    | Ca_kabuli_chr07 | 35186506                | AA                              | GG              | 1946897645               |
| SNP_P4_101238_35186537 | NC_021166.1    | Ca_kabuli_chr07 | 35186537                | AA                              | GG              | 1946897647               |
| SNP_P4_101239_35186595 | NC_021166.1    | Ca_kabuli_chr07 | 35186595                | GG                              | AA              | 1946897649               |

| SNPs IDs               | Chromosome IDs | Chromosomes     | Physical positions (bp) | CDC Frontier (Reference genome) | (ILWC46 & LPNB) | NCBI SNPdb Accession IDs |
|------------------------|----------------|-----------------|-------------------------|---------------------------------|-----------------|--------------------------|
| SNP_P4_101240_35187261 | NC_021166.1    | Ca_kabuli_chr07 | 35187261                | CC                              | AA              | 1946897651               |
| SNP_P4_101241_35187274 | NC_021166.1    | Ca_kabuli_chr07 | 35187274                | AA                              | GG              | 1946897653               |
| SNP_P4_101242_35187348 | NC_021166.1    | Ca_kabuli_chr07 | 35187348                | AA                              | GG              | 1946897655               |
| SNP_P4_101243_35187508 | NC_021166.1    | Ca_kabuli_chr07 | 35187508                | TT                              | CC              | 1946897657               |
| SNP_P4_101244_35187579 | NC_021166.1    | Ca_kabuli_chr07 | 35187579                | AA                              | GG              | 1946897659               |
| SNP_P4_101245_35187580 | NC_021166.1    | Ca_kabuli_chr07 | 35187580                | CC                              | TT              | 1946897661               |
| SNP_P4_101246_35190373 | NC_021166.1    | Ca_kabuli_chr07 | 35190373                | AA                              | GG              | 1946897663               |
| SNP_P4_101247_35190527 | NC_021166.1    | Ca_kabuli_chr07 | 35190527                | AA                              | TT              | 1946897665               |
| SNP_P4_101248_35190568 | NC_021166.1    | Ca_kabuli_chr07 | 35190568                | GG                              | AA              | 1946897667               |
| SNP_P4_101250_35192611 | NC_021166.1    | Ca_kabuli_chr07 | 35192611                | GG                              | AA              | 1946897669               |
| SNP_P4_101251_35204501 | NC_021166.1    | Ca_kabuli_chr07 | 35204501                | CC                              | AA              | 1946897671               |
| SNP_P4_101252_35204547 | NC_021166.1    | Ca_kabuli_chr07 | 35204547                | AA                              | CC              | 1946897673               |
| SNP_P4_101253_35204741 | NC_021166.1    | Ca_kabuli_chr07 | 35204741                | GG                              | AA              | 1946897675               |
| SNP_P4_101254_35204771 | NC_021166.1    | Ca_kabuli_chr07 | 35204771                | GG                              | TT              | 1946897677               |
| SNP_P4_101255_35205018 | NC_021166.1    | Ca_kabuli_chr07 | 35205018                | CC                              | AA              | 1946897679               |
| SNP_P4_101256_35205025 | NC_021166.1    | Ca_kabuli_chr07 | 35205025                | TT                              | AA              | 1946897681               |
| SNP_P4_101257_35207524 | NC_021166.1    | Ca_kabuli_chr07 | 35207524                | CC                              | TT              | 1946897683               |
| SNP_P4_101258_35207711 | NC_021166.1    | Ca_kabuli_chr07 | 35207711                | GG                              | AA              | 1946897685               |
| SNP_P4_101259_35207754 | NC_021166.1    | Ca_kabuli_chr07 | 35207754                | AA                              | TT              | 1946897687               |
| SNP_P4_101260_35208995 | NC_021166.1    | Ca_kabuli_chr07 | 35208995                | GG                              | AA              | 1946897689               |
| SNP_P4_101261_35209019 | NC_021166.1    | Ca_kabuli_chr07 | 35209019                | GG                              | AA              | 1946897691               |
| SNP_P4_101262_35209020 | NC_021166.1    | Ca_kabuli_chr07 | 35209020                | CC                              | AA              | 1946897693               |
| SNP_P4_101263_35210243 | NC_021166.1    | Ca_kabuli_chr07 | 35210243                | TT                              | AA              | 1946897695               |
| SNP_P4_101264_35210495 | NC_021166.1    | Ca_kabuli_chr07 | 35210495                | GG                              | TT              | 1946897697               |
| SNP_P4_101265_35210519 | NC_021166.1    | Ca_kabuli_chr07 | 35210519                | CC                              | AA              | 1946897699               |
| SNP_P4_101267_35212070 | NC_021166.1    | Ca_kabuli_chr07 | 35212070                | GG                              | AA              | 1946897701               |
| SNP_P4_101268_35212201 | NC_021166.1    | Ca_kabuli_chr07 | 35212201                | AA                              | GG              | 1946897703               |
| SNP_P4_101269_35212208 | NC_021166.1    | Ca_kabuli_chr07 | 35212208                | AA                              | GG              | 1946897705               |
| SNP_P4_101271_35213702 | NC_021166.1    | Ca_kabuli_chr07 | 35213702                | GG                              | AA              | 1946897707               |
| SNP_P4_101272_35213707 | NC_021166.1    | Ca_kabuli_chr07 | 35213707                | AA                              | GG              | 1946897709               |
| SNP_P4_101273_35213709 | NC_021166.1    | Ca_kabuli_chr07 | 35213709                | TT                              | GG              | 1946897711               |
| SNP_P4_101275_35216138 | NC_021166.1    | Ca_kabuli_chr07 | 35216138                | TT                              | GG              | 1946897713               |
| SNP_P4_101276_35216159 | NC_021166.1    | Ca_kabuli_chr07 | 35216159                | CC                              | AA              | 1946897715               |
| SNP_P4_101277_35216188 | NC_021166.1    | Ca_kabuli_chr07 | 35216188                | AA                              | GG              | 1946897717               |
| SNP_P4_101278_35216234 | NC_021166.1    | Ca_kabuli_chr07 | 35216234                | CC                              | AA              | 1946897719               |
| SNP_P4_101280_35216476 | NC_021166.1    | Ca_kabuli_chr07 | 35216476                | CC                              | GG              | 1946897721               |
| SNP_P4_101281_35217215 | NC_021166.1    | Ca_kabuli_chr07 | 35217215                | GG                              | AA              | 1946897723               |
| SNP_P4_101282_35217283 | NC_021166.1    | Ca_kabuli_chr07 | 35217283                | GG                              | TT              | 1946897725               |
| SNP_P4_101283_35217420 | NC_021166.1    | Ca_kabuli_chr07 | 35217420                | CC                              | TT              | 1946897727               |
| SNP_P4_101284_35217551 | NC_021166.1    | Ca_kabuli_chr07 | 35217551                | GG                              | CC              | 1946897729               |
| SNP_P4_101286_35219315 | NC_021166.1    | Ca_kabuli_chr07 | 35219315                | GG                              | TT              | 1946897731               |
| SNP_P4_101287_35219330 | NC_021166.1    | Ca_kabuli_chr07 | 35219330                | AA                              | GG              | 1946897733               |

| SNPs IDs               | Chromosome IDs | Chromosomes     | Physical positions (bp) | CDC Frontier (Reference genome) | (ILWC46 & LPNB) | NCBI SNPdb Accession IDs |
|------------------------|----------------|-----------------|-------------------------|---------------------------------|-----------------|--------------------------|
| SNP_P4_101288_35219632 | NC_021166.1    | Ca_kabuli_chr07 | 35219632                | AA                              | GG              | 1946897735               |
| SNP_P4_101289_35219718 | NC_021166.1    | Ca_kabuli_chr07 | 35219718                | AA                              | GG              | 1946897737               |
| SNP_P4_101290_35219757 | NC_021166.1    | Ca_kabuli_chr07 | 35219757                | GG                              | AA              | 1946897739               |
| SNP_P4_101292_35219916 | NC_021166.1    | Ca_kabuli_chr07 | 35219916                | GG                              | AA              | 1946897741               |
| SNP_P4_101293_35220005 | NC_021166.1    | Ca_kabuli_chr07 | 35220005                | GG                              | TT              | 1946897743               |
| SNP_P4_101294_35222940 | NC_021166.1    | Ca_kabuli_chr07 | 35222940                | CC                              | GG              | 1946897745               |
| SNP_P4_101295_35224090 | NC_021166.1    | Ca_kabuli_chr07 | 35224090                | TT                              | CC              | 1946897747               |
| SNP_P4_101296_35224486 | NC_021166.1    | Ca_kabuli_chr07 | 35224486                | GG                              | TT              | 1946897749               |
| SNP_P4_101297_35224988 | NC_021166.1    | Ca_kabuli_chr07 | 35224988                | AA                              | TT              | 1946897751               |
| SNP_P4_101298_35225070 | NC_021166.1    | Ca_kabuli_chr07 | 35225070                | CC                              | TT              | 1946897753               |
| SNP_P4_101299_35225712 | NC_021166.1    | Ca_kabuli_chr07 | 35225712                | TT                              | AA              | 1946897756               |
| SNP_P4_101300_35225952 | NC_021166.1    | Ca_kabuli_chr07 | 35225952                | TT                              | CC              | 1946897758               |
| SNP_P4_101301_35226061 | NC_021166.1    | Ca_kabuli_chr07 | 35226061                | GG                              | TT              | 1946897760               |
| SNP_P4_101302_35226151 | NC_021166.1    | Ca_kabuli_chr07 | 35226151                | CC                              | TT              | 1946897762               |
| SNP_P4_101303_35226369 | NC_021166.1    | Ca_kabuli_chr07 | 35226369                | TT                              | CC              | 1946897764               |
| SNP_P4_101304_35228035 | NC_021166.1    | Ca_kabuli_chr07 | 35228035                | AA                              | CC              | 1946897766               |
| SNP_P4_101305_35229284 | NC_021166.1    | Ca_kabuli_chr07 | 35229284                | GG                              | AA              | 1946897768               |
| SNP_P4_101306_35229292 | NC_021166.1    | Ca_kabuli_chr07 | 35229292                | GG                              | TT              | 1946897770               |
| SNP_P4_101307_35229300 | NC_021166.1    | Ca_kabuli_chr07 | 35229300                | AA                              | GG              | 1946897772               |
| SNP_P4_101309_35230516 | NC_021166.1    | Ca_kabuli_chr07 | 35230516                | CC                              | TT              | 1946897774               |
| SNP_P4_101312_35231779 | NC_021166.1    | Ca_kabuli_chr07 | 35231779                | CC                              | GG              | 1946897776               |
| SNP_P4_101313_35232021 | NC_021166.1    | Ca_kabuli_chr07 | 35232021                | GG                              | TT              | 1946897778               |
| SNP_P4_101316_35232076 | NC_021166.1    | Ca_kabuli_chr07 | 35232076                | GG                              | TT              | 1946897780               |
| SNP_P4_101317_35232245 | NC_021166.1    | Ca_kabuli_chr07 | 35232245                | AA                              | TT              | 1946897783               |
| SNP_P4_101318_35232247 | NC_021166.1    | Ca_kabuli_chr07 | 35232247                | CC                              | TT              | 1946897785               |
| SNP_P4_101319_35232251 | NC_021166.1    | Ca_kabuli_chr07 | 35232251                | TT                              | CC              | 1946897787               |
| SNP_P4_101320_35232409 | NC_021166.1    | Ca_kabuli_chr07 | 35232409                | TT                              | CC              | 1946897789               |
| SNP_P4_101321_35232580 | NC_021166.1    | Ca_kabuli_chr07 | 35232580                | GG                              | TT              | 1946897791               |
| SNP_P4_101322_35232700 | NC_021166.1    | Ca_kabuli_chr07 | 35232700                | GG                              | AA              | 1946897793               |
| SNP_P4_101323_35232904 | NC_021166.1    | Ca_kabuli_chr07 | 35232904                | CC                              | AA              | 1946897795               |
| SNP_P4_101324_35234563 | NC_021166.1    | Ca_kabuli_chr07 | 35234563                | AA                              | GG              | 1946897797               |
| SNP_P4_101325_35235030 | NC_021166.1    | Ca_kabuli_chr07 | 35235030                | AA                              | GG              | 1946897799               |
| SNP_P4_101326_35235447 | NC_021166.1    | Ca_kabuli_chr07 | 35235447                | GG                              | AA              | 1946897801               |
| SNP_P4_101328_35236090 | NC_021166.1    | Ca_kabuli_chr07 | 35236090                | GG                              | CC              | 1946897803               |
| SNP_P4_101329_35237154 | NC_021166.1    | Ca_kabuli_chr07 | 35237154                | TT                              | CC              | 1946897805               |
| SNP_P4_101330_35238793 | NC_021166.1    | Ca_kabuli_chr07 | 35238793                | GG                              | AA              | 1946897807               |
| SNP_P4_101331_35239021 | NC_021166.1    | Ca_kabuli_chr07 | 35239021                | AA                              | GG              | 1946897809               |
| SNP_P4_101332_35241364 | NC_021166.1    | Ca_kabuli_chr07 | 35241364                | CC                              | GG              | 1946897811               |
| SNP_P4_101333_35242109 | NC_021166.1    | Ca_kabuli_chr07 | 35242109                | GG                              | AA              | 1946897813               |
| SNP_P4_101334_35256204 | NC_021166.1    | Ca_kabuli_chr07 | 35256204                | TT                              | CC              | 1946897815               |
| SNP_P4_101336_35256476 | NC_021166.1    | Ca_kabuli_chr07 | 35256476                | TT                              | AA              | 1946897817               |
| SNP_P4_101338_35257021 | NC_021166.1    | Ca_kabuli_chr07 | 35257021                | CC                              | TT              | 1946897819               |

| SNPs IDs               | Chromosome IDs | Chromosomes     | Physical positions (bp) | CDC Frontier (Reference genome) | (ILWC46 & LPNB) | NCBI SNPdb Accession IDs |
|------------------------|----------------|-----------------|-------------------------|---------------------------------|-----------------|--------------------------|
| SNP_P4_101339_35257068 | NC_021166.1    | Ca_kabuli_chr07 | 35257068                | CC                              | GG              | 1946897822               |
| SNP_P4_101340_35257071 | NC_021166.1    | Ca_kabuli_chr07 | 35257071                | TT                              | CC              | 1946897824               |
| SNP_P4_101341_35257131 | NC_021166.1    | Ca_kabuli_chr07 | 35257131                | TT                              | GG              | 1946897826               |
| SNP_P4_101342_35257145 | NC_021166.1    | Ca_kabuli_chr07 | 35257145                | GG                              | CC              | 1946897828               |
| SNP_P4_101343_35257212 | NC_021166.1    | Ca_kabuli_chr07 | 35257212                | TT                              | GG              | 1946897830               |
| SNP_P4_101344_35257511 | NC_021166.1    | Ca_kabuli_chr07 | 35257511                | CC                              | GG              | 1946897833               |
| SNP_P4_101345_35258323 | NC_021166.1    | Ca_kabuli_chr07 | 35258323                | CC                              | TT              | 1946897835               |
| SNP_P4_101346_35259033 | NC_021166.1    | Ca_kabuli_chr07 | 35259033                | GG                              | CC              | 1946897837               |
| SNP_P4_101347_35260182 | NC_021166.1    | Ca_kabuli_chr07 | 35260182                | GG                              | AA              | 1946897839               |
| SNP_P4_101348_35260226 | NC_021166.1    | Ca_kabuli_chr07 | 35260226                | TT                              | CC              | 1946897841               |
| SNP_P4_101349_35260228 | NC_021166.1    | Ca_kabuli_chr07 | 35260228                | CC                              | TT              | 1946897843               |
| SNP_P4_101350_35262827 | NC_021166.1    | Ca_kabuli_chr07 | 35262827                | AA                              | GG              | 1946897845               |
| SNP_P4_101351_35262835 | NC_021166.1    | Ca_kabuli_chr07 | 35262835                | GG                              | AA              | 1946897847               |
| SNP_P4_101352_35263219 | NC_021166.1    | Ca_kabuli_chr07 | 35263219                | TT                              | GG              | 1946897849               |
| SNP_P4_101353_35263736 | NC_021166.1    | Ca_kabuli_chr07 | 35263736                | CC                              | GG              | 1946897851               |
| SNP_P4_101354_35270215 | NC_021166.1    | Ca_kabuli_chr07 | 35270215                | CC                              | TT              | 1946897853               |
| SNP_P4_101355_35273983 | NC_021166.1    | Ca_kabuli_chr07 | 35273983                | GG                              | AA              | 1946897855               |
| SNP_P4_101356_35274680 | NC_021166.1    | Ca_kabuli_chr07 | 35274680                | GG                              | AA              | 1946897858               |
| SNP_P4_101357_35275987 | NC_021166.1    | Ca_kabuli_chr07 | 35275987                | CC                              | GG              | 1946897860               |
| SNP_P4_101358_35278840 | NC_021166.1    | Ca_kabuli_chr07 | 35278840                | TT                              | CC              | 1946897862               |
| SNP_P4_101360_35279169 | NC_021166.1    | Ca_kabuli_chr07 | 35279169                | AA                              | CC              | 1946897864               |
| SNP_P4_101361_35279189 | NC_021166.1    | Ca_kabuli_chr07 | 35279189                | TT                              | CC              | 1946897866               |
| SNP_P4_101362_35279374 | NC_021166.1    | Ca_kabuli_chr07 | 35279374                | AA                              | GG              | 1946897868               |
| SNP_P4_101363_35282415 | NC_021166.1    | Ca_kabuli_chr07 | 35282415                | GG                              | TT              | 1946897870               |
| SNP_P4_101364_35282449 | NC_021166.1    | Ca_kabuli_chr07 | 35282449                | GG                              | AA              | 1946897872               |
| SNP_P4_101365_35282831 | NC_021166.1    | Ca_kabuli_chr07 | 35282831                | TT                              | GG              | 1946897874               |
| SNP_P4_101366_35283079 | NC_021166.1    | Ca_kabuli_chr07 | 35283079                | TT                              | GG              | 1946897876               |
| SNP_P4_101367_35283429 | NC_021166.1    | Ca_kabuli_chr07 | 35283429                | GG                              | AA              | 1946897878               |
| SNP_P4_101368_35283698 | NC_021166.1    | Ca_kabuli_chr07 | 35283698                | CC                              | GG              | 1946897880               |
| SNP_P4_101369_35283737 | NC_021166.1    | Ca_kabuli_chr07 | 35283737                | CC                              | TT              | 1946897882               |
| SNP_P4_101370_35283988 | NC_021166.1    | Ca_kabuli_chr07 | 35283988                | TT                              | AA              | 1946897884               |
| SNP_P4_101371_35283993 | NC_021166.1    | Ca_kabuli_chr07 | 35283993                | TT                              | CC              | 1946897886               |
| SNP_P4_101372_35285465 | NC_021166.1    | Ca_kabuli_chr07 | 35285465                | AA                              | CC              | 1946897888               |
| SNP_P4_101373_35285741 | NC_021166.1    | Ca_kabuli_chr07 | 35285741                | CC                              | GG              | 1946897890               |
| SNP_P4_101375_35289661 | NC_021166.1    | Ca_kabuli_chr07 | 35289661                | TT                              | AA              | 1946897892               |
| SNP_P4_101376_35289951 | NC_021166.1    | Ca_kabuli_chr07 | 35289951                | GG                              | AA              | 1946897894               |
| SNP_P4_101378_35290189 | NC_021166.1    | Ca_kabuli_chr07 | 35290189                | TT                              | AA              | 1946897896               |
| SNP_P4_101380_35290530 | NC_021166.1    | Ca_kabuli_chr07 | 35290530                | TT                              | CC              | 1946897898               |
| SNP_P4_101381_35291823 | NC_021166.1    | Ca_kabuli_chr07 | 35291823                | GG                              | TT              | 1946897900               |
| SNP_P4_101382_35291824 | NC_021166.1    | Ca_kabuli_chr07 | 35291824                | CC                              | TT              | 1946897902               |
| SNP_P4_101383_35291825 | NC_021166.1    | Ca_kabuli_chr07 | 35291825                | TT                              | AA              | 1946897904               |
| SNP_P4_101384_35292029 | NC_021166.1    | Ca_kabuli_chr07 | 35292029                | AA                              | GG              | 1946897906               |

| SNPs IDs               | Chromosome IDs | Chromosomes     | Physical positions (bp) | CDC Frontier (Reference genome) | (ILWC46 & LPNB) | NCBI SNPdb Accession IDs |
|------------------------|----------------|-----------------|-------------------------|---------------------------------|-----------------|--------------------------|
| SNP_P4_101385_35292040 | NC_021166.1    | Ca_kabuli_chr07 | 35292040                | CC                              | TT              | 1946897908               |
| SNP_P4_101386_35292069 | NC_021166.1    | Ca_kabuli_chr07 | 35292069                | TT                              | AA              | 1946897910               |
| SNP_P4_101387_35292085 | NC_021166.1    | Ca_kabuli_chr07 | 35292085                | TT                              | CC              | 1946897912               |
| SNP_P4_101388_35292117 | NC_021166.1    | Ca_kabuli_chr07 | 35292117                | CC                              | TT              | 1946897914               |
| SNP_P4_101389_35292197 | NC_021166.1    | Ca_kabuli_chr07 | 35292197                | TT                              | GG              | 1946897916               |
| SNP_P4_101390_35292349 | NC_021166.1    | Ca_kabuli_chr07 | 35292349                | GG                              | AA              | 1946897918               |
| SNP_P4_101391_35292361 | NC_021166.1    | Ca_kabuli_chr07 | 35292361                | TT                              | AA              | 1946897920               |
| SNP_P4_101392_35292366 | NC_021166.1    | Ca_kabuli_chr07 | 35292366                | CC                              | TT              | 1946897922               |
| SNP_P4_101393_35292411 | NC_021166.1    | Ca_kabuli_chr07 | 35292411                | TT                              | GG              | 1946897924               |
| SNP_P4_101394_35293369 | NC_021166.1    | Ca_kabuli_chr07 | 35293369                | CC                              | AA              | 1946897926               |
| SNP_P4_101395_35293444 | NC_021166.1    | Ca_kabuli_chr07 | 35293444                | TT                              | CC              | 1946897928               |
| SNP_P4_101396_35295210 | NC_021166.1    | Ca_kabuli_chr07 | 35295210                | TT                              | CC              | 1946897930               |
| SNP_P4_101397_35295250 | NC_021166.1    | Ca_kabuli_chr07 | 35295250                | AA                              | TT              | 1946897932               |
| SNP_P4_101398_35295404 | NC_021166.1    | Ca_kabuli_chr07 | 35295404                | TT                              | CC              | 1946897934               |
| SNP_P4_101399_35295702 | NC_021166.1    | Ca_kabuli_chr07 | 35295702                | GG                              | TT              | 1946897936               |
| SNP_P4_101400_35295737 | NC_021166.1    | Ca_kabuli_chr07 | 35295737                | GG                              | CC              | 1946897939               |
| SNP_P4_101401_35296645 | NC_021166.1    | Ca_kabuli_chr07 | 35296645                | TT                              | CC              | 1946897941               |
| SNP_P4_101402_35296648 | NC_021166.1    | Ca_kabuli_chr07 | 35296648                | AA                              | GG              | 1946897943               |
| SNP_P4_101403_35296716 | NC_021166.1    | Ca_kabuli_chr07 | 35296716                | CC                              | TT              | 1946897945               |
| SNP_P4_101404_35296728 | NC_021166.1    | Ca_kabuli_chr07 | 35296728                | GG                              | AA              | 1946897947               |
| SNP_P4_101405_35296759 | NC_021166.1    | Ca_kabuli_chr07 | 35296759                | CC                              | TT              | 1946897949               |
| SNP_P4_101406_35296763 | NC_021166.1    | Ca_kabuli_chr07 | 35296763                | CC                              | TT              | 1946897951               |
| SNP_P4_101407_35296848 | NC_021166.1    | Ca_kabuli_chr07 | 35296848                | TT                              | CC              | 1946897953               |
| SNP_P4_101408_35296912 | NC_021166.1    | Ca_kabuli_chr07 | 35296912                | TT                              | CC              | 1946897955               |
| SNP_P4_101409_35296975 | NC_021166.1    | Ca_kabuli_chr07 | 35296975                | CC                              | TT              | 1946897957               |
| SNP_P4_101410_35297314 | NC_021166.1    | Ca_kabuli_chr07 | 35297314                | TT                              | CC              | 1946897959               |
| SNP_P4_101411_35297751 | NC_021166.1    | Ca_kabuli_chr07 | 35297751                | GG                              | AA              | 1946897961               |
| SNP_P4_101412_35298539 | NC_021166.1    | Ca_kabuli_chr07 | 35298539                | AA                              | TT              | 1946897963               |
| SNP_P4_101413_35300471 | NC_021166.1    | Ca_kabuli_chr07 | 35300471                | GG                              | AA              | 1946897966               |
| SNP_P4_101414_35300824 | NC_021166.1    | Ca_kabuli_chr07 | 35300824                | CC                              | TT              | 1946897968               |
| SNP_P4_101415_35302341 | NC_021166.1    | Ca_kabuli_chr07 | 35302341                | TT                              | CC              | 1946897970               |
| SNP_P4_101416_35302545 | NC_021166.1    | Ca_kabuli_chr07 | 35302545                | AA                              | CC              | 1946897972               |
| SNP_P4_101419_35304771 | NC_021166.1    | Ca_kabuli_chr07 | 35304771                | GG                              | TT              | 1946897974               |
| SNP_P4_101420_35305229 | NC_021166.1    | Ca_kabuli_chr07 | 35305229                | GG                              | AA              | 1946897976               |
| SNP_P4_101421_35305410 | NC_021166.1    | Ca_kabuli_chr07 | 35305410                | GG                              | AA              | 1946897978               |
| SNP_P4_101422_35305435 | NC_021166.1    | Ca_kabuli_chr07 | 35305435                | GG                              | AA              | 1946897980               |
| SNP_P4_101423_35305449 | NC_021166.1    | Ca_kabuli_chr07 | 35305449                | GG                              | AA              | 1946897982               |
| SNP_P4_101424_35305483 | NC_021166.1    | Ca_kabuli_chr07 | 35305483                | AA                              | TT              | 1946897984               |
| SNP_P4_101425_35305544 | NC_021166.1    | Ca_kabuli_chr07 | 35305544                | GG                              | AA              | 1946897986               |
| SNP_P4_101426_35307305 | NC_021166.1    | Ca_kabuli_chr07 | 35307305                | GG                              | AA              | 1946897988               |
| SNP_P4_101427_35308299 | NC_021166.1    | Ca_kabuli_chr07 | 35308299                | TT                              | GG              | 1946897990               |
| SNP_P4_101428_35312301 | NC_021166.1    | Ca_kabuli_chr07 | 35312301                | TT                              | CC              | 1946897993               |

| SNPs IDs               | Chromosome IDs | Chromosomes     | Physical positions (bp) | CDC Frontier (Reference genome) | (ILWC46 & LPNB) | NCBI SNPdb Accession IDs |
|------------------------|----------------|-----------------|-------------------------|---------------------------------|-----------------|--------------------------|
| SNP_P4_101429_35312305 | NC_021166.1    | Ca_kabuli_chr07 | 35312305                | CC                              | TT              | 1946897995               |
| SNP_P4_101430_35312353 | NC_021166.1    | Ca_kabuli_chr07 | 35312353                | CC                              | TT              | 1946897997               |
| SNP_P4_101431_35312606 | NC_021166.1    | Ca_kabuli_chr07 | 35312606                | TT                              | AA              | 1946897999               |
| SNP_P4_101432_35312648 | NC_021166.1    | Ca_kabuli_chr07 | 35312648                | AA                              | GG              | 1946898001               |
| SNP_P4_101433_35312701 | NC_021166.1    | Ca_kabuli_chr07 | 35312701                | TT                              | CC              | 1946898003               |
| SNP_P4_101434_35312832 | NC_021166.1    | Ca_kabuli_chr07 | 35312832                | AA                              | GG              | 1946898005               |
| SNP_P4_101435_35312840 | NC_021166.1    | Ca_kabuli_chr07 | 35312840                | GG                              | TT              | 1946898007               |
| SNP_P4_101436_35312994 | NC_021166.1    | Ca_kabuli_chr07 | 35312994                | TT                              | CC              | 1946898009               |
| SNP_P4_101437_35313046 | NC_021166.1    | Ca_kabuli_chr07 | 35313046                | CC                              | TT              | 1946898011               |
| SNP_P4_101438_35313064 | NC_021166.1    | Ca_kabuli_chr07 | 35313064                | AA                              | GG              | 1946898013               |
| SNP_P4_101439_35313073 | NC_021166.1    | Ca_kabuli_chr07 | 35313073                | CC                              | AA              | 1946898015               |
| SNP_P4_101440_35313083 | NC_021166.1    | Ca_kabuli_chr07 | 35313083                | TT                              | CC              | 1946898017               |
| SNP_P4_101441_35313280 | NC_021166.1    | Ca_kabuli_chr07 | 35313280                | CC                              | TT              | 1946898019               |
| SNP_P4_101442_35313313 | NC_021166.1    | Ca_kabuli_chr07 | 35313313                | AA                              | GG              | 1946898021               |
| SNP_P4_101443_35313335 | NC_021166.1    | Ca_kabuli_chr07 | 35313335                | AA                              | GG              | 1946898023               |
| SNP_P4_101444_35313536 | NC_021166.1    | Ca_kabuli_chr07 | 35313536                | AA                              | CC              | 1946898025               |
| SNP_P4_101445_35313603 | NC_021166.1    | Ca_kabuli_chr07 | 35313603                | GG                              | AA              | 1946898027               |
| SNP_P4_101447_35313657 | NC_021166.1    | Ca_kabuli_chr07 | 35313657                | CC                              | TT              | 1946898029               |
| SNP_P4_101448_35313691 | NC_021166.1    | Ca_kabuli_chr07 | 35313691                | AA                              | CC              | 1946898031               |
| SNP_P4_101449_35313872 | NC_021166.1    | Ca_kabuli_chr07 | 35313872                | GG                              | TT              | 1946898033               |
| SNP_P4_101450_35313952 | NC_021166.1    | Ca_kabuli_chr07 | 35313952                | GG                              | AA              | 1946898035               |
| SNP_P4_101451_35313968 | NC_021166.1    | Ca_kabuli_chr07 | 35313968                | CC                              | AA              | 1946898037               |
| SNP_P4_101452_35313985 | NC_021166.1    | Ca_kabuli_chr07 | 35313985                | CC                              | TT              | 1946898039               |
| SNP_P4_101453_35314509 | NC_021166.1    | Ca_kabuli_chr07 | 35314509                | TT                              | CC              | 1946898041               |
| SNP_P4_101454_35314570 | NC_021166.1    | Ca_kabuli_chr07 | 35314570                | TT                              | CC              | 1946898043               |
| SNP_P4_101455_35314794 | NC_021166.1    | Ca_kabuli_chr07 | 35314794                | TT                              | GG              | 1946898045               |
| SNP_P4_101456_35314857 | NC_021166.1    | Ca_kabuli_chr07 | 35314857                | TT                              | CC              | 1946898047               |
| SNP_P4_101457_35314889 | NC_021166.1    | Ca_kabuli_chr07 | 35314889                | TT                              | CC              | 1946898049               |
| SNP_P4_101458_35314890 | NC_021166.1    | Ca_kabuli_chr07 | 35314890                | GG                              | AA              | 1946898051               |
| SNP_P4_101459_35314994 | NC_021166.1    | Ca_kabuli_chr07 | 35314994                | AA                              | TT              | 1946898053               |
| SNP_P4_101460_35315020 | NC_021166.1    | Ca_kabuli_chr07 | 35315020                | AA                              | GG              | 1946898055               |
| SNP_P4_101461_35315036 | NC_021166.1    | Ca_kabuli_chr07 | 35315036                | AA                              | GG              | 1946898057               |
| SNP_P4_101462_35315107 | NC_021166.1    | Ca_kabuli_chr07 | 35315107                | CC                              | TT              | 1946898059               |
| SNP_P4_101463_35315298 | NC_021166.1    | Ca_kabuli_chr07 | 35315298                | GG                              | TT              | 1946898062               |
| SNP_P4_101464_35315316 | NC_021166.1    | Ca_kabuli_chr07 | 35315316                | CC                              | TT              | 1946898064               |
| SNP_P4_101465_35315329 | NC_021166.1    | Ca_kabuli_chr07 | 35315329                | CC                              | TT              | 1946898066               |
| SNP_P4_101466_35315351 | NC_021166.1    | Ca_kabuli_chr07 | 35315351                | AA                              | GG              | 1946898068               |
| SNP_P4_101467_35315472 | NC_021166.1    | Ca_kabuli_chr07 | 35315472                | CC                              | TT              | 1946898070               |
| SNP_P4_101468_35315511 | NC_021166.1    | Ca_kabuli_chr07 | 35315511                | CC                              | TT              | 1946898072               |
| SNP_P4_101469_35315530 | NC_021166.1    | Ca_kabuli_chr07 | 35315530                | AA                              | GG              | 1946898074               |
| SNP_P4_101470_35315827 | NC_021166.1    | Ca_kabuli_chr07 | 35315827                | CC                              | TT              | 1946898076               |
| SNP_P4_101471_35316797 | NC_021166.1    | Ca_kabuli_chr07 | 35316797                | AA                              | GG              | 1946898078               |

| SNPs IDs               | Chromosome IDs | Chromosomes     | Physical positions (bp) | CDC Frontier (Reference genome) | (ILWC46 & LPNB) | NCBI SNPdb Accession IDs |
|------------------------|----------------|-----------------|-------------------------|---------------------------------|-----------------|--------------------------|
| SNP_P4_101473_35318577 | NC_021166.1    | Ca_kabuli_chr07 | 35318577                | TT                              | AA              | 1946898080               |
| SNP_P4_101474_35319145 | NC_021166.1    | Ca_kabuli_chr07 | 35319145                | TT                              | CC              | 1946898082               |
| SNP_P4_101475_35319151 | NC_021166.1    | Ca_kabuli_chr07 | 35319151                | GG                              | AA              | 1946898084               |
| SNP_P4_101476_35319220 | NC_021166.1    | Ca_kabuli_chr07 | 35319220                | GG                              | AA              | 1946898086               |
| SNP_P4_101477_35319324 | NC_021166.1    | Ca_kabuli_chr07 | 35319324                | TT                              | CC              | 1946898088               |
| SNP_P4_101478_35319508 | NC_021166.1    | Ca_kabuli_chr07 | 35319508                | AA                              | CC              | 1946898090               |
| SNP_P4_101479_35321349 | NC_021166.1    | Ca_kabuli_chr07 | 35321349                | CC                              | TT              | 1946898092               |
| SNP_P4_101480_35323333 | NC_021166.1    | Ca_kabuli_chr07 | 35323333                | TT                              | AA              | 1946898094               |
| SNP_P4_101481_35327911 | NC_021166.1    | Ca_kabuli_chr07 | 35327911                | TT                              | CC              | 1946898096               |
| SNP_P4_101483_35329456 | NC_021166.1    | Ca_kabuli_chr07 | 35329456                | GG                              | TT              | 1946898098               |
| SNP_P4_101484_35330085 | NC_021166.1    | Ca_kabuli_chr07 | 35330085                | GG                              | TT              | 1946898100               |
| SNP_P4_101485_35330117 | NC_021166.1    | Ca_kabuli_chr07 | 35330117                | CC                              | TT              | 1946898102               |
| SNP_P4_101488_35331566 | NC_021166.1    | Ca_kabuli_chr07 | 35331566                | AA                              | GG              | 1946898104               |
| SNP_P4_101490_35331756 | NC_021166.1    | Ca_kabuli_chr07 | 35331756                | TT                              | CC              | 1946898106               |
| SNP_P4_101491_35331811 | NC_021166.1    | Ca_kabuli_chr07 | 35331811                | TT                              | AA              | 1946898108               |
| SNP_P4_101492_35332690 | NC_021166.1    | Ca_kabuli_chr07 | 35332690                | TT                              | CC              | 1946898111               |
| SNP_P4_101495_35333332 | NC_021166.1    | Ca_kabuli_chr07 | 35333332                | GG                              | TT              | 1946898113               |
| SNP_P4_101496_35333371 | NC_021166.1    | Ca_kabuli_chr07 | 35333371                | CC                              | AA              | 1946898115               |
| SNP_P4_101497_35336063 | NC_021166.1    | Ca_kabuli_chr07 | 35336063                | AA                              | GG              | 1946898117               |
| SNP_P4_101498_35339604 | NC_021166.1    | Ca_kabuli_chr07 | 35339604                | GG                              | CC              | 1946898119               |
| SNP_P4_101500_35339662 | NC_021166.1    | Ca_kabuli_chr07 | 35339662                | AA                              | GG              | 1946898121               |
| SNP_P4_101501_35340282 | NC_021166.1    | Ca_kabuli_chr07 | 35340282                | AA                              | TT              | 1946898123               |
| SNP_P4_101502_35340402 | NC_021166.1    | Ca_kabuli_chr07 | 35340402                | AA                              | GG              | 1946898126               |
| SNP_P4_101503_35340552 | NC_021166.1    | Ca_kabuli_chr07 | 35340552                | TT                              | AA              | 1946898128               |
| SNP_P4_101504_35341086 | NC_021166.1    | Ca_kabuli_chr07 | 35341086                | CC                              | TT              | 1946898130               |
| SNP_P4_101505_35342783 | NC_021166.1    | Ca_kabuli_chr07 | 35342783                | AA                              | GG              | 1946898132               |
| SNP_P4_101506_35343146 | NC_021166.1    | Ca_kabuli_chr07 | 35343146                | AA                              | GG              | 1946898135               |
| SNP_P4_101507_35345352 | NC_021166.1    | Ca_kabuli_chr07 | 35345352                | AA                              | GG              | 1946898137               |
| SNP_P4_101509_35345410 | NC_021166.1    | Ca_kabuli_chr07 | 35345410                | CC                              | AA              | 1946898139               |
| SNP_P4_101510_35345414 | NC_021166.1    | Ca_kabuli_chr07 | 35345414                | TT                              | CC              | 1946898141               |
| SNP_P4_101511_35345418 | NC_021166.1    | Ca_kabuli_chr07 | 35345418                | CC                              | TT              | 1946898143               |
| SNP_P4_101513_35345684 | NC_021166.1    | Ca_kabuli_chr07 | 35345684                | AA                              | TT              | 1946898145               |
| SNP_P4_101514_35345727 | NC_021166.1    | Ca_kabuli_chr07 | 35345727                | TT                              | CC              | 1946898146               |
| SNP_P4_101515_35345731 | NC_021166.1    | Ca_kabuli_chr07 | 35345731                | TT                              | GG              | 1946898147               |
| SNP_P4_101516_35345802 | NC_021166.1    | Ca_kabuli_chr07 | 35345802                | AA                              | GG              | 1946898148               |
| SNP_P4_101517_35346087 | NC_021166.1    | Ca_kabuli_chr07 | 35346087                | TT                              | AA              | 1946898150               |
| SNP_P4_101518_35347054 | NC_021166.1    | Ca_kabuli_chr07 | 35347054                | CC                              | AA              | 1946898152               |
| SNP_P4_101519_35347099 | NC_021166.1    | Ca_kabuli_chr07 | 35347099                | CC                              | TT              | 1946898154               |
| SNP_P4_101520_35347101 | NC_021166.1    | Ca_kabuli_chr07 | 35347101                | TT                              | CC              | 1946898156               |
| SNP_P4_101521_35347438 | NC_021166.1    | Ca_kabuli_chr07 | 35347438                | GG                              | AA              | 1946898159               |
| SNP_P4_101522_35347513 | NC_021166.1    | Ca_kabuli_chr07 | 35347513                | GG                              | AA              | 1946898161               |
| SNP_P4_101523_35347893 | NC_021166.1    | Ca_kabuli_chr07 | 35347893                | CC                              | TT              | 1946898163               |

| SNPs IDs               | Chromosome IDs | Chromosomes     | Physical positions (bp) | CDC Frontier (Reference genome) | (ILWC46 & LPNB) | NCBI SNPdb Accession IDs |
|------------------------|----------------|-----------------|-------------------------|---------------------------------|-----------------|--------------------------|
| SNP_P4_101525_35348913 | NC_021166.1    | Ca_kabuli_chr07 | 35348913                | GG                              | AA              | 1946898165               |
| SNP_P4_101529_35357203 | NC_021166.1    | Ca_kabuli_chr07 | 35357203                | AA                              | GG              | 1946898167               |
| SNP_P4_101530_35357248 | NC_021166.1    | Ca_kabuli_chr07 | 35357248                | CC                              | TT              | 1946898169               |
| SNP_P4_101531_35357269 | NC_021166.1    | Ca_kabuli_chr07 | 35357269                | AA                              | GG              | 1946898171               |
| SNP_P4_101532_35357289 | NC_021166.1    | Ca_kabuli_chr07 | 35357289                | CC                              | TT              | 1946898173               |
| SNP_P4_101533_35357297 | NC_021166.1    | Ca_kabuli_chr07 | 35357297                | GG                              | CC              | 1946898175               |
| SNP_P4_101534_35357317 | NC_021166.1    | Ca_kabuli_chr07 | 35357317                | AA                              | CC              | 1946898177               |
| SNP_P4_101535_35357321 | NC_021166.1    | Ca_kabuli_chr07 | 35357321                | AA                              | CC              | 1946898179               |
| SNP_P4_101536_35358269 | NC_021166.1    | Ca_kabuli_chr07 | 35358269                | CC                              | AA              | 1946898181               |
| SNP_P4_101537_35361253 | NC_021166.1    | Ca_kabuli_chr07 | 35361253                | AA                              | GG              | 1946898183               |
| SNP_P4_101538_35361350 | NC_021166.1    | Ca_kabuli_chr07 | 35361350                | AA                              | GG              | 1946898185               |
| SNP_P4_101539_35361357 | NC_021166.1    | Ca_kabuli_chr07 | 35361357                | TT                              | CC              | 1946898187               |
| SNP_P4_101540_35361376 | NC_021166.1    | Ca_kabuli_chr07 | 35361376                | TT                              | CC              | 1946898189               |
| SNP_P4_101541_35361378 | NC_021166.1    | Ca_kabuli_chr07 | 35361378                | GG                              | AA              | 1946898191               |
| SNP_P4_101544_35364092 | NC_021166.1    | Ca_kabuli_chr07 | 35364092                | GG                              | AA              | 1946898193               |
| SNP_P4_101545_35364095 | NC_021166.1    | Ca_kabuli_chr07 | 35364095                | TT                              | AA              | 1946898195               |
| SNP_P4_101546_35364187 | NC_021166.1    | Ca_kabuli_chr07 | 35364187                | TT                              | AA              | 1946898197               |
| SNP_P4_101547_35364531 | NC_021166.1    | Ca_kabuli_chr07 | 35364531                | AA                              | GG              | 1946898199               |
| SNP_P4_101548_35364542 | NC_021166.1    | Ca_kabuli_chr07 | 35364542                | TT                              | GG              | 1946898201               |
| SNP_P4_101549_35364558 | NC_021166.1    | Ca_kabuli_chr07 | 35364558                | GG                              | AA              | 1946898203               |
| SNP_P4_101550_35364723 | NC_021166.1    | Ca_kabuli_chr07 | 35364723                | TT                              | CC              | 1946898205               |
| SNP_P4_101552_35365456 | NC_021166.1    | Ca_kabuli_chr07 | 35365456                | TT                              | CC              | 1946898207               |
| SNP_P4_101553_35365788 | NC_021166.1    | Ca_kabuli_chr07 | 35365788                | TT                              | CC              | 1946898209               |
| SNP_P4_101554_35365804 | NC_021166.1    | Ca_kabuli_chr07 | 35365804                | TT                              | CC              | 1946898211               |
| SNP_P4_101556_35366494 | NC_021166.1    | Ca_kabuli_chr07 | 35366494                | TT                              | CC              | 1946898213               |
| SNP_P4_101559_35366814 | NC_021166.1    | Ca_kabuli_chr07 | 35366814                | GG                              | TT              | 1946898215               |
| SNP_P4_101560_35366816 | NC_021166.1    | Ca_kabuli_chr07 | 35366816                | CC                              | TT              | 1946898217               |
| SNP_P4_101561_35366836 | NC_021166.1    | Ca_kabuli_chr07 | 35366836                | TT                              | CC              | 1946898219               |
| SNP_P4_101562_35366845 | NC_021166.1    | Ca_kabuli_chr07 | 35366845                | CC                              | TT              | 1946898221               |
| SNP_P4_101564_35367079 | NC_021166.1    | Ca_kabuli_chr07 | 35367079                | GG                              | AA              | 1946898223               |
| SNP_P4_101565_35367092 | NC_021166.1    | Ca_kabuli_chr07 | 35367092                | GG                              | AA              | 1946898225               |
| SNP_P4_101566_35367213 | NC_021166.1    | Ca_kabuli_chr07 | 35367213                | TT                              | CC              | 1946898227               |
| SNP_P4_101568_35369051 | NC_021166.1    | Ca_kabuli_chr07 | 35369051                | TT                              | CC              | 1946898229               |
| SNP_P4_101569_35369065 | NC_021166.1    | Ca_kabuli_chr07 | 35369065                | GG                              | AA              | 1946898231               |
| SNP_P4_101570_35369074 | NC_021166.1    | Ca_kabuli_chr07 | 35369074                | GG                              | AA              | 1946898233               |
| SNP_P4_101571_35369079 | NC_021166.1    | Ca_kabuli_chr07 | 35369079                | AA                              | GG              | 1946898236               |
| SNP_P4_101572_35369082 | NC_021166.1    | Ca_kabuli_chr07 | 35369082                | CC                              | TT              | 1946898238               |
| SNP_P4_101573_35369122 | NC_021166.1    | Ca_kabuli_chr07 | 35369122                | GG                              | AA              | 1946898240               |
| SNP_P4_101574_35369131 | NC_021166.1    | Ca_kabuli_chr07 | 35369131                | TT                              | AA              | 1946898242               |
| SNP_P4_101576_35369974 | NC_021166.1    | Ca_kabuli_chr07 | 35369974                | TT                              | CC              | 1946898244               |
| SNP_P4_101577_35370262 | NC_021166.1    | Ca_kabuli_chr07 | 35370262                | CC                              | AA              | 1946898247               |
| SNP_P4_101578_35370275 | NC_021166.1    | Ca_kabuli_chr07 | 35370275                | TT                              | CC              | 1946898249               |



| SNPs IDs               | Chromosome IDs | Chromosomes     | Physical positions (bp) | CDC Frontier (Reference genome) | (ILWC46 & LPNB) | NCBI SNPdb Accession IDs |
|------------------------|----------------|-----------------|-------------------------|---------------------------------|-----------------|--------------------------|
| SNP_P4_101580_35370304 | NC_021166.1    | Ca_kabuli_chr07 | 35370304                | TT                              | AA              | 1946898251               |
| SNP_P4_101581_35370458 | NC_021166.1    | Ca_kabuli_chr07 | 35370458                | CC                              | TT              | 1946898253               |
| SNP_P4_101583_35371218 | NC_021166.1    | Ca_kabuli_chr07 | 35371218                | AA                              | TT              | 1946898255               |
| SNP_P4_101584_35372712 | NC_021166.1    | Ca_kabuli_chr07 | 35372712                | GG                              | AA              | 1946898257               |
| SNP_P4_101585_35373633 | NC_021166.1    | Ca_kabuli_chr07 | 35373633                | CC                              | AA              | 1946898259               |
| SNP_P4_101586_35373685 | NC_021166.1    | Ca_kabuli_chr07 | 35373685                | GG                              | AA              | 1946898261               |
| SNP_P4_101587_35373899 | NC_021166.1    | Ca_kabuli_chr07 | 35373899                | CC                              | TT              | 1946898263               |
| SNP_P4_101588_35373908 | NC_021166.1    | Ca_kabuli_chr07 | 35373908                | GG                              | AA              | 1946898267               |
| SNP_P4_101589_35374359 | NC_021166.1    | Ca_kabuli_chr07 | 35374359                | AA                              | GG              | 1946898269               |
| SNP_P4_101590_35374360 | NC_021166.1    | Ca_kabuli_chr07 | 35374360                | AA                              | CC              | 1946898271               |
| SNP_P4_101591_35375701 | NC_021166.1    | Ca_kabuli_chr07 | 35375701                | CC                              | GG              | 1946898273               |
| SNP_P4_101592_35375702 | NC_021166.1    | Ca_kabuli_chr07 | 35375702                | CC                              | GG              | 1946898275               |
| SNP_P4_101594_35376030 | NC_021166.1    | Ca_kabuli_chr07 | 35376030                | TT                              | CC              | 1946898277               |
| SNP_P4_101595_35376046 | NC_021166.1    | Ca_kabuli_chr07 | 35376046                | AA                              | TT              | 1946898279               |
| SNP_P4_101596_35376236 | NC_021166.1    | Ca_kabuli_chr07 | 35376236                | CC                              | AA              | 1946898281               |
| SNP_P4_101597_35376258 | NC_021166.1    | Ca_kabuli_chr07 | 35376258                | AA                              | GG              | 1946898283               |
| SNP_P4_101598_35376584 | NC_021166.1    | Ca_kabuli_chr07 | 35376584                | TT                              | CC              | 1946898285               |
| SNP_P4_101599_35376639 | NC_021166.1    | Ca_kabuli_chr07 | 35376639                | AA                              | TT              | 1946898288               |
| SNP_P4_101600_35379565 | NC_021166.1    | Ca_kabuli_chr07 | 35379565                | TT                              | CC              | 1946898290               |
| SNP_P4_101601_35379602 | NC_021166.1    | Ca_kabuli_chr07 | 35379602                | AA                              | GG              | 1946898292               |
| SNP_P4_101602_35380740 | NC_021166.1    | Ca_kabuli_chr07 | 35380740                | AA                              | GG              | 1946898294               |
| SNP_P4_101603_35382273 | NC_021166.1    | Ca_kabuli_chr07 | 35382273                | GG                              | AA              | 1946898296               |
| SNP_P4_101604_35382395 | NC_021166.1    | Ca_kabuli_chr07 | 35382395                | CC                              | TT              | 1946898298               |
| SNP_P4_101605_35382400 | NC_021166.1    | Ca_kabuli_chr07 | 35382400                | CC                              | TT              | 1946898300               |
| SNP_P4_101606_35382422 | NC_021166.1    | Ca_kabuli_chr07 | 35382422                | CC                              | GG              | 1946898302               |
| SNP_P4_101607_35382469 | NC_021166.1    | Ca_kabuli_chr07 | 35382469                | TT                              | CC              | 1946898304               |
| SNP_P4_101608_35382478 | NC_021166.1    | Ca_kabuli_chr07 | 35382478                | GG                              | TT              | 1946898306               |
| SNP_P4_101610_35382581 | NC_021166.1    | Ca_kabuli_chr07 | 35382581                | CC                              | TT              | 1946898308               |
| SNP_P4_101611_35382686 | NC_021166.1    | Ca_kabuli_chr07 | 35382686                | CC                              | GG              | 1946898310               |
| SNP_P4_101612_35382695 | NC_021166.1    | Ca_kabuli_chr07 | 35382695                | AA                              | GG              | 1946898312               |
| SNP_P4_101613_35382725 | NC_021166.1    | Ca_kabuli_chr07 | 35382725                | TT                              | AA              | 1946898314               |
| SNP_P4_101614_35382784 | NC_021166.1    | Ca_kabuli_chr07 | 35382784                | TT                              | CC              | 1946898316               |
| SNP_P4_101615_35382792 | NC_021166.1    | Ca_kabuli_chr07 | 35382792                | TT                              | CC              | 1946898318               |
| SNP_P4_101616_35382795 | NC_021166.1    | Ca_kabuli_chr07 | 35382795                | AA                              | CC              | 1946898320               |
| SNP_P4_101617_35382797 | NC_021166.1    | Ca_kabuli_chr07 | 35382797                | GG                              | AA              | 1946898322               |
| SNP_P4_101618_35382803 | NC_021166.1    | Ca_kabuli_chr07 | 35382803                | AA                              | CC              | 1946898324               |
| SNP_P4_101619_35382836 | NC_021166.1    | Ca_kabuli_chr07 | 35382836                | AA                              | GG              | 1946898326               |
| SNP_P4_101620_35382946 | NC_021166.1    | Ca_kabuli_chr07 | 35382946                | TT                              | GG              | 1946898328               |
| SNP_P4_101621_35382981 | NC_021166.1    | Ca_kabuli_chr07 | 35382981                | GG                              | AA              | 1946898330               |
| SNP_P4_101622_35383006 | NC_021166.1    | Ca_kabuli_chr07 | 35383006                | GG                              | AA              | 1946898332               |
| SNP_P4_101623_35383512 | NC_021166.1    | Ca_kabuli_chr07 | 35383512                | TT                              | GG              | 1946898334               |
| SNP_P4_101624_35383535 | NC_021166.1    | Ca_kabuli_chr07 | 35383535                | GG                              | AA              | 1946898337               |

| SNPs IDs               | Chromosome IDs | Chromosomes     | Physical positions (bp) | CDC Frontier (Reference genome) | (ILWC46 & LPNB) | NCBI SNPdb Accession IDs |
|------------------------|----------------|-----------------|-------------------------|---------------------------------|-----------------|--------------------------|
| SNP_P4_101625_35383538 | NC_021166.1    | Ca_kabuli_chr07 | 35383538                | GG                              | TT              | 1946898339               |
| SNP_P4_101626_35383825 | NC_021166.1    | Ca_kabuli_chr07 | 35383825                | TT                              | CC              | 1946898341               |
| SNP_P4_101627_35384730 | NC_021166.1    | Ca_kabuli_chr07 | 35384730                | GG                              | AA              | 1946898343               |
| SNP_P4_101628_35384979 | NC_021166.1    | Ca_kabuli_chr07 | 35384979                | AA                              | TT              | 1946898345               |
| SNP_P4_101629_35384989 | NC_021166.1    | Ca_kabuli_chr07 | 35384989                | AA                              | TT              | 1946898347               |
| SNP_P4_101631_35385631 | NC_021166.1    | Ca_kabuli_chr07 | 35385631                | AA                              | TT              | 1946898350               |
| SNP_P4_101632_35385718 | NC_021166.1    | Ca_kabuli_chr07 | 35385718                | AA                              | CC              | 1946898352               |
| SNP_P4_101633_35385738 | NC_021166.1    | Ca_kabuli_chr07 | 35385738                | TT                              | AA              | 1946898354               |
| SNP_P4_101634_35385741 | NC_021166.1    | Ca_kabuli_chr07 | 35385741                | TT                              | CC              | 1946898356               |
| SNP_P4_101635_35385965 | NC_021166.1    | Ca_kabuli_chr07 | 35385965                | CC                              | TT              | 1946898358               |
| SNP_P4_101636_35385966 | NC_021166.1    | Ca_kabuli_chr07 | 35385966                | AA                              | GG              | 1946898360               |
| SNP_P4_101637_35385968 | NC_021166.1    | Ca_kabuli_chr07 | 35385968                | GG                              | AA              | 1946898362               |
| SNP_P4_101638_35385982 | NC_021166.1    | Ca_kabuli_chr07 | 35385982                | GG                              | TT              | 1946898364               |
| SNP_P4_101639_35389083 | NC_021166.1    | Ca_kabuli_chr07 | 35389083                | CC                              | TT              | 1946898366               |
| SNP_P4_101640_35389092 | NC_021166.1    | Ca_kabuli_chr07 | 35389092                | TT                              | AA              | 1946898368               |
| SNP_P4_101641_35389095 | NC_021166.1    | Ca_kabuli_chr07 | 35389095                | TT                              | CC              | 1946898370               |
| SNP_P4_101642_35389103 | NC_021166.1    | Ca_kabuli_chr07 | 35389103                | AA                              | GG              | 1946898372               |
| SNP_P4_101643_35392736 | NC_021166.1    | Ca_kabuli_chr07 | 35392736                | CC                              | TT              | 1946898374               |
| SNP_P4_101644_35405000 | NC_021166.1    | Ca_kabuli_chr07 | 35405000                | AA                              | GG              | 1946898377               |
| SNP_P4_101645_35407294 | NC_021166.1    | Ca_kabuli_chr07 | 35407294                | TT                              | CC              | 1946898379               |
| SNP_P4_101646_35407302 | NC_021166.1    | Ca_kabuli_chr07 | 35407302                | TT                              | CC              | 1946898381               |
| SNP_P4_101647_35407356 | NC_021166.1    | Ca_kabuli_chr07 | 35407356                | CC                              | TT              | 1946898383               |
| SNP_P4_101648_35407368 | NC_021166.1    | Ca_kabuli_chr07 | 35407368                | TT                              | CC              | 1946898385               |
| SNP_P4_101649_35418411 | NC_021166.1    | Ca_kabuli_chr07 | 35418411                | GG                              | AA              | 1946898388               |
| SNP_P4_101650_35422226 | NC_021166.1    | Ca_kabuli_chr07 | 35422226                | GG                              | AA              | 1946898390               |
| SNP_P4_101651_35423243 | NC_021166.1    | Ca_kabuli_chr07 | 35423243                | CC                              | TT              | 1946898392               |
| SNP_P4_101653_35430574 | NC_021166.1    | Ca_kabuli_chr07 | 35430574                | AA                              | GG              | 1946898394               |
| SNP_P4_101654_35434709 | NC_021166.1    | Ca_kabuli_chr07 | 35434709                | TT                              | CC              | 1946898397               |
| SNP_P4_101655_35454384 | NC_021166.1    | Ca_kabuli_chr07 | 35454384                | TT                              | CC              | 1946898399               |
| SNP_P4_101656_35461922 | NC_021166.1    | Ca_kabuli_chr07 | 35461922                | TT                              | CC              | 1946898401               |
| SNP_P4_101657_35461977 | NC_021166.1    | Ca_kabuli_chr07 | 35461977                | TT                              | CC              | 1946898403               |
| SNP_P4_101659_35461993 | NC_021166.1    | Ca_kabuli_chr07 | 35461993                | AA                              | TT              | 1946898406               |
| SNP_P4_101660_35461997 | NC_021166.1    | Ca_kabuli_chr07 | 35461997                | GG                              | AA              | 1946898408               |
| SNP_P4_101661_35462012 | NC_021166.1    | Ca_kabuli_chr07 | 35462012                | TT                              | CC              | 1946898410               |
| SNP_P4_101662_35462035 | NC_021166.1    | Ca_kabuli_chr07 | 35462035                | AA                              | CC              | 1946898412               |
| SNP_P4_101663_35462077 | NC_021166.1    | Ca_kabuli_chr07 | 35462077                | TT                              | CC              | 1946898414               |
| SNP_P4_101664_35463501 | NC_021166.1    | Ca_kabuli_chr07 | 35463501                | AA                              | GG              | 1946898416               |
| SNP_P4_101665_35463520 | NC_021166.1    | Ca_kabuli_chr07 | 35463520                | AA                              | GG              | 1946898418               |
| SNP_P4_101666_35463543 | NC_021166.1    | Ca_kabuli_chr07 | 35463543                | GG                              | AA              | 1946898421               |
| SNP_P4_101667_35463574 | NC_021166.1    | Ca_kabuli_chr07 | 35463574                | AA                              | CC              | 1946898423               |
| SNP_P4_101668_35463597 | NC_021166.1    | Ca_kabuli_chr07 | 35463597                | TT                              | CC              | 1946898425               |
| SNP_P4_101669_35463907 | NC_021166.1    | Ca_kabuli_chr07 | 35463907                | AA                              | GG              | 1946898427               |

| SNPs IDs               | Chromosome IDs | Chromosomes     | Physical positions (bp) | CDC Frontier (Reference genome) | (ILWC46 & LPNB) | NCBI SNPdb Accession IDs |
|------------------------|----------------|-----------------|-------------------------|---------------------------------|-----------------|--------------------------|
| SNP_P4_101670_35463953 | NC_021166.1    | Ca_kabuli_chr07 | 35463953                | TT                              | CC              | 1946898429               |
| SNP_P4_101671_35463979 | NC_021166.1    | Ca_kabuli_chr07 | 35463979                | AA                              | GG              | 1946898431               |
| SNP_P4_101672_35467143 | NC_021166.1    | Ca_kabuli_chr07 | 35467143                | GG                              | CC              | 1946898434               |
| SNP_P4_101673_35467190 | NC_021166.1    | Ca_kabuli_chr07 | 35467190                | TT                              | CC              | 1946898436               |
| SNP_P4_101674_35473144 | NC_021166.1    | Ca_kabuli_chr07 | 35473144                | GG                              | AA              | 1946898438               |
| SNP_P4_101675_35476295 | NC_021166.1    | Ca_kabuli_chr07 | 35476295                | TT                              | CC              | 1946898440               |
| SNP_P4_101676_35480143 | NC_021166.1    | Ca_kabuli_chr07 | 35480143                | TT                              | CC              | 1946898442               |
| SNP_P4_101678_35480375 | NC_021166.1    | Ca_kabuli_chr07 | 35480375                | CC                              | TT              | 1946898444               |
| SNP_P4_101679_35480393 | NC_021166.1    | Ca_kabuli_chr07 | 35480393                | AA                              | CC              | 1946898446               |
| SNP_P4_101680_35480402 | NC_021166.1    | Ca_kabuli_chr07 | 35480402                | AA                              | GG              | 1946898448               |
| SNP_P4_101681_35480442 | NC_021166.1    | Ca_kabuli_chr07 | 35480442                | AA                              | CC              | 1946898450               |
| SNP_P4_101682_35480462 | NC_021166.1    | Ca_kabuli_chr07 | 35480462                | CC                              | TT              | 1946898453               |
| SNP_P4_101684_35481301 | NC_021166.1    | Ca_kabuli_chr07 | 35481301                | TT                              | GG              | 1946898455               |
| SNP_P4_101685_35481337 | NC_021166.1    | Ca_kabuli_chr07 | 35481337                | CC                              | TT              | 1946898457               |
| SNP_P4_101687_35481622 | NC_021166.1    | Ca_kabuli_chr07 | 35481622                | AA                              | CC              | 1946898459               |
| SNP_P4_101688_35481640 | NC_021166.1    | Ca_kabuli_chr07 | 35481640                | AA                              | TT              | 1946898461               |
| SNP_P4_101689_35481683 | NC_021166.1    | Ca_kabuli_chr07 | 35481683                | AA                              | CC              | 1946898463               |
| SNP_P4_101690_35481686 | NC_021166.1    | Ca_kabuli_chr07 | 35481686                | GG                              | AA              | 1946898465               |
| SNP_P4_101691_35481740 | NC_021166.1    | Ca_kabuli_chr07 | 35481740                | TT                              | CC              | 1946898467               |
| SNP_P4_101692_35481758 | NC_021166.1    | Ca_kabuli_chr07 | 35481758                | CC                              | AA              | 1946898469               |
| SNP_P4_101693_35481808 | NC_021166.1    | Ca_kabuli_chr07 | 35481808                | TT                              | CC              | 1946898471               |
| SNP_P4_101694_35482073 | NC_021166.1    | Ca_kabuli_chr07 | 35482073                | TT                              | AA              | 1946898473               |
| SNP_P4_101695_35501017 | NC_021166.1    | Ca_kabuli_chr07 | 35501017                | CC                              | AA              | 1946898475               |
| SNP_P4_101696_35501363 | NC_021166.1    | Ca_kabuli_chr07 | 35501363                | GG                              | AA              | 1946898477               |
| SNP_P4_101697_35501364 | NC_021166.1    | Ca_kabuli_chr07 | 35501364                | AA                              | GG              | 1946898479               |
| SNP_P4_101698_35501408 | NC_021166.1    | Ca_kabuli_chr07 | 35501408                | TT                              | CC              | 1946898481               |
| SNP_P4_101699_35501498 | NC_021166.1    | Ca_kabuli_chr07 | 35501498                | AA                              | CC              | 1946898483               |
| SNP_P4_101700_35501542 | NC_021166.1    | Ca_kabuli_chr07 | 35501542                | TT                              | CC              | 1946898485               |
| SNP_P4_101701_35501582 | NC_021166.1    | Ca_kabuli_chr07 | 35501582                | AA                              | GG              | 1946898487               |
| SNP_P4_101702_35501661 | NC_021166.1    | Ca_kabuli_chr07 | 35501661                | AA                              | CC              | 1946898489               |
| SNP_P4_101703_35558961 | NC_021166.1    | Ca_kabuli_chr07 | 35558961                | AA                              | GG              | 1946898491               |
| SNP_P4_101705_35568421 | NC_021166.1    | Ca_kabuli_chr07 | 35568421                | AA                              | TT              | 1946898493               |
| SNP_P4_101706_35568423 | NC_021166.1    | Ca_kabuli_chr07 | 35568423                | TT                              | AA              | 1946898495               |
| SNP_P4_101707_35574832 | NC_021166.1    | Ca_kabuli_chr07 | 35574832                | GG                              | AA              | 1946898497               |
| SNP_P4_101708_35580953 | NC_021166.1    | Ca_kabuli_chr07 | 35580953                | GG                              | AA              | 1946898499               |
| SNP_P4_101711_35605758 | NC_021166.1    | Ca_kabuli_chr07 | 35605758                | GG                              | AA              | 1946898501               |
| SNP_P4_101713_35607395 | NC_021166.1    | Ca_kabuli_chr07 | 35607395                | TT                              | CC              | 1946898503               |
| SNP_P4_101714_35612638 | NC_021166.1    | Ca_kabuli_chr07 | 35612638                | GG                              | TT              | 1946898505               |
| SNP_P4_101716_35640379 | NC_021166.1    | Ca_kabuli_chr07 | 35640379                | AA                              | GG              | 1946898507               |
| SNP_P4_101717_35640380 | NC_021166.1    | Ca_kabuli_chr07 | 35640380                | AA                              | GG              | 1946898509               |
| SNP_P4_101718_35640392 | NC_021166.1    | Ca_kabuli_chr07 | 35640392                | TT                              | CC              | 1946898511               |
| SNP_P4_101720_35650857 | NC_021166.1    | Ca_kabuli_chr07 | 35650857                | CC                              | TT              | 1946898513               |

| SNPs IDs               | Chromosome IDs | Chromosomes     | Physical positions (bp) | CDC Frontier (Reference genome) | (ILWC46 & LPNB) | NCBI SNPdb Accession IDs |
|------------------------|----------------|-----------------|-------------------------|---------------------------------|-----------------|--------------------------|
| SNP_P4_101721_35654256 | NC_021166.1    | Ca_kabuli_chr07 | 35654256                | AA                              | GG              | 1946898515               |
| SNP_P4_101722_35691985 | NC_021166.1    | Ca_kabuli_chr07 | 35691985                | AA                              | CC              | 1946898517               |
| SNP_P4_101726_35782770 | NC_021166.1    | Ca_kabuli_chr07 | 35782770                | CC                              | TT              | 1946898519               |
| SNP_P4_101727_35783103 | NC_021166.1    | Ca_kabuli_chr07 | 35783103                | AA                              | GG              | 1946898521               |
| SNP_P4_101728_35785909 | NC_021166.1    | Ca_kabuli_chr07 | 35785909                | CC                              | GG              | 1946898523               |
| SNP_P4_101729_35785943 | NC_021166.1    | Ca_kabuli_chr07 | 35785943                | AA                              | GG              | 1946898525               |
| SNP_P4_101730_35786295 | NC_021166.1    | Ca_kabuli_chr07 | 35786295                | TT                              | CC              | 1946898527               |
| SNP_P4_101731_35786366 | NC_021166.1    | Ca_kabuli_chr07 | 35786366                | GG                              | AA              | 1946898529               |
| SNP_P4_101733_35786959 | NC_021166.1    | Ca_kabuli_chr07 | 35786959                | AA                              | TT              | 1946898531               |
| SNP_P4_101735_35787556 | NC_021166.1    | Ca_kabuli_chr07 | 35787556                | GG                              | AA              | 1946898534               |
| SNP_P4_101736_35787626 | NC_021166.1    | Ca_kabuli_chr07 | 35787626                | GG                              | CC              | 1946898536               |
| SNP_P4_101738_35794061 | NC_021166.1    | Ca_kabuli_chr07 | 35794061                | GG                              | AA              | 1946898538               |
| SNP_P4_101741_35854711 | NC_021166.1    | Ca_kabuli_chr07 | 35854711                | CC                              | TT              | 1946898540               |
| SNP_P4_101744_35863340 | NC_021166.1    | Ca_kabuli_chr07 | 35863340                | AA                              | GG              | 1946898542               |
| SNP_P4_101745_35864074 | NC_021166.1    | Ca_kabuli_chr07 | 35864074                | TT                              | CC              | 1946898544               |
| SNP_P4_101746_35868728 | NC_021166.1    | Ca_kabuli_chr07 | 35868728                | AA                              | GG              | 1946898546               |
| SNP_P4_101748_35893277 | NC_021166.1    | Ca_kabuli_chr07 | 35893277                | AA                              | GG              | 1946898548               |
| SNP_P4_101749_35902733 | NC_021166.1    | Ca_kabuli_chr07 | 35902733                | TT                              | CC              | 1946898550               |
| SNP_P4_101750_35905336 | NC_021166.1    | Ca_kabuli_chr07 | 35905336                | GG                              | AA              | 1946898551               |
| SNP_P4_101751_35917644 | NC_021166.1    | Ca_kabuli_chr07 | 35917644                | GG                              | TT              | 1946898552               |
| SNP_P4_101752_35920403 | NC_021166.1    | Ca_kabuli_chr07 | 35920403                | AA                              | GG              | 1946898553               |
| SNP_P4_101754_35932532 | NC_021166.1    | Ca_kabuli_chr07 | 35932532                | AA                              | GG              | 1946898555               |
| SNP_P4_101756_35939301 | NC_021166.1    | Ca_kabuli_chr07 | 35939301                | CC                              | TT              | 1946898557               |
| SNP_P4_101757_35941967 | NC_021166.1    | Ca_kabuli_chr07 | 35941967                | AA                              | GG              | 1946898558               |
| SNP_P4_101758_35941982 | NC_021166.1    | Ca_kabuli_chr07 | 35941982                | TT                              | GG              | 1946898560               |
| SNP_P4_101759_35942580 | NC_021166.1    | Ca_kabuli_chr07 | 35942580                | TT                              | CC              | 1946898563               |
| SNP_P4_101760_35942646 | NC_021166.1    | Ca_kabuli_chr07 | 35942646                | AA                              | GG              | 1946898565               |
| SNP_P4_101761_35943059 | NC_021166.1    | Ca_kabuli_chr07 | 35943059                | AA                              | CC              | 1946898567               |
| SNP_P4_101762_35943105 | NC_021166.1    | Ca_kabuli_chr07 | 35943105                | AA                              | GG              | 1946898569               |
| SNP_P4_101763_35943496 | NC_021166.1    | Ca_kabuli_chr07 | 35943496                | TT                              | GG              | 1946898571               |
| SNP_P4_101764_35943523 | NC_021166.1    | Ca_kabuli_chr07 | 35943523                | AA                              | GG              | 1946898573               |
| SNP_P4_101765_35943771 | NC_021166.1    | Ca_kabuli_chr07 | 35943771                | GG                              | AA              | 1946898575               |
| SNP_P4_101766_35950963 | NC_021166.1    | Ca_kabuli_chr07 | 35950963                | AA                              | GG              | 1946898577               |
| SNP_P4_101767_35950977 | NC_021166.1    | Ca_kabuli_chr07 | 35950977                | TT                              | GG              | 1946898579               |
| SNP_P4_101768_35951058 | NC_021166.1    | Ca_kabuli_chr07 | 35951058                | CC                              | GG              | 1946898581               |
| SNP_P4_101769_35951549 | NC_021166.1    | Ca_kabuli_chr07 | 35951549                | AA                              | GG              | 1946898583               |
| SNP_P4_101770_35951584 | NC_021166.1    | Ca_kabuli_chr07 | 35951584                | AA                              | GG              | 1946898585               |
| SNP_P4_101771_35953547 | NC_021166.1    | Ca_kabuli_chr07 | 35953547                | CC                              | TT              | 1946898587               |
| SNP_P4_101772_35953989 | NC_021166.1    | Ca_kabuli_chr07 | 35953989                | CC                              | AA              | 1946898589               |
| SNP_P4_101773_35955224 | NC_021166.1    | Ca_kabuli_chr07 | 35955224                | CC                              | AA              | 1946898591               |
| SNP_P4_101774_35959878 | NC_021166.1    | Ca_kabuli_chr07 | 35959878                | GG                              | AA              | 1946898593               |
| SNP_P4_101775_35959982 | NC_021166.1    | Ca_kabuli_chr07 | 35959982                | CC                              | GG              | 1946898595               |

| SNPs IDs               | Chromosome IDs | Chromosomes     | Physical positions (bp) | CDC Frontier (Reference genome) | (ILWC46 & LPNB) | NCBI SNPdb Accession IDs |
|------------------------|----------------|-----------------|-------------------------|---------------------------------|-----------------|--------------------------|
| SNP_P4_101776_35960174 | NC_021166.1    | Ca_kabuli_chr07 | 35960174                | AA                              | GG              | 1946898597               |
| SNP_P4_101777_35960188 | NC_021166.1    | Ca_kabuli_chr07 | 35960188                | CC                              | GG              | 1946898599               |
| SNP_P4_101778_35965685 | NC_021166.1    | Ca_kabuli_chr07 | 35965685                | CC                              | AA              | 1946898601               |
| SNP_P4_101779_35971515 | NC_021166.1    | Ca_kabuli_chr07 | 35971515                | TT                              | CC              | 1946898603               |
| SNP_P4_101780_35973621 | NC_021166.1    | Ca_kabuli_chr07 | 35973621                | AA                              | CC              | 1946898605               |
| SNP_P4_101781_35973709 | NC_021166.1    | Ca_kabuli_chr07 | 35973709                | AA                              | GG              | 1946898607               |
| SNP_P4_101782_35979210 | NC_021166.1    | Ca_kabuli_chr07 | 35979210                | CC                              | TT              | 1946898609               |
| SNP_P4_101783_35979228 | NC_021166.1    | Ca_kabuli_chr07 | 35979228                | GG                              | TT              | 1946898611               |
| SNP_P4_101784_35979286 | NC_021166.1    | Ca_kabuli_chr07 | 35979286                | CC                              | GG              | 1946898613               |
| SNP_P4_101785_35979649 | NC_021166.1    | Ca_kabuli_chr07 | 35979649                | AA                              | GG              | 1946898615               |
| SNP_P4_101786_35982212 | NC_021166.1    | Ca_kabuli_chr07 | 35982212                | AA                              | GG              | 1946898617               |
| SNP_P4_101787_35982293 | NC_021166.1    | Ca_kabuli_chr07 | 35982293                | GG                              | AA              | 1946898619               |
| SNP_P4_101788_35995705 | NC_021166.1    | Ca_kabuli_chr07 | 35995705                | CC                              | AA              | 1946898621               |
| SNP_P4_101789_35998671 | NC_021166.1    | Ca_kabuli_chr07 | 35998671                | GG                              | AA              | 1946898623               |
| SNP_P4_101790_36007830 | NC_021166.1    | Ca_kabuli_chr07 | 36007830                | AA                              | GG              | 1946898625               |
| SNP_P4_101792_36009006 | NC_021166.1    | Ca_kabuli_chr07 | 36009006                | AA                              | TT              | 1946898627               |
| SNP_P4_101793_36009611 | NC_021166.1    | Ca_kabuli_chr07 | 36009611                | GG                              | AA              | 1946898629               |
| SNP_P4_101794_36059586 | NC_021166.1    | Ca_kabuli_chr07 | 36059586                | TT                              | GG              | 1946898631               |
| SNP_P4_101795_36064685 | NC_021166.1    | Ca_kabuli_chr07 | 36064685                | TT                              | GG              | 1946898633               |
| SNP_P4_101796_36065394 | NC_021166.1    | Ca_kabuli_chr07 | 36065394                | AA                              | GG              | 1946898635               |
| SNP_P4_101798_36133028 | NC_021166.1    | Ca_kabuli_chr07 | 36133028                | TT                              | CC              | 1946898637               |
| SNP_P4_101799_36133131 | NC_021166.1    | Ca_kabuli_chr07 | 36133131                | AA                              | CC              | 1946898639               |
| SNP_P4_101800_36133189 | NC_021166.1    | Ca_kabuli_chr07 | 36133189                | TT                              | CC              | 1946898641               |
| SNP_P4_101801_36133216 | NC_021166.1    | Ca_kabuli_chr07 | 36133216                | CC                              | TT              | 1946898643               |
| SNP_P4_101802_36133272 | NC_021166.1    | Ca_kabuli_chr07 | 36133272                | AA                              | GG              | 1946898645               |
| SNP_P4_101803_36133293 | NC_021166.1    | Ca_kabuli_chr07 | 36133293                | CC                              | AA              | 1946898647               |
| SNP_P4_101804_36133311 | NC_021166.1    | Ca_kabuli_chr07 | 36133311                | CC                              | TT              | 1946898649               |
| SNP_P4_101806_36150642 | NC_021166.1    | Ca_kabuli_chr07 | 36150642                | TT                              | GG              | 1946898651               |
| SNP_P4_101807_36236254 | NC_021166.1    | Ca_kabuli_chr07 | 36236254                | TT                              | AA              | 1946898653               |
| SNP_P4_101809_36281859 | NC_021166.1    | Ca_kabuli_chr07 | 36281859                | AA                              | GG              | 1946898655               |
| SNP_P4_101811_36316780 | NC_021166.1    | Ca_kabuli_chr07 | 36316780                | CC                              | TT              | 1946898657               |
| SNP_P4_101812_36318733 | NC_021166.1    | Ca_kabuli_chr07 | 36318733                | TT                              | CC              | 1946898659               |
| SNP_P4_101813_36321252 | NC_021166.1    | Ca_kabuli_chr07 | 36321252                | TT                              | AA              | 1946898661               |
| SNP_P4_101814_36340087 | NC_021166.1    | Ca_kabuli_chr07 | 36340087                | TT                              | AA              | 1946898663               |
| SNP_P4_101815_36341428 | NC_021166.1    | Ca_kabuli_chr07 | 36341428                | CC                              | TT              | 1946898665               |
| SNP_P4_101817_36375084 | NC_021166.1    | Ca_kabuli_chr07 | 36375084                | GG                              | AA              | 1946898667               |
| SNP_P4_101818_36375682 | NC_021166.1    | Ca_kabuli_chr07 | 36375682                | TT                              | GG              | 1946898669               |
| SNP_P4_101819_36375688 | NC_021166.1    | Ca_kabuli_chr07 | 36375688                | TT                              | CC              | 1946898671               |
| SNP_P4_101820_36375752 | NC_021166.1    | Ca_kabuli_chr07 | 36375752                | AA                              | GG              | 1946898673               |
| SNP_P4_101821_36375785 | NC_021166.1    | Ca_kabuli_chr07 | 36375785                | AA                              | GG              | 1946898675               |
| SNP_P4_101822_36375796 | NC_021166.1    | Ca_kabuli_chr07 | 36375796                | GG                              | TT              | 1946898677               |
| SNP_P4_101823_36375830 | NC_021166.1    | Ca_kabuli_chr07 | 36375830                | AA                              | GG              | 1946898679               |

| SNPs IDs               | Chromosome IDs | Chromosomes     | Physical positions (bp) | CDC Frontier (Reference genome) | (ILWC46 & LPNB) | NCBI SNPdb Accession IDs |
|------------------------|----------------|-----------------|-------------------------|---------------------------------|-----------------|--------------------------|
| SNP_P4_101824_36375840 | NC_021166.1    | Ca_kabuli_chr07 | 36375840                | AA                              | TT              | 1946898681               |
| SNP_P4_101825_36375875 | NC_021166.1    | Ca_kabuli_chr07 | 36375875                | TT                              | CC              | 1946898683               |
| SNP_P4_101826_36375994 | NC_021166.1    | Ca_kabuli_chr07 | 36375994                | GG                              | AA              | 1946898685               |
| SNP_P4_101827_36382973 | NC_021166.1    | Ca_kabuli_chr07 | 36382973                | CC                              | TT              | 1946898687               |
| SNP_P4_101828_36387365 | NC_021166.1    | Ca_kabuli_chr07 | 36387365                | TT                              | CC              | 1946898689               |
| SNP_P4_101829_36407384 | NC_021166.1    | Ca_kabuli_chr07 | 36407384                | AA                              | GG              | 1946898691               |
| SNP_P4_101830_36407390 | NC_021166.1    | Ca_kabuli_chr07 | 36407390                | AA                              | TT              | 1946898693               |
| SNP_P4_101831_36432311 | NC_021166.1    | Ca_kabuli_chr07 | 36432311                | GG                              | AA              | 1946898695               |
| SNP_P4_101832_36432372 | NC_021166.1    | Ca_kabuli_chr07 | 36432372                | TT                              | CC              | 1946898697               |
| SNP_P4_101834_36454827 | NC_021166.1    | Ca_kabuli_chr07 | 36454827                | AA                              | GG              | 1946898699               |
| SNP_P4_101836_36477987 | NC_021166.1    | Ca_kabuli_chr07 | 36477987                | AA                              | CC              | 1946898701               |
| SNP_P4_101837_36501698 | NC_021166.1    | Ca_kabuli_chr07 | 36501698                | TT                              | AA              | 1946898703               |
| SNP_P4_101838_36524923 | NC_021166.1    | Ca_kabuli_chr07 | 36524923                | GG                              | CC              | 1946898705               |
| SNP_P4_101839_36525369 | NC_021166.1    | Ca_kabuli_chr07 | 36525369                | AA                              | GG              | 1946898707               |
| SNP_P4_101840_36525383 | NC_021166.1    | Ca_kabuli_chr07 | 36525383                | TT                              | CC              | 1946898709               |
| SNP_P4_101841_36527687 | NC_021166.1    | Ca_kabuli_chr07 | 36527687                | AA                              | CC              | 1946898711               |
| SNP_P4_101842_36528546 | NC_021166.1    | Ca_kabuli_chr07 | 36528546                | AA                              | TT              | 1946898714               |
| SNP_P4_101843_36532457 | NC_021166.1    | Ca_kabuli_chr07 | 36532457                | TT                              | CC              | 1946898716               |
| SNP_P4_101847_36580452 | NC_021166.1    | Ca_kabuli_chr07 | 36580452                | TT                              | GG              | 1946898718               |
| SNP_P4_101849_36617142 | NC_021166.1    | Ca_kabuli_chr07 | 36617142                | TT                              | CC              | 1946898720               |
| SNP_P4_101850_36663608 | NC_021166.1    | Ca_kabuli_chr07 | 36663608                | AA                              | CC              | 1946898722               |
| SNP_P4_101852_36664012 | NC_021166.1    | Ca_kabuli_chr07 | 36664012                | TT                              | AA              | 1946898724               |
| SNP_P4_101856_36680858 | NC_021166.1    | Ca_kabuli_chr07 | 36680858                | CC                              | TT              | 1946898726               |
| SNP_P4_101858_36684776 | NC_021166.1    | Ca_kabuli_chr07 | 36684776                | GG                              | AA              | 1946898728               |
| SNP_P4_101859_36699613 | NC_021166.1    | Ca_kabuli_chr07 | 36699613                | GG                              | AA              | 1946898730               |
| SNP_P4_101860_36699663 | NC_021166.1    | Ca_kabuli_chr07 | 36699663                | AA                              | GG              | 1946898732               |
| SNP_P4_101861_36699943 | NC_021166.1    | Ca_kabuli_chr07 | 36699943                | GG                              | TT              | 1946898735               |
| SNP_P4_101863_36750002 | NC_021166.1    | Ca_kabuli_chr07 | 36750002                | AA                              | GG              | 1946898737               |
| SNP_P4_101864_36750437 | NC_021166.1    | Ca_kabuli_chr07 | 36750437                | TT                              | CC              | 1946898739               |
| SNP_P4_101865_36750443 | NC_021166.1    | Ca_kabuli_chr07 | 36750443                | AA                              | GG              | 1946898741               |
| SNP_P4_101866_36750531 | NC_021166.1    | Ca_kabuli_chr07 | 36750531                | AA                              | CC              | 1946898743               |
| SNP_P4_101867_36750599 | NC_021166.1    | Ca_kabuli_chr07 | 36750599                | CC                              | TT              | 1946898745               |
| SNP_P4_101868_36750795 | NC_021166.1    | Ca_kabuli_chr07 | 36750795                | AA                              | CC              | 1946898747               |
| SNP_P4_101869_36750811 | NC_021166.1    | Ca_kabuli_chr07 | 36750811                | GG                              | CC              | 1946898749               |
| SNP_P4_101870_36750888 | NC_021166.1    | Ca_kabuli_chr07 | 36750888                | AA                              | CC              | 1946898751               |
| SNP_P4_101871_36789791 | NC_021166.1    | Ca_kabuli_chr07 | 36789791                | CC                              | TT              | 1946898753               |
| SNP_P4_101872_36829772 | NC_021166.1    | Ca_kabuli_chr07 | 36829772                | CC                              | TT              | 1946898755               |
| SNP_P4_101873_36841248 | NC_021166.1    | Ca_kabuli_chr07 | 36841248                | GG                              | AA              | 1946898757               |
| SNP_P4_101874_36841249 | NC_021166.1    | Ca_kabuli_chr07 | 36841249                | CC                              | TT              | 1946898759               |
| SNP_P4_101875_36843539 | NC_021166.1    | Ca_kabuli_chr07 | 36843539                | CC                              | TT              | 1946898761               |
| SNP_P4_101877_36881396 | NC_021166.1    | Ca_kabuli_chr07 | 36881396                | AA                              | GG              | 1946898763               |
| SNP_P4_101878_36882702 | NC_021166.1    | Ca_kabuli_chr07 | 36882702                | GG                              | TT              | 1946898766               |

| SNPs IDs               | Chromosome IDs | Chromosomes     | Physical positions (bp) | CDC Frontier (Reference genome) | (ILWC46 & LPNB) | NCBI SNPdb Accession IDs |
|------------------------|----------------|-----------------|-------------------------|---------------------------------|-----------------|--------------------------|
| SNP_P4_101879_36905925 | NC_021166.1    | Ca_kabuli_chr07 | 36905925                | TT                              | GG              | 1946898768               |
| SNP_P4_101880_36906822 | NC_021166.1    | Ca_kabuli_chr07 | 36906822                | AA                              | GG              | 1946898770               |
| SNP_P4_101881_36907253 | NC_021166.1    | Ca_kabuli_chr07 | 36907253                | AA                              | GG              | 1946898772               |
| SNP_P4_101882_36966388 | NC_021166.1    | Ca_kabuli_chr07 | 36966388                | AA                              | GG              | 1946898774               |
| SNP_P4_101883_36969300 | NC_021166.1    | Ca_kabuli_chr07 | 36969300                | TT                              | CC              | 1946898776               |
| SNP_P4_101885_36989664 | NC_021166.1    | Ca_kabuli_chr07 | 36989664                | TT                              | CC              | 1946898778               |
| SNP_P4_101886_36998163 | NC_021166.1    | Ca_kabuli_chr07 | 36998163                | GG                              | AA              | 1946898780               |
| SNP_P4_101887_36998224 | NC_021166.1    | Ca_kabuli_chr07 | 36998224                | GG                              | AA              | 1946898782               |
| SNP_P4_101888_36998226 | NC_021166.1    | Ca_kabuli_chr07 | 36998226                | GG                              | AA              | 1946898784               |
| SNP_P4_101889_36998277 | NC_021166.1    | Ca_kabuli_chr07 | 36998277                | GG                              | AA              | 1946898786               |
| SNP_P4_101890_36998824 | NC_021166.1    | Ca_kabuli_chr07 | 36998824                | GG                              | AA              | 1946898788               |
| SNP_P4_101892_37016274 | NC_021166.1    | Ca_kabuli_chr07 | 37016274                | CC                              | TT              | 1946898790               |
| SNP_P4_101893_37016275 | NC_021166.1    | Ca_kabuli_chr07 | 37016275                | AA                              | GG              | 1946898792               |
| SNP_P4_101894_37016321 | NC_021166.1    | Ca_kabuli_chr07 | 37016321                | TT                              | CC              | 1946898794               |
| SNP_P4_101896_37037880 | NC_021166.1    | Ca_kabuli_chr07 | 37037880                | TT                              | CC              | 1946898796               |
| SNP_P4_101898_37050063 | NC_021166.1    | Ca_kabuli_chr07 | 37050063                | TT                              | GG              | 1946898798               |
| SNP_P4_101899_37066851 | NC_021166.1    | Ca_kabuli_chr07 | 37066851                | AA                              | GG              | 1946898800               |
| SNP_P4_101900_37089580 | NC_021166.1    | Ca_kabuli_chr07 | 37089580                | AA                              | GG              | 1946898802               |
| SNP_P4_101901_37112199 | NC_021166.1    | Ca_kabuli_chr07 | 37112199                | TT                              | CC              | 1946898804               |
| SNP_P4_101902_37112214 | NC_021166.1    | Ca_kabuli_chr07 | 37112214                | AA                              | TT              | 1946898806               |
| SNP_P4_101903_37112343 | NC_021166.1    | Ca_kabuli_chr07 | 37112343                | GG                              | AA              | 1946898808               |
| SNP_P4_101904_37112580 | NC_021166.1    | Ca_kabuli_chr07 | 37112580                | GG                              | AA              | 1946898810               |
| SNP_P4_101905_37112607 | NC_021166.1    | Ca_kabuli_chr07 | 37112607                | CC                              | TT              | 1946898812               |
| SNP_P4_101906_37112645 | NC_021166.1    | Ca_kabuli_chr07 | 37112645                | AA                              | GG              | 1946898814               |
| SNP_P4_101907_37112671 | NC_021166.1    | Ca_kabuli_chr07 | 37112671                | AA                              | CC              | 1946898816               |
| SNP_P4_101909_37175850 | NC_021166.1    | Ca_kabuli_chr07 | 37175850                | CC                              | TT              | 1946898818               |
| SNP_P4_101910_37179788 | NC_021166.1    | Ca_kabuli_chr07 | 37179788                | CC                              | AA              | 1946898820               |
| SNP_P4_101912_37213050 | NC_021166.1    | Ca_kabuli_chr07 | 37213050                | TT                              | CC              | 1946898822               |
| SNP_P4_101913_37213105 | NC_021166.1    | Ca_kabuli_chr07 | 37213105                | AA                              | GG              | 1946898824               |
| SNP_P4_101914_37213156 | NC_021166.1    | Ca_kabuli_chr07 | 37213156                | CC                              | AA              | 1946898826               |
| SNP_P4_101915_37213282 | NC_021166.1    | Ca_kabuli_chr07 | 37213282                | TT                              | AA              | 1946898828               |
| SNP_P4_101916_37213363 | NC_021166.1    | Ca_kabuli_chr07 | 37213363                | AA                              | GG              | 1946898830               |
| SNP_P4_101917_37213390 | NC_021166.1    | Ca_kabuli_chr07 | 37213390                | AA                              | GG              | 1946898832               |
| SNP_P4_101918_37213424 | NC_021166.1    | Ca_kabuli_chr07 | 37213424                | AA                              | GG              | 1946898835               |
| SNP_P4_101919_37213492 | NC_021166.1    | Ca_kabuli_chr07 | 37213492                | AA                              | GG              | 1946898837               |
| SNP_P4_101920_37226220 | NC_021166.1    | Ca_kabuli_chr07 | 37226220                | AA                              | CC              | 1946898839               |
| SNP_P4_101921_37228646 | NC_021166.1    | Ca_kabuli_chr07 | 37228646                | TT                              | CC              | 1946898841               |
| SNP_P4_101922_37235780 | NC_021166.1    | Ca_kabuli_chr07 | 37235780                | GG                              | CC              | 1946898843               |
| SNP_P4_101923_37236135 | NC_021166.1    | Ca_kabuli_chr07 | 37236135                | TT                              | AA              | 1946898845               |
| SNP_P4_101924_37236197 | NC_021166.1    | Ca_kabuli_chr07 | 37236197                | CC                              | TT              | 1946898847               |
| SNP_P4_101925_37236223 | NC_021166.1    | Ca_kabuli_chr07 | 37236223                | GG                              | AA              | 1946898849               |
| SNP_P4_101926_37236243 | NC_021166.1    | Ca_kabuli_chr07 | 37236243                | TT                              | CC              | 1946898851               |

| SNPs IDs               | Chromosome IDs | Chromosomes     | Physical positions (bp) | CDC Frontier (Reference genome) | (ILWC46 & LPNB) | NCBI SNPdb Accession IDs |
|------------------------|----------------|-----------------|-------------------------|---------------------------------|-----------------|--------------------------|
| SNP_P4_101927_37247986 | NC_021166.1    | Ca_kabuli_chr07 | 37247986                | CC                              | AA              | 1946898853               |
| SNP_P4_101928_37248229 | NC_021166.1    | Ca_kabuli_chr07 | 37248229                | TT                              | AA              | 1946898855               |
| SNP_P4_101929_37251714 | NC_021166.1    | Ca_kabuli_chr07 | 37251714                | TT                              | CC              | 1946898857               |
| SNP_P4_101930_37255474 | NC_021166.1    | Ca_kabuli_chr07 | 37255474                | CC                              | TT              | 1946898859               |
| SNP_P4_101931_37257096 | NC_021166.1    | Ca_kabuli_chr07 | 37257096                | CC                              | GG              | 1946898861               |
| SNP_P4_101932_37260119 | NC_021166.1    | Ca_kabuli_chr07 | 37260119                | TT                              | CC              | 1946898863               |
| SNP_P4_101933_37262688 | NC_021166.1    | Ca_kabuli_chr07 | 37262688                | TT                              | GG              | 1946898865               |
| SNP_P4_101934_37270834 | NC_021166.1    | Ca_kabuli_chr07 | 37270834                | TT                              | CC              | 1946898867               |
| SNP_P4_101935_37274363 | NC_021166.1    | Ca_kabuli_chr07 | 37274363                | AA                              | GG              | 1946898869               |
| SNP_P4_101936_37274372 | NC_021166.1    | Ca_kabuli_chr07 | 37274372                | CC                              | GG              | 1946898871               |
| SNP_P4_101937_37274428 | NC_021166.1    | Ca_kabuli_chr07 | 37274428                | TT                              | CC              | 1946898873               |
| SNP_P4_101938_37281954 | NC_021166.1    | Ca_kabuli_chr07 | 37281954                | AA                              | TT              | 1946898875               |
| SNP_P4_101940_37282115 | NC_021166.1    | Ca_kabuli_chr07 | 37282115                | TT                              | CC              | 1946898877               |
| SNP_P4_101941_37282148 | NC_021166.1    | Ca_kabuli_chr07 | 37282148                | AA                              | GG              | 1946898879               |
| SNP_P4_101942_37282586 | NC_021166.1    | Ca_kabuli_chr07 | 37282586                | AA                              | TT              | 1946898881               |
| SNP_P4_101943_37292301 | NC_021166.1    | Ca_kabuli_chr07 | 37292301                | AA                              | GG              | 1946898883               |
| SNP_P4_101944_37292376 | NC_021166.1    | Ca_kabuli_chr07 | 37292376                | AA                              | GG              | 1946898885               |
| SNP_P4_101945_37292550 | NC_021166.1    | Ca_kabuli_chr07 | 37292550                | AA                              | TT              | 1946898887               |
| SNP_P4_101946_37292610 | NC_021166.1    | Ca_kabuli_chr07 | 37292610                | GG                              | TT              | 1946898889               |
| SNP_P4_101947_37292645 | NC_021166.1    | Ca_kabuli_chr07 | 37292645                | TT                              | AA              | 1946898892               |
| SNP_P4_101948_37292662 | NC_021166.1    | Ca_kabuli_chr07 | 37292662                | CC                              | AA              | 1946898894               |
| SNP_P4_101949_37292667 | NC_021166.1    | Ca_kabuli_chr07 | 37292667                | TT                              | AA              | 1946898896               |
| SNP_P4_101950_37302094 | NC_021166.1    | Ca_kabuli_chr07 | 37302094                | GG                              | CC              | 1946898898               |
| SNP_P4_101951_37302926 | NC_021166.1    | Ca_kabuli_chr07 | 37302926                | AA                              | TT              | 1946898900               |
| SNP_P4_101952_37302998 | NC_021166.1    | Ca_kabuli_chr07 | 37302998                | AA                              | GG              | 1946898902               |
| SNP_P4_101953_37302999 | NC_021166.1    | Ca_kabuli_chr07 | 37302999                | TT                              | AA              | 1946898904               |
| SNP_P4_101954_37312799 | NC_021166.1    | Ca_kabuli_chr07 | 37312799                | TT                              | AA              | 1946898906               |
| SNP_P4_101955_37315291 | NC_021166.1    | Ca_kabuli_chr07 | 37315291                | CC                              | TT              | 1946898908               |
| SNP_P4_101956_37315366 | NC_021166.1    | Ca_kabuli_chr07 | 37315366                | AA                              | GG              | 1946898910               |
| SNP_P4_101957_37316032 | NC_021166.1    | Ca_kabuli_chr07 | 37316032                | TT                              | CC              | 1946898912               |
| SNP_P4_101958_37316041 | NC_021166.1    | Ca_kabuli_chr07 | 37316041                | AA                              | GG              | 1946898914               |
| SNP_P4_101959_37316049 | NC_021166.1    | Ca_kabuli_chr07 | 37316049                | AA                              | GG              | 1946898917               |
| SNP_P4_101960_37316052 | NC_021166.1    | Ca_kabuli_chr07 | 37316052                | TT                              | GG              | 1946898919               |
| SNP_P4_101961_37316499 | NC_021166.1    | Ca_kabuli_chr07 | 37316499                | AA                              | GG              | 1946898921               |
| SNP_P4_101962_37321503 | NC_021166.1    | Ca_kabuli_chr07 | 37321503                | CC                              | GG              | 1946898923               |
| SNP_P4_101963_37321548 | NC_021166.1    | Ca_kabuli_chr07 | 37321548                | AA                              | CC              | 1946898925               |
| SNP_P4_101964_37321549 | NC_021166.1    | Ca_kabuli_chr07 | 37321549                | AA                              | GG              | 1946898926               |
| SNP_P4_101965_37321553 | NC_021166.1    | Ca_kabuli_chr07 | 37321553                | CC                              | TT              | 1946898928               |
| SNP_P4_101966_37323189 | NC_021166.1    | Ca_kabuli_chr07 | 37323189                | GG                              | AA              | 1946898930               |
| SNP_P4_101967_37324306 | NC_021166.1    | Ca_kabuli_chr07 | 37324306                | TT                              | GG              | 1946898932               |
| SNP_P4_101968_37339316 | NC_021166.1    | Ca_kabuli_chr07 | 37339316                | TT                              | CC              | 1946898934               |
| SNP_P4_101969_37339319 | NC_021166.1    | Ca_kabuli_chr07 | 37339319                | GG                              | TT              | 1946898936               |



| SNPs IDs               | Chromosome IDs | Chromosomes     | Physical positions (bp) | CDC Frontier (Reference genome) | (ILWC46 & LPNB) | NCBI SNPdb Accession IDs |
|------------------------|----------------|-----------------|-------------------------|---------------------------------|-----------------|--------------------------|
| SNP_P4_101970_37346045 | NC_021166.1    | Ca_kabuli_chr07 | 37346045                | AA                              | GG              | 1946898938               |
| SNP_P4_101971_37347143 | NC_021166.1    | Ca_kabuli_chr07 | 37347143                | GG                              | CC              | 1946898940               |
| SNP_P4_101972_37349396 | NC_021166.1    | Ca_kabuli_chr07 | 37349396                | AA                              | GG              | 1946898942               |
| SNP_P4_101973_37349397 | NC_021166.1    | Ca_kabuli_chr07 | 37349397                | CC                              | GG              | 1946898944               |
| SNP_P4_101974_37350358 | NC_021166.1    | Ca_kabuli_chr07 | 37350358                | TT                              | AA              | 1946898946               |
| SNP_P4_101975_37350361 | NC_021166.1    | Ca_kabuli_chr07 | 37350361                | AA                              | GG              | 1946898948               |
| SNP_P4_101976_37350362 | NC_021166.1    | Ca_kabuli_chr07 | 37350362                | GG                              | TT              | 1946898950               |
| SNP_P4_101977_37366427 | NC_021166.1    | Ca_kabuli_chr07 | 37366427                | GG                              | CC              | 1946898952               |
| SNP_P4_101978_37367176 | NC_021166.1    | Ca_kabuli_chr07 | 37367176                | AA                              | GG              | 1946898954               |
| SNP_P4_101979_37367177 | NC_021166.1    | Ca_kabuli_chr07 | 37367177                | AA                              | TT              | 1946898956               |
| SNP_P4_101980_37367193 | NC_021166.1    | Ca_kabuli_chr07 | 37367193                | TT                              | GG              | 1946898958               |
| SNP_P4_101981_37370017 | NC_021166.1    | Ca_kabuli_chr07 | 37370017                | TT                              | CC              | 1946898959               |
| SNP_P4_101982_37370080 | NC_021166.1    | Ca_kabuli_chr07 | 37370080                | AA                              | TT              | 1946898961               |
| SNP_P4_101983_37370333 | NC_021166.1    | Ca_kabuli_chr07 | 37370333                | GG                              | TT              | 1946898963               |
| SNP_P4_101984_37372023 | NC_021166.1    | Ca_kabuli_chr07 | 37372023                | GG                              | TT              | 1946898965               |
| SNP_P4_101985_37372128 | NC_021166.1    | Ca_kabuli_chr07 | 37372128                | GG                              | TT              | 1946898967               |
| SNP_P4_101986_37372158 | NC_021166.1    | Ca_kabuli_chr07 | 37372158                | AA                              | TT              | 1946898969               |
| SNP_P4_101987_37372387 | NC_021166.1    | Ca_kabuli_chr07 | 37372387                | CC                              | TT              | 1946898971               |
| SNP_P4_101988_37372540 | NC_021166.1    | Ca_kabuli_chr07 | 37372540                | CC                              | TT              | 1946898973               |
| SNP_P4_101989_37372971 | NC_021166.1    | Ca_kabuli_chr07 | 37372971                | CC                              | TT              | 1946898975               |
| SNP_P4_101990_37374030 | NC_021166.1    | Ca_kabuli_chr07 | 37374030                | CC                              | AA              | 1946898977               |
| SNP_P4_101991_37374036 | NC_021166.1    | Ca_kabuli_chr07 | 37374036                | GG                              | AA              | 1946898979               |
| SNP_P4_101992_37374227 | NC_021166.1    | Ca_kabuli_chr07 | 37374227                | TT                              | GG              | 1946898981               |
| SNP_P4_101993_37374235 | NC_021166.1    | Ca_kabuli_chr07 | 37374235                | AA                              | CC              | 1946898983               |
| SNP_P4_101995_37374257 | NC_021166.1    | Ca_kabuli_chr07 | 37374257                | AA                              | GG              | 1946898985               |
| SNP_P4_101996_37374269 | NC_021166.1    | Ca_kabuli_chr07 | 37374269                | TT                              | CC              | 1946898987               |
| SNP_P4_101998_37381341 | NC_021166.1    | Ca_kabuli_chr07 | 37381341                | GG                              | AA              | 1946898989               |
| SNP_P4_101999_37381613 | NC_021166.1    | Ca_kabuli_chr07 | 37381613                | CC                              | TT              | 1946898991               |
| SNP_P4_102000_37381963 | NC_021166.1    | Ca_kabuli_chr07 | 37381963                | GG                              | AA              | 1946898993               |
| SNP_P4_102001_37417291 | NC_021166.1    | Ca_kabuli_chr07 | 37417291                | AA                              | TT              | 1946898995               |
| SNP_P4_102002_37417300 | NC_021166.1    | Ca_kabuli_chr07 | 37417300                | TT                              | AA              | 1946898997               |
| SNP_P4_102003_37417556 | NC_021166.1    | Ca_kabuli_chr07 | 37417556                | TT                              | GG              | 1946898999               |
| SNP_P4_102004_37418287 | NC_021166.1    | Ca_kabuli_chr07 | 37418287                | AA                              | TT              | 1946899001               |
| SNP_P4_102005_37418302 | NC_021166.1    | Ca_kabuli_chr07 | 37418302                | AA                              | CC              | 1946899003               |
| SNP_P4_102006_37427294 | NC_021166.1    | Ca_kabuli_chr07 | 37427294                | TT                              | CC              | 1946899005               |
| SNP_P4_102007_37427583 | NC_021166.1    | Ca_kabuli_chr07 | 37427583                | AA                              | CC              | 1946899007               |
| SNP_P4_102008_37427608 | NC_021166.1    | Ca_kabuli_chr07 | 37427608                | TT                              | CC              | 1946899009               |
| SNP_P4_102009_37427847 | NC_021166.1    | Ca_kabuli_chr07 | 37427847                | AA                              | CC              | 1946899011               |
| SNP_P4_102010_37427897 | NC_021166.1    | Ca_kabuli_chr07 | 37427897                | TT                              | AA              | 1946899013               |
| SNP_P4_102011_37427905 | NC_021166.1    | Ca_kabuli_chr07 | 37427905                | CC                              | TT              | 1946899014               |
| SNP_P4_102012_37427908 | NC_021166.1    | Ca_kabuli_chr07 | 37427908                | TT                              | CC              | 1946899016               |
| SNP_P4_102013_37437486 | NC_021166.1    | Ca_kabuli_chr07 | 37437486                | TT                              | AA              | 1946899018               |

| SNPs IDs               | Chromosome IDs | Chromosomes     | Physical positions (bp) | CDC Frontier (Reference genome) | (ILWC46 & LPNB) | NCBI SNPdb Accession IDs |
|------------------------|----------------|-----------------|-------------------------|---------------------------------|-----------------|--------------------------|
| SNP_P4_102014_37437572 | NC_021166.1    | Ca_kabuli_chr07 | 37437572                | TT                              | GG              | 1946899020               |
| SNP_P4_102015_37437579 | NC_021166.1    | Ca_kabuli_chr07 | 37437579                | CC                              | AA              | 1946899023               |
| SNP_P4_102016_37437580 | NC_021166.1    | Ca_kabuli_chr07 | 37437580                | GG                              | TT              | 1946899025               |
| SNP_P4_102017_37437646 | NC_021166.1    | Ca_kabuli_chr07 | 37437646                | CC                              | TT              | 1946899027               |
| SNP_P4_102018_37441012 | NC_021166.1    | Ca_kabuli_chr07 | 37441012                | CC                              | TT              | 1946899029               |
| SNP_P4_102019_37453623 | NC_021166.1    | Ca_kabuli_chr07 | 37453623                | TT                              | GG              | 1946899031               |
| SNP_P4_102020_37457874 | NC_021166.1    | Ca_kabuli_chr07 | 37457874                | AA                              | TT              | 1946899033               |
| SNP_P4_102021_37469854 | NC_021166.1    | Ca_kabuli_chr07 | 37469854                | TT                              | CC              | 1946899035               |
| SNP_P4_102022_37478031 | NC_021166.1    | Ca_kabuli_chr07 | 37478031                | GG                              | TT              | 1946899037               |
| SNP_P4_102023_37478250 | NC_021166.1    | Ca_kabuli_chr07 | 37478250                | GG                              | TT              | 1946899039               |
| SNP_P4_102024_37479291 | NC_021166.1    | Ca_kabuli_chr07 | 37479291                | TT                              | CC              | 1946899041               |
| SNP_P4_102025_37479294 | NC_021166.1    | Ca_kabuli_chr07 | 37479294                | GG                              | AA              | 1946899043               |
| SNP_P4_102026_37479300 | NC_021166.1    | Ca_kabuli_chr07 | 37479300                | GG                              | AA              | 1946899045               |
| SNP_P4_102027_37479683 | NC_021166.1    | Ca_kabuli_chr07 | 37479683                | AA                              | GG              | 1946899047               |
| SNP_P4_102028_37479690 | NC_021166.1    | Ca_kabuli_chr07 | 37479690                | TT                              | CC              | 1946899049               |
| SNP_P4_102029_37479738 | NC_021166.1    | Ca_kabuli_chr07 | 37479738                | AA                              | TT              | 1946899051               |
| SNP_P4_102030_37479760 | NC_021166.1    | Ca_kabuli_chr07 | 37479760                | CC                              | TT              | 1946899053               |
| SNP_P4_102031_37482641 | NC_021166.1    | Ca_kabuli_chr07 | 37482641                | GG                              | TT              | 1946899055               |
| SNP_P4_102032_37484509 | NC_021166.1    | Ca_kabuli_chr07 | 37484509                | TT                              | CC              | 1946899057               |
| SNP_P4_102033_37488898 | NC_021166.1    | Ca_kabuli_chr07 | 37488898                | CC                              | TT              | 1946899058               |
| SNP_P4_102034_37490738 | NC_021166.1    | Ca_kabuli_chr07 | 37490738                | GG                              | AA              | 1946899060               |
| SNP_P4_102036_37491334 | NC_021166.1    | Ca_kabuli_chr07 | 37491334                | GG                              | AA              | 1946899062               |
| SNP_P4_102037_37493397 | NC_021166.1    | Ca_kabuli_chr07 | 37493397                | GG                              | AA              | 1946899064               |
| SNP_P4_102038_37493921 | NC_021166.1    | Ca_kabuli_chr07 | 37493921                | TT                              | CC              | 1946899066               |
| SNP_P4_102039_37494163 | NC_021166.1    | Ca_kabuli_chr07 | 37494163                | AA                              | TT              | 1946899068               |
| SNP_P4_102040_37495279 | NC_021166.1    | Ca_kabuli_chr07 | 37495279                | GG                              | AA              | 1946899070               |
| SNP_P4_102041_37495344 | NC_021166.1    | Ca_kabuli_chr07 | 37495344                | GG                              | AA              | 1946899072               |
| SNP_P4_102042_37496505 | NC_021166.1    | Ca_kabuli_chr07 | 37496505                | CC                              | TT              | 1946899074               |
| SNP_P4_102043_37496656 | NC_021166.1    | Ca_kabuli_chr07 | 37496656                | CC                              | TT              | 1946899076               |
| SNP_P4_102044_37496696 | NC_021166.1    | Ca_kabuli_chr07 | 37496696                | AA                              | GG              | 1946899078               |
| SNP_P4_102045_37496697 | NC_021166.1    | Ca_kabuli_chr07 | 37496697                | CC                              | TT              | 1946899080               |
| SNP_P4_102046_37496908 | NC_021166.1    | Ca_kabuli_chr07 | 37496908                | AA                              | CC              | 1946899082               |
| SNP_P4_102047_37497044 | NC_021166.1    | Ca_kabuli_chr07 | 37497044                | AA                              | GG              | 1946899084               |
| SNP_P4_102048_37497933 | NC_021166.1    | Ca_kabuli_chr07 | 37497933                | GG                              | AA              | 1946899086               |
| SNP_P4_102049_37498072 | NC_021166.1    | Ca_kabuli_chr07 | 37498072                | GG                              | AA              | 1946899088               |
| SNP_P4_102050_37498084 | NC_021166.1    | Ca_kabuli_chr07 | 37498084                | TT                              | AA              | 1946899090               |
| SNP_P4_102051_37498085 | NC_021166.1    | Ca_kabuli_chr07 | 37498085                | TT                              | CC              | 1946899092               |
| SNP_P4_102052_37498086 | NC_021166.1    | Ca_kabuli_chr07 | 37498086                | GG                              | TT              | 1946899094               |
| SNP_P4_102053_37498100 | NC_021166.1    | Ca_kabuli_chr07 | 37498100                | CC                              | TT              | 1946899096               |
| SNP_P4_102054_37498357 | NC_021166.1    | Ca_kabuli_chr07 | 37498357                | GG                              | AA              | 1946899098               |
| SNP_P4_102055_37498373 | NC_021166.1    | Ca_kabuli_chr07 | 37498373                | GG                              | AA              | 1946899100               |
| SNP_P4_102056_37502433 | NC_021166.1    | Ca_kabuli_chr07 | 37502433                | CC                              | AA              | 1946899103               |

| SNPs IDs               | Chromosome IDs | Chromosomes     | Physical positions (bp) | CDC Frontier (Reference genome) | (ILWC46 & LPNB) | NCBI SNPdb Accession IDs |
|------------------------|----------------|-----------------|-------------------------|---------------------------------|-----------------|--------------------------|
| SNP_P4_102057_37502829 | NC_021166.1    | Ca_kabuli_chr07 | 37502829                | TT                              | CC              | 1946899105               |
| SNP_P4_102058_37502862 | NC_021166.1    | Ca_kabuli_chr07 | 37502862                | GG                              | AA              | 1946899107               |
| SNP_P4_102059_37504295 | NC_021166.1    | Ca_kabuli_chr07 | 37504295                | CC                              | AA              | 1946899109               |
| SNP_P4_102060_37504410 | NC_021166.1    | Ca_kabuli_chr07 | 37504410                | GG                              | AA              | 1946899111               |
| SNP_P4_102061_37506801 | NC_021166.1    | Ca_kabuli_chr07 | 37506801                | GG                              | AA              | 1946899113               |
| SNP_P4_102062_37507196 | NC_021166.1    | Ca_kabuli_chr07 | 37507196                | AA                              | TT              | 1946899115               |
| SNP_P4_102063_37510567 | NC_021166.1    | Ca_kabuli_chr07 | 37510567                | GG                              | AA              | 1946899117               |
| SNP_P4_102064_37513443 | NC_021166.1    | Ca_kabuli_chr07 | 37513443                | AA                              | CC              | 1946899119               |
| SNP_P4_102065_37513557 | NC_021166.1    | Ca_kabuli_chr07 | 37513557                | CC                              | TT              | 1946899121               |
| SNP_P4_102066_37513730 | NC_021166.1    | Ca_kabuli_chr07 | 37513730                | AA                              | CC              | 1946899123               |
| SNP_P4_102067_37516385 | NC_021166.1    | Ca_kabuli_chr07 | 37516385                | AA                              | GG              | 1946899125               |
| SNP_P4_102068_37516488 | NC_021166.1    | Ca_kabuli_chr07 | 37516488                | CC                              | AA              | 1946899127               |
| SNP_P4_102069_37517608 | NC_021166.1    | Ca_kabuli_chr07 | 37517608                | AA                              | TT              | 1946899130               |
| SNP_P4_102070_37529840 | NC_021166.1    | Ca_kabuli_chr07 | 37529840                | GG                              | AA              | 1946899132               |
| SNP_P4_102071_37530372 | NC_021166.1    | Ca_kabuli_chr07 | 37530372                | TT                              | CC              | 1946899134               |
| SNP_P4_102073_37539386 | NC_021166.1    | Ca_kabuli_chr07 | 37539386                | GG                              | AA              | 1946899136               |
| SNP_P4_102074_37540026 | NC_021166.1    | Ca_kabuli_chr07 | 37540026                | GG                              | AA              | 1946899139               |
| SNP_P4_102075_37540139 | NC_021166.1    | Ca_kabuli_chr07 | 37540139                | AA                              | GG              | 1946899141               |
| SNP_P4_102076_37541642 | NC_021166.1    | Ca_kabuli_chr07 | 37541642                | TT                              | AA              | 1946899143               |
| SNP_P4_102077_37543131 | NC_021166.1    | Ca_kabuli_chr07 | 37543131                | CC                              | TT              | 1946899145               |
| SNP_P4_102079_37544607 | NC_021166.1    | Ca_kabuli_chr07 | 37544607                | TT                              | CC              | 1946899147               |
| SNP_P4_102080_37546515 | NC_021166.1    | Ca_kabuli_chr07 | 37546515                | TT                              | CC              | 1946899149               |
| SNP_P4_102081_37547201 | NC_021166.1    | Ca_kabuli_chr07 | 37547201                | AA                              | TT              | 1946899151               |
| SNP_P4_102082_37548127 | NC_021166.1    | Ca_kabuli_chr07 | 37548127                | TT                              | GG              | 1946899153               |
| SNP_P4_102084_37550592 | NC_021166.1    | Ca_kabuli_chr07 | 37550592                | TT                              | CC              | 1946899155               |
| SNP_P4_102085_37551576 | NC_021166.1    | Ca_kabuli_chr07 | 37551576                | GG                              | AA              | 1946899157               |
| SNP_P4_102086_37551641 | NC_021166.1    | Ca_kabuli_chr07 | 37551641                | CC                              | TT              | 1946899159               |
| SNP_P4_102087_37551711 | NC_021166.1    | Ca_kabuli_chr07 | 37551711                | GG                              | AA              | 1946899161               |
| SNP_P4_102088_37556631 | NC_021166.1    | Ca_kabuli_chr07 | 37556631                | GG                              | AA              | 1946899164               |
| SNP_P4_102089_37558298 | NC_021166.1    | Ca_kabuli_chr07 | 37558298                | AA                              | GG              | 1946899166               |
| SNP_P4_102090_37559062 | NC_021166.1    | Ca_kabuli_chr07 | 37559062                | TT                              | CC              | 1946899168               |
| SNP_P4_102091_37562927 | NC_021166.1    | Ca_kabuli_chr07 | 37562927                | CC                              | TT              | 1946899170               |
| SNP_P4_102092_37562941 | NC_021166.1    | Ca_kabuli_chr07 | 37562941                | CC                              | TT              | 1946899172               |
| SNP_P4_102093_37564511 | NC_021166.1    | Ca_kabuli_chr07 | 37564511                | AA                              | GG              | 1946899174               |
| SNP_P4_102094_37564878 | NC_021166.1    | Ca_kabuli_chr07 | 37564878                | GG                              | TT              | 1946899176               |
| SNP_P4_102095_37565068 | NC_021166.1    | Ca_kabuli_chr07 | 37565068                | AA                              | GG              | 1946899178               |
| SNP_P4_102096_37565461 | NC_021166.1    | Ca_kabuli_chr07 | 37565461                | GG                              | AA              | 1946899180               |
| SNP_P4_102097_37565534 | NC_021166.1    | Ca_kabuli_chr07 | 37565534                | GG                              | AA              | 1946899182               |
| SNP_P4_102098_37567754 | NC_021166.1    | Ca_kabuli_chr07 | 37567754                | GG                              | AA              | 1946899184               |
| SNP_P4_102101_37568113 | NC_021166.1    | Ca_kabuli_chr07 | 37568113                | TT                              | CC              | 1946899186               |
| SNP_P4_102102_37568745 | NC_021166.1    | Ca_kabuli_chr07 | 37568745                | TT                              | CC              | 1946899188               |
| SNP_P4_102103_37568766 | NC_021166.1    | Ca_kabuli_chr07 | 37568766                | GG                              | AA              | 1946899190               |

| SNPs IDs               | Chromosome IDs | Chromosomes     | Physical positions (bp) | CDC Frontier (Reference genome) | (ILWC46 & LPNB) | NCBI SNPdb Accession IDs |
|------------------------|----------------|-----------------|-------------------------|---------------------------------|-----------------|--------------------------|
| SNP_P4_102104_37569522 | NC_021166.1    | Ca_kabuli_chr07 | 37569522                | AA                              | CC              | 1946899192               |
| SNP_P4_102105_37570631 | NC_021166.1    | Ca_kabuli_chr07 | 37570631                | CC                              | TT              | 1946899194               |
| SNP_P4_102106_37572720 | NC_021166.1    | Ca_kabuli_chr07 | 37572720                | CC                              | TT              | 1946899196               |
| SNP_P4_102107_37573888 | NC_021166.1    | Ca_kabuli_chr07 | 37573888                | GG                              | AA              | 1946899198               |
| SNP_P4_102108_37573900 | NC_021166.1    | Ca_kabuli_chr07 | 37573900                | TT                              | CC              | 1946899199               |
| SNP_P4_102109_37574009 | NC_021166.1    | Ca_kabuli_chr07 | 37574009                | GG                              | AA              | 1946899201               |
| SNP_P4_102110_37574387 | NC_021166.1    | Ca_kabuli_chr07 | 37574387                | AA                              | GG              | 1946899203               |
| SNP_P4_102111_37574389 | NC_021166.1    | Ca_kabuli_chr07 | 37574389                | GG                              | AA              | 1946899205               |
| SNP_P4_102112_37576712 | NC_021166.1    | Ca_kabuli_chr07 | 37576712                | GG                              | AA              | 1946899207               |
| SNP_P4_102113_37576713 | NC_021166.1    | Ca_kabuli_chr07 | 37576713                | AA                              | GG              | 1946899209               |
| SNP_P4_102114_37576883 | NC_021166.1    | Ca_kabuli_chr07 | 37576883                | GG                              | AA              | 1946899211               |
| SNP_P4_102115_37577008 | NC_021166.1    | Ca_kabuli_chr07 | 37577008                | CC                              | TT              | 1946899213               |
| SNP_P4_102116_37577015 | NC_021166.1    | Ca_kabuli_chr07 | 37577015                | TT                              | CC              | 1946899215               |
| SNP_P4_102117_37583265 | NC_021166.1    | Ca_kabuli_chr07 | 37583265                | TT                              | AA              | 1946899217               |
| SNP_P4_102118_37583282 | NC_021166.1    | Ca_kabuli_chr07 | 37583282                | AA                              | GG              | 1946899219               |
| SNP_P4_102120_37586009 | NC_021166.1    | Ca_kabuli_chr07 | 37586009                | GG                              | AA              | 1946899221               |
| SNP_P4_102122_37589034 | NC_021166.1    | Ca_kabuli_chr07 | 37589034                | CC                              | TT              | 1946899223               |
| SNP_P4_102123_37589213 | NC_021166.1    | Ca_kabuli_chr07 | 37589213                | AA                              | CC              | 1946899225               |
| SNP_P4_102124_37589381 | NC_021166.1    | Ca_kabuli_chr07 | 37589381                | TT                              | CC              | 1946899227               |
| SNP_P4_102125_37589396 | NC_021166.1    | Ca_kabuli_chr07 | 37589396                | TT                              | CC              | 1946899229               |
| SNP_P4_102127_37593749 | NC_021166.1    | Ca_kabuli_chr07 | 37593749                | AA                              | GG              | 1946899231               |
| SNP_P4_102128_37593750 | NC_021166.1    | Ca_kabuli_chr07 | 37593750                | CC                              | TT              | 1946899233               |
| SNP_P4_102130_37594896 | NC_021166.1    | Ca_kabuli_chr07 | 37594896                | TT                              | GG              | 1946899235               |
| SNP_P4_102131_37594901 | NC_021166.1    | Ca_kabuli_chr07 | 37594901                | GG                              | AA              | 1946899236               |
| SNP_P4_102132_37595376 | NC_021166.1    | Ca_kabuli_chr07 | 37595376                | GG                              | TT              | 1946899238               |
| SNP_P4_102134_37595787 | NC_021166.1    | Ca_kabuli_chr07 | 37595787                | AA                              | TT              | 1946899240               |
| SNP_P4_102135_37614570 | NC_021166.1    | Ca_kabuli_chr07 | 37614570                | AA                              | GG              | 1946899242               |
| SNP_P4_102136_37614899 | NC_021166.1    | Ca_kabuli_chr07 | 37614899                | GG                              | CC              | 1946899244               |
| SNP_P4_102137_37615154 | NC_021166.1    | Ca_kabuli_chr07 | 37615154                | AA                              | CC              | 1946899246               |
| SNP_P4_102138_37615200 | NC_021166.1    | Ca_kabuli_chr07 | 37615200                | TT                              | CC              | 1946899248               |
| SNP_P4_102139_37615336 | NC_021166.1    | Ca_kabuli_chr07 | 37615336                | AA                              | GG              | 1946899250               |
| SNP_P4_102140_37615573 | NC_021166.1    | Ca_kabuli_chr07 | 37615573                | GG                              | AA              | 1946899252               |
| SNP_P4_102141_37616093 | NC_021166.1    | Ca_kabuli_chr07 | 37616093                | TT                              | CC              | 1946899254               |
| SNP_P4_102143_37618247 | NC_021166.1    | Ca_kabuli_chr07 | 37618247                | TT                              | CC              | 1946899256               |
| SNP_P4_102145_37620319 | NC_021166.1    | Ca_kabuli_chr07 | 37620319                | AA                              | GG              | 1946899258               |
| SNP_P4_102146_37622066 | NC_021166.1    | Ca_kabuli_chr07 | 37622066                | CC                              | TT              | 1946899260               |
| SNP_P4_102147_37622097 | NC_021166.1    | Ca_kabuli_chr07 | 37622097                | TT                              | CC              | 1946899262               |
| SNP_P4_102148_37622163 | NC_021166.1    | Ca_kabuli_chr07 | 37622163                | TT                              | CC              | 1946899264               |
| SNP_P4_102149_37622207 | NC_021166.1    | Ca_kabuli_chr07 | 37622207                | CC                              | TT              | 1946899266               |
| SNP_P4_102151_37622226 | NC_021166.1    | Ca_kabuli_chr07 | 37622226                | AA                              | GG              | 1946899268               |
| SNP_P4_102152_37622247 | NC_021166.1    | Ca_kabuli_chr07 | 37622247                | AA                              | TT              | 1946899270               |
| SNP_P4_102153_37622256 | NC_021166.1    | Ca_kabuli_chr07 | 37622256                | AA                              | GG              | 1946899272               |

| SNPs IDs               | Chromosome IDs | Chromosomes     | Physical positions (bp) | CDC Frontier (Reference genome) | (ILWC46 & LPNB) | NCBI SNPdb Accession IDs |
|------------------------|----------------|-----------------|-------------------------|---------------------------------|-----------------|--------------------------|
| SNP_P4_102154_37622427 | NC_021166.1    | Ca_kabuli_chr07 | 37622427                | CC                              | AA              | 1946899274               |
| SNP_P4_102155_37622438 | NC_021166.1    | Ca_kabuli_chr07 | 37622438                | TT                              | CC              | 1946899275               |
| SNP_P4_102156_37622482 | NC_021166.1    | Ca_kabuli_chr07 | 37622482                | TT                              | CC              | 1946899277               |
| SNP_P4_102157_37622513 | NC_021166.1    | Ca_kabuli_chr07 | 37622513                | CC                              | TT              | 1946899279               |
| SNP_P4_102158_37622563 | NC_021166.1    | Ca_kabuli_chr07 | 37622563                | TT                              | CC              | 1946899281               |
| SNP_P4_102159_37622572 | NC_021166.1    | Ca_kabuli_chr07 | 37622572                | GG                              | AA              | 1946899283               |
| SNP_P4_102160_37622582 | NC_021166.1    | Ca_kabuli_chr07 | 37622582                | GG                              | AA              | 1946899285               |
| SNP_P4_102161_37622618 | NC_021166.1    | Ca_kabuli_chr07 | 37622618                | TT                              | CC              | 1946899287               |
| SNP_P4_102162_37622658 | NC_021166.1    | Ca_kabuli_chr07 | 37622658                | TT                              | CC              | 1946899289               |
| SNP_P4_102163_37622660 | NC_021166.1    | Ca_kabuli_chr07 | 37622660                | GG                              | AA              | 1946899291               |
| SNP_P4_102164_37622661 | NC_021166.1    | Ca_kabuli_chr07 | 37622661                | CC                              | TT              | 1946899293               |
| SNP_P4_102165_37622705 | NC_021166.1    | Ca_kabuli_chr07 | 37622705                | TT                              | CC              | 1946899295               |
| SNP_P4_102166_37622722 | NC_021166.1    | Ca_kabuli_chr07 | 37622722                | GG                              | CC              | 1946899297               |
| SNP_P4_102167_37622737 | NC_021166.1    | Ca_kabuli_chr07 | 37622737                | AA                              | GG              | 1946899299               |
| SNP_P4_102168_37622860 | NC_021166.1    | Ca_kabuli_chr07 | 37622860                | AA                              | TT              | 1946899302               |
| SNP_P4_102169_37622906 | NC_021166.1    | Ca_kabuli_chr07 | 37622906                | TT                              | GG              | 1946899304               |
| SNP_P4_102170_37623004 | NC_021166.1    | Ca_kabuli_chr07 | 37623004                | AA                              | GG              | 1946899306               |
| SNP_P4_102171_37623108 | NC_021166.1    | Ca_kabuli_chr07 | 37623108                | CC                              | TT              | 1946899308               |
| SNP_P4_102172_37626260 | NC_021166.1    | Ca_kabuli_chr07 | 37626260                | AA                              | GG              | 1946899310               |
| SNP_P4_102173_37626275 | NC_021166.1    | Ca_kabuli_chr07 | 37626275                | GG                              | AA              | 1946899312               |
| SNP_P4_102174_37626287 | NC_021166.1    | Ca_kabuli_chr07 | 37626287                | TT                              | CC              | 1946899314               |
| SNP_P4_102175_37626455 | NC_021166.1    | Ca_kabuli_chr07 | 37626455                | AA                              | GG              | 1946899316               |
| SNP_P4_102176_37626518 | NC_021166.1    | Ca_kabuli_chr07 | 37626518                | TT                              | CC              | 1946899318               |
| SNP_P4_102177_37626534 | NC_021166.1    | Ca_kabuli_chr07 | 37626534                | TT                              | CC              | 1946899320               |
| SNP_P4_102178_37626538 | NC_021166.1    | Ca_kabuli_chr07 | 37626538                | CC                              | TT              | 1946899322               |
| SNP_P4_102179_37626601 | NC_021166.1    | Ca_kabuli_chr07 | 37626601                | TT                              | CC              | 1946899324               |
| SNP_P4_102180_37626628 | NC_021166.1    | Ca_kabuli_chr07 | 37626628                | GG                              | AA              | 1946899326               |
| SNP_P4_102181_37626631 | NC_021166.1    | Ca_kabuli_chr07 | 37626631                | GG                              | AA              | 1946899328               |
| SNP_P4_102182_37626660 | NC_021166.1    | Ca_kabuli_chr07 | 37626660                | GG                              | TT              | 1946899330               |
| SNP_P4_102183_37626666 | NC_021166.1    | Ca_kabuli_chr07 | 37626666                | CC                              | TT              | 1946899332               |
| SNP_P4_102184_37631062 | NC_021166.1    | Ca_kabuli_chr07 | 37631062                | CC                              | TT              | 1946899334               |
| SNP_P4_102185_37631858 | NC_021166.1    | Ca_kabuli_chr07 | 37631858                | AA                              | CC              | 1946899335               |
| SNP_P4_102186_37638612 | NC_021166.1    | Ca_kabuli_chr07 | 37638612                | AA                              | TT              | 1946899337               |
| SNP_P4_102187_37638630 | NC_021166.1    | Ca_kabuli_chr07 | 37638630                | TT                              | CC              | 1946899339               |
| SNP_P4_102188_37640279 | NC_021166.1    | Ca_kabuli_chr07 | 37640279                | AA                              | GG              | 1946899341               |
| SNP_P4_102189_37640694 | NC_021166.1    | Ca_kabuli_chr07 | 37640694                | GG                              | CC              | 1946899343               |
| SNP_P4_102190_37641080 | NC_021166.1    | Ca_kabuli_chr07 | 37641080                | TT                              | GG              | 1946899345               |
| SNP_P4_102191_37646161 | NC_021166.1    | Ca_kabuli_chr07 | 37646161                | TT                              | CC              | 1946899347               |
| SNP_P4_102192_37648094 | NC_021166.1    | Ca_kabuli_chr07 | 37648094                | GG                              | AA              | 1946899349               |
| SNP_P4_102195_37665378 | NC_021166.1    | Ca_kabuli_chr07 | 37665378                | CC                              | AA              | 1946899351               |
| SNP_P4_102196_37667166 | NC_021166.1    | Ca_kabuli_chr07 | 37667166                | AA                              | GG              | 1946899353               |
| SNP_P4_102197_37667366 | NC_021166.1    | Ca_kabuli_chr07 | 37667366                | GG                              | AA              | 1946899355               |

| SNPs IDs               | Chromosome IDs | Chromosomes     | Physical positions (bp) | CDC Frontier (Reference genome) | (ILWC46 & LPNB) | NCBI SNPdb Accession IDs |
|------------------------|----------------|-----------------|-------------------------|---------------------------------|-----------------|--------------------------|
| SNP_P4_102198_37667367 | NC_021166.1    | Ca_kabuli_chr07 | 37667367                | AA                              | GG              | 1946899357               |
| SNP_P4_102199_37667370 | NC_021166.1    | Ca_kabuli_chr07 | 37667370                | AA                              | GG              | 1946899359               |
| SNP_P4_102200_37698456 | NC_021166.1    | Ca_kabuli_chr07 | 37698456                | AA                              | TT              | 1946899361               |
| SNP_P4_102201_37698471 | NC_021166.1    | Ca_kabuli_chr07 | 37698471                | GG                              | AA              | 1946899363               |
| SNP_P4_102202_37706049 | NC_021166.1    | Ca_kabuli_chr07 | 37706049                | TT                              | CC              | 1946899365               |
| SNP_P4_102203_37707765 | NC_021166.1    | Ca_kabuli_chr07 | 37707765                | TT                              | CC              | 1946899367               |
| SNP_P4_102204_37707944 | NC_021166.1    | Ca_kabuli_chr07 | 37707944                | CC                              | TT              | 1946899369               |
| SNP_P4_102206_37711495 | NC_021166.1    | Ca_kabuli_chr07 | 37711495                | CC                              | GG              | 1946899371               |
| SNP_P4_102207_37711550 | NC_021166.1    | Ca_kabuli_chr07 | 37711550                | TT                              | GG              | 1946899373               |
| SNP_P4_102208_37711595 | NC_021166.1    | Ca_kabuli_chr07 | 37711595                | CC                              | TT              | 1946899375               |
| SNP_P4_102209_37711596 | NC_021166.1    | Ca_kabuli_chr07 | 37711596                | GG                              | AA              | 1946899377               |
| SNP_P4_102210_37711721 | NC_021166.1    | Ca_kabuli_chr07 | 37711721                | CC                              | AA              | 1946899379               |
| SNP_P4_102211_37711767 | NC_021166.1    | Ca_kabuli_chr07 | 37711767                | GG                              | AA              | 1946899381               |
| SNP_P4_102212_37711785 | NC_021166.1    | Ca_kabuli_chr07 | 37711785                | TT                              | AA              | 1946899383               |
| SNP_P4_102214_37724206 | NC_021166.1    | Ca_kabuli_chr07 | 37724206                | GG                              | CC              | 1946899385               |
| SNP_P4_102215_37733164 | NC_021166.1    | Ca_kabuli_chr07 | 37733164                | GG                              | TT              | 1946899387               |
| SNP_P4_102217_37797705 | NC_021166.1    | Ca_kabuli_chr07 | 37797705                | CC                              | TT              | 1946899389               |
| SNP_P4_102218_37815009 | NC_021166.1    | Ca_kabuli_chr07 | 37815009                | TT                              | CC              | 1946899391               |
| SNP_P4_102219_37818898 | NC_021166.1    | Ca_kabuli_chr07 | 37818898                | GG                              | TT              | 1946899393               |
| SNP_P4_102220_37819473 | NC_021166.1    | Ca_kabuli_chr07 | 37819473                | CC                              | TT              | 1946899395               |
| SNP_P4_102221_37824275 | NC_021166.1    | Ca_kabuli_chr07 | 37824275                | TT                              | CC              | 1946899397               |
| SNP_P4_102222_37824588 | NC_021166.1    | Ca_kabuli_chr07 | 37824588                | GG                              | AA              | 1946899399               |
| SNP_P4_102223_37824612 | NC_021166.1    | Ca_kabuli_chr07 | 37824612                | TT                              | AA              | 1946899401               |
| SNP_P4_102224_37824632 | NC_021166.1    | Ca_kabuli_chr07 | 37824632                | AA                              | GG              | 1946899403               |
| SNP_P4_102225_37824915 | NC_021166.1    | Ca_kabuli_chr07 | 37824915                | AA                              | GG              | 1946899405               |
| SNP_P4_102226_37827106 | NC_021166.1    | Ca_kabuli_chr07 | 37827106                | AA                              | GG              | 1946899407               |
| SNP_P4_102227_37827138 | NC_021166.1    | Ca_kabuli_chr07 | 37827138                | GG                              | AA              | 1946899409               |
| SNP_P4_102228_37827240 | NC_021166.1    | Ca_kabuli_chr07 | 37827240                | TT                              | CC              | 1946899411               |
| SNP_P4_102229_37827261 | NC_021166.1    | Ca_kabuli_chr07 | 37827261                | CC                              | AA              | 1946899413               |
| SNP_P4_102230_37841939 | NC_021166.1    | Ca_kabuli_chr07 | 37841939                | TT                              | CC              | 1946899415               |
| SNP_P4_102231_37843092 | NC_021166.1    | Ca_kabuli_chr07 | 37843092                | AA                              | GG              | 1946899417               |
| SNP_P4_102232_37849767 | NC_021166.1    | Ca_kabuli_chr07 | 37849767                | AA                              | CC              | 1946899419               |
| SNP_P4_102233_37849812 | NC_021166.1    | Ca_kabuli_chr07 | 37849812                | AA                              | GG              | 1946899421               |
| SNP_P4_102234_37849841 | NC_021166.1    | Ca_kabuli_chr07 | 37849841                | AA                              | CC              | 1946899423               |
| SNP_P4_102235_37849909 | NC_021166.1    | Ca_kabuli_chr07 | 37849909                | TT                              | AA              | 1946899425               |
| SNP_P4_102236_37849951 | NC_021166.1    | Ca_kabuli_chr07 | 37849951                | AA                              | GG              | 1946899427               |
| SNP_P4_102237_37850116 | NC_021166.1    | Ca_kabuli_chr07 | 37850116                | TT                              | GG              | 1946899429               |
| SNP_P4_102238_37850276 | NC_021166.1    | Ca_kabuli_chr07 | 37850276                | AA                              | GG              | 1946899431               |
| SNP_P4_102239_37850290 | NC_021166.1    | Ca_kabuli_chr07 | 37850290                | TT                              | AA              | 1946899433               |
| SNP_P4_102240_37856907 | NC_021166.1    | Ca_kabuli_chr07 | 37856907                | GG                              | TT              | 1946899435               |
| SNP_P4_102241_37856920 | NC_021166.1    | Ca_kabuli_chr07 | 37856920                | AA                              | GG              | 1946899437               |
| SNP_P4_102242_37856932 | NC_021166.1    | Ca_kabuli_chr07 | 37856932                | GG                              | TT              | 1946899439               |

| SNPs IDs               | Chromosome IDs | Chromosomes     | Physical positions (bp) | CDC Frontier (Reference genome) | (ILWC46 & LPNB) | NCBI SNPdb Accession IDs |
|------------------------|----------------|-----------------|-------------------------|---------------------------------|-----------------|--------------------------|
| SNP_P4_102243_37856984 | NC_021166.1    | Ca_kabuli_chr07 | 37856984                | TT                              | GG              | 1946899441               |
| SNP_P4_102244_37857200 | NC_021166.1    | Ca_kabuli_chr07 | 37857200                | TT                              | GG              | 1946899443               |
| SNP_P4_102245_37857210 | NC_021166.1    | Ca_kabuli_chr07 | 37857210                | TT                              | CC              | 1946899445               |
| SNP_P4_102246_37860553 | NC_021166.1    | Ca_kabuli_chr07 | 37860553                | AA                              | CC              | 1946899447               |
| SNP_P4_102247_37860782 | NC_021166.1    | Ca_kabuli_chr07 | 37860782                | AA                              | CC              | 1946899449               |
| SNP_P4_102249_37879935 | NC_021166.1    | Ca_kabuli_chr07 | 37879935                | AA                              | GG              | 1946899451               |
| SNP_P4_102250_37879936 | NC_021166.1    | Ca_kabuli_chr07 | 37879936                | TT                              | CC              | 1946899453               |
| SNP_P4_102251_37879943 | NC_021166.1    | Ca_kabuli_chr07 | 37879943                | AA                              | GG              | 1946899455               |
| SNP_P4_102252_37893883 | NC_021166.1    | Ca_kabuli_chr07 | 37893883                | GG                              | AA              | 1946899457               |
| SNP_P4_102253_37893897 | NC_021166.1    | Ca_kabuli_chr07 | 37893897                | GG                              | CC              | 1946899459               |
| SNP_P4_102254_37893925 | NC_021166.1    | Ca_kabuli_chr07 | 37893925                | AA                              | GG              | 1946899461               |
| SNP_P4_102255_37893937 | NC_021166.1    | Ca_kabuli_chr07 | 37893937                | AA                              | GG              | 1946899463               |
| SNP_P4_102256_37894654 | NC_021166.1    | Ca_kabuli_chr07 | 37894654                | TT                              | AA              | 1946899465               |
| SNP_P4_102257_37904419 | NC_021166.1    | Ca_kabuli_chr07 | 37904419                | GG                              | TT              | 1946899467               |
| SNP_P4_102258_37904694 | NC_021166.1    | Ca_kabuli_chr07 | 37904694                | CC                              | GG              | 1946899469               |
| SNP_P4_102259_37904906 | NC_021166.1    | Ca_kabuli_chr07 | 37904906                | TT                              | GG              | 1946899471               |
| SNP_P4_102260_37904919 | NC_021166.1    | Ca_kabuli_chr07 | 37904919                | CC                              | TT              | 1946899473               |
| SNP_P4_102261_37914279 | NC_021166.1    | Ca_kabuli_chr07 | 37914279                | GG                              | TT              | 1946899474               |
| SNP_P4_102262_37915240 | NC_021166.1    | Ca_kabuli_chr07 | 37915240                | TT                              | CC              | 1946899476               |
| SNP_P4_102263_37915401 | NC_021166.1    | Ca_kabuli_chr07 | 37915401                | TT                              | GG              | 1946899478               |
| SNP_P4_102264_37927687 | NC_021166.1    | Ca_kabuli_chr07 | 37927687                | CC                              | TT              | 1946899480               |
| SNP_P4_102265_37948156 | NC_021166.1    | Ca_kabuli_chr07 | 37948156                | TT                              | GG              | 1946899482               |
| SNP_P4_102267_37992708 | NC_021166.1    | Ca_kabuli_chr07 | 37992708                | AA                              | CC              | 1946899484               |
| SNP_P4_102268_37992709 | NC_021166.1    | Ca_kabuli_chr07 | 37992709                | GG                              | AA              | 1946899486               |
| SNP_P4_102269_37992713 | NC_021166.1    | Ca_kabuli_chr07 | 37992713                | CC                              | AA              | 1946899488               |
| SNP_P4_102270_37992714 | NC_021166.1    | Ca_kabuli_chr07 | 37992714                | CC                              | TT              | 1946899490               |
| SNP_P4_102271_37992728 | NC_021166.1    | Ca_kabuli_chr07 | 37992728                | TT                              | AA              | 1946899491               |
| SNP_P4_102272_37992765 | NC_021166.1    | Ca_kabuli_chr07 | 37992765                | TT                              | CC              | 1946899493               |
| SNP_P4_102273_37992823 | NC_021166.1    | Ca_kabuli_chr07 | 37992823                | CC                              | TT              | 1946899495               |
| SNP_P4_102274_37992834 | NC_021166.1    | Ca_kabuli_chr07 | 37992834                | TT                              | AA              | 1946899497               |
| SNP_P4_102275_37993092 | NC_021166.1    | Ca_kabuli_chr07 | 37993092                | GG                              | AA              | 1946899499               |
| SNP_P4_102276_37993146 | NC_021166.1    | Ca_kabuli_chr07 | 37993146                | AA                              | GG              | 1946899501               |
| SNP_P4_102277_37993207 | NC_021166.1    | Ca_kabuli_chr07 | 37993207                | CC                              | TT              | 1946899503               |
| SNP_P4_102278_37993288 | NC_021166.1    | Ca_kabuli_chr07 | 37993288                | TT                              | CC              | 1946899505               |
| SNP_P4_102279_37993360 | NC_021166.1    | Ca_kabuli_chr07 | 37993360                | AA                              | TT              | 1946899507               |
| SNP_P4_102280_37999525 | NC_021166.1    | Ca_kabuli_chr07 | 37999525                | TT                              | CC              | 1946899509               |
| SNP_P4_102281_38014858 | NC_021166.1    | Ca_kabuli_chr07 | 38014858                | CC                              | TT              | 1946899511               |
| SNP_P4_102282_38024553 | NC_021166.1    | Ca_kabuli_chr07 | 38024553                | CC                              | TT              | 1946899513               |
| SNP_P4_102283_38057795 | NC_021166.1    | Ca_kabuli_chr07 | 38057795                | AA                              | GG              | 1946899515               |
| SNP_P4_102285_38069092 | NC_021166.1    | Ca_kabuli_chr07 | 38069092                | AA                              | GG              | 1946899517               |
| SNP_P4_102286_38072481 | NC_021166.1    | Ca_kabuli_chr07 | 38072481                | GG                              | AA              | 1946899519               |
| SNP_P4_102287_38072495 | NC_021166.1    | Ca_kabuli_chr07 | 38072495                | TT                              | AA              | 1946899521               |

| SNPs IDs               | Chromosome IDs | Chromosomes     | Physical positions (bp) | CDC Frontier (Reference genome) | (ILWC46 & LPNB) | NCBI SNPdb Accession IDs |
|------------------------|----------------|-----------------|-------------------------|---------------------------------|-----------------|--------------------------|
| SNP_P4_102288_38079344 | NC_021166.1    | Ca_kabuli_chr07 | 38079344                | CC                              | TT              | 1946899523               |
| SNP_P4_102289_38081052 | NC_021166.1    | Ca_kabuli_chr07 | 38081052                | CC                              | AA              | 1946899525               |
| SNP_P4_102290_38089857 | NC_021166.1    | Ca_kabuli_chr07 | 38089857                | GG                              | AA              | 1946899527               |
| SNP_P4_102291_38089890 | NC_021166.1    | Ca_kabuli_chr07 | 38089890                | CC                              | TT              | 1946899529               |
| SNP_P4_102292_38090196 | NC_021166.1    | Ca_kabuli_chr07 | 38090196                | AA                              | GG              | 1946899530               |
| SNP_P4_102294_38107100 | NC_021166.1    | Ca_kabuli_chr07 | 38107100                | TT                              | GG              | 1946899532               |
| SNP_P4_102295_38107142 | NC_021166.1    | Ca_kabuli_chr07 | 38107142                | AA                              | TT              | 1946899534               |
| SNP_P4_102296_38107150 | NC_021166.1    | Ca_kabuli_chr07 | 38107150                | GG                              | TT              | 1946899536               |
| SNP_P4_102297_38107352 | NC_021166.1    | Ca_kabuli_chr07 | 38107352                | GG                              | AA              | 1946899538               |
| SNP_P4_102298_38107395 | NC_021166.1    | Ca_kabuli_chr07 | 38107395                | GG                              | AA              | 1946899540               |
| SNP_P4_102299_38107432 | NC_021166.1    | Ca_kabuli_chr07 | 38107432                | TT                              | AA              | 1946899542               |
| SNP_P4_102300_38107449 | NC_021166.1    | Ca_kabuli_chr07 | 38107449                | AA                              | TT              | 1946899544               |
| SNP_P4_102301_38107468 | NC_021166.1    | Ca_kabuli_chr07 | 38107468                | CC                              | TT              | 1946899546               |
| SNP_P4_102302_38107470 | NC_021166.1    | Ca_kabuli_chr07 | 38107470                | AA                              | GG              | 1946899548               |
| SNP_P4_102303_38115860 | NC_021166.1    | Ca_kabuli_chr07 | 38115860                | TT                              | AA              | 1946899549               |
| SNP_P4_102305_38143361 | NC_021166.1    | Ca_kabuli_chr07 | 38143361                | GG                              | AA              | 1946899551               |
| SNP_P4_102307_38159469 | NC_021166.1    | Ca_kabuli_chr07 | 38159469                | GG                              | AA              | 1946899553               |
| SNP_P4_102308_38165908 | NC_021166.1    | Ca_kabuli_chr07 | 38165908                | GG                              | TT              | 1946899555               |
| SNP_P4_102309_38165923 | NC_021166.1    | Ca_kabuli_chr07 | 38165923                | GG                              | AA              | 1946899557               |
| SNP_P4_102310_38166241 | NC_021166.1    | Ca_kabuli_chr07 | 38166241                | TT                              | CC              | 1946899559               |
| SNP_P4_102311_38172105 | NC_021166.1    | Ca_kabuli_chr07 | 38172105                | AA                              | GG              | 1946899561               |
| SNP_P4_102312_38172108 | NC_021166.1    | Ca_kabuli_chr07 | 38172108                | TT                              | CC              | 1946899563               |
| SNP_P4_102313_38182881 | NC_021166.1    | Ca_kabuli_chr07 | 38182881                | TT                              | CC              | 1946899565               |
| SNP_P4_102314_38193606 | NC_021166.1    | Ca_kabuli_chr07 | 38193606                | GG                              | TT              | 1946899567               |
| SNP_P4_102315_38227420 | NC_021166.1    | Ca_kabuli_chr07 | 38227420                | CC                              | TT              | 1946899569               |
| SNP_P4_102316_38232676 | NC_021166.1    | Ca_kabuli_chr07 | 38232676                | AA                              | GG              | 1946899571               |
| SNP_P4_102317_38232706 | NC_021166.1    | Ca_kabuli_chr07 | 38232706                | AA                              | GG              | 1946899572               |
| SNP_P4_102318_38232719 | NC_021166.1    | Ca_kabuli_chr07 | 38232719                | GG                              | CC              | 1946899574               |
| SNP_P4_102319_38232733 | NC_021166.1    | Ca_kabuli_chr07 | 38232733                | AA                              | CC              | 1946899576               |
| SNP_P4_102320_38232866 | NC_021166.1    | Ca_kabuli_chr07 | 38232866                | AA                              | GG              | 1946899578               |
| SNP_P4_102321_38233008 | NC_021166.1    | Ca_kabuli_chr07 | 38233008                | AA                              | GG              | 1946899580               |
| SNP_P4_102322_38233014 | NC_021166.1    | Ca_kabuli_chr07 | 38233014                | TT                              | GG              | 1946899582               |
| SNP_P4_102323_38233093 | NC_021166.1    | Ca_kabuli_chr07 | 38233093                | AA                              | GG              | 1946899584               |
| SNP_P4_102324_38233130 | NC_021166.1    | Ca_kabuli_chr07 | 38233130                | GG                              | AA              | 1946899586               |
| SNP_P4_102325_38233363 | NC_021166.1    | Ca_kabuli_chr07 | 38233363                | AA                              | GG              | 1946899588               |
| SNP_P4_102326_38252151 | NC_021166.1    | Ca_kabuli_chr07 | 38252151                | TT                              | CC              | 1946899590               |
| SNP_P4_102328_38258870 | NC_021166.1    | Ca_kabuli_chr07 | 38258870                | CC                              | TT              | 1946899592               |
| SNP_P4_102329_38264390 | NC_021166.1    | Ca_kabuli_chr07 | 38264390                | GG                              | AA              | 1946899593               |
| SNP_P4_102330_38270009 | NC_021166.1    | Ca_kabuli_chr07 | 38270009                | CC                              | AA              | 1946899595               |
| SNP_P4_102331_38288789 | NC_021166.1    | Ca_kabuli_chr07 | 38288789                | AA                              | GG              | 1946899597               |
| SNP_P4_102332_38296123 | NC_021166.1    | Ca_kabuli_chr07 | 38296123                | TT                              | AA              | 1946899599               |
| SNP_P4_102333_38296309 | NC_021166.1    | Ca_kabuli_chr07 | 38296309                | CC                              | TT              | 1946899601               |



| SNPs IDs               | Chromosome IDs | Chromosomes     | Physical positions (bp) | CDC Frontier (Reference genome) | (ILWC46 & LPNB) | NCBI SNPdb Accession IDs |
|------------------------|----------------|-----------------|-------------------------|---------------------------------|-----------------|--------------------------|
| SNP_P4_102334_38296419 | NC_021166.1    | Ca_kabuli_chr07 | 38296419                | CC                              | AA              | 1946899603               |
| SNP_P4_102335_38297988 | NC_021166.1    | Ca_kabuli_chr07 | 38297988                | AA                              | GG              | 1946899605               |
| SNP_P4_102336_38298159 | NC_021166.1    | Ca_kabuli_chr07 | 38298159                | AA                              | GG              | 1946899607               |
| SNP_P4_102337_38298172 | NC_021166.1    | Ca_kabuli_chr07 | 38298172                | CC                              | TT              | 1946899609               |
| SNP_P4_102338_38298303 | NC_021166.1    | Ca_kabuli_chr07 | 38298303                | TT                              | CC              | 1946899611               |
| SNP_P4_102339_38298587 | NC_021166.1    | Ca_kabuli_chr07 | 38298587                | CC                              | TT              | 1946899613               |
| SNP_P4_102340_38298588 | NC_021166.1    | Ca_kabuli_chr07 | 38298588                | AA                              | TT              | 1946899615               |
| SNP_P4_102341_38298589 | NC_021166.1    | Ca_kabuli_chr07 | 38298589                | AA                              | CC              | 1946899617               |
| SNP_P4_102342_38298591 | NC_021166.1    | Ca_kabuli_chr07 | 38298591                | CC                              | TT              | 1946899618               |
| SNP_P4_102343_38298604 | NC_021166.1    | Ca_kabuli_chr07 | 38298604                | GG                              | AA              | 1946899620               |
| SNP_P4_102344_38298618 | NC_021166.1    | Ca_kabuli_chr07 | 38298618                | CC                              | TT              | 1946899622               |
| SNP_P4_102345_38298624 | NC_021166.1    | Ca_kabuli_chr07 | 38298624                | GG                              | AA              | 1946899624               |
| SNP_P4_102346_38298769 | NC_021166.1    | Ca_kabuli_chr07 | 38298769                | CC                              | AA              | 1946899626               |
| SNP_P4_102348_38298784 | NC_021166.1    | Ca_kabuli_chr07 | 38298784                | AA                              | GG              | 1946899628               |
| SNP_P4_102349_38298790 | NC_021166.1    | Ca_kabuli_chr07 | 38298790                | GG                              | AA              | 1946899630               |
| SNP_P4_102350_38298793 | NC_021166.1    | Ca_kabuli_chr07 | 38298793                | GG                              | AA              | 1946899632               |
| SNP_P4_102351_38298799 | NC_021166.1    | Ca_kabuli_chr07 | 38298799                | GG                              | AA              | 1946899634               |
| SNP_P4_102352_38298829 | NC_021166.1    | Ca_kabuli_chr07 | 38298829                | AA                              | GG              | 1946899635               |
| SNP_P4_102353_38298854 | NC_021166.1    | Ca_kabuli_chr07 | 38298854                | TT                              | GG              | 1946899637               |
| SNP_P4_102354_38298916 | NC_021166.1    | Ca_kabuli_chr07 | 38298916                | CC                              | TT              | 1946899639               |
| SNP_P4_102355_38298917 | NC_021166.1    | Ca_kabuli_chr07 | 38298917                | CC                              | TT              | 1946899641               |
| SNP_P4_102356_38298919 | NC_021166.1    | Ca_kabuli_chr07 | 38298919                | TT                              | AA              | 1946899643               |
| SNP_P4_102357_38298931 | NC_021166.1    | Ca_kabuli_chr07 | 38298931                | TT                              | AA              | 1946899645               |
| SNP_P4_102358_38301716 | NC_021166.1    | Ca_kabuli_chr07 | 38301716                | GG                              | AA              | 1946899647               |
| SNP_P4_102359_38302039 | NC_021166.1    | Ca_kabuli_chr07 | 38302039                | GG                              | AA              | 1946899649               |
| SNP_P4_102360_38302088 | NC_021166.1    | Ca_kabuli_chr07 | 38302088                | TT                              | CC              | 1946899651               |
| SNP_P4_102362_38331823 | NC_021166.1    | Ca_kabuli_chr07 | 38331823                | TT                              | AA              | 1946899653               |
| SNP_P4_102364_38333652 | NC_021166.1    | Ca_kabuli_chr07 | 38333652                | GG                              | AA              | 1946899655               |
| SNP_P4_102365_38353930 | NC_021166.1    | Ca_kabuli_chr07 | 38353930                | CC                              | TT              | 1946899657               |
| SNP_P4_102366_38354491 | NC_021166.1    | Ca_kabuli_chr07 | 38354491                | AA                              | TT              | 1946899658               |
| SNP_P4_102367_38396549 | NC_021166.1    | Ca_kabuli_chr07 | 38396549                | CC                              | TT              | 1946899660               |
| SNP_P4_102368_38399208 | NC_021166.1    | Ca_kabuli_chr07 | 38399208                | GG                              | CC              | 1946899662               |
| SNP_P4_102369_38399233 | NC_021166.1    | Ca_kabuli_chr07 | 38399233                | CC                              | TT              | 1946899664               |
| SNP_P4_102370_38399584 | NC_021166.1    | Ca_kabuli_chr07 | 38399584                | TT                              | GG              | 1946899666               |
| SNP_P4_102371_38399858 | NC_021166.1    | Ca_kabuli_chr07 | 38399858                | CC                              | TT              | 1946899668               |
| SNP_P4_102372_38399875 | NC_021166.1    | Ca_kabuli_chr07 | 38399875                | GG                              | AA              | 1946899670               |
| SNP_P4_102373_38399879 | NC_021166.1    | Ca_kabuli_chr07 | 38399879                | TT                              | CC              | 1946899672               |
| SNP_P4_102375_38414820 | NC_021166.1    | Ca_kabuli_chr07 | 38414820                | AA                              | GG              | 1946899674               |
| SNP_P4_102376_38455325 | NC_021166.1    | Ca_kabuli_chr07 | 38455325                | TT                              | GG              | 1946899676               |
| SNP_P4_102377_38457014 | NC_021166.1    | Ca_kabuli_chr07 | 38457014                | AA                              | GG              | 1946899678               |
| SNP_P4_102378_38457021 | NC_021166.1    | Ca_kabuli_chr07 | 38457021                | AA                              | GG              | 1946899680               |
| SNP_P4_102379_38457051 | NC_021166.1    | Ca_kabuli_chr07 | 38457051                | CC                              | GG              | 1946899682               |

| SNPs IDs               | Chromosome IDs | Chromosomes     | Physical positions (bp) | CDC Frontier (Reference genome) | (ILWC46 & LPNB) | NCBI SNPdb Accession IDs |
|------------------------|----------------|-----------------|-------------------------|---------------------------------|-----------------|--------------------------|
| SNP_P4_102380_38457299 | NC_021166.1    | Ca_kabuli_chr07 | 38457299                | AA                              | CC              | 1946899684               |
| SNP_P4_102381_38460340 | NC_021166.1    | Ca_kabuli_chr07 | 38460340                | CC                              | TT              | 1946899686               |
| SNP_P4_102382_38462883 | NC_021166.1    | Ca_kabuli_chr07 | 38462883                | GG                              | TT              | 1946899688               |
| SNP_P4_102383_38505698 | NC_021166.1    | Ca_kabuli_chr07 | 38505698                | GG                              | CC              | 1946899690               |
| SNP_P4_102384_38510585 | NC_021166.1    | Ca_kabuli_chr07 | 38510585                | AA                              | GG              | 1946899692               |
| SNP_P4_102385_38514110 | NC_021166.1    | Ca_kabuli_chr07 | 38514110                | AA                              | TT              | 1946899694               |
| SNP_P4_102386_38514503 | NC_021166.1    | Ca_kabuli_chr07 | 38514503                | TT                              | CC              | 1946899696               |
| SNP_P4_102387_38572518 | NC_021166.1    | Ca_kabuli_chr07 | 38572518                | CC                              | AA              | 1946899698               |
| SNP_P4_102388_38578765 | NC_021166.1    | Ca_kabuli_chr07 | 38578765                | AA                              | GG              | 1946899700               |
| SNP_P4_102389_38579073 | NC_021166.1    | Ca_kabuli_chr07 | 38579073                | AA                              | GG              | 1946899702               |
| SNP_P4_102390_38613468 | NC_021166.1    | Ca_kabuli_chr07 | 38613468                | AA                              | CC              | 1946899704               |
| SNP_P4_102391_38623000 | NC_021166.1    | Ca_kabuli_chr07 | 38623000                | AA                              | TT              | 1946899706               |
| SNP_P4_102392_38623194 | NC_021166.1    | Ca_kabuli_chr07 | 38623194                | GG                              | CC              | 1946899708               |
| SNP_P4_102394_38626276 | NC_021166.1    | Ca_kabuli_chr07 | 38626276                | TT                              | CC              | 1946899710               |
| SNP_P4_102396_38645175 | NC_021166.1    | Ca_kabuli_chr07 | 38645175                | CC                              | AA              | 1946899712               |
| SNP_P4_102397_38646783 | NC_021166.1    | Ca_kabuli_chr07 | 38646783                | TT                              | CC              | 1946899714               |
| SNP_P4_102398_38646784 | NC_021166.1    | Ca_kabuli_chr07 | 38646784                | CC                              | TT              | 1946899716               |
| SNP_P4_102399_38646799 | NC_021166.1    | Ca_kabuli_chr07 | 38646799                | CC                              | TT              | 1946899718               |
| SNP_P4_102400_38647610 | NC_021166.1    | Ca_kabuli_chr07 | 38647610                | GG                              | AA              | 1946899720               |
| SNP_P4_102401_38665237 | NC_021166.1    | Ca_kabuli_chr07 | 38665237                | GG                              | AA              | 1946899722               |
| SNP_P4_102403_38672017 | NC_021166.1    | Ca_kabuli_chr07 | 38672017                | TT                              | CC              | 1946899724               |
| SNP_P4_102405_38677134 | NC_021166.1    | Ca_kabuli_chr07 | 38677134                | TT                              | AA              | 1946899726               |
| SNP_P4_102406_38677661 | NC_021166.1    | Ca_kabuli_chr07 | 38677661                | AA                              | GG              | 1946899727               |
| SNP_P4_102408_38718756 | NC_021166.1    | Ca_kabuli_chr07 | 38718756                | CC                              | TT              | 1946899729               |
| SNP_P4_102409_38724641 | NC_021166.1    | Ca_kabuli_chr07 | 38724641                | GG                              | AA              | 1946899731               |
| SNP_P4_102410_38738981 | NC_021166.1    | Ca_kabuli_chr07 | 38738981                | AA                              | GG              | 1946899733               |
| SNP_P4_102411_38739110 | NC_021166.1    | Ca_kabuli_chr07 | 38739110                | AA                              | GG              | 1946899735               |
| SNP_P4_102412_38739290 | NC_021166.1    | Ca_kabuli_chr07 | 38739290                | TT                              | GG              | 1946899737               |
| SNP_P4_102413_38739664 | NC_021166.1    | Ca_kabuli_chr07 | 38739664                | CC                              | TT              | 1946899739               |
| SNP_P4_102415_38756934 | NC_021166.1    | Ca_kabuli_chr07 | 38756934                | GG                              | AA              | 1946899741               |
| SNP_P4_102417_38778109 | NC_021166.1    | Ca_kabuli_chr07 | 38778109                | GG                              | AA              | 1946899743               |
| SNP_P4_102418_38779183 | NC_021166.1    | Ca_kabuli_chr07 | 38779183                | TT                              | CC              | 1946899745               |
| SNP_P4_102419_38792662 | NC_021166.1    | Ca_kabuli_chr07 | 38792662                | AA                              | GG              | 1946899747               |
| SNP_P4_102420_38792687 | NC_021166.1    | Ca_kabuli_chr07 | 38792687                | AA                              | GG              | 1946899749               |
| SNP_P4_102422_38809233 | NC_021166.1    | Ca_kabuli_chr07 | 38809233                | AA                              | GG              | 1946899751               |
| SNP_P4_102423_38810875 | NC_021166.1    | Ca_kabuli_chr07 | 38810875                | CC                              | AA              | 1946899752               |
| SNP_P4_102424_38826411 | NC_021166.1    | Ca_kabuli_chr07 | 38826411                | TT                              | AA              | 1946899754               |
| SNP_P4_102425_38827756 | NC_021166.1    | Ca_kabuli_chr07 | 38827756                | GG                              | AA              | 1946899756               |
| SNP_P4_102426_38836941 | NC_021166.1    | Ca_kabuli_chr07 | 38836941                | GG                              | TT              | 1946899758               |
| SNP_P4_102427_38861525 | NC_021166.1    | Ca_kabuli_chr07 | 38861525                | CC                              | AA              | 1946899760               |
| SNP_P4_102428_38861538 | NC_021166.1    | Ca_kabuli_chr07 | 38861538                | TT                              | AA              | 1946899762               |
| SNP_P4_102429_38861772 | NC_021166.1    | Ca_kabuli_chr07 | 38861772                | AA                              | GG              | 1946899764               |

| SNPs IDs               | Chromosome IDs | Chromosomes     | Physical positions (bp) | CDC Frontier (Reference genome) | (ILWC46 & LPNB) | NCBI SNPdb Accession IDs |
|------------------------|----------------|-----------------|-------------------------|---------------------------------|-----------------|--------------------------|
| SNP_P4_102430_38866143 | NC_021166.1    | Ca_kabuli_chr07 | 38866143                | GG                              | AA              | 1946899766               |
| SNP_P4_102431_38866181 | NC_021166.1    | Ca_kabuli_chr07 | 38866181                | TT                              | AA              | 1946899768               |
| SNP_P4_102432_38882652 | NC_021166.1    | Ca_kabuli_chr07 | 38882652                | TT                              | CC              | 1946899770               |
| SNP_P4_102433_38882671 | NC_021166.1    | Ca_kabuli_chr07 | 38882671                | TT                              | GG              | 1946899772               |
| SNP_P4_102434_38882672 | NC_021166.1    | Ca_kabuli_chr07 | 38882672                | TT                              | AA              | 1946899774               |
| SNP_P4_102435_38882678 | NC_021166.1    | Ca_kabuli_chr07 | 38882678                | GG                              | AA              | 1946899775               |
| SNP_P4_102436_38882767 | NC_021166.1    | Ca_kabuli_chr07 | 38882767                | GG                              | AA              | 1946899777               |
| SNP_P4_102437_38883008 | NC_021166.1    | Ca_kabuli_chr07 | 38883008                | CC                              | TT              | 1946899779               |
| SNP_P4_102438_38883029 | NC_021166.1    | Ca_kabuli_chr07 | 38883029                | TT                              | CC              | 1946899781               |
| SNP_P4_102439_38883078 | NC_021166.1    | Ca_kabuli_chr07 | 38883078                | TT                              | CC              | 1946899783               |
| SNP_P4_102440_38889420 | NC_021166.1    | Ca_kabuli_chr07 | 38889420                | TT                              | CC              | 1946899785               |
| SNP_P4_102441_38899259 | NC_021166.1    | Ca_kabuli_chr07 | 38899259                | TT                              | CC              | 1946899787               |
| SNP_P4_102442_38899663 | NC_021166.1    | Ca_kabuli_chr07 | 38899663                | CC                              | TT              | 1946899789               |
| SNP_P4_102443_38922032 | NC_021166.1    | Ca_kabuli_chr07 | 38922032                | AA                              | GG              | 1946899791               |
| SNP_P4_102444_38923756 | NC_021166.1    | Ca_kabuli_chr07 | 38923756                | AA                              | GG              | 1946899793               |
| SNP_P4_102445_38928700 | NC_021166.1    | Ca_kabuli_chr07 | 38928700                | CC                              | GG              | 1946899795               |
| SNP_P4_102446_38931034 | NC_021166.1    | Ca_kabuli_chr07 | 38931034                | TT                              | CC              | 1946899797               |
| SNP_P4_102447_38932817 | NC_021166.1    | Ca_kabuli_chr07 | 38932817                | GG                              | AA              | 1946899798               |
| SNP_P4_102449_38952909 | NC_021166.1    | Ca_kabuli_chr07 | 38952909                | GG                              | TT              | 1946899800               |
| SNP_P4_102450_38957680 | NC_021166.1    | Ca_kabuli_chr07 | 38957680                | GG                              | TT              | 1946899802               |
| SNP_P4_102451_38973184 | NC_021166.1    | Ca_kabuli_chr07 | 38973184                | AA                              | CC              | 1946899804               |
| SNP_P4_102452_38983500 | NC_021166.1    | Ca_kabuli_chr07 | 38983500                | CC                              | TT              | 1946899806               |
| SNP_P4_102453_38983549 | NC_021166.1    | Ca_kabuli_chr07 | 38983549                | AA                              | GG              | 1946899808               |
| SNP_P4_102454_38983863 | NC_021166.1    | Ca_kabuli_chr07 | 38983863                | AA                              | GG              | 1946899810               |
| SNP_P4_102455_38990969 | NC_021166.1    | Ca_kabuli_chr07 | 38990969                | TT                              | GG              | 1946899812               |
| SNP_P4_102456_38991187 | NC_021166.1    | Ca_kabuli_chr07 | 38991187                | AA                              | TT              | 1946899814               |
| SNP_P4_102457_38991210 | NC_021166.1    | Ca_kabuli_chr07 | 38991210                | CC                              | AA              | 1946899816               |
| SNP_P4_102458_38991261 | NC_021166.1    | Ca_kabuli_chr07 | 38991261                | GG                              | AA              | 1946899817               |
| SNP_P4_102459_38991275 | NC_021166.1    | Ca_kabuli_chr07 | 38991275                | CC                              | TT              | 1946899819               |
| SNP_P4_102461_38991604 | NC_021166.1    | Ca_kabuli_chr07 | 38991604                | GG                              | AA              | 1946899821               |
| SNP_P4_102462_38993341 | NC_021166.1    | Ca_kabuli_chr07 | 38993341                | CC                              | AA              | 1946899823               |
| SNP_P4_102463_38993476 | NC_021166.1    | Ca_kabuli_chr07 | 38993476                | CC                              | TT              | 1946899825               |
| SNP_P4_102464_38993492 | NC_021166.1    | Ca_kabuli_chr07 | 38993492                | CC                              | TT              | 1946899828               |
| SNP_P4_102465_39017594 | NC_021166.1    | Ca_kabuli_chr07 | 39017594                | GG                              | AA              | 1946899830               |
| SNP_P4_102466_39020774 | NC_021166.1    | Ca_kabuli_chr07 | 39020774                | GG                              | AA              | 1946899831               |
| SNP_P4_102467_39020801 | NC_021166.1    | Ca_kabuli_chr07 | 39020801                | TT                              | CC              | 1946899833               |
| SNP_P4_102471_39033437 | NC_021166.1    | Ca_kabuli_chr07 | 39033437                | TT                              | CC              | 1946899835               |
| SNP_P4_102472_39046983 | NC_021166.1    | Ca_kabuli_chr07 | 39046983                | TT                              | CC              | 1946899837               |
| SNP_P4_102473_39048445 | NC_021166.1    | Ca_kabuli_chr07 | 39048445                | TT                              | CC              | 1946899839               |
| SNP_P4_102474_39051772 | NC_021166.1    | Ca_kabuli_chr07 | 39051772                | GG                              | AA              | 1946899841               |
| SNP_P4_102476_39054941 | NC_021166.1    | Ca_kabuli_chr07 | 39054941                | AA                              | GG              | 1946899843               |
| SNP_P4_102477_39055173 | NC_021166.1    | Ca_kabuli_chr07 | 39055173                | AA                              | CC              | 1946899845               |

| SNPs IDs               | Chromosome IDs | Chromosomes     | Physical positions (bp) | CDC Frontier (Reference genome) | (ILWC46 & LPNB) | NCBI SNPdb Accession IDs |
|------------------------|----------------|-----------------|-------------------------|---------------------------------|-----------------|--------------------------|
| SNP_P4_102478_39055178 | NC_021166.1    | Ca_kabuli_chr07 | 39055178                | TT                              | AA              | 1946899847               |
| SNP_P4_102479_39055199 | NC_021166.1    | Ca_kabuli_chr07 | 39055199                | CC                              | TT              | 1946899849               |
| SNP_P4_102480_39055354 | NC_021166.1    | Ca_kabuli_chr07 | 39055354                | AA                              | GG              | 1946899851               |
| SNP_P4_102481_39055400 | NC_021166.1    | Ca_kabuli_chr07 | 39055400                | AA                              | GG              | 1946899853               |
| SNP_P4_102482_39055411 | NC_021166.1    | Ca_kabuli_chr07 | 39055411                | AA                              | TT              | 1946899855               |
| SNP_P4_102483_39055420 | NC_021166.1    | Ca_kabuli_chr07 | 39055420                | AA                              | CC              | 1946899857               |
| SNP_P4_102484_39059605 | NC_021166.1    | Ca_kabuli_chr07 | 39059605                | AA                              | GG              | 1946899859               |
| SNP_P4_102485_39076293 | NC_021166.1    | Ca_kabuli_chr07 | 39076293                | TT                              | CC              | 1946899861               |
| SNP_P4_102486_39077109 | NC_021166.1    | Ca_kabuli_chr07 | 39077109                | GG                              | AA              | 1946899863               |
| SNP_P4_102487_39077175 | NC_021166.1    | Ca_kabuli_chr07 | 39077175                | GG                              | TT              | 1946899865               |
| SNP_P4_102488_39078809 | NC_021166.1    | Ca_kabuli_chr07 | 39078809                | CC                              | TT              | 1946899867               |
| SNP_P4_102489_39112582 | NC_021166.1    | Ca_kabuli_chr07 | 39112582                | TT                              | GG              | 1946899869               |
| SNP_P4_102491_39146504 | NC_021166.1    | Ca_kabuli_chr07 | 39146504                | TT                              | CC              | 1946899871               |
| SNP_P4_102492_39146505 | NC_021166.1    | Ca_kabuli_chr07 | 39146505                | TT                              | AA              | 1946899873               |
| SNP_P4_102493_39146506 | NC_021166.1    | Ca_kabuli_chr07 | 39146506                | TT                              | GG              | 1946899875               |
| SNP_P4_102494_39149675 | NC_021166.1    | Ca_kabuli_chr07 | 39149675                | TT                              | CC              | 1946899877               |
| SNP_P4_102495_39149684 | NC_021166.1    | Ca_kabuli_chr07 | 39149684                | AA                              | TT              | 1946899879               |
| SNP_P4_102496_39149687 | NC_021166.1    | Ca_kabuli_chr07 | 39149687                | CC                              | TT              | 1946899881               |
| SNP_P4_102498_39149781 | NC_021166.1    | Ca_kabuli_chr07 | 39149781                | TT                              | GG              | 1946899883               |
| SNP_P4_102499_39167458 | NC_021166.1    | Ca_kabuli_chr07 | 39167458                | CC                              | GG              | 1946899884               |
| SNP_P4_102500_39204924 | NC_021166.1    | Ca_kabuli_chr07 | 39204924                | CC                              | TT              | 1946899886               |
| SNP_P4_102502_39255645 | NC_021166.1    | Ca_kabuli_chr07 | 39255645                | GG                              | TT              | 1946899889               |
| SNP_P4_102503_39259788 | NC_021166.1    | Ca_kabuli_chr07 | 39259788                | CC                              | TT              | 1946899891               |
| SNP_P4_102505_39283614 | NC_021166.1    | Ca_kabuli_chr07 | 39283614                | AA                              | CC              | 1946899893               |
| SNP_P4_102506_39296129 | NC_021166.1    | Ca_kabuli_chr07 | 39296129                | TT                              | CC              | 1946899895               |
| SNP_P4_102507_39300391 | NC_021166.1    | Ca_kabuli_chr07 | 39300391                | GG                              | AA              | 1946899897               |
| SNP_P4_102508_39309472 | NC_021166.1    | Ca_kabuli_chr07 | 39309472                | CC                              | TT              | 1946899899               |
| SNP_P4_102509_39343460 | NC_021166.1    | Ca_kabuli_chr07 | 39343460                | TT                              | CC              | 1946899901               |
| SNP_P4_102511_39348288 | NC_021166.1    | Ca_kabuli_chr07 | 39348288                | TT                              | CC              | 1946899903               |
| SNP_P4_102513_39370809 | NC_021166.1    | Ca_kabuli_chr07 | 39370809                | TT                              | CC              | 1946899905               |
| SNP_P4_102514_39370822 | NC_021166.1    | Ca_kabuli_chr07 | 39370822                | GG                              | AA              | 1946899907               |
| SNP_P4_102515_39370830 | NC_021166.1    | Ca_kabuli_chr07 | 39370830                | GG                              | CC              | 1946899909               |
| SNP_P4_102517_39405479 | NC_021166.1    | Ca_kabuli_chr07 | 39405479                | AA                              | TT              | 1946899911               |
| SNP_P4_102518_39429767 | NC_021166.1    | Ca_kabuli_chr07 | 39429767                | GG                              | AA              | 1946899912               |
| SNP_P4_102519_39438540 | NC_021166.1    | Ca_kabuli_chr07 | 39438540                | TT                              | CC              | 1946899914               |
| SNP_P4_102520_39455256 | NC_021166.1    | Ca_kabuli_chr07 | 39455256                | GG                              | AA              | 1946899916               |
| SNP_P4_102521_39481091 | NC_021166.1    | Ca_kabuli_chr07 | 39481091                | GG                              | AA              | 1946899918               |
| SNP_P4_102523_39495876 | NC_021166.1    | Ca_kabuli_chr07 | 39495876                | CC                              | AA              | 1946899920               |
| SNP_P4_102524_39499237 | NC_021166.1    | Ca_kabuli_chr07 | 39499237                | AA                              | CC              | 1946899922               |
| SNP_P4_102530_39554618 | NC_021166.1    | Ca_kabuli_chr07 | 39554618                | GG                              | TT              | 1946899930               |
| SNP_P4_102531_39554992 | NC_021166.1    | Ca_kabuli_chr07 | 39554992                | TT                              | CC              | 1946899932               |
| SNP_P4_102532_39554998 | NC_021166.1    | Ca_kabuli_chr07 | 39554998                | TT                              | AA              | 1946899934               |

| SNPs IDs               | Chromosome IDs | Chromosomes     | Physical positions (bp) | CDC Frontier (Reference genome) | (ILWC46 & LPNB) | NCBI SNPdb Accession IDs |
|------------------------|----------------|-----------------|-------------------------|---------------------------------|-----------------|--------------------------|
| SNP_P4_102533_39555028 | NC_021166.1    | Ca_kabuli_chr07 | 39555028                | GG                              | CC              | 1946899936               |
| SNP_P4_102534_39555064 | NC_021166.1    | Ca_kabuli_chr07 | 39555064                | AA                              | TT              | 1946899938               |
| SNP_P4_102535_39557494 | NC_021166.1    | Ca_kabuli_chr07 | 39557494                | AA                              | CC              | 1946899940               |
| SNP_P4_102536_39557497 | NC_021166.1    | Ca_kabuli_chr07 | 39557497                | TT                              | CC              | 1946899942               |
| SNP_P4_102537_39557517 | NC_021166.1    | Ca_kabuli_chr07 | 39557517                | TT                              | CC              | 1946899944               |
| SNP_P4_102538_39557529 | NC_021166.1    | Ca_kabuli_chr07 | 39557529                | AA                              | GG              | 1946899946               |
| SNP_P4_102539_39557579 | NC_021166.1    | Ca_kabuli_chr07 | 39557579                | TT                              | GG              | 1946899948               |
| SNP_P4_102540_39557854 | NC_021166.1    | Ca_kabuli_chr07 | 39557854                | AA                              | GG              | 1946899950               |
| SNP_P4_102541_39564326 | NC_021166.1    | Ca_kabuli_chr07 | 39564326                | TT                              | CC              | 1946899952               |
| SNP_P4_102542_39571195 | NC_021166.1    | Ca_kabuli_chr07 | 39571195                | AA                              | GG              | 1946899954               |
| SNP_P4_102543_39575520 | NC_021166.1    | Ca_kabuli_chr07 | 39575520                | TT                              | AA              | 1946899956               |
| SNP_P4_102544_39575533 | NC_021166.1    | Ca_kabuli_chr07 | 39575533                | GG                              | AA              | 1946899958               |
| SNP_P4_102545_39575536 | NC_021166.1    | Ca_kabuli_chr07 | 39575536                | AA                              | GG              | 1946899959               |
| SNP_P4_102546_39575568 | NC_021166.1    | Ca_kabuli_chr07 | 39575568                | CC                              | TT              | 1946899960               |
| SNP_P4_102547_39576143 | NC_021166.1    | Ca_kabuli_chr07 | 39576143                | TT                              | CC              | 1946899961               |
| SNP_P4_102548_39577619 | NC_021166.1    | Ca_kabuli_chr07 | 39577619                | CC                              | AA              | 1946899962               |
| SNP_P4_102549_39602912 | NC_021166.1    | Ca_kabuli_chr07 | 39602912                | GG                              | AA              | 1946899963               |
| SNP_P4_102552_39621481 | NC_021166.1    | Ca_kabuli_chr07 | 39621481                | CC                              | TT              | 1946899965               |
| SNP_P4_102553_39621606 | NC_021166.1    | Ca_kabuli_chr07 | 39621606                | TT                              | CC              | 1946899967               |
| SNP_P4_102554_39621787 | NC_021166.1    | Ca_kabuli_chr07 | 39621787                | AA                              | GG              | 1946899969               |
| SNP_P4_102555_39630382 | NC_021166.1    | Ca_kabuli_chr07 | 39630382                | GG                              | AA              | 1946899971               |
| SNP_P4_102556_39630607 | NC_021166.1    | Ca_kabuli_chr07 | 39630607                | AA                              | TT              | 1946899973               |
| SNP_P4_102557_39630614 | NC_021166.1    | Ca_kabuli_chr07 | 39630614                | GG                              | CC              | 1946899975               |
| SNP_P4_102559_39630696 | NC_021166.1    | Ca_kabuli_chr07 | 39630696                | GG                              | AA              | 1946899977               |
| SNP_P4_102560_39630716 | NC_021166.1    | Ca_kabuli_chr07 | 39630716                | TT                              | GG              | 1946899979               |
| SNP_P4_102561_39630786 | NC_021166.1    | Ca_kabuli_chr07 | 39630786                | TT                              | CC              | 1946899981               |
| SNP_P4_102562_39639367 | NC_021166.1    | Ca_kabuli_chr07 | 39639367                | GG                              | TT              | 1946899983               |
| SNP_P4_102563_39639662 | NC_021166.1    | Ca_kabuli_chr07 | 39639662                | AA                              | CC              | 1946899985               |
| SNP_P4_102564_39673482 | NC_021166.1    | Ca_kabuli_chr07 | 39673482                | GG                              | AA              | 1946899987               |
| SNP_P4_102565_39674856 | NC_021166.1    | Ca_kabuli_chr07 | 39674856                | GG                              | AA              | 1946899989               |
| SNP_P4_102566_39675456 | NC_021166.1    | Ca_kabuli_chr07 | 39675456                | TT                              | CC              | 1946899991               |
| SNP_P4_102567_39683072 | NC_021166.1    | Ca_kabuli_chr07 | 39683072                | TT                              | CC              | 1946899993               |
| SNP_P4_102568_39684018 | NC_021166.1    | Ca_kabuli_chr07 | 39684018                | AA                              | CC              | 1946899996               |
| SNP_P4_102569_39727543 | NC_021166.1    | Ca_kabuli_chr07 | 39727543                | AA                              | GG              | 1946899998               |
| SNP_P4_102570_39728737 | NC_021166.1    | Ca_kabuli_chr07 | 39728737                | TT                              | CC              | 1946900000               |
| SNP_P4_102571_39795079 | NC_021166.1    | Ca_kabuli_chr07 | 39795079                | AA                              | GG              | 1946900002               |
| SNP_P4_102573_39809232 | NC_021166.1    | Ca_kabuli_chr07 | 39809232                | GG                              | TT              | 1946900004               |
| SNP_P4_102574_39809249 | NC_021166.1    | Ca_kabuli_chr07 | 39809249                | TT                              | CC              | 1946900006               |
| SNP_P4_102575_39820028 | NC_021166.1    | Ca_kabuli_chr07 | 39820028                | CC                              | TT              | 1946900008               |
| SNP_P4_102576_39829268 | NC_021166.1    | Ca_kabuli_chr07 | 39829268                | CC                              | TT              | 1946900010               |
| SNP_P4_102577_39829293 | NC_021166.1    | Ca_kabuli_chr07 | 39829293                | AA                              | GG              | 1946900012               |
| SNP_P4_102578_39829347 | NC_021166.1    | Ca_kabuli_chr07 | 39829347                | GG                              | TT              | 1946900014               |

| SNPs IDs               | Chromosome IDs | Chromosomes     | Physical positions (bp) | CDC Frontier (Reference genome) | (ILWC46 & LPNB) | NCBI SNPdb Accession IDs |
|------------------------|----------------|-----------------|-------------------------|---------------------------------|-----------------|--------------------------|
| SNP_P4_102579_39829484 | NC_021166.1    | Ca_kabuli_chr07 | 39829484                | TT                              | CC              | 1946900016               |
| SNP_P4_102580_39829493 | NC_021166.1    | Ca_kabuli_chr07 | 39829493                | GG                              | AA              | 1946900019               |
| SNP_P4_102581_39829623 | NC_021166.1    | Ca_kabuli_chr07 | 39829623                | GG                              | AA              | 1946900021               |
| SNP_P4_102582_39829645 | NC_021166.1    | Ca_kabuli_chr07 | 39829645                | GG                              | TT              | 1946900023               |
| SNP_P4_102583_39829679 | NC_021166.1    | Ca_kabuli_chr07 | 39829679                | AA                              | GG              | 1946900025               |
| SNP_P4_102584_39829751 | NC_021166.1    | Ca_kabuli_chr07 | 39829751                | GG                              | CC              | 1946900027               |
| SNP_P4_102585_39829922 | NC_021166.1    | Ca_kabuli_chr07 | 39829922                | CC                              | AA              | 1946900029               |
| SNP_P4_102586_39830287 | NC_021166.1    | Ca_kabuli_chr07 | 39830287                | GG                              | CC              | 1946900031               |
| SNP_P4_102588_39832114 | NC_021166.1    | Ca_kabuli_chr07 | 39832114                | AA                              | CC              | 1946900033               |
| SNP_P4_102589_39844485 | NC_021166.1    | Ca_kabuli_chr07 | 39844485                | AA                              | GG              | 1946900035               |
| SNP_P4_102590_39844531 | NC_021166.1    | Ca_kabuli_chr07 | 39844531                | TT                              | GG              | 1946900037               |
| SNP_P4_102591_39844558 | NC_021166.1    | Ca_kabuli_chr07 | 39844558                | CC                              | AA              | 1946900039               |
| SNP_P4_102592_39844568 | NC_021166.1    | Ca_kabuli_chr07 | 39844568                | GG                              | TT              | 1946900041               |
| SNP_P4_102593_39844866 | NC_021166.1    | Ca_kabuli_chr07 | 39844866                | TT                              | CC              | 1946900043               |
| SNP_P4_102594_39845456 | NC_021166.1    | Ca_kabuli_chr07 | 39845456                | GG                              | AA              | 1946900045               |
| SNP_P4_102595_39847657 | NC_021166.1    | Ca_kabuli_chr07 | 39847657                | AA                              | TT              | 1946900047               |
| SNP_P4_102596_39847682 | NC_021166.1    | Ca_kabuli_chr07 | 39847682                | AA                              | CC              | 1946900049               |
| SNP_P4_102597_39848044 | NC_021166.1    | Ca_kabuli_chr07 | 39848044                | TT                              | CC              | 1946900051               |
| SNP_P4_102598_39848087 | NC_021166.1    | Ca_kabuli_chr07 | 39848087                | TT                              | GG              | 1946900053               |
| SNP_P4_102599_39848096 | NC_021166.1    | Ca_kabuli_chr07 | 39848096                | TT                              | GG              | 1946900055               |
| SNP_P4_102600_39848111 | NC_021166.1    | Ca_kabuli_chr07 | 39848111                | AA                              | CC              | 1946900057               |
| SNP_P4_102601_39850009 | NC_021166.1    | Ca_kabuli_chr07 | 39850009                | AA                              | GG              | 1946900059               |
| SNP_P4_102602_39850024 | NC_021166.1    | Ca_kabuli_chr07 | 39850024                | GG                              | AA              | 1946900061               |
| SNP_P4_102603_39850486 | NC_021166.1    | Ca_kabuli_chr07 | 39850486                | CC                              | AA              | 1946900063               |
| SNP_P4_102604_39850587 | NC_021166.1    | Ca_kabuli_chr07 | 39850587                | GG                              | AA              | 1946900065               |
| SNP_P4_102605_39850630 | NC_021166.1    | Ca_kabuli_chr07 | 39850630                | AA                              | GG              | 1946900067               |
| SNP_P4_102606_39850746 | NC_021166.1    | Ca_kabuli_chr07 | 39850746                | CC                              | TT              | 1946900069               |
| SNP_P4_102607_39851001 | NC_021166.1    | Ca_kabuli_chr07 | 39851001                | TT                              | CC              | 1946900071               |
| SNP_P4_102608_39851041 | NC_021166.1    | Ca_kabuli_chr07 | 39851041                | TT                              | CC              | 1946900073               |
| SNP_P4_102610_39863628 | NC_021166.1    | Ca_kabuli_chr07 | 39863628                | GG                              | TT              | 1946900075               |
| SNP_P4_102611_39863637 | NC_021166.1    | Ca_kabuli_chr07 | 39863637                | GG                              | TT              | 1946900077               |
| SNP_P4_102612_39868686 | NC_021166.1    | Ca_kabuli_chr07 | 39868686                | AA                              | GG              | 1946900079               |
| SNP_P4_102613_39881698 | NC_021166.1    | Ca_kabuli_chr07 | 39881698                | TT                              | GG              | 1946900081               |
| SNP_P4_102614_39897754 | NC_021166.1    | Ca_kabuli_chr07 | 39897754                | CC                              | TT              | 1946900084               |
| SNP_P4_102615_39902293 | NC_021166.1    | Ca_kabuli_chr07 | 39902293                | GG                              | TT              | 1946900086               |
| SNP_P4_102616_39902508 | NC_021166.1    | Ca_kabuli_chr07 | 39902508                | TT                              | CC              | 1946900088               |
| SNP_P4_102617_39915176 | NC_021166.1    | Ca_kabuli_chr07 | 39915176                | TT                              | CC              | 1946900090               |
| SNP_P4_102618_39930759 | NC_021166.1    | Ca_kabuli_chr07 | 39930759                | CC                              | AA              | 1946900092               |
| SNP_P4_102619_39934364 | NC_021166.1    | Ca_kabuli_chr07 | 39934364                | TT                              | CC              | 1946900094               |
| SNP_P4_102620_39934415 | NC_021166.1    | Ca_kabuli_chr07 | 39934415                | GG                              | AA              | 1946900096               |
| SNP_P4_102621_39934458 | NC_021166.1    | Ca_kabuli_chr07 | 39934458                | AA                              | GG              | 1946900098               |
| SNP_P4_102622_39934616 | NC_021166.1    | Ca_kabuli_chr07 | 39934616                | TT                              | CC              | 1946900100               |

| SNPs IDs               | Chromosome IDs | Chromosomes     | Physical positions (bp) | CDC Frontier (Reference genome) | (ILWC46 & LPNB) | NCBI SNPdb Accession IDs |
|------------------------|----------------|-----------------|-------------------------|---------------------------------|-----------------|--------------------------|
| SNP_P4_102623_39934640 | NC_021166.1    | Ca_kabuli_chr07 | 39934640                | AA                              | CC              | 1946900102               |
| SNP_P4_102624_39934656 | NC_021166.1    | Ca_kabuli_chr07 | 39934656                | TT                              | CC              | 1946900104               |
| SNP_P4_102625_39934667 | NC_021166.1    | Ca_kabuli_chr07 | 39934667                | AA                              | GG              | 1946900106               |
| SNP_P4_102626_39947771 | NC_021166.1    | Ca_kabuli_chr07 | 39947771                | AA                              | TT              | 1946900108               |
| SNP_P4_102627_39970444 | NC_021166.1    | Ca_kabuli_chr07 | 39970444                | TT                              | AA              | 1946900110               |
| SNP_P4_102629_39983406 | NC_021166.1    | Ca_kabuli_chr07 | 39983406                | TT                              | AA              | 1946900112               |
| SNP_P4_102630_39983722 | NC_021166.1    | Ca_kabuli_chr07 | 39983722                | CC                              | AA              | 1946900114               |
| SNP_P4_102632_39984663 | NC_021166.1    | Ca_kabuli_chr07 | 39984663                | AA                              | GG              | 1946900116               |
| SNP_P4_102633_40010493 | NC_021166.1    | Ca_kabuli_chr07 | 40010493                | AA                              | GG              | 1946900118               |
| SNP_P4_102634_40011149 | NC_021166.1    | Ca_kabuli_chr07 | 40011149                | CC                              | TT              | 1946900121               |
| SNP_P4_102635_40011162 | NC_021166.1    | Ca_kabuli_chr07 | 40011162                | CC                              | AA              | 1946900123               |
| SNP_P4_102637_40013559 | NC_021166.1    | Ca_kabuli_chr07 | 40013559                | CC                              | AA              | 1946900125               |
| SNP_P4_102638_40013664 | NC_021166.1    | Ca_kabuli_chr07 | 40013664                | GG                              | AA              | 1946900127               |
| SNP_P4_102639_40013676 | NC_021166.1    | Ca_kabuli_chr07 | 40013676                | GG                              | TT              | 1946900129               |
| SNP_P4_102640_40013719 | NC_021166.1    | Ca_kabuli_chr07 | 40013719                | CC                              | TT              | 1946900131               |
| SNP_P4_102641_40013728 | NC_021166.1    | Ca_kabuli_chr07 | 40013728                | TT                              | AA              | 1946900133               |
| SNP_P4_102642_40013794 | NC_021166.1    | Ca_kabuli_chr07 | 40013794                | GG                              | AA              | 1946900135               |
| SNP_P4_102643_40013837 | NC_021166.1    | Ca_kabuli_chr07 | 40013837                | AA                              | CC              | 1946900137               |
| SNP_P4_102644_40014376 | NC_021166.1    | Ca_kabuli_chr07 | 40014376                | CC                              | TT              | 1946900139               |
| SNP_P4_102647_40045301 | NC_021166.1    | Ca_kabuli_chr07 | 40045301                | TT                              | GG              | 1946900141               |
| SNP_P4_102648_40048089 | NC_021166.1    | Ca_kabuli_chr07 | 40048089                | AA                              | CC              | 1946900143               |
| SNP_P4_102649_40048872 | NC_021166.1    | Ca_kabuli_chr07 | 40048872                | AA                              | TT              | 1946900145               |
| SNP_P4_102650_40048887 | NC_021166.1    | Ca_kabuli_chr07 | 40048887                | TT                              | CC              | 1946900147               |
| SNP_P4_102651_40048916 | NC_021166.1    | Ca_kabuli_chr07 | 40048916                | TT                              | CC              | 1946900149               |
| SNP_P4_102652_40049138 | NC_021166.1    | Ca_kabuli_chr07 | 40049138                | TT                              | CC              | 1946900151               |
| SNP_P4_102653_40049173 | NC_021166.1    | Ca_kabuli_chr07 | 40049173                | AA                              | TT              | 1946900153               |
| SNP_P4_102654_40049179 | NC_021166.1    | Ca_kabuli_chr07 | 40049179                | TT                              | CC              | 1946900155               |
| SNP_P4_102655_40049580 | NC_021166.1    | Ca_kabuli_chr07 | 40049580                | CC                              | GG              | 1946900157               |
| SNP_P4_102656_40049662 | NC_021166.1    | Ca_kabuli_chr07 | 40049662                | TT                              | CC              | 1946900159               |
| SNP_P4_102657_40049900 | NC_021166.1    | Ca_kabuli_chr07 | 40049900                | AA                              | GG              | 1946900161               |
| SNP_P4_102658_40049907 | NC_021166.1    | Ca_kabuli_chr07 | 40049907                | AA                              | GG              | 1946900163               |
| SNP_P4_102659_40049909 | NC_021166.1    | Ca_kabuli_chr07 | 40049909                | AA                              | GG              | 1946900165               |
| SNP_P4_102662_40086996 | NC_021166.1    | Ca_kabuli_chr07 | 40086996                | AA                              | TT              | 1946900167               |
| SNP_P4_102663_40086997 | NC_021166.1    | Ca_kabuli_chr07 | 40086997                | TT                              | GG              | 1946900169               |
| SNP_P4_102664_40087001 | NC_021166.1    | Ca_kabuli_chr07 | 40087001                | TT                              | CC              | 1946900171               |
| SNP_P4_102665_40087056 | NC_021166.1    | Ca_kabuli_chr07 | 40087056                | TT                              | CC              | 1946900173               |
| SNP_P4_102666_40087122 | NC_021166.1    | Ca_kabuli_chr07 | 40087122                | CC                              | AA              | 1946900175               |
| SNP_P4_102667_40087179 | NC_021166.1    | Ca_kabuli_chr07 | 40087179                | TT                              | AA              | 1946900177               |
| SNP_P4_102668_40087196 | NC_021166.1    | Ca_kabuli_chr07 | 40087196                | AA                              | GG              | 1946900179               |
| SNP_P4_102669_40088496 | NC_021166.1    | Ca_kabuli_chr07 | 40088496                | AA                              | GG              | 1946900181               |
| SNP_P4_102670_40088561 | NC_021166.1    | Ca_kabuli_chr07 | 40088561                | AA                              | GG              | 1946900183               |
| SNP_P4_102671_40088923 | NC_021166.1    | Ca_kabuli_chr07 | 40088923                | TT                              | GG              | 1946900185               |

| SNPs IDs               | Chromosome IDs | Chromosomes     | Physical positions (bp) | CDC Frontier (Reference genome) | (ILWC46 & LPNB) | NCBI SNPdb Accession IDs |
|------------------------|----------------|-----------------|-------------------------|---------------------------------|-----------------|--------------------------|
| SNP_P4_102672_40089717 | NC_021166.1    | Ca_kabuli_chr07 | 40089717                | TT                              | CC              | 1946900187               |
| SNP_P4_102673_40089891 | NC_021166.1    | Ca_kabuli_chr07 | 40089891                | CC                              | TT              | 1946900189               |
| SNP_P4_102674_40090137 | NC_021166.1    | Ca_kabuli_chr07 | 40090137                | GG                              | AA              | 1946900191               |
| SNP_P4_102675_40090150 | NC_021166.1    | Ca_kabuli_chr07 | 40090150                | AA                              | CC              | 1946900193               |
| SNP_P4_102676_40090183 | NC_021166.1    | Ca_kabuli_chr07 | 40090183                | GG                              | CC              | 1946900195               |
| SNP_P4_102677_40090208 | NC_021166.1    | Ca_kabuli_chr07 | 40090208                | TT                              | CC              | 1946900197               |
| SNP_P4_102678_40130058 | NC_021166.1    | Ca_kabuli_chr07 | 40130058                | TT                              | CC              | 1946900199               |
| SNP_P4_102679_40130059 | NC_021166.1    | Ca_kabuli_chr07 | 40130059                | CC                              | TT              | 1946900201               |
| SNP_P4_102680_40136641 | NC_021166.1    | Ca_kabuli_chr07 | 40136641                | GG                              | AA              | 1946900204               |
| SNP_P4_102681_40141223 | NC_021166.1    | Ca_kabuli_chr07 | 40141223                | TT                              | CC              | 1946900205               |
| SNP_P4_102682_40153296 | NC_021166.1    | Ca_kabuli_chr07 | 40153296                | AA                              | GG              | 1946900207               |
| SNP_P4_102683_40153297 | NC_021166.1    | Ca_kabuli_chr07 | 40153297                | CC                              | TT              | 1946900210               |
| SNP_P4_102684_40161060 | NC_021166.1    | Ca_kabuli_chr07 | 40161060                | TT                              | CC              | 1946900212               |
| SNP_P4_102685_40189831 | NC_021166.1    | Ca_kabuli_chr07 | 40189831                | TT                              | CC              | 1946900214               |
| SNP_P4_102686_40206535 | NC_021166.1    | Ca_kabuli_chr07 | 40206535                | GG                              | CC              | 1946900216               |
| SNP_P4_102687_40208219 | NC_021166.1    | Ca_kabuli_chr07 | 40208219                | TT                              | CC              | 1946900218               |
| SNP_P4_102688_40209862 | NC_021166.1    | Ca_kabuli_chr07 | 40209862                | AA                              | CC              | 1946900220               |
| SNP_P4_102689_40277823 | NC_021166.1    | Ca_kabuli_chr07 | 40277823                | GG                              | AA              | 1946900222               |
| SNP_P4_102690_40280985 | NC_021166.1    | Ca_kabuli_chr07 | 40280985                | CC                              | TT              | 1946900224               |
| SNP_P4_102691_40281006 | NC_021166.1    | Ca_kabuli_chr07 | 40281006                | AA                              | GG              | 1946900226               |
| SNP_P4_102693_40339345 | NC_021166.1    | Ca_kabuli_chr07 | 40339345                | CC                              | TT              | 1946900228               |
| SNP_P4_102694_40344269 | NC_021166.1    | Ca_kabuli_chr07 | 40344269                | GG                              | AA              | 1946900230               |
| SNP_P4_102695_40374468 | NC_021166.1    | Ca_kabuli_chr07 | 40374468                | TT                              | CC              | 1946900232               |
| SNP_P4_102697_40429662 | NC_021166.1    | Ca_kabuli_chr07 | 40429662                | GG                              | AA              | 1946900234               |
| SNP_P4_102698_40429663 | NC_021166.1    | Ca_kabuli_chr07 | 40429663                | AA                              | GG              | 1946900236               |
| SNP_P4_102699_40429796 | NC_021166.1    | Ca_kabuli_chr07 | 40429796                | AA                              | GG              | 1946900238               |
| SNP_P4_102700_40429870 | NC_021166.1    | Ca_kabuli_chr07 | 40429870                | CC                              | GG              | 1946900240               |
| SNP_P4_102701_40429976 | NC_021166.1    | Ca_kabuli_chr07 | 40429976                | AA                              | GG              | 1946900242               |
| SNP_P4_102702_40430015 | NC_021166.1    | Ca_kabuli_chr07 | 40430015                | GG                              | AA              | 1946900244               |
| SNP_P4_102703_40430046 | NC_021166.1    | Ca_kabuli_chr07 | 40430046                | CC                              | AA              | 1946900246               |
| SNP_P4_102704_40430085 | NC_021166.1    | Ca_kabuli_chr07 | 40430085                | AA                              | CC              | 1946900248               |
| SNP_P4_102705_40430109 | NC_021166.1    | Ca_kabuli_chr07 | 40430109                | GG                              | AA              | 1946900250               |
| SNP_P4_102706_40430110 | NC_021166.1    | Ca_kabuli_chr07 | 40430110                | AA                              | GG              | 1946900252               |
| SNP_P4_102708_40430182 | NC_021166.1    | Ca_kabuli_chr07 | 40430182                | TT                              | GG              | 1946900254               |
| SNP_P4_102709_40430183 | NC_021166.1    | Ca_kabuli_chr07 | 40430183                | TT                              | CC              | 1946900256               |
| SNP_P4_102710_40430299 | NC_021166.1    | Ca_kabuli_chr07 | 40430299                | GG                              | AA              | 1946900258               |
| SNP_P4_102711_40436824 | NC_021166.1    | Ca_kabuli_chr07 | 40436824                | CC                              | TT              | 1946900260               |
| SNP_P4_102712_40439650 | NC_021166.1    | Ca_kabuli_chr07 | 40439650                | CC                              | GG              | 1946900262               |
| SNP_P4_102713_40469785 | NC_021166.1    | Ca_kabuli_chr07 | 40469785                | GG                              | AA              | 1946900264               |
| SNP_P4_102714_40474281 | NC_021166.1    | Ca_kabuli_chr07 | 40474281                | CC                              | GG              | 1946900266               |
| SNP_P4_102716_40494164 | NC_021166.1    | Ca_kabuli_chr07 | 40494164                | AA                              | TT              | 1946900268               |
| SNP_P4_102717_40522080 | NC_021166.1    | Ca_kabuli_chr07 | 40522080                | TT                              | CC              | 1946900270               |



| SNPs IDs               | Chromosome IDs | Chromosomes     | Physical positions (bp) | CDC Frontier (Reference genome) | (ILWC46 & LPNB) | NCBI SNPdb Accession IDs |
|------------------------|----------------|-----------------|-------------------------|---------------------------------|-----------------|--------------------------|
| SNP_P4_102718_40524538 | NC_021166.1    | Ca_kabuli_chr07 | 40524538                | AA                              | GG              | 1946900272               |
| SNP_P4_102719_40524776 | NC_021166.1    | Ca_kabuli_chr07 | 40524776                | GG                              | AA              | 1946900274               |
| SNP_P4_102720_40555188 | NC_021166.1    | Ca_kabuli_chr07 | 40555188                | AA                              | GG              | 1946900276               |
| SNP_P4_102721_40555322 | NC_021166.1    | Ca_kabuli_chr07 | 40555322                | TT                              | CC              | 1946900278               |
| SNP_P4_102722_40555345 | NC_021166.1    | Ca_kabuli_chr07 | 40555345                | GG                              | TT              | 1946900280               |
| SNP_P4_102723_40555686 | NC_021166.1    | Ca_kabuli_chr07 | 40555686                | TT                              | GG              | 1946900281               |
| SNP_P4_102724_40568200 | NC_021166.1    | Ca_kabuli_chr07 | 40568200                | CC                              | TT              | 1946900282               |
| SNP_P4_102725_40575868 | NC_021166.1    | Ca_kabuli_chr07 | 40575868                | GG                              | TT              | 1946900283               |
| SNP_P4_102726_40575885 | NC_021166.1    | Ca_kabuli_chr07 | 40575885                | GG                              | AA              | 1946900284               |
| SNP_P4_102727_40579854 | NC_021166.1    | Ca_kabuli_chr07 | 40579854                | GG                              | AA              | 1946900285               |
| SNP_P4_102728_40579863 | NC_021166.1    | Ca_kabuli_chr07 | 40579863                | CC                              | AA              | 1946900286               |
| SNP_P4_102729_40589201 | NC_021166.1    | Ca_kabuli_chr07 | 40589201                | CC                              | TT              | 1946900287               |
| SNP_P4_102730_40589505 | NC_021166.1    | Ca_kabuli_chr07 | 40589505                | TT                              | CC              | 1946900288               |
| SNP_P4_102731_40589520 | NC_021166.1    | Ca_kabuli_chr07 | 40589520                | TT                              | CC              | 1946900289               |
| SNP_P4_102732_40589549 | NC_021166.1    | Ca_kabuli_chr07 | 40589549                | CC                              | TT              | 1946900290               |
| SNP_P4_102733_40589565 | NC_021166.1    | Ca_kabuli_chr07 | 40589565                | TT                              | CC              | 1946900291               |
| SNP_P4_102734_40589572 | NC_021166.1    | Ca_kabuli_chr07 | 40589572                | CC                              | AA              | 1946900292               |
| SNP_P4_102735_40589573 | NC_021166.1    | Ca_kabuli_chr07 | 40589573                | GG                              | AA              | 1946900293               |
| SNP_P4_102736_40589575 | NC_021166.1    | Ca_kabuli_chr07 | 40589575                | GG                              | TT              | 1946900294               |
| SNP_P4_102737_40589583 | NC_021166.1    | Ca_kabuli_chr07 | 40589583                | AA                              | GG              | 1946900295               |
| SNP_P4_102738_40589607 | NC_021166.1    | Ca_kabuli_chr07 | 40589607                | TT                              | CC              | 1946900296               |
| SNP_P4_102739_40589620 | NC_021166.1    | Ca_kabuli_chr07 | 40589620                | CC                              | TT              | 1946900297               |
| SNP_P4_102740_40589642 | NC_021166.1    | Ca_kabuli_chr07 | 40589642                | TT                              | CC              | 1946900298               |
| SNP_P4_102741_40589649 | NC_021166.1    | Ca_kabuli_chr07 | 40589649                | AA                              | TT              | 1946900299               |
| SNP_P4_102742_40589712 | NC_021166.1    | Ca_kabuli_chr07 | 40589712                | CC                              | GG              | 1946900300               |
| SNP_P4_102743_40589733 | NC_021166.1    | Ca_kabuli_chr07 | 40589733                | AA                              | TT              | 1946900301               |
| SNP_P4_102744_40589760 | NC_021166.1    | Ca_kabuli_chr07 | 40589760                | CC                              | AA              | 1946900302               |
| SNP_P4_102745_40589903 | NC_021166.1    | Ca_kabuli_chr07 | 40589903                | AA                              | CC              | 1946900303               |
| SNP_P4_102746_40589912 | NC_021166.1    | Ca_kabuli_chr07 | 40589912                | AA                              | CC              | 1946900304               |
| SNP_P4_102747_40589935 | NC_021166.1    | Ca_kabuli_chr07 | 40589935                | TT                              | CC              | 1946900305               |
| SNP_P4_102748_40589950 | NC_021166.1    | Ca_kabuli_chr07 | 40589950                | GG                              | TT              | 1946900306               |
| SNP_P4_102749_40589951 | NC_021166.1    | Ca_kabuli_chr07 | 40589951                | CC                              | AA              | 1946900307               |
| SNP_P4_102750_40589985 | NC_021166.1    | Ca_kabuli_chr07 | 40589985                | TT                              | AA              | 1946900308               |
| SNP_P4_102751_40590049 | NC_021166.1    | Ca_kabuli_chr07 | 40590049                | TT                              | GG              | 1946900309               |
| SNP_P4_102752_40609734 | NC_021166.1    | Ca_kabuli_chr07 | 40609734                | CC                              | AA              | 1946900310               |
| SNP_P4_102754_40613662 | NC_021166.1    | Ca_kabuli_chr07 | 40613662                | AA                              | TT              | 1946900311               |
| SNP_P4_102755_40613679 | NC_021166.1    | Ca_kabuli_chr07 | 40613679                | CC                              | AA              | 1946900312               |
| SNP_P4_102756_40613698 | NC_021166.1    | Ca_kabuli_chr07 | 40613698                | TT                              | CC              | 1946900313               |
| SNP_P4_102757_40628880 | NC_021166.1    | Ca_kabuli_chr07 | 40628880                | AA                              | GG              | 1946900314               |
| SNP_P4_102758_40629246 | NC_021166.1    | Ca_kabuli_chr07 | 40629246                | AA                              | GG              | 1946900315               |
| SNP_P4_102759_40633033 | NC_021166.1    | Ca_kabuli_chr07 | 40633033                | GG                              | TT              | 1946900316               |
| SNP_P4_102760_40639458 | NC_021166.1    | Ca_kabuli_chr07 | 40639458                | GG                              | CC              | 1946900317               |

| SNPs IDs               | Chromosome IDs | Chromosomes     | Physical positions (bp) | CDC Frontier (Reference genome) | (ILWC46 & LPNB) | NCBI SNPdb Accession IDs |
|------------------------|----------------|-----------------|-------------------------|---------------------------------|-----------------|--------------------------|
| SNP_P4_102761_40653990 | NC_021166.1    | Ca_kabuli_chr07 | 40653990                | TT                              | CC              | 1946900318               |
| SNP_P4_102762_40656352 | NC_021166.1    | Ca_kabuli_chr07 | 40656352                | GG                              | CC              | 1946900319               |
| SNP_P4_102763_40659392 | NC_021166.1    | Ca_kabuli_chr07 | 40659392                | AA                              | GG              | 1946900320               |
| SNP_P4_102764_40659455 | NC_021166.1    | Ca_kabuli_chr07 | 40659455                | AA                              | TT              | 1946900321               |
| SNP_P4_102765_40659459 | NC_021166.1    | Ca_kabuli_chr07 | 40659459                | AA                              | GG              | 1946900322               |
| SNP_P4_102766_40659728 | NC_021166.1    | Ca_kabuli_chr07 | 40659728                | TT                              | GG              | 1946900323               |
| SNP_P4_102767_40659787 | NC_021166.1    | Ca_kabuli_chr07 | 40659787                | CC                              | TT              | 1946900324               |
| SNP_P4_102768_40662151 | NC_021166.1    | Ca_kabuli_chr07 | 40662151                | TT                              | CC              | 1946900325               |
| SNP_P4_102769_40672236 | NC_021166.1    | Ca_kabuli_chr07 | 40672236                | AA                              | GG              | 1946900326               |
| SNP_P4_102770_40720105 | NC_021166.1    | Ca_kabuli_chr07 | 40720105                | CC                              | TT              | 1946900327               |
| SNP_P4_102771_40748364 | NC_021166.1    | Ca_kabuli_chr07 | 40748364                | AA                              | GG              | 1946900328               |
| SNP_P4_102772_40761984 | NC_021166.1    | Ca_kabuli_chr07 | 40761984                | AA                              | GG              | 1946900329               |
| SNP_P4_102773_40762060 | NC_021166.1    | Ca_kabuli_chr07 | 40762060                | AA                              | TT              | 1946900330               |
| SNP_P4_102774_40768182 | NC_021166.1    | Ca_kabuli_chr07 | 40768182                | CC                              | TT              | 1946900331               |
| SNP_P4_102776_40768770 | NC_021166.1    | Ca_kabuli_chr07 | 40768770                | GG                              | AA              | 1946900332               |
| SNP_P4_102777_40768776 | NC_021166.1    | Ca_kabuli_chr07 | 40768776                | CC                              | TT              | 1946900333               |
| SNP_P4_102778_40768803 | NC_021166.1    | Ca_kabuli_chr07 | 40768803                | CC                              | TT              | 1946900334               |
| SNP_P4_102779_40768860 | NC_021166.1    | Ca_kabuli_chr07 | 40768860                | GG                              | AA              | 1946900335               |
| SNP_P4_102780_40768909 | NC_021166.1    | Ca_kabuli_chr07 | 40768909                | CC                              | TT              | 1946900336               |
| SNP_P4_102781_40768918 | NC_021166.1    | Ca_kabuli_chr07 | 40768918                | AA                              | CC              | 1946900337               |
| SNP_P4_102782_40769076 | NC_021166.1    | Ca_kabuli_chr07 | 40769076                | AA                              | GG              | 1946900338               |
| SNP_P4_102783_40769167 | NC_021166.1    | Ca_kabuli_chr07 | 40769167                | CC                              | AA              | 1946900339               |
| SNP_P4_102784_40769215 | NC_021166.1    | Ca_kabuli_chr07 | 40769215                | TT                              | AA              | 1946900340               |
| SNP_P4_102785_40769216 | NC_021166.1    | Ca_kabuli_chr07 | 40769216                | CC                              | TT              | 1946900341               |
| SNP_P4_102786_40769248 | NC_021166.1    | Ca_kabuli_chr07 | 40769248                | CC                              | TT              | 1946900342               |
| SNP_P4_102787_40770323 | NC_021166.1    | Ca_kabuli_chr07 | 40770323                | CC                              | AA              | 1946900343               |
| SNP_P4_102788_40773885 | NC_021166.1    | Ca_kabuli_chr07 | 40773885                | CC                              | TT              | 1946900344               |
| SNP_P4_102789_40781551 | NC_021166.1    | Ca_kabuli_chr07 | 40781551                | AA                              | GG              | 1946900345               |
| SNP_P4_102790_40785705 | NC_021166.1    | Ca_kabuli_chr07 | 40785705                | AA                              | GG              | 1946900346               |
| SNP_P4_102791_40786448 | NC_021166.1    | Ca_kabuli_chr07 | 40786448                | TT                              | AA              | 1946900347               |
| SNP_P4_102792_40799057 | NC_021166.1    | Ca_kabuli_chr07 | 40799057                | GG                              | AA              | 1946900348               |
| SNP_P4_102794_40804491 | NC_021166.1    | Ca_kabuli_chr07 | 40804491                | CC                              | TT              | 1946900349               |
| SNP_P4_102795_40804503 | NC_021166.1    | Ca_kabuli_chr07 | 40804503                | CC                              | TT              | 1946900350               |
| SNP_P4_102796_40804797 | NC_021166.1    | Ca_kabuli_chr07 | 40804797                | GG                              | AA              | 1946900351               |
| SNP_P4_102797_40804812 | NC_021166.1    | Ca_kabuli_chr07 | 40804812                | AA                              | TT              | 1946900352               |
| SNP_P4_102798_40804992 | NC_021166.1    | Ca_kabuli_chr07 | 40804992                | TT                              | AA              | 1946900354               |
| SNP_P4_102799_40888258 | NC_021166.1    | Ca_kabuli_chr07 | 40888258                | TT                              | CC              | 1946900356               |
| SNP_P4_102800_40888259 | NC_021166.1    | Ca_kabuli_chr07 | 40888259                | GG                              | AA              | 1946900358               |
| SNP_P4_102801_40888575 | NC_021166.1    | Ca_kabuli_chr07 | 40888575                | GG                              | AA              | 1946900360               |
| SNP_P4_102802_40914008 | NC_021166.1    | Ca_kabuli_chr07 | 40914008                | CC                              | GG              | 1946900362               |
| SNP_P4_102803_40951077 | NC_021166.1    | Ca_kabuli_chr07 | 40951077                | GG                              | AA              | 1946900364               |
| SNP_P4_102804_40951083 | NC_021166.1    | Ca_kabuli_chr07 | 40951083                | TT                              | CC              | 1946900366               |

| SNPs IDs               | Chromosome IDs | Chromosomes     | Physical positions (bp) | CDC Frontier (Reference genome) | (ILWC46 & LPNB) | NCBI SNPdb Accession IDs |
|------------------------|----------------|-----------------|-------------------------|---------------------------------|-----------------|--------------------------|
| SNP_P4_102805_40963878 | NC_021166.1    | Ca_kabuli_chr07 | 40963878                | CC                              | TT              | 1946900368               |
| SNP_P4_102806_40965582 | NC_021166.1    | Ca_kabuli_chr07 | 40965582                | CC                              | AA              | 1946900369               |
| SNP_P4_102808_40973569 | NC_021166.1    | Ca_kabuli_chr07 | 40973569                | AA                              | GG              | 1946900371               |
| SNP_P4_102809_40978498 | NC_021166.1    | Ca_kabuli_chr07 | 40978498                | TT                              | AA              | 1946900373               |
| SNP_P4_102810_40978509 | NC_021166.1    | Ca_kabuli_chr07 | 40978509                | GG                              | TT              | 1946900375               |
| SNP_P4_102811_40978512 | NC_021166.1    | Ca_kabuli_chr07 | 40978512                | TT                              | AA              | 1946900377               |
| SNP_P4_102812_40978541 | NC_021166.1    | Ca_kabuli_chr07 | 40978541                | AA                              | TT              | 1946900379               |
| SNP_P4_102813_40978568 | NC_021166.1    | Ca_kabuli_chr07 | 40978568                | TT                              | CC              | 1946900381               |
| SNP_P4_102814_40978599 | NC_021166.1    | Ca_kabuli_chr07 | 40978599                | CC                              | AA              | 1946900383               |
| SNP_P4_102815_40978635 | NC_021166.1    | Ca_kabuli_chr07 | 40978635                | CC                              | TT              | 1946900385               |
| SNP_P4_102816_40978652 | NC_021166.1    | Ca_kabuli_chr07 | 40978652                | CC                              | TT              | 1946900387               |
| SNP_P4_102817_40978653 | NC_021166.1    | Ca_kabuli_chr07 | 40978653                | GG                              | AA              | 1946900389               |
| SNP_P4_102818_40978663 | NC_021166.1    | Ca_kabuli_chr07 | 40978663                | TT                              | CC              | 1946900391               |
| SNP_P4_102819_40978666 | NC_021166.1    | Ca_kabuli_chr07 | 40978666                | AA                              | GG              | 1946900393               |
| SNP_P4_102820_40978670 | NC_021166.1    | Ca_kabuli_chr07 | 40978670                | CC                              | GG              | 1946900395               |
| SNP_P4_102821_40978689 | NC_021166.1    | Ca_kabuli_chr07 | 40978689                | TT                              | CC              | 1946900397               |
| SNP_P4_102822_40978692 | NC_021166.1    | Ca_kabuli_chr07 | 40978692                | TT                              | CC              | 1946900399               |
| SNP_P4_102823_40982522 | NC_021166.1    | Ca_kabuli_chr07 | 40982522                | TT                              | CC              | 1946900401               |
| SNP_P4_102824_40982837 | NC_021166.1    | Ca_kabuli_chr07 | 40982837                | CC                              | TT              | 1946900403               |
| SNP_P4_102825_40984998 | NC_021166.1    | Ca_kabuli_chr07 | 40984998                | CC                              | TT              | 1946900405               |
| SNP_P4_102827_40985058 | NC_021166.1    | Ca_kabuli_chr07 | 40985058                | AA                              | TT              | 1946900407               |
| SNP_P4_102828_40985074 | NC_021166.1    | Ca_kabuli_chr07 | 40985074                | CC                              | AA              | 1946900410               |
| SNP_P4_102829_40985089 | NC_021166.1    | Ca_kabuli_chr07 | 40985089                | CC                              | TT              | 1946900412               |
| SNP_P4_102830_40985097 | NC_021166.1    | Ca_kabuli_chr07 | 40985097                | GG                              | AA              | 1946900414               |
| SNP_P4_102831_40985100 | NC_021166.1    | Ca_kabuli_chr07 | 40985100                | CC                              | TT              | 1946900416               |
| SNP_P4_102832_40985319 | NC_021166.1    | Ca_kabuli_chr07 | 40985319                | GG                              | AA              | 1946900418               |
| SNP_P4_102833_40985340 | NC_021166.1    | Ca_kabuli_chr07 | 40985340                | AA                              | GG              | 1946900420               |
| SNP_P4_102834_40985610 | NC_021166.1    | Ca_kabuli_chr07 | 40985610                | TT                              | CC              | 1946900423               |
| SNP_P4_102835_40985611 | NC_021166.1    | Ca_kabuli_chr07 | 40985611                | GG                              | AA              | 1946900425               |
| SNP_P4_102836_40985718 | NC_021166.1    | Ca_kabuli_chr07 | 40985718                | AA                              | GG              | 1946900427               |
| SNP_P4_102837_40985719 | NC_021166.1    | Ca_kabuli_chr07 | 40985719                | GG                              | AA              | 1946900429               |
| SNP_P4_102838_40985726 | NC_021166.1    | Ca_kabuli_chr07 | 40985726                | GG                              | AA              | 1946900432               |
| SNP_P4_102839_40985733 | NC_021166.1    | Ca_kabuli_chr07 | 40985733                | AA                              | GG              | 1946900434               |
| SNP_P4_102840_40986626 | NC_021166.1    | Ca_kabuli_chr07 | 40986626                | GG                              | TT              | 1946900436               |
| SNP_P4_102841_40986757 | NC_021166.1    | Ca_kabuli_chr07 | 40986757                | AA                              | TT              | 1946900438               |
| SNP_P4_102842_40986759 | NC_021166.1    | Ca_kabuli_chr07 | 40986759                | TT                              | AA              | 1946900440               |
| SNP_P4_102843_40986765 | NC_021166.1    | Ca_kabuli_chr07 | 40986765                | AA                              | TT              | 1946900442               |
| SNP_P4_102844_40986768 | NC_021166.1    | Ca_kabuli_chr07 | 40986768                | TT                              | AA              | 1946900444               |
| SNP_P4_102845_40986781 | NC_021166.1    | Ca_kabuli_chr07 | 40986781                | AA                              | TT              | 1946900446               |
| SNP_P4_102846_40986787 | NC_021166.1    | Ca_kabuli_chr07 | 40986787                | TT                              | AA              | 1946900448               |
| SNP_P4_102847_40986794 | NC_021166.1    | Ca_kabuli_chr07 | 40986794                | AA                              | TT              | 1946900451               |
| SNP_P4_102848_40986816 | NC_021166.1    | Ca_kabuli_chr07 | 40986816                | AA                              | CC              | 1946900453               |

| SNPs IDs               | Chromosome IDs | Chromosomes     | Physical positions (bp) | CDC Frontier (Reference genome) | (ILWC46 & LPNB) | NCBI SNPdb Accession IDs |
|------------------------|----------------|-----------------|-------------------------|---------------------------------|-----------------|--------------------------|
| SNP_P4_102849_40986817 | NC_021166.1    | Ca_kabuli_chr07 | 40986817                | TT                              | CC              | 1946900455               |
| SNP_P4_102850_40986820 | NC_021166.1    | Ca_kabuli_chr07 | 40986820                | AA                              | TT              | 1946900457               |
| SNP_P4_102851_40986853 | NC_021166.1    | Ca_kabuli_chr07 | 40986853                | AA                              | CC              | 1946900459               |
| SNP_P4_102852_40990636 | NC_021166.1    | Ca_kabuli_chr07 | 40990636                | TT                              | GG              | 1946900462               |
| SNP_P4_102853_40990645 | NC_021166.1    | Ca_kabuli_chr07 | 40990645                | GG                              | AA              | 1946900464               |
| SNP_P4_102854_40990684 | NC_021166.1    | Ca_kabuli_chr07 | 40990684                | CC                              | AA              | 1946900466               |
| SNP_P4_102855_40990852 | NC_021166.1    | Ca_kabuli_chr07 | 40990852                | TT                              | CC              | 1946900468               |
| SNP_P4_102856_40990853 | NC_021166.1    | Ca_kabuli_chr07 | 40990853                | GG                              | AA              | 1946900470               |
| SNP_P4_102857_40990867 | NC_021166.1    | Ca_kabuli_chr07 | 40990867                | GG                              | TT              | 1946900472               |
| SNP_P4_102858_40990890 | NC_021166.1    | Ca_kabuli_chr07 | 40990890                | GG                              | AA              | 1946900475               |
| SNP_P4_102859_40990917 | NC_021166.1    | Ca_kabuli_chr07 | 40990917                | AA                              | GG              | 1946900477               |
| SNP_P4_102860_40990919 | NC_021166.1    | Ca_kabuli_chr07 | 40990919                | AA                              | GG              | 1946900479               |
| SNP_P4_102861_40990950 | NC_021166.1    | Ca_kabuli_chr07 | 40990950                | CC                              | TT              | 1946900481               |
| SNP_P4_102862_40990959 | NC_021166.1    | Ca_kabuli_chr07 | 40990959                | CC                              | AA              | 1946900482               |
| SNP_P4_102863_40990964 | NC_021166.1    | Ca_kabuli_chr07 | 40990964                | TT                              | CC              | 1946900483               |
| SNP_P4_102864_40991315 | NC_021166.1    | Ca_kabuli_chr07 | 40991315                | TT                              | AA              | 1946900485               |
| SNP_P4_102865_40991335 | NC_021166.1    | Ca_kabuli_chr07 | 40991335                | GG                              | AA              | 1946900487               |
| SNP_P4_102866_40991340 | NC_021166.1    | Ca_kabuli_chr07 | 40991340                | AA                              | TT              | 1946900489               |
| SNP_P4_102867_40998076 | NC_021166.1    | Ca_kabuli_chr07 | 40998076                | CC                              | TT              | 1946900491               |
| SNP_P4_102868_41002535 | NC_021166.1    | Ca_kabuli_chr07 | 41002535                | AA                              | TT              | 1946900493               |
| SNP_P4_102870_41008376 | NC_021166.1    | Ca_kabuli_chr07 | 41008376                | TT                              | AA              | 1946900495               |
| SNP_P4_102871_41008436 | NC_021166.1    | Ca_kabuli_chr07 | 41008436                | AA                              | GG              | 1946900497               |
| SNP_P4_102872_41008458 | NC_021166.1    | Ca_kabuli_chr07 | 41008458                | TT                              | GG              | 1946900499               |
| SNP_P4_102873_41008493 | NC_021166.1    | Ca_kabuli_chr07 | 41008493                | TT                              | AA              | 1946900501               |
| SNP_P4_102874_41008546 | NC_021166.1    | Ca_kabuli_chr07 | 41008546                | CC                              | TT              | 1946900503               |
| SNP_P4_102875_41008565 | NC_021166.1    | Ca_kabuli_chr07 | 41008565                | AA                              | GG              | 1946900505               |
| SNP_P4_102876_41008607 | NC_021166.1    | Ca_kabuli_chr07 | 41008607                | CC                              | GG              | 1946900508               |
| SNP_P4_102877_41008692 | NC_021166.1    | Ca_kabuli_chr07 | 41008692                | GG                              | AA              | 1946900510               |
| SNP_P4_102878_41008705 | NC_021166.1    | Ca_kabuli_chr07 | 41008705                | AA                              | GG              | 1946900512               |
| SNP_P4_102879_41008762 | NC_021166.1    | Ca_kabuli_chr07 | 41008762                | GG                              | TT              | 1946900514               |
| SNP_P4_102881_41008824 | NC_021166.1    | Ca_kabuli_chr07 | 41008824                | AA                              | CC              | 1946900516               |
| SNP_P4_102882_41008833 | NC_021166.1    | Ca_kabuli_chr07 | 41008833                | GG                              | AA              | 1946900518               |
| SNP_P4_102883_41008839 | NC_021166.1    | Ca_kabuli_chr07 | 41008839                | CC                              | TT              | 1946900520               |
| SNP_P4_102884_41008877 | NC_021166.1    | Ca_kabuli_chr07 | 41008877                | TT                              | AA              | 1946900523               |
| SNP_P4_102885_41008944 | NC_021166.1    | Ca_kabuli_chr07 | 41008944                | TT                              | CC              | 1946900525               |
| SNP_P4_102887_41009240 | NC_021166.1    | Ca_kabuli_chr07 | 41009240                | CC                              | GG              | 1946900527               |
| SNP_P4_102888_41009243 | NC_021166.1    | Ca_kabuli_chr07 | 41009243                | AA                              | TT              | 1946900529               |
| SNP_P4_102889_41009249 | NC_021166.1    | Ca_kabuli_chr07 | 41009249                | AA                              | TT              | 1946900531               |
| SNP_P4_102890_41009304 | NC_021166.1    | Ca_kabuli_chr07 | 41009304                | AA                              | CC              | 1946900533               |
| SNP_P4_102891_41009399 | NC_021166.1    | Ca_kabuli_chr07 | 41009399                | AA                              | TT              | 1946900535               |
| SNP_P4_102892_41009586 | NC_021166.1    | Ca_kabuli_chr07 | 41009586                | AA                              | GG              | 1946900538               |
| SNP_P4_102893_41009898 | NC_021166.1    | Ca_kabuli_chr07 | 41009898                | CC                              | AA              | 1946900540               |

| SNPs IDs               | Chromosome IDs | Chromosomes     | Physical positions (bp) | CDC Frontier (Reference genome) | (ILWC46 & LPNB) | NCBI SNPdb Accession IDs |
|------------------------|----------------|-----------------|-------------------------|---------------------------------|-----------------|--------------------------|
| SNP_P4_102895_41009987 | NC_021166.1    | Ca_kabuli_chr07 | 41009987                | GG                              | AA              | 1946900542               |
| SNP_P4_102896_41010116 | NC_021166.1    | Ca_kabuli_chr07 | 41010116                | GG                              | AA              | 1946900544               |
| SNP_P4_102898_41010247 | NC_021166.1    | Ca_kabuli_chr07 | 41010247                | TT                              | AA              | 1946900546               |
| SNP_P4_102899_41010343 | NC_021166.1    | Ca_kabuli_chr07 | 41010343                | TT                              | AA              | 1946900548               |
| SNP_P4_102900_41027465 | NC_021166.1    | Ca_kabuli_chr07 | 41027465                | AA                              | TT              | 1946900550               |
| SNP_P4_102901_41027537 | NC_021166.1    | Ca_kabuli_chr07 | 41027537                | GG                              | AA              | 1946900552               |
| SNP_P4_102902_41027569 | NC_021166.1    | Ca_kabuli_chr07 | 41027569                | AA                              | CC              | 1946900554               |
| SNP_P4_102903_41027790 | NC_021166.1    | Ca_kabuli_chr07 | 41027790                | AA                              | CC              | 1946900557               |
| SNP_P4_102904_41027830 | NC_021166.1    | Ca_kabuli_chr07 | 41027830                | CC                              | GG              | 1946900559               |
| SNP_P4_102905_41027861 | NC_021166.1    | Ca_kabuli_chr07 | 41027861                | AA                              | GG              | 1946900561               |
| SNP_P4_102906_41027893 | NC_021166.1    | Ca_kabuli_chr07 | 41027893                | TT                              | AA              | 1946900563               |
| SNP_P4_102907_41052325 | NC_021166.1    | Ca_kabuli_chr07 | 41052325                | TT                              | CC              | 1946900565               |
| SNP_P4_102908_41052645 | NC_021166.1    | Ca_kabuli_chr07 | 41052645                | TT                              | GG              | 1946900567               |
| SNP_P4_102909_41060681 | NC_021166.1    | Ca_kabuli_chr07 | 41060681                | CC                              | TT              | 1946900569               |
| SNP_P4_102910_41060694 | NC_021166.1    | Ca_kabuli_chr07 | 41060694                | CC                              | TT              | 1946900571               |
| SNP_P4_102911_41060713 | NC_021166.1    | Ca_kabuli_chr07 | 41060713                | GG                              | AA              | 1946900573               |
| SNP_P4_102912_41060763 | NC_021166.1    | Ca_kabuli_chr07 | 41060763                | CC                              | TT              | 1946900575               |
| SNP_P4_102913_41062676 | NC_021166.1    | Ca_kabuli_chr07 | 41062676                | AA                              | GG              | 1946900577               |
| SNP_P4_102914_41072552 | NC_021166.1    | Ca_kabuli_chr07 | 41072552                | GG                              | AA              | 1946900579               |
| SNP_P4_102915_41073159 | NC_021166.1    | Ca_kabuli_chr07 | 41073159                | AA                              | GG              | 1946900581               |
| SNP_P4_102916_41073180 | NC_021166.1    | Ca_kabuli_chr07 | 41073180                | TT                              | CC              | 1946900583               |
| SNP_P4_102917_41098498 | NC_021166.1    | Ca_kabuli_chr07 | 41098498                | TT                              | CC              | 1946900585               |
| SNP_P4_102918_41106933 | NC_021166.1    | Ca_kabuli_chr07 | 41106933                | AA                              | CC              | 1946900587               |
| SNP_P4_102919_41115650 | NC_021166.1    | Ca_kabuli_chr07 | 41115650                | AA                              | GG              | 1946900589               |
| SNP_P4_102920_41118677 | NC_021166.1    | Ca_kabuli_chr07 | 41118677                | AA                              | TT              | 1946900592               |
| SNP_P4_102921_41129475 | NC_021166.1    | Ca_kabuli_chr07 | 41129475                | TT                              | CC              | 1946900594               |
| SNP_P4_102922_41129562 | NC_021166.1    | Ca_kabuli_chr07 | 41129562                | GG                              | AA              | 1946900596               |
| SNP_P4_102923_41158900 | NC_021166.1    | Ca_kabuli_chr07 | 41158900                | AA                              | CC              | 1946900598               |
| SNP_P4_102924_41160467 | NC_021166.1    | Ca_kabuli_chr07 | 41160467                | AA                              | CC              | 1946900600               |
| SNP_P4_102925_41166196 | NC_021166.1    | Ca_kabuli_chr07 | 41166196                | TT                              | CC              | 1946900602               |
| SNP_P4_102926_41167758 | NC_021166.1    | Ca_kabuli_chr07 | 41167758                | AA                              | GG              | 1946900604               |
| SNP_P4_102927_41167885 | NC_021166.1    | Ca_kabuli_chr07 | 41167885                | CC                              | TT              | 1946900606               |
| SNP_P4_102928_41167907 | NC_021166.1    | Ca_kabuli_chr07 | 41167907                | TT                              | GG              | 1946900608               |
| SNP_P4_102929_41167913 | NC_021166.1    | Ca_kabuli_chr07 | 41167913                | AA                              | CC              | 1946900610               |
| SNP_P4_102930_41167934 | NC_021166.1    | Ca_kabuli_chr07 | 41167934                | GG                              | AA              | 1946900612               |
| SNP_P4_102931_41167952 | NC_021166.1    | Ca_kabuli_chr07 | 41167952                | AA                              | GG              | 1946900614               |
| SNP_P4_102932_41168195 | NC_021166.1    | Ca_kabuli_chr07 | 41168195                | GG                              | TT              | 1946900617               |
| SNP_P4_102933_41168205 | NC_021166.1    | Ca_kabuli_chr07 | 41168205                | AA                              | GG              | 1946900619               |
| SNP_P4_102934_41168230 | NC_021166.1    | Ca_kabuli_chr07 | 41168230                | AA                              | CC              | 1946900621               |
| SNP_P4_102935_41168236 | NC_021166.1    | Ca_kabuli_chr07 | 41168236                | GG                              | AA              | 1946900623               |
| SNP_P4_102936_41168269 | NC_021166.1    | Ca_kabuli_chr07 | 41168269                | GG                              | TT              | 1946900625               |
| SNP_P4_102937_41168307 | NC_021166.1    | Ca_kabuli_chr07 | 41168307                | CC                              | TT              | 1946900627               |

| SNPs IDs               | Chromosome IDs | Chromosomes     | Physical positions (bp) | CDC Frontier (Reference genome) | (ILWC46 & LPNB) | NCBI SNPdb Accession IDs |
|------------------------|----------------|-----------------|-------------------------|---------------------------------|-----------------|--------------------------|
| SNP_P4_102938_41168333 | NC_021166.1    | Ca_kabuli_chr07 | 41168333                | TT                              | AA              | 1946900629               |
| SNP_P4_102939_41170143 | NC_021166.1    | Ca_kabuli_chr07 | 41170143                | AA                              | GG              | 1946900631               |
| SNP_P4_102940_41170170 | NC_021166.1    | Ca_kabuli_chr07 | 41170170                | GG                              | AA              | 1946900633               |
| SNP_P4_102941_41170275 | NC_021166.1    | Ca_kabuli_chr07 | 41170275                | CC                              | GG              | 1946900635               |
| SNP_P4_102942_41170311 | NC_021166.1    | Ca_kabuli_chr07 | 41170311                | CC                              | AA              | 1946900637               |
| SNP_P4_102944_41170628 | NC_021166.1    | Ca_kabuli_chr07 | 41170628                | CC                              | TT              | 1946900639               |
| SNP_P4_102945_41184882 | NC_021166.1    | Ca_kabuli_chr07 | 41184882                | CC                              | TT              | 1946900641               |
| SNP_P4_102946_41185113 | NC_021166.1    | Ca_kabuli_chr07 | 41185113                | AA                              | GG              | 1946900643               |
| SNP_P4_102947_41200763 | NC_021166.1    | Ca_kabuli_chr07 | 41200763                | TT                              | AA              | 1946900645               |
| SNP_P4_102948_41215435 | NC_021166.1    | Ca_kabuli_chr07 | 41215435                | AA                              | CC              | 1946900647               |
| SNP_P4_102949_41215484 | NC_021166.1    | Ca_kabuli_chr07 | 41215484                | TT                              | AA              | 1946900649               |
| SNP_P4_102950_41215487 | NC_021166.1    | Ca_kabuli_chr07 | 41215487                | GG                              | CC              | 1946900651               |
| SNP_P4_102951_41215591 | NC_021166.1    | Ca_kabuli_chr07 | 41215591                | TT                              | CC              | 1946900653               |
| SNP_P4_102952_41215609 | NC_021166.1    | Ca_kabuli_chr07 | 41215609                | GG                              | AA              | 1946900655               |
| SNP_P4_102953_41215657 | NC_021166.1    | Ca_kabuli_chr07 | 41215657                | GG                              | CC              | 1946900657               |
| SNP_P4_102954_41215955 | NC_021166.1    | Ca_kabuli_chr07 | 41215955                | GG                              | AA              | 1946900659               |
| SNP_P4_102955_41232035 | NC_021166.1    | Ca_kabuli_chr07 | 41232035                | AA                              | TT              | 1946900661               |
| SNP_P4_102956_41232036 | NC_021166.1    | Ca_kabuli_chr07 | 41232036                | AA                              | TT              | 1946900663               |
| SNP_P4_102957_41239000 | NC_021166.1    | Ca_kabuli_chr07 | 41239000                | GG                              | TT              | 1946900665               |
| SNP_P4_102958_41239055 | NC_021166.1    | Ca_kabuli_chr07 | 41239055                | AA                              | CC              | 1946900667               |
| SNP_P4_102959_41239078 | NC_021166.1    | Ca_kabuli_chr07 | 41239078                | CC                              | TT              | 1946900669               |
| SNP_P4_102960_41239084 | NC_021166.1    | Ca_kabuli_chr07 | 41239084                | TT                              | CC              | 1946900671               |
| SNP_P4_102961_41239241 | NC_021166.1    | Ca_kabuli_chr07 | 41239241                | AA                              | GG              | 1946900673               |
| SNP_P4_102962_41239244 | NC_021166.1    | Ca_kabuli_chr07 | 41239244                | AA                              | GG              | 1946900676               |
| SNP_P4_102963_41239248 | NC_021166.1    | Ca_kabuli_chr07 | 41239248                | TT                              | CC              | 1946900678               |
| SNP_P4_102964_41239292 | NC_021166.1    | Ca_kabuli_chr07 | 41239292                | AA                              | GG              | 1946900680               |
| SNP_P4_102965_41239315 | NC_021166.1    | Ca_kabuli_chr07 | 41239315                | TT                              | AA              | 1946900682               |
| SNP_P4_102966_41239326 | NC_021166.1    | Ca_kabuli_chr07 | 41239326                | TT                              | CC              | 1946900684               |
| SNP_P4_102967_41239344 | NC_021166.1    | Ca_kabuli_chr07 | 41239344                | TT                              | CC              | 1946900686               |
| SNP_P4_102968_41239648 | NC_021166.1    | Ca_kabuli_chr07 | 41239648                | CC                              | AA              | 1946900688               |
| SNP_P4_102969_41241233 | NC_021166.1    | Ca_kabuli_chr07 | 41241233                | AA                              | CC              | 1946900690               |
| SNP_P4_102970_41241255 | NC_021166.1    | Ca_kabuli_chr07 | 41241255                | AA                              | GG              | 1946900692               |
| SNP_P4_102971_41241260 | NC_021166.1    | Ca_kabuli_chr07 | 41241260                | AA                              | CC              | 1946900694               |
| SNP_P4_102972_41241310 | NC_021166.1    | Ca_kabuli_chr07 | 41241310                | AA                              | TT              | 1946900696               |
| SNP_P4_102973_41249697 | NC_021166.1    | Ca_kabuli_chr07 | 41249697                | AA                              | TT              | 1946900698               |
| SNP_P4_102974_41249978 | NC_021166.1    | Ca_kabuli_chr07 | 41249978                | GG                              | AA              | 1946900700               |
| SNP_P4_102975_41249993 | NC_021166.1    | Ca_kabuli_chr07 | 41249993                | CC                              | TT              | 1946900702               |
| SNP_P4_102976_41250020 | NC_021166.1    | Ca_kabuli_chr07 | 41250020                | AA                              | CC              | 1946900704               |
| SNP_P4_102977_41250721 | NC_021166.1    | Ca_kabuli_chr07 | 41250721                | GG                              | TT              | 1946900707               |
| SNP_P4_102978_41250738 | NC_021166.1    | Ca_kabuli_chr07 | 41250738                | AA                              | TT              | 1946900709               |
| SNP_P4_102979_41250764 | NC_021166.1    | Ca_kabuli_chr07 | 41250764                | GG                              | TT              | 1946900711               |
| SNP_P4_102980_41250827 | NC_021166.1    | Ca_kabuli_chr07 | 41250827                | GG                              | AA              | 1946900713               |

| SNPs IDs               | Chromosome IDs | Chromosomes     | Physical positions (bp) | CDC Frontier (Reference genome) | (ILWC46 & LPNB) | NCBI SNPdb Accession IDs |
|------------------------|----------------|-----------------|-------------------------|---------------------------------|-----------------|--------------------------|
| SNP_P4_102981_41250850 | NC_021166.1    | Ca_kabuli_chr07 | 41250850                | AA                              | TT              | 1946900715               |
| SNP_P4_102982_41250856 | NC_021166.1    | Ca_kabuli_chr07 | 41250856                | AA                              | CC              | 1946900717               |
| SNP_P4_102983_41250944 | NC_021166.1    | Ca_kabuli_chr07 | 41250944                | TT                              | CC              | 1946900719               |
| SNP_P4_102984_41250968 | NC_021166.1    | Ca_kabuli_chr07 | 41250968                | CC                              | GG              | 1946900721               |
| SNP_P4_102985_41251003 | NC_021166.1    | Ca_kabuli_chr07 | 41251003                | GG                              | TT              | 1946900723               |
| SNP_P4_102986_41251026 | NC_021166.1    | Ca_kabuli_chr07 | 41251026                | GG                              | AA              | 1946900725               |
| SNP_P4_102987_41251044 | NC_021166.1    | Ca_kabuli_chr07 | 41251044                | AA                              | TT              | 1946900727               |
| SNP_P4_102988_41251119 | NC_021166.1    | Ca_kabuli_chr07 | 41251119                | GG                              | AA              | 1946900729               |
| SNP_P4_102989_41251125 | NC_021166.1    | Ca_kabuli_chr07 | 41251125                | TT                              | AA              | 1946900731               |
| SNP_P4_102990_41251132 | NC_021166.1    | Ca_kabuli_chr07 | 41251132                | GG                              | CC              | 1946900733               |
| SNP_P4_102991_41251242 | NC_021166.1    | Ca_kabuli_chr07 | 41251242                | CC                              | TT              | 1946900735               |
| SNP_P4_102993_41251296 | NC_021166.1    | Ca_kabuli_chr07 | 41251296                | CC                              | AA              | 1946900737               |
| SNP_P4_102994_41251325 | NC_021166.1    | Ca_kabuli_chr07 | 41251325                | AA                              | GG              | 1946900739               |
| SNP_P4_102995_41251349 | NC_021166.1    | Ca_kabuli_chr07 | 41251349                | CC                              | AA              | 1946900741               |
| SNP_P4_102996_41251402 | NC_021166.1    | Ca_kabuli_chr07 | 41251402                | TT                              | CC              | 1946900743               |
| SNP_P4_102997_41251406 | NC_021166.1    | Ca_kabuli_chr07 | 41251406                | TT                              | GG              | 1946900745               |
| SNP_P4_102998_41251418 | NC_021166.1    | Ca_kabuli_chr07 | 41251418                | CC                              | GG              | 1946900748               |
| SNP_P4_102999_41251471 | NC_021166.1    | Ca_kabuli_chr07 | 41251471                | AA                              | TT              | 1946900750               |
| SNP_P4_103000_41251476 | NC_021166.1    | Ca_kabuli_chr07 | 41251476                | CC                              | TT              | 1946900752               |
| SNP_P4_103001_41251528 | NC_021166.1    | Ca_kabuli_chr07 | 41251528                | GG                              | AA              | 1946900754               |
| SNP_P4_103002_41251594 | NC_021166.1    | Ca_kabuli_chr07 | 41251594                | AA                              | GG              | 1946900756               |
| SNP_P4_103003_41251673 | NC_021166.1    | Ca_kabuli_chr07 | 41251673                | AA                              | GG              | 1946900758               |
| SNP_P4_103004_41251684 | NC_021166.1    | Ca_kabuli_chr07 | 41251684                | GG                              | AA              | 1946900760               |
| SNP_P4_103005_41251756 | NC_021166.1    | Ca_kabuli_chr07 | 41251756                | CC                              | TT              | 1946900762               |
| SNP_P4_103006_41251801 | NC_021166.1    | Ca_kabuli_chr07 | 41251801                | GG                              | TT              | 1946900764               |
| SNP_P4_103007_41251829 | NC_021166.1    | Ca_kabuli_chr07 | 41251829                | TT                              | GG              | 1946900766               |
| SNP_P4_103008_41251855 | NC_021166.1    | Ca_kabuli_chr07 | 41251855                | CC                              | AA              | 1946900768               |
| SNP_P4_103009_41251856 | NC_021166.1    | Ca_kabuli_chr07 | 41251856                | AA                              | GG              | 1946900770               |
| SNP_P4_103010_41251857 | NC_021166.1    | Ca_kabuli_chr07 | 41251857                | GG                              | AA              | 1946900772               |
| SNP_P4_103011_41251889 | NC_021166.1    | Ca_kabuli_chr07 | 41251889                | TT                              | CC              | 1946900774               |
| SNP_P4_103012_41251938 | NC_021166.1    | Ca_kabuli_chr07 | 41251938                | GG                              | AA              | 1946900776               |
| SNP_P4_103013_41251987 | NC_021166.1    | Ca_kabuli_chr07 | 41251987                | CC                              | TT              | 1946900778               |
| SNP_P4_103014_41252030 | NC_021166.1    | Ca_kabuli_chr07 | 41252030                | CC                              | GG              | 1946900780               |
| SNP_P4_103015_41252046 | NC_021166.1    | Ca_kabuli_chr07 | 41252046                | TT                              | CC              | 1946900782               |
| SNP_P4_103016_41252052 | NC_021166.1    | Ca_kabuli_chr07 | 41252052                | GG                              | AA              | 1946900784               |
| SNP_P4_103017_41252113 | NC_021166.1    | Ca_kabuli_chr07 | 41252113                | GG                              | CC              | 1946900786               |
| SNP_P4_103018_41252136 | NC_021166.1    | Ca_kabuli_chr07 | 41252136                | CC                              | TT              | 1946900788               |
| SNP_P4_103019_41252138 | NC_021166.1    | Ca_kabuli_chr07 | 41252138                | CC                              | TT              | 1946900790               |
| SNP_P4_103020_41252242 | NC_021166.1    | Ca_kabuli_chr07 | 41252242                | CC                              | TT              | 1946900792               |
| SNP_P4_103021_41252245 | NC_021166.1    | Ca_kabuli_chr07 | 41252245                | GG                              | AA              | 1946900794               |
| SNP_P4_103023_41252369 | NC_021166.1    | Ca_kabuli_chr07 | 41252369                | CC                              | TT              | 1946900796               |
| SNP_P4_103024_41252375 | NC_021166.1    | Ca_kabuli_chr07 | 41252375                | TT                              | CC              | 1946900799               |

| SNPs IDs               | Chromosome IDs | Chromosomes     | Physical positions (bp) | CDC Frontier (Reference genome) | (ILWC46 & LPNB) | NCBI SNPdb Accession IDs |
|------------------------|----------------|-----------------|-------------------------|---------------------------------|-----------------|--------------------------|
| SNP_P4_103025_41252388 | NC_021166.1    | Ca_kabuli_chr07 | 41252388                | CC                              | TT              | 1946900801               |
| SNP_P4_103026_41252488 | NC_021166.1    | Ca_kabuli_chr07 | 41252488                | TT                              | CC              | 1946900803               |
| SNP_P4_103027_41252636 | NC_021166.1    | Ca_kabuli_chr07 | 41252636                | CC                              | TT              | 1946900805               |
| SNP_P4_103028_41252660 | NC_021166.1    | Ca_kabuli_chr07 | 41252660                | TT                              | AA              | 1946900807               |
| SNP_P4_103029_41282557 | NC_021166.1    | Ca_kabuli_chr07 | 41282557                | GG                              | AA              | 1946900809               |
| SNP_P4_103030_41282702 | NC_021166.1    | Ca_kabuli_chr07 | 41282702                | AA                              | GG              | 1946900811               |
| SNP_P4_103031_41282709 | NC_021166.1    | Ca_kabuli_chr07 | 41282709                | TT                              | CC              | 1946900813               |
| SNP_P4_103032_41282755 | NC_021166.1    | Ca_kabuli_chr07 | 41282755                | GG                              | AA              | 1946900815               |
| SNP_P4_103033_41282889 | NC_021166.1    | Ca_kabuli_chr07 | 41282889                | CC                              | TT              | 1946900817               |
| SNP_P4_103034_41282937 | NC_021166.1    | Ca_kabuli_chr07 | 41282937                | TT                              | GG              | 1946900819               |
| SNP_P4_103035_41282942 | NC_021166.1    | Ca_kabuli_chr07 | 41282942                | TT                              | CC              | 1946900821               |
| SNP_P4_103036_41297024 | NC_021166.1    | Ca_kabuli_chr07 | 41297024                | TT                              | CC              | 1946900823               |
| SNP_P4_103037_41309428 | NC_021166.1    | Ca_kabuli_chr07 | 41309428                | GG                              | AA              | 1946900825               |
| SNP_P4_103038_41309461 | NC_021166.1    | Ca_kabuli_chr07 | 41309461                | TT                              | CC              | 1946900827               |
| SNP_P4_103039_41309842 | NC_021166.1    | Ca_kabuli_chr07 | 41309842                | AA                              | GG              | 1946900829               |
| SNP_P4_103040_41315077 | NC_021166.1    | Ca_kabuli_chr07 | 41315077                | CC                              | AA              | 1946900831               |
| SNP_P4_103041_41322197 | NC_021166.1    | Ca_kabuli_chr07 | 41322197                | GG                              | AA              | 1946900833               |
| SNP_P4_103042_41322221 | NC_021166.1    | Ca_kabuli_chr07 | 41322221                | GG                              | AA              | 1946900835               |
| SNP_P4_103043_41322523 | NC_021166.1    | Ca_kabuli_chr07 | 41322523                | CC                              | TT              | 1946900837               |
| SNP_P4_103044_41322572 | NC_021166.1    | Ca_kabuli_chr07 | 41322572                | TT                              | CC              | 1946900839               |
| SNP_P4_103045_41323041 | NC_021166.1    | Ca_kabuli_chr07 | 41323041                | CC                              | TT              | 1946900841               |
| SNP_P4_103046_41323058 | NC_021166.1    | Ca_kabuli_chr07 | 41323058                | CC                              | TT              | 1946900843               |
| SNP_P4_103047_41323174 | NC_021166.1    | Ca_kabuli_chr07 | 41323174                | AA                              | GG              | 1946900845               |
| SNP_P4_103048_41323646 | NC_021166.1    | Ca_kabuli_chr07 | 41323646                | AA                              | GG              | 1946900847               |
| SNP_P4_103049_41338950 | NC_021166.1    | Ca_kabuli_chr07 | 41338950                | TT                              | AA              | 1946900849               |
| SNP_P4_103050_41338963 | NC_021166.1    | Ca_kabuli_chr07 | 41338963                | AA                              | CC              | 1946900851               |
| SNP_P4_103051_41383381 | NC_021166.1    | Ca_kabuli_chr07 | 41383381                | CC                              | GG              | 1946900853               |
| SNP_P4_103053_41410866 | NC_021166.1    | Ca_kabuli_chr07 | 41410866                | GG                              | AA              | 1946900855               |
| SNP_P4_103054_41413971 | NC_021166.1    | Ca_kabuli_chr07 | 41413971                | AA                              | GG              | 1946900857               |
| SNP_P4_103055_41413974 | NC_021166.1    | Ca_kabuli_chr07 | 41413974                | GG                              | CC              | 1946900859               |
| SNP_P4_103056_41427942 | NC_021166.1    | Ca_kabuli_chr07 | 41427942                | TT                              | GG              | 1946900861               |
| SNP_P4_103057_41428121 | NC_021166.1    | Ca_kabuli_chr07 | 41428121                | TT                              | CC              | 1946900864               |
| SNP_P4_103058_41428801 | NC_021166.1    | Ca_kabuli_chr07 | 41428801                | AA                              | GG              | 1946900866               |
| SNP_P4_103059_41429052 | NC_021166.1    | Ca_kabuli_chr07 | 41429052                | CC                              | TT              | 1946900868               |
| SNP_P4_103062_41536460 | NC_021166.1    | Ca_kabuli_chr07 | 41536460                | GG                              | CC              | 1946900870               |
| SNP_P4_103064_41560961 | NC_021166.1    | Ca_kabuli_chr07 | 41560961                | CC                              | TT              | 1946900872               |
| SNP_P4_103065_41571998 | NC_021166.1    | Ca_kabuli_chr07 | 41571998                | TT                              | AA              | 1946900874               |
| SNP_P4_103067_41583522 | NC_021166.1    | Ca_kabuli_chr07 | 41583522                | CC                              | GG              | 1946900876               |
| SNP_P4_103068_41583908 | NC_021166.1    | Ca_kabuli_chr07 | 41583908                | TT                              | GG              | 1946900878               |
| SNP_P4_103069_41590649 | NC_021166.1    | Ca_kabuli_chr07 | 41590649                | AA                              | GG              | 1946900880               |
| SNP_P4_103070_41591408 | NC_021166.1    | Ca_kabuli_chr07 | 41591408                | AA                              | TT              | 1946900882               |
| SNP_P4_103071_41612299 | NC_021166.1    | Ca_kabuli_chr07 | 41612299                | TT                              | GG              | 1946900884               |



| SNPs IDs               | Chromosome IDs | Chromosomes     | Physical positions (bp) | CDC Frontier (Reference genome) | (ILWC46 & LPNB) | NCBI SNPdb Accession IDs |
|------------------------|----------------|-----------------|-------------------------|---------------------------------|-----------------|--------------------------|
| SNP_P4_103072_41612377 | NC_021166.1    | Ca_kabuli_chr07 | 41612377                | AA                              | GG              | 1946900886               |
| SNP_P4_103073_41612673 | NC_021166.1    | Ca_kabuli_chr07 | 41612673                | TT                              | AA              | 1946900888               |
| SNP_P4_103074_41615022 | NC_021166.1    | Ca_kabuli_chr07 | 41615022                | AA                              | TT              | 1946900890               |
| SNP_P4_103075_41635908 | NC_021166.1    | Ca_kabuli_chr07 | 41635908                | CC                              | TT              | 1946900892               |
| SNP_P4_103076_41659708 | NC_021166.1    | Ca_kabuli_chr07 | 41659708                | TT                              | CC              | 1946900894               |
| SNP_P4_103077_41683775 | NC_021166.1    | Ca_kabuli_chr07 | 41683775                | CC                              | TT              | 1946900896               |
| SNP_P4_103078_41683812 | NC_021166.1    | Ca_kabuli_chr07 | 41683812                | AA                              | GG              | 1946900899               |
| SNP_P4_103079_41724289 | NC_021166.1    | Ca_kabuli_chr07 | 41724289                | GG                              | AA              | 1946900901               |
| SNP_P4_103080_41724298 | NC_021166.1    | Ca_kabuli_chr07 | 41724298                | AA                              | GG              | 1946900903               |
| SNP_P4_103081_41724339 | NC_021166.1    | Ca_kabuli_chr07 | 41724339                | GG                              | AA              | 1946900905               |
| SNP_P4_103082_41732190 | NC_021166.1    | Ca_kabuli_chr07 | 41732190                | AA                              | GG              | 1946900907               |
| SNP_P4_103083_41735840 | NC_021166.1    | Ca_kabuli_chr07 | 41735840                | AA                              | CC              | 1946900909               |
| SNP_P4_103084_41735880 | NC_021166.1    | Ca_kabuli_chr07 | 41735880                | CC                              | GG              | 1946900911               |
| SNP_P4_103085_41735886 | NC_021166.1    | Ca_kabuli_chr07 | 41735886                | TT                              | GG              | 1946900913               |
| SNP_P4_103086_41735893 | NC_021166.1    | Ca_kabuli_chr07 | 41735893                | GG                              | AA              | 1946900915               |
| SNP_P4_103089_41806330 | NC_021166.1    | Ca_kabuli_chr07 | 41806330                | TT                              | GG              | 1946900917               |
| SNP_P4_103090_41806348 | NC_021166.1    | Ca_kabuli_chr07 | 41806348                | CC                              | TT              | 1946900919               |
| SNP_P4_103091_41815417 | NC_021166.1    | Ca_kabuli_chr07 | 41815417                | CC                              | TT              | 1946900921               |
| SNP_P4_103093_41875909 | NC_021166.1    | Ca_kabuli_chr07 | 41875909                | CC                              | TT              | 1946900923               |
| SNP_P4_103094_41917479 | NC_021166.1    | Ca_kabuli_chr07 | 41917479                | AA                              | GG              | 1946900925               |
| SNP_P4_103095_41936260 | NC_021166.1    | Ca_kabuli_chr07 | 41936260                | TT                              | CC              | 1946900927               |
| SNP_P4_103096_41948621 | NC_021166.1    | Ca_kabuli_chr07 | 41948621                | AA                              | GG              | 1946900929               |
| SNP_P4_103097_41958285 | NC_021166.1    | Ca_kabuli_chr07 | 41958285                | AA                              | GG              | 1946900931               |
| SNP_P4_103098_41967080 | NC_021166.1    | Ca_kabuli_chr07 | 41967080                | AA                              | CC              | 1946900933               |
| SNP_P4_103099_41967084 | NC_021166.1    | Ca_kabuli_chr07 | 41967084                | AA                              | CC              | 1946900935               |
| SNP_P4_103100_41985046 | NC_021166.1    | Ca_kabuli_chr07 | 41985046                | AA                              | CC              | 1946900937               |
| SNP_P4_103101_41985559 | NC_021166.1    | Ca_kabuli_chr07 | 41985559                | AA                              | TT              | 1946900939               |
| SNP_P4_103102_41985594 | NC_021166.1    | Ca_kabuli_chr07 | 41985594                | GG                              | AA              | 1946900941               |
| SNP_P4_103103_41986061 | NC_021166.1    | Ca_kabuli_chr07 | 41986061                | GG                              | TT              | 1946900943               |
| SNP_P4_103104_41994380 | NC_021166.1    | Ca_kabuli_chr07 | 41994380                | AA                              | CC              | 1946900945               |
| SNP_P4_103105_41994381 | NC_021166.1    | Ca_kabuli_chr07 | 41994381                | AA                              | CC              | 1946900947               |
| SNP_P4_103106_42022248 | NC_021166.1    | Ca_kabuli_chr07 | 42022248                | GG                              | TT              | 1946900949               |
| SNP_P4_103107_42025365 | NC_021166.1    | Ca_kabuli_chr07 | 42025365                | GG                              | TT              | 1946900951               |
| SNP_P4_103109_42086273 | NC_021166.1    | Ca_kabuli_chr07 | 42086273                | CC                              | AA              | 1946900953               |
| SNP_P4_103110_42086959 | NC_021166.1    | Ca_kabuli_chr07 | 42086959                | TT                              | CC              | 1946900955               |
| SNP_P4_103111_42091451 | NC_021166.1    | Ca_kabuli_chr07 | 42091451                | CC                              | TT              | 1946900957               |
| SNP_P4_103112_42092632 | NC_021166.1    | Ca_kabuli_chr07 | 42092632                | AA                              | GG              | 1946900959               |
| SNP_P4_103113_42092652 | NC_021166.1    | Ca_kabuli_chr07 | 42092652                | GG                              | CC              | 1946900961               |
| SNP_P4_103114_42092700 | NC_021166.1    | Ca_kabuli_chr07 | 42092700                | CC                              | TT              | 1946900963               |
| SNP_P4_103115_42092701 | NC_021166.1    | Ca_kabuli_chr07 | 42092701                | AA                              | GG              | 1946900965               |
| SNP_P4_103116_42092708 | NC_021166.1    | Ca_kabuli_chr07 | 42092708                | CC                              | TT              | 1946900967               |
| SNP_P4_103117_42092733 | NC_021166.1    | Ca_kabuli_chr07 | 42092733                | AA                              | CC              | 1946900969               |

| SNPs IDs               | Chromosome IDs | Chromosomes     | Physical positions (bp) | CDC Frontier (Reference genome) | (ILWC46 & LPNB) | NCBI SNPdb Accession IDs |
|------------------------|----------------|-----------------|-------------------------|---------------------------------|-----------------|--------------------------|
| SNP_P4_103118_42205952 | NC_021166.1    | Ca_kabuli_chr07 | 42205952                | CC                              | TT              | 1946900971               |
| SNP_P4_103119_42206540 | NC_021166.1    | Ca_kabuli_chr07 | 42206540                | TT                              | CC              | 1946900973               |
| SNP_P4_103120_42211203 | NC_021166.1    | Ca_kabuli_chr07 | 42211203                | TT                              | CC              | 1946900975               |
| SNP_P4_103121_42211255 | NC_021166.1    | Ca_kabuli_chr07 | 42211255                | TT                              | CC              | 1946900976               |
| SNP_P4_103122_42221295 | NC_021166.1    | Ca_kabuli_chr07 | 42221295                | CC                              | GG              | 1946900978               |
| SNP_P4_103123_42240335 | NC_021166.1    | Ca_kabuli_chr07 | 42240335                | TT                              | AA              | 1946900980               |
| SNP_P4_103124_42240336 | NC_021166.1    | Ca_kabuli_chr07 | 42240336                | TT                              | AA              | 1946900982               |
| SNP_P4_103125_42240431 | NC_021166.1    | Ca_kabuli_chr07 | 42240431                | CC                              | GG              | 1946900984               |
| SNP_P4_103126_42240432 | NC_021166.1    | Ca_kabuli_chr07 | 42240432                | TT                              | CC              | 1946900986               |
| SNP_P4_103127_42261222 | NC_021166.1    | Ca_kabuli_chr07 | 42261222                | TT                              | CC              | 1946900988               |
| SNP_P4_103128_42262063 | NC_021166.1    | Ca_kabuli_chr07 | 42262063                | CC                              | TT              | 1946900990               |
| SNP_P4_103130_42307564 | NC_021166.1    | Ca_kabuli_chr07 | 42307564                | GG                              | AA              | 1946900992               |
| SNP_P4_103131_42307660 | NC_021166.1    | Ca_kabuli_chr07 | 42307660                | GG                              | AA              | 1946900994               |
| SNP_P4_103132_42307801 | NC_021166.1    | Ca_kabuli_chr07 | 42307801                | TT                              | CC              | 1946900996               |
| SNP_P4_103133_42320142 | NC_021166.1    | Ca_kabuli_chr07 | 42320142                | TT                              | GG              | 1946900998               |
| SNP_P4_103135_42344723 | NC_021166.1    | Ca_kabuli_chr07 | 42344723                | AA                              | GG              | 1946901000               |
| SNP_P4_103136_42344727 | NC_021166.1    | Ca_kabuli_chr07 | 42344727                | AA                              | CC              | 1946901002               |
| SNP_P4_103137_42344765 | NC_021166.1    | Ca_kabuli_chr07 | 42344765                | AA                              | GG              | 1946901004               |
| SNP_P4_103138_42344801 | NC_021166.1    | Ca_kabuli_chr07 | 42344801                | AA                              | GG              | 1946901006               |
| SNP_P4_103139_42344815 | NC_021166.1    | Ca_kabuli_chr07 | 42344815                | TT                              | CC              | 1946901008               |
| SNP_P4_103140_42344960 | NC_021166.1    | Ca_kabuli_chr07 | 42344960                | GG                              | TT              | 1946901010               |
| SNP_P4_103141_42345084 | NC_021166.1    | Ca_kabuli_chr07 | 42345084                | AA                              | TT              | 1946901012               |
| SNP_P4_103142_42345086 | NC_021166.1    | Ca_kabuli_chr07 | 42345086                | GG                              | AA              | 1946901015               |
| SNP_P4_103143_42345154 | NC_021166.1    | Ca_kabuli_chr07 | 42345154                | CC                              | TT              | 1946901017               |
| SNP_P4_103144_42350995 | NC_021166.1    | Ca_kabuli_chr07 | 42350995                | AA                              | TT              | 1946901019               |
| SNP_P4_103145_42352084 | NC_021166.1    | Ca_kabuli_chr07 | 42352084                | AA                              | GG              | 1946901021               |
| SNP_P4_103146_42352144 | NC_021166.1    | Ca_kabuli_chr07 | 42352144                | CC                              | GG              | 1946901023               |
| SNP_P4_103147_42352201 | NC_021166.1    | Ca_kabuli_chr07 | 42352201                | AA                              | CC              | 1946901025               |
| SNP_P4_103148_42354221 | NC_021166.1    | Ca_kabuli_chr07 | 42354221                | CC                              | TT              | 1946901027               |
| SNP_P4_103149_42354227 | NC_021166.1    | Ca_kabuli_chr07 | 42354227                | GG                              | AA              | 1946901029               |
| SNP_P4_103150_42355944 | NC_021166.1    | Ca_kabuli_chr07 | 42355944                | CC                              | TT              | 1946901031               |
| SNP_P4_103151_42356252 | NC_021166.1    | Ca_kabuli_chr07 | 42356252                | TT                              | GG              | 1946901033               |
| SNP_P4_103152_42356367 | NC_021166.1    | Ca_kabuli_chr07 | 42356367                | AA                              | GG              | 1946901035               |
| SNP_P4_103153_42356374 | NC_021166.1    | Ca_kabuli_chr07 | 42356374                | AA                              | GG              | 1946901037               |
| SNP_P4_103154_42356413 | NC_021166.1    | Ca_kabuli_chr07 | 42356413                | GG                              | CC              | 1946901040               |
| SNP_P4_103155_42356427 | NC_021166.1    | Ca_kabuli_chr07 | 42356427                | GG                              | TT              | 1946901042               |
| SNP_P4_103156_42356433 | NC_021166.1    | Ca_kabuli_chr07 | 42356433                | TT                              | CC              | 1946901044               |
| SNP_P4_103157_42356445 | NC_021166.1    | Ca_kabuli_chr07 | 42356445                | GG                              | AA              | 1946901046               |
| SNP_P4_103159_42356731 | NC_021166.1    | Ca_kabuli_chr07 | 42356731                | CC                              | TT              | 1946901048               |
| SNP_P4_103160_42356758 | NC_021166.1    | Ca_kabuli_chr07 | 42356758                | CC                              | TT              | 1946901050               |
| SNP_P4_103161_42357018 | NC_021166.1    | Ca_kabuli_chr07 | 42357018                | GG                              | AA              | 1946901052               |
| SNP_P4_103162_42357046 | NC_021166.1    | Ca_kabuli_chr07 | 42357046                | AA                              | GG              | 1946901054               |

| SNPs IDs               | Chromosome IDs | Chromosomes     | Physical positions (bp) | CDC Frontier (Reference genome) | (ILWC46 & LPNB) | NCBI SNPdb Accession IDs |
|------------------------|----------------|-----------------|-------------------------|---------------------------------|-----------------|--------------------------|
| SNP_P4_103163_42357055 | NC_021166.1    | Ca_kabuli_chr07 | 42357055                | GG                              | AA              | 1946901056               |
| SNP_P4_103164_42357087 | NC_021166.1    | Ca_kabuli_chr07 | 42357087                | GG                              | AA              | 1946901058               |
| SNP_P4_103165_42358193 | NC_021166.1    | Ca_kabuli_chr07 | 42358193                | TT                              | GG              | 1946901060               |
| SNP_P4_103166_42358220 | NC_021166.1    | Ca_kabuli_chr07 | 42358220                | GG                              | TT              | 1946901062               |
| SNP_P4_103167_42358258 | NC_021166.1    | Ca_kabuli_chr07 | 42358258                | AA                              | GG              | 1946901064               |
| SNP_P4_103168_42358280 | NC_021166.1    | Ca_kabuli_chr07 | 42358280                | AA                              | GG              | 1946901066               |
| SNP_P4_103169_42358339 | NC_021166.1    | Ca_kabuli_chr07 | 42358339                | AA                              | GG              | 1946901068               |
| SNP_P4_103171_42358593 | NC_021166.1    | Ca_kabuli_chr07 | 42358593                | GG                              | AA              | 1946901070               |
| SNP_P4_103172_42361476 | NC_021166.1    | Ca_kabuli_chr07 | 42361476                | GG                              | CC              | 1946901072               |
| SNP_P4_103173_42363897 | NC_021166.1    | Ca_kabuli_chr07 | 42363897                | AA                              | GG              | 1946901074               |
| SNP_P4_103174_42368360 | NC_021166.1    | Ca_kabuli_chr07 | 42368360                | CC                              | TT              | 1946901076               |
| SNP_P4_103175_42384580 | NC_021166.1    | Ca_kabuli_chr07 | 42384580                | TT                              | CC              | 1946901078               |
| SNP_P4_103176_42384635 | NC_021166.1    | Ca_kabuli_chr07 | 42384635                | TT                              | AA              | 1946901080               |
| SNP_P4_103178_42384932 | NC_021166.1    | Ca_kabuli_chr07 | 42384932                | CC                              | TT              | 1946901082               |
| SNP_P4_103179_42385007 | NC_021166.1    | Ca_kabuli_chr07 | 42385007                | CC                              | AA              | 1946901084               |
| SNP_P4_103180_42385073 | NC_021166.1    | Ca_kabuli_chr07 | 42385073                | AA                              | GG              | 1946901086               |
| SNP_P4_103181_42392881 | NC_021166.1    | Ca_kabuli_chr07 | 42392881                | CC                              | TT              | 1946901088               |
| SNP_P4_103182_42392972 | NC_021166.1    | Ca_kabuli_chr07 | 42392972                | GG                              | AA              | 1946901090               |
| SNP_P4_103183_42393066 | NC_021166.1    | Ca_kabuli_chr07 | 42393066                | GG                              | AA              | 1946901092               |
| SNP_P4_103184_42393111 | NC_021166.1    | Ca_kabuli_chr07 | 42393111                | TT                              | CC              | 1946901095               |
| SNP_P4_103185_42393133 | NC_021166.1    | Ca_kabuli_chr07 | 42393133                | GG                              | AA              | 1946901097               |
| SNP_P4_103186_42393162 | NC_021166.1    | Ca_kabuli_chr07 | 42393162                | TT                              | AA              | 1946901099               |
| SNP_P4_103187_42393193 | NC_021166.1    | Ca_kabuli_chr07 | 42393193                | AA                              | GG              | 1946901101               |
| SNP_P4_103188_42396638 | NC_021166.1    | Ca_kabuli_chr07 | 42396638                | AA                              | TT              | 1946901103               |
| SNP_P4_103189_42396716 | NC_021166.1    | Ca_kabuli_chr07 | 42396716                | CC                              | TT              | 1946901105               |
| SNP_P4_103190_42396759 | NC_021166.1    | Ca_kabuli_chr07 | 42396759                | GG                              | AA              | 1946901107               |
| SNP_P4_103191_42396787 | NC_021166.1    | Ca_kabuli_chr07 | 42396787                | TT                              | AA              | 1946901109               |
| SNP_P4_103192_42397002 | NC_021166.1    | Ca_kabuli_chr07 | 42397002                | TT                              | CC              | 1946901111               |
| SNP_P4_103193_42397006 | NC_021166.1    | Ca_kabuli_chr07 | 42397006                | AA                              | TT              | 1946901113               |
| SNP_P4_103194_42397049 | NC_021166.1    | Ca_kabuli_chr07 | 42397049                | TT                              | CC              | 1946901115               |
| SNP_P4_103195_42397050 | NC_021166.1    | Ca_kabuli_chr07 | 42397050                | GG                              | AA              | 1946901117               |
| SNP_P4_103196_42399197 | NC_021166.1    | Ca_kabuli_chr07 | 42399197                | AA                              | GG              | 1946901120               |
| SNP_P4_103197_42399227 | NC_021166.1    | Ca_kabuli_chr07 | 42399227                | GG                              | AA              | 1946901122               |
| SNP_P4_103198_42399249 | NC_021166.1    | Ca_kabuli_chr07 | 42399249                | GG                              | AA              | 1946901124               |
| SNP_P4_103199_42399287 | NC_021166.1    | Ca_kabuli_chr07 | 42399287                | CC                              | TT              | 1946901126               |
| SNP_P4_103200_42399500 | NC_021166.1    | Ca_kabuli_chr07 | 42399500                | TT                              | CC              | 1946901128               |
| SNP_P4_103201_42404039 | NC_021166.1    | Ca_kabuli_chr07 | 42404039                | AA                              | GG              | 1946901130               |
| SNP_P4_103202_42404044 | NC_021166.1    | Ca_kabuli_chr07 | 42404044                | GG                              | AA              | 1946901132               |
| SNP_P4_103203_42404056 | NC_021166.1    | Ca_kabuli_chr07 | 42404056                | GG                              | AA              | 1946901134               |
| SNP_P4_103204_42404629 | NC_021166.1    | Ca_kabuli_chr07 | 42404629                | TT                              | CC              | 1946901136               |
| SNP_P4_103205_42409900 | NC_021166.1    | Ca_kabuli_chr07 | 42409900                | GG                              | AA              | 1946901138               |
| SNP_P4_103206_42409905 | NC_021166.1    | Ca_kabuli_chr07 | 42409905                | CC                              | TT              | 1946901140               |

| SNPs IDs               | Chromosome IDs | Chromosomes     | Physical positions (bp) | CDC Frontier (Reference genome) | (ILWC46 & LPNB) | NCBI SNPdb Accession IDs |
|------------------------|----------------|-----------------|-------------------------|---------------------------------|-----------------|--------------------------|
| SNP_P4_103207_42410667 | NC_021166.1    | Ca_kabuli_chr07 | 42410667                | TT                              | CC              | 1946901142               |
| SNP_P4_103208_42414904 | NC_021166.1    | Ca_kabuli_chr07 | 42414904                | CC                              | AA              | 1946901144               |
| SNP_P4_103209_42420966 | NC_021166.1    | Ca_kabuli_chr07 | 42420966                | AA                              | CC              | 1946901146               |
| SNP_P4_103210_42427832 | NC_021166.1    | Ca_kabuli_chr07 | 42427832                | TT                              | CC              | 1946901148               |
| SNP_P4_103211_42428125 | NC_021166.1    | Ca_kabuli_chr07 | 42428125                | GG                              | AA              | 1946901150               |
| SNP_P4_103212_42441634 | NC_021166.1    | Ca_kabuli_chr07 | 42441634                | AA                              | CC              | 1946901152               |
| SNP_P4_103213_42442033 | NC_021166.1    | Ca_kabuli_chr07 | 42442033                | TT                              | CC              | 1946901154               |
| SNP_P4_103214_42442055 | NC_021166.1    | Ca_kabuli_chr07 | 42442055                | AA                              | CC              | 1946901156               |
| SNP_P4_103215_42458446 | NC_021166.1    | Ca_kabuli_chr07 | 42458446                | AA                              | GG              | 1946901159               |
| SNP_P4_103216_42458449 | NC_021166.1    | Ca_kabuli_chr07 | 42458449                | TT                              | CC              | 1946901161               |
| SNP_P4_103217_42458450 | NC_021166.1    | Ca_kabuli_chr07 | 42458450                | TT                              | CC              | 1946901163               |
| SNP_P4_103218_42458457 | NC_021166.1    | Ca_kabuli_chr07 | 42458457                | TT                              | CC              | 1946901165               |
| SNP_P4_103219_42458474 | NC_021166.1    | Ca_kabuli_chr07 | 42458474                | GG                              | AA              | 1946901167               |
| SNP_P4_103220_42458486 | NC_021166.1    | Ca_kabuli_chr07 | 42458486                | AA                              | GG              | 1946901169               |
| SNP_P4_103221_42459709 | NC_021166.1    | Ca_kabuli_chr07 | 42459709                | AA                              | CC              | 1946901171               |
| SNP_P4_103222_42459735 | NC_021166.1    | Ca_kabuli_chr07 | 42459735                | TT                              | GG              | 1946901173               |
| SNP_P4_103223_42459736 | NC_021166.1    | Ca_kabuli_chr07 | 42459736                | AA                              | GG              | 1946901175               |
| SNP_P4_103224_42459762 | NC_021166.1    | Ca_kabuli_chr07 | 42459762                | AA                              | GG              | 1946901177               |
| SNP_P4_103225_42459775 | NC_021166.1    | Ca_kabuli_chr07 | 42459775                | TT                              | AA              | 1946901179               |
| SNP_P4_103226_42459781 | NC_021166.1    | Ca_kabuli_chr07 | 42459781                | GG                              | AA              | 1946901181               |
| SNP_P4_103227_42461748 | NC_021166.1    | Ca_kabuli_chr07 | 42461748                | CC                              | GG              | 1946901183               |
| SNP_P4_103228_42463342 | NC_021166.1    | Ca_kabuli_chr07 | 42463342                | TT                              | CC              | 1946901185               |
| SNP_P4_103229_42465387 | NC_021166.1    | Ca_kabuli_chr07 | 42465387                | GG                              | TT              | 1946901187               |
| SNP_P4_103231_42472715 | NC_021166.1    | Ca_kabuli_chr07 | 42472715                | CC                              | TT              | 1946901189               |
| SNP_P4_103232_42472716 | NC_021166.1    | Ca_kabuli_chr07 | 42472716                | AA                              | TT              | 1946901191               |
| SNP_P4_103233_42472717 | NC_021166.1    | Ca_kabuli_chr07 | 42472717                | AA                              | TT              | 1946901193               |
| SNP_P4_103234_42472718 | NC_021166.1    | Ca_kabuli_chr07 | 42472718                | AA                              | CC              | 1946901195               |
| SNP_P4_103235_42472724 | NC_021166.1    | Ca_kabuli_chr07 | 42472724                | AA                              | TT              | 1946901197               |
| SNP_P4_103236_42472726 | NC_021166.1    | Ca_kabuli_chr07 | 42472726                | AA                              | CC              | 1946901199               |
| SNP_P4_103237_42472727 | NC_021166.1    | Ca_kabuli_chr07 | 42472727                | TT                              | CC              | 1946901201               |
| SNP_P4_103238_42472728 | NC_021166.1    | Ca_kabuli_chr07 | 42472728                | AA                              | CC              | 1946901203               |
| SNP_P4_103239_42472808 | NC_021166.1    | Ca_kabuli_chr07 | 42472808                | GG                              | TT              | 1946901205               |
| SNP_P4_103240_42472858 | NC_021166.1    | Ca_kabuli_chr07 | 42472858                | CC                              | AA              | 1946901207               |
| SNP_P4_103241_42472964 | NC_021166.1    | Ca_kabuli_chr07 | 42472964                | TT                              | CC              | 1946901209               |
| SNP_P4_103242_42473067 | NC_021166.1    | Ca_kabuli_chr07 | 42473067                | TT                              | GG              | 1946901211               |
| SNP_P4_103243_42473191 | NC_021166.1    | Ca_kabuli_chr07 | 42473191                | TT                              | GG              | 1946901213               |
| SNP_P4_103244_42473232 | NC_021166.1    | Ca_kabuli_chr07 | 42473232                | AA                              | TT              | 1946901215               |
| SNP_P4_103245_42473442 | NC_021166.1    | Ca_kabuli_chr07 | 42473442                | TT                              | CC              | 1946901217               |
| SNP_P4_103246_42473528 | NC_021166.1    | Ca_kabuli_chr07 | 42473528                | TT                              | GG              | 1946901219               |
| SNP_P4_103247_42473536 | NC_021166.1    | Ca_kabuli_chr07 | 42473536                | TT                              | CC              | 1946901221               |
| SNP_P4_103248_42473568 | NC_021166.1    | Ca_kabuli_chr07 | 42473568                | GG                              | TT              | 1946901223               |
| SNP_P4_103249_42473602 | NC_021166.1    | Ca_kabuli_chr07 | 42473602                | CC                              | GG              | 1946901225               |

| SNPs IDs               | Chromosome IDs | Chromosomes     | Physical positions (bp) | CDC Frontier (Reference genome) | (ILWC46 & LPNB) | NCBI SNPdb Accession IDs |
|------------------------|----------------|-----------------|-------------------------|---------------------------------|-----------------|--------------------------|
| SNP_P4_103250_42473605 | NC_021166.1    | Ca_kabuli_chr07 | 42473605                | AA                              | TT              | 1946901227               |
| SNP_P4_103251_42473776 | NC_021166.1    | Ca_kabuli_chr07 | 42473776                | TT                              | CC              | 1946901229               |
| SNP_P4_103252_42473864 | NC_021166.1    | Ca_kabuli_chr07 | 42473864                | CC                              | TT              | 1946901231               |
| SNP_P4_103253_42473865 | NC_021166.1    | Ca_kabuli_chr07 | 42473865                | AA                              | GG              | 1946901234               |
| SNP_P4_103255_42474661 | NC_021166.1    | Ca_kabuli_chr07 | 42474661                | GG                              | CC              | 1946901236               |
| SNP_P4_103256_42474701 | NC_021166.1    | Ca_kabuli_chr07 | 42474701                | CC                              | TT              | 1946901238               |
| SNP_P4_103257_42474939 | NC_021166.1    | Ca_kabuli_chr07 | 42474939                | TT                              | AA              | 1946901240               |
| SNP_P4_103258_42474957 | NC_021166.1    | Ca_kabuli_chr07 | 42474957                | AA                              | GG              | 1946901242               |
| SNP_P4_103259_42474960 | NC_021166.1    | Ca_kabuli_chr07 | 42474960                | AA                              | TT              | 1946901244               |
| SNP_P4_103260_42475009 | NC_021166.1    | Ca_kabuli_chr07 | 42475009                | AA                              | TT              | 1946901246               |
| SNP_P4_103261_42475018 | NC_021166.1    | Ca_kabuli_chr07 | 42475018                | TT                              | AA              | 1946901248               |
| SNP_P4_103262_42475246 | NC_021166.1    | Ca_kabuli_chr07 | 42475246                | TT                              | CC              | 1946901250               |
| SNP_P4_103263_42475278 | NC_021166.1    | Ca_kabuli_chr07 | 42475278                | TT                              | CC              | 1946901252               |
| SNP_P4_103264_42475284 | NC_021166.1    | Ca_kabuli_chr07 | 42475284                | GG                              | TT              | 1946901254               |
| SNP_P4_103265_42475361 | NC_021166.1    | Ca_kabuli_chr07 | 42475361                | GG                              | CC              | 1946901256               |
| SNP_P4_103266_42475373 | NC_021166.1    | Ca_kabuli_chr07 | 42475373                | GG                              | AA              | 1946901258               |
| SNP_P4_103267_42475390 | NC_021166.1    | Ca_kabuli_chr07 | 42475390                | TT                              | AA              | 1946901260               |
| SNP_P4_103268_42475442 | NC_021166.1    | Ca_kabuli_chr07 | 42475442                | GG                              | AA              | 1946901262               |
| SNP_P4_103269_42475444 | NC_021166.1    | Ca_kabuli_chr07 | 42475444                | AA                              | TT              | 1946901264               |
| SNP_P4_103270_42475501 | NC_021166.1    | Ca_kabuli_chr07 | 42475501                | TT                              | CC              | 1946901266               |
| SNP_P4_103271_42475571 | NC_021166.1    | Ca_kabuli_chr07 | 42475571                | CC                              | GG              | 1946901268               |
| SNP_P4_103272_42475693 | NC_021166.1    | Ca_kabuli_chr07 | 42475693                | AA                              | GG              | 1946901271               |
| SNP_P4_103273_42475738 | NC_021166.1    | Ca_kabuli_chr07 | 42475738                | GG                              | TT              | 1946901273               |
| SNP_P4_103274_42475747 | NC_021166.1    | Ca_kabuli_chr07 | 42475747                | TT                              | CC              | 1946901275               |
| SNP_P4_103275_42475750 | NC_021166.1    | Ca_kabuli_chr07 | 42475750                | TT                              | GG              | 1946901277               |
| SNP_P4_103276_42475773 | NC_021166.1    | Ca_kabuli_chr07 | 42475773                | TT                              | AA              | 1946901279               |
| SNP_P4_103277_42475776 | NC_021166.1    | Ca_kabuli_chr07 | 42475776                | CC                              | GG              | 1946901281               |
| SNP_P4_103278_42475831 | NC_021166.1    | Ca_kabuli_chr07 | 42475831                | GG                              | AA              | 1946901283               |
| SNP_P4_103280_42475863 | NC_021166.1    | Ca_kabuli_chr07 | 42475863                | CC                              | AA              | 1946901285               |
| SNP_P4_103281_42475887 | NC_021166.1    | Ca_kabuli_chr07 | 42475887                | GG                              | AA              | 1946901287               |
| SNP_P4_103282_42475889 | NC_021166.1    | Ca_kabuli_chr07 | 42475889                | CC                              | AA              | 1946901289               |
| SNP_P4_103283_42475891 | NC_021166.1    | Ca_kabuli_chr07 | 42475891                | AA                              | GG              | 1946901291               |
| SNP_P4_103284_42475934 | NC_021166.1    | Ca_kabuli_chr07 | 42475934                | CC                              | GG              | 1946901293               |
| SNP_P4_103285_42475975 | NC_021166.1    | Ca_kabuli_chr07 | 42475975                | CC                              | GG              | 1946901295               |
| SNP_P4_103286_42475988 | NC_021166.1    | Ca_kabuli_chr07 | 42475988                | GG                              | AA              | 1946901297               |
| SNP_P4_103287_42476051 | NC_021166.1    | Ca_kabuli_chr07 | 42476051                | TT                              | GG              | 1946901299               |
| SNP_P4_103288_42476153 | NC_021166.1    | Ca_kabuli_chr07 | 42476153                | CC                              | TT              | 1946901301               |
| SNP_P4_103289_42476155 | NC_021166.1    | Ca_kabuli_chr07 | 42476155                | GG                              | TT              | 1946901303               |
| SNP_P4_103290_42476198 | NC_021166.1    | Ca_kabuli_chr07 | 42476198                | CC                              | TT              | 1946901305               |
| SNP_P4_103291_42476201 | NC_021166.1    | Ca_kabuli_chr07 | 42476201                | GG                              | AA              | 1946901307               |
| SNP_P4_103292_42476217 | NC_021166.1    | Ca_kabuli_chr07 | 42476217                | CC                              | TT              | 1946901309               |
| SNP_P4_103293_42476252 | NC_021166.1    | Ca_kabuli_chr07 | 42476252                | GG                              | CC              | 1946901311               |

| SNPs IDs               | Chromosome IDs | Chromosomes     | Physical positions (bp) | CDC Frontier (Reference genome) | (ILWC46 & LPNB) | NCBI SNPdb Accession IDs |
|------------------------|----------------|-----------------|-------------------------|---------------------------------|-----------------|--------------------------|
| SNP_P4_103294_42476319 | NC_021166.1    | Ca_kabuli_chr07 | 42476319                | TT                              | AA              | 1946901313               |
| SNP_P4_103295_42476354 | NC_021166.1    | Ca_kabuli_chr07 | 42476354                | CC                              | AA              | 1946901315               |
| SNP_P4_103296_42477886 | NC_021166.1    | Ca_kabuli_chr07 | 42477886                | AA                              | GG              | 1946901317               |
| SNP_P4_103297_42480813 | NC_021166.1    | Ca_kabuli_chr07 | 42480813                | CC                              | TT              | 1946901319               |
| SNP_P4_103298_42495177 | NC_021166.1    | Ca_kabuli_chr07 | 42495177                | CC                              | TT              | 1946901320               |
| SNP_P4_103300_42497070 | NC_021166.1    | Ca_kabuli_chr07 | 42497070                | GG                              | AA              | 1946901322               |
| SNP_P4_103301_42497361 | NC_021166.1    | Ca_kabuli_chr07 | 42497361                | CC                              | GG              | 1946901324               |
| SNP_P4_103302_42497362 | NC_021166.1    | Ca_kabuli_chr07 | 42497362                | AA                              | GG              | 1946901326               |
| SNP_P4_103303_42497377 | NC_021166.1    | Ca_kabuli_chr07 | 42497377                | GG                              | AA              | 1946901329               |
| SNP_P4_103304_42497703 | NC_021166.1    | Ca_kabuli_chr07 | 42497703                | GG                              | AA              | 1946901331               |
| SNP_P4_103306_42503416 | NC_021166.1    | Ca_kabuli_chr07 | 42503416                | AA                              | TT              | 1946901333               |
| SNP_P4_103307_42518211 | NC_021166.1    | Ca_kabuli_chr07 | 42518211                | TT                              | AA              | 1946901335               |
| SNP_P4_103308_42529888 | NC_021166.1    | Ca_kabuli_chr07 | 42529888                | TT                              | GG              | 1946901337               |
| SNP_P4_103309_42540536 | NC_021166.1    | Ca_kabuli_chr07 | 42540536                | TT                              | GG              | 1946901339               |
| SNP_P4_103310_42541256 | NC_021166.1    | Ca_kabuli_chr07 | 42541256                | CC                              | TT              | 1946901341               |
| SNP_P4_103311_42541323 | NC_021166.1    | Ca_kabuli_chr07 | 42541323                | AA                              | GG              | 1946901343               |
| SNP_P4_103312_42541332 | NC_021166.1    | Ca_kabuli_chr07 | 42541332                | AA                              | TT              | 1946901345               |
| SNP_P4_103313_42541333 | NC_021166.1    | Ca_kabuli_chr07 | 42541333                | TT                              | GG              | 1946901347               |
| SNP_P4_103314_42541372 | NC_021166.1    | Ca_kabuli_chr07 | 42541372                | AA                              | GG              | 1946901349               |
| SNP_P4_103315_42558144 | NC_021166.1    | Ca_kabuli_chr07 | 42558144                | TT                              | GG              | 1946901351               |
| SNP_P4_103316_42558164 | NC_021166.1    | Ca_kabuli_chr07 | 42558164                | CC                              | TT              | 1946901353               |
| SNP_P4_103317_42558177 | NC_021166.1    | Ca_kabuli_chr07 | 42558177                | GG                              | CC              | 1946901355               |
| SNP_P4_103318_42582733 | NC_021166.1    | Ca_kabuli_chr07 | 42582733                | AA                              | TT              | 1946901357               |
| SNP_P4_103319_42582737 | NC_021166.1    | Ca_kabuli_chr07 | 42582737                | GG                              | AA              | 1946901360               |
| SNP_P4_103320_42582804 | NC_021166.1    | Ca_kabuli_chr07 | 42582804                | GG                              | AA              | 1946901362               |
| SNP_P4_103321_42582811 | NC_021166.1    | Ca_kabuli_chr07 | 42582811                | CC                              | TT              | 1946901364               |
| SNP_P4_103322_42582897 | NC_021166.1    | Ca_kabuli_chr07 | 42582897                | GG                              | AA              | 1946901366               |
| SNP_P4_103323_42583147 | NC_021166.1    | Ca_kabuli_chr07 | 42583147                | TT                              | CC              | 1946901368               |
| SNP_P4_103324_42583173 | NC_021166.1    | Ca_kabuli_chr07 | 42583173                | AA                              | TT              | 1946901370               |
| SNP_P4_103325_42583319 | NC_021166.1    | Ca_kabuli_chr07 | 42583319                | CC                              | TT              | 1946901372               |
| SNP_P4_103326_42583322 | NC_021166.1    | Ca_kabuli_chr07 | 42583322                | AA                              | TT              | 1946901374               |
| SNP_P4_103327_42589438 | NC_021166.1    | Ca_kabuli_chr07 | 42589438                | GG                              | AA              | 1946901376               |
| SNP_P4_103328_42589454 | NC_021166.1    | Ca_kabuli_chr07 | 42589454                | GG                              | TT              | 1946901378               |
| SNP_P4_103329_42589474 | NC_021166.1    | Ca_kabuli_chr07 | 42589474                | CC                              | TT              | 1946901380               |
| SNP_P4_103330_42589497 | NC_021166.1    | Ca_kabuli_chr07 | 42589497                | GG                              | AA              | 1946901382               |
| SNP_P4_103332_42640168 | NC_021166.1    | Ca_kabuli_chr07 | 42640168                | AA                              | GG              | 1946901384               |
| SNP_P4_103333_42640169 | NC_021166.1    | Ca_kabuli_chr07 | 42640169                | AA                              | CC              | 1946901386               |
| SNP_P4_103334_42642963 | NC_021166.1    | Ca_kabuli_chr07 | 42642963                | GG                              | AA              | 1946901388               |
| SNP_P4_103335_42651825 | NC_021166.1    | Ca_kabuli_chr07 | 42651825                | GG                              | AA              | 1946901390               |
| SNP_P4_103336_42659605 | NC_021166.1    | Ca_kabuli_chr07 | 42659605                | AA                              | GG              | 1946901392               |
| SNP_P4_103338_42665153 | NC_021166.1    | Ca_kabuli_chr07 | 42665153                | GG                              | AA              | 1946901394               |
| SNP_P4_103339_42665158 | NC_021166.1    | Ca_kabuli_chr07 | 42665158                | GG                              | TT              | 1946901396               |

| SNPs IDs               | Chromosome IDs | Chromosomes     | Physical positions (bp) | CDC Frontier (Reference genome) | (ILWC46 & LPNB) | NCBI SNPdb Accession IDs |
|------------------------|----------------|-----------------|-------------------------|---------------------------------|-----------------|--------------------------|
| SNP_P4_103340_42665348 | NC_021166.1    | Ca_kabuli_chr07 | 42665348                | TT                              | CC              | 1946901398               |
| SNP_P4_103341_42665356 | NC_021166.1    | Ca_kabuli_chr07 | 42665356                | GG                              | AA              | 1946901400               |
| SNP_P4_103342_42711708 | NC_021166.1    | Ca_kabuli_chr07 | 42711708                | CC                              | TT              | 1946901402               |
| SNP_P4_103343_42733824 | NC_021166.1    | Ca_kabuli_chr07 | 42733824                | CC                              | AA              | 1946901404               |
| SNP_P4_103345_42743602 | NC_021166.1    | Ca_kabuli_chr07 | 42743602                | CC                              | TT              | 1946901406               |
| SNP_P4_103346_42744025 | NC_021166.1    | Ca_kabuli_chr07 | 42744025                | AA                              | TT              | 1946901408               |
| SNP_P4_103347_42746544 | NC_021166.1    | Ca_kabuli_chr07 | 42746544                | CC                              | TT              | 1946901410               |
| SNP_P4_103348_42746578 | NC_021166.1    | Ca_kabuli_chr07 | 42746578                | CC                              | TT              | 1946901412               |
| SNP_P4_103349_42746594 | NC_021166.1    | Ca_kabuli_chr07 | 42746594                | AA                              | CC              | 1946901414               |
| SNP_P4_103350_42746616 | NC_021166.1    | Ca_kabuli_chr07 | 42746616                | TT                              | GG              | 1946901416               |
| SNP_P4_103351_42746633 | NC_021166.1    | Ca_kabuli_chr07 | 42746633                | CC                              | TT              | 1946901418               |
| SNP_P4_103352_42746652 | NC_021166.1    | Ca_kabuli_chr07 | 42746652                | GG                              | AA              | 1946901419               |
| SNP_P4_103353_42746663 | NC_021166.1    | Ca_kabuli_chr07 | 42746663                | GG                              | AA              | 1946901420               |
| SNP_P4_103354_42746720 | NC_021166.1    | Ca_kabuli_chr07 | 42746720                | TT                              | CC              | 1946901421               |
| SNP_P4_103355_42746918 | NC_021166.1    | Ca_kabuli_chr07 | 42746918                | TT                              | CC              | 1946901422               |
| SNP_P4_103356_42746928 | NC_021166.1    | Ca_kabuli_chr07 | 42746928                | GG                              | AA              | 1946901423               |
| SNP_P4_103357_42746979 | NC_021166.1    | Ca_kabuli_chr07 | 42746979                | GG                              | TT              | 1946901424               |
| SNP_P4_103358_42746993 | NC_021166.1    | Ca_kabuli_chr07 | 42746993                | TT                              | CC              | 1946901425               |
| SNP_P4_103359_42747075 | NC_021166.1    | Ca_kabuli_chr07 | 42747075                | AA                              | GG              | 1946901427               |
| SNP_P4_103361_42776503 | NC_021166.1    | Ca_kabuli_chr07 | 42776503                | CC                              | TT              | 1946901429               |
| SNP_P4_103362_42778468 | NC_021166.1    | Ca_kabuli_chr07 | 42778468                | CC                              | TT              | 1946901431               |
| SNP_P4_103363_42779249 | NC_021166.1    | Ca_kabuli_chr07 | 42779249                | CC                              | TT              | 1946901433               |
| SNP_P4_103364_42819726 | NC_021166.1    | Ca_kabuli_chr07 | 42819726                | GG                              | AA              | 1946901435               |
| SNP_P4_103365_42832397 | NC_021166.1    | Ca_kabuli_chr07 | 42832397                | CC                              | TT              | 1946901437               |
| SNP_P4_103366_42832433 | NC_021166.1    | Ca_kabuli_chr07 | 42832433                | CC                              | TT              | 1946901439               |
| SNP_P4_103367_42832435 | NC_021166.1    | Ca_kabuli_chr07 | 42832435                | TT                              | GG              | 1946901441               |
| SNP_P4_103368_42832449 | NC_021166.1    | Ca_kabuli_chr07 | 42832449                | GG                              | AA              | 1946901443               |
| SNP_P4_103369_42832481 | NC_021166.1    | Ca_kabuli_chr07 | 42832481                | GG                              | TT              | 1946901445               |
| SNP_P4_103370_42832505 | NC_021166.1    | Ca_kabuli_chr07 | 42832505                | AA                              | TT              | 1946901447               |
| SNP_P4_103371_42832509 | NC_021166.1    | Ca_kabuli_chr07 | 42832509                | AA                              | GG              | 1946901449               |
| SNP_P4_103372_42832550 | NC_021166.1    | Ca_kabuli_chr07 | 42832550                | AA                              | GG              | 1946901451               |
| SNP_P4_103374_42832865 | NC_021166.1    | Ca_kabuli_chr07 | 42832865                | AA                              | CC              | 1946901453               |
| SNP_P4_103375_42832868 | NC_021166.1    | Ca_kabuli_chr07 | 42832868                | TT                              | CC              | 1946901455               |
| SNP_P4_103376_42832933 | NC_021166.1    | Ca_kabuli_chr07 | 42832933                | CC                              | TT              | 1946901457               |
| SNP_P4_103377_42833041 | NC_021166.1    | Ca_kabuli_chr07 | 42833041                | CC                              | TT              | 1946901459               |
| SNP_P4_103378_42833078 | NC_021166.1    | Ca_kabuli_chr07 | 42833078                | CC                              | TT              | 1946901461               |
| SNP_P4_103379_42833080 | NC_021166.1    | Ca_kabuli_chr07 | 42833080                | TT                              | GG              | 1946901463               |
| SNP_P4_103380_42837269 | NC_021166.1    | Ca_kabuli_chr07 | 42837269                | AA                              | TT              | 1946901465               |
| SNP_P4_103381_42838616 | NC_021166.1    | Ca_kabuli_chr07 | 42838616                | CC                              | TT              | 1946901467               |
| SNP_P4_103382_42847269 | NC_021166.1    | Ca_kabuli_chr07 | 42847269                | GG                              | TT              | 1946901469               |
| SNP_P4_103383_42847270 | NC_021166.1    | Ca_kabuli_chr07 | 42847270                | GG                              | CC              | 1946901471               |
| SNP_P4_103384_42847285 | NC_021166.1    | Ca_kabuli_chr07 | 42847285                | GG                              | CC              | 1946901473               |

| <b>SNPs IDs</b>        | <b>Chromosome IDs</b> | <b>Chromosomes</b> | <b>Physical positions (bp)</b> | <b>CDC Frontier (Reference genome)</b> | <b>(ILWC46 &amp; LPNB)</b> | <b>NCBI SNPdb Accession IDs</b> |
|------------------------|-----------------------|--------------------|--------------------------------|----------------------------------------|----------------------------|---------------------------------|
| SNP_P4_103385_42848296 | NC_021166.1           | Ca_kabuli_chr07    | 42848296                       | AA                                     | TT                         | 1946901475                      |
| SNP_P4_103386_42848607 | NC_021166.1           | Ca_kabuli_chr07    | 42848607                       | CC                                     | TT                         | 1946901477                      |
| SNP_P4_103387_42848610 | NC_021166.1           | Ca_kabuli_chr07    | 42848610                       | TT                                     | CC                         | 1946901479                      |
| SNP_P4_103388_42866853 | NC_021166.1           | Ca_kabuli_chr07    | 42866853                       | CC                                     | TT                         | 1946901481                      |
| SNP_P4_103389_42870445 | NC_021166.1           | Ca_kabuli_chr07    | 42870445                       | CC                                     | TT                         | 1946901483                      |
| SNP_P4_103390_42901811 | NC_021166.1           | Ca_kabuli_chr07    | 42901811                       | TT                                     | CC                         | 1946901485                      |
| SNP_P4_103391_42902118 | NC_021166.1           | Ca_kabuli_chr07    | 42902118                       | CC                                     | TT                         | 1946901487                      |
| SNP_P4_103392_42902222 | NC_021166.1           | Ca_kabuli_chr07    | 42902222                       | TT                                     | CC                         | 1946901489                      |
| SNP_P4_103393_42915851 | NC_021166.1           | Ca_kabuli_chr07    | 42915851                       | GG                                     | AA                         | 1946901491                      |
| SNP_P4_103394_42918431 | NC_021166.1           | Ca_kabuli_chr07    | 42918431                       | CC                                     | TT                         | 1946901492                      |
| SNP_P4_103395_42918632 | NC_021166.1           | Ca_kabuli_chr07    | 42918632                       | AA                                     | GG                         | 1946901494                      |
| SNP_P4_103396_42918638 | NC_021166.1           | Ca_kabuli_chr07    | 42918638                       | GG                                     | AA                         | 1946901496                      |
| SNP_P4_103398_42922965 | NC_021166.1           | Ca_kabuli_chr07    | 42922965                       | GG                                     | TT                         | 1946901498                      |
| SNP_P4_103399_42923141 | NC_021166.1           | Ca_kabuli_chr07    | 42923141                       | AA                                     | GG                         | 1946901500                      |
| SNP_P4_103400_42923223 | NC_021166.1           | Ca_kabuli_chr07    | 42923223                       | CC                                     | TT                         | 1946901502                      |
| SNP_P4_103401_42927213 | NC_021166.1           | Ca_kabuli_chr07    | 42927213                       | GG                                     | AA                         | 1946901504                      |
| SNP_P4_103402_42931056 | NC_021166.1           | Ca_kabuli_chr07    | 42931056                       | AA                                     | TT                         | 1946901506                      |
| SNP_P4_103405_42955054 | NC_021166.1           | Ca_kabuli_chr07    | 42955054                       | GG                                     | CC                         | 1946901509                      |
| SNP_P4_103406_42973705 | NC_021166.1           | Ca_kabuli_chr07    | 42973705                       | GG                                     | AA                         | 1946901511                      |
| SNP_P4_103407_42978680 | NC_021166.1           | Ca_kabuli_chr07    | 42978680                       | CC                                     | TT                         | 1946901513                      |
| SNP_P4_103408_43000252 | NC_021166.1           | Ca_kabuli_chr07    | 43000252                       | CC                                     | AA                         | 1946901515                      |
| SNP_P4_103410_43017809 | NC_021166.1           | Ca_kabuli_chr07    | 43017809                       | CC                                     | TT                         | 1946901517                      |
| SNP_P4_103411_43032421 | NC_021166.1           | Ca_kabuli_chr07    | 43032421                       | GG                                     | AA                         | 1946901519                      |
| SNP_P4_103412_43033879 | NC_021166.1           | Ca_kabuli_chr07    | 43033879                       | GG                                     | AA                         | 1946901521                      |
| SNP_P4_103413_43050793 | NC_021166.1           | Ca_kabuli_chr07    | 43050793                       | GG                                     | AA                         | 1946901523                      |
| SNP_P4_103414_43050865 | NC_021166.1           | Ca_kabuli_chr07    | 43050865                       | CC                                     | TT                         | 1946901525                      |
| SNP_P4_103415_43091460 | NC_021166.1           | Ca_kabuli_chr07    | 43091460                       | AA                                     | TT                         | 1946901528                      |
| SNP_P4_103416_43137205 | NC_021166.1           | Ca_kabuli_chr07    | 43137205                       | CC                                     | TT                         | 1946901530                      |
| SNP_P4_103417_43145428 | NC_021166.1           | Ca_kabuli_chr07    | 43145428                       | TT                                     | GG                         | 1946901532                      |
| SNP_P4_103418_43168368 | NC_021166.1           | Ca_kabuli_chr07    | 43168368                       | TT                                     | GG                         | 1946901534                      |
| SNP_P4_103419_43170707 | NC_021166.1           | Ca_kabuli_chr07    | 43170707                       | GG                                     | AA                         | 1946901536                      |
| SNP_P4_103420_43175160 | NC_021166.1           | Ca_kabuli_chr07    | 43175160                       | CC                                     | GG                         | 1946901538                      |
| SNP_P4_103421_43177203 | NC_021166.1           | Ca_kabuli_chr07    | 43177203                       | AA                                     | GG                         | 1946901540                      |
| SNP_P4_103422_43208225 | NC_021166.1           | Ca_kabuli_chr07    | 43208225                       | CC                                     | TT                         | 1946901542                      |
| SNP_P4_103423_43208347 | NC_021166.1           | Ca_kabuli_chr07    | 43208347                       | CC                                     | AA                         | 1946901544                      |
| SNP_P4_103425_43209304 | NC_021166.1           | Ca_kabuli_chr07    | 43209304                       | TT                                     | CC                         | 1946901547                      |
| SNP_P4_103427_43210166 | NC_021166.1           | Ca_kabuli_chr07    | 43210166                       | AA                                     | CC                         | 1946901549                      |
| SNP_P4_103428_43210597 | NC_021166.1           | Ca_kabuli_chr07    | 43210597                       | AA                                     | GG                         | 1946901551                      |
| SNP_P4_103429_43210967 | NC_021166.1           | Ca_kabuli_chr07    | 43210967                       | CC                                     | TT                         | 1946901553                      |
| SNP_P4_103430_43232349 | NC_021166.1           | Ca_kabuli_chr07    | 43232349                       | CC                                     | TT                         | 1946901555                      |
| SNP_P4_103431_43232379 | NC_021166.1           | Ca_kabuli_chr07    | 43232379                       | GG                                     | AA                         | 1946901557                      |
| SNP_P4_103432_43232770 | NC_021166.1           | Ca_kabuli_chr07    | 43232770                       | TT                                     | AA                         | 1946901559                      |



| SNPs IDs               | Chromosome IDs | Chromosomes     | Physical positions (bp) | CDC Frontier (Reference genome) | (ILWC46 & LPNB) | NCBI SNPdb Accession IDs |
|------------------------|----------------|-----------------|-------------------------|---------------------------------|-----------------|--------------------------|
| SNP_P4_103433_43240936 | NC_021166.1    | Ca_kabuli_chr07 | 43240936                | TT                              | AA              | 1946901561               |
| SNP_P4_103434_43248277 | NC_021166.1    | Ca_kabuli_chr07 | 43248277                | GG                              | AA              | 1946901564               |
| SNP_P4_103435_43262230 | NC_021166.1    | Ca_kabuli_chr07 | 43262230                | GG                              | CC              | 1946901566               |
| SNP_P4_103436_43262277 | NC_021166.1    | Ca_kabuli_chr07 | 43262277                | CC                              | AA              | 1946901568               |
| SNP_P4_103437_43262321 | NC_021166.1    | Ca_kabuli_chr07 | 43262321                | GG                              | AA              | 1946901570               |
| SNP_P4_103438_43262335 | NC_021166.1    | Ca_kabuli_chr07 | 43262335                | CC                              | TT              | 1946901572               |
| SNP_P4_103439_43262351 | NC_021166.1    | Ca_kabuli_chr07 | 43262351                | GG                              | TT              | 1946901574               |
| SNP_P4_103440_43269599 | NC_021166.1    | Ca_kabuli_chr07 | 43269599                | CC                              | AA              | 1946901576               |
| SNP_P4_103441_43289195 | NC_021166.1    | Ca_kabuli_chr07 | 43289195                | TT                              | AA              | 1946901578               |
| SNP_P4_103442_43290737 | NC_021166.1    | Ca_kabuli_chr07 | 43290737                | GG                              | AA              | 1946901580               |
| SNP_P4_103443_43290757 | NC_021166.1    | Ca_kabuli_chr07 | 43290757                | TT                              | CC              | 1946901582               |
| SNP_P4_103444_43291082 | NC_021166.1    | Ca_kabuli_chr07 | 43291082                | TT                              | AA              | 1946901584               |
| SNP_P4_103445_43311147 | NC_021166.1    | Ca_kabuli_chr07 | 43311147                | CC                              | TT              | 1946901586               |
| SNP_P4_103446_43311173 | NC_021166.1    | Ca_kabuli_chr07 | 43311173                | TT                              | CC              | 1946901588               |
| SNP_P4_103447_43311237 | NC_021166.1    | Ca_kabuli_chr07 | 43311237                | CC                              | TT              | 1946901590               |
| SNP_P4_103448_43311242 | NC_021166.1    | Ca_kabuli_chr07 | 43311242                | GG                              | AA              | 1946901592               |
| SNP_P4_103449_43311278 | NC_021166.1    | Ca_kabuli_chr07 | 43311278                | GG                              | AA              | 1946901594               |
| SNP_P4_103450_43332208 | NC_021166.1    | Ca_kabuli_chr07 | 43332208                | TT                              | CC              | 1946901596               |
| SNP_P4_103451_43333366 | NC_021166.1    | Ca_kabuli_chr07 | 43333366                | CC                              | TT              | 1946901599               |
| SNP_P4_103452_43333388 | NC_021166.1    | Ca_kabuli_chr07 | 43333388                | CC                              | TT              | 1946901601               |
| SNP_P4_103453_43333412 | NC_021166.1    | Ca_kabuli_chr07 | 43333412                | CC                              | TT              | 1946901603               |
| SNP_P4_103454_43333421 | NC_021166.1    | Ca_kabuli_chr07 | 43333421                | AA                              | TT              | 1946901605               |
| SNP_P4_103455_43333584 | NC_021166.1    | Ca_kabuli_chr07 | 43333584                | GG                              | AA              | 1946901606               |
| SNP_P4_103456_43335938 | NC_021166.1    | Ca_kabuli_chr07 | 43335938                | GG                              | AA              | 1946901608               |
| SNP_P4_103457_43351227 | NC_021166.1    | Ca_kabuli_chr07 | 43351227                | CC                              | AA              | 1946901610               |
| SNP_P4_103459_43375542 | NC_021166.1    | Ca_kabuli_chr07 | 43375542                | TT                              | CC              | 1946901612               |
| SNP_P4_103460_43375617 | NC_021166.1    | Ca_kabuli_chr07 | 43375617                | GG                              | AA              | 1946901614               |
| SNP_P4_103461_43381021 | NC_021166.1    | Ca_kabuli_chr07 | 43381021                | CC                              | AA              | 1946901616               |
| SNP_P4_103462_43383016 | NC_021166.1    | Ca_kabuli_chr07 | 43383016                | TT                              | CC              | 1946901618               |
| SNP_P4_103463_43383049 | NC_021166.1    | Ca_kabuli_chr07 | 43383049                | TT                              | AA              | 1946901620               |
| SNP_P4_103464_43394929 | NC_021166.1    | Ca_kabuli_chr07 | 43394929                | CC                              | TT              | 1946901622               |
| SNP_P4_103465_43394988 | NC_021166.1    | Ca_kabuli_chr07 | 43394988                | AA                              | GG              | 1946901624               |
| SNP_P4_103466_43394991 | NC_021166.1    | Ca_kabuli_chr07 | 43394991                | GG                              | CC              | 1946901626               |
| SNP_P4_103467_43395011 | NC_021166.1    | Ca_kabuli_chr07 | 43395011                | TT                              | AA              | 1946901628               |
| SNP_P4_103468_43434119 | NC_021166.1    | Ca_kabuli_chr07 | 43434119                | TT                              | GG              | 1946901630               |
| SNP_P4_103469_43434499 | NC_021166.1    | Ca_kabuli_chr07 | 43434499                | AA                              | TT              | 1946901632               |
| SNP_P4_103470_43435051 | NC_021166.1    | Ca_kabuli_chr07 | 43435051                | TT                              | CC              | 1946901634               |
| SNP_P4_103471_43435069 | NC_021166.1    | Ca_kabuli_chr07 | 43435069                | AA                              | GG              | 1946901636               |
| SNP_P4_103472_43437275 | NC_021166.1    | Ca_kabuli_chr07 | 43437275                | TT                              | GG              | 1946901638               |
| SNP_P4_103473_43437340 | NC_021166.1    | Ca_kabuli_chr07 | 43437340                | AA                              | CC              | 1946901640               |
| SNP_P4_103474_43449005 | NC_021166.1    | Ca_kabuli_chr07 | 43449005                | GG                              | AA              | 1946901642               |
| SNP_P4_103475_43449090 | NC_021166.1    | Ca_kabuli_chr07 | 43449090                | GG                              | AA              | 1946901644               |

| SNPs IDs               | Chromosome IDs | Chromosomes     | Physical positions (bp) | CDC Frontier (Reference genome) | (ILWC46 & LPNB) | NCBI SNPdb Accession IDs |
|------------------------|----------------|-----------------|-------------------------|---------------------------------|-----------------|--------------------------|
| SNP_P4_103476_43449100 | NC_021166.1    | Ca_kabuli_chr07 | 43449100                | CC                              | TT              | 1946901646               |
| SNP_P4_103477_43457789 | NC_021166.1    | Ca_kabuli_chr07 | 43457789                | AA                              | TT              | 1946901648               |
| SNP_P4_103478_43469122 | NC_021166.1    | Ca_kabuli_chr07 | 43469122                | AA                              | CC              | 1946901650               |
| SNP_P4_103479_43476745 | NC_021166.1    | Ca_kabuli_chr07 | 43476745                | TT                              | CC              | 1946901652               |
| SNP_P4_103480_43482969 | NC_021166.1    | Ca_kabuli_chr07 | 43482969                | AA                              | GG              | 1946901654               |
| SNP_P4_103481_43483199 | NC_021166.1    | Ca_kabuli_chr07 | 43483199                | GG                              | TT              | 1946901656               |
| SNP_P4_103482_43483233 | NC_021166.1    | Ca_kabuli_chr07 | 43483233                | TT                              | GG              | 1946901658               |
| SNP_P4_103483_43485017 | NC_021166.1    | Ca_kabuli_chr07 | 43485017                | GG                              | AA              | 1946901660               |
| SNP_P4_103484_43500675 | NC_021166.1    | Ca_kabuli_chr07 | 43500675                | AA                              | GG              | 1946901662               |
| SNP_P4_103485_43500757 | NC_021166.1    | Ca_kabuli_chr07 | 43500757                | TT                              | CC              | 1946901664               |
| SNP_P4_103486_43504626 | NC_021166.1    | Ca_kabuli_chr07 | 43504626                | TT                              | CC              | 1946901667               |
| SNP_P4_103487_43504911 | NC_021166.1    | Ca_kabuli_chr07 | 43504911                | TT                              | CC              | 1946901669               |
| SNP_P4_103488_43504946 | NC_021166.1    | Ca_kabuli_chr07 | 43504946                | AA                              | GG              | 1946901671               |
| SNP_P4_103489_43519278 | NC_021166.1    | Ca_kabuli_chr07 | 43519278                | GG                              | AA              | 1946901673               |
| SNP_P4_103490_43530470 | NC_021166.1    | Ca_kabuli_chr07 | 43530470                | AA                              | GG              | 1946901675               |
| SNP_P4_103491_43530478 | NC_021166.1    | Ca_kabuli_chr07 | 43530478                | TT                              | AA              | 1946901677               |
| SNP_P4_103492_43530514 | NC_021166.1    | Ca_kabuli_chr07 | 43530514                | GG                              | AA              | 1946901679               |
| SNP_P4_103493_43530525 | NC_021166.1    | Ca_kabuli_chr07 | 43530525                | CC                              | TT              | 1946901681               |
| SNP_P4_103494_43530546 | NC_021166.1    | Ca_kabuli_chr07 | 43530546                | GG                              | AA              | 1946901683               |
| SNP_P4_103496_43566840 | NC_021166.1    | Ca_kabuli_chr07 | 43566840                | CC                              | TT              | 1946901684               |
| SNP_P4_103497_43573194 | NC_021166.1    | Ca_kabuli_chr07 | 43573194                | GG                              | AA              | 1946901686               |
| SNP_P4_103500_43608275 | NC_021166.1    | Ca_kabuli_chr07 | 43608275                | TT                              | GG              | 1946901688               |
| SNP_P4_103501_43608306 | NC_021166.1    | Ca_kabuli_chr07 | 43608306                | AA                              | GG              | 1946901690               |
| SNP_P4_103502_43622386 | NC_021166.1    | Ca_kabuli_chr07 | 43622386                | TT                              | GG              | 1946901692               |
| SNP_P4_103503_43622388 | NC_021166.1    | Ca_kabuli_chr07 | 43622388                | TT                              | GG              | 1946901694               |
| SNP_P4_103504_43624584 | NC_021166.1    | Ca_kabuli_chr07 | 43624584                | CC                              | AA              | 1946901696               |
| SNP_P4_103505_43624596 | NC_021166.1    | Ca_kabuli_chr07 | 43624596                | TT                              | CC              | 1946901698               |
| SNP_P4_103506_43624665 | NC_021166.1    | Ca_kabuli_chr07 | 43624665                | AA                              | GG              | 1946901700               |
| SNP_P4_103507_43624674 | NC_021166.1    | Ca_kabuli_chr07 | 43624674                | CC                              | TT              | 1946901703               |
| SNP_P4_103508_43624913 | NC_021166.1    | Ca_kabuli_chr07 | 43624913                | AA                              | TT              | 1946901705               |
| SNP_P4_103509_43625228 | NC_021166.1    | Ca_kabuli_chr07 | 43625228                | AA                              | GG              | 1946901707               |
| SNP_P4_103511_43636188 | NC_021166.1    | Ca_kabuli_chr07 | 43636188                | AA                              | CC              | 1946901709               |
| SNP_P4_103512_43636575 | NC_021166.1    | Ca_kabuli_chr07 | 43636575                | GG                              | CC              | 1946901711               |
| SNP_P4_103513_43641884 | NC_021166.1    | Ca_kabuli_chr07 | 43641884                | GG                              | CC              | 1946901713               |
| SNP_P4_103514_43654590 | NC_021166.1    | Ca_kabuli_chr07 | 43654590                | AA                              | GG              | 1946901715               |
| SNP_P4_103515_43682834 | NC_021166.1    | Ca_kabuli_chr07 | 43682834                | AA                              | GG              | 1946901717               |
| SNP_P4_103516_43685028 | NC_021166.1    | Ca_kabuli_chr07 | 43685028                | GG                              | AA              | 1946901719               |
| SNP_P4_103517_43685580 | NC_021166.1    | Ca_kabuli_chr07 | 43685580                | TT                              | GG              | 1946901721               |
| SNP_P4_103518_43685600 | NC_021166.1    | Ca_kabuli_chr07 | 43685600                | TT                              | GG              | 1946901724               |
| SNP_P4_103519_43685967 | NC_021166.1    | Ca_kabuli_chr07 | 43685967                | GG                              | AA              | 1946901726               |
| SNP_P4_103520_43691779 | NC_021166.1    | Ca_kabuli_chr07 | 43691779                | GG                              | AA              | 1946901728               |
| SNP_P4_103521_43693049 | NC_021166.1    | Ca_kabuli_chr07 | 43693049                | GG                              | AA              | 1946901730               |

| SNPs IDs               | Chromosome IDs | Chromosomes     | Physical positions (bp) | CDC Frontier (Reference genome) | (ILWC46 & LPNB) | NCBI SNPdb Accession IDs |
|------------------------|----------------|-----------------|-------------------------|---------------------------------|-----------------|--------------------------|
| SNP_P4_103522_43693154 | NC_021166.1    | Ca_kabuli_chr07 | 43693154                | GG                              | AA              | 1946901732               |
| SNP_P4_103523_43693175 | NC_021166.1    | Ca_kabuli_chr07 | 43693175                | GG                              | AA              | 1946901734               |
| SNP_P4_103524_43693181 | NC_021166.1    | Ca_kabuli_chr07 | 43693181                | GG                              | CC              | 1946901736               |
| SNP_P4_103525_43702800 | NC_021166.1    | Ca_kabuli_chr07 | 43702800                | TT                              | CC              | 1946901738               |
| SNP_P4_103526_43702862 | NC_021166.1    | Ca_kabuli_chr07 | 43702862                | TT                              | CC              | 1946901740               |
| SNP_P4_103527_43702876 | NC_021166.1    | Ca_kabuli_chr07 | 43702876                | TT                              | CC              | 1946901742               |
| SNP_P4_103528_43705065 | NC_021166.1    | Ca_kabuli_chr07 | 43705065                | TT                              | CC              | 1946901744               |
| SNP_P4_103529_43705135 | NC_021166.1    | Ca_kabuli_chr07 | 43705135                | CC                              | AA              | 1946901746               |
| SNP_P4_103530_43705192 | NC_021166.1    | Ca_kabuli_chr07 | 43705192                | AA                              | GG              | 1946901748               |
| SNP_P4_103531_43705431 | NC_021166.1    | Ca_kabuli_chr07 | 43705431                | CC                              | TT              | 1946901750               |
| SNP_P4_103532_43705465 | NC_021166.1    | Ca_kabuli_chr07 | 43705465                | CC                              | TT              | 1946901752               |
| SNP_P4_103533_43705467 | NC_021166.1    | Ca_kabuli_chr07 | 43705467                | CC                              | TT              | 1946901754               |
| SNP_P4_103535_43705618 | NC_021166.1    | Ca_kabuli_chr07 | 43705618                | AA                              | GG              | 1946901756               |
| SNP_P4_103536_43715164 | NC_021166.1    | Ca_kabuli_chr07 | 43715164                | CC                              | GG              | 1946901758               |
| SNP_P4_103537_43715279 | NC_021166.1    | Ca_kabuli_chr07 | 43715279                | TT                              | CC              | 1946901760               |
| SNP_P4_103538_43715412 | NC_021166.1    | Ca_kabuli_chr07 | 43715412                | AA                              | GG              | 1946901762               |
| SNP_P4_103539_43736102 | NC_021166.1    | Ca_kabuli_chr07 | 43736102                | AA                              | TT              | 1946901764               |
| SNP_P4_103540_43736219 | NC_021166.1    | Ca_kabuli_chr07 | 43736219                | GG                              | AA              | 1946901766               |
| SNP_P4_103541_43737525 | NC_021166.1    | Ca_kabuli_chr07 | 43737525                | AA                              | CC              | 1946901768               |
| SNP_P4_103542_43737685 | NC_021166.1    | Ca_kabuli_chr07 | 43737685                | TT                              | GG              | 1946901770               |
| SNP_P4_103543_43737731 | NC_021166.1    | Ca_kabuli_chr07 | 43737731                | AA                              | GG              | 1946901772               |
| SNP_P4_103544_43748287 | NC_021166.1    | Ca_kabuli_chr07 | 43748287                | GG                              | AA              | 1946901774               |
| SNP_P4_103545_43755359 | NC_021166.1    | Ca_kabuli_chr07 | 43755359                | TT                              | CC              | 1946901776               |
| SNP_P4_103546_43771759 | NC_021166.1    | Ca_kabuli_chr07 | 43771759                | TT                              | GG              | 1946901778               |
| SNP_P4_103547_43772022 | NC_021166.1    | Ca_kabuli_chr07 | 43772022                | CC                              | GG              | 1946901780               |
| SNP_P4_103548_43772082 | NC_021166.1    | Ca_kabuli_chr07 | 43772082                | TT                              | CC              | 1946901782               |
| SNP_P4_103549_43772708 | NC_021166.1    | Ca_kabuli_chr07 | 43772708                | GG                              | TT              | 1946901784               |
| SNP_P4_103550_43780650 | NC_021166.1    | Ca_kabuli_chr07 | 43780650                | AA                              | TT              | 1946901786               |
| SNP_P4_103551_43780659 | NC_021166.1    | Ca_kabuli_chr07 | 43780659                | AA                              | GG              | 1946901788               |
| SNP_P4_103552_43780902 | NC_021166.1    | Ca_kabuli_chr07 | 43780902                | AA                              | GG              | 1946901790               |
| SNP_P4_103553_43780934 | NC_021166.1    | Ca_kabuli_chr07 | 43780934                | CC                              | TT              | 1946901792               |
| SNP_P4_103554_43786463 | NC_021166.1    | Ca_kabuli_chr07 | 43786463                | AA                              | CC              | 1946901794               |
| SNP_P4_103555_43786469 | NC_021166.1    | Ca_kabuli_chr07 | 43786469                | TT                              | CC              | 1946901796               |
| SNP_P4_103556_43786802 | NC_021166.1    | Ca_kabuli_chr07 | 43786802                | AA                              | GG              | 1946901798               |
| SNP_P4_103557_43786856 | NC_021166.1    | Ca_kabuli_chr07 | 43786856                | AA                              | GG              | 1946901800               |
| SNP_P4_103558_43787709 | NC_021166.1    | Ca_kabuli_chr07 | 43787709                | CC                              | AA              | 1946901803               |
| SNP_P4_103559_43791739 | NC_021166.1    | Ca_kabuli_chr07 | 43791739                | AA                              | GG              | 1946901805               |
| SNP_P4_103560_43792572 | NC_021166.1    | Ca_kabuli_chr07 | 43792572                | AA                              | CC              | 1946901807               |
| SNP_P4_103561_43792600 | NC_021166.1    | Ca_kabuli_chr07 | 43792600                | GG                              | AA              | 1946901809               |
| SNP_P4_103562_43792946 | NC_021166.1    | Ca_kabuli_chr07 | 43792946                | GG                              | TT              | 1946901811               |
| SNP_P4_103565_43811199 | NC_021166.1    | Ca_kabuli_chr07 | 43811199                | TT                              | AA              | 1946901813               |
| SNP_P4_103566_43823087 | NC_021166.1    | Ca_kabuli_chr07 | 43823087                | GG                              | TT              | 1946901815               |

| SNPs IDs               | Chromosome IDs | Chromosomes     | Physical positions (bp) | CDC Frontier (Reference genome) | (ILWC46 & LPNB) | NCBI SNPdb Accession IDs |
|------------------------|----------------|-----------------|-------------------------|---------------------------------|-----------------|--------------------------|
| SNP_P4_103567_43827397 | NC_021166.1    | Ca_kabuli_chr07 | 43827397                | CC                              | TT              | 1946901817               |
| SNP_P4_103568_43827451 | NC_021166.1    | Ca_kabuli_chr07 | 43827451                | GG                              | TT              | 1946901819               |
| SNP_P4_103569_43827729 | NC_021166.1    | Ca_kabuli_chr07 | 43827729                | TT                              | CC              | 1946901821               |
| SNP_P4_103570_43827771 | NC_021166.1    | Ca_kabuli_chr07 | 43827771                | AA                              | GG              | 1946901823               |
| SNP_P4_103571_43827783 | NC_021166.1    | Ca_kabuli_chr07 | 43827783                | TT                              | GG              | 1946901825               |
| SNP_P4_103572_43827803 | NC_021166.1    | Ca_kabuli_chr07 | 43827803                | AA                              | GG              | 1946901827               |
| SNP_P4_103573_43838411 | NC_021166.1    | Ca_kabuli_chr07 | 43838411                | TT                              | GG              | 1946901829               |
| SNP_P4_103574_43838576 | NC_021166.1    | Ca_kabuli_chr07 | 43838576                | AA                              | TT              | 1946901831               |
| SNP_P4_103575_43838643 | NC_021166.1    | Ca_kabuli_chr07 | 43838643                | AA                              | GG              | 1946901833               |
| SNP_P4_103576_43838679 | NC_021166.1    | Ca_kabuli_chr07 | 43838679                | AA                              | GG              | 1946901835               |
| SNP_P4_103577_43838711 | NC_021166.1    | Ca_kabuli_chr07 | 43838711                | TT                              | CC              | 1946901837               |
| SNP_P4_103578_43838729 | NC_021166.1    | Ca_kabuli_chr07 | 43838729                | AA                              | CC              | 1946901839               |
| SNP_P4_103579_43840377 | NC_021166.1    | Ca_kabuli_chr07 | 43840377                | CC                              | TT              | 1946901841               |
| SNP_P4_103580_43840433 | NC_021166.1    | Ca_kabuli_chr07 | 43840433                | GG                              | AA              | 1946901843               |
| SNP_P4_103582_43840672 | NC_021166.1    | Ca_kabuli_chr07 | 43840672                | CC                              | AA              | 1946901845               |
| SNP_P4_103583_43840963 | NC_021166.1    | Ca_kabuli_chr07 | 43840963                | AA                              | GG              | 1946901847               |
| SNP_P4_103584_43840967 | NC_021166.1    | Ca_kabuli_chr07 | 43840967                | TT                              | CC              | 1946901849               |
| SNP_P4_103585_43841175 | NC_021166.1    | Ca_kabuli_chr07 | 43841175                | TT                              | CC              | 1946901851               |
| SNP_P4_103586_43888189 | NC_021166.1    | Ca_kabuli_chr07 | 43888189                | GG                              | AA              | 1946901853               |
| SNP_P4_103588_43922181 | NC_021166.1    | Ca_kabuli_chr07 | 43922181                | CC                              | TT              | 1946901855               |
| SNP_P4_103589_43952657 | NC_021166.1    | Ca_kabuli_chr07 | 43952657                | AA                              | GG              | 1946901857               |
| SNP_P4_103590_43975226 | NC_021166.1    | Ca_kabuli_chr07 | 43975226                | TT                              | AA              | 1946901859               |
| SNP_P4_103592_43993554 | NC_021166.1    | Ca_kabuli_chr07 | 43993554                | AA                              | GG              | 1946901861               |
| SNP_P4_103593_43993877 | NC_021166.1    | Ca_kabuli_chr07 | 43993877                | CC                              | GG              | 1946901863               |
| SNP_P4_103594_43993895 | NC_021166.1    | Ca_kabuli_chr07 | 43993895                | GG                              | TT              | 1946901865               |
| SNP_P4_103595_43995295 | NC_021166.1    | Ca_kabuli_chr07 | 43995295                | CC                              | TT              | 1946901867               |
| SNP_P4_103596_43995338 | NC_021166.1    | Ca_kabuli_chr07 | 43995338                | TT                              | AA              | 1946901869               |
| SNP_P4_103597_43995373 | NC_021166.1    | Ca_kabuli_chr07 | 43995373                | TT                              | CC              | 1946901871               |
| SNP_P4_103598_43999236 | NC_021166.1    | Ca_kabuli_chr07 | 43999236                | TT                              | AA              | 1946901873               |
| SNP_P4_103599_43999497 | NC_021166.1    | Ca_kabuli_chr07 | 43999497                | GG                              | AA              | 1946901875               |
| SNP_P4_103600_43999556 | NC_021166.1    | Ca_kabuli_chr07 | 43999556                | CC                              | TT              | 1946901877               |
| SNP_P4_103601_43999572 | NC_021166.1    | Ca_kabuli_chr07 | 43999572                | AA                              | GG              | 1946901879               |
| SNP_P4_103602_43999596 | NC_021166.1    | Ca_kabuli_chr07 | 43999596                | GG                              | AA              | 1946901881               |
| SNP_P4_103603_43999631 | NC_021166.1    | Ca_kabuli_chr07 | 43999631                | AA                              | GG              | 1946901883               |
| SNP_P4_103604_44001061 | NC_021166.1    | Ca_kabuli_chr07 | 44001061                | AA                              | TT              | 1946901885               |
| SNP_P4_103605_44001103 | NC_021166.1    | Ca_kabuli_chr07 | 44001103                | AA                              | GG              | 1946901887               |
| SNP_P4_103607_44001256 | NC_021166.1    | Ca_kabuli_chr07 | 44001256                | CC                              | TT              | 1946901890               |
| SNP_P4_103608_44001355 | NC_021166.1    | Ca_kabuli_chr07 | 44001355                | AA                              | CC              | 1946901892               |
| SNP_P4_103609_44001417 | NC_021166.1    | Ca_kabuli_chr07 | 44001417                | CC                              | AA              | 1946901894               |
| SNP_P4_103610_44001427 | NC_021166.1    | Ca_kabuli_chr07 | 44001427                | GG                              | AA              | 1946901896               |
| SNP_P4_103611_44001431 | NC_021166.1    | Ca_kabuli_chr07 | 44001431                | CC                              | TT              | 1946901898               |
| SNP_P4_103613_44001626 | NC_021166.1    | Ca_kabuli_chr07 | 44001626                | AA                              | TT              | 1946901900               |

| SNPs IDs               | Chromosome IDs | Chromosomes     | Physical positions (bp) | CDC Frontier (Reference genome) | (ILWC46 & LPNB) | NCBI SNPdb Accession IDs |
|------------------------|----------------|-----------------|-------------------------|---------------------------------|-----------------|--------------------------|
| SNP_P4_103614_44001885 | NC_021166.1    | Ca_kabuli_chr07 | 44001885                | AA                              | CC              | 1946901902               |
| SNP_P4_103615_44001939 | NC_021166.1    | Ca_kabuli_chr07 | 44001939                | TT                              | CC              | 1946901904               |
| SNP_P4_103616_44001948 | NC_021166.1    | Ca_kabuli_chr07 | 44001948                | CC                              | TT              | 1946901906               |
| SNP_P4_103617_44001968 | NC_021166.1    | Ca_kabuli_chr07 | 44001968                | GG                              | AA              | 1946901909               |
| SNP_P4_103618_44002223 | NC_021166.1    | Ca_kabuli_chr07 | 44002223                | TT                              | AA              | 1946901911               |
| SNP_P4_103619_44002291 | NC_021166.1    | Ca_kabuli_chr07 | 44002291                | AA                              | CC              | 1946901913               |
| SNP_P4_103620_44002332 | NC_021166.1    | Ca_kabuli_chr07 | 44002332                | GG                              | AA              | 1946901915               |
| SNP_P4_103621_44033578 | NC_021166.1    | Ca_kabuli_chr07 | 44033578                | TT                              | CC              | 1946901917               |
| SNP_P4_103622_44053425 | NC_021166.1    | Ca_kabuli_chr07 | 44053425                | CC                              | TT              | 1946901920               |
| SNP_P4_103625_44074672 | NC_021166.1    | Ca_kabuli_chr07 | 44074672                | AA                              | CC              | 1946901922               |
| SNP_P4_103627_44076016 | NC_021166.1    | Ca_kabuli_chr07 | 44076016                | CC                              | AA              | 1946901924               |
| SNP_P4_103628_44084408 | NC_021166.1    | Ca_kabuli_chr07 | 44084408                | TT                              | GG              | 1946901926               |
| SNP_P4_103629_44088952 | NC_021166.1    | Ca_kabuli_chr07 | 44088952                | TT                              | CC              | 1946901928               |
| SNP_P4_103631_44121373 | NC_021166.1    | Ca_kabuli_chr07 | 44121373                | TT                              | CC              | 1946901930               |
| SNP_P4_103632_44150066 | NC_021166.1    | Ca_kabuli_chr07 | 44150066                | GG                              | AA              | 1946901932               |
| SNP_P4_103635_44150903 | NC_021166.1    | Ca_kabuli_chr07 | 44150903                | AA                              | TT              | 1946901934               |
| SNP_P4_103636_44161213 | NC_021166.1    | Ca_kabuli_chr07 | 44161213                | CC                              | AA              | 1946901936               |
| SNP_P4_103637_44185433 | NC_021166.1    | Ca_kabuli_chr07 | 44185433                | GG                              | AA              | 1946901938               |
| SNP_P4_103638_44186806 | NC_021166.1    | Ca_kabuli_chr07 | 44186806                | GG                              | TT              | 1946901940               |
| SNP_P4_103639_44186809 | NC_021166.1    | Ca_kabuli_chr07 | 44186809                | TT                              | GG              | 1946901942               |
| SNP_P4_103640_44186829 | NC_021166.1    | Ca_kabuli_chr07 | 44186829                | GG                              | AA              | 1946901944               |
| SNP_P4_103641_44199235 | NC_021166.1    | Ca_kabuli_chr07 | 44199235                | GG                              | AA              | 1946901946               |
| SNP_P4_103642_44213826 | NC_021166.1    | Ca_kabuli_chr07 | 44213826                | AA                              | GG              | 1946901949               |
| SNP_P4_103643_44213889 | NC_021166.1    | Ca_kabuli_chr07 | 44213889                | AA                              | TT              | 1946901951               |
| SNP_P4_103644_44214117 | NC_021166.1    | Ca_kabuli_chr07 | 44214117                | AA                              | GG              | 1946901953               |
| SNP_P4_103645_44214125 | NC_021166.1    | Ca_kabuli_chr07 | 44214125                | AA                              | GG              | 1946901955               |
| SNP_P4_103646_44214294 | NC_021166.1    | Ca_kabuli_chr07 | 44214294                | CC                              | AA              | 1946901957               |
| SNP_P4_103647_44214308 | NC_021166.1    | Ca_kabuli_chr07 | 44214308                | TT                              | CC              | 1946901959               |
| SNP_P4_103648_44214492 | NC_021166.1    | Ca_kabuli_chr07 | 44214492                | TT                              | CC              | 1946901961               |
| SNP_P4_103649_44214505 | NC_021166.1    | Ca_kabuli_chr07 | 44214505                | CC                              | TT              | 1946901963               |
| SNP_P4_103650_44214559 | NC_021166.1    | Ca_kabuli_chr07 | 44214559                | TT                              | AA              | 1946901965               |
| SNP_P4_103651_44216286 | NC_021166.1    | Ca_kabuli_chr07 | 44216286                | TT                              | CC              | 1946901967               |
| SNP_P4_103652_44217172 | NC_021166.1    | Ca_kabuli_chr07 | 44217172                | AA                              | TT              | 1946901969               |
| SNP_P4_103653_44217643 | NC_021166.1    | Ca_kabuli_chr07 | 44217643                | CC                              | TT              | 1946901971               |
| SNP_P4_103654_44301665 | NC_021166.1    | Ca_kabuli_chr07 | 44301665                | CC                              | TT              | 1946901973               |
| SNP_P4_103655_44322209 | NC_021166.1    | Ca_kabuli_chr07 | 44322209                | AA                              | CC              | 1946901975               |
| SNP_P4_103656_44343594 | NC_021166.1    | Ca_kabuli_chr07 | 44343594                | TT                              | CC              | 1946901977               |
| SNP_P4_103657_44351034 | NC_021166.1    | Ca_kabuli_chr07 | 44351034                | GG                              | TT              | 1946901979               |
| SNP_P4_103660_44395556 | NC_021166.1    | Ca_kabuli_chr07 | 44395556                | AA                              | CC              | 1946901981               |
| SNP_P4_103661_44395867 | NC_021166.1    | Ca_kabuli_chr07 | 44395867                | TT                              | CC              | 1946901983               |
| SNP_P4_103662_44395922 | NC_021166.1    | Ca_kabuli_chr07 | 44395922                | AA                              | CC              | 1946901985               |
| SNP_P4_103663_44395924 | NC_021166.1    | Ca_kabuli_chr07 | 44395924                | AA                              | TT              | 1946901987               |

| SNPs IDs               | Chromosome IDs | Chromosomes     | Physical positions (bp) | CDC Frontier (Reference genome) | (ILWC46 & LPNB) | NCBI SNPdb Accession IDs |
|------------------------|----------------|-----------------|-------------------------|---------------------------------|-----------------|--------------------------|
| SNP_P4_103664_44395937 | NC_021166.1    | Ca_kabuli_chr07 | 44395937                | AA                              | CC              | 1946901989               |
| SNP_P4_103665_44396011 | NC_021166.1    | Ca_kabuli_chr07 | 44396011                | TT                              | CC              | 1946901991               |
| SNP_P4_103666_44396026 | NC_021166.1    | Ca_kabuli_chr07 | 44396026                | AA                              | GG              | 1946901993               |
| SNP_P4_103667_44396151 | NC_021166.1    | Ca_kabuli_chr07 | 44396151                | AA                              | GG              | 1946901995               |
| SNP_P4_103668_44396158 | NC_021166.1    | Ca_kabuli_chr07 | 44396158                | TT                              | CC              | 1946901997               |
| SNP_P4_103669_44396306 | NC_021166.1    | Ca_kabuli_chr07 | 44396306                | TT                              | GG              | 1946901999               |
| SNP_P4_103670_44396309 | NC_021166.1    | Ca_kabuli_chr07 | 44396309                | CC                              | TT              | 1946902001               |
| SNP_P4_103671_44396353 | NC_021166.1    | Ca_kabuli_chr07 | 44396353                | CC                              | TT              | 1946902003               |
| SNP_P4_103672_44396359 | NC_021166.1    | Ca_kabuli_chr07 | 44396359                | AA                              | GG              | 1946902005               |
| SNP_P4_103673_44396425 | NC_021166.1    | Ca_kabuli_chr07 | 44396425                | AA                              | CC              | 1946902007               |
| SNP_P4_103674_44396427 | NC_021166.1    | Ca_kabuli_chr07 | 44396427                | GG                              | AA              | 1946902009               |
| SNP_P4_103675_44396493 | NC_021166.1    | Ca_kabuli_chr07 | 44396493                | AA                              | GG              | 1946902011               |
| SNP_P4_103676_44396516 | NC_021166.1    | Ca_kabuli_chr07 | 44396516                | GG                              | AA              | 1946902013               |
| SNP_P4_103677_44404721 | NC_021166.1    | Ca_kabuli_chr07 | 44404721                | TT                              | CC              | 1946902015               |
| SNP_P4_103678_44404780 | NC_021166.1    | Ca_kabuli_chr07 | 44404780                | GG                              | AA              | 1946902017               |
| SNP_P4_103679_44405115 | NC_021166.1    | Ca_kabuli_chr07 | 44405115                | TT                              | CC              | 1946902019               |
| SNP_P4_103680_44408185 | NC_021166.1    | Ca_kabuli_chr07 | 44408185                | CC                              | TT              | 1946902021               |
| SNP_P4_103682_44433543 | NC_021166.1    | Ca_kabuli_chr07 | 44433543                | GG                              | AA              | 1946902023               |
| SNP_P4_103683_44440501 | NC_021166.1    | Ca_kabuli_chr07 | 44440501                | GG                              | TT              | 1946902025               |
| SNP_P4_103684_44440548 | NC_021166.1    | Ca_kabuli_chr07 | 44440548                | CC                              | TT              | 1946902028               |
| SNP_P4_103685_44440598 | NC_021166.1    | Ca_kabuli_chr07 | 44440598                | TT                              | CC              | 1946902030               |
| SNP_P4_103686_44440908 | NC_021166.1    | Ca_kabuli_chr07 | 44440908                | CC                              | TT              | 1946902032               |
| SNP_P4_103687_44440928 | NC_021166.1    | Ca_kabuli_chr07 | 44440928                | TT                              | GG              | 1946902034               |
| SNP_P4_103688_44442476 | NC_021166.1    | Ca_kabuli_chr07 | 44442476                | CC                              | TT              | 1946902036               |
| SNP_P4_103689_44442866 | NC_021166.1    | Ca_kabuli_chr07 | 44442866                | AA                              | TT              | 1946902038               |
| SNP_P4_103690_44459674 | NC_021166.1    | Ca_kabuli_chr07 | 44459674                | TT                              | CC              | 1946902040               |
| SNP_P4_103692_44475583 | NC_021166.1    | Ca_kabuli_chr07 | 44475583                | AA                              | GG              | 1946902042               |
| SNP_P4_103693_44476653 | NC_021166.1    | Ca_kabuli_chr07 | 44476653                | TT                              | CC              | 1946902044               |
| SNP_P4_103694_44476672 | NC_021166.1    | Ca_kabuli_chr07 | 44476672                | TT                              | CC              | 1946902046               |
| SNP_P4_103695_44477449 | NC_021166.1    | Ca_kabuli_chr07 | 44477449                | GG                              | AA              | 1946902048               |
| SNP_P4_103696_44477548 | NC_021166.1    | Ca_kabuli_chr07 | 44477548                | AA                              | GG              | 1946902050               |
| SNP_P4_103697_44496691 | NC_021166.1    | Ca_kabuli_chr07 | 44496691                | TT                              | CC              | 1946902052               |
| SNP_P4_103698_44497353 | NC_021166.1    | Ca_kabuli_chr07 | 44497353                | AA                              | TT              | 1946902054               |
| SNP_P4_103699_44508894 | NC_021166.1    | Ca_kabuli_chr07 | 44508894                | TT                              | CC              | 1946902056               |
| SNP_P4_103700_44518553 | NC_021166.1    | Ca_kabuli_chr07 | 44518553                | GG                              | AA              | 1946902058               |
| SNP_P4_103701_44518566 | NC_021166.1    | Ca_kabuli_chr07 | 44518566                | GG                              | AA              | 1946902060               |
| SNP_P4_103702_44533164 | NC_021166.1    | Ca_kabuli_chr07 | 44533164                | GG                              | AA              | 1946902062               |
| SNP_P4_103703_44542989 | NC_021166.1    | Ca_kabuli_chr07 | 44542989                | AA                              | GG              | 1946902064               |
| SNP_P4_103704_44543017 | NC_021166.1    | Ca_kabuli_chr07 | 44543017                | CC                              | GG              | 1946902066               |
| SNP_P4_103705_44543118 | NC_021166.1    | Ca_kabuli_chr07 | 44543118                | TT                              | AA              | 1946902068               |
| SNP_P4_103706_44543578 | NC_021166.1    | Ca_kabuli_chr07 | 44543578                | CC                              | AA              | 1946902070               |
| SNP_P4_103707_44543596 | NC_021166.1    | Ca_kabuli_chr07 | 44543596                | TT                              | AA              | 1946902072               |

| SNPs IDs               | Chromosome IDs | Chromosomes     | Physical positions (bp) | CDC Frontier (Reference genome) | (ILWC46 & LPNB) | NCBI SNPdb Accession IDs |
|------------------------|----------------|-----------------|-------------------------|---------------------------------|-----------------|--------------------------|
| SNP_P4_103708_44543617 | NC_021166.1    | Ca_kabuli_chr07 | 44543617                | AA                              | TT              | 1946902074               |
| SNP_P4_103709_44543618 | NC_021166.1    | Ca_kabuli_chr07 | 44543618                | AA                              | TT              | 1946902077               |
| SNP_P4_103710_44543643 | NC_021166.1    | Ca_kabuli_chr07 | 44543643                | AA                              | TT              | 1946902079               |
| SNP_P4_103711_44543651 | NC_021166.1    | Ca_kabuli_chr07 | 44543651                | GG                              | TT              | 1946902081               |
| SNP_P4_103712_44543864 | NC_021166.1    | Ca_kabuli_chr07 | 44543864                | GG                              | AA              | 1946902083               |
| SNP_P4_103713_44543935 | NC_021166.1    | Ca_kabuli_chr07 | 44543935                | AA                              | GG              | 1946902085               |
| SNP_P4_103714_44543978 | NC_021166.1    | Ca_kabuli_chr07 | 44543978                | AA                              | GG              | 1946902087               |
| SNP_P4_103715_44543980 | NC_021166.1    | Ca_kabuli_chr07 | 44543980                | TT                              | AA              | 1946902089               |
| SNP_P4_103716_44543995 | NC_021166.1    | Ca_kabuli_chr07 | 44543995                | TT                              | GG              | 1946902092               |
| SNP_P4_103717_44569270 | NC_021166.1    | Ca_kabuli_chr07 | 44569270                | TT                              | GG              | 1946902094               |
| SNP_P4_103719_44569765 | NC_021166.1    | Ca_kabuli_chr07 | 44569765                | AA                              | TT              | 1946902096               |
| SNP_P4_103720_44569774 | NC_021166.1    | Ca_kabuli_chr07 | 44569774                | TT                              | CC              | 1946902098               |
| SNP_P4_103721_44569999 | NC_021166.1    | Ca_kabuli_chr07 | 44569999                | AA                              | GG              | 1946902100               |
| SNP_P4_103722_44571598 | NC_021166.1    | Ca_kabuli_chr07 | 44571598                | CC                              | AA              | 1946902102               |
| SNP_P4_103723_44571730 | NC_021166.1    | Ca_kabuli_chr07 | 44571730                | AA                              | GG              | 1946902104               |
| SNP_P4_103724_44571733 | NC_021166.1    | Ca_kabuli_chr07 | 44571733                | TT                              | AA              | 1946902106               |
| SNP_P4_103725_44572129 | NC_021166.1    | Ca_kabuli_chr07 | 44572129                | TT                              | AA              | 1946902108               |
| SNP_P4_103726_44668225 | NC_021166.1    | Ca_kabuli_chr07 | 44668225                | GG                              | AA              | 1946902110               |
| SNP_P4_103727_44669912 | NC_021166.1    | Ca_kabuli_chr07 | 44669912                | TT                              | CC              | 1946902112               |
| SNP_P4_103728_44669916 | NC_021166.1    | Ca_kabuli_chr07 | 44669916                | AA                              | CC              | 1946902114               |
| SNP_P4_103730_44683912 | NC_021166.1    | Ca_kabuli_chr07 | 44683912                | CC                              | TT              | 1946902116               |
| SNP_P4_103731_44701706 | NC_021166.1    | Ca_kabuli_chr07 | 44701706                | CC                              | TT              | 1946902118               |
| SNP_P4_103732_44716395 | NC_021166.1    | Ca_kabuli_chr07 | 44716395                | TT                              | GG              | 1946902120               |
| SNP_P4_103733_44717481 | NC_021166.1    | Ca_kabuli_chr07 | 44717481                | GG                              | TT              | 1946902122               |
| SNP_P4_103734_44720974 | NC_021166.1    | Ca_kabuli_chr07 | 44720974                | AA                              | CC              | 1946902124               |
| SNP_P4_103735_44730539 | NC_021166.1    | Ca_kabuli_chr07 | 44730539                | AA                              | CC              | 1946902126               |
| SNP_P4_103736_44732686 | NC_021166.1    | Ca_kabuli_chr07 | 44732686                | GG                              | AA              | 1946902128               |
| SNP_P4_103737_44753822 | NC_021166.1    | Ca_kabuli_chr07 | 44753822                | AA                              | TT              | 1946902130               |
| SNP_P4_103738_44796461 | NC_021166.1    | Ca_kabuli_chr07 | 44796461                | CC                              | GG              | 1946902132               |
| SNP_P4_103739_44799672 | NC_021166.1    | Ca_kabuli_chr07 | 44799672                | CC                              | TT              | 1946902134               |
| SNP_P4_103740_44799699 | NC_021166.1    | Ca_kabuli_chr07 | 44799699                | CC                              | AA              | 1946902136               |
| SNP_P4_103741_44799852 | NC_021166.1    | Ca_kabuli_chr07 | 44799852                | AA                              | CC              | 1946902138               |
| SNP_P4_103742_44815374 | NC_021166.1    | Ca_kabuli_chr07 | 44815374                | AA                              | CC              | 1946902140               |
| SNP_P4_103743_44815825 | NC_021166.1    | Ca_kabuli_chr07 | 44815825                | GG                              | AA              | 1946902142               |
| SNP_P4_103744_44819304 | NC_021166.1    | Ca_kabuli_chr07 | 44819304                | CC                              | TT              | 1946902144               |
| SNP_P4_103745_44821655 | NC_021166.1    | Ca_kabuli_chr07 | 44821655                | CC                              | GG              | 1946902146               |
| SNP_P4_103746_44821814 | NC_021166.1    | Ca_kabuli_chr07 | 44821814                | GG                              | AA              | 1946902148               |
| SNP_P4_103747_44821834 | NC_021166.1    | Ca_kabuli_chr07 | 44821834                | GG                              | AA              | 1946902150               |
| SNP_P4_103748_44822404 | NC_021166.1    | Ca_kabuli_chr07 | 44822404                | AA                              | TT              | 1946902152               |
| SNP_P4_103749_44822656 | NC_021166.1    | Ca_kabuli_chr07 | 44822656                | CC                              | AA              | 1946902154               |
| SNP_P4_103750_44822659 | NC_021166.1    | Ca_kabuli_chr07 | 44822659                | AA                              | GG              | 1946902156               |
| SNP_P4_103751_44822679 | NC_021166.1    | Ca_kabuli_chr07 | 44822679                | AA                              | CC              | 1946902158               |

| SNPs IDs               | Chromosome IDs | Chromosomes     | Physical positions (bp) | CDC Frontier (Reference genome) | (ILWC46 & LPNB) | NCBI SNPdb Accession IDs |
|------------------------|----------------|-----------------|-------------------------|---------------------------------|-----------------|--------------------------|
| SNP_P4_103752_44822702 | NC_021166.1    | Ca_kabuli_chr07 | 44822702                | TT                              | CC              | 1946902160               |
| SNP_P4_103753_44824978 | NC_021166.1    | Ca_kabuli_chr07 | 44824978                | CC                              | AA              | 1946902162               |
| SNP_P4_103754_44830215 | NC_021166.1    | Ca_kabuli_chr07 | 44830215                | TT                              | AA              | 1946902164               |
| SNP_P4_103755_44830234 | NC_021166.1    | Ca_kabuli_chr07 | 44830234                | GG                              | AA              | 1946902166               |
| SNP_P4_103756_44832889 | NC_021166.1    | Ca_kabuli_chr07 | 44832889                | CC                              | TT              | 1946902168               |
| SNP_P4_103757_44832910 | NC_021166.1    | Ca_kabuli_chr07 | 44832910                | AA                              | GG              | 1946902170               |
| SNP_P4_103758_44832922 | NC_021166.1    | Ca_kabuli_chr07 | 44832922                | CC                              | AA              | 1946902172               |
| SNP_P4_103759_44832943 | NC_021166.1    | Ca_kabuli_chr07 | 44832943                | TT                              | CC              | 1946902174               |
| SNP_P4_103760_44863535 | NC_021166.1    | Ca_kabuli_chr07 | 44863535                | GG                              | TT              | 1946902176               |
| SNP_P4_103762_44895723 | NC_021166.1    | Ca_kabuli_chr07 | 44895723                | GG                              | AA              | 1946902178               |
| SNP_P4_103764_44909802 | NC_021166.1    | Ca_kabuli_chr07 | 44909802                | AA                              | GG              | 1946902180               |
| SNP_P4_103765_44917258 | NC_021166.1    | Ca_kabuli_chr07 | 44917258                | GG                              | AA              | 1946902182               |
| SNP_P4_103766_44921075 | NC_021166.1    | Ca_kabuli_chr07 | 44921075                | GG                              | TT              | 1946902184               |
| SNP_P4_103767_44921077 | NC_021166.1    | Ca_kabuli_chr07 | 44921077                | AA                              | TT              | 1946902186               |
| SNP_P4_103768_44924545 | NC_021166.1    | Ca_kabuli_chr07 | 44924545                | GG                              | CC              | 1946902188               |
| SNP_P4_103769_44926852 | NC_021166.1    | Ca_kabuli_chr07 | 44926852                | CC                              | TT              | 1946902190               |
| SNP_P4_103770_44931309 | NC_021166.1    | Ca_kabuli_chr07 | 44931309                | CC                              | TT              | 1946902192               |
| SNP_P4_103771_44931558 | NC_021166.1    | Ca_kabuli_chr07 | 44931558                | GG                              | AA              | 1946902194               |
| SNP_P4_103772_44977182 | NC_021166.1    | Ca_kabuli_chr07 | 44977182                | TT                              | AA              | 1946902196               |
| SNP_P4_103773_44977183 | NC_021166.1    | Ca_kabuli_chr07 | 44977183                | CC                              | AA              | 1946902198               |
| SNP_P4_103774_45026048 | NC_021166.1    | Ca_kabuli_chr07 | 45026048                | GG                              | CC              | 1946902201               |
| SNP_P4_103775_45034281 | NC_021166.1    | Ca_kabuli_chr07 | 45034281                | CC                              | TT              | 1946902203               |
| SNP_P4_103776_45034658 | NC_021166.1    | Ca_kabuli_chr07 | 45034658                | GG                              | AA              | 1946902205               |
| SNP_P4_103777_45044059 | NC_021166.1    | Ca_kabuli_chr07 | 45044059                | GG                              | AA              | 1946902207               |
| SNP_P4_103778_45044164 | NC_021166.1    | Ca_kabuli_chr07 | 45044164                | GG                              | CC              | 1946902209               |
| SNP_P4_103779_45044246 | NC_021166.1    | Ca_kabuli_chr07 | 45044246                | AA                              | GG              | 1946902211               |
| SNP_P4_103780_45044467 | NC_021166.1    | Ca_kabuli_chr07 | 45044467                | CC                              | TT              | 1946902213               |
| SNP_P4_103781_45044468 | NC_021166.1    | Ca_kabuli_chr07 | 45044468                | TT                              | CC              | 1946902215               |
| SNP_P4_103782_45044478 | NC_021166.1    | Ca_kabuli_chr07 | 45044478                | AA                              | GG              | 1946902217               |
| SNP_P4_103783_45044481 | NC_021166.1    | Ca_kabuli_chr07 | 45044481                | TT                              | GG              | 1946902219               |
| SNP_P4_103784_45044520 | NC_021166.1    | Ca_kabuli_chr07 | 45044520                | AA                              | GG              | 1946902221               |
| SNP_P4_103785_45044538 | NC_021166.1    | Ca_kabuli_chr07 | 45044538                | AA                              | GG              | 1946902223               |
| SNP_P4_103786_45044543 | NC_021166.1    | Ca_kabuli_chr07 | 45044543                | GG                              | AA              | 1946902225               |
| SNP_P4_103787_45044569 | NC_021166.1    | Ca_kabuli_chr07 | 45044569                | CC                              | TT              | 1946902227               |
| SNP_P4_103788_45044625 | NC_021166.1    | Ca_kabuli_chr07 | 45044625                | TT                              | CC              | 1946902229               |
| SNP_P4_103789_45047801 | NC_021166.1    | Ca_kabuli_chr07 | 45047801                | AA                              | GG              | 1946902231               |
| SNP_P4_103790_45053444 | NC_021166.1    | Ca_kabuli_chr07 | 45053444                | CC                              | AA              | 1946902233               |
| SNP_P4_103791_45058257 | NC_021166.1    | Ca_kabuli_chr07 | 45058257                | GG                              | CC              | 1946902235               |
| SNP_P4_103792_45069235 | NC_021166.1    | Ca_kabuli_chr07 | 45069235                | TT                              | CC              | 1946902237               |
| SNP_P4_103793_45084140 | NC_021166.1    | Ca_kabuli_chr07 | 45084140                | GG                              | AA              | 1946902240               |
| SNP_P4_103794_45084169 | NC_021166.1    | Ca_kabuli_chr07 | 45084169                | GG                              | TT              | 1946902242               |
| SNP_P4_103795_45084199 | NC_021166.1    | Ca_kabuli_chr07 | 45084199                | AA                              | GG              | 1946902244               |



| SNPs IDs               | Chromosome IDs | Chromosomes     | Physical positions (bp) | CDC Frontier (Reference genome) | (ILWC46 & LPNB) | NCBI SNPdb Accession IDs |
|------------------------|----------------|-----------------|-------------------------|---------------------------------|-----------------|--------------------------|
| SNP_P4_103796_45084200 | NC_021166.1    | Ca_kabuli_chr07 | 45084200                | TT                              | CC              | 1946902246               |
| SNP_P4_103797_45084204 | NC_021166.1    | Ca_kabuli_chr07 | 45084204                | AA                              | CC              | 1946902248               |
| SNP_P4_103798_45087639 | NC_021166.1    | Ca_kabuli_chr07 | 45087639                | CC                              | TT              | 1946902250               |
| SNP_P4_103799_45088016 | NC_021166.1    | Ca_kabuli_chr07 | 45088016                | CC                              | AA              | 1946902252               |
| SNP_P4_103800_45089336 | NC_021166.1    | Ca_kabuli_chr07 | 45089336                | GG                              | AA              | 1946902254               |
| SNP_P4_103801_45089385 | NC_021166.1    | Ca_kabuli_chr07 | 45089385                | AA                              | GG              | 1946902256               |
| SNP_P4_103802_45112831 | NC_021166.1    | Ca_kabuli_chr07 | 45112831                | AA                              | CC              | 1946902258               |
| SNP_P4_103803_45112834 | NC_021166.1    | Ca_kabuli_chr07 | 45112834                | TT                              | AA              | 1946902260               |
| SNP_P4_103804_45113244 | NC_021166.1    | Ca_kabuli_chr07 | 45113244                | CC                              | TT              | 1946902262               |
| SNP_P4_103805_45113284 | NC_021166.1    | Ca_kabuli_chr07 | 45113284                | AA                              | TT              | 1946902264               |
| SNP_P4_103806_45113311 | NC_021166.1    | Ca_kabuli_chr07 | 45113311                | TT                              | CC              | 1946902266               |
| SNP_P4_103807_45113341 | NC_021166.1    | Ca_kabuli_chr07 | 45113341                | AA                              | GG              | 1946902268               |
| SNP_P4_103808_45113447 | NC_021166.1    | Ca_kabuli_chr07 | 45113447                | AA                              | GG              | 1946902270               |
| SNP_P4_103809_45119509 | NC_021166.1    | Ca_kabuli_chr07 | 45119509                | AA                              | GG              | 1946902272               |
| SNP_P4_103810_45124831 | NC_021166.1    | Ca_kabuli_chr07 | 45124831                | AA                              | GG              | 1946902274               |
| SNP_P4_103811_45124888 | NC_021166.1    | Ca_kabuli_chr07 | 45124888                | TT                              | CC              | 1946902276               |
| SNP_P4_103812_45124893 | NC_021166.1    | Ca_kabuli_chr07 | 45124893                | TT                              | GG              | 1946902278               |
| SNP_P4_103813_45124921 | NC_021166.1    | Ca_kabuli_chr07 | 45124921                | AA                              | GG              | 1946902280               |
| SNP_P4_103814_45128616 | NC_021166.1    | Ca_kabuli_chr07 | 45128616                | AA                              | GG              | 1946902282               |
| SNP_P4_103815_45128945 | NC_021166.1    | Ca_kabuli_chr07 | 45128945                | AA                              | CC              | 1946902285               |
| SNP_P4_103816_45129108 | NC_021166.1    | Ca_kabuli_chr07 | 45129108                | TT                              | CC              | 1946902287               |
| SNP_P4_103817_45132001 | NC_021166.1    | Ca_kabuli_chr07 | 45132001                | TT                              | GG              | 1946902289               |
| SNP_P4_103818_45132289 | NC_021166.1    | Ca_kabuli_chr07 | 45132289                | CC                              | TT              | 1946902291               |
| SNP_P4_103819_45136167 | NC_021166.1    | Ca_kabuli_chr07 | 45136167                | AA                              | GG              | 1946902293               |
| SNP_P4_103820_45149500 | NC_021166.1    | Ca_kabuli_chr07 | 45149500                | AA                              | TT              | 1946902295               |
| SNP_P4_103821_45149529 | NC_021166.1    | Ca_kabuli_chr07 | 45149529                | TT                              | CC              | 1946902297               |
| SNP_P4_103822_45149648 | NC_021166.1    | Ca_kabuli_chr07 | 45149648                | TT                              | CC              | 1946902299               |
| SNP_P4_103823_45149736 | NC_021166.1    | Ca_kabuli_chr07 | 45149736                | AA                              | GG              | 1946902301               |
| SNP_P4_103824_45149790 | NC_021166.1    | Ca_kabuli_chr07 | 45149790                | TT                              | AA              | 1946902303               |
| SNP_P4_103825_45150806 | NC_021166.1    | Ca_kabuli_chr07 | 45150806                | GG                              | AA              | 1946902305               |
| SNP_P4_103826_45150809 | NC_021166.1    | Ca_kabuli_chr07 | 45150809                | GG                              | TT              | 1946902307               |
| SNP_P4_103827_45150810 | NC_021166.1    | Ca_kabuli_chr07 | 45150810                | GG                              | CC              | 1946902309               |
| SNP_P4_103828_45150811 | NC_021166.1    | Ca_kabuli_chr07 | 45150811                | TT                              | CC              | 1946902311               |
| SNP_P4_103829_45150815 | NC_021166.1    | Ca_kabuli_chr07 | 45150815                | AA                              | TT              | 1946902313               |
| SNP_P4_103830_45150817 | NC_021166.1    | Ca_kabuli_chr07 | 45150817                | TT                              | CC              | 1946902315               |
| SNP_P4_103831_45150819 | NC_021166.1    | Ca_kabuli_chr07 | 45150819                | GG                              | AA              | 1946902317               |
| SNP_P4_103832_45150824 | NC_021166.1    | Ca_kabuli_chr07 | 45150824                | GG                              | TT              | 1946902319               |
| SNP_P4_103833_45151007 | NC_021166.1    | Ca_kabuli_chr07 | 45151007                | TT                              | CC              | 1946902321               |
| SNP_P4_103834_45151167 | NC_021166.1    | Ca_kabuli_chr07 | 45151167                | CC                              | GG              | 1946902324               |
| SNP_P4_103835_45151201 | NC_021166.1    | Ca_kabuli_chr07 | 45151201                | AA                              | CC              | 1946902326               |
| SNP_P4_103836_45151257 | NC_021166.1    | Ca_kabuli_chr07 | 45151257                | AA                              | GG              | 1946902328               |
| SNP_P4_103837_45151314 | NC_021166.1    | Ca_kabuli_chr07 | 45151314                | TT                              | CC              | 1946902330               |

| SNPs IDs               | Chromosome IDs | Chromosomes     | Physical positions (bp) | CDC Frontier (Reference genome) | (ILWC46 & LPNB) | NCBI SNPdb Accession IDs |
|------------------------|----------------|-----------------|-------------------------|---------------------------------|-----------------|--------------------------|
| SNP_P4_103838_45151494 | NC_021166.1    | Ca_kabuli_chr07 | 45151494                | TT                              | CC              | 1946902332               |
| SNP_P4_103839_45151523 | NC_021166.1    | Ca_kabuli_chr07 | 45151523                | CC                              | TT              | 1946902334               |
| SNP_P4_103840_45153721 | NC_021166.1    | Ca_kabuli_chr07 | 45153721                | TT                              | AA              | 1946902336               |
| SNP_P4_103841_45154040 | NC_021166.1    | Ca_kabuli_chr07 | 45154040                | GG                              | CC              | 1946902339               |
| SNP_P4_103842_45154043 | NC_021166.1    | Ca_kabuli_chr07 | 45154043                | GG                              | CC              | 1946902341               |
| SNP_P4_103843_45154064 | NC_021166.1    | Ca_kabuli_chr07 | 45154064                | TT                              | CC              | 1946902343               |
| SNP_P4_103844_45164254 | NC_021166.1    | Ca_kabuli_chr07 | 45164254                | GG                              | CC              | 1946902345               |
| SNP_P4_103845_45169409 | NC_021166.1    | Ca_kabuli_chr07 | 45169409                | GG                              | AA              | 1946902347               |
| SNP_P4_103846_45169595 | NC_021166.1    | Ca_kabuli_chr07 | 45169595                | TT                              | AA              | 1946902349               |
| SNP_P4_103847_45169598 | NC_021166.1    | Ca_kabuli_chr07 | 45169598                | AA                              | GG              | 1946902351               |
| SNP_P4_103849_45169882 | NC_021166.1    | Ca_kabuli_chr07 | 45169882                | CC                              | TT              | 1946902353               |
| SNP_P4_103850_45169907 | NC_021166.1    | Ca_kabuli_chr07 | 45169907                | GG                              | AA              | 1946902355               |
| SNP_P4_103851_45170508 | NC_021166.1    | Ca_kabuli_chr07 | 45170508                | CC                              | AA              | 1946902357               |
| SNP_P4_103853_45171009 | NC_021166.1    | Ca_kabuli_chr07 | 45171009                | CC                              | TT              | 1946902359               |
| SNP_P4_103854_45178096 | NC_021166.1    | Ca_kabuli_chr07 | 45178096                | TT                              | AA              | 1946902361               |
| SNP_P4_103855_45178510 | NC_021166.1    | Ca_kabuli_chr07 | 45178510                | TT                              | CC              | 1946902363               |
| SNP_P4_103856_45178963 | NC_021166.1    | Ca_kabuli_chr07 | 45178963                | GG                              | AA              | 1946902365               |
| SNP_P4_103857_45179010 | NC_021166.1    | Ca_kabuli_chr07 | 45179010                | TT                              | AA              | 1946902367               |
| SNP_P4_103858_45179049 | NC_021166.1    | Ca_kabuli_chr07 | 45179049                | CC                              | AA              | 1946902369               |
| SNP_P4_103859_45179224 | NC_021166.1    | Ca_kabuli_chr07 | 45179224                | AA                              | GG              | 1946902371               |
| SNP_P4_103860_45179264 | NC_021166.1    | Ca_kabuli_chr07 | 45179264                | GG                              | AA              | 1946902373               |
| SNP_P4_103861_45179306 | NC_021166.1    | Ca_kabuli_chr07 | 45179306                | CC                              | TT              | 1946902375               |
| SNP_P4_103862_45179427 | NC_021166.1    | Ca_kabuli_chr07 | 45179427                | AA                              | TT              | 1946902378               |
| SNP_P4_103863_45179441 | NC_021166.1    | Ca_kabuli_chr07 | 45179441                | TT                              | CC              | 1946902380               |
| SNP_P4_103864_45179494 | NC_021166.1    | Ca_kabuli_chr07 | 45179494                | TT                              | GG              | 1946902382               |
| SNP_P4_103865_45179697 | NC_021166.1    | Ca_kabuli_chr07 | 45179697                | CC                              | TT              | 1946902384               |
| SNP_P4_103866_45182943 | NC_021166.1    | Ca_kabuli_chr07 | 45182943                | TT                              | CC              | 1946902386               |
| SNP_P4_103869_45219826 | NC_021166.1    | Ca_kabuli_chr07 | 45219826                | GG                              | AA              | 1946902388               |
| SNP_P4_103870_45229246 | NC_021166.1    | Ca_kabuli_chr07 | 45229246                | CC                              | TT              | 1946902390               |
| SNP_P4_103871_45235288 | NC_021166.1    | Ca_kabuli_chr07 | 45235288                | CC                              | TT              | 1946902392               |
| SNP_P4_103873_45239191 | NC_021166.1    | Ca_kabuli_chr07 | 45239191                | TT                              | AA              | 1946902394               |
| SNP_P4_103874_45239383 | NC_021166.1    | Ca_kabuli_chr07 | 45239383                | CC                              | TT              | 1946902396               |
| SNP_P4_103876_45241502 | NC_021166.1    | Ca_kabuli_chr07 | 45241502                | TT                              | AA              | 1946902398               |
| SNP_P4_103877_45241747 | NC_021166.1    | Ca_kabuli_chr07 | 45241747                | CC                              | AA              | 1946902400               |
| SNP_P4_103879_45248837 | NC_021166.1    | Ca_kabuli_chr07 | 45248837                | AA                              | GG              | 1946902402               |
| SNP_P4_103881_45251588 | NC_021166.1    | Ca_kabuli_chr07 | 45251588                | AA                              | GG              | 1946902404               |
| SNP_P4_103883_45290593 | NC_021166.1    | Ca_kabuli_chr07 | 45290593                | CC                              | TT              | 1946902406               |
| SNP_P4_103884_45294029 | NC_021166.1    | Ca_kabuli_chr07 | 45294029                | CC                              | TT              | 1946902408               |
| SNP_P4_103885_45364494 | NC_021166.1    | Ca_kabuli_chr07 | 45364494                | GG                              | AA              | 1946902410               |
| SNP_P4_103886_45378257 | NC_021166.1    | Ca_kabuli_chr07 | 45378257                | TT                              | GG              | 1946902412               |
| SNP_P4_103887_45378377 | NC_021166.1    | Ca_kabuli_chr07 | 45378377                | CC                              | TT              | 1946902414               |
| SNP_P4_103888_45378779 | NC_021166.1    | Ca_kabuli_chr07 | 45378779                | AA                              | CC              | 1946902416               |

| SNPs IDs               | Chromosome IDs | Chromosomes     | Physical positions (bp) | CDC Frontier (Reference genome) | (ILWC46 & LPNB) | NCBI SNPdb Accession IDs |
|------------------------|----------------|-----------------|-------------------------|---------------------------------|-----------------|--------------------------|
| SNP_P4_103889_45380022 | NC_021166.1    | Ca_kabuli_chr07 | 45380022                | CC                              | GG              | 1946902418               |
| SNP_P4_103890_45380024 | NC_021166.1    | Ca_kabuli_chr07 | 45380024                | TT                              | AA              | 1946902420               |
| SNP_P4_103891_45380025 | NC_021166.1    | Ca_kabuli_chr07 | 45380025                | CC                              | AA              | 1946902422               |
| SNP_P4_103892_45380026 | NC_021166.1    | Ca_kabuli_chr07 | 45380026                | AA                              | GG              | 1946902424               |
| SNP_P4_103893_45380030 | NC_021166.1    | Ca_kabuli_chr07 | 45380030                | AA                              | TT              | 1946902426               |
| SNP_P4_103894_45383582 | NC_021166.1    | Ca_kabuli_chr07 | 45383582                | TT                              | AA              | 1946902428               |
| SNP_P4_103895_45385941 | NC_021166.1    | Ca_kabuli_chr07 | 45385941                | GG                              | CC              | 1946902430               |
| SNP_P4_103896_45385951 | NC_021166.1    | Ca_kabuli_chr07 | 45385951                | AA                              | CC              | 1946902432               |
| SNP_P4_103897_45386048 | NC_021166.1    | Ca_kabuli_chr07 | 45386048                | GG                              | TT              | 1946902434               |
| SNP_P4_103898_45386065 | NC_021166.1    | Ca_kabuli_chr07 | 45386065                | TT                              | CC              | 1946902436               |
| SNP_P4_103899_45386402 | NC_021166.1    | Ca_kabuli_chr07 | 45386402                | GG                              | AA              | 1946902438               |
| SNP_P4_103900_45386429 | NC_021166.1    | Ca_kabuli_chr07 | 45386429                | CC                              | TT              | 1946902440               |
| SNP_P4_103901_45388841 | NC_021166.1    | Ca_kabuli_chr07 | 45388841                | CC                              | TT              | 1946902442               |
| SNP_P4_103902_45389477 | NC_021166.1    | Ca_kabuli_chr07 | 45389477                | GG                              | AA              | 1946902444               |
| SNP_P4_103903_45391404 | NC_021166.1    | Ca_kabuli_chr07 | 45391404                | TT                              | CC              | 1946902446               |
| SNP_P4_103904_45391425 | NC_021166.1    | Ca_kabuli_chr07 | 45391425                | CC                              | TT              | 1946902448               |
| SNP_P4_103905_45391634 | NC_021166.1    | Ca_kabuli_chr07 | 45391634                | AA                              | GG              | 1946902450               |
| SNP_P4_103906_45391638 | NC_021166.1    | Ca_kabuli_chr07 | 45391638                | AA                              | GG              | 1946902452               |
| SNP_P4_103907_45391842 | NC_021166.1    | Ca_kabuli_chr07 | 45391842                | TT                              | CC              | 1946902454               |
| SNP_P4_103908_45392019 | NC_021166.1    | Ca_kabuli_chr07 | 45392019                | CC                              | TT              | 1946902456               |
| SNP_P4_103909_45392055 | NC_021166.1    | Ca_kabuli_chr07 | 45392055                | AA                              | TT              | 1946902458               |
| SNP_P4_103910_45392058 | NC_021166.1    | Ca_kabuli_chr07 | 45392058                | GG                              | AA              | 1946902460               |
| SNP_P4_103911_45392178 | NC_021166.1    | Ca_kabuli_chr07 | 45392178                | AA                              | TT              | 1946902462               |
| SNP_P4_103912_45392187 | NC_021166.1    | Ca_kabuli_chr07 | 45392187                | AA                              | GG              | 1946902464               |
| SNP_P4_103913_45392192 | NC_021166.1    | Ca_kabuli_chr07 | 45392192                | GG                              | AA              | 1946902466               |
| SNP_P4_103916_45439849 | NC_021166.1    | Ca_kabuli_chr07 | 45439849                | AA                              | GG              | 1946902468               |
| SNP_P4_103917_45439962 | NC_021166.1    | Ca_kabuli_chr07 | 45439962                | CC                              | TT              | 1946902470               |
| SNP_P4_103918_45439995 | NC_021166.1    | Ca_kabuli_chr07 | 45439995                | GG                              | AA              | 1946902472               |
| SNP_P4_103919_45440005 | NC_021166.1    | Ca_kabuli_chr07 | 45440005                | AA                              | CC              | 1946902474               |
| SNP_P4_103920_45440043 | NC_021166.1    | Ca_kabuli_chr07 | 45440043                | GG                              | TT              | 1946902476               |
| SNP_P4_103921_45440046 | NC_021166.1    | Ca_kabuli_chr07 | 45440046                | AA                              | GG              | 1946902477               |
| SNP_P4_103922_45446457 | NC_021166.1    | Ca_kabuli_chr07 | 45446457                | GG                              | AA              | 1946902478               |
| SNP_P4_103923_45446458 | NC_021166.1    | Ca_kabuli_chr07 | 45446458                | AA                              | GG              | 1946902479               |
| SNP_P4_103924_45447100 | NC_021166.1    | Ca_kabuli_chr07 | 45447100                | AA                              | GG              | 1946902480               |
| SNP_P4_103926_45481593 | NC_021166.1    | Ca_kabuli_chr07 | 45481593                | CC                              | AA              | 1946902481               |
| SNP_P4_103927_45493521 | NC_021166.1    | Ca_kabuli_chr07 | 45493521                | TT                              | CC              | 1946902482               |
| SNP_P4_103928_45498678 | NC_021166.1    | Ca_kabuli_chr07 | 45498678                | TT                              | GG              | 1946902483               |
| SNP_P4_103929_45520481 | NC_021166.1    | Ca_kabuli_chr07 | 45520481                | CC                              | AA              | 1946902484               |
| SNP_P4_103930_45530804 | NC_021166.1    | Ca_kabuli_chr07 | 45530804                | GG                              | AA              | 1946902485               |
| SNP_P4_103931_45530857 | NC_021166.1    | Ca_kabuli_chr07 | 45530857                | CC                              | AA              | 1946902486               |
| SNP_P4_103932_45535365 | NC_021166.1    | Ca_kabuli_chr07 | 45535365                | CC                              | TT              | 1946902487               |
| SNP_P4_103933_45536731 | NC_021166.1    | Ca_kabuli_chr07 | 45536731                | AA                              | GG              | 1946902488               |

| SNPs IDs               | Chromosome IDs | Chromosomes     | Physical positions (bp) | CDC Frontier (Reference genome) | (ILWC46 & LPNB) | NCBI SNPdb Accession IDs |
|------------------------|----------------|-----------------|-------------------------|---------------------------------|-----------------|--------------------------|
| SNP_P4_103934_45539243 | NC_021166.1    | Ca_kabuli_chr07 | 45539243                | AA                              | CC              | 1946902489               |
| SNP_P4_103935_45539531 | NC_021166.1    | Ca_kabuli_chr07 | 45539531                | AA                              | GG              | 1946902490               |
| SNP_P4_103936_45539549 | NC_021166.1    | Ca_kabuli_chr07 | 45539549                | AA                              | CC              | 1946902491               |
| SNP_P4_103937_45539870 | NC_021166.1    | Ca_kabuli_chr07 | 45539870                | CC                              | TT              | 1946902492               |
| SNP_P4_103938_45540436 | NC_021166.1    | Ca_kabuli_chr07 | 45540436                | GG                              | CC              | 1946902494               |
| SNP_P4_103939_45553195 | NC_021166.1    | Ca_kabuli_chr07 | 45553195                | CC                              | TT              | 1946902496               |
| SNP_P4_103940_45553967 | NC_021166.1    | Ca_kabuli_chr07 | 45553967                | GG                              | AA              | 1946902498               |
| SNP_P4_103941_45597998 | NC_021166.1    | Ca_kabuli_chr07 | 45597998                | AA                              | CC              | 1946902500               |
| SNP_P4_103942_45613740 | NC_021166.1    | Ca_kabuli_chr07 | 45613740                | AA                              | GG              | 1946902502               |
| SNP_P4_103943_45621895 | NC_021166.1    | Ca_kabuli_chr07 | 45621895                | AA                              | TT              | 1946902504               |
| SNP_P4_103944_45633933 | NC_021166.1    | Ca_kabuli_chr07 | 45633933                | TT                              | CC              | 1946902506               |
| SNP_P4_103945_45634261 | NC_021166.1    | Ca_kabuli_chr07 | 45634261                | AA                              | GG              | 1946902508               |
| SNP_P4_103946_45634331 | NC_021166.1    | Ca_kabuli_chr07 | 45634331                | CC                              | TT              | 1946902510               |
| SNP_P4_103947_45634332 | NC_021166.1    | Ca_kabuli_chr07 | 45634332                | TT                              | CC              | 1946902512               |
| SNP_P4_103948_45634344 | NC_021166.1    | Ca_kabuli_chr07 | 45634344                | CC                              | TT              | 1946902514               |
| SNP_P4_103949_45634345 | NC_021166.1    | Ca_kabuli_chr07 | 45634345                | AA                              | GG              | 1946902516               |
| SNP_P4_103950_45634520 | NC_021166.1    | Ca_kabuli_chr07 | 45634520                | AA                              | CC              | 1946902518               |
| SNP_P4_103951_45634614 | NC_021166.1    | Ca_kabuli_chr07 | 45634614                | CC                              | AA              | 1946902520               |
| SNP_P4_103952_45634654 | NC_021166.1    | Ca_kabuli_chr07 | 45634654                | CC                              | TT              | 1946902522               |
| SNP_P4_103954_45709669 | NC_021166.1    | Ca_kabuli_chr07 | 45709669                | TT                              | CC              | 1946902524               |
| SNP_P4_103955_45716414 | NC_021166.1    | Ca_kabuli_chr07 | 45716414                | TT                              | CC              | 1946902526               |
| SNP_P4_103956_45716417 | NC_021166.1    | Ca_kabuli_chr07 | 45716417                | AA                              | TT              | 1946902528               |
| SNP_P4_103957_45716418 | NC_021166.1    | Ca_kabuli_chr07 | 45716418                | TT                              | CC              | 1946902530               |
| SNP_P4_103959_45735980 | NC_021166.1    | Ca_kabuli_chr07 | 45735980                | CC                              | TT              | 1946902532               |
| SNP_P4_103960_45738166 | NC_021166.1    | Ca_kabuli_chr07 | 45738166                | AA                              | CC              | 1946902534               |
| SNP_P4_103963_45792639 | NC_021166.1    | Ca_kabuli_chr07 | 45792639                | CC                              | AA              | 1946902536               |
| SNP_P4_103964_45825477 | NC_021166.1    | Ca_kabuli_chr07 | 45825477                | TT                              | CC              | 1946902538               |
| SNP_P4_103965_45832003 | NC_021166.1    | Ca_kabuli_chr07 | 45832003                | GG                              | AA              | 1946902540               |
| SNP_P4_103966_45855053 | NC_021166.1    | Ca_kabuli_chr07 | 45855053                | AA                              | GG              | 1946902542               |
| SNP_P4_103967_45857022 | NC_021166.1    | Ca_kabuli_chr07 | 45857022                | TT                              | AA              | 1946902544               |
| SNP_P4_103968_45857065 | NC_021166.1    | Ca_kabuli_chr07 | 45857065                | GG                              | TT              | 1946902546               |
| SNP_P4_103969_45857083 | NC_021166.1    | Ca_kabuli_chr07 | 45857083                | TT                              | CC              | 1946902548               |
| SNP_P4_103970_45857100 | NC_021166.1    | Ca_kabuli_chr07 | 45857100                | CC                              | TT              | 1946902550               |
| SNP_P4_103971_45857104 | NC_021166.1    | Ca_kabuli_chr07 | 45857104                | GG                              | AA              | 1946902552               |
| SNP_P4_103972_45925356 | NC_021166.1    | Ca_kabuli_chr07 | 45925356                | AA                              | CC              | 1946902554               |
| SNP_P4_103973_45925360 | NC_021166.1    | Ca_kabuli_chr07 | 45925360                | TT                              | CC              | 1946902556               |
| SNP_P4_103974_45925453 | NC_021166.1    | Ca_kabuli_chr07 | 45925453                | AA                              | CC              | 1946902558               |
| SNP_P4_103975_45925471 | NC_021166.1    | Ca_kabuli_chr07 | 45925471                | CC                              | TT              | 1946902560               |
| SNP_P4_103976_45925489 | NC_021166.1    | Ca_kabuli_chr07 | 45925489                | TT                              | GG              | 1946902562               |
| SNP_P4_103977_45925490 | NC_021166.1    | Ca_kabuli_chr07 | 45925490                | TT                              | GG              | 1946902564               |
| SNP_P4_103978_45925516 | NC_021166.1    | Ca_kabuli_chr07 | 45925516                | TT                              | CC              | 1946902566               |
| SNP_P4_103979_45925519 | NC_021166.1    | Ca_kabuli_chr07 | 45925519                | TT                              | CC              | 1946902568               |

| SNPs IDs               | Chromosome IDs | Chromosomes     | Physical positions (bp) | CDC Frontier (Reference genome) | (ILWC46 & LPNB) | NCBI SNPdb Accession IDs |
|------------------------|----------------|-----------------|-------------------------|---------------------------------|-----------------|--------------------------|
| SNP_P4_103980_45925524 | NC_021166.1    | Ca_kabuli_chr07 | 45925524                | TT                              | CC              | 1946902570               |
| SNP_P4_103981_45925533 | NC_021166.1    | Ca_kabuli_chr07 | 45925533                | AA                              | CC              | 1946902572               |
| SNP_P4_103982_45925534 | NC_021166.1    | Ca_kabuli_chr07 | 45925534                | TT                              | CC              | 1946902574               |
| SNP_P4_103983_45925564 | NC_021166.1    | Ca_kabuli_chr07 | 45925564                | CC                              | TT              | 1946902576               |
| SNP_P4_103984_45925573 | NC_021166.1    | Ca_kabuli_chr07 | 45925573                | GG                              | AA              | 1946902578               |
| SNP_P4_103985_45925588 | NC_021166.1    | Ca_kabuli_chr07 | 45925588                | TT                              | AA              | 1946902580               |
| SNP_P4_103986_45925612 | NC_021166.1    | Ca_kabuli_chr07 | 45925612                | TT                              | CC              | 1946902582               |
| SNP_P4_103987_45925631 | NC_021166.1    | Ca_kabuli_chr07 | 45925631                | GG                              | CC              | 1946902584               |
| SNP_P4_103988_45925639 | NC_021166.1    | Ca_kabuli_chr07 | 45925639                | AA                              | GG              | 1946902586               |
| SNP_P4_103989_45925642 | NC_021166.1    | Ca_kabuli_chr07 | 45925642                | TT                              | CC              | 1946902588               |
| SNP_P4_103990_45925809 | NC_021166.1    | Ca_kabuli_chr07 | 45925809                | CC                              | TT              | 1946902590               |
| SNP_P4_103991_45925813 | NC_021166.1    | Ca_kabuli_chr07 | 45925813                | AA                              | TT              | 1946902592               |
| SNP_P4_103992_45925866 | NC_021166.1    | Ca_kabuli_chr07 | 45925866                | GG                              | AA              | 1946902594               |
| SNP_P4_103993_45925899 | NC_021166.1    | Ca_kabuli_chr07 | 45925899                | AA                              | GG              | 1946902596               |
| SNP_P4_103994_45927621 | NC_021166.1    | Ca_kabuli_chr07 | 45927621                | CC                              | AA              | 1946902598               |
| SNP_P4_103995_45927639 | NC_021166.1    | Ca_kabuli_chr07 | 45927639                | CC                              | TT              | 1946902600               |
| SNP_P4_103996_45927646 | NC_021166.1    | Ca_kabuli_chr07 | 45927646                | TT                              | CC              | 1946902602               |
| SNP_P4_103997_45927848 | NC_021166.1    | Ca_kabuli_chr07 | 45927848                | TT                              | CC              | 1946902604               |
| SNP_P4_103998_45927882 | NC_021166.1    | Ca_kabuli_chr07 | 45927882                | GG                              | AA              | 1946902606               |
| SNP_P4_103999_45927884 | NC_021166.1    | Ca_kabuli_chr07 | 45927884                | GG                              | CC              | 1946902608               |
| SNP_P4_104000_45927902 | NC_021166.1    | Ca_kabuli_chr07 | 45927902                | GG                              | AA              | 1946902610               |
| SNP_P4_104001_45927942 | NC_021166.1    | Ca_kabuli_chr07 | 45927942                | CC                              | TT              | 1946902612               |
| SNP_P4_104002_45927975 | NC_021166.1    | Ca_kabuli_chr07 | 45927975                | CC                              | TT              | 1946902614               |
| SNP_P4_104003_45931294 | NC_021166.1    | Ca_kabuli_chr07 | 45931294                | GG                              | CC              | 1946902616               |
| SNP_P4_104004_45931432 | NC_021166.1    | Ca_kabuli_chr07 | 45931432                | TT                              | CC              | 1946902618               |
| SNP_P4_104006_45973010 | NC_021166.1    | Ca_kabuli_chr07 | 45973010                | CC                              | TT              | 1946902620               |
| SNP_P4_104007_45991233 | NC_021166.1    | Ca_kabuli_chr07 | 45991233                | GG                              | TT              | 1946902622               |
| SNP_P4_104008_45991472 | NC_021166.1    | Ca_kabuli_chr07 | 45991472                | CC                              | TT              | 1946902624               |
| SNP_P4_104009_45991731 | NC_021166.1    | Ca_kabuli_chr07 | 45991731                | GG                              | AA              | 1946902626               |
| SNP_P4_104010_45993614 | NC_021166.1    | Ca_kabuli_chr07 | 45993614                | CC                              | TT              | 1946902628               |
| SNP_P4_104011_45993627 | NC_021166.1    | Ca_kabuli_chr07 | 45993627                | CC                              | GG              | 1946902630               |
| SNP_P4_104012_45993641 | NC_021166.1    | Ca_kabuli_chr07 | 45993641                | TT                              | AA              | 1946902632               |
| SNP_P4_104013_45993820 | NC_021166.1    | Ca_kabuli_chr07 | 45993820                | CC                              | GG              | 1946902634               |
| SNP_P4_104014_45993847 | NC_021166.1    | Ca_kabuli_chr07 | 45993847                | GG                              | AA              | 1946902636               |
| SNP_P4_104015_46016564 | NC_021166.1    | Ca_kabuli_chr07 | 46016564                | CC                              | AA              | 1946902638               |
| SNP_P4_104016_46023840 | NC_021166.1    | Ca_kabuli_chr07 | 46023840                | CC                              | TT              | 1946902640               |
| SNP_P4_104018_46025244 | NC_021166.1    | Ca_kabuli_chr07 | 46025244                | AA                              | GG              | 1946902642               |
| SNP_P4_104019_46025245 | NC_021166.1    | Ca_kabuli_chr07 | 46025245                | AA                              | GG              | 1946902644               |
| SNP_P4_104020_46025779 | NC_021166.1    | Ca_kabuli_chr07 | 46025779                | GG                              | AA              | 1946902647               |
| SNP_P4_104022_46087159 | NC_021166.1    | Ca_kabuli_chr07 | 46087159                | AA                              | GG              | 1946902649               |
| SNP_P4_104024_46121304 | NC_021166.1    | Ca_kabuli_chr07 | 46121304                | GG                              | TT              | 1946902651               |
| SNP_P4_104025_46121327 | NC_021166.1    | Ca_kabuli_chr07 | 46121327                | TT                              | CC              | 1946902653               |

| SNPs IDs               | Chromosome IDs | Chromosomes     | Physical positions (bp) | CDC Frontier (Reference genome) | (ILWC46 & LPNB) | NCBI SNPdb Accession IDs |
|------------------------|----------------|-----------------|-------------------------|---------------------------------|-----------------|--------------------------|
| SNP_P4_104026_46123804 | NC_021166.1    | Ca_kabuli_chr07 | 46123804                | CC                              | TT              | 1946902655               |
| SNP_P4_104027_46123827 | NC_021166.1    | Ca_kabuli_chr07 | 46123827                | TT                              | AA              | 1946902657               |
| SNP_P4_104028_46123849 | NC_021166.1    | Ca_kabuli_chr07 | 46123849                | AA                              | CC              | 1946902659               |
| SNP_P4_104029_46123852 | NC_021166.1    | Ca_kabuli_chr07 | 46123852                | TT                              | CC              | 1946902661               |
| SNP_P4_104030_46123867 | NC_021166.1    | Ca_kabuli_chr07 | 46123867                | AA                              | GG              | 1946902663               |
| SNP_P4_104031_46123896 | NC_021166.1    | Ca_kabuli_chr07 | 46123896                | AA                              | GG              | 1946902666               |
| SNP_P4_104032_46123910 | NC_021166.1    | Ca_kabuli_chr07 | 46123910                | AA                              | GG              | 1946902668               |
| SNP_P4_104033_46123980 | NC_021166.1    | Ca_kabuli_chr07 | 46123980                | AA                              | GG              | 1946902670               |
| SNP_P4_104034_46123987 | NC_021166.1    | Ca_kabuli_chr07 | 46123987                | TT                              | CC              | 1946902672               |
| SNP_P4_104035_46123988 | NC_021166.1    | Ca_kabuli_chr07 | 46123988                | TT                              | CC              | 1946902674               |
| SNP_P4_104036_46124001 | NC_021166.1    | Ca_kabuli_chr07 | 46124001                | GG                              | CC              | 1946902676               |
| SNP_P4_104037_46124033 | NC_021166.1    | Ca_kabuli_chr07 | 46124033                | AA                              | CC              | 1946902678               |
| SNP_P4_104038_46124070 | NC_021166.1    | Ca_kabuli_chr07 | 46124070                | CC                              | TT              | 1946902680               |
| SNP_P4_104039_46124282 | NC_021166.1    | Ca_kabuli_chr07 | 46124282                | AA                              | GG              | 1946902683               |
| SNP_P4_104040_46124292 | NC_021166.1    | Ca_kabuli_chr07 | 46124292                | AA                              | CC              | 1946902685               |
| SNP_P4_104041_46126389 | NC_021166.1    | Ca_kabuli_chr07 | 46126389                | GG                              | CC              | 1946902687               |
| SNP_P4_104042_46126399 | NC_021166.1    | Ca_kabuli_chr07 | 46126399                | TT                              | CC              | 1946902689               |
| SNP_P4_104043_46127832 | NC_021166.1    | Ca_kabuli_chr07 | 46127832                | CC                              | TT              | 1946902691               |
| SNP_P4_104044_46127878 | NC_021166.1    | Ca_kabuli_chr07 | 46127878                | AA                              | GG              | 1946902693               |
| SNP_P4_104045_46127882 | NC_021166.1    | Ca_kabuli_chr07 | 46127882                | AA                              | GG              | 1946902695               |
| SNP_P4_104046_46127939 | NC_021166.1    | Ca_kabuli_chr07 | 46127939                | TT                              | GG              | 1946902697               |
| SNP_P4_104047_46127947 | NC_021166.1    | Ca_kabuli_chr07 | 46127947                | TT                              | CC              | 1946902699               |
| SNP_P4_104048_46127959 | NC_021166.1    | Ca_kabuli_chr07 | 46127959                | TT                              | GG              | 1946902701               |
| SNP_P4_104049_46127970 | NC_021166.1    | Ca_kabuli_chr07 | 46127970                | AA                              | TT              | 1946902702               |
| SNP_P4_104050_46128013 | NC_021166.1    | Ca_kabuli_chr07 | 46128013                | AA                              | GG              | 1946902704               |
| SNP_P4_104051_46128208 | NC_021166.1    | Ca_kabuli_chr07 | 46128208                | TT                              | CC              | 1946902706               |
| SNP_P4_104052_46132254 | NC_021166.1    | Ca_kabuli_chr07 | 46132254                | GG                              | AA              | 1946902708               |
| SNP_P4_104053_46132274 | NC_021166.1    | Ca_kabuli_chr07 | 46132274                | TT                              | GG              | 1946902710               |
| SNP_P4_104054_46132314 | NC_021166.1    | Ca_kabuli_chr07 | 46132314                | AA                              | TT              | 1946902712               |
| SNP_P4_104055_46132524 | NC_021166.1    | Ca_kabuli_chr07 | 46132524                | TT                              | CC              | 1946902714               |
| SNP_P4_104056_46132534 | NC_021166.1    | Ca_kabuli_chr07 | 46132534                | AA                              | CC              | 1946902716               |
| SNP_P4_104057_46132537 | NC_021166.1    | Ca_kabuli_chr07 | 46132537                | AA                              | GG              | 1946902718               |
| SNP_P4_104058_46132548 | NC_021166.1    | Ca_kabuli_chr07 | 46132548                | AA                              | CC              | 1946902720               |
| SNP_P4_104059_46132603 | NC_021166.1    | Ca_kabuli_chr07 | 46132603                | TT                              | AA              | 1946902722               |
| SNP_P4_104060_46132617 | NC_021166.1    | Ca_kabuli_chr07 | 46132617                | AA                              | GG              | 1946902724               |
| SNP_P4_104061_46132645 | NC_021166.1    | Ca_kabuli_chr07 | 46132645                | CC                              | TT              | 1946902726               |
| SNP_P4_104062_46132671 | NC_021166.1    | Ca_kabuli_chr07 | 46132671                | CC                              | TT              | 1946902728               |
| SNP_P4_104063_46178446 | NC_021166.1    | Ca_kabuli_chr07 | 46178446                | TT                              | GG              | 1946902730               |
| SNP_P4_104064_46178498 | NC_021166.1    | Ca_kabuli_chr07 | 46178498                | AA                              | GG              | 1946902732               |
| SNP_P4_104065_46178499 | NC_021166.1    | Ca_kabuli_chr07 | 46178499                | AA                              | GG              | 1946902734               |
| SNP_P4_104066_46178595 | NC_021166.1    | Ca_kabuli_chr07 | 46178595                | TT                              | CC              | 1946902736               |
| SNP_P4_104067_46178628 | NC_021166.1    | Ca_kabuli_chr07 | 46178628                | TT                              | CC              | 1946902738               |

| SNPs IDs               | Chromosome IDs | Chromosomes     | Physical positions (bp) | CDC Frontier (Reference genome) | (ILWC46 & LPNB) | NCBI SNPdb Accession IDs |
|------------------------|----------------|-----------------|-------------------------|---------------------------------|-----------------|--------------------------|
| SNP_P4_104068_46178658 | NC_021166.1    | Ca_kabuli_chr07 | 46178658                | CC                              | TT              | 1946902740               |
| SNP_P4_104069_46178863 | NC_021166.1    | Ca_kabuli_chr07 | 46178863                | CC                              | TT              | 1946902742               |
| SNP_P4_104070_46178917 | NC_021166.1    | Ca_kabuli_chr07 | 46178917                | CC                              | TT              | 1946902744               |
| SNP_P4_104071_46178924 | NC_021166.1    | Ca_kabuli_chr07 | 46178924                | CC                              | TT              | 1946902746               |
| SNP_P4_104072_46185493 | NC_021166.1    | Ca_kabuli_chr07 | 46185493                | CC                              | AA              | 1946902748               |
| SNP_P4_104073_46185499 | NC_021166.1    | Ca_kabuli_chr07 | 46185499                | CC                              | AA              | 1946902750               |
| SNP_P4_104074_46185500 | NC_021166.1    | Ca_kabuli_chr07 | 46185500                | AA                              | GG              | 1946902752               |
| SNP_P4_104075_46185508 | NC_021166.1    | Ca_kabuli_chr07 | 46185508                | TT                              | CC              | 1946902754               |
| SNP_P4_104076_46185626 | NC_021166.1    | Ca_kabuli_chr07 | 46185626                | GG                              | AA              | 1946902756               |
| SNP_P4_104077_46185671 | NC_021166.1    | Ca_kabuli_chr07 | 46185671                | TT                              | CC              | 1946902758               |
| SNP_P4_104078_46185674 | NC_021166.1    | Ca_kabuli_chr07 | 46185674                | GG                              | AA              | 1946902760               |
| SNP_P4_104079_46190449 | NC_021166.1    | Ca_kabuli_chr07 | 46190449                | GG                              | AA              | 1946902762               |
| SNP_P4_104080_46214458 | NC_021166.1    | Ca_kabuli_chr07 | 46214458                | AA                              | GG              | 1946902764               |
| SNP_P4_104081_46214701 | NC_021166.1    | Ca_kabuli_chr07 | 46214701                | GG                              | TT              | 1946902766               |
| SNP_P4_104082_46217006 | NC_021166.1    | Ca_kabuli_chr07 | 46217006                | CC                              | AA              | 1946902768               |
| SNP_P4_104083_46221230 | NC_021166.1    | Ca_kabuli_chr07 | 46221230                | GG                              | AA              | 1946902770               |
| SNP_P4_104084_46225906 | NC_021166.1    | Ca_kabuli_chr07 | 46225906                | GG                              | AA              | 1946902772               |
| SNP_P4_104085_46229920 | NC_021166.1    | Ca_kabuli_chr07 | 46229920                | GG                              | AA              | 1946902774               |
| SNP_P4_104086_46239737 | NC_021166.1    | Ca_kabuli_chr07 | 46239737                | AA                              | CC              | 1946902776               |
| SNP_P4_104087_46244237 | NC_021166.1    | Ca_kabuli_chr07 | 46244237                | CC                              | GG              | 1946902778               |
| SNP_P4_104088_46249135 | NC_021166.1    | Ca_kabuli_chr07 | 46249135                | CC                              | TT              | 1946902780               |
| SNP_P4_104089_46249733 | NC_021166.1    | Ca_kabuli_chr07 | 46249733                | GG                              | AA              | 1946902782               |
| SNP_P4_104090_46250235 | NC_021166.1    | Ca_kabuli_chr07 | 46250235                | AA                              | TT              | 1946902784               |
| SNP_P4_104091_46250320 | NC_021166.1    | Ca_kabuli_chr07 | 46250320                | AA                              | GG              | 1946902786               |
| SNP_P4_104092_46250347 | NC_021166.1    | Ca_kabuli_chr07 | 46250347                | TT                              | CC              | 1946902788               |
| SNP_P4_104093_46250432 | NC_021166.1    | Ca_kabuli_chr07 | 46250432                | CC                              | TT              | 1946902790               |
| SNP_P4_104094_46250435 | NC_021166.1    | Ca_kabuli_chr07 | 46250435                | AA                              | GG              | 1946902792               |
| SNP_P4_104095_46250577 | NC_021166.1    | Ca_kabuli_chr07 | 46250577                | CC                              | TT              | 1946902794               |
| SNP_P4_104096_46250665 | NC_021166.1    | Ca_kabuli_chr07 | 46250665                | CC                              | TT              | 1946902796               |
| SNP_P4_104097_46250696 | NC_021166.1    | Ca_kabuli_chr07 | 46250696                | AA                              | GG              | 1946902798               |
| SNP_P4_104098_46250749 | NC_021166.1    | Ca_kabuli_chr07 | 46250749                | CC                              | TT              | 1946902800               |
| SNP_P4_104099_46250754 | NC_021166.1    | Ca_kabuli_chr07 | 46250754                | AA                              | TT              | 1946902802               |
| SNP_P4_104101_46274774 | NC_021166.1    | Ca_kabuli_chr07 | 46274774                | GG                              | CC              | 1946902804               |
| SNP_P4_104102_46279498 | NC_021166.1    | Ca_kabuli_chr07 | 46279498                | TT                              | GG              | 1946902806               |
| SNP_P4_104103_46279507 | NC_021166.1    | Ca_kabuli_chr07 | 46279507                | CC                              | TT              | 1946902808               |
| SNP_P4_104106_46331501 | NC_021166.1    | Ca_kabuli_chr07 | 46331501                | GG                              | AA              | 1946902811               |
| SNP_P4_104107_46331645 | NC_021166.1    | Ca_kabuli_chr07 | 46331645                | TT                              | CC              | 1946902813               |
| SNP_P4_104108_46331672 | NC_021166.1    | Ca_kabuli_chr07 | 46331672                | TT                              | CC              | 1946902815               |
| SNP_P4_104109_46331708 | NC_021166.1    | Ca_kabuli_chr07 | 46331708                | GG                              | AA              | 1946902817               |
| SNP_P4_104110_46331709 | NC_021166.1    | Ca_kabuli_chr07 | 46331709                | CC                              | TT              | 1946902819               |
| SNP_P4_104111_46331729 | NC_021166.1    | Ca_kabuli_chr07 | 46331729                | TT                              | CC              | 1946902821               |
| SNP_P4_104112_46331730 | NC_021166.1    | Ca_kabuli_chr07 | 46331730                | GG                              | AA              | 1946902823               |

| SNPs IDs               | Chromosome IDs | Chromosomes     | Physical positions (bp) | CDC Frontier (Reference genome) | (ILWC46 & LPNB) | NCBI SNPdb Accession IDs |
|------------------------|----------------|-----------------|-------------------------|---------------------------------|-----------------|--------------------------|
| SNP_P4_104114_46331873 | NC_021166.1    | Ca_kabuli_chr07 | 46331873                | TT                              | AA              | 1946902825               |
| SNP_P4_104115_46331883 | NC_021166.1    | Ca_kabuli_chr07 | 46331883                | TT                              | CC              | 1946902827               |
| SNP_P4_104116_46332210 | NC_021166.1    | Ca_kabuli_chr07 | 46332210                | AA                              | TT              | 1946902829               |
| SNP_P4_104117_46332234 | NC_021166.1    | Ca_kabuli_chr07 | 46332234                | TT                              | CC              | 1946902831               |
| SNP_P4_104118_46332271 | NC_021166.1    | Ca_kabuli_chr07 | 46332271                | GG                              | AA              | 1946902833               |
| SNP_P4_104120_46332343 | NC_021166.1    | Ca_kabuli_chr07 | 46332343                | TT                              | AA              | 1946902835               |
| SNP_P4_104121_46332375 | NC_021166.1    | Ca_kabuli_chr07 | 46332375                | TT                              | AA              | 1946902837               |
| SNP_P4_104122_46332401 | NC_021166.1    | Ca_kabuli_chr07 | 46332401                | TT                              | AA              | 1946902839               |
| SNP_P4_104123_46332442 | NC_021166.1    | Ca_kabuli_chr07 | 46332442                | CC                              | TT              | 1946902841               |
| SNP_P4_104124_46332469 | NC_021166.1    | Ca_kabuli_chr07 | 46332469                | CC                              | TT              | 1946902843               |
| SNP_P4_104125_46332470 | NC_021166.1    | Ca_kabuli_chr07 | 46332470                | AA                              | TT              | 1946902845               |
| SNP_P4_104126_46332473 | NC_021166.1    | Ca_kabuli_chr07 | 46332473                | TT                              | AA              | 1946902847               |
| SNP_P4_104127_46338715 | NC_021166.1    | Ca_kabuli_chr07 | 46338715                | GG                              | AA              | 1946902849               |
| SNP_P4_104128_46344539 | NC_021166.1    | Ca_kabuli_chr07 | 46344539                | GG                              | AA              | 1946902851               |
| SNP_P4_104129_46344658 | NC_021166.1    | Ca_kabuli_chr07 | 46344658                | AA                              | CC              | 1946902853               |
| SNP_P4_104131_46361211 | NC_021166.1    | Ca_kabuli_chr07 | 46361211                | AA                              | GG              | 1946902855               |
| SNP_P4_104132_46362030 | NC_021166.1    | Ca_kabuli_chr07 | 46362030                | AA                              | GG              | 1946902857               |
| SNP_P4_104133_46363482 | NC_021166.1    | Ca_kabuli_chr07 | 46363482                | CC                              | TT              | 1946902859               |
| SNP_P4_104134_46366656 | NC_021166.1    | Ca_kabuli_chr07 | 46366656                | CC                              | TT              | 1946902861               |
| SNP_P4_104135_46366670 | NC_021166.1    | Ca_kabuli_chr07 | 46366670                | CC                              | AA              | 1946902863               |
| SNP_P4_104136_46366677 | NC_021166.1    | Ca_kabuli_chr07 | 46366677                | TT                              | AA              | 1946902864               |
| SNP_P4_104137_46416503 | NC_021166.1    | Ca_kabuli_chr07 | 46416503                | TT                              | CC              | 1946902866               |
| SNP_P4_104138_46416534 | NC_021166.1    | Ca_kabuli_chr07 | 46416534                | GG                              | AA              | 1946902868               |
| SNP_P4_104139_46416934 | NC_021166.1    | Ca_kabuli_chr07 | 46416934                | AA                              | GG              | 1946902870               |
| SNP_P4_104140_46417926 | NC_021166.1    | Ca_kabuli_chr07 | 46417926                | TT                              | CC              | 1946902872               |
| SNP_P4_104141_46418098 | NC_021166.1    | Ca_kabuli_chr07 | 46418098                | AA                              | GG              | 1946902874               |
| SNP_P4_104142_46418137 | NC_021166.1    | Ca_kabuli_chr07 | 46418137                | AA                              | GG              | 1946902876               |
| SNP_P4_104143_46418287 | NC_021166.1    | Ca_kabuli_chr07 | 46418287                | AA                              | CC              | 1946902878               |
| SNP_P4_104144_46419987 | NC_021166.1    | Ca_kabuli_chr07 | 46419987                | GG                              | TT              | 1946902880               |
| SNP_P4_104145_46424187 | NC_021166.1    | Ca_kabuli_chr07 | 46424187                | AA                              | CC              | 1946902882               |
| SNP_P4_104146_46432080 | NC_021166.1    | Ca_kabuli_chr07 | 46432080                | GG                              | AA              | 1946902884               |
| SNP_P4_104147_46439003 | NC_021166.1    | Ca_kabuli_chr07 | 46439003                | TT                              | CC              | 1946902886               |
| SNP_P4_104148_46444856 | NC_021166.1    | Ca_kabuli_chr07 | 46444856                | AA                              | TT              | 1946902888               |
| SNP_P4_104149_46444857 | NC_021166.1    | Ca_kabuli_chr07 | 46444857                | TT                              | AA              | 1946902890               |
| SNP_P4_104150_46450466 | NC_021166.1    | Ca_kabuli_chr07 | 46450466                | GG                              | AA              | 1946902892               |
| SNP_P4_104152_46453371 | NC_021166.1    | Ca_kabuli_chr07 | 46453371                | AA                              | CC              | 1946902894               |
| SNP_P4_104153_46453790 | NC_021166.1    | Ca_kabuli_chr07 | 46453790                | GG                              | AA              | 1946902896               |
| SNP_P4_104154_46478835 | NC_021166.1    | Ca_kabuli_chr07 | 46478835                | GG                              | TT              | 1946902898               |
| SNP_P4_104155_46478886 | NC_021166.1    | Ca_kabuli_chr07 | 46478886                | GG                              | AA              | 1946902900               |
| SNP_P4_104156_46478932 | NC_021166.1    | Ca_kabuli_chr07 | 46478932                | CC                              | AA              | 1946902902               |
| SNP_P4_104157_46479493 | NC_021166.1    | Ca_kabuli_chr07 | 46479493                | CC                              | TT              | 1946902904               |
| SNP_P4_104158_46488380 | NC_021166.1    | Ca_kabuli_chr07 | 46488380                | GG                              | AA              | 1946902906               |



| SNPs IDs               | Chromosome IDs | Chromosomes     | Physical positions (bp) | CDC Frontier (Reference genome) | (ILWC46 & LPNB) | NCBI SNPdb Accession IDs |
|------------------------|----------------|-----------------|-------------------------|---------------------------------|-----------------|--------------------------|
| SNP_P4_104159_46500909 | NC_021166.1    | Ca_kabuli_chr07 | 46500909                | GG                              | AA              | 1946902909               |
| SNP_P4_104160_46505455 | NC_021166.1    | Ca_kabuli_chr07 | 46505455                | AA                              | CC              | 1946902911               |
| SNP_P4_104161_46505499 | NC_021166.1    | Ca_kabuli_chr07 | 46505499                | GG                              | TT              | 1946902913               |
| SNP_P4_104162_46505538 | NC_021166.1    | Ca_kabuli_chr07 | 46505538                | CC                              | AA              | 1946902915               |
| SNP_P4_104163_46505609 | NC_021166.1    | Ca_kabuli_chr07 | 46505609                | TT                              | AA              | 1946902917               |
| SNP_P4_104165_46537136 | NC_021166.1    | Ca_kabuli_chr07 | 46537136                | CC                              | TT              | 1946902919               |
| SNP_P4_104166_46537138 | NC_021166.1    | Ca_kabuli_chr07 | 46537138                | CC                              | TT              | 1946902921               |
| SNP_P4_104167_46545255 | NC_021166.1    | Ca_kabuli_chr07 | 46545255                | GG                              | AA              | 1946902923               |
| SNP_P4_104168_46549370 | NC_021166.1    | Ca_kabuli_chr07 | 46549370                | AA                              | TT              | 1946902924               |
| SNP_P4_104169_46551442 | NC_021166.1    | Ca_kabuli_chr07 | 46551442                | GG                              | AA              | 1946902926               |
| SNP_P4_104170_46551454 | NC_021166.1    | Ca_kabuli_chr07 | 46551454                | TT                              | CC              | 1946902928               |
| SNP_P4_104171_46551460 | NC_021166.1    | Ca_kabuli_chr07 | 46551460                | TT                              | CC              | 1946902930               |
| SNP_P4_104174_46569958 | NC_021166.1    | Ca_kabuli_chr07 | 46569958                | CC                              | AA              | 1946902932               |
| SNP_P4_104175_46569969 | NC_021166.1    | Ca_kabuli_chr07 | 46569969                | AA                              | CC              | 1946902934               |
| SNP_P4_104176_46570006 | NC_021166.1    | Ca_kabuli_chr07 | 46570006                | AA                              | GG              | 1946902936               |
| SNP_P4_104177_46570251 | NC_021166.1    | Ca_kabuli_chr07 | 46570251                | CC                              | TT              | 1946902939               |
| SNP_P4_104178_46570390 | NC_021166.1    | Ca_kabuli_chr07 | 46570390                | CC                              | TT              | 1946902940               |
| SNP_P4_104179_46570432 | NC_021166.1    | Ca_kabuli_chr07 | 46570432                | CC                              | TT              | 1946902942               |
| SNP_P4_104181_46581178 | NC_021166.1    | Ca_kabuli_chr07 | 46581178                | AA                              | TT              | 1946902945               |
| SNP_P4_104182_46590000 | NC_021166.1    | Ca_kabuli_chr07 | 46590000                | TT                              | CC              | 1946902946               |
| SNP_P4_104183_46594641 | NC_021166.1    | Ca_kabuli_chr07 | 46594641                | CC                              | TT              | 1946902948               |
| SNP_P4_104184_46606903 | NC_021166.1    | Ca_kabuli_chr07 | 46606903                | TT                              | CC              | 1946902951               |
| SNP_P4_104185_46607310 | NC_021166.1    | Ca_kabuli_chr07 | 46607310                | TT                              | GG              | 1946902953               |
| SNP_P4_104186_46608527 | NC_021166.1    | Ca_kabuli_chr07 | 46608527                | GG                              | TT              | 1946902955               |
| SNP_P4_104188_46626654 | NC_021166.1    | Ca_kabuli_chr07 | 46626654                | GG                              | AA              | 1946902957               |
| SNP_P4_104189_46631911 | NC_021166.1    | Ca_kabuli_chr07 | 46631911                | GG                              | AA              | 1946902959               |
| SNP_P4_104191_46657496 | NC_021166.1    | Ca_kabuli_chr07 | 46657496                | GG                              | AA              | 1946902961               |
| SNP_P4_104192_46657516 | NC_021166.1    | Ca_kabuli_chr07 | 46657516                | AA                              | GG              | 1946902964               |
| SNP_P4_104193_46657530 | NC_021166.1    | Ca_kabuli_chr07 | 46657530                | AA                              | GG              | 1946902966               |
| SNP_P4_104196_46667325 | NC_021166.1    | Ca_kabuli_chr07 | 46667325                | GG                              | AA              | 1946902968               |
| SNP_P4_104197_46667335 | NC_021166.1    | Ca_kabuli_chr07 | 46667335                | TT                              | CC              | 1946902970               |
| SNP_P4_104198_46667484 | NC_021166.1    | Ca_kabuli_chr07 | 46667484                | AA                              | GG              | 1946902972               |
| SNP_P4_104199_46707773 | NC_021166.1    | Ca_kabuli_chr07 | 46707773                | GG                              | AA              | 1946902974               |
| SNP_P4_104200_46715903 | NC_021166.1    | Ca_kabuli_chr07 | 46715903                | GG                              | CC              | 1946902976               |
| SNP_P4_104202_46732314 | NC_021166.1    | Ca_kabuli_chr07 | 46732314                | GG                              | AA              | 1946902978               |
| SNP_P4_104204_46736836 | NC_021166.1    | Ca_kabuli_chr07 | 46736836                | TT                              | CC              | 1946902980               |
| SNP_P4_104205_46736841 | NC_021166.1    | Ca_kabuli_chr07 | 46736841                | CC                              | AA              | 1946902982               |
| SNP_P4_104207_46754558 | NC_021166.1    | Ca_kabuli_chr07 | 46754558                | AA                              | GG              | 1946902984               |
| SNP_P4_104208_46770001 | NC_021166.1    | Ca_kabuli_chr07 | 46770001                | GG                              | AA              | 1946902986               |
| SNP_P4_104209_46777803 | NC_021166.1    | Ca_kabuli_chr07 | 46777803                | TT                              | CC              | 1946902988               |
| SNP_P4_104210_46777819 | NC_021166.1    | Ca_kabuli_chr07 | 46777819                | AA                              | TT              | 1946902990               |
| SNP_P4_104211_46777824 | NC_021166.1    | Ca_kabuli_chr07 | 46777824                | TT                              | GG              | 1946902991               |

| SNPs IDs               | Chromosome IDs | Chromosomes     | Physical positions (bp) | CDC Frontier (Reference genome) | (ILWC46 & LPNB) | NCBI SNPdb Accession IDs |
|------------------------|----------------|-----------------|-------------------------|---------------------------------|-----------------|--------------------------|
| SNP_P4_104212_46777828 | NC_021166.1    | Ca_kabuli_chr07 | 46777828                | TT                              | GG              | 1946902993               |
| SNP_P4_104213_46782334 | NC_021166.1    | Ca_kabuli_chr07 | 46782334                | TT                              | AA              | 1946902995               |
| SNP_P4_104214_46782377 | NC_021166.1    | Ca_kabuli_chr07 | 46782377                | TT                              | AA              | 1946902997               |
| SNP_P4_104215_46782382 | NC_021166.1    | Ca_kabuli_chr07 | 46782382                | TT                              | GG              | 1946902999               |
| SNP_P4_104216_46807948 | NC_021166.1    | Ca_kabuli_chr07 | 46807948                | CC                              | TT              | 1946903001               |
| SNP_P4_104217_46837867 | NC_021166.1    | Ca_kabuli_chr07 | 46837867                | TT                              | CC              | 1946903003               |
| SNP_P4_104218_46844642 | NC_021166.1    | Ca_kabuli_chr07 | 46844642                | AA                              | CC              | 1946903005               |
| SNP_P4_104219_46844883 | NC_021166.1    | Ca_kabuli_chr07 | 46844883                | CC                              | TT              | 1946903007               |
| SNP_P4_104220_46848091 | NC_021166.1    | Ca_kabuli_chr07 | 46848091                | TT                              | AA              | 1946903009               |
| SNP_P4_104221_46859461 | NC_021166.1    | Ca_kabuli_chr07 | 46859461                | GG                              | AA              | 1946903011               |
| SNP_P4_104222_46885851 | NC_021166.1    | Ca_kabuli_chr07 | 46885851                | GG                              | CC              | 1946903013               |
| SNP_P4_104223_46885895 | NC_021166.1    | Ca_kabuli_chr07 | 46885895                | AA                              | TT              | 1946903015               |
| SNP_P4_104224_46885896 | NC_021166.1    | Ca_kabuli_chr07 | 46885896                | AA                              | CC              | 1946903017               |
| SNP_P4_104225_46885911 | NC_021166.1    | Ca_kabuli_chr07 | 46885911                | TT                              | CC              | 1946903019               |
| SNP_P4_104226_46885912 | NC_021166.1    | Ca_kabuli_chr07 | 46885912                | TT                              | CC              | 1946903021               |
| SNP_P4_104227_46885931 | NC_021166.1    | Ca_kabuli_chr07 | 46885931                | GG                              | CC              | 1946903023               |
| SNP_P4_104228_46886007 | NC_021166.1    | Ca_kabuli_chr07 | 46886007                | TT                              | GG              | 1946903025               |
| SNP_P4_104229_46886062 | NC_021166.1    | Ca_kabuli_chr07 | 46886062                | CC                              | AA              | 1946903027               |
| SNP_P4_104230_46886114 | NC_021166.1    | Ca_kabuli_chr07 | 46886114                | TT                              | AA              | 1946903029               |
| SNP_P4_104231_46886115 | NC_021166.1    | Ca_kabuli_chr07 | 46886115                | TT                              | CC              | 1946903031               |
| SNP_P4_104232_46886135 | NC_021166.1    | Ca_kabuli_chr07 | 46886135                | AA                              | GG              | 1946903033               |
| SNP_P4_104233_46886304 | NC_021166.1    | Ca_kabuli_chr07 | 46886304                | AA                              | TT              | 1946903035               |
| SNP_P4_104234_46890328 | NC_021166.1    | Ca_kabuli_chr07 | 46890328                | GG                              | TT              | 1946903037               |
| SNP_P4_104235_46890329 | NC_021166.1    | Ca_kabuli_chr07 | 46890329                | TT                              | AA              | 1946903039               |
| SNP_P4_104236_46895348 | NC_021166.1    | Ca_kabuli_chr07 | 46895348                | CC                              | AA              | 1946903041               |
| SNP_P4_104238_46918131 | NC_021166.1    | Ca_kabuli_chr07 | 46918131                | TT                              | CC              | 1946903043               |
| SNP_P4_104239_46919510 | NC_021166.1    | Ca_kabuli_chr07 | 46919510                | AA                              | GG              | 1946903045               |
| SNP_P4_104240_46959930 | NC_021166.1    | Ca_kabuli_chr07 | 46959930                | TT                              | CC              | 1946903047               |
| SNP_P4_104241_46960411 | NC_021166.1    | Ca_kabuli_chr07 | 46960411                | AA                              | GG              | 1946903049               |
| SNP_P4_104242_46960516 | NC_021166.1    | Ca_kabuli_chr07 | 46960516                | TT                              | CC              | 1946903050               |
| SNP_P4_104243_46969314 | NC_021166.1    | Ca_kabuli_chr07 | 46969314                | GG                              | CC              | 1946903052               |
| SNP_P4_104245_47014734 | NC_021166.1    | Ca_kabuli_chr07 | 47014734                | TT                              | GG              | 1946903054               |
| SNP_P4_104246_47014741 | NC_021166.1    | Ca_kabuli_chr07 | 47014741                | TT                              | GG              | 1946903056               |
| SNP_P4_104247_47015068 | NC_021166.1    | Ca_kabuli_chr07 | 47015068                | AA                              | GG              | 1946903058               |
| SNP_P4_104248_47015126 | NC_021166.1    | Ca_kabuli_chr07 | 47015126                | CC                              | TT              | 1946903060               |
| SNP_P4_104249_47015128 | NC_021166.1    | Ca_kabuli_chr07 | 47015128                | AA                              | GG              | 1946903062               |
| SNP_P4_104250_47025785 | NC_021166.1    | Ca_kabuli_chr07 | 47025785                | AA                              | GG              | 1946903064               |
| SNP_P4_104251_47032344 | NC_021166.1    | Ca_kabuli_chr07 | 47032344                | AA                              | GG              | 1946903066               |
| SNP_P4_104254_47082772 | NC_021166.1    | Ca_kabuli_chr07 | 47082772                | GG                              | CC              | 1946903068               |
| SNP_P4_104255_47082801 | NC_021166.1    | Ca_kabuli_chr07 | 47082801                | CC                              | AA              | 1946903070               |
| SNP_P4_104256_47083006 | NC_021166.1    | Ca_kabuli_chr07 | 47083006                | AA                              | GG              | 1946903072               |
| SNP_P4_104257_47083035 | NC_021166.1    | Ca_kabuli_chr07 | 47083035                | GG                              | AA              | 1946903074               |

| SNPs IDs               | Chromosome IDs | Chromosomes     | Physical positions (bp) | CDC Frontier (Reference genome) | (ILWC46 & LPNB) | NCBI SNPdb Accession IDs |
|------------------------|----------------|-----------------|-------------------------|---------------------------------|-----------------|--------------------------|
| SNP_P4_104258_47083036 | NC_021166.1    | Ca_kabuli_chr07 | 47083036                | TT                              | AA              | 1946903076               |
| SNP_P4_104259_47083037 | NC_021166.1    | Ca_kabuli_chr07 | 47083037                | GG                              | AA              | 1946903078               |
| SNP_P4_104260_47083086 | NC_021166.1    | Ca_kabuli_chr07 | 47083086                | CC                              | TT              | 1946903080               |
| SNP_P4_104261_47083091 | NC_021166.1    | Ca_kabuli_chr07 | 47083091                | CC                              | TT              | 1946903082               |
| SNP_P4_104262_47083092 | NC_021166.1    | Ca_kabuli_chr07 | 47083092                | GG                              | AA              | 1946903083               |
| SNP_P4_104263_47083108 | NC_021166.1    | Ca_kabuli_chr07 | 47083108                | AA                              | GG              | 1946903085               |
| SNP_P4_104264_47083180 | NC_021166.1    | Ca_kabuli_chr07 | 47083180                | TT                              | CC              | 1946903087               |
| SNP_P4_104265_47083189 | NC_021166.1    | Ca_kabuli_chr07 | 47083189                | AA                              | TT              | 1946903089               |
| SNP_P4_104266_47083214 | NC_021166.1    | Ca_kabuli_chr07 | 47083214                | GG                              | AA              | 1946903091               |
| SNP_P4_104267_47083219 | NC_021166.1    | Ca_kabuli_chr07 | 47083219                | AA                              | TT              | 1946903093               |
| SNP_P4_104269_47083390 | NC_021166.1    | Ca_kabuli_chr07 | 47083390                | GG                              | CC              | 1946903095               |
| SNP_P4_104270_47084525 | NC_021166.1    | Ca_kabuli_chr07 | 47084525                | GG                              | AA              | 1946903097               |
| SNP_P4_104271_47084568 | NC_021166.1    | Ca_kabuli_chr07 | 47084568                | CC                              | TT              | 1946903099               |
| SNP_P4_104272_47084585 | NC_021166.1    | Ca_kabuli_chr07 | 47084585                | CC                              | TT              | 1946903101               |
| SNP_P4_104273_47084957 | NC_021166.1    | Ca_kabuli_chr07 | 47084957                | GG                              | AA              | 1946903103               |
| SNP_P4_104274_47084975 | NC_021166.1    | Ca_kabuli_chr07 | 47084975                | TT                              | CC              | 1946903104               |
| SNP_P4_104275_47084978 | NC_021166.1    | Ca_kabuli_chr07 | 47084978                | AA                              | GG              | 1946903106               |
| SNP_P4_104276_47084996 | NC_021166.1    | Ca_kabuli_chr07 | 47084996                | TT                              | CC              | 1946903108               |
| SNP_P4_104278_47093349 | NC_021166.1    | Ca_kabuli_chr07 | 47093349                | GG                              | AA              | 1946903110               |
| SNP_P4_104279_47093437 | NC_021166.1    | Ca_kabuli_chr07 | 47093437                | TT                              | GG              | 1946903112               |
| SNP_P4_104280_47093495 | NC_021166.1    | Ca_kabuli_chr07 | 47093495                | CC                              | TT              | 1946903114               |
| SNP_P4_104281_47093668 | NC_021166.1    | Ca_kabuli_chr07 | 47093668                | GG                              | CC              | 1946903116               |
| SNP_P4_104282_47093786 | NC_021166.1    | Ca_kabuli_chr07 | 47093786                | TT                              | CC              | 1946903118               |
| SNP_P4_104283_47093794 | NC_021166.1    | Ca_kabuli_chr07 | 47093794                | AA                              | GG              | 1946903120               |
| SNP_P4_104284_47093816 | NC_021166.1    | Ca_kabuli_chr07 | 47093816                | TT                              | CC              | 1946903122               |
| SNP_P4_104285_47108305 | NC_021166.1    | Ca_kabuli_chr07 | 47108305                | TT                              | CC              | 1946903124               |
| SNP_P4_104286_47108311 | NC_021166.1    | Ca_kabuli_chr07 | 47108311                | TT                              | CC              | 1946903126               |
| SNP_P4_104287_47108344 | NC_021166.1    | Ca_kabuli_chr07 | 47108344                | AA                              | GG              | 1946903128               |
| SNP_P4_104289_47108405 | NC_021166.1    | Ca_kabuli_chr07 | 47108405                | TT                              | GG              | 1946903130               |
| SNP_P4_104290_47108413 | NC_021166.1    | Ca_kabuli_chr07 | 47108413                | TT                              | CC              | 1946903132               |
| SNP_P4_104291_47108685 | NC_021166.1    | Ca_kabuli_chr07 | 47108685                | GG                              | CC              | 1946903134               |
| SNP_P4_104292_47108764 | NC_021166.1    | Ca_kabuli_chr07 | 47108764                | CC                              | TT              | 1946903136               |
| SNP_P4_104293_47123065 | NC_021166.1    | Ca_kabuli_chr07 | 47123065                | CC                              | TT              | 1946903138               |
| SNP_P4_104294_47126482 | NC_021166.1    | Ca_kabuli_chr07 | 47126482                | GG                              | AA              | 1946903140               |
| SNP_P4_104295_47147054 | NC_021166.1    | Ca_kabuli_chr07 | 47147054                | AA                              | GG              | 1946903142               |
| SNP_P4_104296_47147064 | NC_021166.1    | Ca_kabuli_chr07 | 47147064                | TT                              | AA              | 1946903144               |
| SNP_P4_104298_47155527 | NC_021166.1    | Ca_kabuli_chr07 | 47155527                | AA                              | GG              | 1946903146               |
| SNP_P4_104300_47168132 | NC_021166.1    | Ca_kabuli_chr07 | 47168132                | AA                              | TT              | 1946903148               |
| SNP_P4_104301_47168703 | NC_021166.1    | Ca_kabuli_chr07 | 47168703                | TT                              | GG              | 1946903150               |
| SNP_P4_104302_47182829 | NC_021166.1    | Ca_kabuli_chr07 | 47182829                | CC                              | TT              | 1946903152               |
| SNP_P4_104303_47182894 | NC_021166.1    | Ca_kabuli_chr07 | 47182894                | GG                              | TT              | 1946903154               |
| SNP_P4_104304_47182926 | NC_021166.1    | Ca_kabuli_chr07 | 47182926                | TT                              | GG              | 1946903156               |

| SNPs IDs               | Chromosome IDs | Chromosomes     | Physical positions (bp) | CDC Frontier (Reference genome) | (ILWC46 & LPNB) | NCBI SNPdb Accession IDs |
|------------------------|----------------|-----------------|-------------------------|---------------------------------|-----------------|--------------------------|
| SNP_P4_104305_47182947 | NC_021166.1    | Ca_kabuli_chr07 | 47182947                | CC                              | TT              | 1946903158               |
| SNP_P4_104306_47182949 | NC_021166.1    | Ca_kabuli_chr07 | 47182949                | TT                              | GG              | 1946903160               |
| SNP_P4_104307_47191886 | NC_021166.1    | Ca_kabuli_chr07 | 47191886                | TT                              | CC              | 1946903162               |
| SNP_P4_104309_47211727 | NC_021166.1    | Ca_kabuli_chr07 | 47211727                | TT                              | AA              | 1946903164               |
| SNP_P4_104310_47243248 | NC_021166.1    | Ca_kabuli_chr07 | 47243248                | GG                              | TT              | 1946903166               |
| SNP_P4_104311_47256215 | NC_021166.1    | Ca_kabuli_chr07 | 47256215                | CC                              | TT              | 1946903168               |
| SNP_P4_104312_47256236 | NC_021166.1    | Ca_kabuli_chr07 | 47256236                | AA                              | GG              | 1946903170               |
| SNP_P4_104313_47256480 | NC_021166.1    | Ca_kabuli_chr07 | 47256480                | AA                              | GG              | 1946903172               |
| SNP_P4_104314_47256481 | NC_021166.1    | Ca_kabuli_chr07 | 47256481                | GG                              | AA              | 1946903174               |
| SNP_P4_104315_47256497 | NC_021166.1    | Ca_kabuli_chr07 | 47256497                | TT                              | CC              | 1946903176               |
| SNP_P4_104316_47257930 | NC_021166.1    | Ca_kabuli_chr07 | 47257930                | TT                              | GG              | 1946903178               |
| SNP_P4_104318_47281178 | NC_021166.1    | Ca_kabuli_chr07 | 47281178                | TT                              | CC              | 1946903180               |
| SNP_P4_104319_47281183 | NC_021166.1    | Ca_kabuli_chr07 | 47281183                | TT                              | CC              | 1946903182               |
| SNP_P4_104320_47281515 | NC_021166.1    | Ca_kabuli_chr07 | 47281515                | CC                              | TT              | 1946903184               |
| SNP_P4_104321_47282668 | NC_021166.1    | Ca_kabuli_chr07 | 47282668                | TT                              | AA              | 1946903186               |
| SNP_P4_104322_47282739 | NC_021166.1    | Ca_kabuli_chr07 | 47282739                | AA                              | TT              | 1946903188               |
| SNP_P4_104323_47283671 | NC_021166.1    | Ca_kabuli_chr07 | 47283671                | GG                              | TT              | 1946903190               |
| SNP_P4_104324_47283794 | NC_021166.1    | Ca_kabuli_chr07 | 47283794                | TT                              | CC              | 1946903192               |
| SNP_P4_104325_47284072 | NC_021166.1    | Ca_kabuli_chr07 | 47284072                | CC                              | AA              | 1946903195               |
| SNP_P4_104326_47284323 | NC_021166.1    | Ca_kabuli_chr07 | 47284323                | AA                              | CC              | 1946903197               |
| SNP_P4_104327_47284816 | NC_021166.1    | Ca_kabuli_chr07 | 47284816                | CC                              | TT              | 1946903199               |
| SNP_P4_104329_47295044 | NC_021166.1    | Ca_kabuli_chr07 | 47295044                | AA                              | GG              | 1946903201               |
| SNP_P4_104330_47295047 | NC_021166.1    | Ca_kabuli_chr07 | 47295047                | AA                              | GG              | 1946903203               |
| SNP_P4_104331_47295056 | NC_021166.1    | Ca_kabuli_chr07 | 47295056                | AA                              | GG              | 1946903205               |
| SNP_P4_104332_47295083 | NC_021166.1    | Ca_kabuli_chr07 | 47295083                | CC                              | TT              | 1946903207               |
| SNP_P4_104333_47295143 | NC_021166.1    | Ca_kabuli_chr07 | 47295143                | CC                              | GG              | 1946903209               |
| SNP_P4_104334_47295155 | NC_021166.1    | Ca_kabuli_chr07 | 47295155                | TT                              | CC              | 1946903211               |
| SNP_P4_104335_47295400 | NC_021166.1    | Ca_kabuli_chr07 | 47295400                | TT                              | AA              | 1946903213               |
| SNP_P4_104336_47295404 | NC_021166.1    | Ca_kabuli_chr07 | 47295404                | TT                              | AA              | 1946903215               |
| SNP_P4_104337_47299424 | NC_021166.1    | Ca_kabuli_chr07 | 47299424                | GG                              | CC              | 1946903217               |
| SNP_P4_104338_47299824 | NC_021166.1    | Ca_kabuli_chr07 | 47299824                | AA                              | TT              | 1946903219               |
| SNP_P4_104339_47299863 | NC_021166.1    | Ca_kabuli_chr07 | 47299863                | AA                              | CC              | 1946903221               |
| SNP_P4_104340_47312429 | NC_021166.1    | Ca_kabuli_chr07 | 47312429                | CC                              | AA              | 1946903223               |
| SNP_P4_104341_47324850 | NC_021166.1    | Ca_kabuli_chr07 | 47324850                | TT                              | CC              | 1946903225               |
| SNP_P4_104342_47324945 | NC_021166.1    | Ca_kabuli_chr07 | 47324945                | AA                              | GG              | 1946903227               |
| SNP_P4_104343_47324967 | NC_021166.1    | Ca_kabuli_chr07 | 47324967                | AA                              | GG              | 1946903229               |
| SNP_P4_104344_47324968 | NC_021166.1    | Ca_kabuli_chr07 | 47324968                | GG                              | AA              | 1946903231               |
| SNP_P4_104345_47324975 | NC_021166.1    | Ca_kabuli_chr07 | 47324975                | AA                              | TT              | 1946903233               |
| SNP_P4_104346_47325242 | NC_021166.1    | Ca_kabuli_chr07 | 47325242                | TT                              | AA              | 1946903235               |
| SNP_P4_104347_47325273 | NC_021166.1    | Ca_kabuli_chr07 | 47325273                | AA                              | GG              | 1946903237               |
| SNP_P4_104348_47325296 | NC_021166.1    | Ca_kabuli_chr07 | 47325296                | CC                              | TT              | 1946903239               |
| SNP_P4_104349_47325336 | NC_021166.1    | Ca_kabuli_chr07 | 47325336                | TT                              | CC              | 1946903241               |

| SNPs IDs               | Chromosome IDs | Chromosomes     | Physical positions (bp) | CDC Frontier (Reference genome) | (ILWC46 & LPNB) | NCBI SNPdb Accession IDs |
|------------------------|----------------|-----------------|-------------------------|---------------------------------|-----------------|--------------------------|
| SNP_P4_104350_47325349 | NC_021166.1    | Ca_kabuli_chr07 | 47325349                | CC                              | AA              | 1946903243               |
| SNP_P4_104351_47325350 | NC_021166.1    | Ca_kabuli_chr07 | 47325350                | AA                              | GG              | 1946903245               |
| SNP_P4_104352_47327265 | NC_021166.1    | Ca_kabuli_chr07 | 47327265                | TT                              | GG              | 1946903247               |
| SNP_P4_104353_47327305 | NC_021166.1    | Ca_kabuli_chr07 | 47327305                | CC                              | TT              | 1946903249               |
| SNP_P4_104354_47327581 | NC_021166.1    | Ca_kabuli_chr07 | 47327581                | CC                              | AA              | 1946903251               |
| SNP_P4_104355_47327707 | NC_021166.1    | Ca_kabuli_chr07 | 47327707                | GG                              | TT              | 1946903253               |
| SNP_P4_104356_47327711 | NC_021166.1    | Ca_kabuli_chr07 | 47327711                | TT                              | CC              | 1946903255               |
| SNP_P4_104357_47327980 | NC_021166.1    | Ca_kabuli_chr07 | 47327980                | AA                              | GG              | 1946903257               |
| SNP_P4_104358_47327993 | NC_021166.1    | Ca_kabuli_chr07 | 47327993                | CC                              | TT              | 1946903259               |
| SNP_P4_104359_47328001 | NC_021166.1    | Ca_kabuli_chr07 | 47328001                | GG                              | TT              | 1946903261               |
| SNP_P4_104360_47328026 | NC_021166.1    | Ca_kabuli_chr07 | 47328026                | TT                              | CC              | 1946903263               |
| SNP_P4_104361_47335178 | NC_021166.1    | Ca_kabuli_chr07 | 47335178                | CC                              | TT              | 1946903265               |
| SNP_P4_104362_47335180 | NC_021166.1    | Ca_kabuli_chr07 | 47335180                | CC                              | GG              | 1946903266               |
| SNP_P4_104363_47340620 | NC_021166.1    | Ca_kabuli_chr07 | 47340620                | AA                              | GG              | 1946903268               |
| SNP_P4_104364_47343324 | NC_021166.1    | Ca_kabuli_chr07 | 47343324                | GG                              | AA              | 1946903270               |
| SNP_P4_104365_47343329 | NC_021166.1    | Ca_kabuli_chr07 | 47343329                | AA                              | GG              | 1946903272               |
| SNP_P4_104366_47346794 | NC_021166.1    | Ca_kabuli_chr07 | 47346794                | CC                              | GG              | 1946903274               |
| SNP_P4_104367_47346814 | NC_021166.1    | Ca_kabuli_chr07 | 47346814                | AA                              | GG              | 1946903276               |
| SNP_P4_104368_47362164 | NC_021166.1    | Ca_kabuli_chr07 | 47362164                | AA                              | GG              | 1946903278               |
| SNP_P4_104369_47364484 | NC_021166.1    | Ca_kabuli_chr07 | 47364484                | AA                              | TT              | 1946903280               |
| SNP_P4_104372_47384569 | NC_021166.1    | Ca_kabuli_chr07 | 47384569                | CC                              | TT              | 1946903282               |
| SNP_P4_104373_47388959 | NC_021166.1    | Ca_kabuli_chr07 | 47388959                | TT                              | GG              | 1946903284               |
| SNP_P4_104374_47417661 | NC_021166.1    | Ca_kabuli_chr07 | 47417661                | GG                              | TT              | 1946903286               |
| SNP_P4_104375_47417667 | NC_021166.1    | Ca_kabuli_chr07 | 47417667                | GG                              | TT              | 1946903288               |
| SNP_P4_104376_47424983 | NC_021166.1    | Ca_kabuli_chr07 | 47424983                | TT                              | AA              | 1946903290               |
| SNP_P4_104377_47436394 | NC_021166.1    | Ca_kabuli_chr07 | 47436394                | AA                              | CC              | 1946903292               |
| SNP_P4_104378_47441732 | NC_021166.1    | Ca_kabuli_chr07 | 47441732                | TT                              | CC              | 1946903294               |
| SNP_P4_104379_47451078 | NC_021166.1    | Ca_kabuli_chr07 | 47451078                | AA                              | CC              | 1946903296               |
| SNP_P4_104381_47463702 | NC_021166.1    | Ca_kabuli_chr07 | 47463702                | GG                              | AA              | 1946903298               |
| SNP_P4_104382_47466601 | NC_021166.1    | Ca_kabuli_chr07 | 47466601                | TT                              | CC              | 1946903300               |
| SNP_P4_104383_47478804 | NC_021166.1    | Ca_kabuli_chr07 | 47478804                | GG                              | AA              | 1946903302               |
| SNP_P4_104384_47479118 | NC_021166.1    | Ca_kabuli_chr07 | 47479118                | TT                              | CC              | 1946903304               |
| SNP_P4_104385_47484933 | NC_021166.1    | Ca_kabuli_chr07 | 47484933                | CC                              | TT              | 1946903306               |
| SNP_P4_104386_47504265 | NC_021166.1    | Ca_kabuli_chr07 | 47504265                | AA                              | GG              | 1946903308               |
| SNP_P4_104387_47504299 | NC_021166.1    | Ca_kabuli_chr07 | 47504299                | TT                              | CC              | 1946903310               |
| SNP_P4_104388_47504564 | NC_021166.1    | Ca_kabuli_chr07 | 47504564                | TT                              | CC              | 1946903312               |
| SNP_P4_104389_47504607 | NC_021166.1    | Ca_kabuli_chr07 | 47504607                | AA                              | GG              | 1946903314               |
| SNP_P4_104390_47504632 | NC_021166.1    | Ca_kabuli_chr07 | 47504632                | AA                              | GG              | 1946903316               |
| SNP_P4_104391_47505124 | NC_021166.1    | Ca_kabuli_chr07 | 47505124                | CC                              | AA              | 1946903318               |
| SNP_P4_104392_47505524 | NC_021166.1    | Ca_kabuli_chr07 | 47505524                | AA                              | CC              | 1946903320               |
| SNP_P4_104393_47505530 | NC_021166.1    | Ca_kabuli_chr07 | 47505530                | GG                              | TT              | 1946903321               |
| SNP_P4_104394_47505953 | NC_021166.1    | Ca_kabuli_chr07 | 47505953                | AA                              | TT              | 1946903323               |

| SNPs IDs               | Chromosome IDs | Chromosomes     | Physical positions (bp) | CDC Frontier (Reference genome) | (ILWC46 & LPNB) | NCBI SNPdb Accession IDs |
|------------------------|----------------|-----------------|-------------------------|---------------------------------|-----------------|--------------------------|
| SNP_P4_104395_47517292 | NC_021166.1    | Ca_kabuli_chr07 | 47517292                | CC                              | GG              | 1946903325               |
| SNP_P4_104396_47518147 | NC_021166.1    | Ca_kabuli_chr07 | 47518147                | GG                              | AA              | 1946903327               |
| SNP_P4_104397_47532500 | NC_021166.1    | Ca_kabuli_chr07 | 47532500                | AA                              | GG              | 1946903329               |
| SNP_P4_104398_47532509 | NC_021166.1    | Ca_kabuli_chr07 | 47532509                | AA                              | GG              | 1946903331               |
| SNP_P4_104399_47535655 | NC_021166.1    | Ca_kabuli_chr07 | 47535655                | TT                              | CC              | 1946903333               |
| SNP_P4_104400_47542311 | NC_021166.1    | Ca_kabuli_chr07 | 47542311                | GG                              | AA              | 1946903335               |
| SNP_P4_104403_47577584 | NC_021166.1    | Ca_kabuli_chr07 | 47577584                | TT                              | GG              | 1946903337               |
| SNP_P4_104404_47598643 | NC_021166.1    | Ca_kabuli_chr07 | 47598643                | GG                              | AA              | 1946903339               |
| SNP_P4_104405_47604349 | NC_021166.1    | Ca_kabuli_chr07 | 47604349                | TT                              | GG              | 1946903341               |
| SNP_P4_104406_47604388 | NC_021166.1    | Ca_kabuli_chr07 | 47604388                | GG                              | AA              | 1946903343               |
| SNP_P4_104407_47604449 | NC_021166.1    | Ca_kabuli_chr07 | 47604449                | TT                              | CC              | 1946903345               |
| SNP_P4_104408_47604626 | NC_021166.1    | Ca_kabuli_chr07 | 47604626                | TT                              | GG              | 1946903347               |
| SNP_P4_104409_47604678 | NC_021166.1    | Ca_kabuli_chr07 | 47604678                | AA                              | GG              | 1946903349               |
| SNP_P4_104410_47605196 | NC_021166.1    | Ca_kabuli_chr07 | 47605196                | AA                              | TT              | 1946903352               |
| SNP_P4_104411_47605302 | NC_021166.1    | Ca_kabuli_chr07 | 47605302                | CC                              | TT              | 1946903354               |
| SNP_P4_104412_47605662 | NC_021166.1    | Ca_kabuli_chr07 | 47605662                | AA                              | GG              | 1946903356               |
| SNP_P4_104413_47621786 | NC_021166.1    | Ca_kabuli_chr07 | 47621786                | CC                              | AA              | 1946903358               |
| SNP_P4_104414_47644879 | NC_021166.1    | Ca_kabuli_chr07 | 47644879                | AA                              | GG              | 1946903360               |
| SNP_P4_104415_47645130 | NC_021166.1    | Ca_kabuli_chr07 | 47645130                | AA                              | GG              | 1946903362               |
| SNP_P4_104416_47645228 | NC_021166.1    | Ca_kabuli_chr07 | 47645228                | TT                              | AA              | 1946903364               |
| SNP_P4_104417_47645299 | NC_021166.1    | Ca_kabuli_chr07 | 47645299                | TT                              | GG              | 1946903366               |
| SNP_P4_104418_47645342 | NC_021166.1    | Ca_kabuli_chr07 | 47645342                | AA                              | CC              | 1946903367               |
| SNP_P4_104419_47645363 | NC_021166.1    | Ca_kabuli_chr07 | 47645363                | GG                              | AA              | 1946903369               |
| SNP_P4_104420_47645391 | NC_021166.1    | Ca_kabuli_chr07 | 47645391                | TT                              | AA              | 1946903372               |
| SNP_P4_104421_47645455 | NC_021166.1    | Ca_kabuli_chr07 | 47645455                | TT                              | CC              | 1946903374               |
| SNP_P4_104422_47657126 | NC_021166.1    | Ca_kabuli_chr07 | 47657126                | GG                              | AA              | 1946903376               |
| SNP_P4_104423_47674233 | NC_021166.1    | Ca_kabuli_chr07 | 47674233                | CC                              | TT              | 1946903378               |
| SNP_P4_104424_47674249 | NC_021166.1    | Ca_kabuli_chr07 | 47674249                | CC                              | TT              | 1946903380               |
| SNP_P4_104427_47689912 | NC_021166.1    | Ca_kabuli_chr07 | 47689912                | AA                              | GG              | 1946903382               |
| SNP_P4_104428_47692848 | NC_021166.1    | Ca_kabuli_chr07 | 47692848                | GG                              | TT              | 1946903384               |
| SNP_P4_104429_47714411 | NC_021166.1    | Ca_kabuli_chr07 | 47714411                | TT                              | CC              | 1946903387               |
| SNP_P4_104430_47714814 | NC_021166.1    | Ca_kabuli_chr07 | 47714814                | TT                              | GG              | 1946903389               |
| SNP_P4_104431_47714862 | NC_021166.1    | Ca_kabuli_chr07 | 47714862                | AA                              | GG              | 1946903391               |
| SNP_P4_104432_47714877 | NC_021166.1    | Ca_kabuli_chr07 | 47714877                | TT                              | GG              | 1946903393               |
| SNP_P4_104433_47715060 | NC_021166.1    | Ca_kabuli_chr07 | 47715060                | AA                              | CC              | 1946903395               |
| SNP_P4_104435_47715317 | NC_021166.1    | Ca_kabuli_chr07 | 47715317                | CC                              | TT              | 1946903397               |
| SNP_P4_104436_47715338 | NC_021166.1    | Ca_kabuli_chr07 | 47715338                | CC                              | GG              | 1946903399               |
| SNP_P4_104437_47715365 | NC_021166.1    | Ca_kabuli_chr07 | 47715365                | AA                              | TT              | 1946903401               |
| SNP_P4_104438_47715413 | NC_021166.1    | Ca_kabuli_chr07 | 47715413                | AA                              | CC              | 1946903403               |
| SNP_P4_104439_47715572 | NC_021166.1    | Ca_kabuli_chr07 | 47715572                | GG                              | CC              | 1946903405               |
| SNP_P4_104440_47715601 | NC_021166.1    | Ca_kabuli_chr07 | 47715601                | AA                              | GG              | 1946903407               |
| SNP_P4_104441_47715636 | NC_021166.1    | Ca_kabuli_chr07 | 47715636                | TT                              | GG              | 1946903409               |

| SNPs IDs               | Chromosome IDs | Chromosomes     | Physical positions (bp) | CDC Frontier (Reference genome) | (ILWC46 & LPNB) | NCBI SNPdb Accession IDs |
|------------------------|----------------|-----------------|-------------------------|---------------------------------|-----------------|--------------------------|
| SNP_P4_104442_47718330 | NC_021166.1    | Ca_kabuli_chr07 | 47718330                | AA                              | GG              | 1946903411               |
| SNP_P4_104443_47718345 | NC_021166.1    | Ca_kabuli_chr07 | 47718345                | TT                              | AA              | 1946903413               |
| SNP_P4_104444_47718370 | NC_021166.1    | Ca_kabuli_chr07 | 47718370                | AA                              | TT              | 1946903415               |
| SNP_P4_104445_47718372 | NC_021166.1    | Ca_kabuli_chr07 | 47718372                | TT                              | CC              | 1946903417               |
| SNP_P4_104446_47718373 | NC_021166.1    | Ca_kabuli_chr07 | 47718373                | CC                              | TT              | 1946903419               |
| SNP_P4_104447_47718396 | NC_021166.1    | Ca_kabuli_chr07 | 47718396                | GG                              | AA              | 1946903421               |
| SNP_P4_104448_47718416 | NC_021166.1    | Ca_kabuli_chr07 | 47718416                | AA                              | CC              | 1946903423               |
| SNP_P4_104449_47718441 | NC_021166.1    | Ca_kabuli_chr07 | 47718441                | AA                              | GG              | 1946903425               |
| SNP_P4_104450_47718471 | NC_021166.1    | Ca_kabuli_chr07 | 47718471                | TT                              | CC              | 1946903427               |
| SNP_P4_104451_47718503 | NC_021166.1    | Ca_kabuli_chr07 | 47718503                | TT                              | GG              | 1946903429               |
| SNP_P4_104452_47718547 | NC_021166.1    | Ca_kabuli_chr07 | 47718547                | CC                              | GG              | 1946903432               |
| SNP_P4_104453_47747773 | NC_021166.1    | Ca_kabuli_chr07 | 47747773                | AA                              | GG              | 1946903434               |
| SNP_P4_104454_47764742 | NC_021166.1    | Ca_kabuli_chr07 | 47764742                | CC                              | TT              | 1946903436               |
| SNP_P4_104455_47772319 | NC_021166.1    | Ca_kabuli_chr07 | 47772319                | AA                              | GG              | 1946903438               |
| SNP_P4_104456_47772358 | NC_021166.1    | Ca_kabuli_chr07 | 47772358                | AA                              | GG              | 1946903440               |
| SNP_P4_104457_47772359 | NC_021166.1    | Ca_kabuli_chr07 | 47772359                | CC                              | GG              | 1946903442               |
| SNP_P4_104458_47772364 | NC_021166.1    | Ca_kabuli_chr07 | 47772364                | GG                              | AA              | 1946903444               |
| SNP_P4_104459_47772759 | NC_021166.1    | Ca_kabuli_chr07 | 47772759                | CC                              | TT              | 1946903446               |
| SNP_P4_104460_47772794 | NC_021166.1    | Ca_kabuli_chr07 | 47772794                | AA                              | TT              | 1946903448               |
| SNP_P4_104461_47778369 | NC_021166.1    | Ca_kabuli_chr07 | 47778369                | TT                              | GG              | 1946903450               |
| SNP_P4_104462_47778370 | NC_021166.1    | Ca_kabuli_chr07 | 47778370                | GG                              | TT              | 1946903452               |
| SNP_P4_104464_47792010 | NC_021166.1    | Ca_kabuli_chr07 | 47792010                | AA                              | CC              | 1946903454               |
| SNP_P4_104465_47792350 | NC_021166.1    | Ca_kabuli_chr07 | 47792350                | GG                              | TT              | 1946903456               |
| SNP_P4_104466_47792352 | NC_021166.1    | Ca_kabuli_chr07 | 47792352                | AA                              | CC              | 1946903459               |
| SNP_P4_104467_47792356 | NC_021166.1    | Ca_kabuli_chr07 | 47792356                | GG                              | AA              | 1946903461               |
| SNP_P4_104468_47792372 | NC_021166.1    | Ca_kabuli_chr07 | 47792372                | TT                              | AA              | 1946903463               |
| SNP_P4_104469_47792642 | NC_021166.1    | Ca_kabuli_chr07 | 47792642                | GG                              | AA              | 1946903464               |
| SNP_P4_104470_47794875 | NC_021166.1    | Ca_kabuli_chr07 | 47794875                | TT                              | CC              | 1946903466               |
| SNP_P4_104471_47821984 | NC_021166.1    | Ca_kabuli_chr07 | 47821984                | TT                              | AA              | 1946903468               |
| SNP_P4_104472_47830015 | NC_021166.1    | Ca_kabuli_chr07 | 47830015                | AA                              | GG              | 1946903470               |
| SNP_P4_104473_47830022 | NC_021166.1    | Ca_kabuli_chr07 | 47830022                | GG                              | AA              | 1946903473               |
| SNP_P4_104474_47832027 | NC_021166.1    | Ca_kabuli_chr07 | 47832027                | GG                              | AA              | 1946903475               |
| SNP_P4_104475_47853102 | NC_021166.1    | Ca_kabuli_chr07 | 47853102                | GG                              | AA              | 1946903477               |
| SNP_P4_104476_47855481 | NC_021166.1    | Ca_kabuli_chr07 | 47855481                | AA                              | GG              | 1946903479               |
| SNP_P4_104477_47855484 | NC_021166.1    | Ca_kabuli_chr07 | 47855484                | AA                              | GG              | 1946903481               |
| SNP_P4_104478_47857293 | NC_021166.1    | Ca_kabuli_chr07 | 47857293                | TT                              | CC              | 1946903483               |
| SNP_P4_104479_47857300 | NC_021166.1    | Ca_kabuli_chr07 | 47857300                | AA                              | GG              | 1946903485               |
| SNP_P4_104480_47865009 | NC_021166.1    | Ca_kabuli_chr07 | 47865009                | TT                              | AA              | 1946903487               |
| SNP_P4_104481_47865010 | NC_021166.1    | Ca_kabuli_chr07 | 47865010                | TT                              | CC              | 1946903489               |
| SNP_P4_104482_47865034 | NC_021166.1    | Ca_kabuli_chr07 | 47865034                | AA                              | TT              | 1946903491               |
| SNP_P4_104483_47865102 | NC_021166.1    | Ca_kabuli_chr07 | 47865102                | AA                              | GG              | 1946903493               |
| SNP_P4_104484_47865430 | NC_021166.1    | Ca_kabuli_chr07 | 47865430                | TT                              | CC              | 1946903495               |

| SNPs IDs               | Chromosome IDs | Chromosomes     | Physical positions (bp) | CDC Frontier (Reference genome) | (ILWC46 & LPNB) | NCBI SNPdb Accession IDs |
|------------------------|----------------|-----------------|-------------------------|---------------------------------|-----------------|--------------------------|
| SNP_P4_104485_47865876 | NC_021166.1    | Ca_kabuli_chr07 | 47865876                | AA                              | TT              | 1946903497               |
| SNP_P4_104486_47865912 | NC_021166.1    | Ca_kabuli_chr07 | 47865912                | TT                              | CC              | 1946903499               |
| SNP_P4_104487_47865920 | NC_021166.1    | Ca_kabuli_chr07 | 47865920                | AA                              | GG              | 1946903501               |
| SNP_P4_104488_47865935 | NC_021166.1    | Ca_kabuli_chr07 | 47865935                | AA                              | GG              | 1946903503               |
| SNP_P4_104489_47865937 | NC_021166.1    | Ca_kabuli_chr07 | 47865937                | TT                              | GG              | 1946903505               |
| SNP_P4_104490_47866116 | NC_021166.1    | Ca_kabuli_chr07 | 47866116                | AA                              | GG              | 1946903507               |
| SNP_P4_104491_47866154 | NC_021166.1    | Ca_kabuli_chr07 | 47866154                | TT                              | CC              | 1946903509               |
| SNP_P4_104492_47888109 | NC_021166.1    | Ca_kabuli_chr07 | 47888109                | GG                              | AA              | 1946903511               |
| SNP_P4_104493_47889375 | NC_021166.1    | Ca_kabuli_chr07 | 47889375                | TT                              | CC              | 1946903514               |
| SNP_P4_104494_47906330 | NC_021166.1    | Ca_kabuli_chr07 | 47906330                | AA                              | GG              | 1946903516               |
| SNP_P4_104495_47909452 | NC_021166.1    | Ca_kabuli_chr07 | 47909452                | TT                              | CC              | 1946903518               |
| SNP_P4_104496_47909466 | NC_021166.1    | Ca_kabuli_chr07 | 47909466                | CC                              | TT              | 1946903520               |
| SNP_P4_104497_47909468 | NC_021166.1    | Ca_kabuli_chr07 | 47909468                | AA                              | GG              | 1946903522               |
| SNP_P4_104498_47909472 | NC_021166.1    | Ca_kabuli_chr07 | 47909472                | TT                              | CC              | 1946903524               |
| SNP_P4_104499_47909567 | NC_021166.1    | Ca_kabuli_chr07 | 47909567                | AA                              | CC              | 1946903526               |
| SNP_P4_104500_47909568 | NC_021166.1    | Ca_kabuli_chr07 | 47909568                | CC                              | TT              | 1946903528               |
| SNP_P4_104501_47909611 | NC_021166.1    | Ca_kabuli_chr07 | 47909611                | CC                              | TT              | 1946903530               |
| SNP_P4_104502_47909638 | NC_021166.1    | Ca_kabuli_chr07 | 47909638                | AA                              | GG              | 1946903532               |
| SNP_P4_104503_47909668 | NC_021166.1    | Ca_kabuli_chr07 | 47909668                | CC                              | TT              | 1946903534               |
| SNP_P4_104504_47909686 | NC_021166.1    | Ca_kabuli_chr07 | 47909686                | GG                              | AA              | 1946903536               |
| SNP_P4_104505_47909694 | NC_021166.1    | Ca_kabuli_chr07 | 47909694                | CC                              | TT              | 1946903538               |
| SNP_P4_104506_47909889 | NC_021166.1    | Ca_kabuli_chr07 | 47909889                | GG                              | AA              | 1946903540               |
| SNP_P4_104507_47909910 | NC_021166.1    | Ca_kabuli_chr07 | 47909910                | TT                              | CC              | 1946903542               |
| SNP_P4_104508_47921057 | NC_021166.1    | Ca_kabuli_chr07 | 47921057                | CC                              | AA              | 1946903544               |
| SNP_P4_104510_47927571 | NC_021166.1    | Ca_kabuli_chr07 | 47927571                | GG                              | AA              | 1946903546               |
| SNP_P4_104511_47942098 | NC_021166.1    | Ca_kabuli_chr07 | 47942098                | AA                              | GG              | 1946903548               |
| SNP_P4_104512_47942363 | NC_021166.1    | Ca_kabuli_chr07 | 47942363                | AA                              | GG              | 1946903550               |
| SNP_P4_104513_47942508 | NC_021166.1    | Ca_kabuli_chr07 | 47942508                | TT                              | CC              | 1946903552               |
| SNP_P4_104514_47959494 | NC_021166.1    | Ca_kabuli_chr07 | 47959494                | TT                              | GG              | 1946903554               |
| SNP_P4_104515_47985581 | NC_021166.1    | Ca_kabuli_chr07 | 47985581                | GG                              | AA              | 1946903556               |
| SNP_P4_104516_47985597 | NC_021166.1    | Ca_kabuli_chr07 | 47985597                | AA                              | GG              | 1946903558               |
| SNP_P4_104517_47985601 | NC_021166.1    | Ca_kabuli_chr07 | 47985601                | TT                              | AA              | 1946903560               |
| SNP_P4_104518_47985623 | NC_021166.1    | Ca_kabuli_chr07 | 47985623                | AA                              | GG              | 1946903562               |
| SNP_P4_104519_47985624 | NC_021166.1    | Ca_kabuli_chr07 | 47985624                | AA                              | GG              | 1946903564               |
| SNP_P4_104520_47985674 | NC_021166.1    | Ca_kabuli_chr07 | 47985674                | AA                              | GG              | 1946903566               |
| SNP_P4_104521_47985683 | NC_021166.1    | Ca_kabuli_chr07 | 47985683                | AA                              | GG              | 1946903568               |
| SNP_P4_104522_47990710 | NC_021166.1    | Ca_kabuli_chr07 | 47990710                | AA                              | TT              | 1946903571               |
| SNP_P4_104524_48013300 | NC_021166.1    | Ca_kabuli_chr07 | 48013300                | CC                              | TT              | 1946903573               |
| SNP_P4_104525_48024004 | NC_021166.1    | Ca_kabuli_chr07 | 48024004                | TT                              | AA              | 1946903575               |
| SNP_P4_104526_48024011 | NC_021166.1    | Ca_kabuli_chr07 | 48024011                | CC                              | TT              | 1946903577               |
| SNP_P4_104527_48024047 | NC_021166.1    | Ca_kabuli_chr07 | 48024047                | CC                              | TT              | 1946903579               |
| SNP_P4_104528_48024090 | NC_021166.1    | Ca_kabuli_chr07 | 48024090                | CC                              | TT              | 1946903581               |



| SNPs IDs               | Chromosome IDs | Chromosomes     | Physical positions (bp) | CDC Frontier (Reference genome) | (ILWC46 & LPNB) | NCBI SNPdb Accession IDs |
|------------------------|----------------|-----------------|-------------------------|---------------------------------|-----------------|--------------------------|
| SNP_P4_104529_48024381 | NC_021166.1    | Ca_kabuli_chr07 | 48024381                | AA                              | CC              | 1946903583               |
| SNP_P4_104530_48035606 | NC_021166.1    | Ca_kabuli_chr07 | 48035606                | TT                              | CC              | 1946903585               |
| SNP_P4_104531_48035620 | NC_021166.1    | Ca_kabuli_chr07 | 48035620                | GG                              | CC              | 1946903587               |
| SNP_P4_104532_48035668 | NC_021166.1    | Ca_kabuli_chr07 | 48035668                | AA                              | GG              | 1946903589               |
| SNP_P4_104533_48038233 | NC_021166.1    | Ca_kabuli_chr07 | 48038233                | AA                              | GG              | 1946903591               |
| SNP_P4_104534_48038244 | NC_021166.1    | Ca_kabuli_chr07 | 48038244                | GG                              | CC              | 1946903593               |
| SNP_P4_104535_48038427 | NC_021166.1    | Ca_kabuli_chr07 | 48038427                | TT                              | CC              | 1946903595               |
| SNP_P4_104536_48038429 | NC_021166.1    | Ca_kabuli_chr07 | 48038429                | TT                              | AA              | 1946903597               |
| SNP_P4_104537_48067138 | NC_021166.1    | Ca_kabuli_chr07 | 48067138                | AA                              | GG              | 1946903599               |
| SNP_P4_104538_48067144 | NC_021166.1    | Ca_kabuli_chr07 | 48067144                | TT                              | CC              | 1946903600               |
| SNP_P4_104539_48067167 | NC_021166.1    | Ca_kabuli_chr07 | 48067167                | GG                              | AA              | 1946903602               |
| SNP_P4_104540_48069393 | NC_021166.1    | Ca_kabuli_chr07 | 48069393                | TT                              | AA              | 1946903604               |
| SNP_P4_104541_48073468 | NC_021166.1    | Ca_kabuli_chr07 | 48073468                | CC                              | TT              | 1946903606               |
| SNP_P4_104542_48097586 | NC_021166.1    | Ca_kabuli_chr07 | 48097586                | GG                              | AA              | 1946903608               |
| SNP_P4_104543_48097622 | NC_021166.1    | Ca_kabuli_chr07 | 48097622                | TT                              | CC              | 1946903610               |
| SNP_P4_104544_48098019 | NC_021166.1    | Ca_kabuli_chr07 | 48098019                | AA                              | GG              | 1946903612               |
| SNP_P4_104545_48098137 | NC_021166.1    | Ca_kabuli_chr07 | 48098137                | TT                              | GG              | 1946903614               |
| SNP_P4_104546_48145009 | NC_021166.1    | Ca_kabuli_chr07 | 48145009                | GG                              | AA              | 1946903616               |
| SNP_P4_104547_48145043 | NC_021166.1    | Ca_kabuli_chr07 | 48145043                | GG                              | CC              | 1946903619               |
| SNP_P4_104548_48181446 | NC_021166.1    | Ca_kabuli_chr07 | 48181446                | TT                              | AA              | 1946903621               |
| SNP_P4_104549_48188632 | NC_021166.1    | Ca_kabuli_chr07 | 48188632                | TT                              | CC              | 1946903623               |
| SNP_P4_104550_48190658 | NC_021166.1    | Ca_kabuli_chr07 | 48190658                | TT                              | GG              | 1946903625               |
| SNP_P4_104551_48190809 | NC_021166.1    | Ca_kabuli_chr07 | 48190809                | AA                              | GG              | 1946903627               |
| SNP_P4_104552_48191071 | NC_021166.1    | Ca_kabuli_chr07 | 48191071                | GG                              | TT              | 1946903629               |
| SNP_P4_104553_48210936 | NC_021166.1    | Ca_kabuli_chr07 | 48210936                | CC                              | GG              | 1946903631               |
| SNP_P4_104554_48246077 | NC_021166.1    | Ca_kabuli_chr07 | 48246077                | CC                              | AA              | 1946903633               |
| SNP_P4_104555_48246106 | NC_021166.1    | Ca_kabuli_chr07 | 48246106                | CC                              | TT              | 1946903635               |
| SNP_P4_104556_48246118 | NC_021166.1    | Ca_kabuli_chr07 | 48246118                | TT                              | CC              | 1946903637               |
| SNP_P4_104557_48246119 | NC_021166.1    | Ca_kabuli_chr07 | 48246119                | AA                              | GG              | 1946903639               |
| SNP_P4_104558_48246126 | NC_021166.1    | Ca_kabuli_chr07 | 48246126                | TT                              | CC              | 1946903641               |
| SNP_P4_104559_48246183 | NC_021166.1    | Ca_kabuli_chr07 | 48246183                | CC                              | TT              | 1946903643               |
| SNP_P4_104560_48246230 | NC_021166.1    | Ca_kabuli_chr07 | 48246230                | GG                              | AA              | 1946903645               |
| SNP_P4_104561_48246268 | NC_021166.1    | Ca_kabuli_chr07 | 48246268                | GG                              | AA              | 1946903647               |
| SNP_P4_104562_48246269 | NC_021166.1    | Ca_kabuli_chr07 | 48246269                | TT                              | CC              | 1946903649               |
| SNP_P4_104563_48246271 | NC_021166.1    | Ca_kabuli_chr07 | 48246271                | GG                              | AA              | 1946903651               |
| SNP_P4_104564_48246297 | NC_021166.1    | Ca_kabuli_chr07 | 48246297                | TT                              | CC              | 1946903653               |
| SNP_P4_104565_48246382 | NC_021166.1    | Ca_kabuli_chr07 | 48246382                | TT                              | CC              | 1946903655               |
| SNP_P4_104566_48246416 | NC_021166.1    | Ca_kabuli_chr07 | 48246416                | AA                              | GG              | 1946903657               |
| SNP_P4_104567_48246441 | NC_021166.1    | Ca_kabuli_chr07 | 48246441                | TT                              | CC              | 1946903659               |
| SNP_P4_104568_48246496 | NC_021166.1    | Ca_kabuli_chr07 | 48246496                | TT                              | CC              | 1946903661               |
| SNP_P4_104569_48246612 | NC_021166.1    | Ca_kabuli_chr07 | 48246612                | TT                              | AA              | 1946903663               |
| SNP_P4_104570_48246650 | NC_021166.1    | Ca_kabuli_chr07 | 48246650                | TT                              | CC              | 1946903665               |

| SNPs IDs               | Chromosome IDs | Chromosomes     | Physical positions (bp) | CDC Frontier (Reference genome) | (ILWC46 & LPNB) | NCBI SNPdb Accession IDs |
|------------------------|----------------|-----------------|-------------------------|---------------------------------|-----------------|--------------------------|
| SNP_P4_104571_48276797 | NC_021166.1    | Ca_kabuli_chr07 | 48276797                | AA                              | GG              | 1946903667               |
| SNP_P4_104572_48284451 | NC_021166.1    | Ca_kabuli_chr07 | 48284451                | AA                              | TT              | 1946903669               |
| SNP_P4_104573_48309167 | NC_021166.1    | Ca_kabuli_chr07 | 48309167                | GG                              | AA              | 1946903671               |
| SNP_P4_104574_48311568 | NC_021166.1    | Ca_kabuli_chr07 | 48311568                | CC                              | TT              | 1946903674               |
| SNP_P4_104575_48311570 | NC_021166.1    | Ca_kabuli_chr07 | 48311570                | AA                              | GG              | 1946903676               |
| SNP_P4_104576_48311590 | NC_021166.1    | Ca_kabuli_chr07 | 48311590                | AA                              | GG              | 1946903678               |
| SNP_P4_104577_48311630 | NC_021166.1    | Ca_kabuli_chr07 | 48311630                | AA                              | GG              | 1946903680               |
| SNP_P4_104579_48312060 | NC_021166.1    | Ca_kabuli_chr07 | 48312060                | GG                              | TT              | 1946903682               |
| SNP_P4_104580_48312062 | NC_021166.1    | Ca_kabuli_chr07 | 48312062                | TT                              | GG              | 1946903684               |
| SNP_P4_104581_48312086 | NC_021166.1    | Ca_kabuli_chr07 | 48312086                | GG                              | TT              | 1946903686               |
| SNP_P4_104583_48312135 | NC_021166.1    | Ca_kabuli_chr07 | 48312135                | CC                              | AA              | 1946903688               |
| SNP_P4_104584_48312156 | NC_021166.1    | Ca_kabuli_chr07 | 48312156                | CC                              | AA              | 1946903690               |
| SNP_P4_104585_48312159 | NC_021166.1    | Ca_kabuli_chr07 | 48312159                | GG                              | TT              | 1946903692               |
| SNP_P4_104586_48312514 | NC_021166.1    | Ca_kabuli_chr07 | 48312514                | AA                              | GG              | 1946903694               |
| SNP_P4_104587_48312532 | NC_021166.1    | Ca_kabuli_chr07 | 48312532                | TT                              | GG              | 1946903697               |
| SNP_P4_104588_48312544 | NC_021166.1    | Ca_kabuli_chr07 | 48312544                | AA                              | GG              | 1946903699               |
| SNP_P4_104590_48312576 | NC_021166.1    | Ca_kabuli_chr07 | 48312576                | TT                              | CC              | 1946903701               |
| SNP_P4_104591_48312601 | NC_021166.1    | Ca_kabuli_chr07 | 48312601                | AA                              | GG              | 1946903703               |
| SNP_P4_104593_48312686 | NC_021166.1    | Ca_kabuli_chr07 | 48312686                | GG                              | AA              | 1946903705               |
| SNP_P4_104594_48312688 | NC_021166.1    | Ca_kabuli_chr07 | 48312688                | TT                              | GG              | 1946903707               |
| SNP_P4_104595_48312689 | NC_021166.1    | Ca_kabuli_chr07 | 48312689                | GG                              | AA              | 1946903709               |
| SNP_P4_104596_48312692 | NC_021166.1    | Ca_kabuli_chr07 | 48312692                | TT                              | CC              | 1946903711               |
| SNP_P4_104597_48312966 | NC_021166.1    | Ca_kabuli_chr07 | 48312966                | CC                              | AA              | 1946903713               |
| SNP_P4_104598_48312994 | NC_021166.1    | Ca_kabuli_chr07 | 48312994                | CC                              | AA              | 1946903715               |
| SNP_P4_104599_48313066 | NC_021166.1    | Ca_kabuli_chr07 | 48313066                | GG                              | AA              | 1946903717               |
| SNP_P4_104600_48313095 | NC_021166.1    | Ca_kabuli_chr07 | 48313095                | GG                              | AA              | 1946903719               |
| SNP_P4_104601_48328135 | NC_021166.1    | Ca_kabuli_chr07 | 48328135                | GG                              | AA              | 1946903721               |
| SNP_P4_104602_48328239 | NC_021166.1    | Ca_kabuli_chr07 | 48328239                | TT                              | CC              | 1946903723               |
| SNP_P4_104603_48328305 | NC_021166.1    | Ca_kabuli_chr07 | 48328305                | AA                              | TT              | 1946903725               |
| SNP_P4_104604_48328377 | NC_021166.1    | Ca_kabuli_chr07 | 48328377                | GG                              | AA              | 1946903727               |
| SNP_P4_104605_48328583 | NC_021166.1    | Ca_kabuli_chr07 | 48328583                | TT                              | CC              | 1946903729               |
| SNP_P4_104606_48329894 | NC_021166.1    | Ca_kabuli_chr07 | 48329894                | AA                              | GG              | 1946903731               |
| SNP_P4_104607_48329898 | NC_021166.1    | Ca_kabuli_chr07 | 48329898                | GG                              | TT              | 1946903733               |
| SNP_P4_104608_48329909 | NC_021166.1    | Ca_kabuli_chr07 | 48329909                | GG                              | TT              | 1946903735               |
| SNP_P4_104609_48329964 | NC_021166.1    | Ca_kabuli_chr07 | 48329964                | TT                              | CC              | 1946903737               |
| SNP_P4_104610_48330012 | NC_021166.1    | Ca_kabuli_chr07 | 48330012                | AA                              | TT              | 1946903739               |
| SNP_P4_104611_48330328 | NC_021166.1    | Ca_kabuli_chr07 | 48330328                | TT                              | CC              | 1946903741               |
| SNP_P4_104612_48337071 | NC_021166.1    | Ca_kabuli_chr07 | 48337071                | TT                              | CC              | 1946903743               |
| SNP_P4_104613_48337156 | NC_021166.1    | Ca_kabuli_chr07 | 48337156                | GG                              | AA              | 1946903746               |
| SNP_P4_104614_48337261 | NC_021166.1    | Ca_kabuli_chr07 | 48337261                | TT                              | CC              | 1946903748               |
| SNP_P4_104615_48337267 | NC_021166.1    | Ca_kabuli_chr07 | 48337267                | TT                              | GG              | 1946903750               |
| SNP_P4_104616_48337309 | NC_021166.1    | Ca_kabuli_chr07 | 48337309                | TT                              | CC              | 1946903752               |

| SNPs IDs               | Chromosome IDs | Chromosomes     | Physical positions (bp) | CDC Frontier (Reference genome) | (ILWC46 & LPNB) | NCBI SNPdb Accession IDs |
|------------------------|----------------|-----------------|-------------------------|---------------------------------|-----------------|--------------------------|
| SNP_P4_104617_48337310 | NC_021166.1    | Ca_kabuli_chr07 | 48337310                | CC                              | TT              | 1946903754               |
| SNP_P4_104618_48337321 | NC_021166.1    | Ca_kabuli_chr07 | 48337321                | TT                              | GG              | 1946903757               |
| SNP_P4_104619_48337456 | NC_021166.1    | Ca_kabuli_chr07 | 48337456                | CC                              | TT              | 1946903759               |
| SNP_P4_104620_48337486 | NC_021166.1    | Ca_kabuli_chr07 | 48337486                | TT                              | CC              | 1946903761               |
| SNP_P4_104621_48337547 | NC_021166.1    | Ca_kabuli_chr07 | 48337547                | GG                              | AA              | 1946903763               |
| SNP_P4_104622_48337679 | NC_021166.1    | Ca_kabuli_chr07 | 48337679                | AA                              | GG              | 1946903765               |
| SNP_P4_104623_48366060 | NC_021166.1    | Ca_kabuli_chr07 | 48366060                | CC                              | GG              | 1946903767               |
| SNP_P4_104624_48366129 | NC_021166.1    | Ca_kabuli_chr07 | 48366129                | TT                              | CC              | 1946903769               |
| SNP_P4_104625_48366314 | NC_021166.1    | Ca_kabuli_chr07 | 48366314                | CC                              | AA              | 1946903770               |
| SNP_P4_104626_48366427 | NC_021166.1    | Ca_kabuli_chr07 | 48366427                | AA                              | TT              | 1946903771               |
| SNP_P4_104627_48367034 | NC_021166.1    | Ca_kabuli_chr07 | 48367034                | CC                              | TT              | 1946903772               |
| SNP_P4_104628_48378218 | NC_021166.1    | Ca_kabuli_chr07 | 48378218                | GG                              | AA              | 1946903773               |
| SNP_P4_104629_48390553 | NC_021166.1    | Ca_kabuli_chr07 | 48390553                | CC                              | AA              | 1946903774               |
| SNP_P4_104631_48392132 | NC_021166.1    | Ca_kabuli_chr07 | 48392132                | AA                              | CC              | 1946903775               |
| SNP_P4_104632_48392226 | NC_021166.1    | Ca_kabuli_chr07 | 48392226                | TT                              | CC              | 1946903776               |
| SNP_P4_104633_48392311 | NC_021166.1    | Ca_kabuli_chr07 | 48392311                | TT                              | CC              | 1946903777               |
| SNP_P4_104634_48392323 | NC_021166.1    | Ca_kabuli_chr07 | 48392323                | AA                              | GG              | 1946903779               |
| SNP_P4_104635_48392362 | NC_021166.1    | Ca_kabuli_chr07 | 48392362                | GG                              | TT              | 1946903781               |
| SNP_P4_104636_48392409 | NC_021166.1    | Ca_kabuli_chr07 | 48392409                | CC                              | TT              | 1946903783               |
| SNP_P4_104637_48392490 | NC_021166.1    | Ca_kabuli_chr07 | 48392490                | CC                              | TT              | 1946903785               |
| SNP_P4_104638_48392610 | NC_021166.1    | Ca_kabuli_chr07 | 48392610                | CC                              | AA              | 1946903787               |
| SNP_P4_104639_48392612 | NC_021166.1    | Ca_kabuli_chr07 | 48392612                | AA                              | CC              | 1946903790               |
| SNP_P4_104641_48392699 | NC_021166.1    | Ca_kabuli_chr07 | 48392699                | TT                              | AA              | 1946903792               |
| SNP_P4_104642_48392741 | NC_021166.1    | Ca_kabuli_chr07 | 48392741                | GG                              | CC              | 1946903794               |
| SNP_P4_104643_48392801 | NC_021166.1    | Ca_kabuli_chr07 | 48392801                | GG                              | TT              | 1946903796               |
| SNP_P4_104644_48392915 | NC_021166.1    | Ca_kabuli_chr07 | 48392915                | AA                              | GG              | 1946903798               |
| SNP_P4_104645_48392923 | NC_021166.1    | Ca_kabuli_chr07 | 48392923                | TT                              | AA              | 1946903800               |
| SNP_P4_104646_48393015 | NC_021166.1    | Ca_kabuli_chr07 | 48393015                | TT                              | CC              | 1946903802               |
| SNP_P4_104647_48422190 | NC_021166.1    | Ca_kabuli_chr07 | 48422190                | CC                              | TT              | 1946903804               |
| SNP_P4_104648_48426753 | NC_021166.1    | Ca_kabuli_chr07 | 48426753                | AA                              | GG              | 1946903806               |
| SNP_P4_104649_48426755 | NC_021166.1    | Ca_kabuli_chr07 | 48426755                | GG                              | TT              | 1946903808               |
| SNP_P4_104651_48429431 | NC_021166.1    | Ca_kabuli_chr07 | 48429431                | AA                              | GG              | 1946903810               |
| SNP_P4_104652_48429450 | NC_021166.1    | Ca_kabuli_chr07 | 48429450                | CC                              | AA              | 1946903812               |
| SNP_P4_104653_48429507 | NC_021166.1    | Ca_kabuli_chr07 | 48429507                | GG                              | TT              | 1946903815               |
| SNP_P4_104654_48429629 | NC_021166.1    | Ca_kabuli_chr07 | 48429629                | GG                              | AA              | 1946903817               |
| SNP_P4_104655_48436553 | NC_021166.1    | Ca_kabuli_chr07 | 48436553                | AA                              | GG              | 1946903819               |
| SNP_P4_104657_48437089 | NC_021166.1    | Ca_kabuli_chr07 | 48437089                | AA                              | TT              | 1946903821               |
| SNP_P4_104658_48437110 | NC_021166.1    | Ca_kabuli_chr07 | 48437110                | CC                              | TT              | 1946903823               |
| SNP_P4_104660_48498134 | NC_021166.1    | Ca_kabuli_chr07 | 48498134                | AA                              | TT              | 1946903825               |
| SNP_P4_104661_48498166 | NC_021166.1    | Ca_kabuli_chr07 | 48498166                | CC                              | TT              | 1946903827               |
| SNP_P4_104662_48506854 | NC_021166.1    | Ca_kabuli_chr07 | 48506854                | CC                              | AA              | 1946903829               |
| SNP_P4_104663_48535881 | NC_021166.1    | Ca_kabuli_chr07 | 48535881                | AA                              | CC              | 1946903831               |

| SNPs IDs               | Chromosome IDs | Chromosomes     | Physical positions (bp) | CDC Frontier (Reference genome) | (ILWC46 & LPNB) | NCBI SNPdb Accession IDs |
|------------------------|----------------|-----------------|-------------------------|---------------------------------|-----------------|--------------------------|
| SNP_P4_104664_48548003 | NC_021166.1    | Ca_kabuli_chr07 | 48548003                | AA                              | TT              | 1946903833               |
| SNP_P4_104665_48611308 | NC_021166.1    | Ca_kabuli_chr07 | 48611308                | TT                              | CC              | 1946903835               |
| SNP_P4_104666_48611464 | NC_021166.1    | Ca_kabuli_chr07 | 48611464                | TT                              | AA              | 1946903838               |
| SNP_P4_104667_48611515 | NC_021166.1    | Ca_kabuli_chr07 | 48611515                | CC                              | TT              | 1946903840               |
| SNP_P4_104668_48611542 | NC_021166.1    | Ca_kabuli_chr07 | 48611542                | TT                              | CC              | 1946903842               |
| SNP_P4_104669_48612016 | NC_021166.1    | Ca_kabuli_chr07 | 48612016                | CC                              | TT              | 1946903844               |
| SNP_P4_104670_48616509 | NC_021166.1    | Ca_kabuli_chr07 | 48616509                | TT                              | GG              | 1946903846               |
| SNP_P4_104671_48616542 | NC_021166.1    | Ca_kabuli_chr07 | 48616542                | TT                              | GG              | 1946903848               |
| SNP_P4_104672_48616559 | NC_021166.1    | Ca_kabuli_chr07 | 48616559                | AA                              | CC              | 1946903850               |
| SNP_P4_104673_48631826 | NC_021166.1    | Ca_kabuli_chr07 | 48631826                | CC                              | TT              | 1946903852               |
| SNP_P4_104674_48634017 | NC_021166.1    | Ca_kabuli_chr07 | 48634017                | AA                              | GG              | 1946903854               |
| SNP_P4_104675_48636935 | NC_021166.1    | Ca_kabuli_chr07 | 48636935                | AA                              | CC              | 1946903856               |
| SNP_P4_104676_48636950 | NC_021166.1    | Ca_kabuli_chr07 | 48636950                | GG                              | AA              | 1946903858               |
| SNP_P4_104677_48664964 | NC_021166.1    | Ca_kabuli_chr07 | 48664964                | GG                              | TT              | 1946903860               |
| SNP_P4_104679_48677857 | NC_021166.1    | Ca_kabuli_chr07 | 48677857                | AA                              | GG              | 1946903862               |
| SNP_P4_104680_48677897 | NC_021166.1    | Ca_kabuli_chr07 | 48677897                | AA                              | TT              | 1946903864               |
| SNP_P4_104681_48678170 | NC_021166.1    | Ca_kabuli_chr07 | 48678170                | AA                              | GG              | 1946903866               |
| SNP_P4_104682_48678186 | NC_021166.1    | Ca_kabuli_chr07 | 48678186                | CC                              | TT              | 1946903868               |
| SNP_P4_104683_48678272 | NC_021166.1    | Ca_kabuli_chr07 | 48678272                | CC                              | AA              | 1946903870               |
| SNP_P4_104684_48678279 | NC_021166.1    | Ca_kabuli_chr07 | 48678279                | AA                              | CC              | 1946903872               |
| SNP_P4_104685_48678289 | NC_021166.1    | Ca_kabuli_chr07 | 48678289                | AA                              | GG              | 1946903874               |
| SNP_P4_104686_48678292 | NC_021166.1    | Ca_kabuli_chr07 | 48678292                | AA                              | GG              | 1946903876               |
| SNP_P4_104687_48678296 | NC_021166.1    | Ca_kabuli_chr07 | 48678296                | TT                              | CC              | 1946903878               |
| SNP_P4_104688_48678369 | NC_021166.1    | Ca_kabuli_chr07 | 48678369                | GG                              | AA              | 1946903880               |
| SNP_P4_104689_48678525 | NC_021166.1    | Ca_kabuli_chr07 | 48678525                | CC                              | TT              | 1946903882               |
| SNP_P4_104690_48678533 | NC_021166.1    | Ca_kabuli_chr07 | 48678533                | TT                              | CC              | 1946903884               |
| SNP_P4_104691_48678540 | NC_021166.1    | Ca_kabuli_chr07 | 48678540                | AA                              | GG              | 1946903886               |
| SNP_P4_104692_48678546 | NC_021166.1    | Ca_kabuli_chr07 | 48678546                | TT                              | CC              | 1946903888               |
| SNP_P4_104693_48678549 | NC_021166.1    | Ca_kabuli_chr07 | 48678549                | CC                              | TT              | 1946903890               |
| SNP_P4_104694_48678567 | NC_021166.1    | Ca_kabuli_chr07 | 48678567                | TT                              | CC              | 1946903892               |
| SNP_P4_104695_48678572 | NC_021166.1    | Ca_kabuli_chr07 | 48678572                | CC                              | TT              | 1946903894               |
| SNP_P4_104696_48678582 | NC_021166.1    | Ca_kabuli_chr07 | 48678582                | CC                              | TT              | 1946903896               |
| SNP_P4_104697_48678607 | NC_021166.1    | Ca_kabuli_chr07 | 48678607                | AA                              | GG              | 1946903898               |
| SNP_P4_104698_48679572 | NC_021166.1    | Ca_kabuli_chr07 | 48679572                | GG                              | AA              | 1946903901               |
| SNP_P4_104699_48703776 | NC_021166.1    | Ca_kabuli_chr07 | 48703776                | CC                              | TT              | 1946903903               |
| SNP_P4_104701_48736810 | NC_021166.1    | Ca_kabuli_chr07 | 48736810                | AA                              | TT              | 1946903905               |
| SNP_P4_104702_48748318 | NC_021166.1    | Ca_kabuli_chr07 | 48748318                | TT                              | GG              | 1946903907               |
| SNP_P4_104703_48750090 | NC_021166.1    | Ca_kabuli_chr07 | 48750090                | GG                              | AA              | 1946903909               |
| SNP_P4_104704_48750091 | NC_021166.1    | Ca_kabuli_chr07 | 48750091                | TT                              | CC              | 1946903911               |
| SNP_P4_104705_48768709 | NC_021166.1    | Ca_kabuli_chr07 | 48768709                | CC                              | TT              | 1946903913               |
| SNP_P4_104706_48768757 | NC_021166.1    | Ca_kabuli_chr07 | 48768757                | GG                              | TT              | 1946903915               |
| SNP_P4_104707_48785109 | NC_021166.1    | Ca_kabuli_chr07 | 48785109                | CC                              | TT              | 1946903917               |

| SNPs IDs               | Chromosome IDs | Chromosomes     | Physical positions (bp) | CDC Frontier (Reference genome) | (ILWC46 & LPNB) | NCBI SNPdb Accession IDs |
|------------------------|----------------|-----------------|-------------------------|---------------------------------|-----------------|--------------------------|
| SNP_P4_104708_48787470 | NC_021166.1    | Ca_kabuli_chr07 | 48787470                | AA                              | GG              | 1946903919               |
| SNP_P4_104709_48788157 | NC_021166.1    | Ca_kabuli_chr07 | 48788157                | CC                              | AA              | 1946903921               |
| SNP_P4_104710_48788311 | NC_021166.1    | Ca_kabuli_chr07 | 48788311                | AA                              | CC              | 1946903923               |
| SNP_P4_104711_48788363 | NC_021166.1    | Ca_kabuli_chr07 | 48788363                | GG                              | TT              | 1946903925               |
| SNP_P4_104712_48788367 | NC_021166.1    | Ca_kabuli_chr07 | 48788367                | GG                              | AA              | 1946903927               |
| SNP_P4_104713_48788723 | NC_021166.1    | Ca_kabuli_chr07 | 48788723                | AA                              | GG              | 1946903929               |
| SNP_P4_104714_48790876 | NC_021166.1    | Ca_kabuli_chr07 | 48790876                | CC                              | TT              | 1946903931               |
| SNP_P4_104715_48805298 | NC_021166.1    | Ca_kabuli_chr07 | 48805298                | AA                              | CC              | 1946903933               |
| SNP_P4_104717_48814121 | NC_021166.1    | Ca_kabuli_chr07 | 48814121                | AA                              | GG              | 1946903935               |
| SNP_P4_104718_48814330 | NC_021166.1    | Ca_kabuli_chr07 | 48814330                | CC                              | AA              | 1946903937               |
| SNP_P4_104719_48814343 | NC_021166.1    | Ca_kabuli_chr07 | 48814343                | CC                              | GG              | 1946903939               |
| SNP_P4_104720_48818826 | NC_021166.1    | Ca_kabuli_chr07 | 48818826                | CC                              | TT              | 1946903941               |
| SNP_P4_104721_48826482 | NC_021166.1    | Ca_kabuli_chr07 | 48826482                | GG                              | TT              | 1946903943               |
| SNP_P4_104722_48826601 | NC_021166.1    | Ca_kabuli_chr07 | 48826601                | AA                              | GG              | 1946903945               |
| SNP_P4_104723_48826605 | NC_021166.1    | Ca_kabuli_chr07 | 48826605                | CC                              | TT              | 1946903947               |
| SNP_P4_104724_48834815 | NC_021166.1    | Ca_kabuli_chr07 | 48834815                | TT                              | CC              | 1946903949               |
| SNP_P4_104725_48845443 | NC_021166.1    | Ca_kabuli_chr07 | 48845443                | AA                              | GG              | 1946903951               |
| SNP_P4_104726_48845444 | NC_021166.1    | Ca_kabuli_chr07 | 48845444                | AA                              | TT              | 1946903953               |
| SNP_P4_104728_48846307 | NC_021166.1    | Ca_kabuli_chr07 | 48846307                | AA                              | TT              | 1946903955               |
| SNP_P4_104729_48847202 | NC_021166.1    | Ca_kabuli_chr07 | 48847202                | GG                              | TT              | 1946903957               |
| SNP_P4_104730_48847533 | NC_021166.1    | Ca_kabuli_chr07 | 48847533                | AA                              | GG              | 1946903959               |
| SNP_P4_104731_48855881 | NC_021166.1    | Ca_kabuli_chr07 | 48855881                | TT                              | CC              | 1946903961               |
| SNP_P4_104732_48856871 | NC_021166.1    | Ca_kabuli_chr07 | 48856871                | TT                              | CC              | 1946903963               |
| SNP_P4_104733_48856881 | NC_021166.1    | Ca_kabuli_chr07 | 48856881                | GG                              | AA              | 1946903965               |
| SNP_P4_104734_48858275 | NC_021166.1    | Ca_kabuli_chr07 | 48858275                | CC                              | TT              | 1946903967               |
| SNP_P4_104735_48858365 | NC_021166.1    | Ca_kabuli_chr07 | 48858365                | GG                              | TT              | 1946903969               |
| SNP_P4_104736_48858412 | NC_021166.1    | Ca_kabuli_chr07 | 48858412                | GG                              | CC              | 1946903971               |
| SNP_P4_104738_48871999 | NC_021166.1    | Ca_kabuli_chr07 | 48871999                | TT                              | GG              | 1946903973               |
| SNP_P4_104739_48872172 | NC_021166.1    | Ca_kabuli_chr07 | 48872172                | GG                              | AA              | 1946903975               |
| SNP_P4_104740_48872609 | NC_021166.1    | Ca_kabuli_chr07 | 48872609                | GG                              | AA              | 1946903977               |
| SNP_P4_104741_48872610 | NC_021166.1    | Ca_kabuli_chr07 | 48872610                | AA                              | TT              | 1946903979               |
| SNP_P4_104742_48872611 | NC_021166.1    | Ca_kabuli_chr07 | 48872611                | TT                              | CC              | 1946903981               |
| SNP_P4_104743_48872626 | NC_021166.1    | Ca_kabuli_chr07 | 48872626                | TT                              | AA              | 1946903983               |
| SNP_P4_104744_48872667 | NC_021166.1    | Ca_kabuli_chr07 | 48872667                | GG                              | AA              | 1946903985               |
| SNP_P4_104745_48873386 | NC_021166.1    | Ca_kabuli_chr07 | 48873386                | TT                              | CC              | 1946903987               |
| SNP_P4_104747_48877154 | NC_021166.1    | Ca_kabuli_chr07 | 48877154                | CC                              | TT              | 1946903989               |
| SNP_P4_104748_48879234 | NC_021166.1    | Ca_kabuli_chr07 | 48879234                | TT                              | AA              | 1946903991               |
| SNP_P4_104749_48879410 | NC_021166.1    | Ca_kabuli_chr07 | 48879410                | CC                              | GG              | 1946903993               |
| SNP_P4_104750_48879470 | NC_021166.1    | Ca_kabuli_chr07 | 48879470                | AA                              | GG              | 1946903995               |
| SNP_P4_104751_48885114 | NC_021166.1    | Ca_kabuli_chr07 | 48885114                | GG                              | AA              | 1946903997               |
| SNP_P4_104752_48894685 | NC_021166.1    | Ca_kabuli_chr07 | 48894685                | AA                              | GG              | 1946903999               |
| SNP_P4_104753_48918654 | NC_021166.1    | Ca_kabuli_chr07 | 48918654                | TT                              | GG              | 1946904001               |

| SNPs IDs               | Chromosome IDs | Chromosomes     | Physical positions (bp) | CDC Frontier (Reference genome) | (ILWC46 & LPNB) | NCBI SNPdb Accession IDs |
|------------------------|----------------|-----------------|-------------------------|---------------------------------|-----------------|--------------------------|
| SNP_P4_104754_48918656 | NC_021166.1    | Ca_kabuli_chr07 | 48918656                | GG                              | AA              | 1946904003               |
| SNP_P4_104755_48925810 | NC_021166.1    | Ca_kabuli_chr07 | 48925810                | GG                              | AA              | 1946904005               |
| SNP_P4_104756_48930975 | NC_021166.1    | Ca_kabuli_chr07 | 48930975                | TT                              | CC              | 1946904007               |
| SNP_P4_104758_48942657 | NC_021166.1    | Ca_kabuli_chr07 | 48942657                | CC                              | TT              | 1946904009               |
| SNP_P4_104759_48943988 | NC_021166.1    | Ca_kabuli_chr07 | 48943988                | CC                              | AA              | 1946904012               |
| SNP_P4_104760_48944154 | NC_021166.1    | Ca_kabuli_chr07 | 48944154                | AA                              | CC              | 1946904014               |
| SNP_P4_104761_48944178 | NC_021166.1    | Ca_kabuli_chr07 | 48944178                | GG                              | AA              | 1946904016               |
| SNP_P4_104762_48944279 | NC_021166.1    | Ca_kabuli_chr07 | 48944279                | TT                              | GG              | 1946904017               |
| SNP_P4_104763_48946048 | NC_021166.1    | Ca_kabuli_chr07 | 48946048                | GG                              | AA              | 1946904019               |
| SNP_P4_104764_48950061 | NC_021166.1    | Ca_kabuli_chr07 | 48950061                | TT                              | AA              | 1946904021               |
| SNP_P4_104766_2648     | NC_021167.1    | Ca_kabuli_chr08 | 2648                    | GG                              | AA              | 1946904023               |
| SNP_P4_104767_2666     | NC_021167.1    | Ca_kabuli_chr08 | 2666                    | GG                              | TT              | 1946904025               |
| SNP_P4_104768_3915     | NC_021167.1    | Ca_kabuli_chr08 | 3915                    | TT                              | GG              | 1946904027               |
| SNP_P4_104769_3917     | NC_021167.1    | Ca_kabuli_chr08 | 3917                    | GG                              | AA              | 1946904029               |
| SNP_P4_104770_12731    | NC_021167.1    | Ca_kabuli_chr08 | 12731                   | CC                              | TT              | 1946904031               |
| SNP_P4_104771_12748    | NC_021167.1    | Ca_kabuli_chr08 | 12748                   | AA                              | GG              | 1946904033               |
| SNP_P4_104772_12786    | NC_021167.1    | Ca_kabuli_chr08 | 12786                   | TT                              | GG              | 1946904035               |
| SNP_P4_104773_12826    | NC_021167.1    | Ca_kabuli_chr08 | 12826                   | AA                              | GG              | 1946904037               |
| SNP_P4_104774_12884    | NC_021167.1    | Ca_kabuli_chr08 | 12884                   | GG                              | AA              | 1946904039               |
| SNP_P4_104775_13151    | NC_021167.1    | Ca_kabuli_chr08 | 13151                   | CC                              | TT              | 1946904041               |
| SNP_P4_104777_13947    | NC_021167.1    | Ca_kabuli_chr08 | 13947                   | GG                              | AA              | 1946904043               |
| SNP_P4_104778_15428    | NC_021167.1    | Ca_kabuli_chr08 | 15428                   | CC                              | TT              | 1946904045               |
| SNP_P4_104780_15774    | NC_021167.1    | Ca_kabuli_chr08 | 15774                   | AA                              | GG              | 1946904047               |
| SNP_P4_104782_16049    | NC_021167.1    | Ca_kabuli_chr08 | 16049                   | CC                              | AA              | 1946904049               |
| SNP_P4_104783_16076    | NC_021167.1    | Ca_kabuli_chr08 | 16076                   | CC                              | TT              | 1946904051               |
| SNP_P4_104785_16747    | NC_021167.1    | Ca_kabuli_chr08 | 16747                   | CC                              | GG              | 1946904053               |
| SNP_P4_104786_17327    | NC_021167.1    | Ca_kabuli_chr08 | 17327                   | GG                              | AA              | 1946904055               |
| SNP_P4_104787_17770    | NC_021167.1    | Ca_kabuli_chr08 | 17770                   | AA                              | GG              | 1946904057               |
| SNP_P4_104788_17812    | NC_021167.1    | Ca_kabuli_chr08 | 17812                   | TT                              | GG              | 1946904059               |
| SNP_P4_104789_17961    | NC_021167.1    | Ca_kabuli_chr08 | 17961                   | AA                              | CC              | 1946904061               |
| SNP_P4_104790_18055    | NC_021167.1    | Ca_kabuli_chr08 | 18055                   | AA                              | CC              | 1946904063               |
| SNP_P4_104791_18201    | NC_021167.1    | Ca_kabuli_chr08 | 18201                   | GG                              | AA              | 1946904065               |
| SNP_P4_104792_18205    | NC_021167.1    | Ca_kabuli_chr08 | 18205                   | TT                              | CC              | 1946904067               |
| SNP_P4_104793_18256    | NC_021167.1    | Ca_kabuli_chr08 | 18256                   | TT                              | CC              | 1946904069               |
| SNP_P4_104794_18261    | NC_021167.1    | Ca_kabuli_chr08 | 18261                   | GG                              | AA              | 1946904071               |
| SNP_P4_104796_21982    | NC_021167.1    | Ca_kabuli_chr08 | 21982                   | AA                              | GG              | 1946904073               |
| SNP_P4_104797_24055    | NC_021167.1    | Ca_kabuli_chr08 | 24055                   | TT                              | AA              | 1946904075               |
| SNP_P4_104799_35979    | NC_021167.1    | Ca_kabuli_chr08 | 35979                   | TT                              | CC              | 1946904078               |
| SNP_P4_104800_37460    | NC_021167.1    | Ca_kabuli_chr08 | 37460                   | AA                              | GG              | 1946904080               |
| SNP_P4_104801_37917    | NC_021167.1    | Ca_kabuli_chr08 | 37917                   | TT                              | CC              | 1946904082               |
| SNP_P4_104802_45517    | NC_021167.1    | Ca_kabuli_chr08 | 45517                   | TT                              | GG              | 1946904084               |
| SNP_P4_104803_45519    | NC_021167.1    | Ca_kabuli_chr08 | 45519                   | TT                              | AA              | 1946904086               |

| SNPs IDs             | Chromosome IDs | Chromosomes     | Physical positions (bp) | CDC Frontier (Reference genome) | (ILWC46 & LPNB) | NCBI SNPdb Accession IDs |
|----------------------|----------------|-----------------|-------------------------|---------------------------------|-----------------|--------------------------|
| SNP_P4_104805_47640  | NC_021167.1    | Ca_kabuli_chr08 | 47640                   | CC                              | TT              | 1946904088               |
| SNP_P4_104806_63067  | NC_021167.1    | Ca_kabuli_chr08 | 63067                   | TT                              | CC              | 1946904090               |
| SNP_P4_104807_66004  | NC_021167.1    | Ca_kabuli_chr08 | 66004                   | CC                              | TT              | 1946904092               |
| SNP_P4_104810_109604 | NC_021167.1    | Ca_kabuli_chr08 | 109604                  | GG                              | TT              | 1946904094               |
| SNP_P4_104811_122636 | NC_021167.1    | Ca_kabuli_chr08 | 122636                  | AA                              | TT              | 1946904096               |
| SNP_P4_104812_155383 | NC_021167.1    | Ca_kabuli_chr08 | 155383                  | GG                              | AA              | 1946904098               |
| SNP_P4_104813_191214 | NC_021167.1    | Ca_kabuli_chr08 | 191214                  | CC                              | AA              | 1946904101               |
| SNP_P4_104814_191376 | NC_021167.1    | Ca_kabuli_chr08 | 191376                  | GG                              | AA              | 1946904103               |
| SNP_P4_104815_193824 | NC_021167.1    | Ca_kabuli_chr08 | 193824                  | CC                              | TT              | 1946904105               |
| SNP_P4_104816_193858 | NC_021167.1    | Ca_kabuli_chr08 | 193858                  | AA                              | GG              | 1946904107               |
| SNP_P4_104817_193908 | NC_021167.1    | Ca_kabuli_chr08 | 193908                  | AA                              | GG              | 1946904109               |
| SNP_P4_104818_193959 | NC_021167.1    | Ca_kabuli_chr08 | 193959                  | AA                              | GG              | 1946904111               |
| SNP_P4_104819_194046 | NC_021167.1    | Ca_kabuli_chr08 | 194046                  | CC                              | TT              | 1946904113               |
| SNP_P4_104820_194130 | NC_021167.1    | Ca_kabuli_chr08 | 194130                  | AA                              | GG              | 1946904115               |
| SNP_P4_104821_200021 | NC_021167.1    | Ca_kabuli_chr08 | 200021                  | CC                              | TT              | 1946904117               |
| SNP_P4_104822_200036 | NC_021167.1    | Ca_kabuli_chr08 | 200036                  | GG                              | CC              | 1946904119               |
| SNP_P4_104823_207167 | NC_021167.1    | Ca_kabuli_chr08 | 207167                  | TT                              | CC              | 1946904121               |
| SNP_P4_104824_245292 | NC_021167.1    | Ca_kabuli_chr08 | 245292                  | TT                              | GG              | 1946904123               |
| SNP_P4_104825_261088 | NC_021167.1    | Ca_kabuli_chr08 | 261088                  | CC                              | TT              | 1946904126               |
| SNP_P4_104826_287411 | NC_021167.1    | Ca_kabuli_chr08 | 287411                  | AA                              | TT              | 1946904128               |
| SNP_P4_104827_305437 | NC_021167.1    | Ca_kabuli_chr08 | 305437                  | GG                              | AA              | 1946904130               |
| SNP_P4_104828_316251 | NC_021167.1    | Ca_kabuli_chr08 | 316251                  | AA                              | TT              | 1946904132               |
| SNP_P4_104829_316441 | NC_021167.1    | Ca_kabuli_chr08 | 316441                  | CC                              | TT              | 1946904134               |
| SNP_P4_104830_331038 | NC_021167.1    | Ca_kabuli_chr08 | 331038                  | AA                              | CC              | 1946904136               |
| SNP_P4_104831_331056 | NC_021167.1    | Ca_kabuli_chr08 | 331056                  | AA                              | GG              | 1946904138               |
| SNP_P4_104832_331198 | NC_021167.1    | Ca_kabuli_chr08 | 331198                  | GG                              | AA              | 1946904140               |
| SNP_P4_104833_335259 | NC_021167.1    | Ca_kabuli_chr08 | 335259                  | CC                              | TT              | 1946904142               |
| SNP_P4_104834_335406 | NC_021167.1    | Ca_kabuli_chr08 | 335406                  | AA                              | GG              | 1946904144               |
| SNP_P4_104835_362179 | NC_021167.1    | Ca_kabuli_chr08 | 362179                  | AA                              | GG              | 1946904146               |
| SNP_P4_104836_381755 | NC_021167.1    | Ca_kabuli_chr08 | 381755                  | CC                              | TT              | 1946904148               |
| SNP_P4_104837_383509 | NC_021167.1    | Ca_kabuli_chr08 | 383509                  | CC                              | AA              | 1946904150               |
| SNP_P4_104839_415095 | NC_021167.1    | Ca_kabuli_chr08 | 415095                  | CC                              | TT              | 1946904153               |
| SNP_P4_104841_440254 | NC_021167.1    | Ca_kabuli_chr08 | 440254                  | AA                              | CC              | 1946904155               |
| SNP_P4_104844_468708 | NC_021167.1    | Ca_kabuli_chr08 | 468708                  | AA                              | GG              | 1946904157               |
| SNP_P4_104846_474249 | NC_021167.1    | Ca_kabuli_chr08 | 474249                  | AA                              | CC              | 1946904159               |
| SNP_P4_104847_494317 | NC_021167.1    | Ca_kabuli_chr08 | 494317                  | GG                              | AA              | 1946904160               |
| SNP_P4_104848_494479 | NC_021167.1    | Ca_kabuli_chr08 | 494479                  | CC                              | AA              | 1946904162               |
| SNP_P4_104849_495424 | NC_021167.1    | Ca_kabuli_chr08 | 495424                  | TT                              | CC              | 1946904164               |
| SNP_P4_104850_520301 | NC_021167.1    | Ca_kabuli_chr08 | 520301                  | AA                              | GG              | 1946904166               |
| SNP_P4_104851_520302 | NC_021167.1    | Ca_kabuli_chr08 | 520302                  | AA                              | GG              | 1946904168               |
| SNP_P4_104853_535646 | NC_021167.1    | Ca_kabuli_chr08 | 535646                  | AA                              | CC              | 1946904171               |
| SNP_P4_104854_580770 | NC_021167.1    | Ca_kabuli_chr08 | 580770                  | TT                              | AA              | 1946904173               |

| SNPs IDs              | Chromosome IDs | Chromosomes     | Physical positions (bp) | CDC Frontier (Reference genome) | (ILWC46 & LPNB) | NCBI SNPdb Accession IDs |
|-----------------------|----------------|-----------------|-------------------------|---------------------------------|-----------------|--------------------------|
| SNP_P4_104855_615792  | NC_021167.1    | Ca_kabuli_chr08 | 615792                  | TT                              | CC              | 1946904175               |
| SNP_P4_104856_615808  | NC_021167.1    | Ca_kabuli_chr08 | 615808                  | TT                              | GG              | 1946904177               |
| SNP_P4_104857_696577  | NC_021167.1    | Ca_kabuli_chr08 | 696577                  | TT                              | CC              | 1946904179               |
| SNP_P4_104858_696578  | NC_021167.1    | Ca_kabuli_chr08 | 696578                  | TT                              | GG              | 1946904181               |
| SNP_P4_104859_751797  | NC_021167.1    | Ca_kabuli_chr08 | 751797                  | GG                              | AA              | 1946904183               |
| SNP_P4_104860_754190  | NC_021167.1    | Ca_kabuli_chr08 | 754190                  | CC                              | TT              | 1946904185               |
| SNP_P4_104862_760731  | NC_021167.1    | Ca_kabuli_chr08 | 760731                  | CC                              | TT              | 1946904187               |
| SNP_P4_104863_784412  | NC_021167.1    | Ca_kabuli_chr08 | 784412                  | AA                              | GG              | 1946904189               |
| SNP_P4_104866_815709  | NC_021167.1    | Ca_kabuli_chr08 | 815709                  | TT                              | GG              | 1946904191               |
| SNP_P4_104867_866958  | NC_021167.1    | Ca_kabuli_chr08 | 866958                  | AA                              | CC              | 1946904193               |
| SNP_P4_104868_867800  | NC_021167.1    | Ca_kabuli_chr08 | 867800                  | CC                              | AA              | 1946904195               |
| SNP_P4_104870_906287  | NC_021167.1    | Ca_kabuli_chr08 | 906287                  | AA                              | CC              | 1946904197               |
| SNP_P4_104871_906477  | NC_021167.1    | Ca_kabuli_chr08 | 906477                  | CC                              | AA              | 1946904200               |
| SNP_P4_104872_920310  | NC_021167.1    | Ca_kabuli_chr08 | 920310                  | TT                              | GG              | 1946904202               |
| SNP_P4_104873_938139  | NC_021167.1    | Ca_kabuli_chr08 | 938139                  | CC                              | TT              | 1946904204               |
| SNP_P4_104874_938404  | NC_021167.1    | Ca_kabuli_chr08 | 938404                  | CC                              | TT              | 1946904206               |
| SNP_P4_104875_938437  | NC_021167.1    | Ca_kabuli_chr08 | 938437                  | CC                              | TT              | 1946904208               |
| SNP_P4_104876_938551  | NC_021167.1    | Ca_kabuli_chr08 | 938551                  | TT                              | CC              | 1946904210               |
| SNP_P4_104877_960918  | NC_021167.1    | Ca_kabuli_chr08 | 960918                  | AA                              | TT              | 1946904212               |
| SNP_P4_104879_1080050 | NC_021167.1    | Ca_kabuli_chr08 | 1080050                 | AA                              | GG              | 1946904214               |
| SNP_P4_104880_1080054 | NC_021167.1    | Ca_kabuli_chr08 | 1080054                 | GG                              | AA              | 1946904216               |
| SNP_P4_104881_1085102 | NC_021167.1    | Ca_kabuli_chr08 | 1085102                 | CC                              | TT              | 1946904218               |
| SNP_P4_104882_1130023 | NC_021167.1    | Ca_kabuli_chr08 | 1130023                 | GG                              | CC              | 1946904220               |
| SNP_P4_104883_1134537 | NC_021167.1    | Ca_kabuli_chr08 | 1134537                 | TT                              | CC              | 1946904222               |
| SNP_P4_104885_1183945 | NC_021167.1    | Ca_kabuli_chr08 | 1183945                 | GG                              | TT              | 1946904224               |
| SNP_P4_104887_1185411 | NC_021167.1    | Ca_kabuli_chr08 | 1185411                 | CC                              | TT              | 1946904226               |
| SNP_P4_104888_1185446 | NC_021167.1    | Ca_kabuli_chr08 | 1185446                 | CC                              | TT              | 1946904228               |
| SNP_P4_104890_1205613 | NC_021167.1    | Ca_kabuli_chr08 | 1205613                 | CC                              | TT              | 1946904230               |
| SNP_P4_104891_1223371 | NC_021167.1    | Ca_kabuli_chr08 | 1223371                 | AA                              | CC              | 1946904232               |
| SNP_P4_104892_1243535 | NC_021167.1    | Ca_kabuli_chr08 | 1243535                 | AA                              | CC              | 1946904234               |
| SNP_P4_104893_1243945 | NC_021167.1    | Ca_kabuli_chr08 | 1243945                 | CC                              | TT              | 1946904236               |
| SNP_P4_104894_1246210 | NC_021167.1    | Ca_kabuli_chr08 | 1246210                 | GG                              | TT              | 1946904238               |
| SNP_P4_104895_1284098 | NC_021167.1    | Ca_kabuli_chr08 | 1284098                 | CC                              | AA              | 1946904240               |
| SNP_P4_104896_1343026 | NC_021167.1    | Ca_kabuli_chr08 | 1343026                 | GG                              | CC              | 1946904242               |
| SNP_P4_104897_1343055 | NC_021167.1    | Ca_kabuli_chr08 | 1343055                 | AA                              | CC              | 1946904244               |
| SNP_P4_104898_1343265 | NC_021167.1    | Ca_kabuli_chr08 | 1343265                 | AA                              | GG              | 1946904246               |
| SNP_P4_104899_1343297 | NC_021167.1    | Ca_kabuli_chr08 | 1343297                 | AA                              | GG              | 1946904248               |
| SNP_P4_104900_1343311 | NC_021167.1    | Ca_kabuli_chr08 | 1343311                 | AA                              | GG              | 1946904250               |
| SNP_P4_104902_1349456 | NC_021167.1    | Ca_kabuli_chr08 | 1349456                 | GG                              | AA              | 1946904252               |
| SNP_P4_104903_1352423 | NC_021167.1    | Ca_kabuli_chr08 | 1352423                 | TT                              | CC              | 1946904254               |
| SNP_P4_104904_1353119 | NC_021167.1    | Ca_kabuli_chr08 | 1353119                 | GG                              | AA              | 1946904256               |
| SNP_P4_104905_1353125 | NC_021167.1    | Ca_kabuli_chr08 | 1353125                 | AA                              | GG              | 1946904258               |



| SNPs IDs              | Chromosome IDs | Chromosomes     | Physical positions (bp) | CDC Frontier (Reference genome) | (ILWC46 & LPNB) | NCBI SNPdb Accession IDs |
|-----------------------|----------------|-----------------|-------------------------|---------------------------------|-----------------|--------------------------|
| SNP_P4_104906_1353529 | NC_021167.1    | Ca_kabuli_chr08 | 1353529                 | AA                              | GG              | 1946904260               |
| SNP_P4_104907_1354783 | NC_021167.1    | Ca_kabuli_chr08 | 1354783                 | GG                              | AA              | 1946904262               |
| SNP_P4_104909_1378968 | NC_021167.1    | Ca_kabuli_chr08 | 1378968                 | AA                              | GG              | 1946904265               |
| SNP_P4_104910_1389083 | NC_021167.1    | Ca_kabuli_chr08 | 1389083                 | TT                              | CC              | 1946904267               |
| SNP_P4_104911_1393441 | NC_021167.1    | Ca_kabuli_chr08 | 1393441                 | AA                              | CC              | 1946904269               |
| SNP_P4_104912_1396928 | NC_021167.1    | Ca_kabuli_chr08 | 1396928                 | GG                              | AA              | 1946904271               |
| SNP_P4_104913_1430819 | NC_021167.1    | Ca_kabuli_chr08 | 1430819                 | AA                              | CC              | 1946904273               |
| SNP_P4_104914_1430822 | NC_021167.1    | Ca_kabuli_chr08 | 1430822                 | AA                              | TT              | 1946904275               |
| SNP_P4_104915_1439580 | NC_021167.1    | Ca_kabuli_chr08 | 1439580                 | CC                              | AA              | 1946904277               |
| SNP_P4_104917_1449000 | NC_021167.1    | Ca_kabuli_chr08 | 1449000                 | TT                              | AA              | 1946904279               |
| SNP_P4_104920_1473064 | NC_021167.1    | Ca_kabuli_chr08 | 1473064                 | GG                              | AA              | 1946904281               |
| SNP_P4_104921_1500184 | NC_021167.1    | Ca_kabuli_chr08 | 1500184                 | CC                              | TT              | 1946904283               |
| SNP_P4_104924_1525210 | NC_021167.1    | Ca_kabuli_chr08 | 1525210                 | TT                              | CC              | 1946904285               |
| SNP_P4_104925_1530812 | NC_021167.1    | Ca_kabuli_chr08 | 1530812                 | AA                              | GG              | 1946904287               |
| SNP_P4_104926_1542443 | NC_021167.1    | Ca_kabuli_chr08 | 1542443                 | GG                              | AA              | 1946904289               |
| SNP_P4_104928_1548323 | NC_021167.1    | Ca_kabuli_chr08 | 1548323                 | GG                              | AA              | 1946904292               |
| SNP_P4_104929_1560816 | NC_021167.1    | Ca_kabuli_chr08 | 1560816                 | AA                              | GG              | 1946904293               |
| SNP_P4_104932_1577131 | NC_021167.1    | Ca_kabuli_chr08 | 1577131                 | GG                              | TT              | 1946904295               |
| SNP_P4_104933_1583212 | NC_021167.1    | Ca_kabuli_chr08 | 1583212                 | AA                              | TT              | 1946904297               |
| SNP_P4_104934_1586657 | NC_021167.1    | Ca_kabuli_chr08 | 1586657                 | GG                              | TT              | 1946904300               |
| SNP_P4_104935_1602001 | NC_021167.1    | Ca_kabuli_chr08 | 1602001                 | AA                              | GG              | 1946904302               |
| SNP_P4_104936_1606152 | NC_021167.1    | Ca_kabuli_chr08 | 1606152                 | TT                              | CC              | 1946904304               |
| SNP_P4_104937_1616744 | NC_021167.1    | Ca_kabuli_chr08 | 1616744                 | TT                              | CC              | 1946904306               |
| SNP_P4_104939_1631242 | NC_021167.1    | Ca_kabuli_chr08 | 1631242                 | AA                              | TT              | 1946904308               |
| SNP_P4_104941_1651084 | NC_021167.1    | Ca_kabuli_chr08 | 1651084                 | GG                              | AA              | 1946904310               |
| SNP_P4_104943_1670975 | NC_021167.1    | Ca_kabuli_chr08 | 1670975                 | CC                              | TT              | 1946904312               |
| SNP_P4_104944_1672452 | NC_021167.1    | Ca_kabuli_chr08 | 1672452                 | AA                              | TT              | 1946904314               |
| SNP_P4_104945_1699965 | NC_021167.1    | Ca_kabuli_chr08 | 1699965                 | CC                              | TT              | 1946904317               |
| SNP_P4_104946_1699974 | NC_021167.1    | Ca_kabuli_chr08 | 1699974                 | CC                              | GG              | 1946904319               |
| SNP_P4_104947_1699990 | NC_021167.1    | Ca_kabuli_chr08 | 1699990                 | AA                              | GG              | 1946904322               |
| SNP_P4_104948_1701438 | NC_021167.1    | Ca_kabuli_chr08 | 1701438                 | GG                              | TT              | 1946904324               |
| SNP_P4_104949_1701486 | NC_021167.1    | Ca_kabuli_chr08 | 1701486                 | CC                              | GG              | 1946904326               |
| SNP_P4_104950_1739997 | NC_021167.1    | Ca_kabuli_chr08 | 1739997                 | GG                              | AA              | 1946904328               |
| SNP_P4_104951_1740003 | NC_021167.1    | Ca_kabuli_chr08 | 1740003                 | CC                              | TT              | 1946904330               |
| SNP_P4_104952_1740020 | NC_021167.1    | Ca_kabuli_chr08 | 1740020                 | AA                              | CC              | 1946904332               |
| SNP_P4_104956_1824210 | NC_021167.1    | Ca_kabuli_chr08 | 1824210                 | AA                              | GG              | 1946904334               |
| SNP_P4_104957_1827292 | NC_021167.1    | Ca_kabuli_chr08 | 1827292                 | TT                              | CC              | 1946904337               |
| SNP_P4_104959_1839195 | NC_021167.1    | Ca_kabuli_chr08 | 1839195                 | TT                              | AA              | 1946904339               |
| SNP_P4_104960_1839198 | NC_021167.1    | Ca_kabuli_chr08 | 1839198                 | TT                              | AA              | 1946904341               |
| SNP_P4_104961_1863587 | NC_021167.1    | Ca_kabuli_chr08 | 1863587                 | GG                              | AA              | 1946904343               |
| SNP_P4_104962_1863599 | NC_021167.1    | Ca_kabuli_chr08 | 1863599                 | CC                              | TT              | 1946904345               |
| SNP_P4_104963_1863707 | NC_021167.1    | Ca_kabuli_chr08 | 1863707                 | GG                              | AA              | 1946904347               |

| SNPs IDs              | Chromosome IDs | Chromosomes     | Physical positions (bp) | CDC Frontier (Reference genome) | (ILWC46 & LPNB) | NCBI SNPdb Accession IDs |
|-----------------------|----------------|-----------------|-------------------------|---------------------------------|-----------------|--------------------------|
| SNP_P4_104964_1864342 | NC_021167.1    | Ca_kabuli_chr08 | 1864342                 | TT                              | CC              | 1946904350               |
| SNP_P4_104965_1864346 | NC_021167.1    | Ca_kabuli_chr08 | 1864346                 | TT                              | CC              | 1946904352               |
| SNP_P4_104966_1864392 | NC_021167.1    | Ca_kabuli_chr08 | 1864392                 | TT                              | CC              | 1946904354               |
| SNP_P4_104967_1864403 | NC_021167.1    | Ca_kabuli_chr08 | 1864403                 | AA                              | GG              | 1946904356               |
| SNP_P4_104968_1865048 | NC_021167.1    | Ca_kabuli_chr08 | 1865048                 | AA                              | GG              | 1946904358               |
| SNP_P4_104969_1868977 | NC_021167.1    | Ca_kabuli_chr08 | 1868977                 | AA                              | TT              | 1946904360               |
| SNP_P4_104971_1871359 | NC_021167.1    | Ca_kabuli_chr08 | 1871359                 | AA                              | GG              | 1946904362               |
| SNP_P4_104974_1951510 | NC_021167.1    | Ca_kabuli_chr08 | 1951510                 | AA                              | GG              | 1946904364               |
| SNP_P4_104975_1963226 | NC_021167.1    | Ca_kabuli_chr08 | 1963226                 | CC                              | TT              | 1946904367               |
| SNP_P4_104978_2030373 | NC_021167.1    | Ca_kabuli_chr08 | 2030373                 | CC                              | AA              | 1946904371               |
| SNP_P4_104979_2032644 | NC_021167.1    | Ca_kabuli_chr08 | 2032644                 | CC                              | TT              | 1946904373               |
| SNP_P4_104980_2032703 | NC_021167.1    | Ca_kabuli_chr08 | 2032703                 | TT                              | CC              | 1946904375               |
| SNP_P4_104981_2032994 | NC_021167.1    | Ca_kabuli_chr08 | 2032994                 | TT                              | CC              | 1946904377               |
| SNP_P4_104983_2033475 | NC_021167.1    | Ca_kabuli_chr08 | 2033475                 | CC                              | AA              | 1946904379               |
| SNP_P4_104984_2033544 | NC_021167.1    | Ca_kabuli_chr08 | 2033544                 | TT                              | CC              | 1946904381               |
| SNP_P4_104985_2033676 | NC_021167.1    | Ca_kabuli_chr08 | 2033676                 | CC                              | TT              | 1946904383               |
| SNP_P4_104986_2033699 | NC_021167.1    | Ca_kabuli_chr08 | 2033699                 | GG                              | AA              | 1946904385               |
| SNP_P4_104987_2033802 | NC_021167.1    | Ca_kabuli_chr08 | 2033802                 | TT                              | CC              | 1946904387               |
| SNP_P4_104988_2057423 | NC_021167.1    | Ca_kabuli_chr08 | 2057423                 | TT                              | CC              | 1946904389               |
| SNP_P4_104992_2099826 | NC_021167.1    | Ca_kabuli_chr08 | 2099826                 | AA                              | GG              | 1946904391               |
| SNP_P4_104993_2139976 | NC_021167.1    | Ca_kabuli_chr08 | 2139976                 | GG                              | AA              | 1946904393               |
| SNP_P4_104994_2139978 | NC_021167.1    | Ca_kabuli_chr08 | 2139978                 | TT                              | CC              | 1946904395               |
| SNP_P4_104995_2160573 | NC_021167.1    | Ca_kabuli_chr08 | 2160573                 | CC                              | TT              | 1946904397               |
| SNP_P4_104996_2176257 | NC_021167.1    | Ca_kabuli_chr08 | 2176257                 | CC                              | AA              | 1946904399               |
| SNP_P4_104997_2176637 | NC_021167.1    | Ca_kabuli_chr08 | 2176637                 | GG                              | AA              | 1946904401               |
| SNP_P4_104998_2221314 | NC_021167.1    | Ca_kabuli_chr08 | 2221314                 | AA                              | GG              | 1946904403               |
| SNP_P4_105000_2289065 | NC_021167.1    | Ca_kabuli_chr08 | 2289065                 | CC                              | TT              | 1946904405               |
| SNP_P4_105002_2303380 | NC_021167.1    | Ca_kabuli_chr08 | 2303380                 | AA                              | GG              | 1946904407               |
| SNP_P4_105005_2345897 | NC_021167.1    | Ca_kabuli_chr08 | 2345897                 | TT                              | CC              | 1946904410               |
| SNP_P4_105006_2345961 | NC_021167.1    | Ca_kabuli_chr08 | 2345961                 | AA                              | GG              | 1946904412               |
| SNP_P4_105007_2345971 | NC_021167.1    | Ca_kabuli_chr08 | 2345971                 | AA                              | GG              | 1946904414               |
| SNP_P4_105008_2345992 | NC_021167.1    | Ca_kabuli_chr08 | 2345992                 | TT                              | GG              | 1946904416               |
| SNP_P4_105009_2346002 | NC_021167.1    | Ca_kabuli_chr08 | 2346002                 | CC                              | TT              | 1946904418               |
| SNP_P4_105010_2346043 | NC_021167.1    | Ca_kabuli_chr08 | 2346043                 | TT                              | CC              | 1946904420               |
| SNP_P4_105011_2346056 | NC_021167.1    | Ca_kabuli_chr08 | 2346056                 | TT                              | AA              | 1946904422               |
| SNP_P4_105012_2346089 | NC_021167.1    | Ca_kabuli_chr08 | 2346089                 | TT                              | GG              | 1946904424               |
| SNP_P4_105013_2346123 | NC_021167.1    | Ca_kabuli_chr08 | 2346123                 | TT                              | GG              | 1946904426               |
| SNP_P4_105014_2346149 | NC_021167.1    | Ca_kabuli_chr08 | 2346149                 | CC                              | TT              | 1946904428               |
| SNP_P4_105015_2346270 | NC_021167.1    | Ca_kabuli_chr08 | 2346270                 | TT                              | CC              | 1946904430               |
| SNP_P4_105016_2346274 | NC_021167.1    | Ca_kabuli_chr08 | 2346274                 | GG                              | AA              | 1946904432               |
| SNP_P4_105017_2346363 | NC_021167.1    | Ca_kabuli_chr08 | 2346363                 | CC                              | GG              | 1946904434               |
| SNP_P4_105018_2346371 | NC_021167.1    | Ca_kabuli_chr08 | 2346371                 | TT                              | CC              | 1946904436               |

| SNPs IDs              | Chromosome IDs | Chromosomes     | Physical positions (bp) | CDC Frontier (Reference genome) | (ILWC46 & LPNB) | NCBI SNPdb Accession IDs |
|-----------------------|----------------|-----------------|-------------------------|---------------------------------|-----------------|--------------------------|
| SNP_P4_105019_2346648 | NC_021167.1    | Ca_kabuli_chr08 | 2346648                 | AA                              | GG              | 1946904439               |
| SNP_P4_105020_2353625 | NC_021167.1    | Ca_kabuli_chr08 | 2353625                 | GG                              | AA              | 1946904441               |
| SNP_P4_105021_2354260 | NC_021167.1    | Ca_kabuli_chr08 | 2354260                 | GG                              | TT              | 1946904443               |
| SNP_P4_105022_2359717 | NC_021167.1    | Ca_kabuli_chr08 | 2359717                 | AA                              | CC              | 1946904445               |
| SNP_P4_105023_2424650 | NC_021167.1    | Ca_kabuli_chr08 | 2424650                 | TT                              | CC              | 1946904447               |
| SNP_P4_105025_2431063 | NC_021167.1    | Ca_kabuli_chr08 | 2431063                 | CC                              | TT              | 1946904449               |
| SNP_P4_105026_2442201 | NC_021167.1    | Ca_kabuli_chr08 | 2442201                 | GG                              | CC              | 1946904451               |
| SNP_P4_105027_2451130 | NC_021167.1    | Ca_kabuli_chr08 | 2451130                 | TT                              | CC              | 1946904454               |
| SNP_P4_105028_2479847 | NC_021167.1    | Ca_kabuli_chr08 | 2479847                 | AA                              | CC              | 1946904456               |
| SNP_P4_105029_2480828 | NC_021167.1    | Ca_kabuli_chr08 | 2480828                 | TT                              | GG              | 1946904458               |
| SNP_P4_105031_2511091 | NC_021167.1    | Ca_kabuli_chr08 | 2511091                 | CC                              | TT              | 1946904460               |
| SNP_P4_105034_2525842 | NC_021167.1    | Ca_kabuli_chr08 | 2525842                 | CC                              | TT              | 1946904462               |
| SNP_P4_105035_2552175 | NC_021167.1    | Ca_kabuli_chr08 | 2552175                 | TT                              | CC              | 1946904465               |
| SNP_P4_105036_2552184 | NC_021167.1    | Ca_kabuli_chr08 | 2552184                 | AA                              | GG              | 1946904467               |
| SNP_P4_105037_2608854 | NC_021167.1    | Ca_kabuli_chr08 | 2608854                 | GG                              | AA              | 1946904469               |
| SNP_P4_105038_2619874 | NC_021167.1    | Ca_kabuli_chr08 | 2619874                 | GG                              | AA              | 1946904471               |
| SNP_P4_105041_2683272 | NC_021167.1    | Ca_kabuli_chr08 | 2683272                 | AA                              | TT              | 1946904473               |
| SNP_P4_105044_2884866 | NC_021167.1    | Ca_kabuli_chr08 | 2884866                 | TT                              | GG              | 1946904475               |
| SNP_P4_105045_2890383 | NC_021167.1    | Ca_kabuli_chr08 | 2890383                 | CC                              | AA              | 1946904477               |
| SNP_P4_105046_2934881 | NC_021167.1    | Ca_kabuli_chr08 | 2934881                 | AA                              | GG              | 1946904479               |
| SNP_P4_105047_2934884 | NC_021167.1    | Ca_kabuli_chr08 | 2934884                 | TT                              | AA              | 1946904481               |
| SNP_P4_105048_2982653 | NC_021167.1    | Ca_kabuli_chr08 | 2982653                 | CC                              | AA              | 1946904483               |
| SNP_P4_105051_3037242 | NC_021167.1    | Ca_kabuli_chr08 | 3037242                 | CC                              | TT              | 1946904485               |
| SNP_P4_105053_3128361 | NC_021167.1    | Ca_kabuli_chr08 | 3128361                 | CC                              | TT              | 1946904487               |
| SNP_P4_105054_3156928 | NC_021167.1    | Ca_kabuli_chr08 | 3156928                 | TT                              | AA              | 1946904489               |
| SNP_P4_105055_3164067 | NC_021167.1    | Ca_kabuli_chr08 | 3164067                 | AA                              | GG              | 1946904491               |
| SNP_P4_105056_3164069 | NC_021167.1    | Ca_kabuli_chr08 | 3164069                 | AA                              | GG              | 1946904493               |
| SNP_P4_105057_3224377 | NC_021167.1    | Ca_kabuli_chr08 | 3224377                 | GG                              | AA              | 1946904495               |
| SNP_P4_105059_3266257 | NC_021167.1    | Ca_kabuli_chr08 | 3266257                 | GG                              | AA              | 1946904497               |
| SNP_P4_105060_3304441 | NC_021167.1    | Ca_kabuli_chr08 | 3304441                 | AA                              | GG              | 1946904499               |
| SNP_P4_105061_3304443 | NC_021167.1    | Ca_kabuli_chr08 | 3304443                 | TT                              | AA              | 1946904501               |
| SNP_P4_105062_3330227 | NC_021167.1    | Ca_kabuli_chr08 | 3330227                 | TT                              | AA              | 1946904503               |
| SNP_P4_105064_3335083 | NC_021167.1    | Ca_kabuli_chr08 | 3335083                 | TT                              | GG              | 1946904505               |
| SNP_P4_105065_3362940 | NC_021167.1    | Ca_kabuli_chr08 | 3362940                 | AA                              | GG              | 1946904506               |
| SNP_P4_105066_3362941 | NC_021167.1    | Ca_kabuli_chr08 | 3362941                 | AA                              | TT              | 1946904508               |
| SNP_P4_105067_3362957 | NC_021167.1    | Ca_kabuli_chr08 | 3362957                 | AA                              | TT              | 1946904510               |
| SNP_P4_105069_3387937 | NC_021167.1    | Ca_kabuli_chr08 | 3387937                 | AA                              | CC              | 1946904512               |
| SNP_P4_105070_3388195 | NC_021167.1    | Ca_kabuli_chr08 | 3388195                 | CC                              | TT              | 1946904514               |
| SNP_P4_105071_3388213 | NC_021167.1    | Ca_kabuli_chr08 | 3388213                 | CC                              | TT              | 1946904516               |
| SNP_P4_105072_3418679 | NC_021167.1    | Ca_kabuli_chr08 | 3418679                 | CC                              | TT              | 1946904518               |
| SNP_P4_105073_3475352 | NC_021167.1    | Ca_kabuli_chr08 | 3475352                 | GG                              | TT              | 1946904520               |
| SNP_P4_105074_3476415 | NC_021167.1    | Ca_kabuli_chr08 | 3476415                 | GG                              | AA              | 1946904522               |

| SNPs IDs              | Chromosome IDs | Chromosomes     | Physical positions (bp) | CDC Frontier (Reference genome) | (ILWC46 & LPNB) | NCBI SNPdb Accession IDs |
|-----------------------|----------------|-----------------|-------------------------|---------------------------------|-----------------|--------------------------|
| SNP_P4_105077_3526934 | NC_021167.1    | Ca_kabuli_chr08 | 3526934                 | TT                              | AA              | 1946904524               |
| SNP_P4_105078_3545657 | NC_021167.1    | Ca_kabuli_chr08 | 3545657                 | TT                              | CC              | 1946904525               |
| SNP_P4_105079_3545661 | NC_021167.1    | Ca_kabuli_chr08 | 3545661                 | GG                              | CC              | 1946904527               |
| SNP_P4_105080_3545848 | NC_021167.1    | Ca_kabuli_chr08 | 3545848                 | TT                              | GG              | 1946904529               |
| SNP_P4_105081_3548833 | NC_021167.1    | Ca_kabuli_chr08 | 3548833                 | AA                              | GG              | 1946904531               |
| SNP_P4_105083_3573914 | NC_021167.1    | Ca_kabuli_chr08 | 3573914                 | GG                              | AA              | 1946904533               |
| SNP_P4_105084_3584654 | NC_021167.1    | Ca_kabuli_chr08 | 3584654                 | CC                              | TT              | 1946904535               |
| SNP_P4_105085_3588382 | NC_021167.1    | Ca_kabuli_chr08 | 3588382                 | AA                              | GG              | 1946904537               |
| SNP_P4_105086_3588387 | NC_021167.1    | Ca_kabuli_chr08 | 3588387                 | CC                              | TT              | 1946904539               |
| SNP_P4_105087_3599664 | NC_021167.1    | Ca_kabuli_chr08 | 3599664                 | GG                              | TT              | 1946904541               |
| SNP_P4_105088_3639513 | NC_021167.1    | Ca_kabuli_chr08 | 3639513                 | CC                              | TT              | 1946904543               |
| SNP_P4_105089_3644963 | NC_021167.1    | Ca_kabuli_chr08 | 3644963                 | AA                              | GG              | 1946904545               |
| SNP_P4_105091_3669318 | NC_021167.1    | Ca_kabuli_chr08 | 3669318                 | AA                              | GG              | 1946904547               |
| SNP_P4_105092_3669365 | NC_021167.1    | Ca_kabuli_chr08 | 3669365                 | AA                              | CC              | 1946904549               |
| SNP_P4_105093_3669431 | NC_021167.1    | Ca_kabuli_chr08 | 3669431                 | TT                              | CC              | 1946904551               |
| SNP_P4_105094_3669689 | NC_021167.1    | Ca_kabuli_chr08 | 3669689                 | AA                              | GG              | 1946904553               |
| SNP_P4_105095_3669853 | NC_021167.1    | Ca_kabuli_chr08 | 3669853                 | CC                              | TT              | 1946904555               |
| SNP_P4_105096_3669888 | NC_021167.1    | Ca_kabuli_chr08 | 3669888                 | GG                              | TT              | 1946904557               |
| SNP_P4_105097_3669942 | NC_021167.1    | Ca_kabuli_chr08 | 3669942                 | TT                              | CC              | 1946904559               |
| SNP_P4_105098_3673487 | NC_021167.1    | Ca_kabuli_chr08 | 3673487                 | TT                              | CC              | 1946904560               |
| SNP_P4_105099_3673499 | NC_021167.1    | Ca_kabuli_chr08 | 3673499                 | AA                              | CC              | 1946904562               |
| SNP_P4_105100_3673586 | NC_021167.1    | Ca_kabuli_chr08 | 3673586                 | TT                              | CC              | 1946904564               |
| SNP_P4_105101_3673795 | NC_021167.1    | Ca_kabuli_chr08 | 3673795                 | TT                              | AA              | 1946904566               |
| SNP_P4_105102_3695345 | NC_021167.1    | Ca_kabuli_chr08 | 3695345                 | TT                              | CC              | 1946904568               |
| SNP_P4_105103_3695347 | NC_021167.1    | Ca_kabuli_chr08 | 3695347                 | TT                              | AA              | 1946904570               |
| SNP_P4_105104_3740899 | NC_021167.1    | Ca_kabuli_chr08 | 3740899                 | TT                              | AA              | 1946904572               |
| SNP_P4_105105_3777781 | NC_021167.1    | Ca_kabuli_chr08 | 3777781                 | TT                              | AA              | 1946904574               |
| SNP_P4_105107_3809247 | NC_021167.1    | Ca_kabuli_chr08 | 3809247                 | TT                              | CC              | 1946904576               |
| SNP_P4_105109_3854370 | NC_021167.1    | Ca_kabuli_chr08 | 3854370                 | CC                              | GG              | 1946904578               |
| SNP_P4_105110_3894793 | NC_021167.1    | Ca_kabuli_chr08 | 3894793                 | GG                              | AA              | 1946904580               |
| SNP_P4_105111_3896792 | NC_021167.1    | Ca_kabuli_chr08 | 3896792                 | AA                              | TT              | 1946904582               |
| SNP_P4_105112_3916685 | NC_021167.1    | Ca_kabuli_chr08 | 3916685                 | AA                              | TT              | 1946904584               |
| SNP_P4_105113_3935728 | NC_021167.1    | Ca_kabuli_chr08 | 3935728                 | TT                              | CC              | 1946904586               |
| SNP_P4_105114_3939906 | NC_021167.1    | Ca_kabuli_chr08 | 3939906                 | TT                              | GG              | 1946904588               |
| SNP_P4_105115_3946526 | NC_021167.1    | Ca_kabuli_chr08 | 3946526                 | GG                              | TT              | 1946904590               |
| SNP_P4_105116_3947159 | NC_021167.1    | Ca_kabuli_chr08 | 3947159                 | TT                              | CC              | 1946904592               |
| SNP_P4_105117_3947560 | NC_021167.1    | Ca_kabuli_chr08 | 3947560                 | AA                              | GG              | 1946904594               |
| SNP_P4_105118_3948846 | NC_021167.1    | Ca_kabuli_chr08 | 3948846                 | CC                              | TT              | 1946904596               |
| SNP_P4_105119_3953590 | NC_021167.1    | Ca_kabuli_chr08 | 3953590                 | GG                              | AA              | 1946904598               |
| SNP_P4_105121_3964201 | NC_021167.1    | Ca_kabuli_chr08 | 3964201                 | TT                              | AA              | 1946904600               |
| SNP_P4_105123_3972130 | NC_021167.1    | Ca_kabuli_chr08 | 3972130                 | AA                              | TT              | 1946904602               |
| SNP_P4_105124_4012185 | NC_021167.1    | Ca_kabuli_chr08 | 4012185                 | GG                              | AA              | 1946904604               |

| SNPs IDs              | Chromosome IDs | Chromosomes     | Physical positions (bp) | CDC Frontier (Reference genome) | (ILWC46 & LPNB) | NCBI SNPdb Accession IDs |
|-----------------------|----------------|-----------------|-------------------------|---------------------------------|-----------------|--------------------------|
| SNP_P4_105125_4013965 | NC_021167.1    | Ca_kabuli_chr08 | 4013965                 | GG                              | AA              | 1946904606               |
| SNP_P4_105126_4015668 | NC_021167.1    | Ca_kabuli_chr08 | 4015668                 | AA                              | GG              | 1946904608               |
| SNP_P4_105127_4018355 | NC_021167.1    | Ca_kabuli_chr08 | 4018355                 | TT                              | CC              | 1946904610               |
| SNP_P4_105129_4075004 | NC_021167.1    | Ca_kabuli_chr08 | 4075004                 | AA                              | GG              | 1946904612               |
| SNP_P4_105130_4075010 | NC_021167.1    | Ca_kabuli_chr08 | 4075010                 | AA                              | TT              | 1946904614               |
| SNP_P4_105131_4076903 | NC_021167.1    | Ca_kabuli_chr08 | 4076903                 | AA                              | GG              | 1946904616               |
| SNP_P4_105133_4138408 | NC_021167.1    | Ca_kabuli_chr08 | 4138408                 | CC                              | TT              | 1946904618               |
| SNP_P4_105134_4140056 | NC_021167.1    | Ca_kabuli_chr08 | 4140056                 | AA                              | GG              | 1946904620               |
| SNP_P4_105138_4186400 | NC_021167.1    | Ca_kabuli_chr08 | 4186400                 | GG                              | TT              | 1946904622               |
| SNP_P4_105139_4214714 | NC_021167.1    | Ca_kabuli_chr08 | 4214714                 | AA                              | GG              | 1946904624               |
| SNP_P4_105140_4214749 | NC_021167.1    | Ca_kabuli_chr08 | 4214749                 | AA                              | GG              | 1946904626               |
| SNP_P4_105141_4214807 | NC_021167.1    | Ca_kabuli_chr08 | 4214807                 | GG                              | AA              | 1946904628               |
| SNP_P4_105142_4214837 | NC_021167.1    | Ca_kabuli_chr08 | 4214837                 | GG                              | AA              | 1946904630               |
| SNP_P4_105143_4216460 | NC_021167.1    | Ca_kabuli_chr08 | 4216460                 | CC                              | TT              | 1946904632               |
| SNP_P4_105144_4217751 | NC_021167.1    | Ca_kabuli_chr08 | 4217751                 | TT                              | CC              | 1946904634               |
| SNP_P4_105145_4219432 | NC_021167.1    | Ca_kabuli_chr08 | 4219432                 | AA                              | TT              | 1946904636               |
| SNP_P4_105150_4256300 | NC_021167.1    | Ca_kabuli_chr08 | 4256300                 | TT                              | CC              | 1946904638               |
| SNP_P4_105151_4258922 | NC_021167.1    | Ca_kabuli_chr08 | 4258922                 | AA                              | TT              | 1946904640               |
| SNP_P4_105153_4281196 | NC_021167.1    | Ca_kabuli_chr08 | 4281196                 | CC                              | TT              | 1946904642               |
| SNP_P4_105154_4292992 | NC_021167.1    | Ca_kabuli_chr08 | 4292992                 | TT                              | CC              | 1946904644               |
| SNP_P4_105156_4317020 | NC_021167.1    | Ca_kabuli_chr08 | 4317020                 | CC                              | TT              | 1946904646               |
| SNP_P4_105157_4320609 | NC_021167.1    | Ca_kabuli_chr08 | 4320609                 | GG                              | AA              | 1946904648               |
| SNP_P4_105158_4330119 | NC_021167.1    | Ca_kabuli_chr08 | 4330119                 | GG                              | AA              | 1946904650               |
| SNP_P4_105164_4416584 | NC_021167.1    | Ca_kabuli_chr08 | 4416584                 | CC                              | TT              | 1946904652               |
| SNP_P4_105165_4416654 | NC_021167.1    | Ca_kabuli_chr08 | 4416654                 | AA                              | GG              | 1946904654               |
| SNP_P4_105166_4423747 | NC_021167.1    | Ca_kabuli_chr08 | 4423747                 | TT                              | CC              | 1946904656               |
| SNP_P4_105168_4444949 | NC_021167.1    | Ca_kabuli_chr08 | 4444949                 | TT                              | CC              | 1946904659               |
| SNP_P4_105170_4451264 | NC_021167.1    | Ca_kabuli_chr08 | 4451264                 | AA                              | GG              | 1946904660               |
| SNP_P4_105171_4480117 | NC_021167.1    | Ca_kabuli_chr08 | 4480117                 | TT                              | CC              | 1946904662               |
| SNP_P4_105172_4487593 | NC_021167.1    | Ca_kabuli_chr08 | 4487593                 | CC                              | TT              | 1946904665               |
| SNP_P4_105173_4489660 | NC_021167.1    | Ca_kabuli_chr08 | 4489660                 | AA                              | CC              | 1946904667               |
| SNP_P4_105174_4490077 | NC_021167.1    | Ca_kabuli_chr08 | 4490077                 | GG                              | AA              | 1946904669               |
| SNP_P4_105175_4497095 | NC_021167.1    | Ca_kabuli_chr08 | 4497095                 | GG                              | AA              | 1946904671               |
| SNP_P4_105176_4537461 | NC_021167.1    | Ca_kabuli_chr08 | 4537461                 | AA                              | TT              | 1946904673               |
| SNP_P4_105177_4537935 | NC_021167.1    | Ca_kabuli_chr08 | 4537935                 | GG                              | AA              | 1946904675               |
| SNP_P4_105178_4538232 | NC_021167.1    | Ca_kabuli_chr08 | 4538232                 | CC                              | TT              | 1946904677               |
| SNP_P4_105179_4547589 | NC_021167.1    | Ca_kabuli_chr08 | 4547589                 | AA                              | GG              | 1946904679               |
| SNP_P4_105180_4585155 | NC_021167.1    | Ca_kabuli_chr08 | 4585155                 | AA                              | TT              | 1946904681               |
| SNP_P4_105187_4734199 | NC_021167.1    | Ca_kabuli_chr08 | 4734199                 | CC                              | GG              | 1946904683               |
| SNP_P4_105191_4799555 | NC_021167.1    | Ca_kabuli_chr08 | 4799555                 | GG                              | AA              | 1946904685               |
| SNP_P4_105192_4808334 | NC_021167.1    | Ca_kabuli_chr08 | 4808334                 | GG                              | AA              | 1946904687               |
| SNP_P4_105194_4836435 | NC_021167.1    | Ca_kabuli_chr08 | 4836435                 | CC                              | TT              | 1946904689               |

| SNPs IDs              | Chromosome IDs | Chromosomes     | Physical positions (bp) | CDC Frontier (Reference genome) | (ILWC46 & LPNB) | NCBI SNPdb Accession IDs |
|-----------------------|----------------|-----------------|-------------------------|---------------------------------|-----------------|--------------------------|
| SNP_P4_105196_4867088 | NC_021167.1    | Ca_kabuli_chr08 | 4867088                 | CC                              | AA              | 1946904691               |
| SNP_P4_105197_4878303 | NC_021167.1    | Ca_kabuli_chr08 | 4878303                 | TT                              | CC              | 1946904693               |
| SNP_P4_105198_4896015 | NC_021167.1    | Ca_kabuli_chr08 | 4896015                 | GG                              | CC              | 1946904695               |
| SNP_P4_105199_4901909 | NC_021167.1    | Ca_kabuli_chr08 | 4901909                 | CC                              | AA              | 1946904697               |
| SNP_P4_105202_4978011 | NC_021167.1    | Ca_kabuli_chr08 | 4978011                 | GG                              | AA              | 1946904699               |
| SNP_P4_105203_4981258 | NC_021167.1    | Ca_kabuli_chr08 | 4981258                 | TT                              | GG              | 1946904701               |
| SNP_P4_105204_4981469 | NC_021167.1    | Ca_kabuli_chr08 | 4981469                 | CC                              | TT              | 1946904703               |
| SNP_P4_105206_4988371 | NC_021167.1    | Ca_kabuli_chr08 | 4988371                 | TT                              | AA              | 1946904705               |
| SNP_P4_105208_5017204 | NC_021167.1    | Ca_kabuli_chr08 | 5017204                 | TT                              | CC              | 1946904707               |
| SNP_P4_105209_5018455 | NC_021167.1    | Ca_kabuli_chr08 | 5018455                 | GG                              | AA              | 1946904709               |
| SNP_P4_105210_5023477 | NC_021167.1    | Ca_kabuli_chr08 | 5023477                 | CC                              | TT              | 1946904711               |
| SNP_P4_105211_5023812 | NC_021167.1    | Ca_kabuli_chr08 | 5023812                 | GG                              | TT              | 1946904713               |
| SNP_P4_105213_5037559 | NC_021167.1    | Ca_kabuli_chr08 | 5037559                 | AA                              | GG              | 1946904715               |
| SNP_P4_105215_5051933 | NC_021167.1    | Ca_kabuli_chr08 | 5051933                 | GG                              | AA              | 1946904717               |
| SNP_P4_105217_5062120 | NC_021167.1    | Ca_kabuli_chr08 | 5062120                 | AA                              | GG              | 1946904719               |
| SNP_P4_105218_5066951 | NC_021167.1    | Ca_kabuli_chr08 | 5066951                 | GG                              | AA              | 1946904721               |
| SNP_P4_105219_5069471 | NC_021167.1    | Ca_kabuli_chr08 | 5069471                 | CC                              | TT              | 1946904723               |
| SNP_P4_105220_5069746 | NC_021167.1    | Ca_kabuli_chr08 | 5069746                 | TT                              | CC              | 1946904725               |
| SNP_P4_105221_5069765 | NC_021167.1    | Ca_kabuli_chr08 | 5069765                 | AA                              | GG              | 1946904727               |
| SNP_P4_105222_5069771 | NC_021167.1    | Ca_kabuli_chr08 | 5069771                 | GG                              | AA              | 1946904729               |
| SNP_P4_105223_5069841 | NC_021167.1    | Ca_kabuli_chr08 | 5069841                 | GG                              | AA              | 1946904731               |
| SNP_P4_105224_5069915 | NC_021167.1    | Ca_kabuli_chr08 | 5069915                 | TT                              | GG              | 1946904733               |
| SNP_P4_105225_5069959 | NC_021167.1    | Ca_kabuli_chr08 | 5069959                 | GG                              | TT              | 1946904735               |
| SNP_P4_105226_5069965 | NC_021167.1    | Ca_kabuli_chr08 | 5069965                 | TT                              | CC              | 1946904737               |
| SNP_P4_105227_5069979 | NC_021167.1    | Ca_kabuli_chr08 | 5069979                 | AA                              | CC              | 1946904739               |
| SNP_P4_105228_5070006 | NC_021167.1    | Ca_kabuli_chr08 | 5070006                 | CC                              | TT              | 1946904741               |
| SNP_P4_105229_5070033 | NC_021167.1    | Ca_kabuli_chr08 | 5070033                 | GG                              | TT              | 1946904743               |
| SNP_P4_105230_5070040 | NC_021167.1    | Ca_kabuli_chr08 | 5070040                 | AA                              | CC              | 1946904745               |
| SNP_P4_105231_5070453 | NC_021167.1    | Ca_kabuli_chr08 | 5070453                 | TT                              | CC              | 1946904747               |
| SNP_P4_105232_5075027 | NC_021167.1    | Ca_kabuli_chr08 | 5075027                 | CC                              | TT              | 1946904749               |
| SNP_P4_105233_5088382 | NC_021167.1    | Ca_kabuli_chr08 | 5088382                 | AA                              | CC              | 1946904751               |
| SNP_P4_105234_5088588 | NC_021167.1    | Ca_kabuli_chr08 | 5088588                 | AA                              | CC              | 1946904753               |
| SNP_P4_105235_5088635 | NC_021167.1    | Ca_kabuli_chr08 | 5088635                 | GG                              | AA              | 1946904755               |
| SNP_P4_105236_5088818 | NC_021167.1    | Ca_kabuli_chr08 | 5088818                 | CC                              | TT              | 1946904758               |
| SNP_P4_105237_5089202 | NC_021167.1    | Ca_kabuli_chr08 | 5089202                 | AA                              | GG              | 1946904760               |
| SNP_P4_105238_5089275 | NC_021167.1    | Ca_kabuli_chr08 | 5089275                 | AA                              | CC              | 1946904762               |
| SNP_P4_105240_5089501 | NC_021167.1    | Ca_kabuli_chr08 | 5089501                 | TT                              | GG              | 1946904764               |
| SNP_P4_105241_5089528 | NC_021167.1    | Ca_kabuli_chr08 | 5089528                 | AA                              | GG              | 1946904766               |
| SNP_P4_105242_5092994 | NC_021167.1    | Ca_kabuli_chr08 | 5092994                 | CC                              | AA              | 1946904768               |
| SNP_P4_105243_5100544 | NC_021167.1    | Ca_kabuli_chr08 | 5100544                 | AA                              | GG              | 1946904770               |
| SNP_P4_105244_5101316 | NC_021167.1    | Ca_kabuli_chr08 | 5101316                 | GG                              | TT              | 1946904772               |
| SNP_P4_105245_5111950 | NC_021167.1    | Ca_kabuli_chr08 | 5111950                 | TT                              | CC              | 1946904774               |

| SNPs IDs              | Chromosome IDs | Chromosomes     | Physical positions (bp) | CDC Frontier (Reference genome) | (ILWC46 & LPNB) | NCBI SNPdb Accession IDs |
|-----------------------|----------------|-----------------|-------------------------|---------------------------------|-----------------|--------------------------|
| SNP_P4_105246_5130343 | NC_021167.1    | Ca_kabuli_chr08 | 5130343                 | GG                              | AA              | 1946904776               |
| SNP_P4_105247_5130368 | NC_021167.1    | Ca_kabuli_chr08 | 5130368                 | CC                              | AA              | 1946904778               |
| SNP_P4_105248_5131635 | NC_021167.1    | Ca_kabuli_chr08 | 5131635                 | AA                              | CC              | 1946904780               |
| SNP_P4_105249_5131770 | NC_021167.1    | Ca_kabuli_chr08 | 5131770                 | AA                              | TT              | 1946904782               |
| SNP_P4_105250_5159769 | NC_021167.1    | Ca_kabuli_chr08 | 5159769                 | CC                              | TT              | 1946904784               |
| SNP_P4_105252_5175626 | NC_021167.1    | Ca_kabuli_chr08 | 5175626                 | CC                              | TT              | 1946904787               |
| SNP_P4_105253_5183294 | NC_021167.1    | Ca_kabuli_chr08 | 5183294                 | TT                              | CC              | 1946904789               |
| SNP_P4_105254_5208145 | NC_021167.1    | Ca_kabuli_chr08 | 5208145                 | AA                              | CC              | 1946904791               |
| SNP_P4_105255_5220934 | NC_021167.1    | Ca_kabuli_chr08 | 5220934                 | GG                              | TT              | 1946904793               |
| SNP_P4_105256_5221650 | NC_021167.1    | Ca_kabuli_chr08 | 5221650                 | CC                              | GG              | 1946904795               |
| SNP_P4_105257_5221706 | NC_021167.1    | Ca_kabuli_chr08 | 5221706                 | GG                              | TT              | 1946904797               |
| SNP_P4_105258_5221833 | NC_021167.1    | Ca_kabuli_chr08 | 5221833                 | AA                              | CC              | 1946904799               |
| SNP_P4_105259_5221864 | NC_021167.1    | Ca_kabuli_chr08 | 5221864                 | CC                              | TT              | 1946904801               |
| SNP_P4_105260_5221873 | NC_021167.1    | Ca_kabuli_chr08 | 5221873                 | CC                              | TT              | 1946904803               |
| SNP_P4_105261_5221951 | NC_021167.1    | Ca_kabuli_chr08 | 5221951                 | CC                              | TT              | 1946904805               |
| SNP_P4_105262_5221952 | NC_021167.1    | Ca_kabuli_chr08 | 5221952                 | GG                              | TT              | 1946904807               |
| SNP_P4_105263_5223639 | NC_021167.1    | Ca_kabuli_chr08 | 5223639                 | TT                              | CC              | 1946904809               |
| SNP_P4_105264_5223702 | NC_021167.1    | Ca_kabuli_chr08 | 5223702                 | GG                              | AA              | 1946904811               |
| SNP_P4_105265_5223709 | NC_021167.1    | Ca_kabuli_chr08 | 5223709                 | GG                              | AA              | 1946904813               |
| SNP_P4_105267_5256498 | NC_021167.1    | Ca_kabuli_chr08 | 5256498                 | AA                              | GG              | 1946904815               |
| SNP_P4_105268_5269145 | NC_021167.1    | Ca_kabuli_chr08 | 5269145                 | CC                              | AA              | 1946904817               |
| SNP_P4_105269_5269208 | NC_021167.1    | Ca_kabuli_chr08 | 5269208                 | AA                              | TT              | 1946904819               |
| SNP_P4_105270_5269309 | NC_021167.1    | Ca_kabuli_chr08 | 5269309                 | TT                              | CC              | 1946904821               |
| SNP_P4_105272_5269355 | NC_021167.1    | Ca_kabuli_chr08 | 5269355                 | TT                              | GG              | 1946904823               |
| SNP_P4_105273_5269394 | NC_021167.1    | Ca_kabuli_chr08 | 5269394                 | TT                              | AA              | 1946904825               |
| SNP_P4_105274_5271017 | NC_021167.1    | Ca_kabuli_chr08 | 5271017                 | CC                              | TT              | 1946904827               |
| SNP_P4_105275_5271433 | NC_021167.1    | Ca_kabuli_chr08 | 5271433                 | GG                              | AA              | 1946904829               |
| SNP_P4_105276_5283200 | NC_021167.1    | Ca_kabuli_chr08 | 5283200                 | GG                              | AA              | 1946904831               |
| SNP_P4_105277_5303748 | NC_021167.1    | Ca_kabuli_chr08 | 5303748                 | GG                              | AA              | 1946904833               |
| SNP_P4_105278_5319853 | NC_021167.1    | Ca_kabuli_chr08 | 5319853                 | GG                              | AA              | 1946904835               |
| SNP_P4_105279_5329964 | NC_021167.1    | Ca_kabuli_chr08 | 5329964                 | TT                              | AA              | 1946904837               |
| SNP_P4_105280_5338612 | NC_021167.1    | Ca_kabuli_chr08 | 5338612                 | TT                              | AA              | 1946904839               |
| SNP_P4_105281_5338649 | NC_021167.1    | Ca_kabuli_chr08 | 5338649                 | TT                              | GG              | 1946904841               |
| SNP_P4_105282_5338650 | NC_021167.1    | Ca_kabuli_chr08 | 5338650                 | TT                              | GG              | 1946904843               |
| SNP_P4_105283_5346652 | NC_021167.1    | Ca_kabuli_chr08 | 5346652                 | AA                              | GG              | 1946904845               |
| SNP_P4_105284_5358233 | NC_021167.1    | Ca_kabuli_chr08 | 5358233                 | CC                              | TT              | 1946904847               |
| SNP_P4_105285_5358621 | NC_021167.1    | Ca_kabuli_chr08 | 5358621                 | TT                              | AA              | 1946904849               |
| SNP_P4_105286_5360590 | NC_021167.1    | Ca_kabuli_chr08 | 5360590                 | TT                              | AA              | 1946904851               |
| SNP_P4_105291_5380576 | NC_021167.1    | Ca_kabuli_chr08 | 5380576                 | TT                              | GG              | 1946904853               |
| SNP_P4_105292_5380580 | NC_021167.1    | Ca_kabuli_chr08 | 5380580                 | GG                              | AA              | 1946904856               |
| SNP_P4_105293_5381045 | NC_021167.1    | Ca_kabuli_chr08 | 5381045                 | CC                              | TT              | 1946904858               |
| SNP_P4_105294_5410562 | NC_021167.1    | Ca_kabuli_chr08 | 5410562                 | AA                              | CC              | 1946904860               |

| SNPs IDs              | Chromosome IDs | Chromosomes     | Physical positions (bp) | CDC Frontier (Reference genome) | (ILWC46 & LPNB) | NCBI SNPdb Accession IDs |
|-----------------------|----------------|-----------------|-------------------------|---------------------------------|-----------------|--------------------------|
| SNP_P4_105295_5421914 | NC_021167.1    | Ca_kabuli_chr08 | 5421914                 | CC                              | TT              | 1946904862               |
| SNP_P4_105297_5464850 | NC_021167.1    | Ca_kabuli_chr08 | 5464850                 | TT                              | CC              | 1946904864               |
| SNP_P4_105299_5504601 | NC_021167.1    | Ca_kabuli_chr08 | 5504601                 | AA                              | GG              | 1946904866               |
| SNP_P4_105300_5525196 | NC_021167.1    | Ca_kabuli_chr08 | 5525196                 | CC                              | TT              | 1946904868               |
| SNP_P4_105302_5544000 | NC_021167.1    | Ca_kabuli_chr08 | 5544000                 | AA                              | TT              | 1946904870               |
| SNP_P4_105303_5573290 | NC_021167.1    | Ca_kabuli_chr08 | 5573290                 | AA                              | TT              | 1946904872               |
| SNP_P4_105304_5573291 | NC_021167.1    | Ca_kabuli_chr08 | 5573291                 | CC                              | TT              | 1946904874               |
| SNP_P4_105305_5578425 | NC_021167.1    | Ca_kabuli_chr08 | 5578425                 | AA                              | TT              | 1946904876               |
| SNP_P4_105306_5578988 | NC_021167.1    | Ca_kabuli_chr08 | 5578988                 | CC                              | TT              | 1946904878               |
| SNP_P4_105308_5598557 | NC_021167.1    | Ca_kabuli_chr08 | 5598557                 | TT                              | CC              | 1946904880               |
| SNP_P4_105310_5601553 | NC_021167.1    | Ca_kabuli_chr08 | 5601553                 | TT                              | AA              | 1946904882               |
| SNP_P4_105311_5618755 | NC_021167.1    | Ca_kabuli_chr08 | 5618755                 | GG                              | AA              | 1946904884               |
| SNP_P4_105314_5718927 | NC_021167.1    | Ca_kabuli_chr08 | 5718927                 | AA                              | CC              | 1946904886               |
| SNP_P4_105315_5718928 | NC_021167.1    | Ca_kabuli_chr08 | 5718928                 | TT                              | CC              | 1946904888               |
| SNP_P4_105316_5719139 | NC_021167.1    | Ca_kabuli_chr08 | 5719139                 | CC                              | TT              | 1946904890               |
| SNP_P4_105317_5719176 | NC_021167.1    | Ca_kabuli_chr08 | 5719176                 | GG                              | AA              | 1946904892               |
| SNP_P4_105318_5719181 | NC_021167.1    | Ca_kabuli_chr08 | 5719181                 | TT                              | GG              | 1946904894               |
| SNP_P4_105319_5719191 | NC_021167.1    | Ca_kabuli_chr08 | 5719191                 | CC                              | TT              | 1946904896               |
| SNP_P4_105320_5719194 | NC_021167.1    | Ca_kabuli_chr08 | 5719194                 | TT                              | GG              | 1946904899               |
| SNP_P4_105321_5719252 | NC_021167.1    | Ca_kabuli_chr08 | 5719252                 | GG                              | AA              | 1946904901               |
| SNP_P4_105322_5719296 | NC_021167.1    | Ca_kabuli_chr08 | 5719296                 | GG                              | TT              | 1946904903               |
| SNP_P4_105323_5719338 | NC_021167.1    | Ca_kabuli_chr08 | 5719338                 | AA                              | GG              | 1946904905               |
| SNP_P4_105324_5719380 | NC_021167.1    | Ca_kabuli_chr08 | 5719380                 | TT                              | CC              | 1946904907               |
| SNP_P4_105325_5719399 | NC_021167.1    | Ca_kabuli_chr08 | 5719399                 | AA                              | GG              | 1946904909               |
| SNP_P4_105326_5719434 | NC_021167.1    | Ca_kabuli_chr08 | 5719434                 | CC                              | TT              | 1946904911               |
| SNP_P4_105327_5719461 | NC_021167.1    | Ca_kabuli_chr08 | 5719461                 | TT                              | GG              | 1946904912               |
| SNP_P4_105328_5719625 | NC_021167.1    | Ca_kabuli_chr08 | 5719625                 | CC                              | GG              | 1946904915               |
| SNP_P4_105329_5719697 | NC_021167.1    | Ca_kabuli_chr08 | 5719697                 | GG                              | AA              | 1946904916               |
| SNP_P4_105330_5719702 | NC_021167.1    | Ca_kabuli_chr08 | 5719702                 | CC                              | TT              | 1946904918               |
| SNP_P4_105331_5719724 | NC_021167.1    | Ca_kabuli_chr08 | 5719724                 | CC                              | TT              | 1946904920               |
| SNP_P4_105332_5719767 | NC_021167.1    | Ca_kabuli_chr08 | 5719767                 | AA                              | CC              | 1946904923               |
| SNP_P4_105333_5719777 | NC_021167.1    | Ca_kabuli_chr08 | 5719777                 | AA                              | TT              | 1946904925               |
| SNP_P4_105334_5719783 | NC_021167.1    | Ca_kabuli_chr08 | 5719783                 | TT                              | CC              | 1946904927               |
| SNP_P4_105335_5719784 | NC_021167.1    | Ca_kabuli_chr08 | 5719784                 | AA                              | TT              | 1946904928               |
| SNP_P4_105336_5719785 | NC_021167.1    | Ca_kabuli_chr08 | 5719785                 | AA                              | GG              | 1946904930               |
| SNP_P4_105338_5719978 | NC_021167.1    | Ca_kabuli_chr08 | 5719978                 | GG                              | CC              | 1946904933               |
| SNP_P4_105339_5719981 | NC_021167.1    | Ca_kabuli_chr08 | 5719981                 | GG                              | AA              | 1946904934               |
| SNP_P4_105341_5720033 | NC_021167.1    | Ca_kabuli_chr08 | 5720033                 | CC                              | TT              | 1946904936               |
| SNP_P4_105342_5720037 | NC_021167.1    | Ca_kabuli_chr08 | 5720037                 | CC                              | TT              | 1946904939               |
| SNP_P4_105343_5720092 | NC_021167.1    | Ca_kabuli_chr08 | 5720092                 | AA                              | GG              | 1946904940               |
| SNP_P4_105344_5720101 | NC_021167.1    | Ca_kabuli_chr08 | 5720101                 | GG                              | AA              | 1946904942               |
| SNP_P4_105345_5720118 | NC_021167.1    | Ca_kabuli_chr08 | 5720118                 | TT                              | AA              | 1946904944               |



| SNPs IDs              | Chromosome IDs | Chromosomes     | Physical positions (bp) | CDC Frontier (Reference genome) | (ILWC46 & LPNB) | NCBI SNPdb Accession IDs |
|-----------------------|----------------|-----------------|-------------------------|---------------------------------|-----------------|--------------------------|
| SNP_P4_105346_5720123 | NC_021167.1    | Ca_kabuli_chr08 | 5720123                 | CC                              | TT              | 1946904947               |
| SNP_P4_105347_5720149 | NC_021167.1    | Ca_kabuli_chr08 | 5720149                 | CC                              | TT              | 1946904949               |
| SNP_P4_105349_5724683 | NC_021167.1    | Ca_kabuli_chr08 | 5724683                 | TT                              | AA              | 1946904951               |
| SNP_P4_105350_5733076 | NC_021167.1    | Ca_kabuli_chr08 | 5733076                 | CC                              | TT              | 1946904953               |
| SNP_P4_105351_5733085 | NC_021167.1    | Ca_kabuli_chr08 | 5733085                 | GG                              | AA              | 1946904955               |
| SNP_P4_105353_5733109 | NC_021167.1    | Ca_kabuli_chr08 | 5733109                 | AA                              | GG              | 1946904957               |
| SNP_P4_105354_5733894 | NC_021167.1    | Ca_kabuli_chr08 | 5733894                 | GG                              | TT              | 1946904959               |
| SNP_P4_105356_5779449 | NC_021167.1    | Ca_kabuli_chr08 | 5779449                 | TT                              | GG              | 1946904961               |
| SNP_P4_105357_5779450 | NC_021167.1    | Ca_kabuli_chr08 | 5779450                 | TT                              | CC              | 1946904963               |
| SNP_P4_105358_5812702 | NC_021167.1    | Ca_kabuli_chr08 | 5812702                 | AA                              | TT              | 1946904965               |
| SNP_P4_105359_5844346 | NC_021167.1    | Ca_kabuli_chr08 | 5844346                 | TT                              | AA              | 1946904967               |
| SNP_P4_105361_5878891 | NC_021167.1    | Ca_kabuli_chr08 | 5878891                 | CC                              | TT              | 1946904969               |
| SNP_P4_105362_5879022 | NC_021167.1    | Ca_kabuli_chr08 | 5879022                 | GG                              | AA              | 1946904971               |
| SNP_P4_105363_5879126 | NC_021167.1    | Ca_kabuli_chr08 | 5879126                 | AA                              | GG              | 1946904973               |
| SNP_P4_105364_5880017 | NC_021167.1    | Ca_kabuli_chr08 | 5880017                 | AA                              | GG              | 1946904975               |
| SNP_P4_105365_6037007 | NC_021167.1    | Ca_kabuli_chr08 | 6037007                 | CC                              | TT              | 1946904977               |
| SNP_P4_105366_6037011 | NC_021167.1    | Ca_kabuli_chr08 | 6037011                 | AA                              | GG              | 1946904979               |
| SNP_P4_105367_6052326 | NC_021167.1    | Ca_kabuli_chr08 | 6052326                 | CC                              | AA              | 1946904981               |
| SNP_P4_105368_6055781 | NC_021167.1    | Ca_kabuli_chr08 | 6055781                 | GG                              | CC              | 1946904983               |
| SNP_P4_105369_6055966 | NC_021167.1    | Ca_kabuli_chr08 | 6055966                 | CC                              | TT              | 1946904985               |
| SNP_P4_105370_6056125 | NC_021167.1    | Ca_kabuli_chr08 | 6056125                 | CC                              | TT              | 1946904987               |
| SNP_P4_105371_6056415 | NC_021167.1    | Ca_kabuli_chr08 | 6056415                 | AA                              | GG              | 1946904989               |
| SNP_P4_105372_6056427 | NC_021167.1    | Ca_kabuli_chr08 | 6056427                 | TT                              | GG              | 1946904991               |
| SNP_P4_105373_6056450 | NC_021167.1    | Ca_kabuli_chr08 | 6056450                 | AA                              | GG              | 1946904993               |
| SNP_P4_105374_6056496 | NC_021167.1    | Ca_kabuli_chr08 | 6056496                 | TT                              | CC              | 1946904995               |
| SNP_P4_105375_6066992 | NC_021167.1    | Ca_kabuli_chr08 | 6066992                 | GG                              | TT              | 1946904997               |
| SNP_P4_105376_6075670 | NC_021167.1    | Ca_kabuli_chr08 | 6075670                 | CC                              | TT              | 1946904999               |
| SNP_P4_105377_6076002 | NC_021167.1    | Ca_kabuli_chr08 | 6076002                 | CC                              | AA              | 1946905001               |
| SNP_P4_105378_6082364 | NC_021167.1    | Ca_kabuli_chr08 | 6082364                 | GG                              | AA              | 1946905003               |
| SNP_P4_105379_6082920 | NC_021167.1    | Ca_kabuli_chr08 | 6082920                 | TT                              | GG              | 1946905005               |
| SNP_P4_105380_6086814 | NC_021167.1    | Ca_kabuli_chr08 | 6086814                 | GG                              | AA              | 1946905007               |
| SNP_P4_105381_6086830 | NC_021167.1    | Ca_kabuli_chr08 | 6086830                 | AA                              | GG              | 1946905009               |
| SNP_P4_105382_6086857 | NC_021167.1    | Ca_kabuli_chr08 | 6086857                 | CC                              | AA              | 1946905011               |
| SNP_P4_105383_6086865 | NC_021167.1    | Ca_kabuli_chr08 | 6086865                 | CC                              | GG              | 1946905013               |
| SNP_P4_105384_6086867 | NC_021167.1    | Ca_kabuli_chr08 | 6086867                 | GG                              | AA              | 1946905015               |
| SNP_P4_105385_6086921 | NC_021167.1    | Ca_kabuli_chr08 | 6086921                 | AA                              | GG              | 1946905017               |
| SNP_P4_105386_6086942 | NC_021167.1    | Ca_kabuli_chr08 | 6086942                 | AA                              | GG              | 1946905019               |
| SNP_P4_105387_6087236 | NC_021167.1    | Ca_kabuli_chr08 | 6087236                 | CC                              | TT              | 1946905021               |
| SNP_P4_105388_6087577 | NC_021167.1    | Ca_kabuli_chr08 | 6087577                 | AA                              | TT              | 1946905023               |
| SNP_P4_105389_6087639 | NC_021167.1    | Ca_kabuli_chr08 | 6087639                 | TT                              | AA              | 1946905025               |
| SNP_P4_105390_6087664 | NC_021167.1    | Ca_kabuli_chr08 | 6087664                 | AA                              | GG              | 1946905027               |
| SNP_P4_105391_6087967 | NC_021167.1    | Ca_kabuli_chr08 | 6087967                 | TT                              | GG              | 1946905029               |

| SNPs IDs              | Chromosome IDs | Chromosomes     | Physical positions (bp) | CDC Frontier (Reference genome) | (ILWC46 & LPNB) | NCBI SNPdb Accession IDs |
|-----------------------|----------------|-----------------|-------------------------|---------------------------------|-----------------|--------------------------|
| SNP_P4_105392_6088049 | NC_021167.1    | Ca_kabuli_chr08 | 6088049                 | TT                              | CC              | 1946905031               |
| SNP_P4_105393_6088362 | NC_021167.1    | Ca_kabuli_chr08 | 6088362                 | CC                              | TT              | 1946905033               |
| SNP_P4_105397_6128984 | NC_021167.1    | Ca_kabuli_chr08 | 6128984                 | AA                              | GG              | 1946905035               |
| SNP_P4_105398_6129406 | NC_021167.1    | Ca_kabuli_chr08 | 6129406                 | AA                              | GG              | 1946905037               |
| SNP_P4_105400_6138167 | NC_021167.1    | Ca_kabuli_chr08 | 6138167                 | TT                              | AA              | 1946905039               |
| SNP_P4_105401_6170040 | NC_021167.1    | Ca_kabuli_chr08 | 6170040                 | CC                              | TT              | 1946905041               |
| SNP_P4_105402_6170243 | NC_021167.1    | Ca_kabuli_chr08 | 6170243                 | CC                              | TT              | 1946905043               |
| SNP_P4_105403_6194942 | NC_021167.1    | Ca_kabuli_chr08 | 6194942                 | GG                              | AA              | 1946905045               |
| SNP_P4_105404_6198505 | NC_021167.1    | Ca_kabuli_chr08 | 6198505                 | CC                              | TT              | 1946905047               |
| SNP_P4_105405_6208643 | NC_021167.1    | Ca_kabuli_chr08 | 6208643                 | GG                              | TT              | 1946905049               |
| SNP_P4_105406_6212113 | NC_021167.1    | Ca_kabuli_chr08 | 6212113                 | CC                              | TT              | 1946905051               |
| SNP_P4_105407_6243180 | NC_021167.1    | Ca_kabuli_chr08 | 6243180                 | GG                              | AA              | 1946905053               |
| SNP_P4_105408_6248937 | NC_021167.1    | Ca_kabuli_chr08 | 6248937                 | CC                              | AA              | 1946905055               |
| SNP_P4_105410_6261733 | NC_021167.1    | Ca_kabuli_chr08 | 6261733                 | GG                              | AA              | 1946905057               |
| SNP_P4_105411_6270948 | NC_021167.1    | Ca_kabuli_chr08 | 6270948                 | CC                              | TT              | 1946905059               |
| SNP_P4_105412_6279718 | NC_021167.1    | Ca_kabuli_chr08 | 6279718                 | CC                              | TT              | 1946905061               |
| SNP_P4_105413_6288138 | NC_021167.1    | Ca_kabuli_chr08 | 6288138                 | TT                              | GG              | 1946905062               |
| SNP_P4_105414_6292364 | NC_021167.1    | Ca_kabuli_chr08 | 6292364                 | CC                              | TT              | 1946905064               |
| SNP_P4_105415_6301007 | NC_021167.1    | Ca_kabuli_chr08 | 6301007                 | CC                              | TT              | 1946905066               |
| SNP_P4_105416_6301111 | NC_021167.1    | Ca_kabuli_chr08 | 6301111                 | GG                              | AA              | 1946905068               |
| SNP_P4_105417_6301121 | NC_021167.1    | Ca_kabuli_chr08 | 6301121                 | AA                              | GG              | 1946905070               |
| SNP_P4_105418_6301413 | NC_021167.1    | Ca_kabuli_chr08 | 6301413                 | GG                              | TT              | 1946905072               |
| SNP_P4_105420_6307055 | NC_021167.1    | Ca_kabuli_chr08 | 6307055                 | AA                              | CC              | 1946905074               |
| SNP_P4_105421_6307062 | NC_021167.1    | Ca_kabuli_chr08 | 6307062                 | GG                              | AA              | 1946905076               |
| SNP_P4_105423_6307197 | NC_021167.1    | Ca_kabuli_chr08 | 6307197                 | CC                              | TT              | 1946905078               |
| SNP_P4_105424_6307211 | NC_021167.1    | Ca_kabuli_chr08 | 6307211                 | TT                              | AA              | 1946905080               |
| SNP_P4_105425_6307283 | NC_021167.1    | Ca_kabuli_chr08 | 6307283                 | TT                              | CC              | 1946905082               |
| SNP_P4_105426_6307319 | NC_021167.1    | Ca_kabuli_chr08 | 6307319                 | TT                              | CC              | 1946905084               |
| SNP_P4_105427_6307383 | NC_021167.1    | Ca_kabuli_chr08 | 6307383                 | CC                              | AA              | 1946905086               |
| SNP_P4_105428_6307402 | NC_021167.1    | Ca_kabuli_chr08 | 6307402                 | TT                              | AA              | 1946905088               |
| SNP_P4_105429_6307426 | NC_021167.1    | Ca_kabuli_chr08 | 6307426                 | TT                              | CC              | 1946905090               |
| SNP_P4_105430_6307460 | NC_021167.1    | Ca_kabuli_chr08 | 6307460                 | GG                              | AA              | 1946905092               |
| SNP_P4_105432_6330284 | NC_021167.1    | Ca_kabuli_chr08 | 6330284                 | GG                              | AA              | 1946905094               |
| SNP_P4_105433_6330288 | NC_021167.1    | Ca_kabuli_chr08 | 6330288                 | CC                              | TT              | 1946905096               |
| SNP_P4_105434_6343421 | NC_021167.1    | Ca_kabuli_chr08 | 6343421                 | GG                              | AA              | 1946905098               |
| SNP_P4_105435_6347632 | NC_021167.1    | Ca_kabuli_chr08 | 6347632                 | TT                              | CC              | 1946905100               |
| SNP_P4_105436_6358852 | NC_021167.1    | Ca_kabuli_chr08 | 6358852                 | CC                              | GG              | 1946905102               |
| SNP_P4_105437_6364220 | NC_021167.1    | Ca_kabuli_chr08 | 6364220                 | TT                              | CC              | 1946905104               |
| SNP_P4_105438_6364306 | NC_021167.1    | Ca_kabuli_chr08 | 6364306                 | CC                              | TT              | 1946905106               |
| SNP_P4_105439_6391216 | NC_021167.1    | Ca_kabuli_chr08 | 6391216                 | TT                              | AA              | 1946905108               |
| SNP_P4_105440_6402518 | NC_021167.1    | Ca_kabuli_chr08 | 6402518                 | AA                              | CC              | 1946905110               |
| SNP_P4_105441_6419644 | NC_021167.1    | Ca_kabuli_chr08 | 6419644                 | GG                              | AA              | 1946905112               |

| SNPs IDs              | Chromosome IDs | Chromosomes     | Physical positions (bp) | CDC Frontier (Reference genome) | (ILWC46 & LPNB) | NCBI SNPdb Accession IDs |
|-----------------------|----------------|-----------------|-------------------------|---------------------------------|-----------------|--------------------------|
| SNP_P4_105442_6431979 | NC_021167.1    | Ca_kabuli_chr08 | 6431979                 | GG                              | TT              | 1946905114               |
| SNP_P4_105443_6466093 | NC_021167.1    | Ca_kabuli_chr08 | 6466093                 | AA                              | TT              | 1946905116               |
| SNP_P4_105444_6474547 | NC_021167.1    | Ca_kabuli_chr08 | 6474547                 | TT                              | AA              | 1946905118               |
| SNP_P4_105446_6492087 | NC_021167.1    | Ca_kabuli_chr08 | 6492087                 | TT                              | GG              | 1946905120               |
| SNP_P4_105447_6492381 | NC_021167.1    | Ca_kabuli_chr08 | 6492381                 | CC                              | TT              | 1946905122               |
| SNP_P4_105449_6492558 | NC_021167.1    | Ca_kabuli_chr08 | 6492558                 | TT                              | AA              | 1946905124               |
| SNP_P4_105451_6492679 | NC_021167.1    | Ca_kabuli_chr08 | 6492679                 | CC                              | TT              | 1946905126               |
| SNP_P4_105453_6492771 | NC_021167.1    | Ca_kabuli_chr08 | 6492771                 | AA                              | GG              | 1946905128               |
| SNP_P4_105454_6492900 | NC_021167.1    | Ca_kabuli_chr08 | 6492900                 | GG                              | AA              | 1946905130               |
| SNP_P4_105455_6492902 | NC_021167.1    | Ca_kabuli_chr08 | 6492902                 | AA                              | TT              | 1946905132               |
| SNP_P4_105456_6492934 | NC_021167.1    | Ca_kabuli_chr08 | 6492934                 | AA                              | CC              | 1946905134               |
| SNP_P4_105457_6493025 | NC_021167.1    | Ca_kabuli_chr08 | 6493025                 | AA                              | GG              | 1946905136               |
| SNP_P4_105458_6493146 | NC_021167.1    | Ca_kabuli_chr08 | 6493146                 | TT                              | AA              | 1946905138               |
| SNP_P4_105459_6493207 | NC_021167.1    | Ca_kabuli_chr08 | 6493207                 | CC                              | TT              | 1946905140               |
| SNP_P4_105460_6493236 | NC_021167.1    | Ca_kabuli_chr08 | 6493236                 | CC                              | AA              | 1946905143               |
| SNP_P4_105461_6493408 | NC_021167.1    | Ca_kabuli_chr08 | 6493408                 | GG                              | CC              | 1946905145               |
| SNP_P4_105462_6493411 | NC_021167.1    | Ca_kabuli_chr08 | 6493411                 | GG                              | AA              | 1946905147               |
| SNP_P4_105463_6493412 | NC_021167.1    | Ca_kabuli_chr08 | 6493412                 | AA                              | CC              | 1946905149               |
| SNP_P4_105464_6493415 | NC_021167.1    | Ca_kabuli_chr08 | 6493415                 | GG                              | AA              | 1946905151               |
| SNP_P4_105465_6493442 | NC_021167.1    | Ca_kabuli_chr08 | 6493442                 | CC                              | TT              | 1946905153               |
| SNP_P4_105466_6493444 | NC_021167.1    | Ca_kabuli_chr08 | 6493444                 | AA                              | GG              | 1946905155               |
| SNP_P4_105467_6493461 | NC_021167.1    | Ca_kabuli_chr08 | 6493461                 | CC                              | TT              | 1946905157               |
| SNP_P4_105468_6517953 | NC_021167.1    | Ca_kabuli_chr08 | 6517953                 | AA                              | TT              | 1946905159               |
| SNP_P4_105469_6527994 | NC_021167.1    | Ca_kabuli_chr08 | 6527994                 | AA                              | TT              | 1946905161               |
| SNP_P4_105470_6532252 | NC_021167.1    | Ca_kabuli_chr08 | 6532252                 | TT                              | AA              | 1946905163               |
| SNP_P4_105471_6546220 | NC_021167.1    | Ca_kabuli_chr08 | 6546220                 | TT                              | CC              | 1946905165               |
| SNP_P4_105473_6569359 | NC_021167.1    | Ca_kabuli_chr08 | 6569359                 | CC                              | TT              | 1946905167               |
| SNP_P4_105474_6577068 | NC_021167.1    | Ca_kabuli_chr08 | 6577068                 | AA                              | GG              | 1946905169               |
| SNP_P4_105475_6606990 | NC_021167.1    | Ca_kabuli_chr08 | 6606990                 | CC                              | GG              | 1946905171               |
| SNP_P4_105476_6611332 | NC_021167.1    | Ca_kabuli_chr08 | 6611332                 | CC                              | TT              | 1946905173               |
| SNP_P4_105477_6647699 | NC_021167.1    | Ca_kabuli_chr08 | 6647699                 | CC                              | TT              | 1946905175               |
| SNP_P4_105479_6665269 | NC_021167.1    | Ca_kabuli_chr08 | 6665269                 | CC                              | AA              | 1946905177               |
| SNP_P4_105480_6675560 | NC_021167.1    | Ca_kabuli_chr08 | 6675560                 | CC                              | TT              | 1946905179               |
| SNP_P4_105481_6691733 | NC_021167.1    | Ca_kabuli_chr08 | 6691733                 | CC                              | TT              | 1946905181               |
| SNP_P4_105482_6729458 | NC_021167.1    | Ca_kabuli_chr08 | 6729458                 | CC                              | TT              | 1946905183               |
| SNP_P4_105483_6735234 | NC_021167.1    | Ca_kabuli_chr08 | 6735234                 | TT                              | AA              | 1946905185               |
| SNP_P4_105484_6736659 | NC_021167.1    | Ca_kabuli_chr08 | 6736659                 | AA                              | TT              | 1946905187               |
| SNP_P4_105485_6736660 | NC_021167.1    | Ca_kabuli_chr08 | 6736660                 | AA                              | GG              | 1946905190               |
| SNP_P4_105486_6765459 | NC_021167.1    | Ca_kabuli_chr08 | 6765459                 | GG                              | AA              | 1946905192               |
| SNP_P4_105487_6774220 | NC_021167.1    | Ca_kabuli_chr08 | 6774220                 | CC                              | TT              | 1946905194               |
| SNP_P4_105489_6792628 | NC_021167.1    | Ca_kabuli_chr08 | 6792628                 | CC                              | TT              | 1946905196               |
| SNP_P4_105490_6813468 | NC_021167.1    | Ca_kabuli_chr08 | 6813468                 | TT                              | CC              | 1946905198               |

| SNPs IDs              | Chromosome IDs | Chromosomes     | Physical positions (bp) | CDC Frontier (Reference genome) | (ILWC46 & LPNB) | NCBI SNPdb Accession IDs |
|-----------------------|----------------|-----------------|-------------------------|---------------------------------|-----------------|--------------------------|
| SNP_P4_105491_6813755 | NC_021167.1    | Ca_kabuli_chr08 | 6813755                 | AA                              | TT              | 1946905199               |
| SNP_P4_105492_6818011 | NC_021167.1    | Ca_kabuli_chr08 | 6818011                 | GG                              | AA              | 1946905200               |
| SNP_P4_105493_6822828 | NC_021167.1    | Ca_kabuli_chr08 | 6822828                 | AA                              | GG              | 1946905201               |
| SNP_P4_105494_6824290 | NC_021167.1    | Ca_kabuli_chr08 | 6824290                 | GG                              | AA              | 1946905202               |
| SNP_P4_105495_6836043 | NC_021167.1    | Ca_kabuli_chr08 | 6836043                 | AA                              | TT              | 1946905203               |
| SNP_P4_105497_6866709 | NC_021167.1    | Ca_kabuli_chr08 | 6866709                 | AA                              | GG              | 1946905204               |
| SNP_P4_105498_6897228 | NC_021167.1    | Ca_kabuli_chr08 | 6897228                 | CC                              | TT              | 1946905205               |
| SNP_P4_105499_6899452 | NC_021167.1    | Ca_kabuli_chr08 | 6899452                 | GG                              | AA              | 1946905206               |
| SNP_P4_105500_6907817 | NC_021167.1    | Ca_kabuli_chr08 | 6907817                 | AA                              | TT              | 1946905207               |
| SNP_P4_105501_6910737 | NC_021167.1    | Ca_kabuli_chr08 | 6910737                 | AA                              | GG              | 1946905208               |
| SNP_P4_105502_6918847 | NC_021167.1    | Ca_kabuli_chr08 | 6918847                 | AA                              | GG              | 1946905209               |
| SNP_P4_105503_6919897 | NC_021167.1    | Ca_kabuli_chr08 | 6919897                 | CC                              | AA              | 1946905210               |
| SNP_P4_105504_6924761 | NC_021167.1    | Ca_kabuli_chr08 | 6924761                 | CC                              | TT              | 1946905211               |
| SNP_P4_105505_6930391 | NC_021167.1    | Ca_kabuli_chr08 | 6930391                 | TT                              | AA              | 1946905212               |
| SNP_P4_105506_6932741 | NC_021167.1    | Ca_kabuli_chr08 | 6932741                 | CC                              | GG              | 1946905213               |
| SNP_P4_105507_6934061 | NC_021167.1    | Ca_kabuli_chr08 | 6934061                 | GG                              | AA              | 1946905214               |
| SNP_P4_105509_6950503 | NC_021167.1    | Ca_kabuli_chr08 | 6950503                 | AA                              | CC              | 1946905216               |
| SNP_P4_105510_6953155 | NC_021167.1    | Ca_kabuli_chr08 | 6953155                 | AA                              | GG              | 1946905218               |
| SNP_P4_105512_6978326 | NC_021167.1    | Ca_kabuli_chr08 | 6978326                 | GG                              | AA              | 1946905220               |
| SNP_P4_105513_6978918 | NC_021167.1    | Ca_kabuli_chr08 | 6978918                 | GG                              | AA              | 1946905222               |
| SNP_P4_105515_7030370 | NC_021167.1    | Ca_kabuli_chr08 | 7030370                 | TT                              | AA              | 1946905224               |
| SNP_P4_105519_7108083 | NC_021167.1    | Ca_kabuli_chr08 | 7108083                 | TT                              | CC              | 1946905226               |
| SNP_P4_105520_7129623 | NC_021167.1    | Ca_kabuli_chr08 | 7129623                 | AA                              | GG              | 1946905228               |
| SNP_P4_105521_7129626 | NC_021167.1    | Ca_kabuli_chr08 | 7129626                 | TT                              | GG              | 1946905230               |
| SNP_P4_105522_7133603 | NC_021167.1    | Ca_kabuli_chr08 | 7133603                 | GG                              | AA              | 1946905232               |
| SNP_P4_105523_7155393 | NC_021167.1    | Ca_kabuli_chr08 | 7155393                 | AA                              | GG              | 1946905234               |
| SNP_P4_105524_7155432 | NC_021167.1    | Ca_kabuli_chr08 | 7155432                 | TT                              | GG              | 1946905236               |
| SNP_P4_105525_7155553 | NC_021167.1    | Ca_kabuli_chr08 | 7155553                 | CC                              | TT              | 1946905238               |
| SNP_P4_105526_7155687 | NC_021167.1    | Ca_kabuli_chr08 | 7155687                 | TT                              | GG              | 1946905240               |
| SNP_P4_105527_7155809 | NC_021167.1    | Ca_kabuli_chr08 | 7155809                 | AA                              | GG              | 1946905242               |
| SNP_P4_105528_7155831 | NC_021167.1    | Ca_kabuli_chr08 | 7155831                 | TT                              | CC              | 1946905244               |
| SNP_P4_105529_7155994 | NC_021167.1    | Ca_kabuli_chr08 | 7155994                 | GG                              | AA              | 1946905246               |
| SNP_P4_105530_7156048 | NC_021167.1    | Ca_kabuli_chr08 | 7156048                 | AA                              | GG              | 1946905248               |
| SNP_P4_105533_7246737 | NC_021167.1    | Ca_kabuli_chr08 | 7246737                 | AA                              | GG              | 1946905250               |
| SNP_P4_105534_7260371 | NC_021167.1    | Ca_kabuli_chr08 | 7260371                 | AA                              | TT              | 1946905252               |
| SNP_P4_105535_7260372 | NC_021167.1    | Ca_kabuli_chr08 | 7260372                 | TT                              | GG              | 1946905254               |
| SNP_P4_105537_7285367 | NC_021167.1    | Ca_kabuli_chr08 | 7285367                 | AA                              | GG              | 1946905256               |
| SNP_P4_105539_7295072 | NC_021167.1    | Ca_kabuli_chr08 | 7295072                 | CC                              | TT              | 1946905258               |
| SNP_P4_105540_7301345 | NC_021167.1    | Ca_kabuli_chr08 | 7301345                 | TT                              | CC              | 1946905260               |
| SNP_P4_105541_7303680 | NC_021167.1    | Ca_kabuli_chr08 | 7303680                 | TT                              | AA              | 1946905262               |
| SNP_P4_105542_7303681 | NC_021167.1    | Ca_kabuli_chr08 | 7303681                 | AA                              | TT              | 1946905264               |
| SNP_P4_105543_7319029 | NC_021167.1    | Ca_kabuli_chr08 | 7319029                 | GG                              | AA              | 1946905266               |

| SNPs IDs              | Chromosome IDs | Chromosomes     | Physical positions (bp) | CDC Frontier (Reference genome) | (ILWC46 & LPNB) | NCBI SNPdb Accession IDs |
|-----------------------|----------------|-----------------|-------------------------|---------------------------------|-----------------|--------------------------|
| SNP_P4_105546_7339659 | NC_021167.1    | Ca_kabuli_chr08 | 7339659                 | GG                              | AA              | 1946905268               |
| SNP_P4_105547_7368488 | NC_021167.1    | Ca_kabuli_chr08 | 7368488                 | GG                              | AA              | 1946905270               |
| SNP_P4_105548_7368904 | NC_021167.1    | Ca_kabuli_chr08 | 7368904                 | TT                              | CC              | 1946905272               |
| SNP_P4_105549_7368906 | NC_021167.1    | Ca_kabuli_chr08 | 7368906                 | TT                              | AA              | 1946905274               |
| SNP_P4_105550_7368933 | NC_021167.1    | Ca_kabuli_chr08 | 7368933                 | AA                              | GG              | 1946905276               |
| SNP_P4_105551_7368936 | NC_021167.1    | Ca_kabuli_chr08 | 7368936                 | CC                              | GG              | 1946905278               |
| SNP_P4_105552_7401987 | NC_021167.1    | Ca_kabuli_chr08 | 7401987                 | CC                              | TT              | 1946905280               |
| SNP_P4_105554_7471621 | NC_021167.1    | Ca_kabuli_chr08 | 7471621                 | AA                              | GG              | 1946905282               |
| SNP_P4_105555_7471622 | NC_021167.1    | Ca_kabuli_chr08 | 7471622                 | AA                              | TT              | 1946905284               |
| SNP_P4_105556_7508869 | NC_021167.1    | Ca_kabuli_chr08 | 7508869                 | CC                              | GG              | 1946905286               |
| SNP_P4_105557_7560254 | NC_021167.1    | Ca_kabuli_chr08 | 7560254                 | AA                              | CC              | 1946905288               |
| SNP_P4_105559_7563385 | NC_021167.1    | Ca_kabuli_chr08 | 7563385                 | GG                              | TT              | 1946905290               |
| SNP_P4_105561_7563641 | NC_021167.1    | Ca_kabuli_chr08 | 7563641                 | CC                              | GG              | 1946905292               |
| SNP_P4_105562_7563696 | NC_021167.1    | Ca_kabuli_chr08 | 7563696                 | AA                              | GG              | 1946905294               |
| SNP_P4_105563_7563737 | NC_021167.1    | Ca_kabuli_chr08 | 7563737                 | AA                              | GG              | 1946905296               |
| SNP_P4_105564_7597117 | NC_021167.1    | Ca_kabuli_chr08 | 7597117                 | GG                              | AA              | 1946905298               |
| SNP_P4_105565_7612584 | NC_021167.1    | Ca_kabuli_chr08 | 7612584                 | TT                              | AA              | 1946905300               |
| SNP_P4_105566_7612585 | NC_021167.1    | Ca_kabuli_chr08 | 7612585                 | CC                              | AA              | 1946905302               |
| SNP_P4_105567_7631568 | NC_021167.1    | Ca_kabuli_chr08 | 7631568                 | GG                              | AA              | 1946905304               |
| SNP_P4_105568_7635681 | NC_021167.1    | Ca_kabuli_chr08 | 7635681                 | GG                              | TT              | 1946905305               |
| SNP_P4_105569_7641962 | NC_021167.1    | Ca_kabuli_chr08 | 7641962                 | TT                              | CC              | 1946905308               |
| SNP_P4_105570_7650048 | NC_021167.1    | Ca_kabuli_chr08 | 7650048                 | AA                              | GG              | 1946905310               |
| SNP_P4_105571_7651651 | NC_021167.1    | Ca_kabuli_chr08 | 7651651                 | AA                              | TT              | 1946905312               |
| SNP_P4_105572_7653705 | NC_021167.1    | Ca_kabuli_chr08 | 7653705                 | AA                              | GG              | 1946905314               |
| SNP_P4_105574_7680028 | NC_021167.1    | Ca_kabuli_chr08 | 7680028                 | AA                              | GG              | 1946905316               |
| SNP_P4_105576_7691912 | NC_021167.1    | Ca_kabuli_chr08 | 7691912                 | TT                              | CC              | 1946905318               |
| SNP_P4_105577_7698349 | NC_021167.1    | Ca_kabuli_chr08 | 7698349                 | TT                              | CC              | 1946905321               |
| SNP_P4_105578_7723591 | NC_021167.1    | Ca_kabuli_chr08 | 7723591                 | CC                              | TT              | 1946905323               |
| SNP_P4_105579_7733813 | NC_021167.1    | Ca_kabuli_chr08 | 7733813                 | CC                              | TT              | 1946905325               |
| SNP_P4_105580_7741486 | NC_021167.1    | Ca_kabuli_chr08 | 7741486                 | GG                              | AA              | 1946905327               |
| SNP_P4_105581_7745239 | NC_021167.1    | Ca_kabuli_chr08 | 7745239                 | AA                              | GG              | 1946905329               |
| SNP_P4_105582_7775331 | NC_021167.1    | Ca_kabuli_chr08 | 7775331                 | AA                              | TT              | 1946905332               |
| SNP_P4_105583_7775357 | NC_021167.1    | Ca_kabuli_chr08 | 7775357                 | GG                              | CC              | 1946905334               |
| SNP_P4_105584_7775599 | NC_021167.1    | Ca_kabuli_chr08 | 7775599                 | TT                              | CC              | 1946905336               |
| SNP_P4_105585_7775608 | NC_021167.1    | Ca_kabuli_chr08 | 7775608                 | TT                              | CC              | 1946905338               |
| SNP_P4_105586_7775610 | NC_021167.1    | Ca_kabuli_chr08 | 7775610                 | TT                              | CC              | 1946905340               |
| SNP_P4_105587_7775641 | NC_021167.1    | Ca_kabuli_chr08 | 7775641                 | TT                              | CC              | 1946905342               |
| SNP_P4_105588_7775663 | NC_021167.1    | Ca_kabuli_chr08 | 7775663                 | GG                              | AA              | 1946905344               |
| SNP_P4_105589_7775667 | NC_021167.1    | Ca_kabuli_chr08 | 7775667                 | CC                              | TT              | 1946905346               |
| SNP_P4_105590_7775693 | NC_021167.1    | Ca_kabuli_chr08 | 7775693                 | CC                              | TT              | 1946905348               |
| SNP_P4_105591_7775708 | NC_021167.1    | Ca_kabuli_chr08 | 7775708                 | CC                              | TT              | 1946905350               |
| SNP_P4_105592_7775720 | NC_021167.1    | Ca_kabuli_chr08 | 7775720                 | GG                              | AA              | 1946905352               |

| SNPs IDs              | Chromosome IDs | Chromosomes     | Physical positions (bp) | CDC Frontier (Reference genome) | (ILWC46 & LPNB) | NCBI SNPdb Accession IDs |
|-----------------------|----------------|-----------------|-------------------------|---------------------------------|-----------------|--------------------------|
| SNP_P4_105593_7775822 | NC_021167.1    | Ca_kabuli_chr08 | 7775822                 | GG                              | AA              | 1946905354               |
| SNP_P4_105594_7775860 | NC_021167.1    | Ca_kabuli_chr08 | 7775860                 | TT                              | AA              | 1946905357               |
| SNP_P4_105595_7775861 | NC_021167.1    | Ca_kabuli_chr08 | 7775861                 | GG                              | CC              | 1946905359               |
| SNP_P4_105596_7775908 | NC_021167.1    | Ca_kabuli_chr08 | 7775908                 | TT                              | GG              | 1946905361               |
| SNP_P4_105597_7776014 | NC_021167.1    | Ca_kabuli_chr08 | 7776014                 | GG                              | TT              | 1946905363               |
| SNP_P4_105598_7776018 | NC_021167.1    | Ca_kabuli_chr08 | 7776018                 | CC                              | TT              | 1946905365               |
| SNP_P4_105599_7776041 | NC_021167.1    | Ca_kabuli_chr08 | 7776041                 | AA                              | CC              | 1946905367               |
| SNP_P4_105600_7776042 | NC_021167.1    | Ca_kabuli_chr08 | 7776042                 | CC                              | TT              | 1946905369               |
| SNP_P4_105601_7776071 | NC_021167.1    | Ca_kabuli_chr08 | 7776071                 | GG                              | TT              | 1946905371               |
| SNP_P4_105602_7776130 | NC_021167.1    | Ca_kabuli_chr08 | 7776130                 | TT                              | AA              | 1946905373               |
| SNP_P4_105603_7776186 | NC_021167.1    | Ca_kabuli_chr08 | 7776186                 | GG                              | AA              | 1946905375               |
| SNP_P4_105604_7777195 | NC_021167.1    | Ca_kabuli_chr08 | 7777195                 | TT                              | CC              | 1946905377               |
| SNP_P4_105605_7777312 | NC_021167.1    | Ca_kabuli_chr08 | 7777312                 | AA                              | CC              | 1946905379               |
| SNP_P4_105606_7777396 | NC_021167.1    | Ca_kabuli_chr08 | 7777396                 | AA                              | GG              | 1946905381               |
| SNP_P4_105607_7777420 | NC_021167.1    | Ca_kabuli_chr08 | 7777420                 | TT                              | CC              | 1946905383               |
| SNP_P4_105608_7777469 | NC_021167.1    | Ca_kabuli_chr08 | 7777469                 | TT                              | GG              | 1946905385               |
| SNP_P4_105610_7777497 | NC_021167.1    | Ca_kabuli_chr08 | 7777497                 | AA                              | TT              | 1946905387               |
| SNP_P4_105611_7777547 | NC_021167.1    | Ca_kabuli_chr08 | 7777547                 | GG                              | TT              | 1946905389               |
| SNP_P4_105612_7777575 | NC_021167.1    | Ca_kabuli_chr08 | 7777575                 | GG                              | AA              | 1946905391               |
| SNP_P4_105614_7777741 | NC_021167.1    | Ca_kabuli_chr08 | 7777741                 | GG                              | CC              | 1946905393               |
| SNP_P4_105615_7777749 | NC_021167.1    | Ca_kabuli_chr08 | 7777749                 | GG                              | CC              | 1946905395               |
| SNP_P4_105616_7777971 | NC_021167.1    | Ca_kabuli_chr08 | 7777971                 | GG                              | CC              | 1946905397               |
| SNP_P4_105617_7777973 | NC_021167.1    | Ca_kabuli_chr08 | 7777973                 | TT                              | CC              | 1946905399               |
| SNP_P4_105618_7796612 | NC_021167.1    | Ca_kabuli_chr08 | 7796612                 | TT                              | AA              | 1946905401               |
| SNP_P4_105619_7796614 | NC_021167.1    | Ca_kabuli_chr08 | 7796614                 | AA                              | TT              | 1946905403               |
| SNP_P4_105620_7796615 | NC_021167.1    | Ca_kabuli_chr08 | 7796615                 | TT                              | AA              | 1946905405               |
| SNP_P4_105622_7802422 | NC_021167.1    | Ca_kabuli_chr08 | 7802422                 | TT                              | CC              | 1946905407               |
| SNP_P4_105623_7802467 | NC_021167.1    | Ca_kabuli_chr08 | 7802467                 | CC                              | TT              | 1946905409               |
| SNP_P4_105624_7802500 | NC_021167.1    | Ca_kabuli_chr08 | 7802500                 | TT                              | CC              | 1946905411               |
| SNP_P4_105625_7802649 | NC_021167.1    | Ca_kabuli_chr08 | 7802649                 | TT                              | GG              | 1946905413               |
| SNP_P4_105626_7802681 | NC_021167.1    | Ca_kabuli_chr08 | 7802681                 | TT                              | CC              | 1946905415               |
| SNP_P4_105627_7802844 | NC_021167.1    | Ca_kabuli_chr08 | 7802844                 | GG                              | TT              | 1946905417               |
| SNP_P4_105628_7802902 | NC_021167.1    | Ca_kabuli_chr08 | 7802902                 | CC                              | TT              | 1946905420               |
| SNP_P4_105629_7802913 | NC_021167.1    | Ca_kabuli_chr08 | 7802913                 | AA                              | CC              | 1946905422               |
| SNP_P4_105630_7802951 | NC_021167.1    | Ca_kabuli_chr08 | 7802951                 | AA                              | GG              | 1946905424               |
| SNP_P4_105631_7802999 | NC_021167.1    | Ca_kabuli_chr08 | 7802999                 | TT                              | CC              | 1946905426               |
| SNP_P4_105632_7803047 | NC_021167.1    | Ca_kabuli_chr08 | 7803047                 | AA                              | TT              | 1946905428               |
| SNP_P4_105633_7803823 | NC_021167.1    | Ca_kabuli_chr08 | 7803823                 | CC                              | AA              | 1946905430               |
| SNP_P4_105634_7851778 | NC_021167.1    | Ca_kabuli_chr08 | 7851778                 | TT                              | CC              | 1946905432               |
| SNP_P4_105635_7855639 | NC_021167.1    | Ca_kabuli_chr08 | 7855639                 | GG                              | AA              | 1946905433               |
| SNP_P4_105636_7855872 | NC_021167.1    | Ca_kabuli_chr08 | 7855872                 | GG                              | AA              | 1946905435               |
| SNP_P4_105637_7855880 | NC_021167.1    | Ca_kabuli_chr08 | 7855880                 | AA                              | CC              | 1946905437               |

| SNPs IDs              | Chromosome IDs | Chromosomes     | Physical positions (bp) | CDC Frontier (Reference genome) | (ILWC46 & LPNB) | NCBI SNPdb Accession IDs |
|-----------------------|----------------|-----------------|-------------------------|---------------------------------|-----------------|--------------------------|
| SNP_P4_105638_7855913 | NC_021167.1    | Ca_kabuli_chr08 | 7855913                 | AA                              | TT              | 1946905439               |
| SNP_P4_105640_7866666 | NC_021167.1    | Ca_kabuli_chr08 | 7866666                 | CC                              | TT              | 1946905441               |
| SNP_P4_105641_7881254 | NC_021167.1    | Ca_kabuli_chr08 | 7881254                 | TT                              | CC              | 1946905443               |
| SNP_P4_105642_7881443 | NC_021167.1    | Ca_kabuli_chr08 | 7881443                 | AA                              | GG              | 1946905445               |
| SNP_P4_105643_7883652 | NC_021167.1    | Ca_kabuli_chr08 | 7883652                 | AA                              | TT              | 1946905447               |
| SNP_P4_105644_7883656 | NC_021167.1    | Ca_kabuli_chr08 | 7883656                 | AA                              | TT              | 1946905449               |
| SNP_P4_105645_7883661 | NC_021167.1    | Ca_kabuli_chr08 | 7883661                 | GG                              | AA              | 1946905452               |
| SNP_P4_105646_7883664 | NC_021167.1    | Ca_kabuli_chr08 | 7883664                 | TT                              | AA              | 1946905454               |
| SNP_P4_105647_7883670 | NC_021167.1    | Ca_kabuli_chr08 | 7883670                 | CC                              | TT              | 1946905456               |
| SNP_P4_105648_7884027 | NC_021167.1    | Ca_kabuli_chr08 | 7884027                 | GG                              | AA              | 1946905458               |
| SNP_P4_105649_7889128 | NC_021167.1    | Ca_kabuli_chr08 | 7889128                 | TT                              | AA              | 1946905460               |
| SNP_P4_105650_7889136 | NC_021167.1    | Ca_kabuli_chr08 | 7889136                 | GG                              | CC              | 1946905462               |
| SNP_P4_105653_7895785 | NC_021167.1    | Ca_kabuli_chr08 | 7895785                 | AA                              | GG              | 1946905464               |
| SNP_P4_105654_7895833 | NC_021167.1    | Ca_kabuli_chr08 | 7895833                 | TT                              | CC              | 1946905466               |
| SNP_P4_105655_7895893 | NC_021167.1    | Ca_kabuli_chr08 | 7895893                 | GG                              | AA              | 1946905468               |
| SNP_P4_105656_7895991 | NC_021167.1    | Ca_kabuli_chr08 | 7895991                 | GG                              | AA              | 1946905470               |
| SNP_P4_105657_7895999 | NC_021167.1    | Ca_kabuli_chr08 | 7895999                 | AA                              | TT              | 1946905472               |
| SNP_P4_105658_7896042 | NC_021167.1    | Ca_kabuli_chr08 | 7896042                 | GG                              | AA              | 1946905474               |
| SNP_P4_105659_7896046 | NC_021167.1    | Ca_kabuli_chr08 | 7896046                 | GG                              | TT              | 1946905476               |
| SNP_P4_105660_7896049 | NC_021167.1    | Ca_kabuli_chr08 | 7896049                 | AA                              | GG              | 1946905478               |
| SNP_P4_105661_7896112 | NC_021167.1    | Ca_kabuli_chr08 | 7896112                 | TT                              | CC              | 1946905481               |
| SNP_P4_105662_7896293 | NC_021167.1    | Ca_kabuli_chr08 | 7896293                 | CC                              | TT              | 1946905483               |
| SNP_P4_105663_7896312 | NC_021167.1    | Ca_kabuli_chr08 | 7896312                 | TT                              | CC              | 1946905485               |
| SNP_P4_105664_7896320 | NC_021167.1    | Ca_kabuli_chr08 | 7896320                 | AA                              | GG              | 1946905487               |
| SNP_P4_105665_7896332 | NC_021167.1    | Ca_kabuli_chr08 | 7896332                 | GG                              | AA              | 1946905488               |
| SNP_P4_105667_7896415 | NC_021167.1    | Ca_kabuli_chr08 | 7896415                 | TT                              | CC              | 1946905491               |
| SNP_P4_105668_7896435 | NC_021167.1    | Ca_kabuli_chr08 | 7896435                 | GG                              | AA              | 1946905493               |
| SNP_P4_105669_7896493 | NC_021167.1    | Ca_kabuli_chr08 | 7896493                 | CC                              | TT              | 1946905495               |
| SNP_P4_105670_7896496 | NC_021167.1    | Ca_kabuli_chr08 | 7896496                 | GG                              | TT              | 1946905497               |
| SNP_P4_105671_7896510 | NC_021167.1    | Ca_kabuli_chr08 | 7896510                 | GG                              | CC              | 1946905499               |
| SNP_P4_105672_7896514 | NC_021167.1    | Ca_kabuli_chr08 | 7896514                 | TT                              | CC              | 1946905501               |
| SNP_P4_105673_7896534 | NC_021167.1    | Ca_kabuli_chr08 | 7896534                 | TT                              | GG              | 1946905503               |
| SNP_P4_105674_7896561 | NC_021167.1    | Ca_kabuli_chr08 | 7896561                 | CC                              | AA              | 1946905505               |
| SNP_P4_105675_7896598 | NC_021167.1    | Ca_kabuli_chr08 | 7896598                 | AA                              | CC              | 1946905507               |
| SNP_P4_105676_7896605 | NC_021167.1    | Ca_kabuli_chr08 | 7896605                 | GG                              | AA              | 1946905508               |
| SNP_P4_105677_7896696 | NC_021167.1    | Ca_kabuli_chr08 | 7896696                 | AA                              | TT              | 1946905511               |
| SNP_P4_105678_7896958 | NC_021167.1    | Ca_kabuli_chr08 | 7896958                 | GG                              | AA              | 1946905513               |
| SNP_P4_105679_7900650 | NC_021167.1    | Ca_kabuli_chr08 | 7900650                 | GG                              | AA              | 1946905515               |
| SNP_P4_105680_7901054 | NC_021167.1    | Ca_kabuli_chr08 | 7901054                 | GG                              | AA              | 1946905517               |
| SNP_P4_105681_7901074 | NC_021167.1    | Ca_kabuli_chr08 | 7901074                 | CC                              | TT              | 1946905519               |
| SNP_P4_105683_7912478 | NC_021167.1    | Ca_kabuli_chr08 | 7912478                 | TT                              | CC              | 1946905521               |
| SNP_P4_105685_7913793 | NC_021167.1    | Ca_kabuli_chr08 | 7913793                 | GG                              | AA              | 1946905523               |

| SNPs IDs              | Chromosome IDs | Chromosomes     | Physical positions (bp) | CDC Frontier (Reference genome) | (ILWC46 & LPNB) | NCBI SNPdb Accession IDs |
|-----------------------|----------------|-----------------|-------------------------|---------------------------------|-----------------|--------------------------|
| SNP_P4_105686_7913842 | NC_021167.1    | Ca_kabuli_chr08 | 7913842                 | CC                              | AA              | 1946905525               |
| SNP_P4_105687_7913997 | NC_021167.1    | Ca_kabuli_chr08 | 7913997                 | AA                              | TT              | 1946905527               |
| SNP_P4_105688_7914062 | NC_021167.1    | Ca_kabuli_chr08 | 7914062                 | GG                              | CC              | 1946905529               |
| SNP_P4_105689_7914083 | NC_021167.1    | Ca_kabuli_chr08 | 7914083                 | TT                              | CC              | 1946905531               |
| SNP_P4_105690_7924610 | NC_021167.1    | Ca_kabuli_chr08 | 7924610                 | CC                              | GG              | 1946905533               |
| SNP_P4_105692_7925053 | NC_021167.1    | Ca_kabuli_chr08 | 7925053                 | TT                              | AA              | 1946905535               |
| SNP_P4_105693_7925141 | NC_021167.1    | Ca_kabuli_chr08 | 7925141                 | AA                              | TT              | 1946905537               |
| SNP_P4_105694_7925248 | NC_021167.1    | Ca_kabuli_chr08 | 7925248                 | AA                              | GG              | 1946905539               |
| SNP_P4_105695_7926135 | NC_021167.1    | Ca_kabuli_chr08 | 7926135                 | AA                              | GG              | 1946905541               |
| SNP_P4_105696_7927213 | NC_021167.1    | Ca_kabuli_chr08 | 7927213                 | GG                              | AA              | 1946905543               |
| SNP_P4_105698_7927527 | NC_021167.1    | Ca_kabuli_chr08 | 7927527                 | AA                              | GG              | 1946905545               |
| SNP_P4_105700_7927631 | NC_021167.1    | Ca_kabuli_chr08 | 7927631                 | GG                              | AA              | 1946905547               |
| SNP_P4_105702_7936538 | NC_021167.1    | Ca_kabuli_chr08 | 7936538                 | TT                              | AA              | 1946905549               |
| SNP_P4_105703_7937233 | NC_021167.1    | Ca_kabuli_chr08 | 7937233                 | CC                              | AA              | 1946905551               |
| SNP_P4_105704_7937601 | NC_021167.1    | Ca_kabuli_chr08 | 7937601                 | GG                              | TT              | 1946905553               |
| SNP_P4_105705_7937621 | NC_021167.1    | Ca_kabuli_chr08 | 7937621                 | AA                              | GG              | 1946905555               |
| SNP_P4_105706_7937636 | NC_021167.1    | Ca_kabuli_chr08 | 7937636                 | AA                              | CC              | 1946905557               |
| SNP_P4_105707_7937655 | NC_021167.1    | Ca_kabuli_chr08 | 7937655                 | TT                              | CC              | 1946905559               |
| SNP_P4_105708_7937771 | NC_021167.1    | Ca_kabuli_chr08 | 7937771                 | TT                              | CC              | 1946905561               |
| SNP_P4_105709_7937774 | NC_021167.1    | Ca_kabuli_chr08 | 7937774                 | AA                              | GG              | 1946905563               |
| SNP_P4_105710_7937828 | NC_021167.1    | Ca_kabuli_chr08 | 7937828                 | GG                              | AA              | 1946905565               |
| SNP_P4_105711_7937881 | NC_021167.1    | Ca_kabuli_chr08 | 7937881                 | GG                              | AA              | 1946905567               |
| SNP_P4_105712_7937891 | NC_021167.1    | Ca_kabuli_chr08 | 7937891                 | AA                              | CC              | 1946905569               |
| SNP_P4_105713_7937907 | NC_021167.1    | Ca_kabuli_chr08 | 7937907                 | GG                              | AA              | 1946905571               |
| SNP_P4_105714_7937908 | NC_021167.1    | Ca_kabuli_chr08 | 7937908                 | TT                              | AA              | 1946905573               |
| SNP_P4_105715_7937924 | NC_021167.1    | Ca_kabuli_chr08 | 7937924                 | GG                              | CC              | 1946905575               |
| SNP_P4_105716_7937952 | NC_021167.1    | Ca_kabuli_chr08 | 7937952                 | AA                              | GG              | 1946905577               |
| SNP_P4_105717_7938027 | NC_021167.1    | Ca_kabuli_chr08 | 7938027                 | AA                              | GG              | 1946905579               |
| SNP_P4_105718_7938028 | NC_021167.1    | Ca_kabuli_chr08 | 7938028                 | AA                              | TT              | 1946905581               |
| SNP_P4_105719_7938076 | NC_021167.1    | Ca_kabuli_chr08 | 7938076                 | CC                              | TT              | 1946905583               |
| SNP_P4_105721_7938126 | NC_021167.1    | Ca_kabuli_chr08 | 7938126                 | AA                              | GG              | 1946905585               |
| SNP_P4_105722_7938144 | NC_021167.1    | Ca_kabuli_chr08 | 7938144                 | AA                              | GG              | 1946905587               |
| SNP_P4_105723_7938199 | NC_021167.1    | Ca_kabuli_chr08 | 7938199                 | AA                              | TT              | 1946905589               |
| SNP_P4_105725_7943988 | NC_021167.1    | Ca_kabuli_chr08 | 7943988                 | CC                              | AA              | 1946905591               |
| SNP_P4_105726_7944316 | NC_021167.1    | Ca_kabuli_chr08 | 7944316                 | CC                              | TT              | 1946905593               |
| SNP_P4_105727_7946941 | NC_021167.1    | Ca_kabuli_chr08 | 7946941                 | TT                              | CC              | 1946905595               |
| SNP_P4_105728_7946987 | NC_021167.1    | Ca_kabuli_chr08 | 7946987                 | AA                              | GG              | 1946905597               |
| SNP_P4_105729_7947096 | NC_021167.1    | Ca_kabuli_chr08 | 7947096                 | GG                              | AA              | 1946905599               |
| SNP_P4_105730_7947099 | NC_021167.1    | Ca_kabuli_chr08 | 7947099                 | GG                              | AA              | 1946905601               |
| SNP_P4_105731_7947141 | NC_021167.1    | Ca_kabuli_chr08 | 7947141                 | TT                              | AA              | 1946905603               |
| SNP_P4_105732_7948133 | NC_021167.1    | Ca_kabuli_chr08 | 7948133                 | AA                              | GG              | 1946905605               |
| SNP_P4_105734_7948257 | NC_021167.1    | Ca_kabuli_chr08 | 7948257                 | GG                              | TT              | 1946905607               |



| SNPs IDs              | Chromosome IDs | Chromosomes     | Physical positions (bp) | CDC Frontier (Reference genome) | (ILWC46 & LPNB) | NCBI SNPdb Accession IDs |
|-----------------------|----------------|-----------------|-------------------------|---------------------------------|-----------------|--------------------------|
| SNP_P4_105735_7948698 | NC_021167.1    | Ca_kabuli_chr08 | 7948698                 | CC                              | TT              | 1946905609               |
| SNP_P4_105736_7950205 | NC_021167.1    | Ca_kabuli_chr08 | 7950205                 | GG                              | TT              | 1946905611               |
| SNP_P4_105737_7950275 | NC_021167.1    | Ca_kabuli_chr08 | 7950275                 | TT                              | GG              | 1946905613               |
| SNP_P4_105738_7950287 | NC_021167.1    | Ca_kabuli_chr08 | 7950287                 | TT                              | CC              | 1946905615               |
| SNP_P4_105739_7950313 | NC_021167.1    | Ca_kabuli_chr08 | 7950313                 | AA                              | CC              | 1946905617               |
| SNP_P4_105740_7950332 | NC_021167.1    | Ca_kabuli_chr08 | 7950332                 | AA                              | GG              | 1946905619               |
| SNP_P4_105741_7950502 | NC_021167.1    | Ca_kabuli_chr08 | 7950502                 | CC                              | GG              | 1946905621               |
| SNP_P4_105743_7950594 | NC_021167.1    | Ca_kabuli_chr08 | 7950594                 | CC                              | TT              | 1946905623               |
| SNP_P4_105744_7950821 | NC_021167.1    | Ca_kabuli_chr08 | 7950821                 | CC                              | TT              | 1946905625               |
| SNP_P4_105746_7950866 | NC_021167.1    | Ca_kabuli_chr08 | 7950866                 | TT                              | CC              | 1946905627               |
| SNP_P4_105747_7951002 | NC_021167.1    | Ca_kabuli_chr08 | 7951002                 | TT                              | CC              | 1946905629               |
| SNP_P4_105748_7951035 | NC_021167.1    | Ca_kabuli_chr08 | 7951035                 | TT                              | CC              | 1946905631               |
| SNP_P4_105749_7951061 | NC_021167.1    | Ca_kabuli_chr08 | 7951061                 | CC                              | AA              | 1946905633               |
| SNP_P4_105750_7951166 | NC_021167.1    | Ca_kabuli_chr08 | 7951166                 | TT                              | CC              | 1946905635               |
| SNP_P4_105751_7951190 | NC_021167.1    | Ca_kabuli_chr08 | 7951190                 | AA                              | GG              | 1946905638               |
| SNP_P4_105752_7951234 | NC_021167.1    | Ca_kabuli_chr08 | 7951234                 | TT                              | AA              | 1946905640               |
| SNP_P4_105753_7951399 | NC_021167.1    | Ca_kabuli_chr08 | 7951399                 | CC                              | TT              | 1946905642               |
| SNP_P4_105754_7951454 | NC_021167.1    | Ca_kabuli_chr08 | 7951454                 | CC                              | TT              | 1946905644               |
| SNP_P4_105755_7951514 | NC_021167.1    | Ca_kabuli_chr08 | 7951514                 | CC                              | GG              | 1946905646               |
| SNP_P4_105756_7951523 | NC_021167.1    | Ca_kabuli_chr08 | 7951523                 | CC                              | TT              | 1946905648               |
| SNP_P4_105757_7951591 | NC_021167.1    | Ca_kabuli_chr08 | 7951591                 | TT                              | GG              | 1946905650               |
| SNP_P4_105758_7951658 | NC_021167.1    | Ca_kabuli_chr08 | 7951658                 | TT                              | CC              | 1946905652               |
| SNP_P4_105759_7951735 | NC_021167.1    | Ca_kabuli_chr08 | 7951735                 | TT                              | CC              | 1946905654               |
| SNP_P4_105760_7951815 | NC_021167.1    | Ca_kabuli_chr08 | 7951815                 | TT                              | CC              | 1946905656               |
| SNP_P4_105761_7952016 | NC_021167.1    | Ca_kabuli_chr08 | 7952016                 | CC                              | TT              | 1946905658               |
| SNP_P4_105762_7952042 | NC_021167.1    | Ca_kabuli_chr08 | 7952042                 | AA                              | GG              | 1946905660               |
| SNP_P4_105763_7952123 | NC_021167.1    | Ca_kabuli_chr08 | 7952123                 | TT                              | CC              | 1946905662               |
| SNP_P4_105764_7952131 | NC_021167.1    | Ca_kabuli_chr08 | 7952131                 | GG                              | AA              | 1946905664               |
| SNP_P4_105765_7952340 | NC_021167.1    | Ca_kabuli_chr08 | 7952340                 | TT                              | GG              | 1946905666               |
| SNP_P4_105766_7952434 | NC_021167.1    | Ca_kabuli_chr08 | 7952434                 | AA                              | CC              | 1946905668               |
| SNP_P4_105767_7952546 | NC_021167.1    | Ca_kabuli_chr08 | 7952546                 | GG                              | CC              | 1946905670               |
| SNP_P4_105769_7952633 | NC_021167.1    | Ca_kabuli_chr08 | 7952633                 | TT                              | CC              | 1946905672               |
| SNP_P4_105770_7952636 | NC_021167.1    | Ca_kabuli_chr08 | 7952636                 | AA                              | GG              | 1946905674               |
| SNP_P4_105771_7952665 | NC_021167.1    | Ca_kabuli_chr08 | 7952665                 | GG                              | CC              | 1946905676               |
| SNP_P4_105772_7952737 | NC_021167.1    | Ca_kabuli_chr08 | 7952737                 | CC                              | AA              | 1946905678               |
| SNP_P4_105773_7952773 | NC_021167.1    | Ca_kabuli_chr08 | 7952773                 | GG                              | CC              | 1946905680               |
| SNP_P4_105774_7952810 | NC_021167.1    | Ca_kabuli_chr08 | 7952810                 | AA                              | TT              | 1946905682               |
| SNP_P4_105775_7952822 | NC_021167.1    | Ca_kabuli_chr08 | 7952822                 | AA                              | GG              | 1946905684               |
| SNP_P4_105776_7952831 | NC_021167.1    | Ca_kabuli_chr08 | 7952831                 | AA                              | TT              | 1946905686               |
| SNP_P4_105777_7952837 | NC_021167.1    | Ca_kabuli_chr08 | 7952837                 | GG                              | CC              | 1946905688               |
| SNP_P4_105778_7952840 | NC_021167.1    | Ca_kabuli_chr08 | 7952840                 | CC                              | AA              | 1946905690               |
| SNP_P4_105779_7952860 | NC_021167.1    | Ca_kabuli_chr08 | 7952860                 | AA                              | TT              | 1946905692               |

| SNPs IDs              | Chromosome IDs | Chromosomes     | Physical positions (bp) | CDC Frontier (Reference genome) | (ILWC46 & LPNB) | NCBI SNPdb Accession IDs |
|-----------------------|----------------|-----------------|-------------------------|---------------------------------|-----------------|--------------------------|
| SNP_P4_105780_7952924 | NC_021167.1    | Ca_kabuli_chr08 | 7952924                 | GG                              | AA              | 1946905694               |
| SNP_P4_105781_7953020 | NC_021167.1    | Ca_kabuli_chr08 | 7953020                 | TT                              | CC              | 1946905697               |
| SNP_P4_105782_7953024 | NC_021167.1    | Ca_kabuli_chr08 | 7953024                 | AA                              | GG              | 1946905699               |
| SNP_P4_105783_7953046 | NC_021167.1    | Ca_kabuli_chr08 | 7953046                 | GG                              | AA              | 1946905701               |
| SNP_P4_105785_7953116 | NC_021167.1    | Ca_kabuli_chr08 | 7953116                 | CC                              | TT              | 1946905703               |
| SNP_P4_105786_7953157 | NC_021167.1    | Ca_kabuli_chr08 | 7953157                 | GG                              | AA              | 1946905705               |
| SNP_P4_105787_7953268 | NC_021167.1    | Ca_kabuli_chr08 | 7953268                 | CC                              | TT              | 1946905707               |
| SNP_P4_105788_7953276 | NC_021167.1    | Ca_kabuli_chr08 | 7953276                 | CC                              | TT              | 1946905709               |
| SNP_P4_105789_7953297 | NC_021167.1    | Ca_kabuli_chr08 | 7953297                 | AA                              | GG              | 1946905711               |
| SNP_P4_105790_7953338 | NC_021167.1    | Ca_kabuli_chr08 | 7953338                 | GG                              | AA              | 1946905713               |
| SNP_P4_105791_7953416 | NC_021167.1    | Ca_kabuli_chr08 | 7953416                 | AA                              | GG              | 1946905715               |
| SNP_P4_105792_7953455 | NC_021167.1    | Ca_kabuli_chr08 | 7953455                 | CC                              | TT              | 1946905717               |
| SNP_P4_105793_7953508 | NC_021167.1    | Ca_kabuli_chr08 | 7953508                 | CC                              | TT              | 1946905718               |
| SNP_P4_105794_7953581 | NC_021167.1    | Ca_kabuli_chr08 | 7953581                 | AA                              | GG              | 1946905720               |
| SNP_P4_105795_7953649 | NC_021167.1    | Ca_kabuli_chr08 | 7953649                 | GG                              | CC              | 1946905722               |
| SNP_P4_105796_7953677 | NC_021167.1    | Ca_kabuli_chr08 | 7953677                 | AA                              | GG              | 1946905724               |
| SNP_P4_105797_7953711 | NC_021167.1    | Ca_kabuli_chr08 | 7953711                 | GG                              | AA              | 1946905726               |
| SNP_P4_105798_7953724 | NC_021167.1    | Ca_kabuli_chr08 | 7953724                 | GG                              | TT              | 1946905728               |
| SNP_P4_105799_7953778 | NC_021167.1    | Ca_kabuli_chr08 | 7953778                 | CC                              | TT              | 1946905730               |
| SNP_P4_105801_7953856 | NC_021167.1    | Ca_kabuli_chr08 | 7953856                 | CC                              | AA              | 1946905732               |
| SNP_P4_105802_7953902 | NC_021167.1    | Ca_kabuli_chr08 | 7953902                 | GG                              | AA              | 1946905734               |
| SNP_P4_105803_7953932 | NC_021167.1    | Ca_kabuli_chr08 | 7953932                 | TT                              | CC              | 1946905736               |
| SNP_P4_105804_7953989 | NC_021167.1    | Ca_kabuli_chr08 | 7953989                 | TT                              | CC              | 1946905738               |
| SNP_P4_105805_7953998 | NC_021167.1    | Ca_kabuli_chr08 | 7953998                 | CC                              | TT              | 1946905740               |
| SNP_P4_105806_7954075 | NC_021167.1    | Ca_kabuli_chr08 | 7954075                 | GG                              | TT              | 1946905742               |
| SNP_P4_105807_7954166 | NC_021167.1    | Ca_kabuli_chr08 | 7954166                 | CC                              | TT              | 1946905744               |
| SNP_P4_105808_7954194 | NC_021167.1    | Ca_kabuli_chr08 | 7954194                 | AA                              | CC              | 1946905746               |
| SNP_P4_105809_7954303 | NC_021167.1    | Ca_kabuli_chr08 | 7954303                 | TT                              | AA              | 1946905748               |
| SNP_P4_105810_7954379 | NC_021167.1    | Ca_kabuli_chr08 | 7954379                 | AA                              | GG              | 1946905750               |
| SNP_P4_105812_7954405 | NC_021167.1    | Ca_kabuli_chr08 | 7954405                 | AA                              | GG              | 1946905752               |
| SNP_P4_105813_7954416 | NC_021167.1    | Ca_kabuli_chr08 | 7954416                 | GG                              | AA              | 1946905754               |
| SNP_P4_105815_7954476 | NC_021167.1    | Ca_kabuli_chr08 | 7954476                 | AA                              | TT              | 1946905756               |
| SNP_P4_105816_7954490 | NC_021167.1    | Ca_kabuli_chr08 | 7954490                 | CC                              | TT              | 1946905758               |
| SNP_P4_105818_7954529 | NC_021167.1    | Ca_kabuli_chr08 | 7954529                 | TT                              | CC              | 1946905760               |
| SNP_P4_105819_7954533 | NC_021167.1    | Ca_kabuli_chr08 | 7954533                 | TT                              | CC              | 1946905762               |
| SNP_P4_105820_7954572 | NC_021167.1    | Ca_kabuli_chr08 | 7954572                 | AA                              | CC              | 1946905764               |
| SNP_P4_105821_7954617 | NC_021167.1    | Ca_kabuli_chr08 | 7954617                 | AA                              | CC              | 1946905766               |
| SNP_P4_105822_7954648 | NC_021167.1    | Ca_kabuli_chr08 | 7954648                 | AA                              | GG              | 1946905768               |
| SNP_P4_105823_7954689 | NC_021167.1    | Ca_kabuli_chr08 | 7954689                 | AA                              | TT              | 1946905770               |
| SNP_P4_105824_7954706 | NC_021167.1    | Ca_kabuli_chr08 | 7954706                 | GG                              | TT              | 1946905772               |
| SNP_P4_105825_7954718 | NC_021167.1    | Ca_kabuli_chr08 | 7954718                 | TT                              | AA              | 1946905774               |
| SNP_P4_105826_7954745 | NC_021167.1    | Ca_kabuli_chr08 | 7954745                 | GG                              | CC              | 1946905776               |

| SNPs IDs              | Chromosome IDs | Chromosomes     | Physical positions (bp) | CDC Frontier (Reference genome) | (ILWC46 & LPNB) | NCBI SNPdb Accession IDs |
|-----------------------|----------------|-----------------|-------------------------|---------------------------------|-----------------|--------------------------|
| SNP_P4_105827_7954803 | NC_021167.1    | Ca_kabuli_chr08 | 7954803                 | CC                              | TT              | 1946905778               |
| SNP_P4_105828_7954805 | NC_021167.1    | Ca_kabuli_chr08 | 7954805                 | AA                              | TT              | 1946905780               |
| SNP_P4_105829_7954824 | NC_021167.1    | Ca_kabuli_chr08 | 7954824                 | AA                              | GG              | 1946905782               |
| SNP_P4_105830_7954855 | NC_021167.1    | Ca_kabuli_chr08 | 7954855                 | TT                              | CC              | 1946905784               |
| SNP_P4_105831_7954873 | NC_021167.1    | Ca_kabuli_chr08 | 7954873                 | CC                              | GG              | 1946905786               |
| SNP_P4_105832_7954880 | NC_021167.1    | Ca_kabuli_chr08 | 7954880                 | CC                              | TT              | 1946905787               |
| SNP_P4_105833_7954928 | NC_021167.1    | Ca_kabuli_chr08 | 7954928                 | AA                              | TT              | 1946905789               |
| SNP_P4_105834_7954938 | NC_021167.1    | Ca_kabuli_chr08 | 7954938                 | CC                              | AA              | 1946905791               |
| SNP_P4_105835_7954998 | NC_021167.1    | Ca_kabuli_chr08 | 7954998                 | TT                              | CC              | 1946905793               |
| SNP_P4_105836_7955037 | NC_021167.1    | Ca_kabuli_chr08 | 7955037                 | GG                              | AA              | 1946905796               |
| SNP_P4_105837_7955041 | NC_021167.1    | Ca_kabuli_chr08 | 7955041                 | GG                              | TT              | 1946905798               |
| SNP_P4_105838_7955075 | NC_021167.1    | Ca_kabuli_chr08 | 7955075                 | AA                              | GG              | 1946905800               |
| SNP_P4_105839_7955370 | NC_021167.1    | Ca_kabuli_chr08 | 7955370                 | CC                              | AA              | 1946905802               |
| SNP_P4_105840_7955457 | NC_021167.1    | Ca_kabuli_chr08 | 7955457                 | TT                              | AA              | 1946905804               |
| SNP_P4_105841_7955493 | NC_021167.1    | Ca_kabuli_chr08 | 7955493                 | GG                              | AA              | 1946905806               |
| SNP_P4_105843_7955550 | NC_021167.1    | Ca_kabuli_chr08 | 7955550                 | AA                              | CC              | 1946905808               |
| SNP_P4_105844_7955556 | NC_021167.1    | Ca_kabuli_chr08 | 7955556                 | TT                              | CC              | 1946905810               |
| SNP_P4_105845_7955596 | NC_021167.1    | Ca_kabuli_chr08 | 7955596                 | AA                              | GG              | 1946905812               |
| SNP_P4_105846_7955732 | NC_021167.1    | Ca_kabuli_chr08 | 7955732                 | CC                              | TT              | 1946905814               |
| SNP_P4_105847_7955741 | NC_021167.1    | Ca_kabuli_chr08 | 7955741                 | AA                              | CC              | 1946905816               |
| SNP_P4_105848_7955759 | NC_021167.1    | Ca_kabuli_chr08 | 7955759                 | CC                              | TT              | 1946905818               |
| SNP_P4_105849_7955882 | NC_021167.1    | Ca_kabuli_chr08 | 7955882                 | AA                              | GG              | 1946905820               |
| SNP_P4_105850_7956011 | NC_021167.1    | Ca_kabuli_chr08 | 7956011                 | AA                              | GG              | 1946905822               |
| SNP_P4_105852_7956217 | NC_021167.1    | Ca_kabuli_chr08 | 7956217                 | TT                              | CC              | 1946905824               |
| SNP_P4_105853_7956263 | NC_021167.1    | Ca_kabuli_chr08 | 7956263                 | CC                              | TT              | 1946905826               |
| SNP_P4_105854_7956289 | NC_021167.1    | Ca_kabuli_chr08 | 7956289                 | TT                              | CC              | 1946905828               |
| SNP_P4_105855_7956486 | NC_021167.1    | Ca_kabuli_chr08 | 7956486                 | CC                              | TT              | 1946905830               |
| SNP_P4_105856_7964765 | NC_021167.1    | Ca_kabuli_chr08 | 7964765                 | AA                              | TT              | 1946905832               |
| SNP_P4_105858_7969190 | NC_021167.1    | Ca_kabuli_chr08 | 7969190                 | AA                              | CC              | 1946905834               |
| SNP_P4_105859_7969856 | NC_021167.1    | Ca_kabuli_chr08 | 7969856                 | AA                              | GG              | 1946905836               |
| SNP_P4_105860_7969901 | NC_021167.1    | Ca_kabuli_chr08 | 7969901                 | TT                              | AA              | 1946905838               |
| SNP_P4_105863_8024227 | NC_021167.1    | Ca_kabuli_chr08 | 8024227                 | GG                              | AA              | 1946905840               |
| SNP_P4_105864_8042131 | NC_021167.1    | Ca_kabuli_chr08 | 8042131                 | AA                              | GG              | 1946905842               |
| SNP_P4_105865_8042137 | NC_021167.1    | Ca_kabuli_chr08 | 8042137                 | TT                              | GG              | 1946905844               |
| SNP_P4_105866_8044956 | NC_021167.1    | Ca_kabuli_chr08 | 8044956                 | TT                              | CC              | 1946905846               |
| SNP_P4_105867_8054258 | NC_021167.1    | Ca_kabuli_chr08 | 8054258                 | TT                              | GG              | 1946905848               |
| SNP_P4_105868_8054266 | NC_021167.1    | Ca_kabuli_chr08 | 8054266                 | GG                              | AA              | 1946905850               |
| SNP_P4_105869_8055201 | NC_021167.1    | Ca_kabuli_chr08 | 8055201                 | GG                              | AA              | 1946905852               |
| SNP_P4_105871_8062762 | NC_021167.1    | Ca_kabuli_chr08 | 8062762                 | CC                              | TT              | 1946905855               |
| SNP_P4_105872_8064169 | NC_021167.1    | Ca_kabuli_chr08 | 8064169                 | CC                              | AA              | 1946905857               |
| SNP_P4_105873_8074300 | NC_021167.1    | Ca_kabuli_chr08 | 8074300                 | AA                              | GG              | 1946905859               |
| SNP_P4_105874_8074306 | NC_021167.1    | Ca_kabuli_chr08 | 8074306                 | GG                              | CC              | 1946905860               |

| SNPs IDs              | Chromosome IDs | Chromosomes     | Physical positions (bp) | CDC Frontier (Reference genome) | (ILWC46 & LPNB) | NCBI SNPdb Accession IDs |
|-----------------------|----------------|-----------------|-------------------------|---------------------------------|-----------------|--------------------------|
| SNP_P4_105875_8074334 | NC_021167.1    | Ca_kabuli_chr08 | 8074334                 | CC                              | TT              | 1946905862               |
| SNP_P4_105876_8074570 | NC_021167.1    | Ca_kabuli_chr08 | 8074570                 | CC                              | TT              | 1946905864               |
| SNP_P4_105877_8074695 | NC_021167.1    | Ca_kabuli_chr08 | 8074695                 | GG                              | TT              | 1946905866               |
| SNP_P4_105878_8074702 | NC_021167.1    | Ca_kabuli_chr08 | 8074702                 | AA                              | TT              | 1946905869               |
| SNP_P4_105879_8074704 | NC_021167.1    | Ca_kabuli_chr08 | 8074704                 | CC                              | AA              | 1946905871               |
| SNP_P4_105880_8074711 | NC_021167.1    | Ca_kabuli_chr08 | 8074711                 | TT                              | CC              | 1946905873               |
| SNP_P4_105881_8074717 | NC_021167.1    | Ca_kabuli_chr08 | 8074717                 | GG                              | TT              | 1946905875               |
| SNP_P4_105882_8074724 | NC_021167.1    | Ca_kabuli_chr08 | 8074724                 | TT                              | CC              | 1946905877               |
| SNP_P4_105883_8074731 | NC_021167.1    | Ca_kabuli_chr08 | 8074731                 | AA                              | GG              | 1946905879               |
| SNP_P4_105884_8074745 | NC_021167.1    | Ca_kabuli_chr08 | 8074745                 | GG                              | AA              | 1946905881               |
| SNP_P4_105885_8074783 | NC_021167.1    | Ca_kabuli_chr08 | 8074783                 | GG                              | AA              | 1946905883               |
| SNP_P4_105886_8074788 | NC_021167.1    | Ca_kabuli_chr08 | 8074788                 | AA                              | GG              | 1946905885               |
| SNP_P4_105887_8074791 | NC_021167.1    | Ca_kabuli_chr08 | 8074791                 | CC                              | TT              | 1946905887               |
| SNP_P4_105888_8074836 | NC_021167.1    | Ca_kabuli_chr08 | 8074836                 | CC                              | AA              | 1946905889               |
| SNP_P4_105889_8074866 | NC_021167.1    | Ca_kabuli_chr08 | 8074866                 | TT                              | AA              | 1946905891               |
| SNP_P4_105890_8074892 | NC_021167.1    | Ca_kabuli_chr08 | 8074892                 | TT                              | AA              | 1946905893               |
| SNP_P4_105891_8074894 | NC_021167.1    | Ca_kabuli_chr08 | 8074894                 | TT                              | AA              | 1946905896               |
| SNP_P4_105892_8074987 | NC_021167.1    | Ca_kabuli_chr08 | 8074987                 | GG                              | TT              | 1946905898               |
| SNP_P4_105893_8075176 | NC_021167.1    | Ca_kabuli_chr08 | 8075176                 | CC                              | TT              | 1946905900               |
| SNP_P4_105894_8075318 | NC_021167.1    | Ca_kabuli_chr08 | 8075318                 | TT                              | CC              | 1946905902               |
| SNP_P4_105895_8075590 | NC_021167.1    | Ca_kabuli_chr08 | 8075590                 | GG                              | TT              | 1946905904               |
| SNP_P4_105896_8075593 | NC_021167.1    | Ca_kabuli_chr08 | 8075593                 | CC                              | AA              | 1946905906               |
| SNP_P4_105897_8075975 | NC_021167.1    | Ca_kabuli_chr08 | 8075975                 | GG                              | AA              | 1946905908               |
| SNP_P4_105899_8076089 | NC_021167.1    | Ca_kabuli_chr08 | 8076089                 | TT                              | CC              | 1946905910               |
| SNP_P4_105900_8076291 | NC_021167.1    | Ca_kabuli_chr08 | 8076291                 | CC                              | TT              | 1946905912               |
| SNP_P4_105901_8076323 | NC_021167.1    | Ca_kabuli_chr08 | 8076323                 | AA                              | GG              | 1946905915               |
| SNP_P4_105903_8084586 | NC_021167.1    | Ca_kabuli_chr08 | 8084586                 | TT                              | CC              | 1946905917               |
| SNP_P4_105904_8084592 | NC_021167.1    | Ca_kabuli_chr08 | 8084592                 | GG                              | AA              | 1946905919               |
| SNP_P4_105905_8084735 | NC_021167.1    | Ca_kabuli_chr08 | 8084735                 | AA                              | GG              | 1946905921               |
| SNP_P4_105906_8084747 | NC_021167.1    | Ca_kabuli_chr08 | 8084747                 | AA                              | GG              | 1946905923               |
| SNP_P4_105907_8084755 | NC_021167.1    | Ca_kabuli_chr08 | 8084755                 | GG                              | TT              | 1946905924               |
| SNP_P4_105908_8084758 | NC_021167.1    | Ca_kabuli_chr08 | 8084758                 | CC                              | AA              | 1946905925               |
| SNP_P4_105909_8084802 | NC_021167.1    | Ca_kabuli_chr08 | 8084802                 | AA                              | TT              | 1946905926               |
| SNP_P4_105910_8089902 | NC_021167.1    | Ca_kabuli_chr08 | 8089902                 | AA                              | TT              | 1946905927               |
| SNP_P4_105911_8110969 | NC_021167.1    | Ca_kabuli_chr08 | 8110969                 | CC                              | TT              | 1946905928               |
| SNP_P4_105912_8132902 | NC_021167.1    | Ca_kabuli_chr08 | 8132902                 | TT                              | CC              | 1946905930               |
| SNP_P4_105913_8136485 | NC_021167.1    | Ca_kabuli_chr08 | 8136485                 | AA                              | TT              | 1946905932               |
| SNP_P4_105914_8155153 | NC_021167.1    | Ca_kabuli_chr08 | 8155153                 | CC                              | GG              | 1946905934               |
| SNP_P4_105915_8162354 | NC_021167.1    | Ca_kabuli_chr08 | 8162354                 | TT                              | CC              | 1946905936               |
| SNP_P4_105916_8162415 | NC_021167.1    | Ca_kabuli_chr08 | 8162415                 | AA                              | CC              | 1946905938               |
| SNP_P4_105917_8162418 | NC_021167.1    | Ca_kabuli_chr08 | 8162418                 | TT                              | GG              | 1946905940               |
| SNP_P4_105920_8240103 | NC_021167.1    | Ca_kabuli_chr08 | 8240103                 | TT                              | CC              | 1946905942               |

| SNPs IDs              | Chromosome IDs | Chromosomes     | Physical positions (bp) | CDC Frontier (Reference genome) | (ILWC46 & LPNB) | NCBI SNPdb Accession IDs |
|-----------------------|----------------|-----------------|-------------------------|---------------------------------|-----------------|--------------------------|
| SNP_P4_105922_8251235 | NC_021167.1    | Ca_kabuli_chr08 | 8251235                 | GG                              | AA              | 1946905944               |
| SNP_P4_105923_8254542 | NC_021167.1    | Ca_kabuli_chr08 | 8254542                 | CC                              | TT              | 1946905946               |
| SNP_P4_105924_8254575 | NC_021167.1    | Ca_kabuli_chr08 | 8254575                 | AA                              | GG              | 1946905948               |
| SNP_P4_105925_8254596 | NC_021167.1    | Ca_kabuli_chr08 | 8254596                 | AA                              | GG              | 1946905950               |
| SNP_P4_105926_8254601 | NC_021167.1    | Ca_kabuli_chr08 | 8254601                 | GG                              | AA              | 1946905952               |
| SNP_P4_105927_8254706 | NC_021167.1    | Ca_kabuli_chr08 | 8254706                 | AA                              | GG              | 1946905954               |
| SNP_P4_105928_8254712 | NC_021167.1    | Ca_kabuli_chr08 | 8254712                 | AA                              | GG              | 1946905956               |
| SNP_P4_105929_8254751 | NC_021167.1    | Ca_kabuli_chr08 | 8254751                 | TT                              | GG              | 1946905958               |
| SNP_P4_105930_8254891 | NC_021167.1    | Ca_kabuli_chr08 | 8254891                 | AA                              | GG              | 1946905960               |
| SNP_P4_105931_8254908 | NC_021167.1    | Ca_kabuli_chr08 | 8254908                 | AA                              | CC              | 1946905962               |
| SNP_P4_105932_8254954 | NC_021167.1    | Ca_kabuli_chr08 | 8254954                 | CC                              | GG              | 1946905964               |
| SNP_P4_105933_8260688 | NC_021167.1    | Ca_kabuli_chr08 | 8260688                 | AA                              | GG              | 1946905966               |
| SNP_P4_105934_8269061 | NC_021167.1    | Ca_kabuli_chr08 | 8269061                 | AA                              | GG              | 1946905968               |
| SNP_P4_105935_8271046 | NC_021167.1    | Ca_kabuli_chr08 | 8271046                 | AA                              | CC              | 1946905970               |
| SNP_P4_105936_8272709 | NC_021167.1    | Ca_kabuli_chr08 | 8272709                 | GG                              | CC              | 1946905972               |
| SNP_P4_105937_8272755 | NC_021167.1    | Ca_kabuli_chr08 | 8272755                 | CC                              | TT              | 1946905974               |
| SNP_P4_105938_8272866 | NC_021167.1    | Ca_kabuli_chr08 | 8272866                 | AA                              | GG              | 1946905977               |
| SNP_P4_105940_8272934 | NC_021167.1    | Ca_kabuli_chr08 | 8272934                 | CC                              | TT              | 1946905979               |
| SNP_P4_105941_8272973 | NC_021167.1    | Ca_kabuli_chr08 | 8272973                 | GG                              | TT              | 1946905981               |
| SNP_P4_105942_8273022 | NC_021167.1    | Ca_kabuli_chr08 | 8273022                 | CC                              | AA              | 1946905983               |
| SNP_P4_105943_8273075 | NC_021167.1    | Ca_kabuli_chr08 | 8273075                 | TT                              | CC              | 1946905985               |
| SNP_P4_105944_8273168 | NC_021167.1    | Ca_kabuli_chr08 | 8273168                 | CC                              | TT              | 1946905987               |
| SNP_P4_105945_8273188 | NC_021167.1    | Ca_kabuli_chr08 | 8273188                 | GG                              | CC              | 1946905989               |
| SNP_P4_105946_8273194 | NC_021167.1    | Ca_kabuli_chr08 | 8273194                 | AA                              | GG              | 1946905991               |
| SNP_P4_105947_8273247 | NC_021167.1    | Ca_kabuli_chr08 | 8273247                 | CC                              | AA              | 1946905993               |
| SNP_P4_105948_8276303 | NC_021167.1    | Ca_kabuli_chr08 | 8276303                 | CC                              | TT              | 1946905995               |
| SNP_P4_105949_8277240 | NC_021167.1    | Ca_kabuli_chr08 | 8277240                 | GG                              | AA              | 1946905997               |
| SNP_P4_105950_8277386 | NC_021167.1    | Ca_kabuli_chr08 | 8277386                 | TT                              | CC              | 1946905999               |
| SNP_P4_105951_8277394 | NC_021167.1    | Ca_kabuli_chr08 | 8277394                 | TT                              | CC              | 1946906001               |
| SNP_P4_105952_8277721 | NC_021167.1    | Ca_kabuli_chr08 | 8277721                 | GG                              | TT              | 1946906003               |
| SNP_P4_105954_8289022 | NC_021167.1    | Ca_kabuli_chr08 | 8289022                 | TT                              | AA              | 1946906005               |
| SNP_P4_105955_8289060 | NC_021167.1    | Ca_kabuli_chr08 | 8289060                 | TT                              | CC              | 1946906007               |
| SNP_P4_105956_8289174 | NC_021167.1    | Ca_kabuli_chr08 | 8289174                 | GG                              | CC              | 1946906009               |
| SNP_P4_105957_8290038 | NC_021167.1    | Ca_kabuli_chr08 | 8290038                 | AA                              | GG              | 1946906011               |
| SNP_P4_105958_8290039 | NC_021167.1    | Ca_kabuli_chr08 | 8290039                 | AA                              | CC              | 1946906013               |
| SNP_P4_105963_8315027 | NC_021167.1    | Ca_kabuli_chr08 | 8315027                 | GG                              | AA              | 1946906015               |
| SNP_P4_105964_8337766 | NC_021167.1    | Ca_kabuli_chr08 | 8337766                 | CC                              | TT              | 1946906017               |
| SNP_P4_105965_8337771 | NC_021167.1    | Ca_kabuli_chr08 | 8337771                 | AA                              | GG              | 1946906019               |
| SNP_P4_105966_8337777 | NC_021167.1    | Ca_kabuli_chr08 | 8337777                 | CC                              | TT              | 1946906021               |
| SNP_P4_105967_8357522 | NC_021167.1    | Ca_kabuli_chr08 | 8357522                 | AA                              | TT              | 1946906023               |
| SNP_P4_105969_8370678 | NC_021167.1    | Ca_kabuli_chr08 | 8370678                 | AA                              | GG              | 1946906025               |
| SNP_P4_105970_8382652 | NC_021167.1    | Ca_kabuli_chr08 | 8382652                 | CC                              | TT              | 1946906027               |

| SNPs IDs              | Chromosome IDs | Chromosomes     | Physical positions (bp) | CDC Frontier (Reference genome) | (ILWC46 & LPNB) | NCBI SNPdb Accession IDs |
|-----------------------|----------------|-----------------|-------------------------|---------------------------------|-----------------|--------------------------|
| SNP_P4_105971_8383010 | NC_021167.1    | Ca_kabuli_chr08 | 8383010                 | AA                              | TT              | 1946906029               |
| SNP_P4_105973_8395604 | NC_021167.1    | Ca_kabuli_chr08 | 8395604                 | TT                              | CC              | 1946906031               |
| SNP_P4_105974_8395657 | NC_021167.1    | Ca_kabuli_chr08 | 8395657                 | TT                              | GG              | 1946906033               |
| SNP_P4_105975_8395668 | NC_021167.1    | Ca_kabuli_chr08 | 8395668                 | AA                              | CC              | 1946906035               |
| SNP_P4_105976_8395669 | NC_021167.1    | Ca_kabuli_chr08 | 8395669                 | TT                              | CC              | 1946906037               |
| SNP_P4_105977_8395682 | NC_021167.1    | Ca_kabuli_chr08 | 8395682                 | GG                              | AA              | 1946906039               |
| SNP_P4_105978_8396006 | NC_021167.1    | Ca_kabuli_chr08 | 8396006                 | CC                              | GG              | 1946906042               |
| SNP_P4_105979_8400964 | NC_021167.1    | Ca_kabuli_chr08 | 8400964                 | TT                              | CC              | 1946906044               |
| SNP_P4_105980_8401021 | NC_021167.1    | Ca_kabuli_chr08 | 8401021                 | GG                              | TT              | 1946906046               |
| SNP_P4_105981_8401306 | NC_021167.1    | Ca_kabuli_chr08 | 8401306                 | TT                              | AA              | 1946906048               |
| SNP_P4_105982_8401394 | NC_021167.1    | Ca_kabuli_chr08 | 8401394                 | CC                              | TT              | 1946906050               |
| SNP_P4_105983_8401431 | NC_021167.1    | Ca_kabuli_chr08 | 8401431                 | GG                              | AA              | 1946906052               |
| SNP_P4_105984_8410340 | NC_021167.1    | Ca_kabuli_chr08 | 8410340                 | AA                              | TT              | 1946906054               |
| SNP_P4_105985_8413884 | NC_021167.1    | Ca_kabuli_chr08 | 8413884                 | AA                              | GG              | 1946906056               |
| SNP_P4_105986_8413891 | NC_021167.1    | Ca_kabuli_chr08 | 8413891                 | TT                              | CC              | 1946906058               |
| SNP_P4_105987_8413929 | NC_021167.1    | Ca_kabuli_chr08 | 8413929                 | AA                              | CC              | 1946906060               |
| SNP_P4_105988_8419683 | NC_021167.1    | Ca_kabuli_chr08 | 8419683                 | GG                              | CC              | 1946906062               |
| SNP_P4_105989_8420570 | NC_021167.1    | Ca_kabuli_chr08 | 8420570                 | TT                              | CC              | 1946906064               |
| SNP_P4_105991_8428000 | NC_021167.1    | Ca_kabuli_chr08 | 8428000                 | CC                              | TT              | 1946906066               |
| SNP_P4_105992_8428341 | NC_021167.1    | Ca_kabuli_chr08 | 8428341                 | GG                              | TT              | 1946906068               |
| SNP_P4_105993_8440463 | NC_021167.1    | Ca_kabuli_chr08 | 8440463                 | TT                              | CC              | 1946906070               |
| SNP_P4_105994_8450124 | NC_021167.1    | Ca_kabuli_chr08 | 8450124                 | CC                              | TT              | 1946906072               |
| SNP_P4_105995_8469231 | NC_021167.1    | Ca_kabuli_chr08 | 8469231                 | CC                              | AA              | 1946906074               |
| SNP_P4_105996_8469415 | NC_021167.1    | Ca_kabuli_chr08 | 8469415                 | CC                              | TT              | 1946906076               |
| SNP_P4_105997_8469418 | NC_021167.1    | Ca_kabuli_chr08 | 8469418                 | CC                              | TT              | 1946906078               |
| SNP_P4_105998_8474876 | NC_021167.1    | Ca_kabuli_chr08 | 8474876                 | TT                              | CC              | 1946906079               |
| SNP_P4_105999_8475652 | NC_021167.1    | Ca_kabuli_chr08 | 8475652                 | GG                              | AA              | 1946906081               |
| SNP_P4_106000_8475653 | NC_021167.1    | Ca_kabuli_chr08 | 8475653                 | CC                              | TT              | 1946906083               |
| SNP_P4_106001_8492033 | NC_021167.1    | Ca_kabuli_chr08 | 8492033                 | TT                              | CC              | 1946906086               |
| SNP_P4_106002_8500044 | NC_021167.1    | Ca_kabuli_chr08 | 8500044                 | CC                              | TT              | 1946906088               |
| SNP_P4_106003_8502747 | NC_021167.1    | Ca_kabuli_chr08 | 8502747                 | TT                              | CC              | 1946906090               |
| SNP_P4_106004_8506137 | NC_021167.1    | Ca_kabuli_chr08 | 8506137                 | CC                              | AA              | 1946906092               |
| SNP_P4_106005_8524570 | NC_021167.1    | Ca_kabuli_chr08 | 8524570                 | TT                              | GG              | 1946906094               |
| SNP_P4_106006_8536365 | NC_021167.1    | Ca_kabuli_chr08 | 8536365                 | AA                              | GG              | 1946906096               |
| SNP_P4_106007_8546443 | NC_021167.1    | Ca_kabuli_chr08 | 8546443                 | GG                              | AA              | 1946906098               |
| SNP_P4_106008_8569589 | NC_021167.1    | Ca_kabuli_chr08 | 8569589                 | AA                              | GG              | 1946906100               |
| SNP_P4_106009_8569595 | NC_021167.1    | Ca_kabuli_chr08 | 8569595                 | TT                              | GG              | 1946906102               |
| SNP_P4_106010_8569612 | NC_021167.1    | Ca_kabuli_chr08 | 8569612                 | TT                              | GG              | 1946906104               |
| SNP_P4_106011_8574306 | NC_021167.1    | Ca_kabuli_chr08 | 8574306                 | AA                              | TT              | 1946906106               |
| SNP_P4_106012_8577701 | NC_021167.1    | Ca_kabuli_chr08 | 8577701                 | CC                              | AA              | 1946906108               |
| SNP_P4_106013_8577705 | NC_021167.1    | Ca_kabuli_chr08 | 8577705                 | GG                              | AA              | 1946906110               |
| SNP_P4_106014_8582268 | NC_021167.1    | Ca_kabuli_chr08 | 8582268                 | AA                              | TT              | 1946906112               |

| SNPs IDs              | Chromosome IDs | Chromosomes     | Physical positions (bp) | CDC Frontier (Reference genome) | (ILWC46 & LPNB) | NCBI SNPdb Accession IDs |
|-----------------------|----------------|-----------------|-------------------------|---------------------------------|-----------------|--------------------------|
| SNP_P4_106015_8595793 | NC_021167.1    | Ca_kabuli_chr08 | 8595793                 | AA                              | GG              | 1946906114               |
| SNP_P4_106016_8599419 | NC_021167.1    | Ca_kabuli_chr08 | 8599419                 | TT                              | CC              | 1946906116               |
| SNP_P4_106017_8599523 | NC_021167.1    | Ca_kabuli_chr08 | 8599523                 | TT                              | AA              | 1946906118               |
| SNP_P4_106018_8601984 | NC_021167.1    | Ca_kabuli_chr08 | 8601984                 | CC                              | TT              | 1946906120               |
| SNP_P4_106019_8602885 | NC_021167.1    | Ca_kabuli_chr08 | 8602885                 | AA                              | CC              | 1946906122               |
| SNP_P4_106020_8604841 | NC_021167.1    | Ca_kabuli_chr08 | 8604841                 | AA                              | GG              | 1946906124               |
| SNP_P4_106021_8616448 | NC_021167.1    | Ca_kabuli_chr08 | 8616448                 | GG                              | AA              | 1946906126               |
| SNP_P4_106022_8616608 | NC_021167.1    | Ca_kabuli_chr08 | 8616608                 | AA                              | GG              | 1946906128               |
| SNP_P4_106023_8616617 | NC_021167.1    | Ca_kabuli_chr08 | 8616617                 | TT                              | CC              | 1946906130               |
| SNP_P4_106024_8616632 | NC_021167.1    | Ca_kabuli_chr08 | 8616632                 | TT                              | GG              | 1946906132               |
| SNP_P4_106025_8616634 | NC_021167.1    | Ca_kabuli_chr08 | 8616634                 | TT                              | CC              | 1946906134               |
| SNP_P4_106026_8616650 | NC_021167.1    | Ca_kabuli_chr08 | 8616650                 | CC                              | GG              | 1946906136               |
| SNP_P4_106027_8616784 | NC_021167.1    | Ca_kabuli_chr08 | 8616784                 | TT                              | CC              | 1946906139               |
| SNP_P4_106028_8623160 | NC_021167.1    | Ca_kabuli_chr08 | 8623160                 | TT                              | CC              | 1946906141               |
| SNP_P4_106029_8623181 | NC_021167.1    | Ca_kabuli_chr08 | 8623181                 | CC                              | AA              | 1946906143               |
| SNP_P4_106034_8624641 | NC_021167.1    | Ca_kabuli_chr08 | 8624641                 | AA                              | GG              | 1946906145               |
| SNP_P4_106035_8624646 | NC_021167.1    | Ca_kabuli_chr08 | 8624646                 | TT                              | AA              | 1946906147               |
| SNP_P4_106036_8624779 | NC_021167.1    | Ca_kabuli_chr08 | 8624779                 | GG                              | TT              | 1946906149               |
| SNP_P4_106038_8644847 | NC_021167.1    | Ca_kabuli_chr08 | 8644847                 | CC                              | TT              | 1946906151               |
| SNP_P4_106040_8667341 | NC_021167.1    | Ca_kabuli_chr08 | 8667341                 | CC                              | TT              | 1946906153               |
| SNP_P4_106041_8689935 | NC_021167.1    | Ca_kabuli_chr08 | 8689935                 | GG                              | AA              | 1946906155               |
| SNP_P4_106043_8695055 | NC_021167.1    | Ca_kabuli_chr08 | 8695055                 | TT                              | AA              | 1946906157               |
| SNP_P4_106045_8707383 | NC_021167.1    | Ca_kabuli_chr08 | 8707383                 | GG                              | AA              | 1946906159               |
| SNP_P4_106046_8720464 | NC_021167.1    | Ca_kabuli_chr08 | 8720464                 | AA                              | CC              | 1946906161               |
| SNP_P4_106047_8722979 | NC_021167.1    | Ca_kabuli_chr08 | 8722979                 | CC                              | TT              | 1946906163               |
| SNP_P4_106048_8724274 | NC_021167.1    | Ca_kabuli_chr08 | 8724274                 | GG                              | AA              | 1946906165               |
| SNP_P4_106049_8728507 | NC_021167.1    | Ca_kabuli_chr08 | 8728507                 | TT                              | CC              | 1946906167               |
| SNP_P4_106050_8744180 | NC_021167.1    | Ca_kabuli_chr08 | 8744180                 | AA                              | CC              | 1946906169               |
| SNP_P4_106051_8744480 | NC_021167.1    | Ca_kabuli_chr08 | 8744480                 | TT                              | CC              | 1946906171               |
| SNP_P4_106052_8744745 | NC_021167.1    | Ca_kabuli_chr08 | 8744745                 | GG                              | AA              | 1946906173               |
| SNP_P4_106053_8745123 | NC_021167.1    | Ca_kabuli_chr08 | 8745123                 | GG                              | TT              | 1946906175               |
| SNP_P4_106054_8745536 | NC_021167.1    | Ca_kabuli_chr08 | 8745536                 | AA                              | GG              | 1946906177               |
| SNP_P4_106055_8746324 | NC_021167.1    | Ca_kabuli_chr08 | 8746324                 | CC                              | TT              | 1946906179               |
| SNP_P4_106056_8753782 | NC_021167.1    | Ca_kabuli_chr08 | 8753782                 | CC                              | TT              | 1946906182               |
| SNP_P4_106057_8753801 | NC_021167.1    | Ca_kabuli_chr08 | 8753801                 | CC                              | TT              | 1946906184               |
| SNP_P4_106058_8753812 | NC_021167.1    | Ca_kabuli_chr08 | 8753812                 | TT                              | CC              | 1946906186               |
| SNP_P4_106059_8773979 | NC_021167.1    | Ca_kabuli_chr08 | 8773979                 | GG                              | TT              | 1946906188               |
| SNP_P4_106060_8773994 | NC_021167.1    | Ca_kabuli_chr08 | 8773994                 | AA                              | GG              | 1946906190               |
| SNP_P4_106061_8774033 | NC_021167.1    | Ca_kabuli_chr08 | 8774033                 | AA                              | TT              | 1946906192               |
| SNP_P4_106063_8774227 | NC_021167.1    | Ca_kabuli_chr08 | 8774227                 | TT                              | AA              | 1946906194               |
| SNP_P4_106064_8774313 | NC_021167.1    | Ca_kabuli_chr08 | 8774313                 | CC                              | TT              | 1946906196               |
| SNP_P4_106066_8787756 | NC_021167.1    | Ca_kabuli_chr08 | 8787756                 | GG                              | AA              | 1946906198               |

| SNPs IDs              | Chromosome IDs | Chromosomes     | Physical positions (bp) | CDC Frontier (Reference genome) | (ILWC46 & LPNB) | NCBI SNPdb Accession IDs |
|-----------------------|----------------|-----------------|-------------------------|---------------------------------|-----------------|--------------------------|
| SNP_P4_106067_8792116 | NC_021167.1    | Ca_kabuli_chr08 | 8792116                 | CC                              | TT              | 1946906200               |
| SNP_P4_106068_8792739 | NC_021167.1    | Ca_kabuli_chr08 | 8792739                 | CC                              | GG              | 1946906202               |
| SNP_P4_106069_8794769 | NC_021167.1    | Ca_kabuli_chr08 | 8794769                 | CC                              | TT              | 1946906204               |
| SNP_P4_106070_8799539 | NC_021167.1    | Ca_kabuli_chr08 | 8799539                 | AA                              | GG              | 1946906206               |
| SNP_P4_106072_8809392 | NC_021167.1    | Ca_kabuli_chr08 | 8809392                 | TT                              | GG              | 1946906208               |
| SNP_P4_106073_8809396 | NC_021167.1    | Ca_kabuli_chr08 | 8809396                 | TT                              | CC              | 1946906210               |
| SNP_P4_106074_8809407 | NC_021167.1    | Ca_kabuli_chr08 | 8809407                 | AA                              | CC              | 1946906212               |
| SNP_P4_106075_8824127 | NC_021167.1    | Ca_kabuli_chr08 | 8824127                 | AA                              | GG              | 1946906214               |
| SNP_P4_106076_8824620 | NC_021167.1    | Ca_kabuli_chr08 | 8824620                 | AA                              | TT              | 1946906216               |
| SNP_P4_106077_8828359 | NC_021167.1    | Ca_kabuli_chr08 | 8828359                 | AA                              | TT              | 1946906218               |
| SNP_P4_106078_8832553 | NC_021167.1    | Ca_kabuli_chr08 | 8832553                 | GG                              | AA              | 1946906220               |
| SNP_P4_106079_8833494 | NC_021167.1    | Ca_kabuli_chr08 | 8833494                 | CC                              | TT              | 1946906222               |
| SNP_P4_106080_8835822 | NC_021167.1    | Ca_kabuli_chr08 | 8835822                 | TT                              | CC              | 1946906224               |
| SNP_P4_106082_8838259 | NC_021167.1    | Ca_kabuli_chr08 | 8838259                 | AA                              | CC              | 1946906226               |
| SNP_P4_106083_8839008 | NC_021167.1    | Ca_kabuli_chr08 | 8839008                 | GG                              | AA              | 1946906228               |
| SNP_P4_106084_8840782 | NC_021167.1    | Ca_kabuli_chr08 | 8840782                 | CC                              | GG              | 1946906230               |
| SNP_P4_106085_8844093 | NC_021167.1    | Ca_kabuli_chr08 | 8844093                 | GG                              | AA              | 1946906232               |
| SNP_P4_106086_8844254 | NC_021167.1    | Ca_kabuli_chr08 | 8844254                 | GG                              | AA              | 1946906234               |
| SNP_P4_106087_8844788 | NC_021167.1    | Ca_kabuli_chr08 | 8844788                 | TT                              | CC              | 1946906236               |
| SNP_P4_106088_8845215 | NC_021167.1    | Ca_kabuli_chr08 | 8845215                 | AA                              | GG              | 1946906238               |
| SNP_P4_106089_8847225 | NC_021167.1    | Ca_kabuli_chr08 | 8847225                 | AA                              | TT              | 1946906240               |
| SNP_P4_106090_8847417 | NC_021167.1    | Ca_kabuli_chr08 | 8847417                 | TT                              | AA              | 1946906242               |
| SNP_P4_106091_8849932 | NC_021167.1    | Ca_kabuli_chr08 | 8849932                 | TT                              | CC              | 1946906244               |
| SNP_P4_106092_8849968 | NC_021167.1    | Ca_kabuli_chr08 | 8849968                 | AA                              | GG              | 1946906246               |
| SNP_P4_106093_8851357 | NC_021167.1    | Ca_kabuli_chr08 | 8851357                 | CC                              | TT              | 1946906248               |
| SNP_P4_106094_8852015 | NC_021167.1    | Ca_kabuli_chr08 | 8852015                 | AA                              | TT              | 1946906250               |
| SNP_P4_106095_8852080 | NC_021167.1    | Ca_kabuli_chr08 | 8852080                 | GG                              | AA              | 1946906252               |
| SNP_P4_106096_8852098 | NC_021167.1    | Ca_kabuli_chr08 | 8852098                 | TT                              | GG              | 1946906254               |
| SNP_P4_106097_8852267 | NC_021167.1    | Ca_kabuli_chr08 | 8852267                 | CC                              | GG              | 1946906256               |
| SNP_P4_106098_8852319 | NC_021167.1    | Ca_kabuli_chr08 | 8852319                 | GG                              | AA              | 1946906258               |
| SNP_P4_106101_8853201 | NC_021167.1    | Ca_kabuli_chr08 | 8853201                 | CC                              | AA              | 1946906260               |
| SNP_P4_106102_8853514 | NC_021167.1    | Ca_kabuli_chr08 | 8853514                 | TT                              | GG              | 1946906263               |
| SNP_P4_106103_8854023 | NC_021167.1    | Ca_kabuli_chr08 | 8854023                 | TT                              | CC              | 1946906265               |
| SNP_P4_106104_8854375 | NC_021167.1    | Ca_kabuli_chr08 | 8854375                 | AA                              | GG              | 1946906267               |
| SNP_P4_106105_8854618 | NC_021167.1    | Ca_kabuli_chr08 | 8854618                 | CC                              | TT              | 1946906269               |
| SNP_P4_106106_8854621 | NC_021167.1    | Ca_kabuli_chr08 | 8854621                 | TT                              | GG              | 1946906271               |
| SNP_P4_106108_8855041 | NC_021167.1    | Ca_kabuli_chr08 | 8855041                 | CC                              | GG              | 1946906273               |
| SNP_P4_106109_8855414 | NC_021167.1    | Ca_kabuli_chr08 | 8855414                 | CC                              | AA              | 1946906275               |
| SNP_P4_106110_8856372 | NC_021167.1    | Ca_kabuli_chr08 | 8856372                 | CC                              | TT              | 1946906277               |
| SNP_P4_106111_8856393 | NC_021167.1    | Ca_kabuli_chr08 | 8856393                 | TT                              | CC              | 1946906279               |
| SNP_P4_106112_8856630 | NC_021167.1    | Ca_kabuli_chr08 | 8856630                 | TT                              | CC              | 1946906281               |
| SNP_P4_106113_8857462 | NC_021167.1    | Ca_kabuli_chr08 | 8857462                 | GG                              | AA              | 1946906284               |



| SNPs IDs              | Chromosome IDs | Chromosomes     | Physical positions (bp) | CDC Frontier (Reference genome) | (ILWC46 & LPNB) | NCBI SNPdb Accession IDs |
|-----------------------|----------------|-----------------|-------------------------|---------------------------------|-----------------|--------------------------|
| SNP_P4_106114_8858078 | NC_021167.1    | Ca_kabuli_chr08 | 8858078                 | GG                              | TT              | 1946906286               |
| SNP_P4_106115_8858119 | NC_021167.1    | Ca_kabuli_chr08 | 8858119                 | TT                              | CC              | 1946906288               |
| SNP_P4_106116_8858128 | NC_021167.1    | Ca_kabuli_chr08 | 8858128                 | CC                              | TT              | 1946906290               |
| SNP_P4_106117_8858183 | NC_021167.1    | Ca_kabuli_chr08 | 8858183                 | CC                              | TT              | 1946906292               |
| SNP_P4_106118_8858378 | NC_021167.1    | Ca_kabuli_chr08 | 8858378                 | AA                              | GG              | 1946906294               |
| SNP_P4_106119_8858389 | NC_021167.1    | Ca_kabuli_chr08 | 8858389                 | GG                              | TT              | 1946906296               |
| SNP_P4_106120_8858449 | NC_021167.1    | Ca_kabuli_chr08 | 8858449                 | GG                              | CC              | 1946906298               |
| SNP_P4_106122_8858507 | NC_021167.1    | Ca_kabuli_chr08 | 8858507                 | GG                              | AA              | 1946906300               |
| SNP_P4_106123_8859570 | NC_021167.1    | Ca_kabuli_chr08 | 8859570                 | AA                              | GG              | 1946906302               |
| SNP_P4_106124_8859586 | NC_021167.1    | Ca_kabuli_chr08 | 8859586                 | TT                              | CC              | 1946906304               |
| SNP_P4_106125_8859589 | NC_021167.1    | Ca_kabuli_chr08 | 8859589                 | GG                              | AA              | 1946906306               |
| SNP_P4_106129_8861195 | NC_021167.1    | Ca_kabuli_chr08 | 8861195                 | CC                              | TT              | 1946906308               |
| SNP_P4_106130_8861249 | NC_021167.1    | Ca_kabuli_chr08 | 8861249                 | GG                              | AA              | 1946906310               |
| SNP_P4_106131_8861257 | NC_021167.1    | Ca_kabuli_chr08 | 8861257                 | CC                              | TT              | 1946906312               |
| SNP_P4_106132_8861365 | NC_021167.1    | Ca_kabuli_chr08 | 8861365                 | CC                              | TT              | 1946906314               |
| SNP_P4_106133_8861371 | NC_021167.1    | Ca_kabuli_chr08 | 8861371                 | TT                              | CC              | 1946906316               |
| SNP_P4_106134_8861565 | NC_021167.1    | Ca_kabuli_chr08 | 8861565                 | AA                              | GG              | 1946906318               |
| SNP_P4_106135_8861713 | NC_021167.1    | Ca_kabuli_chr08 | 8861713                 | AA                              | GG              | 1946906320               |
| SNP_P4_106136_8861767 | NC_021167.1    | Ca_kabuli_chr08 | 8861767                 | GG                              | AA              | 1946906322               |
| SNP_P4_106137_8861800 | NC_021167.1    | Ca_kabuli_chr08 | 8861800                 | GG                              | AA              | 1946906324               |
| SNP_P4_106138_8861801 | NC_021167.1    | Ca_kabuli_chr08 | 8861801                 | GG                              | AA              | 1946906326               |
| SNP_P4_106139_8861802 | NC_021167.1    | Ca_kabuli_chr08 | 8861802                 | CC                              | GG              | 1946906328               |
| SNP_P4_106140_8862492 | NC_021167.1    | Ca_kabuli_chr08 | 8862492                 | TT                              | CC              | 1946906330               |
| SNP_P4_106141_8862570 | NC_021167.1    | Ca_kabuli_chr08 | 8862570                 | AA                              | GG              | 1946906332               |
| SNP_P4_106142_8862576 | NC_021167.1    | Ca_kabuli_chr08 | 8862576                 | TT                              | CC              | 1946906334               |
| SNP_P4_106143_8862578 | NC_021167.1    | Ca_kabuli_chr08 | 8862578                 | AA                              | GG              | 1946906337               |
| SNP_P4_106144_8862585 | NC_021167.1    | Ca_kabuli_chr08 | 8862585                 | GG                              | AA              | 1946906338               |
| SNP_P4_106145_8862741 | NC_021167.1    | Ca_kabuli_chr08 | 8862741                 | GG                              | TT              | 1946906340               |
| SNP_P4_106146_8862746 | NC_021167.1    | Ca_kabuli_chr08 | 8862746                 | AA                              | GG              | 1946906342               |
| SNP_P4_106147_8862756 | NC_021167.1    | Ca_kabuli_chr08 | 8862756                 | GG                              | TT              | 1946906345               |
| SNP_P4_106148_8862759 | NC_021167.1    | Ca_kabuli_chr08 | 8862759                 | TT                              | GG              | 1946906347               |
| SNP_P4_106149_8864853 | NC_021167.1    | Ca_kabuli_chr08 | 8864853                 | TT                              | CC              | 1946906349               |
| SNP_P4_106150_8868029 | NC_021167.1    | Ca_kabuli_chr08 | 8868029                 | TT                              | CC              | 1946906350               |
| SNP_P4_106151_8868034 | NC_021167.1    | Ca_kabuli_chr08 | 8868034                 | GG                              | AA              | 1946906352               |
| SNP_P4_106152_8868050 | NC_021167.1    | Ca_kabuli_chr08 | 8868050                 | AA                              | GG              | 1946906354               |
| SNP_P4_106153_8868094 | NC_021167.1    | Ca_kabuli_chr08 | 8868094                 | AA                              | GG              | 1946906356               |
| SNP_P4_106154_8868704 | NC_021167.1    | Ca_kabuli_chr08 | 8868704                 | GG                              | AA              | 1946906358               |
| SNP_P4_106156_8868917 | NC_021167.1    | Ca_kabuli_chr08 | 8868917                 | AA                              | GG              | 1946906360               |
| SNP_P4_106157_8868944 | NC_021167.1    | Ca_kabuli_chr08 | 8868944                 | CC                              | TT              | 1946906362               |
| SNP_P4_106158_8868958 | NC_021167.1    | Ca_kabuli_chr08 | 8868958                 | GG                              | AA              | 1946906364               |
| SNP_P4_106159_8868996 | NC_021167.1    | Ca_kabuli_chr08 | 8868996                 | CC                              | TT              | 1946906366               |
| SNP_P4_106160_8868999 | NC_021167.1    | Ca_kabuli_chr08 | 8868999                 | GG                              | AA              | 1946906368               |

| SNPs IDs              | Chromosome IDs | Chromosomes     | Physical positions (bp) | CDC Frontier (Reference genome) | (ILWC46 & LPNB) | NCBI SNPdb Accession IDs |
|-----------------------|----------------|-----------------|-------------------------|---------------------------------|-----------------|--------------------------|
| SNP_P4_106161_8869006 | NC_021167.1    | Ca_kabuli_chr08 | 8869006                 | GG                              | AA              | 1946906370               |
| SNP_P4_106162_8869158 | NC_021167.1    | Ca_kabuli_chr08 | 8869158                 | CC                              | TT              | 1946906372               |
| SNP_P4_106165_8869248 | NC_021167.1    | Ca_kabuli_chr08 | 8869248                 | AA                              | GG              | 1946906374               |
| SNP_P4_106166_8869397 | NC_021167.1    | Ca_kabuli_chr08 | 8869397                 | GG                              | TT              | 1946906376               |
| SNP_P4_106167_8870244 | NC_021167.1    | Ca_kabuli_chr08 | 8870244                 | TT                              | GG              | 1946906378               |
| SNP_P4_106168_8871029 | NC_021167.1    | Ca_kabuli_chr08 | 8871029                 | CC                              | GG              | 1946906380               |
| SNP_P4_106169_8871037 | NC_021167.1    | Ca_kabuli_chr08 | 8871037                 | GG                              | AA              | 1946906382               |
| SNP_P4_106170_8872797 | NC_021167.1    | Ca_kabuli_chr08 | 8872797                 | CC                              | AA              | 1946906384               |
| SNP_P4_106171_8872861 | NC_021167.1    | Ca_kabuli_chr08 | 8872861                 | GG                              | CC              | 1946906386               |
| SNP_P4_106172_8872981 | NC_021167.1    | Ca_kabuli_chr08 | 8872981                 | CC                              | GG              | 1946906388               |
| SNP_P4_106173_8873523 | NC_021167.1    | Ca_kabuli_chr08 | 8873523                 | TT                              | CC              | 1946906390               |
| SNP_P4_106174_8874615 | NC_021167.1    | Ca_kabuli_chr08 | 8874615                 | AA                              | CC              | 1946906392               |
| SNP_P4_106175_8874673 | NC_021167.1    | Ca_kabuli_chr08 | 8874673                 | TT                              | AA              | 1946906394               |
| SNP_P4_106176_8874995 | NC_021167.1    | Ca_kabuli_chr08 | 8874995                 | GG                              | AA              | 1946906396               |
| SNP_P4_106177_8875006 | NC_021167.1    | Ca_kabuli_chr08 | 8875006                 | TT                              | CC              | 1946906398               |
| SNP_P4_106178_8875019 | NC_021167.1    | Ca_kabuli_chr08 | 8875019                 | TT                              | CC              | 1946906400               |
| SNP_P4_106179_8875028 | NC_021167.1    | Ca_kabuli_chr08 | 8875028                 | TT                              | CC              | 1946906402               |
| SNP_P4_106180_8875039 | NC_021167.1    | Ca_kabuli_chr08 | 8875039                 | GG                              | TT              | 1946906404               |
| SNP_P4_106181_8875062 | NC_021167.1    | Ca_kabuli_chr08 | 8875062                 | AA                              | GG              | 1946906406               |
| SNP_P4_106182_8875714 | NC_021167.1    | Ca_kabuli_chr08 | 8875714                 | AA                              | GG              | 1946906408               |
| SNP_P4_106183_8876216 | NC_021167.1    | Ca_kabuli_chr08 | 8876216                 | AA                              | TT              | 1946906410               |
| SNP_P4_106184_8876228 | NC_021167.1    | Ca_kabuli_chr08 | 8876228                 | TT                              | CC              | 1946906412               |
| SNP_P4_106185_8878183 | NC_021167.1    | Ca_kabuli_chr08 | 8878183                 | AA                              | GG              | 1946906414               |
| SNP_P4_106187_8878838 | NC_021167.1    | Ca_kabuli_chr08 | 8878838                 | CC                              | GG              | 1946906416               |
| SNP_P4_106188_8878862 | NC_021167.1    | Ca_kabuli_chr08 | 8878862                 | GG                              | AA              | 1946906418               |
| SNP_P4_106189_8879115 | NC_021167.1    | Ca_kabuli_chr08 | 8879115                 | GG                              | AA              | 1946906421               |
| SNP_P4_106191_8879730 | NC_021167.1    | Ca_kabuli_chr08 | 8879730                 | TT                              | AA              | 1946906423               |
| SNP_P4_106192_8880019 | NC_021167.1    | Ca_kabuli_chr08 | 8880019                 | CC                              | AA              | 1946906425               |
| SNP_P4_106193_8880025 | NC_021167.1    | Ca_kabuli_chr08 | 8880025                 | AA                              | GG              | 1946906427               |
| SNP_P4_106194_8880026 | NC_021167.1    | Ca_kabuli_chr08 | 8880026                 | AA                              | GG              | 1946906429               |
| SNP_P4_106195_8880065 | NC_021167.1    | Ca_kabuli_chr08 | 8880065                 | GG                              | AA              | 1946906431               |
| SNP_P4_106196_8880098 | NC_021167.1    | Ca_kabuli_chr08 | 8880098                 | AA                              | GG              | 1946906433               |
| SNP_P4_106197_8880475 | NC_021167.1    | Ca_kabuli_chr08 | 8880475                 | TT                              | CC              | 1946906435               |
| SNP_P4_106198_8880515 | NC_021167.1    | Ca_kabuli_chr08 | 8880515                 | GG                              | TT              | 1946906438               |
| SNP_P4_106199_8880561 | NC_021167.1    | Ca_kabuli_chr08 | 8880561                 | AA                              | TT              | 1946906440               |
| SNP_P4_106201_8880581 | NC_021167.1    | Ca_kabuli_chr08 | 8880581                 | TT                              | AA              | 1946906442               |
| SNP_P4_106202_8880667 | NC_021167.1    | Ca_kabuli_chr08 | 8880667                 | GG                              | AA              | 1946906444               |
| SNP_P4_106203_8880674 | NC_021167.1    | Ca_kabuli_chr08 | 8880674                 | TT                              | GG              | 1946906446               |
| SNP_P4_106204_8881371 | NC_021167.1    | Ca_kabuli_chr08 | 8881371                 | GG                              | AA              | 1946906448               |
| SNP_P4_106205_8881388 | NC_021167.1    | Ca_kabuli_chr08 | 8881388                 | AA                              | GG              | 1946906450               |
| SNP_P4_106209_8882263 | NC_021167.1    | Ca_kabuli_chr08 | 8882263                 | TT                              | CC              | 1946906452               |
| SNP_P4_106210_8883411 | NC_021167.1    | Ca_kabuli_chr08 | 8883411                 | GG                              | AA              | 1946906454               |

| SNPs IDs              | Chromosome IDs | Chromosomes     | Physical positions (bp) | CDC Frontier (Reference genome) | (ILWC46 & LPNB) | NCBI SNPdb Accession IDs |
|-----------------------|----------------|-----------------|-------------------------|---------------------------------|-----------------|--------------------------|
| SNP_P4_106211_8883489 | NC_021167.1    | Ca_kabuli_chr08 | 8883489                 | AA                              | GG              | 1946906456               |
| SNP_P4_106212_8884251 | NC_021167.1    | Ca_kabuli_chr08 | 8884251                 | TT                              | CC              | 1946906458               |
| SNP_P4_106216_8885260 | NC_021167.1    | Ca_kabuli_chr08 | 8885260                 | CC                              | TT              | 1946906460               |
| SNP_P4_106217_8885408 | NC_021167.1    | Ca_kabuli_chr08 | 8885408                 | TT                              | CC              | 1946906462               |
| SNP_P4_106218_8885575 | NC_021167.1    | Ca_kabuli_chr08 | 8885575                 | AA                              | GG              | 1946906464               |
| SNP_P4_106219_8886016 | NC_021167.1    | Ca_kabuli_chr08 | 8886016                 | TT                              | CC              | 1946906466               |
| SNP_P4_106220_8886311 | NC_021167.1    | Ca_kabuli_chr08 | 8886311                 | TT                              | CC              | 1946906468               |
| SNP_P4_106221_8886315 | NC_021167.1    | Ca_kabuli_chr08 | 8886315                 | CC                              | TT              | 1946906470               |
| SNP_P4_106222_8886328 | NC_021167.1    | Ca_kabuli_chr08 | 8886328                 | CC                              | TT              | 1946906472               |
| SNP_P4_106223_8886342 | NC_021167.1    | Ca_kabuli_chr08 | 8886342                 | TT                              | CC              | 1946906474               |
| SNP_P4_106224_8886398 | NC_021167.1    | Ca_kabuli_chr08 | 8886398                 | TT                              | CC              | 1946906476               |
| SNP_P4_106225_8886401 | NC_021167.1    | Ca_kabuli_chr08 | 8886401                 | GG                              | CC              | 1946906478               |
| SNP_P4_106226_8887172 | NC_021167.1    | Ca_kabuli_chr08 | 8887172                 | GG                              | AA              | 1946906480               |
| SNP_P4_106227_8887403 | NC_021167.1    | Ca_kabuli_chr08 | 8887403                 | GG                              | AA              | 1946906482               |
| SNP_P4_106228_8887452 | NC_021167.1    | Ca_kabuli_chr08 | 8887452                 | CC                              | TT              | 1946906484               |
| SNP_P4_106229_8887453 | NC_021167.1    | Ca_kabuli_chr08 | 8887453                 | GG                              | AA              | 1946906486               |
| SNP_P4_106230_8887794 | NC_021167.1    | Ca_kabuli_chr08 | 8887794                 | AA                              | TT              | 1946906488               |
| SNP_P4_106231_8887799 | NC_021167.1    | Ca_kabuli_chr08 | 8887799                 | GG                              | AA              | 1946906490               |
| SNP_P4_106233_8888352 | NC_021167.1    | Ca_kabuli_chr08 | 8888352                 | CC                              | TT              | 1946906492               |
| SNP_P4_106234_8888412 | NC_021167.1    | Ca_kabuli_chr08 | 8888412                 | GG                              | AA              | 1946906494               |
| SNP_P4_106235_8888414 | NC_021167.1    | Ca_kabuli_chr08 | 8888414                 | TT                              | GG              | 1946906496               |
| SNP_P4_106236_8893607 | NC_021167.1    | Ca_kabuli_chr08 | 8893607                 | GG                              | AA              | 1946906498               |
| SNP_P4_106237_8894084 | NC_021167.1    | Ca_kabuli_chr08 | 8894084                 | AA                              | GG              | 1946906499               |
| SNP_P4_106239_8897196 | NC_021167.1    | Ca_kabuli_chr08 | 8897196                 | CC                              | GG              | 1946906500               |
| SNP_P4_106241_8900262 | NC_021167.1    | Ca_kabuli_chr08 | 8900262                 | AA                              | GG              | 1946906501               |
| SNP_P4_106242_8900501 | NC_021167.1    | Ca_kabuli_chr08 | 8900501                 | CC                              | TT              | 1946906502               |
| SNP_P4_106243_8901665 | NC_021167.1    | Ca_kabuli_chr08 | 8901665                 | AA                              | GG              | 1946906503               |
| SNP_P4_106245_8902110 | NC_021167.1    | Ca_kabuli_chr08 | 8902110                 | GG                              | TT              | 1946906504               |
| SNP_P4_106246_8902133 | NC_021167.1    | Ca_kabuli_chr08 | 8902133                 | CC                              | TT              | 1946906505               |
| SNP_P4_106247_8902304 | NC_021167.1    | Ca_kabuli_chr08 | 8902304                 | TT                              | CC              | 1946906507               |
| SNP_P4_106248_8902320 | NC_021167.1    | Ca_kabuli_chr08 | 8902320                 | CC                              | TT              | 1946906509               |
| SNP_P4_106249_8902453 | NC_021167.1    | Ca_kabuli_chr08 | 8902453                 | GG                              | AA              | 1946906511               |
| SNP_P4_106250_8902533 | NC_021167.1    | Ca_kabuli_chr08 | 8902533                 | GG                              | AA              | 1946906513               |
| SNP_P4_106251_8902646 | NC_021167.1    | Ca_kabuli_chr08 | 8902646                 | CC                              | TT              | 1946906515               |
| SNP_P4_106253_8905505 | NC_021167.1    | Ca_kabuli_chr08 | 8905505                 | TT                              | CC              | 1946906517               |
| SNP_P4_106254_8906817 | NC_021167.1    | Ca_kabuli_chr08 | 8906817                 | CC                              | GG              | 1946906519               |
| SNP_P4_106258_8907704 | NC_021167.1    | Ca_kabuli_chr08 | 8907704                 | AA                              | GG              | 1946906521               |
| SNP_P4_106259_8907985 | NC_021167.1    | Ca_kabuli_chr08 | 8907985                 | AA                              | GG              | 1946906523               |
| SNP_P4_106260_8907987 | NC_021167.1    | Ca_kabuli_chr08 | 8907987                 | TT                              | CC              | 1946906525               |
| SNP_P4_106261_8908021 | NC_021167.1    | Ca_kabuli_chr08 | 8908021                 | AA                              | CC              | 1946906527               |
| SNP_P4_106262_8908042 | NC_021167.1    | Ca_kabuli_chr08 | 8908042                 | AA                              | GG              | 1946906529               |
| SNP_P4_106263_8908235 | NC_021167.1    | Ca_kabuli_chr08 | 8908235                 | AA                              | CC              | 1946906531               |

| SNPs IDs              | Chromosome IDs | Chromosomes     | Physical positions (bp) | CDC Frontier (Reference genome) | (ILWC46 & LPNB) | NCBI SNPdb Accession IDs |
|-----------------------|----------------|-----------------|-------------------------|---------------------------------|-----------------|--------------------------|
| SNP_P4_106264_8908239 | NC_021167.1    | Ca_kabuli_chr08 | 8908239                 | GG                              | AA              | 1946906533               |
| SNP_P4_106265_8908525 | NC_021167.1    | Ca_kabuli_chr08 | 8908525                 | TT                              | CC              | 1946906535               |
| SNP_P4_106266_8908529 | NC_021167.1    | Ca_kabuli_chr08 | 8908529                 | TT                              | CC              | 1946906537               |
| SNP_P4_106267_8908535 | NC_021167.1    | Ca_kabuli_chr08 | 8908535                 | CC                              | TT              | 1946906539               |
| SNP_P4_106268_8908539 | NC_021167.1    | Ca_kabuli_chr08 | 8908539                 | TT                              | GG              | 1946906541               |
| SNP_P4_106269_8908761 | NC_021167.1    | Ca_kabuli_chr08 | 8908761                 | TT                              | AA              | 1946906543               |
| SNP_P4_106271_8910046 | NC_021167.1    | Ca_kabuli_chr08 | 8910046                 | TT                              | CC              | 1946906545               |
| SNP_P4_106272_8910784 | NC_021167.1    | Ca_kabuli_chr08 | 8910784                 | TT                              | CC              | 1946906547               |
| SNP_P4_106273_8912182 | NC_021167.1    | Ca_kabuli_chr08 | 8912182                 | TT                              | GG              | 1946906549               |
| SNP_P4_106274_8912245 | NC_021167.1    | Ca_kabuli_chr08 | 8912245                 | CC                              | TT              | 1946906551               |
| SNP_P4_106275_8913699 | NC_021167.1    | Ca_kabuli_chr08 | 8913699                 | AA                              | GG              | 1946906553               |
| SNP_P4_106276_8913717 | NC_021167.1    | Ca_kabuli_chr08 | 8913717                 | TT                              | CC              | 1946906555               |
| SNP_P4_106277_8914018 | NC_021167.1    | Ca_kabuli_chr08 | 8914018                 | AA                              | CC              | 1946906557               |
| SNP_P4_106278_8916127 | NC_021167.1    | Ca_kabuli_chr08 | 8916127                 | GG                              | CC              | 1946906559               |
| SNP_P4_106279_8916135 | NC_021167.1    | Ca_kabuli_chr08 | 8916135                 | TT                              | AA              | 1946906562               |
| SNP_P4_106280_8916363 | NC_021167.1    | Ca_kabuli_chr08 | 8916363                 | AA                              | TT              | 1946906564               |
| SNP_P4_106281_8916701 | NC_021167.1    | Ca_kabuli_chr08 | 8916701                 | GG                              | AA              | 1946906566               |
| SNP_P4_106282_8916839 | NC_021167.1    | Ca_kabuli_chr08 | 8916839                 | TT                              | AA              | 1946906568               |
| SNP_P4_106283_8920161 | NC_021167.1    | Ca_kabuli_chr08 | 8920161                 | AA                              | GG              | 1946906570               |
| SNP_P4_106285_8920762 | NC_021167.1    | Ca_kabuli_chr08 | 8920762                 | CC                              | AA              | 1946906572               |
| SNP_P4_106286_8921030 | NC_021167.1    | Ca_kabuli_chr08 | 8921030                 | CC                              | TT              | 1946906574               |
| SNP_P4_106287_8921241 | NC_021167.1    | Ca_kabuli_chr08 | 8921241                 | TT                              | GG              | 1946906576               |
| SNP_P4_106289_8921596 | NC_021167.1    | Ca_kabuli_chr08 | 8921596                 | TT                              | AA              | 1946906578               |
| SNP_P4_106290_8921600 | NC_021167.1    | Ca_kabuli_chr08 | 8921600                 | GG                              | AA              | 1946906581               |
| SNP_P4_106291_8921601 | NC_021167.1    | Ca_kabuli_chr08 | 8921601                 | AA                              | GG              | 1946906583               |
| SNP_P4_106292_8921607 | NC_021167.1    | Ca_kabuli_chr08 | 8921607                 | CC                              | TT              | 1946906585               |
| SNP_P4_106293_8921611 | NC_021167.1    | Ca_kabuli_chr08 | 8921611                 | TT                              | GG              | 1946906587               |
| SNP_P4_106294_8922129 | NC_021167.1    | Ca_kabuli_chr08 | 8922129                 | TT                              | CC              | 1946906589               |
| SNP_P4_106295_8922164 | NC_021167.1    | Ca_kabuli_chr08 | 8922164                 | TT                              | CC              | 1946906591               |
| SNP_P4_106296_8922168 | NC_021167.1    | Ca_kabuli_chr08 | 8922168                 | GG                              | AA              | 1946906593               |
| SNP_P4_106297_8922474 | NC_021167.1    | Ca_kabuli_chr08 | 8922474                 | AA                              | GG              | 1946906595               |
| SNP_P4_106299_8922834 | NC_021167.1    | Ca_kabuli_chr08 | 8922834                 | TT                              | AA              | 1946906597               |
| SNP_P4_106300_8923015 | NC_021167.1    | Ca_kabuli_chr08 | 8923015                 | AA                              | GG              | 1946906599               |
| SNP_P4_106301_8923107 | NC_021167.1    | Ca_kabuli_chr08 | 8923107                 | AA                              | GG              | 1946906601               |
| SNP_P4_106302_8923225 | NC_021167.1    | Ca_kabuli_chr08 | 8923225                 | GG                              | AA              | 1946906603               |
| SNP_P4_106303_8923730 | NC_021167.1    | Ca_kabuli_chr08 | 8923730                 | GG                              | AA              | 1946906605               |
| SNP_P4_106304_8924006 | NC_021167.1    | Ca_kabuli_chr08 | 8924006                 | GG                              | AA              | 1946906607               |
| SNP_P4_106305_8924044 | NC_021167.1    | Ca_kabuli_chr08 | 8924044                 | AA                              | GG              | 1946906610               |
| SNP_P4_106306_8924196 | NC_021167.1    | Ca_kabuli_chr08 | 8924196                 | AA                              | GG              | 1946906612               |
| SNP_P4_106307_8925087 | NC_021167.1    | Ca_kabuli_chr08 | 8925087                 | CC                              | TT              | 1946906614               |
| SNP_P4_106308_8927558 | NC_021167.1    | Ca_kabuli_chr08 | 8927558                 | AA                              | CC              | 1946906616               |
| SNP_P4_106309_8927574 | NC_021167.1    | Ca_kabuli_chr08 | 8927574                 | CC                              | AA              | 1946906618               |

| SNPs IDs              | Chromosome IDs | Chromosomes     | Physical positions (bp) | CDC Frontier (Reference genome) | (ILWC46 & LPNB) | NCBI SNPdb Accession IDs |
|-----------------------|----------------|-----------------|-------------------------|---------------------------------|-----------------|--------------------------|
| SNP_P4_106310_8936596 | NC_021167.1    | Ca_kabuli_chr08 | 8936596                 | AA                              | CC              | 1946906620               |
| SNP_P4_106312_8937807 | NC_021167.1    | Ca_kabuli_chr08 | 8937807                 | AA                              | GG              | 1946906622               |
| SNP_P4_106313_8937818 | NC_021167.1    | Ca_kabuli_chr08 | 8937818                 | GG                              | TT              | 1946906624               |
| SNP_P4_106315_8941237 | NC_021167.1    | Ca_kabuli_chr08 | 8941237                 | AA                              | TT              | 1946906626               |
| SNP_P4_106316_8941956 | NC_021167.1    | Ca_kabuli_chr08 | 8941956                 | AA                              | TT              | 1946906628               |
| SNP_P4_106317_8943474 | NC_021167.1    | Ca_kabuli_chr08 | 8943474                 | AA                              | GG              | 1946906630               |
| SNP_P4_106318_8950094 | NC_021167.1    | Ca_kabuli_chr08 | 8950094                 | AA                              | GG              | 1946906632               |
| SNP_P4_106319_8950193 | NC_021167.1    | Ca_kabuli_chr08 | 8950193                 | AA                              | GG              | 1946906634               |
| SNP_P4_106320_8950497 | NC_021167.1    | Ca_kabuli_chr08 | 8950497                 | AA                              | GG              | 1946906636               |
| SNP_P4_106321_8950871 | NC_021167.1    | Ca_kabuli_chr08 | 8950871                 | CC                              | TT              | 1946906638               |
| SNP_P4_106322_8951091 | NC_021167.1    | Ca_kabuli_chr08 | 8951091                 | AA                              | GG              | 1946906640               |
| SNP_P4_106323_8951349 | NC_021167.1    | Ca_kabuli_chr08 | 8951349                 | GG                              | CC              | 1946906642               |
| SNP_P4_106325_8951417 | NC_021167.1    | Ca_kabuli_chr08 | 8951417                 | AA                              | GG              | 1946906644               |
| SNP_P4_106326_8952932 | NC_021167.1    | Ca_kabuli_chr08 | 8952932                 | TT                              | CC              | 1946906646               |
| SNP_P4_106330_8956481 | NC_021167.1    | Ca_kabuli_chr08 | 8956481                 | GG                              | TT              | 1946906648               |
| SNP_P4_106331_8956554 | NC_021167.1    | Ca_kabuli_chr08 | 8956554                 | GG                              | AA              | 1946906650               |
| SNP_P4_106334_8956658 | NC_021167.1    | Ca_kabuli_chr08 | 8956658                 | GG                              | AA              | 1946906652               |
| SNP_P4_106335_8958089 | NC_021167.1    | Ca_kabuli_chr08 | 8958089                 | TT                              | GG              | 1946906654               |
| SNP_P4_106336_8959106 | NC_021167.1    | Ca_kabuli_chr08 | 8959106                 | GG                              | TT              | 1946906656               |
| SNP_P4_106337_8959302 | NC_021167.1    | Ca_kabuli_chr08 | 8959302                 | CC                              | AA              | 1946906658               |
| SNP_P4_106338_8959421 | NC_021167.1    | Ca_kabuli_chr08 | 8959421                 | TT                              | AA              | 1946906660               |
| SNP_P4_106339_8960387 | NC_021167.1    | Ca_kabuli_chr08 | 8960387                 | TT                              | CC              | 1946906662               |
| SNP_P4_106340_8960416 | NC_021167.1    | Ca_kabuli_chr08 | 8960416                 | CC                              | TT              | 1946906664               |
| SNP_P4_106341_8960771 | NC_021167.1    | Ca_kabuli_chr08 | 8960771                 | CC                              | AA              | 1946906667               |
| SNP_P4_106342_8961102 | NC_021167.1    | Ca_kabuli_chr08 | 8961102                 | GG                              | AA              | 1946906669               |
| SNP_P4_106343_8961112 | NC_021167.1    | Ca_kabuli_chr08 | 8961112                 | TT                              | CC              | 1946906671               |
| SNP_P4_106344_8961166 | NC_021167.1    | Ca_kabuli_chr08 | 8961166                 | TT                              | AA              | 1946906673               |
| SNP_P4_106345_8961549 | NC_021167.1    | Ca_kabuli_chr08 | 8961549                 | TT                              | CC              | 1946906675               |
| SNP_P4_106346_8961864 | NC_021167.1    | Ca_kabuli_chr08 | 8961864                 | TT                              | GG              | 1946906677               |
| SNP_P4_106347_8962901 | NC_021167.1    | Ca_kabuli_chr08 | 8962901                 | GG                              | AA              | 1946906679               |
| SNP_P4_106348_8962905 | NC_021167.1    | Ca_kabuli_chr08 | 8962905                 | GG                              | TT              | 1946906681               |
| SNP_P4_106349_8962952 | NC_021167.1    | Ca_kabuli_chr08 | 8962952                 | TT                              | GG              | 1946906683               |
| SNP_P4_106350_8963219 | NC_021167.1    | Ca_kabuli_chr08 | 8963219                 | AA                              | GG              | 1946906685               |
| SNP_P4_106351_8963277 | NC_021167.1    | Ca_kabuli_chr08 | 8963277                 | CC                              | TT              | 1946906687               |
| SNP_P4_106352_8963279 | NC_021167.1    | Ca_kabuli_chr08 | 8963279                 | CC                              | TT              | 1946906689               |
| SNP_P4_106353_8963280 | NC_021167.1    | Ca_kabuli_chr08 | 8963280                 | CC                              | AA              | 1946906691               |
| SNP_P4_106354_8963304 | NC_021167.1    | Ca_kabuli_chr08 | 8963304                 | TT                              | CC              | 1946906693               |
| SNP_P4_106356_8967512 | NC_021167.1    | Ca_kabuli_chr08 | 8967512                 | GG                              | AA              | 1946906695               |
| SNP_P4_106359_8967879 | NC_021167.1    | Ca_kabuli_chr08 | 8967879                 | TT                              | CC              | 1946906697               |
| SNP_P4_106360_8967890 | NC_021167.1    | Ca_kabuli_chr08 | 8967890                 | TT                              | CC              | 1946906699               |
| SNP_P4_106361_8967942 | NC_021167.1    | Ca_kabuli_chr08 | 8967942                 | TT                              | GG              | 1946906701               |
| SNP_P4_106362_8968002 | NC_021167.1    | Ca_kabuli_chr08 | 8968002                 | TT                              | CC              | 1946906703               |

| SNPs IDs              | Chromosome IDs | Chromosomes     | Physical positions (bp) | CDC Frontier (Reference genome) | (ILWC46 & LPNB) | NCBI SNPdb Accession IDs |
|-----------------------|----------------|-----------------|-------------------------|---------------------------------|-----------------|--------------------------|
| SNP_P4_106363_8968151 | NC_021167.1    | Ca_kabuli_chr08 | 8968151                 | GG                              | AA              | 1946906705               |
| SNP_P4_106364_8968170 | NC_021167.1    | Ca_kabuli_chr08 | 8968170                 | CC                              | TT              | 1946906707               |
| SNP_P4_106365_8968312 | NC_021167.1    | Ca_kabuli_chr08 | 8968312                 | TT                              | AA              | 1946906709               |
| SNP_P4_106368_8968647 | NC_021167.1    | Ca_kabuli_chr08 | 8968647                 | GG                              | AA              | 1946906711               |
| SNP_P4_106369_8968668 | NC_021167.1    | Ca_kabuli_chr08 | 8968668                 | AA                              | GG              | 1946906713               |
| SNP_P4_106370_8968674 | NC_021167.1    | Ca_kabuli_chr08 | 8968674                 | TT                              | CC              | 1946906716               |
| SNP_P4_106371_8968753 | NC_021167.1    | Ca_kabuli_chr08 | 8968753                 | AA                              | GG              | 1946906718               |
| SNP_P4_106372_8968926 | NC_021167.1    | Ca_kabuli_chr08 | 8968926                 | CC                              | TT              | 1946906720               |
| SNP_P4_106373_8968934 | NC_021167.1    | Ca_kabuli_chr08 | 8968934                 | AA                              | GG              | 1946906722               |
| SNP_P4_106374_8968953 | NC_021167.1    | Ca_kabuli_chr08 | 8968953                 | GG                              | AA              | 1946906724               |
| SNP_P4_106375_8969028 | NC_021167.1    | Ca_kabuli_chr08 | 8969028                 | AA                              | GG              | 1946906726               |
| SNP_P4_106376_8969052 | NC_021167.1    | Ca_kabuli_chr08 | 8969052                 | TT                              | GG              | 1946906728               |
| SNP_P4_106377_8969267 | NC_021167.1    | Ca_kabuli_chr08 | 8969267                 | TT                              | CC              | 1946906730               |
| SNP_P4_106378_8969269 | NC_021167.1    | Ca_kabuli_chr08 | 8969269                 | GG                              | AA              | 1946906732               |
| SNP_P4_106381_8969390 | NC_021167.1    | Ca_kabuli_chr08 | 8969390                 | CC                              | TT              | 1946906734               |
| SNP_P4_106382_8969393 | NC_021167.1    | Ca_kabuli_chr08 | 8969393                 | CC                              | AA              | 1946906736               |
| SNP_P4_106383_8969404 | NC_021167.1    | Ca_kabuli_chr08 | 8969404                 | GG                              | AA              | 1946906738               |
| SNP_P4_106384_8969521 | NC_021167.1    | Ca_kabuli_chr08 | 8969521                 | TT                              | CC              | 1946906740               |
| SNP_P4_106385_8969528 | NC_021167.1    | Ca_kabuli_chr08 | 8969528                 | CC                              | TT              | 1946906742               |
| SNP_P4_106386_8969559 | NC_021167.1    | Ca_kabuli_chr08 | 8969559                 | AA                              | GG              | 1946906744               |
| SNP_P4_106387_8969577 | NC_021167.1    | Ca_kabuli_chr08 | 8969577                 | TT                              | CC              | 1946906746               |
| SNP_P4_106388_8969973 | NC_021167.1    | Ca_kabuli_chr08 | 8969973                 | TT                              | CC              | 1946906748               |
| SNP_P4_106389_8969977 | NC_021167.1    | Ca_kabuli_chr08 | 8969977                 | AA                              | TT              | 1946906750               |
| SNP_P4_106390_8969982 | NC_021167.1    | Ca_kabuli_chr08 | 8969982                 | GG                              | AA              | 1946906752               |
| SNP_P4_106391_8970341 | NC_021167.1    | Ca_kabuli_chr08 | 8970341                 | CC                              | GG              | 1946906754               |
| SNP_P4_106392_8970342 | NC_021167.1    | Ca_kabuli_chr08 | 8970342                 | AA                              | GG              | 1946906756               |
| SNP_P4_106393_8970347 | NC_021167.1    | Ca_kabuli_chr08 | 8970347                 | TT                              | CC              | 1946906758               |
| SNP_P4_106394_8970414 | NC_021167.1    | Ca_kabuli_chr08 | 8970414                 | CC                              | TT              | 1946906760               |
| SNP_P4_106395_8970424 | NC_021167.1    | Ca_kabuli_chr08 | 8970424                 | GG                              | AA              | 1946906762               |
| SNP_P4_106396_8970483 | NC_021167.1    | Ca_kabuli_chr08 | 8970483                 | AA                              | GG              | 1946906765               |
| SNP_P4_106397_8972011 | NC_021167.1    | Ca_kabuli_chr08 | 8972011                 | CC                              | TT              | 1946906767               |
| SNP_P4_106398_8972337 | NC_021167.1    | Ca_kabuli_chr08 | 8972337                 | CC                              | TT              | 1946906769               |
| SNP_P4_106403_8973335 | NC_021167.1    | Ca_kabuli_chr08 | 8973335                 | TT                              | CC              | 1946906771               |
| SNP_P4_106404_8973351 | NC_021167.1    | Ca_kabuli_chr08 | 8973351                 | AA                              | GG              | 1946906773               |
| SNP_P4_106405_8973645 | NC_021167.1    | Ca_kabuli_chr08 | 8973645                 | AA                              | GG              | 1946906775               |
| SNP_P4_106406_8973679 | NC_021167.1    | Ca_kabuli_chr08 | 8973679                 | GG                              | TT              | 1946906777               |
| SNP_P4_106407_8973710 | NC_021167.1    | Ca_kabuli_chr08 | 8973710                 | GG                              | TT              | 1946906779               |
| SNP_P4_106408_8973957 | NC_021167.1    | Ca_kabuli_chr08 | 8973957                 | AA                              | TT              | 1946906781               |
| SNP_P4_106411_8974098 | NC_021167.1    | Ca_kabuli_chr08 | 8974098                 | AA                              | TT              | 1946906783               |
| SNP_P4_106412_8974154 | NC_021167.1    | Ca_kabuli_chr08 | 8974154                 | TT                              | GG              | 1946906785               |
| SNP_P4_106413_8974171 | NC_021167.1    | Ca_kabuli_chr08 | 8974171                 | CC                              | TT              | 1946906787               |
| SNP_P4_106414_8974172 | NC_021167.1    | Ca_kabuli_chr08 | 8974172                 | GG                              | AA              | 1946906789               |

| SNPs IDs              | Chromosome IDs | Chromosomes     | Physical positions (bp) | CDC Frontier (Reference genome) | (ILWC46 & LPNB) | NCBI SNPdb Accession IDs |
|-----------------------|----------------|-----------------|-------------------------|---------------------------------|-----------------|--------------------------|
| SNP_P4_106415_8974232 | NC_021167.1    | Ca_kabuli_chr08 | 8974232                 | AA                              | TT              | 1946906791               |
| SNP_P4_106416_8974240 | NC_021167.1    | Ca_kabuli_chr08 | 8974240                 | TT                              | CC              | 1946906793               |
| SNP_P4_106417_8974612 | NC_021167.1    | Ca_kabuli_chr08 | 8974612                 | GG                              | TT              | 1946906795               |
| SNP_P4_106418_8974617 | NC_021167.1    | Ca_kabuli_chr08 | 8974617                 | CC                              | TT              | 1946906797               |
| SNP_P4_106420_8974744 | NC_021167.1    | Ca_kabuli_chr08 | 8974744                 | TT                              | GG              | 1946906799               |
| SNP_P4_106421_8974745 | NC_021167.1    | Ca_kabuli_chr08 | 8974745                 | TT                              | AA              | 1946906801               |
| SNP_P4_106422_8975028 | NC_021167.1    | Ca_kabuli_chr08 | 8975028                 | AA                              | TT              | 1946906803               |
| SNP_P4_106423_8979311 | NC_021167.1    | Ca_kabuli_chr08 | 8979311                 | CC                              | TT              | 1946906805               |
| SNP_P4_106424_8979468 | NC_021167.1    | Ca_kabuli_chr08 | 8979468                 | GG                              | AA              | 1946906807               |
| SNP_P4_106425_8979565 | NC_021167.1    | Ca_kabuli_chr08 | 8979565                 | AA                              | GG              | 1946906809               |
| SNP_P4_106426_8979607 | NC_021167.1    | Ca_kabuli_chr08 | 8979607                 | AA                              | GG              | 1946906811               |
| SNP_P4_106427_8979614 | NC_021167.1    | Ca_kabuli_chr08 | 8979614                 | AA                              | GG              | 1946906813               |
| SNP_P4_106428_8979642 | NC_021167.1    | Ca_kabuli_chr08 | 8979642                 | CC                              | TT              | 1946906815               |
| SNP_P4_106429_8979845 | NC_021167.1    | Ca_kabuli_chr08 | 8979845                 | TT                              | CC              | 1946906817               |
| SNP_P4_106430_8979959 | NC_021167.1    | Ca_kabuli_chr08 | 8979959                 | TT                              | AA              | 1946906819               |
| SNP_P4_106431_8980020 | NC_021167.1    | Ca_kabuli_chr08 | 8980020                 | TT                              | AA              | 1946906822               |
| SNP_P4_106432_8980021 | NC_021167.1    | Ca_kabuli_chr08 | 8980021                 | GG                              | AA              | 1946906824               |
| SNP_P4_106433_8980027 | NC_021167.1    | Ca_kabuli_chr08 | 8980027                 | AA                              | GG              | 1946906826               |
| SNP_P4_106434_8980118 | NC_021167.1    | Ca_kabuli_chr08 | 8980118                 | GG                              | AA              | 1946906828               |
| SNP_P4_106435_8980147 | NC_021167.1    | Ca_kabuli_chr08 | 8980147                 | GG                              | AA              | 1946906830               |
| SNP_P4_106436_8980168 | NC_021167.1    | Ca_kabuli_chr08 | 8980168                 | AA                              | GG              | 1946906832               |
| SNP_P4_106437_8980180 | NC_021167.1    | Ca_kabuli_chr08 | 8980180                 | TT                              | AA              | 1946906834               |
| SNP_P4_106440_8981379 | NC_021167.1    | Ca_kabuli_chr08 | 8981379                 | CC                              | TT              | 1946906836               |
| SNP_P4_106441_8981614 | NC_021167.1    | Ca_kabuli_chr08 | 8981614                 | CC                              | TT              | 1946906838               |
| SNP_P4_106442_8981967 | NC_021167.1    | Ca_kabuli_chr08 | 8981967                 | AA                              | CC              | 1946906840               |
| SNP_P4_106443_8981968 | NC_021167.1    | Ca_kabuli_chr08 | 8981968                 | CC                              | AA              | 1946906842               |
| SNP_P4_106444_8981977 | NC_021167.1    | Ca_kabuli_chr08 | 8981977                 | AA                              | TT              | 1946906844               |
| SNP_P4_106445_8982026 | NC_021167.1    | Ca_kabuli_chr08 | 8982026                 | AA                              | GG              | 1946906846               |
| SNP_P4_106446_8982251 | NC_021167.1    | Ca_kabuli_chr08 | 8982251                 | TT                              | AA              | 1946906848               |
| SNP_P4_106447_8994031 | NC_021167.1    | Ca_kabuli_chr08 | 8994031                 | AA                              | TT              | 1946906850               |
| SNP_P4_106448_8994176 | NC_021167.1    | Ca_kabuli_chr08 | 8994176                 | TT                              | CC              | 1946906852               |
| SNP_P4_106449_8994279 | NC_021167.1    | Ca_kabuli_chr08 | 8994279                 | AA                              | TT              | 1946906854               |
| SNP_P4_106451_8994357 | NC_021167.1    | Ca_kabuli_chr08 | 8994357                 | TT                              | CC              | 1946906856               |
| SNP_P4_106452_8994413 | NC_021167.1    | Ca_kabuli_chr08 | 8994413                 | CC                              | TT              | 1946906858               |
| SNP_P4_106453_8994446 | NC_021167.1    | Ca_kabuli_chr08 | 8994446                 | CC                              | TT              | 1946906860               |
| SNP_P4_106454_8994455 | NC_021167.1    | Ca_kabuli_chr08 | 8994455                 | TT                              | GG              | 1946906862               |
| SNP_P4_106455_8994459 | NC_021167.1    | Ca_kabuli_chr08 | 8994459                 | TT                              | CC              | 1946906864               |
| SNP_P4_106456_8994465 | NC_021167.1    | Ca_kabuli_chr08 | 8994465                 | AA                              | TT              | 1946906866               |
| SNP_P4_106457_8994493 | NC_021167.1    | Ca_kabuli_chr08 | 8994493                 | TT                              | GG              | 1946906868               |
| SNP_P4_106458_8994619 | NC_021167.1    | Ca_kabuli_chr08 | 8994619                 | TT                              | CC              | 1946906870               |
| SNP_P4_106459_8994926 | NC_021167.1    | Ca_kabuli_chr08 | 8994926                 | TT                              | CC              | 1946906872               |
| SNP_P4_106460_8994936 | NC_021167.1    | Ca_kabuli_chr08 | 8994936                 | AA                              | TT              | 1946906874               |

| SNPs IDs              | Chromosome IDs | Chromosomes     | Physical positions (bp) | CDC Frontier (Reference genome) | (ILWC46 & LPNB) | NCBI SNPdb Accession IDs |
|-----------------------|----------------|-----------------|-------------------------|---------------------------------|-----------------|--------------------------|
| SNP_P4_106461_8994945 | NC_021167.1    | Ca_kabuli_chr08 | 8994945                 | AA                              | CC              | 1946906876               |
| SNP_P4_106462_8995007 | NC_021167.1    | Ca_kabuli_chr08 | 8995007                 | GG                              | CC              | 1946906878               |
| SNP_P4_106463_8995984 | NC_021167.1    | Ca_kabuli_chr08 | 8995984                 | AA                              | TT              | 1946906880               |
| SNP_P4_106469_8997315 | NC_021167.1    | Ca_kabuli_chr08 | 8997315                 | GG                              | AA              | 1946906882               |
| SNP_P4_106470_8997370 | NC_021167.1    | Ca_kabuli_chr08 | 8997370                 | TT                              | GG              | 1946906884               |
| SNP_P4_106471_8997728 | NC_021167.1    | Ca_kabuli_chr08 | 8997728                 | GG                              | AA              | 1946906886               |
| SNP_P4_106472_8997863 | NC_021167.1    | Ca_kabuli_chr08 | 8997863                 | GG                              | TT              | 1946906888               |
| SNP_P4_106475_8998073 | NC_021167.1    | Ca_kabuli_chr08 | 8998073                 | TT                              | GG              | 1946906890               |
| SNP_P4_106476_8998261 | NC_021167.1    | Ca_kabuli_chr08 | 8998261                 | GG                              | AA              | 1946906892               |
| SNP_P4_106477_8998381 | NC_021167.1    | Ca_kabuli_chr08 | 8998381                 | GG                              | CC              | 1946906894               |
| SNP_P4_106478_8998384 | NC_021167.1    | Ca_kabuli_chr08 | 8998384                 | AA                              | TT              | 1946906896               |
| SNP_P4_106479_8998400 | NC_021167.1    | Ca_kabuli_chr08 | 8998400                 | TT                              | CC              | 1946906898               |
| SNP_P4_106480_8998405 | NC_021167.1    | Ca_kabuli_chr08 | 8998405                 | GG                              | AA              | 1946906900               |
| SNP_P4_106481_8998443 | NC_021167.1    | Ca_kabuli_chr08 | 8998443                 | CC                              | TT              | 1946906902               |
| SNP_P4_106482_8998533 | NC_021167.1    | Ca_kabuli_chr08 | 8998533                 | CC                              | GG              | 1946906904               |
| SNP_P4_106483_8998557 | NC_021167.1    | Ca_kabuli_chr08 | 8998557                 | AA                              | GG              | 1946906906               |
| SNP_P4_106484_8998578 | NC_021167.1    | Ca_kabuli_chr08 | 8998578                 | TT                              | AA              | 1946906908               |
| SNP_P4_106485_8998589 | NC_021167.1    | Ca_kabuli_chr08 | 8998589                 | CC                              | TT              | 1946906910               |
| SNP_P4_106486_8999315 | NC_021167.1    | Ca_kabuli_chr08 | 8999315                 | GG                              | AA              | 1946906912               |
| SNP_P4_106487_9000285 | NC_021167.1    | Ca_kabuli_chr08 | 9000285                 | TT                              | AA              | 1946906914               |
| SNP_P4_106489_9000986 | NC_021167.1    | Ca_kabuli_chr08 | 9000986                 | CC                              | TT              | 1946906916               |
| SNP_P4_106491_9001618 | NC_021167.1    | Ca_kabuli_chr08 | 9001618                 | GG                              | TT              | 1946906918               |
| SNP_P4_106492_9001624 | NC_021167.1    | Ca_kabuli_chr08 | 9001624                 | GG                              | TT              | 1946906920               |
| SNP_P4_106493_9001701 | NC_021167.1    | Ca_kabuli_chr08 | 9001701                 | AA                              | GG              | 1946906922               |
| SNP_P4_106494_9003100 | NC_021167.1    | Ca_kabuli_chr08 | 9003100                 | TT                              | AA              | 1946906924               |
| SNP_P4_106495_9003142 | NC_021167.1    | Ca_kabuli_chr08 | 9003142                 | AA                              | CC              | 1946906926               |
| SNP_P4_106496_9003148 | NC_021167.1    | Ca_kabuli_chr08 | 9003148                 | AA                              | TT              | 1946906928               |
| SNP_P4_106498_9003649 | NC_021167.1    | Ca_kabuli_chr08 | 9003649                 | TT                              | AA              | 1946906930               |
| SNP_P4_106499_9003866 | NC_021167.1    | Ca_kabuli_chr08 | 9003866                 | AA                              | GG              | 1946906932               |
| SNP_P4_106501_9019618 | NC_021167.1    | Ca_kabuli_chr08 | 9019618                 | AA                              | GG              | 1946906934               |
| SNP_P4_106502_9019621 | NC_021167.1    | Ca_kabuli_chr08 | 9019621                 | TT                              | CC              | 1946906936               |
| SNP_P4_106505_9043940 | NC_021167.1    | Ca_kabuli_chr08 | 9043940                 | TT                              | CC              | 1946906938               |
| SNP_P4_106507_9077849 | NC_021167.1    | Ca_kabuli_chr08 | 9077849                 | AA                              | GG              | 1946906940               |
| SNP_P4_106508_9077877 | NC_021167.1    | Ca_kabuli_chr08 | 9077877                 | AA                              | CC              | 1946906942               |
| SNP_P4_106509_9077892 | NC_021167.1    | Ca_kabuli_chr08 | 9077892                 | AA                              | GG              | 1946906944               |
| SNP_P4_106510_9077900 | NC_021167.1    | Ca_kabuli_chr08 | 9077900                 | TT                              | GG              | 1946906946               |
| SNP_P4_106513_9079265 | NC_021167.1    | Ca_kabuli_chr08 | 9079265                 | AA                              | GG              | 1946906948               |
| SNP_P4_106514_9081068 | NC_021167.1    | Ca_kabuli_chr08 | 9081068                 | TT                              | AA              | 1946906950               |
| SNP_P4_106515_9081523 | NC_021167.1    | Ca_kabuli_chr08 | 9081523                 | AA                              | GG              | 1946906952               |
| SNP_P4_106519_9082570 | NC_021167.1    | Ca_kabuli_chr08 | 9082570                 | AA                              | TT              | 1946906954               |
| SNP_P4_106520_9083002 | NC_021167.1    | Ca_kabuli_chr08 | 9083002                 | TT                              | AA              | 1946906957               |
| SNP_P4_106521_9083235 | NC_021167.1    | Ca_kabuli_chr08 | 9083235                 | CC                              | GG              | 1946906959               |



| SNPs IDs              | Chromosome IDs | Chromosomes     | Physical positions (bp) | CDC Frontier (Reference genome) | (ILWC46 & LPNB) | NCBI SNPdb Accession IDs |
|-----------------------|----------------|-----------------|-------------------------|---------------------------------|-----------------|--------------------------|
| SNP_P4_106522_9083354 | NC_021167.1    | Ca_kabuli_chr08 | 9083354                 | TT                              | GG              | 1946906961               |
| SNP_P4_106523_9083751 | NC_021167.1    | Ca_kabuli_chr08 | 9083751                 | TT                              | CC              | 1946906963               |
| SNP_P4_106524_9084318 | NC_021167.1    | Ca_kabuli_chr08 | 9084318                 | GG                              | CC              | 1946906965               |
| SNP_P4_106525_9084582 | NC_021167.1    | Ca_kabuli_chr08 | 9084582                 | TT                              | CC              | 1946906967               |
| SNP_P4_106526_9084660 | NC_021167.1    | Ca_kabuli_chr08 | 9084660                 | GG                              | TT              | 1946906969               |
| SNP_P4_106528_9086631 | NC_021167.1    | Ca_kabuli_chr08 | 9086631                 | AA                              | TT              | 1946906971               |
| SNP_P4_106529_9086634 | NC_021167.1    | Ca_kabuli_chr08 | 9086634                 | TT                              | CC              | 1946906973               |
| SNP_P4_106530_9086635 | NC_021167.1    | Ca_kabuli_chr08 | 9086635                 | TT                              | AA              | 1946906975               |
| SNP_P4_106531_9086636 | NC_021167.1    | Ca_kabuli_chr08 | 9086636                 | CC                              | TT              | 1946906977               |
| SNP_P4_106533_9088151 | NC_021167.1    | Ca_kabuli_chr08 | 9088151                 | AA                              | GG              | 1946906979               |
| SNP_P4_106535_9088432 | NC_021167.1    | Ca_kabuli_chr08 | 9088432                 | TT                              | AA              | 1946906981               |
| SNP_P4_106537_9088882 | NC_021167.1    | Ca_kabuli_chr08 | 9088882                 | CC                              | AA              | 1946906983               |
| SNP_P4_106540_9098025 | NC_021167.1    | Ca_kabuli_chr08 | 9098025                 | CC                              | TT              | 1946906985               |
| SNP_P4_106541_9098042 | NC_021167.1    | Ca_kabuli_chr08 | 9098042                 | AA                              | TT              | 1946906987               |
| SNP_P4_106542_9098953 | NC_021167.1    | Ca_kabuli_chr08 | 9098953                 | TT                              | CC              | 1946906989               |
| SNP_P4_106543_9099002 | NC_021167.1    | Ca_kabuli_chr08 | 9099002                 | CC                              | AA              | 1946906991               |
| SNP_P4_106544_9101528 | NC_021167.1    | Ca_kabuli_chr08 | 9101528                 | AA                              | TT              | 1946906993               |
| SNP_P4_106547_9101798 | NC_021167.1    | Ca_kabuli_chr08 | 9101798                 | AA                              | CC              | 1946906996               |
| SNP_P4_106548_9101801 | NC_021167.1    | Ca_kabuli_chr08 | 9101801                 | TT                              | CC              | 1946906998               |
| SNP_P4_106550_9102953 | NC_021167.1    | Ca_kabuli_chr08 | 9102953                 | TT                              | AA              | 1946907000               |
| SNP_P4_106551_9102965 | NC_021167.1    | Ca_kabuli_chr08 | 9102965                 | GG                              | AA              | 1946907002               |
| SNP_P4_106552_9102983 | NC_021167.1    | Ca_kabuli_chr08 | 9102983                 | GG                              | TT              | 1946907004               |
| SNP_P4_106554_9103021 | NC_021167.1    | Ca_kabuli_chr08 | 9103021                 | AA                              | TT              | 1946907006               |
| SNP_P4_106557_9104071 | NC_021167.1    | Ca_kabuli_chr08 | 9104071                 | TT                              | AA              | 1946907008               |
| SNP_P4_106558_9104402 | NC_021167.1    | Ca_kabuli_chr08 | 9104402                 | AA                              | GG              | 1946907010               |
| SNP_P4_106559_9105117 | NC_021167.1    | Ca_kabuli_chr08 | 9105117                 | CC                              | TT              | 1946907012               |
| SNP_P4_106560_9105129 | NC_021167.1    | Ca_kabuli_chr08 | 9105129                 | TT                              | CC              | 1946907015               |
| SNP_P4_106561_9105318 | NC_021167.1    | Ca_kabuli_chr08 | 9105318                 | GG                              | AA              | 1946907017               |
| SNP_P4_106563_9105397 | NC_021167.1    | Ca_kabuli_chr08 | 9105397                 | TT                              | AA              | 1946907019               |
| SNP_P4_106565_9110535 | NC_021167.1    | Ca_kabuli_chr08 | 9110535                 | GG                              | AA              | 1946907021               |
| SNP_P4_106567_9111641 | NC_021167.1    | Ca_kabuli_chr08 | 9111641                 | GG                              | AA              | 1946907023               |
| SNP_P4_106569_9113338 | NC_021167.1    | Ca_kabuli_chr08 | 9113338                 | CC                              | AA              | 1946907026               |
| SNP_P4_106570_9113690 | NC_021167.1    | Ca_kabuli_chr08 | 9113690                 | CC                              | AA              | 1946907028               |
| SNP_P4_106572_9116815 | NC_021167.1    | Ca_kabuli_chr08 | 9116815                 | TT                              | GG              | 1946907030               |
| SNP_P4_106573_9117107 | NC_021167.1    | Ca_kabuli_chr08 | 9117107                 | AA                              | CC              | 1946907032               |
| SNP_P4_106574_9117115 | NC_021167.1    | Ca_kabuli_chr08 | 9117115                 | GG                              | AA              | 1946907034               |
| SNP_P4_106575_9118255 | NC_021167.1    | Ca_kabuli_chr08 | 9118255                 | CC                              | AA              | 1946907036               |
| SNP_P4_106576_9120146 | NC_021167.1    | Ca_kabuli_chr08 | 9120146                 | TT                              | CC              | 1946907038               |
| SNP_P4_106577_9120278 | NC_021167.1    | Ca_kabuli_chr08 | 9120278                 | CC                              | TT              | 1946907040               |
| SNP_P4_106578_9120304 | NC_021167.1    | Ca_kabuli_chr08 | 9120304                 | TT                              | CC              | 1946907042               |
| SNP_P4_106579_9120317 | NC_021167.1    | Ca_kabuli_chr08 | 9120317                 | CC                              | TT              | 1946907044               |
| SNP_P4_106580_9120322 | NC_021167.1    | Ca_kabuli_chr08 | 9120322                 | TT                              | GG              | 1946907046               |

| SNPs IDs              | Chromosome IDs | Chromosomes     | Physical positions (bp) | CDC Frontier (Reference genome) | (ILWC46 & LPNB) | NCBI SNPdb Accession IDs |
|-----------------------|----------------|-----------------|-------------------------|---------------------------------|-----------------|--------------------------|
| SNP_P4_106581_9120325 | NC_021167.1    | Ca_kabuli_chr08 | 9120325                 | AA                              | GG              | 1946907048               |
| SNP_P4_106582_9120436 | NC_021167.1    | Ca_kabuli_chr08 | 9120436                 | AA                              | GG              | 1946907050               |
| SNP_P4_106583_9120446 | NC_021167.1    | Ca_kabuli_chr08 | 9120446                 | AA                              | TT              | 1946907052               |
| SNP_P4_106584_9120667 | NC_021167.1    | Ca_kabuli_chr08 | 9120667                 | GG                              | CC              | 1946907054               |
| SNP_P4_106585_9120759 | NC_021167.1    | Ca_kabuli_chr08 | 9120759                 | AA                              | TT              | 1946907056               |
| SNP_P4_106586_9120793 | NC_021167.1    | Ca_kabuli_chr08 | 9120793                 | AA                              | GG              | 1946907058               |
| SNP_P4_106587_9120855 | NC_021167.1    | Ca_kabuli_chr08 | 9120855                 | CC                              | AA              | 1946907060               |
| SNP_P4_106588_9120890 | NC_021167.1    | Ca_kabuli_chr08 | 9120890                 | TT                              | AA              | 1946907062               |
| SNP_P4_106589_9120941 | NC_021167.1    | Ca_kabuli_chr08 | 9120941                 | GG                              | AA              | 1946907064               |
| SNP_P4_106590_9120994 | NC_021167.1    | Ca_kabuli_chr08 | 9120994                 | AA                              | TT              | 1946907066               |
| SNP_P4_106591_9121175 | NC_021167.1    | Ca_kabuli_chr08 | 9121175                 | TT                              | CC              | 1946907068               |
| SNP_P4_106592_9122364 | NC_021167.1    | Ca_kabuli_chr08 | 9122364                 | AA                              | CC              | 1946907070               |
| SNP_P4_106593_9122407 | NC_021167.1    | Ca_kabuli_chr08 | 9122407                 | GG                              | TT              | 1946907072               |
| SNP_P4_106594_9122411 | NC_021167.1    | Ca_kabuli_chr08 | 9122411                 | TT                              | CC              | 1946907074               |
| SNP_P4_106595_9122422 | NC_021167.1    | Ca_kabuli_chr08 | 9122422                 | GG                              | AA              | 1946907076               |
| SNP_P4_106596_9122467 | NC_021167.1    | Ca_kabuli_chr08 | 9122467                 | AA                              | CC              | 1946907077               |
| SNP_P4_106597_9122500 | NC_021167.1    | Ca_kabuli_chr08 | 9122500                 | TT                              | CC              | 1946907078               |
| SNP_P4_106598_9122504 | NC_021167.1    | Ca_kabuli_chr08 | 9122504                 | CC                              | TT              | 1946907079               |
| SNP_P4_106600_9122752 | NC_021167.1    | Ca_kabuli_chr08 | 9122752                 | CC                              | TT              | 1946907080               |
| SNP_P4_106601_9122780 | NC_021167.1    | Ca_kabuli_chr08 | 9122780                 | AA                              | TT              | 1946907081               |
| SNP_P4_106603_9122909 | NC_021167.1    | Ca_kabuli_chr08 | 9122909                 | AA                              | GG              | 1946907082               |
| SNP_P4_106604_9124421 | NC_021167.1    | Ca_kabuli_chr08 | 9124421                 | TT                              | CC              | 1946907083               |
| SNP_P4_106605_9124483 | NC_021167.1    | Ca_kabuli_chr08 | 9124483                 | TT                              | CC              | 1946907085               |
| SNP_P4_106606_9124564 | NC_021167.1    | Ca_kabuli_chr08 | 9124564                 | AA                              | TT              | 1946907087               |
| SNP_P4_106607_9125015 | NC_021167.1    | Ca_kabuli_chr08 | 9125015                 | CC                              | TT              | 1946907089               |
| SNP_P4_106608_9125018 | NC_021167.1    | Ca_kabuli_chr08 | 9125018                 | AA                              | CC              | 1946907091               |
| SNP_P4_106610_9125074 | NC_021167.1    | Ca_kabuli_chr08 | 9125074                 | CC                              | TT              | 1946907093               |
| SNP_P4_106611_9125267 | NC_021167.1    | Ca_kabuli_chr08 | 9125267                 | AA                              | TT              | 1946907095               |
| SNP_P4_106612_9125658 | NC_021167.1    | Ca_kabuli_chr08 | 9125658                 | CC                              | AA              | 1946907097               |
| SNP_P4_106614_9125758 | NC_021167.1    | Ca_kabuli_chr08 | 9125758                 | TT                              | CC              | 1946907099               |
| SNP_P4_106615_9125791 | NC_021167.1    | Ca_kabuli_chr08 | 9125791                 | GG                              | AA              | 1946907101               |
| SNP_P4_106616_9125799 | NC_021167.1    | Ca_kabuli_chr08 | 9125799                 | TT                              | CC              | 1946907103               |
| SNP_P4_106618_9127446 | NC_021167.1    | Ca_kabuli_chr08 | 9127446                 | GG                              | AA              | 1946907105               |
| SNP_P4_106619_9127466 | NC_021167.1    | Ca_kabuli_chr08 | 9127466                 | TT                              | CC              | 1946907107               |
| SNP_P4_106620_9127548 | NC_021167.1    | Ca_kabuli_chr08 | 9127548                 | TT                              | CC              | 1946907109               |
| SNP_P4_106621_9127551 | NC_021167.1    | Ca_kabuli_chr08 | 9127551                 | GG                              | AA              | 1946907112               |
| SNP_P4_106622_9129463 | NC_021167.1    | Ca_kabuli_chr08 | 9129463                 | TT                              | CC              | 1946907114               |
| SNP_P4_106623_9130698 | NC_021167.1    | Ca_kabuli_chr08 | 9130698                 | AA                              | GG              | 1946907116               |
| SNP_P4_106624_9130826 | NC_021167.1    | Ca_kabuli_chr08 | 9130826                 | CC                              | TT              | 1946907118               |
| SNP_P4_106625_9130877 | NC_021167.1    | Ca_kabuli_chr08 | 9130877                 | GG                              | AA              | 1946907120               |
| SNP_P4_106626_9130922 | NC_021167.1    | Ca_kabuli_chr08 | 9130922                 | TT                              | AA              | 1946907122               |
| SNP_P4_106627_9130968 | NC_021167.1    | Ca_kabuli_chr08 | 9130968                 | GG                              | TT              | 1946907124               |

| SNPs IDs              | Chromosome IDs | Chromosomes     | Physical positions (bp) | CDC Frontier (Reference genome) | (ILWC46 & LPNB) | NCBI SNPdb Accession IDs |
|-----------------------|----------------|-----------------|-------------------------|---------------------------------|-----------------|--------------------------|
| SNP_P4_106628_9131146 | NC_021167.1    | Ca_kabuli_chr08 | 9131146                 | AA                              | TT              | 1946907126               |
| SNP_P4_106629_9131806 | NC_021167.1    | Ca_kabuli_chr08 | 9131806                 | CC                              | AA              | 1946907129               |
| SNP_P4_106630_9134536 | NC_021167.1    | Ca_kabuli_chr08 | 9134536                 | CC                              | TT              | 1946907131               |
| SNP_P4_106633_9136432 | NC_021167.1    | Ca_kabuli_chr08 | 9136432                 | AA                              | CC              | 1946907133               |
| SNP_P4_106634_9136716 | NC_021167.1    | Ca_kabuli_chr08 | 9136716                 | AA                              | TT              | 1946907135               |
| SNP_P4_106635_9136894 | NC_021167.1    | Ca_kabuli_chr08 | 9136894                 | AA                              | GG              | 1946907137               |
| SNP_P4_106636_9136913 | NC_021167.1    | Ca_kabuli_chr08 | 9136913                 | GG                              | AA              | 1946907139               |
| SNP_P4_106637_9136957 | NC_021167.1    | Ca_kabuli_chr08 | 9136957                 | TT                              | CC              | 1946907141               |
| SNP_P4_106638_9136970 | NC_021167.1    | Ca_kabuli_chr08 | 9136970                 | CC                              | TT              | 1946907143               |
| SNP_P4_106639_9136972 | NC_021167.1    | Ca_kabuli_chr08 | 9136972                 | GG                              | AA              | 1946907145               |
| SNP_P4_106640_9137712 | NC_021167.1    | Ca_kabuli_chr08 | 9137712                 | CC                              | TT              | 1946907147               |
| SNP_P4_106641_9137734 | NC_021167.1    | Ca_kabuli_chr08 | 9137734                 | AA                              | TT              | 1946907149               |
| SNP_P4_106642_9138773 | NC_021167.1    | Ca_kabuli_chr08 | 9138773                 | TT                              | CC              | 1946907151               |
| SNP_P4_106643_9142811 | NC_021167.1    | Ca_kabuli_chr08 | 9142811                 | TT                              | CC              | 1946907153               |
| SNP_P4_106644_9146697 | NC_021167.1    | Ca_kabuli_chr08 | 9146697                 | AA                              | GG              | 1946907155               |
| SNP_P4_106645_9146954 | NC_021167.1    | Ca_kabuli_chr08 | 9146954                 | AA                              | GG              | 1946907157               |
| SNP_P4_106646_9147863 | NC_021167.1    | Ca_kabuli_chr08 | 9147863                 | GG                              | AA              | 1946907159               |
| SNP_P4_106647_9148013 | NC_021167.1    | Ca_kabuli_chr08 | 9148013                 | AA                              | GG              | 1946907161               |
| SNP_P4_106648_9149064 | NC_021167.1    | Ca_kabuli_chr08 | 9149064                 | CC                              | TT              | 1946907163               |
| SNP_P4_106650_9149152 | NC_021167.1    | Ca_kabuli_chr08 | 9149152                 | TT                              | CC              | 1946907165               |
| SNP_P4_106651_9149160 | NC_021167.1    | Ca_kabuli_chr08 | 9149160                 | GG                              | AA              | 1946907167               |
| SNP_P4_106652_9149200 | NC_021167.1    | Ca_kabuli_chr08 | 9149200                 | TT                              | CC              | 1946907169               |
| SNP_P4_106655_9149460 | NC_021167.1    | Ca_kabuli_chr08 | 9149460                 | CC                              | GG              | 1946907171               |
| SNP_P4_106656_9149464 | NC_021167.1    | Ca_kabuli_chr08 | 9149464                 | TT                              | CC              | 1946907173               |
| SNP_P4_106658_9149543 | NC_021167.1    | Ca_kabuli_chr08 | 9149543                 | TT                              | CC              | 1946907175               |
| SNP_P4_106659_9149683 | NC_021167.1    | Ca_kabuli_chr08 | 9149683                 | GG                              | AA              | 1946907177               |
| SNP_P4_106661_9151207 | NC_021167.1    | Ca_kabuli_chr08 | 9151207                 | AA                              | CC              | 1946907179               |
| SNP_P4_106662_9151486 | NC_021167.1    | Ca_kabuli_chr08 | 9151486                 | AA                              | GG              | 1946907181               |
| SNP_P4_106665_9151921 | NC_021167.1    | Ca_kabuli_chr08 | 9151921                 | TT                              | GG              | 1946907184               |
| SNP_P4_106666_9152139 | NC_021167.1    | Ca_kabuli_chr08 | 9152139                 | GG                              | AA              | 1946907186               |
| SNP_P4_106667_9152140 | NC_021167.1    | Ca_kabuli_chr08 | 9152140                 | CC                              | AA              | 1946907188               |
| SNP_P4_106668_9152155 | NC_021167.1    | Ca_kabuli_chr08 | 9152155                 | GG                              | CC              | 1946907190               |
| SNP_P4_106669_9152158 | NC_021167.1    | Ca_kabuli_chr08 | 9152158                 | AA                              | GG              | 1946907192               |
| SNP_P4_106670_9152186 | NC_021167.1    | Ca_kabuli_chr08 | 9152186                 | CC                              | TT              | 1946907194               |
| SNP_P4_106671_9152239 | NC_021167.1    | Ca_kabuli_chr08 | 9152239                 | TT                              | CC              | 1946907196               |
| SNP_P4_106672_9152242 | NC_021167.1    | Ca_kabuli_chr08 | 9152242                 | CC                              | TT              | 1946907198               |
| SNP_P4_106674_9152679 | NC_021167.1    | Ca_kabuli_chr08 | 9152679                 | AA                              | GG              | 1946907200               |
| SNP_P4_106675_9153538 | NC_021167.1    | Ca_kabuli_chr08 | 9153538                 | AA                              | GG              | 1946907201               |
| SNP_P4_106676_9153571 | NC_021167.1    | Ca_kabuli_chr08 | 9153571                 | AA                              | GG              | 1946907203               |
| SNP_P4_106677_9153815 | NC_021167.1    | Ca_kabuli_chr08 | 9153815                 | CC                              | TT              | 1946907205               |
| SNP_P4_106678_9154113 | NC_021167.1    | Ca_kabuli_chr08 | 9154113                 | CC                              | AA              | 1946907207               |
| SNP_P4_106679_9154120 | NC_021167.1    | Ca_kabuli_chr08 | 9154120                 | GG                              | AA              | 1946907209               |

| SNPs IDs              | Chromosome IDs | Chromosomes     | Physical positions (bp) | CDC Frontier (Reference genome) | (ILWC46 & LPNB) | NCBI SNPdb Accession IDs |
|-----------------------|----------------|-----------------|-------------------------|---------------------------------|-----------------|--------------------------|
| SNP_P4_106680_9154146 | NC_021167.1    | Ca_kabuli_chr08 | 9154146                 | TT                              | CC              | 1946907211               |
| SNP_P4_106681_9154199 | NC_021167.1    | Ca_kabuli_chr08 | 9154199                 | TT                              | AA              | 1946907213               |
| SNP_P4_106682_9154272 | NC_021167.1    | Ca_kabuli_chr08 | 9154272                 | AA                              | CC              | 1946907215               |
| SNP_P4_106683_9154332 | NC_021167.1    | Ca_kabuli_chr08 | 9154332                 | AA                              | TT              | 1946907217               |
| SNP_P4_106685_9154729 | NC_021167.1    | Ca_kabuli_chr08 | 9154729                 | CC                              | TT              | 1946907219               |
| SNP_P4_106686_9155013 | NC_021167.1    | Ca_kabuli_chr08 | 9155013                 | TT                              | AA              | 1946907221               |
| SNP_P4_106687_9155030 | NC_021167.1    | Ca_kabuli_chr08 | 9155030                 | AA                              | GG              | 1946907223               |
| SNP_P4_106688_9155054 | NC_021167.1    | Ca_kabuli_chr08 | 9155054                 | AA                              | GG              | 1946907225               |
| SNP_P4_106689_9155099 | NC_021167.1    | Ca_kabuli_chr08 | 9155099                 | TT                              | GG              | 1946907227               |
| SNP_P4_106690_9155306 | NC_021167.1    | Ca_kabuli_chr08 | 9155306                 | GG                              | CC              | 1946907229               |
| SNP_P4_106692_9155668 | NC_021167.1    | Ca_kabuli_chr08 | 9155668                 | AA                              | CC              | 1946907231               |
| SNP_P4_106693_9155987 | NC_021167.1    | Ca_kabuli_chr08 | 9155987                 | AA                              | TT              | 1946907233               |
| SNP_P4_106694_9156025 | NC_021167.1    | Ca_kabuli_chr08 | 9156025                 | TT                              | CC              | 1946907235               |
| SNP_P4_106695_9156036 | NC_021167.1    | Ca_kabuli_chr08 | 9156036                 | GG                              | TT              | 1946907237               |
| SNP_P4_106696_9156042 | NC_021167.1    | Ca_kabuli_chr08 | 9156042                 | AA                              | GG              | 1946907239               |
| SNP_P4_106697_9156048 | NC_021167.1    | Ca_kabuli_chr08 | 9156048                 | CC                              | GG              | 1946907241               |
| SNP_P4_106699_9157995 | NC_021167.1    | Ca_kabuli_chr08 | 9157995                 | CC                              | GG              | 1946907243               |
| SNP_P4_106701_9168801 | NC_021167.1    | Ca_kabuli_chr08 | 9168801                 | CC                              | GG              | 1946907245               |
| SNP_P4_106702_9168876 | NC_021167.1    | Ca_kabuli_chr08 | 9168876                 | CC                              | AA              | 1946907247               |
| SNP_P4_106703_9169062 | NC_021167.1    | Ca_kabuli_chr08 | 9169062                 | GG                              | AA              | 1946907249               |
| SNP_P4_106704_9169317 | NC_021167.1    | Ca_kabuli_chr08 | 9169317                 | AA                              | TT              | 1946907251               |
| SNP_P4_106706_9170076 | NC_021167.1    | Ca_kabuli_chr08 | 9170076                 | TT                              | CC              | 1946907253               |
| SNP_P4_106707_9173785 | NC_021167.1    | Ca_kabuli_chr08 | 9173785                 | CC                              | TT              | 1946907255               |
| SNP_P4_106708_9173788 | NC_021167.1    | Ca_kabuli_chr08 | 9173788                 | CC                              | TT              | 1946907257               |
| SNP_P4_106709_9173803 | NC_021167.1    | Ca_kabuli_chr08 | 9173803                 | TT                              | CC              | 1946907259               |
| SNP_P4_106710_9174049 | NC_021167.1    | Ca_kabuli_chr08 | 9174049                 | CC                              | TT              | 1946907261               |
| SNP_P4_106711_9174923 | NC_021167.1    | Ca_kabuli_chr08 | 9174923                 | TT                              | AA              | 1946907262               |
| SNP_P4_106713_9183098 | NC_021167.1    | Ca_kabuli_chr08 | 9183098                 | GG                              | AA              | 1946907263               |
| SNP_P4_106714_9183372 | NC_021167.1    | Ca_kabuli_chr08 | 9183372                 | GG                              | AA              | 1946907264               |
| SNP_P4_106715_9183375 | NC_021167.1    | Ca_kabuli_chr08 | 9183375                 | CC                              | TT              | 1946907265               |
| SNP_P4_106716_9183437 | NC_021167.1    | Ca_kabuli_chr08 | 9183437                 | TT                              | CC              | 1946907267               |
| SNP_P4_106718_9184488 | NC_021167.1    | Ca_kabuli_chr08 | 9184488                 | TT                              | CC              | 1946907269               |
| SNP_P4_106719_9184885 | NC_021167.1    | Ca_kabuli_chr08 | 9184885                 | TT                              | AA              | 1946907271               |
| SNP_P4_106721_9185071 | NC_021167.1    | Ca_kabuli_chr08 | 9185071                 | GG                              | AA              | 1946907273               |
| SNP_P4_106722_9185195 | NC_021167.1    | Ca_kabuli_chr08 | 9185195                 | GG                              | TT              | 1946907275               |
| SNP_P4_106723_9185211 | NC_021167.1    | Ca_kabuli_chr08 | 9185211                 | TT                              | AA              | 1946907277               |
| SNP_P4_106724_9185251 | NC_021167.1    | Ca_kabuli_chr08 | 9185251                 | AA                              | TT              | 1946907279               |
| SNP_P4_106725_9185578 | NC_021167.1    | Ca_kabuli_chr08 | 9185578                 | AA                              | TT              | 1946907281               |
| SNP_P4_106726_9186763 | NC_021167.1    | Ca_kabuli_chr08 | 9186763                 | CC                              | TT              | 1946907283               |
| SNP_P4_106727_9195345 | NC_021167.1    | Ca_kabuli_chr08 | 9195345                 | CC                              | GG              | 1946907285               |
| SNP_P4_106728_9195353 | NC_021167.1    | Ca_kabuli_chr08 | 9195353                 | AA                              | GG              | 1946907287               |
| SNP_P4_106729_9195801 | NC_021167.1    | Ca_kabuli_chr08 | 9195801                 | TT                              | AA              | 1946907289               |

| SNPs IDs              | Chromosome IDs | Chromosomes     | Physical positions (bp) | CDC Frontier (Reference genome) | (ILWC46 & LPNB) | NCBI SNPdb Accession IDs |
|-----------------------|----------------|-----------------|-------------------------|---------------------------------|-----------------|--------------------------|
| SNP_P4_106730_9198241 | NC_021167.1    | Ca_kabuli_chr08 | 9198241                 | TT                              | AA              | 1946907291               |
| SNP_P4_106731_9198286 | NC_021167.1    | Ca_kabuli_chr08 | 9198286                 | GG                              | CC              | 1946907293               |
| SNP_P4_106732_9198381 | NC_021167.1    | Ca_kabuli_chr08 | 9198381                 | GG                              | AA              | 1946907295               |
| SNP_P4_106733_9198407 | NC_021167.1    | Ca_kabuli_chr08 | 9198407                 | AA                              | CC              | 1946907297               |
| SNP_P4_106734_9198425 | NC_021167.1    | Ca_kabuli_chr08 | 9198425                 | AA                              | TT              | 1946907300               |
| SNP_P4_106735_9198485 | NC_021167.1    | Ca_kabuli_chr08 | 9198485                 | CC                              | TT              | 1946907302               |
| SNP_P4_106736_9198576 | NC_021167.1    | Ca_kabuli_chr08 | 9198576                 | AA                              | GG              | 1946907304               |
| SNP_P4_106737_9198577 | NC_021167.1    | Ca_kabuli_chr08 | 9198577                 | CC                              | TT              | 1946907306               |
| SNP_P4_106738_9198811 | NC_021167.1    | Ca_kabuli_chr08 | 9198811                 | AA                              | GG              | 1946907308               |
| SNP_P4_106739_9198825 | NC_021167.1    | Ca_kabuli_chr08 | 9198825                 | TT                              | CC              | 1946907310               |
| SNP_P4_106740_9198939 | NC_021167.1    | Ca_kabuli_chr08 | 9198939                 | AA                              | GG              | 1946907312               |
| SNP_P4_106741_9198987 | NC_021167.1    | Ca_kabuli_chr08 | 9198987                 | TT                              | AA              | 1946907314               |
| SNP_P4_106743_9199392 | NC_021167.1    | Ca_kabuli_chr08 | 9199392                 | AA                              | TT              | 1946907316               |
| SNP_P4_106746_9201667 | NC_021167.1    | Ca_kabuli_chr08 | 9201667                 | AA                              | TT              | 1946907319               |
| SNP_P4_106748_9201746 | NC_021167.1    | Ca_kabuli_chr08 | 9201746                 | AA                              | CC              | 1946907321               |
| SNP_P4_106749_9201890 | NC_021167.1    | Ca_kabuli_chr08 | 9201890                 | TT                              | AA              | 1946907323               |
| SNP_P4_106750_9202913 | NC_021167.1    | Ca_kabuli_chr08 | 9202913                 | GG                              | AA              | 1946907325               |
| SNP_P4_106751_9202926 | NC_021167.1    | Ca_kabuli_chr08 | 9202926                 | CC                              | TT              | 1946907327               |
| SNP_P4_106752_9202970 | NC_021167.1    | Ca_kabuli_chr08 | 9202970                 | GG                              | AA              | 1946907329               |
| SNP_P4_106753_9202983 | NC_021167.1    | Ca_kabuli_chr08 | 9202983                 | TT                              | CC              | 1946907331               |
| SNP_P4_106754_9206153 | NC_021167.1    | Ca_kabuli_chr08 | 9206153                 | CC                              | GG              | 1946907333               |
| SNP_P4_106756_9206847 | NC_021167.1    | Ca_kabuli_chr08 | 9206847                 | CC                              | AA              | 1946907335               |
| SNP_P4_106757_9206883 | NC_021167.1    | Ca_kabuli_chr08 | 9206883                 | GG                              | TT              | 1946907337               |
| SNP_P4_106758_9206886 | NC_021167.1    | Ca_kabuli_chr08 | 9206886                 | CC                              | TT              | 1946907339               |
| SNP_P4_106759_9207135 | NC_021167.1    | Ca_kabuli_chr08 | 9207135                 | TT                              | GG              | 1946907341               |
| SNP_P4_106760_9207378 | NC_021167.1    | Ca_kabuli_chr08 | 9207378                 | AA                              | GG              | 1946907343               |
| SNP_P4_106761_9207379 | NC_021167.1    | Ca_kabuli_chr08 | 9207379                 | GG                              | AA              | 1946907345               |
| SNP_P4_106762_9207420 | NC_021167.1    | Ca_kabuli_chr08 | 9207420                 | GG                              | AA              | 1946907347               |
| SNP_P4_106763_9207424 | NC_021167.1    | Ca_kabuli_chr08 | 9207424                 | TT                              | CC              | 1946907349               |
| SNP_P4_106764_9207467 | NC_021167.1    | Ca_kabuli_chr08 | 9207467                 | TT                              | CC              | 1946907351               |
| SNP_P4_106765_9207748 | NC_021167.1    | Ca_kabuli_chr08 | 9207748                 | AA                              | TT              | 1946907354               |
| SNP_P4_106766_9207763 | NC_021167.1    | Ca_kabuli_chr08 | 9207763                 | GG                              | TT              | 1946907356               |
| SNP_P4_106769_9207867 | NC_021167.1    | Ca_kabuli_chr08 | 9207867                 | AA                              | TT              | 1946907358               |
| SNP_P4_106771_9208014 | NC_021167.1    | Ca_kabuli_chr08 | 9208014                 | TT                              | AA              | 1946907360               |
| SNP_P4_106772_9208099 | NC_021167.1    | Ca_kabuli_chr08 | 9208099                 | GG                              | TT              | 1946907362               |
| SNP_P4_106773_9208132 | NC_021167.1    | Ca_kabuli_chr08 | 9208132                 | CC                              | TT              | 1946907364               |
| SNP_P4_106774_9208350 | NC_021167.1    | Ca_kabuli_chr08 | 9208350                 | GG                              | AA              | 1946907366               |
| SNP_P4_106775_9208380 | NC_021167.1    | Ca_kabuli_chr08 | 9208380                 | AA                              | GG              | 1946907367               |
| SNP_P4_106776_9208390 | NC_021167.1    | Ca_kabuli_chr08 | 9208390                 | TT                              | CC              | 1946907369               |
| SNP_P4_106778_9210830 | NC_021167.1    | Ca_kabuli_chr08 | 9210830                 | GG                              | TT              | 1946907371               |
| SNP_P4_106779_9210841 | NC_021167.1    | Ca_kabuli_chr08 | 9210841                 | TT                              | CC              | 1946907373               |
| SNP_P4_106780_9210850 | NC_021167.1    | Ca_kabuli_chr08 | 9210850                 | AA                              | GG              | 1946907375               |

| SNPs IDs              | Chromosome IDs | Chromosomes     | Physical positions (bp) | CDC Frontier (Reference genome) | (ILWC46 & LPNB) | NCBI SNPdb Accession IDs |
|-----------------------|----------------|-----------------|-------------------------|---------------------------------|-----------------|--------------------------|
| SNP_P4_106781_9210931 | NC_021167.1    | Ca_kabuli_chr08 | 9210931                 | AA                              | TT              | 1946907377               |
| SNP_P4_106782_9212262 | NC_021167.1    | Ca_kabuli_chr08 | 9212262                 | TT                              | CC              | 1946907379               |
| SNP_P4_106783_9214466 | NC_021167.1    | Ca_kabuli_chr08 | 9214466                 | CC                              | AA              | 1946907381               |
| SNP_P4_106784_9214482 | NC_021167.1    | Ca_kabuli_chr08 | 9214482                 | CC                              | TT              | 1946907383               |
| SNP_P4_106785_9214747 | NC_021167.1    | Ca_kabuli_chr08 | 9214747                 | GG                              | AA              | 1946907386               |
| SNP_P4_106786_9214841 | NC_021167.1    | Ca_kabuli_chr08 | 9214841                 | GG                              | TT              | 1946907388               |
| SNP_P4_106787_9214946 | NC_021167.1    | Ca_kabuli_chr08 | 9214946                 | TT                              | CC              | 1946907390               |
| SNP_P4_106788_9214950 | NC_021167.1    | Ca_kabuli_chr08 | 9214950                 | TT                              | AA              | 1946907392               |
| SNP_P4_106789_9214989 | NC_021167.1    | Ca_kabuli_chr08 | 9214989                 | GG                              | AA              | 1946907394               |
| SNP_P4_106790_9215024 | NC_021167.1    | Ca_kabuli_chr08 | 9215024                 | CC                              | TT              | 1946907396               |
| SNP_P4_106792_9215119 | NC_021167.1    | Ca_kabuli_chr08 | 9215119                 | AA                              | GG              | 1946907398               |
| SNP_P4_106793_9215157 | NC_021167.1    | Ca_kabuli_chr08 | 9215157                 | AA                              | GG              | 1946907400               |
| SNP_P4_106795_9215302 | NC_021167.1    | Ca_kabuli_chr08 | 9215302                 | TT                              | CC              | 1946907402               |
| SNP_P4_106796_9215303 | NC_021167.1    | Ca_kabuli_chr08 | 9215303                 | TT                              | CC              | 1946907404               |
| SNP_P4_106797_9215316 | NC_021167.1    | Ca_kabuli_chr08 | 9215316                 | GG                              | TT              | 1946907406               |
| SNP_P4_106798_9216192 | NC_021167.1    | Ca_kabuli_chr08 | 9216192                 | GG                              | AA              | 1946907408               |
| SNP_P4_106799_9216202 | NC_021167.1    | Ca_kabuli_chr08 | 9216202                 | AA                              | TT              | 1946907410               |
| SNP_P4_106801_9216789 | NC_021167.1    | Ca_kabuli_chr08 | 9216789                 | TT                              | GG              | 1946907412               |
| SNP_P4_106802_9216809 | NC_021167.1    | Ca_kabuli_chr08 | 9216809                 | CC                              | TT              | 1946907414               |
| SNP_P4_106803_9216833 | NC_021167.1    | Ca_kabuli_chr08 | 9216833                 | CC                              | TT              | 1946907416               |
| SNP_P4_106804_9216851 | NC_021167.1    | Ca_kabuli_chr08 | 9216851                 | CC                              | AA              | 1946907418               |
| SNP_P4_106806_9217083 | NC_021167.1    | Ca_kabuli_chr08 | 9217083                 | AA                              | CC              | 1946907420               |
| SNP_P4_106807_9217399 | NC_021167.1    | Ca_kabuli_chr08 | 9217399                 | GG                              | AA              | 1946907422               |
| SNP_P4_106808_9217689 | NC_021167.1    | Ca_kabuli_chr08 | 9217689                 | CC                              | GG              | 1946907425               |
| SNP_P4_106809_9217723 | NC_021167.1    | Ca_kabuli_chr08 | 9217723                 | AA                              | GG              | 1946907427               |
| SNP_P4_106811_9218053 | NC_021167.1    | Ca_kabuli_chr08 | 9218053                 | AA                              | TT              | 1946907429               |
| SNP_P4_106812_9218054 | NC_021167.1    | Ca_kabuli_chr08 | 9218054                 | CC                              | TT              | 1946907431               |
| SNP_P4_106813_9218181 | NC_021167.1    | Ca_kabuli_chr08 | 9218181                 | AA                              | TT              | 1946907433               |
| SNP_P4_106814_9218208 | NC_021167.1    | Ca_kabuli_chr08 | 9218208                 | AA                              | CC              | 1946907435               |
| SNP_P4_106815_9218209 | NC_021167.1    | Ca_kabuli_chr08 | 9218209                 | GG                              | TT              | 1946907437               |
| SNP_P4_106816_9218210 | NC_021167.1    | Ca_kabuli_chr08 | 9218210                 | TT                              | CC              | 1946907439               |
| SNP_P4_106817_9219881 | NC_021167.1    | Ca_kabuli_chr08 | 9219881                 | GG                              | AA              | 1946907441               |
| SNP_P4_106818_9219883 | NC_021167.1    | Ca_kabuli_chr08 | 9219883                 | AA                              | TT              | 1946907443               |
| SNP_P4_106819_9219884 | NC_021167.1    | Ca_kabuli_chr08 | 9219884                 | TT                              | CC              | 1946907445               |
| SNP_P4_106820_9220054 | NC_021167.1    | Ca_kabuli_chr08 | 9220054                 | CC                              | AA              | 1946907447               |
| SNP_P4_106822_9220074 | NC_021167.1    | Ca_kabuli_chr08 | 9220074                 | TT                              | AA              | 1946907449               |
| SNP_P4_106823_9220152 | NC_021167.1    | Ca_kabuli_chr08 | 9220152                 | GG                              | TT              | 1946907450               |
| SNP_P4_106826_9225308 | NC_021167.1    | Ca_kabuli_chr08 | 9225308                 | TT                              | CC              | 1946907452               |
| SNP_P4_106827_9229987 | NC_021167.1    | Ca_kabuli_chr08 | 9229987                 | TT                              | CC              | 1946907454               |
| SNP_P4_106828_9233313 | NC_021167.1    | Ca_kabuli_chr08 | 9233313                 | GG                              | TT              | 1946907456               |
| SNP_P4_106829_9233340 | NC_021167.1    | Ca_kabuli_chr08 | 9233340                 | AA                              | CC              | 1946907458               |
| SNP_P4_106830_9233515 | NC_021167.1    | Ca_kabuli_chr08 | 9233515                 | AA                              | TT              | 1946907460               |

| SNPs IDs              | Chromosome IDs | Chromosomes     | Physical positions (bp) | CDC Frontier (Reference genome) | (ILWC46 & LPNB) | NCBI SNPdb Accession IDs |
|-----------------------|----------------|-----------------|-------------------------|---------------------------------|-----------------|--------------------------|
| SNP_P4_106831_9250445 | NC_021167.1    | Ca_kabuli_chr08 | 9250445                 | AA                              | GG              | 1946907462               |
| SNP_P4_106832_9251423 | NC_021167.1    | Ca_kabuli_chr08 | 9251423                 | AA                              | GG              | 1946907464               |
| SNP_P4_106834_9268550 | NC_021167.1    | Ca_kabuli_chr08 | 9268550                 | CC                              | AA              | 1946907467               |
| SNP_P4_106835_9268561 | NC_021167.1    | Ca_kabuli_chr08 | 9268561                 | TT                              | CC              | 1946907469               |
| SNP_P4_106836_9268573 | NC_021167.1    | Ca_kabuli_chr08 | 9268573                 | GG                              | TT              | 1946907471               |
| SNP_P4_106837_9273778 | NC_021167.1    | Ca_kabuli_chr08 | 9273778                 | AA                              | CC              | 1946907473               |
| SNP_P4_106839_9274098 | NC_021167.1    | Ca_kabuli_chr08 | 9274098                 | CC                              | TT              | 1946907475               |
| SNP_P4_106840_9274139 | NC_021167.1    | Ca_kabuli_chr08 | 9274139                 | TT                              | CC              | 1946907477               |
| SNP_P4_106841_9274183 | NC_021167.1    | Ca_kabuli_chr08 | 9274183                 | TT                              | CC              | 1946907479               |
| SNP_P4_106842_9274396 | NC_021167.1    | Ca_kabuli_chr08 | 9274396                 | TT                              | CC              | 1946907481               |
| SNP_P4_106843_9274398 | NC_021167.1    | Ca_kabuli_chr08 | 9274398                 | CC                              | TT              | 1946907483               |
| SNP_P4_106844_9274399 | NC_021167.1    | Ca_kabuli_chr08 | 9274399                 | TT                              | AA              | 1946907485               |
| SNP_P4_106845_9274401 | NC_021167.1    | Ca_kabuli_chr08 | 9274401                 | CC                              | GG              | 1946907487               |
| SNP_P4_106846_9274402 | NC_021167.1    | Ca_kabuli_chr08 | 9274402                 | AA                              | TT              | 1946907489               |
| SNP_P4_106847_9274404 | NC_021167.1    | Ca_kabuli_chr08 | 9274404                 | CC                              | TT              | 1946907491               |
| SNP_P4_106848_9300431 | NC_021167.1    | Ca_kabuli_chr08 | 9300431                 | CC                              | TT              | 1946907494               |
| SNP_P4_106850_9323544 | NC_021167.1    | Ca_kabuli_chr08 | 9323544                 | AA                              | GG              | 1946907496               |
| SNP_P4_106851_9323547 | NC_021167.1    | Ca_kabuli_chr08 | 9323547                 | AA                              | TT              | 1946907498               |
| SNP_P4_106853_9323905 | NC_021167.1    | Ca_kabuli_chr08 | 9323905                 | TT                              | AA              | 1946907500               |
| SNP_P4_106854_9324097 | NC_021167.1    | Ca_kabuli_chr08 | 9324097                 | TT                              | CC              | 1946907502               |
| SNP_P4_106855_9324099 | NC_021167.1    | Ca_kabuli_chr08 | 9324099                 | CC                              | AA              | 1946907504               |
| SNP_P4_106856_9324274 | NC_021167.1    | Ca_kabuli_chr08 | 9324274                 | AA                              | GG              | 1946907506               |
| SNP_P4_106857_9327262 | NC_021167.1    | Ca_kabuli_chr08 | 9327262                 | GG                              | AA              | 1946907508               |
| SNP_P4_106858_9335191 | NC_021167.1    | Ca_kabuli_chr08 | 9335191                 | CC                              | TT              | 1946907510               |
| SNP_P4_106859_9337197 | NC_021167.1    | Ca_kabuli_chr08 | 9337197                 | CC                              | TT              | 1946907512               |
| SNP_P4_106860_9338204 | NC_021167.1    | Ca_kabuli_chr08 | 9338204                 | AA                              | GG              | 1946907514               |
| SNP_P4_106861_9339805 | NC_021167.1    | Ca_kabuli_chr08 | 9339805                 | TT                              | CC              | 1946907516               |
| SNP_P4_106862_9354904 | NC_021167.1    | Ca_kabuli_chr08 | 9354904                 | GG                              | AA              | 1946907518               |
| SNP_P4_106863_9357284 | NC_021167.1    | Ca_kabuli_chr08 | 9357284                 | CC                              | TT              | 1946907520               |
| SNP_P4_106864_9358052 | NC_021167.1    | Ca_kabuli_chr08 | 9358052                 | GG                              | AA              | 1946907523               |
| SNP_P4_106865_9359179 | NC_021167.1    | Ca_kabuli_chr08 | 9359179                 | GG                              | AA              | 1946907525               |
| SNP_P4_106866_9359181 | NC_021167.1    | Ca_kabuli_chr08 | 9359181                 | CC                              | TT              | 1946907527               |
| SNP_P4_106867_9359357 | NC_021167.1    | Ca_kabuli_chr08 | 9359357                 | GG                              | TT              | 1946907529               |
| SNP_P4_106868_9359375 | NC_021167.1    | Ca_kabuli_chr08 | 9359375                 | CC                              | GG              | 1946907531               |
| SNP_P4_106869_9362800 | NC_021167.1    | Ca_kabuli_chr08 | 9362800                 | AA                              | GG              | 1946907533               |
| SNP_P4_106870_9363030 | NC_021167.1    | Ca_kabuli_chr08 | 9363030                 | TT                              | AA              | 1946907535               |
| SNP_P4_106871_9363104 | NC_021167.1    | Ca_kabuli_chr08 | 9363104                 | GG                              | TT              | 1946907537               |
| SNP_P4_106872_9363258 | NC_021167.1    | Ca_kabuli_chr08 | 9363258                 | GG                              | AA              | 1946907539               |
| SNP_P4_106873_9363271 | NC_021167.1    | Ca_kabuli_chr08 | 9363271                 | CC                              | TT              | 1946907541               |
| SNP_P4_106874_9363344 | NC_021167.1    | Ca_kabuli_chr08 | 9363344                 | CC                              | TT              | 1946907543               |
| SNP_P4_106875_9363350 | NC_021167.1    | Ca_kabuli_chr08 | 9363350                 | CC                              | AA              | 1946907545               |
| SNP_P4_106876_9363393 | NC_021167.1    | Ca_kabuli_chr08 | 9363393                 | AA                              | TT              | 1946907547               |

| SNPs IDs              | Chromosome IDs | Chromosomes     | Physical positions (bp) | CDC Frontier (Reference genome) | (ILWC46 & LPNB) | NCBI SNPdb Accession IDs |
|-----------------------|----------------|-----------------|-------------------------|---------------------------------|-----------------|--------------------------|
| SNP_P4_106877_9363966 | NC_021167.1    | Ca_kabuli_chr08 | 9363966                 | CC                              | TT              | 1946907549               |
| SNP_P4_106878_9363967 | NC_021167.1    | Ca_kabuli_chr08 | 9363967                 | AA                              | GG              | 1946907551               |
| SNP_P4_106879_9364063 | NC_021167.1    | Ca_kabuli_chr08 | 9364063                 | GG                              | TT              | 1946907553               |
| SNP_P4_106880_9364107 | NC_021167.1    | Ca_kabuli_chr08 | 9364107                 | AA                              | GG              | 1946907555               |
| SNP_P4_106881_9364218 | NC_021167.1    | Ca_kabuli_chr08 | 9364218                 | GG                              | AA              | 1946907557               |
| SNP_P4_106882_9364294 | NC_021167.1    | Ca_kabuli_chr08 | 9364294                 | AA                              | CC              | 1946907559               |
| SNP_P4_106883_9364467 | NC_021167.1    | Ca_kabuli_chr08 | 9364467                 | TT                              | GG              | 1946907561               |
| SNP_P4_106884_9364512 | NC_021167.1    | Ca_kabuli_chr08 | 9364512                 | AA                              | CC              | 1946907563               |
| SNP_P4_106886_9364587 | NC_021167.1    | Ca_kabuli_chr08 | 9364587                 | TT                              | CC              | 1946907565               |
| SNP_P4_106887_9364596 | NC_021167.1    | Ca_kabuli_chr08 | 9364596                 | AA                              | GG              | 1946907567               |
| SNP_P4_106888_9364597 | NC_021167.1    | Ca_kabuli_chr08 | 9364597                 | TT                              | AA              | 1946907569               |
| SNP_P4_106889_9364620 | NC_021167.1    | Ca_kabuli_chr08 | 9364620                 | TT                              | GG              | 1946907571               |
| SNP_P4_106890_9364856 | NC_021167.1    | Ca_kabuli_chr08 | 9364856                 | CC                              | GG              | 1946907573               |
| SNP_P4_106891_9366718 | NC_021167.1    | Ca_kabuli_chr08 | 9366718                 | CC                              | GG              | 1946907575               |
| SNP_P4_106892_9366740 | NC_021167.1    | Ca_kabuli_chr08 | 9366740                 | GG                              | AA              | 1946907577               |
| SNP_P4_106893_9366845 | NC_021167.1    | Ca_kabuli_chr08 | 9366845                 | TT                              | AA              | 1946907579               |
| SNP_P4_106894_9367017 | NC_021167.1    | Ca_kabuli_chr08 | 9367017                 | TT                              | AA              | 1946907581               |
| SNP_P4_106895_9367318 | NC_021167.1    | Ca_kabuli_chr08 | 9367318                 | TT                              | AA              | 1946907583               |
| SNP_P4_106896_9368337 | NC_021167.1    | Ca_kabuli_chr08 | 9368337                 | CC                              | TT              | 1946907585               |
| SNP_P4_106897_9368968 | NC_021167.1    | Ca_kabuli_chr08 | 9368968                 | CC                              | TT              | 1946907587               |
| SNP_P4_106898_9370105 | NC_021167.1    | Ca_kabuli_chr08 | 9370105                 | AA                              | GG              | 1946907589               |
| SNP_P4_106899_9373441 | NC_021167.1    | Ca_kabuli_chr08 | 9373441                 | TT                              | CC              | 1946907591               |
| SNP_P4_106900_9375505 | NC_021167.1    | Ca_kabuli_chr08 | 9375505                 | AA                              | TT              | 1946907593               |
| SNP_P4_106901_9375640 | NC_021167.1    | Ca_kabuli_chr08 | 9375640                 | AA                              | CC              | 1946907595               |
| SNP_P4_106902_9375650 | NC_021167.1    | Ca_kabuli_chr08 | 9375650                 | GG                              | AA              | 1946907597               |
| SNP_P4_106904_9377669 | NC_021167.1    | Ca_kabuli_chr08 | 9377669                 | GG                              | TT              | 1946907600               |
| SNP_P4_106905_9377927 | NC_021167.1    | Ca_kabuli_chr08 | 9377927                 | GG                              | AA              | 1946907602               |
| SNP_P4_106906_9379046 | NC_021167.1    | Ca_kabuli_chr08 | 9379046                 | TT                              | CC              | 1946907604               |
| SNP_P4_106907_9379077 | NC_021167.1    | Ca_kabuli_chr08 | 9379077                 | TT                              | CC              | 1946907606               |
| SNP_P4_106908_9379080 | NC_021167.1    | Ca_kabuli_chr08 | 9379080                 | GG                              | AA              | 1946907608               |
| SNP_P4_106909_9379085 | NC_021167.1    | Ca_kabuli_chr08 | 9379085                 | AA                              | GG              | 1946907610               |
| SNP_P4_106910_9379427 | NC_021167.1    | Ca_kabuli_chr08 | 9379427                 | GG                              | AA              | 1946907612               |
| SNP_P4_106911_9379467 | NC_021167.1    | Ca_kabuli_chr08 | 9379467                 | AA                              | GG              | 1946907614               |
| SNP_P4_106912_9379468 | NC_021167.1    | Ca_kabuli_chr08 | 9379468                 | GG                              | AA              | 1946907616               |
| SNP_P4_106913_9379478 | NC_021167.1    | Ca_kabuli_chr08 | 9379478                 | TT                              | CC              | 1946907618               |
| SNP_P4_106914_9379887 | NC_021167.1    | Ca_kabuli_chr08 | 9379887                 | CC                              | TT              | 1946907620               |
| SNP_P4_106916_9387303 | NC_021167.1    | Ca_kabuli_chr08 | 9387303                 | CC                              | TT              | 1946907622               |
| SNP_P4_106918_9389902 | NC_021167.1    | Ca_kabuli_chr08 | 9389902                 | GG                              | AA              | 1946907624               |
| SNP_P4_106919_9389924 | NC_021167.1    | Ca_kabuli_chr08 | 9389924                 | TT                              | GG              | 1946907626               |
| SNP_P4_106920_9391044 | NC_021167.1    | Ca_kabuli_chr08 | 9391044                 | CC                              | GG              | 1946907628               |
| SNP_P4_106921_9391183 | NC_021167.1    | Ca_kabuli_chr08 | 9391183                 | AA                              | CC              | 1946907630               |
| SNP_P4_106922_9391215 | NC_021167.1    | Ca_kabuli_chr08 | 9391215                 | TT                              | CC              | 1946907632               |



| SNPs IDs              | Chromosome IDs | Chromosomes     | Physical positions (bp) | CDC Frontier (Reference genome) | (ILWC46 & LPNB) | NCBI SNPdb Accession IDs |
|-----------------------|----------------|-----------------|-------------------------|---------------------------------|-----------------|--------------------------|
| SNP_P4_106923_9392782 | NC_021167.1    | Ca_kabuli_chr08 | 9392782                 | AA                              | CC              | 1946907634               |
| SNP_P4_106924_9393213 | NC_021167.1    | Ca_kabuli_chr08 | 9393213                 | AA                              | CC              | 1946907636               |
| SNP_P4_106925_9393667 | NC_021167.1    | Ca_kabuli_chr08 | 9393667                 | GG                              | TT              | 1946907638               |
| SNP_P4_106926_9393671 | NC_021167.1    | Ca_kabuli_chr08 | 9393671                 | GG                              | CC              | 1946907640               |
| SNP_P4_106927_9394557 | NC_021167.1    | Ca_kabuli_chr08 | 9394557                 | TT                              | CC              | 1946907642               |
| SNP_P4_106928_9394932 | NC_021167.1    | Ca_kabuli_chr08 | 9394932                 | TT                              | AA              | 1946907644               |
| SNP_P4_106929_9396264 | NC_021167.1    | Ca_kabuli_chr08 | 9396264                 | CC                              | GG              | 1946907646               |
| SNP_P4_106930_9397189 | NC_021167.1    | Ca_kabuli_chr08 | 9397189                 | CC                              | TT              | 1946907648               |
| SNP_P4_106931_9397306 | NC_021167.1    | Ca_kabuli_chr08 | 9397306                 | GG                              | AA              | 1946907651               |
| SNP_P4_106932_9397773 | NC_021167.1    | Ca_kabuli_chr08 | 9397773                 | CC                              | GG              | 1946907653               |
| SNP_P4_106934_9398564 | NC_021167.1    | Ca_kabuli_chr08 | 9398564                 | AA                              | CC              | 1946907655               |
| SNP_P4_106935_9402075 | NC_021167.1    | Ca_kabuli_chr08 | 9402075                 | CC                              | GG              | 1946907657               |
| SNP_P4_106936_9405269 | NC_021167.1    | Ca_kabuli_chr08 | 9405269                 | TT                              | GG              | 1946907659               |
| SNP_P4_106937_9416525 | NC_021167.1    | Ca_kabuli_chr08 | 9416525                 | AA                              | GG              | 1946907661               |
| SNP_P4_106938_9416622 | NC_021167.1    | Ca_kabuli_chr08 | 9416622                 | AA                              | CC              | 1946907663               |
| SNP_P4_106939_9950362 | NC_021167.1    | Ca_kabuli_chr08 | 9950362                 | AA                              | GG              | 1946907665               |
| SNP_P4_106941_9950730 | NC_021167.1    | Ca_kabuli_chr08 | 9950730                 | AA                              | GG              | 1946907667               |
| SNP_P4_106942_9950744 | NC_021167.1    | Ca_kabuli_chr08 | 9950744                 | GG                              | AA              | 1946907669               |
| SNP_P4_106943_9950803 | NC_021167.1    | Ca_kabuli_chr08 | 9950803                 | CC                              | TT              | 1946907671               |
| SNP_P4_106944_9950828 | NC_021167.1    | Ca_kabuli_chr08 | 9950828                 | TT                              | AA              | 1946907673               |
| SNP_P4_106946_9950954 | NC_021167.1    | Ca_kabuli_chr08 | 9950954                 | TT                              | CC              | 1946907675               |
| SNP_P4_106947_9951643 | NC_021167.1    | Ca_kabuli_chr08 | 9951643                 | GG                              | AA              | 1946907677               |
| SNP_P4_106948_9951664 | NC_021167.1    | Ca_kabuli_chr08 | 9951664                 | GG                              | TT              | 1946907679               |
| SNP_P4_106951_9956613 | NC_021167.1    | Ca_kabuli_chr08 | 9956613                 | CC                              | TT              | 1946907681               |
| SNP_P4_106952_9957133 | NC_021167.1    | Ca_kabuli_chr08 | 9957133                 | CC                              | AA              | 1946907684               |
| SNP_P4_106953_9957165 | NC_021167.1    | Ca_kabuli_chr08 | 9957165                 | CC                              | TT              | 1946907686               |
| SNP_P4_106954_9957573 | NC_021167.1    | Ca_kabuli_chr08 | 9957573                 | GG                              | TT              | 1946907688               |
| SNP_P4_106955_9957574 | NC_021167.1    | Ca_kabuli_chr08 | 9957574                 | TT                              | AA              | 1946907690               |
| SNP_P4_106956_9957675 | NC_021167.1    | Ca_kabuli_chr08 | 9957675                 | CC                              | TT              | 1946907692               |
| SNP_P4_106957_9957717 | NC_021167.1    | Ca_kabuli_chr08 | 9957717                 | GG                              | AA              | 1946907694               |
| SNP_P4_106958_9958331 | NC_021167.1    | Ca_kabuli_chr08 | 9958331                 | AA                              | GG              | 1946907696               |
| SNP_P4_106959_9958631 | NC_021167.1    | Ca_kabuli_chr08 | 9958631                 | AA                              | CC              | 1946907698               |
| SNP_P4_106960_9958636 | NC_021167.1    | Ca_kabuli_chr08 | 9958636                 | GG                              | TT              | 1946907700               |
| SNP_P4_106961_9958859 | NC_021167.1    | Ca_kabuli_chr08 | 9958859                 | GG                              | AA              | 1946907702               |
| SNP_P4_106962_9958888 | NC_021167.1    | Ca_kabuli_chr08 | 9958888                 | TT                              | AA              | 1946907704               |
| SNP_P4_106963_9959002 | NC_021167.1    | Ca_kabuli_chr08 | 9959002                 | CC                              | TT              | 1946907706               |
| SNP_P4_106964_9959035 | NC_021167.1    | Ca_kabuli_chr08 | 9959035                 | AA                              | CC              | 1946907708               |
| SNP_P4_106965_9959121 | NC_021167.1    | Ca_kabuli_chr08 | 9959121                 | TT                              | GG              | 1946907710               |
| SNP_P4_106966_9959695 | NC_021167.1    | Ca_kabuli_chr08 | 9959695                 | AA                              | TT              | 1946907712               |
| SNP_P4_106967_9959696 | NC_021167.1    | Ca_kabuli_chr08 | 9959696                 | CC                              | TT              | 1946907714               |
| SNP_P4_106968_9959809 | NC_021167.1    | Ca_kabuli_chr08 | 9959809                 | CC                              | TT              | 1946907716               |
| SNP_P4_106969_9959943 | NC_021167.1    | Ca_kabuli_chr08 | 9959943                 | GG                              | AA              | 1946907718               |

| SNPs IDs               | Chromosome IDs | Chromosomes     | Physical positions (bp) | CDC Frontier (Reference genome) | (ILWC46 & LPNB) | NCBI SNPdb Accession IDs |
|------------------------|----------------|-----------------|-------------------------|---------------------------------|-----------------|--------------------------|
| SNP_P4_106970_9959949  | NC_021167.1    | Ca_kabuli_chr08 | 9959949                 | AA                              | GG              | 1946907720               |
| SNP_P4_106971_9959951  | NC_021167.1    | Ca_kabuli_chr08 | 9959951                 | TT                              | CC              | 1946907722               |
| SNP_P4_106973_9960326  | NC_021167.1    | Ca_kabuli_chr08 | 9960326                 | GG                              | AA              | 1946907724               |
| SNP_P4_106974_9960472  | NC_021167.1    | Ca_kabuli_chr08 | 9960472                 | CC                              | TT              | 1946907726               |
| SNP_P4_106975_9960475  | NC_021167.1    | Ca_kabuli_chr08 | 9960475                 | TT                              | GG              | 1946907728               |
| SNP_P4_106976_9964459  | NC_021167.1    | Ca_kabuli_chr08 | 9964459                 | GG                              | AA              | 1946907730               |
| SNP_P4_106977_9964590  | NC_021167.1    | Ca_kabuli_chr08 | 9964590                 | AA                              | GG              | 1946907732               |
| SNP_P4_106978_9969160  | NC_021167.1    | Ca_kabuli_chr08 | 9969160                 | AA                              | TT              | 1946907734               |
| SNP_P4_106979_9969170  | NC_021167.1    | Ca_kabuli_chr08 | 9969170                 | CC                              | GG              | 1946907736               |
| SNP_P4_106980_9969421  | NC_021167.1    | Ca_kabuli_chr08 | 9969421                 | GG                              | AA              | 1946907738               |
| SNP_P4_106981_9969423  | NC_021167.1    | Ca_kabuli_chr08 | 9969423                 | CC                              | AA              | 1946907740               |
| SNP_P4_106982_9969426  | NC_021167.1    | Ca_kabuli_chr08 | 9969426                 | GG                              | AA              | 1946907742               |
| SNP_P4_106983_9969431  | NC_021167.1    | Ca_kabuli_chr08 | 9969431                 | TT                              | CC              | 1946907744               |
| SNP_P4_106984_9969432  | NC_021167.1    | Ca_kabuli_chr08 | 9969432                 | AA                              | GG              | 1946907746               |
| SNP_P4_106985_9969469  | NC_021167.1    | Ca_kabuli_chr08 | 9969469                 | AA                              | GG              | 1946907749               |
| SNP_P4_106986_9969730  | NC_021167.1    | Ca_kabuli_chr08 | 9969730                 | AA                              | TT              | 1946907751               |
| SNP_P4_106987_9972126  | NC_021167.1    | Ca_kabuli_chr08 | 9972126                 | TT                              | AA              | 1946907753               |
| SNP_P4_106988_9974315  | NC_021167.1    | Ca_kabuli_chr08 | 9974315                 | CC                              | TT              | 1946907755               |
| SNP_P4_106989_9974323  | NC_021167.1    | Ca_kabuli_chr08 | 9974323                 | AA                              | CC              | 1946907757               |
| SNP_P4_106990_9974325  | NC_021167.1    | Ca_kabuli_chr08 | 9974325                 | AA                              | CC              | 1946907759               |
| SNP_P4_106991_9974326  | NC_021167.1    | Ca_kabuli_chr08 | 9974326                 | GG                              | AA              | 1946907761               |
| SNP_P4_106992_9974417  | NC_021167.1    | Ca_kabuli_chr08 | 9974417                 | AA                              | TT              | 1946907763               |
| SNP_P4_106993_9974461  | NC_021167.1    | Ca_kabuli_chr08 | 9974461                 | CC                              | TT              | 1946907766               |
| SNP_P4_106994_9974601  | NC_021167.1    | Ca_kabuli_chr08 | 9974601                 | CC                              | TT              | 1946907768               |
| SNP_P4_106995_9974624  | NC_021167.1    | Ca_kabuli_chr08 | 9974624                 | TT                              | CC              | 1946907770               |
| SNP_P4_106996_9974670  | NC_021167.1    | Ca_kabuli_chr08 | 9974670                 | GG                              | AA              | 1946907772               |
| SNP_P4_106997_9974672  | NC_021167.1    | Ca_kabuli_chr08 | 9974672                 | CC                              | AA              | 1946907774               |
| SNP_P4_106998_9974681  | NC_021167.1    | Ca_kabuli_chr08 | 9974681                 | AA                              | GG              | 1946907776               |
| SNP_P4_106999_9974718  | NC_021167.1    | Ca_kabuli_chr08 | 9974718                 | AA                              | GG              | 1946907778               |
| SNP_P4_107000_9974764  | NC_021167.1    | Ca_kabuli_chr08 | 9974764                 | GG                              | TT              | 1946907780               |
| SNP_P4_107001_9974766  | NC_021167.1    | Ca_kabuli_chr08 | 9974766                 | GG                              | AA              | 1946907782               |
| SNP_P4_107002_9974772  | NC_021167.1    | Ca_kabuli_chr08 | 9974772                 | AA                              | CC              | 1946907784               |
| SNP_P4_107003_9998104  | NC_021167.1    | Ca_kabuli_chr08 | 9998104                 | AA                              | GG              | 1946907786               |
| SNP_P4_107004_10023295 | NC_021167.1    | Ca_kabuli_chr08 | 10023295                | AA                              | GG              | 1946907788               |
| SNP_P4_107005_10023302 | NC_021167.1    | Ca_kabuli_chr08 | 10023302                | TT                              | CC              | 1946907791               |
| SNP_P4_107006_10023305 | NC_021167.1    | Ca_kabuli_chr08 | 10023305                | AA                              | CC              | 1946907793               |
| SNP_P4_107007_10050263 | NC_021167.1    | Ca_kabuli_chr08 | 10050263                | AA                              | CC              | 1946907795               |
| SNP_P4_107008_10050264 | NC_021167.1    | Ca_kabuli_chr08 | 10050264                | AA                              | GG              | 1946907797               |
| SNP_P4_107010_10064458 | NC_021167.1    | Ca_kabuli_chr08 | 10064458                | AA                              | GG              | 1946907800               |
| SNP_P4_107011_10064569 | NC_021167.1    | Ca_kabuli_chr08 | 10064569                | AA                              | CC              | 1946907802               |
| SNP_P4_107012_10064578 | NC_021167.1    | Ca_kabuli_chr08 | 10064578                | TT                              | GG              | 1946907805               |
| SNP_P4_107013_10064679 | NC_021167.1    | Ca_kabuli_chr08 | 10064679                | TT                              | CC              | 1946907807               |

| SNPs IDs               | Chromosome IDs | Chromosomes     | Physical positions (bp) | CDC Frontier (Reference genome) | (ILWC46 & LPNB) | NCBI SNPdb Accession IDs |
|------------------------|----------------|-----------------|-------------------------|---------------------------------|-----------------|--------------------------|
| SNP_P4_107014_10064810 | NC_021167.1    | Ca_kabuli_chr08 | 10064810                | TT                              | CC              | 1946907809               |
| SNP_P4_107015_10064878 | NC_021167.1    | Ca_kabuli_chr08 | 10064878                | AA                              | GG              | 1946907811               |
| SNP_P4_107016_10064941 | NC_021167.1    | Ca_kabuli_chr08 | 10064941                | AA                              | TT              | 1946907813               |
| SNP_P4_107017_10064987 | NC_021167.1    | Ca_kabuli_chr08 | 10064987                | GG                              | AA              | 1946907815               |
| SNP_P4_107019_10096658 | NC_021167.1    | Ca_kabuli_chr08 | 10096658                | TT                              | CC              | 1946907817               |
| SNP_P4_107020_10107569 | NC_021167.1    | Ca_kabuli_chr08 | 10107569                | AA                              | GG              | 1946907820               |
| SNP_P4_107022_10170002 | NC_021167.1    | Ca_kabuli_chr08 | 10170002                | TT                              | CC              | 1946907822               |
| SNP_P4_107023_10217355 | NC_021167.1    | Ca_kabuli_chr08 | 10217355                | AA                              | CC              | 1946907824               |
| SNP_P4_107024_10217358 | NC_021167.1    | Ca_kabuli_chr08 | 10217358                | AA                              | GG              | 1946907826               |
| SNP_P4_107025_10217407 | NC_021167.1    | Ca_kabuli_chr08 | 10217407                | GG                              | AA              | 1946907828               |
| SNP_P4_107026_10217410 | NC_021167.1    | Ca_kabuli_chr08 | 10217410                | CC                              | TT              | 1946907830               |
| SNP_P4_107027_10217426 | NC_021167.1    | Ca_kabuli_chr08 | 10217426                | AA                              | GG              | 1946907832               |
| SNP_P4_107028_10217573 | NC_021167.1    | Ca_kabuli_chr08 | 10217573                | AA                              | GG              | 1946907834               |
| SNP_P4_107029_10234129 | NC_021167.1    | Ca_kabuli_chr08 | 10234129                | TT                              | CC              | 1946907836               |
| SNP_P4_107030_10253032 | NC_021167.1    | Ca_kabuli_chr08 | 10253032                | AA                              | TT              | 1946907838               |
| SNP_P4_107032_10356101 | NC_021167.1    | Ca_kabuli_chr08 | 10356101                | TT                              | CC              | 1946907840               |
| SNP_P4_107033_10356134 | NC_021167.1    | Ca_kabuli_chr08 | 10356134                | AA                              | CC              | 1946907842               |
| SNP_P4_107034_10356170 | NC_021167.1    | Ca_kabuli_chr08 | 10356170                | AA                              | GG              | 1946907844               |
| SNP_P4_107035_10356614 | NC_021167.1    | Ca_kabuli_chr08 | 10356614                | CC                              | AA              | 1946907846               |
| SNP_P4_107036_10356902 | NC_021167.1    | Ca_kabuli_chr08 | 10356902                | GG                              | AA              | 1946907848               |
| SNP_P4_107037_10357254 | NC_021167.1    | Ca_kabuli_chr08 | 10357254                | AA                              | CC              | 1946907850               |
| SNP_P4_107038_10357277 | NC_021167.1    | Ca_kabuli_chr08 | 10357277                | GG                              | AA              | 1946907852               |
| SNP_P4_107039_10357298 | NC_021167.1    | Ca_kabuli_chr08 | 10357298                | GG                              | AA              | 1946907854               |
| SNP_P4_107040_10362494 | NC_021167.1    | Ca_kabuli_chr08 | 10362494                | CC                              | AA              | 1946907856               |
| SNP_P4_107041_10363066 | NC_021167.1    | Ca_kabuli_chr08 | 10363066                | GG                              | AA              | 1946907858               |
| SNP_P4_107042_10363244 | NC_021167.1    | Ca_kabuli_chr08 | 10363244                | AA                              | CC              | 1946907860               |
| SNP_P4_107043_10363410 | NC_021167.1    | Ca_kabuli_chr08 | 10363410                | GG                              | AA              | 1946907862               |
| SNP_P4_107044_10363823 | NC_021167.1    | Ca_kabuli_chr08 | 10363823                | AA                              | CC              | 1946907864               |
| SNP_P4_107045_10363984 | NC_021167.1    | Ca_kabuli_chr08 | 10363984                | AA                              | GG              | 1946907866               |
| SNP_P4_107046_10364024 | NC_021167.1    | Ca_kabuli_chr08 | 10364024                | TT                              | AA              | 1946907868               |
| SNP_P4_107048_10364269 | NC_021167.1    | Ca_kabuli_chr08 | 10364269                | TT                              | GG              | 1946907870               |
| SNP_P4_107049_10364276 | NC_021167.1    | Ca_kabuli_chr08 | 10364276                | TT                              | CC              | 1946907872               |
| SNP_P4_107050_10364556 | NC_021167.1    | Ca_kabuli_chr08 | 10364556                | CC                              | TT              | 1946907874               |
| SNP_P4_107051_10365789 | NC_021167.1    | Ca_kabuli_chr08 | 10365789                | GG                              | AA              | 1946907876               |
| SNP_P4_107052_10365889 | NC_021167.1    | Ca_kabuli_chr08 | 10365889                | TT                              | AA              | 1946907878               |
| SNP_P4_107053_10365922 | NC_021167.1    | Ca_kabuli_chr08 | 10365922                | GG                              | CC              | 1946907880               |
| SNP_P4_107054_10366034 | NC_021167.1    | Ca_kabuli_chr08 | 10366034                | CC                              | AA              | 1946907882               |
| SNP_P4_107055_10366090 | NC_021167.1    | Ca_kabuli_chr08 | 10366090                | CC                              | TT              | 1946907884               |
| SNP_P4_107056_10366093 | NC_021167.1    | Ca_kabuli_chr08 | 10366093                | GG                              | AA              | 1946907886               |
| SNP_P4_107057_10366334 | NC_021167.1    | Ca_kabuli_chr08 | 10366334                | AA                              | GG              | 1946907888               |
| SNP_P4_107058_10366385 | NC_021167.1    | Ca_kabuli_chr08 | 10366385                | AA                              | TT              | 1946907890               |
| SNP_P4_107059_10366387 | NC_021167.1    | Ca_kabuli_chr08 | 10366387                | CC                              | TT              | 1946907892               |

| SNPs IDs               | Chromosome IDs | Chromosomes     | Physical positions (bp) | CDC Frontier (Reference genome) | (ILWC46 & LPNB) | NCBI SNPdb Accession IDs |
|------------------------|----------------|-----------------|-------------------------|---------------------------------|-----------------|--------------------------|
| SNP_P4_107061_10366760 | NC_021167.1    | Ca_kabuli_chr08 | 10366760                | GG                              | TT              | 1946907894               |
| SNP_P4_107063_10366874 | NC_021167.1    | Ca_kabuli_chr08 | 10366874                | TT                              | CC              | 1946907896               |
| SNP_P4_107064_10366880 | NC_021167.1    | Ca_kabuli_chr08 | 10366880                | TT                              | CC              | 1946907898               |
| SNP_P4_107065_10366912 | NC_021167.1    | Ca_kabuli_chr08 | 10366912                | CC                              | AA              | 1946907900               |
| SNP_P4_107066_10366921 | NC_021167.1    | Ca_kabuli_chr08 | 10366921                | CC                              | TT              | 1946907902               |
| SNP_P4_107067_10366974 | NC_021167.1    | Ca_kabuli_chr08 | 10366974                | AA                              | GG              | 1946907904               |
| SNP_P4_107068_10366984 | NC_021167.1    | Ca_kabuli_chr08 | 10366984                | AA                              | GG              | 1946907906               |
| SNP_P4_107069_10367254 | NC_021167.1    | Ca_kabuli_chr08 | 10367254                | TT                              | CC              | 1946907908               |
| SNP_P4_107070_10367281 | NC_021167.1    | Ca_kabuli_chr08 | 10367281                | TT                              | CC              | 1946907910               |
| SNP_P4_107071_10367387 | NC_021167.1    | Ca_kabuli_chr08 | 10367387                | GG                              | TT              | 1946907912               |
| SNP_P4_107072_10367461 | NC_021167.1    | Ca_kabuli_chr08 | 10367461                | TT                              | CC              | 1946907914               |
| SNP_P4_107073_10367492 | NC_021167.1    | Ca_kabuli_chr08 | 10367492                | CC                              | TT              | 1946907916               |
| SNP_P4_107074_10367521 | NC_021167.1    | Ca_kabuli_chr08 | 10367521                | GG                              | AA              | 1946907918               |
| SNP_P4_107075_10374959 | NC_021167.1    | Ca_kabuli_chr08 | 10374959                | TT                              | CC              | 1946907920               |
| SNP_P4_107076_10374988 | NC_021167.1    | Ca_kabuli_chr08 | 10374988                | TT                              | GG              | 1946907922               |
| SNP_P4_107077_10375081 | NC_021167.1    | Ca_kabuli_chr08 | 10375081                | TT                              | CC              | 1946907924               |
| SNP_P4_107078_10375101 | NC_021167.1    | Ca_kabuli_chr08 | 10375101                | TT                              | CC              | 1946907926               |
| SNP_P4_107079_10375316 | NC_021167.1    | Ca_kabuli_chr08 | 10375316                | GG                              | AA              | 1946907928               |
| SNP_P4_107080_10375381 | NC_021167.1    | Ca_kabuli_chr08 | 10375381                | GG                              | AA              | 1946907930               |
| SNP_P4_107081_10375449 | NC_021167.1    | Ca_kabuli_chr08 | 10375449                | GG                              | TT              | 1946907932               |
| SNP_P4_107082_10375504 | NC_021167.1    | Ca_kabuli_chr08 | 10375504                | CC                              | AA              | 1946907934               |
| SNP_P4_107083_10375520 | NC_021167.1    | Ca_kabuli_chr08 | 10375520                | AA                              | GG              | 1946907936               |
| SNP_P4_107084_10375545 | NC_021167.1    | Ca_kabuli_chr08 | 10375545                | AA                              | TT              | 1946907938               |
| SNP_P4_107085_10375554 | NC_021167.1    | Ca_kabuli_chr08 | 10375554                | AA                              | TT              | 1946907940               |
| SNP_P4_107087_10375602 | NC_021167.1    | Ca_kabuli_chr08 | 10375602                | AA                              | GG              | 1946907942               |
| SNP_P4_107088_10375607 | NC_021167.1    | Ca_kabuli_chr08 | 10375607                | CC                              | TT              | 1946907944               |
| SNP_P4_107089_10375629 | NC_021167.1    | Ca_kabuli_chr08 | 10375629                | GG                              | AA              | 1946907946               |
| SNP_P4_107090_10375654 | NC_021167.1    | Ca_kabuli_chr08 | 10375654                | TT                              | CC              | 1946907948               |
| SNP_P4_107091_10375679 | NC_021167.1    | Ca_kabuli_chr08 | 10375679                | TT                              | CC              | 1946907950               |
| SNP_P4_107092_10375682 | NC_021167.1    | Ca_kabuli_chr08 | 10375682                | CC                              | GG              | 1946907952               |
| SNP_P4_107093_10375686 | NC_021167.1    | Ca_kabuli_chr08 | 10375686                | AA                              | GG              | 1946907954               |
| SNP_P4_107094_10375690 | NC_021167.1    | Ca_kabuli_chr08 | 10375690                | CC                              | TT              | 1946907956               |
| SNP_P4_107095_10375721 | NC_021167.1    | Ca_kabuli_chr08 | 10375721                | CC                              | AA              | 1946907958               |
| SNP_P4_107096_10375734 | NC_021167.1    | Ca_kabuli_chr08 | 10375734                | TT                              | AA              | 1946907960               |
| SNP_P4_107097_10375752 | NC_021167.1    | Ca_kabuli_chr08 | 10375752                | CC                              | TT              | 1946907962               |
| SNP_P4_107098_10375805 | NC_021167.1    | Ca_kabuli_chr08 | 10375805                | GG                              | AA              | 1946907964               |
| SNP_P4_107099_10375832 | NC_021167.1    | Ca_kabuli_chr08 | 10375832                | GG                              | AA              | 1946907966               |
| SNP_P4_107100_10375858 | NC_021167.1    | Ca_kabuli_chr08 | 10375858                | TT                              | CC              | 1946907968               |
| SNP_P4_107101_10375903 | NC_021167.1    | Ca_kabuli_chr08 | 10375903                | AA                              | CC              | 1946907970               |
| SNP_P4_107102_10375910 | NC_021167.1    | Ca_kabuli_chr08 | 10375910                | TT                              | CC              | 1946907972               |
| SNP_P4_107103_10375917 | NC_021167.1    | Ca_kabuli_chr08 | 10375917                | AA                              | CC              | 1946907974               |
| SNP_P4_107104_10375935 | NC_021167.1    | Ca_kabuli_chr08 | 10375935                | GG                              | CC              | 1946907976               |

| SNPs IDs               | Chromosome IDs | Chromosomes     | Physical positions (bp) | CDC Frontier (Reference genome) | (ILWC46 & LPNB) | NCBI SNPdb Accession IDs |
|------------------------|----------------|-----------------|-------------------------|---------------------------------|-----------------|--------------------------|
| SNP_P4_107105_10376020 | NC_021167.1    | Ca_kabuli_chr08 | 10376020                | AA                              | GG              | 1946907978               |
| SNP_P4_107106_10376028 | NC_021167.1    | Ca_kabuli_chr08 | 10376028                | AA                              | GG              | 1946907980               |
| SNP_P4_107107_10376030 | NC_021167.1    | Ca_kabuli_chr08 | 10376030                | AA                              | GG              | 1946907982               |
| SNP_P4_107108_10376057 | NC_021167.1    | Ca_kabuli_chr08 | 10376057                | GG                              | AA              | 1946907985               |
| SNP_P4_107109_10376116 | NC_021167.1    | Ca_kabuli_chr08 | 10376116                | AA                              | GG              | 1946907987               |
| SNP_P4_107110_10376121 | NC_021167.1    | Ca_kabuli_chr08 | 10376121                | CC                              | TT              | 1946907989               |
| SNP_P4_107111_10376145 | NC_021167.1    | Ca_kabuli_chr08 | 10376145                | AA                              | TT              | 1946907991               |
| SNP_P4_107112_10376175 | NC_021167.1    | Ca_kabuli_chr08 | 10376175                | AA                              | CC              | 1946907993               |
| SNP_P4_107113_10376461 | NC_021167.1    | Ca_kabuli_chr08 | 10376461                | CC                              | AA              | 1946907995               |
| SNP_P4_107114_10376490 | NC_021167.1    | Ca_kabuli_chr08 | 10376490                | TT                              | CC              | 1946907997               |
| SNP_P4_107115_10376568 | NC_021167.1    | Ca_kabuli_chr08 | 10376568                | TT                              | CC              | 1946908000               |
| SNP_P4_107116_10376672 | NC_021167.1    | Ca_kabuli_chr08 | 10376672                | GG                              | AA              | 1946908002               |
| SNP_P4_107117_10376680 | NC_021167.1    | Ca_kabuli_chr08 | 10376680                | AA                              | TT              | 1946908004               |
| SNP_P4_107118_10376782 | NC_021167.1    | Ca_kabuli_chr08 | 10376782                | GG                              | CC              | 1946908006               |
| SNP_P4_107119_10376847 | NC_021167.1    | Ca_kabuli_chr08 | 10376847                | CC                              | GG              | 1946908008               |
| SNP_P4_107120_10378470 | NC_021167.1    | Ca_kabuli_chr08 | 10378470                | CC                              | GG              | 1946908011               |
| SNP_P4_107121_10378514 | NC_021167.1    | Ca_kabuli_chr08 | 10378514                | GG                              | AA              | 1946908013               |
| SNP_P4_107122_10378517 | NC_021167.1    | Ca_kabuli_chr08 | 10378517                | GG                              | AA              | 1946908014               |
| SNP_P4_107123_10378558 | NC_021167.1    | Ca_kabuli_chr08 | 10378558                | CC                              | AA              | 1946908015               |
| SNP_P4_107124_10378819 | NC_021167.1    | Ca_kabuli_chr08 | 10378819                | AA                              | TT              | 1946908016               |
| SNP_P4_107125_10378852 | NC_021167.1    | Ca_kabuli_chr08 | 10378852                | CC                              | TT              | 1946908017               |
| SNP_P4_107126_10378883 | NC_021167.1    | Ca_kabuli_chr08 | 10378883                | GG                              | AA              | 1946908019               |
| SNP_P4_107127_10380756 | NC_021167.1    | Ca_kabuli_chr08 | 10380756                | AA                              | GG              | 1946908021               |
| SNP_P4_107128_10380779 | NC_021167.1    | Ca_kabuli_chr08 | 10380779                | AA                              | CC              | 1946908023               |
| SNP_P4_107129_10380785 | NC_021167.1    | Ca_kabuli_chr08 | 10380785                | AA                              | GG              | 1946908025               |
| SNP_P4_107130_10380803 | NC_021167.1    | Ca_kabuli_chr08 | 10380803                | GG                              | TT              | 1946908027               |
| SNP_P4_107131_10380805 | NC_021167.1    | Ca_kabuli_chr08 | 10380805                | TT                              | CC              | 1946908029               |
| SNP_P4_107132_10380836 | NC_021167.1    | Ca_kabuli_chr08 | 10380836                | CC                              | TT              | 1946908031               |
| SNP_P4_107133_10380864 | NC_021167.1    | Ca_kabuli_chr08 | 10380864                | AA                              | CC              | 1946908033               |
| SNP_P4_107134_10380925 | NC_021167.1    | Ca_kabuli_chr08 | 10380925                | CC                              | TT              | 1946908035               |
| SNP_P4_107135_10380968 | NC_021167.1    | Ca_kabuli_chr08 | 10380968                | GG                              | AA              | 1946908037               |
| SNP_P4_107136_10381105 | NC_021167.1    | Ca_kabuli_chr08 | 10381105                | TT                              | CC              | 1946908040               |
| SNP_P4_107137_10381169 | NC_021167.1    | Ca_kabuli_chr08 | 10381169                | AA                              | GG              | 1946908042               |
| SNP_P4_107138_10381175 | NC_021167.1    | Ca_kabuli_chr08 | 10381175                | TT                              | GG              | 1946908044               |
| SNP_P4_107139_10381189 | NC_021167.1    | Ca_kabuli_chr08 | 10381189                | TT                              | CC              | 1946908046               |
| SNP_P4_107140_10381216 | NC_021167.1    | Ca_kabuli_chr08 | 10381216                | GG                              | AA              | 1946908048               |
| SNP_P4_107141_10381234 | NC_021167.1    | Ca_kabuli_chr08 | 10381234                | TT                              | CC              | 1946908050               |
| SNP_P4_107142_10381256 | NC_021167.1    | Ca_kabuli_chr08 | 10381256                | TT                              | CC              | 1946908052               |
| SNP_P4_107143_10381288 | NC_021167.1    | Ca_kabuli_chr08 | 10381288                | TT                              | GG              | 1946908054               |
| SNP_P4_107144_10381307 | NC_021167.1    | Ca_kabuli_chr08 | 10381307                | CC                              | AA              | 1946908056               |
| SNP_P4_107145_10381473 | NC_021167.1    | Ca_kabuli_chr08 | 10381473                | TT                              | CC              | 1946908058               |
| SNP_P4_107146_10381502 | NC_021167.1    | Ca_kabuli_chr08 | 10381502                | GG                              | AA              | 1946908060               |

| SNPs IDs               | Chromosome IDs | Chromosomes     | Physical positions (bp) | CDC Frontier (Reference genome) | (ILWC46 & LPNB) | NCBI SNPdb Accession IDs |
|------------------------|----------------|-----------------|-------------------------|---------------------------------|-----------------|--------------------------|
| SNP_P4_107147_10381522 | NC_021167.1    | Ca_kabuli_chr08 | 10381522                | AA                              | CC              | 1946908062               |
| SNP_P4_107149_10381706 | NC_021167.1    | Ca_kabuli_chr08 | 10381706                | AA                              | GG              | 1946908064               |
| SNP_P4_107150_10381708 | NC_021167.1    | Ca_kabuli_chr08 | 10381708                | GG                              | AA              | 1946908066               |
| SNP_P4_107151_10381782 | NC_021167.1    | Ca_kabuli_chr08 | 10381782                | CC                              | TT              | 1946908068               |
| SNP_P4_107152_10386950 | NC_021167.1    | Ca_kabuli_chr08 | 10386950                | TT                              | GG              | 1946908070               |
| SNP_P4_107153_10386964 | NC_021167.1    | Ca_kabuli_chr08 | 10386964                | AA                              | TT              | 1946908072               |
| SNP_P4_107154_10387025 | NC_021167.1    | Ca_kabuli_chr08 | 10387025                | TT                              | CC              | 1946908074               |
| SNP_P4_107155_10387074 | NC_021167.1    | Ca_kabuli_chr08 | 10387074                | AA                              | GG              | 1946908076               |
| SNP_P4_107156_10387189 | NC_021167.1    | Ca_kabuli_chr08 | 10387189                | TT                              | AA              | 1946908078               |
| SNP_P4_107157_10387233 | NC_021167.1    | Ca_kabuli_chr08 | 10387233                | TT                              | CC              | 1946908080               |
| SNP_P4_107158_10387236 | NC_021167.1    | Ca_kabuli_chr08 | 10387236                | TT                              | GG              | 1946908082               |
| SNP_P4_107159_10387238 | NC_021167.1    | Ca_kabuli_chr08 | 10387238                | TT                              | AA              | 1946908084               |
| SNP_P4_107160_10387267 | NC_021167.1    | Ca_kabuli_chr08 | 10387267                | AA                              | GG              | 1946908086               |
| SNP_P4_107161_10387292 | NC_021167.1    | Ca_kabuli_chr08 | 10387292                | GG                              | TT              | 1946908088               |
| SNP_P4_107162_10387321 | NC_021167.1    | Ca_kabuli_chr08 | 10387321                | TT                              | GG              | 1946908090               |
| SNP_P4_107163_10387630 | NC_021167.1    | Ca_kabuli_chr08 | 10387630                | GG                              | AA              | 1946908092               |
| SNP_P4_107164_10387993 | NC_021167.1    | Ca_kabuli_chr08 | 10387993                | TT                              | CC              | 1946908094               |
| SNP_P4_107165_10401807 | NC_021167.1    | Ca_kabuli_chr08 | 10401807                | AA                              | GG              | 1946908096               |
| SNP_P4_107166_10401824 | NC_021167.1    | Ca_kabuli_chr08 | 10401824                | TT                              | CC              | 1946908098               |
| SNP_P4_107167_10412284 | NC_021167.1    | Ca_kabuli_chr08 | 10412284                | GG                              | AA              | 1946908100               |
| SNP_P4_107168_10412347 | NC_021167.1    | Ca_kabuli_chr08 | 10412347                | CC                              | TT              | 1946908102               |
| SNP_P4_107169_10412387 | NC_021167.1    | Ca_kabuli_chr08 | 10412387                | CC                              | AA              | 1946908104               |
| SNP_P4_107170_10412632 | NC_021167.1    | Ca_kabuli_chr08 | 10412632                | GG                              | TT              | 1946908106               |
| SNP_P4_107171_10413015 | NC_021167.1    | Ca_kabuli_chr08 | 10413015                | TT                              | CC              | 1946908108               |
| SNP_P4_107172_10419129 | NC_021167.1    | Ca_kabuli_chr08 | 10419129                | CC                              | TT              | 1946908110               |
| SNP_P4_107173_10428461 | NC_021167.1    | Ca_kabuli_chr08 | 10428461                | GG                              | AA              | 1946908112               |
| SNP_P4_107174_10428615 | NC_021167.1    | Ca_kabuli_chr08 | 10428615                | AA                              | GG              | 1946908114               |
| SNP_P4_107175_10428676 | NC_021167.1    | Ca_kabuli_chr08 | 10428676                | TT                              | CC              | 1946908116               |
| SNP_P4_107176_10428685 | NC_021167.1    | Ca_kabuli_chr08 | 10428685                | TT                              | CC              | 1946908118               |
| SNP_P4_107177_10429545 | NC_021167.1    | Ca_kabuli_chr08 | 10429545                | AA                              | TT              | 1946908120               |
| SNP_P4_107178_10429562 | NC_021167.1    | Ca_kabuli_chr08 | 10429562                | AA                              | TT              | 1946908122               |
| SNP_P4_107179_10430268 | NC_021167.1    | Ca_kabuli_chr08 | 10430268                | AA                              | GG              | 1946908124               |
| SNP_P4_107180_10442212 | NC_021167.1    | Ca_kabuli_chr08 | 10442212                | TT                              | AA              | 1946908126               |
| SNP_P4_107181_10508410 | NC_021167.1    | Ca_kabuli_chr08 | 10508410                | GG                              | AA              | 1946908128               |
| SNP_P4_107182_10508414 | NC_021167.1    | Ca_kabuli_chr08 | 10508414                | AA                              | CC              | 1946908130               |
| SNP_P4_107183_10509107 | NC_021167.1    | Ca_kabuli_chr08 | 10509107                | CC                              | TT              | 1946908132               |
| SNP_P4_107184_10509130 | NC_021167.1    | Ca_kabuli_chr08 | 10509130                | AA                              | CC              | 1946908134               |
| SNP_P4_107185_10509134 | NC_021167.1    | Ca_kabuli_chr08 | 10509134                | CC                              | TT              | 1946908136               |
| SNP_P4_107186_10509191 | NC_021167.1    | Ca_kabuli_chr08 | 10509191                | TT                              | CC              | 1946908138               |
| SNP_P4_107187_10509198 | NC_021167.1    | Ca_kabuli_chr08 | 10509198                | TT                              | CC              | 1946908140               |
| SNP_P4_107188_10509582 | NC_021167.1    | Ca_kabuli_chr08 | 10509582                | GG                              | AA              | 1946908142               |
| SNP_P4_107191_10574330 | NC_021167.1    | Ca_kabuli_chr08 | 10574330                | GG                              | CC              | 1946908144               |

| SNPs IDs               | Chromosome IDs | Chromosomes     | Physical positions (bp) | CDC Frontier (Reference genome) | (ILWC46 & LPNB) | NCBI SNPdb Accession IDs |
|------------------------|----------------|-----------------|-------------------------|---------------------------------|-----------------|--------------------------|
| SNP_P4_107192_10575678 | NC_021167.1    | Ca_kabuli_chr08 | 10575678                | TT                              | CC              | 1946908146               |
| SNP_P4_107193_10575785 | NC_021167.1    | Ca_kabuli_chr08 | 10575785                | GG                              | AA              | 1946908148               |
| SNP_P4_107194_10589752 | NC_021167.1    | Ca_kabuli_chr08 | 10589752                | CC                              | TT              | 1946908150               |
| SNP_P4_107195_10589808 | NC_021167.1    | Ca_kabuli_chr08 | 10589808                | GG                              | AA              | 1946908152               |
| SNP_P4_107196_10590011 | NC_021167.1    | Ca_kabuli_chr08 | 10590011                | CC                              | GG              | 1946908154               |
| SNP_P4_107197_10590020 | NC_021167.1    | Ca_kabuli_chr08 | 10590020                | TT                              | CC              | 1946908156               |
| SNP_P4_107198_10590022 | NC_021167.1    | Ca_kabuli_chr08 | 10590022                | AA                              | TT              | 1946908158               |
| SNP_P4_107199_10590065 | NC_021167.1    | Ca_kabuli_chr08 | 10590065                | GG                              | CC              | 1946908160               |
| SNP_P4_107201_10590230 | NC_021167.1    | Ca_kabuli_chr08 | 10590230                | AA                              | TT              | 1946908162               |
| SNP_P4_107202_10590404 | NC_021167.1    | Ca_kabuli_chr08 | 10590404                | TT                              | AA              | 1946908164               |
| SNP_P4_107203_10590416 | NC_021167.1    | Ca_kabuli_chr08 | 10590416                | GG                              | AA              | 1946908167               |
| SNP_P4_107204_10590452 | NC_021167.1    | Ca_kabuli_chr08 | 10590452                | CC                              | TT              | 1946908169               |
| SNP_P4_107205_10590629 | NC_021167.1    | Ca_kabuli_chr08 | 10590629                | AA                              | CC              | 1946908171               |
| SNP_P4_107206_10590693 | NC_021167.1    | Ca_kabuli_chr08 | 10590693                | GG                              | AA              | 1946908173               |
| SNP_P4_107207_10590721 | NC_021167.1    | Ca_kabuli_chr08 | 10590721                | CC                              | GG              | 1946908175               |
| SNP_P4_107208_10590752 | NC_021167.1    | Ca_kabuli_chr08 | 10590752                | CC                              | AA              | 1946908177               |
| SNP_P4_107209_10590787 | NC_021167.1    | Ca_kabuli_chr08 | 10590787                | AA                              | TT              | 1946908179               |
| SNP_P4_107210_10590884 | NC_021167.1    | Ca_kabuli_chr08 | 10590884                | CC                              | TT              | 1946908181               |
| SNP_P4_107211_10591047 | NC_021167.1    | Ca_kabuli_chr08 | 10591047                | GG                              | TT              | 1946908183               |
| SNP_P4_107212_10591062 | NC_021167.1    | Ca_kabuli_chr08 | 10591062                | CC                              | AA              | 1946908185               |
| SNP_P4_107213_10591102 | NC_021167.1    | Ca_kabuli_chr08 | 10591102                | TT                              | AA              | 1946908187               |
| SNP_P4_107215_10591148 | NC_021167.1    | Ca_kabuli_chr08 | 10591148                | GG                              | TT              | 1946908190               |
| SNP_P4_107216_10591196 | NC_021167.1    | Ca_kabuli_chr08 | 10591196                | AA                              | TT              | 1946908192               |
| SNP_P4_107217_10591272 | NC_021167.1    | Ca_kabuli_chr08 | 10591272                | GG                              | TT              | 1946908194               |
| SNP_P4_107218_10591281 | NC_021167.1    | Ca_kabuli_chr08 | 10591281                | AA                              | GG              | 1946908196               |
| SNP_P4_107219_10591282 | NC_021167.1    | Ca_kabuli_chr08 | 10591282                | CC                              | AA              | 1946908198               |
| SNP_P4_107220_10591284 | NC_021167.1    | Ca_kabuli_chr08 | 10591284                | CC                              | TT              | 1946908200               |
| SNP_P4_107221_10591288 | NC_021167.1    | Ca_kabuli_chr08 | 10591288                | AA                              | TT              | 1946908202               |
| SNP_P4_107222_10591289 | NC_021167.1    | Ca_kabuli_chr08 | 10591289                | CC                              | TT              | 1946908204               |
| SNP_P4_107223_10591291 | NC_021167.1    | Ca_kabuli_chr08 | 10591291                | TT                              | CC              | 1946908206               |
| SNP_P4_107224_10591315 | NC_021167.1    | Ca_kabuli_chr08 | 10591315                | TT                              | CC              | 1946908208               |
| SNP_P4_107225_10591331 | NC_021167.1    | Ca_kabuli_chr08 | 10591331                | AA                              | GG              | 1946908210               |
| SNP_P4_107226_10591334 | NC_021167.1    | Ca_kabuli_chr08 | 10591334                | CC                              | GG              | 1946908212               |
| SNP_P4_107227_10591339 | NC_021167.1    | Ca_kabuli_chr08 | 10591339                | CC                              | AA              | 1946908214               |
| SNP_P4_107228_10591355 | NC_021167.1    | Ca_kabuli_chr08 | 10591355                | GG                              | AA              | 1946908216               |
| SNP_P4_107229_10591383 | NC_021167.1    | Ca_kabuli_chr08 | 10591383                | GG                              | AA              | 1946908218               |
| SNP_P4_107230_10591463 | NC_021167.1    | Ca_kabuli_chr08 | 10591463                | GG                              | AA              | 1946908220               |
| SNP_P4_107231_10591529 | NC_021167.1    | Ca_kabuli_chr08 | 10591529                | TT                              | AA              | 1946908222               |
| SNP_P4_107232_10591560 | NC_021167.1    | Ca_kabuli_chr08 | 10591560                | TT                              | CC              | 1946908224               |
| SNP_P4_107233_10601993 | NC_021167.1    | Ca_kabuli_chr08 | 10601993                | AA                              | GG              | 1946908226               |
| SNP_P4_107234_10601999 | NC_021167.1    | Ca_kabuli_chr08 | 10601999                | AA                              | TT              | 1946908228               |
| SNP_P4_107235_10606195 | NC_021167.1    | Ca_kabuli_chr08 | 10606195                | GG                              | AA              | 1946908230               |

| SNPs IDs               | Chromosome IDs | Chromosomes     | Physical positions (bp) | CDC Frontier (Reference genome) | (ILWC46 & LPNB) | NCBI SNPdb Accession IDs |
|------------------------|----------------|-----------------|-------------------------|---------------------------------|-----------------|--------------------------|
| SNP_P4_107236_10612439 | NC_021167.1    | Ca_kabuli_chr08 | 10612439                | AA                              | CC              | 1946908232               |
| SNP_P4_107237_10612502 | NC_021167.1    | Ca_kabuli_chr08 | 10612502                | TT                              | CC              | 1946908234               |
| SNP_P4_107238_10612733 | NC_021167.1    | Ca_kabuli_chr08 | 10612733                | TT                              | CC              | 1946908236               |
| SNP_P4_107239_10612771 | NC_021167.1    | Ca_kabuli_chr08 | 10612771                | GG                              | AA              | 1946908238               |
| SNP_P4_107240_10612789 | NC_021167.1    | Ca_kabuli_chr08 | 10612789                | AA                              | GG              | 1946908240               |
| SNP_P4_107242_10632001 | NC_021167.1    | Ca_kabuli_chr08 | 10632001                | GG                              | AA              | 1946908242               |
| SNP_P4_107243_10632004 | NC_021167.1    | Ca_kabuli_chr08 | 10632004                | GG                              | AA              | 1946908244               |
| SNP_P4_107244_10632006 | NC_021167.1    | Ca_kabuli_chr08 | 10632006                | CC                              | TT              | 1946908246               |
| SNP_P4_107245_10645712 | NC_021167.1    | Ca_kabuli_chr08 | 10645712                | CC                              | TT              | 1946908248               |
| SNP_P4_107246_10645835 | NC_021167.1    | Ca_kabuli_chr08 | 10645835                | AA                              | TT              | 1946908250               |
| SNP_P4_107247_10646025 | NC_021167.1    | Ca_kabuli_chr08 | 10646025                | TT                              | CC              | 1946908252               |
| SNP_P4_107248_10646061 | NC_021167.1    | Ca_kabuli_chr08 | 10646061                | GG                              | TT              | 1946908254               |
| SNP_P4_107249_10646076 | NC_021167.1    | Ca_kabuli_chr08 | 10646076                | GG                              | AA              | 1946908256               |
| SNP_P4_107250_10646085 | NC_021167.1    | Ca_kabuli_chr08 | 10646085                | AA                              | TT              | 1946908258               |
| SNP_P4_107251_10646201 | NC_021167.1    | Ca_kabuli_chr08 | 10646201                | CC                              | GG              | 1946908260               |
| SNP_P4_107252_10655700 | NC_021167.1    | Ca_kabuli_chr08 | 10655700                | GG                              | AA              | 1946908262               |
| SNP_P4_107253_10655704 | NC_021167.1    | Ca_kabuli_chr08 | 10655704                | GG                              | AA              | 1946908264               |
| SNP_P4_107254_10660049 | NC_021167.1    | Ca_kabuli_chr08 | 10660049                | GG                              | AA              | 1946908266               |
| SNP_P4_107255_10671813 | NC_021167.1    | Ca_kabuli_chr08 | 10671813                | TT                              | AA              | 1946908268               |
| SNP_P4_107257_10671918 | NC_021167.1    | Ca_kabuli_chr08 | 10671918                | TT                              | CC              | 1946908270               |
| SNP_P4_107258_10672009 | NC_021167.1    | Ca_kabuli_chr08 | 10672009                | CC                              | TT              | 1946908272               |
| SNP_P4_107259_10672140 | NC_021167.1    | Ca_kabuli_chr08 | 10672140                | CC                              | TT              | 1946908274               |
| SNP_P4_107260_10672434 | NC_021167.1    | Ca_kabuli_chr08 | 10672434                | AA                              | GG              | 1946908276               |
| SNP_P4_107261_10672442 | NC_021167.1    | Ca_kabuli_chr08 | 10672442                | GG                              | AA              | 1946908278               |
| SNP_P4_107263_10686627 | NC_021167.1    | Ca_kabuli_chr08 | 10686627                | GG                              | AA              | 1946908280               |
| SNP_P4_107264_10697666 | NC_021167.1    | Ca_kabuli_chr08 | 10697666                | AA                              | GG              | 1946908282               |
| SNP_P4_107265_10697684 | NC_021167.1    | Ca_kabuli_chr08 | 10697684                | CC                              | TT              | 1946908284               |
| SNP_P4_107266_10697689 | NC_021167.1    | Ca_kabuli_chr08 | 10697689                | AA                              | GG              | 1946908286               |
| SNP_P4_107267_10699236 | NC_021167.1    | Ca_kabuli_chr08 | 10699236                | CC                              | TT              | 1946908288               |
| SNP_P4_107268_10699245 | NC_021167.1    | Ca_kabuli_chr08 | 10699245                | TT                              | CC              | 1946908290               |
| SNP_P4_107269_10699247 | NC_021167.1    | Ca_kabuli_chr08 | 10699247                | GG                              | CC              | 1946908292               |
| SNP_P4_107270_10699249 | NC_021167.1    | Ca_kabuli_chr08 | 10699249                | GG                              | AA              | 1946908294               |
| SNP_P4_107271_10699263 | NC_021167.1    | Ca_kabuli_chr08 | 10699263                | AA                              | GG              | 1946908296               |
| SNP_P4_107272_10699268 | NC_021167.1    | Ca_kabuli_chr08 | 10699268                | AA                              | TT              | 1946908298               |
| SNP_P4_107273_10699269 | NC_021167.1    | Ca_kabuli_chr08 | 10699269                | TT                              | CC              | 1946908300               |
| SNP_P4_107274_10699317 | NC_021167.1    | Ca_kabuli_chr08 | 10699317                | CC                              | GG              | 1946908302               |
| SNP_P4_107275_10699341 | NC_021167.1    | Ca_kabuli_chr08 | 10699341                | TT                              | CC              | 1946908304               |
| SNP_P4_107276_10699353 | NC_021167.1    | Ca_kabuli_chr08 | 10699353                | AA                              | CC              | 1946908306               |
| SNP_P4_107277_10699360 | NC_021167.1    | Ca_kabuli_chr08 | 10699360                | CC                              | TT              | 1946908308               |
| SNP_P4_107278_10700081 | NC_021167.1    | Ca_kabuli_chr08 | 10700081                | AA                              | TT              | 1946908310               |
| SNP_P4_107279_10701361 | NC_021167.1    | Ca_kabuli_chr08 | 10701361                | AA                              | CC              | 1946908312               |
| SNP_P4_107280_10701397 | NC_021167.1    | Ca_kabuli_chr08 | 10701397                | AA                              | CC              | 1946908314               |



| SNPs IDs               | Chromosome IDs | Chromosomes     | Physical positions (bp) | CDC Frontier (Reference genome) | (ILWC46 & LPNB) | NCBI SNPdb Accession IDs |
|------------------------|----------------|-----------------|-------------------------|---------------------------------|-----------------|--------------------------|
| SNP_P4_107281_10701411 | NC_021167.1    | Ca_kabuli_chr08 | 10701411                | GG                              | AA              | 1946908316               |
| SNP_P4_107282_10701414 | NC_021167.1    | Ca_kabuli_chr08 | 10701414                | CC                              | TT              | 1946908318               |
| SNP_P4_107283_10701438 | NC_021167.1    | Ca_kabuli_chr08 | 10701438                | AA                              | GG              | 1946908320               |
| SNP_P4_107284_10701470 | NC_021167.1    | Ca_kabuli_chr08 | 10701470                | AA                              | GG              | 1946908322               |
| SNP_P4_107285_10701523 | NC_021167.1    | Ca_kabuli_chr08 | 10701523                | AA                              | TT              | 1946908324               |
| SNP_P4_107286_10701537 | NC_021167.1    | Ca_kabuli_chr08 | 10701537                | CC                              | AA              | 1946908326               |
| SNP_P4_107287_10701556 | NC_021167.1    | Ca_kabuli_chr08 | 10701556                | CC                              | AA              | 1946908328               |
| SNP_P4_107288_10701601 | NC_021167.1    | Ca_kabuli_chr08 | 10701601                | CC                              | TT              | 1946908330               |
| SNP_P4_107289_10701611 | NC_021167.1    | Ca_kabuli_chr08 | 10701611                | AA                              | GG              | 1946908332               |
| SNP_P4_107290_10701698 | NC_021167.1    | Ca_kabuli_chr08 | 10701698                | GG                              | AA              | 1946908334               |
| SNP_P4_107291_10701702 | NC_021167.1    | Ca_kabuli_chr08 | 10701702                | GG                              | AA              | 1946908336               |
| SNP_P4_107292_10701719 | NC_021167.1    | Ca_kabuli_chr08 | 10701719                | AA                              | GG              | 1946908338               |
| SNP_P4_107293_10701745 | NC_021167.1    | Ca_kabuli_chr08 | 10701745                | CC                              | GG              | 1946908340               |
| SNP_P4_107294_10701763 | NC_021167.1    | Ca_kabuli_chr08 | 10701763                | TT                              | AA              | 1946908342               |
| SNP_P4_107295_10701815 | NC_021167.1    | Ca_kabuli_chr08 | 10701815                | CC                              | TT              | 1946908344               |
| SNP_P4_107296_10701915 | NC_021167.1    | Ca_kabuli_chr08 | 10701915                | CC                              | TT              | 1946908346               |
| SNP_P4_107297_10701925 | NC_021167.1    | Ca_kabuli_chr08 | 10701925                | GG                              | AA              | 1946908348               |
| SNP_P4_107299_10702131 | NC_021167.1    | Ca_kabuli_chr08 | 10702131                | CC                              | AA              | 1946908350               |
| SNP_P4_107300_10727845 | NC_021167.1    | Ca_kabuli_chr08 | 10727845                | TT                              | GG              | 1946908352               |
| SNP_P4_107301_10728066 | NC_021167.1    | Ca_kabuli_chr08 | 10728066                | CC                              | AA              | 1946908354               |
| SNP_P4_107302_10728253 | NC_021167.1    | Ca_kabuli_chr08 | 10728253                | GG                              | AA              | 1946908356               |
| SNP_P4_107303_10731032 | NC_021167.1    | Ca_kabuli_chr08 | 10731032                | GG                              | AA              | 1946908358               |
| SNP_P4_107305_10762215 | NC_021167.1    | Ca_kabuli_chr08 | 10762215                | AA                              | GG              | 1946908360               |
| SNP_P4_107306_10762579 | NC_021167.1    | Ca_kabuli_chr08 | 10762579                | CC                              | TT              | 1946908362               |
| SNP_P4_107307_10790566 | NC_021167.1    | Ca_kabuli_chr08 | 10790566                | TT                              | GG              | 1946908364               |
| SNP_P4_107308_10790816 | NC_021167.1    | Ca_kabuli_chr08 | 10790816                | TT                              | GG              | 1946908366               |
| SNP_P4_107310_10825458 | NC_021167.1    | Ca_kabuli_chr08 | 10825458                | AA                              | GG              | 1946908368               |
| SNP_P4_107311_10825459 | NC_021167.1    | Ca_kabuli_chr08 | 10825459                | CC                              | TT              | 1946908370               |
| SNP_P4_107312_10825898 | NC_021167.1    | Ca_kabuli_chr08 | 10825898                | TT                              | AA              | 1946908372               |
| SNP_P4_107313_10826182 | NC_021167.1    | Ca_kabuli_chr08 | 10826182                | GG                              | AA              | 1946908374               |
| SNP_P4_107314_10826192 | NC_021167.1    | Ca_kabuli_chr08 | 10826192                | TT                              | GG              | 1946908376               |
| SNP_P4_107315_10826432 | NC_021167.1    | Ca_kabuli_chr08 | 10826432                | CC                              | GG              | 1946908378               |
| SNP_P4_107316_10826436 | NC_021167.1    | Ca_kabuli_chr08 | 10826436                | GG                              | AA              | 1946908380               |
| SNP_P4_107317_10826440 | NC_021167.1    | Ca_kabuli_chr08 | 10826440                | CC                              | TT              | 1946908382               |
| SNP_P4_107318_10826453 | NC_021167.1    | Ca_kabuli_chr08 | 10826453                | TT                              | CC              | 1946908385               |
| SNP_P4_107319_10826460 | NC_021167.1    | Ca_kabuli_chr08 | 10826460                | GG                              | AA              | 1946908387               |
| SNP_P4_107320_10827800 | NC_021167.1    | Ca_kabuli_chr08 | 10827800                | CC                              | TT              | 1946908389               |
| SNP_P4_107321_10891165 | NC_021167.1    | Ca_kabuli_chr08 | 10891165                | CC                              | TT              | 1946908391               |
| SNP_P4_107322_10905114 | NC_021167.1    | Ca_kabuli_chr08 | 10905114                | CC                              | AA              | 1946908393               |
| SNP_P4_107323_10905538 | NC_021167.1    | Ca_kabuli_chr08 | 10905538                | GG                              | AA              | 1946908395               |
| SNP_P4_107324_10934236 | NC_021167.1    | Ca_kabuli_chr08 | 10934236                | TT                              | CC              | 1946908397               |
| SNP_P4_107325_10934312 | NC_021167.1    | Ca_kabuli_chr08 | 10934312                | CC                              | GG              | 1946908399               |

| SNPs IDs               | Chromosome IDs | Chromosomes     | Physical positions (bp) | CDC Frontier (Reference genome) | (ILWC46 & LPNB) | NCBI SNPdb Accession IDs |
|------------------------|----------------|-----------------|-------------------------|---------------------------------|-----------------|--------------------------|
| SNP_P4_107327_10936279 | NC_021167.1    | Ca_kabuli_chr08 | 10936279                | CC                              | TT              | 1946908401               |
| SNP_P4_107328_10936280 | NC_021167.1    | Ca_kabuli_chr08 | 10936280                | GG                              | AA              | 1946908403               |
| SNP_P4_107329_10936296 | NC_021167.1    | Ca_kabuli_chr08 | 10936296                | GG                              | AA              | 1946908405               |
| SNP_P4_107330_10936322 | NC_021167.1    | Ca_kabuli_chr08 | 10936322                | TT                              | CC              | 1946908407               |
| SNP_P4_107331_10944114 | NC_021167.1    | Ca_kabuli_chr08 | 10944114                | CC                              | TT              | 1946908409               |
| SNP_P4_107332_10948318 | NC_021167.1    | Ca_kabuli_chr08 | 10948318                | TT                              | CC              | 1946908411               |
| SNP_P4_107333_10951313 | NC_021167.1    | Ca_kabuli_chr08 | 10951313                | TT                              | GG              | 1946908413               |
| SNP_P4_107334_10955153 | NC_021167.1    | Ca_kabuli_chr08 | 10955153                | AA                              | CC              | 1946908415               |
| SNP_P4_107335_10955200 | NC_021167.1    | Ca_kabuli_chr08 | 10955200                | GG                              | CC              | 1946908417               |
| SNP_P4_107336_10955588 | NC_021167.1    | Ca_kabuli_chr08 | 10955588                | TT                              | AA              | 1946908419               |
| SNP_P4_107337_10959970 | NC_021167.1    | Ca_kabuli_chr08 | 10959970                | TT                              | CC              | 1946908421               |
| SNP_P4_107338_10960134 | NC_021167.1    | Ca_kabuli_chr08 | 10960134                | GG                              | TT              | 1946908423               |
| SNP_P4_107339_10960190 | NC_021167.1    | Ca_kabuli_chr08 | 10960190                | GG                              | AA              | 1946908425               |
| SNP_P4_107340_10969787 | NC_021167.1    | Ca_kabuli_chr08 | 10969787                | TT                              | AA              | 1946908427               |
| SNP_P4_107341_10969912 | NC_021167.1    | Ca_kabuli_chr08 | 10969912                | AA                              | GG              | 1946908429               |
| SNP_P4_107342_10970479 | NC_021167.1    | Ca_kabuli_chr08 | 10970479                | TT                              | CC              | 1946908431               |
| SNP_P4_107343_10970829 | NC_021167.1    | Ca_kabuli_chr08 | 10970829                | GG                              | TT              | 1946908433               |
| SNP_P4_107344_10970855 | NC_021167.1    | Ca_kabuli_chr08 | 10970855                | AA                              | GG              | 1946908435               |
| SNP_P4_107345_10973867 | NC_021167.1    | Ca_kabuli_chr08 | 10973867                | AA                              | CC              | 1946908437               |
| SNP_P4_107346_10973893 | NC_021167.1    | Ca_kabuli_chr08 | 10973893                | AA                              | TT              | 1946908439               |
| SNP_P4_107347_10974108 | NC_021167.1    | Ca_kabuli_chr08 | 10974108                | GG                              | CC              | 1946908441               |
| SNP_P4_107348_10974160 | NC_021167.1    | Ca_kabuli_chr08 | 10974160                | AA                              | GG              | 1946908444               |
| SNP_P4_107349_11002565 | NC_021167.1    | Ca_kabuli_chr08 | 11002565                | GG                              | TT              | 1946908446               |
| SNP_P4_107350_11002573 | NC_021167.1    | Ca_kabuli_chr08 | 11002573                | TT                              | AA              | 1946908448               |
| SNP_P4_107351_11002585 | NC_021167.1    | Ca_kabuli_chr08 | 11002585                | TT                              | GG              | 1946908450               |
| SNP_P4_107352_11015176 | NC_021167.1    | Ca_kabuli_chr08 | 11015176                | TT                              | GG              | 1946908452               |
| SNP_P4_107353_11015194 | NC_021167.1    | Ca_kabuli_chr08 | 11015194                | GG                              | AA              | 1946908454               |
| SNP_P4_107354_11015222 | NC_021167.1    | Ca_kabuli_chr08 | 11015222                | GG                              | AA              | 1946908456               |
| SNP_P4_107355_11015471 | NC_021167.1    | Ca_kabuli_chr08 | 11015471                | CC                              | GG              | 1946908458               |
| SNP_P4_107356_11015550 | NC_021167.1    | Ca_kabuli_chr08 | 11015550                | AA                              | CC              | 1946908460               |
| SNP_P4_107357_11045493 | NC_021167.1    | Ca_kabuli_chr08 | 11045493                | AA                              | CC              | 1946908462               |
| SNP_P4_107358_11045496 | NC_021167.1    | Ca_kabuli_chr08 | 11045496                | TT                              | CC              | 1946908464               |
| SNP_P4_107359_11060501 | NC_021167.1    | Ca_kabuli_chr08 | 11060501                | GG                              | TT              | 1946908466               |
| SNP_P4_107360_11063093 | NC_021167.1    | Ca_kabuli_chr08 | 11063093                | TT                              | AA              | 1946908468               |
| SNP_P4_107361_11063556 | NC_021167.1    | Ca_kabuli_chr08 | 11063556                | TT                              | AA              | 1946908470               |
| SNP_P4_107362_11063579 | NC_021167.1    | Ca_kabuli_chr08 | 11063579                | AA                              | GG              | 1946908472               |
| SNP_P4_107364_11066644 | NC_021167.1    | Ca_kabuli_chr08 | 11066644                | CC                              | TT              | 1946908474               |
| SNP_P4_107366_11067490 | NC_021167.1    | Ca_kabuli_chr08 | 11067490                | TT                              | CC              | 1946908476               |
| SNP_P4_107367_11067499 | NC_021167.1    | Ca_kabuli_chr08 | 11067499                | TT                              | CC              | 1946908478               |
| SNP_P4_107368_11067546 | NC_021167.1    | Ca_kabuli_chr08 | 11067546                | AA                              | TT              | 1946908480               |
| SNP_P4_107369_11067552 | NC_021167.1    | Ca_kabuli_chr08 | 11067552                | CC                              | TT              | 1946908482               |
| SNP_P4_107370_11067684 | NC_021167.1    | Ca_kabuli_chr08 | 11067684                | GG                              | AA              | 1946908484               |

| SNPs IDs               | Chromosome IDs | Chromosomes     | Physical positions (bp) | CDC Frontier (Reference genome) | (ILWC46 & LPNB) | NCBI SNPdb Accession IDs |
|------------------------|----------------|-----------------|-------------------------|---------------------------------|-----------------|--------------------------|
| SNP_P4_107371_11070652 | NC_021167.1    | Ca_kabuli_chr08 | 11070652                | AA                              | CC              | 1946908486               |
| SNP_P4_107372_11070723 | NC_021167.1    | Ca_kabuli_chr08 | 11070723                | TT                              | CC              | 1946908488               |
| SNP_P4_107373_11070732 | NC_021167.1    | Ca_kabuli_chr08 | 11070732                | CC                              | TT              | 1946908490               |
| SNP_P4_107375_11071878 | NC_021167.1    | Ca_kabuli_chr08 | 11071878                | TT                              | CC              | 1946908492               |
| SNP_P4_107376_11071899 | NC_021167.1    | Ca_kabuli_chr08 | 11071899                | TT                              | CC              | 1946908494               |
| SNP_P4_107377_11071944 | NC_021167.1    | Ca_kabuli_chr08 | 11071944                | TT                              | GG              | 1946908497               |
| SNP_P4_107378_11071979 | NC_021167.1    | Ca_kabuli_chr08 | 11071979                | AA                              | CC              | 1946908499               |
| SNP_P4_107379_11072703 | NC_021167.1    | Ca_kabuli_chr08 | 11072703                | AA                              | GG              | 1946908501               |
| SNP_P4_107380_11072728 | NC_021167.1    | Ca_kabuli_chr08 | 11072728                | CC                              | AA              | 1946908503               |
| SNP_P4_107381_11072747 | NC_021167.1    | Ca_kabuli_chr08 | 11072747                | AA                              | TT              | 1946908505               |
| SNP_P4_107382_11072767 | NC_021167.1    | Ca_kabuli_chr08 | 11072767                | TT                              | CC              | 1946908507               |
| SNP_P4_107383_11072832 | NC_021167.1    | Ca_kabuli_chr08 | 11072832                | TT                              | CC              | 1946908509               |
| SNP_P4_107384_11072842 | NC_021167.1    | Ca_kabuli_chr08 | 11072842                | GG                              | AA              | 1946908511               |
| SNP_P4_107385_11072848 | NC_021167.1    | Ca_kabuli_chr08 | 11072848                | TT                              | CC              | 1946908513               |
| SNP_P4_107386_11073365 | NC_021167.1    | Ca_kabuli_chr08 | 11073365                | AA                              | TT              | 1946908515               |
| SNP_P4_107388_11079293 | NC_021167.1    | Ca_kabuli_chr08 | 11079293                | AA                              | TT              | 1946908517               |
| SNP_P4_107389_11079549 | NC_021167.1    | Ca_kabuli_chr08 | 11079549                | AA                              | GG              | 1946908519               |
| SNP_P4_107390_11081588 | NC_021167.1    | Ca_kabuli_chr08 | 11081588                | AA                              | GG              | 1946908521               |
| SNP_P4_107391_11083762 | NC_021167.1    | Ca_kabuli_chr08 | 11083762                | TT                              | AA              | 1946908523               |
| SNP_P4_107392_11084024 | NC_021167.1    | Ca_kabuli_chr08 | 11084024                | GG                              | AA              | 1946908525               |
| SNP_P4_107393_11084183 | NC_021167.1    | Ca_kabuli_chr08 | 11084183                | GG                              | TT              | 1946908527               |
| SNP_P4_107394_11086526 | NC_021167.1    | Ca_kabuli_chr08 | 11086526                | GG                              | TT              | 1946908529               |
| SNP_P4_107396_11088840 | NC_021167.1    | Ca_kabuli_chr08 | 11088840                | CC                              | GG              | 1946908531               |
| SNP_P4_107397_11089817 | NC_021167.1    | Ca_kabuli_chr08 | 11089817                | AA                              | GG              | 1946908533               |
| SNP_P4_107398_11090245 | NC_021167.1    | Ca_kabuli_chr08 | 11090245                | CC                              | AA              | 1946908535               |
| SNP_P4_107399_11090448 | NC_021167.1    | Ca_kabuli_chr08 | 11090448                | CC                              | TT              | 1946908537               |
| SNP_P4_107400_11090463 | NC_021167.1    | Ca_kabuli_chr08 | 11090463                | TT                              | CC              | 1946908539               |
| SNP_P4_107401_11090531 | NC_021167.1    | Ca_kabuli_chr08 | 11090531                | CC                              | TT              | 1946908541               |
| SNP_P4_107402_11090660 | NC_021167.1    | Ca_kabuli_chr08 | 11090660                | CC                              | AA              | 1946908543               |
| SNP_P4_107403_11090972 | NC_021167.1    | Ca_kabuli_chr08 | 11090972                | TT                              | CC              | 1946908545               |
| SNP_P4_107404_11091118 | NC_021167.1    | Ca_kabuli_chr08 | 11091118                | CC                              | GG              | 1946908547               |
| SNP_P4_107405_11091343 | NC_021167.1    | Ca_kabuli_chr08 | 11091343                | CC                              | AA              | 1946908549               |
| SNP_P4_107406_11091345 | NC_021167.1    | Ca_kabuli_chr08 | 11091345                | TT                              | CC              | 1946908551               |
| SNP_P4_107407_11091360 | NC_021167.1    | Ca_kabuli_chr08 | 11091360                | TT                              | CC              | 1946908553               |
| SNP_P4_107408_11091391 | NC_021167.1    | Ca_kabuli_chr08 | 11091391                | CC                              | TT              | 1946908555               |
| SNP_P4_107409_11091398 | NC_021167.1    | Ca_kabuli_chr08 | 11091398                | AA                              | GG              | 1946908557               |
| SNP_P4_107410_11091617 | NC_021167.1    | Ca_kabuli_chr08 | 11091617                | CC                              | AA              | 1946908559               |
| SNP_P4_107411_11091882 | NC_021167.1    | Ca_kabuli_chr08 | 11091882                | TT                              | AA              | 1946908561               |
| SNP_P4_107412_11092198 | NC_021167.1    | Ca_kabuli_chr08 | 11092198                | AA                              | CC              | 1946908563               |
| SNP_P4_107413_11092370 | NC_021167.1    | Ca_kabuli_chr08 | 11092370                | GG                              | AA              | 1946908565               |
| SNP_P4_107415_11098875 | NC_021167.1    | Ca_kabuli_chr08 | 11098875                | CC                              | TT              | 1946908567               |
| SNP_P4_107416_11099355 | NC_021167.1    | Ca_kabuli_chr08 | 11099355                | TT                              | GG              | 1946908569               |

| SNPs IDs               | Chromosome IDs | Chromosomes     | Physical positions (bp) | CDC Frontier (Reference genome) | (ILWC46 & LPNB) | NCBI SNPdb Accession IDs |
|------------------------|----------------|-----------------|-------------------------|---------------------------------|-----------------|--------------------------|
| SNP_P4_107417_11099357 | NC_021167.1    | Ca_kabuli_chr08 | 11099357                | CC                              | TT              | 1946908571               |
| SNP_P4_107418_11099605 | NC_021167.1    | Ca_kabuli_chr08 | 11099605                | CC                              | TT              | 1946908573               |
| SNP_P4_107419_11099916 | NC_021167.1    | Ca_kabuli_chr08 | 11099916                | TT                              | AA              | 1946908575               |
| SNP_P4_107420_11100872 | NC_021167.1    | Ca_kabuli_chr08 | 11100872                | TT                              | GG              | 1946908577               |
| SNP_P4_107421_11101158 | NC_021167.1    | Ca_kabuli_chr08 | 11101158                | TT                              | CC              | 1946908579               |
| SNP_P4_107422_11101161 | NC_021167.1    | Ca_kabuli_chr08 | 11101161                | TT                              | CC              | 1946908581               |
| SNP_P4_107423_11101727 | NC_021167.1    | Ca_kabuli_chr08 | 11101727                | AA                              | GG              | 1946908583               |
| SNP_P4_107424_11102131 | NC_021167.1    | Ca_kabuli_chr08 | 11102131                | TT                              | CC              | 1946908586               |
| SNP_P4_107425_11106051 | NC_021167.1    | Ca_kabuli_chr08 | 11106051                | GG                              | AA              | 1946908588               |
| SNP_P4_107426_11107152 | NC_021167.1    | Ca_kabuli_chr08 | 11107152                | TT                              | AA              | 1946908590               |
| SNP_P4_107427_11109572 | NC_021167.1    | Ca_kabuli_chr08 | 11109572                | AA                              | TT              | 1946908592               |
| SNP_P4_107428_11109641 | NC_021167.1    | Ca_kabuli_chr08 | 11109641                | GG                              | AA              | 1946908594               |
| SNP_P4_107431_11113485 | NC_021167.1    | Ca_kabuli_chr08 | 11113485                | CC                              | TT              | 1946908596               |
| SNP_P4_107432_11113551 | NC_021167.1    | Ca_kabuli_chr08 | 11113551                | AA                              | GG              | 1946908598               |
| SNP_P4_107433_11113607 | NC_021167.1    | Ca_kabuli_chr08 | 11113607                | GG                              | CC              | 1946908600               |
| SNP_P4_107435_11113957 | NC_021167.1    | Ca_kabuli_chr08 | 11113957                | TT                              | AA              | 1946908602               |
| SNP_P4_107436_11113961 | NC_021167.1    | Ca_kabuli_chr08 | 11113961                | TT                              | AA              | 1946908604               |
| SNP_P4_107437_11113972 | NC_021167.1    | Ca_kabuli_chr08 | 11113972                | TT                              | CC              | 1946908606               |
| SNP_P4_107438_11113984 | NC_021167.1    | Ca_kabuli_chr08 | 11113984                | TT                              | CC              | 1946908608               |
| SNP_P4_107439_11114009 | NC_021167.1    | Ca_kabuli_chr08 | 11114009                | CC                              | TT              | 1946908610               |
| SNP_P4_107440_11114010 | NC_021167.1    | Ca_kabuli_chr08 | 11114010                | TT                              | CC              | 1946908612               |
| SNP_P4_107442_11122277 | NC_021167.1    | Ca_kabuli_chr08 | 11122277                | AA                              | GG              | 1946908614               |
| SNP_P4_107444_11124698 | NC_021167.1    | Ca_kabuli_chr08 | 11124698                | AA                              | GG              | 1946908616               |
| SNP_P4_107446_11130084 | NC_021167.1    | Ca_kabuli_chr08 | 11130084                | CC                              | TT              | 1946908618               |
| SNP_P4_107447_11130119 | NC_021167.1    | Ca_kabuli_chr08 | 11130119                | AA                              | GG              | 1946908620               |
| SNP_P4_107448_11130804 | NC_021167.1    | Ca_kabuli_chr08 | 11130804                | CC                              | TT              | 1946908622               |
| SNP_P4_107449_11132178 | NC_021167.1    | Ca_kabuli_chr08 | 11132178                | AA                              | GG              | 1946908624               |
| SNP_P4_107452_11137078 | NC_021167.1    | Ca_kabuli_chr08 | 11137078                | GG                              | TT              | 1946908626               |
| SNP_P4_107453_11137110 | NC_021167.1    | Ca_kabuli_chr08 | 11137110                | AA                              | GG              | 1946908628               |
| SNP_P4_107454_11142552 | NC_021167.1    | Ca_kabuli_chr08 | 11142552                | AA                              | GG              | 1946908630               |
| SNP_P4_107455_11142580 | NC_021167.1    | Ca_kabuli_chr08 | 11142580                | CC                              | TT              | 1946908632               |
| SNP_P4_107456_11143541 | NC_021167.1    | Ca_kabuli_chr08 | 11143541                | CC                              | TT              | 1946908634               |
| SNP_P4_107457_11143802 | NC_021167.1    | Ca_kabuli_chr08 | 11143802                | TT                              | AA              | 1946908636               |
| SNP_P4_107458_11143902 | NC_021167.1    | Ca_kabuli_chr08 | 11143902                | GG                              | AA              | 1946908638               |
| SNP_P4_107459_11143959 | NC_021167.1    | Ca_kabuli_chr08 | 11143959                | AA                              | GG              | 1946908640               |
| SNP_P4_107460_11143996 | NC_021167.1    | Ca_kabuli_chr08 | 11143996                | AA                              | GG              | 1946908642               |
| SNP_P4_107461_11144005 | NC_021167.1    | Ca_kabuli_chr08 | 11144005                | GG                              | AA              | 1946908644               |
| SNP_P4_107462_11144032 | NC_021167.1    | Ca_kabuli_chr08 | 11144032                | TT                              | CC              | 1946908646               |
| SNP_P4_107463_11144071 | NC_021167.1    | Ca_kabuli_chr08 | 11144071                | GG                              | AA              | 1946908648               |
| SNP_P4_107464_11144190 | NC_021167.1    | Ca_kabuli_chr08 | 11144190                | GG                              | AA              | 1946908650               |
| SNP_P4_107465_11144269 | NC_021167.1    | Ca_kabuli_chr08 | 11144269                | TT                              | CC              | 1946908652               |
| SNP_P4_107466_11144389 | NC_021167.1    | Ca_kabuli_chr08 | 11144389                | CC                              | AA              | 1946908654               |

| SNPs IDs               | Chromosome IDs | Chromosomes     | Physical positions (bp) | CDC Frontier (Reference genome) | (ILWC46 & LPNB) | NCBI SNPdb Accession IDs |
|------------------------|----------------|-----------------|-------------------------|---------------------------------|-----------------|--------------------------|
| SNP_P4_107467_11144397 | NC_021167.1    | Ca_kabuli_chr08 | 11144397                | AA                              | TT              | 1946908656               |
| SNP_P4_107468_11144420 | NC_021167.1    | Ca_kabuli_chr08 | 11144420                | GG                              | AA              | 1946908658               |
| SNP_P4_107469_11144576 | NC_021167.1    | Ca_kabuli_chr08 | 11144576                | GG                              | AA              | 1946908660               |
| SNP_P4_107470_11144584 | NC_021167.1    | Ca_kabuli_chr08 | 11144584                | AA                              | GG              | 1946908662               |
| SNP_P4_107471_11144773 | NC_021167.1    | Ca_kabuli_chr08 | 11144773                | GG                              | AA              | 1946908664               |
| SNP_P4_107472_11144874 | NC_021167.1    | Ca_kabuli_chr08 | 11144874                | GG                              | TT              | 1946908666               |
| SNP_P4_107473_11145023 | NC_021167.1    | Ca_kabuli_chr08 | 11145023                | GG                              | AA              | 1946908668               |
| SNP_P4_107474_11145321 | NC_021167.1    | Ca_kabuli_chr08 | 11145321                | CC                              | TT              | 1946908670               |
| SNP_P4_107475_11145378 | NC_021167.1    | Ca_kabuli_chr08 | 11145378                | TT                              | GG              | 1946908672               |
| SNP_P4_107476_11145554 | NC_021167.1    | Ca_kabuli_chr08 | 11145554                | CC                              | TT              | 1946908674               |
| SNP_P4_107477_11145609 | NC_021167.1    | Ca_kabuli_chr08 | 11145609                | AA                              | CC              | 1946908676               |
| SNP_P4_107479_11145681 | NC_021167.1    | Ca_kabuli_chr08 | 11145681                | CC                              | TT              | 1946908678               |
| SNP_P4_107481_11145871 | NC_021167.1    | Ca_kabuli_chr08 | 11145871                | CC                              | AA              | 1946908680               |
| SNP_P4_107482_11145921 | NC_021167.1    | Ca_kabuli_chr08 | 11145921                | AA                              | GG              | 1946908682               |
| SNP_P4_107483_11146172 | NC_021167.1    | Ca_kabuli_chr08 | 11146172                | CC                              | GG              | 1946908684               |
| SNP_P4_107486_11146576 | NC_021167.1    | Ca_kabuli_chr08 | 11146576                | CC                              | TT              | 1946908686               |
| SNP_P4_107487_11146612 | NC_021167.1    | Ca_kabuli_chr08 | 11146612                | CC                              | TT              | 1946908688               |
| SNP_P4_107488_11146679 | NC_021167.1    | Ca_kabuli_chr08 | 11146679                | TT                              | AA              | 1946908690               |
| SNP_P4_107490_11146812 | NC_021167.1    | Ca_kabuli_chr08 | 11146812                | CC                              | TT              | 1946908692               |
| SNP_P4_107491_11147040 | NC_021167.1    | Ca_kabuli_chr08 | 11147040                | CC                              | TT              | 1946908694               |
| SNP_P4_107492_11147104 | NC_021167.1    | Ca_kabuli_chr08 | 11147104                | AA                              | GG              | 1946908696               |
| SNP_P4_107493_11153182 | NC_021167.1    | Ca_kabuli_chr08 | 11153182                | GG                              | AA              | 1946908698               |
| SNP_P4_107494_11153540 | NC_021167.1    | Ca_kabuli_chr08 | 11153540                | GG                              | AA              | 1946908700               |
| SNP_P4_107495_11154827 | NC_021167.1    | Ca_kabuli_chr08 | 11154827                | TT                              | GG              | 1946908702               |
| SNP_P4_107496_11154844 | NC_021167.1    | Ca_kabuli_chr08 | 11154844                | GG                              | AA              | 1946908704               |
| SNP_P4_107497_11154848 | NC_021167.1    | Ca_kabuli_chr08 | 11154848                | AA                              | TT              | 1946908706               |
| SNP_P4_107498_11154936 | NC_021167.1    | Ca_kabuli_chr08 | 11154936                | TT                              | GG              | 1946908708               |
| SNP_P4_107499_11155097 | NC_021167.1    | Ca_kabuli_chr08 | 11155097                | GG                              | AA              | 1946908710               |
| SNP_P4_107500_11157955 | NC_021167.1    | Ca_kabuli_chr08 | 11157955                | TT                              | CC              | 1946908712               |
| SNP_P4_107501_11158163 | NC_021167.1    | Ca_kabuli_chr08 | 11158163                | CC                              | TT              | 1946908714               |
| SNP_P4_107502_11158187 | NC_021167.1    | Ca_kabuli_chr08 | 11158187                | GG                              | AA              | 1946908716               |
| SNP_P4_107503_11158208 | NC_021167.1    | Ca_kabuli_chr08 | 11158208                | TT                              | CC              | 1946908718               |
| SNP_P4_107504_11158254 | NC_021167.1    | Ca_kabuli_chr08 | 11158254                | CC                              | TT              | 1946908720               |
| SNP_P4_107505_11158320 | NC_021167.1    | Ca_kabuli_chr08 | 11158320                | CC                              | TT              | 1946908722               |
| SNP_P4_107506_11158347 | NC_021167.1    | Ca_kabuli_chr08 | 11158347                | GG                              | AA              | 1946908724               |
| SNP_P4_107507_11158371 | NC_021167.1    | Ca_kabuli_chr08 | 11158371                | TT                              | AA              | 1946908727               |
| SNP_P4_107508_11158384 | NC_021167.1    | Ca_kabuli_chr08 | 11158384                | AA                              | GG              | 1946908728               |
| SNP_P4_107509_11158385 | NC_021167.1    | Ca_kabuli_chr08 | 11158385                | CC                              | TT              | 1946908730               |
| SNP_P4_107510_11158389 | NC_021167.1    | Ca_kabuli_chr08 | 11158389                | GG                              | AA              | 1946908732               |
| SNP_P4_107511_11158401 | NC_021167.1    | Ca_kabuli_chr08 | 11158401                | CC                              | AA              | 1946908734               |
| SNP_P4_107512_11158490 | NC_021167.1    | Ca_kabuli_chr08 | 11158490                | TT                              | GG              | 1946908736               |
| SNP_P4_107513_11158496 | NC_021167.1    | Ca_kabuli_chr08 | 11158496                | AA                              | GG              | 1946908738               |

| SNPs IDs               | Chromosome IDs | Chromosomes     | Physical positions (bp) | CDC Frontier (Reference genome) | (ILWC46 & LPNB) | NCBI SNPdb Accession IDs |
|------------------------|----------------|-----------------|-------------------------|---------------------------------|-----------------|--------------------------|
| SNP_P4_107514_11158532 | NC_021167.1    | Ca_kabuli_chr08 | 11158532                | TT                              | CC              | 1946908740               |
| SNP_P4_107515_11158552 | NC_021167.1    | Ca_kabuli_chr08 | 11158552                | CC                              | AA              | 1946908742               |
| SNP_P4_107516_11158832 | NC_021167.1    | Ca_kabuli_chr08 | 11158832                | GG                              | TT              | 1946908744               |
| SNP_P4_107517_11159279 | NC_021167.1    | Ca_kabuli_chr08 | 11159279                | GG                              | TT              | 1946908746               |
| SNP_P4_107518_11160381 | NC_021167.1    | Ca_kabuli_chr08 | 11160381                | CC                              | TT              | 1946908748               |
| SNP_P4_107519_11160425 | NC_021167.1    | Ca_kabuli_chr08 | 11160425                | TT                              | AA              | 1946908750               |
| SNP_P4_107521_11164015 | NC_021167.1    | Ca_kabuli_chr08 | 11164015                | GG                              | TT              | 1946908752               |
| SNP_P4_107523_11164841 | NC_021167.1    | Ca_kabuli_chr08 | 11164841                | CC                              | TT              | 1946908755               |
| SNP_P4_107524_11164845 | NC_021167.1    | Ca_kabuli_chr08 | 11164845                | TT                              | CC              | 1946908757               |
| SNP_P4_107525_11164871 | NC_021167.1    | Ca_kabuli_chr08 | 11164871                | CC                              | TT              | 1946908759               |
| SNP_P4_107526_11166092 | NC_021167.1    | Ca_kabuli_chr08 | 11166092                | TT                              | CC              | 1946908761               |
| SNP_P4_107527_11167068 | NC_021167.1    | Ca_kabuli_chr08 | 11167068                | CC                              | TT              | 1946908763               |
| SNP_P4_107528_11167196 | NC_021167.1    | Ca_kabuli_chr08 | 11167196                | TT                              | CC              | 1946908765               |
| SNP_P4_107529_11167203 | NC_021167.1    | Ca_kabuli_chr08 | 11167203                | GG                              | AA              | 1946908767               |
| SNP_P4_107531_11167470 | NC_021167.1    | Ca_kabuli_chr08 | 11167470                | TT                              | CC              | 1946908769               |
| SNP_P4_107532_11168665 | NC_021167.1    | Ca_kabuli_chr08 | 11168665                | TT                              | CC              | 1946908772               |
| SNP_P4_107533_11168719 | NC_021167.1    | Ca_kabuli_chr08 | 11168719                | GG                              | AA              | 1946908774               |
| SNP_P4_107534_11168720 | NC_021167.1    | Ca_kabuli_chr08 | 11168720                | GG                              | AA              | 1946908776               |
| SNP_P4_107535_11168727 | NC_021167.1    | Ca_kabuli_chr08 | 11168727                | CC                              | TT              | 1946908778               |
| SNP_P4_107536_11168788 | NC_021167.1    | Ca_kabuli_chr08 | 11168788                | CC                              | GG              | 1946908780               |
| SNP_P4_107538_11168880 | NC_021167.1    | Ca_kabuli_chr08 | 11168880                | CC                              | TT              | 1946908782               |
| SNP_P4_107539_11168904 | NC_021167.1    | Ca_kabuli_chr08 | 11168904                | CC                              | GG              | 1946908784               |
| SNP_P4_107540_11168930 | NC_021167.1    | Ca_kabuli_chr08 | 11168930                | AA                              | GG              | 1946908786               |
| SNP_P4_107541_11168931 | NC_021167.1    | Ca_kabuli_chr08 | 11168931                | GG                              | AA              | 1946908788               |
| SNP_P4_107542_11168949 | NC_021167.1    | Ca_kabuli_chr08 | 11168949                | TT                              | AA              | 1946908790               |
| SNP_P4_107543_11168962 | NC_021167.1    | Ca_kabuli_chr08 | 11168962                | AA                              | GG              | 1946908792               |
| SNP_P4_107544_11169036 | NC_021167.1    | Ca_kabuli_chr08 | 11169036                | CC                              | TT              | 1946908794               |
| SNP_P4_107545_11169037 | NC_021167.1    | Ca_kabuli_chr08 | 11169037                | AA                              | CC              | 1946908796               |
| SNP_P4_107546_11169039 | NC_021167.1    | Ca_kabuli_chr08 | 11169039                | TT                              | CC              | 1946908798               |
| SNP_P4_107547_11169056 | NC_021167.1    | Ca_kabuli_chr08 | 11169056                | AA                              | GG              | 1946908800               |
| SNP_P4_107548_11169105 | NC_021167.1    | Ca_kabuli_chr08 | 11169105                | TT                              | CC              | 1946908802               |
| SNP_P4_107549_11169132 | NC_021167.1    | Ca_kabuli_chr08 | 11169132                | TT                              | CC              | 1946908804               |
| SNP_P4_107550_11169151 | NC_021167.1    | Ca_kabuli_chr08 | 11169151                | GG                              | CC              | 1946908806               |
| SNP_P4_107551_11169198 | NC_021167.1    | Ca_kabuli_chr08 | 11169198                | GG                              | AA              | 1946908808               |
| SNP_P4_107552_11169206 | NC_021167.1    | Ca_kabuli_chr08 | 11169206                | GG                              | AA              | 1946908810               |
| SNP_P4_107553_11169261 | NC_021167.1    | Ca_kabuli_chr08 | 11169261                | GG                              | AA              | 1946908812               |
| SNP_P4_107554_11169262 | NC_021167.1    | Ca_kabuli_chr08 | 11169262                | CC                              | TT              | 1946908814               |
| SNP_P4_107555_11169285 | NC_021167.1    | Ca_kabuli_chr08 | 11169285                | CC                              | GG              | 1946908816               |
| SNP_P4_107556_11169315 | NC_021167.1    | Ca_kabuli_chr08 | 11169315                | AA                              | GG              | 1946908818               |
| SNP_P4_107558_11171111 | NC_021167.1    | Ca_kabuli_chr08 | 11171111                | CC                              | TT              | 1946908820               |
| SNP_P4_107559_11174193 | NC_021167.1    | Ca_kabuli_chr08 | 11174193                | AA                              | TT              | 1946908822               |
| SNP_P4_107560_11175854 | NC_021167.1    | Ca_kabuli_chr08 | 11175854                | GG                              | AA              | 1946908824               |

| SNPs IDs               | Chromosome IDs | Chromosomes     | Physical positions (bp) | CDC Frontier (Reference genome) | (ILWC46 & LPNB) | NCBI SNPdb Accession IDs |
|------------------------|----------------|-----------------|-------------------------|---------------------------------|-----------------|--------------------------|
| SNP_P4_107561_11177501 | NC_021167.1    | Ca_kabuli_chr08 | 11177501                | CC                              | TT              | 1946908826               |
| SNP_P4_107562_11177999 | NC_021167.1    | Ca_kabuli_chr08 | 11177999                | AA                              | TT              | 1946908828               |
| SNP_P4_107563_11179013 | NC_021167.1    | Ca_kabuli_chr08 | 11179013                | AA                              | GG              | 1946908830               |
| SNP_P4_107564_11180283 | NC_021167.1    | Ca_kabuli_chr08 | 11180283                | CC                              | GG              | 1946908832               |
| SNP_P4_107565_11180307 | NC_021167.1    | Ca_kabuli_chr08 | 11180307                | CC                              | TT              | 1946908834               |
| SNP_P4_107566_11180474 | NC_021167.1    | Ca_kabuli_chr08 | 11180474                | TT                              | AA              | 1946908836               |
| SNP_P4_107567_11180498 | NC_021167.1    | Ca_kabuli_chr08 | 11180498                | CC                              | TT              | 1946908838               |
| SNP_P4_107568_11180842 | NC_021167.1    | Ca_kabuli_chr08 | 11180842                | GG                              | AA              | 1946908840               |
| SNP_P4_107569_11180956 | NC_021167.1    | Ca_kabuli_chr08 | 11180956                | CC                              | AA              | 1946908842               |
| SNP_P4_107570_11185077 | NC_021167.1    | Ca_kabuli_chr08 | 11185077                | CC                              | AA              | 1946908844               |
| SNP_P4_107571_11185481 | NC_021167.1    | Ca_kabuli_chr08 | 11185481                | CC                              | AA              | 1946908846               |
| SNP_P4_107572_11185719 | NC_021167.1    | Ca_kabuli_chr08 | 11185719                | GG                              | AA              | 1946908848               |
| SNP_P4_107573_11186071 | NC_021167.1    | Ca_kabuli_chr08 | 11186071                | AA                              | GG              | 1946908850               |
| SNP_P4_107574_11191338 | NC_021167.1    | Ca_kabuli_chr08 | 11191338                | AA                              | GG              | 1946908852               |
| SNP_P4_107576_11193836 | NC_021167.1    | Ca_kabuli_chr08 | 11193836                | AA                              | GG              | 1946908854               |
| SNP_P4_107577_11194201 | NC_021167.1    | Ca_kabuli_chr08 | 11194201                | TT                              | AA              | 1946908856               |
| SNP_P4_107578_11230532 | NC_021167.1    | Ca_kabuli_chr08 | 11230532                | GG                              | AA              | 1946908858               |
| SNP_P4_107580_11246881 | NC_021167.1    | Ca_kabuli_chr08 | 11246881                | AA                              | TT              | 1946908860               |
| SNP_P4_107581_11248404 | NC_021167.1    | Ca_kabuli_chr08 | 11248404                | AA                              | TT              | 1946908862               |
| SNP_P4_107583_11314333 | NC_021167.1    | Ca_kabuli_chr08 | 11314333                | TT                              | CC              | 1946908864               |
| SNP_P4_107584_11336475 | NC_021167.1    | Ca_kabuli_chr08 | 11336475                | CC                              | TT              | 1946908866               |
| SNP_P4_107585_11340332 | NC_021167.1    | Ca_kabuli_chr08 | 11340332                | CC                              | TT              | 1946908868               |
| SNP_P4_107588_11360110 | NC_021167.1    | Ca_kabuli_chr08 | 11360110                | TT                              | CC              | 1946908870               |
| SNP_P4_107589_11360112 | NC_021167.1    | Ca_kabuli_chr08 | 11360112                | CC                              | TT              | 1946908872               |
| SNP_P4_107590_11360123 | NC_021167.1    | Ca_kabuli_chr08 | 11360123                | AA                              | CC              | 1946908874               |
| SNP_P4_107591_11360172 | NC_021167.1    | Ca_kabuli_chr08 | 11360172                | AA                              | GG              | 1946908876               |
| SNP_P4_107592_11369633 | NC_021167.1    | Ca_kabuli_chr08 | 11369633                | AA                              | GG              | 1946908878               |
| SNP_P4_107593_11369671 | NC_021167.1    | Ca_kabuli_chr08 | 11369671                | TT                              | CC              | 1946908880               |
| SNP_P4_107594_11391079 | NC_021167.1    | Ca_kabuli_chr08 | 11391079                | AA                              | TT              | 1946908882               |
| SNP_P4_107595_11393227 | NC_021167.1    | Ca_kabuli_chr08 | 11393227                | GG                              | TT              | 1946908884               |
| SNP_P4_107596_11393239 | NC_021167.1    | Ca_kabuli_chr08 | 11393239                | AA                              | GG              | 1946908886               |
| SNP_P4_107597_11415518 | NC_021167.1    | Ca_kabuli_chr08 | 11415518                | AA                              | GG              | 1946908888               |
| SNP_P4_107598_11415552 | NC_021167.1    | Ca_kabuli_chr08 | 11415552                | AA                              | GG              | 1946908890               |
| SNP_P4_107599_11415554 | NC_021167.1    | Ca_kabuli_chr08 | 11415554                | GG                              | AA              | 1946908892               |
| SNP_P4_107600_11415573 | NC_021167.1    | Ca_kabuli_chr08 | 11415573                | GG                              | AA              | 1946908894               |
| SNP_P4_107601_11421691 | NC_021167.1    | Ca_kabuli_chr08 | 11421691                | AA                              | GG              | 1946908896               |
| SNP_P4_107602_11422533 | NC_021167.1    | Ca_kabuli_chr08 | 11422533                | AA                              | TT              | 1946908899               |
| SNP_P4_107603_11422569 | NC_021167.1    | Ca_kabuli_chr08 | 11422569                | GG                              | AA              | 1946908901               |
| SNP_P4_107604_11422581 | NC_021167.1    | Ca_kabuli_chr08 | 11422581                | AA                              | CC              | 1946908903               |
| SNP_P4_107605_11422612 | NC_021167.1    | Ca_kabuli_chr08 | 11422612                | GG                              | AA              | 1946908905               |
| SNP_P4_107606_11422721 | NC_021167.1    | Ca_kabuli_chr08 | 11422721                | AA                              | GG              | 1946908907               |
| SNP_P4_107607_11422810 | NC_021167.1    | Ca_kabuli_chr08 | 11422810                | CC                              | TT              | 1946908909               |

| SNPs IDs               | Chromosome IDs | Chromosomes     | Physical positions (bp) | CDC Frontier (Reference genome) | (ILWC46 & LPNB) | NCBI SNPdb Accession IDs |
|------------------------|----------------|-----------------|-------------------------|---------------------------------|-----------------|--------------------------|
| SNP_P4_107608_11422847 | NC_021167.1    | Ca_kabuli_chr08 | 11422847                | TT                              | AA              | 1946908912               |
| SNP_P4_107609_11442612 | NC_021167.1    | Ca_kabuli_chr08 | 11442612                | AA                              | GG              | 1946908914               |
| SNP_P4_107610_11442950 | NC_021167.1    | Ca_kabuli_chr08 | 11442950                | TT                              | GG              | 1946908916               |
| SNP_P4_107611_11448882 | NC_021167.1    | Ca_kabuli_chr08 | 11448882                | AA                              | CC              | 1946908918               |
| SNP_P4_107612_11448950 | NC_021167.1    | Ca_kabuli_chr08 | 11448950                | GG                              | AA              | 1946908920               |
| SNP_P4_107613_11448972 | NC_021167.1    | Ca_kabuli_chr08 | 11448972                | AA                              | CC              | 1946908922               |
| SNP_P4_107614_11449290 | NC_021167.1    | Ca_kabuli_chr08 | 11449290                | AA                              | GG              | 1946908924               |
| SNP_P4_107615_11449296 | NC_021167.1    | Ca_kabuli_chr08 | 11449296                | GG                              | AA              | 1946908927               |
| SNP_P4_107616_11449406 | NC_021167.1    | Ca_kabuli_chr08 | 11449406                | CC                              | GG              | 1946908929               |
| SNP_P4_107618_11450163 | NC_021167.1    | Ca_kabuli_chr08 | 11450163                | TT                              | GG              | 1946908931               |
| SNP_P4_107619_11458531 | NC_021167.1    | Ca_kabuli_chr08 | 11458531                | TT                              | CC              | 1946908933               |
| SNP_P4_107620_11458536 | NC_021167.1    | Ca_kabuli_chr08 | 11458536                | TT                              | CC              | 1946908935               |
| SNP_P4_107621_11458537 | NC_021167.1    | Ca_kabuli_chr08 | 11458537                | GG                              | AA              | 1946908938               |
| SNP_P4_107622_11458565 | NC_021167.1    | Ca_kabuli_chr08 | 11458565                | CC                              | TT              | 1946908940               |
| SNP_P4_107623_11458601 | NC_021167.1    | Ca_kabuli_chr08 | 11458601                | GG                              | AA              | 1946908942               |
| SNP_P4_107624_11458624 | NC_021167.1    | Ca_kabuli_chr08 | 11458624                | AA                              | TT              | 1946908944               |
| SNP_P4_107625_11458647 | NC_021167.1    | Ca_kabuli_chr08 | 11458647                | AA                              | GG              | 1946908946               |
| SNP_P4_107626_11463337 | NC_021167.1    | Ca_kabuli_chr08 | 11463337                | TT                              | CC              | 1946908948               |
| SNP_P4_107627_11464428 | NC_021167.1    | Ca_kabuli_chr08 | 11464428                | CC                              | AA              | 1946908950               |
| SNP_P4_107628_11464573 | NC_021167.1    | Ca_kabuli_chr08 | 11464573                | TT                              | CC              | 1946908952               |
| SNP_P4_107629_11466154 | NC_021167.1    | Ca_kabuli_chr08 | 11466154                | CC                              | GG              | 1946908954               |
| SNP_P4_107630_11466351 | NC_021167.1    | Ca_kabuli_chr08 | 11466351                | CC                              | TT              | 1946908956               |
| SNP_P4_107631_11497232 | NC_021167.1    | Ca_kabuli_chr08 | 11497232                | AA                              | CC              | 1946908959               |
| SNP_P4_107633_11523118 | NC_021167.1    | Ca_kabuli_chr08 | 11523118                | TT                              | GG              | 1946908961               |
| SNP_P4_107634_11528288 | NC_021167.1    | Ca_kabuli_chr08 | 11528288                | GG                              | AA              | 1946908963               |
| SNP_P4_107635_11530316 | NC_021167.1    | Ca_kabuli_chr08 | 11530316                | GG                              | TT              | 1946908965               |
| SNP_P4_107637_11545479 | NC_021167.1    | Ca_kabuli_chr08 | 11545479                | TT                              | AA              | 1946908967               |
| SNP_P4_107641_11600517 | NC_021167.1    | Ca_kabuli_chr08 | 11600517                | CC                              | TT              | 1946908969               |
| SNP_P4_107642_11603897 | NC_021167.1    | Ca_kabuli_chr08 | 11603897                | GG                              | TT              | 1946908971               |
| SNP_P4_107643_11604106 | NC_021167.1    | Ca_kabuli_chr08 | 11604106                | CC                              | TT              | 1946908973               |
| SNP_P4_107644_11604157 | NC_021167.1    | Ca_kabuli_chr08 | 11604157                | AA                              | GG              | 1946908975               |
| SNP_P4_107645_11604167 | NC_021167.1    | Ca_kabuli_chr08 | 11604167                | TT                              | AA              | 1946908977               |
| SNP_P4_107646_11604991 | NC_021167.1    | Ca_kabuli_chr08 | 11604991                | AA                              | GG              | 1946908979               |
| SNP_P4_107647_11605010 | NC_021167.1    | Ca_kabuli_chr08 | 11605010                | CC                              | TT              | 1946908981               |
| SNP_P4_107648_11605201 | NC_021167.1    | Ca_kabuli_chr08 | 11605201                | CC                              | TT              | 1946908983               |
| SNP_P4_107649_11605202 | NC_021167.1    | Ca_kabuli_chr08 | 11605202                | TT                              | GG              | 1946908985               |
| SNP_P4_107650_11605213 | NC_021167.1    | Ca_kabuli_chr08 | 11605213                | TT                              | AA              | 1946908987               |
| SNP_P4_107651_11605246 | NC_021167.1    | Ca_kabuli_chr08 | 11605246                | TT                              | GG              | 1946908989               |
| SNP_P4_107652_11605247 | NC_021167.1    | Ca_kabuli_chr08 | 11605247                | AA                              | TT              | 1946908991               |
| SNP_P4_107653_11605311 | NC_021167.1    | Ca_kabuli_chr08 | 11605311                | GG                              | TT              | 1946908993               |
| SNP_P4_107654_11605315 | NC_021167.1    | Ca_kabuli_chr08 | 11605315                | AA                              | TT              | 1946908995               |
| SNP_P4_107655_11605316 | NC_021167.1    | Ca_kabuli_chr08 | 11605316                | GG                              | AA              | 1946908997               |



| SNPs IDs               | Chromosome IDs | Chromosomes     | Physical positions (bp) | CDC Frontier (Reference genome) | (ILWC46 & LPNB) | NCBI SNPdb Accession IDs |
|------------------------|----------------|-----------------|-------------------------|---------------------------------|-----------------|--------------------------|
| SNP_P4_107656_11644391 | NC_021167.1    | Ca_kabuli_chr08 | 11644391                | AA                              | GG              | 1946908999               |
| SNP_P4_107657_11730909 | NC_021167.1    | Ca_kabuli_chr08 | 11730909                | CC                              | GG              | 1946909001               |
| SNP_P4_107658_11731497 | NC_021167.1    | Ca_kabuli_chr08 | 11731497                | TT                              | CC              | 1946909003               |
| SNP_P4_107660_11757371 | NC_021167.1    | Ca_kabuli_chr08 | 11757371                | AA                              | GG              | 1946909005               |
| SNP_P4_107661_11757482 | NC_021167.1    | Ca_kabuli_chr08 | 11757482                | TT                              | CC              | 1946909007               |
| SNP_P4_107664_11778000 | NC_021167.1    | Ca_kabuli_chr08 | 11778000                | TT                              | CC              | 1946909009               |
| SNP_P4_107666_11806085 | NC_021167.1    | Ca_kabuli_chr08 | 11806085                | TT                              | AA              | 1946909011               |
| SNP_P4_107667_11848456 | NC_021167.1    | Ca_kabuli_chr08 | 11848456                | CC                              | TT              | 1946909013               |
| SNP_P4_107668_11848476 | NC_021167.1    | Ca_kabuli_chr08 | 11848476                | TT                              | GG              | 1946909015               |
| SNP_P4_107669_11911562 | NC_021167.1    | Ca_kabuli_chr08 | 11911562                | TT                              | CC              | 1946909017               |
| SNP_P4_107670_11921424 | NC_021167.1    | Ca_kabuli_chr08 | 11921424                | AA                              | GG              | 1946909019               |
| SNP_P4_107671_11921442 | NC_021167.1    | Ca_kabuli_chr08 | 11921442                | AA                              | TT              | 1946909021               |
| SNP_P4_107672_11921782 | NC_021167.1    | Ca_kabuli_chr08 | 11921782                | TT                              | CC              | 1946909023               |
| SNP_P4_107673_11921815 | NC_021167.1    | Ca_kabuli_chr08 | 11921815                | TT                              | CC              | 1946909025               |
| SNP_P4_107674_11921848 | NC_021167.1    | Ca_kabuli_chr08 | 11921848                | TT                              | CC              | 1946909027               |
| SNP_P4_107675_11921918 | NC_021167.1    | Ca_kabuli_chr08 | 11921918                | TT                              | CC              | 1946909029               |
| SNP_P4_107676_11921947 | NC_021167.1    | Ca_kabuli_chr08 | 11921947                | AA                              | CC              | 1946909031               |
| SNP_P4_107677_11926203 | NC_021167.1    | Ca_kabuli_chr08 | 11926203                | CC                              | TT              | 1946909033               |
| SNP_P4_107678_11927071 | NC_021167.1    | Ca_kabuli_chr08 | 11927071                | CC                              | TT              | 1946909035               |
| SNP_P4_107679_11927219 | NC_021167.1    | Ca_kabuli_chr08 | 11927219                | TT                              | CC              | 1946909037               |
| SNP_P4_107680_11927623 | NC_021167.1    | Ca_kabuli_chr08 | 11927623                | TT                              | CC              | 1946909039               |
| SNP_P4_107681_11939207 | NC_021167.1    | Ca_kabuli_chr08 | 11939207                | CC                              | AA              | 1946909041               |
| SNP_P4_107683_11955482 | NC_021167.1    | Ca_kabuli_chr08 | 11955482                | CC                              | TT              | 1946909043               |
| SNP_P4_107684_11955645 | NC_021167.1    | Ca_kabuli_chr08 | 11955645                | CC                              | TT              | 1946909045               |
| SNP_P4_107686_11968846 | NC_021167.1    | Ca_kabuli_chr08 | 11968846                | AA                              | GG              | 1946909047               |
| SNP_P4_107687_11968858 | NC_021167.1    | Ca_kabuli_chr08 | 11968858                | CC                              | TT              | 1946909049               |
| SNP_P4_107688_11968909 | NC_021167.1    | Ca_kabuli_chr08 | 11968909                | TT                              | CC              | 1946909051               |
| SNP_P4_107689_11968923 | NC_021167.1    | Ca_kabuli_chr08 | 11968923                | TT                              | CC              | 1946909053               |
| SNP_P4_107690_11968938 | NC_021167.1    | Ca_kabuli_chr08 | 11968938                | CC                              | TT              | 1946909055               |
| SNP_P4_107691_11969024 | NC_021167.1    | Ca_kabuli_chr08 | 11969024                | CC                              | AA              | 1946909057               |
| SNP_P4_107692_11969073 | NC_021167.1    | Ca_kabuli_chr08 | 11969073                | TT                              | AA              | 1946909059               |
| SNP_P4_107693_11969201 | NC_021167.1    | Ca_kabuli_chr08 | 11969201                | TT                              | CC              | 1946909061               |
| SNP_P4_107694_11969474 | NC_021167.1    | Ca_kabuli_chr08 | 11969474                | CC                              | AA              | 1946909063               |
| SNP_P4_107695_11969487 | NC_021167.1    | Ca_kabuli_chr08 | 11969487                | CC                              | AA              | 1946909065               |
| SNP_P4_107696_11969493 | NC_021167.1    | Ca_kabuli_chr08 | 11969493                | CC                              | TT              | 1946909067               |
| SNP_P4_107697_11975440 | NC_021167.1    | Ca_kabuli_chr08 | 11975440                | TT                              | CC              | 1946909069               |
| SNP_P4_107699_11975718 | NC_021167.1    | Ca_kabuli_chr08 | 11975718                | CC                              | GG              | 1946909071               |
| SNP_P4_107700_11975784 | NC_021167.1    | Ca_kabuli_chr08 | 11975784                | AA                              | TT              | 1946909073               |
| SNP_P4_107701_11975810 | NC_021167.1    | Ca_kabuli_chr08 | 11975810                | GG                              | CC              | 1946909075               |
| SNP_P4_107702_11975895 | NC_021167.1    | Ca_kabuli_chr08 | 11975895                | AA                              | GG              | 1946909077               |
| SNP_P4_107704_11976024 | NC_021167.1    | Ca_kabuli_chr08 | 11976024                | GG                              | AA              | 1946909079               |
| SNP_P4_107705_11976252 | NC_021167.1    | Ca_kabuli_chr08 | 11976252                | AA                              | TT              | 1946909081               |

| SNPs IDs               | Chromosome IDs | Chromosomes     | Physical positions (bp) | CDC Frontier (Reference genome) | (ILWC46 & LPNB) | NCBI SNPdb Accession IDs |
|------------------------|----------------|-----------------|-------------------------|---------------------------------|-----------------|--------------------------|
| SNP_P4_107706_11976324 | NC_021167.1    | Ca_kabuli_chr08 | 11976324                | AA                              | TT              | 1946909083               |
| SNP_P4_107707_11976543 | NC_021167.1    | Ca_kabuli_chr08 | 11976543                | CC                              | TT              | 1946909085               |
| SNP_P4_107708_11976878 | NC_021167.1    | Ca_kabuli_chr08 | 11976878                | CC                              | TT              | 1946909087               |
| SNP_P4_107709_11979474 | NC_021167.1    | Ca_kabuli_chr08 | 11979474                | GG                              | AA              | 1946909089               |
| SNP_P4_107710_11979781 | NC_021167.1    | Ca_kabuli_chr08 | 11979781                | AA                              | TT              | 1946909091               |
| SNP_P4_107711_11979785 | NC_021167.1    | Ca_kabuli_chr08 | 11979785                | GG                              | AA              | 1946909093               |
| SNP_P4_107712_11986056 | NC_021167.1    | Ca_kabuli_chr08 | 11986056                | GG                              | AA              | 1946909095               |
| SNP_P4_107713_11992763 | NC_021167.1    | Ca_kabuli_chr08 | 11992763                | CC                              | AA              | 1946909097               |
| SNP_P4_107714_11992934 | NC_021167.1    | Ca_kabuli_chr08 | 11992934                | TT                              | CC              | 1946909099               |
| SNP_P4_107715_11992956 | NC_021167.1    | Ca_kabuli_chr08 | 11992956                | GG                              | AA              | 1946909101               |
| SNP_P4_107716_11993008 | NC_021167.1    | Ca_kabuli_chr08 | 11993008                | GG                              | AA              | 1946909103               |
| SNP_P4_107718_11993204 | NC_021167.1    | Ca_kabuli_chr08 | 11993204                | CC                              | AA              | 1946909105               |
| SNP_P4_107719_11993264 | NC_021167.1    | Ca_kabuli_chr08 | 11993264                | GG                              | AA              | 1946909107               |
| SNP_P4_107720_11993277 | NC_021167.1    | Ca_kabuli_chr08 | 11993277                | TT                              | AA              | 1946909109               |
| SNP_P4_107722_12021832 | NC_021167.1    | Ca_kabuli_chr08 | 12021832                | AA                              | GG              | 1946909111               |
| SNP_P4_107723_12045291 | NC_021167.1    | Ca_kabuli_chr08 | 12045291                | AA                              | CC              | 1946909113               |
| SNP_P4_107724_12045297 | NC_021167.1    | Ca_kabuli_chr08 | 12045297                | AA                              | TT              | 1946909115               |
| SNP_P4_107725_12046409 | NC_021167.1    | Ca_kabuli_chr08 | 12046409                | GG                              | CC              | 1946909117               |
| SNP_P4_107726_12048281 | NC_021167.1    | Ca_kabuli_chr08 | 12048281                | AA                              | CC              | 1946909119               |
| SNP_P4_107728_12048556 | NC_021167.1    | Ca_kabuli_chr08 | 12048556                | CC                              | TT              | 1946909122               |
| SNP_P4_107729_12048590 | NC_021167.1    | Ca_kabuli_chr08 | 12048590                | AA                              | GG              | 1946909124               |
| SNP_P4_107731_12048748 | NC_021167.1    | Ca_kabuli_chr08 | 12048748                | AA                              | GG              | 1946909126               |
| SNP_P4_107732_12048776 | NC_021167.1    | Ca_kabuli_chr08 | 12048776                | CC                              | AA              | 1946909128               |
| SNP_P4_107733_12048782 | NC_021167.1    | Ca_kabuli_chr08 | 12048782                | TT                              | CC              | 1946909130               |
| SNP_P4_107734_12048821 | NC_021167.1    | Ca_kabuli_chr08 | 12048821                | AA                              | GG              | 1946909132               |
| SNP_P4_107735_12056308 | NC_021167.1    | Ca_kabuli_chr08 | 12056308                | TT                              | CC              | 1946909134               |
| SNP_P4_107736_12056430 | NC_021167.1    | Ca_kabuli_chr08 | 12056430                | TT                              | AA              | 1946909136               |
| SNP_P4_107737_12056463 | NC_021167.1    | Ca_kabuli_chr08 | 12056463                | AA                              | GG              | 1946909138               |
| SNP_P4_107739_12056567 | NC_021167.1    | Ca_kabuli_chr08 | 12056567                | GG                              | TT              | 1946909140               |
| SNP_P4_107740_12056696 | NC_021167.1    | Ca_kabuli_chr08 | 12056696                | AA                              | TT              | 1946909142               |
| SNP_P4_107741_12058369 | NC_021167.1    | Ca_kabuli_chr08 | 12058369                | CC                              | AA              | 1946909144               |
| SNP_P4_107742_12062307 | NC_021167.1    | Ca_kabuli_chr08 | 12062307                | TT                              | CC              | 1946909146               |
| SNP_P4_107743_12067937 | NC_021167.1    | Ca_kabuli_chr08 | 12067937                | GG                              | AA              | 1946909148               |
| SNP_P4_107744_12070536 | NC_021167.1    | Ca_kabuli_chr08 | 12070536                | GG                              | TT              | 1946909150               |
| SNP_P4_107745_12082228 | NC_021167.1    | Ca_kabuli_chr08 | 12082228                | TT                              | GG              | 1946909152               |
| SNP_P4_107746_12086109 | NC_021167.1    | Ca_kabuli_chr08 | 12086109                | AA                              | GG              | 1946909155               |
| SNP_P4_107747_12087523 | NC_021167.1    | Ca_kabuli_chr08 | 12087523                | GG                              | AA              | 1946909157               |
| SNP_P4_107748_12087530 | NC_021167.1    | Ca_kabuli_chr08 | 12087530                | AA                              | CC              | 1946909159               |
| SNP_P4_107750_12807637 | NC_021167.1    | Ca_kabuli_chr08 | 12807637                | AA                              | CC              | 1946909161               |
| SNP_P4_107751_12818311 | NC_021167.1    | Ca_kabuli_chr08 | 12818311                | AA                              | TT              | 1946909163               |
| SNP_P4_107752_12818384 | NC_021167.1    | Ca_kabuli_chr08 | 12818384                | CC                              | TT              | 1946909165               |
| SNP_P4_107753_12818385 | NC_021167.1    | Ca_kabuli_chr08 | 12818385                | TT                              | GG              | 1946909167               |

| SNPs IDs               | Chromosome IDs | Chromosomes     | Physical positions (bp) | CDC Frontier (Reference genome) | (ILWC46 & LPNB) | NCBI SNPdb Accession IDs |
|------------------------|----------------|-----------------|-------------------------|---------------------------------|-----------------|--------------------------|
| SNP_P4_107754_12840692 | NC_021167.1    | Ca_kabuli_chr08 | 12840692                | CC                              | TT              | 1946909169               |
| SNP_P4_107755_12843914 | NC_021167.1    | Ca_kabuli_chr08 | 12843914                | TT                              | CC              | 1946909172               |
| SNP_P4_107756_12871893 | NC_021167.1    | Ca_kabuli_chr08 | 12871893                | GG                              | TT              | 1946909174               |
| SNP_P4_107758_12878103 | NC_021167.1    | Ca_kabuli_chr08 | 12878103                | AA                              | CC              | 1946909176               |
| SNP_P4_107759_12878107 | NC_021167.1    | Ca_kabuli_chr08 | 12878107                | TT                              | GG              | 1946909178               |
| SNP_P4_107760_12966279 | NC_021167.1    | Ca_kabuli_chr08 | 12966279                | CC                              | TT              | 1946909180               |
| SNP_P4_107761_12978770 | NC_021167.1    | Ca_kabuli_chr08 | 12978770                | AA                              | CC              | 1946909182               |
| SNP_P4_107762_12978829 | NC_021167.1    | Ca_kabuli_chr08 | 12978829                | GG                              | TT              | 1946909184               |
| SNP_P4_107763_12978851 | NC_021167.1    | Ca_kabuli_chr08 | 12978851                | AA                              | GG              | 1946909186               |
| SNP_P4_107764_12978883 | NC_021167.1    | Ca_kabuli_chr08 | 12978883                | AA                              | GG              | 1946909189               |
| SNP_P4_107765_12978958 | NC_021167.1    | Ca_kabuli_chr08 | 12978958                | CC                              | AA              | 1946909191               |
| SNP_P4_107768_12979086 | NC_021167.1    | Ca_kabuli_chr08 | 12979086                | CC                              | GG              | 1946909193               |
| SNP_P4_107769_12979106 | NC_021167.1    | Ca_kabuli_chr08 | 12979106                | AA                              | TT              | 1946909195               |
| SNP_P4_107770_12979119 | NC_021167.1    | Ca_kabuli_chr08 | 12979119                | CC                              | AA              | 1946909197               |
| SNP_P4_107771_12979161 | NC_021167.1    | Ca_kabuli_chr08 | 12979161                | CC                              | TT              | 1946909199               |
| SNP_P4_107772_12979166 | NC_021167.1    | Ca_kabuli_chr08 | 12979166                | AA                              | GG              | 1946909201               |
| SNP_P4_107773_12979204 | NC_021167.1    | Ca_kabuli_chr08 | 12979204                | TT                              | CC              | 1946909203               |
| SNP_P4_107774_12979252 | NC_021167.1    | Ca_kabuli_chr08 | 12979252                | AA                              | TT              | 1946909205               |
| SNP_P4_107775_12979296 | NC_021167.1    | Ca_kabuli_chr08 | 12979296                | TT                              | GG              | 1946909207               |
| SNP_P4_107776_12979338 | NC_021167.1    | Ca_kabuli_chr08 | 12979338                | AA                              | GG              | 1946909209               |
| SNP_P4_107777_12979367 | NC_021167.1    | Ca_kabuli_chr08 | 12979367                | TT                              | CC              | 1946909211               |
| SNP_P4_107778_12979513 | NC_021167.1    | Ca_kabuli_chr08 | 12979513                | AA                              | GG              | 1946909213               |
| SNP_P4_107779_12979573 | NC_021167.1    | Ca_kabuli_chr08 | 12979573                | CC                              | GG              | 1946909215               |
| SNP_P4_107780_12979615 | NC_021167.1    | Ca_kabuli_chr08 | 12979615                | TT                              | GG              | 1946909217               |
| SNP_P4_107781_12979772 | NC_021167.1    | Ca_kabuli_chr08 | 12979772                | TT                              | CC              | 1946909220               |
| SNP_P4_107782_12979826 | NC_021167.1    | Ca_kabuli_chr08 | 12979826                | TT                              | GG              | 1946909221               |
| SNP_P4_107783_12979882 | NC_021167.1    | Ca_kabuli_chr08 | 12979882                | TT                              | CC              | 1946909222               |
| SNP_P4_107784_12979943 | NC_021167.1    | Ca_kabuli_chr08 | 12979943                | CC                              | GG              | 1946909223               |
| SNP_P4_107785_12979947 | NC_021167.1    | Ca_kabuli_chr08 | 12979947                | GG                              | AA              | 1946909224               |
| SNP_P4_107786_12980029 | NC_021167.1    | Ca_kabuli_chr08 | 12980029                | AA                              | GG              | 1946909225               |
| SNP_P4_107787_12980036 | NC_021167.1    | Ca_kabuli_chr08 | 12980036                | AA                              | GG              | 1946909226               |
| SNP_P4_107788_12980043 | NC_021167.1    | Ca_kabuli_chr08 | 12980043                | AA                              | CC              | 1946909227               |
| SNP_P4_107789_12980076 | NC_021167.1    | Ca_kabuli_chr08 | 12980076                | CC                              | TT              | 1946909228               |
| SNP_P4_107790_12980506 | NC_021167.1    | Ca_kabuli_chr08 | 12980506                | AA                              | GG              | 1946909229               |
| SNP_P4_107791_12980538 | NC_021167.1    | Ca_kabuli_chr08 | 12980538                | CC                              | TT              | 1946909230               |
| SNP_P4_107792_12980632 | NC_021167.1    | Ca_kabuli_chr08 | 12980632                | GG                              | CC              | 1946909231               |
| SNP_P4_107793_12980656 | NC_021167.1    | Ca_kabuli_chr08 | 12980656                | TT                              | CC              | 1946909232               |
| SNP_P4_107794_12980711 | NC_021167.1    | Ca_kabuli_chr08 | 12980711                | CC                              | TT              | 1946909233               |
| SNP_P4_107795_12980880 | NC_021167.1    | Ca_kabuli_chr08 | 12980880                | AA                              | GG              | 1946909234               |
| SNP_P4_107796_12980927 | NC_021167.1    | Ca_kabuli_chr08 | 12980927                | CC                              | TT              | 1946909235               |
| SNP_P4_107797_12981045 | NC_021167.1    | Ca_kabuli_chr08 | 12981045                | CC                              | TT              | 1946909236               |
| SNP_P4_107798_12982752 | NC_021167.1    | Ca_kabuli_chr08 | 12982752                | AA                              | GG              | 1946909237               |

| SNPs IDs               | Chromosome IDs | Chromosomes     | Physical positions (bp) | CDC Frontier (Reference genome) | (ILWC46 & LPNB) | NCBI SNPdb Accession IDs |
|------------------------|----------------|-----------------|-------------------------|---------------------------------|-----------------|--------------------------|
| SNP_P4_107799_12982921 | NC_021167.1    | Ca_kabuli_chr08 | 12982921                | AA                              | CC              | 1946909238               |
| SNP_P4_107800_12983429 | NC_021167.1    | Ca_kabuli_chr08 | 12983429                | CC                              | TT              | 1946909239               |
| SNP_P4_107801_12983450 | NC_021167.1    | Ca_kabuli_chr08 | 12983450                | CC                              | TT              | 1946909240               |
| SNP_P4_107803_12983506 | NC_021167.1    | Ca_kabuli_chr08 | 12983506                | AA                              | CC              | 1946909241               |
| SNP_P4_107804_12983529 | NC_021167.1    | Ca_kabuli_chr08 | 12983529                | AA                              | GG              | 1946909242               |
| SNP_P4_107805_12983626 | NC_021167.1    | Ca_kabuli_chr08 | 12983626                | TT                              | CC              | 1946909243               |
| SNP_P4_107806_12983705 | NC_021167.1    | Ca_kabuli_chr08 | 12983705                | AA                              | GG              | 1946909244               |
| SNP_P4_107807_12983740 | NC_021167.1    | Ca_kabuli_chr08 | 12983740                | TT                              | AA              | 1946909245               |
| SNP_P4_107808_12983762 | NC_021167.1    | Ca_kabuli_chr08 | 12983762                | CC                              | TT              | 1946909246               |
| SNP_P4_107809_12983803 | NC_021167.1    | Ca_kabuli_chr08 | 12983803                | CC                              | TT              | 1946909247               |
| SNP_P4_107810_12983854 | NC_021167.1    | Ca_kabuli_chr08 | 12983854                | CC                              | AA              | 1946909248               |
| SNP_P4_107811_12983884 | NC_021167.1    | Ca_kabuli_chr08 | 12983884                | CC                              | TT              | 1946909249               |
| SNP_P4_107813_12984004 | NC_021167.1    | Ca_kabuli_chr08 | 12984004                | AA                              | GG              | 1946909250               |
| SNP_P4_107814_12984030 | NC_021167.1    | Ca_kabuli_chr08 | 12984030                | GG                              | AA              | 1946909251               |
| SNP_P4_107815_12984031 | NC_021167.1    | Ca_kabuli_chr08 | 12984031                | GG                              | AA              | 1946909252               |
| SNP_P4_107816_12984089 | NC_021167.1    | Ca_kabuli_chr08 | 12984089                | CC                              | AA              | 1946909253               |
| SNP_P4_107817_12984090 | NC_021167.1    | Ca_kabuli_chr08 | 12984090                | AA                              | CC              | 1946909254               |
| SNP_P4_107819_12984113 | NC_021167.1    | Ca_kabuli_chr08 | 12984113                | AA                              | TT              | 1946909255               |
| SNP_P4_107820_12984150 | NC_021167.1    | Ca_kabuli_chr08 | 12984150                | TT                              | CC              | 1946909256               |
| SNP_P4_107821_12984201 | NC_021167.1    | Ca_kabuli_chr08 | 12984201                | CC                              | TT              | 1946909257               |
| SNP_P4_107822_12984293 | NC_021167.1    | Ca_kabuli_chr08 | 12984293                | AA                              | GG              | 1946909258               |
| SNP_P4_107823_12984359 | NC_021167.1    | Ca_kabuli_chr08 | 12984359                | AA                              | GG              | 1946909259               |
| SNP_P4_107824_12984375 | NC_021167.1    | Ca_kabuli_chr08 | 12984375                | TT                              | CC              | 1946909260               |
| SNP_P4_107825_12984390 | NC_021167.1    | Ca_kabuli_chr08 | 12984390                | TT                              | CC              | 1946909261               |
| SNP_P4_107826_12984562 | NC_021167.1    | Ca_kabuli_chr08 | 12984562                | CC                              | TT              | 1946909262               |
| SNP_P4_107827_12984651 | NC_021167.1    | Ca_kabuli_chr08 | 12984651                | AA                              | GG              | 1946909263               |
| SNP_P4_107828_12984734 | NC_021167.1    | Ca_kabuli_chr08 | 12984734                | AA                              | TT              | 1946909264               |
| SNP_P4_107829_12984782 | NC_021167.1    | Ca_kabuli_chr08 | 12984782                | TT                              | CC              | 1946909265               |
| SNP_P4_107830_12984791 | NC_021167.1    | Ca_kabuli_chr08 | 12984791                | CC                              | GG              | 1946909266               |
| SNP_P4_107831_12984886 | NC_021167.1    | Ca_kabuli_chr08 | 12984886                | CC                              | TT              | 1946909267               |
| SNP_P4_107832_12984943 | NC_021167.1    | Ca_kabuli_chr08 | 12984943                | GG                              | AA              | 1946909268               |
| SNP_P4_107833_12984953 | NC_021167.1    | Ca_kabuli_chr08 | 12984953                | CC                              | TT              | 1946909269               |
| SNP_P4_107834_12984971 | NC_021167.1    | Ca_kabuli_chr08 | 12984971                | AA                              | GG              | 1946909270               |
| SNP_P4_107835_12984994 | NC_021167.1    | Ca_kabuli_chr08 | 12984994                | GG                              | CC              | 1946909271               |
| SNP_P4_107836_12985038 | NC_021167.1    | Ca_kabuli_chr08 | 12985038                | AA                              | CC              | 1946909272               |
| SNP_P4_107837_12985058 | NC_021167.1    | Ca_kabuli_chr08 | 12985058                | TT                              | CC              | 1946909273               |
| SNP_P4_107838_12985109 | NC_021167.1    | Ca_kabuli_chr08 | 12985109                | TT                              | AA              | 1946909274               |
| SNP_P4_107839_12985116 | NC_021167.1    | Ca_kabuli_chr08 | 12985116                | AA                              | GG              | 1946909275               |
| SNP_P4_107840_12985121 | NC_021167.1    | Ca_kabuli_chr08 | 12985121                | TT                              | CC              | 1946909276               |
| SNP_P4_107841_12985151 | NC_021167.1    | Ca_kabuli_chr08 | 12985151                | AA                              | CC              | 1946909277               |
| SNP_P4_107842_12985289 | NC_021167.1    | Ca_kabuli_chr08 | 12985289                | GG                              | CC              | 1946909278               |
| SNP_P4_107844_12985350 | NC_021167.1    | Ca_kabuli_chr08 | 12985350                | AA                              | GG              | 1946909279               |

| SNPs IDs               | Chromosome IDs | Chromosomes     | Physical positions (bp) | CDC Frontier (Reference genome) | (ILWC46 & LPNB) | NCBI SNPdb Accession IDs |
|------------------------|----------------|-----------------|-------------------------|---------------------------------|-----------------|--------------------------|
| SNP_P4_107845_12985586 | NC_021167.1    | Ca_kabuli_chr08 | 12985586                | GG                              | AA              | 1946909280               |
| SNP_P4_107846_12985618 | NC_021167.1    | Ca_kabuli_chr08 | 12985618                | CC                              | TT              | 1946909281               |
| SNP_P4_107847_12985661 | NC_021167.1    | Ca_kabuli_chr08 | 12985661                | CC                              | TT              | 1946909282               |
| SNP_P4_107848_12985762 | NC_021167.1    | Ca_kabuli_chr08 | 12985762                | AA                              | GG              | 1946909283               |
| SNP_P4_107849_12986964 | NC_021167.1    | Ca_kabuli_chr08 | 12986964                | AA                              | CC              | 1946909284               |
| SNP_P4_107850_12987186 | NC_021167.1    | Ca_kabuli_chr08 | 12987186                | CC                              | TT              | 1946909285               |
| SNP_P4_107851_12987197 | NC_021167.1    | Ca_kabuli_chr08 | 12987197                | CC                              | TT              | 1946909287               |
| SNP_P4_107852_12987250 | NC_021167.1    | Ca_kabuli_chr08 | 12987250                | GG                              | TT              | 1946909288               |
| SNP_P4_107853_12987314 | NC_021167.1    | Ca_kabuli_chr08 | 12987314                | TT                              | GG              | 1946909290               |
| SNP_P4_107854_12987355 | NC_021167.1    | Ca_kabuli_chr08 | 12987355                | TT                              | CC              | 1946909292               |
| SNP_P4_107855_12987382 | NC_021167.1    | Ca_kabuli_chr08 | 12987382                | CC                              | TT              | 1946909294               |
| SNP_P4_107856_12987420 | NC_021167.1    | Ca_kabuli_chr08 | 12987420                | CC                              | TT              | 1946909296               |
| SNP_P4_107857_12987435 | NC_021167.1    | Ca_kabuli_chr08 | 12987435                | GG                              | AA              | 1946909298               |
| SNP_P4_107858_12987580 | NC_021167.1    | Ca_kabuli_chr08 | 12987580                | GG                              | CC              | 1946909300               |
| SNP_P4_107859_12987587 | NC_021167.1    | Ca_kabuli_chr08 | 12987587                | GG                              | AA              | 1946909303               |
| SNP_P4_107860_12987628 | NC_021167.1    | Ca_kabuli_chr08 | 12987628                | TT                              | AA              | 1946909305               |
| SNP_P4_107861_12987713 | NC_021167.1    | Ca_kabuli_chr08 | 12987713                | GG                              | AA              | 1946909307               |
| SNP_P4_107862_12987737 | NC_021167.1    | Ca_kabuli_chr08 | 12987737                | CC                              | TT              | 1946909309               |
| SNP_P4_107863_12987754 | NC_021167.1    | Ca_kabuli_chr08 | 12987754                | AA                              | GG              | 1946909311               |
| SNP_P4_107864_12987760 | NC_021167.1    | Ca_kabuli_chr08 | 12987760                | CC                              | TT              | 1946909312               |
| SNP_P4_107865_12987768 | NC_021167.1    | Ca_kabuli_chr08 | 12987768                | GG                              | TT              | 1946909314               |
| SNP_P4_107866_12987779 | NC_021167.1    | Ca_kabuli_chr08 | 12987779                | AA                              | GG              | 1946909317               |
| SNP_P4_107867_12987812 | NC_021167.1    | Ca_kabuli_chr08 | 12987812                | TT                              | CC              | 1946909319               |
| SNP_P4_107868_12987902 | NC_021167.1    | Ca_kabuli_chr08 | 12987902                | CC                              | TT              | 1946909321               |
| SNP_P4_107869_12987950 | NC_021167.1    | Ca_kabuli_chr08 | 12987950                | TT                              | CC              | 1946909323               |
| SNP_P4_107870_12987954 | NC_021167.1    | Ca_kabuli_chr08 | 12987954                | TT                              | AA              | 1946909325               |
| SNP_P4_107871_12988004 | NC_021167.1    | Ca_kabuli_chr08 | 12988004                | TT                              | GG              | 1946909327               |
| SNP_P4_107872_12988071 | NC_021167.1    | Ca_kabuli_chr08 | 12988071                | GG                              | TT              | 1946909329               |
| SNP_P4_107873_12988095 | NC_021167.1    | Ca_kabuli_chr08 | 12988095                | AA                              | GG              | 1946909331               |
| SNP_P4_107874_12988115 | NC_021167.1    | Ca_kabuli_chr08 | 12988115                | AA                              | GG              | 1946909333               |
| SNP_P4_107875_12988135 | NC_021167.1    | Ca_kabuli_chr08 | 12988135                | TT                              | GG              | 1946909335               |
| SNP_P4_107876_12988200 | NC_021167.1    | Ca_kabuli_chr08 | 12988200                | CC                              | TT              | 1946909337               |
| SNP_P4_107877_12988271 | NC_021167.1    | Ca_kabuli_chr08 | 12988271                | AA                              | TT              | 1946909339               |
| SNP_P4_107878_12988422 | NC_021167.1    | Ca_kabuli_chr08 | 12988422                | TT                              | CC              | 1946909341               |
| SNP_P4_107879_12988499 | NC_021167.1    | Ca_kabuli_chr08 | 12988499                | TT                              | GG              | 1946909343               |
| SNP_P4_107880_12988543 | NC_021167.1    | Ca_kabuli_chr08 | 12988543                | AA                              | TT              | 1946909345               |
| SNP_P4_107882_12988665 | NC_021167.1    | Ca_kabuli_chr08 | 12988665                | CC                              | TT              | 1946909347               |
| SNP_P4_107883_12988824 | NC_021167.1    | Ca_kabuli_chr08 | 12988824                | CC                              | AA              | 1946909349               |
| SNP_P4_107884_12988844 | NC_021167.1    | Ca_kabuli_chr08 | 12988844                | GG                              | AA              | 1946909351               |
| SNP_P4_107885_12988960 | NC_021167.1    | Ca_kabuli_chr08 | 12988960                | AA                              | CC              | 1946909353               |
| SNP_P4_107886_12988987 | NC_021167.1    | Ca_kabuli_chr08 | 12988987                | GG                              | CC              | 1946909355               |
| SNP_P4_107887_12989033 | NC_021167.1    | Ca_kabuli_chr08 | 12989033                | CC                              | TT              | 1946909357               |

| SNPs IDs               | Chromosome IDs | Chromosomes     | Physical positions (bp) | CDC Frontier (Reference genome) | (ILWC46 & LPNB) | NCBI SNPdb Accession IDs |
|------------------------|----------------|-----------------|-------------------------|---------------------------------|-----------------|--------------------------|
| SNP_P4_107888_12989035 | NC_021167.1    | Ca_kabuli_chr08 | 12989035                | AA                              | GG              | 1946909359               |
| SNP_P4_107889_12989064 | NC_021167.1    | Ca_kabuli_chr08 | 12989064                | CC                              | GG              | 1946909361               |
| SNP_P4_107890_12989102 | NC_021167.1    | Ca_kabuli_chr08 | 12989102                | AA                              | GG              | 1946909363               |
| SNP_P4_107891_12989143 | NC_021167.1    | Ca_kabuli_chr08 | 12989143                | CC                              | TT              | 1946909365               |
| SNP_P4_107892_12989172 | NC_021167.1    | Ca_kabuli_chr08 | 12989172                | AA                              | GG              | 1946909367               |
| SNP_P4_107893_12989221 | NC_021167.1    | Ca_kabuli_chr08 | 12989221                | TT                              | AA              | 1946909369               |
| SNP_P4_107894_12989252 | NC_021167.1    | Ca_kabuli_chr08 | 12989252                | TT                              | AA              | 1946909371               |
| SNP_P4_107895_12989285 | NC_021167.1    | Ca_kabuli_chr08 | 12989285                | GG                              | AA              | 1946909373               |
| SNP_P4_107896_12989403 | NC_021167.1    | Ca_kabuli_chr08 | 12989403                | TT                              | CC              | 1946909375               |
| SNP_P4_107897_12989412 | NC_021167.1    | Ca_kabuli_chr08 | 12989412                | AA                              | GG              | 1946909377               |
| SNP_P4_107898_12989811 | NC_021167.1    | Ca_kabuli_chr08 | 12989811                | GG                              | AA              | 1946909379               |
| SNP_P4_107899_12989834 | NC_021167.1    | Ca_kabuli_chr08 | 12989834                | TT                              | AA              | 1946909381               |
| SNP_P4_107900_12989855 | NC_021167.1    | Ca_kabuli_chr08 | 12989855                | AA                              | GG              | 1946909383               |
| SNP_P4_107902_12990058 | NC_021167.1    | Ca_kabuli_chr08 | 12990058                | CC                              | GG              | 1946909385               |
| SNP_P4_107903_12996678 | NC_021167.1    | Ca_kabuli_chr08 | 12996678                | CC                              | TT              | 1946909387               |
| SNP_P4_107904_12998626 | NC_021167.1    | Ca_kabuli_chr08 | 12998626                | TT                              | CC              | 1946909389               |
| SNP_P4_107905_12998696 | NC_021167.1    | Ca_kabuli_chr08 | 12998696                | TT                              | AA              | 1946909391               |
| SNP_P4_107907_12998764 | NC_021167.1    | Ca_kabuli_chr08 | 12998764                | AA                              | CC              | 1946909393               |
| SNP_P4_107908_12998841 | NC_021167.1    | Ca_kabuli_chr08 | 12998841                | CC                              | GG              | 1946909395               |
| SNP_P4_107909_12998911 | NC_021167.1    | Ca_kabuli_chr08 | 12998911                | TT                              | GG              | 1946909397               |
| SNP_P4_107910_12998942 | NC_021167.1    | Ca_kabuli_chr08 | 12998942                | CC                              | TT              | 1946909399               |
| SNP_P4_107911_12998948 | NC_021167.1    | Ca_kabuli_chr08 | 12998948                | GG                              | AA              | 1946909401               |
| SNP_P4_107912_12998952 | NC_021167.1    | Ca_kabuli_chr08 | 12998952                | TT                              | CC              | 1946909403               |
| SNP_P4_107913_12998960 | NC_021167.1    | Ca_kabuli_chr08 | 12998960                | TT                              | CC              | 1946909405               |
| SNP_P4_107914_12999101 | NC_021167.1    | Ca_kabuli_chr08 | 12999101                | AA                              | GG              | 1946909407               |
| SNP_P4_107915_12999858 | NC_021167.1    | Ca_kabuli_chr08 | 12999858                | AA                              | TT              | 1946909409               |
| SNP_P4_107916_12999895 | NC_021167.1    | Ca_kabuli_chr08 | 12999895                | TT                              | AA              | 1946909411               |
| SNP_P4_107917_13000251 | NC_021167.1    | Ca_kabuli_chr08 | 13000251                | CC                              | AA              | 1946909413               |
| SNP_P4_107918_13001350 | NC_021167.1    | Ca_kabuli_chr08 | 13001350                | TT                              | CC              | 1946909415               |
| SNP_P4_107919_13001359 | NC_021167.1    | Ca_kabuli_chr08 | 13001359                | AA                              | GG              | 1946909417               |
| SNP_P4_107920_13001457 | NC_021167.1    | Ca_kabuli_chr08 | 13001457                | CC                              | TT              | 1946909419               |
| SNP_P4_107921_13001855 | NC_021167.1    | Ca_kabuli_chr08 | 13001855                | GG                              | TT              | 1946909421               |
| SNP_P4_107922_13005589 | NC_021167.1    | Ca_kabuli_chr08 | 13005589                | AA                              | GG              | 1946909423               |
| SNP_P4_107923_13009422 | NC_021167.1    | Ca_kabuli_chr08 | 13009422                | TT                              | CC              | 1946909425               |
| SNP_P4_107924_13009477 | NC_021167.1    | Ca_kabuli_chr08 | 13009477                | TT                              | CC              | 1946909427               |
| SNP_P4_107925_13009553 | NC_021167.1    | Ca_kabuli_chr08 | 13009553                | TT                              | CC              | 1946909429               |
| SNP_P4_107926_13010722 | NC_021167.1    | Ca_kabuli_chr08 | 13010722                | CC                              | TT              | 1946909431               |
| SNP_P4_107927_13018652 | NC_021167.1    | Ca_kabuli_chr08 | 13018652                | GG                              | AA              | 1946909433               |
| SNP_P4_107928_13020716 | NC_021167.1    | Ca_kabuli_chr08 | 13020716                | CC                              | GG              | 1946909435               |
| SNP_P4_107929_13025011 | NC_021167.1    | Ca_kabuli_chr08 | 13025011                | TT                              | AA              | 1946909437               |
| SNP_P4_107930_13041031 | NC_021167.1    | Ca_kabuli_chr08 | 13041031                | CC                              | TT              | 1946909439               |
| SNP_P4_107931_13061101 | NC_021167.1    | Ca_kabuli_chr08 | 13061101                | CC                              | AA              | 1946909442               |

| SNPs IDs               | Chromosome IDs | Chromosomes     | Physical positions (bp) | CDC Frontier (Reference genome) | (ILWC46 & LPNB) | NCBI SNPdb Accession IDs |
|------------------------|----------------|-----------------|-------------------------|---------------------------------|-----------------|--------------------------|
| SNP_P4_107932_13076502 | NC_021167.1    | Ca_kabuli_chr08 | 13076502                | AA                              | CC              | 1946909444               |
| SNP_P4_107933_13076503 | NC_021167.1    | Ca_kabuli_chr08 | 13076503                | AA                              | TT              | 1946909446               |
| SNP_P4_107935_13083324 | NC_021167.1    | Ca_kabuli_chr08 | 13083324                | GG                              | AA              | 1946909448               |
| SNP_P4_107936_13101385 | NC_021167.1    | Ca_kabuli_chr08 | 13101385                | AA                              | CC              | 1946909450               |
| SNP_P4_107937_13101413 | NC_021167.1    | Ca_kabuli_chr08 | 13101413                | AA                              | GG              | 1946909452               |
| SNP_P4_107938_13102074 | NC_021167.1    | Ca_kabuli_chr08 | 13102074                | AA                              | GG              | 1946909454               |
| SNP_P4_107939_13103664 | NC_021167.1    | Ca_kabuli_chr08 | 13103664                | AA                              | GG              | 1946909456               |
| SNP_P4_107940_13106880 | NC_021167.1    | Ca_kabuli_chr08 | 13106880                | GG                              | TT              | 1946909458               |
| SNP_P4_107943_13268753 | NC_021167.1    | Ca_kabuli_chr08 | 13268753                | AA                              | GG              | 1946909460               |
| SNP_P4_107944_13277506 | NC_021167.1    | Ca_kabuli_chr08 | 13277506                | TT                              | AA              | 1946909462               |
| SNP_P4_107945_13277507 | NC_021167.1    | Ca_kabuli_chr08 | 13277507                | TT                              | AA              | 1946909464               |
| SNP_P4_107946_13297006 | NC_021167.1    | Ca_kabuli_chr08 | 13297006                | AA                              | CC              | 1946909466               |
| SNP_P4_107947_13297017 | NC_021167.1    | Ca_kabuli_chr08 | 13297017                | TT                              | CC              | 1946909468               |
| SNP_P4_107948_13297354 | NC_021167.1    | Ca_kabuli_chr08 | 13297354                | GG                              | CC              | 1946909470               |
| SNP_P4_107949_13297361 | NC_021167.1    | Ca_kabuli_chr08 | 13297361                | TT                              | CC              | 1946909472               |
| SNP_P4_107950_13297373 | NC_021167.1    | Ca_kabuli_chr08 | 13297373                | CC                              | GG              | 1946909474               |
| SNP_P4_107951_13297394 | NC_021167.1    | Ca_kabuli_chr08 | 13297394                | CC                              | GG              | 1946909476               |
| SNP_P4_107952_13297414 | NC_021167.1    | Ca_kabuli_chr08 | 13297414                | AA                              | GG              | 1946909478               |
| SNP_P4_107953_13297435 | NC_021167.1    | Ca_kabuli_chr08 | 13297435                | TT                              | GG              | 1946909480               |
| SNP_P4_107954_13297436 | NC_021167.1    | Ca_kabuli_chr08 | 13297436                | TT                              | CC              | 1946909482               |
| SNP_P4_107955_13297635 | NC_021167.1    | Ca_kabuli_chr08 | 13297635                | TT                              | CC              | 1946909485               |
| SNP_P4_107956_13297718 | NC_021167.1    | Ca_kabuli_chr08 | 13297718                | TT                              | CC              | 1946909487               |
| SNP_P4_107957_13297916 | NC_021167.1    | Ca_kabuli_chr08 | 13297916                | TT                              | GG              | 1946909489               |
| SNP_P4_107959_13298036 | NC_021167.1    | Ca_kabuli_chr08 | 13298036                | TT                              | CC              | 1946909491               |
| SNP_P4_107960_13298057 | NC_021167.1    | Ca_kabuli_chr08 | 13298057                | GG                              | AA              | 1946909493               |
| SNP_P4_107961_13298116 | NC_021167.1    | Ca_kabuli_chr08 | 13298116                | TT                              | CC              | 1946909495               |
| SNP_P4_107962_13298200 | NC_021167.1    | Ca_kabuli_chr08 | 13298200                | AA                              | TT              | 1946909497               |
| SNP_P4_107963_13298206 | NC_021167.1    | Ca_kabuli_chr08 | 13298206                | TT                              | AA              | 1946909499               |
| SNP_P4_107965_13299094 | NC_021167.1    | Ca_kabuli_chr08 | 13299094                | AA                              | CC              | 1946909501               |
| SNP_P4_107966_13305167 | NC_021167.1    | Ca_kabuli_chr08 | 13305167                | TT                              | CC              | 1946909503               |
| SNP_P4_107967_13308277 | NC_021167.1    | Ca_kabuli_chr08 | 13308277                | TT                              | GG              | 1946909505               |
| SNP_P4_107968_13308638 | NC_021167.1    | Ca_kabuli_chr08 | 13308638                | CC                              | TT              | 1946909507               |
| SNP_P4_107969_13308653 | NC_021167.1    | Ca_kabuli_chr08 | 13308653                | AA                              | CC              | 1946909509               |
| SNP_P4_107970_13311065 | NC_021167.1    | Ca_kabuli_chr08 | 13311065                | AA                              | CC              | 1946909511               |
| SNP_P4_107971_13311095 | NC_021167.1    | Ca_kabuli_chr08 | 13311095                | GG                              | CC              | 1946909513               |
| SNP_P4_107972_13311103 | NC_021167.1    | Ca_kabuli_chr08 | 13311103                | CC                              | TT              | 1946909515               |
| SNP_P4_107973_13312912 | NC_021167.1    | Ca_kabuli_chr08 | 13312912                | AA                              | CC              | 1946909517               |
| SNP_P4_107974_13312913 | NC_021167.1    | Ca_kabuli_chr08 | 13312913                | TT                              | AA              | 1946909519               |
| SNP_P4_107975_13312930 | NC_021167.1    | Ca_kabuli_chr08 | 13312930                | CC                              | TT              | 1946909521               |
| SNP_P4_107976_13329419 | NC_021167.1    | Ca_kabuli_chr08 | 13329419                | CC                              | TT              | 1946909523               |
| SNP_P4_107978_13366946 | NC_021167.1    | Ca_kabuli_chr08 | 13366946                | AA                              | CC              | 1946909525               |
| SNP_P4_107979_13368761 | NC_021167.1    | Ca_kabuli_chr08 | 13368761                | CC                              | AA              | 1946909527               |

| SNPs IDs               | Chromosome IDs | Chromosomes     | Physical positions (bp) | CDC Frontier (Reference genome) | (ILWC46 & LPNB) | NCBI SNPdb Accession IDs |
|------------------------|----------------|-----------------|-------------------------|---------------------------------|-----------------|--------------------------|
| SNP_P4_107980_13369166 | NC_021167.1    | Ca_kabuli_chr08 | 13369166                | GG                              | CC              | 1946909529               |
| SNP_P4_107981_13369258 | NC_021167.1    | Ca_kabuli_chr08 | 13369258                | AA                              | GG              | 1946909531               |
| SNP_P4_107982_13369297 | NC_021167.1    | Ca_kabuli_chr08 | 13369297                | AA                              | TT              | 1946909533               |
| SNP_P4_107983_13369390 | NC_021167.1    | Ca_kabuli_chr08 | 13369390                | AA                              | GG              | 1946909535               |
| SNP_P4_107984_13369447 | NC_021167.1    | Ca_kabuli_chr08 | 13369447                | AA                              | GG              | 1946909537               |
| SNP_P4_107985_13369831 | NC_021167.1    | Ca_kabuli_chr08 | 13369831                | AA                              | GG              | 1946909539               |
| SNP_P4_107986_13369858 | NC_021167.1    | Ca_kabuli_chr08 | 13369858                | GG                              | AA              | 1946909541               |
| SNP_P4_107987_13369871 | NC_021167.1    | Ca_kabuli_chr08 | 13369871                | AA                              | GG              | 1946909543               |
| SNP_P4_107989_13438801 | NC_021167.1    | Ca_kabuli_chr08 | 13438801                | AA                              | TT              | 1946909545               |
| SNP_P4_107990_13458597 | NC_021167.1    | Ca_kabuli_chr08 | 13458597                | GG                              | TT              | 1946909548               |
| SNP_P4_107991_13475493 | NC_021167.1    | Ca_kabuli_chr08 | 13475493                | TT                              | GG              | 1946909550               |
| SNP_P4_107992_13475509 | NC_021167.1    | Ca_kabuli_chr08 | 13475509                | GG                              | AA              | 1946909552               |
| SNP_P4_107993_13475510 | NC_021167.1    | Ca_kabuli_chr08 | 13475510                | TT                              | CC              | 1946909554               |
| SNP_P4_107994_13475513 | NC_021167.1    | Ca_kabuli_chr08 | 13475513                | TT                              | AA              | 1946909556               |
| SNP_P4_107995_13475555 | NC_021167.1    | Ca_kabuli_chr08 | 13475555                | TT                              | CC              | 1946909558               |
| SNP_P4_107996_13475561 | NC_021167.1    | Ca_kabuli_chr08 | 13475561                | TT                              | AA              | 1946909560               |
| SNP_P4_107997_13475564 | NC_021167.1    | Ca_kabuli_chr08 | 13475564                | AA                              | GG              | 1946909562               |
| SNP_P4_107998_13475571 | NC_021167.1    | Ca_kabuli_chr08 | 13475571                | AA                              | GG              | 1946909564               |
| SNP_P4_107999_13475797 | NC_021167.1    | Ca_kabuli_chr08 | 13475797                | TT                              | CC              | 1946909566               |
| SNP_P4_108001_13477878 | NC_021167.1    | Ca_kabuli_chr08 | 13477878                | CC                              | TT              | 1946909568               |
| SNP_P4_108002_13504022 | NC_021167.1    | Ca_kabuli_chr08 | 13504022                | TT                              | AA              | 1946909570               |
| SNP_P4_108003_13702171 | NC_021167.1    | Ca_kabuli_chr08 | 13702171                | TT                              | CC              | 1946909572               |
| SNP_P4_108004_13702190 | NC_021167.1    | Ca_kabuli_chr08 | 13702190                | AA                              | TT              | 1946909574               |
| SNP_P4_108005_13702252 | NC_021167.1    | Ca_kabuli_chr08 | 13702252                | TT                              | CC              | 1946909576               |
| SNP_P4_108006_13702272 | NC_021167.1    | Ca_kabuli_chr08 | 13702272                | CC                              | AA              | 1946909578               |
| SNP_P4_108007_13702509 | NC_021167.1    | Ca_kabuli_chr08 | 13702509                | TT                              | CC              | 1946909580               |
| SNP_P4_108008_13702596 | NC_021167.1    | Ca_kabuli_chr08 | 13702596                | AA                              | GG              | 1946909582               |
| SNP_P4_108010_13702608 | NC_021167.1    | Ca_kabuli_chr08 | 13702608                | GG                              | AA              | 1946909584               |
| SNP_P4_108011_13702612 | NC_021167.1    | Ca_kabuli_chr08 | 13702612                | CC                              | TT              | 1946909586               |
| SNP_P4_108012_13705554 | NC_021167.1    | Ca_kabuli_chr08 | 13705554                | TT                              | CC              | 1946909588               |
| SNP_P4_108013_13705585 | NC_021167.1    | Ca_kabuli_chr08 | 13705585                | AA                              | GG              | 1946909590               |
| SNP_P4_108014_13705609 | NC_021167.1    | Ca_kabuli_chr08 | 13705609                | TT                              | CC              | 1946909592               |
| SNP_P4_108015_13714445 | NC_021167.1    | Ca_kabuli_chr08 | 13714445                | AA                              | CC              | 1946909594               |
| SNP_P4_108018_13722167 | NC_021167.1    | Ca_kabuli_chr08 | 13722167                | CC                              | AA              | 1946909596               |
| SNP_P4_108019_13722230 | NC_021167.1    | Ca_kabuli_chr08 | 13722230                | AA                              | TT              | 1946909598               |
| SNP_P4_108020_13723896 | NC_021167.1    | Ca_kabuli_chr08 | 13723896                | AA                              | GG              | 1946909600               |
| SNP_P4_108021_13727052 | NC_021167.1    | Ca_kabuli_chr08 | 13727052                | AA                              | TT              | 1946909602               |
| SNP_P4_108022_13727123 | NC_021167.1    | Ca_kabuli_chr08 | 13727123                | TT                              | GG              | 1946909604               |
| SNP_P4_108023_13727751 | NC_021167.1    | Ca_kabuli_chr08 | 13727751                | TT                              | CC              | 1946909606               |
| SNP_P4_108024_13727788 | NC_021167.1    | Ca_kabuli_chr08 | 13727788                | AA                              | GG              | 1946909608               |
| SNP_P4_108025_13727794 | NC_021167.1    | Ca_kabuli_chr08 | 13727794                | CC                              | TT              | 1946909610               |
| SNP_P4_108026_13727875 | NC_021167.1    | Ca_kabuli_chr08 | 13727875                | CC                              | TT              | 1946909612               |



| SNPs IDs               | Chromosome IDs | Chromosomes     | Physical positions (bp) | CDC Frontier (Reference genome) | (ILWC46 & LPNB) | NCBI SNPdb Accession IDs |
|------------------------|----------------|-----------------|-------------------------|---------------------------------|-----------------|--------------------------|
| SNP_P4_108027_13728017 | NC_021167.1    | Ca_kabuli_chr08 | 13728017                | AA                              | GG              | 1946909614               |
| SNP_P4_108028_13728019 | NC_021167.1    | Ca_kabuli_chr08 | 13728019                | AA                              | GG              | 1946909616               |
| SNP_P4_108029_13728022 | NC_021167.1    | Ca_kabuli_chr08 | 13728022                | AA                              | GG              | 1946909618               |
| SNP_P4_108030_13728161 | NC_021167.1    | Ca_kabuli_chr08 | 13728161                | AA                              | GG              | 1946909620               |
| SNP_P4_108031_13728174 | NC_021167.1    | Ca_kabuli_chr08 | 13728174                | AA                              | GG              | 1946909622               |
| SNP_P4_108032_13728204 | NC_021167.1    | Ca_kabuli_chr08 | 13728204                | CC                              | TT              | 1946909624               |
| SNP_P4_108033_13728276 | NC_021167.1    | Ca_kabuli_chr08 | 13728276                | CC                              | TT              | 1946909626               |
| SNP_P4_108034_13728285 | NC_021167.1    | Ca_kabuli_chr08 | 13728285                | TT                              | CC              | 1946909628               |
| SNP_P4_108035_13728330 | NC_021167.1    | Ca_kabuli_chr08 | 13728330                | TT                              | GG              | 1946909630               |
| SNP_P4_108036_13736583 | NC_021167.1    | Ca_kabuli_chr08 | 13736583                | GG                              | AA              | 1946909632               |
| SNP_P4_108037_13750262 | NC_021167.1    | Ca_kabuli_chr08 | 13750262                | TT                              | CC              | 1946909634               |
| SNP_P4_108038_13750280 | NC_021167.1    | Ca_kabuli_chr08 | 13750280                | TT                              | CC              | 1946909636               |
| SNP_P4_108039_13750328 | NC_021167.1    | Ca_kabuli_chr08 | 13750328                | CC                              | TT              | 1946909638               |
| SNP_P4_108040_13750339 | NC_021167.1    | Ca_kabuli_chr08 | 13750339                | CC                              | GG              | 1946909640               |
| SNP_P4_108041_13750352 | NC_021167.1    | Ca_kabuli_chr08 | 13750352                | TT                              | AA              | 1946909642               |
| SNP_P4_108042_13750356 | NC_021167.1    | Ca_kabuli_chr08 | 13750356                | CC                              | TT              | 1946909644               |
| SNP_P4_108043_13750404 | NC_021167.1    | Ca_kabuli_chr08 | 13750404                | AA                              | GG              | 1946909647               |
| SNP_P4_108045_13751683 | NC_021167.1    | Ca_kabuli_chr08 | 13751683                | TT                              | CC              | 1946909649               |
| SNP_P4_108046_13753623 | NC_021167.1    | Ca_kabuli_chr08 | 13753623                | CC                              | TT              | 1946909651               |
| SNP_P4_108048_13758316 | NC_021167.1    | Ca_kabuli_chr08 | 13758316                | GG                              | AA              | 1946909653               |
| SNP_P4_108049_13758735 | NC_021167.1    | Ca_kabuli_chr08 | 13758735                | GG                              | AA              | 1946909655               |
| SNP_P4_108050_13758737 | NC_021167.1    | Ca_kabuli_chr08 | 13758737                | TT                              | CC              | 1946909657               |
| SNP_P4_108051_13758747 | NC_021167.1    | Ca_kabuli_chr08 | 13758747                | AA                              | TT              | 1946909659               |
| SNP_P4_108052_13764278 | NC_021167.1    | Ca_kabuli_chr08 | 13764278                | TT                              | GG              | 1946909661               |
| SNP_P4_108053_13766603 | NC_021167.1    | Ca_kabuli_chr08 | 13766603                | GG                              | AA              | 1946909663               |
| SNP_P4_108055_13771555 | NC_021167.1    | Ca_kabuli_chr08 | 13771555                | CC                              | TT              | 1946909665               |
| SNP_P4_108056_13774524 | NC_021167.1    | Ca_kabuli_chr08 | 13774524                | CC                              | TT              | 1946909667               |
| SNP_P4_108057_13778822 | NC_021167.1    | Ca_kabuli_chr08 | 13778822                | AA                              | GG              | 1946909669               |
| SNP_P4_108058_13778834 | NC_021167.1    | Ca_kabuli_chr08 | 13778834                | CC                              | TT              | 1946909671               |
| SNP_P4_108059_13778862 | NC_021167.1    | Ca_kabuli_chr08 | 13778862                | TT                              | AA              | 1946909673               |
| SNP_P4_108060_13778863 | NC_021167.1    | Ca_kabuli_chr08 | 13778863                | TT                              | CC              | 1946909675               |
| SNP_P4_108061_13779189 | NC_021167.1    | Ca_kabuli_chr08 | 13779189                | TT                              | CC              | 1946909677               |
| SNP_P4_108062_13799609 | NC_021167.1    | Ca_kabuli_chr08 | 13799609                | CC                              | TT              | 1946909680               |
| SNP_P4_108063_13799657 | NC_021167.1    | Ca_kabuli_chr08 | 13799657                | GG                              | AA              | 1946909682               |
| SNP_P4_108064_13799753 | NC_021167.1    | Ca_kabuli_chr08 | 13799753                | GG                              | AA              | 1946909684               |
| SNP_P4_108065_13799792 | NC_021167.1    | Ca_kabuli_chr08 | 13799792                | CC                              | TT              | 1946909686               |
| SNP_P4_108066_13799873 | NC_021167.1    | Ca_kabuli_chr08 | 13799873                | AA                              | CC              | 1946909688               |
| SNP_P4_108067_13799882 | NC_021167.1    | Ca_kabuli_chr08 | 13799882                | TT                              | CC              | 1946909690               |
| SNP_P4_108068_13799894 | NC_021167.1    | Ca_kabuli_chr08 | 13799894                | TT                              | CC              | 1946909691               |
| SNP_P4_108069_13799921 | NC_021167.1    | Ca_kabuli_chr08 | 13799921                | AA                              | GG              | 1946909693               |
| SNP_P4_108070_13800048 | NC_021167.1    | Ca_kabuli_chr08 | 13800048                | AA                              | CC              | 1946909695               |
| SNP_P4_108071_13800049 | NC_021167.1    | Ca_kabuli_chr08 | 13800049                | CC                              | TT              | 1946909697               |

| SNPs IDs               | Chromosome IDs | Chromosomes     | Physical positions (bp) | CDC Frontier (Reference genome) | (ILWC46 & LPNB) | NCBI SNPdb Accession IDs |
|------------------------|----------------|-----------------|-------------------------|---------------------------------|-----------------|--------------------------|
| SNP_P4_108072_13800059 | NC_021167.1    | Ca_kabuli_chr08 | 13800059                | CC                              | TT              | 1946909699               |
| SNP_P4_108073_13802453 | NC_021167.1    | Ca_kabuli_chr08 | 13802453                | AA                              | GG              | 1946909701               |
| SNP_P4_108074_13802461 | NC_021167.1    | Ca_kabuli_chr08 | 13802461                | AA                              | CC              | 1946909703               |
| SNP_P4_108075_13802521 | NC_021167.1    | Ca_kabuli_chr08 | 13802521                | AA                              | GG              | 1946909705               |
| SNP_P4_108076_13813386 | NC_021167.1    | Ca_kabuli_chr08 | 13813386                | GG                              | AA              | 1946909707               |
| SNP_P4_108077_13813440 | NC_021167.1    | Ca_kabuli_chr08 | 13813440                | AA                              | GG              | 1946909709               |
| SNP_P4_108078_13813471 | NC_021167.1    | Ca_kabuli_chr08 | 13813471                | GG                              | AA              | 1946909711               |
| SNP_P4_108079_13813683 | NC_021167.1    | Ca_kabuli_chr08 | 13813683                | TT                              | AA              | 1946909713               |
| SNP_P4_108080_13813715 | NC_021167.1    | Ca_kabuli_chr08 | 13813715                | CC                              | TT              | 1946909715               |
| SNP_P4_108081_13813849 | NC_021167.1    | Ca_kabuli_chr08 | 13813849                | AA                              | TT              | 1946909717               |
| SNP_P4_108082_13813887 | NC_021167.1    | Ca_kabuli_chr08 | 13813887                | AA                              | GG              | 1946909719               |
| SNP_P4_108083_13813888 | NC_021167.1    | Ca_kabuli_chr08 | 13813888                | GG                              | AA              | 1946909721               |
| SNP_P4_108084_13813908 | NC_021167.1    | Ca_kabuli_chr08 | 13813908                | CC                              | TT              | 1946909723               |
| SNP_P4_108085_13814048 | NC_021167.1    | Ca_kabuli_chr08 | 13814048                | AA                              | GG              | 1946909725               |
| SNP_P4_108086_13814376 | NC_021167.1    | Ca_kabuli_chr08 | 13814376                | CC                              | GG              | 1946909727               |
| SNP_P4_108087_13814878 | NC_021167.1    | Ca_kabuli_chr08 | 13814878                | CC                              | TT              | 1946909729               |
| SNP_P4_108090_13815128 | NC_021167.1    | Ca_kabuli_chr08 | 13815128                | AA                              | GG              | 1946909731               |
| SNP_P4_108091_13815137 | NC_021167.1    | Ca_kabuli_chr08 | 13815137                | CC                              | TT              | 1946909733               |
| SNP_P4_108092_13815150 | NC_021167.1    | Ca_kabuli_chr08 | 13815150                | CC                              | GG              | 1946909735               |
| SNP_P4_108093_13815171 | NC_021167.1    | Ca_kabuli_chr08 | 13815171                | AA                              | TT              | 1946909737               |
| SNP_P4_108094_13815198 | NC_021167.1    | Ca_kabuli_chr08 | 13815198                | GG                              | AA              | 1946909739               |
| SNP_P4_108095_13815204 | NC_021167.1    | Ca_kabuli_chr08 | 13815204                | CC                              | GG              | 1946909741               |
| SNP_P4_108096_13815377 | NC_021167.1    | Ca_kabuli_chr08 | 13815377                | TT                              | CC              | 1946909743               |
| SNP_P4_108097_13815406 | NC_021167.1    | Ca_kabuli_chr08 | 13815406                | CC                              | AA              | 1946909745               |
| SNP_P4_108098_13815453 | NC_021167.1    | Ca_kabuli_chr08 | 13815453                | TT                              | GG              | 1946909747               |
| SNP_P4_108099_13815469 | NC_021167.1    | Ca_kabuli_chr08 | 13815469                | TT                              | CC              | 1946909749               |
| SNP_P4_108100_13815479 | NC_021167.1    | Ca_kabuli_chr08 | 13815479                | AA                              | CC              | 1946909751               |
| SNP_P4_108101_13815524 | NC_021167.1    | Ca_kabuli_chr08 | 13815524                | TT                              | AA              | 1946909753               |
| SNP_P4_108102_13815530 | NC_021167.1    | Ca_kabuli_chr08 | 13815530                | GG                              | AA              | 1946909755               |
| SNP_P4_108103_13815533 | NC_021167.1    | Ca_kabuli_chr08 | 13815533                | TT                              | AA              | 1946909757               |
| SNP_P4_108104_13815590 | NC_021167.1    | Ca_kabuli_chr08 | 13815590                | AA                              | GG              | 1946909759               |
| SNP_P4_108105_13815604 | NC_021167.1    | Ca_kabuli_chr08 | 13815604                | CC                              | TT              | 1946909761               |
| SNP_P4_108106_13815624 | NC_021167.1    | Ca_kabuli_chr08 | 13815624                | TT                              | CC              | 1946909763               |
| SNP_P4_108107_13817357 | NC_021167.1    | Ca_kabuli_chr08 | 13817357                | GG                              | AA              | 1946909765               |
| SNP_P4_108109_13817387 | NC_021167.1    | Ca_kabuli_chr08 | 13817387                | AA                              | TT              | 1946909767               |
| SNP_P4_108110_13821638 | NC_021167.1    | Ca_kabuli_chr08 | 13821638                | TT                              | CC              | 1946909769               |
| SNP_P4_108111_13821674 | NC_021167.1    | Ca_kabuli_chr08 | 13821674                | TT                              | CC              | 1946909771               |
| SNP_P4_108112_13821691 | NC_021167.1    | Ca_kabuli_chr08 | 13821691                | AA                              | GG              | 1946909773               |
| SNP_P4_108113_13821849 | NC_021167.1    | Ca_kabuli_chr08 | 13821849                | TT                              | CC              | 1946909776               |
| SNP_P4_108114_13821871 | NC_021167.1    | Ca_kabuli_chr08 | 13821871                | CC                              | TT              | 1946909778               |
| SNP_P4_108115_13821899 | NC_021167.1    | Ca_kabuli_chr08 | 13821899                | GG                              | AA              | 1946909780               |
| SNP_P4_108116_13821906 | NC_021167.1    | Ca_kabuli_chr08 | 13821906                | AA                              | TT              | 1946909782               |

| SNPs IDs               | Chromosome IDs | Chromosomes     | Physical positions (bp) | CDC Frontier (Reference genome) | (ILWC46 & LPNB) | NCBI SNPdb Accession IDs |
|------------------------|----------------|-----------------|-------------------------|---------------------------------|-----------------|--------------------------|
| SNP_P4_108117_13833784 | NC_021167.1    | Ca_kabuli_chr08 | 13833784                | GG                              | AA              | 1946909784               |
| SNP_P4_108118_13833812 | NC_021167.1    | Ca_kabuli_chr08 | 13833812                | GG                              | TT              | 1946909786               |
| SNP_P4_108119_13833832 | NC_021167.1    | Ca_kabuli_chr08 | 13833832                | GG                              | TT              | 1946909788               |
| SNP_P4_108120_13834015 | NC_021167.1    | Ca_kabuli_chr08 | 13834015                | GG                              | AA              | 1946909790               |
| SNP_P4_108121_13834089 | NC_021167.1    | Ca_kabuli_chr08 | 13834089                | AA                              | CC              | 1946909792               |
| SNP_P4_108122_13834096 | NC_021167.1    | Ca_kabuli_chr08 | 13834096                | AA                              | CC              | 1946909794               |
| SNP_P4_108123_13834203 | NC_021167.1    | Ca_kabuli_chr08 | 13834203                | TT                              | CC              | 1946909796               |
| SNP_P4_108124_13834218 | NC_021167.1    | Ca_kabuli_chr08 | 13834218                | CC                              | AA              | 1946909798               |
| SNP_P4_108125_13834227 | NC_021167.1    | Ca_kabuli_chr08 | 13834227                | AA                              | GG              | 1946909800               |
| SNP_P4_108127_13848601 | NC_021167.1    | Ca_kabuli_chr08 | 13848601                | AA                              | TT              | 1946909802               |
| SNP_P4_108128_13861854 | NC_021167.1    | Ca_kabuli_chr08 | 13861854                | AA                              | GG              | 1946909804               |
| SNP_P4_108129_13870071 | NC_021167.1    | Ca_kabuli_chr08 | 13870071                | AA                              | GG              | 1946909806               |
| SNP_P4_108130_13890932 | NC_021167.1    | Ca_kabuli_chr08 | 13890932                | CC                              | TT              | 1946909808               |
| SNP_P4_108133_13919123 | NC_021167.1    | Ca_kabuli_chr08 | 13919123                | TT                              | CC              | 1946909810               |
| SNP_P4_108134_13919124 | NC_021167.1    | Ca_kabuli_chr08 | 13919124                | TT                              | CC              | 1946909812               |
| SNP_P4_108135_13921376 | NC_021167.1    | Ca_kabuli_chr08 | 13921376                | AA                              | CC              | 1946909814               |
| SNP_P4_108136_13921380 | NC_021167.1    | Ca_kabuli_chr08 | 13921380                | AA                              | GG              | 1946909816               |
| SNP_P4_108137_13927305 | NC_021167.1    | Ca_kabuli_chr08 | 13927305                | GG                              | AA              | 1946909818               |
| SNP_P4_108138_13932711 | NC_021167.1    | Ca_kabuli_chr08 | 13932711                | GG                              | TT              | 1946909820               |
| SNP_P4_108139_13939059 | NC_021167.1    | Ca_kabuli_chr08 | 13939059                | AA                              | GG              | 1946909822               |
| SNP_P4_108140_13939118 | NC_021167.1    | Ca_kabuli_chr08 | 13939118                | AA                              | CC              | 1946909824               |
| SNP_P4_108141_13980185 | NC_021167.1    | Ca_kabuli_chr08 | 13980185                | AA                              | GG              | 1946909826               |
| SNP_P4_108142_13980572 | NC_021167.1    | Ca_kabuli_chr08 | 13980572                | AA                              | GG              | 1946909828               |
| SNP_P4_108143_13993491 | NC_021167.1    | Ca_kabuli_chr08 | 13993491                | TT                              | CC              | 1946909830               |
| SNP_P4_108144_13993507 | NC_021167.1    | Ca_kabuli_chr08 | 13993507                | GG                              | TT              | 1946909832               |
| SNP_P4_108145_13993529 | NC_021167.1    | Ca_kabuli_chr08 | 13993529                | GG                              | AA              | 1946909834               |
| SNP_P4_108146_13993554 | NC_021167.1    | Ca_kabuli_chr08 | 13993554                | TT                              | CC              | 1946909837               |
| SNP_P4_108147_13993565 | NC_021167.1    | Ca_kabuli_chr08 | 13993565                | AA                              | GG              | 1946909839               |
| SNP_P4_108148_13993589 | NC_021167.1    | Ca_kabuli_chr08 | 13993589                | GG                              | CC              | 1946909841               |
| SNP_P4_108150_13993667 | NC_021167.1    | Ca_kabuli_chr08 | 13993667                | CC                              | TT              | 1946909843               |
| SNP_P4_108151_13993680 | NC_021167.1    | Ca_kabuli_chr08 | 13993680                | AA                              | TT              | 1946909845               |
| SNP_P4_108152_13993696 | NC_021167.1    | Ca_kabuli_chr08 | 13993696                | CC                              | TT              | 1946909847               |
| SNP_P4_108153_13993703 | NC_021167.1    | Ca_kabuli_chr08 | 13993703                | GG                              | AA              | 1946909849               |
| SNP_P4_108154_13993725 | NC_021167.1    | Ca_kabuli_chr08 | 13993725                | GG                              | CC              | 1946909851               |
| SNP_P4_108155_13993768 | NC_021167.1    | Ca_kabuli_chr08 | 13993768                | CC                              | TT              | 1946909853               |
| SNP_P4_108156_13993847 | NC_021167.1    | Ca_kabuli_chr08 | 13993847                | TT                              | CC              | 1946909855               |
| SNP_P4_108158_13993976 | NC_021167.1    | Ca_kabuli_chr08 | 13993976                | TT                              | CC              | 1946909857               |
| SNP_P4_108159_13993995 | NC_021167.1    | Ca_kabuli_chr08 | 13993995                | AA                              | TT              | 1946909859               |
| SNP_P4_108160_13996264 | NC_021167.1    | Ca_kabuli_chr08 | 13996264                | AA                              | GG              | 1946909861               |
| SNP_P4_108161_14015931 | NC_021167.1    | Ca_kabuli_chr08 | 14015931                | AA                              | GG              | 1946909863               |
| SNP_P4_108162_14022351 | NC_021167.1    | Ca_kabuli_chr08 | 14022351                | CC                              | TT              | 1946909865               |
| SNP_P4_108163_14034673 | NC_021167.1    | Ca_kabuli_chr08 | 14034673                | GG                              | CC              | 1946909867               |

| SNPs IDs               | Chromosome IDs | Chromosomes     | Physical positions (bp) | CDC Frontier (Reference genome) | (ILWC46 & LPNB) | NCBI SNPdb Accession IDs |
|------------------------|----------------|-----------------|-------------------------|---------------------------------|-----------------|--------------------------|
| SNP_P4_108164_14035127 | NC_021167.1    | Ca_kabuli_chr08 | 14035127                | TT                              | AA              | 1946909869               |
| SNP_P4_108165_14035159 | NC_021167.1    | Ca_kabuli_chr08 | 14035159                | AA                              | TT              | 1946909871               |
| SNP_P4_108166_14035161 | NC_021167.1    | Ca_kabuli_chr08 | 14035161                | TT                              | AA              | 1946909873               |
| SNP_P4_108167_14035184 | NC_021167.1    | Ca_kabuli_chr08 | 14035184                | TT                              | AA              | 1946909875               |
| SNP_P4_108168_14035342 | NC_021167.1    | Ca_kabuli_chr08 | 14035342                | CC                              | TT              | 1946909878               |
| SNP_P4_108169_14035454 | NC_021167.1    | Ca_kabuli_chr08 | 14035454                | TT                              | CC              | 1946909880               |
| SNP_P4_108171_14035524 | NC_021167.1    | Ca_kabuli_chr08 | 14035524                | GG                              | AA              | 1946909882               |
| SNP_P4_108172_14035568 | NC_021167.1    | Ca_kabuli_chr08 | 14035568                | AA                              | GG              | 1946909884               |
| SNP_P4_108173_14035662 | NC_021167.1    | Ca_kabuli_chr08 | 14035662                | CC                              | GG              | 1946909886               |
| SNP_P4_108174_14035779 | NC_021167.1    | Ca_kabuli_chr08 | 14035779                | CC                              | TT              | 1946909888               |
| SNP_P4_108175_14035827 | NC_021167.1    | Ca_kabuli_chr08 | 14035827                | AA                              | GG              | 1946909890               |
| SNP_P4_108176_14035831 | NC_021167.1    | Ca_kabuli_chr08 | 14035831                | GG                              | AA              | 1946909892               |
| SNP_P4_108177_14036229 | NC_021167.1    | Ca_kabuli_chr08 | 14036229                | TT                              | GG              | 1946909894               |
| SNP_P4_108179_14040892 | NC_021167.1    | Ca_kabuli_chr08 | 14040892                | AA                              | TT              | 1946909896               |
| SNP_P4_108181_14063813 | NC_021167.1    | Ca_kabuli_chr08 | 14063813                | AA                              | GG              | 1946909898               |
| SNP_P4_108182_14063891 | NC_021167.1    | Ca_kabuli_chr08 | 14063891                | AA                              | CC              | 1946909900               |
| SNP_P4_108183_14063960 | NC_021167.1    | Ca_kabuli_chr08 | 14063960                | GG                              | CC              | 1946909902               |
| SNP_P4_108184_14063984 | NC_021167.1    | Ca_kabuli_chr08 | 14063984                | CC                              | TT              | 1946909904               |
| SNP_P4_108186_14064120 | NC_021167.1    | Ca_kabuli_chr08 | 14064120                | TT                              | AA              | 1946909906               |
| SNP_P4_108187_14064150 | NC_021167.1    | Ca_kabuli_chr08 | 14064150                | GG                              | CC              | 1946909908               |
| SNP_P4_108189_14064277 | NC_021167.1    | Ca_kabuli_chr08 | 14064277                | GG                              | AA              | 1946909910               |
| SNP_P4_108190_14064292 | NC_021167.1    | Ca_kabuli_chr08 | 14064292                | AA                              | GG              | 1946909912               |
| SNP_P4_108191_14064298 | NC_021167.1    | Ca_kabuli_chr08 | 14064298                | CC                              | GG              | 1946909914               |
| SNP_P4_108192_14064302 | NC_021167.1    | Ca_kabuli_chr08 | 14064302                | TT                              | AA              | 1946909916               |
| SNP_P4_108193_14064325 | NC_021167.1    | Ca_kabuli_chr08 | 14064325                | TT                              | AA              | 1946909918               |
| SNP_P4_108194_14066725 | NC_021167.1    | Ca_kabuli_chr08 | 14066725                | TT                              | CC              | 1946909921               |
| SNP_P4_108195_14068972 | NC_021167.1    | Ca_kabuli_chr08 | 14068972                | CC                              | TT              | 1946909923               |
| SNP_P4_108196_14072694 | NC_021167.1    | Ca_kabuli_chr08 | 14072694                | CC                              | TT              | 1946909925               |
| SNP_P4_108197_14072724 | NC_021167.1    | Ca_kabuli_chr08 | 14072724                | AA                              | TT              | 1946909927               |
| SNP_P4_108198_14072726 | NC_021167.1    | Ca_kabuli_chr08 | 14072726                | CC                              | TT              | 1946909929               |
| SNP_P4_108199_14072739 | NC_021167.1    | Ca_kabuli_chr08 | 14072739                | AA                              | GG              | 1946909931               |
| SNP_P4_108200_14072763 | NC_021167.1    | Ca_kabuli_chr08 | 14072763                | TT                              | CC              | 1946909933               |
| SNP_P4_108201_14072791 | NC_021167.1    | Ca_kabuli_chr08 | 14072791                | CC                              | AA              | 1946909935               |
| SNP_P4_108203_14072802 | NC_021167.1    | Ca_kabuli_chr08 | 14072802                | AA                              | GG              | 1946909937               |
| SNP_P4_108204_14072810 | NC_021167.1    | Ca_kabuli_chr08 | 14072810                | CC                              | TT              | 1946909939               |
| SNP_P4_108205_14072875 | NC_021167.1    | Ca_kabuli_chr08 | 14072875                | CC                              | TT              | 1946909941               |
| SNP_P4_108206_14072936 | NC_021167.1    | Ca_kabuli_chr08 | 14072936                | CC                              | TT              | 1946909943               |
| SNP_P4_108207_14072937 | NC_021167.1    | Ca_kabuli_chr08 | 14072937                | GG                              | AA              | 1946909945               |
| SNP_P4_108208_14072949 | NC_021167.1    | Ca_kabuli_chr08 | 14072949                | CC                              | GG              | 1946909947               |
| SNP_P4_108209_14073036 | NC_021167.1    | Ca_kabuli_chr08 | 14073036                | CC                              | GG              | 1946909949               |
| SNP_P4_108210_14073455 | NC_021167.1    | Ca_kabuli_chr08 | 14073455                | TT                              | CC              | 1946909951               |
| SNP_P4_108211_14073462 | NC_021167.1    | Ca_kabuli_chr08 | 14073462                | CC                              | TT              | 1946909953               |

| SNPs IDs               | Chromosome IDs | Chromosomes     | Physical positions (bp) | CDC Frontier (Reference genome) | (ILWC46 & LPNB) | NCBI SNPdb Accession IDs |
|------------------------|----------------|-----------------|-------------------------|---------------------------------|-----------------|--------------------------|
| SNP_P4_108213_14073621 | NC_021167.1    | Ca_kabuli_chr08 | 14073621                | TT                              | CC              | 1946909955               |
| SNP_P4_108214_14073756 | NC_021167.1    | Ca_kabuli_chr08 | 14073756                | AA                              | CC              | 1946909957               |
| SNP_P4_108215_14074253 | NC_021167.1    | Ca_kabuli_chr08 | 14074253                | CC                              | TT              | 1946909959               |
| SNP_P4_108217_14074313 | NC_021167.1    | Ca_kabuli_chr08 | 14074313                | CC                              | GG              | 1946909961               |
| SNP_P4_108218_14074566 | NC_021167.1    | Ca_kabuli_chr08 | 14074566                | CC                              | GG              | 1946909963               |
| SNP_P4_108219_14074624 | NC_021167.1    | Ca_kabuli_chr08 | 14074624                | GG                              | TT              | 1946909965               |
| SNP_P4_108220_14076536 | NC_021167.1    | Ca_kabuli_chr08 | 14076536                | GG                              | TT              | 1946909967               |
| SNP_P4_108221_14076621 | NC_021167.1    | Ca_kabuli_chr08 | 14076621                | CC                              | AA              | 1946909969               |
| SNP_P4_108222_14076698 | NC_021167.1    | Ca_kabuli_chr08 | 14076698                | TT                              | GG              | 1946909971               |
| SNP_P4_108223_14076820 | NC_021167.1    | Ca_kabuli_chr08 | 14076820                | GG                              | AA              | 1946909973               |
| SNP_P4_108224_14076993 | NC_021167.1    | Ca_kabuli_chr08 | 14076993                | AA                              | CC              | 1946909975               |
| SNP_P4_108225_14076994 | NC_021167.1    | Ca_kabuli_chr08 | 14076994                | GG                              | AA              | 1946909977               |
| SNP_P4_108226_14077208 | NC_021167.1    | Ca_kabuli_chr08 | 14077208                | TT                              | CC              | 1946909979               |
| SNP_P4_108227_14077264 | NC_021167.1    | Ca_kabuli_chr08 | 14077264                | CC                              | AA              | 1946909981               |
| SNP_P4_108230_14093677 | NC_021167.1    | Ca_kabuli_chr08 | 14093677                | AA                              | TT              | 1946909983               |
| SNP_P4_108231_14098127 | NC_021167.1    | Ca_kabuli_chr08 | 14098127                | AA                              | GG              | 1946909985               |
| SNP_P4_108232_14098231 | NC_021167.1    | Ca_kabuli_chr08 | 14098231                | GG                              | TT              | 1946909987               |
| SNP_P4_108233_14101188 | NC_021167.1    | Ca_kabuli_chr08 | 14101188                | TT                              | CC              | 1946909989               |
| SNP_P4_108235_14107325 | NC_021167.1    | Ca_kabuli_chr08 | 14107325                | TT                              | CC              | 1946909991               |
| SNP_P4_108236_14109045 | NC_021167.1    | Ca_kabuli_chr08 | 14109045                | GG                              | AA              | 1946909993               |
| SNP_P4_108238_14111516 | NC_021167.1    | Ca_kabuli_chr08 | 14111516                | TT                              | AA              | 1946909995               |
| SNP_P4_108239_14111574 | NC_021167.1    | Ca_kabuli_chr08 | 14111574                | CC                              | TT              | 1946909997               |
| SNP_P4_108241_14112083 | NC_021167.1    | Ca_kabuli_chr08 | 14112083                | TT                              | AA              | 1946909999               |
| SNP_P4_108242_14112105 | NC_021167.1    | Ca_kabuli_chr08 | 14112105                | GG                              | AA              | 1946910001               |
| SNP_P4_108243_14112150 | NC_021167.1    | Ca_kabuli_chr08 | 14112150                | AA                              | CC              | 1946910003               |
| SNP_P4_108244_14112163 | NC_021167.1    | Ca_kabuli_chr08 | 14112163                | CC                              | TT              | 1946910005               |
| SNP_P4_108248_14113731 | NC_021167.1    | Ca_kabuli_chr08 | 14113731                | GG                              | TT              | 1946910007               |
| SNP_P4_108249_14113761 | NC_021167.1    | Ca_kabuli_chr08 | 14113761                | GG                              | AA              | 1946910009               |
| SNP_P4_108250_14114704 | NC_021167.1    | Ca_kabuli_chr08 | 14114704                | GG                              | AA              | 1946910011               |
| SNP_P4_108251_14116158 | NC_021167.1    | Ca_kabuli_chr08 | 14116158                | CC                              | AA              | 1946910013               |
| SNP_P4_108252_14116159 | NC_021167.1    | Ca_kabuli_chr08 | 14116159                | AA                              | TT              | 1946910016               |
| SNP_P4_108253_14116198 | NC_021167.1    | Ca_kabuli_chr08 | 14116198                | AA                              | GG              | 1946910018               |
| SNP_P4_108254_14116971 | NC_021167.1    | Ca_kabuli_chr08 | 14116971                | AA                              | GG              | 1946910020               |
| SNP_P4_108255_14117089 | NC_021167.1    | Ca_kabuli_chr08 | 14117089                | CC                              | TT              | 1946910022               |
| SNP_P4_108256_14117437 | NC_021167.1    | Ca_kabuli_chr08 | 14117437                | GG                              | AA              | 1946910024               |
| SNP_P4_108257_14118115 | NC_021167.1    | Ca_kabuli_chr08 | 14118115                | CC                              | TT              | 1946910026               |
| SNP_P4_108258_14118497 | NC_021167.1    | Ca_kabuli_chr08 | 14118497                | CC                              | TT              | 1946910028               |
| SNP_P4_108259_14119419 | NC_021167.1    | Ca_kabuli_chr08 | 14119419                | AA                              | CC              | 1946910030               |
| SNP_P4_108260_14120293 | NC_021167.1    | Ca_kabuli_chr08 | 14120293                | AA                              | TT              | 1946910032               |
| SNP_P4_108262_14120828 | NC_021167.1    | Ca_kabuli_chr08 | 14120828                | GG                              | TT              | 1946910034               |
| SNP_P4_108263_14120829 | NC_021167.1    | Ca_kabuli_chr08 | 14120829                | TT                              | AA              | 1946910036               |
| SNP_P4_108264_14121289 | NC_021167.1    | Ca_kabuli_chr08 | 14121289                | AA                              | GG              | 1946910038               |

| SNPs IDs               | Chromosome IDs | Chromosomes     | Physical positions (bp) | CDC Frontier (Reference genome) | (ILWC46 & LPNB) | NCBI SNPdb Accession IDs |
|------------------------|----------------|-----------------|-------------------------|---------------------------------|-----------------|--------------------------|
| SNP_P4_108266_14123549 | NC_021167.1    | Ca_kabuli_chr08 | 14123549                | TT                              | CC              | 1946910040               |
| SNP_P4_108267_14123581 | NC_021167.1    | Ca_kabuli_chr08 | 14123581                | TT                              | AA              | 1946910042               |
| SNP_P4_108269_14127348 | NC_021167.1    | Ca_kabuli_chr08 | 14127348                | TT                              | CC              | 1946910044               |
| SNP_P4_108270_14127418 | NC_021167.1    | Ca_kabuli_chr08 | 14127418                | CC                              | GG              | 1946910046               |
| SNP_P4_108271_14128362 | NC_021167.1    | Ca_kabuli_chr08 | 14128362                | CC                              | TT              | 1946910048               |
| SNP_P4_108272_14130458 | NC_021167.1    | Ca_kabuli_chr08 | 14130458                | GG                              | AA              | 1946910050               |
| SNP_P4_108273_14131198 | NC_021167.1    | Ca_kabuli_chr08 | 14131198                | GG                              | AA              | 1946910052               |
| SNP_P4_108275_14131269 | NC_021167.1    | Ca_kabuli_chr08 | 14131269                | GG                              | AA              | 1946910054               |
| SNP_P4_108276_14131284 | NC_021167.1    | Ca_kabuli_chr08 | 14131284                | CC                              | TT              | 1946910056               |
| SNP_P4_108277_14132509 | NC_021167.1    | Ca_kabuli_chr08 | 14132509                | CC                              | TT              | 1946910058               |
| SNP_P4_108278_14134550 | NC_021167.1    | Ca_kabuli_chr08 | 14134550                | AA                              | CC              | 1946910060               |
| SNP_P4_108279_14136518 | NC_021167.1    | Ca_kabuli_chr08 | 14136518                | GG                              | CC              | 1946910062               |
| SNP_P4_108282_14139124 | NC_021167.1    | Ca_kabuli_chr08 | 14139124                | TT                              | AA              | 1946910064               |
| SNP_P4_108283_14139498 | NC_021167.1    | Ca_kabuli_chr08 | 14139498                | TT                              | GG              | 1946910066               |
| SNP_P4_108284_14139827 | NC_021167.1    | Ca_kabuli_chr08 | 14139827                | GG                              | AA              | 1946910068               |
| SNP_P4_108285_14140300 | NC_021167.1    | Ca_kabuli_chr08 | 14140300                | GG                              | AA              | 1946910070               |
| SNP_P4_108286_14140792 | NC_021167.1    | Ca_kabuli_chr08 | 14140792                | GG                              | AA              | 1946910072               |
| SNP_P4_108287_14140800 | NC_021167.1    | Ca_kabuli_chr08 | 14140800                | GG                              | AA              | 1946910074               |
| SNP_P4_108288_14142468 | NC_021167.1    | Ca_kabuli_chr08 | 14142468                | CC                              | TT              | 1946910077               |
| SNP_P4_108289_14142591 | NC_021167.1    | Ca_kabuli_chr08 | 14142591                | GG                              | TT              | 1946910079               |
| SNP_P4_108292_14150025 | NC_021167.1    | Ca_kabuli_chr08 | 14150025                | AA                              | GG              | 1946910081               |
| SNP_P4_108293_14150409 | NC_021167.1    | Ca_kabuli_chr08 | 14150409                | CC                              | AA              | 1946910083               |
| SNP_P4_108294_14153311 | NC_021167.1    | Ca_kabuli_chr08 | 14153311                | TT                              | CC              | 1946910085               |
| SNP_P4_108295_14155293 | NC_021167.1    | Ca_kabuli_chr08 | 14155293                | AA                              | GG              | 1946910087               |
| SNP_P4_108296_14156488 | NC_021167.1    | Ca_kabuli_chr08 | 14156488                | AA                              | TT              | 1946910089               |
| SNP_P4_108298_14157730 | NC_021167.1    | Ca_kabuli_chr08 | 14157730                | TT                              | CC              | 1946910091               |
| SNP_P4_108299_14157894 | NC_021167.1    | Ca_kabuli_chr08 | 14157894                | CC                              | AA              | 1946910093               |
| SNP_P4_108300_14161816 | NC_021167.1    | Ca_kabuli_chr08 | 14161816                | AA                              | GG              | 1946910095               |
| SNP_P4_108301_14162118 | NC_021167.1    | Ca_kabuli_chr08 | 14162118                | CC                              | AA              | 1946910097               |
| SNP_P4_108302_14162122 | NC_021167.1    | Ca_kabuli_chr08 | 14162122                | TT                              | GG              | 1946910099               |
| SNP_P4_108303_14162124 | NC_021167.1    | Ca_kabuli_chr08 | 14162124                | TT                              | AA              | 1946910101               |
| SNP_P4_108304_14162150 | NC_021167.1    | Ca_kabuli_chr08 | 14162150                | TT                              | AA              | 1946910103               |
| SNP_P4_108305_14162375 | NC_021167.1    | Ca_kabuli_chr08 | 14162375                | GG                              | CC              | 1946910105               |
| SNP_P4_108306_14162377 | NC_021167.1    | Ca_kabuli_chr08 | 14162377                | TT                              | AA              | 1946910107               |
| SNP_P4_108307_14163078 | NC_021167.1    | Ca_kabuli_chr08 | 14163078                | CC                              | TT              | 1946910109               |
| SNP_P4_108308_14163105 | NC_021167.1    | Ca_kabuli_chr08 | 14163105                | AA                              | GG              | 1946910111               |
| SNP_P4_108309_14163127 | NC_021167.1    | Ca_kabuli_chr08 | 14163127                | TT                              | AA              | 1946910113               |
| SNP_P4_108311_14163269 | NC_021167.1    | Ca_kabuli_chr08 | 14163269                | TT                              | AA              | 1946910115               |
| SNP_P4_108312_14163279 | NC_021167.1    | Ca_kabuli_chr08 | 14163279                | AA                              | TT              | 1946910117               |
| SNP_P4_108313_14163497 | NC_021167.1    | Ca_kabuli_chr08 | 14163497                | GG                              | AA              | 1946910119               |
| SNP_P4_108314_14164428 | NC_021167.1    | Ca_kabuli_chr08 | 14164428                | AA                              | TT              | 1946910121               |
| SNP_P4_108315_14164641 | NC_021167.1    | Ca_kabuli_chr08 | 14164641                | GG                              | AA              | 1946910123               |

| SNPs IDs               | Chromosome IDs | Chromosomes     | Physical positions (bp) | CDC Frontier (Reference genome) | (ILWC46 & LPNB) | NCBI SNPdb Accession IDs |
|------------------------|----------------|-----------------|-------------------------|---------------------------------|-----------------|--------------------------|
| SNP_P4_108316_14164654 | NC_021167.1    | Ca_kabuli_chr08 | 14164654                | TT                              | CC              | 1946910125               |
| SNP_P4_108317_14164678 | NC_021167.1    | Ca_kabuli_chr08 | 14164678                | GG                              | AA              | 1946910127               |
| SNP_P4_108318_14164778 | NC_021167.1    | Ca_kabuli_chr08 | 14164778                | CC                              | TT              | 1946910129               |
| SNP_P4_108319_14164784 | NC_021167.1    | Ca_kabuli_chr08 | 14164784                | CC                              | TT              | 1946910131               |
| SNP_P4_108320_14164787 | NC_021167.1    | Ca_kabuli_chr08 | 14164787                | CC                              | TT              | 1946910133               |
| SNP_P4_108321_14164788 | NC_021167.1    | Ca_kabuli_chr08 | 14164788                | AA                              | TT              | 1946910135               |
| SNP_P4_108323_14165115 | NC_021167.1    | Ca_kabuli_chr08 | 14165115                | CC                              | GG              | 1946910137               |
| SNP_P4_108324_14165350 | NC_021167.1    | Ca_kabuli_chr08 | 14165350                | CC                              | TT              | 1946910139               |
| SNP_P4_108325_14165361 | NC_021167.1    | Ca_kabuli_chr08 | 14165361                | CC                              | AA              | 1946910141               |
| SNP_P4_108326_14165429 | NC_021167.1    | Ca_kabuli_chr08 | 14165429                | CC                              | TT              | 1946910143               |
| SNP_P4_108327_14166266 | NC_021167.1    | Ca_kabuli_chr08 | 14166266                | AA                              | TT              | 1946910145               |
| SNP_P4_108328_14166272 | NC_021167.1    | Ca_kabuli_chr08 | 14166272                | TT                              | CC              | 1946910147               |
| SNP_P4_108329_14166302 | NC_021167.1    | Ca_kabuli_chr08 | 14166302                | TT                              | CC              | 1946910149               |
| SNP_P4_108330_14167393 | NC_021167.1    | Ca_kabuli_chr08 | 14167393                | CC                              | AA              | 1946910151               |
| SNP_P4_108331_14168815 | NC_021167.1    | Ca_kabuli_chr08 | 14168815                | GG                              | TT              | 1946910153               |
| SNP_P4_108332_14168883 | NC_021167.1    | Ca_kabuli_chr08 | 14168883                | TT                              | GG              | 1946910155               |
| SNP_P4_108333_14168884 | NC_021167.1    | Ca_kabuli_chr08 | 14168884                | TT                              | AA              | 1946910157               |
| SNP_P4_108334_14169228 | NC_021167.1    | Ca_kabuli_chr08 | 14169228                | GG                              | AA              | 1946910159               |
| SNP_P4_108336_14169390 | NC_021167.1    | Ca_kabuli_chr08 | 14169390                | AA                              | CC              | 1946910161               |
| SNP_P4_108337_14170395 | NC_021167.1    | Ca_kabuli_chr08 | 14170395                | TT                              | AA              | 1946910163               |
| SNP_P4_108338_14170462 | NC_021167.1    | Ca_kabuli_chr08 | 14170462                | CC                              | TT              | 1946910165               |
| SNP_P4_108339_14170554 | NC_021167.1    | Ca_kabuli_chr08 | 14170554                | AA                              | GG              | 1946910167               |
| SNP_P4_108342_14170764 | NC_021167.1    | Ca_kabuli_chr08 | 14170764                | CC                              | TT              | 1946910169               |
| SNP_P4_108343_14182884 | NC_021167.1    | Ca_kabuli_chr08 | 14182884                | TT                              | CC              | 1946910171               |
| SNP_P4_108344_14182944 | NC_021167.1    | Ca_kabuli_chr08 | 14182944                | AA                              | TT              | 1946910173               |
| SNP_P4_108345_14182946 | NC_021167.1    | Ca_kabuli_chr08 | 14182946                | AA                              | GG              | 1946910175               |
| SNP_P4_108347_14183515 | NC_021167.1    | Ca_kabuli_chr08 | 14183515                | CC                              | TT              | 1946910177               |
| SNP_P4_108348_14184439 | NC_021167.1    | Ca_kabuli_chr08 | 14184439                | GG                              | AA              | 1946910179               |
| SNP_P4_108349_14184451 | NC_021167.1    | Ca_kabuli_chr08 | 14184451                | AA                              | CC              | 1946910181               |
| SNP_P4_108350_14184464 | NC_021167.1    | Ca_kabuli_chr08 | 14184464                | AA                              | TT              | 1946910183               |
| SNP_P4_108351_14186097 | NC_021167.1    | Ca_kabuli_chr08 | 14186097                | AA                              | TT              | 1946910185               |
| SNP_P4_108353_14186975 | NC_021167.1    | Ca_kabuli_chr08 | 14186975                | GG                              | AA              | 1946910187               |
| SNP_P4_108354_14187154 | NC_021167.1    | Ca_kabuli_chr08 | 14187154                | TT                              | AA              | 1946910189               |
| SNP_P4_108355_14187814 | NC_021167.1    | Ca_kabuli_chr08 | 14187814                | CC                              | TT              | 1946910191               |
| SNP_P4_108356_14187826 | NC_021167.1    | Ca_kabuli_chr08 | 14187826                | TT                              | CC              | 1946910193               |
| SNP_P4_108357_14187847 | NC_021167.1    | Ca_kabuli_chr08 | 14187847                | AA                              | GG              | 1946910195               |
| SNP_P4_108358_14189770 | NC_021167.1    | Ca_kabuli_chr08 | 14189770                | TT                              | GG              | 1946910197               |
| SNP_P4_108359_14189777 | NC_021167.1    | Ca_kabuli_chr08 | 14189777                | TT                              | AA              | 1946910199               |
| SNP_P4_108360_14189812 | NC_021167.1    | Ca_kabuli_chr08 | 14189812                | AA                              | CC              | 1946910201               |
| SNP_P4_108361_14189998 | NC_021167.1    | Ca_kabuli_chr08 | 14189998                | CC                              | TT              | 1946910203               |
| SNP_P4_108362_14190203 | NC_021167.1    | Ca_kabuli_chr08 | 14190203                | CC                              | TT              | 1946910205               |
| SNP_P4_108363_14190320 | NC_021167.1    | Ca_kabuli_chr08 | 14190320                | TT                              | CC              | 1946910207               |

| SNPs IDs               | Chromosome IDs | Chromosomes     | Physical positions (bp) | CDC Frontier (Reference genome) | (ILWC46 & LPNB) | NCBI SNPdb Accession IDs |
|------------------------|----------------|-----------------|-------------------------|---------------------------------|-----------------|--------------------------|
| SNP_P4_108364_14190394 | NC_021167.1    | Ca_kabuli_chr08 | 14190394                | AA                              | TT              | 1946910209               |
| SNP_P4_108365_14190704 | NC_021167.1    | Ca_kabuli_chr08 | 14190704                | TT                              | AA              | 1946910211               |
| SNP_P4_108366_14190761 | NC_021167.1    | Ca_kabuli_chr08 | 14190761                | GG                              | AA              | 1946910213               |
| SNP_P4_108367_14191440 | NC_021167.1    | Ca_kabuli_chr08 | 14191440                | CC                              | TT              | 1946910215               |
| SNP_P4_108368_14191448 | NC_021167.1    | Ca_kabuli_chr08 | 14191448                | CC                              | TT              | 1946910217               |
| SNP_P4_108369_14191473 | NC_021167.1    | Ca_kabuli_chr08 | 14191473                | TT                              | CC              | 1946910219               |
| SNP_P4_108370_14191520 | NC_021167.1    | Ca_kabuli_chr08 | 14191520                | AA                              | GG              | 1946910221               |
| SNP_P4_108371_14191524 | NC_021167.1    | Ca_kabuli_chr08 | 14191524                | TT                              | CC              | 1946910223               |
| SNP_P4_108372_14191531 | NC_021167.1    | Ca_kabuli_chr08 | 14191531                | CC                              | TT              | 1946910225               |
| SNP_P4_108373_14191540 | NC_021167.1    | Ca_kabuli_chr08 | 14191540                | TT                              | CC              | 1946910227               |
| SNP_P4_108374_14191552 | NC_021167.1    | Ca_kabuli_chr08 | 14191552                | CC                              | GG              | 1946910229               |
| SNP_P4_108375_14194718 | NC_021167.1    | Ca_kabuli_chr08 | 14194718                | AA                              | GG              | 1946910231               |
| SNP_P4_108376_14194744 | NC_021167.1    | Ca_kabuli_chr08 | 14194744                | GG                              | AA              | 1946910233               |
| SNP_P4_108377_14194895 | NC_021167.1    | Ca_kabuli_chr08 | 14194895                | AA                              | TT              | 1946910235               |
| SNP_P4_108378_14194919 | NC_021167.1    | Ca_kabuli_chr08 | 14194919                | GG                              | AA              | 1946910237               |
| SNP_P4_108380_14209191 | NC_021167.1    | Ca_kabuli_chr08 | 14209191                | CC                              | TT              | 1946910239               |
| SNP_P4_108381_14209390 | NC_021167.1    | Ca_kabuli_chr08 | 14209390                | AA                              | GG              | 1946910241               |
| SNP_P4_108382_14209391 | NC_021167.1    | Ca_kabuli_chr08 | 14209391                | CC                              | TT              | 1946910243               |
| SNP_P4_108383_14209402 | NC_021167.1    | Ca_kabuli_chr08 | 14209402                | CC                              | TT              | 1946910245               |
| SNP_P4_108384_14209520 | NC_021167.1    | Ca_kabuli_chr08 | 14209520                | TT                              | CC              | 1946910247               |
| SNP_P4_108385_14209917 | NC_021167.1    | Ca_kabuli_chr08 | 14209917                | AA                              | CC              | 1946910249               |
| SNP_P4_108386_14211532 | NC_021167.1    | Ca_kabuli_chr08 | 14211532                | AA                              | GG              | 1946910251               |
| SNP_P4_108388_14212415 | NC_021167.1    | Ca_kabuli_chr08 | 14212415                | GG                              | CC              | 1946910253               |
| SNP_P4_108389_14218036 | NC_021167.1    | Ca_kabuli_chr08 | 14218036                | AA                              | CC              | 1946910255               |
| SNP_P4_108390_14218037 | NC_021167.1    | Ca_kabuli_chr08 | 14218037                | AA                              | TT              | 1946910257               |
| SNP_P4_108391_14218038 | NC_021167.1    | Ca_kabuli_chr08 | 14218038                | AA                              | TT              | 1946910259               |
| SNP_P4_108392_14218039 | NC_021167.1    | Ca_kabuli_chr08 | 14218039                | AA                              | TT              | 1946910261               |
| SNP_P4_108393_14218092 | NC_021167.1    | Ca_kabuli_chr08 | 14218092                | TT                              | CC              | 1946910263               |
| SNP_P4_108396_14218191 | NC_021167.1    | Ca_kabuli_chr08 | 14218191                | TT                              | CC              | 1946910265               |
| SNP_P4_108398_14218264 | NC_021167.1    | Ca_kabuli_chr08 | 14218264                | GG                              | AA              | 1946910267               |
| SNP_P4_108399_14218317 | NC_021167.1    | Ca_kabuli_chr08 | 14218317                | AA                              | GG              | 1946910269               |
| SNP_P4_108400_14218329 | NC_021167.1    | Ca_kabuli_chr08 | 14218329                | GG                              | CC              | 1946910271               |
| SNP_P4_108401_14218377 | NC_021167.1    | Ca_kabuli_chr08 | 14218377                | GG                              | TT              | 1946910273               |
| SNP_P4_108402_14218505 | NC_021167.1    | Ca_kabuli_chr08 | 14218505                | TT                              | AA              | 1946910275               |
| SNP_P4_108403_14218534 | NC_021167.1    | Ca_kabuli_chr08 | 14218534                | TT                              | CC              | 1946910277               |
| SNP_P4_108404_14218625 | NC_021167.1    | Ca_kabuli_chr08 | 14218625                | GG                              | TT              | 1946910279               |
| SNP_P4_108405_14218704 | NC_021167.1    | Ca_kabuli_chr08 | 14218704                | TT                              | AA              | 1946910281               |
| SNP_P4_108406_14218720 | NC_021167.1    | Ca_kabuli_chr08 | 14218720                | GG                              | AA              | 1946910283               |
| SNP_P4_108407_14218726 | NC_021167.1    | Ca_kabuli_chr08 | 14218726                | AA                              | GG              | 1946910285               |
| SNP_P4_108408_14218743 | NC_021167.1    | Ca_kabuli_chr08 | 14218743                | CC                              | TT              | 1946910287               |
| SNP_P4_108409_14218792 | NC_021167.1    | Ca_kabuli_chr08 | 14218792                | GG                              | AA              | 1946910289               |
| SNP_P4_108410_14218804 | NC_021167.1    | Ca_kabuli_chr08 | 14218804                | AA                              | GG              | 1946910291               |



| SNPs IDs               | Chromosome IDs | Chromosomes     | Physical positions (bp) | CDC Frontier (Reference genome) | (ILWC46 & LPNB) | NCBI SNPdb Accession IDs |
|------------------------|----------------|-----------------|-------------------------|---------------------------------|-----------------|--------------------------|
| SNP_P4_108411_14218807 | NC_021167.1    | Ca_kabuli_chr08 | 14218807                | CC                              | TT              | 1946910293               |
| SNP_P4_108412_14218858 | NC_021167.1    | Ca_kabuli_chr08 | 14218858                | GG                              | AA              | 1946910295               |
| SNP_P4_108414_14222786 | NC_021167.1    | Ca_kabuli_chr08 | 14222786                | CC                              | GG              | 1946910297               |
| SNP_P4_108415_14222787 | NC_021167.1    | Ca_kabuli_chr08 | 14222787                | TT                              | GG              | 1946910299               |
| SNP_P4_108416_14223246 | NC_021167.1    | Ca_kabuli_chr08 | 14223246                | AA                              | GG              | 1946910301               |
| SNP_P4_108417_14223533 | NC_021167.1    | Ca_kabuli_chr08 | 14223533                | CC                              | TT              | 1946910303               |
| SNP_P4_108418_14223600 | NC_021167.1    | Ca_kabuli_chr08 | 14223600                | TT                              | CC              | 1946910305               |
| SNP_P4_108419_14223632 | NC_021167.1    | Ca_kabuli_chr08 | 14223632                | AA                              | TT              | 1946910307               |
| SNP_P4_108420_14223856 | NC_021167.1    | Ca_kabuli_chr08 | 14223856                | TT                              | CC              | 1946910309               |
| SNP_P4_108421_14223895 | NC_021167.1    | Ca_kabuli_chr08 | 14223895                | TT                              | CC              | 1946910311               |
| SNP_P4_108422_14224765 | NC_021167.1    | Ca_kabuli_chr08 | 14224765                | TT                              | GG              | 1946910313               |
| SNP_P4_108423_14224774 | NC_021167.1    | Ca_kabuli_chr08 | 14224774                | TT                              | AA              | 1946910315               |
| SNP_P4_108424_14225127 | NC_021167.1    | Ca_kabuli_chr08 | 14225127                | CC                              | TT              | 1946910317               |
| SNP_P4_108425_14231345 | NC_021167.1    | Ca_kabuli_chr08 | 14231345                | TT                              | CC              | 1946910319               |
| SNP_P4_108426_14231347 | NC_021167.1    | Ca_kabuli_chr08 | 14231347                | TT                              | CC              | 1946910321               |
| SNP_P4_108427_14231349 | NC_021167.1    | Ca_kabuli_chr08 | 14231349                | TT                              | CC              | 1946910323               |
| SNP_P4_108428_14231367 | NC_021167.1    | Ca_kabuli_chr08 | 14231367                | GG                              | AA              | 1946910325               |
| SNP_P4_108429_14231371 | NC_021167.1    | Ca_kabuli_chr08 | 14231371                | TT                              | CC              | 1946910327               |
| SNP_P4_108430_14231673 | NC_021167.1    | Ca_kabuli_chr08 | 14231673                | GG                              | AA              | 1946910329               |
| SNP_P4_108431_14239374 | NC_021167.1    | Ca_kabuli_chr08 | 14239374                | TT                              | CC              | 1946910331               |
| SNP_P4_108432_14239406 | NC_021167.1    | Ca_kabuli_chr08 | 14239406                | TT                              | CC              | 1946910333               |
| SNP_P4_108433_14239430 | NC_021167.1    | Ca_kabuli_chr08 | 14239430                | TT                              | AA              | 1946910335               |
| SNP_P4_108434_14243954 | NC_021167.1    | Ca_kabuli_chr08 | 14243954                | AA                              | TT              | 1946910337               |
| SNP_P4_108436_14244535 | NC_021167.1    | Ca_kabuli_chr08 | 14244535                | GG                              | AA              | 1946910339               |
| SNP_P4_108438_14244935 | NC_021167.1    | Ca_kabuli_chr08 | 14244935                | AA                              | TT              | 1946910341               |
| SNP_P4_108439_14245306 | NC_021167.1    | Ca_kabuli_chr08 | 14245306                | TT                              | CC              | 1946910343               |
| SNP_P4_108440_14245578 | NC_021167.1    | Ca_kabuli_chr08 | 14245578                | CC                              | AA              | 1946910345               |
| SNP_P4_108441_14247201 | NC_021167.1    | Ca_kabuli_chr08 | 14247201                | CC                              | TT              | 1946910347               |
| SNP_P4_108442_14247256 | NC_021167.1    | Ca_kabuli_chr08 | 14247256                | AA                              | GG              | 1946910349               |
| SNP_P4_108443_14247674 | NC_021167.1    | Ca_kabuli_chr08 | 14247674                | AA                              | TT              | 1946910351               |
| SNP_P4_108444_14248472 | NC_021167.1    | Ca_kabuli_chr08 | 14248472                | TT                              | CC              | 1946910353               |
| SNP_P4_108445_14248489 | NC_021167.1    | Ca_kabuli_chr08 | 14248489                | AA                              | GG              | 1946910355               |
| SNP_P4_108446_14248500 | NC_021167.1    | Ca_kabuli_chr08 | 14248500                | TT                              | CC              | 1946910358               |
| SNP_P4_108447_14248570 | NC_021167.1    | Ca_kabuli_chr08 | 14248570                | TT                              | AA              | 1946910360               |
| SNP_P4_108448_14248571 | NC_021167.1    | Ca_kabuli_chr08 | 14248571                | GG                              | AA              | 1946910362               |
| SNP_P4_108451_14248795 | NC_021167.1    | Ca_kabuli_chr08 | 14248795                | GG                              | TT              | 1946910364               |
| SNP_P4_108452_14248932 | NC_021167.1    | Ca_kabuli_chr08 | 14248932                | CC                              | GG              | 1946910366               |
| SNP_P4_108453_14250202 | NC_021167.1    | Ca_kabuli_chr08 | 14250202                | GG                              | AA              | 1946910368               |
| SNP_P4_108454_14250228 | NC_021167.1    | Ca_kabuli_chr08 | 14250228                | GG                              | AA              | 1946910370               |
| SNP_P4_108455_14250272 | NC_021167.1    | Ca_kabuli_chr08 | 14250272                | GG                              | CC              | 1946910372               |
| SNP_P4_108456_14250440 | NC_021167.1    | Ca_kabuli_chr08 | 14250440                | TT                              | CC              | 1946910374               |
| SNP_P4_108457_14250447 | NC_021167.1    | Ca_kabuli_chr08 | 14250447                | GG                              | AA              | 1946910376               |

| SNPs IDs               | Chromosome IDs | Chromosomes     | Physical positions (bp) | CDC Frontier (Reference genome) | (ILWC46 & LPNB) | NCBI SNPdb Accession IDs |
|------------------------|----------------|-----------------|-------------------------|---------------------------------|-----------------|--------------------------|
| SNP_P4_108458_14250832 | NC_021167.1    | Ca_kabuli_chr08 | 14250832                | TT                              | CC              | 1946910378               |
| SNP_P4_108460_14252417 | NC_021167.1    | Ca_kabuli_chr08 | 14252417                | CC                              | TT              | 1946910380               |
| SNP_P4_108461_14252419 | NC_021167.1    | Ca_kabuli_chr08 | 14252419                | CC                              | TT              | 1946910382               |
| SNP_P4_108462_14252426 | NC_021167.1    | Ca_kabuli_chr08 | 14252426                | CC                              | TT              | 1946910384               |
| SNP_P4_108463_14252427 | NC_021167.1    | Ca_kabuli_chr08 | 14252427                | GG                              | AA              | 1946910386               |
| SNP_P4_108464_14252436 | NC_021167.1    | Ca_kabuli_chr08 | 14252436                | CC                              | TT              | 1946910388               |
| SNP_P4_108465_14252461 | NC_021167.1    | Ca_kabuli_chr08 | 14252461                | CC                              | TT              | 1946910390               |
| SNP_P4_108466_14252468 | NC_021167.1    | Ca_kabuli_chr08 | 14252468                | CC                              | TT              | 1946910392               |
| SNP_P4_108467_14252473 | NC_021167.1    | Ca_kabuli_chr08 | 14252473                | CC                              | TT              | 1946910394               |
| SNP_P4_108469_14252951 | NC_021167.1    | Ca_kabuli_chr08 | 14252951                | GG                              | AA              | 1946910396               |
| SNP_P4_108470_14253348 | NC_021167.1    | Ca_kabuli_chr08 | 14253348                | CC                              | TT              | 1946910398               |
| SNP_P4_108471_14253552 | NC_021167.1    | Ca_kabuli_chr08 | 14253552                | CC                              | AA              | 1946910400               |
| SNP_P4_108472_14255232 | NC_021167.1    | Ca_kabuli_chr08 | 14255232                | TT                              | CC              | 1946910402               |
| SNP_P4_108473_14255556 | NC_021167.1    | Ca_kabuli_chr08 | 14255556                | GG                              | AA              | 1946910404               |
| SNP_P4_108474_14255624 | NC_021167.1    | Ca_kabuli_chr08 | 14255624                | CC                              | TT              | 1946910406               |
| SNP_P4_108475_14256698 | NC_021167.1    | Ca_kabuli_chr08 | 14256698                | CC                              | AA              | 1946910408               |
| SNP_P4_108476_14256705 | NC_021167.1    | Ca_kabuli_chr08 | 14256705                | AA                              | GG              | 1946910410               |
| SNP_P4_108478_14257306 | NC_021167.1    | Ca_kabuli_chr08 | 14257306                | TT                              | CC              | 1946910411               |
| SNP_P4_108479_14257313 | NC_021167.1    | Ca_kabuli_chr08 | 14257313                | GG                              | AA              | 1946910412               |
| SNP_P4_108480_14257314 | NC_021167.1    | Ca_kabuli_chr08 | 14257314                | GG                              | AA              | 1946910413               |
| SNP_P4_108482_14257349 | NC_021167.1    | Ca_kabuli_chr08 | 14257349                | AA                              | GG              | 1946910414               |
| SNP_P4_108483_14257360 | NC_021167.1    | Ca_kabuli_chr08 | 14257360                | CC                              | TT              | 1946910415               |
| SNP_P4_108484_14257361 | NC_021167.1    | Ca_kabuli_chr08 | 14257361                | TT                              | CC              | 1946910417               |
| SNP_P4_108485_14257364 | NC_021167.1    | Ca_kabuli_chr08 | 14257364                | CC                              | TT              | 1946910419               |
| SNP_P4_108487_14258972 | NC_021167.1    | Ca_kabuli_chr08 | 14258972                | AA                              | CC              | 1946910421               |
| SNP_P4_108490_14265256 | NC_021167.1    | Ca_kabuli_chr08 | 14265256                | CC                              | TT              | 1946910423               |
| SNP_P4_108491_14265261 | NC_021167.1    | Ca_kabuli_chr08 | 14265261                | GG                              | AA              | 1946910425               |
| SNP_P4_108492_14265263 | NC_021167.1    | Ca_kabuli_chr08 | 14265263                | CC                              | TT              | 1946910427               |
| SNP_P4_108493_14265264 | NC_021167.1    | Ca_kabuli_chr08 | 14265264                | AA                              | GG              | 1946910429               |
| SNP_P4_108494_14266260 | NC_021167.1    | Ca_kabuli_chr08 | 14266260                | AA                              | TT              | 1946910431               |
| SNP_P4_108495_14266722 | NC_021167.1    | Ca_kabuli_chr08 | 14266722                | GG                              | TT              | 1946910433               |
| SNP_P4_108496_14266802 | NC_021167.1    | Ca_kabuli_chr08 | 14266802                | AA                              | GG              | 1946910435               |
| SNP_P4_108498_14269196 | NC_021167.1    | Ca_kabuli_chr08 | 14269196                | CC                              | TT              | 1946910437               |
| SNP_P4_108499_14269405 | NC_021167.1    | Ca_kabuli_chr08 | 14269405                | CC                              | AA              | 1946910439               |
| SNP_P4_108500_14269420 | NC_021167.1    | Ca_kabuli_chr08 | 14269420                | TT                              | CC              | 1946910441               |
| SNP_P4_108501_14269438 | NC_021167.1    | Ca_kabuli_chr08 | 14269438                | AA                              | GG              | 1946910443               |
| SNP_P4_108502_14269453 | NC_021167.1    | Ca_kabuli_chr08 | 14269453                | TT                              | AA              | 1946910445               |
| SNP_P4_108504_14270029 | NC_021167.1    | Ca_kabuli_chr08 | 14270029                | GG                              | AA              | 1946910449               |
| SNP_P4_108505_14270068 | NC_021167.1    | Ca_kabuli_chr08 | 14270068                | AA                              | TT              | 1946910452               |
| SNP_P4_108506_14270089 | NC_021167.1    | Ca_kabuli_chr08 | 14270089                | AA                              | CC              | 1946910455               |
| SNP_P4_108507_14270288 | NC_021167.1    | Ca_kabuli_chr08 | 14270288                | GG                              | AA              | 1946910459               |
| SNP_P4_108508_14270290 | NC_021167.1    | Ca_kabuli_chr08 | 14270290                | CC                              | AA              | 1946910462               |

| SNPs IDs               | Chromosome IDs | Chromosomes     | Physical positions (bp) | CDC Frontier (Reference genome) | (ILWC46 & LPNB) | NCBI SNPdb Accession IDs |
|------------------------|----------------|-----------------|-------------------------|---------------------------------|-----------------|--------------------------|
| SNP_P4_108509_14270553 | NC_021167.1    | Ca_kabuli_chr08 | 14270553                | AA                              | GG              | 1946910464               |
| SNP_P4_108510_14270785 | NC_021167.1    | Ca_kabuli_chr08 | 14270785                | CC                              | TT              | 1946910466               |
| SNP_P4_108511_14270786 | NC_021167.1    | Ca_kabuli_chr08 | 14270786                | TT                              | CC              | 1946910468               |
| SNP_P4_108512_14270876 | NC_021167.1    | Ca_kabuli_chr08 | 14270876                | TT                              | CC              | 1946910471               |
| SNP_P4_108513_14270944 | NC_021167.1    | Ca_kabuli_chr08 | 14270944                | CC                              | GG              | 1946910473               |
| SNP_P4_108514_14270992 | NC_021167.1    | Ca_kabuli_chr08 | 14270992                | GG                              | AA              | 1946910475               |
| SNP_P4_108515_14271121 | NC_021167.1    | Ca_kabuli_chr08 | 14271121                | TT                              | CC              | 1946910477               |
| SNP_P4_108516_14271139 | NC_021167.1    | Ca_kabuli_chr08 | 14271139                | GG                              | TT              | 1946910479               |
| SNP_P4_108517_14271143 | NC_021167.1    | Ca_kabuli_chr08 | 14271143                | AA                              | GG              | 1946910481               |
| SNP_P4_108518_14279632 | NC_021167.1    | Ca_kabuli_chr08 | 14279632                | GG                              | AA              | 1946910483               |
| SNP_P4_108520_14282023 | NC_021167.1    | Ca_kabuli_chr08 | 14282023                | TT                              | AA              | 1946910485               |
| SNP_P4_108521_14288571 | NC_021167.1    | Ca_kabuli_chr08 | 14288571                | AA                              | GG              | 1946910487               |
| SNP_P4_108522_14288620 | NC_021167.1    | Ca_kabuli_chr08 | 14288620                | TT                              | CC              | 1946910489               |
| SNP_P4_108525_14291944 | NC_021167.1    | Ca_kabuli_chr08 | 14291944                | TT                              | CC              | 1946910491               |
| SNP_P4_108527_14292470 | NC_021167.1    | Ca_kabuli_chr08 | 14292470                | TT                              | GG              | 1946910493               |
| SNP_P4_108528_14293175 | NC_021167.1    | Ca_kabuli_chr08 | 14293175                | TT                              | CC              | 1946910495               |
| SNP_P4_108529_14293191 | NC_021167.1    | Ca_kabuli_chr08 | 14293191                | TT                              | CC              | 1946910497               |
| SNP_P4_108530_14293195 | NC_021167.1    | Ca_kabuli_chr08 | 14293195                | AA                              | CC              | 1946910499               |
| SNP_P4_108531_14293222 | NC_021167.1    | Ca_kabuli_chr08 | 14293222                | CC                              | AA              | 1946910501               |
| SNP_P4_108532_14293236 | NC_021167.1    | Ca_kabuli_chr08 | 14293236                | GG                              | AA              | 1946910503               |
| SNP_P4_108533_14301148 | NC_021167.1    | Ca_kabuli_chr08 | 14301148                | CC                              | TT              | 1946910505               |
| SNP_P4_108534_14302514 | NC_021167.1    | Ca_kabuli_chr08 | 14302514                | GG                              | TT              | 1946910507               |
| SNP_P4_108535_14302522 | NC_021167.1    | Ca_kabuli_chr08 | 14302522                | GG                              | AA              | 1946910509               |
| SNP_P4_108536_14302596 | NC_021167.1    | Ca_kabuli_chr08 | 14302596                | TT                              | CC              | 1946910511               |
| SNP_P4_108537_14302608 | NC_021167.1    | Ca_kabuli_chr08 | 14302608                | GG                              | AA              | 1946910513               |
| SNP_P4_108538_14302642 | NC_021167.1    | Ca_kabuli_chr08 | 14302642                | CC                              | GG              | 1946910515               |
| SNP_P4_108539_14302666 | NC_021167.1    | Ca_kabuli_chr08 | 14302666                | CC                              | TT              | 1946910517               |
| SNP_P4_108540_14302667 | NC_021167.1    | Ca_kabuli_chr08 | 14302667                | TT                              | CC              | 1946910519               |
| SNP_P4_108541_14302680 | NC_021167.1    | Ca_kabuli_chr08 | 14302680                | TT                              | GG              | 1946910521               |
| SNP_P4_108542_14302732 | NC_021167.1    | Ca_kabuli_chr08 | 14302732                | GG                              | TT              | 1946910524               |
| SNP_P4_108543_14302737 | NC_021167.1    | Ca_kabuli_chr08 | 14302737                | TT                              | CC              | 1946910526               |
| SNP_P4_108544_14302791 | NC_021167.1    | Ca_kabuli_chr08 | 14302791                | CC                              | TT              | 1946910528               |
| SNP_P4_108545_14302793 | NC_021167.1    | Ca_kabuli_chr08 | 14302793                | CC                              | GG              | 1946910530               |
| SNP_P4_108548_14302875 | NC_021167.1    | Ca_kabuli_chr08 | 14302875                | CC                              | TT              | 1946910532               |
| SNP_P4_108549_14302880 | NC_021167.1    | Ca_kabuli_chr08 | 14302880                | AA                              | TT              | 1946910534               |
| SNP_P4_108550_14302917 | NC_021167.1    | Ca_kabuli_chr08 | 14302917                | TT                              | CC              | 1946910536               |
| SNP_P4_108551_14302947 | NC_021167.1    | Ca_kabuli_chr08 | 14302947                | TT                              | AA              | 1946910538               |
| SNP_P4_108552_14303007 | NC_021167.1    | Ca_kabuli_chr08 | 14303007                | CC                              | TT              | 1946910540               |
| SNP_P4_108553_14303478 | NC_021167.1    | Ca_kabuli_chr08 | 14303478                | AA                              | GG              | 1946910542               |
| SNP_P4_108554_14303944 | NC_021167.1    | Ca_kabuli_chr08 | 14303944                | CC                              | AA              | 1946910544               |
| SNP_P4_108555_14306060 | NC_021167.1    | Ca_kabuli_chr08 | 14306060                | CC                              | TT              | 1946910546               |
| SNP_P4_108556_14306073 | NC_021167.1    | Ca_kabuli_chr08 | 14306073                | CC                              | TT              | 1946910548               |

| SNPs IDs               | Chromosome IDs | Chromosomes     | Physical positions (bp) | CDC Frontier (Reference genome) | (ILWC46 & LPNB) | NCBI SNPdb Accession IDs |
|------------------------|----------------|-----------------|-------------------------|---------------------------------|-----------------|--------------------------|
| SNP_P4_108557_14307637 | NC_021167.1    | Ca_kabuli_chr08 | 14307637                | TT                              | AA              | 1946910550               |
| SNP_P4_108560_14310160 | NC_021167.1    | Ca_kabuli_chr08 | 14310160                | AA                              | GG              | 1946910552               |
| SNP_P4_108561_14310997 | NC_021167.1    | Ca_kabuli_chr08 | 14310997                | CC                              | TT              | 1946910554               |
| SNP_P4_108563_14312443 | NC_021167.1    | Ca_kabuli_chr08 | 14312443                | AA                              | GG              | 1946910556               |
| SNP_P4_108564_14312445 | NC_021167.1    | Ca_kabuli_chr08 | 14312445                | TT                              | CC              | 1946910558               |
| SNP_P4_108565_14312478 | NC_021167.1    | Ca_kabuli_chr08 | 14312478                | TT                              | CC              | 1946910560               |
| SNP_P4_108566_14312831 | NC_021167.1    | Ca_kabuli_chr08 | 14312831                | TT                              | AA              | 1946910562               |
| SNP_P4_108567_14312855 | NC_021167.1    | Ca_kabuli_chr08 | 14312855                | GG                              | AA              | 1946910564               |
| SNP_P4_108569_14315180 | NC_021167.1    | Ca_kabuli_chr08 | 14315180                | AA                              | GG              | 1946910566               |
| SNP_P4_108570_14315603 | NC_021167.1    | Ca_kabuli_chr08 | 14315603                | CC                              | TT              | 1946910568               |
| SNP_P4_108571_14318588 | NC_021167.1    | Ca_kabuli_chr08 | 14318588                | CC                              | TT              | 1946910570               |
| SNP_P4_108572_14318590 | NC_021167.1    | Ca_kabuli_chr08 | 14318590                | CC                              | TT              | 1946910572               |
| SNP_P4_108573_14318782 | NC_021167.1    | Ca_kabuli_chr08 | 14318782                | TT                              | CC              | 1946910574               |
| SNP_P4_108574_14318797 | NC_021167.1    | Ca_kabuli_chr08 | 14318797                | TT                              | AA              | 1946910576               |
| SNP_P4_108576_14319887 | NC_021167.1    | Ca_kabuli_chr08 | 14319887                | AA                              | GG              | 1946910579               |
| SNP_P4_108578_14319904 | NC_021167.1    | Ca_kabuli_chr08 | 14319904                | TT                              | GG              | 1946910581               |
| SNP_P4_108579_14320177 | NC_021167.1    | Ca_kabuli_chr08 | 14320177                | AA                              | TT              | 1946910583               |
| SNP_P4_108583_14321523 | NC_021167.1    | Ca_kabuli_chr08 | 14321523                | GG                              | CC              | 1946910585               |
| SNP_P4_108584_14321599 | NC_021167.1    | Ca_kabuli_chr08 | 14321599                | AA                              | TT              | 1946910587               |
| SNP_P4_108585_14324349 | NC_021167.1    | Ca_kabuli_chr08 | 14324349                | GG                              | AA              | 1946910589               |
| SNP_P4_108586_14326569 | NC_021167.1    | Ca_kabuli_chr08 | 14326569                | GG                              | TT              | 1946910591               |
| SNP_P4_108587_14329495 | NC_021167.1    | Ca_kabuli_chr08 | 14329495                | GG                              | TT              | 1946910593               |
| SNP_P4_108588_14330506 | NC_021167.1    | Ca_kabuli_chr08 | 14330506                | TT                              | AA              | 1946910595               |
| SNP_P4_108589_14330780 | NC_021167.1    | Ca_kabuli_chr08 | 14330780                | GG                              | AA              | 1946910596               |
| SNP_P4_108590_14331021 | NC_021167.1    | Ca_kabuli_chr08 | 14331021                | TT                              | AA              | 1946910598               |
| SNP_P4_108591_14331166 | NC_021167.1    | Ca_kabuli_chr08 | 14331166                | GG                              | AA              | 1946910600               |
| SNP_P4_108592_14333215 | NC_021167.1    | Ca_kabuli_chr08 | 14333215                | AA                              | GG              | 1946910602               |
| SNP_P4_108593_14333478 | NC_021167.1    | Ca_kabuli_chr08 | 14333478                | TT                              | AA              | 1946910604               |
| SNP_P4_108594_14333479 | NC_021167.1    | Ca_kabuli_chr08 | 14333479                | CC                              | TT              | 1946910606               |
| SNP_P4_108595_14334076 | NC_021167.1    | Ca_kabuli_chr08 | 14334076                | TT                              | CC              | 1946910608               |
| SNP_P4_108596_14334078 | NC_021167.1    | Ca_kabuli_chr08 | 14334078                | TT                              | AA              | 1946910610               |
| SNP_P4_108597_14334079 | NC_021167.1    | Ca_kabuli_chr08 | 14334079                | TT                              | CC              | 1946910612               |
| SNP_P4_108599_14334438 | NC_021167.1    | Ca_kabuli_chr08 | 14334438                | GG                              | AA              | 1946910614               |
| SNP_P4_108601_14334938 | NC_021167.1    | Ca_kabuli_chr08 | 14334938                | AA                              | GG              | 1946910615               |
| SNP_P4_108602_14335049 | NC_021167.1    | Ca_kabuli_chr08 | 14335049                | AA                              | CC              | 1946910617               |
| SNP_P4_108603_14335065 | NC_021167.1    | Ca_kabuli_chr08 | 14335065                | AA                              | GG              | 1946910619               |
| SNP_P4_108604_14337142 | NC_021167.1    | Ca_kabuli_chr08 | 14337142                | TT                              | CC              | 1946910621               |
| SNP_P4_108605_14337508 | NC_021167.1    | Ca_kabuli_chr08 | 14337508                | CC                              | TT              | 1946910623               |
| SNP_P4_108606_14337655 | NC_021167.1    | Ca_kabuli_chr08 | 14337655                | CC                              | TT              | 1946910625               |
| SNP_P4_108607_14337694 | NC_021167.1    | Ca_kabuli_chr08 | 14337694                | AA                              | GG              | 1946910627               |
| SNP_P4_108608_14337704 | NC_021167.1    | Ca_kabuli_chr08 | 14337704                | GG                              | AA              | 1946910629               |
| SNP_P4_108609_14337750 | NC_021167.1    | Ca_kabuli_chr08 | 14337750                | AA                              | GG              | 1946910631               |

| SNPs IDs               | Chromosome IDs | Chromosomes     | Physical positions (bp) | CDC Frontier (Reference genome) | (ILWC46 & LPNB) | NCBI SNPdb Accession IDs |
|------------------------|----------------|-----------------|-------------------------|---------------------------------|-----------------|--------------------------|
| SNP_P4_108610_14337751 | NC_021167.1    | Ca_kabuli_chr08 | 14337751                | GG                              | AA              | 1946910633               |
| SNP_P4_108613_14337856 | NC_021167.1    | Ca_kabuli_chr08 | 14337856                | AA                              | GG              | 1946910635               |
| SNP_P4_108614_14337864 | NC_021167.1    | Ca_kabuli_chr08 | 14337864                | AA                              | GG              | 1946910637               |
| SNP_P4_108615_14337880 | NC_021167.1    | Ca_kabuli_chr08 | 14337880                | TT                              | GG              | 1946910639               |
| SNP_P4_108616_14337887 | NC_021167.1    | Ca_kabuli_chr08 | 14337887                | TT                              | CC              | 1946910641               |
| SNP_P4_108617_14337942 | NC_021167.1    | Ca_kabuli_chr08 | 14337942                | TT                              | CC              | 1946910643               |
| SNP_P4_108618_14338160 | NC_021167.1    | Ca_kabuli_chr08 | 14338160                | AA                              | CC              | 1946910645               |
| SNP_P4_108620_14338581 | NC_021167.1    | Ca_kabuli_chr08 | 14338581                | GG                              | AA              | 1946910647               |
| SNP_P4_108621_14340804 | NC_021167.1    | Ca_kabuli_chr08 | 14340804                | GG                              | AA              | 1946910649               |
| SNP_P4_108622_14340828 | NC_021167.1    | Ca_kabuli_chr08 | 14340828                | TT                              | GG              | 1946910651               |
| SNP_P4_108623_14341205 | NC_021167.1    | Ca_kabuli_chr08 | 14341205                | AA                              | CC              | 1946910653               |
| SNP_P4_108624_14342097 | NC_021167.1    | Ca_kabuli_chr08 | 14342097                | AA                              | CC              | 1946910655               |
| SNP_P4_108625_14342100 | NC_021167.1    | Ca_kabuli_chr08 | 14342100                | GG                              | CC              | 1946910657               |
| SNP_P4_108626_14342104 | NC_021167.1    | Ca_kabuli_chr08 | 14342104                | CC                              | TT              | 1946910659               |
| SNP_P4_108627_14342138 | NC_021167.1    | Ca_kabuli_chr08 | 14342138                | TT                              | AA              | 1946910661               |
| SNP_P4_108628_14342139 | NC_021167.1    | Ca_kabuli_chr08 | 14342139                | CC                              | AA              | 1946910663               |
| SNP_P4_108629_14342142 | NC_021167.1    | Ca_kabuli_chr08 | 14342142                | GG                              | AA              | 1946910665               |
| SNP_P4_108630_14342938 | NC_021167.1    | Ca_kabuli_chr08 | 14342938                | TT                              | AA              | 1946910667               |
| SNP_P4_108631_14344137 | NC_021167.1    | Ca_kabuli_chr08 | 14344137                | TT                              | CC              | 1946910669               |
| SNP_P4_108632_14344177 | NC_021167.1    | Ca_kabuli_chr08 | 14344177                | TT                              | CC              | 1946910671               |
| SNP_P4_108635_14347050 | NC_021167.1    | Ca_kabuli_chr08 | 14347050                | CC                              | TT              | 1946910673               |
| SNP_P4_108636_14349953 | NC_021167.1    | Ca_kabuli_chr08 | 14349953                | CC                              | AA              | 1946910675               |
| SNP_P4_108637_14349968 | NC_021167.1    | Ca_kabuli_chr08 | 14349968                | CC                              | TT              | 1946910677               |
| SNP_P4_108638_14354683 | NC_021167.1    | Ca_kabuli_chr08 | 14354683                | CC                              | TT              | 1946910679               |
| SNP_P4_108639_14356486 | NC_021167.1    | Ca_kabuli_chr08 | 14356486                | CC                              | GG              | 1946910681               |
| SNP_P4_108640_14356873 | NC_021167.1    | Ca_kabuli_chr08 | 14356873                | GG                              | AA              | 1946910683               |
| SNP_P4_108641_14356884 | NC_021167.1    | Ca_kabuli_chr08 | 14356884                | GG                              | AA              | 1946910685               |
| SNP_P4_108642_14357660 | NC_021167.1    | Ca_kabuli_chr08 | 14357660                | TT                              | AA              | 1946910687               |
| SNP_P4_108643_14357661 | NC_021167.1    | Ca_kabuli_chr08 | 14357661                | AA                              | GG              | 1946910689               |
| SNP_P4_108644_14359392 | NC_021167.1    | Ca_kabuli_chr08 | 14359392                | CC                              | TT              | 1946910691               |
| SNP_P4_108645_14359731 | NC_021167.1    | Ca_kabuli_chr08 | 14359731                | CC                              | TT              | 1946910693               |
| SNP_P4_108646_14361109 | NC_021167.1    | Ca_kabuli_chr08 | 14361109                | TT                              | CC              | 1946910695               |
| SNP_P4_108647_14362382 | NC_021167.1    | Ca_kabuli_chr08 | 14362382                | CC                              | TT              | 1946910697               |
| SNP_P4_108648_14362438 | NC_021167.1    | Ca_kabuli_chr08 | 14362438                | TT                              | CC              | 1946910699               |
| SNP_P4_108649_14362682 | NC_021167.1    | Ca_kabuli_chr08 | 14362682                | TT                              | AA              | 1946910701               |
| SNP_P4_108650_14362739 | NC_021167.1    | Ca_kabuli_chr08 | 14362739                | AA                              | CC              | 1946910703               |
| SNP_P4_108652_14363443 | NC_021167.1    | Ca_kabuli_chr08 | 14363443                | CC                              | AA              | 1946910705               |
| SNP_P4_108654_14363518 | NC_021167.1    | Ca_kabuli_chr08 | 14363518                | CC                              | GG              | 1946910708               |
| SNP_P4_108655_14363726 | NC_021167.1    | Ca_kabuli_chr08 | 14363726                | GG                              | AA              | 1946910710               |
| SNP_P4_108656_14363798 | NC_021167.1    | Ca_kabuli_chr08 | 14363798                | CC                              | AA              | 1946910712               |
| SNP_P4_108660_14367751 | NC_021167.1    | Ca_kabuli_chr08 | 14367751                | GG                              | AA              | 1946910714               |
| SNP_P4_108661_14368586 | NC_021167.1    | Ca_kabuli_chr08 | 14368586                | AA                              | CC              | 1946910716               |

| SNPs IDs               | Chromosome IDs | Chromosomes     | Physical positions (bp) | CDC Frontier (Reference genome) | (ILWC46 & LPNB) | NCBI SNPdb Accession IDs |
|------------------------|----------------|-----------------|-------------------------|---------------------------------|-----------------|--------------------------|
| SNP_P4_108663_14370412 | NC_021167.1    | Ca_kabuli_chr08 | 14370412                | GG                              | TT              | 1946910718               |
| SNP_P4_108664_14370451 | NC_021167.1    | Ca_kabuli_chr08 | 14370451                | GG                              | AA              | 1946910720               |
| SNP_P4_108666_14370748 | NC_021167.1    | Ca_kabuli_chr08 | 14370748                | GG                              | AA              | 1946910722               |
| SNP_P4_108667_14370786 | NC_021167.1    | Ca_kabuli_chr08 | 14370786                | CC                              | TT              | 1946910724               |
| SNP_P4_108668_14370791 | NC_021167.1    | Ca_kabuli_chr08 | 14370791                | AA                              | GG              | 1946910726               |
| SNP_P4_108669_14373482 | NC_021167.1    | Ca_kabuli_chr08 | 14373482                | CC                              | TT              | 1946910728               |
| SNP_P4_108670_14373488 | NC_021167.1    | Ca_kabuli_chr08 | 14373488                | AA                              | GG              | 1946910730               |
| SNP_P4_108671_14373503 | NC_021167.1    | Ca_kabuli_chr08 | 14373503                | CC                              | TT              | 1946910732               |
| SNP_P4_108672_14373512 | NC_021167.1    | Ca_kabuli_chr08 | 14373512                | TT                              | GG              | 1946910734               |
| SNP_P4_108673_14373558 | NC_021167.1    | Ca_kabuli_chr08 | 14373558                | AA                              | CC              | 1946910736               |
| SNP_P4_108674_14373904 | NC_021167.1    | Ca_kabuli_chr08 | 14373904                | GG                              | CC              | 1946910738               |
| SNP_P4_108675_14373945 | NC_021167.1    | Ca_kabuli_chr08 | 14373945                | CC                              | TT              | 1946910740               |
| SNP_P4_108676_14379080 | NC_021167.1    | Ca_kabuli_chr08 | 14379080                | CC                              | TT              | 1946910742               |
| SNP_P4_108677_14397079 | NC_021167.1    | Ca_kabuli_chr08 | 14397079                | TT                              | CC              | 1946910744               |
| SNP_P4_108678_14437565 | NC_021167.1    | Ca_kabuli_chr08 | 14437565                | TT                              | GG              | 1946910746               |
| SNP_P4_108679_14437567 | NC_021167.1    | Ca_kabuli_chr08 | 14437567                | TT                              | GG              | 1946910748               |
| SNP_P4_108680_14444024 | NC_021167.1    | Ca_kabuli_chr08 | 14444024                | GG                              | AA              | 1946910751               |
| SNP_P4_108682_14487001 | NC_021167.1    | Ca_kabuli_chr08 | 14487001                | CC                              | TT              | 1946910753               |
| SNP_P4_108683_14516264 | NC_021167.1    | Ca_kabuli_chr08 | 14516264                | TT                              | GG              | 1946910755               |
| SNP_P4_108684_14563574 | NC_021167.1    | Ca_kabuli_chr08 | 14563574                | GG                              | AA              | 1946910757               |
| SNP_P4_108685_14563695 | NC_021167.1    | Ca_kabuli_chr08 | 14563695                | AA                              | CC              | 1946910759               |
| SNP_P4_108686_14564622 | NC_021167.1    | Ca_kabuli_chr08 | 14564622                | TT                              | GG              | 1946910761               |
| SNP_P4_108687_14564740 | NC_021167.1    | Ca_kabuli_chr08 | 14564740                | AA                              | GG              | 1946910763               |
| SNP_P4_108689_14564948 | NC_021167.1    | Ca_kabuli_chr08 | 14564948                | TT                              | AA              | 1946910765               |
| SNP_P4_108690_14564999 | NC_021167.1    | Ca_kabuli_chr08 | 14564999                | TT                              | AA              | 1946910767               |
| SNP_P4_108691_14565691 | NC_021167.1    | Ca_kabuli_chr08 | 14565691                | TT                              | GG              | 1946910769               |
| SNP_P4_108692_14565743 | NC_021167.1    | Ca_kabuli_chr08 | 14565743                | CC                              | TT              | 1946910771               |
| SNP_P4_108693_14566042 | NC_021167.1    | Ca_kabuli_chr08 | 14566042                | CC                              | TT              | 1946910773               |
| SNP_P4_108694_14566050 | NC_021167.1    | Ca_kabuli_chr08 | 14566050                | TT                              | AA              | 1946910775               |
| SNP_P4_108695_14566059 | NC_021167.1    | Ca_kabuli_chr08 | 14566059                | AA                              | TT              | 1946910777               |
| SNP_P4_108696_14566091 | NC_021167.1    | Ca_kabuli_chr08 | 14566091                | CC                              | TT              | 1946910779               |
| SNP_P4_108697_14568216 | NC_021167.1    | Ca_kabuli_chr08 | 14568216                | AA                              | GG              | 1946910781               |
| SNP_P4_108698_14568250 | NC_021167.1    | Ca_kabuli_chr08 | 14568250                | AA                              | GG              | 1946910784               |
| SNP_P4_108700_14568612 | NC_021167.1    | Ca_kabuli_chr08 | 14568612                | CC                              | TT              | 1946910786               |
| SNP_P4_108702_14569038 | NC_021167.1    | Ca_kabuli_chr08 | 14569038                | GG                              | TT              | 1946910788               |
| SNP_P4_108704_14569766 | NC_021167.1    | Ca_kabuli_chr08 | 14569766                | GG                              | AA              | 1946910790               |
| SNP_P4_108705_14571168 | NC_021167.1    | Ca_kabuli_chr08 | 14571168                | CC                              | TT              | 1946910792               |
| SNP_P4_108706_14571444 | NC_021167.1    | Ca_kabuli_chr08 | 14571444                | CC                              | TT              | 1946910794               |
| SNP_P4_108707_14571460 | NC_021167.1    | Ca_kabuli_chr08 | 14571460                | CC                              | TT              | 1946910796               |
| SNP_P4_108708_14572504 | NC_021167.1    | Ca_kabuli_chr08 | 14572504                | AA                              | TT              | 1946910798               |
| SNP_P4_108712_14576573 | NC_021167.1    | Ca_kabuli_chr08 | 14576573                | TT                              | AA              | 1946910800               |
| SNP_P4_108714_14576905 | NC_021167.1    | Ca_kabuli_chr08 | 14576905                | AA                              | GG              | 1946910802               |

| SNPs IDs               | Chromosome IDs | Chromosomes     | Physical positions (bp) | CDC Frontier (Reference genome) | (ILWC46 & LPNB) | NCBI SNPdb Accession IDs |
|------------------------|----------------|-----------------|-------------------------|---------------------------------|-----------------|--------------------------|
| SNP_P4_108715_14577599 | NC_021167.1    | Ca_kabuli_chr08 | 14577599                | AA                              | GG              | 1946910804               |
| SNP_P4_108716_14577642 | NC_021167.1    | Ca_kabuli_chr08 | 14577642                | TT                              | AA              | 1946910806               |
| SNP_P4_108719_14578226 | NC_021167.1    | Ca_kabuli_chr08 | 14578226                | GG                              | AA              | 1946910808               |
| SNP_P4_108720_14579537 | NC_021167.1    | Ca_kabuli_chr08 | 14579537                | AA                              | CC              | 1946910810               |
| SNP_P4_108721_14579915 | NC_021167.1    | Ca_kabuli_chr08 | 14579915                | TT                              | CC              | 1946910812               |
| SNP_P4_108722_14581650 | NC_021167.1    | Ca_kabuli_chr08 | 14581650                | AA                              | TT              | 1946910814               |
| SNP_P4_108723_14581746 | NC_021167.1    | Ca_kabuli_chr08 | 14581746                | TT                              | GG              | 1946910816               |
| SNP_P4_108724_14581803 | NC_021167.1    | Ca_kabuli_chr08 | 14581803                | TT                              | CC              | 1946910817               |
| SNP_P4_108725_14583614 | NC_021167.1    | Ca_kabuli_chr08 | 14583614                | TT                              | GG              | 1946910819               |
| SNP_P4_108726_14583899 | NC_021167.1    | Ca_kabuli_chr08 | 14583899                | AA                              | GG              | 1946910821               |
| SNP_P4_108727_14583938 | NC_021167.1    | Ca_kabuli_chr08 | 14583938                | TT                              | CC              | 1946910823               |
| SNP_P4_108729_14584021 | NC_021167.1    | Ca_kabuli_chr08 | 14584021                | TT                              | CC              | 1946910825               |
| SNP_P4_108730_14584280 | NC_021167.1    | Ca_kabuli_chr08 | 14584280                | CC                              | TT              | 1946910827               |
| SNP_P4_108732_14585939 | NC_021167.1    | Ca_kabuli_chr08 | 14585939                | AA                              | TT              | 1946910829               |
| SNP_P4_108733_14586833 | NC_021167.1    | Ca_kabuli_chr08 | 14586833                | GG                              | TT              | 1946910831               |
| SNP_P4_108734_14587238 | NC_021167.1    | Ca_kabuli_chr08 | 14587238                | TT                              | CC              | 1946910833               |
| SNP_P4_108735_14587248 | NC_021167.1    | Ca_kabuli_chr08 | 14587248                | TT                              | CC              | 1946910835               |
| SNP_P4_108736_14587930 | NC_021167.1    | Ca_kabuli_chr08 | 14587930                | CC                              | TT              | 1946910837               |
| SNP_P4_108737_14589065 | NC_021167.1    | Ca_kabuli_chr08 | 14589065                | AA                              | GG              | 1946910839               |
| SNP_P4_108738_14589390 | NC_021167.1    | Ca_kabuli_chr08 | 14589390                | AA                              | GG              | 1946910841               |
| SNP_P4_108739_14591422 | NC_021167.1    | Ca_kabuli_chr08 | 14591422                | CC                              | GG              | 1946910843               |
| SNP_P4_108740_14591696 | NC_021167.1    | Ca_kabuli_chr08 | 14591696                | AA                              | GG              | 1946910845               |
| SNP_P4_108741_14591709 | NC_021167.1    | Ca_kabuli_chr08 | 14591709                | GG                              | AA              | 1946910847               |
| SNP_P4_108743_14591818 | NC_021167.1    | Ca_kabuli_chr08 | 14591818                | GG                              | AA              | 1946910848               |
| SNP_P4_108744_14592843 | NC_021167.1    | Ca_kabuli_chr08 | 14592843                | AA                              | CC              | 1946910850               |
| SNP_P4_108745_14592931 | NC_021167.1    | Ca_kabuli_chr08 | 14592931                | TT                              | GG              | 1946910852               |
| SNP_P4_108746_14593092 | NC_021167.1    | Ca_kabuli_chr08 | 14593092                | TT                              | CC              | 1946910854               |
| SNP_P4_108747_14601817 | NC_021167.1    | Ca_kabuli_chr08 | 14601817                | TT                              | GG              | 1946910856               |
| SNP_P4_108748_14601820 | NC_021167.1    | Ca_kabuli_chr08 | 14601820                | CC                              | TT              | 1946910858               |
| SNP_P4_108749_14603294 | NC_021167.1    | Ca_kabuli_chr08 | 14603294                | TT                              | GG              | 1946910860               |
| SNP_P4_108750_14603300 | NC_021167.1    | Ca_kabuli_chr08 | 14603300                | GG                              | AA              | 1946910862               |
| SNP_P4_108751_14603414 | NC_021167.1    | Ca_kabuli_chr08 | 14603414                | TT                              | AA              | 1946910864               |
| SNP_P4_108752_14603539 | NC_021167.1    | Ca_kabuli_chr08 | 14603539                | TT                              | AA              | 1946910865               |
| SNP_P4_108753_14603579 | NC_021167.1    | Ca_kabuli_chr08 | 14603579                | CC                              | TT              | 1946910866               |
| SNP_P4_108754_14603589 | NC_021167.1    | Ca_kabuli_chr08 | 14603589                | AA                              | TT              | 1946910867               |
| SNP_P4_108756_14603809 | NC_021167.1    | Ca_kabuli_chr08 | 14603809                | CC                              | AA              | 1946910868               |
| SNP_P4_108757_14603965 | NC_021167.1    | Ca_kabuli_chr08 | 14603965                | GG                              | TT              | 1946910869               |
| SNP_P4_108758_14604489 | NC_021167.1    | Ca_kabuli_chr08 | 14604489                | CC                              | TT              | 1946910870               |
| SNP_P4_108759_14604492 | NC_021167.1    | Ca_kabuli_chr08 | 14604492                | CC                              | TT              | 1946910871               |
| SNP_P4_108760_14604503 | NC_021167.1    | Ca_kabuli_chr08 | 14604503                | AA                              | TT              | 1946910872               |
| SNP_P4_108761_14605926 | NC_021167.1    | Ca_kabuli_chr08 | 14605926                | CC                              | GG              | 1946910874               |
| SNP_P4_108763_14607913 | NC_021167.1    | Ca_kabuli_chr08 | 14607913                | CC                              | TT              | 1946910876               |

| SNPs IDs               | Chromosome IDs | Chromosomes     | Physical positions (bp) | CDC Frontier (Reference genome) | (ILWC46 & LPNB) | NCBI SNPdb Accession IDs |
|------------------------|----------------|-----------------|-------------------------|---------------------------------|-----------------|--------------------------|
| SNP_P4_108764_14607916 | NC_021167.1    | Ca_kabuli_chr08 | 14607916                | GG                              | TT              | 1946910878               |
| SNP_P4_108765_14607939 | NC_021167.1    | Ca_kabuli_chr08 | 14607939                | AA                              | GG              | 1946910880               |
| SNP_P4_108766_14608615 | NC_021167.1    | Ca_kabuli_chr08 | 14608615                | GG                              | AA              | 1946910882               |
| SNP_P4_108767_14608858 | NC_021167.1    | Ca_kabuli_chr08 | 14608858                | TT                              | CC              | 1946910884               |
| SNP_P4_108768_14608871 | NC_021167.1    | Ca_kabuli_chr08 | 14608871                | AA                              | CC              | 1946910886               |
| SNP_P4_108769_14608948 | NC_021167.1    | Ca_kabuli_chr08 | 14608948                | AA                              | TT              | 1946910888               |
| SNP_P4_108770_14609088 | NC_021167.1    | Ca_kabuli_chr08 | 14609088                | CC                              | TT              | 1946910890               |
| SNP_P4_108771_14609089 | NC_021167.1    | Ca_kabuli_chr08 | 14609089                | CC                              | TT              | 1946910891               |
| SNP_P4_108772_14609095 | NC_021167.1    | Ca_kabuli_chr08 | 14609095                | AA                              | TT              | 1946910893               |
| SNP_P4_108773_14609098 | NC_021167.1    | Ca_kabuli_chr08 | 14609098                | CC                              | TT              | 1946910895               |
| SNP_P4_108774_14609119 | NC_021167.1    | Ca_kabuli_chr08 | 14609119                | GG                              | AA              | 1946910897               |
| SNP_P4_108775_14610390 | NC_021167.1    | Ca_kabuli_chr08 | 14610390                | TT                              | CC              | 1946910899               |
| SNP_P4_108776_14610405 | NC_021167.1    | Ca_kabuli_chr08 | 14610405                | AA                              | GG              | 1946910901               |
| SNP_P4_108777_14610409 | NC_021167.1    | Ca_kabuli_chr08 | 14610409                | CC                              | GG              | 1946910903               |
| SNP_P4_108778_14613214 | NC_021167.1    | Ca_kabuli_chr08 | 14613214                | TT                              | CC              | 1946910905               |
| SNP_P4_108781_14616063 | NC_021167.1    | Ca_kabuli_chr08 | 14616063                | GG                              | AA              | 1946910907               |
| SNP_P4_108782_14616166 | NC_021167.1    | Ca_kabuli_chr08 | 14616166                | GG                              | AA              | 1946910909               |
| SNP_P4_108783_14616644 | NC_021167.1    | Ca_kabuli_chr08 | 14616644                | AA                              | CC              | 1946910911               |
| SNP_P4_108784_14617261 | NC_021167.1    | Ca_kabuli_chr08 | 14617261                | AA                              | TT              | 1946910913               |
| SNP_P4_108786_14617548 | NC_021167.1    | Ca_kabuli_chr08 | 14617548                | TT                              | AA              | 1946910915               |
| SNP_P4_108788_14621338 | NC_021167.1    | Ca_kabuli_chr08 | 14621338                | AA                              | GG              | 1946910917               |
| SNP_P4_108789_14622010 | NC_021167.1    | Ca_kabuli_chr08 | 14622010                | CC                              | TT              | 1946910919               |
| SNP_P4_108794_14628939 | NC_021167.1    | Ca_kabuli_chr08 | 14628939                | TT                              | CC              | 1946910920               |
| SNP_P4_108795_14629130 | NC_021167.1    | Ca_kabuli_chr08 | 14629130                | AA                              | GG              | 1946910922               |
| SNP_P4_108796_14629308 | NC_021167.1    | Ca_kabuli_chr08 | 14629308                | CC                              | AA              | 1946910924               |
| SNP_P4_108797_14629493 | NC_021167.1    | Ca_kabuli_chr08 | 14629493                | TT                              | GG              | 1946910926               |
| SNP_P4_108798_14629508 | NC_021167.1    | Ca_kabuli_chr08 | 14629508                | GG                              | AA              | 1946910928               |
| SNP_P4_108799_14629522 | NC_021167.1    | Ca_kabuli_chr08 | 14629522                | TT                              | AA              | 1946910930               |
| SNP_P4_108800_14630393 | NC_021167.1    | Ca_kabuli_chr08 | 14630393                | AA                              | CC              | 1946910932               |
| SNP_P4_108804_14631060 | NC_021167.1    | Ca_kabuli_chr08 | 14631060                | CC                              | TT              | 1946910934               |
| SNP_P4_108805_14631108 | NC_021167.1    | Ca_kabuli_chr08 | 14631108                | CC                              | TT              | 1946910936               |
| SNP_P4_108807_14631310 | NC_021167.1    | Ca_kabuli_chr08 | 14631310                | CC                              | TT              | 1946910938               |
| SNP_P4_108808_14632006 | NC_021167.1    | Ca_kabuli_chr08 | 14632006                | GG                              | TT              | 1946910940               |
| SNP_P4_108809_14632016 | NC_021167.1    | Ca_kabuli_chr08 | 14632016                | AA                              | TT              | 1946910942               |
| SNP_P4_108810_14632030 | NC_021167.1    | Ca_kabuli_chr08 | 14632030                | TT                              | CC              | 1946910944               |
| SNP_P4_108811_14632053 | NC_021167.1    | Ca_kabuli_chr08 | 14632053                | CC                              | AA              | 1946910946               |
| SNP_P4_108814_14638092 | NC_021167.1    | Ca_kabuli_chr08 | 14638092                | GG                              | AA              | 1946910948               |
| SNP_P4_108815_14642757 | NC_021167.1    | Ca_kabuli_chr08 | 14642757                | AA                              | GG              | 1946910950               |
| SNP_P4_108816_14643118 | NC_021167.1    | Ca_kabuli_chr08 | 14643118                | AA                              | TT              | 1946910952               |
| SNP_P4_108818_14644109 | NC_021167.1    | Ca_kabuli_chr08 | 14644109                | AA                              | TT              | 1946910954               |
| SNP_P4_108819_14644376 | NC_021167.1    | Ca_kabuli_chr08 | 14644376                | TT                              | AA              | 1946910956               |
| SNP_P4_108820_14644386 | NC_021167.1    | Ca_kabuli_chr08 | 14644386                | CC                              | TT              | 1946910957               |



| SNPs IDs               | Chromosome IDs | Chromosomes     | Physical positions (bp) | CDC Frontier (Reference genome) | (ILWC46 & LPNB) | NCBI SNPdb Accession IDs |
|------------------------|----------------|-----------------|-------------------------|---------------------------------|-----------------|--------------------------|
| SNP_P4_108821_14644406 | NC_021167.1    | Ca_kabuli_chr08 | 14644406                | CC                              | TT              | 1946910958               |
| SNP_P4_108822_14644423 | NC_021167.1    | Ca_kabuli_chr08 | 14644423                | CC                              | TT              | 1946910959               |
| SNP_P4_108823_14644430 | NC_021167.1    | Ca_kabuli_chr08 | 14644430                | GG                              | AA              | 1946910960               |
| SNP_P4_108824_14644431 | NC_021167.1    | Ca_kabuli_chr08 | 14644431                | AA                              | TT              | 1946910961               |
| SNP_P4_108825_14644432 | NC_021167.1    | Ca_kabuli_chr08 | 14644432                | TT                              | AA              | 1946910962               |
| SNP_P4_108826_14644440 | NC_021167.1    | Ca_kabuli_chr08 | 14644440                | AA                              | GG              | 1946910963               |
| SNP_P4_108828_14645140 | NC_021167.1    | Ca_kabuli_chr08 | 14645140                | TT                              | CC              | 1946910964               |
| SNP_P4_108829_14645346 | NC_021167.1    | Ca_kabuli_chr08 | 14645346                | CC                              | AA              | 1946910965               |
| SNP_P4_108830_14645361 | NC_021167.1    | Ca_kabuli_chr08 | 14645361                | TT                              | CC              | 1946910967               |
| SNP_P4_108831_14646391 | NC_021167.1    | Ca_kabuli_chr08 | 14646391                | AA                              | TT              | 1946910969               |
| SNP_P4_108832_14646423 | NC_021167.1    | Ca_kabuli_chr08 | 14646423                | AA                              | CC              | 1946910970               |
| SNP_P4_108833_14646699 | NC_021167.1    | Ca_kabuli_chr08 | 14646699                | GG                              | AA              | 1946910972               |
| SNP_P4_108834_14646796 | NC_021167.1    | Ca_kabuli_chr08 | 14646796                | GG                              | AA              | 1946910974               |
| SNP_P4_108835_14646808 | NC_021167.1    | Ca_kabuli_chr08 | 14646808                | CC                              | TT              | 1946910976               |
| SNP_P4_108836_14646829 | NC_021167.1    | Ca_kabuli_chr08 | 14646829                | GG                              | TT              | 1946910978               |
| SNP_P4_108837_14646912 | NC_021167.1    | Ca_kabuli_chr08 | 14646912                | GG                              | TT              | 1946910980               |
| SNP_P4_108838_14646929 | NC_021167.1    | Ca_kabuli_chr08 | 14646929                | TT                              | CC              | 1946910982               |
| SNP_P4_108839_14646961 | NC_021167.1    | Ca_kabuli_chr08 | 14646961                | TT                              | AA              | 1946910984               |
| SNP_P4_108840_14646970 | NC_021167.1    | Ca_kabuli_chr08 | 14646970                | CC                              | AA              | 1946910986               |
| SNP_P4_108841_14647135 | NC_021167.1    | Ca_kabuli_chr08 | 14647135                | CC                              | TT              | 1946910988               |
| SNP_P4_108843_14647483 | NC_021167.1    | Ca_kabuli_chr08 | 14647483                | TT                              | AA              | 1946910990               |
| SNP_P4_108844_14647792 | NC_021167.1    | Ca_kabuli_chr08 | 14647792                | GG                              | AA              | 1946910992               |
| SNP_P4_108846_14647999 | NC_021167.1    | Ca_kabuli_chr08 | 14647999                | CC                              | TT              | 1946910994               |
| SNP_P4_108847_14648010 | NC_021167.1    | Ca_kabuli_chr08 | 14648010                | AA                              | GG              | 1946910996               |
| SNP_P4_108849_14648256 | NC_021167.1    | Ca_kabuli_chr08 | 14648256                | CC                              | TT              | 1946910998               |
| SNP_P4_108850_14648412 | NC_021167.1    | Ca_kabuli_chr08 | 14648412                | GG                              | AA              | 1946911000               |
| SNP_P4_108851_14649021 | NC_021167.1    | Ca_kabuli_chr08 | 14649021                | GG                              | TT              | 1946911002               |
| SNP_P4_108852_14649605 | NC_021167.1    | Ca_kabuli_chr08 | 14649605                | TT                              | GG              | 1946911004               |
| SNP_P4_108853_14649681 | NC_021167.1    | Ca_kabuli_chr08 | 14649681                | AA                              | CC              | 1946911006               |
| SNP_P4_108854_14649686 | NC_021167.1    | Ca_kabuli_chr08 | 14649686                | AA                              | GG              | 1946911008               |
| SNP_P4_108855_14649765 | NC_021167.1    | Ca_kabuli_chr08 | 14649765                | TT                              | CC              | 1946911010               |
| SNP_P4_108856_14649857 | NC_021167.1    | Ca_kabuli_chr08 | 14649857                | CC                              | TT              | 1946911012               |
| SNP_P4_108857_14649873 | NC_021167.1    | Ca_kabuli_chr08 | 14649873                | TT                              | CC              | 1946911014               |
| SNP_P4_108858_14649893 | NC_021167.1    | Ca_kabuli_chr08 | 14649893                | CC                              | TT              | 1946911016               |
| SNP_P4_108859_14649895 | NC_021167.1    | Ca_kabuli_chr08 | 14649895                | CC                              | TT              | 1946911018               |
| SNP_P4_108860_14649992 | NC_021167.1    | Ca_kabuli_chr08 | 14649992                | TT                              | CC              | 1946911020               |
| SNP_P4_108861_14649997 | NC_021167.1    | Ca_kabuli_chr08 | 14649997                | CC                              | TT              | 1946911022               |
| SNP_P4_108862_14650015 | NC_021167.1    | Ca_kabuli_chr08 | 14650015                | TT                              | CC              | 1946911024               |
| SNP_P4_108863_14650125 | NC_021167.1    | Ca_kabuli_chr08 | 14650125                | AA                              | TT              | 1946911026               |
| SNP_P4_108864_14650127 | NC_021167.1    | Ca_kabuli_chr08 | 14650127                | GG                              | AA              | 1946911028               |
| SNP_P4_108865_14650157 | NC_021167.1    | Ca_kabuli_chr08 | 14650157                | TT                              | CC              | 1946911030               |
| SNP_P4_108866_14650169 | NC_021167.1    | Ca_kabuli_chr08 | 14650169                | GG                              | AA              | 1946911032               |

| SNPs IDs               | Chromosome IDs | Chromosomes     | Physical positions (bp) | CDC Frontier (Reference genome) | (ILWC46 & LPNB) | NCBI SNPdb Accession IDs |
|------------------------|----------------|-----------------|-------------------------|---------------------------------|-----------------|--------------------------|
| SNP_P4_108867_14650172 | NC_021167.1    | Ca_kabuli_chr08 | 14650172                | GG                              | AA              | 1946911034               |
| SNP_P4_108868_14650179 | NC_021167.1    | Ca_kabuli_chr08 | 14650179                | AA                              | GG              | 1946911036               |
| SNP_P4_108869_14650193 | NC_021167.1    | Ca_kabuli_chr08 | 14650193                | TT                              | CC              | 1946911038               |
| SNP_P4_108870_14650239 | NC_021167.1    | Ca_kabuli_chr08 | 14650239                | TT                              | CC              | 1946911040               |
| SNP_P4_108871_14650330 | NC_021167.1    | Ca_kabuli_chr08 | 14650330                | GG                              | AA              | 1946911042               |
| SNP_P4_108872_14650438 | NC_021167.1    | Ca_kabuli_chr08 | 14650438                | TT                              | AA              | 1946911044               |
| SNP_P4_108873_14652699 | NC_021167.1    | Ca_kabuli_chr08 | 14652699                | CC                              | AA              | 1946911046               |
| SNP_P4_108875_14653145 | NC_021167.1    | Ca_kabuli_chr08 | 14653145                | TT                              | CC              | 1946911048               |
| SNP_P4_108876_14653157 | NC_021167.1    | Ca_kabuli_chr08 | 14653157                | AA                              | CC              | 1946911050               |
| SNP_P4_108877_14653166 | NC_021167.1    | Ca_kabuli_chr08 | 14653166                | AA                              | GG              | 1946911052               |
| SNP_P4_108878_14655894 | NC_021167.1    | Ca_kabuli_chr08 | 14655894                | GG                              | AA              | 1946911054               |
| SNP_P4_108879_14656630 | NC_021167.1    | Ca_kabuli_chr08 | 14656630                | GG                              | AA              | 1946911056               |
| SNP_P4_108880_14656718 | NC_021167.1    | Ca_kabuli_chr08 | 14656718                | GG                              | AA              | 1946911059               |
| SNP_P4_108881_14656753 | NC_021167.1    | Ca_kabuli_chr08 | 14656753                | CC                              | AA              | 1946911061               |
| SNP_P4_108882_14656756 | NC_021167.1    | Ca_kabuli_chr08 | 14656756                | TT                              | CC              | 1946911063               |
| SNP_P4_108883_14656762 | NC_021167.1    | Ca_kabuli_chr08 | 14656762                | GG                              | AA              | 1946911065               |
| SNP_P4_108884_14657069 | NC_021167.1    | Ca_kabuli_chr08 | 14657069                | AA                              | GG              | 1946911067               |
| SNP_P4_108886_14657126 | NC_021167.1    | Ca_kabuli_chr08 | 14657126                | AA                              | TT              | 1946911069               |
| SNP_P4_108887_14658071 | NC_021167.1    | Ca_kabuli_chr08 | 14658071                | GG                              | CC              | 1946911071               |
| SNP_P4_108888_14658475 | NC_021167.1    | Ca_kabuli_chr08 | 14658475                | GG                              | AA              | 1946911073               |
| SNP_P4_108889_14658542 | NC_021167.1    | Ca_kabuli_chr08 | 14658542                | GG                              | AA              | 1946911075               |
| SNP_P4_108890_14658547 | NC_021167.1    | Ca_kabuli_chr08 | 14658547                | GG                              | AA              | 1946911077               |
| SNP_P4_108891_14658725 | NC_021167.1    | Ca_kabuli_chr08 | 14658725                | CC                              | AA              | 1946911079               |
| SNP_P4_108892_14658844 | NC_021167.1    | Ca_kabuli_chr08 | 14658844                | AA                              | TT              | 1946911081               |
| SNP_P4_108893_14659356 | NC_021167.1    | Ca_kabuli_chr08 | 14659356                | CC                              | TT              | 1946911083               |
| SNP_P4_108894_14659671 | NC_021167.1    | Ca_kabuli_chr08 | 14659671                | AA                              | GG              | 1946911085               |
| SNP_P4_108895_14659762 | NC_021167.1    | Ca_kabuli_chr08 | 14659762                | TT                              | CC              | 1946911087               |
| SNP_P4_108896_14659763 | NC_021167.1    | Ca_kabuli_chr08 | 14659763                | GG                              | CC              | 1946911089               |
| SNP_P4_108897_14660089 | NC_021167.1    | Ca_kabuli_chr08 | 14660089                | TT                              | GG              | 1946911091               |
| SNP_P4_108899_14660711 | NC_021167.1    | Ca_kabuli_chr08 | 14660711                | GG                              | AA              | 1946911093               |
| SNP_P4_108900_14660713 | NC_021167.1    | Ca_kabuli_chr08 | 14660713                | TT                              | AA              | 1946911095               |
| SNP_P4_108901_14660718 | NC_021167.1    | Ca_kabuli_chr08 | 14660718                | CC                              | AA              | 1946911097               |
| SNP_P4_108903_14660766 | NC_021167.1    | Ca_kabuli_chr08 | 14660766                | GG                              | AA              | 1946911099               |
| SNP_P4_108904_14661161 | NC_021167.1    | Ca_kabuli_chr08 | 14661161                | CC                              | GG              | 1946911101               |
| SNP_P4_108905_14661298 | NC_021167.1    | Ca_kabuli_chr08 | 14661298                | TT                              | CC              | 1946911103               |
| SNP_P4_108906_14661428 | NC_021167.1    | Ca_kabuli_chr08 | 14661428                | AA                              | TT              | 1946911105               |
| SNP_P4_108907_14661439 | NC_021167.1    | Ca_kabuli_chr08 | 14661439                | TT                              | CC              | 1946911107               |
| SNP_P4_108908_14661440 | NC_021167.1    | Ca_kabuli_chr08 | 14661440                | AA                              | CC              | 1946911109               |
| SNP_P4_108909_14661453 | NC_021167.1    | Ca_kabuli_chr08 | 14661453                | CC                              | AA              | 1946911111               |
| SNP_P4_108910_14661477 | NC_021167.1    | Ca_kabuli_chr08 | 14661477                | AA                              | CC              | 1946911113               |
| SNP_P4_108911_14661625 | NC_021167.1    | Ca_kabuli_chr08 | 14661625                | AA                              | GG              | 1946911115               |
| SNP_P4_108912_14661914 | NC_021167.1    | Ca_kabuli_chr08 | 14661914                | GG                              | AA              | 1946911117               |

| SNPs IDs               | Chromosome IDs | Chromosomes     | Physical positions (bp) | CDC Frontier (Reference genome) | (ILWC46 & LPNB) | NCBI SNPdb Accession IDs |
|------------------------|----------------|-----------------|-------------------------|---------------------------------|-----------------|--------------------------|
| SNP_P4_108915_14662284 | NC_021167.1    | Ca_kabuli_chr08 | 14662284                | CC                              | TT              | 1946911119               |
| SNP_P4_108916_14662314 | NC_021167.1    | Ca_kabuli_chr08 | 14662314                | AA                              | CC              | 1946911121               |
| SNP_P4_108917_14664395 | NC_021167.1    | Ca_kabuli_chr08 | 14664395                | TT                              | CC              | 1946911123               |
| SNP_P4_108919_14665188 | NC_021167.1    | Ca_kabuli_chr08 | 14665188                | AA                              | TT              | 1946911125               |
| SNP_P4_108920_14665189 | NC_021167.1    | Ca_kabuli_chr08 | 14665189                | AA                              | TT              | 1946911127               |
| SNP_P4_108921_14665346 | NC_021167.1    | Ca_kabuli_chr08 | 14665346                | GG                              | TT              | 1946911129               |
| SNP_P4_108922_14665365 | NC_021167.1    | Ca_kabuli_chr08 | 14665365                | TT                              | CC              | 1946911131               |
| SNP_P4_108924_14666115 | NC_021167.1    | Ca_kabuli_chr08 | 14666115                | AA                              | GG              | 1946911133               |
| SNP_P4_108925_14666331 | NC_021167.1    | Ca_kabuli_chr08 | 14666331                | CC                              | TT              | 1946911136               |
| SNP_P4_108926_14666337 | NC_021167.1    | Ca_kabuli_chr08 | 14666337                | TT                              | AA              | 1946911138               |
| SNP_P4_108927_14666646 | NC_021167.1    | Ca_kabuli_chr08 | 14666646                | AA                              | GG              | 1946911140               |
| SNP_P4_108928_14666651 | NC_021167.1    | Ca_kabuli_chr08 | 14666651                | GG                              | AA              | 1946911142               |
| SNP_P4_108929_14666729 | NC_021167.1    | Ca_kabuli_chr08 | 14666729                | TT                              | AA              | 1946911144               |
| SNP_P4_108931_14666985 | NC_021167.1    | Ca_kabuli_chr08 | 14666985                | AA                              | TT              | 1946911146               |
| SNP_P4_108932_14667021 | NC_021167.1    | Ca_kabuli_chr08 | 14667021                | TT                              | GG              | 1946911148               |
| SNP_P4_108933_14667893 | NC_021167.1    | Ca_kabuli_chr08 | 14667893                | AA                              | GG              | 1946911150               |
| SNP_P4_108934_14668226 | NC_021167.1    | Ca_kabuli_chr08 | 14668226                | CC                              | GG              | 1946911152               |
| SNP_P4_108935_14668645 | NC_021167.1    | Ca_kabuli_chr08 | 14668645                | AA                              | GG              | 1946911154               |
| SNP_P4_108937_14669663 | NC_021167.1    | Ca_kabuli_chr08 | 14669663                | AA                              | GG              | 1946911156               |
| SNP_P4_108938_14669924 | NC_021167.1    | Ca_kabuli_chr08 | 14669924                | TT                              | GG              | 1946911158               |
| SNP_P4_108939_14669937 | NC_021167.1    | Ca_kabuli_chr08 | 14669937                | CC                              | TT              | 1946911160               |
| SNP_P4_108940_14669988 | NC_021167.1    | Ca_kabuli_chr08 | 14669988                | CC                              | TT              | 1946911162               |
| SNP_P4_108941_14669992 | NC_021167.1    | Ca_kabuli_chr08 | 14669992                | AA                              | GG              | 1946911164               |
| SNP_P4_108942_14671007 | NC_021167.1    | Ca_kabuli_chr08 | 14671007                | CC                              | TT              | 1946911166               |
| SNP_P4_108944_14671143 | NC_021167.1    | Ca_kabuli_chr08 | 14671143                | GG                              | AA              | 1946911168               |
| SNP_P4_108945_14671284 | NC_021167.1    | Ca_kabuli_chr08 | 14671284                | TT                              | CC              | 1946911170               |
| SNP_P4_108946_14671359 | NC_021167.1    | Ca_kabuli_chr08 | 14671359                | GG                              | AA              | 1946911172               |
| SNP_P4_108947_14671414 | NC_021167.1    | Ca_kabuli_chr08 | 14671414                | TT                              | AA              | 1946911174               |
| SNP_P4_108949_14671496 | NC_021167.1    | Ca_kabuli_chr08 | 14671496                | GG                              | AA              | 1946911176               |
| SNP_P4_108951_14677115 | NC_021167.1    | Ca_kabuli_chr08 | 14677115                | AA                              | GG              | 1946911178               |
| SNP_P4_108952_14677119 | NC_021167.1    | Ca_kabuli_chr08 | 14677119                | AA                              | GG              | 1946911180               |
| SNP_P4_108953_14677436 | NC_021167.1    | Ca_kabuli_chr08 | 14677436                | CC                              | TT              | 1946911182               |
| SNP_P4_108954_14677759 | NC_021167.1    | Ca_kabuli_chr08 | 14677759                | CC                              | TT              | 1946911184               |
| SNP_P4_108955_14677798 | NC_021167.1    | Ca_kabuli_chr08 | 14677798                | AA                              | TT              | 1946911186               |
| SNP_P4_108956_14677813 | NC_021167.1    | Ca_kabuli_chr08 | 14677813                | GG                              | AA              | 1946911188               |
| SNP_P4_108957_14677823 | NC_021167.1    | Ca_kabuli_chr08 | 14677823                | GG                              | AA              | 1946911190               |
| SNP_P4_108958_14678007 | NC_021167.1    | Ca_kabuli_chr08 | 14678007                | AA                              | TT              | 1946911192               |
| SNP_P4_108959_14678088 | NC_021167.1    | Ca_kabuli_chr08 | 14678088                | CC                              | TT              | 1946911194               |
| SNP_P4_108961_14678982 | NC_021167.1    | Ca_kabuli_chr08 | 14678982                | CC                              | TT              | 1946911196               |
| SNP_P4_108962_14680367 | NC_021167.1    | Ca_kabuli_chr08 | 14680367                | GG                              | AA              | 1946911198               |
| SNP_P4_108963_14680609 | NC_021167.1    | Ca_kabuli_chr08 | 14680609                | TT                              | CC              | 1946911200               |
| SNP_P4_108964_14680651 | NC_021167.1    | Ca_kabuli_chr08 | 14680651                | CC                              | AA              | 1946911202               |

| SNPs IDs               | Chromosome IDs | Chromosomes     | Physical positions (bp) | CDC Frontier (Reference genome) | (ILWC46 & LPNB) | NCBI SNPdb Accession IDs |
|------------------------|----------------|-----------------|-------------------------|---------------------------------|-----------------|--------------------------|
| SNP_P4_108966_14680908 | NC_021167.1    | Ca_kabuli_chr08 | 14680908                | CC                              | AA              | 1946911204               |
| SNP_P4_108967_14680918 | NC_021167.1    | Ca_kabuli_chr08 | 14680918                | TT                              | CC              | 1946911206               |
| SNP_P4_108968_14680929 | NC_021167.1    | Ca_kabuli_chr08 | 14680929                | TT                              | AA              | 1946911209               |
| SNP_P4_108969_14680960 | NC_021167.1    | Ca_kabuli_chr08 | 14680960                | TT                              | AA              | 1946911211               |
| SNP_P4_108971_14686257 | NC_021167.1    | Ca_kabuli_chr08 | 14686257                | TT                              | GG              | 1946911213               |
| SNP_P4_108972_14686797 | NC_021167.1    | Ca_kabuli_chr08 | 14686797                | CC                              | TT              | 1946911215               |
| SNP_P4_108973_14687232 | NC_021167.1    | Ca_kabuli_chr08 | 14687232                | AA                              | GG              | 1946911217               |
| SNP_P4_108974_14687684 | NC_021167.1    | Ca_kabuli_chr08 | 14687684                | TT                              | AA              | 1946911219               |
| SNP_P4_108975_14687727 | NC_021167.1    | Ca_kabuli_chr08 | 14687727                | CC                              | TT              | 1946911221               |
| SNP_P4_108977_14688128 | NC_021167.1    | Ca_kabuli_chr08 | 14688128                | TT                              | AA              | 1946911223               |
| SNP_P4_108979_14688513 | NC_021167.1    | Ca_kabuli_chr08 | 14688513                | GG                              | AA              | 1946911225               |
| SNP_P4_108981_14689094 | NC_021167.1    | Ca_kabuli_chr08 | 14689094                | GG                              | AA              | 1946911227               |
| SNP_P4_108982_14689150 | NC_021167.1    | Ca_kabuli_chr08 | 14689150                | TT                              | AA              | 1946911229               |
| SNP_P4_108983_14692350 | NC_021167.1    | Ca_kabuli_chr08 | 14692350                | CC                              | GG              | 1946911231               |
| SNP_P4_108984_14692352 | NC_021167.1    | Ca_kabuli_chr08 | 14692352                | TT                              | CC              | 1946911233               |
| SNP_P4_108985_14693453 | NC_021167.1    | Ca_kabuli_chr08 | 14693453                | TT                              | CC              | 1946911235               |
| SNP_P4_108986_14693486 | NC_021167.1    | Ca_kabuli_chr08 | 14693486                | TT                              | CC              | 1946911237               |
| SNP_P4_108987_14693509 | NC_021167.1    | Ca_kabuli_chr08 | 14693509                | CC                              | GG              | 1946911239               |
| SNP_P4_108988_14693741 | NC_021167.1    | Ca_kabuli_chr08 | 14693741                | GG                              | AA              | 1946911240               |
| SNP_P4_108990_14693768 | NC_021167.1    | Ca_kabuli_chr08 | 14693768                | GG                              | TT              | 1946911241               |
| SNP_P4_108992_14698467 | NC_021167.1    | Ca_kabuli_chr08 | 14698467                | TT                              | GG              | 1946911242               |
| SNP_P4_108993_14698578 | NC_021167.1    | Ca_kabuli_chr08 | 14698578                | GG                              | AA              | 1946911243               |
| SNP_P4_108994_14698870 | NC_021167.1    | Ca_kabuli_chr08 | 14698870                | TT                              | AA              | 1946911244               |
| SNP_P4_108995_14700602 | NC_021167.1    | Ca_kabuli_chr08 | 14700602                | GG                              | AA              | 1946911245               |
| SNP_P4_108997_14700847 | NC_021167.1    | Ca_kabuli_chr08 | 14700847                | GG                              | AA              | 1946911246               |
| SNP_P4_108998_14700848 | NC_021167.1    | Ca_kabuli_chr08 | 14700848                | CC                              | TT              | 1946911247               |
| SNP_P4_108999_14700947 | NC_021167.1    | Ca_kabuli_chr08 | 14700947                | GG                              | AA              | 1946911248               |
| SNP_P4_109000_14701032 | NC_021167.1    | Ca_kabuli_chr08 | 14701032                | TT                              | CC              | 1946911249               |
| SNP_P4_109001_14701057 | NC_021167.1    | Ca_kabuli_chr08 | 14701057                | GG                              | AA              | 1946911250               |
| SNP_P4_109003_14701095 | NC_021167.1    | Ca_kabuli_chr08 | 14701095                | TT                              | AA              | 1946911251               |
| SNP_P4_109004_14701487 | NC_021167.1    | Ca_kabuli_chr08 | 14701487                | CC                              | TT              | 1946911253               |
| SNP_P4_109005_14702060 | NC_021167.1    | Ca_kabuli_chr08 | 14702060                | AA                              | GG              | 1946911255               |
| SNP_P4_109006_14702092 | NC_021167.1    | Ca_kabuli_chr08 | 14702092                | TT                              | CC              | 1946911257               |
| SNP_P4_109007_14702127 | NC_021167.1    | Ca_kabuli_chr08 | 14702127                | CC                              | TT              | 1946911259               |
| SNP_P4_109008_14702458 | NC_021167.1    | Ca_kabuli_chr08 | 14702458                | AA                              | TT              | 1946911261               |
| SNP_P4_109009_14704601 | NC_021167.1    | Ca_kabuli_chr08 | 14704601                | TT                              | CC              | 1946911263               |
| SNP_P4_109010_14704602 | NC_021167.1    | Ca_kabuli_chr08 | 14704602                | CC                              | TT              | 1946911265               |
| SNP_P4_109011_14704612 | NC_021167.1    | Ca_kabuli_chr08 | 14704612                | AA                              | TT              | 1946911267               |
| SNP_P4_109012_14704987 | NC_021167.1    | Ca_kabuli_chr08 | 14704987                | CC                              | TT              | 1946911269               |
| SNP_P4_109013_14704990 | NC_021167.1    | Ca_kabuli_chr08 | 14704990                | GG                              | AA              | 1946911271               |
| SNP_P4_109014_14704991 | NC_021167.1    | Ca_kabuli_chr08 | 14704991                | GG                              | TT              | 1946911273               |
| SNP_P4_109015_14705006 | NC_021167.1    | Ca_kabuli_chr08 | 14705006                | TT                              | CC              | 1946911275               |

| SNPs IDs               | Chromosome IDs | Chromosomes     | Physical positions (bp) | CDC Frontier (Reference genome) | (ILWC46 & LPNB) | NCBI SNPdb Accession IDs |
|------------------------|----------------|-----------------|-------------------------|---------------------------------|-----------------|--------------------------|
| SNP_P4_109016_14705011 | NC_021167.1    | Ca_kabuli_chr08 | 14705011                | CC                              | TT              | 1946911277               |
| SNP_P4_109017_14705023 | NC_021167.1    | Ca_kabuli_chr08 | 14705023                | AA                              | GG              | 1946911279               |
| SNP_P4_109018_14705042 | NC_021167.1    | Ca_kabuli_chr08 | 14705042                | CC                              | GG              | 1946911281               |
| SNP_P4_109020_14706139 | NC_021167.1    | Ca_kabuli_chr08 | 14706139                | TT                              | GG              | 1946911283               |
| SNP_P4_109021_14706145 | NC_021167.1    | Ca_kabuli_chr08 | 14706145                | TT                              | CC              | 1946911285               |
| SNP_P4_109022_14706175 | NC_021167.1    | Ca_kabuli_chr08 | 14706175                | TT                              | AA              | 1946911287               |
| SNP_P4_109023_14707654 | NC_021167.1    | Ca_kabuli_chr08 | 14707654                | CC                              | AA              | 1946911289               |
| SNP_P4_109024_14707657 | NC_021167.1    | Ca_kabuli_chr08 | 14707657                | TT                              | CC              | 1946911291               |
| SNP_P4_109025_14707674 | NC_021167.1    | Ca_kabuli_chr08 | 14707674                | TT                              | CC              | 1946911293               |
| SNP_P4_109026_14707688 | NC_021167.1    | Ca_kabuli_chr08 | 14707688                | GG                              | TT              | 1946911295               |
| SNP_P4_109027_14707750 | NC_021167.1    | Ca_kabuli_chr08 | 14707750                | TT                              | GG              | 1946911297               |
| SNP_P4_109028_14707756 | NC_021167.1    | Ca_kabuli_chr08 | 14707756                | GG                              | AA              | 1946911299               |
| SNP_P4_109029_14707815 | NC_021167.1    | Ca_kabuli_chr08 | 14707815                | TT                              | AA              | 1946911301               |
| SNP_P4_109030_14707952 | NC_021167.1    | Ca_kabuli_chr08 | 14707952                | AA                              | TT              | 1946911303               |
| SNP_P4_109031_14707982 | NC_021167.1    | Ca_kabuli_chr08 | 14707982                | TT                              | GG              | 1946911305               |
| SNP_P4_109032_14708028 | NC_021167.1    | Ca_kabuli_chr08 | 14708028                | CC                              | AA              | 1946911307               |
| SNP_P4_109033_14708039 | NC_021167.1    | Ca_kabuli_chr08 | 14708039                | TT                              | CC              | 1946911309               |
| SNP_P4_109034_14708057 | NC_021167.1    | Ca_kabuli_chr08 | 14708057                | TT                              | CC              | 1946911311               |
| SNP_P4_109035_14708091 | NC_021167.1    | Ca_kabuli_chr08 | 14708091                | TT                              | AA              | 1946911313               |
| SNP_P4_109036_14708285 | NC_021167.1    | Ca_kabuli_chr08 | 14708285                | CC                              | AA              | 1946911315               |
| SNP_P4_109037_14708451 | NC_021167.1    | Ca_kabuli_chr08 | 14708451                | CC                              | TT              | 1946911317               |
| SNP_P4_109038_14709266 | NC_021167.1    | Ca_kabuli_chr08 | 14709266                | CC                              | TT              | 1946911319               |
| SNP_P4_109039_14710506 | NC_021167.1    | Ca_kabuli_chr08 | 14710506                | GG                              | TT              | 1946911321               |
| SNP_P4_109040_14711029 | NC_021167.1    | Ca_kabuli_chr08 | 14711029                | CC                              | TT              | 1946911323               |
| SNP_P4_109042_14712192 | NC_021167.1    | Ca_kabuli_chr08 | 14712192                | AA                              | CC              | 1946911325               |
| SNP_P4_109044_14713266 | NC_021167.1    | Ca_kabuli_chr08 | 14713266                | TT                              | CC              | 1946911327               |
| SNP_P4_109045_14713558 | NC_021167.1    | Ca_kabuli_chr08 | 14713558                | GG                              | AA              | 1946911329               |
| SNP_P4_109046_14714101 | NC_021167.1    | Ca_kabuli_chr08 | 14714101                | AA                              | CC              | 1946911331               |
| SNP_P4_109047_14715368 | NC_021167.1    | Ca_kabuli_chr08 | 14715368                | GG                              | AA              | 1946911333               |
| SNP_P4_109048_14716988 | NC_021167.1    | Ca_kabuli_chr08 | 14716988                | AA                              | GG              | 1946911335               |
| SNP_P4_109049_14718292 | NC_021167.1    | Ca_kabuli_chr08 | 14718292                | CC                              | TT              | 1946911337               |
| SNP_P4_109050_14719863 | NC_021167.1    | Ca_kabuli_chr08 | 14719863                | CC                              | TT              | 1946911339               |
| SNP_P4_109051_14720599 | NC_021167.1    | Ca_kabuli_chr08 | 14720599                | TT                              | AA              | 1946911341               |
| SNP_P4_109052_14720612 | NC_021167.1    | Ca_kabuli_chr08 | 14720612                | GG                              | AA              | 1946911343               |
| SNP_P4_109053_14720670 | NC_021167.1    | Ca_kabuli_chr08 | 14720670                | CC                              | TT              | 1946911345               |
| SNP_P4_109054_14720685 | NC_021167.1    | Ca_kabuli_chr08 | 14720685                | AA                              | TT              | 1946911347               |
| SNP_P4_109055_14720703 | NC_021167.1    | Ca_kabuli_chr08 | 14720703                | AA                              | GG              | 1946911349               |
| SNP_P4_109056_14720804 | NC_021167.1    | Ca_kabuli_chr08 | 14720804                | GG                              | TT              | 1946911351               |
| SNP_P4_109057_14721744 | NC_021167.1    | Ca_kabuli_chr08 | 14721744                | TT                              | AA              | 1946911353               |
| SNP_P4_109058_14721798 | NC_021167.1    | Ca_kabuli_chr08 | 14721798                | AA                              | CC              | 1946911355               |
| SNP_P4_109061_14724326 | NC_021167.1    | Ca_kabuli_chr08 | 14724326                | TT                              | CC              | 1946911357               |
| SNP_P4_109062_14724726 | NC_021167.1    | Ca_kabuli_chr08 | 14724726                | TT                              | CC              | 1946911359               |

| SNPs IDs               | Chromosome IDs | Chromosomes     | Physical positions (bp) | CDC Frontier (Reference genome) | (ILWC46 & LPNB) | NCBI SNPdb Accession IDs |
|------------------------|----------------|-----------------|-------------------------|---------------------------------|-----------------|--------------------------|
| SNP_P4_109065_14727360 | NC_021167.1    | Ca_kabuli_chr08 | 14727360                | AA                              | GG              | 1946911361               |
| SNP_P4_109066_14727584 | NC_021167.1    | Ca_kabuli_chr08 | 14727584                | GG                              | CC              | 1946911363               |
| SNP_P4_109067_14729155 | NC_021167.1    | Ca_kabuli_chr08 | 14729155                | CC                              | TT              | 1946911365               |
| SNP_P4_109068_14729470 | NC_021167.1    | Ca_kabuli_chr08 | 14729470                | TT                              | CC              | 1946911367               |
| SNP_P4_109069_14730226 | NC_021167.1    | Ca_kabuli_chr08 | 14730226                | CC                              | TT              | 1946911369               |
| SNP_P4_109070_14730234 | NC_021167.1    | Ca_kabuli_chr08 | 14730234                | AA                              | GG              | 1946911371               |
| SNP_P4_109071_14730286 | NC_021167.1    | Ca_kabuli_chr08 | 14730286                | CC                              | TT              | 1946911373               |
| SNP_P4_109072_14731803 | NC_021167.1    | Ca_kabuli_chr08 | 14731803                | CC                              | TT              | 1946911375               |
| SNP_P4_109073_14731827 | NC_021167.1    | Ca_kabuli_chr08 | 14731827                | GG                              | CC              | 1946911377               |
| SNP_P4_109075_14734187 | NC_021167.1    | Ca_kabuli_chr08 | 14734187                | AA                              | TT              | 1946911379               |
| SNP_P4_109077_14735180 | NC_021167.1    | Ca_kabuli_chr08 | 14735180                | GG                              | AA              | 1946911381               |
| SNP_P4_109078_14736521 | NC_021167.1    | Ca_kabuli_chr08 | 14736521                | CC                              | AA              | 1946911383               |
| SNP_P4_109079_14736756 | NC_021167.1    | Ca_kabuli_chr08 | 14736756                | TT                              | CC              | 1946911385               |
| SNP_P4_109080_14736774 | NC_021167.1    | Ca_kabuli_chr08 | 14736774                | TT                              | CC              | 1946911387               |
| SNP_P4_109081_14737388 | NC_021167.1    | Ca_kabuli_chr08 | 14737388                | GG                              | TT              | 1946911389               |
| SNP_P4_109082_14737449 | NC_021167.1    | Ca_kabuli_chr08 | 14737449                | CC                              | TT              | 1946911391               |
| SNP_P4_109083_14737627 | NC_021167.1    | Ca_kabuli_chr08 | 14737627                | AA                              | GG              | 1946911393               |
| SNP_P4_109084_14737808 | NC_021167.1    | Ca_kabuli_chr08 | 14737808                | AA                              | TT              | 1946911395               |
| SNP_P4_109085_14740003 | NC_021167.1    | Ca_kabuli_chr08 | 14740003                | TT                              | AA              | 1946911397               |
| SNP_P4_109086_14740035 | NC_021167.1    | Ca_kabuli_chr08 | 14740035                | AA                              | GG              | 1946911399               |
| SNP_P4_109087_14740054 | NC_021167.1    | Ca_kabuli_chr08 | 14740054                | TT                              | GG              | 1946911401               |
| SNP_P4_109089_14741343 | NC_021167.1    | Ca_kabuli_chr08 | 14741343                | TT                              | AA              | 1946911403               |
| SNP_P4_109090_14741608 | NC_021167.1    | Ca_kabuli_chr08 | 14741608                | AA                              | CC              | 1946911405               |
| SNP_P4_109091_14741922 | NC_021167.1    | Ca_kabuli_chr08 | 14741922                | TT                              | CC              | 1946911407               |
| SNP_P4_109092_14741945 | NC_021167.1    | Ca_kabuli_chr08 | 14741945                | TT                              | CC              | 1946911409               |
| SNP_P4_109094_14742040 | NC_021167.1    | Ca_kabuli_chr08 | 14742040                | TT                              | CC              | 1946911411               |
| SNP_P4_109096_14742083 | NC_021167.1    | Ca_kabuli_chr08 | 14742083                | TT                              | CC              | 1946911413               |
| SNP_P4_109098_14742296 | NC_021167.1    | Ca_kabuli_chr08 | 14742296                | CC                              | TT              | 1946911415               |
| SNP_P4_109099_14742415 | NC_021167.1    | Ca_kabuli_chr08 | 14742415                | AA                              | GG              | 1946911417               |
| SNP_P4_109100_14744236 | NC_021167.1    | Ca_kabuli_chr08 | 14744236                | TT                              | AA              | 1946911419               |
| SNP_P4_109101_14744955 | NC_021167.1    | Ca_kabuli_chr08 | 14744955                | GG                              | TT              | 1946911420               |
| SNP_P4_109104_14748342 | NC_021167.1    | Ca_kabuli_chr08 | 14748342                | GG                              | AA              | 1946911422               |
| SNP_P4_109105_14749314 | NC_021167.1    | Ca_kabuli_chr08 | 14749314                | TT                              | CC              | 1946911424               |
| SNP_P4_109106_14749412 | NC_021167.1    | Ca_kabuli_chr08 | 14749412                | AA                              | TT              | 1946911426               |
| SNP_P4_109107_14749605 | NC_021167.1    | Ca_kabuli_chr08 | 14749605                | GG                              | AA              | 1946911428               |
| SNP_P4_109108_14749817 | NC_021167.1    | Ca_kabuli_chr08 | 14749817                | AA                              | GG              | 1946911430               |
| SNP_P4_109109_14749925 | NC_021167.1    | Ca_kabuli_chr08 | 14749925                | TT                              | AA              | 1946911432               |
| SNP_P4_109110_14749928 | NC_021167.1    | Ca_kabuli_chr08 | 14749928                | TT                              | GG              | 1946911434               |
| SNP_P4_109111_14749932 | NC_021167.1    | Ca_kabuli_chr08 | 14749932                | TT                              | CC              | 1946911436               |
| SNP_P4_109112_14749939 | NC_021167.1    | Ca_kabuli_chr08 | 14749939                | AA                              | GG              | 1946911438               |
| SNP_P4_109113_14749982 | NC_021167.1    | Ca_kabuli_chr08 | 14749982                | TT                              | CC              | 1946911440               |
| SNP_P4_109114_14749987 | NC_021167.1    | Ca_kabuli_chr08 | 14749987                | AA                              | TT              | 1946911442               |

| SNPs IDs               | Chromosome IDs | Chromosomes     | Physical positions (bp) | CDC Frontier (Reference genome) | (ILWC46 & LPNB) | NCBI SNPdb Accession IDs |
|------------------------|----------------|-----------------|-------------------------|---------------------------------|-----------------|--------------------------|
| SNP_P4_109115_14750007 | NC_021167.1    | Ca_kabuli_chr08 | 14750007                | AA                              | TT              | 1946911444               |
| SNP_P4_109116_14750838 | NC_021167.1    | Ca_kabuli_chr08 | 14750838                | CC                              | TT              | 1946911446               |
| SNP_P4_109117_14750872 | NC_021167.1    | Ca_kabuli_chr08 | 14750872                | CC                              | TT              | 1946911448               |
| SNP_P4_109118_14750873 | NC_021167.1    | Ca_kabuli_chr08 | 14750873                | AA                              | GG              | 1946911450               |
| SNP_P4_109120_14751012 | NC_021167.1    | Ca_kabuli_chr08 | 14751012                | GG                              | TT              | 1946911452               |
| SNP_P4_109123_14751150 | NC_021167.1    | Ca_kabuli_chr08 | 14751150                | CC                              | TT              | 1946911454               |
| SNP_P4_109124_14751425 | NC_021167.1    | Ca_kabuli_chr08 | 14751425                | CC                              | TT              | 1946911456               |
| SNP_P4_109125_14751445 | NC_021167.1    | Ca_kabuli_chr08 | 14751445                | GG                              | CC              | 1946911458               |
| SNP_P4_109126_14751468 | NC_021167.1    | Ca_kabuli_chr08 | 14751468                | AA                              | GG              | 1946911460               |
| SNP_P4_109128_14751534 | NC_021167.1    | Ca_kabuli_chr08 | 14751534                | GG                              | TT              | 1946911462               |
| SNP_P4_109129_14751537 | NC_021167.1    | Ca_kabuli_chr08 | 14751537                | CC                              | AA              | 1946911464               |
| SNP_P4_109130_14751573 | NC_021167.1    | Ca_kabuli_chr08 | 14751573                | CC                              | TT              | 1946911466               |
| SNP_P4_109131_14753132 | NC_021167.1    | Ca_kabuli_chr08 | 14753132                | TT                              | CC              | 1946911468               |
| SNP_P4_109132_14753136 | NC_021167.1    | Ca_kabuli_chr08 | 14753136                | CC                              | TT              | 1946911470               |
| SNP_P4_109133_14753138 | NC_021167.1    | Ca_kabuli_chr08 | 14753138                | AA                              | GG              | 1946911472               |
| SNP_P4_109135_14754257 | NC_021167.1    | Ca_kabuli_chr08 | 14754257                | CC                              | GG              | 1946911474               |
| SNP_P4_109136_14754299 | NC_021167.1    | Ca_kabuli_chr08 | 14754299                | TT                              | CC              | 1946911476               |
| SNP_P4_109137_14755745 | NC_021167.1    | Ca_kabuli_chr08 | 14755745                | CC                              | TT              | 1946911478               |
| SNP_P4_109138_14755770 | NC_021167.1    | Ca_kabuli_chr08 | 14755770                | AA                              | GG              | 1946911480               |
| SNP_P4_109139_14755824 | NC_021167.1    | Ca_kabuli_chr08 | 14755824                | AA                              | TT              | 1946911482               |
| SNP_P4_109140_14756065 | NC_021167.1    | Ca_kabuli_chr08 | 14756065                | GG                              | TT              | 1946911484               |
| SNP_P4_109141_14757170 | NC_021167.1    | Ca_kabuli_chr08 | 14757170                | GG                              | AA              | 1946911486               |
| SNP_P4_109143_14758178 | NC_021167.1    | Ca_kabuli_chr08 | 14758178                | CC                              | AA              | 1946911488               |
| SNP_P4_109144_14758192 | NC_021167.1    | Ca_kabuli_chr08 | 14758192                | AA                              | GG              | 1946911490               |
| SNP_P4_109147_14759239 | NC_021167.1    | Ca_kabuli_chr08 | 14759239                | AA                              | GG              | 1946911493               |
| SNP_P4_109149_14760129 | NC_021167.1    | Ca_kabuli_chr08 | 14760129                | AA                              | TT              | 1946911495               |
| SNP_P4_109150_14760722 | NC_021167.1    | Ca_kabuli_chr08 | 14760722                | GG                              | AA              | 1946911497               |
| SNP_P4_109152_14762528 | NC_021167.1    | Ca_kabuli_chr08 | 14762528                | TT                              | CC              | 1946911499               |
| SNP_P4_109153_14763988 | NC_021167.1    | Ca_kabuli_chr08 | 14763988                | GG                              | AA              | 1946911501               |
| SNP_P4_109154_14763989 | NC_021167.1    | Ca_kabuli_chr08 | 14763989                | GG                              | AA              | 1946911503               |
| SNP_P4_109155_14764052 | NC_021167.1    | Ca_kabuli_chr08 | 14764052                | GG                              | TT              | 1946911505               |
| SNP_P4_109157_14764091 | NC_021167.1    | Ca_kabuli_chr08 | 14764091                | AA                              | TT              | 1946911507               |
| SNP_P4_109158_14764098 | NC_021167.1    | Ca_kabuli_chr08 | 14764098                | CC                              | TT              | 1946911509               |
| SNP_P4_109159_14764110 | NC_021167.1    | Ca_kabuli_chr08 | 14764110                | GG                              | AA              | 1946911511               |
| SNP_P4_109160_14764133 | NC_021167.1    | Ca_kabuli_chr08 | 14764133                | AA                              | CC              | 1946911513               |
| SNP_P4_109161_14764216 | NC_021167.1    | Ca_kabuli_chr08 | 14764216                | TT                              | CC              | 1946911515               |
| SNP_P4_109162_14764493 | NC_021167.1    | Ca_kabuli_chr08 | 14764493                | CC                              | TT              | 1946911517               |
| SNP_P4_109163_14768294 | NC_021167.1    | Ca_kabuli_chr08 | 14768294                | CC                              | GG              | 1946911519               |
| SNP_P4_109165_14770133 | NC_021167.1    | Ca_kabuli_chr08 | 14770133                | GG                              | AA              | 1946911521               |
| SNP_P4_109166_14770426 | NC_021167.1    | Ca_kabuli_chr08 | 14770426                | CC                              | GG              | 1946911523               |
| SNP_P4_109167_14770472 | NC_021167.1    | Ca_kabuli_chr08 | 14770472                | CC                              | GG              | 1946911525               |
| SNP_P4_109168_14772582 | NC_021167.1    | Ca_kabuli_chr08 | 14772582                | TT                              | CC              | 1946911527               |

| SNPs IDs               | Chromosome IDs | Chromosomes     | Physical positions (bp) | CDC Frontier (Reference genome) | (ILWC46 & LPNB) | NCBI SNPdb Accession IDs |
|------------------------|----------------|-----------------|-------------------------|---------------------------------|-----------------|--------------------------|
| SNP_P4_109169_14772605 | NC_021167.1    | Ca_kabuli_chr08 | 14772605                | AA                              | TT              | 1946911529               |
| SNP_P4_109170_14772615 | NC_021167.1    | Ca_kabuli_chr08 | 14772615                | CC                              | TT              | 1946911531               |
| SNP_P4_109171_14773204 | NC_021167.1    | Ca_kabuli_chr08 | 14773204                | GG                              | AA              | 1946911533               |
| SNP_P4_109173_14773229 | NC_021167.1    | Ca_kabuli_chr08 | 14773229                | CC                              | TT              | 1946911535               |
| SNP_P4_109174_14773287 | NC_021167.1    | Ca_kabuli_chr08 | 14773287                | AA                              | TT              | 1946911537               |
| SNP_P4_109176_14774864 | NC_021167.1    | Ca_kabuli_chr08 | 14774864                | CC                              | TT              | 1946911539               |
| SNP_P4_109177_14774896 | NC_021167.1    | Ca_kabuli_chr08 | 14774896                | CC                              | TT              | 1946911541               |
| SNP_P4_109178_14774915 | NC_021167.1    | Ca_kabuli_chr08 | 14774915                | CC                              | TT              | 1946911543               |
| SNP_P4_109179_14774919 | NC_021167.1    | Ca_kabuli_chr08 | 14774919                | GG                              | AA              | 1946911545               |
| SNP_P4_109180_14774926 | NC_021167.1    | Ca_kabuli_chr08 | 14774926                | TT                              | AA              | 1946911547               |
| SNP_P4_109181_14774932 | NC_021167.1    | Ca_kabuli_chr08 | 14774932                | CC                              | TT              | 1946911549               |
| SNP_P4_109183_14775157 | NC_021167.1    | Ca_kabuli_chr08 | 14775157                | CC                              | AA              | 1946911551               |
| SNP_P4_109184_14775349 | NC_021167.1    | Ca_kabuli_chr08 | 14775349                | GG                              | AA              | 1946911553               |
| SNP_P4_109185_14775672 | NC_021167.1    | Ca_kabuli_chr08 | 14775672                | GG                              | AA              | 1946911555               |
| SNP_P4_109186_14776625 | NC_021167.1    | Ca_kabuli_chr08 | 14776625                | GG                              | AA              | 1946911557               |
| SNP_P4_109187_14776628 | NC_021167.1    | Ca_kabuli_chr08 | 14776628                | GG                              | AA              | 1946911559               |
| SNP_P4_109190_14776740 | NC_021167.1    | Ca_kabuli_chr08 | 14776740                | GG                              | AA              | 1946911561               |
| SNP_P4_109191_14776788 | NC_021167.1    | Ca_kabuli_chr08 | 14776788                | GG                              | AA              | 1946911563               |
| SNP_P4_109192_14776791 | NC_021167.1    | Ca_kabuli_chr08 | 14776791                | CC                              | TT              | 1946911565               |
| SNP_P4_109193_14776802 | NC_021167.1    | Ca_kabuli_chr08 | 14776802                | AA                              | TT              | 1946911567               |
| SNP_P4_109194_14776810 | NC_021167.1    | Ca_kabuli_chr08 | 14776810                | CC                              | TT              | 1946911569               |
| SNP_P4_109195_14777917 | NC_021167.1    | Ca_kabuli_chr08 | 14777917                | AA                              | GG              | 1946911571               |
| SNP_P4_109196_14778260 | NC_021167.1    | Ca_kabuli_chr08 | 14778260                | CC                              | TT              | 1946911573               |
| SNP_P4_109197_14780500 | NC_021167.1    | Ca_kabuli_chr08 | 14780500                | AA                              | TT              | 1946911575               |
| SNP_P4_109198_14780571 | NC_021167.1    | Ca_kabuli_chr08 | 14780571                | AA                              | GG              | 1946911577               |
| SNP_P4_109199_14780916 | NC_021167.1    | Ca_kabuli_chr08 | 14780916                | TT                              | CC              | 1946911579               |
| SNP_P4_109201_14781410 | NC_021167.1    | Ca_kabuli_chr08 | 14781410                | GG                              | AA              | 1946911581               |
| SNP_P4_109202_14785755 | NC_021167.1    | Ca_kabuli_chr08 | 14785755                | GG                              | CC              | 1946911583               |
| SNP_P4_109204_14788683 | NC_021167.1    | Ca_kabuli_chr08 | 14788683                | TT                              | CC              | 1946911585               |
| SNP_P4_109205_14790544 | NC_021167.1    | Ca_kabuli_chr08 | 14790544                | CC                              | AA              | 1946911587               |
| SNP_P4_109206_14793714 | NC_021167.1    | Ca_kabuli_chr08 | 14793714                | TT                              | CC              | 1946911589               |
| SNP_P4_109207_14793758 | NC_021167.1    | Ca_kabuli_chr08 | 14793758                | CC                              | AA              | 1946911591               |
| SNP_P4_109208_14794190 | NC_021167.1    | Ca_kabuli_chr08 | 14794190                | TT                              | CC              | 1946911593               |
| SNP_P4_109209_14795333 | NC_021167.1    | Ca_kabuli_chr08 | 14795333                | CC                              | TT              | 1946911595               |
| SNP_P4_109210_14795705 | NC_021167.1    | Ca_kabuli_chr08 | 14795705                | CC                              | TT              | 1946911597               |
| SNP_P4_109211_14796329 | NC_021167.1    | Ca_kabuli_chr08 | 14796329                | AA                              | GG              | 1946911599               |
| SNP_P4_109212_14796423 | NC_021167.1    | Ca_kabuli_chr08 | 14796423                | TT                              | AA              | 1946911601               |
| SNP_P4_109213_14796424 | NC_021167.1    | Ca_kabuli_chr08 | 14796424                | AA                              | TT              | 1946911603               |
| SNP_P4_109214_14797583 | NC_021167.1    | Ca_kabuli_chr08 | 14797583                | CC                              | AA              | 1946911605               |
| SNP_P4_109215_14797708 | NC_021167.1    | Ca_kabuli_chr08 | 14797708                | AA                              | CC              | 1946911607               |
| SNP_P4_109216_14799005 | NC_021167.1    | Ca_kabuli_chr08 | 14799005                | CC                              | TT              | 1946911609               |
| SNP_P4_109217_14799008 | NC_021167.1    | Ca_kabuli_chr08 | 14799008                | TT                              | CC              | 1946911611               |



| SNPs IDs               | Chromosome IDs | Chromosomes     | Physical positions (bp) | CDC Frontier (Reference genome) | (ILWC46 & LPNB) | NCBI SNPdb Accession IDs |
|------------------------|----------------|-----------------|-------------------------|---------------------------------|-----------------|--------------------------|
| SNP_P4_109218_14799810 | NC_021167.1    | Ca_kabuli_chr08 | 14799810                | GG                              | AA              | 1946911613               |
| SNP_P4_109219_14799819 | NC_021167.1    | Ca_kabuli_chr08 | 14799819                | GG                              | AA              | 1946911615               |
| SNP_P4_109220_14799897 | NC_021167.1    | Ca_kabuli_chr08 | 14799897                | TT                              | CC              | 1946911617               |
| SNP_P4_109221_14801951 | NC_021167.1    | Ca_kabuli_chr08 | 14801951                | AA                              | TT              | 1946911619               |
| SNP_P4_109222_14802837 | NC_021167.1    | Ca_kabuli_chr08 | 14802837                | TT                              | CC              | 1946911621               |
| SNP_P4_109223_14802886 | NC_021167.1    | Ca_kabuli_chr08 | 14802886                | CC                              | TT              | 1946911623               |
| SNP_P4_109224_14803624 | NC_021167.1    | Ca_kabuli_chr08 | 14803624                | TT                              | GG              | 1946911625               |
| SNP_P4_109225_14803643 | NC_021167.1    | Ca_kabuli_chr08 | 14803643                | TT                              | AA              | 1946911627               |
| SNP_P4_109226_14806309 | NC_021167.1    | Ca_kabuli_chr08 | 14806309                | GG                              | CC              | 1946911629               |
| SNP_P4_109228_14808336 | NC_021167.1    | Ca_kabuli_chr08 | 14808336                | TT                              | AA              | 1946911631               |
| SNP_P4_109229_14808344 | NC_021167.1    | Ca_kabuli_chr08 | 14808344                | CC                              | AA              | 1946911633               |
| SNP_P4_109230_14808359 | NC_021167.1    | Ca_kabuli_chr08 | 14808359                | CC                              | TT              | 1946911635               |
| SNP_P4_109231_14808652 | NC_021167.1    | Ca_kabuli_chr08 | 14808652                | CC                              | TT              | 1946911637               |
| SNP_P4_109232_14808733 | NC_021167.1    | Ca_kabuli_chr08 | 14808733                | TT                              | AA              | 1946911639               |
| SNP_P4_109233_14808823 | NC_021167.1    | Ca_kabuli_chr08 | 14808823                | GG                              | AA              | 1946911641               |
| SNP_P4_109236_14812272 | NC_021167.1    | Ca_kabuli_chr08 | 14812272                | AA                              | TT              | 1946911643               |
| SNP_P4_109237_14812281 | NC_021167.1    | Ca_kabuli_chr08 | 14812281                | AA                              | GG              | 1946911645               |
| SNP_P4_109238_14812293 | NC_021167.1    | Ca_kabuli_chr08 | 14812293                | GG                              | AA              | 1946911647               |
| SNP_P4_109239_14812302 | NC_021167.1    | Ca_kabuli_chr08 | 14812302                | AA                              | GG              | 1946911649               |
| SNP_P4_109240_14812306 | NC_021167.1    | Ca_kabuli_chr08 | 14812306                | CC                              | TT              | 1946911651               |
| SNP_P4_109241_14812337 | NC_021167.1    | Ca_kabuli_chr08 | 14812337                | AA                              | GG              | 1946911653               |
| SNP_P4_109242_14812351 | NC_021167.1    | Ca_kabuli_chr08 | 14812351                | TT                              | AA              | 1946911655               |
| SNP_P4_109243_14813059 | NC_021167.1    | Ca_kabuli_chr08 | 14813059                | AA                              | GG              | 1946911657               |
| SNP_P4_109244_14813071 | NC_021167.1    | Ca_kabuli_chr08 | 14813071                | AA                              | GG              | 1946911659               |
| SNP_P4_109245_14813078 | NC_021167.1    | Ca_kabuli_chr08 | 14813078                | GG                              | TT              | 1946911661               |
| SNP_P4_109246_14813081 | NC_021167.1    | Ca_kabuli_chr08 | 14813081                | CC                              | TT              | 1946911663               |
| SNP_P4_109247_14813362 | NC_021167.1    | Ca_kabuli_chr08 | 14813362                | GG                              | AA              | 1946911665               |
| SNP_P4_109248_14813414 | NC_021167.1    | Ca_kabuli_chr08 | 14813414                | GG                              | AA              | 1946911667               |
| SNP_P4_109249_14813690 | NC_021167.1    | Ca_kabuli_chr08 | 14813690                | TT                              | CC              | 1946911669               |
| SNP_P4_109250_14813713 | NC_021167.1    | Ca_kabuli_chr08 | 14813713                | TT                              | AA              | 1946911671               |
| SNP_P4_109251_14813714 | NC_021167.1    | Ca_kabuli_chr08 | 14813714                | AA                              | CC              | 1946911673               |
| SNP_P4_109253_14813841 | NC_021167.1    | Ca_kabuli_chr08 | 14813841                | AA                              | TT              | 1946911675               |
| SNP_P4_109254_14814150 | NC_021167.1    | Ca_kabuli_chr08 | 14814150                | CC                              | AA              | 1946911677               |
| SNP_P4_109256_14814368 | NC_021167.1    | Ca_kabuli_chr08 | 14814368                | CC                              | TT              | 1946911679               |
| SNP_P4_109257_14814556 | NC_021167.1    | Ca_kabuli_chr08 | 14814556                | GG                              | AA              | 1946911681               |
| SNP_P4_109260_14815853 | NC_021167.1    | Ca_kabuli_chr08 | 14815853                | CC                              | TT              | 1946911683               |
| SNP_P4_109261_14821075 | NC_021167.1    | Ca_kabuli_chr08 | 14821075                | GG                              | AA              | 1946911685               |
| SNP_P4_109262_14821083 | NC_021167.1    | Ca_kabuli_chr08 | 14821083                | GG                              | AA              | 1946911687               |
| SNP_P4_109263_14821102 | NC_021167.1    | Ca_kabuli_chr08 | 14821102                | TT                              | AA              | 1946911689               |
| SNP_P4_109264_14821160 | NC_021167.1    | Ca_kabuli_chr08 | 14821160                | GG                              | AA              | 1946911691               |
| SNP_P4_109267_14821536 | NC_021167.1    | Ca_kabuli_chr08 | 14821536                | CC                              | GG              | 1946911693               |
| SNP_P4_109268_14821538 | NC_021167.1    | Ca_kabuli_chr08 | 14821538                | TT                              | CC              | 1946911695               |

| SNPs IDs               | Chromosome IDs | Chromosomes     | Physical positions (bp) | CDC Frontier (Reference genome) | (ILWC46 & LPNB) | NCBI SNPdb Accession IDs |
|------------------------|----------------|-----------------|-------------------------|---------------------------------|-----------------|--------------------------|
| SNP_P4_109269_14821798 | NC_021167.1    | Ca_kabuli_chr08 | 14821798                | GG                              | AA              | 1946911697               |
| SNP_P4_109270_14822363 | NC_021167.1    | Ca_kabuli_chr08 | 14822363                | AA                              | GG              | 1946911699               |
| SNP_P4_109271_14824133 | NC_021167.1    | Ca_kabuli_chr08 | 14824133                | AA                              | GG              | 1946911701               |
| SNP_P4_109272_14824385 | NC_021167.1    | Ca_kabuli_chr08 | 14824385                | TT                              | CC              | 1946911703               |
| SNP_P4_109274_14852204 | NC_021167.1    | Ca_kabuli_chr08 | 14852204                | GG                              | AA              | 1946911705               |
| SNP_P4_109275_14852208 | NC_021167.1    | Ca_kabuli_chr08 | 14852208                | AA                              | GG              | 1946911707               |
| SNP_P4_109276_14852225 | NC_021167.1    | Ca_kabuli_chr08 | 14852225                | AA                              | CC              | 1946911709               |
| SNP_P4_109278_14859304 | NC_021167.1    | Ca_kabuli_chr08 | 14859304                | CC                              | TT              | 1946911711               |
| SNP_P4_109279_14870364 | NC_021167.1    | Ca_kabuli_chr08 | 14870364                | AA                              | GG              | 1946911714               |
| SNP_P4_109280_14879628 | NC_021167.1    | Ca_kabuli_chr08 | 14879628                | TT                              | GG              | 1946911716               |
| SNP_P4_109281_14879629 | NC_021167.1    | Ca_kabuli_chr08 | 14879629                | TT                              | CC              | 1946911718               |
| SNP_P4_109282_14883521 | NC_021167.1    | Ca_kabuli_chr08 | 14883521                | GG                              | TT              | 1946911720               |
| SNP_P4_109283_14885432 | NC_021167.1    | Ca_kabuli_chr08 | 14885432                | AA                              | TT              | 1946911722               |
| SNP_P4_109284_14885433 | NC_021167.1    | Ca_kabuli_chr08 | 14885433                | CC                              | AA              | 1946911724               |
| SNP_P4_109287_14916837 | NC_021167.1    | Ca_kabuli_chr08 | 14916837                | AA                              | CC              | 1946911726               |
| SNP_P4_109289_14921585 | NC_021167.1    | Ca_kabuli_chr08 | 14921585                | AA                              | GG              | 1946911728               |
| SNP_P4_109293_14942822 | NC_021167.1    | Ca_kabuli_chr08 | 14942822                | AA                              | CC              | 1946911730               |
| SNP_P4_109294_14951603 | NC_021167.1    | Ca_kabuli_chr08 | 14951603                | AA                              | GG              | 1946911732               |
| SNP_P4_109295_14963338 | NC_021167.1    | Ca_kabuli_chr08 | 14963338                | CC                              | AA              | 1946911734               |
| SNP_P4_109296_14989500 | NC_021167.1    | Ca_kabuli_chr08 | 14989500                | AA                              | CC              | 1946911736               |
| SNP_P4_109297_14996549 | NC_021167.1    | Ca_kabuli_chr08 | 14996549                | AA                              | GG              | 1946911739               |
| SNP_P4_109298_14997791 | NC_021167.1    | Ca_kabuli_chr08 | 14997791                | AA                              | TT              | 1946911741               |
| SNP_P4_109299_15013261 | NC_021167.1    | Ca_kabuli_chr08 | 15013261                | CC                              | TT              | 1946911743               |
| SNP_P4_109300_15052028 | NC_021167.1    | Ca_kabuli_chr08 | 15052028                | TT                              | GG              | 1946911745               |
| SNP_P4_109301_15052119 | NC_021167.1    | Ca_kabuli_chr08 | 15052119                | TT                              | CC              | 1946911747               |
| SNP_P4_109302_15052701 | NC_021167.1    | Ca_kabuli_chr08 | 15052701                | TT                              | CC              | 1946911749               |
| SNP_P4_109303_15057733 | NC_021167.1    | Ca_kabuli_chr08 | 15057733                | AA                              | CC              | 1946911751               |
| SNP_P4_109304_15058323 | NC_021167.1    | Ca_kabuli_chr08 | 15058323                | AA                              | GG              | 1946911753               |
| SNP_P4_109305_15059197 | NC_021167.1    | Ca_kabuli_chr08 | 15059197                | AA                              | TT              | 1946911755               |
| SNP_P4_109306_15078217 | NC_021167.1    | Ca_kabuli_chr08 | 15078217                | CC                              | TT              | 1946911757               |
| SNP_P4_109307_15091879 | NC_021167.1    | Ca_kabuli_chr08 | 15091879                | CC                              | TT              | 1946911760               |
| SNP_P4_109309_15093148 | NC_021167.1    | Ca_kabuli_chr08 | 15093148                | AA                              | GG              | 1946911762               |
| SNP_P4_109310_15099477 | NC_021167.1    | Ca_kabuli_chr08 | 15099477                | CC                              | TT              | 1946911764               |
| SNP_P4_109311_15099550 | NC_021167.1    | Ca_kabuli_chr08 | 15099550                | GG                              | AA              | 1946911766               |
| SNP_P4_109312_15099560 | NC_021167.1    | Ca_kabuli_chr08 | 15099560                | TT                              | CC              | 1946911768               |
| SNP_P4_109313_15099566 | NC_021167.1    | Ca_kabuli_chr08 | 15099566                | AA                              | GG              | 1946911770               |
| SNP_P4_109314_15099595 | NC_021167.1    | Ca_kabuli_chr08 | 15099595                | AA                              | GG              | 1946911772               |
| SNP_P4_109315_15099596 | NC_021167.1    | Ca_kabuli_chr08 | 15099596                | AA                              | GG              | 1946911774               |
| SNP_P4_109316_15099599 | NC_021167.1    | Ca_kabuli_chr08 | 15099599                | AA                              | GG              | 1946911776               |
| SNP_P4_109317_15100236 | NC_021167.1    | Ca_kabuli_chr08 | 15100236                | CC                              | AA              | 1946911778               |
| SNP_P4_109318_15101330 | NC_021167.1    | Ca_kabuli_chr08 | 15101330                | GG                              | AA              | 1946911780               |
| SNP_P4_109320_15112994 | NC_021167.1    | Ca_kabuli_chr08 | 15112994                | TT                              | GG              | 1946911782               |

| SNPs IDs               | Chromosome IDs | Chromosomes     | Physical positions (bp) | CDC Frontier (Reference genome) | (ILWC46 & LPNB) | NCBI SNPdb Accession IDs |
|------------------------|----------------|-----------------|-------------------------|---------------------------------|-----------------|--------------------------|
| SNP_P4_109321_15113010 | NC_021167.1    | Ca_kabuli_chr08 | 15113010                | TT                              | GG              | 1946911784               |
| SNP_P4_109322_15144375 | NC_021167.1    | Ca_kabuli_chr08 | 15144375                | AA                              | TT              | 1946911786               |
| SNP_P4_109323_15154725 | NC_021167.1    | Ca_kabuli_chr08 | 15154725                | AA                              | CC              | 1946911788               |
| SNP_P4_109324_15156147 | NC_021167.1    | Ca_kabuli_chr08 | 15156147                | GG                              | AA              | 1946911790               |
| SNP_P4_109326_15162431 | NC_021167.1    | Ca_kabuli_chr08 | 15162431                | GG                              | CC              | 1946911792               |
| SNP_P4_109327_15162474 | NC_021167.1    | Ca_kabuli_chr08 | 15162474                | TT                              | GG              | 1946911794               |
| SNP_P4_109328_15165486 | NC_021167.1    | Ca_kabuli_chr08 | 15165486                | CC                              | TT              | 1946911796               |
| SNP_P4_109330_15198422 | NC_021167.1    | Ca_kabuli_chr08 | 15198422                | AA                              | GG              | 1946911798               |
| SNP_P4_109331_15198611 | NC_021167.1    | Ca_kabuli_chr08 | 15198611                | GG                              | TT              | 1946911800               |
| SNP_P4_109332_15226882 | NC_021167.1    | Ca_kabuli_chr08 | 15226882                | GG                              | AA              | 1946911803               |
| SNP_P4_109333_15263647 | NC_021167.1    | Ca_kabuli_chr08 | 15263647                | TT                              | CC              | 1946911805               |
| SNP_P4_109334_15266554 | NC_021167.1    | Ca_kabuli_chr08 | 15266554                | GG                              | CC              | 1946911807               |
| SNP_P4_109335_15266718 | NC_021167.1    | Ca_kabuli_chr08 | 15266718                | TT                              | CC              | 1946911809               |
| SNP_P4_109336_15269237 | NC_021167.1    | Ca_kabuli_chr08 | 15269237                | TT                              | AA              | 1946911811               |
| SNP_P4_109337_15272012 | NC_021167.1    | Ca_kabuli_chr08 | 15272012                | TT                              | CC              | 1946911813               |
| SNP_P4_109338_15274884 | NC_021167.1    | Ca_kabuli_chr08 | 15274884                | GG                              | AA              | 1946911815               |
| SNP_P4_109339_15282717 | NC_021167.1    | Ca_kabuli_chr08 | 15282717                | CC                              | GG              | 1946911817               |
| SNP_P4_109340_15294310 | NC_021167.1    | Ca_kabuli_chr08 | 15294310                | GG                              | AA              | 1946911819               |
| SNP_P4_109341_15296134 | NC_021167.1    | Ca_kabuli_chr08 | 15296134                | CC                              | AA              | 1946911821               |
| SNP_P4_109342_15296137 | NC_021167.1    | Ca_kabuli_chr08 | 15296137                | TT                              | CC              | 1946911823               |
| SNP_P4_109343_15296139 | NC_021167.1    | Ca_kabuli_chr08 | 15296139                | AA                              | GG              | 1946911825               |
| SNP_P4_109344_15296143 | NC_021167.1    | Ca_kabuli_chr08 | 15296143                | AA                              | TT              | 1946911827               |
| SNP_P4_109345_15307635 | NC_021167.1    | Ca_kabuli_chr08 | 15307635                | TT                              | CC              | 1946911829               |
| SNP_P4_109346_15313843 | NC_021167.1    | Ca_kabuli_chr08 | 15313843                | CC                              | TT              | 1946911831               |
| SNP_P4_109347_15313849 | NC_021167.1    | Ca_kabuli_chr08 | 15313849                | CC                              | TT              | 1946911833               |
| SNP_P4_109348_15313888 | NC_021167.1    | Ca_kabuli_chr08 | 15313888                | CC                              | TT              | 1946911835               |
| SNP_P4_109349_15313894 | NC_021167.1    | Ca_kabuli_chr08 | 15313894                | CC                              | TT              | 1946911837               |
| SNP_P4_109350_15313912 | NC_021167.1    | Ca_kabuli_chr08 | 15313912                | TT                              | CC              | 1946911839               |
| SNP_P4_109351_15313954 | NC_021167.1    | Ca_kabuli_chr08 | 15313954                | TT                              | AA              | 1946911841               |
| SNP_P4_109353_15314135 | NC_021167.1    | Ca_kabuli_chr08 | 15314135                | GG                              | AA              | 1946911843               |
| SNP_P4_109354_15314175 | NC_021167.1    | Ca_kabuli_chr08 | 15314175                | AA                              | GG              | 1946911845               |
| SNP_P4_109355_15314185 | NC_021167.1    | Ca_kabuli_chr08 | 15314185                | AA                              | CC              | 1946911847               |
| SNP_P4_109356_15314249 | NC_021167.1    | Ca_kabuli_chr08 | 15314249                | GG                              | AA              | 1946911849               |
| SNP_P4_109357_15314322 | NC_021167.1    | Ca_kabuli_chr08 | 15314322                | TT                              | GG              | 1946911851               |
| SNP_P4_109358_15320069 | NC_021167.1    | Ca_kabuli_chr08 | 15320069                | GG                              | AA              | 1946911853               |
| SNP_P4_109359_15342248 | NC_021167.1    | Ca_kabuli_chr08 | 15342248                | AA                              | TT              | 1946911855               |
| SNP_P4_109360_15343861 | NC_021167.1    | Ca_kabuli_chr08 | 15343861                | CC                              | TT              | 1946911857               |
| SNP_P4_109361_15348586 | NC_021167.1    | Ca_kabuli_chr08 | 15348586                | CC                              | GG              | 1946911859               |
| SNP_P4_109362_15348918 | NC_021167.1    | Ca_kabuli_chr08 | 15348918                | GG                              | AA              | 1946911861               |
| SNP_P4_109363_15349031 | NC_021167.1    | Ca_kabuli_chr08 | 15349031                | TT                              | CC              | 1946911863               |
| SNP_P4_109364_15349056 | NC_021167.1    | Ca_kabuli_chr08 | 15349056                | TT                              | GG              | 1946911865               |
| SNP_P4_109365_15349080 | NC_021167.1    | Ca_kabuli_chr08 | 15349080                | AA                              | GG              | 1946911867               |

| SNPs IDs               | Chromosome IDs | Chromosomes     | Physical positions (bp) | CDC Frontier (Reference genome) | (ILWC46 & LPNB) | NCBI SNPdb Accession IDs |
|------------------------|----------------|-----------------|-------------------------|---------------------------------|-----------------|--------------------------|
| SNP_P4_109366_15349123 | NC_021167.1    | Ca_kabuli_chr08 | 15349123                | AA                              | GG              | 1946911869               |
| SNP_P4_109367_15349141 | NC_021167.1    | Ca_kabuli_chr08 | 15349141                | GG                              | AA              | 1946911871               |
| SNP_P4_109369_15421151 | NC_021167.1    | Ca_kabuli_chr08 | 15421151                | GG                              | TT              | 1946911873               |
| SNP_P4_109370_15421473 | NC_021167.1    | Ca_kabuli_chr08 | 15421473                | AA                              | GG              | 1946911875               |
| SNP_P4_109371_15424636 | NC_021167.1    | Ca_kabuli_chr08 | 15424636                | GG                              | CC              | 1946911877               |
| SNP_P4_109372_15428137 | NC_021167.1    | Ca_kabuli_chr08 | 15428137                | AA                              | GG              | 1946911879               |
| SNP_P4_109373_15433010 | NC_021167.1    | Ca_kabuli_chr08 | 15433010                | CC                              | TT              | 1946911881               |
| SNP_P4_109375_15437730 | NC_021167.1    | Ca_kabuli_chr08 | 15437730                | GG                              | AA              | 1946911883               |
| SNP_P4_109376_15445373 | NC_021167.1    | Ca_kabuli_chr08 | 15445373                | CC                              | TT              | 1946911885               |
| SNP_P4_109378_15471621 | NC_021167.1    | Ca_kabuli_chr08 | 15471621                | TT                              | CC              | 1946911887               |
| SNP_P4_109379_15532407 | NC_021167.1    | Ca_kabuli_chr08 | 15532407                | TT                              | CC              | 1946911889               |
| SNP_P4_109381_15576984 | NC_021167.1    | Ca_kabuli_chr08 | 15576984                | AA                              | GG              | 1946911891               |
| SNP_P4_109382_15577101 | NC_021167.1    | Ca_kabuli_chr08 | 15577101                | AA                              | TT              | 1946911893               |
| SNP_P4_109383_15577292 | NC_021167.1    | Ca_kabuli_chr08 | 15577292                | AA                              | CC              | 1946911895               |
| SNP_P4_109384_15577828 | NC_021167.1    | Ca_kabuli_chr08 | 15577828                | CC                              | GG              | 1946911897               |
| SNP_P4_109385_15577833 | NC_021167.1    | Ca_kabuli_chr08 | 15577833                | CC                              | AA              | 1946911899               |
| SNP_P4_109386_15577841 | NC_021167.1    | Ca_kabuli_chr08 | 15577841                | AA                              | CC              | 1946911901               |
| SNP_P4_109388_15577907 | NC_021167.1    | Ca_kabuli_chr08 | 15577907                | TT                              | CC              | 1946911903               |
| SNP_P4_109389_15578042 | NC_021167.1    | Ca_kabuli_chr08 | 15578042                | CC                              | TT              | 1946911905               |
| SNP_P4_109390_15578303 | NC_021167.1    | Ca_kabuli_chr08 | 15578303                | CC                              | AA              | 1946911907               |
| SNP_P4_109392_15579335 | NC_021167.1    | Ca_kabuli_chr08 | 15579335                | GG                              | TT              | 1946911909               |
| SNP_P4_109393_15579728 | NC_021167.1    | Ca_kabuli_chr08 | 15579728                | AA                              | GG              | 1946911911               |
| SNP_P4_109394_15579799 | NC_021167.1    | Ca_kabuli_chr08 | 15579799                | GG                              | AA              | 1946911913               |
| SNP_P4_109396_15580638 | NC_021167.1    | Ca_kabuli_chr08 | 15580638                | AA                              | GG              | 1946911915               |
| SNP_P4_109397_15580850 | NC_021167.1    | Ca_kabuli_chr08 | 15580850                | CC                              | TT              | 1946911917               |
| SNP_P4_109398_15580860 | NC_021167.1    | Ca_kabuli_chr08 | 15580860                | CC                              | TT              | 1946911919               |
| SNP_P4_109399_15591273 | NC_021167.1    | Ca_kabuli_chr08 | 15591273                | GG                              | AA              | 1946911921               |
| SNP_P4_109400_15600957 | NC_021167.1    | Ca_kabuli_chr08 | 15600957                | TT                              | AA              | 1946911923               |
| SNP_P4_109401_15657636 | NC_021167.1    | Ca_kabuli_chr08 | 15657636                | CC                              | TT              | 1946911925               |
| SNP_P4_109402_15666924 | NC_021167.1    | Ca_kabuli_chr08 | 15666924                | TT                              | AA              | 1946911927               |
| SNP_P4_109403_15681784 | NC_021167.1    | Ca_kabuli_chr08 | 15681784                | CC                              | GG              | 1946911929               |
| SNP_P4_109404_15681921 | NC_021167.1    | Ca_kabuli_chr08 | 15681921                | AA                              | TT              | 1946911931               |
| SNP_P4_109405_15682135 | NC_021167.1    | Ca_kabuli_chr08 | 15682135                | TT                              | CC              | 1946911933               |
| SNP_P4_109406_15682147 | NC_021167.1    | Ca_kabuli_chr08 | 15682147                | AA                              | CC              | 1946911935               |
| SNP_P4_109407_15683897 | NC_021167.1    | Ca_kabuli_chr08 | 15683897                | AA                              | GG              | 1946911937               |
| SNP_P4_109408_15683901 | NC_021167.1    | Ca_kabuli_chr08 | 15683901                | AA                              | CC              | 1946911939               |
| SNP_P4_109409_15684835 | NC_021167.1    | Ca_kabuli_chr08 | 15684835                | AA                              | GG              | 1946911942               |
| SNP_P4_109411_15685083 | NC_021167.1    | Ca_kabuli_chr08 | 15685083                | TT                              | CC              | 1946911944               |
| SNP_P4_109412_15685156 | NC_021167.1    | Ca_kabuli_chr08 | 15685156                | AA                              | GG              | 1946911946               |
| SNP_P4_109414_15685308 | NC_021167.1    | Ca_kabuli_chr08 | 15685308                | TT                              | CC              | 1946911948               |
| SNP_P4_109416_15685414 | NC_021167.1    | Ca_kabuli_chr08 | 15685414                | CC                              | TT              | 1946911950               |
| SNP_P4_109418_15685663 | NC_021167.1    | Ca_kabuli_chr08 | 15685663                | TT                              | CC              | 1946911952               |

| SNPs IDs               | Chromosome IDs | Chromosomes     | Physical positions (bp) | CDC Frontier (Reference genome) | (ILWC46 & LPNB) | NCBI SNPdb Accession IDs |
|------------------------|----------------|-----------------|-------------------------|---------------------------------|-----------------|--------------------------|
| SNP_P4_109419_15685773 | NC_021167.1    | Ca_kabuli_chr08 | 15685773                | AA                              | GG              | 1946911954               |
| SNP_P4_109422_15685922 | NC_021167.1    | Ca_kabuli_chr08 | 15685922                | GG                              | CC              | 1946911956               |
| SNP_P4_109423_15685957 | NC_021167.1    | Ca_kabuli_chr08 | 15685957                | AA                              | GG              | 1946911958               |
| SNP_P4_109424_15685998 | NC_021167.1    | Ca_kabuli_chr08 | 15685998                | AA                              | GG              | 1946911960               |
| SNP_P4_109425_15685999 | NC_021167.1    | Ca_kabuli_chr08 | 15685999                | AA                              | TT              | 1946911962               |
| SNP_P4_109426_15686000 | NC_021167.1    | Ca_kabuli_chr08 | 15686000                | GG                              | CC              | 1946911964               |
| SNP_P4_109427_15686004 | NC_021167.1    | Ca_kabuli_chr08 | 15686004                | AA                              | TT              | 1946911966               |
| SNP_P4_109428_15686009 | NC_021167.1    | Ca_kabuli_chr08 | 15686009                | AA                              | TT              | 1946911968               |
| SNP_P4_109429_15686010 | NC_021167.1    | Ca_kabuli_chr08 | 15686010                | AA                              | CC              | 1946911970               |
| SNP_P4_109430_15686011 | NC_021167.1    | Ca_kabuli_chr08 | 15686011                | AA                              | CC              | 1946911972               |
| SNP_P4_109431_15686012 | NC_021167.1    | Ca_kabuli_chr08 | 15686012                | CC                              | AA              | 1946911974               |
| SNP_P4_109432_15686013 | NC_021167.1    | Ca_kabuli_chr08 | 15686013                | TT                              | AA              | 1946911976               |
| SNP_P4_109433_15688206 | NC_021167.1    | Ca_kabuli_chr08 | 15688206                | AA                              | TT              | 1946911978               |
| SNP_P4_109434_15689022 | NC_021167.1    | Ca_kabuli_chr08 | 15689022                | CC                              | TT              | 1946911980               |
| SNP_P4_109435_15689034 | NC_021167.1    | Ca_kabuli_chr08 | 15689034                | CC                              | TT              | 1946911982               |
| SNP_P4_109436_15689137 | NC_021167.1    | Ca_kabuli_chr08 | 15689137                | AA                              | TT              | 1946911984               |
| SNP_P4_109437_15689376 | NC_021167.1    | Ca_kabuli_chr08 | 15689376                | CC                              | TT              | 1946911986               |
| SNP_P4_109438_15689673 | NC_021167.1    | Ca_kabuli_chr08 | 15689673                | AA                              | CC              | 1946911988               |
| SNP_P4_109439_15691056 | NC_021167.1    | Ca_kabuli_chr08 | 15691056                | TT                              | CC              | 1946911990               |
| SNP_P4_109440_15691466 | NC_021167.1    | Ca_kabuli_chr08 | 15691466                | AA                              | GG              | 1946911992               |
| SNP_P4_109441_15691700 | NC_021167.1    | Ca_kabuli_chr08 | 15691700                | GG                              | AA              | 1946911994               |
| SNP_P4_109442_15692070 | NC_021167.1    | Ca_kabuli_chr08 | 15692070                | GG                              | AA              | 1946911996               |
| SNP_P4_109443_15692243 | NC_021167.1    | Ca_kabuli_chr08 | 15692243                | GG                              | AA              | 1946911998               |
| SNP_P4_109444_15693803 | NC_021167.1    | Ca_kabuli_chr08 | 15693803                | TT                              | CC              | 1946912000               |
| SNP_P4_109448_15732069 | NC_021167.1    | Ca_kabuli_chr08 | 15732069                | TT                              | AA              | 1946912002               |
| SNP_P4_109449_15743571 | NC_021167.1    | Ca_kabuli_chr08 | 15743571                | AA                              | TT              | 1946912004               |
| SNP_P4_109450_15764874 | NC_021167.1    | Ca_kabuli_chr08 | 15764874                | AA                              | GG              | 1946912006               |
| SNP_P4_109451_15767891 | NC_021167.1    | Ca_kabuli_chr08 | 15767891                | AA                              | GG              | 1946912008               |
| SNP_P4_109452_15773424 | NC_021167.1    | Ca_kabuli_chr08 | 15773424                | CC                              | TT              | 1946912010               |
| SNP_P4_109453_15778713 | NC_021167.1    | Ca_kabuli_chr08 | 15778713                | CC                              | AA              | 1946912012               |
| SNP_P4_109456_15789602 | NC_021167.1    | Ca_kabuli_chr08 | 15789602                | GG                              | AA              | 1946912014               |
| SNP_P4_109457_15789746 | NC_021167.1    | Ca_kabuli_chr08 | 15789746                | AA                              | GG              | 1946912016               |
| SNP_P4_109458_15790332 | NC_021167.1    | Ca_kabuli_chr08 | 15790332                | AA                              | GG              | 1946912018               |
| SNP_P4_109459_15790970 | NC_021167.1    | Ca_kabuli_chr08 | 15790970                | CC                              | TT              | 1946912020               |
| SNP_P4_109460_15791130 | NC_021167.1    | Ca_kabuli_chr08 | 15791130                | GG                              | TT              | 1946912022               |
| SNP_P4_109461_15791181 | NC_021167.1    | Ca_kabuli_chr08 | 15791181                | GG                              | AA              | 1946912024               |
| SNP_P4_109462_15791206 | NC_021167.1    | Ca_kabuli_chr08 | 15791206                | TT                              | CC              | 1946912026               |
| SNP_P4_109464_15791360 | NC_021167.1    | Ca_kabuli_chr08 | 15791360                | TT                              | AA              | 1946912028               |
| SNP_P4_109465_15797555 | NC_021167.1    | Ca_kabuli_chr08 | 15797555                | CC                              | GG              | 1946912031               |
| SNP_P4_109466_15802597 | NC_021167.1    | Ca_kabuli_chr08 | 15802597                | TT                              | CC              | 1946912033               |
| SNP_P4_109467_15815668 | NC_021167.1    | Ca_kabuli_chr08 | 15815668                | CC                              | TT              | 1946912035               |
| SNP_P4_109469_15829967 | NC_021167.1    | Ca_kabuli_chr08 | 15829967                | GG                              | TT              | 1946912037               |

| SNPs IDs               | Chromosome IDs | Chromosomes     | Physical positions (bp) | CDC Frontier (Reference genome) | (ILWC46 & LPNB) | NCBI SNPdb Accession IDs |
|------------------------|----------------|-----------------|-------------------------|---------------------------------|-----------------|--------------------------|
| SNP_P4_109470_15830786 | NC_021167.1    | Ca_kabuli_chr08 | 15830786                | CC                              | TT              | 1946912039               |
| SNP_P4_109471_15850375 | NC_021167.1    | Ca_kabuli_chr08 | 15850375                | TT                              | CC              | 1946912041               |
| SNP_P4_109472_15850392 | NC_021167.1    | Ca_kabuli_chr08 | 15850392                | GG                              | AA              | 1946912043               |
| SNP_P4_109473_15850404 | NC_021167.1    | Ca_kabuli_chr08 | 15850404                | AA                              | TT              | 1946912045               |
| SNP_P4_109474_15850493 | NC_021167.1    | Ca_kabuli_chr08 | 15850493                | AA                              | GG              | 1946912047               |
| SNP_P4_109475_15850511 | NC_021167.1    | Ca_kabuli_chr08 | 15850511                | AA                              | GG              | 1946912049               |
| SNP_P4_109476_15850739 | NC_021167.1    | Ca_kabuli_chr08 | 15850739                | GG                              | CC              | 1946912051               |
| SNP_P4_109480_15876818 | NC_021167.1    | Ca_kabuli_chr08 | 15876818                | CC                              | TT              | 1946912053               |
| SNP_P4_109481_15877482 | NC_021167.1    | Ca_kabuli_chr08 | 15877482                | GG                              | AA              | 1946912055               |
| SNP_P4_109482_15877503 | NC_021167.1    | Ca_kabuli_chr08 | 15877503                | CC                              | TT              | 1946912057               |
| SNP_P4_109483_15877557 | NC_021167.1    | Ca_kabuli_chr08 | 15877557                | TT                              | CC              | 1946912059               |
| SNP_P4_109486_15879885 | NC_021167.1    | Ca_kabuli_chr08 | 15879885                | AA                              | GG              | 1946912061               |
| SNP_P4_109487_15879896 | NC_021167.1    | Ca_kabuli_chr08 | 15879896                | TT                              | AA              | 1946912063               |
| SNP_P4_109488_15879931 | NC_021167.1    | Ca_kabuli_chr08 | 15879931                | GG                              | TT              | 1946912065               |
| SNP_P4_109490_15880258 | NC_021167.1    | Ca_kabuli_chr08 | 15880258                | TT                              | CC              | 1946912067               |
| SNP_P4_109491_15880352 | NC_021167.1    | Ca_kabuli_chr08 | 15880352                | TT                              | CC              | 1946912069               |
| SNP_P4_109492_15880368 | NC_021167.1    | Ca_kabuli_chr08 | 15880368                | GG                              | CC              | 1946912071               |
| SNP_P4_109494_15880534 | NC_021167.1    | Ca_kabuli_chr08 | 15880534                | TT                              | CC              | 1946912073               |
| SNP_P4_109495_15880767 | NC_021167.1    | Ca_kabuli_chr08 | 15880767                | AA                              | GG              | 1946912075               |
| SNP_P4_109496_15880994 | NC_021167.1    | Ca_kabuli_chr08 | 15880994                | AA                              | GG              | 1946912077               |
| SNP_P4_109497_15881040 | NC_021167.1    | Ca_kabuli_chr08 | 15881040                | TT                              | AA              | 1946912079               |
| SNP_P4_109498_15881083 | NC_021167.1    | Ca_kabuli_chr08 | 15881083                | GG                              | AA              | 1946912081               |
| SNP_P4_109500_15881572 | NC_021167.1    | Ca_kabuli_chr08 | 15881572                | AA                              | GG              | 1946912083               |
| SNP_P4_109501_15881589 | NC_021167.1    | Ca_kabuli_chr08 | 15881589                | CC                              | GG              | 1946912085               |
| SNP_P4_109502_15881624 | NC_021167.1    | Ca_kabuli_chr08 | 15881624                | CC                              | TT              | 1946912087               |
| SNP_P4_109503_15881914 | NC_021167.1    | Ca_kabuli_chr08 | 15881914                | AA                              | GG              | 1946912089               |
| SNP_P4_109504_15881994 | NC_021167.1    | Ca_kabuli_chr08 | 15881994                | TT                              | CC              | 1946912091               |
| SNP_P4_109505_15882018 | NC_021167.1    | Ca_kabuli_chr08 | 15882018                | TT                              | CC              | 1946912093               |
| SNP_P4_109506_15882028 | NC_021167.1    | Ca_kabuli_chr08 | 15882028                | CC                              | GG              | 1946912095               |
| SNP_P4_109507_15882556 | NC_021167.1    | Ca_kabuli_chr08 | 15882556                | GG                              | AA              | 1946912097               |
| SNP_P4_109508_15883378 | NC_021167.1    | Ca_kabuli_chr08 | 15883378                | GG                              | TT              | 1946912099               |
| SNP_P4_109511_15890845 | NC_021167.1    | Ca_kabuli_chr08 | 15890845                | TT                              | AA              | 1946912102               |
| SNP_P4_109512_15891242 | NC_021167.1    | Ca_kabuli_chr08 | 15891242                | AA                              | CC              | 1946912104               |
| SNP_P4_109513_15891404 | NC_021167.1    | Ca_kabuli_chr08 | 15891404                | TT                              | CC              | 1946912106               |
| SNP_P4_109514_15892437 | NC_021167.1    | Ca_kabuli_chr08 | 15892437                | CC                              | TT              | 1946912108               |
| SNP_P4_109515_15892506 | NC_021167.1    | Ca_kabuli_chr08 | 15892506                | GG                              | TT              | 1946912110               |
| SNP_P4_109516_15892608 | NC_021167.1    | Ca_kabuli_chr08 | 15892608                | TT                              | CC              | 1946912112               |
| SNP_P4_109517_15892746 | NC_021167.1    | Ca_kabuli_chr08 | 15892746                | CC                              | AA              | 1946912114               |
| SNP_P4_109519_15892800 | NC_021167.1    | Ca_kabuli_chr08 | 15892800                | CC                              | TT              | 1946912116               |
| SNP_P4_109520_15892802 | NC_021167.1    | Ca_kabuli_chr08 | 15892802                | CC                              | AA              | 1946912118               |
| SNP_P4_109521_15892808 | NC_021167.1    | Ca_kabuli_chr08 | 15892808                | TT                              | GG              | 1946912121               |
| SNP_P4_109522_15893116 | NC_021167.1    | Ca_kabuli_chr08 | 15893116                | AA                              | GG              | 1946912123               |

| SNPs IDs               | Chromosome IDs | Chromosomes     | Physical positions (bp) | CDC Frontier (Reference genome) | (ILWC46 & LPNB) | NCBI SNPdb Accession IDs |
|------------------------|----------------|-----------------|-------------------------|---------------------------------|-----------------|--------------------------|
| SNP_P4_109523_15893132 | NC_021167.1    | Ca_kabuli_chr08 | 15893132                | GG                              | AA              | 1946912125               |
| SNP_P4_109524_15893369 | NC_021167.1    | Ca_kabuli_chr08 | 15893369                | AA                              | CC              | 1946912127               |
| SNP_P4_109527_15894675 | NC_021167.1    | Ca_kabuli_chr08 | 15894675                | AA                              | GG              | 1946912129               |
| SNP_P4_109529_15897593 | NC_021167.1    | Ca_kabuli_chr08 | 15897593                | AA                              | GG              | 1946912131               |
| SNP_P4_109531_15918362 | NC_021167.1    | Ca_kabuli_chr08 | 15918362                | CC                              | TT              | 1946912133               |
| SNP_P4_109532_15918519 | NC_021167.1    | Ca_kabuli_chr08 | 15918519                | AA                              | CC              | 1946912135               |
| SNP_P4_109533_15918537 | NC_021167.1    | Ca_kabuli_chr08 | 15918537                | GG                              | AA              | 1946912137               |
| SNP_P4_109534_15921617 | NC_021167.1    | Ca_kabuli_chr08 | 15921617                | AA                              | GG              | 1946912139               |
| SNP_P4_109535_15922447 | NC_021167.1    | Ca_kabuli_chr08 | 15922447                | CC                              | TT              | 1946912141               |
| SNP_P4_109536_15925610 | NC_021167.1    | Ca_kabuli_chr08 | 15925610                | TT                              | AA              | 1946912143               |
| SNP_P4_109537_15925611 | NC_021167.1    | Ca_kabuli_chr08 | 15925611                | TT                              | AA              | 1946912145               |
| SNP_P4_109538_15925612 | NC_021167.1    | Ca_kabuli_chr08 | 15925612                | TT                              | AA              | 1946912147               |
| SNP_P4_109539_15925613 | NC_021167.1    | Ca_kabuli_chr08 | 15925613                | TT                              | AA              | 1946912150               |
| SNP_P4_109542_15972247 | NC_021167.1    | Ca_kabuli_chr08 | 15972247                | CC                              | TT              | 1946912152               |
| SNP_P4_109543_15972256 | NC_021167.1    | Ca_kabuli_chr08 | 15972256                | CC                              | TT              | 1946912154               |
| SNP_P4_109544_15972283 | NC_021167.1    | Ca_kabuli_chr08 | 15972283                | AA                              | CC              | 1946912156               |
| SNP_P4_109545_15972322 | NC_021167.1    | Ca_kabuli_chr08 | 15972322                | CC                              | TT              | 1946912158               |
| SNP_P4_109546_15972397 | NC_021167.1    | Ca_kabuli_chr08 | 15972397                | CC                              | TT              | 1946912160               |
| SNP_P4_109547_15972400 | NC_021167.1    | Ca_kabuli_chr08 | 15972400                | TT                              | CC              | 1946912162               |
| SNP_P4_109548_15972407 | NC_021167.1    | Ca_kabuli_chr08 | 15972407                | TT                              | AA              | 1946912164               |
| SNP_P4_109549_15972493 | NC_021167.1    | Ca_kabuli_chr08 | 15972493                | TT                              | CC              | 1946912166               |
| SNP_P4_109550_15972502 | NC_021167.1    | Ca_kabuli_chr08 | 15972502                | CC                              | AA              | 1946912168               |
| SNP_P4_109551_15972510 | NC_021167.1    | Ca_kabuli_chr08 | 15972510                | TT                              | AA              | 1946912169               |
| SNP_P4_109552_15972529 | NC_021167.1    | Ca_kabuli_chr08 | 15972529                | CC                              | TT              | 1946912170               |
| SNP_P4_109553_15972680 | NC_021167.1    | Ca_kabuli_chr08 | 15972680                | AA                              | TT              | 1946912171               |
| SNP_P4_109554_15972683 | NC_021167.1    | Ca_kabuli_chr08 | 15972683                | TT                              | CC              | 1946912172               |
| SNP_P4_109555_15972684 | NC_021167.1    | Ca_kabuli_chr08 | 15972684                | CC                              | AA              | 1946912173               |
| SNP_P4_109556_15972686 | NC_021167.1    | Ca_kabuli_chr08 | 15972686                | AA                              | GG              | 1946912174               |
| SNP_P4_109557_15972754 | NC_021167.1    | Ca_kabuli_chr08 | 15972754                | GG                              | AA              | 1946912175               |
| SNP_P4_109558_15972759 | NC_021167.1    | Ca_kabuli_chr08 | 15972759                | GG                              | AA              | 1946912176               |
| SNP_P4_109559_15972809 | NC_021167.1    | Ca_kabuli_chr08 | 15972809                | AA                              | GG              | 1946912177               |
| SNP_P4_109560_15972816 | NC_021167.1    | Ca_kabuli_chr08 | 15972816                | TT                              | AA              | 1946912179               |
| SNP_P4_109561_15972837 | NC_021167.1    | Ca_kabuli_chr08 | 15972837                | AA                              | CC              | 1946912181               |
| SNP_P4_109562_15972856 | NC_021167.1    | Ca_kabuli_chr08 | 15972856                | GG                              | TT              | 1946912183               |
| SNP_P4_109563_15972910 | NC_021167.1    | Ca_kabuli_chr08 | 15972910                | AA                              | GG              | 1946912185               |
| SNP_P4_109564_15972917 | NC_021167.1    | Ca_kabuli_chr08 | 15972917                | AA                              | GG              | 1946912187               |
| SNP_P4_109565_15974087 | NC_021167.1    | Ca_kabuli_chr08 | 15974087                | CC                              | AA              | 1946912189               |
| SNP_P4_109566_15974088 | NC_021167.1    | Ca_kabuli_chr08 | 15974088                | TT                              | GG              | 1946912191               |
| SNP_P4_109568_15977133 | NC_021167.1    | Ca_kabuli_chr08 | 15977133                | GG                              | AA              | 1946912193               |
| SNP_P4_109569_16000359 | NC_021167.1    | Ca_kabuli_chr08 | 16000359                | CC                              | TT              | 1946912195               |
| SNP_P4_109570_16029175 | NC_021167.1    | Ca_kabuli_chr08 | 16029175                | GG                              | AA              | 1946912197               |
| SNP_P4_109572_16058386 | NC_021167.1    | Ca_kabuli_chr08 | 16058386                | GG                              | AA              | 1946912199               |

| SNPs IDs               | Chromosome IDs | Chromosomes     | Physical positions (bp) | CDC Frontier (Reference genome) | (ILWC46 & LPNB) | NCBI SNPdb Accession IDs |
|------------------------|----------------|-----------------|-------------------------|---------------------------------|-----------------|--------------------------|
| SNP_P4_109574_16066600 | NC_021167.1    | Ca_kabuli_chr08 | 16066600                | TT                              | CC              | 1946912201               |
| SNP_P4_109575_16071409 | NC_021167.1    | Ca_kabuli_chr08 | 16071409                | CC                              | TT              | 1946912203               |
| SNP_P4_109576_16081988 | NC_021167.1    | Ca_kabuli_chr08 | 16081988                | AA                              | GG              | 1946912205               |
| SNP_P4_109577_16125567 | NC_021167.1    | Ca_kabuli_chr08 | 16125567                | CC                              | TT              | 1946912207               |
| SNP_P4_109580_16187331 | NC_021167.1    | Ca_kabuli_chr08 | 16187331                | CC                              | TT              | 1946912209               |
| SNP_P4_109581_16197450 | NC_021167.1    | Ca_kabuli_chr08 | 16197450                | AA                              | TT              | 1946912211               |
| SNP_P4_109582_16203067 | NC_021167.1    | Ca_kabuli_chr08 | 16203067                | AA                              | GG              | 1946912213               |
| SNP_P4_109583_16204215 | NC_021167.1    | Ca_kabuli_chr08 | 16204215                | CC                              | TT              | 1946912215               |
| SNP_P4_109584_16212751 | NC_021167.1    | Ca_kabuli_chr08 | 16212751                | TT                              | GG              | 1946912217               |
| SNP_P4_109585_16212770 | NC_021167.1    | Ca_kabuli_chr08 | 16212770                | AA                              | GG              | 1946912219               |
| SNP_P4_109586_16212786 | NC_021167.1    | Ca_kabuli_chr08 | 16212786                | TT                              | GG              | 1946912221               |
| SNP_P4_109587_16213163 | NC_021167.1    | Ca_kabuli_chr08 | 16213163                | AA                              | TT              | 1946912223               |
| SNP_P4_109588_16213286 | NC_021167.1    | Ca_kabuli_chr08 | 16213286                | AA                              | GG              | 1946912225               |
| SNP_P4_109589_16213301 | NC_021167.1    | Ca_kabuli_chr08 | 16213301                | TT                              | CC              | 1946912227               |
| SNP_P4_109591_16252788 | NC_021167.1    | Ca_kabuli_chr08 | 16252788                | AA                              | CC              | 1946912229               |
| SNP_P4_109592_16253814 | NC_021167.1    | Ca_kabuli_chr08 | 16253814                | AA                              | GG              | 1946912231               |
| SNP_P4_109593_16265525 | NC_021167.1    | Ca_kabuli_chr08 | 16265525                | TT                              | AA              | 1946912233               |
| SNP_P4_109594_16292785 | NC_021167.1    | Ca_kabuli_chr08 | 16292785                | AA                              | TT              | 1946912235               |
| SNP_P4_109595_16314817 | NC_021167.1    | Ca_kabuli_chr08 | 16314817                | AA                              | TT              | 1946912237               |
| SNP_P4_109596_16314828 | NC_021167.1    | Ca_kabuli_chr08 | 16314828                | AA                              | GG              | 1946912239               |
| SNP_P4_109597_16314835 | NC_021167.1    | Ca_kabuli_chr08 | 16314835                | CC                              | TT              | 1946912241               |
| SNP_P4_109598_16314843 | NC_021167.1    | Ca_kabuli_chr08 | 16314843                | CC                              | TT              | 1946912243               |
| SNP_P4_109599_16314906 | NC_021167.1    | Ca_kabuli_chr08 | 16314906                | AA                              | GG              | 1946912245               |
| SNP_P4_109600_16314931 | NC_021167.1    | Ca_kabuli_chr08 | 16314931                | GG                              | AA              | 1946912247               |
| SNP_P4_109604_16315165 | NC_021167.1    | Ca_kabuli_chr08 | 16315165                | AA                              | GG              | 1946912249               |
| SNP_P4_109605_16315186 | NC_021167.1    | Ca_kabuli_chr08 | 16315186                | GG                              | TT              | 1946912251               |
| SNP_P4_109606_16315233 | NC_021167.1    | Ca_kabuli_chr08 | 16315233                | CC                              | TT              | 1946912253               |
| SNP_P4_109607_16315267 | NC_021167.1    | Ca_kabuli_chr08 | 16315267                | GG                              | TT              | 1946912255               |
| SNP_P4_109608_16316012 | NC_021167.1    | Ca_kabuli_chr08 | 16316012                | TT                              | AA              | 1946912257               |
| SNP_P4_109610_16316556 | NC_021167.1    | Ca_kabuli_chr08 | 16316556                | AA                              | TT              | 1946912259               |
| SNP_P4_109611_16316708 | NC_021167.1    | Ca_kabuli_chr08 | 16316708                | AA                              | GG              | 1946912261               |
| SNP_P4_109612_16316721 | NC_021167.1    | Ca_kabuli_chr08 | 16316721                | TT                              | CC              | 1946912263               |
| SNP_P4_109613_16316747 | NC_021167.1    | Ca_kabuli_chr08 | 16316747                | TT                              | GG              | 1946912265               |
| SNP_P4_109614_16316780 | NC_021167.1    | Ca_kabuli_chr08 | 16316780                | GG                              | AA              | 1946912267               |
| SNP_P4_109615_16316848 | NC_021167.1    | Ca_kabuli_chr08 | 16316848                | TT                              | CC              | 1946912269               |
| SNP_P4_109617_16356872 | NC_021167.1    | Ca_kabuli_chr08 | 16356872                | GG                              | AA              | 1946912271               |
| SNP_P4_109619_16363043 | NC_021167.1    | Ca_kabuli_chr08 | 16363043                | AA                              | GG              | 1946912273               |
| SNP_P4_109620_16444987 | NC_021167.1    | Ca_kabuli_chr08 | 16444987                | GG                              | TT              | 1946912275               |
| SNP_P4_109621_16463510 | NC_021167.1    | Ca_kabuli_chr08 | 16463510                | TT                              | CC              | 1946912277               |
| SNP_P4_109622_16463566 | NC_021167.1    | Ca_kabuli_chr08 | 16463566                | TT                              | GG              | 1946912279               |
| SNP_P4_109623_16463569 | NC_021167.1    | Ca_kabuli_chr08 | 16463569                | CC                              | TT              | 1946912281               |
| SNP_P4_109624_16463581 | NC_021167.1    | Ca_kabuli_chr08 | 16463581                | AA                              | GG              | 1946912283               |



| SNPs IDs               | Chromosome IDs | Chromosomes     | Physical positions (bp) | CDC Frontier (Reference genome) | (ILWC46 & LPNB) | NCBI SNPdb Accession IDs |
|------------------------|----------------|-----------------|-------------------------|---------------------------------|-----------------|--------------------------|
| SNP_P4_109625_16463626 | NC_021167.1    | Ca_kabuli_chr08 | 16463626                | AA                              | GG              | 1946912285               |
| SNP_P4_109626_16463638 | NC_021167.1    | Ca_kabuli_chr08 | 16463638                | AA                              | GG              | 1946912287               |
| SNP_P4_109627_16463644 | NC_021167.1    | Ca_kabuli_chr08 | 16463644                | AA                              | TT              | 1946912289               |
| SNP_P4_109628_16463662 | NC_021167.1    | Ca_kabuli_chr08 | 16463662                | TT                              | CC              | 1946912291               |
| SNP_P4_109629_16463680 | NC_021167.1    | Ca_kabuli_chr08 | 16463680                | AA                              | TT              | 1946912293               |
| SNP_P4_109630_16463686 | NC_021167.1    | Ca_kabuli_chr08 | 16463686                | AA                              | GG              | 1946912295               |
| SNP_P4_109631_16463695 | NC_021167.1    | Ca_kabuli_chr08 | 16463695                | TT                              | GG              | 1946912297               |
| SNP_P4_109632_16463701 | NC_021167.1    | Ca_kabuli_chr08 | 16463701                | AA                              | TT              | 1946912299               |
| SNP_P4_109633_16463733 | NC_021167.1    | Ca_kabuli_chr08 | 16463733                | AA                              | GG              | 1946912301               |
| SNP_P4_109634_16463743 | NC_021167.1    | Ca_kabuli_chr08 | 16463743                | AA                              | TT              | 1946912303               |
| SNP_P4_109635_16463748 | NC_021167.1    | Ca_kabuli_chr08 | 16463748                | AA                              | CC              | 1946912305               |
| SNP_P4_109636_16463764 | NC_021167.1    | Ca_kabuli_chr08 | 16463764                | AA                              | GG              | 1946912307               |
| SNP_P4_109637_16463794 | NC_021167.1    | Ca_kabuli_chr08 | 16463794                | GG                              | TT              | 1946912309               |
| SNP_P4_109638_16463797 | NC_021167.1    | Ca_kabuli_chr08 | 16463797                | TT                              | AA              | 1946912311               |
| SNP_P4_109639_16463802 | NC_021167.1    | Ca_kabuli_chr08 | 16463802                | GG                              | AA              | 1946912313               |
| SNP_P4_109640_16463806 | NC_021167.1    | Ca_kabuli_chr08 | 16463806                | AA                              | GG              | 1946912315               |
| SNP_P4_109641_16463873 | NC_021167.1    | Ca_kabuli_chr08 | 16463873                | CC                              | TT              | 1946912317               |
| SNP_P4_109642_16463923 | NC_021167.1    | Ca_kabuli_chr08 | 16463923                | AA                              | GG              | 1946912319               |
| SNP_P4_109643_16463964 | NC_021167.1    | Ca_kabuli_chr08 | 16463964                | AA                              | TT              | 1946912321               |
| SNP_P4_109644_16463984 | NC_021167.1    | Ca_kabuli_chr08 | 16463984                | GG                              | AA              | 1946912323               |
| SNP_P4_109645_16463991 | NC_021167.1    | Ca_kabuli_chr08 | 16463991                | CC                              | AA              | 1946912325               |
| SNP_P4_109646_16463992 | NC_021167.1    | Ca_kabuli_chr08 | 16463992                | AA                              | TT              | 1946912327               |
| SNP_P4_109647_16464427 | NC_021167.1    | Ca_kabuli_chr08 | 16464427                | GG                              | AA              | 1946912329               |
| SNP_P4_109648_16464478 | NC_021167.1    | Ca_kabuli_chr08 | 16464478                | TT                              | CC              | 1946912331               |
| SNP_P4_109649_16464481 | NC_021167.1    | Ca_kabuli_chr08 | 16464481                | CC                              | TT              | 1946912333               |
| SNP_P4_109650_16464661 | NC_021167.1    | Ca_kabuli_chr08 | 16464661                | AA                              | TT              | 1946912335               |
| SNP_P4_109651_16465023 | NC_021167.1    | Ca_kabuli_chr08 | 16465023                | AA                              | GG              | 1946912337               |
| SNP_P4_109654_16473139 | NC_021167.1    | Ca_kabuli_chr08 | 16473139                | TT                              | CC              | 1946912339               |
| SNP_P4_109655_3713     | NW_004515637.1 | Scaffold2       | 3713                    | GG                              | AA              | 1946912341               |
| SNP_P4_109656_3735     | NW_004515637.1 | Scaffold2       | 3735                    | TT                              | AA              | 1946912343               |
| SNP_P4_109657_3888     | NW_004515637.1 | Scaffold2       | 3888                    | AA                              | CC              | 1946912345               |
| SNP_P4_109658_4076     | NW_004515637.1 | Scaffold2       | 4076                    | TT                              | CC              | 1946912347               |
| SNP_P4_109659_4079     | NW_004515637.1 | Scaffold2       | 4079                    | AA                              | GG              | 1946912349               |
| SNP_P4_109660_4100     | NW_004515637.1 | Scaffold2       | 4100                    | AA                              | GG              | 1946912351               |
| SNP_P4_109661_4124     | NW_004515637.1 | Scaffold2       | 4124                    | CC                              | AA              | 1946912353               |
| SNP_P4_109662_4132     | NW_004515637.1 | Scaffold2       | 4132                    | GG                              | AA              | 1946912355               |
| SNP_P4_109663_4554     | NW_004515637.1 | Scaffold2       | 4554                    | AA                              | TT              | 1946912357               |
| SNP_P4_109664_4557     | NW_004515637.1 | Scaffold2       | 4557                    | CC                              | GG              | 1946912359               |
| SNP_P4_109665_5463     | NW_004515637.1 | Scaffold2       | 5463                    | AA                              | GG              | 1946912361               |
| SNP_P4_109666_8125     | NW_004515637.1 | Scaffold2       | 8125                    | TT                              | CC              | 1946912363               |
| SNP_P4_109668_8177     | NW_004515637.1 | Scaffold2       | 8177                    | CC                              | TT              | 1946912365               |
| SNP_P4_109669_8192     | NW_004515637.1 | Scaffold2       | 8192                    | CC                              | TT              | 1946912367               |

| SNPs IDs             | Chromosome IDs | Chromosomes | Physical positions (bp) | CDC Frontier (Reference genome) | (ILWC46 & LPNB) | NCBI SNPdb Accession IDs |
|----------------------|----------------|-------------|-------------------------|---------------------------------|-----------------|--------------------------|
| SNP_P4_109670_8258   | NW_004515637.1 | Scaffold2   | 8258                    | AA                              | GG              | 1946912369               |
| SNP_P4_109671_8423   | NW_004515637.1 | Scaffold2   | 8423                    | GG                              | TT              | 1946912371               |
| SNP_P4_109672_9889   | NW_004515637.1 | Scaffold2   | 9889                    | CC                              | GG              | 1946912373               |
| SNP_P4_109673_9922   | NW_004515637.1 | Scaffold2   | 9922                    | GG                              | AA              | 1946912375               |
| SNP_P4_109674_25272  | NW_004515637.1 | Scaffold2   | 25272                   | AA                              | GG              | 1946912377               |
| SNP_P4_109675_27673  | NW_004515637.1 | Scaffold2   | 27673                   | CC                              | TT              | 1946912379               |
| SNP_P4_109676_33144  | NW_004515637.1 | Scaffold2   | 33144                   | AA                              | GG              | 1946912381               |
| SNP_P4_109678_39086  | NW_004515637.1 | Scaffold2   | 39086                   | CC                              | TT              | 1946912383               |
| SNP_P4_109679_40576  | NW_004515637.1 | Scaffold2   | 40576                   | GG                              | AA              | 1946912385               |
| SNP_P4_109680_43914  | NW_004515637.1 | Scaffold2   | 43914                   | AA                              | CC              | 1946912387               |
| SNP_P4_109681_43931  | NW_004515637.1 | Scaffold2   | 43931                   | AA                              | GG              | 1946912389               |
| SNP_P4_109682_44025  | NW_004515637.1 | Scaffold2   | 44025                   | AA                              | GG              | 1946912391               |
| SNP_P4_109683_44333  | NW_004515637.1 | Scaffold2   | 44333                   | AA                              | TT              | 1946912393               |
| SNP_P4_109684_50972  | NW_004515637.1 | Scaffold2   | 50972                   | AA                              | GG              | 1946912395               |
| SNP_P4_109685_51034  | NW_004515637.1 | Scaffold2   | 51034                   | CC                              | GG              | 1946912397               |
| SNP_P4_109686_55923  | NW_004515637.1 | Scaffold2   | 55923                   | CC                              | GG              | 1946912399               |
| SNP_P4_109687_67606  | NW_004515637.1 | Scaffold2   | 67606                   | AA                              | CC              | 1946912401               |
| SNP_P4_109688_69827  | NW_004515637.1 | Scaffold2   | 69827                   | CC                              | TT              | 1946912403               |
| SNP_P4_109690_69935  | NW_004515637.1 | Scaffold2   | 69935                   | GG                              | TT              | 1946912405               |
| SNP_P4_109691_69942  | NW_004515637.1 | Scaffold2   | 69942                   | AA                              | GG              | 1946912407               |
| SNP_P4_109692_70024  | NW_004515637.1 | Scaffold2   | 70024                   | CC                              | GG              | 1946912409               |
| SNP_P4_109693_70053  | NW_004515637.1 | Scaffold2   | 70053                   | AA                              | TT              | 1946912411               |
| SNP_P4_109694_70280  | NW_004515637.1 | Scaffold2   | 70280                   | AA                              | GG              | 1946912413               |
| SNP_P4_109695_70539  | NW_004515637.1 | Scaffold2   | 70539                   | TT                              | GG              | 1946912415               |
| SNP_P4_109696_71323  | NW_004515637.1 | Scaffold2   | 71323                   | AA                              | CC              | 1946912417               |
| SNP_P4_109697_71816  | NW_004515637.1 | Scaffold2   | 71816                   | TT                              | CC              | 1946912419               |
| SNP_P4_109698_78949  | NW_004515637.1 | Scaffold2   | 78949                   | GG                              | TT              | 1946912421               |
| SNP_P4_109699_79376  | NW_004515637.1 | Scaffold2   | 79376                   | TT                              | CC              | 1946912423               |
| SNP_P4_109700_79444  | NW_004515637.1 | Scaffold2   | 79444                   | CC                              | AA              | 1946912425               |
| SNP_P4_109701_79463  | NW_004515637.1 | Scaffold2   | 79463                   | GG                              | TT              | 1946912427               |
| SNP_P4_109702_80728  | NW_004515637.1 | Scaffold2   | 80728                   | CC                              | AA              | 1946912429               |
| SNP_P4_109703_83657  | NW_004515637.1 | Scaffold2   | 83657                   | TT                              | CC              | 1946912431               |
| SNP_P4_109704_83709  | NW_004515637.1 | Scaffold2   | 83709                   | CC                              | AA              | 1946912433               |
| SNP_P4_109705_83921  | NW_004515637.1 | Scaffold2   | 83921                   | CC                              | GG              | 1946912435               |
| SNP_P4_109706_83922  | NW_004515637.1 | Scaffold2   | 83922                   | AA                              | GG              | 1946912437               |
| SNP_P4_109707_84006  | NW_004515637.1 | Scaffold2   | 84006                   | AA                              | TT              | 1946912439               |
| SNP_P4_109708_87291  | NW_004515637.1 | Scaffold2   | 87291                   | AA                              | TT              | 1946912441               |
| SNP_P4_109709_103927 | NW_004515637.1 | Scaffold2   | 103927                  | CC                              | TT              | 1946912443               |
| SNP_P4_109710_103938 | NW_004515637.1 | Scaffold2   | 103938                  | TT                              | CC              | 1946912445               |
| SNP_P4_109711_103978 | NW_004515637.1 | Scaffold2   | 103978                  | AA                              | CC              | 1946912447               |
| SNP_P4_109712_103982 | NW_004515637.1 | Scaffold2   | 103982                  | TT                              | CC              | 1946912449               |
| SNP_P4_109713_103996 | NW_004515637.1 | Scaffold2   | 103996                  | CC                              | TT              | 1946912451               |

| SNPs IDs             | Chromosome IDs | Chromosomes | Physical positions (bp) | CDC Frontier (Reference genome) | (ILWC46 & LPNB) | NCBI SNPdb Accession IDs |
|----------------------|----------------|-------------|-------------------------|---------------------------------|-----------------|--------------------------|
| SNP_P4_109714_144255 | NW_004515637.1 | Scaffold2   | 144255                  | CC                              | TT              | 1946912453               |
| SNP_P4_109715_144554 | NW_004515637.1 | Scaffold2   | 144554                  | AA                              | CC              | 1946912455               |
| SNP_P4_109716_170643 | NW_004515637.1 | Scaffold2   | 170643                  | TT                              | CC              | 1946912457               |
| SNP_P4_109717_182263 | NW_004515637.1 | Scaffold2   | 182263                  | AA                              | GG              | 1946912459               |
| SNP_P4_109718_190860 | NW_004515637.1 | Scaffold2   | 190860                  | TT                              | AA              | 1946912461               |
| SNP_P4_109719_200217 | NW_004515637.1 | Scaffold2   | 200217                  | AA                              | GG              | 1946912463               |
| SNP_P4_109720_207920 | NW_004515637.1 | Scaffold2   | 207920                  | TT                              | AA              | 1946912465               |
| SNP_P4_109721_210602 | NW_004515637.1 | Scaffold2   | 210602                  | AA                              | GG              | 1946912467               |
| SNP_P4_109722_210691 | NW_004515637.1 | Scaffold2   | 210691                  | AA                              | GG              | 1946912469               |
| SNP_P4_109723_210714 | NW_004515637.1 | Scaffold2   | 210714                  | AA                              | CC              | 1946912471               |
| SNP_P4_109724_210733 | NW_004515637.1 | Scaffold2   | 210733                  | GG                              | AA              | 1946912473               |
| SNP_P4_109725_210955 | NW_004515637.1 | Scaffold2   | 210955                  | GG                              | AA              | 1946912475               |
| SNP_P4_109726_210970 | NW_004515637.1 | Scaffold2   | 210970                  | CC                              | TT              | 1946912477               |
| SNP_P4_109727_210980 | NW_004515637.1 | Scaffold2   | 210980                  | TT                              | AA              | 1946912479               |
| SNP_P4_109728_211599 | NW_004515637.1 | Scaffold2   | 211599                  | TT                              | GG              | 1946912481               |
| SNP_P4_109729_211903 | NW_004515637.1 | Scaffold2   | 211903                  | TT                              | CC              | 1946912483               |
| SNP_P4_109730_211930 | NW_004515637.1 | Scaffold2   | 211930                  | GG                              | CC              | 1946912485               |
| SNP_P4_109731_211988 | NW_004515637.1 | Scaffold2   | 211988                  | TT                              | CC              | 1946912487               |
| SNP_P4_109732_212230 | NW_004515637.1 | Scaffold2   | 212230                  | GG                              | TT              | 1946912489               |
| SNP_P4_109733_212349 | NW_004515637.1 | Scaffold2   | 212349                  | GG                              | CC              | 1946912491               |
| SNP_P4_109734_226251 | NW_004515637.1 | Scaffold2   | 226251                  | TT                              | CC              | 1946912493               |
| SNP_P4_109735_226281 | NW_004515637.1 | Scaffold2   | 226281                  | TT                              | CC              | 1946912495               |
| SNP_P4_109736_226291 | NW_004515637.1 | Scaffold2   | 226291                  | TT                              | CC              | 1946912497               |
| SNP_P4_109737_226351 | NW_004515637.1 | Scaffold2   | 226351                  | AA                              | TT              | 1946912499               |
| SNP_P4_109738_238255 | NW_004515637.1 | Scaffold2   | 238255                  | AA                              | CC              | 1946912501               |
| SNP_P4_109739_238260 | NW_004515637.1 | Scaffold2   | 238260                  | AA                              | GG              | 1946912503               |
| SNP_P4_109740_238326 | NW_004515637.1 | Scaffold2   | 238326                  | TT                              | GG              | 1946912505               |
| SNP_P4_109741_239200 | NW_004515637.1 | Scaffold2   | 239200                  | GG                              | AA              | 1946912507               |
| SNP_P4_109742_239219 | NW_004515637.1 | Scaffold2   | 239219                  | GG                              | AA              | 1946912509               |
| SNP_P4_109743_239221 | NW_004515637.1 | Scaffold2   | 239221                  | GG                              | AA              | 1946912511               |
| SNP_P4_109744_239265 | NW_004515637.1 | Scaffold2   | 239265                  | CC                              | TT              | 1946912513               |
| SNP_P4_109745_286943 | NW_004515637.1 | Scaffold2   | 286943                  | AA                              | GG              | 1946912515               |
| SNP_P4_109746_293825 | NW_004515637.1 | Scaffold2   | 293825                  | TT                              | AA              | 1946912517               |
| SNP_P4_109747_303457 | NW_004515637.1 | Scaffold2   | 303457                  | GG                              | TT              | 1946912519               |
| SNP_P4_109748_303482 | NW_004515637.1 | Scaffold2   | 303482                  | TT                              | AA              | 1946912521               |
| SNP_P4_109749_323581 | NW_004515637.1 | Scaffold2   | 323581                  | CC                              | TT              | 1946912523               |
| SNP_P4_109750_323590 | NW_004515637.1 | Scaffold2   | 323590                  | CC                              | TT              | 1946912525               |
| SNP_P4_109751_338613 | NW_004515637.1 | Scaffold2   | 338613                  | CC                              | TT              | 1946912527               |
| SNP_P4_109752_344753 | NW_004515637.1 | Scaffold2   | 344753                  | TT                              | AA              | 1946912529               |
| SNP_P4_109753_354037 | NW_004515637.1 | Scaffold2   | 354037                  | AA                              | TT              | 1946912531               |
| SNP_P4_109754_357839 | NW_004515637.1 | Scaffold2   | 357839                  | TT                              | CC              | 1946912533               |
| SNP_P4_109755_357858 | NW_004515637.1 | Scaffold2   | 357858                  | AA                              | GG              | 1946912535               |

| SNPs IDs             | Chromosome IDs | Chromosomes | Physical positions (bp) | CDC Frontier (Reference genome) | (ILWC46 & LPNB) | NCBI SNPdb Accession IDs |
|----------------------|----------------|-------------|-------------------------|---------------------------------|-----------------|--------------------------|
| SNP_P4_109756_357861 | NW_004515637.1 | Scaffold2   | 357861                  | AA                              | CC              | 1946912536               |
| SNP_P4_109757_357866 | NW_004515637.1 | Scaffold2   | 357866                  | CC                              | TT              | 1946912538               |
| SNP_P4_109759_368803 | NW_004515637.1 | Scaffold2   | 368803                  | CC                              | TT              | 1946912540               |
| SNP_P4_109760_379030 | NW_004515637.1 | Scaffold2   | 379030                  | CC                              | GG              | 1946912542               |
| SNP_P4_109762_402757 | NW_004515637.1 | Scaffold2   | 402757                  | AA                              | GG              | 1946912544               |
| SNP_P4_109763_402844 | NW_004515637.1 | Scaffold2   | 402844                  | TT                              | CC              | 1946912546               |
| SNP_P4_109764_402845 | NW_004515637.1 | Scaffold2   | 402845                  | AA                              | GG              | 1946912548               |
| SNP_P4_109765_407740 | NW_004515637.1 | Scaffold2   | 407740                  | TT                              | GG              | 1946912550               |
| SNP_P4_109766_407803 | NW_004515637.1 | Scaffold2   | 407803                  | AA                              | CC              | 1946912552               |
| SNP_P4_109767_408001 | NW_004515637.1 | Scaffold2   | 408001                  | TT                              | CC              | 1946912554               |
| SNP_P4_109770_408119 | NW_004515637.1 | Scaffold2   | 408119                  | TT                              | CC              | 1946912556               |
| SNP_P4_109771_408122 | NW_004515637.1 | Scaffold2   | 408122                  | AA                              | CC              | 1946912558               |
| SNP_P4_109772_408132 | NW_004515637.1 | Scaffold2   | 408132                  | TT                              | GG              | 1946912560               |
| SNP_P4_109773_408165 | NW_004515637.1 | Scaffold2   | 408165                  | AA                              | TT              | 1946912562               |
| SNP_P4_109774_408207 | NW_004515637.1 | Scaffold2   | 408207                  | AA                              | TT              | 1946912564               |
| SNP_P4_109775_408637 | NW_004515637.1 | Scaffold2   | 408637                  | GG                              | TT              | 1946912566               |
| SNP_P4_109776_411073 | NW_004515637.1 | Scaffold2   | 411073                  | TT                              | CC              | 1946912568               |
| SNP_P4_109777_411096 | NW_004515637.1 | Scaffold2   | 411096                  | TT                              | CC              | 1946912570               |
| SNP_P4_109778_411742 | NW_004515637.1 | Scaffold2   | 411742                  | CC                              | TT              | 1946912572               |
| SNP_P4_109779_426481 | NW_004515637.1 | Scaffold2   | 426481                  | TT                              | CC              | 1946912574               |
| SNP_P4_109780_463209 | NW_004515637.1 | Scaffold2   | 463209                  | GG                              | TT              | 1946912576               |
| SNP_P4_109781_472745 | NW_004515637.1 | Scaffold2   | 472745                  | TT                              | CC              | 1946912578               |
| SNP_P4_109782_483438 | NW_004515637.1 | Scaffold2   | 483438                  | TT                              | AA              | 1946912580               |
| SNP_P4_109783_500364 | NW_004515637.1 | Scaffold2   | 500364                  | GG                              | TT              | 1946912582               |
| SNP_P4_109786_504086 | NW_004515637.1 | Scaffold2   | 504086                  | CC                              | TT              | 1946912584               |
| SNP_P4_109787_504093 | NW_004515637.1 | Scaffold2   | 504093                  | CC                              | TT              | 1946912586               |
| SNP_P4_109788_505961 | NW_004515637.1 | Scaffold2   | 505961                  | TT                              | CC              | 1946912588               |
| SNP_P4_109789_511166 | NW_004515637.1 | Scaffold2   | 511166                  | GG                              | AA              | 1946912590               |
| SNP_P4_109790_527134 | NW_004515637.1 | Scaffold2   | 527134                  | GG                              | AA              | 1946912592               |
| SNP_P4_109791_527886 | NW_004515637.1 | Scaffold2   | 527886                  | TT                              | GG              | 1946912594               |
| SNP_P4_109792_527891 | NW_004515637.1 | Scaffold2   | 527891                  | GG                              | AA              | 1946912596               |
| SNP_P4_109793_527922 | NW_004515637.1 | Scaffold2   | 527922                  | TT                              | GG              | 1946912598               |
| SNP_P4_109794_528163 | NW_004515637.1 | Scaffold2   | 528163                  | GG                              | AA              | 1946912600               |
| SNP_P4_109795_540748 | NW_004515637.1 | Scaffold2   | 540748                  | TT                              | CC              | 1946912602               |
| SNP_P4_109796_1469   | NW_004515638.1 | Scaffold5   | 1469                    | TT                              | CC              | 1946912604               |
| SNP_P4_109797_1496   | NW_004515638.1 | Scaffold5   | 1496                    | AA                              | CC              | 1946912606               |
| SNP_P4_109799_1542   | NW_004515638.1 | Scaffold5   | 1542                    | AA                              | GG              | 1946912608               |
| SNP_P4_109800_1565   | NW_004515638.1 | Scaffold5   | 1565                    | AA                              | GG              | 1946912610               |
| SNP_P4_109802_5498   | NW_004515638.1 | Scaffold5   | 5498                    | TT                              | CC              | 1946912612               |
| SNP_P4_109803_5855   | NW_004515638.1 | Scaffold5   | 5855                    | AA                              | GG              | 1946912614               |
| SNP_P4_109804_5861   | NW_004515638.1 | Scaffold5   | 5861                    | TT                              | CC              | 1946912616               |
| SNP_P4_109805_5948   | NW_004515638.1 | Scaffold5   | 5948                    | AA                              | GG              | 1946912618               |

| SNPs IDs             | Chromosome IDs | Chromosomes | Physical positions (bp) | CDC Frontier (Reference genome) | (ILWC46 & LPNB) | NCBI SNPdb Accession IDs |
|----------------------|----------------|-------------|-------------------------|---------------------------------|-----------------|--------------------------|
| SNP_P4_109806_16867  | NW_004515638.1 | Scaffold5   | 16867                   | TT                              | CC              | 1946912620               |
| SNP_P4_109807_17311  | NW_004515638.1 | Scaffold5   | 17311                   | GG                              | AA              | 1946912622               |
| SNP_P4_109809_17576  | NW_004515638.1 | Scaffold5   | 17576                   | CC                              | AA              | 1946912624               |
| SNP_P4_109810_2043   | NW_004515639.1 | Scaffold7   | 2043                    | CC                              | AA              | 1946912626               |
| SNP_P4_109811_2090   | NW_004515639.1 | Scaffold7   | 2090                    | TT                              | AA              | 1946912628               |
| SNP_P4_109812_10868  | NW_004515639.1 | Scaffold7   | 10868                   | GG                              | TT              | 1946912630               |
| SNP_P4_109813_13473  | NW_004515639.1 | Scaffold7   | 13473                   | AA                              | TT              | 1946912633               |
| SNP_P4_109814_13474  | NW_004515639.1 | Scaffold7   | 13474                   | AA                              | CC              | 1946912635               |
| SNP_P4_109815_13477  | NW_004515639.1 | Scaffold7   | 13477                   | TT                              | CC              | 1946912637               |
| SNP_P4_109816_13487  | NW_004515639.1 | Scaffold7   | 13487                   | GG                              | CC              | 1946912639               |
| SNP_P4_109817_40904  | NW_004515639.1 | Scaffold7   | 40904                   | TT                              | GG              | 1946912641               |
| SNP_P4_109818_50232  | NW_004515639.1 | Scaffold7   | 50232                   | TT                              | CC              | 1946912643               |
| SNP_P4_109819_50486  | NW_004515639.1 | Scaffold7   | 50486                   | GG                              | AA              | 1946912645               |
| SNP_P4_109820_50492  | NW_004515639.1 | Scaffold7   | 50492                   | CC                              | TT              | 1946912647               |
| SNP_P4_109821_50519  | NW_004515639.1 | Scaffold7   | 50519                   | CC                              | GG              | 1946912649               |
| SNP_P4_109822_79449  | NW_004515639.1 | Scaffold7   | 79449                   | TT                              | CC              | 1946912651               |
| SNP_P4_109823_79481  | NW_004515639.1 | Scaffold7   | 79481                   | AA                              | CC              | 1946912653               |
| SNP_P4_109824_79497  | NW_004515639.1 | Scaffold7   | 79497                   | TT                              | AA              | 1946912655               |
| SNP_P4_109825_94503  | NW_004515639.1 | Scaffold7   | 94503                   | AA                              | GG              | 1946912657               |
| SNP_P4_109826_94648  | NW_004515639.1 | Scaffold7   | 94648                   | AA                              | GG              | 1946912659               |
| SNP_P4_109827_94654  | NW_004515639.1 | Scaffold7   | 94654                   | GG                              | TT              | 1946912661               |
| SNP_P4_109828_101890 | NW_004515639.1 | Scaffold7   | 101890                  | AA                              | TT              | 1946912663               |
| SNP_P4_109829_101942 | NW_004515639.1 | Scaffold7   | 101942                  | GG                              | CC              | 1946912665               |
| SNP_P4_109830_116312 | NW_004515639.1 | Scaffold7   | 116312                  | AA                              | TT              | 1946912667               |
| SNP_P4_109831_151445 | NW_004515639.1 | Scaffold7   | 151445                  | GG                              | TT              | 1946912669               |
| SNP_P4_109832_151464 | NW_004515639.1 | Scaffold7   | 151464                  | GG                              | CC              | 1946912671               |
| SNP_P4_109833_169671 | NW_004515639.1 | Scaffold7   | 169671                  | AA                              | TT              | 1946912673               |
| SNP_P4_109834_169789 | NW_004515639.1 | Scaffold7   | 169789                  | AA                              | GG              | 1946912675               |
| SNP_P4_109835_170154 | NW_004515639.1 | Scaffold7   | 170154                  | TT                              | CC              | 1946912677               |
| SNP_P4_109836_170195 | NW_004515639.1 | Scaffold7   | 170195                  | AA                              | CC              | 1946912679               |
| SNP_P4_109837_170228 | NW_004515639.1 | Scaffold7   | 170228                  | TT                              | CC              | 1946912681               |
| SNP_P4_109838_170269 | NW_004515639.1 | Scaffold7   | 170269                  | AA                              | GG              | 1946912683               |
| SNP_P4_109839_170303 | NW_004515639.1 | Scaffold7   | 170303                  | AA                              | TT              | 1946912685               |
| SNP_P4_109840_170354 | NW_004515639.1 | Scaffold7   | 170354                  | AA                              | GG              | 1946912687               |
| SNP_P4_109841_170361 | NW_004515639.1 | Scaffold7   | 170361                  | AA                              | GG              | 1946912689               |
| SNP_P4_109842_170369 | NW_004515639.1 | Scaffold7   | 170369                  | AA                              | GG              | 1946912691               |
| SNP_P4_109843_170380 | NW_004515639.1 | Scaffold7   | 170380                  | AA                              | GG              | 1946912693               |
| SNP_P4_109844_170416 | NW_004515639.1 | Scaffold7   | 170416                  | AA                              | GG              | 1946912695               |
| SNP_P4_109845_170426 | NW_004515639.1 | Scaffold7   | 170426                  | TT                              | AA              | 1946912697               |
| SNP_P4_109846_170445 | NW_004515639.1 | Scaffold7   | 170445                  | TT                              | CC              | 1946912699               |
| SNP_P4_109847_170456 | NW_004515639.1 | Scaffold7   | 170456                  | AA                              | GG              | 1946912701               |
| SNP_P4_109848_170476 | NW_004515639.1 | Scaffold7   | 170476                  | CC                              | TT              | 1946912703               |

| SNPs IDs             | Chromosome IDs | Chromosomes | Physical positions (bp) | CDC Frontier (Reference genome) | (ILWC46 & LPNB) | NCBI SNPdb Accession IDs |
|----------------------|----------------|-------------|-------------------------|---------------------------------|-----------------|--------------------------|
| SNP_P4_109849_170492 | NW_004515639.1 | Scaffold7   | 170492                  | TT                              | CC              | 1946912705               |
| SNP_P4_109850_170515 | NW_004515639.1 | Scaffold7   | 170515                  | CC                              | TT              | 1946912707               |
| SNP_P4_109851_210680 | NW_004515639.1 | Scaffold7   | 210680                  | TT                              | GG              | 1946912709               |
| SNP_P4_109852_210681 | NW_004515639.1 | Scaffold7   | 210681                  | TT                              | AA              | 1946912711               |
| SNP_P4_109853_210748 | NW_004515639.1 | Scaffold7   | 210748                  | AA                              | TT              | 1946912713               |
| SNP_P4_109854_210751 | NW_004515639.1 | Scaffold7   | 210751                  | TT                              | CC              | 1946912715               |
| SNP_P4_109855_210769 | NW_004515639.1 | Scaffold7   | 210769                  | AA                              | CC              | 1946912717               |
| SNP_P4_109856_210782 | NW_004515639.1 | Scaffold7   | 210782                  | TT                              | CC              | 1946912719               |
| SNP_P4_109857_210790 | NW_004515639.1 | Scaffold7   | 210790                  | TT                              | CC              | 1946912721               |
| SNP_P4_109858_210800 | NW_004515639.1 | Scaffold7   | 210800                  | GG                              | AA              | 1946912723               |
| SNP_P4_109859_210802 | NW_004515639.1 | Scaffold7   | 210802                  | AA                              | TT              | 1946912725               |
| SNP_P4_109860_210808 | NW_004515639.1 | Scaffold7   | 210808                  | AA                              | GG              | 1946912727               |
| SNP_P4_109861_210814 | NW_004515639.1 | Scaffold7   | 210814                  | CC                              | TT              | 1946912729               |
| SNP_P4_109862_210820 | NW_004515639.1 | Scaffold7   | 210820                  | GG                              | AA              | 1946912731               |
| SNP_P4_109863_215031 | NW_004515639.1 | Scaffold7   | 215031                  | TT                              | CC              | 1946912733               |
| SNP_P4_109864_215092 | NW_004515639.1 | Scaffold7   | 215092                  | GG                              | TT              | 1946912735               |
| SNP_P4_109866_215374 | NW_004515639.1 | Scaffold7   | 215374                  | GG                              | AA              | 1946912737               |
| SNP_P4_109867_247071 | NW_004515639.1 | Scaffold7   | 247071                  | TT                              | CC              | 1946912739               |
| SNP_P4_109868_247202 | NW_004515639.1 | Scaffold7   | 247202                  | GG                              | TT              | 1946912741               |
| SNP_P4_109869_247205 | NW_004515639.1 | Scaffold7   | 247205                  | TT                              | CC              | 1946912743               |
| SNP_P4_109870_247275 | NW_004515639.1 | Scaffold7   | 247275                  | TT                              | AA              | 1946912745               |
| SNP_P4_109871_247327 | NW_004515639.1 | Scaffold7   | 247327                  | GG                              | AA              | 1946912747               |
| SNP_P4_109872_247347 | NW_004515639.1 | Scaffold7   | 247347                  | CC                              | TT              | 1946912750               |
| SNP_P4_109873_247349 | NW_004515639.1 | Scaffold7   | 247349                  | GG                              | AA              | 1946912752               |
| SNP_P4_109874_247413 | NW_004515639.1 | Scaffold7   | 247413                  | TT                              | AA              | 1946912754               |
| SNP_P4_109875_254692 | NW_004515639.1 | Scaffold7   | 254692                  | TT                              | AA              | 1946912756               |
| SNP_P4_109876_254693 | NW_004515639.1 | Scaffold7   | 254693                  | AA                              | GG              | 1946912758               |
| SNP_P4_109877_254724 | NW_004515639.1 | Scaffold7   | 254724                  | TT                              | CC              | 1946912760               |
| SNP_P4_109878_254851 | NW_004515639.1 | Scaffold7   | 254851                  | AA                              | GG              | 1946912762               |
| SNP_P4_109879_254883 | NW_004515639.1 | Scaffold7   | 254883                  | AA                              | GG              | 1946912764               |
| SNP_P4_109880_255098 | NW_004515639.1 | Scaffold7   | 255098                  | TT                              | AA              | 1946912766               |
| SNP_P4_109881_255130 | NW_004515639.1 | Scaffold7   | 255130                  | GG                              | TT              | 1946912768               |
| SNP_P4_109882_255148 | NW_004515639.1 | Scaffold7   | 255148                  | TT                              | CC              | 1946912770               |
| SNP_P4_109883_255149 | NW_004515639.1 | Scaffold7   | 255149                  | AA                              | TT              | 1946912772               |
| SNP_P4_109884_255169 | NW_004515639.1 | Scaffold7   | 255169                  | TT                              | CC              | 1946912774               |
| SNP_P4_109885_255206 | NW_004515639.1 | Scaffold7   | 255206                  | TT                              | CC              | 1946912776               |
| SNP_P4_109886_255223 | NW_004515639.1 | Scaffold7   | 255223                  | AA                              | GG              | 1946912778               |
| SNP_P4_109887_255238 | NW_004515639.1 | Scaffold7   | 255238                  | CC                              | TT              | 1946912780               |
| SNP_P4_109888_255244 | NW_004515639.1 | Scaffold7   | 255244                  | GG                              | AA              | 1946912783               |
| SNP_P4_109889_255261 | NW_004515639.1 | Scaffold7   | 255261                  | TT                              | CC              | 1946912785               |
| SNP_P4_109890_262959 | NW_004515639.1 | Scaffold7   | 262959                  | CC                              | TT              | 1946912787               |
| SNP_P4_109891_270525 | NW_004515639.1 | Scaffold7   | 270525                  | AA                              | TT              | 1946912789               |

| SNPs IDs             | Chromosome IDs | Chromosomes | Physical positions (bp) | CDC Frontier (Reference genome) | (ILWC46 & LPNB) | NCBI SNPdb Accession IDs |
|----------------------|----------------|-------------|-------------------------|---------------------------------|-----------------|--------------------------|
| SNP_P4_109892_273442 | NW_004515639.1 | Scaffold7   | 273442                  | AA                              | GG              | 1946912791               |
| SNP_P4_109893_273446 | NW_004515639.1 | Scaffold7   | 273446                  | TT                              | GG              | 1946912793               |
| SNP_P4_109894_273473 | NW_004515639.1 | Scaffold7   | 273473                  | TT                              | CC              | 1946912795               |
| SNP_P4_109895_273489 | NW_004515639.1 | Scaffold7   | 273489                  | TT                              | CC              | 1946912797               |
| SNP_P4_109896_273811 | NW_004515639.1 | Scaffold7   | 273811                  | AA                              | GG              | 1946912799               |
| SNP_P4_109897_274011 | NW_004515639.1 | Scaffold7   | 274011                  | TT                              | GG              | 1946912801               |
| SNP_P4_109898_274038 | NW_004515639.1 | Scaffold7   | 274038                  | GG                              | AA              | 1946912803               |
| SNP_P4_109899_274049 | NW_004515639.1 | Scaffold7   | 274049                  | TT                              | GG              | 1946912805               |
| SNP_P4_109900_274111 | NW_004515639.1 | Scaffold7   | 274111                  | GG                              | AA              | 1946912807               |
| SNP_P4_109901_274147 | NW_004515639.1 | Scaffold7   | 274147                  | AA                              | CC              | 1946912809               |
| SNP_P4_109902_274184 | NW_004515639.1 | Scaffold7   | 274184                  | GG                              | AA              | 1946912811               |
| SNP_P4_109903_1570   | NW_004515640.1 | Scaffold9   | 1570                    | TT                              | CC              | 1946912813               |
| SNP_P4_109904_2005   | NW_004515640.1 | Scaffold9   | 2005                    | CC                              | TT              | 1946912815               |
| SNP_P4_109905_8544   | NW_004515640.1 | Scaffold9   | 8544                    | CC                              | TT              | 1946912817               |
| SNP_P4_109906_8572   | NW_004515640.1 | Scaffold9   | 8572                    | AA                              | CC              | 1946912819               |
| SNP_P4_109907_9227   | NW_004515640.1 | Scaffold9   | 9227                    | GG                              | CC              | 1946912821               |
| SNP_P4_109908_12429  | NW_004515640.1 | Scaffold9   | 12429                   | CC                              | AA              | 1946912823               |
| SNP_P4_109909_12556  | NW_004515640.1 | Scaffold9   | 12556                   | AA                              | GG              | 1946912825               |
| SNP_P4_109910_12609  | NW_004515640.1 | Scaffold9   | 12609                   | CC                              | TT              | 1946912827               |
| SNP_P4_109911_12841  | NW_004515640.1 | Scaffold9   | 12841                   | GG                              | AA              | 1946912829               |
| SNP_P4_109912_12845  | NW_004515640.1 | Scaffold9   | 12845                   | TT                              | CC              | 1946912831               |
| SNP_P4_109913_12870  | NW_004515640.1 | Scaffold9   | 12870                   | TT                              | GG              | 1946912833               |
| SNP_P4_109914_12890  | NW_004515640.1 | Scaffold9   | 12890                   | AA                              | GG              | 1946912835               |
| SNP_P4_109915_15374  | NW_004515640.1 | Scaffold9   | 15374                   | GG                              | AA              | 1946912837               |
| SNP_P4_109916_28196  | NW_004515640.1 | Scaffold9   | 28196                   | AA                              | GG              | 1946912839               |
| SNP_P4_109917_31010  | NW_004515640.1 | Scaffold9   | 31010                   | GG                              | AA              | 1946912841               |
| SNP_P4_109918_34558  | NW_004515640.1 | Scaffold9   | 34558                   | GG                              | TT              | 1946912843               |
| SNP_P4_109919_34564  | NW_004515640.1 | Scaffold9   | 34564                   | AA                              | GG              | 1946912846               |
| SNP_P4_109921_34850  | NW_004515640.1 | Scaffold9   | 34850                   | GG                              | AA              | 1946912848               |
| SNP_P4_109922_34943  | NW_004515640.1 | Scaffold9   | 34943                   | TT                              | AA              | 1946912850               |
| SNP_P4_109923_34994  | NW_004515640.1 | Scaffold9   | 34994                   | GG                              | AA              | 1946912852               |
| SNP_P4_109924_35106  | NW_004515640.1 | Scaffold9   | 35106                   | TT                              | AA              | 1946912854               |
| SNP_P4_109925_35291  | NW_004515640.1 | Scaffold9   | 35291                   | GG                              | TT              | 1946912856               |
| SNP_P4_109926_41646  | NW_004515640.1 | Scaffold9   | 41646                   | CC                              | TT              | 1946912859               |
| SNP_P4_109927_76101  | NW_004515640.1 | Scaffold9   | 76101                   | AA                              | GG              | 1946912861               |
| SNP_P4_109928_76109  | NW_004515640.1 | Scaffold9   | 76109                   | GG                              | AA              | 1946912863               |
| SNP_P4_109929_76110  | NW_004515640.1 | Scaffold9   | 76110                   | GG                              | AA              | 1946912865               |
| SNP_P4_109930_76208  | NW_004515640.1 | Scaffold9   | 76208                   | CC                              | GG              | 1946912867               |
| SNP_P4_109931_76398  | NW_004515640.1 | Scaffold9   | 76398                   | AA                              | CC              | 1946912870               |
| SNP_P4_109932_76412  | NW_004515640.1 | Scaffold9   | 76412                   | AA                              | GG              | 1946912872               |
| SNP_P4_109933_76908  | NW_004515640.1 | Scaffold9   | 76908                   | GG                              | AA              | 1946912874               |
| SNP_P4_109934_91948  | NW_004515640.1 | Scaffold9   | 91948                   | TT                              | AA              | 1946912876               |

| SNPs IDs            | Chromosome IDs | Chromosomes | Physical positions (bp) | CDC Frontier (Reference genome) | (ILWC46 & LPNB) | NCBI SNPdb Accession IDs |
|---------------------|----------------|-------------|-------------------------|---------------------------------|-----------------|--------------------------|
| SNP_P4_109935_94254 | NW_004515640.1 | Scaffold9   | 94254                   | GG                              | AA              | 1946912878               |
| SNP_P4_109936_97339 | NW_004515640.1 | Scaffold9   | 97339                   | TT                              | GG              | 1946912879               |
| SNP_P4_109937_97372 | NW_004515640.1 | Scaffold9   | 97372                   | GG                              | AA              | 1946912880               |
| SNP_P4_109938_97386 | NW_004515640.1 | Scaffold9   | 97386                   | GG                              | AA              | 1946912881               |
| SNP_P4_109939_97603 | NW_004515640.1 | Scaffold9   | 97603                   | GG                              | AA              | 1946912883               |
| SNP_P4_109940_97606 | NW_004515640.1 | Scaffold9   | 97606                   | TT                              | CC              | 1946912885               |
| SNP_P4_109941_97696 | NW_004515640.1 | Scaffold9   | 97696                   | GG                              | AA              | 1946912887               |
| SNP_P4_109942_8775  | NW_004515641.1 | Scaffold10  | 8775                    | TT                              | CC              | 1946912889               |
| SNP_P4_109945_19823 | NW_004515641.1 | Scaffold10  | 19823                   | AA                              | CC              | 1946912891               |
| SNP_P4_109946_19910 | NW_004515641.1 | Scaffold10  | 19910                   | CC                              | TT              | 1946912894               |
| SNP_P4_109947_20314 | NW_004515641.1 | Scaffold10  | 20314                   | CC                              | TT              | 1946912896               |
| SNP_P4_109948_23377 | NW_004515641.1 | Scaffold10  | 23377                   | CC                              | AA              | 1946912898               |
| SNP_P4_109949_23738 | NW_004515641.1 | Scaffold10  | 23738                   | GG                              | AA              | 1946912900               |
| SNP_P4_109950_23757 | NW_004515641.1 | Scaffold10  | 23757                   | TT                              | CC              | 1946912902               |
| SNP_P4_109951_34142 | NW_004515641.1 | Scaffold10  | 34142                   | TT                              | AA              | 1946912904               |
| SNP_P4_109952_34550 | NW_004515641.1 | Scaffold10  | 34550                   | TT                              | CC              | 1946912906               |
| SNP_P4_109953_34624 | NW_004515641.1 | Scaffold10  | 34624                   | CC                              | TT              | 1946912908               |
| SNP_P4_109954_34629 | NW_004515641.1 | Scaffold10  | 34629                   | CC                              | TT              | 1946912910               |
| SNP_P4_109955_54598 | NW_004515641.1 | Scaffold10  | 54598                   | AA                              | GG              | 1946912912               |
| SNP_P4_109956_54602 | NW_004515641.1 | Scaffold10  | 54602                   | CC                              | TT              | 1946912914               |
| SNP_P4_109957_54606 | NW_004515641.1 | Scaffold10  | 54606                   | CC                              | TT              | 1946912916               |
| SNP_P4_109958_54607 | NW_004515641.1 | Scaffold10  | 54607                   | CC                              | GG              | 1946912918               |
| SNP_P4_109959_54618 | NW_004515641.1 | Scaffold10  | 54618                   | TT                              | CC              | 1946912920               |
| SNP_P4_109960_55458 | NW_004515641.1 | Scaffold10  | 55458                   | TT                              | CC              | 1946912922               |
| SNP_P4_109962_70781 | NW_004515641.1 | Scaffold10  | 70781                   | AA                              | GG              | 1946912924               |
| SNP_P4_109963_87215 | NW_004515641.1 | Scaffold10  | 87215                   | CC                              | AA              | 1946912926               |
| SNP_P4_109964_87401 | NW_004515641.1 | Scaffold10  | 87401                   | TT                              | CC              | 1946912928               |
| SNP_P4_109965_87411 | NW_004515641.1 | Scaffold10  | 87411                   | TT                              | CC              | 1946912930               |
| SNP_P4_109966_87424 | NW_004515641.1 | Scaffold10  | 87424                   | AA                              | GG              | 1946912932               |
| SNP_P4_109967_87462 | NW_004515641.1 | Scaffold10  | 87462                   | CC                              | AA              | 1946912934               |
| SNP_P4_109968_87763 | NW_004515641.1 | Scaffold10  | 87763                   | AA                              | GG              | 1946912936               |
| SNP_P4_109969_87818 | NW_004515641.1 | Scaffold10  | 87818                   | AA                              | GG              | 1946912938               |
| SNP_P4_109970_89547 | NW_004515641.1 | Scaffold10  | 89547                   | GG                              | AA              | 1946912940               |
| SNP_P4_109971_89570 | NW_004515641.1 | Scaffold10  | 89570                   | TT                              | CC              | 1946912942               |
| SNP_P4_109972_89898 | NW_004515641.1 | Scaffold10  | 89898                   | AA                              | TT              | 1946912944               |
| SNP_P4_109973_89910 | NW_004515641.1 | Scaffold10  | 89910                   | TT                              | GG              | 1946912946               |
| SNP_P4_109974_89913 | NW_004515641.1 | Scaffold10  | 89913                   | GG                              | AA              | 1946912948               |
| SNP_P4_109975_89932 | NW_004515641.1 | Scaffold10  | 89932                   | TT                              | AA              | 1946912950               |
| SNP_P4_109976_89950 | NW_004515641.1 | Scaffold10  | 89950                   | CC                              | AA              | 1946912953               |
| SNP_P4_109977_91259 | NW_004515641.1 | Scaffold10  | 91259                   | GG                              | AA              | 1946912955               |
| SNP_P4_109978_91277 | NW_004515641.1 | Scaffold10  | 91277                   | AA                              | GG              | 1946912957               |
| SNP_P4_109979_91464 | NW_004515641.1 | Scaffold10  | 91464                   | AA                              | CC              | 1946912959               |



| SNPs IDs             | Chromosome IDs | Chromosomes | Physical positions (bp) | CDC Frontier (Reference genome) | (ILWC46 & LPNB) | NCBI SNPdb Accession IDs |
|----------------------|----------------|-------------|-------------------------|---------------------------------|-----------------|--------------------------|
| SNP_P4_109980_91472  | NW_004515641.1 | Scaffold10  | 91472                   | CC                              | TT              | 1946912961               |
| SNP_P4_109981_91517  | NW_004515641.1 | Scaffold10  | 91517                   | TT                              | CC              | 1946912963               |
| SNP_P4_109982_91619  | NW_004515641.1 | Scaffold10  | 91619                   | GG                              | TT              | 1946912965               |
| SNP_P4_109983_91669  | NW_004515641.1 | Scaffold10  | 91669                   | TT                              | AA              | 1946912967               |
| SNP_P4_109984_91720  | NW_004515641.1 | Scaffold10  | 91720                   | AA                              | CC              | 1946912969               |
| SNP_P4_109985_91809  | NW_004515641.1 | Scaffold10  | 91809                   | AA                              | GG              | 1946912971               |
| SNP_P4_109986_91879  | NW_004515641.1 | Scaffold10  | 91879                   | TT                              | AA              | 1946912973               |
| SNP_P4_109987_91886  | NW_004515641.1 | Scaffold10  | 91886                   | CC                              | TT              | 1946912975               |
| SNP_P4_109988_91889  | NW_004515641.1 | Scaffold10  | 91889                   | GG                              | TT              | 1946912977               |
| SNP_P4_109989_91909  | NW_004515641.1 | Scaffold10  | 91909                   | GG                              | CC              | 1946912979               |
| SNP_P4_109990_91913  | NW_004515641.1 | Scaffold10  | 91913                   | TT                              | CC              | 1946912981               |
| SNP_P4_109991_91923  | NW_004515641.1 | Scaffold10  | 91923                   | TT                              | CC              | 1946912984               |
| SNP_P4_109992_91974  | NW_004515641.1 | Scaffold10  | 91974                   | CC                              | AA              | 1946912986               |
| SNP_P4_109993_92031  | NW_004515641.1 | Scaffold10  | 92031                   | GG                              | AA              | 1946912988               |
| SNP_P4_109994_92049  | NW_004515641.1 | Scaffold10  | 92049                   | AA                              | CC              | 1946912990               |
| SNP_P4_109995_92064  | NW_004515641.1 | Scaffold10  | 92064                   | CC                              | AA              | 1946912992               |
| SNP_P4_109996_92087  | NW_004515641.1 | Scaffold10  | 92087                   | AA                              | CC              | 1946912995               |
| SNP_P4_109997_92092  | NW_004515641.1 | Scaffold10  | 92092                   | CC                              | TT              | 1946912997               |
| SNP_P4_109998_92249  | NW_004515641.1 | Scaffold10  | 92249                   | CC                              | AA              | 1946912999               |
| SNP_P4_109999_117357 | NW_004515641.1 | Scaffold10  | 117357                  | AA                              | GG              | 1946913001               |
| SNP_P4_110000_117691 | NW_004515641.1 | Scaffold10  | 117691                  | GG                              | AA              | 1946913003               |
| SNP_P4_110001_126009 | NW_004515641.1 | Scaffold10  | 126009                  | AA                              | TT              | 1946913005               |
| SNP_P4_110002_4279   | NW_004515642.1 | Scaffold11  | 4279                    | AA                              | TT              | 1946913007               |
| SNP_P4_110003_6908   | NW_004515642.1 | Scaffold11  | 6908                    | CC                              | AA              | 1946913010               |
| SNP_P4_110004_6975   | NW_004515642.1 | Scaffold11  | 6975                    | TT                              | CC              | 1946913012               |
| SNP_P4_110005_7328   | NW_004515642.1 | Scaffold11  | 7328                    | AA                              | CC              | 1946913014               |
| SNP_P4_110006_7382   | NW_004515642.1 | Scaffold11  | 7382                    | TT                              | CC              | 1946913016               |
| SNP_P4_110007_7625   | NW_004515642.1 | Scaffold11  | 7625                    | CC                              | AA              | 1946913018               |
| SNP_P4_110008_17174  | NW_004515642.1 | Scaffold11  | 17174                   | AA                              | TT              | 1946913020               |
| SNP_P4_110009_30005  | NW_004515642.1 | Scaffold11  | 30005                   | AA                              | GG              | 1946913023               |
| SNP_P4_110010_30095  | NW_004515642.1 | Scaffold11  | 30095                   | AA                              | TT              | 1946913025               |
| SNP_P4_110011_8590   | NW_004515643.1 | Scaffold12  | 8590                    | GG                              | AA              | 1946913027               |
| SNP_P4_110012_9022   | NW_004515643.1 | Scaffold12  | 9022                    | CC                              | AA              | 1946913029               |
| SNP_P4_110013_16377  | NW_004515643.1 | Scaffold12  | 16377                   | AA                              | GG              | 1946913031               |
| SNP_P4_110015_16671  | NW_004515643.1 | Scaffold12  | 16671                   | TT                              | CC              | 1946913033               |
| SNP_P4_110016_16673  | NW_004515643.1 | Scaffold12  | 16673                   | GG                              | AA              | 1946913035               |
| SNP_P4_110019_58049  | NW_004515643.1 | Scaffold12  | 58049                   | AA                              | GG              | 1946913037               |
| SNP_P4_110020_99377  | NW_004515643.1 | Scaffold12  | 99377                   | AA                              | GG              | 1946913039               |
| SNP_P4_110021_101096 | NW_004515643.1 | Scaffold12  | 101096                  | GG                              | TT              | 1946913041               |
| SNP_P4_110023_101845 | NW_004515643.1 | Scaffold12  | 101845                  | GG                              | CC              | 1946913043               |
| SNP_P4_110024_110398 | NW_004515643.1 | Scaffold12  | 110398                  | AA                              | CC              | 1946913045               |
| SNP_P4_110025_110410 | NW_004515643.1 | Scaffold12  | 110410                  | CC                              | TT              | 1946913047               |

| SNPs IDs             | Chromosome IDs | Chromosomes | Physical positions (bp) | CDC Frontier (Reference genome) | (ILWC46 & LPNB) | NCBI SNPdb Accession IDs |
|----------------------|----------------|-------------|-------------------------|---------------------------------|-----------------|--------------------------|
| SNP_P4_110026_110412 | NW_004515643.1 | Scaffold12  | 110412                  | AA                              | TT              | 1946913049               |
| SNP_P4_110027_110444 | NW_004515643.1 | Scaffold12  | 110444                  | CC                              | TT              | 1946913051               |
| SNP_P4_110028_110511 | NW_004515643.1 | Scaffold12  | 110511                  | GG                              | AA              | 1946913053               |
| SNP_P4_110029_110515 | NW_004515643.1 | Scaffold12  | 110515                  | AA                              | CC              | 1946913055               |
| SNP_P4_110030_110556 | NW_004515643.1 | Scaffold12  | 110556                  | GG                              | TT              | 1946913057               |
| SNP_P4_110031_110572 | NW_004515643.1 | Scaffold12  | 110572                  | GG                              | TT              | 1946913059               |
| SNP_P4_110032_110680 | NW_004515643.1 | Scaffold12  | 110680                  | TT                              | CC              | 1946913061               |
| SNP_P4_110033_124428 | NW_004515643.1 | Scaffold12  | 124428                  | AA                              | TT              | 1946913064               |
| SNP_P4_110035_161007 | NW_004515643.1 | Scaffold12  | 161007                  | TT                              | GG              | 1946913066               |
| SNP_P4_110036_177674 | NW_004515643.1 | Scaffold12  | 177674                  | CC                              | TT              | 1946913068               |
| SNP_P4_110038_190055 | NW_004515643.1 | Scaffold12  | 190055                  | CC                              | TT              | 1946913070               |
| SNP_P4_110039_198294 | NW_004515643.1 | Scaffold12  | 198294                  | GG                              | AA              | 1946913072               |
| SNP_P4_110040_198299 | NW_004515643.1 | Scaffold12  | 198299                  | AA                              | GG              | 1946913074               |
| SNP_P4_110041_198311 | NW_004515643.1 | Scaffold12  | 198311                  | TT                              | GG              | 1946913076               |
| SNP_P4_110042_198432 | NW_004515643.1 | Scaffold12  | 198432                  | TT                              | CC              | 1946913078               |
| SNP_P4_110043_198467 | NW_004515643.1 | Scaffold12  | 198467                  | GG                              | CC              | 1946913080               |
| SNP_P4_110044_198484 | NW_004515643.1 | Scaffold12  | 198484                  | AA                              | GG              | 1946913082               |
| SNP_P4_110045_198500 | NW_004515643.1 | Scaffold12  | 198500                  | TT                              | CC              | 1946913084               |
| SNP_P4_110046_198691 | NW_004515643.1 | Scaffold12  | 198691                  | TT                              | CC              | 1946913086               |
| SNP_P4_110047_198772 | NW_004515643.1 | Scaffold12  | 198772                  | GG                              | TT              | 1946913088               |
| SNP_P4_110048_198824 | NW_004515643.1 | Scaffold12  | 198824                  | GG                              | AA              | 1946913090               |
| SNP_P4_110049_198847 | NW_004515643.1 | Scaffold12  | 198847                  | AA                              | GG              | 1946913092               |
| SNP_P4_110050_218328 | NW_004515643.1 | Scaffold12  | 218328                  | TT                              | AA              | 1946913094               |
| SNP_P4_110051_218405 | NW_004515643.1 | Scaffold12  | 218405                  | TT                              | CC              | 1946913096               |
| SNP_P4_110052_238270 | NW_004515643.1 | Scaffold12  | 238270                  | TT                              | CC              | 1946913098               |
| SNP_P4_110053_238282 | NW_004515643.1 | Scaffold12  | 238282                  | AA                              | GG              | 1946913100               |
| SNP_P4_110054_239915 | NW_004515643.1 | Scaffold12  | 239915                  | AA                              | CC              | 1946913102               |
| SNP_P4_110055_245074 | NW_004515643.1 | Scaffold12  | 245074                  | TT                              | CC              | 1946913104               |
| SNP_P4_110056_245153 | NW_004515643.1 | Scaffold12  | 245153                  | CC                              | GG              | 1946913106               |
| SNP_P4_110057_245462 | NW_004515643.1 | Scaffold12  | 245462                  | TT                              | GG              | 1946913108               |
| SNP_P4_110058_249557 | NW_004515643.1 | Scaffold12  | 249557                  | AA                              | TT              | 1946913110               |
| SNP_P4_110059_275936 | NW_004515643.1 | Scaffold12  | 275936                  | AA                              | TT              | 1946913112               |
| SNP_P4_110060_275947 | NW_004515643.1 | Scaffold12  | 275947                  | TT                              | GG              | 1946913115               |
| SNP_P4_110061_275953 | NW_004515643.1 | Scaffold12  | 275953                  | TT                              | AA              | 1946913117               |
| SNP_P4_110062_275955 | NW_004515643.1 | Scaffold12  | 275955                  | GG                              | TT              | 1946913119               |
| SNP_P4_110064_292813 | NW_004515643.1 | Scaffold12  | 292813                  | AA                              | GG              | 1946913121               |
| SNP_P4_110065_293027 | NW_004515643.1 | Scaffold12  | 293027                  | CC                              | TT              | 1946913123               |
| SNP_P4_110066_296029 | NW_004515643.1 | Scaffold12  | 296029                  | GG                              | AA              | 1946913125               |
| SNP_P4_110067_296054 | NW_004515643.1 | Scaffold12  | 296054                  | AA                              | GG              | 1946913127               |
| SNP_P4_110068_296064 | NW_004515643.1 | Scaffold12  | 296064                  | AA                              | GG              | 1946913129               |
| SNP_P4_110069_296078 | NW_004515643.1 | Scaffold12  | 296078                  | GG                              | TT              | 1946913131               |
| SNP_P4_110070_296079 | NW_004515643.1 | Scaffold12  | 296079                  | CC                              | TT              | 1946913133               |

| SNPs IDs             | Chromosome IDs | Chromosomes | Physical positions (bp) | CDC Frontier (Reference genome) | (ILWC46 & LPNB) | NCBI SNPdb Accession IDs |
|----------------------|----------------|-------------|-------------------------|---------------------------------|-----------------|--------------------------|
| SNP_P4_110071_296104 | NW_004515643.1 | Scaffold12  | 296104                  | CC                              | TT              | 1946913135               |
| SNP_P4_110072_296120 | NW_004515643.1 | Scaffold12  | 296120                  | GG                              | AA              | 1946913137               |
| SNP_P4_110073_296247 | NW_004515643.1 | Scaffold12  | 296247                  | AA                              | GG              | 1946913139               |
| SNP_P4_110074_296357 | NW_004515643.1 | Scaffold12  | 296357                  | AA                              | GG              | 1946913141               |
| SNP_P4_110075_296444 | NW_004515643.1 | Scaffold12  | 296444                  | GG                              | AA              | 1946913143               |
| SNP_P4_110076_296449 | NW_004515643.1 | Scaffold12  | 296449                  | AA                              | GG              | 1946913145               |
| SNP_P4_110077_296480 | NW_004515643.1 | Scaffold12  | 296480                  | TT                              | AA              | 1946913147               |
| SNP_P4_110078_296500 | NW_004515643.1 | Scaffold12  | 296500                  | TT                              | GG              | 1946913149               |
| SNP_P4_110079_296528 | NW_004515643.1 | Scaffold12  | 296528                  | TT                              | CC              | 1946913151               |
| SNP_P4_110080_296538 | NW_004515643.1 | Scaffold12  | 296538                  | TT                              | CC              | 1946913153               |
| SNP_P4_110081_296582 | NW_004515643.1 | Scaffold12  | 296582                  | TT                              | CC              | 1946913155               |
| SNP_P4_110083_304973 | NW_004515643.1 | Scaffold12  | 304973                  | TT                              | CC              | 1946913157               |
| SNP_P4_110084_305476 | NW_004515643.1 | Scaffold12  | 305476                  | AA                              | GG              | 1946913159               |
| SNP_P4_110085_305478 | NW_004515643.1 | Scaffold12  | 305478                  | AA                              | GG              | 1946913161               |
| SNP_P4_110086_307138 | NW_004515643.1 | Scaffold12  | 307138                  | GG                              | AA              | 1946913163               |
| SNP_P4_110087_344147 | NW_004515643.1 | Scaffold12  | 344147                  | CC                              | TT              | 1946913165               |
| SNP_P4_110088_3143   | NW_004515644.1 | Scaffold13  | 3143                    | CC                              | TT              | 1946913168               |
| SNP_P4_110089_3419   | NW_004515644.1 | Scaffold13  | 3419                    | GG                              | CC              | 1946913170               |
| SNP_P4_110090_3481   | NW_004515644.1 | Scaffold13  | 3481                    | TT                              | AA              | 1946913172               |
| SNP_P4_110091_3505   | NW_004515644.1 | Scaffold13  | 3505                    | TT                              | AA              | 1946913174               |
| SNP_P4_110092_5608   | NW_004515644.1 | Scaffold13  | 5608                    | TT                              | GG              | 1946913176               |
| SNP_P4_110093_5637   | NW_004515644.1 | Scaffold13  | 5637                    | CC                              | GG              | 1946913178               |
| SNP_P4_110094_9232   | NW_004515644.1 | Scaffold13  | 9232                    | TT                              | GG              | 1946913180               |
| SNP_P4_110095_9312   | NW_004515644.1 | Scaffold13  | 9312                    | GG                              | AA              | 1946913182               |
| SNP_P4_110096_16820  | NW_004515644.1 | Scaffold13  | 16820                   | TT                              | AA              | 1946913184               |
| SNP_P4_110097_16886  | NW_004515644.1 | Scaffold13  | 16886                   | TT                              | AA              | 1946913186               |
| SNP_P4_110098_16890  | NW_004515644.1 | Scaffold13  | 16890                   | TT                              | CC              | 1946913188               |
| SNP_P4_110099_16956  | NW_004515644.1 | Scaffold13  | 16956                   | GG                              | CC              | 1946913190               |
| SNP_P4_110100_16980  | NW_004515644.1 | Scaffold13  | 16980                   | TT                              | CC              | 1946913192               |
| SNP_P4_110101_16992  | NW_004515644.1 | Scaffold13  | 16992                   | TT                              | CC              | 1946913194               |
| SNP_P4_110102_17080  | NW_004515644.1 | Scaffold13  | 17080                   | CC                              | AA              | 1946913196               |
| SNP_P4_110103_17081  | NW_004515644.1 | Scaffold13  | 17081                   | TT                              | CC              | 1946913198               |
| SNP_P4_110104_17127  | NW_004515644.1 | Scaffold13  | 17127                   | AA                              | TT              | 1946913200               |
| SNP_P4_110105_17369  | NW_004515644.1 | Scaffold13  | 17369                   | TT                              | AA              | 1946913202               |
| SNP_P4_110106_22753  | NW_004515644.1 | Scaffold13  | 22753                   | AA                              | TT              | 1946913204               |
| SNP_P4_110107_22890  | NW_004515644.1 | Scaffold13  | 22890                   | TT                              | CC              | 1946913206               |
| SNP_P4_110108_22968  | NW_004515644.1 | Scaffold13  | 22968                   | TT                              | GG              | 1946913208               |
| SNP_P4_110109_26321  | NW_004515644.1 | Scaffold13  | 26321                   | TT                              | GG              | 1946913210               |
| SNP_P4_110110_26341  | NW_004515644.1 | Scaffold13  | 26341                   | AA                              | GG              | 1946913212               |
| SNP_P4_110111_26352  | NW_004515644.1 | Scaffold13  | 26352                   | TT                              | AA              | 1946913214               |
| SNP_P4_110112_26398  | NW_004515644.1 | Scaffold13  | 26398                   | CC                              | GG              | 1946913216               |
| SNP_P4_110113_26400  | NW_004515644.1 | Scaffold13  | 26400                   | CC                              | GG              | 1946913218               |

| SNPs IDs            | Chromosome IDs | Chromosomes | Physical positions (bp) | CDC Frontier (Reference genome) | (ILWC46 & LPNB) | NCBI SNPdb Accession IDs |
|---------------------|----------------|-------------|-------------------------|---------------------------------|-----------------|--------------------------|
| SNP_P4_110114_26629 | NW_004515644.1 | Scaffold13  | 26629                   | TT                              | AA              | 1946913220               |
| SNP_P4_110115_26649 | NW_004515644.1 | Scaffold13  | 26649                   | TT                              | CC              | 1946913222               |
| SNP_P4_110116_26665 | NW_004515644.1 | Scaffold13  | 26665                   | CC                              | TT              | 1946913224               |
| SNP_P4_110117_26666 | NW_004515644.1 | Scaffold13  | 26666                   | CC                              | AA              | 1946913226               |
| SNP_P4_110118_26690 | NW_004515644.1 | Scaffold13  | 26690                   | AA                              | GG              | 1946913228               |
| SNP_P4_110119_26794 | NW_004515644.1 | Scaffold13  | 26794                   | CC                              | GG              | 1946913230               |
| SNP_P4_110120_32946 | NW_004515644.1 | Scaffold13  | 32946                   | CC                              | TT              | 1946913232               |
| SNP_P4_110121_32987 | NW_004515644.1 | Scaffold13  | 32987                   | AA                              | TT              | 1946913234               |
| SNP_P4_110122_33032 | NW_004515644.1 | Scaffold13  | 33032                   | AA                              | GG              | 1946913236               |
| SNP_P4_110123_33049 | NW_004515644.1 | Scaffold13  | 33049                   | CC                              | TT              | 1946913238               |
| SNP_P4_110124_33061 | NW_004515644.1 | Scaffold13  | 33061                   | GG                              | AA              | 1946913240               |
| SNP_P4_110125_33074 | NW_004515644.1 | Scaffold13  | 33074                   | CC                              | GG              | 1946913242               |
| SNP_P4_110126_33098 | NW_004515644.1 | Scaffold13  | 33098                   | AA                              | TT              | 1946913244               |
| SNP_P4_110127_33099 | NW_004515644.1 | Scaffold13  | 33099                   | TT                              | CC              | 1946913246               |
| SNP_P4_110128_33103 | NW_004515644.1 | Scaffold13  | 33103                   | TT                              | CC              | 1946913248               |
| SNP_P4_110129_33140 | NW_004515644.1 | Scaffold13  | 33140                   | AA                              | GG              | 1946913250               |
| SNP_P4_110130_33150 | NW_004515644.1 | Scaffold13  | 33150                   | AA                              | GG              | 1946913252               |
| SNP_P4_110131_33178 | NW_004515644.1 | Scaffold13  | 33178                   | AA                              | GG              | 1946913254               |
| SNP_P4_110132_33182 | NW_004515644.1 | Scaffold13  | 33182                   | GG                              | AA              | 1946913256               |
| SNP_P4_110133_33375 | NW_004515644.1 | Scaffold13  | 33375                   | CC                              | TT              | 1946913258               |
| SNP_P4_110134_33380 | NW_004515644.1 | Scaffold13  | 33380                   | CC                              | AA              | 1946913260               |
| SNP_P4_110135_33427 | NW_004515644.1 | Scaffold13  | 33427                   | CC                              | TT              | 1946913262               |
| SNP_P4_110136_33432 | NW_004515644.1 | Scaffold13  | 33432                   | AA                              | CC              | 1946913264               |
| SNP_P4_110137_33470 | NW_004515644.1 | Scaffold13  | 33470                   | CC                              | AA              | 1946913266               |
| SNP_P4_110138_33806 | NW_004515644.1 | Scaffold13  | 33806                   | CC                              | AA              | 1946913268               |
| SNP_P4_110139_40156 | NW_004515644.1 | Scaffold13  | 40156                   | AA                              | CC              | 1946913271               |
| SNP_P4_110140_44106 | NW_004515644.1 | Scaffold13  | 44106                   | AA                              | GG              | 1946913273               |
| SNP_P4_110141_51669 | NW_004515644.1 | Scaffold13  | 51669                   | TT                              | AA              | 1946913275               |
| SNP_P4_110142_58616 | NW_004515644.1 | Scaffold13  | 58616                   | TT                              | AA              | 1946913277               |
| SNP_P4_110143_63588 | NW_004515644.1 | Scaffold13  | 63588                   | CC                              | TT              | 1946913279               |
| SNP_P4_110144_65550 | NW_004515644.1 | Scaffold13  | 65550                   | AA                              | GG              | 1946913281               |
| SNP_P4_110145_70732 | NW_004515644.1 | Scaffold13  | 70732                   | AA                              | GG              | 1946913283               |
| SNP_P4_110146_70956 | NW_004515644.1 | Scaffold13  | 70956                   | CC                              | AA              | 1946913285               |
| SNP_P4_110147_3502  | NW_004515645.1 | Scaffold15  | 3502                    | GG                              | AA              | 1946913287               |
| SNP_P4_110148_8745  | NW_004515645.1 | Scaffold15  | 8745                    | TT                              | CC              | 1946913289               |
| SNP_P4_110149_13473 | NW_004515645.1 | Scaffold15  | 13473                   | AA                              | TT              | 1946913291               |
| SNP_P4_110150_13497 | NW_004515645.1 | Scaffold15  | 13497                   | CC                              | TT              | 1946913293               |
| SNP_P4_110151_13597 | NW_004515645.1 | Scaffold15  | 13597                   | AA                              | CC              | 1946913295               |
| SNP_P4_110152_13810 | NW_004515645.1 | Scaffold15  | 13810                   | TT                              | GG              | 1946913297               |
| SNP_P4_110153_13816 | NW_004515645.1 | Scaffold15  | 13816                   | TT                              | CC              | 1946913299               |
| SNP_P4_110154_13828 | NW_004515645.1 | Scaffold15  | 13828                   | GG                              | AA              | 1946913301               |
| SNP_P4_110156_13900 | NW_004515645.1 | Scaffold15  | 13900                   | GG                              | AA              | 1946913303               |

| SNPs IDs             | Chromosome IDs | Chromosomes | Physical positions (bp) | CDC Frontier (Reference genome) | (ILWC46 & LPNB) | NCBI SNPdb Accession IDs |
|----------------------|----------------|-------------|-------------------------|---------------------------------|-----------------|--------------------------|
| SNP_P4_110157_13901  | NW_004515645.1 | Scaffold15  | 13901                   | CC                              | GG              | 1946913305               |
| SNP_P4_110158_13926  | NW_004515645.1 | Scaffold15  | 13926                   | GG                              | CC              | 1946913307               |
| SNP_P4_110159_19612  | NW_004515645.1 | Scaffold15  | 19612                   | GG                              | AA              | 1946913309               |
| SNP_P4_110160_20077  | NW_004515645.1 | Scaffold15  | 20077                   | TT                              | CC              | 1946913311               |
| SNP_P4_110161_20094  | NW_004515645.1 | Scaffold15  | 20094                   | AA                              | TT              | 1946913313               |
| SNP_P4_110162_20243  | NW_004515645.1 | Scaffold15  | 20243                   | CC                              | AA              | 1946913315               |
| SNP_P4_110163_20276  | NW_004515645.1 | Scaffold15  | 20276                   | GG                              | TT              | 1946913317               |
| SNP_P4_110164_20290  | NW_004515645.1 | Scaffold15  | 20290                   | TT                              | GG              | 1946913319               |
| SNP_P4_110165_20336  | NW_004515645.1 | Scaffold15  | 20336                   | CC                              | TT              | 1946913321               |
| SNP_P4_110166_27464  | NW_004515645.1 | Scaffold15  | 27464                   | GG                              | TT              | 1946913323               |
| SNP_P4_110167_27721  | NW_004515645.1 | Scaffold15  | 27721                   | AA                              | GG              | 1946913326               |
| SNP_P4_110168_28931  | NW_004515645.1 | Scaffold15  | 28931                   | AA                              | CC              | 1946913328               |
| SNP_P4_110169_28944  | NW_004515645.1 | Scaffold15  | 28944                   | AA                              | TT              | 1946913330               |
| SNP_P4_110170_28991  | NW_004515645.1 | Scaffold15  | 28991                   | GG                              | AA              | 1946913332               |
| SNP_P4_110171_32233  | NW_004515645.1 | Scaffold15  | 32233                   | TT                              | CC              | 1946913334               |
| SNP_P4_110172_37986  | NW_004515645.1 | Scaffold15  | 37986                   | TT                              | AA              | 1946913336               |
| SNP_P4_110173_38055  | NW_004515645.1 | Scaffold15  | 38055                   | GG                              | AA              | 1946913338               |
| SNP_P4_110174_38284  | NW_004515645.1 | Scaffold15  | 38284                   | GG                              | AA              | 1946913340               |
| SNP_P4_110176_46923  | NW_004515645.1 | Scaffold15  | 46923                   | GG                              | TT              | 1946913342               |
| SNP_P4_110177_49598  | NW_004515645.1 | Scaffold15  | 49598                   | TT                              | CC              | 1946913344               |
| SNP_P4_110178_49612  | NW_004515645.1 | Scaffold15  | 49612                   | CC                              | TT              | 1946913346               |
| SNP_P4_110179_49634  | NW_004515645.1 | Scaffold15  | 49634                   | AA                              | TT              | 1946913348               |
| SNP_P4_110180_49655  | NW_004515645.1 | Scaffold15  | 49655                   | TT                              | CC              | 1946913350               |
| SNP_P4_110181_63175  | NW_004515645.1 | Scaffold15  | 63175                   | AA                              | CC              | 1946913352               |
| SNP_P4_110182_63193  | NW_004515645.1 | Scaffold15  | 63193                   | GG                              | CC              | 1946913354               |
| SNP_P4_110183_63258  | NW_004515645.1 | Scaffold15  | 63258                   | GG                              | AA              | 1946913356               |
| SNP_P4_110184_63271  | NW_004515645.1 | Scaffold15  | 63271                   | TT                              | CC              | 1946913358               |
| SNP_P4_110185_67294  | NW_004515645.1 | Scaffold15  | 67294                   | AA                              | TT              | 1946913360               |
| SNP_P4_110186_69890  | NW_004515645.1 | Scaffold15  | 69890                   | CC                              | GG              | 1946913362               |
| SNP_P4_110187_69923  | NW_004515645.1 | Scaffold15  | 69923                   | TT                              | CC              | 1946913364               |
| SNP_P4_110188_70346  | NW_004515645.1 | Scaffold15  | 70346                   | CC                              | TT              | 1946913366               |
| SNP_P4_110189_70348  | NW_004515645.1 | Scaffold15  | 70348                   | GG                              | AA              | 1946913368               |
| SNP_P4_110190_70366  | NW_004515645.1 | Scaffold15  | 70366                   | GG                              | AA              | 1946913370               |
| SNP_P4_110191_70477  | NW_004515645.1 | Scaffold15  | 70477                   | GG                              | AA              | 1946913372               |
| SNP_P4_110192_70541  | NW_004515645.1 | Scaffold15  | 70541                   | AA                              | GG              | 1946913374               |
| SNP_P4_110193_70549  | NW_004515645.1 | Scaffold15  | 70549                   | AA                              | GG              | 1946913376               |
| SNP_P4_110194_70569  | NW_004515645.1 | Scaffold15  | 70569                   | GG                              | CC              | 1946913378               |
| SNP_P4_110195_70618  | NW_004515645.1 | Scaffold15  | 70618                   | GG                              | AA              | 1946913380               |
| SNP_P4_110196_70662  | NW_004515645.1 | Scaffold15  | 70662                   | GG                              | AA              | 1946913382               |
| SNP_P4_110199_92776  | NW_004515645.1 | Scaffold15  | 92776                   | AA                              | TT              | 1946913384               |
| SNP_P4_110200_98159  | NW_004515645.1 | Scaffold15  | 98159                   | AA                              | TT              | 1946913386               |
| SNP_P4_110202_107588 | NW_004515645.1 | Scaffold15  | 107588                  | TT                              | AA              | 1946913388               |

| SNPs IDs             | Chromosome IDs | Chromosomes | Physical positions (bp) | CDC Frontier (Reference genome) | (ILWC46 & LPNB) | NCBI SNPdb Accession IDs |
|----------------------|----------------|-------------|-------------------------|---------------------------------|-----------------|--------------------------|
| SNP_P4_110203_115221 | NW_004515645.1 | Scaffold15  | 115221                  | GG                              | AA              | 1946913390               |
| SNP_P4_110204_115224 | NW_004515645.1 | Scaffold15  | 115224                  | GG                              | TT              | 1946913392               |
| SNP_P4_110206_134325 | NW_004515645.1 | Scaffold15  | 134325                  | TT                              | CC              | 1946913394               |
| SNP_P4_110207_134420 | NW_004515645.1 | Scaffold15  | 134420                  | CC                              | AA              | 1946913396               |
| SNP_P4_110208_140899 | NW_004515645.1 | Scaffold15  | 140899                  | GG                              | CC              | 1946913398               |
| SNP_P4_110209_141027 | NW_004515645.1 | Scaffold15  | 141027                  | AA                              | GG              | 1946913400               |
| SNP_P4_110210_143706 | NW_004515645.1 | Scaffold15  | 143706                  | GG                              | AA              | 1946913402               |
| SNP_P4_110213_144014 | NW_004515645.1 | Scaffold15  | 144014                  | TT                              | AA              | 1946913404               |
| SNP_P4_110214_144076 | NW_004515645.1 | Scaffold15  | 144076                  | GG                              | AA              | 1946913406               |
| SNP_P4_110216_158486 | NW_004515645.1 | Scaffold15  | 158486                  | AA                              | CC              | 1946913408               |
| SNP_P4_110217_158760 | NW_004515645.1 | Scaffold15  | 158760                  | AA                              | GG              | 1946913410               |
| SNP_P4_110218_158810 | NW_004515645.1 | Scaffold15  | 158810                  | AA                              | TT              | 1946913412               |
| SNP_P4_110219_158819 | NW_004515645.1 | Scaffold15  | 158819                  | AA                              | GG              | 1946913414               |
| SNP_P4_110220_158960 | NW_004515645.1 | Scaffold15  | 158960                  | AA                              | TT              | 1946913416               |
| SNP_P4_110221_159714 | NW_004515645.1 | Scaffold15  | 159714                  | CC                              | GG              | 1946913418               |
| SNP_P4_110222_165358 | NW_004515645.1 | Scaffold15  | 165358                  | GG                              | AA              | 1946913420               |
| SNP_P4_110223_165381 | NW_004515645.1 | Scaffold15  | 165381                  | TT                              | AA              | 1946913422               |
| SNP_P4_110224_165677 | NW_004515645.1 | Scaffold15  | 165677                  | AA                              | GG              | 1946913424               |
| SNP_P4_110225_471    | NW_004515646.1 | Scaffold16  | 471                     | CC                              | AA              | 1946913426               |
| SNP_P4_110226_827    | NW_004515646.1 | Scaffold16  | 827                     | TT                              | GG              | 1946913428               |
| SNP_P4_110227_894    | NW_004515646.1 | Scaffold16  | 894                     | TT                              | CC              | 1946913430               |
| SNP_P4_110228_896    | NW_004515646.1 | Scaffold16  | 896                     | GG                              | AA              | 1946913432               |
| SNP_P4_110229_912    | NW_004515646.1 | Scaffold16  | 912                     | GG                              | AA              | 1946913434               |
| SNP_P4_110230_924    | NW_004515646.1 | Scaffold16  | 924                     | AA                              | GG              | 1946913436               |
| SNP_P4_110231_949    | NW_004515646.1 | Scaffold16  | 949                     | AA                              | GG              | 1946913438               |
| SNP_P4_110232_992    | NW_004515646.1 | Scaffold16  | 992                     | AA                              | CC              | 1946913440               |
| SNP_P4_110233_1009   | NW_004515646.1 | Scaffold16  | 1009                    | TT                              | GG              | 1946913442               |
| SNP_P4_110234_1068   | NW_004515646.1 | Scaffold16  | 1068                    | TT                              | CC              | 1946913444               |
| SNP_P4_110235_1088   | NW_004515646.1 | Scaffold16  | 1088                    | TT                              | AA              | 1946913446               |
| SNP_P4_110236_1292   | NW_004515646.1 | Scaffold16  | 1292                    | GG                              | AA              | 1946913448               |
| SNP_P4_110237_4600   | NW_004515646.1 | Scaffold16  | 4600                    | AA                              | CC              | 1946913450               |
| SNP_P4_110238_4681   | NW_004515646.1 | Scaffold16  | 4681                    | AA                              | GG              | 1946913452               |
| SNP_P4_110239_4687   | NW_004515646.1 | Scaffold16  | 4687                    | AA                              | CC              | 1946913454               |
| SNP_P4_110240_15440  | NW_004515646.1 | Scaffold16  | 15440                   | TT                              | AA              | 1946913456               |
| SNP_P4_110241_15454  | NW_004515646.1 | Scaffold16  | 15454                   | CC                              | TT              | 1946913458               |
| SNP_P4_110242_5677   | NW_004515647.1 | Scaffold17  | 5677                    | TT                              | CC              | 1946913460               |
| SNP_P4_110243_5720   | NW_004515647.1 | Scaffold17  | 5720                    | AA                              | GG              | 1946913462               |
| SNP_P4_110244_31792  | NW_004515647.1 | Scaffold17  | 31792                   | GG                              | CC              | 1946913464               |
| SNP_P4_110245_31801  | NW_004515647.1 | Scaffold17  | 31801                   | AA                              | TT              | 1946913466               |
| SNP_P4_110246_40299  | NW_004515647.1 | Scaffold17  | 40299                   | CC                              | GG              | 1946913468               |
| SNP_P4_110248_75649  | NW_004515647.1 | Scaffold17  | 75649                   | TT                              | CC              | 1946913470               |
| SNP_P4_110249_95083  | NW_004515647.1 | Scaffold17  | 95083                   | TT                              | AA              | 1946913472               |

| SNPs IDs             | Chromosome IDs | Chromosomes | Physical positions (bp) | CDC Frontier (Reference genome) | (ILWC46 & LPNB) | NCBI SNPdb Accession IDs |
|----------------------|----------------|-------------|-------------------------|---------------------------------|-----------------|--------------------------|
| SNP_P4_110250_95255  | NW_004515647.1 | Scaffold17  | 95255                   | AA                              | GG              | 1946913474               |
| SNP_P4_110251_95280  | NW_004515647.1 | Scaffold17  | 95280                   | CC                              | AA              | 1946913477               |
| SNP_P4_110252_95285  | NW_004515647.1 | Scaffold17  | 95285                   | TT                              | CC              | 1946913479               |
| SNP_P4_110253_95508  | NW_004515647.1 | Scaffold17  | 95508                   | AA                              | CC              | 1946913481               |
| SNP_P4_110254_95598  | NW_004515647.1 | Scaffold17  | 95598                   | CC                              | TT              | 1946913483               |
| SNP_P4_110255_99768  | NW_004515647.1 | Scaffold17  | 99768                   | AA                              | TT              | 1946913485               |
| SNP_P4_110256_99790  | NW_004515647.1 | Scaffold17  | 99790                   | CC                              | TT              | 1946913487               |
| SNP_P4_110257_99811  | NW_004515647.1 | Scaffold17  | 99811                   | GG                              | AA              | 1946913489               |
| SNP_P4_110258_99826  | NW_004515647.1 | Scaffold17  | 99826                   | AA                              | TT              | 1946913491               |
| SNP_P4_110259_99833  | NW_004515647.1 | Scaffold17  | 99833                   | TT                              | CC              | 1946913493               |
| SNP_P4_110261_99964  | NW_004515647.1 | Scaffold17  | 99964                   | GG                              | AA              | 1946913495               |
| SNP_P4_110262_99997  | NW_004515647.1 | Scaffold17  | 99997                   | AA                              | TT              | 1946913497               |
| SNP_P4_110263_101846 | NW_004515647.1 | Scaffold17  | 101846                  | TT                              | CC              | 1946913499               |
| SNP_P4_110264_103440 | NW_004515647.1 | Scaffold17  | 103440                  | GG                              | AA              | 1946913501               |
| SNP_P4_110265_103501 | NW_004515647.1 | Scaffold17  | 103501                  | AA                              | GG              | 1946913503               |
| SNP_P4_110266_125114 | NW_004515647.1 | Scaffold17  | 125114                  | CC                              | GG              | 1946913505               |
| SNP_P4_110267_125545 | NW_004515647.1 | Scaffold17  | 125545                  | CC                              | TT              | 1946913507               |
| SNP_P4_110268_125547 | NW_004515647.1 | Scaffold17  | 125547                  | GG                              | TT              | 1946913509               |
| SNP_P4_110269_125584 | NW_004515647.1 | Scaffold17  | 125584                  | TT                              | CC              | 1946913511               |
| SNP_P4_110270_125586 | NW_004515647.1 | Scaffold17  | 125586                  | GG                              | AA              | 1946913513               |
| SNP_P4_110271_125712 | NW_004515647.1 | Scaffold17  | 125712                  | TT                              | CC              | 1946913515               |
| SNP_P4_110272_128083 | NW_004515647.1 | Scaffold17  | 128083                  | TT                              | GG              | 1946913517               |
| SNP_P4_110273_128304 | NW_004515647.1 | Scaffold17  | 128304                  | TT                              | CC              | 1946913520               |
| SNP_P4_110274_128662 | NW_004515647.1 | Scaffold17  | 128662                  | GG                              | AA              | 1946913522               |
| SNP_P4_110275_128663 | NW_004515647.1 | Scaffold17  | 128663                  | CC                              | TT              | 1946913524               |
| SNP_P4_110276_128726 | NW_004515647.1 | Scaffold17  | 128726                  | TT                              | GG              | 1946913526               |
| SNP_P4_110277_128747 | NW_004515647.1 | Scaffold17  | 128747                  | CC                              | TT              | 1946913528               |
| SNP_P4_110278_134914 | NW_004515647.1 | Scaffold17  | 134914                  | CC                              | TT              | 1946913530               |
| SNP_P4_110279_135649 | NW_004515647.1 | Scaffold17  | 135649                  | GG                              | TT              | 1946913532               |
| SNP_P4_110280_135696 | NW_004515647.1 | Scaffold17  | 135696                  | CC                              | GG              | 1946913534               |
| SNP_P4_110281_135703 | NW_004515647.1 | Scaffold17  | 135703                  | GG                              | AA              | 1946913536               |
| SNP_P4_110282_139158 | NW_004515647.1 | Scaffold17  | 139158                  | CC                              | AA              | 1946913538               |
| SNP_P4_110283_142646 | NW_004515647.1 | Scaffold17  | 142646                  | TT                              | CC              | 1946913540               |
| SNP_P4_110284_142801 | NW_004515647.1 | Scaffold17  | 142801                  | GG                              | AA              | 1946913542               |
| SNP_P4_110285_143018 | NW_004515647.1 | Scaffold17  | 143018                  | CC                              | AA              | 1946913544               |
| SNP_P4_110286_143029 | NW_004515647.1 | Scaffold17  | 143029                  | TT                              | CC              | 1946913546               |
| SNP_P4_110287_143168 | NW_004515647.1 | Scaffold17  | 143168                  | CC                              | AA              | 1946913548               |
| SNP_P4_110288_145721 | NW_004515647.1 | Scaffold17  | 145721                  | TT                              | GG              | 1946913550               |
| SNP_P4_110289_145751 | NW_004515647.1 | Scaffold17  | 145751                  | TT                              | CC              | 1946913552               |
| SNP_P4_110290_145778 | NW_004515647.1 | Scaffold17  | 145778                  | AA                              | GG              | 1946913554               |
| SNP_P4_110291_146115 | NW_004515647.1 | Scaffold17  | 146115                  | AA                              | GG              | 1946913556               |
| SNP_P4_110292_146128 | NW_004515647.1 | Scaffold17  | 146128                  | AA                              | GG              | 1946913558               |

| SNPs IDs             | Chromosome IDs | Chromosomes | Physical positions (bp) | CDC Frontier (Reference genome) | (ILWC46 & LPNB) | NCBI SNPdb Accession IDs |
|----------------------|----------------|-------------|-------------------------|---------------------------------|-----------------|--------------------------|
| SNP_P4_110293_146140 | NW_004515647.1 | Scaffold17  | 146140                  | GG                              | TT              | 1946913560               |
| SNP_P4_110294_146142 | NW_004515647.1 | Scaffold17  | 146142                  | AA                              | GG              | 1946913562               |
| SNP_P4_110295_153125 | NW_004515647.1 | Scaffold17  | 153125                  | TT                              | CC              | 1946913564               |
| SNP_P4_110296_153190 | NW_004515647.1 | Scaffold17  | 153190                  | CC                              | TT              | 1946913566               |
| SNP_P4_110297_157700 | NW_004515647.1 | Scaffold17  | 157700                  | TT                              | CC              | 1946913568               |
| SNP_P4_110298_157730 | NW_004515647.1 | Scaffold17  | 157730                  | AA                              | GG              | 1946913570               |
| SNP_P4_110299_157752 | NW_004515647.1 | Scaffold17  | 157752                  | GG                              | AA              | 1946913572               |
| SNP_P4_110300_158016 | NW_004515647.1 | Scaffold17  | 158016                  | AA                              | CC              | 1946913574               |
| SNP_P4_110301_170385 | NW_004515647.1 | Scaffold17  | 170385                  | AA                              | GG              | 1946913576               |
| SNP_P4_110302_170716 | NW_004515647.1 | Scaffold17  | 170716                  | CC                              | TT              | 1946913577               |
| SNP_P4_110303_170718 | NW_004515647.1 | Scaffold17  | 170718                  | AA                              | CC              | 1946913578               |
| SNP_P4_110304_170723 | NW_004515647.1 | Scaffold17  | 170723                  | TT                              | AA              | 1946913579               |
| SNP_P4_110305_178063 | NW_004515647.1 | Scaffold17  | 178063                  | TT                              | AA              | 1946913580               |
| SNP_P4_110306_204630 | NW_004515647.1 | Scaffold17  | 204630                  | TT                              | CC              | 1946913581               |
| SNP_P4_110307_204631 | NW_004515647.1 | Scaffold17  | 204631                  | GG                              | AA              | 1946913582               |
| SNP_P4_110308_232065 | NW_004515647.1 | Scaffold17  | 232065                  | AA                              | TT              | 1946913583               |
| SNP_P4_110309_233541 | NW_004515647.1 | Scaffold17  | 233541                  | AA                              | TT              | 1946913584               |
| SNP_P4_110310_233595 | NW_004515647.1 | Scaffold17  | 233595                  | CC                              | TT              | 1946913585               |
| SNP_P4_110311_233659 | NW_004515647.1 | Scaffold17  | 233659                  | AA                              | GG              | 1946913586               |
| SNP_P4_110312_233820 | NW_004515647.1 | Scaffold17  | 233820                  | TT                              | CC              | 1946913587               |
| SNP_P4_110313_237969 | NW_004515647.1 | Scaffold17  | 237969                  | CC                              | TT              | 1946913588               |
| SNP_P4_110314_238026 | NW_004515647.1 | Scaffold17  | 238026                  | CC                              | GG              | 1946913589               |
| SNP_P4_110315_238441 | NW_004515647.1 | Scaffold17  | 238441                  | AA                              | GG              | 1946913590               |
| SNP_P4_110316_239765 | NW_004515647.1 | Scaffold17  | 239765                  | TT                              | AA              | 1946913592               |
| SNP_P4_110317_259107 | NW_004515647.1 | Scaffold17  | 259107                  | AA                              | CC              | 1946913594               |
| SNP_P4_110318_259109 | NW_004515647.1 | Scaffold17  | 259109                  | TT                              | AA              | 1946913596               |
| SNP_P4_110319_259114 | NW_004515647.1 | Scaffold17  | 259114                  | AA                              | GG              | 1946913598               |
| SNP_P4_110320_259151 | NW_004515647.1 | Scaffold17  | 259151                  | GG                              | TT              | 1946913600               |
| SNP_P4_110321_281977 | NW_004515647.1 | Scaffold17  | 281977                  | TT                              | GG              | 1946913602               |
| SNP_P4_110322_282039 | NW_004515647.1 | Scaffold17  | 282039                  | CC                              | TT              | 1946913604               |
| SNP_P4_110323_291830 | NW_004515647.1 | Scaffold17  | 291830                  | CC                              | TT              | 1946913606               |
| SNP_P4_110324_291917 | NW_004515647.1 | Scaffold17  | 291917                  | AA                              | TT              | 1946913608               |
| SNP_P4_110325_292010 | NW_004515647.1 | Scaffold17  | 292010                  | AA                              | TT              | 1946913610               |
| SNP_P4_110326_292068 | NW_004515647.1 | Scaffold17  | 292068                  | CC                              | TT              | 1946913612               |
| SNP_P4_110327_292224 | NW_004515647.1 | Scaffold17  | 292224                  | AA                              | GG              | 1946913614               |
| SNP_P4_110328_292267 | NW_004515647.1 | Scaffold17  | 292267                  | GG                              | AA              | 1946913616               |
| SNP_P4_110329_292273 | NW_004515647.1 | Scaffold17  | 292273                  | AA                              | CC              | 1946913618               |
| SNP_P4_110330_292274 | NW_004515647.1 | Scaffold17  | 292274                  | AA                              | GG              | 1946913620               |
| SNP_P4_110331_292593 | NW_004515647.1 | Scaffold17  | 292593                  | TT                              | GG              | 1946913622               |
| SNP_P4_110332_292796 | NW_004515647.1 | Scaffold17  | 292796                  | GG                              | AA              | 1946913624               |
| SNP_P4_110333_292869 | NW_004515647.1 | Scaffold17  | 292869                  | TT                              | CC              | 1946913626               |
| SNP_P4_110334_293110 | NW_004515647.1 | Scaffold17  | 293110                  | AA                              | TT              | 1946913628               |



| SNPs IDs             | Chromosome IDs | Chromosomes | Physical positions (bp) | CDC Frontier (Reference genome) | (ILWC46 & LPNB) | NCBI SNPdb Accession IDs |
|----------------------|----------------|-------------|-------------------------|---------------------------------|-----------------|--------------------------|
| SNP_P4_110335_293317 | NW_004515647.1 | Scaffold17  | 293317                  | AA                              | CC              | 1946913630               |
| SNP_P4_110336_294785 | NW_004515647.1 | Scaffold17  | 294785                  | TT                              | AA              | 1946913632               |
| SNP_P4_110337_294810 | NW_004515647.1 | Scaffold17  | 294810                  | AA                              | GG              | 1946913634               |
| SNP_P4_110338_295120 | NW_004515647.1 | Scaffold17  | 295120                  | GG                              | AA              | 1946913636               |
| SNP_P4_110339_296007 | NW_004515647.1 | Scaffold17  | 296007                  | GG                              | AA              | 1946913638               |
| SNP_P4_110340_296737 | NW_004515647.1 | Scaffold17  | 296737                  | CC                              | AA              | 1946913640               |
| SNP_P4_110341_296993 | NW_004515647.1 | Scaffold17  | 296993                  | TT                              | CC              | 1946913642               |
| SNP_P4_110342_297240 | NW_004515647.1 | Scaffold17  | 297240                  | GG                              | AA              | 1946913644               |
| SNP_P4_110343_297266 | NW_004515647.1 | Scaffold17  | 297266                  | TT                              | CC              | 1946913646               |
| SNP_P4_110344_297286 | NW_004515647.1 | Scaffold17  | 297286                  | TT                              | CC              | 1946913648               |
| SNP_P4_110345_297289 | NW_004515647.1 | Scaffold17  | 297289                  | CC                              | TT              | 1946913650               |
| SNP_P4_110346_297291 | NW_004515647.1 | Scaffold17  | 297291                  | TT                              | CC              | 1946913652               |
| SNP_P4_110347_297296 | NW_004515647.1 | Scaffold17  | 297296                  | TT                              | CC              | 1946913654               |
| SNP_P4_110349_13277  | NW_004515648.1 | Scaffold22  | 13277                   | TT                              | CC              | 1946913655               |
| SNP_P4_110350_13296  | NW_004515648.1 | Scaffold22  | 13296                   | CC                              | TT              | 1946913657               |
| SNP_P4_110352_24527  | NW_004515648.1 | Scaffold22  | 24527                   | AA                              | GG              | 1946913659               |
| SNP_P4_110353_24530  | NW_004515648.1 | Scaffold22  | 24530                   | CC                              | TT              | 1946913661               |
| SNP_P4_110354_24869  | NW_004515648.1 | Scaffold22  | 24869                   | AA                              | GG              | 1946913663               |
| SNP_P4_110355_24879  | NW_004515648.1 | Scaffold22  | 24879                   | TT                              | CC              | 1946913665               |
| SNP_P4_110356_24948  | NW_004515648.1 | Scaffold22  | 24948                   | AA                              | TT              | 1946913667               |
| SNP_P4_110357_25000  | NW_004515648.1 | Scaffold22  | 25000                   | CC                              | AA              | 1946913669               |
| SNP_P4_110358_25018  | NW_004515648.1 | Scaffold22  | 25018                   | GG                              | AA              | 1946913671               |
| SNP_P4_110359_25019  | NW_004515648.1 | Scaffold22  | 25019                   | TT                              | AA              | 1946913673               |
| SNP_P4_110360_29132  | NW_004515648.1 | Scaffold22  | 29132                   | TT                              | CC              | 1946913675               |
| SNP_P4_110361_29574  | NW_004515648.1 | Scaffold22  | 29574                   | AA                              | GG              | 1946913677               |
| SNP_P4_110362_32666  | NW_004515648.1 | Scaffold22  | 32666                   | TT                              | CC              | 1946913679               |
| SNP_P4_110363_34280  | NW_004515648.1 | Scaffold22  | 34280                   | TT                              | CC              | 1946913681               |
| SNP_P4_110364_34287  | NW_004515648.1 | Scaffold22  | 34287                   | GG                              | AA              | 1946913683               |
| SNP_P4_110365_34289  | NW_004515648.1 | Scaffold22  | 34289                   | AA                              | GG              | 1946913685               |
| SNP_P4_110366_34295  | NW_004515648.1 | Scaffold22  | 34295                   | AA                              | CC              | 1946913687               |
| SNP_P4_110367_34303  | NW_004515648.1 | Scaffold22  | 34303                   | AA                              | GG              | 1946913689               |
| SNP_P4_110368_34316  | NW_004515648.1 | Scaffold22  | 34316                   | TT                              | CC              | 1946913691               |
| SNP_P4_110369_34359  | NW_004515648.1 | Scaffold22  | 34359                   | AA                              | CC              | 1946913693               |
| SNP_P4_110370_34369  | NW_004515648.1 | Scaffold22  | 34369                   | TT                              | CC              | 1946913695               |
| SNP_P4_110371_34394  | NW_004515648.1 | Scaffold22  | 34394                   | AA                              | GG              | 1946913697               |
| SNP_P4_110372_34427  | NW_004515648.1 | Scaffold22  | 34427                   | CC                              | AA              | 1946913699               |
| SNP_P4_110373_34429  | NW_004515648.1 | Scaffold22  | 34429                   | GG                              | AA              | 1946913701               |
| SNP_P4_110374_34434  | NW_004515648.1 | Scaffold22  | 34434                   | TT                              | GG              | 1946913703               |
| SNP_P4_110375_34493  | NW_004515648.1 | Scaffold22  | 34493                   | TT                              | GG              | 1946913705               |
| SNP_P4_110377_34570  | NW_004515648.1 | Scaffold22  | 34570                   | CC                              | TT              | 1946913707               |
| SNP_P4_110378_34647  | NW_004515648.1 | Scaffold22  | 34647                   | GG                              | TT              | 1946913709               |
| SNP_P4_110379_34724  | NW_004515648.1 | Scaffold22  | 34724                   | TT                              | CC              | 1946913711               |

| SNPs IDs            | Chromosome IDs | Chromosomes | Physical positions (bp) | CDC Frontier (Reference genome) | (ILWC46 & LPNB) | NCBI SNPdb Accession IDs |
|---------------------|----------------|-------------|-------------------------|---------------------------------|-----------------|--------------------------|
| SNP_P4_110380_34752 | NW_004515648.1 | Scaffold22  | 34752                   | GG                              | AA              | 1946913713               |
| SNP_P4_110381_34761 | NW_004515648.1 | Scaffold22  | 34761                   | AA                              | GG              | 1946913715               |
| SNP_P4_110382_34766 | NW_004515648.1 | Scaffold22  | 34766                   | GG                              | AA              | 1946913717               |
| SNP_P4_110383_34767 | NW_004515648.1 | Scaffold22  | 34767                   | GG                              | AA              | 1946913719               |
| SNP_P4_110384_34810 | NW_004515648.1 | Scaffold22  | 34810                   | CC                              | AA              | 1946913721               |
| SNP_P4_110385_34998 | NW_004515648.1 | Scaffold22  | 34998                   | CC                              | GG              | 1946913723               |
| SNP_P4_110386_41747 | NW_004515648.1 | Scaffold22  | 41747                   | AA                              | GG              | 1946913725               |
| SNP_P4_110387_41837 | NW_004515648.1 | Scaffold22  | 41837                   | GG                              | TT              | 1946913727               |
| SNP_P4_110388_41915 | NW_004515648.1 | Scaffold22  | 41915                   | AA                              | GG              | 1946913729               |
| SNP_P4_110389_89    | NW_004515649.1 | Scaffold25  | 89                      | AA                              | GG              | 1946913731               |
| SNP_P4_110390_120   | NW_004515649.1 | Scaffold25  | 120                     | CC                              | AA              | 1946913733               |
| SNP_P4_110391_13852 | NW_004515649.1 | Scaffold25  | 13852                   | CC                              | TT              | 1946913735               |
| SNP_P4_110392_13929 | NW_004515649.1 | Scaffold25  | 13929                   | AA                              | TT              | 1946913737               |
| SNP_P4_110393_14336 | NW_004515649.1 | Scaffold25  | 14336                   | TT                              | CC              | 1946913739               |
| SNP_P4_110394_14756 | NW_004515649.1 | Scaffold25  | 14756                   | CC                              | GG              | 1946913741               |
| SNP_P4_110395_16117 | NW_004515649.1 | Scaffold25  | 16117                   | AA                              | GG              | 1946913743               |
| SNP_P4_110396_17215 | NW_004515649.1 | Scaffold25  | 17215                   | TT                              | GG              | 1946913745               |
| SNP_P4_110397_20369 | NW_004515649.1 | Scaffold25  | 20369                   | TT                              | CC              | 1946913747               |
| SNP_P4_110398_22412 | NW_004515649.1 | Scaffold25  | 22412                   | CC                              | AA              | 1946913749               |
| SNP_P4_110399_33851 | NW_004515649.1 | Scaffold25  | 33851                   | AA                              | TT              | 1946913751               |
| SNP_P4_110400_36967 | NW_004515649.1 | Scaffold25  | 36967                   | CC                              | TT              | 1946913753               |
| SNP_P4_110402_39357 | NW_004515649.1 | Scaffold25  | 39357                   | GG                              | AA              | 1946913755               |
| SNP_P4_110403_39449 | NW_004515649.1 | Scaffold25  | 39449                   | TT                              | AA              | 1946913757               |
| SNP_P4_110404_39480 | NW_004515649.1 | Scaffold25  | 39480                   | TT                              | CC              | 1946913759               |
| SNP_P4_110405_39515 | NW_004515649.1 | Scaffold25  | 39515                   | GG                              | TT              | 1946913761               |
| SNP_P4_110406_39747 | NW_004515649.1 | Scaffold25  | 39747                   | GG                              | TT              | 1946913763               |
| SNP_P4_110407_41791 | NW_004515649.1 | Scaffold25  | 41791                   | GG                              | TT              | 1946913765               |
| SNP_P4_110408_43124 | NW_004515649.1 | Scaffold25  | 43124                   | CC                              | TT              | 1946913767               |
| SNP_P4_110409_43131 | NW_004515649.1 | Scaffold25  | 43131                   | CC                              | AA              | 1946913769               |
| SNP_P4_110410_43300 | NW_004515649.1 | Scaffold25  | 43300                   | TT                              | GG              | 1946913771               |
| SNP_P4_110411_43344 | NW_004515649.1 | Scaffold25  | 43344                   | GG                              | AA              | 1946913773               |
| SNP_P4_110412_43428 | NW_004515649.1 | Scaffold25  | 43428                   | TT                              | CC              | 1946913775               |
| SNP_P4_110413_43451 | NW_004515649.1 | Scaffold25  | 43451                   | TT                              | AA              | 1946913777               |
| SNP_P4_110414_43456 | NW_004515649.1 | Scaffold25  | 43456                   | TT                              | CC              | 1946913779               |
| SNP_P4_110415_43479 | NW_004515649.1 | Scaffold25  | 43479                   | CC                              | TT              | 1946913781               |
| SNP_P4_110416_43481 | NW_004515649.1 | Scaffold25  | 43481                   | AA                              | GG              | 1946913783               |
| SNP_P4_110417_43485 | NW_004515649.1 | Scaffold25  | 43485                   | TT                              | AA              | 1946913785               |
| SNP_P4_110418_43506 | NW_004515649.1 | Scaffold25  | 43506                   | TT                              | AA              | 1946913787               |
| SNP_P4_110419_46342 | NW_004515649.1 | Scaffold25  | 46342                   | CC                              | TT              | 1946913789               |
| SNP_P4_110420_46477 | NW_004515649.1 | Scaffold25  | 46477                   | GG                              | CC              | 1946913791               |
| SNP_P4_110421_49152 | NW_004515649.1 | Scaffold25  | 49152                   | CC                              | TT              | 1946913793               |
| SNP_P4_110422_49188 | NW_004515649.1 | Scaffold25  | 49188                   | AA                              | TT              | 1946913795               |

| SNPs IDs            | Chromosome IDs | Chromosomes | Physical positions (bp) | CDC Frontier (Reference genome) | (ILWC46 & LPNB) | NCBI SNPdb Accession IDs |
|---------------------|----------------|-------------|-------------------------|---------------------------------|-----------------|--------------------------|
| SNP_P4_110423_49189 | NW_004515649.1 | Scaffold25  | 49189                   | CC                              | TT              | 1946913797               |
| SNP_P4_110424_50904 | NW_004515649.1 | Scaffold25  | 50904                   | CC                              | GG              | 1946913799               |
| SNP_P4_110425_50994 | NW_004515649.1 | Scaffold25  | 50994                   | TT                              | AA              | 1946913801               |
| SNP_P4_110426_51251 | NW_004515649.1 | Scaffold25  | 51251                   | GG                              | TT              | 1946913803               |
| SNP_P4_110427_51412 | NW_004515649.1 | Scaffold25  | 51412                   | TT                              | CC              | 1946913805               |
| SNP_P4_110428_52907 | NW_004515649.1 | Scaffold25  | 52907                   | GG                              | CC              | 1946913807               |
| SNP_P4_110429_55183 | NW_004515649.1 | Scaffold25  | 55183                   | AA                              | GG              | 1946913809               |
| SNP_P4_110430_55301 | NW_004515649.1 | Scaffold25  | 55301                   | CC                              | TT              | 1946913811               |
| SNP_P4_110431_55334 | NW_004515649.1 | Scaffold25  | 55334                   | TT                              | AA              | 1946913813               |
| SNP_P4_110432_55347 | NW_004515649.1 | Scaffold25  | 55347                   | GG                              | TT              | 1946913815               |
| SNP_P4_110433_55358 | NW_004515649.1 | Scaffold25  | 55358                   | GG                              | TT              | 1946913817               |
| SNP_P4_110434_55396 | NW_004515649.1 | Scaffold25  | 55396                   | AA                              | TT              | 1946913819               |
| SNP_P4_110435_55556 | NW_004515649.1 | Scaffold25  | 55556                   | AA                              | GG              | 1946913821               |
| SNP_P4_110436_56814 | NW_004515649.1 | Scaffold25  | 56814                   | TT                              | AA              | 1946913823               |
| SNP_P4_110437_57118 | NW_004515649.1 | Scaffold25  | 57118                   | CC                              | TT              | 1946913825               |
| SNP_P4_110438_57128 | NW_004515649.1 | Scaffold25  | 57128                   | CC                              | TT              | 1946913827               |
| SNP_P4_110439_57201 | NW_004515649.1 | Scaffold25  | 57201                   | TT                              | GG              | 1946913829               |
| SNP_P4_110440_57225 | NW_004515649.1 | Scaffold25  | 57225                   | TT                              | CC              | 1946913831               |
| SNP_P4_110441_57478 | NW_004515649.1 | Scaffold25  | 57478                   | TT                              | AA              | 1946913833               |
| SNP_P4_110442_57625 | NW_004515649.1 | Scaffold25  | 57625                   | CC                              | TT              | 1946913835               |
| SNP_P4_110443_58148 | NW_004515649.1 | Scaffold25  | 58148                   | AA                              | TT              | 1946913837               |
| SNP_P4_110444_59209 | NW_004515649.1 | Scaffold25  | 59209                   | TT                              | AA              | 1946913839               |
| SNP_P4_110445_59227 | NW_004515649.1 | Scaffold25  | 59227                   | CC                              | TT              | 1946913841               |
| SNP_P4_110446_59877 | NW_004515649.1 | Scaffold25  | 59877                   | GG                              | TT              | 1946913843               |
| SNP_P4_110447_60400 | NW_004515649.1 | Scaffold25  | 60400                   | GG                              | CC              | 1946913845               |
| SNP_P4_110448_60584 | NW_004515649.1 | Scaffold25  | 60584                   | AA                              | TT              | 1946913847               |
| SNP_P4_110449_60728 | NW_004515649.1 | Scaffold25  | 60728                   | CC                              | TT              | 1946913849               |
| SNP_P4_110450_62048 | NW_004515649.1 | Scaffold25  | 62048                   | CC                              | AA              | 1946913851               |
| SNP_P4_110451_62183 | NW_004515649.1 | Scaffold25  | 62183                   | AA                              | CC              | 1946913853               |
| SNP_P4_110452_62277 | NW_004515649.1 | Scaffold25  | 62277                   | GG                              | AA              | 1946913855               |
| SNP_P4_110453_62383 | NW_004515649.1 | Scaffold25  | 62383                   | AA                              | GG              | 1946913857               |
| SNP_P4_110454_66430 | NW_004515649.1 | Scaffold25  | 66430                   | AA                              | TT              | 1946913859               |
| SNP_P4_110456_69021 | NW_004515649.1 | Scaffold25  | 69021                   | TT                              | CC              | 1946913861               |
| SNP_P4_110457_69342 | NW_004515649.1 | Scaffold25  | 69342                   | CC                              | AA              | 1946913863               |
| SNP_P4_110458_69756 | NW_004515649.1 | Scaffold25  | 69756                   | TT                              | CC              | 1946913865               |
| SNP_P4_110459_71161 | NW_004515649.1 | Scaffold25  | 71161                   | AA                              | TT              | 1946913867               |
| SNP_P4_110460_71168 | NW_004515649.1 | Scaffold25  | 71168                   | CC                              | TT              | 1946913869               |
| SNP_P4_110461_71170 | NW_004515649.1 | Scaffold25  | 71170                   | TT                              | CC              | 1946913871               |
| SNP_P4_110462_71171 | NW_004515649.1 | Scaffold25  | 71171                   | CC                              | TT              | 1946913873               |
| SNP_P4_110463_71232 | NW_004515649.1 | Scaffold25  | 71232                   | CC                              | AA              | 1946913875               |
| SNP_P4_110464_71238 | NW_004515649.1 | Scaffold25  | 71238                   | AA                              | GG              | 1946913877               |
| SNP_P4_110465_71268 | NW_004515649.1 | Scaffold25  | 71268                   | AA                              | CC              | 1946913879               |

| SNPs IDs             | Chromosome IDs | Chromosomes | Physical positions (bp) | CDC Frontier (Reference genome) | (ILWC46 & LPNB) | NCBI SNPdb Accession IDs |
|----------------------|----------------|-------------|-------------------------|---------------------------------|-----------------|--------------------------|
| SNP_P4_110466_71304  | NW_004515649.1 | Scaffold25  | 71304                   | GG                              | TT              | 1946913881               |
| SNP_P4_110467_71409  | NW_004515649.1 | Scaffold25  | 71409                   | GG                              | AA              | 1946913883               |
| SNP_P4_110468_71429  | NW_004515649.1 | Scaffold25  | 71429                   | AA                              | GG              | 1946913885               |
| SNP_P4_110469_72611  | NW_004515649.1 | Scaffold25  | 72611                   | TT                              | CC              | 1946913887               |
| SNP_P4_110470_72741  | NW_004515649.1 | Scaffold25  | 72741                   | AA                              | CC              | 1946913889               |
| SNP_P4_110471_73699  | NW_004515649.1 | Scaffold25  | 73699                   | GG                              | CC              | 1946913891               |
| SNP_P4_110472_73847  | NW_004515649.1 | Scaffold25  | 73847                   | AA                              | TT              | 1946913893               |
| SNP_P4_110473_76056  | NW_004515649.1 | Scaffold25  | 76056                   | AA                              | CC              | 1946913895               |
| SNP_P4_110474_76169  | NW_004515649.1 | Scaffold25  | 76169                   | CC                              | TT              | 1946913897               |
| SNP_P4_110476_76324  | NW_004515649.1 | Scaffold25  | 76324                   | AA                              | CC              | 1946913899               |
| SNP_P4_110477_78078  | NW_004515649.1 | Scaffold25  | 78078                   | AA                              | GG              | 1946913901               |
| SNP_P4_110478_78079  | NW_004515649.1 | Scaffold25  | 78079                   | AA                              | GG              | 1946913903               |
| SNP_P4_110479_78080  | NW_004515649.1 | Scaffold25  | 78080                   | GG                              | AA              | 1946913905               |
| SNP_P4_110480_79083  | NW_004515649.1 | Scaffold25  | 79083                   | AA                              | CC              | 1946913907               |
| SNP_P4_110481_2198   | NW_004515650.1 | Scaffold26  | 2198                    | TT                              | AA              | 1946913909               |
| SNP_P4_110482_4387   | NW_004515650.1 | Scaffold26  | 4387                    | TT                              | CC              | 1946913911               |
| SNP_P4_110483_6132   | NW_004515650.1 | Scaffold26  | 6132                    | TT                              | GG              | 1946913913               |
| SNP_P4_110484_6134   | NW_004515650.1 | Scaffold26  | 6134                    | TT                              | CC              | 1946913915               |
| SNP_P4_110485_6169   | NW_004515650.1 | Scaffold26  | 6169                    | GG                              | TT              | 1946913917               |
| SNP_P4_110486_6206   | NW_004515650.1 | Scaffold26  | 6206                    | TT                              | AA              | 1946913919               |
| SNP_P4_110487_6463   | NW_004515650.1 | Scaffold26  | 6463                    | TT                              | GG              | 1946913921               |
| SNP_P4_110488_6681   | NW_004515650.1 | Scaffold26  | 6681                    | TT                              | CC              | 1946913923               |
| SNP_P4_110489_18862  | NW_004515650.1 | Scaffold26  | 18862                   | TT                              | CC              | 1946913925               |
| SNP_P4_110490_18870  | NW_004515650.1 | Scaffold26  | 18870                   | AA                              | CC              | 1946913927               |
| SNP_P4_110491_18894  | NW_004515650.1 | Scaffold26  | 18894                   | CC                              | TT              | 1946913929               |
| SNP_P4_110492_18945  | NW_004515650.1 | Scaffold26  | 18945                   | GG                              | AA              | 1946913931               |
| SNP_P4_110493_19237  | NW_004515650.1 | Scaffold26  | 19237                   | AA                              | TT              | 1946913933               |
| SNP_P4_110494_20450  | NW_004515650.1 | Scaffold26  | 20450                   | GG                              | AA              | 1946913935               |
| SNP_P4_110495_20468  | NW_004515650.1 | Scaffold26  | 20468                   | GG                              | AA              | 1946913937               |
| SNP_P4_110496_20854  | NW_004515650.1 | Scaffold26  | 20854                   | TT                              | CC              | 1946913939               |
| SNP_P4_110497_25144  | NW_004515650.1 | Scaffold26  | 25144                   | TT                              | AA              | 1946913941               |
| SNP_P4_110498_69310  | NW_004515650.1 | Scaffold26  | 69310                   | TT                              | CC              | 1946913943               |
| SNP_P4_110500_112374 | NW_004515650.1 | Scaffold26  | 112374                  | TT                              | GG              | 1946913945               |
| SNP_P4_110501_112376 | NW_004515650.1 | Scaffold26  | 112376                  | AA                              | GG              | 1946913947               |
| SNP_P4_110502_123390 | NW_004515650.1 | Scaffold26  | 123390                  | GG                              | AA              | 1946913949               |
| SNP_P4_110503_126777 | NW_004515650.1 | Scaffold26  | 126777                  | AA                              | GG              | 1946913951               |
| SNP_P4_110504_126796 | NW_004515650.1 | Scaffold26  | 126796                  | AA                              | GG              | 1946913953               |
| SNP_P4_110505_126816 | NW_004515650.1 | Scaffold26  | 126816                  | AA                              | GG              | 1946913955               |
| SNP_P4_110506_126829 | NW_004515650.1 | Scaffold26  | 126829                  | AA                              | GG              | 1946913957               |
| SNP_P4_110507_126846 | NW_004515650.1 | Scaffold26  | 126846                  | AA                              | GG              | 1946913959               |
| SNP_P4_110508_126998 | NW_004515650.1 | Scaffold26  | 126998                  | AA                              | CC              | 1946913961               |
| SNP_P4_110509_145329 | NW_004515650.1 | Scaffold26  | 145329                  | CC                              | AA              | 1946913963               |

| SNPs IDs             | Chromosome IDs | Chromosomes | Physical positions (bp) | CDC Frontier (Reference genome) | (ILWC46 & LPNB) | NCBI SNPdb Accession IDs |
|----------------------|----------------|-------------|-------------------------|---------------------------------|-----------------|--------------------------|
| SNP_P4_110510_170361 | NW_004515650.1 | Scaffold26  | 170361                  | CC                              | AA              | 1946913965               |
| SNP_P4_110511_191741 | NW_004515650.1 | Scaffold26  | 191741                  | AA                              | CC              | 1946913967               |
| SNP_P4_110512_191780 | NW_004515650.1 | Scaffold26  | 191780                  | GG                              | AA              | 1946913969               |
| SNP_P4_110513_205320 | NW_004515650.1 | Scaffold26  | 205320                  | TT                              | GG              | 1946913971               |
| SNP_P4_110514_205656 | NW_004515650.1 | Scaffold26  | 205656                  | GG                              | TT              | 1946913973               |
| SNP_P4_110515_205658 | NW_004515650.1 | Scaffold26  | 205658                  | CC                              | TT              | 1946913975               |
| SNP_P4_110516_209158 | NW_004515650.1 | Scaffold26  | 209158                  | TT                              | GG              | 1946913977               |
| SNP_P4_110517_209194 | NW_004515650.1 | Scaffold26  | 209194                  | GG                              | AA              | 1946913979               |
| SNP_P4_110518_209197 | NW_004515650.1 | Scaffold26  | 209197                  | GG                              | TT              | 1946913981               |
| SNP_P4_110519_224354 | NW_004515650.1 | Scaffold26  | 224354                  | GG                              | AA              | 1946913983               |
| SNP_P4_110520_224358 | NW_004515650.1 | Scaffold26  | 224358                  | GG                              | AA              | 1946913985               |
| SNP_P4_110521_224405 | NW_004515650.1 | Scaffold26  | 224405                  | TT                              | CC              | 1946913987               |
| SNP_P4_110522_224685 | NW_004515650.1 | Scaffold26  | 224685                  | TT                              | CC              | 1946913989               |
| SNP_P4_110523_224757 | NW_004515650.1 | Scaffold26  | 224757                  | GG                              | TT              | 1946913991               |
| SNP_P4_110524_227551 | NW_004515650.1 | Scaffold26  | 227551                  | TT                              | AA              | 1946913993               |
| SNP_P4_110525_227573 | NW_004515650.1 | Scaffold26  | 227573                  | GG                              | AA              | 1946913995               |
| SNP_P4_110526_227668 | NW_004515650.1 | Scaffold26  | 227668                  | TT                              | CC              | 1946913997               |
| SNP_P4_110527_227709 | NW_004515650.1 | Scaffold26  | 227709                  | TT                              | CC              | 1946913999               |
| SNP_P4_110529_293216 | NW_004515650.1 | Scaffold26  | 293216                  | CC                              | AA              | 1946914001               |
| SNP_P4_110530_294707 | NW_004515650.1 | Scaffold26  | 294707                  | GG                              | TT              | 1946914003               |
| SNP_P4_110531_294816 | NW_004515650.1 | Scaffold26  | 294816                  | AA                              | GG              | 1946914005               |
| SNP_P4_110532_295001 | NW_004515650.1 | Scaffold26  | 295001                  | CC                              | AA              | 1946914007               |
| SNP_P4_110533_295002 | NW_004515650.1 | Scaffold26  | 295002                  | AA                              | CC              | 1946914009               |
| SNP_P4_110534_295003 | NW_004515650.1 | Scaffold26  | 295003                  | AA                              | TT              | 1946914011               |
| SNP_P4_110535_295016 | NW_004515650.1 | Scaffold26  | 295016                  | AA                              | GG              | 1946914013               |
| SNP_P4_110536_295048 | NW_004515650.1 | Scaffold26  | 295048                  | CC                              | TT              | 1946914015               |
| SNP_P4_110537_295068 | NW_004515650.1 | Scaffold26  | 295068                  | GG                              | AA              | 1946914017               |
| SNP_P4_110538_295077 | NW_004515650.1 | Scaffold26  | 295077                  | CC                              | TT              | 1946914019               |
| SNP_P4_110539_295090 | NW_004515650.1 | Scaffold26  | 295090                  | GG                              | TT              | 1946914021               |
| SNP_P4_110540_295120 | NW_004515650.1 | Scaffold26  | 295120                  | GG                              | TT              | 1946914023               |
| SNP_P4_110541_295129 | NW_004515650.1 | Scaffold26  | 295129                  | TT                              | GG              | 1946914025               |
| SNP_P4_110542_295135 | NW_004515650.1 | Scaffold26  | 295135                  | GG                              | AA              | 1946914027               |
| SNP_P4_110543_295160 | NW_004515650.1 | Scaffold26  | 295160                  | TT                              | GG              | 1946914029               |
| SNP_P4_110544_295168 | NW_004515650.1 | Scaffold26  | 295168                  | CC                              | TT              | 1946914031               |
| SNP_P4_110545_295260 | NW_004515650.1 | Scaffold26  | 295260                  | TT                              | CC              | 1946914033               |
| SNP_P4_110546_323480 | NW_004515650.1 | Scaffold26  | 323480                  | AA                              | TT              | 1946914035               |
| SNP_P4_110547_350651 | NW_004515650.1 | Scaffold26  | 350651                  | CC                              | TT              | 1946914037               |
| SNP_P4_110548_400695 | NW_004515650.1 | Scaffold26  | 400695                  | TT                              | CC              | 1946914039               |
| SNP_P4_110549_429913 | NW_004515650.1 | Scaffold26  | 429913                  | GG                              | TT              | 1946914041               |
| SNP_P4_110550_455255 | NW_004515650.1 | Scaffold26  | 455255                  | AA                              | GG              | 1946914043               |
| SNP_P4_110551_455256 | NW_004515650.1 | Scaffold26  | 455256                  | AA                              | GG              | 1946914045               |
| SNP_P4_110552_455741 | NW_004515650.1 | Scaffold26  | 455741                  | AA                              | GG              | 1946914047               |

| SNPs IDs             | Chromosome IDs | Chromosomes | Physical positions (bp) | CDC Frontier (Reference genome) | (ILWC46 & LPNB) | NCBI SNPdb Accession IDs |
|----------------------|----------------|-------------|-------------------------|---------------------------------|-----------------|--------------------------|
| SNP_P4_110553_469311 | NW_004515650.1 | Scaffold26  | 469311                  | AA                              | GG              | 1946914049               |
| SNP_P4_110554_469630 | NW_004515650.1 | Scaffold26  | 469630                  | CC                              | TT              | 1946914051               |
| SNP_P4_110555_469706 | NW_004515650.1 | Scaffold26  | 469706                  | AA                              | TT              | 1946914053               |
| SNP_P4_110556_469708 | NW_004515650.1 | Scaffold26  | 469708                  | GG                              | AA              | 1946914055               |
| SNP_P4_110557_469738 | NW_004515650.1 | Scaffold26  | 469738                  | AA                              | CC              | 1946914057               |
| SNP_P4_110558_469782 | NW_004515650.1 | Scaffold26  | 469782                  | CC                              | TT              | 1946914059               |
| SNP_P4_110559_469789 | NW_004515650.1 | Scaffold26  | 469789                  | GG                              | AA              | 1946914061               |
| SNP_P4_110560_469804 | NW_004515650.1 | Scaffold26  | 469804                  | AA                              | GG              | 1946914063               |
| SNP_P4_110561_469825 | NW_004515650.1 | Scaffold26  | 469825                  | TT                              | CC              | 1946914065               |
| SNP_P4_110562_472138 | NW_004515650.1 | Scaffold26  | 472138                  | AA                              | GG              | 1946914067               |
| SNP_P4_110563_472146 | NW_004515650.1 | Scaffold26  | 472146                  | TT                              | AA              | 1946914069               |
| SNP_P4_110564_472232 | NW_004515650.1 | Scaffold26  | 472232                  | TT                              | GG              | 1946914071               |
| SNP_P4_110565_486232 | NW_004515650.1 | Scaffold26  | 486232                  | AA                              | GG              | 1946914073               |
| SNP_P4_110566_486245 | NW_004515650.1 | Scaffold26  | 486245                  | GG                              | AA              | 1946914075               |
| SNP_P4_110567_486267 | NW_004515650.1 | Scaffold26  | 486267                  | CC                              | TT              | 1946914077               |
| SNP_P4_110568_486512 | NW_004515650.1 | Scaffold26  | 486512                  | CC                              | AA              | 1946914079               |
| SNP_P4_110569_486609 | NW_004515650.1 | Scaffold26  | 486609                  | TT                              | CC              | 1946914081               |
| SNP_P4_110570_491273 | NW_004515650.1 | Scaffold26  | 491273                  | TT                              | AA              | 1946914083               |
| SNP_P4_110571_501244 | NW_004515650.1 | Scaffold26  | 501244                  | AA                              | TT              | 1946914085               |
| SNP_P4_110572_501258 | NW_004515650.1 | Scaffold26  | 501258                  | TT                              | GG              | 1946914087               |
| SNP_P4_110573_501272 | NW_004515650.1 | Scaffold26  | 501272                  | TT                              | GG              | 1946914089               |
| SNP_P4_110574_501454 | NW_004515650.1 | Scaffold26  | 501454                  | GG                              | AA              | 1946914091               |
| SNP_P4_110575_501728 | NW_004515650.1 | Scaffold26  | 501728                  | TT                              | CC              | 1946914093               |
| SNP_P4_110576_502182 | NW_004515650.1 | Scaffold26  | 502182                  | GG                              | TT              | 1946914095               |
| SNP_P4_110577_502215 | NW_004515650.1 | Scaffold26  | 502215                  | GG                              | AA              | 1946914097               |
| SNP_P4_110578_502489 | NW_004515650.1 | Scaffold26  | 502489                  | GG                              | AA              | 1946914099               |
| SNP_P4_110579_502551 | NW_004515650.1 | Scaffold26  | 502551                  | GG                              | AA              | 1946914101               |
| SNP_P4_110580_502923 | NW_004515650.1 | Scaffold26  | 502923                  | TT                              | AA              | 1946914103               |
| SNP_P4_110581_502956 | NW_004515650.1 | Scaffold26  | 502956                  | GG                              | AA              | 1946914105               |
| SNP_P4_110582_502966 | NW_004515650.1 | Scaffold26  | 502966                  | TT                              | CC              | 1946914107               |
| SNP_P4_110583_503124 | NW_004515650.1 | Scaffold26  | 503124                  | TT                              | CC              | 1946914109               |
| SNP_P4_110584_503238 | NW_004515650.1 | Scaffold26  | 503238                  | AA                              | GG              | 1946914111               |
| SNP_P4_110585_503260 | NW_004515650.1 | Scaffold26  | 503260                  | GG                              | AA              | 1946914113               |
| SNP_P4_110586_503274 | NW_004515650.1 | Scaffold26  | 503274                  | AA                              | GG              | 1946914115               |
| SNP_P4_110587_503289 | NW_004515650.1 | Scaffold26  | 503289                  | GG                              | CC              | 1946914117               |
| SNP_P4_110588_503303 | NW_004515650.1 | Scaffold26  | 503303                  | CC                              | TT              | 1946914119               |
| SNP_P4_110589_503328 | NW_004515650.1 | Scaffold26  | 503328                  | AA                              | GG              | 1946914121               |
| SNP_P4_110590_503354 | NW_004515650.1 | Scaffold26  | 503354                  | TT                              | CC              | 1946914123               |
| SNP_P4_110591_503370 | NW_004515650.1 | Scaffold26  | 503370                  | AA                              | GG              | 1946914125               |
| SNP_P4_110592_503376 | NW_004515650.1 | Scaffold26  | 503376                  | CC                              | TT              | 1946914127               |
| SNP_P4_110593_503383 | NW_004515650.1 | Scaffold26  | 503383                  | TT                              | CC              | 1946914129               |
| SNP_P4_110594_503393 | NW_004515650.1 | Scaffold26  | 503393                  | GG                              | AA              | 1946914131               |

| SNPs IDs             | Chromosome IDs | Chromosomes | Physical positions (bp) | CDC Frontier (Reference genome) | (ILWC46 & LPNB) | NCBI SNPdb Accession IDs |
|----------------------|----------------|-------------|-------------------------|---------------------------------|-----------------|--------------------------|
| SNP_P4_110595_503409 | NW_004515650.1 | Scaffold26  | 503409                  | TT                              | CC              | 1946914133               |
| SNP_P4_110596_503431 | NW_004515650.1 | Scaffold26  | 503431                  | AA                              | GG              | 1946914135               |
| SNP_P4_110597_503437 | NW_004515650.1 | Scaffold26  | 503437                  | TT                              | CC              | 1946914137               |
| SNP_P4_110599_513394 | NW_004515650.1 | Scaffold26  | 513394                  | TT                              | CC              | 1946914139               |
| SNP_P4_110600_513465 | NW_004515650.1 | Scaffold26  | 513465                  | AA                              | CC              | 1946914141               |
| SNP_P4_110601_513520 | NW_004515650.1 | Scaffold26  | 513520                  | TT                              | CC              | 1946914143               |
| SNP_P4_110602_543969 | NW_004515650.1 | Scaffold26  | 543969                  | CC                              | TT              | 1946914145               |
| SNP_P4_110604_547005 | NW_004515650.1 | Scaffold26  | 547005                  | AA                              | CC              | 1946914147               |
| SNP_P4_110605_559810 | NW_004515650.1 | Scaffold26  | 559810                  | AA                              | GG              | 1946914149               |
| SNP_P4_110606_559818 | NW_004515650.1 | Scaffold26  | 559818                  | GG                              | TT              | 1946914151               |
| SNP_P4_110607_560141 | NW_004515650.1 | Scaffold26  | 560141                  | TT                              | GG              | 1946914153               |
| SNP_P4_110608_575682 | NW_004515650.1 | Scaffold26  | 575682                  | CC                              | TT              | 1946914155               |
| SNP_P4_110609_575697 | NW_004515650.1 | Scaffold26  | 575697                  | CC                              | TT              | 1946914157               |
| SNP_P4_110610_575700 | NW_004515650.1 | Scaffold26  | 575700                  | TT                              | CC              | 1946914159               |
| SNP_P4_110612_575761 | NW_004515650.1 | Scaffold26  | 575761                  | CC                              | TT              | 1946914161               |
| SNP_P4_110613_576490 | NW_004515650.1 | Scaffold26  | 576490                  | AA                              | GG              | 1946914163               |
| SNP_P4_110614_576499 | NW_004515650.1 | Scaffold26  | 576499                  | TT                              | CC              | 1946914165               |
| SNP_P4_110615_576516 | NW_004515650.1 | Scaffold26  | 576516                  | TT                              | CC              | 1946914167               |
| SNP_P4_110616_576539 | NW_004515650.1 | Scaffold26  | 576539                  | TT                              | GG              | 1946914169               |
| SNP_P4_110617_576559 | NW_004515650.1 | Scaffold26  | 576559                  | AA                              | GG              | 1946914171               |
| SNP_P4_110618_584139 | NW_004515650.1 | Scaffold26  | 584139                  | TT                              | AA              | 1946914173               |
| SNP_P4_110619_64     | NW_004515651.1 | Scaffold29  | 64                      | GG                              | AA              | 1946914175               |
| SNP_P4_110620_122    | NW_004515651.1 | Scaffold29  | 122                     | CC                              | GG              | 1946914177               |
| SNP_P4_110621_670    | NW_004515651.1 | Scaffold29  | 670                     | CC                              | AA              | 1946914179               |
| SNP_P4_110622_759    | NW_004515651.1 | Scaffold29  | 759                     | TT                              | CC              | 1946914181               |
| SNP_P4_110623_872    | NW_004515651.1 | Scaffold29  | 872                     | AA                              | GG              | 1946914183               |
| SNP_P4_110624_3108   | NW_004515651.1 | Scaffold29  | 3108                    | AA                              | TT              | 1946914185               |
| SNP_P4_110625_3169   | NW_004515651.1 | Scaffold29  | 3169                    | GG                              | AA              | 1946914187               |
| SNP_P4_110626_7416   | NW_004515651.1 | Scaffold29  | 7416                    | AA                              | GG              | 1946914189               |
| SNP_P4_110627_8470   | NW_004515651.1 | Scaffold29  | 8470                    | TT                              | GG              | 1946914191               |
| SNP_P4_110628_8735   | NW_004515651.1 | Scaffold29  | 8735                    | AA                              | GG              | 1946914193               |
| SNP_P4_110629_8803   | NW_004515651.1 | Scaffold29  | 8803                    | AA                              | CC              | 1946914195               |
| SNP_P4_110630_12290  | NW_004515651.1 | Scaffold29  | 12290                   | CC                              | TT              | 1946914197               |
| SNP_P4_110631_12789  | NW_004515651.1 | Scaffold29  | 12789                   | TT                              | CC              | 1946914199               |
| SNP_P4_110632_16526  | NW_004515651.1 | Scaffold29  | 16526                   | AA                              | TT              | 1946914201               |
| SNP_P4_110633_22385  | NW_004515651.1 | Scaffold29  | 22385                   | AA                              | TT              | 1946914203               |
| SNP_P4_110634_30587  | NW_004515651.1 | Scaffold29  | 30587                   | GG                              | AA              | 1946914205               |
| SNP_P4_110635_34003  | NW_004515651.1 | Scaffold29  | 34003                   | AA                              | GG              | 1946914207               |
| SNP_P4_110636_34187  | NW_004515651.1 | Scaffold29  | 34187                   | AA                              | TT              | 1946914209               |
| SNP_P4_110637_42279  | NW_004515651.1 | Scaffold29  | 42279                   | AA                              | CC              | 1946914211               |
| SNP_P4_110638_42292  | NW_004515651.1 | Scaffold29  | 42292                   | AA                              | GG              | 1946914213               |
| SNP_P4_110639_42302  | NW_004515651.1 | Scaffold29  | 42302                   | AA                              | TT              | 1946914215               |

| SNPs IDs            | Chromosome IDs | Chromosomes | Physical positions (bp) | CDC Frontier (Reference genome) | (ILWC46 & LPNB) | NCBI SNPdb Accession IDs |
|---------------------|----------------|-------------|-------------------------|---------------------------------|-----------------|--------------------------|
| SNP_P4_110640_43158 | NW_004515651.1 | Scaffold29  | 43158                   | AA                              | GG              | 1946914217               |
| SNP_P4_110641_54316 | NW_004515651.1 | Scaffold29  | 54316                   | AA                              | GG              | 1946914219               |
| SNP_P4_110642_55767 | NW_004515651.1 | Scaffold29  | 55767                   | AA                              | GG              | 1946914221               |
| SNP_P4_110643_55797 | NW_004515651.1 | Scaffold29  | 55797                   | TT                              | GG              | 1946914223               |
| SNP_P4_110644_55835 | NW_004515651.1 | Scaffold29  | 55835                   | AA                              | GG              | 1946914225               |
| SNP_P4_110645_55883 | NW_004515651.1 | Scaffold29  | 55883                   | CC                              | TT              | 1946914227               |
| SNP_P4_110646_63311 | NW_004515651.1 | Scaffold29  | 63311                   | TT                              | CC              | 1946914229               |
| SNP_P4_110647_63352 | NW_004515651.1 | Scaffold29  | 63352                   | GG                              | AA              | 1946914231               |
| SNP_P4_110648_63367 | NW_004515651.1 | Scaffold29  | 63367                   | TT                              | CC              | 1946914233               |
| SNP_P4_110649_63794 | NW_004515651.1 | Scaffold29  | 63794                   | CC                              | TT              | 1946914235               |
| SNP_P4_110650_80700 | NW_004515651.1 | Scaffold29  | 80700                   | TT                              | GG              | 1946914237               |
| SNP_P4_110651_84620 | NW_004515651.1 | Scaffold29  | 84620                   | AA                              | GG              | 1946914239               |
| SNP_P4_110652_85958 | NW_004515651.1 | Scaffold29  | 85958                   | CC                              | AA              | 1946914241               |
| SNP_P4_110653_90951 | NW_004515651.1 | Scaffold29  | 90951                   | TT                              | CC              | 1946914243               |
| SNP_P4_110654_90980 | NW_004515651.1 | Scaffold29  | 90980                   | CC                              | TT              | 1946914245               |
| SNP_P4_110655_91236 | NW_004515651.1 | Scaffold29  | 91236                   | CC                              | GG              | 1946914247               |
| SNP_P4_110656_91249 | NW_004515651.1 | Scaffold29  | 91249                   | GG                              | TT              | 1946914249               |
| SNP_P4_110657_91251 | NW_004515651.1 | Scaffold29  | 91251                   | GG                              | TT              | 1946914251               |
| SNP_P4_110658_91274 | NW_004515651.1 | Scaffold29  | 91274                   | CC                              | AA              | 1946914253               |
| SNP_P4_110659_91284 | NW_004515651.1 | Scaffold29  | 91284                   | TT                              | CC              | 1946914255               |
| SNP_P4_110660_91318 | NW_004515651.1 | Scaffold29  | 91318                   | CC                              | AA              | 1946914257               |
| SNP_P4_110661_91325 | NW_004515651.1 | Scaffold29  | 91325                   | TT                              | CC              | 1946914259               |
| SNP_P4_110662_91372 | NW_004515651.1 | Scaffold29  | 91372                   | GG                              | AA              | 1946914261               |
| SNP_P4_110663_91424 | NW_004515651.1 | Scaffold29  | 91424                   | TT                              | CC              | 1946914263               |
| SNP_P4_110664_91514 | NW_004515651.1 | Scaffold29  | 91514                   | TT                              | GG              | 1946914265               |
| SNP_P4_110665_91785 | NW_004515651.1 | Scaffold29  | 91785                   | TT                              | AA              | 1946914267               |
| SNP_P4_110666_91806 | NW_004515651.1 | Scaffold29  | 91806                   | AA                              | GG              | 1946914269               |
| SNP_P4_110667_92071 | NW_004515651.1 | Scaffold29  | 92071                   | AA                              | CC              | 1946914271               |
| SNP_P4_110668_92096 | NW_004515651.1 | Scaffold29  | 92096                   | GG                              | TT              | 1946914273               |
| SNP_P4_110669_92124 | NW_004515651.1 | Scaffold29  | 92124                   | AA                              | CC              | 1946914275               |
| SNP_P4_110670_92127 | NW_004515651.1 | Scaffold29  | 92127                   | CC                              | TT              | 1946914277               |
| SNP_P4_110671_92212 | NW_004515651.1 | Scaffold29  | 92212                   | AA                              | GG              | 1946914279               |
| SNP_P4_110672_92231 | NW_004515651.1 | Scaffold29  | 92231                   | CC                              | TT              | 1946914281               |
| SNP_P4_110673_92417 | NW_004515651.1 | Scaffold29  | 92417                   | CC                              | AA              | 1946914283               |
| SNP_P4_110674_92954 | NW_004515651.1 | Scaffold29  | 92954                   | GG                              | AA              | 1946914285               |
| SNP_P4_110675_93050 | NW_004515651.1 | Scaffold29  | 93050                   | AA                              | CC              | 1946914287               |
| SNP_P4_110676_93183 | NW_004515651.1 | Scaffold29  | 93183                   | CC                              | AA              | 1946914289               |
| SNP_P4_110677_93184 | NW_004515651.1 | Scaffold29  | 93184                   | AA                              | CC              | 1946914291               |
| SNP_P4_110678_93232 | NW_004515651.1 | Scaffold29  | 93232                   | GG                              | CC              | 1946914293               |
| SNP_P4_110679_93296 | NW_004515651.1 | Scaffold29  | 93296                   | CC                              | AA              | 1946914295               |
| SNP_P4_110680_93300 | NW_004515651.1 | Scaffold29  | 93300                   | AA                              | GG              | 1946914297               |
| SNP_P4_110681_93398 | NW_004515651.1 | Scaffold29  | 93398                   | CC                              | AA              | 1946914299               |



| SNPs IDs             | Chromosome IDs | Chromosomes | Physical positions (bp) | CDC Frontier (Reference genome) | (ILWC46 & LPNB) | NCBI SNPdb Accession IDs |
|----------------------|----------------|-------------|-------------------------|---------------------------------|-----------------|--------------------------|
| SNP_P4_110682_93401  | NW_004515651.1 | Scaffold29  | 93401                   | TT                              | AA              | 1946914301               |
| SNP_P4_110683_93413  | NW_004515651.1 | Scaffold29  | 93413                   | TT                              | CC              | 1946914303               |
| SNP_P4_110684_93429  | NW_004515651.1 | Scaffold29  | 93429                   | TT                              | CC              | 1946914305               |
| SNP_P4_110685_93466  | NW_004515651.1 | Scaffold29  | 93466                   | TT                              | CC              | 1946914307               |
| SNP_P4_110686_93518  | NW_004515651.1 | Scaffold29  | 93518                   | TT                              | CC              | 1946914309               |
| SNP_P4_110687_93530  | NW_004515651.1 | Scaffold29  | 93530                   | AA                              | GG              | 1946914311               |
| SNP_P4_110688_93608  | NW_004515651.1 | Scaffold29  | 93608                   | AA                              | CC              | 1946914313               |
| SNP_P4_110689_94827  | NW_004515651.1 | Scaffold29  | 94827                   | CC                              | TT              | 1946914315               |
| SNP_P4_110690_95443  | NW_004515651.1 | Scaffold29  | 95443                   | TT                              | CC              | 1946914317               |
| SNP_P4_110691_95456  | NW_004515651.1 | Scaffold29  | 95456                   | AA                              | GG              | 1946914319               |
| SNP_P4_110692_95720  | NW_004515651.1 | Scaffold29  | 95720                   | AA                              | GG              | 1946914321               |
| SNP_P4_110693_95744  | NW_004515651.1 | Scaffold29  | 95744                   | AA                              | GG              | 1946914323               |
| SNP_P4_110694_95749  | NW_004515651.1 | Scaffold29  | 95749                   | GG                              | TT              | 1946914325               |
| SNP_P4_110695_95775  | NW_004515651.1 | Scaffold29  | 95775                   | GG                              | TT              | 1946914327               |
| SNP_P4_110696_96448  | NW_004515651.1 | Scaffold29  | 96448                   | TT                              | CC              | 1946914329               |
| SNP_P4_110697_96463  | NW_004515651.1 | Scaffold29  | 96463                   | GG                              | AA              | 1946914331               |
| SNP_P4_110698_96478  | NW_004515651.1 | Scaffold29  | 96478                   | CC                              | TT              | 1946914333               |
| SNP_P4_110699_96493  | NW_004515651.1 | Scaffold29  | 96493                   | AA                              | GG              | 1946914335               |
| SNP_P4_110700_96817  | NW_004515651.1 | Scaffold29  | 96817                   | TT                              | GG              | 1946914337               |
| SNP_P4_110701_96837  | NW_004515651.1 | Scaffold29  | 96837                   | GG                              | TT              | 1946914339               |
| SNP_P4_110702_97989  | NW_004515651.1 | Scaffold29  | 97989                   | TT                              | GG              | 1946914341               |
| SNP_P4_110703_98048  | NW_004515651.1 | Scaffold29  | 98048                   | GG                              | TT              | 1946914343               |
| SNP_P4_110704_98067  | NW_004515651.1 | Scaffold29  | 98067                   | CC                              | GG              | 1946914345               |
| SNP_P4_110705_98159  | NW_004515651.1 | Scaffold29  | 98159                   | TT                              | CC              | 1946914347               |
| SNP_P4_110706_98162  | NW_004515651.1 | Scaffold29  | 98162                   | CC                              | TT              | 1946914349               |
| SNP_P4_110707_98205  | NW_004515651.1 | Scaffold29  | 98205                   | AA                              | GG              | 1946914351               |
| SNP_P4_110708_98388  | NW_004515651.1 | Scaffold29  | 98388                   | CC                              | GG              | 1946914353               |
| SNP_P4_110709_98403  | NW_004515651.1 | Scaffold29  | 98403                   | CC                              | TT              | 1946914355               |
| SNP_P4_110710_98510  | NW_004515651.1 | Scaffold29  | 98510                   | AA                              | GG              | 1946914357               |
| SNP_P4_110711_98513  | NW_004515651.1 | Scaffold29  | 98513                   | AA                              | GG              | 1946914359               |
| SNP_P4_110712_98638  | NW_004515651.1 | Scaffold29  | 98638                   | GG                              | CC              | 1946914361               |
| SNP_P4_110713_98659  | NW_004515651.1 | Scaffold29  | 98659                   | TT                              | AA              | 1946914363               |
| SNP_P4_110714_98685  | NW_004515651.1 | Scaffold29  | 98685                   | TT                              | CC              | 1946914365               |
| SNP_P4_110715_98837  | NW_004515651.1 | Scaffold29  | 98837                   | GG                              | AA              | 1946914367               |
| SNP_P4_110716_98858  | NW_004515651.1 | Scaffold29  | 98858                   | GG                              | AA              | 1946914369               |
| SNP_P4_110717_98882  | NW_004515651.1 | Scaffold29  | 98882                   | CC                              | GG              | 1946914371               |
| SNP_P4_110718_99016  | NW_004515651.1 | Scaffold29  | 99016                   | TT                              | GG              | 1946914373               |
| SNP_P4_110719_99223  | NW_004515651.1 | Scaffold29  | 99223                   | CC                              | AA              | 1946914375               |
| SNP_P4_110720_100478 | NW_004515651.1 | Scaffold29  | 100478                  | AA                              | GG              | 1946914377               |
| SNP_P4_110721_100525 | NW_004515651.1 | Scaffold29  | 100525                  | TT                              | CC              | 1946914380               |
| SNP_P4_110723_100657 | NW_004515651.1 | Scaffold29  | 100657                  | GG                              | AA              | 1946914382               |
| SNP_P4_110724_100738 | NW_004515651.1 | Scaffold29  | 100738                  | AA                              | CC              | 1946914384               |

| SNPs IDs             | Chromosome IDs | Chromosomes | Physical positions (bp) | CDC Frontier (Reference genome) | (ILWC46 & LPNB) | NCBI SNPdb Accession IDs |
|----------------------|----------------|-------------|-------------------------|---------------------------------|-----------------|--------------------------|
| SNP_P4_110725_100765 | NW_004515651.1 | Scaffold29  | 100765                  | TT                              | GG              | 1946914386               |
| SNP_P4_110726_100794 | NW_004515651.1 | Scaffold29  | 100794                  | TT                              | CC              | 1946914388               |
| SNP_P4_110727_100941 | NW_004515651.1 | Scaffold29  | 100941                  | GG                              | AA              | 1946914390               |
| SNP_P4_110728_101000 | NW_004515651.1 | Scaffold29  | 101000                  | GG                              | CC              | 1946914392               |
| SNP_P4_110729_101142 | NW_004515651.1 | Scaffold29  | 101142                  | TT                              | AA              | 1946914394               |
| SNP_P4_110730_101159 | NW_004515651.1 | Scaffold29  | 101159                  | TT                              | CC              | 1946914396               |
| SNP_P4_110731_101186 | NW_004515651.1 | Scaffold29  | 101186                  | CC                              | TT              | 1946914398               |
| SNP_P4_110732_101363 | NW_004515651.1 | Scaffold29  | 101363                  | GG                              | AA              | 1946914400               |
| SNP_P4_110733_101381 | NW_004515651.1 | Scaffold29  | 101381                  | TT                              | AA              | 1946914403               |
| SNP_P4_110734_101414 | NW_004515651.1 | Scaffold29  | 101414                  | TT                              | CC              | 1946914405               |
| SNP_P4_110735_101552 | NW_004515651.1 | Scaffold29  | 101552                  | GG                              | CC              | 1946914407               |
| SNP_P4_110736_101585 | NW_004515651.1 | Scaffold29  | 101585                  | TT                              | AA              | 1946914409               |
| SNP_P4_110737_101590 | NW_004515651.1 | Scaffold29  | 101590                  | AA                              | GG              | 1946914411               |
| SNP_P4_110738_101642 | NW_004515651.1 | Scaffold29  | 101642                  | TT                              | CC              | 1946914413               |
| SNP_P4_110739_101738 | NW_004515651.1 | Scaffold29  | 101738                  | TT                              | CC              | 1946914415               |
| SNP_P4_110740_101808 | NW_004515651.1 | Scaffold29  | 101808                  | AA                              | CC              | 1946914417               |
| SNP_P4_110741_101845 | NW_004515651.1 | Scaffold29  | 101845                  | CC                              | TT              | 1946914419               |
| SNP_P4_110742_101866 | NW_004515651.1 | Scaffold29  | 101866                  | TT                              | GG              | 1946914421               |
| SNP_P4_110743_101913 | NW_004515651.1 | Scaffold29  | 101913                  | GG                              | AA              | 1946914423               |
| SNP_P4_110744_101922 | NW_004515651.1 | Scaffold29  | 101922                  | GG                              | TT              | 1946914425               |
| SNP_P4_110745_101968 | NW_004515651.1 | Scaffold29  | 101968                  | GG                              | TT              | 1946914427               |
| SNP_P4_110746_102030 | NW_004515651.1 | Scaffold29  | 102030                  | GG                              | TT              | 1946914429               |
| SNP_P4_110747_102046 | NW_004515651.1 | Scaffold29  | 102046                  | GG                              | AA              | 1946914431               |
| SNP_P4_110748_102060 | NW_004515651.1 | Scaffold29  | 102060                  | CC                              | AA              | 1946914433               |
| SNP_P4_110749_102175 | NW_004515651.1 | Scaffold29  | 102175                  | GG                              | AA              | 1946914435               |
| SNP_P4_110750_102188 | NW_004515651.1 | Scaffold29  | 102188                  | AA                              | GG              | 1946914437               |
| SNP_P4_110751_102281 | NW_004515651.1 | Scaffold29  | 102281                  | GG                              | CC              | 1946914439               |
| SNP_P4_110752_102321 | NW_004515651.1 | Scaffold29  | 102321                  | AA                              | GG              | 1946914441               |
| SNP_P4_110753_102332 | NW_004515651.1 | Scaffold29  | 102332                  | CC                              | GG              | 1946914443               |
| SNP_P4_110754_102428 | NW_004515651.1 | Scaffold29  | 102428                  | CC                              | TT              | 1946914446               |
| SNP_P4_110755_102456 | NW_004515651.1 | Scaffold29  | 102456                  | GG                              | TT              | 1946914448               |
| SNP_P4_110756_102545 | NW_004515651.1 | Scaffold29  | 102545                  | GG                              | AA              | 1946914450               |
| SNP_P4_110757_102549 | NW_004515651.1 | Scaffold29  | 102549                  | AA                              | CC              | 1946914452               |
| SNP_P4_110758_108705 | NW_004515651.1 | Scaffold29  | 108705                  | CC                              | AA              | 1946914453               |
| SNP_P4_110759_108742 | NW_004515651.1 | Scaffold29  | 108742                  | CC                              | AA              | 1946914455               |
| SNP_P4_110760_108805 | NW_004515651.1 | Scaffold29  | 108805                  | AA                              | GG              | 1946914457               |
| SNP_P4_110761_108814 | NW_004515651.1 | Scaffold29  | 108814                  | AA                              | CC              | 1946914459               |
| SNP_P4_110762_108921 | NW_004515651.1 | Scaffold29  | 108921                  | TT                              | CC              | 1946914461               |
| SNP_P4_110763_108962 | NW_004515651.1 | Scaffold29  | 108962                  | TT                              | AA              | 1946914463               |
| SNP_P4_110764_109240 | NW_004515651.1 | Scaffold29  | 109240                  | GG                              | AA              | 1946914465               |
| SNP_P4_110765_112168 | NW_004515651.1 | Scaffold29  | 112168                  | AA                              | GG              | 1946914467               |
| SNP_P4_110766_117879 | NW_004515651.1 | Scaffold29  | 117879                  | AA                              | CC              | 1946914469               |

| SNPs IDs             | Chromosome IDs | Chromosomes | Physical positions (bp) | CDC Frontier (Reference genome) | (ILWC46 & LPNB) | NCBI SNPdb Accession IDs |
|----------------------|----------------|-------------|-------------------------|---------------------------------|-----------------|--------------------------|
| SNP_P4_110767_118141 | NW_004515651.1 | Scaffold29  | 118141                  | TT                              | CC              | 1946914471               |
| SNP_P4_110768_118164 | NW_004515651.1 | Scaffold29  | 118164                  | AA                              | GG              | 1946914473               |
| SNP_P4_110769_118207 | NW_004515651.1 | Scaffold29  | 118207                  | TT                              | CC              | 1946914475               |
| SNP_P4_110770_120029 | NW_004515651.1 | Scaffold29  | 120029                  | CC                              | TT              | 1946914477               |
| SNP_P4_110771_120040 | NW_004515651.1 | Scaffold29  | 120040                  | TT                              | CC              | 1946914479               |
| SNP_P4_110772_120063 | NW_004515651.1 | Scaffold29  | 120063                  | GG                              | AA              | 1946914481               |
| SNP_P4_110773_120082 | NW_004515651.1 | Scaffold29  | 120082                  | TT                              | CC              | 1946914483               |
| SNP_P4_110774_120094 | NW_004515651.1 | Scaffold29  | 120094                  | TT                              | CC              | 1946914485               |
| SNP_P4_110775_120118 | NW_004515651.1 | Scaffold29  | 120118                  | GG                              | AA              | 1946914487               |
| SNP_P4_110776_120119 | NW_004515651.1 | Scaffold29  | 120119                  | AA                              | GG              | 1946914489               |
| SNP_P4_110777_120135 | NW_004515651.1 | Scaffold29  | 120135                  | CC                              | TT              | 1946914491               |
| SNP_P4_110778_120138 | NW_004515651.1 | Scaffold29  | 120138                  | TT                              | AA              | 1946914493               |
| SNP_P4_110779_120140 | NW_004515651.1 | Scaffold29  | 120140                  | TT                              | CC              | 1946914495               |
| SNP_P4_110780_120258 | NW_004515651.1 | Scaffold29  | 120258                  | TT                              | CC              | 1946914497               |
| SNP_P4_110781_120275 | NW_004515651.1 | Scaffold29  | 120275                  | TT                              | GG              | 1946914499               |
| SNP_P4_110782_120277 | NW_004515651.1 | Scaffold29  | 120277                  | AA                              | TT              | 1946914501               |
| SNP_P4_110783_120317 | NW_004515651.1 | Scaffold29  | 120317                  | CC                              | AA              | 1946914503               |
| SNP_P4_110784_120407 | NW_004515651.1 | Scaffold29  | 120407                  | AA                              | GG              | 1946914505               |
| SNP_P4_110785_120500 | NW_004515651.1 | Scaffold29  | 120500                  | GG                              | AA              | 1946914507               |
| SNP_P4_110786_120792 | NW_004515651.1 | Scaffold29  | 120792                  | TT                              | GG              | 1946914509               |
| SNP_P4_110787_120801 | NW_004515651.1 | Scaffold29  | 120801                  | TT                              | CC              | 1946914511               |
| SNP_P4_110788_120892 | NW_004515651.1 | Scaffold29  | 120892                  | AA                              | TT              | 1946914513               |
| SNP_P4_110789_120959 | NW_004515651.1 | Scaffold29  | 120959                  | AA                              | TT              | 1946914515               |
| SNP_P4_110790_121000 | NW_004515651.1 | Scaffold29  | 121000                  | GG                              | TT              | 1946914517               |
| SNP_P4_110791_121010 | NW_004515651.1 | Scaffold29  | 121010                  | TT                              | AA              | 1946914519               |
| SNP_P4_110792_121859 | NW_004515651.1 | Scaffold29  | 121859                  | GG                              | AA              | 1946914521               |
| SNP_P4_110793_126285 | NW_004515651.1 | Scaffold29  | 126285                  | AA                              | GG              | 1946914523               |
| SNP_P4_110794_126629 | NW_004515651.1 | Scaffold29  | 126629                  | TT                              | GG              | 1946914525               |
| SNP_P4_110795_127847 | NW_004515651.1 | Scaffold29  | 127847                  | CC                              | TT              | 1946914527               |
| SNP_P4_110796_127871 | NW_004515651.1 | Scaffold29  | 127871                  | GG                              | AA              | 1946914529               |
| SNP_P4_110797_134642 | NW_004515651.1 | Scaffold29  | 134642                  | AA                              | GG              | 1946914531               |
| SNP_P4_110798_134725 | NW_004515651.1 | Scaffold29  | 134725                  | CC                              | TT              | 1946914533               |
| SNP_P4_110799_134779 | NW_004515651.1 | Scaffold29  | 134779                  | AA                              | TT              | 1946914535               |
| SNP_P4_110800_134803 | NW_004515651.1 | Scaffold29  | 134803                  | CC                              | TT              | 1946914537               |
| SNP_P4_110801_134810 | NW_004515651.1 | Scaffold29  | 134810                  | TT                              | AA              | 1946914539               |
| SNP_P4_110802_134874 | NW_004515651.1 | Scaffold29  | 134874                  | CC                              | AA              | 1946914541               |
| SNP_P4_110803_134952 | NW_004515651.1 | Scaffold29  | 134952                  | TT                              | CC              | 1946914543               |
| SNP_P4_110804_134953 | NW_004515651.1 | Scaffold29  | 134953                  | GG                              | AA              | 1946914545               |
| SNP_P4_110805_134958 | NW_004515651.1 | Scaffold29  | 134958                  | CC                              | GG              | 1946914547               |
| SNP_P4_110806_134960 | NW_004515651.1 | Scaffold29  | 134960                  | AA                              | GG              | 1946914549               |
| SNP_P4_110807_134965 | NW_004515651.1 | Scaffold29  | 134965                  | CC                              | AA              | 1946914551               |
| SNP_P4_110808_135009 | NW_004515651.1 | Scaffold29  | 135009                  | CC                              | AA              | 1946914553               |

| SNPs IDs             | Chromosome IDs | Chromosomes | Physical positions (bp) | CDC Frontier (Reference genome) | (ILWC46 & LPNB) | NCBI SNPdb Accession IDs |
|----------------------|----------------|-------------|-------------------------|---------------------------------|-----------------|--------------------------|
| SNP_P4_110809_135027 | NW_004515651.1 | Scaffold29  | 135027                  | TT                              | AA              | 1946914555               |
| SNP_P4_110810_135066 | NW_004515651.1 | Scaffold29  | 135066                  | TT                              | GG              | 1946914557               |
| SNP_P4_110811_135067 | NW_004515651.1 | Scaffold29  | 135067                  | TT                              | CC              | 1946914559               |
| SNP_P4_110812_135263 | NW_004515651.1 | Scaffold29  | 135263                  | AA                              | GG              | 1946914561               |
| SNP_P4_110813_135383 | NW_004515651.1 | Scaffold29  | 135383                  | CC                              | AA              | 1946914563               |
| SNP_P4_110814_135384 | NW_004515651.1 | Scaffold29  | 135384                  | CC                              | TT              | 1946914565               |
| SNP_P4_110815_135385 | NW_004515651.1 | Scaffold29  | 135385                  | AA                              | GG              | 1946914567               |
| SNP_P4_110816_135421 | NW_004515651.1 | Scaffold29  | 135421                  | TT                              | CC              | 1946914569               |
| SNP_P4_110817_135429 | NW_004515651.1 | Scaffold29  | 135429                  | GG                              | CC              | 1946914571               |
| SNP_P4_110818_135565 | NW_004515651.1 | Scaffold29  | 135565                  | GG                              | CC              | 1946914573               |
| SNP_P4_110819_135595 | NW_004515651.1 | Scaffold29  | 135595                  | AA                              | TT              | 1946914575               |
| SNP_P4_110820_135597 | NW_004515651.1 | Scaffold29  | 135597                  | AA                              | CC              | 1946914577               |
| SNP_P4_110821_137601 | NW_004515651.1 | Scaffold29  | 137601                  | AA                              | CC              | 1946914579               |
| SNP_P4_110822_137620 | NW_004515651.1 | Scaffold29  | 137620                  | TT                              | AA              | 1946914581               |
| SNP_P4_110823_137657 | NW_004515651.1 | Scaffold29  | 137657                  | TT                              | AA              | 1946914583               |
| SNP_P4_110824_137666 | NW_004515651.1 | Scaffold29  | 137666                  | TT                              | CC              | 1946914585               |
| SNP_P4_110825_137667 | NW_004515651.1 | Scaffold29  | 137667                  | GG                              | AA              | 1946914587               |
| SNP_P4_110826_137684 | NW_004515651.1 | Scaffold29  | 137684                  | CC                              | TT              | 1946914589               |
| SNP_P4_110827_137687 | NW_004515651.1 | Scaffold29  | 137687                  | GG                              | AA              | 1946914591               |
| SNP_P4_110828_137764 | NW_004515651.1 | Scaffold29  | 137764                  | CC                              | AA              | 1946914593               |
| SNP_P4_110829_137803 | NW_004515651.1 | Scaffold29  | 137803                  | TT                              | AA              | 1946914595               |
| SNP_P4_110830_137849 | NW_004515651.1 | Scaffold29  | 137849                  | TT                              | GG              | 1946914597               |
| SNP_P4_110831_137857 | NW_004515651.1 | Scaffold29  | 137857                  | TT                              | GG              | 1946914599               |
| SNP_P4_110832_137892 | NW_004515651.1 | Scaffold29  | 137892                  | TT                              | CC              | 1946914601               |
| SNP_P4_110833_137933 | NW_004515651.1 | Scaffold29  | 137933                  | CC                              | AA              | 1946914603               |
| SNP_P4_110834_137961 | NW_004515651.1 | Scaffold29  | 137961                  | GG                              | AA              | 1946914605               |
| SNP_P4_110835_137964 | NW_004515651.1 | Scaffold29  | 137964                  | GG                              | CC              | 1946914607               |
| SNP_P4_110836_137966 | NW_004515651.1 | Scaffold29  | 137966                  | CC                              | GG              | 1946914609               |
| SNP_P4_110837_138001 | NW_004515651.1 | Scaffold29  | 138001                  | GG                              | AA              | 1946914611               |
| SNP_P4_110838_138077 | NW_004515651.1 | Scaffold29  | 138077                  | GG                              | TT              | 1946914613               |
| SNP_P4_110839_138079 | NW_004515651.1 | Scaffold29  | 138079                  | CC                              | GG              | 1946914615               |
| SNP_P4_110840_138182 | NW_004515651.1 | Scaffold29  | 138182                  | GG                              | CC              | 1946914617               |
| SNP_P4_110841_138237 | NW_004515651.1 | Scaffold29  | 138237                  | GG                              | AA              | 1946914619               |
| SNP_P4_110842_138344 | NW_004515651.1 | Scaffold29  | 138344                  | CC                              | AA              | 1946914621               |
| SNP_P4_110843_138381 | NW_004515651.1 | Scaffold29  | 138381                  | TT                              | CC              | 1946914623               |
| SNP_P4_110844_138419 | NW_004515651.1 | Scaffold29  | 138419                  | GG                              | TT              | 1946914625               |
| SNP_P4_110845_138436 | NW_004515651.1 | Scaffold29  | 138436                  | GG                              | AA              | 1946914627               |
| SNP_P4_110846_138437 | NW_004515651.1 | Scaffold29  | 138437                  | AA                              | TT              | 1946914629               |
| SNP_P4_110847_138438 | NW_004515651.1 | Scaffold29  | 138438                  | AA                              | TT              | 1946914631               |
| SNP_P4_110848_138513 | NW_004515651.1 | Scaffold29  | 138513                  | TT                              | CC              | 1946914633               |
| SNP_P4_110849_138862 | NW_004515651.1 | Scaffold29  | 138862                  | GG                              | AA              | 1946914635               |
| SNP_P4_110850_138907 | NW_004515651.1 | Scaffold29  | 138907                  | CC                              | AA              | 1946914637               |

| SNPs IDs             | Chromosome IDs | Chromosomes | Physical positions (bp) | CDC Frontier (Reference genome) | (ILWC46 & LPNB) | NCBI SNPdb Accession IDs |
|----------------------|----------------|-------------|-------------------------|---------------------------------|-----------------|--------------------------|
| SNP_P4_110851_143565 | NW_004515651.1 | Scaffold29  | 143565                  | GG                              | AA              | 1946914639               |
| SNP_P4_110852_144869 | NW_004515651.1 | Scaffold29  | 144869                  | CC                              | TT              | 1946914641               |
| SNP_P4_110853_144892 | NW_004515651.1 | Scaffold29  | 144892                  | TT                              | AA              | 1946914643               |
| SNP_P4_110854_144905 | NW_004515651.1 | Scaffold29  | 144905                  | TT                              | GG              | 1946914645               |
| SNP_P4_110855_145033 | NW_004515651.1 | Scaffold29  | 145033                  | TT                              | CC              | 1946914647               |
| SNP_P4_110856_145185 | NW_004515651.1 | Scaffold29  | 145185                  | GG                              | AA              | 1946914649               |
| SNP_P4_110857_145199 | NW_004515651.1 | Scaffold29  | 145199                  | TT                              | AA              | 1946914651               |
| SNP_P4_110858_145215 | NW_004515651.1 | Scaffold29  | 145215                  | AA                              | GG              | 1946914653               |
| SNP_P4_110859_145230 | NW_004515651.1 | Scaffold29  | 145230                  | AA                              | TT              | 1946914655               |
| SNP_P4_110860_145309 | NW_004515651.1 | Scaffold29  | 145309                  | TT                              | AA              | 1946914657               |
| SNP_P4_110861_145346 | NW_004515651.1 | Scaffold29  | 145346                  | AA                              | CC              | 1946914659               |
| SNP_P4_110862_145356 | NW_004515651.1 | Scaffold29  | 145356                  | TT                              | GG              | 1946914661               |
| SNP_P4_110863_145366 | NW_004515651.1 | Scaffold29  | 145366                  | TT                              | GG              | 1946914663               |
| SNP_P4_110864_145414 | NW_004515651.1 | Scaffold29  | 145414                  | AA                              | CC              | 1946914665               |
| SNP_P4_110865_145524 | NW_004515651.1 | Scaffold29  | 145524                  | CC                              | TT              | 1946914667               |
| SNP_P4_110866_147077 | NW_004515651.1 | Scaffold29  | 147077                  | TT                              | CC              | 1946914669               |
| SNP_P4_110867_147095 | NW_004515651.1 | Scaffold29  | 147095                  | TT                              | GG              | 1946914671               |
| SNP_P4_110868_147118 | NW_004515651.1 | Scaffold29  | 147118                  | CC                              | TT              | 1946914673               |
| SNP_P4_110869_147155 | NW_004515651.1 | Scaffold29  | 147155                  | GG                              | AA              | 1946914675               |
| SNP_P4_110870_147267 | NW_004515651.1 | Scaffold29  | 147267                  | CC                              | GG              | 1946914677               |
| SNP_P4_110871_147275 | NW_004515651.1 | Scaffold29  | 147275                  | CC                              | TT              | 1946914679               |
| SNP_P4_110872_147284 | NW_004515651.1 | Scaffold29  | 147284                  | AA                              | TT              | 1946914681               |
| SNP_P4_110873_147286 | NW_004515651.1 | Scaffold29  | 147286                  | TT                              | AA              | 1946914683               |
| SNP_P4_110874_147369 | NW_004515651.1 | Scaffold29  | 147369                  | TT                              | AA              | 1946914685               |
| SNP_P4_110875_147411 | NW_004515651.1 | Scaffold29  | 147411                  | AA                              | GG              | 1946914687               |
| SNP_P4_110876_147502 | NW_004515651.1 | Scaffold29  | 147502                  | GG                              | CC              | 1946914689               |
| SNP_P4_110877_147510 | NW_004515651.1 | Scaffold29  | 147510                  | TT                              | AA              | 1946914691               |
| SNP_P4_110878_147626 | NW_004515651.1 | Scaffold29  | 147626                  | TT                              | AA              | 1946914693               |
| SNP_P4_110879_147654 | NW_004515651.1 | Scaffold29  | 147654                  | GG                              | AA              | 1946914695               |
| SNP_P4_110880_147731 | NW_004515651.1 | Scaffold29  | 147731                  | AA                              | GG              | 1946914697               |
| SNP_P4_110881_149630 | NW_004515651.1 | Scaffold29  | 149630                  | AA                              | GG              | 1946914699               |
| SNP_P4_110882_150807 | NW_004515651.1 | Scaffold29  | 150807                  | AA                              | GG              | 1946914700               |
| SNP_P4_110883_150840 | NW_004515651.1 | Scaffold29  | 150840                  | TT                              | GG              | 1946914701               |
| SNP_P4_110884_150844 | NW_004515651.1 | Scaffold29  | 150844                  | TT                              | GG              | 1946914702               |
| SNP_P4_110885_150882 | NW_004515651.1 | Scaffold29  | 150882                  | GG                              | AA              | 1946914703               |
| SNP_P4_110886_150898 | NW_004515651.1 | Scaffold29  | 150898                  | GG                              | AA              | 1946914704               |
| SNP_P4_110887_150929 | NW_004515651.1 | Scaffold29  | 150929                  | AA                              | TT              | 1946914705               |
| SNP_P4_110888_150936 | NW_004515651.1 | Scaffold29  | 150936                  | TT                              | CC              | 1946914706               |
| SNP_P4_110889_151057 | NW_004515651.1 | Scaffold29  | 151057                  | GG                              | TT              | 1946914707               |
| SNP_P4_110890_151071 | NW_004515651.1 | Scaffold29  | 151071                  | GG                              | AA              | 1946914708               |
| SNP_P4_110891_151154 | NW_004515651.1 | Scaffold29  | 151154                  | AA                              | GG              | 1946914709               |
| SNP_P4_110892_151166 | NW_004515651.1 | Scaffold29  | 151166                  | TT                              | GG              | 1946914710               |

| SNPs IDs             | Chromosome IDs | Chromosomes | Physical positions (bp) | CDC Frontier (Reference genome) | (ILWC46 & LPNB) | NCBI SNPdb Accession IDs |
|----------------------|----------------|-------------|-------------------------|---------------------------------|-----------------|--------------------------|
| SNP_P4_110893_162372 | NW_004515651.1 | Scaffold29  | 162372                  | AA                              | GG              | 1946914711               |
| SNP_P4_110894_167310 | NW_004515651.1 | Scaffold29  | 167310                  | TT                              | CC              | 1946914712               |
| SNP_P4_110895_170298 | NW_004515651.1 | Scaffold29  | 170298                  | AA                              | CC              | 1946914713               |
| SNP_P4_110896_170299 | NW_004515651.1 | Scaffold29  | 170299                  | TT                              | CC              | 1946914714               |
| SNP_P4_110897_170319 | NW_004515651.1 | Scaffold29  | 170319                  | TT                              | CC              | 1946914715               |
| SNP_P4_110898_170328 | NW_004515651.1 | Scaffold29  | 170328                  | AA                              | GG              | 1946914716               |
| SNP_P4_110899_170634 | NW_004515651.1 | Scaffold29  | 170634                  | AA                              | GG              | 1946914717               |
| SNP_P4_110900_177878 | NW_004515651.1 | Scaffold29  | 177878                  | GG                              | AA              | 1946914719               |
| SNP_P4_110901_181561 | NW_004515651.1 | Scaffold29  | 181561                  | GG                              | AA              | 1946914721               |
| SNP_P4_110902_183841 | NW_004515651.1 | Scaffold29  | 183841                  | TT                              | CC              | 1946914723               |
| SNP_P4_110903_185800 | NW_004515651.1 | Scaffold29  | 185800                  | TT                              | CC              | 1946914725               |
| SNP_P4_110904_186959 | NW_004515651.1 | Scaffold29  | 186959                  | AA                              | TT              | 1946914727               |
| SNP_P4_110905_198427 | NW_004515651.1 | Scaffold29  | 198427                  | CC                              | AA              | 1946914729               |
| SNP_P4_110906_198441 | NW_004515651.1 | Scaffold29  | 198441                  | CC                              | TT              | 1946914731               |
| SNP_P4_110908_205461 | NW_004515651.1 | Scaffold29  | 205461                  | TT                              | GG              | 1946914733               |
| SNP_P4_110909_205469 | NW_004515651.1 | Scaffold29  | 205469                  | GG                              | TT              | 1946914735               |
| SNP_P4_110910_209417 | NW_004515651.1 | Scaffold29  | 209417                  | AA                              | CC              | 1946914737               |
| SNP_P4_110911_209496 | NW_004515651.1 | Scaffold29  | 209496                  | TT                              | GG              | 1946914739               |
| SNP_P4_110912_209543 | NW_004515651.1 | Scaffold29  | 209543                  | AA                              | CC              | 1946914741               |
| SNP_P4_110913_209562 | NW_004515651.1 | Scaffold29  | 209562                  | GG                              | AA              | 1946914743               |
| SNP_P4_110914_209571 | NW_004515651.1 | Scaffold29  | 209571                  | AA                              | GG              | 1946914745               |
| SNP_P4_110915_209578 | NW_004515651.1 | Scaffold29  | 209578                  | TT                              | CC              | 1946914747               |
| SNP_P4_110916_209641 | NW_004515651.1 | Scaffold29  | 209641                  | AA                              | GG              | 1946914749               |
| SNP_P4_110917_209651 | NW_004515651.1 | Scaffold29  | 209651                  | AA                              | GG              | 1946914751               |
| SNP_P4_110918_209682 | NW_004515651.1 | Scaffold29  | 209682                  | CC                              | TT              | 1946914753               |
| SNP_P4_110919_209690 | NW_004515651.1 | Scaffold29  | 209690                  | TT                              | GG              | 1946914755               |
| SNP_P4_110920_209711 | NW_004515651.1 | Scaffold29  | 209711                  | AA                              | GG              | 1946914758               |
| SNP_P4_110921_209742 | NW_004515651.1 | Scaffold29  | 209742                  | AA                              | GG              | 1946914760               |
| SNP_P4_110922_209751 | NW_004515651.1 | Scaffold29  | 209751                  | AA                              | GG              | 1946914762               |
| SNP_P4_110923_209754 | NW_004515651.1 | Scaffold29  | 209754                  | GG                              | TT              | 1946914764               |
| SNP_P4_110924_209764 | NW_004515651.1 | Scaffold29  | 209764                  | TT                              | CC              | 1946914766               |
| SNP_P4_110925_209940 | NW_004515651.1 | Scaffold29  | 209940                  | CC                              | AA              | 1946914768               |
| SNP_P4_110926_209946 | NW_004515651.1 | Scaffold29  | 209946                  | CC                              | TT              | 1946914770               |
| SNP_P4_110927_214834 | NW_004515651.1 | Scaffold29  | 214834                  | AA                              | GG              | 1946914772               |
| SNP_P4_110928_230218 | NW_004515651.1 | Scaffold29  | 230218                  | CC                              | TT              | 1946914774               |
| SNP_P4_110929_230256 | NW_004515651.1 | Scaffold29  | 230256                  | GG                              | AA              | 1946914776               |
| SNP_P4_110930_230378 | NW_004515651.1 | Scaffold29  | 230378                  | CC                              | TT              | 1946914778               |
| SNP_P4_110931_230379 | NW_004515651.1 | Scaffold29  | 230379                  | AA                              | GG              | 1946914780               |
| SNP_P4_110932_230732 | NW_004515651.1 | Scaffold29  | 230732                  | GG                              | TT              | 1946914783               |
| SNP_P4_110933_232019 | NW_004515651.1 | Scaffold29  | 232019                  | GG                              | AA              | 1946914785               |
| SNP_P4_110934_234317 | NW_004515651.1 | Scaffold29  | 234317                  | CC                              | AA              | 1946914787               |
| SNP_P4_110935_234340 | NW_004515651.1 | Scaffold29  | 234340                  | AA                              | GG              | 1946914789               |

| SNPs IDs             | Chromosome IDs | Chromosomes | Physical positions (bp) | CDC Frontier (Reference genome) | (ILWC46 & LPNB) | NCBI SNPdb Accession IDs |
|----------------------|----------------|-------------|-------------------------|---------------------------------|-----------------|--------------------------|
| SNP_P4_110936_234373 | NW_004515651.1 | Scaffold29  | 234373                  | CC                              | TT              | 1946914791               |
| SNP_P4_110937_234374 | NW_004515651.1 | Scaffold29  | 234374                  | AA                              | GG              | 1946914793               |
| SNP_P4_110938_234785 | NW_004515651.1 | Scaffold29  | 234785                  | TT                              | CC              | 1946914795               |
| SNP_P4_110939_238914 | NW_004515651.1 | Scaffold29  | 238914                  | CC                              | TT              | 1946914797               |
| SNP_P4_110940_238929 | NW_004515651.1 | Scaffold29  | 238929                  | TT                              | CC              | 1946914799               |
| SNP_P4_110941_239027 | NW_004515651.1 | Scaffold29  | 239027                  | TT                              | GG              | 1946914801               |
| SNP_P4_110942_239179 | NW_004515651.1 | Scaffold29  | 239179                  | AA                              | TT              | 1946914803               |
| SNP_P4_110943_241648 | NW_004515651.1 | Scaffold29  | 241648                  | GG                              | TT              | 1946914805               |
| SNP_P4_110944_242097 | NW_004515651.1 | Scaffold29  | 242097                  | TT                              | AA              | 1946914807               |
| SNP_P4_110945_242267 | NW_004515651.1 | Scaffold29  | 242267                  | TT                              | AA              | 1946914809               |
| SNP_P4_110946_242312 | NW_004515651.1 | Scaffold29  | 242312                  | AA                              | CC              | 1946914811               |
| SNP_P4_110947_242313 | NW_004515651.1 | Scaffold29  | 242313                  | CC                              | GG              | 1946914813               |
| SNP_P4_110948_242375 | NW_004515651.1 | Scaffold29  | 242375                  | AA                              | TT              | 1946914815               |
| SNP_P4_110949_242380 | NW_004515651.1 | Scaffold29  | 242380                  | CC                              | AA              | 1946914817               |
| SNP_P4_110950_242405 | NW_004515651.1 | Scaffold29  | 242405                  | AA                              | TT              | 1946914819               |
| SNP_P4_110951_242466 | NW_004515651.1 | Scaffold29  | 242466                  | AA                              | TT              | 1946914821               |
| SNP_P4_110952_448    | NW_004515652.1 | Scaffold30  | 448                     | TT                              | CC              | 1946914823               |
| SNP_P4_110953_547    | NW_004515652.1 | Scaffold30  | 547                     | CC                              | TT              | 1946914825               |
| SNP_P4_110954_1513   | NW_004515652.1 | Scaffold30  | 1513                    | AA                              | GG              | 1946914827               |
| SNP_P4_110955_1552   | NW_004515652.1 | Scaffold30  | 1552                    | TT                              | CC              | 1946914829               |
| SNP_P4_110956_1564   | NW_004515652.1 | Scaffold30  | 1564                    | AA                              | TT              | 1946914831               |
| SNP_P4_110957_1590   | NW_004515652.1 | Scaffold30  | 1590                    | AA                              | GG              | 1946914833               |
| SNP_P4_110958_1600   | NW_004515652.1 | Scaffold30  | 1600                    | TT                              | CC              | 1946914836               |
| SNP_P4_110959_1828   | NW_004515652.1 | Scaffold30  | 1828                    | TT                              | CC              | 1946914838               |
| SNP_P4_110960_1873   | NW_004515652.1 | Scaffold30  | 1873                    | TT                              | CC              | 1946914840               |
| SNP_P4_110961_1891   | NW_004515652.1 | Scaffold30  | 1891                    | TT                              | CC              | 1946914842               |
| SNP_P4_110962_1908   | NW_004515652.1 | Scaffold30  | 1908                    | AA                              | GG              | 1946914844               |
| SNP_P4_110963_1912   | NW_004515652.1 | Scaffold30  | 1912                    | GG                              | AA              | 1946914846               |
| SNP_P4_110964_1921   | NW_004515652.1 | Scaffold30  | 1921                    | AA                              | CC              | 1946914848               |
| SNP_P4_110965_1936   | NW_004515652.1 | Scaffold30  | 1936                    | TT                              | CC              | 1946914850               |
| SNP_P4_110966_1944   | NW_004515652.1 | Scaffold30  | 1944                    | TT                              | GG              | 1946914852               |
| SNP_P4_110967_1946   | NW_004515652.1 | Scaffold30  | 1946                    | GG                              | AA              | 1946914854               |
| SNP_P4_110968_1957   | NW_004515652.1 | Scaffold30  | 1957                    | CC                              | TT              | 1946914856               |
| SNP_P4_110969_1958   | NW_004515652.1 | Scaffold30  | 1958                    | CC                              | TT              | 1946914858               |
| SNP_P4_110970_1984   | NW_004515652.1 | Scaffold30  | 1984                    | TT                              | CC              | 1946914860               |
| SNP_P4_110971_1992   | NW_004515652.1 | Scaffold30  | 1992                    | TT                              | CC              | 1946914862               |
| SNP_P4_110972_2001   | NW_004515652.1 | Scaffold30  | 2001                    | AA                              | CC              | 1946914864               |
| SNP_P4_110973_2002   | NW_004515652.1 | Scaffold30  | 2002                    | TT                              | CC              | 1946914866               |
| SNP_P4_110974_2004   | NW_004515652.1 | Scaffold30  | 2004                    | GG                              | CC              | 1946914868               |
| SNP_P4_110975_2032   | NW_004515652.1 | Scaffold30  | 2032                    | CC                              | TT              | 1946914870               |
| SNP_P4_110976_2041   | NW_004515652.1 | Scaffold30  | 2041                    | GG                              | AA              | 1946914872               |
| SNP_P4_110977_2050   | NW_004515652.1 | Scaffold30  | 2050                    | TT                              | CC              | 1946914874               |

| SNPs IDs            | Chromosome IDs | Chromosomes | Physical positions (bp) | CDC Frontier (Reference genome) | (ILWC46 & LPNB) | NCBI SNPdb Accession IDs |
|---------------------|----------------|-------------|-------------------------|---------------------------------|-----------------|--------------------------|
| SNP_P4_110978_2056  | NW_004515652.1 | Scaffold30  | 2056                    | TT                              | AA              | 1946914876               |
| SNP_P4_110979_2064  | NW_004515652.1 | Scaffold30  | 2064                    | TT                              | CC              | 1946914878               |
| SNP_P4_110980_2071  | NW_004515652.1 | Scaffold30  | 2071                    | TT                              | CC              | 1946914880               |
| SNP_P4_110981_12708 | NW_004515652.1 | Scaffold30  | 12708                   | CC                              | TT              | 1946914882               |
| SNP_P4_110982_12717 | NW_004515652.1 | Scaffold30  | 12717                   | GG                              | AA              | 1946914884               |
| SNP_P4_110983_13617 | NW_004515652.1 | Scaffold30  | 13617                   | AA                              | CC              | 1946914886               |
| SNP_P4_110984_23863 | NW_004515652.1 | Scaffold30  | 23863                   | GG                              | AA              | 1946914888               |
| SNP_P4_110985_23881 | NW_004515652.1 | Scaffold30  | 23881                   | GG                              | AA              | 1946914890               |
| SNP_P4_110986_44452 | NW_004515652.1 | Scaffold30  | 44452                   | CC                              | AA              | 1946914892               |
| SNP_P4_110987_44455 | NW_004515652.1 | Scaffold30  | 44455                   | AA                              | GG              | 1946914894               |
| SNP_P4_110988_66115 | NW_004515652.1 | Scaffold30  | 66115                   | GG                              | AA              | 1946914896               |
| SNP_P4_110989_66118 | NW_004515652.1 | Scaffold30  | 66118                   | AA                              | GG              | 1946914898               |
| SNP_P4_110990_67121 | NW_004515652.1 | Scaffold30  | 67121                   | AA                              | TT              | 1946914900               |
| SNP_P4_110991_67137 | NW_004515652.1 | Scaffold30  | 67137                   | TT                              | GG              | 1946914901               |
| SNP_P4_110992_67147 | NW_004515652.1 | Scaffold30  | 67147                   | TT                              | CC              | 1946914902               |
| SNP_P4_110993_67149 | NW_004515652.1 | Scaffold30  | 67149                   | TT                              | AA              | 1946914903               |
| SNP_P4_110994_78298 | NW_004515652.1 | Scaffold30  | 78298                   | CC                              | GG              | 1946914904               |
| SNP_P4_110995_78359 | NW_004515652.1 | Scaffold30  | 78359                   | AA                              | CC              | 1946914905               |
| SNP_P4_110996_78645 | NW_004515652.1 | Scaffold30  | 78645                   | AA                              | TT              | 1946914906               |
| SNP_P4_110997_78673 | NW_004515652.1 | Scaffold30  | 78673                   | TT                              | AA              | 1946914907               |
| SNP_P4_110998_78743 | NW_004515652.1 | Scaffold30  | 78743                   | TT                              | CC              | 1946914908               |
| SNP_P4_110999_78783 | NW_004515652.1 | Scaffold30  | 78783                   | AA                              | CC              | 1946914910               |
| SNP_P4_111000_78800 | NW_004515652.1 | Scaffold30  | 78800                   | CC                              | AA              | 1946914912               |
| SNP_P4_111001_78992 | NW_004515652.1 | Scaffold30  | 78992                   | TT                              | CC              | 1946914914               |
| SNP_P4_111002_84690 | NW_004515652.1 | Scaffold30  | 84690                   | TT                              | AA              | 1946914916               |
| SNP_P4_111003_84702 | NW_004515652.1 | Scaffold30  | 84702                   | TT                              | AA              | 1946914918               |
| SNP_P4_111004_84709 | NW_004515652.1 | Scaffold30  | 84709                   | AA                              | GG              | 1946914920               |
| SNP_P4_111005_84735 | NW_004515652.1 | Scaffold30  | 84735                   | CC                              | TT              | 1946914922               |
| SNP_P4_111006_85346 | NW_004515652.1 | Scaffold30  | 85346                   | AA                              | GG              | 1946914924               |
| SNP_P4_111007_85661 | NW_004515652.1 | Scaffold30  | 85661                   | TT                              | AA              | 1946914926               |
| SNP_P4_111008_85753 | NW_004515652.1 | Scaffold30  | 85753                   | CC                              | AA              | 1946914928               |
| SNP_P4_111009_85930 | NW_004515652.1 | Scaffold30  | 85930                   | TT                              | GG              | 1946914930               |
| SNP_P4_111010_86098 | NW_004515652.1 | Scaffold30  | 86098                   | GG                              | CC              | 1946914932               |
| SNP_P4_111011_86108 | NW_004515652.1 | Scaffold30  | 86108                   | GG                              | CC              | 1946914934               |
| SNP_P4_111012_87337 | NW_004515652.1 | Scaffold30  | 87337                   | AA                              | TT              | 1946914937               |
| SNP_P4_111013_91886 | NW_004515652.1 | Scaffold30  | 91886                   | CC                              | TT              | 1946914939               |
| SNP_P4_111014_93183 | NW_004515652.1 | Scaffold30  | 93183                   | AA                              | GG              | 1946914941               |
| SNP_P4_111015_93185 | NW_004515652.1 | Scaffold30  | 93185                   | CC                              | AA              | 1946914943               |
| SNP_P4_111016_97646 | NW_004515652.1 | Scaffold30  | 97646                   | CC                              | TT              | 1946914945               |
| SNP_P4_111017_98379 | NW_004515652.1 | Scaffold30  | 98379                   | TT                              | AA              | 1946914947               |
| SNP_P4_111018_98723 | NW_004515652.1 | Scaffold30  | 98723                   | CC                              | AA              | 1946914949               |
| SNP_P4_111019_98755 | NW_004515652.1 | Scaffold30  | 98755                   | AA                              | CC              | 1946914951               |



| SNPs IDs             | Chromosome IDs | Chromosomes | Physical positions (bp) | CDC Frontier (Reference genome) | (ILWC46 & LPNB) | NCBI SNPdb Accession IDs |
|----------------------|----------------|-------------|-------------------------|---------------------------------|-----------------|--------------------------|
| SNP_P4_111020_98980  | NW_004515652.1 | Scaffold30  | 98980                   | TT                              | AA              | 1946914953               |
| SNP_P4_111021_99021  | NW_004515652.1 | Scaffold30  | 99021                   | CC                              | AA              | 1946914955               |
| SNP_P4_111022_101820 | NW_004515652.1 | Scaffold30  | 101820                  | AA                              | TT              | 1946914957               |
| SNP_P4_111023_104790 | NW_004515652.1 | Scaffold30  | 104790                  | GG                              | TT              | 1946914959               |
| SNP_P4_111024_105568 | NW_004515652.1 | Scaffold30  | 105568                  | TT                              | AA              | 1946914961               |
| SNP_P4_111025_105913 | NW_004515652.1 | Scaffold30  | 105913                  | GG                              | CC              | 1946914963               |
| SNP_P4_111026_105926 | NW_004515652.1 | Scaffold30  | 105926                  | GG                              | CC              | 1946914965               |
| SNP_P4_111028_121885 | NW_004515652.1 | Scaffold30  | 121885                  | TT                              | CC              | 1946914967               |
| SNP_P4_111029_123870 | NW_004515652.1 | Scaffold30  | 123870                  | GG                              | CC              | 1946914969               |
| SNP_P4_111030_127160 | NW_004515652.1 | Scaffold30  | 127160                  | GG                              | TT              | 1946914971               |
| SNP_P4_111031_131068 | NW_004515652.1 | Scaffold30  | 131068                  | CC                              | AA              | 1946914974               |
| SNP_P4_111032_131071 | NW_004515652.1 | Scaffold30  | 131071                  | CC                              | AA              | 1946914976               |
| SNP_P4_111033_131072 | NW_004515652.1 | Scaffold30  | 131072                  | CC                              | TT              | 1946914978               |
| SNP_P4_111034_135172 | NW_004515652.1 | Scaffold30  | 135172                  | GG                              | CC              | 1946914980               |
| SNP_P4_111035_135829 | NW_004515652.1 | Scaffold30  | 135829                  | GG                              | AA              | 1946914982               |
| SNP_P4_111036_136523 | NW_004515652.1 | Scaffold30  | 136523                  | AA                              | CC              | 1946914984               |
| SNP_P4_111037_136543 | NW_004515652.1 | Scaffold30  | 136543                  | AA                              | TT              | 1946914986               |
| SNP_P4_111038_136549 | NW_004515652.1 | Scaffold30  | 136549                  | GG                              | AA              | 1946914988               |
| SNP_P4_111039_136755 | NW_004515652.1 | Scaffold30  | 136755                  | AA                              | TT              | 1946914990               |
| SNP_P4_111040_136757 | NW_004515652.1 | Scaffold30  | 136757                  | TT                              | GG              | 1946914992               |
| SNP_P4_111041_137541 | NW_004515652.1 | Scaffold30  | 137541                  | GG                              | AA              | 1946914994               |
| SNP_P4_111042_6380   | NW_004515653.1 | Scaffold36  | 6380                    | TT                              | AA              | 1946914996               |
| SNP_P4_111043_9017   | NW_004515653.1 | Scaffold36  | 9017                    | AA                              | GG              | 1946914998               |
| SNP_P4_111044_12321  | NW_004515653.1 | Scaffold36  | 12321                   | AA                              | GG              | 1946915000               |
| SNP_P4_111045_22007  | NW_004515653.1 | Scaffold36  | 22007                   | GG                              | TT              | 1946915002               |
| SNP_P4_111046_22008  | NW_004515653.1 | Scaffold36  | 22008                   | GG                              | TT              | 1946915004               |
| SNP_P4_111047_22016  | NW_004515653.1 | Scaffold36  | 22016                   | CC                              | TT              | 1946915006               |
| SNP_P4_111048_24955  | NW_004515653.1 | Scaffold36  | 24955                   | CC                              | AA              | 1946915008               |
| SNP_P4_111049_41979  | NW_004515653.1 | Scaffold36  | 41979                   | TT                              | CC              | 1946915010               |
| SNP_P4_111051_64397  | NW_004515653.1 | Scaffold36  | 64397                   | TT                              | GG              | 1946915012               |
| SNP_P4_111054_119326 | NW_004515653.1 | Scaffold36  | 119326                  | CC                              | TT              | 1946915014               |
| SNP_P4_111055_130103 | NW_004515653.1 | Scaffold36  | 130103                  | GG                              | AA              | 1946915016               |
| SNP_P4_111056_131660 | NW_004515653.1 | Scaffold36  | 131660                  | TT                              | CC              | 1946915018               |
| SNP_P4_111057_131719 | NW_004515653.1 | Scaffold36  | 131719                  | TT                              | CC              | 1946915020               |
| SNP_P4_111058_131738 | NW_004515653.1 | Scaffold36  | 131738                  | CC                              | AA              | 1946915022               |
| SNP_P4_111059_149413 | NW_004515653.1 | Scaffold36  | 149413                  | TT                              | AA              | 1946915024               |
| SNP_P4_111060_158827 | NW_004515653.1 | Scaffold36  | 158827                  | GG                              | AA              | 1946915026               |
| SNP_P4_111062_187893 | NW_004515653.1 | Scaffold36  | 187893                  | AA                              | GG              | 1946915028               |
| SNP_P4_111063_200994 | NW_004515653.1 | Scaffold36  | 200994                  | CC                              | AA              | 1946915030               |
| SNP_P4_111064_201474 | NW_004515653.1 | Scaffold36  | 201474                  | AA                              | CC              | 1946915032               |
| SNP_P4_111065_203797 | NW_004515653.1 | Scaffold36  | 203797                  | AA                              | GG              | 1946915034               |
| SNP_P4_111066_209556 | NW_004515653.1 | Scaffold36  | 209556                  | GG                              | TT              | 1946915036               |

| SNPs IDs             | Chromosome IDs | Chromosomes | Physical positions (bp) | CDC Frontier (Reference genome) | (ILWC46 & LPNB) | NCBI SNPdb Accession IDs |
|----------------------|----------------|-------------|-------------------------|---------------------------------|-----------------|--------------------------|
| SNP_P4_111068_209770 | NW_004515653.1 | Scaffold36  | 209770                  | TT                              | CC              | 1946915038               |
| SNP_P4_111069_209805 | NW_004515653.1 | Scaffold36  | 209805                  | GG                              | AA              | 1946915040               |
| SNP_P4_111070_210204 | NW_004515653.1 | Scaffold36  | 210204                  | GG                              | AA              | 1946915042               |
| SNP_P4_111071_210338 | NW_004515653.1 | Scaffold36  | 210338                  | AA                              | CC              | 1946915044               |
| SNP_P4_111072_210674 | NW_004515653.1 | Scaffold36  | 210674                  | AA                              | TT              | 1946915046               |
| SNP_P4_111073_210683 | NW_004515653.1 | Scaffold36  | 210683                  | TT                              | GG              | 1946915048               |
| SNP_P4_111074_214985 | NW_004515653.1 | Scaffold36  | 214985                  | AA                              | TT              | 1946915050               |
| SNP_P4_111075_214992 | NW_004515653.1 | Scaffold36  | 214992                  | TT                              | GG              | 1946915052               |
| SNP_P4_111076_215031 | NW_004515653.1 | Scaffold36  | 215031                  | CC                              | GG              | 1946915054               |
| SNP_P4_111077_215040 | NW_004515653.1 | Scaffold36  | 215040                  | AA                              | TT              | 1946915056               |
| SNP_P4_111078_215050 | NW_004515653.1 | Scaffold36  | 215050                  | CC                              | AA              | 1946915058               |
| SNP_P4_111079_215062 | NW_004515653.1 | Scaffold36  | 215062                  | AA                              | TT              | 1946915060               |
| SNP_P4_111080_215071 | NW_004515653.1 | Scaffold36  | 215071                  | TT                              | CC              | 1946915062               |
| SNP_P4_111081_215382 | NW_004515653.1 | Scaffold36  | 215382                  | CC                              | GG              | 1946915064               |
| SNP_P4_111082_215421 | NW_004515653.1 | Scaffold36  | 215421                  | CC                              | TT              | 1946915066               |
| SNP_P4_111083_221196 | NW_004515653.1 | Scaffold36  | 221196                  | AA                              | GG              | 1946915068               |
| SNP_P4_111084_221866 | NW_004515653.1 | Scaffold36  | 221866                  | AA                              | GG              | 1946915070               |
| SNP_P4_111085_221882 | NW_004515653.1 | Scaffold36  | 221882                  | CC                              | AA              | 1946915072               |
| SNP_P4_111086_221894 | NW_004515653.1 | Scaffold36  | 221894                  | CC                              | TT              | 1946915074               |
| SNP_P4_111087_221902 | NW_004515653.1 | Scaffold36  | 221902                  | GG                              | AA              | 1946915076               |
| SNP_P4_111088_221916 | NW_004515653.1 | Scaffold36  | 221916                  | TT                              | CC              | 1946915078               |
| SNP_P4_111089_221929 | NW_004515653.1 | Scaffold36  | 221929                  | TT                              | CC              | 1946915080               |
| SNP_P4_111090_221944 | NW_004515653.1 | Scaffold36  | 221944                  | GG                              | TT              | 1946915082               |
| SNP_P4_111091_221952 | NW_004515653.1 | Scaffold36  | 221952                  | GG                              | AA              | 1946915084               |
| SNP_P4_111092_221965 | NW_004515653.1 | Scaffold36  | 221965                  | GG                              | AA              | 1946915086               |
| SNP_P4_111093_221966 | NW_004515653.1 | Scaffold36  | 221966                  | GG                              | AA              | 1946915088               |
| SNP_P4_111094_221999 | NW_004515653.1 | Scaffold36  | 221999                  | AA                              | CC              | 1946915090               |
| SNP_P4_111095_222030 | NW_004515653.1 | Scaffold36  | 222030                  | GG                              | CC              | 1946915092               |
| SNP_P4_111096_222063 | NW_004515653.1 | Scaffold36  | 222063                  | GG                              | TT              | 1946915094               |
| SNP_P4_111097_222067 | NW_004515653.1 | Scaffold36  | 222067                  | TT                              | GG              | 1946915096               |
| SNP_P4_111098_222139 | NW_004515653.1 | Scaffold36  | 222139                  | TT                              | CC              | 1946915098               |
| SNP_P4_111099_222164 | NW_004515653.1 | Scaffold36  | 222164                  | TT                              | GG              | 1946915100               |
| SNP_P4_111100_222327 | NW_004515653.1 | Scaffold36  | 222327                  | CC                              | GG              | 1946915102               |
| SNP_P4_111101_222343 | NW_004515653.1 | Scaffold36  | 222343                  | GG                              | TT              | 1946915104               |
| SNP_P4_111102_222396 | NW_004515653.1 | Scaffold36  | 222396                  | GG                              | CC              | 1946915106               |
| SNP_P4_111103_222621 | NW_004515653.1 | Scaffold36  | 222621                  | CC                              | TT              | 1946915108               |
| SNP_P4_111104_227685 | NW_004515653.1 | Scaffold36  | 227685                  | TT                              | CC              | 1946915110               |
| SNP_P4_111105_227924 | NW_004515653.1 | Scaffold36  | 227924                  | AA                              | CC              | 1946915112               |
| SNP_P4_111106_228037 | NW_004515653.1 | Scaffold36  | 228037                  | AA                              | GG              | 1946915114               |
| SNP_P4_111107_228180 | NW_004515653.1 | Scaffold36  | 228180                  | AA                              | GG              | 1946915116               |
| SNP_P4_111109_236702 | NW_004515653.1 | Scaffold36  | 236702                  | TT                              | AA              | 1946915118               |
| SNP_P4_111110_236812 | NW_004515653.1 | Scaffold36  | 236812                  | AA                              | CC              | 1946915120               |

| SNPs IDs             | Chromosome IDs | Chromosomes | Physical positions (bp) | CDC Frontier (Reference genome) | (ILWC46 & LPNB) | NCBI SNPdb Accession IDs |
|----------------------|----------------|-------------|-------------------------|---------------------------------|-----------------|--------------------------|
| SNP_P4_111111_236819 | NW_004515653.1 | Scaffold36  | 236819                  | AA                              | CC              | 1946915122               |
| SNP_P4_111112_236827 | NW_004515653.1 | Scaffold36  | 236827                  | GG                              | AA              | 1946915124               |
| SNP_P4_111113_236898 | NW_004515653.1 | Scaffold36  | 236898                  | AA                              | TT              | 1946915126               |
| SNP_P4_111114_241456 | NW_004515653.1 | Scaffold36  | 241456                  | AA                              | CC              | 1946915128               |
| SNP_P4_111115_241536 | NW_004515653.1 | Scaffold36  | 241536                  | TT                              | AA              | 1946915130               |
| SNP_P4_111116_245024 | NW_004515653.1 | Scaffold36  | 245024                  | AA                              | GG              | 1946915132               |
| SNP_P4_111117_261237 | NW_004515653.1 | Scaffold36  | 261237                  | AA                              | TT              | 1946915134               |
| SNP_P4_111118_261238 | NW_004515653.1 | Scaffold36  | 261238                  | GG                              | TT              | 1946915136               |
| SNP_P4_111119_261239 | NW_004515653.1 | Scaffold36  | 261239                  | TT                              | GG              | 1946915138               |
| SNP_P4_111120_267064 | NW_004515653.1 | Scaffold36  | 267064                  | TT                              | CC              | 1946915140               |
| SNP_P4_111121_281733 | NW_004515653.1 | Scaffold36  | 281733                  | CC                              | TT              | 1946915142               |
| SNP_P4_111124_308013 | NW_004515653.1 | Scaffold36  | 308013                  | GG                              | TT              | 1946915144               |
| SNP_P4_111125_308369 | NW_004515653.1 | Scaffold36  | 308369                  | AA                              | CC              | 1946915146               |
| SNP_P4_111126_308583 | NW_004515653.1 | Scaffold36  | 308583                  | TT                              | CC              | 1946915149               |
| SNP_P4_111127_308628 | NW_004515653.1 | Scaffold36  | 308628                  | CC                              | TT              | 1946915151               |
| SNP_P4_111128_316718 | NW_004515653.1 | Scaffold36  | 316718                  | TT                              | CC              | 1946915153               |
| SNP_P4_111129_316740 | NW_004515653.1 | Scaffold36  | 316740                  | AA                              | TT              | 1946915155               |
| SNP_P4_111130_317272 | NW_004515653.1 | Scaffold36  | 317272                  | AA                              | GG              | 1946915157               |
| SNP_P4_111131_317651 | NW_004515653.1 | Scaffold36  | 317651                  | TT                              | CC              | 1946915159               |
| SNP_P4_111132_319867 | NW_004515653.1 | Scaffold36  | 319867                  | AA                              | GG              | 1946915161               |
| SNP_P4_111133_320241 | NW_004515653.1 | Scaffold36  | 320241                  | AA                              | GG              | 1946915163               |
| SNP_P4_111135_327963 | NW_004515653.1 | Scaffold36  | 327963                  | CC                              | TT              | 1946915165               |
| SNP_P4_111136_327981 | NW_004515653.1 | Scaffold36  | 327981                  | TT                              | GG              | 1946915167               |
| SNP_P4_111137_330694 | NW_004515653.1 | Scaffold36  | 330694                  | GG                              | AA              | 1946915169               |
| SNP_P4_111138_336215 | NW_004515653.1 | Scaffold36  | 336215                  | GG                              | TT              | 1946915171               |
| SNP_P4_111139_337606 | NW_004515653.1 | Scaffold36  | 337606                  | TT                              | CC              | 1946915173               |
| SNP_P4_111140_419    | NW_004515654.1 | Scaffold37  | 419                     | AA                              | GG              | 1946915175               |
| SNP_P4_111141_477    | NW_004515654.1 | Scaffold37  | 477                     | CC                              | TT              | 1946915177               |
| SNP_P4_111142_1069   | NW_004515654.1 | Scaffold37  | 1069                    | AA                              | TT              | 1946915180               |
| SNP_P4_111143_1081   | NW_004515654.1 | Scaffold37  | 1081                    | AA                              | TT              | 1946915182               |
| SNP_P4_111144_5910   | NW_004515654.1 | Scaffold37  | 5910                    | TT                              | AA              | 1946915184               |
| SNP_P4_111145_5926   | NW_004515654.1 | Scaffold37  | 5926                    | AA                              | TT              | 1946915186               |
| SNP_P4_111146_6062   | NW_004515654.1 | Scaffold37  | 6062                    | GG                              | TT              | 1946915188               |
| SNP_P4_111147_6068   | NW_004515654.1 | Scaffold37  | 6068                    | TT                              | AA              | 1946915190               |
| SNP_P4_111148_11534  | NW_004515654.1 | Scaffold37  | 11534                   | CC                              | TT              | 1946915192               |
| SNP_P4_111149_15104  | NW_004515654.1 | Scaffold37  | 15104                   | AA                              | GG              | 1946915194               |
| SNP_P4_111150_15159  | NW_004515654.1 | Scaffold37  | 15159                   | CC                              | TT              | 1946915196               |
| SNP_P4_111151_15321  | NW_004515654.1 | Scaffold37  | 15321                   | AA                              | TT              | 1946915198               |
| SNP_P4_111152_15355  | NW_004515654.1 | Scaffold37  | 15355                   | AA                              | TT              | 1946915200               |
| SNP_P4_111153_15357  | NW_004515654.1 | Scaffold37  | 15357                   | AA                              | CC              | 1946915202               |
| SNP_P4_111154_15363  | NW_004515654.1 | Scaffold37  | 15363                   | TT                              | CC              | 1946915204               |
| SNP_P4_111155_15394  | NW_004515654.1 | Scaffold37  | 15394                   | TT                              | CC              | 1946915206               |

| SNPs IDs             | Chromosome IDs | Chromosomes | Physical positions (bp) | CDC Frontier (Reference genome) | (ILWC46 & LPNB) | NCBI SNPdb Accession IDs |
|----------------------|----------------|-------------|-------------------------|---------------------------------|-----------------|--------------------------|
| SNP_P4_111156_15400  | NW_004515654.1 | Scaffold37  | 15400                   | CC                              | TT              | 1946915208               |
| SNP_P4_111157_15407  | NW_004515654.1 | Scaffold37  | 15407                   | AA                              | GG              | 1946915210               |
| SNP_P4_111158_15446  | NW_004515654.1 | Scaffold37  | 15446                   | TT                              | CC              | 1946915212               |
| SNP_P4_111159_22324  | NW_004515654.1 | Scaffold37  | 22324                   | GG                              | AA              | 1946915215               |
| SNP_P4_111160_22365  | NW_004515654.1 | Scaffold37  | 22365                   | AA                              | GG              | 1946915217               |
| SNP_P4_111161_22749  | NW_004515654.1 | Scaffold37  | 22749                   | TT                              | CC              | 1946915219               |
| SNP_P4_111162_25744  | NW_004515654.1 | Scaffold37  | 25744                   | AA                              | GG              | 1946915221               |
| SNP_P4_111163_25751  | NW_004515654.1 | Scaffold37  | 25751                   | AA                              | GG              | 1946915223               |
| SNP_P4_111164_26609  | NW_004515654.1 | Scaffold37  | 26609                   | GG                              | AA              | 1946915225               |
| SNP_P4_111165_26651  | NW_004515654.1 | Scaffold37  | 26651                   | GG                              | TT              | 1946915227               |
| SNP_P4_111166_28362  | NW_004515654.1 | Scaffold37  | 28362                   | GG                              | AA              | 1946915229               |
| SNP_P4_111167_28398  | NW_004515654.1 | Scaffold37  | 28398                   | AA                              | CC              | 1946915231               |
| SNP_P4_111168_28483  | NW_004515654.1 | Scaffold37  | 28483                   | TT                              | AA              | 1946915233               |
| SNP_P4_111169_28520  | NW_004515654.1 | Scaffold37  | 28520                   | TT                              | AA              | 1946915235               |
| SNP_P4_111170_36820  | NW_004515654.1 | Scaffold37  | 36820                   | CC                              | TT              | 1946915237               |
| SNP_P4_111171_37820  | NW_004515654.1 | Scaffold37  | 37820                   | AA                              | TT              | 1946915239               |
| SNP_P4_111172_40031  | NW_004515654.1 | Scaffold37  | 40031                   | AA                              | CC              | 1946915241               |
| SNP_P4_111173_40039  | NW_004515654.1 | Scaffold37  | 40039                   | GG                              | TT              | 1946915243               |
| SNP_P4_111174_40046  | NW_004515654.1 | Scaffold37  | 40046                   | AA                              | CC              | 1946915245               |
| SNP_P4_111175_42352  | NW_004515654.1 | Scaffold37  | 42352                   | GG                              | CC              | 1946915247               |
| SNP_P4_111176_59082  | NW_004515654.1 | Scaffold37  | 59082                   | TT                              | AA              | 1946915249               |
| SNP_P4_111177_75764  | NW_004515654.1 | Scaffold37  | 75764                   | GG                              | TT              | 1946915251               |
| SNP_P4_111178_75859  | NW_004515654.1 | Scaffold37  | 75859                   | CC                              | AA              | 1946915253               |
| SNP_P4_111179_82807  | NW_004515654.1 | Scaffold37  | 82807                   | TT                              | AA              | 1946915255               |
| SNP_P4_111180_88458  | NW_004515654.1 | Scaffold37  | 88458                   | AA                              | CC              | 1946915257               |
| SNP_P4_111181_88515  | NW_004515654.1 | Scaffold37  | 88515                   | TT                              | GG              | 1946915259               |
| SNP_P4_111182_88601  | NW_004515654.1 | Scaffold37  | 88601                   | TT                              | CC              | 1946915261               |
| SNP_P4_111183_88952  | NW_004515654.1 | Scaffold37  | 88952                   | TT                              | AA              | 1946915263               |
| SNP_P4_111184_120687 | NW_004515654.1 | Scaffold37  | 120687                  | TT                              | CC              | 1946915265               |
| SNP_P4_111185_125367 | NW_004515654.1 | Scaffold37  | 125367                  | AA                              | GG              | 1946915267               |
| SNP_P4_111186_126219 | NW_004515654.1 | Scaffold37  | 126219                  | AA                              | TT              | 1946915269               |
| SNP_P4_111187_126290 | NW_004515654.1 | Scaffold37  | 126290                  | CC                              | GG              | 1946915271               |
| SNP_P4_111188_126376 | NW_004515654.1 | Scaffold37  | 126376                  | AA                              | CC              | 1946915273               |
| SNP_P4_111189_126381 | NW_004515654.1 | Scaffold37  | 126381                  | CC                              | GG              | 1946915275               |
| SNP_P4_111190_133945 | NW_004515654.1 | Scaffold37  | 133945                  | TT                              | GG              | 1946915277               |
| SNP_P4_111191_134258 | NW_004515654.1 | Scaffold37  | 134258                  | AA                              | GG              | 1946915279               |
| SNP_P4_111192_134284 | NW_004515654.1 | Scaffold37  | 134284                  | AA                              | CC              | 1946915281               |
| SNP_P4_111193_134470 | NW_004515654.1 | Scaffold37  | 134470                  | GG                              | TT              | 1946915283               |
| SNP_P4_111194_134538 | NW_004515654.1 | Scaffold37  | 134538                  | AA                              | GG              | 1946915285               |
| SNP_P4_111195_134546 | NW_004515654.1 | Scaffold37  | 134546                  | CC                              | TT              | 1946915287               |
| SNP_P4_111196_134585 | NW_004515654.1 | Scaffold37  | 134585                  | TT                              | CC              | 1946915289               |
| SNP_P4_111197_134653 | NW_004515654.1 | Scaffold37  | 134653                  | AA                              | GG              | 1946915291               |

| SNPs IDs             | Chromosome IDs | Chromosomes | Physical positions (bp) | CDC Frontier (Reference genome) | (ILWC46 & LPNB) | NCBI SNPdb Accession IDs |
|----------------------|----------------|-------------|-------------------------|---------------------------------|-----------------|--------------------------|
| SNP_P4_111198_134674 | NW_004515654.1 | Scaffold37  | 134674                  | TT                              | GG              | 1946915293               |
| SNP_P4_111199_134702 | NW_004515654.1 | Scaffold37  | 134702                  | CC                              | TT              | 1946915295               |
| SNP_P4_111200_134711 | NW_004515654.1 | Scaffold37  | 134711                  | GG                              | AA              | 1946915297               |
| SNP_P4_111201_134982 | NW_004515654.1 | Scaffold37  | 134982                  | TT                              | CC              | 1946915299               |
| SNP_P4_111202_135579 | NW_004515654.1 | Scaffold37  | 135579                  | AA                              | TT              | 1946915301               |
| SNP_P4_111203_136006 | NW_004515654.1 | Scaffold37  | 136006                  | AA                              | GG              | 1946915303               |
| SNP_P4_111204_136008 | NW_004515654.1 | Scaffold37  | 136008                  | GG                              | AA              | 1946915306               |
| SNP_P4_111205_136012 | NW_004515654.1 | Scaffold37  | 136012                  | CC                              | TT              | 1946915308               |
| SNP_P4_111206_136199 | NW_004515654.1 | Scaffold37  | 136199                  | AA                              | GG              | 1946915310               |
| SNP_P4_111207_136298 | NW_004515654.1 | Scaffold37  | 136298                  | TT                              | GG              | 1946915312               |
| SNP_P4_111208_136404 | NW_004515654.1 | Scaffold37  | 136404                  | AA                              | GG              | 1946915314               |
| SNP_P4_111209_136719 | NW_004515654.1 | Scaffold37  | 136719                  | AA                              | GG              | 1946915316               |
| SNP_P4_111210_136770 | NW_004515654.1 | Scaffold37  | 136770                  | TT                              | GG              | 1946915318               |
| SNP_P4_111211_136785 | NW_004515654.1 | Scaffold37  | 136785                  | TT                              | CC              | 1946915320               |
| SNP_P4_111212_136787 | NW_004515654.1 | Scaffold37  | 136787                  | GG                              | TT              | 1946915322               |
| SNP_P4_111213_136803 | NW_004515654.1 | Scaffold37  | 136803                  | GG                              | TT              | 1946915324               |
| SNP_P4_111214_136814 | NW_004515654.1 | Scaffold37  | 136814                  | AA                              | GG              | 1946915326               |
| SNP_P4_111215_140595 | NW_004515654.1 | Scaffold37  | 140595                  | TT                              | CC              | 1946915328               |
| SNP_P4_111216_161672 | NW_004515654.1 | Scaffold37  | 161672                  | TT                              | CC              | 1946915330               |
| SNP_P4_111217_2444   | NW_004515655.1 | Scaffold38  | 2444                    | TT                              | GG              | 1946915332               |
| SNP_P4_111219_4803   | NW_004515655.1 | Scaffold38  | 4803                    | GG                              | CC              | 1946915334               |
| SNP_P4_111220_8061   | NW_004515655.1 | Scaffold38  | 8061                    | GG                              | TT              | 1946915336               |
| SNP_P4_111221_8137   | NW_004515655.1 | Scaffold38  | 8137                    | CC                              | AA              | 1946915338               |
| SNP_P4_111222_9834   | NW_004515655.1 | Scaffold38  | 9834                    | TT                              | CC              | 1946915340               |
| SNP_P4_111223_9897   | NW_004515655.1 | Scaffold38  | 9897                    | TT                              | CC              | 1946915342               |
| SNP_P4_111224_10588  | NW_004515655.1 | Scaffold38  | 10588                   | TT                              | CC              | 1946915345               |
| SNP_P4_111225_18728  | NW_004515655.1 | Scaffold38  | 18728                   | GG                              | AA              | 1946915347               |
| SNP_P4_111226_20923  | NW_004515655.1 | Scaffold38  | 20923                   | CC                              | TT              | 1946915349               |
| SNP_P4_111227_29671  | NW_004515655.1 | Scaffold38  | 29671                   | GG                              | AA              | 1946915351               |
| SNP_P4_111228_32841  | NW_004515655.1 | Scaffold38  | 32841                   | AA                              | TT              | 1946915353               |
| SNP_P4_111229_55103  | NW_004515655.1 | Scaffold38  | 55103                   | GG                              | AA              | 1946915355               |
| SNP_P4_111230_55137  | NW_004515655.1 | Scaffold38  | 55137                   | AA                              | GG              | 1946915357               |
| SNP_P4_111231_56037  | NW_004515655.1 | Scaffold38  | 56037                   | GG                              | AA              | 1946915359               |
| SNP_P4_111232_58743  | NW_004515655.1 | Scaffold38  | 58743                   | AA                              | TT              | 1946915361               |
| SNP_P4_111233_59679  | NW_004515655.1 | Scaffold38  | 59679                   | TT                              | GG              | 1946915363               |
| SNP_P4_111234_62821  | NW_004515655.1 | Scaffold38  | 62821                   | TT                              | CC              | 1946915365               |
| SNP_P4_111235_65884  | NW_004515655.1 | Scaffold38  | 65884                   | GG                              | TT              | 1946915367               |
| SNP_P4_111236_67367  | NW_004515655.1 | Scaffold38  | 67367                   | CC                              | TT              | 1946915369               |
| SNP_P4_111237_68786  | NW_004515655.1 | Scaffold38  | 68786                   | TT                              | CC              | 1946915371               |
| SNP_P4_111238_69917  | NW_004515655.1 | Scaffold38  | 69917                   | AA                              | TT              | 1946915373               |
| SNP_P4_111239_70341  | NW_004515655.1 | Scaffold38  | 70341                   | GG                              | AA              | 1946915375               |
| SNP_P4_111240_70342  | NW_004515655.1 | Scaffold38  | 70342                   | TT                              | AA              | 1946915377               |

| SNPs IDs             | Chromosome IDs | Chromosomes | Physical positions (bp) | CDC Frontier (Reference genome) | (ILWC46 & LPNB) | NCBI SNPdb Accession IDs |
|----------------------|----------------|-------------|-------------------------|---------------------------------|-----------------|--------------------------|
| SNP_P4_111241_70831  | NW_004515655.1 | Scaffold38  | 70831                   | GG                              | AA              | 1946915379               |
| SNP_P4_111243_73796  | NW_004515655.1 | Scaffold38  | 73796                   | AA                              | CC              | 1946915381               |
| SNP_P4_111244_74213  | NW_004515655.1 | Scaffold38  | 74213                   | AA                              | GG              | 1946915383               |
| SNP_P4_111245_74685  | NW_004515655.1 | Scaffold38  | 74685                   | CC                              | TT              | 1946915385               |
| SNP_P4_111246_78095  | NW_004515655.1 | Scaffold38  | 78095                   | CC                              | AA              | 1946915387               |
| SNP_P4_111247_78113  | NW_004515655.1 | Scaffold38  | 78113                   | CC                              | TT              | 1946915389               |
| SNP_P4_111248_78433  | NW_004515655.1 | Scaffold38  | 78433                   | GG                              | TT              | 1946915391               |
| SNP_P4_111249_78457  | NW_004515655.1 | Scaffold38  | 78457                   | TT                              | CC              | 1946915393               |
| SNP_P4_111250_78490  | NW_004515655.1 | Scaffold38  | 78490                   | CC                              | TT              | 1946915395               |
| SNP_P4_111251_80634  | NW_004515655.1 | Scaffold38  | 80634                   | TT                              | GG              | 1946915397               |
| SNP_P4_111252_83970  | NW_004515655.1 | Scaffold38  | 83970                   | CC                              | TT              | 1946915399               |
| SNP_P4_111253_84142  | NW_004515655.1 | Scaffold38  | 84142                   | AA                              | GG              | 1946915401               |
| SNP_P4_111254_84562  | NW_004515655.1 | Scaffold38  | 84562                   | CC                              | TT              | 1946915403               |
| SNP_P4_111255_98598  | NW_004515655.1 | Scaffold38  | 98598                   | TT                              | CC              | 1946915405               |
| SNP_P4_111256_98701  | NW_004515655.1 | Scaffold38  | 98701                   | GG                              | AA              | 1946915407               |
| SNP_P4_111257_99094  | NW_004515655.1 | Scaffold38  | 99094                   | GG                              | TT              | 1946915409               |
| SNP_P4_111258_110913 | NW_004515655.1 | Scaffold38  | 110913                  | GG                              | TT              | 1946915411               |
| SNP_P4_111259_110937 | NW_004515655.1 | Scaffold38  | 110937                  | AA                              | GG              | 1946915413               |
| SNP_P4_111260_115714 | NW_004515655.1 | Scaffold38  | 115714                  | CC                              | TT              | 1946915415               |
| SNP_P4_111261_119995 | NW_004515655.1 | Scaffold38  | 119995                  | CC                              | TT              | 1946915417               |
| SNP_P4_111262_120000 | NW_004515655.1 | Scaffold38  | 120000                  | TT                              | CC              | 1946915419               |
| SNP_P4_111263_120813 | NW_004515655.1 | Scaffold38  | 120813                  | GG                              | TT              | 1946915421               |
| SNP_P4_111264_133001 | NW_004515655.1 | Scaffold38  | 133001                  | CC                              | TT              | 1946915423               |
| SNP_P4_111265_133114 | NW_004515655.1 | Scaffold38  | 133114                  | AA                              | GG              | 1946915425               |
| SNP_P4_111266_133426 | NW_004515655.1 | Scaffold38  | 133426                  | AA                              | GG              | 1946915427               |
| SNP_P4_111267_133628 | NW_004515655.1 | Scaffold38  | 133628                  | AA                              | GG              | 1946915429               |
| SNP_P4_111268_133644 | NW_004515655.1 | Scaffold38  | 133644                  | TT                              | CC              | 1946915431               |
| SNP_P4_111270_137550 | NW_004515655.1 | Scaffold38  | 137550                  | AA                              | GG              | 1946915433               |
| SNP_P4_111271_138371 | NW_004515655.1 | Scaffold38  | 138371                  | TT                              | AA              | 1946915435               |
| SNP_P4_111272_141153 | NW_004515655.1 | Scaffold38  | 141153                  | TT                              | CC              | 1946915437               |
| SNP_P4_111273_141484 | NW_004515655.1 | Scaffold38  | 141484                  | AA                              | GG              | 1946915439               |
| SNP_P4_111274_141530 | NW_004515655.1 | Scaffold38  | 141530                  | GG                              | AA              | 1946915441               |
| SNP_P4_111275_141615 | NW_004515655.1 | Scaffold38  | 141615                  | AA                              | TT              | 1946915443               |
| SNP_P4_111276_147459 | NW_004515655.1 | Scaffold38  | 147459                  | CC                              | GG              | 1946915445               |
| SNP_P4_111277_147762 | NW_004515655.1 | Scaffold38  | 147762                  | AA                              | GG              | 1946915447               |
| SNP_P4_111278_160563 | NW_004515655.1 | Scaffold38  | 160563                  | CC                              | TT              | 1946915449               |
| SNP_P4_111279_173852 | NW_004515655.1 | Scaffold38  | 173852                  | AA                              | GG              | 1946915451               |
| SNP_P4_111280_179417 | NW_004515655.1 | Scaffold38  | 179417                  | CC                              | TT              | 1946915453               |
| SNP_P4_111281_181689 | NW_004515655.1 | Scaffold38  | 181689                  | CC                              | TT              | 1946915455               |
| SNP_P4_111282_186576 | NW_004515655.1 | Scaffold38  | 186576                  | CC                              | AA              | 1946915457               |
| SNP_P4_111283_188761 | NW_004515655.1 | Scaffold38  | 188761                  | GG                              | AA              | 1946915459               |
| SNP_P4_111284_190013 | NW_004515655.1 | Scaffold38  | 190013                  | GG                              | AA              | 1946915461               |

| SNPs IDs             | Chromosome IDs | Chromosomes | Physical positions (bp) | CDC Frontier (Reference genome) | (ILWC46 & LPNB) | NCBI SNPdb Accession IDs |
|----------------------|----------------|-------------|-------------------------|---------------------------------|-----------------|--------------------------|
| SNP_P4_111286_211195 | NW_004515655.1 | Scaffold38  | 211195                  | AA                              | GG              | 1946915463               |
| SNP_P4_111287_213156 | NW_004515655.1 | Scaffold38  | 213156                  | AA                              | GG              | 1946915465               |
| SNP_P4_111288_216037 | NW_004515655.1 | Scaffold38  | 216037                  | TT                              | CC              | 1946915467               |
| SNP_P4_111289_216196 | NW_004515655.1 | Scaffold38  | 216196                  | TT                              | CC              | 1946915470               |
| SNP_P4_111290_221235 | NW_004515655.1 | Scaffold38  | 221235                  | TT                              | CC              | 1946915472               |
| SNP_P4_111291_233823 | NW_004515655.1 | Scaffold38  | 233823                  | TT                              | CC              | 1946915474               |
| SNP_P4_111292_234582 | NW_004515655.1 | Scaffold38  | 234582                  | GG                              | AA              | 1946915476               |
| SNP_P4_111293_235124 | NW_004515655.1 | Scaffold38  | 235124                  | AA                              | GG              | 1946915478               |
| SNP_P4_111294_237340 | NW_004515655.1 | Scaffold38  | 237340                  | TT                              | CC              | 1946915480               |
| SNP_P4_111295_237675 | NW_004515655.1 | Scaffold38  | 237675                  | GG                              | AA              | 1946915482               |
| SNP_P4_111297_238450 | NW_004515655.1 | Scaffold38  | 238450                  | TT                              | CC              | 1946915484               |
| SNP_P4_111298_238475 | NW_004515655.1 | Scaffold38  | 238475                  | AA                              | TT              | 1946915486               |
| SNP_P4_111299_238479 | NW_004515655.1 | Scaffold38  | 238479                  | GG                              | AA              | 1946915488               |
| SNP_P4_111300_238635 | NW_004515655.1 | Scaffold38  | 238635                  | TT                              | AA              | 1946915490               |
| SNP_P4_111301_238661 | NW_004515655.1 | Scaffold38  | 238661                  | GG                              | AA              | 1946915492               |
| SNP_P4_111303_241209 | NW_004515655.1 | Scaffold38  | 241209                  | AA                              | GG              | 1946915494               |
| SNP_P4_111304_245857 | NW_004515655.1 | Scaffold38  | 245857                  | CC                              | TT              | 1946915496               |
| SNP_P4_111306_248686 | NW_004515655.1 | Scaffold38  | 248686                  | TT                              | CC              | 1946915498               |
| SNP_P4_111307_252156 | NW_004515655.1 | Scaffold38  | 252156                  | AA                              | TT              | 1946915500               |
| SNP_P4_111308_252174 | NW_004515655.1 | Scaffold38  | 252174                  | AA                              | TT              | 1946915502               |
| SNP_P4_111309_252175 | NW_004515655.1 | Scaffold38  | 252175                  | CC                              | AA              | 1946915504               |
| SNP_P4_111310_252178 | NW_004515655.1 | Scaffold38  | 252178                  | AA                              | GG              | 1946915506               |
| SNP_P4_111311_252191 | NW_004515655.1 | Scaffold38  | 252191                  | TT                              | AA              | 1946915508               |
| SNP_P4_111312_252212 | NW_004515655.1 | Scaffold38  | 252212                  | GG                              | AA              | 1946915510               |
| SNP_P4_111313_252215 | NW_004515655.1 | Scaffold38  | 252215                  | GG                              | AA              | 1946915512               |
| SNP_P4_111314_252248 | NW_004515655.1 | Scaffold38  | 252248                  | CC                              | TT              | 1946915514               |
| SNP_P4_111315_252320 | NW_004515655.1 | Scaffold38  | 252320                  | CC                              | AA              | 1946915516               |
| SNP_P4_111317_252360 | NW_004515655.1 | Scaffold38  | 252360                  | AA                              | GG              | 1946915518               |
| SNP_P4_111318_252370 | NW_004515655.1 | Scaffold38  | 252370                  | CC                              | TT              | 1946915520               |
| SNP_P4_111319_252381 | NW_004515655.1 | Scaffold38  | 252381                  | TT                              | CC              | 1946915522               |
| SNP_P4_111320_253476 | NW_004515655.1 | Scaffold38  | 253476                  | GG                              | CC              | 1946915524               |
| SNP_P4_111321_255548 | NW_004515655.1 | Scaffold38  | 255548                  | GG                              | AA              | 1946915526               |
| SNP_P4_111322_261124 | NW_004515655.1 | Scaffold38  | 261124                  | TT                              | AA              | 1946915528               |
| SNP_P4_111323_263159 | NW_004515655.1 | Scaffold38  | 263159                  | CC                              | AA              | 1946915530               |
| SNP_P4_111324_263520 | NW_004515655.1 | Scaffold38  | 263520                  | CC                              | AA              | 1946915532               |
| SNP_P4_111325_263659 | NW_004515655.1 | Scaffold38  | 263659                  | GG                              | TT              | 1946915534               |
| SNP_P4_111326_264346 | NW_004515655.1 | Scaffold38  | 264346                  | TT                              | AA              | 1946915536               |
| SNP_P4_111327_264379 | NW_004515655.1 | Scaffold38  | 264379                  | AA                              | CC              | 1946915538               |
| SNP_P4_111328_265895 | NW_004515655.1 | Scaffold38  | 265895                  | CC                              | TT              | 1946915540               |
| SNP_P4_111330_269915 | NW_004515655.1 | Scaffold38  | 269915                  | GG                              | AA              | 1946915542               |
| SNP_P4_111331_270805 | NW_004515655.1 | Scaffold38  | 270805                  | CC                              | TT              | 1946915544               |
| SNP_P4_111332_274726 | NW_004515655.1 | Scaffold38  | 274726                  | GG                              | TT              | 1946915546               |

| SNPs IDs             | Chromosome IDs | Chromosomes | Physical positions (bp) | CDC Frontier (Reference genome) | (ILWC46 & LPNB) | NCBI SNPdb Accession IDs |
|----------------------|----------------|-------------|-------------------------|---------------------------------|-----------------|--------------------------|
| SNP_P4_111333_280164 | NW_004515655.1 | Scaffold38  | 280164                  | AA                              | TT              | 1946915548               |
| SNP_P4_111335_281950 | NW_004515655.1 | Scaffold38  | 281950                  | GG                              | TT              | 1946915550               |
| SNP_P4_111336_288296 | NW_004515655.1 | Scaffold38  | 288296                  | GG                              | AA              | 1946915552               |
| SNP_P4_111337_289728 | NW_004515655.1 | Scaffold38  | 289728                  | AA                              | GG              | 1946915554               |
| SNP_P4_111338_290071 | NW_004515655.1 | Scaffold38  | 290071                  | TT                              | CC              | 1946915556               |
| SNP_P4_111339_290146 | NW_004515655.1 | Scaffold38  | 290146                  | TT                              | CC              | 1946915558               |
| SNP_P4_111340_291155 | NW_004515655.1 | Scaffold38  | 291155                  | CC                              | TT              | 1946915560               |
| SNP_P4_111341_293251 | NW_004515655.1 | Scaffold38  | 293251                  | GG                              | AA              | 1946915562               |
| SNP_P4_111342_294694 | NW_004515655.1 | Scaffold38  | 294694                  | GG                              | CC              | 1946915564               |
| SNP_P4_111343_295384 | NW_004515655.1 | Scaffold38  | 295384                  | CC                              | TT              | 1946915566               |
| SNP_P4_111344_318278 | NW_004515655.1 | Scaffold38  | 318278                  | GG                              | TT              | 1946915568               |
| SNP_P4_111347_331968 | NW_004515655.1 | Scaffold38  | 331968                  | CC                              | AA              | 1946915570               |
| SNP_P4_111348_334208 | NW_004515655.1 | Scaffold38  | 334208                  | GG                              | AA              | 1946915572               |
| SNP_P4_111349_334283 | NW_004515655.1 | Scaffold38  | 334283                  | TT                              | CC              | 1946915574               |
| SNP_P4_111350_335400 | NW_004515655.1 | Scaffold38  | 335400                  | AA                              | GG              | 1946915576               |
| SNP_P4_111352_335663 | NW_004515655.1 | Scaffold38  | 335663                  | CC                              | TT              | 1946915578               |
| SNP_P4_111353_345530 | NW_004515655.1 | Scaffold38  | 345530                  | GG                              | AA              | 1946915580               |
| SNP_P4_111357_361233 | NW_004515655.1 | Scaffold38  | 361233                  | GG                              | AA              | 1946915582               |
| SNP_P4_111358_376208 | NW_004515655.1 | Scaffold38  | 376208                  | TT                              | AA              | 1946915584               |
| SNP_P4_111359_377431 | NW_004515655.1 | Scaffold38  | 377431                  | CC                              | GG              | 1946915586               |
| SNP_P4_111361_382852 | NW_004515655.1 | Scaffold38  | 382852                  | CC                              | TT              | 1946915588               |
| SNP_P4_111362_382868 | NW_004515655.1 | Scaffold38  | 382868                  | AA                              | GG              | 1946915590               |
| SNP_P4_111364_383410 | NW_004515655.1 | Scaffold38  | 383410                  | AA                              | GG              | 1946915592               |
| SNP_P4_111365_385685 | NW_004515655.1 | Scaffold38  | 385685                  | AA                              | GG              | 1946915594               |
| SNP_P4_111366_386024 | NW_004515655.1 | Scaffold38  | 386024                  | GG                              | CC              | 1946915597               |
| SNP_P4_111369_393976 | NW_004515655.1 | Scaffold38  | 393976                  | GG                              | TT              | 1946915599               |
| SNP_P4_111370_398325 | NW_004515655.1 | Scaffold38  | 398325                  | CC                              | GG              | 1946915601               |
| SNP_P4_111371_399510 | NW_004515655.1 | Scaffold38  | 399510                  | CC                              | TT              | 1946915603               |
| SNP_P4_111372_402607 | NW_004515655.1 | Scaffold38  | 402607                  | AA                              | TT              | 1946915605               |
| SNP_P4_111373_405895 | NW_004515655.1 | Scaffold38  | 405895                  | GG                              | TT              | 1946915607               |
| SNP_P4_111374_406507 | NW_004515655.1 | Scaffold38  | 406507                  | AA                              | CC              | 1946915609               |
| SNP_P4_111375_406518 | NW_004515655.1 | Scaffold38  | 406518                  | AA                              | GG              | 1946915611               |
| SNP_P4_111376_406525 | NW_004515655.1 | Scaffold38  | 406525                  | AA                              | CC              | 1946915613               |
| SNP_P4_111377_407273 | NW_004515655.1 | Scaffold38  | 407273                  | CC                              | GG              | 1946915615               |
| SNP_P4_111378_408454 | NW_004515655.1 | Scaffold38  | 408454                  | CC                              | AA              | 1946915617               |
| SNP_P4_111379_408840 | NW_004515655.1 | Scaffold38  | 408840                  | GG                              | AA              | 1946915619               |
| SNP_P4_111380_409030 | NW_004515655.1 | Scaffold38  | 409030                  | CC                              | TT              | 1946915621               |
| SNP_P4_111381_411922 | NW_004515655.1 | Scaffold38  | 411922                  | AA                              | GG              | 1946915623               |
| SNP_P4_111382_411941 | NW_004515655.1 | Scaffold38  | 411941                  | TT                              | CC              | 1946915625               |
| SNP_P4_111383_412789 | NW_004515655.1 | Scaffold38  | 412789                  | AA                              | TT              | 1946915627               |
| SNP_P4_111384_413554 | NW_004515655.1 | Scaffold38  | 413554                  | TT                              | CC              | 1946915629               |
| SNP_P4_111385_413627 | NW_004515655.1 | Scaffold38  | 413627                  | AA                              | GG              | 1946915631               |



| SNPs IDs             | Chromosome IDs | Chromosomes | Physical positions (bp) | CDC Frontier (Reference genome) | (ILWC46 & LPNB) | NCBI SNPdb Accession IDs |
|----------------------|----------------|-------------|-------------------------|---------------------------------|-----------------|--------------------------|
| SNP_P4_111386_413691 | NW_004515655.1 | Scaffold38  | 413691                  | GG                              | AA              | 1946915633               |
| SNP_P4_111387_413713 | NW_004515655.1 | Scaffold38  | 413713                  | CC                              | AA              | 1946915635               |
| SNP_P4_111388_413719 | NW_004515655.1 | Scaffold38  | 413719                  | AA                              | GG              | 1946915637               |
| SNP_P4_111389_413785 | NW_004515655.1 | Scaffold38  | 413785                  | GG                              | AA              | 1946915640               |
| SNP_P4_111391_413837 | NW_004515655.1 | Scaffold38  | 413837                  | TT                              | CC              | 1946915642               |
| SNP_P4_111392_414086 | NW_004515655.1 | Scaffold38  | 414086                  | AA                              | GG              | 1946915644               |
| SNP_P4_111393_419737 | NW_004515655.1 | Scaffold38  | 419737                  | TT                              | CC              | 1946915646               |
| SNP_P4_111394_421653 | NW_004515655.1 | Scaffold38  | 421653                  | TT                              | CC              | 1946915648               |
| SNP_P4_111396_431286 | NW_004515655.1 | Scaffold38  | 431286                  | AA                              | GG              | 1946915650               |
| SNP_P4_111397_433968 | NW_004515655.1 | Scaffold38  | 433968                  | GG                              | AA              | 1946915652               |
| SNP_P4_111399_471290 | NW_004515655.1 | Scaffold38  | 471290                  | TT                              | CC              | 1946915654               |
| SNP_P4_111400_473867 | NW_004515655.1 | Scaffold38  | 473867                  | GG                              | AA              | 1946915656               |
| SNP_P4_111401_473909 | NW_004515655.1 | Scaffold38  | 473909                  | CC                              | GG              | 1946915658               |
| SNP_P4_111402_473934 | NW_004515655.1 | Scaffold38  | 473934                  | AA                              | GG              | 1946915660               |
| SNP_P4_111404_476840 | NW_004515655.1 | Scaffold38  | 476840                  | GG                              | AA              | 1946915662               |
| SNP_P4_111405_487822 | NW_004515655.1 | Scaffold38  | 487822                  | TT                              | CC              | 1946915664               |
| SNP_P4_111406_487861 | NW_004515655.1 | Scaffold38  | 487861                  | GG                              | TT              | 1946915666               |
| SNP_P4_111407_487954 | NW_004515655.1 | Scaffold38  | 487954                  | TT                              | CC              | 1946915668               |
| SNP_P4_111408_488164 | NW_004515655.1 | Scaffold38  | 488164                  | CC                              | TT              | 1946915670               |
| SNP_P4_111409_488213 | NW_004515655.1 | Scaffold38  | 488213                  | GG                              | AA              | 1946915672               |
| SNP_P4_111410_488219 | NW_004515655.1 | Scaffold38  | 488219                  | TT                              | CC              | 1946915674               |
| SNP_P4_111411_488220 | NW_004515655.1 | Scaffold38  | 488220                  | CC                              | AA              | 1946915677               |
| SNP_P4_111412_488221 | NW_004515655.1 | Scaffold38  | 488221                  | CC                              | TT              | 1946915679               |
| SNP_P4_111413_488287 | NW_004515655.1 | Scaffold38  | 488287                  | TT                              | CC              | 1946915681               |
| SNP_P4_111414_488447 | NW_004515655.1 | Scaffold38  | 488447                  | CC                              | TT              | 1946915683               |
| SNP_P4_111415_488476 | NW_004515655.1 | Scaffold38  | 488476                  | AA                              | TT              | 1946915685               |
| SNP_P4_111416_488542 | NW_004515655.1 | Scaffold38  | 488542                  | TT                              | CC              | 1946915687               |
| SNP_P4_111417_488945 | NW_004515655.1 | Scaffold38  | 488945                  | CC                              | TT              | 1946915689               |
| SNP_P4_111418_488962 | NW_004515655.1 | Scaffold38  | 488962                  | GG                              | AA              | 1946915691               |
| SNP_P4_111419_488973 | NW_004515655.1 | Scaffold38  | 488973                  | TT                              | CC              | 1946915693               |
| SNP_P4_111420_489218 | NW_004515655.1 | Scaffold38  | 489218                  | TT                              | CC              | 1946915695               |
| SNP_P4_111421_490200 | NW_004515655.1 | Scaffold38  | 490200                  | TT                              | CC              | 1946915697               |
| SNP_P4_111422_491384 | NW_004515655.1 | Scaffold38  | 491384                  | TT                              | CC              | 1946915699               |
| SNP_P4_111423_496364 | NW_004515655.1 | Scaffold38  | 496364                  | GG                              | AA              | 1946915701               |
| SNP_P4_111424_497498 | NW_004515655.1 | Scaffold38  | 497498                  | TT                              | GG              | 1946915703               |
| SNP_P4_111426_501846 | NW_004515655.1 | Scaffold38  | 501846                  | AA                              | GG              | 1946915705               |
| SNP_P4_111427_502133 | NW_004515655.1 | Scaffold38  | 502133                  | CC                              | GG              | 1946915708               |
| SNP_P4_111428_503805 | NW_004515655.1 | Scaffold38  | 503805                  | AA                              | GG              | 1946915710               |
| SNP_P4_111429_503850 | NW_004515655.1 | Scaffold38  | 503850                  | CC                              | TT              | 1946915712               |
| SNP_P4_111430_504299 | NW_004515655.1 | Scaffold38  | 504299                  | AA                              | GG              | 1946915714               |
| SNP_P4_111431_504349 | NW_004515655.1 | Scaffold38  | 504349                  | TT                              | CC              | 1946915716               |
| SNP_P4_111432_504366 | NW_004515655.1 | Scaffold38  | 504366                  | AA                              | GG              | 1946915718               |

| SNPs IDs             | Chromosome IDs | Chromosomes | Physical positions (bp) | CDC Frontier (Reference genome) | (ILWC46 & LPNB) | NCBI SNPdb Accession IDs |
|----------------------|----------------|-------------|-------------------------|---------------------------------|-----------------|--------------------------|
| SNP_P4_111433_504391 | NW_004515655.1 | Scaffold38  | 504391                  | AA                              | GG              | 1946915720               |
| SNP_P4_111434_504401 | NW_004515655.1 | Scaffold38  | 504401                  | TT                              | AA              | 1946915722               |
| SNP_P4_111435_504413 | NW_004515655.1 | Scaffold38  | 504413                  | TT                              | GG              | 1946915724               |
| SNP_P4_111436_504417 | NW_004515655.1 | Scaffold38  | 504417                  | CC                              | TT              | 1946915726               |
| SNP_P4_111437_504432 | NW_004515655.1 | Scaffold38  | 504432                  | TT                              | GG              | 1946915728               |
| SNP_P4_111438_505442 | NW_004515655.1 | Scaffold38  | 505442                  | GG                              | TT              | 1946915730               |
| SNP_P4_111439_509524 | NW_004515655.1 | Scaffold38  | 509524                  | GG                              | AA              | 1946915732               |
| SNP_P4_111440_510959 | NW_004515655.1 | Scaffold38  | 510959                  | AA                              | GG              | 1946915734               |
| SNP_P4_111441_511966 | NW_004515655.1 | Scaffold38  | 511966                  | CC                              | TT              | 1946915736               |
| SNP_P4_111442_520372 | NW_004515655.1 | Scaffold38  | 520372                  | GG                              | TT              | 1946915738               |
| SNP_P4_111443_524232 | NW_004515655.1 | Scaffold38  | 524232                  | TT                              | CC              | 1946915740               |
| SNP_P4_111444_524246 | NW_004515655.1 | Scaffold38  | 524246                  | GG                              | AA              | 1946915742               |
| SNP_P4_111445_524299 | NW_004515655.1 | Scaffold38  | 524299                  | TT                              | CC              | 1946915744               |
| SNP_P4_111446_524526 | NW_004515655.1 | Scaffold38  | 524526                  | CC                              | GG              | 1946915747               |
| SNP_P4_111447_524570 | NW_004515655.1 | Scaffold38  | 524570                  | AA                              | CC              | 1946915749               |
| SNP_P4_111448_524584 | NW_004515655.1 | Scaffold38  | 524584                  | GG                              | AA              | 1946915751               |
| SNP_P4_111449_526383 | NW_004515655.1 | Scaffold38  | 526383                  | GG                              | CC              | 1946915753               |
| SNP_P4_111450_528158 | NW_004515655.1 | Scaffold38  | 528158                  | CC                              | AA              | 1946915755               |
| SNP_P4_111451_530889 | NW_004515655.1 | Scaffold38  | 530889                  | AA                              | GG              | 1946915757               |
| SNP_P4_111452_530901 | NW_004515655.1 | Scaffold38  | 530901                  | GG                              | TT              | 1946915759               |
| SNP_P4_111453_530942 | NW_004515655.1 | Scaffold38  | 530942                  | GG                              | TT              | 1946915761               |
| SNP_P4_111454_535359 | NW_004515655.1 | Scaffold38  | 535359                  | CC                              | TT              | 1946915763               |
| SNP_P4_111455_535594 | NW_004515655.1 | Scaffold38  | 535594                  | CC                              | TT              | 1946915765               |
| SNP_P4_111456_536132 | NW_004515655.1 | Scaffold38  | 536132                  | TT                              | GG              | 1946915767               |
| SNP_P4_111457_539963 | NW_004515655.1 | Scaffold38  | 539963                  | AA                              | CC              | 1946915769               |
| SNP_P4_111458_541439 | NW_004515655.1 | Scaffold38  | 541439                  | CC                              | TT              | 1946915771               |
| SNP_P4_111460_541795 | NW_004515655.1 | Scaffold38  | 541795                  | GG                              | AA              | 1946915773               |
| SNP_P4_111461_541839 | NW_004515655.1 | Scaffold38  | 541839                  | TT                              | CC              | 1946915775               |
| SNP_P4_111462_541844 | NW_004515655.1 | Scaffold38  | 541844                  | CC                              | AA              | 1946915777               |
| SNP_P4_111463_8987   | NW_004515656.1 | Scaffold39  | 8987                    | CC                              | TT              | 1946915779               |
| SNP_P4_111465_40074  | NW_004515656.1 | Scaffold39  | 40074                   | AA                              | GG              | 1946915781               |
| SNP_P4_111466_40146  | NW_004515656.1 | Scaffold39  | 40146                   | TT                              | CC              | 1946915783               |
| SNP_P4_111468_40339  | NW_004515656.1 | Scaffold39  | 40339                   | AA                              | GG              | 1946915785               |
| SNP_P4_111469_40345  | NW_004515656.1 | Scaffold39  | 40345                   | AA                              | CC              | 1946915787               |
| SNP_P4_111470_40390  | NW_004515656.1 | Scaffold39  | 40390                   | AA                              | GG              | 1946915789               |
| SNP_P4_111471_44789  | NW_004515656.1 | Scaffold39  | 44789                   | AA                              | TT              | 1946915791               |
| SNP_P4_111472_276    | NW_004515657.1 | Scaffold40  | 276                     | CC                              | TT              | 1946915793               |
| SNP_P4_111473_415    | NW_004515657.1 | Scaffold40  | 415                     | AA                              | GG              | 1946915795               |
| SNP_P4_111474_906    | NW_004515657.1 | Scaffold40  | 906                     | TT                              | CC              | 1946915797               |
| SNP_P4_111475_974    | NW_004515657.1 | Scaffold40  | 974                     | AA                              | GG              | 1946915799               |
| SNP_P4_111476_1254   | NW_004515657.1 | Scaffold40  | 1254                    | TT                              | AA              | 1946915801               |
| SNP_P4_111477_1256   | NW_004515657.1 | Scaffold40  | 1256                    | TT                              | CC              | 1946915803               |

| SNPs IDs            | Chromosome IDs | Chromosomes | Physical positions (bp) | CDC Frontier (Reference genome) | (ILWC46 & LPNB) | NCBI SNPdb Accession IDs |
|---------------------|----------------|-------------|-------------------------|---------------------------------|-----------------|--------------------------|
| SNP_P4_111478_12380 | NW_004515657.1 | Scaffold40  | 12380                   | AA                              | GG              | 1946915805               |
| SNP_P4_111479_12404 | NW_004515657.1 | Scaffold40  | 12404                   | GG                              | TT              | 1946915807               |
| SNP_P4_111480_12413 | NW_004515657.1 | Scaffold40  | 12413                   | CC                              | TT              | 1946915809               |
| SNP_P4_111481_12414 | NW_004515657.1 | Scaffold40  | 12414                   | GG                              | TT              | 1946915811               |
| SNP_P4_111482_12418 | NW_004515657.1 | Scaffold40  | 12418                   | GG                              | TT              | 1946915813               |
| SNP_P4_111483_12424 | NW_004515657.1 | Scaffold40  | 12424                   | GG                              | AA              | 1946915815               |
| SNP_P4_111484_39198 | NW_004515657.1 | Scaffold40  | 39198                   | GG                              | AA              | 1946915817               |
| SNP_P4_111485_40457 | NW_004515657.1 | Scaffold40  | 40457                   | CC                              | TT              | 1946915819               |
| SNP_P4_111486_40967 | NW_004515657.1 | Scaffold40  | 40967                   | CC                              | TT              | 1946915821               |
| SNP_P4_111487_40969 | NW_004515657.1 | Scaffold40  | 40969                   | AA                              | GG              | 1946915823               |
| SNP_P4_111488_41035 | NW_004515657.1 | Scaffold40  | 41035                   | GG                              | TT              | 1946915825               |
| SNP_P4_111490_41345 | NW_004515657.1 | Scaffold40  | 41345                   | TT                              | CC              | 1946915827               |
| SNP_P4_111491_41417 | NW_004515657.1 | Scaffold40  | 41417                   | GG                              | AA              | 1946915829               |
| SNP_P4_111493_56944 | NW_004515657.1 | Scaffold40  | 56944                   | GG                              | AA              | 1946915831               |
| SNP_P4_111494_58162 | NW_004515657.1 | Scaffold40  | 58162                   | AA                              | GG              | 1946915833               |
| SNP_P4_111495_58915 | NW_004515657.1 | Scaffold40  | 58915                   | AA                              | CC              | 1946915835               |
| SNP_P4_111496_58937 | NW_004515657.1 | Scaffold40  | 58937                   | TT                              | CC              | 1946915837               |
| SNP_P4_111497_58986 | NW_004515657.1 | Scaffold40  | 58986                   | CC                              | TT              | 1946915839               |
| SNP_P4_111498_58990 | NW_004515657.1 | Scaffold40  | 58990                   | TT                              | CC              | 1946915841               |
| SNP_P4_111499_58991 | NW_004515657.1 | Scaffold40  | 58991                   | GG                              | TT              | 1946915843               |
| SNP_P4_111500_59113 | NW_004515657.1 | Scaffold40  | 59113                   | AA                              | TT              | 1946915845               |
| SNP_P4_111501_59229 | NW_004515657.1 | Scaffold40  | 59229                   | AA                              | GG              | 1946915847               |
| SNP_P4_111502_59265 | NW_004515657.1 | Scaffold40  | 59265                   | TT                              | CC              | 1946915849               |
| SNP_P4_111504_59336 | NW_004515657.1 | Scaffold40  | 59336                   | AA                              | GG              | 1946915851               |
| SNP_P4_111505_59431 | NW_004515657.1 | Scaffold40  | 59431                   | GG                              | TT              | 1946915853               |
| SNP_P4_111506_59436 | NW_004515657.1 | Scaffold40  | 59436                   | GG                              | CC              | 1946915855               |
| SNP_P4_111507_59546 | NW_004515657.1 | Scaffold40  | 59546                   | AA                              | TT              | 1946915857               |
| SNP_P4_111508_59570 | NW_004515657.1 | Scaffold40  | 59570                   | CC                              | TT              | 1946915859               |
| SNP_P4_111509_59716 | NW_004515657.1 | Scaffold40  | 59716                   | TT                              | CC              | 1946915861               |
| SNP_P4_111510_59718 | NW_004515657.1 | Scaffold40  | 59718                   | AA                              | GG              | 1946915864               |
| SNP_P4_111511_59781 | NW_004515657.1 | Scaffold40  | 59781                   | TT                              | CC              | 1946915866               |
| SNP_P4_111512_67593 | NW_004515657.1 | Scaffold40  | 67593                   | AA                              | GG              | 1946915868               |
| SNP_P4_111513_71484 | NW_004515657.1 | Scaffold40  | 71484                   | AA                              | GG              | 1946915870               |
| SNP_P4_111514_72936 | NW_004515657.1 | Scaffold40  | 72936                   | TT                              | CC              | 1946915872               |
| SNP_P4_111515_75994 | NW_004515657.1 | Scaffold40  | 75994                   | CC                              | TT              | 1946915874               |
| SNP_P4_111516_76643 | NW_004515657.1 | Scaffold40  | 76643                   | TT                              | CC              | 1946915876               |
| SNP_P4_111517_76749 | NW_004515657.1 | Scaffold40  | 76749                   | TT                              | CC              | 1946915878               |
| SNP_P4_111518_87725 | NW_004515657.1 | Scaffold40  | 87725                   | GG                              | TT              | 1946915880               |
| SNP_P4_111519_87849 | NW_004515657.1 | Scaffold40  | 87849                   | GG                              | AA              | 1946915882               |
| SNP_P4_111520_88324 | NW_004515657.1 | Scaffold40  | 88324                   | GG                              | AA              | 1946915884               |
| SNP_P4_111521_88343 | NW_004515657.1 | Scaffold40  | 88343                   | AA                              | CC              | 1946915886               |
| SNP_P4_111522_89184 | NW_004515657.1 | Scaffold40  | 89184                   | AA                              | CC              | 1946915889               |

| SNPs IDs             | Chromosome IDs | Chromosomes | Physical positions (bp) | CDC Frontier (Reference genome) | (ILWC46 & LPNB) | NCBI SNPdb Accession IDs |
|----------------------|----------------|-------------|-------------------------|---------------------------------|-----------------|--------------------------|
| SNP_P4_111523_89247  | NW_004515657.1 | Scaffold40  | 89247                   | CC                              | AA              | 1946915891               |
| SNP_P4_111524_89471  | NW_004515657.1 | Scaffold40  | 89471                   | CC                              | TT              | 1946915893               |
| SNP_P4_111525_89523  | NW_004515657.1 | Scaffold40  | 89523                   | AA                              | TT              | 1946915895               |
| SNP_P4_111526_89540  | NW_004515657.1 | Scaffold40  | 89540                   | GG                              | TT              | 1946915897               |
| SNP_P4_111528_93883  | NW_004515657.1 | Scaffold40  | 93883                   | CC                              | GG              | 1946915899               |
| SNP_P4_111529_94751  | NW_004515657.1 | Scaffold40  | 94751                   | CC                              | TT              | 1946915901               |
| SNP_P4_111530_96779  | NW_004515657.1 | Scaffold40  | 96779                   | AA                              | CC              | 1946915903               |
| SNP_P4_111531_96834  | NW_004515657.1 | Scaffold40  | 96834                   | TT                              | AA              | 1946915905               |
| SNP_P4_111532_100417 | NW_004515657.1 | Scaffold40  | 100417                  | GG                              | TT              | 1946915907               |
| SNP_P4_111533_100451 | NW_004515657.1 | Scaffold40  | 100451                  | TT                              | CC              | 1946915909               |
| SNP_P4_111534_100467 | NW_004515657.1 | Scaffold40  | 100467                  | TT                              | AA              | 1946915911               |
| SNP_P4_111535_100469 | NW_004515657.1 | Scaffold40  | 100469                  | GG                              | TT              | 1946915913               |
| SNP_P4_111536_100567 | NW_004515657.1 | Scaffold40  | 100567                  | TT                              | CC              | 1946915915               |
| SNP_P4_111537_100640 | NW_004515657.1 | Scaffold40  | 100640                  | CC                              | TT              | 1946915917               |
| SNP_P4_111538_100659 | NW_004515657.1 | Scaffold40  | 100659                  | CC                              | TT              | 1946915919               |
| SNP_P4_111539_100818 | NW_004515657.1 | Scaffold40  | 100818                  | CC                              | TT              | 1946915921               |
| SNP_P4_111540_100819 | NW_004515657.1 | Scaffold40  | 100819                  | AA                              | TT              | 1946915923               |
| SNP_P4_111541_100855 | NW_004515657.1 | Scaffold40  | 100855                  | CC                              | TT              | 1946915925               |
| SNP_P4_111542_100994 | NW_004515657.1 | Scaffold40  | 100994                  | AA                              | TT              | 1946915927               |
| SNP_P4_111543_101022 | NW_004515657.1 | Scaffold40  | 101022                  | TT                              | CC              | 1946915929               |
| SNP_P4_111544_101046 | NW_004515657.1 | Scaffold40  | 101046                  | TT                              | AA              | 1946915931               |
| SNP_P4_111546_101086 | NW_004515657.1 | Scaffold40  | 101086                  | GG                              | CC              | 1946915933               |
| SNP_P4_111547_101126 | NW_004515657.1 | Scaffold40  | 101126                  | AA                              | TT              | 1946915935               |
| SNP_P4_111548_101435 | NW_004515657.1 | Scaffold40  | 101435                  | GG                              | AA              | 1946915937               |
| SNP_P4_111549_101453 | NW_004515657.1 | Scaffold40  | 101453                  | GG                              | CC              | 1946915939               |
| SNP_P4_111550_101468 | NW_004515657.1 | Scaffold40  | 101468                  | TT                              | GG              | 1946915941               |
| SNP_P4_111551_101477 | NW_004515657.1 | Scaffold40  | 101477                  | AA                              | GG              | 1946915943               |
| SNP_P4_111552_101478 | NW_004515657.1 | Scaffold40  | 101478                  | GG                              | AA              | 1946915945               |
| SNP_P4_111553_101485 | NW_004515657.1 | Scaffold40  | 101485                  | TT                              | CC              | 1946915947               |
| SNP_P4_111554_101487 | NW_004515657.1 | Scaffold40  | 101487                  | AA                              | TT              | 1946915949               |
| SNP_P4_111555_101504 | NW_004515657.1 | Scaffold40  | 101504                  | CC                              | TT              | 1946915951               |
| SNP_P4_111556_101510 | NW_004515657.1 | Scaffold40  | 101510                  | CC                              | TT              | 1946915953               |
| SNP_P4_111557_101526 | NW_004515657.1 | Scaffold40  | 101526                  | TT                              | AA              | 1946915955               |
| SNP_P4_111558_101545 | NW_004515657.1 | Scaffold40  | 101545                  | GG                              | AA              | 1946915957               |
| SNP_P4_111559_101595 | NW_004515657.1 | Scaffold40  | 101595                  | GG                              | AA              | 1946915959               |
| SNP_P4_111560_101596 | NW_004515657.1 | Scaffold40  | 101596                  | CC                              | AA              | 1946915961               |
| SNP_P4_111561_101605 | NW_004515657.1 | Scaffold40  | 101605                  | GG                              | AA              | 1946915963               |
| SNP_P4_111562_101663 | NW_004515657.1 | Scaffold40  | 101663                  | TT                              | AA              | 1946915965               |
| SNP_P4_111563_101912 | NW_004515657.1 | Scaffold40  | 101912                  | CC                              | GG              | 1946915967               |
| SNP_P4_111564_102079 | NW_004515657.1 | Scaffold40  | 102079                  | AA                              | GG              | 1946915969               |
| SNP_P4_111565_108717 | NW_004515657.1 | Scaffold40  | 108717                  | GG                              | AA              | 1946915971               |
| SNP_P4_111566_108934 | NW_004515657.1 | Scaffold40  | 108934                  | TT                              | AA              | 1946915973               |

| SNPs IDs             | Chromosome IDs | Chromosomes | Physical positions (bp) | CDC Frontier (Reference genome) | (ILWC46 & LPNB) | NCBI SNPdb Accession IDs |
|----------------------|----------------|-------------|-------------------------|---------------------------------|-----------------|--------------------------|
| SNP_P4_111567_121541 | NW_004515657.1 | Scaffold40  | 121541                  | TT                              | AA              | 1946915975               |
| SNP_P4_111569_133923 | NW_004515657.1 | Scaffold40  | 133923                  | CC                              | TT              | 1946915977               |
| SNP_P4_111570_133939 | NW_004515657.1 | Scaffold40  | 133939                  | CC                              | TT              | 1946915979               |
| SNP_P4_111571_133944 | NW_004515657.1 | Scaffold40  | 133944                  | AA                              | GG              | 1946915981               |
| SNP_P4_111572_133994 | NW_004515657.1 | Scaffold40  | 133994                  | CC                              | TT              | 1946915983               |
| SNP_P4_111573_135077 | NW_004515657.1 | Scaffold40  | 135077                  | GG                              | AA              | 1946915985               |
| SNP_P4_111574_135286 | NW_004515657.1 | Scaffold40  | 135286                  | AA                              | GG              | 1946915987               |
| SNP_P4_111575_135287 | NW_004515657.1 | Scaffold40  | 135287                  | CC                              | TT              | 1946915989               |
| SNP_P4_111576_135322 | NW_004515657.1 | Scaffold40  | 135322                  | TT                              | AA              | 1946915991               |
| SNP_P4_111577_135374 | NW_004515657.1 | Scaffold40  | 135374                  | CC                              | TT              | 1946915993               |
| SNP_P4_111578_135379 | NW_004515657.1 | Scaffold40  | 135379                  | AA                              | CC              | 1946915995               |
| SNP_P4_111579_135473 | NW_004515657.1 | Scaffold40  | 135473                  | TT                              | AA              | 1946915997               |
| SNP_P4_111580_135475 | NW_004515657.1 | Scaffold40  | 135475                  | CC                              | TT              | 1946915999               |
| SNP_P4_111581_135484 | NW_004515657.1 | Scaffold40  | 135484                  | TT                              | AA              | 1946916001               |
| SNP_P4_111582_152178 | NW_004515657.1 | Scaffold40  | 152178                  | AA                              | TT              | 1946916003               |
| SNP_P4_111583_181289 | NW_004515657.1 | Scaffold40  | 181289                  | AA                              | GG              | 1946916005               |
| SNP_P4_111584_181290 | NW_004515657.1 | Scaffold40  | 181290                  | TT                              | AA              | 1946916007               |
| SNP_P4_111585_181296 | NW_004515657.1 | Scaffold40  | 181296                  | TT                              | GG              | 1946916009               |
| SNP_P4_111586_181297 | NW_004515657.1 | Scaffold40  | 181297                  | TT                              | AA              | 1946916011               |
| SNP_P4_111587_212426 | NW_004515657.1 | Scaffold40  | 212426                  | AA                              | GG              | 1946916013               |
| SNP_P4_111588_212997 | NW_004515657.1 | Scaffold40  | 212997                  | TT                              | CC              | 1946916015               |
| SNP_P4_111589_214979 | NW_004515657.1 | Scaffold40  | 214979                  | CC                              | TT              | 1946916017               |
| SNP_P4_111590_226678 | NW_004515657.1 | Scaffold40  | 226678                  | TT                              | AA              | 1946916019               |
| SNP_P4_111591_226682 | NW_004515657.1 | Scaffold40  | 226682                  | CC                              | TT              | 1946916021               |
| SNP_P4_111592_229194 | NW_004515657.1 | Scaffold40  | 229194                  | TT                              | GG              | 1946916023               |
| SNP_P4_111593_229262 | NW_004515657.1 | Scaffold40  | 229262                  | GG                              | AA              | 1946916025               |
| SNP_P4_111594_229283 | NW_004515657.1 | Scaffold40  | 229283                  | AA                              | GG              | 1946916027               |
| SNP_P4_111595_229435 | NW_004515657.1 | Scaffold40  | 229435                  | AA                              | GG              | 1946916030               |
| SNP_P4_111596_229453 | NW_004515657.1 | Scaffold40  | 229453                  | TT                              | CC              | 1946916032               |
| SNP_P4_111597_229456 | NW_004515657.1 | Scaffold40  | 229456                  | GG                              | TT              | 1946916034               |
| SNP_P4_111598_229489 | NW_004515657.1 | Scaffold40  | 229489                  | CC                              | AA              | 1946916036               |
| SNP_P4_111599_229492 | NW_004515657.1 | Scaffold40  | 229492                  | AA                              | TT              | 1946916038               |
| SNP_P4_111600_229525 | NW_004515657.1 | Scaffold40  | 229525                  | AA                              | GG              | 1946916040               |
| SNP_P4_111601_229571 | NW_004515657.1 | Scaffold40  | 229571                  | AA                              | TT              | 1946916042               |
| SNP_P4_111602_229588 | NW_004515657.1 | Scaffold40  | 229588                  | AA                              | GG              | 1946916044               |
| SNP_P4_111603_229618 | NW_004515657.1 | Scaffold40  | 229618                  | CC                              | TT              | 1946916046               |
| SNP_P4_111604_229690 | NW_004515657.1 | Scaffold40  | 229690                  | CC                              | AA              | 1946916048               |
| SNP_P4_111605_229693 | NW_004515657.1 | Scaffold40  | 229693                  | TT                              | GG              | 1946916050               |
| SNP_P4_111606_230613 | NW_004515657.1 | Scaffold40  | 230613                  | TT                              | CC              | 1946916052               |
| SNP_P4_111607_230630 | NW_004515657.1 | Scaffold40  | 230630                  | GG                              | AA              | 1946916054               |
| SNP_P4_111608_231249 | NW_004515657.1 | Scaffold40  | 231249                  | CC                              | TT              | 1946916056               |
| SNP_P4_111609_239830 | NW_004515657.1 | Scaffold40  | 239830                  | AA                              | CC              | 1946916058               |

| SNPs IDs             | Chromosome IDs | Chromosomes | Physical positions (bp) | CDC Frontier (Reference genome) | (ILWC46 & LPNB) | NCBI SNPdb Accession IDs |
|----------------------|----------------|-------------|-------------------------|---------------------------------|-----------------|--------------------------|
| SNP_P4_111610_239835 | NW_004515657.1 | Scaffold40  | 239835                  | GG                              | AA              | 1946916060               |
| SNP_P4_111611_239841 | NW_004515657.1 | Scaffold40  | 239841                  | CC                              | GG              | 1946916062               |
| SNP_P4_111612_239858 | NW_004515657.1 | Scaffold40  | 239858                  | AA                              | TT              | 1946916064               |
| SNP_P4_111613_239884 | NW_004515657.1 | Scaffold40  | 239884                  | TT                              | GG              | 1946916066               |
| SNP_P4_111614_264793 | NW_004515657.1 | Scaffold40  | 264793                  | TT                              | CC              | 1946916068               |
| SNP_P4_111615_265226 | NW_004515657.1 | Scaffold40  | 265226                  | CC                              | TT              | 1946916070               |
| SNP_P4_111616_293912 | NW_004515657.1 | Scaffold40  | 293912                  | TT                              | CC              | 1946916072               |
| SNP_P4_111617_293917 | NW_004515657.1 | Scaffold40  | 293917                  | AA                              | CC              | 1946916074               |
| SNP_P4_111618_330029 | NW_004515657.1 | Scaffold40  | 330029                  | CC                              | AA              | 1946916076               |
| SNP_P4_111619_330047 | NW_004515657.1 | Scaffold40  | 330047                  | GG                              | AA              | 1946916078               |
| SNP_P4_111620_357102 | NW_004515657.1 | Scaffold40  | 357102                  | CC                              | AA              | 1946916080               |
| SNP_P4_111623_363235 | NW_004515657.1 | Scaffold40  | 363235                  | CC                              | TT              | 1946916082               |
| SNP_P4_111624_363396 | NW_004515657.1 | Scaffold40  | 363396                  | CC                              | AA              | 1946916084               |
| SNP_P4_111625_363469 | NW_004515657.1 | Scaffold40  | 363469                  | CC                              | TT              | 1946916086               |
| SNP_P4_111626_363494 | NW_004515657.1 | Scaffold40  | 363494                  | CC                              | TT              | 1946916088               |
| SNP_P4_111627_393100 | NW_004515657.1 | Scaffold40  | 393100                  | TT                              | CC              | 1946916090               |
| SNP_P4_111628_393108 | NW_004515657.1 | Scaffold40  | 393108                  | GG                              | AA              | 1946916092               |
| SNP_P4_111629_393359 | NW_004515657.1 | Scaffold40  | 393359                  | GG                              | TT              | 1946916094               |
| SNP_P4_111630_393479 | NW_004515657.1 | Scaffold40  | 393479                  | TT                              | AA              | 1946916096               |
| SNP_P4_111631_393541 | NW_004515657.1 | Scaffold40  | 393541                  | TT                              | CC              | 1946916099               |
| SNP_P4_111632_413472 | NW_004515657.1 | Scaffold40  | 413472                  | AA                              | CC              | 1946916101               |
| SNP_P4_111633_413488 | NW_004515657.1 | Scaffold40  | 413488                  | AA                              | GG              | 1946916103               |
| SNP_P4_111634_434269 | NW_004515657.1 | Scaffold40  | 434269                  | TT                              | AA              | 1946916105               |
| SNP_P4_111635_451052 | NW_004515657.1 | Scaffold40  | 451052                  | TT                              | CC              | 1946916106               |
| SNP_P4_111636_457037 | NW_004515657.1 | Scaffold40  | 457037                  | GG                              | AA              | 1946916108               |
| SNP_P4_111637_457253 | NW_004515657.1 | Scaffold40  | 457253                  | TT                              | CC              | 1946916110               |
| SNP_P4_111638_466350 | NW_004515657.1 | Scaffold40  | 466350                  | CC                              | TT              | 1946916112               |
| SNP_P4_111639_466354 | NW_004515657.1 | Scaffold40  | 466354                  | GG                              | CC              | 1946916114               |
| SNP_P4_111640_466372 | NW_004515657.1 | Scaffold40  | 466372                  | GG                              | AA              | 1946916116               |
| SNP_P4_111642_466560 | NW_004515657.1 | Scaffold40  | 466560                  | CC                              | GG              | 1946916118               |
| SNP_P4_111644_466819 | NW_004515657.1 | Scaffold40  | 466819                  | CC                              | GG              | 1946916120               |
| SNP_P4_111645_466829 | NW_004515657.1 | Scaffold40  | 466829                  | TT                              | CC              | 1946916122               |
| SNP_P4_111646_467057 | NW_004515657.1 | Scaffold40  | 467057                  | TT                              | CC              | 1946916124               |
| SNP_P4_111648_499185 | NW_004515657.1 | Scaffold40  | 499185                  | AA                              | GG              | 1946916126               |
| SNP_P4_111649_527703 | NW_004515657.1 | Scaffold40  | 527703                  | CC                              | GG              | 1946916128               |
| SNP_P4_111650_547395 | NW_004515657.1 | Scaffold40  | 547395                  | GG                              | AA              | 1946916130               |
| SNP_P4_111651_583595 | NW_004515657.1 | Scaffold40  | 583595                  | TT                              | GG              | 1946916132               |
| SNP_P4_111652_585640 | NW_004515657.1 | Scaffold40  | 585640                  | TT                              | CC              | 1946916134               |
| SNP_P4_111653_586261 | NW_004515657.1 | Scaffold40  | 586261                  | CC                              | TT              | 1946916136               |
| SNP_P4_111654_590294 | NW_004515657.1 | Scaffold40  | 590294                  | TT                              | CC              | 1946916138               |
| SNP_P4_111655_590313 | NW_004515657.1 | Scaffold40  | 590313                  | TT                              | CC              | 1946916140               |
| SNP_P4_111656_606092 | NW_004515657.1 | Scaffold40  | 606092                  | GG                              | AA              | 1946916142               |

| SNPs IDs             | Chromosome IDs | Chromosomes | Physical positions (bp) | CDC Frontier (Reference genome) | (ILWC46 & LPNB) | NCBI SNPdb Accession IDs |
|----------------------|----------------|-------------|-------------------------|---------------------------------|-----------------|--------------------------|
| SNP_P4_111657_625068 | NW_004515657.1 | Scaffold40  | 625068                  | AA                              | TT              | 1946916144               |
| SNP_P4_111658_648918 | NW_004515657.1 | Scaffold40  | 648918                  | TT                              | CC              | 1946916146               |
| SNP_P4_111659_651364 | NW_004515657.1 | Scaffold40  | 651364                  | TT                              | GG              | 1946916148               |
| SNP_P4_111660_651700 | NW_004515657.1 | Scaffold40  | 651700                  | TT                              | CC              | 1946916150               |
| SNP_P4_111661_668894 | NW_004515657.1 | Scaffold40  | 668894                  | AA                              | GG              | 1946916152               |
| SNP_P4_111662_669092 | NW_004515657.1 | Scaffold40  | 669092                  | CC                              | TT              | 1946916154               |
| SNP_P4_111663_740800 | NW_004515657.1 | Scaffold40  | 740800                  | CC                              | TT              | 1946916156               |
| SNP_P4_111664_753600 | NW_004515657.1 | Scaffold40  | 753600                  | AA                              | TT              | 1946916158               |
| SNP_P4_111666_766838 | NW_004515657.1 | Scaffold40  | 766838                  | CC                              | GG              | 1946916160               |
| SNP_P4_111667_769948 | NW_004515657.1 | Scaffold40  | 769948                  | GG                              | AA              | 1946916162               |
| SNP_P4_111668_770312 | NW_004515657.1 | Scaffold40  | 770312                  | TT                              | GG              | 1946916164               |
| SNP_P4_111669_770315 | NW_004515657.1 | Scaffold40  | 770315                  | TT                              | CC              | 1946916166               |
| SNP_P4_111670_800095 | NW_004515657.1 | Scaffold40  | 800095                  | GG                              | TT              | 1946916168               |
| SNP_P4_111671_800100 | NW_004515657.1 | Scaffold40  | 800100                  | GG                              | AA              | 1946916170               |
| SNP_P4_111673_816463 | NW_004515657.1 | Scaffold40  | 816463                  | TT                              | CC              | 1946916172               |
| SNP_P4_111674_819201 | NW_004515657.1 | Scaffold40  | 819201                  | CC                              | GG              | 1946916174               |
| SNP_P4_111676_829075 | NW_004515657.1 | Scaffold40  | 829075                  | AA                              | CC              | 1946916176               |
| SNP_P4_111678_836281 | NW_004515657.1 | Scaffold40  | 836281                  | TT                              | CC              | 1946916178               |
| SNP_P4_111679_839679 | NW_004515657.1 | Scaffold40  | 839679                  | TT                              | CC              | 1946916180               |
| SNP_P4_111680_839841 | NW_004515657.1 | Scaffold40  | 839841                  | GG                              | CC              | 1946916182               |
| SNP_P4_111681_840297 | NW_004515657.1 | Scaffold40  | 840297                  | CC                              | AA              | 1946916184               |
| SNP_P4_111682_841340 | NW_004515657.1 | Scaffold40  | 841340                  | AA                              | CC              | 1946916186               |
| SNP_P4_111683_841885 | NW_004515657.1 | Scaffold40  | 841885                  | TT                              | GG              | 1946916187               |
| SNP_P4_111684_844943 | NW_004515657.1 | Scaffold40  | 844943                  | TT                              | GG              | 1946916188               |
| SNP_P4_111685_844949 | NW_004515657.1 | Scaffold40  | 844949                  | CC                              | AA              | 1946916189               |
| SNP_P4_111686_844959 | NW_004515657.1 | Scaffold40  | 844959                  | GG                              | AA              | 1946916191               |
| SNP_P4_111687_844961 | NW_004515657.1 | Scaffold40  | 844961                  | CC                              | GG              | 1946916193               |
| SNP_P4_111688_844963 | NW_004515657.1 | Scaffold40  | 844963                  | TT                              | GG              | 1946916195               |
| SNP_P4_111689_845148 | NW_004515657.1 | Scaffold40  | 845148                  | GG                              | AA              | 1946916197               |
| SNP_P4_111690_845149 | NW_004515657.1 | Scaffold40  | 845149                  | GG                              | AA              | 1946916199               |
| SNP_P4_111691_845158 | NW_004515657.1 | Scaffold40  | 845158                  | GG                              | AA              | 1946916201               |
| SNP_P4_111692_845192 | NW_004515657.1 | Scaffold40  | 845192                  | CC                              | TT              | 1946916204               |
| SNP_P4_111693_845211 | NW_004515657.1 | Scaffold40  | 845211                  | CC                              | TT              | 1946916206               |
| SNP_P4_111694_845373 | NW_004515657.1 | Scaffold40  | 845373                  | GG                              | AA              | 1946916208               |
| SNP_P4_111697_846736 | NW_004515657.1 | Scaffold40  | 846736                  | TT                              | AA              | 1946916210               |
| SNP_P4_111698_846902 | NW_004515657.1 | Scaffold40  | 846902                  | AA                              | CC              | 1946916212               |
| SNP_P4_111699_846905 | NW_004515657.1 | Scaffold40  | 846905                  | TT                              | CC              | 1946916214               |
| SNP_P4_111701_852165 | NW_004515657.1 | Scaffold40  | 852165                  | GG                              | AA              | 1946916216               |
| SNP_P4_111702_852235 | NW_004515657.1 | Scaffold40  | 852235                  | TT                              | AA              | 1946916218               |
| SNP_P4_111703_852238 | NW_004515657.1 | Scaffold40  | 852238                  | CC                              | TT              | 1946916220               |
| SNP_P4_111705_852649 | NW_004515657.1 | Scaffold40  | 852649                  | CC                              | TT              | 1946916222               |
| SNP_P4_111706_852678 | NW_004515657.1 | Scaffold40  | 852678                  | GG                              | TT              | 1946916224               |

| SNPs IDs             | Chromosome IDs | Chromosomes | Physical positions (bp) | CDC Frontier (Reference genome) | (ILWC46 & LPNB) | NCBI SNPdb Accession IDs |
|----------------------|----------------|-------------|-------------------------|---------------------------------|-----------------|--------------------------|
| SNP_P4_111707_852695 | NW_004515657.1 | Scaffold40  | 852695                  | AA                              | GG              | 1946916226               |
| SNP_P4_111708_852702 | NW_004515657.1 | Scaffold40  | 852702                  | TT                              | CC              | 1946916228               |
| SNP_P4_111709_852853 | NW_004515657.1 | Scaffold40  | 852853                  | CC                              | TT              | 1946916230               |
| SNP_P4_111710_852861 | NW_004515657.1 | Scaffold40  | 852861                  | GG                              | AA              | 1946916232               |
| SNP_P4_111711_852862 | NW_004515657.1 | Scaffold40  | 852862                  | AA                              | GG              | 1946916234               |
| SNP_P4_111712_854020 | NW_004515657.1 | Scaffold40  | 854020                  | TT                              | CC              | 1946916236               |
| SNP_P4_111713_854871 | NW_004515657.1 | Scaffold40  | 854871                  | CC                              | GG              | 1946916239               |
| SNP_P4_111715_854959 | NW_004515657.1 | Scaffold40  | 854959                  | TT                              | GG              | 1946916241               |
| SNP_P4_111716_854974 | NW_004515657.1 | Scaffold40  | 854974                  | AA                              | CC              | 1946916243               |
| SNP_P4_111717_854985 | NW_004515657.1 | Scaffold40  | 854985                  | AA                              | TT              | 1946916245               |
| SNP_P4_111718_855012 | NW_004515657.1 | Scaffold40  | 855012                  | AA                              | TT              | 1946916247               |
| SNP_P4_111719_855082 | NW_004515657.1 | Scaffold40  | 855082                  | AA                              | TT              | 1946916249               |
| SNP_P4_111720_855135 | NW_004515657.1 | Scaffold40  | 855135                  | AA                              | GG              | 1946916251               |
| SNP_P4_111721_855272 | NW_004515657.1 | Scaffold40  | 855272                  | TT                              | CC              | 1946916254               |
| SNP_P4_111722_855866 | NW_004515657.1 | Scaffold40  | 855866                  | CC                              | AA              | 1946916256               |
| SNP_P4_111724_855951 | NW_004515657.1 | Scaffold40  | 855951                  | AA                              | GG              | 1946916258               |
| SNP_P4_111725_856557 | NW_004515657.1 | Scaffold40  | 856557                  | TT                              | CC              | 1946916260               |
| SNP_P4_111726_856983 | NW_004515657.1 | Scaffold40  | 856983                  | GG                              | AA              | 1946916262               |
| SNP_P4_111727_857202 | NW_004515657.1 | Scaffold40  | 857202                  | TT                              | CC              | 1946916264               |
| SNP_P4_111728_857267 | NW_004515657.1 | Scaffold40  | 857267                  | CC                              | TT              | 1946916267               |
| SNP_P4_111729_857280 | NW_004515657.1 | Scaffold40  | 857280                  | AA                              | TT              | 1946916269               |
| SNP_P4_111730_857632 | NW_004515657.1 | Scaffold40  | 857632                  | TT                              | GG              | 1946916271               |
| SNP_P4_111731_858801 | NW_004515657.1 | Scaffold40  | 858801                  | AA                              | GG              | 1946916273               |
| SNP_P4_111732_858835 | NW_004515657.1 | Scaffold40  | 858835                  | AA                              | GG              | 1946916275               |
| SNP_P4_111733_859176 | NW_004515657.1 | Scaffold40  | 859176                  | CC                              | AA              | 1946916277               |
| SNP_P4_111734_860193 | NW_004515657.1 | Scaffold40  | 860193                  | CC                              | TT              | 1946916279               |
| SNP_P4_111735_860194 | NW_004515657.1 | Scaffold40  | 860194                  | GG                              | AA              | 1946916281               |
| SNP_P4_111736_861655 | NW_004515657.1 | Scaffold40  | 861655                  | TT                              | CC              | 1946916283               |
| SNP_P4_111737_861679 | NW_004515657.1 | Scaffold40  | 861679                  | GG                              | CC              | 1946916285               |
| SNP_P4_111738_861802 | NW_004515657.1 | Scaffold40  | 861802                  | CC                              | TT              | 1946916288               |
| SNP_P4_111739_862496 | NW_004515657.1 | Scaffold40  | 862496                  | AA                              | CC              | 1946916290               |
| SNP_P4_111740_862705 | NW_004515657.1 | Scaffold40  | 862705                  | GG                              | AA              | 1946916292               |
| SNP_P4_111741_862710 | NW_004515657.1 | Scaffold40  | 862710                  | TT                              | CC              | 1946916294               |
| SNP_P4_111742_862712 | NW_004515657.1 | Scaffold40  | 862712                  | AA                              | GG              | 1946916296               |
| SNP_P4_111743_862805 | NW_004515657.1 | Scaffold40  | 862805                  | AA                              | TT              | 1946916298               |
| SNP_P4_111744_862875 | NW_004515657.1 | Scaffold40  | 862875                  | AA                              | TT              | 1946916300               |
| SNP_P4_111745_863070 | NW_004515657.1 | Scaffold40  | 863070                  | CC                              | TT              | 1946916302               |
| SNP_P4_111746_863071 | NW_004515657.1 | Scaffold40  | 863071                  | AA                              | GG              | 1946916304               |
| SNP_P4_111747_863093 | NW_004515657.1 | Scaffold40  | 863093                  | TT                              | AA              | 1946916307               |
| SNP_P4_111748_863712 | NW_004515657.1 | Scaffold40  | 863712                  | TT                              | GG              | 1946916309               |
| SNP_P4_111749_863891 | NW_004515657.1 | Scaffold40  | 863891                  | CC                              | AA              | 1946916311               |
| SNP_P4_111750_864866 | NW_004515657.1 | Scaffold40  | 864866                  | TT                              | CC              | 1946916313               |



| SNPs IDs             | Chromosome IDs | Chromosomes | Physical positions (bp) | CDC Frontier (Reference genome) | (ILWC46 & LPNB) | NCBI SNPdb Accession IDs |
|----------------------|----------------|-------------|-------------------------|---------------------------------|-----------------|--------------------------|
| SNP_P4_111751_864924 | NW_004515657.1 | Scaffold40  | 864924                  | CC                              | GG              | 1946916315               |
| SNP_P4_111753_866084 | NW_004515657.1 | Scaffold40  | 866084                  | GG                              | AA              | 1946916317               |
| SNP_P4_111754_867432 | NW_004515657.1 | Scaffold40  | 867432                  | GG                              | TT              | 1946916319               |
| SNP_P4_111755_867522 | NW_004515657.1 | Scaffold40  | 867522                  | CC                              | AA              | 1946916321               |
| SNP_P4_111756_867552 | NW_004515657.1 | Scaffold40  | 867552                  | TT                              | CC              | 1946916323               |
| SNP_P4_111758_867731 | NW_004515657.1 | Scaffold40  | 867731                  | GG                              | AA              | 1946916325               |
| SNP_P4_111759_867810 | NW_004515657.1 | Scaffold40  | 867810                  | CC                              | AA              | 1946916327               |
| SNP_P4_111760_867831 | NW_004515657.1 | Scaffold40  | 867831                  | TT                              | CC              | 1946916329               |
| SNP_P4_111761_867837 | NW_004515657.1 | Scaffold40  | 867837                  | CC                              | AA              | 1946916331               |
| SNP_P4_111762_868610 | NW_004515657.1 | Scaffold40  | 868610                  | AA                              | TT              | 1946916334               |
| SNP_P4_111763_869079 | NW_004515657.1 | Scaffold40  | 869079                  | TT                              | CC              | 1946916336               |
| SNP_P4_111764_869452 | NW_004515657.1 | Scaffold40  | 869452                  | TT                              | CC              | 1946916338               |
| SNP_P4_111765_870096 | NW_004515657.1 | Scaffold40  | 870096                  | AA                              | GG              | 1946916340               |
| SNP_P4_111766_874102 | NW_004515657.1 | Scaffold40  | 874102                  | TT                              | AA              | 1946916342               |
| SNP_P4_111767_874932 | NW_004515657.1 | Scaffold40  | 874932                  | TT                              | CC              | 1946916344               |
| SNP_P4_111768_874933 | NW_004515657.1 | Scaffold40  | 874933                  | GG                              | AA              | 1946916346               |
| SNP_P4_111769_874996 | NW_004515657.1 | Scaffold40  | 874996                  | AA                              | GG              | 1946916349               |
| SNP_P4_111770_886329 | NW_004515657.1 | Scaffold40  | 886329                  | GG                              | AA              | 1946916351               |
| SNP_P4_111771_888083 | NW_004515657.1 | Scaffold40  | 888083                  | TT                              | GG              | 1946916353               |
| SNP_P4_111772_892251 | NW_004515657.1 | Scaffold40  | 892251                  | CC                              | AA              | 1946916355               |
| SNP_P4_111773_892266 | NW_004515657.1 | Scaffold40  | 892266                  | TT                              | GG              | 1946916357               |
| SNP_P4_111774_892557 | NW_004515657.1 | Scaffold40  | 892557                  | TT                              | CC              | 1946916359               |
| SNP_P4_111775_894257 | NW_004515657.1 | Scaffold40  | 894257                  | TT                              | AA              | 1946916361               |
| SNP_P4_111776_894756 | NW_004515657.1 | Scaffold40  | 894756                  | AA                              | GG              | 1946916363               |
| SNP_P4_111777_894761 | NW_004515657.1 | Scaffold40  | 894761                  | AA                              | GG              | 1946916365               |
| SNP_P4_111780_895409 | NW_004515657.1 | Scaffold40  | 895409                  | TT                              | CC              | 1946916367               |
| SNP_P4_111781_896107 | NW_004515657.1 | Scaffold40  | 896107                  | TT                              | CC              | 1946916369               |
| SNP_P4_111782_898378 | NW_004515657.1 | Scaffold40  | 898378                  | AA                              | TT              | 1946916371               |
| SNP_P4_111783_899232 | NW_004515657.1 | Scaffold40  | 899232                  | TT                              | AA              | 1946916373               |
| SNP_P4_111784_899238 | NW_004515657.1 | Scaffold40  | 899238                  | CC                              | TT              | 1946916375               |
| SNP_P4_111785_900274 | NW_004515657.1 | Scaffold40  | 900274                  | GG                              | CC              | 1946916377               |
| SNP_P4_111786_901083 | NW_004515657.1 | Scaffold40  | 901083                  | CC                              | TT              | 1946916379               |
| SNP_P4_111787_901133 | NW_004515657.1 | Scaffold40  | 901133                  | AA                              | GG              | 1946916381               |
| SNP_P4_111788_901378 | NW_004515657.1 | Scaffold40  | 901378                  | GG                              | AA              | 1946916383               |
| SNP_P4_111790_903551 | NW_004515657.1 | Scaffold40  | 903551                  | TT                              | CC              | 1946916385               |
| SNP_P4_111791_903790 | NW_004515657.1 | Scaffold40  | 903790                  | TT                              | CC              | 1946916387               |
| SNP_P4_111792_906688 | NW_004515657.1 | Scaffold40  | 906688                  | AA                              | GG              | 1946916389               |
| SNP_P4_111793_906697 | NW_004515657.1 | Scaffold40  | 906697                  | TT                              | AA              | 1946916391               |
| SNP_P4_111794_907491 | NW_004515657.1 | Scaffold40  | 907491                  | TT                              | AA              | 1946916393               |
| SNP_P4_111795_908669 | NW_004515657.1 | Scaffold40  | 908669                  | GG                              | CC              | 1946916395               |
| SNP_P4_111796_910184 | NW_004515657.1 | Scaffold40  | 910184                  | CC                              | TT              | 1946916397               |
| SNP_P4_111797_918317 | NW_004515657.1 | Scaffold40  | 918317                  | CC                              | TT              | 1946916399               |

| SNPs IDs             | Chromosome IDs | Chromosomes | Physical positions (bp) | CDC Frontier (Reference genome) | (ILWC46 & LPNB) | NCBI SNPdb Accession IDs |
|----------------------|----------------|-------------|-------------------------|---------------------------------|-----------------|--------------------------|
| SNP_P4_111798_918604 | NW_004515657.1 | Scaffold40  | 918604                  | TT                              | CC              | 1946916401               |
| SNP_P4_111799_918608 | NW_004515657.1 | Scaffold40  | 918608                  | TT                              | CC              | 1946916403               |
| SNP_P4_111800_918609 | NW_004515657.1 | Scaffold40  | 918609                  | CC                              | TT              | 1946916405               |
| SNP_P4_111801_918612 | NW_004515657.1 | Scaffold40  | 918612                  | TT                              | CC              | 1946916407               |
| SNP_P4_111802_920283 | NW_004515657.1 | Scaffold40  | 920283                  | CC                              | AA              | 1946916409               |
| SNP_P4_111803_920936 | NW_004515657.1 | Scaffold40  | 920936                  | TT                              | CC              | 1946916411               |
| SNP_P4_111804_921942 | NW_004515657.1 | Scaffold40  | 921942                  | CC                              | GG              | 1946916413               |
| SNP_P4_111805_921946 | NW_004515657.1 | Scaffold40  | 921946                  | CC                              | AA              | 1946916414               |
| SNP_P4_111807_925495 | NW_004515657.1 | Scaffold40  | 925495                  | TT                              | CC              | 1946916416               |
| SNP_P4_111808_926037 | NW_004515657.1 | Scaffold40  | 926037                  | CC                              | TT              | 1946916418               |
| SNP_P4_111809_926178 | NW_004515657.1 | Scaffold40  | 926178                  | CC                              | AA              | 1946916420               |
| SNP_P4_111810_926323 | NW_004515657.1 | Scaffold40  | 926323                  | AA                              | GG              | 1946916422               |
| SNP_P4_111811_926455 | NW_004515657.1 | Scaffold40  | 926455                  | GG                              | TT              | 1946916424               |
| SNP_P4_111812_926477 | NW_004515657.1 | Scaffold40  | 926477                  | GG                              | AA              | 1946916426               |
| SNP_P4_111813_932725 | NW_004515657.1 | Scaffold40  | 932725                  | CC                              | TT              | 1946916428               |
| SNP_P4_111814_932727 | NW_004515657.1 | Scaffold40  | 932727                  | AA                              | CC              | 1946916430               |
| SNP_P4_111815_932752 | NW_004515657.1 | Scaffold40  | 932752                  | TT                              | GG              | 1946916432               |
| SNP_P4_111816_933060 | NW_004515657.1 | Scaffold40  | 933060                  | TT                              | CC              | 1946916435               |
| SNP_P4_111817_933062 | NW_004515657.1 | Scaffold40  | 933062                  | GG                              | TT              | 1946916437               |
| SNP_P4_111818_933064 | NW_004515657.1 | Scaffold40  | 933064                  | AA                              | TT              | 1946916439               |
| SNP_P4_111819_933184 | NW_004515657.1 | Scaffold40  | 933184                  | TT                              | CC              | 1946916441               |
| SNP_P4_111820_933430 | NW_004515657.1 | Scaffold40  | 933430                  | AA                              | GG              | 1946916443               |
| SNP_P4_111821_937042 | NW_004515657.1 | Scaffold40  | 937042                  | TT                              | CC              | 1946916445               |
| SNP_P4_111822_937079 | NW_004515657.1 | Scaffold40  | 937079                  | GG                              | AA              | 1946916447               |
| SNP_P4_111823_937137 | NW_004515657.1 | Scaffold40  | 937137                  | AA                              | GG              | 1946916449               |
| SNP_P4_111824_937159 | NW_004515657.1 | Scaffold40  | 937159                  | AA                              | GG              | 1946916451               |
| SNP_P4_111825_937407 | NW_004515657.1 | Scaffold40  | 937407                  | TT                              | CC              | 1946916453               |
| SNP_P4_111826_937500 | NW_004515657.1 | Scaffold40  | 937500                  | AA                              | GG              | 1946916455               |
| SNP_P4_111827_937614 | NW_004515657.1 | Scaffold40  | 937614                  | TT                              | CC              | 1946916457               |
| SNP_P4_111828_953110 | NW_004515657.1 | Scaffold40  | 953110                  | TT                              | AA              | 1946916459               |
| SNP_P4_111829_953136 | NW_004515657.1 | Scaffold40  | 953136                  | TT                              | GG              | 1946916461               |
| SNP_P4_111830_953457 | NW_004515657.1 | Scaffold40  | 953457                  | CC                              | TT              | 1946916463               |
| SNP_P4_111832_954825 | NW_004515657.1 | Scaffold40  | 954825                  | GG                              | CC              | 1946916466               |
| SNP_P4_111833_956098 | NW_004515657.1 | Scaffold40  | 956098                  | AA                              | GG              | 1946916468               |
| SNP_P4_111834_956135 | NW_004515657.1 | Scaffold40  | 956135                  | TT                              | CC              | 1946916470               |
| SNP_P4_111835_958532 | NW_004515657.1 | Scaffold40  | 958532                  | GG                              | TT              | 1946916472               |
| SNP_P4_111836_961053 | NW_004515657.1 | Scaffold40  | 961053                  | CC                              | GG              | 1946916474               |
| SNP_P4_111837_964189 | NW_004515657.1 | Scaffold40  | 964189                  | AA                              | CC              | 1946916476               |
| SNP_P4_111838_964193 | NW_004515657.1 | Scaffold40  | 964193                  | AA                              | TT              | 1946916478               |
| SNP_P4_111839_966561 | NW_004515657.1 | Scaffold40  | 966561                  | AA                              | GG              | 1946916480               |
| SNP_P4_111840_968798 | NW_004515657.1 | Scaffold40  | 968798                  | AA                              | GG              | 1946916482               |
| SNP_P4_111842_976539 | NW_004515657.1 | Scaffold40  | 976539                  | TT                              | AA              | 1946916484               |

| SNPs IDs              | Chromosome IDs | Chromosomes | Physical positions (bp) | CDC Frontier (Reference genome) | (ILWC46 & LPNB) | NCBI SNPdb Accession IDs |
|-----------------------|----------------|-------------|-------------------------|---------------------------------|-----------------|--------------------------|
| SNP_P4_111843_978643  | NW_004515657.1 | Scaffold40  | 978643                  | AA                              | GG              | 1946916486               |
| SNP_P4_111844_979032  | NW_004515657.1 | Scaffold40  | 979032                  | CC                              | TT              | 1946916488               |
| SNP_P4_111845_979262  | NW_004515657.1 | Scaffold40  | 979262                  | AA                              | GG              | 1946916490               |
| SNP_P4_111847_980965  | NW_004515657.1 | Scaffold40  | 980965                  | TT                              | AA              | 1946916492               |
| SNP_P4_111848_981316  | NW_004515657.1 | Scaffold40  | 981316                  | AA                              | TT              | 1946916494               |
| SNP_P4_111849_981788  | NW_004515657.1 | Scaffold40  | 981788                  | CC                              | TT              | 1946916496               |
| SNP_P4_111850_981808  | NW_004515657.1 | Scaffold40  | 981808                  | GG                              | TT              | 1946916498               |
| SNP_P4_111851_982115  | NW_004515657.1 | Scaffold40  | 982115                  | AA                              | GG              | 1946916500               |
| SNP_P4_111852_982985  | NW_004515657.1 | Scaffold40  | 982985                  | AA                              | TT              | 1946916502               |
| SNP_P4_111853_983045  | NW_004515657.1 | Scaffold40  | 983045                  | TT                              | AA              | 1946916504               |
| SNP_P4_111854_983798  | NW_004515657.1 | Scaffold40  | 983798                  | AA                              | GG              | 1946916506               |
| SNP_P4_111855_988248  | NW_004515657.1 | Scaffold40  | 988248                  | TT                              | CC              | 1946916508               |
| SNP_P4_111856_988548  | NW_004515657.1 | Scaffold40  | 988548                  | TT                              | CC              | 1946916510               |
| SNP_P4_111857_989508  | NW_004515657.1 | Scaffold40  | 989508                  | CC                              | AA              | 1946916512               |
| SNP_P4_111858_989562  | NW_004515657.1 | Scaffold40  | 989562                  | TT                              | AA              | 1946916514               |
| SNP_P4_111859_989580  | NW_004515657.1 | Scaffold40  | 989580                  | TT                              | CC              | 1946916516               |
| SNP_P4_111860_990000  | NW_004515657.1 | Scaffold40  | 990000                  | GG                              | AA              | 1946916518               |
| SNP_P4_111861_990128  | NW_004515657.1 | Scaffold40  | 990128                  | TT                              | CC              | 1946916520               |
| SNP_P4_111862_990452  | NW_004515657.1 | Scaffold40  | 990452                  | GG                              | TT              | 1946916522               |
| SNP_P4_111864_990605  | NW_004515657.1 | Scaffold40  | 990605                  | TT                              | AA              | 1946916524               |
| SNP_P4_111865_990655  | NW_004515657.1 | Scaffold40  | 990655                  | GG                              | AA              | 1946916526               |
| SNP_P4_111866_990727  | NW_004515657.1 | Scaffold40  | 990727                  | TT                              | CC              | 1946916528               |
| SNP_P4_111867_990754  | NW_004515657.1 | Scaffold40  | 990754                  | TT                              | CC              | 1946916530               |
| SNP_P4_111868_990789  | NW_004515657.1 | Scaffold40  | 990789                  | GG                              | AA              | 1946916532               |
| SNP_P4_111869_991068  | NW_004515657.1 | Scaffold40  | 991068                  | AA                              | GG              | 1946916534               |
| SNP_P4_111870_991159  | NW_004515657.1 | Scaffold40  | 991159                  | TT                              | CC              | 1946916536               |
| SNP_P4_111871_991167  | NW_004515657.1 | Scaffold40  | 991167                  | AA                              | CC              | 1946916538               |
| SNP_P4_111872_996079  | NW_004515657.1 | Scaffold40  | 996079                  | CC                              | TT              | 1946916540               |
| SNP_P4_111874_998964  | NW_004515657.1 | Scaffold40  | 998964                  | CC                              | TT              | 1946916543               |
| SNP_P4_111875_999206  | NW_004515657.1 | Scaffold40  | 999206                  | TT                              | CC              | 1946916545               |
| SNP_P4_111876_1000234 | NW_004515657.1 | Scaffold40  | 1000234                 | TT                              | GG              | 1946916547               |
| SNP_P4_111877_1000684 | NW_004515657.1 | Scaffold40  | 1000684                 | AA                              | TT              | 1946916549               |
| SNP_P4_111878_1001231 | NW_004515657.1 | Scaffold40  | 1001231                 | CC                              | GG              | 1946916551               |
| SNP_P4_111879_1001232 | NW_004515657.1 | Scaffold40  | 1001232                 | AA                              | CC              | 1946916553               |
| SNP_P4_111880_1005212 | NW_004515657.1 | Scaffold40  | 1005212                 | CC                              | TT              | 1946916555               |
| SNP_P4_111881_1006421 | NW_004515657.1 | Scaffold40  | 1006421                 | CC                              | TT              | 1946916557               |
| SNP_P4_111882_1007710 | NW_004515657.1 | Scaffold40  | 1007710                 | AA                              | TT              | 1946916559               |
| SNP_P4_111883_1007719 | NW_004515657.1 | Scaffold40  | 1007719                 | GG                              | AA              | 1946916561               |
| SNP_P4_111884_1009410 | NW_004515657.1 | Scaffold40  | 1009410                 | AA                              | GG              | 1946916563               |
| SNP_P4_111886_1009524 | NW_004515657.1 | Scaffold40  | 1009524                 | TT                              | CC              | 1946916565               |
| SNP_P4_111887_1009571 | NW_004515657.1 | Scaffold40  | 1009571                 | GG                              | AA              | 1946916567               |
| SNP_P4_111888_1009576 | NW_004515657.1 | Scaffold40  | 1009576                 | GG                              | CC              | 1946916569               |

| SNPs IDs              | Chromosome IDs | Chromosomes | Physical positions (bp) | CDC Frontier (Reference genome) | (ILWC46 & LPNB) | NCBI SNPdb Accession IDs |
|-----------------------|----------------|-------------|-------------------------|---------------------------------|-----------------|--------------------------|
| SNP_P4_111889_1009838 | NW_004515657.1 | Scaffold40  | 1009838                 | GG                              | AA              | 1946916571               |
| SNP_P4_111890_1009861 | NW_004515657.1 | Scaffold40  | 1009861                 | GG                              | AA              | 1946916573               |
| SNP_P4_111891_1016017 | NW_004515657.1 | Scaffold40  | 1016017                 | GG                              | AA              | 1946916575               |
| SNP_P4_111892_1016291 | NW_004515657.1 | Scaffold40  | 1016291                 | TT                              | AA              | 1946916577               |
| SNP_P4_111893_1016295 | NW_004515657.1 | Scaffold40  | 1016295                 | GG                              | AA              | 1946916579               |
| SNP_P4_111895_1016327 | NW_004515657.1 | Scaffold40  | 1016327                 | GG                              | AA              | 1946916581               |
| SNP_P4_111896_1018244 | NW_004515657.1 | Scaffold40  | 1018244                 | TT                              | CC              | 1946916583               |
| SNP_P4_111897_1018572 | NW_004515657.1 | Scaffold40  | 1018572                 | TT                              | CC              | 1946916585               |
| SNP_P4_111898_1018639 | NW_004515657.1 | Scaffold40  | 1018639                 | CC                              | TT              | 1946916587               |
| SNP_P4_111899_1019398 | NW_004515657.1 | Scaffold40  | 1019398                 | AA                              | TT              | 1946916589               |
| SNP_P4_111900_1019562 | NW_004515657.1 | Scaffold40  | 1019562                 | CC                              | AA              | 1946916591               |
| SNP_P4_111901_1019563 | NW_004515657.1 | Scaffold40  | 1019563                 | AA                              | GG              | 1946916593               |
| SNP_P4_111902_1021096 | NW_004515657.1 | Scaffold40  | 1021096                 | CC                              | GG              | 1946916595               |
| SNP_P4_111903_1023465 | NW_004515657.1 | Scaffold40  | 1023465                 | GG                              | AA              | 1946916597               |
| SNP_P4_111904_1023472 | NW_004515657.1 | Scaffold40  | 1023472                 | AA                              | GG              | 1946916599               |
| SNP_P4_111905_1023880 | NW_004515657.1 | Scaffold40  | 1023880                 | AA                              | CC              | 1946916601               |
| SNP_P4_111906_1023929 | NW_004515657.1 | Scaffold40  | 1023929                 | CC                              | TT              | 1946916603               |
| SNP_P4_111907_1023967 | NW_004515657.1 | Scaffold40  | 1023967                 | CC                              | AA              | 1946916605               |
| SNP_P4_111908_1024246 | NW_004515657.1 | Scaffold40  | 1024246                 | CC                              | TT              | 1946916607               |
| SNP_P4_111909_1024247 | NW_004515657.1 | Scaffold40  | 1024247                 | TT                              | CC              | 1946916609               |
| SNP_P4_111910_1024955 | NW_004515657.1 | Scaffold40  | 1024955                 | GG                              | AA              | 1946916611               |
| SNP_P4_111911_1024971 | NW_004515657.1 | Scaffold40  | 1024971                 | TT                              | GG              | 1946916613               |
| SNP_P4_111912_1024985 | NW_004515657.1 | Scaffold40  | 1024985                 | AA                              | GG              | 1946916615               |
| SNP_P4_111913_1025002 | NW_004515657.1 | Scaffold40  | 1025002                 | CC                              | TT              | 1946916617               |
| SNP_P4_111914_1025420 | NW_004515657.1 | Scaffold40  | 1025420                 | GG                              | AA              | 1946916619               |
| SNP_P4_111915_1025429 | NW_004515657.1 | Scaffold40  | 1025429                 | GG                              | AA              | 1946916621               |
| SNP_P4_111916_1025436 | NW_004515657.1 | Scaffold40  | 1025436                 | AA                              | GG              | 1946916623               |
| SNP_P4_111917_1025442 | NW_004515657.1 | Scaffold40  | 1025442                 | TT                              | CC              | 1946916625               |
| SNP_P4_111918_1025456 | NW_004515657.1 | Scaffold40  | 1025456                 | AA                              | GG              | 1946916627               |
| SNP_P4_111919_1025465 | NW_004515657.1 | Scaffold40  | 1025465                 | TT                              | CC              | 1946916630               |
| SNP_P4_111920_1025576 | NW_004515657.1 | Scaffold40  | 1025576                 | AA                              | CC              | 1946916632               |
| SNP_P4_111921_1028442 | NW_004515657.1 | Scaffold40  | 1028442                 | GG                              | AA              | 1946916634               |
| SNP_P4_111922_1028677 | NW_004515657.1 | Scaffold40  | 1028677                 | TT                              | CC              | 1946916636               |
| SNP_P4_111923_1029175 | NW_004515657.1 | Scaffold40  | 1029175                 | TT                              | CC              | 1946916638               |
| SNP_P4_111924_1030070 | NW_004515657.1 | Scaffold40  | 1030070                 | CC                              | TT              | 1946916640               |
| SNP_P4_111925_1030136 | NW_004515657.1 | Scaffold40  | 1030136                 | AA                              | GG              | 1946916642               |
| SNP_P4_111926_1030439 | NW_004515657.1 | Scaffold40  | 1030439                 | CC                              | TT              | 1946916644               |
| SNP_P4_111927_1031586 | NW_004515657.1 | Scaffold40  | 1031586                 | AA                              | GG              | 1946916646               |
| SNP_P4_111928_1031628 | NW_004515657.1 | Scaffold40  | 1031628                 | AA                              | GG              | 1946916649               |
| SNP_P4_111929_1031632 | NW_004515657.1 | Scaffold40  | 1031632                 | GG                              | AA              | 1946916651               |
| SNP_P4_111930_1031653 | NW_004515657.1 | Scaffold40  | 1031653                 | AA                              | TT              | 1946916653               |
| SNP_P4_111931_1031678 | NW_004515657.1 | Scaffold40  | 1031678                 | GG                              | AA              | 1946916655               |

| SNPs IDs              | Chromosome IDs | Chromosomes | Physical positions (bp) | CDC Frontier (Reference genome) | (ILWC46 & LPNB) | NCBI SNPdb Accession IDs |
|-----------------------|----------------|-------------|-------------------------|---------------------------------|-----------------|--------------------------|
| SNP_P4_111932_1031893 | NW_004515657.1 | Scaffold40  | 1031893                 | AA                              | GG              | 1946916657               |
| SNP_P4_111933_1031914 | NW_004515657.1 | Scaffold40  | 1031914                 | CC                              | TT              | 1946916659               |
| SNP_P4_111934_1031971 | NW_004515657.1 | Scaffold40  | 1031971                 | TT                              | CC              | 1946916661               |
| SNP_P4_111935_1032047 | NW_004515657.1 | Scaffold40  | 1032047                 | AA                              | GG              | 1946916663               |
| SNP_P4_111936_1032180 | NW_004515657.1 | Scaffold40  | 1032180                 | AA                              | GG              | 1946916665               |
| SNP_P4_111937_1033662 | NW_004515657.1 | Scaffold40  | 1033662                 | AA                              | GG              | 1946916667               |
| SNP_P4_111938_1043075 | NW_004515657.1 | Scaffold40  | 1043075                 | CC                              | AA              | 1946916669               |
| SNP_P4_111939_1043144 | NW_004515657.1 | Scaffold40  | 1043144                 | CC                              | AA              | 1946916671               |
| SNP_P4_111940_1049250 | NW_004515657.1 | Scaffold40  | 1049250                 | CC                              | TT              | 1946916673               |
| SNP_P4_111941_1050979 | NW_004515657.1 | Scaffold40  | 1050979                 | TT                              | GG              | 1946916675               |
| SNP_P4_111942_1051936 | NW_004515657.1 | Scaffold40  | 1051936                 | AA                              | GG              | 1946916677               |
| SNP_P4_111943_1052438 | NW_004515657.1 | Scaffold40  | 1052438                 | CC                              | AA              | 1946916679               |
| SNP_P4_111944_1054723 | NW_004515657.1 | Scaffold40  | 1054723                 | GG                              | AA              | 1946916681               |
| SNP_P4_111945_1054766 | NW_004515657.1 | Scaffold40  | 1054766                 | GG                              | AA              | 1946916683               |
| SNP_P4_111946_1054768 | NW_004515657.1 | Scaffold40  | 1054768                 | TT                              | CC              | 1946916685               |
| SNP_P4_111948_1055087 | NW_004515657.1 | Scaffold40  | 1055087                 | TT                              | AA              | 1946916687               |
| SNP_P4_111950_1056968 | NW_004515657.1 | Scaffold40  | 1056968                 | GG                              | TT              | 1946916689               |
| SNP_P4_111951_1056982 | NW_004515657.1 | Scaffold40  | 1056982                 | TT                              | CC              | 1946916691               |
| SNP_P4_111952_1056986 | NW_004515657.1 | Scaffold40  | 1056986                 | CC                              | TT              | 1946916693               |
| SNP_P4_111953_1056988 | NW_004515657.1 | Scaffold40  | 1056988                 | CC                              | AA              | 1946916695               |
| SNP_P4_111954_1056998 | NW_004515657.1 | Scaffold40  | 1056998                 | AA                              | GG              | 1946916697               |
| SNP_P4_111955_1057014 | NW_004515657.1 | Scaffold40  | 1057014                 | GG                              | AA              | 1946916699               |
| SNP_P4_111956_1057505 | NW_004515657.1 | Scaffold40  | 1057505                 | GG                              | AA              | 1946916701               |
| SNP_P4_111957_1057970 | NW_004515657.1 | Scaffold40  | 1057970                 | TT                              | CC              | 1946916703               |
| SNP_P4_111958_1057981 | NW_004515657.1 | Scaffold40  | 1057981                 | AA                              | GG              | 1946916705               |
| SNP_P4_111959_1058001 | NW_004515657.1 | Scaffold40  | 1058001                 | GG                              | CC              | 1946916707               |
| SNP_P4_111960_1058066 | NW_004515657.1 | Scaffold40  | 1058066                 | GG                              | AA              | 1946916709               |
| SNP_P4_111961_1058375 | NW_004515657.1 | Scaffold40  | 1058375                 | AA                              | TT              | 1946916711               |
| SNP_P4_111962_1058380 | NW_004515657.1 | Scaffold40  | 1058380                 | CC                              | TT              | 1946916713               |
| SNP_P4_111963_1060174 | NW_004515657.1 | Scaffold40  | 1060174                 | GG                              | AA              | 1946916715               |
| SNP_P4_111964_1060196 | NW_004515657.1 | Scaffold40  | 1060196                 | GG                              | AA              | 1946916717               |
| SNP_P4_111965_1060349 | NW_004515657.1 | Scaffold40  | 1060349                 | AA                              | GG              | 1946916719               |
| SNP_P4_111967_7147    | NW_004515658.1 | Scaffold41  | 7147                    | AA                              | TT              | 1946916721               |
| SNP_P4_111968_25125   | NW_004515658.1 | Scaffold41  | 25125                   | CC                              | TT              | 1946916723               |
| SNP_P4_111969_25143   | NW_004515658.1 | Scaffold41  | 25143                   | GG                              | AA              | 1946916725               |
| SNP_P4_111970_25153   | NW_004515658.1 | Scaffold41  | 25153                   | TT                              | CC              | 1946916727               |
| SNP_P4_111971_25161   | NW_004515658.1 | Scaffold41  | 25161                   | GG                              | TT              | 1946916729               |
| SNP_P4_111972_25162   | NW_004515658.1 | Scaffold41  | 25162                   | CC                              | AA              | 1946916730               |
| SNP_P4_111973_25164   | NW_004515658.1 | Scaffold41  | 25164                   | CC                              | TT              | 1946916731               |
| SNP_P4_111974_25182   | NW_004515658.1 | Scaffold41  | 25182                   | TT                              | CC              | 1946916732               |
| SNP_P4_111975_25237   | NW_004515658.1 | Scaffold41  | 25237                   | GG                              | AA              | 1946916734               |
| SNP_P4_111976_25249   | NW_004515658.1 | Scaffold41  | 25249                   | TT                              | GG              | 1946916736               |

| SNPs IDs             | Chromosome IDs | Chromosomes | Physical positions (bp) | CDC Frontier (Reference genome) | (ILWC46 & LPNB) | NCBI SNPdb Accession IDs |
|----------------------|----------------|-------------|-------------------------|---------------------------------|-----------------|--------------------------|
| SNP_P4_111977_25256  | NW_004515658.1 | Scaffold41  | 25256                   | TT                              | CC              | 1946916738               |
| SNP_P4_111978_25260  | NW_004515658.1 | Scaffold41  | 25260                   | TT                              | CC              | 1946916740               |
| SNP_P4_111979_25266  | NW_004515658.1 | Scaffold41  | 25266                   | CC                              | TT              | 1946916742               |
| SNP_P4_111980_25296  | NW_004515658.1 | Scaffold41  | 25296                   | GG                              | TT              | 1946916744               |
| SNP_P4_111981_25329  | NW_004515658.1 | Scaffold41  | 25329                   | GG                              | AA              | 1946916746               |
| SNP_P4_111982_25350  | NW_004515658.1 | Scaffold41  | 25350                   | GG                              | AA              | 1946916748               |
| SNP_P4_111983_25428  | NW_004515658.1 | Scaffold41  | 25428                   | CC                              | TT              | 1946916750               |
| SNP_P4_111984_25555  | NW_004515658.1 | Scaffold41  | 25555                   | GG                              | AA              | 1946916752               |
| SNP_P4_111985_28449  | NW_004515658.1 | Scaffold41  | 28449                   | CC                              | AA              | 1946916754               |
| SNP_P4_111986_53395  | NW_004515658.1 | Scaffold41  | 53395                   | CC                              | AA              | 1946916755               |
| SNP_P4_111988_92997  | NW_004515658.1 | Scaffold41  | 92997                   | AA                              | CC              | 1946916757               |
| SNP_P4_111989_100759 | NW_004515658.1 | Scaffold41  | 100759                  | GG                              | AA              | 1946916759               |
| SNP_P4_111990_108544 | NW_004515658.1 | Scaffold41  | 108544                  | TT                              | CC              | 1946916761               |
| SNP_P4_111991_113170 | NW_004515658.1 | Scaffold41  | 113170                  | GG                              | TT              | 1946916763               |
| SNP_P4_111992_113773 | NW_004515658.1 | Scaffold41  | 113773                  | TT                              | CC              | 1946916765               |
| SNP_P4_111993_113817 | NW_004515658.1 | Scaffold41  | 113817                  | AA                              | GG              | 1946916767               |
| SNP_P4_111995_114018 | NW_004515658.1 | Scaffold41  | 114018                  | AA                              | TT              | 1946916769               |
| SNP_P4_111996_114062 | NW_004515658.1 | Scaffold41  | 114062                  | TT                              | AA              | 1946916771               |
| SNP_P4_111997_114118 | NW_004515658.1 | Scaffold41  | 114118                  | GG                              | CC              | 1946916773               |
| SNP_P4_111999_114744 | NW_004515658.1 | Scaffold41  | 114744                  | TT                              | AA              | 1946916775               |
| SNP_P4_112000_114808 | NW_004515658.1 | Scaffold41  | 114808                  | AA                              | GG              | 1946916777               |
| SNP_P4_112001_114861 | NW_004515658.1 | Scaffold41  | 114861                  | TT                              | CC              | 1946916779               |
| SNP_P4_112002_114932 | NW_004515658.1 | Scaffold41  | 114932                  | AA                              | TT              | 1946916781               |
| SNP_P4_112004_116465 | NW_004515658.1 | Scaffold41  | 116465                  | TT                              | GG              | 1946916783               |
| SNP_P4_112005_116543 | NW_004515658.1 | Scaffold41  | 116543                  | AA                              | CC              | 1946916785               |
| SNP_P4_112006_116574 | NW_004515658.1 | Scaffold41  | 116574                  | AA                              | CC              | 1946916787               |
| SNP_P4_112007_122127 | NW_004515658.1 | Scaffold41  | 122127                  | TT                              | CC              | 1946916789               |
| SNP_P4_112008_122128 | NW_004515658.1 | Scaffold41  | 122128                  | AA                              | GG              | 1946916791               |
| SNP_P4_112009_122189 | NW_004515658.1 | Scaffold41  | 122189                  | TT                              | CC              | 1946916793               |
| SNP_P4_112011_122285 | NW_004515658.1 | Scaffold41  | 122285                  | TT                              | CC              | 1946916795               |
| SNP_P4_112012_122286 | NW_004515658.1 | Scaffold41  | 122286                  | GG                              | AA              | 1946916797               |
| SNP_P4_112013_122301 | NW_004515658.1 | Scaffold41  | 122301                  | AA                              | GG              | 1946916799               |
| SNP_P4_112014_122302 | NW_004515658.1 | Scaffold41  | 122302                  | TT                              | GG              | 1946916801               |
| SNP_P4_112017_122388 | NW_004515658.1 | Scaffold41  | 122388                  | AA                              | CC              | 1946916803               |
| SNP_P4_112018_122402 | NW_004515658.1 | Scaffold41  | 122402                  | AA                              | TT              | 1946916805               |
| SNP_P4_112019_122409 | NW_004515658.1 | Scaffold41  | 122409                  | CC                              | TT              | 1946916807               |
| SNP_P4_112020_122427 | NW_004515658.1 | Scaffold41  | 122427                  | CC                              | GG              | 1946916809               |
| SNP_P4_112021_122509 | NW_004515658.1 | Scaffold41  | 122509                  | TT                              | CC              | 1946916811               |
| SNP_P4_112022_122510 | NW_004515658.1 | Scaffold41  | 122510                  | TT                              | GG              | 1946916813               |
| SNP_P4_112023_122513 | NW_004515658.1 | Scaffold41  | 122513                  | TT                              | CC              | 1946916815               |
| SNP_P4_112024_122527 | NW_004515658.1 | Scaffold41  | 122527                  | TT                              | GG              | 1946916817               |
| SNP_P4_112025_122633 | NW_004515658.1 | Scaffold41  | 122633                  | TT                              | CC              | 1946916819               |

| SNPs IDs             | Chromosome IDs | Chromosomes | Physical positions (bp) | CDC Frontier (Reference genome) | (ILWC46 & LPNB) | NCBI SNPdb Accession IDs |
|----------------------|----------------|-------------|-------------------------|---------------------------------|-----------------|--------------------------|
| SNP_P4_112026_122683 | NW_004515658.1 | Scaffold41  | 122683                  | AA                              | GG              | 1946916821               |
| SNP_P4_112027_122687 | NW_004515658.1 | Scaffold41  | 122687                  | AA                              | TT              | 1946916823               |
| SNP_P4_112028_122713 | NW_004515658.1 | Scaffold41  | 122713                  | TT                              | CC              | 1946916825               |
| SNP_P4_112029_122789 | NW_004515658.1 | Scaffold41  | 122789                  | AA                              | CC              | 1946916827               |
| SNP_P4_112030_127684 | NW_004515658.1 | Scaffold41  | 127684                  | CC                              | AA              | 1946916830               |
| SNP_P4_112031_127687 | NW_004515658.1 | Scaffold41  | 127687                  | TT                              | AA              | 1946916832               |
| SNP_P4_112032_145041 | NW_004515658.1 | Scaffold41  | 145041                  | GG                              | AA              | 1946916834               |
| SNP_P4_112033_145088 | NW_004515658.1 | Scaffold41  | 145088                  | GG                              | AA              | 1946916836               |
| SNP_P4_112034_145425 | NW_004515658.1 | Scaffold41  | 145425                  | TT                              | CC              | 1946916838               |
| SNP_P4_112035_159664 | NW_004515658.1 | Scaffold41  | 159664                  | AA                              | CC              | 1946916840               |
| SNP_P4_112037_157    | NW_004515660.1 | Scaffold44  | 157                     | AA                              | GG              | 1946916842               |
| SNP_P4_112038_434    | NW_004515660.1 | Scaffold44  | 434                     | CC                              | TT              | 1946916844               |
| SNP_P4_112039_637    | NW_004515660.1 | Scaffold44  | 637                     | TT                              | GG              | 1946916846               |
| SNP_P4_112041_3722   | NW_004515660.1 | Scaffold44  | 3722                    | CC                              | GG              | 1946916848               |
| SNP_P4_112042_15327  | NW_004515660.1 | Scaffold44  | 15327                   | CC                              | TT              | 1946916850               |
| SNP_P4_112043_19629  | NW_004515660.1 | Scaffold44  | 19629                   | GG                              | TT              | 1946916852               |
| SNP_P4_112044_23527  | NW_004515660.1 | Scaffold44  | 23527                   | CC                              | TT              | 1946916854               |
| SNP_P4_112046_27751  | NW_004515660.1 | Scaffold44  | 27751                   | TT                              | AA              | 1946916856               |
| SNP_P4_112047_35740  | NW_004515660.1 | Scaffold44  | 35740                   | GG                              | TT              | 1946916858               |
| SNP_P4_112048_53763  | NW_004515660.1 | Scaffold44  | 53763                   | CC                              | TT              | 1946916860               |
| SNP_P4_112049_53818  | NW_004515660.1 | Scaffold44  | 53818                   | AA                              | GG              | 1946916862               |
| SNP_P4_112050_69191  | NW_004515660.1 | Scaffold44  | 69191                   | CC                              | AA              | 1946916864               |
| SNP_P4_112052_97796  | NW_004515660.1 | Scaffold44  | 97796                   | AA                              | GG              | 1946916866               |
| SNP_P4_112053_97802  | NW_004515660.1 | Scaffold44  | 97802                   | GG                              | AA              | 1946916868               |
| SNP_P4_112054_98151  | NW_004515660.1 | Scaffold44  | 98151                   | AA                              | CC              | 1946916870               |
| SNP_P4_112055_98190  | NW_004515660.1 | Scaffold44  | 98190                   | AA                              | GG              | 1946916872               |
| SNP_P4_112056_101540 | NW_004515660.1 | Scaffold44  | 101540                  | AA                              | GG              | 1946916874               |
| SNP_P4_112057_101636 | NW_004515660.1 | Scaffold44  | 101636                  | AA                              | GG              | 1946916876               |
| SNP_P4_112058_113019 | NW_004515660.1 | Scaffold44  | 113019                  | GG                              | AA              | 1946916878               |
| SNP_P4_112059_113726 | NW_004515660.1 | Scaffold44  | 113726                  | CC                              | TT              | 1946916879               |
| SNP_P4_112060_126639 | NW_004515660.1 | Scaffold44  | 126639                  | AA                              | GG              | 1946916881               |
| SNP_P4_112061_126989 | NW_004515660.1 | Scaffold44  | 126989                  | AA                              | GG              | 1946916883               |
| SNP_P4_112062_127079 | NW_004515660.1 | Scaffold44  | 127079                  | TT                              | GG              | 1946916885               |
| SNP_P4_112063_127099 | NW_004515660.1 | Scaffold44  | 127099                  | AA                              | GG              | 1946916887               |
| SNP_P4_112064_127609 | NW_004515660.1 | Scaffold44  | 127609                  | GG                              | AA              | 1946916889               |
| SNP_P4_112065_127667 | NW_004515660.1 | Scaffold44  | 127667                  | TT                              | CC              | 1946916891               |
| SNP_P4_112066_143363 | NW_004515660.1 | Scaffold44  | 143363                  | CC                              | TT              | 1946916893               |
| SNP_P4_112067_147111 | NW_004515660.1 | Scaffold44  | 147111                  | TT                              | CC              | 1946916895               |
| SNP_P4_112068_147137 | NW_004515660.1 | Scaffold44  | 147137                  | GG                              | TT              | 1946916897               |
| SNP_P4_112069_189116 | NW_004515660.1 | Scaffold44  | 189116                  | GG                              | AA              | 1946916899               |
| SNP_P4_112070_205973 | NW_004515660.1 | Scaffold44  | 205973                  | CC                              | AA              | 1946916900               |
| SNP_P4_112071_218473 | NW_004515660.1 | Scaffold44  | 218473                  | GG                              | CC              | 1946916902               |

| SNPs IDs             | Chromosome IDs | Chromosomes | Physical positions (bp) | CDC Frontier (Reference genome) | (ILWC46 & LPNB) | NCBI SNPdb Accession IDs |
|----------------------|----------------|-------------|-------------------------|---------------------------------|-----------------|--------------------------|
| SNP_P4_112072_229388 | NW_004515660.1 | Scaffold44  | 229388                  | CC                              | AA              | 1946916904               |
| SNP_P4_112073_241881 | NW_004515660.1 | Scaffold44  | 241881                  | AA                              | GG              | 1946916906               |
| SNP_P4_112075_282200 | NW_004515660.1 | Scaffold44  | 282200                  | AA                              | GG              | 1946916908               |
| SNP_P4_112076_282217 | NW_004515660.1 | Scaffold44  | 282217                  | AA                              | TT              | 1946916910               |
| SNP_P4_112079_290462 | NW_004515660.1 | Scaffold44  | 290462                  | GG                              | TT              | 1946916912               |
| SNP_P4_112080_290878 | NW_004515660.1 | Scaffold44  | 290878                  | CC                              | TT              | 1946916914               |
| SNP_P4_112081_489    | NW_004515661.1 | Scaffold46  | 489                     | GG                              | TT              | 1946916916               |
| SNP_P4_112082_900    | NW_004515661.1 | Scaffold46  | 900                     | AA                              | GG              | 1946916918               |
| SNP_P4_112083_1027   | NW_004515661.1 | Scaffold46  | 1027                    | GG                              | AA              | 1946916920               |
| SNP_P4_112084_1607   | NW_004515661.1 | Scaffold46  | 1607                    | AA                              | GG              | 1946916922               |
| SNP_P4_112085_1823   | NW_004515661.1 | Scaffold46  | 1823                    | AA                              | GG              | 1946916924               |
| SNP_P4_112086_2910   | NW_004515661.1 | Scaffold46  | 2910                    | CC                              | AA              | 1946916925               |
| SNP_P4_112087_3108   | NW_004515661.1 | Scaffold46  | 3108                    | CC                              | TT              | 1946916927               |
| SNP_P4_112088_3190   | NW_004515661.1 | Scaffold46  | 3190                    | AA                              | CC              | 1946916929               |
| SNP_P4_112089_3193   | NW_004515661.1 | Scaffold46  | 3193                    | CC                              | GG              | 1946916931               |
| SNP_P4_112090_3254   | NW_004515661.1 | Scaffold46  | 3254                    | AA                              | TT              | 1946916933               |
| SNP_P4_112091_3288   | NW_004515661.1 | Scaffold46  | 3288                    | GG                              | AA              | 1946916935               |
| SNP_P4_112092_3575   | NW_004515661.1 | Scaffold46  | 3575                    | AA                              | CC              | 1946916937               |
| SNP_P4_112093_4423   | NW_004515661.1 | Scaffold46  | 4423                    | AA                              | GG              | 1946916939               |
| SNP_P4_112094_4496   | NW_004515661.1 | Scaffold46  | 4496                    | GG                              | AA              | 1946916941               |
| SNP_P4_112095_5073   | NW_004515661.1 | Scaffold46  | 5073                    | TT                              | GG              | 1946916943               |
| SNP_P4_112096_5087   | NW_004515661.1 | Scaffold46  | 5087                    | TT                              | AA              | 1946916945               |
| SNP_P4_112097_5178   | NW_004515661.1 | Scaffold46  | 5178                    | AA                              | GG              | 1946916947               |
| SNP_P4_112098_5192   | NW_004515661.1 | Scaffold46  | 5192                    | TT                              | CC              | 1946916949               |
| SNP_P4_112099_5345   | NW_004515661.1 | Scaffold46  | 5345                    | AA                              | CC              | 1946916951               |
| SNP_P4_112100_5367   | NW_004515661.1 | Scaffold46  | 5367                    | GG                              | TT              | 1946916953               |
| SNP_P4_112101_5424   | NW_004515661.1 | Scaffold46  | 5424                    | CC                              | TT              | 1946916955               |
| SNP_P4_112102_5450   | NW_004515661.1 | Scaffold46  | 5450                    | GG                              | AA              | 1946916957               |
| SNP_P4_112103_5590   | NW_004515661.1 | Scaffold46  | 5590                    | AA                              | CC              | 1946916958               |
| SNP_P4_112104_5611   | NW_004515661.1 | Scaffold46  | 5611                    | TT                              | CC              | 1946916960               |
| SNP_P4_112105_5684   | NW_004515661.1 | Scaffold46  | 5684                    | CC                              | TT              | 1946916962               |
| SNP_P4_112106_5767   | NW_004515661.1 | Scaffold46  | 5767                    | CC                              | TT              | 1946916964               |
| SNP_P4_112107_5832   | NW_004515661.1 | Scaffold46  | 5832                    | GG                              | AA              | 1946916966               |
| SNP_P4_112108_5930   | NW_004515661.1 | Scaffold46  | 5930                    | CC                              | TT              | 1946916968               |
| SNP_P4_112110_6132   | NW_004515661.1 | Scaffold46  | 6132                    | CC                              | TT              | 1946916971               |
| SNP_P4_112111_6134   | NW_004515661.1 | Scaffold46  | 6134                    | GG                              | AA              | 1946916973               |
| SNP_P4_112112_6374   | NW_004515661.1 | Scaffold46  | 6374                    | AA                              | GG              | 1946916975               |
| SNP_P4_112113_6444   | NW_004515661.1 | Scaffold46  | 6444                    | TT                              | CC              | 1946916977               |
| SNP_P4_112114_6459   | NW_004515661.1 | Scaffold46  | 6459                    | AA                              | GG              | 1946916979               |
| SNP_P4_112115_6538   | NW_004515661.1 | Scaffold46  | 6538                    | AA                              | GG              | 1946916981               |
| SNP_P4_112116_6680   | NW_004515661.1 | Scaffold46  | 6680                    | AA                              | GG              | 1946916983               |
| SNP_P4_112117_6756   | NW_004515661.1 | Scaffold46  | 6756                    | TT                              | GG              | 1946916985               |



| SNPs IDs            | Chromosome IDs | Chromosomes | Physical positions (bp) | CDC Frontier (Reference genome) | (ILWC46 & LPNB) | NCBI SNPdb Accession IDs |
|---------------------|----------------|-------------|-------------------------|---------------------------------|-----------------|--------------------------|
| SNP_P4_112118_6762  | NW_004515661.1 | Scaffold46  | 6762                    | TT                              | CC              | 1946916987               |
| SNP_P4_112119_7335  | NW_004515661.1 | Scaffold46  | 7335                    | TT                              | CC              | 1946916989               |
| SNP_P4_112120_7516  | NW_004515661.1 | Scaffold46  | 7516                    | GG                              | CC              | 1946916991               |
| SNP_P4_112121_7713  | NW_004515661.1 | Scaffold46  | 7713                    | TT                              | GG              | 1946916993               |
| SNP_P4_112122_7788  | NW_004515661.1 | Scaffold46  | 7788                    | AA                              | TT              | 1946916995               |
| SNP_P4_112123_7789  | NW_004515661.1 | Scaffold46  | 7789                    | GG                              | AA              | 1946916997               |
| SNP_P4_112124_7803  | NW_004515661.1 | Scaffold46  | 7803                    | TT                              | GG              | 1946916999               |
| SNP_P4_112125_7815  | NW_004515661.1 | Scaffold46  | 7815                    | CC                              | GG              | 1946917001               |
| SNP_P4_112126_7865  | NW_004515661.1 | Scaffold46  | 7865                    | TT                              | AA              | 1946917003               |
| SNP_P4_112127_7928  | NW_004515661.1 | Scaffold46  | 7928                    | TT                              | CC              | 1946917005               |
| SNP_P4_112128_7952  | NW_004515661.1 | Scaffold46  | 7952                    | GG                              | CC              | 1946917007               |
| SNP_P4_112129_8033  | NW_004515661.1 | Scaffold46  | 8033                    | AA                              | GG              | 1946917010               |
| SNP_P4_112130_8055  | NW_004515661.1 | Scaffold46  | 8055                    | GG                              | CC              | 1946917012               |
| SNP_P4_112131_8091  | NW_004515661.1 | Scaffold46  | 8091                    | AA                              | CC              | 1946917014               |
| SNP_P4_112132_8093  | NW_004515661.1 | Scaffold46  | 8093                    | GG                              | TT              | 1946917016               |
| SNP_P4_112133_8193  | NW_004515661.1 | Scaffold46  | 8193                    | GG                              | CC              | 1946917018               |
| SNP_P4_112134_8197  | NW_004515661.1 | Scaffold46  | 8197                    | AA                              | TT              | 1946917020               |
| SNP_P4_112135_8224  | NW_004515661.1 | Scaffold46  | 8224                    | GG                              | AA              | 1946917022               |
| SNP_P4_112136_8239  | NW_004515661.1 | Scaffold46  | 8239                    | AA                              | GG              | 1946917024               |
| SNP_P4_112137_8298  | NW_004515661.1 | Scaffold46  | 8298                    | AA                              | TT              | 1946917026               |
| SNP_P4_112138_8350  | NW_004515661.1 | Scaffold46  | 8350                    | CC                              | TT              | 1946917028               |
| SNP_P4_112139_8518  | NW_004515661.1 | Scaffold46  | 8518                    | CC                              | GG              | 1946917030               |
| SNP_P4_112140_8557  | NW_004515661.1 | Scaffold46  | 8557                    | AA                              | CC              | 1946917032               |
| SNP_P4_112142_9155  | NW_004515661.1 | Scaffold46  | 9155                    | AA                              | TT              | 1946917035               |
| SNP_P4_112143_14000 | NW_004515661.1 | Scaffold46  | 14000                   | TT                              | CC              | 1946917037               |
| SNP_P4_112144_14148 | NW_004515661.1 | Scaffold46  | 14148                   | AA                              | CC              | 1946917039               |
| SNP_P4_112145_14149 | NW_004515661.1 | Scaffold46  | 14149                   | CC                              | GG              | 1946917041               |
| SNP_P4_112146_14172 | NW_004515661.1 | Scaffold46  | 14172                   | TT                              | CC              | 1946917043               |
| SNP_P4_112147_14330 | NW_004515661.1 | Scaffold46  | 14330                   | AA                              | CC              | 1946917045               |
| SNP_P4_112148_14331 | NW_004515661.1 | Scaffold46  | 14331                   | CC                              | AA              | 1946917047               |
| SNP_P4_112149_14376 | NW_004515661.1 | Scaffold46  | 14376                   | AA                              | TT              | 1946917049               |
| SNP_P4_112150_14442 | NW_004515661.1 | Scaffold46  | 14442                   | TT                              | GG              | 1946917051               |
| SNP_P4_112151_14470 | NW_004515661.1 | Scaffold46  | 14470                   | GG                              | CC              | 1946917053               |
| SNP_P4_112152_14484 | NW_004515661.1 | Scaffold46  | 14484                   | TT                              | AA              | 1946917055               |
| SNP_P4_112153_14505 | NW_004515661.1 | Scaffold46  | 14505                   | TT                              | AA              | 1946917057               |
| SNP_P4_112154_14643 | NW_004515661.1 | Scaffold46  | 14643                   | AA                              | GG              | 1946917059               |
| SNP_P4_112155_14800 | NW_004515661.1 | Scaffold46  | 14800                   | AA                              | GG              | 1946917061               |
| SNP_P4_112156_14818 | NW_004515661.1 | Scaffold46  | 14818                   | GG                              | CC              | 1946917063               |
| SNP_P4_112157_14821 | NW_004515661.1 | Scaffold46  | 14821                   | TT                              | AA              | 1946917065               |
| SNP_P4_112158_14891 | NW_004515661.1 | Scaffold46  | 14891                   | GG                              | AA              | 1946917067               |
| SNP_P4_112159_14960 | NW_004515661.1 | Scaffold46  | 14960                   | TT                              | GG              | 1946917069               |
| SNP_P4_112160_14996 | NW_004515661.1 | Scaffold46  | 14996                   | TT                              | AA              | 1946917071               |

| SNPs IDs            | Chromosome IDs | Chromosomes | Physical positions (bp) | CDC Frontier (Reference genome) | (ILWC46 & LPNB) | NCBI SNPdb Accession IDs |
|---------------------|----------------|-------------|-------------------------|---------------------------------|-----------------|--------------------------|
| SNP_P4_112161_15020 | NW_004515661.1 | Scaffold46  | 15020                   | AA                              | GG              | 1946917073               |
| SNP_P4_112162_15035 | NW_004515661.1 | Scaffold46  | 15035                   | GG                              | AA              | 1946917075               |
| SNP_P4_112163_15063 | NW_004515661.1 | Scaffold46  | 15063                   | TT                              | CC              | 1946917077               |
| SNP_P4_112164_15140 | NW_004515661.1 | Scaffold46  | 15140                   | TT                              | GG              | 1946917079               |
| SNP_P4_112165_15235 | NW_004515661.1 | Scaffold46  | 15235                   | CC                              | TT              | 1946917081               |
| SNP_P4_112166_15266 | NW_004515661.1 | Scaffold46  | 15266                   | AA                              | CC              | 1946917083               |
| SNP_P4_112167_15405 | NW_004515661.1 | Scaffold46  | 15405                   | CC                              | TT              | 1946917085               |
| SNP_P4_112168_15408 | NW_004515661.1 | Scaffold46  | 15408                   | AA                              | GG              | 1946917087               |
| SNP_P4_112169_15413 | NW_004515661.1 | Scaffold46  | 15413                   | TT                              | GG              | 1946917089               |
| SNP_P4_112170_15458 | NW_004515661.1 | Scaffold46  | 15458                   | GG                              | AA              | 1946917091               |
| SNP_P4_112171_15460 | NW_004515661.1 | Scaffold46  | 15460                   | TT                              | AA              | 1946917093               |
| SNP_P4_112172_15468 | NW_004515661.1 | Scaffold46  | 15468                   | GG                              | TT              | 1946917095               |
| SNP_P4_112173_15486 | NW_004515661.1 | Scaffold46  | 15486                   | TT                              | CC              | 1946917098               |
| SNP_P4_112174_15577 | NW_004515661.1 | Scaffold46  | 15577                   | AA                              | TT              | 1946917100               |
| SNP_P4_112175_15598 | NW_004515661.1 | Scaffold46  | 15598                   | TT                              | CC              | 1946917102               |
| SNP_P4_112176_16278 | NW_004515661.1 | Scaffold46  | 16278                   | AA                              | GG              | 1946917104               |
| SNP_P4_112177_16612 | NW_004515661.1 | Scaffold46  | 16612                   | TT                              | GG              | 1946917106               |
| SNP_P4_112178_20117 | NW_004515661.1 | Scaffold46  | 20117                   | AA                              | TT              | 1946917108               |
| SNP_P4_112179_20139 | NW_004515661.1 | Scaffold46  | 20139                   | AA                              | TT              | 1946917110               |
| SNP_P4_112180_20184 | NW_004515661.1 | Scaffold46  | 20184                   | AA                              | GG              | 1946917112               |
| SNP_P4_112181_20311 | NW_004515661.1 | Scaffold46  | 20311                   | AA                              | GG              | 1946917114               |
| SNP_P4_112182_20363 | NW_004515661.1 | Scaffold46  | 20363                   | TT                              | CC              | 1946917116               |
| SNP_P4_112183_20497 | NW_004515661.1 | Scaffold46  | 20497                   | GG                              | AA              | 1946917118               |
| SNP_P4_112184_20810 | NW_004515661.1 | Scaffold46  | 20810                   | AA                              | TT              | 1946917120               |
| SNP_P4_112185_20940 | NW_004515661.1 | Scaffold46  | 20940                   | TT                              | AA              | 1946917122               |
| SNP_P4_112186_20959 | NW_004515661.1 | Scaffold46  | 20959                   | AA                              | GG              | 1946917124               |
| SNP_P4_112187_20998 | NW_004515661.1 | Scaffold46  | 20998                   | AA                              | CC              | 1946917126               |
| SNP_P4_112188_21069 | NW_004515661.1 | Scaffold46  | 21069                   | GG                              | CC              | 1946917128               |
| SNP_P4_112189_21150 | NW_004515661.1 | Scaffold46  | 21150                   | GG                              | AA              | 1946917130               |
| SNP_P4_112190_21227 | NW_004515661.1 | Scaffold46  | 21227                   | TT                              | AA              | 1946917132               |
| SNP_P4_112191_21382 | NW_004515661.1 | Scaffold46  | 21382                   | CC                              | AA              | 1946917134               |
| SNP_P4_112192_21405 | NW_004515661.1 | Scaffold46  | 21405                   | TT                              | CC              | 1946917136               |
| SNP_P4_112193_21437 | NW_004515661.1 | Scaffold46  | 21437                   | AA                              | GG              | 1946917138               |
| SNP_P4_112194_24487 | NW_004515661.1 | Scaffold46  | 24487                   | TT                              | AA              | 1946917140               |
| SNP_P4_112195_24506 | NW_004515661.1 | Scaffold46  | 24506                   | GG                              | AA              | 1946917142               |
| SNP_P4_112196_24539 | NW_004515661.1 | Scaffold46  | 24539                   | GG                              | AA              | 1946917144               |
| SNP_P4_112197_24545 | NW_004515661.1 | Scaffold46  | 24545                   | GG                              | AA              | 1946917146               |
| SNP_P4_112198_27943 | NW_004515661.1 | Scaffold46  | 27943                   | TT                              | CC              | 1946917148               |
| SNP_P4_112199_28250 | NW_004515661.1 | Scaffold46  | 28250                   | CC                              | TT              | 1946917150               |
| SNP_P4_112200_28438 | NW_004515661.1 | Scaffold46  | 28438                   | TT                              | CC              | 1946917152               |
| SNP_P4_112201_32873 | NW_004515661.1 | Scaffold46  | 32873                   | TT                              | CC              | 1946917154               |
| SNP_P4_112202_32917 | NW_004515661.1 | Scaffold46  | 32917                   | GG                              | CC              | 1946917156               |

| SNPs IDs            | Chromosome IDs | Chromosomes | Physical positions (bp) | CDC Frontier (Reference genome) | (ILWC46 & LPNB) | NCBI SNPdb Accession IDs |
|---------------------|----------------|-------------|-------------------------|---------------------------------|-----------------|--------------------------|
| SNP_P4_112203_33201 | NW_004515661.1 | Scaffold46  | 33201                   | AA                              | GG              | 1946917158               |
| SNP_P4_112204_33336 | NW_004515661.1 | Scaffold46  | 33336                   | TT                              | GG              | 1946917160               |
| SNP_P4_112205_33632 | NW_004515661.1 | Scaffold46  | 33632                   | GG                              | TT              | 1946917162               |
| SNP_P4_112206_33650 | NW_004515661.1 | Scaffold46  | 33650                   | CC                              | AA              | 1946917164               |
| SNP_P4_112207_34172 | NW_004515661.1 | Scaffold46  | 34172                   | AA                              | GG              | 1946917166               |
| SNP_P4_112208_34390 | NW_004515661.1 | Scaffold46  | 34390                   | TT                              | CC              | 1946917168               |
| SNP_P4_112209_34399 | NW_004515661.1 | Scaffold46  | 34399                   | CC                              | TT              | 1946917170               |
| SNP_P4_112210_34422 | NW_004515661.1 | Scaffold46  | 34422                   | TT                              | GG              | 1946917172               |
| SNP_P4_112211_34517 | NW_004515661.1 | Scaffold46  | 34517                   | CC                              | TT              | 1946917174               |
| SNP_P4_112212_34526 | NW_004515661.1 | Scaffold46  | 34526                   | CC                              | TT              | 1946917176               |
| SNP_P4_112213_34716 | NW_004515661.1 | Scaffold46  | 34716                   | CC                              | TT              | 1946917178               |
| SNP_P4_112214_34717 | NW_004515661.1 | Scaffold46  | 34717                   | AA                              | GG              | 1946917180               |
| SNP_P4_112215_34740 | NW_004515661.1 | Scaffold46  | 34740                   | GG                              | CC              | 1946917182               |
| SNP_P4_112216_38926 | NW_004515661.1 | Scaffold46  | 38926                   | TT                              | CC              | 1946917185               |
| SNP_P4_112217_39040 | NW_004515661.1 | Scaffold46  | 39040                   | CC                              | AA              | 1946917187               |
| SNP_P4_112218_39045 | NW_004515661.1 | Scaffold46  | 39045                   | TT                              | CC              | 1946917189               |
| SNP_P4_112219_39438 | NW_004515661.1 | Scaffold46  | 39438                   | CC                              | AA              | 1946917191               |
| SNP_P4_112220_39470 | NW_004515661.1 | Scaffold46  | 39470                   | CC                              | TT              | 1946917193               |
| SNP_P4_112221_39593 | NW_004515661.1 | Scaffold46  | 39593                   | AA                              | CC              | 1946917195               |
| SNP_P4_112222_39631 | NW_004515661.1 | Scaffold46  | 39631                   | AA                              | GG              | 1946917197               |
| SNP_P4_112223_39657 | NW_004515661.1 | Scaffold46  | 39657                   | TT                              | CC              | 1946917199               |
| SNP_P4_112225_39855 | NW_004515661.1 | Scaffold46  | 39855                   | CC                              | GG              | 1946917201               |
| SNP_P4_112226_40004 | NW_004515661.1 | Scaffold46  | 40004                   | TT                              | CC              | 1946917203               |
| SNP_P4_112227_40015 | NW_004515661.1 | Scaffold46  | 40015                   | TT                              | CC              | 1946917205               |
| SNP_P4_112228_40089 | NW_004515661.1 | Scaffold46  | 40089                   | CC                              | AA              | 1946917207               |
| SNP_P4_112229_40122 | NW_004515661.1 | Scaffold46  | 40122                   | GG                              | CC              | 1946917209               |
| SNP_P4_112230_40132 | NW_004515661.1 | Scaffold46  | 40132                   | GG                              | CC              | 1946917211               |
| SNP_P4_112231_40236 | NW_004515661.1 | Scaffold46  | 40236                   | AA                              | GG              | 1946917213               |
| SNP_P4_112232_40248 | NW_004515661.1 | Scaffold46  | 40248                   | AA                              | GG              | 1946917216               |
| SNP_P4_112234_41071 | NW_004515661.1 | Scaffold46  | 41071                   | CC                              | GG              | 1946917218               |
| SNP_P4_112235_41094 | NW_004515661.1 | Scaffold46  | 41094                   | TT                              | CC              | 1946917220               |
| SNP_P4_112236_41115 | NW_004515661.1 | Scaffold46  | 41115                   | CC                              | TT              | 1946917222               |
| SNP_P4_112237_41127 | NW_004515661.1 | Scaffold46  | 41127                   | TT                              | AA              | 1946917224               |
| SNP_P4_112238_41896 | NW_004515661.1 | Scaffold46  | 41896                   | CC                              | TT              | 1946917226               |
| SNP_P4_112239_42056 | NW_004515661.1 | Scaffold46  | 42056                   | TT                              | CC              | 1946917228               |
| SNP_P4_112240_42111 | NW_004515661.1 | Scaffold46  | 42111                   | TT                              | CC              | 1946917230               |
| SNP_P4_112241_42309 | NW_004515661.1 | Scaffold46  | 42309                   | CC                              | AA              | 1946917232               |
| SNP_P4_112242_7738  | NW_004515662.1 | Scaffold48  | 7738                    | AA                              | TT              | 1946917234               |
| SNP_P4_112243_8017  | NW_004515662.1 | Scaffold48  | 8017                    | GG                              | TT              | 1946917236               |
| SNP_P4_112244_8067  | NW_004515662.1 | Scaffold48  | 8067                    | GG                              | TT              | 1946917238               |
| SNP_P4_112245_8391  | NW_004515662.1 | Scaffold48  | 8391                    | GG                              | AA              | 1946917240               |
| SNP_P4_112246_10032 | NW_004515662.1 | Scaffold48  | 10032                   | CC                              | GG              | 1946917242               |

| SNPs IDs             | Chromosome IDs | Chromosomes | Physical positions (bp) | CDC Frontier (Reference genome) | (ILWC46 & LPNB) | NCBI SNPdb Accession IDs |
|----------------------|----------------|-------------|-------------------------|---------------------------------|-----------------|--------------------------|
| SNP_P4_112247_10615  | NW_004515662.1 | Scaffold48  | 10615                   | TT                              | AA              | 1946917244               |
| SNP_P4_112248_11789  | NW_004515662.1 | Scaffold48  | 11789                   | TT                              | AA              | 1946917246               |
| SNP_P4_112250_11918  | NW_004515662.1 | Scaffold48  | 11918                   | GG                              | AA              | 1946917248               |
| SNP_P4_112251_13056  | NW_004515662.1 | Scaffold48  | 13056                   | GG                              | AA              | 1946917250               |
| SNP_P4_112253_15977  | NW_004515662.1 | Scaffold48  | 15977                   | CC                              | TT              | 1946917252               |
| SNP_P4_112255_16024  | NW_004515662.1 | Scaffold48  | 16024                   | CC                              | TT              | 1946917254               |
| SNP_P4_112256_16081  | NW_004515662.1 | Scaffold48  | 16081                   | CC                              | AA              | 1946917256               |
| SNP_P4_112257_16156  | NW_004515662.1 | Scaffold48  | 16156                   | AA                              | GG              | 1946917258               |
| SNP_P4_112259_24829  | NW_004515662.1 | Scaffold48  | 24829                   | CC                              | TT              | 1946917260               |
| SNP_P4_112260_39333  | NW_004515662.1 | Scaffold48  | 39333                   | AA                              | GG              | 1946917262               |
| SNP_P4_112261_56619  | NW_004515662.1 | Scaffold48  | 56619                   | AA                              | GG              | 1946917264               |
| SNP_P4_112262_56664  | NW_004515662.1 | Scaffold48  | 56664                   | GG                              | AA              | 1946917266               |
| SNP_P4_112263_56847  | NW_004515662.1 | Scaffold48  | 56847                   | TT                              | GG              | 1946917268               |
| SNP_P4_112265_112635 | NW_004515662.1 | Scaffold48  | 112635                  | TT                              | GG              | 1946917270               |
| SNP_P4_112266_112641 | NW_004515662.1 | Scaffold48  | 112641                  | CC                              | TT              | 1946917272               |
| SNP_P4_112267_112643 | NW_004515662.1 | Scaffold48  | 112643                  | AA                              | GG              | 1946917274               |
| SNP_P4_112268_140695 | NW_004515662.1 | Scaffold48  | 140695                  | TT                              | AA              | 1946917276               |
| SNP_P4_112269_140913 | NW_004515662.1 | Scaffold48  | 140913                  | TT                              | CC              | 1946917278               |
| SNP_P4_112270_140917 | NW_004515662.1 | Scaffold48  | 140917                  | AA                              | GG              | 1946917280               |
| SNP_P4_112271_140926 | NW_004515662.1 | Scaffold48  | 140926                  | TT                              | CC              | 1946917282               |
| SNP_P4_112272_140939 | NW_004515662.1 | Scaffold48  | 140939                  | CC                              | AA              | 1946917284               |
| SNP_P4_112273_140943 | NW_004515662.1 | Scaffold48  | 140943                  | GG                              | AA              | 1946917286               |
| SNP_P4_112274_140946 | NW_004515662.1 | Scaffold48  | 140946                  | AA                              | GG              | 1946917288               |
| SNP_P4_112275_141081 | NW_004515662.1 | Scaffold48  | 141081                  | TT                              | CC              | 1946917290               |
| SNP_P4_112276_141133 | NW_004515662.1 | Scaffold48  | 141133                  | TT                              | CC              | 1946917292               |
| SNP_P4_112277_141134 | NW_004515662.1 | Scaffold48  | 141134                  | AA                              | GG              | 1946917294               |
| SNP_P4_112278_147822 | NW_004515662.1 | Scaffold48  | 147822                  | TT                              | CC              | 1946917297               |
| SNP_P4_112279_173688 | NW_004515662.1 | Scaffold48  | 173688                  | TT                              | CC              | 1946917299               |
| SNP_P4_112281_205071 | NW_004515662.1 | Scaffold48  | 205071                  | GG                              | TT              | 1946917301               |
| SNP_P4_112282_214503 | NW_004515662.1 | Scaffold48  | 214503                  | AA                              | TT              | 1946917303               |
| SNP_P4_112283_214504 | NW_004515662.1 | Scaffold48  | 214504                  | AA                              | GG              | 1946917305               |
| SNP_P4_112284_214547 | NW_004515662.1 | Scaffold48  | 214547                  | TT                              | GG              | 1946917307               |
| SNP_P4_112285_214563 | NW_004515662.1 | Scaffold48  | 214563                  | TT                              | GG              | 1946917309               |
| SNP_P4_112287_260406 | NW_004515662.1 | Scaffold48  | 260406                  | CC                              | TT              | 1946917311               |
| SNP_P4_112288_284038 | NW_004515662.1 | Scaffold48  | 284038                  | GG                              | AA              | 1946917313               |
| SNP_P4_112290_326364 | NW_004515662.1 | Scaffold48  | 326364                  | AA                              | CC              | 1946917315               |
| SNP_P4_112291_326387 | NW_004515662.1 | Scaffold48  | 326387                  | TT                              | GG              | 1946917317               |
| SNP_P4_112292_357985 | NW_004515662.1 | Scaffold48  | 357985                  | GG                              | AA              | 1946917319               |
| SNP_P4_112293_381537 | NW_004515662.1 | Scaffold48  | 381537                  | GG                              | TT              | 1946917321               |
| SNP_P4_112294_381557 | NW_004515662.1 | Scaffold48  | 381557                  | CC                              | TT              | 1946917323               |
| SNP_P4_112295_390422 | NW_004515662.1 | Scaffold48  | 390422                  | CC                              | TT              | 1946917325               |
| SNP_P4_112296_397107 | NW_004515662.1 | Scaffold48  | 397107                  | CC                              | TT              | 1946917327               |

| SNPs IDs             | Chromosome IDs | Chromosomes | Physical positions (bp) | CDC Frontier (Reference genome) | (ILWC46 & LPNB) | NCBI SNPdb Accession IDs |
|----------------------|----------------|-------------|-------------------------|---------------------------------|-----------------|--------------------------|
| SNP_P4_112297_397113 | NW_004515662.1 | Scaffold48  | 397113                  | TT                              | CC              | 1946917329               |
| SNP_P4_112298_397123 | NW_004515662.1 | Scaffold48  | 397123                  | AA                              | GG              | 1946917331               |
| SNP_P4_112299_397139 | NW_004515662.1 | Scaffold48  | 397139                  | AA                              | CC              | 1946917333               |
| SNP_P4_112300_397154 | NW_004515662.1 | Scaffold48  | 397154                  | TT                              | CC              | 1946917335               |
| SNP_P4_112301_422282 | NW_004515662.1 | Scaffold48  | 422282                  | CC                              | TT              | 1946917337               |
| SNP_P4_112302_431923 | NW_004515662.1 | Scaffold48  | 431923                  | TT                              | CC              | 1946917339               |
| SNP_P4_112303_431939 | NW_004515662.1 | Scaffold48  | 431939                  | AA                              | GG              | 1946917341               |
| SNP_P4_112304_431955 | NW_004515662.1 | Scaffold48  | 431955                  | CC                              | AA              | 1946917343               |
| SNP_P4_112305_438765 | NW_004515662.1 | Scaffold48  | 438765                  | AA                              | GG              | 1946917345               |
| SNP_P4_112306_461170 | NW_004515662.1 | Scaffold48  | 461170                  | TT                              | AA              | 1946917348               |
| SNP_P4_112307_595    | NW_004515663.1 | Scaffold49  | 595                     | AA                              | CC              | 1946917350               |
| SNP_P4_112308_626    | NW_004515663.1 | Scaffold49  | 626                     | TT                              | AA              | 1946917352               |
| SNP_P4_112309_2644   | NW_004515664.1 | Scaffold50  | 2644                    | GG                              | AA              | 1946917354               |
| SNP_P4_112310_2965   | NW_004515664.1 | Scaffold50  | 2965                    | GG                              | AA              | 1946917356               |
| SNP_P4_112312_3533   | NW_004515664.1 | Scaffold50  | 3533                    | CC                              | TT              | 1946917358               |
| SNP_P4_112313_5734   | NW_004515664.1 | Scaffold50  | 5734                    | CC                              | AA              | 1946917360               |
| SNP_P4_112314_5827   | NW_004515664.1 | Scaffold50  | 5827                    | CC                              | TT              | 1946917362               |
| SNP_P4_112315_5916   | NW_004515664.1 | Scaffold50  | 5916                    | CC                              | TT              | 1946917364               |
| SNP_P4_112316_5980   | NW_004515664.1 | Scaffold50  | 5980                    | AA                              | GG              | 1946917366               |
| SNP_P4_112317_6089   | NW_004515664.1 | Scaffold50  | 6089                    | TT                              | CC              | 1946917369               |
| SNP_P4_112318_6106   | NW_004515664.1 | Scaffold50  | 6106                    | CC                              | TT              | 1946917371               |
| SNP_P4_112319_6282   | NW_004515664.1 | Scaffold50  | 6282                    | AA                              | GG              | 1946917373               |
| SNP_P4_112320_7021   | NW_004515664.1 | Scaffold50  | 7021                    | AA                              | CC              | 1946917375               |
| SNP_P4_112321_9214   | NW_004515664.1 | Scaffold50  | 9214                    | CC                              | TT              | 1946917378               |
| SNP_P4_112322_9253   | NW_004515664.1 | Scaffold50  | 9253                    | CC                              | TT              | 1946917380               |
| SNP_P4_112323_9510   | NW_004515664.1 | Scaffold50  | 9510                    | AA                              | CC              | 1946917382               |
| SNP_P4_112324_9555   | NW_004515664.1 | Scaffold50  | 9555                    | CC                              | TT              | 1946917384               |
| SNP_P4_112325_9568   | NW_004515664.1 | Scaffold50  | 9568                    | TT                              | AA              | 1946917386               |
| SNP_P4_112326_10770  | NW_004515664.1 | Scaffold50  | 10770                   | GG                              | AA              | 1946917388               |
| SNP_P4_112327_10776  | NW_004515664.1 | Scaffold50  | 10776                   | GG                              | AA              | 1946917390               |
| SNP_P4_112328_12096  | NW_004515664.1 | Scaffold50  | 12096                   | AA                              | TT              | 1946917392               |
| SNP_P4_112329_12168  | NW_004515664.1 | Scaffold50  | 12168                   | AA                              | GG              | 1946917394               |
| SNP_P4_112330_12222  | NW_004515664.1 | Scaffold50  | 12222                   | GG                              | CC              | 1946917396               |
| SNP_P4_112331_15742  | NW_004515664.1 | Scaffold50  | 15742                   | AA                              | CC              | 1946917398               |
| SNP_P4_112332_16537  | NW_004515664.1 | Scaffold50  | 16537                   | TT                              | CC              | 1946917400               |
| SNP_P4_112333_16540  | NW_004515664.1 | Scaffold50  | 16540                   | CC                              | GG              | 1946917402               |
| SNP_P4_112334_17789  | NW_004515664.1 | Scaffold50  | 17789                   | TT                              | AA              | 1946917404               |
| SNP_P4_112335_17804  | NW_004515664.1 | Scaffold50  | 17804                   | AA                              | TT              | 1946917407               |
| SNP_P4_112336_18326  | NW_004515664.1 | Scaffold50  | 18326                   | TT                              | CC              | 1946917409               |
| SNP_P4_112337_18339  | NW_004515664.1 | Scaffold50  | 18339                   | GG                              | AA              | 1946917411               |
| SNP_P4_112338_18340  | NW_004515664.1 | Scaffold50  | 18340                   | TT                              | CC              | 1946917413               |
| SNP_P4_112339_18357  | NW_004515664.1 | Scaffold50  | 18357                   | CC                              | AA              | 1946917415               |

| SNPs IDs             | Chromosome IDs | Chromosomes | Physical positions (bp) | CDC Frontier (Reference genome) | (ILWC46 & LPNB) | NCBI SNPdb Accession IDs |
|----------------------|----------------|-------------|-------------------------|---------------------------------|-----------------|--------------------------|
| SNP_P4_112340_18392  | NW_004515664.1 | Scaffold50  | 18392                   | AA                              | TT              | 1946917417               |
| SNP_P4_112341_18549  | NW_004515664.1 | Scaffold50  | 18549                   | AA                              | CC              | 1946917419               |
| SNP_P4_112342_46369  | NW_004515664.1 | Scaffold50  | 46369                   | TT                              | CC              | 1946917421               |
| SNP_P4_112343_46468  | NW_004515664.1 | Scaffold50  | 46468                   | CC                              | AA              | 1946917423               |
| SNP_P4_112344_46632  | NW_004515664.1 | Scaffold50  | 46632                   | AA                              | CC              | 1946917425               |
| SNP_P4_112345_46805  | NW_004515664.1 | Scaffold50  | 46805                   | GG                              | AA              | 1946917427               |
| SNP_P4_112346_46817  | NW_004515664.1 | Scaffold50  | 46817                   | AA                              | TT              | 1946917429               |
| SNP_P4_112347_46860  | NW_004515664.1 | Scaffold50  | 46860                   | TT                              | CC              | 1946917431               |
| SNP_P4_112348_46875  | NW_004515664.1 | Scaffold50  | 46875                   | AA                              | GG              | 1946917433               |
| SNP_P4_112349_46885  | NW_004515664.1 | Scaffold50  | 46885                   | CC                              | AA              | 1946917435               |
| SNP_P4_112350_46901  | NW_004515664.1 | Scaffold50  | 46901                   | TT                              | CC              | 1946917437               |
| SNP_P4_112351_46911  | NW_004515664.1 | Scaffold50  | 46911                   | AA                              | TT              | 1946917439               |
| SNP_P4_112352_84502  | NW_004515664.1 | Scaffold50  | 84502                   | TT                              | CC              | 1946917441               |
| SNP_P4_112354_105721 | NW_004515664.1 | Scaffold50  | 105721                  | TT                              | CC              | 1946917443               |
| SNP_P4_112355_133001 | NW_004515664.1 | Scaffold50  | 133001                  | TT                              | GG              | 1946917445               |
| SNP_P4_112356_133973 | NW_004515664.1 | Scaffold50  | 133973                  | CC                              | AA              | 1946917447               |
| SNP_P4_112357_161690 | NW_004515664.1 | Scaffold50  | 161690                  | AA                              | GG              | 1946917449               |
| SNP_P4_112359_181597 | NW_004515664.1 | Scaffold50  | 181597                  | AA                              | TT              | 1946917451               |
| SNP_P4_112360_191340 | NW_004515664.1 | Scaffold50  | 191340                  | CC                              | TT              | 1946917453               |
| SNP_P4_112361_191709 | NW_004515664.1 | Scaffold50  | 191709                  | AA                              | CC              | 1946917455               |
| SNP_P4_112362_191760 | NW_004515664.1 | Scaffold50  | 191760                  | AA                              | GG              | 1946917457               |
| SNP_P4_112363_191790 | NW_004515664.1 | Scaffold50  | 191790                  | AA                              | GG              | 1946917459               |
| SNP_P4_112364_191803 | NW_004515664.1 | Scaffold50  | 191803                  | GG                              | AA              | 1946917461               |
| SNP_P4_112368_193609 | NW_004515664.1 | Scaffold50  | 193609                  | TT                              | CC              | 1946917463               |
| SNP_P4_112369_194061 | NW_004515664.1 | Scaffold50  | 194061                  | CC                              | AA              | 1946917466               |
| SNP_P4_112371_195736 | NW_004515664.1 | Scaffold50  | 195736                  | AA                              | GG              | 1946917468               |
| SNP_P4_112372_195777 | NW_004515664.1 | Scaffold50  | 195777                  | AA                              | GG              | 1946917470               |
| SNP_P4_112373_195800 | NW_004515664.1 | Scaffold50  | 195800                  | AA                              | GG              | 1946917472               |
| SNP_P4_112374_196010 | NW_004515664.1 | Scaffold50  | 196010                  | CC                              | AA              | 1946917474               |
| SNP_P4_112375_196015 | NW_004515664.1 | Scaffold50  | 196015                  | CC                              | AA              | 1946917476               |
| SNP_P4_112376_196016 | NW_004515664.1 | Scaffold50  | 196016                  | CC                              | TT              | 1946917478               |
| SNP_P4_112377_196017 | NW_004515664.1 | Scaffold50  | 196017                  | CC                              | GG              | 1946917480               |
| SNP_P4_112378_196024 | NW_004515664.1 | Scaffold50  | 196024                  | TT                              | CC              | 1946917482               |
| SNP_P4_112379_196026 | NW_004515664.1 | Scaffold50  | 196026                  | TT                              | AA              | 1946917484               |
| SNP_P4_112380_196032 | NW_004515664.1 | Scaffold50  | 196032                  | TT                              | AA              | 1946917487               |
| SNP_P4_112381_196033 | NW_004515664.1 | Scaffold50  | 196033                  | TT                              | AA              | 1946917489               |
| SNP_P4_112383_196127 | NW_004515664.1 | Scaffold50  | 196127                  | GG                              | TT              | 1946917491               |
| SNP_P4_112384_196162 | NW_004515664.1 | Scaffold50  | 196162                  | AA                              | GG              | 1946917493               |
| SNP_P4_112385_201610 | NW_004515664.1 | Scaffold50  | 201610                  | AA                              | CC              | 1946917495               |
| SNP_P4_112386_201660 | NW_004515664.1 | Scaffold50  | 201660                  | AA                              | CC              | 1946917497               |
| SNP_P4_112387_201675 | NW_004515664.1 | Scaffold50  | 201675                  | AA                              | GG              | 1946917499               |
| SNP_P4_112388_201730 | NW_004515664.1 | Scaffold50  | 201730                  | AA                              | GG              | 1946917501               |

| SNPs IDs             | Chromosome IDs | Chromosomes | Physical positions (bp) | CDC Frontier (Reference genome) | (ILWC46 & LPNB) | NCBI SNPdb Accession IDs |
|----------------------|----------------|-------------|-------------------------|---------------------------------|-----------------|--------------------------|
| SNP_P4_112389_201754 | NW_004515664.1 | Scaffold50  | 201754                  | AA                              | GG              | 1946917503               |
| SNP_P4_112390_202129 | NW_004515664.1 | Scaffold50  | 202129                  | CC                              | GG              | 1946917505               |
| SNP_P4_112391_202172 | NW_004515664.1 | Scaffold50  | 202172                  | TT                              | CC              | 1946917507               |
| SNP_P4_112392_202233 | NW_004515664.1 | Scaffold50  | 202233                  | GG                              | CC              | 1946917509               |
| SNP_P4_112394_249455 | NW_004515664.1 | Scaffold50  | 249455                  | GG                              | TT              | 1946917511               |
| SNP_P4_112396_307881 | NW_004515664.1 | Scaffold50  | 307881                  | CC                              | TT              | 1946917514               |
| SNP_P4_112397_323228 | NW_004515664.1 | Scaffold50  | 323228                  | GG                              | AA              | 1946917516               |
| SNP_P4_112399_336562 | NW_004515664.1 | Scaffold50  | 336562                  | GG                              | AA              | 1946917518               |
| SNP_P4_112400_336582 | NW_004515664.1 | Scaffold50  | 336582                  | TT                              | AA              | 1946917520               |
| SNP_P4_112401_336899 | NW_004515664.1 | Scaffold50  | 336899                  | GG                              | AA              | 1946917522               |
| SNP_P4_112403_376924 | NW_004515664.1 | Scaffold50  | 376924                  | TT                              | CC              | 1946917525               |
| SNP_P4_112404_379062 | NW_004515664.1 | Scaffold50  | 379062                  | GG                              | AA              | 1946917527               |
| SNP_P4_112405_382302 | NW_004515664.1 | Scaffold50  | 382302                  | TT                              | AA              | 1946917529               |
| SNP_P4_112407_423452 | NW_004515664.1 | Scaffold50  | 423452                  | CC                              | TT              | 1946917531               |
| SNP_P4_112408_423492 | NW_004515664.1 | Scaffold50  | 423492                  | AA                              | GG              | 1946917533               |
| SNP_P4_112409_423511 | NW_004515664.1 | Scaffold50  | 423511                  | AA                              | GG              | 1946917536               |
| SNP_P4_112410_436188 | NW_004515664.1 | Scaffold50  | 436188                  | CC                              | TT              | 1946917538               |
| SNP_P4_112411_436981 | NW_004515664.1 | Scaffold50  | 436981                  | GG                              | AA              | 1946917540               |
| SNP_P4_112412_437005 | NW_004515664.1 | Scaffold50  | 437005                  | AA                              | TT              | 1946917543               |
| SNP_P4_112413_437010 | NW_004515664.1 | Scaffold50  | 437010                  | AA                              | GG              | 1946917545               |
| SNP_P4_112414_437124 | NW_004515664.1 | Scaffold50  | 437124                  | TT                              | CC              | 1946917547               |
| SNP_P4_112415_437131 | NW_004515664.1 | Scaffold50  | 437131                  | AA                              | GG              | 1946917549               |
| SNP_P4_112416_437145 | NW_004515664.1 | Scaffold50  | 437145                  | AA                              | CC              | 1946917551               |
| SNP_P4_112417_437338 | NW_004515664.1 | Scaffold50  | 437338                  | AA                              | GG              | 1946917553               |
| SNP_P4_112418_437352 | NW_004515664.1 | Scaffold50  | 437352                  | TT                              | CC              | 1946917555               |
| SNP_P4_112419_437410 | NW_004515664.1 | Scaffold50  | 437410                  | CC                              | TT              | 1946917557               |
| SNP_P4_112420_437471 | NW_004515664.1 | Scaffold50  | 437471                  | CC                              | TT              | 1946917559               |
| SNP_P4_112421_437519 | NW_004515664.1 | Scaffold50  | 437519                  | GG                              | AA              | 1946917561               |
| SNP_P4_112422_456346 | NW_004515664.1 | Scaffold50  | 456346                  | AA                              | GG              | 1946917564               |
| SNP_P4_112423_464038 | NW_004515664.1 | Scaffold50  | 464038                  | GG                              | AA              | 1946917566               |
| SNP_P4_112424_466542 | NW_004515664.1 | Scaffold50  | 466542                  | CC                              | TT              | 1946917568               |
| SNP_P4_112425_471275 | NW_004515664.1 | Scaffold50  | 471275                  | AA                              | CC              | 1946917570               |
| SNP_P4_112426_142    | NW_004515665.1 | Scaffold53  | 142                     | TT                              | CC              | 1946917572               |
| SNP_P4_112427_562    | NW_004515665.1 | Scaffold53  | 562                     | TT                              | CC              | 1946917574               |
| SNP_P4_112428_577    | NW_004515665.1 | Scaffold53  | 577                     | CC                              | TT              | 1946917576               |
| SNP_P4_112429_590    | NW_004515665.1 | Scaffold53  | 590                     | GG                              | AA              | 1946917578               |
| SNP_P4_112430_914    | NW_004515665.1 | Scaffold53  | 914                     | TT                              | AA              | 1946917580               |
| SNP_P4_112431_915    | NW_004515665.1 | Scaffold53  | 915                     | GG                              | CC              | 1946917582               |
| SNP_P4_112432_2014   | NW_004515665.1 | Scaffold53  | 2014                    | TT                              | CC              | 1946917585               |
| SNP_P4_112434_2211   | NW_004515665.1 | Scaffold53  | 2211                    | TT                              | AA              | 1946917587               |
| SNP_P4_112435_2225   | NW_004515665.1 | Scaffold53  | 2225                    | TT                              | CC              | 1946917589               |
| SNP_P4_112436_2295   | NW_004515665.1 | Scaffold53  | 2295                    | TT                              | CC              | 1946917591               |

| SNPs IDs             | Chromosome IDs | Chromosomes | Physical positions (bp) | CDC Frontier (Reference genome) | (ILWC46 & LPNB) | NCBI SNPdb Accession IDs |
|----------------------|----------------|-------------|-------------------------|---------------------------------|-----------------|--------------------------|
| SNP_P4_112437_2327   | NW_004515665.1 | Scaffold53  | 2327                    | TT                              | CC              | 1946917593               |
| SNP_P4_112438_27301  | NW_004515665.1 | Scaffold53  | 27301                   | CC                              | TT              | 1946917595               |
| SNP_P4_112439_31508  | NW_004515665.1 | Scaffold53  | 31508                   | CC                              | AA              | 1946917597               |
| SNP_P4_112441_103821 | NW_004515665.1 | Scaffold53  | 103821                  | GG                              | CC              | 1946917599               |
| SNP_P4_112442_104118 | NW_004515665.1 | Scaffold53  | 104118                  | CC                              | AA              | 1946917601               |
| SNP_P4_112443_124471 | NW_004515665.1 | Scaffold53  | 124471                  | CC                              | TT              | 1946917603               |
| SNP_P4_112444_124864 | NW_004515665.1 | Scaffold53  | 124864                  | TT                              | AA              | 1946917605               |
| SNP_P4_112445_124905 | NW_004515665.1 | Scaffold53  | 124905                  | CC                              | AA              | 1946917607               |
| SNP_P4_112446_124925 | NW_004515665.1 | Scaffold53  | 124925                  | CC                              | AA              | 1946917609               |
| SNP_P4_112447_125222 | NW_004515665.1 | Scaffold53  | 125222                  | AA                              | GG              | 1946917611               |
| SNP_P4_112448_125254 | NW_004515665.1 | Scaffold53  | 125254                  | AA                              | TT              | 1946917614               |
| SNP_P4_112449_125295 | NW_004515665.1 | Scaffold53  | 125295                  | AA                              | GG              | 1946917616               |
| SNP_P4_112450_125356 | NW_004515665.1 | Scaffold53  | 125356                  | AA                              | CC              | 1946917618               |
| SNP_P4_112451_126845 | NW_004515665.1 | Scaffold53  | 126845                  | GG                              | AA              | 1946917620               |
| SNP_P4_112452_126857 | NW_004515665.1 | Scaffold53  | 126857                  | AA                              | GG              | 1946917622               |
| SNP_P4_112453_126868 | NW_004515665.1 | Scaffold53  | 126868                  | GG                              | AA              | 1946917624               |
| SNP_P4_112454_126875 | NW_004515665.1 | Scaffold53  | 126875                  | AA                              | TT              | 1946917626               |
| SNP_P4_112455_126892 | NW_004515665.1 | Scaffold53  | 126892                  | GG                              | AA              | 1946917628               |
| SNP_P4_112456_126931 | NW_004515665.1 | Scaffold53  | 126931                  | AA                              | TT              | 1946917630               |
| SNP_P4_112457_126946 | NW_004515665.1 | Scaffold53  | 126946                  | AA                              | GG              | 1946917632               |
| SNP_P4_112458_126973 | NW_004515665.1 | Scaffold53  | 126973                  | CC                              | TT              | 1946917634               |
| SNP_P4_112459_127371 | NW_004515665.1 | Scaffold53  | 127371                  | GG                              | TT              | 1946917636               |
| SNP_P4_112460_127387 | NW_004515665.1 | Scaffold53  | 127387                  | TT                              | AA              | 1946917638               |
| SNP_P4_112461_127485 | NW_004515665.1 | Scaffold53  | 127485                  | CC                              | TT              | 1946917640               |
| SNP_P4_112462_127506 | NW_004515665.1 | Scaffold53  | 127506                  | AA                              | GG              | 1946917642               |
| SNP_P4_112463_132274 | NW_004515665.1 | Scaffold53  | 132274                  | CC                              | AA              | 1946917644               |
| SNP_P4_112464_132317 | NW_004515665.1 | Scaffold53  | 132317                  | AA                              | GG              | 1946917646               |
| SNP_P4_112465_132900 | NW_004515665.1 | Scaffold53  | 132900                  | TT                              | CC              | 1946917648               |
| SNP_P4_112466_133951 | NW_004515665.1 | Scaffold53  | 133951                  | TT                              | GG              | 1946917650               |
| SNP_P4_112467_134418 | NW_004515665.1 | Scaffold53  | 134418                  | CC                              | TT              | 1946917652               |
| SNP_P4_112468_135738 | NW_004515665.1 | Scaffold53  | 135738                  | AA                              | TT              | 1946917654               |
| SNP_P4_112469_136111 | NW_004515665.1 | Scaffold53  | 136111                  | TT                              | AA              | 1946917656               |
| SNP_P4_112471_140897 | NW_004515665.1 | Scaffold53  | 140897                  | GG                              | AA              | 1946917658               |
| SNP_P4_112472_140903 | NW_004515665.1 | Scaffold53  | 140903                  | CC                              | TT              | 1946917660               |
| SNP_P4_112474_433    | NW_004515667.1 | Scaffold56  | 433                     | AA                              | GG              | 1946917662               |
| SNP_P4_112476_1832   | NW_004515667.1 | Scaffold56  | 1832                    | GG                              | CC              | 1946917664               |
| SNP_P4_112477_2003   | NW_004515667.1 | Scaffold56  | 2003                    | GG                              | CC              | 1946917666               |
| SNP_P4_112478_2004   | NW_004515667.1 | Scaffold56  | 2004                    | TT                              | AA              | 1946917668               |
| SNP_P4_112479_2006   | NW_004515667.1 | Scaffold56  | 2006                    | CC                              | GG              | 1946917670               |
| SNP_P4_112480_2110   | NW_004515667.1 | Scaffold56  | 2110                    | CC                              | TT              | 1946917672               |
| SNP_P4_112481_2230   | NW_004515667.1 | Scaffold56  | 2230                    | TT                              | AA              | 1946917674               |
| SNP_P4_112482_2300   | NW_004515667.1 | Scaffold56  | 2300                    | CC                              | TT              | 1946917676               |



| SNPs IDs            | Chromosome IDs | Chromosomes | Physical positions (bp) | CDC Frontier (Reference genome) | (ILWC46 & LPNB) | NCBI SNPdb Accession IDs |
|---------------------|----------------|-------------|-------------------------|---------------------------------|-----------------|--------------------------|
| SNP_P4_112483_2524  | NW_004515667.1 | Scaffold56  | 2524                    | GG                              | AA              | 1946917678               |
| SNP_P4_112484_2538  | NW_004515667.1 | Scaffold56  | 2538                    | AA                              | GG              | 1946917680               |
| SNP_P4_112485_2561  | NW_004515667.1 | Scaffold56  | 2561                    | TT                              | CC              | 1946917682               |
| SNP_P4_112486_2597  | NW_004515667.1 | Scaffold56  | 2597                    | AA                              | GG              | 1946917684               |
| SNP_P4_112487_2655  | NW_004515667.1 | Scaffold56  | 2655                    | GG                              | AA              | 1946917686               |
| SNP_P4_112488_3024  | NW_004515667.1 | Scaffold56  | 3024                    | TT                              | CC              | 1946917688               |
| SNP_P4_112489_3074  | NW_004515667.1 | Scaffold56  | 3074                    | AA                              | TT              | 1946917690               |
| SNP_P4_112490_3396  | NW_004515667.1 | Scaffold56  | 3396                    | TT                              | GG              | 1946917692               |
| SNP_P4_112491_3434  | NW_004515667.1 | Scaffold56  | 3434                    | GG                              | AA              | 1946917694               |
| SNP_P4_112492_3450  | NW_004515667.1 | Scaffold56  | 3450                    | CC                              | AA              | 1946917696               |
| SNP_P4_112493_3476  | NW_004515667.1 | Scaffold56  | 3476                    | TT                              | AA              | 1946917698               |
| SNP_P4_112494_3490  | NW_004515667.1 | Scaffold56  | 3490                    | CC                              | TT              | 1946917700               |
| SNP_P4_112495_6692  | NW_004515667.1 | Scaffold56  | 6692                    | TT                              | CC              | 1946917702               |
| SNP_P4_112496_12596 | NW_004515667.1 | Scaffold56  | 12596                   | AA                              | GG              | 1946917704               |
| SNP_P4_112497_9305  | NW_004515668.1 | Scaffold62  | 9305                    | GG                              | AA              | 1946917706               |
| SNP_P4_112498_9653  | NW_004515668.1 | Scaffold62  | 9653                    | AA                              | CC              | 1946917708               |
| SNP_P4_112499_10501 | NW_004515668.1 | Scaffold62  | 10501                   | AA                              | GG              | 1946917710               |
| SNP_P4_112500_10747 | NW_004515668.1 | Scaffold62  | 10747                   | CC                              | AA              | 1946917713               |
| SNP_P4_112501_10753 | NW_004515668.1 | Scaffold62  | 10753                   | AA                              | CC              | 1946917715               |
| SNP_P4_112502_11178 | NW_004515668.1 | Scaffold62  | 11178                   | TT                              | CC              | 1946917717               |
| SNP_P4_112503_16013 | NW_004515668.1 | Scaffold62  | 16013                   | TT                              | AA              | 1946917719               |
| SNP_P4_112504_16435 | NW_004515668.1 | Scaffold62  | 16435                   | TT                              | CC              | 1946917721               |
| SNP_P4_112505_17932 | NW_004515668.1 | Scaffold62  | 17932                   | TT                              | GG              | 1946917723               |
| SNP_P4_112506_18214 | NW_004515668.1 | Scaffold62  | 18214                   | CC                              | TT              | 1946917726               |
| SNP_P4_112507_18238 | NW_004515668.1 | Scaffold62  | 18238                   | GG                              | TT              | 1946917727               |
| SNP_P4_112508_18245 | NW_004515668.1 | Scaffold62  | 18245                   | GG                              | AA              | 1946917729               |
| SNP_P4_112509_18261 | NW_004515668.1 | Scaffold62  | 18261                   | TT                              | GG              | 1946917731               |
| SNP_P4_112510_20100 | NW_004515668.1 | Scaffold62  | 20100                   | AA                              | GG              | 1946917733               |
| SNP_P4_112511_20338 | NW_004515668.1 | Scaffold62  | 20338                   | TT                              | AA              | 1946917735               |
| SNP_P4_112512_20626 | NW_004515668.1 | Scaffold62  | 20626                   | TT                              | GG              | 1946917737               |
| SNP_P4_112513_20684 | NW_004515668.1 | Scaffold62  | 20684                   | TT                              | GG              | 1946917739               |
| SNP_P4_112514_20776 | NW_004515668.1 | Scaffold62  | 20776                   | AA                              | GG              | 1946917741               |
| SNP_P4_112515_20837 | NW_004515668.1 | Scaffold62  | 20837                   | CC                              | AA              | 1946917743               |
| SNP_P4_112516_45573 | NW_004515668.1 | Scaffold62  | 45573                   | CC                              | TT              | 1946917745               |
| SNP_P4_112517_45591 | NW_004515668.1 | Scaffold62  | 45591                   | AA                              | GG              | 1946917748               |
| SNP_P4_112518_45600 | NW_004515668.1 | Scaffold62  | 45600                   | GG                              | TT              | 1946917750               |
| SNP_P4_112519_45631 | NW_004515668.1 | Scaffold62  | 45631                   | CC                              | TT              | 1946917752               |
| SNP_P4_112520_45665 | NW_004515668.1 | Scaffold62  | 45665                   | CC                              | TT              | 1946917754               |
| SNP_P4_112521_45674 | NW_004515668.1 | Scaffold62  | 45674                   | CC                              | TT              | 1946917756               |
| SNP_P4_112522_48132 | NW_004515668.1 | Scaffold62  | 48132                   | CC                              | AA              | 1946917758               |
| SNP_P4_112523_70122 | NW_004515668.1 | Scaffold62  | 70122                   | AA                              | GG              | 1946917760               |
| SNP_P4_112524_80287 | NW_004515668.1 | Scaffold62  | 80287                   | CC                              | GG              | 1946917762               |

| SNPs IDs             | Chromosome IDs | Chromosomes | Physical positions (bp) | CDC Frontier (Reference genome) | (ILWC46 & LPNB) | NCBI SNPdb Accession IDs |
|----------------------|----------------|-------------|-------------------------|---------------------------------|-----------------|--------------------------|
| SNP_P4_112525_81374  | NW_004515668.1 | Scaffold62  | 81374                   | TT                              | CC              | 1946917764               |
| SNP_P4_112526_81386  | NW_004515668.1 | Scaffold62  | 81386                   | TT                              | CC              | 1946917766               |
| SNP_P4_112529_81856  | NW_004515668.1 | Scaffold62  | 81856                   | CC                              | TT              | 1946917768               |
| SNP_P4_112530_81890  | NW_004515668.1 | Scaffold62  | 81890                   | GG                              | AA              | 1946917770               |
| SNP_P4_112531_81916  | NW_004515668.1 | Scaffold62  | 81916                   | AA                              | GG              | 1946917772               |
| SNP_P4_112532_95108  | NW_004515668.1 | Scaffold62  | 95108                   | TT                              | GG              | 1946917774               |
| SNP_P4_112533_114915 | NW_004515668.1 | Scaffold62  | 114915                  | GG                              | AA              | 1946917776               |
| SNP_P4_112534_119096 | NW_004515668.1 | Scaffold62  | 119096                  | TT                              | CC              | 1946917778               |
| SNP_P4_112535_120547 | NW_004515668.1 | Scaffold62  | 120547                  | TT                              | CC              | 1946917780               |
| SNP_P4_112536_125675 | NW_004515668.1 | Scaffold62  | 125675                  | GG                              | AA              | 1946917782               |
| SNP_P4_112537_127817 | NW_004515668.1 | Scaffold62  | 127817                  | GG                              | AA              | 1946917784               |
| SNP_P4_112538_129532 | NW_004515668.1 | Scaffold62  | 129532                  | CC                              | TT              | 1946917786               |
| SNP_P4_112539_141246 | NW_004515668.1 | Scaffold62  | 141246                  | AA                              | GG              | 1946917788               |
| SNP_P4_112540_141305 | NW_004515668.1 | Scaffold62  | 141305                  | AA                              | GG              | 1946917790               |
| SNP_P4_112541_149283 | NW_004515668.1 | Scaffold62  | 149283                  | GG                              | AA              | 1946917792               |
| SNP_P4_112542_149303 | NW_004515668.1 | Scaffold62  | 149303                  | GG                              | CC              | 1946917794               |
| SNP_P4_112543_149340 | NW_004515668.1 | Scaffold62  | 149340                  | CC                              | GG              | 1946917796               |
| SNP_P4_112544_149498 | NW_004515668.1 | Scaffold62  | 149498                  | GG                              | AA              | 1946917798               |
| SNP_P4_112545_149852 | NW_004515668.1 | Scaffold62  | 149852                  | AA                              | GG              | 1946917800               |
| SNP_P4_112546_149903 | NW_004515668.1 | Scaffold62  | 149903                  | AA                              | TT              | 1946917802               |
| SNP_P4_112547_150018 | NW_004515668.1 | Scaffold62  | 150018                  | CC                              | TT              | 1946917804               |
| SNP_P4_112548_150064 | NW_004515668.1 | Scaffold62  | 150064                  | CC                              | TT              | 1946917806               |
| SNP_P4_112549_150120 | NW_004515668.1 | Scaffold62  | 150120                  | TT                              | AA              | 1946917808               |
| SNP_P4_112552_150840 | NW_004515668.1 | Scaffold62  | 150840                  | AA                              | GG              | 1946917810               |
| SNP_P4_112554_150983 | NW_004515668.1 | Scaffold62  | 150983                  | AA                              | TT              | 1946917812               |
| SNP_P4_112555_150988 | NW_004515668.1 | Scaffold62  | 150988                  | CC                              | TT              | 1946917814               |
| SNP_P4_112556_150990 | NW_004515668.1 | Scaffold62  | 150990                  | AA                              | GG              | 1946917816               |
| SNP_P4_112557_151030 | NW_004515668.1 | Scaffold62  | 151030                  | AA                              | GG              | 1946917818               |
| SNP_P4_112558_151111 | NW_004515668.1 | Scaffold62  | 151111                  | TT                              | CC              | 1946917820               |
| SNP_P4_112559_151129 | NW_004515668.1 | Scaffold62  | 151129                  | AA                              | GG              | 1946917823               |
| SNP_P4_112560_151250 | NW_004515668.1 | Scaffold62  | 151250                  | GG                              | TT              | 1946917825               |
| SNP_P4_112561_152052 | NW_004515668.1 | Scaffold62  | 152052                  | CC                              | TT              | 1946917827               |
| SNP_P4_112562_153350 | NW_004515668.1 | Scaffold62  | 153350                  | AA                              | GG              | 1946917829               |
| SNP_P4_112563_154059 | NW_004515668.1 | Scaffold62  | 154059                  | GG                              | TT              | 1946917831               |
| SNP_P4_112564_154543 | NW_004515668.1 | Scaffold62  | 154543                  | TT                              | CC              | 1946917833               |
| SNP_P4_112565_168503 | NW_004515668.1 | Scaffold62  | 168503                  | GG                              | AA              | 1946917835               |
| SNP_P4_112566_171698 | NW_004515668.1 | Scaffold62  | 171698                  | GG                              | AA              | 1946917837               |
| SNP_P4_112567_171709 | NW_004515668.1 | Scaffold62  | 171709                  | TT                              | GG              | 1946917839               |
| SNP_P4_112568_171727 | NW_004515668.1 | Scaffold62  | 171727                  | AA                              | GG              | 1946917842               |
| SNP_P4_112569_171886 | NW_004515668.1 | Scaffold62  | 171886                  | TT                              | CC              | 1946917844               |
| SNP_P4_112570_175567 | NW_004515668.1 | Scaffold62  | 175567                  | GG                              | AA              | 1946917846               |
| SNP_P4_112571_175923 | NW_004515668.1 | Scaffold62  | 175923                  | CC                              | TT              | 1946917848               |

| SNPs IDs             | Chromosome IDs | Chromosomes | Physical positions (bp) | CDC Frontier (Reference genome) | (ILWC46 & LPNB) | NCBI SNPdb Accession IDs |
|----------------------|----------------|-------------|-------------------------|---------------------------------|-----------------|--------------------------|
| SNP_P4_112572_175924 | NW_004515668.1 | Scaffold62  | 175924                  | CC                              | GG              | 1946917850               |
| SNP_P4_112573_175925 | NW_004515668.1 | Scaffold62  | 175925                  | AA                              | TT              | 1946917852               |
| SNP_P4_112574_176207 | NW_004515668.1 | Scaffold62  | 176207                  | AA                              | GG              | 1946917854               |
| SNP_P4_112575_186612 | NW_004515668.1 | Scaffold62  | 186612                  | TT                              | AA              | 1946917856               |
| SNP_P4_112576_186613 | NW_004515668.1 | Scaffold62  | 186613                  | GG                              | TT              | 1946917859               |
| SNP_P4_112577_186805 | NW_004515668.1 | Scaffold62  | 186805                  | CC                              | TT              | 1946917861               |
| SNP_P4_112578_205071 | NW_004515668.1 | Scaffold62  | 205071                  | AA                              | TT              | 1946917863               |
| SNP_P4_112579_205123 | NW_004515668.1 | Scaffold62  | 205123                  | AA                              | GG              | 1946917865               |
| SNP_P4_112580_205148 | NW_004515668.1 | Scaffold62  | 205148                  | TT                              | CC              | 1946917867               |
| SNP_P4_112581_205151 | NW_004515668.1 | Scaffold62  | 205151                  | TT                              | CC              | 1946917870               |
| SNP_P4_112582_205294 | NW_004515668.1 | Scaffold62  | 205294                  | CC                              | TT              | 1946917872               |
| SNP_P4_112583_205314 | NW_004515668.1 | Scaffold62  | 205314                  | AA                              | TT              | 1946917874               |
| SNP_P4_112584_205680 | NW_004515668.1 | Scaffold62  | 205680                  | GG                              | TT              | 1946917876               |
| SNP_P4_112585_208908 | NW_004515668.1 | Scaffold62  | 208908                  | TT                              | CC              | 1946917878               |
| SNP_P4_112586_208991 | NW_004515668.1 | Scaffold62  | 208991                  | AA                              | GG              | 1946917881               |
| SNP_P4_112587_209167 | NW_004515668.1 | Scaffold62  | 209167                  | GG                              | AA              | 1946917883               |
| SNP_P4_112588_209240 | NW_004515668.1 | Scaffold62  | 209240                  | CC                              | TT              | 1946917885               |
| SNP_P4_112589_209241 | NW_004515668.1 | Scaffold62  | 209241                  | TT                              | AA              | 1946917887               |
| SNP_P4_112590_209260 | NW_004515668.1 | Scaffold62  | 209260                  | TT                              | AA              | 1946917889               |
| SNP_P4_112591_209284 | NW_004515668.1 | Scaffold62  | 209284                  | TT                              | GG              | 1946917892               |
| SNP_P4_112592_209312 | NW_004515668.1 | Scaffold62  | 209312                  | AA                              | TT              | 1946917894               |
| SNP_P4_112593_209314 | NW_004515668.1 | Scaffold62  | 209314                  | TT                              | GG              | 1946917896               |
| SNP_P4_112594_209465 | NW_004515668.1 | Scaffold62  | 209465                  | AA                              | TT              | 1946917898               |
| SNP_P4_112595_212568 | NW_004515668.1 | Scaffold62  | 212568                  | AA                              | TT              | 1946917900               |
| SNP_P4_112596_212614 | NW_004515668.1 | Scaffold62  | 212614                  | AA                              | GG              | 1946917902               |
| SNP_P4_112597_212616 | NW_004515668.1 | Scaffold62  | 212616                  | CC                              | TT              | 1946917904               |
| SNP_P4_112598_212869 | NW_004515668.1 | Scaffold62  | 212869                  | GG                              | AA              | 1946917907               |
| SNP_P4_112599_223662 | NW_004515668.1 | Scaffold62  | 223662                  | AA                              | CC              | 1946917909               |
| SNP_P4_112600_224010 | NW_004515668.1 | Scaffold62  | 224010                  | TT                              | CC              | 1946917911               |
| SNP_P4_112601_224021 | NW_004515668.1 | Scaffold62  | 224021                  | GG                              | AA              | 1946917913               |
| SNP_P4_112602_224032 | NW_004515668.1 | Scaffold62  | 224032                  | CC                              | TT              | 1946917915               |
| SNP_P4_112603_224033 | NW_004515668.1 | Scaffold62  | 224033                  | CC                              | AA              | 1946917918               |
| SNP_P4_112604_228212 | NW_004515668.1 | Scaffold62  | 228212                  | AA                              | GG              | 1946917920               |
| SNP_P4_112605_228281 | NW_004515668.1 | Scaffold62  | 228281                  | AA                              | CC              | 1946917922               |
| SNP_P4_112606_228289 | NW_004515668.1 | Scaffold62  | 228289                  | TT                              | CC              | 1946917924               |
| SNP_P4_112607_228317 | NW_004515668.1 | Scaffold62  | 228317                  | GG                              | AA              | 1946917926               |
| SNP_P4_112608_228326 | NW_004515668.1 | Scaffold62  | 228326                  | AA                              | GG              | 1946917928               |
| SNP_P4_112609_228331 | NW_004515668.1 | Scaffold62  | 228331                  | CC                              | TT              | 1946917930               |
| SNP_P4_112610_228335 | NW_004515668.1 | Scaffold62  | 228335                  | CC                              | TT              | 1946917932               |
| SNP_P4_112611_228345 | NW_004515668.1 | Scaffold62  | 228345                  | GG                              | AA              | 1946917934               |
| SNP_P4_112612_228367 | NW_004515668.1 | Scaffold62  | 228367                  | GG                              | TT              | 1946917937               |
| SNP_P4_112613_228368 | NW_004515668.1 | Scaffold62  | 228368                  | AA                              | CC              | 1946917939               |

| SNPs IDs             | Chromosome IDs | Chromosomes | Physical positions (bp) | CDC Frontier (Reference genome) | (ILWC46 & LPNB) | NCBI SNPdb Accession IDs |
|----------------------|----------------|-------------|-------------------------|---------------------------------|-----------------|--------------------------|
| SNP_P4_112614_228410 | NW_004515668.1 | Scaffold62  | 228410                  | AA                              | GG              | 1946917941               |
| SNP_P4_112615_228516 | NW_004515668.1 | Scaffold62  | 228516                  | GG                              | TT              | 1946917943               |
| SNP_P4_112616_228526 | NW_004515668.1 | Scaffold62  | 228526                  | TT                              | GG              | 1946917945               |
| SNP_P4_112617_228692 | NW_004515668.1 | Scaffold62  | 228692                  | CC                              | TT              | 1946917947               |
| SNP_P4_112618_228693 | NW_004515668.1 | Scaffold62  | 228693                  | AA                              | GG              | 1946917949               |
| SNP_P4_112619_228702 | NW_004515668.1 | Scaffold62  | 228702                  | CC                              | AA              | 1946917951               |
| SNP_P4_112620_228709 | NW_004515668.1 | Scaffold62  | 228709                  | GG                              | AA              | 1946917953               |
| SNP_P4_112621_230121 | NW_004515668.1 | Scaffold62  | 230121                  | AA                              | GG              | 1946917955               |
| SNP_P4_112622_230128 | NW_004515668.1 | Scaffold62  | 230128                  | TT                              | CC              | 1946917957               |
| SNP_P4_112623_230151 | NW_004515668.1 | Scaffold62  | 230151                  | AA                              | GG              | 1946917959               |
| SNP_P4_112624_230218 | NW_004515668.1 | Scaffold62  | 230218                  | CC                              | TT              | 1946917961               |
| SNP_P4_112625_230219 | NW_004515668.1 | Scaffold62  | 230219                  | AA                              | GG              | 1946917963               |
| SNP_P4_112626_230796 | NW_004515668.1 | Scaffold62  | 230796                  | AA                              | TT              | 1946917965               |
| SNP_P4_112627_230809 | NW_004515668.1 | Scaffold62  | 230809                  | AA                              | GG              | 1946917967               |
| SNP_P4_112628_240746 | NW_004515668.1 | Scaffold62  | 240746                  | AA                              | CC              | 1946917969               |
| SNP_P4_112629_240823 | NW_004515668.1 | Scaffold62  | 240823                  | TT                              | AA              | 1946917971               |
| SNP_P4_112630_240838 | NW_004515668.1 | Scaffold62  | 240838                  | GG                              | AA              | 1946917973               |
| SNP_P4_112631_241091 | NW_004515668.1 | Scaffold62  | 241091                  | AA                              | TT              | 1946917975               |
| SNP_P4_112632_241095 | NW_004515668.1 | Scaffold62  | 241095                  | AA                              | GG              | 1946917977               |
| SNP_P4_112633_241112 | NW_004515668.1 | Scaffold62  | 241112                  | AA                              | GG              | 1946917979               |
| SNP_P4_112634_241140 | NW_004515668.1 | Scaffold62  | 241140                  | CC                              | AA              | 1946917981               |
| SNP_P4_112635_241174 | NW_004515668.1 | Scaffold62  | 241174                  | CC                              | TT              | 1946917983               |
| SNP_P4_112636_241181 | NW_004515668.1 | Scaffold62  | 241181                  | TT                              | GG              | 1946917985               |
| SNP_P4_112637_243592 | NW_004515668.1 | Scaffold62  | 243592                  | GG                              | TT              | 1946917987               |
| SNP_P4_112638_243942 | NW_004515668.1 | Scaffold62  | 243942                  | AA                              | TT              | 1946917989               |
| SNP_P4_112639_248612 | NW_004515668.1 | Scaffold62  | 248612                  | AA                              | CC              | 1946917991               |
| SNP_P4_112640_248632 | NW_004515668.1 | Scaffold62  | 248632                  | AA                              | TT              | 1946917993               |
| SNP_P4_112641_248700 | NW_004515668.1 | Scaffold62  | 248700                  | GG                              | TT              | 1946917995               |
| SNP_P4_112642_248728 | NW_004515668.1 | Scaffold62  | 248728                  | GG                              | AA              | 1946917997               |
| SNP_P4_112643_248753 | NW_004515668.1 | Scaffold62  | 248753                  | AA                              | CC              | 1946917999               |
| SNP_P4_112644_248768 | NW_004515668.1 | Scaffold62  | 248768                  | TT                              | AA              | 1946918001               |
| SNP_P4_112645_248789 | NW_004515668.1 | Scaffold62  | 248789                  | CC                              | GG              | 1946918003               |
| SNP_P4_112646_248804 | NW_004515668.1 | Scaffold62  | 248804                  | CC                              | TT              | 1946918005               |
| SNP_P4_112647_248805 | NW_004515668.1 | Scaffold62  | 248805                  | TT                              | GG              | 1946918008               |
| SNP_P4_112648_248844 | NW_004515668.1 | Scaffold62  | 248844                  | TT                              | AA              | 1946918010               |
| SNP_P4_112649_248847 | NW_004515668.1 | Scaffold62  | 248847                  | TT                              | AA              | 1946918012               |
| SNP_P4_112650_248848 | NW_004515668.1 | Scaffold62  | 248848                  | GG                              | CC              | 1946918014               |
| SNP_P4_112651_248849 | NW_004515668.1 | Scaffold62  | 248849                  | TT                              | AA              | 1946918016               |
| SNP_P4_112652_249914 | NW_004515668.1 | Scaffold62  | 249914                  | TT                              | CC              | 1946918018               |
| SNP_P4_112653_249934 | NW_004515668.1 | Scaffold62  | 249934                  | CC                              | TT              | 1946918020               |
| SNP_P4_112654_250260 | NW_004515668.1 | Scaffold62  | 250260                  | AA                              | TT              | 1946918022               |
| SNP_P4_112655_250286 | NW_004515668.1 | Scaffold62  | 250286                  | TT                              | CC              | 1946918024               |

| SNPs IDs             | Chromosome IDs | Chromosomes | Physical positions (bp) | CDC Frontier (Reference genome) | (ILWC46 & LPNB) | NCBI SNPdb Accession IDs |
|----------------------|----------------|-------------|-------------------------|---------------------------------|-----------------|--------------------------|
| SNP_P4_112656_250294 | NW_004515668.1 | Scaffold62  | 250294                  | TT                              | AA              | 1946918026               |
| SNP_P4_112657_250299 | NW_004515668.1 | Scaffold62  | 250299                  | CC                              | TT              | 1946918028               |
| SNP_P4_112658_250304 | NW_004515668.1 | Scaffold62  | 250304                  | GG                              | CC              | 1946918030               |
| SNP_P4_112659_259305 | NW_004515668.1 | Scaffold62  | 259305                  | TT                              | CC              | 1946918032               |
| SNP_P4_112660_259524 | NW_004515668.1 | Scaffold62  | 259524                  | TT                              | AA              | 1946918034               |
| SNP_P4_112661_259527 | NW_004515668.1 | Scaffold62  | 259527                  | CC                              | TT              | 1946918037               |
| SNP_P4_112662_260455 | NW_004515668.1 | Scaffold62  | 260455                  | CC                              | AA              | 1946918039               |
| SNP_P4_112663_260497 | NW_004515668.1 | Scaffold62  | 260497                  | CC                              | TT              | 1946918041               |
| SNP_P4_112664_260803 | NW_004515668.1 | Scaffold62  | 260803                  | CC                              | AA              | 1946918043               |
| SNP_P4_112665_260830 | NW_004515668.1 | Scaffold62  | 260830                  | TT                              | AA              | 1946918045               |
| SNP_P4_112666_261079 | NW_004515668.1 | Scaffold62  | 261079                  | AA                              | TT              | 1946918047               |
| SNP_P4_112667_261211 | NW_004515668.1 | Scaffold62  | 261211                  | GG                              | AA              | 1946918050               |
| SNP_P4_112668_261225 | NW_004515668.1 | Scaffold62  | 261225                  | TT                              | CC              | 1946918052               |
| SNP_P4_112669_261483 | NW_004515668.1 | Scaffold62  | 261483                  | TT                              | GG              | 1946918054               |
| SNP_P4_112670_261561 | NW_004515668.1 | Scaffold62  | 261561                  | AA                              | TT              | 1946918056               |
| SNP_P4_112671_261564 | NW_004515668.1 | Scaffold62  | 261564                  | GG                              | AA              | 1946918058               |
| SNP_P4_112672_261869 | NW_004515668.1 | Scaffold62  | 261869                  | TT                              | GG              | 1946918060               |
| SNP_P4_112673_264484 | NW_004515668.1 | Scaffold62  | 264484                  | CC                              | TT              | 1946918062               |
| SNP_P4_112674_266455 | NW_004515668.1 | Scaffold62  | 266455                  | TT                              | CC              | 1946918064               |
| SNP_P4_112675_266493 | NW_004515668.1 | Scaffold62  | 266493                  | GG                              | CC              | 1946918066               |
| SNP_P4_112676_266865 | NW_004515668.1 | Scaffold62  | 266865                  | TT                              | CC              | 1946918068               |
| SNP_P4_112677_266878 | NW_004515668.1 | Scaffold62  | 266878                  | AA                              | GG              | 1946918070               |
| SNP_P4_112678_266901 | NW_004515668.1 | Scaffold62  | 266901                  | AA                              | CC              | 1946918072               |
| SNP_P4_112679_268190 | NW_004515668.1 | Scaffold62  | 268190                  | AA                              | TT              | 1946918074               |
| SNP_P4_112680_273361 | NW_004515668.1 | Scaffold62  | 273361                  | CC                              | TT              | 1946918076               |
| SNP_P4_112681_276309 | NW_004515668.1 | Scaffold62  | 276309                  | CC                              | AA              | 1946918078               |
| SNP_P4_112682_279769 | NW_004515668.1 | Scaffold62  | 279769                  | CC                              | TT              | 1946918080               |
| SNP_P4_112683_280709 | NW_004515668.1 | Scaffold62  | 280709                  | GG                              | AA              | 1946918082               |
| SNP_P4_112684_281143 | NW_004515668.1 | Scaffold62  | 281143                  | AA                              | CC              | 1946918084               |
| SNP_P4_112685_282369 | NW_004515668.1 | Scaffold62  | 282369                  | AA                              | CC              | 1946918086               |
| SNP_P4_112686_283642 | NW_004515668.1 | Scaffold62  | 283642                  | AA                              | CC              | 1946918089               |
| SNP_P4_112687_283650 | NW_004515668.1 | Scaffold62  | 283650                  | AA                              | TT              | 1946918091               |
| SNP_P4_112688_283780 | NW_004515668.1 | Scaffold62  | 283780                  | CC                              | TT              | 1946918093               |
| SNP_P4_112689_283784 | NW_004515668.1 | Scaffold62  | 283784                  | TT                              | AA              | 1946918095               |
| SNP_P4_112690_283801 | NW_004515668.1 | Scaffold62  | 283801                  | AA                              | GG              | 1946918097               |
| SNP_P4_112692_284049 | NW_004515668.1 | Scaffold62  | 284049                  | CC                              | TT              | 1946918099               |
| SNP_P4_112693_284160 | NW_004515668.1 | Scaffold62  | 284160                  | GG                              | AA              | 1946918101               |
| SNP_P4_112694_292616 | NW_004515668.1 | Scaffold62  | 292616                  | AA                              | GG              | 1946918103               |
| SNP_P4_112695_327063 | NW_004515668.1 | Scaffold62  | 327063                  | AA                              | CC              | 1946918105               |
| SNP_P4_112696_327077 | NW_004515668.1 | Scaffold62  | 327077                  | CC                              | TT              | 1946918107               |
| SNP_P4_112697_333366 | NW_004515668.1 | Scaffold62  | 333366                  | GG                              | TT              | 1946918109               |
| SNP_P4_112698_334132 | NW_004515668.1 | Scaffold62  | 334132                  | GG                              | TT              | 1946918111               |

| SNPs IDs             | Chromosome IDs | Chromosomes | Physical positions (bp) | CDC Frontier (Reference genome) | (ILWC46 & LPNB) | NCBI SNPdb Accession IDs |
|----------------------|----------------|-------------|-------------------------|---------------------------------|-----------------|--------------------------|
| SNP_P4_112699_335111 | NW_004515668.1 | Scaffold62  | 335111                  | AA                              | CC              | 1946918113               |
| SNP_P4_112700_335412 | NW_004515668.1 | Scaffold62  | 335412                  | AA                              | TT              | 1946918115               |
| SNP_P4_112701_338648 | NW_004515668.1 | Scaffold62  | 338648                  | AA                              | TT              | 1946918117               |
| SNP_P4_112703_343837 | NW_004515668.1 | Scaffold62  | 343837                  | GG                              | AA              | 1946918119               |
| SNP_P4_112704_344829 | NW_004515668.1 | Scaffold62  | 344829                  | CC                              | TT              | 1946918121               |
| SNP_P4_112705_350250 | NW_004515668.1 | Scaffold62  | 350250                  | AA                              | TT              | 1946918123               |
| SNP_P4_112706_4051   | NW_004515669.1 | Scaffold63  | 4051                    | TT                              | AA              | 1946918125               |
| SNP_P4_112707_4787   | NW_004515669.1 | Scaffold63  | 4787                    | AA                              | TT              | 1946918127               |
| SNP_P4_112708_5540   | NW_004515669.1 | Scaffold63  | 5540                    | TT                              | AA              | 1946918129               |
| SNP_P4_112709_5556   | NW_004515669.1 | Scaffold63  | 5556                    | TT                              | GG              | 1946918131               |
| SNP_P4_112710_5587   | NW_004515669.1 | Scaffold63  | 5587                    | TT                              | AA              | 1946918133               |
| SNP_P4_112711_5775   | NW_004515669.1 | Scaffold63  | 5775                    | GG                              | AA              | 1946918135               |
| SNP_P4_112712_6798   | NW_004515669.1 | Scaffold63  | 6798                    | CC                              | GG              | 1946918137               |
| SNP_P4_112713_6824   | NW_004515669.1 | Scaffold63  | 6824                    | AA                              | GG              | 1946918139               |
| SNP_P4_112714_6838   | NW_004515669.1 | Scaffold63  | 6838                    | TT                              | CC              | 1946918141               |
| SNP_P4_112715_6924   | NW_004515669.1 | Scaffold63  | 6924                    | TT                              | GG              | 1946918143               |
| SNP_P4_112716_6933   | NW_004515669.1 | Scaffold63  | 6933                    | GG                              | TT              | 1946918145               |
| SNP_P4_112717_16633  | NW_004515669.1 | Scaffold63  | 16633                   | GG                              | CC              | 1946918147               |
| SNP_P4_112718_16810  | NW_004515669.1 | Scaffold63  | 16810                   | GG                              | TT              | 1946918149               |
| SNP_P4_112719_19688  | NW_004515669.1 | Scaffold63  | 19688                   | AA                              | GG              | 1946918151               |
| SNP_P4_112720_20430  | NW_004515669.1 | Scaffold63  | 20430                   | CC                              | TT              | 1946918153               |
| SNP_P4_112721_20660  | NW_004515669.1 | Scaffold63  | 20660                   | GG                              | AA              | 1946918155               |
| SNP_P4_112722_20855  | NW_004515669.1 | Scaffold63  | 20855                   | TT                              | CC              | 1946918157               |
| SNP_P4_112723_20872  | NW_004515669.1 | Scaffold63  | 20872                   | TT                              | AA              | 1946918158               |
| SNP_P4_112724_20877  | NW_004515669.1 | Scaffold63  | 20877                   | TT                              | GG              | 1946918159               |
| SNP_P4_112725_20880  | NW_004515669.1 | Scaffold63  | 20880                   | TT                              | AA              | 1946918161               |
| SNP_P4_112726_20905  | NW_004515669.1 | Scaffold63  | 20905                   | GG                              | CC              | 1946918163               |
| SNP_P4_112727_20918  | NW_004515669.1 | Scaffold63  | 20918                   | GG                              | TT              | 1946918165               |
| SNP_P4_112728_21024  | NW_004515669.1 | Scaffold63  | 21024                   | AA                              | GG              | 1946918167               |
| SNP_P4_112729_21080  | NW_004515669.1 | Scaffold63  | 21080                   | GG                              | TT              | 1946918169               |
| SNP_P4_112730_21212  | NW_004515669.1 | Scaffold63  | 21212                   | GG                              | TT              | 1946918171               |
| SNP_P4_112731_21257  | NW_004515669.1 | Scaffold63  | 21257                   | GG                              | AA              | 1946918173               |
| SNP_P4_112732_21300  | NW_004515669.1 | Scaffold63  | 21300                   | TT                              | GG              | 1946918175               |
| SNP_P4_112733_21326  | NW_004515669.1 | Scaffold63  | 21326                   | AA                              | GG              | 1946918177               |
| SNP_P4_112734_21330  | NW_004515669.1 | Scaffold63  | 21330                   | AA                              | GG              | 1946918179               |
| SNP_P4_112735_21735  | NW_004515669.1 | Scaffold63  | 21735                   | AA                              | GG              | 1946918181               |
| SNP_P4_112736_23008  | NW_004515669.1 | Scaffold63  | 23008                   | CC                              | TT              | 1946918183               |
| SNP_P4_112737_23027  | NW_004515669.1 | Scaffold63  | 23027                   | AA                              | GG              | 1946918185               |
| SNP_P4_112738_23057  | NW_004515669.1 | Scaffold63  | 23057                   | AA                              | GG              | 1946918187               |
| SNP_P4_112739_23132  | NW_004515669.1 | Scaffold63  | 23132                   | CC                              | AA              | 1946918189               |
| SNP_P4_112740_23211  | NW_004515669.1 | Scaffold63  | 23211                   | CC                              | TT              | 1946918191               |
| SNP_P4_112741_23362  | NW_004515669.1 | Scaffold63  | 23362                   | TT                              | CC              | 1946918193               |

| SNPs IDs            | Chromosome IDs | Chromosomes | Physical positions (bp) | CDC Frontier (Reference genome) | (ILWC46 & LPNB) | NCBI SNPdb Accession IDs |
|---------------------|----------------|-------------|-------------------------|---------------------------------|-----------------|--------------------------|
| SNP_P4_112742_23365 | NW_004515669.1 | Scaffold63  | 23365                   | AA                              | GG              | 1946918195               |
| SNP_P4_112743_26333 | NW_004515669.1 | Scaffold63  | 26333                   | CC                              | AA              | 1946918197               |
| SNP_P4_112744_26497 | NW_004515669.1 | Scaffold63  | 26497                   | AA                              | TT              | 1946918199               |
| SNP_P4_112745_26503 | NW_004515669.1 | Scaffold63  | 26503                   | TT                              | AA              | 1946918201               |
| SNP_P4_112746_36195 | NW_004515669.1 | Scaffold63  | 36195                   | TT                              | AA              | 1946918203               |
| SNP_P4_112747_36288 | NW_004515669.1 | Scaffold63  | 36288                   | TT                              | AA              | 1946918205               |
| SNP_P4_112748_36307 | NW_004515669.1 | Scaffold63  | 36307                   | TT                              | AA              | 1946918207               |
| SNP_P4_112749_41886 | NW_004515669.1 | Scaffold63  | 41886                   | TT                              | CC              | 1946918209               |
| SNP_P4_112750_41911 | NW_004515669.1 | Scaffold63  | 41911                   | AA                              | GG              | 1946918212               |
| SNP_P4_112751_50341 | NW_004515669.1 | Scaffold63  | 50341                   | AA                              | GG              | 1946918214               |
| SNP_P4_112752_50348 | NW_004515669.1 | Scaffold63  | 50348                   | AA                              | GG              | 1946918216               |
| SNP_P4_112753_52111 | NW_004515669.1 | Scaffold63  | 52111                   | TT                              | AA              | 1946918218               |
| SNP_P4_112754_52193 | NW_004515669.1 | Scaffold63  | 52193                   | AA                              | GG              | 1946918220               |
| SNP_P4_112755_52210 | NW_004515669.1 | Scaffold63  | 52210                   | GG                              | AA              | 1946918222               |
| SNP_P4_112756_52245 | NW_004515669.1 | Scaffold63  | 52245                   | CC                              | GG              | 1946918224               |
| SNP_P4_112757_52246 | NW_004515669.1 | Scaffold63  | 52246                   | CC                              | AA              | 1946918226               |
| SNP_P4_112758_52430 | NW_004515669.1 | Scaffold63  | 52430                   | CC                              | TT              | 1946918228               |
| SNP_P4_112759_55002 | NW_004515669.1 | Scaffold63  | 55002                   | TT                              | GG              | 1946918230               |
| SNP_P4_112760_58072 | NW_004515669.1 | Scaffold63  | 58072                   | CC                              | TT              | 1946918232               |
| SNP_P4_112761_59261 | NW_004515669.1 | Scaffold63  | 59261                   | AA                              | GG              | 1946918235               |
| SNP_P4_112763_59350 | NW_004515669.1 | Scaffold63  | 59350                   | AA                              | TT              | 1946918237               |
| SNP_P4_112764_59395 | NW_004515669.1 | Scaffold63  | 59395                   | TT                              | AA              | 1946918239               |
| SNP_P4_112765_59448 | NW_004515669.1 | Scaffold63  | 59448                   | AA                              | TT              | 1946918241               |
| SNP_P4_112766_59672 | NW_004515669.1 | Scaffold63  | 59672                   | TT                              | CC              | 1946918243               |
| SNP_P4_112767_63733 | NW_004515669.1 | Scaffold63  | 63733                   | GG                              | AA              | 1946918245               |
| SNP_P4_112768_63959 | NW_004515669.1 | Scaffold63  | 63959                   | CC                              | TT              | 1946918247               |
| SNP_P4_112769_64178 | NW_004515669.1 | Scaffold63  | 64178                   | GG                              | TT              | 1946918249               |
| SNP_P4_112770_64180 | NW_004515669.1 | Scaffold63  | 64180                   | AA                              | TT              | 1946918251               |
| SNP_P4_112771_64540 | NW_004515669.1 | Scaffold63  | 64540                   | TT                              | CC              | 1946918253               |
| SNP_P4_112772_64620 | NW_004515669.1 | Scaffold63  | 64620                   | GG                              | TT              | 1946918255               |
| SNP_P4_112773_64632 | NW_004515669.1 | Scaffold63  | 64632                   | CC                              | TT              | 1946918257               |
| SNP_P4_112774_64902 | NW_004515669.1 | Scaffold63  | 64902                   | CC                              | AA              | 1946918259               |
| SNP_P4_112775_65073 | NW_004515669.1 | Scaffold63  | 65073                   | TT                              | GG              | 1946918261               |
| SNP_P4_112777_68179 | NW_004515669.1 | Scaffold63  | 68179                   | AA                              | GG              | 1946918263               |
| SNP_P4_112778_21009 | NW_004515671.1 | Scaffold71  | 21009                   | TT                              | CC              | 1946918265               |
| SNP_P4_112779_21012 | NW_004515671.1 | Scaffold71  | 21012                   | CC                              | GG              | 1946918267               |
| SNP_P4_112780_21024 | NW_004515671.1 | Scaffold71  | 21024                   | GG                              | TT              | 1946918269               |
| SNP_P4_112781_21044 | NW_004515671.1 | Scaffold71  | 21044                   | CC                              | GG              | 1946918271               |
| SNP_P4_112782_21144 | NW_004515671.1 | Scaffold71  | 21144                   | TT                              | CC              | 1946918273               |
| SNP_P4_112783_21150 | NW_004515671.1 | Scaffold71  | 21150                   | AA                              | GG              | 1946918275               |
| SNP_P4_112784_21270 | NW_004515671.1 | Scaffold71  | 21270                   | TT                              | CC              | 1946918277               |
| SNP_P4_112785_21349 | NW_004515671.1 | Scaffold71  | 21349                   | AA                              | GG              | 1946918279               |

| SNPs IDs            | Chromosome IDs | Chromosomes | Physical positions (bp) | CDC Frontier (Reference genome) | (ILWC46 & LPNB) | NCBI SNPdb Accession IDs |
|---------------------|----------------|-------------|-------------------------|---------------------------------|-----------------|--------------------------|
| SNP_P4_112786_21458 | NW_004515671.1 | Scaffold71  | 21458                   | AA                              | CC              | 1946918281               |
| SNP_P4_112787_21459 | NW_004515671.1 | Scaffold71  | 21459                   | TT                              | AA              | 1946918283               |
| SNP_P4_112788_25781 | NW_004515671.1 | Scaffold71  | 25781                   | AA                              | GG              | 1946918285               |
| SNP_P4_112790_43446 | NW_004515671.1 | Scaffold71  | 43446                   | CC                              | TT              | 1946918287               |
| SNP_P4_112791_52235 | NW_004515671.1 | Scaffold71  | 52235                   | CC                              | GG              | 1946918289               |
| SNP_P4_112792_8277  | NW_004515672.1 | Scaffold72  | 8277                    | TT                              | CC              | 1946918291               |
| SNP_P4_112793_8300  | NW_004515672.1 | Scaffold72  | 8300                    | TT                              | CC              | 1946918293               |
| SNP_P4_112794_8635  | NW_004515672.1 | Scaffold72  | 8635                    | AA                              | CC              | 1946918295               |
| SNP_P4_112795_8662  | NW_004515672.1 | Scaffold72  | 8662                    | AA                              | GG              | 1946918297               |
| SNP_P4_112796_9832  | NW_004515672.1 | Scaffold72  | 9832                    | GG                              | AA              | 1946918299               |
| SNP_P4_112797_9910  | NW_004515672.1 | Scaffold72  | 9910                    | GG                              | TT              | 1946918301               |
| SNP_P4_112798_10300 | NW_004515672.1 | Scaffold72  | 10300                   | TT                              | CC              | 1946918303               |
| SNP_P4_112799_10337 | NW_004515672.1 | Scaffold72  | 10337                   | TT                              | GG              | 1946918305               |
| SNP_P4_112800_15250 | NW_004515672.1 | Scaffold72  | 15250                   | GG                              | TT              | 1946918307               |
| SNP_P4_112801_15386 | NW_004515672.1 | Scaffold72  | 15386                   | AA                              | CC              | 1946918309               |
| SNP_P4_112802_43072 | NW_004515672.1 | Scaffold72  | 43072                   | CC                              | TT              | 1946918311               |
| SNP_P4_112803_902   | NW_004515674.1 | Scaffold74  | 902                     | GG                              | CC              | 1946918313               |
| SNP_P4_112804_2366  | NW_004515674.1 | Scaffold74  | 2366                    | TT                              | AA              | 1946918315               |
| SNP_P4_112805_2367  | NW_004515674.1 | Scaffold74  | 2367                    | AA                              | TT              | 1946918317               |
| SNP_P4_112806_6667  | NW_004515674.1 | Scaffold74  | 6667                    | TT                              | GG              | 1946918319               |
| SNP_P4_112807_13400 | NW_004515674.1 | Scaffold74  | 13400                   | CC                              | AA              | 1946918321               |
| SNP_P4_112809_17451 | NW_004515674.1 | Scaffold74  | 17451                   | TT                              | AA              | 1946918323               |
| SNP_P4_112810_17592 | NW_004515674.1 | Scaffold74  | 17592                   | AA                              | TT              | 1946918325               |
| SNP_P4_112811_18030 | NW_004515674.1 | Scaffold74  | 18030                   | TT                              | AA              | 1946918327               |
| SNP_P4_112812_19983 | NW_004515674.1 | Scaffold74  | 19983                   | AA                              | GG              | 1946918329               |
| SNP_P4_112813_20258 | NW_004515674.1 | Scaffold74  | 20258                   | AA                              | CC              | 1946918331               |
| SNP_P4_112814_30194 | NW_004515674.1 | Scaffold74  | 30194                   | AA                              | GG              | 1946918333               |
| SNP_P4_112815_34299 | NW_004515674.1 | Scaffold74  | 34299                   | GG                              | AA              | 1946918335               |
| SNP_P4_112816_34550 | NW_004515674.1 | Scaffold74  | 34550                   | GG                              | AA              | 1946918337               |
| SNP_P4_112817_34636 | NW_004515674.1 | Scaffold74  | 34636                   | GG                              | AA              | 1946918339               |
| SNP_P4_112818_40407 | NW_004515674.1 | Scaffold74  | 40407                   | GG                              | CC              | 1946918341               |
| SNP_P4_112819_43257 | NW_004515674.1 | Scaffold74  | 43257                   | TT                              | AA              | 1946918343               |
| SNP_P4_112820_55314 | NW_004515674.1 | Scaffold74  | 55314                   | CC                              | TT              | 1946918345               |
| SNP_P4_112821_55380 | NW_004515674.1 | Scaffold74  | 55380                   | GG                              | AA              | 1946918347               |
| SNP_P4_112822_55387 | NW_004515674.1 | Scaffold74  | 55387                   | AA                              | GG              | 1946918349               |
| SNP_P4_112823_66292 | NW_004515674.1 | Scaffold74  | 66292                   | CC                              | AA              | 1946918351               |
| SNP_P4_112824_66297 | NW_004515674.1 | Scaffold74  | 66297                   | CC                              | TT              | 1946918353               |
| SNP_P4_112825_66300 | NW_004515674.1 | Scaffold74  | 66300                   | GG                              | TT              | 1946918355               |
| SNP_P4_112826_66301 | NW_004515674.1 | Scaffold74  | 66301                   | TT                              | CC              | 1946918357               |
| SNP_P4_112827_66307 | NW_004515674.1 | Scaffold74  | 66307                   | CC                              | GG              | 1946918359               |
| SNP_P4_112828_66310 | NW_004515674.1 | Scaffold74  | 66310                   | GG                              | TT              | 1946918361               |
| SNP_P4_112829_66314 | NW_004515674.1 | Scaffold74  | 66314                   | AA                              | TT              | 1946918363               |



| SNPs IDs             | Chromosome IDs | Chromosomes | Physical positions (bp) | CDC Frontier (Reference genome) | (ILWC46 & LPNB) | NCBI SNPdb Accession IDs |
|----------------------|----------------|-------------|-------------------------|---------------------------------|-----------------|--------------------------|
| SNP_P4_112830_67384  | NW_004515674.1 | Scaffold74  | 67384                   | AA                              | CC              | 1946918365               |
| SNP_P4_112831_68927  | NW_004515674.1 | Scaffold74  | 68927                   | TT                              | AA              | 1946918367               |
| SNP_P4_112832_70651  | NW_004515674.1 | Scaffold74  | 70651                   | CC                              | GG              | 1946918370               |
| SNP_P4_112833_71935  | NW_004515674.1 | Scaffold74  | 71935                   | GG                              | TT              | 1946918372               |
| SNP_P4_112834_72091  | NW_004515674.1 | Scaffold74  | 72091                   | AA                              | CC              | 1946918374               |
| SNP_P4_112835_72264  | NW_004515674.1 | Scaffold74  | 72264                   | AA                              | CC              | 1946918376               |
| SNP_P4_112836_72269  | NW_004515674.1 | Scaffold74  | 72269                   | TT                              | CC              | 1946918378               |
| SNP_P4_112837_72272  | NW_004515674.1 | Scaffold74  | 72272                   | TT                              | AA              | 1946918380               |
| SNP_P4_112838_72273  | NW_004515674.1 | Scaffold74  | 72273                   | CC                              | TT              | 1946918382               |
| SNP_P4_112839_72279  | NW_004515674.1 | Scaffold74  | 72279                   | GG                              | TT              | 1946918384               |
| SNP_P4_112840_72280  | NW_004515674.1 | Scaffold74  | 72280                   | AA                              | GG              | 1946918386               |
| SNP_P4_112841_86574  | NW_004515674.1 | Scaffold74  | 86574                   | AA                              | TT              | 1946918388               |
| SNP_P4_112842_95604  | NW_004515674.1 | Scaffold74  | 95604                   | AA                              | TT              | 1946918390               |
| SNP_P4_112843_64     | NW_004515675.1 | Scaffold76  | 64                      | TT                              | CC              | 1946918392               |
| SNP_P4_112845_266    | NW_004515675.1 | Scaffold76  | 266                     | CC                              | TT              | 1946918394               |
| SNP_P4_112846_43083  | NW_004515676.1 | Scaffold80  | 43083                   | TT                              | CC              | 1946918396               |
| SNP_P4_112847_43193  | NW_004515676.1 | Scaffold80  | 43193                   | TT                              | CC              | 1946918398               |
| SNP_P4_112849_56015  | NW_004515676.1 | Scaffold80  | 56015                   | AA                              | GG              | 1946918400               |
| SNP_P4_112850_56184  | NW_004515676.1 | Scaffold80  | 56184                   | AA                              | GG              | 1946918402               |
| SNP_P4_112851_56186  | NW_004515676.1 | Scaffold80  | 56186                   | TT                              | CC              | 1946918404               |
| SNP_P4_112852_56617  | NW_004515676.1 | Scaffold80  | 56617                   | CC                              | TT              | 1946918406               |
| SNP_P4_112853_56668  | NW_004515676.1 | Scaffold80  | 56668                   | TT                              | GG              | 1946918408               |
| SNP_P4_112854_56708  | NW_004515676.1 | Scaffold80  | 56708                   | AA                              | CC              | 1946918410               |
| SNP_P4_112855_56758  | NW_004515676.1 | Scaffold80  | 56758                   | TT                              | CC              | 1946918412               |
| SNP_P4_112856_56850  | NW_004515676.1 | Scaffold80  | 56850                   | TT                              | GG              | 1946918414               |
| SNP_P4_112858_63891  | NW_004515676.1 | Scaffold80  | 63891                   | TT                              | GG              | 1946918416               |
| SNP_P4_112859_66259  | NW_004515676.1 | Scaffold80  | 66259                   | CC                              | GG              | 1946918418               |
| SNP_P4_112860_66262  | NW_004515676.1 | Scaffold80  | 66262                   | AA                              | TT              | 1946918420               |
| SNP_P4_112861_66429  | NW_004515676.1 | Scaffold80  | 66429                   | AA                              | TT              | 1946918422               |
| SNP_P4_112862_70103  | NW_004515676.1 | Scaffold80  | 70103                   | AA                              | GG              | 1946918424               |
| SNP_P4_112863_79057  | NW_004515676.1 | Scaffold80  | 79057                   | TT                              | CC              | 1946918426               |
| SNP_P4_112864_83415  | NW_004515676.1 | Scaffold80  | 83415                   | CC                              | TT              | 1946918428               |
| SNP_P4_112865_83424  | NW_004515676.1 | Scaffold80  | 83424                   | AA                              | GG              | 1946918430               |
| SNP_P4_112866_89909  | NW_004515676.1 | Scaffold80  | 89909                   | TT                              | GG              | 1946918432               |
| SNP_P4_112867_89928  | NW_004515676.1 | Scaffold80  | 89928                   | GG                              | AA              | 1946918434               |
| SNP_P4_112868_90170  | NW_004515676.1 | Scaffold80  | 90170                   | CC                              | TT              | 1946918436               |
| SNP_P4_112869_90178  | NW_004515676.1 | Scaffold80  | 90178                   | AA                              | CC              | 1946918438               |
| SNP_P4_112870_90207  | NW_004515676.1 | Scaffold80  | 90207                   | AA                              | GG              | 1946918441               |
| SNP_P4_112871_90234  | NW_004515676.1 | Scaffold80  | 90234                   | TT                              | AA              | 1946918443               |
| SNP_P4_112873_101613 | NW_004515676.1 | Scaffold80  | 101613                  | GG                              | TT              | 1946918445               |
| SNP_P4_112874_101664 | NW_004515676.1 | Scaffold80  | 101664                  | TT                              | CC              | 1946918447               |
| SNP_P4_112875_101774 | NW_004515676.1 | Scaffold80  | 101774                  | AA                              | GG              | 1946918449               |

| SNPs IDs             | Chromosome IDs | Chromosomes | Physical positions (bp) | CDC Frontier (Reference genome) | (ILWC46 & LPNB) | NCBI SNPdb Accession IDs |
|----------------------|----------------|-------------|-------------------------|---------------------------------|-----------------|--------------------------|
| SNP_P4_112876_101869 | NW_004515676.1 | Scaffold80  | 101869                  | CC                              | TT              | 1946918451               |
| SNP_P4_112877_101895 | NW_004515676.1 | Scaffold80  | 101895                  | CC                              | GG              | 1946918453               |
| SNP_P4_112878_119925 | NW_004515676.1 | Scaffold80  | 119925                  | TT                              | CC              | 1946918455               |
| SNP_P4_112879_125465 | NW_004515676.1 | Scaffold80  | 125465                  | TT                              | AA              | 1946918457               |
| SNP_P4_112880_134445 | NW_004515676.1 | Scaffold80  | 134445                  | GG                              | TT              | 1946918459               |
| SNP_P4_112881_134458 | NW_004515676.1 | Scaffold80  | 134458                  | CC                              | TT              | 1946918461               |
| SNP_P4_112882_134476 | NW_004515676.1 | Scaffold80  | 134476                  | AA                              | TT              | 1946918463               |
| SNP_P4_112883_134499 | NW_004515676.1 | Scaffold80  | 134499                  | GG                              | AA              | 1946918465               |
| SNP_P4_112884_144065 | NW_004515676.1 | Scaffold80  | 144065                  | AA                              | TT              | 1946918467               |
| SNP_P4_112885_144098 | NW_004515676.1 | Scaffold80  | 144098                  | TT                              | CC              | 1946918469               |
| SNP_P4_112886_144171 | NW_004515676.1 | Scaffold80  | 144171                  | CC                              | AA              | 1946918471               |
| SNP_P4_112887_144212 | NW_004515676.1 | Scaffold80  | 144212                  | AA                              | TT              | 1946918473               |
| SNP_P4_112888_144426 | NW_004515676.1 | Scaffold80  | 144426                  | AA                              | GG              | 1946918475               |
| SNP_P4_112889_144466 | NW_004515676.1 | Scaffold80  | 144466                  | CC                              | TT              | 1946918477               |
| SNP_P4_112890_150705 | NW_004515676.1 | Scaffold80  | 150705                  | TT                              | GG              | 1946918479               |
| SNP_P4_112891_150730 | NW_004515676.1 | Scaffold80  | 150730                  | GG                              | AA              | 1946918481               |
| SNP_P4_112892_150754 | NW_004515676.1 | Scaffold80  | 150754                  | TT                              | CC              | 1946918483               |
| SNP_P4_112893_150774 | NW_004515676.1 | Scaffold80  | 150774                  | TT                              | CC              | 1946918485               |
| SNP_P4_112894_150908 | NW_004515676.1 | Scaffold80  | 150908                  | AA                              | GG              | 1946918487               |
| SNP_P4_112895_151148 | NW_004515676.1 | Scaffold80  | 151148                  | AA                              | CC              | 1946918489               |
| SNP_P4_112896_151382 | NW_004515676.1 | Scaffold80  | 151382                  | TT                              | CC              | 1946918491               |
| SNP_P4_112897_162215 | NW_004515676.1 | Scaffold80  | 162215                  | AA                              | GG              | 1946918493               |
| SNP_P4_112898_162584 | NW_004515676.1 | Scaffold80  | 162584                  | TT                              | CC              | 1946918495               |
| SNP_P4_112899_162625 | NW_004515676.1 | Scaffold80  | 162625                  | GG                              | TT              | 1946918497               |
| SNP_P4_112900_162684 | NW_004515676.1 | Scaffold80  | 162684                  | AA                              | GG              | 1946918499               |
| SNP_P4_112901_162716 | NW_004515676.1 | Scaffold80  | 162716                  | TT                              | GG              | 1946918501               |
| SNP_P4_112902_173329 | NW_004515676.1 | Scaffold80  | 173329                  | TT                              | AA              | 1946918503               |
| SNP_P4_112904_191309 | NW_004515676.1 | Scaffold80  | 191309                  | GG                              | TT              | 1946918505               |
| SNP_P4_112907_273140 | NW_004515676.1 | Scaffold80  | 273140                  | AA                              | GG              | 1946918507               |
| SNP_P4_112908_273141 | NW_004515676.1 | Scaffold80  | 273141                  | GG                              | AA              | 1946918509               |
| SNP_P4_112909_273519 | NW_004515676.1 | Scaffold80  | 273519                  | AA                              | GG              | 1946918511               |
| SNP_P4_112910_277646 | NW_004515676.1 | Scaffold80  | 277646                  | TT                              | CC              | 1946918513               |
| SNP_P4_112912_331838 | NW_004515676.1 | Scaffold80  | 331838                  | AA                              | GG              | 1946918515               |
| SNP_P4_112913_331851 | NW_004515676.1 | Scaffold80  | 331851                  | AA                              | GG              | 1946918517               |
| SNP_P4_112914_332274 | NW_004515676.1 | Scaffold80  | 332274                  | GG                              | AA              | 1946918519               |
| SNP_P4_112915_332302 | NW_004515676.1 | Scaffold80  | 332302                  | AA                              | GG              | 1946918521               |
| SNP_P4_112916_345260 | NW_004515676.1 | Scaffold80  | 345260                  | TT                              | CC              | 1946918523               |
| SNP_P4_112917_345264 | NW_004515676.1 | Scaffold80  | 345264                  | TT                              | CC              | 1946918525               |
| SNP_P4_112918_346244 | NW_004515676.1 | Scaffold80  | 346244                  | AA                              | GG              | 1946918527               |
| SNP_P4_112919_350766 | NW_004515676.1 | Scaffold80  | 350766                  | AA                              | GG              | 1946918529               |
| SNP_P4_112920_350816 | NW_004515676.1 | Scaffold80  | 350816                  | TT                              | CC              | 1946918531               |
| SNP_P4_112921_354107 | NW_004515676.1 | Scaffold80  | 354107                  | TT                              | CC              | 1946918533               |

| SNPs IDs             | Chromosome IDs | Chromosomes | Physical positions (bp) | CDC Frontier (Reference genome) | (ILWC46 & LPNB) | NCBI SNPdb Accession IDs |
|----------------------|----------------|-------------|-------------------------|---------------------------------|-----------------|--------------------------|
| SNP_P4_112922_354121 | NW_004515676.1 | Scaffold80  | 354121                  | TT                              | CC              | 1946918535               |
| SNP_P4_112923_354135 | NW_004515676.1 | Scaffold80  | 354135                  | TT                              | CC              | 1946918537               |
| SNP_P4_112924_354624 | NW_004515676.1 | Scaffold80  | 354624                  | AA                              | GG              | 1946918539               |
| SNP_P4_112925_355722 | NW_004515676.1 | Scaffold80  | 355722                  | AA                              | GG              | 1946918542               |
| SNP_P4_112926_355728 | NW_004515676.1 | Scaffold80  | 355728                  | TT                              | CC              | 1946918544               |
| SNP_P4_112927_357546 | NW_004515676.1 | Scaffold80  | 357546                  | TT                              | GG              | 1946918546               |
| SNP_P4_112928_358227 | NW_004515676.1 | Scaffold80  | 358227                  | CC                              | AA              | 1946918548               |
| SNP_P4_112929_358229 | NW_004515676.1 | Scaffold80  | 358229                  | AA                              | GG              | 1946918550               |
| SNP_P4_112930_358776 | NW_004515676.1 | Scaffold80  | 358776                  | TT                              | CC              | 1946918552               |
| SNP_P4_112931_359517 | NW_004515676.1 | Scaffold80  | 359517                  | CC                              | TT              | 1946918554               |
| SNP_P4_112932_364567 | NW_004515676.1 | Scaffold80  | 364567                  | AA                              | GG              | 1946918556               |
| SNP_P4_112933_364583 | NW_004515676.1 | Scaffold80  | 364583                  | GG                              | AA              | 1946918558               |
| SNP_P4_112934_364594 | NW_004515676.1 | Scaffold80  | 364594                  | AA                              | TT              | 1946918561               |
| SNP_P4_112935_364646 | NW_004515676.1 | Scaffold80  | 364646                  | GG                              | TT              | 1946918563               |
| SNP_P4_112936_365349 | NW_004515676.1 | Scaffold80  | 365349                  | GG                              | TT              | 1946918565               |
| SNP_P4_112937_365392 | NW_004515676.1 | Scaffold80  | 365392                  | GG                              | AA              | 1946918567               |
| SNP_P4_112938_382495 | NW_004515676.1 | Scaffold80  | 382495                  | TT                              | CC              | 1946918569               |
| SNP_P4_112939_382498 | NW_004515676.1 | Scaffold80  | 382498                  | AA                              | CC              | 1946918571               |
| SNP_P4_112940_382518 | NW_004515676.1 | Scaffold80  | 382518                  | TT                              | CC              | 1946918573               |
| SNP_P4_112941_382521 | NW_004515676.1 | Scaffold80  | 382521                  | TT                              | CC              | 1946918575               |
| SNP_P4_112942_382543 | NW_004515676.1 | Scaffold80  | 382543                  | AA                              | GG              | 1946918577               |
| SNP_P4_112944_396387 | NW_004515676.1 | Scaffold80  | 396387                  | TT                              | AA              | 1946918579               |
| SNP_P4_112945_429866 | NW_004515676.1 | Scaffold80  | 429866                  | GG                              | AA              | 1946918581               |
| SNP_P4_112946_4266   | NW_004515677.1 | Scaffold81  | 4266                    | TT                              | CC              | 1946918583               |
| SNP_P4_112947_90420  | NW_004515677.1 | Scaffold81  | 90420                   | TT                              | AA              | 1946918585               |
| SNP_P4_112948_90451  | NW_004515677.1 | Scaffold81  | 90451                   | AA                              | GG              | 1946918587               |
| SNP_P4_112949_90456  | NW_004515677.1 | Scaffold81  | 90456                   | CC                              | TT              | 1946918589               |
| SNP_P4_112950_90513  | NW_004515677.1 | Scaffold81  | 90513                   | CC                              | AA              | 1946918591               |
| SNP_P4_112951_90615  | NW_004515677.1 | Scaffold81  | 90615                   | CC                              | TT              | 1946918593               |
| SNP_P4_112952_90700  | NW_004515677.1 | Scaffold81  | 90700                   | GG                              | AA              | 1946918595               |
| SNP_P4_112953_91219  | NW_004515677.1 | Scaffold81  | 91219                   | AA                              | TT              | 1946918597               |
| SNP_P4_112954_91280  | NW_004515677.1 | Scaffold81  | 91280                   | TT                              | AA              | 1946918599               |
| SNP_P4_112955_91305  | NW_004515677.1 | Scaffold81  | 91305                   | AA                              | GG              | 1946918601               |
| SNP_P4_112956_91314  | NW_004515677.1 | Scaffold81  | 91314                   | GG                              | TT              | 1946918603               |
| SNP_P4_112957_91326  | NW_004515677.1 | Scaffold81  | 91326                   | TT                              | AA              | 1946918605               |
| SNP_P4_112958_91338  | NW_004515677.1 | Scaffold81  | 91338                   | CC                              | AA              | 1946918607               |
| SNP_P4_112959_91356  | NW_004515677.1 | Scaffold81  | 91356                   | CC                              | TT              | 1946918609               |
| SNP_P4_112961_91424  | NW_004515677.1 | Scaffold81  | 91424                   | GG                              | CC              | 1946918611               |
| SNP_P4_112962_91446  | NW_004515677.1 | Scaffold81  | 91446                   | GG                              | AA              | 1946918613               |
| SNP_P4_112963_91448  | NW_004515677.1 | Scaffold81  | 91448                   | GG                              | AA              | 1946918615               |
| SNP_P4_112964_91469  | NW_004515677.1 | Scaffold81  | 91469                   | GG                              | CC              | 1946918617               |
| SNP_P4_112965_91499  | NW_004515677.1 | Scaffold81  | 91499                   | TT                              | CC              | 1946918619               |

| SNPs IDs            | Chromosome IDs | Chromosomes | Physical positions (bp) | CDC Frontier (Reference genome) | (ILWC46 & LPNB) | NCBI SNPdb Accession IDs |
|---------------------|----------------|-------------|-------------------------|---------------------------------|-----------------|--------------------------|
| SNP_P4_112966_91502 | NW_004515677.1 | Scaffold81  | 91502                   | AA                              | TT              | 1946918621               |
| SNP_P4_112967_91513 | NW_004515677.1 | Scaffold81  | 91513                   | AA                              | GG              | 1946918623               |
| SNP_P4_112968_91524 | NW_004515677.1 | Scaffold81  | 91524                   | GG                              | AA              | 1946918625               |
| SNP_P4_112969_91561 | NW_004515677.1 | Scaffold81  | 91561                   | GG                              | AA              | 1946918627               |
| SNP_P4_112970_91602 | NW_004515677.1 | Scaffold81  | 91602                   | AA                              | CC              | 1946918629               |
| SNP_P4_112971_91603 | NW_004515677.1 | Scaffold81  | 91603                   | CC                              | AA              | 1946918631               |
| SNP_P4_112972_91609 | NW_004515677.1 | Scaffold81  | 91609                   | AA                              | TT              | 1946918633               |
| SNP_P4_112973_91643 | NW_004515677.1 | Scaffold81  | 91643                   | GG                              | AA              | 1946918635               |
| SNP_P4_112974_91665 | NW_004515677.1 | Scaffold81  | 91665                   | AA                              | GG              | 1946918637               |
| SNP_P4_112975_91773 | NW_004515677.1 | Scaffold81  | 91773                   | AA                              | TT              | 1946918639               |
| SNP_P4_112976_91778 | NW_004515677.1 | Scaffold81  | 91778                   | GG                              | CC              | 1946918641               |
| SNP_P4_112978_91866 | NW_004515677.1 | Scaffold81  | 91866                   | CC                              | TT              | 1946918643               |
| SNP_P4_112979_91928 | NW_004515677.1 | Scaffold81  | 91928                   | AA                              | GG              | 1946918645               |
| SNP_P4_112980_91931 | NW_004515677.1 | Scaffold81  | 91931                   | AA                              | TT              | 1946918647               |
| SNP_P4_112981_92003 | NW_004515677.1 | Scaffold81  | 92003                   | AA                              | TT              | 1946918649               |
| SNP_P4_112982_92010 | NW_004515677.1 | Scaffold81  | 92010                   | TT                              | AA              | 1946918651               |
| SNP_P4_112983_92017 | NW_004515677.1 | Scaffold81  | 92017                   | AA                              | GG              | 1946918653               |
| SNP_P4_112984_92033 | NW_004515677.1 | Scaffold81  | 92033                   | AA                              | TT              | 1946918655               |
| SNP_P4_112985_92054 | NW_004515677.1 | Scaffold81  | 92054                   | AA                              | CC              | 1946918657               |
| SNP_P4_112986_92117 | NW_004515677.1 | Scaffold81  | 92117                   | CC                              | GG              | 1946918659               |
| SNP_P4_112987_92172 | NW_004515677.1 | Scaffold81  | 92172                   | TT                              | GG              | 1946918661               |
| SNP_P4_112988_5531  | NW_004515679.1 | Scaffold83  | 5531                    | AA                              | GG              | 1946918663               |
| SNP_P4_112989_5632  | NW_004515679.1 | Scaffold83  | 5632                    | AA                              | GG              | 1946918665               |
| SNP_P4_112990_5972  | NW_004515679.1 | Scaffold83  | 5972                    | TT                              | CC              | 1946918667               |
| SNP_P4_112991_6039  | NW_004515679.1 | Scaffold83  | 6039                    | GG                              | AA              | 1946918669               |
| SNP_P4_112992_6063  | NW_004515679.1 | Scaffold83  | 6063                    | AA                              | TT              | 1946918671               |
| SNP_P4_112993_6067  | NW_004515679.1 | Scaffold83  | 6067                    | GG                              | AA              | 1946918673               |
| SNP_P4_112994_6079  | NW_004515679.1 | Scaffold83  | 6079                    | CC                              | TT              | 1946918675               |
| SNP_P4_112995_6080  | NW_004515679.1 | Scaffold83  | 6080                    | TT                              | CC              | 1946918677               |
| SNP_P4_112996_6441  | NW_004515679.1 | Scaffold83  | 6441                    | TT                              | AA              | 1946918679               |
| SNP_P4_112997_646   | NW_004515680.1 | Scaffold84  | 646                     | GG                              | AA              | 1946918681               |
| SNP_P4_112998_437   | NW_004515681.1 | Scaffold86  | 437                     | GG                              | AA              | 1946918683               |
| SNP_P4_112999_1105  | NW_004515681.1 | Scaffold86  | 1105                    | AA                              | GG              | 1946918685               |
| SNP_P4_113000_1116  | NW_004515681.1 | Scaffold86  | 1116                    | AA                              | GG              | 1946918687               |
| SNP_P4_113001_1152  | NW_004515681.1 | Scaffold86  | 1152                    | TT                              | AA              | 1946918689               |
| SNP_P4_113003_26100 | NW_004515681.1 | Scaffold86  | 26100                   | GG                              | TT              | 1946918691               |
| SNP_P4_113004_26101 | NW_004515681.1 | Scaffold86  | 26101                   | GG                              | AA              | 1946918693               |
| SNP_P4_113005_26107 | NW_004515681.1 | Scaffold86  | 26107                   | AA                              | TT              | 1946918695               |
| SNP_P4_113006_26115 | NW_004515681.1 | Scaffold86  | 26115                   | AA                              | GG              | 1946918697               |
| SNP_P4_113007_26141 | NW_004515681.1 | Scaffold86  | 26141                   | TT                              | CC              | 1946918699               |
| SNP_P4_113008_26154 | NW_004515681.1 | Scaffold86  | 26154                   | GG                              | TT              | 1946918701               |
| SNP_P4_113009_30895 | NW_004515681.1 | Scaffold86  | 30895                   | AA                              | GG              | 1946918703               |

| SNPs IDs             | Chromosome IDs | Chromosomes | Physical positions (bp) | CDC Frontier (Reference genome) | (ILWC46 & LPNB) | NCBI SNPdb Accession IDs |
|----------------------|----------------|-------------|-------------------------|---------------------------------|-----------------|--------------------------|
| SNP_P4_113010_31257  | NW_004515681.1 | Scaffold86  | 31257                   | AA                              | GG              | 1946918705               |
| SNP_P4_113011_31262  | NW_004515681.1 | Scaffold86  | 31262                   | AA                              | TT              | 1946918707               |
| SNP_P4_113012_31271  | NW_004515681.1 | Scaffold86  | 31271                   | GG                              | CC              | 1946918709               |
| SNP_P4_113013_31933  | NW_004515681.1 | Scaffold86  | 31933                   | CC                              | TT              | 1946918712               |
| SNP_P4_113014_37272  | NW_004515681.1 | Scaffold86  | 37272                   | AA                              | TT              | 1946918714               |
| SNP_P4_113015_37552  | NW_004515681.1 | Scaffold86  | 37552                   | GG                              | AA              | 1946918716               |
| SNP_P4_113016_39508  | NW_004515681.1 | Scaffold86  | 39508                   | GG                              | CC              | 1946918718               |
| SNP_P4_113017_39557  | NW_004515681.1 | Scaffold86  | 39557                   | AA                              | GG              | 1946918720               |
| SNP_P4_113018_48524  | NW_004515681.1 | Scaffold86  | 48524                   | AA                              | CC              | 1946918722               |
| SNP_P4_113019_64651  | NW_004515681.1 | Scaffold86  | 64651                   | TT                              | CC              | 1946918724               |
| SNP_P4_113020_74809  | NW_004515681.1 | Scaffold86  | 74809                   | GG                              | TT              | 1946918726               |
| SNP_P4_113021_83748  | NW_004515681.1 | Scaffold86  | 83748                   | AA                              | CC              | 1946918728               |
| SNP_P4_113022_94941  | NW_004515681.1 | Scaffold86  | 94941                   | CC                              | AA              | 1946918730               |
| SNP_P4_113023_6204   | NW_004515682.1 | Scaffold87  | 6204                    | TT                              | CC              | 1946918732               |
| SNP_P4_113024_9071   | NW_004515682.1 | Scaffold87  | 9071                    | AA                              | GG              | 1946918734               |
| SNP_P4_113025_9216   | NW_004515682.1 | Scaffold87  | 9216                    | CC                              | AA              | 1946918736               |
| SNP_P4_113026_9424   | NW_004515682.1 | Scaffold87  | 9424                    | TT                              | CC              | 1946918739               |
| SNP_P4_113027_9456   | NW_004515682.1 | Scaffold87  | 9456                    | AA                              | GG              | 1946918741               |
| SNP_P4_113028_9472   | NW_004515682.1 | Scaffold87  | 9472                    | GG                              | CC              | 1946918743               |
| SNP_P4_113029_9717   | NW_004515682.1 | Scaffold87  | 9717                    | AA                              | GG              | 1946918745               |
| SNP_P4_113030_29407  | NW_004515682.1 | Scaffold87  | 29407                   | TT                              | CC              | 1946918747               |
| SNP_P4_113031_50809  | NW_004515682.1 | Scaffold87  | 50809                   | AA                              | CC              | 1946918749               |
| SNP_P4_113032_50860  | NW_004515682.1 | Scaffold87  | 50860                   | CC                              | GG              | 1946918751               |
| SNP_P4_113033_51832  | NW_004515682.1 | Scaffold87  | 51832                   | TT                              | GG              | 1946918753               |
| SNP_P4_113034_67179  | NW_004515682.1 | Scaffold87  | 67179                   | CC                              | TT              | 1946918755               |
| SNP_P4_113035_79112  | NW_004515682.1 | Scaffold87  | 79112                   | GG                              | CC              | 1946918757               |
| SNP_P4_113036_87135  | NW_004515682.1 | Scaffold87  | 87135                   | TT                              | CC              | 1946918759               |
| SNP_P4_113037_115006 | NW_004515682.1 | Scaffold87  | 115006                  | GG                              | AA              | 1946918761               |
| SNP_P4_113038_118025 | NW_004515682.1 | Scaffold87  | 118025                  | TT                              | GG              | 1946918763               |
| SNP_P4_113039_118030 | NW_004515682.1 | Scaffold87  | 118030                  | CC                              | TT              | 1946918765               |
| SNP_P4_113040_118039 | NW_004515682.1 | Scaffold87  | 118039                  | TT                              | CC              | 1946918767               |
| SNP_P4_113041_118045 | NW_004515682.1 | Scaffold87  | 118045                  | AA                              | GG              | 1946918769               |
| SNP_P4_113042_118111 | NW_004515682.1 | Scaffold87  | 118111                  | TT                              | AA              | 1946918771               |
| SNP_P4_113043_118123 | NW_004515682.1 | Scaffold87  | 118123                  | TT                              | CC              | 1946918773               |
| SNP_P4_113044_118196 | NW_004515682.1 | Scaffold87  | 118196                  | GG                              | AA              | 1946918775               |
| SNP_P4_113045_118265 | NW_004515682.1 | Scaffold87  | 118265                  | CC                              | TT              | 1946918777               |
| SNP_P4_113046_118577 | NW_004515682.1 | Scaffold87  | 118577                  | AA                              | GG              | 1946918779               |
| SNP_P4_113047_120906 | NW_004515682.1 | Scaffold87  | 120906                  | AA                              | GG              | 1946918781               |
| SNP_P4_113048_121522 | NW_004515682.1 | Scaffold87  | 121522                  | TT                              | GG              | 1946918783               |
| SNP_P4_113049_121573 | NW_004515682.1 | Scaffold87  | 121573                  | TT                              | CC              | 1946918785               |
| SNP_P4_113050_140568 | NW_004515682.1 | Scaffold87  | 140568                  | CC                              | TT              | 1946918787               |
| SNP_P4_113051_140571 | NW_004515682.1 | Scaffold87  | 140571                  | TT                              | GG              | 1946918789               |

| SNPs IDs             | Chromosome IDs | Chromosomes | Physical positions (bp) | CDC Frontier (Reference genome) | (ILWC46 & LPNB) | NCBI SNPdb Accession IDs |
|----------------------|----------------|-------------|-------------------------|---------------------------------|-----------------|--------------------------|
| SNP_P4_113052_140588 | NW_004515682.1 | Scaffold87  | 140588                  | CC                              | AA              | 1946918791               |
| SNP_P4_113053_149115 | NW_004515682.1 | Scaffold87  | 149115                  | AA                              | GG              | 1946918793               |
| SNP_P4_113054_149153 | NW_004515682.1 | Scaffold87  | 149153                  | AA                              | TT              | 1946918795               |
| SNP_P4_113055_149356 | NW_004515682.1 | Scaffold87  | 149356                  | AA                              | GG              | 1946918797               |
| SNP_P4_113056_149362 | NW_004515682.1 | Scaffold87  | 149362                  | CC                              | AA              | 1946918799               |
| SNP_P4_113057_149395 | NW_004515682.1 | Scaffold87  | 149395                  | GG                              | AA              | 1946918801               |
| SNP_P4_113058_149408 | NW_004515682.1 | Scaffold87  | 149408                  | GG                              | AA              | 1946918803               |
| SNP_P4_113059_158697 | NW_004515682.1 | Scaffold87  | 158697                  | AA                              | GG              | 1946918805               |
| SNP_P4_113060_158754 | NW_004515682.1 | Scaffold87  | 158754                  | AA                              | GG              | 1946918807               |
| SNP_P4_113061_158760 | NW_004515682.1 | Scaffold87  | 158760                  | CC                              | GG              | 1946918809               |
| SNP_P4_113062_158811 | NW_004515682.1 | Scaffold87  | 158811                  | GG                              | AA              | 1946918811               |
| SNP_P4_113063_158828 | NW_004515682.1 | Scaffold87  | 158828                  | GG                              | AA              | 1946918813               |
| SNP_P4_113064_158934 | NW_004515682.1 | Scaffold87  | 158934                  | TT                              | CC              | 1946918815               |
| SNP_P4_113066_170810 | NW_004515682.1 | Scaffold87  | 170810                  | GG                              | AA              | 1946918817               |
| SNP_P4_113067_257223 | NW_004515682.1 | Scaffold87  | 257223                  | CC                              | TT              | 1946918819               |
| SNP_P4_113068_262470 | NW_004515682.1 | Scaffold87  | 262470                  | AA                              | GG              | 1946918821               |
| SNP_P4_113070_297591 | NW_004515682.1 | Scaffold87  | 297591                  | CC                              | AA              | 1946918823               |
| SNP_P4_113071_306847 | NW_004515682.1 | Scaffold87  | 306847                  | AA                              | GG              | 1946918825               |
| SNP_P4_113072_306863 | NW_004515682.1 | Scaffold87  | 306863                  | AA                              | GG              | 1946918827               |
| SNP_P4_113073_306899 | NW_004515682.1 | Scaffold87  | 306899                  | AA                              | GG              | 1946918829               |
| SNP_P4_113074_306982 | NW_004515682.1 | Scaffold87  | 306982                  | AA                              | TT              | 1946918831               |
| SNP_P4_113075_310489 | NW_004515682.1 | Scaffold87  | 310489                  | TT                              | AA              | 1946918833               |
| SNP_P4_113076_331186 | NW_004515682.1 | Scaffold87  | 331186                  | CC                              | TT              | 1946918835               |
| SNP_P4_113077_333314 | NW_004515682.1 | Scaffold87  | 333314                  | GG                              | AA              | 1946918837               |
| SNP_P4_113078_346889 | NW_004515682.1 | Scaffold87  | 346889                  | AA                              | TT              | 1946918839               |
| SNP_P4_113081_415705 | NW_004515682.1 | Scaffold87  | 415705                  | GG                              | TT              | 1946918841               |
| SNP_P4_113082_417576 | NW_004515682.1 | Scaffold87  | 417576                  | AA                              | CC              | 1946918843               |
| SNP_P4_113083_421829 | NW_004515682.1 | Scaffold87  | 421829                  | TT                              | GG              | 1946918845               |
| SNP_P4_113084_424661 | NW_004515682.1 | Scaffold87  | 424661                  | GG                              | AA              | 1946918847               |
| SNP_P4_113085_434715 | NW_004515682.1 | Scaffold87  | 434715                  | CC                              | TT              | 1946918849               |
| SNP_P4_113086_435106 | NW_004515682.1 | Scaffold87  | 435106                  | CC                              | GG              | 1946918851               |
| SNP_P4_113087_435146 | NW_004515682.1 | Scaffold87  | 435146                  | TT                              | GG              | 1946918853               |
| SNP_P4_113088_435161 | NW_004515682.1 | Scaffold87  | 435161                  | GG                              | AA              | 1946918855               |
| SNP_P4_113089_435172 | NW_004515682.1 | Scaffold87  | 435172                  | TT                              | AA              | 1946918857               |
| SNP_P4_113090_435203 | NW_004515682.1 | Scaffold87  | 435203                  | GG                              | AA              | 1946918859               |
| SNP_P4_113091_444553 | NW_004515682.1 | Scaffold87  | 444553                  | CC                              | AA              | 1946918861               |
| SNP_P4_113092_445415 | NW_004515682.1 | Scaffold87  | 445415                  | AA                              | GG              | 1946918863               |
| SNP_P4_113093_445431 | NW_004515682.1 | Scaffold87  | 445431                  | GG                              | CC              | 1946918865               |
| SNP_P4_113094_445577 | NW_004515682.1 | Scaffold87  | 445577                  | AA                              | TT              | 1946918867               |
| SNP_P4_113095_461931 | NW_004515682.1 | Scaffold87  | 461931                  | AA                              | CC              | 1946918869               |
| SNP_P4_113096_462277 | NW_004515682.1 | Scaffold87  | 462277                  | CC                              | GG              | 1946918871               |
| SNP_P4_113097_468733 | NW_004515682.1 | Scaffold87  | 468733                  | TT                              | CC              | 1946918873               |

| SNPs IDs             | Chromosome IDs | Chromosomes | Physical positions (bp) | CDC Frontier (Reference genome) | (ILWC46 & LPNB) | NCBI SNPdb Accession IDs |
|----------------------|----------------|-------------|-------------------------|---------------------------------|-----------------|--------------------------|
| SNP_P4_113098_468922 | NW_004515682.1 | Scaffold87  | 468922                  | CC                              | TT              | 1946918875               |
| SNP_P4_113100_469100 | NW_004515682.1 | Scaffold87  | 469100                  | GG                              | AA              | 1946918877               |
| SNP_P4_113101_469134 | NW_004515682.1 | Scaffold87  | 469134                  | TT                              | GG              | 1946918879               |
| SNP_P4_113102_471189 | NW_004515682.1 | Scaffold87  | 471189                  | CC                              | TT              | 1946918881               |
| SNP_P4_113103_471501 | NW_004515682.1 | Scaffold87  | 471501                  | AA                              | GG              | 1946918883               |
| SNP_P4_113104_500864 | NW_004515682.1 | Scaffold87  | 500864                  | TT                              | CC              | 1946918885               |
| SNP_P4_113105_503752 | NW_004515682.1 | Scaffold87  | 503752                  | TT                              | CC              | 1946918887               |
| SNP_P4_113108_538007 | NW_004515682.1 | Scaffold87  | 538007                  | GG                              | TT              | 1946918889               |
| SNP_P4_113109_538016 | NW_004515682.1 | Scaffold87  | 538016                  | TT                              | GG              | 1946918891               |
| SNP_P4_113110_538227 | NW_004515682.1 | Scaffold87  | 538227                  | TT                              | CC              | 1946918893               |
| SNP_P4_113111_538251 | NW_004515682.1 | Scaffold87  | 538251                  | AA                              | CC              | 1946918895               |
| SNP_P4_113112_538268 | NW_004515682.1 | Scaffold87  | 538268                  | CC                              | AA              | 1946918897               |
| SNP_P4_113113_538280 | NW_004515682.1 | Scaffold87  | 538280                  | CC                              | TT              | 1946918899               |
| SNP_P4_113114_538397 | NW_004515682.1 | Scaffold87  | 538397                  | CC                              | TT              | 1946918901               |
| SNP_P4_113115_538418 | NW_004515682.1 | Scaffold87  | 538418                  | TT                              | CC              | 1946918903               |
| SNP_P4_113116_538907 | NW_004515682.1 | Scaffold87  | 538907                  | CC                              | AA              | 1946918905               |
| SNP_P4_113117_538921 | NW_004515682.1 | Scaffold87  | 538921                  | GG                              | AA              | 1946918907               |
| SNP_P4_113118_538962 | NW_004515682.1 | Scaffold87  | 538962                  | AA                              | GG              | 1946918909               |
| SNP_P4_113119_539016 | NW_004515682.1 | Scaffold87  | 539016                  | CC                              | AA              | 1946918911               |
| SNP_P4_113120_551598 | NW_004515682.1 | Scaffold87  | 551598                  | GG                              | AA              | 1946918913               |
| SNP_P4_113123_593817 | NW_004515682.1 | Scaffold87  | 593817                  | GG                              | AA              | 1946918915               |
| SNP_P4_113124_593837 | NW_004515682.1 | Scaffold87  | 593837                  | CC                              | AA              | 1946918917               |
| SNP_P4_113125_593858 | NW_004515682.1 | Scaffold87  | 593858                  | GG                              | AA              | 1946918919               |
| SNP_P4_113126_594167 | NW_004515682.1 | Scaffold87  | 594167                  | GG                              | TT              | 1946918921               |
| SNP_P4_113128_595285 | NW_004515682.1 | Scaffold87  | 595285                  | AA                              | GG              | 1946918923               |
| SNP_P4_113129_595291 | NW_004515682.1 | Scaffold87  | 595291                  | CC                              | TT              | 1946918925               |
| SNP_P4_113130_595350 | NW_004515682.1 | Scaffold87  | 595350                  | AA                              | GG              | 1946918927               |
| SNP_P4_113131_595408 | NW_004515682.1 | Scaffold87  | 595408                  | TT                              | GG              | 1946918929               |
| SNP_P4_113132_595542 | NW_004515682.1 | Scaffold87  | 595542                  | TT                              | AA              | 1946918931               |
| SNP_P4_113133_595591 | NW_004515682.1 | Scaffold87  | 595591                  | TT                              | CC              | 1946918933               |
| SNP_P4_113134_595592 | NW_004515682.1 | Scaffold87  | 595592                  | TT                              | AA              | 1946918935               |
| SNP_P4_113135_595614 | NW_004515682.1 | Scaffold87  | 595614                  | TT                              | CC              | 1946918937               |
| SNP_P4_113136_595813 | NW_004515682.1 | Scaffold87  | 595813                  | GG                              | AA              | 1946918939               |
| SNP_P4_113137_595921 | NW_004515682.1 | Scaffold87  | 595921                  | GG                              | AA              | 1946918941               |
| SNP_P4_113138_596042 | NW_004515682.1 | Scaffold87  | 596042                  | GG                              | AA              | 1946918943               |
| SNP_P4_113139_596043 | NW_004515682.1 | Scaffold87  | 596043                  | TT                              | CC              | 1946918945               |
| SNP_P4_113140_596044 | NW_004515682.1 | Scaffold87  | 596044                  | TT                              | CC              | 1946918947               |
| SNP_P4_113141_596981 | NW_004515682.1 | Scaffold87  | 596981                  | GG                              | AA              | 1946918949               |
| SNP_P4_113143_598090 | NW_004515682.1 | Scaffold87  | 598090                  | GG                              | TT              | 1946918951               |
| SNP_P4_113144_598166 | NW_004515682.1 | Scaffold87  | 598166                  | TT                              | CC              | 1946918952               |
| SNP_P4_113145_598184 | NW_004515682.1 | Scaffold87  | 598184                  | AA                              | GG              | 1946918953               |
| SNP_P4_113146_598308 | NW_004515682.1 | Scaffold87  | 598308                  | GG                              | CC              | 1946918955               |

| SNPs IDs             | Chromosome IDs | Chromosomes | Physical positions (bp) | CDC Frontier (Reference genome) | (ILWC46 & LPNB) | NCBI SNPdb Accession IDs |
|----------------------|----------------|-------------|-------------------------|---------------------------------|-----------------|--------------------------|
| SNP_P4_113147_598355 | NW_004515682.1 | Scaffold87  | 598355                  | AA                              | TT              | 1946918957               |
| SNP_P4_113148_598388 | NW_004515682.1 | Scaffold87  | 598388                  | CC                              | TT              | 1946918959               |
| SNP_P4_113149_598408 | NW_004515682.1 | Scaffold87  | 598408                  | AA                              | TT              | 1946918961               |
| SNP_P4_113150_598409 | NW_004515682.1 | Scaffold87  | 598409                  | TT                              | GG              | 1946918963               |
| SNP_P4_113151_598431 | NW_004515682.1 | Scaffold87  | 598431                  | GG                              | AA              | 1946918965               |
| SNP_P4_113152_598481 | NW_004515682.1 | Scaffold87  | 598481                  | TT                              | CC              | 1946918967               |
| SNP_P4_113153_11765  | NW_004515683.1 | Scaffold88  | 11765                   | CC                              | TT              | 1946918969               |
| SNP_P4_113154_12019  | NW_004515683.1 | Scaffold88  | 12019                   | CC                              | TT              | 1946918971               |
| SNP_P4_113156_31848  | NW_004515683.1 | Scaffold88  | 31848                   | GG                              | AA              | 1946918973               |
| SNP_P4_113157_48778  | NW_004515683.1 | Scaffold88  | 48778                   | CC                              | TT              | 1946918975               |
| SNP_P4_113158_61858  | NW_004515683.1 | Scaffold88  | 61858                   | GG                              | AA              | 1946918977               |
| SNP_P4_113159_61861  | NW_004515683.1 | Scaffold88  | 61861                   | AA                              | GG              | 1946918979               |
| SNP_P4_113160_85607  | NW_004515683.1 | Scaffold88  | 85607                   | CC                              | TT              | 1946918981               |
| SNP_P4_113161_85615  | NW_004515683.1 | Scaffold88  | 85615                   | AA                              | GG              | 1946918983               |
| SNP_P4_113162_85628  | NW_004515683.1 | Scaffold88  | 85628                   | AA                              | GG              | 1946918985               |
| SNP_P4_113163_85640  | NW_004515683.1 | Scaffold88  | 85640                   | CC                              | TT              | 1946918987               |
| SNP_P4_113164_85655  | NW_004515683.1 | Scaffold88  | 85655                   | GG                              | AA              | 1946918989               |
| SNP_P4_113165_85661  | NW_004515683.1 | Scaffold88  | 85661                   | TT                              | CC              | 1946918991               |
| SNP_P4_113166_85679  | NW_004515683.1 | Scaffold88  | 85679                   | TT                              | CC              | 1946918993               |
| SNP_P4_113167_85700  | NW_004515683.1 | Scaffold88  | 85700                   | AA                              | GG              | 1946918995               |
| SNP_P4_113168_85703  | NW_004515683.1 | Scaffold88  | 85703                   | AA                              | GG              | 1946918997               |
| SNP_P4_113169_86085  | NW_004515683.1 | Scaffold88  | 86085                   | TT                              | AA              | 1946918999               |
| SNP_P4_113170_86177  | NW_004515683.1 | Scaffold88  | 86177                   | TT                              | CC              | 1946919001               |
| SNP_P4_113171_86229  | NW_004515683.1 | Scaffold88  | 86229                   | CC                              | TT              | 1946919003               |
| SNP_P4_113173_122995 | NW_004515683.1 | Scaffold88  | 122995                  | GG                              | AA              | 1946919005               |
| SNP_P4_113174_123079 | NW_004515683.1 | Scaffold88  | 123079                  | AA                              | GG              | 1946919007               |
| SNP_P4_113175_133845 | NW_004515683.1 | Scaffold88  | 133845                  | GG                              | TT              | 1946919009               |
| SNP_P4_113176_134229 | NW_004515683.1 | Scaffold88  | 134229                  | TT                              | GG              | 1946919011               |
| SNP_P4_113177_134316 | NW_004515683.1 | Scaffold88  | 134316                  | AA                              | GG              | 1946919013               |
| SNP_P4_113178_134328 | NW_004515683.1 | Scaffold88  | 134328                  | TT                              | CC              | 1946919015               |
| SNP_P4_113179_165264 | NW_004515683.1 | Scaffold88  | 165264                  | CC                              | TT              | 1946919017               |
| SNP_P4_113180_181325 | NW_004515683.1 | Scaffold88  | 181325                  | CC                              | TT              | 1946919019               |
| SNP_P4_113181_246989 | NW_004515683.1 | Scaffold88  | 246989                  | TT                              | CC              | 1946919022               |
| SNP_P4_113182_295159 | NW_004515683.1 | Scaffold88  | 295159                  | GG                              | AA              | 1946919024               |
| SNP_P4_113183_6576   | NW_004515684.1 | Scaffold89  | 6576                    | GG                              | AA              | 1946919026               |
| SNP_P4_113184_6586   | NW_004515684.1 | Scaffold89  | 6586                    | AA                              | GG              | 1946919028               |
| SNP_P4_113185_6628   | NW_004515684.1 | Scaffold89  | 6628                    | GG                              | AA              | 1946919030               |
| SNP_P4_113186_6705   | NW_004515684.1 | Scaffold89  | 6705                    | CC                              | TT              | 1946919032               |
| SNP_P4_113187_6778   | NW_004515684.1 | Scaffold89  | 6778                    | CC                              | TT              | 1946919034               |
| SNP_P4_113188_13164  | NW_004515684.1 | Scaffold89  | 13164                   | CC                              | TT              | 1946919036               |
| SNP_P4_113189_13174  | NW_004515684.1 | Scaffold89  | 13174                   | CC                              | AA              | 1946919038               |
| SNP_P4_113190_13220  | NW_004515684.1 | Scaffold89  | 13220                   | GG                              | AA              | 1946919040               |



| SNPs IDs             | Chromosome IDs | Chromosomes | Physical positions (bp) | CDC Frontier (Reference genome) | (ILWC46 & LPNB) | NCBI SNPdb Accession IDs |
|----------------------|----------------|-------------|-------------------------|---------------------------------|-----------------|--------------------------|
| SNP_P4_113191_13223  | NW_004515684.1 | Scaffold89  | 13223                   | AA                              | TT              | 1946919042               |
| SNP_P4_113192_13487  | NW_004515684.1 | Scaffold89  | 13487                   | AA                              | CC              | 1946919044               |
| SNP_P4_113193_13505  | NW_004515684.1 | Scaffold89  | 13505                   | AA                              | GG              | 1946919046               |
| SNP_P4_113194_13562  | NW_004515684.1 | Scaffold89  | 13562                   | TT                              | CC              | 1946919048               |
| SNP_P4_113195_13609  | NW_004515684.1 | Scaffold89  | 13609                   | TT                              | GG              | 1946919050               |
| SNP_P4_113196_22908  | NW_004515684.1 | Scaffold89  | 22908                   | CC                              | TT              | 1946919052               |
| SNP_P4_113197_22948  | NW_004515684.1 | Scaffold89  | 22948                   | CC                              | TT              | 1946919054               |
| SNP_P4_113198_23117  | NW_004515684.1 | Scaffold89  | 23117                   | AA                              | GG              | 1946919056               |
| SNP_P4_113199_23562  | NW_004515684.1 | Scaffold89  | 23562                   | TT                              | CC              | 1946919058               |
| SNP_P4_113200_24052  | NW_004515684.1 | Scaffold89  | 24052                   | GG                              | AA              | 1946919060               |
| SNP_P4_113201_24148  | NW_004515684.1 | Scaffold89  | 24148                   | CC                              | TT              | 1946919062               |
| SNP_P4_113202_24673  | NW_004515684.1 | Scaffold89  | 24673                   | TT                              | CC              | 1946919064               |
| SNP_P4_113204_25127  | NW_004515684.1 | Scaffold89  | 25127                   | TT                              | CC              | 1946919066               |
| SNP_P4_113205_54244  | NW_004515684.1 | Scaffold89  | 54244                   | AA                              | TT              | 1946919068               |
| SNP_P4_113207_64942  | NW_004515684.1 | Scaffold89  | 64942                   | CC                              | TT              | 1946919070               |
| SNP_P4_113208_66855  | NW_004515684.1 | Scaffold89  | 66855                   | CC                              | TT              | 1946919072               |
| SNP_P4_113209_69069  | NW_004515684.1 | Scaffold89  | 69069                   | AA                              | TT              | 1946919074               |
| SNP_P4_113210_81118  | NW_004515684.1 | Scaffold89  | 81118                   | AA                              | TT              | 1946919076               |
| SNP_P4_113211_81380  | NW_004515684.1 | Scaffold89  | 81380                   | CC                              | AA              | 1946919078               |
| SNP_P4_113212_81732  | NW_004515684.1 | Scaffold89  | 81732                   | TT                              | CC              | 1946919080               |
| SNP_P4_113213_87762  | NW_004515684.1 | Scaffold89  | 87762                   | AA                              | TT              | 1946919082               |
| SNP_P4_113214_93755  | NW_004515684.1 | Scaffold89  | 93755                   | GG                              | AA              | 1946919084               |
| SNP_P4_113215_95006  | NW_004515684.1 | Scaffold89  | 95006                   | TT                              | AA              | 1946919087               |
| SNP_P4_113216_95102  | NW_004515684.1 | Scaffold89  | 95102                   | AA                              | TT              | 1946919089               |
| SNP_P4_113217_95122  | NW_004515684.1 | Scaffold89  | 95122                   | AA                              | GG              | 1946919091               |
| SNP_P4_113219_136746 | NW_004515684.1 | Scaffold89  | 136746                  | TT                              | CC              | 1946919093               |
| SNP_P4_113220_140148 | NW_004515684.1 | Scaffold89  | 140148                  | TT                              | CC              | 1946919095               |
| SNP_P4_113221_140194 | NW_004515684.1 | Scaffold89  | 140194                  | TT                              | CC              | 1946919098               |
| SNP_P4_113222_140261 | NW_004515684.1 | Scaffold89  | 140261                  | AA                              | GG              | 1946919100               |
| SNP_P4_113223_147022 | NW_004515684.1 | Scaffold89  | 147022                  | TT                              | AA              | 1946919102               |
| SNP_P4_113224_155205 | NW_004515684.1 | Scaffold89  | 155205                  | TT                              | GG              | 1946919104               |
| SNP_P4_113225_160870 | NW_004515684.1 | Scaffold89  | 160870                  | GG                              | CC              | 1946919106               |
| SNP_P4_113226_162751 | NW_004515684.1 | Scaffold89  | 162751                  | TT                              | CC              | 1946919108               |
| SNP_P4_113227_169043 | NW_004515684.1 | Scaffold89  | 169043                  | AA                              | GG              | 1946919111               |
| SNP_P4_113228_169458 | NW_004515684.1 | Scaffold89  | 169458                  | TT                              | AA              | 1946919113               |
| SNP_P4_113229_169822 | NW_004515684.1 | Scaffold89  | 169822                  | GG                              | AA              | 1946919115               |
| SNP_P4_113230_201341 | NW_004515684.1 | Scaffold89  | 201341                  | GG                              | AA              | 1946919117               |
| SNP_P4_113231_205059 | NW_004515684.1 | Scaffold89  | 205059                  | AA                              | GG              | 1946919119               |
| SNP_P4_113233_221464 | NW_004515684.1 | Scaffold89  | 221464                  | AA                              | CC              | 1946919121               |
| SNP_P4_113234_221465 | NW_004515684.1 | Scaffold89  | 221465                  | TT                              | AA              | 1946919123               |
| SNP_P4_113235_221478 | NW_004515684.1 | Scaffold89  | 221478                  | AA                              | GG              | 1946919125               |
| SNP_P4_113236_221483 | NW_004515684.1 | Scaffold89  | 221483                  | TT                              | CC              | 1946919128               |

| SNPs IDs             | Chromosome IDs | Chromosomes | Physical positions (bp) | CDC Frontier (Reference genome) | (ILWC46 & LPNB) | NCBI SNPdb Accession IDs |
|----------------------|----------------|-------------|-------------------------|---------------------------------|-----------------|--------------------------|
| SNP_P4_113237_221498 | NW_004515684.1 | Scaffold89  | 221498                  | TT                              | CC              | 1946919130               |
| SNP_P4_113238_221596 | NW_004515684.1 | Scaffold89  | 221596                  | TT                              | CC              | 1946919132               |
| SNP_P4_113239_221632 | NW_004515684.1 | Scaffold89  | 221632                  | TT                              | CC              | 1946919134               |
| SNP_P4_113240_221799 | NW_004515684.1 | Scaffold89  | 221799                  | AA                              | GG              | 1946919136               |
| SNP_P4_113241_221813 | NW_004515684.1 | Scaffold89  | 221813                  | CC                              | TT              | 1946919138               |
| SNP_P4_113242_221854 | NW_004515684.1 | Scaffold89  | 221854                  | TT                              | CC              | 1946919140               |
| SNP_P4_113243_221870 | NW_004515684.1 | Scaffold89  | 221870                  | AA                              | GG              | 1946919142               |
| SNP_P4_113244_221904 | NW_004515684.1 | Scaffold89  | 221904                  | TT                              | CC              | 1946919144               |
| SNP_P4_113245_221974 | NW_004515684.1 | Scaffold89  | 221974                  | GG                              | AA              | 1946919147               |
| SNP_P4_113246_221979 | NW_004515684.1 | Scaffold89  | 221979                  | TT                              | CC              | 1946919149               |
| SNP_P4_113247_221981 | NW_004515684.1 | Scaffold89  | 221981                  | TT                              | CC              | 1946919151               |
| SNP_P4_113248_222013 | NW_004515684.1 | Scaffold89  | 222013                  | TT                              | CC              | 1946919153               |
| SNP_P4_113249_222109 | NW_004515684.1 | Scaffold89  | 222109                  | GG                              | AA              | 1946919155               |
| SNP_P4_113250_222135 | NW_004515684.1 | Scaffold89  | 222135                  | GG                              | CC              | 1946919157               |
| SNP_P4_113251_222312 | NW_004515684.1 | Scaffold89  | 222312                  | CC                              | TT              | 1946919159               |
| SNP_P4_113253_240543 | NW_004515684.1 | Scaffold89  | 240543                  | CC                              | AA              | 1946919162               |
| SNP_P4_113254_149    | NW_004515685.1 | Scaffold92  | 149                     | AA                              | CC              | 1946919164               |
| SNP_P4_113255_3432   | NW_004515685.1 | Scaffold92  | 3432                    | TT                              | CC              | 1946919166               |
| SNP_P4_113256_3507   | NW_004515685.1 | Scaffold92  | 3507                    | TT                              | CC              | 1946919168               |
| SNP_P4_113257_3720   | NW_004515685.1 | Scaffold92  | 3720                    | CC                              | TT              | 1946919171               |
| SNP_P4_113258_4093   | NW_004515685.1 | Scaffold92  | 4093                    | TT                              | CC              | 1946919173               |
| SNP_P4_113259_4495   | NW_004515685.1 | Scaffold92  | 4495                    | AA                              | GG              | 1946919175               |
| SNP_P4_113260_20636  | NW_004515685.1 | Scaffold92  | 20636                   | CC                              | TT              | 1946919177               |
| SNP_P4_113261_26826  | NW_004515685.1 | Scaffold92  | 26826                   | AA                              | TT              | 1946919179               |
| SNP_P4_113262_26828  | NW_004515685.1 | Scaffold92  | 26828                   | CC                              | AA              | 1946919181               |
| SNP_P4_113263_28021  | NW_004515685.1 | Scaffold92  | 28021                   | TT                              | AA              | 1946919183               |
| SNP_P4_113264_28258  | NW_004515685.1 | Scaffold92  | 28258                   | TT                              | GG              | 1946919185               |
| SNP_P4_113265_28259  | NW_004515685.1 | Scaffold92  | 28259                   | AA                              | GG              | 1946919187               |
| SNP_P4_113266_28274  | NW_004515685.1 | Scaffold92  | 28274                   | AA                              | GG              | 1946919189               |
| SNP_P4_113267_28367  | NW_004515685.1 | Scaffold92  | 28367                   | AA                              | GG              | 1946919191               |
| SNP_P4_113268_28770  | NW_004515685.1 | Scaffold92  | 28770                   | AA                              | TT              | 1946919194               |
| SNP_P4_113269_28865  | NW_004515685.1 | Scaffold92  | 28865                   | GG                              | AA              | 1946919196               |
| SNP_P4_113270_28892  | NW_004515685.1 | Scaffold92  | 28892                   | AA                              | CC              | 1946919198               |
| SNP_P4_113271_28904  | NW_004515685.1 | Scaffold92  | 28904                   | AA                              | GG              | 1946919200               |
| SNP_P4_113272_28921  | NW_004515685.1 | Scaffold92  | 28921                   | AA                              | TT              | 1946919202               |
| SNP_P4_113273_28935  | NW_004515685.1 | Scaffold92  | 28935                   | TT                              | AA              | 1946919204               |
| SNP_P4_113274_28944  | NW_004515685.1 | Scaffold92  | 28944                   | GG                              | AA              | 1946919206               |
| SNP_P4_113275_28960  | NW_004515685.1 | Scaffold92  | 28960                   | AA                              | CC              | 1946919209               |
| SNP_P4_113276_29117  | NW_004515685.1 | Scaffold92  | 29117                   | AA                              | GG              | 1946919211               |
| SNP_P4_113277_29205  | NW_004515685.1 | Scaffold92  | 29205                   | CC                              | TT              | 1946919213               |
| SNP_P4_113278_29219  | NW_004515685.1 | Scaffold92  | 29219                   | GG                              | AA              | 1946919215               |
| SNP_P4_113279_29347  | NW_004515685.1 | Scaffold92  | 29347                   | TT                              | AA              | 1946919217               |

| SNPs IDs            | Chromosome IDs | Chromosomes | Physical positions (bp) | CDC Frontier (Reference genome) | (ILWC46 & LPNB) | NCBI SNPdb Accession IDs |
|---------------------|----------------|-------------|-------------------------|---------------------------------|-----------------|--------------------------|
| SNP_P4_113280_31222 | NW_004515685.1 | Scaffold92  | 31222                   | AA                              | TT              | 1946919219               |
| SNP_P4_113281_31342 | NW_004515685.1 | Scaffold92  | 31342                   | AA                              | TT              | 1946919221               |
| SNP_P4_113282_31344 | NW_004515685.1 | Scaffold92  | 31344                   | AA                              | CC              | 1946919223               |
| SNP_P4_113283_31617 | NW_004515685.1 | Scaffold92  | 31617                   | AA                              | CC              | 1946919225               |
| SNP_P4_113284_31628 | NW_004515685.1 | Scaffold92  | 31628                   | TT                              | AA              | 1946919227               |
| SNP_P4_113285_31805 | NW_004515685.1 | Scaffold92  | 31805                   | AA                              | CC              | 1946919229               |
| SNP_P4_113286_32987 | NW_004515685.1 | Scaffold92  | 32987                   | AA                              | TT              | 1946919231               |
| SNP_P4_113287_33675 | NW_004515685.1 | Scaffold92  | 33675                   | AA                              | TT              | 1946919233               |
| SNP_P4_113288_33956 | NW_004515685.1 | Scaffold92  | 33956                   | AA                              | TT              | 1946919235               |
| SNP_P4_113289_33967 | NW_004515685.1 | Scaffold92  | 33967                   | CC                              | TT              | 1946919237               |
| SNP_P4_113290_34002 | NW_004515685.1 | Scaffold92  | 34002                   | AA                              | TT              | 1946919239               |
| SNP_P4_113291_34563 | NW_004515685.1 | Scaffold92  | 34563                   | GG                              | CC              | 1946919241               |
| SNP_P4_113292_34639 | NW_004515685.1 | Scaffold92  | 34639                   | GG                              | TT              | 1946919243               |
| SNP_P4_113293_34779 | NW_004515685.1 | Scaffold92  | 34779                   | GG                              | CC              | 1946919245               |
| SNP_P4_113294_34794 | NW_004515685.1 | Scaffold92  | 34794                   | CC                              | TT              | 1946919247               |
| SNP_P4_113295_34916 | NW_004515685.1 | Scaffold92  | 34916                   | GG                              | AA              | 1946919249               |
| SNP_P4_113296_34919 | NW_004515685.1 | Scaffold92  | 34919                   | TT                              | CC              | 1946919251               |
| SNP_P4_113297_34942 | NW_004515685.1 | Scaffold92  | 34942                   | AA                              | GG              | 1946919253               |
| SNP_P4_113298_34943 | NW_004515685.1 | Scaffold92  | 34943                   | TT                              | CC              | 1946919255               |
| SNP_P4_113299_34946 | NW_004515685.1 | Scaffold92  | 34946                   | GG                              | AA              | 1946919257               |
| SNP_P4_113300_34969 | NW_004515685.1 | Scaffold92  | 34969                   | TT                              | AA              | 1946919259               |
| SNP_P4_113301_34975 | NW_004515685.1 | Scaffold92  | 34975                   | AA                              | GG              | 1946919261               |
| SNP_P4_113302_34979 | NW_004515685.1 | Scaffold92  | 34979                   | GG                              | CC              | 1946919263               |
| SNP_P4_113303_34980 | NW_004515685.1 | Scaffold92  | 34980                   | GG                              | AA              | 1946919265               |
| SNP_P4_113304_35106 | NW_004515685.1 | Scaffold92  | 35106                   | CC                              | TT              | 1946919267               |
| SNP_P4_113305_35149 | NW_004515685.1 | Scaffold92  | 35149                   | AA                              | GG              | 1946919269               |
| SNP_P4_113306_35151 | NW_004515685.1 | Scaffold92  | 35151                   | AA                              | GG              | 1946919271               |
| SNP_P4_113307_35417 | NW_004515685.1 | Scaffold92  | 35417                   | TT                              | GG              | 1946919273               |
| SNP_P4_113308_35586 | NW_004515685.1 | Scaffold92  | 35586                   | AA                              | GG              | 1946919275               |
| SNP_P4_113309_35614 | NW_004515685.1 | Scaffold92  | 35614                   | CC                              | TT              | 1946919277               |
| SNP_P4_113310_35648 | NW_004515685.1 | Scaffold92  | 35648                   | AA                              | GG              | 1946919279               |
| SNP_P4_113311_35649 | NW_004515685.1 | Scaffold92  | 35649                   | TT                              | CC              | 1946919281               |
| SNP_P4_113312_35656 | NW_004515685.1 | Scaffold92  | 35656                   | TT                              | CC              | 1946919283               |
| SNP_P4_113313_35685 | NW_004515685.1 | Scaffold92  | 35685                   | GG                              | AA              | 1946919285               |
| SNP_P4_113314_39428 | NW_004515685.1 | Scaffold92  | 39428                   | AA                              | GG              | 1946919287               |
| SNP_P4_113315_41411 | NW_004515685.1 | Scaffold92  | 41411                   | GG                              | TT              | 1946919289               |
| SNP_P4_113316_41462 | NW_004515685.1 | Scaffold92  | 41462                   | TT                              | CC              | 1946919292               |
| SNP_P4_113317_43452 | NW_004515685.1 | Scaffold92  | 43452                   | GG                              | AA              | 1946919294               |
| SNP_P4_113318_44767 | NW_004515685.1 | Scaffold92  | 44767                   | TT                              | GG              | 1946919296               |
| SNP_P4_113319_44775 | NW_004515685.1 | Scaffold92  | 44775                   | CC                              | TT              | 1946919298               |
| SNP_P4_113320_44875 | NW_004515685.1 | Scaffold92  | 44875                   | GG                              | AA              | 1946919300               |
| SNP_P4_113321_44884 | NW_004515685.1 | Scaffold92  | 44884                   | CC                              | TT              | 1946919302               |

| SNPs IDs             | Chromosome IDs | Chromosomes | Physical positions (bp) | CDC Frontier (Reference genome) | (ILWC46 & LPNB) | NCBI SNPdb Accession IDs |
|----------------------|----------------|-------------|-------------------------|---------------------------------|-----------------|--------------------------|
| SNP_P4_113322_45106  | NW_004515685.1 | Scaffold92  | 45106                   | TT                              | AA              | 1946919304               |
| SNP_P4_113324_49816  | NW_004515685.1 | Scaffold92  | 49816                   | CC                              | GG              | 1946919307               |
| SNP_P4_113325_49824  | NW_004515685.1 | Scaffold92  | 49824                   | GG                              | TT              | 1946919309               |
| SNP_P4_113326_49826  | NW_004515685.1 | Scaffold92  | 49826                   | AA                              | TT              | 1946919311               |
| SNP_P4_113327_49894  | NW_004515685.1 | Scaffold92  | 49894                   | GG                              | AA              | 1946919313               |
| SNP_P4_113328_49900  | NW_004515685.1 | Scaffold92  | 49900                   | CC                              | TT              | 1946919315               |
| SNP_P4_113329_49906  | NW_004515685.1 | Scaffold92  | 49906                   | CC                              | AA              | 1946919317               |
| SNP_P4_113330_58227  | NW_004515685.1 | Scaffold92  | 58227                   | GG                              | CC              | 1946919319               |
| SNP_P4_113331_69142  | NW_004515685.1 | Scaffold92  | 69142                   | TT                              | CC              | 1946919321               |
| SNP_P4_113332_69169  | NW_004515685.1 | Scaffold92  | 69169                   | AA                              | CC              | 1946919323               |
| SNP_P4_113333_69170  | NW_004515685.1 | Scaffold92  | 69170                   | AA                              | CC              | 1946919325               |
| SNP_P4_113334_69174  | NW_004515685.1 | Scaffold92  | 69174                   | CC                              | GG              | 1946919327               |
| SNP_P4_113335_69179  | NW_004515685.1 | Scaffold92  | 69179                   | CC                              | TT              | 1946919329               |
| SNP_P4_113336_69613  | NW_004515685.1 | Scaffold92  | 69613                   | AA                              | GG              | 1946919331               |
| SNP_P4_113337_70925  | NW_004515685.1 | Scaffold92  | 70925                   | AA                              | CC              | 1946919333               |
| SNP_P4_113338_70938  | NW_004515685.1 | Scaffold92  | 70938                   | TT                              | CC              | 1946919335               |
| SNP_P4_113339_73448  | NW_004515685.1 | Scaffold92  | 73448                   | TT                              | GG              | 1946919337               |
| SNP_P4_113340_78357  | NW_004515685.1 | Scaffold92  | 78357                   | TT                              | AA              | 1946919340               |
| SNP_P4_113341_78368  | NW_004515685.1 | Scaffold92  | 78368                   | TT                              | AA              | 1946919342               |
| SNP_P4_113342_78389  | NW_004515685.1 | Scaffold92  | 78389                   | TT                              | GG              | 1946919344               |
| SNP_P4_113343_79726  | NW_004515685.1 | Scaffold92  | 79726                   | AA                              | CC              | 1946919346               |
| SNP_P4_113344_79994  | NW_004515685.1 | Scaffold92  | 79994                   | GG                              | AA              | 1946919348               |
| SNP_P4_113345_79999  | NW_004515685.1 | Scaffold92  | 79999                   | GG                              | CC              | 1946919350               |
| SNP_P4_113346_80075  | NW_004515685.1 | Scaffold92  | 80075                   | TT                              | AA              | 1946919352               |
| SNP_P4_113347_80633  | NW_004515685.1 | Scaffold92  | 80633                   | CC                              | TT              | 1946919354               |
| SNP_P4_113348_85493  | NW_004515685.1 | Scaffold92  | 85493                   | AA                              | TT              | 1946919356               |
| SNP_P4_113349_85740  | NW_004515685.1 | Scaffold92  | 85740                   | AA                              | GG              | 1946919359               |
| SNP_P4_113350_89077  | NW_004515685.1 | Scaffold92  | 89077                   | GG                              | TT              | 1946919361               |
| SNP_P4_113351_92416  | NW_004515685.1 | Scaffold92  | 92416                   | AA                              | CC              | 1946919363               |
| SNP_P4_113352_92471  | NW_004515685.1 | Scaffold92  | 92471                   | TT                              | GG              | 1946919365               |
| SNP_P4_113353_96623  | NW_004515685.1 | Scaffold92  | 96623                   | CC                              | TT              | 1946919367               |
| SNP_P4_113354_101177 | NW_004515685.1 | Scaffold92  | 101177                  | GG                              | AA              | 1946919369               |
| SNP_P4_113355_107267 | NW_004515685.1 | Scaffold92  | 107267                  | TT                              | CC              | 1946919371               |
| SNP_P4_113357_108910 | NW_004515685.1 | Scaffold92  | 108910                  | AA                              | TT              | 1946919373               |
| SNP_P4_113358_109199 | NW_004515685.1 | Scaffold92  | 109199                  | TT                              | AA              | 1946919376               |
| SNP_P4_113359_109201 | NW_004515685.1 | Scaffold92  | 109201                  | CC                              | TT              | 1946919378               |
| SNP_P4_113360_109255 | NW_004515685.1 | Scaffold92  | 109255                  | CC                              | TT              | 1946919381               |
| SNP_P4_113361_109482 | NW_004515685.1 | Scaffold92  | 109482                  | TT                              | CC              | 1946919383               |
| SNP_P4_113362_109841 | NW_004515685.1 | Scaffold92  | 109841                  | GG                              | CC              | 1946919385               |
| SNP_P4_113363_109993 | NW_004515685.1 | Scaffold92  | 109993                  | TT                              | CC              | 1946919387               |
| SNP_P4_113364_110101 | NW_004515685.1 | Scaffold92  | 110101                  | CC                              | TT              | 1946919389               |
| SNP_P4_113365_110190 | NW_004515685.1 | Scaffold92  | 110190                  | AA                              | TT              | 1946919391               |

| SNPs IDs             | Chromosome IDs | Chromosomes | Physical positions (bp) | CDC Frontier (Reference genome) | (ILWC46 & LPNB) | NCBI SNPdb Accession IDs |
|----------------------|----------------|-------------|-------------------------|---------------------------------|-----------------|--------------------------|
| SNP_P4_113366_110221 | NW_004515685.1 | Scaffold92  | 110221                  | TT                              | CC              | 1946919393               |
| SNP_P4_113367_110235 | NW_004515685.1 | Scaffold92  | 110235                  | CC                              | TT              | 1946919395               |
| SNP_P4_113368_110286 | NW_004515685.1 | Scaffold92  | 110286                  | GG                              | TT              | 1946919397               |
| SNP_P4_113369_110290 | NW_004515685.1 | Scaffold92  | 110290                  | TT                              | CC              | 1946919400               |
| SNP_P4_113370_110333 | NW_004515685.1 | Scaffold92  | 110333                  | CC                              | TT              | 1946919402               |
| SNP_P4_113371_110377 | NW_004515685.1 | Scaffold92  | 110377                  | TT                              | CC              | 1946919404               |
| SNP_P4_113372_110378 | NW_004515685.1 | Scaffold92  | 110378                  | GG                              | AA              | 1946919406               |
| SNP_P4_113373_123092 | NW_004515685.1 | Scaffold92  | 123092                  | GG                              | AA              | 1946919408               |
| SNP_P4_113375_7687   | NW_004515686.1 | Scaffold93  | 7687                    | GG                              | TT              | 1946919410               |
| SNP_P4_113376_7721   | NW_004515686.1 | Scaffold93  | 7721                    | GG                              | AA              | 1946919412               |
| SNP_P4_113377_8360   | NW_004515686.1 | Scaffold93  | 8360                    | AA                              | GG              | 1946919414               |
| SNP_P4_113378_9276   | NW_004515686.1 | Scaffold93  | 9276                    | GG                              | TT              | 1946919416               |
| SNP_P4_113379_9363   | NW_004515686.1 | Scaffold93  | 9363                    | AA                              | TT              | 1946919418               |
| SNP_P4_113380_9382   | NW_004515686.1 | Scaffold93  | 9382                    | TT                              | GG              | 1946919420               |
| SNP_P4_113381_9457   | NW_004515686.1 | Scaffold93  | 9457                    | AA                              | GG              | 1946919422               |
| SNP_P4_113382_9643   | NW_004515686.1 | Scaffold93  | 9643                    | TT                              | CC              | 1946919424               |
| SNP_P4_113383_9699   | NW_004515686.1 | Scaffold93  | 9699                    | AA                              | CC              | 1946919426               |
| SNP_P4_113384_9708   | NW_004515686.1 | Scaffold93  | 9708                    | CC                              | TT              | 1946919428               |
| SNP_P4_113385_16124  | NW_004515686.1 | Scaffold93  | 16124                   | AA                              | TT              | 1946919430               |
| SNP_P4_113386_27351  | NW_004515686.1 | Scaffold93  | 27351                   | CC                              | TT              | 1946919432               |
| SNP_P4_113387_38601  | NW_004515686.1 | Scaffold93  | 38601                   | GG                              | AA              | 1946919434               |
| SNP_P4_113388_38979  | NW_004515686.1 | Scaffold93  | 38979                   | CC                              | TT              | 1946919436               |
| SNP_P4_113389_38984  | NW_004515686.1 | Scaffold93  | 38984                   | TT                              | CC              | 1946919438               |
| SNP_P4_113390_38999  | NW_004515686.1 | Scaffold93  | 38999                   | TT                              | CC              | 1946919440               |
| SNP_P4_113391_46774  | NW_004515686.1 | Scaffold93  | 46774                   | TT                              | GG              | 1946919442               |
| SNP_P4_113392_46796  | NW_004515686.1 | Scaffold93  | 46796                   | AA                              | GG              | 1946919444               |
| SNP_P4_113393_46884  | NW_004515686.1 | Scaffold93  | 46884                   | AA                              | GG              | 1946919446               |
| SNP_P4_113394_46895  | NW_004515686.1 | Scaffold93  | 46895                   | TT                              | AA              | 1946919448               |
| SNP_P4_113395_46902  | NW_004515686.1 | Scaffold93  | 46902                   | TT                              | CC              | 1946919450               |
| SNP_P4_113396_46930  | NW_004515686.1 | Scaffold93  | 46930                   | AA                              | CC              | 1946919452               |
| SNP_P4_113397_46946  | NW_004515686.1 | Scaffold93  | 46946                   | CC                              | TT              | 1946919454               |
| SNP_P4_113398_47254  | NW_004515686.1 | Scaffold93  | 47254                   | GG                              | AA              | 1946919456               |
| SNP_P4_113399_47465  | NW_004515686.1 | Scaffold93  | 47465                   | TT                              | CC              | 1946919458               |
| SNP_P4_113400_63448  | NW_004515686.1 | Scaffold93  | 63448                   | GG                              | AA              | 1946919460               |
| SNP_P4_113401_63497  | NW_004515686.1 | Scaffold93  | 63497                   | AA                              | CC              | 1946919462               |
| SNP_P4_113402_63499  | NW_004515686.1 | Scaffold93  | 63499                   | TT                              | GG              | 1946919464               |
| SNP_P4_113403_63784  | NW_004515686.1 | Scaffold93  | 63784                   | CC                              | TT              | 1946919466               |
| SNP_P4_113404_94044  | NW_004515686.1 | Scaffold93  | 94044                   | AA                              | CC              | 1946919468               |
| SNP_P4_113405_94054  | NW_004515686.1 | Scaffold93  | 94054                   | TT                              | CC              | 1946919470               |
| SNP_P4_113406_94057  | NW_004515686.1 | Scaffold93  | 94057                   | GG                              | AA              | 1946919473               |
| SNP_P4_113407_94060  | NW_004515686.1 | Scaffold93  | 94060                   | AA                              | CC              | 1946919475               |
| SNP_P4_113408_94192  | NW_004515686.1 | Scaffold93  | 94192                   | TT                              | CC              | 1946919477               |

| SNPs IDs             | Chromosome IDs | Chromosomes | Physical positions (bp) | CDC Frontier (Reference genome) | (ILWC46 & LPNB) | NCBI SNPdb Accession IDs |
|----------------------|----------------|-------------|-------------------------|---------------------------------|-----------------|--------------------------|
| SNP_P4_113409_94356  | NW_004515686.1 | Scaffold93  | 94356                   | CC                              | TT              | 1946919480               |
| SNP_P4_113410_94557  | NW_004515686.1 | Scaffold93  | 94557                   | TT                              | AA              | 1946919482               |
| SNP_P4_113411_97175  | NW_004515686.1 | Scaffold93  | 97175                   | TT                              | CC              | 1946919484               |
| SNP_P4_113412_97193  | NW_004515686.1 | Scaffold93  | 97193                   | AA                              | TT              | 1946919486               |
| SNP_P4_113413_97293  | NW_004515686.1 | Scaffold93  | 97293                   | TT                              | CC              | 1946919488               |
| SNP_P4_113414_97487  | NW_004515686.1 | Scaffold93  | 97487                   | CC                              | GG              | 1946919490               |
| SNP_P4_113415_110362 | NW_004515686.1 | Scaffold93  | 110362                  | CC                              | AA              | 1946919493               |
| SNP_P4_113416_110375 | NW_004515686.1 | Scaffold93  | 110375                  | GG                              | AA              | 1946919495               |
| SNP_P4_113417_110381 | NW_004515686.1 | Scaffold93  | 110381                  | TT                              | AA              | 1946919497               |
| SNP_P4_113418_127178 | NW_004515686.1 | Scaffold93  | 127178                  | GG                              | TT              | 1946919499               |
| SNP_P4_113419_132665 | NW_004515686.1 | Scaffold93  | 132665                  | AA                              | CC              | 1946919501               |
| SNP_P4_113420_132680 | NW_004515686.1 | Scaffold93  | 132680                  | AA                              | TT              | 1946919503               |
| SNP_P4_113421_132692 | NW_004515686.1 | Scaffold93  | 132692                  | GG                              | TT              | 1946919505               |
| SNP_P4_113422_140813 | NW_004515686.1 | Scaffold93  | 140813                  | TT                              | CC              | 1946919507               |
| SNP_P4_113423_140886 | NW_004515686.1 | Scaffold93  | 140886                  | AA                              | GG              | 1946919510               |
| SNP_P4_113425_141174 | NW_004515686.1 | Scaffold93  | 141174                  | CC                              | TT              | 1946919512               |
| SNP_P4_113426_141258 | NW_004515686.1 | Scaffold93  | 141258                  | AA                              | GG              | 1946919514               |
| SNP_P4_113427_149120 | NW_004515686.1 | Scaffold93  | 149120                  | CC                              | TT              | 1946919516               |
| SNP_P4_113428_153621 | NW_004515686.1 | Scaffold93  | 153621                  | TT                              | CC              | 1946919518               |
| SNP_P4_113429_153897 | NW_004515686.1 | Scaffold93  | 153897                  | TT                              | CC              | 1946919520               |
| SNP_P4_113430_178356 | NW_004515686.1 | Scaffold93  | 178356                  | CC                              | TT              | 1946919522               |
| SNP_P4_113431_180662 | NW_004515686.1 | Scaffold93  | 180662                  | AA                              | CC              | 1946919524               |
| SNP_P4_113432_180685 | NW_004515686.1 | Scaffold93  | 180685                  | TT                              | CC              | 1946919526               |
| SNP_P4_113433_192487 | NW_004515686.1 | Scaffold93  | 192487                  | GG                              | AA              | 1946919528               |
| SNP_P4_113434_193740 | NW_004515686.1 | Scaffold93  | 193740                  | TT                              | CC              | 1946919530               |
| SNP_P4_113435_213132 | NW_004515686.1 | Scaffold93  | 213132                  | TT                              | CC              | 1946919532               |
| SNP_P4_113436_230847 | NW_004515686.1 | Scaffold93  | 230847                  | GG                              | TT              | 1946919534               |
| SNP_P4_113437_230848 | NW_004515686.1 | Scaffold93  | 230848                  | CC                              | TT              | 1946919536               |
| SNP_P4_113438_231059 | NW_004515686.1 | Scaffold93  | 231059                  | TT                              | CC              | 1946919538               |
| SNP_P4_113439_254009 | NW_004515686.1 | Scaffold93  | 254009                  | AA                              | GG              | 1946919540               |
| SNP_P4_113440_254015 | NW_004515686.1 | Scaffold93  | 254015                  | TT                              | CC              | 1946919542               |
| SNP_P4_113441_254128 | NW_004515686.1 | Scaffold93  | 254128                  | AA                              | CC              | 1946919544               |
| SNP_P4_113442_264352 | NW_004515686.1 | Scaffold93  | 264352                  | CC                              | TT              | 1946919547               |
| SNP_P4_113443_264434 | NW_004515686.1 | Scaffold93  | 264434                  | GG                              | TT              | 1946919549               |
| SNP_P4_113445_272263 | NW_004515686.1 | Scaffold93  | 272263                  | GG                              | AA              | 1946919551               |
| SNP_P4_113446_296275 | NW_004515686.1 | Scaffold93  | 296275                  | CC                              | AA              | 1946919553               |
| SNP_P4_113447_296276 | NW_004515686.1 | Scaffold93  | 296276                  | TT                              | CC              | 1946919555               |
| SNP_P4_113448_296277 | NW_004515686.1 | Scaffold93  | 296277                  | GG                              | AA              | 1946919557               |
| SNP_P4_113449_296309 | NW_004515686.1 | Scaffold93  | 296309                  | CC                              | AA              | 1946919559               |
| SNP_P4_113450_296320 | NW_004515686.1 | Scaffold93  | 296320                  | TT                              | CC              | 1946919561               |
| SNP_P4_113451_296322 | NW_004515686.1 | Scaffold93  | 296322                  | GG                              | AA              | 1946919563               |
| SNP_P4_113452_296561 | NW_004515686.1 | Scaffold93  | 296561                  | CC                              | TT              | 1946919565               |

| SNPs IDs             | Chromosome IDs | Chromosomes | Physical positions (bp) | CDC Frontier (Reference genome) | (ILWC46 & LPNB) | NCBI SNPdb Accession IDs |
|----------------------|----------------|-------------|-------------------------|---------------------------------|-----------------|--------------------------|
| SNP_P4_113453_296596 | NW_004515686.1 | Scaffold93  | 296596                  | TT                              | GG              | 1946919567               |
| SNP_P4_113454_296671 | NW_004515686.1 | Scaffold93  | 296671                  | TT                              | CC              | 1946919569               |
| SNP_P4_113455_296679 | NW_004515686.1 | Scaffold93  | 296679                  | GG                              | AA              | 1946919571               |
| SNP_P4_113456_296720 | NW_004515686.1 | Scaffold93  | 296720                  | TT                              | GG              | 1946919573               |
| SNP_P4_113457_297499 | NW_004515686.1 | Scaffold93  | 297499                  | CC                              | AA              | 1946919575               |
| SNP_P4_113458_297681 | NW_004515686.1 | Scaffold93  | 297681                  | TT                              | GG              | 1946919577               |
| SNP_P4_113459_305867 | NW_004515686.1 | Scaffold93  | 305867                  | TT                              | CC              | 1946919579               |
| SNP_P4_113460_318681 | NW_004515686.1 | Scaffold93  | 318681                  | AA                              | GG              | 1946919581               |
| SNP_P4_113461_337779 | NW_004515686.1 | Scaffold93  | 337779                  | GG                              | AA              | 1946919583               |
| SNP_P4_113462_337830 | NW_004515686.1 | Scaffold93  | 337830                  | TT                              | CC              | 1946919585               |
| SNP_P4_113463_337851 | NW_004515686.1 | Scaffold93  | 337851                  | TT                              | CC              | 1946919587               |
| SNP_P4_113464_337889 | NW_004515686.1 | Scaffold93  | 337889                  | TT                              | CC              | 1946919589               |
| SNP_P4_113465_337925 | NW_004515686.1 | Scaffold93  | 337925                  | TT                              | CC              | 1946919591               |
| SNP_P4_113467_338043 | NW_004515686.1 | Scaffold93  | 338043                  | AA                              | CC              | 1946919593               |
| SNP_P4_113468_338101 | NW_004515686.1 | Scaffold93  | 338101                  | CC                              | TT              | 1946919595               |
| SNP_P4_113469_338127 | NW_004515686.1 | Scaffold93  | 338127                  | CC                              | GG              | 1946919597               |
| SNP_P4_113470_338135 | NW_004515686.1 | Scaffold93  | 338135                  | GG                              | TT              | 1946919599               |
| SNP_P4_113471_338139 | NW_004515686.1 | Scaffold93  | 338139                  | CC                              | TT              | 1946919601               |
| SNP_P4_113472_338148 | NW_004515686.1 | Scaffold93  | 338148                  | TT                              | GG              | 1946919603               |
| SNP_P4_113473_338224 | NW_004515686.1 | Scaffold93  | 338224                  | AA                              | GG              | 1946919605               |
| SNP_P4_113474_338408 | NW_004515686.1 | Scaffold93  | 338408                  | GG                              | AA              | 1946919607               |
| SNP_P4_113475_338424 | NW_004515686.1 | Scaffold93  | 338424                  | AA                              | GG              | 1946919609               |
| SNP_P4_113476_356048 | NW_004515686.1 | Scaffold93  | 356048                  | CC                              | GG              | 1946919611               |
| SNP_P4_113477_362879 | NW_004515686.1 | Scaffold93  | 362879                  | AA                              | GG              | 1946919613               |
| SNP_P4_113478_362921 | NW_004515686.1 | Scaffold93  | 362921                  | AA                              | CC              | 1946919615               |
| SNP_P4_113480_449701 | NW_004515686.1 | Scaffold93  | 449701                  | GG                              | AA              | 1946919617               |
| SNP_P4_113481_449742 | NW_004515686.1 | Scaffold93  | 449742                  | TT                              | CC              | 1946919619               |
| SNP_P4_113482_469724 | NW_004515686.1 | Scaffold93  | 469724                  | CC                              | AA              | 1946919621               |
| SNP_P4_113483_483448 | NW_004515686.1 | Scaffold93  | 483448                  | TT                              | GG              | 1946919623               |
| SNP_P4_113484_483455 | NW_004515686.1 | Scaffold93  | 483455                  | GG                              | AA              | 1946919625               |
| SNP_P4_113485_483613 | NW_004515686.1 | Scaffold93  | 483613                  | GG                              | AA              | 1946919627               |
| SNP_P4_113486_483653 | NW_004515686.1 | Scaffold93  | 483653                  | TT                              | CC              | 1946919629               |
| SNP_P4_113487_483661 | NW_004515686.1 | Scaffold93  | 483661                  | AA                              | GG              | 1946919631               |
| SNP_P4_113488_483786 | NW_004515686.1 | Scaffold93  | 483786                  | AA                              | CC              | 1946919633               |
| SNP_P4_113489_483787 | NW_004515686.1 | Scaffold93  | 483787                  | CC                              | TT              | 1946919635               |
| SNP_P4_113490_499075 | NW_004515686.1 | Scaffold93  | 499075                  | TT                              | CC              | 1946919637               |
| SNP_P4_113491_499606 | NW_004515686.1 | Scaffold93  | 499606                  | TT                              | CC              | 1946919639               |
| SNP_P4_113492_503457 | NW_004515686.1 | Scaffold93  | 503457                  | CC                              | TT              | 1946919641               |
| SNP_P4_113493_503470 | NW_004515686.1 | Scaffold93  | 503470                  | TT                              | CC              | 1946919643               |
| SNP_P4_113494_503529 | NW_004515686.1 | Scaffold93  | 503529                  | AA                              | GG              | 1946919645               |
| SNP_P4_113495_503537 | NW_004515686.1 | Scaffold93  | 503537                  | TT                              | CC              | 1946919647               |
| SNP_P4_113496_503540 | NW_004515686.1 | Scaffold93  | 503540                  | AA                              | CC              | 1946919649               |

| SNPs IDs             | Chromosome IDs | Chromosomes | Physical positions (bp) | CDC Frontier (Reference genome) | (ILWC46 & LPNB) | NCBI SNPdb Accession IDs |
|----------------------|----------------|-------------|-------------------------|---------------------------------|-----------------|--------------------------|
| SNP_P4_113497_503547 | NW_004515686.1 | Scaffold93  | 503547                  | AA                              | GG              | 1946919651               |
| SNP_P4_113498_503550 | NW_004515686.1 | Scaffold93  | 503550                  | GG                              | CC              | 1946919653               |
| SNP_P4_113499_503556 | NW_004515686.1 | Scaffold93  | 503556                  | GG                              | TT              | 1946919655               |
| SNP_P4_113500_503562 | NW_004515686.1 | Scaffold93  | 503562                  | AA                              | TT              | 1946919657               |
| SNP_P4_113501_503566 | NW_004515686.1 | Scaffold93  | 503566                  | TT                              | GG              | 1946919659               |
| SNP_P4_113503_515504 | NW_004515686.1 | Scaffold93  | 515504                  | TT                              | CC              | 1946919662               |
| SNP_P4_113504_529696 | NW_004515686.1 | Scaffold93  | 529696                  | CC                              | TT              | 1946919664               |
| SNP_P4_113505_542746 | NW_004515686.1 | Scaffold93  | 542746                  | GG                              | AA              | 1946919666               |
| SNP_P4_113507_572635 | NW_004515686.1 | Scaffold93  | 572635                  | TT                              | GG              | 1946919668               |
| SNP_P4_113508_572649 | NW_004515686.1 | Scaffold93  | 572649                  | GG                              | TT              | 1946919670               |
| SNP_P4_113509_572673 | NW_004515686.1 | Scaffold93  | 572673                  | CC                              | TT              | 1946919672               |
| SNP_P4_113510_572803 | NW_004515686.1 | Scaffold93  | 572803                  | CC                              | AA              | 1946919674               |
| SNP_P4_113511_572872 | NW_004515686.1 | Scaffold93  | 572872                  | AA                              | TT              | 1946919676               |
| SNP_P4_113512_573019 | NW_004515686.1 | Scaffold93  | 573019                  | GG                              | CC              | 1946919678               |
| SNP_P4_113513_573062 | NW_004515686.1 | Scaffold93  | 573062                  | TT                              | CC              | 1946919680               |
| SNP_P4_113514_573063 | NW_004515686.1 | Scaffold93  | 573063                  | GG                              | AA              | 1946919682               |
| SNP_P4_113515_573273 | NW_004515686.1 | Scaffold93  | 573273                  | CC                              | TT              | 1946919684               |
| SNP_P4_113517_573301 | NW_004515686.1 | Scaffold93  | 573301                  | CC                              | AA              | 1946919686               |
| SNP_P4_113518_573472 | NW_004515686.1 | Scaffold93  | 573472                  | GG                              | CC              | 1946919688               |
| SNP_P4_113519_573542 | NW_004515686.1 | Scaffold93  | 573542                  | CC                              | TT              | 1946919690               |
| SNP_P4_113520_574270 | NW_004515686.1 | Scaffold93  | 574270                  | CC                              | TT              | 1946919692               |
| SNP_P4_113521_584752 | NW_004515686.1 | Scaffold93  | 584752                  | GG                              | TT              | 1946919694               |
| SNP_P4_113522_613186 | NW_004515686.1 | Scaffold93  | 613186                  | GG                              | TT              | 1946919696               |
| SNP_P4_113523_613222 | NW_004515686.1 | Scaffold93  | 613222                  | CC                              | TT              | 1946919698               |
| SNP_P4_113524_617264 | NW_004515686.1 | Scaffold93  | 617264                  | GG                              | TT              | 1946919700               |
| SNP_P4_113525_625732 | NW_004515686.1 | Scaffold93  | 625732                  | CC                              | TT              | 1946919702               |
| SNP_P4_113526_640186 | NW_004515686.1 | Scaffold93  | 640186                  | GG                              | AA              | 1946919704               |
| SNP_P4_113527_640277 | NW_004515686.1 | Scaffold93  | 640277                  | CC                              | TT              | 1946919706               |
| SNP_P4_113528_640282 | NW_004515686.1 | Scaffold93  | 640282                  | CC                              | GG              | 1946919708               |
| SNP_P4_113529_654042 | NW_004515686.1 | Scaffold93  | 654042                  | AA                              | GG              | 1946919710               |
| SNP_P4_113531_662868 | NW_004515686.1 | Scaffold93  | 662868                  | AA                              | CC              | 1946919712               |
| SNP_P4_113532_663130 | NW_004515686.1 | Scaffold93  | 663130                  | TT                              | CC              | 1946919714               |
| SNP_P4_113533_663182 | NW_004515686.1 | Scaffold93  | 663182                  | CC                              | AA              | 1946919716               |
| SNP_P4_113534_663193 | NW_004515686.1 | Scaffold93  | 663193                  | CC                              | TT              | 1946919718               |
| SNP_P4_113535_663197 | NW_004515686.1 | Scaffold93  | 663197                  | TT                              | AA              | 1946919720               |
| SNP_P4_113536_663208 | NW_004515686.1 | Scaffold93  | 663208                  | GG                              | TT              | 1946919722               |
| SNP_P4_113537_2160   | NW_004515687.1 | Scaffold96  | 2160                    | AA                              | CC              | 1946919724               |
| SNP_P4_113538_2334   | NW_004515687.1 | Scaffold96  | 2334                    | TT                              | CC              | 1946919726               |
| SNP_P4_113539_3781   | NW_004515687.1 | Scaffold96  | 3781                    | GG                              | AA              | 1946919728               |
| SNP_P4_113540_3804   | NW_004515687.1 | Scaffold96  | 3804                    | GG                              | AA              | 1946919730               |
| SNP_P4_113541_4112   | NW_004515687.1 | Scaffold96  | 4112                    | AA                              | CC              | 1946919732               |
| SNP_P4_113542_4156   | NW_004515687.1 | Scaffold96  | 4156                    | AA                              | GG              | 1946919734               |



| SNPs IDs             | Chromosome IDs | Chromosomes | Physical positions (bp) | CDC Frontier (Reference genome) | (ILWC46 & LPNB) | NCBI SNPdb Accession IDs |
|----------------------|----------------|-------------|-------------------------|---------------------------------|-----------------|--------------------------|
| SNP_P4_113543_6155   | NW_004515687.1 | Scaffold96  | 6155                    | CC                              | TT              | 1946919736               |
| SNP_P4_113544_27796  | NW_004515687.1 | Scaffold96  | 27796                   | TT                              | CC              | 1946919738               |
| SNP_P4_113545_35301  | NW_004515687.1 | Scaffold96  | 35301                   | AA                              | TT              | 1946919740               |
| SNP_P4_113546_61191  | NW_004515687.1 | Scaffold96  | 61191                   | CC                              | TT              | 1946919742               |
| SNP_P4_113547_93567  | NW_004515687.1 | Scaffold96  | 93567                   | GG                              | AA              | 1946919744               |
| SNP_P4_113548_100497 | NW_004515687.1 | Scaffold96  | 100497                  | CC                              | TT              | 1946919746               |
| SNP_P4_113549_107062 | NW_004515687.1 | Scaffold96  | 107062                  | TT                              | CC              | 1946919748               |
| SNP_P4_113550_117638 | NW_004515687.1 | Scaffold96  | 117638                  | TT                              | GG              | 1946919750               |
| SNP_P4_113551_157421 | NW_004515687.1 | Scaffold96  | 157421                  | CC                              | TT              | 1946919752               |
| SNP_P4_113552_159487 | NW_004515687.1 | Scaffold96  | 159487                  | GG                              | AA              | 1946919754               |
| SNP_P4_113553_159513 | NW_004515687.1 | Scaffold96  | 159513                  | TT                              | CC              | 1946919756               |
| SNP_P4_113554_159605 | NW_004515687.1 | Scaffold96  | 159605                  | CC                              | AA              | 1946919758               |
| SNP_P4_113555_159635 | NW_004515687.1 | Scaffold96  | 159635                  | GG                              | AA              | 1946919760               |
| SNP_P4_113556_159863 | NW_004515687.1 | Scaffold96  | 159863                  | GG                              | AA              | 1946919762               |
| SNP_P4_113557_159889 | NW_004515687.1 | Scaffold96  | 159889                  | GG                              | TT              | 1946919764               |
| SNP_P4_113558_159950 | NW_004515687.1 | Scaffold96  | 159950                  | GG                              | AA              | 1946919766               |
| SNP_P4_113559_160043 | NW_004515687.1 | Scaffold96  | 160043                  | TT                              | GG              | 1946919768               |
| SNP_P4_113560_160069 | NW_004515687.1 | Scaffold96  | 160069                  | TT                              | GG              | 1946919770               |
| SNP_P4_113561_169381 | NW_004515687.1 | Scaffold96  | 169381                  | TT                              | CC              | 1946919772               |
| SNP_P4_113562_170615 | NW_004515687.1 | Scaffold96  | 170615                  | AA                              | CC              | 1946919774               |
| SNP_P4_113563_170617 | NW_004515687.1 | Scaffold96  | 170617                  | TT                              | CC              | 1946919776               |
| SNP_P4_113564_170942 | NW_004515687.1 | Scaffold96  | 170942                  | TT                              | CC              | 1946919778               |
| SNP_P4_113565_180943 | NW_004515687.1 | Scaffold96  | 180943                  | GG                              | AA              | 1946919780               |
| SNP_P4_113566_180952 | NW_004515687.1 | Scaffold96  | 180952                  | TT                              | AA              | 1946919782               |
| SNP_P4_113567_180961 | NW_004515687.1 | Scaffold96  | 180961                  | AA                              | CC              | 1946919784               |
| SNP_P4_113568_181031 | NW_004515687.1 | Scaffold96  | 181031                  | TT                              | AA              | 1946919786               |
| SNP_P4_113569_197941 | NW_004515687.1 | Scaffold96  | 197941                  | CC                              | TT              | 1946919788               |
| SNP_P4_113570_229898 | NW_004515687.1 | Scaffold96  | 229898                  | CC                              | AA              | 1946919790               |
| SNP_P4_113571_282460 | NW_004515687.1 | Scaffold96  | 282460                  | CC                              | AA              | 1946919792               |
| SNP_P4_113572_316524 | NW_004515687.1 | Scaffold96  | 316524                  | CC                              | TT              | 1946919794               |
| SNP_P4_113573_316537 | NW_004515687.1 | Scaffold96  | 316537                  | CC                              | GG              | 1946919796               |
| SNP_P4_113574_316562 | NW_004515687.1 | Scaffold96  | 316562                  | CC                              | TT              | 1946919798               |
| SNP_P4_113576_316637 | NW_004515687.1 | Scaffold96  | 316637                  | CC                              | TT              | 1946919800               |
| SNP_P4_113577_320180 | NW_004515687.1 | Scaffold96  | 320180                  | TT                              | CC              | 1946919802               |
| SNP_P4_113578_320204 | NW_004515687.1 | Scaffold96  | 320204                  | TT                              | CC              | 1946919804               |
| SNP_P4_113579_341485 | NW_004515687.1 | Scaffold96  | 341485                  | AA                              | CC              | 1946919806               |
| SNP_P4_113580_6173   | NW_004515688.1 | Scaffold98  | 6173                    | AA                              | TT              | 1946919808               |
| SNP_P4_113581_6178   | NW_004515688.1 | Scaffold98  | 6178                    | CC                              | GG              | 1946919810               |
| SNP_P4_113582_13937  | NW_004515688.1 | Scaffold98  | 13937                   | GG                              | AA              | 1946919812               |
| SNP_P4_113583_13943  | NW_004515688.1 | Scaffold98  | 13943                   | GG                              | AA              | 1946919814               |
| SNP_P4_113584_13944  | NW_004515688.1 | Scaffold98  | 13944                   | GG                              | AA              | 1946919816               |
| SNP_P4_113585_14602  | NW_004515688.1 | Scaffold98  | 14602                   | TT                              | CC              | 1946919818               |

| SNPs IDs             | Chromosome IDs | Chromosomes | Physical positions (bp) | CDC Frontier (Reference genome) | (ILWC46 & LPNB) | NCBI SNPdb Accession IDs |
|----------------------|----------------|-------------|-------------------------|---------------------------------|-----------------|--------------------------|
| SNP_P4_113586_14611  | NW_004515688.1 | Scaffold98  | 14611                   | AA                              | TT              | 1946919820               |
| SNP_P4_113587_14619  | NW_004515688.1 | Scaffold98  | 14619                   | TT                              | CC              | 1946919822               |
| SNP_P4_113588_22127  | NW_004515688.1 | Scaffold98  | 22127                   | GG                              | AA              | 1946919824               |
| SNP_P4_113589_63963  | NW_004515688.1 | Scaffold98  | 63963                   | GG                              | TT              | 1946919826               |
| SNP_P4_113590_63978  | NW_004515688.1 | Scaffold98  | 63978                   | AA                              | GG              | 1946919828               |
| SNP_P4_113591_63979  | NW_004515688.1 | Scaffold98  | 63979                   | AA                              | GG              | 1946919830               |
| SNP_P4_113592_89115  | NW_004515688.1 | Scaffold98  | 89115                   | AA                              | TT              | 1946919832               |
| SNP_P4_113593_89134  | NW_004515688.1 | Scaffold98  | 89134                   | TT                              | CC              | 1946919834               |
| SNP_P4_113594_89495  | NW_004515688.1 | Scaffold98  | 89495                   | AA                              | TT              | 1946919836               |
| SNP_P4_113595_108017 | NW_004515688.1 | Scaffold98  | 108017                  | GG                              | TT              | 1946919838               |
| SNP_P4_113596_109957 | NW_004515688.1 | Scaffold98  | 109957                  | TT                              | CC              | 1946919840               |
| SNP_P4_113597_109966 | NW_004515688.1 | Scaffold98  | 109966                  | TT                              | CC              | 1946919842               |
| SNP_P4_113598_110104 | NW_004515688.1 | Scaffold98  | 110104                  | AA                              | GG              | 1946919844               |
| SNP_P4_113599_132156 | NW_004515688.1 | Scaffold98  | 132156                  | AA                              | GG              | 1946919847               |
| SNP_P4_113603_162958 | NW_004515688.1 | Scaffold98  | 162958                  | CC                              | TT              | 1946919849               |
| SNP_P4_113604_163061 | NW_004515688.1 | Scaffold98  | 163061                  | TT                              | AA              | 1946919851               |
| SNP_P4_113605_175300 | NW_004515688.1 | Scaffold98  | 175300                  | CC                              | TT              | 1946919853               |
| SNP_P4_113607_199922 | NW_004515688.1 | Scaffold98  | 199922                  | GG                              | TT              | 1946919855               |
| SNP_P4_113608_210165 | NW_004515688.1 | Scaffold98  | 210165                  | AA                              | GG              | 1946919857               |
| SNP_P4_113610_251070 | NW_004515688.1 | Scaffold98  | 251070                  | TT                              | AA              | 1946919859               |
| SNP_P4_113611_270824 | NW_004515688.1 | Scaffold98  | 270824                  | AA                              | GG              | 1946919861               |
| SNP_P4_113612_271153 | NW_004515688.1 | Scaffold98  | 271153                  | TT                              | CC              | 1946919863               |
| SNP_P4_113613_271201 | NW_004515688.1 | Scaffold98  | 271201                  | AA                              | GG              | 1946919865               |
| SNP_P4_113614_271225 | NW_004515688.1 | Scaffold98  | 271225                  | CC                              | TT              | 1946919867               |
| SNP_P4_113615_277276 | NW_004515688.1 | Scaffold98  | 277276                  | AA                              | GG              | 1946919869               |
| SNP_P4_113616_277329 | NW_004515688.1 | Scaffold98  | 277329                  | TT                              | CC              | 1946919872               |
| SNP_P4_113617_277388 | NW_004515688.1 | Scaffold98  | 277388                  | CC                              | TT              | 1946919874               |
| SNP_P4_113618_296061 | NW_004515688.1 | Scaffold98  | 296061                  | AA                              | CC              | 1946919876               |
| SNP_P4_113619_296073 | NW_004515688.1 | Scaffold98  | 296073                  | AA                              | CC              | 1946919878               |
| SNP_P4_113620_296094 | NW_004515688.1 | Scaffold98  | 296094                  | TT                              | CC              | 1946919880               |
| SNP_P4_113621_296100 | NW_004515688.1 | Scaffold98  | 296100                  | AA                              | CC              | 1946919882               |
| SNP_P4_113622_296134 | NW_004515688.1 | Scaffold98  | 296134                  | TT                              | CC              | 1946919884               |
| SNP_P4_113623_296347 | NW_004515688.1 | Scaffold98  | 296347                  | AA                              | GG              | 1946919886               |
| SNP_P4_113624_296374 | NW_004515688.1 | Scaffold98  | 296374                  | AA                              | GG              | 1946919888               |
| SNP_P4_113625_312466 | NW_004515688.1 | Scaffold98  | 312466                  | AA                              | TT              | 1946919890               |
| SNP_P4_113626_334623 | NW_004515688.1 | Scaffold98  | 334623                  | TT                              | CC              | 1946919892               |
| SNP_P4_113627_334630 | NW_004515688.1 | Scaffold98  | 334630                  | AA                              | GG              | 1946919894               |
| SNP_P4_113628_335028 | NW_004515688.1 | Scaffold98  | 335028                  | TT                              | CC              | 1946919896               |
| SNP_P4_113629_335065 | NW_004515688.1 | Scaffold98  | 335065                  | GG                              | AA              | 1946919898               |
| SNP_P4_113630_335559 | NW_004515688.1 | Scaffold98  | 335559                  | TT                              | CC              | 1946919900               |
| SNP_P4_113631_335579 | NW_004515688.1 | Scaffold98  | 335579                  | AA                              | TT              | 1946919902               |
| SNP_P4_113635_362301 | NW_004515688.1 | Scaffold98  | 362301                  | AA                              | TT              | 1946919904               |

| SNPs IDs             | Chromosome IDs | Chromosomes | Physical positions (bp) | CDC Frontier (Reference genome) | (ILWC46 & LPNB) | NCBI SNPdb Accession IDs |
|----------------------|----------------|-------------|-------------------------|---------------------------------|-----------------|--------------------------|
| SNP_P4_113636_362311 | NW_004515688.1 | Scaffold98  | 362311                  | AA                              | TT              | 1946919906               |
| SNP_P4_113638_432950 | NW_004515688.1 | Scaffold98  | 432950                  | AA                              | CC              | 1946919908               |
| SNP_P4_113639_432951 | NW_004515688.1 | Scaffold98  | 432951                  | AA                              | CC              | 1946919910               |
| SNP_P4_113641_457070 | NW_004515688.1 | Scaffold98  | 457070                  | CC                              | TT              | 1946919912               |
| SNP_P4_113642_489167 | NW_004515688.1 | Scaffold98  | 489167                  | AA                              | GG              | 1946919914               |
| SNP_P4_113643_512190 | NW_004515688.1 | Scaffold98  | 512190                  | GG                              | CC              | 1946919916               |
| SNP_P4_113644_524332 | NW_004515688.1 | Scaffold98  | 524332                  | GG                              | AA              | 1946919918               |
| SNP_P4_113645_524460 | NW_004515688.1 | Scaffold98  | 524460                  | AA                              | GG              | 1946919920               |
| SNP_P4_113646_524662 | NW_004515688.1 | Scaffold98  | 524662                  | AA                              | CC              | 1946919922               |
| SNP_P4_113649_598574 | NW_004515688.1 | Scaffold98  | 598574                  | TT                              | CC              | 1946919924               |
| SNP_P4_113650_610844 | NW_004515688.1 | Scaffold98  | 610844                  | AA                              | CC              | 1946919926               |
| SNP_P4_113651_627620 | NW_004515688.1 | Scaffold98  | 627620                  | CC                              | TT              | 1946919928               |
| SNP_P4_113652_628217 | NW_004515688.1 | Scaffold98  | 628217                  | CC                              | TT              | 1946919930               |
| SNP_P4_113654_668635 | NW_004515688.1 | Scaffold98  | 668635                  | AA                              | GG              | 1946919932               |
| SNP_P4_113655_694671 | NW_004515688.1 | Scaffold98  | 694671                  | CC                              | AA              | 1946919934               |
| SNP_P4_113656_5747   | NW_004515689.1 | Scaffold99  | 5747                    | CC                              | TT              | 1946919936               |
| SNP_P4_113657_5782   | NW_004515689.1 | Scaffold99  | 5782                    | CC                              | AA              | 1946919938               |
| SNP_P4_113658_10155  | NW_004515689.1 | Scaffold99  | 10155                   | TT                              | CC              | 1946919940               |
| SNP_P4_113659_11743  | NW_004515689.1 | Scaffold99  | 11743                   | TT                              | CC              | 1946919942               |
| SNP_P4_113660_11772  | NW_004515689.1 | Scaffold99  | 11772                   | AA                              | CC              | 1946919944               |
| SNP_P4_113661_11773  | NW_004515689.1 | Scaffold99  | 11773                   | GG                              | CC              | 1946919946               |
| SNP_P4_113662_11801  | NW_004515689.1 | Scaffold99  | 11801                   | GG                              | TT              | 1946919948               |
| SNP_P4_113663_11811  | NW_004515689.1 | Scaffold99  | 11811                   | TT                              | CC              | 1946919950               |
| SNP_P4_113664_11820  | NW_004515689.1 | Scaffold99  | 11820                   | GG                              | AA              | 1946919953               |
| SNP_P4_113665_11836  | NW_004515689.1 | Scaffold99  | 11836                   | TT                              | AA              | 1946919955               |
| SNP_P4_113666_12018  | NW_004515689.1 | Scaffold99  | 12018                   | TT                              | CC              | 1946919957               |
| SNP_P4_113667_29038  | NW_004515689.1 | Scaffold99  | 29038                   | AA                              | GG              | 1946919959               |
| SNP_P4_113668_51556  | NW_004515689.1 | Scaffold99  | 51556                   | CC                              | TT              | 1946919961               |
| SNP_P4_113670_69331  | NW_004515689.1 | Scaffold99  | 69331                   | AA                              | CC              | 1946919963               |
| SNP_P4_113671_69499  | NW_004515689.1 | Scaffold99  | 69499                   | AA                              | GG              | 1946919965               |
| SNP_P4_113672_69634  | NW_004515689.1 | Scaffold99  | 69634                   | AA                              | CC              | 1946919967               |
| SNP_P4_113673_79741  | NW_004515689.1 | Scaffold99  | 79741                   | AA                              | GG              | 1946919969               |
| SNP_P4_113674_81566  | NW_004515689.1 | Scaffold99  | 81566                   | GG                              | TT              | 1946919971               |
| SNP_P4_113676_109298 | NW_004515689.1 | Scaffold99  | 109298                  | CC                              | TT              | 1946919973               |
| SNP_P4_113677_110442 | NW_004515689.1 | Scaffold99  | 110442                  | TT                              | CC              | 1946919975               |
| SNP_P4_113678_110486 | NW_004515689.1 | Scaffold99  | 110486                  | AA                              | TT              | 1946919977               |
| SNP_P4_113679_111825 | NW_004515689.1 | Scaffold99  | 111825                  | GG                              | AA              | 1946919979               |
| SNP_P4_113680_111971 | NW_004515689.1 | Scaffold99  | 111971                  | GG                              | AA              | 1946919981               |
| SNP_P4_113681_132395 | NW_004515689.1 | Scaffold99  | 132395                  | GG                              | AA              | 1946919983               |
| SNP_P4_113682_132461 | NW_004515689.1 | Scaffold99  | 132461                  | AA                              | GG              | 1946919985               |
| SNP_P4_113683_132473 | NW_004515689.1 | Scaffold99  | 132473                  | GG                              | AA              | 1946919987               |
| SNP_P4_113684_132799 | NW_004515689.1 | Scaffold99  | 132799                  | TT                              | CC              | 1946919989               |

| SNPs IDs             | Chromosome IDs | Chromosomes | Physical positions (bp) | CDC Frontier (Reference genome) | (ILWC46 & LPNB) | NCBI SNPdb Accession IDs |
|----------------------|----------------|-------------|-------------------------|---------------------------------|-----------------|--------------------------|
| SNP_P4_113685_132812 | NW_004515689.1 | Scaffold99  | 132812                  | AA                              | CC              | 1946919991               |
| SNP_P4_113686_132815 | NW_004515689.1 | Scaffold99  | 132815                  | GG                              | TT              | 1946919993               |
| SNP_P4_113687_132835 | NW_004515689.1 | Scaffold99  | 132835                  | AA                              | GG              | 1946919995               |
| SNP_P4_113688_133171 | NW_004515689.1 | Scaffold99  | 133171                  | TT                              | CC              | 1946919997               |
| SNP_P4_113689_160695 | NW_004515689.1 | Scaffold99  | 160695                  | TT                              | GG              | 1946919999               |
| SNP_P4_113690_176534 | NW_004515689.1 | Scaffold99  | 176534                  | GG                              | AA              | 1946920001               |
| SNP_P4_113691_189830 | NW_004515689.1 | Scaffold99  | 189830                  | GG                              | AA              | 1946920003               |
| SNP_P4_113692_189879 | NW_004515689.1 | Scaffold99  | 189879                  | TT                              | AA              | 1946920005               |
| SNP_P4_113693_189943 | NW_004515689.1 | Scaffold99  | 189943                  | TT                              | CC              | 1946920007               |
| SNP_P4_113694_199203 | NW_004515689.1 | Scaffold99  | 199203                  | CC                              | TT              | 1946920009               |
| SNP_P4_113695_199231 | NW_004515689.1 | Scaffold99  | 199231                  | GG                              | CC              | 1946920011               |
| SNP_P4_113696_199288 | NW_004515689.1 | Scaffold99  | 199288                  | TT                              | AA              | 1946920013               |
| SNP_P4_113697_199381 | NW_004515689.1 | Scaffold99  | 199381                  | GG                              | AA              | 1946920015               |
| SNP_P4_113698_201872 | NW_004515689.1 | Scaffold99  | 201872                  | AA                              | GG              | 1946920017               |
| SNP_P4_113699_210315 | NW_004515689.1 | Scaffold99  | 210315                  | GG                              | TT              | 1946920019               |
| SNP_P4_113700_210869 | NW_004515689.1 | Scaffold99  | 210869                  | CC                              | TT              | 1946920021               |
| SNP_P4_113701_215175 | NW_004515689.1 | Scaffold99  | 215175                  | AA                              | GG              | 1946920023               |
| SNP_P4_113702_215181 | NW_004515689.1 | Scaffold99  | 215181                  | TT                              | CC              | 1946920025               |
| SNP_P4_113704_215569 | NW_004515689.1 | Scaffold99  | 215569                  | GG                              | AA              | 1946920027               |
| SNP_P4_113705_223287 | NW_004515689.1 | Scaffold99  | 223287                  | TT                              | CC              | 1946920029               |
| SNP_P4_113706_225128 | NW_004515689.1 | Scaffold99  | 225128                  | CC                              | TT              | 1946920031               |
| SNP_P4_113707_225149 | NW_004515689.1 | Scaffold99  | 225149                  | TT                              | CC              | 1946920033               |
| SNP_P4_113708_225150 | NW_004515689.1 | Scaffold99  | 225150                  | TT                              | AA              | 1946920035               |
| SNP_P4_113709_241968 | NW_004515689.1 | Scaffold99  | 241968                  | GG                              | AA              | 1946920037               |
| SNP_P4_113710_9156   | NW_004515690.1 | Scaffold100 | 9156                    | TT                              | CC              | 1946920039               |
| SNP_P4_113711_9160   | NW_004515690.1 | Scaffold100 | 9160                    | CC                              | GG              | 1946920041               |
| SNP_P4_113712_9180   | NW_004515690.1 | Scaffold100 | 9180                    | GG                              | TT              | 1946920043               |
| SNP_P4_113713_9189   | NW_004515690.1 | Scaffold100 | 9189                    | CC                              | TT              | 1946920045               |
| SNP_P4_113714_9243   | NW_004515690.1 | Scaffold100 | 9243                    | AA                              | TT              | 1946920048               |
| SNP_P4_113715_9413   | NW_004515690.1 | Scaffold100 | 9413                    | AA                              | GG              | 1946920050               |
| SNP_P4_113716_9616   | NW_004515690.1 | Scaffold100 | 9616                    | TT                              | CC              | 1946920052               |
| SNP_P4_113717_9658   | NW_004515690.1 | Scaffold100 | 9658                    | CC                              | TT              | 1946920054               |
| SNP_P4_113718_12636  | NW_004515690.1 | Scaffold100 | 12636                   | CC                              | TT              | 1946920056               |
| SNP_P4_113719_13058  | NW_004515690.1 | Scaffold100 | 13058                   | TT                              | GG              | 1946920058               |
| SNP_P4_113720_13107  | NW_004515690.1 | Scaffold100 | 13107                   | TT                              | AA              | 1946920060               |
| SNP_P4_113721_14030  | NW_004515690.1 | Scaffold100 | 14030                   | TT                              | AA              | 1946920062               |
| SNP_P4_113722_18759  | NW_004515690.1 | Scaffold100 | 18759                   | GG                              | AA              | 1946920064               |
| SNP_P4_113723_18777  | NW_004515690.1 | Scaffold100 | 18777                   | CC                              | TT              | 1946920066               |
| SNP_P4_113724_18779  | NW_004515690.1 | Scaffold100 | 18779                   | AA                              | GG              | 1946920068               |
| SNP_P4_113725_18783  | NW_004515690.1 | Scaffold100 | 18783                   | TT                              | CC              | 1946920070               |
| SNP_P4_113726_18789  | NW_004515690.1 | Scaffold100 | 18789                   | GG                              | AA              | 1946920072               |
| SNP_P4_113727_18793  | NW_004515690.1 | Scaffold100 | 18793                   | TT                              | GG              | 1946920074               |

| SNPs IDs             | Chromosome IDs | Chromosomes   | Physical positions (bp) | CDC Frontier (Reference genome) | (ILWC46 & LPNB) | NCBI SNPdb Accession IDs |
|----------------------|----------------|---------------|-------------------------|---------------------------------|-----------------|--------------------------|
| SNP_P4_113728_18804  | NW_004515690.1 | Scaffold100   | 18804                   | GG                              | CC              | 1946920076               |
| SNP_P4_113729_18809  | NW_004515690.1 | Scaffold100   | 18809                   | AA                              | TT              | 1946920078               |
| SNP_P4_113730_18882  | NW_004515690.1 | Scaffold100   | 18882                   | CC                              | TT              | 1946920080               |
| SNP_P4_113731_19301  | NW_004515690.1 | Scaffold100   | 19301                   | GG                              | TT              | 1946920082               |
| SNP_P4_113732_19643  | NW_004515690.1 | Scaffold100   | 19643                   | GG                              | AA              | 1946920084               |
| SNP_P4_113733_48285  | NW_004515690.1 | Scaffold100   | 48285                   | GG                              | AA              | 1946920086               |
| SNP_P4_113734_53545  | NW_004515690.1 | Scaffold100   | 53545                   | AA                              | GG              | 1946920088               |
| SNP_P4_113735_53550  | NW_004515690.1 | Scaffold100   | 53550                   | TT                              | GG              | 1946920090               |
| SNP_P4_113736_28429  | NW_004515691.1 | Scaffold102   | 28429                   | CC                              | TT              | 1946920092               |
| SNP_P4_113737_53420  | NW_004515691.1 | Scaffold102   | 53420                   | GG                              | TT              | 1946920094               |
| SNP_P4_113738_96224  | NW_004515691.1 | Scaffold102   | 96224                   | CC                              | TT              | 1946920096               |
| SNP_P4_113739_104495 | NW_004515691.1 | Scaffold102   | 104495                  | TT                              | CC              | 1946920098               |
| SNP_P4_113740_104695 | NW_004515691.1 | Scaffold102   | 104695                  | TT                              | CC              | 1946920100               |
| SNP_P4_113741_104842 | NW_004515691.1 | Scaffold102   | 104842                  | CC                              | TT              | 1946920102               |
| SNP_P4_113743_105031 | NW_004515691.1 | Scaffold102   | 105031                  | TT                              | CC              | 1946920105               |
| SNP_P4_113744_105059 | NW_004515691.1 | Scaffold102   | 105059                  | AA                              | GG              | 1946920107               |
| SNP_P4_113745_105064 | NW_004515691.1 | Scaffold102   | 105064                  | CC                              | TT              | 1946920109               |
| SNP_P4_113746_109135 | NW_004515691.1 | Scaffold102   | 109135                  | AA                              | GG              | 1946920111               |
| SNP_P4_113747_142423 | NW_004515691.1 | Scaffold102   | 142423                  | CC                              | AA              | 1946920113               |
| SNP_P4_113748_142424 | NW_004515691.1 | Scaffold102   | 142424                  | AA                              | TT              | 1946920115               |
| SNP_P4_113749_193    | NW_004515692.1 | Scaffold103   | 193                     | AA                              | GG              | 1946920117               |
| SNP_P4_113750_297    | NW_004515692.1 | Scaffold103   | 297                     | TT                              | GG              | 1946920119               |
| SNP_P4_113751_110    | NW_004515693.1 | Scaffold106   | 110                     | TT                              | GG              | 1946920121               |
| SNP_P4_113752_1198   | NW_004515693.1 | Scaffold106   | 1198                    | CC                              | TT              | 1946920123               |
| SNP_P4_113753_8968   | NW_004515694.1 | Scaffold109_1 | 8968                    | GG                              | TT              | 1946920125               |
| SNP_P4_113754_36400  | NW_004515694.1 | Scaffold109_1 | 36400                   | TT                              | CC              | 1946920127               |
| SNP_P4_113755_37325  | NW_004515694.1 | Scaffold109_1 | 37325                   | AA                              | TT              | 1946920129               |
| SNP_P4_113756_48872  | NW_004515694.1 | Scaffold109_1 | 48872                   | AA                              | GG              | 1946920131               |
| SNP_P4_113758_60582  | NW_004515694.1 | Scaffold109_1 | 60582                   | CC                              | AA              | 1946920133               |
| SNP_P4_113759_60602  | NW_004515694.1 | Scaffold109_1 | 60602                   | AA                              | GG              | 1946920135               |
| SNP_P4_113760_60729  | NW_004515694.1 | Scaffold109_1 | 60729                   | AA                              | CC              | 1946920137               |
| SNP_P4_113761_60768  | NW_004515694.1 | Scaffold109_1 | 60768                   | AA                              | GG              | 1946920139               |
| SNP_P4_113762_60778  | NW_004515694.1 | Scaffold109_1 | 60778                   | TT                              | GG              | 1946920141               |
| SNP_P4_113763_60798  | NW_004515694.1 | Scaffold109_1 | 60798                   | AA                              | CC              | 1946920143               |
| SNP_P4_113764_60837  | NW_004515694.1 | Scaffold109_1 | 60837                   | AA                              | CC              | 1946920145               |
| SNP_P4_113765_60840  | NW_004515694.1 | Scaffold109_1 | 60840                   | TT                              | CC              | 1946920148               |
| SNP_P4_113766_60850  | NW_004515694.1 | Scaffold109_1 | 60850                   | AA                              | TT              | 1946920150               |
| SNP_P4_113767_60888  | NW_004515694.1 | Scaffold109_1 | 60888                   | TT                              | CC              | 1946920152               |
| SNP_P4_113768_60922  | NW_004515694.1 | Scaffold109_1 | 60922                   | GG                              | AA              | 1946920154               |
| SNP_P4_113769_60945  | NW_004515694.1 | Scaffold109_1 | 60945                   | TT                              | CC              | 1946920156               |
| SNP_P4_113770_60970  | NW_004515694.1 | Scaffold109_1 | 60970                   | TT                              | AA              | 1946920158               |
| SNP_P4_113771_61024  | NW_004515694.1 | Scaffold109_1 | 61024                   | CC                              | TT              | 1946920160               |

| SNPs IDs             | Chromosome IDs | Chromosomes   | Physical positions (bp) | CDC Frontier (Reference genome) | (ILWC46 & LPNB) | NCBI SNPdb Accession IDs |
|----------------------|----------------|---------------|-------------------------|---------------------------------|-----------------|--------------------------|
| SNP_P4_113772_61030  | NW_004515694.1 | Scaffold109_1 | 61030                   | GG                              | AA              | 1946920162               |
| SNP_P4_113773_61033  | NW_004515694.1 | Scaffold109_1 | 61033                   | CC                              | TT              | 1946920164               |
| SNP_P4_113774_61051  | NW_004515694.1 | Scaffold109_1 | 61051                   | AA                              | CC              | 1946920166               |
| SNP_P4_113775_61054  | NW_004515694.1 | Scaffold109_1 | 61054                   | AA                              | TT              | 1946920168               |
| SNP_P4_113776_61114  | NW_004515694.1 | Scaffold109_1 | 61114                   | TT                              | CC              | 1946920170               |
| SNP_P4_113777_61159  | NW_004515694.1 | Scaffold109_1 | 61159                   | GG                              | AA              | 1946920172               |
| SNP_P4_113778_66745  | NW_004515694.1 | Scaffold109_1 | 66745                   | CC                              | TT              | 1946920174               |
| SNP_P4_113779_66764  | NW_004515694.1 | Scaffold109_1 | 66764                   | GG                              | CC              | 1946920176               |
| SNP_P4_113780_95531  | NW_004515694.1 | Scaffold109_1 | 95531                   | GG                              | TT              | 1946920178               |
| SNP_P4_113781_96034  | NW_004515694.1 | Scaffold109_1 | 96034                   | TT                              | GG              | 1946920181               |
| SNP_P4_113782_96036  | NW_004515694.1 | Scaffold109_1 | 96036                   | TT                              | CC              | 1946920183               |
| SNP_P4_113783_96037  | NW_004515694.1 | Scaffold109_1 | 96037                   | CC                              | TT              | 1946920185               |
| SNP_P4_113784_96056  | NW_004515694.1 | Scaffold109_1 | 96056                   | GG                              | AA              | 1946920187               |
| SNP_P4_113785_105052 | NW_004515694.1 | Scaffold109_1 | 105052                  | CC                              | TT              | 1946920189               |
| SNP_P4_113786_112269 | NW_004515694.1 | Scaffold109_1 | 112269                  | AA                              | GG              | 1946920191               |
| SNP_P4_113787_122729 | NW_004515694.1 | Scaffold109_1 | 122729                  | TT                              | GG              | 1946920193               |
| SNP_P4_113788_123646 | NW_004515694.1 | Scaffold109_1 | 123646                  | GG                              | AA              | 1946920195               |
| SNP_P4_113790_137387 | NW_004515694.1 | Scaffold109_1 | 137387                  | TT                              | CC              | 1946920197               |
| SNP_P4_113791_138883 | NW_004515694.1 | Scaffold109_1 | 138883                  | TT                              | AA              | 1946920199               |
| SNP_P4_113792_149929 | NW_004515694.1 | Scaffold109_1 | 149929                  | GG                              | AA              | 1946920201               |
| SNP_P4_113793_153676 | NW_004515694.1 | Scaffold109_1 | 153676                  | AA                              | CC              | 1946920203               |
| SNP_P4_113794_153686 | NW_004515694.1 | Scaffold109_1 | 153686                  | AA                              | TT              | 1946920205               |
| SNP_P4_113795_153753 | NW_004515694.1 | Scaffold109_1 | 153753                  | GG                              | CC              | 1946920207               |
| SNP_P4_113796_153767 | NW_004515694.1 | Scaffold109_1 | 153767                  | TT                              | GG              | 1946920209               |
| SNP_P4_113797_154138 | NW_004515694.1 | Scaffold109_1 | 154138                  | GG                              | AA              | 1946920211               |
| SNP_P4_113798_155577 | NW_004515694.1 | Scaffold109_1 | 155577                  | TT                              | CC              | 1946920213               |
| SNP_P4_113800_160411 | NW_004515694.1 | Scaffold109_1 | 160411                  | TT                              | CC              | 1946920215               |
| SNP_P4_113801_160414 | NW_004515694.1 | Scaffold109_1 | 160414                  | TT                              | CC              | 1946920217               |
| SNP_P4_113802_161506 | NW_004515694.1 | Scaffold109_1 | 161506                  | TT                              | AA              | 1946920219               |
| SNP_P4_113805_210984 | NW_004515694.1 | Scaffold109_1 | 210984                  | TT                              | CC              | 1946920221               |
| SNP_P4_113806_245825 | NW_004515694.1 | Scaffold109_1 | 245825                  | AA                              | GG              | 1946920223               |
| SNP_P4_113807_245826 | NW_004515694.1 | Scaffold109_1 | 245826                  | AA                              | CC              | 1946920225               |
| SNP_P4_113808_246815 | NW_004515694.1 | Scaffold109_1 | 246815                  | AA                              | GG              | 1946920227               |
| SNP_P4_113809_246827 | NW_004515694.1 | Scaffold109_1 | 246827                  | CC                              | GG              | 1946920229               |
| SNP_P4_113810_246847 | NW_004515694.1 | Scaffold109_1 | 246847                  | TT                              | GG              | 1946920231               |
| SNP_P4_113811_246922 | NW_004515694.1 | Scaffold109_1 | 246922                  | AA                              | GG              | 1946920233               |
| SNP_P4_113812_246924 | NW_004515694.1 | Scaffold109_1 | 246924                  | GG                              | AA              | 1946920235               |
| SNP_P4_113813_246946 | NW_004515694.1 | Scaffold109_1 | 246946                  | TT                              | GG              | 1946920237               |
| SNP_P4_113814_246970 | NW_004515694.1 | Scaffold109_1 | 246970                  | CC                              | TT              | 1946920239               |
| SNP_P4_113815_247276 | NW_004515694.1 | Scaffold109_1 | 247276                  | AA                              | CC              | 1946920241               |
| SNP_P4_113816_247313 | NW_004515694.1 | Scaffold109_1 | 247313                  | TT                              | CC              | 1946920243               |
| SNP_P4_113817_247607 | NW_004515694.1 | Scaffold109_1 | 247607                  | TT                              | AA              | 1946920245               |

| SNPs IDs             | Chromosome IDs | Chromosomes   | Physical positions (bp) | CDC Frontier (Reference genome) | (ILWC46 & LPNB) | NCBI SNPdb Accession IDs |
|----------------------|----------------|---------------|-------------------------|---------------------------------|-----------------|--------------------------|
| SNP_P4_113818_247623 | NW_004515694.1 | Scaffold109_1 | 247623                  | AA                              | GG              | 1946920247               |
| SNP_P4_113819_248646 | NW_004515694.1 | Scaffold109_1 | 248646                  | AA                              | GG              | 1946920249               |
| SNP_P4_113821_248900 | NW_004515694.1 | Scaffold109_1 | 248900                  | AA                              | GG              | 1946920252               |
| SNP_P4_113822_277293 | NW_004515694.1 | Scaffold109_1 | 277293                  | AA                              | GG              | 1946920254               |
| SNP_P4_113823_277552 | NW_004515694.1 | Scaffold109_1 | 277552                  | AA                              | GG              | 1946920256               |
| SNP_P4_113824_281969 | NW_004515694.1 | Scaffold109_1 | 281969                  | CC                              | TT              | 1946920258               |
| SNP_P4_113825_282662 | NW_004515694.1 | Scaffold109_1 | 282662                  | GG                              | AA              | 1946920260               |
| SNP_P4_113826_314185 | NW_004515694.1 | Scaffold109_1 | 314185                  | TT                              | CC              | 1946920262               |
| SNP_P4_113827_322992 | NW_004515694.1 | Scaffold109_1 | 322992                  | GG                              | AA              | 1946920264               |
| SNP_P4_113828_336468 | NW_004515694.1 | Scaffold109_1 | 336468                  | TT                              | CC              | 1946920266               |
| SNP_P4_113829_421233 | NW_004515694.1 | Scaffold109_1 | 421233                  | CC                              | TT              | 1946920268               |
| SNP_P4_113830_450994 | NW_004515694.1 | Scaffold109_1 | 450994                  | CC                              | TT              | 1946920270               |
| SNP_P4_113833_474741 | NW_004515694.1 | Scaffold109_1 | 474741                  | TT                              | CC              | 1946920272               |
| SNP_P4_113835_495785 | NW_004515694.1 | Scaffold109_1 | 495785                  | TT                              | CC              | 1946920274               |
| SNP_P4_113836_504436 | NW_004515694.1 | Scaffold109_1 | 504436                  | GG                              | AA              | 1946920276               |
| SNP_P4_113837_504517 | NW_004515694.1 | Scaffold109_1 | 504517                  | TT                              | CC              | 1946920278               |
| SNP_P4_113838_504541 | NW_004515694.1 | Scaffold109_1 | 504541                  | AA                              | TT              | 1946920280               |
| SNP_P4_113839_504855 | NW_004515694.1 | Scaffold109_1 | 504855                  | AA                              | CC              | 1946920282               |
| SNP_P4_113840_504878 | NW_004515694.1 | Scaffold109_1 | 504878                  | GG                              | TT              | 1946920284               |
| SNP_P4_113841_504879 | NW_004515694.1 | Scaffold109_1 | 504879                  | TT                              | AA              | 1946920286               |
| SNP_P4_113842_504932 | NW_004515694.1 | Scaffold109_1 | 504932                  | AA                              | GG              | 1946920288               |
| SNP_P4_113843_504936 | NW_004515694.1 | Scaffold109_1 | 504936                  | TT                              | CC              | 1946920290               |
| SNP_P4_113844_504939 | NW_004515694.1 | Scaffold109_1 | 504939                  | TT                              | GG              | 1946920292               |
| SNP_P4_113845_517901 | NW_004515694.1 | Scaffold109_1 | 517901                  | CC                              | TT              | 1946920294               |
| SNP_P4_113848_569506 | NW_004515694.1 | Scaffold109_1 | 569506                  | AA                              | GG              | 1946920296               |
| SNP_P4_113849_569507 | NW_004515694.1 | Scaffold109_1 | 569507                  | TT                              | CC              | 1946920298               |
| SNP_P4_113850_580850 | NW_004515694.1 | Scaffold109_1 | 580850                  | AA                              | CC              | 1946920300               |
| SNP_P4_113851_593661 | NW_004515694.1 | Scaffold109_1 | 593661                  | TT                              | GG              | 1946920302               |
| SNP_P4_113852_618759 | NW_004515694.1 | Scaffold109_1 | 618759                  | TT                              | CC              | 1946920304               |
| SNP_P4_113854_647666 | NW_004515694.1 | Scaffold109_1 | 647666                  | AA                              | GG              | 1946920306               |
| SNP_P4_113855_654244 | NW_004515694.1 | Scaffold109_1 | 654244                  | TT                              | CC              | 1946920308               |
| SNP_P4_113856_654265 | NW_004515694.1 | Scaffold109_1 | 654265                  | GG                              | AA              | 1946920310               |
| SNP_P4_113857_654327 | NW_004515694.1 | Scaffold109_1 | 654327                  | AA                              | GG              | 1946920312               |
| SNP_P4_113858_654336 | NW_004515694.1 | Scaffold109_1 | 654336                  | AA                              | CC              | 1946920314               |
| SNP_P4_113860_668720 | NW_004515694.1 | Scaffold109_1 | 668720                  | GG                              | AA              | 1946920316               |
| SNP_P4_113861_670594 | NW_004515694.1 | Scaffold109_1 | 670594                  | AA                              | GG              | 1946920318               |
| SNP_P4_113862_670597 | NW_004515694.1 | Scaffold109_1 | 670597                  | TT                              | AA              | 1946920320               |
| SNP_P4_113863_684956 | NW_004515694.1 | Scaffold109_1 | 684956                  | AA                              | GG              | 1946920322               |
| SNP_P4_113864_691466 | NW_004515694.1 | Scaffold109_1 | 691466                  | TT                              | CC              | 1946920324               |
| SNP_P4_113865_724762 | NW_004515694.1 | Scaffold109_1 | 724762                  | CC                              | TT              | 1946920326               |
| SNP_P4_113866_772896 | NW_004515694.1 | Scaffold109_1 | 772896                  | TT                              | CC              | 1946920328               |
| SNP_P4_113867_776929 | NW_004515694.1 | Scaffold109_1 | 776929                  | TT                              | CC              | 1946920330               |

| SNPs IDs             | Chromosome IDs | Chromosomes   | Physical positions (bp) | CDC Frontier (Reference genome) | (ILWC46 & LPNB) | NCBI SNPdb Accession IDs |
|----------------------|----------------|---------------|-------------------------|---------------------------------|-----------------|--------------------------|
| SNP_P4_113868_780452 | NW_004515694.1 | Scaffold109_1 | 780452                  | CC                              | AA              | 1946920332               |
| SNP_P4_113869_788133 | NW_004515694.1 | Scaffold109_1 | 788133                  | TT                              | AA              | 1946920334               |
| SNP_P4_113870_788134 | NW_004515694.1 | Scaffold109_1 | 788134                  | TT                              | AA              | 1946920336               |
| SNP_P4_113871_793421 | NW_004515694.1 | Scaffold109_1 | 793421                  | TT                              | GG              | 1946920338               |
| SNP_P4_113872_793422 | NW_004515694.1 | Scaffold109_1 | 793422                  | AA                              | GG              | 1946920340               |
| SNP_P4_113874_802545 | NW_004515694.1 | Scaffold109_1 | 802545                  | TT                              | AA              | 1946920342               |
| SNP_P4_113875_810599 | NW_004515694.1 | Scaffold109_1 | 810599                  | AA                              | CC              | 1946920344               |
| SNP_P4_113876_826784 | NW_004515694.1 | Scaffold109_1 | 826784                  | TT                              | AA              | 1946920346               |
| SNP_P4_113877_837111 | NW_004515694.1 | Scaffold109_1 | 837111                  | GG                              | AA              | 1946920348               |
| SNP_P4_113878_837630 | NW_004515694.1 | Scaffold109_1 | 837630                  | TT                              | AA              | 1946920350               |
| SNP_P4_113879_6067   | NW_004515695.1 | Scaffold110   | 6067                    | TT                              | CC              | 1946920352               |
| SNP_P4_113880_99885  | NW_004515696.1 | Scaffold111   | 99885                   | CC                              | AA              | 1946920354               |
| SNP_P4_113881_99886  | NW_004515696.1 | Scaffold111   | 99886                   | CC                              | AA              | 1946920356               |
| SNP_P4_113882_99887  | NW_004515696.1 | Scaffold111   | 99887                   | TT                              | CC              | 1946920358               |
| SNP_P4_113883_99889  | NW_004515696.1 | Scaffold111   | 99889                   | CC                              | AA              | 1946920360               |
| SNP_P4_113884_99891  | NW_004515696.1 | Scaffold111   | 99891                   | CC                              | GG              | 1946920362               |
| SNP_P4_113885_99919  | NW_004515696.1 | Scaffold111   | 99919                   | TT                              | CC              | 1946920364               |
| SNP_P4_113886_99929  | NW_004515696.1 | Scaffold111   | 99929                   | AA                              | GG              | 1946920366               |
| SNP_P4_113887_110620 | NW_004515696.1 | Scaffold111   | 110620                  | TT                              | CC              | 1946920368               |
| SNP_P4_113888_131494 | NW_004515696.1 | Scaffold111   | 131494                  | TT                              | GG              | 1946920370               |
| SNP_P4_113889_131495 | NW_004515696.1 | Scaffold111   | 131495                  | TT                              | CC              | 1946920372               |
| SNP_P4_113890_3672   | NW_004515697.1 | Scaffold113   | 3672                    | TT                              | AA              | 1946920374               |
| SNP_P4_113891_4037   | NW_004515697.1 | Scaffold113   | 4037                    | TT                              | CC              | 1946920376               |
| SNP_P4_113892_4188   | NW_004515697.1 | Scaffold113   | 4188                    | AA                              | TT              | 1946920378               |
| SNP_P4_113893_4196   | NW_004515697.1 | Scaffold113   | 4196                    | AA                              | TT              | 1946920380               |
| SNP_P4_113894_1340   | NW_004515698.1 | Scaffold114   | 1340                    | AA                              | TT              | 1946920382               |
| SNP_P4_113895_1341   | NW_004515698.1 | Scaffold114   | 1341                    | GG                              | AA              | 1946920384               |
| SNP_P4_113896_1365   | NW_004515698.1 | Scaffold114   | 1365                    | AA                              | TT              | 1946920386               |
| SNP_P4_113897_5106   | NW_004515699.1 | Scaffold115   | 5106                    | CC                              | GG              | 1946920388               |
| SNP_P4_113898_8790   | NW_004515699.1 | Scaffold115   | 8790                    | CC                              | AA              | 1946920390               |
| SNP_P4_113899_8817   | NW_004515699.1 | Scaffold115   | 8817                    | GG                              | AA              | 1946920392               |
| SNP_P4_113900_9938   | NW_004515699.1 | Scaffold115   | 9938                    | GG                              | TT              | 1946920394               |
| SNP_P4_113901_28542  | NW_004515699.1 | Scaffold115   | 28542                   | AA                              | CC              | 1946920396               |
| SNP_P4_113902_37365  | NW_004515699.1 | Scaffold115   | 37365                   | TT                              | AA              | 1946920398               |
| SNP_P4_113903_37367  | NW_004515699.1 | Scaffold115   | 37367                   | TT                              | CC              | 1946920400               |
| SNP_P4_113904_45624  | NW_004515699.1 | Scaffold115   | 45624                   | AA                              | GG              | 1946920402               |
| SNP_P4_113905_51824  | NW_004515699.1 | Scaffold115   | 51824                   | GG                              | AA              | 1946920404               |
| SNP_P4_113906_52045  | NW_004515699.1 | Scaffold115   | 52045                   | CC                              | GG              | 1946920406               |
| SNP_P4_113908_52231  | NW_004515699.1 | Scaffold115   | 52231                   | TT                              | AA              | 1946920408               |
| SNP_P4_113909_52249  | NW_004515699.1 | Scaffold115   | 52249                   | TT                              | CC              | 1946920410               |
| SNP_P4_113910_52259  | NW_004515699.1 | Scaffold115   | 52259                   | AA                              | CC              | 1946920412               |
| SNP_P4_113911_52360  | NW_004515699.1 | Scaffold115   | 52360                   | CC                              | TT              | 1946920414               |



| SNPs IDs             | Chromosome IDs | Chromosomes | Physical positions (bp) | CDC Frontier (Reference genome) | (ILWC46 & LPNB) | NCBI SNPdb Accession IDs |
|----------------------|----------------|-------------|-------------------------|---------------------------------|-----------------|--------------------------|
| SNP_P4_113912_52400  | NW_004515699.1 | Scaffold115 | 52400                   | CC                              | AA              | 1946920416               |
| SNP_P4_113913_52459  | NW_004515699.1 | Scaffold115 | 52459                   | CC                              | AA              | 1946920418               |
| SNP_P4_113914_52467  | NW_004515699.1 | Scaffold115 | 52467                   | TT                              | AA              | 1946920420               |
| SNP_P4_113915_52468  | NW_004515699.1 | Scaffold115 | 52468                   | AA                              | GG              | 1946920422               |
| SNP_P4_113916_52551  | NW_004515699.1 | Scaffold115 | 52551                   | GG                              | TT              | 1946920424               |
| SNP_P4_113917_52664  | NW_004515699.1 | Scaffold115 | 52664                   | AA                              | CC              | 1946920426               |
| SNP_P4_113918_52824  | NW_004515699.1 | Scaffold115 | 52824                   | AA                              | GG              | 1946920428               |
| SNP_P4_113919_52827  | NW_004515699.1 | Scaffold115 | 52827                   | GG                              | AA              | 1946920430               |
| SNP_P4_113920_52939  | NW_004515699.1 | Scaffold115 | 52939                   | CC                              | TT              | 1946920432               |
| SNP_P4_113921_52984  | NW_004515699.1 | Scaffold115 | 52984                   | GG                              | AA              | 1946920434               |
| SNP_P4_113922_52993  | NW_004515699.1 | Scaffold115 | 52993                   | TT                              | AA              | 1946920436               |
| SNP_P4_113923_53073  | NW_004515699.1 | Scaffold115 | 53073                   | TT                              | GG              | 1946920438               |
| SNP_P4_113924_56838  | NW_004515699.1 | Scaffold115 | 56838                   | AA                              | CC              | 1946920440               |
| SNP_P4_113925_26891  | NW_004515700.1 | Scaffold118 | 26891                   | CC                              | AA              | 1946920442               |
| SNP_P4_113926_26926  | NW_004515700.1 | Scaffold118 | 26926                   | CC                              | GG              | 1946920444               |
| SNP_P4_113927_27226  | NW_004515700.1 | Scaffold118 | 27226                   | AA                              | GG              | 1946920446               |
| SNP_P4_113928_27241  | NW_004515700.1 | Scaffold118 | 27241                   | AA                              | GG              | 1946920448               |
| SNP_P4_113929_30092  | NW_004515700.1 | Scaffold118 | 30092                   | AA                              | GG              | 1946920450               |
| SNP_P4_113930_30169  | NW_004515700.1 | Scaffold118 | 30169                   | AA                              | GG              | 1946920452               |
| SNP_P4_113931_30496  | NW_004515700.1 | Scaffold118 | 30496                   | GG                              | AA              | 1946920454               |
| SNP_P4_113932_30534  | NW_004515700.1 | Scaffold118 | 30534                   | AA                              | GG              | 1946920456               |
| SNP_P4_113933_30566  | NW_004515700.1 | Scaffold118 | 30566                   | TT                              | CC              | 1946920458               |
| SNP_P4_113934_30642  | NW_004515700.1 | Scaffold118 | 30642                   | AA                              | GG              | 1946920460               |
| SNP_P4_113935_30655  | NW_004515700.1 | Scaffold118 | 30655                   | TT                              | CC              | 1946920462               |
| SNP_P4_113936_54488  | NW_004515700.1 | Scaffold118 | 54488                   | TT                              | GG              | 1946920464               |
| SNP_P4_113937_59779  | NW_004515700.1 | Scaffold118 | 59779                   | AA                              | CC              | 1946920467               |
| SNP_P4_113939_80598  | NW_004515700.1 | Scaffold118 | 80598                   | GG                              | AA              | 1946920469               |
| SNP_P4_113941_113345 | NW_004515700.1 | Scaffold118 | 113345                  | CC                              | TT              | 1946920471               |
| SNP_P4_113942_113357 | NW_004515700.1 | Scaffold118 | 113357                  | CC                              | TT              | 1946920473               |
| SNP_P4_113943_113452 | NW_004515700.1 | Scaffold118 | 113452                  | TT                              | CC              | 1946920475               |
| SNP_P4_113944_113471 | NW_004515700.1 | Scaffold118 | 113471                  | TT                              | CC              | 1946920477               |
| SNP_P4_113945_113495 | NW_004515700.1 | Scaffold118 | 113495                  | CC                              | TT              | 1946920479               |
| SNP_P4_113946_118255 | NW_004515700.1 | Scaffold118 | 118255                  | CC                              | AA              | 1946920481               |
| SNP_P4_113947_118269 | NW_004515700.1 | Scaffold118 | 118269                  | GG                              | AA              | 1946920483               |
| SNP_P4_113948_118597 | NW_004515700.1 | Scaffold118 | 118597                  | GG                              | AA              | 1946920485               |
| SNP_P4_113949_118625 | NW_004515700.1 | Scaffold118 | 118625                  | TT                              | AA              | 1946920487               |
| SNP_P4_113951_152723 | NW_004515700.1 | Scaffold118 | 152723                  | CC                              | TT              | 1946920489               |
| SNP_P4_113952_152787 | NW_004515700.1 | Scaffold118 | 152787                  | TT                              | GG              | 1946920492               |
| SNP_P4_113953_152809 | NW_004515700.1 | Scaffold118 | 152809                  | TT                              | GG              | 1946920494               |
| SNP_P4_113954_171253 | NW_004515700.1 | Scaffold118 | 171253                  | TT                              | AA              | 1946920496               |
| SNP_P4_113955_171646 | NW_004515700.1 | Scaffold118 | 171646                  | GG                              | AA              | 1946920498               |
| SNP_P4_113956_173131 | NW_004515700.1 | Scaffold118 | 173131                  | CC                              | TT              | 1946920500               |

| SNPs IDs             | Chromosome IDs | Chromosomes | Physical positions (bp) | CDC Frontier (Reference genome) | (ILWC46 & LPNB) | NCBI SNPdb Accession IDs |
|----------------------|----------------|-------------|-------------------------|---------------------------------|-----------------|--------------------------|
| SNP_P4_113957_173500 | NW_004515700.1 | Scaffold118 | 173500                  | AA                              | TT              | 1946920502               |
| SNP_P4_113959_178466 | NW_004515700.1 | Scaffold118 | 178466                  | CC                              | TT              | 1946920504               |
| SNP_P4_113960_178471 | NW_004515700.1 | Scaffold118 | 178471                  | AA                              | GG              | 1946920506               |
| SNP_P4_113961_178477 | NW_004515700.1 | Scaffold118 | 178477                  | AA                              | GG              | 1946920508               |
| SNP_P4_113962_178594 | NW_004515700.1 | Scaffold118 | 178594                  | GG                              | AA              | 1946920510               |
| SNP_P4_113963_178861 | NW_004515700.1 | Scaffold118 | 178861                  | GG                              | TT              | 1946920512               |
| SNP_P4_113964_188054 | NW_004515700.1 | Scaffold118 | 188054                  | GG                              | AA              | 1946920514               |
| SNP_P4_113966_189274 | NW_004515700.1 | Scaffold118 | 189274                  | TT                              | GG              | 1946920516               |
| SNP_P4_113967_228575 | NW_004515700.1 | Scaffold118 | 228575                  | CC                              | TT              | 1946920518               |
| SNP_P4_113968_254846 | NW_004515700.1 | Scaffold118 | 254846                  | CC                              | AA              | 1946920520               |
| SNP_P4_113969_273624 | NW_004515700.1 | Scaffold118 | 273624                  | TT                              | CC              | 1946920522               |
| SNP_P4_113970_325953 | NW_004515700.1 | Scaffold118 | 325953                  | TT                              | CC              | 1946920524               |
| SNP_P4_113971_394961 | NW_004515700.1 | Scaffold118 | 394961                  | GG                              | AA              | 1946920526               |
| SNP_P4_113972_444973 | NW_004515700.1 | Scaffold118 | 444973                  | GG                              | AA              | 1946920528               |
| SNP_P4_113973_461130 | NW_004515700.1 | Scaffold118 | 461130                  | AA                              | GG              | 1946920530               |
| SNP_P4_113974_461150 | NW_004515700.1 | Scaffold118 | 461150                  | CC                              | TT              | 1946920532               |
| SNP_P4_113975_461367 | NW_004515700.1 | Scaffold118 | 461367                  | CC                              | TT              | 1946920534               |
| SNP_P4_113976_463089 | NW_004515700.1 | Scaffold118 | 463089                  | AA                              | TT              | 1946920536               |
| SNP_P4_113977_463287 | NW_004515700.1 | Scaffold118 | 463287                  | GG                              | AA              | 1946920538               |
| SNP_P4_113978_463288 | NW_004515700.1 | Scaffold118 | 463288                  | AA                              | TT              | 1946920540               |
| SNP_P4_113979_463296 | NW_004515700.1 | Scaffold118 | 463296                  | TT                              | GG              | 1946920542               |
| SNP_P4_113980_463346 | NW_004515700.1 | Scaffold118 | 463346                  | TT                              | CC              | 1946920544               |
| SNP_P4_113981_463349 | NW_004515700.1 | Scaffold118 | 463349                  | CC                              | TT              | 1946920546               |
| SNP_P4_113982_463380 | NW_004515700.1 | Scaffold118 | 463380                  | CC                              | GG              | 1946920548               |
| SNP_P4_113983_463441 | NW_004515700.1 | Scaffold118 | 463441                  | TT                              | AA              | 1946920550               |
| SNP_P4_113984_465492 | NW_004515700.1 | Scaffold118 | 465492                  | TT                              | CC              | 1946920552               |
| SNP_P4_113985_465537 | NW_004515700.1 | Scaffold118 | 465537                  | CC                              | AA              | 1946920554               |
| SNP_P4_113986_465864 | NW_004515700.1 | Scaffold118 | 465864                  | CC                              | TT              | 1946920556               |
| SNP_P4_113987_465896 | NW_004515700.1 | Scaffold118 | 465896                  | CC                              | GG              | 1946920558               |
| SNP_P4_113988_466136 | NW_004515700.1 | Scaffold118 | 466136                  | TT                              | CC              | 1946920560               |
| SNP_P4_113989_473241 | NW_004515700.1 | Scaffold118 | 473241                  | AA                              | GG              | 1946920562               |
| SNP_P4_113990_516005 | NW_004515700.1 | Scaffold118 | 516005                  | CC                              | TT              | 1946920564               |
| SNP_P4_113991_518881 | NW_004515700.1 | Scaffold118 | 518881                  | CC                              | AA              | 1946920566               |
| SNP_P4_113992_518884 | NW_004515700.1 | Scaffold118 | 518884                  | TT                              | AA              | 1946920568               |
| SNP_P4_113993_518887 | NW_004515700.1 | Scaffold118 | 518887                  | TT                              | GG              | 1946920570               |
| SNP_P4_113994_518892 | NW_004515700.1 | Scaffold118 | 518892                  | TT                              | AA              | 1946920572               |
| SNP_P4_113995_521255 | NW_004515700.1 | Scaffold118 | 521255                  | AA                              | GG              | 1946920574               |
| SNP_P4_113996_526828 | NW_004515700.1 | Scaffold118 | 526828                  | AA                              | GG              | 1946920576               |
| SNP_P4_113997_543524 | NW_004515700.1 | Scaffold118 | 543524                  | GG                              | AA              | 1946920578               |
| SNP_P4_113998_544403 | NW_004515700.1 | Scaffold118 | 544403                  | AA                              | GG              | 1946920580               |
| SNP_P4_113999_549965 | NW_004515700.1 | Scaffold118 | 549965                  | TT                              | CC              | 1946920582               |
| SNP_P4_114000_549971 | NW_004515700.1 | Scaffold118 | 549971                  | GG                              | AA              | 1946920584               |

| SNPs IDs             | Chromosome IDs | Chromosomes | Physical positions (bp) | CDC Frontier (Reference genome) | (ILWC46 & LPNB) | NCBI SNPdb Accession IDs |
|----------------------|----------------|-------------|-------------------------|---------------------------------|-----------------|--------------------------|
| SNP_P4_114001_554065 | NW_004515700.1 | Scaffold118 | 554065                  | GG                              | AA              | 1946920586               |
| SNP_P4_114002_554208 | NW_004515700.1 | Scaffold118 | 554208                  | AA                              | GG              | 1946920588               |
| SNP_P4_114003_554214 | NW_004515700.1 | Scaffold118 | 554214                  | AA                              | GG              | 1946920590               |
| SNP_P4_114004_554220 | NW_004515700.1 | Scaffold118 | 554220                  | CC                              | TT              | 1946920592               |
| SNP_P4_114005_554227 | NW_004515700.1 | Scaffold118 | 554227                  | TT                              | CC              | 1946920594               |
| SNP_P4_114006_554547 | NW_004515700.1 | Scaffold118 | 554547                  | CC                              | TT              | 1946920596               |
| SNP_P4_114007_554588 | NW_004515700.1 | Scaffold118 | 554588                  | CC                              | TT              | 1946920598               |
| SNP_P4_114008_557857 | NW_004515700.1 | Scaffold118 | 557857                  | TT                              | GG              | 1946920600               |
| SNP_P4_114009_560636 | NW_004515700.1 | Scaffold118 | 560636                  | TT                              | CC              | 1946920602               |
| SNP_P4_114010_560715 | NW_004515700.1 | Scaffold118 | 560715                  | AA                              | TT              | 1946920604               |
| SNP_P4_114011_560885 | NW_004515700.1 | Scaffold118 | 560885                  | GG                              | AA              | 1946920606               |
| SNP_P4_114012_560886 | NW_004515700.1 | Scaffold118 | 560886                  | GG                              | CC              | 1946920608               |
| SNP_P4_114013_560891 | NW_004515700.1 | Scaffold118 | 560891                  | AA                              | GG              | 1946920610               |
| SNP_P4_114014_560917 | NW_004515700.1 | Scaffold118 | 560917                  | GG                              | AA              | 1946920612               |
| SNP_P4_114015_560930 | NW_004515700.1 | Scaffold118 | 560930                  | CC                              | TT              | 1946920614               |
| SNP_P4_114016_587433 | NW_004515700.1 | Scaffold118 | 587433                  | CC                              | TT              | 1946920616               |
| SNP_P4_114017_592054 | NW_004515700.1 | Scaffold118 | 592054                  | CC                              | AA              | 1946920618               |
| SNP_P4_114019_592442 | NW_004515700.1 | Scaffold118 | 592442                  | CC                              | AA              | 1946920620               |
| SNP_P4_114020_592457 | NW_004515700.1 | Scaffold118 | 592457                  | TT                              | CC              | 1946920622               |
| SNP_P4_114021_592467 | NW_004515700.1 | Scaffold118 | 592467                  | AA                              | CC              | 1946920624               |
| SNP_P4_114022_593072 | NW_004515700.1 | Scaffold118 | 593072                  | GG                              | AA              | 1946920626               |
| SNP_P4_114023_602162 | NW_004515700.1 | Scaffold118 | 602162                  | CC                              | TT              | 1946920628               |
| SNP_P4_114024_642375 | NW_004515700.1 | Scaffold118 | 642375                  | AA                              | CC              | 1946920630               |
| SNP_P4_114025_491    | NW_004515701.1 | Scaffold119 | 491                     | GG                              | AA              | 1946920632               |
| SNP_P4_114026_533    | NW_004515701.1 | Scaffold119 | 533                     | CC                              | AA              | 1946920634               |
| SNP_P4_114027_568    | NW_004515701.1 | Scaffold119 | 568                     | TT                              | CC              | 1946920636               |
| SNP_P4_114028_585    | NW_004515701.1 | Scaffold119 | 585                     | TT                              | CC              | 1946920638               |
| SNP_P4_114029_615    | NW_004515701.1 | Scaffold119 | 615                     | TT                              | GG              | 1946920640               |
| SNP_P4_114030_15344  | NW_004515701.1 | Scaffold119 | 15344                   | AA                              | GG              | 1946920642               |
| SNP_P4_114031_15674  | NW_004515701.1 | Scaffold119 | 15674                   | TT                              | GG              | 1946920644               |
| SNP_P4_114032_16659  | NW_004515701.1 | Scaffold119 | 16659                   | CC                              | AA              | 1946920646               |
| SNP_P4_114033_16902  | NW_004515701.1 | Scaffold119 | 16902                   | GG                              | AA              | 1946920648               |
| SNP_P4_114034_17087  | NW_004515701.1 | Scaffold119 | 17087                   | TT                              | AA              | 1946920650               |
| SNP_P4_114035_17237  | NW_004515701.1 | Scaffold119 | 17237                   | GG                              | AA              | 1946920652               |
| SNP_P4_114036_17437  | NW_004515701.1 | Scaffold119 | 17437                   | GG                              | AA              | 1946920654               |
| SNP_P4_114037_17487  | NW_004515701.1 | Scaffold119 | 17487                   | GG                              | AA              | 1946920656               |
| SNP_P4_114038_17740  | NW_004515701.1 | Scaffold119 | 17740                   | AA                              | GG              | 1946920658               |
| SNP_P4_114039_17977  | NW_004515701.1 | Scaffold119 | 17977                   | AA                              | TT              | 1946920660               |
| SNP_P4_114041_18283  | NW_004515701.1 | Scaffold119 | 18283                   | TT                              | GG              | 1946920662               |
| SNP_P4_114042_18354  | NW_004515701.1 | Scaffold119 | 18354                   | GG                              | CC              | 1946920664               |
| SNP_P4_114043_21688  | NW_004515701.1 | Scaffold119 | 21688                   | TT                              | GG              | 1946920666               |
| SNP_P4_114044_26547  | NW_004515701.1 | Scaffold119 | 26547                   | GG                              | AA              | 1946920668               |

| SNPs IDs            | Chromosome IDs | Chromosomes | Physical positions (bp) | CDC Frontier (Reference genome) | (ILWC46 & LPNB) | NCBI SNPdb Accession IDs |
|---------------------|----------------|-------------|-------------------------|---------------------------------|-----------------|--------------------------|
| SNP_P4_114046_48136 | NW_004515701.1 | Scaffold119 | 48136                   | AA                              | GG              | 1946920670               |
| SNP_P4_114047_48137 | NW_004515701.1 | Scaffold119 | 48137                   | CC                              | TT              | 1946920672               |
| SNP_P4_114048_48164 | NW_004515701.1 | Scaffold119 | 48164                   | TT                              | CC              | 1946920674               |
| SNP_P4_114049_48211 | NW_004515701.1 | Scaffold119 | 48211                   | GG                              | AA              | 1946920676               |
| SNP_P4_114050_48588 | NW_004515701.1 | Scaffold119 | 48588                   | TT                              | CC              | 1946920678               |
| SNP_P4_114051_48605 | NW_004515701.1 | Scaffold119 | 48605                   | AA                              | GG              | 1946920681               |
| SNP_P4_114052_49343 | NW_004515701.1 | Scaffold119 | 49343                   | CC                              | TT              | 1946920683               |
| SNP_P4_114053_49355 | NW_004515701.1 | Scaffold119 | 49355                   | AA                              | GG              | 1946920685               |
| SNP_P4_114054_52777 | NW_004515701.1 | Scaffold119 | 52777                   | TT                              | GG              | 1946920687               |
| SNP_P4_114055_53067 | NW_004515701.1 | Scaffold119 | 53067                   | AA                              | GG              | 1946920689               |
| SNP_P4_114056_53089 | NW_004515701.1 | Scaffold119 | 53089                   | CC                              | TT              | 1946920691               |
| SNP_P4_114058_62321 | NW_004515701.1 | Scaffold119 | 62321                   | TT                              | CC              | 1946920693               |
| SNP_P4_114059_69928 | NW_004515701.1 | Scaffold119 | 69928                   | GG                              | TT              | 1946920695               |
| SNP_P4_114060_70308 | NW_004515701.1 | Scaffold119 | 70308                   | TT                              | CC              | 1946920697               |
| SNP_P4_114061_70336 | NW_004515701.1 | Scaffold119 | 70336                   | CC                              | TT              | 1946920699               |
| SNP_P4_114063_70851 | NW_004515701.1 | Scaffold119 | 70851                   | AA                              | TT              | 1946920701               |
| SNP_P4_114064_71253 | NW_004515701.1 | Scaffold119 | 71253                   | GG                              | AA              | 1946920703               |
| SNP_P4_114065_71263 | NW_004515701.1 | Scaffold119 | 71263                   | TT                              | AA              | 1946920705               |
| SNP_P4_114066_71542 | NW_004515701.1 | Scaffold119 | 71542                   | GG                              | AA              | 1946920707               |
| SNP_P4_114068_72145 | NW_004515701.1 | Scaffold119 | 72145                   | AA                              | CC              | 1946920709               |
| SNP_P4_114069_72212 | NW_004515701.1 | Scaffold119 | 72212                   | CC                              | TT              | 1946920711               |
| SNP_P4_114070_72221 | NW_004515701.1 | Scaffold119 | 72221                   | CC                              | TT              | 1946920713               |
| SNP_P4_114071_75253 | NW_004515701.1 | Scaffold119 | 75253                   | AA                              | CC              | 1946920715               |
| SNP_P4_114072_76638 | NW_004515701.1 | Scaffold119 | 76638                   | TT                              | GG              | 1946920717               |
| SNP_P4_114073_76708 | NW_004515701.1 | Scaffold119 | 76708                   | GG                              | AA              | 1946920719               |
| SNP_P4_114074_76710 | NW_004515701.1 | Scaffold119 | 76710                   | GG                              | AA              | 1946920721               |
| SNP_P4_114075_76736 | NW_004515701.1 | Scaffold119 | 76736                   | GG                              | CC              | 1946920723               |
| SNP_P4_114076_76788 | NW_004515701.1 | Scaffold119 | 76788                   | AA                              | GG              | 1946920725               |
| SNP_P4_114077_2572  | NW_004515702.1 | Scaffold120 | 2572                    | TT                              | AA              | 1946920727               |
| SNP_P4_114078_2689  | NW_004515702.1 | Scaffold120 | 2689                    | AA                              | GG              | 1946920729               |
| SNP_P4_114079_2890  | NW_004515702.1 | Scaffold120 | 2890                    | AA                              | GG              | 1946920731               |
| SNP_P4_114080_2903  | NW_004515702.1 | Scaffold120 | 2903                    | AA                              | CC              | 1946920733               |
| SNP_P4_114081_5657  | NW_004515702.1 | Scaffold120 | 5657                    | AA                              | GG              | 1946920735               |
| SNP_P4_114082_5659  | NW_004515702.1 | Scaffold120 | 5659                    | AA                              | GG              | 1946920737               |
| SNP_P4_114083_5677  | NW_004515702.1 | Scaffold120 | 5677                    | CC                              | TT              | 1946920739               |
| SNP_P4_114084_5682  | NW_004515702.1 | Scaffold120 | 5682                    | TT                              | CC              | 1946920741               |
| SNP_P4_114085_5693  | NW_004515702.1 | Scaffold120 | 5693                    | CC                              | TT              | 1946920743               |
| SNP_P4_114086_5695  | NW_004515702.1 | Scaffold120 | 5695                    | TT                              | CC              | 1946920745               |
| SNP_P4_114087_5704  | NW_004515702.1 | Scaffold120 | 5704                    | CC                              | TT              | 1946920747               |
| SNP_P4_114088_8638  | NW_004515702.1 | Scaffold120 | 8638                    | GG                              | AA              | 1946920749               |
| SNP_P4_114089_12451 | NW_004515702.1 | Scaffold120 | 12451                   | AA                              | GG              | 1946920751               |
| SNP_P4_114090_16170 | NW_004515702.1 | Scaffold120 | 16170                   | GG                              | AA              | 1946920753               |

| SNPs IDs             | Chromosome IDs | Chromosomes | Physical positions (bp) | CDC Frontier (Reference genome) | (ILWC46 & LPNB) | NCBI SNPdb Accession IDs |
|----------------------|----------------|-------------|-------------------------|---------------------------------|-----------------|--------------------------|
| SNP_P4_114091_16240  | NW_004515702.1 | Scaffold120 | 16240                   | GG                              | AA              | 1946920755               |
| SNP_P4_114092_16472  | NW_004515702.1 | Scaffold120 | 16472                   | CC                              | TT              | 1946920757               |
| SNP_P4_114093_11730  | NW_004515703.1 | Scaffold123 | 11730                   | CC                              | AA              | 1946920759               |
| SNP_P4_114094_29129  | NW_004515703.1 | Scaffold123 | 29129                   | TT                              | AA              | 1946920761               |
| SNP_P4_114095_33359  | NW_004515703.1 | Scaffold123 | 33359                   | AA                              | GG              | 1946920763               |
| SNP_P4_114096_33511  | NW_004515703.1 | Scaffold123 | 33511                   | TT                              | AA              | 1946920765               |
| SNP_P4_114097_33527  | NW_004515703.1 | Scaffold123 | 33527                   | TT                              | CC              | 1946920767               |
| SNP_P4_114098_33532  | NW_004515703.1 | Scaffold123 | 33532                   | CC                              | TT              | 1946920769               |
| SNP_P4_114099_33667  | NW_004515703.1 | Scaffold123 | 33667                   | CC                              | TT              | 1946920771               |
| SNP_P4_114101_33714  | NW_004515703.1 | Scaffold123 | 33714                   | TT                              | CC              | 1946920773               |
| SNP_P4_114102_33723  | NW_004515703.1 | Scaffold123 | 33723                   | AA                              | GG              | 1946920775               |
| SNP_P4_114103_33724  | NW_004515703.1 | Scaffold123 | 33724                   | TT                              | AA              | 1946920777               |
| SNP_P4_114104_33833  | NW_004515703.1 | Scaffold123 | 33833                   | GG                              | AA              | 1946920779               |
| SNP_P4_114105_33840  | NW_004515703.1 | Scaffold123 | 33840                   | CC                              | TT              | 1946920781               |
| SNP_P4_114106_34960  | NW_004515703.1 | Scaffold123 | 34960                   | CC                              | AA              | 1946920783               |
| SNP_P4_114107_34967  | NW_004515703.1 | Scaffold123 | 34967                   | AA                              | GG              | 1946920785               |
| SNP_P4_114108_35049  | NW_004515703.1 | Scaffold123 | 35049                   | AA                              | GG              | 1946920787               |
| SNP_P4_114109_35093  | NW_004515703.1 | Scaffold123 | 35093                   | AA                              | GG              | 1946920789               |
| SNP_P4_114110_35113  | NW_004515703.1 | Scaffold123 | 35113                   | TT                              | CC              | 1946920791               |
| SNP_P4_114111_35186  | NW_004515703.1 | Scaffold123 | 35186                   | GG                              | AA              | 1946920793               |
| SNP_P4_114112_35198  | NW_004515703.1 | Scaffold123 | 35198                   | GG                              | AA              | 1946920795               |
| SNP_P4_114113_35372  | NW_004515703.1 | Scaffold123 | 35372                   | CC                              | AA              | 1946920797               |
| SNP_P4_114114_35392  | NW_004515703.1 | Scaffold123 | 35392                   | GG                              | AA              | 1946920799               |
| SNP_P4_114115_37517  | NW_004515703.1 | Scaffold123 | 37517                   | GG                              | CC              | 1946920801               |
| SNP_P4_114116_37521  | NW_004515703.1 | Scaffold123 | 37521                   | GG                              | TT              | 1946920803               |
| SNP_P4_114117_37541  | NW_004515703.1 | Scaffold123 | 37541                   | AA                              | GG              | 1946920805               |
| SNP_P4_114118_37574  | NW_004515703.1 | Scaffold123 | 37574                   | GG                              | AA              | 1946920807               |
| SNP_P4_114119_37578  | NW_004515703.1 | Scaffold123 | 37578                   | TT                              | GG              | 1946920809               |
| SNP_P4_114120_37579  | NW_004515703.1 | Scaffold123 | 37579                   | CC                              | GG              | 1946920811               |
| SNP_P4_114121_66627  | NW_004515703.1 | Scaffold123 | 66627                   | TT                              | CC              | 1946920814               |
| SNP_P4_114122_66723  | NW_004515703.1 | Scaffold123 | 66723                   | TT                              | CC              | 1946920816               |
| SNP_P4_114123_66799  | NW_004515703.1 | Scaffold123 | 66799                   | TT                              | CC              | 1946920818               |
| SNP_P4_114124_66883  | NW_004515703.1 | Scaffold123 | 66883                   | TT                              | CC              | 1946920820               |
| SNP_P4_114126_66937  | NW_004515703.1 | Scaffold123 | 66937                   | CC                              | AA              | 1946920822               |
| SNP_P4_114127_66956  | NW_004515703.1 | Scaffold123 | 66956                   | TT                              | CC              | 1946920824               |
| SNP_P4_114128_78669  | NW_004515703.1 | Scaffold123 | 78669                   | CC                              | AA              | 1946920827               |
| SNP_P4_114129_98720  | NW_004515703.1 | Scaffold123 | 98720                   | TT                              | CC              | 1946920829               |
| SNP_P4_114130_102094 | NW_004515703.1 | Scaffold123 | 102094                  | CC                              | GG              | 1946920831               |
| SNP_P4_114131_136477 | NW_004515703.1 | Scaffold123 | 136477                  | AA                              | GG              | 1946920833               |
| SNP_P4_114132_136825 | NW_004515703.1 | Scaffold123 | 136825                  | AA                              | GG              | 1946920835               |
| SNP_P4_114133_141651 | NW_004515703.1 | Scaffold123 | 141651                  | AA                              | GG              | 1946920837               |
| SNP_P4_114134_141701 | NW_004515703.1 | Scaffold123 | 141701                  | CC                              | TT              | 1946920839               |

| SNPs IDs             | Chromosome IDs | Chromosomes | Physical positions (bp) | CDC Frontier (Reference genome) | (ILWC46 & LPNB) | NCBI SNPdb Accession IDs |
|----------------------|----------------|-------------|-------------------------|---------------------------------|-----------------|--------------------------|
| SNP_P4_114135_141824 | NW_004515703.1 | Scaffold123 | 141824                  | AA                              | GG              | 1946920841               |
| SNP_P4_114136_150543 | NW_004515703.1 | Scaffold123 | 150543                  | CC                              | TT              | 1946920843               |
| SNP_P4_114137_150551 | NW_004515703.1 | Scaffold123 | 150551                  | GG                              | CC              | 1946920845               |
| SNP_P4_114138_172547 | NW_004515703.1 | Scaffold123 | 172547                  | CC                              | TT              | 1946920847               |
| SNP_P4_114139_211563 | NW_004515703.1 | Scaffold123 | 211563                  | TT                              | AA              | 1946920849               |
| SNP_P4_114140_211776 | NW_004515703.1 | Scaffold123 | 211776                  | TT                              | CC              | 1946920851               |
| SNP_P4_114141_266276 | NW_004515703.1 | Scaffold123 | 266276                  | CC                              | TT              | 1946920853               |
| SNP_P4_114142_270060 | NW_004515703.1 | Scaffold123 | 270060                  | CC                              | TT              | 1946920855               |
| SNP_P4_114143_270130 | NW_004515703.1 | Scaffold123 | 270130                  | TT                              | CC              | 1946920857               |
| SNP_P4_114144_301048 | NW_004515703.1 | Scaffold123 | 301048                  | TT                              | CC              | 1946920860               |
| SNP_P4_114145_301212 | NW_004515703.1 | Scaffold123 | 301212                  | GG                              | AA              | 1946920862               |
| SNP_P4_114146_305438 | NW_004515703.1 | Scaffold123 | 305438                  | AA                              | GG              | 1946920864               |
| SNP_P4_114147_305442 | NW_004515703.1 | Scaffold123 | 305442                  | AA                              | CC              | 1946920866               |
| SNP_P4_114148_316126 | NW_004515703.1 | Scaffold123 | 316126                  | AA                              | GG              | 1946920868               |
| SNP_P4_114149_316201 | NW_004515703.1 | Scaffold123 | 316201                  | AA                              | GG              | 1946920870               |
| SNP_P4_114150_344064 | NW_004515703.1 | Scaffold123 | 344064                  | GG                              | AA              | 1946920872               |
| SNP_P4_114151_344069 | NW_004515703.1 | Scaffold123 | 344069                  | TT                              | CC              | 1946920874               |
| SNP_P4_114152_348074 | NW_004515703.1 | Scaffold123 | 348074                  | CC                              | AA              | 1946920876               |
| SNP_P4_114153_348080 | NW_004515703.1 | Scaffold123 | 348080                  | TT                              | CC              | 1946920878               |
| SNP_P4_114154_348660 | NW_004515703.1 | Scaffold123 | 348660                  | TT                              | CC              | 1946920880               |
| SNP_P4_114155_391008 | NW_004515703.1 | Scaffold123 | 391008                  | AA                              | GG              | 1946920882               |
| SNP_P4_114156_391412 | NW_004515703.1 | Scaffold123 | 391412                  | GG                              | AA              | 1946920884               |
| SNP_P4_114157_3372   | NW_004515705.1 | Scaffold126 | 3372                    | CC                              | TT              | 1946920886               |
| SNP_P4_114158_5786   | NW_004515705.1 | Scaffold126 | 5786                    | AA                              | GG              | 1946920888               |
| SNP_P4_114159_5826   | NW_004515705.1 | Scaffold126 | 5826                    | TT                              | AA              | 1946920890               |
| SNP_P4_114160_5856   | NW_004515705.1 | Scaffold126 | 5856                    | AA                              | TT              | 1946920892               |
| SNP_P4_114161_6261   | NW_004515705.1 | Scaffold126 | 6261                    | AA                              | GG              | 1946920894               |
| SNP_P4_114162_7711   | NW_004515705.1 | Scaffold126 | 7711                    | CC                              | TT              | 1946920896               |
| SNP_P4_114163_12166  | NW_004515705.1 | Scaffold126 | 12166                   | CC                              | AA              | 1946920898               |
| SNP_P4_114164_12284  | NW_004515705.1 | Scaffold126 | 12284                   | TT                              | CC              | 1946920900               |
| SNP_P4_114165_16257  | NW_004515705.1 | Scaffold126 | 16257                   | TT                              | GG              | 1946920902               |
| SNP_P4_114166_16344  | NW_004515705.1 | Scaffold126 | 16344                   | GG                              | AA              | 1946920904               |
| SNP_P4_114167_16404  | NW_004515705.1 | Scaffold126 | 16404                   | TT                              | CC              | 1946920906               |
| SNP_P4_114168_16716  | NW_004515705.1 | Scaffold126 | 16716                   | CC                              | GG              | 1946920908               |
| SNP_P4_114169_610    | NW_004515706.1 | Scaffold127 | 610                     | TT                              | AA              | 1946920910               |
| SNP_P4_114170_2864   | NW_004515706.1 | Scaffold127 | 2864                    | AA                              | CC              | 1946920912               |
| SNP_P4_114172_5703   | NW_004515706.1 | Scaffold127 | 5703                    | TT                              | AA              | 1946920914               |
| SNP_P4_114173_5709   | NW_004515706.1 | Scaffold127 | 5709                    | TT                              | CC              | 1946920916               |
| SNP_P4_114174_15335  | NW_004515706.1 | Scaffold127 | 15335                   | TT                              | CC              | 1946920918               |
| SNP_P4_114175_20213  | NW_004515706.1 | Scaffold127 | 20213                   | GG                              | TT              | 1946920920               |
| SNP_P4_114176_20240  | NW_004515706.1 | Scaffold127 | 20240                   | GG                              | AA              | 1946920922               |
| SNP_P4_114177_20247  | NW_004515706.1 | Scaffold127 | 20247                   | TT                              | GG              | 1946920924               |

| SNPs IDs             | Chromosome IDs | Chromosomes | Physical positions (bp) | CDC Frontier (Reference genome) | (ILWC46 & LPNB) | NCBI SNPdb Accession IDs |
|----------------------|----------------|-------------|-------------------------|---------------------------------|-----------------|--------------------------|
| SNP_P4_114178_20273  | NW_004515706.1 | Scaffold127 | 20273                   | TT                              | AA              | 1946920926               |
| SNP_P4_114179_20274  | NW_004515706.1 | Scaffold127 | 20274                   | TT                              | AA              | 1946920928               |
| SNP_P4_114180_20276  | NW_004515706.1 | Scaffold127 | 20276                   | TT                              | CC              | 1946920930               |
| SNP_P4_114181_20277  | NW_004515706.1 | Scaffold127 | 20277                   | TT                              | CC              | 1946920932               |
| SNP_P4_114182_20288  | NW_004515706.1 | Scaffold127 | 20288                   | TT                              | CC              | 1946920934               |
| SNP_P4_114183_20289  | NW_004515706.1 | Scaffold127 | 20289                   | AA                              | CC              | 1946920936               |
| SNP_P4_114184_20330  | NW_004515706.1 | Scaffold127 | 20330                   | AA                              | CC              | 1946920938               |
| SNP_P4_114185_20347  | NW_004515706.1 | Scaffold127 | 20347                   | AA                              | GG              | 1946920940               |
| SNP_P4_114186_20353  | NW_004515706.1 | Scaffold127 | 20353                   | CC                              | TT              | 1946920942               |
| SNP_P4_114187_20367  | NW_004515706.1 | Scaffold127 | 20367                   | AA                              | CC              | 1946920944               |
| SNP_P4_114188_20396  | NW_004515706.1 | Scaffold127 | 20396                   | TT                              | CC              | 1946920946               |
| SNP_P4_114189_20421  | NW_004515706.1 | Scaffold127 | 20421                   | AA                              | GG              | 1946920948               |
| SNP_P4_114191_20508  | NW_004515706.1 | Scaffold127 | 20508                   | CC                              | TT              | 1946920950               |
| SNP_P4_114192_20555  | NW_004515706.1 | Scaffold127 | 20555                   | AA                              | GG              | 1946920953               |
| SNP_P4_114193_43792  | NW_004515706.1 | Scaffold127 | 43792                   | AA                              | CC              | 1946920955               |
| SNP_P4_114194_46724  | NW_004515706.1 | Scaffold127 | 46724                   | AA                              | GG              | 1946920957               |
| SNP_P4_114195_46793  | NW_004515706.1 | Scaffold127 | 46793                   | TT                              | AA              | 1946920958               |
| SNP_P4_114196_46836  | NW_004515706.1 | Scaffold127 | 46836                   | AA                              | GG              | 1946920960               |
| SNP_P4_114197_47111  | NW_004515706.1 | Scaffold127 | 47111                   | TT                              | AA              | 1946920962               |
| SNP_P4_114198_47122  | NW_004515706.1 | Scaffold127 | 47122                   | TT                              | CC              | 1946920964               |
| SNP_P4_114199_47169  | NW_004515706.1 | Scaffold127 | 47169                   | CC                              | TT              | 1946920966               |
| SNP_P4_114200_47517  | NW_004515706.1 | Scaffold127 | 47517                   | GG                              | AA              | 1946920968               |
| SNP_P4_114201_50713  | NW_004515706.1 | Scaffold127 | 50713                   | GG                              | TT              | 1946920970               |
| SNP_P4_114202_53483  | NW_004515706.1 | Scaffold127 | 53483                   | AA                              | GG              | 1946920972               |
| SNP_P4_114203_53502  | NW_004515706.1 | Scaffold127 | 53502                   | GG                              | TT              | 1946920974               |
| SNP_P4_114204_53536  | NW_004515706.1 | Scaffold127 | 53536                   | AA                              | GG              | 1946920976               |
| SNP_P4_114205_53989  | NW_004515706.1 | Scaffold127 | 53989                   | AA                              | TT              | 1946920978               |
| SNP_P4_114207_54097  | NW_004515706.1 | Scaffold127 | 54097                   | AA                              | TT              | 1946920980               |
| SNP_P4_114208_54174  | NW_004515706.1 | Scaffold127 | 54174                   | CC                              | GG              | 1946920982               |
| SNP_P4_114209_54728  | NW_004515706.1 | Scaffold127 | 54728                   | AA                              | TT              | 1946920984               |
| SNP_P4_114210_54740  | NW_004515706.1 | Scaffold127 | 54740                   | AA                              | GG              | 1946920986               |
| SNP_P4_114211_55117  | NW_004515706.1 | Scaffold127 | 55117                   | TT                              | CC              | 1946920989               |
| SNP_P4_114212_69749  | NW_004515706.1 | Scaffold127 | 69749                   | GG                              | AA              | 1946920991               |
| SNP_P4_114213_107368 | NW_004515706.1 | Scaffold127 | 107368                  | AA                              | GG              | 1946920993               |
| SNP_P4_114215_127650 | NW_004515706.1 | Scaffold127 | 127650                  | GG                              | AA              | 1946920995               |
| SNP_P4_114216_131756 | NW_004515706.1 | Scaffold127 | 131756                  | AA                              | GG              | 1946920997               |
| SNP_P4_114217_131759 | NW_004515706.1 | Scaffold127 | 131759                  | TT                              | GG              | 1946920999               |
| SNP_P4_114218_132064 | NW_004515706.1 | Scaffold127 | 132064                  | TT                              | CC              | 1946921001               |
| SNP_P4_114219_135547 | NW_004515706.1 | Scaffold127 | 135547                  | TT                              | GG              | 1946921003               |
| SNP_P4_114220_135809 | NW_004515706.1 | Scaffold127 | 135809                  | GG                              | AA              | 1946921005               |
| SNP_P4_114221_135823 | NW_004515706.1 | Scaffold127 | 135823                  | TT                              | CC              | 1946921007               |
| SNP_P4_114222_135892 | NW_004515706.1 | Scaffold127 | 135892                  | GG                              | AA              | 1946921009               |

| SNPs IDs             | Chromosome IDs | Chromosomes | Physical positions (bp) | CDC Frontier (Reference genome) | (ILWC46 & LPNB) | NCBI SNPdb Accession IDs |
|----------------------|----------------|-------------|-------------------------|---------------------------------|-----------------|--------------------------|
| SNP_P4_114223_135955 | NW_004515706.1 | Scaffold127 | 135955                  | CC                              | TT              | 1946921011               |
| SNP_P4_114224_135973 | NW_004515706.1 | Scaffold127 | 135973                  | CC                              | TT              | 1946921013               |
| SNP_P4_114225_135994 | NW_004515706.1 | Scaffold127 | 135994                  | TT                              | CC              | 1946921015               |
| SNP_P4_114226_136033 | NW_004515706.1 | Scaffold127 | 136033                  | GG                              | AA              | 1946921017               |
| SNP_P4_114227_136876 | NW_004515706.1 | Scaffold127 | 136876                  | AA                              | TT              | 1946921019               |
| SNP_P4_114228_141595 | NW_004515706.1 | Scaffold127 | 141595                  | AA                              | GG              | 1946921021               |
| SNP_P4_114229_141607 | NW_004515706.1 | Scaffold127 | 141607                  | AA                              | TT              | 1946921023               |
| SNP_P4_114230_141907 | NW_004515706.1 | Scaffold127 | 141907                  | GG                              | AA              | 1946921025               |
| SNP_P4_114231_141921 | NW_004515706.1 | Scaffold127 | 141921                  | GG                              | AA              | 1946921027               |
| SNP_P4_114232_141923 | NW_004515706.1 | Scaffold127 | 141923                  | AA                              | CC              | 1946921029               |
| SNP_P4_114233_141963 | NW_004515706.1 | Scaffold127 | 141963                  | TT                              | GG              | 1946921031               |
| SNP_P4_114235_144628 | NW_004515706.1 | Scaffold127 | 144628                  | CC                              | AA              | 1946921033               |
| SNP_P4_114236_159787 | NW_004515706.1 | Scaffold127 | 159787                  | AA                              | GG              | 1946921035               |
| SNP_P4_114237_161714 | NW_004515706.1 | Scaffold127 | 161714                  | CC                              | GG              | 1946921037               |
| SNP_P4_114238_164419 | NW_004515706.1 | Scaffold127 | 164419                  | TT                              | AA              | 1946921039               |
| SNP_P4_114239_164420 | NW_004515706.1 | Scaffold127 | 164420                  | TT                              | CC              | 1946921041               |
| SNP_P4_114240_165654 | NW_004515706.1 | Scaffold127 | 165654                  | GG                              | CC              | 1946921043               |
| SNP_P4_114241_165928 | NW_004515706.1 | Scaffold127 | 165928                  | TT                              | AA              | 1946921045               |
| SNP_P4_114242_166317 | NW_004515706.1 | Scaffold127 | 166317                  | TT                              | CC              | 1946921047               |
| SNP_P4_114243_166324 | NW_004515706.1 | Scaffold127 | 166324                  | GG                              | TT              | 1946921049               |
| SNP_P4_114244_166347 | NW_004515706.1 | Scaffold127 | 166347                  | AA                              | GG              | 1946921051               |
| SNP_P4_114245_174840 | NW_004515706.1 | Scaffold127 | 174840                  | GG                              | TT              | 1946921053               |
| SNP_P4_114246_184749 | NW_004515706.1 | Scaffold127 | 184749                  | AA                              | GG              | 1946921055               |
| SNP_P4_114247_184763 | NW_004515706.1 | Scaffold127 | 184763                  | AA                              | TT              | 1946921057               |
| SNP_P4_114248_184768 | NW_004515706.1 | Scaffold127 | 184768                  | TT                              | CC              | 1946921059               |
| SNP_P4_114249_184777 | NW_004515706.1 | Scaffold127 | 184777                  | TT                              | CC              | 1946921061               |
| SNP_P4_114250_184799 | NW_004515706.1 | Scaffold127 | 184799                  | TT                              | GG              | 1946921063               |
| SNP_P4_114251_184819 | NW_004515706.1 | Scaffold127 | 184819                  | AA                              | GG              | 1946921065               |
| SNP_P4_114252_184892 | NW_004515706.1 | Scaffold127 | 184892                  | CC                              | TT              | 1946921067               |
| SNP_P4_114253_184898 | NW_004515706.1 | Scaffold127 | 184898                  | GG                              | CC              | 1946921069               |
| SNP_P4_114254_184953 | NW_004515706.1 | Scaffold127 | 184953                  | TT                              | AA              | 1946921071               |
| SNP_P4_114255_184979 | NW_004515706.1 | Scaffold127 | 184979                  | AA                              | GG              | 1946921073               |
| SNP_P4_114256_185067 | NW_004515706.1 | Scaffold127 | 185067                  | TT                              | CC              | 1946921075               |
| SNP_P4_114257_185201 | NW_004515706.1 | Scaffold127 | 185201                  | GG                              | AA              | 1946921077               |
| SNP_P4_114258_193988 | NW_004515706.1 | Scaffold127 | 193988                  | CC                              | AA              | 1946921079               |
| SNP_P4_114259_202097 | NW_004515706.1 | Scaffold127 | 202097                  | GG                              | AA              | 1946921081               |
| SNP_P4_114260_216726 | NW_004515706.1 | Scaffold127 | 216726                  | GG                              | CC              | 1946921084               |
| SNP_P4_114261_219249 | NW_004515706.1 | Scaffold127 | 219249                  | TT                              | CC              | 1946921086               |
| SNP_P4_114262_225222 | NW_004515706.1 | Scaffold127 | 225222                  | GG                              | AA              | 1946921088               |
| SNP_P4_114263_229456 | NW_004515706.1 | Scaffold127 | 229456                  | TT                              | CC              | 1946921090               |
| SNP_P4_114264_229457 | NW_004515706.1 | Scaffold127 | 229457                  | AA                              | GG              | 1946921093               |
| SNP_P4_114265_229469 | NW_004515706.1 | Scaffold127 | 229469                  | GG                              | AA              | 1946921095               |



| SNPs IDs             | Chromosome IDs | Chromosomes | Physical positions (bp) | CDC Frontier (Reference genome) | (ILWC46 & LPNB) | NCBI SNPdb Accession IDs |
|----------------------|----------------|-------------|-------------------------|---------------------------------|-----------------|--------------------------|
| SNP_P4_114266_229495 | NW_004515706.1 | Scaffold127 | 229495                  | TT                              | CC              | 1946921097               |
| SNP_P4_114267_229517 | NW_004515706.1 | Scaffold127 | 229517                  | TT                              | GG              | 1946921099               |
| SNP_P4_114268_230745 | NW_004515706.1 | Scaffold127 | 230745                  | CC                              | TT              | 1946921101               |
| SNP_P4_114269_231141 | NW_004515706.1 | Scaffold127 | 231141                  | AA                              | TT              | 1946921103               |
| SNP_P4_114270_231180 | NW_004515706.1 | Scaffold127 | 231180                  | AA                              | GG              | 1946921105               |
| SNP_P4_114271_232071 | NW_004515706.1 | Scaffold127 | 232071                  | CC                              | TT              | 1946921107               |
| SNP_P4_114272_232103 | NW_004515706.1 | Scaffold127 | 232103                  | AA                              | CC              | 1946921109               |
| SNP_P4_114273_232149 | NW_004515706.1 | Scaffold127 | 232149                  | TT                              | CC              | 1946921111               |
| SNP_P4_114274_232229 | NW_004515706.1 | Scaffold127 | 232229                  | CC                              | AA              | 1946921113               |
| SNP_P4_114275_232643 | NW_004515706.1 | Scaffold127 | 232643                  | GG                              | AA              | 1946921115               |
| SNP_P4_114276_237338 | NW_004515706.1 | Scaffold127 | 237338                  | GG                              | TT              | 1946921117               |
| SNP_P4_114277_239950 | NW_004515706.1 | Scaffold127 | 239950                  | CC                              | AA              | 1946921119               |
| SNP_P4_114278_239972 | NW_004515706.1 | Scaffold127 | 239972                  | GG                              | AA              | 1946921121               |
| SNP_P4_114279_240057 | NW_004515706.1 | Scaffold127 | 240057                  | TT                              | GG              | 1946921123               |
| SNP_P4_114280_240227 | NW_004515706.1 | Scaffold127 | 240227                  | TT                              | CC              | 1946921125               |
| SNP_P4_114281_240276 | NW_004515706.1 | Scaffold127 | 240276                  | TT                              | AA              | 1946921127               |
| SNP_P4_114282_240287 | NW_004515706.1 | Scaffold127 | 240287                  | CC                              | TT              | 1946921129               |
| SNP_P4_114283_240296 | NW_004515706.1 | Scaffold127 | 240296                  | CC                              | AA              | 1946921131               |
| SNP_P4_114284_240380 | NW_004515706.1 | Scaffold127 | 240380                  | GG                              | AA              | 1946921133               |
| SNP_P4_114285_255784 | NW_004515706.1 | Scaffold127 | 255784                  | TT                              | CC              | 1946921135               |
| SNP_P4_114286_256051 | NW_004515706.1 | Scaffold127 | 256051                  | AA                              | TT              | 1946921137               |
| SNP_P4_114287_256064 | NW_004515706.1 | Scaffold127 | 256064                  | TT                              | CC              | 1946921139               |
| SNP_P4_114288_256808 | NW_004515706.1 | Scaffold127 | 256808                  | AA                              | CC              | 1946921141               |
| SNP_P4_114290_256867 | NW_004515706.1 | Scaffold127 | 256867                  | TT                              | CC              | 1946921143               |
| SNP_P4_114291_265735 | NW_004515706.1 | Scaffold127 | 265735                  | TT                              | CC              | 1946921145               |
| SNP_P4_114292_265873 | NW_004515706.1 | Scaffold127 | 265873                  | CC                              | TT              | 1946921147               |
| SNP_P4_114293_270062 | NW_004515706.1 | Scaffold127 | 270062                  | GG                              | AA              | 1946921149               |
| SNP_P4_114294_270087 | NW_004515706.1 | Scaffold127 | 270087                  | CC                              | GG              | 1946921151               |
| SNP_P4_114295_270214 | NW_004515706.1 | Scaffold127 | 270214                  | GG                              | AA              | 1946921153               |
| SNP_P4_114296_270264 | NW_004515706.1 | Scaffold127 | 270264                  | AA                              | CC              | 1946921155               |
| SNP_P4_114297_270319 | NW_004515706.1 | Scaffold127 | 270319                  | AA                              | CC              | 1946921157               |
| SNP_P4_114298_270342 | NW_004515706.1 | Scaffold127 | 270342                  | TT                              | CC              | 1946921159               |
| SNP_P4_114299_270343 | NW_004515706.1 | Scaffold127 | 270343                  | CC                              | TT              | 1946921161               |
| SNP_P4_114301_270518 | NW_004515706.1 | Scaffold127 | 270518                  | CC                              | GG              | 1946921164               |
| SNP_P4_114302_270537 | NW_004515706.1 | Scaffold127 | 270537                  | AA                              | GG              | 1946921166               |
| SNP_P4_114303_270776 | NW_004515706.1 | Scaffold127 | 270776                  | CC                              | AA              | 1946921168               |
| SNP_P4_114304_270778 | NW_004515706.1 | Scaffold127 | 270778                  | AA                              | GG              | 1946921170               |
| SNP_P4_114305_271175 | NW_004515706.1 | Scaffold127 | 271175                  | AA                              | TT              | 1946921172               |
| SNP_P4_114306_271188 | NW_004515706.1 | Scaffold127 | 271188                  | CC                              | TT              | 1946921174               |
| SNP_P4_114307_271194 | NW_004515706.1 | Scaffold127 | 271194                  | AA                              | CC              | 1946921176               |
| SNP_P4_114308_271198 | NW_004515706.1 | Scaffold127 | 271198                  | TT                              | AA              | 1946921178               |
| SNP_P4_114309_271206 | NW_004515706.1 | Scaffold127 | 271206                  | CC                              | TT              | 1946921180               |

| SNPs IDs             | Chromosome IDs | Chromosomes | Physical positions (bp) | CDC Frontier (Reference genome) | (ILWC46 & LPNB) | NCBI SNPdb Accession IDs |
|----------------------|----------------|-------------|-------------------------|---------------------------------|-----------------|--------------------------|
| SNP_P4_114310_271224 | NW_004515706.1 | Scaffold127 | 271224                  | AA                              | GG              | 1946921182               |
| SNP_P4_114311_271234 | NW_004515706.1 | Scaffold127 | 271234                  | AA                              | TT              | 1946921185               |
| SNP_P4_114312_276153 | NW_004515706.1 | Scaffold127 | 276153                  | GG                              | TT              | 1946921187               |
| SNP_P4_114314_299486 | NW_004515706.1 | Scaffold127 | 299486                  | TT                              | CC              | 1946921189               |
| SNP_P4_114315_299524 | NW_004515706.1 | Scaffold127 | 299524                  | AA                              | GG              | 1946921191               |
| SNP_P4_114316_299553 | NW_004515706.1 | Scaffold127 | 299553                  | GG                              | CC              | 1946921193               |
| SNP_P4_114317_299611 | NW_004515706.1 | Scaffold127 | 299611                  | AA                              | GG              | 1946921195               |
| SNP_P4_114318_299723 | NW_004515706.1 | Scaffold127 | 299723                  | TT                              | CC              | 1946921197               |
| SNP_P4_114319_304939 | NW_004515706.1 | Scaffold127 | 304939                  | AA                              | GG              | 1946921199               |
| SNP_P4_114320_4033   | NW_004515707.1 | Scaffold128 | 4033                    | AA                              | GG              | 1946921201               |
| SNP_P4_114321_5666   | NW_004515707.1 | Scaffold128 | 5666                    | AA                              | GG              | 1946921203               |
| SNP_P4_114322_5961   | NW_004515707.1 | Scaffold128 | 5961                    | AA                              | CC              | 1946921205               |
| SNP_P4_114323_6887   | NW_004515707.1 | Scaffold128 | 6887                    | CC                              | TT              | 1946921207               |
| SNP_P4_114325_11266  | NW_004515707.1 | Scaffold128 | 11266                   | CC                              | TT              | 1946921209               |
| SNP_P4_114326_12453  | NW_004515707.1 | Scaffold128 | 12453                   | AA                              | GG              | 1946921211               |
| SNP_P4_114327_12477  | NW_004515707.1 | Scaffold128 | 12477                   | TT                              | GG              | 1946921213               |
| SNP_P4_114328_12502  | NW_004515707.1 | Scaffold128 | 12502                   | TT                              | GG              | 1946921215               |
| SNP_P4_114329_12697  | NW_004515707.1 | Scaffold128 | 12697                   | CC                              | TT              | 1946921217               |
| SNP_P4_114330_12713  | NW_004515707.1 | Scaffold128 | 12713                   | GG                              | TT              | 1946921219               |
| SNP_P4_114331_12976  | NW_004515707.1 | Scaffold128 | 12976                   | GG                              | AA              | 1946921221               |
| SNP_P4_114332_14926  | NW_004515707.1 | Scaffold128 | 14926                   | AA                              | GG              | 1946921223               |
| SNP_P4_114334_30958  | NW_004515707.1 | Scaffold128 | 30958                   | GG                              | AA              | 1946921225               |
| SNP_P4_114335_30965  | NW_004515707.1 | Scaffold128 | 30965                   | GG                              | AA              | 1946921227               |
| SNP_P4_114336_30971  | NW_004515707.1 | Scaffold128 | 30971                   | AA                              | GG              | 1946921229               |
| SNP_P4_114337_31857  | NW_004515707.1 | Scaffold128 | 31857                   | AA                              | TT              | 1946921231               |
| SNP_P4_114338_32595  | NW_004515707.1 | Scaffold128 | 32595                   | AA                              | GG              | 1946921233               |
| SNP_P4_114339_32599  | NW_004515707.1 | Scaffold128 | 32599                   | CC                              | TT              | 1946921235               |
| SNP_P4_114340_32691  | NW_004515707.1 | Scaffold128 | 32691                   | GG                              | CC              | 1946921237               |
| SNP_P4_114341_32711  | NW_004515707.1 | Scaffold128 | 32711                   | GG                              | AA              | 1946921239               |
| SNP_P4_114342_32767  | NW_004515707.1 | Scaffold128 | 32767                   | TT                              | CC              | 1946921241               |
| SNP_P4_114343_32788  | NW_004515707.1 | Scaffold128 | 32788                   | TT                              | GG              | 1946921243               |
| SNP_P4_114344_32836  | NW_004515707.1 | Scaffold128 | 32836                   | CC                              | AA              | 1946921245               |
| SNP_P4_114345_51993  | NW_004515707.1 | Scaffold128 | 51993                   | GG                              | AA              | 1946921247               |
| SNP_P4_114346_82555  | NW_004515707.1 | Scaffold128 | 82555                   | GG                              | AA              | 1946921249               |
| SNP_P4_114347_88134  | NW_004515707.1 | Scaffold128 | 88134                   | TT                              | AA              | 1946921251               |
| SNP_P4_114349_91905  | NW_004515707.1 | Scaffold128 | 91905                   | AA                              | GG              | 1946921253               |
| SNP_P4_114350_92232  | NW_004515707.1 | Scaffold128 | 92232                   | CC                              | TT              | 1946921255               |
| SNP_P4_114351_92245  | NW_004515707.1 | Scaffold128 | 92245                   | GG                              | AA              | 1946921257               |
| SNP_P4_114353_174728 | NW_004515707.1 | Scaffold128 | 174728                  | TT                              | CC              | 1946921259               |
| SNP_P4_114354_174730 | NW_004515707.1 | Scaffold128 | 174730                  | GG                              | AA              | 1946921261               |
| SNP_P4_114356_177090 | NW_004515707.1 | Scaffold128 | 177090                  | CC                              | GG              | 1946921263               |
| SNP_P4_114357_177109 | NW_004515707.1 | Scaffold128 | 177109                  | TT                              | AA              | 1946921265               |

| SNPs IDs             | Chromosome IDs | Chromosomes | Physical positions (bp) | CDC Frontier (Reference genome) | (ILWC46 & LPNB) | NCBI SNPdb Accession IDs |
|----------------------|----------------|-------------|-------------------------|---------------------------------|-----------------|--------------------------|
| SNP_P4_114358_177144 | NW_004515707.1 | Scaffold128 | 177144                  | AA                              | TT              | 1946921267               |
| SNP_P4_114359_177502 | NW_004515707.1 | Scaffold128 | 177502                  | TT                              | CC              | 1946921268               |
| SNP_P4_114360_179013 | NW_004515707.1 | Scaffold128 | 179013                  | GG                              | AA              | 1946921270               |
| SNP_P4_114361_179037 | NW_004515707.1 | Scaffold128 | 179037                  | CC                              | AA              | 1946921272               |
| SNP_P4_114362_197778 | NW_004515707.1 | Scaffold128 | 197778                  | TT                              | GG              | 1946921273               |
| SNP_P4_114363_197781 | NW_004515707.1 | Scaffold128 | 197781                  | TT                              | CC              | 1946921274               |
| SNP_P4_114364_197803 | NW_004515707.1 | Scaffold128 | 197803                  | AA                              | GG              | 1946921275               |
| SNP_P4_114365_205812 | NW_004515707.1 | Scaffold128 | 205812                  | TT                              | AA              | 1946921276               |
| SNP_P4_114366_206133 | NW_004515707.1 | Scaffold128 | 206133                  | AA                              | GG              | 1946921278               |
| SNP_P4_114368_230672 | NW_004515707.1 | Scaffold128 | 230672                  | TT                              | CC              | 1946921280               |
| SNP_P4_114370_240687 | NW_004515707.1 | Scaffold128 | 240687                  | TT                              | CC              | 1946921282               |
| SNP_P4_114371_240697 | NW_004515707.1 | Scaffold128 | 240697                  | AA                              | CC              | 1946921284               |
| SNP_P4_114372_240700 | NW_004515707.1 | Scaffold128 | 240700                  | AA                              | GG              | 1946921286               |
| SNP_P4_114373_240712 | NW_004515707.1 | Scaffold128 | 240712                  | TT                              | CC              | 1946921288               |
| SNP_P4_114374_241067 | NW_004515707.1 | Scaffold128 | 241067                  | TT                              | CC              | 1946921290               |
| SNP_P4_114376_256706 | NW_004515707.1 | Scaffold128 | 256706                  | GG                              | AA              | 1946921292               |
| SNP_P4_114377_266459 | NW_004515707.1 | Scaffold128 | 266459                  | AA                              | GG              | 1946921294               |
| SNP_P4_114378_266462 | NW_004515707.1 | Scaffold128 | 266462                  | GG                              | AA              | 1946921296               |
| SNP_P4_114379_279112 | NW_004515707.1 | Scaffold128 | 279112                  | AA                              | GG              | 1946921298               |
| SNP_P4_114380_279151 | NW_004515707.1 | Scaffold128 | 279151                  | AA                              | CC              | 1946921300               |
| SNP_P4_114381_279406 | NW_004515707.1 | Scaffold128 | 279406                  | CC                              | AA              | 1946921302               |
| SNP_P4_114382_285259 | NW_004515707.1 | Scaffold128 | 285259                  | GG                              | AA              | 1946921304               |
| SNP_P4_114383_285399 | NW_004515707.1 | Scaffold128 | 285399                  | AA                              | GG              | 1946921306               |
| SNP_P4_114385_344005 | NW_004515707.1 | Scaffold128 | 344005                  | CC                              | TT              | 1946921308               |
| SNP_P4_114386_346201 | NW_004515707.1 | Scaffold128 | 346201                  | AA                              | GG              | 1946921310               |
| SNP_P4_114387_346294 | NW_004515707.1 | Scaffold128 | 346294                  | CC                              | TT              | 1946921312               |
| SNP_P4_114388_346336 | NW_004515707.1 | Scaffold128 | 346336                  | TT                              | CC              | 1946921314               |
| SNP_P4_114389_346347 | NW_004515707.1 | Scaffold128 | 346347                  | TT                              | AA              | 1946921316               |
| SNP_P4_114390_346379 | NW_004515707.1 | Scaffold128 | 346379                  | TT                              | GG              | 1946921318               |
| SNP_P4_114391_346473 | NW_004515707.1 | Scaffold128 | 346473                  | GG                              | CC              | 1946921320               |
| SNP_P4_114392_347542 | NW_004515707.1 | Scaffold128 | 347542                  | TT                              | CC              | 1946921322               |
| SNP_P4_114393_350531 | NW_004515707.1 | Scaffold128 | 350531                  | CC                              | AA              | 1946921324               |
| SNP_P4_114394_359104 | NW_004515707.1 | Scaffold128 | 359104                  | AA                              | GG              | 1946921326               |
| SNP_P4_114395_362714 | NW_004515707.1 | Scaffold128 | 362714                  | GG                              | AA              | 1946921328               |
| SNP_P4_114397_379798 | NW_004515707.1 | Scaffold128 | 379798                  | GG                              | AA              | 1946921330               |
| SNP_P4_114398_379803 | NW_004515707.1 | Scaffold128 | 379803                  | GG                              | AA              | 1946921332               |
| SNP_P4_114399_379926 | NW_004515707.1 | Scaffold128 | 379926                  | GG                              | TT              | 1946921334               |
| SNP_P4_114400_393232 | NW_004515707.1 | Scaffold128 | 393232                  | CC                              | TT              | 1946921336               |
| SNP_P4_114401_393384 | NW_004515707.1 | Scaffold128 | 393384                  | TT                              | CC              | 1946921338               |
| SNP_P4_114402_393432 | NW_004515707.1 | Scaffold128 | 393432                  | GG                              | CC              | 1946921340               |
| SNP_P4_114403_393433 | NW_004515707.1 | Scaffold128 | 393433                  | TT                              | AA              | 1946921342               |
| SNP_P4_114404_393520 | NW_004515707.1 | Scaffold128 | 393520                  | AA                              | TT              | 1946921344               |

| SNPs IDs             | Chromosome IDs | Chromosomes | Physical positions (bp) | CDC Frontier (Reference genome) | (ILWC46 & LPNB) | NCBI SNPdb Accession IDs |
|----------------------|----------------|-------------|-------------------------|---------------------------------|-----------------|--------------------------|
| SNP_P4_114405_393613 | NW_004515707.1 | Scaffold128 | 393613                  | AA                              | TT              | 1946921346               |
| SNP_P4_114406_404025 | NW_004515707.1 | Scaffold128 | 404025                  | CC                              | TT              | 1946921348               |
| SNP_P4_114407_404123 | NW_004515707.1 | Scaffold128 | 404123                  | AA                              | GG              | 1946921350               |
| SNP_P4_114408_404391 | NW_004515707.1 | Scaffold128 | 404391                  | CC                              | TT              | 1946921352               |
| SNP_P4_114409_407777 | NW_004515707.1 | Scaffold128 | 407777                  | TT                              | CC              | 1946921354               |
| SNP_P4_114410_417151 | NW_004515707.1 | Scaffold128 | 417151                  | CC                              | TT              | 1946921356               |
| SNP_P4_114411_417273 | NW_004515707.1 | Scaffold128 | 417273                  | TT                              | AA              | 1946921358               |
| SNP_P4_114412_429454 | NW_004515707.1 | Scaffold128 | 429454                  | TT                              | CC              | 1946921360               |
| SNP_P4_114413_429459 | NW_004515707.1 | Scaffold128 | 429459                  | GG                              | TT              | 1946921362               |
| SNP_P4_114414_430434 | NW_004515707.1 | Scaffold128 | 430434                  | GG                              | AA              | 1946921364               |
| SNP_P4_114415_432378 | NW_004515707.1 | Scaffold128 | 432378                  | TT                              | CC              | 1946921366               |
| SNP_P4_114416_437346 | NW_004515707.1 | Scaffold128 | 437346                  | AA                              | TT              | 1946921368               |
| SNP_P4_114417_448594 | NW_004515707.1 | Scaffold128 | 448594                  | TT                              | AA              | 1946921370               |
| SNP_P4_114418_450425 | NW_004515707.1 | Scaffold128 | 450425                  | CC                              | AA              | 1946921372               |
| SNP_P4_114419_450490 | NW_004515707.1 | Scaffold128 | 450490                  | TT                              | AA              | 1946921374               |
| SNP_P4_114420_450499 | NW_004515707.1 | Scaffold128 | 450499                  | TT                              | CC              | 1946921376               |
| SNP_P4_114421_450548 | NW_004515707.1 | Scaffold128 | 450548                  | GG                              | AA              | 1946921378               |
| SNP_P4_114422_450689 | NW_004515707.1 | Scaffold128 | 450689                  | TT                              | CC              | 1946921380               |
| SNP_P4_114423_450707 | NW_004515707.1 | Scaffold128 | 450707                  | CC                              | TT              | 1946921382               |
| SNP_P4_114424_450710 | NW_004515707.1 | Scaffold128 | 450710                  | TT                              | GG              | 1946921384               |
| SNP_P4_114425_450713 | NW_004515707.1 | Scaffold128 | 450713                  | CC                              | TT              | 1946921386               |
| SNP_P4_114426_450878 | NW_004515707.1 | Scaffold128 | 450878                  | AA                              | TT              | 1946921388               |
| SNP_P4_114427_450890 | NW_004515707.1 | Scaffold128 | 450890                  | GG                              | AA              | 1946921390               |
| SNP_P4_114428_452886 | NW_004515707.1 | Scaffold128 | 452886                  | AA                              | GG              | 1946921392               |
| SNP_P4_114429_475659 | NW_004515707.1 | Scaffold128 | 475659                  | GG                              | TT              | 1946921394               |
| SNP_P4_114430_475930 | NW_004515707.1 | Scaffold128 | 475930                  | AA                              | CC              | 1946921396               |
| SNP_P4_114431_531688 | NW_004515707.1 | Scaffold128 | 531688                  | TT                              | CC              | 1946921398               |
| SNP_P4_114432_531741 | NW_004515707.1 | Scaffold128 | 531741                  | AA                              | GG              | 1946921400               |
| SNP_P4_114433_531913 | NW_004515707.1 | Scaffold128 | 531913                  | AA                              | TT              | 1946921402               |
| SNP_P4_114434_531933 | NW_004515707.1 | Scaffold128 | 531933                  | TT                              | CC              | 1946921404               |
| SNP_P4_114435_532045 | NW_004515707.1 | Scaffold128 | 532045                  | TT                              | CC              | 1946921406               |
| SNP_P4_114436_532049 | NW_004515707.1 | Scaffold128 | 532049                  | TT                              | CC              | 1946921408               |
| SNP_P4_114437_532112 | NW_004515707.1 | Scaffold128 | 532112                  | GG                              | AA              | 1946921410               |
| SNP_P4_114438_532144 | NW_004515707.1 | Scaffold128 | 532144                  | TT                              | CC              | 1946921412               |
| SNP_P4_114439_532175 | NW_004515707.1 | Scaffold128 | 532175                  | TT                              | CC              | 1946921414               |
| SNP_P4_114440_532227 | NW_004515707.1 | Scaffold128 | 532227                  | GG                              | TT              | 1946921416               |
| SNP_P4_114441_537850 | NW_004515707.1 | Scaffold128 | 537850                  | TT                              | CC              | 1946921418               |
| SNP_P4_114442_540359 | NW_004515707.1 | Scaffold128 | 540359                  | CC                              | TT              | 1946921420               |
| SNP_P4_114443_540495 | NW_004515707.1 | Scaffold128 | 540495                  | TT                              | CC              | 1946921422               |
| SNP_P4_114444_540569 | NW_004515707.1 | Scaffold128 | 540569                  | AA                              | GG              | 1946921424               |
| SNP_P4_114445_540570 | NW_004515707.1 | Scaffold128 | 540570                  | CC                              | TT              | 1946921426               |
| SNP_P4_114446_547218 | NW_004515707.1 | Scaffold128 | 547218                  | TT                              | AA              | 1946921428               |

| SNPs IDs             | Chromosome IDs | Chromosomes | Physical positions (bp) | CDC Frontier (Reference genome) | (ILWC46 & LPNB) | NCBI SNPdb Accession IDs |
|----------------------|----------------|-------------|-------------------------|---------------------------------|-----------------|--------------------------|
| SNP_P4_114448_548134 | NW_004515707.1 | Scaffold128 | 548134                  | CC                              | AA              | 1946921430               |
| SNP_P4_114449_549987 | NW_004515707.1 | Scaffold128 | 549987                  | GG                              | AA              | 1946921432               |
| SNP_P4_114450_550315 | NW_004515707.1 | Scaffold128 | 550315                  | TT                              | CC              | 1946921434               |
| SNP_P4_114451_550338 | NW_004515707.1 | Scaffold128 | 550338                  | TT                              | CC              | 1946921436               |
| SNP_P4_114452_554048 | NW_004515707.1 | Scaffold128 | 554048                  | AA                              | GG              | 1946921438               |
| SNP_P4_114453_562004 | NW_004515707.1 | Scaffold128 | 562004                  | CC                              | TT              | 1946921440               |
| SNP_P4_114454_577302 | NW_004515707.1 | Scaffold128 | 577302                  | GG                              | AA              | 1946921442               |
| SNP_P4_114455_577407 | NW_004515707.1 | Scaffold128 | 577407                  | CC                              | TT              | 1946921444               |
| SNP_P4_114456_578559 | NW_004515707.1 | Scaffold128 | 578559                  | TT                              | CC              | 1946921446               |
| SNP_P4_114457_578870 | NW_004515707.1 | Scaffold128 | 578870                  | AA                              | GG              | 1946921448               |
| SNP_P4_114458_580854 | NW_004515707.1 | Scaffold128 | 580854                  | GG                              | TT              | 1946921450               |
| SNP_P4_114459_580935 | NW_004515707.1 | Scaffold128 | 580935                  | CC                              | TT              | 1946921452               |
| SNP_P4_114460_581160 | NW_004515707.1 | Scaffold128 | 581160                  | CC                              | AA              | 1946921454               |
| SNP_P4_114461_587403 | NW_004515707.1 | Scaffold128 | 587403                  | CC                              | TT              | 1946921456               |
| SNP_P4_114462_587494 | NW_004515707.1 | Scaffold128 | 587494                  | AA                              | GG              | 1946921458               |
| SNP_P4_114463_587604 | NW_004515707.1 | Scaffold128 | 587604                  | TT                              | AA              | 1946921460               |
| SNP_P4_114464_587625 | NW_004515707.1 | Scaffold128 | 587625                  | TT                              | GG              | 1946921462               |
| SNP_P4_114465_587711 | NW_004515707.1 | Scaffold128 | 587711                  | TT                              | AA              | 1946921464               |
| SNP_P4_114466_587743 | NW_004515707.1 | Scaffold128 | 587743                  | TT                              | CC              | 1946921466               |
| SNP_P4_114468_588109 | NW_004515707.1 | Scaffold128 | 588109                  | CC                              | TT              | 1946921468               |
| SNP_P4_114469_588110 | NW_004515707.1 | Scaffold128 | 588110                  | GG                              | AA              | 1946921470               |
| SNP_P4_114470_588111 | NW_004515707.1 | Scaffold128 | 588111                  | CC                              | AA              | 1946921472               |
| SNP_P4_114471_588123 | NW_004515707.1 | Scaffold128 | 588123                  | TT                              | GG              | 1946921474               |
| SNP_P4_114472_588124 | NW_004515707.1 | Scaffold128 | 588124                  | AA                              | GG              | 1946921476               |
| SNP_P4_114473_588135 | NW_004515707.1 | Scaffold128 | 588135                  | AA                              | GG              | 1946921478               |
| SNP_P4_114474_588145 | NW_004515707.1 | Scaffold128 | 588145                  | GG                              | AA              | 1946921480               |
| SNP_P4_114475_611001 | NW_004515707.1 | Scaffold128 | 611001                  | GG                              | AA              | 1946921482               |
| SNP_P4_114476_623946 | NW_004515707.1 | Scaffold128 | 623946                  | AA                              | GG              | 1946921484               |
| SNP_P4_114477_667770 | NW_004515707.1 | Scaffold128 | 667770                  | GG                              | AA              | 1946921486               |
| SNP_P4_114478_676539 | NW_004515707.1 | Scaffold128 | 676539                  | CC                              | TT              | 1946921488               |
| SNP_P4_114479_678339 | NW_004515707.1 | Scaffold128 | 678339                  | AA                              | CC              | 1946921490               |
| SNP_P4_114480_678359 | NW_004515707.1 | Scaffold128 | 678359                  | AA                              | CC              | 1946921492               |
| SNP_P4_114481_689134 | NW_004515707.1 | Scaffold128 | 689134                  | AA                              | GG              | 1946921494               |
| SNP_P4_114482_701124 | NW_004515707.1 | Scaffold128 | 701124                  | CC                              | TT              | 1946921496               |
| SNP_P4_114483_701165 | NW_004515707.1 | Scaffold128 | 701165                  | CC                              | TT              | 1946921498               |
| SNP_P4_114484_701256 | NW_004515707.1 | Scaffold128 | 701256                  | TT                              | CC              | 1946921500               |
| SNP_P4_114485_711215 | NW_004515707.1 | Scaffold128 | 711215                  | GG                              | TT              | 1946921502               |
| SNP_P4_114486_711255 | NW_004515707.1 | Scaffold128 | 711255                  | GG                              | AA              | 1946921504               |
| SNP_P4_114487_711372 | NW_004515707.1 | Scaffold128 | 711372                  | AA                              | TT              | 1946921506               |
| SNP_P4_114488_711377 | NW_004515707.1 | Scaffold128 | 711377                  | CC                              | GG              | 1946921508               |
| SNP_P4_114489_711382 | NW_004515707.1 | Scaffold128 | 711382                  | TT                              | CC              | 1946921510               |
| SNP_P4_114490_711394 | NW_004515707.1 | Scaffold128 | 711394                  | TT                              | CC              | 1946921512               |

| SNPs IDs             | Chromosome IDs | Chromosomes | Physical positions (bp) | CDC Frontier (Reference genome) | (ILWC46 & LPNB) | NCBI SNPdb Accession IDs |
|----------------------|----------------|-------------|-------------------------|---------------------------------|-----------------|--------------------------|
| SNP_P4_114491_711418 | NW_004515707.1 | Scaffold128 | 711418                  | GG                              | TT              | 1946921514               |
| SNP_P4_114492_711639 | NW_004515707.1 | Scaffold128 | 711639                  | TT                              | CC              | 1946921516               |
| SNP_P4_114493_711646 | NW_004515707.1 | Scaffold128 | 711646                  | AA                              | GG              | 1946921518               |
| SNP_P4_114494_711678 | NW_004515707.1 | Scaffold128 | 711678                  | TT                              | GG              | 1946921520               |
| SNP_P4_114495_711685 | NW_004515707.1 | Scaffold128 | 711685                  | CC                              | TT              | 1946921522               |
| SNP_P4_114496_711773 | NW_004515707.1 | Scaffold128 | 711773                  | CC                              | TT              | 1946921524               |
| SNP_P4_114497_719345 | NW_004515707.1 | Scaffold128 | 719345                  | TT                              | AA              | 1946921526               |
| SNP_P4_114498_720025 | NW_004515707.1 | Scaffold128 | 720025                  | TT                              | CC              | 1946921528               |
| SNP_P4_114499_720085 | NW_004515707.1 | Scaffold128 | 720085                  | GG                              | AA              | 1946921530               |
| SNP_P4_114500_728234 | NW_004515707.1 | Scaffold128 | 728234                  | TT                              | AA              | 1946921531               |
| SNP_P4_114501_729194 | NW_004515707.1 | Scaffold128 | 729194                  | AA                              | GG              | 1946921534               |
| SNP_P4_114502_729770 | NW_004515707.1 | Scaffold128 | 729770                  | GG                              | AA              | 1946921536               |
| SNP_P4_114503_732432 | NW_004515707.1 | Scaffold128 | 732432                  | AA                              | TT              | 1946921538               |
| SNP_P4_114504_732465 | NW_004515707.1 | Scaffold128 | 732465                  | TT                              | CC              | 1946921540               |
| SNP_P4_114505_732515 | NW_004515707.1 | Scaffold128 | 732515                  | AA                              | TT              | 1946921542               |
| SNP_P4_114506_732575 | NW_004515707.1 | Scaffold128 | 732575                  | CC                              | TT              | 1946921544               |
| SNP_P4_114507_732629 | NW_004515707.1 | Scaffold128 | 732629                  | GG                              | AA              | 1946921546               |
| SNP_P4_114509_732718 | NW_004515707.1 | Scaffold128 | 732718                  | AA                              | GG              | 1946921548               |
| SNP_P4_114510_732744 | NW_004515707.1 | Scaffold128 | 732744                  | GG                              | AA              | 1946921550               |
| SNP_P4_114511_732772 | NW_004515707.1 | Scaffold128 | 732772                  | CC                              | AA              | 1946921552               |
| SNP_P4_114512_732802 | NW_004515707.1 | Scaffold128 | 732802                  | AA                              | CC              | 1946921555               |
| SNP_P4_114513_732818 | NW_004515707.1 | Scaffold128 | 732818                  | AA                              | TT              | 1946921557               |
| SNP_P4_114514_737483 | NW_004515707.1 | Scaffold128 | 737483                  | CC                              | AA              | 1946921559               |
| SNP_P4_114515_745711 | NW_004515707.1 | Scaffold128 | 745711                  | AA                              | GG              | 1946921561               |
| SNP_P4_114516_746221 | NW_004515707.1 | Scaffold128 | 746221                  | GG                              | TT              | 1946921563               |
| SNP_P4_114517_746773 | NW_004515707.1 | Scaffold128 | 746773                  | CC                              | GG              | 1946921565               |
| SNP_P4_114519_747506 | NW_004515707.1 | Scaffold128 | 747506                  | AA                              | CC              | 1946921567               |
| SNP_P4_114520_747693 | NW_004515707.1 | Scaffold128 | 747693                  | AA                              | GG              | 1946921569               |
| SNP_P4_114521_747694 | NW_004515707.1 | Scaffold128 | 747694                  | TT                              | AA              | 1946921571               |
| SNP_P4_114523_762351 | NW_004515707.1 | Scaffold128 | 762351                  | GG                              | CC              | 1946921573               |
| SNP_P4_114524_762384 | NW_004515707.1 | Scaffold128 | 762384                  | AA                              | CC              | 1946921575               |
| SNP_P4_114525_769736 | NW_004515707.1 | Scaffold128 | 769736                  | CC                              | TT              | 1946921577               |
| SNP_P4_114526_813085 | NW_004515707.1 | Scaffold128 | 813085                  | AA                              | TT              | 1946921579               |
| SNP_P4_114527_820564 | NW_004515707.1 | Scaffold128 | 820564                  | TT                              | CC              | 1946921581               |
| SNP_P4_114528_820672 | NW_004515707.1 | Scaffold128 | 820672                  | GG                              | CC              | 1946921583               |
| SNP_P4_114529_820681 | NW_004515707.1 | Scaffold128 | 820681                  | AA                              | TT              | 1946921585               |
| SNP_P4_114530_820695 | NW_004515707.1 | Scaffold128 | 820695                  | AA                              | CC              | 1946921587               |
| SNP_P4_114531_820697 | NW_004515707.1 | Scaffold128 | 820697                  | AA                              | CC              | 1946921589               |
| SNP_P4_114533_820876 | NW_004515707.1 | Scaffold128 | 820876                  | TT                              | CC              | 1946921591               |
| SNP_P4_114534_820932 | NW_004515707.1 | Scaffold128 | 820932                  | AA                              | GG              | 1946921593               |
| SNP_P4_114535_820960 | NW_004515707.1 | Scaffold128 | 820960                  | TT                              | AA              | 1946921595               |
| SNP_P4_114536_835803 | NW_004515707.1 | Scaffold128 | 835803                  | AA                              | GG              | 1946921597               |

| SNPs IDs             | Chromosome IDs | Chromosomes | Physical positions (bp) | CDC Frontier (Reference genome) | (ILWC46 & LPNB) | NCBI SNPdb Accession IDs |
|----------------------|----------------|-------------|-------------------------|---------------------------------|-----------------|--------------------------|
| SNP_P4_114537_848026 | NW_004515707.1 | Scaffold128 | 848026                  | AA                              | CC              | 1946921599               |
| SNP_P4_114538_853456 | NW_004515707.1 | Scaffold128 | 853456                  | CC                              | TT              | 1946921601               |
| SNP_P4_114540_859090 | NW_004515707.1 | Scaffold128 | 859090                  | AA                              | GG              | 1946921603               |
| SNP_P4_114541_887432 | NW_004515707.1 | Scaffold128 | 887432                  | CC                              | GG              | 1946921605               |
| SNP_P4_114543_12954  | NW_004515708.1 | Scaffold131 | 12954                   | AA                              | GG              | 1946921607               |
| SNP_P4_114544_13002  | NW_004515708.1 | Scaffold131 | 13002                   | CC                              | TT              | 1946921609               |
| SNP_P4_114545_13021  | NW_004515708.1 | Scaffold131 | 13021                   | TT                              | GG              | 1946921611               |
| SNP_P4_114546_13026  | NW_004515708.1 | Scaffold131 | 13026                   | AA                              | GG              | 1946921613               |
| SNP_P4_114547_13291  | NW_004515708.1 | Scaffold131 | 13291                   | TT                              | CC              | 1946921615               |
| SNP_P4_114548_28346  | NW_004515708.1 | Scaffold131 | 28346                   | CC                              | AA              | 1946921617               |
| SNP_P4_114549_28652  | NW_004515708.1 | Scaffold131 | 28652                   | AA                              | GG              | 1946921619               |
| SNP_P4_114550_28753  | NW_004515708.1 | Scaffold131 | 28753                   | TT                              | CC              | 1946921621               |
| SNP_P4_114551_28756  | NW_004515708.1 | Scaffold131 | 28756                   | TT                              | AA              | 1946921623               |
| SNP_P4_114552_28784  | NW_004515708.1 | Scaffold131 | 28784                   | TT                              | CC              | 1946921625               |
| SNP_P4_114553_28789  | NW_004515708.1 | Scaffold131 | 28789                   | AA                              | TT              | 1946921627               |
| SNP_P4_114554_30329  | NW_004515708.1 | Scaffold131 | 30329                   | GG                              | TT              | 1946921629               |
| SNP_P4_114555_30537  | NW_004515708.1 | Scaffold131 | 30537                   | TT                              | GG              | 1946921631               |
| SNP_P4_114556_30610  | NW_004515708.1 | Scaffold131 | 30610                   | TT                              | AA              | 1946921633               |
| SNP_P4_114557_38181  | NW_004515708.1 | Scaffold131 | 38181                   | CC                              | TT              | 1946921635               |
| SNP_P4_114558_38213  | NW_004515708.1 | Scaffold131 | 38213                   | AA                              | TT              | 1946921637               |
| SNP_P4_114559_38254  | NW_004515708.1 | Scaffold131 | 38254                   | AA                              | GG              | 1946921639               |
| SNP_P4_114560_15710  | NW_004515709.1 | Scaffold132 | 15710                   | AA                              | TT              | 1946921641               |
| SNP_P4_114561_30536  | NW_004515709.1 | Scaffold132 | 30536                   | TT                              | CC              | 1946921643               |
| SNP_P4_114562_30556  | NW_004515709.1 | Scaffold132 | 30556                   | CC                              | AA              | 1946921645               |
| SNP_P4_114563_41558  | NW_004515709.1 | Scaffold132 | 41558                   | AA                              | TT              | 1946921647               |
| SNP_P4_114564_41654  | NW_004515709.1 | Scaffold132 | 41654                   | CC                              | TT              | 1946921649               |
| SNP_P4_114565_41660  | NW_004515709.1 | Scaffold132 | 41660                   | TT                              | AA              | 1946921651               |
| SNP_P4_114566_41673  | NW_004515709.1 | Scaffold132 | 41673                   | TT                              | GG              | 1946921653               |
| SNP_P4_114567_41732  | NW_004515709.1 | Scaffold132 | 41732                   | GG                              | AA              | 1946921655               |
| SNP_P4_114568_41755  | NW_004515709.1 | Scaffold132 | 41755                   | AA                              | GG              | 1946921657               |
| SNP_P4_114569_41842  | NW_004515709.1 | Scaffold132 | 41842                   | AA                              | GG              | 1946921659               |
| SNP_P4_114570_50661  | NW_004515709.1 | Scaffold132 | 50661                   | TT                              | CC              | 1946921661               |
| SNP_P4_114571_54019  | NW_004515709.1 | Scaffold132 | 54019                   | TT                              | AA              | 1946921663               |
| SNP_P4_114572_54050  | NW_004515709.1 | Scaffold132 | 54050                   | GG                              | CC              | 1946921665               |
| SNP_P4_114573_54075  | NW_004515709.1 | Scaffold132 | 54075                   | GG                              | AA              | 1946921667               |
| SNP_P4_114574_60629  | NW_004515709.1 | Scaffold132 | 60629                   | CC                              | TT              | 1946921669               |
| SNP_P4_114575_60633  | NW_004515709.1 | Scaffold132 | 60633                   | TT                              | CC              | 1946921671               |
| SNP_P4_114576_60722  | NW_004515709.1 | Scaffold132 | 60722                   | AA                              | GG              | 1946921673               |
| SNP_P4_114577_60736  | NW_004515709.1 | Scaffold132 | 60736                   | TT                              | CC              | 1946921675               |
| SNP_P4_114578_60737  | NW_004515709.1 | Scaffold132 | 60737                   | CC                              | TT              | 1946921677               |
| SNP_P4_114579_60758  | NW_004515709.1 | Scaffold132 | 60758                   | TT                              | CC              | 1946921679               |
| SNP_P4_114580_60759  | NW_004515709.1 | Scaffold132 | 60759                   | GG                              | AA              | 1946921681               |

| SNPs IDs             | Chromosome IDs | Chromosomes | Physical positions (bp) | CDC Frontier (Reference genome) | (ILWC46 & LPNB) | NCBI SNPdb Accession IDs |
|----------------------|----------------|-------------|-------------------------|---------------------------------|-----------------|--------------------------|
| SNP_P4_114581_60761  | NW_004515709.1 | Scaffold132 | 60761                   | GG                              | TT              | 1946921683               |
| SNP_P4_114582_61135  | NW_004515709.1 | Scaffold132 | 61135                   | TT                              | CC              | 1946921685               |
| SNP_P4_114583_76420  | NW_004515709.1 | Scaffold132 | 76420                   | GG                              | CC              | 1946921687               |
| SNP_P4_114584_87266  | NW_004515709.1 | Scaffold132 | 87266                   | GG                              | CC              | 1946921690               |
| SNP_P4_114585_90425  | NW_004515709.1 | Scaffold132 | 90425                   | GG                              | AA              | 1946921692               |
| SNP_P4_114586_94063  | NW_004515709.1 | Scaffold132 | 94063                   | AA                              | GG              | 1946921694               |
| SNP_P4_114587_94655  | NW_004515709.1 | Scaffold132 | 94655                   | TT                              | CC              | 1946921696               |
| SNP_P4_114588_98957  | NW_004515709.1 | Scaffold132 | 98957                   | TT                              | CC              | 1946921698               |
| SNP_P4_114589_99343  | NW_004515709.1 | Scaffold132 | 99343                   | TT                              | CC              | 1946921700               |
| SNP_P4_114590_112387 | NW_004515709.1 | Scaffold132 | 112387                  | AA                              | GG              | 1946921702               |
| SNP_P4_114591_113944 | NW_004515709.1 | Scaffold132 | 113944                  | CC                              | GG              | 1946921704               |
| SNP_P4_114592_128602 | NW_004515709.1 | Scaffold132 | 128602                  | TT                              | CC              | 1946921706               |
| SNP_P4_114593_137190 | NW_004515709.1 | Scaffold132 | 137190                  | TT                              | GG              | 1946921709               |
| SNP_P4_114594_137555 | NW_004515709.1 | Scaffold132 | 137555                  | GG                              | AA              | 1946921711               |
| SNP_P4_114595_137567 | NW_004515709.1 | Scaffold132 | 137567                  | CC                              | TT              | 1946921713               |
| SNP_P4_114596_152977 | NW_004515709.1 | Scaffold132 | 152977                  | CC                              | TT              | 1946921715               |
| SNP_P4_114597_153109 | NW_004515709.1 | Scaffold132 | 153109                  | CC                              | TT              | 1946921717               |
| SNP_P4_114598_153521 | NW_004515709.1 | Scaffold132 | 153521                  | TT                              | AA              | 1946921719               |
| SNP_P4_114599_160827 | NW_004515709.1 | Scaffold132 | 160827                  | TT                              | CC              | 1946921721               |
| SNP_P4_114600_160871 | NW_004515709.1 | Scaffold132 | 160871                  | AA                              | TT              | 1946921723               |
| SNP_P4_114601_21113  | NW_004515710.1 | Scaffold133 | 21113                   | CC                              | AA              | 1946921725               |
| SNP_P4_114602_21119  | NW_004515710.1 | Scaffold133 | 21119                   | CC                              | AA              | 1946921727               |
| SNP_P4_114603_21131  | NW_004515710.1 | Scaffold133 | 21131                   | TT                              | CC              | 1946921729               |
| SNP_P4_114604_17831  | NW_004515711.1 | Scaffold134 | 17831                   | TT                              | CC              | 1946921731               |
| SNP_P4_114605_20476  | NW_004515711.1 | Scaffold134 | 20476                   | CC                              | TT              | 1946921733               |
| SNP_P4_114606_30368  | NW_004515711.1 | Scaffold134 | 30368                   | CC                              | TT              | 1946921736               |
| SNP_P4_114607_36583  | NW_004515711.1 | Scaffold134 | 36583                   | TT                              | GG              | 1946921738               |
| SNP_P4_114609_50447  | NW_004515711.1 | Scaffold134 | 50447                   | TT                              | CC              | 1946921740               |
| SNP_P4_114610_58328  | NW_004515711.1 | Scaffold134 | 58328                   | CC                              | TT              | 1946921742               |
| SNP_P4_114611_103242 | NW_004515711.1 | Scaffold134 | 103242                  | CC                              | TT              | 1946921744               |
| SNP_P4_114612_103248 | NW_004515711.1 | Scaffold134 | 103248                  | GG                              | AA              | 1946921746               |
| SNP_P4_114613_161234 | NW_004515711.1 | Scaffold134 | 161234                  | AA                              | GG              | 1946921748               |
| SNP_P4_114614_161303 | NW_004515711.1 | Scaffold134 | 161303                  | TT                              | CC              | 1946921750               |
| SNP_P4_114615_161957 | NW_004515711.1 | Scaffold134 | 161957                  | GG                              | AA              | 1946921752               |
| SNP_P4_114616_162029 | NW_004515711.1 | Scaffold134 | 162029                  | GG                              | AA              | 1946921754               |
| SNP_P4_114617_166688 | NW_004515711.1 | Scaffold134 | 166688                  | TT                              | CC              | 1946921756               |
| SNP_P4_114618_167551 | NW_004515711.1 | Scaffold134 | 167551                  | TT                              | CC              | 1946921758               |
| SNP_P4_114619_172924 | NW_004515711.1 | Scaffold134 | 172924                  | GG                              | TT              | 1946921760               |
| SNP_P4_114620_185675 | NW_004515711.1 | Scaffold134 | 185675                  | AA                              | TT              | 1946921762               |
| SNP_P4_114621_198136 | NW_004515711.1 | Scaffold134 | 198136                  | TT                              | AA              | 1946921764               |
| SNP_P4_114622_216401 | NW_004515711.1 | Scaffold134 | 216401                  | TT                              | CC              | 1946921766               |
| SNP_P4_114624_266833 | NW_004515711.1 | Scaffold134 | 266833                  | GG                              | AA              | 1946921768               |



| SNPs IDs             | Chromosome IDs | Chromosomes | Physical positions (bp) | CDC Frontier (Reference genome) | (ILWC46 & LPNB) | NCBI SNPdb Accession IDs |
|----------------------|----------------|-------------|-------------------------|---------------------------------|-----------------|--------------------------|
| SNP_P4_114625_274599 | NW_004515711.1 | Scaffold134 | 274599                  | CC                              | TT              | 1946921770               |
| SNP_P4_114626_279916 | NW_004515711.1 | Scaffold134 | 279916                  | CC                              | AA              | 1946921772               |
| SNP_P4_114627_309381 | NW_004515711.1 | Scaffold134 | 309381                  | AA                              | CC              | 1946921774               |
| SNP_P4_114628_323217 | NW_004515711.1 | Scaffold134 | 323217                  | TT                              | CC              | 1946921776               |
| SNP_P4_114629_323238 | NW_004515711.1 | Scaffold134 | 323238                  | AA                              | GG              | 1946921778               |
| SNP_P4_114630_323246 | NW_004515711.1 | Scaffold134 | 323246                  | TT                              | CC              | 1946921780               |
| SNP_P4_114631_323258 | NW_004515711.1 | Scaffold134 | 323258                  | AA                              | GG              | 1946921782               |
| SNP_P4_114632_323261 | NW_004515711.1 | Scaffold134 | 323261                  | TT                              | CC              | 1946921784               |
| SNP_P4_114633_323381 | NW_004515711.1 | Scaffold134 | 323381                  | AA                              | GG              | 1946921787               |
| SNP_P4_114634_334315 | NW_004515711.1 | Scaffold134 | 334315                  | TT                              | CC              | 1946921789               |
| SNP_P4_114635_334340 | NW_004515711.1 | Scaffold134 | 334340                  | AA                              | GG              | 1946921791               |
| SNP_P4_114636_334358 | NW_004515711.1 | Scaffold134 | 334358                  | CC                              | GG              | 1946921793               |
| SNP_P4_114637_334384 | NW_004515711.1 | Scaffold134 | 334384                  | TT                              | CC              | 1946921795               |
| SNP_P4_114638_334396 | NW_004515711.1 | Scaffold134 | 334396                  | TT                              | GG              | 1946921797               |
| SNP_P4_114639_334539 | NW_004515711.1 | Scaffold134 | 334539                  | AA                              | GG              | 1946921799               |
| SNP_P4_114640_334569 | NW_004515711.1 | Scaffold134 | 334569                  | GG                              | AA              | 1946921801               |
| SNP_P4_114641_334591 | NW_004515711.1 | Scaffold134 | 334591                  | AA                              | CC              | 1946921803               |
| SNP_P4_114642_334694 | NW_004515711.1 | Scaffold134 | 334694                  | AA                              | TT              | 1946921805               |
| SNP_P4_114643_334819 | NW_004515711.1 | Scaffold134 | 334819                  | AA                              | GG              | 1946921807               |
| SNP_P4_114645_336564 | NW_004515711.1 | Scaffold134 | 336564                  | TT                              | CC              | 1946921809               |
| SNP_P4_114646_336664 | NW_004515711.1 | Scaffold134 | 336664                  | TT                              | CC              | 1946921811               |
| SNP_P4_114647_336666 | NW_004515711.1 | Scaffold134 | 336666                  | AA                              | CC              | 1946921813               |
| SNP_P4_114648_336670 | NW_004515711.1 | Scaffold134 | 336670                  | TT                              | AA              | 1946921815               |
| SNP_P4_114649_336712 | NW_004515711.1 | Scaffold134 | 336712                  | TT                              | AA              | 1946921817               |
| SNP_P4_114650_337151 | NW_004515711.1 | Scaffold134 | 337151                  | TT                              | CC              | 1946921819               |
| SNP_P4_114652_355742 | NW_004515711.1 | Scaffold134 | 355742                  | AA                              | GG              | 1946921821               |
| SNP_P4_114653_364718 | NW_004515711.1 | Scaffold134 | 364718                  | AA                              | GG              | 1946921823               |
| SNP_P4_114654_364725 | NW_004515711.1 | Scaffold134 | 364725                  | GG                              | AA              | 1946921825               |
| SNP_P4_114655_364776 | NW_004515711.1 | Scaffold134 | 364776                  | TT                              | CC              | 1946921827               |
| SNP_P4_114656_364788 | NW_004515711.1 | Scaffold134 | 364788                  | AA                              | GG              | 1946921829               |
| SNP_P4_114657_364832 | NW_004515711.1 | Scaffold134 | 364832                  | GG                              | AA              | 1946921831               |
| SNP_P4_114658_364892 | NW_004515711.1 | Scaffold134 | 364892                  | TT                              | CC              | 1946921833               |
| SNP_P4_114659_364915 | NW_004515711.1 | Scaffold134 | 364915                  | AA                              | CC              | 1946921835               |
| SNP_P4_114661_365205 | NW_004515711.1 | Scaffold134 | 365205                  | AA                              | TT              | 1946921837               |
| SNP_P4_114662_365236 | NW_004515711.1 | Scaffold134 | 365236                  | GG                              | TT              | 1946921839               |
| SNP_P4_114663_365237 | NW_004515711.1 | Scaffold134 | 365237                  | AA                              | GG              | 1946921841               |
| SNP_P4_114664_365424 | NW_004515711.1 | Scaffold134 | 365424                  | GG                              | TT              | 1946921843               |
| SNP_P4_114665_399419 | NW_004515711.1 | Scaffold134 | 399419                  | TT                              | CC              | 1946921845               |
| SNP_P4_114667_431774 | NW_004515711.1 | Scaffold134 | 431774                  | TT                              | CC              | 1946921847               |
| SNP_P4_114668_447056 | NW_004515711.1 | Scaffold134 | 447056                  | CC                              | TT              | 1946921849               |
| SNP_P4_114669_451490 | NW_004515711.1 | Scaffold134 | 451490                  | TT                              | GG              | 1946921851               |
| SNP_P4_114670_451491 | NW_004515711.1 | Scaffold134 | 451491                  | AA                              | TT              | 1946921853               |

| SNPs IDs             | Chromosome IDs | Chromosomes | Physical positions (bp) | CDC Frontier (Reference genome) | (ILWC46 & LPNB) | NCBI SNPdb Accession IDs |
|----------------------|----------------|-------------|-------------------------|---------------------------------|-----------------|--------------------------|
| SNP_P4_114671_451804 | NW_004515711.1 | Scaffold134 | 451804                  | AA                              | TT              | 1946921855               |
| SNP_P4_114672_459101 | NW_004515711.1 | Scaffold134 | 459101                  | AA                              | GG              | 1946921857               |
| SNP_P4_114673_459609 | NW_004515711.1 | Scaffold134 | 459609                  | GG                              | TT              | 1946921859               |
| SNP_P4_114674_472556 | NW_004515711.1 | Scaffold134 | 472556                  | AA                              | CC              | 1946921861               |
| SNP_P4_114675_489587 | NW_004515711.1 | Scaffold134 | 489587                  | GG                              | AA              | 1946921863               |
| SNP_P4_114676_489638 | NW_004515711.1 | Scaffold134 | 489638                  | TT                              | CC              | 1946921865               |
| SNP_P4_114677_556583 | NW_004515711.1 | Scaffold134 | 556583                  | AA                              | GG              | 1946921867               |
| SNP_P4_114678_556589 | NW_004515711.1 | Scaffold134 | 556589                  | CC                              | TT              | 1946921869               |
| SNP_P4_114679_556591 | NW_004515711.1 | Scaffold134 | 556591                  | AA                              | GG              | 1946921871               |
| SNP_P4_114680_562765 | NW_004515711.1 | Scaffold134 | 562765                  | AA                              | TT              | 1946921874               |
| SNP_P4_114681_564026 | NW_004515711.1 | Scaffold134 | 564026                  | AA                              | TT              | 1946921876               |
| SNP_P4_114682_564146 | NW_004515711.1 | Scaffold134 | 564146                  | AA                              | GG              | 1946921878               |
| SNP_P4_114683_260    | NW_004515712.1 | Scaffold135 | 260                     | TT                              | CC              | 1946921880               |
| SNP_P4_114684_3480   | NW_004515712.1 | Scaffold135 | 3480                    | TT                              | CC              | 1946921882               |
| SNP_P4_114685_3496   | NW_004515712.1 | Scaffold135 | 3496                    | TT                              | CC              | 1946921884               |
| SNP_P4_114687_10411  | NW_004515712.1 | Scaffold135 | 10411                   | GG                              | TT              | 1946921886               |
| SNP_P4_114689_11649  | NW_004515712.1 | Scaffold135 | 11649                   | CC                              | TT              | 1946921888               |
| SNP_P4_114690_18301  | NW_004515712.1 | Scaffold135 | 18301                   | AA                              | CC              | 1946921890               |
| SNP_P4_114691_53259  | NW_004515712.1 | Scaffold135 | 53259                   | TT                              | GG              | 1946921892               |
| SNP_P4_114692_53295  | NW_004515712.1 | Scaffold135 | 53295                   | GG                              | CC              | 1946921894               |
| SNP_P4_114693_56822  | NW_004515712.1 | Scaffold135 | 56822                   | AA                              | GG              | 1946921896               |
| SNP_P4_114694_56896  | NW_004515712.1 | Scaffold135 | 56896                   | AA                              | GG              | 1946921898               |
| SNP_P4_114695_57028  | NW_004515712.1 | Scaffold135 | 57028                   | GG                              | AA              | 1946921900               |
| SNP_P4_114696_57115  | NW_004515712.1 | Scaffold135 | 57115                   | CC                              | TT              | 1946921902               |
| SNP_P4_114697_57206  | NW_004515712.1 | Scaffold135 | 57206                   | TT                              | AA              | 1946921904               |
| SNP_P4_114698_57262  | NW_004515712.1 | Scaffold135 | 57262                   | AA                              | GG              | 1946921906               |
| SNP_P4_114699_57408  | NW_004515712.1 | Scaffold135 | 57408                   | CC                              | AA              | 1946921908               |
| SNP_P4_114700_57410  | NW_004515712.1 | Scaffold135 | 57410                   | TT                              | CC              | 1946921910               |
| SNP_P4_114701_57414  | NW_004515712.1 | Scaffold135 | 57414                   | TT                              | AA              | 1946921912               |
| SNP_P4_114702_57421  | NW_004515712.1 | Scaffold135 | 57421                   | AA                              | TT              | 1946921914               |
| SNP_P4_114703_57486  | NW_004515712.1 | Scaffold135 | 57486                   | TT                              | GG              | 1946921916               |
| SNP_P4_114704_57550  | NW_004515712.1 | Scaffold135 | 57550                   | CC                              | TT              | 1946921918               |
| SNP_P4_114705_57636  | NW_004515712.1 | Scaffold135 | 57636                   | TT                              | CC              | 1946921920               |
| SNP_P4_114706_73638  | NW_004515712.1 | Scaffold135 | 73638                   | AA                              | GG              | 1946921922               |
| SNP_P4_114707_73653  | NW_004515712.1 | Scaffold135 | 73653                   | TT                              | GG              | 1946921924               |
| SNP_P4_114708_73656  | NW_004515712.1 | Scaffold135 | 73656                   | CC                              | TT              | 1946921926               |
| SNP_P4_114709_73775  | NW_004515712.1 | Scaffold135 | 73775                   | CC                              | GG              | 1946921928               |
| SNP_P4_114710_74063  | NW_004515712.1 | Scaffold135 | 74063                   | CC                              | TT              | 1946921930               |
| SNP_P4_114711_74064  | NW_004515712.1 | Scaffold135 | 74064                   | AA                              | GG              | 1946921932               |
| SNP_P4_114712_95342  | NW_004515712.1 | Scaffold135 | 95342                   | TT                              | CC              | 1946921934               |
| SNP_P4_114713_95464  | NW_004515712.1 | Scaffold135 | 95464                   | CC                              | TT              | 1946921936               |
| SNP_P4_114714_95633  | NW_004515712.1 | Scaffold135 | 95633                   | AA                              | TT              | 1946921938               |

| SNPs IDs             | Chromosome IDs | Chromosomes | Physical positions (bp) | CDC Frontier (Reference genome) | (ILWC46 & LPNB) | NCBI SNPdb Accession IDs |
|----------------------|----------------|-------------|-------------------------|---------------------------------|-----------------|--------------------------|
| SNP_P4_114715_95634  | NW_004515712.1 | Scaffold135 | 95634                   | AA                              | TT              | 1946921940               |
| SNP_P4_114716_95641  | NW_004515712.1 | Scaffold135 | 95641                   | AA                              | TT              | 1946921942               |
| SNP_P4_114717_95962  | NW_004515712.1 | Scaffold135 | 95962                   | CC                              | AA              | 1946921944               |
| SNP_P4_114718_96032  | NW_004515712.1 | Scaffold135 | 96032                   | AA                              | TT              | 1946921946               |
| SNP_P4_114720_96427  | NW_004515712.1 | Scaffold135 | 96427                   | AA                              | GG              | 1946921948               |
| SNP_P4_114721_96464  | NW_004515712.1 | Scaffold135 | 96464                   | CC                              | AA              | 1946921950               |
| SNP_P4_114722_113198 | NW_004515712.1 | Scaffold135 | 113198                  | GG                              | AA              | 1946921952               |
| SNP_P4_114724_115487 | NW_004515712.1 | Scaffold135 | 115487                  | TT                              | CC              | 1946921954               |
| SNP_P4_114725_115594 | NW_004515712.1 | Scaffold135 | 115594                  | TT                              | CC              | 1946921957               |
| SNP_P4_114726_115603 | NW_004515712.1 | Scaffold135 | 115603                  | TT                              | CC              | 1946921959               |
| SNP_P4_114727_115623 | NW_004515712.1 | Scaffold135 | 115623                  | TT                              | CC              | 1946921961               |
| SNP_P4_114728_115625 | NW_004515712.1 | Scaffold135 | 115625                  | AA                              | TT              | 1946921963               |
| SNP_P4_114729_115627 | NW_004515712.1 | Scaffold135 | 115627                  | TT                              | AA              | 1946921965               |
| SNP_P4_114730_115629 | NW_004515712.1 | Scaffold135 | 115629                  | GG                              | AA              | 1946921967               |
| SNP_P4_114731_115717 | NW_004515712.1 | Scaffold135 | 115717                  | CC                              | TT              | 1946921969               |
| SNP_P4_114732_115891 | NW_004515712.1 | Scaffold135 | 115891                  | CC                              | TT              | 1946921971               |
| SNP_P4_114733_115911 | NW_004515712.1 | Scaffold135 | 115911                  | TT                              | CC              | 1946921973               |
| SNP_P4_114734_115923 | NW_004515712.1 | Scaffold135 | 115923                  | CC                              | TT              | 1946921975               |
| SNP_P4_114735_115924 | NW_004515712.1 | Scaffold135 | 115924                  | AA                              | GG              | 1946921977               |
| SNP_P4_114736_115985 | NW_004515712.1 | Scaffold135 | 115985                  | CC                              | TT              | 1946921979               |
| SNP_P4_114737_1164   | NW_004515713.1 | Scaffold136 | 1164                    | AA                              | TT              | 1946921981               |
| SNP_P4_114738_19772  | NW_004515713.1 | Scaffold136 | 19772                   | GG                              | AA              | 1946921983               |
| SNP_P4_114739_34863  | NW_004515713.1 | Scaffold136 | 34863                   | CC                              | TT              | 1946921985               |
| SNP_P4_114740_45917  | NW_004515713.1 | Scaffold136 | 45917                   | AA                              | TT              | 1946921987               |
| SNP_P4_114741_49366  | NW_004515713.1 | Scaffold136 | 49366                   | CC                              | TT              | 1946921989               |
| SNP_P4_114742_52985  | NW_004515713.1 | Scaffold136 | 52985                   | TT                              | GG              | 1946921991               |
| SNP_P4_114743_2357   | NW_004515715.1 | Scaffold140 | 2357                    | TT                              | CC              | 1946921993               |
| SNP_P4_114745_5344   | NW_004515715.1 | Scaffold140 | 5344                    | TT                              | AA              | 1946921995               |
| SNP_P4_114746_5718   | NW_004515715.1 | Scaffold140 | 5718                    | CC                              | AA              | 1946921997               |
| SNP_P4_114747_6073   | NW_004515715.1 | Scaffold140 | 6073                    | TT                              | CC              | 1946921999               |
| SNP_P4_114748_6115   | NW_004515715.1 | Scaffold140 | 6115                    | AA                              | GG              | 1946922001               |
| SNP_P4_114749_7442   | NW_004515715.1 | Scaffold140 | 7442                    | TT                              | CC              | 1946922003               |
| SNP_P4_114750_7734   | NW_004515715.1 | Scaffold140 | 7734                    | TT                              | GG              | 1946922005               |
| SNP_P4_114751_7750   | NW_004515715.1 | Scaffold140 | 7750                    | AA                              | GG              | 1946922007               |
| SNP_P4_114752_7776   | NW_004515715.1 | Scaffold140 | 7776                    | CC                              | TT              | 1946922009               |
| SNP_P4_114753_7794   | NW_004515715.1 | Scaffold140 | 7794                    | GG                              | AA              | 1946922012               |
| SNP_P4_114754_7821   | NW_004515715.1 | Scaffold140 | 7821                    | CC                              | TT              | 1946922014               |
| SNP_P4_114755_15962  | NW_004515715.1 | Scaffold140 | 15962                   | AA                              | TT              | 1946922016               |
| SNP_P4_114756_16270  | NW_004515715.1 | Scaffold140 | 16270                   | GG                              | AA              | 1946922018               |
| SNP_P4_114757_24573  | NW_004515715.1 | Scaffold140 | 24573                   | TT                              | CC              | 1946922020               |
| SNP_P4_114758_24637  | NW_004515715.1 | Scaffold140 | 24637                   | TT                              | CC              | 1946922022               |
| SNP_P4_114759_25001  | NW_004515715.1 | Scaffold140 | 25001                   | AA                              | GG              | 1946922024               |

| SNPs IDs            | Chromosome IDs | Chromosomes | Physical positions (bp) | CDC Frontier (Reference genome) | (ILWC46 & LPNB) | NCBI SNPdb Accession IDs |
|---------------------|----------------|-------------|-------------------------|---------------------------------|-----------------|--------------------------|
| SNP_P4_114760_25054 | NW_004515715.1 | Scaffold140 | 25054                   | TT                              | CC              | 1946922026               |
| SNP_P4_114762_25822 | NW_004515715.1 | Scaffold140 | 25822                   | GG                              | AA              | 1946922028               |
| SNP_P4_114763_25823 | NW_004515715.1 | Scaffold140 | 25823                   | TT                              | GG              | 1946922030               |
| SNP_P4_114764_26087 | NW_004515715.1 | Scaffold140 | 26087                   | TT                              | GG              | 1946922032               |
| SNP_P4_114765_26443 | NW_004515715.1 | Scaffold140 | 26443                   | AA                              | GG              | 1946922034               |
| SNP_P4_114766_26496 | NW_004515715.1 | Scaffold140 | 26496                   | AA                              | GG              | 1946922036               |
| SNP_P4_114767_27260 | NW_004515715.1 | Scaffold140 | 27260                   | AA                              | GG              | 1946922038               |
| SNP_P4_114768_27358 | NW_004515715.1 | Scaffold140 | 27358                   | TT                              | GG              | 1946922040               |
| SNP_P4_114769_27601 | NW_004515715.1 | Scaffold140 | 27601                   | GG                              | AA              | 1946922042               |
| SNP_P4_114770_36798 | NW_004515715.1 | Scaffold140 | 36798                   | AA                              | TT              | 1946922044               |
| SNP_P4_114771_37034 | NW_004515715.1 | Scaffold140 | 37034                   | TT                              | CC              | 1946922046               |
| SNP_P4_114772_37135 | NW_004515715.1 | Scaffold140 | 37135                   | TT                              | AA              | 1946922048               |
| SNP_P4_114773_37256 | NW_004515715.1 | Scaffold140 | 37256                   | AA                              | TT              | 1946922050               |
| SNP_P4_114774_37293 | NW_004515715.1 | Scaffold140 | 37293                   | AA                              | GG              | 1946922052               |
| SNP_P4_114775_49668 | NW_004515715.1 | Scaffold140 | 49668                   | GG                              | TT              | 1946922054               |
| SNP_P4_114776_49670 | NW_004515715.1 | Scaffold140 | 49670                   | TT                              | CC              | 1946922056               |
| SNP_P4_114777_49678 | NW_004515715.1 | Scaffold140 | 49678                   | AA                              | TT              | 1946922058               |
| SNP_P4_114778_52033 | NW_004515715.1 | Scaffold140 | 52033                   | GG                              | AA              | 1946922060               |
| SNP_P4_114779_11725 | NW_004515716.1 | Scaffold141 | 11725                   | GG                              | AA              | 1946922062               |
| SNP_P4_114780_13491 | NW_004515716.1 | Scaffold141 | 13491                   | CC                              | TT              | 1946922064               |
| SNP_P4_114781_13509 | NW_004515716.1 | Scaffold141 | 13509                   | GG                              | AA              | 1946922066               |
| SNP_P4_114782_13579 | NW_004515716.1 | Scaffold141 | 13579                   | GG                              | AA              | 1946922068               |
| SNP_P4_114783_14090 | NW_004515716.1 | Scaffold141 | 14090                   | CC                              | TT              | 1946922070               |
| SNP_P4_114784_14442 | NW_004515716.1 | Scaffold141 | 14442                   | TT                              | CC              | 1946922072               |
| SNP_P4_114785_15781 | NW_004515716.1 | Scaffold141 | 15781                   | AA                              | GG              | 1946922074               |
| SNP_P4_114786_15983 | NW_004515716.1 | Scaffold141 | 15983                   | GG                              | AA              | 1946922076               |
| SNP_P4_114787_16225 | NW_004515716.1 | Scaffold141 | 16225                   | GG                              | AA              | 1946922078               |
| SNP_P4_114788_16298 | NW_004515716.1 | Scaffold141 | 16298                   | CC                              | GG              | 1946922080               |
| SNP_P4_114789_16385 | NW_004515716.1 | Scaffold141 | 16385                   | AA                              | TT              | 1946922082               |
| SNP_P4_114790_16866 | NW_004515716.1 | Scaffold141 | 16866                   | CC                              | TT              | 1946922084               |
| SNP_P4_114791_16991 | NW_004515716.1 | Scaffold141 | 16991                   | AA                              | GG              | 1946922086               |
| SNP_P4_114792_18079 | NW_004515716.1 | Scaffold141 | 18079                   | CC                              | TT              | 1946922088               |
| SNP_P4_114793_18408 | NW_004515716.1 | Scaffold141 | 18408                   | CC                              | GG              | 1946922091               |
| SNP_P4_114794_18620 | NW_004515716.1 | Scaffold141 | 18620                   | CC                              | TT              | 1946922093               |
| SNP_P4_114795_29637 | NW_004515716.1 | Scaffold141 | 29637                   | GG                              | AA              | 1946922095               |
| SNP_P4_114796_48432 | NW_004515716.1 | Scaffold141 | 48432                   | TT                              | GG              | 1946922097               |
| SNP_P4_114797_48468 | NW_004515716.1 | Scaffold141 | 48468                   | AA                              | GG              | 1946922099               |
| SNP_P4_114798_48634 | NW_004515716.1 | Scaffold141 | 48634                   | AA                              | GG              | 1946922101               |
| SNP_P4_114799_48635 | NW_004515716.1 | Scaffold141 | 48635                   | AA                              | CC              | 1946922103               |
| SNP_P4_114800_48685 | NW_004515716.1 | Scaffold141 | 48685                   | TT                              | CC              | 1946922105               |
| SNP_P4_114801_50327 | NW_004515716.1 | Scaffold141 | 50327                   | GG                              | TT              | 1946922107               |
| SNP_P4_114802_55914 | NW_004515716.1 | Scaffold141 | 55914                   | TT                              | CC              | 1946922109               |

| SNPs IDs             | Chromosome IDs | Chromosomes | Physical positions (bp) | CDC Frontier (Reference genome) | (ILWC46 & LPNB) | NCBI SNPdb Accession IDs |
|----------------------|----------------|-------------|-------------------------|---------------------------------|-----------------|--------------------------|
| SNP_P4_114803_56211  | NW_004515716.1 | Scaffold141 | 56211                   | GG                              | AA              | 1946922111               |
| SNP_P4_114804_56338  | NW_004515716.1 | Scaffold141 | 56338                   | CC                              | TT              | 1946922113               |
| SNP_P4_114805_56419  | NW_004515716.1 | Scaffold141 | 56419                   | AA                              | GG              | 1946922115               |
| SNP_P4_114806_56426  | NW_004515716.1 | Scaffold141 | 56426                   | CC                              | AA              | 1946922117               |
| SNP_P4_114807_66968  | NW_004515716.1 | Scaffold141 | 66968                   | AA                              | CC              | 1946922119               |
| SNP_P4_114808_67014  | NW_004515716.1 | Scaffold141 | 67014                   | AA                              | CC              | 1946922122               |
| SNP_P4_114809_67060  | NW_004515716.1 | Scaffold141 | 67060                   | AA                              | GG              | 1946922124               |
| SNP_P4_114810_67171  | NW_004515716.1 | Scaffold141 | 67171                   | TT                              | CC              | 1946922126               |
| SNP_P4_114811_67226  | NW_004515716.1 | Scaffold141 | 67226                   | AA                              | CC              | 1946922128               |
| SNP_P4_114812_67232  | NW_004515716.1 | Scaffold141 | 67232                   | TT                              | AA              | 1946922130               |
| SNP_P4_114814_68708  | NW_004515716.1 | Scaffold141 | 68708                   | CC                              | TT              | 1946922132               |
| SNP_P4_114815_68712  | NW_004515716.1 | Scaffold141 | 68712                   | GG                              | AA              | 1946922134               |
| SNP_P4_114816_68875  | NW_004515716.1 | Scaffold141 | 68875                   | GG                              | TT              | 1946922136               |
| SNP_P4_114817_69214  | NW_004515716.1 | Scaffold141 | 69214                   | AA                              | TT              | 1946922138               |
| SNP_P4_114818_69215  | NW_004515716.1 | Scaffold141 | 69215                   | TT                              | GG              | 1946922140               |
| SNP_P4_114819_76446  | NW_004515716.1 | Scaffold141 | 76446                   | TT                              | AA              | 1946922142               |
| SNP_P4_114820_77161  | NW_004515716.1 | Scaffold141 | 77161                   | TT                              | GG              | 1946922144               |
| SNP_P4_114821_77168  | NW_004515716.1 | Scaffold141 | 77168                   | TT                              | AA              | 1946922146               |
| SNP_P4_114822_82372  | NW_004515716.1 | Scaffold141 | 82372                   | CC                              | AA              | 1946922148               |
| SNP_P4_114823_85274  | NW_004515716.1 | Scaffold141 | 85274                   | AA                              | TT              | 1946922150               |
| SNP_P4_114824_85277  | NW_004515716.1 | Scaffold141 | 85277                   | TT                              | CC              | 1946922152               |
| SNP_P4_114825_85278  | NW_004515716.1 | Scaffold141 | 85278                   | TT                              | GG              | 1946922154               |
| SNP_P4_114827_85298  | NW_004515716.1 | Scaffold141 | 85298                   | AA                              | TT              | 1946922156               |
| SNP_P4_114828_101795 | NW_004515716.1 | Scaffold141 | 101795                  | TT                              | CC              | 1946922158               |
| SNP_P4_114829_102239 | NW_004515716.1 | Scaffold141 | 102239                  | CC                              | GG              | 1946922160               |
| SNP_P4_114830_102289 | NW_004515716.1 | Scaffold141 | 102289                  | AA                              | GG              | 1946922162               |
| SNP_P4_114831_102478 | NW_004515716.1 | Scaffold141 | 102478                  | CC                              | AA              | 1946922164               |
| SNP_P4_114832_114437 | NW_004515716.1 | Scaffold141 | 114437                  | CC                              | GG              | 1946922166               |
| SNP_P4_114833_118068 | NW_004515716.1 | Scaffold141 | 118068                  | CC                              | TT              | 1946922168               |
| SNP_P4_114834_119045 | NW_004515716.1 | Scaffold141 | 119045                  | GG                              | AA              | 1946922170               |
| SNP_P4_114835_119052 | NW_004515716.1 | Scaffold141 | 119052                  | TT                              | AA              | 1946922172               |
| SNP_P4_114836_119055 | NW_004515716.1 | Scaffold141 | 119055                  | GG                              | AA              | 1946922174               |
| SNP_P4_114837_119080 | NW_004515716.1 | Scaffold141 | 119080                  | TT                              | AA              | 1946922176               |
| SNP_P4_114838_132781 | NW_004515716.1 | Scaffold141 | 132781                  | TT                              | GG              | 1946922178               |
| SNP_P4_114839_132905 | NW_004515716.1 | Scaffold141 | 132905                  | TT                              | AA              | 1946922180               |
| SNP_P4_114840_133091 | NW_004515716.1 | Scaffold141 | 133091                  | TT                              | AA              | 1946922182               |
| SNP_P4_114841_133103 | NW_004515716.1 | Scaffold141 | 133103                  | TT                              | CC              | 1946922184               |
| SNP_P4_114842_133150 | NW_004515716.1 | Scaffold141 | 133150                  | TT                              | GG              | 1946922186               |
| SNP_P4_114843_133166 | NW_004515716.1 | Scaffold141 | 133166                  | CC                              | TT              | 1946922188               |
| SNP_P4_114844_133169 | NW_004515716.1 | Scaffold141 | 133169                  | TT                              | GG              | 1946922190               |
| SNP_P4_114845_133184 | NW_004515716.1 | Scaffold141 | 133184                  | TT                              | CC              | 1946922192               |
| SNP_P4_114846_133237 | NW_004515716.1 | Scaffold141 | 133237                  | AA                              | CC              | 1946922194               |

| SNPs IDs             | Chromosome IDs | Chromosomes | Physical positions (bp) | CDC Frontier (Reference genome) | (ILWC46 & LPNB) | NCBI SNPdb Accession IDs |
|----------------------|----------------|-------------|-------------------------|---------------------------------|-----------------|--------------------------|
| SNP_P4_114847_138555 | NW_004515716.1 | Scaffold141 | 138555                  | GG                              | AA              | 1946922196               |
| SNP_P4_114848_138695 | NW_004515716.1 | Scaffold141 | 138695                  | GG                              | TT              | 1946922198               |
| SNP_P4_114849_139458 | NW_004515716.1 | Scaffold141 | 139458                  | CC                              | AA              | 1946922200               |
| SNP_P4_114850_139720 | NW_004515716.1 | Scaffold141 | 139720                  | AA                              | GG              | 1946922202               |
| SNP_P4_114851_139790 | NW_004515716.1 | Scaffold141 | 139790                  | AA                              | GG              | 1946922204               |
| SNP_P4_114852_139806 | NW_004515716.1 | Scaffold141 | 139806                  | TT                              | GG              | 1946922206               |
| SNP_P4_114853_139821 | NW_004515716.1 | Scaffold141 | 139821                  | TT                              | CC              | 1946922208               |
| SNP_P4_114854_139829 | NW_004515716.1 | Scaffold141 | 139829                  | AA                              | GG              | 1946922211               |
| SNP_P4_114855_139844 | NW_004515716.1 | Scaffold141 | 139844                  | TT                              | AA              | 1946922213               |
| SNP_P4_114856_139862 | NW_004515716.1 | Scaffold141 | 139862                  | TT                              | GG              | 1946922215               |
| SNP_P4_114857_139951 | NW_004515716.1 | Scaffold141 | 139951                  | TT                              | CC              | 1946922217               |
| SNP_P4_114858_140185 | NW_004515716.1 | Scaffold141 | 140185                  | TT                              | GG              | 1946922219               |
| SNP_P4_114859_140750 | NW_004515716.1 | Scaffold141 | 140750                  | TT                              | CC              | 1946922221               |
| SNP_P4_114860_146722 | NW_004515716.1 | Scaffold141 | 146722                  | AA                              | GG              | 1946922223               |
| SNP_P4_114861_146857 | NW_004515716.1 | Scaffold141 | 146857                  | TT                              | CC              | 1946922225               |
| SNP_P4_114862_146900 | NW_004515716.1 | Scaffold141 | 146900                  | GG                              | TT              | 1946922227               |
| SNP_P4_114863_147230 | NW_004515716.1 | Scaffold141 | 147230                  | TT                              | CC              | 1946922229               |
| SNP_P4_114864_147487 | NW_004515716.1 | Scaffold141 | 147487                  | AA                              | CC              | 1946922231               |
| SNP_P4_114865_147540 | NW_004515716.1 | Scaffold141 | 147540                  | AA                              | TT              | 1946922233               |
| SNP_P4_114866_147554 | NW_004515716.1 | Scaffold141 | 147554                  | GG                              | CC              | 1946922235               |
| SNP_P4_114867_161798 | NW_004515716.1 | Scaffold141 | 161798                  | CC                              | TT              | 1946922237               |
| SNP_P4_114868_166927 | NW_004515716.1 | Scaffold141 | 166927                  | GG                              | TT              | 1946922239               |
| SNP_P4_114869_166974 | NW_004515716.1 | Scaffold141 | 166974                  | TT                              | AA              | 1946922241               |
| SNP_P4_114870_166983 | NW_004515716.1 | Scaffold141 | 166983                  | TT                              | CC              | 1946922243               |
| SNP_P4_114871_167242 | NW_004515716.1 | Scaffold141 | 167242                  | AA                              | CC              | 1946922245               |
| SNP_P4_114872_172027 | NW_004515716.1 | Scaffold141 | 172027                  | AA                              | TT              | 1946922247               |
| SNP_P4_114873_172136 | NW_004515716.1 | Scaffold141 | 172136                  | AA                              | GG              | 1946922249               |
| SNP_P4_114874_172182 | NW_004515716.1 | Scaffold141 | 172182                  | CC                              | GG              | 1946922251               |
| SNP_P4_114875_172226 | NW_004515716.1 | Scaffold141 | 172226                  | AA                              | GG              | 1946922253               |
| SNP_P4_114876_172300 | NW_004515716.1 | Scaffold141 | 172300                  | TT                              | AA              | 1946922255               |
| SNP_P4_114877_174698 | NW_004515716.1 | Scaffold141 | 174698                  | AA                              | GG              | 1946922257               |
| SNP_P4_114879_3787   | NW_004515717.1 | Scaffold142 | 3787                    | AA                              | GG              | 1946922259               |
| SNP_P4_114880_4689   | NW_004515717.1 | Scaffold142 | 4689                    | GG                              | TT              | 1946922261               |
| SNP_P4_114881_4746   | NW_004515717.1 | Scaffold142 | 4746                    | TT                              | GG              | 1946922263               |
| SNP_P4_114882_5347   | NW_004515717.1 | Scaffold142 | 5347                    | AA                              | GG              | 1946922265               |
| SNP_P4_114884_8919   | NW_004515718.1 | Scaffold143 | 8919                    | AA                              | CC              | 1946922267               |
| SNP_P4_114885_14028  | NW_004515718.1 | Scaffold143 | 14028                   | TT                              | GG              | 1946922269               |
| SNP_P4_114886_14083  | NW_004515718.1 | Scaffold143 | 14083                   | GG                              | AA              | 1946922272               |
| SNP_P4_114887_14103  | NW_004515718.1 | Scaffold143 | 14103                   | TT                              | CC              | 1946922274               |
| SNP_P4_114888_22047  | NW_004515718.1 | Scaffold143 | 22047                   | GG                              | AA              | 1946922276               |
| SNP_P4_114889_29228  | NW_004515718.1 | Scaffold143 | 29228                   | TT                              | CC              | 1946922278               |
| SNP_P4_114890_31800  | NW_004515718.1 | Scaffold143 | 31800                   | AA                              | GG              | 1946922280               |

| SNPs IDs             | Chromosome IDs | Chromosomes | Physical positions (bp) | CDC Frontier (Reference genome) | (ILWC46 & LPNB) | NCBI SNPdb Accession IDs |
|----------------------|----------------|-------------|-------------------------|---------------------------------|-----------------|--------------------------|
| SNP_P4_114891_35139  | NW_004515718.1 | Scaffold143 | 35139                   | TT                              | CC              | 1946922282               |
| SNP_P4_114892_35183  | NW_004515718.1 | Scaffold143 | 35183                   | AA                              | GG              | 1946922284               |
| SNP_P4_114893_35189  | NW_004515718.1 | Scaffold143 | 35189                   | CC                              | TT              | 1946922286               |
| SNP_P4_114894_44090  | NW_004515718.1 | Scaffold143 | 44090                   | CC                              | TT              | 1946922288               |
| SNP_P4_114895_63639  | NW_004515718.1 | Scaffold143 | 63639                   | CC                              | TT              | 1946922290               |
| SNP_P4_114896_67165  | NW_004515718.1 | Scaffold143 | 67165                   | TT                              | AA              | 1946922292               |
| SNP_P4_114897_67418  | NW_004515718.1 | Scaffold143 | 67418                   | TT                              | CC              | 1946922294               |
| SNP_P4_114898_67472  | NW_004515718.1 | Scaffold143 | 67472                   | AA                              | GG              | 1946922296               |
| SNP_P4_114900_67536  | NW_004515718.1 | Scaffold143 | 67536                   | AA                              | TT              | 1946922298               |
| SNP_P4_114901_67543  | NW_004515718.1 | Scaffold143 | 67543                   | CC                              | TT              | 1946922300               |
| SNP_P4_114902_67578  | NW_004515718.1 | Scaffold143 | 67578                   | CC                              | TT              | 1946922302               |
| SNP_P4_114903_67679  | NW_004515718.1 | Scaffold143 | 67679                   | AA                              | TT              | 1946922304               |
| SNP_P4_114904_67698  | NW_004515718.1 | Scaffold143 | 67698                   | AA                              | TT              | 1946922306               |
| SNP_P4_114906_67949  | NW_004515718.1 | Scaffold143 | 67949                   | AA                              | GG              | 1946922308               |
| SNP_P4_114907_67988  | NW_004515718.1 | Scaffold143 | 67988                   | TT                              | GG              | 1946922311               |
| SNP_P4_114908_68042  | NW_004515718.1 | Scaffold143 | 68042                   | CC                              | TT              | 1946922313               |
| SNP_P4_114909_68057  | NW_004515718.1 | Scaffold143 | 68057                   | AA                              | TT              | 1946922315               |
| SNP_P4_114910_68074  | NW_004515718.1 | Scaffold143 | 68074                   | AA                              | TT              | 1946922317               |
| SNP_P4_114911_68092  | NW_004515718.1 | Scaffold143 | 68092                   | TT                              | GG              | 1946922319               |
| SNP_P4_114912_68128  | NW_004515718.1 | Scaffold143 | 68128                   | AA                              | GG              | 1946922321               |
| SNP_P4_114913_84190  | NW_004515718.1 | Scaffold143 | 84190                   | AA                              | CC              | 1946922323               |
| SNP_P4_114914_84191  | NW_004515718.1 | Scaffold143 | 84191                   | GG                              | AA              | 1946922325               |
| SNP_P4_114915_85250  | NW_004515718.1 | Scaffold143 | 85250                   | CC                              | TT              | 1946922327               |
| SNP_P4_114916_110964 | NW_004515718.1 | Scaffold143 | 110964                  | AA                              | CC              | 1946922329               |
| SNP_P4_114917_110976 | NW_004515718.1 | Scaffold143 | 110976                  | TT                              | CC              | 1946922331               |
| SNP_P4_114918_110977 | NW_004515718.1 | Scaffold143 | 110977                  | GG                              | AA              | 1946922333               |
| SNP_P4_114919_110984 | NW_004515718.1 | Scaffold143 | 110984                  | CC                              | TT              | 1946922335               |
| SNP_P4_114920_112501 | NW_004515718.1 | Scaffold143 | 112501                  | CC                              | GG              | 1946922337               |
| SNP_P4_114921_121417 | NW_004515718.1 | Scaffold143 | 121417                  | GG                              | AA              | 1946922339               |
| SNP_P4_114922_124538 | NW_004515718.1 | Scaffold143 | 124538                  | AA                              | GG              | 1946922341               |
| SNP_P4_114923_124818 | NW_004515718.1 | Scaffold143 | 124818                  | GG                              | TT              | 1946922343               |
| SNP_P4_114924_124820 | NW_004515718.1 | Scaffold143 | 124820                  | CC                              | TT              | 1946922345               |
| SNP_P4_114925_125371 | NW_004515718.1 | Scaffold143 | 125371                  | TT                              | AA              | 1946922347               |
| SNP_P4_114926_136345 | NW_004515718.1 | Scaffold143 | 136345                  | TT                              | GG              | 1946922349               |
| SNP_P4_114927_136501 | NW_004515718.1 | Scaffold143 | 136501                  | TT                              | AA              | 1946922351               |
| SNP_P4_114928_147519 | NW_004515718.1 | Scaffold143 | 147519                  | GG                              | AA              | 1946922353               |
| SNP_P4_114929_152887 | NW_004515718.1 | Scaffold143 | 152887                  | TT                              | CC              | 1946922355               |
| SNP_P4_114931_167407 | NW_004515718.1 | Scaffold143 | 167407                  | AA                              | GG              | 1946922357               |
| SNP_P4_114932_167434 | NW_004515718.1 | Scaffold143 | 167434                  | AA                              | GG              | 1946922359               |
| SNP_P4_114933_182407 | NW_004515718.1 | Scaffold143 | 182407                  | GG                              | AA              | 1946922361               |
| SNP_P4_114934_205667 | NW_004515718.1 | Scaffold143 | 205667                  | TT                              | AA              | 1946922363               |
| SNP_P4_114935_227120 | NW_004515718.1 | Scaffold143 | 227120                  | GG                              | AA              | 1946922365               |

| SNPs IDs             | Chromosome IDs | Chromosomes | Physical positions (bp) | CDC Frontier (Reference genome) | (ILWC46 & LPNB) | NCBI SNPdb Accession IDs |
|----------------------|----------------|-------------|-------------------------|---------------------------------|-----------------|--------------------------|
| SNP_P4_114936_227148 | NW_004515718.1 | Scaffold143 | 227148                  | TT                              | CC              | 1946922367               |
| SNP_P4_114937_227547 | NW_004515718.1 | Scaffold143 | 227547                  | AA                              | GG              | 1946922369               |
| SNP_P4_114938_231083 | NW_004515718.1 | Scaffold143 | 231083                  | AA                              | GG              | 1946922371               |
| SNP_P4_114939_234047 | NW_004515718.1 | Scaffold143 | 234047                  | CC                              | TT              | 1946922372               |
| SNP_P4_114940_786    | NW_004515719.1 | Scaffold144 | 786                     | CC                              | TT              | 1946922373               |
| SNP_P4_114941_852    | NW_004515719.1 | Scaffold144 | 852                     | TT                              | AA              | 1946922374               |
| SNP_P4_114942_1790   | NW_004515719.1 | Scaffold144 | 1790                    | AA                              | CC              | 1946922375               |
| SNP_P4_114943_2842   | NW_004515719.1 | Scaffold144 | 2842                    | CC                              | TT              | 1946922377               |
| SNP_P4_114944_3666   | NW_004515719.1 | Scaffold144 | 3666                    | TT                              | GG              | 1946922379               |
| SNP_P4_114945_3864   | NW_004515719.1 | Scaffold144 | 3864                    | GG                              | CC              | 1946922381               |
| SNP_P4_114946_3882   | NW_004515719.1 | Scaffold144 | 3882                    | TT                              | AA              | 1946922383               |
| SNP_P4_114947_4028   | NW_004515719.1 | Scaffold144 | 4028                    | AA                              | CC              | 1946922385               |
| SNP_P4_114948_4788   | NW_004515719.1 | Scaffold144 | 4788                    | GG                              | AA              | 1946922387               |
| SNP_P4_114949_4819   | NW_004515719.1 | Scaffold144 | 4819                    | CC                              | AA              | 1946922389               |
| SNP_P4_114950_5061   | NW_004515719.1 | Scaffold144 | 5061                    | AA                              | TT              | 1946922391               |
| SNP_P4_114951_17061  | NW_004515719.1 | Scaffold144 | 17061                   | TT                              | AA              | 1946922393               |
| SNP_P4_114952_17076  | NW_004515719.1 | Scaffold144 | 17076                   | AA                              | CC              | 1946922395               |
| SNP_P4_114953_17182  | NW_004515719.1 | Scaffold144 | 17182                   | AA                              | GG              | 1946922397               |
| SNP_P4_114954_17201  | NW_004515719.1 | Scaffold144 | 17201                   | CC                              | TT              | 1946922399               |
| SNP_P4_114955_17226  | NW_004515719.1 | Scaffold144 | 17226                   | AA                              | GG              | 1946922401               |
| SNP_P4_114956_17459  | NW_004515719.1 | Scaffold144 | 17459                   | CC                              | AA              | 1946922403               |
| SNP_P4_114957_17670  | NW_004515719.1 | Scaffold144 | 17670                   | TT                              | GG              | 1946922405               |
| SNP_P4_114958_17806  | NW_004515719.1 | Scaffold144 | 17806                   | AA                              | CC              | 1946922407               |
| SNP_P4_114959_18100  | NW_004515719.1 | Scaffold144 | 18100                   | CC                              | TT              | 1946922409               |
| SNP_P4_114960_9656   | NW_004515720.1 | Scaffold146 | 9656                    | AA                              | CC              | 1946922411               |
| SNP_P4_114961_9666   | NW_004515720.1 | Scaffold146 | 9666                    | GG                              | CC              | 1946922413               |
| SNP_P4_114962_9671   | NW_004515720.1 | Scaffold146 | 9671                    | TT                              | AA              | 1946922415               |
| SNP_P4_114963_9810   | NW_004515720.1 | Scaffold146 | 9810                    | GG                              | AA              | 1946922417               |
| SNP_P4_114964_9813   | NW_004515720.1 | Scaffold146 | 9813                    | AA                              | TT              | 1946922419               |
| SNP_P4_114965_9814   | NW_004515720.1 | Scaffold146 | 9814                    | TT                              | AA              | 1946922421               |
| SNP_P4_114966_9847   | NW_004515720.1 | Scaffold146 | 9847                    | AA                              | GG              | 1946922423               |
| SNP_P4_114968_10001  | NW_004515720.1 | Scaffold146 | 10001                   | TT                              | CC              | 1946922425               |
| SNP_P4_114969_10029  | NW_004515720.1 | Scaffold146 | 10029                   | CC                              | TT              | 1946922427               |
| SNP_P4_114970_10074  | NW_004515720.1 | Scaffold146 | 10074                   | GG                              | AA              | 1946922429               |
| SNP_P4_114971_10418  | NW_004515720.1 | Scaffold146 | 10418                   | CC                              | AA              | 1946922431               |
| SNP_P4_114972_10732  | NW_004515720.1 | Scaffold146 | 10732                   | TT                              | GG              | 1946922433               |
| SNP_P4_114973_10946  | NW_004515720.1 | Scaffold146 | 10946                   | AA                              | CC              | 1946922435               |
| SNP_P4_114974_10958  | NW_004515720.1 | Scaffold146 | 10958                   | CC                              | TT              | 1946922437               |
| SNP_P4_114975_12181  | NW_004515720.1 | Scaffold146 | 12181                   | TT                              | CC              | 1946922439               |
| SNP_P4_114976_12186  | NW_004515720.1 | Scaffold146 | 12186                   | AA                              | GG              | 1946922441               |
| SNP_P4_114977_12221  | NW_004515720.1 | Scaffold146 | 12221                   | GG                              | TT              | 1946922443               |
| SNP_P4_114978_12226  | NW_004515720.1 | Scaffold146 | 12226                   | AA                              | GG              | 1946922445               |



| SNPs IDs            | Chromosome IDs | Chromosomes | Physical positions (bp) | CDC Frontier (Reference genome) | (ILWC46 & LPNB) | NCBI SNPdb Accession IDs |
|---------------------|----------------|-------------|-------------------------|---------------------------------|-----------------|--------------------------|
| SNP_P4_114979_12233 | NW_004515720.1 | Scaffold146 | 12233                   | TT                              | CC              | 1946922447               |
| SNP_P4_114980_12258 | NW_004515720.1 | Scaffold146 | 12258                   | CC                              | TT              | 1946922449               |
| SNP_P4_114981_12284 | NW_004515720.1 | Scaffold146 | 12284                   | CC                              | GG              | 1946922451               |
| SNP_P4_114982_12316 | NW_004515720.1 | Scaffold146 | 12316                   | TT                              | CC              | 1946922453               |
| SNP_P4_114983_12384 | NW_004515720.1 | Scaffold146 | 12384                   | TT                              | GG              | 1946922455               |
| SNP_P4_114984_12388 | NW_004515720.1 | Scaffold146 | 12388                   | AA                              | GG              | 1946922457               |
| SNP_P4_114985_12405 | NW_004515720.1 | Scaffold146 | 12405                   | AA                              | GG              | 1946922459               |
| SNP_P4_114986_12408 | NW_004515720.1 | Scaffold146 | 12408                   | GG                              | AA              | 1946922461               |
| SNP_P4_114987_19138 | NW_004515720.1 | Scaffold146 | 19138                   | AA                              | GG              | 1946922463               |
| SNP_P4_114988_28125 | NW_004515720.1 | Scaffold146 | 28125                   | AA                              | TT              | 1946922465               |
| SNP_P4_114989_37102 | NW_004515720.1 | Scaffold146 | 37102                   | CC                              | TT              | 1946922467               |
| SNP_P4_114990_37222 | NW_004515720.1 | Scaffold146 | 37222                   | AA                              | GG              | 1946922469               |
| SNP_P4_114991_46544 | NW_004515720.1 | Scaffold146 | 46544                   | CC                              | GG              | 1946922471               |
| SNP_P4_114992_47663 | NW_004515720.1 | Scaffold146 | 47663                   | TT                              | CC              | 1946922473               |
| SNP_P4_114993_47664 | NW_004515720.1 | Scaffold146 | 47664                   | TT                              | GG              | 1946922475               |
| SNP_P4_114994_47739 | NW_004515720.1 | Scaffold146 | 47739                   | AA                              | GG              | 1946922477               |
| SNP_P4_114995_48080 | NW_004515720.1 | Scaffold146 | 48080                   | GG                              | CC              | 1946922479               |
| SNP_P4_114996_70100 | NW_004515720.1 | Scaffold146 | 70100                   | AA                              | GG              | 1946922481               |
| SNP_P4_114997_70113 | NW_004515720.1 | Scaffold146 | 70113                   | AA                              | GG              | 1946922483               |
| SNP_P4_114998_70234 | NW_004515720.1 | Scaffold146 | 70234                   | TT                              | CC              | 1946922485               |
| SNP_P4_114999_70235 | NW_004515720.1 | Scaffold146 | 70235                   | AA                              | TT              | 1946922487               |
| SNP_P4_115000_70237 | NW_004515720.1 | Scaffold146 | 70237                   | TT                              | CC              | 1946922489               |
| SNP_P4_115001_70514 | NW_004515720.1 | Scaffold146 | 70514                   | AA                              | GG              | 1946922491               |
| SNP_P4_115002_70875 | NW_004515720.1 | Scaffold146 | 70875                   | AA                              | GG              | 1946922493               |
| SNP_P4_115003_70881 | NW_004515720.1 | Scaffold146 | 70881                   | GG                              | AA              | 1946922495               |
| SNP_P4_115004_70890 | NW_004515720.1 | Scaffold146 | 70890                   | AA                              | GG              | 1946922497               |
| SNP_P4_115005_71720 | NW_004515720.1 | Scaffold146 | 71720                   | AA                              | TT              | 1946922499               |
| SNP_P4_115006_71805 | NW_004515720.1 | Scaffold146 | 71805                   | CC                              | AA              | 1946922501               |
| SNP_P4_115007_82138 | NW_004515720.1 | Scaffold146 | 82138                   | AA                              | GG              | 1946922503               |
| SNP_P4_115008_82185 | NW_004515720.1 | Scaffold146 | 82185                   | TT                              | GG              | 1946922505               |
| SNP_P4_115009_82510 | NW_004515720.1 | Scaffold146 | 82510                   | TT                              | CC              | 1946922507               |
| SNP_P4_115010_82650 | NW_004515720.1 | Scaffold146 | 82650                   | TT                              | AA              | 1946922509               |
| SNP_P4_115011_82691 | NW_004515720.1 | Scaffold146 | 82691                   | GG                              | CC              | 1946922511               |
| SNP_P4_115012_82881 | NW_004515720.1 | Scaffold146 | 82881                   | AA                              | GG              | 1946922513               |
| SNP_P4_115013_83317 | NW_004515720.1 | Scaffold146 | 83317                   | GG                              | AA              | 1946922515               |
| SNP_P4_115014_83318 | NW_004515720.1 | Scaffold146 | 83318                   | AA                              | TT              | 1946922517               |
| SNP_P4_115015_83340 | NW_004515720.1 | Scaffold146 | 83340                   | GG                              | TT              | 1946922519               |
| SNP_P4_115016_83351 | NW_004515720.1 | Scaffold146 | 83351                   | AA                              | TT              | 1946922521               |
| SNP_P4_115017_83378 | NW_004515720.1 | Scaffold146 | 83378                   | CC                              | TT              | 1946922523               |
| SNP_P4_115018_83380 | NW_004515720.1 | Scaffold146 | 83380                   | AA                              | TT              | 1946922525               |
| SNP_P4_115019_83385 | NW_004515720.1 | Scaffold146 | 83385                   | AA                              | GG              | 1946922527               |
| SNP_P4_115020_83400 | NW_004515720.1 | Scaffold146 | 83400                   | CC                              | TT              | 1946922529               |

| SNPs IDs            | Chromosome IDs | Chromosomes | Physical positions (bp) | CDC Frontier (Reference genome) | (ILWC46 & LPNB) | NCBI SNPdb Accession IDs |
|---------------------|----------------|-------------|-------------------------|---------------------------------|-----------------|--------------------------|
| SNP_P4_115021_83430 | NW_004515720.1 | Scaffold146 | 83430                   | AA                              | GG              | 1946922531               |
| SNP_P4_115022_83447 | NW_004515720.1 | Scaffold146 | 83447                   | TT                              | AA              | 1946922533               |
| SNP_P4_115023_83460 | NW_004515720.1 | Scaffold146 | 83460                   | TT                              | GG              | 1946922535               |
| SNP_P4_115024_83527 | NW_004515720.1 | Scaffold146 | 83527                   | GG                              | CC              | 1946922537               |
| SNP_P4_115025_83536 | NW_004515720.1 | Scaffold146 | 83536                   | AA                              | CC              | 1946922539               |
| SNP_P4_115026_83708 | NW_004515720.1 | Scaffold146 | 83708                   | CC                              | AA              | 1946922541               |
| SNP_P4_115027_83760 | NW_004515720.1 | Scaffold146 | 83760                   | AA                              | TT              | 1946922543               |
| SNP_P4_115028_83770 | NW_004515720.1 | Scaffold146 | 83770                   | TT                              | AA              | 1946922545               |
| SNP_P4_115029_84306 | NW_004515720.1 | Scaffold146 | 84306                   | TT                              | AA              | 1946922547               |
| SNP_P4_115030_86293 | NW_004515720.1 | Scaffold146 | 86293                   | TT                              | AA              | 1946922549               |
| SNP_P4_115031_86472 | NW_004515720.1 | Scaffold146 | 86472                   | GG                              | AA              | 1946922551               |
| SNP_P4_115032_13455 | NW_004515721.1 | Scaffold150 | 13455                   | AA                              | CC              | 1946922553               |
| SNP_P4_115033_13456 | NW_004515721.1 | Scaffold150 | 13456                   | TT                              | AA              | 1946922555               |
| SNP_P4_115035_638   | NW_004515722.1 | Scaffold151 | 638                     | TT                              | AA              | 1946922557               |
| SNP_P4_115037_860   | NW_004515722.1 | Scaffold151 | 860                     | TT                              | AA              | 1946922559               |
| SNP_P4_115038_1159  | NW_004515722.1 | Scaffold151 | 1159                    | AA                              | TT              | 1946922561               |
| SNP_P4_115039_1175  | NW_004515722.1 | Scaffold151 | 1175                    | AA                              | GG              | 1946922563               |
| SNP_P4_115041_1482  | NW_004515722.1 | Scaffold151 | 1482                    | TT                              | GG              | 1946922565               |
| SNP_P4_115042_1499  | NW_004515722.1 | Scaffold151 | 1499                    | AA                              | CC              | 1946922567               |
| SNP_P4_115043_1843  | NW_004515722.1 | Scaffold151 | 1843                    | CC                              | GG              | 1946922569               |
| SNP_P4_115044_1844  | NW_004515722.1 | Scaffold151 | 1844                    | AA                              | GG              | 1946922571               |
| SNP_P4_115045_1847  | NW_004515722.1 | Scaffold151 | 1847                    | AA                              | CC              | 1946922573               |
| SNP_P4_115046_1850  | NW_004515722.1 | Scaffold151 | 1850                    | AA                              | GG              | 1946922575               |
| SNP_P4_115047_1857  | NW_004515722.1 | Scaffold151 | 1857                    | AA                              | TT              | 1946922577               |
| SNP_P4_115048_1875  | NW_004515722.1 | Scaffold151 | 1875                    | AA                              | CC              | 1946922579               |
| SNP_P4_115049_1889  | NW_004515722.1 | Scaffold151 | 1889                    | CC                              | TT              | 1946922581               |
| SNP_P4_115052_4586  | NW_004515722.1 | Scaffold151 | 4586                    | GG                              | TT              | 1946922583               |
| SNP_P4_115053_4613  | NW_004515722.1 | Scaffold151 | 4613                    | GG                              | AA              | 1946922585               |
| SNP_P4_115054_4653  | NW_004515722.1 | Scaffold151 | 4653                    | TT                              | CC              | 1946922587               |
| SNP_P4_115055_4657  | NW_004515722.1 | Scaffold151 | 4657                    | AA                              | GG              | 1946922589               |
| SNP_P4_115056_5423  | NW_004515722.1 | Scaffold151 | 5423                    | AA                              | GG              | 1946922591               |
| SNP_P4_115057_6098  | NW_004515722.1 | Scaffold151 | 6098                    | GG                              | TT              | 1946922593               |
| SNP_P4_115058_6129  | NW_004515722.1 | Scaffold151 | 6129                    | AA                              | GG              | 1946922595               |
| SNP_P4_115059_6302  | NW_004515722.1 | Scaffold151 | 6302                    | TT                              | CC              | 1946922597               |
| SNP_P4_115060_6336  | NW_004515722.1 | Scaffold151 | 6336                    | AA                              | GG              | 1946922599               |
| SNP_P4_115061_6472  | NW_004515722.1 | Scaffold151 | 6472                    | AA                              | TT              | 1946922601               |
| SNP_P4_115062_6898  | NW_004515722.1 | Scaffold151 | 6898                    | AA                              | GG              | 1946922603               |
| SNP_P4_115063_7043  | NW_004515722.1 | Scaffold151 | 7043                    | AA                              | GG              | 1946922605               |
| SNP_P4_115064_7071  | NW_004515722.1 | Scaffold151 | 7071                    | AA                              | GG              | 1946922607               |
| SNP_P4_115065_7096  | NW_004515722.1 | Scaffold151 | 7096                    | TT                              | GG              | 1946922609               |
| SNP_P4_115066_7122  | NW_004515722.1 | Scaffold151 | 7122                    | CC                              | TT              | 1946922611               |
| SNP_P4_115067_7126  | NW_004515722.1 | Scaffold151 | 7126                    | CC                              | TT              | 1946922613               |

| SNPs IDs            | Chromosome IDs | Chromosomes | Physical positions (bp) | CDC Frontier (Reference genome) | (ILWC46 & LPNB) | NCBI SNPdb Accession IDs |
|---------------------|----------------|-------------|-------------------------|---------------------------------|-----------------|--------------------------|
| SNP_P4_115068_7153  | NW_004515722.1 | Scaffold151 | 7153                    | TT                              | CC              | 1946922615               |
| SNP_P4_115069_7176  | NW_004515722.1 | Scaffold151 | 7176                    | GG                              | AA              | 1946922617               |
| SNP_P4_115070_7464  | NW_004515722.1 | Scaffold151 | 7464                    | AA                              | GG              | 1946922619               |
| SNP_P4_115071_7522  | NW_004515722.1 | Scaffold151 | 7522                    | GG                              | AA              | 1946922622               |
| SNP_P4_115072_7523  | NW_004515722.1 | Scaffold151 | 7523                    | CC                              | TT              | 1946922624               |
| SNP_P4_115073_7566  | NW_004515722.1 | Scaffold151 | 7566                    | GG                              | AA              | 1946922626               |
| SNP_P4_115074_7656  | NW_004515722.1 | Scaffold151 | 7656                    | AA                              | GG              | 1946922628               |
| SNP_P4_115075_7787  | NW_004515722.1 | Scaffold151 | 7787                    | AA                              | GG              | 1946922630               |
| SNP_P4_115076_9385  | NW_004515722.1 | Scaffold151 | 9385                    | TT                              | AA              | 1946922632               |
| SNP_P4_115077_9664  | NW_004515722.1 | Scaffold151 | 9664                    | TT                              | CC              | 1946922634               |
| SNP_P4_115078_10458 | NW_004515722.1 | Scaffold151 | 10458                   | CC                              | TT              | 1946922636               |
| SNP_P4_115079_11038 | NW_004515722.1 | Scaffold151 | 11038                   | TT                              | CC              | 1946922638               |
| SNP_P4_115080_11041 | NW_004515722.1 | Scaffold151 | 11041                   | TT                              | CC              | 1946922640               |
| SNP_P4_115081_11072 | NW_004515722.1 | Scaffold151 | 11072                   | AA                              | GG              | 1946922642               |
| SNP_P4_115082_11237 | NW_004515722.1 | Scaffold151 | 11237                   | AA                              | GG              | 1946922644               |
| SNP_P4_115084_17511 | NW_004515722.1 | Scaffold151 | 17511                   | TT                              | CC              | 1946922646               |
| SNP_P4_115085_18261 | NW_004515722.1 | Scaffold151 | 18261                   | CC                              | TT              | 1946922648               |
| SNP_P4_115086_18429 | NW_004515722.1 | Scaffold151 | 18429                   | GG                              | AA              | 1946922650               |
| SNP_P4_115087_18638 | NW_004515722.1 | Scaffold151 | 18638                   | GG                              | AA              | 1946922652               |
| SNP_P4_115089_18789 | NW_004515722.1 | Scaffold151 | 18789                   | GG                              | AA              | 1946922654               |
| SNP_P4_115090_18874 | NW_004515722.1 | Scaffold151 | 18874                   | AA                              | TT              | 1946922656               |
| SNP_P4_115091_19030 | NW_004515722.1 | Scaffold151 | 19030                   | GG                              | AA              | 1946922658               |
| SNP_P4_115092_19351 | NW_004515722.1 | Scaffold151 | 19351                   | TT                              | AA              | 1946922660               |
| SNP_P4_115093_19352 | NW_004515722.1 | Scaffold151 | 19352                   | CC                              | TT              | 1946922662               |
| SNP_P4_115094_25189 | NW_004515722.1 | Scaffold151 | 25189                   | CC                              | TT              | 1946922664               |
| SNP_P4_115095_26076 | NW_004515722.1 | Scaffold151 | 26076                   | GG                              | AA              | 1946922666               |
| SNP_P4_115096_26791 | NW_004515722.1 | Scaffold151 | 26791                   | AA                              | GG              | 1946922668               |
| SNP_P4_115097_26796 | NW_004515722.1 | Scaffold151 | 26796                   | GG                              | AA              | 1946922670               |
| SNP_P4_115098_26840 | NW_004515722.1 | Scaffold151 | 26840                   | TT                              | GG              | 1946922672               |
| SNP_P4_115099_26901 | NW_004515722.1 | Scaffold151 | 26901                   | CC                              | TT              | 1946922674               |
| SNP_P4_115100_27009 | NW_004515722.1 | Scaffold151 | 27009                   | GG                              | CC              | 1946922676               |
| SNP_P4_115101_27016 | NW_004515722.1 | Scaffold151 | 27016                   | TT                              | CC              | 1946922678               |
| SNP_P4_115102_27428 | NW_004515722.1 | Scaffold151 | 27428                   | AA                              | TT              | 1946922680               |
| SNP_P4_115103_27429 | NW_004515722.1 | Scaffold151 | 27429                   | TT                              | AA              | 1946922682               |
| SNP_P4_115104_28234 | NW_004515722.1 | Scaffold151 | 28234                   | CC                              | TT              | 1946922684               |
| SNP_P4_115105_28547 | NW_004515722.1 | Scaffold151 | 28547                   | GG                              | AA              | 1946922686               |
| SNP_P4_115106_28613 | NW_004515722.1 | Scaffold151 | 28613                   | CC                              | AA              | 1946922688               |
| SNP_P4_115107_28884 | NW_004515722.1 | Scaffold151 | 28884                   | CC                              | AA              | 1946922690               |
| SNP_P4_115108_29300 | NW_004515722.1 | Scaffold151 | 29300                   | GG                              | AA              | 1946922692               |
| SNP_P4_115109_29369 | NW_004515722.1 | Scaffold151 | 29369                   | TT                              | AA              | 1946922694               |
| SNP_P4_115111_30928 | NW_004515722.1 | Scaffold151 | 30928                   | AA                              | TT              | 1946922696               |
| SNP_P4_115112_30944 | NW_004515722.1 | Scaffold151 | 30944                   | TT                              | CC              | 1946922698               |

| SNPs IDs            | Chromosome IDs | Chromosomes | Physical positions (bp) | CDC Frontier (Reference genome) | (ILWC46 & LPNB) | NCBI SNPdb Accession IDs |
|---------------------|----------------|-------------|-------------------------|---------------------------------|-----------------|--------------------------|
| SNP_P4_115113_31323 | NW_004515722.1 | Scaffold151 | 31323                   | CC                              | TT              | 1946922700               |
| SNP_P4_115114_35037 | NW_004515722.1 | Scaffold151 | 35037                   | CC                              | AA              | 1946922702               |
| SNP_P4_115115_35544 | NW_004515722.1 | Scaffold151 | 35544                   | TT                              | AA              | 1946922704               |
| SNP_P4_115116_35733 | NW_004515722.1 | Scaffold151 | 35733                   | CC                              | GG              | 1946922706               |
| SNP_P4_115117_35740 | NW_004515722.1 | Scaffold151 | 35740                   | AA                              | GG              | 1946922708               |
| SNP_P4_115118_35741 | NW_004515722.1 | Scaffold151 | 35741                   | CC                              | TT              | 1946922710               |
| SNP_P4_115119_35768 | NW_004515722.1 | Scaffold151 | 35768                   | TT                              | CC              | 1946922712               |
| SNP_P4_115120_35802 | NW_004515722.1 | Scaffold151 | 35802                   | TT                              | AA              | 1946922714               |
| SNP_P4_115121_35812 | NW_004515722.1 | Scaffold151 | 35812                   | AA                              | CC              | 1946922716               |
| SNP_P4_115122_35875 | NW_004515722.1 | Scaffold151 | 35875                   | GG                              | AA              | 1946922718               |
| SNP_P4_115123_35898 | NW_004515722.1 | Scaffold151 | 35898                   | AA                              | GG              | 1946922720               |
| SNP_P4_115125_36091 | NW_004515722.1 | Scaffold151 | 36091                   | TT                              | AA              | 1946922722               |
| SNP_P4_115126_36108 | NW_004515722.1 | Scaffold151 | 36108                   | AA                              | GG              | 1946922724               |
| SNP_P4_115127_36131 | NW_004515722.1 | Scaffold151 | 36131                   | GG                              | CC              | 1946922726               |
| SNP_P4_115128_41101 | NW_004515722.1 | Scaffold151 | 41101                   | GG                              | CC              | 1946922728               |
| SNP_P4_115129_41120 | NW_004515722.1 | Scaffold151 | 41120                   | GG                              | AA              | 1946922730               |
| SNP_P4_115130_41936 | NW_004515722.1 | Scaffold151 | 41936                   | AA                              | CC              | 1946922732               |
| SNP_P4_115131_41987 | NW_004515722.1 | Scaffold151 | 41987                   | TT                              | CC              | 1946922734               |
| SNP_P4_115132_42006 | NW_004515722.1 | Scaffold151 | 42006                   | GG                              | AA              | 1946922736               |
| SNP_P4_115133_42197 | NW_004515722.1 | Scaffold151 | 42197                   | AA                              | GG              | 1946922738               |
| SNP_P4_115134_42342 | NW_004515722.1 | Scaffold151 | 42342                   | AA                              | GG              | 1946922740               |
| SNP_P4_115136_42369 | NW_004515722.1 | Scaffold151 | 42369                   | CC                              | GG              | 1946922742               |
| SNP_P4_115137_42549 | NW_004515722.1 | Scaffold151 | 42549                   | TT                              | CC              | 1946922744               |
| SNP_P4_115138_42562 | NW_004515722.1 | Scaffold151 | 42562                   | TT                              | AA              | 1946922746               |
| SNP_P4_115139_42658 | NW_004515722.1 | Scaffold151 | 42658                   | AA                              | GG              | 1946922748               |
| SNP_P4_115140_42697 | NW_004515722.1 | Scaffold151 | 42697                   | CC                              | TT              | 1946922750               |
| SNP_P4_115141_42773 | NW_004515722.1 | Scaffold151 | 42773                   | TT                              | CC              | 1946922752               |
| SNP_P4_115142_42813 | NW_004515722.1 | Scaffold151 | 42813                   | AA                              | GG              | 1946922754               |
| SNP_P4_115143_42824 | NW_004515722.1 | Scaffold151 | 42824                   | TT                              | AA              | 1946922756               |
| SNP_P4_115144_42857 | NW_004515722.1 | Scaffold151 | 42857                   | TT                              | CC              | 1946922758               |
| SNP_P4_115145_42888 | NW_004515722.1 | Scaffold151 | 42888                   | TT                              | AA              | 1946922760               |
| SNP_P4_115146_42945 | NW_004515722.1 | Scaffold151 | 42945                   | CC                              | GG              | 1946922762               |
| SNP_P4_115147_44246 | NW_004515722.1 | Scaffold151 | 44246                   | TT                              | AA              | 1946922764               |
| SNP_P4_115148_44663 | NW_004515722.1 | Scaffold151 | 44663                   | TT                              | CC              | 1946922766               |
| SNP_P4_115149_45101 | NW_004515722.1 | Scaffold151 | 45101                   | AA                              | GG              | 1946922768               |
| SNP_P4_115150_54629 | NW_004515722.1 | Scaffold151 | 54629                   | CC                              | TT              | 1946922770               |
| SNP_P4_115151_55413 | NW_004515722.1 | Scaffold151 | 55413                   | AA                              | GG              | 1946922772               |
| SNP_P4_115152_63696 | NW_004515722.1 | Scaffold151 | 63696                   | GG                              | TT              | 1946922774               |
| SNP_P4_115153_65819 | NW_004515722.1 | Scaffold151 | 65819                   | TT                              | CC              | 1946922776               |
| SNP_P4_115154_65821 | NW_004515722.1 | Scaffold151 | 65821                   | GG                              | CC              | 1946922778               |
| SNP_P4_115155_65877 | NW_004515722.1 | Scaffold151 | 65877                   | CC                              | TT              | 1946922780               |
| SNP_P4_115157_69392 | NW_004515722.1 | Scaffold151 | 69392                   | CC                              | AA              | 1946922782               |

| SNPs IDs             | Chromosome IDs | Chromosomes | Physical positions (bp) | CDC Frontier (Reference genome) | (ILWC46 & LPNB) | NCBI SNPdb Accession IDs |
|----------------------|----------------|-------------|-------------------------|---------------------------------|-----------------|--------------------------|
| SNP_P4_115158_69393  | NW_004515722.1 | Scaffold151 | 69393                   | AA                              | TT              | 1946922784               |
| SNP_P4_115159_73894  | NW_004515722.1 | Scaffold151 | 73894                   | AA                              | GG              | 1946922786               |
| SNP_P4_115160_76607  | NW_004515722.1 | Scaffold151 | 76607                   | GG                              | AA              | 1946922788               |
| SNP_P4_115161_79313  | NW_004515722.1 | Scaffold151 | 79313                   | TT                              | GG              | 1946922790               |
| SNP_P4_115162_97115  | NW_004515722.1 | Scaffold151 | 97115                   | AA                              | GG              | 1946922792               |
| SNP_P4_115163_106878 | NW_004515722.1 | Scaffold151 | 106878                  | GG                              | TT              | 1946922794               |
| SNP_P4_115164_107122 | NW_004515722.1 | Scaffold151 | 107122                  | TT                              | CC              | 1946922796               |
| SNP_P4_115165_107150 | NW_004515722.1 | Scaffold151 | 107150                  | GG                              | AA              | 1946922798               |
| SNP_P4_115166_107437 | NW_004515722.1 | Scaffold151 | 107437                  | TT                              | CC              | 1946922800               |
| SNP_P4_115167_111548 | NW_004515722.1 | Scaffold151 | 111548                  | TT                              | CC              | 1946922802               |
| SNP_P4_115168_111560 | NW_004515722.1 | Scaffold151 | 111560                  | TT                              | CC              | 1946922804               |
| SNP_P4_115169_111563 | NW_004515722.1 | Scaffold151 | 111563                  | TT                              | CC              | 1946922806               |
| SNP_P4_115171_111689 | NW_004515722.1 | Scaffold151 | 111689                  | CC                              | AA              | 1946922808               |
| SNP_P4_115172_111747 | NW_004515722.1 | Scaffold151 | 111747                  | TT                              | CC              | 1946922810               |
| SNP_P4_115173_111751 | NW_004515722.1 | Scaffold151 | 111751                  | CC                              | TT              | 1946922812               |
| SNP_P4_115174_111763 | NW_004515722.1 | Scaffold151 | 111763                  | TT                              | CC              | 1946922814               |
| SNP_P4_115175_111770 | NW_004515722.1 | Scaffold151 | 111770                  | CC                              | TT              | 1946922816               |
| SNP_P4_115176_111807 | NW_004515722.1 | Scaffold151 | 111807                  | AA                              | GG              | 1946922818               |
| SNP_P4_115177_111952 | NW_004515722.1 | Scaffold151 | 111952                  | CC                              | TT              | 1946922820               |
| SNP_P4_115178_111955 | NW_004515722.1 | Scaffold151 | 111955                  | AA                              | GG              | 1946922822               |
| SNP_P4_115179_114577 | NW_004515722.1 | Scaffold151 | 114577                  | CC                              | TT              | 1946922824               |
| SNP_P4_115180_134760 | NW_004515722.1 | Scaffold151 | 134760                  | TT                              | AA              | 1946922826               |
| SNP_P4_115182_177500 | NW_004515722.1 | Scaffold151 | 177500                  | CC                              | TT              | 1946922828               |
| SNP_P4_115183_186884 | NW_004515722.1 | Scaffold151 | 186884                  | CC                              | GG              | 1946922830               |
| SNP_P4_115184_205487 | NW_004515722.1 | Scaffold151 | 205487                  | GG                              | TT              | 1946922832               |
| SNP_P4_115185_216362 | NW_004515722.1 | Scaffold151 | 216362                  | TT                              | CC              | 1946922834               |
| SNP_P4_115186_217474 | NW_004515722.1 | Scaffold151 | 217474                  | GG                              | CC              | 1946922836               |
| SNP_P4_115187_220703 | NW_004515722.1 | Scaffold151 | 220703                  | TT                              | AA              | 1946922838               |
| SNP_P4_115189_222272 | NW_004515722.1 | Scaffold151 | 222272                  | CC                              | GG              | 1946922840               |
| SNP_P4_115190_224186 | NW_004515722.1 | Scaffold151 | 224186                  | AA                              | GG              | 1946922842               |
| SNP_P4_115191_239467 | NW_004515722.1 | Scaffold151 | 239467                  | AA                              | GG              | 1946922844               |
| SNP_P4_115193_251620 | NW_004515722.1 | Scaffold151 | 251620                  | TT                              | AA              | 1946922846               |
| SNP_P4_115194_282298 | NW_004515722.1 | Scaffold151 | 282298                  | AA                              | CC              | 1946922848               |
| SNP_P4_115195_287913 | NW_004515722.1 | Scaffold151 | 287913                  | TT                              | CC              | 1946922850               |
| SNP_P4_115197_296552 | NW_004515722.1 | Scaffold151 | 296552                  | CC                              | AA              | 1946922852               |
| SNP_P4_115198_298645 | NW_004515722.1 | Scaffold151 | 298645                  | AA                              | CC              | 1946922854               |
| SNP_P4_115199_308843 | NW_004515722.1 | Scaffold151 | 308843                  | TT                              | CC              | 1946922856               |
| SNP_P4_115200_308844 | NW_004515722.1 | Scaffold151 | 308844                  | TT                              | GG              | 1946922858               |
| SNP_P4_115201_311509 | NW_004515722.1 | Scaffold151 | 311509                  | TT                              | CC              | 1946922860               |
| SNP_P4_115203_6344   | NW_004515723.1 | Scaffold153 | 6344                    | TT                              | GG              | 1946922862               |
| SNP_P4_115204_6634   | NW_004515723.1 | Scaffold153 | 6634                    | TT                              | CC              | 1946922864               |
| SNP_P4_115205_11392  | NW_004515723.1 | Scaffold153 | 11392                   | CC                              | TT              | 1946922866               |

| SNPs IDs            | Chromosome IDs | Chromosomes | Physical positions (bp) | CDC Frontier (Reference genome) | (ILWC46 & LPNB) | NCBI SNPdb Accession IDs |
|---------------------|----------------|-------------|-------------------------|---------------------------------|-----------------|--------------------------|
| SNP_P4_115206_13301 | NW_004515723.1 | Scaffold153 | 13301                   | TT                              | AA              | 1946922868               |
| SNP_P4_115207_17942 | NW_004515723.1 | Scaffold153 | 17942                   | CC                              | TT              | 1946922870               |
| SNP_P4_115208_19453 | NW_004515723.1 | Scaffold153 | 19453                   | GG                              | AA              | 1946922872               |
| SNP_P4_115209_19484 | NW_004515723.1 | Scaffold153 | 19484                   | GG                              | CC              | 1946922874               |
| SNP_P4_115210_19545 | NW_004515723.1 | Scaffold153 | 19545                   | GG                              | AA              | 1946922876               |
| SNP_P4_115211_19673 | NW_004515723.1 | Scaffold153 | 19673                   | TT                              | CC              | 1946922878               |
| SNP_P4_115212_19678 | NW_004515723.1 | Scaffold153 | 19678                   | CC                              | AA              | 1946922880               |
| SNP_P4_115213_19690 | NW_004515723.1 | Scaffold153 | 19690                   | AA                              | TT              | 1946922882               |
| SNP_P4_115214_19919 | NW_004515723.1 | Scaffold153 | 19919                   | TT                              | AA              | 1946922884               |
| SNP_P4_115215_20014 | NW_004515723.1 | Scaffold153 | 20014                   | GG                              | AA              | 1946922886               |
| SNP_P4_115216_20050 | NW_004515723.1 | Scaffold153 | 20050                   | TT                              | CC              | 1946922888               |
| SNP_P4_115217_20052 | NW_004515723.1 | Scaffold153 | 20052                   | TT                              | CC              | 1946922890               |
| SNP_P4_115218_28000 | NW_004515723.1 | Scaffold153 | 28000                   | TT                              | CC              | 1946922892               |
| SNP_P4_115219_28002 | NW_004515723.1 | Scaffold153 | 28002                   | TT                              | CC              | 1946922894               |
| SNP_P4_115221_28100 | NW_004515723.1 | Scaffold153 | 28100                   | AA                              | GG              | 1946922896               |
| SNP_P4_115222_28114 | NW_004515723.1 | Scaffold153 | 28114                   | GG                              | AA              | 1946922898               |
| SNP_P4_115223_28122 | NW_004515723.1 | Scaffold153 | 28122                   | GG                              | TT              | 1946922900               |
| SNP_P4_115224_28124 | NW_004515723.1 | Scaffold153 | 28124                   | TT                              | GG              | 1946922902               |
| SNP_P4_115225_28162 | NW_004515723.1 | Scaffold153 | 28162                   | CC                              | TT              | 1946922904               |
| SNP_P4_115226_31048 | NW_004515723.1 | Scaffold153 | 31048                   | CC                              | TT              | 1946922906               |
| SNP_P4_115227_31059 | NW_004515723.1 | Scaffold153 | 31059                   | GG                              | AA              | 1946922908               |
| SNP_P4_115228_31089 | NW_004515723.1 | Scaffold153 | 31089                   | TT                              | GG              | 1946922910               |
| SNP_P4_115229_31305 | NW_004515723.1 | Scaffold153 | 31305                   | GG                              | AA              | 1946922912               |
| SNP_P4_115230_31320 | NW_004515723.1 | Scaffold153 | 31320                   | GG                              | AA              | 1946922915               |
| SNP_P4_115231_32191 | NW_004515723.1 | Scaffold153 | 32191                   | AA                              | CC              | 1946922917               |
| SNP_P4_115232_35067 | NW_004515723.1 | Scaffold153 | 35067                   | CC                              | AA              | 1946922919               |
| SNP_P4_115233_35165 | NW_004515723.1 | Scaffold153 | 35165                   | GG                              | AA              | 1946922921               |
| SNP_P4_115234_44057 | NW_004515723.1 | Scaffold153 | 44057                   | AA                              | CC              | 1946922923               |
| SNP_P4_115235_44095 | NW_004515723.1 | Scaffold153 | 44095                   | TT                              | GG              | 1946922925               |
| SNP_P4_115236_44192 | NW_004515723.1 | Scaffold153 | 44192                   | GG                              | AA              | 1946922927               |
| SNP_P4_115237_44320 | NW_004515723.1 | Scaffold153 | 44320                   | AA                              | TT              | 1946922930               |
| SNP_P4_115238_45468 | NW_004515723.1 | Scaffold153 | 45468                   | TT                              | CC              | 1946922932               |
| SNP_P4_115239_45804 | NW_004515723.1 | Scaffold153 | 45804                   | GG                              | AA              | 1946922934               |
| SNP_P4_115240_51064 | NW_004515723.1 | Scaffold153 | 51064                   | GG                              | AA              | 1946922936               |
| SNP_P4_115241_51382 | NW_004515723.1 | Scaffold153 | 51382                   | CC                              | TT              | 1946922938               |
| SNP_P4_115242_51548 | NW_004515723.1 | Scaffold153 | 51548                   | GG                              | AA              | 1946922940               |
| SNP_P4_115243_56474 | NW_004515723.1 | Scaffold153 | 56474                   | AA                              | GG              | 1946922942               |
| SNP_P4_115244_56840 | NW_004515723.1 | Scaffold153 | 56840                   | TT                              | CC              | 1946922944               |
| SNP_P4_115245_56851 | NW_004515723.1 | Scaffold153 | 56851                   | TT                              | CC              | 1946922946               |
| SNP_P4_115246_80976 | NW_004515723.1 | Scaffold153 | 80976                   | AA                              | GG              | 1946922948               |
| SNP_P4_115247_80999 | NW_004515723.1 | Scaffold153 | 80999                   | TT                              | CC              | 1946922950               |
| SNP_P4_115249_81518 | NW_004515723.1 | Scaffold153 | 81518                   | AA                              | TT              | 1946922952               |

| SNPs IDs             | Chromosome IDs | Chromosomes | Physical positions (bp) | CDC Frontier (Reference genome) | (ILWC46 & LPNB) | NCBI SNPdb Accession IDs |
|----------------------|----------------|-------------|-------------------------|---------------------------------|-----------------|--------------------------|
| SNP_P4_115250_81645  | NW_004515723.1 | Scaffold153 | 81645                   | AA                              | GG              | 1946922954               |
| SNP_P4_115251_89654  | NW_004515723.1 | Scaffold153 | 89654                   | AA                              | TT              | 1946922956               |
| SNP_P4_115252_89688  | NW_004515723.1 | Scaffold153 | 89688                   | GG                              | CC              | 1946922958               |
| SNP_P4_115253_89695  | NW_004515723.1 | Scaffold153 | 89695                   | TT                              | CC              | 1946922960               |
| SNP_P4_115254_89793  | NW_004515723.1 | Scaffold153 | 89793                   | TT                              | CC              | 1946922962               |
| SNP_P4_115255_89899  | NW_004515723.1 | Scaffold153 | 89899                   | TT                              | AA              | 1946922964               |
| SNP_P4_115256_89983  | NW_004515723.1 | Scaffold153 | 89983                   | TT                              | CC              | 1946922966               |
| SNP_P4_115257_90006  | NW_004515723.1 | Scaffold153 | 90006                   | TT                              | GG              | 1946922968               |
| SNP_P4_115258_90056  | NW_004515723.1 | Scaffold153 | 90056                   | CC                              | TT              | 1946922970               |
| SNP_P4_115259_90141  | NW_004515723.1 | Scaffold153 | 90141                   | AA                              | CC              | 1946922972               |
| SNP_P4_115260_92073  | NW_004515723.1 | Scaffold153 | 92073                   | TT                              | CC              | 1946922974               |
| SNP_P4_115261_94407  | NW_004515723.1 | Scaffold153 | 94407                   | GG                              | AA              | 1946922976               |
| SNP_P4_115262_98399  | NW_004515723.1 | Scaffold153 | 98399                   | TT                              | CC              | 1946922978               |
| SNP_P4_115263_100706 | NW_004515723.1 | Scaffold153 | 100706                  | GG                              | AA              | 1946922980               |
| SNP_P4_115264_103290 | NW_004515723.1 | Scaffold153 | 103290                  | CC                              | TT              | 1946922982               |
| SNP_P4_115265_104306 | NW_004515723.1 | Scaffold153 | 104306                  | TT                              | CC              | 1946922984               |
| SNP_P4_115266_106521 | NW_004515723.1 | Scaffold153 | 106521                  | AA                              | GG              | 1946922986               |
| SNP_P4_115267_107910 | NW_004515723.1 | Scaffold153 | 107910                  | GG                              | AA              | 1946922988               |
| SNP_P4_115268_116364 | NW_004515723.1 | Scaffold153 | 116364                  | GG                              | AA              | 1946922990               |
| SNP_P4_115271_27127  | NW_004515725.1 | Scaffold157 | 27127                   | TT                              | GG              | 1946922992               |
| SNP_P4_115272_31359  | NW_004515725.1 | Scaffold157 | 31359                   | TT                              | GG              | 1946922994               |
| SNP_P4_115274_34924  | NW_004515725.1 | Scaffold157 | 34924                   | TT                              | CC              | 1946922996               |
| SNP_P4_115275_40387  | NW_004515725.1 | Scaffold157 | 40387                   | CC                              | TT              | 1946922998               |
| SNP_P4_115276_40432  | NW_004515725.1 | Scaffold157 | 40432                   | AA                              | CC              | 1946923000               |
| SNP_P4_115277_40441  | NW_004515725.1 | Scaffold157 | 40441                   | AA                              | GG              | 1946923002               |
| SNP_P4_115278_40647  | NW_004515725.1 | Scaffold157 | 40647                   | TT                              | AA              | 1946923004               |
| SNP_P4_115279_59146  | NW_004515725.1 | Scaffold157 | 59146                   | CC                              | AA              | 1946923006               |
| SNP_P4_115280_89962  | NW_004515725.1 | Scaffold157 | 89962                   | GG                              | AA              | 1946923008               |
| SNP_P4_115281_114201 | NW_004515725.1 | Scaffold157 | 114201                  | TT                              | CC              | 1946923010               |
| SNP_P4_115282_116723 | NW_004515725.1 | Scaffold157 | 116723                  | TT                              | CC              | 1946923012               |
| SNP_P4_115285_155043 | NW_004515725.1 | Scaffold157 | 155043                  | GG                              | AA              | 1946923014               |
| SNP_P4_115286_164533 | NW_004515725.1 | Scaffold157 | 164533                  | TT                              | CC              | 1946923016               |
| SNP_P4_115287_169543 | NW_004515725.1 | Scaffold157 | 169543                  | CC                              | AA              | 1946923018               |
| SNP_P4_115288_169723 | NW_004515725.1 | Scaffold157 | 169723                  | AA                              | CC              | 1946923020               |
| SNP_P4_115289_169764 | NW_004515725.1 | Scaffold157 | 169764                  | TT                              | CC              | 1946923022               |
| SNP_P4_115290_171587 | NW_004515725.1 | Scaffold157 | 171587                  | CC                              | TT              | 1946923024               |
| SNP_P4_115291_182929 | NW_004515725.1 | Scaffold157 | 182929                  | AA                              | GG              | 1946923026               |
| SNP_P4_115292_185476 | NW_004515725.1 | Scaffold157 | 185476                  | GG                              | AA              | 1946923028               |
| SNP_P4_115293_195643 | NW_004515725.1 | Scaffold157 | 195643                  | AA                              | GG              | 1946923030               |
| SNP_P4_115295_248014 | NW_004515725.1 | Scaffold157 | 248014                  | GG                              | AA              | 1946923032               |
| SNP_P4_115296_248021 | NW_004515725.1 | Scaffold157 | 248021                  | AA                              | GG              | 1946923034               |
| SNP_P4_115297_248056 | NW_004515725.1 | Scaffold157 | 248056                  | GG                              | AA              | 1946923036               |

| SNPs IDs             | Chromosome IDs | Chromosomes | Physical positions (bp) | CDC Frontier (Reference genome) | (ILWC46 & LPNB) | NCBI SNPdb Accession IDs |
|----------------------|----------------|-------------|-------------------------|---------------------------------|-----------------|--------------------------|
| SNP_P4_115298_248057 | NW_004515725.1 | Scaffold157 | 248057                  | AA                              | CC              | 1946923038               |
| SNP_P4_115300_248353 | NW_004515725.1 | Scaffold157 | 248353                  | TT                              | CC              | 1946923040               |
| SNP_P4_115301_248355 | NW_004515725.1 | Scaffold157 | 248355                  | GG                              | AA              | 1946923042               |
| SNP_P4_115302_248377 | NW_004515725.1 | Scaffold157 | 248377                  | GG                              | AA              | 1946923044               |
| SNP_P4_115303_248431 | NW_004515725.1 | Scaffold157 | 248431                  | CC                              | AA              | 1946923046               |
| SNP_P4_115304_248432 | NW_004515725.1 | Scaffold157 | 248432                  | AA                              | TT              | 1946923048               |
| SNP_P4_115305_248437 | NW_004515725.1 | Scaffold157 | 248437                  | GG                              | AA              | 1946923050               |
| SNP_P4_115306_248473 | NW_004515725.1 | Scaffold157 | 248473                  | TT                              | CC              | 1946923052               |
| SNP_P4_115307_248477 | NW_004515725.1 | Scaffold157 | 248477                  | CC                              | TT              | 1946923054               |
| SNP_P4_115308_251001 | NW_004515725.1 | Scaffold157 | 251001                  | TT                              | CC              | 1946923056               |
| SNP_P4_115309_251330 | NW_004515725.1 | Scaffold157 | 251330                  | TT                              | GG              | 1946923058               |
| SNP_P4_115310_251363 | NW_004515725.1 | Scaffold157 | 251363                  | TT                              | CC              | 1946923060               |
| SNP_P4_115311_251940 | NW_004515725.1 | Scaffold157 | 251940                  | AA                              | GG              | 1946923062               |
| SNP_P4_115312_252933 | NW_004515725.1 | Scaffold157 | 252933                  | CC                              | GG              | 1946923064               |
| SNP_P4_115313_254339 | NW_004515725.1 | Scaffold157 | 254339                  | TT                              | GG              | 1946923066               |
| SNP_P4_115314_254361 | NW_004515725.1 | Scaffold157 | 254361                  | CC                              | TT              | 1946923068               |
| SNP_P4_115316_256973 | NW_004515725.1 | Scaffold157 | 256973                  | TT                              | GG              | 1946923070               |
| SNP_P4_115318_257017 | NW_004515725.1 | Scaffold157 | 257017                  | AA                              | CC              | 1946923072               |
| SNP_P4_115319_257678 | NW_004515725.1 | Scaffold157 | 257678                  | CC                              | TT              | 1946923074               |
| SNP_P4_115320_258179 | NW_004515725.1 | Scaffold157 | 258179                  | AA                              | GG              | 1946923076               |
| SNP_P4_115321_258208 | NW_004515725.1 | Scaffold157 | 258208                  | AA                              | GG              | 1946923078               |
| SNP_P4_115322_258220 | NW_004515725.1 | Scaffold157 | 258220                  | AA                              | TT              | 1946923080               |
| SNP_P4_115323_280548 | NW_004515725.1 | Scaffold157 | 280548                  | GG                              | AA              | 1946923082               |
| SNP_P4_115324_280775 | NW_004515725.1 | Scaffold157 | 280775                  | TT                              | CC              | 1946923084               |
| SNP_P4_115325_280851 | NW_004515725.1 | Scaffold157 | 280851                  | GG                              | AA              | 1946923086               |
| SNP_P4_115326_280852 | NW_004515725.1 | Scaffold157 | 280852                  | CC                              | TT              | 1946923088               |
| SNP_P4_115327_281214 | NW_004515725.1 | Scaffold157 | 281214                  | TT                              | CC              | 1946923090               |
| SNP_P4_115328_282597 | NW_004515725.1 | Scaffold157 | 282597                  | AA                              | GG              | 1946923092               |
| SNP_P4_115329_282627 | NW_004515725.1 | Scaffold157 | 282627                  | GG                              | CC              | 1946923094               |
| SNP_P4_115330_282757 | NW_004515725.1 | Scaffold157 | 282757                  | TT                              | AA              | 1946923096               |
| SNP_P4_115331_288978 | NW_004515725.1 | Scaffold157 | 288978                  | GG                              | CC              | 1946923098               |
| SNP_P4_115332_289254 | NW_004515725.1 | Scaffold157 | 289254                  | TT                              | AA              | 1946923100               |
| SNP_P4_115334_289329 | NW_004515725.1 | Scaffold157 | 289329                  | TT                              | CC              | 1946923102               |
| SNP_P4_115335_289331 | NW_004515725.1 | Scaffold157 | 289331                  | GG                              | AA              | 1946923104               |
| SNP_P4_115336_289341 | NW_004515725.1 | Scaffold157 | 289341                  | TT                              | GG              | 1946923106               |
| SNP_P4_115337_290655 | NW_004515725.1 | Scaffold157 | 290655                  | TT                              | GG              | 1946923108               |
| SNP_P4_115338_290676 | NW_004515725.1 | Scaffold157 | 290676                  | GG                              | AA              | 1946923111               |
| SNP_P4_115339_301988 | NW_004515725.1 | Scaffold157 | 301988                  | GG                              | AA              | 1946923113               |
| SNP_P4_115340_303069 | NW_004515725.1 | Scaffold157 | 303069                  | TT                              | CC              | 1946923115               |
| SNP_P4_115341_303897 | NW_004515725.1 | Scaffold157 | 303897                  | TT                              | CC              | 1946923117               |
| SNP_P4_115342_303942 | NW_004515725.1 | Scaffold157 | 303942                  | GG                              | AA              | 1946923119               |
| SNP_P4_115343_305098 | NW_004515725.1 | Scaffold157 | 305098                  | CC                              | GG              | 1946923121               |



| SNPs IDs             | Chromosome IDs | Chromosomes | Physical positions (bp) | CDC Frontier (Reference genome) | (ILWC46 & LPNB) | NCBI SNPdb Accession IDs |
|----------------------|----------------|-------------|-------------------------|---------------------------------|-----------------|--------------------------|
| SNP_P4_115344_305555 | NW_004515725.1 | Scaffold157 | 305555                  | AA                              | TT              | 1946923123               |
| SNP_P4_115345_305595 | NW_004515725.1 | Scaffold157 | 305595                  | GG                              | TT              | 1946923125               |
| SNP_P4_115346_305602 | NW_004515725.1 | Scaffold157 | 305602                  | AA                              | GG              | 1946923127               |
| SNP_P4_115347_305618 | NW_004515725.1 | Scaffold157 | 305618                  | AA                              | GG              | 1946923129               |
| SNP_P4_115348_305623 | NW_004515725.1 | Scaffold157 | 305623                  | TT                              | GG              | 1946923131               |
| SNP_P4_115349_305896 | NW_004515725.1 | Scaffold157 | 305896                  | TT                              | CC              | 1946923133               |
| SNP_P4_115350_306643 | NW_004515725.1 | Scaffold157 | 306643                  | TT                              | AA              | 1946923135               |
| SNP_P4_115351_307779 | NW_004515725.1 | Scaffold157 | 307779                  | CC                              | TT              | 1946923137               |
| SNP_P4_115353_308047 | NW_004515725.1 | Scaffold157 | 308047                  | GG                              | TT              | 1946923139               |
| SNP_P4_115354_309208 | NW_004515725.1 | Scaffold157 | 309208                  | GG                              | TT              | 1946923141               |
| SNP_P4_115355_309248 | NW_004515725.1 | Scaffold157 | 309248                  | TT                              | CC              | 1946923143               |
| SNP_P4_115356_309268 | NW_004515725.1 | Scaffold157 | 309268                  | AA                              | GG              | 1946923145               |
| SNP_P4_115357_309269 | NW_004515725.1 | Scaffold157 | 309269                  | TT                              | CC              | 1946923147               |
| SNP_P4_115358_309574 | NW_004515725.1 | Scaffold157 | 309574                  | CC                              | TT              | 1946923149               |
| SNP_P4_115360_309741 | NW_004515725.1 | Scaffold157 | 309741                  | TT                              | AA              | 1946923151               |
| SNP_P4_115362_312451 | NW_004515725.1 | Scaffold157 | 312451                  | AA                              | GG              | 1946923153               |
| SNP_P4_115363_313878 | NW_004515725.1 | Scaffold157 | 313878                  | GG                              | CC              | 1946923155               |
| SNP_P4_115365_314364 | NW_004515725.1 | Scaffold157 | 314364                  | TT                              | AA              | 1946923157               |
| SNP_P4_115366_314401 | NW_004515725.1 | Scaffold157 | 314401                  | AA                              | GG              | 1946923159               |
| SNP_P4_115367_315431 | NW_004515725.1 | Scaffold157 | 315431                  | TT                              | GG              | 1946923161               |
| SNP_P4_115368_315580 | NW_004515725.1 | Scaffold157 | 315580                  | AA                              | TT              | 1946923163               |
| SNP_P4_115369_315587 | NW_004515725.1 | Scaffold157 | 315587                  | AA                              | GG              | 1946923165               |
| SNP_P4_115370_315623 | NW_004515725.1 | Scaffold157 | 315623                  | GG                              | AA              | 1946923167               |
| SNP_P4_115371_315629 | NW_004515725.1 | Scaffold157 | 315629                  | TT                              | CC              | 1946923169               |
| SNP_P4_115372_323230 | NW_004515725.1 | Scaffold157 | 323230                  | GG                              | AA              | 1946923171               |
| SNP_P4_115373_323855 | NW_004515725.1 | Scaffold157 | 323855                  | TT                              | AA              | 1946923173               |
| SNP_P4_115374_324031 | NW_004515725.1 | Scaffold157 | 324031                  | CC                              | TT              | 1946923175               |
| SNP_P4_115375_326298 | NW_004515725.1 | Scaffold157 | 326298                  | GG                              | AA              | 1946923177               |
| SNP_P4_115376_327059 | NW_004515725.1 | Scaffold157 | 327059                  | CC                              | TT              | 1946923179               |
| SNP_P4_115377_327600 | NW_004515725.1 | Scaffold157 | 327600                  | CC                              | TT              | 1946923181               |
| SNP_P4_115378_327815 | NW_004515725.1 | Scaffold157 | 327815                  | GG                              | TT              | 1946923183               |
| SNP_P4_115379_328392 | NW_004515725.1 | Scaffold157 | 328392                  | TT                              | CC              | 1946923185               |
| SNP_P4_115380_328393 | NW_004515725.1 | Scaffold157 | 328393                  | AA                              | GG              | 1946923187               |
| SNP_P4_115381_328657 | NW_004515725.1 | Scaffold157 | 328657                  | GG                              | AA              | 1946923189               |
| SNP_P4_115382_328702 | NW_004515725.1 | Scaffold157 | 328702                  | TT                              | CC              | 1946923191               |
| SNP_P4_115383_329410 | NW_004515725.1 | Scaffold157 | 329410                  | GG                              | AA              | 1946923193               |
| SNP_P4_115384_330564 | NW_004515725.1 | Scaffold157 | 330564                  | GG                              | AA              | 1946923195               |
| SNP_P4_115385_330623 | NW_004515725.1 | Scaffold157 | 330623                  | AA                              | GG              | 1946923197               |
| SNP_P4_115386_330637 | NW_004515725.1 | Scaffold157 | 330637                  | TT                              | GG              | 1946923199               |
| SNP_P4_115387_330671 | NW_004515725.1 | Scaffold157 | 330671                  | TT                              | CC              | 1946923201               |
| SNP_P4_115388_330676 | NW_004515725.1 | Scaffold157 | 330676                  | AA                              | GG              | 1946923203               |
| SNP_P4_115389_330724 | NW_004515725.1 | Scaffold157 | 330724                  | GG                              | AA              | 1946923205               |

| SNPs IDs             | Chromosome IDs | Chromosomes | Physical positions (bp) | CDC Frontier (Reference genome) | (ILWC46 & LPNB) | NCBI SNPdb Accession IDs |
|----------------------|----------------|-------------|-------------------------|---------------------------------|-----------------|--------------------------|
| SNP_P4_115390_330730 | NW_004515725.1 | Scaffold157 | 330730                  | AA                              | GG              | 1946923208               |
| SNP_P4_115391_330736 | NW_004515725.1 | Scaffold157 | 330736                  | AA                              | GG              | 1946923210               |
| SNP_P4_115393_330873 | NW_004515725.1 | Scaffold157 | 330873                  | TT                              | CC              | 1946923212               |
| SNP_P4_115394_330893 | NW_004515725.1 | Scaffold157 | 330893                  | AA                              | TT              | 1946923214               |
| SNP_P4_115395_330991 | NW_004515725.1 | Scaffold157 | 330991                  | AA                              | GG              | 1946923216               |
| SNP_P4_115396_330993 | NW_004515725.1 | Scaffold157 | 330993                  | AA                              | GG              | 1946923218               |
| SNP_P4_115397_331003 | NW_004515725.1 | Scaffold157 | 331003                  | GG                              | AA              | 1946923220               |
| SNP_P4_115398_331020 | NW_004515725.1 | Scaffold157 | 331020                  | CC                              | GG              | 1946923222               |
| SNP_P4_115399_331119 | NW_004515725.1 | Scaffold157 | 331119                  | AA                              | GG              | 1946923224               |
| SNP_P4_115400_331123 | NW_004515725.1 | Scaffold157 | 331123                  | GG                              | TT              | 1946923226               |
| SNP_P4_115401_331130 | NW_004515725.1 | Scaffold157 | 331130                  | GG                              | AA              | 1946923228               |
| SNP_P4_115402_331315 | NW_004515725.1 | Scaffold157 | 331315                  | GG                              | AA              | 1946923231               |
| SNP_P4_115403_331386 | NW_004515725.1 | Scaffold157 | 331386                  | AA                              | GG              | 1946923233               |
| SNP_P4_115404_332692 | NW_004515725.1 | Scaffold157 | 332692                  | GG                              | AA              | 1946923235               |
| SNP_P4_115405_332721 | NW_004515725.1 | Scaffold157 | 332721                  | TT                              | CC              | 1946923237               |
| SNP_P4_115406_332735 | NW_004515725.1 | Scaffold157 | 332735                  | GG                              | AA              | 1946923239               |
| SNP_P4_115407_332947 | NW_004515725.1 | Scaffold157 | 332947                  | TT                              | CC              | 1946923241               |
| SNP_P4_115408_332948 | NW_004515725.1 | Scaffold157 | 332948                  | TT                              | CC              | 1946923243               |
| SNP_P4_115409_333002 | NW_004515725.1 | Scaffold157 | 333002                  | GG                              | AA              | 1946923245               |
| SNP_P4_115410_333190 | NW_004515725.1 | Scaffold157 | 333190                  | CC                              | TT              | 1946923247               |
| SNP_P4_115411_334504 | NW_004515725.1 | Scaffold157 | 334504                  | CC                              | GG              | 1946923249               |
| SNP_P4_115412_334505 | NW_004515725.1 | Scaffold157 | 334505                  | CC                              | GG              | 1946923251               |
| SNP_P4_115413_334515 | NW_004515725.1 | Scaffold157 | 334515                  | TT                              | CC              | 1946923253               |
| SNP_P4_115414_335976 | NW_004515725.1 | Scaffold157 | 335976                  | GG                              | AA              | 1946923255               |
| SNP_P4_115415_335977 | NW_004515725.1 | Scaffold157 | 335977                  | TT                              | CC              | 1946923257               |
| SNP_P4_115416_336013 | NW_004515725.1 | Scaffold157 | 336013                  | CC                              | GG              | 1946923260               |
| SNP_P4_115417_336223 | NW_004515725.1 | Scaffold157 | 336223                  | GG                              | TT              | 1946923262               |
| SNP_P4_115418_336408 | NW_004515725.1 | Scaffold157 | 336408                  | GG                              | CC              | 1946923264               |
| SNP_P4_115419_336443 | NW_004515725.1 | Scaffold157 | 336443                  | GG                              | AA              | 1946923266               |
| SNP_P4_115420_336847 | NW_004515725.1 | Scaffold157 | 336847                  | AA                              | TT              | 1946923268               |
| SNP_P4_115421_338379 | NW_004515725.1 | Scaffold157 | 338379                  | GG                              | TT              | 1946923270               |
| SNP_P4_115422_338402 | NW_004515725.1 | Scaffold157 | 338402                  | GG                              | AA              | 1946923272               |
| SNP_P4_115423_338584 | NW_004515725.1 | Scaffold157 | 338584                  | AA                              | GG              | 1946923274               |
| SNP_P4_115424_341210 | NW_004515725.1 | Scaffold157 | 341210                  | GG                              | CC              | 1946923276               |
| SNP_P4_115425_341546 | NW_004515725.1 | Scaffold157 | 341546                  | AA                              | TT              | 1946923278               |
| SNP_P4_115426_341555 | NW_004515725.1 | Scaffold157 | 341555                  | TT                              | CC              | 1946923280               |
| SNP_P4_115427_342366 | NW_004515725.1 | Scaffold157 | 342366                  | GG                              | TT              | 1946923282               |
| SNP_P4_115428_343466 | NW_004515725.1 | Scaffold157 | 343466                  | TT                              | CC              | 1946923284               |
| SNP_P4_115429_343757 | NW_004515725.1 | Scaffold157 | 343757                  | GG                              | AA              | 1946923286               |
| SNP_P4_115430_345034 | NW_004515725.1 | Scaffold157 | 345034                  | GG                              | AA              | 1946923288               |
| SNP_P4_115432_345947 | NW_004515725.1 | Scaffold157 | 345947                  | AA                              | GG              | 1946923290               |
| SNP_P4_115433_345950 | NW_004515725.1 | Scaffold157 | 345950                  | AA                              | GG              | 1946923292               |

| SNPs IDs             | Chromosome IDs | Chromosomes | Physical positions (bp) | CDC Frontier (Reference genome) | (ILWC46 & LPNB) | NCBI SNPdb Accession IDs |
|----------------------|----------------|-------------|-------------------------|---------------------------------|-----------------|--------------------------|
| SNP_P4_115434_345967 | NW_004515725.1 | Scaffold157 | 345967                  | TT                              | AA              | 1946923294               |
| SNP_P4_115435_348118 | NW_004515725.1 | Scaffold157 | 348118                  | GG                              | AA              | 1946923296               |
| SNP_P4_115437_348293 | NW_004515725.1 | Scaffold157 | 348293                  | AA                              | GG              | 1946923298               |
| SNP_P4_115438_348319 | NW_004515725.1 | Scaffold157 | 348319                  | CC                              | TT              | 1946923300               |
| SNP_P4_115439_348464 | NW_004515725.1 | Scaffold157 | 348464                  | TT                              | AA              | 1946923302               |
| SNP_P4_115440_348472 | NW_004515725.1 | Scaffold157 | 348472                  | GG                              | AA              | 1946923304               |
| SNP_P4_115441_348751 | NW_004515725.1 | Scaffold157 | 348751                  | AA                              | TT              | 1946923306               |
| SNP_P4_115442_349158 | NW_004515725.1 | Scaffold157 | 349158                  | AA                              | GG              | 1946923308               |
| SNP_P4_115443_351869 | NW_004515725.1 | Scaffold157 | 351869                  | GG                              | CC              | 1946923310               |
| SNP_P4_115444_352079 | NW_004515725.1 | Scaffold157 | 352079                  | GG                              | AA              | 1946923312               |
| SNP_P4_115445_352147 | NW_004515725.1 | Scaffold157 | 352147                  | AA                              | TT              | 1946923314               |
| SNP_P4_115448_354733 | NW_004515725.1 | Scaffold157 | 354733                  | CC                              | TT              | 1946923316               |
| SNP_P4_115449_355531 | NW_004515725.1 | Scaffold157 | 355531                  | GG                              | AA              | 1946923318               |
| SNP_P4_115450_355532 | NW_004515725.1 | Scaffold157 | 355532                  | CC                              | AA              | 1946923320               |
| SNP_P4_115452_358419 | NW_004515725.1 | Scaffold157 | 358419                  | CC                              | AA              | 1946923322               |
| SNP_P4_115453_358420 | NW_004515725.1 | Scaffold157 | 358420                  | TT                              | CC              | 1946923324               |
| SNP_P4_115454_358685 | NW_004515725.1 | Scaffold157 | 358685                  | CC                              | TT              | 1946923326               |
| SNP_P4_115456_359201 | NW_004515725.1 | Scaffold157 | 359201                  | AA                              | CC              | 1946923329               |
| SNP_P4_115457_359210 | NW_004515725.1 | Scaffold157 | 359210                  | TT                              | CC              | 1946923331               |
| SNP_P4_115458_359229 | NW_004515725.1 | Scaffold157 | 359229                  | CC                              | TT              | 1946923334               |
| SNP_P4_115459_359232 | NW_004515725.1 | Scaffold157 | 359232                  | GG                              | TT              | 1946923336               |
| SNP_P4_115460_359660 | NW_004515725.1 | Scaffold157 | 359660                  | CC                              | TT              | 1946923338               |
| SNP_P4_115462_359810 | NW_004515725.1 | Scaffold157 | 359810                  | TT                              | CC              | 1946923340               |
| SNP_P4_115463_359812 | NW_004515725.1 | Scaffold157 | 359812                  | GG                              | AA              | 1946923342               |
| SNP_P4_115464_359828 | NW_004515725.1 | Scaffold157 | 359828                  | AA                              | CC              | 1946923344               |
| SNP_P4_115465_359838 | NW_004515725.1 | Scaffold157 | 359838                  | AA                              | TT              | 1946923346               |
| SNP_P4_115466_359999 | NW_004515725.1 | Scaffold157 | 359999                  | GG                              | TT              | 1946923348               |
| SNP_P4_115468_360052 | NW_004515725.1 | Scaffold157 | 360052                  | GG                              | TT              | 1946923350               |
| SNP_P4_115469_360075 | NW_004515725.1 | Scaffold157 | 360075                  | GG                              | AA              | 1946923352               |
| SNP_P4_115471_360100 | NW_004515725.1 | Scaffold157 | 360100                  | CC                              | TT              | 1946923354               |
| SNP_P4_115472_360231 | NW_004515725.1 | Scaffold157 | 360231                  | AA                              | GG              | 1946923356               |
| SNP_P4_115474_360580 | NW_004515725.1 | Scaffold157 | 360580                  | GG                              | AA              | 1946923358               |
| SNP_P4_115475_360581 | NW_004515725.1 | Scaffold157 | 360581                  | TT                              | CC              | 1946923360               |
| SNP_P4_115476_360633 | NW_004515725.1 | Scaffold157 | 360633                  | AA                              | GG              | 1946923362               |
| SNP_P4_115477_360634 | NW_004515725.1 | Scaffold157 | 360634                  | GG                              | AA              | 1946923364               |
| SNP_P4_115478_360821 | NW_004515725.1 | Scaffold157 | 360821                  | TT                              | CC              | 1946923366               |
| SNP_P4_115479_360863 | NW_004515725.1 | Scaffold157 | 360863                  | GG                              | TT              | 1946923368               |
| SNP_P4_115481_361203 | NW_004515725.1 | Scaffold157 | 361203                  | GG                              | TT              | 1946923370               |
| SNP_P4_115482_362640 | NW_004515725.1 | Scaffold157 | 362640                  | GG                              | AA              | 1946923372               |
| SNP_P4_115483_363475 | NW_004515725.1 | Scaffold157 | 363475                  | TT                              | CC              | 1946923374               |
| SNP_P4_115484_363486 | NW_004515725.1 | Scaffold157 | 363486                  | TT                              | AA              | 1946923376               |
| SNP_P4_115485_363489 | NW_004515725.1 | Scaffold157 | 363489                  | GG                              | AA              | 1946923378               |

| SNPs IDs             | Chromosome IDs | Chromosomes | Physical positions (bp) | CDC Frontier (Reference genome) | (ILWC46 & LPNB) | NCBI SNPdb Accession IDs |
|----------------------|----------------|-------------|-------------------------|---------------------------------|-----------------|--------------------------|
| SNP_P4_115486_372742 | NW_004515725.1 | Scaffold157 | 372742                  | TT                              | GG              | 1946923379               |
| SNP_P4_115487_378197 | NW_004515725.1 | Scaffold157 | 378197                  | TT                              | CC              | 1946923381               |
| SNP_P4_115488_381139 | NW_004515725.1 | Scaffold157 | 381139                  | CC                              | AA              | 1946923383               |
| SNP_P4_115489_399206 | NW_004515725.1 | Scaffold157 | 399206                  | CC                              | TT              | 1946923385               |
| SNP_P4_115490_399214 | NW_004515725.1 | Scaffold157 | 399214                  | AA                              | GG              | 1946923387               |
| SNP_P4_115491_403328 | NW_004515725.1 | Scaffold157 | 403328                  | AA                              | GG              | 1946923389               |
| SNP_P4_115492_427898 | NW_004515725.1 | Scaffold157 | 427898                  | GG                              | TT              | 1946923391               |
| SNP_P4_115493_459953 | NW_004515725.1 | Scaffold157 | 459953                  | TT                              | CC              | 1946923393               |
| SNP_P4_115494_459957 | NW_004515725.1 | Scaffold157 | 459957                  | GG                              | AA              | 1946923395               |
| SNP_P4_115495_460044 | NW_004515725.1 | Scaffold157 | 460044                  | GG                              | AA              | 1946923397               |
| SNP_P4_115497_485459 | NW_004515725.1 | Scaffold157 | 485459                  | TT                              | GG              | 1946923399               |
| SNP_P4_115498_489403 | NW_004515725.1 | Scaffold157 | 489403                  | CC                              | GG              | 1946923401               |
| SNP_P4_115499_513951 | NW_004515725.1 | Scaffold157 | 513951                  | GG                              | TT              | 1946923403               |
| SNP_P4_115500_515144 | NW_004515725.1 | Scaffold157 | 515144                  | AA                              | GG              | 1946923405               |
| SNP_P4_115501_533539 | NW_004515725.1 | Scaffold157 | 533539                  | TT                              | GG              | 1946923407               |
| SNP_P4_115502_533961 | NW_004515725.1 | Scaffold157 | 533961                  | CC                              | TT              | 1946923409               |
| SNP_P4_115503_533969 | NW_004515725.1 | Scaffold157 | 533969                  | AA                              | GG              | 1946923411               |
| SNP_P4_115504_2019   | NW_004515726.1 | Scaffold158 | 2019                    | TT                              | CC              | 1946923413               |
| SNP_P4_115505_2048   | NW_004515726.1 | Scaffold158 | 2048                    | AA                              | GG              | 1946923415               |
| SNP_P4_115506_10385  | NW_004515726.1 | Scaffold158 | 10385                   | AA                              | GG              | 1946923417               |
| SNP_P4_115507_27144  | NW_004515726.1 | Scaffold158 | 27144                   | AA                              | GG              | 1946923419               |
| SNP_P4_115508_28264  | NW_004515726.1 | Scaffold158 | 28264                   | TT                              | CC              | 1946923421               |
| SNP_P4_115509_28289  | NW_004515726.1 | Scaffold158 | 28289                   | GG                              | AA              | 1946923423               |
| SNP_P4_115510_30038  | NW_004515726.1 | Scaffold158 | 30038                   | CC                              | TT              | 1946923425               |
| SNP_P4_115511_36622  | NW_004515726.1 | Scaffold158 | 36622                   | TT                              | GG              | 1946923427               |
| SNP_P4_115512_36630  | NW_004515726.1 | Scaffold158 | 36630                   | GG                              | AA              | 1946923429               |
| SNP_P4_115513_36670  | NW_004515726.1 | Scaffold158 | 36670                   | GG                              | CC              | 1946923431               |
| SNP_P4_115514_40718  | NW_004515726.1 | Scaffold158 | 40718                   | AA                              | GG              | 1946923433               |
| SNP_P4_115515_53005  | NW_004515726.1 | Scaffold158 | 53005                   | GG                              | TT              | 1946923435               |
| SNP_P4_115516_53008  | NW_004515726.1 | Scaffold158 | 53008                   | CC                              | TT              | 1946923438               |
| SNP_P4_115517_73834  | NW_004515726.1 | Scaffold158 | 73834                   | GG                              | AA              | 1946923440               |
| SNP_P4_115518_75600  | NW_004515726.1 | Scaffold158 | 75600                   | GG                              | AA              | 1946923442               |
| SNP_P4_115519_80096  | NW_004515726.1 | Scaffold158 | 80096                   | GG                              | CC              | 1946923444               |
| SNP_P4_115520_121931 | NW_004515726.1 | Scaffold158 | 121931                  | GG                              | TT              | 1946923446               |
| SNP_P4_115521_121958 | NW_004515726.1 | Scaffold158 | 121958                  | CC                              | TT              | 1946923448               |
| SNP_P4_115522_121978 | NW_004515726.1 | Scaffold158 | 121978                  | AA                              | CC              | 1946923450               |
| SNP_P4_115524_131630 | NW_004515726.1 | Scaffold158 | 131630                  | GG                              | AA              | 1946923452               |
| SNP_P4_115526_131652 | NW_004515726.1 | Scaffold158 | 131652                  | TT                              | CC              | 1946923454               |
| SNP_P4_115527_131701 | NW_004515726.1 | Scaffold158 | 131701                  | CC                              | TT              | 1946923456               |
| SNP_P4_115528_131754 | NW_004515726.1 | Scaffold158 | 131754                  | CC                              | AA              | 1946923458               |
| SNP_P4_115529_131762 | NW_004515726.1 | Scaffold158 | 131762                  | AA                              | GG              | 1946923460               |
| SNP_P4_115530_131797 | NW_004515726.1 | Scaffold158 | 131797                  | TT                              | CC              | 1946923462               |

| SNPs IDs             | Chromosome IDs | Chromosomes | Physical positions (bp) | CDC Frontier (Reference genome) | (ILWC46 & LPNB) | NCBI SNPdb Accession IDs |
|----------------------|----------------|-------------|-------------------------|---------------------------------|-----------------|--------------------------|
| SNP_P4_115531_131953 | NW_004515726.1 | Scaffold158 | 131953                  | AA                              | TT              | 1946923464               |
| SNP_P4_115533_132136 | NW_004515726.1 | Scaffold158 | 132136                  | AA                              | CC              | 1946923467               |
| SNP_P4_115534_132228 | NW_004515726.1 | Scaffold158 | 132228                  | TT                              | GG              | 1946923469               |
| SNP_P4_115535_16551  | NW_004515728.1 | Scaffold166 | 16551                   | TT                              | CC              | 1946923471               |
| SNP_P4_115537_40681  | NW_004515728.1 | Scaffold166 | 40681                   | AA                              | GG              | 1946923473               |
| SNP_P4_115538_51497  | NW_004515728.1 | Scaffold166 | 51497                   | GG                              | TT              | 1946923475               |
| SNP_P4_115539_56239  | NW_004515728.1 | Scaffold166 | 56239                   | GG                              | CC              | 1946923477               |
| SNP_P4_115540_60948  | NW_004515728.1 | Scaffold166 | 60948                   | GG                              | AA              | 1946923479               |
| SNP_P4_115541_75148  | NW_004515728.1 | Scaffold166 | 75148                   | TT                              | CC              | 1946923481               |
| SNP_P4_115543_82563  | NW_004515728.1 | Scaffold166 | 82563                   | AA                              | GG              | 1946923483               |
| SNP_P4_115544_98781  | NW_004515728.1 | Scaffold166 | 98781                   | TT                              | GG              | 1946923485               |
| SNP_P4_115545_99164  | NW_004515728.1 | Scaffold166 | 99164                   | AA                              | GG              | 1946923487               |
| SNP_P4_115546_105785 | NW_004515728.1 | Scaffold166 | 105785                  | TT                              | AA              | 1946923489               |
| SNP_P4_115547_108734 | NW_004515728.1 | Scaffold166 | 108734                  | CC                              | TT              | 1946923491               |
| SNP_P4_115548_108967 | NW_004515728.1 | Scaffold166 | 108967                  | GG                              | TT              | 1946923493               |
| SNP_P4_115549_115149 | NW_004515728.1 | Scaffold166 | 115149                  | GG                              | AA              | 1946923495               |
| SNP_P4_115550_115544 | NW_004515728.1 | Scaffold166 | 115544                  | AA                              | TT              | 1946923497               |
| SNP_P4_115551_127429 | NW_004515728.1 | Scaffold166 | 127429                  | TT                              | GG              | 1946923499               |
| SNP_P4_115552_134141 | NW_004515728.1 | Scaffold166 | 134141                  | TT                              | AA              | 1946923501               |
| SNP_P4_115553_152330 | NW_004515728.1 | Scaffold166 | 152330                  | GG                              | AA              | 1946923503               |
| SNP_P4_115554_152639 | NW_004515728.1 | Scaffold166 | 152639                  | TT                              | CC              | 1946923505               |
| SNP_P4_115555_166807 | NW_004515728.1 | Scaffold166 | 166807                  | AA                              | TT              | 1946923507               |
| SNP_P4_115556_166814 | NW_004515728.1 | Scaffold166 | 166814                  | AA                              | GG              | 1946923509               |
| SNP_P4_115557_196625 | NW_004515728.1 | Scaffold166 | 196625                  | TT                              | GG              | 1946923511               |
| SNP_P4_115558_196657 | NW_004515728.1 | Scaffold166 | 196657                  | AA                              | CC              | 1946923513               |
| SNP_P4_115559_196836 | NW_004515728.1 | Scaffold166 | 196836                  | TT                              | GG              | 1946923515               |
| SNP_P4_115560_196891 | NW_004515728.1 | Scaffold166 | 196891                  | CC                              | GG              | 1946923517               |
| SNP_P4_115561_196945 | NW_004515728.1 | Scaffold166 | 196945                  | CC                              | GG              | 1946923519               |
| SNP_P4_115562_199587 | NW_004515728.1 | Scaffold166 | 199587                  | TT                              | CC              | 1946923521               |
| SNP_P4_115564_199898 | NW_004515728.1 | Scaffold166 | 199898                  | AA                              | GG              | 1946923523               |
| SNP_P4_115565_212515 | NW_004515728.1 | Scaffold166 | 212515                  | AA                              | GG              | 1946923525               |
| SNP_P4_115566_212563 | NW_004515728.1 | Scaffold166 | 212563                  | GG                              | TT              | 1946923527               |
| SNP_P4_115567_226968 | NW_004515728.1 | Scaffold166 | 226968                  | AA                              | GG              | 1946923529               |
| SNP_P4_115568_226985 | NW_004515728.1 | Scaffold166 | 226985                  | GG                              | AA              | 1946923532               |
| SNP_P4_115569_227286 | NW_004515728.1 | Scaffold166 | 227286                  | CC                              | TT              | 1946923534               |
| SNP_P4_115570_227305 | NW_004515728.1 | Scaffold166 | 227305                  | GG                              | TT              | 1946923536               |
| SNP_P4_115572_227643 | NW_004515728.1 | Scaffold166 | 227643                  | CC                              | TT              | 1946923538               |
| SNP_P4_115573_239872 | NW_004515728.1 | Scaffold166 | 239872                  | GG                              | TT              | 1946923540               |
| SNP_P4_115574_254992 | NW_004515728.1 | Scaffold166 | 254992                  | GG                              | AA              | 1946923542               |
| SNP_P4_115575_274832 | NW_004515728.1 | Scaffold166 | 274832                  | GG                              | AA              | 1946923544               |
| SNP_P4_115576_276197 | NW_004515728.1 | Scaffold166 | 276197                  | GG                              | TT              | 1946923546               |
| SNP_P4_115577_277424 | NW_004515728.1 | Scaffold166 | 277424                  | GG                              | AA              | 1946923548               |

| SNPs IDs             | Chromosome IDs | Chromosomes | Physical positions (bp) | CDC Frontier (Reference genome) | (ILWC46 & LPNB) | NCBI SNPdb Accession IDs |
|----------------------|----------------|-------------|-------------------------|---------------------------------|-----------------|--------------------------|
| SNP_P4_115578_284198 | NW_004515728.1 | Scaffold166 | 284198                  | AA                              | GG              | 1946923550               |
| SNP_P4_115579_284799 | NW_004515728.1 | Scaffold166 | 284799                  | GG                              | AA              | 1946923552               |
| SNP_P4_115580_284862 | NW_004515728.1 | Scaffold166 | 284862                  | AA                              | GG              | 1946923554               |
| SNP_P4_115581_284863 | NW_004515728.1 | Scaffold166 | 284863                  | AA                              | GG              | 1946923556               |
| SNP_P4_115582_285053 | NW_004515728.1 | Scaffold166 | 285053                  | GG                              | AA              | 1946923558               |
| SNP_P4_115583_285084 | NW_004515728.1 | Scaffold166 | 285084                  | TT                              | CC              | 1946923560               |
| SNP_P4_115584_288929 | NW_004515728.1 | Scaffold166 | 288929                  | CC                              | TT              | 1946923562               |
| SNP_P4_115585_288931 | NW_004515728.1 | Scaffold166 | 288931                  | AA                              | GG              | 1946923564               |
| SNP_P4_115586_294362 | NW_004515728.1 | Scaffold166 | 294362                  | TT                              | GG              | 1946923566               |
| SNP_P4_115587_294469 | NW_004515728.1 | Scaffold166 | 294469                  | GG                              | AA              | 1946923568               |
| SNP_P4_115588_294479 | NW_004515728.1 | Scaffold166 | 294479                  | CC                              | TT              | 1946923570               |
| SNP_P4_115589_298924 | NW_004515728.1 | Scaffold166 | 298924                  | GG                              | TT              | 1946923572               |
| SNP_P4_115590_298945 | NW_004515728.1 | Scaffold166 | 298945                  | TT                              | CC              | 1946923574               |
| SNP_P4_115591_298972 | NW_004515728.1 | Scaffold166 | 298972                  | GG                              | TT              | 1946923576               |
| SNP_P4_115592_299005 | NW_004515728.1 | Scaffold166 | 299005                  | CC                              | TT              | 1946923578               |
| SNP_P4_115593_299007 | NW_004515728.1 | Scaffold166 | 299007                  | GG                              | AA              | 1946923580               |
| SNP_P4_115594_299022 | NW_004515728.1 | Scaffold166 | 299022                  | TT                              | CC              | 1946923582               |
| SNP_P4_115595_299028 | NW_004515728.1 | Scaffold166 | 299028                  | AA                              | GG              | 1946923584               |
| SNP_P4_115596_299078 | NW_004515728.1 | Scaffold166 | 299078                  | AA                              | TT              | 1946923586               |
| SNP_P4_115597_299117 | NW_004515728.1 | Scaffold166 | 299117                  | CC                              | TT              | 1946923588               |
| SNP_P4_115598_299129 | NW_004515728.1 | Scaffold166 | 299129                  | TT                              | CC              | 1946923590               |
| SNP_P4_115599_299137 | NW_004515728.1 | Scaffold166 | 299137                  | TT                              | CC              | 1946923592               |
| SNP_P4_115600_299146 | NW_004515728.1 | Scaffold166 | 299146                  | TT                              | CC              | 1946923594               |
| SNP_P4_115601_299340 | NW_004515728.1 | Scaffold166 | 299340                  | TT                              | GG              | 1946923596               |
| SNP_P4_115602_5378   | NW_004515729.1 | Scaffold167 | 5378                    | AA                              | GG              | 1946923599               |
| SNP_P4_115603_5626   | NW_004515729.1 | Scaffold167 | 5626                    | TT                              | CC              | 1946923601               |
| SNP_P4_115604_5815   | NW_004515729.1 | Scaffold167 | 5815                    | AA                              | CC              | 1946923603               |
| SNP_P4_115605_5829   | NW_004515729.1 | Scaffold167 | 5829                    | CC                              | GG              | 1946923605               |
| SNP_P4_115606_5853   | NW_004515729.1 | Scaffold167 | 5853                    | TT                              | AA              | 1946923607               |
| SNP_P4_115607_5855   | NW_004515729.1 | Scaffold167 | 5855                    | TT                              | GG              | 1946923609               |
| SNP_P4_115608_6116   | NW_004515729.1 | Scaffold167 | 6116                    | GG                              | AA              | 1946923611               |
| SNP_P4_115609_6144   | NW_004515729.1 | Scaffold167 | 6144                    | TT                              | CC              | 1946923613               |
| SNP_P4_115610_6161   | NW_004515729.1 | Scaffold167 | 6161                    | TT                              | AA              | 1946923615               |
| SNP_P4_115611_6162   | NW_004515729.1 | Scaffold167 | 6162                    | AA                              | GG              | 1946923617               |
| SNP_P4_115612_6166   | NW_004515729.1 | Scaffold167 | 6166                    | TT                              | AA              | 1946923619               |
| SNP_P4_115613_6173   | NW_004515729.1 | Scaffold167 | 6173                    | GG                              | TT              | 1946923621               |
| SNP_P4_115614_6174   | NW_004515729.1 | Scaffold167 | 6174                    | TT                              | AA              | 1946923623               |
| SNP_P4_115615_6186   | NW_004515729.1 | Scaffold167 | 6186                    | CC                              | AA              | 1946923625               |
| SNP_P4_115616_6187   | NW_004515729.1 | Scaffold167 | 6187                    | AA                              | TT              | 1946923627               |
| SNP_P4_115617_6272   | NW_004515729.1 | Scaffold167 | 6272                    | TT                              | AA              | 1946923629               |
| SNP_P4_115618_6346   | NW_004515729.1 | Scaffold167 | 6346                    | CC                              | TT              | 1946923631               |
| SNP_P4_115619_10130  | NW_004515729.1 | Scaffold167 | 10130                   | GG                              | TT              | 1946923633               |

| SNPs IDs             | Chromosome IDs | Chromosomes | Physical positions (bp) | CDC Frontier (Reference genome) | (ILWC46 & LPNB) | NCBI SNPdb Accession IDs |
|----------------------|----------------|-------------|-------------------------|---------------------------------|-----------------|--------------------------|
| SNP_P4_115620_21592  | NW_004515729.1 | Scaffold167 | 21592                   | GG                              | TT              | 1946923635               |
| SNP_P4_115622_29083  | NW_004515729.1 | Scaffold167 | 29083                   | CC                              | GG              | 1946923638               |
| SNP_P4_115623_38705  | NW_004515729.1 | Scaffold167 | 38705                   | TT                              | CC              | 1946923640               |
| SNP_P4_115624_38766  | NW_004515729.1 | Scaffold167 | 38766                   | GG                              | CC              | 1946923642               |
| SNP_P4_115625_38986  | NW_004515729.1 | Scaffold167 | 38986                   | CC                              | TT              | 1946923644               |
| SNP_P4_115626_39032  | NW_004515729.1 | Scaffold167 | 39032                   | TT                              | GG              | 1946923646               |
| SNP_P4_115627_39048  | NW_004515729.1 | Scaffold167 | 39048                   | CC                              | TT              | 1946923648               |
| SNP_P4_115628_39139  | NW_004515729.1 | Scaffold167 | 39139                   | TT                              | CC              | 1946923650               |
| SNP_P4_115629_39197  | NW_004515729.1 | Scaffold167 | 39197                   | TT                              | GG              | 1946923653               |
| SNP_P4_115630_39229  | NW_004515729.1 | Scaffold167 | 39229                   | TT                              | AA              | 1946923655               |
| SNP_P4_115631_55907  | NW_004515729.1 | Scaffold167 | 55907                   | AA                              | GG              | 1946923657               |
| SNP_P4_115632_63039  | NW_004515729.1 | Scaffold167 | 63039                   | GG                              | CC              | 1946923659               |
| SNP_P4_115633_63075  | NW_004515729.1 | Scaffold167 | 63075                   | AA                              | GG              | 1946923661               |
| SNP_P4_115636_67993  | NW_004515729.1 | Scaffold167 | 67993                   | AA                              | TT              | 1946923663               |
| SNP_P4_115637_68147  | NW_004515729.1 | Scaffold167 | 68147                   | CC                              | TT              | 1946923665               |
| SNP_P4_115638_68352  | NW_004515729.1 | Scaffold167 | 68352                   | CC                              | TT              | 1946923667               |
| SNP_P4_115639_68359  | NW_004515729.1 | Scaffold167 | 68359                   | GG                              | TT              | 1946923669               |
| SNP_P4_115640_68370  | NW_004515729.1 | Scaffold167 | 68370                   | GG                              | CC              | 1946923671               |
| SNP_P4_115641_68372  | NW_004515729.1 | Scaffold167 | 68372                   | TT                              | CC              | 1946923673               |
| SNP_P4_115642_68440  | NW_004515729.1 | Scaffold167 | 68440                   | TT                              | CC              | 1946923675               |
| SNP_P4_115643_68453  | NW_004515729.1 | Scaffold167 | 68453                   | GG                              | CC              | 1946923677               |
| SNP_P4_115644_84148  | NW_004515729.1 | Scaffold167 | 84148                   | CC                              | TT              | 1946923679               |
| SNP_P4_115645_137473 | NW_004515729.1 | Scaffold167 | 137473                  | TT                              | AA              | 1946923681               |
| SNP_P4_115646_152983 | NW_004515729.1 | Scaffold167 | 152983                  | TT                              | GG              | 1946923683               |
| SNP_P4_115647_153145 | NW_004515729.1 | Scaffold167 | 153145                  | AA                              | TT              | 1946923685               |
| SNP_P4_115648_153163 | NW_004515729.1 | Scaffold167 | 153163                  | TT                              | CC              | 1946923687               |
| SNP_P4_115649_169169 | NW_004515729.1 | Scaffold167 | 169169                  | TT                              | CC              | 1946923689               |
| SNP_P4_115650_201732 | NW_004515729.1 | Scaffold167 | 201732                  | GG                              | AA              | 1946923691               |
| SNP_P4_115651_201733 | NW_004515729.1 | Scaffold167 | 201733                  | GG                              | TT              | 1946923693               |
| SNP_P4_115653_217802 | NW_004515729.1 | Scaffold167 | 217802                  | AA                              | CC              | 1946923695               |
| SNP_P4_115654_217816 | NW_004515729.1 | Scaffold167 | 217816                  | TT                              | GG              | 1946923697               |
| SNP_P4_115655_217837 | NW_004515729.1 | Scaffold167 | 217837                  | AA                              | GG              | 1946923699               |
| SNP_P4_115656_217893 | NW_004515729.1 | Scaffold167 | 217893                  | GG                              | AA              | 1946923701               |
| SNP_P4_115657_217925 | NW_004515729.1 | Scaffold167 | 217925                  | TT                              | CC              | 1946923703               |
| SNP_P4_115658_217951 | NW_004515729.1 | Scaffold167 | 217951                  | GG                              | AA              | 1946923705               |
| SNP_P4_115659_217956 | NW_004515729.1 | Scaffold167 | 217956                  | CC                              | TT              | 1946923708               |
| SNP_P4_115660_219289 | NW_004515729.1 | Scaffold167 | 219289                  | AA                              | GG              | 1946923710               |
| SNP_P4_115662_219319 | NW_004515729.1 | Scaffold167 | 219319                  | GG                              | AA              | 1946923712               |
| SNP_P4_115663_219332 | NW_004515729.1 | Scaffold167 | 219332                  | TT                              | AA              | 1946923714               |
| SNP_P4_115664_219384 | NW_004515729.1 | Scaffold167 | 219384                  | AA                              | GG              | 1946923716               |
| SNP_P4_115665_219597 | NW_004515729.1 | Scaffold167 | 219597                  | TT                              | CC              | 1946923718               |
| SNP_P4_115666_219605 | NW_004515729.1 | Scaffold167 | 219605                  | TT                              | AA              | 1946923720               |

| SNPs IDs             | Chromosome IDs | Chromosomes | Physical positions (bp) | CDC Frontier (Reference genome) | (ILWC46 & LPNB) | NCBI SNPdb Accession IDs |
|----------------------|----------------|-------------|-------------------------|---------------------------------|-----------------|--------------------------|
| SNP_P4_115667_219813 | NW_004515729.1 | Scaffold167 | 219813                  | CC                              | TT              | 1946923722               |
| SNP_P4_115668_219851 | NW_004515729.1 | Scaffold167 | 219851                  | AA                              | GG              | 1946923725               |
| SNP_P4_115669_219860 | NW_004515729.1 | Scaffold167 | 219860                  | CC                              | TT              | 1946923727               |
| SNP_P4_115670_219868 | NW_004515729.1 | Scaffold167 | 219868                  | TT                              | CC              | 1946923729               |
| SNP_P4_115671_219980 | NW_004515729.1 | Scaffold167 | 219980                  | AA                              | GG              | 1946923731               |
| SNP_P4_115672_219992 | NW_004515729.1 | Scaffold167 | 219992                  | AA                              | GG              | 1946923733               |
| SNP_P4_115673_220003 | NW_004515729.1 | Scaffold167 | 220003                  | AA                              | GG              | 1946923735               |
| SNP_P4_115674_220059 | NW_004515729.1 | Scaffold167 | 220059                  | CC                              | GG              | 1946923737               |
| SNP_P4_115675_220063 | NW_004515729.1 | Scaffold167 | 220063                  | CC                              | TT              | 1946923739               |
| SNP_P4_115676_220072 | NW_004515729.1 | Scaffold167 | 220072                  | TT                              | CC              | 1946923741               |
| SNP_P4_115677_220191 | NW_004515729.1 | Scaffold167 | 220191                  | AA                              | GG              | 1946923744               |
| SNP_P4_115678_220229 | NW_004515729.1 | Scaffold167 | 220229                  | AA                              | CC              | 1946923746               |
| SNP_P4_115679_220301 | NW_004515729.1 | Scaffold167 | 220301                  | AA                              | CC              | 1946923748               |
| SNP_P4_115680_220303 | NW_004515729.1 | Scaffold167 | 220303                  | GG                              | AA              | 1946923750               |
| SNP_P4_115681_220373 | NW_004515729.1 | Scaffold167 | 220373                  | TT                              | CC              | 1946923752               |
| SNP_P4_115682_222353 | NW_004515729.1 | Scaffold167 | 222353                  | CC                              | TT              | 1946923754               |
| SNP_P4_115683_222515 | NW_004515729.1 | Scaffold167 | 222515                  | AA                              | GG              | 1946923756               |
| SNP_P4_115684_222648 | NW_004515729.1 | Scaffold167 | 222648                  | GG                              | AA              | 1946923758               |
| SNP_P4_115685_222734 | NW_004515729.1 | Scaffold167 | 222734                  | AA                              | GG              | 1946923760               |
| SNP_P4_115686_222802 | NW_004515729.1 | Scaffold167 | 222802                  | AA                              | GG              | 1946923762               |
| SNP_P4_115687_222817 | NW_004515729.1 | Scaffold167 | 222817                  | GG                              | AA              | 1946923765               |
| SNP_P4_115688_247493 | NW_004515729.1 | Scaffold167 | 247493                  | AA                              | GG              | 1946923767               |
| SNP_P4_115689_274549 | NW_004515729.1 | Scaffold167 | 274549                  | TT                              | CC              | 1946923769               |
| SNP_P4_115690_288900 | NW_004515729.1 | Scaffold167 | 288900                  | AA                              | TT              | 1946923771               |
| SNP_P4_115691_288904 | NW_004515729.1 | Scaffold167 | 288904                  | CC                              | TT              | 1946923773               |
| SNP_P4_115693_295259 | NW_004515729.1 | Scaffold167 | 295259                  | AA                              | GG              | 1946923775               |
| SNP_P4_115694_298616 | NW_004515729.1 | Scaffold167 | 298616                  | AA                              | GG              | 1946923777               |
| SNP_P4_115695_303081 | NW_004515729.1 | Scaffold167 | 303081                  | TT                              | CC              | 1946923779               |
| SNP_P4_115696_303097 | NW_004515729.1 | Scaffold167 | 303097                  | AA                              | GG              | 1946923782               |
| SNP_P4_115697_303098 | NW_004515729.1 | Scaffold167 | 303098                  | CC                              | AA              | 1946923784               |
| SNP_P4_115698_303103 | NW_004515729.1 | Scaffold167 | 303103                  | CC                              | TT              | 1946923786               |
| SNP_P4_115699_303143 | NW_004515729.1 | Scaffold167 | 303143                  | TT                              | CC              | 1946923788               |
| SNP_P4_115700_303222 | NW_004515729.1 | Scaffold167 | 303222                  | GG                              | TT              | 1946923790               |
| SNP_P4_115701_303286 | NW_004515729.1 | Scaffold167 | 303286                  | AA                              | GG              | 1946923792               |
| SNP_P4_115702_303400 | NW_004515729.1 | Scaffold167 | 303400                  | GG                              | AA              | 1946923794               |
| SNP_P4_115703_303429 | NW_004515729.1 | Scaffold167 | 303429                  | GG                              | AA              | 1946923796               |
| SNP_P4_115704_303524 | NW_004515729.1 | Scaffold167 | 303524                  | GG                              | TT              | 1946923798               |
| SNP_P4_115705_303528 | NW_004515729.1 | Scaffold167 | 303528                  | CC                              | TT              | 1946923800               |
| SNP_P4_115706_303534 | NW_004515729.1 | Scaffold167 | 303534                  | AA                              | GG              | 1946923802               |
| SNP_P4_115707_303553 | NW_004515729.1 | Scaffold167 | 303553                  | AA                              | GG              | 1946923805               |
| SNP_P4_115708_303898 | NW_004515729.1 | Scaffold167 | 303898                  | TT                              | GG              | 1946923807               |
| SNP_P4_115709_304581 | NW_004515729.1 | Scaffold167 | 304581                  | TT                              | CC              | 1946923809               |



| SNPs IDs             | Chromosome IDs | Chromosomes | Physical positions (bp) | CDC Frontier (Reference genome) | (ILWC46 & LPNB) | NCBI SNPdb Accession IDs |
|----------------------|----------------|-------------|-------------------------|---------------------------------|-----------------|--------------------------|
| SNP_P4_115710_315140 | NW_004515729.1 | Scaffold167 | 315140                  | GG                              | AA              | 1946923811               |
| SNP_P4_115711_318687 | NW_004515729.1 | Scaffold167 | 318687                  | TT                              | GG              | 1946923813               |
| SNP_P4_115712_320806 | NW_004515729.1 | Scaffold167 | 320806                  | AA                              | GG              | 1946923815               |
| SNP_P4_115713_320872 | NW_004515729.1 | Scaffold167 | 320872                  | AA                              | CC              | 1946923818               |
| SNP_P4_115714_320898 | NW_004515729.1 | Scaffold167 | 320898                  | AA                              | CC              | 1946923820               |
| SNP_P4_115715_322726 | NW_004515729.1 | Scaffold167 | 322726                  | AA                              | CC              | 1946923822               |
| SNP_P4_115716_322778 | NW_004515729.1 | Scaffold167 | 322778                  | TT                              | AA              | 1946923824               |
| SNP_P4_115717_323198 | NW_004515729.1 | Scaffold167 | 323198                  | CC                              | TT              | 1946923826               |
| SNP_P4_115718_323210 | NW_004515729.1 | Scaffold167 | 323210                  | CC                              | TT              | 1946923829               |
| SNP_P4_115719_331993 | NW_004515729.1 | Scaffold167 | 331993                  | CC                              | TT              | 1946923831               |
| SNP_P4_115720_332023 | NW_004515729.1 | Scaffold167 | 332023                  | TT                              | CC              | 1946923833               |
| SNP_P4_115721_332068 | NW_004515729.1 | Scaffold167 | 332068                  | AA                              | GG              | 1946923835               |
| SNP_P4_115722_332305 | NW_004515729.1 | Scaffold167 | 332305                  | GG                              | TT              | 1946923837               |
| SNP_P4_115723_332306 | NW_004515729.1 | Scaffold167 | 332306                  | TT                              | AA              | 1946923839               |
| SNP_P4_115724_332321 | NW_004515729.1 | Scaffold167 | 332321                  | AA                              | GG              | 1946923841               |
| SNP_P4_115725_332358 | NW_004515729.1 | Scaffold167 | 332358                  | GG                              | AA              | 1946923844               |
| SNP_P4_115726_396936 | NW_004515729.1 | Scaffold167 | 396936                  | AA                              | GG              | 1946923846               |
| SNP_P4_115727_404304 | NW_004515729.1 | Scaffold167 | 404304                  | GG                              | AA              | 1946923848               |
| SNP_P4_115729_415237 | NW_004515729.1 | Scaffold167 | 415237                  | GG                              | TT              | 1946923850               |
| SNP_P4_115730_415324 | NW_004515729.1 | Scaffold167 | 415324                  | TT                              | CC              | 1946923852               |
| SNP_P4_115731_415356 | NW_004515729.1 | Scaffold167 | 415356                  | GG                              | AA              | 1946923854               |
| SNP_P4_115733_427794 | NW_004515729.1 | Scaffold167 | 427794                  | CC                              | TT              | 1946923857               |
| SNP_P4_115734_445413 | NW_004515729.1 | Scaffold167 | 445413                  | GG                              | AA              | 1946923859               |
| SNP_P4_115735_445425 | NW_004515729.1 | Scaffold167 | 445425                  | CC                              | TT              | 1946923861               |
| SNP_P4_115736_447299 | NW_004515729.1 | Scaffold167 | 447299                  | TT                              | CC              | 1946923863               |
| SNP_P4_115737_449656 | NW_004515729.1 | Scaffold167 | 449656                  | CC                              | TT              | 1946923865               |
| SNP_P4_115738_4669   | NW_004515730.1 | Scaffold170 | 4669                    | TT                              | CC              | 1946923867               |
| SNP_P4_115739_5365   | NW_004515730.1 | Scaffold170 | 5365                    | TT                              | CC              | 1946923869               |
| SNP_P4_115740_5378   | NW_004515730.1 | Scaffold170 | 5378                    | TT                              | CC              | 1946923871               |
| SNP_P4_115741_5398   | NW_004515730.1 | Scaffold170 | 5398                    | AA                              | GG              | 1946923874               |
| SNP_P4_115742_13454  | NW_004515730.1 | Scaffold170 | 13454                   | GG                              | AA              | 1946923876               |
| SNP_P4_115743_13504  | NW_004515730.1 | Scaffold170 | 13504                   | TT                              | CC              | 1946923878               |
| SNP_P4_115744_13676  | NW_004515730.1 | Scaffold170 | 13676                   | TT                              | CC              | 1946923880               |
| SNP_P4_115745_13723  | NW_004515730.1 | Scaffold170 | 13723                   | AA                              | GG              | 1946923882               |
| SNP_P4_115747_8159   | NW_004515731.1 | Scaffold171 | 8159                    | TT                              | CC              | 1946923885               |
| SNP_P4_115748_8198   | NW_004515731.1 | Scaffold171 | 8198                    | AA                              | CC              | 1946923887               |
| SNP_P4_115749_8211   | NW_004515731.1 | Scaffold171 | 8211                    | AA                              | GG              | 1946923889               |
| SNP_P4_115750_12748  | NW_004515731.1 | Scaffold171 | 12748                   | CC                              | GG              | 1946923894               |
| SNP_P4_115751_15298  | NW_004515731.1 | Scaffold171 | 15298                   | AA                              | GG              | 1946923896               |
| SNP_P4_115752_15435  | NW_004515731.1 | Scaffold171 | 15435                   | AA                              | GG              | 1946923899               |
| SNP_P4_115753_19475  | NW_004515731.1 | Scaffold171 | 19475                   | AA                              | GG              | 1946923901               |
| SNP_P4_115754_20165  | NW_004515731.1 | Scaffold171 | 20165                   | CC                              | GG              | 1946923903               |

| SNPs IDs             | Chromosome IDs | Chromosomes | Physical positions (bp) | CDC Frontier (Reference genome) | (ILWC46 & LPNB) | NCBI SNPdb Accession IDs |
|----------------------|----------------|-------------|-------------------------|---------------------------------|-----------------|--------------------------|
| SNP_P4_115755_21917  | NW_004515731.1 | Scaffold171 | 21917                   | AA                              | GG              | 1946923905               |
| SNP_P4_115756_26057  | NW_004515731.1 | Scaffold171 | 26057                   | AA                              | TT              | 1946923907               |
| SNP_P4_115757_26250  | NW_004515731.1 | Scaffold171 | 26250                   | AA                              | GG              | 1946923909               |
| SNP_P4_115758_26486  | NW_004515731.1 | Scaffold171 | 26486                   | AA                              | CC              | 1946923911               |
| SNP_P4_115759_26523  | NW_004515731.1 | Scaffold171 | 26523                   | TT                              | GG              | 1946923913               |
| SNP_P4_115760_26607  | NW_004515731.1 | Scaffold171 | 26607                   | AA                              | GG              | 1946923915               |
| SNP_P4_115761_26670  | NW_004515731.1 | Scaffold171 | 26670                   | GG                              | AA              | 1946923918               |
| SNP_P4_115762_26692  | NW_004515731.1 | Scaffold171 | 26692                   | GG                              | AA              | 1946923920               |
| SNP_P4_115763_26963  | NW_004515731.1 | Scaffold171 | 26963                   | GG                              | AA              | 1946923922               |
| SNP_P4_115764_27040  | NW_004515731.1 | Scaffold171 | 27040                   | TT                              | GG              | 1946923924               |
| SNP_P4_115765_36906  | NW_004515731.1 | Scaffold171 | 36906                   | AA                              | GG              | 1946923926               |
| SNP_P4_115766_46292  | NW_004515731.1 | Scaffold171 | 46292                   | GG                              | AA              | 1946923929               |
| SNP_P4_115767_48342  | NW_004515731.1 | Scaffold171 | 48342                   | CC                              | AA              | 1946923931               |
| SNP_P4_115768_48372  | NW_004515731.1 | Scaffold171 | 48372                   | GG                              | AA              | 1946923933               |
| SNP_P4_115769_49100  | NW_004515731.1 | Scaffold171 | 49100                   | TT                              | CC              | 1946923935               |
| SNP_P4_115770_54472  | NW_004515731.1 | Scaffold171 | 54472                   | GG                              | AA              | 1946923937               |
| SNP_P4_115772_57614  | NW_004515731.1 | Scaffold171 | 57614                   | CC                              | TT              | 1946923940               |
| SNP_P4_115773_57841  | NW_004515731.1 | Scaffold171 | 57841                   | CC                              | AA              | 1946923942               |
| SNP_P4_115774_57924  | NW_004515731.1 | Scaffold171 | 57924                   | GG                              | AA              | 1946923944               |
| SNP_P4_115775_58019  | NW_004515731.1 | Scaffold171 | 58019                   | GG                              | AA              | 1946923946               |
| SNP_P4_115776_58391  | NW_004515731.1 | Scaffold171 | 58391                   | CC                              | TT              | 1946923948               |
| SNP_P4_115777_58437  | NW_004515731.1 | Scaffold171 | 58437                   | AA                              | GG              | 1946923950               |
| SNP_P4_115778_58455  | NW_004515731.1 | Scaffold171 | 58455                   | TT                              | AA              | 1946923952               |
| SNP_P4_115779_76764  | NW_004515731.1 | Scaffold171 | 76764                   | CC                              | TT              | 1946923954               |
| SNP_P4_115780_88658  | NW_004515731.1 | Scaffold171 | 88658                   | CC                              | TT              | 1946923956               |
| SNP_P4_115782_107215 | NW_004515731.1 | Scaffold171 | 107215                  | CC                              | TT              | 1946923958               |
| SNP_P4_115783_107428 | NW_004515731.1 | Scaffold171 | 107428                  | GG                              | TT              | 1946923960               |
| SNP_P4_115784_108233 | NW_004515731.1 | Scaffold171 | 108233                  | TT                              | CC              | 1946923962               |
| SNP_P4_115785_108791 | NW_004515731.1 | Scaffold171 | 108791                  | GG                              | TT              | 1946923964               |
| SNP_P4_115786_109753 | NW_004515731.1 | Scaffold171 | 109753                  | GG                              | TT              | 1946923965               |
| SNP_P4_115787_109773 | NW_004515731.1 | Scaffold171 | 109773                  | CC                              | TT              | 1946923966               |
| SNP_P4_115789_119993 | NW_004515731.1 | Scaffold171 | 119993                  | AA                              | GG              | 1946923967               |
| SNP_P4_115790_121603 | NW_004515731.1 | Scaffold171 | 121603                  | GG                              | CC              | 1946923968               |
| SNP_P4_115791_121851 | NW_004515731.1 | Scaffold171 | 121851                  | GG                              | AA              | 1946923969               |
| SNP_P4_115793_123120 | NW_004515731.1 | Scaffold171 | 123120                  | TT                              | CC              | 1946923971               |
| SNP_P4_115794_126193 | NW_004515731.1 | Scaffold171 | 126193                  | TT                              | AA              | 1946923973               |
| SNP_P4_115795_129781 | NW_004515731.1 | Scaffold171 | 129781                  | AA                              | CC              | 1946923975               |
| SNP_P4_115796_129815 | NW_004515731.1 | Scaffold171 | 129815                  | TT                              | CC              | 1946923977               |
| SNP_P4_115797_130118 | NW_004515731.1 | Scaffold171 | 130118                  | TT                              | CC              | 1946923979               |
| SNP_P4_115798_130193 | NW_004515731.1 | Scaffold171 | 130193                  | TT                              | CC              | 1946923981               |
| SNP_P4_115799_130195 | NW_004515731.1 | Scaffold171 | 130195                  | CC                              | TT              | 1946923983               |
| SNP_P4_115800_130412 | NW_004515731.1 | Scaffold171 | 130412                  | CC                              | TT              | 1946923984               |

| SNPs IDs             | Chromosome IDs | Chromosomes | Physical positions (bp) | CDC Frontier (Reference genome) | (ILWC46 & LPNB) | NCBI SNPdb Accession IDs |
|----------------------|----------------|-------------|-------------------------|---------------------------------|-----------------|--------------------------|
| SNP_P4_115801_130420 | NW_004515731.1 | Scaffold171 | 130420                  | GG                              | AA              | 1946923986               |
| SNP_P4_115802_130458 | NW_004515731.1 | Scaffold171 | 130458                  | CC                              | GG              | 1946923988               |
| SNP_P4_115803_131175 | NW_004515731.1 | Scaffold171 | 131175                  | AA                              | TT              | 1946923990               |
| SNP_P4_115804_135849 | NW_004515731.1 | Scaffold171 | 135849                  | TT                              | CC              | 1946923992               |
| SNP_P4_115805_135952 | NW_004515731.1 | Scaffold171 | 135952                  | AA                              | GG              | 1946923994               |
| SNP_P4_115806_136040 | NW_004515731.1 | Scaffold171 | 136040                  | GG                              | AA              | 1946923996               |
| SNP_P4_115807_136051 | NW_004515731.1 | Scaffold171 | 136051                  | GG                              | AA              | 1946923998               |
| SNP_P4_115808_136849 | NW_004515731.1 | Scaffold171 | 136849                  | AA                              | TT              | 1946924000               |
| SNP_P4_115809_137095 | NW_004515731.1 | Scaffold171 | 137095                  | TT                              | AA              | 1946924002               |
| SNP_P4_115810_137099 | NW_004515731.1 | Scaffold171 | 137099                  | CC                              | TT              | 1946924004               |
| SNP_P4_115811_137153 | NW_004515731.1 | Scaffold171 | 137153                  | AA                              | GG              | 1946924006               |
| SNP_P4_115812_137597 | NW_004515731.1 | Scaffold171 | 137597                  | TT                              | CC              | 1946924008               |
| SNP_P4_115813_137841 | NW_004515731.1 | Scaffold171 | 137841                  | CC                              | AA              | 1946924011               |
| SNP_P4_115814_137863 | NW_004515731.1 | Scaffold171 | 137863                  | AA                              | CC              | 1946924013               |
| SNP_P4_115815_137945 | NW_004515731.1 | Scaffold171 | 137945                  | GG                              | AA              | 1946924015               |
| SNP_P4_115816_137946 | NW_004515731.1 | Scaffold171 | 137946                  | TT                              | AA              | 1946924017               |
| SNP_P4_115817_141631 | NW_004515731.1 | Scaffold171 | 141631                  | AA                              | GG              | 1946924019               |
| SNP_P4_115818_142559 | NW_004515731.1 | Scaffold171 | 142559                  | CC                              | AA              | 1946924021               |
| SNP_P4_115819_142564 | NW_004515731.1 | Scaffold171 | 142564                  | GG                              | AA              | 1946924023               |
| SNP_P4_115820_142570 | NW_004515731.1 | Scaffold171 | 142570                  | AA                              | GG              | 1946924025               |
| SNP_P4_115821_144598 | NW_004515731.1 | Scaffold171 | 144598                  | AA                              | GG              | 1946924027               |
| SNP_P4_115822_145655 | NW_004515731.1 | Scaffold171 | 145655                  | TT                              | CC              | 1946924029               |
| SNP_P4_115823_146714 | NW_004515731.1 | Scaffold171 | 146714                  | GG                              | AA              | 1946924031               |
| SNP_P4_115824_146760 | NW_004515731.1 | Scaffold171 | 146760                  | AA                              | GG              | 1946924033               |
| SNP_P4_115825_159656 | NW_004515731.1 | Scaffold171 | 159656                  | CC                              | AA              | 1946924035               |
| SNP_P4_115826_181824 | NW_004515731.1 | Scaffold171 | 181824                  | TT                              | CC              | 1946924037               |
| SNP_P4_115827_182491 | NW_004515731.1 | Scaffold171 | 182491                  | GG                              | AA              | 1946924039               |
| SNP_P4_115828_182602 | NW_004515731.1 | Scaffold171 | 182602                  | TT                              | AA              | 1946924041               |
| SNP_P4_115829_182699 | NW_004515731.1 | Scaffold171 | 182699                  | TT                              | CC              | 1946924043               |
| SNP_P4_115830_186431 | NW_004515731.1 | Scaffold171 | 186431                  | CC                              | AA              | 1946924045               |
| SNP_P4_115831_188135 | NW_004515731.1 | Scaffold171 | 188135                  | GG                              | AA              | 1946924047               |
| SNP_P4_115832_188445 | NW_004515731.1 | Scaffold171 | 188445                  | AA                              | GG              | 1946924049               |
| SNP_P4_115833_189871 | NW_004515731.1 | Scaffold171 | 189871                  | GG                              | AA              | 1946924051               |
| SNP_P4_115834_190168 | NW_004515731.1 | Scaffold171 | 190168                  | CC                              | AA              | 1946924053               |
| SNP_P4_115835_192884 | NW_004515731.1 | Scaffold171 | 192884                  | TT                              | CC              | 1946924055               |
| SNP_P4_115836_192974 | NW_004515731.1 | Scaffold171 | 192974                  | AA                              | CC              | 1946924057               |
| SNP_P4_115837_193165 | NW_004515731.1 | Scaffold171 | 193165                  | TT                              | CC              | 1946924059               |
| SNP_P4_115838_200039 | NW_004515731.1 | Scaffold171 | 200039                  | TT                              | GG              | 1946924061               |
| SNP_P4_115839_200785 | NW_004515731.1 | Scaffold171 | 200785                  | TT                              | CC              | 1946924063               |
| SNP_P4_115840_205853 | NW_004515731.1 | Scaffold171 | 205853                  | GG                              | TT              | 1946924065               |
| SNP_P4_115841_209599 | NW_004515731.1 | Scaffold171 | 209599                  | AA                              | TT              | 1946924067               |
| SNP_P4_115843_217406 | NW_004515731.1 | Scaffold171 | 217406                  | TT                              | GG              | 1946924069               |

| SNPs IDs             | Chromosome IDs | Chromosomes | Physical positions (bp) | CDC Frontier (Reference genome) | (ILWC46 & LPNB) | NCBI SNPdb Accession IDs |
|----------------------|----------------|-------------|-------------------------|---------------------------------|-----------------|--------------------------|
| SNP_P4_115844_219159 | NW_004515731.1 | Scaffold171 | 219159                  | CC                              | TT              | 1946924071               |
| SNP_P4_115845_219268 | NW_004515731.1 | Scaffold171 | 219268                  | GG                              | AA              | 1946924073               |
| SNP_P4_115846_219951 | NW_004515731.1 | Scaffold171 | 219951                  | CC                              | GG              | 1946924075               |
| SNP_P4_115848_223744 | NW_004515731.1 | Scaffold171 | 223744                  | TT                              | CC              | 1946924077               |
| SNP_P4_115850_225896 | NW_004515731.1 | Scaffold171 | 225896                  | CC                              | TT              | 1946924079               |
| SNP_P4_115851_229343 | NW_004515731.1 | Scaffold171 | 229343                  | AA                              | GG              | 1946924081               |
| SNP_P4_115852_234892 | NW_004515731.1 | Scaffold171 | 234892                  | AA                              | GG              | 1946924083               |
| SNP_P4_115853_243225 | NW_004515731.1 | Scaffold171 | 243225                  | GG                              | AA              | 1946924085               |
| SNP_P4_115854_1802   | NW_004515733.1 | Scaffold174 | 1802                    | GG                              | AA              | 1946924087               |
| SNP_P4_115855_1811   | NW_004515733.1 | Scaffold174 | 1811                    | AA                              | TT              | 1946924089               |
| SNP_P4_115856_1812   | NW_004515733.1 | Scaffold174 | 1812                    | GG                              | AA              | 1946924091               |
| SNP_P4_115857_1813   | NW_004515733.1 | Scaffold174 | 1813                    | TT                              | GG              | 1946924093               |
| SNP_P4_115858_1850   | NW_004515733.1 | Scaffold174 | 1850                    | TT                              | GG              | 1946924095               |
| SNP_P4_115859_1863   | NW_004515733.1 | Scaffold174 | 1863                    | AA                              | GG              | 1946924097               |
| SNP_P4_115860_1870   | NW_004515733.1 | Scaffold174 | 1870                    | CC                              | TT              | 1946924099               |
| SNP_P4_115861_1912   | NW_004515733.1 | Scaffold174 | 1912                    | GG                              | AA              | 1946924101               |
| SNP_P4_115862_1943   | NW_004515733.1 | Scaffold174 | 1943                    | TT                              | AA              | 1946924103               |
| SNP_P4_115863_4591   | NW_004515733.1 | Scaffold174 | 4591                    | TT                              | AA              | 1946924105               |
| SNP_P4_115864_5210   | NW_004515733.1 | Scaffold174 | 5210                    | CC                              | AA              | 1946924107               |
| SNP_P4_115865_8364   | NW_004515733.1 | Scaffold174 | 8364                    | GG                              | AA              | 1946924109               |
| SNP_P4_115867_9861   | NW_004515733.1 | Scaffold174 | 9861                    | CC                              | TT              | 1946924111               |
| SNP_P4_115868_11220  | NW_004515733.1 | Scaffold174 | 11220                   | CC                              | TT              | 1946924113               |
| SNP_P4_115869_11239  | NW_004515733.1 | Scaffold174 | 11239                   | CC                              | TT              | 1946924115               |
| SNP_P4_115871_12526  | NW_004515733.1 | Scaffold174 | 12526                   | CC                              | TT              | 1946924117               |
| SNP_P4_115872_14918  | NW_004515733.1 | Scaffold174 | 14918                   | GG                              | TT              | 1946924119               |
| SNP_P4_115873_15154  | NW_004515733.1 | Scaffold174 | 15154                   | AA                              | GG              | 1946924121               |
| SNP_P4_115874_20685  | NW_004515733.1 | Scaffold174 | 20685                   | AA                              | GG              | 1946924123               |
| SNP_P4_115875_21311  | NW_004515733.1 | Scaffold174 | 21311                   | CC                              | AA              | 1946924125               |
| SNP_P4_115876_21321  | NW_004515733.1 | Scaffold174 | 21321                   | AA                              | TT              | 1946924127               |
| SNP_P4_115877_21606  | NW_004515733.1 | Scaffold174 | 21606                   | TT                              | CC              | 1946924129               |
| SNP_P4_115878_23182  | NW_004515733.1 | Scaffold174 | 23182                   | AA                              | GG              | 1946924131               |
| SNP_P4_115879_23646  | NW_004515733.1 | Scaffold174 | 23646                   | CC                              | TT              | 1946924133               |
| SNP_P4_115880_24064  | NW_004515733.1 | Scaffold174 | 24064                   | CC                              | TT              | 1946924136               |
| SNP_P4_115881_24178  | NW_004515733.1 | Scaffold174 | 24178                   | TT                              | CC              | 1946924138               |
| SNP_P4_115882_26297  | NW_004515733.1 | Scaffold174 | 26297                   | TT                              | CC              | 1946924140               |
| SNP_P4_115883_26419  | NW_004515733.1 | Scaffold174 | 26419                   | AA                              | GG              | 1946924142               |
| SNP_P4_115884_26703  | NW_004515733.1 | Scaffold174 | 26703                   | GG                              | TT              | 1946924144               |
| SNP_P4_115885_27218  | NW_004515733.1 | Scaffold174 | 27218                   | TT                              | AA              | 1946924146               |
| SNP_P4_115886_28581  | NW_004515733.1 | Scaffold174 | 28581                   | TT                              | AA              | 1946924148               |
| SNP_P4_115887_29024  | NW_004515733.1 | Scaffold174 | 29024                   | TT                              | CC              | 1946924150               |
| SNP_P4_115888_40631  | NW_004515733.1 | Scaffold174 | 40631                   | AA                              | GG              | 1946924152               |
| SNP_P4_115889_41075  | NW_004515733.1 | Scaffold174 | 41075                   | GG                              | CC              | 1946924154               |

| SNPs IDs             | Chromosome IDs | Chromosomes | Physical positions (bp) | CDC Frontier (Reference genome) | (ILWC46 & LPNB) | NCBI SNPdb Accession IDs |
|----------------------|----------------|-------------|-------------------------|---------------------------------|-----------------|--------------------------|
| SNP_P4_115890_47011  | NW_004515733.1 | Scaffold174 | 47011                   | CC                              | TT              | 1946924156               |
| SNP_P4_115892_59227  | NW_004515733.1 | Scaffold174 | 59227                   | TT                              | CC              | 1946924158               |
| SNP_P4_115893_68115  | NW_004515733.1 | Scaffold174 | 68115                   | TT                              | CC              | 1946924160               |
| SNP_P4_115894_70888  | NW_004515733.1 | Scaffold174 | 70888                   | CC                              | TT              | 1946924162               |
| SNP_P4_115895_85259  | NW_004515733.1 | Scaffold174 | 85259                   | CC                              | TT              | 1946924164               |
| SNP_P4_115896_85280  | NW_004515733.1 | Scaffold174 | 85280                   | CC                              | TT              | 1946924166               |
| SNP_P4_115897_85445  | NW_004515733.1 | Scaffold174 | 85445                   | TT                              | CC              | 1946924168               |
| SNP_P4_115899_89898  | NW_004515733.1 | Scaffold174 | 89898                   | TT                              | CC              | 1946924170               |
| SNP_P4_115900_89899  | NW_004515733.1 | Scaffold174 | 89899                   | AA                              | GG              | 1946924172               |
| SNP_P4_115901_89909  | NW_004515733.1 | Scaffold174 | 89909                   | GG                              | AA              | 1946924174               |
| SNP_P4_115902_89934  | NW_004515733.1 | Scaffold174 | 89934                   | CC                              | TT              | 1946924176               |
| SNP_P4_115903_89945  | NW_004515733.1 | Scaffold174 | 89945                   | TT                              | AA              | 1946924178               |
| SNP_P4_115904_89958  | NW_004515733.1 | Scaffold174 | 89958                   | AA                              | CC              | 1946924180               |
| SNP_P4_115905_89977  | NW_004515733.1 | Scaffold174 | 89977                   | AA                              | GG              | 1946924182               |
| SNP_P4_115906_89997  | NW_004515733.1 | Scaffold174 | 89997                   | GG                              | TT              | 1946924184               |
| SNP_P4_115907_90018  | NW_004515733.1 | Scaffold174 | 90018                   | AA                              | GG              | 1946924186               |
| SNP_P4_115908_90034  | NW_004515733.1 | Scaffold174 | 90034                   | GG                              | AA              | 1946924188               |
| SNP_P4_115909_90051  | NW_004515733.1 | Scaffold174 | 90051                   | AA                              | GG              | 1946924190               |
| SNP_P4_115910_90107  | NW_004515733.1 | Scaffold174 | 90107                   | AA                              | TT              | 1946924192               |
| SNP_P4_115911_90187  | NW_004515733.1 | Scaffold174 | 90187                   | AA                              | TT              | 1946924195               |
| SNP_P4_115912_90219  | NW_004515733.1 | Scaffold174 | 90219                   | TT                              | CC              | 1946924197               |
| SNP_P4_115913_90416  | NW_004515733.1 | Scaffold174 | 90416                   | AA                              | GG              | 1946924199               |
| SNP_P4_115914_90478  | NW_004515733.1 | Scaffold174 | 90478                   | TT                              | AA              | 1946924201               |
| SNP_P4_115915_90531  | NW_004515733.1 | Scaffold174 | 90531                   | TT                              | CC              | 1946924203               |
| SNP_P4_115916_92669  | NW_004515733.1 | Scaffold174 | 92669                   | CC                              | TT              | 1946924205               |
| SNP_P4_115917_99433  | NW_004515733.1 | Scaffold174 | 99433                   | GG                              | AA              | 1946924208               |
| SNP_P4_115918_101506 | NW_004515733.1 | Scaffold174 | 101506                  | GG                              | CC              | 1946924210               |
| SNP_P4_115919_101693 | NW_004515733.1 | Scaffold174 | 101693                  | TT                              | AA              | 1946924212               |
| SNP_P4_115921_103464 | NW_004515733.1 | Scaffold174 | 103464                  | TT                              | AA              | 1946924214               |
| SNP_P4_115922_103465 | NW_004515733.1 | Scaffold174 | 103465                  | CC                              | TT              | 1946924216               |
| SNP_P4_115923_104277 | NW_004515733.1 | Scaffold174 | 104277                  | CC                              | TT              | 1946924218               |
| SNP_P4_115924_105120 | NW_004515733.1 | Scaffold174 | 105120                  | AA                              | CC              | 1946924220               |
| SNP_P4_115925_107834 | NW_004515733.1 | Scaffold174 | 107834                  | CC                              | TT              | 1946924222               |
| SNP_P4_115926_107867 | NW_004515733.1 | Scaffold174 | 107867                  | AA                              | GG              | 1946924224               |
| SNP_P4_115928_111251 | NW_004515733.1 | Scaffold174 | 111251                  | AA                              | GG              | 1946924226               |
| SNP_P4_115929_121612 | NW_004515733.1 | Scaffold174 | 121612                  | AA                              | CC              | 1946924228               |
| SNP_P4_115930_124181 | NW_004515733.1 | Scaffold174 | 124181                  | CC                              | TT              | 1946924230               |
| SNP_P4_115931_124582 | NW_004515733.1 | Scaffold174 | 124582                  | AA                              | TT              | 1946924232               |
| SNP_P4_115933_130395 | NW_004515733.1 | Scaffold174 | 130395                  | CC                              | TT              | 1946924235               |
| SNP_P4_115934_131295 | NW_004515733.1 | Scaffold174 | 131295                  | AA                              | CC              | 1946924237               |
| SNP_P4_115935_133639 | NW_004515733.1 | Scaffold174 | 133639                  | GG                              | AA              | 1946924239               |
| SNP_P4_115936_136440 | NW_004515733.1 | Scaffold174 | 136440                  | CC                              | AA              | 1946924241               |

| SNPs IDs             | Chromosome IDs | Chromosomes | Physical positions (bp) | CDC Frontier (Reference genome) | (ILWC46 & LPNB) | NCBI SNPdb Accession IDs |
|----------------------|----------------|-------------|-------------------------|---------------------------------|-----------------|--------------------------|
| SNP_P4_115938_139678 | NW_004515733.1 | Scaffold174 | 139678                  | AA                              | GG              | 1946924243               |
| SNP_P4_115939_142242 | NW_004515733.1 | Scaffold174 | 142242                  | AA                              | GG              | 1946924245               |
| SNP_P4_115940_142723 | NW_004515733.1 | Scaffold174 | 142723                  | CC                              | TT              | 1946924247               |
| SNP_P4_115941_143055 | NW_004515733.1 | Scaffold174 | 143055                  | AA                              | GG              | 1946924250               |
| SNP_P4_115942_143120 | NW_004515733.1 | Scaffold174 | 143120                  | TT                              | GG              | 1946924252               |
| SNP_P4_115944_146033 | NW_004515733.1 | Scaffold174 | 146033                  | TT                              | CC              | 1946924254               |
| SNP_P4_115945_148923 | NW_004515733.1 | Scaffold174 | 148923                  | GG                              | TT              | 1946924256               |
| SNP_P4_115946_151868 | NW_004515733.1 | Scaffold174 | 151868                  | TT                              | GG              | 1946924258               |
| SNP_P4_115947_151880 | NW_004515733.1 | Scaffold174 | 151880                  | AA                              | GG              | 1946924260               |
| SNP_P4_115948_152419 | NW_004515733.1 | Scaffold174 | 152419                  | GG                              | AA              | 1946924262               |
| SNP_P4_115950_155493 | NW_004515733.1 | Scaffold174 | 155493                  | AA                              | CC              | 1946924264               |
| SNP_P4_115951_158891 | NW_004515733.1 | Scaffold174 | 158891                  | AA                              | CC              | 1946924267               |
| SNP_P4_115952_163420 | NW_004515733.1 | Scaffold174 | 163420                  | CC                              | TT              | 1946924269               |
| SNP_P4_115953_165203 | NW_004515733.1 | Scaffold174 | 165203                  | CC                              | TT              | 1946924271               |
| SNP_P4_115954_166309 | NW_004515733.1 | Scaffold174 | 166309                  | AA                              | CC              | 1946924273               |
| SNP_P4_115955_167603 | NW_004515733.1 | Scaffold174 | 167603                  | AA                              | TT              | 1946924275               |
| SNP_P4_115957_167695 | NW_004515733.1 | Scaffold174 | 167695                  | AA                              | GG              | 1946924277               |
| SNP_P4_115958_167711 | NW_004515733.1 | Scaffold174 | 167711                  | AA                              | TT              | 1946924280               |
| SNP_P4_115959_168624 | NW_004515733.1 | Scaffold174 | 168624                  | CC                              | TT              | 1946924282               |
| SNP_P4_115960_174296 | NW_004515733.1 | Scaffold174 | 174296                  | GG                              | AA              | 1946924284               |
| SNP_P4_115961_174301 | NW_004515733.1 | Scaffold174 | 174301                  | GG                              | AA              | 1946924286               |
| SNP_P4_115962_174316 | NW_004515733.1 | Scaffold174 | 174316                  | GG                              | AA              | 1946924288               |
| SNP_P4_115963_174610 | NW_004515733.1 | Scaffold174 | 174610                  | TT                              | GG              | 1946924290               |
| SNP_P4_115964_174622 | NW_004515733.1 | Scaffold174 | 174622                  | TT                              | GG              | 1946924292               |
| SNP_P4_115966_180037 | NW_004515733.1 | Scaffold174 | 180037                  | AA                              | TT              | 1946924294               |
| SNP_P4_115967_180894 | NW_004515733.1 | Scaffold174 | 180894                  | AA                              | GG              | 1946924296               |
| SNP_P4_115968_184962 | NW_004515733.1 | Scaffold174 | 184962                  | TT                              | CC              | 1946924298               |
| SNP_P4_115970_185178 | NW_004515733.1 | Scaffold174 | 185178                  | GG                              | AA              | 1946924300               |
| SNP_P4_115971_185187 | NW_004515733.1 | Scaffold174 | 185187                  | GG                              | AA              | 1946924302               |
| SNP_P4_115972_185403 | NW_004515733.1 | Scaffold174 | 185403                  | CC                              | TT              | 1946924304               |
| SNP_P4_115974_190462 | NW_004515733.1 | Scaffold174 | 190462                  | GG                              | AA              | 1946924306               |
| SNP_P4_115975_191349 | NW_004515733.1 | Scaffold174 | 191349                  | CC                              | TT              | 1946924308               |
| SNP_P4_115976_191359 | NW_004515733.1 | Scaffold174 | 191359                  | CC                              | GG              | 1946924310               |
| SNP_P4_115977_191675 | NW_004515733.1 | Scaffold174 | 191675                  | CC                              | TT              | 1946924313               |
| SNP_P4_115979_194890 | NW_004515733.1 | Scaffold174 | 194890                  | TT                              | GG              | 1946924315               |
| SNP_P4_115980_195384 | NW_004515733.1 | Scaffold174 | 195384                  | TT                              | AA              | 1946924317               |
| SNP_P4_115981_195676 | NW_004515733.1 | Scaffold174 | 195676                  | AA                              | GG              | 1946924319               |
| SNP_P4_115982_195969 | NW_004515733.1 | Scaffold174 | 195969                  | AA                              | TT              | 1946924320               |
| SNP_P4_115983_196352 | NW_004515733.1 | Scaffold174 | 196352                  | TT                              | CC              | 1946924322               |
| SNP_P4_115984_196737 | NW_004515733.1 | Scaffold174 | 196737                  | AA                              | GG              | 1946924324               |
| SNP_P4_115985_198560 | NW_004515733.1 | Scaffold174 | 198560                  | TT                              | GG              | 1946924326               |
| SNP_P4_115986_199040 | NW_004515733.1 | Scaffold174 | 199040                  | GG                              | AA              | 1946924328               |

| SNPs IDs             | Chromosome IDs | Chromosomes | Physical positions (bp) | CDC Frontier (Reference genome) | (ILWC46 & LPNB) | NCBI SNPdb Accession IDs |
|----------------------|----------------|-------------|-------------------------|---------------------------------|-----------------|--------------------------|
| SNP_P4_115987_199469 | NW_004515733.1 | Scaffold174 | 199469                  | TT                              | CC              | 1946924330               |
| SNP_P4_115988_200942 | NW_004515733.1 | Scaffold174 | 200942                  | TT                              | GG              | 1946924332               |
| SNP_P4_115989_200954 | NW_004515733.1 | Scaffold174 | 200954                  | GG                              | CC              | 1946924334               |
| SNP_P4_115990_201018 | NW_004515733.1 | Scaffold174 | 201018                  | AA                              | TT              | 1946924336               |
| SNP_P4_115993_201833 | NW_004515733.1 | Scaffold174 | 201833                  | CC                              | AA              | 1946924338               |
| SNP_P4_115994_202282 | NW_004515733.1 | Scaffold174 | 202282                  | TT                              | GG              | 1946924340               |
| SNP_P4_115995_202324 | NW_004515733.1 | Scaffold174 | 202324                  | GG                              | AA              | 1946924342               |
| SNP_P4_115996_202359 | NW_004515733.1 | Scaffold174 | 202359                  | TT                              | CC              | 1946924344               |
| SNP_P4_115997_205024 | NW_004515733.1 | Scaffold174 | 205024                  | GG                              | AA              | 1946924346               |
| SNP_P4_115998_207958 | NW_004515733.1 | Scaffold174 | 207958                  | AA                              | GG              | 1946924348               |
| SNP_P4_115999_208366 | NW_004515733.1 | Scaffold174 | 208366                  | TT                              | AA              | 1946924350               |
| SNP_P4_116001_208578 | NW_004515733.1 | Scaffold174 | 208578                  | AA                              | GG              | 1946924352               |
| SNP_P4_116002_208766 | NW_004515733.1 | Scaffold174 | 208766                  | TT                              | GG              | 1946924354               |
| SNP_P4_116003_209136 | NW_004515733.1 | Scaffold174 | 209136                  | CC                              | TT              | 1946924356               |
| SNP_P4_116004_209469 | NW_004515733.1 | Scaffold174 | 209469                  | TT                              | CC              | 1946924358               |
| SNP_P4_116005_209832 | NW_004515733.1 | Scaffold174 | 209832                  | TT                              | GG              | 1946924360               |
| SNP_P4_116006_210057 | NW_004515733.1 | Scaffold174 | 210057                  | TT                              | CC              | 1946924362               |
| SNP_P4_116007_216886 | NW_004515733.1 | Scaffold174 | 216886                  | TT                              | CC              | 1946924364               |
| SNP_P4_116008_218788 | NW_004515733.1 | Scaffold174 | 218788                  | AA                              | GG              | 1946924366               |
| SNP_P4_116009_221326 | NW_004515733.1 | Scaffold174 | 221326                  | AA                              | GG              | 1946924368               |
| SNP_P4_116010_221394 | NW_004515733.1 | Scaffold174 | 221394                  | TT                              | CC              | 1946924370               |
| SNP_P4_116011_224802 | NW_004515733.1 | Scaffold174 | 224802                  | AA                              | GG              | 1946924372               |
| SNP_P4_116012_225087 | NW_004515733.1 | Scaffold174 | 225087                  | AA                              | GG              | 1946924374               |
| SNP_P4_116013_230725 | NW_004515733.1 | Scaffold174 | 230725                  | AA                              | GG              | 1946924376               |
| SNP_P4_116015_233279 | NW_004515733.1 | Scaffold174 | 233279                  | CC                              | TT              | 1946924378               |
| SNP_P4_116016_237424 | NW_004515733.1 | Scaffold174 | 237424                  | CC                              | TT              | 1946924380               |
| SNP_P4_116017_238299 | NW_004515733.1 | Scaffold174 | 238299                  | CC                              | TT              | 1946924382               |
| SNP_P4_116018_240997 | NW_004515733.1 | Scaffold174 | 240997                  | TT                              | CC              | 1946924384               |
| SNP_P4_116019_258897 | NW_004515733.1 | Scaffold174 | 258897                  | AA                              | CC              | 1946924386               |
| SNP_P4_116020_262589 | NW_004515733.1 | Scaffold174 | 262589                  | CC                              | TT              | 1946924388               |
| SNP_P4_116021_262608 | NW_004515733.1 | Scaffold174 | 262608                  | CC                              | TT              | 1946924390               |
| SNP_P4_116022_262625 | NW_004515733.1 | Scaffold174 | 262625                  | AA                              | CC              | 1946924392               |
| SNP_P4_116023_270025 | NW_004515733.1 | Scaffold174 | 270025                  | GG                              | AA              | 1946924394               |
| SNP_P4_116024_270081 | NW_004515733.1 | Scaffold174 | 270081                  | CC                              | TT              | 1946924396               |
| SNP_P4_116025_277620 | NW_004515733.1 | Scaffold174 | 277620                  | CC                              | TT              | 1946924398               |
| SNP_P4_116026_278559 | NW_004515733.1 | Scaffold174 | 278559                  | AA                              | GG              | 1946924401               |
| SNP_P4_116027_281357 | NW_004515733.1 | Scaffold174 | 281357                  | AA                              | GG              | 1946924403               |
| SNP_P4_116028_285204 | NW_004515733.1 | Scaffold174 | 285204                  | AA                              | GG              | 1946924405               |
| SNP_P4_116029_285608 | NW_004515733.1 | Scaffold174 | 285608                  | CC                              | TT              | 1946924407               |
| SNP_P4_116030_287039 | NW_004515733.1 | Scaffold174 | 287039                  | TT                              | CC              | 1946924409               |
| SNP_P4_116031_287042 | NW_004515733.1 | Scaffold174 | 287042                  | TT                              | CC              | 1946924411               |
| SNP_P4_116033_299335 | NW_004515733.1 | Scaffold174 | 299335                  | GG                              | AA              | 1946924413               |

| SNPs IDs             | Chromosome IDs | Chromosomes | Physical positions (bp) | CDC Frontier (Reference genome) | (ILWC46 & LPNB) | NCBI SNPdb Accession IDs |
|----------------------|----------------|-------------|-------------------------|---------------------------------|-----------------|--------------------------|
| SNP_P4_116036_320206 | NW_004515733.1 | Scaffold174 | 320206                  | AA                              | GG              | 1946924415               |
| SNP_P4_116037_322743 | NW_004515733.1 | Scaffold174 | 322743                  | TT                              | CC              | 1946924417               |
| SNP_P4_116038_324336 | NW_004515733.1 | Scaffold174 | 324336                  | CC                              | TT              | 1946924419               |
| SNP_P4_116039_325765 | NW_004515733.1 | Scaffold174 | 325765                  | AA                              | GG              | 1946924421               |
| SNP_P4_116040_326076 | NW_004515733.1 | Scaffold174 | 326076                  | GG                              | TT              | 1946924423               |
| SNP_P4_116041_330356 | NW_004515733.1 | Scaffold174 | 330356                  | GG                              | AA              | 1946924425               |
| SNP_P4_116042_341032 | NW_004515733.1 | Scaffold174 | 341032                  | GG                              | AA              | 1946924427               |
| SNP_P4_116043_347921 | NW_004515733.1 | Scaffold174 | 347921                  | TT                              | AA              | 1946924429               |
| SNP_P4_116044_349922 | NW_004515733.1 | Scaffold174 | 349922                  | AA                              | CC              | 1946924431               |
| SNP_P4_116048_350583 | NW_004515733.1 | Scaffold174 | 350583                  | AA                              | GG              | 1946924434               |
| SNP_P4_116049_350878 | NW_004515733.1 | Scaffold174 | 350878                  | CC                              | TT              | 1946924436               |
| SNP_P4_116050_352099 | NW_004515733.1 | Scaffold174 | 352099                  | TT                              | CC              | 1946924438               |
| SNP_P4_116051_352583 | NW_004515733.1 | Scaffold174 | 352583                  | TT                              | CC              | 1946924440               |
| SNP_P4_116052_352584 | NW_004515733.1 | Scaffold174 | 352584                  | AA                              | GG              | 1946924442               |
| SNP_P4_116053_352629 | NW_004515733.1 | Scaffold174 | 352629                  | TT                              | GG              | 1946924444               |
| SNP_P4_116054_352779 | NW_004515733.1 | Scaffold174 | 352779                  | AA                              | CC              | 1946924446               |
| SNP_P4_116055_352830 | NW_004515733.1 | Scaffold174 | 352830                  | AA                              | GG              | 1946924448               |
| SNP_P4_116056_352831 | NW_004515733.1 | Scaffold174 | 352831                  | AA                              | GG              | 1946924450               |
| SNP_P4_116057_353084 | NW_004515733.1 | Scaffold174 | 353084                  | TT                              | CC              | 1946924452               |
| SNP_P4_116058_354471 | NW_004515733.1 | Scaffold174 | 354471                  | AA                              | GG              | 1946924454               |
| SNP_P4_116060_363172 | NW_004515733.1 | Scaffold174 | 363172                  | CC                              | TT              | 1946924456               |
| SNP_P4_116061_363516 | NW_004515733.1 | Scaffold174 | 363516                  | GG                              | AA              | 1946924458               |
| SNP_P4_116063_369731 | NW_004515733.1 | Scaffold174 | 369731                  | AA                              | TT              | 1946924460               |
| SNP_P4_116064_369988 | NW_004515733.1 | Scaffold174 | 369988                  | GG                              | AA              | 1946924462               |
| SNP_P4_116065_370951 | NW_004515733.1 | Scaffold174 | 370951                  | AA                              | GG              | 1946924464               |
| SNP_P4_116066_371295 | NW_004515733.1 | Scaffold174 | 371295                  | AA                              | GG              | 1946924466               |
| SNP_P4_116067_372975 | NW_004515733.1 | Scaffold174 | 372975                  | TT                              | AA              | 1946924468               |
| SNP_P4_116068_374790 | NW_004515733.1 | Scaffold174 | 374790                  | TT                              | CC              | 1946924470               |
| SNP_P4_116069_375087 | NW_004515733.1 | Scaffold174 | 375087                  | CC                              | GG              | 1946924472               |
| SNP_P4_116070_375913 | NW_004515733.1 | Scaffold174 | 375913                  | TT                              | CC              | 1946924474               |
| SNP_P4_116072_380284 | NW_004515733.1 | Scaffold174 | 380284                  | AA                              | GG              | 1946924476               |
| SNP_P4_116073_381012 | NW_004515733.1 | Scaffold174 | 381012                  | CC                              | TT              | 1946924478               |
| SNP_P4_116074_381363 | NW_004515733.1 | Scaffold174 | 381363                  | AA                              | GG              | 1946924480               |
| SNP_P4_116075_381583 | NW_004515733.1 | Scaffold174 | 381583                  | GG                              | CC              | 1946924482               |
| SNP_P4_116076_381608 | NW_004515733.1 | Scaffold174 | 381608                  | CC                              | TT              | 1946924484               |
| SNP_P4_116077_381641 | NW_004515733.1 | Scaffold174 | 381641                  | CC                              | TT              | 1946924486               |
| SNP_P4_116078_381829 | NW_004515733.1 | Scaffold174 | 381829                  | CC                              | TT              | 1946924488               |
| SNP_P4_116079_382812 | NW_004515733.1 | Scaffold174 | 382812                  | CC                              | TT              | 1946924490               |
| SNP_P4_116080_382857 | NW_004515733.1 | Scaffold174 | 382857                  | TT                              | CC              | 1946924492               |
| SNP_P4_116081_382859 | NW_004515733.1 | Scaffold174 | 382859                  | GG                              | AA              | 1946924494               |
| SNP_P4_116082_383184 | NW_004515733.1 | Scaffold174 | 383184                  | AA                              | GG              | 1946924496               |
| SNP_P4_116083_384251 | NW_004515733.1 | Scaffold174 | 384251                  | AA                              | GG              | 1946924498               |



| SNPs IDs             | Chromosome IDs | Chromosomes | Physical positions (bp) | CDC Frontier (Reference genome) | (ILWC46 & LPNB) | NCBI SNPdb Accession IDs |
|----------------------|----------------|-------------|-------------------------|---------------------------------|-----------------|--------------------------|
| SNP_P4_116084_385081 | NW_004515733.1 | Scaffold174 | 385081                  | TT                              | AA              | 1946924500               |
| SNP_P4_116085_390078 | NW_004515733.1 | Scaffold174 | 390078                  | CC                              | TT              | 1946924502               |
| SNP_P4_116086_390083 | NW_004515733.1 | Scaffold174 | 390083                  | AA                              | CC              | 1946924504               |
| SNP_P4_116088_398056 | NW_004515733.1 | Scaffold174 | 398056                  | TT                              | GG              | 1946924506               |
| SNP_P4_116089_398965 | NW_004515733.1 | Scaffold174 | 398965                  | AA                              | CC              | 1946924508               |
| SNP_P4_116090_407462 | NW_004515733.1 | Scaffold174 | 407462                  | GG                              | AA              | 1946924510               |
| SNP_P4_116091_407536 | NW_004515733.1 | Scaffold174 | 407536                  | TT                              | CC              | 1946924512               |
| SNP_P4_116092_408583 | NW_004515733.1 | Scaffold174 | 408583                  | TT                              | AA              | 1946924514               |
| SNP_P4_116093_409166 | NW_004515733.1 | Scaffold174 | 409166                  | AA                              | TT              | 1946924516               |
| SNP_P4_116094_409241 | NW_004515733.1 | Scaffold174 | 409241                  | AA                              | CC              | 1946924518               |
| SNP_P4_116095_409257 | NW_004515733.1 | Scaffold174 | 409257                  | AA                              | GG              | 1946924520               |
| SNP_P4_116096_409350 | NW_004515733.1 | Scaffold174 | 409350                  | AA                              | GG              | 1946924522               |
| SNP_P4_116097_409399 | NW_004515733.1 | Scaffold174 | 409399                  | TT                              | GG              | 1946924524               |
| SNP_P4_116098_418691 | NW_004515733.1 | Scaffold174 | 418691                  | GG                              | TT              | 1946924526               |
| SNP_P4_116099_418755 | NW_004515733.1 | Scaffold174 | 418755                  | TT                              | CC              | 1946924528               |
| SNP_P4_116100_420254 | NW_004515733.1 | Scaffold174 | 420254                  | GG                              | AA              | 1946924530               |
| SNP_P4_116101_421757 | NW_004515733.1 | Scaffold174 | 421757                  | AA                              | GG              | 1946924532               |
| SNP_P4_116103_422255 | NW_004515733.1 | Scaffold174 | 422255                  | TT                              | CC              | 1946924534               |
| SNP_P4_116104_422257 | NW_004515733.1 | Scaffold174 | 422257                  | AA                              | GG              | 1946924536               |
| SNP_P4_116105_422828 | NW_004515733.1 | Scaffold174 | 422828                  | TT                              | AA              | 1946924538               |
| SNP_P4_116106_424191 | NW_004515733.1 | Scaffold174 | 424191                  | GG                              | AA              | 1946924540               |
| SNP_P4_116108_424653 | NW_004515733.1 | Scaffold174 | 424653                  | GG                              | TT              | 1946924542               |
| SNP_P4_116109_424888 | NW_004515733.1 | Scaffold174 | 424888                  | GG                              | AA              | 1946924544               |
| SNP_P4_116110_429088 | NW_004515733.1 | Scaffold174 | 429088                  | CC                              | TT              | 1946924546               |
| SNP_P4_116111_429267 | NW_004515733.1 | Scaffold174 | 429267                  | GG                              | AA              | 1946924548               |
| SNP_P4_116112_430454 | NW_004515733.1 | Scaffold174 | 430454                  | AA                              | TT              | 1946924550               |
| SNP_P4_116113_431014 | NW_004515733.1 | Scaffold174 | 431014                  | TT                              | CC              | 1946924552               |
| SNP_P4_116114_431222 | NW_004515733.1 | Scaffold174 | 431222                  | GG                              | AA              | 1946924554               |
| SNP_P4_116115_433578 | NW_004515733.1 | Scaffold174 | 433578                  | CC                              | TT              | 1946924556               |
| SNP_P4_116117_447018 | NW_004515733.1 | Scaffold174 | 447018                  | AA                              | CC              | 1946924559               |
| SNP_P4_116118_447071 | NW_004515733.1 | Scaffold174 | 447071                  | GG                              | CC              | 1946924561               |
| SNP_P4_116120_448927 | NW_004515733.1 | Scaffold174 | 448927                  | TT                              | AA              | 1946924563               |
| SNP_P4_116122_451990 | NW_004515733.1 | Scaffold174 | 451990                  | AA                              | GG              | 1946924565               |
| SNP_P4_116123_455192 | NW_004515733.1 | Scaffold174 | 455192                  | TT                              | CC              | 1946924567               |
| SNP_P4_116124_456834 | NW_004515733.1 | Scaffold174 | 456834                  | AA                              | CC              | 1946924569               |
| SNP_P4_116125_457133 | NW_004515733.1 | Scaffold174 | 457133                  | TT                              | CC              | 1946924571               |
| SNP_P4_116126_460569 | NW_004515733.1 | Scaffold174 | 460569                  | CC                              | AA              | 1946924573               |
| SNP_P4_116127_462651 | NW_004515733.1 | Scaffold174 | 462651                  | AA                              | GG              | 1946924575               |
| SNP_P4_116128_462730 | NW_004515733.1 | Scaffold174 | 462730                  | CC                              | TT              | 1946924577               |
| SNP_P4_116129_465634 | NW_004515733.1 | Scaffold174 | 465634                  | TT                              | CC              | 1946924579               |
| SNP_P4_116130_465705 | NW_004515733.1 | Scaffold174 | 465705                  | TT                              | CC              | 1946924582               |
| SNP_P4_116132_466046 | NW_004515733.1 | Scaffold174 | 466046                  | GG                              | AA              | 1946924584               |

| SNPs IDs             | Chromosome IDs | Chromosomes | Physical positions (bp) | CDC Frontier (Reference genome) | (ILWC46 & LPNB) | NCBI SNPdb Accession IDs |
|----------------------|----------------|-------------|-------------------------|---------------------------------|-----------------|--------------------------|
| SNP_P4_116133_466683 | NW_004515733.1 | Scaffold174 | 466683                  | AA                              | CC              | 1946924586               |
| SNP_P4_116134_470465 | NW_004515733.1 | Scaffold174 | 470465                  | CC                              | TT              | 1946924588               |
| SNP_P4_116135_470510 | NW_004515733.1 | Scaffold174 | 470510                  | AA                              | GG              | 1946924590               |
| SNP_P4_116136_470520 | NW_004515733.1 | Scaffold174 | 470520                  | GG                              | TT              | 1946924592               |
| SNP_P4_116137_470528 | NW_004515733.1 | Scaffold174 | 470528                  | AA                              | TT              | 1946924594               |
| SNP_P4_116138_470534 | NW_004515733.1 | Scaffold174 | 470534                  | CC                              | AA              | 1946924596               |
| SNP_P4_116139_470558 | NW_004515733.1 | Scaffold174 | 470558                  | GG                              | AA              | 1946924599               |
| SNP_P4_116140_470587 | NW_004515733.1 | Scaffold174 | 470587                  | AA                              | GG              | 1946924601               |
| SNP_P4_116142_470693 | NW_004515733.1 | Scaffold174 | 470693                  | GG                              | AA              | 1946924603               |
| SNP_P4_116143_470849 | NW_004515733.1 | Scaffold174 | 470849                  | TT                              | CC              | 1946924605               |
| SNP_P4_116144_470971 | NW_004515733.1 | Scaffold174 | 470971                  | GG                              | CC              | 1946924607               |
| SNP_P4_116145_479242 | NW_004515733.1 | Scaffold174 | 479242                  | GG                              | TT              | 1946924609               |
| SNP_P4_116146_479560 | NW_004515733.1 | Scaffold174 | 479560                  | CC                              | TT              | 1946924611               |
| SNP_P4_116147_479714 | NW_004515733.1 | Scaffold174 | 479714                  | TT                              | GG              | 1946924613               |
| SNP_P4_116148_479730 | NW_004515733.1 | Scaffold174 | 479730                  | GG                              | TT              | 1946924615               |
| SNP_P4_116149_479760 | NW_004515733.1 | Scaffold174 | 479760                  | AA                              | CC              | 1946924617               |
| SNP_P4_116150_479837 | NW_004515733.1 | Scaffold174 | 479837                  | GG                              | AA              | 1946924619               |
| SNP_P4_116151_479912 | NW_004515733.1 | Scaffold174 | 479912                  | GG                              | TT              | 1946924621               |
| SNP_P4_116153_483295 | NW_004515733.1 | Scaffold174 | 483295                  | GG                              | TT              | 1946924623               |
| SNP_P4_116155_487778 | NW_004515733.1 | Scaffold174 | 487778                  | AA                              | GG              | 1946924625               |
| SNP_P4_116156_495055 | NW_004515733.1 | Scaffold174 | 495055                  | AA                              | TT              | 1946924627               |
| SNP_P4_116157_498039 | NW_004515733.1 | Scaffold174 | 498039                  | TT                              | CC              | 1946924629               |
| SNP_P4_116158_498053 | NW_004515733.1 | Scaffold174 | 498053                  | TT                              | AA              | 1946924631               |
| SNP_P4_116161_38709  | NW_004515735.1 | Scaffold181 | 38709                   | CC                              | TT              | 1946924633               |
| SNP_P4_116162_68347  | NW_004515735.1 | Scaffold181 | 68347                   | AA                              | GG              | 1946924635               |
| SNP_P4_116163_68352  | NW_004515735.1 | Scaffold181 | 68352                   | CC                              | AA              | 1946924637               |
| SNP_P4_116165_94267  | NW_004515735.1 | Scaffold181 | 94267                   | AA                              | CC              | 1946924638               |
| SNP_P4_116166_94294  | NW_004515735.1 | Scaffold181 | 94294                   | GG                              | TT              | 1946924639               |
| SNP_P4_116167_94330  | NW_004515735.1 | Scaffold181 | 94330                   | AA                              | GG              | 1946924640               |
| SNP_P4_116168_94337  | NW_004515735.1 | Scaffold181 | 94337                   | AA                              | CC              | 1946924642               |
| SNP_P4_116169_104025 | NW_004515735.1 | Scaffold181 | 104025                  | CC                              | TT              | 1946924644               |
| SNP_P4_116170_104027 | NW_004515735.1 | Scaffold181 | 104027                  | AA                              | GG              | 1946924646               |
| SNP_P4_116171_117194 | NW_004515735.1 | Scaffold181 | 117194                  | CC                              | TT              | 1946924648               |
| SNP_P4_116172_122547 | NW_004515735.1 | Scaffold181 | 122547                  | GG                              | TT              | 1946924650               |
| SNP_P4_116174_183018 | NW_004515735.1 | Scaffold181 | 183018                  | AA                              | GG              | 1946924652               |
| SNP_P4_116175_183383 | NW_004515735.1 | Scaffold181 | 183383                  | GG                              | CC              | 1946924654               |
| SNP_P4_116176_185776 | NW_004515735.1 | Scaffold181 | 185776                  | AA                              | GG              | 1946924656               |
| SNP_P4_116177_203774 | NW_004515735.1 | Scaffold181 | 203774                  | AA                              | GG              | 1946924658               |
| SNP_P4_116178_4230   | NW_004515738.1 | Scaffold186 | 4230                    | TT                              | CC              | 1946924660               |
| SNP_P4_116179_17042  | NW_004515738.1 | Scaffold186 | 17042                   | TT                              | CC              | 1946924662               |
| SNP_P4_116180_25807  | NW_004515738.1 | Scaffold186 | 25807                   | GG                              | TT              | 1946924664               |
| SNP_P4_116181_25834  | NW_004515738.1 | Scaffold186 | 25834                   | CC                              | AA              | 1946924666               |

| SNPs IDs             | Chromosome IDs | Chromosomes | Physical positions (bp) | CDC Frontier (Reference genome) | (ILWC46 & LPNB) | NCBI SNPdb Accession IDs |
|----------------------|----------------|-------------|-------------------------|---------------------------------|-----------------|--------------------------|
| SNP_P4_116183_65058  | NW_004515738.1 | Scaffold186 | 65058                   | TT                              | CC              | 1946924668               |
| SNP_P4_116184_77320  | NW_004515738.1 | Scaffold186 | 77320                   | CC                              | TT              | 1946924670               |
| SNP_P4_116186_79299  | NW_004515738.1 | Scaffold186 | 79299                   | AA                              | CC              | 1946924672               |
| SNP_P4_116187_79326  | NW_004515738.1 | Scaffold186 | 79326                   | GG                              | AA              | 1946924674               |
| SNP_P4_116188_79332  | NW_004515738.1 | Scaffold186 | 79332                   | GG                              | AA              | 1946924676               |
| SNP_P4_116189_95184  | NW_004515738.1 | Scaffold186 | 95184                   | AA                              | GG              | 1946924678               |
| SNP_P4_116190_112341 | NW_004515738.1 | Scaffold186 | 112341                  | CC                              | TT              | 1946924679               |
| SNP_P4_116191_112348 | NW_004515738.1 | Scaffold186 | 112348                  | TT                              | CC              | 1946924681               |
| SNP_P4_116193_124086 | NW_004515738.1 | Scaffold186 | 124086                  | TT                              | CC              | 1946924683               |
| SNP_P4_116194_124727 | NW_004515738.1 | Scaffold186 | 124727                  | CC                              | TT              | 1946924685               |
| SNP_P4_116195_125093 | NW_004515738.1 | Scaffold186 | 125093                  | CC                              | TT              | 1946924687               |
| SNP_P4_116196_125184 | NW_004515738.1 | Scaffold186 | 125184                  | AA                              | GG              | 1946924689               |
| SNP_P4_116197_142612 | NW_004515738.1 | Scaffold186 | 142612                  | AA                              | TT              | 1946924691               |
| SNP_P4_116198_146091 | NW_004515738.1 | Scaffold186 | 146091                  | TT                              | CC              | 1946924693               |
| SNP_P4_116199_151481 | NW_004515738.1 | Scaffold186 | 151481                  | CC                              | TT              | 1946924696               |
| SNP_P4_116200_151539 | NW_004515738.1 | Scaffold186 | 151539                  | CC                              | TT              | 1946924698               |
| SNP_P4_116201_151599 | NW_004515738.1 | Scaffold186 | 151599                  | AA                              | TT              | 1946924700               |
| SNP_P4_116202_151641 | NW_004515738.1 | Scaffold186 | 151641                  | AA                              | GG              | 1946924702               |
| SNP_P4_116203_152903 | NW_004515738.1 | Scaffold186 | 152903                  | CC                              | TT              | 1946924704               |
| SNP_P4_116204_176380 | NW_004515738.1 | Scaffold186 | 176380                  | TT                              | GG              | 1946924706               |
| SNP_P4_116205_176412 | NW_004515738.1 | Scaffold186 | 176412                  | TT                              | CC              | 1946924708               |
| SNP_P4_116206_176491 | NW_004515738.1 | Scaffold186 | 176491                  | CC                              | TT              | 1946924710               |
| SNP_P4_116207_176492 | NW_004515738.1 | Scaffold186 | 176492                  | AA                              | GG              | 1946924712               |
| SNP_P4_116208_176736 | NW_004515738.1 | Scaffold186 | 176736                  | CC                              | TT              | 1946924714               |
| SNP_P4_116209_176782 | NW_004515738.1 | Scaffold186 | 176782                  | CC                              | TT              | 1946924716               |
| SNP_P4_116210_176826 | NW_004515738.1 | Scaffold186 | 176826                  | GG                              | CC              | 1946924719               |
| SNP_P4_116211_176828 | NW_004515738.1 | Scaffold186 | 176828                  | TT                              | CC              | 1946924721               |
| SNP_P4_116212_176830 | NW_004515738.1 | Scaffold186 | 176830                  | CC                              | AA              | 1946924723               |
| SNP_P4_116213_176831 | NW_004515738.1 | Scaffold186 | 176831                  | AA                              | GG              | 1946924725               |
| SNP_P4_116214_176851 | NW_004515738.1 | Scaffold186 | 176851                  | AA                              | GG              | 1946924727               |
| SNP_P4_116215_176867 | NW_004515738.1 | Scaffold186 | 176867                  | AA                              | GG              | 1946924729               |
| SNP_P4_116217_178782 | NW_004515738.1 | Scaffold186 | 178782                  | GG                              | CC              | 1946924731               |
| SNP_P4_116218_178783 | NW_004515738.1 | Scaffold186 | 178783                  | TT                              | CC              | 1946924733               |
| SNP_P4_116219_178816 | NW_004515738.1 | Scaffold186 | 178816                  | CC                              | TT              | 1946924735               |
| SNP_P4_116220_178827 | NW_004515738.1 | Scaffold186 | 178827                  | AA                              | GG              | 1946924737               |
| SNP_P4_116221_178840 | NW_004515738.1 | Scaffold186 | 178840                  | CC                              | TT              | 1946924739               |
| SNP_P4_116222_178849 | NW_004515738.1 | Scaffold186 | 178849                  | TT                              | AA              | 1946924741               |
| SNP_P4_116223_178933 | NW_004515738.1 | Scaffold186 | 178933                  | GG                              | AA              | 1946924743               |
| SNP_P4_116224_178957 | NW_004515738.1 | Scaffold186 | 178957                  | CC                              | TT              | 1946924745               |
| SNP_P4_116225_179100 | NW_004515738.1 | Scaffold186 | 179100                  | GG                              | AA              | 1946924747               |
| SNP_P4_116226_179146 | NW_004515738.1 | Scaffold186 | 179146                  | TT                              | CC              | 1946924749               |
| SNP_P4_116227_222499 | NW_004515738.1 | Scaffold186 | 222499                  | TT                              | AA              | 1946924751               |

| SNPs IDs             | Chromosome IDs | Chromosomes | Physical positions (bp) | CDC Frontier (Reference genome) | (ILWC46 & LPNB) | NCBI SNPdb Accession IDs |
|----------------------|----------------|-------------|-------------------------|---------------------------------|-----------------|--------------------------|
| SNP_P4_116229_235945 | NW_004515738.1 | Scaffold186 | 235945                  | TT                              | AA              | 1946924753               |
| SNP_P4_116231_252533 | NW_004515738.1 | Scaffold186 | 252533                  | GG                              | AA              | 1946924755               |
| SNP_P4_116232_274375 | NW_004515738.1 | Scaffold186 | 274375                  | AA                              | GG              | 1946924757               |
| SNP_P4_116233_304782 | NW_004515738.1 | Scaffold186 | 304782                  | CC                              | TT              | 1946924759               |
| SNP_P4_116234_307483 | NW_004515738.1 | Scaffold186 | 307483                  | AA                              | GG              | 1946924761               |
| SNP_P4_116235_307530 | NW_004515738.1 | Scaffold186 | 307530                  | TT                              | CC              | 1946924763               |
| SNP_P4_116236_310844 | NW_004515738.1 | Scaffold186 | 310844                  | AA                              | GG              | 1946924765               |
| SNP_P4_116237_311229 | NW_004515738.1 | Scaffold186 | 311229                  | CC                              | AA              | 1946924767               |
| SNP_P4_116238_311236 | NW_004515738.1 | Scaffold186 | 311236                  | CC                              | AA              | 1946924769               |
| SNP_P4_116239_311264 | NW_004515738.1 | Scaffold186 | 311264                  | AA                              | TT              | 1946924771               |
| SNP_P4_116240_311428 | NW_004515738.1 | Scaffold186 | 311428                  | GG                              | AA              | 1946924773               |
| SNP_P4_116241_311432 | NW_004515738.1 | Scaffold186 | 311432                  | CC                              | TT              | 1946924775               |
| SNP_P4_116242_311433 | NW_004515738.1 | Scaffold186 | 311433                  | AA                              | GG              | 1946924777               |
| SNP_P4_116243_311439 | NW_004515738.1 | Scaffold186 | 311439                  | CC                              | GG              | 1946924779               |
| SNP_P4_116244_318210 | NW_004515738.1 | Scaffold186 | 318210                  | AA                              | GG              | 1946924781               |
| SNP_P4_116245_331026 | NW_004515738.1 | Scaffold186 | 331026                  | TT                              | AA              | 1946924783               |
| SNP_P4_116246_331893 | NW_004515738.1 | Scaffold186 | 331893                  | GG                              | TT              | 1946924785               |
| SNP_P4_116247_331923 | NW_004515738.1 | Scaffold186 | 331923                  | CC                              | TT              | 1946924787               |
| SNP_P4_116248_331945 | NW_004515738.1 | Scaffold186 | 331945                  | CC                              | GG              | 1946924789               |
| SNP_P4_116249_331951 | NW_004515738.1 | Scaffold186 | 331951                  | CC                              | TT              | 1946924791               |
| SNP_P4_116250_349630 | NW_004515738.1 | Scaffold186 | 349630                  | GG                              | AA              | 1946924793               |
| SNP_P4_116251_349659 | NW_004515738.1 | Scaffold186 | 349659                  | GG                              | AA              | 1946924795               |
| SNP_P4_116252_349708 | NW_004515738.1 | Scaffold186 | 349708                  | CC                              | AA              | 1946924797               |
| SNP_P4_116253_351024 | NW_004515738.1 | Scaffold186 | 351024                  | AA                              | GG              | 1946924799               |
| SNP_P4_116254_351043 | NW_004515738.1 | Scaffold186 | 351043                  | GG                              | TT              | 1946924802               |
| SNP_P4_116255_351436 | NW_004515738.1 | Scaffold186 | 351436                  | TT                              | CC              | 1946924804               |
| SNP_P4_116256_351440 | NW_004515738.1 | Scaffold186 | 351440                  | TT                              | GG              | 1946924806               |
| SNP_P4_116257_351515 | NW_004515738.1 | Scaffold186 | 351515                  | TT                              | AA              | 1946924808               |
| SNP_P4_116258_361658 | NW_004515738.1 | Scaffold186 | 361658                  | AA                              | GG              | 1946924810               |
| SNP_P4_116259_370709 | NW_004515738.1 | Scaffold186 | 370709                  | AA                              | TT              | 1946924812               |
| SNP_P4_116260_370714 | NW_004515738.1 | Scaffold186 | 370714                  | AA                              | TT              | 1946924814               |
| SNP_P4_116261_370716 | NW_004515738.1 | Scaffold186 | 370716                  | AA                              | TT              | 1946924816               |
| SNP_P4_116262_370725 | NW_004515738.1 | Scaffold186 | 370725                  | AA                              | GG              | 1946924818               |
| SNP_P4_116263_389522 | NW_004515738.1 | Scaffold186 | 389522                  | TT                              | CC              | 1946924820               |
| SNP_P4_116264_439463 | NW_004515738.1 | Scaffold186 | 439463                  | AA                              | CC              | 1946924822               |
| SNP_P4_116265_441258 | NW_004515738.1 | Scaffold186 | 441258                  | CC                              | AA              | 1946924824               |
| SNP_P4_116266_460229 | NW_004515738.1 | Scaffold186 | 460229                  | AA                              | CC              | 1946924826               |
| SNP_P4_116267_461780 | NW_004515738.1 | Scaffold186 | 461780                  | TT                              | AA              | 1946924828               |
| SNP_P4_116268_461781 | NW_004515738.1 | Scaffold186 | 461781                  | TT                              | CC              | 1946924830               |
| SNP_P4_116269_464429 | NW_004515738.1 | Scaffold186 | 464429                  | GG                              | TT              | 1946924832               |
| SNP_P4_116270_464454 | NW_004515738.1 | Scaffold186 | 464454                  | CC                              | AA              | 1946924834               |
| SNP_P4_116271_464602 | NW_004515738.1 | Scaffold186 | 464602                  | GG                              | AA              | 1946924836               |

| SNPs IDs             | Chromosome IDs | Chromosomes | Physical positions (bp) | CDC Frontier (Reference genome) | (ILWC46 & LPNB) | NCBI SNPdb Accession IDs |
|----------------------|----------------|-------------|-------------------------|---------------------------------|-----------------|--------------------------|
| SNP_P4_116272_465281 | NW_004515738.1 | Scaffold186 | 465281                  | TT                              | CC              | 1946924838               |
| SNP_P4_116274_10844  | NW_004515740.1 | Scaffold193 | 10844                   | CC                              | TT              | 1946924840               |
| SNP_P4_116275_61942  | NW_004515740.1 | Scaffold193 | 61942                   | GG                              | AA              | 1946924842               |
| SNP_P4_116276_63823  | NW_004515740.1 | Scaffold193 | 63823                   | GG                              | AA              | 1946924844               |
| SNP_P4_116277_64856  | NW_004515740.1 | Scaffold193 | 64856                   | AA                              | GG              | 1946924846               |
| SNP_P4_116278_65818  | NW_004515740.1 | Scaffold193 | 65818                   | GG                              | TT              | 1946924848               |
| SNP_P4_116279_79268  | NW_004515740.1 | Scaffold193 | 79268                   | TT                              | GG              | 1946924850               |
| SNP_P4_116280_79273  | NW_004515740.1 | Scaffold193 | 79273                   | TT                              | CC              | 1946924852               |
| SNP_P4_116281_79469  | NW_004515740.1 | Scaffold193 | 79469                   | AA                              | CC              | 1946924854               |
| SNP_P4_116282_79478  | NW_004515740.1 | Scaffold193 | 79478                   | TT                              | CC              | 1946924856               |
| SNP_P4_116283_79545  | NW_004515740.1 | Scaffold193 | 79545                   | AA                              | GG              | 1946924858               |
| SNP_P4_116285_79661  | NW_004515740.1 | Scaffold193 | 79661                   | TT                              | AA              | 1946924860               |
| SNP_P4_116287_79774  | NW_004515740.1 | Scaffold193 | 79774                   | TT                              | CC              | 1946924862               |
| SNP_P4_116288_79830  | NW_004515740.1 | Scaffold193 | 79830                   | GG                              | AA              | 1946924864               |
| SNP_P4_116289_80018  | NW_004515740.1 | Scaffold193 | 80018                   | AA                              | CC              | 1946924866               |
| SNP_P4_116290_86146  | NW_004515740.1 | Scaffold193 | 86146                   | AA                              | TT              | 1946924868               |
| SNP_P4_116291_89219  | NW_004515740.1 | Scaffold193 | 89219                   | GG                              | TT              | 1946924870               |
| SNP_P4_116292_115822 | NW_004515740.1 | Scaffold193 | 115822                  | TT                              | CC              | 1946924872               |
| SNP_P4_116293_125716 | NW_004515740.1 | Scaffold193 | 125716                  | TT                              | CC              | 1946924874               |
| SNP_P4_116294_130324 | NW_004515740.1 | Scaffold193 | 130324                  | TT                              | CC              | 1946924876               |
| SNP_P4_116295_190106 | NW_004515740.1 | Scaffold193 | 190106                  | CC                              | TT              | 1946924879               |
| SNP_P4_116296_199790 | NW_004515740.1 | Scaffold193 | 199790                  | TT                              | AA              | 1946924881               |
| SNP_P4_116297_199791 | NW_004515740.1 | Scaffold193 | 199791                  | TT                              | AA              | 1946924883               |
| SNP_P4_116298_201639 | NW_004515740.1 | Scaffold193 | 201639                  | CC                              | AA              | 1946924885               |
| SNP_P4_116299_201696 | NW_004515740.1 | Scaffold193 | 201696                  | TT                              | GG              | 1946924887               |
| SNP_P4_116300_201711 | NW_004515740.1 | Scaffold193 | 201711                  | GG                              | AA              | 1946924889               |
| SNP_P4_116301_201771 | NW_004515740.1 | Scaffold193 | 201771                  | GG                              | TT              | 1946924891               |
| SNP_P4_116302_201823 | NW_004515740.1 | Scaffold193 | 201823                  | CC                              | TT              | 1946924893               |
| SNP_P4_116304_201979 | NW_004515740.1 | Scaffold193 | 201979                  | TT                              | CC              | 1946924895               |
| SNP_P4_116305_208273 | NW_004515740.1 | Scaffold193 | 208273                  | TT                              | CC              | 1946924897               |
| SNP_P4_116306_208333 | NW_004515740.1 | Scaffold193 | 208333                  | TT                              | CC              | 1946924900               |
| SNP_P4_116307_208361 | NW_004515740.1 | Scaffold193 | 208361                  | GG                              | AA              | 1946924902               |
| SNP_P4_116308_208382 | NW_004515740.1 | Scaffold193 | 208382                  | TT                              | CC              | 1946924904               |
| SNP_P4_116309_208386 | NW_004515740.1 | Scaffold193 | 208386                  | TT                              | CC              | 1946924906               |
| SNP_P4_116310_208457 | NW_004515740.1 | Scaffold193 | 208457                  | GG                              | TT              | 1946924908               |
| SNP_P4_116311_208486 | NW_004515740.1 | Scaffold193 | 208486                  | AA                              | GG              | 1946924910               |
| SNP_P4_116313_208727 | NW_004515740.1 | Scaffold193 | 208727                  | CC                              | GG              | 1946924912               |
| SNP_P4_116314_208773 | NW_004515740.1 | Scaffold193 | 208773                  | GG                              | CC              | 1946924914               |
| SNP_P4_116315_238539 | NW_004515740.1 | Scaffold193 | 238539                  | TT                              | GG              | 1946924916               |
| SNP_P4_116316_252501 | NW_004515740.1 | Scaffold193 | 252501                  | TT                              | CC              | 1946924918               |
| SNP_P4_116317_255505 | NW_004515740.1 | Scaffold193 | 255505                  | TT                              | CC              | 1946924920               |
| SNP_P4_116318_255506 | NW_004515740.1 | Scaffold193 | 255506                  | CC                              | TT              | 1946924922               |

| SNPs IDs             | Chromosome IDs | Chromosomes | Physical positions (bp) | CDC Frontier (Reference genome) | (ILWC46 & LPNB) | NCBI SNPdb Accession IDs |
|----------------------|----------------|-------------|-------------------------|---------------------------------|-----------------|--------------------------|
| SNP_P4_116319_255602 | NW_004515740.1 | Scaffold193 | 255602                  | TT                              | CC              | 1946924924               |
| SNP_P4_116320_268007 | NW_004515740.1 | Scaffold193 | 268007                  | AA                              | GG              | 1946924926               |
| SNP_P4_116321_268154 | NW_004515740.1 | Scaffold193 | 268154                  | AA                              | GG              | 1946924928               |
| SNP_P4_116322_268169 | NW_004515740.1 | Scaffold193 | 268169                  | CC                              | TT              | 1946924930               |
| SNP_P4_116323_277626 | NW_004515740.1 | Scaffold193 | 277626                  | GG                              | AA              | 1946924932               |
| SNP_P4_116324_280649 | NW_004515740.1 | Scaffold193 | 280649                  | TT                              | CC              | 1946924934               |
| SNP_P4_116325_280650 | NW_004515740.1 | Scaffold193 | 280650                  | GG                              | TT              | 1946924936               |
| SNP_P4_116326_280669 | NW_004515740.1 | Scaffold193 | 280669                  | GG                              | TT              | 1946924939               |
| SNP_P4_116327_280671 | NW_004515740.1 | Scaffold193 | 280671                  | TT                              | CC              | 1946924941               |
| SNP_P4_116328_289674 | NW_004515740.1 | Scaffold193 | 289674                  | TT                              | AA              | 1946924943               |
| SNP_P4_116329_295646 | NW_004515740.1 | Scaffold193 | 295646                  | AA                              | GG              | 1946924945               |
| SNP_P4_116330_295650 | NW_004515740.1 | Scaffold193 | 295650                  | TT                              | CC              | 1946924947               |
| SNP_P4_116332_295685 | NW_004515740.1 | Scaffold193 | 295685                  | GG                              | AA              | 1946924949               |
| SNP_P4_116333_295691 | NW_004515740.1 | Scaffold193 | 295691                  | CC                              | TT              | 1946924951               |
| SNP_P4_116334_295711 | NW_004515740.1 | Scaffold193 | 295711                  | GG                              | AA              | 1946924953               |
| SNP_P4_116335_295754 | NW_004515740.1 | Scaffold193 | 295754                  | AA                              | TT              | 1946924956               |
| SNP_P4_116336_295760 | NW_004515740.1 | Scaffold193 | 295760                  | TT                              | CC              | 1946924958               |
| SNP_P4_116337_295778 | NW_004515740.1 | Scaffold193 | 295778                  | GG                              | TT              | 1946924960               |
| SNP_P4_116338_295781 | NW_004515740.1 | Scaffold193 | 295781                  | GG                              | AA              | 1946924962               |
| SNP_P4_116339_295788 | NW_004515740.1 | Scaffold193 | 295788                  | TT                              | CC              | 1946924964               |
| SNP_P4_116340_295813 | NW_004515740.1 | Scaffold193 | 295813                  | CC                              | TT              | 1946924966               |
| SNP_P4_116341_295850 | NW_004515740.1 | Scaffold193 | 295850                  | AA                              | CC              | 1946924968               |
| SNP_P4_116342_295859 | NW_004515740.1 | Scaffold193 | 295859                  | CC                              | TT              | 1946924970               |
| SNP_P4_116343_295865 | NW_004515740.1 | Scaffold193 | 295865                  | GG                              | TT              | 1946924972               |
| SNP_P4_116344_296010 | NW_004515740.1 | Scaffold193 | 296010                  | GG                              | AA              | 1946924974               |
| SNP_P4_116345_296025 | NW_004515740.1 | Scaffold193 | 296025                  | GG                              | AA              | 1946924976               |
| SNP_P4_116346_296034 | NW_004515740.1 | Scaffold193 | 296034                  | CC                              | AA              | 1946924978               |
| SNP_P4_116347_296055 | NW_004515740.1 | Scaffold193 | 296055                  | AA                              | GG              | 1946924980               |
| SNP_P4_116348_296076 | NW_004515740.1 | Scaffold193 | 296076                  | GG                              | CC              | 1946924982               |
| SNP_P4_116349_305727 | NW_004515740.1 | Scaffold193 | 305727                  | CC                              | TT              | 1946924984               |
| SNP_P4_116350_310189 | NW_004515740.1 | Scaffold193 | 310189                  | GG                              | AA              | 1946924986               |
| SNP_P4_116351_310216 | NW_004515740.1 | Scaffold193 | 310216                  | CC                              | GG              | 1946924988               |
| SNP_P4_116352_310279 | NW_004515740.1 | Scaffold193 | 310279                  | AA                              | CC              | 1946924990               |
| SNP_P4_116353_310350 | NW_004515740.1 | Scaffold193 | 310350                  | GG                              | AA              | 1946924992               |
| SNP_P4_116354_310385 | NW_004515740.1 | Scaffold193 | 310385                  | TT                              | CC              | 1946924994               |
| SNP_P4_116355_310386 | NW_004515740.1 | Scaffold193 | 310386                  | TT                              | GG              | 1946924996               |
| SNP_P4_116356_310478 | NW_004515740.1 | Scaffold193 | 310478                  | CC                              | AA              | 1946924998               |
| SNP_P4_116357_310514 | NW_004515740.1 | Scaffold193 | 310514                  | TT                              | AA              | 1946925000               |
| SNP_P4_116358_311244 | NW_004515740.1 | Scaffold193 | 311244                  | AA                              | GG              | 1946925002               |
| SNP_P4_116359_316225 | NW_004515740.1 | Scaffold193 | 316225                  | TT                              | GG              | 1946925004               |
| SNP_P4_116360_316668 | NW_004515740.1 | Scaffold193 | 316668                  | CC                              | TT              | 1946925006               |
| SNP_P4_116361_317082 | NW_004515740.1 | Scaffold193 | 317082                  | CC                              | TT              | 1946925008               |

| SNPs IDs             | Chromosome IDs | Chromosomes | Physical positions (bp) | CDC Frontier (Reference genome) | (ILWC46 & LPNB) | NCBI SNPdb Accession IDs |
|----------------------|----------------|-------------|-------------------------|---------------------------------|-----------------|--------------------------|
| SNP_P4_116362_317318 | NW_004515740.1 | Scaffold193 | 317318                  | TT                              | AA              | 1946925010               |
| SNP_P4_116363_318918 | NW_004515740.1 | Scaffold193 | 318918                  | GG                              | AA              | 1946925012               |
| SNP_P4_116364_321508 | NW_004515740.1 | Scaffold193 | 321508                  | CC                              | TT              | 1946925014               |
| SNP_P4_116365_329499 | NW_004515740.1 | Scaffold193 | 329499                  | GG                              | AA              | 1946925016               |
| SNP_P4_116367_329751 | NW_004515740.1 | Scaffold193 | 329751                  | AA                              | GG              | 1946925018               |
| SNP_P4_116368_329875 | NW_004515740.1 | Scaffold193 | 329875                  | GG                              | TT              | 1946925020               |
| SNP_P4_116369_329916 | NW_004515740.1 | Scaffold193 | 329916                  | GG                              | CC              | 1946925022               |
| SNP_P4_116370_353202 | NW_004515740.1 | Scaffold193 | 353202                  | AA                              | GG              | 1946925024               |
| SNP_P4_116371_354687 | NW_004515740.1 | Scaffold193 | 354687                  | AA                              | CC              | 1946925026               |
| SNP_P4_116372_354688 | NW_004515740.1 | Scaffold193 | 354688                  | GG                              | AA              | 1946925028               |
| SNP_P4_116374_393999 | NW_004515740.1 | Scaffold193 | 393999                  | TT                              | CC              | 1946925030               |
| SNP_P4_116375_394253 | NW_004515740.1 | Scaffold193 | 394253                  | GG                              | AA              | 1946925032               |
| SNP_P4_116376_394291 | NW_004515740.1 | Scaffold193 | 394291                  | AA                              | CC              | 1946925034               |
| SNP_P4_116377_394302 | NW_004515740.1 | Scaffold193 | 394302                  | GG                              | AA              | 1946925036               |
| SNP_P4_116379_394540 | NW_004515740.1 | Scaffold193 | 394540                  | AA                              | CC              | 1946925038               |
| SNP_P4_116380_394557 | NW_004515740.1 | Scaffold193 | 394557                  | AA                              | CC              | 1946925040               |
| SNP_P4_116381_417537 | NW_004515740.1 | Scaffold193 | 417537                  | TT                              | GG              | 1946925042               |
| SNP_P4_116382_417913 | NW_004515740.1 | Scaffold193 | 417913                  | CC                              | AA              | 1946925045               |
| SNP_P4_116383_417922 | NW_004515740.1 | Scaffold193 | 417922                  | AA                              | GG              | 1946925047               |
| SNP_P4_116384_424911 | NW_004515740.1 | Scaffold193 | 424911                  | CC                              | TT              | 1946925049               |
| SNP_P4_116385_424924 | NW_004515740.1 | Scaffold193 | 424924                  | AA                              | TT              | 1946925051               |
| SNP_P4_116386_424963 | NW_004515740.1 | Scaffold193 | 424963                  | TT                              | AA              | 1946925053               |
| SNP_P4_116387_428970 | NW_004515740.1 | Scaffold193 | 428970                  | TT                              | CC              | 1946925055               |
| SNP_P4_116388_428972 | NW_004515740.1 | Scaffold193 | 428972                  | GG                              | TT              | 1946925057               |
| SNP_P4_116389_429014 | NW_004515740.1 | Scaffold193 | 429014                  | TT                              | GG              | 1946925059               |
| SNP_P4_116390_429247 | NW_004515740.1 | Scaffold193 | 429247                  | CC                              | TT              | 1946925061               |
| SNP_P4_116391_429251 | NW_004515740.1 | Scaffold193 | 429251                  | AA                              | GG              | 1946925063               |
| SNP_P4_116392_429347 | NW_004515740.1 | Scaffold193 | 429347                  | AA                              | CC              | 1946925065               |
| SNP_P4_116393_429390 | NW_004515740.1 | Scaffold193 | 429390                  | TT                              | CC              | 1946925067               |
| SNP_P4_116394_429392 | NW_004515740.1 | Scaffold193 | 429392                  | AA                              | CC              | 1946925070               |
| SNP_P4_116395_433101 | NW_004515740.1 | Scaffold193 | 433101                  | GG                              | AA              | 1946925072               |
| SNP_P4_116396_435738 | NW_004515740.1 | Scaffold193 | 435738                  | TT                              | CC              | 1946925074               |
| SNP_P4_116397_435765 | NW_004515740.1 | Scaffold193 | 435765                  | TT                              | CC              | 1946925076               |
| SNP_P4_116398_436132 | NW_004515740.1 | Scaffold193 | 436132                  | AA                              | GG              | 1946925078               |
| SNP_P4_116399_453761 | NW_004515740.1 | Scaffold193 | 453761                  | AA                              | GG              | 1946925080               |
| SNP_P4_116400_462785 | NW_004515740.1 | Scaffold193 | 462785                  | CC                              | TT              | 1946925082               |
| SNP_P4_116401_462792 | NW_004515740.1 | Scaffold193 | 462792                  | GG                              | AA              | 1946925084               |
| SNP_P4_116402_462807 | NW_004515740.1 | Scaffold193 | 462807                  | CC                              | TT              | 1946925086               |
| SNP_P4_116403_464827 | NW_004515740.1 | Scaffold193 | 464827                  | GG                              | AA              | 1946925087               |
| SNP_P4_116404_9376   | NW_004515741.1 | Scaffold194 | 9376                    | AA                              | GG              | 1946925089               |
| SNP_P4_116405_1481   | NW_004515743.1 | Scaffold196 | 1481                    | GG                              | AA              | 1946925091               |
| SNP_P4_116406_1653   | NW_004515743.1 | Scaffold196 | 1653                    | AA                              | CC              | 1946925093               |

| SNPs IDs             | Chromosome IDs | Chromosomes | Physical positions (bp) | CDC Frontier (Reference genome) | (ILWC46 & LPNB) | NCBI SNPdb Accession IDs |
|----------------------|----------------|-------------|-------------------------|---------------------------------|-----------------|--------------------------|
| SNP_P4_116407_7881   | NW_004515743.1 | Scaffold196 | 7881                    | GG                              | CC              | 1946925095               |
| SNP_P4_116408_15393  | NW_004515743.1 | Scaffold196 | 15393                   | GG                              | TT              | 1946925097               |
| SNP_P4_116409_19212  | NW_004515743.1 | Scaffold196 | 19212                   | GG                              | AA              | 1946925099               |
| SNP_P4_116410_8032   | NW_004515744.1 | Scaffold198 | 8032                    | TT                              | CC              | 1946925101               |
| SNP_P4_116411_49943  | NW_004515744.1 | Scaffold198 | 49943                   | GG                              | AA              | 1946925103               |
| SNP_P4_116412_50020  | NW_004515744.1 | Scaffold198 | 50020                   | GG                              | AA              | 1946925105               |
| SNP_P4_116413_51038  | NW_004515744.1 | Scaffold198 | 51038                   | CC                              | TT              | 1946925107               |
| SNP_P4_116414_51222  | NW_004515744.1 | Scaffold198 | 51222                   | GG                              | AA              | 1946925109               |
| SNP_P4_116415_51445  | NW_004515744.1 | Scaffold198 | 51445                   | AA                              | GG              | 1946925111               |
| SNP_P4_116416_51565  | NW_004515744.1 | Scaffold198 | 51565                   | TT                              | CC              | 1946925112               |
| SNP_P4_116417_51580  | NW_004515744.1 | Scaffold198 | 51580                   | AA                              | GG              | 1946925114               |
| SNP_P4_116418_54432  | NW_004515744.1 | Scaffold198 | 54432                   | GG                              | AA              | 1946925116               |
| SNP_P4_116419_54436  | NW_004515744.1 | Scaffold198 | 54436                   | TT                              | CC              | 1946925118               |
| SNP_P4_116420_54441  | NW_004515744.1 | Scaffold198 | 54441                   | AA                              | TT              | 1946925120               |
| SNP_P4_116421_54480  | NW_004515744.1 | Scaffold198 | 54480                   | TT                              | AA              | 1946925122               |
| SNP_P4_116422_54484  | NW_004515744.1 | Scaffold198 | 54484                   | AA                              | GG              | 1946925124               |
| SNP_P4_116423_54777  | NW_004515744.1 | Scaffold198 | 54777                   | TT                              | CC              | 1946925126               |
| SNP_P4_116424_56356  | NW_004515744.1 | Scaffold198 | 56356                   | AA                              | GG              | 1946925128               |
| SNP_P4_116425_56398  | NW_004515744.1 | Scaffold198 | 56398                   | GG                              | AA              | 1946925130               |
| SNP_P4_116426_56399  | NW_004515744.1 | Scaffold198 | 56399                   | AA                              | GG              | 1946925132               |
| SNP_P4_116427_56495  | NW_004515744.1 | Scaffold198 | 56495                   | TT                              | CC              | 1946925134               |
| SNP_P4_116428_56529  | NW_004515744.1 | Scaffold198 | 56529                   | AA                              | GG              | 1946925135               |
| SNP_P4_116429_56548  | NW_004515744.1 | Scaffold198 | 56548                   | TT                              | CC              | 1946925137               |
| SNP_P4_116430_56586  | NW_004515744.1 | Scaffold198 | 56586                   | GG                              | AA              | 1946925139               |
| SNP_P4_116432_60905  | NW_004515744.1 | Scaffold198 | 60905                   | TT                              | AA              | 1946925141               |
| SNP_P4_116434_93325  | NW_004515744.1 | Scaffold198 | 93325                   | AA                              | TT              | 1946925143               |
| SNP_P4_116435_93330  | NW_004515744.1 | Scaffold198 | 93330                   | GG                              | AA              | 1946925145               |
| SNP_P4_116437_98211  | NW_004515744.1 | Scaffold198 | 98211                   | TT                              | AA              | 1946925147               |
| SNP_P4_116438_101122 | NW_004515744.1 | Scaffold198 | 101122                  | GG                              | TT              | 1946925149               |
| SNP_P4_116439_101123 | NW_004515744.1 | Scaffold198 | 101123                  | TT                              | GG              | 1946925151               |
| SNP_P4_116441_149318 | NW_004515744.1 | Scaffold198 | 149318                  | AA                              | GG              | 1946925152               |
| SNP_P4_116442_159932 | NW_004515744.1 | Scaffold198 | 159932                  | AA                              | GG              | 1946925154               |
| SNP_P4_116443_159938 | NW_004515744.1 | Scaffold198 | 159938                  | AA                              | GG              | 1946925156               |
| SNP_P4_116444_162503 | NW_004515744.1 | Scaffold198 | 162503                  | AA                              | GG              | 1946925158               |
| SNP_P4_116445_162521 | NW_004515744.1 | Scaffold198 | 162521                  | AA                              | CC              | 1946925160               |
| SNP_P4_116446_162547 | NW_004515744.1 | Scaffold198 | 162547                  | AA                              | GG              | 1946925162               |
| SNP_P4_116447_188043 | NW_004515744.1 | Scaffold198 | 188043                  | TT                              | CC              | 1946925164               |
| SNP_P4_116448_188093 | NW_004515744.1 | Scaffold198 | 188093                  | GG                              | AA              | 1946925166               |
| SNP_P4_116449_188102 | NW_004515744.1 | Scaffold198 | 188102                  | GG                              | AA              | 1946925168               |
| SNP_P4_116450_188108 | NW_004515744.1 | Scaffold198 | 188108                  | CC                              | TT              | 1946925170               |
| SNP_P4_116451_188113 | NW_004515744.1 | Scaffold198 | 188113                  | TT                              | CC              | 1946925172               |
| SNP_P4_116452_188122 | NW_004515744.1 | Scaffold198 | 188122                  | CC                              | TT              | 1946925173               |



| SNPs IDs             | Chromosome IDs | Chromosomes | Physical positions (bp) | CDC Frontier (Reference genome) | (ILWC46 & LPNB) | NCBI SNPdb Accession IDs |
|----------------------|----------------|-------------|-------------------------|---------------------------------|-----------------|--------------------------|
| SNP_P4_116453_188126 | NW_004515744.1 | Scaffold198 | 188126                  | CC                              | AA              | 1946925175               |
| SNP_P4_116454_199268 | NW_004515744.1 | Scaffold198 | 199268                  | AA                              | TT              | 1946925177               |
| SNP_P4_116455_211114 | NW_004515744.1 | Scaffold198 | 211114                  | TT                              | AA              | 1946925179               |
| SNP_P4_116456_251472 | NW_004515744.1 | Scaffold198 | 251472                  | TT                              | GG              | 1946925181               |
| SNP_P4_116457_251488 | NW_004515744.1 | Scaffold198 | 251488                  | AA                              | GG              | 1946925183               |
| SNP_P4_116458_251556 | NW_004515744.1 | Scaffold198 | 251556                  | CC                              | TT              | 1946925185               |
| SNP_P4_116459_251569 | NW_004515744.1 | Scaffold198 | 251569                  | AA                              | GG              | 1946925187               |
| SNP_P4_116461_267507 | NW_004515744.1 | Scaffold198 | 267507                  | CC                              | TT              | 1946925189               |
| SNP_P4_116462_267578 | NW_004515744.1 | Scaffold198 | 267578                  | GG                              | AA              | 1946925191               |
| SNP_P4_116463_267592 | NW_004515744.1 | Scaffold198 | 267592                  | AA                              | TT              | 1946925193               |
| SNP_P4_116465_267640 | NW_004515744.1 | Scaffold198 | 267640                  | TT                              | AA              | 1946925195               |
| SNP_P4_116466_267647 | NW_004515744.1 | Scaffold198 | 267647                  | CC                              | TT              | 1946925197               |
| SNP_P4_116467_286962 | NW_004515744.1 | Scaffold198 | 286962                  | AA                              | GG              | 1946925199               |
| SNP_P4_116468_287031 | NW_004515744.1 | Scaffold198 | 287031                  | TT                              | GG              | 1946925201               |
| SNP_P4_116469_287323 | NW_004515744.1 | Scaffold198 | 287323                  | AA                              | GG              | 1946925203               |
| SNP_P4_116470_287363 | NW_004515744.1 | Scaffold198 | 287363                  | AA                              | CC              | 1946925205               |
| SNP_P4_116471_287366 | NW_004515744.1 | Scaffold198 | 287366                  | TT                              | CC              | 1946925206               |
| SNP_P4_116472_318351 | NW_004515744.1 | Scaffold198 | 318351                  | TT                              | CC              | 1946925208               |
| SNP_P4_116473_320283 | NW_004515744.1 | Scaffold198 | 320283                  | TT                              | AA              | 1946925210               |
| SNP_P4_116474_330416 | NW_004515744.1 | Scaffold198 | 330416                  | TT                              | CC              | 1946925212               |
| SNP_P4_116475_330637 | NW_004515744.1 | Scaffold198 | 330637                  | AA                              | CC              | 1946925214               |
| SNP_P4_116476_330678 | NW_004515744.1 | Scaffold198 | 330678                  | TT                              | GG              | 1946925216               |
| SNP_P4_116477_330722 | NW_004515744.1 | Scaffold198 | 330722                  | TT                              | CC              | 1946925218               |
| SNP_P4_116478_330749 | NW_004515744.1 | Scaffold198 | 330749                  | GG                              | AA              | 1946925220               |
| SNP_P4_116479_330772 | NW_004515744.1 | Scaffold198 | 330772                  | GG                              | TT              | 1946925221               |
| SNP_P4_116480_335472 | NW_004515744.1 | Scaffold198 | 335472                  | TT                              | AA              | 1946925223               |
| SNP_P4_116481_335540 | NW_004515744.1 | Scaffold198 | 335540                  | TT                              | GG              | 1946925225               |
| SNP_P4_116482_335588 | NW_004515744.1 | Scaffold198 | 335588                  | AA                              | GG              | 1946925227               |
| SNP_P4_116483_335815 | NW_004515744.1 | Scaffold198 | 335815                  | GG                              | AA              | 1946925229               |
| SNP_P4_116484_335868 | NW_004515744.1 | Scaffold198 | 335868                  | AA                              | GG              | 1946925231               |
| SNP_P4_116487_373726 | NW_004515744.1 | Scaffold198 | 373726                  | TT                              | CC              | 1946925233               |
| SNP_P4_116488_410889 | NW_004515744.1 | Scaffold198 | 410889                  | AA                              | TT              | 1946925235               |
| SNP_P4_116489_410890 | NW_004515744.1 | Scaffold198 | 410890                  | TT                              | AA              | 1946925237               |
| SNP_P4_116490_413454 | NW_004515744.1 | Scaffold198 | 413454                  | CC                              | AA              | 1946925238               |
| SNP_P4_116491_413458 | NW_004515744.1 | Scaffold198 | 413458                  | CC                              | TT              | 1946925240               |
| SNP_P4_116492_413476 | NW_004515744.1 | Scaffold198 | 413476                  | GG                              | AA              | 1946925242               |
| SNP_P4_116493_420138 | NW_004515744.1 | Scaffold198 | 420138                  | GG                              | AA              | 1946925244               |
| SNP_P4_116494_420152 | NW_004515744.1 | Scaffold198 | 420152                  | CC                              | TT              | 1946925246               |
| SNP_P4_116495_420695 | NW_004515744.1 | Scaffold198 | 420695                  | CC                              | AA              | 1946925248               |
| SNP_P4_116496_420716 | NW_004515744.1 | Scaffold198 | 420716                  | TT                              | GG              | 1946925250               |
| SNP_P4_116497_420730 | NW_004515744.1 | Scaffold198 | 420730                  | GG                              | AA              | 1946925252               |
| SNP_P4_116498_420779 | NW_004515744.1 | Scaffold198 | 420779                  | TT                              | AA              | 1946925254               |

| SNPs IDs             | Chromosome IDs | Chromosomes | Physical positions (bp) | CDC Frontier (Reference genome) | (ILWC46 & LPNB) | NCBI SNPdb Accession IDs |
|----------------------|----------------|-------------|-------------------------|---------------------------------|-----------------|--------------------------|
| SNP_P4_116499_420806 | NW_004515744.1 | Scaffold198 | 420806                  | AA                              | TT              | 1946925256               |
| SNP_P4_116500_420807 | NW_004515744.1 | Scaffold198 | 420807                  | AA                              | TT              | 1946925258               |
| SNP_P4_116501_421049 | NW_004515744.1 | Scaffold198 | 421049                  | AA                              | TT              | 1946925260               |
| SNP_P4_116502_421052 | NW_004515744.1 | Scaffold198 | 421052                  | TT                              | CC              | 1946925262               |
| SNP_P4_116503_421134 | NW_004515744.1 | Scaffold198 | 421134                  | CC                              | TT              | 1946925263               |
| SNP_P4_116504_423018 | NW_004515744.1 | Scaffold198 | 423018                  | GG                              | AA              | 1946925265               |
| SNP_P4_116505_423239 | NW_004515744.1 | Scaffold198 | 423239                  | AA                              | GG              | 1946925267               |
| SNP_P4_116506_423475 | NW_004515744.1 | Scaffold198 | 423475                  | TT                              | CC              | 1946925269               |
| SNP_P4_116507_423601 | NW_004515744.1 | Scaffold198 | 423601                  | AA                              | TT              | 1946925271               |
| SNP_P4_116509_444825 | NW_004515744.1 | Scaffold198 | 444825                  | AA                              | GG              | 1946925273               |
| SNP_P4_116510_444833 | NW_004515744.1 | Scaffold198 | 444833                  | GG                              | AA              | 1946925275               |
| SNP_P4_116511_446410 | NW_004515744.1 | Scaffold198 | 446410                  | CC                              | TT              | 1946925277               |
| SNP_P4_116512_450842 | NW_004515744.1 | Scaffold198 | 450842                  | AA                              | GG              | 1946925279               |
| SNP_P4_116513_490922 | NW_004515744.1 | Scaffold198 | 490922                  | AA                              | TT              | 1946925280               |
| SNP_P4_116514_500211 | NW_004515744.1 | Scaffold198 | 500211                  | GG                              | AA              | 1946925282               |
| SNP_P4_116515_500998 | NW_004515744.1 | Scaffold198 | 500998                  | GG                              | AA              | 1946925284               |
| SNP_P4_116516_501036 | NW_004515744.1 | Scaffold198 | 501036                  | GG                              | TT              | 1946925286               |
| SNP_P4_116517_501423 | NW_004515744.1 | Scaffold198 | 501423                  | AA                              | TT              | 1946925288               |
| SNP_P4_116518_501433 | NW_004515744.1 | Scaffold198 | 501433                  | TT                              | AA              | 1946925290               |
| SNP_P4_116519_501474 | NW_004515744.1 | Scaffold198 | 501474                  | CC                              | AA              | 1946925292               |
| SNP_P4_116521_501524 | NW_004515744.1 | Scaffold198 | 501524                  | GG                              | TT              | 1946925294               |
| SNP_P4_116522_501550 | NW_004515744.1 | Scaffold198 | 501550                  | TT                              | CC              | 1946925296               |
| SNP_P4_116523_501606 | NW_004515744.1 | Scaffold198 | 501606                  | AA                              | GG              | 1946925298               |
| SNP_P4_116524_501683 | NW_004515744.1 | Scaffold198 | 501683                  | AA                              | CC              | 1946925299               |
| SNP_P4_116525_501738 | NW_004515744.1 | Scaffold198 | 501738                  | AA                              | TT              | 1946925301               |
| SNP_P4_116526_501810 | NW_004515744.1 | Scaffold198 | 501810                  | AA                              | GG              | 1946925303               |
| SNP_P4_116527_509538 | NW_004515744.1 | Scaffold198 | 509538                  | TT                              | CC              | 1946925305               |
| SNP_P4_116528_509784 | NW_004515744.1 | Scaffold198 | 509784                  | GG                              | AA              | 1946925307               |
| SNP_P4_116529_509841 | NW_004515744.1 | Scaffold198 | 509841                  | TT                              | CC              | 1946925309               |
| SNP_P4_116530_510161 | NW_004515744.1 | Scaffold198 | 510161                  | AA                              | GG              | 1946925311               |
| SNP_P4_116531_510249 | NW_004515744.1 | Scaffold198 | 510249                  | AA                              | GG              | 1946925313               |
| SNP_P4_116532_518035 | NW_004515744.1 | Scaffold198 | 518035                  | CC                              | TT              | 1946925315               |
| SNP_P4_116533_518064 | NW_004515744.1 | Scaffold198 | 518064                  | CC                              | AA              | 1946925317               |
| SNP_P4_116536_594147 | NW_004515744.1 | Scaffold198 | 594147                  | AA                              | GG              | 1946925319               |
| SNP_P4_116537_594305 | NW_004515744.1 | Scaffold198 | 594305                  | GG                              | CC              | 1946925321               |
| SNP_P4_116538_594306 | NW_004515744.1 | Scaffold198 | 594306                  | CC                              | AA              | 1946925322               |
| SNP_P4_116539_594308 | NW_004515744.1 | Scaffold198 | 594308                  | GG                              | TT              | 1946925324               |
| SNP_P4_116540_594507 | NW_004515744.1 | Scaffold198 | 594507                  | CC                              | AA              | 1946925326               |
| SNP_P4_116541_594560 | NW_004515744.1 | Scaffold198 | 594560                  | AA                              | GG              | 1946925328               |
| SNP_P4_116542_594569 | NW_004515744.1 | Scaffold198 | 594569                  | GG                              | AA              | 1946925330               |
| SNP_P4_116543_594610 | NW_004515744.1 | Scaffold198 | 594610                  | TT                              | AA              | 1946925332               |
| SNP_P4_116544_596291 | NW_004515744.1 | Scaffold198 | 596291                  | CC                              | AA              | 1946925334               |

| SNPs IDs             | Chromosome IDs | Chromosomes | Physical positions (bp) | CDC Frontier (Reference genome) | (ILWC46 & LPNB) | NCBI SNPdb Accession IDs |
|----------------------|----------------|-------------|-------------------------|---------------------------------|-----------------|--------------------------|
| SNP_P4_116545_596292 | NW_004515744.1 | Scaffold198 | 596292                  | CC                              | TT              | 1946925336               |
| SNP_P4_116546_596293 | NW_004515744.1 | Scaffold198 | 596293                  | AA                              | TT              | 1946925338               |
| SNP_P4_116547_601049 | NW_004515744.1 | Scaffold198 | 601049                  | CC                              | AA              | 1946925340               |
| SNP_P4_116548_611372 | NW_004515744.1 | Scaffold198 | 611372                  | TT                              | CC              | 1946925342               |
| SNP_P4_116549_631116 | NW_004515744.1 | Scaffold198 | 631116                  | CC                              | AA              | 1946925344               |
| SNP_P4_116550_631654 | NW_004515744.1 | Scaffold198 | 631654                  | CC                              | GG              | 1946925346               |
| SNP_P4_116551_631671 | NW_004515744.1 | Scaffold198 | 631671                  | AA                              | GG              | 1946925347               |
| SNP_P4_116553_632755 | NW_004515744.1 | Scaffold198 | 632755                  | GG                              | AA              | 1946925349               |
| SNP_P4_116554_632827 | NW_004515744.1 | Scaffold198 | 632827                  | AA                              | TT              | 1946925351               |
| SNP_P4_116555_632846 | NW_004515744.1 | Scaffold198 | 632846                  | GG                              | AA              | 1946925353               |
| SNP_P4_116557_632944 | NW_004515744.1 | Scaffold198 | 632944                  | GG                              | CC              | 1946925355               |
| SNP_P4_116558_633047 | NW_004515744.1 | Scaffold198 | 633047                  | CC                              | TT              | 1946925357               |
| SNP_P4_116559_633048 | NW_004515744.1 | Scaffold198 | 633048                  | TT                              | GG              | 1946925359               |
| SNP_P4_116560_633049 | NW_004515744.1 | Scaffold198 | 633049                  | GG                              | CC              | 1946925361               |
| SNP_P4_116561_633055 | NW_004515744.1 | Scaffold198 | 633055                  | CC                              | AA              | 1946925363               |
| SNP_P4_116562_633361 | NW_004515744.1 | Scaffold198 | 633361                  | CC                              | TT              | 1946925365               |
| SNP_P4_116563_633415 | NW_004515744.1 | Scaffold198 | 633415                  | GG                              | CC              | 1946925367               |
| SNP_P4_116564_633511 | NW_004515744.1 | Scaffold198 | 633511                  | GG                              | CC              | 1946925369               |
| SNP_P4_116565_633596 | NW_004515744.1 | Scaffold198 | 633596                  | TT                              | CC              | 1946925371               |
| SNP_P4_116566_633607 | NW_004515744.1 | Scaffold198 | 633607                  | GG                              | TT              | 1946925373               |
| SNP_P4_116567_633776 | NW_004515744.1 | Scaffold198 | 633776                  | CC                              | GG              | 1946925375               |
| SNP_P4_116568_637317 | NW_004515744.1 | Scaffold198 | 637317                  | TT                              | CC              | 1946925377               |
| SNP_P4_116569_637320 | NW_004515744.1 | Scaffold198 | 637320                  | AA                              | GG              | 1946925379               |
| SNP_P4_116570_637384 | NW_004515744.1 | Scaffold198 | 637384                  | CC                              | TT              | 1946925381               |
| SNP_P4_116572_638473 | NW_004515744.1 | Scaffold198 | 638473                  | GG                              | AA              | 1946925383               |
| SNP_P4_116573_638490 | NW_004515744.1 | Scaffold198 | 638490                  | GG                              | AA              | 1946925385               |
| SNP_P4_116574_638747 | NW_004515744.1 | Scaffold198 | 638747                  | CC                              | TT              | 1946925387               |
| SNP_P4_116575_638968 | NW_004515744.1 | Scaffold198 | 638968                  | AA                              | GG              | 1946925389               |
| SNP_P4_116576_639079 | NW_004515744.1 | Scaffold198 | 639079                  | GG                              | AA              | 1946925391               |
| SNP_P4_116577_639362 | NW_004515744.1 | Scaffold198 | 639362                  | CC                              | TT              | 1946925393               |
| SNP_P4_116578_642019 | NW_004515744.1 | Scaffold198 | 642019                  | CC                              | TT              | 1946925395               |
| SNP_P4_116579_5247   | NW_004515746.1 | Scaffold200 | 5247                    | AA                              | CC              | 1946925397               |
| SNP_P4_116580_10423  | NW_004515746.1 | Scaffold200 | 10423                   | CC                              | TT              | 1946925399               |
| SNP_P4_116581_28092  | NW_004515746.1 | Scaffold200 | 28092                   | AA                              | TT              | 1946925401               |
| SNP_P4_116582_31886  | NW_004515746.1 | Scaffold200 | 31886                   | TT                              | CC              | 1946925404               |
| SNP_P4_116583_32211  | NW_004515746.1 | Scaffold200 | 32211                   | CC                              | AA              | 1946925406               |
| SNP_P4_116584_35731  | NW_004515746.1 | Scaffold200 | 35731                   | AA                              | CC              | 1946925408               |
| SNP_P4_116585_39497  | NW_004515746.1 | Scaffold200 | 39497                   | AA                              | TT              | 1946925410               |
| SNP_P4_116586_43823  | NW_004515746.1 | Scaffold200 | 43823                   | CC                              | AA              | 1946925412               |
| SNP_P4_116587_43929  | NW_004515746.1 | Scaffold200 | 43929                   | TT                              | GG              | 1946925414               |
| SNP_P4_116588_49485  | NW_004515746.1 | Scaffold200 | 49485                   | AA                              | TT              | 1946925416               |
| SNP_P4_116589_51103  | NW_004515746.1 | Scaffold200 | 51103                   | CC                              | TT              | 1946925418               |

| SNPs IDs             | Chromosome IDs | Chromosomes | Physical positions (bp) | CDC Frontier (Reference genome) | (ILWC46 & LPNB) | NCBI SNPdb Accession IDs |
|----------------------|----------------|-------------|-------------------------|---------------------------------|-----------------|--------------------------|
| SNP_P4_116590_59188  | NW_004515746.1 | Scaffold200 | 59188                   | AA                              | GG              | 1946925420               |
| SNP_P4_116591_59195  | NW_004515746.1 | Scaffold200 | 59195                   | AA                              | TT              | 1946925422               |
| SNP_P4_116592_59203  | NW_004515746.1 | Scaffold200 | 59203                   | CC                              | GG              | 1946925424               |
| SNP_P4_116593_59918  | NW_004515746.1 | Scaffold200 | 59918                   | GG                              | CC              | 1946925426               |
| SNP_P4_116595_69351  | NW_004515746.1 | Scaffold200 | 69351                   | GG                              | AA              | 1946925428               |
| SNP_P4_116596_69744  | NW_004515746.1 | Scaffold200 | 69744                   | TT                              | CC              | 1946925430               |
| SNP_P4_116597_77152  | NW_004515746.1 | Scaffold200 | 77152                   | GG                              | AA              | 1946925432               |
| SNP_P4_116598_82601  | NW_004515746.1 | Scaffold200 | 82601                   | AA                              | GG              | 1946925434               |
| SNP_P4_116599_87762  | NW_004515746.1 | Scaffold200 | 87762                   | GG                              | AA              | 1946925436               |
| SNP_P4_116600_87772  | NW_004515746.1 | Scaffold200 | 87772                   | GG                              | TT              | 1946925438               |
| SNP_P4_116601_100221 | NW_004515746.1 | Scaffold200 | 100221                  | CC                              | AA              | 1946925440               |
| SNP_P4_116602_109117 | NW_004515746.1 | Scaffold200 | 109117                  | TT                              | CC              | 1946925442               |
| SNP_P4_116603_109486 | NW_004515746.1 | Scaffold200 | 109486                  | AA                              | GG              | 1946925445               |
| SNP_P4_116604_109491 | NW_004515746.1 | Scaffold200 | 109491                  | AA                              | TT              | 1946925447               |
| SNP_P4_116605_109561 | NW_004515746.1 | Scaffold200 | 109561                  | AA                              | GG              | 1946925449               |
| SNP_P4_116606_109834 | NW_004515746.1 | Scaffold200 | 109834                  | GG                              | TT              | 1946925451               |
| SNP_P4_116607_112872 | NW_004515746.1 | Scaffold200 | 112872                  | GG                              | AA              | 1946925453               |
| SNP_P4_116608_112878 | NW_004515746.1 | Scaffold200 | 112878                  | TT                              | CC              | 1946925455               |
| SNP_P4_116609_3761   | NW_004515747.1 | Scaffold202 | 3761                    | TT                              | CC              | 1946925457               |
| SNP_P4_116610_3762   | NW_004515747.1 | Scaffold202 | 3762                    | AA                              | GG              | 1946925459               |
| SNP_P4_116611_3774   | NW_004515747.1 | Scaffold202 | 3774                    | TT                              | CC              | 1946925461               |
| SNP_P4_116612_3807   | NW_004515747.1 | Scaffold202 | 3807                    | GG                              | AA              | 1946925463               |
| SNP_P4_116613_4225   | NW_004515747.1 | Scaffold202 | 4225                    | CC                              | AA              | 1946925465               |
| SNP_P4_116614_10420  | NW_004515747.1 | Scaffold202 | 10420                   | TT                              | CC              | 1946925467               |
| SNP_P4_116615_10431  | NW_004515747.1 | Scaffold202 | 10431                   | AA                              | GG              | 1946925469               |
| SNP_P4_116616_10475  | NW_004515747.1 | Scaffold202 | 10475                   | AA                              | TT              | 1946925471               |
| SNP_P4_116617_10480  | NW_004515747.1 | Scaffold202 | 10480                   | AA                              | CC              | 1946925473               |
| SNP_P4_116618_10481  | NW_004515747.1 | Scaffold202 | 10481                   | GG                              | AA              | 1946925475               |
| SNP_P4_116619_10490  | NW_004515747.1 | Scaffold202 | 10490                   | AA                              | CC              | 1946925477               |
| SNP_P4_116620_10515  | NW_004515747.1 | Scaffold202 | 10515                   | TT                              | AA              | 1946925479               |
| SNP_P4_116621_10538  | NW_004515747.1 | Scaffold202 | 10538                   | TT                              | AA              | 1946925481               |
| SNP_P4_116622_16842  | NW_004515747.1 | Scaffold202 | 16842                   | CC                              | GG              | 1946925483               |
| SNP_P4_116623_16849  | NW_004515747.1 | Scaffold202 | 16849                   | GG                              | AA              | 1946925486               |
| SNP_P4_116624_16896  | NW_004515747.1 | Scaffold202 | 16896                   | GG                              | AA              | 1946925488               |
| SNP_P4_116625_16914  | NW_004515747.1 | Scaffold202 | 16914                   | GG                              | TT              | 1946925490               |
| SNP_P4_116626_16920  | NW_004515747.1 | Scaffold202 | 16920                   | AA                              | GG              | 1946925492               |
| SNP_P4_116627_17161  | NW_004515747.1 | Scaffold202 | 17161                   | CC                              | AA              | 1946925494               |
| SNP_P4_116628_17342  | NW_004515747.1 | Scaffold202 | 17342                   | TT                              | CC              | 1946925496               |
| SNP_P4_116629_17421  | NW_004515747.1 | Scaffold202 | 17421                   | GG                              | TT              | 1946925498               |
| SNP_P4_116630_17508  | NW_004515747.1 | Scaffold202 | 17508                   | CC                              | AA              | 1946925500               |
| SNP_P4_116631_17518  | NW_004515747.1 | Scaffold202 | 17518                   | TT                              | GG              | 1946925502               |
| SNP_P4_116632_17630  | NW_004515747.1 | Scaffold202 | 17630                   | GG                              | AA              | 1946925504               |

| SNPs IDs            | Chromosome IDs | Chromosomes | Physical positions (bp) | CDC Frontier (Reference genome) | (ILWC46 & LPNB) | NCBI SNPdb Accession IDs |
|---------------------|----------------|-------------|-------------------------|---------------------------------|-----------------|--------------------------|
| SNP_P4_116633_17752 | NW_004515747.1 | Scaffold202 | 17752                   | CC                              | TT              | 1946925506               |
| SNP_P4_116634_17767 | NW_004515747.1 | Scaffold202 | 17767                   | AA                              | GG              | 1946925508               |
| SNP_P4_116635_17793 | NW_004515747.1 | Scaffold202 | 17793                   | TT                              | CC              | 1946925510               |
| SNP_P4_116637_19877 | NW_004515747.1 | Scaffold202 | 19877                   | TT                              | GG              | 1946925512               |
| SNP_P4_116638_19886 | NW_004515747.1 | Scaffold202 | 19886                   | AA                              | TT              | 1946925514               |
| SNP_P4_116639_19887 | NW_004515747.1 | Scaffold202 | 19887                   | GG                              | AA              | 1946925516               |
| SNP_P4_116640_19888 | NW_004515747.1 | Scaffold202 | 19888                   | TT                              | CC              | 1946925518               |
| SNP_P4_116641_19891 | NW_004515747.1 | Scaffold202 | 19891                   | GG                              | AA              | 1946925520               |
| SNP_P4_116642_19901 | NW_004515747.1 | Scaffold202 | 19901                   | TT                              | CC              | 1946925522               |
| SNP_P4_116643_19922 | NW_004515747.1 | Scaffold202 | 19922                   | GG                              | AA              | 1946925524               |
| SNP_P4_116644_19938 | NW_004515747.1 | Scaffold202 | 19938                   | TT                              | GG              | 1946925526               |
| SNP_P4_116645_19940 | NW_004515747.1 | Scaffold202 | 19940                   | TT                              | CC              | 1946925528               |
| SNP_P4_116647_19985 | NW_004515747.1 | Scaffold202 | 19985                   | GG                              | AA              | 1946925530               |
| SNP_P4_116648_19994 | NW_004515747.1 | Scaffold202 | 19994                   | TT                              | AA              | 1946925532               |
| SNP_P4_116649_20059 | NW_004515747.1 | Scaffold202 | 20059                   | AA                              | GG              | 1946925534               |
| SNP_P4_116650_20097 | NW_004515747.1 | Scaffold202 | 20097                   | AA                              | CC              | 1946925536               |
| SNP_P4_116651_20219 | NW_004515747.1 | Scaffold202 | 20219                   | GG                              | TT              | 1946925538               |
| SNP_P4_116652_20297 | NW_004515747.1 | Scaffold202 | 20297                   | GG                              | AA              | 1946925540               |
| SNP_P4_116653_20303 | NW_004515747.1 | Scaffold202 | 20303                   | GG                              | TT              | 1946925542               |
| SNP_P4_116654_20338 | NW_004515747.1 | Scaffold202 | 20338                   | TT                              | AA              | 1946925544               |
| SNP_P4_116655_20389 | NW_004515747.1 | Scaffold202 | 20389                   | TT                              | CC              | 1946925546               |
| SNP_P4_116656_20403 | NW_004515747.1 | Scaffold202 | 20403                   | AA                              | GG              | 1946925548               |
| SNP_P4_116657_20471 | NW_004515747.1 | Scaffold202 | 20471                   | AA                              | GG              | 1946925550               |
| SNP_P4_116658_20474 | NW_004515747.1 | Scaffold202 | 20474                   | GG                              | TT              | 1946925552               |
| SNP_P4_116660_20572 | NW_004515747.1 | Scaffold202 | 20572                   | CC                              | TT              | 1946925554               |
| SNP_P4_116661_20613 | NW_004515747.1 | Scaffold202 | 20613                   | CC                              | TT              | 1946925556               |
| SNP_P4_116662_20741 | NW_004515747.1 | Scaffold202 | 20741                   | CC                              | AA              | 1946925558               |
| SNP_P4_116663_20821 | NW_004515747.1 | Scaffold202 | 20821                   | TT                              | AA              | 1946925560               |
| SNP_P4_116664_20914 | NW_004515747.1 | Scaffold202 | 20914                   | TT                              | CC              | 1946925562               |
| SNP_P4_116665_20925 | NW_004515747.1 | Scaffold202 | 20925                   | CC                              | TT              | 1946925564               |
| SNP_P4_116666_20976 | NW_004515747.1 | Scaffold202 | 20976                   | TT                              | AA              | 1946925566               |
| SNP_P4_116667_21020 | NW_004515747.1 | Scaffold202 | 21020                   | CC                              | TT              | 1946925568               |
| SNP_P4_116668_21028 | NW_004515747.1 | Scaffold202 | 21028                   | AA                              | GG              | 1946925570               |
| SNP_P4_116669_21182 | NW_004515747.1 | Scaffold202 | 21182                   | GG                              | TT              | 1946925572               |
| SNP_P4_116670_22208 | NW_004515747.1 | Scaffold202 | 22208                   | AA                              | CC              | 1946925574               |
| SNP_P4_116671_22408 | NW_004515747.1 | Scaffold202 | 22408                   | AA                              | TT              | 1946925576               |
| SNP_P4_116673_22663 | NW_004515747.1 | Scaffold202 | 22663                   | CC                              | TT              | 1946925578               |
| SNP_P4_116674_22729 | NW_004515747.1 | Scaffold202 | 22729                   | CC                              | AA              | 1946925580               |
| SNP_P4_116676_22796 | NW_004515747.1 | Scaffold202 | 22796                   | TT                              | GG              | 1946925582               |
| SNP_P4_116677_22899 | NW_004515747.1 | Scaffold202 | 22899                   | AA                              | TT              | 1946925584               |
| SNP_P4_116678_22926 | NW_004515747.1 | Scaffold202 | 22926                   | GG                              | AA              | 1946925586               |
| SNP_P4_116679_22951 | NW_004515747.1 | Scaffold202 | 22951                   | AA                              | TT              | 1946925588               |

| SNPs IDs            | Chromosome IDs | Chromosomes | Physical positions (bp) | CDC Frontier (Reference genome) | (ILWC46 & LPNB) | NCBI SNPdb Accession IDs |
|---------------------|----------------|-------------|-------------------------|---------------------------------|-----------------|--------------------------|
| SNP_P4_116680_22972 | NW_004515747.1 | Scaffold202 | 22972                   | CC                              | TT              | 1946925590               |
| SNP_P4_116681_23512 | NW_004515747.1 | Scaffold202 | 23512                   | TT                              | AA              | 1946925592               |
| SNP_P4_116682_23533 | NW_004515747.1 | Scaffold202 | 23533                   | AA                              | GG              | 1946925594               |
| SNP_P4_116683_23596 | NW_004515747.1 | Scaffold202 | 23596                   | TT                              | CC              | 1946925596               |
| SNP_P4_116684_23612 | NW_004515747.1 | Scaffold202 | 23612                   | TT                              | CC              | 1946925598               |
| SNP_P4_116685_23650 | NW_004515747.1 | Scaffold202 | 23650                   | TT                              | CC              | 1946925600               |
| SNP_P4_116686_23790 | NW_004515747.1 | Scaffold202 | 23790                   | CC                              | AA              | 1946925602               |
| SNP_P4_116687_23850 | NW_004515747.1 | Scaffold202 | 23850                   | AA                              | GG              | 1946925604               |
| SNP_P4_116688_23920 | NW_004515747.1 | Scaffold202 | 23920                   | AA                              | CC              | 1946925606               |
| SNP_P4_116689_23930 | NW_004515747.1 | Scaffold202 | 23930                   | CC                              | GG              | 1946925608               |
| SNP_P4_116690_24044 | NW_004515747.1 | Scaffold202 | 24044                   | TT                              | CC              | 1946925610               |
| SNP_P4_116691_24296 | NW_004515747.1 | Scaffold202 | 24296                   | CC                              | TT              | 1946925612               |
| SNP_P4_116692_24363 | NW_004515747.1 | Scaffold202 | 24363                   | TT                              | GG              | 1946925614               |
| SNP_P4_116693_24406 | NW_004515747.1 | Scaffold202 | 24406                   | AA                              | GG              | 1946925616               |
| SNP_P4_116694_24595 | NW_004515747.1 | Scaffold202 | 24595                   | AA                              | GG              | 1946925618               |
| SNP_P4_116695_24642 | NW_004515747.1 | Scaffold202 | 24642                   | AA                              | GG              | 1946925620               |
| SNP_P4_116696_24663 | NW_004515747.1 | Scaffold202 | 24663                   | TT                              | CC              | 1946925622               |
| SNP_P4_116697_24664 | NW_004515747.1 | Scaffold202 | 24664                   | AA                              | GG              | 1946925624               |
| SNP_P4_116698_24700 | NW_004515747.1 | Scaffold202 | 24700                   | AA                              | GG              | 1946925626               |
| SNP_P4_116699_24939 | NW_004515747.1 | Scaffold202 | 24939                   | TT                              | GG              | 1946925628               |
| SNP_P4_116700_24942 | NW_004515747.1 | Scaffold202 | 24942                   | TT                              | AA              | 1946925630               |
| SNP_P4_116701_24971 | NW_004515747.1 | Scaffold202 | 24971                   | CC                              | TT              | 1946925632               |
| SNP_P4_116702_24987 | NW_004515747.1 | Scaffold202 | 24987                   | AA                              | GG              | 1946925634               |
| SNP_P4_116703_27622 | NW_004515747.1 | Scaffold202 | 27622                   | CC                              | TT              | 1946925636               |
| SNP_P4_116704_27629 | NW_004515747.1 | Scaffold202 | 27629                   | GG                              | AA              | 1946925638               |
| SNP_P4_116705_27674 | NW_004515747.1 | Scaffold202 | 27674                   | GG                              | AA              | 1946925640               |
| SNP_P4_116706_27675 | NW_004515747.1 | Scaffold202 | 27675                   | CC                              | TT              | 1946925642               |
| SNP_P4_116707_27684 | NW_004515747.1 | Scaffold202 | 27684                   | TT                              | CC              | 1946925644               |
| SNP_P4_116708_27966 | NW_004515747.1 | Scaffold202 | 27966                   | AA                              | GG              | 1946925646               |
| SNP_P4_116709_29951 | NW_004515747.1 | Scaffold202 | 29951                   | TT                              | CC              | 1946925648               |
| SNP_P4_116710_29955 | NW_004515747.1 | Scaffold202 | 29955                   | TT                              | CC              | 1946925650               |
| SNP_P4_116711_29976 | NW_004515747.1 | Scaffold202 | 29976                   | TT                              | CC              | 1946925652               |
| SNP_P4_116712_31473 | NW_004515747.1 | Scaffold202 | 31473                   | AA                              | CC              | 1946925654               |
| SNP_P4_116713_35665 | NW_004515747.1 | Scaffold202 | 35665                   | CC                              | GG              | 1946925656               |
| SNP_P4_116714_35778 | NW_004515747.1 | Scaffold202 | 35778                   | CC                              | TT              | 1946925658               |
| SNP_P4_116715_35834 | NW_004515747.1 | Scaffold202 | 35834                   | AA                              | GG              | 1946925660               |
| SNP_P4_116716_35907 | NW_004515747.1 | Scaffold202 | 35907                   | AA                              | GG              | 1946925662               |
| SNP_P4_116717_35941 | NW_004515747.1 | Scaffold202 | 35941                   | CC                              | TT              | 1946925664               |
| SNP_P4_116718_35976 | NW_004515747.1 | Scaffold202 | 35976                   | AA                              | CC              | 1946925666               |
| SNP_P4_116719_36173 | NW_004515747.1 | Scaffold202 | 36173                   | GG                              | AA              | 1946925668               |
| SNP_P4_116720_36332 | NW_004515747.1 | Scaffold202 | 36332                   | CC                              | TT              | 1946925670               |
| SNP_P4_116721_36463 | NW_004515747.1 | Scaffold202 | 36463                   | CC                              | TT              | 1946925672               |

| SNPs IDs            | Chromosome IDs | Chromosomes | Physical positions (bp) | CDC Frontier (Reference genome) | (ILWC46 & LPNB) | NCBI SNPdb Accession IDs |
|---------------------|----------------|-------------|-------------------------|---------------------------------|-----------------|--------------------------|
| SNP_P4_116722_36503 | NW_004515747.1 | Scaffold202 | 36503                   | GG                              | AA              | 1946925674               |
| SNP_P4_116723_36619 | NW_004515747.1 | Scaffold202 | 36619                   | GG                              | TT              | 1946925676               |
| SNP_P4_116725_36855 | NW_004515747.1 | Scaffold202 | 36855                   | TT                              | GG              | 1946925678               |
| SNP_P4_116726_36941 | NW_004515747.1 | Scaffold202 | 36941                   | AA                              | TT              | 1946925680               |
| SNP_P4_116727_37089 | NW_004515747.1 | Scaffold202 | 37089                   | CC                              | TT              | 1946925682               |
| SNP_P4_116728_37140 | NW_004515747.1 | Scaffold202 | 37140                   | TT                              | GG              | 1946925684               |
| SNP_P4_116729_37244 | NW_004515747.1 | Scaffold202 | 37244                   | TT                              | CC              | 1946925686               |
| SNP_P4_116730_37375 | NW_004515747.1 | Scaffold202 | 37375                   | AA                              | GG              | 1946925688               |
| SNP_P4_116731_37400 | NW_004515747.1 | Scaffold202 | 37400                   | GG                              | CC              | 1946925690               |
| SNP_P4_116732_37585 | NW_004515747.1 | Scaffold202 | 37585                   | TT                              | AA              | 1946925692               |
| SNP_P4_116733_37825 | NW_004515747.1 | Scaffold202 | 37825                   | AA                              | TT              | 1946925694               |
| SNP_P4_116736_37989 | NW_004515747.1 | Scaffold202 | 37989                   | GG                              | AA              | 1946925696               |
| SNP_P4_116737_37994 | NW_004515747.1 | Scaffold202 | 37994                   | TT                              | CC              | 1946925698               |
| SNP_P4_116738_38080 | NW_004515747.1 | Scaffold202 | 38080                   | TT                              | GG              | 1946925700               |
| SNP_P4_116739_38083 | NW_004515747.1 | Scaffold202 | 38083                   | AA                              | GG              | 1946925702               |
| SNP_P4_116740_38090 | NW_004515747.1 | Scaffold202 | 38090                   | GG                              | AA              | 1946925704               |
| SNP_P4_116741_38236 | NW_004515747.1 | Scaffold202 | 38236                   | GG                              | AA              | 1946925706               |
| SNP_P4_116744_38539 | NW_004515747.1 | Scaffold202 | 38539                   | TT                              | GG              | 1946925708               |
| SNP_P4_116745_38675 | NW_004515747.1 | Scaffold202 | 38675                   | AA                              | TT              | 1946925710               |
| SNP_P4_116746_38695 | NW_004515747.1 | Scaffold202 | 38695                   | GG                              | TT              | 1946925712               |
| SNP_P4_116747_38746 | NW_004515747.1 | Scaffold202 | 38746                   | GG                              | AA              | 1946925714               |
| SNP_P4_116748_38775 | NW_004515747.1 | Scaffold202 | 38775                   | CC                              | TT              | 1946925716               |
| SNP_P4_116749_38796 | NW_004515747.1 | Scaffold202 | 38796                   | GG                              | AA              | 1946925718               |
| SNP_P4_116750_38836 | NW_004515747.1 | Scaffold202 | 38836                   | CC                              | TT              | 1946925720               |
| SNP_P4_116751_38848 | NW_004515747.1 | Scaffold202 | 38848                   | TT                              | CC              | 1946925722               |
| SNP_P4_116752_38895 | NW_004515747.1 | Scaffold202 | 38895                   | AA                              | GG              | 1946925724               |
| SNP_P4_116753_38989 | NW_004515747.1 | Scaffold202 | 38989                   | AA                              | CC              | 1946925726               |
| SNP_P4_116754_39013 | NW_004515747.1 | Scaffold202 | 39013                   | GG                              | AA              | 1946925728               |
| SNP_P4_116758_39344 | NW_004515747.1 | Scaffold202 | 39344                   | GG                              | AA              | 1946925730               |
| SNP_P4_116759_39351 | NW_004515747.1 | Scaffold202 | 39351                   | TT                              | CC              | 1946925732               |
| SNP_P4_116760_39413 | NW_004515747.1 | Scaffold202 | 39413                   | GG                              | TT              | 1946925734               |
| SNP_P4_116761_39414 | NW_004515747.1 | Scaffold202 | 39414                   | CC                              | TT              | 1946925736               |
| SNP_P4_116762_39418 | NW_004515747.1 | Scaffold202 | 39418                   | TT                              | GG              | 1946925738               |
| SNP_P4_116763_39645 | NW_004515747.1 | Scaffold202 | 39645                   | CC                              | TT              | 1946925740               |
| SNP_P4_116764_39684 | NW_004515747.1 | Scaffold202 | 39684                   | CC                              | TT              | 1946925742               |
| SNP_P4_116765_40848 | NW_004515747.1 | Scaffold202 | 40848                   | AA                              | CC              | 1946925744               |
| SNP_P4_116766_44773 | NW_004515747.1 | Scaffold202 | 44773                   | CC                              | TT              | 1946925746               |
| SNP_P4_116767_45789 | NW_004515747.1 | Scaffold202 | 45789                   | AA                              | GG              | 1946925748               |
| SNP_P4_116768_52529 | NW_004515747.1 | Scaffold202 | 52529                   | GG                              | TT              | 1946925750               |
| SNP_P4_116769_52542 | NW_004515747.1 | Scaffold202 | 52542                   | GG                              | CC              | 1946925752               |
| SNP_P4_116770_52858 | NW_004515747.1 | Scaffold202 | 52858                   | AA                              | TT              | 1946925754               |
| SNP_P4_116771_53336 | NW_004515747.1 | Scaffold202 | 53336                   | CC                              | TT              | 1946925756               |

| SNPs IDs            | Chromosome IDs | Chromosomes | Physical positions (bp) | CDC Frontier (Reference genome) | (ILWC46 & LPNB) | NCBI SNPdb Accession IDs |
|---------------------|----------------|-------------|-------------------------|---------------------------------|-----------------|--------------------------|
| SNP_P4_116772_53473 | NW_004515747.1 | Scaffold202 | 53473                   | TT                              | AA              | 1946925757               |
| SNP_P4_116773_53494 | NW_004515747.1 | Scaffold202 | 53494                   | AA                              | GG              | 1946925759               |
| SNP_P4_116774_53503 | NW_004515747.1 | Scaffold202 | 53503                   | TT                              | CC              | 1946925761               |
| SNP_P4_116775_53512 | NW_004515747.1 | Scaffold202 | 53512                   | CC                              | AA              | 1946925763               |
| SNP_P4_116776_53522 | NW_004515747.1 | Scaffold202 | 53522                   | GG                              | AA              | 1946925765               |
| SNP_P4_116777_53550 | NW_004515747.1 | Scaffold202 | 53550                   | AA                              | GG              | 1946925767               |
| SNP_P4_116778_53634 | NW_004515747.1 | Scaffold202 | 53634                   | GG                              | AA              | 1946925769               |
| SNP_P4_116779_60969 | NW_004515747.1 | Scaffold202 | 60969                   | CC                              | TT              | 1946925771               |
| SNP_P4_116781_62088 | NW_004515747.1 | Scaffold202 | 62088                   | GG                              | TT              | 1946925773               |
| SNP_P4_116782_93016 | NW_004515747.1 | Scaffold202 | 93016                   | GG                              | AA              | 1946925775               |
| SNP_P4_116783_93081 | NW_004515747.1 | Scaffold202 | 93081                   | GG                              | TT              | 1946925777               |
| SNP_P4_116784_93108 | NW_004515747.1 | Scaffold202 | 93108                   | GG                              | TT              | 1946925779               |
| SNP_P4_116785_93142 | NW_004515747.1 | Scaffold202 | 93142                   | AA                              | TT              | 1946925781               |
| SNP_P4_116786_93654 | NW_004515747.1 | Scaffold202 | 93654                   | GG                              | AA              | 1946925783               |
| SNP_P4_116787_93702 | NW_004515747.1 | Scaffold202 | 93702                   | AA                              | GG              | 1946925786               |
| SNP_P4_116789_93898 | NW_004515747.1 | Scaffold202 | 93898                   | CC                              | GG              | 1946925787               |
| SNP_P4_116790_94027 | NW_004515747.1 | Scaffold202 | 94027                   | CC                              | TT              | 1946925790               |
| SNP_P4_116791_94030 | NW_004515747.1 | Scaffold202 | 94030                   | CC                              | GG              | 1946925792               |
| SNP_P4_116792_94097 | NW_004515747.1 | Scaffold202 | 94097                   | AA                              | GG              | 1946925794               |
| SNP_P4_116793_94235 | NW_004515747.1 | Scaffold202 | 94235                   | CC                              | TT              | 1946925796               |
| SNP_P4_116794_94318 | NW_004515747.1 | Scaffold202 | 94318                   | GG                              | TT              | 1946925798               |
| SNP_P4_116795_94482 | NW_004515747.1 | Scaffold202 | 94482                   | TT                              | CC              | 1946925800               |
| SNP_P4_116796_94557 | NW_004515747.1 | Scaffold202 | 94557                   | CC                              | TT              | 1946925802               |
| SNP_P4_116797_94566 | NW_004515747.1 | Scaffold202 | 94566                   | CC                              | TT              | 1946925804               |
| SNP_P4_116798_94594 | NW_004515747.1 | Scaffold202 | 94594                   | CC                              | TT              | 1946925806               |
| SNP_P4_116799_94912 | NW_004515747.1 | Scaffold202 | 94912                   | AA                              | GG              | 1946925808               |
| SNP_P4_116800_94918 | NW_004515747.1 | Scaffold202 | 94918                   | CC                              | TT              | 1946925810               |
| SNP_P4_116801_94919 | NW_004515747.1 | Scaffold202 | 94919                   | AA                              | GG              | 1946925812               |
| SNP_P4_116802_95070 | NW_004515747.1 | Scaffold202 | 95070                   | TT                              | GG              | 1946925814               |
| SNP_P4_116803_95071 | NW_004515747.1 | Scaffold202 | 95071                   | AA                              | CC              | 1946925816               |
| SNP_P4_116804_95182 | NW_004515747.1 | Scaffold202 | 95182                   | GG                              | AA              | 1946925818               |
| SNP_P4_116805_95246 | NW_004515747.1 | Scaffold202 | 95246                   | AA                              | TT              | 1946925820               |
| SNP_P4_116806_95276 | NW_004515747.1 | Scaffold202 | 95276                   | TT                              | CC              | 1946925822               |
| SNP_P4_116807_95429 | NW_004515747.1 | Scaffold202 | 95429                   | AA                              | GG              | 1946925824               |
| SNP_P4_116808_95438 | NW_004515747.1 | Scaffold202 | 95438                   | AA                              | GG              | 1946925826               |
| SNP_P4_116809_95496 | NW_004515747.1 | Scaffold202 | 95496                   | AA                              | GG              | 1946925828               |
| SNP_P4_116810_95533 | NW_004515747.1 | Scaffold202 | 95533                   | AA                              | GG              | 1946925830               |
| SNP_P4_116811_95609 | NW_004515747.1 | Scaffold202 | 95609                   | TT                              | CC              | 1946925832               |
| SNP_P4_116812_95619 | NW_004515747.1 | Scaffold202 | 95619                   | GG                              | AA              | 1946925834               |
| SNP_P4_116813_95708 | NW_004515747.1 | Scaffold202 | 95708                   | GG                              | AA              | 1946925836               |
| SNP_P4_116814_95792 | NW_004515747.1 | Scaffold202 | 95792                   | GG                              | AA              | 1946925838               |
| SNP_P4_116815_95869 | NW_004515747.1 | Scaffold202 | 95869                   | TT                              | CC              | 1946925840               |



| SNPs IDs             | Chromosome IDs | Chromosomes | Physical positions (bp) | CDC Frontier (Reference genome) | (ILWC46 & LPNB) | NCBI SNPdb Accession IDs |
|----------------------|----------------|-------------|-------------------------|---------------------------------|-----------------|--------------------------|
| SNP_P4_116816_95904  | NW_004515747.1 | Scaffold202 | 95904                   | AA                              | GG              | 1946925842               |
| SNP_P4_116817_95942  | NW_004515747.1 | Scaffold202 | 95942                   | TT                              | CC              | 1946925844               |
| SNP_P4_116818_96043  | NW_004515747.1 | Scaffold202 | 96043                   | GG                              | AA              | 1946925845               |
| SNP_P4_116819_96074  | NW_004515747.1 | Scaffold202 | 96074                   | AA                              | GG              | 1946925847               |
| SNP_P4_116820_96097  | NW_004515747.1 | Scaffold202 | 96097                   | GG                              | AA              | 1946925849               |
| SNP_P4_116821_96140  | NW_004515747.1 | Scaffold202 | 96140                   | TT                              | CC              | 1946925851               |
| SNP_P4_116822_96281  | NW_004515747.1 | Scaffold202 | 96281                   | AA                              | GG              | 1946925853               |
| SNP_P4_116823_96333  | NW_004515747.1 | Scaffold202 | 96333                   | AA                              | GG              | 1946925855               |
| SNP_P4_116824_96363  | NW_004515747.1 | Scaffold202 | 96363                   | GG                              | TT              | 1946925857               |
| SNP_P4_116825_96394  | NW_004515747.1 | Scaffold202 | 96394                   | AA                              | TT              | 1946925859               |
| SNP_P4_116826_96397  | NW_004515747.1 | Scaffold202 | 96397                   | AA                              | GG              | 1946925860               |
| SNP_P4_116827_96444  | NW_004515747.1 | Scaffold202 | 96444                   | AA                              | GG              | 1946925862               |
| SNP_P4_116828_96456  | NW_004515747.1 | Scaffold202 | 96456                   | CC                              | TT              | 1946925864               |
| SNP_P4_116829_96532  | NW_004515747.1 | Scaffold202 | 96532                   | TT                              | GG              | 1946925866               |
| SNP_P4_116830_96580  | NW_004515747.1 | Scaffold202 | 96580                   | GG                              | TT              | 1946925868               |
| SNP_P4_116831_96589  | NW_004515747.1 | Scaffold202 | 96589                   | TT                              | AA              | 1946925870               |
| SNP_P4_116832_96614  | NW_004515747.1 | Scaffold202 | 96614                   | TT                              | CC              | 1946925872               |
| SNP_P4_116833_96868  | NW_004515747.1 | Scaffold202 | 96868                   | CC                              | AA              | 1946925874               |
| SNP_P4_116836_97636  | NW_004515747.1 | Scaffold202 | 97636                   | AA                              | GG              | 1946925876               |
| SNP_P4_116837_97768  | NW_004515747.1 | Scaffold202 | 97768                   | CC                              | GG              | 1946925878               |
| SNP_P4_116838_97839  | NW_004515747.1 | Scaffold202 | 97839                   | TT                              | CC              | 1946925880               |
| SNP_P4_116839_98426  | NW_004515747.1 | Scaffold202 | 98426                   | CC                              | GG              | 1946925882               |
| SNP_P4_116840_98607  | NW_004515747.1 | Scaffold202 | 98607                   | GG                              | AA              | 1946925884               |
| SNP_P4_116841_98848  | NW_004515747.1 | Scaffold202 | 98848                   | CC                              | AA              | 1946925886               |
| SNP_P4_116842_99123  | NW_004515747.1 | Scaffold202 | 99123                   | TT                              | CC              | 1946925888               |
| SNP_P4_116843_99208  | NW_004515747.1 | Scaffold202 | 99208                   | CC                              | TT              | 1946925890               |
| SNP_P4_116844_99273  | NW_004515747.1 | Scaffold202 | 99273                   | GG                              | CC              | 1946925892               |
| SNP_P4_116845_99420  | NW_004515747.1 | Scaffold202 | 99420                   | AA                              | GG              | 1946925894               |
| SNP_P4_116846_99849  | NW_004515747.1 | Scaffold202 | 99849                   | AA                              | TT              | 1946925896               |
| SNP_P4_116847_100132 | NW_004515747.1 | Scaffold202 | 100132                  | CC                              | TT              | 1946925898               |
| SNP_P4_116848_100186 | NW_004515747.1 | Scaffold202 | 100186                  | TT                              | CC              | 1946925900               |
| SNP_P4_116849_100216 | NW_004515747.1 | Scaffold202 | 100216                  | AA                              | TT              | 1946925902               |
| SNP_P4_116850_100242 | NW_004515747.1 | Scaffold202 | 100242                  | AA                              | TT              | 1946925904               |
| SNP_P4_116851_100359 | NW_004515747.1 | Scaffold202 | 100359                  | CC                              | AA              | 1946925906               |
| SNP_P4_116852_101745 | NW_004515747.1 | Scaffold202 | 101745                  | AA                              | GG              | 1946925908               |
| SNP_P4_116853_101758 | NW_004515747.1 | Scaffold202 | 101758                  | AA                              | GG              | 1946925910               |
| SNP_P4_116854_101766 | NW_004515747.1 | Scaffold202 | 101766                  | GG                              | AA              | 1946925912               |
| SNP_P4_116855_101772 | NW_004515747.1 | Scaffold202 | 101772                  | AA                              | GG              | 1946925914               |
| SNP_P4_116857_103956 | NW_004515747.1 | Scaffold202 | 103956                  | GG                              | AA              | 1946925915               |
| SNP_P4_116859_104037 | NW_004515747.1 | Scaffold202 | 104037                  | AA                              | TT              | 1946925917               |
| SNP_P4_116860_104043 | NW_004515747.1 | Scaffold202 | 104043                  | TT                              | AA              | 1946925919               |
| SNP_P4_116861_104044 | NW_004515747.1 | Scaffold202 | 104044                  | TT                              | AA              | 1946925921               |

| SNPs IDs             | Chromosome IDs | Chromosomes | Physical positions (bp) | CDC Frontier (Reference genome) | (ILWC46 & LPNB) | NCBI SNPdb Accession IDs |
|----------------------|----------------|-------------|-------------------------|---------------------------------|-----------------|--------------------------|
| SNP_P4_116862_104045 | NW_004515747.1 | Scaffold202 | 104045                  | AA                              | TT              | 1946925923               |
| SNP_P4_116863_104082 | NW_004515747.1 | Scaffold202 | 104082                  | CC                              | TT              | 1946925925               |
| SNP_P4_116864_104187 | NW_004515747.1 | Scaffold202 | 104187                  | AA                              | CC              | 1946925927               |
| SNP_P4_116865_104221 | NW_004515747.1 | Scaffold202 | 104221                  | GG                              | CC              | 1946925929               |
| SNP_P4_116867_104407 | NW_004515747.1 | Scaffold202 | 104407                  | GG                              | AA              | 1946925931               |
| SNP_P4_116868_104669 | NW_004515747.1 | Scaffold202 | 104669                  | TT                              | GG              | 1946925933               |
| SNP_P4_116869_104714 | NW_004515747.1 | Scaffold202 | 104714                  | AA                              | TT              | 1946925935               |
| SNP_P4_116871_16267  | NW_004515748.1 | Scaffold204 | 16267                   | TT                              | CC              | 1946925937               |
| SNP_P4_116872_23583  | NW_004515748.1 | Scaffold204 | 23583                   | CC                              | TT              | 1946925939               |
| SNP_P4_116873_23657  | NW_004515748.1 | Scaffold204 | 23657                   | GG                              | TT              | 1946925941               |
| SNP_P4_116874_23814  | NW_004515748.1 | Scaffold204 | 23814                   | GG                              | AA              | 1946925943               |
| SNP_P4_116875_23859  | NW_004515748.1 | Scaffold204 | 23859                   | AA                              | CC              | 1946925945               |
| SNP_P4_116876_23932  | NW_004515748.1 | Scaffold204 | 23932                   | TT                              | CC              | 1946925947               |
| SNP_P4_116877_29358  | NW_004515748.1 | Scaffold204 | 29358                   | GG                              | AA              | 1946925949               |
| SNP_P4_116878_52617  | NW_004515748.1 | Scaffold204 | 52617                   | GG                              | CC              | 1946925951               |
| SNP_P4_116879_52648  | NW_004515748.1 | Scaffold204 | 52648                   | AA                              | GG              | 1946925953               |
| SNP_P4_116881_40690  | NW_004515749.1 | Scaffold205 | 40690                   | AA                              | CC              | 1946925955               |
| SNP_P4_116882_40693  | NW_004515749.1 | Scaffold205 | 40693                   | CC                              | GG              | 1946925957               |
| SNP_P4_116883_40896  | NW_004515749.1 | Scaffold205 | 40896                   | TT                              | CC              | 1946925959               |
| SNP_P4_116884_40964  | NW_004515749.1 | Scaffold205 | 40964                   | TT                              | CC              | 1946925961               |
| SNP_P4_116885_40983  | NW_004515749.1 | Scaffold205 | 40983                   | AA                              | GG              | 1946925963               |
| SNP_P4_116886_41016  | NW_004515749.1 | Scaffold205 | 41016                   | AA                              | GG              | 1946925965               |
| SNP_P4_116887_41020  | NW_004515749.1 | Scaffold205 | 41020                   | GG                              | AA              | 1946925967               |
| SNP_P4_116888_41078  | NW_004515749.1 | Scaffold205 | 41078                   | CC                              | TT              | 1946925969               |
| SNP_P4_116890_41124  | NW_004515749.1 | Scaffold205 | 41124                   | TT                              | AA              | 1946925972               |
| SNP_P4_116891_41600  | NW_004515749.1 | Scaffold205 | 41600                   | CC                              | TT              | 1946925974               |
| SNP_P4_116892_41634  | NW_004515749.1 | Scaffold205 | 41634                   | AA                              | GG              | 1946925976               |
| SNP_P4_116893_41644  | NW_004515749.1 | Scaffold205 | 41644                   | AA                              | TT              | 1946925978               |
| SNP_P4_116894_41688  | NW_004515749.1 | Scaffold205 | 41688                   | AA                              | CC              | 1946925980               |
| SNP_P4_116895_41704  | NW_004515749.1 | Scaffold205 | 41704                   | TT                              | AA              | 1946925982               |
| SNP_P4_116896_41708  | NW_004515749.1 | Scaffold205 | 41708                   | TT                              | CC              | 1946925984               |
| SNP_P4_116897_41758  | NW_004515749.1 | Scaffold205 | 41758                   | TT                              | CC              | 1946925986               |
| SNP_P4_116898_41878  | NW_004515749.1 | Scaffold205 | 41878                   | TT                              | AA              | 1946925988               |
| SNP_P4_116899_41910  | NW_004515749.1 | Scaffold205 | 41910                   | TT                              | GG              | 1946925990               |
| SNP_P4_116900_41938  | NW_004515749.1 | Scaffold205 | 41938                   | GG                              | AA              | 1946925991               |
| SNP_P4_116901_41992  | NW_004515749.1 | Scaffold205 | 41992                   | AA                              | GG              | 1946925993               |
| SNP_P4_116902_41997  | NW_004515749.1 | Scaffold205 | 41997                   | TT                              | CC              | 1946925995               |
| SNP_P4_116903_41999  | NW_004515749.1 | Scaffold205 | 41999                   | GG                              | AA              | 1946925997               |
| SNP_P4_116904_42023  | NW_004515749.1 | Scaffold205 | 42023                   | CC                              | TT              | 1946925999               |
| SNP_P4_116905_42048  | NW_004515749.1 | Scaffold205 | 42048                   | GG                              | AA              | 1946926001               |
| SNP_P4_116906_42052  | NW_004515749.1 | Scaffold205 | 42052                   | TT                              | CC              | 1946926003               |
| SNP_P4_116907_42104  | NW_004515749.1 | Scaffold205 | 42104                   | AA                              | TT              | 1946926005               |

| SNPs IDs             | Chromosome IDs | Chromosomes | Physical positions (bp) | CDC Frontier (Reference genome) | (ILWC46 & LPNB) | NCBI SNPdb Accession IDs |
|----------------------|----------------|-------------|-------------------------|---------------------------------|-----------------|--------------------------|
| SNP_P4_116908_42204  | NW_004515749.1 | Scaffold205 | 42204                   | GG                              | AA              | 1946926007               |
| SNP_P4_116909_42248  | NW_004515749.1 | Scaffold205 | 42248                   | CC                              | TT              | 1946926009               |
| SNP_P4_116910_42259  | NW_004515749.1 | Scaffold205 | 42259                   | GG                              | AA              | 1946926011               |
| SNP_P4_116911_42290  | NW_004515749.1 | Scaffold205 | 42290                   | AA                              | GG              | 1946926013               |
| SNP_P4_116912_42299  | NW_004515749.1 | Scaffold205 | 42299                   | TT                              | CC              | 1946926015               |
| SNP_P4_116913_42347  | NW_004515749.1 | Scaffold205 | 42347                   | TT                              | GG              | 1946926017               |
| SNP_P4_116914_46496  | NW_004515749.1 | Scaffold205 | 46496                   | CC                              | TT              | 1946926019               |
| SNP_P4_116915_46569  | NW_004515749.1 | Scaffold205 | 46569                   | AA                              | GG              | 1946926021               |
| SNP_P4_116917_59415  | NW_004515749.1 | Scaffold205 | 59415                   | CC                              | TT              | 1946926023               |
| SNP_P4_116918_60599  | NW_004515749.1 | Scaffold205 | 60599                   | CC                              | TT              | 1946926025               |
| SNP_P4_116919_70839  | NW_004515749.1 | Scaffold205 | 70839                   | TT                              | AA              | 1946926027               |
| SNP_P4_116920_70938  | NW_004515749.1 | Scaffold205 | 70938                   | GG                              | TT              | 1946926029               |
| SNP_P4_116921_75507  | NW_004515749.1 | Scaffold205 | 75507                   | GG                              | TT              | 1946926031               |
| SNP_P4_116922_75575  | NW_004515749.1 | Scaffold205 | 75575                   | AA                              | GG              | 1946926033               |
| SNP_P4_116923_75592  | NW_004515749.1 | Scaffold205 | 75592                   | CC                              | TT              | 1946926035               |
| SNP_P4_116925_76009  | NW_004515749.1 | Scaffold205 | 76009                   | TT                              | CC              | 1946926037               |
| SNP_P4_116926_90469  | NW_004515749.1 | Scaffold205 | 90469                   | AA                              | TT              | 1946926039               |
| SNP_P4_116927_90470  | NW_004515749.1 | Scaffold205 | 90470                   | TT                              | GG              | 1946926041               |
| SNP_P4_116928_112657 | NW_004515749.1 | Scaffold205 | 112657                  | TT                              | CC              | 1946926043               |
| SNP_P4_116929_113401 | NW_004515749.1 | Scaffold205 | 113401                  | AA                              | TT              | 1946926045               |
| SNP_P4_116930_113402 | NW_004515749.1 | Scaffold205 | 113402                  | AA                              | GG              | 1946926047               |
| SNP_P4_116931_114640 | NW_004515749.1 | Scaffold205 | 114640                  | AA                              | GG              | 1946926049               |
| SNP_P4_116932_115058 | NW_004515749.1 | Scaffold205 | 115058                  | GG                              | AA              | 1946926051               |
| SNP_P4_116933_116407 | NW_004515749.1 | Scaffold205 | 116407                  | TT                              | AA              | 1946926053               |
| SNP_P4_116934_116449 | NW_004515749.1 | Scaffold205 | 116449                  | AA                              | GG              | 1946926055               |
| SNP_P4_116936_149810 | NW_004515749.1 | Scaffold205 | 149810                  | GG                              | TT              | 1946926057               |
| SNP_P4_116937_149888 | NW_004515749.1 | Scaffold205 | 149888                  | GG                              | AA              | 1946926059               |
| SNP_P4_116938_149953 | NW_004515749.1 | Scaffold205 | 149953                  | AA                              | GG              | 1946926061               |
| SNP_P4_116939_149964 | NW_004515749.1 | Scaffold205 | 149964                  | GG                              | AA              | 1946926062               |
| SNP_P4_116940_150565 | NW_004515749.1 | Scaffold205 | 150565                  | TT                              | CC              | 1946926064               |
| SNP_P4_116942_155737 | NW_004515749.1 | Scaffold205 | 155737                  | GG                              | AA              | 1946926066               |
| SNP_P4_116943_195021 | NW_004515749.1 | Scaffold205 | 195021                  | TT                              | CC              | 1946926068               |
| SNP_P4_116944_195042 | NW_004515749.1 | Scaffold205 | 195042                  | AA                              | CC              | 1946926071               |
| SNP_P4_116945_195057 | NW_004515749.1 | Scaffold205 | 195057                  | AA                              | CC              | 1946926073               |
| SNP_P4_116946_195279 | NW_004515749.1 | Scaffold205 | 195279                  | TT                              | CC              | 1946926075               |
| SNP_P4_116947_198934 | NW_004515749.1 | Scaffold205 | 198934                  | CC                              | GG              | 1946926077               |
| SNP_P4_116948_198972 | NW_004515749.1 | Scaffold205 | 198972                  | AA                              | GG              | 1946926079               |
| SNP_P4_116949_199165 | NW_004515749.1 | Scaffold205 | 199165                  | AA                              | TT              | 1946926081               |
| SNP_P4_116950_199205 | NW_004515749.1 | Scaffold205 | 199205                  | AA                              | GG              | 1946926083               |
| SNP_P4_116951_199233 | NW_004515749.1 | Scaffold205 | 199233                  | CC                              | TT              | 1946926085               |
| SNP_P4_116952_199237 | NW_004515749.1 | Scaffold205 | 199237                  | TT                              | CC              | 1946926087               |
| SNP_P4_116953_199306 | NW_004515749.1 | Scaffold205 | 199306                  | AA                              | GG              | 1946926089               |

| SNPs IDs             | Chromosome IDs | Chromosomes | Physical positions (bp) | CDC Frontier (Reference genome) | (ILWC46 & LPNB) | NCBI SNPdb Accession IDs |
|----------------------|----------------|-------------|-------------------------|---------------------------------|-----------------|--------------------------|
| SNP_P4_116954_199440 | NW_004515749.1 | Scaffold205 | 199440                  | TT                              | CC              | 1946926091               |
| SNP_P4_116955_199501 | NW_004515749.1 | Scaffold205 | 199501                  | TT                              | AA              | 1946926093               |
| SNP_P4_116957_201206 | NW_004515749.1 | Scaffold205 | 201206                  | TT                              | CC              | 1946926095               |
| SNP_P4_116958_211892 | NW_004515749.1 | Scaffold205 | 211892                  | GG                              | AA              | 1946926097               |
| SNP_P4_116959_214037 | NW_004515749.1 | Scaffold205 | 214037                  | GG                              | AA              | 1946926099               |
| SNP_P4_116960_16661  | NW_004515750.1 | Scaffold206 | 16661                   | TT                              | CC              | 1946926101               |
| SNP_P4_116961_16677  | NW_004515750.1 | Scaffold206 | 16677                   | AA                              | GG              | 1946926103               |
| SNP_P4_116962_16717  | NW_004515750.1 | Scaffold206 | 16717                   | GG                              | TT              | 1946926105               |
| SNP_P4_116964_62134  | NW_004515750.1 | Scaffold206 | 62134                   | AA                              | GG              | 1946926107               |
| SNP_P4_116965_62141  | NW_004515750.1 | Scaffold206 | 62141                   | AA                              | GG              | 1946926109               |
| SNP_P4_116966_62429  | NW_004515750.1 | Scaffold206 | 62429                   | TT                              | GG              | 1946926111               |
| SNP_P4_116967_62916  | NW_004515750.1 | Scaffold206 | 62916                   | CC                              | TT              | 1946926113               |
| SNP_P4_116968_67895  | NW_004515750.1 | Scaffold206 | 67895                   | GG                              | AA              | 1946926115               |
| SNP_P4_116969_68193  | NW_004515750.1 | Scaffold206 | 68193                   | GG                              | AA              | 1946926117               |
| SNP_P4_116970_68268  | NW_004515750.1 | Scaffold206 | 68268                   | CC                              | TT              | 1946926119               |
| SNP_P4_116971_68291  | NW_004515750.1 | Scaffold206 | 68291                   | TT                              | GG              | 1946926121               |
| SNP_P4_116972_68294  | NW_004515750.1 | Scaffold206 | 68294                   | CC                              | TT              | 1946926123               |
| SNP_P4_116973_68481  | NW_004515750.1 | Scaffold206 | 68481                   | AA                              | TT              | 1946926125               |
| SNP_P4_116974_73366  | NW_004515750.1 | Scaffold206 | 73366                   | TT                              | CC              | 1946926127               |
| SNP_P4_116975_73372  | NW_004515750.1 | Scaffold206 | 73372                   | GG                              | TT              | 1946926129               |
| SNP_P4_116976_77206  | NW_004515750.1 | Scaffold206 | 77206                   | CC                              | TT              | 1946926131               |
| SNP_P4_116977_78144  | NW_004515750.1 | Scaffold206 | 78144                   | GG                              | AA              | 1946926133               |
| SNP_P4_116978_85890  | NW_004515750.1 | Scaffold206 | 85890                   | CC                              | AA              | 1946926135               |
| SNP_P4_116979_108194 | NW_004515750.1 | Scaffold206 | 108194                  | TT                              | GG              | 1946926137               |
| SNP_P4_116980_108233 | NW_004515750.1 | Scaffold206 | 108233                  | AA                              | GG              | 1946926139               |
| SNP_P4_116981_108461 | NW_004515750.1 | Scaffold206 | 108461                  | TT                              | CC              | 1946926141               |
| SNP_P4_116982_108613 | NW_004515750.1 | Scaffold206 | 108613                  | GG                              | AA              | 1946926143               |
| SNP_P4_116983_108627 | NW_004515750.1 | Scaffold206 | 108627                  | AA                              | TT              | 1946926145               |
| SNP_P4_116984_108758 | NW_004515750.1 | Scaffold206 | 108758                  | AA                              | GG              | 1946926147               |
| SNP_P4_116985_111145 | NW_004515750.1 | Scaffold206 | 111145                  | TT                              | CC              | 1946926149               |
| SNP_P4_116986_113614 | NW_004515750.1 | Scaffold206 | 113614                  | CC                              | TT              | 1946926151               |
| SNP_P4_116987_114007 | NW_004515750.1 | Scaffold206 | 114007                  | TT                              | AA              | 1946926153               |
| SNP_P4_116988_114050 | NW_004515750.1 | Scaffold206 | 114050                  | AA                              | GG              | 1946926154               |
| SNP_P4_116989_115271 | NW_004515750.1 | Scaffold206 | 115271                  | AA                              | GG              | 1946926157               |
| SNP_P4_116990_115275 | NW_004515750.1 | Scaffold206 | 115275                  | TT                              | GG              | 1946926159               |
| SNP_P4_116991_115461 | NW_004515750.1 | Scaffold206 | 115461                  | TT                              | AA              | 1946926161               |
| SNP_P4_116992_115530 | NW_004515750.1 | Scaffold206 | 115530                  | TT                              | CC              | 1946926163               |
| SNP_P4_116993_115539 | NW_004515750.1 | Scaffold206 | 115539                  | AA                              | GG              | 1946926165               |
| SNP_P4_116994_115808 | NW_004515750.1 | Scaffold206 | 115808                  | AA                              | GG              | 1946926167               |
| SNP_P4_116995_115810 | NW_004515750.1 | Scaffold206 | 115810                  | CC                              | AA              | 1946926169               |
| SNP_P4_116996_115824 | NW_004515750.1 | Scaffold206 | 115824                  | TT                              | CC              | 1946926171               |
| SNP_P4_116997_119897 | NW_004515750.1 | Scaffold206 | 119897                  | AA                              | GG              | 1946926173               |

| SNPs IDs             | Chromosome IDs | Chromosomes | Physical positions (bp) | CDC Frontier (Reference genome) | (ILWC46 & LPNB) | NCBI SNPdb Accession IDs |
|----------------------|----------------|-------------|-------------------------|---------------------------------|-----------------|--------------------------|
| SNP_P4_116998_119956 | NW_004515750.1 | Scaffold206 | 119956                  | GG                              | AA              | 1946926175               |
| SNP_P4_116999_120157 | NW_004515750.1 | Scaffold206 | 120157                  | GG                              | AA              | 1946926177               |
| SNP_P4_117000_120295 | NW_004515750.1 | Scaffold206 | 120295                  | TT                              | CC              | 1946926179               |
| SNP_P4_117001_120303 | NW_004515750.1 | Scaffold206 | 120303                  | CC                              | TT              | 1946926181               |
| SNP_P4_117002_120309 | NW_004515750.1 | Scaffold206 | 120309                  | CC                              | TT              | 1946926183               |
| SNP_P4_117003_137803 | NW_004515750.1 | Scaffold206 | 137803                  | AA                              | GG              | 1946926185               |
| SNP_P4_117004_138037 | NW_004515750.1 | Scaffold206 | 138037                  | AA                              | TT              | 1946926187               |
| SNP_P4_117005_139575 | NW_004515750.1 | Scaffold206 | 139575                  | TT                              | AA              | 1946926189               |
| SNP_P4_117006_139622 | NW_004515750.1 | Scaffold206 | 139622                  | CC                              | TT              | 1946926191               |
| SNP_P4_117007_139732 | NW_004515750.1 | Scaffold206 | 139732                  | CC                              | AA              | 1946926193               |
| SNP_P4_117008_139813 | NW_004515750.1 | Scaffold206 | 139813                  | TT                              | CC              | 1946926195               |
| SNP_P4_117009_139834 | NW_004515750.1 | Scaffold206 | 139834                  | GG                              | AA              | 1946926197               |
| SNP_P4_117010_139874 | NW_004515750.1 | Scaffold206 | 139874                  | TT                              | GG              | 1946926200               |
| SNP_P4_117011_139924 | NW_004515750.1 | Scaffold206 | 139924                  | AA                              | GG              | 1946926202               |
| SNP_P4_117012_139932 | NW_004515750.1 | Scaffold206 | 139932                  | TT                              | GG              | 1946926204               |
| SNP_P4_117013_139990 | NW_004515750.1 | Scaffold206 | 139990                  | CC                              | TT              | 1946926206               |
| SNP_P4_117014_140006 | NW_004515750.1 | Scaffold206 | 140006                  | TT                              | GG              | 1946926208               |
| SNP_P4_117015_140017 | NW_004515750.1 | Scaffold206 | 140017                  | AA                              | GG              | 1946926210               |
| SNP_P4_117016_140018 | NW_004515750.1 | Scaffold206 | 140018                  | GG                              | AA              | 1946926212               |
| SNP_P4_117017_140043 | NW_004515750.1 | Scaffold206 | 140043                  | AA                              | TT              | 1946926214               |
| SNP_P4_117018_140105 | NW_004515750.1 | Scaffold206 | 140105                  | TT                              | CC              | 1946926216               |
| SNP_P4_117019_140159 | NW_004515750.1 | Scaffold206 | 140159                  | CC                              | TT              | 1946926218               |
| SNP_P4_117020_140181 | NW_004515750.1 | Scaffold206 | 140181                  | TT                              | CC              | 1946926219               |
| SNP_P4_117021_140210 | NW_004515750.1 | Scaffold206 | 140210                  | CC                              | TT              | 1946926221               |
| SNP_P4_117022_140220 | NW_004515750.1 | Scaffold206 | 140220                  | GG                              | AA              | 1946926223               |
| SNP_P4_117023_140237 | NW_004515750.1 | Scaffold206 | 140237                  | AA                              | GG              | 1946926225               |
| SNP_P4_117024_140243 | NW_004515750.1 | Scaffold206 | 140243                  | TT                              | CC              | 1946926227               |
| SNP_P4_117025_140254 | NW_004515750.1 | Scaffold206 | 140254                  | AA                              | GG              | 1946926229               |
| SNP_P4_117026_140255 | NW_004515750.1 | Scaffold206 | 140255                  | AA                              | TT              | 1946926231               |
| SNP_P4_117027_140291 | NW_004515750.1 | Scaffold206 | 140291                  | TT                              | CC              | 1946926233               |
| SNP_P4_117028_140294 | NW_004515750.1 | Scaffold206 | 140294                  | CC                              | TT              | 1946926235               |
| SNP_P4_117029_140306 | NW_004515750.1 | Scaffold206 | 140306                  | TT                              | CC              | 1946926238               |
| SNP_P4_117030_140312 | NW_004515750.1 | Scaffold206 | 140312                  | CC                              | TT              | 1946926240               |
| SNP_P4_117031_146958 | NW_004515750.1 | Scaffold206 | 146958                  | TT                              | AA              | 1946926242               |
| SNP_P4_117032_147094 | NW_004515750.1 | Scaffold206 | 147094                  | TT                              | AA              | 1946926244               |
| SNP_P4_117033_147200 | NW_004515750.1 | Scaffold206 | 147200                  | CC                              | TT              | 1946926246               |
| SNP_P4_117034_159719 | NW_004515750.1 | Scaffold206 | 159719                  | AA                              | CC              | 1946926248               |
| SNP_P4_117035_159734 | NW_004515750.1 | Scaffold206 | 159734                  | TT                              | AA              | 1946926250               |
| SNP_P4_117036_159745 | NW_004515750.1 | Scaffold206 | 159745                  | GG                              | AA              | 1946926252               |
| SNP_P4_117037_160126 | NW_004515750.1 | Scaffold206 | 160126                  | AA                              | GG              | 1946926254               |
| SNP_P4_117039_162044 | NW_004515750.1 | Scaffold206 | 162044                  | CC                              | GG              | 1946926256               |
| SNP_P4_117040_162237 | NW_004515750.1 | Scaffold206 | 162237                  | TT                              | CC              | 1946926258               |

| SNPs IDs             | Chromosome IDs | Chromosomes | Physical positions (bp) | CDC Frontier (Reference genome) | (ILWC46 & LPNB) | NCBI SNPdb Accession IDs |
|----------------------|----------------|-------------|-------------------------|---------------------------------|-----------------|--------------------------|
| SNP_P4_117041_162240 | NW_004515750.1 | Scaffold206 | 162240                  | TT                              | AA              | 1946926260               |
| SNP_P4_117042_162243 | NW_004515750.1 | Scaffold206 | 162243                  | AA                              | GG              | 1946926262               |
| SNP_P4_117043_164418 | NW_004515750.1 | Scaffold206 | 164418                  | AA                              | GG              | 1946926264               |
| SNP_P4_117044_166896 | NW_004515750.1 | Scaffold206 | 166896                  | AA                              | TT              | 1946926266               |
| SNP_P4_117046_175775 | NW_004515750.1 | Scaffold206 | 175775                  | CC                              | TT              | 1946926268               |
| SNP_P4_117048_176357 | NW_004515750.1 | Scaffold206 | 176357                  | TT                              | CC              | 1946926270               |
| SNP_P4_117049_176379 | NW_004515750.1 | Scaffold206 | 176379                  | CC                              | TT              | 1946926272               |
| SNP_P4_117051_190582 | NW_004515750.1 | Scaffold206 | 190582                  | CC                              | TT              | 1946926274               |
| SNP_P4_117052_190583 | NW_004515750.1 | Scaffold206 | 190583                  | GG                              | AA              | 1946926276               |
| SNP_P4_117053_190624 | NW_004515750.1 | Scaffold206 | 190624                  | AA                              | CC              | 1946926278               |
| SNP_P4_117055_199511 | NW_004515750.1 | Scaffold206 | 199511                  | TT                              | CC              | 1946926280               |
| SNP_P4_117057_228629 | NW_004515750.1 | Scaffold206 | 228629                  | CC                              | GG              | 1946926282               |
| SNP_P4_117058_228965 | NW_004515750.1 | Scaffold206 | 228965                  | GG                              | AA              | 1946926284               |
| SNP_P4_117059_229011 | NW_004515750.1 | Scaffold206 | 229011                  | GG                              | CC              | 1946926286               |
| SNP_P4_117060_233701 | NW_004515750.1 | Scaffold206 | 233701                  | CC                              | GG              | 1946926288               |
| SNP_P4_117061_233720 | NW_004515750.1 | Scaffold206 | 233720                  | TT                              | CC              | 1946926290               |
| SNP_P4_117062_234390 | NW_004515750.1 | Scaffold206 | 234390                  | GG                              | TT              | 1946926292               |
| SNP_P4_117063_234450 | NW_004515750.1 | Scaffold206 | 234450                  | TT                              | CC              | 1946926294               |
| SNP_P4_117064_234467 | NW_004515750.1 | Scaffold206 | 234467                  | CC                              | TT              | 1946926296               |
| SNP_P4_117065_234785 | NW_004515750.1 | Scaffold206 | 234785                  | TT                              | CC              | 1946926298               |
| SNP_P4_117066_234795 | NW_004515750.1 | Scaffold206 | 234795                  | TT                              | CC              | 1946926300               |
| SNP_P4_117067_234822 | NW_004515750.1 | Scaffold206 | 234822                  | GG                              | AA              | 1946926302               |
| SNP_P4_117068_234839 | NW_004515750.1 | Scaffold206 | 234839                  | AA                              | GG              | 1946926304               |
| SNP_P4_117069_234859 | NW_004515750.1 | Scaffold206 | 234859                  | AA                              | CC              | 1946926306               |
| SNP_P4_117070_234963 | NW_004515750.1 | Scaffold206 | 234963                  | CC                              | TT              | 1946926308               |
| SNP_P4_117071_235021 | NW_004515750.1 | Scaffold206 | 235021                  | TT                              | CC              | 1946926310               |
| SNP_P4_117072_238563 | NW_004515750.1 | Scaffold206 | 238563                  | CC                              | TT              | 1946926312               |
| SNP_P4_117074_246716 | NW_004515750.1 | Scaffold206 | 246716                  | CC                              | TT              | 1946926314               |
| SNP_P4_117075_246731 | NW_004515750.1 | Scaffold206 | 246731                  | AA                              | TT              | 1946926317               |
| SNP_P4_117076_272191 | NW_004515750.1 | Scaffold206 | 272191                  | AA                              | GG              | 1946926319               |
| SNP_P4_117077_589    | NW_004515751.1 | Scaffold207 | 589                     | GG                              | AA              | 1946926321               |
| SNP_P4_117078_761    | NW_004515751.1 | Scaffold207 | 761                     | GG                              | AA              | 1946926323               |
| SNP_P4_117079_2783   | NW_004515751.1 | Scaffold207 | 2783                    | GG                              | CC              | 1946926325               |
| SNP_P4_117080_5994   | NW_004515751.1 | Scaffold207 | 5994                    | CC                              | AA              | 1946926327               |
| SNP_P4_117081_5999   | NW_004515751.1 | Scaffold207 | 5999                    | CC                              | AA              | 1946926329               |
| SNP_P4_117082_6000   | NW_004515751.1 | Scaffold207 | 6000                    | TT                              | CC              | 1946926331               |
| SNP_P4_117083_6025   | NW_004515751.1 | Scaffold207 | 6025                    | GG                              | AA              | 1946926333               |
| SNP_P4_117084_6042   | NW_004515751.1 | Scaffold207 | 6042                    | TT                              | CC              | 1946926335               |
| SNP_P4_117085_6245   | NW_004515751.1 | Scaffold207 | 6245                    | GG                              | CC              | 1946926337               |
| SNP_P4_117087_6961   | NW_004515751.1 | Scaffold207 | 6961                    | CC                              | AA              | 1946926339               |
| SNP_P4_117088_7352   | NW_004515751.1 | Scaffold207 | 7352                    | AA                              | TT              | 1946926341               |
| SNP_P4_117089_7369   | NW_004515751.1 | Scaffold207 | 7369                    | CC                              | TT              | 1946926343               |

| SNPs IDs            | Chromosome IDs | Chromosomes | Physical positions (bp) | CDC Frontier (Reference genome) | (ILWC46 & LPNB) | NCBI SNPdb Accession IDs |
|---------------------|----------------|-------------|-------------------------|---------------------------------|-----------------|--------------------------|
| SNP_P4_117090_7484  | NW_004515751.1 | Scaffold207 | 7484                    | GG                              | TT              | 1946926345               |
| SNP_P4_117091_7544  | NW_004515751.1 | Scaffold207 | 7544                    | GG                              | AA              | 1946926347               |
| SNP_P4_117092_7644  | NW_004515751.1 | Scaffold207 | 7644                    | CC                              | AA              | 1946926349               |
| SNP_P4_117093_7760  | NW_004515751.1 | Scaffold207 | 7760                    | TT                              | CC              | 1946926351               |
| SNP_P4_117094_7795  | NW_004515751.1 | Scaffold207 | 7795                    | AA                              | TT              | 1946926353               |
| SNP_P4_117095_8056  | NW_004515751.1 | Scaffold207 | 8056                    | AA                              | GG              | 1946926355               |
| SNP_P4_117096_8215  | NW_004515751.1 | Scaffold207 | 8215                    | AA                              | GG              | 1946926357               |
| SNP_P4_117097_8217  | NW_004515751.1 | Scaffold207 | 8217                    | GG                              | TT              | 1946926359               |
| SNP_P4_117098_9409  | NW_004515751.1 | Scaffold207 | 9409                    | GG                              | TT              | 1946926361               |
| SNP_P4_117099_9466  | NW_004515751.1 | Scaffold207 | 9466                    | CC                              | TT              | 1946926363               |
| SNP_P4_117100_9513  | NW_004515751.1 | Scaffold207 | 9513                    | AA                              | GG              | 1946926365               |
| SNP_P4_117101_9580  | NW_004515751.1 | Scaffold207 | 9580                    | AA                              | CC              | 1946926367               |
| SNP_P4_117103_9640  | NW_004515751.1 | Scaffold207 | 9640                    | AA                              | TT              | 1946926369               |
| SNP_P4_117104_9831  | NW_004515751.1 | Scaffold207 | 9831                    | TT                              | AA              | 1946926371               |
| SNP_P4_117105_9946  | NW_004515751.1 | Scaffold207 | 9946                    | TT                              | AA              | 1946926373               |
| SNP_P4_117106_25138 | NW_004515751.1 | Scaffold207 | 25138                   | TT                              | GG              | 1946926375               |
| SNP_P4_117107_25181 | NW_004515751.1 | Scaffold207 | 25181                   | CC                              | TT              | 1946926377               |
| SNP_P4_117108_25183 | NW_004515751.1 | Scaffold207 | 25183                   | AA                              | CC              | 1946926379               |
| SNP_P4_117109_476   | NW_004515752.1 | Scaffold208 | 476                     | GG                              | AA              | 1946926381               |
| SNP_P4_117110_500   | NW_004515752.1 | Scaffold208 | 500                     | TT                              | CC              | 1946926383               |
| SNP_P4_117111_10922 | NW_004515752.1 | Scaffold208 | 10922                   | TT                              | CC              | 1946926385               |
| SNP_P4_117113_16123 | NW_004515752.1 | Scaffold208 | 16123                   | AA                              | GG              | 1946926387               |
| SNP_P4_117114_18416 | NW_004515752.1 | Scaffold208 | 18416                   | GG                              | AA              | 1946926389               |
| SNP_P4_117115_19376 | NW_004515752.1 | Scaffold208 | 19376                   | TT                              | CC              | 1946926391               |
| SNP_P4_117116_19388 | NW_004515752.1 | Scaffold208 | 19388                   | AA                              | GG              | 1946926393               |
| SNP_P4_117117_19411 | NW_004515752.1 | Scaffold208 | 19411                   | GG                              | AA              | 1946926395               |
| SNP_P4_117118_19823 | NW_004515752.1 | Scaffold208 | 19823                   | CC                              | TT              | 1946926397               |
| SNP_P4_117119_21035 | NW_004515752.1 | Scaffold208 | 21035                   | AA                              | GG              | 1946926399               |
| SNP_P4_117120_21100 | NW_004515752.1 | Scaffold208 | 21100                   | AA                              | CC              | 1946926401               |
| SNP_P4_117121_21149 | NW_004515752.1 | Scaffold208 | 21149                   | GG                              | TT              | 1946926403               |
| SNP_P4_117122_21153 | NW_004515752.1 | Scaffold208 | 21153                   | TT                              | GG              | 1946926405               |
| SNP_P4_117123_21463 | NW_004515752.1 | Scaffold208 | 21463                   | AA                              | TT              | 1946926407               |
| SNP_P4_117124_21505 | NW_004515752.1 | Scaffold208 | 21505                   | AA                              | CC              | 1946926409               |
| SNP_P4_117125_21533 | NW_004515752.1 | Scaffold208 | 21533                   | AA                              | GG              | 1946926411               |
| SNP_P4_117126_22008 | NW_004515752.1 | Scaffold208 | 22008                   | CC                              | GG              | 1946926413               |
| SNP_P4_117127_22034 | NW_004515752.1 | Scaffold208 | 22034                   | CC                              | TT              | 1946926415               |
| SNP_P4_117128_22035 | NW_004515752.1 | Scaffold208 | 22035                   | TT                              | AA              | 1946926417               |
| SNP_P4_117129_22037 | NW_004515752.1 | Scaffold208 | 22037                   | TT                              | AA              | 1946926419               |
| SNP_P4_117130_24747 | NW_004515752.1 | Scaffold208 | 24747                   | AA                              | GG              | 1946926421               |
| SNP_P4_117131_36071 | NW_004515752.1 | Scaffold208 | 36071                   | TT                              | AA              | 1946926423               |
| SNP_P4_117132_36440 | NW_004515752.1 | Scaffold208 | 36440                   | AA                              | GG              | 1946926425               |
| SNP_P4_117134_39210 | NW_004515752.1 | Scaffold208 | 39210                   | TT                              | CC              | 1946926427               |

| SNPs IDs             | Chromosome IDs | Chromosomes | Physical positions (bp) | CDC Frontier (Reference genome) | (ILWC46 & LPNB) | NCBI SNPdb Accession IDs |
|----------------------|----------------|-------------|-------------------------|---------------------------------|-----------------|--------------------------|
| SNP_P4_117135_45583  | NW_004515752.1 | Scaffold208 | 45583                   | GG                              | TT              | 1946926429               |
| SNP_P4_117136_49436  | NW_004515752.1 | Scaffold208 | 49436                   | AA                              | CC              | 1946926431               |
| SNP_P4_117137_52018  | NW_004515752.1 | Scaffold208 | 52018                   | TT                              | GG              | 1946926433               |
| SNP_P4_117138_72761  | NW_004515752.1 | Scaffold208 | 72761                   | TT                              | CC              | 1946926435               |
| SNP_P4_117139_72780  | NW_004515752.1 | Scaffold208 | 72780                   | GG                              | AA              | 1946926437               |
| SNP_P4_117140_72791  | NW_004515752.1 | Scaffold208 | 72791                   | TT                              | GG              | 1946926439               |
| SNP_P4_117141_74971  | NW_004515752.1 | Scaffold208 | 74971                   | GG                              | AA              | 1946926441               |
| SNP_P4_117142_119425 | NW_004515752.1 | Scaffold208 | 119425                  | TT                              | AA              | 1946926443               |
| SNP_P4_117143_119629 | NW_004515752.1 | Scaffold208 | 119629                  | TT                              | CC              | 1946926445               |
| SNP_P4_117144_119732 | NW_004515752.1 | Scaffold208 | 119732                  | CC                              | TT              | 1946926447               |
| SNP_P4_117145_119742 | NW_004515752.1 | Scaffold208 | 119742                  | GG                              | TT              | 1946926449               |
| SNP_P4_117147_119766 | NW_004515752.1 | Scaffold208 | 119766                  | CC                              | GG              | 1946926451               |
| SNP_P4_117148_119794 | NW_004515752.1 | Scaffold208 | 119794                  | CC                              | AA              | 1946926453               |
| SNP_P4_117149_126308 | NW_004515752.1 | Scaffold208 | 126308                  | AA                              | GG              | 1946926455               |
| SNP_P4_117150_126320 | NW_004515752.1 | Scaffold208 | 126320                  | TT                              | CC              | 1946926457               |
| SNP_P4_117151_126343 | NW_004515752.1 | Scaffold208 | 126343                  | GG                              | TT              | 1946926459               |
| SNP_P4_117152_126384 | NW_004515752.1 | Scaffold208 | 126384                  | CC                              | TT              | 1946926462               |
| SNP_P4_117153_126665 | NW_004515752.1 | Scaffold208 | 126665                  | AA                              | GG              | 1946926464               |
| SNP_P4_117154_126699 | NW_004515752.1 | Scaffold208 | 126699                  | AA                              | TT              | 1946926466               |
| SNP_P4_117155_126714 | NW_004515752.1 | Scaffold208 | 126714                  | GG                              | AA              | 1946926468               |
| SNP_P4_117156_127452 | NW_004515752.1 | Scaffold208 | 127452                  | CC                              | TT              | 1946926470               |
| SNP_P4_117157_127758 | NW_004515752.1 | Scaffold208 | 127758                  | CC                              | AA              | 1946926472               |
| SNP_P4_117158_127783 | NW_004515752.1 | Scaffold208 | 127783                  | GG                              | AA              | 1946926474               |
| SNP_P4_117159_127804 | NW_004515752.1 | Scaffold208 | 127804                  | AA                              | GG              | 1946926476               |
| SNP_P4_117160_131610 | NW_004515752.1 | Scaffold208 | 131610                  | AA                              | TT              | 1946926478               |
| SNP_P4_117161_156847 | NW_004515752.1 | Scaffold208 | 156847                  | CC                              | TT              | 1946926480               |
| SNP_P4_117162_157208 | NW_004515752.1 | Scaffold208 | 157208                  | TT                              | CC              | 1946926482               |
| SNP_P4_117164_162264 | NW_004515752.1 | Scaffold208 | 162264                  | TT                              | GG              | 1946926484               |
| SNP_P4_117165_162326 | NW_004515752.1 | Scaffold208 | 162326                  | AA                              | CC              | 1946926486               |
| SNP_P4_117166_173588 | NW_004515752.1 | Scaffold208 | 173588                  | TT                              | AA              | 1946926488               |
| SNP_P4_117167_173927 | NW_004515752.1 | Scaffold208 | 173927                  | CC                              | TT              | 1946926490               |
| SNP_P4_117168_173958 | NW_004515752.1 | Scaffold208 | 173958                  | GG                              | AA              | 1946926492               |
| SNP_P4_117169_173970 | NW_004515752.1 | Scaffold208 | 173970                  | GG                              | AA              | 1946926494               |
| SNP_P4_117170_174028 | NW_004515752.1 | Scaffold208 | 174028                  | CC                              | TT              | 1946926496               |
| SNP_P4_117171_174107 | NW_004515752.1 | Scaffold208 | 174107                  | AA                              | CC              | 1946926498               |
| SNP_P4_117173_174372 | NW_004515752.1 | Scaffold208 | 174372                  | TT                              | CC              | 1946926500               |
| SNP_P4_117174_188307 | NW_004515752.1 | Scaffold208 | 188307                  | AA                              | CC              | 1946926502               |
| SNP_P4_117175_188316 | NW_004515752.1 | Scaffold208 | 188316                  | TT                              | GG              | 1946926504               |
| SNP_P4_117176_188337 | NW_004515752.1 | Scaffold208 | 188337                  | CC                              | AA              | 1946926506               |
| SNP_P4_117177_188381 | NW_004515752.1 | Scaffold208 | 188381                  | GG                              | AA              | 1946926508               |
| SNP_P4_117178_188536 | NW_004515752.1 | Scaffold208 | 188536                  | GG                              | AA              | 1946926510               |
| SNP_P4_117179_200165 | NW_004515752.1 | Scaffold208 | 200165                  | TT                              | AA              | 1946926512               |



| SNPs IDs             | Chromosome IDs | Chromosomes | Physical positions (bp) | CDC Frontier (Reference genome) | (ILWC46 & LPNB) | NCBI SNPdb Accession IDs |
|----------------------|----------------|-------------|-------------------------|---------------------------------|-----------------|--------------------------|
| SNP_P4_117181_254007 | NW_004515752.1 | Scaffold208 | 254007                  | GG                              | CC              | 1946926514               |
| SNP_P4_117182_254029 | NW_004515752.1 | Scaffold208 | 254029                  | AA                              | TT              | 1946926516               |
| SNP_P4_117183_254337 | NW_004515752.1 | Scaffold208 | 254337                  | GG                              | TT              | 1946926518               |
| SNP_P4_117184_254499 | NW_004515752.1 | Scaffold208 | 254499                  | AA                              | GG              | 1946926520               |
| SNP_P4_117185_266072 | NW_004515752.1 | Scaffold208 | 266072                  | TT                              | AA              | 1946926522               |
| SNP_P4_117186_312422 | NW_004515752.1 | Scaffold208 | 312422                  | CC                              | AA              | 1946926524               |
| SNP_P4_117187_320536 | NW_004515752.1 | Scaffold208 | 320536                  | AA                              | TT              | 1946926526               |
| SNP_P4_117188_320822 | NW_004515752.1 | Scaffold208 | 320822                  | CC                              | TT              | 1946926528               |
| SNP_P4_117190_417963 | NW_004515752.1 | Scaffold208 | 417963                  | TT                              | CC              | 1946926530               |
| SNP_P4_117191_433956 | NW_004515752.1 | Scaffold208 | 433956                  | AA                              | CC              | 1946926532               |
| SNP_P4_117192_434326 | NW_004515752.1 | Scaffold208 | 434326                  | TT                              | CC              | 1946926534               |
| SNP_P4_117193_437175 | NW_004515752.1 | Scaffold208 | 437175                  | TT                              | AA              | 1946926536               |
| SNP_P4_117194_457841 | NW_004515752.1 | Scaffold208 | 457841                  | TT                              | AA              | 1946926538               |
| SNP_P4_117195_2295   | NW_004515753.1 | Scaffold209 | 2295                    | CC                              | TT              | 1946926540               |
| SNP_P4_117196_2314   | NW_004515753.1 | Scaffold209 | 2314                    | GG                              | AA              | 1946926542               |
| SNP_P4_117197_2595   | NW_004515753.1 | Scaffold209 | 2595                    | GG                              | CC              | 1946926544               |
| SNP_P4_117198_2625   | NW_004515753.1 | Scaffold209 | 2625                    | GG                              | TT              | 1946926546               |
| SNP_P4_117199_2674   | NW_004515753.1 | Scaffold209 | 2674                    | AA                              | CC              | 1946926548               |
| SNP_P4_117200_3023   | NW_004515753.1 | Scaffold209 | 3023                    | TT                              | AA              | 1946926550               |
| SNP_P4_117201_5720   | NW_004515753.1 | Scaffold209 | 5720                    | CC                              | AA              | 1946926552               |
| SNP_P4_117202_5768   | NW_004515753.1 | Scaffold209 | 5768                    | AA                              | GG              | 1946926554               |
| SNP_P4_117203_5770   | NW_004515753.1 | Scaffold209 | 5770                    | TT                              | AA              | 1946926556               |
| SNP_P4_117204_5826   | NW_004515753.1 | Scaffold209 | 5826                    | AA                              | TT              | 1946926558               |
| SNP_P4_117205_5958   | NW_004515753.1 | Scaffold209 | 5958                    | TT                              | CC              | 1946926560               |
| SNP_P4_117206_6040   | NW_004515753.1 | Scaffold209 | 6040                    | AA                              | TT              | 1946926562               |
| SNP_P4_117207_6138   | NW_004515753.1 | Scaffold209 | 6138                    | GG                              | CC              | 1946926564               |
| SNP_P4_117208_6314   | NW_004515753.1 | Scaffold209 | 6314                    | CC                              | TT              | 1946926566               |
| SNP_P4_117209_6340   | NW_004515753.1 | Scaffold209 | 6340                    | GG                              | TT              | 1946926568               |
| SNP_P4_117210_6344   | NW_004515753.1 | Scaffold209 | 6344                    | GG                              | TT              | 1946926570               |
| SNP_P4_117211_7670   | NW_004515753.1 | Scaffold209 | 7670                    | TT                              | GG              | 1946926572               |
| SNP_P4_117212_7683   | NW_004515753.1 | Scaffold209 | 7683                    | CC                              | TT              | 1946926574               |
| SNP_P4_117213_7695   | NW_004515753.1 | Scaffold209 | 7695                    | TT                              | AA              | 1946926576               |
| SNP_P4_117214_7937   | NW_004515753.1 | Scaffold209 | 7937                    | GG                              | TT              | 1946926578               |
| SNP_P4_117215_31636  | NW_004515753.1 | Scaffold209 | 31636                   | AA                              | CC              | 1946926580               |
| SNP_P4_117216_37377  | NW_004515753.1 | Scaffold209 | 37377                   | TT                              | CC              | 1946926582               |
| SNP_P4_117217_65740  | NW_004515753.1 | Scaffold209 | 65740                   | TT                              | CC              | 1946926584               |
| SNP_P4_117218_66013  | NW_004515753.1 | Scaffold209 | 66013                   | TT                              | GG              | 1946926586               |
| SNP_P4_117219_66052  | NW_004515753.1 | Scaffold209 | 66052                   | CC                              | AA              | 1946926588               |
| SNP_P4_117220_79246  | NW_004515753.1 | Scaffold209 | 79246                   | AA                              | CC              | 1946926590               |
| SNP_P4_117221_79273  | NW_004515753.1 | Scaffold209 | 79273                   | CC                              | GG              | 1946926592               |
| SNP_P4_117222_79274  | NW_004515753.1 | Scaffold209 | 79274                   | TT                              | AA              | 1946926594               |
| SNP_P4_117223_79555  | NW_004515753.1 | Scaffold209 | 79555                   | CC                              | TT              | 1946926596               |

| SNPs IDs             | Chromosome IDs | Chromosomes | Physical positions (bp) | CDC Frontier (Reference genome) | (ILWC46 & LPNB) | NCBI SNPdb Accession IDs |
|----------------------|----------------|-------------|-------------------------|---------------------------------|-----------------|--------------------------|
| SNP_P4_117224_79585  | NW_004515753.1 | Scaffold209 | 79585                   | CC                              | TT              | 1946926598               |
| SNP_P4_117225_79596  | NW_004515753.1 | Scaffold209 | 79596                   | CC                              | AA              | 1946926600               |
| SNP_P4_117226_83869  | NW_004515753.1 | Scaffold209 | 83869                   | AA                              | CC              | 1946926602               |
| SNP_P4_117227_89922  | NW_004515753.1 | Scaffold209 | 89922                   | CC                              | TT              | 1946926604               |
| SNP_P4_117228_89926  | NW_004515753.1 | Scaffold209 | 89926                   | TT                              | CC              | 1946926606               |
| SNP_P4_117230_100695 | NW_004515753.1 | Scaffold209 | 100695                  | CC                              | TT              | 1946926608               |
| SNP_P4_117231_102250 | NW_004515753.1 | Scaffold209 | 102250                  | TT                              | GG              | 1946926610               |
| SNP_P4_117232_126594 | NW_004515753.1 | Scaffold209 | 126594                  | AA                              | GG              | 1946926612               |
| SNP_P4_117233_137840 | NW_004515753.1 | Scaffold209 | 137840                  | GG                              | AA              | 1946926614               |
| SNP_P4_117234_138282 | NW_004515753.1 | Scaffold209 | 138282                  | AA                              | GG              | 1946926616               |
| SNP_P4_117235_139293 | NW_004515753.1 | Scaffold209 | 139293                  | AA                              | GG              | 1946926618               |
| SNP_P4_117236_139322 | NW_004515753.1 | Scaffold209 | 139322                  | TT                              | CC              | 1946926620               |
| SNP_P4_117237_145551 | NW_004515753.1 | Scaffold209 | 145551                  | GG                              | TT              | 1946926622               |
| SNP_P4_117238_145588 | NW_004515753.1 | Scaffold209 | 145588                  | AA                              | CC              | 1946926624               |
| SNP_P4_117239_154186 | NW_004515753.1 | Scaffold209 | 154186                  | CC                              | AA              | 1946926626               |
| SNP_P4_117240_154214 | NW_004515753.1 | Scaffold209 | 154214                  | AA                              | GG              | 1946926628               |
| SNP_P4_117241_163977 | NW_004515753.1 | Scaffold209 | 163977                  | AA                              | GG              | 1946926630               |
| SNP_P4_117242_163980 | NW_004515753.1 | Scaffold209 | 163980                  | AA                              | GG              | 1946926632               |
| SNP_P4_117243_202671 | NW_004515753.1 | Scaffold209 | 202671                  | TT                              | CC              | 1946926634               |
| SNP_P4_117244_218140 | NW_004515753.1 | Scaffold209 | 218140                  | TT                              | AA              | 1946926636               |
| SNP_P4_117245_253219 | NW_004515753.1 | Scaffold209 | 253219                  | CC                              | TT              | 1946926638               |
| SNP_P4_117246_257767 | NW_004515753.1 | Scaffold209 | 257767                  | CC                              | TT              | 1946926640               |
| SNP_P4_117247_258003 | NW_004515753.1 | Scaffold209 | 258003                  | GG                              | TT              | 1946926642               |
| SNP_P4_117249_258324 | NW_004515753.1 | Scaffold209 | 258324                  | GG                              | AA              | 1946926644               |
| SNP_P4_117250_258420 | NW_004515753.1 | Scaffold209 | 258420                  | TT                              | AA              | 1946926646               |
| SNP_P4_117251_258586 | NW_004515753.1 | Scaffold209 | 258586                  | CC                              | GG              | 1946926648               |
| SNP_P4_117252_258601 | NW_004515753.1 | Scaffold209 | 258601                  | GG                              | TT              | 1946926650               |
| SNP_P4_117253_258613 | NW_004515753.1 | Scaffold209 | 258613                  | GG                              | AA              | 1946926652               |
| SNP_P4_117254_265468 | NW_004515753.1 | Scaffold209 | 265468                  | TT                              | GG              | 1946926654               |
| SNP_P4_117255_296445 | NW_004515753.1 | Scaffold209 | 296445                  | GG                              | CC              | 1946926656               |
| SNP_P4_117256_296458 | NW_004515753.1 | Scaffold209 | 296458                  | GG                              | AA              | 1946926658               |
| SNP_P4_117257_298255 | NW_004515753.1 | Scaffold209 | 298255                  | GG                              | CC              | 1946926660               |
| SNP_P4_117258_298336 | NW_004515753.1 | Scaffold209 | 298336                  | TT                              | CC              | 1946926662               |
| SNP_P4_117259_298341 | NW_004515753.1 | Scaffold209 | 298341                  | TT                              | CC              | 1946926664               |
| SNP_P4_117260_298366 | NW_004515753.1 | Scaffold209 | 298366                  | CC                              | GG              | 1946926666               |
| SNP_P4_117261_329395 | NW_004515753.1 | Scaffold209 | 329395                  | TT                              | CC              | 1946926668               |
| SNP_P4_117262_329407 | NW_004515753.1 | Scaffold209 | 329407                  | AA                              | TT              | 1946926670               |
| SNP_P4_117263_329408 | NW_004515753.1 | Scaffold209 | 329408                  | AA                              | TT              | 1946926672               |
| SNP_P4_117264_329409 | NW_004515753.1 | Scaffold209 | 329409                  | AA                              | GG              | 1946926674               |
| SNP_P4_117265_329411 | NW_004515753.1 | Scaffold209 | 329411                  | CC                              | TT              | 1946926676               |
| SNP_P4_117266_329412 | NW_004515753.1 | Scaffold209 | 329412                  | CC                              | AA              | 1946926678               |
| SNP_P4_117267_329420 | NW_004515753.1 | Scaffold209 | 329420                  | GG                              | AA              | 1946926680               |

| SNPs IDs             | Chromosome IDs | Chromosomes | Physical positions (bp) | CDC Frontier (Reference genome) | (ILWC46 & LPNB) | NCBI SNPdb Accession IDs |
|----------------------|----------------|-------------|-------------------------|---------------------------------|-----------------|--------------------------|
| SNP_P4_117268_329436 | NW_004515753.1 | Scaffold209 | 329436                  | GG                              | AA              | 1946926683               |
| SNP_P4_117269_329439 | NW_004515753.1 | Scaffold209 | 329439                  | CC                              | AA              | 1946926684               |
| SNP_P4_117270_329440 | NW_004515753.1 | Scaffold209 | 329440                  | AA                              | CC              | 1946926685               |
| SNP_P4_117271_329486 | NW_004515753.1 | Scaffold209 | 329486                  | TT                              | AA              | 1946926686               |
| SNP_P4_117272_329508 | NW_004515753.1 | Scaffold209 | 329508                  | AA                              | TT              | 1946926687               |
| SNP_P4_117273_329565 | NW_004515753.1 | Scaffold209 | 329565                  | GG                              | TT              | 1946926688               |
| SNP_P4_117274_329582 | NW_004515753.1 | Scaffold209 | 329582                  | GG                              | TT              | 1946926689               |
| SNP_P4_117275_329606 | NW_004515753.1 | Scaffold209 | 329606                  | AA                              | CC              | 1946926690               |
| SNP_P4_117276_329607 | NW_004515753.1 | Scaffold209 | 329607                  | GG                              | TT              | 1946926691               |
| SNP_P4_117277_329627 | NW_004515753.1 | Scaffold209 | 329627                  | AA                              | TT              | 1946926692               |
| SNP_P4_117278_329798 | NW_004515753.1 | Scaffold209 | 329798                  | GG                              | AA              | 1946926693               |
| SNP_P4_117279_329804 | NW_004515753.1 | Scaffold209 | 329804                  | TT                              | AA              | 1946926694               |
| SNP_P4_117280_329915 | NW_004515753.1 | Scaffold209 | 329915                  | TT                              | GG              | 1946926695               |
| SNP_P4_117281_329916 | NW_004515753.1 | Scaffold209 | 329916                  | GG                              | AA              | 1946926696               |
| SNP_P4_117282_330112 | NW_004515753.1 | Scaffold209 | 330112                  | AA                              | CC              | 1946926697               |
| SNP_P4_117283_330309 | NW_004515753.1 | Scaffold209 | 330309                  | GG                              | TT              | 1946926698               |
| SNP_P4_117284_330325 | NW_004515753.1 | Scaffold209 | 330325                  | AA                              | TT              | 1946926699               |
| SNP_P4_117285_330545 | NW_004515753.1 | Scaffold209 | 330545                  | CC                              | TT              | 1946926700               |
| SNP_P4_117286_330655 | NW_004515753.1 | Scaffold209 | 330655                  | TT                              | CC              | 1946926701               |
| SNP_P4_117287_344769 | NW_004515753.1 | Scaffold209 | 344769                  | GG                              | TT              | 1946926702               |
| SNP_P4_117288_345077 | NW_004515753.1 | Scaffold209 | 345077                  | TT                              | CC              | 1946926703               |
| SNP_P4_117289_345109 | NW_004515753.1 | Scaffold209 | 345109                  | AA                              | GG              | 1946926705               |
| SNP_P4_117290_345154 | NW_004515753.1 | Scaffold209 | 345154                  | AA                              | GG              | 1946926706               |
| SNP_P4_117291_345174 | NW_004515753.1 | Scaffold209 | 345174                  | CC                              | GG              | 1946926708               |
| SNP_P4_117292_345190 | NW_004515753.1 | Scaffold209 | 345190                  | GG                              | TT              | 1946926710               |
| SNP_P4_117293_345278 | NW_004515753.1 | Scaffold209 | 345278                  | AA                              | GG              | 1946926712               |
| SNP_P4_117294_345303 | NW_004515753.1 | Scaffold209 | 345303                  | GG                              | AA              | 1946926714               |
| SNP_P4_117295_345316 | NW_004515753.1 | Scaffold209 | 345316                  | TT                              | CC              | 1946926716               |
| SNP_P4_117296_345348 | NW_004515753.1 | Scaffold209 | 345348                  | AA                              | GG              | 1946926718               |
| SNP_P4_117297_345410 | NW_004515753.1 | Scaffold209 | 345410                  | AA                              | GG              | 1946926720               |
| SNP_P4_117298_345413 | NW_004515753.1 | Scaffold209 | 345413                  | GG                              | AA              | 1946926722               |
| SNP_P4_117299_345509 | NW_004515753.1 | Scaffold209 | 345509                  | CC                              | AA              | 1946926724               |
| SNP_P4_117300_345560 | NW_004515753.1 | Scaffold209 | 345560                  | AA                              | TT              | 1946926726               |
| SNP_P4_117301_345582 | NW_004515753.1 | Scaffold209 | 345582                  | GG                              | TT              | 1946926728               |
| SNP_P4_117302_345612 | NW_004515753.1 | Scaffold209 | 345612                  | CC                              | AA              | 1946926730               |
| SNP_P4_117303_345659 | NW_004515753.1 | Scaffold209 | 345659                  | TT                              | AA              | 1946926732               |
| SNP_P4_117304_345718 | NW_004515753.1 | Scaffold209 | 345718                  | GG                              | TT              | 1946926734               |
| SNP_P4_117305_345762 | NW_004515753.1 | Scaffold209 | 345762                  | TT                              | AA              | 1946926736               |
| SNP_P4_117306_345770 | NW_004515753.1 | Scaffold209 | 345770                  | GG                              | AA              | 1946926739               |
| SNP_P4_117307_345777 | NW_004515753.1 | Scaffold209 | 345777                  | CC                              | GG              | 1946926741               |
| SNP_P4_117308_345822 | NW_004515753.1 | Scaffold209 | 345822                  | AA                              | CC              | 1946926743               |
| SNP_P4_117309_345853 | NW_004515753.1 | Scaffold209 | 345853                  | AA                              | TT              | 1946926745               |

| SNPs IDs             | Chromosome IDs | Chromosomes | Physical positions (bp) | CDC Frontier (Reference genome) | (ILWC46 & LPNB) | NCBI SNPdb Accession IDs |
|----------------------|----------------|-------------|-------------------------|---------------------------------|-----------------|--------------------------|
| SNP_P4_117310_356385 | NW_004515753.1 | Scaffold209 | 356385                  | AA                              | GG              | 1946926747               |
| SNP_P4_117311_356414 | NW_004515753.1 | Scaffold209 | 356414                  | AA                              | GG              | 1946926749               |
| SNP_P4_117312_356433 | NW_004515753.1 | Scaffold209 | 356433                  | CC                              | GG              | 1946926751               |
| SNP_P4_117313_356440 | NW_004515753.1 | Scaffold209 | 356440                  | TT                              | AA              | 1946926753               |
| SNP_P4_117314_358044 | NW_004515753.1 | Scaffold209 | 358044                  | GG                              | AA              | 1946926755               |
| SNP_P4_117315_358106 | NW_004515753.1 | Scaffold209 | 358106                  | AA                              | GG              | 1946926757               |
| SNP_P4_117316_358158 | NW_004515753.1 | Scaffold209 | 358158                  | GG                              | AA              | 1946926759               |
| SNP_P4_117317_358179 | NW_004515753.1 | Scaffold209 | 358179                  | CC                              | TT              | 1946926761               |
| SNP_P4_117318_358193 | NW_004515753.1 | Scaffold209 | 358193                  | CC                              | TT              | 1946926763               |
| SNP_P4_117319_358200 | NW_004515753.1 | Scaffold209 | 358200                  | GG                              | AA              | 1946926765               |
| SNP_P4_117320_358249 | NW_004515753.1 | Scaffold209 | 358249                  | TT                              | AA              | 1946926767               |
| SNP_P4_117321_358276 | NW_004515753.1 | Scaffold209 | 358276                  | TT                              | CC              | 1946926769               |
| SNP_P4_117322_358284 | NW_004515753.1 | Scaffold209 | 358284                  | TT                              | GG              | 1946926771               |
| SNP_P4_117323_358351 | NW_004515753.1 | Scaffold209 | 358351                  | AA                              | GG              | 1946926773               |
| SNP_P4_117324_358390 | NW_004515753.1 | Scaffold209 | 358390                  | TT                              | GG              | 1946926775               |
| SNP_P4_117325_358478 | NW_004515753.1 | Scaffold209 | 358478                  | TT                              | GG              | 1946926777               |
| SNP_P4_117326_358511 | NW_004515753.1 | Scaffold209 | 358511                  | GG                              | AA              | 1946926779               |
| SNP_P4_117327_369625 | NW_004515753.1 | Scaffold209 | 369625                  | TT                              | AA              | 1946926781               |
| SNP_P4_117328_374923 | NW_004515753.1 | Scaffold209 | 374923                  | AA                              | TT              | 1946926783               |
| SNP_P4_117330_378626 | NW_004515753.1 | Scaffold209 | 378626                  | AA                              | GG              | 1946926785               |
| SNP_P4_117331_378676 | NW_004515753.1 | Scaffold209 | 378676                  | CC                              | TT              | 1946926787               |
| SNP_P4_117332_378677 | NW_004515753.1 | Scaffold209 | 378677                  | TT                              | CC              | 1946926789               |
| SNP_P4_117333_381927 | NW_004515753.1 | Scaffold209 | 381927                  | AA                              | GG              | 1946926791               |
| SNP_P4_117334_31548  | NW_004515754.1 | Scaffold210 | 31548                   | AA                              | GG              | 1946926793               |
| SNP_P4_117335_31555  | NW_004515754.1 | Scaffold210 | 31555                   | AA                              | GG              | 1946926795               |
| SNP_P4_117336_31634  | NW_004515754.1 | Scaffold210 | 31634                   | TT                              | AA              | 1946926797               |
| SNP_P4_117337_31649  | NW_004515754.1 | Scaffold210 | 31649                   | TT                              | CC              | 1946926799               |
| SNP_P4_117338_31654  | NW_004515754.1 | Scaffold210 | 31654                   | AA                              | GG              | 1946926801               |
| SNP_P4_117340_31728  | NW_004515754.1 | Scaffold210 | 31728                   | TT                              | CC              | 1946926803               |
| SNP_P4_117341_31830  | NW_004515754.1 | Scaffold210 | 31830                   | CC                              | GG              | 1946926805               |
| SNP_P4_117342_31831  | NW_004515754.1 | Scaffold210 | 31831                   | AA                              | GG              | 1946926807               |
| SNP_P4_117343_31854  | NW_004515754.1 | Scaffold210 | 31854                   | TT                              | AA              | 1946926809               |
| SNP_P4_117344_31856  | NW_004515754.1 | Scaffold210 | 31856                   | AA                              | GG              | 1946926811               |
| SNP_P4_117345_32564  | NW_004515754.1 | Scaffold210 | 32564                   | GG                              | TT              | 1946926813               |
| SNP_P4_117346_32595  | NW_004515754.1 | Scaffold210 | 32595                   | GG                              | TT              | 1946926815               |
| SNP_P4_117348_34111  | NW_004515754.1 | Scaffold210 | 34111                   | AA                              | CC              | 1946926817               |
| SNP_P4_117349_43685  | NW_004515754.1 | Scaffold210 | 43685                   | TT                              | CC              | 1946926819               |
| SNP_P4_117350_49684  | NW_004515754.1 | Scaffold210 | 49684                   | AA                              | GG              | 1946926821               |
| SNP_P4_117351_49687  | NW_004515754.1 | Scaffold210 | 49687                   | TT                              | GG              | 1946926823               |
| SNP_P4_117352_49691  | NW_004515754.1 | Scaffold210 | 49691                   | CC                              | TT              | 1946926825               |
| SNP_P4_117353_49694  | NW_004515754.1 | Scaffold210 | 49694                   | TT                              | AA              | 1946926827               |
| SNP_P4_117354_49707  | NW_004515754.1 | Scaffold210 | 49707                   | GG                              | TT              | 1946926829               |

| SNPs IDs             | Chromosome IDs | Chromosomes | Physical positions (bp) | CDC Frontier (Reference genome) | (ILWC46 & LPNB) | NCBI SNPdb Accession IDs |
|----------------------|----------------|-------------|-------------------------|---------------------------------|-----------------|--------------------------|
| SNP_P4_117355_49710  | NW_004515754.1 | Scaffold210 | 49710                   | GG                              | AA              | 1946926831               |
| SNP_P4_117356_49713  | NW_004515754.1 | Scaffold210 | 49713                   | GG                              | TT              | 1946926833               |
| SNP_P4_117357_87547  | NW_004515754.1 | Scaffold210 | 87547                   | TT                              | GG              | 1946926835               |
| SNP_P4_117358_87778  | NW_004515754.1 | Scaffold210 | 87778                   | GG                              | AA              | 1946926837               |
| SNP_P4_117359_95640  | NW_004515754.1 | Scaffold210 | 95640                   | CC                              | TT              | 1946926839               |
| SNP_P4_117360_95742  | NW_004515754.1 | Scaffold210 | 95742                   | GG                              | AA              | 1946926842               |
| SNP_P4_117361_95769  | NW_004515754.1 | Scaffold210 | 95769                   | AA                              | GG              | 1946926844               |
| SNP_P4_117362_95848  | NW_004515754.1 | Scaffold210 | 95848                   | TT                              | AA              | 1946926846               |
| SNP_P4_117363_111881 | NW_004515754.1 | Scaffold210 | 111881                  | TT                              | GG              | 1946926848               |
| SNP_P4_117364_117046 | NW_004515754.1 | Scaffold210 | 117046                  | GG                              | AA              | 1946926850               |
| SNP_P4_117365_121567 | NW_004515754.1 | Scaffold210 | 121567                  | CC                              | TT              | 1946926852               |
| SNP_P4_117367_192378 | NW_004515754.1 | Scaffold210 | 192378                  | AA                              | GG              | 1946926854               |
| SNP_P4_117368_192425 | NW_004515754.1 | Scaffold210 | 192425                  | AA                              | TT              | 1946926856               |
| SNP_P4_117369_192697 | NW_004515754.1 | Scaffold210 | 192697                  | TT                              | CC              | 1946926858               |
| SNP_P4_117370_192712 | NW_004515754.1 | Scaffold210 | 192712                  | TT                              | GG              | 1946926860               |
| SNP_P4_117371_192734 | NW_004515754.1 | Scaffold210 | 192734                  | AA                              | GG              | 1946926862               |
| SNP_P4_117372_192791 | NW_004515754.1 | Scaffold210 | 192791                  | TT                              | CC              | 1946926864               |
| SNP_P4_117373_192822 | NW_004515754.1 | Scaffold210 | 192822                  | GG                              | AA              | 1946926867               |
| SNP_P4_117375_202152 | NW_004515754.1 | Scaffold210 | 202152                  | CC                              | TT              | 1946926869               |
| SNP_P4_117376_223280 | NW_004515754.1 | Scaffold210 | 223280                  | TT                              | CC              | 1946926871               |
| SNP_P4_117377_223491 | NW_004515754.1 | Scaffold210 | 223491                  | CC                              | TT              | 1946926873               |
| SNP_P4_117378_223508 | NW_004515754.1 | Scaffold210 | 223508                  | GG                              | AA              | 1946926875               |
| SNP_P4_117379_233613 | NW_004515754.1 | Scaffold210 | 233613                  | CC                              | AA              | 1946926877               |
| SNP_P4_117380_233696 | NW_004515754.1 | Scaffold210 | 233696                  | AA                              | CC              | 1946926879               |
| SNP_P4_117381_233859 | NW_004515754.1 | Scaffold210 | 233859                  | CC                              | TT              | 1946926881               |
| SNP_P4_117382_233861 | NW_004515754.1 | Scaffold210 | 233861                  | GG                              | AA              | 1946926883               |
| SNP_P4_117383_233867 | NW_004515754.1 | Scaffold210 | 233867                  | AA                              | GG              | 1946926886               |
| SNP_P4_117384_234011 | NW_004515754.1 | Scaffold210 | 234011                  | TT                              | GG              | 1946926888               |
| SNP_P4_117385_263589 | NW_004515754.1 | Scaffold210 | 263589                  | GG                              | AA              | 1946926890               |
| SNP_P4_117386_269057 | NW_004515754.1 | Scaffold210 | 269057                  | GG                              | TT              | 1946926892               |
| SNP_P4_117387_269379 | NW_004515754.1 | Scaffold210 | 269379                  | AA                              | GG              | 1946926894               |
| SNP_P4_117388_298803 | NW_004515754.1 | Scaffold210 | 298803                  | GG                              | AA              | 1946926896               |
| SNP_P4_117389_298816 | NW_004515754.1 | Scaffold210 | 298816                  | AA                              | GG              | 1946926899               |
| SNP_P4_117390_298817 | NW_004515754.1 | Scaffold210 | 298817                  | TT                              | AA              | 1946926901               |
| SNP_P4_117391_298818 | NW_004515754.1 | Scaffold210 | 298818                  | TT                              | AA              | 1946926903               |
| SNP_P4_117392_298981 | NW_004515754.1 | Scaffold210 | 298981                  | TT                              | GG              | 1946926905               |
| SNP_P4_117393_299023 | NW_004515754.1 | Scaffold210 | 299023                  | GG                              | AA              | 1946926907               |
| SNP_P4_117394_299025 | NW_004515754.1 | Scaffold210 | 299025                  | AA                              | GG              | 1946926909               |
| SNP_P4_117396_300727 | NW_004515754.1 | Scaffold210 | 300727                  | GG                              | TT              | 1946926911               |
| SNP_P4_117397_300795 | NW_004515754.1 | Scaffold210 | 300795                  | CC                              | TT              | 1946926913               |
| SNP_P4_117398_301859 | NW_004515754.1 | Scaffold210 | 301859                  | AA                              | TT              | 1946926915               |
| SNP_P4_117400_337957 | NW_004515754.1 | Scaffold210 | 337957                  | GG                              | TT              | 1946926917               |

| SNPs IDs             | Chromosome IDs | Chromosomes | Physical positions (bp) | CDC Frontier (Reference genome) | (ILWC46 & LPNB) | NCBI SNPdb Accession IDs |
|----------------------|----------------|-------------|-------------------------|---------------------------------|-----------------|--------------------------|
| SNP_P4_117401_343711 | NW_004515754.1 | Scaffold210 | 343711                  | AA                              | GG              | 1946926920               |
| SNP_P4_117402_343732 | NW_004515754.1 | Scaffold210 | 343732                  | TT                              | GG              | 1946926921               |
| SNP_P4_117403_343744 | NW_004515754.1 | Scaffold210 | 343744                  | TT                              | GG              | 1946926922               |
| SNP_P4_117404_343762 | NW_004515754.1 | Scaffold210 | 343762                  | TT                              | CC              | 1946926923               |
| SNP_P4_117405_345099 | NW_004515754.1 | Scaffold210 | 345099                  | TT                              | AA              | 1946926924               |
| SNP_P4_117406_345102 | NW_004515754.1 | Scaffold210 | 345102                  | GG                              | CC              | 1946926925               |
| SNP_P4_117407_345153 | NW_004515754.1 | Scaffold210 | 345153                  | CC                              | TT              | 1946926926               |
| SNP_P4_117408_345205 | NW_004515754.1 | Scaffold210 | 345205                  | GG                              | AA              | 1946926928               |
| SNP_P4_117409_345233 | NW_004515754.1 | Scaffold210 | 345233                  | GG                              | AA              | 1946926930               |
| SNP_P4_117410_345484 | NW_004515754.1 | Scaffold210 | 345484                  | AA                              | CC              | 1946926932               |
| SNP_P4_117411_345487 | NW_004515754.1 | Scaffold210 | 345487                  | CC                              | AA              | 1946926934               |
| SNP_P4_117412_387831 | NW_004515754.1 | Scaffold210 | 387831                  | GG                              | AA              | 1946926936               |
| SNP_P4_117413_388204 | NW_004515754.1 | Scaffold210 | 388204                  | AA                              | GG              | 1946926938               |
| SNP_P4_117414_392031 | NW_004515754.1 | Scaffold210 | 392031                  | GG                              | AA              | 1946926940               |
| SNP_P4_117415_400218 | NW_004515754.1 | Scaffold210 | 400218                  | CC                              | TT              | 1946926942               |
| SNP_P4_117416_429654 | NW_004515754.1 | Scaffold210 | 429654                  | AA                              | GG              | 1946926944               |
| SNP_P4_117417_429663 | NW_004515754.1 | Scaffold210 | 429663                  | TT                              | AA              | 1946926946               |
| SNP_P4_117418_429752 | NW_004515754.1 | Scaffold210 | 429752                  | AA                              | GG              | 1946926948               |
| SNP_P4_117419_429757 | NW_004515754.1 | Scaffold210 | 429757                  | TT                              | CC              | 1946926950               |
| SNP_P4_117420_429788 | NW_004515754.1 | Scaffold210 | 429788                  | CC                              | GG              | 1946926952               |
| SNP_P4_117421_429794 | NW_004515754.1 | Scaffold210 | 429794                  | TT                              | AA              | 1946926954               |
| SNP_P4_117422_429810 | NW_004515754.1 | Scaffold210 | 429810                  | AA                              | TT              | 1946926956               |
| SNP_P4_117423_429823 | NW_004515754.1 | Scaffold210 | 429823                  | AA                              | CC              | 1946926958               |
| SNP_P4_117424_429854 | NW_004515754.1 | Scaffold210 | 429854                  | CC                              | AA              | 1946926960               |
| SNP_P4_117425_429859 | NW_004515754.1 | Scaffold210 | 429859                  | CC                              | GG              | 1946926962               |
| SNP_P4_117426_429860 | NW_004515754.1 | Scaffold210 | 429860                  | TT                              | GG              | 1946926964               |
| SNP_P4_117427_429861 | NW_004515754.1 | Scaffold210 | 429861                  | GG                              | TT              | 1946926966               |
| SNP_P4_117428_429986 | NW_004515754.1 | Scaffold210 | 429986                  | TT                              | CC              | 1946926968               |
| SNP_P4_117429_429995 | NW_004515754.1 | Scaffold210 | 429995                  | AA                              | GG              | 1946926970               |
| SNP_P4_117430_430112 | NW_004515754.1 | Scaffold210 | 430112                  | AA                              | CC              | 1946926972               |
| SNP_P4_117431_454633 | NW_004515754.1 | Scaffold210 | 454633                  | TT                              | CC              | 1946926974               |
| SNP_P4_117432_480823 | NW_004515754.1 | Scaffold210 | 480823                  | GG                              | CC              | 1946926976               |
| SNP_P4_117433_496141 | NW_004515754.1 | Scaffold210 | 496141                  | GG                              | AA              | 1946926978               |
| SNP_P4_117434_496205 | NW_004515754.1 | Scaffold210 | 496205                  | AA                              | CC              | 1946926980               |
| SNP_P4_117435_506409 | NW_004515754.1 | Scaffold210 | 506409                  | GG                              | AA              | 1946926982               |
| SNP_P4_117436_509454 | NW_004515754.1 | Scaffold210 | 509454                  | CC                              | GG              | 1946926984               |
| SNP_P4_117437_513262 | NW_004515754.1 | Scaffold210 | 513262                  | TT                              | CC              | 1946926986               |
| SNP_P4_117438_513265 | NW_004515754.1 | Scaffold210 | 513265                  | GG                              | AA              | 1946926988               |
| SNP_P4_117439_513355 | NW_004515754.1 | Scaffold210 | 513355                  | CC                              | TT              | 1946926990               |
| SNP_P4_117440_513576 | NW_004515754.1 | Scaffold210 | 513576                  | GG                              | AA              | 1946926992               |
| SNP_P4_117441_513583 | NW_004515754.1 | Scaffold210 | 513583                  | TT                              | GG              | 1946926994               |
| SNP_P4_117442_513599 | NW_004515754.1 | Scaffold210 | 513599                  | CC                              | TT              | 1946926996               |

| SNPs IDs             | Chromosome IDs | Chromosomes | Physical positions (bp) | CDC Frontier (Reference genome) | (ILWC46 & LPNB) | NCBI SNPdb Accession IDs |
|----------------------|----------------|-------------|-------------------------|---------------------------------|-----------------|--------------------------|
| SNP_P4_117443_513617 | NW_004515754.1 | Scaffold210 | 513617                  | TT                              | CC              | 1946926998               |
| SNP_P4_117444_513637 | NW_004515754.1 | Scaffold210 | 513637                  | TT                              | CC              | 1946927000               |
| SNP_P4_117445_513638 | NW_004515754.1 | Scaffold210 | 513638                  | AA                              | GG              | 1946927002               |
| SNP_P4_117446_513661 | NW_004515754.1 | Scaffold210 | 513661                  | AA                              | GG              | 1946927004               |
| SNP_P4_117447_513665 | NW_004515754.1 | Scaffold210 | 513665                  | AA                              | GG              | 1946927006               |
| SNP_P4_117448_513681 | NW_004515754.1 | Scaffold210 | 513681                  | TT                              | AA              | 1946927008               |
| SNP_P4_117449_515632 | NW_004515754.1 | Scaffold210 | 515632                  | AA                              | TT              | 1946927010               |
| SNP_P4_117450_550501 | NW_004515754.1 | Scaffold210 | 550501                  | TT                              | GG              | 1946927012               |
| SNP_P4_117451_555201 | NW_004515754.1 | Scaffold210 | 555201                  | GG                              | AA              | 1946927014               |
| SNP_P4_117452_555213 | NW_004515754.1 | Scaffold210 | 555213                  | CC                              | GG              | 1946927016               |
| SNP_P4_117453_555217 | NW_004515754.1 | Scaffold210 | 555217                  | AA                              | TT              | 1946927018               |
| SNP_P4_117454_568665 | NW_004515754.1 | Scaffold210 | 568665                  | TT                              | CC              | 1946927020               |
| SNP_P4_117455_568728 | NW_004515754.1 | Scaffold210 | 568728                  | CC                              | TT              | 1946927021               |
| SNP_P4_117456_569746 | NW_004515754.1 | Scaffold210 | 569746                  | CC                              | TT              | 1946927022               |
| SNP_P4_117457_572654 | NW_004515754.1 | Scaffold210 | 572654                  | TT                              | CC              | 1946927023               |
| SNP_P4_117458_572907 | NW_004515754.1 | Scaffold210 | 572907                  | CC                              | TT              | 1946927025               |
| SNP_P4_117459_572975 | NW_004515754.1 | Scaffold210 | 572975                  | TT                              | CC              | 1946927027               |
| SNP_P4_117460_572997 | NW_004515754.1 | Scaffold210 | 572997                  | AA                              | TT              | 1946927029               |
| SNP_P4_117461_573013 | NW_004515754.1 | Scaffold210 | 573013                  | AA                              | GG              | 1946927031               |
| SNP_P4_117462_573028 | NW_004515754.1 | Scaffold210 | 573028                  | AA                              | GG              | 1946927033               |
| SNP_P4_117463_576672 | NW_004515754.1 | Scaffold210 | 576672                  | CC                              | AA              | 1946927035               |
| SNP_P4_117464_576694 | NW_004515754.1 | Scaffold210 | 576694                  | TT                              | GG              | 1946927037               |
| SNP_P4_117465_576766 | NW_004515754.1 | Scaffold210 | 576766                  | TT                              | AA              | 1946927039               |
| SNP_P4_117466_576834 | NW_004515754.1 | Scaffold210 | 576834                  | AA                              | TT              | 1946927041               |
| SNP_P4_117467_576855 | NW_004515754.1 | Scaffold210 | 576855                  | CC                              | TT              | 1946927043               |
| SNP_P4_117468_576909 | NW_004515754.1 | Scaffold210 | 576909                  | GG                              | CC              | 1946927045               |
| SNP_P4_117469_576950 | NW_004515754.1 | Scaffold210 | 576950                  | GG                              | AA              | 1946927047               |
| SNP_P4_117470_577006 | NW_004515754.1 | Scaffold210 | 577006                  | TT                              | AA              | 1946927049               |
| SNP_P4_117471_577019 | NW_004515754.1 | Scaffold210 | 577019                  | GG                              | TT              | 1946927051               |
| SNP_P4_117472_577028 | NW_004515754.1 | Scaffold210 | 577028                  | AA                              | TT              | 1946927053               |
| SNP_P4_117473_577077 | NW_004515754.1 | Scaffold210 | 577077                  | CC                              | TT              | 1946927055               |
| SNP_P4_117475_577150 | NW_004515754.1 | Scaffold210 | 577150                  | AA                              | GG              | 1946927057               |
| SNP_P4_117476_577402 | NW_004515754.1 | Scaffold210 | 577402                  | AA                              | GG              | 1946927059               |
| SNP_P4_117477_577466 | NW_004515754.1 | Scaffold210 | 577466                  | AA                              | GG              | 1946927061               |
| SNP_P4_117478_577479 | NW_004515754.1 | Scaffold210 | 577479                  | AA                              | CC              | 1946927063               |
| SNP_P4_117479_577491 | NW_004515754.1 | Scaffold210 | 577491                  | GG                              | AA              | 1946927065               |
| SNP_P4_117480_577591 | NW_004515754.1 | Scaffold210 | 577591                  | GG                              | AA              | 1946927067               |
| SNP_P4_117481_577641 | NW_004515754.1 | Scaffold210 | 577641                  | AA                              | CC              | 1946927069               |
| SNP_P4_117482_577677 | NW_004515754.1 | Scaffold210 | 577677                  | GG                              | AA              | 1946927071               |
| SNP_P4_117483_577698 | NW_004515754.1 | Scaffold210 | 577698                  | GG                              | AA              | 1946927073               |
| SNP_P4_117484_577781 | NW_004515754.1 | Scaffold210 | 577781                  | AA                              | GG              | 1946927075               |
| SNP_P4_117485_577869 | NW_004515754.1 | Scaffold210 | 577869                  | TT                              | CC              | 1946927077               |

| SNPs IDs             | Chromosome IDs | Chromosomes | Physical positions (bp) | CDC Frontier (Reference genome) | (ILWC46 & LPNB) | NCBI SNPdb Accession IDs |
|----------------------|----------------|-------------|-------------------------|---------------------------------|-----------------|--------------------------|
| SNP_P4_117486_577911 | NW_004515754.1 | Scaffold210 | 577911                  | AA                              | CC              | 1946927079               |
| SNP_P4_117487_580628 | NW_004515754.1 | Scaffold210 | 580628                  | TT                              | AA              | 1946927081               |
| SNP_P4_117488_580670 | NW_004515754.1 | Scaffold210 | 580670                  | CC                              | AA              | 1946927083               |
| SNP_P4_117489_580957 | NW_004515754.1 | Scaffold210 | 580957                  | AA                              | GG              | 1946927085               |
| SNP_P4_117490_580968 | NW_004515754.1 | Scaffold210 | 580968                  | AA                              | TT              | 1946927087               |
| SNP_P4_117491_607381 | NW_004515754.1 | Scaffold210 | 607381                  | CC                              | TT              | 1946927089               |
| SNP_P4_117492_617332 | NW_004515754.1 | Scaffold210 | 617332                  | AA                              | TT              | 1946927091               |
| SNP_P4_117493_620742 | NW_004515754.1 | Scaffold210 | 620742                  | TT                              | CC              | 1946927093               |
| SNP_P4_117494_621857 | NW_004515754.1 | Scaffold210 | 621857                  | TT                              | AA              | 1946927095               |
| SNP_P4_117495_622264 | NW_004515754.1 | Scaffold210 | 622264                  | TT                              | AA              | 1946927097               |
| SNP_P4_117496_622284 | NW_004515754.1 | Scaffold210 | 622284                  | TT                              | GG              | 1946927099               |
| SNP_P4_117497_8677   | NW_004515755.1 | Scaffold212 | 8677                    | GG                              | AA              | 1946927101               |
| SNP_P4_117498_8739   | NW_004515755.1 | Scaffold212 | 8739                    | CC                              | GG              | 1946927103               |
| SNP_P4_117499_8808   | NW_004515755.1 | Scaffold212 | 8808                    | CC                              | TT              | 1946927105               |
| SNP_P4_117500_8904   | NW_004515755.1 | Scaffold212 | 8904                    | AA                              | GG              | 1946927107               |
| SNP_P4_117501_8989   | NW_004515755.1 | Scaffold212 | 8989                    | CC                              | TT              | 1946927109               |
| SNP_P4_117502_9052   | NW_004515755.1 | Scaffold212 | 9052                    | TT                              | GG              | 1946927111               |
| SNP_P4_117503_9107   | NW_004515755.1 | Scaffold212 | 9107                    | CC                              | TT              | 1946927113               |
| SNP_P4_117504_9119   | NW_004515755.1 | Scaffold212 | 9119                    | AA                              | GG              | 1946927115               |
| SNP_P4_117505_9132   | NW_004515755.1 | Scaffold212 | 9132                    | AA                              | GG              | 1946927117               |
| SNP_P4_117506_40380  | NW_004515755.1 | Scaffold212 | 40380                   | AA                              | GG              | 1946927119               |
| SNP_P4_117507_40604  | NW_004515755.1 | Scaffold212 | 40604                   | AA                              | GG              | 1946927121               |
| SNP_P4_117508_52412  | NW_004515755.1 | Scaffold212 | 52412                   | TT                              | CC              | 1946927123               |
| SNP_P4_117509_64573  | NW_004515755.1 | Scaffold212 | 64573                   | CC                              | GG              | 1946927125               |
| SNP_P4_117510_64595  | NW_004515755.1 | Scaffold212 | 64595                   | AA                              | TT              | 1946927127               |
| SNP_P4_117511_64609  | NW_004515755.1 | Scaffold212 | 64609                   | CC                              | AA              | 1946927129               |
| SNP_P4_117512_89120  | NW_004515755.1 | Scaffold212 | 89120                   | CC                              | TT              | 1946927131               |
| SNP_P4_117513_101089 | NW_004515755.1 | Scaffold212 | 101089                  | CC                              | TT              | 1946927133               |
| SNP_P4_117514_101231 | NW_004515755.1 | Scaffold212 | 101231                  | CC                              | GG              | 1946927135               |
| SNP_P4_117515_101233 | NW_004515755.1 | Scaffold212 | 101233                  | AA                              | TT              | 1946927137               |
| SNP_P4_117516_101240 | NW_004515755.1 | Scaffold212 | 101240                  | AA                              | GG              | 1946927139               |
| SNP_P4_117517_101249 | NW_004515755.1 | Scaffold212 | 101249                  | CC                              | TT              | 1946927141               |
| SNP_P4_117518_101253 | NW_004515755.1 | Scaffold212 | 101253                  | TT                              | CC              | 1946927143               |
| SNP_P4_117519_101260 | NW_004515755.1 | Scaffold212 | 101260                  | CC                              | AA              | 1946927145               |
| SNP_P4_117520_101264 | NW_004515755.1 | Scaffold212 | 101264                  | GG                              | AA              | 1946927147               |
| SNP_P4_117521_101265 | NW_004515755.1 | Scaffold212 | 101265                  | GG                              | AA              | 1946927149               |
| SNP_P4_117522_101267 | NW_004515755.1 | Scaffold212 | 101267                  | GG                              | AA              | 1946927151               |
| SNP_P4_117523_101268 | NW_004515755.1 | Scaffold212 | 101268                  | TT                              | GG              | 1946927153               |
| SNP_P4_117524_107148 | NW_004515755.1 | Scaffold212 | 107148                  | GG                              | TT              | 1946927155               |
| SNP_P4_117525_107150 | NW_004515755.1 | Scaffold212 | 107150                  | TT                              | AA              | 1946927157               |
| SNP_P4_117526_110754 | NW_004515755.1 | Scaffold212 | 110754                  | GG                              | AA              | 1946927159               |
| SNP_P4_117527_119532 | NW_004515755.1 | Scaffold212 | 119532                  | AA                              | CC              | 1946927161               |



| SNPs IDs             | Chromosome IDs | Chromosomes | Physical positions (bp) | CDC Frontier (Reference genome) | (ILWC46 & LPNB) | NCBI SNPdb Accession IDs |
|----------------------|----------------|-------------|-------------------------|---------------------------------|-----------------|--------------------------|
| SNP_P4_117528_119597 | NW_004515755.1 | Scaffold212 | 119597                  | TT                              | CC              | 1946927163               |
| SNP_P4_117529_161307 | NW_004515755.1 | Scaffold212 | 161307                  | AA                              | CC              | 1946927165               |
| SNP_P4_117530_161490 | NW_004515755.1 | Scaffold212 | 161490                  | TT                              | GG              | 1946927167               |
| SNP_P4_117531_161565 | NW_004515755.1 | Scaffold212 | 161565                  | AA                              | TT              | 1946927169               |
| SNP_P4_117533_180832 | NW_004515755.1 | Scaffold212 | 180832                  | CC                              | TT              | 1946927171               |
| SNP_P4_117534_180938 | NW_004515755.1 | Scaffold212 | 180938                  | TT                              | GG              | 1946927173               |
| SNP_P4_117535_181056 | NW_004515755.1 | Scaffold212 | 181056                  | CC                              | AA              | 1946927176               |
| SNP_P4_117536_181153 | NW_004515755.1 | Scaffold212 | 181153                  | CC                              | AA              | 1946927178               |
| SNP_P4_117537_181362 | NW_004515755.1 | Scaffold212 | 181362                  | CC                              | TT              | 1946927180               |
| SNP_P4_117538_181367 | NW_004515755.1 | Scaffold212 | 181367                  | AA                              | TT              | 1946927182               |
| SNP_P4_117539_181431 | NW_004515755.1 | Scaffold212 | 181431                  | GG                              | AA              | 1946927184               |
| SNP_P4_117540_183238 | NW_004515755.1 | Scaffold212 | 183238                  | AA                              | GG              | 1946927186               |
| SNP_P4_117541_185651 | NW_004515755.1 | Scaffold212 | 185651                  | TT                              | CC              | 1946927188               |
| SNP_P4_117542_186371 | NW_004515755.1 | Scaffold212 | 186371                  | CC                              | TT              | 1946927190               |
| SNP_P4_117543_204502 | NW_004515755.1 | Scaffold212 | 204502                  | TT                              | AA              | 1946927192               |
| SNP_P4_117544_207339 | NW_004515755.1 | Scaffold212 | 207339                  | TT                              | CC              | 1946927194               |
| SNP_P4_117545_207758 | NW_004515755.1 | Scaffold212 | 207758                  | GG                              | AA              | 1946927196               |
| SNP_P4_117546_207809 | NW_004515755.1 | Scaffold212 | 207809                  | TT                              | CC              | 1946927199               |
| SNP_P4_117547_207838 | NW_004515755.1 | Scaffold212 | 207838                  | TT                              | CC              | 1946927201               |
| SNP_P4_117548_209695 | NW_004515755.1 | Scaffold212 | 209695                  | TT                              | CC              | 1946927203               |
| SNP_P4_117549_273304 | NW_004515755.1 | Scaffold212 | 273304                  | TT                              | CC              | 1946927205               |
| SNP_P4_117551_296366 | NW_004515755.1 | Scaffold212 | 296366                  | GG                              | TT              | 1946927207               |
| SNP_P4_117552_296919 | NW_004515755.1 | Scaffold212 | 296919                  | AA                              | TT              | 1946927209               |
| SNP_P4_117554_296929 | NW_004515755.1 | Scaffold212 | 296929                  | TT                              | GG              | 1946927211               |
| SNP_P4_117555_296932 | NW_004515755.1 | Scaffold212 | 296932                  | AA                              | CC              | 1946927213               |
| SNP_P4_117556_296967 | NW_004515755.1 | Scaffold212 | 296967                  | CC                              | TT              | 1946927215               |
| SNP_P4_117557_296972 | NW_004515755.1 | Scaffold212 | 296972                  | AA                              | GG              | 1946927217               |
| SNP_P4_117558_296981 | NW_004515755.1 | Scaffold212 | 296981                  | TT                              | AA              | 1946927219               |
| SNP_P4_117559_297975 | NW_004515755.1 | Scaffold212 | 297975                  | TT                              | CC              | 1946927221               |
| SNP_P4_117561_331862 | NW_004515755.1 | Scaffold212 | 331862                  | AA                              | TT              | 1946927223               |
| SNP_P4_117562_331981 | NW_004515755.1 | Scaffold212 | 331981                  | CC                              | TT              | 1946927225               |
| SNP_P4_117563_332052 | NW_004515755.1 | Scaffold212 | 332052                  | GG                              | AA              | 1946927227               |
| SNP_P4_117564_332169 | NW_004515755.1 | Scaffold212 | 332169                  | GG                              | TT              | 1946927229               |
| SNP_P4_117565_353931 | NW_004515755.1 | Scaffold212 | 353931                  | AA                              | TT              | 1946927231               |
| SNP_P4_117566_354322 | NW_004515755.1 | Scaffold212 | 354322                  | AA                              | GG              | 1946927233               |
| SNP_P4_117567_354544 | NW_004515755.1 | Scaffold212 | 354544                  | CC                              | TT              | 1946927235               |
| SNP_P4_117568_354564 | NW_004515755.1 | Scaffold212 | 354564                  | CC                              | TT              | 1946927237               |
| SNP_P4_117569_356394 | NW_004515755.1 | Scaffold212 | 356394                  | TT                              | CC              | 1946927239               |
| SNP_P4_117570_356470 | NW_004515755.1 | Scaffold212 | 356470                  | GG                              | CC              | 1946927241               |
| SNP_P4_117571_356587 | NW_004515755.1 | Scaffold212 | 356587                  | TT                              | CC              | 1946927243               |
| SNP_P4_117572_356607 | NW_004515755.1 | Scaffold212 | 356607                  | TT                              | CC              | 1946927245               |
| SNP_P4_117573_356634 | NW_004515755.1 | Scaffold212 | 356634                  | GG                              | TT              | 1946927247               |

| SNPs IDs             | Chromosome IDs | Chromosomes | Physical positions (bp) | CDC Frontier (Reference genome) | (ILWC46 & LPNB) | NCBI SNPdb Accession IDs |
|----------------------|----------------|-------------|-------------------------|---------------------------------|-----------------|--------------------------|
| SNP_P4_117574_356814 | NW_004515755.1 | Scaffold212 | 356814                  | TT                              | CC              | 1946927249               |
| SNP_P4_117575_356837 | NW_004515755.1 | Scaffold212 | 356837                  | AA                              | GG              | 1946927251               |
| SNP_P4_117576_356840 | NW_004515755.1 | Scaffold212 | 356840                  | AA                              | GG              | 1946927253               |
| SNP_P4_117577_356896 | NW_004515755.1 | Scaffold212 | 356896                  | TT                              | GG              | 1946927255               |
| SNP_P4_117578_356979 | NW_004515755.1 | Scaffold212 | 356979                  | GG                              | AA              | 1946927257               |
| SNP_P4_117579_356996 | NW_004515755.1 | Scaffold212 | 356996                  | GG                              | AA              | 1946927260               |
| SNP_P4_117580_357009 | NW_004515755.1 | Scaffold212 | 357009                  | GG                              | AA              | 1946927262               |
| SNP_P4_117581_357016 | NW_004515755.1 | Scaffold212 | 357016                  | CC                              | TT              | 1946927264               |
| SNP_P4_117582_357039 | NW_004515755.1 | Scaffold212 | 357039                  | CC                              | TT              | 1946927266               |
| SNP_P4_117583_357045 | NW_004515755.1 | Scaffold212 | 357045                  | CC                              | GG              | 1946927268               |
| SNP_P4_117584_365672 | NW_004515755.1 | Scaffold212 | 365672                  | AA                              | GG              | 1946927270               |
| SNP_P4_117585_366004 | NW_004515755.1 | Scaffold212 | 366004                  | TT                              | CC              | 1946927272               |
| SNP_P4_117586_366039 | NW_004515755.1 | Scaffold212 | 366039                  | TT                              | CC              | 1946927274               |
| SNP_P4_117587_367957 | NW_004515755.1 | Scaffold212 | 367957                  | AA                              | GG              | 1946927276               |
| SNP_P4_117588_367984 | NW_004515755.1 | Scaffold212 | 367984                  | CC                              | TT              | 1946927278               |
| SNP_P4_117589_368309 | NW_004515755.1 | Scaffold212 | 368309                  | AA                              | CC              | 1946927280               |
| SNP_P4_117590_368333 | NW_004515755.1 | Scaffold212 | 368333                  | GG                              | AA              | 1946927282               |
| SNP_P4_117591_368345 | NW_004515755.1 | Scaffold212 | 368345                  | AA                              | GG              | 1946927284               |
| SNP_P4_117592_368839 | NW_004515755.1 | Scaffold212 | 368839                  | GG                              | AA              | 1946927286               |
| SNP_P4_117593_368868 | NW_004515755.1 | Scaffold212 | 368868                  | GG                              | TT              | 1946927288               |
| SNP_P4_117594_369019 | NW_004515755.1 | Scaffold212 | 369019                  | CC                              | TT              | 1946927290               |
| SNP_P4_117595_369277 | NW_004515755.1 | Scaffold212 | 369277                  | TT                              | CC              | 1946927292               |
| SNP_P4_117596_369292 | NW_004515755.1 | Scaffold212 | 369292                  | AA                              | GG              | 1946927294               |
| SNP_P4_117597_369304 | NW_004515755.1 | Scaffold212 | 369304                  | AA                              | GG              | 1946927296               |
| SNP_P4_117598_369382 | NW_004515755.1 | Scaffold212 | 369382                  | GG                              | AA              | 1946927298               |
| SNP_P4_117599_412703 | NW_004515755.1 | Scaffold212 | 412703                  | AA                              | GG              | 1946927300               |
| SNP_P4_117600_426175 | NW_004515755.1 | Scaffold212 | 426175                  | TT                              | CC              | 1946927302               |
| SNP_P4_117601_426176 | NW_004515755.1 | Scaffold212 | 426176                  | GG                              | AA              | 1946927304               |
| SNP_P4_117602_463392 | NW_004515755.1 | Scaffold212 | 463392                  | TT                              | AA              | 1946927306               |
| SNP_P4_117603_463437 | NW_004515755.1 | Scaffold212 | 463437                  | AA                              | TT              | 1946927308               |
| SNP_P4_117604_463438 | NW_004515755.1 | Scaffold212 | 463438                  | TT                              | GG              | 1946927310               |
| SNP_P4_117605_463452 | NW_004515755.1 | Scaffold212 | 463452                  | GG                              | AA              | 1946927312               |
| SNP_P4_117606_463476 | NW_004515755.1 | Scaffold212 | 463476                  | TT                              | GG              | 1946927314               |
| SNP_P4_117607_463503 | NW_004515755.1 | Scaffold212 | 463503                  | TT                              | AA              | 1946927316               |
| SNP_P4_117608_463544 | NW_004515755.1 | Scaffold212 | 463544                  | AA                              | GG              | 1946927319               |
| SNP_P4_117609_463583 | NW_004515755.1 | Scaffold212 | 463583                  | GG                              | AA              | 1946927321               |
| SNP_P4_117610_463584 | NW_004515755.1 | Scaffold212 | 463584                  | GG                              | CC              | 1946927323               |
| SNP_P4_117611_463589 | NW_004515755.1 | Scaffold212 | 463589                  | AA                              | GG              | 1946927325               |
| SNP_P4_117612_463652 | NW_004515755.1 | Scaffold212 | 463652                  | AA                              | GG              | 1946927327               |
| SNP_P4_117613_463677 | NW_004515755.1 | Scaffold212 | 463677                  | AA                              | CC              | 1946927329               |
| SNP_P4_117615_464197 | NW_004515755.1 | Scaffold212 | 464197                  | TT                              | GG              | 1946927331               |
| SNP_P4_117616_464214 | NW_004515755.1 | Scaffold212 | 464214                  | TT                              | CC              | 1946927333               |

| SNPs IDs             | Chromosome IDs | Chromosomes | Physical positions (bp) | CDC Frontier (Reference genome) | (ILWC46 & LPNB) | NCBI SNPdb Accession IDs |
|----------------------|----------------|-------------|-------------------------|---------------------------------|-----------------|--------------------------|
| SNP_P4_117617_464598 | NW_004515755.1 | Scaffold212 | 464598                  | GG                              | AA              | 1946927335               |
| SNP_P4_117618_488740 | NW_004515755.1 | Scaffold212 | 488740                  | GG                              | TT              | 1946927337               |
| SNP_P4_117619_495343 | NW_004515755.1 | Scaffold212 | 495343                  | AA                              | GG              | 1946927339               |
| SNP_P4_117620_500661 | NW_004515755.1 | Scaffold212 | 500661                  | CC                              | TT              | 1946927341               |
| SNP_P4_117621_500664 | NW_004515755.1 | Scaffold212 | 500664                  | TT                              | CC              | 1946927343               |
| SNP_P4_117622_500670 | NW_004515755.1 | Scaffold212 | 500670                  | GG                              | AA              | 1946927345               |
| SNP_P4_117623_500674 | NW_004515755.1 | Scaffold212 | 500674                  | CC                              | TT              | 1946927347               |
| SNP_P4_117624_500687 | NW_004515755.1 | Scaffold212 | 500687                  | TT                              | GG              | 1946927349               |
| SNP_P4_117625_500715 | NW_004515755.1 | Scaffold212 | 500715                  | AA                              | GG              | 1946927351               |
| SNP_P4_117626_500723 | NW_004515755.1 | Scaffold212 | 500723                  | TT                              | CC              | 1946927353               |
| SNP_P4_117627_500733 | NW_004515755.1 | Scaffold212 | 500733                  | AA                              | GG              | 1946927355               |
| SNP_P4_117628_500799 | NW_004515755.1 | Scaffold212 | 500799                  | AA                              | GG              | 1946927357               |
| SNP_P4_117629_500949 | NW_004515755.1 | Scaffold212 | 500949                  | TT                              | CC              | 1946927359               |
| SNP_P4_117630_500987 | NW_004515755.1 | Scaffold212 | 500987                  | GG                              | AA              | 1946927361               |
| SNP_P4_117631_501001 | NW_004515755.1 | Scaffold212 | 501001                  | GG                              | CC              | 1946927363               |
| SNP_P4_117632_501033 | NW_004515755.1 | Scaffold212 | 501033                  | TT                              | GG              | 1946927365               |
| SNP_P4_117633_501047 | NW_004515755.1 | Scaffold212 | 501047                  | CC                              | GG              | 1946927367               |
| SNP_P4_117634_501058 | NW_004515755.1 | Scaffold212 | 501058                  | CC                              | TT              | 1946927369               |
| SNP_P4_117635_6875   | NW_004515756.1 | Scaffold214 | 6875                    | GG                              | TT              | 1946927371               |
| SNP_P4_117636_6993   | NW_004515756.1 | Scaffold214 | 6993                    | GG                              | TT              | 1946927373               |
| SNP_P4_117637_7303   | NW_004515756.1 | Scaffold214 | 7303                    | CC                              | GG              | 1946927375               |
| SNP_P4_117638_7511   | NW_004515756.1 | Scaffold214 | 7511                    | AA                              | TT              | 1946927377               |
| SNP_P4_117639_13379  | NW_004515756.1 | Scaffold214 | 13379                   | CC                              | TT              | 1946927379               |
| SNP_P4_117640_14322  | NW_004515756.1 | Scaffold214 | 14322                   | AA                              | CC              | 1946927381               |
| SNP_P4_117641_14332  | NW_004515756.1 | Scaffold214 | 14332                   | GG                              | AA              | 1946927383               |
| SNP_P4_117643_19118  | NW_004515756.1 | Scaffold214 | 19118                   | TT                              | CC              | 1946927386               |
| SNP_P4_117644_19128  | NW_004515756.1 | Scaffold214 | 19128                   | CC                              | GG              | 1946927388               |
| SNP_P4_117645_19659  | NW_004515756.1 | Scaffold214 | 19659                   | TT                              | GG              | 1946927390               |
| SNP_P4_117646_24773  | NW_004515756.1 | Scaffold214 | 24773                   | AA                              | GG              | 1946927392               |
| SNP_P4_117647_25098  | NW_004515756.1 | Scaffold214 | 25098                   | GG                              | TT              | 1946927394               |
| SNP_P4_117648_29373  | NW_004515756.1 | Scaffold214 | 29373                   | AA                              | GG              | 1946927396               |
| SNP_P4_117649_29447  | NW_004515756.1 | Scaffold214 | 29447                   | GG                              | AA              | 1946927398               |
| SNP_P4_117650_29489  | NW_004515756.1 | Scaffold214 | 29489                   | TT                              | CC              | 1946927400               |
| SNP_P4_117651_34593  | NW_004515756.1 | Scaffold214 | 34593                   | AA                              | CC              | 1946927402               |
| SNP_P4_117652_34765  | NW_004515756.1 | Scaffold214 | 34765                   | TT                              | AA              | 1946927404               |
| SNP_P4_117653_34776  | NW_004515756.1 | Scaffold214 | 34776                   | AA                              | GG              | 1946927406               |
| SNP_P4_117654_34823  | NW_004515756.1 | Scaffold214 | 34823                   | AA                              | TT              | 1946927408               |
| SNP_P4_117655_34983  | NW_004515756.1 | Scaffold214 | 34983                   | TT                              | GG              | 1946927410               |
| SNP_P4_117656_35004  | NW_004515756.1 | Scaffold214 | 35004                   | GG                              | TT              | 1946927412               |
| SNP_P4_117657_35095  | NW_004515756.1 | Scaffold214 | 35095                   | CC                              | AA              | 1946927414               |
| SNP_P4_117658_35310  | NW_004515756.1 | Scaffold214 | 35310                   | GG                              | AA              | 1946927416               |
| SNP_P4_117659_35311  | NW_004515756.1 | Scaffold214 | 35311                   | AA                              | GG              | 1946927418               |

| SNPs IDs            | Chromosome IDs | Chromosomes | Physical positions (bp) | CDC Frontier (Reference genome) | (ILWC46 & LPNB) | NCBI SNPdb Accession IDs |
|---------------------|----------------|-------------|-------------------------|---------------------------------|-----------------|--------------------------|
| SNP_P4_117660_35355 | NW_004515756.1 | Scaffold214 | 35355                   | TT                              | CC              | 1946927420               |
| SNP_P4_117661_35375 | NW_004515756.1 | Scaffold214 | 35375                   | AA                              | GG              | 1946927422               |
| SNP_P4_117662_39041 | NW_004515756.1 | Scaffold214 | 39041                   | AA                              | TT              | 1946927424               |
| SNP_P4_117663_39043 | NW_004515756.1 | Scaffold214 | 39043                   | AA                              | TT              | 1946927426               |
| SNP_P4_117664_39240 | NW_004515756.1 | Scaffold214 | 39240                   | AA                              | TT              | 1946927428               |
| SNP_P4_117665_39306 | NW_004515756.1 | Scaffold214 | 39306                   | AA                              | GG              | 1946927430               |
| SNP_P4_117666_49470 | NW_004515756.1 | Scaffold214 | 49470                   | AA                              | CC              | 1946927432               |
| SNP_P4_117667_49796 | NW_004515756.1 | Scaffold214 | 49796                   | CC                              | TT              | 1946927434               |
| SNP_P4_117668_51685 | NW_004515756.1 | Scaffold214 | 51685                   | TT                              | CC              | 1946927436               |
| SNP_P4_117669_52029 | NW_004515756.1 | Scaffold214 | 52029                   | CC                              | TT              | 1946927438               |
| SNP_P4_117670_52034 | NW_004515756.1 | Scaffold214 | 52034                   | TT                              | GG              | 1946927440               |
| SNP_P4_117671_52040 | NW_004515756.1 | Scaffold214 | 52040                   | AA                              | GG              | 1946927442               |
| SNP_P4_117672_52044 | NW_004515756.1 | Scaffold214 | 52044                   | TT                              | GG              | 1946927444               |
| SNP_P4_117673_52841 | NW_004515756.1 | Scaffold214 | 52841                   | TT                              | GG              | 1946927446               |
| SNP_P4_117674_53240 | NW_004515756.1 | Scaffold214 | 53240                   | TT                              | CC              | 1946927448               |
| SNP_P4_117675_54711 | NW_004515756.1 | Scaffold214 | 54711                   | AA                              | GG              | 1946927450               |
| SNP_P4_117676_54754 | NW_004515756.1 | Scaffold214 | 54754                   | CC                              | TT              | 1946927452               |
| SNP_P4_117677_54890 | NW_004515756.1 | Scaffold214 | 54890                   | TT                              | AA              | 1946927454               |
| SNP_P4_117678_55137 | NW_004515756.1 | Scaffold214 | 55137                   | AA                              | GG              | 1946927456               |
| SNP_P4_117679_55172 | NW_004515756.1 | Scaffold214 | 55172                   | CC                              | TT              | 1946927458               |
| SNP_P4_117680_55243 | NW_004515756.1 | Scaffold214 | 55243                   | TT                              | CC              | 1946927460               |
| SNP_P4_117681_55245 | NW_004515756.1 | Scaffold214 | 55245                   | TT                              | CC              | 1946927462               |
| SNP_P4_117682_55261 | NW_004515756.1 | Scaffold214 | 55261                   | GG                              | AA              | 1946927464               |
| SNP_P4_117683_55510 | NW_004515756.1 | Scaffold214 | 55510                   | TT                              | AA              | 1946927466               |
| SNP_P4_117684_59809 | NW_004515756.1 | Scaffold214 | 59809                   | CC                              | GG              | 1946927468               |
| SNP_P4_117685_59823 | NW_004515756.1 | Scaffold214 | 59823                   | GG                              | AA              | 1946927469               |
| SNP_P4_117686_60105 | NW_004515756.1 | Scaffold214 | 60105                   | TT                              | AA              | 1946927471               |
| SNP_P4_117687_72795 | NW_004515756.1 | Scaffold214 | 72795                   | CC                              | TT              | 1946927473               |
| SNP_P4_117688_72797 | NW_004515756.1 | Scaffold214 | 72797                   | AA                              | TT              | 1946927475               |
| SNP_P4_117689_72811 | NW_004515756.1 | Scaffold214 | 72811                   | CC                              | TT              | 1946927477               |
| SNP_P4_117690_72816 | NW_004515756.1 | Scaffold214 | 72816                   | CC                              | TT              | 1946927479               |
| SNP_P4_117691_79386 | NW_004515756.1 | Scaffold214 | 79386                   | GG                              | AA              | 1946927481               |
| SNP_P4_117692_79522 | NW_004515756.1 | Scaffold214 | 79522                   | AA                              | GG              | 1946927483               |
| SNP_P4_117693_79712 | NW_004515756.1 | Scaffold214 | 79712                   | TT                              | CC              | 1946927485               |
| SNP_P4_117694_81036 | NW_004515756.1 | Scaffold214 | 81036                   | TT                              | GG              | 1946927487               |
| SNP_P4_117695_81344 | NW_004515756.1 | Scaffold214 | 81344                   | CC                              | TT              | 1946927488               |
| SNP_P4_117696_81748 | NW_004515756.1 | Scaffold214 | 81748                   | AA                              | CC              | 1946927490               |
| SNP_P4_117697_82070 | NW_004515756.1 | Scaffold214 | 82070                   | AA                              | TT              | 1946927492               |
| SNP_P4_117698_82144 | NW_004515756.1 | Scaffold214 | 82144                   | AA                              | TT              | 1946927494               |
| SNP_P4_117699_86463 | NW_004515756.1 | Scaffold214 | 86463                   | AA                              | GG              | 1946927496               |
| SNP_P4_117700_86465 | NW_004515756.1 | Scaffold214 | 86465                   | CC                              | TT              | 1946927498               |
| SNP_P4_117701_89109 | NW_004515756.1 | Scaffold214 | 89109                   | CC                              | TT              | 1946927500               |

| SNPs IDs             | Chromosome IDs | Chromosomes | Physical positions (bp) | CDC Frontier (Reference genome) | (ILWC46 & LPNB) | NCBI SNPdb Accession IDs |
|----------------------|----------------|-------------|-------------------------|---------------------------------|-----------------|--------------------------|
| SNP_P4_117702_89159  | NW_004515756.1 | Scaffold214 | 89159                   | TT                              | CC              | 1946927502               |
| SNP_P4_117703_89445  | NW_004515756.1 | Scaffold214 | 89445                   | GG                              | CC              | 1946927504               |
| SNP_P4_117704_91780  | NW_004515756.1 | Scaffold214 | 91780                   | TT                              | CC              | 1946927505               |
| SNP_P4_117705_92041  | NW_004515756.1 | Scaffold214 | 92041                   | CC                              | AA              | 1946927507               |
| SNP_P4_117706_92188  | NW_004515756.1 | Scaffold214 | 92188                   | CC                              | TT              | 1946927509               |
| SNP_P4_117707_92340  | NW_004515756.1 | Scaffold214 | 92340                   | GG                              | AA              | 1946927511               |
| SNP_P4_117708_93538  | NW_004515756.1 | Scaffold214 | 93538                   | CC                              | GG              | 1946927513               |
| SNP_P4_117709_102598 | NW_004515756.1 | Scaffold214 | 102598                  | CC                              | TT              | 1946927515               |
| SNP_P4_117710_104418 | NW_004515756.1 | Scaffold214 | 104418                  | CC                              | TT              | 1946927517               |
| SNP_P4_117711_106341 | NW_004515756.1 | Scaffold214 | 106341                  | GG                              | AA              | 1946927519               |
| SNP_P4_117712_106347 | NW_004515756.1 | Scaffold214 | 106347                  | AA                              | CC              | 1946927521               |
| SNP_P4_117713_106450 | NW_004515756.1 | Scaffold214 | 106450                  | GG                              | AA              | 1946927523               |
| SNP_P4_117714_119977 | NW_004515756.1 | Scaffold214 | 119977                  | CC                              | GG              | 1946927525               |
| SNP_P4_117715_120145 | NW_004515756.1 | Scaffold214 | 120145                  | CC                              | GG              | 1946927527               |
| SNP_P4_117716_120546 | NW_004515756.1 | Scaffold214 | 120546                  | AA                              | CC              | 1946927529               |
| SNP_P4_117717_122927 | NW_004515756.1 | Scaffold214 | 122927                  | TT                              | AA              | 1946927531               |
| SNP_P4_117718_122951 | NW_004515756.1 | Scaffold214 | 122951                  | TT                              | AA              | 1946927533               |
| SNP_P4_117719_125677 | NW_004515756.1 | Scaffold214 | 125677                  | GG                              | AA              | 1946927535               |
| SNP_P4_117720_125782 | NW_004515756.1 | Scaffold214 | 125782                  | GG                              | AA              | 1946927537               |
| SNP_P4_117721_126095 | NW_004515756.1 | Scaffold214 | 126095                  | TT                              | GG              | 1946927539               |
| SNP_P4_117722_128104 | NW_004515756.1 | Scaffold214 | 128104                  | CC                              | TT              | 1946927541               |
| SNP_P4_117723_128109 | NW_004515756.1 | Scaffold214 | 128109                  | CC                              | TT              | 1946927543               |
| SNP_P4_117724_128119 | NW_004515756.1 | Scaffold214 | 128119                  | GG                              | TT              | 1946927545               |
| SNP_P4_117725_128223 | NW_004515756.1 | Scaffold214 | 128223                  | AA                              | GG              | 1946927547               |
| SNP_P4_117726_131186 | NW_004515756.1 | Scaffold214 | 131186                  | CC                              | TT              | 1946927549               |
| SNP_P4_117727_131287 | NW_004515756.1 | Scaffold214 | 131287                  | GG                              | AA              | 1946927551               |
| SNP_P4_117728_136985 | NW_004515756.1 | Scaffold214 | 136985                  | AA                              | TT              | 1946927554               |
| SNP_P4_117729_136994 | NW_004515756.1 | Scaffold214 | 136994                  | AA                              | TT              | 1946927556               |
| SNP_P4_117730_137032 | NW_004515756.1 | Scaffold214 | 137032                  | TT                              | CC              | 1946927558               |
| SNP_P4_117731_137357 | NW_004515756.1 | Scaffold214 | 137357                  | TT                              | GG              | 1946927560               |
| SNP_P4_117732_138712 | NW_004515756.1 | Scaffold214 | 138712                  | TT                              | GG              | 1946927563               |
| SNP_P4_117733_139070 | NW_004515756.1 | Scaffold214 | 139070                  | GG                              | TT              | 1946927565               |
| SNP_P4_117734_139206 | NW_004515756.1 | Scaffold214 | 139206                  | CC                              | TT              | 1946927567               |
| SNP_P4_117735_139241 | NW_004515756.1 | Scaffold214 | 139241                  | CC                              | TT              | 1946927569               |
| SNP_P4_117736_139270 | NW_004515756.1 | Scaffold214 | 139270                  | CC                              | TT              | 1946927571               |
| SNP_P4_117737_139295 | NW_004515756.1 | Scaffold214 | 139295                  | CC                              | GG              | 1946927573               |
| SNP_P4_117738_139309 | NW_004515756.1 | Scaffold214 | 139309                  | AA                              | CC              | 1946927575               |
| SNP_P4_117739_139401 | NW_004515756.1 | Scaffold214 | 139401                  | TT                              | GG              | 1946927577               |
| SNP_P4_117740_139412 | NW_004515756.1 | Scaffold214 | 139412                  | TT                              | CC              | 1946927579               |
| SNP_P4_117741_139413 | NW_004515756.1 | Scaffold214 | 139413                  | GG                              | AA              | 1946927581               |
| SNP_P4_117743_139428 | NW_004515756.1 | Scaffold214 | 139428                  | CC                              | AA              | 1946927583               |
| SNP_P4_117744_139436 | NW_004515756.1 | Scaffold214 | 139436                  | GG                              | TT              | 1946927585               |

| SNPs IDs             | Chromosome IDs | Chromosomes | Physical positions (bp) | CDC Frontier (Reference genome) | (ILWC46 & LPNB) | NCBI SNPdb Accession IDs |
|----------------------|----------------|-------------|-------------------------|---------------------------------|-----------------|--------------------------|
| SNP_P4_117745_139442 | NW_004515756.1 | Scaffold214 | 139442                  | CC                              | TT              | 1946927587               |
| SNP_P4_117746_139449 | NW_004515756.1 | Scaffold214 | 139449                  | TT                              | CC              | 1946927589               |
| SNP_P4_117747_139472 | NW_004515756.1 | Scaffold214 | 139472                  | CC                              | TT              | 1946927591               |
| SNP_P4_117748_139608 | NW_004515756.1 | Scaffold214 | 139608                  | AA                              | CC              | 1946927593               |
| SNP_P4_117749_139625 | NW_004515756.1 | Scaffold214 | 139625                  | TT                              | AA              | 1946927595               |
| SNP_P4_117750_143022 | NW_004515756.1 | Scaffold214 | 143022                  | GG                              | TT              | 1946927597               |
| SNP_P4_117751_143876 | NW_004515756.1 | Scaffold214 | 143876                  | AA                              | CC              | 1946927599               |
| SNP_P4_117752_143934 | NW_004515756.1 | Scaffold214 | 143934                  | TT                              | GG              | 1946927601               |
| SNP_P4_117753_144334 | NW_004515756.1 | Scaffold214 | 144334                  | TT                              | GG              | 1946927603               |
| SNP_P4_117754_144470 | NW_004515756.1 | Scaffold214 | 144470                  | GG                              | TT              | 1946927605               |
| SNP_P4_117755_144563 | NW_004515756.1 | Scaffold214 | 144563                  | AA                              | GG              | 1946927607               |
| SNP_P4_117756_144612 | NW_004515756.1 | Scaffold214 | 144612                  | TT                              | AA              | 1946927609               |
| SNP_P4_117757_144738 | NW_004515756.1 | Scaffold214 | 144738                  | CC                              | TT              | 1946927611               |
| SNP_P4_117758_144774 | NW_004515756.1 | Scaffold214 | 144774                  | AA                              | TT              | 1946927613               |
| SNP_P4_117759_144834 | NW_004515756.1 | Scaffold214 | 144834                  | AA                              | CC              | 1946927614               |
| SNP_P4_117760_144996 | NW_004515756.1 | Scaffold214 | 144996                  | TT                              | CC              | 1946927616               |
| SNP_P4_117761_145065 | NW_004515756.1 | Scaffold214 | 145065                  | TT                              | GG              | 1946927618               |
| SNP_P4_117762_14175  | NW_004515757.1 | Scaffold217 | 14175                   | GG                              | TT              | 1946927620               |
| SNP_P4_117763_16808  | NW_004515757.1 | Scaffold217 | 16808                   | CC                              | AA              | 1946927622               |
| SNP_P4_117764_1186   | NW_004515758.1 | Scaffold220 | 1186                    | AA                              | CC              | 1946927624               |
| SNP_P4_117765_1532   | NW_004515758.1 | Scaffold220 | 1532                    | TT                              | CC              | 1946927626               |
| SNP_P4_117766_1646   | NW_004515758.1 | Scaffold220 | 1646                    | GG                              | TT              | 1946927628               |
| SNP_P4_117767_1708   | NW_004515758.1 | Scaffold220 | 1708                    | AA                              | CC              | 1946927630               |
| SNP_P4_117768_1744   | NW_004515758.1 | Scaffold220 | 1744                    | CC                              | TT              | 1946927632               |
| SNP_P4_117769_4193   | NW_004515758.1 | Scaffold220 | 4193                    | AA                              | GG              | 1946927633               |
| SNP_P4_117770_4253   | NW_004515758.1 | Scaffold220 | 4253                    | GG                              | CC              | 1946927635               |
| SNP_P4_117771_4261   | NW_004515758.1 | Scaffold220 | 4261                    | GG                              | AA              | 1946927637               |
| SNP_P4_117772_4644   | NW_004515758.1 | Scaffold220 | 4644                    | AA                              | GG              | 1946927639               |
| SNP_P4_117773_4706   | NW_004515758.1 | Scaffold220 | 4706                    | TT                              | AA              | 1946927641               |
| SNP_P4_117774_4775   | NW_004515758.1 | Scaffold220 | 4775                    | GG                              | AA              | 1946927643               |
| SNP_P4_117775_4784   | NW_004515758.1 | Scaffold220 | 4784                    | GG                              | AA              | 1946927645               |
| SNP_P4_117776_4812   | NW_004515758.1 | Scaffold220 | 4812                    | GG                              | CC              | 1946927647               |
| SNP_P4_117777_4845   | NW_004515758.1 | Scaffold220 | 4845                    | AA                              | CC              | 1946927649               |
| SNP_P4_117778_4954   | NW_004515758.1 | Scaffold220 | 4954                    | CC                              | AA              | 1946927651               |
| SNP_P4_117779_4981   | NW_004515758.1 | Scaffold220 | 4981                    | AA                              | GG              | 1946927653               |
| SNP_P4_117780_4984   | NW_004515758.1 | Scaffold220 | 4984                    | TT                              | CC              | 1946927655               |
| SNP_P4_117781_4987   | NW_004515758.1 | Scaffold220 | 4987                    | TT                              | CC              | 1946927657               |
| SNP_P4_117782_4989   | NW_004515758.1 | Scaffold220 | 4989                    | GG                              | AA              | 1946927659               |
| SNP_P4_117783_5028   | NW_004515758.1 | Scaffold220 | 5028                    | TT                              | CC              | 1946927661               |
| SNP_P4_117784_5414   | NW_004515758.1 | Scaffold220 | 5414                    | AA                              | TT              | 1946927662               |
| SNP_P4_117785_5520   | NW_004515758.1 | Scaffold220 | 5520                    | TT                              | AA              | 1946927664               |
| SNP_P4_117786_5707   | NW_004515758.1 | Scaffold220 | 5707                    | GG                              | AA              | 1946927666               |

| SNPs IDs            | Chromosome IDs | Chromosomes | Physical positions (bp) | CDC Frontier (Reference genome) | (ILWC46 & LPNB) | NCBI SNPdb Accession IDs |
|---------------------|----------------|-------------|-------------------------|---------------------------------|-----------------|--------------------------|
| SNP_P4_117787_5789  | NW_004515758.1 | Scaffold220 | 5789                    | AA                              | GG              | 1946927668               |
| SNP_P4_117788_753   | NW_004515759.1 | Scaffold221 | 753                     | CC                              | TT              | 1946927670               |
| SNP_P4_117789_756   | NW_004515759.1 | Scaffold221 | 756                     | CC                              | TT              | 1946927672               |
| SNP_P4_117790_3148  | NW_004515759.1 | Scaffold221 | 3148                    | AA                              | GG              | 1946927674               |
| SNP_P4_117791_3152  | NW_004515759.1 | Scaffold221 | 3152                    | GG                              | CC              | 1946927676               |
| SNP_P4_117792_3166  | NW_004515759.1 | Scaffold221 | 3166                    | TT                              | AA              | 1946927678               |
| SNP_P4_117793_3502  | NW_004515759.1 | Scaffold221 | 3502                    | AA                              | TT              | 1946927680               |
| SNP_P4_117794_3511  | NW_004515759.1 | Scaffold221 | 3511                    | AA                              | GG              | 1946927682               |
| SNP_P4_117795_3524  | NW_004515759.1 | Scaffold221 | 3524                    | TT                              | CC              | 1946927684               |
| SNP_P4_117796_18834 | NW_004515759.1 | Scaffold221 | 18834                   | AA                              | GG              | 1946927686               |
| SNP_P4_117797_18858 | NW_004515759.1 | Scaffold221 | 18858                   | AA                              | GG              | 1946927688               |
| SNP_P4_117798_18866 | NW_004515759.1 | Scaffold221 | 18866                   | AA                              | TT              | 1946927690               |
| SNP_P4_117799_25895 | NW_004515759.1 | Scaffold221 | 25895                   | GG                              | CC              | 1946927692               |
| SNP_P4_117800_26376 | NW_004515759.1 | Scaffold221 | 26376                   | CC                              | TT              | 1946927694               |
| SNP_P4_117801_43445 | NW_004515759.1 | Scaffold221 | 43445                   | AA                              | GG              | 1946927696               |
| SNP_P4_117802_44677 | NW_004515759.1 | Scaffold221 | 44677                   | CC                              | AA              | 1946927698               |
| SNP_P4_117803_52864 | NW_004515759.1 | Scaffold221 | 52864                   | AA                              | GG              | 1946927700               |
| SNP_P4_117804_55317 | NW_004515759.1 | Scaffold221 | 55317                   | GG                              | CC              | 1946927702               |
| SNP_P4_117805_55326 | NW_004515759.1 | Scaffold221 | 55326                   | GG                              | AA              | 1946927704               |
| SNP_P4_117806_55335 | NW_004515759.1 | Scaffold221 | 55335                   | GG                              | AA              | 1946927706               |
| SNP_P4_117807_55340 | NW_004515759.1 | Scaffold221 | 55340                   | AA                              | CC              | 1946927708               |
| SNP_P4_117808_61219 | NW_004515759.1 | Scaffold221 | 61219                   | TT                              | CC              | 1946927710               |
| SNP_P4_117809_61301 | NW_004515759.1 | Scaffold221 | 61301                   | CC                              | AA              | 1946927713               |
| SNP_P4_117810_61306 | NW_004515759.1 | Scaffold221 | 61306                   | TT                              | CC              | 1946927715               |
| SNP_P4_117812_61644 | NW_004515759.1 | Scaffold221 | 61644                   | AA                              | GG              | 1946927717               |
| SNP_P4_117813_62907 | NW_004515759.1 | Scaffold221 | 62907                   | AA                              | GG              | 1946927719               |
| SNP_P4_117814_62913 | NW_004515759.1 | Scaffold221 | 62913                   | TT                              | CC              | 1946927721               |
| SNP_P4_117815_63025 | NW_004515759.1 | Scaffold221 | 63025                   | TT                              | CC              | 1946927723               |
| SNP_P4_117816_65208 | NW_004515759.1 | Scaffold221 | 65208                   | GG                              | AA              | 1946927726               |
| SNP_P4_117817_79331 | NW_004515759.1 | Scaffold221 | 79331                   | AA                              | CC              | 1946927728               |
| SNP_P4_117818_81383 | NW_004515759.1 | Scaffold221 | 81383                   | TT                              | CC              | 1946927730               |
| SNP_P4_117819_81406 | NW_004515759.1 | Scaffold221 | 81406                   | GG                              | TT              | 1946927732               |
| SNP_P4_117820_81497 | NW_004515759.1 | Scaffold221 | 81497                   | TT                              | CC              | 1946927734               |
| SNP_P4_117821_86854 | NW_004515759.1 | Scaffold221 | 86854                   | AA                              | GG              | 1946927736               |
| SNP_P4_117822_86856 | NW_004515759.1 | Scaffold221 | 86856                   | CC                              | AA              | 1946927738               |
| SNP_P4_117823_89421 | NW_004515759.1 | Scaffold221 | 89421                   | GG                              | CC              | 1946927740               |
| SNP_P4_117824_89431 | NW_004515759.1 | Scaffold221 | 89431                   | CC                              | TT              | 1946927742               |
| SNP_P4_117825_89460 | NW_004515759.1 | Scaffold221 | 89460                   | TT                              | GG              | 1946927744               |
| SNP_P4_117826_92571 | NW_004515759.1 | Scaffold221 | 92571                   | CC                              | TT              | 1946927746               |
| SNP_P4_117827_92573 | NW_004515759.1 | Scaffold221 | 92573                   | AA                              | GG              | 1946927748               |
| SNP_P4_117828_94040 | NW_004515759.1 | Scaffold221 | 94040                   | AA                              | GG              | 1946927750               |
| SNP_P4_117829_94049 | NW_004515759.1 | Scaffold221 | 94049                   | TT                              | CC              | 1946927752               |

| SNPs IDs             | Chromosome IDs | Chromosomes | Physical positions (bp) | CDC Frontier (Reference genome) | (ILWC46 & LPNB) | NCBI SNPdb Accession IDs |
|----------------------|----------------|-------------|-------------------------|---------------------------------|-----------------|--------------------------|
| SNP_P4_117831_107584 | NW_004515759.1 | Scaffold221 | 107584                  | TT                              | CC              | 1946927754               |
| SNP_P4_117832_109925 | NW_004515759.1 | Scaffold221 | 109925                  | CC                              | AA              | 1946927756               |
| SNP_P4_117833_110034 | NW_004515759.1 | Scaffold221 | 110034                  | AA                              | GG              | 1946927758               |
| SNP_P4_117834_110179 | NW_004515759.1 | Scaffold221 | 110179                  | AA                              | TT              | 1946927760               |
| SNP_P4_117835_110186 | NW_004515759.1 | Scaffold221 | 110186                  | CC                              | TT              | 1946927762               |
| SNP_P4_117836_110363 | NW_004515759.1 | Scaffold221 | 110363                  | TT                              | GG              | 1946927764               |
| SNP_P4_117837_110364 | NW_004515759.1 | Scaffold221 | 110364                  | CC                              | AA              | 1946927766               |
| SNP_P4_117838_110376 | NW_004515759.1 | Scaffold221 | 110376                  | GG                              | CC              | 1946927768               |
| SNP_P4_117839_110459 | NW_004515759.1 | Scaffold221 | 110459                  | CC                              | AA              | 1946927770               |
| SNP_P4_117840_35786  | NW_004515760.1 | Scaffold222 | 35786                   | AA                              | CC              | 1946927772               |
| SNP_P4_117841_46729  | NW_004515760.1 | Scaffold222 | 46729                   | AA                              | GG              | 1946927774               |
| SNP_P4_117842_46735  | NW_004515760.1 | Scaffold222 | 46735                   | AA                              | GG              | 1946927776               |
| SNP_P4_117843_47168  | NW_004515760.1 | Scaffold222 | 47168                   | TT                              | CC              | 1946927778               |
| SNP_P4_117844_47180  | NW_004515760.1 | Scaffold222 | 47180                   | GG                              | AA              | 1946927780               |
| SNP_P4_117845_63625  | NW_004515760.1 | Scaffold222 | 63625                   | CC                              | TT              | 1946927782               |
| SNP_P4_117846_65848  | NW_004515760.1 | Scaffold222 | 65848                   | AA                              | GG              | 1946927784               |
| SNP_P4_117847_530    | NW_004515761.1 | Scaffold223 | 530                     | GG                              | TT              | 1946927786               |
| SNP_P4_117849_28684  | NW_004515761.1 | Scaffold223 | 28684                   | AA                              | GG              | 1946927788               |
| SNP_P4_117850_32800  | NW_004515761.1 | Scaffold223 | 32800                   | TT                              | GG              | 1946927790               |
| SNP_P4_117851_36543  | NW_004515761.1 | Scaffold223 | 36543                   | TT                              | GG              | 1946927792               |
| SNP_P4_117852_36639  | NW_004515761.1 | Scaffold223 | 36639                   | TT                              | AA              | 1946927794               |
| SNP_P4_117853_40531  | NW_004515761.1 | Scaffold223 | 40531                   | TT                              | CC              | 1946927796               |
| SNP_P4_117854_42098  | NW_004515761.1 | Scaffold223 | 42098                   | GG                              | AA              | 1946927798               |
| SNP_P4_117856_50923  | NW_004515761.1 | Scaffold223 | 50923                   | AA                              | GG              | 1946927800               |
| SNP_P4_117857_61172  | NW_004515761.1 | Scaffold223 | 61172                   | GG                              | AA              | 1946927802               |
| SNP_P4_117859_67975  | NW_004515761.1 | Scaffold223 | 67975                   | AA                              | CC              | 1946927804               |
| SNP_P4_117860_71754  | NW_004515761.1 | Scaffold223 | 71754                   | GG                              | AA              | 1946927806               |
| SNP_P4_117861_78760  | NW_004515761.1 | Scaffold223 | 78760                   | CC                              | TT              | 1946927808               |
| SNP_P4_117862_78851  | NW_004515761.1 | Scaffold223 | 78851                   | CC                              | TT              | 1946927810               |
| SNP_P4_117863_81328  | NW_004515761.1 | Scaffold223 | 81328                   | CC                              | AA              | 1946927812               |
| SNP_P4_117864_82186  | NW_004515761.1 | Scaffold223 | 82186                   | TT                              | AA              | 1946927814               |
| SNP_P4_117865_87958  | NW_004515761.1 | Scaffold223 | 87958                   | AA                              | CC              | 1946927816               |
| SNP_P4_117866_88432  | NW_004515761.1 | Scaffold223 | 88432                   | TT                              | AA              | 1946927818               |
| SNP_P4_117867_95723  | NW_004515761.1 | Scaffold223 | 95723                   | CC                              | TT              | 1946927820               |
| SNP_P4_117868_95859  | NW_004515761.1 | Scaffold223 | 95859                   | AA                              | CC              | 1946927821               |
| SNP_P4_117869_95862  | NW_004515761.1 | Scaffold223 | 95862                   | AA                              | GG              | 1946927823               |
| SNP_P4_117871_106609 | NW_004515761.1 | Scaffold223 | 106609                  | AA                              | CC              | 1946927825               |
| SNP_P4_117873_144618 | NW_004515761.1 | Scaffold223 | 144618                  | TT                              | CC              | 1946927827               |
| SNP_P4_117874_144663 | NW_004515761.1 | Scaffold223 | 144663                  | GG                              | TT              | 1946927829               |
| SNP_P4_117875_149074 | NW_004515761.1 | Scaffold223 | 149074                  | AA                              | GG              | 1946927831               |
| SNP_P4_117876_150281 | NW_004515761.1 | Scaffold223 | 150281                  | AA                              | GG              | 1946927833               |
| SNP_P4_117878_152286 | NW_004515761.1 | Scaffold223 | 152286                  | CC                              | TT              | 1946927835               |



| SNPs IDs             | Chromosome IDs | Chromosomes | Physical positions (bp) | CDC Frontier (Reference genome) | (ILWC46 & LPNB) | NCBI SNPdb Accession IDs |
|----------------------|----------------|-------------|-------------------------|---------------------------------|-----------------|--------------------------|
| SNP_P4_117879_152290 | NW_004515761.1 | Scaffold223 | 152290                  | AA                              | GG              | 1946927837               |
| SNP_P4_117881_152307 | NW_004515761.1 | Scaffold223 | 152307                  | GG                              | TT              | 1946927839               |
| SNP_P4_117882_167788 | NW_004515761.1 | Scaffold223 | 167788                  | TT                              | CC              | 1946927841               |
| SNP_P4_117883_170793 | NW_004515761.1 | Scaffold223 | 170793                  | CC                              | AA              | 1946927842               |
| SNP_P4_117884_175051 | NW_004515761.1 | Scaffold223 | 175051                  | CC                              | AA              | 1946927844               |
| SNP_P4_117885_180270 | NW_004515761.1 | Scaffold223 | 180270                  | AA                              | GG              | 1946927846               |
| SNP_P4_117886_182153 | NW_004515761.1 | Scaffold223 | 182153                  | CC                              | TT              | 1946927848               |
| SNP_P4_117887_182154 | NW_004515761.1 | Scaffold223 | 182154                  | TT                              | CC              | 1946927850               |
| SNP_P4_117888_182192 | NW_004515761.1 | Scaffold223 | 182192                  | CC                              | TT              | 1946927852               |
| SNP_P4_117889_182198 | NW_004515761.1 | Scaffold223 | 182198                  | TT                              | GG              | 1946927854               |
| SNP_P4_117890_182257 | NW_004515761.1 | Scaffold223 | 182257                  | AA                              | TT              | 1946927856               |
| SNP_P4_117891_802    | NW_004515762.1 | Scaffold224 | 802                     | TT                              | CC              | 1946927858               |
| SNP_P4_117892_810    | NW_004515762.1 | Scaffold224 | 810                     | CC                              | TT              | 1946927860               |
| SNP_P4_117893_847    | NW_004515762.1 | Scaffold224 | 847                     | GG                              | AA              | 1946927862               |
| SNP_P4_117894_8154   | NW_004515762.1 | Scaffold224 | 8154                    | AA                              | GG              | 1946927864               |
| SNP_P4_117895_8396   | NW_004515762.1 | Scaffold224 | 8396                    | AA                              | GG              | 1946927866               |
| SNP_P4_117896_8475   | NW_004515762.1 | Scaffold224 | 8475                    | TT                              | CC              | 1946927867               |
| SNP_P4_117897_20397  | NW_004515762.1 | Scaffold224 | 20397                   | CC                              | TT              | 1946927869               |
| SNP_P4_117898_20412  | NW_004515762.1 | Scaffold224 | 20412                   | GG                              | AA              | 1946927871               |
| SNP_P4_117899_20419  | NW_004515762.1 | Scaffold224 | 20419                   | AA                              | CC              | 1946927873               |
| SNP_P4_117900_20428  | NW_004515762.1 | Scaffold224 | 20428                   | GG                              | AA              | 1946927875               |
| SNP_P4_117901_20488  | NW_004515762.1 | Scaffold224 | 20488                   | CC                              | AA              | 1946927877               |
| SNP_P4_117902_20499  | NW_004515762.1 | Scaffold224 | 20499                   | GG                              | AA              | 1946927879               |
| SNP_P4_117903_20526  | NW_004515762.1 | Scaffold224 | 20526                   | TT                              | GG              | 1946927881               |
| SNP_P4_117904_20677  | NW_004515762.1 | Scaffold224 | 20677                   | AA                              | GG              | 1946927883               |
| SNP_P4_117905_20761  | NW_004515762.1 | Scaffold224 | 20761                   | CC                              | TT              | 1946927885               |
| SNP_P4_117906_20878  | NW_004515762.1 | Scaffold224 | 20878                   | TT                              | CC              | 1946927887               |
| SNP_P4_117907_20942  | NW_004515762.1 | Scaffold224 | 20942                   | GG                              | AA              | 1946927889               |
| SNP_P4_117908_32731  | NW_004515762.1 | Scaffold224 | 32731                   | CC                              | TT              | 1946927891               |
| SNP_P4_117909_32815  | NW_004515762.1 | Scaffold224 | 32815                   | CC                              | GG              | 1946927893               |
| SNP_P4_117910_32871  | NW_004515762.1 | Scaffold224 | 32871                   | CC                              | AA              | 1946927895               |
| SNP_P4_117911_34677  | NW_004515762.1 | Scaffold224 | 34677                   | TT                              | CC              | 1946927897               |
| SNP_P4_117912_34698  | NW_004515762.1 | Scaffold224 | 34698                   | GG                              | AA              | 1946927899               |
| SNP_P4_117913_34720  | NW_004515762.1 | Scaffold224 | 34720                   | GG                              | TT              | 1946927901               |
| SNP_P4_117914_35184  | NW_004515762.1 | Scaffold224 | 35184                   | TT                              | CC              | 1946927903               |
| SNP_P4_117915_36203  | NW_004515762.1 | Scaffold224 | 36203                   | TT                              | AA              | 1946927905               |
| SNP_P4_117916_36204  | NW_004515762.1 | Scaffold224 | 36204                   | TT                              | AA              | 1946927907               |
| SNP_P4_117917_36597  | NW_004515762.1 | Scaffold224 | 36597                   | AA                              | GG              | 1946927909               |
| SNP_P4_117918_36598  | NW_004515762.1 | Scaffold224 | 36598                   | GG                              | CC              | 1946927911               |
| SNP_P4_117919_36688  | NW_004515762.1 | Scaffold224 | 36688                   | TT                              | GG              | 1946927913               |
| SNP_P4_117920_36692  | NW_004515762.1 | Scaffold224 | 36692                   | TT                              | GG              | 1946927915               |
| SNP_P4_117921_36699  | NW_004515762.1 | Scaffold224 | 36699                   | CC                              | TT              | 1946927917               |

| SNPs IDs             | Chromosome IDs | Chromosomes | Physical positions (bp) | CDC Frontier (Reference genome) | (ILWC46 & LPNB) | NCBI SNPdb Accession IDs |
|----------------------|----------------|-------------|-------------------------|---------------------------------|-----------------|--------------------------|
| SNP_P4_117922_36712  | NW_004515762.1 | Scaffold224 | 36712                   | TT                              | AA              | 1946927919               |
| SNP_P4_117923_37051  | NW_004515762.1 | Scaffold224 | 37051                   | AA                              | GG              | 1946927921               |
| SNP_P4_117925_95291  | NW_004515762.1 | Scaffold224 | 95291                   | TT                              | CC              | 1946927923               |
| SNP_P4_117926_95325  | NW_004515762.1 | Scaffold224 | 95325                   | GG                              | TT              | 1946927924               |
| SNP_P4_117927_102849 | NW_004515762.1 | Scaffold224 | 102849                  | AA                              | GG              | 1946927926               |
| SNP_P4_117928_102908 | NW_004515762.1 | Scaffold224 | 102908                  | TT                              | AA              | 1946927928               |
| SNP_P4_117929_103040 | NW_004515762.1 | Scaffold224 | 103040                  | AA                              | GG              | 1946927931               |
| SNP_P4_117930_103087 | NW_004515762.1 | Scaffold224 | 103087                  | CC                              | TT              | 1946927933               |
| SNP_P4_117931_113887 | NW_004515762.1 | Scaffold224 | 113887                  | TT                              | GG              | 1946927935               |
| SNP_P4_117932_132340 | NW_004515762.1 | Scaffold224 | 132340                  | GG                              | TT              | 1946927937               |
| SNP_P4_117933_132343 | NW_004515762.1 | Scaffold224 | 132343                  | TT                              | CC              | 1946927939               |
| SNP_P4_117934_151227 | NW_004515762.1 | Scaffold224 | 151227                  | AA                              | GG              | 1946927941               |
| SNP_P4_117935_151237 | NW_004515762.1 | Scaffold224 | 151237                  | AA                              | GG              | 1946927943               |
| SNP_P4_117936_151246 | NW_004515762.1 | Scaffold224 | 151246                  | TT                              | GG              | 1946927945               |
| SNP_P4_117937_151250 | NW_004515762.1 | Scaffold224 | 151250                  | AA                              | GG              | 1946927946               |
| SNP_P4_117938_152163 | NW_004515762.1 | Scaffold224 | 152163                  | AA                              | CC              | 1946927948               |
| SNP_P4_117939_152179 | NW_004515762.1 | Scaffold224 | 152179                  | AA                              | TT              | 1946927950               |
| SNP_P4_117940_152191 | NW_004515762.1 | Scaffold224 | 152191                  | AA                              | GG              | 1946927952               |
| SNP_P4_117941_152192 | NW_004515762.1 | Scaffold224 | 152192                  | TT                              | AA              | 1946927954               |
| SNP_P4_117942_152197 | NW_004515762.1 | Scaffold224 | 152197                  | GG                              | AA              | 1946927956               |
| SNP_P4_117943_152228 | NW_004515762.1 | Scaffold224 | 152228                  | GG                              | CC              | 1946927958               |
| SNP_P4_117944_152236 | NW_004515762.1 | Scaffold224 | 152236                  | GG                              | CC              | 1946927960               |
| SNP_P4_117945_152251 | NW_004515762.1 | Scaffold224 | 152251                  | TT                              | AA              | 1946927962               |
| SNP_P4_117946_152252 | NW_004515762.1 | Scaffold224 | 152252                  | TT                              | CC              | 1946927964               |
| SNP_P4_117947_152269 | NW_004515762.1 | Scaffold224 | 152269                  | AA                              | CC              | 1946927965               |
| SNP_P4_117948_152287 | NW_004515762.1 | Scaffold224 | 152287                  | GG                              | CC              | 1946927967               |
| SNP_P4_117949_152288 | NW_004515762.1 | Scaffold224 | 152288                  | TT                              | CC              | 1946927969               |
| SNP_P4_117950_152518 | NW_004515762.1 | Scaffold224 | 152518                  | AA                              | GG              | 1946927971               |
| SNP_P4_117951_152570 | NW_004515762.1 | Scaffold224 | 152570                  | AA                              | GG              | 1946927973               |
| SNP_P4_117952_152579 | NW_004515762.1 | Scaffold224 | 152579                  | AA                              | TT              | 1946927975               |
| SNP_P4_117953_152595 | NW_004515762.1 | Scaffold224 | 152595                  | GG                              | AA              | 1946927977               |
| SNP_P4_117954_152669 | NW_004515762.1 | Scaffold224 | 152669                  | AA                              | GG              | 1946927978               |
| SNP_P4_117955_152676 | NW_004515762.1 | Scaffold224 | 152676                  | AA                              | GG              | 1946927980               |
| SNP_P4_117956_152682 | NW_004515762.1 | Scaffold224 | 152682                  | AA                              | CC              | 1946927982               |
| SNP_P4_117957_158517 | NW_004515762.1 | Scaffold224 | 158517                  | GG                              | CC              | 1946927984               |
| SNP_P4_117958_161249 | NW_004515762.1 | Scaffold224 | 161249                  | CC                              | TT              | 1946927986               |
| SNP_P4_117959_161257 | NW_004515762.1 | Scaffold224 | 161257                  | TT                              | GG              | 1946927988               |
| SNP_P4_117960_161314 | NW_004515762.1 | Scaffold224 | 161314                  | TT                              | CC              | 1946927990               |
| SNP_P4_117961_161320 | NW_004515762.1 | Scaffold224 | 161320                  | TT                              | CC              | 1946927992               |
| SNP_P4_117962_161322 | NW_004515762.1 | Scaffold224 | 161322                  | AA                              | GG              | 1946927994               |
| SNP_P4_117963_161324 | NW_004515762.1 | Scaffold224 | 161324                  | TT                              | CC              | 1946927996               |
| SNP_P4_117964_161332 | NW_004515762.1 | Scaffold224 | 161332                  | TT                              | CC              | 1946927998               |

| SNPs IDs             | Chromosome IDs | Chromosomes | Physical positions (bp) | CDC Frontier (Reference genome) | (ILWC46 & LPNB) | NCBI SNPdb Accession IDs |
|----------------------|----------------|-------------|-------------------------|---------------------------------|-----------------|--------------------------|
| SNP_P4_117965_161345 | NW_004515762.1 | Scaffold224 | 161345                  | AA                              | GG              | 1946928000               |
| SNP_P4_117966_161355 | NW_004515762.1 | Scaffold224 | 161355                  | TT                              | CC              | 1946928001               |
| SNP_P4_117967_161659 | NW_004515762.1 | Scaffold224 | 161659                  | TT                              | CC              | 1946928003               |
| SNP_P4_117968_161683 | NW_004515762.1 | Scaffold224 | 161683                  | AA                              | GG              | 1946928005               |
| SNP_P4_117969_161694 | NW_004515762.1 | Scaffold224 | 161694                  | CC                              | GG              | 1946928007               |
| SNP_P4_117970_161752 | NW_004515762.1 | Scaffold224 | 161752                  | GG                              | TT              | 1946928009               |
| SNP_P4_117971_165323 | NW_004515762.1 | Scaffold224 | 165323                  | AA                              | GG              | 1946928011               |
| SNP_P4_117972_165328 | NW_004515762.1 | Scaffold224 | 165328                  | GG                              | TT              | 1946928013               |
| SNP_P4_117973_165688 | NW_004515762.1 | Scaffold224 | 165688                  | CC                              | AA              | 1946928015               |
| SNP_P4_117974_165715 | NW_004515762.1 | Scaffold224 | 165715                  | AA                              | GG              | 1946928017               |
| SNP_P4_117975_165731 | NW_004515762.1 | Scaffold224 | 165731                  | TT                              | AA              | 1946928019               |
| SNP_P4_117976_165736 | NW_004515762.1 | Scaffold224 | 165736                  | GG                              | CC              | 1946928021               |
| SNP_P4_117977_165737 | NW_004515762.1 | Scaffold224 | 165737                  | TT                              | GG              | 1946928023               |
| SNP_P4_117978_170544 | NW_004515762.1 | Scaffold224 | 170544                  | GG                              | AA              | 1946928025               |
| SNP_P4_117979_170552 | NW_004515762.1 | Scaffold224 | 170552                  | GG                              | CC              | 1946928027               |
| SNP_P4_117981_174896 | NW_004515762.1 | Scaffold224 | 174896                  | TT                              | CC              | 1946928029               |
| SNP_P4_117982_174913 | NW_004515762.1 | Scaffold224 | 174913                  | TT                              | GG              | 1946928031               |
| SNP_P4_117983_175202 | NW_004515762.1 | Scaffold224 | 175202                  | TT                              | GG              | 1946928033               |
| SNP_P4_117984_176671 | NW_004515762.1 | Scaffold224 | 176671                  | TT                              | GG              | 1946928035               |
| SNP_P4_117985_176739 | NW_004515762.1 | Scaffold224 | 176739                  | AA                              | CC              | 1946928037               |
| SNP_P4_117986_178501 | NW_004515762.1 | Scaffold224 | 178501                  | TT                              | CC              | 1946928039               |
| SNP_P4_117987_180482 | NW_004515762.1 | Scaffold224 | 180482                  | TT                              | CC              | 1946928041               |
| SNP_P4_117988_180493 | NW_004515762.1 | Scaffold224 | 180493                  | GG                              | AA              | 1946928043               |
| SNP_P4_117989_180879 | NW_004515762.1 | Scaffold224 | 180879                  | TT                              | CC              | 1946928045               |
| SNP_P4_117991_186113 | NW_004515762.1 | Scaffold224 | 186113                  | TT                              | AA              | 1946928047               |
| SNP_P4_117992_186158 | NW_004515762.1 | Scaffold224 | 186158                  | AA                              | GG              | 1946928049               |
| SNP_P4_117993_186187 | NW_004515762.1 | Scaffold224 | 186187                  | TT                              | CC              | 1946928051               |
| SNP_P4_117994_186188 | NW_004515762.1 | Scaffold224 | 186188                  | GG                              | CC              | 1946928053               |
| SNP_P4_117995_186225 | NW_004515762.1 | Scaffold224 | 186225                  | GG                              | TT              | 1946928055               |
| SNP_P4_117996_186233 | NW_004515762.1 | Scaffold224 | 186233                  | TT                              | CC              | 1946928057               |
| SNP_P4_117997_186235 | NW_004515762.1 | Scaffold224 | 186235                  | AA                              | GG              | 1946928060               |
| SNP_P4_117998_186248 | NW_004515762.1 | Scaffold224 | 186248                  | AA                              | GG              | 1946928062               |
| SNP_P4_117999_186254 | NW_004515762.1 | Scaffold224 | 186254                  | AA                              | GG              | 1946928064               |
| SNP_P4_118000_186270 | NW_004515762.1 | Scaffold224 | 186270                  | AA                              | GG              | 1946928066               |
| SNP_P4_118001_186289 | NW_004515762.1 | Scaffold224 | 186289                  | TT                              | GG              | 1946928068               |
| SNP_P4_118002_186323 | NW_004515762.1 | Scaffold224 | 186323                  | AA                              | GG              | 1946928070               |
| SNP_P4_118003_186356 | NW_004515762.1 | Scaffold224 | 186356                  | TT                              | CC              | 1946928072               |
| SNP_P4_118004_186357 | NW_004515762.1 | Scaffold224 | 186357                  | AA                              | GG              | 1946928074               |
| SNP_P4_118005_186371 | NW_004515762.1 | Scaffold224 | 186371                  | TT                              | CC              | 1946928076               |
| SNP_P4_118006_186398 | NW_004515762.1 | Scaffold224 | 186398                  | AA                              | GG              | 1946928078               |
| SNP_P4_118008_186490 | NW_004515762.1 | Scaffold224 | 186490                  | TT                              | CC              | 1946928080               |
| SNP_P4_118009_186502 | NW_004515762.1 | Scaffold224 | 186502                  | TT                              | AA              | 1946928082               |

| SNPs IDs             | Chromosome IDs | Chromosomes | Physical positions (bp) | CDC Frontier (Reference genome) | (ILWC46 & LPNB) | NCBI SNPdb Accession IDs |
|----------------------|----------------|-------------|-------------------------|---------------------------------|-----------------|--------------------------|
| SNP_P4_118011_186603 | NW_004515762.1 | Scaffold224 | 186603                  | AA                              | GG              | 1946928084               |
| SNP_P4_118012_186619 | NW_004515762.1 | Scaffold224 | 186619                  | AA                              | GG              | 1946928086               |
| SNP_P4_118013_186625 | NW_004515762.1 | Scaffold224 | 186625                  | TT                              | AA              | 1946928088               |
| SNP_P4_118014_186789 | NW_004515762.1 | Scaffold224 | 186789                  | TT                              | CC              | 1946928090               |
| SNP_P4_118015_198397 | NW_004515762.1 | Scaffold224 | 198397                  | AA                              | GG              | 1946928092               |
| SNP_P4_118017_204225 | NW_004515762.1 | Scaffold224 | 204225                  | TT                              | GG              | 1946928094               |
| SNP_P4_118018_204226 | NW_004515762.1 | Scaffold224 | 204226                  | TT                              | CC              | 1946928096               |
| SNP_P4_118019_221395 | NW_004515762.1 | Scaffold224 | 221395                  | CC                              | GG              | 1946928098               |
| SNP_P4_118020_260680 | NW_004515762.1 | Scaffold224 | 260680                  | AA                              | CC              | 1946928100               |
| SNP_P4_118021_288442 | NW_004515762.1 | Scaffold224 | 288442                  | TT                              | AA              | 1946928102               |
| SNP_P4_118022_288444 | NW_004515762.1 | Scaffold224 | 288444                  | TT                              | GG              | 1946928104               |
| SNP_P4_118023_294209 | NW_004515762.1 | Scaffold224 | 294209                  | AA                              | GG              | 1946928106               |
| SNP_P4_118024_294281 | NW_004515762.1 | Scaffold224 | 294281                  | CC                              | TT              | 1946928108               |
| SNP_P4_118025_301817 | NW_004515762.1 | Scaffold224 | 301817                  | AA                              | GG              | 1946928110               |
| SNP_P4_118026_5358   | NW_004515763.1 | Scaffold227 | 5358                    | GG                              | AA              | 1946928112               |
| SNP_P4_118027_11880  | NW_004515763.1 | Scaffold227 | 11880                   | CC                              | TT              | 1946928114               |
| SNP_P4_118028_12407  | NW_004515763.1 | Scaffold227 | 12407                   | AA                              | GG              | 1946928116               |
| SNP_P4_118029_32610  | NW_004515763.1 | Scaffold227 | 32610                   | AA                              | TT              | 1946928118               |
| SNP_P4_118032_59588  | NW_004515763.1 | Scaffold227 | 59588                   | TT                              | CC              | 1946928120               |
| SNP_P4_118033_59907  | NW_004515763.1 | Scaffold227 | 59907                   | GG                              | AA              | 1946928122               |
| SNP_P4_118034_59983  | NW_004515763.1 | Scaffold227 | 59983                   | AA                              | CC              | 1946928124               |
| SNP_P4_118035_59986  | NW_004515763.1 | Scaffold227 | 59986                   | AA                              | CC              | 1946928126               |
| SNP_P4_118036_73954  | NW_004515763.1 | Scaffold227 | 73954                   | TT                              | GG              | 1946928128               |
| SNP_P4_118037_80425  | NW_004515763.1 | Scaffold227 | 80425                   | GG                              | AA              | 1946928130               |
| SNP_P4_118038_80426  | NW_004515763.1 | Scaffold227 | 80426                   | TT                              | GG              | 1946928132               |
| SNP_P4_118039_86520  | NW_004515763.1 | Scaffold227 | 86520                   | GG                              | TT              | 1946928135               |
| SNP_P4_118040_100218 | NW_004515763.1 | Scaffold227 | 100218                  | AA                              | GG              | 1946928137               |
| SNP_P4_118041_102857 | NW_004515763.1 | Scaffold227 | 102857                  | GG                              | AA              | 1946928139               |
| SNP_P4_118042_106836 | NW_004515763.1 | Scaffold227 | 106836                  | CC                              | TT              | 1946928141               |
| SNP_P4_118043_117332 | NW_004515763.1 | Scaffold227 | 117332                  | CC                              | TT              | 1946928143               |
| SNP_P4_118044_134777 | NW_004515763.1 | Scaffold227 | 134777                  | TT                              | CC              | 1946928145               |
| SNP_P4_118045_134778 | NW_004515763.1 | Scaffold227 | 134778                  | TT                              | CC              | 1946928147               |
| SNP_P4_118046_134780 | NW_004515763.1 | Scaffold227 | 134780                  | TT                              | CC              | 1946928149               |
| SNP_P4_118047_134791 | NW_004515763.1 | Scaffold227 | 134791                  | AA                              | GG              | 1946928151               |
| SNP_P4_118048_134953 | NW_004515763.1 | Scaffold227 | 134953                  | AA                              | GG              | 1946928153               |
| SNP_P4_118049_134956 | NW_004515763.1 | Scaffold227 | 134956                  | AA                              | GG              | 1946928155               |
| SNP_P4_118050_134959 | NW_004515763.1 | Scaffold227 | 134959                  | TT                              | CC              | 1946928157               |
| SNP_P4_118051_135004 | NW_004515763.1 | Scaffold227 | 135004                  | TT                              | AA              | 1946928159               |
| SNP_P4_118052_135017 | NW_004515763.1 | Scaffold227 | 135017                  | AA                              | GG              | 1946928161               |
| SNP_P4_118053_135387 | NW_004515763.1 | Scaffold227 | 135387                  | TT                              | GG              | 1946928163               |
| SNP_P4_118054_135403 | NW_004515763.1 | Scaffold227 | 135403                  | AA                              | GG              | 1946928165               |
| SNP_P4_118055_135408 | NW_004515763.1 | Scaffold227 | 135408                  | AA                              | CC              | 1946928167               |

| SNPs IDs             | Chromosome IDs | Chromosomes | Physical positions (bp) | CDC Frontier (Reference genome) | (ILWC46 & LPNB) | NCBI SNPdb Accession IDs |
|----------------------|----------------|-------------|-------------------------|---------------------------------|-----------------|--------------------------|
| SNP_P4_118056_135409 | NW_004515763.1 | Scaffold227 | 135409                  | AA                              | GG              | 1946928169               |
| SNP_P4_118057_135419 | NW_004515763.1 | Scaffold227 | 135419                  | TT                              | CC              | 1946928171               |
| SNP_P4_118058_135455 | NW_004515763.1 | Scaffold227 | 135455                  | TT                              | CC              | 1946928173               |
| SNP_P4_118060_135525 | NW_004515763.1 | Scaffold227 | 135525                  | AA                              | GG              | 1946928175               |
| SNP_P4_118061_135532 | NW_004515763.1 | Scaffold227 | 135532                  | AA                              | CC              | 1946928177               |
| SNP_P4_118062_136434 | NW_004515763.1 | Scaffold227 | 136434                  | GG                              | TT              | 1946928179               |
| SNP_P4_118063_136507 | NW_004515763.1 | Scaffold227 | 136507                  | AA                              | GG              | 1946928181               |
| SNP_P4_118064_136515 | NW_004515763.1 | Scaffold227 | 136515                  | AA                              | TT              | 1946928183               |
| SNP_P4_118065_136528 | NW_004515763.1 | Scaffold227 | 136528                  | CC                              | GG              | 1946928185               |
| SNP_P4_118066_136878 | NW_004515763.1 | Scaffold227 | 136878                  | TT                              | CC              | 1946928187               |
| SNP_P4_118067_136917 | NW_004515763.1 | Scaffold227 | 136917                  | TT                              | AA              | 1946928189               |
| SNP_P4_118068_136935 | NW_004515763.1 | Scaffold227 | 136935                  | TT                              | AA              | 1946928191               |
| SNP_P4_118069_140527 | NW_004515763.1 | Scaffold227 | 140527                  | GG                              | AA              | 1946928193               |
| SNP_P4_118070_140572 | NW_004515763.1 | Scaffold227 | 140572                  | AA                              | GG              | 1946928195               |
| SNP_P4_118071_140577 | NW_004515763.1 | Scaffold227 | 140577                  | TT                              | CC              | 1946928197               |
| SNP_P4_118072_140627 | NW_004515763.1 | Scaffold227 | 140627                  | AA                              | GG              | 1946928199               |
| SNP_P4_118073_140884 | NW_004515763.1 | Scaffold227 | 140884                  | TT                              | AA              | 1946928201               |
| SNP_P4_118074_140918 | NW_004515763.1 | Scaffold227 | 140918                  | AA                              | CC              | 1946928203               |
| SNP_P4_118075_140921 | NW_004515763.1 | Scaffold227 | 140921                  | AA                              | CC              | 1946928205               |
| SNP_P4_118076_140937 | NW_004515763.1 | Scaffold227 | 140937                  | AA                              | TT              | 1946928207               |
| SNP_P4_118078_141016 | NW_004515763.1 | Scaffold227 | 141016                  | GG                              | TT              | 1946928209               |
| SNP_P4_118079_141037 | NW_004515763.1 | Scaffold227 | 141037                  | TT                              | CC              | 1946928211               |
| SNP_P4_118080_141068 | NW_004515763.1 | Scaffold227 | 141068                  | AA                              | GG              | 1946928213               |
| SNP_P4_118081_141082 | NW_004515763.1 | Scaffold227 | 141082                  | TT                              | CC              | 1946928215               |
| SNP_P4_118082_141164 | NW_004515763.1 | Scaffold227 | 141164                  | GG                              | AA              | 1946928217               |
| SNP_P4_118083_141177 | NW_004515763.1 | Scaffold227 | 141177                  | TT                              | CC              | 1946928219               |
| SNP_P4_118084_141207 | NW_004515763.1 | Scaffold227 | 141207                  | TT                              | AA              | 1946928221               |
| SNP_P4_118085_141256 | NW_004515763.1 | Scaffold227 | 141256                  | TT                              | CC              | 1946928223               |
| SNP_P4_118086_141333 | NW_004515763.1 | Scaffold227 | 141333                  | AA                              | GG              | 1946928225               |
| SNP_P4_118087_141444 | NW_004515763.1 | Scaffold227 | 141444                  | TT                              | CC              | 1946928227               |
| SNP_P4_118088_141461 | NW_004515763.1 | Scaffold227 | 141461                  | AA                              | GG              | 1946928229               |
| SNP_P4_118089_141605 | NW_004515763.1 | Scaffold227 | 141605                  | CC                              | GG              | 1946928231               |
| SNP_P4_118090_141609 | NW_004515763.1 | Scaffold227 | 141609                  | AA                              | GG              | 1946928233               |
| SNP_P4_118091_141680 | NW_004515763.1 | Scaffold227 | 141680                  | GG                              | CC              | 1946928235               |
| SNP_P4_118092_141685 | NW_004515763.1 | Scaffold227 | 141685                  | TT                              | CC              | 1946928237               |
| SNP_P4_118093_142531 | NW_004515763.1 | Scaffold227 | 142531                  | TT                              | CC              | 1946928239               |
| SNP_P4_118094_142547 | NW_004515763.1 | Scaffold227 | 142547                  | AA                              | GG              | 1946928241               |
| SNP_P4_118095_142553 | NW_004515763.1 | Scaffold227 | 142553                  | AA                              | GG              | 1946928243               |
| SNP_P4_118096_142564 | NW_004515763.1 | Scaffold227 | 142564                  | AA                              | CC              | 1946928245               |
| SNP_P4_118097_142615 | NW_004515763.1 | Scaffold227 | 142615                  | AA                              | GG              | 1946928247               |
| SNP_P4_118098_142923 | NW_004515763.1 | Scaffold227 | 142923                  | TT                              | CC              | 1946928249               |
| SNP_P4_118099_142942 | NW_004515763.1 | Scaffold227 | 142942                  | AA                              | GG              | 1946928251               |

| SNPs IDs             | Chromosome IDs | Chromosomes | Physical positions (bp) | CDC Frontier (Reference genome) | (ILWC46 & LPNB) | NCBI SNPdb Accession IDs |
|----------------------|----------------|-------------|-------------------------|---------------------------------|-----------------|--------------------------|
| SNP_P4_118100_142961 | NW_004515763.1 | Scaffold227 | 142961                  | TT                              | CC              | 1946928253               |
| SNP_P4_118101_142981 | NW_004515763.1 | Scaffold227 | 142981                  | TT                              | CC              | 1946928255               |
| SNP_P4_118102_143022 | NW_004515763.1 | Scaffold227 | 143022                  | AA                              | GG              | 1946928257               |
| SNP_P4_118103_143030 | NW_004515763.1 | Scaffold227 | 143030                  | AA                              | TT              | 1946928259               |
| SNP_P4_118105_143045 | NW_004515763.1 | Scaffold227 | 143045                  | TT                              | CC              | 1946928261               |
| SNP_P4_118106_144233 | NW_004515763.1 | Scaffold227 | 144233                  | AA                              | GG              | 1946928263               |
| SNP_P4_118107_144260 | NW_004515763.1 | Scaffold227 | 144260                  | TT                              | CC              | 1946928265               |
| SNP_P4_118108_144291 | NW_004515763.1 | Scaffold227 | 144291                  | AA                              | GG              | 1946928267               |
| SNP_P4_118109_144323 | NW_004515763.1 | Scaffold227 | 144323                  | TT                              | CC              | 1946928270               |
| SNP_P4_118110_144360 | NW_004515763.1 | Scaffold227 | 144360                  | TT                              | AA              | 1946928272               |
| SNP_P4_118111_144406 | NW_004515763.1 | Scaffold227 | 144406                  | TT                              | CC              | 1946928274               |
| SNP_P4_118113_144514 | NW_004515763.1 | Scaffold227 | 144514                  | TT                              | CC              | 1946928276               |
| SNP_P4_118114_144516 | NW_004515763.1 | Scaffold227 | 144516                  | AA                              | CC              | 1946928278               |
| SNP_P4_118115_144525 | NW_004515763.1 | Scaffold227 | 144525                  | AA                              | CC              | 1946928280               |
| SNP_P4_118116_144542 | NW_004515763.1 | Scaffold227 | 144542                  | AA                              | GG              | 1946928282               |
| SNP_P4_118117_144561 | NW_004515763.1 | Scaffold227 | 144561                  | TT                              | CC              | 1946928284               |
| SNP_P4_118118_144587 | NW_004515763.1 | Scaffold227 | 144587                  | AA                              | GG              | 1946928286               |
| SNP_P4_118119_144602 | NW_004515763.1 | Scaffold227 | 144602                  | GG                              | AA              | 1946928288               |
| SNP_P4_118120_144618 | NW_004515763.1 | Scaffold227 | 144618                  | AA                              | CC              | 1946928290               |
| SNP_P4_118121_147205 | NW_004515763.1 | Scaffold227 | 147205                  | TT                              | GG              | 1946928292               |
| SNP_P4_118122_148314 | NW_004515763.1 | Scaffold227 | 148314                  | GG                              | CC              | 1946928295               |
| SNP_P4_118123_155205 | NW_004515763.1 | Scaffold227 | 155205                  | GG                              | AA              | 1946928297               |
| SNP_P4_118124_161189 | NW_004515763.1 | Scaffold227 | 161189                  | AA                              | TT              | 1946928299               |
| SNP_P4_118125_194745 | NW_004515763.1 | Scaffold227 | 194745                  | CC                              | TT              | 1946928301               |
| SNP_P4_118126_194866 | NW_004515763.1 | Scaffold227 | 194866                  | GG                              | AA              | 1946928303               |
| SNP_P4_118127_194901 | NW_004515763.1 | Scaffold227 | 194901                  | TT                              | CC              | 1946928305               |
| SNP_P4_118128_195033 | NW_004515763.1 | Scaffold227 | 195033                  | GG                              | TT              | 1946928307               |
| SNP_P4_118129_195072 | NW_004515763.1 | Scaffold227 | 195072                  | CC                              | AA              | 1946928309               |
| SNP_P4_118130_195080 | NW_004515763.1 | Scaffold227 | 195080                  | AA                              | CC              | 1946928311               |
| SNP_P4_118131_195088 | NW_004515763.1 | Scaffold227 | 195088                  | GG                              | AA              | 1946928313               |
| SNP_P4_118132_195092 | NW_004515763.1 | Scaffold227 | 195092                  | TT                              | CC              | 1946928315               |
| SNP_P4_118133_195149 | NW_004515763.1 | Scaffold227 | 195149                  | TT                              | GG              | 1946928317               |
| SNP_P4_118134_195271 | NW_004515763.1 | Scaffold227 | 195271                  | AA                              | TT              | 1946928319               |
| SNP_P4_118135_195431 | NW_004515763.1 | Scaffold227 | 195431                  | GG                              | TT              | 1946928321               |
| SNP_P4_118136_195497 | NW_004515763.1 | Scaffold227 | 195497                  | CC                              | AA              | 1946928323               |
| SNP_P4_118137_195547 | NW_004515763.1 | Scaffold227 | 195547                  | TT                              | CC              | 1946928325               |
| SNP_P4_118138_195606 | NW_004515763.1 | Scaffold227 | 195606                  | AA                              | CC              | 1946928327               |
| SNP_P4_118139_195667 | NW_004515763.1 | Scaffold227 | 195667                  | AA                              | GG              | 1946928329               |
| SNP_P4_118141_195708 | NW_004515763.1 | Scaffold227 | 195708                  | TT                              | CC              | 1946928331               |
| SNP_P4_118142_195725 | NW_004515763.1 | Scaffold227 | 195725                  | AA                              | GG              | 1946928333               |
| SNP_P4_118143_195734 | NW_004515763.1 | Scaffold227 | 195734                  | CC                              | GG              | 1946928335               |
| SNP_P4_118144_195790 | NW_004515763.1 | Scaffold227 | 195790                  | TT                              | AA              | 1946928337               |

| SNPs IDs             | Chromosome IDs | Chromosomes | Physical positions (bp) | CDC Frontier (Reference genome) | (ILWC46 & LPNB) | NCBI SNPdb Accession IDs |
|----------------------|----------------|-------------|-------------------------|---------------------------------|-----------------|--------------------------|
| SNP_P4_118145_195891 | NW_004515763.1 | Scaffold227 | 195891                  | GG                              | TT              | 1946928339               |
| SNP_P4_118146_195936 | NW_004515763.1 | Scaffold227 | 195936                  | CC                              | TT              | 1946928341               |
| SNP_P4_118147_195940 | NW_004515763.1 | Scaffold227 | 195940                  | AA                              | CC              | 1946928343               |
| SNP_P4_118149_196012 | NW_004515763.1 | Scaffold227 | 196012                  | GG                              | AA              | 1946928345               |
| SNP_P4_118150_196046 | NW_004515763.1 | Scaffold227 | 196046                  | TT                              | CC              | 1946928347               |
| SNP_P4_118151_196089 | NW_004515763.1 | Scaffold227 | 196089                  | AA                              | GG              | 1946928349               |
| SNP_P4_118152_196095 | NW_004515763.1 | Scaffold227 | 196095                  | AA                              | GG              | 1946928351               |
| SNP_P4_118154_196157 | NW_004515763.1 | Scaffold227 | 196157                  | AA                              | GG              | 1946928353               |
| SNP_P4_118155_196185 | NW_004515763.1 | Scaffold227 | 196185                  | AA                              | GG              | 1946928355               |
| SNP_P4_118156_196193 | NW_004515763.1 | Scaffold227 | 196193                  | CC                              | TT              | 1946928357               |
| SNP_P4_118157_196196 | NW_004515763.1 | Scaffold227 | 196196                  | CC                              | TT              | 1946928359               |
| SNP_P4_118158_196228 | NW_004515763.1 | Scaffold227 | 196228                  | AA                              | CC              | 1946928361               |
| SNP_P4_118160_196384 | NW_004515763.1 | Scaffold227 | 196384                  | TT                              | AA              | 1946928363               |
| SNP_P4_118161_196445 | NW_004515763.1 | Scaffold227 | 196445                  | CC                              | TT              | 1946928365               |
| SNP_P4_118162_196469 | NW_004515763.1 | Scaffold227 | 196469                  | TT                              | CC              | 1946928367               |
| SNP_P4_118163_196496 | NW_004515763.1 | Scaffold227 | 196496                  | TT                              | CC              | 1946928369               |
| SNP_P4_118164_196583 | NW_004515763.1 | Scaffold227 | 196583                  | GG                              | AA              | 1946928371               |
| SNP_P4_118165_197139 | NW_004515763.1 | Scaffold227 | 197139                  | GG                              | AA              | 1946928373               |
| SNP_P4_118166_197296 | NW_004515763.1 | Scaffold227 | 197296                  | GG                              | AA              | 1946928375               |
| SNP_P4_118167_197349 | NW_004515763.1 | Scaffold227 | 197349                  | TT                              | CC              | 1946928377               |
| SNP_P4_118168_197397 | NW_004515763.1 | Scaffold227 | 197397                  | TT                              | CC              | 1946928379               |
| SNP_P4_118170_197493 | NW_004515763.1 | Scaffold227 | 197493                  | GG                              | AA              | 1946928381               |
| SNP_P4_118171_197506 | NW_004515763.1 | Scaffold227 | 197506                  | CC                              | TT              | 1946928383               |
| SNP_P4_118172_197552 | NW_004515763.1 | Scaffold227 | 197552                  | AA                              | TT              | 1946928385               |
| SNP_P4_118173_197575 | NW_004515763.1 | Scaffold227 | 197575                  | CC                              | TT              | 1946928387               |
| SNP_P4_118174_197615 | NW_004515763.1 | Scaffold227 | 197615                  | AA                              | CC              | 1946928389               |
| SNP_P4_118175_197630 | NW_004515763.1 | Scaffold227 | 197630                  | AA                              | GG              | 1946928391               |
| SNP_P4_118176_197633 | NW_004515763.1 | Scaffold227 | 197633                  | GG                              | AA              | 1946928393               |
| SNP_P4_118177_197727 | NW_004515763.1 | Scaffold227 | 197727                  | CC                              | GG              | 1946928395               |
| SNP_P4_118178_197730 | NW_004515763.1 | Scaffold227 | 197730                  | GG                              | TT              | 1946928397               |
| SNP_P4_118179_197747 | NW_004515763.1 | Scaffold227 | 197747                  | CC                              | TT              | 1946928398               |
| SNP_P4_118180_197792 | NW_004515763.1 | Scaffold227 | 197792                  | TT                              | AA              | 1946928400               |
| SNP_P4_118181_197937 | NW_004515763.1 | Scaffold227 | 197937                  | GG                              | CC              | 1946928402               |
| SNP_P4_118182_197954 | NW_004515763.1 | Scaffold227 | 197954                  | AA                              | GG              | 1946928404               |
| SNP_P4_118183_197988 | NW_004515763.1 | Scaffold227 | 197988                  | CC                              | AA              | 1946928406               |
| SNP_P4_118184_197989 | NW_004515763.1 | Scaffold227 | 197989                  | AA                              | GG              | 1946928408               |
| SNP_P4_118185_197997 | NW_004515763.1 | Scaffold227 | 197997                  | AA                              | CC              | 1946928410               |
| SNP_P4_118186_198003 | NW_004515763.1 | Scaffold227 | 198003                  | GG                              | CC              | 1946928412               |
| SNP_P4_118187_198012 | NW_004515763.1 | Scaffold227 | 198012                  | AA                              | CC              | 1946928414               |
| SNP_P4_118188_198046 | NW_004515763.1 | Scaffold227 | 198046                  | TT                              | CC              | 1946928416               |
| SNP_P4_118189_198061 | NW_004515763.1 | Scaffold227 | 198061                  | CC                              | TT              | 1946928418               |
| SNP_P4_118190_198137 | NW_004515763.1 | Scaffold227 | 198137                  | AA                              | GG              | 1946928420               |

| SNPs IDs             | Chromosome IDs | Chromosomes | Physical positions (bp) | CDC Frontier (Reference genome) | (ILWC46 & LPNB) | NCBI SNPdb Accession IDs |
|----------------------|----------------|-------------|-------------------------|---------------------------------|-----------------|--------------------------|
| SNP_P4_118191_198148 | NW_004515763.1 | Scaffold227 | 198148                  | GG                              | AA              | 1946928422               |
| SNP_P4_118192_198185 | NW_004515763.1 | Scaffold227 | 198185                  | AA                              | CC              | 1946928424               |
| SNP_P4_118193_198192 | NW_004515763.1 | Scaffold227 | 198192                  | GG                              | AA              | 1946928426               |
| SNP_P4_118194_198214 | NW_004515763.1 | Scaffold227 | 198214                  | AA                              | GG              | 1946928428               |
| SNP_P4_118195_207449 | NW_004515763.1 | Scaffold227 | 207449                  | CC                              | TT              | 1946928429               |
| SNP_P4_118196_211220 | NW_004515763.1 | Scaffold227 | 211220                  | CC                              | TT              | 1946928431               |
| SNP_P4_118197_225159 | NW_004515763.1 | Scaffold227 | 225159                  | GG                              | TT              | 1946928433               |
| SNP_P4_118198_225173 | NW_004515763.1 | Scaffold227 | 225173                  | CC                              | TT              | 1946928435               |
| SNP_P4_118200_238429 | NW_004515763.1 | Scaffold227 | 238429                  | AA                              | CC              | 1946928437               |
| SNP_P4_118201_250991 | NW_004515763.1 | Scaffold227 | 250991                  | GG                              | AA              | 1946928439               |
| SNP_P4_118202_314781 | NW_004515763.1 | Scaffold227 | 314781                  | TT                              | CC              | 1946928441               |
| SNP_P4_118203_315113 | NW_004515763.1 | Scaffold227 | 315113                  | CC                              | TT              | 1946928443               |
| SNP_P4_118204_315927 | NW_004515763.1 | Scaffold227 | 315927                  | CC                              | TT              | 1946928445               |
| SNP_P4_118205_319231 | NW_004515763.1 | Scaffold227 | 319231                  | CC                              | TT              | 1946928447               |
| SNP_P4_118206_326371 | NW_004515763.1 | Scaffold227 | 326371                  | CC                              | TT              | 1946928449               |
| SNP_P4_118207_343204 | NW_004515763.1 | Scaffold227 | 343204                  | CC                              | TT              | 1946928451               |
| SNP_P4_118208_343218 | NW_004515763.1 | Scaffold227 | 343218                  | CC                              | TT              | 1946928453               |
| SNP_P4_118209_379522 | NW_004515763.1 | Scaffold227 | 379522                  | CC                              | TT              | 1946928455               |
| SNP_P4_118210_379614 | NW_004515763.1 | Scaffold227 | 379614                  | CC                              | AA              | 1946928457               |
| SNP_P4_118211_380673 | NW_004515763.1 | Scaffold227 | 380673                  | AA                              | GG              | 1946928460               |
| SNP_P4_118212_383852 | NW_004515763.1 | Scaffold227 | 383852                  | GG                              | TT              | 1946928462               |
| SNP_P4_118214_478    | NW_004515764.1 | Scaffold228 | 478                     | AA                              | TT              | 1946928465               |
| SNP_P4_118215_4616   | NW_004515764.1 | Scaffold228 | 4616                    | CC                              | TT              | 1946928467               |
| SNP_P4_118216_4630   | NW_004515764.1 | Scaffold228 | 4630                    | AA                              | CC              | 1946928469               |
| SNP_P4_118217_9637   | NW_004515764.1 | Scaffold228 | 9637                    | TT                              | GG              | 1946928471               |
| SNP_P4_118219_18729  | NW_004515764.1 | Scaffold228 | 18729                   | GG                              | TT              | 1946928474               |
| SNP_P4_118220_19633  | NW_004515764.1 | Scaffold228 | 19633                   | AA                              | CC              | 1946928476               |
| SNP_P4_118221_19638  | NW_004515764.1 | Scaffold228 | 19638                   | AA                              | CC              | 1946928478               |
| SNP_P4_118222_19937  | NW_004515764.1 | Scaffold228 | 19937                   | AA                              | TT              | 1946928480               |
| SNP_P4_118223_19946  | NW_004515764.1 | Scaffold228 | 19946                   | CC                              | AA              | 1946928482               |
| SNP_P4_118224_19950  | NW_004515764.1 | Scaffold228 | 19950                   | AA                              | GG              | 1946928484               |
| SNP_P4_118225_26046  | NW_004515764.1 | Scaffold228 | 26046                   | GG                              | AA              | 1946928486               |
| SNP_P4_118226_40082  | NW_004515764.1 | Scaffold228 | 40082                   | TT                              | CC              | 1946928488               |
| SNP_P4_118227_56431  | NW_004515764.1 | Scaffold228 | 56431                   | GG                              | AA              | 1946928490               |
| SNP_P4_118228_64615  | NW_004515764.1 | Scaffold228 | 64615                   | GG                              | CC              | 1946928492               |
| SNP_P4_118229_64646  | NW_004515764.1 | Scaffold228 | 64646                   | AA                              | GG              | 1946928494               |
| SNP_P4_118230_64707  | NW_004515764.1 | Scaffold228 | 64707                   | TT                              | CC              | 1946928496               |
| SNP_P4_118231_64709  | NW_004515764.1 | Scaffold228 | 64709                   | GG                              | TT              | 1946928498               |
| SNP_P4_118232_64716  | NW_004515764.1 | Scaffold228 | 64716                   | CC                              | TT              | 1946928500               |
| SNP_P4_118233_64741  | NW_004515764.1 | Scaffold228 | 64741                   | AA                              | TT              | 1946928502               |
| SNP_P4_118234_80106  | NW_004515764.1 | Scaffold228 | 80106                   | TT                              | CC              | 1946928504               |
| SNP_P4_118235_80393  | NW_004515764.1 | Scaffold228 | 80393                   | GG                              | AA              | 1946928506               |



| SNPs IDs             | Chromosome IDs | Chromosomes | Physical positions (bp) | CDC Frontier (Reference genome) | (ILWC46 & LPNB) | NCBI SNPdb Accession IDs |
|----------------------|----------------|-------------|-------------------------|---------------------------------|-----------------|--------------------------|
| SNP_P4_118236_94196  | NW_004515764.1 | Scaffold228 | 94196                   | TT                              | CC              | 1946928508               |
| SNP_P4_118237_94215  | NW_004515764.1 | Scaffold228 | 94215                   | TT                              | AA              | 1946928510               |
| SNP_P4_118238_94216  | NW_004515764.1 | Scaffold228 | 94216                   | GG                              | TT              | 1946928512               |
| SNP_P4_118239_99535  | NW_004515764.1 | Scaffold228 | 99535                   | CC                              | GG              | 1946928514               |
| SNP_P4_118240_99546  | NW_004515764.1 | Scaffold228 | 99546                   | TT                              | CC              | 1946928516               |
| SNP_P4_118241_99563  | NW_004515764.1 | Scaffold228 | 99563                   | GG                              | AA              | 1946928518               |
| SNP_P4_118242_99579  | NW_004515764.1 | Scaffold228 | 99579                   | GG                              | AA              | 1946928520               |
| SNP_P4_118243_99607  | NW_004515764.1 | Scaffold228 | 99607                   | AA                              | GG              | 1946928522               |
| SNP_P4_118244_99614  | NW_004515764.1 | Scaffold228 | 99614                   | GG                              | TT              | 1946928524               |
| SNP_P4_118245_99617  | NW_004515764.1 | Scaffold228 | 99617                   | CC                              | TT              | 1946928526               |
| SNP_P4_118246_102878 | NW_004515764.1 | Scaffold228 | 102878                  | CC                              | TT              | 1946928528               |
| SNP_P4_118247_103295 | NW_004515764.1 | Scaffold228 | 103295                  | TT                              | GG              | 1946928530               |
| SNP_P4_118248_106098 | NW_004515764.1 | Scaffold228 | 106098                  | AA                              | GG              | 1946928532               |
| SNP_P4_118250_106512 | NW_004515764.1 | Scaffold228 | 106512                  | AA                              | GG              | 1946928534               |
| SNP_P4_118251_106542 | NW_004515764.1 | Scaffold228 | 106542                  | GG                              | TT              | 1946928536               |
| SNP_P4_118252_106563 | NW_004515764.1 | Scaffold228 | 106563                  | TT                              | CC              | 1946928538               |
| SNP_P4_118253_108982 | NW_004515764.1 | Scaffold228 | 108982                  | TT                              | GG              | 1946928540               |
| SNP_P4_118254_109014 | NW_004515764.1 | Scaffold228 | 109014                  | TT                              | CC              | 1946928542               |
| SNP_P4_118255_109023 | NW_004515764.1 | Scaffold228 | 109023                  | AA                              | GG              | 1946928544               |
| SNP_P4_118256_109108 | NW_004515764.1 | Scaffold228 | 109108                  | GG                              | TT              | 1946928546               |
| SNP_P4_118257_109329 | NW_004515764.1 | Scaffold228 | 109329                  | AA                              | TT              | 1946928548               |
| SNP_P4_118258_109454 | NW_004515764.1 | Scaffold228 | 109454                  | TT                              | AA              | 1946928550               |
| SNP_P4_118259_110358 | NW_004515764.1 | Scaffold228 | 110358                  | TT                              | AA              | 1946928552               |
| SNP_P4_118260_114517 | NW_004515764.1 | Scaffold228 | 114517                  | TT                              | CC              | 1946928554               |
| SNP_P4_118261_114520 | NW_004515764.1 | Scaffold228 | 114520                  | AA                              | CC              | 1946928556               |
| SNP_P4_118262_117125 | NW_004515764.1 | Scaffold228 | 117125                  | TT                              | CC              | 1946928558               |
| SNP_P4_118263_117411 | NW_004515764.1 | Scaffold228 | 117411                  | TT                              | CC              | 1946928560               |
| SNP_P4_118264_117431 | NW_004515764.1 | Scaffold228 | 117431                  | AA                              | GG              | 1946928562               |
| SNP_P4_118265_117653 | NW_004515764.1 | Scaffold228 | 117653                  | TT                              | CC              | 1946928564               |
| SNP_P4_118266_117740 | NW_004515764.1 | Scaffold228 | 117740                  | GG                              | AA              | 1946928566               |
| SNP_P4_118267_117755 | NW_004515764.1 | Scaffold228 | 117755                  | TT                              | CC              | 1946928568               |
| SNP_P4_118268_117759 | NW_004515764.1 | Scaffold228 | 117759                  | CC                              | TT              | 1946928570               |
| SNP_P4_118269_117853 | NW_004515764.1 | Scaffold228 | 117853                  | TT                              | GG              | 1946928572               |
| SNP_P4_118270_117892 | NW_004515764.1 | Scaffold228 | 117892                  | TT                              | CC              | 1946928574               |
| SNP_P4_118271_118129 | NW_004515764.1 | Scaffold228 | 118129                  | TT                              | AA              | 1946928576               |
| SNP_P4_118272_121460 | NW_004515764.1 | Scaffold228 | 121460                  | TT                              | AA              | 1946928578               |
| SNP_P4_118273_121469 | NW_004515764.1 | Scaffold228 | 121469                  | CC                              | TT              | 1946928580               |
| SNP_P4_118274_121976 | NW_004515764.1 | Scaffold228 | 121976                  | AA                              | TT              | 1946928582               |
| SNP_P4_118275_122053 | NW_004515764.1 | Scaffold228 | 122053                  | CC                              | TT              | 1946928584               |
| SNP_P4_118276_122102 | NW_004515764.1 | Scaffold228 | 122102                  | TT                              | AA              | 1946928586               |
| SNP_P4_118277_122206 | NW_004515764.1 | Scaffold228 | 122206                  | TT                              | CC              | 1946928588               |
| SNP_P4_118278_122232 | NW_004515764.1 | Scaffold228 | 122232                  | CC                              | GG              | 1946928590               |

| SNPs IDs             | Chromosome IDs | Chromosomes | Physical positions (bp) | CDC Frontier (Reference genome) | (ILWC46 & LPNB) | NCBI SNPdb Accession IDs |
|----------------------|----------------|-------------|-------------------------|---------------------------------|-----------------|--------------------------|
| SNP_P4_118279_122238 | NW_004515764.1 | Scaffold228 | 122238                  | TT                              | GG              | 1946928592               |
| SNP_P4_118280_122249 | NW_004515764.1 | Scaffold228 | 122249                  | TT                              | CC              | 1946928594               |
| SNP_P4_118281_132554 | NW_004515764.1 | Scaffold228 | 132554                  | GG                              | CC              | 1946928596               |
| SNP_P4_118282_132565 | NW_004515764.1 | Scaffold228 | 132565                  | TT                              | GG              | 1946928598               |
| SNP_P4_118283_134072 | NW_004515764.1 | Scaffold228 | 134072                  | TT                              | AA              | 1946928600               |
| SNP_P4_118284_134637 | NW_004515764.1 | Scaffold228 | 134637                  | AA                              | TT              | 1946928602               |
| SNP_P4_118285_134736 | NW_004515764.1 | Scaffold228 | 134736                  | AA                              | TT              | 1946928604               |
| SNP_P4_118286_134747 | NW_004515764.1 | Scaffold228 | 134747                  | CC                              | TT              | 1946928606               |
| SNP_P4_118287_134758 | NW_004515764.1 | Scaffold228 | 134758                  | TT                              | CC              | 1946928609               |
| SNP_P4_118288_134883 | NW_004515764.1 | Scaffold228 | 134883                  | TT                              | CC              | 1946928611               |
| SNP_P4_118289_134913 | NW_004515764.1 | Scaffold228 | 134913                  | AA                              | GG              | 1946928613               |
| SNP_P4_118290_135074 | NW_004515764.1 | Scaffold228 | 135074                  | TT                              | AA              | 1946928615               |
| SNP_P4_118291_135089 | NW_004515764.1 | Scaffold228 | 135089                  | CC                              | TT              | 1946928616               |
| SNP_P4_118292_135109 | NW_004515764.1 | Scaffold228 | 135109                  | CC                              | TT              | 1946928618               |
| SNP_P4_118294_136880 | NW_004515764.1 | Scaffold228 | 136880                  | AA                              | CC              | 1946928620               |
| SNP_P4_118295_144135 | NW_004515764.1 | Scaffold228 | 144135                  | TT                              | GG              | 1946928622               |
| SNP_P4_118296_144220 | NW_004515764.1 | Scaffold228 | 144220                  | GG                              | AA              | 1946928624               |
| SNP_P4_118297_144229 | NW_004515764.1 | Scaffold228 | 144229                  | GG                              | TT              | 1946928626               |
| SNP_P4_118298_146868 | NW_004515764.1 | Scaffold228 | 146868                  | GG                              | AA              | 1946928628               |
| SNP_P4_118299_147194 | NW_004515764.1 | Scaffold228 | 147194                  | TT                              | CC              | 1946928630               |
| SNP_P4_118300_147239 | NW_004515764.1 | Scaffold228 | 147239                  | CC                              | GG              | 1946928632               |
| SNP_P4_118301_147364 | NW_004515764.1 | Scaffold228 | 147364                  | AA                              | TT              | 1946928634               |
| SNP_P4_118302_147575 | NW_004515764.1 | Scaffold228 | 147575                  | CC                              | TT              | 1946928636               |
| SNP_P4_118303_148584 | NW_004515764.1 | Scaffold228 | 148584                  | CC                              | TT              | 1946928638               |
| SNP_P4_118304_148585 | NW_004515764.1 | Scaffold228 | 148585                  | CC                              | GG              | 1946928640               |
| SNP_P4_118305_148593 | NW_004515764.1 | Scaffold228 | 148593                  | AA                              | GG              | 1946928642               |
| SNP_P4_118306_148598 | NW_004515764.1 | Scaffold228 | 148598                  | AA                              | TT              | 1946928644               |
| SNP_P4_118307_148623 | NW_004515764.1 | Scaffold228 | 148623                  | AA                              | TT              | 1946928646               |
| SNP_P4_118308_149616 | NW_004515764.1 | Scaffold228 | 149616                  | AA                              | CC              | 1946928648               |
| SNP_P4_118309_149806 | NW_004515764.1 | Scaffold228 | 149806                  | TT                              | CC              | 1946928650               |
| SNP_P4_118310_149811 | NW_004515764.1 | Scaffold228 | 149811                  | GG                              | CC              | 1946928652               |
| SNP_P4_118311_149927 | NW_004515764.1 | Scaffold228 | 149927                  | TT                              | CC              | 1946928654               |
| SNP_P4_118312_150254 | NW_004515764.1 | Scaffold228 | 150254                  | AA                              | GG              | 1946928656               |
| SNP_P4_118313_150336 | NW_004515764.1 | Scaffold228 | 150336                  | AA                              | TT              | 1946928658               |
| SNP_P4_118314_153543 | NW_004515764.1 | Scaffold228 | 153543                  | TT                              | CC              | 1946928660               |
| SNP_P4_118315_155091 | NW_004515764.1 | Scaffold228 | 155091                  | TT                              | CC              | 1946928662               |
| SNP_P4_118316_155571 | NW_004515764.1 | Scaffold228 | 155571                  | AA                              | TT              | 1946928664               |
| SNP_P4_118317_155720 | NW_004515764.1 | Scaffold228 | 155720                  | CC                              | TT              | 1946928666               |
| SNP_P4_118318_155721 | NW_004515764.1 | Scaffold228 | 155721                  | GG                              | AA              | 1946928668               |
| SNP_P4_118319_155774 | NW_004515764.1 | Scaffold228 | 155774                  | TT                              | CC              | 1946928670               |
| SNP_P4_118320_155959 | NW_004515764.1 | Scaffold228 | 155959                  | AA                              | GG              | 1946928672               |
| SNP_P4_118321_155967 | NW_004515764.1 | Scaffold228 | 155967                  | AA                              | CC              | 1946928674               |

| SNPs IDs             | Chromosome IDs | Chromosomes | Physical positions (bp) | CDC Frontier (Reference genome) | (ILWC46 & LPNB) | NCBI SNPdb Accession IDs |
|----------------------|----------------|-------------|-------------------------|---------------------------------|-----------------|--------------------------|
| SNP_P4_118322_158320 | NW_004515764.1 | Scaffold228 | 158320                  | AA                              | GG              | 1946928676               |
| SNP_P4_118323_158370 | NW_004515764.1 | Scaffold228 | 158370                  | AA                              | GG              | 1946928678               |
| SNP_P4_118324_158372 | NW_004515764.1 | Scaffold228 | 158372                  | AA                              | CC              | 1946928680               |
| SNP_P4_118325_164607 | NW_004515764.1 | Scaffold228 | 164607                  | GG                              | AA              | 1946928682               |
| SNP_P4_118326_164612 | NW_004515764.1 | Scaffold228 | 164612                  | GG                              | CC              | 1946928684               |
| SNP_P4_118327_164637 | NW_004515764.1 | Scaffold228 | 164637                  | TT                              | CC              | 1946928686               |
| SNP_P4_118328_164733 | NW_004515764.1 | Scaffold228 | 164733                  | AA                              | TT              | 1946928688               |
| SNP_P4_118329_164800 | NW_004515764.1 | Scaffold228 | 164800                  | CC                              | TT              | 1946928690               |
| SNP_P4_118330_164801 | NW_004515764.1 | Scaffold228 | 164801                  | CC                              | AA              | 1946928692               |
| SNP_P4_118331_164805 | NW_004515764.1 | Scaffold228 | 164805                  | GG                              | AA              | 1946928694               |
| SNP_P4_118332_164891 | NW_004515764.1 | Scaffold228 | 164891                  | CC                              | TT              | 1946928696               |
| SNP_P4_118333_164908 | NW_004515764.1 | Scaffold228 | 164908                  | CC                              | TT              | 1946928698               |
| SNP_P4_118334_164910 | NW_004515764.1 | Scaffold228 | 164910                  | AA                              | GG              | 1946928700               |
| SNP_P4_118335_164932 | NW_004515764.1 | Scaffold228 | 164932                  | GG                              | TT              | 1946928702               |
| SNP_P4_118336_164936 | NW_004515764.1 | Scaffold228 | 164936                  | AA                              | GG              | 1946928704               |
| SNP_P4_118337_165013 | NW_004515764.1 | Scaffold228 | 165013                  | AA                              | GG              | 1946928706               |
| SNP_P4_118338_165049 | NW_004515764.1 | Scaffold228 | 165049                  | AA                              | GG              | 1946928708               |
| SNP_P4_118339_165208 | NW_004515764.1 | Scaffold228 | 165208                  | CC                              | TT              | 1946928710               |
| SNP_P4_118340_165240 | NW_004515764.1 | Scaffold228 | 165240                  | AA                              | GG              | 1946928712               |
| SNP_P4_118341_174503 | NW_004515764.1 | Scaffold228 | 174503                  | AA                              | TT              | 1946928714               |
| SNP_P4_118342_174526 | NW_004515764.1 | Scaffold228 | 174526                  | TT                              | AA              | 1946928716               |
| SNP_P4_118343_175266 | NW_004515764.1 | Scaffold228 | 175266                  | AA                              | TT              | 1946928718               |
| SNP_P4_118344_176157 | NW_004515764.1 | Scaffold228 | 176157                  | CC                              | TT              | 1946928720               |
| SNP_P4_118345_176165 | NW_004515764.1 | Scaffold228 | 176165                  | AA                              | CC              | 1946928722               |
| SNP_P4_118346_176178 | NW_004515764.1 | Scaffold228 | 176178                  | GG                              | AA              | 1946928724               |
| SNP_P4_118347_176231 | NW_004515764.1 | Scaffold228 | 176231                  | GG                              | AA              | 1946928726               |
| SNP_P4_118348_176290 | NW_004515764.1 | Scaffold228 | 176290                  | GG                              | AA              | 1946928728               |
| SNP_P4_118349_176412 | NW_004515764.1 | Scaffold228 | 176412                  | CC                              | TT              | 1946928730               |
| SNP_P4_118350_176429 | NW_004515764.1 | Scaffold228 | 176429                  | CC                              | AA              | 1946928732               |
| SNP_P4_118351_176643 | NW_004515764.1 | Scaffold228 | 176643                  | TT                              | GG              | 1946928734               |
| SNP_P4_118352_177650 | NW_004515764.1 | Scaffold228 | 177650                  | TT                              | CC              | 1946928736               |
| SNP_P4_118353_177819 | NW_004515764.1 | Scaffold228 | 177819                  | AA                              | GG              | 1946928738               |
| SNP_P4_118354_177974 | NW_004515764.1 | Scaffold228 | 177974                  | GG                              | CC              | 1946928740               |
| SNP_P4_118355_177977 | NW_004515764.1 | Scaffold228 | 177977                  | GG                              | AA              | 1946928742               |
| SNP_P4_118356_178008 | NW_004515764.1 | Scaffold228 | 178008                  | CC                              | TT              | 1946928744               |
| SNP_P4_118357_178032 | NW_004515764.1 | Scaffold228 | 178032                  | CC                              | AA              | 1946928746               |
| SNP_P4_118358_178072 | NW_004515764.1 | Scaffold228 | 178072                  | GG                              | AA              | 1946928748               |
| SNP_P4_118359_178123 | NW_004515764.1 | Scaffold228 | 178123                  | CC                              | TT              | 1946928750               |
| SNP_P4_118360_178147 | NW_004515764.1 | Scaffold228 | 178147                  | GG                              | AA              | 1946928752               |
| SNP_P4_118361_178228 | NW_004515764.1 | Scaffold228 | 178228                  | AA                              | GG              | 1946928754               |
| SNP_P4_118362_179315 | NW_004515764.1 | Scaffold228 | 179315                  | TT                              | CC              | 1946928756               |
| SNP_P4_118363_179320 | NW_004515764.1 | Scaffold228 | 179320                  | AA                              | GG              | 1946928758               |

| SNPs IDs             | Chromosome IDs | Chromosomes | Physical positions (bp) | CDC Frontier (Reference genome) | (ILWC46 & LPNB) | NCBI SNPdb Accession IDs |
|----------------------|----------------|-------------|-------------------------|---------------------------------|-----------------|--------------------------|
| SNP_P4_118364_179441 | NW_004515764.1 | Scaffold228 | 179441                  | TT                              | CC              | 1946928760               |
| SNP_P4_118365_179503 | NW_004515764.1 | Scaffold228 | 179503                  | TT                              | CC              | 1946928762               |
| SNP_P4_118366_179545 | NW_004515764.1 | Scaffold228 | 179545                  | GG                              | CC              | 1946928764               |
| SNP_P4_118367_179636 | NW_004515764.1 | Scaffold228 | 179636                  | TT                              | CC              | 1946928766               |
| SNP_P4_118368_179669 | NW_004515764.1 | Scaffold228 | 179669                  | AA                              | TT              | 1946928768               |
| SNP_P4_118369_179820 | NW_004515764.1 | Scaffold228 | 179820                  | CC                              | AA              | 1946928770               |
| SNP_P4_118370_180110 | NW_004515764.1 | Scaffold228 | 180110                  | TT                              | GG              | 1946928772               |
| SNP_P4_118371_180164 | NW_004515764.1 | Scaffold228 | 180164                  | AA                              | GG              | 1946928774               |
| SNP_P4_118372_180786 | NW_004515764.1 | Scaffold228 | 180786                  | TT                              | CC              | 1946928776               |
| SNP_P4_118374_183172 | NW_004515764.1 | Scaffold228 | 183172                  | GG                              | CC              | 1946928778               |
| SNP_P4_118375_183303 | NW_004515764.1 | Scaffold228 | 183303                  | AA                              | TT              | 1946928780               |
| SNP_P4_118376_183361 | NW_004515764.1 | Scaffold228 | 183361                  | TT                              | CC              | 1946928782               |
| SNP_P4_118377_183488 | NW_004515764.1 | Scaffold228 | 183488                  | CC                              | TT              | 1946928784               |
| SNP_P4_118378_184357 | NW_004515764.1 | Scaffold228 | 184357                  | CC                              | AA              | 1946928786               |
| SNP_P4_118379_184374 | NW_004515764.1 | Scaffold228 | 184374                  | AA                              | GG              | 1946928788               |
| SNP_P4_118380_184391 | NW_004515764.1 | Scaffold228 | 184391                  | AA                              | TT              | 1946928790               |
| SNP_P4_118381_184695 | NW_004515764.1 | Scaffold228 | 184695                  | AA                              | GG              | 1946928792               |
| SNP_P4_118382_185335 | NW_004515764.1 | Scaffold228 | 185335                  | CC                              | TT              | 1946928795               |
| SNP_P4_118383_185338 | NW_004515764.1 | Scaffold228 | 185338                  | AA                              | CC              | 1946928797               |
| SNP_P4_118384_185410 | NW_004515764.1 | Scaffold228 | 185410                  | TT                              | CC              | 1946928799               |
| SNP_P4_118385_185807 | NW_004515764.1 | Scaffold228 | 185807                  | GG                              | CC              | 1946928801               |
| SNP_P4_118386_185822 | NW_004515764.1 | Scaffold228 | 185822                  | CC                              | AA              | 1946928803               |
| SNP_P4_118387_186006 | NW_004515764.1 | Scaffold228 | 186006                  | TT                              | CC              | 1946928805               |
| SNP_P4_118388_186223 | NW_004515764.1 | Scaffold228 | 186223                  | CC                              | TT              | 1946928807               |
| SNP_P4_118389_186254 | NW_004515764.1 | Scaffold228 | 186254                  | GG                              | CC              | 1946928809               |
| SNP_P4_118390_186708 | NW_004515764.1 | Scaffold228 | 186708                  | AA                              | CC              | 1946928811               |
| SNP_P4_118391_187077 | NW_004515764.1 | Scaffold228 | 187077                  | AA                              | GG              | 1946928813               |
| SNP_P4_118392_187911 | NW_004515764.1 | Scaffold228 | 187911                  | GG                              | AA              | 1946928815               |
| SNP_P4_118393_188086 | NW_004515764.1 | Scaffold228 | 188086                  | TT                              | CC              | 1946928817               |
| SNP_P4_118394_188400 | NW_004515764.1 | Scaffold228 | 188400                  | GG                              | AA              | 1946928820               |
| SNP_P4_118395_188442 | NW_004515764.1 | Scaffold228 | 188442                  | GG                              | AA              | 1946928822               |
| SNP_P4_118396_188553 | NW_004515764.1 | Scaffold228 | 188553                  | CC                              | TT              | 1946928824               |
| SNP_P4_118397_188645 | NW_004515764.1 | Scaffold228 | 188645                  | TT                              | AA              | 1946928827               |
| SNP_P4_118398_188740 | NW_004515764.1 | Scaffold228 | 188740                  | GG                              | AA              | 1946928830               |
| SNP_P4_118399_188744 | NW_004515764.1 | Scaffold228 | 188744                  | CC                              | GG              | 1946928832               |
| SNP_P4_118400_188746 | NW_004515764.1 | Scaffold228 | 188746                  | AA                              | CC              | 1946928835               |
| SNP_P4_118401_188891 | NW_004515764.1 | Scaffold228 | 188891                  | GG                              | AA              | 1946928837               |
| SNP_P4_118402_189010 | NW_004515764.1 | Scaffold228 | 189010                  | GG                              | TT              | 1946928840               |
| SNP_P4_118403_189011 | NW_004515764.1 | Scaffold228 | 189011                  | CC                              | TT              | 1946928843               |
| SNP_P4_118404_189018 | NW_004515764.1 | Scaffold228 | 189018                  | CC                              | AA              | 1946928845               |
| SNP_P4_118405_189143 | NW_004515764.1 | Scaffold228 | 189143                  | TT                              | GG              | 1946928848               |
| SNP_P4_118406_189159 | NW_004515764.1 | Scaffold228 | 189159                  | GG                              | AA              | 1946928850               |

| SNPs IDs             | Chromosome IDs | Chromosomes | Physical positions (bp) | CDC Frontier (Reference genome) | (ILWC46 & LPNB) | NCBI SNPdb Accession IDs |
|----------------------|----------------|-------------|-------------------------|---------------------------------|-----------------|--------------------------|
| SNP_P4_118407_189167 | NW_004515764.1 | Scaffold228 | 189167                  | GG                              | CC              | 1946928852               |
| SNP_P4_118408_189173 | NW_004515764.1 | Scaffold228 | 189173                  | GG                              | AA              | 1946928855               |
| SNP_P4_118409_189181 | NW_004515764.1 | Scaffold228 | 189181                  | CC                              | TT              | 1946928857               |
| SNP_P4_118410_189203 | NW_004515764.1 | Scaffold228 | 189203                  | AA                              | TT              | 1946928859               |
| SNP_P4_118411_189372 | NW_004515764.1 | Scaffold228 | 189372                  | TT                              | CC              | 1946928861               |
| SNP_P4_118412_189634 | NW_004515764.1 | Scaffold228 | 189634                  | TT                              | AA              | 1946928863               |
| SNP_P4_118413_189647 | NW_004515764.1 | Scaffold228 | 189647                  | AA                              | GG              | 1946928865               |
| SNP_P4_118414_193506 | NW_004515764.1 | Scaffold228 | 193506                  | GG                              | AA              | 1946928867               |
| SNP_P4_118417_16547  | NW_004515765.1 | Scaffold229 | 16547                   | TT                              | CC              | 1946928869               |
| SNP_P4_118418_16555  | NW_004515765.1 | Scaffold229 | 16555                   | AA                              | TT              | 1946928871               |
| SNP_P4_118419_17878  | NW_004515765.1 | Scaffold229 | 17878                   | CC                              | TT              | 1946928873               |
| SNP_P4_118420_17879  | NW_004515765.1 | Scaffold229 | 17879                   | AA                              | GG              | 1946928875               |
| SNP_P4_118421_17880  | NW_004515765.1 | Scaffold229 | 17880                   | CC                              | AA              | 1946928878               |
| SNP_P4_118422_17883  | NW_004515765.1 | Scaffold229 | 17883                   | CC                              | TT              | 1946928880               |
| SNP_P4_118423_19885  | NW_004515765.1 | Scaffold229 | 19885                   | GG                              | AA              | 1946928882               |
| SNP_P4_118424_30886  | NW_004515765.1 | Scaffold229 | 30886                   | AA                              | GG              | 1946928884               |
| SNP_P4_118425_33781  | NW_004515765.1 | Scaffold229 | 33781                   | AA                              | GG              | 1946928886               |
| SNP_P4_118426_36757  | NW_004515765.1 | Scaffold229 | 36757                   | TT                              | AA              | 1946928888               |
| SNP_P4_118427_37095  | NW_004515765.1 | Scaffold229 | 37095                   | GG                              | CC              | 1946928890               |
| SNP_P4_118428_37419  | NW_004515765.1 | Scaffold229 | 37419                   | AA                              | GG              | 1946928892               |
| SNP_P4_118429_40762  | NW_004515765.1 | Scaffold229 | 40762                   | TT                              | CC              | 1946928894               |
| SNP_P4_118430_47419  | NW_004515765.1 | Scaffold229 | 47419                   | CC                              | TT              | 1946928896               |
| SNP_P4_118431_47435  | NW_004515765.1 | Scaffold229 | 47435                   | AA                              | CC              | 1946928898               |
| SNP_P4_118432_47442  | NW_004515765.1 | Scaffold229 | 47442                   | GG                              | CC              | 1946928900               |
| SNP_P4_118433_47482  | NW_004515765.1 | Scaffold229 | 47482                   | GG                              | TT              | 1946928903               |
| SNP_P4_118434_47686  | NW_004515765.1 | Scaffold229 | 47686                   | TT                              | AA              | 1946928905               |
| SNP_P4_118435_47717  | NW_004515765.1 | Scaffold229 | 47717                   | GG                              | CC              | 1946928907               |
| SNP_P4_118436_47720  | NW_004515765.1 | Scaffold229 | 47720                   | GG                              | AA              | 1946928909               |
| SNP_P4_118437_47758  | NW_004515765.1 | Scaffold229 | 47758                   | AA                              | TT              | 1946928911               |
| SNP_P4_118438_48728  | NW_004515765.1 | Scaffold229 | 48728                   | TT                              | AA              | 1946928913               |
| SNP_P4_118440_53158  | NW_004515765.1 | Scaffold229 | 53158                   | CC                              | TT              | 1946928915               |
| SNP_P4_118441_54603  | NW_004515765.1 | Scaffold229 | 54603                   | AA                              | CC              | 1946928917               |
| SNP_P4_118442_75572  | NW_004515765.1 | Scaffold229 | 75572                   | AA                              | GG              | 1946928919               |
| SNP_P4_118443_75588  | NW_004515765.1 | Scaffold229 | 75588                   | GG                              | AA              | 1946928921               |
| SNP_P4_118444_76786  | NW_004515765.1 | Scaffold229 | 76786                   | GG                              | CC              | 1946928923               |
| SNP_P4_118445_78581  | NW_004515765.1 | Scaffold229 | 78581                   | CC                              | AA              | 1946928925               |
| SNP_P4_118446_82015  | NW_004515765.1 | Scaffold229 | 82015                   | AA                              | CC              | 1946928927               |
| SNP_P4_118447_82018  | NW_004515765.1 | Scaffold229 | 82018                   | TT                              | CC              | 1946928930               |
| SNP_P4_118448_82356  | NW_004515765.1 | Scaffold229 | 82356                   | AA                              | GG              | 1946928932               |
| SNP_P4_118449_82556  | NW_004515765.1 | Scaffold229 | 82556                   | CC                              | GG              | 1946928934               |
| SNP_P4_118450_82568  | NW_004515765.1 | Scaffold229 | 82568                   | AA                              | CC              | 1946928936               |
| SNP_P4_118451_82625  | NW_004515765.1 | Scaffold229 | 82625                   | AA                              | CC              | 1946928938               |

| SNPs IDs             | Chromosome IDs | Chromosomes | Physical positions (bp) | CDC Frontier (Reference genome) | (ILWC46 & LPNB) | NCBI SNPdb Accession IDs |
|----------------------|----------------|-------------|-------------------------|---------------------------------|-----------------|--------------------------|
| SNP_P4_118452_83671  | NW_004515765.1 | Scaffold229 | 83671                   | AA                              | TT              | 1946928940               |
| SNP_P4_118453_84081  | NW_004515765.1 | Scaffold229 | 84081                   | TT                              | AA              | 1946928942               |
| SNP_P4_118454_84094  | NW_004515765.1 | Scaffold229 | 84094                   | CC                              | TT              | 1946928944               |
| SNP_P4_118455_85147  | NW_004515765.1 | Scaffold229 | 85147                   | AA                              | TT              | 1946928946               |
| SNP_P4_118457_87462  | NW_004515765.1 | Scaffold229 | 87462                   | AA                              | GG              | 1946928948               |
| SNP_P4_118458_91083  | NW_004515765.1 | Scaffold229 | 91083                   | GG                              | TT              | 1946928950               |
| SNP_P4_118459_97275  | NW_004515765.1 | Scaffold229 | 97275                   | AA                              | TT              | 1946928952               |
| SNP_P4_118460_97594  | NW_004515765.1 | Scaffold229 | 97594                   | CC                              | TT              | 1946928954               |
| SNP_P4_118461_97729  | NW_004515765.1 | Scaffold229 | 97729                   | GG                              | AA              | 1946928956               |
| SNP_P4_118462_97864  | NW_004515765.1 | Scaffold229 | 97864                   | AA                              | CC              | 1946928958               |
| SNP_P4_118463_97876  | NW_004515765.1 | Scaffold229 | 97876                   | GG                              | AA              | 1946928960               |
| SNP_P4_118464_102854 | NW_004515765.1 | Scaffold229 | 102854                  | AA                              | GG              | 1946928962               |
| SNP_P4_118465_102858 | NW_004515765.1 | Scaffold229 | 102858                  | CC                              | AA              | 1946928964               |
| SNP_P4_118466_102931 | NW_004515765.1 | Scaffold229 | 102931                  | TT                              | CC              | 1946928966               |
| SNP_P4_118467_106318 | NW_004515765.1 | Scaffold229 | 106318                  | TT                              | AA              | 1946928968               |
| SNP_P4_118468_106322 | NW_004515765.1 | Scaffold229 | 106322                  | AA                              | GG              | 1946928970               |
| SNP_P4_118469_106327 | NW_004515765.1 | Scaffold229 | 106327                  | TT                              | GG              | 1946928972               |
| SNP_P4_118470_106337 | NW_004515765.1 | Scaffold229 | 106337                  | AA                              | CC              | 1946928974               |
| SNP_P4_118471_106378 | NW_004515765.1 | Scaffold229 | 106378                  | AA                              | TT              | 1946928976               |
| SNP_P4_118472_106380 | NW_004515765.1 | Scaffold229 | 106380                  | CC                              | AA              | 1946928978               |
| SNP_P4_118473_106381 | NW_004515765.1 | Scaffold229 | 106381                  | GG                              | AA              | 1946928980               |
| SNP_P4_118474_106392 | NW_004515765.1 | Scaffold229 | 106392                  | GG                              | AA              | 1946928982               |
| SNP_P4_118475_114146 | NW_004515765.1 | Scaffold229 | 114146                  | GG                              | AA              | 1946928984               |
| SNP_P4_118476_114148 | NW_004515765.1 | Scaffold229 | 114148                  | AA                              | GG              | 1946928986               |
| SNP_P4_118477_114183 | NW_004515765.1 | Scaffold229 | 114183                  | TT                              | CC              | 1946928988               |
| SNP_P4_118478_114636 | NW_004515765.1 | Scaffold229 | 114636                  | CC                              | GG              | 1946928990               |
| SNP_P4_118479_114638 | NW_004515765.1 | Scaffold229 | 114638                  | GG                              | CC              | 1946928992               |
| SNP_P4_118480_114645 | NW_004515765.1 | Scaffold229 | 114645                  | TT                              | GG              | 1946928994               |
| SNP_P4_118481_114875 | NW_004515765.1 | Scaffold229 | 114875                  | AA                              | CC              | 1946928996               |
| SNP_P4_118482_126674 | NW_004515765.1 | Scaffold229 | 126674                  | GG                              | TT              | 1946928998               |
| SNP_P4_118483_140330 | NW_004515765.1 | Scaffold229 | 140330                  | AA                              | GG              | 1946929000               |
| SNP_P4_118484_140333 | NW_004515765.1 | Scaffold229 | 140333                  | AA                              | CC              | 1946929003               |
| SNP_P4_118485_140343 | NW_004515765.1 | Scaffold229 | 140343                  | CC                              | AA              | 1946929005               |
| SNP_P4_118486_143195 | NW_004515765.1 | Scaffold229 | 143195                  | AA                              | TT              | 1946929007               |
| SNP_P4_118487_153326 | NW_004515765.1 | Scaffold229 | 153326                  | CC                              | TT              | 1946929009               |
| SNP_P4_118488_155389 | NW_004515765.1 | Scaffold229 | 155389                  | AA                              | GG              | 1946929011               |
| SNP_P4_118489_156642 | NW_004515765.1 | Scaffold229 | 156642                  | CC                              | AA              | 1946929014               |
| SNP_P4_118490_157874 | NW_004515765.1 | Scaffold229 | 157874                  | GG                              | AA              | 1946929016               |
| SNP_P4_118491_160454 | NW_004515765.1 | Scaffold229 | 160454                  | GG                              | TT              | 1946929018               |
| SNP_P4_118492_160660 | NW_004515765.1 | Scaffold229 | 160660                  | TT                              | AA              | 1946929020               |
| SNP_P4_118493_160701 | NW_004515765.1 | Scaffold229 | 160701                  | TT                              | CC              | 1946929022               |
| SNP_P4_118494_518    | NW_004515766.1 | Scaffold231 | 518                     | GG                              | TT              | 1946929024               |

| SNPs IDs            | Chromosome IDs | Chromosomes | Physical positions (bp) | CDC Frontier (Reference genome) | (ILWC46 & LPNB) | NCBI SNPdb Accession IDs |
|---------------------|----------------|-------------|-------------------------|---------------------------------|-----------------|--------------------------|
| SNP_P4_118495_519   | NW_004515766.1 | Scaffold231 | 519                     | TT                              | GG              | 1946929026               |
| SNP_P4_118496_5185  | NW_004515766.1 | Scaffold231 | 5185                    | TT                              | CC              | 1946929028               |
| SNP_P4_118497_10324 | NW_004515766.1 | Scaffold231 | 10324                   | CC                              | TT              | 1946929030               |
| SNP_P4_118498_10331 | NW_004515766.1 | Scaffold231 | 10331                   | CC                              | GG              | 1946929032               |
| SNP_P4_118499_10428 | NW_004515766.1 | Scaffold231 | 10428                   | TT                              | AA              | 1946929034               |
| SNP_P4_118500_10441 | NW_004515766.1 | Scaffold231 | 10441                   | TT                              | CC              | 1946929036               |
| SNP_P4_118501_10442 | NW_004515766.1 | Scaffold231 | 10442                   | GG                              | AA              | 1946929038               |
| SNP_P4_118502_10539 | NW_004515766.1 | Scaffold231 | 10539                   | TT                              | CC              | 1946929040               |
| SNP_P4_118503_10555 | NW_004515766.1 | Scaffold231 | 10555                   | CC                              | TT              | 1946929042               |
| SNP_P4_118504_10562 | NW_004515766.1 | Scaffold231 | 10562                   | CC                              | AA              | 1946929044               |
| SNP_P4_118505_17490 | NW_004515766.1 | Scaffold231 | 17490                   | AA                              | TT              | 1946929046               |
| SNP_P4_118506_17502 | NW_004515766.1 | Scaffold231 | 17502                   | AA                              | GG              | 1946929048               |
| SNP_P4_118507_17680 | NW_004515766.1 | Scaffold231 | 17680                   | AA                              | GG              | 1946929051               |
| SNP_P4_118509_23900 | NW_004515766.1 | Scaffold231 | 23900                   | CC                              | TT              | 1946929053               |
| SNP_P4_118510_25181 | NW_004515766.1 | Scaffold231 | 25181                   | TT                              | AA              | 1946929055               |
| SNP_P4_118511_25318 | NW_004515766.1 | Scaffold231 | 25318                   | CC                              | TT              | 1946929057               |
| SNP_P4_118512_25457 | NW_004515766.1 | Scaffold231 | 25457                   | TT                              | CC              | 1946929059               |
| SNP_P4_118513_25464 | NW_004515766.1 | Scaffold231 | 25464                   | AA                              | GG              | 1946929061               |
| SNP_P4_118514_27870 | NW_004515766.1 | Scaffold231 | 27870                   | GG                              | AA              | 1946929063               |
| SNP_P4_118515_26428 | NW_004515769.1 | Scaffold235 | 26428                   | AA                              | GG              | 1946929065               |
| SNP_P4_118516_26807 | NW_004515769.1 | Scaffold235 | 26807                   | TT                              | CC              | 1946929067               |
| SNP_P4_118517_41785 | NW_004515769.1 | Scaffold235 | 41785                   | TT                              | AA              | 1946929069               |
| SNP_P4_118518_41796 | NW_004515769.1 | Scaffold235 | 41796                   | AA                              | GG              | 1946929071               |
| SNP_P4_118519_41803 | NW_004515769.1 | Scaffold235 | 41803                   | GG                              | TT              | 1946929073               |
| SNP_P4_118520_42146 | NW_004515769.1 | Scaffold235 | 42146                   | CC                              | AA              | 1946929075               |
| SNP_P4_118521_46029 | NW_004515769.1 | Scaffold235 | 46029                   | AA                              | GG              | 1946929077               |
| SNP_P4_118522_47067 | NW_004515769.1 | Scaffold235 | 47067                   | AA                              | CC              | 1946929079               |
| SNP_P4_118523_47146 | NW_004515769.1 | Scaffold235 | 47146                   | AA                              | GG              | 1946929081               |
| SNP_P4_118524_47181 | NW_004515769.1 | Scaffold235 | 47181                   | AA                              | TT              | 1946929083               |
| SNP_P4_118525_47197 | NW_004515769.1 | Scaffold235 | 47197                   | TT                              | AA              | 1946929085               |
| SNP_P4_118526_47329 | NW_004515769.1 | Scaffold235 | 47329                   | AA                              | TT              | 1946929087               |
| SNP_P4_118527_47544 | NW_004515769.1 | Scaffold235 | 47544                   | AA                              | GG              | 1946929089               |
| SNP_P4_118528_48003 | NW_004515769.1 | Scaffold235 | 48003                   | CC                              | TT              | 1946929091               |
| SNP_P4_118529_48211 | NW_004515769.1 | Scaffold235 | 48211                   | CC                              | AA              | 1946929093               |
| SNP_P4_118530_48269 | NW_004515769.1 | Scaffold235 | 48269                   | AA                              | CC              | 1946929095               |
| SNP_P4_118531_48289 | NW_004515769.1 | Scaffold235 | 48289                   | AA                              | CC              | 1946929097               |
| SNP_P4_118532_48296 | NW_004515769.1 | Scaffold235 | 48296                   | TT                              | AA              | 1946929099               |
| SNP_P4_118533_48321 | NW_004515769.1 | Scaffold235 | 48321                   | TT                              | AA              | 1946929101               |
| SNP_P4_118536_60207 | NW_004515769.1 | Scaffold235 | 60207                   | TT                              | CC              | 1946929103               |
| SNP_P4_118537_60528 | NW_004515769.1 | Scaffold235 | 60528                   | TT                              | CC              | 1946929105               |
| SNP_P4_118538_64755 | NW_004515769.1 | Scaffold235 | 64755                   | AA                              | GG              | 1946929107               |
| SNP_P4_118539_64760 | NW_004515769.1 | Scaffold235 | 64760                   | GG                              | AA              | 1946929109               |

| SNPs IDs             | Chromosome IDs | Chromosomes | Physical positions (bp) | CDC Frontier (Reference genome) | (ILWC46 & LPNB) | NCBI SNPdb Accession IDs |
|----------------------|----------------|-------------|-------------------------|---------------------------------|-----------------|--------------------------|
| SNP_P4_118540_64840  | NW_004515769.1 | Scaffold235 | 64840                   | AA                              | GG              | 1946929111               |
| SNP_P4_118541_65142  | NW_004515769.1 | Scaffold235 | 65142                   | AA                              | GG              | 1946929113               |
| SNP_P4_118542_97829  | NW_004515769.1 | Scaffold235 | 97829                   | GG                              | CC              | 1946929115               |
| SNP_P4_118543_101181 | NW_004515769.1 | Scaffold235 | 101181                  | GG                              | AA              | 1946929117               |
| SNP_P4_118544_101259 | NW_004515769.1 | Scaffold235 | 101259                  | GG                              | AA              | 1946929119               |
| SNP_P4_118546_145148 | NW_004515769.1 | Scaffold235 | 145148                  | TT                              | CC              | 1946929121               |
| SNP_P4_118548_146265 | NW_004515769.1 | Scaffold235 | 146265                  | GG                              | AA              | 1946929123               |
| SNP_P4_118549_146314 | NW_004515769.1 | Scaffold235 | 146314                  | CC                              | TT              | 1946929125               |
| SNP_P4_118550_149134 | NW_004515769.1 | Scaffold235 | 149134                  | GG                              | AA              | 1946929127               |
| SNP_P4_118551_159696 | NW_004515769.1 | Scaffold235 | 159696                  | TT                              | GG              | 1946929129               |
| SNP_P4_118552_159738 | NW_004515769.1 | Scaffold235 | 159738                  | TT                              | AA              | 1946929131               |
| SNP_P4_118553_161435 | NW_004515769.1 | Scaffold235 | 161435                  | GG                              | AA              | 1946929133               |
| SNP_P4_118554_171833 | NW_004515769.1 | Scaffold235 | 171833                  | AA                              | GG              | 1946929135               |
| SNP_P4_118555_178596 | NW_004515769.1 | Scaffold235 | 178596                  | CC                              | TT              | 1946929137               |
| SNP_P4_118556_192152 | NW_004515769.1 | Scaffold235 | 192152                  | GG                              | AA              | 1946929139               |
| SNP_P4_118557_205225 | NW_004515769.1 | Scaffold235 | 205225                  | CC                              | TT              | 1946929141               |
| SNP_P4_118558_205257 | NW_004515769.1 | Scaffold235 | 205257                  | GG                              | AA              | 1946929143               |
| SNP_P4_118559_205288 | NW_004515769.1 | Scaffold235 | 205288                  | AA                              | GG              | 1946929145               |
| SNP_P4_118560_205328 | NW_004515769.1 | Scaffold235 | 205328                  | AA                              | GG              | 1946929147               |
| SNP_P4_118561_205335 | NW_004515769.1 | Scaffold235 | 205335                  | GG                              | AA              | 1946929149               |
| SNP_P4_118562_205384 | NW_004515769.1 | Scaffold235 | 205384                  | AA                              | CC              | 1946929151               |
| SNP_P4_118563_205388 | NW_004515769.1 | Scaffold235 | 205388                  | TT                              | CC              | 1946929154               |
| SNP_P4_118564_205413 | NW_004515769.1 | Scaffold235 | 205413                  | GG                              | AA              | 1946929156               |
| SNP_P4_118565_205430 | NW_004515769.1 | Scaffold235 | 205430                  | GG                              | TT              | 1946929158               |
| SNP_P4_118566_205435 | NW_004515769.1 | Scaffold235 | 205435                  | GG                              | CC              | 1946929160               |
| SNP_P4_118567_205514 | NW_004515769.1 | Scaffold235 | 205514                  | CC                              | TT              | 1946929162               |
| SNP_P4_118568_205535 | NW_004515769.1 | Scaffold235 | 205535                  | TT                              | CC              | 1946929164               |
| SNP_P4_118569_205554 | NW_004515769.1 | Scaffold235 | 205554                  | TT                              | CC              | 1946929166               |
| SNP_P4_118570_205604 | NW_004515769.1 | Scaffold235 | 205604                  | TT                              | GG              | 1946929168               |
| SNP_P4_118571_211780 | NW_004515769.1 | Scaffold235 | 211780                  | TT                              | CC              | 1946929170               |
| SNP_P4_118572_212089 | NW_004515769.1 | Scaffold235 | 212089                  | TT                              | GG              | 1946929172               |
| SNP_P4_118573_231848 | NW_004515769.1 | Scaffold235 | 231848                  | GG                              | AA              | 1946929174               |
| SNP_P4_118574_232261 | NW_004515769.1 | Scaffold235 | 232261                  | AA                              | TT              | 1946929176               |
| SNP_P4_118575_277535 | NW_004515769.1 | Scaffold235 | 277535                  | AA                              | TT              | 1946929178               |
| SNP_P4_118576_2585   | NW_004515770.1 | Scaffold236 | 2585                    | TT                              | AA              | 1946929180               |
| SNP_P4_118577_5195   | NW_004515770.1 | Scaffold236 | 5195                    | TT                              | GG              | 1946929183               |
| SNP_P4_118578_5285   | NW_004515770.1 | Scaffold236 | 5285                    | AA                              | GG              | 1946929185               |
| SNP_P4_118579_5365   | NW_004515770.1 | Scaffold236 | 5365                    | TT                              | AA              | 1946929187               |
| SNP_P4_118580_5775   | NW_004515770.1 | Scaffold236 | 5775                    | AA                              | TT              | 1946929189               |
| SNP_P4_118581_12085  | NW_004515770.1 | Scaffold236 | 12085                   | GG                              | TT              | 1946929191               |
| SNP_P4_118582_15191  | NW_004515770.1 | Scaffold236 | 15191                   | CC                              | TT              | 1946929193               |
| SNP_P4_118583_15854  | NW_004515770.1 | Scaffold236 | 15854                   | TT                              | CC              | 1946929195               |



| SNPs IDs            | Chromosome IDs | Chromosomes | Physical positions (bp) | CDC Frontier (Reference genome) | (ILWC46 & LPNB) | NCBI SNPdb Accession IDs |
|---------------------|----------------|-------------|-------------------------|---------------------------------|-----------------|--------------------------|
| SNP_P4_118584_16001 | NW_004515770.1 | Scaffold236 | 16001                   | CC                              | AA              | 1946929197               |
| SNP_P4_118585_17123 | NW_004515770.1 | Scaffold236 | 17123                   | CC                              | GG              | 1946929200               |
| SNP_P4_118586_17127 | NW_004515770.1 | Scaffold236 | 17127                   | AA                              | GG              | 1946929202               |
| SNP_P4_118587_17333 | NW_004515770.1 | Scaffold236 | 17333                   | CC                              | AA              | 1946929204               |
| SNP_P4_118588_22968 | NW_004515770.1 | Scaffold236 | 22968                   | CC                              | TT              | 1946929206               |
| SNP_P4_118589_23041 | NW_004515770.1 | Scaffold236 | 23041                   | TT                              | CC              | 1946929209               |
| SNP_P4_118590_23060 | NW_004515770.1 | Scaffold236 | 23060                   | GG                              | AA              | 1946929211               |
| SNP_P4_118591_23166 | NW_004515770.1 | Scaffold236 | 23166                   | TT                              | CC              | 1946929213               |
| SNP_P4_118592_23171 | NW_004515770.1 | Scaffold236 | 23171                   | GG                              | AA              | 1946929216               |
| SNP_P4_118593_23375 | NW_004515770.1 | Scaffold236 | 23375                   | TT                              | CC              | 1946929218               |
| SNP_P4_118594_23468 | NW_004515770.1 | Scaffold236 | 23468                   | AA                              | TT              | 1946929220               |
| SNP_P4_118595_23512 | NW_004515770.1 | Scaffold236 | 23512                   | CC                              | AA              | 1946929222               |
| SNP_P4_118596_23533 | NW_004515770.1 | Scaffold236 | 23533                   | TT                              | AA              | 1946929224               |
| SNP_P4_118597_23561 | NW_004515770.1 | Scaffold236 | 23561                   | AA                              | GG              | 1946929226               |
| SNP_P4_118598_23734 | NW_004515770.1 | Scaffold236 | 23734                   | TT                              | AA              | 1946929228               |
| SNP_P4_118599_23752 | NW_004515770.1 | Scaffold236 | 23752                   | CC                              | TT              | 1946929230               |
| SNP_P4_118600_23753 | NW_004515770.1 | Scaffold236 | 23753                   | AA                              | TT              | 1946929232               |
| SNP_P4_118601_23755 | NW_004515770.1 | Scaffold236 | 23755                   | AA                              | GG              | 1946929234               |
| SNP_P4_118602_23769 | NW_004515770.1 | Scaffold236 | 23769                   | CC                              | TT              | 1946929237               |
| SNP_P4_118603_23789 | NW_004515770.1 | Scaffold236 | 23789                   | CC                              | GG              | 1946929239               |
| SNP_P4_118604_23943 | NW_004515770.1 | Scaffold236 | 23943                   | CC                              | TT              | 1946929241               |
| SNP_P4_118605_23964 | NW_004515770.1 | Scaffold236 | 23964                   | TT                              | CC              | 1946929243               |
| SNP_P4_118606_23971 | NW_004515770.1 | Scaffold236 | 23971                   | CC                              | TT              | 1946929245               |
| SNP_P4_118607_23997 | NW_004515770.1 | Scaffold236 | 23997                   | AA                              | GG              | 1946929247               |
| SNP_P4_118608_24040 | NW_004515770.1 | Scaffold236 | 24040                   | CC                              | GG              | 1946929249               |
| SNP_P4_118610_25387 | NW_004515770.1 | Scaffold236 | 25387                   | GG                              | AA              | 1946929251               |
| SNP_P4_118611_25477 | NW_004515770.1 | Scaffold236 | 25477                   | AA                              | GG              | 1946929253               |
| SNP_P4_118612_25588 | NW_004515770.1 | Scaffold236 | 25588                   | AA                              | GG              | 1946929255               |
| SNP_P4_118613_25613 | NW_004515770.1 | Scaffold236 | 25613                   | GG                              | AA              | 1946929257               |
| SNP_P4_118614_25617 | NW_004515770.1 | Scaffold236 | 25617                   | AA                              | TT              | 1946929260               |
| SNP_P4_118615_25688 | NW_004515770.1 | Scaffold236 | 25688                   | CC                              | AA              | 1946929262               |
| SNP_P4_118616_25872 | NW_004515770.1 | Scaffold236 | 25872                   | TT                              | CC              | 1946929264               |
| SNP_P4_118617_25889 | NW_004515770.1 | Scaffold236 | 25889                   | GG                              | TT              | 1946929266               |
| SNP_P4_118618_26025 | NW_004515770.1 | Scaffold236 | 26025                   | CC                              | TT              | 1946929268               |
| SNP_P4_118619_26040 | NW_004515770.1 | Scaffold236 | 26040                   | CC                              | TT              | 1946929270               |
| SNP_P4_118620_26083 | NW_004515770.1 | Scaffold236 | 26083                   | AA                              | TT              | 1946929272               |
| SNP_P4_118621_26718 | NW_004515770.1 | Scaffold236 | 26718                   | CC                              | TT              | 1946929274               |
| SNP_P4_118622_26863 | NW_004515770.1 | Scaffold236 | 26863                   | AA                              | CC              | 1946929276               |
| SNP_P4_118623_26894 | NW_004515770.1 | Scaffold236 | 26894                   | AA                              | TT              | 1946929279               |
| SNP_P4_118624_26947 | NW_004515770.1 | Scaffold236 | 26947                   | AA                              | GG              | 1946929281               |
| SNP_P4_118625_26954 | NW_004515770.1 | Scaffold236 | 26954                   | AA                              | CC              | 1946929283               |
| SNP_P4_118626_27495 | NW_004515770.1 | Scaffold236 | 27495                   | TT                              | CC              | 1946929285               |

| SNPs IDs            | Chromosome IDs | Chromosomes | Physical positions (bp) | CDC Frontier (Reference genome) | (ILWC46 & LPNB) | NCBI SNPdb Accession IDs |
|---------------------|----------------|-------------|-------------------------|---------------------------------|-----------------|--------------------------|
| SNP_P4_118627_27850 | NW_004515770.1 | Scaffold236 | 27850                   | GG                              | AA              | 1946929287               |
| SNP_P4_118628_28804 | NW_004515770.1 | Scaffold236 | 28804                   | GG                              | TT              | 1946929289               |
| SNP_P4_118629_29072 | NW_004515770.1 | Scaffold236 | 29072                   | TT                              | AA              | 1946929291               |
| SNP_P4_118630_29100 | NW_004515770.1 | Scaffold236 | 29100                   | GG                              | AA              | 1946929293               |
| SNP_P4_118631_29128 | NW_004515770.1 | Scaffold236 | 29128                   | CC                              | AA              | 1946929295               |
| SNP_P4_118632_29131 | NW_004515770.1 | Scaffold236 | 29131                   | CC                              | TT              | 1946929297               |
| SNP_P4_118633_29178 | NW_004515770.1 | Scaffold236 | 29178                   | TT                              | AA              | 1946929299               |
| SNP_P4_118634_29243 | NW_004515770.1 | Scaffold236 | 29243                   | TT                              | CC              | 1946929301               |
| SNP_P4_118635_29525 | NW_004515770.1 | Scaffold236 | 29525                   | AA                              | CC              | 1946929303               |
| SNP_P4_118636_29630 | NW_004515770.1 | Scaffold236 | 29630                   | TT                              | CC              | 1946929305               |
| SNP_P4_118637_29795 | NW_004515770.1 | Scaffold236 | 29795                   | CC                              | TT              | 1946929307               |
| SNP_P4_118638_29836 | NW_004515770.1 | Scaffold236 | 29836                   | GG                              | TT              | 1946929309               |
| SNP_P4_118639_29865 | NW_004515770.1 | Scaffold236 | 29865                   | AA                              | TT              | 1946929311               |
| SNP_P4_118640_30822 | NW_004515770.1 | Scaffold236 | 30822                   | CC                              | AA              | 1946929313               |
| SNP_P4_118641_31607 | NW_004515770.1 | Scaffold236 | 31607                   | GG                              | AA              | 1946929315               |
| SNP_P4_118642_31820 | NW_004515770.1 | Scaffold236 | 31820                   | GG                              | TT              | 1946929317               |
| SNP_P4_118643_34922 | NW_004515770.1 | Scaffold236 | 34922                   | CC                              | TT              | 1946929319               |
| SNP_P4_118644_35193 | NW_004515770.1 | Scaffold236 | 35193                   | CC                              | AA              | 1946929321               |
| SNP_P4_118646_42201 | NW_004515770.1 | Scaffold236 | 42201                   | GG                              | TT              | 1946929323               |
| SNP_P4_118647_42321 | NW_004515770.1 | Scaffold236 | 42321                   | CC                              | AA              | 1946929325               |
| SNP_P4_118648_42362 | NW_004515770.1 | Scaffold236 | 42362                   | AA                              | CC              | 1946929327               |
| SNP_P4_118649_42376 | NW_004515770.1 | Scaffold236 | 42376                   | GG                              | AA              | 1946929329               |
| SNP_P4_118650_43130 | NW_004515770.1 | Scaffold236 | 43130                   | CC                              | TT              | 1946929332               |
| SNP_P4_118651_43261 | NW_004515770.1 | Scaffold236 | 43261                   | GG                              | AA              | 1946929334               |
| SNP_P4_118652_43594 | NW_004515770.1 | Scaffold236 | 43594                   | AA                              | CC              | 1946929336               |
| SNP_P4_118653_43612 | NW_004515770.1 | Scaffold236 | 43612                   | AA                              | CC              | 1946929339               |
| SNP_P4_118654_44852 | NW_004515770.1 | Scaffold236 | 44852                   | TT                              | CC              | 1946929341               |
| SNP_P4_118655_44905 | NW_004515770.1 | Scaffold236 | 44905                   | GG                              | AA              | 1946929343               |
| SNP_P4_118656_44906 | NW_004515770.1 | Scaffold236 | 44906                   | TT                              | AA              | 1946929345               |
| SNP_P4_118657_45300 | NW_004515770.1 | Scaffold236 | 45300                   | GG                              | CC              | 1946929347               |
| SNP_P4_118658_45586 | NW_004515770.1 | Scaffold236 | 45586                   | CC                              | TT              | 1946929349               |
| SNP_P4_118659_45597 | NW_004515770.1 | Scaffold236 | 45597                   | GG                              | TT              | 1946929351               |
| SNP_P4_118660_45621 | NW_004515770.1 | Scaffold236 | 45621                   | CC                              | GG              | 1946929353               |
| SNP_P4_118661_45746 | NW_004515770.1 | Scaffold236 | 45746                   | AA                              | GG              | 1946929355               |
| SNP_P4_118662_45990 | NW_004515770.1 | Scaffold236 | 45990                   | CC                              | TT              | 1946929357               |
| SNP_P4_118663_46054 | NW_004515770.1 | Scaffold236 | 46054                   | AA                              | GG              | 1946929359               |
| SNP_P4_118664_46405 | NW_004515770.1 | Scaffold236 | 46405                   | AA                              | GG              | 1946929361               |
| SNP_P4_118665_51464 | NW_004515770.1 | Scaffold236 | 51464                   | AA                              | GG              | 1946929364               |
| SNP_P4_118666_51473 | NW_004515770.1 | Scaffold236 | 51473                   | AA                              | GG              | 1946929366               |
| SNP_P4_118667_51480 | NW_004515770.1 | Scaffold236 | 51480                   | TT                              | GG              | 1946929368               |
| SNP_P4_118668_51701 | NW_004515770.1 | Scaffold236 | 51701                   | AA                              | TT              | 1946929370               |
| SNP_P4_118669_51810 | NW_004515770.1 | Scaffold236 | 51810                   | GG                              | AA              | 1946929372               |

| SNPs IDs            | Chromosome IDs | Chromosomes | Physical positions (bp) | CDC Frontier (Reference genome) | (ILWC46 & LPNB) | NCBI SNPdb Accession IDs |
|---------------------|----------------|-------------|-------------------------|---------------------------------|-----------------|--------------------------|
| SNP_P4_118670_51894 | NW_004515770.1 | Scaffold236 | 51894                   | GG                              | AA              | 1946929374               |
| SNP_P4_118671_51927 | NW_004515770.1 | Scaffold236 | 51927                   | TT                              | CC              | 1946929376               |
| SNP_P4_118672_51942 | NW_004515770.1 | Scaffold236 | 51942                   | GG                              | TT              | 1946929378               |
| SNP_P4_118673_52077 | NW_004515770.1 | Scaffold236 | 52077                   | CC                              | GG              | 1946929380               |
| SNP_P4_118674_52440 | NW_004515770.1 | Scaffold236 | 52440                   | CC                              | TT              | 1946929382               |
| SNP_P4_118675_52519 | NW_004515770.1 | Scaffold236 | 52519                   | CC                              | GG              | 1946929384               |
| SNP_P4_118676_58260 | NW_004515770.1 | Scaffold236 | 58260                   | TT                              | CC              | 1946929386               |
| SNP_P4_118677_58577 | NW_004515770.1 | Scaffold236 | 58577                   | GG                              | AA              | 1946929388               |
| SNP_P4_118678_59186 | NW_004515770.1 | Scaffold236 | 59186                   | AA                              | GG              | 1946929390               |
| SNP_P4_118679_59196 | NW_004515770.1 | Scaffold236 | 59196                   | CC                              | TT              | 1946929392               |
| SNP_P4_118680_59205 | NW_004515770.1 | Scaffold236 | 59205                   | TT                              | CC              | 1946929394               |
| SNP_P4_118681_59223 | NW_004515770.1 | Scaffold236 | 59223                   | GG                              | CC              | 1946929396               |
| SNP_P4_118682_59252 | NW_004515770.1 | Scaffold236 | 59252                   | TT                              | AA              | 1946929398               |
| SNP_P4_118683_59538 | NW_004515770.1 | Scaffold236 | 59538                   | TT                              | GG              | 1946929400               |
| SNP_P4_118684_59636 | NW_004515770.1 | Scaffold236 | 59636                   | CC                              | GG              | 1946929402               |
| SNP_P4_118685_59694 | NW_004515770.1 | Scaffold236 | 59694                   | GG                              | AA              | 1946929403               |
| SNP_P4_118686_59731 | NW_004515770.1 | Scaffold236 | 59731                   | AA                              | GG              | 1946929404               |
| SNP_P4_118687_59805 | NW_004515770.1 | Scaffold236 | 59805                   | GG                              | AA              | 1946929405               |
| SNP_P4_118688_59945 | NW_004515770.1 | Scaffold236 | 59945                   | CC                              | GG              | 1946929406               |
| SNP_P4_118690_60221 | NW_004515770.1 | Scaffold236 | 60221                   | AA                              | TT              | 1946929408               |
| SNP_P4_118691_60236 | NW_004515770.1 | Scaffold236 | 60236                   | TT                              | AA              | 1946929410               |
| SNP_P4_118692_60627 | NW_004515770.1 | Scaffold236 | 60627                   | AA                              | TT              | 1946929412               |
| SNP_P4_118693_64301 | NW_004515770.1 | Scaffold236 | 64301                   | GG                              | AA              | 1946929414               |
| SNP_P4_118694_64468 | NW_004515770.1 | Scaffold236 | 64468                   | CC                              | TT              | 1946929416               |
| SNP_P4_118695_64503 | NW_004515770.1 | Scaffold236 | 64503                   | CC                              | TT              | 1946929418               |
| SNP_P4_118696_64506 | NW_004515770.1 | Scaffold236 | 64506                   | AA                              | GG              | 1946929420               |
| SNP_P4_118697_64521 | NW_004515770.1 | Scaffold236 | 64521                   | GG                              | CC              | 1946929422               |
| SNP_P4_118698_64746 | NW_004515770.1 | Scaffold236 | 64746                   | GG                              | TT              | 1946929424               |
| SNP_P4_118699_66436 | NW_004515770.1 | Scaffold236 | 66436                   | CC                              | GG              | 1946929426               |
| SNP_P4_118700_67278 | NW_004515770.1 | Scaffold236 | 67278                   | GG                              | AA              | 1946929428               |
| SNP_P4_118701_71934 | NW_004515770.1 | Scaffold236 | 71934                   | CC                              | TT              | 1946929430               |
| SNP_P4_118702_77309 | NW_004515770.1 | Scaffold236 | 77309                   | TT                              | CC              | 1946929432               |
| SNP_P4_118703_2477  | NW_004515771.1 | Scaffold237 | 2477                    | TT                              | CC              | 1946929434               |
| SNP_P4_118704_5316  | NW_004515771.1 | Scaffold237 | 5316                    | CC                              | TT              | 1946929436               |
| SNP_P4_118705_5663  | NW_004515771.1 | Scaffold237 | 5663                    | CC                              | TT              | 1946929438               |
| SNP_P4_118706_6360  | NW_004515771.1 | Scaffold237 | 6360                    | AA                              | GG              | 1946929440               |
| SNP_P4_118707_16095 | NW_004515771.1 | Scaffold237 | 16095                   | TT                              | CC              | 1946929442               |
| SNP_P4_118708_16147 | NW_004515771.1 | Scaffold237 | 16147                   | AA                              | TT              | 1946929444               |
| SNP_P4_118709_16150 | NW_004515771.1 | Scaffold237 | 16150                   | AA                              | CC              | 1946929446               |
| SNP_P4_118710_16845 | NW_004515771.1 | Scaffold237 | 16845                   | CC                              | AA              | 1946929448               |
| SNP_P4_118711_25061 | NW_004515771.1 | Scaffold237 | 25061                   | CC                              | AA              | 1946929450               |
| SNP_P4_118712_52393 | NW_004515771.1 | Scaffold237 | 52393                   | TT                              | AA              | 1946929452               |

| SNPs IDs            | Chromosome IDs | Chromosomes | Physical positions (bp) | CDC Frontier (Reference genome) | (ILWC46 & LPNB) | NCBI SNPdb Accession IDs |
|---------------------|----------------|-------------|-------------------------|---------------------------------|-----------------|--------------------------|
| SNP_P4_118713_52408 | NW_004515771.1 | Scaffold237 | 52408                   | TT                              | CC              | 1946929454               |
| SNP_P4_118714_52415 | NW_004515771.1 | Scaffold237 | 52415                   | TT                              | AA              | 1946929456               |
| SNP_P4_118715_57082 | NW_004515771.1 | Scaffold237 | 57082                   | CC                              | TT              | 1946929458               |
| SNP_P4_118716_57090 | NW_004515771.1 | Scaffold237 | 57090                   | CC                              | GG              | 1946929460               |
| SNP_P4_118717_57108 | NW_004515771.1 | Scaffold237 | 57108                   | CC                              | AA              | 1946929462               |
| SNP_P4_118718_57112 | NW_004515771.1 | Scaffold237 | 57112                   | CC                              | TT              | 1946929464               |
| SNP_P4_118719_57129 | NW_004515771.1 | Scaffold237 | 57129                   | TT                              | CC              | 1946929466               |
| SNP_P4_118720_57146 | NW_004515771.1 | Scaffold237 | 57146                   | AA                              | GG              | 1946929468               |
| SNP_P4_118721_57148 | NW_004515771.1 | Scaffold237 | 57148                   | GG                              | AA              | 1946929470               |
| SNP_P4_118722_57158 | NW_004515771.1 | Scaffold237 | 57158                   | AA                              | CC              | 1946929472               |
| SNP_P4_118723_57696 | NW_004515771.1 | Scaffold237 | 57696                   | CC                              | AA              | 1946929474               |
| SNP_P4_118724_57864 | NW_004515771.1 | Scaffold237 | 57864                   | GG                              | AA              | 1946929476               |
| SNP_P4_118725_57964 | NW_004515771.1 | Scaffold237 | 57964                   | AA                              | TT              | 1946929478               |
| SNP_P4_118726_58051 | NW_004515771.1 | Scaffold237 | 58051                   | CC                              | GG              | 1946929480               |
| SNP_P4_118727_58105 | NW_004515771.1 | Scaffold237 | 58105                   | TT                              | CC              | 1946929482               |
| SNP_P4_118728_60131 | NW_004515771.1 | Scaffold237 | 60131                   | TT                              | AA              | 1946929484               |
| SNP_P4_118729_60132 | NW_004515771.1 | Scaffold237 | 60132                   | AA                              | GG              | 1946929486               |
| SNP_P4_118730_61745 | NW_004515771.1 | Scaffold237 | 61745                   | AA                              | CC              | 1946929488               |
| SNP_P4_118731_70746 | NW_004515771.1 | Scaffold237 | 70746                   | AA                              | TT              | 1946929490               |
| SNP_P4_118732_70750 | NW_004515771.1 | Scaffold237 | 70750                   | CC                              | TT              | 1946929492               |
| SNP_P4_118733_70853 | NW_004515771.1 | Scaffold237 | 70853                   | TT                              | AA              | 1946929494               |
| SNP_P4_118734_71142 | NW_004515771.1 | Scaffold237 | 71142                   | CC                              | AA              | 1946929496               |
| SNP_P4_118735_71585 | NW_004515771.1 | Scaffold237 | 71585                   | TT                              | GG              | 1946929498               |
| SNP_P4_118736_71730 | NW_004515771.1 | Scaffold237 | 71730                   | TT                              | AA              | 1946929500               |
| SNP_P4_118737_71751 | NW_004515771.1 | Scaffold237 | 71751                   | TT                              | CC              | 1946929502               |
| SNP_P4_118738_629   | NW_004515772.1 | Scaffold238 | 629                     | GG                              | CC              | 1946929504               |
| SNP_P4_118739_643   | NW_004515772.1 | Scaffold238 | 643                     | GG                              | TT              | 1946929506               |
| SNP_P4_118740_688   | NW_004515772.1 | Scaffold238 | 688                     | AA                              | GG              | 1946929508               |
| SNP_P4_118741_731   | NW_004515772.1 | Scaffold238 | 731                     | CC                              | TT              | 1946929510               |
| SNP_P4_118742_928   | NW_004515772.1 | Scaffold238 | 928                     | TT                              | AA              | 1946929512               |
| SNP_P4_118743_1092  | NW_004515772.1 | Scaffold238 | 1092                    | GG                              | AA              | 1946929514               |
| SNP_P4_118744_1102  | NW_004515772.1 | Scaffold238 | 1102                    | TT                              | GG              | 1946929516               |
| SNP_P4_118745_1111  | NW_004515772.1 | Scaffold238 | 1111                    | AA                              | GG              | 1946929518               |
| SNP_P4_118746_1155  | NW_004515772.1 | Scaffold238 | 1155                    | TT                              | CC              | 1946929520               |
| SNP_P4_118747_1169  | NW_004515772.1 | Scaffold238 | 1169                    | TT                              | CC              | 1946929522               |
| SNP_P4_118748_1259  | NW_004515772.1 | Scaffold238 | 1259                    | TT                              | AA              | 1946929524               |
| SNP_P4_118749_1291  | NW_004515772.1 | Scaffold238 | 1291                    | AA                              | CC              | 1946929526               |
| SNP_P4_118750_1342  | NW_004515772.1 | Scaffold238 | 1342                    | CC                              | TT              | 1946929528               |
| SNP_P4_118751_1381  | NW_004515772.1 | Scaffold238 | 1381                    | TT                              | AA              | 1946929530               |
| SNP_P4_118752_1430  | NW_004515772.1 | Scaffold238 | 1430                    | GG                              | CC              | 1946929532               |
| SNP_P4_118753_1749  | NW_004515772.1 | Scaffold238 | 1749                    | CC                              | TT              | 1946929535               |
| SNP_P4_118754_1860  | NW_004515772.1 | Scaffold238 | 1860                    | GG                              | AA              | 1946929537               |

| SNPs IDs            | Chromosome IDs | Chromosomes | Physical positions (bp) | CDC Frontier (Reference genome) | (ILWC46 & LPNB) | NCBI SNPdb Accession IDs |
|---------------------|----------------|-------------|-------------------------|---------------------------------|-----------------|--------------------------|
| SNP_P4_118755_2072  | NW_004515772.1 | Scaffold238 | 2072                    | GG                              | AA              | 1946929539               |
| SNP_P4_118756_2294  | NW_004515772.1 | Scaffold238 | 2294                    | AA                              | TT              | 1946929541               |
| SNP_P4_118757_4195  | NW_004515772.1 | Scaffold238 | 4195                    | CC                              | TT              | 1946929543               |
| SNP_P4_118758_4230  | NW_004515772.1 | Scaffold238 | 4230                    | TT                              | CC              | 1946929545               |
| SNP_P4_118759_4367  | NW_004515772.1 | Scaffold238 | 4367                    | TT                              | CC              | 1946929547               |
| SNP_P4_118760_4368  | NW_004515772.1 | Scaffold238 | 4368                    | TT                              | CC              | 1946929549               |
| SNP_P4_118761_4408  | NW_004515772.1 | Scaffold238 | 4408                    | CC                              | TT              | 1946929551               |
| SNP_P4_118762_4443  | NW_004515772.1 | Scaffold238 | 4443                    | AA                              | TT              | 1946929553               |
| SNP_P4_118763_4488  | NW_004515772.1 | Scaffold238 | 4488                    | CC                              | AA              | 1946929555               |
| SNP_P4_118764_4521  | NW_004515772.1 | Scaffold238 | 4521                    | TT                              | GG              | 1946929557               |
| SNP_P4_118765_4652  | NW_004515772.1 | Scaffold238 | 4652                    | GG                              | TT              | 1946929560               |
| SNP_P4_118767_8547  | NW_004515772.1 | Scaffold238 | 8547                    | TT                              | AA              | 1946929562               |
| SNP_P4_118768_14481 | NW_004515772.1 | Scaffold238 | 14481                   | CC                              | AA              | 1946929564               |
| SNP_P4_118769_14502 | NW_004515772.1 | Scaffold238 | 14502                   | AA                              | TT              | 1946929566               |
| SNP_P4_118770_14503 | NW_004515772.1 | Scaffold238 | 14503                   | GG                              | AA              | 1946929568               |
| SNP_P4_118771_18885 | NW_004515772.1 | Scaffold238 | 18885                   | AA                              | CC              | 1946929570               |
| SNP_P4_118772_19191 | NW_004515772.1 | Scaffold238 | 19191                   | TT                              | AA              | 1946929572               |
| SNP_P4_118773_20289 | NW_004515772.1 | Scaffold238 | 20289                   | AA                              | GG              | 1946929574               |
| SNP_P4_118774_20604 | NW_004515772.1 | Scaffold238 | 20604                   | AA                              | TT              | 1946929576               |
| SNP_P4_118775_20672 | NW_004515772.1 | Scaffold238 | 20672                   | GG                              | AA              | 1946929578               |
| SNP_P4_118776_20675 | NW_004515772.1 | Scaffold238 | 20675                   | AA                              | CC              | 1946929580               |
| SNP_P4_118777_20706 | NW_004515772.1 | Scaffold238 | 20706                   | AA                              | TT              | 1946929582               |
| SNP_P4_118778_21094 | NW_004515772.1 | Scaffold238 | 21094                   | CC                              | AA              | 1946929585               |
| SNP_P4_118779_21122 | NW_004515772.1 | Scaffold238 | 21122                   | TT                              | GG              | 1946929587               |
| SNP_P4_118780_23809 | NW_004515772.1 | Scaffold238 | 23809                   | GG                              | AA              | 1946929589               |
| SNP_P4_118781_23823 | NW_004515772.1 | Scaffold238 | 23823                   | AA                              | TT              | 1946929591               |
| SNP_P4_118782_23915 | NW_004515772.1 | Scaffold238 | 23915                   | AA                              | GG              | 1946929593               |
| SNP_P4_118783_23964 | NW_004515772.1 | Scaffold238 | 23964                   | CC                              | TT              | 1946929595               |
| SNP_P4_118784_24308 | NW_004515772.1 | Scaffold238 | 24308                   | AA                              | TT              | 1946929597               |
| SNP_P4_118785_24343 | NW_004515772.1 | Scaffold238 | 24343                   | CC                              | TT              | 1946929599               |
| SNP_P4_118786_27159 | NW_004515772.1 | Scaffold238 | 27159                   | GG                              | AA              | 1946929601               |
| SNP_P4_118787_27371 | NW_004515772.1 | Scaffold238 | 27371                   | CC                              | AA              | 1946929603               |
| SNP_P4_118788_27692 | NW_004515772.1 | Scaffold238 | 27692                   | CC                              | TT              | 1946929605               |
| SNP_P4_118789_27705 | NW_004515772.1 | Scaffold238 | 27705                   | TT                              | CC              | 1946929607               |
| SNP_P4_118790_15110 | NW_004515773.1 | Scaffold239 | 15110                   | TT                              | AA              | 1946929609               |
| SNP_P4_118791_15254 | NW_004515773.1 | Scaffold239 | 15254                   | GG                              | AA              | 1946929611               |
| SNP_P4_118792_15255 | NW_004515773.1 | Scaffold239 | 15255                   | GG                              | AA              | 1946929613               |
| SNP_P4_118793_15332 | NW_004515773.1 | Scaffold239 | 15332                   | GG                              | AA              | 1946929615               |
| SNP_P4_118794_36824 | NW_004515773.1 | Scaffold239 | 36824                   | GG                              | TT              | 1946929617               |
| SNP_P4_118795_36852 | NW_004515773.1 | Scaffold239 | 36852                   | TT                              | GG              | 1946929619               |
| SNP_P4_118796_37944 | NW_004515773.1 | Scaffold239 | 37944                   | TT                              | CC              | 1946929621               |
| SNP_P4_118797_47649 | NW_004515773.1 | Scaffold239 | 47649                   | GG                              | CC              | 1946929623               |

| SNPs IDs            | Chromosome IDs | Chromosomes | Physical positions (bp) | CDC Frontier (Reference genome) | (ILWC46 & LPNB) | NCBI SNPdb Accession IDs |
|---------------------|----------------|-------------|-------------------------|---------------------------------|-----------------|--------------------------|
| SNP_P4_118798_47650 | NW_004515773.1 | Scaffold239 | 47650                   | TT                              | AA              | 1946929625               |
| SNP_P4_118799_47656 | NW_004515773.1 | Scaffold239 | 47656                   | GG                              | TT              | 1946929627               |
| SNP_P4_118800_49915 | NW_004515773.1 | Scaffold239 | 49915                   | CC                              | TT              | 1946929629               |
| SNP_P4_118801_49921 | NW_004515773.1 | Scaffold239 | 49921                   | AA                              | TT              | 1946929631               |
| SNP_P4_118802_49923 | NW_004515773.1 | Scaffold239 | 49923                   | AA                              | TT              | 1946929633               |
| SNP_P4_118803_49950 | NW_004515773.1 | Scaffold239 | 49950                   | AA                              | GG              | 1946929635               |
| SNP_P4_118804_50057 | NW_004515773.1 | Scaffold239 | 50057                   | GG                              | AA              | 1946929637               |
| SNP_P4_118805_50141 | NW_004515773.1 | Scaffold239 | 50141                   | TT                              | CC              | 1946929639               |
| SNP_P4_118806_50183 | NW_004515773.1 | Scaffold239 | 50183                   | AA                              | TT              | 1946929641               |
| SNP_P4_118807_50184 | NW_004515773.1 | Scaffold239 | 50184                   | AA                              | GG              | 1946929643               |
| SNP_P4_118808_50210 | NW_004515773.1 | Scaffold239 | 50210                   | AA                              | CC              | 1946929645               |
| SNP_P4_118809_50213 | NW_004515773.1 | Scaffold239 | 50213                   | TT                              | AA              | 1946929647               |
| SNP_P4_118810_50221 | NW_004515773.1 | Scaffold239 | 50221                   | GG                              | AA              | 1946929649               |
| SNP_P4_118811_50224 | NW_004515773.1 | Scaffold239 | 50224                   | AA                              | TT              | 1946929651               |
| SNP_P4_118812_50232 | NW_004515773.1 | Scaffold239 | 50232                   | GG                              | AA              | 1946929653               |
| SNP_P4_118813_50249 | NW_004515773.1 | Scaffold239 | 50249                   | AA                              | CC              | 1946929655               |
| SNP_P4_118814_50267 | NW_004515773.1 | Scaffold239 | 50267                   | CC                              | GG              | 1946929657               |
| SNP_P4_118816_50292 | NW_004515773.1 | Scaffold239 | 50292                   | TT                              | CC              | 1946929659               |
| SNP_P4_118817_50332 | NW_004515773.1 | Scaffold239 | 50332                   | TT                              | CC              | 1946929661               |
| SNP_P4_118818_50581 | NW_004515773.1 | Scaffold239 | 50581                   | GG                              | AA              | 1946929663               |
| SNP_P4_118819_50588 | NW_004515773.1 | Scaffold239 | 50588                   | AA                              | GG              | 1946929665               |
| SNP_P4_118820_54139 | NW_004515773.1 | Scaffold239 | 54139                   | CC                              | TT              | 1946929667               |
| SNP_P4_118821_54148 | NW_004515773.1 | Scaffold239 | 54148                   | TT                              | AA              | 1946929669               |
| SNP_P4_118822_54407 | NW_004515773.1 | Scaffold239 | 54407                   | AA                              | GG              | 1946929671               |
| SNP_P4_118823_54418 | NW_004515773.1 | Scaffold239 | 54418                   | GG                              | AA              | 1946929673               |
| SNP_P4_118824_56878 | NW_004515773.1 | Scaffold239 | 56878                   | CC                              | AA              | 1946929675               |
| SNP_P4_118825_56891 | NW_004515773.1 | Scaffold239 | 56891                   | AA                              | CC              | 1946929677               |
| SNP_P4_118826_57058 | NW_004515773.1 | Scaffold239 | 57058                   | AA                              | GG              | 1946929679               |
| SNP_P4_118828_59043 | NW_004515773.1 | Scaffold239 | 59043                   | CC                              | TT              | 1946929681               |
| SNP_P4_118829_59049 | NW_004515773.1 | Scaffold239 | 59049                   | TT                              | AA              | 1946929683               |
| SNP_P4_118830_59069 | NW_004515773.1 | Scaffold239 | 59069                   | AA                              | TT              | 1946929685               |
| SNP_P4_118831_59072 | NW_004515773.1 | Scaffold239 | 59072                   | GG                              | TT              | 1946929687               |
| SNP_P4_118832_59081 | NW_004515773.1 | Scaffold239 | 59081                   | AA                              | CC              | 1946929689               |
| SNP_P4_118833_59117 | NW_004515773.1 | Scaffold239 | 59117                   | AA                              | TT              | 1946929691               |
| SNP_P4_118834_59240 | NW_004515773.1 | Scaffold239 | 59240                   | CC                              | TT              | 1946929693               |
| SNP_P4_118835_59544 | NW_004515773.1 | Scaffold239 | 59544                   | CC                              | AA              | 1946929695               |
| SNP_P4_118836_59546 | NW_004515773.1 | Scaffold239 | 59546                   | CC                              | GG              | 1946929697               |
| SNP_P4_118837_60813 | NW_004515773.1 | Scaffold239 | 60813                   | TT                              | GG              | 1946929700               |
| SNP_P4_118838_61384 | NW_004515773.1 | Scaffold239 | 61384                   | GG                              | AA              | 1946929702               |
| SNP_P4_118839_61493 | NW_004515773.1 | Scaffold239 | 61493                   | AA                              | GG              | 1946929704               |
| SNP_P4_118840_61522 | NW_004515773.1 | Scaffold239 | 61522                   | GG                              | TT              | 1946929706               |
| SNP_P4_118841_61523 | NW_004515773.1 | Scaffold239 | 61523                   | CC                              | AA              | 1946929708               |

| SNPs IDs            | Chromosome IDs | Chromosomes | Physical positions (bp) | CDC Frontier (Reference genome) | (ILWC46 & LPNB) | NCBI SNPdb Accession IDs |
|---------------------|----------------|-------------|-------------------------|---------------------------------|-----------------|--------------------------|
| SNP_P4_118844_64811 | NW_004515773.1 | Scaffold239 | 64811                   | GG                              | AA              | 1946929710               |
| SNP_P4_118845_64813 | NW_004515773.1 | Scaffold239 | 64813                   | TT                              | GG              | 1946929712               |
| SNP_P4_118846_64832 | NW_004515773.1 | Scaffold239 | 64832                   | CC                              | TT              | 1946929714               |
| SNP_P4_118847_64838 | NW_004515773.1 | Scaffold239 | 64838                   | AA                              | TT              | 1946929716               |
| SNP_P4_118848_64861 | NW_004515773.1 | Scaffold239 | 64861                   | GG                              | TT              | 1946929718               |
| SNP_P4_118849_64898 | NW_004515773.1 | Scaffold239 | 64898                   | CC                              | TT              | 1946929720               |
| SNP_P4_118850_64978 | NW_004515773.1 | Scaffold239 | 64978                   | CC                              | AA              | 1946929722               |
| SNP_P4_118851_75131 | NW_004515773.1 | Scaffold239 | 75131                   | AA                              | CC              | 1946929724               |
| SNP_P4_118852_75778 | NW_004515773.1 | Scaffold239 | 75778                   | AA                              | CC              | 1946929726               |
| SNP_P4_118853_76066 | NW_004515773.1 | Scaffold239 | 76066                   | GG                              | TT              | 1946929728               |
| SNP_P4_118854_80998 | NW_004515773.1 | Scaffold239 | 80998                   | GG                              | CC              | 1946929730               |
| SNP_P4_118855_83765 | NW_004515773.1 | Scaffold239 | 83765                   | TT                              | GG              | 1946929732               |
| SNP_P4_118856_83786 | NW_004515773.1 | Scaffold239 | 83786                   | AA                              | TT              | 1946929734               |
| SNP_P4_118857_83787 | NW_004515773.1 | Scaffold239 | 83787                   | TT                              | CC              | 1946929736               |
| SNP_P4_118858_83934 | NW_004515773.1 | Scaffold239 | 83934                   | AA                              | GG              | 1946929738               |
| SNP_P4_118859_85004 | NW_004515773.1 | Scaffold239 | 85004                   | AA                              | GG              | 1946929740               |
| SNP_P4_118860_88682 | NW_004515773.1 | Scaffold239 | 88682                   | AA                              | CC              | 1946929742               |
| SNP_P4_118861_89296 | NW_004515773.1 | Scaffold239 | 89296                   | CC                              | GG              | 1946929744               |
| SNP_P4_118862_89375 | NW_004515773.1 | Scaffold239 | 89375                   | GG                              | TT              | 1946929746               |
| SNP_P4_118863_89387 | NW_004515773.1 | Scaffold239 | 89387                   | CC                              | AA              | 1946929748               |
| SNP_P4_118864_89475 | NW_004515773.1 | Scaffold239 | 89475                   | AA                              | GG              | 1946929750               |
| SNP_P4_118865_89477 | NW_004515773.1 | Scaffold239 | 89477                   | GG                              | CC              | 1946929752               |
| SNP_P4_118866_89484 | NW_004515773.1 | Scaffold239 | 89484                   | AA                              | GG              | 1946929754               |
| SNP_P4_118867_89653 | NW_004515773.1 | Scaffold239 | 89653                   | GG                              | AA              | 1946929756               |
| SNP_P4_118868_89667 | NW_004515773.1 | Scaffold239 | 89667                   | TT                              | CC              | 1946929759               |
| SNP_P4_118869_89681 | NW_004515773.1 | Scaffold239 | 89681                   | AA                              | TT              | 1946929761               |
| SNP_P4_118870_89801 | NW_004515773.1 | Scaffold239 | 89801                   | GG                              | AA              | 1946929763               |
| SNP_P4_118871_89802 | NW_004515773.1 | Scaffold239 | 89802                   | GG                              | AA              | 1946929765               |
| SNP_P4_118872_89892 | NW_004515773.1 | Scaffold239 | 89892                   | AA                              | TT              | 1946929767               |
| SNP_P4_118873_89893 | NW_004515773.1 | Scaffold239 | 89893                   | GG                              | TT              | 1946929769               |
| SNP_P4_118874_89900 | NW_004515773.1 | Scaffold239 | 89900                   | TT                              | AA              | 1946929771               |
| SNP_P4_118875_89923 | NW_004515773.1 | Scaffold239 | 89923                   | CC                              | TT              | 1946929773               |
| SNP_P4_118876_89948 | NW_004515773.1 | Scaffold239 | 89948                   | TT                              | GG              | 1946929775               |
| SNP_P4_118877_89991 | NW_004515773.1 | Scaffold239 | 89991                   | TT                              | AA              | 1946929777               |
| SNP_P4_118878_90011 | NW_004515773.1 | Scaffold239 | 90011                   | CC                              | AA              | 1946929779               |
| SNP_P4_118879_90023 | NW_004515773.1 | Scaffold239 | 90023                   | CC                              | TT              | 1946929781               |
| SNP_P4_118880_90065 | NW_004515773.1 | Scaffold239 | 90065                   | GG                              | CC              | 1946929783               |
| SNP_P4_118881_90070 | NW_004515773.1 | Scaffold239 | 90070                   | CC                              | TT              | 1946929785               |
| SNP_P4_118882_90092 | NW_004515773.1 | Scaffold239 | 90092                   | AA                              | TT              | 1946929787               |
| SNP_P4_118883_90115 | NW_004515773.1 | Scaffold239 | 90115                   | TT                              | AA              | 1946929789               |
| SNP_P4_118884_96604 | NW_004515773.1 | Scaffold239 | 96604                   | AA                              | TT              | 1946929791               |
| SNP_P4_118885_96609 | NW_004515773.1 | Scaffold239 | 96609                   | GG                              | CC              | 1946929793               |

| SNPs IDs             | Chromosome IDs | Chromosomes | Physical positions (bp) | CDC Frontier (Reference genome) | (ILWC46 & LPNB) | NCBI SNPdb Accession IDs |
|----------------------|----------------|-------------|-------------------------|---------------------------------|-----------------|--------------------------|
| SNP_P4_118886_96778  | NW_004515773.1 | Scaffold239 | 96778                   | GG                              | TT              | 1946929795               |
| SNP_P4_118887_96793  | NW_004515773.1 | Scaffold239 | 96793                   | AA                              | TT              | 1946929797               |
| SNP_P4_118888_96808  | NW_004515773.1 | Scaffold239 | 96808                   | TT                              | AA              | 1946929799               |
| SNP_P4_118889_96819  | NW_004515773.1 | Scaffold239 | 96819                   | CC                              | AA              | 1946929801               |
| SNP_P4_118890_96823  | NW_004515773.1 | Scaffold239 | 96823                   | AA                              | GG              | 1946929803               |
| SNP_P4_118891_96838  | NW_004515773.1 | Scaffold239 | 96838                   | AA                              | TT              | 1946929805               |
| SNP_P4_118892_96847  | NW_004515773.1 | Scaffold239 | 96847                   | AA                              | TT              | 1946929807               |
| SNP_P4_118893_97093  | NW_004515773.1 | Scaffold239 | 97093                   | AA                              | GG              | 1946929809               |
| SNP_P4_118894_97379  | NW_004515773.1 | Scaffold239 | 97379                   | CC                              | TT              | 1946929811               |
| SNP_P4_118895_97493  | NW_004515773.1 | Scaffold239 | 97493                   | GG                              | TT              | 1946929813               |
| SNP_P4_118896_97504  | NW_004515773.1 | Scaffold239 | 97504                   | CC                              | GG              | 1946929815               |
| SNP_P4_118897_97574  | NW_004515773.1 | Scaffold239 | 97574                   | CC                              | TT              | 1946929817               |
| SNP_P4_118898_97611  | NW_004515773.1 | Scaffold239 | 97611                   | TT                              | CC              | 1946929819               |
| SNP_P4_118899_97622  | NW_004515773.1 | Scaffold239 | 97622                   | TT                              | GG              | 1946929821               |
| SNP_P4_118900_97631  | NW_004515773.1 | Scaffold239 | 97631                   | AA                              | CC              | 1946929823               |
| SNP_P4_118901_97638  | NW_004515773.1 | Scaffold239 | 97638                   | CC                              | TT              | 1946929825               |
| SNP_P4_118902_97641  | NW_004515773.1 | Scaffold239 | 97641                   | CC                              | GG              | 1946929827               |
| SNP_P4_118903_97676  | NW_004515773.1 | Scaffold239 | 97676                   | TT                              | CC              | 1946929829               |
| SNP_P4_118904_97712  | NW_004515773.1 | Scaffold239 | 97712                   | AA                              | CC              | 1946929831               |
| SNP_P4_118905_97748  | NW_004515773.1 | Scaffold239 | 97748                   | CC                              | TT              | 1946929833               |
| SNP_P4_118906_97799  | NW_004515773.1 | Scaffold239 | 97799                   | GG                              | TT              | 1946929835               |
| SNP_P4_118907_97962  | NW_004515773.1 | Scaffold239 | 97962                   | TT                              | CC              | 1946929837               |
| SNP_P4_118908_97978  | NW_004515773.1 | Scaffold239 | 97978                   | CC                              | TT              | 1946929839               |
| SNP_P4_118909_98019  | NW_004515773.1 | Scaffold239 | 98019                   | TT                              | AA              | 1946929841               |
| SNP_P4_118910_98034  | NW_004515773.1 | Scaffold239 | 98034                   | CC                              | GG              | 1946929843               |
| SNP_P4_118911_98044  | NW_004515773.1 | Scaffold239 | 98044                   | GG                              | TT              | 1946929845               |
| SNP_P4_118912_98061  | NW_004515773.1 | Scaffold239 | 98061                   | TT                              | AA              | 1946929847               |
| SNP_P4_118913_98087  | NW_004515773.1 | Scaffold239 | 98087                   | TT                              | CC              | 1946929849               |
| SNP_P4_118914_98104  | NW_004515773.1 | Scaffold239 | 98104                   | CC                              | GG              | 1946929851               |
| SNP_P4_118915_98121  | NW_004515773.1 | Scaffold239 | 98121                   | GG                              | AA              | 1946929853               |
| SNP_P4_118916_98313  | NW_004515773.1 | Scaffold239 | 98313                   | CC                              | TT              | 1946929855               |
| SNP_P4_118917_98339  | NW_004515773.1 | Scaffold239 | 98339                   | TT                              | CC              | 1946929857               |
| SNP_P4_118918_98363  | NW_004515773.1 | Scaffold239 | 98363                   | GG                              | TT              | 1946929859               |
| SNP_P4_118919_98371  | NW_004515773.1 | Scaffold239 | 98371                   | TT                              | GG              | 1946929861               |
| SNP_P4_118920_98372  | NW_004515773.1 | Scaffold239 | 98372                   | TT                              | CC              | 1946929863               |
| SNP_P4_118921_98434  | NW_004515773.1 | Scaffold239 | 98434                   | GG                              | TT              | 1946929865               |
| SNP_P4_118922_98711  | NW_004515773.1 | Scaffold239 | 98711                   | GG                              | AA              | 1946929867               |
| SNP_P4_118923_98739  | NW_004515773.1 | Scaffold239 | 98739                   | TT                              | AA              | 1946929869               |
| SNP_P4_118924_108470 | NW_004515773.1 | Scaffold239 | 108470                  | TT                              | CC              | 1946929871               |
| SNP_P4_118925_108516 | NW_004515773.1 | Scaffold239 | 108516                  | CC                              | AA              | 1946929873               |
| SNP_P4_118926_109035 | NW_004515773.1 | Scaffold239 | 109035                  | TT                              | AA              | 1946929875               |
| SNP_P4_118929_109319 | NW_004515773.1 | Scaffold239 | 109319                  | TT                              | CC              | 1946929877               |



| SNPs IDs             | Chromosome IDs | Chromosomes | Physical positions (bp) | CDC Frontier (Reference genome) | (ILWC46 & LPNB) | NCBI SNPdb Accession IDs |
|----------------------|----------------|-------------|-------------------------|---------------------------------|-----------------|--------------------------|
| SNP_P4_118930_109360 | NW_004515773.1 | Scaffold239 | 109360                  | AA                              | GG              | 1946929879               |
| SNP_P4_118931_109370 | NW_004515773.1 | Scaffold239 | 109370                  | AA                              | GG              | 1946929881               |
| SNP_P4_118932_109635 | NW_004515773.1 | Scaffold239 | 109635                  | CC                              | TT              | 1946929883               |
| SNP_P4_118933_109670 | NW_004515773.1 | Scaffold239 | 109670                  | CC                              | TT              | 1946929886               |
| SNP_P4_118934_109877 | NW_004515773.1 | Scaffold239 | 109877                  | AA                              | GG              | 1946929888               |
| SNP_P4_118935_109888 | NW_004515773.1 | Scaffold239 | 109888                  | GG                              | TT              | 1946929890               |
| SNP_P4_118936_109954 | NW_004515773.1 | Scaffold239 | 109954                  | CC                              | TT              | 1946929892               |
| SNP_P4_118937_110004 | NW_004515773.1 | Scaffold239 | 110004                  | CC                              | TT              | 1946929894               |
| SNP_P4_118938_110314 | NW_004515773.1 | Scaffold239 | 110314                  | AA                              | TT              | 1946929896               |
| SNP_P4_118939_4629   | NW_004515774.1 | Scaffold240 | 4629                    | CC                              | TT              | 1946929898               |
| SNP_P4_118940_4645   | NW_004515774.1 | Scaffold240 | 4645                    | CC                              | TT              | 1946929900               |
| SNP_P4_118941_6760   | NW_004515774.1 | Scaffold240 | 6760                    | AA                              | TT              | 1946929902               |
| SNP_P4_118943_32761  | NW_004515774.1 | Scaffold240 | 32761                   | AA                              | CC              | 1946929904               |
| SNP_P4_118944_38660  | NW_004515774.1 | Scaffold240 | 38660                   | GG                              | AA              | 1946929906               |
| SNP_P4_118946_73014  | NW_004515774.1 | Scaffold240 | 73014                   | TT                              | GG              | 1946929908               |
| SNP_P4_118947_73019  | NW_004515774.1 | Scaffold240 | 73019                   | GG                              | AA              | 1946929911               |
| SNP_P4_118948_73052  | NW_004515774.1 | Scaffold240 | 73052                   | CC                              | TT              | 1946929913               |
| SNP_P4_118949_73056  | NW_004515774.1 | Scaffold240 | 73056                   | TT                              | AA              | 1946929915               |
| SNP_P4_118950_73069  | NW_004515774.1 | Scaffold240 | 73069                   | TT                              | AA              | 1946929917               |
| SNP_P4_118951_73113  | NW_004515774.1 | Scaffold240 | 73113                   | TT                              | CC              | 1946929919               |
| SNP_P4_118952_73119  | NW_004515774.1 | Scaffold240 | 73119                   | AA                              | GG              | 1946929921               |
| SNP_P4_118954_73464  | NW_004515774.1 | Scaffold240 | 73464                   | GG                              | AA              | 1946929923               |
| SNP_P4_118955_73525  | NW_004515774.1 | Scaffold240 | 73525                   | AA                              | CC              | 1946929925               |
| SNP_P4_118956_73530  | NW_004515774.1 | Scaffold240 | 73530                   | TT                              | AA              | 1946929927               |
| SNP_P4_118957_73554  | NW_004515774.1 | Scaffold240 | 73554                   | TT                              | GG              | 1946929929               |
| SNP_P4_118958_73583  | NW_004515774.1 | Scaffold240 | 73583                   | GG                              | AA              | 1946929931               |
| SNP_P4_118959_83674  | NW_004515774.1 | Scaffold240 | 83674                   | CC                              | TT              | 1946929933               |
| SNP_P4_118960_83681  | NW_004515774.1 | Scaffold240 | 83681                   | GG                              | AA              | 1946929935               |
| SNP_P4_118961_83710  | NW_004515774.1 | Scaffold240 | 83710                   | AA                              | CC              | 1946929937               |
| SNP_P4_118962_84111  | NW_004515774.1 | Scaffold240 | 84111                   | CC                              | TT              | 1946929939               |
| SNP_P4_118963_100929 | NW_004515774.1 | Scaffold240 | 100929                  | TT                              | CC              | 1946929941               |
| SNP_P4_118964_100966 | NW_004515774.1 | Scaffold240 | 100966                  | GG                              | CC              | 1946929943               |
| SNP_P4_118966_138292 | NW_004515774.1 | Scaffold240 | 138292                  | TT                              | GG              | 1946929945               |
| SNP_P4_118967_139332 | NW_004515774.1 | Scaffold240 | 139332                  | AA                              | GG              | 1946929947               |
| SNP_P4_118968_142277 | NW_004515774.1 | Scaffold240 | 142277                  | TT                              | CC              | 1946929949               |
| SNP_P4_118969_142302 | NW_004515774.1 | Scaffold240 | 142302                  | TT                              | AA              | 1946929951               |
| SNP_P4_118970_142325 | NW_004515774.1 | Scaffold240 | 142325                  | AA                              | TT              | 1946929953               |
| SNP_P4_118971_142329 | NW_004515774.1 | Scaffold240 | 142329                  | CC                              | AA              | 1946929955               |
| SNP_P4_118972_142344 | NW_004515774.1 | Scaffold240 | 142344                  | TT                              | GG              | 1946929957               |
| SNP_P4_118973_142774 | NW_004515774.1 | Scaffold240 | 142774                  | CC                              | TT              | 1946929959               |
| SNP_P4_118974_142776 | NW_004515774.1 | Scaffold240 | 142776                  | TT                              | CC              | 1946929961               |
| SNP_P4_118975_142791 | NW_004515774.1 | Scaffold240 | 142791                  | CC                              | TT              | 1946929963               |

| SNPs IDs             | Chromosome IDs | Chromosomes | Physical positions (bp) | CDC Frontier (Reference genome) | (ILWC46 & LPNB) | NCBI SNPdb Accession IDs |
|----------------------|----------------|-------------|-------------------------|---------------------------------|-----------------|--------------------------|
| SNP_P4_118976_142917 | NW_004515774.1 | Scaffold240 | 142917                  | TT                              | GG              | 1946929965               |
| SNP_P4_118977_142920 | NW_004515774.1 | Scaffold240 | 142920                  | TT                              | CC              | 1946929967               |
| SNP_P4_118978_142921 | NW_004515774.1 | Scaffold240 | 142921                  | GG                              | AA              | 1946929969               |
| SNP_P4_118979_142922 | NW_004515774.1 | Scaffold240 | 142922                  | AA                              | CC              | 1946929971               |
| SNP_P4_118980_142944 | NW_004515774.1 | Scaffold240 | 142944                  | TT                              | CC              | 1946929973               |
| SNP_P4_118981_143754 | NW_004515774.1 | Scaffold240 | 143754                  | TT                              | AA              | 1946929975               |
| SNP_P4_118982_143768 | NW_004515774.1 | Scaffold240 | 143768                  | CC                              | AA              | 1946929977               |
| SNP_P4_118983_145027 | NW_004515774.1 | Scaffold240 | 145027                  | CC                              | TT              | 1946929979               |
| SNP_P4_118984_145182 | NW_004515774.1 | Scaffold240 | 145182                  | CC                              | TT              | 1946929981               |
| SNP_P4_118985_145185 | NW_004515774.1 | Scaffold240 | 145185                  | TT                              | GG              | 1946929983               |
| SNP_P4_118986_147268 | NW_004515774.1 | Scaffold240 | 147268                  | AA                              | GG              | 1946929985               |
| SNP_P4_118987_147677 | NW_004515774.1 | Scaffold240 | 147677                  | CC                              | TT              | 1946929987               |
| SNP_P4_118990_149727 | NW_004515774.1 | Scaffold240 | 149727                  | CC                              | TT              | 1946929989               |
| SNP_P4_118992_150309 | NW_004515774.1 | Scaffold240 | 150309                  | AA                              | GG              | 1946929992               |
| SNP_P4_118994_151401 | NW_004515774.1 | Scaffold240 | 151401                  | CC                              | TT              | 1946929994               |
| SNP_P4_118995_151905 | NW_004515774.1 | Scaffold240 | 151905                  | GG                              | AA              | 1946929996               |
| SNP_P4_118996_153962 | NW_004515774.1 | Scaffold240 | 153962                  | TT                              | CC              | 1946929998               |
| SNP_P4_118997_155587 | NW_004515774.1 | Scaffold240 | 155587                  | CC                              | TT              | 1946930000               |
| SNP_P4_118999_159182 | NW_004515774.1 | Scaffold240 | 159182                  | AA                              | GG              | 1946930002               |
| SNP_P4_119000_2481   | NW_004515775.1 | Scaffold242 | 2481                    | TT                              | GG              | 1946930004               |
| SNP_P4_119001_2817   | NW_004515775.1 | Scaffold242 | 2817                    | CC                              | TT              | 1946930006               |
| SNP_P4_119002_6532   | NW_004515775.1 | Scaffold242 | 6532                    | GG                              | TT              | 1946930008               |
| SNP_P4_119003_8474   | NW_004515775.1 | Scaffold242 | 8474                    | AA                              | CC              | 1946930010               |
| SNP_P4_119004_9073   | NW_004515775.1 | Scaffold242 | 9073                    | TT                              | CC              | 1946930012               |
| SNP_P4_119005_9302   | NW_004515775.1 | Scaffold242 | 9302                    | AA                              | CC              | 1946930014               |
| SNP_P4_119006_10782  | NW_004515775.1 | Scaffold242 | 10782                   | TT                              | AA              | 1946930016               |
| SNP_P4_119007_16591  | NW_004515775.1 | Scaffold242 | 16591                   | AA                              | GG              | 1946930018               |
| SNP_P4_119008_17432  | NW_004515775.1 | Scaffold242 | 17432                   | GG                              | TT              | 1946930020               |
| SNP_P4_119009_19779  | NW_004515775.1 | Scaffold242 | 19779                   | AA                              | TT              | 1946930022               |
| SNP_P4_119010_22345  | NW_004515775.1 | Scaffold242 | 22345                   | CC                              | TT              | 1946930024               |
| SNP_P4_119011_22362  | NW_004515775.1 | Scaffold242 | 22362                   | TT                              | CC              | 1946930026               |
| SNP_P4_119012_30869  | NW_004515775.1 | Scaffold242 | 30869                   | TT                              | GG              | 1946930028               |
| SNP_P4_119013_42110  | NW_004515775.1 | Scaffold242 | 42110                   | GG                              | AA              | 1946930030               |
| SNP_P4_119014_42753  | NW_004515775.1 | Scaffold242 | 42753                   | CC                              | AA              | 1946930032               |
| SNP_P4_119015_42896  | NW_004515775.1 | Scaffold242 | 42896                   | CC                              | AA              | 1946930034               |
| SNP_P4_119016_44671  | NW_004515775.1 | Scaffold242 | 44671                   | CC                              | GG              | 1946930036               |
| SNP_P4_119017_44722  | NW_004515775.1 | Scaffold242 | 44722                   | TT                              | CC              | 1946930038               |
| SNP_P4_119018_44820  | NW_004515775.1 | Scaffold242 | 44820                   | TT                              | CC              | 1946930040               |
| SNP_P4_119019_44837  | NW_004515775.1 | Scaffold242 | 44837                   | TT                              | GG              | 1946930042               |
| SNP_P4_119020_44839  | NW_004515775.1 | Scaffold242 | 44839                   | CC                              | AA              | 1946930044               |
| SNP_P4_119021_44853  | NW_004515775.1 | Scaffold242 | 44853                   | CC                              | AA              | 1946930046               |
| SNP_P4_119022_45094  | NW_004515775.1 | Scaffold242 | 45094                   | TT                              | CC              | 1946930048               |

| SNPs IDs            | Chromosome IDs | Chromosomes | Physical positions (bp) | CDC Frontier (Reference genome) | (ILWC46 & LPNB) | NCBI SNPdb Accession IDs |
|---------------------|----------------|-------------|-------------------------|---------------------------------|-----------------|--------------------------|
| SNP_P4_119023_45227 | NW_004515775.1 | Scaffold242 | 45227                   | TT                              | GG              | 1946930050               |
| SNP_P4_119024_45228 | NW_004515775.1 | Scaffold242 | 45228                   | AA                              | GG              | 1946930052               |
| SNP_P4_119025_45243 | NW_004515775.1 | Scaffold242 | 45243                   | AA                              | GG              | 1946930054               |
| SNP_P4_119026_45294 | NW_004515775.1 | Scaffold242 | 45294                   | AA                              | GG              | 1946930056               |
| SNP_P4_119027_45366 | NW_004515775.1 | Scaffold242 | 45366                   | TT                              | CC              | 1946930058               |
| SNP_P4_119028_45468 | NW_004515775.1 | Scaffold242 | 45468                   | TT                              | AA              | 1946930060               |
| SNP_P4_119029_45475 | NW_004515775.1 | Scaffold242 | 45475                   | AA                              | GG              | 1946930062               |
| SNP_P4_119030_45483 | NW_004515775.1 | Scaffold242 | 45483                   | GG                              | AA              | 1946930064               |
| SNP_P4_119031_45485 | NW_004515775.1 | Scaffold242 | 45485                   | GG                              | TT              | 1946930066               |
| SNP_P4_119032_45516 | NW_004515775.1 | Scaffold242 | 45516                   | CC                              | TT              | 1946930068               |
| SNP_P4_119033_48653 | NW_004515775.1 | Scaffold242 | 48653                   | CC                              | AA              | 1946930071               |
| SNP_P4_119034_49412 | NW_004515775.1 | Scaffold242 | 49412                   | GG                              | AA              | 1946930073               |
| SNP_P4_119035_50294 | NW_004515775.1 | Scaffold242 | 50294                   | TT                              | CC              | 1946930075               |
| SNP_P4_119036_50301 | NW_004515775.1 | Scaffold242 | 50301                   | CC                              | AA              | 1946930077               |
| SNP_P4_119037_50335 | NW_004515775.1 | Scaffold242 | 50335                   | AA                              | GG              | 1946930079               |
| SNP_P4_119038_50356 | NW_004515775.1 | Scaffold242 | 50356                   | GG                              | AA              | 1946930081               |
| SNP_P4_119039_50365 | NW_004515775.1 | Scaffold242 | 50365                   | CC                              | GG              | 1946930083               |
| SNP_P4_119040_50421 | NW_004515775.1 | Scaffold242 | 50421                   | AA                              | GG              | 1946930085               |
| SNP_P4_119041_50426 | NW_004515775.1 | Scaffold242 | 50426                   | TT                              | CC              | 1946930087               |
| SNP_P4_119042_50644 | NW_004515775.1 | Scaffold242 | 50644                   | AA                              | GG              | 1946930090               |
| SNP_P4_119043_50832 | NW_004515775.1 | Scaffold242 | 50832                   | AA                              | GG              | 1946930092               |
| SNP_P4_119044_50861 | NW_004515775.1 | Scaffold242 | 50861                   | TT                              | CC              | 1946930094               |
| SNP_P4_119045_50879 | NW_004515775.1 | Scaffold242 | 50879                   | AA                              | GG              | 1946930096               |
| SNP_P4_119046_51027 | NW_004515775.1 | Scaffold242 | 51027                   | TT                              | CC              | 1946930098               |
| SNP_P4_119047_52762 | NW_004515775.1 | Scaffold242 | 52762                   | GG                              | AA              | 1946930100               |
| SNP_P4_119048_53852 | NW_004515775.1 | Scaffold242 | 53852                   | GG                              | CC              | 1946930102               |
| SNP_P4_119049_58689 | NW_004515775.1 | Scaffold242 | 58689                   | AA                              | TT              | 1946930104               |
| SNP_P4_119050_62721 | NW_004515775.1 | Scaffold242 | 62721                   | CC                              | AA              | 1946930106               |
| SNP_P4_119051_63161 | NW_004515775.1 | Scaffold242 | 63161                   | GG                              | AA              | 1946930108               |
| SNP_P4_119052_64397 | NW_004515775.1 | Scaffold242 | 64397                   | CC                              | TT              | 1946930110               |
| SNP_P4_119053_64740 | NW_004515775.1 | Scaffold242 | 64740                   | GG                              | AA              | 1946930112               |
| SNP_P4_119054_64769 | NW_004515775.1 | Scaffold242 | 64769                   | GG                              | AA              | 1946930114               |
| SNP_P4_119055_69945 | NW_004515775.1 | Scaffold242 | 69945                   | TT                              | CC              | 1946930116               |
| SNP_P4_119056_70740 | NW_004515775.1 | Scaffold242 | 70740                   | AA                              | GG              | 1946930118               |
| SNP_P4_119058_73377 | NW_004515775.1 | Scaffold242 | 73377                   | GG                              | AA              | 1946930120               |
| SNP_P4_119059_73875 | NW_004515775.1 | Scaffold242 | 73875                   | AA                              | CC              | 1946930122               |
| SNP_P4_119060_74024 | NW_004515775.1 | Scaffold242 | 74024                   | CC                              | TT              | 1946930124               |
| SNP_P4_119061_74027 | NW_004515775.1 | Scaffold242 | 74027                   | GG                              | AA              | 1946930126               |
| SNP_P4_119062_82394 | NW_004515775.1 | Scaffold242 | 82394                   | GG                              | TT              | 1946930128               |
| SNP_P4_119063_84118 | NW_004515775.1 | Scaffold242 | 84118                   | GG                              | AA              | 1946930130               |
| SNP_P4_119065_90296 | NW_004515775.1 | Scaffold242 | 90296                   | GG                              | AA              | 1946930132               |
| SNP_P4_119066_90589 | NW_004515775.1 | Scaffold242 | 90589                   | GG                              | TT              | 1946930134               |

| SNPs IDs             | Chromosome IDs | Chromosomes | Physical positions (bp) | CDC Frontier (Reference genome) | (ILWC46 & LPNB) | NCBI SNPdb Accession IDs |
|----------------------|----------------|-------------|-------------------------|---------------------------------|-----------------|--------------------------|
| SNP_P4_119067_90615  | NW_004515775.1 | Scaffold242 | 90615                   | TT                              | CC              | 1946930136               |
| SNP_P4_119068_103662 | NW_004515775.1 | Scaffold242 | 103662                  | CC                              | TT              | 1946930138               |
| SNP_P4_119069_103679 | NW_004515775.1 | Scaffold242 | 103679                  | TT                              | GG              | 1946930140               |
| SNP_P4_119070_103724 | NW_004515775.1 | Scaffold242 | 103724                  | AA                              | GG              | 1946930142               |
| SNP_P4_119071_103749 | NW_004515775.1 | Scaffold242 | 103749                  | CC                              | TT              | 1946930144               |
| SNP_P4_119072_103775 | NW_004515775.1 | Scaffold242 | 103775                  | CC                              | TT              | 1946930146               |
| SNP_P4_119073_103779 | NW_004515775.1 | Scaffold242 | 103779                  | CC                              | AA              | 1946930148               |
| SNP_P4_119074_103932 | NW_004515775.1 | Scaffold242 | 103932                  | AA                              | GG              | 1946930150               |
| SNP_P4_119075_103998 | NW_004515775.1 | Scaffold242 | 103998                  | CC                              | TT              | 1946930152               |
| SNP_P4_119076_104050 | NW_004515775.1 | Scaffold242 | 104050                  | AA                              | GG              | 1946930154               |
| SNP_P4_119077_104098 | NW_004515775.1 | Scaffold242 | 104098                  | GG                              | AA              | 1946930156               |
| SNP_P4_119078_104100 | NW_004515775.1 | Scaffold242 | 104100                  | GG                              | AA              | 1946930158               |
| SNP_P4_119079_106747 | NW_004515775.1 | Scaffold242 | 106747                  | AA                              | TT              | 1946930160               |
| SNP_P4_119080_106779 | NW_004515775.1 | Scaffold242 | 106779                  | TT                              | CC              | 1946930162               |
| SNP_P4_119081_107779 | NW_004515775.1 | Scaffold242 | 107779                  | TT                              | CC              | 1946930164               |
| SNP_P4_119082_108193 | NW_004515775.1 | Scaffold242 | 108193                  | GG                              | AA              | 1946930166               |
| SNP_P4_119083_108197 | NW_004515775.1 | Scaffold242 | 108197                  | CC                              | TT              | 1946930168               |
| SNP_P4_119084_108207 | NW_004515775.1 | Scaffold242 | 108207                  | CC                              | AA              | 1946930170               |
| SNP_P4_119085_109816 | NW_004515775.1 | Scaffold242 | 109816                  | GG                              | TT              | 1946930172               |
| SNP_P4_119086_114393 | NW_004515775.1 | Scaffold242 | 114393                  | AA                              | TT              | 1946930174               |
| SNP_P4_119087_116505 | NW_004515775.1 | Scaffold242 | 116505                  | GG                              | AA              | 1946930176               |
| SNP_P4_119088_117983 | NW_004515775.1 | Scaffold242 | 117983                  | GG                              | AA              | 1946930178               |
| SNP_P4_119089_121771 | NW_004515775.1 | Scaffold242 | 121771                  | TT                              | CC              | 1946930180               |
| SNP_P4_119090_121778 | NW_004515775.1 | Scaffold242 | 121778                  | CC                              | TT              | 1946930182               |
| SNP_P4_119091_122934 | NW_004515775.1 | Scaffold242 | 122934                  | GG                              | CC              | 1946930184               |
| SNP_P4_119092_123010 | NW_004515775.1 | Scaffold242 | 123010                  | CC                              | TT              | 1946930186               |
| SNP_P4_119093_130510 | NW_004515775.1 | Scaffold242 | 130510                  | AA                              | GG              | 1946930188               |
| SNP_P4_119094_133212 | NW_004515775.1 | Scaffold242 | 133212                  | GG                              | TT              | 1946930190               |
| SNP_P4_119095_139874 | NW_004515775.1 | Scaffold242 | 139874                  | AA                              | GG              | 1946930192               |
| SNP_P4_119096_152190 | NW_004515775.1 | Scaffold242 | 152190                  | AA                              | CC              | 1946930194               |
| SNP_P4_119097_156781 | NW_004515775.1 | Scaffold242 | 156781                  | AA                              | GG              | 1946930196               |
| SNP_P4_119098_160218 | NW_004515775.1 | Scaffold242 | 160218                  | TT                              | AA              | 1946930198               |
| SNP_P4_119099_161394 | NW_004515775.1 | Scaffold242 | 161394                  | AA                              | TT              | 1946930200               |
| SNP_P4_119100_163045 | NW_004515775.1 | Scaffold242 | 163045                  | CC                              | TT              | 1946930202               |
| SNP_P4_119101_163316 | NW_004515775.1 | Scaffold242 | 163316                  | CC                              | GG              | 1946930204               |
| SNP_P4_119102_169547 | NW_004515775.1 | Scaffold242 | 169547                  | CC                              | TT              | 1946930206               |
| SNP_P4_119103_183359 | NW_004515775.1 | Scaffold242 | 183359                  | TT                              | CC              | 1946930208               |
| SNP_P4_119104_183678 | NW_004515775.1 | Scaffold242 | 183678                  | TT                              | CC              | 1946930210               |
| SNP_P4_119105_187993 | NW_004515775.1 | Scaffold242 | 187993                  | TT                              | CC              | 1946930212               |
| SNP_P4_119106_191152 | NW_004515775.1 | Scaffold242 | 191152                  | GG                              | AA              | 1946930214               |
| SNP_P4_119107_191472 | NW_004515775.1 | Scaffold242 | 191472                  | AA                              | GG              | 1946930216               |
| SNP_P4_119108_191552 | NW_004515775.1 | Scaffold242 | 191552                  | TT                              | CC              | 1946930218               |

| SNPs IDs             | Chromosome IDs | Chromosomes | Physical positions (bp) | CDC Frontier (Reference genome) | (ILWC46 & LPNB) | NCBI SNPdb Accession IDs |
|----------------------|----------------|-------------|-------------------------|---------------------------------|-----------------|--------------------------|
| SNP_P4_119109_191579 | NW_004515775.1 | Scaffold242 | 191579                  | CC                              | TT              | 1946930220               |
| SNP_P4_119110_191717 | NW_004515775.1 | Scaffold242 | 191717                  | TT                              | AA              | 1946930222               |
| SNP_P4_119111_198787 | NW_004515775.1 | Scaffold242 | 198787                  | GG                              | AA              | 1946930224               |
| SNP_P4_119113_210297 | NW_004515775.1 | Scaffold242 | 210297                  | TT                              | AA              | 1946930227               |
| SNP_P4_119114_211548 | NW_004515775.1 | Scaffold242 | 211548                  | AA                              | GG              | 1946930229               |
| SNP_P4_119115_213469 | NW_004515775.1 | Scaffold242 | 213469                  | CC                              | AA              | 1946930231               |
| SNP_P4_119116_213859 | NW_004515775.1 | Scaffold242 | 213859                  | CC                              | TT              | 1946930233               |
| SNP_P4_119117_215907 | NW_004515775.1 | Scaffold242 | 215907                  | TT                              | CC              | 1946930235               |
| SNP_P4_119118_216156 | NW_004515775.1 | Scaffold242 | 216156                  | CC                              | TT              | 1946930237               |
| SNP_P4_119119_223528 | NW_004515775.1 | Scaffold242 | 223528                  | CC                              | GG              | 1946930239               |
| SNP_P4_119120_229265 | NW_004515775.1 | Scaffold242 | 229265                  | GG                              | AA              | 1946930241               |
| SNP_P4_119122_233657 | NW_004515775.1 | Scaffold242 | 233657                  | GG                              | AA              | 1946930244               |
| SNP_P4_119123_233658 | NW_004515775.1 | Scaffold242 | 233658                  | TT                              | CC              | 1946930246               |
| SNP_P4_119124_234615 | NW_004515775.1 | Scaffold242 | 234615                  | AA                              | GG              | 1946930248               |
| SNP_P4_119125_244176 | NW_004515775.1 | Scaffold242 | 244176                  | AA                              | GG              | 1946930250               |
| SNP_P4_119126_247389 | NW_004515775.1 | Scaffold242 | 247389                  | AA                              | GG              | 1946930252               |
| SNP_P4_119127_247404 | NW_004515775.1 | Scaffold242 | 247404                  | TT                              | AA              | 1946930254               |
| SNP_P4_119128_247653 | NW_004515775.1 | Scaffold242 | 247653                  | TT                              | AA              | 1946930256               |
| SNP_P4_119129_247705 | NW_004515775.1 | Scaffold242 | 247705                  | TT                              | CC              | 1946930258               |
| SNP_P4_119130_254200 | NW_004515775.1 | Scaffold242 | 254200                  | GG                              | AA              | 1946930260               |
| SNP_P4_119131_254885 | NW_004515775.1 | Scaffold242 | 254885                  | TT                              | CC              | 1946930262               |
| SNP_P4_119132_258814 | NW_004515775.1 | Scaffold242 | 258814                  | TT                              | GG              | 1946930265               |
| SNP_P4_119134_260896 | NW_004515775.1 | Scaffold242 | 260896                  | TT                              | GG              | 1946930267               |
| SNP_P4_119135_266007 | NW_004515775.1 | Scaffold242 | 266007                  | CC                              | TT              | 1946930269               |
| SNP_P4_119138_288374 | NW_004515775.1 | Scaffold242 | 288374                  | AA                              | GG              | 1946930271               |
| SNP_P4_119139_291697 | NW_004515775.1 | Scaffold242 | 291697                  | GG                              | AA              | 1946930273               |
| SNP_P4_119140_292115 | NW_004515775.1 | Scaffold242 | 292115                  | AA                              | GG              | 1946930275               |
| SNP_P4_119141_301344 | NW_004515775.1 | Scaffold242 | 301344                  | GG                              | AA              | 1946930277               |
| SNP_P4_119143_306972 | NW_004515775.1 | Scaffold242 | 306972                  | TT                              | CC              | 1946930279               |
| SNP_P4_119145_307525 | NW_004515775.1 | Scaffold242 | 307525                  | AA                              | TT              | 1946930281               |
| SNP_P4_119146_309863 | NW_004515775.1 | Scaffold242 | 309863                  | AA                              | GG              | 1946930283               |
| SNP_P4_119147_310194 | NW_004515775.1 | Scaffold242 | 310194                  | TT                              | CC              | 1946930285               |
| SNP_P4_119148_310372 | NW_004515775.1 | Scaffold242 | 310372                  | CC                              | GG              | 1946930287               |
| SNP_P4_119149_311756 | NW_004515775.1 | Scaffold242 | 311756                  | AA                              | CC              | 1946930289               |
| SNP_P4_119150_313347 | NW_004515775.1 | Scaffold242 | 313347                  | TT                              | CC              | 1946930291               |
| SNP_P4_119151_315688 | NW_004515775.1 | Scaffold242 | 315688                  | CC                              | TT              | 1946930293               |
| SNP_P4_119152_316002 | NW_004515775.1 | Scaffold242 | 316002                  | CC                              | AA              | 1946930295               |
| SNP_P4_119156_319211 | NW_004515775.1 | Scaffold242 | 319211                  | TT                              | AA              | 1946930297               |
| SNP_P4_119157_320362 | NW_004515775.1 | Scaffold242 | 320362                  | GG                              | AA              | 1946930299               |
| SNP_P4_119158_320430 | NW_004515775.1 | Scaffold242 | 320430                  | CC                              | TT              | 1946930301               |
| SNP_P4_119159_324719 | NW_004515775.1 | Scaffold242 | 324719                  | GG                              | TT              | 1946930303               |
| SNP_P4_119160_329522 | NW_004515775.1 | Scaffold242 | 329522                  | AA                              | GG              | 1946930306               |

| SNPs IDs             | Chromosome IDs | Chromosomes | Physical positions (bp) | CDC Frontier (Reference genome) | (ILWC46 & LPNB) | NCBI SNPdb Accession IDs |
|----------------------|----------------|-------------|-------------------------|---------------------------------|-----------------|--------------------------|
| SNP_P4_119161_334766 | NW_004515775.1 | Scaffold242 | 334766                  | CC                              | TT              | 1946930308               |
| SNP_P4_119162_335108 | NW_004515775.1 | Scaffold242 | 335108                  | GG                              | TT              | 1946930310               |
| SNP_P4_119163_336092 | NW_004515775.1 | Scaffold242 | 336092                  | AA                              | CC              | 1946930312               |
| SNP_P4_119165_339146 | NW_004515775.1 | Scaffold242 | 339146                  | TT                              | CC              | 1946930314               |
| SNP_P4_119166_340900 | NW_004515775.1 | Scaffold242 | 340900                  | GG                              | AA              | 1946930316               |
| SNP_P4_119167_342534 | NW_004515775.1 | Scaffold242 | 342534                  | TT                              | CC              | 1946930318               |
| SNP_P4_119169_344488 | NW_004515775.1 | Scaffold242 | 344488                  | GG                              | TT              | 1946930320               |
| SNP_P4_119170_344529 | NW_004515775.1 | Scaffold242 | 344529                  | TT                              | GG              | 1946930322               |
| SNP_P4_119171_344720 | NW_004515775.1 | Scaffold242 | 344720                  | TT                              | AA              | 1946930324               |
| SNP_P4_119172_345796 | NW_004515775.1 | Scaffold242 | 345796                  | AA                              | TT              | 1946930326               |
| SNP_P4_119173_353254 | NW_004515775.1 | Scaffold242 | 353254                  | TT                              | CC              | 1946930328               |
| SNP_P4_119174_354694 | NW_004515775.1 | Scaffold242 | 354694                  | AA                              | TT              | 1946930330               |
| SNP_P4_119175_354716 | NW_004515775.1 | Scaffold242 | 354716                  | TT                              | CC              | 1946930332               |
| SNP_P4_119176_356992 | NW_004515775.1 | Scaffold242 | 356992                  | CC                              | AA              | 1946930334               |
| SNP_P4_119178_357392 | NW_004515775.1 | Scaffold242 | 357392                  | GG                              | TT              | 1946930336               |
| SNP_P4_119179_358213 | NW_004515775.1 | Scaffold242 | 358213                  | AA                              | GG              | 1946930338               |
| SNP_P4_119180_358214 | NW_004515775.1 | Scaffold242 | 358214                  | AA                              | CC              | 1946930340               |
| SNP_P4_119183_360835 | NW_004515775.1 | Scaffold242 | 360835                  | GG                              | TT              | 1946930343               |
| SNP_P4_119184_361129 | NW_004515775.1 | Scaffold242 | 361129                  | GG                              | AA              | 1946930345               |
| SNP_P4_119185_361195 | NW_004515775.1 | Scaffold242 | 361195                  | CC                              | TT              | 1946930347               |
| SNP_P4_119186_364776 | NW_004515775.1 | Scaffold242 | 364776                  | CC                              | AA              | 1946930349               |
| SNP_P4_119188_372545 | NW_004515775.1 | Scaffold242 | 372545                  | TT                              | AA              | 1946930351               |
| SNP_P4_119189_372636 | NW_004515775.1 | Scaffold242 | 372636                  | TT                              | AA              | 1946930353               |
| SNP_P4_119190_373076 | NW_004515775.1 | Scaffold242 | 373076                  | CC                              | GG              | 1946930355               |
| SNP_P4_119191_375072 | NW_004515775.1 | Scaffold242 | 375072                  | AA                              | GG              | 1946930357               |
| SNP_P4_119192_377509 | NW_004515775.1 | Scaffold242 | 377509                  | AA                              | GG              | 1946930359               |
| SNP_P4_119193_382343 | NW_004515775.1 | Scaffold242 | 382343                  | TT                              | CC              | 1946930361               |
| SNP_P4_119194_384574 | NW_004515775.1 | Scaffold242 | 384574                  | AA                              | GG              | 1946930364               |
| SNP_P4_119195_393667 | NW_004515775.1 | Scaffold242 | 393667                  | AA                              | GG              | 1946930366               |
| SNP_P4_119196_393670 | NW_004515775.1 | Scaffold242 | 393670                  | TT                              | GG              | 1946930368               |
| SNP_P4_119199_394099 | NW_004515775.1 | Scaffold242 | 394099                  | GG                              | AA              | 1946930370               |
| SNP_P4_119200_395101 | NW_004515775.1 | Scaffold242 | 395101                  | AA                              | GG              | 1946930372               |
| SNP_P4_119201_397818 | NW_004515775.1 | Scaffold242 | 397818                  | CC                              | AA              | 1946930374               |
| SNP_P4_119202_404385 | NW_004515775.1 | Scaffold242 | 404385                  | TT                              | AA              | 1946930376               |
| SNP_P4_119204_405411 | NW_004515775.1 | Scaffold242 | 405411                  | AA                              | GG              | 1946930378               |
| SNP_P4_119205_405423 | NW_004515775.1 | Scaffold242 | 405423                  | GG                              | TT              | 1946930380               |
| SNP_P4_119206_405629 | NW_004515775.1 | Scaffold242 | 405629                  | GG                              | AA              | 1946930382               |
| SNP_P4_119208_405879 | NW_004515775.1 | Scaffold242 | 405879                  | CC                              | GG              | 1946930384               |
| SNP_P4_119209_408516 | NW_004515775.1 | Scaffold242 | 408516                  | AA                              | TT              | 1946930387               |
| SNP_P4_119210_411892 | NW_004515775.1 | Scaffold242 | 411892                  | AA                              | TT              | 1946930389               |
| SNP_P4_119211_411967 | NW_004515775.1 | Scaffold242 | 411967                  | GG                              | TT              | 1946930391               |
| SNP_P4_119212_413765 | NW_004515775.1 | Scaffold242 | 413765                  | GG                              | AA              | 1946930393               |

| SNPs IDs             | Chromosome IDs | Chromosomes | Physical positions (bp) | CDC Frontier (Reference genome) | (ILWC46 & LPNB) | NCBI SNPdb Accession IDs |
|----------------------|----------------|-------------|-------------------------|---------------------------------|-----------------|--------------------------|
| SNP_P4_119213_413916 | NW_004515775.1 | Scaffold242 | 413916                  | CC                              | TT              | 1946930395               |
| SNP_P4_119215_418076 | NW_004515775.1 | Scaffold242 | 418076                  | AA                              | CC              | 1946930396               |
| SNP_P4_119216_419606 | NW_004515775.1 | Scaffold242 | 419606                  | GG                              | TT              | 1946930398               |
| SNP_P4_119217_419621 | NW_004515775.1 | Scaffold242 | 419621                  | TT                              | CC              | 1946930400               |
| SNP_P4_119221_425574 | NW_004515775.1 | Scaffold242 | 425574                  | TT                              | CC              | 1946930402               |
| SNP_P4_119222_425575 | NW_004515775.1 | Scaffold242 | 425575                  | AA                              | TT              | 1946930404               |
| SNP_P4_119223_431100 | NW_004515775.1 | Scaffold242 | 431100                  | AA                              | CC              | 1946930406               |
| SNP_P4_119224_439081 | NW_004515775.1 | Scaffold242 | 439081                  | AA                              | CC              | 1946930408               |
| SNP_P4_119225_441152 | NW_004515775.1 | Scaffold242 | 441152                  | TT                              | CC              | 1946930410               |
| SNP_P4_119226_441162 | NW_004515775.1 | Scaffold242 | 441162                  | CC                              | AA              | 1946930412               |
| SNP_P4_119227_441326 | NW_004515775.1 | Scaffold242 | 441326                  | CC                              | TT              | 1946930414               |
| SNP_P4_119228_442269 | NW_004515775.1 | Scaffold242 | 442269                  | CC                              | TT              | 1946930416               |
| SNP_P4_119229_449828 | NW_004515775.1 | Scaffold242 | 449828                  | CC                              | GG              | 1946930418               |
| SNP_P4_119230_450810 | NW_004515775.1 | Scaffold242 | 450810                  | GG                              | AA              | 1946930420               |
| SNP_P4_119232_453095 | NW_004515775.1 | Scaffold242 | 453095                  | TT                              | CC              | 1946930422               |
| SNP_P4_119233_453373 | NW_004515775.1 | Scaffold242 | 453373                  | GG                              | AA              | 1946930425               |
| SNP_P4_119236_455617 | NW_004515775.1 | Scaffold242 | 455617                  | GG                              | AA              | 1946930427               |
| SNP_P4_119237_458614 | NW_004515775.1 | Scaffold242 | 458614                  | AA                              | TT              | 1946930429               |
| SNP_P4_119238_459320 | NW_004515775.1 | Scaffold242 | 459320                  | GG                              | AA              | 1946930432               |
| SNP_P4_119239_460730 | NW_004515775.1 | Scaffold242 | 460730                  | AA                              | TT              | 1946930434               |
| SNP_P4_119240_460731 | NW_004515775.1 | Scaffold242 | 460731                  | AA                              | TT              | 1946930436               |
| SNP_P4_119241_460732 | NW_004515775.1 | Scaffold242 | 460732                  | AA                              | TT              | 1946930438               |
| SNP_P4_119242_460733 | NW_004515775.1 | Scaffold242 | 460733                  | AA                              | TT              | 1946930440               |
| SNP_P4_119243_462075 | NW_004515775.1 | Scaffold242 | 462075                  | TT                              | GG              | 1946930442               |
| SNP_P4_119244_462106 | NW_004515775.1 | Scaffold242 | 462106                  | TT                              | CC              | 1946930444               |
| SNP_P4_119247_470387 | NW_004515775.1 | Scaffold242 | 470387                  | CC                              | AA              | 1946930446               |
| SNP_P4_119250_483329 | NW_004515775.1 | Scaffold242 | 483329                  | CC                              | TT              | 1946930448               |
| SNP_P4_119251_483868 | NW_004515775.1 | Scaffold242 | 483868                  | GG                              | AA              | 1946930450               |
| SNP_P4_119252_484077 | NW_004515775.1 | Scaffold242 | 484077                  | GG                              | AA              | 1946930452               |
| SNP_P4_119253_484162 | NW_004515775.1 | Scaffold242 | 484162                  | CC                              | GG              | 1946930454               |
| SNP_P4_119254_484596 | NW_004515775.1 | Scaffold242 | 484596                  | CC                              | TT              | 1946930456               |
| SNP_P4_119255_489862 | NW_004515775.1 | Scaffold242 | 489862                  | GG                              | AA              | 1946930458               |
| SNP_P4_119256_490765 | NW_004515775.1 | Scaffold242 | 490765                  | TT                              | GG              | 1946930460               |
| SNP_P4_119258_491103 | NW_004515775.1 | Scaffold242 | 491103                  | GG                              | AA              | 1946930462               |
| SNP_P4_119259_495802 | NW_004515775.1 | Scaffold242 | 495802                  | CC                              | TT              | 1946930464               |
| SNP_P4_119261_503055 | NW_004515775.1 | Scaffold242 | 503055                  | GG                              | AA              | 1946930466               |
| SNP_P4_119262_505838 | NW_004515775.1 | Scaffold242 | 505838                  | CC                              | TT              | 1946930468               |
| SNP_P4_119263_506124 | NW_004515775.1 | Scaffold242 | 506124                  | TT                              | CC              | 1946930470               |
| SNP_P4_119264_509393 | NW_004515775.1 | Scaffold242 | 509393                  | TT                              | AA              | 1946930472               |
| SNP_P4_119265_509441 | NW_004515775.1 | Scaffold242 | 509441                  | GG                              | AA              | 1946930474               |
| SNP_P4_119266_509530 | NW_004515775.1 | Scaffold242 | 509530                  | AA                              | TT              | 1946930476               |
| SNP_P4_119267_511085 | NW_004515775.1 | Scaffold242 | 511085                  | AA                              | GG              | 1946930478               |

| SNPs IDs             | Chromosome IDs | Chromosomes | Physical positions (bp) | CDC Frontier (Reference genome) | (ILWC46 & LPNB) | NCBI SNPdb Accession IDs |
|----------------------|----------------|-------------|-------------------------|---------------------------------|-----------------|--------------------------|
| SNP_P4_119268_511360 | NW_004515775.1 | Scaffold242 | 511360                  | CC                              | TT              | 1946930480               |
| SNP_P4_119269_514123 | NW_004515775.1 | Scaffold242 | 514123                  | AA                              | GG              | 1946930482               |
| SNP_P4_119270_517228 | NW_004515775.1 | Scaffold242 | 517228                  | GG                              | TT              | 1946930484               |
| SNP_P4_119271_518631 | NW_004515775.1 | Scaffold242 | 518631                  | GG                              | AA              | 1946930486               |
| SNP_P4_119272_518735 | NW_004515775.1 | Scaffold242 | 518735                  | TT                              | CC              | 1946930488               |
| SNP_P4_119273_520904 | NW_004515775.1 | Scaffold242 | 520904                  | AA                              | CC              | 1946930491               |
| SNP_P4_119274_522831 | NW_004515775.1 | Scaffold242 | 522831                  | AA                              | GG              | 1946930493               |
| SNP_P4_119275_531999 | NW_004515775.1 | Scaffold242 | 531999                  | AA                              | GG              | 1946930494               |
| SNP_P4_119276_534047 | NW_004515775.1 | Scaffold242 | 534047                  | TT                              | GG              | 1946930496               |
| SNP_P4_119277_534535 | NW_004515775.1 | Scaffold242 | 534535                  | AA                              | GG              | 1946930498               |
| SNP_P4_119278_534540 | NW_004515775.1 | Scaffold242 | 534540                  | GG                              | AA              | 1946930500               |
| SNP_P4_119279_534561 | NW_004515775.1 | Scaffold242 | 534561                  | AA                              | GG              | 1946930502               |
| SNP_P4_119280_535063 | NW_004515775.1 | Scaffold242 | 535063                  | CC                              | TT              | 1946930504               |
| SNP_P4_119282_536901 | NW_004515775.1 | Scaffold242 | 536901                  | TT                              | CC              | 1946930506               |
| SNP_P4_119283_536902 | NW_004515775.1 | Scaffold242 | 536902                  | CC                              | AA              | 1946930508               |
| SNP_P4_119284_536915 | NW_004515775.1 | Scaffold242 | 536915                  | GG                              | AA              | 1946930510               |
| SNP_P4_119285_537236 | NW_004515775.1 | Scaffold242 | 537236                  | TT                              | AA              | 1946930512               |
| SNP_P4_119286_537327 | NW_004515775.1 | Scaffold242 | 537327                  | GG                              | AA              | 1946930514               |
| SNP_P4_119287_537337 | NW_004515775.1 | Scaffold242 | 537337                  | CC                              | TT              | 1946930516               |
| SNP_P4_119288_537813 | NW_004515775.1 | Scaffold242 | 537813                  | AA                              | GG              | 1946930518               |
| SNP_P4_119289_537850 | NW_004515775.1 | Scaffold242 | 537850                  | AA                              | GG              | 1946930520               |
| SNP_P4_119290_539645 | NW_004515775.1 | Scaffold242 | 539645                  | AA                              | CC              | 1946930522               |
| SNP_P4_119291_539822 | NW_004515775.1 | Scaffold242 | 539822                  | AA                              | CC              | 1946930525               |
| SNP_P4_119292_539828 | NW_004515775.1 | Scaffold242 | 539828                  | TT                              | CC              | 1946930527               |
| SNP_P4_119293_546056 | NW_004515775.1 | Scaffold242 | 546056                  | TT                              | AA              | 1946930529               |
| SNP_P4_119294_549769 | NW_004515775.1 | Scaffold242 | 549769                  | CC                              | TT              | 1946930531               |
| SNP_P4_119295_549786 | NW_004515775.1 | Scaffold242 | 549786                  | GG                              | AA              | 1946930533               |
| SNP_P4_119296_549812 | NW_004515775.1 | Scaffold242 | 549812                  | CC                              | AA              | 1946930535               |
| SNP_P4_119297_549844 | NW_004515775.1 | Scaffold242 | 549844                  | CC                              | TT              | 1946930537               |
| SNP_P4_119298_550446 | NW_004515775.1 | Scaffold242 | 550446                  | AA                              | TT              | 1946930539               |
| SNP_P4_119299_551514 | NW_004515775.1 | Scaffold242 | 551514                  | TT                              | AA              | 1946930541               |
| SNP_P4_119301_552421 | NW_004515775.1 | Scaffold242 | 552421                  | TT                              | GG              | 1946930543               |
| SNP_P4_119302_552422 | NW_004515775.1 | Scaffold242 | 552422                  | TT                              | CC              | 1946930545               |
| SNP_P4_119303_553967 | NW_004515775.1 | Scaffold242 | 553967                  | TT                              | CC              | 1946930547               |
| SNP_P4_119304_554325 | NW_004515775.1 | Scaffold242 | 554325                  | TT                              | CC              | 1946930549               |
| SNP_P4_119305_554343 | NW_004515775.1 | Scaffold242 | 554343                  | GG                              | AA              | 1946930551               |
| SNP_P4_119306_561694 | NW_004515775.1 | Scaffold242 | 561694                  | AA                              | GG              | 1946930553               |
| SNP_P4_119307_561698 | NW_004515775.1 | Scaffold242 | 561698                  | CC                              | GG              | 1946930555               |
| SNP_P4_119309_561752 | NW_004515775.1 | Scaffold242 | 561752                  | GG                              | AA              | 1946930557               |
| SNP_P4_119310_562110 | NW_004515775.1 | Scaffold242 | 562110                  | TT                              | CC              | 1946930559               |
| SNP_P4_119311_564937 | NW_004515775.1 | Scaffold242 | 564937                  | TT                              | AA              | 1946930561               |
| SNP_P4_119312_572448 | NW_004515775.1 | Scaffold242 | 572448                  | TT                              | AA              | 1946930563               |



| SNPs IDs             | Chromosome IDs | Chromosomes | Physical positions (bp) | CDC Frontier (Reference genome) | (ILWC46 & LPNB) | NCBI SNPdb Accession IDs |
|----------------------|----------------|-------------|-------------------------|---------------------------------|-----------------|--------------------------|
| SNP_P4_119313_574122 | NW_004515775.1 | Scaffold242 | 574122                  | AA                              | GG              | 1946930565               |
| SNP_P4_119314_574606 | NW_004515775.1 | Scaffold242 | 574606                  | AA                              | TT              | 1946930567               |
| SNP_P4_119315_575301 | NW_004515775.1 | Scaffold242 | 575301                  | CC                              | TT              | 1946930569               |
| SNP_P4_119316_575365 | NW_004515775.1 | Scaffold242 | 575365                  | CC                              | AA              | 1946930571               |
| SNP_P4_119319_581631 | NW_004515775.1 | Scaffold242 | 581631                  | GG                              | AA              | 1946930573               |
| SNP_P4_119321_591274 | NW_004515775.1 | Scaffold242 | 591274                  | TT                              | CC              | 1946930575               |
| SNP_P4_119323_595541 | NW_004515775.1 | Scaffold242 | 595541                  | TT                              | AA              | 1946930577               |
| SNP_P4_119324_598819 | NW_004515775.1 | Scaffold242 | 598819                  | TT                              | AA              | 1946930579               |
| SNP_P4_119325_601809 | NW_004515775.1 | Scaffold242 | 601809                  | CC                              | TT              | 1946930581               |
| SNP_P4_119326_604019 | NW_004515775.1 | Scaffold242 | 604019                  | TT                              | CC              | 1946930583               |
| SNP_P4_119327_605479 | NW_004515775.1 | Scaffold242 | 605479                  | CC                              | AA              | 1946930585               |
| SNP_P4_119328_606374 | NW_004515775.1 | Scaffold242 | 606374                  | CC                              | TT              | 1946930587               |
| SNP_P4_119329_606567 | NW_004515775.1 | Scaffold242 | 606567                  | GG                              | AA              | 1946930590               |
| SNP_P4_119330_606572 | NW_004515775.1 | Scaffold242 | 606572                  | TT                              | CC              | 1946930592               |
| SNP_P4_119331_606580 | NW_004515775.1 | Scaffold242 | 606580                  | GG                              | AA              | 1946930594               |
| SNP_P4_119332_608228 | NW_004515775.1 | Scaffold242 | 608228                  | AA                              | GG              | 1946930596               |
| SNP_P4_119333_610862 | NW_004515775.1 | Scaffold242 | 610862                  | CC                              | TT              | 1946930598               |
| SNP_P4_119334_612678 | NW_004515775.1 | Scaffold242 | 612678                  | AA                              | TT              | 1946930600               |
| SNP_P4_119335_612707 | NW_004515775.1 | Scaffold242 | 612707                  | GG                              | AA              | 1946930602               |
| SNP_P4_119336_614989 | NW_004515775.1 | Scaffold242 | 614989                  | TT                              | CC              | 1946930604               |
| SNP_P4_119337_618159 | NW_004515775.1 | Scaffold242 | 618159                  | AA                              | GG              | 1946930606               |
| SNP_P4_119338_618328 | NW_004515775.1 | Scaffold242 | 618328                  | CC                              | TT              | 1946930608               |
| SNP_P4_119339_618584 | NW_004515775.1 | Scaffold242 | 618584                  | AA                              | GG              | 1946930611               |
| SNP_P4_119340_620200 | NW_004515775.1 | Scaffold242 | 620200                  | CC                              | TT              | 1946930613               |
| SNP_P4_119341_624581 | NW_004515775.1 | Scaffold242 | 624581                  | AA                              | GG              | 1946930615               |
| SNP_P4_119342_624598 | NW_004515775.1 | Scaffold242 | 624598                  | AA                              | GG              | 1946930617               |
| SNP_P4_119343_624631 | NW_004515775.1 | Scaffold242 | 624631                  | AA                              | GG              | 1946930619               |
| SNP_P4_119344_624880 | NW_004515775.1 | Scaffold242 | 624880                  | CC                              | TT              | 1946930621               |
| SNP_P4_119345_624901 | NW_004515775.1 | Scaffold242 | 624901                  | CC                              | AA              | 1946930623               |
| SNP_P4_119346_624904 | NW_004515775.1 | Scaffold242 | 624904                  | TT                              | AA              | 1946930625               |
| SNP_P4_119347_624922 | NW_004515775.1 | Scaffold242 | 624922                  | AA                              | CC              | 1946930627               |
| SNP_P4_119348_624983 | NW_004515775.1 | Scaffold242 | 624983                  | TT                              | CC              | 1946930629               |
| SNP_P4_119349_625021 | NW_004515775.1 | Scaffold242 | 625021                  | TT                              | CC              | 1946930631               |
| SNP_P4_119350_625042 | NW_004515775.1 | Scaffold242 | 625042                  | AA                              | GG              | 1946930633               |
| SNP_P4_119352_625293 | NW_004515775.1 | Scaffold242 | 625293                  | CC                              | TT              | 1946930635               |
| SNP_P4_119353_628308 | NW_004515775.1 | Scaffold242 | 628308                  | TT                              | CC              | 1946930637               |
| SNP_P4_119354_628728 | NW_004515775.1 | Scaffold242 | 628728                  | CC                              | TT              | 1946930639               |
| SNP_P4_119355_629311 | NW_004515775.1 | Scaffold242 | 629311                  | CC                              | TT              | 1946930641               |
| SNP_P4_119356_629671 | NW_004515775.1 | Scaffold242 | 629671                  | AA                              | GG              | 1946930643               |
| SNP_P4_119357_629676 | NW_004515775.1 | Scaffold242 | 629676                  | CC                              | TT              | 1946930645               |
| SNP_P4_119358_633061 | NW_004515775.1 | Scaffold242 | 633061                  | TT                              | CC              | 1946930647               |
| SNP_P4_119359_633269 | NW_004515775.1 | Scaffold242 | 633269                  | CC                              | TT              | 1946930650               |

| SNPs IDs             | Chromosome IDs | Chromosomes | Physical positions (bp) | CDC Frontier (Reference genome) | (ILWC46 & LPNB) | NCBI SNPdb Accession IDs |
|----------------------|----------------|-------------|-------------------------|---------------------------------|-----------------|--------------------------|
| SNP_P4_119360_634365 | NW_004515775.1 | Scaffold242 | 634365                  | TT                              | CC              | 1946930652               |
| SNP_P4_119361_638769 | NW_004515775.1 | Scaffold242 | 638769                  | AA                              | TT              | 1946930654               |
| SNP_P4_119362_639277 | NW_004515775.1 | Scaffold242 | 639277                  | TT                              | CC              | 1946930656               |
| SNP_P4_119363_642555 | NW_004515775.1 | Scaffold242 | 642555                  | CC                              | AA              | 1946930658               |
| SNP_P4_119364_644199 | NW_004515775.1 | Scaffold242 | 644199                  | AA                              | GG              | 1946930660               |
| SNP_P4_119365_644288 | NW_004515775.1 | Scaffold242 | 644288                  | TT                              | CC              | 1946930662               |
| SNP_P4_119366_645198 | NW_004515775.1 | Scaffold242 | 645198                  | GG                              | AA              | 1946930664               |
| SNP_P4_119367_645855 | NW_004515775.1 | Scaffold242 | 645855                  | AA                              | TT              | 1946930666               |
| SNP_P4_119368_646192 | NW_004515775.1 | Scaffold242 | 646192                  | TT                              | CC              | 1946930668               |
| SNP_P4_119369_647158 | NW_004515775.1 | Scaffold242 | 647158                  | TT                              | GG              | 1946930670               |
| SNP_P4_119370_647183 | NW_004515775.1 | Scaffold242 | 647183                  | CC                              | TT              | 1946930672               |
| SNP_P4_119371_653461 | NW_004515775.1 | Scaffold242 | 653461                  | CC                              | TT              | 1946930674               |
| SNP_P4_119372_653639 | NW_004515775.1 | Scaffold242 | 653639                  | GG                              | AA              | 1946930676               |
| SNP_P4_119373_654369 | NW_004515775.1 | Scaffold242 | 654369                  | GG                              | AA              | 1946930678               |
| SNP_P4_119374_654485 | NW_004515775.1 | Scaffold242 | 654485                  | AA                              | TT              | 1946930680               |
| SNP_P4_119375_654595 | NW_004515775.1 | Scaffold242 | 654595                  | AA                              | CC              | 1946930683               |
| SNP_P4_119376_654651 | NW_004515775.1 | Scaffold242 | 654651                  | CC                              | TT              | 1946930685               |
| SNP_P4_119378_668457 | NW_004515775.1 | Scaffold242 | 668457                  | TT                              | CC              | 1946930687               |
| SNP_P4_119379_668882 | NW_004515775.1 | Scaffold242 | 668882                  | CC                              | TT              | 1946930689               |
| SNP_P4_119380_668883 | NW_004515775.1 | Scaffold242 | 668883                  | GG                              | TT              | 1946930691               |
| SNP_P4_119381_670710 | NW_004515775.1 | Scaffold242 | 670710                  | AA                              | GG              | 1946930693               |
| SNP_P4_119382_670917 | NW_004515775.1 | Scaffold242 | 670917                  | CC                              | TT              | 1946930695               |
| SNP_P4_119383_671033 | NW_004515775.1 | Scaffold242 | 671033                  | AA                              | CC              | 1946930697               |
| SNP_P4_119384_671034 | NW_004515775.1 | Scaffold242 | 671034                  | GG                              | AA              | 1946930699               |
| SNP_P4_119385_674031 | NW_004515775.1 | Scaffold242 | 674031                  | AA                              | CC              | 1946930701               |
| SNP_P4_119386_676970 | NW_004515775.1 | Scaffold242 | 676970                  | AA                              | GG              | 1946930703               |
| SNP_P4_119387_678873 | NW_004515775.1 | Scaffold242 | 678873                  | CC                              | TT              | 1946930705               |
| SNP_P4_119388_683695 | NW_004515775.1 | Scaffold242 | 683695                  | AA                              | CC              | 1946930707               |
| SNP_P4_119389_684617 | NW_004515775.1 | Scaffold242 | 684617                  | AA                              | TT              | 1946930709               |
| SNP_P4_119390_684835 | NW_004515775.1 | Scaffold242 | 684835                  | CC                              | TT              | 1946930711               |
| SNP_P4_119391_684898 | NW_004515775.1 | Scaffold242 | 684898                  | CC                              | TT              | 1946930714               |
| SNP_P4_119392_687232 | NW_004515775.1 | Scaffold242 | 687232                  | GG                              | AA              | 1946930716               |
| SNP_P4_119394_687759 | NW_004515775.1 | Scaffold242 | 687759                  | TT                              | GG              | 1946930718               |
| SNP_P4_119395_687836 | NW_004515775.1 | Scaffold242 | 687836                  | TT                              | AA              | 1946930720               |
| SNP_P4_119396_688249 | NW_004515775.1 | Scaffold242 | 688249                  | GG                              | AA              | 1946930722               |
| SNP_P4_119397_688472 | NW_004515775.1 | Scaffold242 | 688472                  | CC                              | GG              | 1946930724               |
| SNP_P4_119398_690128 | NW_004515775.1 | Scaffold242 | 690128                  | CC                              | TT              | 1946930726               |
| SNP_P4_119399_691351 | NW_004515775.1 | Scaffold242 | 691351                  | CC                              | TT              | 1946930728               |
| SNP_P4_119400_691535 | NW_004515775.1 | Scaffold242 | 691535                  | TT                              | CC              | 1946930730               |
| SNP_P4_119402_697961 | NW_004515775.1 | Scaffold242 | 697961                  | AA                              | GG              | 1946930732               |
| SNP_P4_119403_697967 | NW_004515775.1 | Scaffold242 | 697967                  | CC                              | TT              | 1946930734               |
| SNP_P4_119405_699163 | NW_004515775.1 | Scaffold242 | 699163                  | GG                              | AA              | 1946930736               |

| SNPs IDs             | Chromosome IDs | Chromosomes | Physical positions (bp) | CDC Frontier (Reference genome) | (ILWC46 & LPNB) | NCBI SNPdb Accession IDs |
|----------------------|----------------|-------------|-------------------------|---------------------------------|-----------------|--------------------------|
| SNP_P4_119406_700384 | NW_004515775.1 | Scaffold242 | 700384                  | TT                              | CC              | 1946930738               |
| SNP_P4_119407_700423 | NW_004515775.1 | Scaffold242 | 700423                  | CC                              | TT              | 1946930741               |
| SNP_P4_119408_701350 | NW_004515775.1 | Scaffold242 | 701350                  | CC                              | TT              | 1946930743               |
| SNP_P4_119409_701537 | NW_004515775.1 | Scaffold242 | 701537                  | AA                              | GG              | 1946930745               |
| SNP_P4_119410_701668 | NW_004515775.1 | Scaffold242 | 701668                  | CC                              | TT              | 1946930747               |
| SNP_P4_119412_704922 | NW_004515775.1 | Scaffold242 | 704922                  | CC                              | TT              | 1946930749               |
| SNP_P4_119413_704935 | NW_004515775.1 | Scaffold242 | 704935                  | GG                              | AA              | 1946930751               |
| SNP_P4_119415_709621 | NW_004515775.1 | Scaffold242 | 709621                  | GG                              | AA              | 1946930753               |
| SNP_P4_119419_722328 | NW_004515775.1 | Scaffold242 | 722328                  | GG                              | CC              | 1946930755               |
| SNP_P4_119420_722329 | NW_004515775.1 | Scaffold242 | 722329                  | TT                              | AA              | 1946930757               |
| SNP_P4_119421_730200 | NW_004515775.1 | Scaffold242 | 730200                  | AA                              | GG              | 1946930759               |
| SNP_P4_119423_731222 | NW_004515775.1 | Scaffold242 | 731222                  | AA                              | CC              | 1946930761               |
| SNP_P4_119424_731331 | NW_004515775.1 | Scaffold242 | 731331                  | TT                              | CC              | 1946930763               |
| SNP_P4_119425_732589 | NW_004515775.1 | Scaffold242 | 732589                  | AA                              | GG              | 1946930765               |
| SNP_P4_119426_734662 | NW_004515775.1 | Scaffold242 | 734662                  | TT                              | CC              | 1946930767               |
| SNP_P4_119427_735409 | NW_004515775.1 | Scaffold242 | 735409                  | AA                              | TT              | 1946930769               |
| SNP_P4_119428_735417 | NW_004515775.1 | Scaffold242 | 735417                  | CC                              | TT              | 1946930771               |
| SNP_P4_119431_735569 | NW_004515775.1 | Scaffold242 | 735569                  | TT                              | GG              | 1946930773               |
| SNP_P4_119432_735608 | NW_004515775.1 | Scaffold242 | 735608                  | AA                              | CC              | 1946930776               |
| SNP_P4_119433_735804 | NW_004515775.1 | Scaffold242 | 735804                  | TT                              | CC              | 1946930778               |
| SNP_P4_119434_735830 | NW_004515775.1 | Scaffold242 | 735830                  | TT                              | AA              | 1946930780               |
| SNP_P4_119435_735833 | NW_004515775.1 | Scaffold242 | 735833                  | TT                              | CC              | 1946930782               |
| SNP_P4_119436_735862 | NW_004515775.1 | Scaffold242 | 735862                  | AA                              | GG              | 1946930784               |
| SNP_P4_119437_735867 | NW_004515775.1 | Scaffold242 | 735867                  | AA                              | GG              | 1946930786               |
| SNP_P4_119438_735869 | NW_004515775.1 | Scaffold242 | 735869                  | TT                              | CC              | 1946930788               |
| SNP_P4_119439_735889 | NW_004515775.1 | Scaffold242 | 735889                  | AA                              | GG              | 1946930790               |
| SNP_P4_119440_736015 | NW_004515775.1 | Scaffold242 | 736015                  | GG                              | AA              | 1946930792               |
| SNP_P4_119441_736024 | NW_004515775.1 | Scaffold242 | 736024                  | GG                              | AA              | 1946930794               |
| SNP_P4_119442_736027 | NW_004515775.1 | Scaffold242 | 736027                  | GG                              | TT              | 1946930797               |
| SNP_P4_119443_736039 | NW_004515775.1 | Scaffold242 | 736039                  | CC                              | TT              | 1946930799               |
| SNP_P4_119444_736042 | NW_004515775.1 | Scaffold242 | 736042                  | CC                              | GG              | 1946930801               |
| SNP_P4_119445_736316 | NW_004515775.1 | Scaffold242 | 736316                  | AA                              | CC              | 1946930803               |
| SNP_P4_119446_736317 | NW_004515775.1 | Scaffold242 | 736317                  | AA                              | CC              | 1946930805               |
| SNP_P4_119447_736318 | NW_004515775.1 | Scaffold242 | 736318                  | GG                              | AA              | 1946930807               |
| SNP_P4_119448_736320 | NW_004515775.1 | Scaffold242 | 736320                  | TT                              | CC              | 1946930810               |
| SNP_P4_119449_736324 | NW_004515775.1 | Scaffold242 | 736324                  | AA                              | CC              | 1946930812               |
| SNP_P4_119450_737614 | NW_004515775.1 | Scaffold242 | 737614                  | TT                              | CC              | 1946930814               |
| SNP_P4_119451_737648 | NW_004515775.1 | Scaffold242 | 737648                  | TT                              | GG              | 1946930816               |
| SNP_P4_119452_739672 | NW_004515775.1 | Scaffold242 | 739672                  | GG                              | AA              | 1946930818               |
| SNP_P4_119453_740905 | NW_004515775.1 | Scaffold242 | 740905                  | AA                              | GG              | 1946930820               |
| SNP_P4_119454_740936 | NW_004515775.1 | Scaffold242 | 740936                  | AA                              | TT              | 1946930822               |
| SNP_P4_119455_741157 | NW_004515775.1 | Scaffold242 | 741157                  | AA                              | CC              | 1946930824               |

| SNPs IDs             | Chromosome IDs | Chromosomes | Physical positions (bp) | CDC Frontier (Reference genome) | (ILWC46 & LPNB) | NCBI SNPdb Accession IDs |
|----------------------|----------------|-------------|-------------------------|---------------------------------|-----------------|--------------------------|
| SNP_P4_119456_742313 | NW_004515775.1 | Scaffold242 | 742313                  | CC                              | TT              | 1946930826               |
| SNP_P4_119457_764797 | NW_004515775.1 | Scaffold242 | 764797                  | AA                              | TT              | 1946930828               |
| SNP_P4_119458_764807 | NW_004515775.1 | Scaffold242 | 764807                  | CC                              | TT              | 1946930830               |
| SNP_P4_119459_765927 | NW_004515775.1 | Scaffold242 | 765927                  | AA                              | GG              | 1946930832               |
| SNP_P4_119460_767644 | NW_004515775.1 | Scaffold242 | 767644                  | AA                              | GG              | 1946930835               |
| SNP_P4_119462_769587 | NW_004515775.1 | Scaffold242 | 769587                  | AA                              | GG              | 1946930837               |
| SNP_P4_119463_769755 | NW_004515775.1 | Scaffold242 | 769755                  | GG                              | CC              | 1946930839               |
| SNP_P4_119464_773960 | NW_004515775.1 | Scaffold242 | 773960                  | AA                              | GG              | 1946930841               |
| SNP_P4_119465_779202 | NW_004515775.1 | Scaffold242 | 779202                  | TT                              | CC              | 1946930843               |
| SNP_P4_119466_779493 | NW_004515775.1 | Scaffold242 | 779493                  | TT                              | AA              | 1946930845               |
| SNP_P4_119467_779515 | NW_004515775.1 | Scaffold242 | 779515                  | GG                              | TT              | 1946930847               |
| SNP_P4_119468_783434 | NW_004515775.1 | Scaffold242 | 783434                  | CC                              | TT              | 1946930849               |
| SNP_P4_119469_785100 | NW_004515775.1 | Scaffold242 | 785100                  | TT                              | GG              | 1946930851               |
| SNP_P4_119470_786683 | NW_004515775.1 | Scaffold242 | 786683                  | TT                              | CC              | 1946930853               |
| SNP_P4_119471_787576 | NW_004515775.1 | Scaffold242 | 787576                  | GG                              | AA              | 1946930855               |
| SNP_P4_119472_787703 | NW_004515775.1 | Scaffold242 | 787703                  | GG                              | AA              | 1946930857               |
| SNP_P4_119473_792473 | NW_004515775.1 | Scaffold242 | 792473                  | CC                              | AA              | 1946930859               |
| SNP_P4_119474_792845 | NW_004515775.1 | Scaffold242 | 792845                  | AA                              | GG              | 1946930861               |
| SNP_P4_119475_792859 | NW_004515775.1 | Scaffold242 | 792859                  | AA                              | GG              | 1946930863               |
| SNP_P4_119476_792864 | NW_004515775.1 | Scaffold242 | 792864                  | GG                              | TT              | 1946930865               |
| SNP_P4_119478_800774 | NW_004515775.1 | Scaffold242 | 800774                  | CC                              | TT              | 1946930867               |
| SNP_P4_119479_800833 | NW_004515775.1 | Scaffold242 | 800833                  | GG                              | TT              | 1946930869               |
| SNP_P4_119480_801739 | NW_004515775.1 | Scaffold242 | 801739                  | AA                              | CC              | 1946930871               |
| SNP_P4_119481_801849 | NW_004515775.1 | Scaffold242 | 801849                  | CC                              | GG              | 1946930873               |
| SNP_P4_119482_801955 | NW_004515775.1 | Scaffold242 | 801955                  | GG                              | AA              | 1946930875               |
| SNP_P4_119483_801960 | NW_004515775.1 | Scaffold242 | 801960                  | AA                              | GG              | 1946930877               |
| SNP_P4_119484_801991 | NW_004515775.1 | Scaffold242 | 801991                  | TT                              | CC              | 1946930879               |
| SNP_P4_119485_802325 | NW_004515775.1 | Scaffold242 | 802325                  | TT                              | CC              | 1946930881               |
| SNP_P4_119486_803008 | NW_004515775.1 | Scaffold242 | 803008                  | GG                              | AA              | 1946930883               |
| SNP_P4_119487_803019 | NW_004515775.1 | Scaffold242 | 803019                  | GG                              | AA              | 1946930885               |
| SNP_P4_119488_803082 | NW_004515775.1 | Scaffold242 | 803082                  | TT                              | CC              | 1946930887               |
| SNP_P4_119489_803447 | NW_004515775.1 | Scaffold242 | 803447                  | AA                              | TT              | 1946930889               |
| SNP_P4_119490_804124 | NW_004515775.1 | Scaffold242 | 804124                  | AA                              | CC              | 1946930891               |
| SNP_P4_119493_804360 | NW_004515775.1 | Scaffold242 | 804360                  | GG                              | AA              | 1946930893               |
| SNP_P4_119494_804366 | NW_004515775.1 | Scaffold242 | 804366                  | GG                              | CC              | 1946930895               |
| SNP_P4_119495_804939 | NW_004515775.1 | Scaffold242 | 804939                  | CC                              | AA              | 1946930897               |
| SNP_P4_119496_804968 | NW_004515775.1 | Scaffold242 | 804968                  | AA                              | GG              | 1946930898               |
| SNP_P4_119497_804978 | NW_004515775.1 | Scaffold242 | 804978                  | TT                              | AA              | 1946930899               |
| SNP_P4_119498_805112 | NW_004515775.1 | Scaffold242 | 805112                  | GG                              | AA              | 1946930900               |
| SNP_P4_119499_805333 | NW_004515775.1 | Scaffold242 | 805333                  | GG                              | TT              | 1946930901               |
| SNP_P4_119500_810235 | NW_004515775.1 | Scaffold242 | 810235                  | CC                              | TT              | 1946930902               |
| SNP_P4_119501_811165 | NW_004515775.1 | Scaffold242 | 811165                  | CC                              | AA              | 1946930903               |

| SNPs IDs             | Chromosome IDs | Chromosomes | Physical positions (bp) | CDC Frontier (Reference genome) | (ILWC46 & LPNB) | NCBI SNPdb Accession IDs |
|----------------------|----------------|-------------|-------------------------|---------------------------------|-----------------|--------------------------|
| SNP_P4_119502_811831 | NW_004515775.1 | Scaffold242 | 811831                  | CC                              | AA              | 1946930905               |
| SNP_P4_119503_813151 | NW_004515775.1 | Scaffold242 | 813151                  | GG                              | AA              | 1946930907               |
| SNP_P4_119504_813172 | NW_004515775.1 | Scaffold242 | 813172                  | TT                              | CC              | 1946930909               |
| SNP_P4_119505_813207 | NW_004515775.1 | Scaffold242 | 813207                  | AA                              | TT              | 1946930911               |
| SNP_P4_119506_813399 | NW_004515775.1 | Scaffold242 | 813399                  | GG                              | AA              | 1946930913               |
| SNP_P4_119507_813432 | NW_004515775.1 | Scaffold242 | 813432                  | AA                              | GG              | 1946930915               |
| SNP_P4_119508_815605 | NW_004515775.1 | Scaffold242 | 815605                  | CC                              | AA              | 1946930917               |
| SNP_P4_119509_821018 | NW_004515775.1 | Scaffold242 | 821018                  | AA                              | TT              | 1946930919               |
| SNP_P4_119510_821049 | NW_004515775.1 | Scaffold242 | 821049                  | GG                              | AA              | 1946930921               |
| SNP_P4_119511_407    | NW_004515776.1 | Scaffold243 | 407                     | AA                              | GG              | 1946930923               |
| SNP_P4_119512_531    | NW_004515776.1 | Scaffold243 | 531                     | TT                              | CC              | 1946930925               |
| SNP_P4_119513_14245  | NW_004515777.1 | Scaffold244 | 14245                   | TT                              | CC              | 1946930927               |
| SNP_P4_119514_293    | NW_004515778.1 | Scaffold246 | 293                     | GG                              | AA              | 1946930929               |
| SNP_P4_119515_461    | NW_004515778.1 | Scaffold246 | 461                     | GG                              | TT              | 1946930931               |
| SNP_P4_119516_36001  | NW_004515778.1 | Scaffold246 | 36001                   | TT                              | CC              | 1946930933               |
| SNP_P4_119517_36183  | NW_004515778.1 | Scaffold246 | 36183                   | AA                              | TT              | 1946930935               |
| SNP_P4_119518_48171  | NW_004515778.1 | Scaffold246 | 48171                   | CC                              | TT              | 1946930937               |
| SNP_P4_119519_48174  | NW_004515778.1 | Scaffold246 | 48174                   | TT                              | CC              | 1946930939               |
| SNP_P4_119520_48193  | NW_004515778.1 | Scaffold246 | 48193                   | TT                              | GG              | 1946930941               |
| SNP_P4_119521_55047  | NW_004515778.1 | Scaffold246 | 55047                   | GG                              | AA              | 1946930943               |
| SNP_P4_119522_55134  | NW_004515778.1 | Scaffold246 | 55134                   | TT                              | GG              | 1946930945               |
| SNP_P4_119523_55214  | NW_004515778.1 | Scaffold246 | 55214                   | GG                              | TT              | 1946930947               |
| SNP_P4_119524_55227  | NW_004515778.1 | Scaffold246 | 55227                   | AA                              | CC              | 1946930949               |
| SNP_P4_119525_55240  | NW_004515778.1 | Scaffold246 | 55240                   | TT                              | CC              | 1946930951               |
| SNP_P4_119526_55341  | NW_004515778.1 | Scaffold246 | 55341                   | TT                              | AA              | 1946930953               |
| SNP_P4_119527_55380  | NW_004515778.1 | Scaffold246 | 55380                   | TT                              | AA              | 1946930955               |
| SNP_P4_119528_55471  | NW_004515778.1 | Scaffold246 | 55471                   | CC                              | TT              | 1946930957               |
| SNP_P4_119529_55492  | NW_004515778.1 | Scaffold246 | 55492                   | TT                              | AA              | 1946930959               |
| SNP_P4_119530_56286  | NW_004515778.1 | Scaffold246 | 56286                   | TT                              | GG              | 1946930961               |
| SNP_P4_119531_61007  | NW_004515778.1 | Scaffold246 | 61007                   | AA                              | TT              | 1946930964               |
| SNP_P4_119532_61047  | NW_004515778.1 | Scaffold246 | 61047                   | TT                              | GG              | 1946930966               |
| SNP_P4_119533_62821  | NW_004515778.1 | Scaffold246 | 62821                   | TT                              | CC              | 1946930968               |
| SNP_P4_119534_62862  | NW_004515778.1 | Scaffold246 | 62862                   | TT                              | GG              | 1946930970               |
| SNP_P4_119535_62870  | NW_004515778.1 | Scaffold246 | 62870                   | AA                              | GG              | 1946930972               |
| SNP_P4_119536_67410  | NW_004515778.1 | Scaffold246 | 67410                   | AA                              | GG              | 1946930974               |
| SNP_P4_119537_67432  | NW_004515778.1 | Scaffold246 | 67432                   | CC                              | TT              | 1946930976               |
| SNP_P4_119538_67511  | NW_004515778.1 | Scaffold246 | 67511                   | TT                              | GG              | 1946930978               |
| SNP_P4_119539_67572  | NW_004515778.1 | Scaffold246 | 67572                   | GG                              | AA              | 1946930981               |
| SNP_P4_119540_67664  | NW_004515778.1 | Scaffold246 | 67664                   | TT                              | CC              | 1946930983               |
| SNP_P4_119541_67896  | NW_004515778.1 | Scaffold246 | 67896                   | TT                              | CC              | 1946930985               |
| SNP_P4_119542_1489   | NW_004515779.1 | Scaffold249 | 1489                    | TT                              | GG              | 1946930987               |
| SNP_P4_119543_1566   | NW_004515779.1 | Scaffold249 | 1566                    | TT                              | GG              | 1946930989               |

| SNPs IDs            | Chromosome IDs | Chromosomes | Physical positions (bp) | CDC Frontier (Reference genome) | (ILWC46 & LPNB) | NCBI SNPdb Accession IDs |
|---------------------|----------------|-------------|-------------------------|---------------------------------|-----------------|--------------------------|
| SNP_P4_119544_1793  | NW_004515779.1 | Scaffold249 | 1793                    | GG                              | AA              | 1946930991               |
| SNP_P4_119545_1831  | NW_004515779.1 | Scaffold249 | 1831                    | GG                              | TT              | 1946930993               |
| SNP_P4_119546_4252  | NW_004515779.1 | Scaffold249 | 4252                    | GG                              | AA              | 1946930995               |
| SNP_P4_119547_4408  | NW_004515779.1 | Scaffold249 | 4408                    | CC                              | TT              | 1946930997               |
| SNP_P4_119548_4447  | NW_004515779.1 | Scaffold249 | 4447                    | TT                              | CC              | 1946931000               |
| SNP_P4_119549_4488  | NW_004515779.1 | Scaffold249 | 4488                    | TT                              | AA              | 1946931002               |
| SNP_P4_119550_4583  | NW_004515779.1 | Scaffold249 | 4583                    | TT                              | AA              | 1946931004               |
| SNP_P4_119551_18469 | NW_004515779.1 | Scaffold249 | 18469                   | GG                              | TT              | 1946931006               |
| SNP_P4_119552_20258 | NW_004515779.1 | Scaffold249 | 20258                   | CC                              | AA              | 1946931008               |
| SNP_P4_119553_20277 | NW_004515779.1 | Scaffold249 | 20277                   | GG                              | AA              | 1946931010               |
| SNP_P4_119554_20286 | NW_004515779.1 | Scaffold249 | 20286                   | TT                              | AA              | 1946931012               |
| SNP_P4_119556_23864 | NW_004515779.1 | Scaffold249 | 23864                   | AA                              | TT              | 1946931014               |
| SNP_P4_119557_23956 | NW_004515779.1 | Scaffold249 | 23956                   | AA                              | TT              | 1946931016               |
| SNP_P4_119558_29519 | NW_004515779.1 | Scaffold249 | 29519                   | AA                              | GG              | 1946931018               |
| SNP_P4_119559_31507 | NW_004515779.1 | Scaffold249 | 31507                   | AA                              | TT              | 1946931020               |
| SNP_P4_119560_45070 | NW_004515779.1 | Scaffold249 | 45070                   | CC                              | AA              | 1946931022               |
| SNP_P4_119561_54034 | NW_004515779.1 | Scaffold249 | 54034                   | TT                              | CC              | 1946931024               |
| SNP_P4_119562_54088 | NW_004515779.1 | Scaffold249 | 54088                   | CC                              | TT              | 1946931026               |
| SNP_P4_119563_54094 | NW_004515779.1 | Scaffold249 | 54094                   | TT                              | GG              | 1946931028               |
| SNP_P4_119564_54100 | NW_004515779.1 | Scaffold249 | 54100                   | CC                              | AA              | 1946931031               |
| SNP_P4_119565_54126 | NW_004515779.1 | Scaffold249 | 54126                   | GG                              | CC              | 1946931033               |
| SNP_P4_119566_54160 | NW_004515779.1 | Scaffold249 | 54160                   | AA                              | CC              | 1946931035               |
| SNP_P4_119568_54166 | NW_004515779.1 | Scaffold249 | 54166                   | AA                              | TT              | 1946931037               |
| SNP_P4_119569_54200 | NW_004515779.1 | Scaffold249 | 54200                   | AA                              | CC              | 1946931040               |
| SNP_P4_119570_54225 | NW_004515779.1 | Scaffold249 | 54225                   | TT                              | GG              | 1946931042               |
| SNP_P4_119571_54229 | NW_004515779.1 | Scaffold249 | 54229                   | CC                              | TT              | 1946931044               |
| SNP_P4_119572_54338 | NW_004515779.1 | Scaffold249 | 54338                   | TT                              | AA              | 1946931046               |
| SNP_P4_119573_54343 | NW_004515779.1 | Scaffold249 | 54343                   | TT                              | CC              | 1946931048               |
| SNP_P4_119574_54418 | NW_004515779.1 | Scaffold249 | 54418                   | AA                              | GG              | 1946931050               |
| SNP_P4_119575_54447 | NW_004515779.1 | Scaffold249 | 54447                   | TT                              | GG              | 1946931052               |
| SNP_P4_119576_54461 | NW_004515779.1 | Scaffold249 | 54461                   | GG                              | AA              | 1946931054               |
| SNP_P4_119577_54485 | NW_004515779.1 | Scaffold249 | 54485                   | TT                              | AA              | 1946931056               |
| SNP_P4_119578_56993 | NW_004515779.1 | Scaffold249 | 56993                   | AA                              | TT              | 1946931058               |
| SNP_P4_119579_68917 | NW_004515779.1 | Scaffold249 | 68917                   | TT                              | CC              | 1946931060               |
| SNP_P4_119581_73316 | NW_004515779.1 | Scaffold249 | 73316                   | AA                              | GG              | 1946931062               |
| SNP_P4_119582_73317 | NW_004515779.1 | Scaffold249 | 73317                   | CC                              | TT              | 1946931064               |
| SNP_P4_119583_73541 | NW_004515779.1 | Scaffold249 | 73541                   | CC                              | GG              | 1946931066               |
| SNP_P4_119584_73553 | NW_004515779.1 | Scaffold249 | 73553                   | AA                              | CC              | 1946931068               |
| SNP_P4_119585_73635 | NW_004515779.1 | Scaffold249 | 73635                   | GG                              | AA              | 1946931070               |
| SNP_P4_119586_73679 | NW_004515779.1 | Scaffold249 | 73679                   | AA                              | TT              | 1946931072               |
| SNP_P4_119587_73862 | NW_004515779.1 | Scaffold249 | 73862                   | AA                              | GG              | 1946931074               |
| SNP_P4_119588_89440 | NW_004515779.1 | Scaffold249 | 89440                   | AA                              | TT              | 1946931076               |

| SNPs IDs             | Chromosome IDs | Chromosomes | Physical positions (bp) | CDC Frontier (Reference genome) | (ILWC46 & LPNB) | NCBI SNPdb Accession IDs |
|----------------------|----------------|-------------|-------------------------|---------------------------------|-----------------|--------------------------|
| SNP_P4_119589_89441  | NW_004515779.1 | Scaffold249 | 89441                   | CC                              | TT              | 1946931078               |
| SNP_P4_119590_89453  | NW_004515779.1 | Scaffold249 | 89453                   | AA                              | TT              | 1946931080               |
| SNP_P4_119591_89471  | NW_004515779.1 | Scaffold249 | 89471                   | AA                              | GG              | 1946931082               |
| SNP_P4_119592_89472  | NW_004515779.1 | Scaffold249 | 89472                   | AA                              | TT              | 1946931084               |
| SNP_P4_119593_89474  | NW_004515779.1 | Scaffold249 | 89474                   | GG                              | AA              | 1946931086               |
| SNP_P4_119594_89483  | NW_004515779.1 | Scaffold249 | 89483                   | CC                              | AA              | 1946931088               |
| SNP_P4_119595_89486  | NW_004515779.1 | Scaffold249 | 89486                   | CC                              | AA              | 1946931090               |
| SNP_P4_119596_89495  | NW_004515779.1 | Scaffold249 | 89495                   | TT                              | CC              | 1946931092               |
| SNP_P4_119597_89743  | NW_004515779.1 | Scaffold249 | 89743                   | CC                              | TT              | 1946931094               |
| SNP_P4_119598_91730  | NW_004515779.1 | Scaffold249 | 91730                   | CC                              | TT              | 1946931096               |
| SNP_P4_119599_108852 | NW_004515779.1 | Scaffold249 | 108852                  | TT                              | AA              | 1946931098               |
| SNP_P4_119600_120154 | NW_004515779.1 | Scaffold249 | 120154                  | TT                              | AA              | 1946931100               |
| SNP_P4_119601_122344 | NW_004515779.1 | Scaffold249 | 122344                  | AA                              | GG              | 1946931102               |
| SNP_P4_119602_122349 | NW_004515779.1 | Scaffold249 | 122349                  | AA                              | GG              | 1946931104               |
| SNP_P4_119603_140938 | NW_004515779.1 | Scaffold249 | 140938                  | TT                              | AA              | 1946931106               |
| SNP_P4_119604_141144 | NW_004515779.1 | Scaffold249 | 141144                  | GG                              | AA              | 1946931108               |
| SNP_P4_119605_141178 | NW_004515779.1 | Scaffold249 | 141178                  | AA                              | GG              | 1946931110               |
| SNP_P4_119606_141355 | NW_004515779.1 | Scaffold249 | 141355                  | CC                              | TT              | 1946931112               |
| SNP_P4_119607_141536 | NW_004515779.1 | Scaffold249 | 141536                  | AA                              | GG              | 1946931114               |
| SNP_P4_119608_141939 | NW_004515779.1 | Scaffold249 | 141939                  | AA                              | GG              | 1946931116               |
| SNP_P4_119609_141976 | NW_004515779.1 | Scaffold249 | 141976                  | GG                              | AA              | 1946931118               |
| SNP_P4_119610_142049 | NW_004515779.1 | Scaffold249 | 142049                  | TT                              | AA              | 1946931120               |
| SNP_P4_119611_142136 | NW_004515779.1 | Scaffold249 | 142136                  | AA                              | GG              | 1946931122               |
| SNP_P4_119612_142326 | NW_004515779.1 | Scaffold249 | 142326                  | CC                              | AA              | 1946931124               |
| SNP_P4_119614_144894 | NW_004515779.1 | Scaffold249 | 144894                  | AA                              | TT              | 1946931126               |
| SNP_P4_119615_145053 | NW_004515779.1 | Scaffold249 | 145053                  | CC                              | TT              | 1946931128               |
| SNP_P4_119616_145121 | NW_004515779.1 | Scaffold249 | 145121                  | CC                              | GG              | 1946931130               |
| SNP_P4_119617_145148 | NW_004515779.1 | Scaffold249 | 145148                  | GG                              | CC              | 1946931132               |
| SNP_P4_119618_145171 | NW_004515779.1 | Scaffold249 | 145171                  | CC                              | AA              | 1946931135               |
| SNP_P4_119619_145313 | NW_004515779.1 | Scaffold249 | 145313                  | TT                              | AA              | 1946931137               |
| SNP_P4_119620_145373 | NW_004515779.1 | Scaffold249 | 145373                  | TT                              | AA              | 1946931139               |
| SNP_P4_119622_145507 | NW_004515779.1 | Scaffold249 | 145507                  | AA                              | GG              | 1946931141               |
| SNP_P4_119623_145546 | NW_004515779.1 | Scaffold249 | 145546                  | AA                              | TT              | 1946931143               |
| SNP_P4_119624_145559 | NW_004515779.1 | Scaffold249 | 145559                  | AA                              | TT              | 1946931145               |
| SNP_P4_119625_145652 | NW_004515779.1 | Scaffold249 | 145652                  | AA                              | TT              | 1946931147               |
| SNP_P4_119626_145686 | NW_004515779.1 | Scaffold249 | 145686                  | CC                              | AA              | 1946931149               |
| SNP_P4_119627_145688 | NW_004515779.1 | Scaffold249 | 145688                  | AA                              | CC              | 1946931151               |
| SNP_P4_119628_145689 | NW_004515779.1 | Scaffold249 | 145689                  | GG                              | CC              | 1946931153               |
| SNP_P4_119629_145693 | NW_004515779.1 | Scaffold249 | 145693                  | GG                              | AA              | 1946931155               |
| SNP_P4_119630_145703 | NW_004515779.1 | Scaffold249 | 145703                  | TT                              | CC              | 1946931157               |
| SNP_P4_119631_145713 | NW_004515779.1 | Scaffold249 | 145713                  | AA                              | CC              | 1946931159               |
| SNP_P4_119632_145820 | NW_004515779.1 | Scaffold249 | 145820                  | TT                              | AA              | 1946931161               |

| SNPs IDs             | Chromosome IDs | Chromosomes | Physical positions (bp) | CDC Frontier (Reference genome) | (ILWC46 & LPNB) | NCBI SNPdb Accession IDs |
|----------------------|----------------|-------------|-------------------------|---------------------------------|-----------------|--------------------------|
| SNP_P4_119633_145894 | NW_004515779.1 | Scaffold249 | 145894                  | TT                              | GG              | 1946931163               |
| SNP_P4_119634_145919 | NW_004515779.1 | Scaffold249 | 145919                  | GG                              | AA              | 1946931165               |
| SNP_P4_119635_145934 | NW_004515779.1 | Scaffold249 | 145934                  | GG                              | CC              | 1946931167               |
| SNP_P4_119636_145940 | NW_004515779.1 | Scaffold249 | 145940                  | AA                              | GG              | 1946931169               |
| SNP_P4_119638_152972 | NW_004515779.1 | Scaffold249 | 152972                  | AA                              | GG              | 1946931171               |
| SNP_P4_119639_155183 | NW_004515779.1 | Scaffold249 | 155183                  | CC                              | AA              | 1946931173               |
| SNP_P4_119640_167333 | NW_004515779.1 | Scaffold249 | 167333                  | AA                              | GG              | 1946931175               |
| SNP_P4_119641_168950 | NW_004515779.1 | Scaffold249 | 168950                  | CC                              | TT              | 1946931177               |
| SNP_P4_119642_169061 | NW_004515779.1 | Scaffold249 | 169061                  | AA                              | CC              | 1946931179               |
| SNP_P4_119643_169081 | NW_004515779.1 | Scaffold249 | 169081                  | GG                              | TT              | 1946931181               |
| SNP_P4_119644_169104 | NW_004515779.1 | Scaffold249 | 169104                  | TT                              | AA              | 1946931183               |
| SNP_P4_119645_169124 | NW_004515779.1 | Scaffold249 | 169124                  | AA                              | TT              | 1946931185               |
| SNP_P4_119646_169126 | NW_004515779.1 | Scaffold249 | 169126                  | AA                              | GG              | 1946931187               |
| SNP_P4_119647_169191 | NW_004515779.1 | Scaffold249 | 169191                  | TT                              | GG              | 1946931189               |
| SNP_P4_119648_170588 | NW_004515779.1 | Scaffold249 | 170588                  | TT                              | CC              | 1946931191               |
| SNP_P4_119649_170606 | NW_004515779.1 | Scaffold249 | 170606                  | CC                              | TT              | 1946931193               |
| SNP_P4_119650_170676 | NW_004515779.1 | Scaffold249 | 170676                  | AA                              | TT              | 1946931195               |
| SNP_P4_119651_170685 | NW_004515779.1 | Scaffold249 | 170685                  | CC                              | TT              | 1946931197               |
| SNP_P4_119652_171281 | NW_004515779.1 | Scaffold249 | 171281                  | TT                              | CC              | 1946931199               |
| SNP_P4_119653_184443 | NW_004515779.1 | Scaffold249 | 184443                  | GG                              | AA              | 1946931201               |
| SNP_P4_119654_189874 | NW_004515779.1 | Scaffold249 | 189874                  | GG                              | AA              | 1946931203               |
| SNP_P4_119655_190087 | NW_004515779.1 | Scaffold249 | 190087                  | AA                              | CC              | 1946931205               |
| SNP_P4_119656_190281 | NW_004515779.1 | Scaffold249 | 190281                  | TT                              | GG              | 1946931207               |
| SNP_P4_119657_191502 | NW_004515779.1 | Scaffold249 | 191502                  | GG                              | CC              | 1946931209               |
| SNP_P4_119658_191583 | NW_004515779.1 | Scaffold249 | 191583                  | AA                              | TT              | 1946931211               |
| SNP_P4_119660_610    | NW_004515780.1 | Scaffold250 | 610                     | AA                              | GG              | 1946931213               |
| SNP_P4_119662_29156  | NW_004515780.1 | Scaffold250 | 29156                   | AA                              | GG              | 1946931215               |
| SNP_P4_119663_42295  | NW_004515780.1 | Scaffold250 | 42295                   | TT                              | CC              | 1946931217               |
| SNP_P4_119664_42503  | NW_004515780.1 | Scaffold250 | 42503                   | CC                              | GG              | 1946931219               |
| SNP_P4_119665_53265  | NW_004515780.1 | Scaffold250 | 53265                   | AA                              | GG              | 1946931221               |
| SNP_P4_119666_77484  | NW_004515780.1 | Scaffold250 | 77484                   | TT                              | CC              | 1946931223               |
| SNP_P4_119667_77506  | NW_004515780.1 | Scaffold250 | 77506                   | AA                              | GG              | 1946931225               |
| SNP_P4_119668_77544  | NW_004515780.1 | Scaffold250 | 77544                   | AA                              | CC              | 1946931227               |
| SNP_P4_119669_77547  | NW_004515780.1 | Scaffold250 | 77547                   | TT                              | CC              | 1946931229               |
| SNP_P4_119670_77549  | NW_004515780.1 | Scaffold250 | 77549                   | TT                              | CC              | 1946931231               |
| SNP_P4_119671_77709  | NW_004515780.1 | Scaffold250 | 77709                   | CC                              | TT              | 1946931233               |
| SNP_P4_119672_77710  | NW_004515780.1 | Scaffold250 | 77710                   | AA                              | TT              | 1946931235               |
| SNP_P4_119673_77751  | NW_004515780.1 | Scaffold250 | 77751                   | TT                              | CC              | 1946931237               |
| SNP_P4_119674_77760  | NW_004515780.1 | Scaffold250 | 77760                   | AA                              | CC              | 1946931239               |
| SNP_P4_119675_77788  | NW_004515780.1 | Scaffold250 | 77788                   | TT                              | CC              | 1946931241               |
| SNP_P4_119676_77794  | NW_004515780.1 | Scaffold250 | 77794                   | TT                              | CC              | 1946931243               |
| SNP_P4_119677_77808  | NW_004515780.1 | Scaffold250 | 77808                   | AA                              | GG              | 1946931245               |



| SNPs IDs             | Chromosome IDs | Chromosomes | Physical positions (bp) | CDC Frontier (Reference genome) | (ILWC46 & LPNB) | NCBI SNPdb Accession IDs |
|----------------------|----------------|-------------|-------------------------|---------------------------------|-----------------|--------------------------|
| SNP_P4_119678_79753  | NW_004515780.1 | Scaffold250 | 79753                   | AA                              | GG              | 1946931247               |
| SNP_P4_119679_82172  | NW_004515780.1 | Scaffold250 | 82172                   | AA                              | GG              | 1946931249               |
| SNP_P4_119680_82178  | NW_004515780.1 | Scaffold250 | 82178                   | CC                              | AA              | 1946931251               |
| SNP_P4_119681_82252  | NW_004515780.1 | Scaffold250 | 82252                   | CC                              | TT              | 1946931254               |
| SNP_P4_119682_82612  | NW_004515780.1 | Scaffold250 | 82612                   | AA                              | CC              | 1946931256               |
| SNP_P4_119685_91049  | NW_004515780.1 | Scaffold250 | 91049                   | GG                              | AA              | 1946931258               |
| SNP_P4_119686_120862 | NW_004515780.1 | Scaffold250 | 120862                  | AA                              | CC              | 1946931260               |
| SNP_P4_119687_655    | NW_004515781.1 | Scaffold251 | 655                     | TT                              | CC              | 1946931262               |
| SNP_P4_119688_693    | NW_004515781.1 | Scaffold251 | 693                     | AA                              | TT              | 1946931264               |
| SNP_P4_119689_878    | NW_004515781.1 | Scaffold251 | 878                     | GG                              | AA              | 1946931266               |
| SNP_P4_119690_957    | NW_004515781.1 | Scaffold251 | 957                     | AA                              | GG              | 1946931268               |
| SNP_P4_119691_2669   | NW_004515781.1 | Scaffold251 | 2669                    | AA                              | CC              | 1946931270               |
| SNP_P4_119692_3060   | NW_004515781.1 | Scaffold251 | 3060                    | AA                              | TT              | 1946931272               |
| SNP_P4_119693_8307   | NW_004515781.1 | Scaffold251 | 8307                    | CC                              | TT              | 1946931274               |
| SNP_P4_119694_9966   | NW_004515781.1 | Scaffold251 | 9966                    | GG                              | AA              | 1946931276               |
| SNP_P4_119695_2175   | NW_004515782.1 | Scaffold253 | 2175                    | CC                              | GG              | 1946931278               |
| SNP_P4_119696_2189   | NW_004515782.1 | Scaffold253 | 2189                    | AA                              | TT              | 1946931280               |
| SNP_P4_119697_2264   | NW_004515782.1 | Scaffold253 | 2264                    | CC                              | TT              | 1946931282               |
| SNP_P4_119698_184    | NW_004515783.1 | Scaffold254 | 184                     | AA                              | GG              | 1946931284               |
| SNP_P4_119699_559    | NW_004515783.1 | Scaffold254 | 559                     | CC                              | GG              | 1946931287               |
| SNP_P4_119700_8917   | NW_004515784.1 | Scaffold255 | 8917                    | CC                              | TT              | 1946931289               |
| SNP_P4_119701_8923   | NW_004515784.1 | Scaffold255 | 8923                    | GG                              | AA              | 1946931291               |
| SNP_P4_119702_8929   | NW_004515784.1 | Scaffold255 | 8929                    | AA                              | GG              | 1946931293               |
| SNP_P4_119703_8958   | NW_004515784.1 | Scaffold255 | 8958                    | CC                              | TT              | 1946931295               |
| SNP_P4_119704_8974   | NW_004515784.1 | Scaffold255 | 8974                    | GG                              | AA              | 1946931297               |
| SNP_P4_119705_9046   | NW_004515784.1 | Scaffold255 | 9046                    | AA                              | GG              | 1946931299               |
| SNP_P4_119706_9061   | NW_004515784.1 | Scaffold255 | 9061                    | TT                              | CC              | 1946931301               |
| SNP_P4_119707_9263   | NW_004515784.1 | Scaffold255 | 9263                    | AA                              | GG              | 1946931303               |
| SNP_P4_119708_9280   | NW_004515784.1 | Scaffold255 | 9280                    | TT                              | CC              | 1946931305               |
| SNP_P4_119709_9304   | NW_004515784.1 | Scaffold255 | 9304                    | TT                              | GG              | 1946931308               |
| SNP_P4_119710_9347   | NW_004515784.1 | Scaffold255 | 9347                    | AA                              | CC              | 1946931310               |
| SNP_P4_119711_9355   | NW_004515784.1 | Scaffold255 | 9355                    | AA                              | GG              | 1946931312               |
| SNP_P4_119712_9370   | NW_004515784.1 | Scaffold255 | 9370                    | TT                              | GG              | 1946931314               |
| SNP_P4_119713_9383   | NW_004515784.1 | Scaffold255 | 9383                    | TT                              | CC              | 1946931316               |
| SNP_P4_119714_9406   | NW_004515784.1 | Scaffold255 | 9406                    | TT                              | AA              | 1946931318               |
| SNP_P4_119715_9409   | NW_004515784.1 | Scaffold255 | 9409                    | AA                              | GG              | 1946931320               |
| SNP_P4_119716_9418   | NW_004515784.1 | Scaffold255 | 9418                    | AA                              | GG              | 1946931322               |
| SNP_P4_119717_10575  | NW_004515784.1 | Scaffold255 | 10575                   | GG                              | AA              | 1946931324               |
| SNP_P4_119718_10645  | NW_004515784.1 | Scaffold255 | 10645                   | AA                              | TT              | 1946931327               |
| SNP_P4_119719_10812  | NW_004515784.1 | Scaffold255 | 10812                   | CC                              | TT              | 1946931329               |
| SNP_P4_119720_11317  | NW_004515784.1 | Scaffold255 | 11317                   | GG                              | CC              | 1946931331               |
| SNP_P4_119721_45931  | NW_004515784.1 | Scaffold255 | 45931                   | AA                              | GG              | 1946931333               |

| SNPs IDs             | Chromosome IDs | Chromosomes | Physical positions (bp) | CDC Frontier (Reference genome) | (ILWC46 & LPNB) | NCBI SNPdb Accession IDs |
|----------------------|----------------|-------------|-------------------------|---------------------------------|-----------------|--------------------------|
| SNP_P4_119722_45960  | NW_004515784.1 | Scaffold255 | 45960                   | GG                              | TT              | 1946931335               |
| SNP_P4_119723_46259  | NW_004515784.1 | Scaffold255 | 46259                   | TT                              | AA              | 1946931337               |
| SNP_P4_119724_46279  | NW_004515784.1 | Scaffold255 | 46279                   | GG                              | AA              | 1946931339               |
| SNP_P4_119725_48135  | NW_004515784.1 | Scaffold255 | 48135                   | AA                              | TT              | 1946931341               |
| SNP_P4_119726_51325  | NW_004515784.1 | Scaffold255 | 51325                   | AA                              | TT              | 1946931343               |
| SNP_P4_119727_51621  | NW_004515784.1 | Scaffold255 | 51621                   | TT                              | CC              | 1946931345               |
| SNP_P4_119728_69813  | NW_004515784.1 | Scaffold255 | 69813                   | AA                              | GG              | 1946931347               |
| SNP_P4_119729_70113  | NW_004515784.1 | Scaffold255 | 70113                   | TT                              | CC              | 1946931349               |
| SNP_P4_119730_70327  | NW_004515784.1 | Scaffold255 | 70327                   | AA                              | CC              | 1946931351               |
| SNP_P4_119731_70347  | NW_004515784.1 | Scaffold255 | 70347                   | AA                              | CC              | 1946931353               |
| SNP_P4_119732_70412  | NW_004515784.1 | Scaffold255 | 70412                   | CC                              | TT              | 1946931355               |
| SNP_P4_119733_79278  | NW_004515784.1 | Scaffold255 | 79278                   | CC                              | AA              | 1946931357               |
| SNP_P4_119734_79358  | NW_004515784.1 | Scaffold255 | 79358                   | AA                              | TT              | 1946931359               |
| SNP_P4_119735_79497  | NW_004515784.1 | Scaffold255 | 79497                   | CC                              | GG              | 1946931361               |
| SNP_P4_119736_79510  | NW_004515784.1 | Scaffold255 | 79510                   | TT                              | GG              | 1946931363               |
| SNP_P4_119737_85719  | NW_004515784.1 | Scaffold255 | 85719                   | TT                              | GG              | 1946931365               |
| SNP_P4_119738_85720  | NW_004515784.1 | Scaffold255 | 85720                   | AA                              | GG              | 1946931367               |
| SNP_P4_119739_1967   | NW_004515785.1 | Scaffold256 | 1967                    | TT                              | CC              | 1946931369               |
| SNP_P4_119740_2438   | NW_004515785.1 | Scaffold256 | 2438                    | AA                              | TT              | 1946931371               |
| SNP_P4_119741_3499   | NW_004515785.1 | Scaffold256 | 3499                    | CC                              | TT              | 1946931373               |
| SNP_P4_119742_10480  | NW_004515785.1 | Scaffold256 | 10480                   | TT                              | CC              | 1946931375               |
| SNP_P4_119743_10550  | NW_004515785.1 | Scaffold256 | 10550                   | CC                              | TT              | 1946931377               |
| SNP_P4_119744_10578  | NW_004515785.1 | Scaffold256 | 10578                   | AA                              | TT              | 1946931379               |
| SNP_P4_119745_10594  | NW_004515785.1 | Scaffold256 | 10594                   | TT                              | CC              | 1946931381               |
| SNP_P4_119746_10865  | NW_004515785.1 | Scaffold256 | 10865                   | AA                              | CC              | 1946931383               |
| SNP_P4_119747_15972  | NW_004515785.1 | Scaffold256 | 15972                   | AA                              | GG              | 1946931385               |
| SNP_P4_119750_43641  | NW_004515785.1 | Scaffold256 | 43641                   | GG                              | AA              | 1946931387               |
| SNP_P4_119751_43698  | NW_004515785.1 | Scaffold256 | 43698                   | CC                              | AA              | 1946931389               |
| SNP_P4_119752_43702  | NW_004515785.1 | Scaffold256 | 43702                   | CC                              | TT              | 1946931391               |
| SNP_P4_119753_43742  | NW_004515785.1 | Scaffold256 | 43742                   | GG                              | AA              | 1946931393               |
| SNP_P4_119754_43760  | NW_004515785.1 | Scaffold256 | 43760                   | TT                              | AA              | 1946931395               |
| SNP_P4_119755_44157  | NW_004515785.1 | Scaffold256 | 44157                   | GG                              | TT              | 1946931397               |
| SNP_P4_119756_44165  | NW_004515785.1 | Scaffold256 | 44165                   | GG                              | AA              | 1946931399               |
| SNP_P4_119757_44611  | NW_004515785.1 | Scaffold256 | 44611                   | GG                              | AA              | 1946931401               |
| SNP_P4_119758_44618  | NW_004515785.1 | Scaffold256 | 44618                   | AA                              | GG              | 1946931403               |
| SNP_P4_119759_61884  | NW_004515785.1 | Scaffold256 | 61884                   | AA                              | GG              | 1946931405               |
| SNP_P4_119760_62209  | NW_004515785.1 | Scaffold256 | 62209                   | TT                              | CC              | 1946931407               |
| SNP_P4_119761_62211  | NW_004515785.1 | Scaffold256 | 62211                   | TT                              | GG              | 1946931409               |
| SNP_P4_119762_74112  | NW_004515785.1 | Scaffold256 | 74112                   | TT                              | AA              | 1946931411               |
| SNP_P4_119763_87744  | NW_004515785.1 | Scaffold256 | 87744                   | TT                              | CC              | 1946931413               |
| SNP_P4_119764_92137  | NW_004515785.1 | Scaffold256 | 92137                   | GG                              | AA              | 1946931415               |
| SNP_P4_119765_101362 | NW_004515785.1 | Scaffold256 | 101362                  | CC                              | GG              | 1946931417               |

| SNPs IDs             | Chromosome IDs | Chromosomes | Physical positions (bp) | CDC Frontier (Reference genome) | (ILWC46 & LPNB) | NCBI SNPdb Accession IDs |
|----------------------|----------------|-------------|-------------------------|---------------------------------|-----------------|--------------------------|
| SNP_P4_119766_101453 | NW_004515785.1 | Scaffold256 | 101453                  | TT                              | AA              | 1946931419               |
| SNP_P4_119767_101455 | NW_004515785.1 | Scaffold256 | 101455                  | AA                              | GG              | 1946931421               |
| SNP_P4_119768_101476 | NW_004515785.1 | Scaffold256 | 101476                  | CC                              | TT              | 1946931423               |
| SNP_P4_119769_101621 | NW_004515785.1 | Scaffold256 | 101621                  | CC                              | AA              | 1946931425               |
| SNP_P4_119770_101663 | NW_004515785.1 | Scaffold256 | 101663                  | TT                              | AA              | 1946931427               |
| SNP_P4_119771_101707 | NW_004515785.1 | Scaffold256 | 101707                  | TT                              | CC              | 1946931429               |
| SNP_P4_119772_101719 | NW_004515785.1 | Scaffold256 | 101719                  | AA                              | TT              | 1946931431               |
| SNP_P4_119773_101724 | NW_004515785.1 | Scaffold256 | 101724                  | TT                              | AA              | 1946931433               |
| SNP_P4_119774_101898 | NW_004515785.1 | Scaffold256 | 101898                  | TT                              | CC              | 1946931435               |
| SNP_P4_119775_108516 | NW_004515785.1 | Scaffold256 | 108516                  | TT                              | GG              | 1946931437               |
| SNP_P4_119776_108517 | NW_004515785.1 | Scaffold256 | 108517                  | CC                              | AA              | 1946931439               |
| SNP_P4_119777_111700 | NW_004515785.1 | Scaffold256 | 111700                  | GG                              | AA              | 1946931441               |
| SNP_P4_119778_111711 | NW_004515785.1 | Scaffold256 | 111711                  | GG                              | AA              | 1946931443               |
| SNP_P4_119779_113670 | NW_004515785.1 | Scaffold256 | 113670                  | TT                              | GG              | 1946931445               |
| SNP_P4_119781_152599 | NW_004515785.1 | Scaffold256 | 152599                  | TT                              | CC              | 1946931447               |
| SNP_P4_119782_171559 | NW_004515785.1 | Scaffold256 | 171559                  | TT                              | CC              | 1946931449               |
| SNP_P4_119783_171607 | NW_004515785.1 | Scaffold256 | 171607                  | AA                              | GG              | 1946931451               |
| SNP_P4_119784_171861 | NW_004515785.1 | Scaffold256 | 171861                  | AA                              | GG              | 1946931454               |
| SNP_P4_119785_171893 | NW_004515785.1 | Scaffold256 | 171893                  | AA                              | TT              | 1946931456               |
| SNP_P4_119786_171952 | NW_004515785.1 | Scaffold256 | 171952                  | CC                              | TT              | 1946931458               |
| SNP_P4_119787_1338   | NW_004515786.1 | Scaffold260 | 1338                    | TT                              | AA              | 1946931460               |
| SNP_P4_119788_1341   | NW_004515786.1 | Scaffold260 | 1341                    | GG                              | TT              | 1946931462               |
| SNP_P4_119789_1342   | NW_004515786.1 | Scaffold260 | 1342                    | TT                              | CC              | 1946931464               |
| SNP_P4_119790_1356   | NW_004515786.1 | Scaffold260 | 1356                    | TT                              | CC              | 1946931466               |
| SNP_P4_119791_1628   | NW_004515786.1 | Scaffold260 | 1628                    | TT                              | AA              | 1946931468               |
| SNP_P4_119792_1646   | NW_004515786.1 | Scaffold260 | 1646                    | CC                              | TT              | 1946931470               |
| SNP_P4_119794_1933   | NW_004515786.1 | Scaffold260 | 1933                    | TT                              | CC              | 1946931472               |
| SNP_P4_119795_4675   | NW_004515786.1 | Scaffold260 | 4675                    | GG                              | AA              | 1946931474               |
| SNP_P4_119796_4726   | NW_004515786.1 | Scaffold260 | 4726                    | GG                              | AA              | 1946931477               |
| SNP_P4_119797_4732   | NW_004515786.1 | Scaffold260 | 4732                    | TT                              | GG              | 1946931479               |
| SNP_P4_119798_4748   | NW_004515786.1 | Scaffold260 | 4748                    | GG                              | AA              | 1946931481               |
| SNP_P4_119799_15986  | NW_004515786.1 | Scaffold260 | 15986                   | CC                              | AA              | 1946931483               |
| SNP_P4_119800_17634  | NW_004515786.1 | Scaffold260 | 17634                   | GG                              | AA              | 1946931485               |
| SNP_P4_119802_58220  | NW_004515786.1 | Scaffold260 | 58220                   | TT                              | CC              | 1946931487               |
| SNP_P4_119803_58600  | NW_004515786.1 | Scaffold260 | 58600                   | AA                              | CC              | 1946931489               |
| SNP_P4_119805_65031  | NW_004515786.1 | Scaffold260 | 65031                   | TT                              | AA              | 1946931491               |
| SNP_P4_119806_65035  | NW_004515786.1 | Scaffold260 | 65035                   | AA                              | TT              | 1946931493               |
| SNP_P4_119807_65048  | NW_004515786.1 | Scaffold260 | 65048                   | CC                              | TT              | 1946931495               |
| SNP_P4_119808_65317  | NW_004515786.1 | Scaffold260 | 65317                   | TT                              | AA              | 1946931497               |
| SNP_P4_119809_65327  | NW_004515786.1 | Scaffold260 | 65327                   | GG                              | TT              | 1946931499               |
| SNP_P4_119810_65329  | NW_004515786.1 | Scaffold260 | 65329                   | AA                              | TT              | 1946931501               |
| SNP_P4_119811_65332  | NW_004515786.1 | Scaffold260 | 65332                   | TT                              | AA              | 1946931503               |

| SNPs IDs             | Chromosome IDs | Chromosomes | Physical positions (bp) | CDC Frontier (Reference genome) | (ILWC46 & LPNB) | NCBI SNPdb Accession IDs |
|----------------------|----------------|-------------|-------------------------|---------------------------------|-----------------|--------------------------|
| SNP_P4_119812_65498  | NW_004515786.1 | Scaffold260 | 65498                   | GG                              | AA              | 1946931505               |
| SNP_P4_119814_74898  | NW_004515786.1 | Scaffold260 | 74898                   | TT                              | CC              | 1946931507               |
| SNP_P4_119815_75301  | NW_004515786.1 | Scaffold260 | 75301                   | CC                              | TT              | 1946931510               |
| SNP_P4_119816_87518  | NW_004515786.1 | Scaffold260 | 87518                   | GG                              | AA              | 1946931512               |
| SNP_P4_119817_90279  | NW_004515786.1 | Scaffold260 | 90279                   | TT                              | AA              | 1946931514               |
| SNP_P4_119818_144930 | NW_004515786.1 | Scaffold260 | 144930                  | TT                              | AA              | 1946931516               |
| SNP_P4_119819_145378 | NW_004515786.1 | Scaffold260 | 145378                  | GG                              | AA              | 1946931518               |
| SNP_P4_119820_148487 | NW_004515786.1 | Scaffold260 | 148487                  | GG                              | AA              | 1946931520               |
| SNP_P4_119821_150743 | NW_004515786.1 | Scaffold260 | 150743                  | AA                              | CC              | 1946931522               |
| SNP_P4_119822_160438 | NW_004515786.1 | Scaffold260 | 160438                  | AA                              | CC              | 1946931524               |
| SNP_P4_119823_174326 | NW_004515786.1 | Scaffold260 | 174326                  | AA                              | GG              | 1946931526               |
| SNP_P4_119824_181849 | NW_004515786.1 | Scaffold260 | 181849                  | GG                              | AA              | 1946931528               |
| SNP_P4_119825_189480 | NW_004515786.1 | Scaffold260 | 189480                  | CC                              | AA              | 1946931530               |
| SNP_P4_119826_192170 | NW_004515786.1 | Scaffold260 | 192170                  | CC                              | TT              | 1946931532               |
| SNP_P4_119827_192711 | NW_004515786.1 | Scaffold260 | 192711                  | CC                              | TT              | 1946931534               |
| SNP_P4_119828_205043 | NW_004515786.1 | Scaffold260 | 205043                  | AA                              | CC              | 1946931536               |
| SNP_P4_119829_205263 | NW_004515786.1 | Scaffold260 | 205263                  | AA                              | GG              | 1946931538               |
| SNP_P4_119830_205287 | NW_004515786.1 | Scaffold260 | 205287                  | TT                              | CC              | 1946931540               |
| SNP_P4_119831_209408 | NW_004515786.1 | Scaffold260 | 209408                  | AA                              | TT              | 1946931542               |
| SNP_P4_119832_210669 | NW_004515786.1 | Scaffold260 | 210669                  | GG                              | AA              | 1946931544               |
| SNP_P4_119833_219507 | NW_004515786.1 | Scaffold260 | 219507                  | GG                              | AA              | 1946931546               |
| SNP_P4_119834_233641 | NW_004515786.1 | Scaffold260 | 233641                  | CC                              | TT              | 1946931548               |
| SNP_P4_119835_233674 | NW_004515786.1 | Scaffold260 | 233674                  | GG                              | TT              | 1946931550               |
| SNP_P4_119836_233704 | NW_004515786.1 | Scaffold260 | 233704                  | CC                              | TT              | 1946931552               |
| SNP_P4_119837_237174 | NW_004515786.1 | Scaffold260 | 237174                  | TT                              | CC              | 1946931554               |
| SNP_P4_119838_237198 | NW_004515786.1 | Scaffold260 | 237198                  | TT                              | CC              | 1946931556               |
| SNP_P4_119839_237218 | NW_004515786.1 | Scaffold260 | 237218                  | AA                              | GG              | 1946931558               |
| SNP_P4_119840_257318 | NW_004515786.1 | Scaffold260 | 257318                  | TT                              | CC              | 1946931560               |
| SNP_P4_119841_267253 | NW_004515786.1 | Scaffold260 | 267253                  | GG                              | AA              | 1946931562               |
| SNP_P4_119842_274867 | NW_004515786.1 | Scaffold260 | 274867                  | TT                              | GG              | 1946931564               |
| SNP_P4_119843_274868 | NW_004515786.1 | Scaffold260 | 274868                  | GG                              | TT              | 1946931566               |
| SNP_P4_119844_278212 | NW_004515786.1 | Scaffold260 | 278212                  | AA                              | GG              | 1946931568               |
| SNP_P4_119845_286663 | NW_004515786.1 | Scaffold260 | 286663                  | GG                              | AA              | 1946931570               |
| SNP_P4_119846_286693 | NW_004515786.1 | Scaffold260 | 286693                  | AA                              | GG              | 1946931572               |
| SNP_P4_119847_330698 | NW_004515786.1 | Scaffold260 | 330698                  | AA                              | GG              | 1946931574               |
| SNP_P4_119849_349242 | NW_004515786.1 | Scaffold260 | 349242                  | TT                              | CC              | 1946931576               |
| SNP_P4_119850_349270 | NW_004515786.1 | Scaffold260 | 349270                  | TT                              | AA              | 1946931578               |
| SNP_P4_119851_354873 | NW_004515786.1 | Scaffold260 | 354873                  | CC                              | TT              | 1946931580               |
| SNP_P4_119852_354876 | NW_004515786.1 | Scaffold260 | 354876                  | TT                              | AA              | 1946931582               |
| SNP_P4_119853_354892 | NW_004515786.1 | Scaffold260 | 354892                  | CC                              | TT              | 1946931585               |
| SNP_P4_119854_354924 | NW_004515786.1 | Scaffold260 | 354924                  | AA                              | TT              | 1946931587               |
| SNP_P4_119855_354927 | NW_004515786.1 | Scaffold260 | 354927                  | AA                              | GG              | 1946931589               |

| SNPs IDs             | Chromosome IDs | Chromosomes | Physical positions (bp) | CDC Frontier (Reference genome) | (ILWC46 & LPNB) | NCBI SNPdb Accession IDs |
|----------------------|----------------|-------------|-------------------------|---------------------------------|-----------------|--------------------------|
| SNP_P4_119856_354944 | NW_004515786.1 | Scaffold260 | 354944                  | AA                              | CC              | 1946931591               |
| SNP_P4_119857_355036 | NW_004515786.1 | Scaffold260 | 355036                  | AA                              | CC              | 1946931593               |
| SNP_P4_119858_355296 | NW_004515786.1 | Scaffold260 | 355296                  | TT                              | CC              | 1946931595               |
| SNP_P4_119859_355609 | NW_004515786.1 | Scaffold260 | 355609                  | TT                              | AA              | 1946931598               |
| SNP_P4_119861_355751 | NW_004515786.1 | Scaffold260 | 355751                  | AA                              | GG              | 1946931600               |
| SNP_P4_119862_355757 | NW_004515786.1 | Scaffold260 | 355757                  | CC                              | TT              | 1946931602               |
| SNP_P4_119863_355774 | NW_004515786.1 | Scaffold260 | 355774                  | TT                              | CC              | 1946931604               |
| SNP_P4_119864_356023 | NW_004515786.1 | Scaffold260 | 356023                  | GG                              | AA              | 1946931606               |
| SNP_P4_119865_356176 | NW_004515786.1 | Scaffold260 | 356176                  | CC                              | AA              | 1946931608               |
| SNP_P4_119866_356191 | NW_004515786.1 | Scaffold260 | 356191                  | TT                              | CC              | 1946931610               |
| SNP_P4_119867_356252 | NW_004515786.1 | Scaffold260 | 356252                  | TT                              | CC              | 1946931611               |
| SNP_P4_119868_356289 | NW_004515786.1 | Scaffold260 | 356289                  | AA                              | TT              | 1946931612               |
| SNP_P4_119869_356532 | NW_004515786.1 | Scaffold260 | 356532                  | AA                              | GG              | 1946931613               |
| SNP_P4_119870_356544 | NW_004515786.1 | Scaffold260 | 356544                  | CC                              | AA              | 1946931614               |
| SNP_P4_119872_356640 | NW_004515786.1 | Scaffold260 | 356640                  | CC                              | TT              | 1946931615               |
| SNP_P4_119873_356730 | NW_004515786.1 | Scaffold260 | 356730                  | AA                              | GG              | 1946931616               |
| SNP_P4_119874_415172 | NW_004515786.1 | Scaffold260 | 415172                  | TT                              | CC              | 1946931617               |
| SNP_P4_119875_415590 | NW_004515786.1 | Scaffold260 | 415590                  | GG                              | TT              | 1946931619               |
| SNP_P4_119876_419372 | NW_004515786.1 | Scaffold260 | 419372                  | TT                              | CC              | 1946931622               |
| SNP_P4_119877_437796 | NW_004515786.1 | Scaffold260 | 437796                  | AA                              | CC              | 1946931624               |
| SNP_P4_119878_10179  | NW_004515788.1 | Scaffold263 | 10179                   | CC                              | GG              | 1946931626               |
| SNP_P4_119879_11449  | NW_004515788.1 | Scaffold263 | 11449                   | AA                              | GG              | 1946931628               |
| SNP_P4_119880_11487  | NW_004515788.1 | Scaffold263 | 11487                   | TT                              | CC              | 1946931630               |
| SNP_P4_119881_20472  | NW_004515788.1 | Scaffold263 | 20472                   | AA                              | TT              | 1946931632               |
| SNP_P4_119883_42451  | NW_004515788.1 | Scaffold263 | 42451                   | AA                              | GG              | 1946931634               |
| SNP_P4_119884_64724  | NW_004515788.1 | Scaffold263 | 64724                   | TT                              | CC              | 1946931636               |
| SNP_P4_119885_66557  | NW_004515788.1 | Scaffold263 | 66557                   | GG                              | AA              | 1946931638               |
| SNP_P4_119886_66560  | NW_004515788.1 | Scaffold263 | 66560                   | CC                              | TT              | 1946931641               |
| SNP_P4_119887_81322  | NW_004515788.1 | Scaffold263 | 81322                   | AA                              | GG              | 1946931643               |
| SNP_P4_119888_138823 | NW_004515788.1 | Scaffold263 | 138823                  | CC                              | AA              | 1946931645               |
| SNP_P4_119889_148227 | NW_004515788.1 | Scaffold263 | 148227                  | GG                              | AA              | 1946931647               |
| SNP_P4_119890_157938 | NW_004515788.1 | Scaffold263 | 157938                  | CC                              | TT              | 1946931649               |
| SNP_P4_119891_162305 | NW_004515788.1 | Scaffold263 | 162305                  | CC                              | AA              | 1946931651               |
| SNP_P4_119892_162887 | NW_004515788.1 | Scaffold263 | 162887                  | GG                              | AA              | 1946931653               |
| SNP_P4_119893_162903 | NW_004515788.1 | Scaffold263 | 162903                  | GG                              | TT              | 1946931655               |
| SNP_P4_119894_162928 | NW_004515788.1 | Scaffold263 | 162928                  | TT                              | CC              | 1946931657               |
| SNP_P4_119895_165496 | NW_004515788.1 | Scaffold263 | 165496                  | TT                              | CC              | 1946931659               |
| SNP_P4_119896_165645 | NW_004515788.1 | Scaffold263 | 165645                  | AA                              | GG              | 1946931661               |
| SNP_P4_119897_165821 | NW_004515788.1 | Scaffold263 | 165821                  | TT                              | CC              | 1946931663               |
| SNP_P4_119898_165880 | NW_004515788.1 | Scaffold263 | 165880                  | TT                              | GG              | 1946931665               |
| SNP_P4_119899_165940 | NW_004515788.1 | Scaffold263 | 165940                  | AA                              | GG              | 1946931667               |
| SNP_P4_119900_165970 | NW_004515788.1 | Scaffold263 | 165970                  | TT                              | CC              | 1946931670               |

| SNPs IDs             | Chromosome IDs | Chromosomes | Physical positions (bp) | CDC Frontier (Reference genome) | (ILWC46 & LPNB) | NCBI SNPdb Accession IDs |
|----------------------|----------------|-------------|-------------------------|---------------------------------|-----------------|--------------------------|
| SNP_P4_119901_166352 | NW_004515788.1 | Scaffold263 | 166352                  | CC                              | TT              | 1946931672               |
| SNP_P4_119902_166357 | NW_004515788.1 | Scaffold263 | 166357                  | CC                              | TT              | 1946931674               |
| SNP_P4_119903_166757 | NW_004515788.1 | Scaffold263 | 166757                  | GG                              | AA              | 1946931676               |
| SNP_P4_119904_166760 | NW_004515788.1 | Scaffold263 | 166760                  | AA                              | GG              | 1946931678               |
| SNP_P4_119905_166772 | NW_004515788.1 | Scaffold263 | 166772                  | TT                              | GG              | 1946931680               |
| SNP_P4_119906_166775 | NW_004515788.1 | Scaffold263 | 166775                  | GG                              | AA              | 1946931682               |
| SNP_P4_119907_166835 | NW_004515788.1 | Scaffold263 | 166835                  | TT                              | CC              | 1946931685               |
| SNP_P4_119908_167258 | NW_004515788.1 | Scaffold263 | 167258                  | GG                              | AA              | 1946931687               |
| SNP_P4_119909_167890 | NW_004515788.1 | Scaffold263 | 167890                  | TT                              | CC              | 1946931689               |
| SNP_P4_119910_172488 | NW_004515788.1 | Scaffold263 | 172488                  | GG                              | AA              | 1946931691               |
| SNP_P4_119911_172819 | NW_004515788.1 | Scaffold263 | 172819                  | AA                              | GG              | 1946931693               |
| SNP_P4_119912_172904 | NW_004515788.1 | Scaffold263 | 172904                  | AA                              | GG              | 1946931695               |
| SNP_P4_119913_172929 | NW_004515788.1 | Scaffold263 | 172929                  | TT                              | CC              | 1946931697               |
| SNP_P4_119914_172930 | NW_004515788.1 | Scaffold263 | 172930                  | TT                              | CC              | 1946931699               |
| SNP_P4_119915_174059 | NW_004515788.1 | Scaffold263 | 174059                  | GG                              | AA              | 1946931701               |
| SNP_P4_119916_174169 | NW_004515788.1 | Scaffold263 | 174169                  | CC                              | TT              | 1946931703               |
| SNP_P4_119917_174170 | NW_004515788.1 | Scaffold263 | 174170                  | TT                              | CC              | 1946931705               |
| SNP_P4_119918_174213 | NW_004515788.1 | Scaffold263 | 174213                  | TT                              | CC              | 1946931707               |
| SNP_P4_119919_176205 | NW_004515788.1 | Scaffold263 | 176205                  | AA                              | GG              | 1946931709               |
| SNP_P4_119920_176246 | NW_004515788.1 | Scaffold263 | 176246                  | AA                              | TT              | 1946931711               |
| SNP_P4_119921_176269 | NW_004515788.1 | Scaffold263 | 176269                  | AA                              | GG              | 1946931713               |
| SNP_P4_119922_176274 | NW_004515788.1 | Scaffold263 | 176274                  | GG                              | AA              | 1946931715               |
| SNP_P4_119923_176353 | NW_004515788.1 | Scaffold263 | 176353                  | GG                              | TT              | 1946931717               |
| SNP_P4_119924_176538 | NW_004515788.1 | Scaffold263 | 176538                  | TT                              | CC              | 1946931719               |
| SNP_P4_119925_176623 | NW_004515788.1 | Scaffold263 | 176623                  | CC                              | TT              | 1946931721               |
| SNP_P4_119926_176630 | NW_004515788.1 | Scaffold263 | 176630                  | GG                              | AA              | 1946931724               |
| SNP_P4_119927_176635 | NW_004515788.1 | Scaffold263 | 176635                  | CC                              | TT              | 1946931726               |
| SNP_P4_119928_176655 | NW_004515788.1 | Scaffold263 | 176655                  | CC                              | TT              | 1946931728               |
| SNP_P4_119929_177642 | NW_004515788.1 | Scaffold263 | 177642                  | GG                              | TT              | 1946931730               |
| SNP_P4_119932_177842 | NW_004515788.1 | Scaffold263 | 177842                  | AA                              | CC              | 1946931732               |
| SNP_P4_119933_177975 | NW_004515788.1 | Scaffold263 | 177975                  | TT                              | AA              | 1946931734               |
| SNP_P4_119934_178162 | NW_004515788.1 | Scaffold263 | 178162                  | AA                              | GG              | 1946931736               |
| SNP_P4_119935_178201 | NW_004515788.1 | Scaffold263 | 178201                  | AA                              | GG              | 1946931738               |
| SNP_P4_119936_178248 | NW_004515788.1 | Scaffold263 | 178248                  | CC                              | TT              | 1946931740               |
| SNP_P4_119937_178782 | NW_004515788.1 | Scaffold263 | 178782                  | GG                              | TT              | 1946931742               |
| SNP_P4_119938_4693   | NW_004515790.1 | Scaffold268 | 4693                    | CC                              | TT              | 1946931744               |
| SNP_P4_119939_4698   | NW_004515790.1 | Scaffold268 | 4698                    | CC                              | GG              | 1946931746               |
| SNP_P4_119940_4700   | NW_004515790.1 | Scaffold268 | 4700                    | AA                              | TT              | 1946931748               |
| SNP_P4_119941_7274   | NW_004515790.1 | Scaffold268 | 7274                    | AA                              | GG              | 1946931750               |
| SNP_P4_119942_13013  | NW_004515790.1 | Scaffold268 | 13013                   | CC                              | AA              | 1946931752               |
| SNP_P4_119943_13180  | NW_004515790.1 | Scaffold268 | 13180                   | CC                              | AA              | 1946931754               |
| SNP_P4_119944_13200  | NW_004515790.1 | Scaffold268 | 13200                   | TT                              | CC              | 1946931756               |

| SNPs IDs            | Chromosome IDs | Chromosomes | Physical positions (bp) | CDC Frontier (Reference genome) | (ILWC46 & LPNB) | NCBI SNPdb Accession IDs |
|---------------------|----------------|-------------|-------------------------|---------------------------------|-----------------|--------------------------|
| SNP_P4_119945_13202 | NW_004515790.1 | Scaffold268 | 13202                   | GG                              | TT              | 1946931759               |
| SNP_P4_119946_13216 | NW_004515790.1 | Scaffold268 | 13216                   | TT                              | CC              | 1946931761               |
| SNP_P4_119947_13223 | NW_004515790.1 | Scaffold268 | 13223                   | GG                              | TT              | 1946931763               |
| SNP_P4_119948_13229 | NW_004515790.1 | Scaffold268 | 13229                   | AA                              | GG              | 1946931765               |
| SNP_P4_119949_13237 | NW_004515790.1 | Scaffold268 | 13237                   | CC                              | AA              | 1946931767               |
| SNP_P4_119950_13359 | NW_004515790.1 | Scaffold268 | 13359                   | TT                              | CC              | 1946931769               |
| SNP_P4_119951_13452 | NW_004515790.1 | Scaffold268 | 13452                   | AA                              | TT              | 1946931771               |
| SNP_P4_119952_13453 | NW_004515790.1 | Scaffold268 | 13453                   | CC                              | AA              | 1946931774               |
| SNP_P4_119953_13454 | NW_004515790.1 | Scaffold268 | 13454                   | TT                              | AA              | 1946931776               |
| SNP_P4_119954_15861 | NW_004515790.1 | Scaffold268 | 15861                   | CC                              | TT              | 1946931778               |
| SNP_P4_119955_15866 | NW_004515790.1 | Scaffold268 | 15866                   | TT                              | GG              | 1946931780               |
| SNP_P4_119956_15940 | NW_004515790.1 | Scaffold268 | 15940                   | TT                              | CC              | 1946931782               |
| SNP_P4_119957_17928 | NW_004515790.1 | Scaffold268 | 17928                   | AA                              | TT              | 1946931784               |
| SNP_P4_119958_30715 | NW_004515790.1 | Scaffold268 | 30715                   | GG                              | TT              | 1946931786               |
| SNP_P4_119959_33924 | NW_004515790.1 | Scaffold268 | 33924                   | GG                              | AA              | 1946931788               |
| SNP_P4_119960_34236 | NW_004515790.1 | Scaffold268 | 34236                   | AA                              | TT              | 1946931790               |
| SNP_P4_119961_34237 | NW_004515790.1 | Scaffold268 | 34237                   | TT                              | CC              | 1946931792               |
| SNP_P4_119962_34251 | NW_004515790.1 | Scaffold268 | 34251                   | TT                              | CC              | 1946931794               |
| SNP_P4_119963_43077 | NW_004515790.1 | Scaffold268 | 43077                   | TT                              | CC              | 1946931796               |
| SNP_P4_119964_43657 | NW_004515790.1 | Scaffold268 | 43657                   | GG                              | AA              | 1946931798               |
| SNP_P4_119965_43846 | NW_004515790.1 | Scaffold268 | 43846                   | AA                              | GG              | 1946931800               |
| SNP_P4_119966_44729 | NW_004515790.1 | Scaffold268 | 44729                   | CC                              | TT              | 1946931802               |
| SNP_P4_119967_45733 | NW_004515790.1 | Scaffold268 | 45733                   | AA                              | TT              | 1946931804               |
| SNP_P4_119968_56160 | NW_004515790.1 | Scaffold268 | 56160                   | AA                              | TT              | 1946931806               |
| SNP_P4_119969_58532 | NW_004515790.1 | Scaffold268 | 58532                   | TT                              | CC              | 1946931808               |
| SNP_P4_119970_1642  | NW_004515791.1 | Scaffold269 | 1642                    | GG                              | AA              | 1946931810               |
| SNP_P4_119971_2973  | NW_004515791.1 | Scaffold269 | 2973                    | TT                              | AA              | 1946931812               |
| SNP_P4_119972_3158  | NW_004515791.1 | Scaffold269 | 3158                    | GG                              | CC              | 1946931814               |
| SNP_P4_119973_3176  | NW_004515791.1 | Scaffold269 | 3176                    | GG                              | AA              | 1946931816               |
| SNP_P4_119974_3193  | NW_004515791.1 | Scaffold269 | 3193                    | AA                              | GG              | 1946931818               |
| SNP_P4_119975_3262  | NW_004515791.1 | Scaffold269 | 3262                    | GG                              | TT              | 1946931820               |
| SNP_P4_119976_3333  | NW_004515791.1 | Scaffold269 | 3333                    | CC                              | TT              | 1946931822               |
| SNP_P4_119977_3378  | NW_004515791.1 | Scaffold269 | 3378                    | TT                              | CC              | 1946931824               |
| SNP_P4_119978_3398  | NW_004515791.1 | Scaffold269 | 3398                    | GG                              | AA              | 1946931826               |
| SNP_P4_119979_3550  | NW_004515791.1 | Scaffold269 | 3550                    | GG                              | TT              | 1946931828               |
| SNP_P4_119980_3558  | NW_004515791.1 | Scaffold269 | 3558                    | GG                              | AA              | 1946931830               |
| SNP_P4_119981_3592  | NW_004515791.1 | Scaffold269 | 3592                    | AA                              | GG              | 1946931832               |
| SNP_P4_119982_3612  | NW_004515791.1 | Scaffold269 | 3612                    | AA                              | CC              | 1946931834               |
| SNP_P4_119983_3824  | NW_004515791.1 | Scaffold269 | 3824                    | AA                              | TT              | 1946931836               |
| SNP_P4_119985_15591 | NW_004515792.1 | Scaffold271 | 15591                   | TT                              | AA              | 1946931838               |
| SNP_P4_119986_19459 | NW_004515792.1 | Scaffold271 | 19459                   | GG                              | AA              | 1946931840               |
| SNP_P4_119987_19480 | NW_004515792.1 | Scaffold271 | 19480                   | GG                              | AA              | 1946931842               |

| SNPs IDs             | Chromosome IDs | Chromosomes | Physical positions (bp) | CDC Frontier (Reference genome) | (ILWC46 & LPNB) | NCBI SNPdb Accession IDs |
|----------------------|----------------|-------------|-------------------------|---------------------------------|-----------------|--------------------------|
| SNP_P4_119988_19539  | NW_004515792.1 | Scaffold271 | 19539                   | TT                              | CC              | 1946931844               |
| SNP_P4_119989_19554  | NW_004515792.1 | Scaffold271 | 19554                   | GG                              | AA              | 1946931846               |
| SNP_P4_119990_19557  | NW_004515792.1 | Scaffold271 | 19557                   | TT                              | CC              | 1946931848               |
| SNP_P4_119991_19564  | NW_004515792.1 | Scaffold271 | 19564                   | CC                              | TT              | 1946931850               |
| SNP_P4_119992_19600  | NW_004515792.1 | Scaffold271 | 19600                   | CC                              | TT              | 1946931852               |
| SNP_P4_119993_19623  | NW_004515792.1 | Scaffold271 | 19623                   | AA                              | CC              | 1946931854               |
| SNP_P4_119994_19690  | NW_004515792.1 | Scaffold271 | 19690                   | TT                              | CC              | 1946931856               |
| SNP_P4_119995_19720  | NW_004515792.1 | Scaffold271 | 19720                   | CC                              | TT              | 1946931858               |
| SNP_P4_119996_19732  | NW_004515792.1 | Scaffold271 | 19732                   | TT                              | CC              | 1946931860               |
| SNP_P4_119997_19756  | NW_004515792.1 | Scaffold271 | 19756                   | CC                              | TT              | 1946931862               |
| SNP_P4_119998_19820  | NW_004515792.1 | Scaffold271 | 19820                   | AA                              | GG              | 1946931864               |
| SNP_P4_119999_19835  | NW_004515792.1 | Scaffold271 | 19835                   | AA                              | CC              | 1946931866               |
| SNP_P4_120000_19842  | NW_004515792.1 | Scaffold271 | 19842                   | TT                              | CC              | 1946931868               |
| SNP_P4_120001_19862  | NW_004515792.1 | Scaffold271 | 19862                   | TT                              | GG              | 1946931870               |
| SNP_P4_120002_19869  | NW_004515792.1 | Scaffold271 | 19869                   | TT                              | CC              | 1946931872               |
| SNP_P4_120003_19874  | NW_004515792.1 | Scaffold271 | 19874                   | AA                              | GG              | 1946931874               |
| SNP_P4_120004_19897  | NW_004515792.1 | Scaffold271 | 19897                   | AA                              | CC              | 1946931876               |
| SNP_P4_120005_19958  | NW_004515792.1 | Scaffold271 | 19958                   | TT                              | AA              | 1946931878               |
| SNP_P4_120006_19982  | NW_004515792.1 | Scaffold271 | 19982                   | TT                              | CC              | 1946931880               |
| SNP_P4_120007_20006  | NW_004515792.1 | Scaffold271 | 20006                   | AA                              | GG              | 1946931882               |
| SNP_P4_120008_20015  | NW_004515792.1 | Scaffold271 | 20015                   | TT                              | CC              | 1946931884               |
| SNP_P4_120009_20018  | NW_004515792.1 | Scaffold271 | 20018                   | TT                              | AA              | 1946931886               |
| SNP_P4_120010_20035  | NW_004515792.1 | Scaffold271 | 20035                   | GG                              | AA              | 1946931888               |
| SNP_P4_120011_20075  | NW_004515792.1 | Scaffold271 | 20075                   | CC                              | TT              | 1946931890               |
| SNP_P4_120012_22249  | NW_004515792.1 | Scaffold271 | 22249                   | AA                              | GG              | 1946931892               |
| SNP_P4_120013_22269  | NW_004515792.1 | Scaffold271 | 22269                   | TT                              | AA              | 1946931894               |
| SNP_P4_120014_27177  | NW_004515792.1 | Scaffold271 | 27177                   | CC                              | TT              | 1946931897               |
| SNP_P4_120015_34414  | NW_004515792.1 | Scaffold271 | 34414                   | TT                              | AA              | 1946931899               |
| SNP_P4_120016_34421  | NW_004515792.1 | Scaffold271 | 34421                   | GG                              | AA              | 1946931901               |
| SNP_P4_120017_34446  | NW_004515792.1 | Scaffold271 | 34446                   | GG                              | CC              | 1946931903               |
| SNP_P4_120018_44094  | NW_004515792.1 | Scaffold271 | 44094                   | GG                              | TT              | 1946931905               |
| SNP_P4_120019_44119  | NW_004515792.1 | Scaffold271 | 44119                   | TT                              | CC              | 1946931907               |
| SNP_P4_120021_61483  | NW_004515792.1 | Scaffold271 | 61483                   | AA                              | GG              | 1946931909               |
| SNP_P4_120022_96049  | NW_004515792.1 | Scaffold271 | 96049                   | GG                              | TT              | 1946931911               |
| SNP_P4_120023_130014 | NW_004515792.1 | Scaffold271 | 130014                  | GG                              | TT              | 1946931913               |
| SNP_P4_120024_146651 | NW_004515792.1 | Scaffold271 | 146651                  | AA                              | TT              | 1946931915               |
| SNP_P4_120026_186393 | NW_004515792.1 | Scaffold271 | 186393                  | GG                              | AA              | 1946931917               |
| SNP_P4_120028_204954 | NW_004515792.1 | Scaffold271 | 204954                  | GG                              | AA              | 1946931919               |
| SNP_P4_120029_204988 | NW_004515792.1 | Scaffold271 | 204988                  | GG                              | AA              | 1946931921               |
| SNP_P4_120030_205119 | NW_004515792.1 | Scaffold271 | 205119                  | AA                              | GG              | 1946931923               |
| SNP_P4_120031_205186 | NW_004515792.1 | Scaffold271 | 205186                  | GG                              | CC              | 1946931925               |
| SNP_P4_120032_205308 | NW_004515792.1 | Scaffold271 | 205308                  | GG                              | AA              | 1946931927               |



| SNPs IDs             | Chromosome IDs | Chromosomes | Physical positions (bp) | CDC Frontier (Reference genome) | (ILWC46 & LPNB) | NCBI SNPdb Accession IDs |
|----------------------|----------------|-------------|-------------------------|---------------------------------|-----------------|--------------------------|
| SNP_P4_120033_205380 | NW_004515792.1 | Scaffold271 | 205380                  | TT                              | CC              | 1946931929               |
| SNP_P4_120034_205688 | NW_004515792.1 | Scaffold271 | 205688                  | AA                              | GG              | 1946931931               |
| SNP_P4_120036_205984 | NW_004515792.1 | Scaffold271 | 205984                  | CC                              | TT              | 1946931933               |
| SNP_P4_120037_256866 | NW_004515792.1 | Scaffold271 | 256866                  | CC                              | TT              | 1946931935               |
| SNP_P4_120038_262585 | NW_004515792.1 | Scaffold271 | 262585                  | GG                              | TT              | 1946931937               |
| SNP_P4_120040_276755 | NW_004515792.1 | Scaffold271 | 276755                  | CC                              | GG              | 1946931939               |
| SNP_P4_120041_276872 | NW_004515792.1 | Scaffold271 | 276872                  | GG                              | AA              | 1946931941               |
| SNP_P4_120042_277292 | NW_004515792.1 | Scaffold271 | 277292                  | GG                              | AA              | 1946931943               |
| SNP_P4_120043_3350   | NW_004515793.1 | Scaffold273 | 3350                    | GG                              | AA              | 1946931945               |
| SNP_P4_120044_27729  | NW_004515793.1 | Scaffold273 | 27729                   | GG                              | AA              | 1946931948               |
| SNP_P4_120045_48835  | NW_004515793.1 | Scaffold273 | 48835                   | AA                              | GG              | 1946931950               |
| SNP_P4_120047_49095  | NW_004515793.1 | Scaffold273 | 49095                   | AA                              | TT              | 1946931952               |
| SNP_P4_120048_50139  | NW_004515793.1 | Scaffold273 | 50139                   | GG                              | TT              | 1946931954               |
| SNP_P4_120049_50195  | NW_004515793.1 | Scaffold273 | 50195                   | TT                              | AA              | 1946931956               |
| SNP_P4_120050_50199  | NW_004515793.1 | Scaffold273 | 50199                   | TT                              | CC              | 1946931958               |
| SNP_P4_120051_50222  | NW_004515793.1 | Scaffold273 | 50222                   | AA                              | TT              | 1946931960               |
| SNP_P4_120052_50225  | NW_004515793.1 | Scaffold273 | 50225                   | TT                              | AA              | 1946931962               |
| SNP_P4_120053_50401  | NW_004515793.1 | Scaffold273 | 50401                   | AA                              | GG              | 1946931964               |
| SNP_P4_120054_50430  | NW_004515793.1 | Scaffold273 | 50430                   | GG                              | AA              | 1946931966               |
| SNP_P4_120055_50452  | NW_004515793.1 | Scaffold273 | 50452                   | AA                              | GG              | 1946931968               |
| SNP_P4_120056_52116  | NW_004515793.1 | Scaffold273 | 52116                   | CC                              | TT              | 1946931971               |
| SNP_P4_120057_52146  | NW_004515793.1 | Scaffold273 | 52146                   | AA                              | GG              | 1946931973               |
| SNP_P4_120058_65451  | NW_004515793.1 | Scaffold273 | 65451                   | AA                              | TT              | 1946931975               |
| SNP_P4_120059_66186  | NW_004515793.1 | Scaffold273 | 66186                   | TT                              | AA              | 1946931977               |
| SNP_P4_120060_83263  | NW_004515793.1 | Scaffold273 | 83263                   | TT                              | CC              | 1946931979               |
| SNP_P4_120061_83266  | NW_004515793.1 | Scaffold273 | 83266                   | AA                              | GG              | 1946931981               |
| SNP_P4_120062_83287  | NW_004515793.1 | Scaffold273 | 83287                   | AA                              | GG              | 1946931983               |
| SNP_P4_120063_83293  | NW_004515793.1 | Scaffold273 | 83293                   | TT                              | CC              | 1946931985               |
| SNP_P4_120064_83336  | NW_004515793.1 | Scaffold273 | 83336                   | CC                              | TT              | 1946931987               |
| SNP_P4_120067_103541 | NW_004515793.1 | Scaffold273 | 103541                  | GG                              | CC              | 1946931989               |
| SNP_P4_120068_103803 | NW_004515793.1 | Scaffold273 | 103803                  | CC                              | TT              | 1946931992               |
| SNP_P4_120069_103969 | NW_004515793.1 | Scaffold273 | 103969                  | AA                              | GG              | 1946931994               |
| SNP_P4_120070_103972 | NW_004515793.1 | Scaffold273 | 103972                  | GG                              | TT              | 1946931996               |
| SNP_P4_120071_104157 | NW_004515793.1 | Scaffold273 | 104157                  | TT                              | CC              | 1946931998               |
| SNP_P4_120072_104203 | NW_004515793.1 | Scaffold273 | 104203                  | AA                              | GG              | 1946932000               |
| SNP_P4_120074_128215 | NW_004515793.1 | Scaffold273 | 128215                  | TT                              | GG              | 1946932002               |
| SNP_P4_120075_144467 | NW_004515793.1 | Scaffold273 | 144467                  | CC                              | TT              | 1946932004               |
| SNP_P4_120076_144514 | NW_004515793.1 | Scaffold273 | 144514                  | TT                              | CC              | 1946932006               |
| SNP_P4_120077_144576 | NW_004515793.1 | Scaffold273 | 144576                  | TT                              | CC              | 1946932008               |
| SNP_P4_120078_160215 | NW_004515793.1 | Scaffold273 | 160215                  | AA                              | CC              | 1946932010               |
| SNP_P4_120079_180254 | NW_004515793.1 | Scaffold273 | 180254                  | TT                              | GG              | 1946932012               |
| SNP_P4_120081_189230 | NW_004515793.1 | Scaffold273 | 189230                  | AA                              | GG              | 1946932014               |

| SNPs IDs             | Chromosome IDs | Chromosomes | Physical positions (bp) | CDC Frontier (Reference genome) | (ILWC46 & LPNB) | NCBI SNPdb Accession IDs |
|----------------------|----------------|-------------|-------------------------|---------------------------------|-----------------|--------------------------|
| SNP_P4_120082_190296 | NW_004515793.1 | Scaffold273 | 190296                  | AA                              | GG              | 1946932016               |
| SNP_P4_120083_190348 | NW_004515793.1 | Scaffold273 | 190348                  | AA                              | GG              | 1946932018               |
| SNP_P4_120084_190438 | NW_004515793.1 | Scaffold273 | 190438                  | TT                              | CC              | 1946932020               |
| SNP_P4_120085_190486 | NW_004515793.1 | Scaffold273 | 190486                  | CC                              | TT              | 1946932022               |
| SNP_P4_120086_190564 | NW_004515793.1 | Scaffold273 | 190564                  | AA                              | CC              | 1946932024               |
| SNP_P4_120088_190683 | NW_004515793.1 | Scaffold273 | 190683                  | GG                              | TT              | 1946932026               |
| SNP_P4_120089_190691 | NW_004515793.1 | Scaffold273 | 190691                  | TT                              | CC              | 1946932028               |
| SNP_P4_120090_190765 | NW_004515793.1 | Scaffold273 | 190765                  | AA                              | GG              | 1946932030               |
| SNP_P4_120091_190882 | NW_004515793.1 | Scaffold273 | 190882                  | TT                              | CC              | 1946932032               |
| SNP_P4_120092_190905 | NW_004515793.1 | Scaffold273 | 190905                  | TT                              | CC              | 1946932034               |
| SNP_P4_120093_190949 | NW_004515793.1 | Scaffold273 | 190949                  | TT                              | GG              | 1946932036               |
| SNP_P4_120094_191739 | NW_004515793.1 | Scaffold273 | 191739                  | TT                              | CC              | 1946932038               |
| SNP_P4_120095_191750 | NW_004515793.1 | Scaffold273 | 191750                  | GG                              | CC              | 1946932040               |
| SNP_P4_120096_191760 | NW_004515793.1 | Scaffold273 | 191760                  | AA                              | GG              | 1946932042               |
| SNP_P4_120098_191857 | NW_004515793.1 | Scaffold273 | 191857                  | AA                              | GG              | 1946932044               |
| SNP_P4_120099_191858 | NW_004515793.1 | Scaffold273 | 191858                  | CC                              | TT              | 1946932046               |
| SNP_P4_120100_191870 | NW_004515793.1 | Scaffold273 | 191870                  | TT                              | CC              | 1946932048               |
| SNP_P4_120101_209680 | NW_004515793.1 | Scaffold273 | 209680                  | AA                              | CC              | 1946932050               |
| SNP_P4_120102_209705 | NW_004515793.1 | Scaffold273 | 209705                  | TT                              | GG              | 1946932052               |
| SNP_P4_120103_209716 | NW_004515793.1 | Scaffold273 | 209716                  | AA                              | GG              | 1946932054               |
| SNP_P4_120104_209802 | NW_004515793.1 | Scaffold273 | 209802                  | TT                              | CC              | 1946932056               |
| SNP_P4_120105_209845 | NW_004515793.1 | Scaffold273 | 209845                  | CC                              | GG              | 1946932059               |
| SNP_P4_120106_209846 | NW_004515793.1 | Scaffold273 | 209846                  | AA                              | CC              | 1946932061               |
| SNP_P4_120107_6470   | NW_004515794.1 | Scaffold275 | 6470                    | AA                              | CC              | 1946932063               |
| SNP_P4_120108_6976   | NW_004515794.1 | Scaffold275 | 6976                    | AA                              | GG              | 1946932065               |
| SNP_P4_120109_7014   | NW_004515794.1 | Scaffold275 | 7014                    | TT                              | CC              | 1946932067               |
| SNP_P4_120110_7037   | NW_004515794.1 | Scaffold275 | 7037                    | GG                              | CC              | 1946932069               |
| SNP_P4_120111_7146   | NW_004515794.1 | Scaffold275 | 7146                    | CC                              | GG              | 1946932071               |
| SNP_P4_120112_7147   | NW_004515794.1 | Scaffold275 | 7147                    | AA                              | GG              | 1946932073               |
| SNP_P4_120113_8282   | NW_004515794.1 | Scaffold275 | 8282                    | AA                              | TT              | 1946932075               |
| SNP_P4_120114_8285   | NW_004515794.1 | Scaffold275 | 8285                    | AA                              | CC              | 1946932077               |
| SNP_P4_120115_15776  | NW_004515794.1 | Scaffold275 | 15776                   | GG                              | AA              | 1946932079               |
| SNP_P4_120116_16140  | NW_004515794.1 | Scaffold275 | 16140                   | GG                              | CC              | 1946932081               |
| SNP_P4_120117_16190  | NW_004515794.1 | Scaffold275 | 16190                   | GG                              | AA              | 1946932083               |
| SNP_P4_120118_16195  | NW_004515794.1 | Scaffold275 | 16195                   | AA                              | GG              | 1946932085               |
| SNP_P4_120119_55301  | NW_004515794.1 | Scaffold275 | 55301                   | GG                              | CC              | 1946932087               |
| SNP_P4_120120_55633  | NW_004515794.1 | Scaffold275 | 55633                   | AA                              | TT              | 1946932089               |
| SNP_P4_120121_55659  | NW_004515794.1 | Scaffold275 | 55659                   | AA                              | TT              | 1946932091               |
| SNP_P4_120122_57196  | NW_004515794.1 | Scaffold275 | 57196                   | CC                              | TT              | 1946932093               |
| SNP_P4_120123_57517  | NW_004515794.1 | Scaffold275 | 57517                   | TT                              | GG              | 1946932095               |
| SNP_P4_120124_59502  | NW_004515794.1 | Scaffold275 | 59502                   | GG                              | AA              | 1946932097               |
| SNP_P4_120125_67385  | NW_004515794.1 | Scaffold275 | 67385                   | CC                              | TT              | 1946932099               |

| SNPs IDs             | Chromosome IDs | Chromosomes | Physical positions (bp) | CDC Frontier (Reference genome) | (ILWC46 & LPNB) | NCBI SNPdb Accession IDs |
|----------------------|----------------|-------------|-------------------------|---------------------------------|-----------------|--------------------------|
| SNP_P4_120128_112344 | NW_004515794.1 | Scaffold275 | 112344                  | AA                              | GG              | 1946932101               |
| SNP_P4_120129_140598 | NW_004515794.1 | Scaffold275 | 140598                  | TT                              | CC              | 1946932103               |
| SNP_P4_120130_142439 | NW_004515794.1 | Scaffold275 | 142439                  | GG                              | TT              | 1946932105               |
| SNP_P4_120131_143089 | NW_004515794.1 | Scaffold275 | 143089                  | AA                              | TT              | 1946932107               |
| SNP_P4_120132_143172 | NW_004515794.1 | Scaffold275 | 143172                  | GG                              | AA              | 1946932109               |
| SNP_P4_120133_143768 | NW_004515794.1 | Scaffold275 | 143768                  | AA                              | TT              | 1946932111               |
| SNP_P4_120134_143781 | NW_004515794.1 | Scaffold275 | 143781                  | TT                              | CC              | 1946932113               |
| SNP_P4_120135_145819 | NW_004515794.1 | Scaffold275 | 145819                  | AA                              | CC              | 1946932115               |
| SNP_P4_120136_145942 | NW_004515794.1 | Scaffold275 | 145942                  | AA                              | GG              | 1946932117               |
| SNP_P4_120137_146249 | NW_004515794.1 | Scaffold275 | 146249                  | CC                              | TT              | 1946932119               |
| SNP_P4_120138_146277 | NW_004515794.1 | Scaffold275 | 146277                  | CC                              | TT              | 1946932121               |
| SNP_P4_120139_146849 | NW_004515794.1 | Scaffold275 | 146849                  | CC                              | TT              | 1946932123               |
| SNP_P4_120140_146865 | NW_004515794.1 | Scaffold275 | 146865                  | AA                              | GG              | 1946932125               |
| SNP_P4_120141_147129 | NW_004515794.1 | Scaffold275 | 147129                  | TT                              | AA              | 1946932127               |
| SNP_P4_120143_147189 | NW_004515794.1 | Scaffold275 | 147189                  | CC                              | TT              | 1946932129               |
| SNP_P4_120144_147394 | NW_004515794.1 | Scaffold275 | 147394                  | CC                              | AA              | 1946932131               |
| SNP_P4_120145_148036 | NW_004515794.1 | Scaffold275 | 148036                  | TT                              | CC              | 1946932133               |
| SNP_P4_120146_148181 | NW_004515794.1 | Scaffold275 | 148181                  | GG                              | TT              | 1946932135               |
| SNP_P4_120147_148399 | NW_004515794.1 | Scaffold275 | 148399                  | AA                              | GG              | 1946932137               |
| SNP_P4_120148_148535 | NW_004515794.1 | Scaffold275 | 148535                  | GG                              | AA              | 1946932139               |
| SNP_P4_120149_148536 | NW_004515794.1 | Scaffold275 | 148536                  | AA                              | GG              | 1946932142               |
| SNP_P4_120150_148569 | NW_004515794.1 | Scaffold275 | 148569                  | GG                              | TT              | 1946932144               |
| SNP_P4_120151_148706 | NW_004515794.1 | Scaffold275 | 148706                  | TT                              | CC              | 1946932146               |
| SNP_P4_120152_148749 | NW_004515794.1 | Scaffold275 | 148749                  | CC                              | TT              | 1946932148               |
| SNP_P4_120153_148795 | NW_004515794.1 | Scaffold275 | 148795                  | GG                              | TT              | 1946932150               |
| SNP_P4_120154_154977 | NW_004515794.1 | Scaffold275 | 154977                  | GG                              | TT              | 1946932152               |
| SNP_P4_120155_161097 | NW_004515794.1 | Scaffold275 | 161097                  | AA                              | CC              | 1946932154               |
| SNP_P4_120156_161957 | NW_004515794.1 | Scaffold275 | 161957                  | GG                              | AA              | 1946932156               |
| SNP_P4_120157_161978 | NW_004515794.1 | Scaffold275 | 161978                  | TT                              | CC              | 1946932158               |
| SNP_P4_120158_162090 | NW_004515794.1 | Scaffold275 | 162090                  | AA                              | TT              | 1946932160               |
| SNP_P4_120159_162126 | NW_004515794.1 | Scaffold275 | 162126                  | CC                              | GG              | 1946932162               |
| SNP_P4_120160_162143 | NW_004515794.1 | Scaffold275 | 162143                  | AA                              | GG              | 1946932164               |
| SNP_P4_120161_162171 | NW_004515794.1 | Scaffold275 | 162171                  | AA                              | GG              | 1946932166               |
| SNP_P4_120162_162233 | NW_004515794.1 | Scaffold275 | 162233                  | TT                              | CC              | 1946932168               |
| SNP_P4_120163_162343 | NW_004515794.1 | Scaffold275 | 162343                  | GG                              | AA              | 1946932170               |
| SNP_P4_120166_162392 | NW_004515794.1 | Scaffold275 | 162392                  | TT                              | AA              | 1946932172               |
| SNP_P4_120167_162414 | NW_004515794.1 | Scaffold275 | 162414                  | GG                              | TT              | 1946932174               |
| SNP_P4_120168_162473 | NW_004515794.1 | Scaffold275 | 162473                  | TT                              | AA              | 1946932176               |
| SNP_P4_120169_162551 | NW_004515794.1 | Scaffold275 | 162551                  | AA                              | CC              | 1946932179               |
| SNP_P4_120170_162555 | NW_004515794.1 | Scaffold275 | 162555                  | GG                              | TT              | 1946932181               |
| SNP_P4_120171_162597 | NW_004515794.1 | Scaffold275 | 162597                  | GG                              | AA              | 1946932183               |
| SNP_P4_120172_162607 | NW_004515794.1 | Scaffold275 | 162607                  | TT                              | AA              | 1946932185               |

| SNPs IDs             | Chromosome IDs | Chromosomes | Physical positions (bp) | CDC Frontier (Reference genome) | (ILWC46 & LPNB) | NCBI SNPdb Accession IDs |
|----------------------|----------------|-------------|-------------------------|---------------------------------|-----------------|--------------------------|
| SNP_P4_120173_162609 | NW_004515794.1 | Scaffold275 | 162609                  | TT                              | CC              | 1946932187               |
| SNP_P4_120174_162626 | NW_004515794.1 | Scaffold275 | 162626                  | GG                              | AA              | 1946932189               |
| SNP_P4_120175_167269 | NW_004515794.1 | Scaffold275 | 167269                  | CC                              | AA              | 1946932191               |
| SNP_P4_120176_167270 | NW_004515794.1 | Scaffold275 | 167270                  | AA                              | CC              | 1946932193               |
| SNP_P4_120177_167275 | NW_004515794.1 | Scaffold275 | 167275                  | AA                              | CC              | 1946932195               |
| SNP_P4_120178_167511 | NW_004515794.1 | Scaffold275 | 167511                  | TT                              | CC              | 1946932198               |
| SNP_P4_120180_167710 | NW_004515794.1 | Scaffold275 | 167710                  | TT                              | CC              | 1946932200               |
| SNP_P4_120181_167746 | NW_004515794.1 | Scaffold275 | 167746                  | GG                              | TT              | 1946932202               |
| SNP_P4_120182_167806 | NW_004515794.1 | Scaffold275 | 167806                  | TT                              | GG              | 1946932204               |
| SNP_P4_120184_208453 | NW_004515794.1 | Scaffold275 | 208453                  | AA                              | TT              | 1946932206               |
| SNP_P4_120185_208768 | NW_004515794.1 | Scaffold275 | 208768                  | AA                              | GG              | 1946932208               |
| SNP_P4_120186_208786 | NW_004515794.1 | Scaffold275 | 208786                  | GG                              | CC              | 1946932210               |
| SNP_P4_120187_208788 | NW_004515794.1 | Scaffold275 | 208788                  | CC                              | TT              | 1946932212               |
| SNP_P4_120188_208793 | NW_004515794.1 | Scaffold275 | 208793                  | CC                              | GG              | 1946932214               |
| SNP_P4_120189_220608 | NW_004515794.1 | Scaffold275 | 220608                  | GG                              | AA              | 1946932216               |
| SNP_P4_120190_220610 | NW_004515794.1 | Scaffold275 | 220610                  | TT                              | GG              | 1946932218               |
| SNP_P4_120191_226026 | NW_004515794.1 | Scaffold275 | 226026                  | TT                              | CC              | 1946932220               |
| SNP_P4_120192_226027 | NW_004515794.1 | Scaffold275 | 226027                  | AA                              | CC              | 1946932222               |
| SNP_P4_120193_226083 | NW_004515794.1 | Scaffold275 | 226083                  | TT                              | CC              | 1946932224               |
| SNP_P4_120194_226090 | NW_004515794.1 | Scaffold275 | 226090                  | AA                              | CC              | 1946932227               |
| SNP_P4_120195_226155 | NW_004515794.1 | Scaffold275 | 226155                  | CC                              | TT              | 1946932229               |
| SNP_P4_120196_226467 | NW_004515794.1 | Scaffold275 | 226467                  | TT                              | CC              | 1946932231               |
| SNP_P4_120197_229874 | NW_004515794.1 | Scaffold275 | 229874                  | CC                              | TT              | 1946932233               |
| SNP_P4_120198_255392 | NW_004515794.1 | Scaffold275 | 255392                  | GG                              | AA              | 1946932235               |
| SNP_P4_120199_255405 | NW_004515794.1 | Scaffold275 | 255405                  | TT                              | AA              | 1946932237               |
| SNP_P4_120200_255409 | NW_004515794.1 | Scaffold275 | 255409                  | AA                              | TT              | 1946932239               |
| SNP_P4_120201_255415 | NW_004515794.1 | Scaffold275 | 255415                  | AA                              | TT              | 1946932241               |
| SNP_P4_120202_255438 | NW_004515794.1 | Scaffold275 | 255438                  | AA                              | GG              | 1946932243               |
| SNP_P4_120205_294527 | NW_004515794.1 | Scaffold275 | 294527                  | GG                              | TT              | 1946932245               |
| SNP_P4_120206_304806 | NW_004515794.1 | Scaffold275 | 304806                  | GG                              | AA              | 1946932247               |
| SNP_P4_120207_304824 | NW_004515794.1 | Scaffold275 | 304824                  | AA                              | TT              | 1946932249               |
| SNP_P4_120208_304827 | NW_004515794.1 | Scaffold275 | 304827                  | GG                              | AA              | 1946932251               |
| SNP_P4_120209_316525 | NW_004515794.1 | Scaffold275 | 316525                  | TT                              | GG              | 1946932253               |
| SNP_P4_120210_321593 | NW_004515794.1 | Scaffold275 | 321593                  | TT                              | CC              | 1946932255               |
| SNP_P4_120211_347422 | NW_004515794.1 | Scaffold275 | 347422                  | CC                              | AA              | 1946932257               |
| SNP_P4_120213_360415 | NW_004515794.1 | Scaffold275 | 360415                  | AA                              | TT              | 1946932259               |
| SNP_P4_120214_360417 | NW_004515794.1 | Scaffold275 | 360417                  | AA                              | GG              | 1946932261               |
| SNP_P4_120221_383144 | NW_004515794.1 | Scaffold275 | 383144                  | TT                              | CC              | 1946932263               |
| SNP_P4_120222_383170 | NW_004515794.1 | Scaffold275 | 383170                  | TT                              | AA              | 1946932266               |
| SNP_P4_120223_386867 | NW_004515794.1 | Scaffold275 | 386867                  | CC                              | AA              | 1946932268               |
| SNP_P4_120224_386956 | NW_004515794.1 | Scaffold275 | 386956                  | TT                              | CC              | 1946932270               |
| SNP_P4_120225_399434 | NW_004515794.1 | Scaffold275 | 399434                  | AA                              | GG              | 1946932272               |

| SNPs IDs             | Chromosome IDs | Chromosomes | Physical positions (bp) | CDC Frontier (Reference genome) | (ILWC46 & LPNB) | NCBI SNPdb Accession IDs |
|----------------------|----------------|-------------|-------------------------|---------------------------------|-----------------|--------------------------|
| SNP_P4_120226_403851 | NW_004515794.1 | Scaffold275 | 403851                  | TT                              | CC              | 1946932274               |
| SNP_P4_120227_403927 | NW_004515794.1 | Scaffold275 | 403927                  | CC                              | TT              | 1946932276               |
| SNP_P4_120228_404075 | NW_004515794.1 | Scaffold275 | 404075                  | TT                              | AA              | 1946932278               |
| SNP_P4_120229_404129 | NW_004515794.1 | Scaffold275 | 404129                  | AA                              | CC              | 1946932280               |
| SNP_P4_120230_405066 | NW_004515794.1 | Scaffold275 | 405066                  | TT                              | AA              | 1946932282               |
| SNP_P4_120231_405116 | NW_004515794.1 | Scaffold275 | 405116                  | TT                              | CC              | 1946932284               |
| SNP_P4_120232_405218 | NW_004515794.1 | Scaffold275 | 405218                  | AA                              | CC              | 1946932287               |
| SNP_P4_120233_405254 | NW_004515794.1 | Scaffold275 | 405254                  | AA                              | CC              | 1946932289               |
| SNP_P4_120234_405263 | NW_004515794.1 | Scaffold275 | 405263                  | AA                              | GG              | 1946932291               |
| SNP_P4_120235_405272 | NW_004515794.1 | Scaffold275 | 405272                  | AA                              | CC              | 1946932293               |
| SNP_P4_120236_405290 | NW_004515794.1 | Scaffold275 | 405290                  | CC                              | TT              | 1946932295               |
| SNP_P4_120237_405291 | NW_004515794.1 | Scaffold275 | 405291                  | GG                              | TT              | 1946932297               |
| SNP_P4_120238_405294 | NW_004515794.1 | Scaffold275 | 405294                  | TT                              | GG              | 1946932299               |
| SNP_P4_120239_405315 | NW_004515794.1 | Scaffold275 | 405315                  | AA                              | GG              | 1946932301               |
| SNP_P4_120240_405317 | NW_004515794.1 | Scaffold275 | 405317                  | CC                              | TT              | 1946932303               |
| SNP_P4_120241_405320 | NW_004515794.1 | Scaffold275 | 405320                  | TT                              | CC              | 1946932305               |
| SNP_P4_120242_405349 | NW_004515794.1 | Scaffold275 | 405349                  | AA                              | GG              | 1946932307               |
| SNP_P4_120243_405426 | NW_004515794.1 | Scaffold275 | 405426                  | AA                              | CC              | 1946932309               |
| SNP_P4_120244_405427 | NW_004515794.1 | Scaffold275 | 405427                  | CC                              | GG              | 1946932311               |
| SNP_P4_120245_406177 | NW_004515794.1 | Scaffold275 | 406177                  | GG                              | AA              | 1946932313               |
| SNP_P4_120246_406314 | NW_004515794.1 | Scaffold275 | 406314                  | CC                              | GG              | 1946932315               |
| SNP_P4_120247_406347 | NW_004515794.1 | Scaffold275 | 406347                  | TT                              | GG              | 1946932317               |
| SNP_P4_120248_412727 | NW_004515794.1 | Scaffold275 | 412727                  | CC                              | TT              | 1946932320               |
| SNP_P4_120249_412758 | NW_004515794.1 | Scaffold275 | 412758                  | CC                              | TT              | 1946932322               |
| SNP_P4_120250_413945 | NW_004515794.1 | Scaffold275 | 413945                  | AA                              | GG              | 1946932324               |
| SNP_P4_120251_448419 | NW_004515794.1 | Scaffold275 | 448419                  | GG                              | AA              | 1946932326               |
| SNP_P4_120253_458243 | NW_004515794.1 | Scaffold275 | 458243                  | CC                              | TT              | 1946932328               |
| SNP_P4_120254_461773 | NW_004515794.1 | Scaffold275 | 461773                  | CC                              | AA              | 1946932330               |
| SNP_P4_120255_487349 | NW_004515794.1 | Scaffold275 | 487349                  | GG                              | AA              | 1946932332               |
| SNP_P4_120256_487354 | NW_004515794.1 | Scaffold275 | 487354                  | CC                              | AA              | 1946932334               |
| SNP_P4_120258_491336 | NW_004515794.1 | Scaffold275 | 491336                  | GG                              | TT              | 1946932336               |
| SNP_P4_120259_491337 | NW_004515794.1 | Scaffold275 | 491337                  | CC                              | AA              | 1946932338               |
| SNP_P4_120260_491338 | NW_004515794.1 | Scaffold275 | 491338                  | GG                              | AA              | 1946932340               |
| SNP_P4_120261_491339 | NW_004515794.1 | Scaffold275 | 491339                  | TT                              | CC              | 1946932342               |
| SNP_P4_120262_491432 | NW_004515794.1 | Scaffold275 | 491432                  | CC                              | TT              | 1946932344               |
| SNP_P4_120264_491544 | NW_004515794.1 | Scaffold275 | 491544                  | AA                              | TT              | 1946932346               |
| SNP_P4_120265_491545 | NW_004515794.1 | Scaffold275 | 491545                  | TT                              | AA              | 1946932348               |
| SNP_P4_120266_492057 | NW_004515794.1 | Scaffold275 | 492057                  | GG                              | AA              | 1946932351               |
| SNP_P4_120267_492209 | NW_004515794.1 | Scaffold275 | 492209                  | GG                              | AA              | 1946932353               |
| SNP_P4_120268_492230 | NW_004515794.1 | Scaffold275 | 492230                  | CC                              | TT              | 1946932355               |
| SNP_P4_120269_492232 | NW_004515794.1 | Scaffold275 | 492232                  | GG                              | AA              | 1946932357               |
| SNP_P4_120270_492234 | NW_004515794.1 | Scaffold275 | 492234                  | CC                              | AA              | 1946932359               |

| SNPs IDs             | Chromosome IDs | Chromosomes | Physical positions (bp) | CDC Frontier (Reference genome) | (ILWC46 & LPNB) | NCBI SNPdb Accession IDs |
|----------------------|----------------|-------------|-------------------------|---------------------------------|-----------------|--------------------------|
| SNP_P4_120271_492290 | NW_004515794.1 | Scaffold275 | 492290                  | TT                              | AA              | 1946932361               |
| SNP_P4_120272_495459 | NW_004515794.1 | Scaffold275 | 495459                  | CC                              | TT              | 1946932363               |
| SNP_P4_120273_495483 | NW_004515794.1 | Scaffold275 | 495483                  | TT                              | GG              | 1946932365               |
| SNP_P4_120274_517896 | NW_004515794.1 | Scaffold275 | 517896                  | AA                              | CC              | 1946932367               |
| SNP_P4_120275_517910 | NW_004515794.1 | Scaffold275 | 517910                  | TT                              | CC              | 1946932369               |
| SNP_P4_120276_523577 | NW_004515794.1 | Scaffold275 | 523577                  | CC                              | TT              | 1946932371               |
| SNP_P4_120277_523605 | NW_004515794.1 | Scaffold275 | 523605                  | CC                              | TT              | 1946932373               |
| SNP_P4_120278_524821 | NW_004515794.1 | Scaffold275 | 524821                  | TT                              | AA              | 1946932375               |
| SNP_P4_120279_546132 | NW_004515794.1 | Scaffold275 | 546132                  | CC                              | TT              | 1946932377               |
| SNP_P4_120280_546709 | NW_004515794.1 | Scaffold275 | 546709                  | TT                              | GG              | 1946932379               |
| SNP_P4_120281_546901 | NW_004515794.1 | Scaffold275 | 546901                  | TT                              | CC              | 1946932381               |
| SNP_P4_120282_546942 | NW_004515794.1 | Scaffold275 | 546942                  | TT                              | CC              | 1946932383               |
| SNP_P4_120283_552744 | NW_004515794.1 | Scaffold275 | 552744                  | TT                              | CC              | 1946932385               |
| SNP_P4_120284_563020 | NW_004515794.1 | Scaffold275 | 563020                  | TT                              | CC              | 1946932387               |
| SNP_P4_120285_563031 | NW_004515794.1 | Scaffold275 | 563031                  | AA                              | GG              | 1946932389               |
| SNP_P4_120286_579321 | NW_004515794.1 | Scaffold275 | 579321                  | TT                              | CC              | 1946932391               |
| SNP_P4_120288_585903 | NW_004515794.1 | Scaffold275 | 585903                  | GG                              | AA              | 1946932393               |
| SNP_P4_120289_586225 | NW_004515794.1 | Scaffold275 | 586225                  | CC                              | AA              | 1946932395               |
| SNP_P4_120291_594182 | NW_004515794.1 | Scaffold275 | 594182                  | AA                              | CC              | 1946932397               |
| SNP_P4_120292_605099 | NW_004515794.1 | Scaffold275 | 605099                  | CC                              | TT              | 1946932399               |
| SNP_P4_120293_607272 | NW_004515794.1 | Scaffold275 | 607272                  | TT                              | CC              | 1946932401               |
| SNP_P4_120294_607336 | NW_004515794.1 | Scaffold275 | 607336                  | AA                              | GG              | 1946932403               |
| SNP_P4_120295_607341 | NW_004515794.1 | Scaffold275 | 607341                  | GG                              | TT              | 1946932405               |
| SNP_P4_120296_607419 | NW_004515794.1 | Scaffold275 | 607419                  | TT                              | GG              | 1946932407               |
| SNP_P4_120297_622310 | NW_004515794.1 | Scaffold275 | 622310                  | AA                              | TT              | 1946932409               |
| SNP_P4_120298_624306 | NW_004515794.1 | Scaffold275 | 624306                  | TT                              | AA              | 1946932411               |
| SNP_P4_120299_624428 | NW_004515794.1 | Scaffold275 | 624428                  | TT                              | GG              | 1946932414               |
| SNP_P4_120300_624732 | NW_004515794.1 | Scaffold275 | 624732                  | GG                              | TT              | 1946932416               |
| SNP_P4_120301_626884 | NW_004515794.1 | Scaffold275 | 626884                  | AA                              | CC              | 1946932418               |
| SNP_P4_120303_636704 | NW_004515794.1 | Scaffold275 | 636704                  | AA                              | TT              | 1946932420               |
| SNP_P4_120304_636713 | NW_004515794.1 | Scaffold275 | 636713                  | GG                              | TT              | 1946932422               |
| SNP_P4_120305_636739 | NW_004515794.1 | Scaffold275 | 636739                  | AA                              | GG              | 1946932424               |
| SNP_P4_120306_647956 | NW_004515794.1 | Scaffold275 | 647956                  | TT                              | AA              | 1946932426               |
| SNP_P4_120307_648088 | NW_004515794.1 | Scaffold275 | 648088                  | GG                              | TT              | 1946932428               |
| SNP_P4_120308_648094 | NW_004515794.1 | Scaffold275 | 648094                  | CC                              | AA              | 1946932430               |
| SNP_P4_120309_648123 | NW_004515794.1 | Scaffold275 | 648123                  | TT                              | AA              | 1946932432               |
| SNP_P4_120310_648125 | NW_004515794.1 | Scaffold275 | 648125                  | TT                              | GG              | 1946932434               |
| SNP_P4_120311_649140 | NW_004515794.1 | Scaffold275 | 649140                  | TT                              | CC              | 1946932436               |
| SNP_P4_120312_649260 | NW_004515794.1 | Scaffold275 | 649260                  | TT                              | CC              | 1946932438               |
| SNP_P4_120313_649293 | NW_004515794.1 | Scaffold275 | 649293                  | AA                              | TT              | 1946932440               |
| SNP_P4_120314_649325 | NW_004515794.1 | Scaffold275 | 649325                  | GG                              | TT              | 1946932442               |
| SNP_P4_120315_656871 | NW_004515794.1 | Scaffold275 | 656871                  | GG                              | TT              | 1946932444               |

| SNPs IDs             | Chromosome IDs | Chromosomes | Physical positions (bp) | CDC Frontier (Reference genome) | (ILWC46 & LPNB) | NCBI SNPdb Accession IDs |
|----------------------|----------------|-------------|-------------------------|---------------------------------|-----------------|--------------------------|
| SNP_P4_120316_660018 | NW_004515794.1 | Scaffold275 | 660018                  | TT                              | GG              | 1946932446               |
| SNP_P4_120317_681340 | NW_004515794.1 | Scaffold275 | 681340                  | TT                              | CC              | 1946932448               |
| SNP_P4_120319_688050 | NW_004515794.1 | Scaffold275 | 688050                  | CC                              | TT              | 1946932450               |
| SNP_P4_120320_690238 | NW_004515794.1 | Scaffold275 | 690238                  | GG                              | TT              | 1946932453               |
| SNP_P4_120321_690287 | NW_004515794.1 | Scaffold275 | 690287                  | GG                              | AA              | 1946932455               |
| SNP_P4_120322_717803 | NW_004515794.1 | Scaffold275 | 717803                  | CC                              | AA              | 1946932457               |
| SNP_P4_120323_749219 | NW_004515794.1 | Scaffold275 | 749219                  | GG                              | AA              | 1946932459               |
| SNP_P4_120324_749222 | NW_004515794.1 | Scaffold275 | 749222                  | TT                              | GG              | 1946932461               |
| SNP_P4_120325_751130 | NW_004515794.1 | Scaffold275 | 751130                  | GG                              | TT              | 1946932463               |
| SNP_P4_120326_751134 | NW_004515794.1 | Scaffold275 | 751134                  | TT                              | CC              | 1946932465               |
| SNP_P4_120327_751140 | NW_004515794.1 | Scaffold275 | 751140                  | TT                              | CC              | 1946932467               |
| SNP_P4_120328_751144 | NW_004515794.1 | Scaffold275 | 751144                  | AA                              | GG              | 1946932469               |
| SNP_P4_120329_759336 | NW_004515794.1 | Scaffold275 | 759336                  | TT                              | GG              | 1946932472               |
| SNP_P4_120331_776643 | NW_004515794.1 | Scaffold275 | 776643                  | CC                              | TT              | 1946932474               |
| SNP_P4_120332_776736 | NW_004515794.1 | Scaffold275 | 776736                  | CC                              | AA              | 1946932476               |
| SNP_P4_120333_778673 | NW_004515794.1 | Scaffold275 | 778673                  | AA                              | TT              | 1946932478               |
| SNP_P4_120334_780313 | NW_004515794.1 | Scaffold275 | 780313                  | GG                              | CC              | 1946932480               |
| SNP_P4_120335_780321 | NW_004515794.1 | Scaffold275 | 780321                  | GG                              | AA              | 1946932482               |
| SNP_P4_120336_780327 | NW_004515794.1 | Scaffold275 | 780327                  | AA                              | GG              | 1946932484               |
| SNP_P4_120337_780350 | NW_004515794.1 | Scaffold275 | 780350                  | CC                              | AA              | 1946932486               |
| SNP_P4_120338_781403 | NW_004515794.1 | Scaffold275 | 781403                  | AA                              | TT              | 1946932488               |
| SNP_P4_120339_782140 | NW_004515794.1 | Scaffold275 | 782140                  | CC                              | TT              | 1946932490               |
| SNP_P4_120340_783219 | NW_004515794.1 | Scaffold275 | 783219                  | GG                              | AA              | 1946932492               |
| SNP_P4_120341_783295 | NW_004515794.1 | Scaffold275 | 783295                  | CC                              | TT              | 1946932495               |
| SNP_P4_120342_790189 | NW_004515794.1 | Scaffold275 | 790189                  | AA                              | GG              | 1946932497               |
| SNP_P4_120343_797916 | NW_004515794.1 | Scaffold275 | 797916                  | AA                              | TT              | 1946932499               |
| SNP_P4_120344_798193 | NW_004515794.1 | Scaffold275 | 798193                  | CC                              | AA              | 1946932501               |
| SNP_P4_120345_798221 | NW_004515794.1 | Scaffold275 | 798221                  | AA                              | GG              | 1946932503               |
| SNP_P4_120346_809209 | NW_004515794.1 | Scaffold275 | 809209                  | AA                              | GG              | 1946932505               |
| SNP_P4_120347_812186 | NW_004515794.1 | Scaffold275 | 812186                  | GG                              | AA              | 1946932507               |
| SNP_P4_120349_812275 | NW_004515794.1 | Scaffold275 | 812275                  | GG                              | AA              | 1946932509               |
| SNP_P4_120350_812361 | NW_004515794.1 | Scaffold275 | 812361                  | TT                              | AA              | 1946932511               |
| SNP_P4_120351_812608 | NW_004515794.1 | Scaffold275 | 812608                  | CC                              | TT              | 1946932513               |
| SNP_P4_120353_812676 | NW_004515794.1 | Scaffold275 | 812676                  | AA                              | TT              | 1946932515               |
| SNP_P4_120354_812688 | NW_004515794.1 | Scaffold275 | 812688                  | TT                              | GG              | 1946932517               |
| SNP_P4_120355_812717 | NW_004515794.1 | Scaffold275 | 812717                  | CC                              | TT              | 1946932519               |
| SNP_P4_120356_812718 | NW_004515794.1 | Scaffold275 | 812718                  | CC                              | TT              | 1946932521               |
| SNP_P4_120357_813626 | NW_004515794.1 | Scaffold275 | 813626                  | CC                              | AA              | 1946932523               |
| SNP_P4_120358_813747 | NW_004515794.1 | Scaffold275 | 813747                  | AA                              | CC              | 1946932526               |
| SNP_P4_120359_813761 | NW_004515794.1 | Scaffold275 | 813761                  | CC                              | AA              | 1946932528               |
| SNP_P4_120360_813787 | NW_004515794.1 | Scaffold275 | 813787                  | GG                              | CC              | 1946932530               |
| SNP_P4_120361_1174   | NW_004515795.1 | Scaffold276 | 1174                    | TT                              | GG              | 1946932532               |

| SNPs IDs            | Chromosome IDs | Chromosomes | Physical positions (bp) | CDC Frontier (Reference genome) | (ILWC46 & LPNB) | NCBI SNPdb Accession IDs |
|---------------------|----------------|-------------|-------------------------|---------------------------------|-----------------|--------------------------|
| SNP_P4_120362_1219  | NW_004515795.1 | Scaffold276 | 1219                    | AA                              | GG              | 1946932534               |
| SNP_P4_120363_1230  | NW_004515795.1 | Scaffold276 | 1230                    | AA                              | CC              | 1946932536               |
| SNP_P4_120364_1256  | NW_004515795.1 | Scaffold276 | 1256                    | GG                              | AA              | 1946932538               |
| SNP_P4_120365_1301  | NW_004515795.1 | Scaffold276 | 1301                    | TT                              | CC              | 1946932540               |
| SNP_P4_120366_3072  | NW_004515795.1 | Scaffold276 | 3072                    | TT                              | CC              | 1946932542               |
| SNP_P4_120367_3073  | NW_004515795.1 | Scaffold276 | 3073                    | AA                              | GG              | 1946932544               |
| SNP_P4_120368_13136 | NW_004515795.1 | Scaffold276 | 13136                   | TT                              | CC              | 1946932546               |
| SNP_P4_120369_13137 | NW_004515795.1 | Scaffold276 | 13137                   | TT                              | CC              | 1946932548               |
| SNP_P4_120370_13840 | NW_004515795.1 | Scaffold276 | 13840                   | AA                              | TT              | 1946932551               |
| SNP_P4_120371_15178 | NW_004515795.1 | Scaffold276 | 15178                   | TT                              | AA              | 1946932553               |
| SNP_P4_120372_21465 | NW_004515795.1 | Scaffold276 | 21465                   | TT                              | CC              | 1946932555               |
| SNP_P4_120373_21478 | NW_004515795.1 | Scaffold276 | 21478                   | GG                              | TT              | 1946932557               |
| SNP_P4_120374_21571 | NW_004515795.1 | Scaffold276 | 21571                   | TT                              | CC              | 1946932560               |
| SNP_P4_120375_21827 | NW_004515795.1 | Scaffold276 | 21827                   | AA                              | GG              | 1946932562               |
| SNP_P4_120376_21838 | NW_004515795.1 | Scaffold276 | 21838                   | AA                              | GG              | 1946932564               |
| SNP_P4_120377_21847 | NW_004515795.1 | Scaffold276 | 21847                   | AA                              | GG              | 1946932566               |
| SNP_P4_120378_21875 | NW_004515795.1 | Scaffold276 | 21875                   | GG                              | AA              | 1946932568               |
| SNP_P4_120379_45301 | NW_004515795.1 | Scaffold276 | 45301                   | TT                              | CC              | 1946932570               |
| SNP_P4_120380_50441 | NW_004515795.1 | Scaffold276 | 50441                   | AA                              | GG              | 1946932572               |
| SNP_P4_120381_50514 | NW_004515795.1 | Scaffold276 | 50514                   | AA                              | CC              | 1946932574               |
| SNP_P4_120382_53120 | NW_004515795.1 | Scaffold276 | 53120                   | TT                              | GG              | 1946932577               |
| SNP_P4_120383_53125 | NW_004515795.1 | Scaffold276 | 53125                   | AA                              | CC              | 1946932579               |
| SNP_P4_120384_53418 | NW_004515795.1 | Scaffold276 | 53418                   | CC                              | TT              | 1946932581               |
| SNP_P4_120385_69082 | NW_004515795.1 | Scaffold276 | 69082                   | TT                              | CC              | 1946932583               |
| SNP_P4_120386_69135 | NW_004515795.1 | Scaffold276 | 69135                   | AA                              | GG              | 1946932585               |
| SNP_P4_120387_69150 | NW_004515795.1 | Scaffold276 | 69150                   | AA                              | GG              | 1946932587               |
| SNP_P4_120388_69412 | NW_004515795.1 | Scaffold276 | 69412                   | GG                              | TT              | 1946932589               |
| SNP_P4_120389_483   | NW_004515796.1 | Scaffold277 | 483                     | GG                              | TT              | 1946932591               |
| SNP_P4_120390_642   | NW_004515796.1 | Scaffold277 | 642                     | GG                              | AA              | 1946932593               |
| SNP_P4_120391_675   | NW_004515796.1 | Scaffold277 | 675                     | GG                              | TT              | 1946932595               |
| SNP_P4_120392_729   | NW_004515796.1 | Scaffold277 | 729                     | CC                              | TT              | 1946932597               |
| SNP_P4_120393_823   | NW_004515796.1 | Scaffold277 | 823                     | TT                              | GG              | 1946932599               |
| SNP_P4_120394_873   | NW_004515796.1 | Scaffold277 | 873                     | AA                              | GG              | 1946932601               |
| SNP_P4_120395_879   | NW_004515796.1 | Scaffold277 | 879                     | AA                              | GG              | 1946932603               |
| SNP_P4_120396_975   | NW_004515796.1 | Scaffold277 | 975                     | TT                              | CC              | 1946932606               |
| SNP_P4_120397_1486  | NW_004515796.1 | Scaffold277 | 1486                    | GG                              | AA              | 1946932608               |
| SNP_P4_120398_1514  | NW_004515796.1 | Scaffold277 | 1514                    | TT                              | CC              | 1946932610               |
| SNP_P4_120399_1596  | NW_004515796.1 | Scaffold277 | 1596                    | AA                              | CC              | 1946932612               |
| SNP_P4_120400_3116  | NW_004515796.1 | Scaffold277 | 3116                    | AA                              | CC              | 1946932614               |
| SNP_P4_120401_3750  | NW_004515796.1 | Scaffold277 | 3750                    | AA                              | GG              | 1946932616               |
| SNP_P4_120402_4322  | NW_004515796.1 | Scaffold277 | 4322                    | AA                              | GG              | 1946932619               |
| SNP_P4_120404_4504  | NW_004515796.1 | Scaffold277 | 4504                    | GG                              | AA              | 1946932621               |



| SNPs IDs             | Chromosome IDs | Chromosomes | Physical positions (bp) | CDC Frontier (Reference genome) | (ILWC46 & LPNB) | NCBI SNPdb Accession IDs |
|----------------------|----------------|-------------|-------------------------|---------------------------------|-----------------|--------------------------|
| SNP_P4_120405_4612   | NW_004515796.1 | Scaffold277 | 4612                    | AA                              | TT              | 1946932623               |
| SNP_P4_120406_4781   | NW_004515796.1 | Scaffold277 | 4781                    | AA                              | GG              | 1946932625               |
| SNP_P4_120408_4929   | NW_004515796.1 | Scaffold277 | 4929                    | CC                              | GG              | 1946932627               |
| SNP_P4_120409_5231   | NW_004515796.1 | Scaffold277 | 5231                    | CC                              | GG              | 1946932630               |
| SNP_P4_120410_5290   | NW_004515796.1 | Scaffold277 | 5290                    | AA                              | GG              | 1946932632               |
| SNP_P4_120411_5326   | NW_004515796.1 | Scaffold277 | 5326                    | GG                              | AA              | 1946932634               |
| SNP_P4_120412_5363   | NW_004515796.1 | Scaffold277 | 5363                    | AA                              | TT              | 1946932636               |
| SNP_P4_120413_5367   | NW_004515796.1 | Scaffold277 | 5367                    | AA                              | TT              | 1946932639               |
| SNP_P4_120414_5419   | NW_004515796.1 | Scaffold277 | 5419                    | TT                              | CC              | 1946932641               |
| SNP_P4_120415_5488   | NW_004515796.1 | Scaffold277 | 5488                    | CC                              | AA              | 1946932643               |
| SNP_P4_120416_5502   | NW_004515796.1 | Scaffold277 | 5502                    | GG                              | AA              | 1946932645               |
| SNP_P4_120417_5579   | NW_004515796.1 | Scaffold277 | 5579                    | TT                              | CC              | 1946932647               |
| SNP_P4_120418_22527  | NW_004515796.1 | Scaffold277 | 22527                   | TT                              | CC              | 1946932650               |
| SNP_P4_120419_60497  | NW_004515796.1 | Scaffold277 | 60497                   | TT                              | CC              | 1946932652               |
| SNP_P4_120420_60571  | NW_004515796.1 | Scaffold277 | 60571                   | GG                              | TT              | 1946932654               |
| SNP_P4_120421_60596  | NW_004515796.1 | Scaffold277 | 60596                   | AA                              | GG              | 1946932656               |
| SNP_P4_120422_60971  | NW_004515796.1 | Scaffold277 | 60971                   | TT                              | GG              | 1946932658               |
| SNP_P4_120423_65748  | NW_004515796.1 | Scaffold277 | 65748                   | GG                              | AA              | 1946932660               |
| SNP_P4_120424_65765  | NW_004515796.1 | Scaffold277 | 65765                   | GG                              | CC              | 1946932662               |
| SNP_P4_120425_74372  | NW_004515796.1 | Scaffold277 | 74372                   | TT                              | CC              | 1946932664               |
| SNP_P4_120426_77075  | NW_004515796.1 | Scaffold277 | 77075                   | TT                              | GG              | 1946932666               |
| SNP_P4_120427_79171  | NW_004515796.1 | Scaffold277 | 79171                   | AA                              | GG              | 1946932668               |
| SNP_P4_120428_79175  | NW_004515796.1 | Scaffold277 | 79175                   | TT                              | CC              | 1946932670               |
| SNP_P4_120429_79211  | NW_004515796.1 | Scaffold277 | 79211                   | TT                              | CC              | 1946932672               |
| SNP_P4_120430_79334  | NW_004515796.1 | Scaffold277 | 79334                   | AA                              | CC              | 1946932674               |
| SNP_P4_120431_79398  | NW_004515796.1 | Scaffold277 | 79398                   | GG                              | AA              | 1946932676               |
| SNP_P4_120432_79414  | NW_004515796.1 | Scaffold277 | 79414                   | AA                              | GG              | 1946932678               |
| SNP_P4_120433_79505  | NW_004515796.1 | Scaffold277 | 79505                   | GG                              | AA              | 1946932680               |
| SNP_P4_120434_79512  | NW_004515796.1 | Scaffold277 | 79512                   | TT                              | GG              | 1946932682               |
| SNP_P4_120435_79559  | NW_004515796.1 | Scaffold277 | 79559                   | GG                              | TT              | 1946932684               |
| SNP_P4_120436_79932  | NW_004515796.1 | Scaffold277 | 79932                   | AA                              | GG              | 1946932686               |
| SNP_P4_120437_79934  | NW_004515796.1 | Scaffold277 | 79934                   | TT                              | GG              | 1946932688               |
| SNP_P4_120438_79947  | NW_004515796.1 | Scaffold277 | 79947                   | TT                              | GG              | 1946932690               |
| SNP_P4_120439_79999  | NW_004515796.1 | Scaffold277 | 79999                   | AA                              | GG              | 1946932692               |
| SNP_P4_120440_132277 | NW_004515796.1 | Scaffold277 | 132277                  | TT                              | GG              | 1946932694               |
| SNP_P4_120441_132391 | NW_004515796.1 | Scaffold277 | 132391                  | TT                              | CC              | 1946932696               |
| SNP_P4_120442_137556 | NW_004515796.1 | Scaffold277 | 137556                  | CC                              | TT              | 1946932698               |
| SNP_P4_120443_152987 | NW_004515796.1 | Scaffold277 | 152987                  | CC                              | AA              | 1946932700               |
| SNP_P4_120444_165452 | NW_004515796.1 | Scaffold277 | 165452                  | GG                              | CC              | 1946932702               |
| SNP_P4_120445_165709 | NW_004515796.1 | Scaffold277 | 165709                  | CC                              | AA              | 1946932704               |
| SNP_P4_120446_165750 | NW_004515796.1 | Scaffold277 | 165750                  | GG                              | TT              | 1946932706               |
| SNP_P4_120447_165825 | NW_004515796.1 | Scaffold277 | 165825                  | GG                              | TT              | 1946932708               |

| SNPs IDs             | Chromosome IDs | Chromosomes | Physical positions (bp) | CDC Frontier (Reference genome) | (ILWC46 & LPNB) | NCBI SNPdb Accession IDs |
|----------------------|----------------|-------------|-------------------------|---------------------------------|-----------------|--------------------------|
| SNP_P4_120448_165979 | NW_004515796.1 | Scaffold277 | 165979                  | TT                              | GG              | 1946932710               |
| SNP_P4_120449_166003 | NW_004515796.1 | Scaffold277 | 166003                  | AA                              | TT              | 1946932712               |
| SNP_P4_120450_166126 | NW_004515796.1 | Scaffold277 | 166126                  | CC                              | AA              | 1946932714               |
| SNP_P4_120451_168587 | NW_004515796.1 | Scaffold277 | 168587                  | TT                              | AA              | 1946932716               |
| SNP_P4_120452_184982 | NW_004515796.1 | Scaffold277 | 184982                  | CC                              | TT              | 1946932718               |
| SNP_P4_120454_185172 | NW_004515796.1 | Scaffold277 | 185172                  | AA                              | GG              | 1946932720               |
| SNP_P4_120455_185183 | NW_004515796.1 | Scaffold277 | 185183                  | TT                              | GG              | 1946932722               |
| SNP_P4_120456_188835 | NW_004515796.1 | Scaffold277 | 188835                  | CC                              | AA              | 1946932724               |
| SNP_P4_120457_189067 | NW_004515796.1 | Scaffold277 | 189067                  | GG                              | AA              | 1946932726               |
| SNP_P4_120458_189101 | NW_004515796.1 | Scaffold277 | 189101                  | AA                              | GG              | 1946932728               |
| SNP_P4_120459_189127 | NW_004515796.1 | Scaffold277 | 189127                  | TT                              | AA              | 1946932730               |
| SNP_P4_120460_189170 | NW_004515796.1 | Scaffold277 | 189170                  | GG                              | AA              | 1946932732               |
| SNP_P4_120461_201866 | NW_004515796.1 | Scaffold277 | 201866                  | CC                              | TT              | 1946932734               |
| SNP_P4_120462_201940 | NW_004515796.1 | Scaffold277 | 201940                  | AA                              | GG              | 1946932736               |
| SNP_P4_120463_202090 | NW_004515796.1 | Scaffold277 | 202090                  | GG                              | AA              | 1946932738               |
| SNP_P4_120464_202226 | NW_004515796.1 | Scaffold277 | 202226                  | GG                              | AA              | 1946932740               |
| SNP_P4_120465_202464 | NW_004515796.1 | Scaffold277 | 202464                  | CC                              | TT              | 1946932742               |
| SNP_P4_120466_202501 | NW_004515796.1 | Scaffold277 | 202501                  | TT                              | GG              | 1946932744               |
| SNP_P4_120467_202502 | NW_004515796.1 | Scaffold277 | 202502                  | GG                              | AA              | 1946932746               |
| SNP_P4_120468_202504 | NW_004515796.1 | Scaffold277 | 202504                  | CC                              | TT              | 1946932748               |
| SNP_P4_120469_202539 | NW_004515796.1 | Scaffold277 | 202539                  | AA                              | GG              | 1946932750               |
| SNP_P4_120470_202578 | NW_004515796.1 | Scaffold277 | 202578                  | CC                              | TT              | 1946932752               |
| SNP_P4_120471_202716 | NW_004515796.1 | Scaffold277 | 202716                  | CC                              | TT              | 1946932754               |
| SNP_P4_120472_202794 | NW_004515796.1 | Scaffold277 | 202794                  | GG                              | AA              | 1946932756               |
| SNP_P4_120473_202796 | NW_004515796.1 | Scaffold277 | 202796                  | AA                              | GG              | 1946932758               |
| SNP_P4_120474_202812 | NW_004515796.1 | Scaffold277 | 202812                  | AA                              | GG              | 1946932760               |
| SNP_P4_120475_202839 | NW_004515796.1 | Scaffold277 | 202839                  | AA                              | GG              | 1946932763               |
| SNP_P4_120476_202862 | NW_004515796.1 | Scaffold277 | 202862                  | AA                              | GG              | 1946932765               |
| SNP_P4_120477_202880 | NW_004515796.1 | Scaffold277 | 202880                  | TT                              | GG              | 1946932767               |
| SNP_P4_120478_202903 | NW_004515796.1 | Scaffold277 | 202903                  | GG                              | AA              | 1946932769               |
| SNP_P4_120479_203032 | NW_004515796.1 | Scaffold277 | 203032                  | AA                              | GG              | 1946932771               |
| SNP_P4_120480_203096 | NW_004515796.1 | Scaffold277 | 203096                  | AA                              | TT              | 1946932773               |
| SNP_P4_120481_204843 | NW_004515796.1 | Scaffold277 | 204843                  | GG                              | AA              | 1946932775               |
| SNP_P4_120483_205116 | NW_004515796.1 | Scaffold277 | 205116                  | TT                              | CC              | 1946932777               |
| SNP_P4_120484_205166 | NW_004515796.1 | Scaffold277 | 205166                  | GG                              | TT              | 1946932779               |
| SNP_P4_120485_205179 | NW_004515796.1 | Scaffold277 | 205179                  | AA                              | GG              | 1946932781               |
| SNP_P4_120486_205230 | NW_004515796.1 | Scaffold277 | 205230                  | GG                              | AA              | 1946932783               |
| SNP_P4_120487_205331 | NW_004515796.1 | Scaffold277 | 205331                  | TT                              | CC              | 1946932785               |
| SNP_P4_120488_205337 | NW_004515796.1 | Scaffold277 | 205337                  | TT                              | CC              | 1946932787               |
| SNP_P4_120489_205353 | NW_004515796.1 | Scaffold277 | 205353                  | CC                              | TT              | 1946932789               |
| SNP_P4_120490_205416 | NW_004515796.1 | Scaffold277 | 205416                  | TT                              | CC              | 1946932791               |
| SNP_P4_120492_205692 | NW_004515796.1 | Scaffold277 | 205692                  | GG                              | AA              | 1946932793               |

| SNPs IDs             | Chromosome IDs | Chromosomes | Physical positions (bp) | CDC Frontier (Reference genome) | (ILWC46 & LPNB) | NCBI SNPdb Accession IDs |
|----------------------|----------------|-------------|-------------------------|---------------------------------|-----------------|--------------------------|
| SNP_P4_120493_207755 | NW_004515796.1 | Scaffold277 | 207755                  | GG                              | AA              | 1946932795               |
| SNP_P4_120494_211021 | NW_004515796.1 | Scaffold277 | 211021                  | GG                              | TT              | 1946932797               |
| SNP_P4_120495_211032 | NW_004515796.1 | Scaffold277 | 211032                  | GG                              | AA              | 1946932799               |
| SNP_P4_120497_218538 | NW_004515796.1 | Scaffold277 | 218538                  | AA                              | CC              | 1946932801               |
| SNP_P4_120498_218582 | NW_004515796.1 | Scaffold277 | 218582                  | AA                              | GG              | 1946932803               |
| SNP_P4_120499_218598 | NW_004515796.1 | Scaffold277 | 218598                  | AA                              | TT              | 1946932805               |
| SNP_P4_120500_218714 | NW_004515796.1 | Scaffold277 | 218714                  | GG                              | AA              | 1946932807               |
| SNP_P4_120501_218762 | NW_004515796.1 | Scaffold277 | 218762                  | AA                              | CC              | 1946932809               |
| SNP_P4_120502_218825 | NW_004515796.1 | Scaffold277 | 218825                  | CC                              | TT              | 1946932811               |
| SNP_P4_120503_218873 | NW_004515796.1 | Scaffold277 | 218873                  | TT                              | AA              | 1946932813               |
| SNP_P4_120505_219186 | NW_004515796.1 | Scaffold277 | 219186                  | AA                              | CC              | 1946932815               |
| SNP_P4_120506_219521 | NW_004515796.1 | Scaffold277 | 219521                  | GG                              | AA              | 1946932817               |
| SNP_P4_120507_219684 | NW_004515796.1 | Scaffold277 | 219684                  | AA                              | GG              | 1946932819               |
| SNP_P4_120508_219782 | NW_004515796.1 | Scaffold277 | 219782                  | CC                              | AA              | 1946932821               |
| SNP_P4_120509_219783 | NW_004515796.1 | Scaffold277 | 219783                  | AA                              | TT              | 1946932823               |
| SNP_P4_120510_229512 | NW_004515796.1 | Scaffold277 | 229512                  | CC                              | TT              | 1946932825               |
| SNP_P4_120511_236240 | NW_004515796.1 | Scaffold277 | 236240                  | GG                              | AA              | 1946932827               |
| SNP_P4_120512_247178 | NW_004515796.1 | Scaffold277 | 247178                  | AA                              | CC              | 1946932829               |
| SNP_P4_120513_247438 | NW_004515796.1 | Scaffold277 | 247438                  | AA                              | TT              | 1946932831               |
| SNP_P4_120514_247446 | NW_004515796.1 | Scaffold277 | 247446                  | CC                              | TT              | 1946932833               |
| SNP_P4_120515_247474 | NW_004515796.1 | Scaffold277 | 247474                  | CC                              | AA              | 1946932835               |
| SNP_P4_120516_247483 | NW_004515796.1 | Scaffold277 | 247483                  | GG                              | TT              | 1946932837               |
| SNP_P4_120517_252022 | NW_004515796.1 | Scaffold277 | 252022                  | TT                              | CC              | 1946932839               |
| SNP_P4_120518_252147 | NW_004515796.1 | Scaffold277 | 252147                  | TT                              | AA              | 1946932841               |
| SNP_P4_120519_252220 | NW_004515796.1 | Scaffold277 | 252220                  | CC                              | AA              | 1946932843               |
| SNP_P4_120520_252352 | NW_004515796.1 | Scaffold277 | 252352                  | AA                              | GG              | 1946932845               |
| SNP_P4_120522_252496 | NW_004515796.1 | Scaffold277 | 252496                  | AA                              | GG              | 1946932847               |
| SNP_P4_120523_263946 | NW_004515796.1 | Scaffold277 | 263946                  | CC                              | AA              | 1946932849               |
| SNP_P4_120524_523    | NW_004515797.1 | Scaffold280 | 523                     | GG                              | TT              | 1946932851               |
| SNP_P4_120525_4894   | NW_004515797.1 | Scaffold280 | 4894                    | GG                              | CC              | 1946932853               |
| SNP_P4_120526_4903   | NW_004515797.1 | Scaffold280 | 4903                    | AA                              | TT              | 1946932855               |
| SNP_P4_120527_4930   | NW_004515797.1 | Scaffold280 | 4930                    | GG                              | AA              | 1946932857               |
| SNP_P4_120528_5203   | NW_004515797.1 | Scaffold280 | 5203                    | CC                              | AA              | 1946932859               |
| SNP_P4_120529_6449   | NW_004515797.1 | Scaffold280 | 6449                    | CC                              | TT              | 1946932861               |
| SNP_P4_120530_6690   | NW_004515797.1 | Scaffold280 | 6690                    | GG                              | AA              | 1946932863               |
| SNP_P4_120531_10553  | NW_004515797.1 | Scaffold280 | 10553                   | TT                              | CC              | 1946932865               |
| SNP_P4_120532_10581  | NW_004515797.1 | Scaffold280 | 10581                   | AA                              | CC              | 1946932867               |
| SNP_P4_120533_10664  | NW_004515797.1 | Scaffold280 | 10664                   | TT                              | CC              | 1946932869               |
| SNP_P4_120536_15044  | NW_004515797.1 | Scaffold280 | 15044                   | AA                              | CC              | 1946932871               |
| SNP_P4_120537_15581  | NW_004515797.1 | Scaffold280 | 15581                   | CC                              | AA              | 1946932873               |
| SNP_P4_120538_15602  | NW_004515797.1 | Scaffold280 | 15602                   | CC                              | AA              | 1946932875               |
| SNP_P4_120539_17697  | NW_004515797.1 | Scaffold280 | 17697                   | TT                              | GG              | 1946932877               |

| SNPs IDs            | Chromosome IDs | Chromosomes | Physical positions (bp) | CDC Frontier (Reference genome) | (ILWC46 & LPNB) | NCBI SNPdb Accession IDs |
|---------------------|----------------|-------------|-------------------------|---------------------------------|-----------------|--------------------------|
| SNP_P4_120540_17730 | NW_004515797.1 | Scaffold280 | 17730                   | AA                              | TT              | 1946932879               |
| SNP_P4_120541_17731 | NW_004515797.1 | Scaffold280 | 17731                   | GG                              | AA              | 1946932881               |
| SNP_P4_120542_17755 | NW_004515797.1 | Scaffold280 | 17755                   | AA                              | GG              | 1946932883               |
| SNP_P4_120543_17976 | NW_004515797.1 | Scaffold280 | 17976                   | CC                              | AA              | 1946932885               |
| SNP_P4_120544_17984 | NW_004515797.1 | Scaffold280 | 17984                   | AA                              | GG              | 1946932887               |
| SNP_P4_120545_18017 | NW_004515797.1 | Scaffold280 | 18017                   | TT                              | CC              | 1946932889               |
| SNP_P4_120546_23337 | NW_004515797.1 | Scaffold280 | 23337                   | GG                              | AA              | 1946932891               |
| SNP_P4_120547_35056 | NW_004515797.1 | Scaffold280 | 35056                   | AA                              | GG              | 1946932893               |
| SNP_P4_120548_35138 | NW_004515797.1 | Scaffold280 | 35138                   | GG                              | AA              | 1946932895               |
| SNP_P4_120549_35318 | NW_004515797.1 | Scaffold280 | 35318                   | AA                              | TT              | 1946932897               |
| SNP_P4_120550_35391 | NW_004515797.1 | Scaffold280 | 35391                   | AA                              | GG              | 1946932899               |
| SNP_P4_120551_35422 | NW_004515797.1 | Scaffold280 | 35422                   | GG                              | TT              | 1946932901               |
| SNP_P4_120552_37353 | NW_004515797.1 | Scaffold280 | 37353                   | CC                              | TT              | 1946932903               |
| SNP_P4_120553_38533 | NW_004515797.1 | Scaffold280 | 38533                   | TT                              | AA              | 1946932906               |
| SNP_P4_120554_44654 | NW_004515797.1 | Scaffold280 | 44654                   | AA                              | GG              | 1946932908               |
| SNP_P4_120556_61287 | NW_004515797.1 | Scaffold280 | 61287                   | AA                              | CC              | 1946932910               |
| SNP_P4_120557_61291 | NW_004515797.1 | Scaffold280 | 61291                   | TT                              | CC              | 1946932913               |
| SNP_P4_120558_61294 | NW_004515797.1 | Scaffold280 | 61294                   | AA                              | TT              | 1946932915               |
| SNP_P4_120559_61321 | NW_004515797.1 | Scaffold280 | 61321                   | CC                              | TT              | 1946932917               |
| SNP_P4_120560_61333 | NW_004515797.1 | Scaffold280 | 61333                   | AA                              | TT              | 1946932919               |
| SNP_P4_120561_61339 | NW_004515797.1 | Scaffold280 | 61339                   | CC                              | AA              | 1946932921               |
| SNP_P4_120562_62526 | NW_004515797.1 | Scaffold280 | 62526                   | CC                              | AA              | 1946932924               |
| SNP_P4_120564_71669 | NW_004515797.1 | Scaffold280 | 71669                   | GG                              | CC              | 1946932926               |
| SNP_P4_120565_73675 | NW_004515797.1 | Scaffold280 | 73675                   | GG                              | CC              | 1946932928               |
| SNP_P4_120566_73740 | NW_004515797.1 | Scaffold280 | 73740                   | CC                              | TT              | 1946932930               |
| SNP_P4_120567_73775 | NW_004515797.1 | Scaffold280 | 73775                   | TT                              | CC              | 1946932933               |
| SNP_P4_120568_74198 | NW_004515797.1 | Scaffold280 | 74198                   | TT                              | CC              | 1946932935               |
| SNP_P4_120569_74205 | NW_004515797.1 | Scaffold280 | 74205                   | TT                              | CC              | 1946932937               |
| SNP_P4_120570_74222 | NW_004515797.1 | Scaffold280 | 74222                   | CC                              | AA              | 1946932939               |
| SNP_P4_120571_74232 | NW_004515797.1 | Scaffold280 | 74232                   | AA                              | GG              | 1946932941               |
| SNP_P4_120572_74248 | NW_004515797.1 | Scaffold280 | 74248                   | TT                              | CC              | 1946932943               |
| SNP_P4_120574_83350 | NW_004515797.1 | Scaffold280 | 83350                   | CC                              | AA              | 1946932945               |
| SNP_P4_120575_83355 | NW_004515797.1 | Scaffold280 | 83355                   | TT                              | AA              | 1946932947               |
| SNP_P4_120576_83437 | NW_004515797.1 | Scaffold280 | 83437                   | AA                              | CC              | 1946932949               |
| SNP_P4_120577_83702 | NW_004515797.1 | Scaffold280 | 83702                   | TT                              | AA              | 1946932951               |
| SNP_P4_120578_93852 | NW_004515797.1 | Scaffold280 | 93852                   | CC                              | TT              | 1946932953               |
| SNP_P4_120579_97931 | NW_004515797.1 | Scaffold280 | 97931                   | TT                              | GG              | 1946932955               |
| SNP_P4_120580_97943 | NW_004515797.1 | Scaffold280 | 97943                   | TT                              | GG              | 1946932957               |
| SNP_P4_120581_97959 | NW_004515797.1 | Scaffold280 | 97959                   | TT                              | GG              | 1946932959               |
| SNP_P4_120582_97995 | NW_004515797.1 | Scaffold280 | 97995                   | TT                              | CC              | 1946932962               |
| SNP_P4_120583_98038 | NW_004515797.1 | Scaffold280 | 98038                   | TT                              | AA              | 1946932964               |
| SNP_P4_120584_98417 | NW_004515797.1 | Scaffold280 | 98417                   | AA                              | CC              | 1946932966               |

| SNPs IDs             | Chromosome IDs | Chromosomes | Physical positions (bp) | CDC Frontier (Reference genome) | (ILWC46 & LPNB) | NCBI SNPdb Accession IDs |
|----------------------|----------------|-------------|-------------------------|---------------------------------|-----------------|--------------------------|
| SNP_P4_120585_98455  | NW_004515797.1 | Scaffold280 | 98455                   | AA                              | GG              | 1946932968               |
| SNP_P4_120586_98554  | NW_004515797.1 | Scaffold280 | 98554                   | AA                              | GG              | 1946932970               |
| SNP_P4_120587_100054 | NW_004515797.1 | Scaffold280 | 100054                  | TT                              | CC              | 1946932972               |
| SNP_P4_120588_102208 | NW_004515797.1 | Scaffold280 | 102208                  | GG                              | AA              | 1946932974               |
| SNP_P4_120589_102543 | NW_004515797.1 | Scaffold280 | 102543                  | GG                              | AA              | 1946932976               |
| SNP_P4_120591_105598 | NW_004515797.1 | Scaffold280 | 105598                  | TT                              | CC              | 1946932978               |
| SNP_P4_120592_105602 | NW_004515797.1 | Scaffold280 | 105602                  | AA                              | GG              | 1946932980               |
| SNP_P4_120593_106204 | NW_004515797.1 | Scaffold280 | 106204                  | TT                              | AA              | 1946932982               |
| SNP_P4_120594_106224 | NW_004515797.1 | Scaffold280 | 106224                  | AA                              | GG              | 1946932984               |
| SNP_P4_120595_106241 | NW_004515797.1 | Scaffold280 | 106241                  | AA                              | GG              | 1946932986               |
| SNP_P4_120596_106523 | NW_004515797.1 | Scaffold280 | 106523                  | TT                              | CC              | 1946932988               |
| SNP_P4_120597_106554 | NW_004515797.1 | Scaffold280 | 106554                  | TT                              | AA              | 1946932990               |
| SNP_P4_120598_106581 | NW_004515797.1 | Scaffold280 | 106581                  | TT                              | CC              | 1946932992               |
| SNP_P4_120600_107588 | NW_004515797.1 | Scaffold280 | 107588                  | AA                              | GG              | 1946932994               |
| SNP_P4_120601_107713 | NW_004515797.1 | Scaffold280 | 107713                  | TT                              | GG              | 1946932996               |
| SNP_P4_120602_107734 | NW_004515797.1 | Scaffold280 | 107734                  | AA                              | CC              | 1946932998               |
| SNP_P4_120603_107758 | NW_004515797.1 | Scaffold280 | 107758                  | AA                              | GG              | 1946933000               |
| SNP_P4_120604_107794 | NW_004515797.1 | Scaffold280 | 107794                  | TT                              | CC              | 1946933002               |
| SNP_P4_120605_107841 | NW_004515797.1 | Scaffold280 | 107841                  | TT                              | GG              | 1946933004               |
| SNP_P4_120606_107965 | NW_004515797.1 | Scaffold280 | 107965                  | AA                              | CC              | 1946933006               |
| SNP_P4_120607_107979 | NW_004515797.1 | Scaffold280 | 107979                  | TT                              | GG              | 1946933008               |
| SNP_P4_120608_108030 | NW_004515797.1 | Scaffold280 | 108030                  | AA                              | TT              | 1946933010               |
| SNP_P4_120609_108043 | NW_004515797.1 | Scaffold280 | 108043                  | AA                              | GG              | 1946933012               |
| SNP_P4_120610_108048 | NW_004515797.1 | Scaffold280 | 108048                  | AA                              | CC              | 1946933014               |
| SNP_P4_120611_108109 | NW_004515797.1 | Scaffold280 | 108109                  | AA                              | GG              | 1946933016               |
| SNP_P4_120612_108147 | NW_004515797.1 | Scaffold280 | 108147                  | AA                              | GG              | 1946933018               |
| SNP_P4_120613_108185 | NW_004515797.1 | Scaffold280 | 108185                  | GG                              | CC              | 1946933020               |
| SNP_P4_120614_108212 | NW_004515797.1 | Scaffold280 | 108212                  | TT                              | CC              | 1946933022               |
| SNP_P4_120615_110262 | NW_004515797.1 | Scaffold280 | 110262                  | AA                              | GG              | 1946933024               |
| SNP_P4_120616_110278 | NW_004515797.1 | Scaffold280 | 110278                  | TT                              | CC              | 1946933027               |
| SNP_P4_120617_110356 | NW_004515797.1 | Scaffold280 | 110356                  | TT                              | CC              | 1946933029               |
| SNP_P4_120618_112047 | NW_004515797.1 | Scaffold280 | 112047                  | AA                              | GG              | 1946933031               |
| SNP_P4_120619_112072 | NW_004515797.1 | Scaffold280 | 112072                  | CC                              | AA              | 1946933033               |
| SNP_P4_120620_112108 | NW_004515797.1 | Scaffold280 | 112108                  | GG                              | AA              | 1946933035               |
| SNP_P4_120621_112145 | NW_004515797.1 | Scaffold280 | 112145                  | AA                              | GG              | 1946933037               |
| SNP_P4_120622_113381 | NW_004515797.1 | Scaffold280 | 113381                  | AA                              | TT              | 1946933039               |
| SNP_P4_120623_113385 | NW_004515797.1 | Scaffold280 | 113385                  | TT                              | GG              | 1946933041               |
| SNP_P4_120624_113428 | NW_004515797.1 | Scaffold280 | 113428                  | GG                              | TT              | 1946933043               |
| SNP_P4_120625_113440 | NW_004515797.1 | Scaffold280 | 113440                  | TT                              | GG              | 1946933046               |
| SNP_P4_120626_113463 | NW_004515797.1 | Scaffold280 | 113463                  | AA                              | GG              | 1946933048               |
| SNP_P4_120627_113514 | NW_004515797.1 | Scaffold280 | 113514                  | TT                              | GG              | 1946933050               |
| SNP_P4_120628_113527 | NW_004515797.1 | Scaffold280 | 113527                  | AA                              | CC              | 1946933052               |

| SNPs IDs             | Chromosome IDs | Chromosomes | Physical positions (bp) | CDC Frontier (Reference genome) | (ILWC46 & LPNB) | NCBI SNPdb Accession IDs |
|----------------------|----------------|-------------|-------------------------|---------------------------------|-----------------|--------------------------|
| SNP_P4_120629_113567 | NW_004515797.1 | Scaffold280 | 113567                  | CC                              | GG              | 1946933054               |
| SNP_P4_120630_113783 | NW_004515797.1 | Scaffold280 | 113783                  | AA                              | GG              | 1946933057               |
| SNP_P4_120631_113826 | NW_004515797.1 | Scaffold280 | 113826                  | AA                              | GG              | 1946933059               |
| SNP_P4_120632_113883 | NW_004515797.1 | Scaffold280 | 113883                  | AA                              | GG              | 1946933061               |
| SNP_P4_120633_113925 | NW_004515797.1 | Scaffold280 | 113925                  | CC                              | TT              | 1946933063               |
| SNP_P4_120634_114036 | NW_004515797.1 | Scaffold280 | 114036                  | AA                              | GG              | 1946933065               |
| SNP_P4_120635_114122 | NW_004515797.1 | Scaffold280 | 114122                  | GG                              | TT              | 1946933067               |
| SNP_P4_120636_114134 | NW_004515797.1 | Scaffold280 | 114134                  | CC                              | GG              | 1946933069               |
| SNP_P4_120637_114202 | NW_004515797.1 | Scaffold280 | 114202                  | AA                              | GG              | 1946933072               |
| SNP_P4_120638_114840 | NW_004515797.1 | Scaffold280 | 114840                  | AA                              | GG              | 1946933074               |
| SNP_P4_120639_114882 | NW_004515797.1 | Scaffold280 | 114882                  | TT                              | CC              | 1946933076               |
| SNP_P4_120640_114920 | NW_004515797.1 | Scaffold280 | 114920                  | TT                              | CC              | 1946933078               |
| SNP_P4_120641_115770 | NW_004515797.1 | Scaffold280 | 115770                  | TT                              | GG              | 1946933081               |
| SNP_P4_120642_116726 | NW_004515797.1 | Scaffold280 | 116726                  | TT                              | CC              | 1946933083               |
| SNP_P4_120643_116800 | NW_004515797.1 | Scaffold280 | 116800                  | TT                              | CC              | 1946933085               |
| SNP_P4_120644_116803 | NW_004515797.1 | Scaffold280 | 116803                  | AA                              | GG              | 1946933087               |
| SNP_P4_120645_116899 | NW_004515797.1 | Scaffold280 | 116899                  | AA                              | CC              | 1946933089               |
| SNP_P4_120646_116904 | NW_004515797.1 | Scaffold280 | 116904                  | TT                              | CC              | 1946933091               |
| SNP_P4_120647_116930 | NW_004515797.1 | Scaffold280 | 116930                  | AA                              | GG              | 1946933093               |
| SNP_P4_120649_118402 | NW_004515797.1 | Scaffold280 | 118402                  | AA                              | GG              | 1946933095               |
| SNP_P4_120650_118610 | NW_004515797.1 | Scaffold280 | 118610                  | AA                              | CC              | 1946933097               |
| SNP_P4_120651_118782 | NW_004515797.1 | Scaffold280 | 118782                  | TT                              | CC              | 1946933099               |
| SNP_P4_120652_118823 | NW_004515797.1 | Scaffold280 | 118823                  | AA                              | GG              | 1946933101               |
| SNP_P4_120653_118904 | NW_004515797.1 | Scaffold280 | 118904                  | TT                              | CC              | 1946933103               |
| SNP_P4_120655_118927 | NW_004515797.1 | Scaffold280 | 118927                  | GG                              | CC              | 1946933105               |
| SNP_P4_120656_118931 | NW_004515797.1 | Scaffold280 | 118931                  | TT                              | CC              | 1946933107               |
| SNP_P4_120657_118947 | NW_004515797.1 | Scaffold280 | 118947                  | AA                              | CC              | 1946933110               |
| SNP_P4_120658_119037 | NW_004515797.1 | Scaffold280 | 119037                  | GG                              | CC              | 1946933112               |
| SNP_P4_120659_119045 | NW_004515797.1 | Scaffold280 | 119045                  | AA                              | GG              | 1946933114               |
| SNP_P4_120660_119079 | NW_004515797.1 | Scaffold280 | 119079                  | TT                              | GG              | 1946933116               |
| SNP_P4_120661_119080 | NW_004515797.1 | Scaffold280 | 119080                  | AA                              | TT              | 1946933118               |
| SNP_P4_120662_119194 | NW_004515797.1 | Scaffold280 | 119194                  | GG                              | TT              | 1946933120               |
| SNP_P4_120663_119218 | NW_004515797.1 | Scaffold280 | 119218                  | TT                              | CC              | 1946933122               |
| SNP_P4_120664_119247 | NW_004515797.1 | Scaffold280 | 119247                  | AA                              | CC              | 1946933124               |
| SNP_P4_120665_119310 | NW_004515797.1 | Scaffold280 | 119310                  | AA                              | CC              | 1946933126               |
| SNP_P4_120666_119320 | NW_004515797.1 | Scaffold280 | 119320                  | TT                              | CC              | 1946933128               |
| SNP_P4_120667_119333 | NW_004515797.1 | Scaffold280 | 119333                  | CC                              | TT              | 1946933130               |
| SNP_P4_120668_119412 | NW_004515797.1 | Scaffold280 | 119412                  | AA                              | CC              | 1946933132               |
| SNP_P4_120669_119422 | NW_004515797.1 | Scaffold280 | 119422                  | AA                              | GG              | 1946933134               |
| SNP_P4_120670_126801 | NW_004515797.1 | Scaffold280 | 126801                  | CC                              | GG              | 1946933136               |
| SNP_P4_120671_127661 | NW_004515797.1 | Scaffold280 | 127661                  | CC                              | TT              | 1946933138               |
| SNP_P4_120672_128684 | NW_004515797.1 | Scaffold280 | 128684                  | AA                              | CC              | 1946933140               |

| SNPs IDs             | Chromosome IDs | Chromosomes | Physical positions (bp) | CDC Frontier (Reference genome) | (ILWC46 & LPNB) | NCBI SNPdb Accession IDs |
|----------------------|----------------|-------------|-------------------------|---------------------------------|-----------------|--------------------------|
| SNP_P4_120674_129281 | NW_004515797.1 | Scaffold280 | 129281                  | CC                              | AA              | 1946933142               |
| SNP_P4_120675_132258 | NW_004515797.1 | Scaffold280 | 132258                  | AA                              | CC              | 1946933144               |
| SNP_P4_120676_138738 | NW_004515797.1 | Scaffold280 | 138738                  | GG                              | AA              | 1946933146               |
| SNP_P4_120677_138786 | NW_004515797.1 | Scaffold280 | 138786                  | TT                              | GG              | 1946933148               |
| SNP_P4_120678_138788 | NW_004515797.1 | Scaffold280 | 138788                  | AA                              | TT              | 1946933150               |
| SNP_P4_120679_138940 | NW_004515797.1 | Scaffold280 | 138940                  | TT                              | GG              | 1946933152               |
| SNP_P4_120680_141123 | NW_004515797.1 | Scaffold280 | 141123                  | GG                              | AA              | 1946933154               |
| SNP_P4_120681_159956 | NW_004515797.1 | Scaffold280 | 159956                  | TT                              | AA              | 1946933156               |
| SNP_P4_120682_159980 | NW_004515797.1 | Scaffold280 | 159980                  | CC                              | AA              | 1946933158               |
| SNP_P4_120683_160335 | NW_004515797.1 | Scaffold280 | 160335                  | GG                              | AA              | 1946933160               |
| SNP_P4_120684_166230 | NW_004515797.1 | Scaffold280 | 166230                  | CC                              | TT              | 1946933162               |
| SNP_P4_120685_166308 | NW_004515797.1 | Scaffold280 | 166308                  | CC                              | AA              | 1946933164               |
| SNP_P4_120686_166500 | NW_004515797.1 | Scaffold280 | 166500                  | GG                              | AA              | 1946933166               |
| SNP_P4_120687_166547 | NW_004515797.1 | Scaffold280 | 166547                  | TT                              | AA              | 1946933169               |
| SNP_P4_120688_166564 | NW_004515797.1 | Scaffold280 | 166564                  | AA                              | TT              | 1946933171               |
| SNP_P4_120689_166630 | NW_004515797.1 | Scaffold280 | 166630                  | TT                              | AA              | 1946933173               |
| SNP_P4_120690_166664 | NW_004515797.1 | Scaffold280 | 166664                  | AA                              | CC              | 1946933175               |
| SNP_P4_120691_174533 | NW_004515797.1 | Scaffold280 | 174533                  | GG                              | AA              | 1946933177               |
| SNP_P4_120692_177855 | NW_004515797.1 | Scaffold280 | 177855                  | TT                              | CC              | 1946933179               |
| SNP_P4_120693_177856 | NW_004515797.1 | Scaffold280 | 177856                  | AA                              | CC              | 1946933181               |
| SNP_P4_120694_185747 | NW_004515797.1 | Scaffold280 | 185747                  | TT                              | AA              | 1946933183               |
| SNP_P4_120695_188504 | NW_004515797.1 | Scaffold280 | 188504                  | CC                              | GG              | 1946933185               |
| SNP_P4_120696_192519 | NW_004515797.1 | Scaffold280 | 192519                  | AA                              | TT              | 1946933187               |
| SNP_P4_120697_192529 | NW_004515797.1 | Scaffold280 | 192529                  | TT                              | CC              | 1946933189               |
| SNP_P4_120698_192802 | NW_004515797.1 | Scaffold280 | 192802                  | GG                              | AA              | 1946933191               |
| SNP_P4_120699_192807 | NW_004515797.1 | Scaffold280 | 192807                  | TT                              | CC              | 1946933194               |
| SNP_P4_120700_192812 | NW_004515797.1 | Scaffold280 | 192812                  | TT                              | CC              | 1946933196               |
| SNP_P4_120701_194929 | NW_004515797.1 | Scaffold280 | 194929                  | AA                              | TT              | 1946933198               |
| SNP_P4_120702_199889 | NW_004515797.1 | Scaffold280 | 199889                  | GG                              | AA              | 1946933200               |
| SNP_P4_120703_200313 | NW_004515797.1 | Scaffold280 | 200313                  | AA                              | GG              | 1946933202               |
| SNP_P4_120704_200332 | NW_004515797.1 | Scaffold280 | 200332                  | CC                              | GG              | 1946933204               |
| SNP_P4_120705_200448 | NW_004515797.1 | Scaffold280 | 200448                  | CC                              | AA              | 1946933206               |
| SNP_P4_120706_200569 | NW_004515797.1 | Scaffold280 | 200569                  | AA                              | TT              | 1946933208               |
| SNP_P4_120707_206063 | NW_004515797.1 | Scaffold280 | 206063                  | AA                              | GG              | 1946933210               |
| SNP_P4_120708_206136 | NW_004515797.1 | Scaffold280 | 206136                  | CC                              | GG              | 1946933212               |
| SNP_P4_120709_206234 | NW_004515797.1 | Scaffold280 | 206234                  | TT                              | CC              | 1946933215               |
| SNP_P4_120710_206273 | NW_004515797.1 | Scaffold280 | 206273                  | CC                              | AA              | 1946933217               |
| SNP_P4_120711_208522 | NW_004515797.1 | Scaffold280 | 208522                  | AA                              | GG              | 1946933219               |
| SNP_P4_120712_208524 | NW_004515797.1 | Scaffold280 | 208524                  | AA                              | CC              | 1946933221               |
| SNP_P4_120713_214699 | NW_004515797.1 | Scaffold280 | 214699                  | TT                              | CC              | 1946933223               |
| SNP_P4_120714_217961 | NW_004515797.1 | Scaffold280 | 217961                  | GG                              | AA              | 1946933225               |
| SNP_P4_120715_220831 | NW_004515797.1 | Scaffold280 | 220831                  | GG                              | AA              | 1946933227               |

| SNPs IDs             | Chromosome IDs | Chromosomes | Physical positions (bp) | CDC Frontier (Reference genome) | (ILWC46 & LPNB) | NCBI SNPdb Accession IDs |
|----------------------|----------------|-------------|-------------------------|---------------------------------|-----------------|--------------------------|
| SNP_P4_120716_221107 | NW_004515797.1 | Scaffold280 | 221107                  | AA                              | TT              | 1946933229               |
| SNP_P4_120717_221123 | NW_004515797.1 | Scaffold280 | 221123                  | CC                              | TT              | 1946933231               |
| SNP_P4_120718_221134 | NW_004515797.1 | Scaffold280 | 221134                  | TT                              | GG              | 1946933233               |
| SNP_P4_120719_225989 | NW_004515797.1 | Scaffold280 | 225989                  | TT                              | GG              | 1946933235               |
| SNP_P4_120720_240018 | NW_004515797.1 | Scaffold280 | 240018                  | CC                              | AA              | 1946933237               |
| SNP_P4_120721_240106 | NW_004515797.1 | Scaffold280 | 240106                  | AA                              | GG              | 1946933239               |
| SNP_P4_120722_240143 | NW_004515797.1 | Scaffold280 | 240143                  | TT                              | CC              | 1946933241               |
| SNP_P4_120723_240144 | NW_004515797.1 | Scaffold280 | 240144                  | GG                              | AA              | 1946933243               |
| SNP_P4_120724_258455 | NW_004515797.1 | Scaffold280 | 258455                  | TT                              | GG              | 1946933245               |
| SNP_P4_120725_258463 | NW_004515797.1 | Scaffold280 | 258463                  | AA                              | CC              | 1946933247               |
| SNP_P4_120726_258481 | NW_004515797.1 | Scaffold280 | 258481                  | CC                              | TT              | 1946933249               |
| SNP_P4_120727_258484 | NW_004515797.1 | Scaffold280 | 258484                  | GG                              | TT              | 1946933252               |
| SNP_P4_120728_258490 | NW_004515797.1 | Scaffold280 | 258490                  | TT                              | GG              | 1946933254               |
| SNP_P4_120730_276359 | NW_004515797.1 | Scaffold280 | 276359                  | TT                              | CC              | 1946933256               |
| SNP_P4_120731_284098 | NW_004515797.1 | Scaffold280 | 284098                  | AA                              | GG              | 1946933258               |
| SNP_P4_120732_284172 | NW_004515797.1 | Scaffold280 | 284172                  | AA                              | CC              | 1946933260               |
| SNP_P4_120733_294604 | NW_004515797.1 | Scaffold280 | 294604                  | CC                              | TT              | 1946933262               |
| SNP_P4_120734_294980 | NW_004515797.1 | Scaffold280 | 294980                  | AA                              | GG              | 1946933264               |
| SNP_P4_120735_295564 | NW_004515797.1 | Scaffold280 | 295564                  | AA                              | GG              | 1946933266               |
| SNP_P4_120736_295920 | NW_004515797.1 | Scaffold280 | 295920                  | AA                              | CC              | 1946933268               |
| SNP_P4_120737_295937 | NW_004515797.1 | Scaffold280 | 295937                  | AA                              | GG              | 1946933270               |
| SNP_P4_120738_296168 | NW_004515797.1 | Scaffold280 | 296168                  | CC                              | TT              | 1946933272               |
| SNP_P4_120739_298693 | NW_004515797.1 | Scaffold280 | 298693                  | TT                              | CC              | 1946933274               |
| SNP_P4_120740_302072 | NW_004515797.1 | Scaffold280 | 302072                  | TT                              | CC              | 1946933276               |
| SNP_P4_120742_302201 | NW_004515797.1 | Scaffold280 | 302201                  | GG                              | AA              | 1946933278               |
| SNP_P4_120743_302533 | NW_004515797.1 | Scaffold280 | 302533                  | GG                              | AA              | 1946933280               |
| SNP_P4_120744_302535 | NW_004515797.1 | Scaffold280 | 302535                  | AA                              | CC              | 1946933282               |
| SNP_P4_120745_302908 | NW_004515797.1 | Scaffold280 | 302908                  | AA                              | GG              | 1946933284               |
| SNP_P4_120746_304407 | NW_004515797.1 | Scaffold280 | 304407                  | CC                              | AA              | 1946933286               |
| SNP_P4_120747_304825 | NW_004515797.1 | Scaffold280 | 304825                  | AA                              | GG              | 1946933288               |
| SNP_P4_120748_305165 | NW_004515797.1 | Scaffold280 | 305165                  | TT                              | CC              | 1946933290               |
| SNP_P4_120749_305170 | NW_004515797.1 | Scaffold280 | 305170                  | TT                              | GG              | 1946933292               |
| SNP_P4_120750_305174 | NW_004515797.1 | Scaffold280 | 305174                  | CC                              | GG              | 1946933295               |
| SNP_P4_120751_305277 | NW_004515797.1 | Scaffold280 | 305277                  | TT                              | CC              | 1946933297               |
| SNP_P4_120752_319573 | NW_004515797.1 | Scaffold280 | 319573                  | TT                              | GG              | 1946933299               |
| SNP_P4_120753_319605 | NW_004515797.1 | Scaffold280 | 319605                  | CC                              | TT              | 1946933301               |
| SNP_P4_120754_319647 | NW_004515797.1 | Scaffold280 | 319647                  | GG                              | CC              | 1946933303               |
| SNP_P4_120755_319648 | NW_004515797.1 | Scaffold280 | 319648                  | AA                              | TT              | 1946933305               |
| SNP_P4_120756_319835 | NW_004515797.1 | Scaffold280 | 319835                  | TT                              | GG              | 1946933307               |
| SNP_P4_120758_320022 | NW_004515797.1 | Scaffold280 | 320022                  | TT                              | AA              | 1946933309               |
| SNP_P4_120759_320172 | NW_004515797.1 | Scaffold280 | 320172                  | TT                              | CC              | 1946933311               |
| SNP_P4_120760_320671 | NW_004515797.1 | Scaffold280 | 320671                  | TT                              | GG              | 1946933313               |



| SNPs IDs             | Chromosome IDs | Chromosomes | Physical positions (bp) | CDC Frontier (Reference genome) | (ILWC46 & LPNB) | NCBI SNPdb Accession IDs |
|----------------------|----------------|-------------|-------------------------|---------------------------------|-----------------|--------------------------|
| SNP_P4_120761_323423 | NW_004515797.1 | Scaffold280 | 323423                  | AA                              | TT              | 1946933315               |
| SNP_P4_120762_323567 | NW_004515797.1 | Scaffold280 | 323567                  | GG                              | AA              | 1946933317               |
| SNP_P4_120763_323578 | NW_004515797.1 | Scaffold280 | 323578                  | AA                              | CC              | 1946933319               |
| SNP_P4_120764_324370 | NW_004515797.1 | Scaffold280 | 324370                  | GG                              | AA              | 1946933321               |
| SNP_P4_120765_324390 | NW_004515797.1 | Scaffold280 | 324390                  | TT                              | GG              | 1946933323               |
| SNP_P4_120766_324426 | NW_004515797.1 | Scaffold280 | 324426                  | CC                              | TT              | 1946933325               |
| SNP_P4_120767_324442 | NW_004515797.1 | Scaffold280 | 324442                  | GG                              | TT              | 1946933328               |
| SNP_P4_120768_324466 | NW_004515797.1 | Scaffold280 | 324466                  | AA                              | CC              | 1946933330               |
| SNP_P4_120769_324472 | NW_004515797.1 | Scaffold280 | 324472                  | GG                              | AA              | 1946933332               |
| SNP_P4_120770_324527 | NW_004515797.1 | Scaffold280 | 324527                  | TT                              | AA              | 1946933334               |
| SNP_P4_120771_325942 | NW_004515797.1 | Scaffold280 | 325942                  | TT                              | AA              | 1946933336               |
| SNP_P4_120773_334734 | NW_004515797.1 | Scaffold280 | 334734                  | TT                              | CC              | 1946933338               |
| SNP_P4_120774_334735 | NW_004515797.1 | Scaffold280 | 334735                  | TT                              | GG              | 1946933340               |
| SNP_P4_120775_334742 | NW_004515797.1 | Scaffold280 | 334742                  | TT                              | CC              | 1946933342               |
| SNP_P4_120776_335192 | NW_004515797.1 | Scaffold280 | 335192                  | TT                              | GG              | 1946933344               |
| SNP_P4_120777_335237 | NW_004515797.1 | Scaffold280 | 335237                  | TT                              | CC              | 1946933346               |
| SNP_P4_120778_335269 | NW_004515797.1 | Scaffold280 | 335269                  | AA                              | GG              | 1946933348               |
| SNP_P4_120779_335342 | NW_004515797.1 | Scaffold280 | 335342                  | AA                              | TT              | 1946933350               |
| SNP_P4_120780_335479 | NW_004515797.1 | Scaffold280 | 335479                  | CC                              | TT              | 1946933352               |
| SNP_P4_120781_335525 | NW_004515797.1 | Scaffold280 | 335525                  | TT                              | GG              | 1946933354               |
| SNP_P4_120782_335682 | NW_004515797.1 | Scaffold280 | 335682                  | AA                              | GG              | 1946933356               |
| SNP_P4_120783_335691 | NW_004515797.1 | Scaffold280 | 335691                  | AA                              | GG              | 1946933358               |
| SNP_P4_120784_335700 | NW_004515797.1 | Scaffold280 | 335700                  | AA                              | GG              | 1946933361               |
| SNP_P4_120785_336885 | NW_004515797.1 | Scaffold280 | 336885                  | AA                              | TT              | 1946933363               |
| SNP_P4_120786_342253 | NW_004515797.1 | Scaffold280 | 342253                  | TT                              | CC              | 1946933365               |
| SNP_P4_120787_344009 | NW_004515797.1 | Scaffold280 | 344009                  | TT                              | AA              | 1946933367               |
| SNP_P4_120788_352432 | NW_004515797.1 | Scaffold280 | 352432                  | CC                              | AA              | 1946933369               |
| SNP_P4_120789_352450 | NW_004515797.1 | Scaffold280 | 352450                  | TT                              | CC              | 1946933371               |
| SNP_P4_120790_352542 | NW_004515797.1 | Scaffold280 | 352542                  | TT                              | CC              | 1946933373               |
| SNP_P4_120791_373486 | NW_004515797.1 | Scaffold280 | 373486                  | GG                              | TT              | 1946933376               |
| SNP_P4_120792_373494 | NW_004515797.1 | Scaffold280 | 373494                  | GG                              | AA              | 1946933378               |
| SNP_P4_120793_373516 | NW_004515797.1 | Scaffold280 | 373516                  | TT                              | CC              | 1946933380               |
| SNP_P4_120794_373528 | NW_004515797.1 | Scaffold280 | 373528                  | AA                              | CC              | 1946933382               |
| SNP_P4_120795_373604 | NW_004515797.1 | Scaffold280 | 373604                  | GG                              | TT              | 1946933384               |
| SNP_P4_120796_373644 | NW_004515797.1 | Scaffold280 | 373644                  | TT                              | CC              | 1946933386               |
| SNP_P4_120797_373785 | NW_004515797.1 | Scaffold280 | 373785                  | AA                              | GG              | 1946933388               |
| SNP_P4_120798_373807 | NW_004515797.1 | Scaffold280 | 373807                  | AA                              | CC              | 1946933390               |
| SNP_P4_120799_373926 | NW_004515797.1 | Scaffold280 | 373926                  | CC                              | TT              | 1946933392               |
| SNP_P4_120800_373945 | NW_004515797.1 | Scaffold280 | 373945                  | AA                              | CC              | 1946933394               |
| SNP_P4_120801_373950 | NW_004515797.1 | Scaffold280 | 373950                  | GG                              | AA              | 1946933396               |
| SNP_P4_120802_374359 | NW_004515797.1 | Scaffold280 | 374359                  | GG                              | AA              | 1946933399               |
| SNP_P4_120803_374518 | NW_004515797.1 | Scaffold280 | 374518                  | AA                              | TT              | 1946933401               |

| SNPs IDs             | Chromosome IDs | Chromosomes | Physical positions (bp) | CDC Frontier (Reference genome) | (ILWC46 & LPNB) | NCBI SNPdb Accession IDs |
|----------------------|----------------|-------------|-------------------------|---------------------------------|-----------------|--------------------------|
| SNP_P4_120804_374646 | NW_004515797.1 | Scaffold280 | 374646                  | AA                              | GG              | 1946933403               |
| SNP_P4_120805_374811 | NW_004515797.1 | Scaffold280 | 374811                  | AA                              | GG              | 1946933405               |
| SNP_P4_120806_374890 | NW_004515797.1 | Scaffold280 | 374890                  | TT                              | CC              | 1946933407               |
| SNP_P4_120807_374902 | NW_004515797.1 | Scaffold280 | 374902                  | TT                              | CC              | 1946933409               |
| SNP_P4_120808_375152 | NW_004515797.1 | Scaffold280 | 375152                  | AA                              | GG              | 1946933411               |
| SNP_P4_120809_378472 | NW_004515797.1 | Scaffold280 | 378472                  | AA                              | GG              | 1946933413               |
| SNP_P4_120810_378479 | NW_004515797.1 | Scaffold280 | 378479                  | GG                              | AA              | 1946933415               |
| SNP_P4_120811_378651 | NW_004515797.1 | Scaffold280 | 378651                  | GG                              | AA              | 1946933417               |
| SNP_P4_120812_378853 | NW_004515797.1 | Scaffold280 | 378853                  | CC                              | AA              | 1946933419               |
| SNP_P4_120813_378885 | NW_004515797.1 | Scaffold280 | 378885                  | TT                              | AA              | 1946933421               |
| SNP_P4_120814_378934 | NW_004515797.1 | Scaffold280 | 378934                  | TT                              | CC              | 1946933423               |
| SNP_P4_120815_379148 | NW_004515797.1 | Scaffold280 | 379148                  | AA                              | CC              | 1946933425               |
| SNP_P4_120816_379510 | NW_004515797.1 | Scaffold280 | 379510                  | TT                              | CC              | 1946933427               |
| SNP_P4_120817_379569 | NW_004515797.1 | Scaffold280 | 379569                  | AA                              | GG              | 1946933429               |
| SNP_P4_120818_379573 | NW_004515797.1 | Scaffold280 | 379573                  | AA                              | TT              | 1946933431               |
| SNP_P4_120819_381775 | NW_004515797.1 | Scaffold280 | 381775                  | CC                              | AA              | 1946933433               |
| SNP_P4_120820_381780 | NW_004515797.1 | Scaffold280 | 381780                  | GG                              | CC              | 1946933435               |
| SNP_P4_120821_381795 | NW_004515797.1 | Scaffold280 | 381795                  | CC                              | GG              | 1946933437               |
| SNP_P4_120822_381816 | NW_004515797.1 | Scaffold280 | 381816                  | AA                              | CC              | 1946933439               |
| SNP_P4_120823_381825 | NW_004515797.1 | Scaffold280 | 381825                  | AA                              | TT              | 1946933441               |
| SNP_P4_120824_381827 | NW_004515797.1 | Scaffold280 | 381827                  | AA                              | GG              | 1946933443               |
| SNP_P4_120825_381835 | NW_004515797.1 | Scaffold280 | 381835                  | TT                              | GG              | 1946933445               |
| SNP_P4_120826_381909 | NW_004515797.1 | Scaffold280 | 381909                  | GG                              | AA              | 1946933447               |
| SNP_P4_120827_382141 | NW_004515797.1 | Scaffold280 | 382141                  | GG                              | TT              | 1946933449               |
| SNP_P4_120828_382196 | NW_004515797.1 | Scaffold280 | 382196                  | GG                              | AA              | 1946933452               |
| SNP_P4_120829_384744 | NW_004515797.1 | Scaffold280 | 384744                  | TT                              | CC              | 1946933454               |
| SNP_P4_120830_387229 | NW_004515797.1 | Scaffold280 | 387229                  | TT                              | CC              | 1946933456               |
| SNP_P4_120831_390345 | NW_004515797.1 | Scaffold280 | 390345                  | TT                              | CC              | 1946933459               |
| SNP_P4_120832_392489 | NW_004515797.1 | Scaffold280 | 392489                  | TT                              | AA              | 1946933461               |
| SNP_P4_120833_392558 | NW_004515797.1 | Scaffold280 | 392558                  | CC                              | TT              | 1946933463               |
| SNP_P4_120834_626    | NW_004515798.1 | Scaffold281 | 626                     | TT                              | CC              | 1946933465               |
| SNP_P4_120835_629    | NW_004515798.1 | Scaffold281 | 629                     | CC                              | TT              | 1946933467               |
| SNP_P4_120836_699    | NW_004515798.1 | Scaffold281 | 699                     | AA                              | GG              | 1946933469               |
| SNP_P4_120837_739    | NW_004515798.1 | Scaffold281 | 739                     | AA                              | TT              | 1946933471               |
| SNP_P4_120838_791    | NW_004515798.1 | Scaffold281 | 791                     | GG                              | AA              | 1946933473               |
| SNP_P4_120839_793    | NW_004515798.1 | Scaffold281 | 793                     | GG                              | AA              | 1946933475               |
| SNP_P4_120840_802    | NW_004515798.1 | Scaffold281 | 802                     | AA                              | GG              | 1946933477               |
| SNP_P4_120841_817    | NW_004515798.1 | Scaffold281 | 817                     | CC                              | GG              | 1946933479               |
| SNP_P4_120842_857    | NW_004515798.1 | Scaffold281 | 857                     | GG                              | AA              | 1946933482               |
| SNP_P4_120843_910    | NW_004515798.1 | Scaffold281 | 910                     | TT                              | CC              | 1946933484               |
| SNP_P4_120844_930    | NW_004515798.1 | Scaffold281 | 930                     | GG                              | AA              | 1946933486               |
| SNP_P4_120845_1013   | NW_004515798.1 | Scaffold281 | 1013                    | GG                              | AA              | 1946933488               |

| SNPs IDs           | Chromosome IDs | Chromosomes | Physical positions (bp) | CDC Frontier (Reference genome) | (ILWC46 & LPNB) | NCBI SNPdb Accession IDs |
|--------------------|----------------|-------------|-------------------------|---------------------------------|-----------------|--------------------------|
| SNP_P4_120846_1045 | NW_004515798.1 | Scaffold281 | 1045                    | GG                              | AA              | 1946933490               |
| SNP_P4_120847_1143 | NW_004515798.1 | Scaffold281 | 1143                    | AA                              | GG              | 1946933492               |
| SNP_P4_120848_1170 | NW_004515798.1 | Scaffold281 | 1170                    | CC                              | TT              | 1946933494               |
| SNP_P4_120849_1195 | NW_004515798.1 | Scaffold281 | 1195                    | CC                              | TT              | 1946933496               |
| SNP_P4_120850_1217 | NW_004515798.1 | Scaffold281 | 1217                    | GG                              | TT              | 1946933498               |
| SNP_P4_120851_1251 | NW_004515798.1 | Scaffold281 | 1251                    | AA                              | GG              | 1946933500               |
| SNP_P4_120853_1322 | NW_004515798.1 | Scaffold281 | 1322                    | TT                              | CC              | 1946933502               |
| SNP_P4_120856_1547 | NW_004515798.1 | Scaffold281 | 1547                    | TT                              | CC              | 1946933504               |
| SNP_P4_120857_1575 | NW_004515798.1 | Scaffold281 | 1575                    | CC                              | TT              | 1946933506               |
| SNP_P4_120858_1618 | NW_004515798.1 | Scaffold281 | 1618                    | GG                              | TT              | 1946933509               |
| SNP_P4_120859_1652 | NW_004515798.1 | Scaffold281 | 1652                    | TT                              | AA              | 1946933511               |
| SNP_P4_120860_1653 | NW_004515798.1 | Scaffold281 | 1653                    | GG                              | AA              | 1946933513               |
| SNP_P4_120861_1657 | NW_004515798.1 | Scaffold281 | 1657                    | TT                              | CC              | 1946933515               |
| SNP_P4_120862_1661 | NW_004515798.1 | Scaffold281 | 1661                    | TT                              | CC              | 1946933517               |
| SNP_P4_120863_1711 | NW_004515798.1 | Scaffold281 | 1711                    | AA                              | GG              | 1946933519               |
| SNP_P4_120864_1721 | NW_004515798.1 | Scaffold281 | 1721                    | TT                              | AA              | 1946933521               |
| SNP_P4_120865_1755 | NW_004515798.1 | Scaffold281 | 1755                    | CC                              | TT              | 1946933523               |
| SNP_P4_120866_1775 | NW_004515798.1 | Scaffold281 | 1775                    | AA                              | GG              | 1946933525               |
| SNP_P4_120867_1779 | NW_004515798.1 | Scaffold281 | 1779                    | AA                              | GG              | 1946933527               |
| SNP_P4_120868_1782 | NW_004515798.1 | Scaffold281 | 1782                    | GG                              | AA              | 1946933529               |
| SNP_P4_120869_2046 | NW_004515798.1 | Scaffold281 | 2046                    | AA                              | TT              | 1946933531               |
| SNP_P4_120870_2138 | NW_004515798.1 | Scaffold281 | 2138                    | AA                              | GG              | 1946933533               |
| SNP_P4_120871_2159 | NW_004515798.1 | Scaffold281 | 2159                    | GG                              | CC              | 1946933535               |
| SNP_P4_120873_2268 | NW_004515798.1 | Scaffold281 | 2268                    | CC                              | TT              | 1946933537               |
| SNP_P4_120874_2273 | NW_004515798.1 | Scaffold281 | 2273                    | CC                              | TT              | 1946933540               |
| SNP_P4_120875_2278 | NW_004515798.1 | Scaffold281 | 2278                    | TT                              | CC              | 1946933542               |
| SNP_P4_120876_2286 | NW_004515798.1 | Scaffold281 | 2286                    | AA                              | TT              | 1946933544               |
| SNP_P4_120877_2622 | NW_004515798.1 | Scaffold281 | 2622                    | CC                              | TT              | 1946933546               |
| SNP_P4_120878_2624 | NW_004515798.1 | Scaffold281 | 2624                    | TT                              | CC              | 1946933548               |
| SNP_P4_120879_2625 | NW_004515798.1 | Scaffold281 | 2625                    | TT                              | GG              | 1946933550               |
| SNP_P4_120880_2659 | NW_004515798.1 | Scaffold281 | 2659                    | CC                              | TT              | 1946933552               |
| SNP_P4_120881_2831 | NW_004515798.1 | Scaffold281 | 2831                    | CC                              | TT              | 1946933554               |
| SNP_P4_120882_2911 | NW_004515798.1 | Scaffold281 | 2911                    | TT                              | AA              | 1946933556               |
| SNP_P4_120883_2935 | NW_004515798.1 | Scaffold281 | 2935                    | GG                              | TT              | 1946933558               |
| SNP_P4_120885_3032 | NW_004515798.1 | Scaffold281 | 3032                    | TT                              | CC              | 1946933560               |
| SNP_P4_120886_3034 | NW_004515798.1 | Scaffold281 | 3034                    | CC                              | TT              | 1946933562               |
| SNP_P4_120888_3141 | NW_004515798.1 | Scaffold281 | 3141                    | AA                              | CC              | 1946933564               |
| SNP_P4_120889_3256 | NW_004515798.1 | Scaffold281 | 3256                    | TT                              | CC              | 1946933566               |
| SNP_P4_120890_3274 | NW_004515798.1 | Scaffold281 | 3274                    | TT                              | CC              | 1946933568               |
| SNP_P4_120892_3362 | NW_004515798.1 | Scaffold281 | 3362                    | CC                              | AA              | 1946933570               |
| SNP_P4_120894_3433 | NW_004515798.1 | Scaffold281 | 3433                    | TT                              | AA              | 1946933572               |
| SNP_P4_120895_3439 | NW_004515798.1 | Scaffold281 | 3439                    | GG                              | AA              | 1946933575               |

| SNPs IDs           | Chromosome IDs | Chromosomes | Physical positions (bp) | CDC Frontier (Reference genome) | (ILWC46 & LPNB) | NCBI SNPdb Accession IDs |
|--------------------|----------------|-------------|-------------------------|---------------------------------|-----------------|--------------------------|
| SNP_P4_120896_3442 | NW_004515798.1 | Scaffold281 | 3442                    | GG                              | CC              | 1946933577               |
| SNP_P4_120897_3480 | NW_004515798.1 | Scaffold281 | 3480                    | CC                              | GG              | 1946933579               |
| SNP_P4_120898_3510 | NW_004515798.1 | Scaffold281 | 3510                    | TT                              | CC              | 1946933581               |
| SNP_P4_120899_3561 | NW_004515798.1 | Scaffold281 | 3561                    | AA                              | TT              | 1946933583               |
| SNP_P4_120900_3603 | NW_004515798.1 | Scaffold281 | 3603                    | AA                              | GG              | 1946933585               |
| SNP_P4_120901_3648 | NW_004515798.1 | Scaffold281 | 3648                    | AA                              | GG              | 1946933587               |
| SNP_P4_120902_3651 | NW_004515798.1 | Scaffold281 | 3651                    | TT                              | CC              | 1946933589               |
| SNP_P4_120903_3694 | NW_004515798.1 | Scaffold281 | 3694                    | TT                              | CC              | 1946933591               |
| SNP_P4_120904_3719 | NW_004515798.1 | Scaffold281 | 3719                    | CC                              | TT              | 1946933593               |
| SNP_P4_120906_3757 | NW_004515798.1 | Scaffold281 | 3757                    | CC                              | TT              | 1946933595               |
| SNP_P4_120907_3810 | NW_004515798.1 | Scaffold281 | 3810                    | GG                              | CC              | 1946933597               |
| SNP_P4_120908_3880 | NW_004515798.1 | Scaffold281 | 3880                    | AA                              | GG              | 1946933600               |
| SNP_P4_120909_3908 | NW_004515798.1 | Scaffold281 | 3908                    | AA                              | CC              | 1946933602               |
| SNP_P4_120910_4031 | NW_004515798.1 | Scaffold281 | 4031                    | AA                              | CC              | 1946933604               |
| SNP_P4_120911_4093 | NW_004515798.1 | Scaffold281 | 4093                    | TT                              | AA              | 1946933606               |
| SNP_P4_120913_4173 | NW_004515798.1 | Scaffold281 | 4173                    | AA                              | GG              | 1946933608               |
| SNP_P4_120915_4234 | NW_004515798.1 | Scaffold281 | 4234                    | TT                              | CC              | 1946933610               |
| SNP_P4_120916_4248 | NW_004515798.1 | Scaffold281 | 4248                    | TT                              | CC              | 1946933612               |
| SNP_P4_120917_4347 | NW_004515798.1 | Scaffold281 | 4347                    | TT                              | AA              | 1946933614               |
| SNP_P4_120918_4807 | NW_004515798.1 | Scaffold281 | 4807                    | GG                              | TT              | 1946933616               |
| SNP_P4_120920_4976 | NW_004515798.1 | Scaffold281 | 4976                    | AA                              | CC              | 1946933618               |
| SNP_P4_120922_5149 | NW_004515798.1 | Scaffold281 | 5149                    | TT                              | CC              | 1946933620               |
| SNP_P4_120923_5157 | NW_004515798.1 | Scaffold281 | 5157                    | CC                              | TT              | 1946933622               |
| SNP_P4_120924_5168 | NW_004515798.1 | Scaffold281 | 5168                    | TT                              | CC              | 1946933624               |
| SNP_P4_120925_5181 | NW_004515798.1 | Scaffold281 | 5181                    | TT                              | AA              | 1946933626               |
| SNP_P4_120926_5182 | NW_004515798.1 | Scaffold281 | 5182                    | AA                              | CC              | 1946933628               |
| SNP_P4_120927_5199 | NW_004515798.1 | Scaffold281 | 5199                    | GG                              | AA              | 1946933630               |
| SNP_P4_120928_5200 | NW_004515798.1 | Scaffold281 | 5200                    | CC                              | TT              | 1946933632               |
| SNP_P4_120929_5345 | NW_004515798.1 | Scaffold281 | 5345                    | TT                              | CC              | 1946933634               |
| SNP_P4_120930_5362 | NW_004515798.1 | Scaffold281 | 5362                    | AA                              | GG              | 1946933636               |
| SNP_P4_120931_5363 | NW_004515798.1 | Scaffold281 | 5363                    | CC                              | GG              | 1946933638               |
| SNP_P4_120932_5400 | NW_004515798.1 | Scaffold281 | 5400                    | GG                              | CC              | 1946933640               |
| SNP_P4_120933_5401 | NW_004515798.1 | Scaffold281 | 5401                    | CC                              | GG              | 1946933642               |
| SNP_P4_120934_5406 | NW_004515798.1 | Scaffold281 | 5406                    | CC                              | TT              | 1946933644               |
| SNP_P4_120935_5436 | NW_004515798.1 | Scaffold281 | 5436                    | CC                              | AA              | 1946933646               |
| SNP_P4_120936_5442 | NW_004515798.1 | Scaffold281 | 5442                    | GG                              | AA              | 1946933648               |
| SNP_P4_120937_5455 | NW_004515798.1 | Scaffold281 | 5455                    | AA                              | GG              | 1946933650               |
| SNP_P4_120938_6505 | NW_004515798.1 | Scaffold281 | 6505                    | TT                              | AA              | 1946933652               |
| SNP_P4_120939_6526 | NW_004515798.1 | Scaffold281 | 6526                    | TT                              | CC              | 1946933654               |
| SNP_P4_120940_6569 | NW_004515798.1 | Scaffold281 | 6569                    | TT                              | CC              | 1946933657               |
| SNP_P4_120941_6575 | NW_004515798.1 | Scaffold281 | 6575                    | AA                              | CC              | 1946933659               |
| SNP_P4_120942_6600 | NW_004515798.1 | Scaffold281 | 6600                    | GG                              | TT              | 1946933661               |

| SNPs IDs            | Chromosome IDs | Chromosomes | Physical positions (bp) | CDC Frontier (Reference genome) | (ILWC46 & LPNB) | NCBI SNPdb Accession IDs |
|---------------------|----------------|-------------|-------------------------|---------------------------------|-----------------|--------------------------|
| SNP_P4_120943_6621  | NW_004515798.1 | Scaffold281 | 6621                    | CC                              | GG              | 1946933663               |
| SNP_P4_120944_6905  | NW_004515798.1 | Scaffold281 | 6905                    | AA                              | GG              | 1946933665               |
| SNP_P4_120945_6921  | NW_004515798.1 | Scaffold281 | 6921                    | CC                              | TT              | 1946933667               |
| SNP_P4_120946_6931  | NW_004515798.1 | Scaffold281 | 6931                    | CC                              | GG              | 1946933669               |
| SNP_P4_120947_6999  | NW_004515798.1 | Scaffold281 | 6999                    | AA                              | GG              | 1946933671               |
| SNP_P4_120948_7051  | NW_004515798.1 | Scaffold281 | 7051                    | GG                              | AA              | 1946933673               |
| SNP_P4_120949_8346  | NW_004515798.1 | Scaffold281 | 8346                    | AA                              | GG              | 1946933675               |
| SNP_P4_120950_8402  | NW_004515798.1 | Scaffold281 | 8402                    | TT                              | CC              | 1946933677               |
| SNP_P4_120951_8457  | NW_004515798.1 | Scaffold281 | 8457                    | CC                              | AA              | 1946933679               |
| SNP_P4_120952_8748  | NW_004515798.1 | Scaffold281 | 8748                    | AA                              | GG              | 1946933681               |
| SNP_P4_120953_8824  | NW_004515798.1 | Scaffold281 | 8824                    | AA                              | TT              | 1946933683               |
| SNP_P4_120954_8871  | NW_004515798.1 | Scaffold281 | 8871                    | GG                              | AA              | 1946933685               |
| SNP_P4_120955_9266  | NW_004515798.1 | Scaffold281 | 9266                    | TT                              | CC              | 1946933687               |
| SNP_P4_120956_9277  | NW_004515798.1 | Scaffold281 | 9277                    | GG                              | CC              | 1946933689               |
| SNP_P4_120957_9321  | NW_004515798.1 | Scaffold281 | 9321                    | CC                              | AA              | 1946933691               |
| SNP_P4_120958_9337  | NW_004515798.1 | Scaffold281 | 9337                    | CC                              | TT              | 1946933693               |
| SNP_P4_120959_9343  | NW_004515798.1 | Scaffold281 | 9343                    | GG                              | CC              | 1946933695               |
| SNP_P4_120960_9372  | NW_004515798.1 | Scaffold281 | 9372                    | TT                              | CC              | 1946933697               |
| SNP_P4_120961_27037 | NW_004515798.1 | Scaffold281 | 27037                   | CC                              | TT              | 1946933700               |
| SNP_P4_120962_27223 | NW_004515798.1 | Scaffold281 | 27223                   | CC                              | TT              | 1946933702               |
| SNP_P4_120963_27225 | NW_004515798.1 | Scaffold281 | 27225                   | TT                              | GG              | 1946933704               |
| SNP_P4_120964_27245 | NW_004515798.1 | Scaffold281 | 27245                   | AA                              | GG              | 1946933706               |
| SNP_P4_120965_27248 | NW_004515798.1 | Scaffold281 | 27248                   | AA                              | GG              | 1946933708               |
| SNP_P4_120966_27249 | NW_004515798.1 | Scaffold281 | 27249                   | TT                              | GG              | 1946933710               |
| SNP_P4_120967_27268 | NW_004515798.1 | Scaffold281 | 27268                   | AA                              | GG              | 1946933712               |
| SNP_P4_120968_27314 | NW_004515798.1 | Scaffold281 | 27314                   | AA                              | GG              | 1946933714               |
| SNP_P4_120969_27317 | NW_004515798.1 | Scaffold281 | 27317                   | AA                              | GG              | 1946933716               |
| SNP_P4_120970_27338 | NW_004515798.1 | Scaffold281 | 27338                   | AA                              | GG              | 1946933718               |
| SNP_P4_120971_27349 | NW_004515798.1 | Scaffold281 | 27349                   | GG                              | AA              | 1946933720               |
| SNP_P4_120972_27359 | NW_004515798.1 | Scaffold281 | 27359                   | TT                              | GG              | 1946933722               |
| SNP_P4_120973_27394 | NW_004515798.1 | Scaffold281 | 27394                   | AA                              | TT              | 1946933724               |
| SNP_P4_120974_27396 | NW_004515798.1 | Scaffold281 | 27396                   | AA                              | TT              | 1946933726               |
| SNP_P4_120975_27468 | NW_004515798.1 | Scaffold281 | 27468                   | GG                              | TT              | 1946933728               |
| SNP_P4_120976_28627 | NW_004515798.1 | Scaffold281 | 28627                   | GG                              | TT              | 1946933730               |
| SNP_P4_120977_29202 | NW_004515798.1 | Scaffold281 | 29202                   | TT                              | GG              | 1946933732               |
| SNP_P4_120978_898   | NW_004515799.1 | Scaffold282 | 898                     | CC                              | AA              | 1946933734               |
| SNP_P4_120979_6105  | NW_004515799.1 | Scaffold282 | 6105                    | TT                              | CC              | 1946933736               |
| SNP_P4_120980_7915  | NW_004515799.1 | Scaffold282 | 7915                    | AA                              | TT              | 1946933738               |
| SNP_P4_120981_8653  | NW_004515799.1 | Scaffold282 | 8653                    | GG                              | AA              | 1946933740               |
| SNP_P4_120982_18903 | NW_004515799.1 | Scaffold282 | 18903                   | GG                              | TT              | 1946933742               |
| SNP_P4_120983_38127 | NW_004515799.1 | Scaffold282 | 38127                   | AA                              | GG              | 1946933744               |
| SNP_P4_120984_38197 | NW_004515799.1 | Scaffold282 | 38197                   | TT                              | GG              | 1946933746               |

| SNPs IDs            | Chromosome IDs | Chromosomes | Physical positions (bp) | CDC Frontier (Reference genome) | (ILWC46 & LPNB) | NCBI SNPdb Accession IDs |
|---------------------|----------------|-------------|-------------------------|---------------------------------|-----------------|--------------------------|
| SNP_P4_120985_38369 | NW_004515799.1 | Scaffold282 | 38369                   | TT                              | CC              | 1946933748               |
| SNP_P4_120986_39573 | NW_004515799.1 | Scaffold282 | 39573                   | CC                              | TT              | 1946933750               |
| SNP_P4_120987_39578 | NW_004515799.1 | Scaffold282 | 39578                   | CC                              | TT              | 1946933752               |
| SNP_P4_120988_39692 | NW_004515799.1 | Scaffold282 | 39692                   | GG                              | AA              | 1946933754               |
| SNP_P4_120989_39717 | NW_004515799.1 | Scaffold282 | 39717                   | GG                              | CC              | 1946933756               |
| SNP_P4_120990_39728 | NW_004515799.1 | Scaffold282 | 39728                   | CC                              | TT              | 1946933758               |
| SNP_P4_120991_39732 | NW_004515799.1 | Scaffold282 | 39732                   | GG                              | CC              | 1946933760               |
| SNP_P4_120992_39921 | NW_004515799.1 | Scaffold282 | 39921                   | CC                              | TT              | 1946933762               |
| SNP_P4_120993_39925 | NW_004515799.1 | Scaffold282 | 39925                   | TT                              | CC              | 1946933764               |
| SNP_P4_120994_39947 | NW_004515799.1 | Scaffold282 | 39947                   | GG                              | AA              | 1946933766               |
| SNP_P4_120995_40119 | NW_004515799.1 | Scaffold282 | 40119                   | AA                              | TT              | 1946933768               |
| SNP_P4_120996_40120 | NW_004515799.1 | Scaffold282 | 40120                   | TT                              | CC              | 1946933770               |
| SNP_P4_120997_40156 | NW_004515799.1 | Scaffold282 | 40156                   | AA                              | GG              | 1946933772               |
| SNP_P4_120998_52007 | NW_004515799.1 | Scaffold282 | 52007                   | GG                              | AA              | 1946933774               |
| SNP_P4_120999_61651 | NW_004515799.1 | Scaffold282 | 61651                   | CC                              | AA              | 1946933776               |
| SNP_P4_121000_62765 | NW_004515799.1 | Scaffold282 | 62765                   | TT                              | GG              | 1946933778               |
| SNP_P4_121001_70502 | NW_004515799.1 | Scaffold282 | 70502                   | GG                              | TT              | 1946933780               |
| SNP_P4_121002_70505 | NW_004515799.1 | Scaffold282 | 70505                   | TT                              | CC              | 1946933782               |
| SNP_P4_121003_75054 | NW_004515799.1 | Scaffold282 | 75054                   | CC                              | TT              | 1946933784               |
| SNP_P4_121004_75273 | NW_004515799.1 | Scaffold282 | 75273                   | GG                              | TT              | 1946933786               |
| SNP_P4_121005_75274 | NW_004515799.1 | Scaffold282 | 75274                   | GG                              | AA              | 1946933788               |
| SNP_P4_121006_75311 | NW_004515799.1 | Scaffold282 | 75311                   | AA                              | GG              | 1946933790               |
| SNP_P4_121007_75387 | NW_004515799.1 | Scaffold282 | 75387                   | CC                              | TT              | 1946933792               |
| SNP_P4_121008_75389 | NW_004515799.1 | Scaffold282 | 75389                   | TT                              | CC              | 1946933794               |
| SNP_P4_121009_75398 | NW_004515799.1 | Scaffold282 | 75398                   | AA                              | GG              | 1946933796               |
| SNP_P4_121010_75400 | NW_004515799.1 | Scaffold282 | 75400                   | AA                              | TT              | 1946933798               |
| SNP_P4_121011_75425 | NW_004515799.1 | Scaffold282 | 75425                   | CC                              | TT              | 1946933800               |
| SNP_P4_121012_75601 | NW_004515799.1 | Scaffold282 | 75601                   | TT                              | CC              | 1946933802               |
| SNP_P4_121013_75645 | NW_004515799.1 | Scaffold282 | 75645                   | GG                              | TT              | 1946933804               |
| SNP_P4_121014_75671 | NW_004515799.1 | Scaffold282 | 75671                   | CC                              | AA              | 1946933806               |
| SNP_P4_121015_75712 | NW_004515799.1 | Scaffold282 | 75712                   | CC                              | TT              | 1946933808               |
| SNP_P4_121016_75725 | NW_004515799.1 | Scaffold282 | 75725                   | CC                              | TT              | 1946933810               |
| SNP_P4_121017_1973  | NW_004515800.1 | Scaffold283 | 1973                    | CC                              | TT              | 1946933812               |
| SNP_P4_121018_1975  | NW_004515800.1 | Scaffold283 | 1975                    | AA                              | GG              | 1946933814               |
| SNP_P4_121019_2305  | NW_004515800.1 | Scaffold283 | 2305                    | CC                              | AA              | 1946933816               |
| SNP_P4_121020_5421  | NW_004515800.1 | Scaffold283 | 5421                    | AA                              | GG              | 1946933818               |
| SNP_P4_121021_5429  | NW_004515800.1 | Scaffold283 | 5429                    | TT                              | CC              | 1946933820               |
| SNP_P4_121022_16310 | NW_004515800.1 | Scaffold283 | 16310                   | CC                              | AA              | 1946933822               |
| SNP_P4_121023_16347 | NW_004515800.1 | Scaffold283 | 16347                   | TT                              | AA              | 1946933824               |
| SNP_P4_121024_16369 | NW_004515800.1 | Scaffold283 | 16369                   | AA                              | GG              | 1946933826               |
| SNP_P4_121025_16431 | NW_004515800.1 | Scaffold283 | 16431                   | AA                              | GG              | 1946933828               |
| SNP_P4_121026_16463 | NW_004515800.1 | Scaffold283 | 16463                   | GG                              | CC              | 1946933830               |

| SNPs IDs            | Chromosome IDs | Chromosomes | Physical positions (bp) | CDC Frontier (Reference genome) | (ILWC46 & LPNB) | NCBI SNPdb Accession IDs |
|---------------------|----------------|-------------|-------------------------|---------------------------------|-----------------|--------------------------|
| SNP_P4_121027_16513 | NW_004515800.1 | Scaffold283 | 16513                   | TT                              | CC              | 1946933832               |
| SNP_P4_121029_25928 | NW_004515800.1 | Scaffold283 | 25928                   | CC                              | TT              | 1946933834               |
| SNP_P4_121031_26108 | NW_004515800.1 | Scaffold283 | 26108                   | AA                              | GG              | 1946933836               |
| SNP_P4_121032_26177 | NW_004515800.1 | Scaffold283 | 26177                   | GG                              | AA              | 1946933838               |
| SNP_P4_121033_26213 | NW_004515800.1 | Scaffold283 | 26213                   | GG                              | TT              | 1946933841               |
| SNP_P4_121034_29440 | NW_004515800.1 | Scaffold283 | 29440                   | GG                              | AA              | 1946933843               |
| SNP_P4_121035_29502 | NW_004515800.1 | Scaffold283 | 29502                   | CC                              | AA              | 1946933845               |
| SNP_P4_121036_29924 | NW_004515800.1 | Scaffold283 | 29924                   | AA                              | GG              | 1946933847               |
| SNP_P4_121037_29940 | NW_004515800.1 | Scaffold283 | 29940                   | AA                              | GG              | 1946933849               |
| SNP_P4_121038_30079 | NW_004515800.1 | Scaffold283 | 30079                   | TT                              | CC              | 1946933851               |
| SNP_P4_121039_30267 | NW_004515800.1 | Scaffold283 | 30267                   | GG                              | AA              | 1946933853               |
| SNP_P4_121040_95255 | NW_004515800.1 | Scaffold283 | 95255                   | AA                              | TT              | 1946933855               |
| SNP_P4_121041_95282 | NW_004515800.1 | Scaffold283 | 95282                   | CC                              | AA              | 1946933857               |
| SNP_P4_121042_95306 | NW_004515800.1 | Scaffold283 | 95306                   | AA                              | TT              | 1946933859               |
| SNP_P4_121043_95333 | NW_004515800.1 | Scaffold283 | 95333                   | GG                              | TT              | 1946933861               |
| SNP_P4_121044_95580 | NW_004515800.1 | Scaffold283 | 95580                   | TT                              | AA              | 1946933863               |
| SNP_P4_121045_95602 | NW_004515800.1 | Scaffold283 | 95602                   | CC                              | TT              | 1946933865               |
| SNP_P4_121046_95668 | NW_004515800.1 | Scaffold283 | 95668                   | AA                              | GG              | 1946933867               |
| SNP_P4_121047_95918 | NW_004515800.1 | Scaffold283 | 95918                   | AA                              | GG              | 1946933869               |
| SNP_P4_121048_95966 | NW_004515800.1 | Scaffold283 | 95966                   | TT                              | GG              | 1946933872               |
| SNP_P4_121049_95990 | NW_004515800.1 | Scaffold283 | 95990                   | GG                              | CC              | 1946933874               |
| SNP_P4_121051_3921  | NW_004515801.1 | Scaffold284 | 3921                    | CC                              | TT              | 1946933876               |
| SNP_P4_121053_4740  | NW_004515801.1 | Scaffold284 | 4740                    | TT                              | CC              | 1946933878               |
| SNP_P4_121054_4815  | NW_004515801.1 | Scaffold284 | 4815                    | CC                              | GG              | 1946933880               |
| SNP_P4_121055_4950  | NW_004515801.1 | Scaffold284 | 4950                    | TT                              | CC              | 1946933882               |
| SNP_P4_121056_5785  | NW_004515801.1 | Scaffold284 | 5785                    | TT                              | CC              | 1946933884               |
| SNP_P4_121057_6487  | NW_004515801.1 | Scaffold284 | 6487                    | AA                              | GG              | 1946933886               |
| SNP_P4_121058_6633  | NW_004515801.1 | Scaffold284 | 6633                    | TT                              | CC              | 1946933888               |
| SNP_P4_121059_6973  | NW_004515801.1 | Scaffold284 | 6973                    | GG                              | AA              | 1946933891               |
| SNP_P4_121060_7270  | NW_004515801.1 | Scaffold284 | 7270                    | CC                              | GG              | 1946933893               |
| SNP_P4_121061_7600  | NW_004515801.1 | Scaffold284 | 7600                    | GG                              | AA              | 1946933895               |
| SNP_P4_121062_10453 | NW_004515801.1 | Scaffold284 | 10453                   | CC                              | AA              | 1946933897               |
| SNP_P4_121063_10799 | NW_004515801.1 | Scaffold284 | 10799                   | GG                              | AA              | 1946933899               |
| SNP_P4_121064_10820 | NW_004515801.1 | Scaffold284 | 10820                   | GG                              | AA              | 1946933901               |
| SNP_P4_121065_11495 | NW_004515801.1 | Scaffold284 | 11495                   | CC                              | TT              | 1946933903               |
| SNP_P4_121066_12292 | NW_004515801.1 | Scaffold284 | 12292                   | TT                              | AA              | 1946933905               |
| SNP_P4_121067_12378 | NW_004515801.1 | Scaffold284 | 12378                   | CC                              | AA              | 1946933907               |
| SNP_P4_121068_13103 | NW_004515801.1 | Scaffold284 | 13103                   | GG                              | TT              | 1946933909               |
| SNP_P4_121069_13123 | NW_004515801.1 | Scaffold284 | 13123                   | AA                              | CC              | 1946933911               |
| SNP_P4_121071_14900 | NW_004515801.1 | Scaffold284 | 14900                   | AA                              | TT              | 1946933913               |
| SNP_P4_121072_15004 | NW_004515801.1 | Scaffold284 | 15004                   | GG                              | TT              | 1946933915               |
| SNP_P4_121074_15536 | NW_004515801.1 | Scaffold284 | 15536                   | TT                              | AA              | 1946933917               |

| SNPs IDs            | Chromosome IDs | Chromosomes | Physical positions (bp) | CDC Frontier (Reference genome) | (ILWC46 & LPNB) | NCBI SNPdb Accession IDs |
|---------------------|----------------|-------------|-------------------------|---------------------------------|-----------------|--------------------------|
| SNP_P4_121075_16966 | NW_004515801.1 | Scaffold284 | 16966                   | GG                              | AA              | 1946933919               |
| SNP_P4_121076_17371 | NW_004515801.1 | Scaffold284 | 17371                   | CC                              | TT              | 1946933921               |
| SNP_P4_121077_17863 | NW_004515801.1 | Scaffold284 | 17863                   | AA                              | CC              | 1946933923               |
| SNP_P4_121078_17873 | NW_004515801.1 | Scaffold284 | 17873                   | TT                              | CC              | 1946933925               |
| SNP_P4_121079_17877 | NW_004515801.1 | Scaffold284 | 17877                   | CC                              | TT              | 1946933927               |
| SNP_P4_121081_21742 | NW_004515801.1 | Scaffold284 | 21742                   | GG                              | AA              | 1946933929               |
| SNP_P4_121082_21839 | NW_004515801.1 | Scaffold284 | 21839                   | AA                              | CC              | 1946933931               |
| SNP_P4_121083_21866 | NW_004515801.1 | Scaffold284 | 21866                   | AA                              | GG              | 1946933933               |
| SNP_P4_121084_21868 | NW_004515801.1 | Scaffold284 | 21868                   | AA                              | TT              | 1946933935               |
| SNP_P4_121085_21880 | NW_004515801.1 | Scaffold284 | 21880                   | TT                              | CC              | 1946933937               |
| SNP_P4_121086_22131 | NW_004515801.1 | Scaffold284 | 22131                   | CC                              | TT              | 1946933939               |
| SNP_P4_121087_22219 | NW_004515801.1 | Scaffold284 | 22219                   | TT                              | AA              | 1946933941               |
| SNP_P4_121088_40183 | NW_004515801.1 | Scaffold284 | 40183                   | AA                              | GG              | 1946933943               |
| SNP_P4_121089_40397 | NW_004515801.1 | Scaffold284 | 40397                   | CC                              | TT              | 1946933945               |
| SNP_P4_121090_40410 | NW_004515801.1 | Scaffold284 | 40410                   | TT                              | CC              | 1946933947               |
| SNP_P4_121091_40708 | NW_004515801.1 | Scaffold284 | 40708                   | CC                              | TT              | 1946933949               |
| SNP_P4_121092_40726 | NW_004515801.1 | Scaffold284 | 40726                   | TT                              | AA              | 1946933951               |
| SNP_P4_121093_40727 | NW_004515801.1 | Scaffold284 | 40727                   | GG                              | TT              | 1946933953               |
| SNP_P4_121094_40732 | NW_004515801.1 | Scaffold284 | 40732                   | CC                              | GG              | 1946933955               |
| SNP_P4_121095_40738 | NW_004515801.1 | Scaffold284 | 40738                   | TT                              | CC              | 1946933957               |
| SNP_P4_121096_40748 | NW_004515801.1 | Scaffold284 | 40748                   | CC                              | TT              | 1946933959               |
| SNP_P4_121097_40750 | NW_004515801.1 | Scaffold284 | 40750                   | GG                              | AA              | 1946933961               |
| SNP_P4_121098_40751 | NW_004515801.1 | Scaffold284 | 40751                   | CC                              | AA              | 1946933963               |
| SNP_P4_121099_40767 | NW_004515801.1 | Scaffold284 | 40767                   | TT                              | AA              | 1946933965               |
| SNP_P4_121100_40773 | NW_004515801.1 | Scaffold284 | 40773                   | CC                              | AA              | 1946933967               |
| SNP_P4_121101_40779 | NW_004515801.1 | Scaffold284 | 40779                   | AA                              | TT              | 1946933969               |
| SNP_P4_121102_40984 | NW_004515801.1 | Scaffold284 | 40984                   | AA                              | TT              | 1946933971               |
| SNP_P4_121103_41008 | NW_004515801.1 | Scaffold284 | 41008                   | AA                              | GG              | 1946933973               |
| SNP_P4_121104_41236 | NW_004515801.1 | Scaffold284 | 41236                   | AA                              | CC              | 1946933975               |
| SNP_P4_121105_41239 | NW_004515801.1 | Scaffold284 | 41239                   | CC                              | AA              | 1946933977               |
| SNP_P4_121106_41246 | NW_004515801.1 | Scaffold284 | 41246                   | AA                              | CC              | 1946933979               |
| SNP_P4_121107_47181 | NW_004515801.1 | Scaffold284 | 47181                   | AA                              | GG              | 1946933981               |
| SNP_P4_121108_47197 | NW_004515801.1 | Scaffold284 | 47197                   | TT                              | AA              | 1946933983               |
| SNP_P4_121109_47557 | NW_004515801.1 | Scaffold284 | 47557                   | CC                              | AA              | 1946933985               |
| SNP_P4_121110_47558 | NW_004515801.1 | Scaffold284 | 47558                   | AA                              | CC              | 1946933987               |
| SNP_P4_121111_49833 | NW_004515801.1 | Scaffold284 | 49833                   | GG                              | AA              | 1946933989               |
| SNP_P4_121112_49893 | NW_004515801.1 | Scaffold284 | 49893                   | TT                              | GG              | 1946933991               |
| SNP_P4_121113_49904 | NW_004515801.1 | Scaffold284 | 49904                   | TT                              | CC              | 1946933993               |
| SNP_P4_121114_49916 | NW_004515801.1 | Scaffold284 | 49916                   | GG                              | CC              | 1946933995               |
| SNP_P4_121115_50028 | NW_004515801.1 | Scaffold284 | 50028                   | CC                              | TT              | 1946933997               |
| SNP_P4_121116_50076 | NW_004515801.1 | Scaffold284 | 50076                   | TT                              | AA              | 1946933999               |
| SNP_P4_121117_50099 | NW_004515801.1 | Scaffold284 | 50099                   | AA                              | TT              | 1946934001               |



| SNPs IDs             | Chromosome IDs | Chromosomes | Physical positions (bp) | CDC Frontier (Reference genome) | (ILWC46 & LPNB) | NCBI SNPdb Accession IDs |
|----------------------|----------------|-------------|-------------------------|---------------------------------|-----------------|--------------------------|
| SNP_P4_121118_50111  | NW_004515801.1 | Scaffold284 | 50111                   | GG                              | AA              | 1946934003               |
| SNP_P4_121119_50115  | NW_004515801.1 | Scaffold284 | 50115                   | AA                              | CC              | 1946934005               |
| SNP_P4_121120_50116  | NW_004515801.1 | Scaffold284 | 50116                   | TT                              | GG              | 1946934007               |
| SNP_P4_121121_50148  | NW_004515801.1 | Scaffold284 | 50148                   | TT                              | AA              | 1946934009               |
| SNP_P4_121122_50173  | NW_004515801.1 | Scaffold284 | 50173                   | GG                              | CC              | 1946934011               |
| SNP_P4_121123_50201  | NW_004515801.1 | Scaffold284 | 50201                   | TT                              | AA              | 1946934013               |
| SNP_P4_121124_50221  | NW_004515801.1 | Scaffold284 | 50221                   | AA                              | GG              | 1946934015               |
| SNP_P4_121125_50302  | NW_004515801.1 | Scaffold284 | 50302                   | TT                              | AA              | 1946934017               |
| SNP_P4_121126_79862  | NW_004515801.1 | Scaffold284 | 79862                   | CC                              | TT              | 1946934019               |
| SNP_P4_121127_79864  | NW_004515801.1 | Scaffold284 | 79864                   | AA                              | GG              | 1946934021               |
| SNP_P4_121128_84089  | NW_004515801.1 | Scaffold284 | 84089                   | CC                              | TT              | 1946934023               |
| SNP_P4_121129_84510  | NW_004515801.1 | Scaffold284 | 84510                   | GG                              | AA              | 1946934025               |
| SNP_P4_121130_84796  | NW_004515801.1 | Scaffold284 | 84796                   | TT                              | AA              | 1946934027               |
| SNP_P4_121131_104480 | NW_004515801.1 | Scaffold284 | 104480                  | GG                              | TT              | 1946934029               |
| SNP_P4_121132_104533 | NW_004515801.1 | Scaffold284 | 104533                  | CC                              | TT              | 1946934031               |
| SNP_P4_121134_119942 | NW_004515801.1 | Scaffold284 | 119942                  | GG                              | AA              | 1946934033               |
| SNP_P4_121135_184534 | NW_004515801.1 | Scaffold284 | 184534                  | CC                              | AA              | 1946934035               |
| SNP_P4_121136_206950 | NW_004515801.1 | Scaffold284 | 206950                  | TT                              | GG              | 1946934037               |
| SNP_P4_121137_207032 | NW_004515801.1 | Scaffold284 | 207032                  | AA                              | GG              | 1946934039               |
| SNP_P4_121138_207262 | NW_004515801.1 | Scaffold284 | 207262                  | TT                              | CC              | 1946934041               |
| SNP_P4_121139_253014 | NW_004515801.1 | Scaffold284 | 253014                  | TT                              | CC              | 1946934043               |
| SNP_P4_121140_257115 | NW_004515801.1 | Scaffold284 | 257115                  | CC                              | GG              | 1946934045               |
| SNP_P4_121141_257130 | NW_004515801.1 | Scaffold284 | 257130                  | TT                              | CC              | 1946934047               |
| SNP_P4_121142_257134 | NW_004515801.1 | Scaffold284 | 257134                  | TT                              | AA              | 1946934049               |
| SNP_P4_121143_257170 | NW_004515801.1 | Scaffold284 | 257170                  | CC                              | AA              | 1946934051               |
| SNP_P4_121144_257181 | NW_004515801.1 | Scaffold284 | 257181                  | TT                              | CC              | 1946934053               |
| SNP_P4_121145_257184 | NW_004515801.1 | Scaffold284 | 257184                  | AA                              | TT              | 1946934055               |
| SNP_P4_121146_257186 | NW_004515801.1 | Scaffold284 | 257186                  | AA                              | GG              | 1946934057               |
| SNP_P4_121147_257210 | NW_004515801.1 | Scaffold284 | 257210                  | GG                              | AA              | 1946934059               |
| SNP_P4_121148_257246 | NW_004515801.1 | Scaffold284 | 257246                  | CC                              | TT              | 1946934061               |
| SNP_P4_121149_257251 | NW_004515801.1 | Scaffold284 | 257251                  | GG                              | AA              | 1946934063               |
| SNP_P4_121150_257252 | NW_004515801.1 | Scaffold284 | 257252                  | AA                              | TT              | 1946934065               |
| SNP_P4_121151_257435 | NW_004515801.1 | Scaffold284 | 257435                  | CC                              | AA              | 1946934067               |
| SNP_P4_121152_257480 | NW_004515801.1 | Scaffold284 | 257480                  | CC                              | TT              | 1946934069               |
| SNP_P4_121153_257557 | NW_004515801.1 | Scaffold284 | 257557                  | GG                              | TT              | 1946934071               |
| SNP_P4_121154_257560 | NW_004515801.1 | Scaffold284 | 257560                  | AA                              | GG              | 1946934073               |
| SNP_P4_121155_267284 | NW_004515801.1 | Scaffold284 | 267284                  | TT                              | CC              | 1946934075               |
| SNP_P4_121156_297666 | NW_004515801.1 | Scaffold284 | 297666                  | TT                              | CC              | 1946934076               |
| SNP_P4_121157_297671 | NW_004515801.1 | Scaffold284 | 297671                  | GG                              | AA              | 1946934078               |
| SNP_P4_121159_352335 | NW_004515801.1 | Scaffold284 | 352335                  | AA                              | GG              | 1946934080               |
| SNP_P4_121160_352672 | NW_004515801.1 | Scaffold284 | 352672                  | AA                              | GG              | 1946934082               |
| SNP_P4_121161_352859 | NW_004515801.1 | Scaffold284 | 352859                  | AA                              | GG              | 1946934084               |

| SNPs IDs             | Chromosome IDs | Chromosomes | Physical positions (bp) | CDC Frontier (Reference genome) | (ILWC46 & LPNB) | NCBI SNPdb Accession IDs |
|----------------------|----------------|-------------|-------------------------|---------------------------------|-----------------|--------------------------|
| SNP_P4_121162_352906 | NW_004515801.1 | Scaffold284 | 352906                  | GG                              | TT              | 1946934086               |
| SNP_P4_121163_352945 | NW_004515801.1 | Scaffold284 | 352945                  | AA                              | GG              | 1946934088               |
| SNP_P4_121164_353197 | NW_004515801.1 | Scaffold284 | 353197                  | GG                              | AA              | 1946934090               |
| SNP_P4_121165_353392 | NW_004515801.1 | Scaffold284 | 353392                  | TT                              | CC              | 1946934092               |
| SNP_P4_121166_354257 | NW_004515801.1 | Scaffold284 | 354257                  | AA                              | GG              | 1946934094               |
| SNP_P4_121167_355103 | NW_004515801.1 | Scaffold284 | 355103                  | AA                              | GG              | 1946934096               |
| SNP_P4_121168_365922 | NW_004515801.1 | Scaffold284 | 365922                  | TT                              | CC              | 1946934098               |
| SNP_P4_121169_420674 | NW_004515801.1 | Scaffold284 | 420674                  | AA                              | GG              | 1946934100               |
| SNP_P4_121170_463252 | NW_004515801.1 | Scaffold284 | 463252                  | CC                              | TT              | 1946934102               |
| SNP_P4_121171_463254 | NW_004515801.1 | Scaffold284 | 463254                  | TT                              | GG              | 1946934104               |
| SNP_P4_121172_463987 | NW_004515801.1 | Scaffold284 | 463987                  | CC                              | TT              | 1946934106               |
| SNP_P4_121173_472743 | NW_004515801.1 | Scaffold284 | 472743                  | CC                              | TT              | 1946934108               |
| SNP_P4_121174_472972 | NW_004515801.1 | Scaffold284 | 472972                  | AA                              | GG              | 1946934110               |
| SNP_P4_121175_472973 | NW_004515801.1 | Scaffold284 | 472973                  | TT                              | CC              | 1946934112               |
| SNP_P4_121176_472990 | NW_004515801.1 | Scaffold284 | 472990                  | AA                              | GG              | 1946934114               |
| SNP_P4_121177_472992 | NW_004515801.1 | Scaffold284 | 472992                  | CC                              | AA              | 1946934116               |
| SNP_P4_121178_473035 | NW_004515801.1 | Scaffold284 | 473035                  | GG                              | CC              | 1946934118               |
| SNP_P4_121179_473061 | NW_004515801.1 | Scaffold284 | 473061                  | CC                              | TT              | 1946934120               |
| SNP_P4_121180_473093 | NW_004515801.1 | Scaffold284 | 473093                  | AA                              | GG              | 1946934122               |
| SNP_P4_121182_506097 | NW_004515801.1 | Scaffold284 | 506097                  | TT                              | AA              | 1946934124               |
| SNP_P4_121183_524629 | NW_004515801.1 | Scaffold284 | 524629                  | AA                              | TT              | 1946934126               |
| SNP_P4_121184_524633 | NW_004515801.1 | Scaffold284 | 524633                  | AA                              | CC              | 1946934128               |
| SNP_P4_121185_530021 | NW_004515801.1 | Scaffold284 | 530021                  | CC                              | AA              | 1946934130               |
| SNP_P4_121186_531572 | NW_004515801.1 | Scaffold284 | 531572                  | AA                              | GG              | 1946934132               |
| SNP_P4_121187_534330 | NW_004515801.1 | Scaffold284 | 534330                  | CC                              | GG              | 1946934134               |
| SNP_P4_121188_537236 | NW_004515801.1 | Scaffold284 | 537236                  | GG                              | TT              | 1946934136               |
| SNP_P4_121189_545611 | NW_004515801.1 | Scaffold284 | 545611                  | TT                              | GG              | 1946934138               |
| SNP_P4_121190_579278 | NW_004515801.1 | Scaffold284 | 579278                  | CC                              | TT              | 1946934140               |
| SNP_P4_121191_639463 | NW_004515801.1 | Scaffold284 | 639463                  | AA                              | TT              | 1946934142               |
| SNP_P4_121193_721918 | NW_004515801.1 | Scaffold284 | 721918                  | TT                              | AA              | 1946934144               |
| SNP_P4_121194_722304 | NW_004515801.1 | Scaffold284 | 722304                  | GG                              | AA              | 1946934146               |
| SNP_P4_121195_722579 | NW_004515801.1 | Scaffold284 | 722579                  | CC                              | TT              | 1946934148               |
| SNP_P4_121196_722602 | NW_004515801.1 | Scaffold284 | 722602                  | AA                              | TT              | 1946934150               |
| SNP_P4_121197_748011 | NW_004515801.1 | Scaffold284 | 748011                  | CC                              | AA              | 1946934152               |
| SNP_P4_121198_750046 | NW_004515801.1 | Scaffold284 | 750046                  | TT                              | AA              | 1946934154               |
| SNP_P4_121199_760980 | NW_004515801.1 | Scaffold284 | 760980                  | CC                              | GG              | 1946934156               |
| SNP_P4_121200_766553 | NW_004515801.1 | Scaffold284 | 766553                  | CC                              | TT              | 1946934158               |
| SNP_P4_121201_766637 | NW_004515801.1 | Scaffold284 | 766637                  | CC                              | TT              | 1946934160               |
| SNP_P4_121202_767213 | NW_004515801.1 | Scaffold284 | 767213                  | CC                              | TT              | 1946934162               |
| SNP_P4_121203_767217 | NW_004515801.1 | Scaffold284 | 767217                  | CC                              | TT              | 1946934164               |
| SNP_P4_121204_768674 | NW_004515801.1 | Scaffold284 | 768674                  | GG                              | AA              | 1946934166               |
| SNP_P4_121205_803196 | NW_004515801.1 | Scaffold284 | 803196                  | TT                              | CC              | 1946934168               |

| SNPs IDs             | Chromosome IDs | Chromosomes | Physical positions (bp) | CDC Frontier (Reference genome) | (ILWC46 & LPNB) | NCBI SNPdb Accession IDs |
|----------------------|----------------|-------------|-------------------------|---------------------------------|-----------------|--------------------------|
| SNP_P4_121206_803441 | NW_004515801.1 | Scaffold284 | 803441                  | TT                              | GG              | 1946934170               |
| SNP_P4_121207_803445 | NW_004515801.1 | Scaffold284 | 803445                  | GG                              | TT              | 1946934172               |
| SNP_P4_121209_829049 | NW_004515801.1 | Scaffold284 | 829049                  | TT                              | AA              | 1946934174               |
| SNP_P4_121210_861402 | NW_004515801.1 | Scaffold284 | 861402                  | CC                              | GG              | 1946934176               |
| SNP_P4_121211_870831 | NW_004515801.1 | Scaffold284 | 870831                  | TT                              | CC              | 1946934178               |
| SNP_P4_121212_882209 | NW_004515801.1 | Scaffold284 | 882209                  | CC                              | AA              | 1946934180               |
| SNP_P4_121213_902085 | NW_004515801.1 | Scaffold284 | 902085                  | GG                              | AA              | 1946934182               |
| SNP_P4_121214_902093 | NW_004515801.1 | Scaffold284 | 902093                  | TT                              | AA              | 1946934184               |
| SNP_P4_121216_902101 | NW_004515801.1 | Scaffold284 | 902101                  | AA                              | GG              | 1946934186               |
| SNP_P4_121217_902108 | NW_004515801.1 | Scaffold284 | 902108                  | TT                              | CC              | 1946934188               |
| SNP_P4_121218_907851 | NW_004515801.1 | Scaffold284 | 907851                  | AA                              | TT              | 1946934190               |
| SNP_P4_121219_915266 | NW_004515801.1 | Scaffold284 | 915266                  | CC                              | TT              | 1946934192               |
| SNP_P4_121220_915398 | NW_004515801.1 | Scaffold284 | 915398                  | AA                              | GG              | 1946934194               |
| SNP_P4_121221_915520 | NW_004515801.1 | Scaffold284 | 915520                  | GG                              | AA              | 1946934196               |
| SNP_P4_121222_915761 | NW_004515801.1 | Scaffold284 | 915761                  | TT                              | GG              | 1946934198               |
| SNP_P4_121223_915777 | NW_004515801.1 | Scaffold284 | 915777                  | CC                              | TT              | 1946934201               |
| SNP_P4_121224_915804 | NW_004515801.1 | Scaffold284 | 915804                  | AA                              | GG              | 1946934203               |
| SNP_P4_121225_18511  | NW_004515803.1 | Scaffold287 | 18511                   | AA                              | TT              | 1946934205               |
| SNP_P4_121226_18542  | NW_004515803.1 | Scaffold287 | 18542                   | GG                              | AA              | 1946934207               |
| SNP_P4_121227_18551  | NW_004515803.1 | Scaffold287 | 18551                   | GG                              | TT              | 1946934209               |
| SNP_P4_121228_19184  | NW_004515803.1 | Scaffold287 | 19184                   | CC                              | AA              | 1946934211               |
| SNP_P4_121229_19223  | NW_004515803.1 | Scaffold287 | 19223                   | GG                              | CC              | 1946934213               |
| SNP_P4_121230_19253  | NW_004515803.1 | Scaffold287 | 19253                   | AA                              | TT              | 1946934215               |
| SNP_P4_121231_19257  | NW_004515803.1 | Scaffold287 | 19257                   | TT                              | GG              | 1946934217               |
| SNP_P4_121232_19306  | NW_004515803.1 | Scaffold287 | 19306                   | TT                              | GG              | 1946934219               |
| SNP_P4_121233_19334  | NW_004515803.1 | Scaffold287 | 19334                   | TT                              | GG              | 1946934221               |
| SNP_P4_121234_19358  | NW_004515803.1 | Scaffold287 | 19358                   | AA                              | TT              | 1946934223               |
| SNP_P4_121235_19429  | NW_004515803.1 | Scaffold287 | 19429                   | AA                              | TT              | 1946934225               |
| SNP_P4_121236_19462  | NW_004515803.1 | Scaffold287 | 19462                   | TT                              | GG              | 1946934227               |
| SNP_P4_121237_19499  | NW_004515803.1 | Scaffold287 | 19499                   | GG                              | AA              | 1946934229               |
| SNP_P4_121238_19513  | NW_004515803.1 | Scaffold287 | 19513                   | TT                              | AA              | 1946934232               |
| SNP_P4_121239_19519  | NW_004515803.1 | Scaffold287 | 19519                   | TT                              | AA              | 1946934234               |
| SNP_P4_121240_19534  | NW_004515803.1 | Scaffold287 | 19534                   | TT                              | CC              | 1946934236               |
| SNP_P4_121241_19565  | NW_004515803.1 | Scaffold287 | 19565                   | TT                              | GG              | 1946934238               |
| SNP_P4_121242_19571  | NW_004515803.1 | Scaffold287 | 19571                   | AA                              | CC              | 1946934240               |
| SNP_P4_121243_19577  | NW_004515803.1 | Scaffold287 | 19577                   | TT                              | AA              | 1946934242               |
| SNP_P4_121244_19637  | NW_004515803.1 | Scaffold287 | 19637                   | AA                              | GG              | 1946934244               |
| SNP_P4_121245_19674  | NW_004515803.1 | Scaffold287 | 19674                   | GG                              | CC              | 1946934246               |
| SNP_P4_121246_21091  | NW_004515803.1 | Scaffold287 | 21091                   | CC                              | AA              | 1946934248               |
| SNP_P4_121247_21483  | NW_004515803.1 | Scaffold287 | 21483                   | CC                              | GG              | 1946934250               |
| SNP_P4_121248_21487  | NW_004515803.1 | Scaffold287 | 21487                   | TT                              | GG              | 1946934252               |
| SNP_P4_121249_21495  | NW_004515803.1 | Scaffold287 | 21495                   | CC                              | GG              | 1946934254               |

| SNPs IDs             | Chromosome IDs | Chromosomes | Physical positions (bp) | CDC Frontier (Reference genome) | (ILWC46 & LPNB) | NCBI SNPdb Accession IDs |
|----------------------|----------------|-------------|-------------------------|---------------------------------|-----------------|--------------------------|
| SNP_P4_121250_22251  | NW_004515803.1 | Scaffold287 | 22251                   | TT                              | GG              | 1946934256               |
| SNP_P4_121251_22268  | NW_004515803.1 | Scaffold287 | 22268                   | GG                              | TT              | 1946934258               |
| SNP_P4_121252_22419  | NW_004515803.1 | Scaffold287 | 22419                   | CC                              | TT              | 1946934260               |
| SNP_P4_121253_22579  | NW_004515803.1 | Scaffold287 | 22579                   | CC                              | TT              | 1946934262               |
| SNP_P4_121254_22581  | NW_004515803.1 | Scaffold287 | 22581                   | AA                              | GG              | 1946934264               |
| SNP_P4_121255_22591  | NW_004515803.1 | Scaffold287 | 22591                   | TT                              | CC              | 1946934266               |
| SNP_P4_121257_22669  | NW_004515803.1 | Scaffold287 | 22669                   | TT                              | CC              | 1946934268               |
| SNP_P4_121258_22725  | NW_004515803.1 | Scaffold287 | 22725                   | AA                              | GG              | 1946934270               |
| SNP_P4_121259_22732  | NW_004515803.1 | Scaffold287 | 22732                   | GG                              | AA              | 1946934272               |
| SNP_P4_121260_22752  | NW_004515803.1 | Scaffold287 | 22752                   | AA                              | GG              | 1946934274               |
| SNP_P4_121261_22759  | NW_004515803.1 | Scaffold287 | 22759                   | GG                              | CC              | 1946934276               |
| SNP_P4_121262_22971  | NW_004515803.1 | Scaffold287 | 22971                   | GG                              | TT              | 1946934278               |
| SNP_P4_121263_25494  | NW_004515803.1 | Scaffold287 | 25494                   | TT                              | CC              | 1946934279               |
| SNP_P4_121264_25502  | NW_004515803.1 | Scaffold287 | 25502                   | CC                              | AA              | 1946934280               |
| SNP_P4_121265_25547  | NW_004515803.1 | Scaffold287 | 25547                   | AA                              | GG              | 1946934281               |
| SNP_P4_121266_26655  | NW_004515803.1 | Scaffold287 | 26655                   | TT                              | AA              | 1946934282               |
| SNP_P4_121267_27552  | NW_004515803.1 | Scaffold287 | 27552                   | AA                              | GG              | 1946934283               |
| SNP_P4_121268_27568  | NW_004515803.1 | Scaffold287 | 27568                   | GG                              | TT              | 1946934284               |
| SNP_P4_121269_27587  | NW_004515803.1 | Scaffold287 | 27587                   | TT                              | AA              | 1946934285               |
| SNP_P4_121270_27603  | NW_004515803.1 | Scaffold287 | 27603                   | AA                              | GG              | 1946934286               |
| SNP_P4_121271_27618  | NW_004515803.1 | Scaffold287 | 27618                   | AA                              | TT              | 1946934288               |
| SNP_P4_121272_52440  | NW_004515803.1 | Scaffold287 | 52440                   | AA                              | CC              | 1946934290               |
| SNP_P4_121273_72366  | NW_004515803.1 | Scaffold287 | 72366                   | GG                              | AA              | 1946934292               |
| SNP_P4_121274_73238  | NW_004515803.1 | Scaffold287 | 73238                   | AA                              | GG              | 1946934294               |
| SNP_P4_121275_83646  | NW_004515803.1 | Scaffold287 | 83646                   | GG                              | AA              | 1946934296               |
| SNP_P4_121276_84835  | NW_004515803.1 | Scaffold287 | 84835                   | TT                              | CC              | 1946934298               |
| SNP_P4_121277_84838  | NW_004515803.1 | Scaffold287 | 84838                   | AA                              | TT              | 1946934300               |
| SNP_P4_121278_85481  | NW_004515803.1 | Scaffold287 | 85481                   | TT                              | CC              | 1946934302               |
| SNP_P4_121279_86438  | NW_004515803.1 | Scaffold287 | 86438                   | AA                              | GG              | 1946934304               |
| SNP_P4_121280_119205 | NW_004515803.1 | Scaffold287 | 119205                  | TT                              | AA              | 1946934306               |
| SNP_P4_121281_137477 | NW_004515803.1 | Scaffold287 | 137477                  | TT                              | AA              | 1946934308               |
| SNP_P4_121282_137484 | NW_004515803.1 | Scaffold287 | 137484                  | GG                              | TT              | 1946934310               |
| SNP_P4_121283_155732 | NW_004515803.1 | Scaffold287 | 155732                  | AA                              | GG              | 1946934312               |
| SNP_P4_121284_170444 | NW_004515803.1 | Scaffold287 | 170444                  | GG                              | TT              | 1946934314               |
| SNP_P4_121285_170720 | NW_004515803.1 | Scaffold287 | 170720                  | TT                              | CC              | 1946934316               |
| SNP_P4_121286_170746 | NW_004515803.1 | Scaffold287 | 170746                  | TT                              | GG              | 1946934318               |
| SNP_P4_121287_170765 | NW_004515803.1 | Scaffold287 | 170765                  | TT                              | AA              | 1946934320               |
| SNP_P4_121288_180844 | NW_004515803.1 | Scaffold287 | 180844                  | GG                              | TT              | 1946934322               |
| SNP_P4_121289_180846 | NW_004515803.1 | Scaffold287 | 180846                  | TT                              | GG              | 1946934324               |
| SNP_P4_121291_181065 | NW_004515803.1 | Scaffold287 | 181065                  | CC                              | TT              | 1946934326               |
| SNP_P4_121292_181108 | NW_004515803.1 | Scaffold287 | 181108                  | TT                              | GG              | 1946934328               |
| SNP_P4_121293_182599 | NW_004515803.1 | Scaffold287 | 182599                  | CC                              | TT              | 1946934330               |

| SNPs IDs             | Chromosome IDs | Chromosomes | Physical positions (bp) | CDC Frontier (Reference genome) | (ILWC46 & LPNB) | NCBI SNPdb Accession IDs |
|----------------------|----------------|-------------|-------------------------|---------------------------------|-----------------|--------------------------|
| SNP_P4_121294_182603 | NW_004515803.1 | Scaffold287 | 182603                  | AA                              | GG              | 1946934332               |
| SNP_P4_121295_185637 | NW_004515803.1 | Scaffold287 | 185637                  | AA                              | TT              | 1946934334               |
| SNP_P4_121297_258571 | NW_004515803.1 | Scaffold287 | 258571                  | AA                              | GG              | 1946934336               |
| SNP_P4_121298_269661 | NW_004515803.1 | Scaffold287 | 269661                  | CC                              | AA              | 1946934338               |
| SNP_P4_121299_269852 | NW_004515803.1 | Scaffold287 | 269852                  | TT                              | CC              | 1946934340               |
| SNP_P4_121300_277799 | NW_004515803.1 | Scaffold287 | 277799                  | TT                              | CC              | 1946934342               |
| SNP_P4_121301_277854 | NW_004515803.1 | Scaffold287 | 277854                  | AA                              | GG              | 1946934344               |
| SNP_P4_121302_277862 | NW_004515803.1 | Scaffold287 | 277862                  | AA                              | CC              | 1946934346               |
| SNP_P4_121304_324611 | NW_004515803.1 | Scaffold287 | 324611                  | AA                              | GG              | 1946934348               |
| SNP_P4_121305_330393 | NW_004515803.1 | Scaffold287 | 330393                  | TT                              | CC              | 1946934350               |
| SNP_P4_121306_353113 | NW_004515803.1 | Scaffold287 | 353113                  | TT                              | CC              | 1946934352               |
| SNP_P4_121307_8922   | NW_004515805.1 | Scaffold290 | 8922                    | TT                              | CC              | 1946934354               |
| SNP_P4_121308_8973   | NW_004515805.1 | Scaffold290 | 8973                    | TT                              | GG              | 1946934356               |
| SNP_P4_121309_8980   | NW_004515805.1 | Scaffold290 | 8980                    | AA                              | CC              | 1946934358               |
| SNP_P4_121310_12634  | NW_004515805.1 | Scaffold290 | 12634                   | CC                              | TT              | 1946934360               |
| SNP_P4_121311_13823  | NW_004515805.1 | Scaffold290 | 13823                   | TT                              | AA              | 1946934361               |
| SNP_P4_121312_13931  | NW_004515805.1 | Scaffold290 | 13931                   | CC                              | TT              | 1946934363               |
| SNP_P4_121313_14075  | NW_004515805.1 | Scaffold290 | 14075                   | CC                              | AA              | 1946934365               |
| SNP_P4_121314_14110  | NW_004515805.1 | Scaffold290 | 14110                   | CC                              | AA              | 1946934367               |
| SNP_P4_121315_14778  | NW_004515805.1 | Scaffold290 | 14778                   | CC                              | TT              | 1946934369               |
| SNP_P4_121316_32074  | NW_004515805.1 | Scaffold290 | 32074                   | CC                              | AA              | 1946934371               |
| SNP_P4_121317_33871  | NW_004515805.1 | Scaffold290 | 33871                   | GG                              | AA              | 1946934373               |
| SNP_P4_121318_34798  | NW_004515805.1 | Scaffold290 | 34798                   | GG                              | AA              | 1946934375               |
| SNP_P4_121319_39296  | NW_004515805.1 | Scaffold290 | 39296                   | TT                              | AA              | 1946934377               |
| SNP_P4_121320_40886  | NW_004515805.1 | Scaffold290 | 40886                   | TT                              | CC              | 1946934379               |
| SNP_P4_121321_41125  | NW_004515805.1 | Scaffold290 | 41125                   | GG                              | TT              | 1946934381               |
| SNP_P4_121322_41493  | NW_004515805.1 | Scaffold290 | 41493                   | CC                              | TT              | 1946934383               |
| SNP_P4_121323_42073  | NW_004515805.1 | Scaffold290 | 42073                   | CC                              | GG              | 1946934385               |
| SNP_P4_121324_42606  | NW_004515805.1 | Scaffold290 | 42606                   | GG                              | AA              | 1946934387               |
| SNP_P4_121325_44938  | NW_004515805.1 | Scaffold290 | 44938                   | CC                              | TT              | 1946934389               |
| SNP_P4_121326_44974  | NW_004515805.1 | Scaffold290 | 44974                   | CC                              | TT              | 1946934391               |
| SNP_P4_121327_46892  | NW_004515805.1 | Scaffold290 | 46892                   | TT                              | CC              | 1946934393               |
| SNP_P4_121328_60822  | NW_004515805.1 | Scaffold290 | 60822                   | AA                              | GG              | 1946934395               |
| SNP_P4_121329_61351  | NW_004515805.1 | Scaffold290 | 61351                   | AA                              | TT              | 1946934397               |
| SNP_P4_121330_61755  | NW_004515805.1 | Scaffold290 | 61755                   | CC                              | TT              | 1946934399               |
| SNP_P4_121331_62780  | NW_004515805.1 | Scaffold290 | 62780                   | AA                              | GG              | 1946934401               |
| SNP_P4_121332_63982  | NW_004515805.1 | Scaffold290 | 63982                   | CC                              | TT              | 1946934403               |
| SNP_P4_121333_64692  | NW_004515805.1 | Scaffold290 | 64692                   | TT                              | CC              | 1946934405               |
| SNP_P4_121334_90320  | NW_004515805.1 | Scaffold290 | 90320                   | TT                              | CC              | 1946934407               |
| SNP_P4_121335_91277  | NW_004515805.1 | Scaffold290 | 91277                   | CC                              | TT              | 1946934409               |
| SNP_P4_121336_91671  | NW_004515805.1 | Scaffold290 | 91671                   | GG                              | AA              | 1946934411               |
| SNP_P4_121337_93103  | NW_004515805.1 | Scaffold290 | 93103                   | TT                              | CC              | 1946934413               |

| SNPs IDs             | Chromosome IDs | Chromosomes | Physical positions (bp) | CDC Frontier (Reference genome) | (ILWC46 & LPNB) | NCBI SNPdb Accession IDs |
|----------------------|----------------|-------------|-------------------------|---------------------------------|-----------------|--------------------------|
| SNP_P4_121338_96978  | NW_004515805.1 | Scaffold290 | 96978                   | TT                              | CC              | 1946934415               |
| SNP_P4_121340_97460  | NW_004515805.1 | Scaffold290 | 97460                   | GG                              | CC              | 1946934417               |
| SNP_P4_121341_98642  | NW_004515805.1 | Scaffold290 | 98642                   | TT                              | CC              | 1946934419               |
| SNP_P4_121342_99278  | NW_004515805.1 | Scaffold290 | 99278                   | CC                              | TT              | 1946934421               |
| SNP_P4_121344_103750 | NW_004515805.1 | Scaffold290 | 103750                  | TT                              | CC              | 1946934423               |
| SNP_P4_121345_106283 | NW_004515805.1 | Scaffold290 | 106283                  | GG                              | TT              | 1946934425               |
| SNP_P4_121346_106310 | NW_004515805.1 | Scaffold290 | 106310                  | AA                              | GG              | 1946934427               |
| SNP_P4_121347_109951 | NW_004515805.1 | Scaffold290 | 109951                  | GG                              | TT              | 1946934429               |
| SNP_P4_121348_110441 | NW_004515805.1 | Scaffold290 | 110441                  | TT                              | CC              | 1946934431               |
| SNP_P4_121349_112726 | NW_004515805.1 | Scaffold290 | 112726                  | TT                              | CC              | 1946934433               |
| SNP_P4_121351_112788 | NW_004515805.1 | Scaffold290 | 112788                  | GG                              | CC              | 1946934435               |
| SNP_P4_121352_112857 | NW_004515805.1 | Scaffold290 | 112857                  | GG                              | AA              | 1946934437               |
| SNP_P4_121353_113793 | NW_004515805.1 | Scaffold290 | 113793                  | GG                              | TT              | 1946934439               |
| SNP_P4_121354_113849 | NW_004515805.1 | Scaffold290 | 113849                  | GG                              | AA              | 1946934441               |
| SNP_P4_121355_117835 | NW_004515805.1 | Scaffold290 | 117835                  | AA                              | CC              | 1946934443               |
| SNP_P4_121356_119810 | NW_004515805.1 | Scaffold290 | 119810                  | CC                              | AA              | 1946934445               |
| SNP_P4_121357_121969 | NW_004515805.1 | Scaffold290 | 121969                  | CC                              | GG              | 1946934447               |
| SNP_P4_121358_125664 | NW_004515805.1 | Scaffold290 | 125664                  | AA                              | GG              | 1946934449               |
| SNP_P4_121359_129280 | NW_004515805.1 | Scaffold290 | 129280                  | AA                              | GG              | 1946934451               |
| SNP_P4_121360_133860 | NW_004515805.1 | Scaffold290 | 133860                  | CC                              | TT              | 1946934453               |
| SNP_P4_121361_135480 | NW_004515805.1 | Scaffold290 | 135480                  | AA                              | GG              | 1946934455               |
| SNP_P4_121362_138431 | NW_004515805.1 | Scaffold290 | 138431                  | AA                              | TT              | 1946934457               |
| SNP_P4_121363_138502 | NW_004515805.1 | Scaffold290 | 138502                  | GG                              | CC              | 1946934459               |
| SNP_P4_121364_140019 | NW_004515805.1 | Scaffold290 | 140019                  | GG                              | AA              | 1946934461               |
| SNP_P4_121365_140396 | NW_004515805.1 | Scaffold290 | 140396                  | AA                              | CC              | 1946934463               |
| SNP_P4_121366_140868 | NW_004515805.1 | Scaffold290 | 140868                  | GG                              | TT              | 1946934465               |
| SNP_P4_121367_140878 | NW_004515805.1 | Scaffold290 | 140878                  | AA                              | GG              | 1946934467               |
| SNP_P4_121368_141215 | NW_004515805.1 | Scaffold290 | 141215                  | CC                              | TT              | 1946934469               |
| SNP_P4_121369_146318 | NW_004515805.1 | Scaffold290 | 146318                  | CC                              | TT              | 1946934471               |
| SNP_P4_121370_153693 | NW_004515805.1 | Scaffold290 | 153693                  | TT                              | GG              | 1946934473               |
| SNP_P4_121372_158832 | NW_004515805.1 | Scaffold290 | 158832                  | GG                              | AA              | 1946934475               |
| SNP_P4_121373_159455 | NW_004515805.1 | Scaffold290 | 159455                  | TT                              | AA              | 1946934477               |
| SNP_P4_121374_161641 | NW_004515805.1 | Scaffold290 | 161641                  | CC                              | TT              | 1946934479               |
| SNP_P4_121375_162165 | NW_004515805.1 | Scaffold290 | 162165                  | GG                              | AA              | 1946934481               |
| SNP_P4_121376_162205 | NW_004515805.1 | Scaffold290 | 162205                  | TT                              | CC              | 1946934483               |
| SNP_P4_121377_166515 | NW_004515805.1 | Scaffold290 | 166515                  | CC                              | TT              | 1946934485               |
| SNP_P4_121378_170130 | NW_004515805.1 | Scaffold290 | 170130                  | AA                              | GG              | 1946934487               |
| SNP_P4_121379_170275 | NW_004515805.1 | Scaffold290 | 170275                  | GG                              | AA              | 1946934489               |
| SNP_P4_121380_170278 | NW_004515805.1 | Scaffold290 | 170278                  | GG                              | AA              | 1946934491               |
| SNP_P4_121381_170465 | NW_004515805.1 | Scaffold290 | 170465                  | CC                              | TT              | 1946934493               |
| SNP_P4_121382_172179 | NW_004515805.1 | Scaffold290 | 172179                  | AA                              | CC              | 1946934495               |
| SNP_P4_121383_174426 | NW_004515805.1 | Scaffold290 | 174426                  | AA                              | GG              | 1946934497               |

| SNPs IDs             | Chromosome IDs | Chromosomes | Physical positions (bp) | CDC Frontier (Reference genome) | (ILWC46 & LPNB) | NCBI SNPdb Accession IDs |
|----------------------|----------------|-------------|-------------------------|---------------------------------|-----------------|--------------------------|
| SNP_P4_121385_177651 | NW_004515805.1 | Scaffold290 | 177651                  | AA                              | TT              | 1946934499               |
| SNP_P4_121386_179341 | NW_004515805.1 | Scaffold290 | 179341                  | TT                              | CC              | 1946934501               |
| SNP_P4_121387_182917 | NW_004515805.1 | Scaffold290 | 182917                  | AA                              | GG              | 1946934503               |
| SNP_P4_121388_186613 | NW_004515805.1 | Scaffold290 | 186613                  | TT                              | GG              | 1946934505               |
| SNP_P4_121389_187562 | NW_004515805.1 | Scaffold290 | 187562                  | TT                              | CC              | 1946934507               |
| SNP_P4_121390_188037 | NW_004515805.1 | Scaffold290 | 188037                  | CC                              | TT              | 1946934509               |
| SNP_P4_121391_188435 | NW_004515805.1 | Scaffold290 | 188435                  | TT                              | CC              | 1946934511               |
| SNP_P4_121392_190700 | NW_004515805.1 | Scaffold290 | 190700                  | GG                              | TT              | 1946934513               |
| SNP_P4_121393_191092 | NW_004515805.1 | Scaffold290 | 191092                  | AA                              | CC              | 1946934515               |
| SNP_P4_121394_193845 | NW_004515805.1 | Scaffold290 | 193845                  | CC                              | AA              | 1946934517               |
| SNP_P4_121395_197590 | NW_004515805.1 | Scaffold290 | 197590                  | CC                              | AA              | 1946934519               |
| SNP_P4_121396_200963 | NW_004515805.1 | Scaffold290 | 200963                  | TT                              | CC              | 1946934521               |
| SNP_P4_121397_202591 | NW_004515805.1 | Scaffold290 | 202591                  | TT                              | CC              | 1946934523               |
| SNP_P4_121399_209780 | NW_004515805.1 | Scaffold290 | 209780                  | GG                              | TT              | 1946934525               |
| SNP_P4_121400_210113 | NW_004515805.1 | Scaffold290 | 210113                  | TT                              | CC              | 1946934527               |
| SNP_P4_121401_210823 | NW_004515805.1 | Scaffold290 | 210823                  | GG                              | TT              | 1946934529               |
| SNP_P4_121402_213020 | NW_004515805.1 | Scaffold290 | 213020                  | CC                              | GG              | 1946934531               |
| SNP_P4_121403_225944 | NW_004515805.1 | Scaffold290 | 225944                  | CC                              | GG              | 1946934533               |
| SNP_P4_121404_233710 | NW_004515805.1 | Scaffold290 | 233710                  | GG                              | TT              | 1946934534               |
| SNP_P4_121405_236310 | NW_004515805.1 | Scaffold290 | 236310                  | TT                              | CC              | 1946934535               |
| SNP_P4_121406_238638 | NW_004515805.1 | Scaffold290 | 238638                  | CC                              | GG              | 1946934536               |
| SNP_P4_121407_247462 | NW_004515805.1 | Scaffold290 | 247462                  | TT                              | CC              | 1946934537               |
| SNP_P4_121408_250707 | NW_004515805.1 | Scaffold290 | 250707                  | TT                              | GG              | 1946934538               |
| SNP_P4_121410_250847 | NW_004515805.1 | Scaffold290 | 250847                  | TT                              | CC              | 1946934539               |
| SNP_P4_121411_250893 | NW_004515805.1 | Scaffold290 | 250893                  | CC                              | TT              | 1946934540               |
| SNP_P4_121412_250899 | NW_004515805.1 | Scaffold290 | 250899                  | GG                              | AA              | 1946934542               |
| SNP_P4_121413_250951 | NW_004515805.1 | Scaffold290 | 250951                  | TT                              | CC              | 1946934544               |
| SNP_P4_121414_251382 | NW_004515805.1 | Scaffold290 | 251382                  | AA                              | CC              | 1946934546               |
| SNP_P4_121415_251390 | NW_004515805.1 | Scaffold290 | 251390                  | GG                              | AA              | 1946934548               |
| SNP_P4_121416_251400 | NW_004515805.1 | Scaffold290 | 251400                  | GG                              | AA              | 1946934550               |
| SNP_P4_121417_251412 | NW_004515805.1 | Scaffold290 | 251412                  | GG                              | AA              | 1946934552               |
| SNP_P4_121418_251415 | NW_004515805.1 | Scaffold290 | 251415                  | AA                              | GG              | 1946934554               |
| SNP_P4_121419_251517 | NW_004515805.1 | Scaffold290 | 251517                  | AA                              | GG              | 1946934556               |
| SNP_P4_121420_252040 | NW_004515805.1 | Scaffold290 | 252040                  | AA                              | GG              | 1946934558               |
| SNP_P4_121421_252137 | NW_004515805.1 | Scaffold290 | 252137                  | CC                              | TT              | 1946934560               |
| SNP_P4_121422_252152 | NW_004515805.1 | Scaffold290 | 252152                  | TT                              | CC              | 1946934562               |
| SNP_P4_121423_252509 | NW_004515805.1 | Scaffold290 | 252509                  | CC                              | TT              | 1946934564               |
| SNP_P4_121424_252529 | NW_004515805.1 | Scaffold290 | 252529                  | CC                              | GG              | 1946934566               |
| SNP_P4_121425_252965 | NW_004515805.1 | Scaffold290 | 252965                  | CC                              | TT              | 1946934568               |
| SNP_P4_121426_252979 | NW_004515805.1 | Scaffold290 | 252979                  | GG                              | TT              | 1946934570               |
| SNP_P4_121427_253005 | NW_004515805.1 | Scaffold290 | 253005                  | GG                              | AA              | 1946934572               |
| SNP_P4_121429_262742 | NW_004515805.1 | Scaffold290 | 262742                  | GG                              | AA              | 1946934574               |

| SNPs IDs             | Chromosome IDs | Chromosomes | Physical positions (bp) | CDC Frontier (Reference genome) | (ILWC46 & LPNB) | NCBI SNPdb Accession IDs |
|----------------------|----------------|-------------|-------------------------|---------------------------------|-----------------|--------------------------|
| SNP_P4_121430_271108 | NW_004515805.1 | Scaffold290 | 271108                  | TT                              | CC              | 1946934576               |
| SNP_P4_121431_288243 | NW_004515805.1 | Scaffold290 | 288243                  | GG                              | AA              | 1946934578               |
| SNP_P4_121432_290970 | NW_004515805.1 | Scaffold290 | 290970                  | CC                              | AA              | 1946934580               |
| SNP_P4_121433_291644 | NW_004515805.1 | Scaffold290 | 291644                  | GG                              | AA              | 1946934582               |
| SNP_P4_121437_294422 | NW_004515805.1 | Scaffold290 | 294422                  | TT                              | AA              | 1946934584               |
| SNP_P4_121439_298325 | NW_004515805.1 | Scaffold290 | 298325                  | CC                              | TT              | 1946934586               |
| SNP_P4_121441_299496 | NW_004515805.1 | Scaffold290 | 299496                  | GG                              | AA              | 1946934588               |
| SNP_P4_121442_300670 | NW_004515805.1 | Scaffold290 | 300670                  | AA                              | TT              | 1946934590               |
| SNP_P4_121443_300836 | NW_004515805.1 | Scaffold290 | 300836                  | AA                              | GG              | 1946934592               |
| SNP_P4_121444_302066 | NW_004515805.1 | Scaffold290 | 302066                  | TT                              | CC              | 1946934594               |
| SNP_P4_121445_306392 | NW_004515805.1 | Scaffold290 | 306392                  | TT                              | GG              | 1946934597               |
| SNP_P4_121446_306599 | NW_004515805.1 | Scaffold290 | 306599                  | GG                              | AA              | 1946934599               |
| SNP_P4_121447_307018 | NW_004515805.1 | Scaffold290 | 307018                  | CC                              | TT              | 1946934601               |
| SNP_P4_121449_309263 | NW_004515805.1 | Scaffold290 | 309263                  | GG                              | CC              | 1946934603               |
| SNP_P4_121450_309270 | NW_004515805.1 | Scaffold290 | 309270                  | GG                              | AA              | 1946934605               |
| SNP_P4_121451_309271 | NW_004515805.1 | Scaffold290 | 309271                  | TT                              | CC              | 1946934607               |
| SNP_P4_121452_309300 | NW_004515805.1 | Scaffold290 | 309300                  | GG                              | TT              | 1946934609               |
| SNP_P4_121453_312144 | NW_004515805.1 | Scaffold290 | 312144                  | GG                              | AA              | 1946934612               |
| SNP_P4_121454_312357 | NW_004515805.1 | Scaffold290 | 312357                  | GG                              | AA              | 1946934614               |
| SNP_P4_121455_312376 | NW_004515805.1 | Scaffold290 | 312376                  | CC                              | TT              | 1946934616               |
| SNP_P4_121456_312433 | NW_004515805.1 | Scaffold290 | 312433                  | TT                              | AA              | 1946934618               |
| SNP_P4_121457_312438 | NW_004515805.1 | Scaffold290 | 312438                  | AA                              | CC              | 1946934620               |
| SNP_P4_121459_312638 | NW_004515805.1 | Scaffold290 | 312638                  | GG                              | AA              | 1946934622               |
| SNP_P4_121460_314947 | NW_004515805.1 | Scaffold290 | 314947                  | AA                              | TT              | 1946934624               |
| SNP_P4_121462_317167 | NW_004515805.1 | Scaffold290 | 317167                  | GG                              | AA              | 1946934626               |
| SNP_P4_121463_336416 | NW_004515805.1 | Scaffold290 | 336416                  | CC                              | AA              | 1946934628               |
| SNP_P4_121464_337017 | NW_004515805.1 | Scaffold290 | 337017                  | CC                              | TT              | 1946934630               |
| SNP_P4_121465_337917 | NW_004515805.1 | Scaffold290 | 337917                  | GG                              | CC              | 1946934632               |
| SNP_P4_121466_339330 | NW_004515805.1 | Scaffold290 | 339330                  | AA                              | CC              | 1946934634               |
| SNP_P4_121467_339888 | NW_004515805.1 | Scaffold290 | 339888                  | CC                              | GG              | 1946934636               |
| SNP_P4_121468_373020 | NW_004515805.1 | Scaffold290 | 373020                  | AA                              | GG              | 1946934638               |
| SNP_P4_121469_374457 | NW_004515805.1 | Scaffold290 | 374457                  | CC                              | TT              | 1946934640               |
| SNP_P4_121470_375803 | NW_004515805.1 | Scaffold290 | 375803                  | TT                              | CC              | 1946934642               |
| SNP_P4_121471_381433 | NW_004515805.1 | Scaffold290 | 381433                  | TT                              | CC              | 1946934644               |
| SNP_P4_121472_383354 | NW_004515805.1 | Scaffold290 | 383354                  | AA                              | GG              | 1946934647               |
| SNP_P4_121473_387924 | NW_004515805.1 | Scaffold290 | 387924                  | AA                              | GG              | 1946934649               |
| SNP_P4_121474_390960 | NW_004515805.1 | Scaffold290 | 390960                  | AA                              | GG              | 1946934651               |
| SNP_P4_121475_391790 | NW_004515805.1 | Scaffold290 | 391790                  | CC                              | GG              | 1946934653               |
| SNP_P4_121478_398570 | NW_004515805.1 | Scaffold290 | 398570                  | AA                              | GG              | 1946934655               |
| SNP_P4_121480_400935 | NW_004515805.1 | Scaffold290 | 400935                  | AA                              | TT              | 1946934657               |
| SNP_P4_121481_402636 | NW_004515805.1 | Scaffold290 | 402636                  | GG                              | AA              | 1946934659               |
| SNP_P4_121482_402765 | NW_004515805.1 | Scaffold290 | 402765                  | TT                              | CC              | 1946934661               |



| SNPs IDs             | Chromosome IDs | Chromosomes | Physical positions (bp) | CDC Frontier (Reference genome) | (ILWC46 & LPNB) | NCBI SNPdb Accession IDs |
|----------------------|----------------|-------------|-------------------------|---------------------------------|-----------------|--------------------------|
| SNP_P4_121483_405458 | NW_004515805.1 | Scaffold290 | 405458                  | AA                              | GG              | 1946934663               |
| SNP_P4_121484_407155 | NW_004515805.1 | Scaffold290 | 407155                  | CC                              | TT              | 1946934665               |
| SNP_P4_121485_416723 | NW_004515805.1 | Scaffold290 | 416723                  | AA                              | TT              | 1946934667               |
| SNP_P4_121486_416765 | NW_004515805.1 | Scaffold290 | 416765                  | GG                              | AA              | 1946934669               |
| SNP_P4_121487_416800 | NW_004515805.1 | Scaffold290 | 416800                  | GG                              | AA              | 1946934671               |
| SNP_P4_121488_422895 | NW_004515805.1 | Scaffold290 | 422895                  | TT                              | CC              | 1946934673               |
| SNP_P4_121489_424392 | NW_004515805.1 | Scaffold290 | 424392                  | TT                              | GG              | 1946934675               |
| SNP_P4_121494_452338 | NW_004515805.1 | Scaffold290 | 452338                  | TT                              | GG              | 1946934677               |
| SNP_P4_121495_452971 | NW_004515805.1 | Scaffold290 | 452971                  | TT                              | CC              | 1946934679               |
| SNP_P4_121496_461764 | NW_004515805.1 | Scaffold290 | 461764                  | CC                              | GG              | 1946934681               |
| SNP_P4_121497_467677 | NW_004515805.1 | Scaffold290 | 467677                  | GG                              | AA              | 1946934683               |
| SNP_P4_121499_475520 | NW_004515805.1 | Scaffold290 | 475520                  | CC                              | TT              | 1946934685               |
| SNP_P4_121500_488931 | NW_004515805.1 | Scaffold290 | 488931                  | TT                              | AA              | 1946934687               |
| SNP_P4_121501_489457 | NW_004515805.1 | Scaffold290 | 489457                  | TT                              | AA              | 1946934689               |
| SNP_P4_121502_489940 | NW_004515805.1 | Scaffold290 | 489940                  | TT                              | GG              | 1946934691               |
| SNP_P4_121503_490382 | NW_004515805.1 | Scaffold290 | 490382                  | TT                              | CC              | 1946934693               |
| SNP_P4_121504_491243 | NW_004515805.1 | Scaffold290 | 491243                  | GG                              | TT              | 1946934695               |
| SNP_P4_121505_494375 | NW_004515805.1 | Scaffold290 | 494375                  | CC                              | TT              | 1946934697               |
| SNP_P4_121506_497982 | NW_004515805.1 | Scaffold290 | 497982                  | AA                              | GG              | 1946934699               |
| SNP_P4_121507_497995 | NW_004515805.1 | Scaffold290 | 497995                  | AA                              | TT              | 1946934701               |
| SNP_P4_121508_498251 | NW_004515805.1 | Scaffold290 | 498251                  | TT                              | CC              | 1946934703               |
| SNP_P4_121509_498273 | NW_004515805.1 | Scaffold290 | 498273                  | TT                              | CC              | 1946934705               |
| SNP_P4_121510_499430 | NW_004515805.1 | Scaffold290 | 499430                  | GG                              | TT              | 1946934707               |
| SNP_P4_121511_499851 | NW_004515805.1 | Scaffold290 | 499851                  | GG                              | AA              | 1946934709               |
| SNP_P4_121512_499954 | NW_004515805.1 | Scaffold290 | 499954                  | CC                              | TT              | 1946934711               |
| SNP_P4_121513_500014 | NW_004515805.1 | Scaffold290 | 500014                  | AA                              | GG              | 1946934713               |
| SNP_P4_121514_500017 | NW_004515805.1 | Scaffold290 | 500017                  | AA                              | GG              | 1946934715               |
| SNP_P4_121515_500031 | NW_004515805.1 | Scaffold290 | 500031                  | CC                              | TT              | 1946934717               |
| SNP_P4_121516_500262 | NW_004515805.1 | Scaffold290 | 500262                  | CC                              | TT              | 1946934719               |
| SNP_P4_121517_500380 | NW_004515805.1 | Scaffold290 | 500380                  | TT                              | CC              | 1946934721               |
| SNP_P4_121518_500382 | NW_004515805.1 | Scaffold290 | 500382                  | TT                              | CC              | 1946934723               |
| SNP_P4_121519_500418 | NW_004515805.1 | Scaffold290 | 500418                  | GG                              | AA              | 1946934725               |
| SNP_P4_121520_500438 | NW_004515805.1 | Scaffold290 | 500438                  | TT                              | CC              | 1946934727               |
| SNP_P4_121521_502893 | NW_004515805.1 | Scaffold290 | 502893                  | TT                              | CC              | 1946934729               |
| SNP_P4_121522_502894 | NW_004515805.1 | Scaffold290 | 502894                  | TT                              | GG              | 1946934731               |
| SNP_P4_121523_502939 | NW_004515805.1 | Scaffold290 | 502939                  | TT                              | CC              | 1946934733               |
| SNP_P4_121524_505589 | NW_004515805.1 | Scaffold290 | 505589                  | AA                              | TT              | 1946934735               |
| SNP_P4_121525_506207 | NW_004515805.1 | Scaffold290 | 506207                  | CC                              | AA              | 1946934737               |
| SNP_P4_121526_508202 | NW_004515805.1 | Scaffold290 | 508202                  | AA                              | TT              | 1946934739               |
| SNP_P4_121527_508223 | NW_004515805.1 | Scaffold290 | 508223                  | TT                              | CC              | 1946934741               |
| SNP_P4_121528_508528 | NW_004515805.1 | Scaffold290 | 508528                  | AA                              | TT              | 1946934743               |
| SNP_P4_121529_508537 | NW_004515805.1 | Scaffold290 | 508537                  | AA                              | GG              | 1946934745               |

| SNPs IDs             | Chromosome IDs | Chromosomes | Physical positions (bp) | CDC Frontier (Reference genome) | (ILWC46 & LPNB) | NCBI SNPdb Accession IDs |
|----------------------|----------------|-------------|-------------------------|---------------------------------|-----------------|--------------------------|
| SNP_P4_121530_508574 | NW_004515805.1 | Scaffold290 | 508574                  | CC                              | TT              | 1946934747               |
| SNP_P4_121531_511319 | NW_004515805.1 | Scaffold290 | 511319                  | TT                              | CC              | 1946934749               |
| SNP_P4_121532_539875 | NW_004515805.1 | Scaffold290 | 539875                  | CC                              | TT              | 1946934751               |
| SNP_P4_121533_544517 | NW_004515805.1 | Scaffold290 | 544517                  | TT                              | CC              | 1946934753               |
| SNP_P4_121534_544533 | NW_004515805.1 | Scaffold290 | 544533                  | CC                              | AA              | 1946934755               |
| SNP_P4_121535_544547 | NW_004515805.1 | Scaffold290 | 544547                  | CC                              | TT              | 1946934757               |
| SNP_P4_121536_544623 | NW_004515805.1 | Scaffold290 | 544623                  | AA                              | GG              | 1946934759               |
| SNP_P4_121537_544653 | NW_004515805.1 | Scaffold290 | 544653                  | AA                              | GG              | 1946934761               |
| SNP_P4_121538_544723 | NW_004515805.1 | Scaffold290 | 544723                  | AA                              | GG              | 1946934763               |
| SNP_P4_121539_544731 | NW_004515805.1 | Scaffold290 | 544731                  | GG                              | AA              | 1946934765               |
| SNP_P4_121540_544850 | NW_004515805.1 | Scaffold290 | 544850                  | CC                              | TT              | 1946934767               |
| SNP_P4_121541_544858 | NW_004515805.1 | Scaffold290 | 544858                  | GG                              | AA              | 1946934769               |
| SNP_P4_121542_544873 | NW_004515805.1 | Scaffold290 | 544873                  | TT                              | GG              | 1946934771               |
| SNP_P4_121543_544878 | NW_004515805.1 | Scaffold290 | 544878                  | GG                              | AA              | 1946934773               |
| SNP_P4_121544_544895 | NW_004515805.1 | Scaffold290 | 544895                  | AA                              | GG              | 1946934776               |
| SNP_P4_121545_552789 | NW_004515805.1 | Scaffold290 | 552789                  | GG                              | AA              | 1946934778               |
| SNP_P4_121546_554073 | NW_004515805.1 | Scaffold290 | 554073                  | TT                              | AA              | 1946934780               |
| SNP_P4_121547_555121 | NW_004515805.1 | Scaffold290 | 555121                  | TT                              | CC              | 1946934782               |
| SNP_P4_121548_555851 | NW_004515805.1 | Scaffold290 | 555851                  | GG                              | AA              | 1946934784               |
| SNP_P4_121549_557805 | NW_004515805.1 | Scaffold290 | 557805                  | CC                              | TT              | 1946934786               |
| SNP_P4_121550_561049 | NW_004515805.1 | Scaffold290 | 561049                  | GG                              | AA              | 1946934788               |
| SNP_P4_121551_561135 | NW_004515805.1 | Scaffold290 | 561135                  | CC                              | TT              | 1946934790               |
| SNP_P4_121552_561500 | NW_004515805.1 | Scaffold290 | 561500                  | TT                              | CC              | 1946934792               |
| SNP_P4_121553_561511 | NW_004515805.1 | Scaffold290 | 561511                  | GG                              | TT              | 1946934794               |
| SNP_P4_121554_561594 | NW_004515805.1 | Scaffold290 | 561594                  | GG                              | AA              | 1946934796               |
| SNP_P4_121555_561837 | NW_004515805.1 | Scaffold290 | 561837                  | TT                              | AA              | 1946934798               |
| SNP_P4_121556_561843 | NW_004515805.1 | Scaffold290 | 561843                  | GG                              | AA              | 1946934800               |
| SNP_P4_121557_562004 | NW_004515805.1 | Scaffold290 | 562004                  | CC                              | TT              | 1946934802               |
| SNP_P4_121558_564207 | NW_004515805.1 | Scaffold290 | 564207                  | CC                              | AA              | 1946934804               |
| SNP_P4_121559_571609 | NW_004515805.1 | Scaffold290 | 571609                  | GG                              | AA              | 1946934806               |
| SNP_P4_121560_571682 | NW_004515805.1 | Scaffold290 | 571682                  | CC                              | AA              | 1946934809               |
| SNP_P4_121561_571699 | NW_004515805.1 | Scaffold290 | 571699                  | AA                              | GG              | 1946934811               |
| SNP_P4_121562_571709 | NW_004515805.1 | Scaffold290 | 571709                  | AA                              | GG              | 1946934813               |
| SNP_P4_121563_571717 | NW_004515805.1 | Scaffold290 | 571717                  | TT                              | CC              | 1946934815               |
| SNP_P4_121564_571963 | NW_004515805.1 | Scaffold290 | 571963                  | TT                              | CC              | 1946934817               |
| SNP_P4_121565_572089 | NW_004515805.1 | Scaffold290 | 572089                  | CC                              | TT              | 1946934819               |
| SNP_P4_121566_572090 | NW_004515805.1 | Scaffold290 | 572090                  | AA                              | CC              | 1946934821               |
| SNP_P4_121568_572100 | NW_004515805.1 | Scaffold290 | 572100                  | TT                              | CC              | 1946934823               |
| SNP_P4_121569_572229 | NW_004515805.1 | Scaffold290 | 572229                  | GG                              | AA              | 1946934825               |
| SNP_P4_121570_572231 | NW_004515805.1 | Scaffold290 | 572231                  | TT                              | CC              | 1946934827               |
| SNP_P4_121571_572249 | NW_004515805.1 | Scaffold290 | 572249                  | AA                              | GG              | 1946934829               |
| SNP_P4_121572_572275 | NW_004515805.1 | Scaffold290 | 572275                  | AA                              | TT              | 1946934831               |

| SNPs IDs             | Chromosome IDs | Chromosomes | Physical positions (bp) | CDC Frontier (Reference genome) | (ILWC46 & LPNB) | NCBI SNPdb Accession IDs |
|----------------------|----------------|-------------|-------------------------|---------------------------------|-----------------|--------------------------|
| SNP_P4_121573_572325 | NW_004515805.1 | Scaffold290 | 572325                  | AA                              | TT              | 1946934833               |
| SNP_P4_121574_573433 | NW_004515805.1 | Scaffold290 | 573433                  | TT                              | CC              | 1946934835               |
| SNP_P4_121575_575364 | NW_004515805.1 | Scaffold290 | 575364                  | GG                              | CC              | 1946934837               |
| SNP_P4_121576_585822 | NW_004515805.1 | Scaffold290 | 585822                  | AA                              | CC              | 1946934839               |
| SNP_P4_121577_586300 | NW_004515805.1 | Scaffold290 | 586300                  | CC                              | TT              | 1946934841               |
| SNP_P4_121578_586301 | NW_004515805.1 | Scaffold290 | 586301                  | TT                              | AA              | 1946934843               |
| SNP_P4_121579_603199 | NW_004515805.1 | Scaffold290 | 603199                  | TT                              | CC              | 1946934845               |
| SNP_P4_121582_605010 | NW_004515805.1 | Scaffold290 | 605010                  | CC                              | TT              | 1946934847               |
| SNP_P4_121583_609603 | NW_004515805.1 | Scaffold290 | 609603                  | CC                              | TT              | 1946934849               |
| SNP_P4_121584_615997 | NW_004515805.1 | Scaffold290 | 615997                  | TT                              | GG              | 1946934851               |
| SNP_P4_121585_617460 | NW_004515805.1 | Scaffold290 | 617460                  | AA                              | CC              | 1946934853               |
| SNP_P4_121586_618416 | NW_004515805.1 | Scaffold290 | 618416                  | CC                              | TT              | 1946934855               |
| SNP_P4_121587_618462 | NW_004515805.1 | Scaffold290 | 618462                  | CC                              | GG              | 1946934857               |
| SNP_P4_121588_629085 | NW_004515805.1 | Scaffold290 | 629085                  | GG                              | TT              | 1946934859               |
| SNP_P4_121589_633735 | NW_004515805.1 | Scaffold290 | 633735                  | CC                              | GG              | 1946934861               |
| SNP_P4_121590_637001 | NW_004515805.1 | Scaffold290 | 637001                  | CC                              | AA              | 1946934863               |
| SNP_P4_121591_639631 | NW_004515805.1 | Scaffold290 | 639631                  | AA                              | GG              | 1946934865               |
| SNP_P4_121592_640007 | NW_004515805.1 | Scaffold290 | 640007                  | CC                              | TT              | 1946934867               |
| SNP_P4_121593_640921 | NW_004515805.1 | Scaffold290 | 640921                  | TT                              | AA              | 1946934869               |
| SNP_P4_121594_641104 | NW_004515805.1 | Scaffold290 | 641104                  | CC                              | TT              | 1946934871               |
| SNP_P4_121595_641341 | NW_004515805.1 | Scaffold290 | 641341                  | AA                              | GG              | 1946934873               |
| SNP_P4_121596_642746 | NW_004515805.1 | Scaffold290 | 642746                  | CC                              | TT              | 1946934875               |
| SNP_P4_121597_647016 | NW_004515805.1 | Scaffold290 | 647016                  | TT                              | AA              | 1946934877               |
| SNP_P4_121598_648023 | NW_004515805.1 | Scaffold290 | 648023                  | AA                              | GG              | 1946934879               |
| SNP_P4_121599_654492 | NW_004515805.1 | Scaffold290 | 654492                  | TT                              | AA              | 1946934881               |
| SNP_P4_121600_654493 | NW_004515805.1 | Scaffold290 | 654493                  | AA                              | GG              | 1946934883               |
| SNP_P4_121601_655546 | NW_004515805.1 | Scaffold290 | 655546                  | AA                              | CC              | 1946934885               |
| SNP_P4_121602_660228 | NW_004515805.1 | Scaffold290 | 660228                  | AA                              | GG              | 1946934887               |
| SNP_P4_121604_670140 | NW_004515805.1 | Scaffold290 | 670140                  | CC                              | TT              | 1946934889               |
| SNP_P4_121605_670685 | NW_004515805.1 | Scaffold290 | 670685                  | TT                              | CC              | 1946934891               |
| SNP_P4_121606_670900 | NW_004515805.1 | Scaffold290 | 670900                  | AA                              | GG              | 1946934893               |
| SNP_P4_121607_671273 | NW_004515805.1 | Scaffold290 | 671273                  | TT                              | GG              | 1946934895               |
| SNP_P4_121608_673427 | NW_004515805.1 | Scaffold290 | 673427                  | CC                              | TT              | 1946934897               |
| SNP_P4_121610_676871 | NW_004515805.1 | Scaffold290 | 676871                  | GG                              | CC              | 1946934899               |
| SNP_P4_121611_680125 | NW_004515805.1 | Scaffold290 | 680125                  | GG                              | AA              | 1946934901               |
| SNP_P4_121612_680335 | NW_004515805.1 | Scaffold290 | 680335                  | AA                              | GG              | 1946934903               |
| SNP_P4_121613_680540 | NW_004515805.1 | Scaffold290 | 680540                  | CC                              | TT              | 1946934905               |
| SNP_P4_121614_683330 | NW_004515805.1 | Scaffold290 | 683330                  | GG                              | AA              | 1946934907               |
| SNP_P4_121615_698995 | NW_004515805.1 | Scaffold290 | 698995                  | GG                              | TT              | 1946934909               |
| SNP_P4_121617_701292 | NW_004515805.1 | Scaffold290 | 701292                  | GG                              | AA              | 1946934911               |
| SNP_P4_121618_702131 | NW_004515805.1 | Scaffold290 | 702131                  | GG                              | CC              | 1946934913               |
| SNP_P4_121620_709724 | NW_004515805.1 | Scaffold290 | 709724                  | CC                              | GG              | 1946934915               |

| SNPs IDs             | Chromosome IDs | Chromosomes | Physical positions (bp) | CDC Frontier (Reference genome) | (ILWC46 & LPNB) | NCBI SNPdb Accession IDs |
|----------------------|----------------|-------------|-------------------------|---------------------------------|-----------------|--------------------------|
| SNP_P4_121621_709773 | NW_004515805.1 | Scaffold290 | 709773                  | GG                              | AA              | 1946934917               |
| SNP_P4_121622_710148 | NW_004515805.1 | Scaffold290 | 710148                  | CC                              | AA              | 1946934919               |
| SNP_P4_121623_710159 | NW_004515805.1 | Scaffold290 | 710159                  | GG                              | AA              | 1946934921               |
| SNP_P4_121624_716017 | NW_004515805.1 | Scaffold290 | 716017                  | GG                              | AA              | 1946934923               |
| SNP_P4_121626_728593 | NW_004515805.1 | Scaffold290 | 728593                  | GG                              | TT              | 1946934925               |
| SNP_P4_121627_729098 | NW_004515805.1 | Scaffold290 | 729098                  | AA                              | TT              | 1946934927               |
| SNP_P4_121628_729372 | NW_004515805.1 | Scaffold290 | 729372                  | TT                              | CC              | 1946934929               |
| SNP_P4_121629_731850 | NW_004515805.1 | Scaffold290 | 731850                  | TT                              | AA              | 1946934931               |
| SNP_P4_121630_731940 | NW_004515805.1 | Scaffold290 | 731940                  | AA                              | GG              | 1946934933               |
| SNP_P4_121631_738870 | NW_004515805.1 | Scaffold290 | 738870                  | CC                              | TT              | 1946934935               |
| SNP_P4_121632_740667 | NW_004515805.1 | Scaffold290 | 740667                  | TT                              | CC              | 1946934937               |
| SNP_P4_121633_744635 | NW_004515805.1 | Scaffold290 | 744635                  | AA                              | GG              | 1946934939               |
| SNP_P4_121634_744858 | NW_004515805.1 | Scaffold290 | 744858                  | AA                              | GG              | 1946934941               |
| SNP_P4_121635_745535 | NW_004515805.1 | Scaffold290 | 745535                  | CC                              | TT              | 1946934943               |
| SNP_P4_121636_745934 | NW_004515805.1 | Scaffold290 | 745934                  | CC                              | TT              | 1946934945               |
| SNP_P4_121637_750069 | NW_004515805.1 | Scaffold290 | 750069                  | GG                              | AA              | 1946934947               |
| SNP_P4_121638_752973 | NW_004515805.1 | Scaffold290 | 752973                  | CC                              | TT              | 1946934949               |
| SNP_P4_121639_753260 | NW_004515805.1 | Scaffold290 | 753260                  | CC                              | TT              | 1946934951               |
| SNP_P4_121640_757675 | NW_004515805.1 | Scaffold290 | 757675                  | CC                              | TT              | 1946934953               |
| SNP_P4_121641_760414 | NW_004515805.1 | Scaffold290 | 760414                  | AA                              | CC              | 1946934955               |
| SNP_P4_121642_764095 | NW_004515805.1 | Scaffold290 | 764095                  | CC                              | AA              | 1946934957               |
| SNP_P4_121643_766767 | NW_004515805.1 | Scaffold290 | 766767                  | GG                              | AA              | 1946934959               |
| SNP_P4_121644_777912 | NW_004515805.1 | Scaffold290 | 777912                  | TT                              | CC              | 1946934961               |
| SNP_P4_121645_778414 | NW_004515805.1 | Scaffold290 | 778414                  | TT                              | AA              | 1946934963               |
| SNP_P4_121646_797379 | NW_004515805.1 | Scaffold290 | 797379                  | TT                              | GG              | 1946934965               |
| SNP_P4_121647_797388 | NW_004515805.1 | Scaffold290 | 797388                  | TT                              | CC              | 1946934967               |
| SNP_P4_121648_797391 | NW_004515805.1 | Scaffold290 | 797391                  | CC                              | TT              | 1946934969               |
| SNP_P4_121649_797422 | NW_004515805.1 | Scaffold290 | 797422                  | GG                              | CC              | 1946934971               |
| SNP_P4_121650_797425 | NW_004515805.1 | Scaffold290 | 797425                  | AA                              | TT              | 1946934973               |
| SNP_P4_121651_797438 | NW_004515805.1 | Scaffold290 | 797438                  | AA                              | GG              | 1946934975               |
| SNP_P4_121652_797450 | NW_004515805.1 | Scaffold290 | 797450                  | TT                              | CC              | 1946934977               |
| SNP_P4_121653_797569 | NW_004515805.1 | Scaffold290 | 797569                  | GG                              | AA              | 1946934979               |
| SNP_P4_121654_797715 | NW_004515805.1 | Scaffold290 | 797715                  | GG                              | AA              | 1946934981               |
| SNP_P4_121655_798289 | NW_004515805.1 | Scaffold290 | 798289                  | CC                              | TT              | 1946934983               |
| SNP_P4_121656_809912 | NW_004515805.1 | Scaffold290 | 809912                  | TT                              | AA              | 1946934985               |
| SNP_P4_121657_813710 | NW_004515805.1 | Scaffold290 | 813710                  | TT                              | CC              | 1946934987               |
| SNP_P4_121658_813716 | NW_004515805.1 | Scaffold290 | 813716                  | CC                              | TT              | 1946934989               |
| SNP_P4_121659_813722 | NW_004515805.1 | Scaffold290 | 813722                  | TT                              | CC              | 1946934991               |
| SNP_P4_121660_813749 | NW_004515805.1 | Scaffold290 | 813749                  | AA                              | GG              | 1946934993               |
| SNP_P4_121661_813788 | NW_004515805.1 | Scaffold290 | 813788                  | TT                              | GG              | 1946934995               |
| SNP_P4_121662_815082 | NW_004515805.1 | Scaffold290 | 815082                  | TT                              | CC              | 1946934997               |
| SNP_P4_121663_816219 | NW_004515805.1 | Scaffold290 | 816219                  | AA                              | CC              | 1946934999               |

| SNPs IDs             | Chromosome IDs | Chromosomes | Physical positions (bp) | CDC Frontier (Reference genome) | (ILWC46 & LPNB) | NCBI SNPdb Accession IDs |
|----------------------|----------------|-------------|-------------------------|---------------------------------|-----------------|--------------------------|
| SNP_P4_121664_817373 | NW_004515805.1 | Scaffold290 | 817373                  | AA                              | GG              | 1946935001               |
| SNP_P4_121665_817702 | NW_004515805.1 | Scaffold290 | 817702                  | TT                              | GG              | 1946935003               |
| SNP_P4_121666_818291 | NW_004515805.1 | Scaffold290 | 818291                  | AA                              | CC              | 1946935005               |
| SNP_P4_121667_818356 | NW_004515805.1 | Scaffold290 | 818356                  | GG                              | TT              | 1946935007               |
| SNP_P4_121668_818508 | NW_004515805.1 | Scaffold290 | 818508                  | TT                              | AA              | 1946935009               |
| SNP_P4_121670_822386 | NW_004515805.1 | Scaffold290 | 822386                  | GG                              | AA              | 1946935011               |
| SNP_P4_121671_823551 | NW_004515805.1 | Scaffold290 | 823551                  | TT                              | GG              | 1946935013               |
| SNP_P4_121672_823863 | NW_004515805.1 | Scaffold290 | 823863                  | TT                              | CC              | 1946935015               |
| SNP_P4_121673_825515 | NW_004515805.1 | Scaffold290 | 825515                  | AA                              | TT              | 1946935017               |
| SNP_P4_121674_825899 | NW_004515805.1 | Scaffold290 | 825899                  | CC                              | TT              | 1946935019               |
| SNP_P4_121675_829363 | NW_004515805.1 | Scaffold290 | 829363                  | TT                              | GG              | 1946935021               |
| SNP_P4_121676_832442 | NW_004515805.1 | Scaffold290 | 832442                  | GG                              | CC              | 1946935023               |
| SNP_P4_121677_833211 | NW_004515805.1 | Scaffold290 | 833211                  | AA                              | GG              | 1946935025               |
| SNP_P4_121678_838281 | NW_004515805.1 | Scaffold290 | 838281                  | CC                              | AA              | 1946935027               |
| SNP_P4_121679_844964 | NW_004515805.1 | Scaffold290 | 844964                  | AA                              | GG              | 1946935029               |
| SNP_P4_121680_844974 | NW_004515805.1 | Scaffold290 | 844974                  | TT                              | CC              | 1946935031               |
| SNP_P4_121681_844984 | NW_004515805.1 | Scaffold290 | 844984                  | AA                              | GG              | 1946935033               |
| SNP_P4_121682_848944 | NW_004515805.1 | Scaffold290 | 848944                  | GG                              | TT              | 1946935035               |
| SNP_P4_121683_848951 | NW_004515805.1 | Scaffold290 | 848951                  | TT                              | AA              | 1946935037               |
| SNP_P4_121685_848988 | NW_004515805.1 | Scaffold290 | 848988                  | TT                              | GG              | 1946935039               |
| SNP_P4_121687_859879 | NW_004515805.1 | Scaffold290 | 859879                  | GG                              | AA              | 1946935041               |
| SNP_P4_121690_861861 | NW_004515805.1 | Scaffold290 | 861861                  | AA                              | GG              | 1946935043               |
| SNP_P4_121691_862717 | NW_004515805.1 | Scaffold290 | 862717                  | CC                              | TT              | 1946935045               |
| SNP_P4_121693_874452 | NW_004515805.1 | Scaffold290 | 874452                  | AA                              | GG              | 1946935047               |
| SNP_P4_121694_874460 | NW_004515805.1 | Scaffold290 | 874460                  | AA                              | GG              | 1946935049               |
| SNP_P4_121695_874817 | NW_004515805.1 | Scaffold290 | 874817                  | TT                              | CC              | 1946935051               |
| SNP_P4_121696_877134 | NW_004515805.1 | Scaffold290 | 877134                  | CC                              | TT              | 1946935053               |
| SNP_P4_121697_877348 | NW_004515805.1 | Scaffold290 | 877348                  | GG                              | TT              | 1946935055               |
| SNP_P4_121698_879542 | NW_004515805.1 | Scaffold290 | 879542                  | AA                              | CC              | 1946935057               |
| SNP_P4_121699_887543 | NW_004515805.1 | Scaffold290 | 887543                  | CC                              | TT              | 1946935059               |
| SNP_P4_121702_893452 | NW_004515805.1 | Scaffold290 | 893452                  | AA                              | GG              | 1946935061               |
| SNP_P4_121703_895532 | NW_004515805.1 | Scaffold290 | 895532                  | AA                              | GG              | 1946935063               |
| SNP_P4_121704_899619 | NW_004515805.1 | Scaffold290 | 899619                  | CC                              | TT              | 1946935065               |
| SNP_P4_121705_899779 | NW_004515805.1 | Scaffold290 | 899779                  | AA                              | GG              | 1946935067               |
| SNP_P4_121706_905693 | NW_004515805.1 | Scaffold290 | 905693                  | CC                              | AA              | 1946935069               |
| SNP_P4_121707_907159 | NW_004515805.1 | Scaffold290 | 907159                  | TT                              | CC              | 1946935071               |
| SNP_P4_121708_910032 | NW_004515805.1 | Scaffold290 | 910032                  | GG                              | AA              | 1946935073               |
| SNP_P4_121709_1773   | NW_004515806.1 | Scaffold292 | 1773                    | TT                              | AA              | 1946935075               |
| SNP_P4_121710_1796   | NW_004515806.1 | Scaffold292 | 1796                    | AA                              | GG              | 1946935077               |
| SNP_P4_121711_1807   | NW_004515806.1 | Scaffold292 | 1807                    | GG                              | AA              | 1946935079               |
| SNP_P4_121712_2156   | NW_004515806.1 | Scaffold292 | 2156                    | GG                              | CC              | 1946935081               |
| SNP_P4_121713_5219   | NW_004515806.1 | Scaffold292 | 5219                    | AA                              | GG              | 1946935083               |

| SNPs IDs            | Chromosome IDs | Chromosomes | Physical positions (bp) | CDC Frontier (Reference genome) | (ILWC46 & LPNB) | NCBI SNPdb Accession IDs |
|---------------------|----------------|-------------|-------------------------|---------------------------------|-----------------|--------------------------|
| SNP_P4_121714_5242  | NW_004515806.1 | Scaffold292 | 5242                    | AA                              | CC              | 1946935085               |
| SNP_P4_121715_5290  | NW_004515806.1 | Scaffold292 | 5290                    | AA                              | CC              | 1946935087               |
| SNP_P4_121716_5295  | NW_004515806.1 | Scaffold292 | 5295                    | AA                              | TT              | 1946935089               |
| SNP_P4_121717_5316  | NW_004515806.1 | Scaffold292 | 5316                    | TT                              | AA              | 1946935091               |
| SNP_P4_121718_5362  | NW_004515806.1 | Scaffold292 | 5362                    | AA                              | CC              | 1946935093               |
| SNP_P4_121719_5498  | NW_004515806.1 | Scaffold292 | 5498                    | AA                              | CC              | 1946935095               |
| SNP_P4_121720_6060  | NW_004515807.1 | Scaffold293 | 6060                    | AA                              | GG              | 1946935096               |
| SNP_P4_121721_6455  | NW_004515807.1 | Scaffold293 | 6455                    | CC                              | TT              | 1946935098               |
| SNP_P4_121722_9329  | NW_004515807.1 | Scaffold293 | 9329                    | TT                              | CC              | 1946935100               |
| SNP_P4_121723_11176 | NW_004515807.1 | Scaffold293 | 11176                   | AA                              | GG              | 1946935102               |
| SNP_P4_121724_11518 | NW_004515807.1 | Scaffold293 | 11518                   | TT                              | AA              | 1946935104               |
| SNP_P4_121725_12853 | NW_004515807.1 | Scaffold293 | 12853                   | CC                              | TT              | 1946935106               |
| SNP_P4_121726_12938 | NW_004515807.1 | Scaffold293 | 12938                   | CC                              | TT              | 1946935108               |
| SNP_P4_121727_12976 | NW_004515807.1 | Scaffold293 | 12976                   | GG                              | AA              | 1946935110               |
| SNP_P4_121728_12983 | NW_004515807.1 | Scaffold293 | 12983                   | TT                              | AA              | 1946935112               |
| SNP_P4_121729_12997 | NW_004515807.1 | Scaffold293 | 12997                   | TT                              | CC              | 1946935114               |
| SNP_P4_121730_13006 | NW_004515807.1 | Scaffold293 | 13006                   | TT                              | CC              | 1946935116               |
| SNP_P4_121731_13007 | NW_004515807.1 | Scaffold293 | 13007                   | CC                              | TT              | 1946935118               |
| SNP_P4_121732_13030 | NW_004515807.1 | Scaffold293 | 13030                   | CC                              | TT              | 1946935120               |
| SNP_P4_121733_19977 | NW_004515807.1 | Scaffold293 | 19977                   | AA                              | CC              | 1946935122               |
| SNP_P4_121735_23542 | NW_004515807.1 | Scaffold293 | 23542                   | AA                              | TT              | 1946935124               |
| SNP_P4_121736_23830 | NW_004515807.1 | Scaffold293 | 23830                   | GG                              | AA              | 1946935126               |
| SNP_P4_121737_23867 | NW_004515807.1 | Scaffold293 | 23867                   | CC                              | AA              | 1946935128               |
| SNP_P4_121739_30395 | NW_004515807.1 | Scaffold293 | 30395                   | AA                              | GG              | 1946935130               |
| SNP_P4_121740_30400 | NW_004515807.1 | Scaffold293 | 30400                   | CC                              | AA              | 1946935132               |
| SNP_P4_121741_30428 | NW_004515807.1 | Scaffold293 | 30428                   | AA                              | GG              | 1946935134               |
| SNP_P4_121742_30431 | NW_004515807.1 | Scaffold293 | 30431                   | CC                              | TT              | 1946935136               |
| SNP_P4_121744_30457 | NW_004515807.1 | Scaffold293 | 30457                   | TT                              | CC              | 1946935138               |
| SNP_P4_121745_30467 | NW_004515807.1 | Scaffold293 | 30467                   | TT                              | CC              | 1946935140               |
| SNP_P4_121746_30632 | NW_004515807.1 | Scaffold293 | 30632                   | TT                              | CC              | 1946935142               |
| SNP_P4_121747_33655 | NW_004515807.1 | Scaffold293 | 33655                   | GG                              | AA              | 1946935144               |
| SNP_P4_121748_33685 | NW_004515807.1 | Scaffold293 | 33685                   | AA                              | GG              | 1946935146               |
| SNP_P4_121749_35422 | NW_004515807.1 | Scaffold293 | 35422                   | TT                              | AA              | 1946935148               |
| SNP_P4_121750_35528 | NW_004515807.1 | Scaffold293 | 35528                   | AA                              | GG              | 1946935150               |
| SNP_P4_121751_45782 | NW_004515807.1 | Scaffold293 | 45782                   | TT                              | AA              | 1946935152               |
| SNP_P4_121752_55364 | NW_004515807.1 | Scaffold293 | 55364                   | TT                              | AA              | 1946935154               |
| SNP_P4_121753_239   | NW_004515808.1 | Scaffold295 | 239                     | AA                              | GG              | 1946935156               |
| SNP_P4_121754_245   | NW_004515808.1 | Scaffold295 | 245                     | CC                              | AA              | 1946935158               |
| SNP_P4_121755_281   | NW_004515808.1 | Scaffold295 | 281                     | TT                              | GG              | 1946935160               |
| SNP_P4_121756_317   | NW_004515808.1 | Scaffold295 | 317                     | GG                              | TT              | 1946935162               |
| SNP_P4_121757_363   | NW_004515808.1 | Scaffold295 | 363                     | TT                              | GG              | 1946935164               |
| SNP_P4_121758_368   | NW_004515808.1 | Scaffold295 | 368                     | TT                              | AA              | 1946935166               |

| SNPs IDs            | Chromosome IDs | Chromosomes | Physical positions (bp) | CDC Frontier (Reference genome) | (ILWC46 & LPNB) | NCBI SNPdb Accession IDs |
|---------------------|----------------|-------------|-------------------------|---------------------------------|-----------------|--------------------------|
| SNP_P4_121759_379   | NW_004515808.1 | Scaffold295 | 379                     | AA                              | TT              | 1946935168               |
| SNP_P4_121760_617   | NW_004515808.1 | Scaffold295 | 617                     | TT                              | AA              | 1946935170               |
| SNP_P4_121761_644   | NW_004515808.1 | Scaffold295 | 644                     | AA                              | GG              | 1946935172               |
| SNP_P4_121762_703   | NW_004515808.1 | Scaffold295 | 703                     | TT                              | CC              | 1946935174               |
| SNP_P4_121763_723   | NW_004515808.1 | Scaffold295 | 723                     | TT                              | CC              | 1946935176               |
| SNP_P4_121764_763   | NW_004515808.1 | Scaffold295 | 763                     | TT                              | CC              | 1946935178               |
| SNP_P4_121765_833   | NW_004515808.1 | Scaffold295 | 833                     | TT                              | CC              | 1946935180               |
| SNP_P4_121766_844   | NW_004515808.1 | Scaffold295 | 844                     | GG                              | CC              | 1946935182               |
| SNP_P4_121767_8310  | NW_004515808.1 | Scaffold295 | 8310                    | GG                              | TT              | 1946935184               |
| SNP_P4_121768_22935 | NW_004515808.1 | Scaffold295 | 22935                   | CC                              | TT              | 1946935186               |
| SNP_P4_121769_418   | NW_004515809.1 | Scaffold296 | 418                     | AA                              | GG              | 1946935188               |
| SNP_P4_121770_10205 | NW_004515809.1 | Scaffold296 | 10205                   | GG                              | CC              | 1946935190               |
| SNP_P4_121771_10230 | NW_004515809.1 | Scaffold296 | 10230                   | CC                              | TT              | 1946935192               |
| SNP_P4_121772_10349 | NW_004515809.1 | Scaffold296 | 10349                   | GG                              | AA              | 1946935194               |
| SNP_P4_121773_10401 | NW_004515809.1 | Scaffold296 | 10401                   | TT                              | CC              | 1946935196               |
| SNP_P4_121774_10422 | NW_004515809.1 | Scaffold296 | 10422                   | CC                              | AA              | 1946935198               |
| SNP_P4_121775_10458 | NW_004515809.1 | Scaffold296 | 10458                   | GG                              | TT              | 1946935200               |
| SNP_P4_121776_10592 | NW_004515809.1 | Scaffold296 | 10592                   | GG                              | AA              | 1946935202               |
| SNP_P4_121777_10630 | NW_004515809.1 | Scaffold296 | 10630                   | GG                              | TT              | 1946935204               |
| SNP_P4_121778_10685 | NW_004515809.1 | Scaffold296 | 10685                   | CC                              | TT              | 1946935206               |
| SNP_P4_121780_11152 | NW_004515809.1 | Scaffold296 | 11152                   | GG                              | TT              | 1946935208               |
| SNP_P4_121781_11193 | NW_004515809.1 | Scaffold296 | 11193                   | GG                              | AA              | 1946935210               |
| SNP_P4_121783_11376 | NW_004515809.1 | Scaffold296 | 11376                   | CC                              | TT              | 1946935212               |
| SNP_P4_121784_11829 | NW_004515809.1 | Scaffold296 | 11829                   | CC                              | TT              | 1946935214               |
| SNP_P4_121785_14275 | NW_004515809.1 | Scaffold296 | 14275                   | TT                              | AA              | 1946935216               |
| SNP_P4_121786_14473 | NW_004515809.1 | Scaffold296 | 14473                   | CC                              | TT              | 1946935218               |
| SNP_P4_121787_14693 | NW_004515809.1 | Scaffold296 | 14693                   | CC                              | TT              | 1946935220               |
| SNP_P4_121788_14800 | NW_004515809.1 | Scaffold296 | 14800                   | GG                              | AA              | 1946935222               |
| SNP_P4_121789_14809 | NW_004515809.1 | Scaffold296 | 14809                   | CC                              | AA              | 1946935224               |
| SNP_P4_121790_14960 | NW_004515809.1 | Scaffold296 | 14960                   | GG                              | AA              | 1946935226               |
| SNP_P4_121791_15029 | NW_004515809.1 | Scaffold296 | 15029                   | TT                              | CC              | 1946935228               |
| SNP_P4_121792_15212 | NW_004515809.1 | Scaffold296 | 15212                   | TT                              | CC              | 1946935230               |
| SNP_P4_121793_15232 | NW_004515809.1 | Scaffold296 | 15232                   | TT                              | CC              | 1946935232               |
| SNP_P4_121794_15250 | NW_004515809.1 | Scaffold296 | 15250                   | AA                              | CC              | 1946935234               |
| SNP_P4_121795_15253 | NW_004515809.1 | Scaffold296 | 15253                   | CC                              | TT              | 1946935236               |
| SNP_P4_121796_15320 | NW_004515809.1 | Scaffold296 | 15320                   | CC                              | TT              | 1946935238               |
| SNP_P4_121797_15377 | NW_004515809.1 | Scaffold296 | 15377                   | TT                              | CC              | 1946935240               |
| SNP_P4_121799_15419 | NW_004515809.1 | Scaffold296 | 15419                   | AA                              | TT              | 1946935242               |
| SNP_P4_121800_15424 | NW_004515809.1 | Scaffold296 | 15424                   | GG                              | AA              | 1946935244               |
| SNP_P4_121801_15458 | NW_004515809.1 | Scaffold296 | 15458                   | GG                              | AA              | 1946935246               |
| SNP_P4_121802_15460 | NW_004515809.1 | Scaffold296 | 15460                   | CC                              | TT              | 1946935248               |
| SNP_P4_121803_15486 | NW_004515809.1 | Scaffold296 | 15486                   | GG                              | AA              | 1946935250               |

| SNPs IDs            | Chromosome IDs | Chromosomes | Physical positions (bp) | CDC Frontier (Reference genome) | (ILWC46 & LPNB) | NCBI SNPdb Accession IDs |
|---------------------|----------------|-------------|-------------------------|---------------------------------|-----------------|--------------------------|
| SNP_P4_121804_15507 | NW_004515809.1 | Scaffold296 | 15507                   | TT                              | CC              | 1946935252               |
| SNP_P4_121805_15519 | NW_004515809.1 | Scaffold296 | 15519                   | AA                              | GG              | 1946935254               |
| SNP_P4_121806_15523 | NW_004515809.1 | Scaffold296 | 15523                   | TT                              | AA              | 1946935256               |
| SNP_P4_121807_15540 | NW_004515809.1 | Scaffold296 | 15540                   | CC                              | AA              | 1946935258               |
| SNP_P4_121808_15572 | NW_004515809.1 | Scaffold296 | 15572                   | GG                              | AA              | 1946935260               |
| SNP_P4_121809_15596 | NW_004515809.1 | Scaffold296 | 15596                   | CC                              | TT              | 1946935262               |
| SNP_P4_121810_15625 | NW_004515809.1 | Scaffold296 | 15625                   | TT                              | CC              | 1946935264               |
| SNP_P4_121811_15641 | NW_004515809.1 | Scaffold296 | 15641                   | AA                              | CC              | 1946935266               |
| SNP_P4_121812_15645 | NW_004515809.1 | Scaffold296 | 15645                   | CC                              | AA              | 1946935268               |
| SNP_P4_121813_15744 | NW_004515809.1 | Scaffold296 | 15744                   | TT                              | GG              | 1946935270               |
| SNP_P4_121814_15769 | NW_004515809.1 | Scaffold296 | 15769                   | AA                              | GG              | 1946935272               |
| SNP_P4_121815_15770 | NW_004515809.1 | Scaffold296 | 15770                   | GG                              | AA              | 1946935274               |
| SNP_P4_121816_15787 | NW_004515809.1 | Scaffold296 | 15787                   | CC                              | GG              | 1946935276               |
| SNP_P4_121817_15789 | NW_004515809.1 | Scaffold296 | 15789                   | GG                              | AA              | 1946935278               |
| SNP_P4_121818_15791 | NW_004515809.1 | Scaffold296 | 15791                   | AA                              | CC              | 1946935280               |
| SNP_P4_121819_15802 | NW_004515809.1 | Scaffold296 | 15802                   | CC                              | TT              | 1946935282               |
| SNP_P4_121820_15823 | NW_004515809.1 | Scaffold296 | 15823                   | TT                              | GG              | 1946935284               |
| SNP_P4_121821_15835 | NW_004515809.1 | Scaffold296 | 15835                   | GG                              | AA              | 1946935286               |
| SNP_P4_121822_15861 | NW_004515809.1 | Scaffold296 | 15861                   | TT                              | GG              | 1946935288               |
| SNP_P4_121823_15872 | NW_004515809.1 | Scaffold296 | 15872                   | GG                              | AA              | 1946935290               |
| SNP_P4_121824_15882 | NW_004515809.1 | Scaffold296 | 15882                   | CC                              | AA              | 1946935292               |
| SNP_P4_121825_15928 | NW_004515809.1 | Scaffold296 | 15928                   | AA                              | CC              | 1946935294               |
| SNP_P4_121826_15992 | NW_004515809.1 | Scaffold296 | 15992                   | CC                              | AA              | 1946935296               |
| SNP_P4_121827_16152 | NW_004515809.1 | Scaffold296 | 16152                   | AA                              | CC              | 1946935298               |
| SNP_P4_121828_16313 | NW_004515809.1 | Scaffold296 | 16313                   | GG                              | CC              | 1946935300               |
| SNP_P4_121829_16328 | NW_004515809.1 | Scaffold296 | 16328                   | CC                              | AA              | 1946935302               |
| SNP_P4_121830_16336 | NW_004515809.1 | Scaffold296 | 16336                   | CC                              | TT              | 1946935304               |
| SNP_P4_121831_16351 | NW_004515809.1 | Scaffold296 | 16351                   | CC                              | TT              | 1946935306               |
| SNP_P4_121832_16354 | NW_004515809.1 | Scaffold296 | 16354                   | AA                              | GG              | 1946935308               |
| SNP_P4_121833_16380 | NW_004515809.1 | Scaffold296 | 16380                   | TT                              | GG              | 1946935310               |
| SNP_P4_121834_16409 | NW_004515809.1 | Scaffold296 | 16409                   | TT                              | CC              | 1946935312               |
| SNP_P4_121835_16454 | NW_004515809.1 | Scaffold296 | 16454                   | TT                              | CC              | 1946935314               |
| SNP_P4_121836_16456 | NW_004515809.1 | Scaffold296 | 16456                   | GG                              | AA              | 1946935316               |
| SNP_P4_121837_16472 | NW_004515809.1 | Scaffold296 | 16472                   | TT                              | GG              | 1946935318               |
| SNP_P4_121838_16496 | NW_004515809.1 | Scaffold296 | 16496                   | TT                              | CC              | 1946935320               |
| SNP_P4_121839_16503 | NW_004515809.1 | Scaffold296 | 16503                   | TT                              | AA              | 1946935322               |
| SNP_P4_121840_16564 | NW_004515809.1 | Scaffold296 | 16564                   | AA                              | GG              | 1946935324               |
| SNP_P4_121841_16589 | NW_004515809.1 | Scaffold296 | 16589                   | CC                              | TT              | 1946935326               |
| SNP_P4_121842_16594 | NW_004515809.1 | Scaffold296 | 16594                   | AA                              | GG              | 1946935328               |
| SNP_P4_121843_16637 | NW_004515809.1 | Scaffold296 | 16637                   | CC                              | TT              | 1946935330               |
| SNP_P4_121844_16646 | NW_004515809.1 | Scaffold296 | 16646                   | AA                              | GG              | 1946935332               |
| SNP_P4_121845_16693 | NW_004515809.1 | Scaffold296 | 16693                   | CC                              | TT              | 1946935334               |



| SNPs IDs             | Chromosome IDs | Chromosomes | Physical positions (bp) | CDC Frontier (Reference genome) | (ILWC46 & LPNB) | NCBI SNPdb Accession IDs |
|----------------------|----------------|-------------|-------------------------|---------------------------------|-----------------|--------------------------|
| SNP_P4_121846_16703  | NW_004515809.1 | Scaffold296 | 16703                   | AA                              | GG              | 1946935336               |
| SNP_P4_121847_16712  | NW_004515809.1 | Scaffold296 | 16712                   | GG                              | AA              | 1946935338               |
| SNP_P4_121848_16730  | NW_004515809.1 | Scaffold296 | 16730                   | GG                              | TT              | 1946935340               |
| SNP_P4_121849_16747  | NW_004515809.1 | Scaffold296 | 16747                   | AA                              | CC              | 1946935342               |
| SNP_P4_121850_16798  | NW_004515809.1 | Scaffold296 | 16798                   | TT                              | CC              | 1946935344               |
| SNP_P4_121851_16813  | NW_004515809.1 | Scaffold296 | 16813                   | CC                              | TT              | 1946935346               |
| SNP_P4_121852_16856  | NW_004515809.1 | Scaffold296 | 16856                   | GG                              | AA              | 1946935348               |
| SNP_P4_121853_16867  | NW_004515809.1 | Scaffold296 | 16867                   | AA                              | TT              | 1946935351               |
| SNP_P4_121854_16874  | NW_004515809.1 | Scaffold296 | 16874                   | TT                              | CC              | 1946935353               |
| SNP_P4_121856_16944  | NW_004515809.1 | Scaffold296 | 16944                   | GG                              | TT              | 1946935355               |
| SNP_P4_121858_74167  | NW_004515809.1 | Scaffold296 | 74167                   | TT                              | AA              | 1946935357               |
| SNP_P4_121859_78611  | NW_004515809.1 | Scaffold296 | 78611                   | CC                              | TT              | 1946935359               |
| SNP_P4_121860_78724  | NW_004515809.1 | Scaffold296 | 78724                   | GG                              | AA              | 1946935361               |
| SNP_P4_121861_78771  | NW_004515809.1 | Scaffold296 | 78771                   | AA                              | GG              | 1946935363               |
| SNP_P4_121862_78783  | NW_004515809.1 | Scaffold296 | 78783                   | GG                              | TT              | 1946935365               |
| SNP_P4_121863_78799  | NW_004515809.1 | Scaffold296 | 78799                   | AA                              | GG              | 1946935367               |
| SNP_P4_121864_78816  | NW_004515809.1 | Scaffold296 | 78816                   | GG                              | AA              | 1946935369               |
| SNP_P4_121865_79092  | NW_004515809.1 | Scaffold296 | 79092                   | TT                              | GG              | 1946935371               |
| SNP_P4_121866_83387  | NW_004515809.1 | Scaffold296 | 83387                   | TT                              | CC              | 1946935373               |
| SNP_P4_121867_105156 | NW_004515809.1 | Scaffold296 | 105156                  | TT                              | GG              | 1946935375               |
| SNP_P4_121868_105368 | NW_004515809.1 | Scaffold296 | 105368                  | CC                              | GG              | 1946935377               |
| SNP_P4_121869_105420 | NW_004515809.1 | Scaffold296 | 105420                  | CC                              | TT              | 1946935379               |
| SNP_P4_121870_108335 | NW_004515809.1 | Scaffold296 | 108335                  | GG                              | AA              | 1946935381               |
| SNP_P4_121871_112192 | NW_004515809.1 | Scaffold296 | 112192                  | TT                              | AA              | 1946935383               |
| SNP_P4_121872_140242 | NW_004515809.1 | Scaffold296 | 140242                  | AA                              | CC              | 1946935385               |
| SNP_P4_121874_170943 | NW_004515809.1 | Scaffold296 | 170943                  | CC                              | TT              | 1946935387               |
| SNP_P4_121875_224696 | NW_004515809.1 | Scaffold296 | 224696                  | CC                              | TT              | 1946935389               |
| SNP_P4_121876_225117 | NW_004515809.1 | Scaffold296 | 225117                  | CC                              | AA              | 1946935391               |
| SNP_P4_121877_225127 | NW_004515809.1 | Scaffold296 | 225127                  | GG                              | AA              | 1946935393               |
| SNP_P4_121878_225140 | NW_004515809.1 | Scaffold296 | 225140                  | TT                              | AA              | 1946935395               |
| SNP_P4_121879_225151 | NW_004515809.1 | Scaffold296 | 225151                  | GG                              | CC              | 1946935397               |
| SNP_P4_121880_225152 | NW_004515809.1 | Scaffold296 | 225152                  | AA                              | GG              | 1946935399               |
| SNP_P4_121881_231465 | NW_004515809.1 | Scaffold296 | 231465                  | CC                              | GG              | 1946935401               |
| SNP_P4_121882_231471 | NW_004515809.1 | Scaffold296 | 231471                  | CC                              | AA              | 1946935403               |
| SNP_P4_121885_253853 | NW_004515809.1 | Scaffold296 | 253853                  | TT                              | AA              | 1946935405               |
| SNP_P4_121886_258552 | NW_004515809.1 | Scaffold296 | 258552                  | TT                              | CC              | 1946935407               |
| SNP_P4_121887_258844 | NW_004515809.1 | Scaffold296 | 258844                  | CC                              | TT              | 1946935409               |
| SNP_P4_121888_258898 | NW_004515809.1 | Scaffold296 | 258898                  | AA                              | TT              | 1946935411               |
| SNP_P4_121889_258950 | NW_004515809.1 | Scaffold296 | 258950                  | AA                              | GG              | 1946935413               |
| SNP_P4_121890_259037 | NW_004515809.1 | Scaffold296 | 259037                  | GG                              | AA              | 1946935415               |
| SNP_P4_121891_259058 | NW_004515809.1 | Scaffold296 | 259058                  | TT                              | GG              | 1946935417               |
| SNP_P4_121892_259141 | NW_004515809.1 | Scaffold296 | 259141                  | TT                              | AA              | 1946935419               |

| SNPs IDs             | Chromosome IDs | Chromosomes | Physical positions (bp) | CDC Frontier (Reference genome) | (ILWC46 & LPNB) | NCBI SNPdb Accession IDs |
|----------------------|----------------|-------------|-------------------------|---------------------------------|-----------------|--------------------------|
| SNP_P4_121893_259200 | NW_004515809.1 | Scaffold296 | 259200                  | AA                              | TT              | 1946935421               |
| SNP_P4_121894_259221 | NW_004515809.1 | Scaffold296 | 259221                  | AA                              | GG              | 1946935423               |
| SNP_P4_121895_259230 | NW_004515809.1 | Scaffold296 | 259230                  | AA                              | TT              | 1946935425               |
| SNP_P4_121896_259246 | NW_004515809.1 | Scaffold296 | 259246                  | TT                              | CC              | 1946935427               |
| SNP_P4_121897_259341 | NW_004515809.1 | Scaffold296 | 259341                  | GG                              | AA              | 1946935429               |
| SNP_P4_121898_260822 | NW_004515809.1 | Scaffold296 | 260822                  | TT                              | AA              | 1946935431               |
| SNP_P4_121899_260846 | NW_004515809.1 | Scaffold296 | 260846                  | TT                              | CC              | 1946935433               |
| SNP_P4_121900_260876 | NW_004515809.1 | Scaffold296 | 260876                  | TT                              | CC              | 1946935435               |
| SNP_P4_121901_260896 | NW_004515809.1 | Scaffold296 | 260896                  | TT                              | AA              | 1946935437               |
| SNP_P4_121903_261137 | NW_004515809.1 | Scaffold296 | 261137                  | GG                              | AA              | 1946935439               |
| SNP_P4_121904_261173 | NW_004515809.1 | Scaffold296 | 261173                  | AA                              | GG              | 1946935441               |
| SNP_P4_121905_261194 | NW_004515809.1 | Scaffold296 | 261194                  | AA                              | GG              | 1946935443               |
| SNP_P4_121906_261203 | NW_004515809.1 | Scaffold296 | 261203                  | TT                              | GG              | 1946935445               |
| SNP_P4_121907_261214 | NW_004515809.1 | Scaffold296 | 261214                  | GG                              | TT              | 1946935447               |
| SNP_P4_121908_261254 | NW_004515809.1 | Scaffold296 | 261254                  | AA                              | GG              | 1946935449               |
| SNP_P4_121909_261259 | NW_004515809.1 | Scaffold296 | 261259                  | TT                              | CC              | 1946935451               |
| SNP_P4_121910_261290 | NW_004515809.1 | Scaffold296 | 261290                  | TT                              | CC              | 1946935453               |
| SNP_P4_121911_261332 | NW_004515809.1 | Scaffold296 | 261332                  | GG                              | AA              | 1946935455               |
| SNP_P4_121912_261347 | NW_004515809.1 | Scaffold296 | 261347                  | AA                              | GG              | 1946935457               |
| SNP_P4_121914_261476 | NW_004515809.1 | Scaffold296 | 261476                  | CC                              | TT              | 1946935459               |
| SNP_P4_121915_261535 | NW_004515809.1 | Scaffold296 | 261535                  | TT                              | AA              | 1946935461               |
| SNP_P4_121916_261545 | NW_004515809.1 | Scaffold296 | 261545                  | AA                              | TT              | 1946935463               |
| SNP_P4_121917_261546 | NW_004515809.1 | Scaffold296 | 261546                  | AA                              | GG              | 1946935465               |
| SNP_P4_121918_261564 | NW_004515809.1 | Scaffold296 | 261564                  | TT                              | CC              | 1946935467               |
| SNP_P4_121920_261722 | NW_004515809.1 | Scaffold296 | 261722                  | CC                              | TT              | 1946935469               |
| SNP_P4_121921_261724 | NW_004515809.1 | Scaffold296 | 261724                  | GG                              | AA              | 1946935471               |
| SNP_P4_121922_261790 | NW_004515809.1 | Scaffold296 | 261790                  | CC                              | AA              | 1946935473               |
| SNP_P4_121924_262028 | NW_004515809.1 | Scaffold296 | 262028                  | CC                              | TT              | 1946935475               |
| SNP_P4_121925_262173 | NW_004515809.1 | Scaffold296 | 262173                  | AA                              | GG              | 1946935478               |
| SNP_P4_121926_262250 | NW_004515809.1 | Scaffold296 | 262250                  | TT                              | AA              | 1946935480               |
| SNP_P4_121927_262636 | NW_004515809.1 | Scaffold296 | 262636                  | AA                              | TT              | 1946935482               |
| SNP_P4_121928_262730 | NW_004515809.1 | Scaffold296 | 262730                  | CC                              | GG              | 1946935484               |
| SNP_P4_121929_262755 | NW_004515809.1 | Scaffold296 | 262755                  | GG                              | AA              | 1946935486               |
| SNP_P4_121930_262803 | NW_004515809.1 | Scaffold296 | 262803                  | AA                              | GG              | 1946935488               |
| SNP_P4_121932_262852 | NW_004515809.1 | Scaffold296 | 262852                  | AA                              | GG              | 1946935490               |
| SNP_P4_121933_262876 | NW_004515809.1 | Scaffold296 | 262876                  | CC                              | TT              | 1946935492               |
| SNP_P4_121934_263144 | NW_004515809.1 | Scaffold296 | 263144                  | GG                              | CC              | 1946935495               |
| SNP_P4_121935_264864 | NW_004515809.1 | Scaffold296 | 264864                  | AA                              | TT              | 1946935497               |
| SNP_P4_121936_264867 | NW_004515809.1 | Scaffold296 | 264867                  | AA                              | CC              | 1946935499               |
| SNP_P4_121937_264971 | NW_004515809.1 | Scaffold296 | 264971                  | TT                              | CC              | 1946935501               |
| SNP_P4_121938_265058 | NW_004515809.1 | Scaffold296 | 265058                  | GG                              | CC              | 1946935503               |
| SNP_P4_121939_265145 | NW_004515809.1 | Scaffold296 | 265145                  | TT                              | AA              | 1946935505               |

| SNPs IDs             | Chromosome IDs | Chromosomes | Physical positions (bp) | CDC Frontier (Reference genome) | (ILWC46 & LPNB) | NCBI SNPdb Accession IDs |
|----------------------|----------------|-------------|-------------------------|---------------------------------|-----------------|--------------------------|
| SNP_P4_121940_265183 | NW_004515809.1 | Scaffold296 | 265183                  | GG                              | TT              | 1946935507               |
| SNP_P4_121941_265208 | NW_004515809.1 | Scaffold296 | 265208                  | GG                              | CC              | 1946935509               |
| SNP_P4_121942_265378 | NW_004515809.1 | Scaffold296 | 265378                  | TT                              | CC              | 1946935511               |
| SNP_P4_121943_265435 | NW_004515809.1 | Scaffold296 | 265435                  | GG                              | TT              | 1946935513               |
| SNP_P4_121944_265457 | NW_004515809.1 | Scaffold296 | 265457                  | TT                              | CC              | 1946935515               |
| SNP_P4_121945_265458 | NW_004515809.1 | Scaffold296 | 265458                  | TT                              | CC              | 1946935517               |
| SNP_P4_121946_265518 | NW_004515809.1 | Scaffold296 | 265518                  | GG                              | CC              | 1946935519               |
| SNP_P4_121947_265530 | NW_004515809.1 | Scaffold296 | 265530                  | AA                              | GG              | 1946935521               |
| SNP_P4_121948_265584 | NW_004515809.1 | Scaffold296 | 265584                  | TT                              | CC              | 1946935523               |
| SNP_P4_121949_266216 | NW_004515809.1 | Scaffold296 | 266216                  | AA                              | TT              | 1946935525               |
| SNP_P4_121950_267850 | NW_004515809.1 | Scaffold296 | 267850                  | GG                              | AA              | 1946935527               |
| SNP_P4_121951_282975 | NW_004515809.1 | Scaffold296 | 282975                  | TT                              | CC              | 1946935529               |
| SNP_P4_121953_316080 | NW_004515809.1 | Scaffold296 | 316080                  | TT                              | CC              | 1946935531               |
| SNP_P4_121954_322543 | NW_004515809.1 | Scaffold296 | 322543                  | AA                              | CC              | 1946935533               |
| SNP_P4_121956_340160 | NW_004515809.1 | Scaffold296 | 340160                  | AA                              | GG              | 1946935535               |
| SNP_P4_121959_386861 | NW_004515809.1 | Scaffold296 | 386861                  | TT                              | AA              | 1946935537               |
| SNP_P4_121961_391653 | NW_004515809.1 | Scaffold296 | 391653                  | AA                              | GG              | 1946935539               |
| SNP_P4_121962_404621 | NW_004515809.1 | Scaffold296 | 404621                  | CC                              | TT              | 1946935541               |
| SNP_P4_121964_406920 | NW_004515809.1 | Scaffold296 | 406920                  | CC                              | GG              | 1946935543               |
| SNP_P4_121966_427492 | NW_004515809.1 | Scaffold296 | 427492                  | TT                              | CC              | 1946935545               |
| SNP_P4_121967_427531 | NW_004515809.1 | Scaffold296 | 427531                  | TT                              | CC              | 1946935547               |
| SNP_P4_121968_434519 | NW_004515809.1 | Scaffold296 | 434519                  | TT                              | CC              | 1946935549               |
| SNP_P4_121969_434558 | NW_004515809.1 | Scaffold296 | 434558                  | AA                              | GG              | 1946935551               |
| SNP_P4_121970_434582 | NW_004515809.1 | Scaffold296 | 434582                  | TT                              | CC              | 1946935553               |
| SNP_P4_121971_436965 | NW_004515809.1 | Scaffold296 | 436965                  | CC                              | TT              | 1946935555               |
| SNP_P4_121972_439751 | NW_004515809.1 | Scaffold296 | 439751                  | AA                              | CC              | 1946935557               |
| SNP_P4_121974_450452 | NW_004515809.1 | Scaffold296 | 450452                  | TT                              | CC              | 1946935559               |
| SNP_P4_121975_450460 | NW_004515809.1 | Scaffold296 | 450460                  | TT                              | CC              | 1946935561               |
| SNP_P4_121978_486012 | NW_004515809.1 | Scaffold296 | 486012                  | CC                              | TT              | 1946935563               |
| SNP_P4_121979_486013 | NW_004515809.1 | Scaffold296 | 486013                  | TT                              | GG              | 1946935565               |
| SNP_P4_121980_648    | NW_004515810.1 | Scaffold298 | 648                     | AA                              | CC              | 1946935567               |
| SNP_P4_121981_1347   | NW_004515810.1 | Scaffold298 | 1347                    | TT                              | GG              | 1946935569               |
| SNP_P4_121982_1493   | NW_004515810.1 | Scaffold298 | 1493                    | AA                              | TT              | 1946935571               |
| SNP_P4_121983_1575   | NW_004515810.1 | Scaffold298 | 1575                    | AA                              | GG              | 1946935573               |
| SNP_P4_121984_2106   | NW_004515810.1 | Scaffold298 | 2106                    | TT                              | CC              | 1946935575               |
| SNP_P4_121985_2223   | NW_004515810.1 | Scaffold298 | 2223                    | TT                              | GG              | 1946935577               |
| SNP_P4_121986_2591   | NW_004515810.1 | Scaffold298 | 2591                    | TT                              | AA              | 1946935579               |
| SNP_P4_121987_2594   | NW_004515810.1 | Scaffold298 | 2594                    | AA                              | TT              | 1946935581               |
| SNP_P4_121989_2686   | NW_004515810.1 | Scaffold298 | 2686                    | TT                              | CC              | 1946935583               |
| SNP_P4_121990_2712   | NW_004515810.1 | Scaffold298 | 2712                    | CC                              | TT              | 1946935585               |
| SNP_P4_121991_2917   | NW_004515810.1 | Scaffold298 | 2917                    | TT                              | AA              | 1946935587               |
| SNP_P4_121992_2937   | NW_004515810.1 | Scaffold298 | 2937                    | AA                              | TT              | 1946935589               |

| SNPs IDs            | Chromosome IDs | Chromosomes | Physical positions (bp) | CDC Frontier (Reference genome) | (ILWC46 & LPNB) | NCBI SNPdb Accession IDs |
|---------------------|----------------|-------------|-------------------------|---------------------------------|-----------------|--------------------------|
| SNP_P4_121993_2938  | NW_004515810.1 | Scaffold298 | 2938                    | CC                              | AA              | 1946935591               |
| SNP_P4_121994_2983  | NW_004515810.1 | Scaffold298 | 2983                    | AA                              | GG              | 1946935593               |
| SNP_P4_121995_3194  | NW_004515810.1 | Scaffold298 | 3194                    | TT                              | AA              | 1946935595               |
| SNP_P4_121996_3521  | NW_004515810.1 | Scaffold298 | 3521                    | AA                              | TT              | 1946935597               |
| SNP_P4_121997_3606  | NW_004515810.1 | Scaffold298 | 3606                    | TT                              | AA              | 1946935599               |
| SNP_P4_121999_3751  | NW_004515810.1 | Scaffold298 | 3751                    | TT                              | CC              | 1946935601               |
| SNP_P4_122000_3768  | NW_004515810.1 | Scaffold298 | 3768                    | GG                              | CC              | 1946935603               |
| SNP_P4_122001_3773  | NW_004515810.1 | Scaffold298 | 3773                    | CC                              | TT              | 1946935605               |
| SNP_P4_122002_3777  | NW_004515810.1 | Scaffold298 | 3777                    | GG                              | AA              | 1946935607               |
| SNP_P4_122003_3784  | NW_004515810.1 | Scaffold298 | 3784                    | CC                              | AA              | 1946935609               |
| SNP_P4_122004_3830  | NW_004515810.1 | Scaffold298 | 3830                    | CC                              | TT              | 1946935611               |
| SNP_P4_122005_4119  | NW_004515810.1 | Scaffold298 | 4119                    | AA                              | CC              | 1946935613               |
| SNP_P4_122006_5342  | NW_004515810.1 | Scaffold298 | 5342                    | CC                              | TT              | 1946935615               |
| SNP_P4_122007_7940  | NW_004515810.1 | Scaffold298 | 7940                    | AA                              | CC              | 1946935617               |
| SNP_P4_122008_7987  | NW_004515810.1 | Scaffold298 | 7987                    | AA                              | TT              | 1946935619               |
| SNP_P4_122010_8261  | NW_004515810.1 | Scaffold298 | 8261                    | TT                              | GG              | 1946935621               |
| SNP_P4_122011_8429  | NW_004515810.1 | Scaffold298 | 8429                    | AA                              | TT              | 1946935623               |
| SNP_P4_122012_8578  | NW_004515810.1 | Scaffold298 | 8578                    | CC                              | TT              | 1946935625               |
| SNP_P4_122013_8788  | NW_004515810.1 | Scaffold298 | 8788                    | CC                              | AA              | 1946935627               |
| SNP_P4_122015_9117  | NW_004515810.1 | Scaffold298 | 9117                    | TT                              | CC              | 1946935629               |
| SNP_P4_122016_9448  | NW_004515810.1 | Scaffold298 | 9448                    | TT                              | GG              | 1946935631               |
| SNP_P4_122017_9452  | NW_004515810.1 | Scaffold298 | 9452                    | TT                              | GG              | 1946935633               |
| SNP_P4_122018_9494  | NW_004515810.1 | Scaffold298 | 9494                    | AA                              | TT              | 1946935635               |
| SNP_P4_122019_9571  | NW_004515810.1 | Scaffold298 | 9571                    | CC                              | TT              | 1946935637               |
| SNP_P4_122021_9639  | NW_004515810.1 | Scaffold298 | 9639                    | CC                              | AA              | 1946935639               |
| SNP_P4_122022_9709  | NW_004515810.1 | Scaffold298 | 9709                    | TT                              | AA              | 1946935641               |
| SNP_P4_122023_9748  | NW_004515810.1 | Scaffold298 | 9748                    | TT                              | CC              | 1946935643               |
| SNP_P4_122024_9802  | NW_004515810.1 | Scaffold298 | 9802                    | TT                              | CC              | 1946935645               |
| SNP_P4_122025_10034 | NW_004515810.1 | Scaffold298 | 10034                   | TT                              | CC              | 1946935647               |
| SNP_P4_122026_10039 | NW_004515810.1 | Scaffold298 | 10039                   | TT                              | GG              | 1946935649               |
| SNP_P4_122027_10174 | NW_004515810.1 | Scaffold298 | 10174                   | TT                              | CC              | 1946935651               |
| SNP_P4_122028_10339 | NW_004515810.1 | Scaffold298 | 10339                   | GG                              | AA              | 1946935653               |
| SNP_P4_122029_10414 | NW_004515810.1 | Scaffold298 | 10414                   | GG                              | TT              | 1946935655               |
| SNP_P4_122030_14059 | NW_004515810.1 | Scaffold298 | 14059                   | AA                              | TT              | 1946935657               |
| SNP_P4_122031_14212 | NW_004515810.1 | Scaffold298 | 14212                   | CC                              | AA              | 1946935660               |
| SNP_P4_122032_14291 | NW_004515810.1 | Scaffold298 | 14291                   | AA                              | CC              | 1946935662               |
| SNP_P4_122033_14351 | NW_004515810.1 | Scaffold298 | 14351                   | CC                              | TT              | 1946935664               |
| SNP_P4_122034_14392 | NW_004515810.1 | Scaffold298 | 14392                   | AA                              | CC              | 1946935666               |
| SNP_P4_122036_20176 | NW_004515810.1 | Scaffold298 | 20176                   | CC                              | TT              | 1946935668               |
| SNP_P4_122037_21003 | NW_004515810.1 | Scaffold298 | 21003                   | CC                              | TT              | 1946935670               |
| SNP_P4_122039_83015 | NW_004515810.1 | Scaffold298 | 83015                   | AA                              | GG              | 1946935672               |
| SNP_P4_122040_85626 | NW_004515810.1 | Scaffold298 | 85626                   | CC                              | TT              | 1946935674               |

| SNPs IDs             | Chromosome IDs | Chromosomes | Physical positions (bp) | CDC Frontier (Reference genome) | (ILWC46 & LPNB) | NCBI SNPdb Accession IDs |
|----------------------|----------------|-------------|-------------------------|---------------------------------|-----------------|--------------------------|
| SNP_P4_122041_95595  | NW_004515810.1 | Scaffold298 | 95595                   | GG                              | AA              | 1946935676               |
| SNP_P4_122042_98344  | NW_004515810.1 | Scaffold298 | 98344                   | CC                              | TT              | 1946935678               |
| SNP_P4_122043_98421  | NW_004515810.1 | Scaffold298 | 98421                   | CC                              | TT              | 1946935680               |
| SNP_P4_122044_98429  | NW_004515810.1 | Scaffold298 | 98429                   | TT                              | GG              | 1946935682               |
| SNP_P4_122045_98455  | NW_004515810.1 | Scaffold298 | 98455                   | GG                              | AA              | 1946935684               |
| SNP_P4_122046_106497 | NW_004515810.1 | Scaffold298 | 106497                  | TT                              | CC              | 1946935686               |
| SNP_P4_122047_106732 | NW_004515810.1 | Scaffold298 | 106732                  | TT                              | CC              | 1946935688               |
| SNP_P4_122048_106737 | NW_004515810.1 | Scaffold298 | 106737                  | GG                              | CC              | 1946935690               |
| SNP_P4_122049_127141 | NW_004515810.1 | Scaffold298 | 127141                  | CC                              | GG              | 1946935692               |
| SNP_P4_122050_127511 | NW_004515810.1 | Scaffold298 | 127511                  | AA                              | CC              | 1946935694               |
| SNP_P4_122051_127515 | NW_004515810.1 | Scaffold298 | 127515                  | AA                              | CC              | 1946935696               |
| SNP_P4_122052_127526 | NW_004515810.1 | Scaffold298 | 127526                  | TT                              | CC              | 1946935698               |
| SNP_P4_122053_127533 | NW_004515810.1 | Scaffold298 | 127533                  | CC                              | TT              | 1946935700               |
| SNP_P4_122054_139832 | NW_004515810.1 | Scaffold298 | 139832                  | GG                              | AA              | 1946935702               |
| SNP_P4_122055_147648 | NW_004515810.1 | Scaffold298 | 147648                  | AA                              | GG              | 1946935704               |
| SNP_P4_122056_147749 | NW_004515810.1 | Scaffold298 | 147749                  | GG                              | CC              | 1946935706               |
| SNP_P4_122057_147765 | NW_004515810.1 | Scaffold298 | 147765                  | CC                              | TT              | 1946935708               |
| SNP_P4_122058_150053 | NW_004515810.1 | Scaffold298 | 150053                  | CC                              | TT              | 1946935710               |
| SNP_P4_122059_155075 | NW_004515810.1 | Scaffold298 | 155075                  | GG                              | AA              | 1946935712               |
| SNP_P4_122060_155156 | NW_004515810.1 | Scaffold298 | 155156                  | GG                              | AA              | 1946935714               |
| SNP_P4_122061_155330 | NW_004515810.1 | Scaffold298 | 155330                  | AA                              | GG              | 1946935716               |
| SNP_P4_122062_155336 | NW_004515810.1 | Scaffold298 | 155336                  | GG                              | TT              | 1946935718               |
| SNP_P4_122063_155370 | NW_004515810.1 | Scaffold298 | 155370                  | AA                              | GG              | 1946935720               |
| SNP_P4_122064_155394 | NW_004515810.1 | Scaffold298 | 155394                  | TT                              | CC              | 1946935722               |
| SNP_P4_122065_155408 | NW_004515810.1 | Scaffold298 | 155408                  | TT                              | GG              | 1946935724               |
| SNP_P4_122066_155513 | NW_004515810.1 | Scaffold298 | 155513                  | CC                              | TT              | 1946935726               |
| SNP_P4_122067_155679 | NW_004515810.1 | Scaffold298 | 155679                  | CC                              | TT              | 1946935728               |
| SNP_P4_122068_155700 | NW_004515810.1 | Scaffold298 | 155700                  | GG                              | AA              | 1946935730               |
| SNP_P4_122069_155909 | NW_004515810.1 | Scaffold298 | 155909                  | GG                              | AA              | 1946935732               |
| SNP_P4_122070_156037 | NW_004515810.1 | Scaffold298 | 156037                  | AA                              | GG              | 1946935734               |
| SNP_P4_122072_168037 | NW_004515810.1 | Scaffold298 | 168037                  | GG                              | AA              | 1946935736               |
| SNP_P4_122073_171196 | NW_004515810.1 | Scaffold298 | 171196                  | CC                              | TT              | 1946935738               |
| SNP_P4_122074_176915 | NW_004515810.1 | Scaffold298 | 176915                  | AA                              | GG              | 1946935740               |
| SNP_P4_122075_188411 | NW_004515810.1 | Scaffold298 | 188411                  | GG                              | AA              | 1946935742               |
| SNP_P4_122076_193600 | NW_004515810.1 | Scaffold298 | 193600                  | AA                              | CC              | 1946935744               |
| SNP_P4_122077_193639 | NW_004515810.1 | Scaffold298 | 193639                  | TT                              | GG              | 1946935746               |
| SNP_P4_122078_193658 | NW_004515810.1 | Scaffold298 | 193658                  | GG                              | AA              | 1946935748               |
| SNP_P4_122079_193720 | NW_004515810.1 | Scaffold298 | 193720                  | AA                              | GG              | 1946935750               |
| SNP_P4_122080_193721 | NW_004515810.1 | Scaffold298 | 193721                  | GG                              | AA              | 1946935752               |
| SNP_P4_122081_194073 | NW_004515810.1 | Scaffold298 | 194073                  | CC                              | GG              | 1946935754               |
| SNP_P4_122082_195904 | NW_004515810.1 | Scaffold298 | 195904                  | AA                              | CC              | 1946935756               |
| SNP_P4_122083_201775 | NW_004515810.1 | Scaffold298 | 201775                  | GG                              | AA              | 1946935758               |

| SNPs IDs             | Chromosome IDs | Chromosomes | Physical positions (bp) | CDC Frontier (Reference genome) | (ILWC46 & LPNB) | NCBI SNPdb Accession IDs |
|----------------------|----------------|-------------|-------------------------|---------------------------------|-----------------|--------------------------|
| SNP_P4_122084_202059 | NW_004515810.1 | Scaffold298 | 202059                  | AA                              | GG              | 1946935760               |
| SNP_P4_122085_202091 | NW_004515810.1 | Scaffold298 | 202091                  | AA                              | GG              | 1946935762               |
| SNP_P4_122086_204962 | NW_004515810.1 | Scaffold298 | 204962                  | TT                              | CC              | 1946935764               |
| SNP_P4_122087_207801 | NW_004515810.1 | Scaffold298 | 207801                  | TT                              | AA              | 1946935766               |
| SNP_P4_122088_207852 | NW_004515810.1 | Scaffold298 | 207852                  | TT                              | GG              | 1946935768               |
| SNP_P4_122089_207915 | NW_004515810.1 | Scaffold298 | 207915                  | AA                              | CC              | 1946935770               |
| SNP_P4_122090_207966 | NW_004515810.1 | Scaffold298 | 207966                  | GG                              | TT              | 1946935772               |
| SNP_P4_122091_208055 | NW_004515810.1 | Scaffold298 | 208055                  | GG                              | AA              | 1946935774               |
| SNP_P4_122092_208076 | NW_004515810.1 | Scaffold298 | 208076                  | AA                              | GG              | 1946935776               |
| SNP_P4_122095_208249 | NW_004515810.1 | Scaffold298 | 208249                  | CC                              | TT              | 1946935778               |
| SNP_P4_122096_208347 | NW_004515810.1 | Scaffold298 | 208347                  | AA                              | GG              | 1946935780               |
| SNP_P4_122097_208376 | NW_004515810.1 | Scaffold298 | 208376                  | CC                              | GG              | 1946935782               |
| SNP_P4_122098_208381 | NW_004515810.1 | Scaffold298 | 208381                  | GG                              | AA              | 1946935784               |
| SNP_P4_122099_208490 | NW_004515810.1 | Scaffold298 | 208490                  | GG                              | AA              | 1946935786               |
| SNP_P4_122100_208502 | NW_004515810.1 | Scaffold298 | 208502                  | GG                              | AA              | 1946935788               |
| SNP_P4_122101_208619 | NW_004515810.1 | Scaffold298 | 208619                  | TT                              | AA              | 1946935790               |
| SNP_P4_122102_208620 | NW_004515810.1 | Scaffold298 | 208620                  | AA                              | TT              | 1946935792               |
| SNP_P4_122103_208664 | NW_004515810.1 | Scaffold298 | 208664                  | AA                              | GG              | 1946935794               |
| SNP_P4_122104_210715 | NW_004515810.1 | Scaffold298 | 210715                  | GG                              | AA              | 1946935796               |
| SNP_P4_122105_210851 | NW_004515810.1 | Scaffold298 | 210851                  | GG                              | TT              | 1946935798               |
| SNP_P4_122106_210898 | NW_004515810.1 | Scaffold298 | 210898                  | AA                              | GG              | 1946935800               |
| SNP_P4_122107_211731 | NW_004515810.1 | Scaffold298 | 211731                  | AA                              | CC              | 1946935802               |
| SNP_P4_122108_211739 | NW_004515810.1 | Scaffold298 | 211739                  | GG                              | TT              | 1946935804               |
| SNP_P4_122109_211963 | NW_004515810.1 | Scaffold298 | 211963                  | AA                              | TT              | 1946935806               |
| SNP_P4_122110_211998 | NW_004515810.1 | Scaffold298 | 211998                  | GG                              | CC              | 1946935808               |
| SNP_P4_122111_212057 | NW_004515810.1 | Scaffold298 | 212057                  | GG                              | CC              | 1946935810               |
| SNP_P4_122113_212157 | NW_004515810.1 | Scaffold298 | 212157                  | GG                              | TT              | 1946935812               |
| SNP_P4_122114_212176 | NW_004515810.1 | Scaffold298 | 212176                  | AA                              | TT              | 1946935813               |
| SNP_P4_122115_212739 | NW_004515810.1 | Scaffold298 | 212739                  | AA                              | TT              | 1946935815               |
| SNP_P4_122116_10943  | NW_004515811.1 | Scaffold299 | 10943                   | CC                              | TT              | 1946935817               |
| SNP_P4_122117_10944  | NW_004515811.1 | Scaffold299 | 10944                   | TT                              | AA              | 1946935819               |
| SNP_P4_122118_10967  | NW_004515811.1 | Scaffold299 | 10967                   | GG                              | AA              | 1946935821               |
| SNP_P4_122119_10979  | NW_004515811.1 | Scaffold299 | 10979                   | TT                              | CC              | 1946935824               |
| SNP_P4_122120_10993  | NW_004515811.1 | Scaffold299 | 10993                   | AA                              | TT              | 1946935826               |
| SNP_P4_122121_10994  | NW_004515811.1 | Scaffold299 | 10994                   | GG                              | AA              | 1946935828               |
| SNP_P4_122122_11001  | NW_004515811.1 | Scaffold299 | 11001                   | TT                              | GG              | 1946935830               |
| SNP_P4_122123_12722  | NW_004515811.1 | Scaffold299 | 12722                   | TT                              | CC              | 1946935832               |
| SNP_P4_122124_12799  | NW_004515811.1 | Scaffold299 | 12799                   | TT                              | CC              | 1946935834               |
| SNP_P4_122126_36460  | NW_004515811.1 | Scaffold299 | 36460                   | TT                              | CC              | 1946935836               |
| SNP_P4_122127_36495  | NW_004515811.1 | Scaffold299 | 36495                   | CC                              | TT              | 1946935838               |
| SNP_P4_122128_36520  | NW_004515811.1 | Scaffold299 | 36520                   | AA                              | GG              | 1946935839               |
| SNP_P4_122129_36526  | NW_004515811.1 | Scaffold299 | 36526                   | GG                              | TT              | 1946935840               |

| SNPs IDs             | Chromosome IDs | Chromosomes | Physical positions (bp) | CDC Frontier (Reference genome) | (ILWC46 & LPNB) | NCBI SNPdb Accession IDs |
|----------------------|----------------|-------------|-------------------------|---------------------------------|-----------------|--------------------------|
| SNP_P4_122130_36536  | NW_004515811.1 | Scaffold299 | 36536                   | AA                              | GG              | 1946935841               |
| SNP_P4_122131_36556  | NW_004515811.1 | Scaffold299 | 36556                   | TT                              | AA              | 1946935842               |
| SNP_P4_122132_36561  | NW_004515811.1 | Scaffold299 | 36561                   | AA                              | GG              | 1946935843               |
| SNP_P4_122133_36813  | NW_004515811.1 | Scaffold299 | 36813                   | TT                              | CC              | 1946935844               |
| SNP_P4_122134_36824  | NW_004515811.1 | Scaffold299 | 36824                   | CC                              | TT              | 1946935845               |
| SNP_P4_122135_45456  | NW_004515811.1 | Scaffold299 | 45456                   | AA                              | GG              | 1946935846               |
| SNP_P4_122136_52696  | NW_004515811.1 | Scaffold299 | 52696                   | TT                              | GG              | 1946935847               |
| SNP_P4_122137_52721  | NW_004515811.1 | Scaffold299 | 52721                   | GG                              | TT              | 1946935849               |
| SNP_P4_122141_66297  | NW_004515811.1 | Scaffold299 | 66297                   | TT                              | AA              | 1946935850               |
| SNP_P4_122142_66298  | NW_004515811.1 | Scaffold299 | 66298                   | GG                              | TT              | 1946935852               |
| SNP_P4_122143_66427  | NW_004515811.1 | Scaffold299 | 66427                   | GG                              | CC              | 1946935854               |
| SNP_P4_122144_66663  | NW_004515811.1 | Scaffold299 | 66663                   | AA                              | GG              | 1946935856               |
| SNP_P4_122145_67400  | NW_004515811.1 | Scaffold299 | 67400                   | AA                              | GG              | 1946935858               |
| SNP_P4_122146_71844  | NW_004515811.1 | Scaffold299 | 71844                   | GG                              | AA              | 1946935860               |
| SNP_P4_122147_83423  | NW_004515811.1 | Scaffold299 | 83423                   | TT                              | AA              | 1946935862               |
| SNP_P4_122148_94160  | NW_004515811.1 | Scaffold299 | 94160                   | CC                              | TT              | 1946935864               |
| SNP_P4_122150_112803 | NW_004515811.1 | Scaffold299 | 112803                  | AA                              | GG              | 1946935866               |
| SNP_P4_122151_121209 | NW_004515811.1 | Scaffold299 | 121209                  | TT                              | GG              | 1946935868               |
| SNP_P4_122152_123594 | NW_004515811.1 | Scaffold299 | 123594                  | TT                              | CC              | 1946935870               |
| SNP_P4_122153_123633 | NW_004515811.1 | Scaffold299 | 123633                  | GG                              | TT              | 1946935872               |
| SNP_P4_122154_124750 | NW_004515811.1 | Scaffold299 | 124750                  | GG                              | AA              | 1946935874               |
| SNP_P4_122155_124751 | NW_004515811.1 | Scaffold299 | 124751                  | GG                              | CC              | 1946935876               |
| SNP_P4_122156_134934 | NW_004515811.1 | Scaffold299 | 134934                  | AA                              | CC              | 1946935878               |
| SNP_P4_122157_135051 | NW_004515811.1 | Scaffold299 | 135051                  | AA                              | GG              | 1946935880               |
| SNP_P4_122158_135058 | NW_004515811.1 | Scaffold299 | 135058                  | CC                              | TT              | 1946935882               |
| SNP_P4_122159_135063 | NW_004515811.1 | Scaffold299 | 135063                  | TT                              | CC              | 1946935884               |
| SNP_P4_122160_135144 | NW_004515811.1 | Scaffold299 | 135144                  | AA                              | CC              | 1946935886               |
| SNP_P4_122161_135258 | NW_004515811.1 | Scaffold299 | 135258                  | AA                              | GG              | 1946935888               |
| SNP_P4_122162_139971 | NW_004515811.1 | Scaffold299 | 139971                  | TT                              | CC              | 1946935890               |
| SNP_P4_122163_147901 | NW_004515811.1 | Scaffold299 | 147901                  | CC                              | AA              | 1946935892               |
| SNP_P4_122164_153177 | NW_004515811.1 | Scaffold299 | 153177                  | AA                              | GG              | 1946935894               |
| SNP_P4_122165_153219 | NW_004515811.1 | Scaffold299 | 153219                  | AA                              | GG              | 1946935896               |
| SNP_P4_122166_153527 | NW_004515811.1 | Scaffold299 | 153527                  | GG                              | AA              | 1946935898               |
| SNP_P4_122167_158405 | NW_004515811.1 | Scaffold299 | 158405                  | GG                              | TT              | 1946935900               |
| SNP_P4_122168_158477 | NW_004515811.1 | Scaffold299 | 158477                  | TT                              | CC              | 1946935902               |
| SNP_P4_122169_158540 | NW_004515811.1 | Scaffold299 | 158540                  | AA                              | TT              | 1946935903               |
| SNP_P4_122170_158625 | NW_004515811.1 | Scaffold299 | 158625                  | AA                              | GG              | 1946935905               |
| SNP_P4_122171_158654 | NW_004515811.1 | Scaffold299 | 158654                  | AA                              | GG              | 1946935907               |
| SNP_P4_122172_158693 | NW_004515811.1 | Scaffold299 | 158693                  | TT                              | GG              | 1946935909               |
| SNP_P4_122173_158720 | NW_004515811.1 | Scaffold299 | 158720                  | GG                              | AA              | 1946935911               |
| SNP_P4_122174_158734 | NW_004515811.1 | Scaffold299 | 158734                  | CC                              | TT              | 1946935913               |
| SNP_P4_122175_158948 | NW_004515811.1 | Scaffold299 | 158948                  | AA                              | GG              | 1946935915               |

| SNPs IDs             | Chromosome IDs | Chromosomes | Physical positions (bp) | CDC Frontier (Reference genome) | (ILWC46 & LPNB) | NCBI SNPdb Accession IDs |
|----------------------|----------------|-------------|-------------------------|---------------------------------|-----------------|--------------------------|
| SNP_P4_122177_158966 | NW_004515811.1 | Scaffold299 | 158966                  | AA                              | CC              | 1946935917               |
| SNP_P4_122178_196494 | NW_004515811.1 | Scaffold299 | 196494                  | AA                              | GG              | 1946935919               |
| SNP_P4_122179_196897 | NW_004515811.1 | Scaffold299 | 196897                  | TT                              | CC              | 1946935921               |
| SNP_P4_122180_197300 | NW_004515811.1 | Scaffold299 | 197300                  | CC                              | TT              | 1946935923               |
| SNP_P4_122181_205981 | NW_004515811.1 | Scaffold299 | 205981                  | GG                              | CC              | 1946935925               |
| SNP_P4_122182_206110 | NW_004515811.1 | Scaffold299 | 206110                  | TT                              | GG              | 1946935927               |
| SNP_P4_122183_206172 | NW_004515811.1 | Scaffold299 | 206172                  | CC                              | TT              | 1946935929               |
| SNP_P4_122184_206216 | NW_004515811.1 | Scaffold299 | 206216                  | AA                              | GG              | 1946935930               |
| SNP_P4_122185_206243 | NW_004515811.1 | Scaffold299 | 206243                  | CC                              | TT              | 1946935932               |
| SNP_P4_122186_206416 | NW_004515811.1 | Scaffold299 | 206416                  | AA                              | CC              | 1946935934               |
| SNP_P4_122187_206471 | NW_004515811.1 | Scaffold299 | 206471                  | AA                              | GG              | 1946935936               |
| SNP_P4_122188_206535 | NW_004515811.1 | Scaffold299 | 206535                  | AA                              | GG              | 1946935938               |
| SNP_P4_122189_206540 | NW_004515811.1 | Scaffold299 | 206540                  | CC                              | AA              | 1946935940               |
| SNP_P4_122190_213277 | NW_004515811.1 | Scaffold299 | 213277                  | AA                              | GG              | 1946935942               |
| SNP_P4_122191_213385 | NW_004515811.1 | Scaffold299 | 213385                  | AA                              | TT              | 1946935944               |
| SNP_P4_122192_213389 | NW_004515811.1 | Scaffold299 | 213389                  | GG                              | AA              | 1946935946               |
| SNP_P4_122193_213393 | NW_004515811.1 | Scaffold299 | 213393                  | GG                              | TT              | 1946935948               |
| SNP_P4_122194_213401 | NW_004515811.1 | Scaffold299 | 213401                  | CC                              | TT              | 1946935950               |
| SNP_P4_122195_213617 | NW_004515811.1 | Scaffold299 | 213617                  | CC                              | TT              | 1946935952               |
| SNP_P4_122196_213653 | NW_004515811.1 | Scaffold299 | 213653                  | AA                              | TT              | 1946935953               |
| SNP_P4_122197_213801 | NW_004515811.1 | Scaffold299 | 213801                  | TT                              | CC              | 1946935955               |
| SNP_P4_122198_214298 | NW_004515811.1 | Scaffold299 | 214298                  | AA                              | CC              | 1946935957               |
| SNP_P4_122199_214694 | NW_004515811.1 | Scaffold299 | 214694                  | CC                              | AA              | 1946935959               |
| SNP_P4_122200_2778   | NW_004515812.1 | Scaffold300 | 2778                    | AA                              | TT              | 1946935961               |
| SNP_P4_122201_6570   | NW_004515812.1 | Scaffold300 | 6570                    | TT                              | AA              | 1946935963               |
| SNP_P4_122202_8004   | NW_004515812.1 | Scaffold300 | 8004                    | TT                              | GG              | 1946935965               |
| SNP_P4_122203_12567  | NW_004515812.1 | Scaffold300 | 12567                   | AA                              | TT              | 1946935967               |
| SNP_P4_122204_23630  | NW_004515812.1 | Scaffold300 | 23630                   | TT                              | AA              | 1946935969               |
| SNP_P4_122205_23961  | NW_004515812.1 | Scaffold300 | 23961                   | TT                              | AA              | 1946935971               |
| SNP_P4_122206_28290  | NW_004515812.1 | Scaffold300 | 28290                   | CC                              | AA              | 1946935973               |
| SNP_P4_122207_31641  | NW_004515812.1 | Scaffold300 | 31641                   | CC                              | TT              | 1946935975               |
| SNP_P4_122208_31644  | NW_004515812.1 | Scaffold300 | 31644                   | CC                              | GG              | 1946935976               |
| SNP_P4_122209_31699  | NW_004515812.1 | Scaffold300 | 31699                   | TT                              | GG              | 1946935978               |
| SNP_P4_122210_32774  | NW_004515812.1 | Scaffold300 | 32774                   | CC                              | GG              | 1946935980               |
| SNP_P4_122211_32782  | NW_004515812.1 | Scaffold300 | 32782                   | GG                              | AA              | 1946935982               |
| SNP_P4_122212_32812  | NW_004515812.1 | Scaffold300 | 32812                   | CC                              | AA              | 1946935984               |
| SNP_P4_122213_32814  | NW_004515812.1 | Scaffold300 | 32814                   | TT                              | CC              | 1946935986               |
| SNP_P4_122214_41063  | NW_004515812.1 | Scaffold300 | 41063                   | AA                              | GG              | 1946935988               |
| SNP_P4_122215_41064  | NW_004515812.1 | Scaffold300 | 41064                   | CC                              | GG              | 1946935990               |
| SNP_P4_122216_41249  | NW_004515812.1 | Scaffold300 | 41249                   | CC                              | AA              | 1946935992               |
| SNP_P4_122217_41469  | NW_004515812.1 | Scaffold300 | 41469                   | GG                              | AA              | 1946935993               |
| SNP_P4_122218_45448  | NW_004515812.1 | Scaffold300 | 45448                   | AA                              | GG              | 1946935995               |



| SNPs IDs             | Chromosome IDs | Chromosomes | Physical positions (bp) | CDC Frontier (Reference genome) | (ILWC46 & LPNB) | NCBI SNPdb Accession IDs |
|----------------------|----------------|-------------|-------------------------|---------------------------------|-----------------|--------------------------|
| SNP_P4_122219_45454  | NW_004515812.1 | Scaffold300 | 45454                   | AA                              | TT              | 1946935997               |
| SNP_P4_122220_45455  | NW_004515812.1 | Scaffold300 | 45455                   | CC                              | TT              | 1946935999               |
| SNP_P4_122221_45456  | NW_004515812.1 | Scaffold300 | 45456                   | AA                              | GG              | 1946936001               |
| SNP_P4_122222_45459  | NW_004515812.1 | Scaffold300 | 45459                   | CC                              | AA              | 1946936003               |
| SNP_P4_122223_54314  | NW_004515812.1 | Scaffold300 | 54314                   | TT                              | AA              | 1946936005               |
| SNP_P4_122224_57867  | NW_004515812.1 | Scaffold300 | 57867                   | CC                              | TT              | 1946936007               |
| SNP_P4_122225_74150  | NW_004515812.1 | Scaffold300 | 74150                   | AA                              | GG              | 1946936009               |
| SNP_P4_122227_74752  | NW_004515812.1 | Scaffold300 | 74752                   | AA                              | CC              | 1946936011               |
| SNP_P4_122228_80552  | NW_004515812.1 | Scaffold300 | 80552                   | AA                              | GG              | 1946936013               |
| SNP_P4_122229_85495  | NW_004515812.1 | Scaffold300 | 85495                   | CC                              | GG              | 1946936015               |
| SNP_P4_122230_89520  | NW_004515812.1 | Scaffold300 | 89520                   | AA                              | CC              | 1946936017               |
| SNP_P4_122231_90349  | NW_004515812.1 | Scaffold300 | 90349                   | AA                              | TT              | 1946936019               |
| SNP_P4_122232_101023 | NW_004515812.1 | Scaffold300 | 101023                  | TT                              | CC              | 1946936021               |
| SNP_P4_122233_101412 | NW_004515812.1 | Scaffold300 | 101412                  | AA                              | CC              | 1946936023               |
| SNP_P4_122234_101447 | NW_004515812.1 | Scaffold300 | 101447                  | TT                              | CC              | 1946936025               |
| SNP_P4_122235_101452 | NW_004515812.1 | Scaffold300 | 101452                  | AA                              | GG              | 1946936027               |
| SNP_P4_122236_101495 | NW_004515812.1 | Scaffold300 | 101495                  | TT                              | GG              | 1946936029               |
| SNP_P4_122238_101536 | NW_004515812.1 | Scaffold300 | 101536                  | CC                              | GG              | 1946936031               |
| SNP_P4_122239_101540 | NW_004515812.1 | Scaffold300 | 101540                  | CC                              | GG              | 1946936032               |
| SNP_P4_122240_101541 | NW_004515812.1 | Scaffold300 | 101541                  | AA                              | TT              | 1946936034               |
| SNP_P4_122241_101599 | NW_004515812.1 | Scaffold300 | 101599                  | AA                              | CC              | 1946936036               |
| SNP_P4_122242_101615 | NW_004515812.1 | Scaffold300 | 101615                  | AA                              | TT              | 1946936038               |
| SNP_P4_122243_101634 | NW_004515812.1 | Scaffold300 | 101634                  | AA                              | CC              | 1946936040               |
| SNP_P4_122244_102450 | NW_004515812.1 | Scaffold300 | 102450                  | GG                              | AA              | 1946936042               |
| SNP_P4_122245_103704 | NW_004515812.1 | Scaffold300 | 103704                  | CC                              | TT              | 1946936044               |
| SNP_P4_122246_1249   | NW_004515813.1 | Scaffold301 | 1249                    | CC                              | AA              | 1946936046               |
| SNP_P4_122247_5233   | NW_004515814.1 | Scaffold303 | 5233                    | TT                              | CC              | 1946936048               |
| SNP_P4_122248_9923   | NW_004515814.1 | Scaffold303 | 9923                    | CC                              | TT              | 1946936050               |
| SNP_P4_122249_9933   | NW_004515814.1 | Scaffold303 | 9933                    | TT                              | AA              | 1946936052               |
| SNP_P4_122250_9944   | NW_004515814.1 | Scaffold303 | 9944                    | TT                              | GG              | 1946936053               |
| SNP_P4_122251_18056  | NW_004515814.1 | Scaffold303 | 18056                   | CC                              | TT              | 1946936055               |
| SNP_P4_122253_29830  | NW_004515814.1 | Scaffold303 | 29830                   | AA                              | CC              | 1946936057               |
| SNP_P4_122254_30257  | NW_004515814.1 | Scaffold303 | 30257                   | GG                              | TT              | 1946936059               |
| SNP_P4_122255_33068  | NW_004515814.1 | Scaffold303 | 33068                   | GG                              | AA              | 1946936061               |
| SNP_P4_122256_37830  | NW_004515814.1 | Scaffold303 | 37830                   | GG                              | AA              | 1946936063               |
| SNP_P4_122257_39634  | NW_004515814.1 | Scaffold303 | 39634                   | TT                              | CC              | 1946936065               |
| SNP_P4_122259_89526  | NW_004515814.1 | Scaffold303 | 89526                   | AA                              | GG              | 1946936067               |
| SNP_P4_122260_120605 | NW_004515814.1 | Scaffold303 | 120605                  | GG                              | TT              | 1946936069               |
| SNP_P4_122261_120655 | NW_004515814.1 | Scaffold303 | 120655                  | TT                              | CC              | 1946936071               |
| SNP_P4_122262_135997 | NW_004515814.1 | Scaffold303 | 135997                  | TT                              | CC              | 1946936073               |
| SNP_P4_122264_592    | NW_004515815.1 | Scaffold304 | 592                     | AA                              | CC              | 1946936075               |
| SNP_P4_122265_648    | NW_004515815.1 | Scaffold304 | 648                     | TT                              | AA              | 1946936077               |

| SNPs IDs            | Chromosome IDs | Chromosomes | Physical positions (bp) | CDC Frontier (Reference genome) | (ILWC46 & LPNB) | NCBI SNPdb Accession IDs |
|---------------------|----------------|-------------|-------------------------|---------------------------------|-----------------|--------------------------|
| SNP_P4_122266_649   | NW_004515815.1 | Scaffold304 | 649                     | AA                              | TT              | 1946936079               |
| SNP_P4_122267_868   | NW_004515815.1 | Scaffold304 | 868                     | GG                              | AA              | 1946936081               |
| SNP_P4_122268_1806  | NW_004515816.1 | Scaffold305 | 1806                    | CC                              | AA              | 1946936083               |
| SNP_P4_122269_2106  | NW_004515816.1 | Scaffold305 | 2106                    | TT                              | CC              | 1946936085               |
| SNP_P4_122270_2107  | NW_004515816.1 | Scaffold305 | 2107                    | AA                              | TT              | 1946936087               |
| SNP_P4_122271_3942  | NW_004515816.1 | Scaffold305 | 3942                    | CC                              | AA              | 1946936089               |
| SNP_P4_122272_3954  | NW_004515816.1 | Scaffold305 | 3954                    | TT                              | GG              | 1946936091               |
| SNP_P4_122273_4072  | NW_004515816.1 | Scaffold305 | 4072                    | TT                              | CC              | 1946936093               |
| SNP_P4_122274_4100  | NW_004515816.1 | Scaffold305 | 4100                    | CC                              | TT              | 1946936095               |
| SNP_P4_122275_4106  | NW_004515816.1 | Scaffold305 | 4106                    | CC                              | AA              | 1946936097               |
| SNP_P4_122276_4122  | NW_004515816.1 | Scaffold305 | 4122                    | CC                              | TT              | 1946936099               |
| SNP_P4_122277_26600 | NW_004515816.1 | Scaffold305 | 26600                   | CC                              | TT              | 1946936101               |
| SNP_P4_122278_29167 | NW_004515816.1 | Scaffold305 | 29167                   | CC                              | TT              | 1946936103               |
| SNP_P4_122279_29959 | NW_004515816.1 | Scaffold305 | 29959                   | AA                              | GG              | 1946936105               |
| SNP_P4_122280_30042 | NW_004515816.1 | Scaffold305 | 30042                   | AA                              | GG              | 1946936107               |
| SNP_P4_122281_30343 | NW_004515816.1 | Scaffold305 | 30343                   | GG                              | CC              | 1946936109               |
| SNP_P4_122282_30354 | NW_004515816.1 | Scaffold305 | 30354                   | GG                              | TT              | 1946936111               |
| SNP_P4_122283_30364 | NW_004515816.1 | Scaffold305 | 30364                   | GG                              | CC              | 1946936113               |
| SNP_P4_122284_30370 | NW_004515816.1 | Scaffold305 | 30370                   | CC                              | TT              | 1946936115               |
| SNP_P4_122285_30388 | NW_004515816.1 | Scaffold305 | 30388                   | AA                              | GG              | 1946936117               |
| SNP_P4_122286_30413 | NW_004515816.1 | Scaffold305 | 30413                   | TT                              | CC              | 1946936119               |
| SNP_P4_122287_30424 | NW_004515816.1 | Scaffold305 | 30424                   | AA                              | GG              | 1946936121               |
| SNP_P4_122288_31562 | NW_004515816.1 | Scaffold305 | 31562                   | TT                              | GG              | 1946936123               |
| SNP_P4_122289_31568 | NW_004515816.1 | Scaffold305 | 31568                   | TT                              | AA              | 1946936125               |
| SNP_P4_122290_31578 | NW_004515816.1 | Scaffold305 | 31578                   | GG                              | AA              | 1946936127               |
| SNP_P4_122291_31633 | NW_004515816.1 | Scaffold305 | 31633                   | TT                              | CC              | 1946936129               |
| SNP_P4_122292_31679 | NW_004515816.1 | Scaffold305 | 31679                   | TT                              | CC              | 1946936131               |
| SNP_P4_122293_31771 | NW_004515816.1 | Scaffold305 | 31771                   | TT                              | GG              | 1946936133               |
| SNP_P4_122294_31781 | NW_004515816.1 | Scaffold305 | 31781                   | TT                              | CC              | 1946936135               |
| SNP_P4_122295_31927 | NW_004515816.1 | Scaffold305 | 31927                   | CC                              | TT              | 1946936137               |
| SNP_P4_122296_31948 | NW_004515816.1 | Scaffold305 | 31948                   | AA                              | GG              | 1946936139               |
| SNP_P4_122297_31958 | NW_004515816.1 | Scaffold305 | 31958                   | CC                              | TT              | 1946936141               |
| SNP_P4_122298_31967 | NW_004515816.1 | Scaffold305 | 31967                   | TT                              | CC              | 1946936143               |
| SNP_P4_122299_31994 | NW_004515816.1 | Scaffold305 | 31994                   | GG                              | AA              | 1946936145               |
| SNP_P4_122300_32054 | NW_004515816.1 | Scaffold305 | 32054                   | CC                              | TT              | 1946936147               |
| SNP_P4_122301_32283 | NW_004515816.1 | Scaffold305 | 32283                   | AA                              | CC              | 1946936149               |
| SNP_P4_122302_32287 | NW_004515816.1 | Scaffold305 | 32287                   | GG                              | AA              | 1946936151               |
| SNP_P4_122303_34709 | NW_004515816.1 | Scaffold305 | 34709                   | TT                              | GG              | 1946936153               |
| SNP_P4_122304_34710 | NW_004515816.1 | Scaffold305 | 34710                   | GG                              | AA              | 1946936155               |
| SNP_P4_122305_37890 | NW_004515816.1 | Scaffold305 | 37890                   | GG                              | TT              | 1946936157               |
| SNP_P4_122307_59501 | NW_004515816.1 | Scaffold305 | 59501                   | AA                              | GG              | 1946936159               |
| SNP_P4_122308_59873 | NW_004515816.1 | Scaffold305 | 59873                   | AA                              | GG              | 1946936161               |

| SNPs IDs             | Chromosome IDs | Chromosomes | Physical positions (bp) | CDC Frontier (Reference genome) | (ILWC46 & LPNB) | NCBI SNPdb Accession IDs |
|----------------------|----------------|-------------|-------------------------|---------------------------------|-----------------|--------------------------|
| SNP_P4_122309_63757  | NW_004515816.1 | Scaffold305 | 63757                   | GG                              | AA              | 1946936163               |
| SNP_P4_122310_99787  | NW_004515816.1 | Scaffold305 | 99787                   | GG                              | TT              | 1946936165               |
| SNP_P4_122311_99805  | NW_004515816.1 | Scaffold305 | 99805                   | GG                              | TT              | 1946936167               |
| SNP_P4_122312_124439 | NW_004515816.1 | Scaffold305 | 124439                  | GG                              | AA              | 1946936169               |
| SNP_P4_122313_124794 | NW_004515816.1 | Scaffold305 | 124794                  | CC                              | AA              | 1946936171               |
| SNP_P4_122314_124800 | NW_004515816.1 | Scaffold305 | 124800                  | CC                              | AA              | 1946936173               |
| SNP_P4_122315_124816 | NW_004515816.1 | Scaffold305 | 124816                  | TT                              | CC              | 1946936175               |
| SNP_P4_122316_124848 | NW_004515816.1 | Scaffold305 | 124848                  | GG                              | TT              | 1946936177               |
| SNP_P4_122317_150019 | NW_004515816.1 | Scaffold305 | 150019                  | CC                              | GG              | 1946936179               |
| SNP_P4_122318_162234 | NW_004515816.1 | Scaffold305 | 162234                  | AA                              | TT              | 1946936181               |
| SNP_P4_122319_193196 | NW_004515816.1 | Scaffold305 | 193196                  | AA                              | GG              | 1946936183               |
| SNP_P4_122320_196689 | NW_004515816.1 | Scaffold305 | 196689                  | CC                              | AA              | 1946936185               |
| SNP_P4_122321_203917 | NW_004515816.1 | Scaffold305 | 203917                  | CC                              | TT              | 1946936187               |
| SNP_P4_122322_205093 | NW_004515816.1 | Scaffold305 | 205093                  | CC                              | TT              | 1946936189               |
| SNP_P4_122323_205098 | NW_004515816.1 | Scaffold305 | 205098                  | AA                              | TT              | 1946936191               |
| SNP_P4_122324_205131 | NW_004515816.1 | Scaffold305 | 205131                  | CC                              | AA              | 1946936193               |
| SNP_P4_122325_205183 | NW_004515816.1 | Scaffold305 | 205183                  | GG                              | TT              | 1946936195               |
| SNP_P4_122326_205324 | NW_004515816.1 | Scaffold305 | 205324                  | GG                              | AA              | 1946936197               |
| SNP_P4_122327_205329 | NW_004515816.1 | Scaffold305 | 205329                  | CC                              | TT              | 1946936199               |
| SNP_P4_122328_205355 | NW_004515816.1 | Scaffold305 | 205355                  | AA                              | GG              | 1946936201               |
| SNP_P4_122329_205461 | NW_004515816.1 | Scaffold305 | 205461                  | AA                              | TT              | 1946936203               |
| SNP_P4_122330_207002 | NW_004515816.1 | Scaffold305 | 207002                  | TT                              | CC              | 1946936205               |
| SNP_P4_122331_93     | NW_004515817.1 | Scaffold306 | 93                      | CC                              | TT              | 1946936207               |
| SNP_P4_122332_5171   | NW_004515817.1 | Scaffold306 | 5171                    | CC                              | TT              | 1946936209               |
| SNP_P4_122333_5210   | NW_004515817.1 | Scaffold306 | 5210                    | GG                              | AA              | 1946936211               |
| SNP_P4_122334_5631   | NW_004515817.1 | Scaffold306 | 5631                    | AA                              | GG              | 1946936213               |
| SNP_P4_122336_6755   | NW_004515817.1 | Scaffold306 | 6755                    | AA                              | GG              | 1946936215               |
| SNP_P4_122338_25553  | NW_004515817.1 | Scaffold306 | 25553                   | GG                              | AA              | 1946936217               |
| SNP_P4_122339_29168  | NW_004515817.1 | Scaffold306 | 29168                   | AA                              | TT              | 1946936219               |
| SNP_P4_122340_35380  | NW_004515817.1 | Scaffold306 | 35380                   | AA                              | GG              | 1946936221               |
| SNP_P4_122341_35649  | NW_004515817.1 | Scaffold306 | 35649                   | GG                              | TT              | 1946936223               |
| SNP_P4_122342_35717  | NW_004515817.1 | Scaffold306 | 35717                   | AA                              | GG              | 1946936225               |
| SNP_P4_122343_35860  | NW_004515817.1 | Scaffold306 | 35860                   | TT                              | CC              | 1946936227               |
| SNP_P4_122344_35960  | NW_004515817.1 | Scaffold306 | 35960                   | CC                              | AA              | 1946936229               |
| SNP_P4_122345_40015  | NW_004515817.1 | Scaffold306 | 40015                   | CC                              | TT              | 1946936232               |
| SNP_P4_122346_40237  | NW_004515817.1 | Scaffold306 | 40237                   | TT                              | CC              | 1946936234               |
| SNP_P4_122347_41758  | NW_004515817.1 | Scaffold306 | 41758                   | TT                              | CC              | 1946936236               |
| SNP_P4_122348_42462  | NW_004515817.1 | Scaffold306 | 42462                   | TT                              | AA              | 1946936238               |
| SNP_P4_122349_43630  | NW_004515817.1 | Scaffold306 | 43630                   | AA                              | GG              | 1946936240               |
| SNP_P4_122350_43846  | NW_004515817.1 | Scaffold306 | 43846                   | AA                              | CC              | 1946936242               |
| SNP_P4_122351_43907  | NW_004515817.1 | Scaffold306 | 43907                   | AA                              | GG              | 1946936244               |
| SNP_P4_122352_43911  | NW_004515817.1 | Scaffold306 | 43911                   | AA                              | GG              | 1946936246               |

| SNPs IDs            | Chromosome IDs | Chromosomes | Physical positions (bp) | CDC Frontier (Reference genome) | (ILWC46 & LPNB) | NCBI SNPdb Accession IDs |
|---------------------|----------------|-------------|-------------------------|---------------------------------|-----------------|--------------------------|
| SNP_P4_122353_43967 | NW_004515817.1 | Scaffold306 | 43967                   | TT                              | CC              | 1946936248               |
| SNP_P4_122354_44640 | NW_004515817.1 | Scaffold306 | 44640                   | GG                              | AA              | 1946936250               |
| SNP_P4_122355_44642 | NW_004515817.1 | Scaffold306 | 44642                   | AA                              | CC              | 1946936252               |
| SNP_P4_122356_44676 | NW_004515817.1 | Scaffold306 | 44676                   | TT                              | AA              | 1946936254               |
| SNP_P4_122357_44853 | NW_004515817.1 | Scaffold306 | 44853                   | AA                              | GG              | 1946936256               |
| SNP_P4_122358_44997 | NW_004515817.1 | Scaffold306 | 44997                   | TT                              | CC              | 1946936258               |
| SNP_P4_122359_45018 | NW_004515817.1 | Scaffold306 | 45018                   | CC                              | GG              | 1946936260               |
| SNP_P4_122361_45880 | NW_004515817.1 | Scaffold306 | 45880                   | AA                              | TT              | 1946936262               |
| SNP_P4_122362_45891 | NW_004515817.1 | Scaffold306 | 45891                   | TT                              | CC              | 1946936264               |
| SNP_P4_122363_45903 | NW_004515817.1 | Scaffold306 | 45903                   | AA                              | GG              | 1946936266               |
| SNP_P4_122364_46770 | NW_004515817.1 | Scaffold306 | 46770                   | TT                              | CC              | 1946936268               |
| SNP_P4_122366_47335 | NW_004515817.1 | Scaffold306 | 47335                   | CC                              | GG              | 1946936270               |
| SNP_P4_122367_47401 | NW_004515817.1 | Scaffold306 | 47401                   | CC                              | AA              | 1946936272               |
| SNP_P4_122368_48313 | NW_004515817.1 | Scaffold306 | 48313                   | TT                              | CC              | 1946936274               |
| SNP_P4_122369_49250 | NW_004515817.1 | Scaffold306 | 49250                   | GG                              | AA              | 1946936276               |
| SNP_P4_122370_49561 | NW_004515817.1 | Scaffold306 | 49561                   | CC                              | TT              | 1946936278               |
| SNP_P4_122371_55534 | NW_004515817.1 | Scaffold306 | 55534                   | TT                              | GG              | 1946936279               |
| SNP_P4_122373_56523 | NW_004515817.1 | Scaffold306 | 56523                   | CC                              | TT              | 1946936281               |
| SNP_P4_122375_58885 | NW_004515817.1 | Scaffold306 | 58885                   | GG                              | AA              | 1946936283               |
| SNP_P4_122376_58898 | NW_004515817.1 | Scaffold306 | 58898                   | TT                              | AA              | 1946936285               |
| SNP_P4_122377_59684 | NW_004515817.1 | Scaffold306 | 59684                   | TT                              | CC              | 1946936287               |
| SNP_P4_122378_60031 | NW_004515817.1 | Scaffold306 | 60031                   | AA                              | CC              | 1946936289               |
| SNP_P4_122379_60445 | NW_004515817.1 | Scaffold306 | 60445                   | TT                              | CC              | 1946936291               |
| SNP_P4_122381_60612 | NW_004515817.1 | Scaffold306 | 60612                   | AA                              | GG              | 1946936293               |
| SNP_P4_122382_61748 | NW_004515817.1 | Scaffold306 | 61748                   | GG                              | AA              | 1946936295               |
| SNP_P4_122383_63393 | NW_004515817.1 | Scaffold306 | 63393                   | TT                              | CC              | 1946936297               |
| SNP_P4_122384_64014 | NW_004515817.1 | Scaffold306 | 64014                   | CC                              | TT              | 1946936299               |
| SNP_P4_122386_64285 | NW_004515817.1 | Scaffold306 | 64285                   | TT                              | CC              | 1946936301               |
| SNP_P4_122387_64780 | NW_004515817.1 | Scaffold306 | 64780                   | GG                              | AA              | 1946936303               |
| SNP_P4_122388_64786 | NW_004515817.1 | Scaffold306 | 64786                   | AA                              | GG              | 1946936305               |
| SNP_P4_122389_64837 | NW_004515817.1 | Scaffold306 | 64837                   | AA                              | CC              | 1946936307               |
| SNP_P4_122390_64967 | NW_004515817.1 | Scaffold306 | 64967                   | CC                              | AA              | 1946936309               |
| SNP_P4_122391_64971 | NW_004515817.1 | Scaffold306 | 64971                   | GG                              | AA              | 1946936311               |
| SNP_P4_122392_67856 | NW_004515817.1 | Scaffold306 | 67856                   | TT                              | CC              | 1946936313               |
| SNP_P4_122393_67888 | NW_004515817.1 | Scaffold306 | 67888                   | AA                              | CC              | 1946936315               |
| SNP_P4_122394_76861 | NW_004515817.1 | Scaffold306 | 76861                   | GG                              | TT              | 1946936317               |
| SNP_P4_122395_76868 | NW_004515817.1 | Scaffold306 | 76868                   | AA                              | TT              | 1946936319               |
| SNP_P4_122396_76901 | NW_004515817.1 | Scaffold306 | 76901                   | GG                              | CC              | 1946936321               |
| SNP_P4_122397_76908 | NW_004515817.1 | Scaffold306 | 76908                   | AA                              | GG              | 1946936323               |
| SNP_P4_122398_78138 | NW_004515817.1 | Scaffold306 | 78138                   | TT                              | AA              | 1946936325               |
| SNP_P4_122399_78169 | NW_004515817.1 | Scaffold306 | 78169                   | AA                              | CC              | 1946936327               |
| SNP_P4_122400_78810 | NW_004515817.1 | Scaffold306 | 78810                   | CC                              | GG              | 1946936329               |

| SNPs IDs             | Chromosome IDs | Chromosomes | Physical positions (bp) | CDC Frontier (Reference genome) | (ILWC46 & LPNB) | NCBI SNPdb Accession IDs |
|----------------------|----------------|-------------|-------------------------|---------------------------------|-----------------|--------------------------|
| SNP_P4_122401_80539  | NW_004515817.1 | Scaffold306 | 80539                   | TT                              | AA              | 1946936331               |
| SNP_P4_122402_80608  | NW_004515817.1 | Scaffold306 | 80608                   | TT                              | CC              | 1946936333               |
| SNP_P4_122403_80769  | NW_004515817.1 | Scaffold306 | 80769                   | CC                              | GG              | 1946936335               |
| SNP_P4_122404_83151  | NW_004515817.1 | Scaffold306 | 83151                   | AA                              | GG              | 1946936337               |
| SNP_P4_122405_83180  | NW_004515817.1 | Scaffold306 | 83180                   | AA                              | GG              | 1946936339               |
| SNP_P4_122406_84010  | NW_004515817.1 | Scaffold306 | 84010                   | AA                              | TT              | 1946936341               |
| SNP_P4_122407_84253  | NW_004515817.1 | Scaffold306 | 84253                   | TT                              | CC              | 1946936343               |
| SNP_P4_122408_84273  | NW_004515817.1 | Scaffold306 | 84273                   | GG                              | AA              | 1946936345               |
| SNP_P4_122409_88789  | NW_004515817.1 | Scaffold306 | 88789                   | CC                              | AA              | 1946936347               |
| SNP_P4_122410_89216  | NW_004515817.1 | Scaffold306 | 89216                   | AA                              | CC              | 1946936349               |
| SNP_P4_122411_94653  | NW_004515817.1 | Scaffold306 | 94653                   | GG                              | CC              | 1946936351               |
| SNP_P4_122412_94675  | NW_004515817.1 | Scaffold306 | 94675                   | GG                              | AA              | 1946936353               |
| SNP_P4_122413_94687  | NW_004515817.1 | Scaffold306 | 94687                   | GG                              | CC              | 1946936355               |
| SNP_P4_122414_95819  | NW_004515817.1 | Scaffold306 | 95819                   | CC                              | AA              | 1946936357               |
| SNP_P4_122415_96395  | NW_004515817.1 | Scaffold306 | 96395                   | TT                              | GG              | 1946936359               |
| SNP_P4_122416_96759  | NW_004515817.1 | Scaffold306 | 96759                   | CC                              | TT              | 1946936361               |
| SNP_P4_122417_97702  | NW_004515817.1 | Scaffold306 | 97702                   | CC                              | TT              | 1946936363               |
| SNP_P4_122418_98230  | NW_004515817.1 | Scaffold306 | 98230                   | TT                              | CC              | 1946936365               |
| SNP_P4_122419_100687 | NW_004515817.1 | Scaffold306 | 100687                  | AA                              | TT              | 1946936367               |
| SNP_P4_122420_101932 | NW_004515817.1 | Scaffold306 | 101932                  | AA                              | GG              | 1946936369               |
| SNP_P4_122421_106003 | NW_004515817.1 | Scaffold306 | 106003                  | CC                              | TT              | 1946936371               |
| SNP_P4_122422_106092 | NW_004515817.1 | Scaffold306 | 106092                  | AA                              | GG              | 1946936373               |
| SNP_P4_122423_107779 | NW_004515817.1 | Scaffold306 | 107779                  | AA                              | GG              | 1946936375               |
| SNP_P4_122424_109100 | NW_004515817.1 | Scaffold306 | 109100                  | CC                              | TT              | 1946936377               |
| SNP_P4_122425_109195 | NW_004515817.1 | Scaffold306 | 109195                  | GG                              | AA              | 1946936379               |
| SNP_P4_122426_109196 | NW_004515817.1 | Scaffold306 | 109196                  | CC                              | TT              | 1946936381               |
| SNP_P4_122427_109212 | NW_004515817.1 | Scaffold306 | 109212                  | TT                              | CC              | 1946936383               |
| SNP_P4_122428_109496 | NW_004515817.1 | Scaffold306 | 109496                  | AA                              | TT              | 1946936385               |
| SNP_P4_122429_117252 | NW_004515817.1 | Scaffold306 | 117252                  | GG                              | AA              | 1946936387               |
| SNP_P4_122430_117260 | NW_004515817.1 | Scaffold306 | 117260                  | CC                              | TT              | 1946936389               |
| SNP_P4_122431_117266 | NW_004515817.1 | Scaffold306 | 117266                  | AA                              | TT              | 1946936391               |
| SNP_P4_122432_119109 | NW_004515817.1 | Scaffold306 | 119109                  | AA                              | GG              | 1946936393               |
| SNP_P4_122433_125472 | NW_004515817.1 | Scaffold306 | 125472                  | TT                              | CC              | 1946936395               |
| SNP_P4_122434_125989 | NW_004515817.1 | Scaffold306 | 125989                  | GG                              | AA              | 1946936397               |
| SNP_P4_122435_126343 | NW_004515817.1 | Scaffold306 | 126343                  | CC                              | GG              | 1946936399               |
| SNP_P4_122436_126419 | NW_004515817.1 | Scaffold306 | 126419                  | TT                              | GG              | 1946936401               |
| SNP_P4_122438_126581 | NW_004515817.1 | Scaffold306 | 126581                  | CC                              | TT              | 1946936403               |
| SNP_P4_122439_127489 | NW_004515817.1 | Scaffold306 | 127489                  | AA                              | TT              | 1946936405               |
| SNP_P4_122440_127671 | NW_004515817.1 | Scaffold306 | 127671                  | AA                              | GG              | 1946936407               |
| SNP_P4_122441_127679 | NW_004515817.1 | Scaffold306 | 127679                  | CC                              | TT              | 1946936409               |
| SNP_P4_122442_127822 | NW_004515817.1 | Scaffold306 | 127822                  | CC                              | GG              | 1946936411               |
| SNP_P4_122443_128091 | NW_004515817.1 | Scaffold306 | 128091                  | TT                              | CC              | 1946936413               |

| SNPs IDs             | Chromosome IDs | Chromosomes | Physical positions (bp) | CDC Frontier (Reference genome) | (ILWC46 & LPNB) | NCBI SNPdb Accession IDs |
|----------------------|----------------|-------------|-------------------------|---------------------------------|-----------------|--------------------------|
| SNP_P4_122444_128122 | NW_004515817.1 | Scaffold306 | 128122                  | CC                              | TT              | 1946936415               |
| SNP_P4_122445_128171 | NW_004515817.1 | Scaffold306 | 128171                  | TT                              | AA              | 1946936417               |
| SNP_P4_122446_128173 | NW_004515817.1 | Scaffold306 | 128173                  | AA                              | TT              | 1946936419               |
| SNP_P4_122447_128425 | NW_004515817.1 | Scaffold306 | 128425                  | CC                              | AA              | 1946936421               |
| SNP_P4_122448_128525 | NW_004515817.1 | Scaffold306 | 128525                  | AA                              | GG              | 1946936423               |
| SNP_P4_122450_128591 | NW_004515817.1 | Scaffold306 | 128591                  | TT                              | AA              | 1946936425               |
| SNP_P4_122451_128619 | NW_004515817.1 | Scaffold306 | 128619                  | GG                              | AA              | 1946936427               |
| SNP_P4_122452_128753 | NW_004515817.1 | Scaffold306 | 128753                  | TT                              | CC              | 1946936429               |
| SNP_P4_122453_128864 | NW_004515817.1 | Scaffold306 | 128864                  | AA                              | GG              | 1946936431               |
| SNP_P4_122455_130338 | NW_004515817.1 | Scaffold306 | 130338                  | GG                              | AA              | 1946936433               |
| SNP_P4_122456_130509 | NW_004515817.1 | Scaffold306 | 130509                  | GG                              | AA              | 1946936435               |
| SNP_P4_122457_130525 | NW_004515817.1 | Scaffold306 | 130525                  | CC                              | TT              | 1946936437               |
| SNP_P4_122458_130556 | NW_004515817.1 | Scaffold306 | 130556                  | TT                              | CC              | 1946936439               |
| SNP_P4_122459_130666 | NW_004515817.1 | Scaffold306 | 130666                  | TT                              | GG              | 1946936441               |
| SNP_P4_122460_130699 | NW_004515817.1 | Scaffold306 | 130699                  | AA                              | CC              | 1946936443               |
| SNP_P4_122461_130767 | NW_004515817.1 | Scaffold306 | 130767                  | AA                              | CC              | 1946936445               |
| SNP_P4_122462_131271 | NW_004515817.1 | Scaffold306 | 131271                  | AA                              | TT              | 1946936447               |
| SNP_P4_122463_131368 | NW_004515817.1 | Scaffold306 | 131368                  | TT                              | CC              | 1946936449               |
| SNP_P4_122464_131438 | NW_004515817.1 | Scaffold306 | 131438                  | AA                              | GG              | 1946936451               |
| SNP_P4_122465_131457 | NW_004515817.1 | Scaffold306 | 131457                  | TT                              | CC              | 1946936453               |
| SNP_P4_122466_131508 | NW_004515817.1 | Scaffold306 | 131508                  | AA                              | GG              | 1946936455               |
| SNP_P4_122467_131708 | NW_004515817.1 | Scaffold306 | 131708                  | AA                              | GG              | 1946936457               |
| SNP_P4_122468_131832 | NW_004515817.1 | Scaffold306 | 131832                  | TT                              | CC              | 1946936459               |
| SNP_P4_122469_146273 | NW_004515817.1 | Scaffold306 | 146273                  | CC                              | TT              | 1946936461               |
| SNP_P4_122470_146413 | NW_004515817.1 | Scaffold306 | 146413                  | GG                              | AA              | 1946936463               |
| SNP_P4_122471_146596 | NW_004515817.1 | Scaffold306 | 146596                  | TT                              | CC              | 1946936465               |
| SNP_P4_122472_146626 | NW_004515817.1 | Scaffold306 | 146626                  | GG                              | AA              | 1946936467               |
| SNP_P4_122473_146664 | NW_004515817.1 | Scaffold306 | 146664                  | CC                              | AA              | 1946936469               |
| SNP_P4_122474_146685 | NW_004515817.1 | Scaffold306 | 146685                  | TT                              | AA              | 1946936471               |
| SNP_P4_122475_149245 | NW_004515817.1 | Scaffold306 | 149245                  | TT                              | GG              | 1946936473               |
| SNP_P4_122476_150309 | NW_004515817.1 | Scaffold306 | 150309                  | CC                              | AA              | 1946936475               |
| SNP_P4_122477_162934 | NW_004515817.1 | Scaffold306 | 162934                  | TT                              | GG              | 1946936477               |
| SNP_P4_122478_163856 | NW_004515817.1 | Scaffold306 | 163856                  | GG                              | AA              | 1946936479               |
| SNP_P4_122479_164012 | NW_004515817.1 | Scaffold306 | 164012                  | CC                              | TT              | 1946936481               |
| SNP_P4_122481_166464 | NW_004515817.1 | Scaffold306 | 166464                  | AA                              | TT              | 1946936483               |
| SNP_P4_122482_166472 | NW_004515817.1 | Scaffold306 | 166472                  | AA                              | GG              | 1946936485               |
| SNP_P4_122483_166487 | NW_004515817.1 | Scaffold306 | 166487                  | AA                              | CC              | 1946936487               |
| SNP_P4_122484_166493 | NW_004515817.1 | Scaffold306 | 166493                  | AA                              | CC              | 1946936490               |
| SNP_P4_122485_166670 | NW_004515817.1 | Scaffold306 | 166670                  | CC                              | GG              | 1946936492               |
| SNP_P4_122486_166728 | NW_004515817.1 | Scaffold306 | 166728                  | TT                              | CC              | 1946936494               |
| SNP_P4_122487_166741 | NW_004515817.1 | Scaffold306 | 166741                  | AA                              | TT              | 1946936496               |
| SNP_P4_122488_166867 | NW_004515817.1 | Scaffold306 | 166867                  | AA                              | GG              | 1946936498               |

| SNPs IDs             | Chromosome IDs | Chromosomes | Physical positions (bp) | CDC Frontier (Reference genome) | (ILWC46 & LPNB) | NCBI SNPdb Accession IDs |
|----------------------|----------------|-------------|-------------------------|---------------------------------|-----------------|--------------------------|
| SNP_P4_122489_169808 | NW_004515817.1 | Scaffold306 | 169808                  | TT                              | AA              | 1946936500               |
| SNP_P4_122490_169950 | NW_004515817.1 | Scaffold306 | 169950                  | TT                              | GG              | 1946936502               |
| SNP_P4_122491_171473 | NW_004515817.1 | Scaffold306 | 171473                  | GG                              | AA              | 1946936504               |
| SNP_P4_122492_171746 | NW_004515817.1 | Scaffold306 | 171746                  | AA                              | CC              | 1946936506               |
| SNP_P4_122493_175187 | NW_004515817.1 | Scaffold306 | 175187                  | CC                              | TT              | 1946936508               |
| SNP_P4_122494_180468 | NW_004515817.1 | Scaffold306 | 180468                  | TT                              | GG              | 1946936510               |
| SNP_P4_122495_186298 | NW_004515817.1 | Scaffold306 | 186298                  | AA                              | TT              | 1946936513               |
| SNP_P4_122496_186590 | NW_004515817.1 | Scaffold306 | 186590                  | TT                              | AA              | 1946936515               |
| SNP_P4_122498_197395 | NW_004515817.1 | Scaffold306 | 197395                  | TT                              | CC              | 1946936517               |
| SNP_P4_122499_197432 | NW_004515817.1 | Scaffold306 | 197432                  | TT                              | AA              | 1946936519               |
| SNP_P4_122500_203336 | NW_004515817.1 | Scaffold306 | 203336                  | CC                              | TT              | 1946936521               |
| SNP_P4_122501_203351 | NW_004515817.1 | Scaffold306 | 203351                  | AA                              | GG              | 1946936523               |
| SNP_P4_122502_203379 | NW_004515817.1 | Scaffold306 | 203379                  | AA                              | GG              | 1946936525               |
| SNP_P4_122503_203645 | NW_004515817.1 | Scaffold306 | 203645                  | TT                              | GG              | 1946936527               |
| SNP_P4_122504_203678 | NW_004515817.1 | Scaffold306 | 203678                  | GG                              | AA              | 1946936529               |
| SNP_P4_122505_208200 | NW_004515817.1 | Scaffold306 | 208200                  | CC                              | AA              | 1946936531               |
| SNP_P4_122506_208691 | NW_004515817.1 | Scaffold306 | 208691                  | TT                              | CC              | 1946936533               |
| SNP_P4_122507_212326 | NW_004515817.1 | Scaffold306 | 212326                  | TT                              | CC              | 1946936535               |
| SNP_P4_122508_212951 | NW_004515817.1 | Scaffold306 | 212951                  | TT                              | AA              | 1946936537               |
| SNP_P4_122509_212952 | NW_004515817.1 | Scaffold306 | 212952                  | AA                              | TT              | 1946936539               |
| SNP_P4_122510_212955 | NW_004515817.1 | Scaffold306 | 212955                  | CC                              | AA              | 1946936541               |
| SNP_P4_122511_213227 | NW_004515817.1 | Scaffold306 | 213227                  | TT                              | CC              | 1946936543               |
| SNP_P4_122512_213229 | NW_004515817.1 | Scaffold306 | 213229                  | GG                              | AA              | 1946936545               |
| SNP_P4_122513_214855 | NW_004515817.1 | Scaffold306 | 214855                  | AA                              | CC              | 1946936547               |
| SNP_P4_122514_214919 | NW_004515817.1 | Scaffold306 | 214919                  | CC                              | TT              | 1946936549               |
| SNP_P4_122515_214984 | NW_004515817.1 | Scaffold306 | 214984                  | AA                              | GG              | 1946936551               |
| SNP_P4_122516_214988 | NW_004515817.1 | Scaffold306 | 214988                  | AA                              | CC              | 1946936553               |
| SNP_P4_122517_215293 | NW_004515817.1 | Scaffold306 | 215293                  | TT                              | GG              | 1946936555               |
| SNP_P4_122518_215300 | NW_004515817.1 | Scaffold306 | 215300                  | AA                              | CC              | 1946936557               |
| SNP_P4_122519_215354 | NW_004515817.1 | Scaffold306 | 215354                  | AA                              | GG              | 1946936559               |
| SNP_P4_122520_216430 | NW_004515817.1 | Scaffold306 | 216430                  | TT                              | GG              | 1946936561               |
| SNP_P4_122521_216454 | NW_004515817.1 | Scaffold306 | 216454                  | CC                              | TT              | 1946936563               |
| SNP_P4_122522_216864 | NW_004515817.1 | Scaffold306 | 216864                  | TT                              | CC              | 1946936565               |
| SNP_P4_122523_216943 | NW_004515817.1 | Scaffold306 | 216943                  | TT                              | GG              | 1946936567               |
| SNP_P4_122524_216947 | NW_004515817.1 | Scaffold306 | 216947                  | CC                              | TT              | 1946936569               |
| SNP_P4_122525_218552 | NW_004515817.1 | Scaffold306 | 218552                  | AA                              | CC              | 1946936571               |
| SNP_P4_122526_218555 | NW_004515817.1 | Scaffold306 | 218555                  | TT                              | CC              | 1946936573               |
| SNP_P4_122527_219494 | NW_004515817.1 | Scaffold306 | 219494                  | AA                              | GG              | 1946936575               |
| SNP_P4_122528_221470 | NW_004515817.1 | Scaffold306 | 221470                  | CC                              | TT              | 1946936577               |
| SNP_P4_122529_221630 | NW_004515817.1 | Scaffold306 | 221630                  | GG                              | CC              | 1946936579               |
| SNP_P4_122530_221772 | NW_004515817.1 | Scaffold306 | 221772                  | GG                              | AA              | 1946936581               |
| SNP_P4_122531_221800 | NW_004515817.1 | Scaffold306 | 221800                  | CC                              | TT              | 1946936584               |

| SNPs IDs             | Chromosome IDs | Chromosomes | Physical positions (bp) | CDC Frontier (Reference genome) | (ILWC46 & LPNB) | NCBI SNPdb Accession IDs |
|----------------------|----------------|-------------|-------------------------|---------------------------------|-----------------|--------------------------|
| SNP_P4_122532_221896 | NW_004515817.1 | Scaffold306 | 221896                  | TT                              | CC              | 1946936586               |
| SNP_P4_122534_226902 | NW_004515817.1 | Scaffold306 | 226902                  | GG                              | AA              | 1946936588               |
| SNP_P4_122535_227272 | NW_004515817.1 | Scaffold306 | 227272                  | TT                              | AA              | 1946936590               |
| SNP_P4_122537_236636 | NW_004515817.1 | Scaffold306 | 236636                  | CC                              | AA              | 1946936592               |
| SNP_P4_122538_236646 | NW_004515817.1 | Scaffold306 | 236646                  | CC                              | TT              | 1946936594               |
| SNP_P4_122539_241483 | NW_004515817.1 | Scaffold306 | 241483                  | AA                              | CC              | 1946936596               |
| SNP_P4_122540_264895 | NW_004515817.1 | Scaffold306 | 264895                  | AA                              | TT              | 1946936598               |
| SNP_P4_122541_264979 | NW_004515817.1 | Scaffold306 | 264979                  | AA                              | TT              | 1946936600               |
| SNP_P4_122542_265229 | NW_004515817.1 | Scaffold306 | 265229                  | TT                              | AA              | 1946936602               |
| SNP_P4_122543_265256 | NW_004515817.1 | Scaffold306 | 265256                  | TT                              | CC              | 1946936604               |
| SNP_P4_122544_265278 | NW_004515817.1 | Scaffold306 | 265278                  | GG                              | AA              | 1946936606               |
| SNP_P4_122545_265284 | NW_004515817.1 | Scaffold306 | 265284                  | GG                              | AA              | 1946936608               |
| SNP_P4_122546_265321 | NW_004515817.1 | Scaffold306 | 265321                  | GG                              | AA              | 1946936610               |
| SNP_P4_122547_269242 | NW_004515817.1 | Scaffold306 | 269242                  | GG                              | CC              | 1946936612               |
| SNP_P4_122548_269813 | NW_004515817.1 | Scaffold306 | 269813                  | TT                              | AA              | 1946936614               |
| SNP_P4_122549_269941 | NW_004515817.1 | Scaffold306 | 269941                  | TT                              | AA              | 1946936616               |
| SNP_P4_122550_269950 | NW_004515817.1 | Scaffold306 | 269950                  | TT                              | CC              | 1946936618               |
| SNP_P4_122551_270236 | NW_004515817.1 | Scaffold306 | 270236                  | TT                              | CC              | 1946936620               |
| SNP_P4_122552_273551 | NW_004515817.1 | Scaffold306 | 273551                  | CC                              | GG              | 1946936622               |
| SNP_P4_122553_273569 | NW_004515817.1 | Scaffold306 | 273569                  | GG                              | AA              | 1946936624               |
| SNP_P4_122554_273641 | NW_004515817.1 | Scaffold306 | 273641                  | AA                              | CC              | 1946936626               |
| SNP_P4_122555_273934 | NW_004515817.1 | Scaffold306 | 273934                  | AA                              | GG              | 1946936628               |
| SNP_P4_122556_277284 | NW_004515817.1 | Scaffold306 | 277284                  | CC                              | TT              | 1946936630               |
| SNP_P4_122557_278306 | NW_004515817.1 | Scaffold306 | 278306                  | CC                              | TT              | 1946936632               |
| SNP_P4_122558_280297 | NW_004515817.1 | Scaffold306 | 280297                  | GG                              | CC              | 1946936634               |
| SNP_P4_122559_289953 | NW_004515817.1 | Scaffold306 | 289953                  | CC                              | TT              | 1946936636               |
| SNP_P4_122561_296047 | NW_004515817.1 | Scaffold306 | 296047                  | AA                              | GG              | 1946936638               |
| SNP_P4_122562_302242 | NW_004515817.1 | Scaffold306 | 302242                  | AA                              | GG              | 1946936640               |
| SNP_P4_122563_302453 | NW_004515817.1 | Scaffold306 | 302453                  | GG                              | AA              | 1946936642               |
| SNP_P4_122564_309313 | NW_004515817.1 | Scaffold306 | 309313                  | GG                              | CC              | 1946936644               |
| SNP_P4_122565_309324 | NW_004515817.1 | Scaffold306 | 309324                  | TT                              | CC              | 1946936646               |
| SNP_P4_122566_309527 | NW_004515817.1 | Scaffold306 | 309527                  | GG                              | AA              | 1946936648               |
| SNP_P4_122567_310036 | NW_004515817.1 | Scaffold306 | 310036                  | AA                              | GG              | 1946936650               |
| SNP_P4_122568_325301 | NW_004515817.1 | Scaffold306 | 325301                  | GG                              | TT              | 1946936652               |
| SNP_P4_122569_325480 | NW_004515817.1 | Scaffold306 | 325480                  | CC                              | TT              | 1946936654               |
| SNP_P4_122571_325671 | NW_004515817.1 | Scaffold306 | 325671                  | AA                              | GG              | 1946936656               |
| SNP_P4_122573_325977 | NW_004515817.1 | Scaffold306 | 325977                  | GG                              | CC              | 1946936658               |
| SNP_P4_122574_326050 | NW_004515817.1 | Scaffold306 | 326050                  | GG                              | CC              | 1946936660               |
| SNP_P4_122575_331680 | NW_004515817.1 | Scaffold306 | 331680                  | GG                              | AA              | 1946936662               |
| SNP_P4_122576_334394 | NW_004515817.1 | Scaffold306 | 334394                  | GG                              | TT              | 1946936664               |
| SNP_P4_122577_336046 | NW_004515817.1 | Scaffold306 | 336046                  | TT                              | CC              | 1946936666               |
| SNP_P4_122578_336117 | NW_004515817.1 | Scaffold306 | 336117                  | AA                              | GG              | 1946936668               |



| SNPs IDs             | Chromosome IDs | Chromosomes | Physical positions (bp) | CDC Frontier (Reference genome) | (ILWC46 & LPNB) | NCBI SNPdb Accession IDs |
|----------------------|----------------|-------------|-------------------------|---------------------------------|-----------------|--------------------------|
| SNP_P4_122580_337021 | NW_004515817.1 | Scaffold306 | 337021                  | GG                              | AA              | 1946936670               |
| SNP_P4_122581_337665 | NW_004515817.1 | Scaffold306 | 337665                  | TT                              | GG              | 1946936672               |
| SNP_P4_122582_337674 | NW_004515817.1 | Scaffold306 | 337674                  | AA                              | GG              | 1946936675               |
| SNP_P4_122583_337676 | NW_004515817.1 | Scaffold306 | 337676                  | AA                              | TT              | 1946936677               |
| SNP_P4_122584_339833 | NW_004515817.1 | Scaffold306 | 339833                  | CC                              | AA              | 1946936679               |
| SNP_P4_122585_340175 | NW_004515817.1 | Scaffold306 | 340175                  | TT                              | AA              | 1946936681               |
| SNP_P4_122586_341928 | NW_004515817.1 | Scaffold306 | 341928                  | AA                              | GG              | 1946936683               |
| SNP_P4_122587_343061 | NW_004515817.1 | Scaffold306 | 343061                  | AA                              | GG              | 1946936685               |
| SNP_P4_122588_343467 | NW_004515817.1 | Scaffold306 | 343467                  | CC                              | AA              | 1946936687               |
| SNP_P4_122589_345570 | NW_004515817.1 | Scaffold306 | 345570                  | GG                              | AA              | 1946936689               |
| SNP_P4_122590_346377 | NW_004515817.1 | Scaffold306 | 346377                  | CC                              | AA              | 1946936691               |
| SNP_P4_122591_348644 | NW_004515817.1 | Scaffold306 | 348644                  | AA                              | GG              | 1946936693               |
| SNP_P4_122592_353277 | NW_004515817.1 | Scaffold306 | 353277                  | GG                              | AA              | 1946936695               |
| SNP_P4_122593_354632 | NW_004515817.1 | Scaffold306 | 354632                  | TT                              | CC              | 1946936697               |
| SNP_P4_122594_354680 | NW_004515817.1 | Scaffold306 | 354680                  | CC                              | AA              | 1946936699               |
| SNP_P4_122595_357263 | NW_004515817.1 | Scaffold306 | 357263                  | AA                              | GG              | 1946936701               |
| SNP_P4_122596_357274 | NW_004515817.1 | Scaffold306 | 357274                  | TT                              | AA              | 1946936703               |
| SNP_P4_122597_357286 | NW_004515817.1 | Scaffold306 | 357286                  | AA                              | GG              | 1946936705               |
| SNP_P4_122598_358238 | NW_004515817.1 | Scaffold306 | 358238                  | TT                              | GG              | 1946936707               |
| SNP_P4_122599_359423 | NW_004515817.1 | Scaffold306 | 359423                  | GG                              | AA              | 1946936709               |
| SNP_P4_122600_361012 | NW_004515817.1 | Scaffold306 | 361012                  | AA                              | GG              | 1946936711               |
| SNP_P4_122601_368395 | NW_004515817.1 | Scaffold306 | 368395                  | AA                              | GG              | 1946936713               |
| SNP_P4_122602_368465 | NW_004515817.1 | Scaffold306 | 368465                  | CC                              | GG              | 1946936715               |
| SNP_P4_122603_371586 | NW_004515817.1 | Scaffold306 | 371586                  | TT                              | CC              | 1946936717               |
| SNP_P4_122604_371798 | NW_004515817.1 | Scaffold306 | 371798                  | TT                              | GG              | 1946936719               |
| SNP_P4_122605_374402 | NW_004515817.1 | Scaffold306 | 374402                  | GG                              | CC              | 1946936721               |
| SNP_P4_122606_374516 | NW_004515817.1 | Scaffold306 | 374516                  | TT                              | CC              | 1946936723               |
| SNP_P4_122607_379695 | NW_004515817.1 | Scaffold306 | 379695                  | TT                              | CC              | 1946936725               |
| SNP_P4_122608_379723 | NW_004515817.1 | Scaffold306 | 379723                  | CC                              | GG              | 1946936727               |
| SNP_P4_122609_380840 | NW_004515817.1 | Scaffold306 | 380840                  | GG                              | AA              | 1946936729               |
| SNP_P4_122610_382484 | NW_004515817.1 | Scaffold306 | 382484                  | TT                              | AA              | 1946936731               |
| SNP_P4_122611_383182 | NW_004515817.1 | Scaffold306 | 383182                  | GG                              | AA              | 1946936733               |
| SNP_P4_122612_404068 | NW_004515817.1 | Scaffold306 | 404068                  | AA                              | CC              | 1946936735               |
| SNP_P4_122613_410060 | NW_004515817.1 | Scaffold306 | 410060                  | TT                              | AA              | 1946936737               |
| SNP_P4_122614_416660 | NW_004515817.1 | Scaffold306 | 416660                  | AA                              | TT              | 1946936739               |
| SNP_P4_122615_418245 | NW_004515817.1 | Scaffold306 | 418245                  | AA                              | CC              | 1946936741               |
| SNP_P4_122616_418270 | NW_004515817.1 | Scaffold306 | 418270                  | AA                              | TT              | 1946936743               |
| SNP_P4_122617_418272 | NW_004515817.1 | Scaffold306 | 418272                  | CC                              | TT              | 1946936745               |
| SNP_P4_122618_418278 | NW_004515817.1 | Scaffold306 | 418278                  | AA                              | GG              | 1946936747               |
| SNP_P4_122619_418287 | NW_004515817.1 | Scaffold306 | 418287                  | AA                              | TT              | 1946936749               |
| SNP_P4_122620_418509 | NW_004515817.1 | Scaffold306 | 418509                  | CC                              | AA              | 1946936751               |
| SNP_P4_122621_418614 | NW_004515817.1 | Scaffold306 | 418614                  | AA                              | CC              | 1946936753               |

| SNPs IDs             | Chromosome IDs | Chromosomes | Physical positions (bp) | CDC Frontier (Reference genome) | (ILWC46 & LPNB) | NCBI SNPdb Accession IDs |
|----------------------|----------------|-------------|-------------------------|---------------------------------|-----------------|--------------------------|
| SNP_P4_122622_419830 | NW_004515817.1 | Scaffold306 | 419830                  | CC                              | TT              | 1946936755               |
| SNP_P4_122623_419843 | NW_004515817.1 | Scaffold306 | 419843                  | TT                              | CC              | 1946936757               |
| SNP_P4_122624_420109 | NW_004515817.1 | Scaffold306 | 420109                  | GG                              | TT              | 1946936759               |
| SNP_P4_122625_420373 | NW_004515817.1 | Scaffold306 | 420373                  | GG                              | AA              | 1946936761               |
| SNP_P4_122626_421936 | NW_004515817.1 | Scaffold306 | 421936                  | CC                              | AA              | 1946936763               |
| SNP_P4_122627_421938 | NW_004515817.1 | Scaffold306 | 421938                  | TT                              | CC              | 1946936765               |
| SNP_P4_122629_424731 | NW_004515817.1 | Scaffold306 | 424731                  | CC                              | AA              | 1946936767               |
| SNP_P4_122630_445440 | NW_004515817.1 | Scaffold306 | 445440                  | AA                              | GG              | 1946936769               |
| SNP_P4_122631_446988 | NW_004515817.1 | Scaffold306 | 446988                  | GG                              | TT              | 1946936771               |
| SNP_P4_122632_447316 | NW_004515817.1 | Scaffold306 | 447316                  | TT                              | CC              | 1946936773               |
| SNP_P4_122633_447401 | NW_004515817.1 | Scaffold306 | 447401                  | TT                              | CC              | 1946936775               |
| SNP_P4_122634_447664 | NW_004515817.1 | Scaffold306 | 447664                  | AA                              | GG              | 1946936777               |
| SNP_P4_122635_447675 | NW_004515817.1 | Scaffold306 | 447675                  | GG                              | CC              | 1946936779               |
| SNP_P4_122636_448150 | NW_004515817.1 | Scaffold306 | 448150                  | CC                              | AA              | 1946936781               |
| SNP_P4_122637_449488 | NW_004515817.1 | Scaffold306 | 449488                  | TT                              | CC              | 1946936783               |
| SNP_P4_122638_454284 | NW_004515817.1 | Scaffold306 | 454284                  | CC                              | TT              | 1946936785               |
| SNP_P4_122639_455068 | NW_004515817.1 | Scaffold306 | 455068                  | CC                              | GG              | 1946936787               |
| SNP_P4_122640_456956 | NW_004515817.1 | Scaffold306 | 456956                  | GG                              | AA              | 1946936789               |
| SNP_P4_122641_457843 | NW_004515817.1 | Scaffold306 | 457843                  | GG                              | AA              | 1946936791               |
| SNP_P4_122642_459407 | NW_004515817.1 | Scaffold306 | 459407                  | AA                              | GG              | 1946936793               |
| SNP_P4_122643_459521 | NW_004515817.1 | Scaffold306 | 459521                  | TT                              | CC              | 1946936795               |
| SNP_P4_122644_464354 | NW_004515817.1 | Scaffold306 | 464354                  | GG                              | TT              | 1946936797               |
| SNP_P4_122645_464470 | NW_004515817.1 | Scaffold306 | 464470                  | CC                              | TT              | 1946936799               |
| SNP_P4_122646_464755 | NW_004515817.1 | Scaffold306 | 464755                  | AA                              | GG              | 1946936801               |
| SNP_P4_122647_467890 | NW_004515817.1 | Scaffold306 | 467890                  | GG                              | TT              | 1946936803               |
| SNP_P4_122648_467940 | NW_004515817.1 | Scaffold306 | 467940                  | TT                              | CC              | 1946936805               |
| SNP_P4_122649_468110 | NW_004515817.1 | Scaffold306 | 468110                  | TT                              | CC              | 1946936807               |
| SNP_P4_122650_469139 | NW_004515817.1 | Scaffold306 | 469139                  | TT                              | GG              | 1946936809               |
| SNP_P4_122651_475924 | NW_004515817.1 | Scaffold306 | 475924                  | CC                              | AA              | 1946936811               |
| SNP_P4_122653_478909 | NW_004515817.1 | Scaffold306 | 478909                  | TT                              | AA              | 1946936813               |
| SNP_P4_122654_479307 | NW_004515817.1 | Scaffold306 | 479307                  | CC                              | AA              | 1946936815               |
| SNP_P4_122655_479347 | NW_004515817.1 | Scaffold306 | 479347                  | CC                              | TT              | 1946936817               |
| SNP_P4_122656_480260 | NW_004515817.1 | Scaffold306 | 480260                  | GG                              | TT              | 1946936819               |
| SNP_P4_122657_481570 | NW_004515817.1 | Scaffold306 | 481570                  | GG                              | AA              | 1946936821               |
| SNP_P4_122658_481873 | NW_004515817.1 | Scaffold306 | 481873                  | GG                              | AA              | 1946936823               |
| SNP_P4_122660_482440 | NW_004515817.1 | Scaffold306 | 482440                  | TT                              | CC              | 1946936825               |
| SNP_P4_122661_482715 | NW_004515817.1 | Scaffold306 | 482715                  | AA                              | TT              | 1946936827               |
| SNP_P4_122662_482736 | NW_004515817.1 | Scaffold306 | 482736                  | CC                              | TT              | 1946936829               |
| SNP_P4_122663_482775 | NW_004515817.1 | Scaffold306 | 482775                  | TT                              | AA              | 1946936831               |
| SNP_P4_122664_483459 | NW_004515817.1 | Scaffold306 | 483459                  | GG                              | TT              | 1946936833               |
| SNP_P4_122665_483523 | NW_004515817.1 | Scaffold306 | 483523                  | TT                              | CC              | 1946936835               |
| SNP_P4_122666_484783 | NW_004515817.1 | Scaffold306 | 484783                  | GG                              | AA              | 1946936837               |

| SNPs IDs             | Chromosome IDs | Chromosomes   | Physical positions (bp) | CDC Frontier (Reference genome) | (ILWC46 & LPNB) | NCBI SNPdb Accession IDs |
|----------------------|----------------|---------------|-------------------------|---------------------------------|-----------------|--------------------------|
| SNP_P4_122668_487134 | NW_004515817.1 | Scaffold306   | 487134                  | GG                              | AA              | 1946936840               |
| SNP_P4_122669_490282 | NW_004515817.1 | Scaffold306   | 490282                  | GG                              | AA              | 1946936842               |
| SNP_P4_122670_490308 | NW_004515817.1 | Scaffold306   | 490308                  | GG                              | CC              | 1946936844               |
| SNP_P4_122671_38803  | NW_004515818.1 | Scaffold308_2 | 38803                   | TT                              | AA              | 1946936846               |
| SNP_P4_122672_44123  | NW_004515818.1 | Scaffold308_2 | 44123                   | AA                              | CC              | 1946936848               |
| SNP_P4_122673_44378  | NW_004515818.1 | Scaffold308_2 | 44378                   | CC                              | AA              | 1946936850               |
| SNP_P4_122674_44438  | NW_004515818.1 | Scaffold308_2 | 44438                   | AA                              | TT              | 1946936852               |
| SNP_P4_122675_67833  | NW_004515818.1 | Scaffold308_2 | 67833                   | CC                              | AA              | 1946936854               |
| SNP_P4_122676_69929  | NW_004515818.1 | Scaffold308_2 | 69929                   | GG                              | AA              | 1946936856               |
| SNP_P4_122677_69960  | NW_004515818.1 | Scaffold308_2 | 69960                   | TT                              | GG              | 1946936858               |
| SNP_P4_122679_76110  | NW_004515818.1 | Scaffold308_2 | 76110                   | CC                              | TT              | 1946936860               |
| SNP_P4_122680_76135  | NW_004515818.1 | Scaffold308_2 | 76135                   | AA                              | TT              | 1946936862               |
| SNP_P4_122681_76267  | NW_004515818.1 | Scaffold308_2 | 76267                   | AA                              | GG              | 1946936864               |
| SNP_P4_122682_76415  | NW_004515818.1 | Scaffold308_2 | 76415                   | AA                              | GG              | 1946936866               |
| SNP_P4_122684_79711  | NW_004515818.1 | Scaffold308_2 | 79711                   | CC                              | GG              | 1946936868               |
| SNP_P4_122685_79713  | NW_004515818.1 | Scaffold308_2 | 79713                   | AA                              | GG              | 1946936870               |
| SNP_P4_122686_79756  | NW_004515818.1 | Scaffold308_2 | 79756                   | CC                              | TT              | 1946936872               |
| SNP_P4_122688_84021  | NW_004515818.1 | Scaffold308_2 | 84021                   | CC                              | AA              | 1946936874               |
| SNP_P4_122689_84096  | NW_004515818.1 | Scaffold308_2 | 84096                   | AA                              | GG              | 1946936876               |
| SNP_P4_122690_84622  | NW_004515818.1 | Scaffold308_2 | 84622                   | TT                              | AA              | 1946936878               |
| SNP_P4_122691_84675  | NW_004515818.1 | Scaffold308_2 | 84675                   | CC                              | TT              | 1946936880               |
| SNP_P4_122692_84683  | NW_004515818.1 | Scaffold308_2 | 84683                   | GG                              | AA              | 1946936882               |
| SNP_P4_122693_84767  | NW_004515818.1 | Scaffold308_2 | 84767                   | TT                              | CC              | 1946936884               |
| SNP_P4_122694_84848  | NW_004515818.1 | Scaffold308_2 | 84848                   | AA                              | GG              | 1946936886               |
| SNP_P4_122695_84889  | NW_004515818.1 | Scaffold308_2 | 84889                   | TT                              | AA              | 1946936888               |
| SNP_P4_122696_85042  | NW_004515818.1 | Scaffold308_2 | 85042                   | GG                              | AA              | 1946936890               |
| SNP_P4_122698_85441  | NW_004515818.1 | Scaffold308_2 | 85441                   | TT                              | AA              | 1946936892               |
| SNP_P4_122699_85514  | NW_004515818.1 | Scaffold308_2 | 85514                   | TT                              | AA              | 1946936894               |
| SNP_P4_122701_85716  | NW_004515818.1 | Scaffold308_2 | 85716                   | TT                              | AA              | 1946936896               |
| SNP_P4_122702_85720  | NW_004515818.1 | Scaffold308_2 | 85720                   | CC                              | TT              | 1946936898               |
| SNP_P4_122703_85726  | NW_004515818.1 | Scaffold308_2 | 85726                   | GG                              | AA              | 1946936900               |
| SNP_P4_122704_93009  | NW_004515818.1 | Scaffold308_2 | 93009                   | CC                              | AA              | 1946936902               |
| SNP_P4_122705_96857  | NW_004515818.1 | Scaffold308_2 | 96857                   | GG                              | AA              | 1946936904               |
| SNP_P4_122706_101270 | NW_004515818.1 | Scaffold308_2 | 101270                  | GG                              | AA              | 1946936907               |
| SNP_P4_122707_103077 | NW_004515818.1 | Scaffold308_2 | 103077                  | GG                              | TT              | 1946936909               |
| SNP_P4_122708_103090 | NW_004515818.1 | Scaffold308_2 | 103090                  | GG                              | AA              | 1946936911               |
| SNP_P4_122709_103122 | NW_004515818.1 | Scaffold308_2 | 103122                  | TT                              | CC              | 1946936913               |
| SNP_P4_122710_104727 | NW_004515818.1 | Scaffold308_2 | 104727                  | GG                              | CC              | 1946936915               |
| SNP_P4_122712_123506 | NW_004515818.1 | Scaffold308_2 | 123506                  | TT                              | CC              | 1946936917               |
| SNP_P4_122713_132206 | NW_004515818.1 | Scaffold308_2 | 132206                  | AA                              | GG              | 1946936919               |
| SNP_P4_122714_173909 | NW_004515818.1 | Scaffold308_2 | 173909                  | AA                              | GG              | 1946936921               |
| SNP_P4_122715_173974 | NW_004515818.1 | Scaffold308_2 | 173974                  | TT                              | CC              | 1946936923               |

| SNPs IDs             | Chromosome IDs | Chromosomes   | Physical positions (bp) | CDC Frontier (Reference genome) | (ILWC46 & LPNB) | NCBI SNPdb Accession IDs |
|----------------------|----------------|---------------|-------------------------|---------------------------------|-----------------|--------------------------|
| SNP_P4_122716_174001 | NW_004515818.1 | Scaffold308_2 | 174001                  | GG                              | AA              | 1946936925               |
| SNP_P4_122717_174292 | NW_004515818.1 | Scaffold308_2 | 174292                  | AA                              | GG              | 1946936927               |
| SNP_P4_122718_174335 | NW_004515818.1 | Scaffold308_2 | 174335                  | TT                              | AA              | 1946936929               |
| SNP_P4_122719_208210 | NW_004515818.1 | Scaffold308_2 | 208210                  | TT                              | CC              | 1946936931               |
| SNP_P4_122721_212817 | NW_004515818.1 | Scaffold308_2 | 212817                  | TT                              | CC              | 1946936933               |
| SNP_P4_122722_246841 | NW_004515818.1 | Scaffold308_2 | 246841                  | GG                              | TT              | 1946936935               |
| SNP_P4_122723_246929 | NW_004515818.1 | Scaffold308_2 | 246929                  | AA                              | CC              | 1946936937               |
| SNP_P4_122724_262432 | NW_004515818.1 | Scaffold308_2 | 262432                  | GG                              | TT              | 1946936939               |
| SNP_P4_122725_262469 | NW_004515818.1 | Scaffold308_2 | 262469                  | AA                              | GG              | 1946936941               |
| SNP_P4_122728_263428 | NW_004515818.1 | Scaffold308_2 | 263428                  | AA                              | GG              | 1946936943               |
| SNP_P4_122729_263534 | NW_004515818.1 | Scaffold308_2 | 263534                  | GG                              | CC              | 1946936945               |
| SNP_P4_122730_263546 | NW_004515818.1 | Scaffold308_2 | 263546                  | CC                              | TT              | 1946936947               |
| SNP_P4_122731_263580 | NW_004515818.1 | Scaffold308_2 | 263580                  | AA                              | GG              | 1946936949               |
| SNP_P4_122732_263596 | NW_004515818.1 | Scaffold308_2 | 263596                  | TT                              | CC              | 1946936951               |
| SNP_P4_122733_263630 | NW_004515818.1 | Scaffold308_2 | 263630                  | CC                              | GG              | 1946936953               |
| SNP_P4_122734_263639 | NW_004515818.1 | Scaffold308_2 | 263639                  | GG                              | AA              | 1946936955               |
| SNP_P4_122735_263649 | NW_004515818.1 | Scaffold308_2 | 263649                  | CC                              | AA              | 1946936958               |
| SNP_P4_122736_263650 | NW_004515818.1 | Scaffold308_2 | 263650                  | TT                              | CC              | 1946936960               |
| SNP_P4_122737_263675 | NW_004515818.1 | Scaffold308_2 | 263675                  | TT                              | CC              | 1946936962               |
| SNP_P4_122738_263677 | NW_004515818.1 | Scaffold308_2 | 263677                  | CC                              | TT              | 1946936964               |
| SNP_P4_122739_264340 | NW_004515818.1 | Scaffold308_2 | 264340                  | AA                              | GG              | 1946936966               |
| SNP_P4_122740_264341 | NW_004515818.1 | Scaffold308_2 | 264341                  | CC                              | AA              | 1946936968               |
| SNP_P4_122742_264371 | NW_004515818.1 | Scaffold308_2 | 264371                  | GG                              | TT              | 1946936970               |
| SNP_P4_122744_264419 | NW_004515818.1 | Scaffold308_2 | 264419                  | AA                              | GG              | 1946936972               |
| SNP_P4_122745_264472 | NW_004515818.1 | Scaffold308_2 | 264472                  | AA                              | TT              | 1946936974               |
| SNP_P4_122746_264499 | NW_004515818.1 | Scaffold308_2 | 264499                  | GG                              | CC              | 1946936976               |
| SNP_P4_122748_264557 | NW_004515818.1 | Scaffold308_2 | 264557                  | AA                              | GG              | 1946936978               |
| SNP_P4_122749_264589 | NW_004515818.1 | Scaffold308_2 | 264589                  | TT                              | AA              | 1946936980               |
| SNP_P4_122750_264602 | NW_004515818.1 | Scaffold308_2 | 264602                  | AA                              | GG              | 1946936982               |
| SNP_P4_122752_264880 | NW_004515818.1 | Scaffold308_2 | 264880                  | CC                              | AA              | 1946936984               |
| SNP_P4_122753_264885 | NW_004515818.1 | Scaffold308_2 | 264885                  | TT                              | AA              | 1946936986               |
| SNP_P4_122754_264912 | NW_004515818.1 | Scaffold308_2 | 264912                  | TT                              | CC              | 1946936988               |
| SNP_P4_122755_264956 | NW_004515818.1 | Scaffold308_2 | 264956                  | AA                              | GG              | 1946936990               |
| SNP_P4_122756_265008 | NW_004515818.1 | Scaffold308_2 | 265008                  | TT                              | CC              | 1946936992               |
| SNP_P4_122757_265368 | NW_004515818.1 | Scaffold308_2 | 265368                  | GG                              | AA              | 1946936995               |
| SNP_P4_122758_265395 | NW_004515818.1 | Scaffold308_2 | 265395                  | TT                              | CC              | 1946936997               |
| SNP_P4_122759_265423 | NW_004515818.1 | Scaffold308_2 | 265423                  | AA                              | GG              | 1946936999               |
| SNP_P4_122761_265767 | NW_004515818.1 | Scaffold308_2 | 265767                  | TT                              | CC              | 1946937001               |
| SNP_P4_122762_265820 | NW_004515818.1 | Scaffold308_2 | 265820                  | TT                              | AA              | 1946937003               |
| SNP_P4_122763_265837 | NW_004515818.1 | Scaffold308_2 | 265837                  | TT                              | CC              | 1946937005               |
| SNP_P4_122764_265963 | NW_004515818.1 | Scaffold308_2 | 265963                  | TT                              | CC              | 1946937007               |
| SNP_P4_122765_266021 | NW_004515818.1 | Scaffold308_2 | 266021                  | TT                              | CC              | 1946937009               |

| SNPs IDs             | Chromosome IDs | Chromosomes   | Physical positions (bp) | CDC Frontier (Reference genome) | (ILWC46 & LPNB) | NCBI SNPdb Accession IDs |
|----------------------|----------------|---------------|-------------------------|---------------------------------|-----------------|--------------------------|
| SNP_P4_122767_266366 | NW_004515818.1 | Scaffold308_2 | 266366                  | AA                              | GG              | 1946937011               |
| SNP_P4_122768_266372 | NW_004515818.1 | Scaffold308_2 | 266372                  | TT                              | AA              | 1946937013               |
| SNP_P4_122769_266380 | NW_004515818.1 | Scaffold308_2 | 266380                  | TT                              | CC              | 1946937015               |
| SNP_P4_122770_267031 | NW_004515818.1 | Scaffold308_2 | 267031                  | AA                              | GG              | 1946937017               |
| SNP_P4_122771_267037 | NW_004515818.1 | Scaffold308_2 | 267037                  | TT                              | CC              | 1946937019               |
| SNP_P4_122772_268441 | NW_004515818.1 | Scaffold308_2 | 268441                  | GG                              | AA              | 1946937021               |
| SNP_P4_122773_307734 | NW_004515818.1 | Scaffold308_2 | 307734                  | GG                              | AA              | 1946937023               |
| SNP_P4_122774_320736 | NW_004515818.1 | Scaffold308_2 | 320736                  | AA                              | GG              | 1946937025               |
| SNP_P4_122775_325474 | NW_004515818.1 | Scaffold308_2 | 325474                  | TT                              | AA              | 1946937027               |
| SNP_P4_122776_325584 | NW_004515818.1 | Scaffold308_2 | 325584                  | CC                              | TT              | 1946937029               |
| SNP_P4_122777_325598 | NW_004515818.1 | Scaffold308_2 | 325598                  | CC                              | TT              | 1946937031               |
| SNP_P4_122778_357185 | NW_004515818.1 | Scaffold308_2 | 357185                  | TT                              | CC              | 1946937033               |
| SNP_P4_122779_357229 | NW_004515818.1 | Scaffold308_2 | 357229                  | AA                              | GG              | 1946937035               |
| SNP_P4_122780_358726 | NW_004515818.1 | Scaffold308_2 | 358726                  | AA                              | GG              | 1946937037               |
| SNP_P4_122781_6699   | NW_004515819.1 | Scaffold310   | 6699                    | GG                              | CC              | 1946937039               |
| SNP_P4_122782_6739   | NW_004515819.1 | Scaffold310   | 6739                    | GG                              | TT              | 1946937041               |
| SNP_P4_122783_6792   | NW_004515819.1 | Scaffold310   | 6792                    | TT                              | CC              | 1946937043               |
| SNP_P4_122784_7429   | NW_004515819.1 | Scaffold310   | 7429                    | CC                              | TT              | 1946937045               |
| SNP_P4_122785_7456   | NW_004515819.1 | Scaffold310   | 7456                    | TT                              | CC              | 1946937047               |
| SNP_P4_122786_7515   | NW_004515819.1 | Scaffold310   | 7515                    | TT                              | CC              | 1946937049               |
| SNP_P4_122787_7564   | NW_004515819.1 | Scaffold310   | 7564                    | AA                              | CC              | 1946937051               |
| SNP_P4_122788_7565   | NW_004515819.1 | Scaffold310   | 7565                    | TT                              | CC              | 1946937053               |
| SNP_P4_122789_7765   | NW_004515819.1 | Scaffold310   | 7765                    | CC                              | TT              | 1946937055               |
| SNP_P4_122790_7801   | NW_004515819.1 | Scaffold310   | 7801                    | GG                              | AA              | 1946937057               |
| SNP_P4_122791_7857   | NW_004515819.1 | Scaffold310   | 7857                    | GG                              | CC              | 1946937059               |
| SNP_P4_122792_7932   | NW_004515819.1 | Scaffold310   | 7932                    | TT                              | AA              | 1946937062               |
| SNP_P4_122793_8358   | NW_004515819.1 | Scaffold310   | 8358                    | TT                              | GG              | 1946937064               |
| SNP_P4_122794_12364  | NW_004515819.1 | Scaffold310   | 12364                   | GG                              | TT              | 1946937065               |
| SNP_P4_122795_12478  | NW_004515819.1 | Scaffold310   | 12478                   | GG                              | AA              | 1946937067               |
| SNP_P4_122796_23962  | NW_004515819.1 | Scaffold310   | 23962                   | CC                              | TT              | 1946937069               |
| SNP_P4_122797_24047  | NW_004515819.1 | Scaffold310   | 24047                   | TT                              | AA              | 1946937071               |
| SNP_P4_122798_24096  | NW_004515819.1 | Scaffold310   | 24096                   | GG                              | TT              | 1946937073               |
| SNP_P4_122799_24101  | NW_004515819.1 | Scaffold310   | 24101                   | AA                              | TT              | 1946937075               |
| SNP_P4_122800_24182  | NW_004515819.1 | Scaffold310   | 24182                   | TT                              | CC              | 1946937077               |
| SNP_P4_122801_24201  | NW_004515819.1 | Scaffold310   | 24201                   | GG                              | AA              | 1946937079               |
| SNP_P4_122802_25854  | NW_004515819.1 | Scaffold310   | 25854                   | AA                              | GG              | 1946937081               |
| SNP_P4_122803_26171  | NW_004515819.1 | Scaffold310   | 26171                   | TT                              | AA              | 1946937083               |
| SNP_P4_122804_26214  | NW_004515819.1 | Scaffold310   | 26214                   | CC                              | TT              | 1946937085               |
| SNP_P4_122805_26230  | NW_004515819.1 | Scaffold310   | 26230                   | AA                              | GG              | 1946937087               |
| SNP_P4_122806_26294  | NW_004515819.1 | Scaffold310   | 26294                   | GG                              | AA              | 1946937089               |
| SNP_P4_122807_33494  | NW_004515819.1 | Scaffold310   | 33494                   | GG                              | AA              | 1946937091               |
| SNP_P4_122808_34773  | NW_004515819.1 | Scaffold310   | 34773                   | AA                              | GG              | 1946937093               |

| SNPs IDs            | Chromosome IDs | Chromosomes | Physical positions (bp) | CDC Frontier (Reference genome) | (ILWC46 & LPNB) | NCBI SNPdb Accession IDs |
|---------------------|----------------|-------------|-------------------------|---------------------------------|-----------------|--------------------------|
| SNP_P4_122809_37939 | NW_004515819.1 | Scaffold310 | 37939                   | CC                              | TT              | 1946937095               |
| SNP_P4_122810_37948 | NW_004515819.1 | Scaffold310 | 37948                   | TT                              | AA              | 1946937097               |
| SNP_P4_122811_38018 | NW_004515819.1 | Scaffold310 | 38018                   | AA                              | GG              | 1946937099               |
| SNP_P4_122812_38250 | NW_004515819.1 | Scaffold310 | 38250                   | TT                              | AA              | 1946937101               |
| SNP_P4_122813_38268 | NW_004515819.1 | Scaffold310 | 38268                   | AA                              | TT              | 1946937104               |
| SNP_P4_122814_38292 | NW_004515819.1 | Scaffold310 | 38292                   | GG                              | AA              | 1946937106               |
| SNP_P4_122815_39519 | NW_004515819.1 | Scaffold310 | 39519                   | TT                              | CC              | 1946937108               |
| SNP_P4_122816_39554 | NW_004515819.1 | Scaffold310 | 39554                   | TT                              | AA              | 1946937110               |
| SNP_P4_122818_39835 | NW_004515819.1 | Scaffold310 | 39835                   | TT                              | AA              | 1946937112               |
| SNP_P4_122819_45149 | NW_004515819.1 | Scaffold310 | 45149                   | AA                              | GG              | 1946937114               |
| SNP_P4_122820_1479  | NW_004515820.1 | Scaffold311 | 1479                    | TT                              | GG              | 1946937116               |
| SNP_P4_122821_1515  | NW_004515820.1 | Scaffold311 | 1515                    | TT                              | GG              | 1946937118               |
| SNP_P4_122822_4226  | NW_004515820.1 | Scaffold311 | 4226                    | AA                              | GG              | 1946937120               |
| SNP_P4_122823_4454  | NW_004515820.1 | Scaffold311 | 4454                    | AA                              | GG              | 1946937122               |
| SNP_P4_122824_8707  | NW_004515820.1 | Scaffold311 | 8707                    | AA                              | TT              | 1946937124               |
| SNP_P4_122825_8710  | NW_004515820.1 | Scaffold311 | 8710                    | AA                              | CC              | 1946937126               |
| SNP_P4_122826_9833  | NW_004515820.1 | Scaffold311 | 9833                    | TT                              | CC              | 1946937128               |
| SNP_P4_122827_9856  | NW_004515820.1 | Scaffold311 | 9856                    | TT                              | GG              | 1946937130               |
| SNP_P4_122828_9868  | NW_004515820.1 | Scaffold311 | 9868                    | GG                              | AA              | 1946937132               |
| SNP_P4_122829_9894  | NW_004515820.1 | Scaffold311 | 9894                    | AA                              | TT              | 1946937134               |
| SNP_P4_122830_19247 | NW_004515820.1 | Scaffold311 | 19247                   | TT                              | GG              | 1946937136               |
| SNP_P4_122831_21237 | NW_004515820.1 | Scaffold311 | 21237                   | GG                              | AA              | 1946937138               |
| SNP_P4_122832_21358 | NW_004515820.1 | Scaffold311 | 21358                   | TT                              | CC              | 1946937140               |
| SNP_P4_122833_21367 | NW_004515820.1 | Scaffold311 | 21367                   | AA                              | CC              | 1946937142               |
| SNP_P4_122834_22771 | NW_004515820.1 | Scaffold311 | 22771                   | AA                              | TT              | 1946937144               |
| SNP_P4_122836_24003 | NW_004515820.1 | Scaffold311 | 24003                   | GG                              | CC              | 1946937146               |
| SNP_P4_122837_24045 | NW_004515820.1 | Scaffold311 | 24045                   | CC                              | GG              | 1946937148               |
| SNP_P4_122838_24053 | NW_004515820.1 | Scaffold311 | 24053                   | GG                              | CC              | 1946937150               |
| SNP_P4_122839_24400 | NW_004515820.1 | Scaffold311 | 24400                   | TT                              | CC              | 1946937152               |
| SNP_P4_122840_24533 | NW_004515820.1 | Scaffold311 | 24533                   | TT                              | GG              | 1946937154               |
| SNP_P4_122841_24864 | NW_004515820.1 | Scaffold311 | 24864                   | AA                              | GG              | 1946937156               |
| SNP_P4_122842_24921 | NW_004515820.1 | Scaffold311 | 24921                   | GG                              | AA              | 1946937158               |
| SNP_P4_122843_24933 | NW_004515820.1 | Scaffold311 | 24933                   | GG                              | TT              | 1946937160               |
| SNP_P4_122844_25197 | NW_004515820.1 | Scaffold311 | 25197                   | CC                              | GG              | 1946937162               |
| SNP_P4_122845_31327 | NW_004515820.1 | Scaffold311 | 31327                   | GG                              | TT              | 1946937164               |
| SNP_P4_122846_34610 | NW_004515820.1 | Scaffold311 | 34610                   | TT                              | AA              | 1946937166               |
| SNP_P4_122848_43377 | NW_004515820.1 | Scaffold311 | 43377                   | AA                              | TT              | 1946937168               |
| SNP_P4_122849_43449 | NW_004515820.1 | Scaffold311 | 43449                   | AA                              | TT              | 1946937170               |
| SNP_P4_122850_43474 | NW_004515820.1 | Scaffold311 | 43474                   | AA                              | CC              | 1946937172               |
| SNP_P4_122851_43475 | NW_004515820.1 | Scaffold311 | 43475                   | GG                              | AA              | 1946937174               |
| SNP_P4_122852_43495 | NW_004515820.1 | Scaffold311 | 43495                   | CC                              | AA              | 1946937176               |
| SNP_P4_122853_43689 | NW_004515820.1 | Scaffold311 | 43689                   | AA                              | CC              | 1946937178               |

| SNPs IDs             | Chromosome IDs | Chromosomes | Physical positions (bp) | CDC Frontier (Reference genome) | (ILWC46 & LPNB) | NCBI SNPdb Accession IDs |
|----------------------|----------------|-------------|-------------------------|---------------------------------|-----------------|--------------------------|
| SNP_P4_122854_43722  | NW_004515820.1 | Scaffold311 | 43722                   | AA                              | GG              | 1946937180               |
| SNP_P4_122855_43821  | NW_004515820.1 | Scaffold311 | 43821                   | TT                              | GG              | 1946937182               |
| SNP_P4_122856_43883  | NW_004515820.1 | Scaffold311 | 43883                   | AA                              | CC              | 1946937185               |
| SNP_P4_122857_44003  | NW_004515820.1 | Scaffold311 | 44003                   | GG                              | TT              | 1946937187               |
| SNP_P4_122858_44026  | NW_004515820.1 | Scaffold311 | 44026                   | TT                              | CC              | 1946937189               |
| SNP_P4_122859_44053  | NW_004515820.1 | Scaffold311 | 44053                   | GG                              | AA              | 1946937191               |
| SNP_P4_122860_44080  | NW_004515820.1 | Scaffold311 | 44080                   | GG                              | AA              | 1946937193               |
| SNP_P4_122861_60595  | NW_004515820.1 | Scaffold311 | 60595                   | GG                              | TT              | 1946937195               |
| SNP_P4_122862_60609  | NW_004515820.1 | Scaffold311 | 60609                   | CC                              | TT              | 1946937197               |
| SNP_P4_122863_60610  | NW_004515820.1 | Scaffold311 | 60610                   | TT                              | GG              | 1946937199               |
| SNP_P4_122864_60611  | NW_004515820.1 | Scaffold311 | 60611                   | TT                              | AA              | 1946937201               |
| SNP_P4_122865_60612  | NW_004515820.1 | Scaffold311 | 60612                   | GG                              | AA              | 1946937203               |
| SNP_P4_122866_60614  | NW_004515820.1 | Scaffold311 | 60614                   | TT                              | GG              | 1946937205               |
| SNP_P4_122867_60618  | NW_004515820.1 | Scaffold311 | 60618                   | AA                              | CC              | 1946937207               |
| SNP_P4_122868_63983  | NW_004515820.1 | Scaffold311 | 63983                   | AA                              | GG              | 1946937209               |
| SNP_P4_122869_74310  | NW_004515820.1 | Scaffold311 | 74310                   | TT                              | CC              | 1946937211               |
| SNP_P4_122870_74656  | NW_004515820.1 | Scaffold311 | 74656                   | TT                              | GG              | 1946937213               |
| SNP_P4_122871_83249  | NW_004515820.1 | Scaffold311 | 83249                   | CC                              | TT              | 1946937215               |
| SNP_P4_122872_90314  | NW_004515820.1 | Scaffold311 | 90314                   | GG                              | TT              | 1946937217               |
| SNP_P4_122873_90320  | NW_004515820.1 | Scaffold311 | 90320                   | TT                              | AA              | 1946937219               |
| SNP_P4_122874_90345  | NW_004515820.1 | Scaffold311 | 90345                   | AA                              | CC              | 1946937221               |
| SNP_P4_122875_90583  | NW_004515820.1 | Scaffold311 | 90583                   | GG                              | TT              | 1946937223               |
| SNP_P4_122876_90600  | NW_004515820.1 | Scaffold311 | 90600                   | AA                              | CC              | 1946937225               |
| SNP_P4_122877_90674  | NW_004515820.1 | Scaffold311 | 90674                   | AA                              | CC              | 1946937227               |
| SNP_P4_122878_90675  | NW_004515820.1 | Scaffold311 | 90675                   | AA                              | TT              | 1946937229               |
| SNP_P4_122879_90714  | NW_004515820.1 | Scaffold311 | 90714                   | CC                              | GG              | 1946937231               |
| SNP_P4_122880_90960  | NW_004515820.1 | Scaffold311 | 90960                   | AA                              | CC              | 1946937233               |
| SNP_P4_122881_91595  | NW_004515820.1 | Scaffold311 | 91595                   | GG                              | AA              | 1946937235               |
| SNP_P4_122882_91626  | NW_004515820.1 | Scaffold311 | 91626                   | GG                              | TT              | 1946937236               |
| SNP_P4_122883_91629  | NW_004515820.1 | Scaffold311 | 91629                   | TT                              | CC              | 1946937237               |
| SNP_P4_122885_92000  | NW_004515820.1 | Scaffold311 | 92000                   | GG                              | CC              | 1946937238               |
| SNP_P4_122886_98091  | NW_004515820.1 | Scaffold311 | 98091                   | AA                              | GG              | 1946937239               |
| SNP_P4_122887_98102  | NW_004515820.1 | Scaffold311 | 98102                   | TT                              | CC              | 1946937240               |
| SNP_P4_122888_98103  | NW_004515820.1 | Scaffold311 | 98103                   | CC                              | GG              | 1946937241               |
| SNP_P4_122889_98107  | NW_004515820.1 | Scaffold311 | 98107                   | TT                              | AA              | 1946937243               |
| SNP_P4_122890_98112  | NW_004515820.1 | Scaffold311 | 98112                   | AA                              | TT              | 1946937245               |
| SNP_P4_122891_98118  | NW_004515820.1 | Scaffold311 | 98118                   | TT                              | AA              | 1946937247               |
| SNP_P4_122892_98143  | NW_004515820.1 | Scaffold311 | 98143                   | GG                              | TT              | 1946937249               |
| SNP_P4_122893_102239 | NW_004515820.1 | Scaffold311 | 102239                  | AA                              | CC              | 1946937251               |
| SNP_P4_122894_102245 | NW_004515820.1 | Scaffold311 | 102245                  | CC                              | AA              | 1946937253               |
| SNP_P4_122895_102424 | NW_004515820.1 | Scaffold311 | 102424                  | AA                              | CC              | 1946937255               |
| SNP_P4_122896_102433 | NW_004515820.1 | Scaffold311 | 102433                  | AA                              | TT              | 1946937257               |

| SNPs IDs             | Chromosome IDs | Chromosomes | Physical positions (bp) | CDC Frontier (Reference genome) | (ILWC46 & LPNB) | NCBI SNPdb Accession IDs |
|----------------------|----------------|-------------|-------------------------|---------------------------------|-----------------|--------------------------|
| SNP_P4_122897_119935 | NW_004515820.1 | Scaffold311 | 119935                  | TT                              | GG              | 1946937259               |
| SNP_P4_122898_123354 | NW_004515820.1 | Scaffold311 | 123354                  | AA                              | TT              | 1946937261               |
| SNP_P4_122899_123536 | NW_004515820.1 | Scaffold311 | 123536                  | AA                              | TT              | 1946937263               |
| SNP_P4_122900_123575 | NW_004515820.1 | Scaffold311 | 123575                  | TT                              | CC              | 1946937265               |
| SNP_P4_122901_123601 | NW_004515820.1 | Scaffold311 | 123601                  | AA                              | TT              | 1946937267               |
| SNP_P4_122902_123603 | NW_004515820.1 | Scaffold311 | 123603                  | AA                              | CC              | 1946937269               |
| SNP_P4_122903_123609 | NW_004515820.1 | Scaffold311 | 123609                  | TT                              | CC              | 1946937271               |
| SNP_P4_122904_123694 | NW_004515820.1 | Scaffold311 | 123694                  | GG                              | AA              | 1946937273               |
| SNP_P4_122905_124735 | NW_004515820.1 | Scaffold311 | 124735                  | TT                              | GG              | 1946937275               |
| SNP_P4_122906_124769 | NW_004515820.1 | Scaffold311 | 124769                  | AA                              | TT              | 1946937277               |
| SNP_P4_122907_124777 | NW_004515820.1 | Scaffold311 | 124777                  | GG                              | AA              | 1946937279               |
| SNP_P4_122908_129354 | NW_004515820.1 | Scaffold311 | 129354                  | TT                              | CC              | 1946937281               |
| SNP_P4_122909_129375 | NW_004515820.1 | Scaffold311 | 129375                  | TT                              | AA              | 1946937283               |
| SNP_P4_122910_129376 | NW_004515820.1 | Scaffold311 | 129376                  | TT                              | AA              | 1946937285               |
| SNP_P4_122912_129706 | NW_004515820.1 | Scaffold311 | 129706                  | CC                              | TT              | 1946937287               |
| SNP_P4_122913_131311 | NW_004515820.1 | Scaffold311 | 131311                  | CC                              | TT              | 1946937289               |
| SNP_P4_122914_131355 | NW_004515820.1 | Scaffold311 | 131355                  | GG                              | CC              | 1946937291               |
| SNP_P4_122916_131634 | NW_004515820.1 | Scaffold311 | 131634                  | TT                              | CC              | 1946937293               |
| SNP_P4_122917_131668 | NW_004515820.1 | Scaffold311 | 131668                  | TT                              | CC              | 1946937295               |
| SNP_P4_122918_131669 | NW_004515820.1 | Scaffold311 | 131669                  | GG                              | AA              | 1946937297               |
| SNP_P4_122919_131866 | NW_004515820.1 | Scaffold311 | 131866                  | AA                              | GG              | 1946937299               |
| SNP_P4_122920_131972 | NW_004515820.1 | Scaffold311 | 131972                  | CC                              | GG              | 1946937301               |
| SNP_P4_122921_131977 | NW_004515820.1 | Scaffold311 | 131977                  | CC                              | TT              | 1946937303               |
| SNP_P4_122922_134995 | NW_004515820.1 | Scaffold311 | 134995                  | CC                              | GG              | 1946937305               |
| SNP_P4_122923_135019 | NW_004515820.1 | Scaffold311 | 135019                  | AA                              | CC              | 1946937307               |
| SNP_P4_122925_160278 | NW_004515820.1 | Scaffold311 | 160278                  | AA                              | CC              | 1946937309               |
| SNP_P4_122926_160279 | NW_004515820.1 | Scaffold311 | 160279                  | CC                              | AA              | 1946937311               |
| SNP_P4_122927_160324 | NW_004515820.1 | Scaffold311 | 160324                  | CC                              | TT              | 1946937313               |
| SNP_P4_122928_160851 | NW_004515820.1 | Scaffold311 | 160851                  | GG                              | TT              | 1946937315               |
| SNP_P4_122929_160879 | NW_004515820.1 | Scaffold311 | 160879                  | CC                              | TT              | 1946937317               |
| SNP_P4_122930_160880 | NW_004515820.1 | Scaffold311 | 160880                  | TT                              | AA              | 1946937319               |
| SNP_P4_122931_160979 | NW_004515820.1 | Scaffold311 | 160979                  | GG                              | CC              | 1946937321               |
| SNP_P4_122932_160986 | NW_004515820.1 | Scaffold311 | 160986                  | CC                              | AA              | 1946937323               |
| SNP_P4_122933_169908 | NW_004515820.1 | Scaffold311 | 169908                  | GG                              | AA              | 1946937325               |
| SNP_P4_122934_169970 | NW_004515820.1 | Scaffold311 | 169970                  | TT                              | CC              | 1946937327               |
| SNP_P4_122935_180052 | NW_004515820.1 | Scaffold311 | 180052                  | TT                              | CC              | 1946937329               |
| SNP_P4_122936_180563 | NW_004515820.1 | Scaffold311 | 180563                  | TT                              | GG              | 1946937331               |
| SNP_P4_122937_180569 | NW_004515820.1 | Scaffold311 | 180569                  | AA                              | CC              | 1946937333               |
| SNP_P4_122938_180656 | NW_004515820.1 | Scaffold311 | 180656                  | AA                              | GG              | 1946937335               |
| SNP_P4_122939_180742 | NW_004515820.1 | Scaffold311 | 180742                  | TT                              | CC              | 1946937337               |
| SNP_P4_122940_180906 | NW_004515820.1 | Scaffold311 | 180906                  | GG                              | AA              | 1946937339               |
| SNP_P4_122941_180936 | NW_004515820.1 | Scaffold311 | 180936                  | TT                              | CC              | 1946937341               |



| SNPs IDs             | Chromosome IDs | Chromosomes | Physical positions (bp) | CDC Frontier (Reference genome) | (ILWC46 & LPNB) | NCBI SNPdb Accession IDs |
|----------------------|----------------|-------------|-------------------------|---------------------------------|-----------------|--------------------------|
| SNP_P4_122942_180937 | NW_004515820.1 | Scaffold311 | 180937                  | GG                              | AA              | 1946937343               |
| SNP_P4_122943_180966 | NW_004515820.1 | Scaffold311 | 180966                  | CC                              | TT              | 1946937345               |
| SNP_P4_122944_180984 | NW_004515820.1 | Scaffold311 | 180984                  | TT                              | CC              | 1946937347               |
| SNP_P4_122945_180997 | NW_004515820.1 | Scaffold311 | 180997                  | AA                              | TT              | 1946937349               |
| SNP_P4_122946_181014 | NW_004515820.1 | Scaffold311 | 181014                  | GG                              | AA              | 1946937351               |
| SNP_P4_122947_181017 | NW_004515820.1 | Scaffold311 | 181017                  | CC                              | TT              | 1946937353               |
| SNP_P4_122948_181029 | NW_004515820.1 | Scaffold311 | 181029                  | AA                              | GG              | 1946937355               |
| SNP_P4_122949_181049 | NW_004515820.1 | Scaffold311 | 181049                  | GG                              | AA              | 1946937357               |
| SNP_P4_122950_181081 | NW_004515820.1 | Scaffold311 | 181081                  | TT                              | CC              | 1946937359               |
| SNP_P4_122951_181086 | NW_004515820.1 | Scaffold311 | 181086                  | TT                              | CC              | 1946937361               |
| SNP_P4_122952_181095 | NW_004515820.1 | Scaffold311 | 181095                  | GG                              | AA              | 1946937363               |
| SNP_P4_122953_186108 | NW_004515820.1 | Scaffold311 | 186108                  | AA                              | TT              | 1946937365               |
| SNP_P4_122954_186167 | NW_004515820.1 | Scaffold311 | 186167                  | CC                              | TT              | 1946937367               |
| SNP_P4_122955_199672 | NW_004515820.1 | Scaffold311 | 199672                  | AA                              | TT              | 1946937369               |
| SNP_P4_122956_199770 | NW_004515820.1 | Scaffold311 | 199770                  | CC                              | TT              | 1946937371               |
| SNP_P4_122957_205852 | NW_004515820.1 | Scaffold311 | 205852                  | TT                              | CC              | 1946937373               |
| SNP_P4_122958_205874 | NW_004515820.1 | Scaffold311 | 205874                  | TT                              | AA              | 1946937375               |
| SNP_P4_122959_206331 | NW_004515820.1 | Scaffold311 | 206331                  | CC                              | AA              | 1946937377               |
| SNP_P4_122961_3213   | NW_004515822.1 | Scaffold313 | 3213                    | GG                              | CC              | 1946937379               |
| SNP_P4_122962_3262   | NW_004515822.1 | Scaffold313 | 3262                    | CC                              | AA              | 1946937381               |
| SNP_P4_122963_4190   | NW_004515822.1 | Scaffold313 | 4190                    | TT                              | GG              | 1946937383               |
| SNP_P4_122964_4320   | NW_004515822.1 | Scaffold313 | 4320                    | CC                              | TT              | 1946937385               |
| SNP_P4_122965_4760   | NW_004515822.1 | Scaffold313 | 4760                    | AA                              | GG              | 1946937387               |
| SNP_P4_122966_4966   | NW_004515822.1 | Scaffold313 | 4966                    | AA                              | TT              | 1946937389               |
| SNP_P4_122967_6130   | NW_004515822.1 | Scaffold313 | 6130                    | GG                              | TT              | 1946937391               |
| SNP_P4_122968_6239   | NW_004515822.1 | Scaffold313 | 6239                    | TT                              | GG              | 1946937393               |
| SNP_P4_122969_6274   | NW_004515822.1 | Scaffold313 | 6274                    | CC                              | GG              | 1946937395               |
| SNP_P4_122970_6446   | NW_004515822.1 | Scaffold313 | 6446                    | AA                              | TT              | 1946937397               |
| SNP_P4_122971_6447   | NW_004515822.1 | Scaffold313 | 6447                    | CC                              | AA              | 1946937400               |
| SNP_P4_122972_6575   | NW_004515822.1 | Scaffold313 | 6575                    | TT                              | GG              | 1946937402               |
| SNP_P4_122973_6723   | NW_004515822.1 | Scaffold313 | 6723                    | AA                              | CC              | 1946937404               |
| SNP_P4_122974_6733   | NW_004515822.1 | Scaffold313 | 6733                    | CC                              | TT              | 1946937406               |
| SNP_P4_122975_6774   | NW_004515822.1 | Scaffold313 | 6774                    | AA                              | GG              | 1946937408               |
| SNP_P4_122976_6841   | NW_004515822.1 | Scaffold313 | 6841                    | AA                              | TT              | 1946937410               |
| SNP_P4_122977_7186   | NW_004515822.1 | Scaffold313 | 7186                    | TT                              | CC              | 1946937412               |
| SNP_P4_122978_7441   | NW_004515822.1 | Scaffold313 | 7441                    | AA                              | GG              | 1946937414               |
| SNP_P4_122979_10570  | NW_004515822.1 | Scaffold313 | 10570                   | TT                              | CC              | 1946937416               |
| SNP_P4_122980_10582  | NW_004515822.1 | Scaffold313 | 10582                   | GG                              | AA              | 1946937418               |
| SNP_P4_122981_10586  | NW_004515822.1 | Scaffold313 | 10586                   | AA                              | TT              | 1946937420               |
| SNP_P4_122983_11912  | NW_004515822.1 | Scaffold313 | 11912                   | AA                              | TT              | 1946937422               |
| SNP_P4_122984_1662   | NW_004515823.1 | Scaffold314 | 1662                    | GG                              | AA              | 1946937424               |
| SNP_P4_122986_2278   | NW_004515823.1 | Scaffold314 | 2278                    | CC                              | TT              | 1946937426               |

| SNPs IDs             | Chromosome IDs | Chromosomes | Physical positions (bp) | CDC Frontier (Reference genome) | (ILWC46 & LPNB) | NCBI SNPdb Accession IDs |
|----------------------|----------------|-------------|-------------------------|---------------------------------|-----------------|--------------------------|
| SNP_P4_122987_22645  | NW_004515823.1 | Scaffold314 | 22645                   | AA                              | GG              | 1946937428               |
| SNP_P4_122988_22686  | NW_004515823.1 | Scaffold314 | 22686                   | AA                              | GG              | 1946937430               |
| SNP_P4_122989_22699  | NW_004515823.1 | Scaffold314 | 22699                   | TT                              | CC              | 1946937432               |
| SNP_P4_122990_22706  | NW_004515823.1 | Scaffold314 | 22706                   | CC                              | AA              | 1946937434               |
| SNP_P4_122991_22723  | NW_004515823.1 | Scaffold314 | 22723                   | GG                              | AA              | 1946937436               |
| SNP_P4_122992_22765  | NW_004515823.1 | Scaffold314 | 22765                   | TT                              | CC              | 1946937439               |
| SNP_P4_122993_22786  | NW_004515823.1 | Scaffold314 | 22786                   | GG                              | CC              | 1946937441               |
| SNP_P4_122994_22813  | NW_004515823.1 | Scaffold314 | 22813                   | TT                              | CC              | 1946937446               |
| SNP_P4_122995_22831  | NW_004515823.1 | Scaffold314 | 22831                   | AA                              | GG              | 1946937448               |
| SNP_P4_122996_22858  | NW_004515823.1 | Scaffold314 | 22858                   | AA                              | GG              | 1946937450               |
| SNP_P4_122997_22870  | NW_004515823.1 | Scaffold314 | 22870                   | GG                              | TT              | 1946937452               |
| SNP_P4_122998_22880  | NW_004515823.1 | Scaffold314 | 22880                   | CC                              | GG              | 1946937454               |
| SNP_P4_122999_22890  | NW_004515823.1 | Scaffold314 | 22890                   | CC                              | TT              | 1946937456               |
| SNP_P4_123000_22918  | NW_004515823.1 | Scaffold314 | 22918                   | AA                              | GG              | 1946937458               |
| SNP_P4_123001_23037  | NW_004515823.1 | Scaffold314 | 23037                   | AA                              | GG              | 1946937460               |
| SNP_P4_123002_23163  | NW_004515823.1 | Scaffold314 | 23163                   | CC                              | TT              | 1946937462               |
| SNP_P4_123003_23164  | NW_004515823.1 | Scaffold314 | 23164                   | CC                              | TT              | 1946937464               |
| SNP_P4_123004_23165  | NW_004515823.1 | Scaffold314 | 23165                   | TT                              | CC              | 1946937466               |
| SNP_P4_123005_23196  | NW_004515823.1 | Scaffold314 | 23196                   | GG                              | TT              | 1946937468               |
| SNP_P4_123006_23218  | NW_004515823.1 | Scaffold314 | 23218                   | GG                              | AA              | 1946937470               |
| SNP_P4_123007_23241  | NW_004515823.1 | Scaffold314 | 23241                   | TT                              | GG              | 1946937472               |
| SNP_P4_123008_23297  | NW_004515823.1 | Scaffold314 | 23297                   | AA                              | GG              | 1946937474               |
| SNP_P4_123009_23321  | NW_004515823.1 | Scaffold314 | 23321                   | AA                              | GG              | 1946937476               |
| SNP_P4_123010_31904  | NW_004515823.1 | Scaffold314 | 31904                   | AA                              | GG              | 1946937479               |
| SNP_P4_123011_36065  | NW_004515823.1 | Scaffold314 | 36065                   | TT                              | CC              | 1946937481               |
| SNP_P4_123012_55382  | NW_004515823.1 | Scaffold314 | 55382                   | AA                              | GG              | 1946937483               |
| SNP_P4_123013_76943  | NW_004515823.1 | Scaffold314 | 76943                   | AA                              | GG              | 1946937485               |
| SNP_P4_123014_77368  | NW_004515823.1 | Scaffold314 | 77368                   | AA                              | GG              | 1946937487               |
| SNP_P4_123015_77402  | NW_004515823.1 | Scaffold314 | 77402                   | AA                              | GG              | 1946937489               |
| SNP_P4_123016_79745  | NW_004515823.1 | Scaffold314 | 79745                   | CC                              | TT              | 1946937491               |
| SNP_P4_123017_113458 | NW_004515823.1 | Scaffold314 | 113458                  | GG                              | AA              | 1946937493               |
| SNP_P4_123018_118666 | NW_004515823.1 | Scaffold314 | 118666                  | CC                              | TT              | 1946937495               |
| SNP_P4_123020_130599 | NW_004515823.1 | Scaffold314 | 130599                  | CC                              | TT              | 1946937497               |
| SNP_P4_123022_141058 | NW_004515823.1 | Scaffold314 | 141058                  | CC                              | TT              | 1946937499               |
| SNP_P4_123023_157308 | NW_004515823.1 | Scaffold314 | 157308                  | TT                              | GG              | 1946937501               |
| SNP_P4_123024_157356 | NW_004515823.1 | Scaffold314 | 157356                  | AA                              | GG              | 1946937503               |
| SNP_P4_123025_189248 | NW_004515823.1 | Scaffold314 | 189248                  | AA                              | GG              | 1946937505               |
| SNP_P4_123026_213789 | NW_004515823.1 | Scaffold314 | 213789                  | TT                              | CC              | 1946937507               |
| SNP_P4_123027_215888 | NW_004515823.1 | Scaffold314 | 215888                  | CC                              | TT              | 1946937509               |
| SNP_P4_123028_218865 | NW_004515823.1 | Scaffold314 | 218865                  | AA                              | CC              | 1946937511               |
| SNP_P4_123029_222657 | NW_004515823.1 | Scaffold314 | 222657                  | CC                              | TT              | 1946937513               |
| SNP_P4_123030_222730 | NW_004515823.1 | Scaffold314 | 222730                  | CC                              | TT              | 1946937515               |

| SNPs IDs             | Chromosome IDs | Chromosomes | Physical positions (bp) | CDC Frontier (Reference genome) | (ILWC46 & LPNB) | NCBI SNPdb Accession IDs |
|----------------------|----------------|-------------|-------------------------|---------------------------------|-----------------|--------------------------|
| SNP_P4_123031_223299 | NW_004515823.1 | Scaffold314 | 223299                  | CC                              | AA              | 1946937517               |
| SNP_P4_123032_223479 | NW_004515823.1 | Scaffold314 | 223479                  | GG                              | AA              | 1946937519               |
| SNP_P4_123033_223938 | NW_004515823.1 | Scaffold314 | 223938                  | AA                              | TT              | 1946937521               |
| SNP_P4_123034_224056 | NW_004515823.1 | Scaffold314 | 224056                  | TT                              | CC              | 1946937523               |
| SNP_P4_123035_224324 | NW_004515823.1 | Scaffold314 | 224324                  | CC                              | TT              | 1946937525               |
| SNP_P4_123036_224500 | NW_004515823.1 | Scaffold314 | 224500                  | TT                              | GG              | 1946937527               |
| SNP_P4_123037_225033 | NW_004515823.1 | Scaffold314 | 225033                  | TT                              | CC              | 1946937529               |
| SNP_P4_123038_225201 | NW_004515823.1 | Scaffold314 | 225201                  | CC                              | AA              | 1946937531               |
| SNP_P4_123039_229299 | NW_004515823.1 | Scaffold314 | 229299                  | AA                              | GG              | 1946937533               |
| SNP_P4_123040_229726 | NW_004515823.1 | Scaffold314 | 229726                  | GG                              | AA              | 1946937535               |
| SNP_P4_123041_231751 | NW_004515823.1 | Scaffold314 | 231751                  | GG                              | AA              | 1946937537               |
| SNP_P4_123042_232451 | NW_004515823.1 | Scaffold314 | 232451                  | TT                              | GG              | 1946937539               |
| SNP_P4_123045_273754 | NW_004515823.1 | Scaffold314 | 273754                  | TT                              | GG              | 1946937541               |
| SNP_P4_123047_274592 | NW_004515823.1 | Scaffold314 | 274592                  | TT                              | CC              | 1946937543               |
| SNP_P4_123048_274609 | NW_004515823.1 | Scaffold314 | 274609                  | GG                              | AA              | 1946937545               |
| SNP_P4_123049_275295 | NW_004515823.1 | Scaffold314 | 275295                  | TT                              | CC              | 1946937547               |
| SNP_P4_123050_275361 | NW_004515823.1 | Scaffold314 | 275361                  | GG                              | CC              | 1946937549               |
| SNP_P4_123051_275416 | NW_004515823.1 | Scaffold314 | 275416                  | AA                              | CC              | 1946937551               |
| SNP_P4_123052_275550 | NW_004515823.1 | Scaffold314 | 275550                  | AA                              | GG              | 1946937553               |
| SNP_P4_123053_275619 | NW_004515823.1 | Scaffold314 | 275619                  | TT                              | CC              | 1946937555               |
| SNP_P4_123054_275659 | NW_004515823.1 | Scaffold314 | 275659                  | GG                              | TT              | 1946937557               |
| SNP_P4_123055_290750 | NW_004515823.1 | Scaffold314 | 290750                  | AA                              | TT              | 1946937559               |
| SNP_P4_123057_302803 | NW_004515823.1 | Scaffold314 | 302803                  | GG                              | AA              | 1946937561               |
| SNP_P4_123058_302811 | NW_004515823.1 | Scaffold314 | 302811                  | AA                              | GG              | 1946937563               |
| SNP_P4_123059_306126 | NW_004515823.1 | Scaffold314 | 306126                  | GG                              | TT              | 1946937565               |
| SNP_P4_123060_308207 | NW_004515823.1 | Scaffold314 | 308207                  | TT                              | CC              | 1946937567               |
| SNP_P4_123061_316315 | NW_004515823.1 | Scaffold314 | 316315                  | TT                              | GG              | 1946937569               |
| SNP_P4_123062_316327 | NW_004515823.1 | Scaffold314 | 316327                  | TT                              | GG              | 1946937571               |
| SNP_P4_123063_316400 | NW_004515823.1 | Scaffold314 | 316400                  | TT                              | CC              | 1946937573               |
| SNP_P4_123064_316627 | NW_004515823.1 | Scaffold314 | 316627                  | AA                              | GG              | 1946937575               |
| SNP_P4_123065_316650 | NW_004515823.1 | Scaffold314 | 316650                  | TT                              | GG              | 1946937577               |
| SNP_P4_123066_322271 | NW_004515823.1 | Scaffold314 | 322271                  | AA                              | CC              | 1946937579               |
| SNP_P4_123067_328548 | NW_004515823.1 | Scaffold314 | 328548                  | CC                              | TT              | 1946937581               |
| SNP_P4_123068_335486 | NW_004515823.1 | Scaffold314 | 335486                  | CC                              | TT              | 1946937583               |
| SNP_P4_123069_340309 | NW_004515823.1 | Scaffold314 | 340309                  | TT                              | CC              | 1946937585               |
| SNP_P4_123070_340794 | NW_004515823.1 | Scaffold314 | 340794                  | AA                              | CC              | 1946937587               |
| SNP_P4_123071_378504 | NW_004515823.1 | Scaffold314 | 378504                  | AA                              | GG              | 1946937589               |
| SNP_P4_123072_378750 | NW_004515823.1 | Scaffold314 | 378750                  | AA                              | GG              | 1946937591               |
| SNP_P4_123073_380896 | NW_004515823.1 | Scaffold314 | 380896                  | TT                              | CC              | 1946937593               |
| SNP_P4_123074_400464 | NW_004515823.1 | Scaffold314 | 400464                  | AA                              | CC              | 1946937595               |
| SNP_P4_123076_431916 | NW_004515823.1 | Scaffold314 | 431916                  | AA                              | TT              | 1946937597               |
| SNP_P4_123077_480350 | NW_004515823.1 | Scaffold314 | 480350                  | CC                              | TT              | 1946937599               |

| SNPs IDs             | Chromosome IDs | Chromosomes | Physical positions (bp) | CDC Frontier (Reference genome) | (ILWC46 & LPNB) | NCBI SNPdb Accession IDs |
|----------------------|----------------|-------------|-------------------------|---------------------------------|-----------------|--------------------------|
| SNP_P4_123078_490369 | NW_004515823.1 | Scaffold314 | 490369                  | AA                              | GG              | 1946937601               |
| SNP_P4_123080_512134 | NW_004515823.1 | Scaffold314 | 512134                  | CC                              | AA              | 1946937603               |
| SNP_P4_123082_512327 | NW_004515823.1 | Scaffold314 | 512327                  | CC                              | TT              | 1946937605               |
| SNP_P4_123083_577001 | NW_004515823.1 | Scaffold314 | 577001                  | GG                              | CC              | 1946937607               |
| SNP_P4_123084_595293 | NW_004515823.1 | Scaffold314 | 595293                  | TT                              | CC              | 1946937609               |
| SNP_P4_123085_604023 | NW_004515823.1 | Scaffold314 | 604023                  | TT                              | AA              | 1946937611               |
| SNP_P4_123086_629435 | NW_004515823.1 | Scaffold314 | 629435                  | AA                              | GG              | 1946937613               |
| SNP_P4_123087_645720 | NW_004515823.1 | Scaffold314 | 645720                  | TT                              | AA              | 1946937615               |
| SNP_P4_123088_663860 | NW_004515823.1 | Scaffold314 | 663860                  | CC                              | GG              | 1946937617               |
| SNP_P4_123089_666281 | NW_004515823.1 | Scaffold314 | 666281                  | AA                              | GG              | 1946937619               |
| SNP_P4_123090_675290 | NW_004515823.1 | Scaffold314 | 675290                  | TT                              | GG              | 1946937621               |
| SNP_P4_123091_696954 | NW_004515823.1 | Scaffold314 | 696954                  | AA                              | GG              | 1946937623               |
| SNP_P4_123092_708939 | NW_004515823.1 | Scaffold314 | 708939                  | GG                              | AA              | 1946937625               |
| SNP_P4_123093_709176 | NW_004515823.1 | Scaffold314 | 709176                  | AA                              | CC              | 1946937627               |
| SNP_P4_123094_719134 | NW_004515823.1 | Scaffold314 | 719134                  | GG                              | AA              | 1946937629               |
| SNP_P4_123095_740745 | NW_004515823.1 | Scaffold314 | 740745                  | TT                              | AA              | 1946937631               |
| SNP_P4_123096_740808 | NW_004515823.1 | Scaffold314 | 740808                  | CC                              | TT              | 1946937633               |
| SNP_P4_123097_759737 | NW_004515823.1 | Scaffold314 | 759737                  | AA                              | TT              | 1946937635               |
| SNP_P4_123098_760045 | NW_004515823.1 | Scaffold314 | 760045                  | TT                              | CC              | 1946937637               |
| SNP_P4_123099_1020   | NW_004515824.1 | Scaffold315 | 1020                    | GG                              | CC              | 1946937639               |
| SNP_P4_123100_1021   | NW_004515824.1 | Scaffold315 | 1021                    | GG                              | CC              | 1946937641               |
| SNP_P4_123101_1024   | NW_004515824.1 | Scaffold315 | 1024                    | TT                              | AA              | 1946937643               |
| SNP_P4_123102_308    | NW_004515825.1 | Scaffold317 | 308                     | GG                              | AA              | 1946937645               |
| SNP_P4_123103_608    | NW_004515825.1 | Scaffold317 | 608                     | GG                              | CC              | 1946937647               |
| SNP_P4_123104_685    | NW_004515825.1 | Scaffold317 | 685                     | AA                              | GG              | 1946937649               |
| SNP_P4_123105_6490   | NW_004515825.1 | Scaffold317 | 6490                    | CC                              | TT              | 1946937651               |
| SNP_P4_123107_46355  | NW_004515825.1 | Scaffold317 | 46355                   | TT                              | CC              | 1946937653               |
| SNP_P4_123108_46388  | NW_004515825.1 | Scaffold317 | 46388                   | CC                              | TT              | 1946937655               |
| SNP_P4_123109_46476  | NW_004515825.1 | Scaffold317 | 46476                   | AA                              | GG              | 1946937657               |
| SNP_P4_123110_46479  | NW_004515825.1 | Scaffold317 | 46479                   | CC                              | TT              | 1946937659               |
| SNP_P4_123111_46500  | NW_004515825.1 | Scaffold317 | 46500                   | TT                              | CC              | 1946937661               |
| SNP_P4_123112_46565  | NW_004515825.1 | Scaffold317 | 46565                   | GG                              | TT              | 1946937663               |
| SNP_P4_123113_46681  | NW_004515825.1 | Scaffold317 | 46681                   | GG                              | CC              | 1946937665               |
| SNP_P4_123114_46707  | NW_004515825.1 | Scaffold317 | 46707                   | GG                              | TT              | 1946937667               |
| SNP_P4_123115_46710  | NW_004515825.1 | Scaffold317 | 46710                   | AA                              | GG              | 1946937669               |
| SNP_P4_123116_46737  | NW_004515825.1 | Scaffold317 | 46737                   | AA                              | GG              | 1946937671               |
| SNP_P4_123117_46770  | NW_004515825.1 | Scaffold317 | 46770                   | TT                              | CC              | 1946937673               |
| SNP_P4_123118_46872  | NW_004515825.1 | Scaffold317 | 46872                   | AA                              | GG              | 1946937675               |
| SNP_P4_123119_46962  | NW_004515825.1 | Scaffold317 | 46962                   | AA                              | GG              | 1946937677               |
| SNP_P4_123120_48303  | NW_004515825.1 | Scaffold317 | 48303                   | CC                              | TT              | 1946937679               |
| SNP_P4_123121_54391  | NW_004515825.1 | Scaffold317 | 54391                   | AA                              | GG              | 1946937681               |
| SNP_P4_123122_54707  | NW_004515825.1 | Scaffold317 | 54707                   | GG                              | AA              | 1946937683               |

| SNPs IDs             | Chromosome IDs | Chromosomes | Physical positions (bp) | CDC Frontier (Reference genome) | (ILWC46 & LPNB) | NCBI SNPdb Accession IDs |
|----------------------|----------------|-------------|-------------------------|---------------------------------|-----------------|--------------------------|
| SNP_P4_123123_59794  | NW_004515825.1 | Scaffold317 | 59794                   | TT                              | CC              | 1946937685               |
| SNP_P4_123124_66262  | NW_004515825.1 | Scaffold317 | 66262                   | AA                              | GG              | 1946937688               |
| SNP_P4_123125_67294  | NW_004515825.1 | Scaffold317 | 67294                   | AA                              | GG              | 1946937690               |
| SNP_P4_123126_80537  | NW_004515825.1 | Scaffold317 | 80537                   | AA                              | CC              | 1946937692               |
| SNP_P4_123127_80573  | NW_004515825.1 | Scaffold317 | 80573                   | GG                              | AA              | 1946937694               |
| SNP_P4_123128_80822  | NW_004515825.1 | Scaffold317 | 80822                   | GG                              | AA              | 1946937696               |
| SNP_P4_123129_80848  | NW_004515825.1 | Scaffold317 | 80848                   | TT                              | CC              | 1946937698               |
| SNP_P4_123131_102292 | NW_004515825.1 | Scaffold317 | 102292                  | GG                              | AA              | 1946937700               |
| SNP_P4_123133_105563 | NW_004515825.1 | Scaffold317 | 105563                  | TT                              | GG              | 1946937702               |
| SNP_P4_123134_107736 | NW_004515825.1 | Scaffold317 | 107736                  | AA                              | GG              | 1946937704               |
| SNP_P4_123135_107912 | NW_004515825.1 | Scaffold317 | 107912                  | TT                              | CC              | 1946937706               |
| SNP_P4_123136_112674 | NW_004515825.1 | Scaffold317 | 112674                  | TT                              | CC              | 1946937708               |
| SNP_P4_123137_136405 | NW_004515825.1 | Scaffold317 | 136405                  | TT                              | CC              | 1946937710               |
| SNP_P4_123138_145510 | NW_004515825.1 | Scaffold317 | 145510                  | GG                              | AA              | 1946937712               |
| SNP_P4_123139_145788 | NW_004515825.1 | Scaffold317 | 145788                  | GG                              | AA              | 1946937714               |
| SNP_P4_123140_145793 | NW_004515825.1 | Scaffold317 | 145793                  | AA                              | GG              | 1946937716               |
| SNP_P4_123141_145811 | NW_004515825.1 | Scaffold317 | 145811                  | AA                              | GG              | 1946937718               |
| SNP_P4_123142_145830 | NW_004515825.1 | Scaffold317 | 145830                  | TT                              | CC              | 1946937720               |
| SNP_P4_123143_145863 | NW_004515825.1 | Scaffold317 | 145863                  | GG                              | CC              | 1946937722               |
| SNP_P4_123144_145883 | NW_004515825.1 | Scaffold317 | 145883                  | CC                              | AA              | 1946937724               |
| SNP_P4_123145_145899 | NW_004515825.1 | Scaffold317 | 145899                  | GG                              | AA              | 1946937726               |
| SNP_P4_123146_145919 | NW_004515825.1 | Scaffold317 | 145919                  | AA                              | GG              | 1946937728               |
| SNP_P4_123147_157193 | NW_004515825.1 | Scaffold317 | 157193                  | TT                              | GG              | 1946937730               |
| SNP_P4_123148_159685 | NW_004515825.1 | Scaffold317 | 159685                  | CC                              | TT              | 1946937732               |
| SNP_P4_123149_171678 | NW_004515825.1 | Scaffold317 | 171678                  | GG                              | AA              | 1946937734               |
| SNP_P4_123150_171862 | NW_004515825.1 | Scaffold317 | 171862                  | AA                              | GG              | 1946937736               |
| SNP_P4_123151_171928 | NW_004515825.1 | Scaffold317 | 171928                  | CC                              | TT              | 1946937738               |
| SNP_P4_123152_171929 | NW_004515825.1 | Scaffold317 | 171929                  | AA                              | CC              | 1946937740               |
| SNP_P4_123153_173343 | NW_004515825.1 | Scaffold317 | 173343                  | TT                              | GG              | 1946937743               |
| SNP_P4_123154_180274 | NW_004515825.1 | Scaffold317 | 180274                  | TT                              | GG              | 1946937745               |
| SNP_P4_123155_180298 | NW_004515825.1 | Scaffold317 | 180298                  | TT                              | GG              | 1946937747               |
| SNP_P4_123156_180364 | NW_004515825.1 | Scaffold317 | 180364                  | CC                              | AA              | 1946937749               |
| SNP_P4_123157_180388 | NW_004515825.1 | Scaffold317 | 180388                  | CC                              | TT              | 1946937751               |
| SNP_P4_123158_180394 | NW_004515825.1 | Scaffold317 | 180394                  | GG                              | TT              | 1946937753               |
| SNP_P4_123159_180410 | NW_004515825.1 | Scaffold317 | 180410                  | AA                              | GG              | 1946937755               |
| SNP_P4_123160_180574 | NW_004515825.1 | Scaffold317 | 180574                  | TT                              | CC              | 1946937757               |
| SNP_P4_123161_180592 | NW_004515825.1 | Scaffold317 | 180592                  | TT                              | AA              | 1946937759               |
| SNP_P4_123162_180593 | NW_004515825.1 | Scaffold317 | 180593                  | AA                              | GG              | 1946937761               |
| SNP_P4_123163_180603 | NW_004515825.1 | Scaffold317 | 180603                  | TT                              | GG              | 1946937763               |
| SNP_P4_123164_180619 | NW_004515825.1 | Scaffold317 | 180619                  | GG                              | AA              | 1946937765               |
| SNP_P4_123165_180628 | NW_004515825.1 | Scaffold317 | 180628                  | TT                              | CC              | 1946937767               |
| SNP_P4_123166_180640 | NW_004515825.1 | Scaffold317 | 180640                  | AA                              | TT              | 1946937769               |

| SNPs IDs             | Chromosome IDs | Chromosomes | Physical positions (bp) | CDC Frontier (Reference genome) | (ILWC46 & LPNB) | NCBI SNPdb Accession IDs |
|----------------------|----------------|-------------|-------------------------|---------------------------------|-----------------|--------------------------|
| SNP_P4_123167_180655 | NW_004515825.1 | Scaffold317 | 180655                  | AA                              | GG              | 1946937771               |
| SNP_P4_123168_180673 | NW_004515825.1 | Scaffold317 | 180673                  | TT                              | AA              | 1946937773               |
| SNP_P4_123169_180704 | NW_004515825.1 | Scaffold317 | 180704                  | TT                              | GG              | 1946937775               |
| SNP_P4_123170_181012 | NW_004515825.1 | Scaffold317 | 181012                  | GG                              | CC              | 1946937777               |
| SNP_P4_123172_183192 | NW_004515825.1 | Scaffold317 | 183192                  | CC                              | GG              | 1946937779               |
| SNP_P4_123173_184144 | NW_004515825.1 | Scaffold317 | 184144                  | CC                              | AA              | 1946937781               |
| SNP_P4_123174_189711 | NW_004515825.1 | Scaffold317 | 189711                  | TT                              | CC              | 1946937783               |
| SNP_P4_123175_189778 | NW_004515825.1 | Scaffold317 | 189778                  | TT                              | GG              | 1946937785               |
| SNP_P4_123176_189784 | NW_004515825.1 | Scaffold317 | 189784                  | TT                              | GG              | 1946937788               |
| SNP_P4_123177_189809 | NW_004515825.1 | Scaffold317 | 189809                  | TT                              | CC              | 1946937790               |
| SNP_P4_123178_189836 | NW_004515825.1 | Scaffold317 | 189836                  | CC                              | TT              | 1946937792               |
| SNP_P4_123179_189861 | NW_004515825.1 | Scaffold317 | 189861                  | GG                              | CC              | 1946937794               |
| SNP_P4_123180_189886 | NW_004515825.1 | Scaffold317 | 189886                  | AA                              | GG              | 1946937796               |
| SNP_P4_123181_189887 | NW_004515825.1 | Scaffold317 | 189887                  | TT                              | AA              | 1946937798               |
| SNP_P4_123182_190079 | NW_004515825.1 | Scaffold317 | 190079                  | GG                              | AA              | 1946937800               |
| SNP_P4_123183_190089 | NW_004515825.1 | Scaffold317 | 190089                  | CC                              | GG              | 1946937802               |
| SNP_P4_123184_190149 | NW_004515825.1 | Scaffold317 | 190149                  | GG                              | AA              | 1946937804               |
| SNP_P4_123185_190191 | NW_004515825.1 | Scaffold317 | 190191                  | AA                              | GG              | 1946937806               |
| SNP_P4_123186_190234 | NW_004515825.1 | Scaffold317 | 190234                  | CC                              | TT              | 1946937808               |
| SNP_P4_123189_213472 | NW_004515825.1 | Scaffold317 | 213472                  | AA                              | CC              | 1946937810               |
| SNP_P4_123190_215489 | NW_004515825.1 | Scaffold317 | 215489                  | AA                              | GG              | 1946937812               |
| SNP_P4_123191_215650 | NW_004515825.1 | Scaffold317 | 215650                  | AA                              | GG              | 1946937814               |
| SNP_P4_123192_215683 | NW_004515825.1 | Scaffold317 | 215683                  | CC                              | TT              | 1946937816               |
| SNP_P4_123193_215933 | NW_004515825.1 | Scaffold317 | 215933                  | TT                              | AA              | 1946937818               |
| SNP_P4_123194_215952 | NW_004515825.1 | Scaffold317 | 215952                  | CC                              | TT              | 1946937820               |
| SNP_P4_123195_217750 | NW_004515825.1 | Scaffold317 | 217750                  | CC                              | TT              | 1946937823               |
| SNP_P4_123197_218037 | NW_004515825.1 | Scaffold317 | 218037                  | CC                              | TT              | 1946937825               |
| SNP_P4_123198_218045 | NW_004515825.1 | Scaffold317 | 218045                  | AA                              | TT              | 1946937827               |
| SNP_P4_123199_218108 | NW_004515825.1 | Scaffold317 | 218108                  | GG                              | AA              | 1946937829               |
| SNP_P4_123200_218138 | NW_004515825.1 | Scaffold317 | 218138                  | CC                              | TT              | 1946937831               |
| SNP_P4_123202_218170 | NW_004515825.1 | Scaffold317 | 218170                  | TT                              | CC              | 1946937833               |
| SNP_P4_123203_218226 | NW_004515825.1 | Scaffold317 | 218226                  | TT                              | AA              | 1946937835               |
| SNP_P4_123204_219899 | NW_004515825.1 | Scaffold317 | 219899                  | GG                              | AA              | 1946937837               |
| SNP_P4_123205_219921 | NW_004515825.1 | Scaffold317 | 219921                  | CC                              | TT              | 1946937839               |
| SNP_P4_123206_219954 | NW_004515825.1 | Scaffold317 | 219954                  | CC                              | TT              | 1946937841               |
| SNP_P4_123207_219969 | NW_004515825.1 | Scaffold317 | 219969                  | GG                              | AA              | 1946937843               |
| SNP_P4_123208_219987 | NW_004515825.1 | Scaffold317 | 219987                  | TT                              | CC              | 1946937845               |
| SNP_P4_123209_230105 | NW_004515825.1 | Scaffold317 | 230105                  | GG                              | TT              | 1946937847               |
| SNP_P4_123210_230357 | NW_004515825.1 | Scaffold317 | 230357                  | GG                              | AA              | 1946937849               |
| SNP_P4_123211_230741 | NW_004515825.1 | Scaffold317 | 230741                  | TT                              | CC              | 1946937851               |
| SNP_P4_123212_2494   | NW_004515826.1 | Scaffold319 | 2494                    | CC                              | TT              | 1946937853               |
| SNP_P4_123213_2607   | NW_004515826.1 | Scaffold319 | 2607                    | GG                              | AA              | 1946937855               |

| SNPs IDs            | Chromosome IDs | Chromosomes | Physical positions (bp) | CDC Frontier (Reference genome) | (ILWC46 & LPNB) | NCBI SNPdb Accession IDs |
|---------------------|----------------|-------------|-------------------------|---------------------------------|-----------------|--------------------------|
| SNP_P4_123214_2805  | NW_004515826.1 | Scaffold319 | 2805                    | TT                              | CC              | 1946937857               |
| SNP_P4_123215_5556  | NW_004515826.1 | Scaffold319 | 5556                    | CC                              | AA              | 1946937859               |
| SNP_P4_123217_6671  | NW_004515826.1 | Scaffold319 | 6671                    | CC                              | AA              | 1946937861               |
| SNP_P4_123218_6687  | NW_004515826.1 | Scaffold319 | 6687                    | GG                              | AA              | 1946937863               |
| SNP_P4_123219_6733  | NW_004515826.1 | Scaffold319 | 6733                    | CC                              | GG              | 1946937865               |
| SNP_P4_123220_6774  | NW_004515826.1 | Scaffold319 | 6774                    | AA                              | CC              | 1946937867               |
| SNP_P4_123221_6936  | NW_004515826.1 | Scaffold319 | 6936                    | CC                              | TT              | 1946937869               |
| SNP_P4_123222_7011  | NW_004515826.1 | Scaffold319 | 7011                    | GG                              | CC              | 1946937872               |
| SNP_P4_123223_7174  | NW_004515826.1 | Scaffold319 | 7174                    | GG                              | TT              | 1946937874               |
| SNP_P4_123224_7175  | NW_004515826.1 | Scaffold319 | 7175                    | GG                              | AA              | 1946937876               |
| SNP_P4_123225_7178  | NW_004515826.1 | Scaffold319 | 7178                    | TT                              | CC              | 1946937878               |
| SNP_P4_123227_9685  | NW_004515826.1 | Scaffold319 | 9685                    | AA                              | GG              | 1946937880               |
| SNP_P4_123228_10434 | NW_004515826.1 | Scaffold319 | 10434                   | GG                              | CC              | 1946937882               |
| SNP_P4_123229_11068 | NW_004515826.1 | Scaffold319 | 11068                   | AA                              | GG              | 1946937884               |
| SNP_P4_123230_11884 | NW_004515826.1 | Scaffold319 | 11884                   | CC                              | AA              | 1946937886               |
| SNP_P4_123231_11943 | NW_004515826.1 | Scaffold319 | 11943                   | TT                              | CC              | 1946937888               |
| SNP_P4_123232_11977 | NW_004515826.1 | Scaffold319 | 11977                   | GG                              | AA              | 1946937890               |
| SNP_P4_123233_11978 | NW_004515826.1 | Scaffold319 | 11978                   | CC                              | TT              | 1946937892               |
| SNP_P4_123234_11992 | NW_004515826.1 | Scaffold319 | 11992                   | TT                              | CC              | 1946937894               |
| SNP_P4_123235_12046 | NW_004515826.1 | Scaffold319 | 12046                   | GG                              | TT              | 1946937896               |
| SNP_P4_123236_12069 | NW_004515826.1 | Scaffold319 | 12069                   | AA                              | GG              | 1946937898               |
| SNP_P4_123237_12078 | NW_004515826.1 | Scaffold319 | 12078                   | AA                              | GG              | 1946937900               |
| SNP_P4_123238_14609 | NW_004515826.1 | Scaffold319 | 14609                   | GG                              | TT              | 1946937902               |
| SNP_P4_123239_16161 | NW_004515826.1 | Scaffold319 | 16161                   | GG                              | TT              | 1946937904               |
| SNP_P4_123240_18473 | NW_004515826.1 | Scaffold319 | 18473                   | TT                              | GG              | 1946937907               |
| SNP_P4_123241_33362 | NW_004515826.1 | Scaffold319 | 33362                   | TT                              | GG              | 1946937909               |
| SNP_P4_123242_33368 | NW_004515826.1 | Scaffold319 | 33368                   | CC                              | TT              | 1946937911               |
| SNP_P4_123243_34483 | NW_004515826.1 | Scaffold319 | 34483                   | GG                              | AA              | 1946937913               |
| SNP_P4_123244_35368 | NW_004515826.1 | Scaffold319 | 35368                   | AA                              | GG              | 1946937915               |
| SNP_P4_123245_35389 | NW_004515826.1 | Scaffold319 | 35389                   | GG                              | CC              | 1946937917               |
| SNP_P4_123246_35405 | NW_004515826.1 | Scaffold319 | 35405                   | AA                              | GG              | 1946937919               |
| SNP_P4_123247_35428 | NW_004515826.1 | Scaffold319 | 35428                   | TT                              | CC              | 1946937921               |
| SNP_P4_123248_35871 | NW_004515826.1 | Scaffold319 | 35871                   | TT                              | CC              | 1946937923               |
| SNP_P4_123249_40570 | NW_004515826.1 | Scaffold319 | 40570                   | AA                              | GG              | 1946937925               |
| SNP_P4_123250_40581 | NW_004515826.1 | Scaffold319 | 40581                   | CC                              | TT              | 1946937927               |
| SNP_P4_123251_42902 | NW_004515826.1 | Scaffold319 | 42902                   | AA                              | GG              | 1946937929               |
| SNP_P4_123252_42904 | NW_004515826.1 | Scaffold319 | 42904                   | TT                              | AA              | 1946937931               |
| SNP_P4_123253_42914 | NW_004515826.1 | Scaffold319 | 42914                   | AA                              | CC              | 1946937933               |
| SNP_P4_123254_43222 | NW_004515826.1 | Scaffold319 | 43222                   | GG                              | TT              | 1946937935               |
| SNP_P4_123255_43298 | NW_004515826.1 | Scaffold319 | 43298                   | TT                              | AA              | 1946937937               |
| SNP_P4_123256_43318 | NW_004515826.1 | Scaffold319 | 43318                   | AA                              | TT              | 1946937939               |
| SNP_P4_123257_43354 | NW_004515826.1 | Scaffold319 | 43354                   | GG                              | TT              | 1946937941               |

| SNPs IDs            | Chromosome IDs | Chromosomes | Physical positions (bp) | CDC Frontier (Reference genome) | (ILWC46 & LPNB) | NCBI SNPdb Accession IDs |
|---------------------|----------------|-------------|-------------------------|---------------------------------|-----------------|--------------------------|
| SNP_P4_123258_43355 | NW_004515826.1 | Scaffold319 | 43355                   | TT                              | AA              | 1946937943               |
| SNP_P4_123259_43360 | NW_004515826.1 | Scaffold319 | 43360                   | AA                              | GG              | 1946937945               |
| SNP_P4_123260_43388 | NW_004515826.1 | Scaffold319 | 43388                   | TT                              | AA              | 1946937947               |
| SNP_P4_123261_43500 | NW_004515826.1 | Scaffold319 | 43500                   | AA                              | TT              | 1946937949               |
| SNP_P4_123262_43585 | NW_004515826.1 | Scaffold319 | 43585                   | GG                              | TT              | 1946937951               |
| SNP_P4_123263_43599 | NW_004515826.1 | Scaffold319 | 43599                   | AA                              | GG              | 1946937953               |
| SNP_P4_123264_43620 | NW_004515826.1 | Scaffold319 | 43620                   | AA                              | TT              | 1946937955               |
| SNP_P4_123265_45040 | NW_004515826.1 | Scaffold319 | 45040                   | TT                              | CC              | 1946937957               |
| SNP_P4_123266_51825 | NW_004515826.1 | Scaffold319 | 51825                   | AA                              | GG              | 1946937959               |
| SNP_P4_123267_51833 | NW_004515826.1 | Scaffold319 | 51833                   | AA                              | CC              | 1946937961               |
| SNP_P4_123268_51853 | NW_004515826.1 | Scaffold319 | 51853                   | CC                              | TT              | 1946937963               |
| SNP_P4_123269_52369 | NW_004515826.1 | Scaffold319 | 52369                   | TT                              | CC              | 1946937965               |
| SNP_P4_123270_52406 | NW_004515826.1 | Scaffold319 | 52406                   | TT                              | AA              | 1946937967               |
| SNP_P4_123271_52705 | NW_004515826.1 | Scaffold319 | 52705                   | TT                              | GG              | 1946937969               |
| SNP_P4_123272_56000 | NW_004515826.1 | Scaffold319 | 56000                   | AA                              | GG              | 1946937971               |
| SNP_P4_123273_56055 | NW_004515826.1 | Scaffold319 | 56055                   | AA                              | GG              | 1946937973               |
| SNP_P4_123274_64    | NW_004515827.1 | Scaffold321 | 64                      | CC                              | GG              | 1946937975               |
| SNP_P4_123275_108   | NW_004515827.1 | Scaffold321 | 108                     | TT                              | AA              | 1946937978               |
| SNP_P4_123276_174   | NW_004515827.1 | Scaffold321 | 174                     | TT                              | CC              | 1946937980               |
| SNP_P4_123277_347   | NW_004515827.1 | Scaffold321 | 347                     | GG                              | CC              | 1946937982               |
| SNP_P4_123278_484   | NW_004515827.1 | Scaffold321 | 484                     | AA                              | TT              | 1946937984               |
| SNP_P4_123279_9843  | NW_004515827.1 | Scaffold321 | 9843                    | TT                              | AA              | 1946937986               |
| SNP_P4_123280_9997  | NW_004515827.1 | Scaffold321 | 9997                    | AA                              | GG              | 1946937988               |
| SNP_P4_123281_10040 | NW_004515827.1 | Scaffold321 | 10040                   | CC                              | TT              | 1946937990               |
| SNP_P4_123282_10290 | NW_004515827.1 | Scaffold321 | 10290                   | CC                              | GG              | 1946937992               |
| SNP_P4_123283_12741 | NW_004515827.1 | Scaffold321 | 12741                   | TT                              | CC              | 1946937994               |
| SNP_P4_123284_12777 | NW_004515827.1 | Scaffold321 | 12777                   | CC                              | GG              | 1946937996               |
| SNP_P4_123285_13197 | NW_004515827.1 | Scaffold321 | 13197                   | TT                              | AA              | 1946937998               |
| SNP_P4_123286_13269 | NW_004515827.1 | Scaffold321 | 13269                   | CC                              | GG              | 1946938000               |
| SNP_P4_123287_13737 | NW_004515827.1 | Scaffold321 | 13737                   | TT                              | GG              | 1946938002               |
| SNP_P4_123288_14523 | NW_004515827.1 | Scaffold321 | 14523                   | AA                              | GG              | 1946938004               |
| SNP_P4_123289_19232 | NW_004515827.1 | Scaffold321 | 19232                   | AA                              | GG              | 1946938006               |
| SNP_P4_123290_27725 | NW_004515827.1 | Scaffold321 | 27725                   | CC                              | TT              | 1946938008               |
| SNP_P4_123291_27782 | NW_004515827.1 | Scaffold321 | 27782                   | AA                              | CC              | 1946938010               |
| SNP_P4_123292_27828 | NW_004515827.1 | Scaffold321 | 27828                   | GG                              | AA              | 1946938012               |
| SNP_P4_123293_27855 | NW_004515827.1 | Scaffold321 | 27855                   | TT                              | AA              | 1946938014               |
| SNP_P4_123294_27909 | NW_004515827.1 | Scaffold321 | 27909                   | TT                              | CC              | 1946938016               |
| SNP_P4_123295_27998 | NW_004515827.1 | Scaffold321 | 27998                   | GG                              | AA              | 1946938018               |
| SNP_P4_123296_28065 | NW_004515827.1 | Scaffold321 | 28065                   | TT                              | CC              | 1946938020               |
| SNP_P4_123297_30214 | NW_004515827.1 | Scaffold321 | 30214                   | TT                              | AA              | 1946938022               |
| SNP_P4_123298_33096 | NW_004515827.1 | Scaffold321 | 33096                   | AA                              | CC              | 1946938024               |
| SNP_P4_123300_36118 | NW_004515827.1 | Scaffold321 | 36118                   | GG                              | AA              | 1946938026               |



| SNPs IDs            | Chromosome IDs | Chromosomes | Physical positions (bp) | CDC Frontier (Reference genome) | (ILWC46 & LPNB) | NCBI SNPdb Accession IDs |
|---------------------|----------------|-------------|-------------------------|---------------------------------|-----------------|--------------------------|
| SNP_P4_123301_36125 | NW_004515827.1 | Scaffold321 | 36125                   | CC                              | AA              | 1946938028               |
| SNP_P4_123302_36756 | NW_004515827.1 | Scaffold321 | 36756                   | AA                              | TT              | 1946938030               |
| SNP_P4_123303_37047 | NW_004515827.1 | Scaffold321 | 37047                   | GG                              | TT              | 1946938032               |
| SNP_P4_123304_37211 | NW_004515827.1 | Scaffold321 | 37211                   | TT                              | CC              | 1946938034               |
| SNP_P4_123305_37225 | NW_004515827.1 | Scaffold321 | 37225                   | GG                              | CC              | 1946938036               |
| SNP_P4_123306_37548 | NW_004515827.1 | Scaffold321 | 37548                   | AA                              | CC              | 1946938038               |
| SNP_P4_123307_37605 | NW_004515827.1 | Scaffold321 | 37605                   | GG                              | AA              | 1946938040               |
| SNP_P4_123308_38315 | NW_004515827.1 | Scaffold321 | 38315                   | CC                              | TT              | 1946938042               |
| SNP_P4_123309_38316 | NW_004515827.1 | Scaffold321 | 38316                   | CC                              | AA              | 1946938044               |
| SNP_P4_123310_38360 | NW_004515827.1 | Scaffold321 | 38360                   | AA                              | CC              | 1946938046               |
| SNP_P4_123311_38400 | NW_004515827.1 | Scaffold321 | 38400                   | CC                              | GG              | 1946938048               |
| SNP_P4_123312_38424 | NW_004515827.1 | Scaffold321 | 38424                   | GG                              | TT              | 1946938050               |
| SNP_P4_123313_38539 | NW_004515827.1 | Scaffold321 | 38539                   | TT                              | CC              | 1946938052               |
| SNP_P4_123314_38593 | NW_004515827.1 | Scaffold321 | 38593                   | TT                              | CC              | 1946938054               |
| SNP_P4_123315_38641 | NW_004515827.1 | Scaffold321 | 38641                   | GG                              | AA              | 1946938056               |
| SNP_P4_123316_38706 | NW_004515827.1 | Scaffold321 | 38706                   | TT                              | AA              | 1946938058               |
| SNP_P4_123317_38760 | NW_004515827.1 | Scaffold321 | 38760                   | TT                              | AA              | 1946938060               |
| SNP_P4_123318_38778 | NW_004515827.1 | Scaffold321 | 38778                   | AA                              | TT              | 1946938062               |
| SNP_P4_123319_38785 | NW_004515827.1 | Scaffold321 | 38785                   | GG                              | CC              | 1946938064               |
| SNP_P4_123320_38788 | NW_004515827.1 | Scaffold321 | 38788                   | GG                              | AA              | 1946938066               |
| SNP_P4_123321_38795 | NW_004515827.1 | Scaffold321 | 38795                   | AA                              | GG              | 1946938068               |
| SNP_P4_123322_38914 | NW_004515827.1 | Scaffold321 | 38914                   | GG                              | AA              | 1946938070               |
| SNP_P4_123323_38983 | NW_004515827.1 | Scaffold321 | 38983                   | GG                              | AA              | 1946938072               |
| SNP_P4_123324_39068 | NW_004515827.1 | Scaffold321 | 39068                   | TT                              | AA              | 1946938074               |
| SNP_P4_123325_39085 | NW_004515827.1 | Scaffold321 | 39085                   | AA                              | GG              | 1946938076               |
| SNP_P4_123326_39109 | NW_004515827.1 | Scaffold321 | 39109                   | CC                              | AA              | 1946938078               |
| SNP_P4_123327_39290 | NW_004515827.1 | Scaffold321 | 39290                   | AA                              | CC              | 1946938080               |
| SNP_P4_123328_39340 | NW_004515827.1 | Scaffold321 | 39340                   | TT                              | CC              | 1946938082               |
| SNP_P4_123329_39372 | NW_004515827.1 | Scaffold321 | 39372                   | AA                              | GG              | 1946938084               |
| SNP_P4_123330_39383 | NW_004515827.1 | Scaffold321 | 39383                   | AA                              | GG              | 1946938086               |
| SNP_P4_123331_43956 | NW_004515827.1 | Scaffold321 | 43956                   | GG                              | TT              | 1946938088               |
| SNP_P4_123332_43958 | NW_004515827.1 | Scaffold321 | 43958                   | TT                              | AA              | 1946938090               |
| SNP_P4_123333_44119 | NW_004515827.1 | Scaffold321 | 44119                   | TT                              | CC              | 1946938092               |
| SNP_P4_123334_44231 | NW_004515827.1 | Scaffold321 | 44231                   | AA                              | GG              | 1946938094               |
| SNP_P4_123335_44310 | NW_004515827.1 | Scaffold321 | 44310                   | TT                              | AA              | 1946938096               |
| SNP_P4_123336_44331 | NW_004515827.1 | Scaffold321 | 44331                   | GG                              | TT              | 1946938098               |
| SNP_P4_123337_44339 | NW_004515827.1 | Scaffold321 | 44339                   | GG                              | AA              | 1946938100               |
| SNP_P4_123338_44346 | NW_004515827.1 | Scaffold321 | 44346                   | AA                              | GG              | 1946938102               |
| SNP_P4_123339_44387 | NW_004515827.1 | Scaffold321 | 44387                   | AA                              | TT              | 1946938104               |
| SNP_P4_123340_44390 | NW_004515827.1 | Scaffold321 | 44390                   | TT                              | GG              | 1946938106               |
| SNP_P4_123341_58435 | NW_004515827.1 | Scaffold321 | 58435                   | CC                              | AA              | 1946938108               |
| SNP_P4_123342_58441 | NW_004515827.1 | Scaffold321 | 58441                   | TT                              | AA              | 1946938110               |

| SNPs IDs            | Chromosome IDs | Chromosomes | Physical positions (bp) | CDC Frontier (Reference genome) | (ILWC46 & LPNB) | NCBI SNPdb Accession IDs |
|---------------------|----------------|-------------|-------------------------|---------------------------------|-----------------|--------------------------|
| SNP_P4_123343_58444 | NW_004515827.1 | Scaffold321 | 58444                   | CC                              | TT              | 1946938112               |
| SNP_P4_123344_58465 | NW_004515827.1 | Scaffold321 | 58465                   | GG                              | AA              | 1946938115               |
| SNP_P4_123345_58735 | NW_004515827.1 | Scaffold321 | 58735                   | TT                              | AA              | 1946938117               |
| SNP_P4_123346_58855 | NW_004515827.1 | Scaffold321 | 58855                   | CC                              | TT              | 1946938119               |
| SNP_P4_123347_58865 | NW_004515827.1 | Scaffold321 | 58865                   | CC                              | TT              | 1946938121               |
| SNP_P4_123348_58888 | NW_004515827.1 | Scaffold321 | 58888                   | GG                              | AA              | 1946938123               |
| SNP_P4_123349_58914 | NW_004515827.1 | Scaffold321 | 58914                   | CC                              | GG              | 1946938125               |
| SNP_P4_123350_59623 | NW_004515827.1 | Scaffold321 | 59623                   | GG                              | AA              | 1946938127               |
| SNP_P4_123351_66718 | NW_004515827.1 | Scaffold321 | 66718                   | AA                              | GG              | 1946938129               |
| SNP_P4_123352_66730 | NW_004515827.1 | Scaffold321 | 66730                   | AA                              | GG              | 1946938131               |
| SNP_P4_123353_66741 | NW_004515827.1 | Scaffold321 | 66741                   | TT                              | CC              | 1946938133               |
| SNP_P4_123354_66853 | NW_004515827.1 | Scaffold321 | 66853                   | CC                              | GG              | 1946938135               |
| SNP_P4_123355_66927 | NW_004515827.1 | Scaffold321 | 66927                   | TT                              | CC              | 1946938137               |
| SNP_P4_123356_66939 | NW_004515827.1 | Scaffold321 | 66939                   | TT                              | AA              | 1946938139               |
| SNP_P4_123357_67643 | NW_004515827.1 | Scaffold321 | 67643                   | AA                              | GG              | 1946938141               |
| SNP_P4_123358_67721 | NW_004515827.1 | Scaffold321 | 67721                   | AA                              | GG              | 1946938143               |
| SNP_P4_123359_67849 | NW_004515827.1 | Scaffold321 | 67849                   | CC                              | TT              | 1946938145               |
| SNP_P4_123360_67854 | NW_004515827.1 | Scaffold321 | 67854                   | AA                              | GG              | 1946938147               |
| SNP_P4_123361_67869 | NW_004515827.1 | Scaffold321 | 67869                   | CC                              | TT              | 1946938149               |
| SNP_P4_123362_67884 | NW_004515827.1 | Scaffold321 | 67884                   | CC                              | TT              | 1946938151               |
| SNP_P4_123363_67924 | NW_004515827.1 | Scaffold321 | 67924                   | GG                              | AA              | 1946938153               |
| SNP_P4_123364_67938 | NW_004515827.1 | Scaffold321 | 67938                   | AA                              | CC              | 1946938155               |
| SNP_P4_123365_67968 | NW_004515827.1 | Scaffold321 | 67968                   | GG                              | AA              | 1946938157               |
| SNP_P4_123366_67974 | NW_004515827.1 | Scaffold321 | 67974                   | AA                              | CC              | 1946938159               |
| SNP_P4_123367_67986 | NW_004515827.1 | Scaffold321 | 67986                   | TT                              | GG              | 1946938161               |
| SNP_P4_123368_72235 | NW_004515827.1 | Scaffold321 | 72235                   | GG                              | AA              | 1946938163               |
| SNP_P4_123369_73063 | NW_004515827.1 | Scaffold321 | 73063                   | CC                              | AA              | 1946938165               |
| SNP_P4_123371_81060 | NW_004515827.1 | Scaffold321 | 81060                   | AA                              | CC              | 1946938167               |
| SNP_P4_123372_81153 | NW_004515827.1 | Scaffold321 | 81153                   | TT                              | CC              | 1946938169               |
| SNP_P4_123373_81376 | NW_004515827.1 | Scaffold321 | 81376                   | AA                              | GG              | 1946938171               |
| SNP_P4_123374_83237 | NW_004515827.1 | Scaffold321 | 83237                   | AA                              | TT              | 1946938173               |
| SNP_P4_123375_83277 | NW_004515827.1 | Scaffold321 | 83277                   | TT                              | AA              | 1946938175               |
| SNP_P4_123376_83306 | NW_004515827.1 | Scaffold321 | 83306                   | AA                              | GG              | 1946938177               |
| SNP_P4_123377_83361 | NW_004515827.1 | Scaffold321 | 83361                   | CC                              | GG              | 1946938179               |
| SNP_P4_123378_83362 | NW_004515827.1 | Scaffold321 | 83362                   | AA                              | CC              | 1946938181               |
| SNP_P4_123379_83499 | NW_004515827.1 | Scaffold321 | 83499                   | GG                              | AA              | 1946938183               |
| SNP_P4_123380_83710 | NW_004515827.1 | Scaffold321 | 83710                   | TT                              | CC              | 1946938185               |
| SNP_P4_123381_83728 | NW_004515827.1 | Scaffold321 | 83728                   | CC                              | TT              | 1946938187               |
| SNP_P4_123382_2539  | NW_004515828.1 | Scaffold322 | 2539                    | AA                              | TT              | 1946938189               |
| SNP_P4_123383_2560  | NW_004515828.1 | Scaffold322 | 2560                    | CC                              | AA              | 1946938191               |
| SNP_P4_123384_2575  | NW_004515828.1 | Scaffold322 | 2575                    | TT                              | GG              | 1946938193               |
| SNP_P4_123385_13869 | NW_004515828.1 | Scaffold322 | 13869                   | CC                              | TT              | 1946938196               |

| SNPs IDs             | Chromosome IDs | Chromosomes | Physical positions (bp) | CDC Frontier (Reference genome) | (ILWC46 & LPNB) | NCBI SNPdb Accession IDs |
|----------------------|----------------|-------------|-------------------------|---------------------------------|-----------------|--------------------------|
| SNP_P4_123386_14068  | NW_004515828.1 | Scaffold322 | 14068                   | GG                              | TT              | 1946938198               |
| SNP_P4_123387_26880  | NW_004515828.1 | Scaffold322 | 26880                   | CC                              | TT              | 1946938200               |
| SNP_P4_123388_27294  | NW_004515828.1 | Scaffold322 | 27294                   | TT                              | CC              | 1946938202               |
| SNP_P4_123389_27950  | NW_004515828.1 | Scaffold322 | 27950                   | TT                              | GG              | 1946938204               |
| SNP_P4_123390_30533  | NW_004515828.1 | Scaffold322 | 30533                   | TT                              | AA              | 1946938206               |
| SNP_P4_123391_30545  | NW_004515828.1 | Scaffold322 | 30545                   | CC                              | AA              | 1946938208               |
| SNP_P4_123392_30550  | NW_004515828.1 | Scaffold322 | 30550                   | GG                              | TT              | 1946938210               |
| SNP_P4_123393_30551  | NW_004515828.1 | Scaffold322 | 30551                   | GG                              | AA              | 1946938212               |
| SNP_P4_123394_30553  | NW_004515828.1 | Scaffold322 | 30553                   | GG                              | TT              | 1946938214               |
| SNP_P4_123395_30555  | NW_004515828.1 | Scaffold322 | 30555                   | GG                              | CC              | 1946938216               |
| SNP_P4_123396_30562  | NW_004515828.1 | Scaffold322 | 30562                   | TT                              | CC              | 1946938218               |
| SNP_P4_123397_30591  | NW_004515828.1 | Scaffold322 | 30591                   | TT                              | AA              | 1946938219               |
| SNP_P4_123398_34408  | NW_004515828.1 | Scaffold322 | 34408                   | AA                              | GG              | 1946938222               |
| SNP_P4_123399_39292  | NW_004515828.1 | Scaffold322 | 39292                   | AA                              | CC              | 1946938224               |
| SNP_P4_123400_53732  | NW_004515828.1 | Scaffold322 | 53732                   | AA                              | GG              | 1946938226               |
| SNP_P4_123401_53743  | NW_004515828.1 | Scaffold322 | 53743                   | AA                              | GG              | 1946938227               |
| SNP_P4_123402_54079  | NW_004515828.1 | Scaffold322 | 54079                   | CC                              | GG              | 1946938230               |
| SNP_P4_123403_54097  | NW_004515828.1 | Scaffold322 | 54097                   | GG                              | CC              | 1946938232               |
| SNP_P4_123406_55475  | NW_004515828.1 | Scaffold322 | 55475                   | GG                              | AA              | 1946938234               |
| SNP_P4_123407_55479  | NW_004515828.1 | Scaffold322 | 55479                   | GG                              | TT              | 1946938236               |
| SNP_P4_123408_75672  | NW_004515828.1 | Scaffold322 | 75672                   | AA                              | CC              | 1946938238               |
| SNP_P4_123410_86884  | NW_004515828.1 | Scaffold322 | 86884                   | GG                              | AA              | 1946938240               |
| SNP_P4_123411_87159  | NW_004515828.1 | Scaffold322 | 87159                   | GG                              | AA              | 1946938242               |
| SNP_P4_123412_103441 | NW_004515828.1 | Scaffold322 | 103441                  | GG                              | AA              | 1946938244               |
| SNP_P4_123413_104877 | NW_004515828.1 | Scaffold322 | 104877                  | CC                              | GG              | 1946938246               |
| SNP_P4_123414_125652 | NW_004515828.1 | Scaffold322 | 125652                  | TT                              | AA              | 1946938248               |
| SNP_P4_123415_125703 | NW_004515828.1 | Scaffold322 | 125703                  | AA                              | TT              | 1946938250               |
| SNP_P4_123416_129887 | NW_004515828.1 | Scaffold322 | 129887                  | CC                              | TT              | 1946938252               |
| SNP_P4_123417_151506 | NW_004515828.1 | Scaffold322 | 151506                  | TT                              | AA              | 1946938254               |
| SNP_P4_123418_151507 | NW_004515828.1 | Scaffold322 | 151507                  | TT                              | GG              | 1946938256               |
| SNP_P4_123419_151510 | NW_004515828.1 | Scaffold322 | 151510                  | CC                              | TT              | 1946938258               |
| SNP_P4_123420_151513 | NW_004515828.1 | Scaffold322 | 151513                  | CC                              | AA              | 1946938260               |
| SNP_P4_123421_151517 | NW_004515828.1 | Scaffold322 | 151517                  | AA                              | GG              | 1946938262               |
| SNP_P4_123422_151519 | NW_004515828.1 | Scaffold322 | 151519                  | TT                              | GG              | 1946938264               |
| SNP_P4_123423_151525 | NW_004515828.1 | Scaffold322 | 151525                  | TT                              | AA              | 1946938266               |
| SNP_P4_123424_151531 | NW_004515828.1 | Scaffold322 | 151531                  | CC                              | AA              | 1946938268               |
| SNP_P4_123425_151541 | NW_004515828.1 | Scaffold322 | 151541                  | AA                              | CC              | 1946938270               |
| SNP_P4_123426_151547 | NW_004515828.1 | Scaffold322 | 151547                  | TT                              | GG              | 1946938272               |
| SNP_P4_123427_151580 | NW_004515828.1 | Scaffold322 | 151580                  | AA                              | GG              | 1946938274               |
| SNP_P4_123428_151634 | NW_004515828.1 | Scaffold322 | 151634                  | GG                              | AA              | 1946938276               |
| SNP_P4_123429_151699 | NW_004515828.1 | Scaffold322 | 151699                  | AA                              | TT              | 1946938278               |
| SNP_P4_123430_151881 | NW_004515828.1 | Scaffold322 | 151881                  | GG                              | AA              | 1946938280               |

| SNPs IDs             | Chromosome IDs | Chromosomes | Physical positions (bp) | CDC Frontier (Reference genome) | (ILWC46 & LPNB) | NCBI SNPdb Accession IDs |
|----------------------|----------------|-------------|-------------------------|---------------------------------|-----------------|--------------------------|
| SNP_P4_123431_151905 | NW_004515828.1 | Scaffold322 | 151905                  | TT                              | CC              | 1946938282               |
| SNP_P4_123432_151912 | NW_004515828.1 | Scaffold322 | 151912                  | GG                              | TT              | 1946938284               |
| SNP_P4_123433_151957 | NW_004515828.1 | Scaffold322 | 151957                  | GG                              | CC              | 1946938286               |
| SNP_P4_123434_152024 | NW_004515828.1 | Scaffold322 | 152024                  | CC                              | AA              | 1946938288               |
| SNP_P4_123435_152036 | NW_004515828.1 | Scaffold322 | 152036                  | CC                              | GG              | 1946938290               |
| SNP_P4_123436_152308 | NW_004515828.1 | Scaffold322 | 152308                  | GG                              | AA              | 1946938292               |
| SNP_P4_123437_162429 | NW_004515828.1 | Scaffold322 | 162429                  | GG                              | AA              | 1946938294               |
| SNP_P4_123438_162643 | NW_004515828.1 | Scaffold322 | 162643                  | AA                              | TT              | 1946938296               |
| SNP_P4_123439_168595 | NW_004515828.1 | Scaffold322 | 168595                  | TT                              | AA              | 1946938298               |
| SNP_P4_123440_168609 | NW_004515828.1 | Scaffold322 | 168609                  | TT                              | CC              | 1946938300               |
| SNP_P4_123441_168613 | NW_004515828.1 | Scaffold322 | 168613                  | AA                              | CC              | 1946938302               |
| SNP_P4_123442_168615 | NW_004515828.1 | Scaffold322 | 168615                  | CC                              | TT              | 1946938303               |
| SNP_P4_123443_168639 | NW_004515828.1 | Scaffold322 | 168639                  | GG                              | AA              | 1946938305               |
| SNP_P4_123444_168678 | NW_004515828.1 | Scaffold322 | 168678                  | CC                              | TT              | 1946938307               |
| SNP_P4_123445_168751 | NW_004515828.1 | Scaffold322 | 168751                  | CC                              | AA              | 1946938309               |
| SNP_P4_123446_168786 | NW_004515828.1 | Scaffold322 | 168786                  | TT                              | CC              | 1946938311               |
| SNP_P4_123447_168879 | NW_004515828.1 | Scaffold322 | 168879                  | GG                              | AA              | 1946938313               |
| SNP_P4_123448_168889 | NW_004515828.1 | Scaffold322 | 168889                  | GG                              | AA              | 1946938315               |
| SNP_P4_123449_168919 | NW_004515828.1 | Scaffold322 | 168919                  | AA                              | TT              | 1946938317               |
| SNP_P4_123450_169003 | NW_004515828.1 | Scaffold322 | 169003                  | GG                              | CC              | 1946938319               |
| SNP_P4_123451_169006 | NW_004515828.1 | Scaffold322 | 169006                  | TT                              | CC              | 1946938321               |
| SNP_P4_123452_169019 | NW_004515828.1 | Scaffold322 | 169019                  | TT                              | AA              | 1946938323               |
| SNP_P4_123453_169059 | NW_004515828.1 | Scaffold322 | 169059                  | AA                              | TT              | 1946938325               |
| SNP_P4_123454_169072 | NW_004515828.1 | Scaffold322 | 169072                  | TT                              | CC              | 1946938328               |
| SNP_P4_123455_169105 | NW_004515828.1 | Scaffold322 | 169105                  | TT                              | AA              | 1946938330               |
| SNP_P4_123456_169113 | NW_004515828.1 | Scaffold322 | 169113                  | GG                              | CC              | 1946938332               |
| SNP_P4_123457_169116 | NW_004515828.1 | Scaffold322 | 169116                  | CC                              | GG              | 1946938334               |
| SNP_P4_123458_169134 | NW_004515828.1 | Scaffold322 | 169134                  | CC                              | TT              | 1946938336               |
| SNP_P4_123459_169157 | NW_004515828.1 | Scaffold322 | 169157                  | CC                              | AA              | 1946938338               |
| SNP_P4_123460_169360 | NW_004515828.1 | Scaffold322 | 169360                  | AA                              | TT              | 1946938340               |
| SNP_P4_123461_169394 | NW_004515828.1 | Scaffold322 | 169394                  | TT                              | CC              | 1946938342               |
| SNP_P4_123462_169414 | NW_004515828.1 | Scaffold322 | 169414                  | AA                              | CC              | 1946938344               |
| SNP_P4_123463_169475 | NW_004515828.1 | Scaffold322 | 169475                  | GG                              | AA              | 1946938346               |
| SNP_P4_123464_170041 | NW_004515828.1 | Scaffold322 | 170041                  | TT                              | CC              | 1946938348               |
| SNP_P4_123465_170229 | NW_004515828.1 | Scaffold322 | 170229                  | TT                              | CC              | 1946938350               |
| SNP_P4_123466_170307 | NW_004515828.1 | Scaffold322 | 170307                  | GG                              | TT              | 1946938352               |
| SNP_P4_123467_170324 | NW_004515828.1 | Scaffold322 | 170324                  | TT                              | GG              | 1946938354               |
| SNP_P4_123468_170906 | NW_004515828.1 | Scaffold322 | 170906                  | GG                              | AA              | 1946938356               |
| SNP_P4_123469_174517 | NW_004515828.1 | Scaffold322 | 174517                  | GG                              | CC              | 1946938358               |
| SNP_P4_123470_174868 | NW_004515828.1 | Scaffold322 | 174868                  | GG                              | AA              | 1946938360               |
| SNP_P4_123471_174917 | NW_004515828.1 | Scaffold322 | 174917                  | AA                              | GG              | 1946938362               |
| SNP_P4_123472_179184 | NW_004515828.1 | Scaffold322 | 179184                  | AA                              | GG              | 1946938364               |

| SNPs IDs            | Chromosome IDs | Chromosomes | Physical positions (bp) | CDC Frontier (Reference genome) | (ILWC46 & LPNB) | NCBI SNPdb Accession IDs |
|---------------------|----------------|-------------|-------------------------|---------------------------------|-----------------|--------------------------|
| SNP_P4_123473_64    | NW_004515829.1 | Scaffold323 | 64                      | AA                              | TT              | 1946938366               |
| SNP_P4_123474_150   | NW_004515829.1 | Scaffold323 | 150                     | CC                              | TT              | 1946938368               |
| SNP_P4_123475_320   | NW_004515829.1 | Scaffold323 | 320                     | AA                              | TT              | 1946938370               |
| SNP_P4_123476_2071  | NW_004515829.1 | Scaffold323 | 2071                    | CC                              | AA              | 1946938372               |
| SNP_P4_123477_2080  | NW_004515829.1 | Scaffold323 | 2080                    | CC                              | GG              | 1946938374               |
| SNP_P4_123478_2258  | NW_004515829.1 | Scaffold323 | 2258                    | TT                              | CC              | 1946938376               |
| SNP_P4_123479_2311  | NW_004515829.1 | Scaffold323 | 2311                    | TT                              | AA              | 1946938378               |
| SNP_P4_123480_2329  | NW_004515829.1 | Scaffold323 | 2329                    | TT                              | AA              | 1946938380               |
| SNP_P4_123481_2374  | NW_004515829.1 | Scaffold323 | 2374                    | TT                              | AA              | 1946938382               |
| SNP_P4_123482_3104  | NW_004515829.1 | Scaffold323 | 3104                    | GG                              | TT              | 1946938384               |
| SNP_P4_123483_3124  | NW_004515829.1 | Scaffold323 | 3124                    | AA                              | TT              | 1946938386               |
| SNP_P4_123484_3189  | NW_004515829.1 | Scaffold323 | 3189                    | TT                              | CC              | 1946938388               |
| SNP_P4_123485_7338  | NW_004515829.1 | Scaffold323 | 7338                    | AA                              | GG              | 1946938390               |
| SNP_P4_123486_9762  | NW_004515829.1 | Scaffold323 | 9762                    | CC                              | TT              | 1946938392               |
| SNP_P4_123487_9766  | NW_004515829.1 | Scaffold323 | 9766                    | TT                              | GG              | 1946938394               |
| SNP_P4_123488_10579 | NW_004515829.1 | Scaffold323 | 10579                   | TT                              | GG              | 1946938396               |
| SNP_P4_123489_11227 | NW_004515829.1 | Scaffold323 | 11227                   | CC                              | AA              | 1946938398               |
| SNP_P4_123490_11243 | NW_004515829.1 | Scaffold323 | 11243                   | CC                              | GG              | 1946938401               |
| SNP_P4_123491_11273 | NW_004515829.1 | Scaffold323 | 11273                   | GG                              | CC              | 1946938403               |
| SNP_P4_123492_11295 | NW_004515829.1 | Scaffold323 | 11295                   | TT                              | AA              | 1946938405               |
| SNP_P4_123493_11316 | NW_004515829.1 | Scaffold323 | 11316                   | CC                              | GG              | 1946938407               |
| SNP_P4_123494_11509 | NW_004515829.1 | Scaffold323 | 11509                   | AA                              | GG              | 1946938409               |
| SNP_P4_123495_11838 | NW_004515829.1 | Scaffold323 | 11838                   | GG                              | AA              | 1946938411               |
| SNP_P4_123496_13848 | NW_004515829.1 | Scaffold323 | 13848                   | AA                              | GG              | 1946938413               |
| SNP_P4_123497_14768 | NW_004515829.1 | Scaffold323 | 14768                   | CC                              | AA              | 1946938415               |
| SNP_P4_123498_17510 | NW_004515829.1 | Scaffold323 | 17510                   | CC                              | TT              | 1946938417               |
| SNP_P4_123499_18284 | NW_004515829.1 | Scaffold323 | 18284                   | CC                              | TT              | 1946938419               |
| SNP_P4_123500_18288 | NW_004515829.1 | Scaffold323 | 18288                   | GG                              | TT              | 1946938421               |
| SNP_P4_123501_20862 | NW_004515829.1 | Scaffold323 | 20862                   | CC                              | TT              | 1946938423               |
| SNP_P4_123502_23952 | NW_004515829.1 | Scaffold323 | 23952                   | GG                              | AA              | 1946938425               |
| SNP_P4_123503_23962 | NW_004515829.1 | Scaffold323 | 23962                   | TT                              | AA              | 1946938427               |
| SNP_P4_123504_23963 | NW_004515829.1 | Scaffold323 | 23963                   | CC                              | GG              | 1946938429               |
| SNP_P4_123505_23964 | NW_004515829.1 | Scaffold323 | 23964                   | AA                              | TT              | 1946938431               |
| SNP_P4_123506_23966 | NW_004515829.1 | Scaffold323 | 23966                   | CC                              | GG              | 1946938433               |
| SNP_P4_123507_23969 | NW_004515829.1 | Scaffold323 | 23969                   | TT                              | CC              | 1946938435               |
| SNP_P4_123508_23973 | NW_004515829.1 | Scaffold323 | 23973                   | GG                              | TT              | 1946938438               |
| SNP_P4_123509_45837 | NW_004515829.1 | Scaffold323 | 45837                   | CC                              | AA              | 1946938440               |
| SNP_P4_123510_45975 | NW_004515829.1 | Scaffold323 | 45975                   | CC                              | AA              | 1946938442               |
| SNP_P4_123511_45987 | NW_004515829.1 | Scaffold323 | 45987                   | TT                              | GG              | 1946938444               |
| SNP_P4_123512_45995 | NW_004515829.1 | Scaffold323 | 45995                   | CC                              | GG              | 1946938446               |
| SNP_P4_123513_45996 | NW_004515829.1 | Scaffold323 | 45996                   | GG                              | AA              | 1946938448               |
| SNP_P4_123514_46000 | NW_004515829.1 | Scaffold323 | 46000                   | CC                              | TT              | 1946938450               |

| SNPs IDs            | Chromosome IDs | Chromosomes | Physical positions (bp) | CDC Frontier (Reference genome) | (ILWC46 & LPNB) | NCBI SNPdb Accession IDs |
|---------------------|----------------|-------------|-------------------------|---------------------------------|-----------------|--------------------------|
| SNP_P4_123515_47841 | NW_004515829.1 | Scaffold323 | 47841                   | CC                              | AA              | 1946938452               |
| SNP_P4_123516_54006 | NW_004515829.1 | Scaffold323 | 54006                   | AA                              | GG              | 1946938454               |
| SNP_P4_123517_54107 | NW_004515829.1 | Scaffold323 | 54107                   | TT                              | CC              | 1946938456               |
| SNP_P4_123518_54108 | NW_004515829.1 | Scaffold323 | 54108                   | CC                              | AA              | 1946938458               |
| SNP_P4_123519_54124 | NW_004515829.1 | Scaffold323 | 54124                   | TT                              | CC              | 1946938460               |
| SNP_P4_123520_54160 | NW_004515829.1 | Scaffold323 | 54160                   | GG                              | TT              | 1946938462               |
| SNP_P4_123521_54191 | NW_004515829.1 | Scaffold323 | 54191                   | TT                              | AA              | 1946938464               |
| SNP_P4_123522_54195 | NW_004515829.1 | Scaffold323 | 54195                   | AA                              | TT              | 1946938466               |
| SNP_P4_123523_54203 | NW_004515829.1 | Scaffold323 | 54203                   | CC                              | GG              | 1946938468               |
| SNP_P4_123524_57794 | NW_004515829.1 | Scaffold323 | 57794                   | AA                              | TT              | 1946938470               |
| SNP_P4_123525_58187 | NW_004515829.1 | Scaffold323 | 58187                   | AA                              | TT              | 1946938472               |
| SNP_P4_123526_58285 | NW_004515829.1 | Scaffold323 | 58285                   | CC                              | TT              | 1946938474               |
| SNP_P4_123527_3773  | NW_004515830.1 | Scaffold324 | 3773                    | AA                              | GG              | 1946938476               |
| SNP_P4_123529_3843  | NW_004515830.1 | Scaffold324 | 3843                    | AA                              | GG              | 1946938478               |
| SNP_P4_123530_11981 | NW_004515830.1 | Scaffold324 | 11981                   | CC                              | TT              | 1946938480               |
| SNP_P4_123531_17655 | NW_004515830.1 | Scaffold324 | 17655                   | AA                              | GG              | 1946938481               |
| SNP_P4_123532_17700 | NW_004515830.1 | Scaffold324 | 17700                   | GG                              | TT              | 1946938483               |
| SNP_P4_123533_19694 | NW_004515830.1 | Scaffold324 | 19694                   | AA                              | CC              | 1946938485               |
| SNP_P4_123534_20051 | NW_004515830.1 | Scaffold324 | 20051                   | CC                              | TT              | 1946938487               |
| SNP_P4_123536_26931 | NW_004515830.1 | Scaffold324 | 26931                   | TT                              | CC              | 1946938489               |
| SNP_P4_123537_27345 | NW_004515830.1 | Scaffold324 | 27345                   | AA                              | CC              | 1946938491               |
| SNP_P4_123538_27404 | NW_004515830.1 | Scaffold324 | 27404                   | AA                              | GG              | 1946938493               |
| SNP_P4_123539_27423 | NW_004515830.1 | Scaffold324 | 27423                   | TT                              | CC              | 1946938495               |
| SNP_P4_123540_27746 | NW_004515830.1 | Scaffold324 | 27746                   | GG                              | AA              | 1946938498               |
| SNP_P4_123541_27966 | NW_004515830.1 | Scaffold324 | 27966                   | GG                              | AA              | 1946938500               |
| SNP_P4_123542_28127 | NW_004515830.1 | Scaffold324 | 28127                   | GG                              | AA              | 1946938502               |
| SNP_P4_123543_34350 | NW_004515830.1 | Scaffold324 | 34350                   | TT                              | CC              | 1946938504               |
| SNP_P4_123544_41721 | NW_004515830.1 | Scaffold324 | 41721                   | TT                              | CC              | 1946938506               |
| SNP_P4_123545_45384 | NW_004515830.1 | Scaffold324 | 45384                   | GG                              | CC              | 1946938508               |
| SNP_P4_123546_45386 | NW_004515830.1 | Scaffold324 | 45386                   | TT                              | GG              | 1946938511               |
| SNP_P4_123547_45387 | NW_004515830.1 | Scaffold324 | 45387                   | AA                              | TT              | 1946938513               |
| SNP_P4_123548_45396 | NW_004515830.1 | Scaffold324 | 45396                   | AA                              | GG              | 1946938515               |
| SNP_P4_123549_45589 | NW_004515830.1 | Scaffold324 | 45589                   | AA                              | GG              | 1946938518               |
| SNP_P4_123550_51290 | NW_004515830.1 | Scaffold324 | 51290                   | GG                              | AA              | 1946938519               |
| SNP_P4_123551_53171 | NW_004515830.1 | Scaffold324 | 53171                   | AA                              | GG              | 1946938520               |
| SNP_P4_123552_53186 | NW_004515830.1 | Scaffold324 | 53186                   | TT                              | CC              | 1946938521               |
| SNP_P4_123553_53210 | NW_004515830.1 | Scaffold324 | 53210                   | CC                              | AA              | 1946938522               |
| SNP_P4_123554_53240 | NW_004515830.1 | Scaffold324 | 53240                   | CC                              | TT              | 1946938523               |
| SNP_P4_123555_53248 | NW_004515830.1 | Scaffold324 | 53248                   | TT                              | GG              | 1946938524               |
| SNP_P4_123556_55128 | NW_004515830.1 | Scaffold324 | 55128                   | TT                              | GG              | 1946938525               |
| SNP_P4_123557_55139 | NW_004515830.1 | Scaffold324 | 55139                   | TT                              | CC              | 1946938526               |
| SNP_P4_123558_55142 | NW_004515830.1 | Scaffold324 | 55142                   | AA                              | GG              | 1946938527               |

| SNPs IDs             | Chromosome IDs | Chromosomes | Physical positions (bp) | CDC Frontier (Reference genome) | (ILWC46 & LPNB) | NCBI SNPdb Accession IDs |
|----------------------|----------------|-------------|-------------------------|---------------------------------|-----------------|--------------------------|
| SNP_P4_123559_55178  | NW_004515830.1 | Scaffold324 | 55178                   | CC                              | TT              | 1946938528               |
| SNP_P4_123560_55333  | NW_004515830.1 | Scaffold324 | 55333                   | TT                              | CC              | 1946938529               |
| SNP_P4_123561_55515  | NW_004515830.1 | Scaffold324 | 55515                   | TT                              | GG              | 1946938530               |
| SNP_P4_123562_55562  | NW_004515830.1 | Scaffold324 | 55562                   | GG                              | AA              | 1946938531               |
| SNP_P4_123563_58689  | NW_004515830.1 | Scaffold324 | 58689                   | GG                              | CC              | 1946938532               |
| SNP_P4_123564_59469  | NW_004515830.1 | Scaffold324 | 59469                   | GG                              | TT              | 1946938533               |
| SNP_P4_123565_59484  | NW_004515830.1 | Scaffold324 | 59484                   | AA                              | GG              | 1946938534               |
| SNP_P4_123566_59497  | NW_004515830.1 | Scaffold324 | 59497                   | CC                              | AA              | 1946938535               |
| SNP_P4_123568_75808  | NW_004515830.1 | Scaffold324 | 75808                   | GG                              | TT              | 1946938536               |
| SNP_P4_123569_85922  | NW_004515830.1 | Scaffold324 | 85922                   | AA                              | CC              | 1946938537               |
| SNP_P4_123570_85958  | NW_004515830.1 | Scaffold324 | 85958                   | CC                              | TT              | 1946938538               |
| SNP_P4_123571_85988  | NW_004515830.1 | Scaffold324 | 85988                   | CC                              | AA              | 1946938540               |
| SNP_P4_123572_86008  | NW_004515830.1 | Scaffold324 | 86008                   | AA                              | GG              | 1946938542               |
| SNP_P4_123573_86041  | NW_004515830.1 | Scaffold324 | 86041                   | GG                              | AA              | 1946938544               |
| SNP_P4_123574_86190  | NW_004515830.1 | Scaffold324 | 86190                   | AA                              | GG              | 1946938546               |
| SNP_P4_123575_87151  | NW_004515830.1 | Scaffold324 | 87151                   | AA                              | GG              | 1946938548               |
| SNP_P4_123576_87596  | NW_004515830.1 | Scaffold324 | 87596                   | AA                              | TT              | 1946938550               |
| SNP_P4_123577_96805  | NW_004515830.1 | Scaffold324 | 96805                   | GG                              | AA              | 1946938552               |
| SNP_P4_123578_105355 | NW_004515830.1 | Scaffold324 | 105355                  | GG                              | CC              | 1946938554               |
| SNP_P4_123579_105851 | NW_004515830.1 | Scaffold324 | 105851                  | TT                              | GG              | 1946938556               |
| SNP_P4_123580_126401 | NW_004515830.1 | Scaffold324 | 126401                  | CC                              | TT              | 1946938558               |
| SNP_P4_123581_134028 | NW_004515830.1 | Scaffold324 | 134028                  | CC                              | AA              | 1946938560               |
| SNP_P4_123582_144803 | NW_004515830.1 | Scaffold324 | 144803                  | AA                              | GG              | 1946938562               |
| SNP_P4_123583_144810 | NW_004515830.1 | Scaffold324 | 144810                  | AA                              | TT              | 1946938564               |
| SNP_P4_123585_157490 | NW_004515830.1 | Scaffold324 | 157490                  | GG                              | CC              | 1946938566               |
| SNP_P4_123586_159570 | NW_004515830.1 | Scaffold324 | 159570                  | TT                              | GG              | 1946938568               |
| SNP_P4_123587_161457 | NW_004515830.1 | Scaffold324 | 161457                  | AA                              | GG              | 1946938570               |
| SNP_P4_123589_165663 | NW_004515830.1 | Scaffold324 | 165663                  | AA                              | GG              | 1946938572               |
| SNP_P4_123590_177644 | NW_004515830.1 | Scaffold324 | 177644                  | AA                              | GG              | 1946938574               |
| SNP_P4_123591_180195 | NW_004515830.1 | Scaffold324 | 180195                  | TT                              | CC              | 1946938576               |
| SNP_P4_123592_180209 | NW_004515830.1 | Scaffold324 | 180209                  | CC                              | GG              | 1946938578               |
| SNP_P4_123593_180435 | NW_004515830.1 | Scaffold324 | 180435                  | AA                              | CC              | 1946938580               |
| SNP_P4_123594_184541 | NW_004515830.1 | Scaffold324 | 184541                  | AA                              | GG              | 1946938582               |
| SNP_P4_123595_185373 | NW_004515830.1 | Scaffold324 | 185373                  | TT                              | GG              | 1946938584               |
| SNP_P4_123596_188194 | NW_004515830.1 | Scaffold324 | 188194                  | TT                              | AA              | 1946938586               |
| SNP_P4_123597_220286 | NW_004515830.1 | Scaffold324 | 220286                  | TT                              | AA              | 1946938588               |
| SNP_P4_123598_224465 | NW_004515830.1 | Scaffold324 | 224465                  | TT                              | CC              | 1946938590               |
| SNP_P4_123599_224802 | NW_004515830.1 | Scaffold324 | 224802                  | CC                              | AA              | 1946938592               |
| SNP_P4_123600_224859 | NW_004515830.1 | Scaffold324 | 224859                  | CC                              | AA              | 1946938594               |
| SNP_P4_123602_244369 | NW_004515830.1 | Scaffold324 | 244369                  | GG                              | AA              | 1946938596               |
| SNP_P4_123603_244395 | NW_004515830.1 | Scaffold324 | 244395                  | CC                              | AA              | 1946938598               |
| SNP_P4_123604_244654 | NW_004515830.1 | Scaffold324 | 244654                  | CC                              | TT              | 1946938599               |

| SNPs IDs             | Chromosome IDs | Chromosomes | Physical positions (bp) | CDC Frontier (Reference genome) | (ILWC46 & LPNB) | NCBI SNPdb Accession IDs |
|----------------------|----------------|-------------|-------------------------|---------------------------------|-----------------|--------------------------|
| SNP_P4_123605_244752 | NW_004515830.1 | Scaffold324 | 244752                  | CC                              | TT              | 1946938600               |
| SNP_P4_123606_250521 | NW_004515830.1 | Scaffold324 | 250521                  | CC                              | TT              | 1946938602               |
| SNP_P4_123607_279729 | NW_004515830.1 | Scaffold324 | 279729                  | TT                              | AA              | 1946938604               |
| SNP_P4_123608_280308 | NW_004515830.1 | Scaffold324 | 280308                  | TT                              | CC              | 1946938606               |
| SNP_P4_123609_280374 | NW_004515830.1 | Scaffold324 | 280374                  | AA                              | TT              | 1946938608               |
| SNP_P4_123610_310287 | NW_004515830.1 | Scaffold324 | 310287                  | CC                              | AA              | 1946938610               |
| SNP_P4_123611_312119 | NW_004515830.1 | Scaffold324 | 312119                  | AA                              | GG              | 1946938612               |
| SNP_P4_123612_312255 | NW_004515830.1 | Scaffold324 | 312255                  | AA                              | TT              | 1946938614               |
| SNP_P4_123613_312275 | NW_004515830.1 | Scaffold324 | 312275                  | AA                              | CC              | 1946938616               |
| SNP_P4_123614_312463 | NW_004515830.1 | Scaffold324 | 312463                  | CC                              | GG              | 1946938618               |
| SNP_P4_123615_312486 | NW_004515830.1 | Scaffold324 | 312486                  | TT                              | CC              | 1946938620               |
| SNP_P4_123616_330346 | NW_004515830.1 | Scaffold324 | 330346                  | CC                              | TT              | 1946938622               |
| SNP_P4_123617_330370 | NW_004515830.1 | Scaffold324 | 330370                  | TT                              | CC              | 1946938624               |
| SNP_P4_123618_340498 | NW_004515830.1 | Scaffold324 | 340498                  | TT                              | CC              | 1946938626               |
| SNP_P4_123619_340523 | NW_004515830.1 | Scaffold324 | 340523                  | AA                              | TT              | 1946938628               |
| SNP_P4_123620_343231 | NW_004515830.1 | Scaffold324 | 343231                  | AA                              | GG              | 1946938630               |
| SNP_P4_123621_343253 | NW_004515830.1 | Scaffold324 | 343253                  | TT                              | CC              | 1946938632               |
| SNP_P4_123622_346764 | NW_004515830.1 | Scaffold324 | 346764                  | TT                              | AA              | 1946938634               |
| SNP_P4_123623_347197 | NW_004515830.1 | Scaffold324 | 347197                  | TT                              | AA              | 1946938636               |
| SNP_P4_123624_347202 | NW_004515830.1 | Scaffold324 | 347202                  | AA                              | TT              | 1946938638               |
| SNP_P4_123625_347475 | NW_004515830.1 | Scaffold324 | 347475                  | AA                              | CC              | 1946938640               |
| SNP_P4_123626_347841 | NW_004515830.1 | Scaffold324 | 347841                  | TT                              | GG              | 1946938642               |
| SNP_P4_123628_354325 | NW_004515830.1 | Scaffold324 | 354325                  | CC                              | GG              | 1946938644               |
| SNP_P4_123629_354399 | NW_004515830.1 | Scaffold324 | 354399                  | CC                              | TT              | 1946938646               |
| SNP_P4_123630_357307 | NW_004515830.1 | Scaffold324 | 357307                  | GG                              | AA              | 1946938648               |
| SNP_P4_123631_357317 | NW_004515830.1 | Scaffold324 | 357317                  | AA                              | CC              | 1946938650               |
| SNP_P4_123632_357343 | NW_004515830.1 | Scaffold324 | 357343                  | TT                              | CC              | 1946938652               |
| SNP_P4_123633_357346 | NW_004515830.1 | Scaffold324 | 357346                  | AA                              | GG              | 1946938654               |
| SNP_P4_123634_357419 | NW_004515830.1 | Scaffold324 | 357419                  | CC                              | GG              | 1946938656               |
| SNP_P4_123635_366882 | NW_004515830.1 | Scaffold324 | 366882                  | GG                              | TT              | 1946938658               |
| SNP_P4_123636_367639 | NW_004515830.1 | Scaffold324 | 367639                  | AA                              | GG              | 1946938660               |
| SNP_P4_123637_368255 | NW_004515830.1 | Scaffold324 | 368255                  | TT                              | CC              | 1946938662               |
| SNP_P4_123638_368266 | NW_004515830.1 | Scaffold324 | 368266                  | TT                              | GG              | 1946938664               |
| SNP_P4_123639_368469 | NW_004515830.1 | Scaffold324 | 368469                  | GG                              | TT              | 1946938666               |
| SNP_P4_123640_368472 | NW_004515830.1 | Scaffold324 | 368472                  | GG                              | AA              | 1946938668               |
| SNP_P4_123641_368474 | NW_004515830.1 | Scaffold324 | 368474                  | TT                              | CC              | 1946938670               |
| SNP_P4_123642_368476 | NW_004515830.1 | Scaffold324 | 368476                  | CC                              | TT              | 1946938672               |
| SNP_P4_123643_368495 | NW_004515830.1 | Scaffold324 | 368495                  | GG                              | TT              | 1946938674               |
| SNP_P4_123644_368659 | NW_004515830.1 | Scaffold324 | 368659                  | AA                              | GG              | 1946938676               |
| SNP_P4_123645_369495 | NW_004515830.1 | Scaffold324 | 369495                  | GG                              | TT              | 1946938678               |
| SNP_P4_123646_369496 | NW_004515830.1 | Scaffold324 | 369496                  | CC                              | AA              | 1946938680               |
| SNP_P4_123647_371055 | NW_004515830.1 | Scaffold324 | 371055                  | TT                              | GG              | 1946938682               |



| SNPs IDs             | Chromosome IDs | Chromosomes | Physical positions (bp) | CDC Frontier (Reference genome) | (ILWC46 & LPNB) | NCBI SNPdb Accession IDs |
|----------------------|----------------|-------------|-------------------------|---------------------------------|-----------------|--------------------------|
| SNP_P4_123648_371111 | NW_004515830.1 | Scaffold324 | 371111                  | AA                              | CC              | 1946938684               |
| SNP_P4_123649_371178 | NW_004515830.1 | Scaffold324 | 371178                  | TT                              | AA              | 1946938686               |
| SNP_P4_123650_371291 | NW_004515830.1 | Scaffold324 | 371291                  | AA                              | GG              | 1946938688               |
| SNP_P4_123651_371309 | NW_004515830.1 | Scaffold324 | 371309                  | AA                              | CC              | 1946938690               |
| SNP_P4_123652_371466 | NW_004515830.1 | Scaffold324 | 371466                  | AA                              | GG              | 1946938692               |
| SNP_P4_123653_371532 | NW_004515830.1 | Scaffold324 | 371532                  | AA                              | GG              | 1946938694               |
| SNP_P4_123654_371533 | NW_004515830.1 | Scaffold324 | 371533                  | AA                              | GG              | 1946938696               |
| SNP_P4_123655_376473 | NW_004515830.1 | Scaffold324 | 376473                  | CC                              | AA              | 1946938698               |
| SNP_P4_123656_376564 | NW_004515830.1 | Scaffold324 | 376564                  | GG                              | AA              | 1946938700               |
| SNP_P4_123657_376630 | NW_004515830.1 | Scaffold324 | 376630                  | CC                              | AA              | 1946938702               |
| SNP_P4_123658_377276 | NW_004515830.1 | Scaffold324 | 377276                  | GG                              | AA              | 1946938704               |
| SNP_P4_123659_377322 | NW_004515830.1 | Scaffold324 | 377322                  | TT                              | CC              | 1946938706               |
| SNP_P4_123660_378358 | NW_004515830.1 | Scaffold324 | 378358                  | TT                              | AA              | 1946938708               |
| SNP_P4_123661_378712 | NW_004515830.1 | Scaffold324 | 378712                  | AA                              | GG              | 1946938710               |
| SNP_P4_123662_378756 | NW_004515830.1 | Scaffold324 | 378756                  | GG                              | TT              | 1946938712               |
| SNP_P4_123663_383421 | NW_004515830.1 | Scaffold324 | 383421                  | TT                              | CC              | 1946938714               |
| SNP_P4_123664_383440 | NW_004515830.1 | Scaffold324 | 383440                  | CC                              | TT              | 1946938716               |
| SNP_P4_123665_383466 | NW_004515830.1 | Scaffold324 | 383466                  | CC                              | TT              | 1946938718               |
| SNP_P4_123666_383514 | NW_004515830.1 | Scaffold324 | 383514                  | AA                              | GG              | 1946938720               |
| SNP_P4_123667_383528 | NW_004515830.1 | Scaffold324 | 383528                  | CC                              | GG              | 1946938722               |
| SNP_P4_123668_383541 | NW_004515830.1 | Scaffold324 | 383541                  | AA                              | GG              | 1946938724               |
| SNP_P4_123669_383552 | NW_004515830.1 | Scaffold324 | 383552                  | GG                              | AA              | 1946938726               |
| SNP_P4_123670_383568 | NW_004515830.1 | Scaffold324 | 383568                  | AA                              | GG              | 1946938728               |
| SNP_P4_123671_383781 | NW_004515830.1 | Scaffold324 | 383781                  | AA                              | TT              | 1946938730               |
| SNP_P4_123672_385867 | NW_004515830.1 | Scaffold324 | 385867                  | AA                              | CC              | 1946938732               |
| SNP_P4_123673_385877 | NW_004515830.1 | Scaffold324 | 385877                  | TT                              | CC              | 1946938734               |
| SNP_P4_123674_386747 | NW_004515830.1 | Scaffold324 | 386747                  | CC                              | GG              | 1946938736               |
| SNP_P4_123675_387315 | NW_004515830.1 | Scaffold324 | 387315                  | AA                              | GG              | 1946938738               |
| SNP_P4_123676_387428 | NW_004515830.1 | Scaffold324 | 387428                  | TT                              | GG              | 1946938740               |
| SNP_P4_123677_387546 | NW_004515830.1 | Scaffold324 | 387546                  | TT                              | CC              | 1946938742               |
| SNP_P4_123678_387667 | NW_004515830.1 | Scaffold324 | 387667                  | AA                              | TT              | 1946938744               |
| SNP_P4_123679_387687 | NW_004515830.1 | Scaffold324 | 387687                  | GG                              | AA              | 1946938746               |
| SNP_P4_123680_387733 | NW_004515830.1 | Scaffold324 | 387733                  | GG                              | AA              | 1946938748               |
| SNP_P4_123681_387788 | NW_004515830.1 | Scaffold324 | 387788                  | GG                              | TT              | 1946938750               |
| SNP_P4_123682_393771 | NW_004515830.1 | Scaffold324 | 393771                  | AA                              | TT              | 1946938752               |
| SNP_P4_123683_394562 | NW_004515830.1 | Scaffold324 | 394562                  | AA                              | GG              | 1946938754               |
| SNP_P4_123684_395272 | NW_004515830.1 | Scaffold324 | 395272                  | TT                              | CC              | 1946938756               |
| SNP_P4_123685_395292 | NW_004515830.1 | Scaffold324 | 395292                  | AA                              | GG              | 1946938758               |
| SNP_P4_123686_395295 | NW_004515830.1 | Scaffold324 | 395295                  | CC                              | AA              | 1946938760               |
| SNP_P4_123687_395296 | NW_004515830.1 | Scaffold324 | 395296                  | AA                              | TT              | 1946938762               |
| SNP_P4_123688_395299 | NW_004515830.1 | Scaffold324 | 395299                  | AA                              | TT              | 1946938764               |
| SNP_P4_123689_395697 | NW_004515830.1 | Scaffold324 | 395697                  | TT                              | CC              | 1946938766               |

| SNPs IDs             | Chromosome IDs | Chromosomes | Physical positions (bp) | CDC Frontier (Reference genome) | (ILWC46 & LPNB) | NCBI SNPdb Accession IDs |
|----------------------|----------------|-------------|-------------------------|---------------------------------|-----------------|--------------------------|
| SNP_P4_123690_395736 | NW_004515830.1 | Scaffold324 | 395736                  | AA                              | CC              | 1946938768               |
| SNP_P4_123691_395745 | NW_004515830.1 | Scaffold324 | 395745                  | TT                              | CC              | 1946938770               |
| SNP_P4_123692_396101 | NW_004515830.1 | Scaffold324 | 396101                  | TT                              | CC              | 1946938772               |
| SNP_P4_123693_398242 | NW_004515830.1 | Scaffold324 | 398242                  | TT                              | CC              | 1946938774               |
| SNP_P4_123694_398635 | NW_004515830.1 | Scaffold324 | 398635                  | CC                              | TT              | 1946938776               |
| SNP_P4_123695_400739 | NW_004515830.1 | Scaffold324 | 400739                  | TT                              | AA              | 1946938778               |
| SNP_P4_123696_401153 | NW_004515830.1 | Scaffold324 | 401153                  | TT                              | CC              | 1946938780               |
| SNP_P4_123697_412144 | NW_004515830.1 | Scaffold324 | 412144                  | CC                              | AA              | 1946938782               |
| SNP_P4_123698_414415 | NW_004515830.1 | Scaffold324 | 414415                  | GG                              | AA              | 1946938784               |
| SNP_P4_123699_415884 | NW_004515830.1 | Scaffold324 | 415884                  | AA                              | CC              | 1946938786               |
| SNP_P4_123700_415905 | NW_004515830.1 | Scaffold324 | 415905                  | AA                              | CC              | 1946938788               |
| SNP_P4_123701_415927 | NW_004515830.1 | Scaffold324 | 415927                  | TT                              | GG              | 1946938790               |
| SNP_P4_123702_417383 | NW_004515830.1 | Scaffold324 | 417383                  | CC                              | AA              | 1946938792               |
| SNP_P4_123703_418936 | NW_004515830.1 | Scaffold324 | 418936                  | AA                              | GG              | 1946938794               |
| SNP_P4_123704_419293 | NW_004515830.1 | Scaffold324 | 419293                  | AA                              | GG              | 1946938796               |
| SNP_P4_123705_427921 | NW_004515830.1 | Scaffold324 | 427921                  | AA                              | GG              | 1946938798               |
| SNP_P4_123706_430594 | NW_004515830.1 | Scaffold324 | 430594                  | GG                              | AA              | 1946938800               |
| SNP_P4_123707_430602 | NW_004515830.1 | Scaffold324 | 430602                  | AA                              | GG              | 1946938802               |
| SNP_P4_123708_430684 | NW_004515830.1 | Scaffold324 | 430684                  | TT                              | AA              | 1946938804               |
| SNP_P4_123709_450752 | NW_004515830.1 | Scaffold324 | 450752                  | AA                              | GG              | 1946938806               |
| SNP_P4_123710_450805 | NW_004515830.1 | Scaffold324 | 450805                  | GG                              | AA              | 1946938808               |
| SNP_P4_123711_457033 | NW_004515830.1 | Scaffold324 | 457033                  | TT                              | CC              | 1946938810               |
| SNP_P4_123712_457108 | NW_004515830.1 | Scaffold324 | 457108                  | AA                              | CC              | 1946938812               |
| SNP_P4_123713_457127 | NW_004515830.1 | Scaffold324 | 457127                  | TT                              | CC              | 1946938814               |
| SNP_P4_123714_457427 | NW_004515830.1 | Scaffold324 | 457427                  | CC                              | TT              | 1946938816               |
| SNP_P4_123715_457514 | NW_004515830.1 | Scaffold324 | 457514                  | TT                              | GG              | 1946938818               |
| SNP_P4_123716_457581 | NW_004515830.1 | Scaffold324 | 457581                  | TT                              | AA              | 1946938820               |
| SNP_P4_123717_1633   | NW_004515831.1 | Scaffold325 | 1633                    | AA                              | CC              | 1946938822               |
| SNP_P4_123718_1664   | NW_004515831.1 | Scaffold325 | 1664                    | CC                              | TT              | 1946938824               |
| SNP_P4_123719_2577   | NW_004515831.1 | Scaffold325 | 2577                    | GG                              | AA              | 1946938826               |
| SNP_P4_123720_5507   | NW_004515831.1 | Scaffold325 | 5507                    | AA                              | CC              | 1946938828               |
| SNP_P4_123721_5520   | NW_004515831.1 | Scaffold325 | 5520                    | CC                              | TT              | 1946938830               |
| SNP_P4_123722_10198  | NW_004515831.1 | Scaffold325 | 10198                   | CC                              | GG              | 1946938832               |
| SNP_P4_123723_10228  | NW_004515831.1 | Scaffold325 | 10228                   | TT                              | CC              | 1946938834               |
| SNP_P4_123724_9051   | NW_004515834.1 | Scaffold328 | 9051                    | AA                              | CC              | 1946938836               |
| SNP_P4_123725_10839  | NW_004515834.1 | Scaffold328 | 10839                   | CC                              | TT              | 1946938838               |
| SNP_P4_123726_12119  | NW_004515834.1 | Scaffold328 | 12119                   | CC                              | GG              | 1946938840               |
| SNP_P4_123727_12126  | NW_004515834.1 | Scaffold328 | 12126                   | TT                              | AA              | 1946938842               |
| SNP_P4_123728_12128  | NW_004515834.1 | Scaffold328 | 12128                   | GG                              | TT              | 1946938844               |
| SNP_P4_123729_12139  | NW_004515834.1 | Scaffold328 | 12139                   | TT                              | GG              | 1946938846               |
| SNP_P4_123730_12151  | NW_004515834.1 | Scaffold328 | 12151                   | CC                              | GG              | 1946938848               |
| SNP_P4_123731_12233  | NW_004515834.1 | Scaffold328 | 12233                   | TT                              | AA              | 1946938850               |

| SNPs IDs            | Chromosome IDs | Chromosomes | Physical positions (bp) | CDC Frontier (Reference genome) | (ILWC46 & LPNB) | NCBI SNPdb Accession IDs |
|---------------------|----------------|-------------|-------------------------|---------------------------------|-----------------|--------------------------|
| SNP_P4_123732_12260 | NW_004515834.1 | Scaffold328 | 12260                   | AA                              | GG              | 1946938852               |
| SNP_P4_123733_12278 | NW_004515834.1 | Scaffold328 | 12278                   | CC                              | TT              | 1946938854               |
| SNP_P4_123734_12289 | NW_004515834.1 | Scaffold328 | 12289                   | GG                              | TT              | 1946938856               |
| SNP_P4_123735_12666 | NW_004515834.1 | Scaffold328 | 12666                   | TT                              | AA              | 1946938858               |
| SNP_P4_123736_12667 | NW_004515834.1 | Scaffold328 | 12667                   | TT                              | GG              | 1946938861               |
| SNP_P4_123737_12684 | NW_004515834.1 | Scaffold328 | 12684                   | AA                              | GG              | 1946938863               |
| SNP_P4_123738_1349  | NW_004515835.1 | Scaffold330 | 1349                    | TT                              | CC              | 1946938865               |
| SNP_P4_123739_2358  | NW_004515835.1 | Scaffold330 | 2358                    | AA                              | GG              | 1946938867               |
| SNP_P4_123740_2379  | NW_004515835.1 | Scaffold330 | 2379                    | GG                              | AA              | 1946938869               |
| SNP_P4_123741_2397  | NW_004515835.1 | Scaffold330 | 2397                    | GG                              | CC              | 1946938871               |
| SNP_P4_123742_2483  | NW_004515835.1 | Scaffold330 | 2483                    | CC                              | GG              | 1946938873               |
| SNP_P4_123743_2495  | NW_004515835.1 | Scaffold330 | 2495                    | AA                              | GG              | 1946938875               |
| SNP_P4_123744_2607  | NW_004515835.1 | Scaffold330 | 2607                    | AA                              | GG              | 1946938877               |
| SNP_P4_123745_2683  | NW_004515835.1 | Scaffold330 | 2683                    | TT                              | CC              | 1946938879               |
| SNP_P4_123746_2788  | NW_004515835.1 | Scaffold330 | 2788                    | AA                              | TT              | 1946938881               |
| SNP_P4_123747_2818  | NW_004515835.1 | Scaffold330 | 2818                    | CC                              | GG              | 1946938883               |
| SNP_P4_123748_2907  | NW_004515835.1 | Scaffold330 | 2907                    | CC                              | TT              | 1946938885               |
| SNP_P4_123750_2964  | NW_004515835.1 | Scaffold330 | 2964                    | AA                              | GG              | 1946938887               |
| SNP_P4_123751_8040  | NW_004515835.1 | Scaffold330 | 8040                    | TT                              | CC              | 1946938889               |
| SNP_P4_123752_8053  | NW_004515835.1 | Scaffold330 | 8053                    | AA                              | CC              | 1946938892               |
| SNP_P4_123753_8065  | NW_004515835.1 | Scaffold330 | 8065                    | CC                              | TT              | 1946938894               |
| SNP_P4_123754_8066  | NW_004515835.1 | Scaffold330 | 8066                    | TT                              | AA              | 1946938896               |
| SNP_P4_123755_8109  | NW_004515835.1 | Scaffold330 | 8109                    | CC                              | TT              | 1946938898               |
| SNP_P4_123756_8112  | NW_004515835.1 | Scaffold330 | 8112                    | CC                              | TT              | 1946938900               |
| SNP_P4_123757_8133  | NW_004515835.1 | Scaffold330 | 8133                    | AA                              | CC              | 1946938902               |
| SNP_P4_123759_9059  | NW_004515835.1 | Scaffold330 | 9059                    | AA                              | TT              | 1946938904               |
| SNP_P4_123760_9258  | NW_004515835.1 | Scaffold330 | 9258                    | TT                              | AA              | 1946938906               |
| SNP_P4_123761_9283  | NW_004515835.1 | Scaffold330 | 9283                    | TT                              | AA              | 1946938908               |
| SNP_P4_123762_10224 | NW_004515835.1 | Scaffold330 | 10224                   | CC                              | GG              | 1946938910               |
| SNP_P4_123763_10603 | NW_004515835.1 | Scaffold330 | 10603                   | AA                              | GG              | 1946938912               |
| SNP_P4_123764_10606 | NW_004515835.1 | Scaffold330 | 10606                   | GG                              | TT              | 1946938914               |
| SNP_P4_123765_10622 | NW_004515835.1 | Scaffold330 | 10622                   | AA                              | TT              | 1946938916               |
| SNP_P4_123767_10831 | NW_004515835.1 | Scaffold330 | 10831                   | GG                              | AA              | 1946938918               |
| SNP_P4_123768_122   | NW_004515836.1 | Scaffold331 | 122                     | AA                              | CC              | 1946938920               |
| SNP_P4_123769_238   | NW_004515836.1 | Scaffold331 | 238                     | GG                              | AA              | 1946938922               |
| SNP_P4_123770_760   | NW_004515836.1 | Scaffold331 | 760                     | AA                              | CC              | 1946938924               |
| SNP_P4_123771_780   | NW_004515836.1 | Scaffold331 | 780                     | AA                              | GG              | 1946938926               |
| SNP_P4_123772_834   | NW_004515836.1 | Scaffold331 | 834                     | AA                              | TT              | 1946938928               |
| SNP_P4_123773_1237  | NW_004515836.1 | Scaffold331 | 1237                    | GG                              | AA              | 1946938930               |
| SNP_P4_123774_2127  | NW_004515836.1 | Scaffold331 | 2127                    | TT                              | AA              | 1946938932               |
| SNP_P4_123775_5222  | NW_004515836.1 | Scaffold331 | 5222                    | TT                              | AA              | 1946938934               |
| SNP_P4_123776_5390  | NW_004515836.1 | Scaffold331 | 5390                    | CC                              | GG              | 1946938936               |

| SNPs IDs             | Chromosome IDs | Chromosomes | Physical positions (bp) | CDC Frontier (Reference genome) | (ILWC46 & LPNB) | NCBI SNPdb Accession IDs |
|----------------------|----------------|-------------|-------------------------|---------------------------------|-----------------|--------------------------|
| SNP_P4_123777_5473   | NW_004515836.1 | Scaffold331 | 5473                    | CC                              | TT              | 1946938938               |
| SNP_P4_123779_20617  | NW_004515836.1 | Scaffold331 | 20617                   | AA                              | CC              | 1946938940               |
| SNP_P4_123780_20682  | NW_004515836.1 | Scaffold331 | 20682                   | CC                              | AA              | 1946938942               |
| SNP_P4_123781_20955  | NW_004515836.1 | Scaffold331 | 20955                   | TT                              | CC              | 1946938944               |
| SNP_P4_123782_21027  | NW_004515836.1 | Scaffold331 | 21027                   | TT                              | GG              | 1946938946               |
| SNP_P4_123783_21037  | NW_004515836.1 | Scaffold331 | 21037                   | AA                              | GG              | 1946938948               |
| SNP_P4_123784_24993  | NW_004515836.1 | Scaffold331 | 24993                   | AA                              | GG              | 1946938950               |
| SNP_P4_123785_33520  | NW_004515836.1 | Scaffold331 | 33520                   | GG                              | AA              | 1946938952               |
| SNP_P4_123786_33858  | NW_004515836.1 | Scaffold331 | 33858                   | TT                              | CC              | 1946938954               |
| SNP_P4_123787_33860  | NW_004515836.1 | Scaffold331 | 33860                   | AA                              | CC              | 1946938956               |
| SNP_P4_123788_35006  | NW_004515836.1 | Scaffold331 | 35006                   | AA                              | GG              | 1946938958               |
| SNP_P4_123789_38462  | NW_004515836.1 | Scaffold331 | 38462                   | GG                              | CC              | 1946938960               |
| SNP_P4_123790_43735  | NW_004515836.1 | Scaffold331 | 43735                   | GG                              | AA              | 1946938962               |
| SNP_P4_123791_43779  | NW_004515836.1 | Scaffold331 | 43779                   | AA                              | GG              | 1946938964               |
| SNP_P4_123792_43957  | NW_004515836.1 | Scaffold331 | 43957                   | TT                              | CC              | 1946938966               |
| SNP_P4_123793_43968  | NW_004515836.1 | Scaffold331 | 43968                   | GG                              | AA              | 1946938968               |
| SNP_P4_123794_44027  | NW_004515836.1 | Scaffold331 | 44027                   | TT                              | GG              | 1946938970               |
| SNP_P4_123796_50228  | NW_004515836.1 | Scaffold331 | 50228                   | TT                              | CC              | 1946938972               |
| SNP_P4_123797_50568  | NW_004515836.1 | Scaffold331 | 50568                   | AA                              | GG              | 1946938974               |
| SNP_P4_123798_50956  | NW_004515836.1 | Scaffold331 | 50956                   | CC                              | GG              | 1946938976               |
| SNP_P4_123799_56272  | NW_004515836.1 | Scaffold331 | 56272                   | AA                              | CC              | 1946938978               |
| SNP_P4_123800_59101  | NW_004515836.1 | Scaffold331 | 59101                   | GG                              | TT              | 1946938980               |
| SNP_P4_123801_59448  | NW_004515836.1 | Scaffold331 | 59448                   | AA                              | CC              | 1946938982               |
| SNP_P4_123802_60670  | NW_004515836.1 | Scaffold331 | 60670                   | GG                              | TT              | 1946938984               |
| SNP_P4_123803_62227  | NW_004515836.1 | Scaffold331 | 62227                   | AA                              | CC              | 1946938986               |
| SNP_P4_123804_62233  | NW_004515836.1 | Scaffold331 | 62233                   | TT                              | CC              | 1946938988               |
| SNP_P4_123805_62275  | NW_004515836.1 | Scaffold331 | 62275                   | AA                              | TT              | 1946938990               |
| SNP_P4_123806_62282  | NW_004515836.1 | Scaffold331 | 62282                   | TT                              | AA              | 1946938992               |
| SNP_P4_123807_62555  | NW_004515836.1 | Scaffold331 | 62555                   | GG                              | AA              | 1946938994               |
| SNP_P4_123808_66770  | NW_004515836.1 | Scaffold331 | 66770                   | GG                              | AA              | 1946938996               |
| SNP_P4_123809_75205  | NW_004515836.1 | Scaffold331 | 75205                   | GG                              | AA              | 1946938998               |
| SNP_P4_123810_90811  | NW_004515836.1 | Scaffold331 | 90811                   | GG                              | AA              | 1946939000               |
| SNP_P4_123811_107286 | NW_004515836.1 | Scaffold331 | 107286                  | GG                              | AA              | 1946939002               |
| SNP_P4_123812_116628 | NW_004515836.1 | Scaffold331 | 116628                  | GG                              | AA              | 1946939004               |
| SNP_P4_123813_129444 | NW_004515836.1 | Scaffold331 | 129444                  | AA                              | GG              | 1946939006               |
| SNP_P4_123814_129453 | NW_004515836.1 | Scaffold331 | 129453                  | AA                              | GG              | 1946939008               |
| SNP_P4_123815_129481 | NW_004515836.1 | Scaffold331 | 129481                  | TT                              | CC              | 1946939010               |
| SNP_P4_123816_129803 | NW_004515836.1 | Scaffold331 | 129803                  | CC                              | AA              | 1946939012               |
| SNP_P4_123818_219666 | NW_004515836.1 | Scaffold331 | 219666                  | AA                              | GG              | 1946939014               |
| SNP_P4_123819_242891 | NW_004515836.1 | Scaffold331 | 242891                  | CC                              | TT              | 1946939016               |
| SNP_P4_123820_252880 | NW_004515836.1 | Scaffold331 | 252880                  | TT                              | CC              | 1946939018               |
| SNP_P4_123821_283933 | NW_004515836.1 | Scaffold331 | 283933                  | GG                              | AA              | 1946939020               |

| SNPs IDs             | Chromosome IDs | Chromosomes | Physical positions (bp) | CDC Frontier (Reference genome) | (ILWC46 & LPNB) | NCBI SNPdb Accession IDs |
|----------------------|----------------|-------------|-------------------------|---------------------------------|-----------------|--------------------------|
| SNP_P4_123822_283942 | NW_004515836.1 | Scaffold331 | 283942                  | TT                              | CC              | 1946939022               |
| SNP_P4_123823_305895 | NW_004515836.1 | Scaffold331 | 305895                  | GG                              | AA              | 1946939024               |
| SNP_P4_123824_48544  | NW_004515837.1 | Scaffold332 | 48544                   | GG                              | AA              | 1946939026               |
| SNP_P4_123825_48731  | NW_004515837.1 | Scaffold332 | 48731                   | AA                              | GG              | 1946939028               |
| SNP_P4_123826_48874  | NW_004515837.1 | Scaffold332 | 48874                   | TT                              | CC              | 1946939030               |
| SNP_P4_123827_48919  | NW_004515837.1 | Scaffold332 | 48919                   | AA                              | GG              | 1946939032               |
| SNP_P4_123828_51861  | NW_004515837.1 | Scaffold332 | 51861                   | TT                              | GG              | 1946939034               |
| SNP_P4_123829_51982  | NW_004515837.1 | Scaffold332 | 51982                   | TT                              | GG              | 1946939036               |
| SNP_P4_123830_51990  | NW_004515837.1 | Scaffold332 | 51990                   | TT                              | GG              | 1946939038               |
| SNP_P4_123831_52757  | NW_004515837.1 | Scaffold332 | 52757                   | AA                              | CC              | 1946939040               |
| SNP_P4_123832_52765  | NW_004515837.1 | Scaffold332 | 52765                   | AA                              | GG              | 1946939042               |
| SNP_P4_123833_52836  | NW_004515837.1 | Scaffold332 | 52836                   | TT                              | CC              | 1946939044               |
| SNP_P4_123834_52997  | NW_004515837.1 | Scaffold332 | 52997                   | AA                              | GG              | 1946939046               |
| SNP_P4_123835_53012  | NW_004515837.1 | Scaffold332 | 53012                   | TT                              | CC              | 1946939048               |
| SNP_P4_123836_97745  | NW_004515837.1 | Scaffold332 | 97745                   | CC                              | TT              | 1946939050               |
| SNP_P4_123837_97747  | NW_004515837.1 | Scaffold332 | 97747                   | CC                              | AA              | 1946939052               |
| SNP_P4_123838_123351 | NW_004515837.1 | Scaffold332 | 123351                  | CC                              | TT              | 1946939054               |
| SNP_P4_123839_164200 | NW_004515837.1 | Scaffold332 | 164200                  | TT                              | CC              | 1946939056               |
| SNP_P4_123840_180764 | NW_004515837.1 | Scaffold332 | 180764                  | AA                              | TT              | 1946939058               |
| SNP_P4_123841_180792 | NW_004515837.1 | Scaffold332 | 180792                  | AA                              | CC              | 1946939060               |
| SNP_P4_123842_181178 | NW_004515837.1 | Scaffold332 | 181178                  | TT                              | GG              | 1946939062               |
| SNP_P4_123843_183216 | NW_004515837.1 | Scaffold332 | 183216                  | AA                              | TT              | 1946939064               |
| SNP_P4_123844_183609 | NW_004515837.1 | Scaffold332 | 183609                  | AA                              | GG              | 1946939066               |
| SNP_P4_123846_203755 | NW_004515837.1 | Scaffold332 | 203755                  | AA                              | GG              | 1946939068               |
| SNP_P4_123847_203756 | NW_004515837.1 | Scaffold332 | 203756                  | CC                              | TT              | 1946939070               |
| SNP_P4_123848_204952 | NW_004515837.1 | Scaffold332 | 204952                  | GG                              | AA              | 1946939072               |
| SNP_P4_123849_216297 | NW_004515837.1 | Scaffold332 | 216297                  | GG                              | AA              | 1946939074               |
| SNP_P4_123850_216390 | NW_004515837.1 | Scaffold332 | 216390                  | GG                              | CC              | 1946939076               |
| SNP_P4_123851_218647 | NW_004515837.1 | Scaffold332 | 218647                  | CC                              | GG              | 1946939078               |
| SNP_P4_123852_4822   | NW_004515838.1 | Scaffold333 | 4822                    | GG                              | TT              | 1946939080               |
| SNP_P4_123853_5048   | NW_004515838.1 | Scaffold333 | 5048                    | GG                              | AA              | 1946939082               |
| SNP_P4_123854_8646   | NW_004515838.1 | Scaffold333 | 8646                    | AA                              | GG              | 1946939084               |
| SNP_P4_123856_12264  | NW_004515838.1 | Scaffold333 | 12264                   | AA                              | TT              | 1946939086               |
| SNP_P4_123857_12373  | NW_004515838.1 | Scaffold333 | 12373                   | CC                              | TT              | 1946939088               |
| SNP_P4_123858_12386  | NW_004515838.1 | Scaffold333 | 12386                   | TT                              | GG              | 1946939090               |
| SNP_P4_123859_12405  | NW_004515838.1 | Scaffold333 | 12405                   | GG                              | CC              | 1946939092               |
| SNP_P4_123860_12428  | NW_004515838.1 | Scaffold333 | 12428                   | AA                              | CC              | 1946939094               |
| SNP_P4_123861_12847  | NW_004515838.1 | Scaffold333 | 12847                   | CC                              | TT              | 1946939096               |
| SNP_P4_123862_12967  | NW_004515838.1 | Scaffold333 | 12967                   | AA                              | CC              | 1946939098               |
| SNP_P4_123863_16222  | NW_004515838.1 | Scaffold333 | 16222                   | GG                              | AA              | 1946939100               |
| SNP_P4_123864_16503  | NW_004515838.1 | Scaffold333 | 16503                   | GG                              | AA              | 1946939102               |
| SNP_P4_123865_19399  | NW_004515838.1 | Scaffold333 | 19399                   | GG                              | AA              | 1946939104               |

| SNPs IDs             | Chromosome IDs | Chromosomes | Physical positions (bp) | CDC Frontier (Reference genome) | (ILWC46 & LPNB) | NCBI SNPdb Accession IDs |
|----------------------|----------------|-------------|-------------------------|---------------------------------|-----------------|--------------------------|
| SNP_P4_123866_19612  | NW_004515838.1 | Scaffold333 | 19612                   | AA                              | CC              | 1946939106               |
| SNP_P4_123867_19668  | NW_004515838.1 | Scaffold333 | 19668                   | TT                              | CC              | 1946939108               |
| SNP_P4_123868_19736  | NW_004515838.1 | Scaffold333 | 19736                   | AA                              | TT              | 1946939110               |
| SNP_P4_123869_19883  | NW_004515838.1 | Scaffold333 | 19883                   | TT                              | AA              | 1946939112               |
| SNP_P4_123870_19978  | NW_004515838.1 | Scaffold333 | 19978                   | AA                              | GG              | 1946939114               |
| SNP_P4_123871_20034  | NW_004515838.1 | Scaffold333 | 20034                   | AA                              | CC              | 1946939116               |
| SNP_P4_123873_22519  | NW_004515838.1 | Scaffold333 | 22519                   | TT                              | CC              | 1946939118               |
| SNP_P4_123874_22525  | NW_004515838.1 | Scaffold333 | 22525                   | CC                              | TT              | 1946939120               |
| SNP_P4_123875_22621  | NW_004515838.1 | Scaffold333 | 22621                   | GG                              | TT              | 1946939122               |
| SNP_P4_123876_22845  | NW_004515838.1 | Scaffold333 | 22845                   | CC                              | TT              | 1946939124               |
| SNP_P4_123877_22890  | NW_004515838.1 | Scaffold333 | 22890                   | TT                              | GG              | 1946939126               |
| SNP_P4_123878_26653  | NW_004515838.1 | Scaffold333 | 26653                   | TT                              | CC              | 1946939128               |
| SNP_P4_123879_28021  | NW_004515838.1 | Scaffold333 | 28021                   | GG                              | AA              | 1946939130               |
| SNP_P4_123880_28294  | NW_004515838.1 | Scaffold333 | 28294                   | TT                              | GG              | 1946939132               |
| SNP_P4_123881_28295  | NW_004515838.1 | Scaffold333 | 28295                   | TT                              | CC              | 1946939134               |
| SNP_P4_123882_28929  | NW_004515838.1 | Scaffold333 | 28929                   | CC                              | TT              | 1946939136               |
| SNP_P4_123883_32491  | NW_004515838.1 | Scaffold333 | 32491                   | GG                              | CC              | 1946939138               |
| SNP_P4_123885_44410  | NW_004515838.1 | Scaffold333 | 44410                   | CC                              | TT              | 1946939140               |
| SNP_P4_123886_44423  | NW_004515838.1 | Scaffold333 | 44423                   | TT                              | AA              | 1946939142               |
| SNP_P4_123887_44446  | NW_004515838.1 | Scaffold333 | 44446                   | AA                              | TT              | 1946939144               |
| SNP_P4_123888_44644  | NW_004515838.1 | Scaffold333 | 44644                   | CC                              | AA              | 1946939146               |
| SNP_P4_123889_44950  | NW_004515838.1 | Scaffold333 | 44950                   | TT                              | GG              | 1946939148               |
| SNP_P4_123890_44982  | NW_004515838.1 | Scaffold333 | 44982                   | CC                              | TT              | 1946939150               |
| SNP_P4_123891_45227  | NW_004515838.1 | Scaffold333 | 45227                   | AA                              | CC              | 1946939152               |
| SNP_P4_123892_52251  | NW_004515838.1 | Scaffold333 | 52251                   | TT                              | GG              | 1946939154               |
| SNP_P4_123893_52299  | NW_004515838.1 | Scaffold333 | 52299                   | TT                              | CC              | 1946939156               |
| SNP_P4_123894_56489  | NW_004515838.1 | Scaffold333 | 56489                   | TT                              | GG              | 1946939158               |
| SNP_P4_123895_56503  | NW_004515838.1 | Scaffold333 | 56503                   | GG                              | CC              | 1946939160               |
| SNP_P4_123896_76122  | NW_004515838.1 | Scaffold333 | 76122                   | AA                              | TT              | 1946939162               |
| SNP_P4_123897_89552  | NW_004515838.1 | Scaffold333 | 89552                   | TT                              | CC              | 1946939164               |
| SNP_P4_123898_90400  | NW_004515838.1 | Scaffold333 | 90400                   | GG                              | AA              | 1946939166               |
| SNP_P4_123899_91483  | NW_004515838.1 | Scaffold333 | 91483                   | TT                              | GG              | 1946939168               |
| SNP_P4_123900_91596  | NW_004515838.1 | Scaffold333 | 91596                   | AA                              | GG              | 1946939170               |
| SNP_P4_123901_91702  | NW_004515838.1 | Scaffold333 | 91702                   | CC                              | GG              | 1946939172               |
| SNP_P4_123903_91943  | NW_004515838.1 | Scaffold333 | 91943                   | GG                              | AA              | 1946939174               |
| SNP_P4_123904_100786 | NW_004515838.1 | Scaffold333 | 100786                  | TT                              | CC              | 1946939176               |
| SNP_P4_123905_101169 | NW_004515838.1 | Scaffold333 | 101169                  | TT                              | GG              | 1946939178               |
| SNP_P4_123906_101184 | NW_004515838.1 | Scaffold333 | 101184                  | AA                              | TT              | 1946939180               |
| SNP_P4_123907_101187 | NW_004515838.1 | Scaffold333 | 101187                  | GG                              | TT              | 1946939182               |
| SNP_P4_123908_101193 | NW_004515838.1 | Scaffold333 | 101193                  | TT                              | CC              | 1946939184               |
| SNP_P4_123909_101196 | NW_004515838.1 | Scaffold333 | 101196                  | AA                              | TT              | 1946939186               |
| SNP_P4_123910_5047   | NW_004515839.1 | Scaffold334 | 5047                    | TT                              | CC              | 1946939188               |

| SNPs IDs             | Chromosome IDs | Chromosomes | Physical positions (bp) | CDC Frontier (Reference genome) | (ILWC46 & LPNB) | NCBI SNPdb Accession IDs |
|----------------------|----------------|-------------|-------------------------|---------------------------------|-----------------|--------------------------|
| SNP_P4_123911_5079   | NW_004515839.1 | Scaffold334 | 5079                    | CC                              | TT              | 1946939190               |
| SNP_P4_123912_5080   | NW_004515839.1 | Scaffold334 | 5080                    | TT                              | CC              | 1946939192               |
| SNP_P4_123913_5106   | NW_004515839.1 | Scaffold334 | 5106                    | AA                              | GG              | 1946939194               |
| SNP_P4_123914_5166   | NW_004515839.1 | Scaffold334 | 5166                    | GG                              | AA              | 1946939196               |
| SNP_P4_123915_5231   | NW_004515839.1 | Scaffold334 | 5231                    | AA                              | GG              | 1946939198               |
| SNP_P4_123916_5249   | NW_004515839.1 | Scaffold334 | 5249                    | AA                              | TT              | 1946939200               |
| SNP_P4_123917_5262   | NW_004515839.1 | Scaffold334 | 5262                    | GG                              | AA              | 1946939202               |
| SNP_P4_123918_5291   | NW_004515839.1 | Scaffold334 | 5291                    | GG                              | AA              | 1946939204               |
| SNP_P4_123919_26517  | NW_004515839.1 | Scaffold334 | 26517                   | AA                              | TT              | 1946939206               |
| SNP_P4_123920_40342  | NW_004515839.1 | Scaffold334 | 40342                   | AA                              | GG              | 1946939208               |
| SNP_P4_123921_40763  | NW_004515839.1 | Scaffold334 | 40763                   | AA                              | GG              | 1946939210               |
| SNP_P4_123922_40949  | NW_004515839.1 | Scaffold334 | 40949                   | GG                              | AA              | 1946939212               |
| SNP_P4_123923_55993  | NW_004515839.1 | Scaffold334 | 55993                   | AA                              | GG              | 1946939214               |
| SNP_P4_123924_56406  | NW_004515839.1 | Scaffold334 | 56406                   | AA                              | TT              | 1946939216               |
| SNP_P4_123926_68850  | NW_004515839.1 | Scaffold334 | 68850                   | GG                              | AA              | 1946939218               |
| SNP_P4_123927_69021  | NW_004515839.1 | Scaffold334 | 69021                   | TT                              | CC              | 1946939220               |
| SNP_P4_123928_69027  | NW_004515839.1 | Scaffold334 | 69027                   | AA                              | GG              | 1946939222               |
| SNP_P4_123929_69173  | NW_004515839.1 | Scaffold334 | 69173                   | AA                              | GG              | 1946939224               |
| SNP_P4_123930_69175  | NW_004515839.1 | Scaffold334 | 69175                   | AA                              | GG              | 1946939226               |
| SNP_P4_123931_69305  | NW_004515839.1 | Scaffold334 | 69305                   | TT                              | CC              | 1946939228               |
| SNP_P4_123932_69336  | NW_004515839.1 | Scaffold334 | 69336                   | TT                              | CC              | 1946939230               |
| SNP_P4_123933_94465  | NW_004515839.1 | Scaffold334 | 94465                   | GG                              | AA              | 1946939232               |
| SNP_P4_123934_94492  | NW_004515839.1 | Scaffold334 | 94492                   | CC                              | TT              | 1946939234               |
| SNP_P4_123936_94634  | NW_004515839.1 | Scaffold334 | 94634                   | CC                              | AA              | 1946939236               |
| SNP_P4_123937_105840 | NW_004515839.1 | Scaffold334 | 105840                  | TT                              | CC              | 1946939238               |
| SNP_P4_123938_105844 | NW_004515839.1 | Scaffold334 | 105844                  | CC                              | TT              | 1946939240               |
| SNP_P4_123939_105852 | NW_004515839.1 | Scaffold334 | 105852                  | CC                              | AA              | 1946939242               |
| SNP_P4_123940_105903 | NW_004515839.1 | Scaffold334 | 105903                  | TT                              | AA              | 1946939244               |
| SNP_P4_123941_105913 | NW_004515839.1 | Scaffold334 | 105913                  | TT                              | CC              | 1946939246               |
| SNP_P4_123942_105945 | NW_004515839.1 | Scaffold334 | 105945                  | TT                              | AA              | 1946939249               |
| SNP_P4_123943_105951 | NW_004515839.1 | Scaffold334 | 105951                  | AA                              | CC              | 1946939251               |
| SNP_P4_123944_105960 | NW_004515839.1 | Scaffold334 | 105960                  | TT                              | CC              | 1946939253               |
| SNP_P4_123945_105966 | NW_004515839.1 | Scaffold334 | 105966                  | TT                              | AA              | 1946939255               |
| SNP_P4_123946_105984 | NW_004515839.1 | Scaffold334 | 105984                  | AA                              | GG              | 1946939257               |
| SNP_P4_123947_106020 | NW_004515839.1 | Scaffold334 | 106020                  | TT                              | CC              | 1946939259               |
| SNP_P4_123948_106080 | NW_004515839.1 | Scaffold334 | 106080                  | AA                              | CC              | 1946939261               |
| SNP_P4_123949_106194 | NW_004515839.1 | Scaffold334 | 106194                  | CC                              | TT              | 1946939263               |
| SNP_P4_123950_106214 | NW_004515839.1 | Scaffold334 | 106214                  | GG                              | TT              | 1946939265               |
| SNP_P4_123951_106322 | NW_004515839.1 | Scaffold334 | 106322                  | TT                              | CC              | 1946939267               |
| SNP_P4_123952_108714 | NW_004515839.1 | Scaffold334 | 108714                  | AA                              | CC              | 1946939269               |
| SNP_P4_123953_108805 | NW_004515839.1 | Scaffold334 | 108805                  | TT                              | CC              | 1946939271               |
| SNP_P4_123954_108882 | NW_004515839.1 | Scaffold334 | 108882                  | GG                              | AA              | 1946939273               |

| SNPs IDs             | Chromosome IDs | Chromosomes | Physical positions (bp) | CDC Frontier (Reference genome) | (ILWC46 & LPNB) | NCBI SNPdb Accession IDs |
|----------------------|----------------|-------------|-------------------------|---------------------------------|-----------------|--------------------------|
| SNP_P4_123955_108912 | NW_004515839.1 | Scaffold334 | 108912                  | CC                              | AA              | 1946939275               |
| SNP_P4_123956_108939 | NW_004515839.1 | Scaffold334 | 108939                  | AA                              | TT              | 1946939277               |
| SNP_P4_123957_109006 | NW_004515839.1 | Scaffold334 | 109006                  | GG                              | AA              | 1946939279               |
| SNP_P4_123958_109017 | NW_004515839.1 | Scaffold334 | 109017                  | CC                              | TT              | 1946939281               |
| SNP_P4_123959_109019 | NW_004515839.1 | Scaffold334 | 109019                  | TT                              | CC              | 1946939283               |
| SNP_P4_123960_109020 | NW_004515839.1 | Scaffold334 | 109020                  | GG                              | AA              | 1946939285               |
| SNP_P4_123961_109083 | NW_004515839.1 | Scaffold334 | 109083                  | TT                              | CC              | 1946939287               |
| SNP_P4_123962_110607 | NW_004515839.1 | Scaffold334 | 110607                  | AA                              | CC              | 1946939289               |
| SNP_P4_123963_110632 | NW_004515839.1 | Scaffold334 | 110632                  | CC                              | GG              | 1946939291               |
| SNP_P4_123964_112484 | NW_004515839.1 | Scaffold334 | 112484                  | CC                              | TT              | 1946939293               |
| SNP_P4_123965_112508 | NW_004515839.1 | Scaffold334 | 112508                  | GG                              | AA              | 1946939295               |
| SNP_P4_123966_151355 | NW_004515839.1 | Scaffold334 | 151355                  | TT                              | CC              | 1946939297               |
| SNP_P4_123967_156371 | NW_004515839.1 | Scaffold334 | 156371                  | TT                              | CC              | 1946939299               |
| SNP_P4_123968_166830 | NW_004515839.1 | Scaffold334 | 166830                  | TT                              | CC              | 1946939301               |
| SNP_P4_123969_184904 | NW_004515839.1 | Scaffold334 | 184904                  | CC                              | TT              | 1946939304               |
| SNP_P4_123970_18729  | NW_004515840.1 | Scaffold335 | 18729                   | GG                              | TT              | 1946939306               |
| SNP_P4_123971_28813  | NW_004515840.1 | Scaffold335 | 28813                   | TT                              | CC              | 1946939308               |
| SNP_P4_123972_28818  | NW_004515840.1 | Scaffold335 | 28818                   | AA                              | GG              | 1946939310               |
| SNP_P4_123973_28888  | NW_004515840.1 | Scaffold335 | 28888                   | TT                              | CC              | 1946939312               |
| SNP_P4_123974_28901  | NW_004515840.1 | Scaffold335 | 28901                   | TT                              | GG              | 1946939314               |
| SNP_P4_123975_28902  | NW_004515840.1 | Scaffold335 | 28902                   | AA                              | TT              | 1946939316               |
| SNP_P4_123976_28919  | NW_004515840.1 | Scaffold335 | 28919                   | TT                              | CC              | 1946939318               |
| SNP_P4_123977_29031  | NW_004515840.1 | Scaffold335 | 29031                   | CC                              | TT              | 1946939320               |
| SNP_P4_123978_37692  | NW_004515840.1 | Scaffold335 | 37692                   | AA                              | TT              | 1946939322               |
| SNP_P4_123979_37694  | NW_004515840.1 | Scaffold335 | 37694                   | TT                              | CC              | 1946939324               |
| SNP_P4_123981_81477  | NW_004515840.1 | Scaffold335 | 81477                   | GG                              | AA              | 1946939326               |
| SNP_P4_123982_84974  | NW_004515840.1 | Scaffold335 | 84974                   | TT                              | CC              | 1946939328               |
| SNP_P4_123985_90914  | NW_004515840.1 | Scaffold335 | 90914                   | TT                              | AA              | 1946939330               |
| SNP_P4_123986_91177  | NW_004515840.1 | Scaffold335 | 91177                   | TT                              | AA              | 1946939332               |
| SNP_P4_123988_133674 | NW_004515840.1 | Scaffold335 | 133674                  | AA                              | GG              | 1946939334               |
| SNP_P4_123990_134646 | NW_004515840.1 | Scaffold335 | 134646                  | GG                              | AA              | 1946939336               |
| SNP_P4_123991_134653 | NW_004515840.1 | Scaffold335 | 134653                  | TT                              | CC              | 1946939338               |
| SNP_P4_123992_134697 | NW_004515840.1 | Scaffold335 | 134697                  | GG                              | CC              | 1946939340               |
| SNP_P4_123993_134745 | NW_004515840.1 | Scaffold335 | 134745                  | TT                              | CC              | 1946939342               |
| SNP_P4_123994_134982 | NW_004515840.1 | Scaffold335 | 134982                  | GG                              | TT              | 1946939344               |
| SNP_P4_123995_137272 | NW_004515840.1 | Scaffold335 | 137272                  | TT                              | GG              | 1946939346               |
| SNP_P4_123996_137279 | NW_004515840.1 | Scaffold335 | 137279                  | TT                              | AA              | 1946939348               |
| SNP_P4_123997_137309 | NW_004515840.1 | Scaffold335 | 137309                  | CC                              | TT              | 1946939350               |
| SNP_P4_123998_137327 | NW_004515840.1 | Scaffold335 | 137327                  | GG                              | AA              | 1946939352               |
| SNP_P4_124000_137449 | NW_004515840.1 | Scaffold335 | 137449                  | AA                              | CC              | 1946939354               |
| SNP_P4_124001_137465 | NW_004515840.1 | Scaffold335 | 137465                  | CC                              | GG              | 1946939357               |
| SNP_P4_124002_137492 | NW_004515840.1 | Scaffold335 | 137492                  | AA                              | TT              | 1946939359               |



| SNPs IDs             | Chromosome IDs | Chromosomes | Physical positions (bp) | CDC Frontier (Reference genome) | (ILWC46 & LPNB) | NCBI SNPdb Accession IDs |
|----------------------|----------------|-------------|-------------------------|---------------------------------|-----------------|--------------------------|
| SNP_P4_124003_137528 | NW_004515840.1 | Scaffold335 | 137528                  | CC                              | TT              | 1946939361               |
| SNP_P4_124004_137544 | NW_004515840.1 | Scaffold335 | 137544                  | TT                              | CC              | 1946939363               |
| SNP_P4_124005_137785 | NW_004515840.1 | Scaffold335 | 137785                  | AA                              | GG              | 1946939365               |
| SNP_P4_124007_137805 | NW_004515840.1 | Scaffold335 | 137805                  | AA                              | TT              | 1946939367               |
| SNP_P4_124008_137808 | NW_004515840.1 | Scaffold335 | 137808                  | AA                              | TT              | 1946939369               |
| SNP_P4_124009_137817 | NW_004515840.1 | Scaffold335 | 137817                  | TT                              | CC              | 1946939371               |
| SNP_P4_124010_137833 | NW_004515840.1 | Scaffold335 | 137833                  | AA                              | GG              | 1946939373               |
| SNP_P4_124011_137920 | NW_004515840.1 | Scaffold335 | 137920                  | AA                              | GG              | 1946939375               |
| SNP_P4_124012_137975 | NW_004515840.1 | Scaffold335 | 137975                  | AA                              | GG              | 1946939377               |
| SNP_P4_124013_138313 | NW_004515840.1 | Scaffold335 | 138313                  | CC                              | TT              | 1946939379               |
| SNP_P4_124014_138824 | NW_004515840.1 | Scaffold335 | 138824                  | GG                              | CC              | 1946939381               |
| SNP_P4_124015_139001 | NW_004515840.1 | Scaffold335 | 139001                  | TT                              | CC              | 1946939383               |
| SNP_P4_124016_139151 | NW_004515840.1 | Scaffold335 | 139151                  | CC                              | AA              | 1946939385               |
| SNP_P4_124017_139505 | NW_004515840.1 | Scaffold335 | 139505                  | GG                              | AA              | 1946939387               |
| SNP_P4_124018_142244 | NW_004515840.1 | Scaffold335 | 142244                  | GG                              | AA              | 1946939389               |
| SNP_P4_124019_142249 | NW_004515840.1 | Scaffold335 | 142249                  | CC                              | TT              | 1946939391               |
| SNP_P4_124020_148158 | NW_004515840.1 | Scaffold335 | 148158                  | CC                              | GG              | 1946939393               |
| SNP_P4_124021_157205 | NW_004515840.1 | Scaffold335 | 157205                  | TT                              | CC              | 1946939395               |
| SNP_P4_124022_157218 | NW_004515840.1 | Scaffold335 | 157218                  | GG                              | AA              | 1946939397               |
| SNP_P4_124023_157838 | NW_004515840.1 | Scaffold335 | 157838                  | GG                              | CC              | 1946939399               |
| SNP_P4_124024_157915 | NW_004515840.1 | Scaffold335 | 157915                  | GG                              | AA              | 1946939401               |
| SNP_P4_124025_157976 | NW_004515840.1 | Scaffold335 | 157976                  | TT                              | CC              | 1946939403               |
| SNP_P4_124027_174825 | NW_004515840.1 | Scaffold335 | 174825                  | GG                              | TT              | 1946939405               |
| SNP_P4_124028_187148 | NW_004515840.1 | Scaffold335 | 187148                  | CC                              | TT              | 1946939407               |
| SNP_P4_124029_187155 | NW_004515840.1 | Scaffold335 | 187155                  | GG                              | AA              | 1946939409               |
| SNP_P4_124030_187162 | NW_004515840.1 | Scaffold335 | 187162                  | AA                              | GG              | 1946939411               |
| SNP_P4_124032_195396 | NW_004515840.1 | Scaffold335 | 195396                  | AA                              | GG              | 1946939413               |
| SNP_P4_124033_195435 | NW_004515840.1 | Scaffold335 | 195435                  | AA                              | GG              | 1946939415               |
| SNP_P4_124034_195821 | NW_004515840.1 | Scaffold335 | 195821                  | GG                              | AA              | 1946939417               |
| SNP_P4_124035_202770 | NW_004515840.1 | Scaffold335 | 202770                  | CC                              | TT              | 1946939419               |
| SNP_P4_124036_202777 | NW_004515840.1 | Scaffold335 | 202777                  | AA                              | GG              | 1946939421               |
| SNP_P4_124037_206889 | NW_004515840.1 | Scaffold335 | 206889                  | TT                              | CC              | 1946939423               |
| SNP_P4_124038_208796 | NW_004515840.1 | Scaffold335 | 208796                  | CC                              | TT              | 1946939425               |
| SNP_P4_124039_210945 | NW_004515840.1 | Scaffold335 | 210945                  | TT                              | CC              | 1946939427               |
| SNP_P4_124040_210947 | NW_004515840.1 | Scaffold335 | 210947                  | CC                              | TT              | 1946939429               |
| SNP_P4_124041_211140 | NW_004515840.1 | Scaffold335 | 211140                  | TT                              | GG              | 1946939431               |
| SNP_P4_124042_216049 | NW_004515840.1 | Scaffold335 | 216049                  | TT                              | GG              | 1946939433               |
| SNP_P4_124043_216296 | NW_004515840.1 | Scaffold335 | 216296                  | GG                              | AA              | 1946939435               |
| SNP_P4_124044_219038 | NW_004515840.1 | Scaffold335 | 219038                  | CC                              | AA              | 1946939437               |
| SNP_P4_124045_219048 | NW_004515840.1 | Scaffold335 | 219048                  | CC                              | TT              | 1946939439               |
| SNP_P4_124046_219059 | NW_004515840.1 | Scaffold335 | 219059                  | TT                              | AA              | 1946939441               |
| SNP_P4_124047_219060 | NW_004515840.1 | Scaffold335 | 219060                  | TT                              | CC              | 1946939443               |

| SNPs IDs             | Chromosome IDs | Chromosomes | Physical positions (bp) | CDC Frontier (Reference genome) | (ILWC46 & LPNB) | NCBI SNPdb Accession IDs |
|----------------------|----------------|-------------|-------------------------|---------------------------------|-----------------|--------------------------|
| SNP_P4_124048_219068 | NW_004515840.1 | Scaffold335 | 219068                  | CC                              | TT              | 1946939445               |
| SNP_P4_124049_10626  | NW_004515841.1 | Scaffold336 | 10626                   | CC                              | TT              | 1946939447               |
| SNP_P4_124050_12075  | NW_004515841.1 | Scaffold336 | 12075                   | TT                              | AA              | 1946939449               |
| SNP_P4_124051_12092  | NW_004515841.1 | Scaffold336 | 12092                   | AA                              | GG              | 1946939451               |
| SNP_P4_124052_12112  | NW_004515841.1 | Scaffold336 | 12112                   | AA                              | CC              | 1946939453               |
| SNP_P4_124053_12121  | NW_004515841.1 | Scaffold336 | 12121                   | GG                              | AA              | 1946939455               |
| SNP_P4_124054_12124  | NW_004515841.1 | Scaffold336 | 12124                   | GG                              | TT              | 1946939457               |
| SNP_P4_124055_12130  | NW_004515841.1 | Scaffold336 | 12130                   | AA                              | CC              | 1946939459               |
| SNP_P4_124056_12180  | NW_004515841.1 | Scaffold336 | 12180                   | TT                              | CC              | 1946939461               |
| SNP_P4_124057_12286  | NW_004515841.1 | Scaffold336 | 12286                   | GG                              | CC              | 1946939463               |
| SNP_P4_124058_12438  | NW_004515841.1 | Scaffold336 | 12438                   | AA                              | GG              | 1946939465               |
| SNP_P4_124059_12482  | NW_004515841.1 | Scaffold336 | 12482                   | TT                              | GG              | 1946939467               |
| SNP_P4_124060_13226  | NW_004515841.1 | Scaffold336 | 13226                   | CC                              | TT              | 1946939469               |
| SNP_P4_124061_13591  | NW_004515841.1 | Scaffold336 | 13591                   | AA                              | TT              | 1946939471               |
| SNP_P4_124062_13677  | NW_004515841.1 | Scaffold336 | 13677                   | AA                              | GG              | 1946939473               |
| SNP_P4_124063_13685  | NW_004515841.1 | Scaffold336 | 13685                   | CC                              | TT              | 1946939475               |
| SNP_P4_124064_13711  | NW_004515841.1 | Scaffold336 | 13711                   | GG                              | AA              | 1946939477               |
| SNP_P4_124065_13740  | NW_004515841.1 | Scaffold336 | 13740                   | AA                              | GG              | 1946939479               |
| SNP_P4_124066_16005  | NW_004515841.1 | Scaffold336 | 16005                   | AA                              | GG              | 1946939481               |
| SNP_P4_124067_16112  | NW_004515841.1 | Scaffold336 | 16112                   | TT                              | CC              | 1946939483               |
| SNP_P4_124068_16315  | NW_004515841.1 | Scaffold336 | 16315                   | AA                              | GG              | 1946939485               |
| SNP_P4_124069_22507  | NW_004515841.1 | Scaffold336 | 22507                   | TT                              | AA              | 1946939487               |
| SNP_P4_124070_52842  | NW_004515841.1 | Scaffold336 | 52842                   | TT                              | CC              | 1946939489               |
| SNP_P4_124071_62987  | NW_004515841.1 | Scaffold336 | 62987                   | GG                              | AA              | 1946939491               |
| SNP_P4_124072_63808  | NW_004515841.1 | Scaffold336 | 63808                   | AA                              | GG              | 1946939493               |
| SNP_P4_124073_64062  | NW_004515841.1 | Scaffold336 | 64062                   | GG                              | CC              | 1946939495               |
| SNP_P4_124074_64895  | NW_004515841.1 | Scaffold336 | 64895                   | AA                              | TT              | 1946939497               |
| SNP_P4_124075_64943  | NW_004515841.1 | Scaffold336 | 64943                   | AA                              | GG              | 1946939499               |
| SNP_P4_124076_64957  | NW_004515841.1 | Scaffold336 | 64957                   | TT                              | CC              | 1946939501               |
| SNP_P4_124077_65307  | NW_004515841.1 | Scaffold336 | 65307                   | TT                              | CC              | 1946939503               |
| SNP_P4_124078_65436  | NW_004515841.1 | Scaffold336 | 65436                   | TT                              | GG              | 1946939505               |
| SNP_P4_124079_67784  | NW_004515841.1 | Scaffold336 | 67784                   | AA                              | GG              | 1946939507               |
| SNP_P4_124080_68747  | NW_004515841.1 | Scaffold336 | 68747                   | TT                              | GG              | 1946939509               |
| SNP_P4_124081_68798  | NW_004515841.1 | Scaffold336 | 68798                   | AA                              | GG              | 1946939511               |
| SNP_P4_124082_68816  | NW_004515841.1 | Scaffold336 | 68816                   | AA                              | CC              | 1946939513               |
| SNP_P4_124083_68830  | NW_004515841.1 | Scaffold336 | 68830                   | TT                              | AA              | 1946939515               |
| SNP_P4_124084_68864  | NW_004515841.1 | Scaffold336 | 68864                   | GG                              | TT              | 1946939517               |
| SNP_P4_124085_90934  | NW_004515841.1 | Scaffold336 | 90934                   | GG                              | AA              | 1946939519               |
| SNP_P4_124086_90971  | NW_004515841.1 | Scaffold336 | 90971                   | AA                              | TT              | 1946939521               |
| SNP_P4_124087_90981  | NW_004515841.1 | Scaffold336 | 90981                   | AA                              | GG              | 1946939523               |
| SNP_P4_124088_99303  | NW_004515841.1 | Scaffold336 | 99303                   | GG                              | CC              | 1946939525               |
| SNP_P4_124089_105950 | NW_004515841.1 | Scaffold336 | 105950                  | AA                              | GG              | 1946939527               |

| SNPs IDs             | Chromosome IDs | Chromosomes | Physical positions (bp) | CDC Frontier (Reference genome) | (ILWC46 & LPNB) | NCBI SNPdb Accession IDs |
|----------------------|----------------|-------------|-------------------------|---------------------------------|-----------------|--------------------------|
| SNP_P4_124090_105989 | NW_004515841.1 | Scaffold336 | 105989                  | GG                              | TT              | 1946939529               |
| SNP_P4_124091_106120 | NW_004515841.1 | Scaffold336 | 106120                  | GG                              | AA              | 1946939531               |
| SNP_P4_124092_110732 | NW_004515841.1 | Scaffold336 | 110732                  | TT                              | AA              | 1946939533               |
| SNP_P4_124093_137332 | NW_004515841.1 | Scaffold336 | 137332                  | TT                              | AA              | 1946939535               |
| SNP_P4_124094_174699 | NW_004515841.1 | Scaffold336 | 174699                  | CC                              | AA              | 1946939537               |
| SNP_P4_124095_174703 | NW_004515841.1 | Scaffold336 | 174703                  | GG                              | TT              | 1946939539               |
| SNP_P4_124096_174715 | NW_004515841.1 | Scaffold336 | 174715                  | CC                              | TT              | 1946939541               |
| SNP_P4_124097_174717 | NW_004515841.1 | Scaffold336 | 174717                  | AA                              | TT              | 1946939543               |
| SNP_P4_124098_174740 | NW_004515841.1 | Scaffold336 | 174740                  | AA                              | GG              | 1946939545               |
| SNP_P4_124099_174754 | NW_004515841.1 | Scaffold336 | 174754                  | CC                              | TT              | 1946939547               |
| SNP_P4_124100_174757 | NW_004515841.1 | Scaffold336 | 174757                  | AA                              | GG              | 1946939549               |
| SNP_P4_124101_174761 | NW_004515841.1 | Scaffold336 | 174761                  | GG                              | TT              | 1946939551               |
| SNP_P4_124102_175028 | NW_004515841.1 | Scaffold336 | 175028                  | TT                              | GG              | 1946939553               |
| SNP_P4_124103_177667 | NW_004515841.1 | Scaffold336 | 177667                  | TT                              | CC              | 1946939555               |
| SNP_P4_124104_177676 | NW_004515841.1 | Scaffold336 | 177676                  | CC                              | GG              | 1946939557               |
| SNP_P4_124105_178501 | NW_004515841.1 | Scaffold336 | 178501                  | AA                              | CC              | 1946939559               |
| SNP_P4_124106_178545 | NW_004515841.1 | Scaffold336 | 178545                  | TT                              | AA              | 1946939561               |
| SNP_P4_124107_178852 | NW_004515841.1 | Scaffold336 | 178852                  | TT                              | AA              | 1946939563               |
| SNP_P4_124108_178959 | NW_004515841.1 | Scaffold336 | 178959                  | AA                              | CC              | 1946939565               |
| SNP_P4_124109_184524 | NW_004515841.1 | Scaffold336 | 184524                  | TT                              | AA              | 1946939567               |
| SNP_P4_124112_187863 | NW_004515841.1 | Scaffold336 | 187863                  | AA                              | GG              | 1946939569               |
| SNP_P4_124113_197399 | NW_004515841.1 | Scaffold336 | 197399                  | AA                              | GG              | 1946939572               |
| SNP_P4_124114_216742 | NW_004515841.1 | Scaffold336 | 216742                  | CC                              | TT              | 1946939574               |
| SNP_P4_124115_217631 | NW_004515841.1 | Scaffold336 | 217631                  | CC                              | AA              | 1946939576               |
| SNP_P4_124116_217678 | NW_004515841.1 | Scaffold336 | 217678                  | AA                              | GG              | 1946939578               |
| SNP_P4_124117_242364 | NW_004515841.1 | Scaffold336 | 242364                  | AA                              | GG              | 1946939580               |
| SNP_P4_124119_307551 | NW_004515841.1 | Scaffold336 | 307551                  | CC                              | TT              | 1946939582               |
| SNP_P4_124121_333995 | NW_004515841.1 | Scaffold336 | 333995                  | AA                              | GG              | 1946939584               |
| SNP_P4_124122_360823 | NW_004515841.1 | Scaffold336 | 360823                  | TT                              | CC              | 1946939586               |
| SNP_P4_124123_360869 | NW_004515841.1 | Scaffold336 | 360869                  | AA                              | GG              | 1946939588               |
| SNP_P4_124125_360932 | NW_004515841.1 | Scaffold336 | 360932                  | AA                              | CC              | 1946939590               |
| SNP_P4_124126_360971 | NW_004515841.1 | Scaffold336 | 360971                  | AA                              | CC              | 1946939592               |
| SNP_P4_124127_386577 | NW_004515841.1 | Scaffold336 | 386577                  | AA                              | TT              | 1946939594               |
| SNP_P4_124128_386709 | NW_004515841.1 | Scaffold336 | 386709                  | GG                              | AA              | 1946939596               |
| SNP_P4_124130_400088 | NW_004515841.1 | Scaffold336 | 400088                  | AA                              | GG              | 1946939598               |
| SNP_P4_124131_400089 | NW_004515841.1 | Scaffold336 | 400089                  | AA                              | GG              | 1946939600               |
| SNP_P4_124132_400348 | NW_004515841.1 | Scaffold336 | 400348                  | GG                              | AA              | 1946939602               |
| SNP_P4_124133_400425 | NW_004515841.1 | Scaffold336 | 400425                  | TT                              | GG              | 1946939604               |
| SNP_P4_124134_400437 | NW_004515841.1 | Scaffold336 | 400437                  | TT                              | CC              | 1946939606               |
| SNP_P4_124135_401379 | NW_004515841.1 | Scaffold336 | 401379                  | CC                              | TT              | 1946939607               |
| SNP_P4_124136_401381 | NW_004515841.1 | Scaffold336 | 401381                  | CC                              | TT              | 1946939608               |
| SNP_P4_124137_401383 | NW_004515841.1 | Scaffold336 | 401383                  | AA                              | GG              | 1946939609               |

| SNPs IDs             | Chromosome IDs | Chromosomes | Physical positions (bp) | CDC Frontier (Reference genome) | (ILWC46 & LPNB) | NCBI SNPdb Accession IDs |
|----------------------|----------------|-------------|-------------------------|---------------------------------|-----------------|--------------------------|
| SNP_P4_124138_412227 | NW_004515841.1 | Scaffold336 | 412227                  | TT                              | CC              | 1946939611               |
| SNP_P4_124139_415682 | NW_004515841.1 | Scaffold336 | 415682                  | TT                              | AA              | 1946939613               |
| SNP_P4_124140_438915 | NW_004515841.1 | Scaffold336 | 438915                  | AA                              | GG              | 1946939615               |
| SNP_P4_124142_455682 | NW_004515841.1 | Scaffold336 | 455682                  | CC                              | AA              | 1946939617               |
| SNP_P4_124143_457446 | NW_004515841.1 | Scaffold336 | 457446                  | AA                              | CC              | 1946939619               |
| SNP_P4_124144_493418 | NW_004515841.1 | Scaffold336 | 493418                  | CC                              | TT              | 1946939621               |
| SNP_P4_124145_530113 | NW_004515841.1 | Scaffold336 | 530113                  | AA                              | CC              | 1946939623               |
| SNP_P4_124146_530124 | NW_004515841.1 | Scaffold336 | 530124                  | AA                              | GG              | 1946939625               |
| SNP_P4_124147_530174 | NW_004515841.1 | Scaffold336 | 530174                  | CC                              | TT              | 1946939627               |
| SNP_P4_124148_530181 | NW_004515841.1 | Scaffold336 | 530181                  | TT                              | GG              | 1946939629               |
| SNP_P4_124149_538344 | NW_004515841.1 | Scaffold336 | 538344                  | GG                              | AA              | 1946939631               |
| SNP_P4_124150_538364 | NW_004515841.1 | Scaffold336 | 538364                  | TT                              | CC              | 1946939633               |
| SNP_P4_124151_538373 | NW_004515841.1 | Scaffold336 | 538373                  | AA                              | GG              | 1946939635               |
| SNP_P4_124152_538401 | NW_004515841.1 | Scaffold336 | 538401                  | TT                              | GG              | 1946939637               |
| SNP_P4_124153_538409 | NW_004515841.1 | Scaffold336 | 538409                  | GG                              | AA              | 1946939639               |
| SNP_P4_124154_538413 | NW_004515841.1 | Scaffold336 | 538413                  | AA                              | GG              | 1946939641               |
| SNP_P4_124155_538479 | NW_004515841.1 | Scaffold336 | 538479                  | TT                              | GG              | 1946939642               |
| SNP_P4_124156_538530 | NW_004515841.1 | Scaffold336 | 538530                  | GG                              | AA              | 1946939644               |
| SNP_P4_124157_538542 | NW_004515841.1 | Scaffold336 | 538542                  | GG                              | AA              | 1946939646               |
| SNP_P4_124158_538689 | NW_004515841.1 | Scaffold336 | 538689                  | AA                              | GG              | 1946939648               |
| SNP_P4_124159_538741 | NW_004515841.1 | Scaffold336 | 538741                  | AA                              | GG              | 1946939650               |
| SNP_P4_124160_538761 | NW_004515841.1 | Scaffold336 | 538761                  | GG                              | AA              | 1946939652               |
| SNP_P4_124161_538780 | NW_004515841.1 | Scaffold336 | 538780                  | TT                              | CC              | 1946939654               |
| SNP_P4_124162_538789 | NW_004515841.1 | Scaffold336 | 538789                  | TT                              | CC              | 1946939656               |
| SNP_P4_124163_538862 | NW_004515841.1 | Scaffold336 | 538862                  | CC                              | AA              | 1946939658               |
| SNP_P4_124164_546435 | NW_004515841.1 | Scaffold336 | 546435                  | TT                              | AA              | 1946939660               |
| SNP_P4_124165_546496 | NW_004515841.1 | Scaffold336 | 546496                  | AA                              | TT              | 1946939662               |
| SNP_P4_124166_546788 | NW_004515841.1 | Scaffold336 | 546788                  | CC                              | TT              | 1946939664               |
| SNP_P4_124167_546878 | NW_004515841.1 | Scaffold336 | 546878                  | CC                              | TT              | 1946939666               |
| SNP_P4_124168_546985 | NW_004515841.1 | Scaffold336 | 546985                  | AA                              | CC              | 1946939668               |
| SNP_P4_124169_547051 | NW_004515841.1 | Scaffold336 | 547051                  | CC                              | TT              | 1946939670               |
| SNP_P4_124170_552230 | NW_004515841.1 | Scaffold336 | 552230                  | AA                              | GG              | 1946939672               |
| SNP_P4_124171_552520 | NW_004515841.1 | Scaffold336 | 552520                  | CC                              | AA              | 1946939674               |
| SNP_P4_124172_552594 | NW_004515841.1 | Scaffold336 | 552594                  | GG                              | AA              | 1946939676               |
| SNP_P4_124173_565427 | NW_004515841.1 | Scaffold336 | 565427                  | TT                              | CC              | 1946939678               |
| SNP_P4_124174_565839 | NW_004515841.1 | Scaffold336 | 565839                  | CC                              | AA              | 1946939680               |
| SNP_P4_124175_583610 | NW_004515841.1 | Scaffold336 | 583610                  | CC                              | TT              | 1946939682               |
| SNP_P4_124176_583619 | NW_004515841.1 | Scaffold336 | 583619                  | TT                              | GG              | 1946939684               |
| SNP_P4_124177_583629 | NW_004515841.1 | Scaffold336 | 583629                  | CC                              | AA              | 1946939686               |
| SNP_P4_124178_583640 | NW_004515841.1 | Scaffold336 | 583640                  | AA                              | GG              | 1946939688               |
| SNP_P4_124179_583658 | NW_004515841.1 | Scaffold336 | 583658                  | TT                              | CC              | 1946939690               |
| SNP_P4_124180_583664 | NW_004515841.1 | Scaffold336 | 583664                  | AA                              | GG              | 1946939692               |

| SNPs IDs             | Chromosome IDs | Chromosomes | Physical positions (bp) | CDC Frontier (Reference genome) | (ILWC46 & LPNB) | NCBI SNPdb Accession IDs |
|----------------------|----------------|-------------|-------------------------|---------------------------------|-----------------|--------------------------|
| SNP_P4_124181_583697 | NW_004515841.1 | Scaffold336 | 583697                  | AA                              | CC              | 1946939694               |
| SNP_P4_124182_584021 | NW_004515841.1 | Scaffold336 | 584021                  | AA                              | GG              | 1946939696               |
| SNP_P4_124183_614618 | NW_004515841.1 | Scaffold336 | 614618                  | CC                              | AA              | 1946939698               |
| SNP_P4_124184_616547 | NW_004515841.1 | Scaffold336 | 616547                  | AA                              | GG              | 1946939700               |
| SNP_P4_124185_616959 | NW_004515841.1 | Scaffold336 | 616959                  | CC                              | TT              | 1946939702               |
| SNP_P4_124186_617479 | NW_004515841.1 | Scaffold336 | 617479                  | CC                              | AA              | 1946939704               |
| SNP_P4_124188_623475 | NW_004515841.1 | Scaffold336 | 623475                  | TT                              | AA              | 1946939706               |
| SNP_P4_124189_633811 | NW_004515841.1 | Scaffold336 | 633811                  | GG                              | AA              | 1946939708               |
| SNP_P4_124190_633900 | NW_004515841.1 | Scaffold336 | 633900                  | AA                              | GG              | 1946939710               |
| SNP_P4_124192_634151 | NW_004515841.1 | Scaffold336 | 634151                  | GG                              | AA              | 1946939712               |
| SNP_P4_124193_634155 | NW_004515841.1 | Scaffold336 | 634155                  | AA                              | GG              | 1946939714               |
| SNP_P4_124194_634248 | NW_004515841.1 | Scaffold336 | 634248                  | TT                              | CC              | 1946939716               |
| SNP_P4_124195_634266 | NW_004515841.1 | Scaffold336 | 634266                  | AA                              | GG              | 1946939718               |
| SNP_P4_124196_634377 | NW_004515841.1 | Scaffold336 | 634377                  | AA                              | GG              | 1946939720               |
| SNP_P4_124197_647295 | NW_004515841.1 | Scaffold336 | 647295                  | AA                              | TT              | 1946939722               |
| SNP_P4_124198_676262 | NW_004515841.1 | Scaffold336 | 676262                  | TT                              | CC              | 1946939724               |
| SNP_P4_124199_709844 | NW_004515841.1 | Scaffold336 | 709844                  | AA                              | GG              | 1946939726               |
| SNP_P4_124200_709868 | NW_004515841.1 | Scaffold336 | 709868                  | GG                              | AA              | 1946939728               |
| SNP_P4_124201_709937 | NW_004515841.1 | Scaffold336 | 709937                  | TT                              | GG              | 1946939730               |
| SNP_P4_124202_710048 | NW_004515841.1 | Scaffold336 | 710048                  | AA                              | GG              | 1946939732               |
| SNP_P4_124203_710068 | NW_004515841.1 | Scaffold336 | 710068                  | GG                              | TT              | 1946939734               |
| SNP_P4_124204_710249 | NW_004515841.1 | Scaffold336 | 710249                  | TT                              | CC              | 1946939736               |
| SNP_P4_124205_710286 | NW_004515841.1 | Scaffold336 | 710286                  | AA                              | GG              | 1946939738               |
| SNP_P4_124207_710497 | NW_004515841.1 | Scaffold336 | 710497                  | CC                              | TT              | 1946939740               |
| SNP_P4_124208_710499 | NW_004515841.1 | Scaffold336 | 710499                  | TT                              | CC              | 1946939742               |
| SNP_P4_124209_757522 | NW_004515841.1 | Scaffold336 | 757522                  | AA                              | GG              | 1946939744               |
| SNP_P4_124210_757523 | NW_004515841.1 | Scaffold336 | 757523                  | TT                              | GG              | 1946939746               |
| SNP_P4_124211_757678 | NW_004515841.1 | Scaffold336 | 757678                  | AA                              | TT              | 1946939748               |
| SNP_P4_124212_758051 | NW_004515841.1 | Scaffold336 | 758051                  | TT                              | CC              | 1946939750               |
| SNP_P4_124213_758058 | NW_004515841.1 | Scaffold336 | 758058                  | AA                              | GG              | 1946939752               |
| SNP_P4_124214_758059 | NW_004515841.1 | Scaffold336 | 758059                  | TT                              | CC              | 1946939754               |
| SNP_P4_124215_758076 | NW_004515841.1 | Scaffold336 | 758076                  | AA                              | GG              | 1946939756               |
| SNP_P4_124216_760726 | NW_004515841.1 | Scaffold336 | 760726                  | CC                              | AA              | 1946939758               |
| SNP_P4_124217_763146 | NW_004515841.1 | Scaffold336 | 763146                  | TT                              | CC              | 1946939760               |
| SNP_P4_124218_764898 | NW_004515841.1 | Scaffold336 | 764898                  | GG                              | TT              | 1946939762               |
| SNP_P4_124219_768063 | NW_004515841.1 | Scaffold336 | 768063                  | TT                              | GG              | 1946939764               |
| SNP_P4_124221_768328 | NW_004515841.1 | Scaffold336 | 768328                  | TT                              | CC              | 1946939766               |
| SNP_P4_124222_784790 | NW_004515841.1 | Scaffold336 | 784790                  | AA                              | GG              | 1946939768               |
| SNP_P4_124223_785628 | NW_004515841.1 | Scaffold336 | 785628                  | TT                              | CC              | 1946939770               |
| SNP_P4_124224_798078 | NW_004515841.1 | Scaffold336 | 798078                  | TT                              | AA              | 1946939772               |
| SNP_P4_124225_800641 | NW_004515841.1 | Scaffold336 | 800641                  | CC                              | TT              | 1946939774               |
| SNP_P4_124226_805407 | NW_004515841.1 | Scaffold336 | 805407                  | AA                              | GG              | 1946939776               |

| SNPs IDs             | Chromosome IDs | Chromosomes | Physical positions (bp) | CDC Frontier (Reference genome) | (ILWC46 & LPNB) | NCBI SNPdb Accession IDs |
|----------------------|----------------|-------------|-------------------------|---------------------------------|-----------------|--------------------------|
| SNP_P4_124227_805497 | NW_004515841.1 | Scaffold336 | 805497                  | CC                              | TT              | 1946939778               |
| SNP_P4_124228_805764 | NW_004515841.1 | Scaffold336 | 805764                  | TT                              | CC              | 1946939780               |
| SNP_P4_124229_805908 | NW_004515841.1 | Scaffold336 | 805908                  | GG                              | AA              | 1946939782               |
| SNP_P4_124230_805909 | NW_004515841.1 | Scaffold336 | 805909                  | AA                              | GG              | 1946939784               |
| SNP_P4_124231_822030 | NW_004515841.1 | Scaffold336 | 822030                  | CC                              | AA              | 1946939786               |
| SNP_P4_124232_864558 | NW_004515841.1 | Scaffold336 | 864558                  | AA                              | CC              | 1946939788               |
| SNP_P4_124233_867454 | NW_004515841.1 | Scaffold336 | 867454                  | AA                              | GG              | 1946939790               |
| SNP_P4_124234_867455 | NW_004515841.1 | Scaffold336 | 867455                  | AA                              | GG              | 1946939792               |
| SNP_P4_124235_867505 | NW_004515841.1 | Scaffold336 | 867505                  | AA                              | TT              | 1946939794               |
| SNP_P4_124236_867806 | NW_004515841.1 | Scaffold336 | 867806                  | GG                              | AA              | 1946939796               |
| SNP_P4_124237_71170  | NW_004515842.1 | Scaffold338 | 71170                   | TT                              | CC              | 1946939798               |
| SNP_P4_124238_71253  | NW_004515842.1 | Scaffold338 | 71253                   | AA                              | TT              | 1946939800               |
| SNP_P4_124239_71497  | NW_004515842.1 | Scaffold338 | 71497                   | AA                              | GG              | 1946939802               |
| SNP_P4_124240_71633  | NW_004515842.1 | Scaffold338 | 71633                   | CC                              | TT              | 1946939804               |
| SNP_P4_124241_71725  | NW_004515842.1 | Scaffold338 | 71725                   | GG                              | AA              | 1946939806               |
| SNP_P4_124243_8337   | NW_004515843.1 | Scaffold340 | 8337                    | TT                              | AA              | 1946939808               |
| SNP_P4_124244_8416   | NW_004515843.1 | Scaffold340 | 8416                    | AA                              | CC              | 1946939810               |
| SNP_P4_124245_8439   | NW_004515843.1 | Scaffold340 | 8439                    | CC                              | TT              | 1946939812               |
| SNP_P4_124246_8754   | NW_004515843.1 | Scaffold340 | 8754                    | GG                              | AA              | 1946939814               |
| SNP_P4_124247_9819   | NW_004515843.1 | Scaffold340 | 9819                    | CC                              | TT              | 1946939816               |
| SNP_P4_124248_9874   | NW_004515843.1 | Scaffold340 | 9874                    | GG                              | AA              | 1946939818               |
| SNP_P4_124249_10404  | NW_004515843.1 | Scaffold340 | 10404                   | GG                              | AA              | 1946939820               |
| SNP_P4_124250_10478  | NW_004515843.1 | Scaffold340 | 10478                   | AA                              | GG              | 1946939822               |
| SNP_P4_124251_12093  | NW_004515843.1 | Scaffold340 | 12093                   | AA                              | TT              | 1946939824               |
| SNP_P4_124252_12123  | NW_004515843.1 | Scaffold340 | 12123                   | AA                              | CC              | 1946939826               |
| SNP_P4_124253_12171  | NW_004515843.1 | Scaffold340 | 12171                   | TT                              | AA              | 1946939828               |
| SNP_P4_124254_12175  | NW_004515843.1 | Scaffold340 | 12175                   | CC                              | AA              | 1946939830               |
| SNP_P4_124255_12311  | NW_004515843.1 | Scaffold340 | 12311                   | GG                              | AA              | 1946939832               |
| SNP_P4_124256_12394  | NW_004515843.1 | Scaffold340 | 12394                   | CC                              | AA              | 1946939834               |
| SNP_P4_124257_12399  | NW_004515843.1 | Scaffold340 | 12399                   | TT                              | CC              | 1946939836               |
| SNP_P4_124258_12463  | NW_004515843.1 | Scaffold340 | 12463                   | CC                              | TT              | 1946939838               |
| SNP_P4_124259_18643  | NW_004515843.1 | Scaffold340 | 18643                   | AA                              | GG              | 1946939840               |
| SNP_P4_124261_20064  | NW_004515843.1 | Scaffold340 | 20064                   | GG                              | CC              | 1946939842               |
| SNP_P4_124262_23426  | NW_004515843.1 | Scaffold340 | 23426                   | CC                              | TT              | 1946939844               |
| SNP_P4_124263_23481  | NW_004515843.1 | Scaffold340 | 23481                   | TT                              | CC              | 1946939846               |
| SNP_P4_124264_37627  | NW_004515843.1 | Scaffold340 | 37627                   | GG                              | CC              | 1946939848               |
| SNP_P4_124265_38141  | NW_004515843.1 | Scaffold340 | 38141                   | TT                              | CC              | 1946939850               |
| SNP_P4_124266_41016  | NW_004515843.1 | Scaffold340 | 41016                   | AA                              | GG              | 1946939852               |
| SNP_P4_124267_45581  | NW_004515843.1 | Scaffold340 | 45581                   | GG                              | AA              | 1946939854               |
| SNP_P4_124268_54205  | NW_004515843.1 | Scaffold340 | 54205                   | GG                              | AA              | 1946939856               |
| SNP_P4_124269_57253  | NW_004515843.1 | Scaffold340 | 57253                   | CC                              | GG              | 1946939858               |
| SNP_P4_124271_58532  | NW_004515843.1 | Scaffold340 | 58532                   | GG                              | AA              | 1946939860               |

| SNPs IDs             | Chromosome IDs | Chromosomes | Physical positions (bp) | CDC Frontier (Reference genome) | (ILWC46 & LPNB) | NCBI SNPdb Accession IDs |
|----------------------|----------------|-------------|-------------------------|---------------------------------|-----------------|--------------------------|
| SNP_P4_124275_61177  | NW_004515843.1 | Scaffold340 | 61177                   | CC                              | TT              | 1946939862               |
| SNP_P4_124276_61818  | NW_004515843.1 | Scaffold340 | 61818                   | CC                              | TT              | 1946939864               |
| SNP_P4_124277_66358  | NW_004515843.1 | Scaffold340 | 66358                   | AA                              | CC              | 1946939866               |
| SNP_P4_124278_66609  | NW_004515843.1 | Scaffold340 | 66609                   | CC                              | TT              | 1946939868               |
| SNP_P4_124279_68827  | NW_004515843.1 | Scaffold340 | 68827                   | CC                              | TT              | 1946939870               |
| SNP_P4_124280_68876  | NW_004515843.1 | Scaffold340 | 68876                   | AA                              | GG              | 1946939872               |
| SNP_P4_124281_68884  | NW_004515843.1 | Scaffold340 | 68884                   | TT                              | CC              | 1946939874               |
| SNP_P4_124282_68892  | NW_004515843.1 | Scaffold340 | 68892                   | AA                              | GG              | 1946939876               |
| SNP_P4_124283_68898  | NW_004515843.1 | Scaffold340 | 68898                   | TT                              | CC              | 1946939878               |
| SNP_P4_124284_68953  | NW_004515843.1 | Scaffold340 | 68953                   | CC                              | TT              | 1946939880               |
| SNP_P4_124285_68955  | NW_004515843.1 | Scaffold340 | 68955                   | AA                              | GG              | 1946939882               |
| SNP_P4_124286_69182  | NW_004515843.1 | Scaffold340 | 69182                   | TT                              | CC              | 1946939884               |
| SNP_P4_124287_69332  | NW_004515843.1 | Scaffold340 | 69332                   | GG                              | AA              | 1946939886               |
| SNP_P4_124288_69451  | NW_004515843.1 | Scaffold340 | 69451                   | GG                              | CC              | 1946939888               |
| SNP_P4_124289_72753  | NW_004515843.1 | Scaffold340 | 72753                   | AA                              | TT              | 1946939890               |
| SNP_P4_124290_77355  | NW_004515843.1 | Scaffold340 | 77355                   | GG                              | TT              | 1946939892               |
| SNP_P4_124291_77387  | NW_004515843.1 | Scaffold340 | 77387                   | AA                              | GG              | 1946939894               |
| SNP_P4_124292_77545  | NW_004515843.1 | Scaffold340 | 77545                   | TT                              | CC              | 1946939896               |
| SNP_P4_124293_78292  | NW_004515843.1 | Scaffold340 | 78292                   | TT                              | CC              | 1946939898               |
| SNP_P4_124294_90216  | NW_004515843.1 | Scaffold340 | 90216                   | CC                              | TT              | 1946939900               |
| SNP_P4_124295_90236  | NW_004515843.1 | Scaffold340 | 90236                   | CC                              | TT              | 1946939902               |
| SNP_P4_124296_90585  | NW_004515843.1 | Scaffold340 | 90585                   | TT                              | GG              | 1946939904               |
| SNP_P4_124297_90701  | NW_004515843.1 | Scaffold340 | 90701                   | GG                              | AA              | 1946939906               |
| SNP_P4_124298_90716  | NW_004515843.1 | Scaffold340 | 90716                   | GG                              | AA              | 1946939908               |
| SNP_P4_124299_90732  | NW_004515843.1 | Scaffold340 | 90732                   | GG                              | AA              | 1946939910               |
| SNP_P4_124300_90790  | NW_004515843.1 | Scaffold340 | 90790                   | CC                              | TT              | 1946939912               |
| SNP_P4_124301_90820  | NW_004515843.1 | Scaffold340 | 90820                   | AA                              | CC              | 1946939914               |
| SNP_P4_124303_91163  | NW_004515843.1 | Scaffold340 | 91163                   | AA                              | TT              | 1946939916               |
| SNP_P4_124304_91168  | NW_004515843.1 | Scaffold340 | 91168                   | TT                              | AA              | 1946939918               |
| SNP_P4_124305_91182  | NW_004515843.1 | Scaffold340 | 91182                   | TT                              | GG              | 1946939920               |
| SNP_P4_124306_91324  | NW_004515843.1 | Scaffold340 | 91324                   | CC                              | GG              | 1946939922               |
| SNP_P4_124307_94253  | NW_004515843.1 | Scaffold340 | 94253                   | AA                              | CC              | 1946939924               |
| SNP_P4_124308_94881  | NW_004515843.1 | Scaffold340 | 94881                   | AA                              | GG              | 1946939926               |
| SNP_P4_124309_98141  | NW_004515843.1 | Scaffold340 | 98141                   | GG                              | TT              | 1946939928               |
| SNP_P4_124312_100153 | NW_004515843.1 | Scaffold340 | 100153                  | GG                              | AA              | 1946939930               |
| SNP_P4_124313_100176 | NW_004515843.1 | Scaffold340 | 100176                  | GG                              | AA              | 1946939932               |
| SNP_P4_124314_100622 | NW_004515843.1 | Scaffold340 | 100622                  | CC                              | TT              | 1946939934               |
| SNP_P4_124316_102955 | NW_004515843.1 | Scaffold340 | 102955                  | GG                              | AA              | 1946939936               |
| SNP_P4_124317_109212 | NW_004515843.1 | Scaffold340 | 109212                  | AA                              | GG              | 1946939938               |
| SNP_P4_124319_110305 | NW_004515843.1 | Scaffold340 | 110305                  | AA                              | GG              | 1946939940               |
| SNP_P4_124320_110485 | NW_004515843.1 | Scaffold340 | 110485                  | TT                              | CC              | 1946939942               |
| SNP_P4_124321_110521 | NW_004515843.1 | Scaffold340 | 110521                  | GG                              | TT              | 1946939944               |

| SNPs IDs             | Chromosome IDs | Chromosomes | Physical positions (bp) | CDC Frontier (Reference genome) | (ILWC46 & LPNB) | NCBI SNPdb Accession IDs |
|----------------------|----------------|-------------|-------------------------|---------------------------------|-----------------|--------------------------|
| SNP_P4_124322_110522 | NW_004515843.1 | Scaffold340 | 110522                  | CC                              | AA              | 1946939946               |
| SNP_P4_124323_110609 | NW_004515843.1 | Scaffold340 | 110609                  | TT                              | CC              | 1946939948               |
| SNP_P4_124324_111660 | NW_004515843.1 | Scaffold340 | 111660                  | GG                              | AA              | 1946939950               |
| SNP_P4_124325_111738 | NW_004515843.1 | Scaffold340 | 111738                  | AA                              | CC              | 1946939952               |
| SNP_P4_124326_111784 | NW_004515843.1 | Scaffold340 | 111784                  | TT                              | CC              | 1946939954               |
| SNP_P4_124327_114060 | NW_004515843.1 | Scaffold340 | 114060                  | CC                              | TT              | 1946939956               |
| SNP_P4_124328_122373 | NW_004515843.1 | Scaffold340 | 122373                  | AA                              | GG              | 1946939958               |
| SNP_P4_124329_122408 | NW_004515843.1 | Scaffold340 | 122408                  | GG                              | AA              | 1946939960               |
| SNP_P4_124330_122417 | NW_004515843.1 | Scaffold340 | 122417                  | CC                              | AA              | 1946939962               |
| SNP_P4_124331_131551 | NW_004515843.1 | Scaffold340 | 131551                  | AA                              | GG              | 1946939964               |
| SNP_P4_124332_132105 | NW_004515843.1 | Scaffold340 | 132105                  | AA                              | GG              | 1946939966               |
| SNP_P4_124333_133390 | NW_004515843.1 | Scaffold340 | 133390                  | GG                              | AA              | 1946939968               |
| SNP_P4_124334_134555 | NW_004515843.1 | Scaffold340 | 134555                  | TT                              | CC              | 1946939970               |
| SNP_P4_124335_137135 | NW_004515843.1 | Scaffold340 | 137135                  | GG                              | AA              | 1946939972               |
| SNP_P4_124336_137201 | NW_004515843.1 | Scaffold340 | 137201                  | TT                              | AA              | 1946939974               |
| SNP_P4_124337_137222 | NW_004515843.1 | Scaffold340 | 137222                  | AA                              | GG              | 1946939976               |
| SNP_P4_124338_138236 | NW_004515843.1 | Scaffold340 | 138236                  | AA                              | GG              | 1946939979               |
| SNP_P4_124339_138363 | NW_004515843.1 | Scaffold340 | 138363                  | GG                              | CC              | 1946939981               |
| SNP_P4_124340_138818 | NW_004515843.1 | Scaffold340 | 138818                  | TT                              | CC              | 1946939983               |
| SNP_P4_124341_141120 | NW_004515843.1 | Scaffold340 | 141120                  | CC                              | AA              | 1946939985               |
| SNP_P4_124342_141121 | NW_004515843.1 | Scaffold340 | 141121                  | AA                              | TT              | 1946939987               |
| SNP_P4_124343_143340 | NW_004515843.1 | Scaffold340 | 143340                  | GG                              | CC              | 1946939989               |
| SNP_P4_124344_144434 | NW_004515843.1 | Scaffold340 | 144434                  | GG                              | TT              | 1946939991               |
| SNP_P4_124345_145128 | NW_004515843.1 | Scaffold340 | 145128                  | AA                              | CC              | 1946939993               |
| SNP_P4_124346_145963 | NW_004515843.1 | Scaffold340 | 145963                  | AA                              | GG              | 1946939995               |
| SNP_P4_124348_148276 | NW_004515843.1 | Scaffold340 | 148276                  | CC                              | TT              | 1946939997               |
| SNP_P4_124349_155737 | NW_004515843.1 | Scaffold340 | 155737                  | CC                              | TT              | 1946939999               |
| SNP_P4_124350_155980 | NW_004515843.1 | Scaffold340 | 155980                  | GG                              | TT              | 1946940001               |
| SNP_P4_124351_156714 | NW_004515843.1 | Scaffold340 | 156714                  | TT                              | CC              | 1946940003               |
| SNP_P4_124352_156945 | NW_004515843.1 | Scaffold340 | 156945                  | AA                              | GG              | 1946940005               |
| SNP_P4_124353_157257 | NW_004515843.1 | Scaffold340 | 157257                  | GG                              | TT              | 1946940007               |
| SNP_P4_124356_162117 | NW_004515843.1 | Scaffold340 | 162117                  | GG                              | AA              | 1946940009               |
| SNP_P4_124357_162152 | NW_004515843.1 | Scaffold340 | 162152                  | CC                              | TT              | 1946940011               |
| SNP_P4_124358_162355 | NW_004515843.1 | Scaffold340 | 162355                  | GG                              | TT              | 1946940013               |
| SNP_P4_124359_162637 | NW_004515843.1 | Scaffold340 | 162637                  | TT                              | CC              | 1946940015               |
| SNP_P4_124360_162722 | NW_004515843.1 | Scaffold340 | 162722                  | CC                              | AA              | 1946940017               |
| SNP_P4_124361_163512 | NW_004515843.1 | Scaffold340 | 163512                  | CC                              | TT              | 1946940019               |
| SNP_P4_124362_163883 | NW_004515843.1 | Scaffold340 | 163883                  | GG                              | TT              | 1946940021               |
| SNP_P4_124363_164014 | NW_004515843.1 | Scaffold340 | 164014                  | CC                              | TT              | 1946940023               |
| SNP_P4_124364_164027 | NW_004515843.1 | Scaffold340 | 164027                  | GG                              | AA              | 1946940025               |
| SNP_P4_124365_164039 | NW_004515843.1 | Scaffold340 | 164039                  | GG                              | AA              | 1946940027               |
| SNP_P4_124366_164266 | NW_004515843.1 | Scaffold340 | 164266                  | AA                              | GG              | 1946940029               |



| SNPs IDs             | Chromosome IDs | Chromosomes | Physical positions (bp) | CDC Frontier (Reference genome) | (ILWC46 & LPNB) | NCBI SNPdb Accession IDs |
|----------------------|----------------|-------------|-------------------------|---------------------------------|-----------------|--------------------------|
| SNP_P4_124368_165109 | NW_004515843.1 | Scaffold340 | 165109                  | AA                              | GG              | 1946940031               |
| SNP_P4_124370_172119 | NW_004515843.1 | Scaffold340 | 172119                  | CC                              | AA              | 1946940033               |
| SNP_P4_124371_173558 | NW_004515843.1 | Scaffold340 | 173558                  | GG                              | AA              | 1946940035               |
| SNP_P4_124372_174509 | NW_004515843.1 | Scaffold340 | 174509                  | AA                              | TT              | 1946940037               |
| SNP_P4_124373_175370 | NW_004515843.1 | Scaffold340 | 175370                  | TT                              | GG              | 1946940039               |
| SNP_P4_124374_175422 | NW_004515843.1 | Scaffold340 | 175422                  | AA                              | TT              | 1946940041               |
| SNP_P4_124375_186424 | NW_004515843.1 | Scaffold340 | 186424                  | CC                              | TT              | 1946940043               |
| SNP_P4_124376_190492 | NW_004515843.1 | Scaffold340 | 190492                  | TT                              | CC              | 1946940045               |
| SNP_P4_124379_201208 | NW_004515843.1 | Scaffold340 | 201208                  | AA                              | GG              | 1946940047               |
| SNP_P4_124380_203790 | NW_004515843.1 | Scaffold340 | 203790                  | GG                              | TT              | 1946940049               |
| SNP_P4_124381_204166 | NW_004515843.1 | Scaffold340 | 204166                  | GG                              | AA              | 1946940051               |
| SNP_P4_124382_204367 | NW_004515843.1 | Scaffold340 | 204367                  | AA                              | GG              | 1946940053               |
| SNP_P4_124383_205793 | NW_004515843.1 | Scaffold340 | 205793                  | CC                              | TT              | 1946940055               |
| SNP_P4_124384_206180 | NW_004515843.1 | Scaffold340 | 206180                  | AA                              | GG              | 1946940057               |
| SNP_P4_124385_206181 | NW_004515843.1 | Scaffold340 | 206181                  | GG                              | AA              | 1946940059               |
| SNP_P4_124386_206461 | NW_004515843.1 | Scaffold340 | 206461                  | GG                              | AA              | 1946940061               |
| SNP_P4_124387_210249 | NW_004515843.1 | Scaffold340 | 210249                  | GG                              | AA              | 1946940064               |
| SNP_P4_124389_216736 | NW_004515843.1 | Scaffold340 | 216736                  | CC                              | AA              | 1946940066               |
| SNP_P4_124390_216807 | NW_004515843.1 | Scaffold340 | 216807                  | AA                              | GG              | 1946940068               |
| SNP_P4_124392_219176 | NW_004515843.1 | Scaffold340 | 219176                  | CC                              | TT              | 1946940070               |
| SNP_P4_124393_219397 | NW_004515843.1 | Scaffold340 | 219397                  | CC                              | TT              | 1946940072               |
| SNP_P4_124394_221238 | NW_004515843.1 | Scaffold340 | 221238                  | CC                              | TT              | 1946940074               |
| SNP_P4_124395_222917 | NW_004515843.1 | Scaffold340 | 222917                  | CC                              | TT              | 1946940076               |
| SNP_P4_124396_223303 | NW_004515843.1 | Scaffold340 | 223303                  | GG                              | AA              | 1946940078               |
| SNP_P4_124397_224199 | NW_004515843.1 | Scaffold340 | 224199                  | TT                              | AA              | 1946940080               |
| SNP_P4_124399_226255 | NW_004515843.1 | Scaffold340 | 226255                  | CC                              | TT              | 1946940082               |
| SNP_P4_124400_226674 | NW_004515843.1 | Scaffold340 | 226674                  | CC                              | TT              | 1946940084               |
| SNP_P4_124401_227247 | NW_004515843.1 | Scaffold340 | 227247                  | AA                              | TT              | 1946940086               |
| SNP_P4_124402_228513 | NW_004515843.1 | Scaffold340 | 228513                  | TT                              | CC              | 1946940088               |
| SNP_P4_124403_228524 | NW_004515843.1 | Scaffold340 | 228524                  | TT                              | CC              | 1946940090               |
| SNP_P4_124404_238396 | NW_004515843.1 | Scaffold340 | 238396                  | GG                              | AA              | 1946940092               |
| SNP_P4_124405_238445 | NW_004515843.1 | Scaffold340 | 238445                  | GG                              | TT              | 1946940094               |
| SNP_P4_124406_238465 | NW_004515843.1 | Scaffold340 | 238465                  | CC                              | TT              | 1946940096               |
| SNP_P4_124407_238529 | NW_004515843.1 | Scaffold340 | 238529                  | CC                              | AA              | 1946940098               |
| SNP_P4_124408_242038 | NW_004515843.1 | Scaffold340 | 242038                  | GG                              | AA              | 1946940100               |
| SNP_P4_124409_242042 | NW_004515843.1 | Scaffold340 | 242042                  | AA                              | GG              | 1946940102               |
| SNP_P4_124410_242097 | NW_004515843.1 | Scaffold340 | 242097                  | AA                              | GG              | 1946940104               |
| SNP_P4_124411_242131 | NW_004515843.1 | Scaffold340 | 242131                  | TT                              | CC              | 1946940106               |
| SNP_P4_124412_242159 | NW_004515843.1 | Scaffold340 | 242159                  | AA                              | GG              | 1946940108               |
| SNP_P4_124413_242168 | NW_004515843.1 | Scaffold340 | 242168                  | CC                              | TT              | 1946940110               |
| SNP_P4_124414_242199 | NW_004515843.1 | Scaffold340 | 242199                  | TT                              | GG              | 1946940112               |
| SNP_P4_124415_242225 | NW_004515843.1 | Scaffold340 | 242225                  | AA                              | CC              | 1946940114               |

| SNPs IDs             | Chromosome IDs | Chromosomes | Physical positions (bp) | CDC Frontier (Reference genome) | (ILWC46 & LPNB) | NCBI SNPdb Accession IDs |
|----------------------|----------------|-------------|-------------------------|---------------------------------|-----------------|--------------------------|
| SNP_P4_124416_242461 | NW_004515843.1 | Scaffold340 | 242461                  | TT                              | CC              | 1946940116               |
| SNP_P4_124417_242472 | NW_004515843.1 | Scaffold340 | 242472                  | TT                              | GG              | 1946940118               |
| SNP_P4_124418_242473 | NW_004515843.1 | Scaffold340 | 242473                  | GG                              | TT              | 1946940120               |
| SNP_P4_124419_243384 | NW_004515843.1 | Scaffold340 | 243384                  | TT                              | CC              | 1946940122               |
| SNP_P4_124420_248898 | NW_004515843.1 | Scaffold340 | 248898                  | AA                              | GG              | 1946940124               |
| SNP_P4_124421_249279 | NW_004515843.1 | Scaffold340 | 249279                  | CC                              | TT              | 1946940126               |
| SNP_P4_124423_250063 | NW_004515843.1 | Scaffold340 | 250063                  | AA                              | GG              | 1946940128               |
| SNP_P4_124425_252009 | NW_004515843.1 | Scaffold340 | 252009                  | AA                              | TT              | 1946940130               |
| SNP_P4_124426_252010 | NW_004515843.1 | Scaffold340 | 252010                  | TT                              | AA              | 1946940132               |
| SNP_P4_124429_259960 | NW_004515843.1 | Scaffold340 | 259960                  | GG                              | AA              | 1946940134               |
| SNP_P4_124430_262591 | NW_004515843.1 | Scaffold340 | 262591                  | AA                              | GG              | 1946940136               |
| SNP_P4_124431_264400 | NW_004515843.1 | Scaffold340 | 264400                  | AA                              | GG              | 1946940138               |
| SNP_P4_124432_264491 | NW_004515843.1 | Scaffold340 | 264491                  | GG                              | AA              | 1946940140               |
| SNP_P4_124433_265216 | NW_004515843.1 | Scaffold340 | 265216                  | AA                              | GG              | 1946940142               |
| SNP_P4_124434_265228 | NW_004515843.1 | Scaffold340 | 265228                  | AA                              | GG              | 1946940144               |
| SNP_P4_124435_270282 | NW_004515843.1 | Scaffold340 | 270282                  | GG                              | CC              | 1946940146               |
| SNP_P4_124436_274422 | NW_004515843.1 | Scaffold340 | 274422                  | TT                              | GG              | 1946940148               |
| SNP_P4_124438_274939 | NW_004515843.1 | Scaffold340 | 274939                  | CC                              | GG              | 1946940150               |
| SNP_P4_124439_275496 | NW_004515843.1 | Scaffold340 | 275496                  | TT                              | AA              | 1946940152               |
| SNP_P4_124440_276085 | NW_004515843.1 | Scaffold340 | 276085                  | CC                              | TT              | 1946940155               |
| SNP_P4_124441_277783 | NW_004515843.1 | Scaffold340 | 277783                  | CC                              | TT              | 1946940157               |
| SNP_P4_124442_281806 | NW_004515843.1 | Scaffold340 | 281806                  | AA                              | GG              | 1946940159               |
| SNP_P4_124443_282212 | NW_004515843.1 | Scaffold340 | 282212                  | AA                              | GG              | 1946940161               |
| SNP_P4_124444_283994 | NW_004515843.1 | Scaffold340 | 283994                  | CC                              | TT              | 1946940163               |
| SNP_P4_124446_284411 | NW_004515843.1 | Scaffold340 | 284411                  | GG                              | TT              | 1946940165               |
| SNP_P4_124447_287650 | NW_004515843.1 | Scaffold340 | 287650                  | GG                              | AA              | 1946940167               |
| SNP_P4_124450_289989 | NW_004515843.1 | Scaffold340 | 289989                  | AA                              | GG              | 1946940169               |
| SNP_P4_124451_290022 | NW_004515843.1 | Scaffold340 | 290022                  | CC                              | TT              | 1946940171               |
| SNP_P4_124452_290750 | NW_004515843.1 | Scaffold340 | 290750                  | GG                              | AA              | 1946940173               |
| SNP_P4_124453_293851 | NW_004515843.1 | Scaffold340 | 293851                  | TT                              | CC              | 1946940175               |
| SNP_P4_124455_295069 | NW_004515843.1 | Scaffold340 | 295069                  | CC                              | TT              | 1946940177               |
| SNP_P4_124456_295097 | NW_004515843.1 | Scaffold340 | 295097                  | AA                              | TT              | 1946940179               |
| SNP_P4_124457_295473 | NW_004515843.1 | Scaffold340 | 295473                  | TT                              | CC              | 1946940181               |
| SNP_P4_124458_295497 | NW_004515843.1 | Scaffold340 | 295497                  | TT                              | AA              | 1946940183               |
| SNP_P4_124459_296648 | NW_004515843.1 | Scaffold340 | 296648                  | CC                              | TT              | 1946940185               |
| SNP_P4_124460_298227 | NW_004515843.1 | Scaffold340 | 298227                  | TT                              | GG              | 1946940187               |
| SNP_P4_124461_298244 | NW_004515843.1 | Scaffold340 | 298244                  | CC                              | TT              | 1946940189               |
| SNP_P4_124462_298995 | NW_004515843.1 | Scaffold340 | 298995                  | CC                              | TT              | 1946940191               |
| SNP_P4_124463_299011 | NW_004515843.1 | Scaffold340 | 299011                  | TT                              | CC              | 1946940193               |
| SNP_P4_124465_300669 | NW_004515843.1 | Scaffold340 | 300669                  | CC                              | TT              | 1946940195               |
| SNP_P4_124466_313707 | NW_004515843.1 | Scaffold340 | 313707                  | AA                              | TT              | 1946940197               |
| SNP_P4_124467_315091 | NW_004515843.1 | Scaffold340 | 315091                  | TT                              | CC              | 1946940199               |

| SNPs IDs             | Chromosome IDs | Chromosomes | Physical positions (bp) | CDC Frontier (Reference genome) | (ILWC46 & LPNB) | NCBI SNPdb Accession IDs |
|----------------------|----------------|-------------|-------------------------|---------------------------------|-----------------|--------------------------|
| SNP_P4_124468_315101 | NW_004515843.1 | Scaffold340 | 315101                  | GG                              | TT              | 1946940201               |
| SNP_P4_124470_316374 | NW_004515843.1 | Scaffold340 | 316374                  | CC                              | TT              | 1946940203               |
| SNP_P4_124473_318121 | NW_004515843.1 | Scaffold340 | 318121                  | GG                              | AA              | 1946940205               |
| SNP_P4_124474_318320 | NW_004515843.1 | Scaffold340 | 318320                  | TT                              | GG              | 1946940207               |
| SNP_P4_124475_318510 | NW_004515843.1 | Scaffold340 | 318510                  | CC                              | TT              | 1946940210               |
| SNP_P4_124476_669    | NW_004515844.1 | Scaffold341 | 669                     | AA                              | GG              | 1946940212               |
| SNP_P4_124477_879    | NW_004515844.1 | Scaffold341 | 879                     | TT                              | CC              | 1946940214               |
| SNP_P4_124478_3712   | NW_004515844.1 | Scaffold341 | 3712                    | AA                              | GG              | 1946940216               |
| SNP_P4_124479_3924   | NW_004515844.1 | Scaffold341 | 3924                    | CC                              | TT              | 1946940218               |
| SNP_P4_124480_4194   | NW_004515844.1 | Scaffold341 | 4194                    | TT                              | CC              | 1946940220               |
| SNP_P4_124481_63434  | NW_004515844.1 | Scaffold341 | 63434                   | GG                              | AA              | 1946940222               |
| SNP_P4_124482_67905  | NW_004515844.1 | Scaffold341 | 67905                   | TT                              | CC              | 1946940224               |
| SNP_P4_124483_68166  | NW_004515844.1 | Scaffold341 | 68166                   | AA                              | CC              | 1946940226               |
| SNP_P4_124484_68884  | NW_004515844.1 | Scaffold341 | 68884                   | AA                              | GG              | 1946940228               |
| SNP_P4_124485_90737  | NW_004515844.1 | Scaffold341 | 90737                   | GG                              | TT              | 1946940230               |
| SNP_P4_124486_90798  | NW_004515844.1 | Scaffold341 | 90798                   | CC                              | TT              | 1946940232               |
| SNP_P4_124487_91229  | NW_004515844.1 | Scaffold341 | 91229                   | TT                              | AA              | 1946940234               |
| SNP_P4_124488_91246  | NW_004515844.1 | Scaffold341 | 91246                   | TT                              | GG              | 1946940236               |
| SNP_P4_124489_92581  | NW_004515844.1 | Scaffold341 | 92581                   | GG                              | AA              | 1946940238               |
| SNP_P4_124490_92630  | NW_004515844.1 | Scaffold341 | 92630                   | TT                              | GG              | 1946940240               |
| SNP_P4_124491_92761  | NW_004515844.1 | Scaffold341 | 92761                   | GG                              | AA              | 1946940242               |
| SNP_P4_124492_92769  | NW_004515844.1 | Scaffold341 | 92769                   | AA                              | GG              | 1946940244               |
| SNP_P4_124493_92770  | NW_004515844.1 | Scaffold341 | 92770                   | CC                              | TT              | 1946940246               |
| SNP_P4_124494_92775  | NW_004515844.1 | Scaffold341 | 92775                   | AA                              | CC              | 1946940248               |
| SNP_P4_124495_101170 | NW_004515844.1 | Scaffold341 | 101170                  | TT                              | CC              | 1946940250               |
| SNP_P4_124496_101828 | NW_004515844.1 | Scaffold341 | 101828                  | TT                              | AA              | 1946940252               |
| SNP_P4_124497_102427 | NW_004515844.1 | Scaffold341 | 102427                  | TT                              | CC              | 1946940254               |
| SNP_P4_124498_116228 | NW_004515844.1 | Scaffold341 | 116228                  | AA                              | GG              | 1946940256               |
| SNP_P4_124499_116259 | NW_004515844.1 | Scaffold341 | 116259                  | TT                              | CC              | 1946940258               |
| SNP_P4_124500_116299 | NW_004515844.1 | Scaffold341 | 116299                  | GG                              | TT              | 1946940260               |
| SNP_P4_124502_127398 | NW_004515844.1 | Scaffold341 | 127398                  | GG                              | CC              | 1946940262               |
| SNP_P4_124504_135048 | NW_004515844.1 | Scaffold341 | 135048                  | GG                              | CC              | 1946940264               |
| SNP_P4_124505_135069 | NW_004515844.1 | Scaffold341 | 135069                  | GG                              | AA              | 1946940266               |
| SNP_P4_124506_135144 | NW_004515844.1 | Scaffold341 | 135144                  | AA                              | GG              | 1946940268               |
| SNP_P4_124507_135151 | NW_004515844.1 | Scaffold341 | 135151                  | TT                              | CC              | 1946940270               |
| SNP_P4_124508_135180 | NW_004515844.1 | Scaffold341 | 135180                  | TT                              | GG              | 1946940272               |
| SNP_P4_124510_135265 | NW_004515844.1 | Scaffold341 | 135265                  | AA                              | GG              | 1946940274               |
| SNP_P4_124512_135377 | NW_004515844.1 | Scaffold341 | 135377                  | TT                              | AA              | 1946940276               |
| SNP_P4_124513_135509 | NW_004515844.1 | Scaffold341 | 135509                  | GG                              | AA              | 1946940278               |
| SNP_P4_124514_135546 | NW_004515844.1 | Scaffold341 | 135546                  | TT                              | AA              | 1946940280               |
| SNP_P4_124515_135569 | NW_004515844.1 | Scaffold341 | 135569                  | GG                              | TT              | 1946940282               |
| SNP_P4_124516_137194 | NW_004515844.1 | Scaffold341 | 137194                  | AA                              | CC              | 1946940284               |

| SNPs IDs             | Chromosome IDs | Chromosomes | Physical positions (bp) | CDC Frontier (Reference genome) | (ILWC46 & LPNB) | NCBI SNPdb Accession IDs |
|----------------------|----------------|-------------|-------------------------|---------------------------------|-----------------|--------------------------|
| SNP_P4_124517_137202 | NW_004515844.1 | Scaffold341 | 137202                  | GG                              | AA              | 1946940286               |
| SNP_P4_124518_137484 | NW_004515844.1 | Scaffold341 | 137484                  | AA                              | GG              | 1946940289               |
| SNP_P4_124519_137511 | NW_004515844.1 | Scaffold341 | 137511                  | AA                              | GG              | 1946940291               |
| SNP_P4_124520_138015 | NW_004515844.1 | Scaffold341 | 138015                  | CC                              | TT              | 1946940293               |
| SNP_P4_124521_138027 | NW_004515844.1 | Scaffold341 | 138027                  | CC                              | GG              | 1946940295               |
| SNP_P4_124522_138033 | NW_004515844.1 | Scaffold341 | 138033                  | AA                              | CC              | 1946940297               |
| SNP_P4_124523_144688 | NW_004515844.1 | Scaffold341 | 144688                  | TT                              | AA              | 1946940299               |
| SNP_P4_124524_144852 | NW_004515844.1 | Scaffold341 | 144852                  | AA                              | CC              | 1946940301               |
| SNP_P4_124525_144859 | NW_004515844.1 | Scaffold341 | 144859                  | CC                              | TT              | 1946940303               |
| SNP_P4_124527_144879 | NW_004515844.1 | Scaffold341 | 144879                  | AA                              | GG              | 1946940305               |
| SNP_P4_124528_155070 | NW_004515844.1 | Scaffold341 | 155070                  | CC                              | TT              | 1946940307               |
| SNP_P4_124529_159346 | NW_004515844.1 | Scaffold341 | 159346                  | GG                              | AA              | 1946940309               |
| SNP_P4_124530_159360 | NW_004515844.1 | Scaffold341 | 159360                  | CC                              | TT              | 1946940311               |
| SNP_P4_124532_184974 | NW_004515844.1 | Scaffold341 | 184974                  | AA                              | CC              | 1946940313               |
| SNP_P4_124533_185004 | NW_004515844.1 | Scaffold341 | 185004                  | AA                              | GG              | 1946940315               |
| SNP_P4_124534_185007 | NW_004515844.1 | Scaffold341 | 185007                  | TT                              | CC              | 1946940317               |
| SNP_P4_124535_185029 | NW_004515844.1 | Scaffold341 | 185029                  | AA                              | TT              | 1946940319               |
| SNP_P4_124536_185055 | NW_004515844.1 | Scaffold341 | 185055                  | TT                              | CC              | 1946940321               |
| SNP_P4_124537_185067 | NW_004515844.1 | Scaffold341 | 185067                  | CC                              | TT              | 1946940323               |
| SNP_P4_124538_185354 | NW_004515844.1 | Scaffold341 | 185354                  | CC                              | TT              | 1946940325               |
| SNP_P4_124539_185400 | NW_004515844.1 | Scaffold341 | 185400                  | CC                              | TT              | 1946940327               |
| SNP_P4_124540_185542 | NW_004515844.1 | Scaffold341 | 185542                  | AA                              | GG              | 1946940329               |
| SNP_P4_124541_674    | NW_004515845.1 | Scaffold342 | 674                     | AA                              | GG              | 1946940331               |
| SNP_P4_124542_681    | NW_004515845.1 | Scaffold342 | 681                     | TT                              | CC              | 1946940333               |
| SNP_P4_124543_706    | NW_004515845.1 | Scaffold342 | 706                     | AA                              | GG              | 1946940335               |
| SNP_P4_124544_757    | NW_004515845.1 | Scaffold342 | 757                     | TT                              | AA              | 1946940337               |
| SNP_P4_124545_881    | NW_004515845.1 | Scaffold342 | 881                     | AA                              | GG              | 1946940339               |
| SNP_P4_124546_979    | NW_004515845.1 | Scaffold342 | 979                     | GG                              | AA              | 1946940341               |
| SNP_P4_124547_15559  | NW_004515845.1 | Scaffold342 | 15559                   | TT                              | GG              | 1946940343               |
| SNP_P4_124548_19257  | NW_004515845.1 | Scaffold342 | 19257                   | CC                              | GG              | 1946940345               |
| SNP_P4_124549_19525  | NW_004515845.1 | Scaffold342 | 19525                   | TT                              | CC              | 1946940347               |
| SNP_P4_124550_19565  | NW_004515845.1 | Scaffold342 | 19565                   | TT                              | AA              | 1946940349               |
| SNP_P4_124551_19566  | NW_004515845.1 | Scaffold342 | 19566                   | CC                              | AA              | 1946940351               |
| SNP_P4_124552_19567  | NW_004515845.1 | Scaffold342 | 19567                   | TT                              | CC              | 1946940353               |
| SNP_P4_124553_19633  | NW_004515845.1 | Scaffold342 | 19633                   | TT                              | CC              | 1946940355               |
| SNP_P4_124554_23996  | NW_004515845.1 | Scaffold342 | 23996                   | TT                              | CC              | 1946940357               |
| SNP_P4_124555_24536  | NW_004515845.1 | Scaffold342 | 24536                   | CC                              | AA              | 1946940359               |
| SNP_P4_124556_35810  | NW_004515845.1 | Scaffold342 | 35810                   | CC                              | GG              | 1946940361               |
| SNP_P4_124557_37781  | NW_004515845.1 | Scaffold342 | 37781                   | AA                              | GG              | 1946940363               |
| SNP_P4_124558_46110  | NW_004515845.1 | Scaffold342 | 46110                   | CC                              | TT              | 1946940365               |
| SNP_P4_124559_46112  | NW_004515845.1 | Scaffold342 | 46112                   | CC                              | GG              | 1946940367               |
| SNP_P4_124560_61391  | NW_004515845.1 | Scaffold342 | 61391                   | TT                              | CC              | 1946940369               |

| SNPs IDs             | Chromosome IDs | Chromosomes | Physical positions (bp) | CDC Frontier (Reference genome) | (ILWC46 & LPNB) | NCBI SNPdb Accession IDs |
|----------------------|----------------|-------------|-------------------------|---------------------------------|-----------------|--------------------------|
| SNP_P4_124561_61396  | NW_004515845.1 | Scaffold342 | 61396                   | CC                              | TT              | 1946940371               |
| SNP_P4_124562_61569  | NW_004515845.1 | Scaffold342 | 61569                   | CC                              | TT              | 1946940373               |
| SNP_P4_124563_61574  | NW_004515845.1 | Scaffold342 | 61574                   | TT                              | CC              | 1946940375               |
| SNP_P4_124564_78338  | NW_004515845.1 | Scaffold342 | 78338                   | AA                              | GG              | 1946940377               |
| SNP_P4_124565_78419  | NW_004515845.1 | Scaffold342 | 78419                   | AA                              | CC              | 1946940379               |
| SNP_P4_124566_78715  | NW_004515845.1 | Scaffold342 | 78715                   | AA                              | GG              | 1946940381               |
| SNP_P4_124567_78719  | NW_004515845.1 | Scaffold342 | 78719                   | AA                              | GG              | 1946940383               |
| SNP_P4_124568_78731  | NW_004515845.1 | Scaffold342 | 78731                   | TT                              | CC              | 1946940385               |
| SNP_P4_124569_78791  | NW_004515845.1 | Scaffold342 | 78791                   | TT                              | CC              | 1946940387               |
| SNP_P4_124570_78810  | NW_004515845.1 | Scaffold342 | 78810                   | AA                              | GG              | 1946940389               |
| SNP_P4_124571_80405  | NW_004515845.1 | Scaffold342 | 80405                   | GG                              | AA              | 1946940391               |
| SNP_P4_124572_111841 | NW_004515845.1 | Scaffold342 | 111841                  | AA                              | GG              | 1946940393               |
| SNP_P4_124573_121779 | NW_004515845.1 | Scaffold342 | 121779                  | AA                              | TT              | 1946940395               |
| SNP_P4_124574_121808 | NW_004515845.1 | Scaffold342 | 121808                  | TT                              | CC              | 1946940397               |
| SNP_P4_124575_121841 | NW_004515845.1 | Scaffold342 | 121841                  | AA                              | GG              | 1946940399               |
| SNP_P4_124576_121844 | NW_004515845.1 | Scaffold342 | 121844                  | GG                              | TT              | 1946940401               |
| SNP_P4_124577_121853 | NW_004515845.1 | Scaffold342 | 121853                  | AA                              | GG              | 1946940403               |
| SNP_P4_124578_121868 | NW_004515845.1 | Scaffold342 | 121868                  | AA                              | CC              | 1946940405               |
| SNP_P4_124579_121873 | NW_004515845.1 | Scaffold342 | 121873                  | GG                              | AA              | 1946940407               |
| SNP_P4_124580_125463 | NW_004515845.1 | Scaffold342 | 125463                  | TT                              | CC              | 1946940409               |
| SNP_P4_124581_125465 | NW_004515845.1 | Scaffold342 | 125465                  | GG                              | AA              | 1946940411               |
| SNP_P4_124582_125534 | NW_004515845.1 | Scaffold342 | 125534                  | CC                              | TT              | 1946940413               |
| SNP_P4_124583_125558 | NW_004515845.1 | Scaffold342 | 125558                  | TT                              | CC              | 1946940415               |
| SNP_P4_124584_125580 | NW_004515845.1 | Scaffold342 | 125580                  | GG                              | AA              | 1946940417               |
| SNP_P4_124585_125621 | NW_004515845.1 | Scaffold342 | 125621                  | AA                              | TT              | 1946940419               |
| SNP_P4_124586_125636 | NW_004515845.1 | Scaffold342 | 125636                  | GG                              | AA              | 1946940421               |
| SNP_P4_124587_125685 | NW_004515845.1 | Scaffold342 | 125685                  | AA                              | CC              | 1946940423               |
| SNP_P4_124588_125720 | NW_004515845.1 | Scaffold342 | 125720                  | GG                              | AA              | 1946940425               |
| SNP_P4_124589_125723 | NW_004515845.1 | Scaffold342 | 125723                  | TT                              | CC              | 1946940427               |
| SNP_P4_124590_125728 | NW_004515845.1 | Scaffold342 | 125728                  | AA                              | CC              | 1946940430               |
| SNP_P4_124591_125751 | NW_004515845.1 | Scaffold342 | 125751                  | AA                              | GG              | 1946940432               |
| SNP_P4_124592_125784 | NW_004515845.1 | Scaffold342 | 125784                  | TT                              | CC              | 1946940434               |
| SNP_P4_124593_125790 | NW_004515845.1 | Scaffold342 | 125790                  | CC                              | TT              | 1946940436               |
| SNP_P4_124594_125831 | NW_004515845.1 | Scaffold342 | 125831                  | TT                              | CC              | 1946940438               |
| SNP_P4_124595_125853 | NW_004515845.1 | Scaffold342 | 125853                  | TT                              | CC              | 1946940440               |
| SNP_P4_124596_125871 | NW_004515845.1 | Scaffold342 | 125871                  | AA                              | GG              | 1946940442               |
| SNP_P4_124597_125899 | NW_004515845.1 | Scaffold342 | 125899                  | AA                              | GG              | 1946940444               |
| SNP_P4_124598_125940 | NW_004515845.1 | Scaffold342 | 125940                  | TT                              | CC              | 1946940446               |
| SNP_P4_124599_125946 | NW_004515845.1 | Scaffold342 | 125946                  | TT                              | CC              | 1946940448               |
| SNP_P4_124600_126120 | NW_004515845.1 | Scaffold342 | 126120                  | AA                              | GG              | 1946940450               |
| SNP_P4_124601_132992 | NW_004515845.1 | Scaffold342 | 132992                  | GG                              | TT              | 1946940452               |
| SNP_P4_124602_133054 | NW_004515845.1 | Scaffold342 | 133054                  | AA                              | GG              | 1946940454               |

| SNPs IDs             | Chromosome IDs | Chromosomes   | Physical positions (bp) | CDC Frontier (Reference genome) | (ILWC46 & LPNB) | NCBI SNPdb Accession IDs |
|----------------------|----------------|---------------|-------------------------|---------------------------------|-----------------|--------------------------|
| SNP_P4_124603_133329 | NW_004515845.1 | Scaffold342   | 133329                  | TT                              | AA              | 1946940456               |
| SNP_P4_124604_133337 | NW_004515845.1 | Scaffold342   | 133337                  | TT                              | CC              | 1946940458               |
| SNP_P4_124605_134358 | NW_004515845.1 | Scaffold342   | 134358                  | AA                              | TT              | 1946940460               |
| SNP_P4_124607_168452 | NW_004515845.1 | Scaffold342   | 168452                  | CC                              | AA              | 1946940462               |
| SNP_P4_124608_172281 | NW_004515845.1 | Scaffold342   | 172281                  | AA                              | GG              | 1946940464               |
| SNP_P4_124609_183570 | NW_004515845.1 | Scaffold342   | 183570                  | TT                              | GG              | 1946940466               |
| SNP_P4_124610_183593 | NW_004515845.1 | Scaffold342   | 183593                  | GG                              | CC              | 1946940468               |
| SNP_P4_124611_183758 | NW_004515845.1 | Scaffold342   | 183758                  | AA                              | TT              | 1946940470               |
| SNP_P4_124612_201213 | NW_004515845.1 | Scaffold342   | 201213                  | GG                              | CC              | 1946940472               |
| SNP_P4_124613_201214 | NW_004515845.1 | Scaffold342   | 201214                  | TT                              | CC              | 1946940474               |
| SNP_P4_124614_203973 | NW_004515845.1 | Scaffold342   | 203973                  | AA                              | GG              | 1946940476               |
| SNP_P4_124615_203981 | NW_004515845.1 | Scaffold342   | 203981                  | AA                              | GG              | 1946940478               |
| SNP_P4_124616_207468 | NW_004515845.1 | Scaffold342   | 207468                  | GG                              | AA              | 1946940480               |
| SNP_P4_124617_241703 | NW_004515845.1 | Scaffold342   | 241703                  | TT                              | CC              | 1946940482               |
| SNP_P4_124618_243085 | NW_004515845.1 | Scaffold342   | 243085                  | GG                              | AA              | 1946940484               |
| SNP_P4_124620_308341 | NW_004515845.1 | Scaffold342   | 308341                  | CC                              | TT              | 1946940486               |
| SNP_P4_124622_313477 | NW_004515845.1 | Scaffold342   | 313477                  | TT                              | AA              | 1946940488               |
| SNP_P4_124623_313941 | NW_004515845.1 | Scaffold342   | 313941                  | CC                              | AA              | 1946940490               |
| SNP_P4_124624_324849 | NW_004515845.1 | Scaffold342   | 324849                  | CC                              | AA              | 1946940493               |
| SNP_P4_124625_325320 | NW_004515845.1 | Scaffold342   | 325320                  | CC                              | AA              | 1946940495               |
| SNP_P4_124626_338493 | NW_004515845.1 | Scaffold342   | 338493                  | CC                              | TT              | 1946940497               |
| SNP_P4_124627_340036 | NW_004515845.1 | Scaffold342   | 340036                  | GG                              | AA              | 1946940499               |
| SNP_P4_124628_340113 | NW_004515845.1 | Scaffold342   | 340113                  | TT                              | CC              | 1946940501               |
| SNP_P4_124629_340405 | NW_004515845.1 | Scaffold342   | 340405                  | CC                              | TT              | 1946940503               |
| SNP_P4_124630_340425 | NW_004515845.1 | Scaffold342   | 340425                  | AA                              | CC              | 1946940505               |
| SNP_P4_124631_340444 | NW_004515845.1 | Scaffold342   | 340444                  | TT                              | CC              | 1946940507               |
| SNP_P4_124632_340499 | NW_004515845.1 | Scaffold342   | 340499                  | CC                              | GG              | 1946940509               |
| SNP_P4_124634_344837 | NW_004515845.1 | Scaffold342   | 344837                  | TT                              | CC              | 1946940511               |
| SNP_P4_124635_344839 | NW_004515845.1 | Scaffold342   | 344839                  | GG                              | TT              | 1946940513               |
| SNP_P4_124636_345028 | NW_004515845.1 | Scaffold342   | 345028                  | CC                              | GG              | 1946940515               |
| SNP_P4_124637_356183 | NW_004515845.1 | Scaffold342   | 356183                  | TT                              | CC              | 1946940517               |
| SNP_P4_124638_358888 | NW_004515845.1 | Scaffold342   | 358888                  | GG                              | AA              | 1946940519               |
| SNP_P4_124639_359109 | NW_004515845.1 | Scaffold342   | 359109                  | TT                              | CC              | 1946940521               |
| SNP_P4_124640_359122 | NW_004515845.1 | Scaffold342   | 359122                  | AA                              | CC              | 1946940523               |
| SNP_P4_124641_365806 | NW_004515845.1 | Scaffold342   | 365806                  | AA                              | GG              | 1946940525               |
| SNP_P4_124643_372349 | NW_004515845.1 | Scaffold342   | 372349                  | AA                              | CC              | 1946940527               |
| SNP_P4_124644_372483 | NW_004515845.1 | Scaffold342   | 372483                  | CC                              | TT              | 1946940530               |
| SNP_P4_124645_372511 | NW_004515845.1 | Scaffold342   | 372511                  | CC                              | AA              | 1946940532               |
| SNP_P4_124646_375192 | NW_004515845.1 | Scaffold342   | 375192                  | CC                              | AA              | 1946940534               |
| SNP_P4_124647_14465  | NW_004515847.1 | Scaffold346_1 | 14465                   | GG                              | TT              | 1946940536               |
| SNP_P4_124648_30493  | NW_004515847.1 | Scaffold346_1 | 30493                   | AA                              | TT              | 1946940538               |
| SNP_P4_124649_41303  | NW_004515847.1 | Scaffold346_1 | 41303                   | TT                              | CC              | 1946940539               |

| SNPs IDs             | Chromosome IDs | Chromosomes   | Physical positions (bp) | CDC Frontier (Reference genome) | (ILWC46 & LPNB) | NCBI SNPdb Accession IDs |
|----------------------|----------------|---------------|-------------------------|---------------------------------|-----------------|--------------------------|
| SNP_P4_124650_41581  | NW_004515847.1 | Scaffold346_1 | 41581                   | GG                              | CC              | 1946940540               |
| SNP_P4_124651_41881  | NW_004515847.1 | Scaffold346_1 | 41881                   | CC                              | TT              | 1946940541               |
| SNP_P4_124652_41904  | NW_004515847.1 | Scaffold346_1 | 41904                   | GG                              | AA              | 1946940542               |
| SNP_P4_124653_41984  | NW_004515847.1 | Scaffold346_1 | 41984                   | AA                              | CC              | 1946940543               |
| SNP_P4_124654_42068  | NW_004515847.1 | Scaffold346_1 | 42068                   | GG                              | CC              | 1946940544               |
| SNP_P4_124655_42109  | NW_004515847.1 | Scaffold346_1 | 42109                   | AA                              | GG              | 1946940545               |
| SNP_P4_124656_42134  | NW_004515847.1 | Scaffold346_1 | 42134                   | GG                              | AA              | 1946940546               |
| SNP_P4_124657_42169  | NW_004515847.1 | Scaffold346_1 | 42169                   | TT                              | CC              | 1946940547               |
| SNP_P4_124658_42170  | NW_004515847.1 | Scaffold346_1 | 42170                   | GG                              | AA              | 1946940548               |
| SNP_P4_124659_42281  | NW_004515847.1 | Scaffold346_1 | 42281                   | AA                              | GG              | 1946940549               |
| SNP_P4_124660_42439  | NW_004515847.1 | Scaffold346_1 | 42439                   | GG                              | TT              | 1946940550               |
| SNP_P4_124661_42521  | NW_004515847.1 | Scaffold346_1 | 42521                   | AA                              | GG              | 1946940551               |
| SNP_P4_124662_42554  | NW_004515847.1 | Scaffold346_1 | 42554                   | CC                              | TT              | 1946940552               |
| SNP_P4_124663_42795  | NW_004515847.1 | Scaffold346_1 | 42795                   | CC                              | TT              | 1946940553               |
| SNP_P4_124664_42864  | NW_004515847.1 | Scaffold346_1 | 42864                   | CC                              | TT              | 1946940554               |
| SNP_P4_124665_67318  | NW_004515847.1 | Scaffold346_1 | 67318                   | CC                              | GG              | 1946940555               |
| SNP_P4_124666_67340  | NW_004515847.1 | Scaffold346_1 | 67340                   | AA                              | GG              | 1946940556               |
| SNP_P4_124667_67349  | NW_004515847.1 | Scaffold346_1 | 67349                   | TT                              | CC              | 1946940557               |
| SNP_P4_124668_67356  | NW_004515847.1 | Scaffold346_1 | 67356                   | GG                              | AA              | 1946940558               |
| SNP_P4_124669_72997  | NW_004515847.1 | Scaffold346_1 | 72997                   | AA                              | TT              | 1946940559               |
| SNP_P4_124671_107939 | NW_004515847.1 | Scaffold346_1 | 107939                  | AA                              | TT              | 1946940560               |
| SNP_P4_124673_130009 | NW_004515847.1 | Scaffold346_1 | 130009                  | TT                              | CC              | 1946940561               |
| SNP_P4_124674_138562 | NW_004515847.1 | Scaffold346_1 | 138562                  | CC                              | TT              | 1946940562               |
| SNP_P4_124675_160635 | NW_004515847.1 | Scaffold346_1 | 160635                  | TT                              | CC              | 1946940563               |
| SNP_P4_124676_198960 | NW_004515847.1 | Scaffold346_1 | 198960                  | TT                              | CC              | 1946940564               |
| SNP_P4_124677_199112 | NW_004515847.1 | Scaffold346_1 | 199112                  | TT                              | CC              | 1946940565               |
| SNP_P4_124678_199168 | NW_004515847.1 | Scaffold346_1 | 199168                  | GG                              | TT              | 1946940567               |
| SNP_P4_124679_199245 | NW_004515847.1 | Scaffold346_1 | 199245                  | CC                              | TT              | 1946940569               |
| SNP_P4_124680_199293 | NW_004515847.1 | Scaffold346_1 | 199293                  | GG                              | AA              | 1946940571               |
| SNP_P4_124681_199317 | NW_004515847.1 | Scaffold346_1 | 199317                  | TT                              | CC              | 1946940573               |
| SNP_P4_124682_199326 | NW_004515847.1 | Scaffold346_1 | 199326                  | AA                              | GG              | 1946940575               |
| SNP_P4_124683_199449 | NW_004515847.1 | Scaffold346_1 | 199449                  | AA                              | GG              | 1946940577               |
| SNP_P4_124684_199583 | NW_004515847.1 | Scaffold346_1 | 199583                  | CC                              | TT              | 1946940579               |
| SNP_P4_124685_199716 | NW_004515847.1 | Scaffold346_1 | 199716                  | AA                              | GG              | 1946940581               |
| SNP_P4_124686_199752 | NW_004515847.1 | Scaffold346_1 | 199752                  | AA                              | CC              | 1946940583               |
| SNP_P4_124687_199765 | NW_004515847.1 | Scaffold346_1 | 199765                  | TT                              | GG              | 1946940585               |
| SNP_P4_124688_282071 | NW_004515847.1 | Scaffold346_1 | 282071                  | AA                              | CC              | 1946940587               |
| SNP_P4_124689_291295 | NW_004515847.1 | Scaffold346_1 | 291295                  | GG                              | TT              | 1946940589               |
| SNP_P4_124690_291515 | NW_004515847.1 | Scaffold346_1 | 291515                  | TT                              | GG              | 1946940591               |
| SNP_P4_124691_297100 | NW_004515847.1 | Scaffold346_1 | 297100                  | GG                              | AA              | 1946940593               |
| SNP_P4_124692_297133 | NW_004515847.1 | Scaffold346_1 | 297133                  | TT                              | CC              | 1946940595               |
| SNP_P4_124693_297144 | NW_004515847.1 | Scaffold346_1 | 297144                  | TT                              | CC              | 1946940597               |

| SNPs IDs             | Chromosome IDs | Chromosomes   | Physical positions (bp) | CDC Frontier (Reference genome) | (ILWC46 & LPNB) | NCBI SNPdb Accession IDs |
|----------------------|----------------|---------------|-------------------------|---------------------------------|-----------------|--------------------------|
| SNP_P4_124694_297159 | NW_004515847.1 | Scaffold346_1 | 297159                  | AA                              | GG              | 1946940599               |
| SNP_P4_124696_314043 | NW_004515847.1 | Scaffold346_1 | 314043                  | TT                              | AA              | 1946940601               |
| SNP_P4_124697_331521 | NW_004515847.1 | Scaffold346_1 | 331521                  | AA                              | TT              | 1946940603               |
| SNP_P4_124698_331543 | NW_004515847.1 | Scaffold346_1 | 331543                  | AA                              | GG              | 1946940605               |
| SNP_P4_124699_331547 | NW_004515847.1 | Scaffold346_1 | 331547                  | TT                              | GG              | 1946940607               |
| SNP_P4_124700_1278   | NW_004515849.1 | Scaffold349   | 1278                    | AA                              | CC              | 1946940609               |
| SNP_P4_124701_1412   | NW_004515849.1 | Scaffold349   | 1412                    | AA                              | CC              | 1946940611               |
| SNP_P4_124702_1477   | NW_004515849.1 | Scaffold349   | 1477                    | CC                              | TT              | 1946940613               |
| SNP_P4_124703_17509  | NW_004515849.1 | Scaffold349   | 17509                   | AA                              | GG              | 1946940615               |
| SNP_P4_124704_21680  | NW_004515849.1 | Scaffold349   | 21680                   | AA                              | TT              | 1946940617               |
| SNP_P4_124705_33163  | NW_004515849.1 | Scaffold349   | 33163                   | AA                              | TT              | 1946940619               |
| SNP_P4_124706_36372  | NW_004515849.1 | Scaffold349   | 36372                   | AA                              | GG              | 1946940621               |
| SNP_P4_124707_67733  | NW_004515849.1 | Scaffold349   | 67733                   | TT                              | AA              | 1946940623               |
| SNP_P4_124708_67752  | NW_004515849.1 | Scaffold349   | 67752                   | AA                              | GG              | 1946940625               |
| SNP_P4_124709_67756  | NW_004515849.1 | Scaffold349   | 67756                   | AA                              | GG              | 1946940627               |
| SNP_P4_124710_67767  | NW_004515849.1 | Scaffold349   | 67767                   | TT                              | CC              | 1946940629               |
| SNP_P4_124711_72262  | NW_004515849.1 | Scaffold349   | 72262                   | AA                              | GG              | 1946940631               |
| SNP_P4_124712_79164  | NW_004515849.1 | Scaffold349   | 79164                   | TT                              | AA              | 1946940633               |
| SNP_P4_124713_91869  | NW_004515849.1 | Scaffold349   | 91869                   | GG                              | CC              | 1946940635               |
| SNP_P4_124714_92313  | NW_004515849.1 | Scaffold349   | 92313                   | AA                              | GG              | 1946940637               |
| SNP_P4_124715_116525 | NW_004515849.1 | Scaffold349   | 116525                  | CC                              | AA              | 1946940639               |
| SNP_P4_124716_159465 | NW_004515849.1 | Scaffold349   | 159465                  | AA                              | CC              | 1946940641               |
| SNP_P4_124717_159508 | NW_004515849.1 | Scaffold349   | 159508                  | GG                              | TT              | 1946940643               |
| SNP_P4_124718_159529 | NW_004515849.1 | Scaffold349   | 159529                  | AA                              | GG              | 1946940645               |
| SNP_P4_124719_159796 | NW_004515849.1 | Scaffold349   | 159796                  | TT                              | GG              | 1946940647               |
| SNP_P4_124720_159882 | NW_004515849.1 | Scaffold349   | 159882                  | TT                              | CC              | 1946940650               |
| SNP_P4_124721_159886 | NW_004515849.1 | Scaffold349   | 159886                  | AA                              | GG              | 1946940652               |
| SNP_P4_124722_159918 | NW_004515849.1 | Scaffold349   | 159918                  | CC                              | AA              | 1946940654               |
| SNP_P4_124723_172964 | NW_004515849.1 | Scaffold349   | 172964                  | TT                              | AA              | 1946940656               |
| SNP_P4_124724_177690 | NW_004515849.1 | Scaffold349   | 177690                  | AA                              | TT              | 1946940658               |
| SNP_P4_124725_177697 | NW_004515849.1 | Scaffold349   | 177697                  | GG                              | AA              | 1946940660               |
| SNP_P4_124726_177715 | NW_004515849.1 | Scaffold349   | 177715                  | TT                              | CC              | 1946940662               |
| SNP_P4_124727_177737 | NW_004515849.1 | Scaffold349   | 177737                  | CC                              | TT              | 1946940664               |
| SNP_P4_124729_218104 | NW_004515849.1 | Scaffold349   | 218104                  | TT                              | GG              | 1946940666               |
| SNP_P4_124730_218137 | NW_004515849.1 | Scaffold349   | 218137                  | CC                              | TT              | 1946940668               |
| SNP_P4_124732_238289 | NW_004515849.1 | Scaffold349   | 238289                  | AA                              | GG              | 1946940670               |
| SNP_P4_124733_238378 | NW_004515849.1 | Scaffold349   | 238378                  | TT                              | AA              | 1946940672               |
| SNP_P4_124734_238410 | NW_004515849.1 | Scaffold349   | 238410                  | CC                              | TT              | 1946940675               |
| SNP_P4_124735_238431 | NW_004515849.1 | Scaffold349   | 238431                  | AA                              | GG              | 1946940677               |
| SNP_P4_124736_238434 | NW_004515849.1 | Scaffold349   | 238434                  | TT                              | CC              | 1946940679               |
| SNP_P4_124737_238453 | NW_004515849.1 | Scaffold349   | 238453                  | CC                              | TT              | 1946940681               |
| SNP_P4_124738_238887 | NW_004515849.1 | Scaffold349   | 238887                  | TT                              | CC              | 1946940683               |



| SNPs IDs             | Chromosome IDs | Chromosomes | Physical positions (bp) | CDC Frontier (Reference genome) | (ILWC46 & LPNB) | NCBI SNPdb Accession IDs |
|----------------------|----------------|-------------|-------------------------|---------------------------------|-----------------|--------------------------|
| SNP_P4_124739_238899 | NW_004515849.1 | Scaffold349 | 238899                  | TT                              | CC              | 1946940685               |
| SNP_P4_124740_251050 | NW_004515849.1 | Scaffold349 | 251050                  | AA                              | GG              | 1946940687               |
| SNP_P4_124741_261889 | NW_004515849.1 | Scaffold349 | 261889                  | AA                              | GG              | 1946940689               |
| SNP_P4_124743_304634 | NW_004515849.1 | Scaffold349 | 304634                  | AA                              | CC              | 1946940691               |
| SNP_P4_124744_304924 | NW_004515849.1 | Scaffold349 | 304924                  | AA                              | GG              | 1946940693               |
| SNP_P4_124745_309207 | NW_004515849.1 | Scaffold349 | 309207                  | GG                              | TT              | 1946940695               |
| SNP_P4_124746_314577 | NW_004515849.1 | Scaffold349 | 314577                  | CC                              | TT              | 1946940697               |
| SNP_P4_124747_335237 | NW_004515849.1 | Scaffold349 | 335237                  | GG                              | AA              | 1946940699               |
| SNP_P4_124749_335716 | NW_004515849.1 | Scaffold349 | 335716                  | GG                              | AA              | 1946940701               |
| SNP_P4_124750_336280 | NW_004515849.1 | Scaffold349 | 336280                  | GG                              | TT              | 1946940703               |
| SNP_P4_124751_346948 | NW_004515849.1 | Scaffold349 | 346948                  | AA                              | GG              | 1946940705               |
| SNP_P4_124752_10306  | NW_004515850.1 | Scaffold350 | 10306                   | GG                              | CC              | 1946940707               |
| SNP_P4_124753_23104  | NW_004515850.1 | Scaffold350 | 23104                   | CC                              | TT              | 1946940709               |
| SNP_P4_124754_37038  | NW_004515850.1 | Scaffold350 | 37038                   | GG                              | CC              | 1946940711               |
| SNP_P4_124755_41954  | NW_004515850.1 | Scaffold350 | 41954                   | TT                              | CC              | 1946940714               |
| SNP_P4_124756_41991  | NW_004515850.1 | Scaffold350 | 41991                   | TT                              | CC              | 1946940716               |
| SNP_P4_124757_42013  | NW_004515850.1 | Scaffold350 | 42013                   | GG                              | AA              | 1946940718               |
| SNP_P4_124758_60664  | NW_004515850.1 | Scaffold350 | 60664                   | GG                              | TT              | 1946940720               |
| SNP_P4_124759_67062  | NW_004515850.1 | Scaffold350 | 67062                   | AA                              | CC              | 1946940722               |
| SNP_P4_124760_67076  | NW_004515850.1 | Scaffold350 | 67076                   | GG                              | TT              | 1946940724               |
| SNP_P4_124762_68491  | NW_004515850.1 | Scaffold350 | 68491                   | TT                              | CC              | 1946940726               |
| SNP_P4_124763_69510  | NW_004515850.1 | Scaffold350 | 69510                   | CC                              | TT              | 1946940728               |
| SNP_P4_124764_69521  | NW_004515850.1 | Scaffold350 | 69521                   | AA                              | CC              | 1946940730               |
| SNP_P4_124765_69549  | NW_004515850.1 | Scaffold350 | 69549                   | CC                              | TT              | 1946940732               |
| SNP_P4_124766_69552  | NW_004515850.1 | Scaffold350 | 69552                   | GG                              | AA              | 1946940734               |
| SNP_P4_124767_69564  | NW_004515850.1 | Scaffold350 | 69564                   | CC                              | TT              | 1946940736               |
| SNP_P4_124768_69980  | NW_004515850.1 | Scaffold350 | 69980                   | TT                              | CC              | 1946940738               |
| SNP_P4_124769_70052  | NW_004515850.1 | Scaffold350 | 70052                   | CC                              | TT              | 1946940740               |
| SNP_P4_124770_86904  | NW_004515850.1 | Scaffold350 | 86904                   | AA                              | GG              | 1946940742               |
| SNP_P4_124771_92519  | NW_004515850.1 | Scaffold350 | 92519                   | CC                              | AA              | 1946940744               |
| SNP_P4_124772_95347  | NW_004515850.1 | Scaffold350 | 95347                   | CC                              | TT              | 1946940746               |
| SNP_P4_124773_95439  | NW_004515850.1 | Scaffold350 | 95439                   | TT                              | AA              | 1946940749               |
| SNP_P4_124774_103771 | NW_004515850.1 | Scaffold350 | 103771                  | GG                              | TT              | 1946940751               |
| SNP_P4_124775_118735 | NW_004515850.1 | Scaffold350 | 118735                  | GG                              | TT              | 1946940753               |
| SNP_P4_124776_146817 | NW_004515850.1 | Scaffold350 | 146817                  | GG                              | AA              | 1946940755               |
| SNP_P4_124777_150564 | NW_004515850.1 | Scaffold350 | 150564                  | AA                              | GG              | 1946940757               |
| SNP_P4_124778_164633 | NW_004515850.1 | Scaffold350 | 164633                  | TT                              | AA              | 1946940759               |
| SNP_P4_124779_165101 | NW_004515850.1 | Scaffold350 | 165101                  | GG                              | AA              | 1946940761               |
| SNP_P4_124780_165206 | NW_004515850.1 | Scaffold350 | 165206                  | CC                              | TT              | 1946940763               |
| SNP_P4_124781_165244 | NW_004515850.1 | Scaffold350 | 165244                  | GG                              | CC              | 1946940765               |
| SNP_P4_124783_165798 | NW_004515850.1 | Scaffold350 | 165798                  | TT                              | CC              | 1946940767               |
| SNP_P4_124784_166048 | NW_004515850.1 | Scaffold350 | 166048                  | TT                              | AA              | 1946940769               |

| SNPs IDs            | Chromosome IDs | Chromosomes | Physical positions (bp) | CDC Frontier (Reference genome) | (ILWC46 & LPNB) | NCBI SNPdb Accession IDs |
|---------------------|----------------|-------------|-------------------------|---------------------------------|-----------------|--------------------------|
| SNP_P4_124785_4414  | NW_004515851.1 | Scaffold351 | 4414                    | CC                              | GG              | 1946940771               |
| SNP_P4_124786_10988 | NW_004515851.1 | Scaffold351 | 10988                   | AA                              | GG              | 1946940774               |
| SNP_P4_124787_10995 | NW_004515851.1 | Scaffold351 | 10995                   | CC                              | TT              | 1946940776               |
| SNP_P4_124788_15491 | NW_004515851.1 | Scaffold351 | 15491                   | GG                              | AA              | 1946940778               |
| SNP_P4_124789_15509 | NW_004515851.1 | Scaffold351 | 15509                   | GG                              | AA              | 1946940780               |
| SNP_P4_124790_23970 | NW_004515851.1 | Scaffold351 | 23970                   | CC                              | TT              | 1946940782               |
| SNP_P4_124791_24220 | NW_004515851.1 | Scaffold351 | 24220                   | CC                              | GG              | 1946940784               |
| SNP_P4_124792_24231 | NW_004515851.1 | Scaffold351 | 24231                   | GG                              | AA              | 1946940786               |
| SNP_P4_124793_24251 | NW_004515851.1 | Scaffold351 | 24251                   | GG                              | TT              | 1946940788               |
| SNP_P4_124794_24268 | NW_004515851.1 | Scaffold351 | 24268                   | GG                              | AA              | 1946940791               |
| SNP_P4_124795_24285 | NW_004515851.1 | Scaffold351 | 24285                   | CC                              | GG              | 1946940793               |
| SNP_P4_124796_24385 | NW_004515851.1 | Scaffold351 | 24385                   | AA                              | CC              | 1946940795               |
| SNP_P4_124797_27457 | NW_004515851.1 | Scaffold351 | 27457                   | AA                              | GG              | 1946940797               |
| SNP_P4_124798_46387 | NW_004515851.1 | Scaffold351 | 46387                   | CC                              | GG              | 1946940799               |
| SNP_P4_124800_61013 | NW_004515851.1 | Scaffold351 | 61013                   | CC                              | TT              | 1946940801               |
| SNP_P4_124801_66533 | NW_004515851.1 | Scaffold351 | 66533                   | GG                              | AA              | 1946940803               |
| SNP_P4_124803_68036 | NW_004515851.1 | Scaffold351 | 68036                   | GG                              | AA              | 1946940805               |
| SNP_P4_124804_6825  | NW_004515852.1 | Scaffold352 | 6825                    | TT                              | CC              | 1946940807               |
| SNP_P4_124805_6890  | NW_004515852.1 | Scaffold352 | 6890                    | AA                              | TT              | 1946940809               |
| SNP_P4_124806_8192  | NW_004515852.1 | Scaffold352 | 8192                    | GG                              | TT              | 1946940811               |
| SNP_P4_124807_8500  | NW_004515852.1 | Scaffold352 | 8500                    | TT                              | GG              | 1946940813               |
| SNP_P4_124808_20827 | NW_004515852.1 | Scaffold352 | 20827                   | AA                              | GG              | 1946940815               |
| SNP_P4_124809_21219 | NW_004515852.1 | Scaffold352 | 21219                   | AA                              | GG              | 1946940817               |
| SNP_P4_124810_22912 | NW_004515852.1 | Scaffold352 | 22912                   | CC                              | TT              | 1946940819               |
| SNP_P4_124811_23062 | NW_004515852.1 | Scaffold352 | 23062                   | GG                              | AA              | 1946940822               |
| SNP_P4_124812_23069 | NW_004515852.1 | Scaffold352 | 23069                   | GG                              | TT              | 1946940824               |
| SNP_P4_124813_23106 | NW_004515852.1 | Scaffold352 | 23106                   | TT                              | CC              | 1946940826               |
| SNP_P4_124814_23152 | NW_004515852.1 | Scaffold352 | 23152                   | CC                              | TT              | 1946940828               |
| SNP_P4_124815_23223 | NW_004515852.1 | Scaffold352 | 23223                   | AA                              | GG              | 1946940830               |
| SNP_P4_124816_23291 | NW_004515852.1 | Scaffold352 | 23291                   | CC                              | TT              | 1946940832               |
| SNP_P4_124817_23304 | NW_004515852.1 | Scaffold352 | 23304                   | CC                              | TT              | 1946940834               |
| SNP_P4_124818_23327 | NW_004515852.1 | Scaffold352 | 23327                   | TT                              | AA              | 1946940836               |
| SNP_P4_124819_28315 | NW_004515852.1 | Scaffold352 | 28315                   | CC                              | TT              | 1946940838               |
| SNP_P4_124820_28350 | NW_004515852.1 | Scaffold352 | 28350                   | AA                              | GG              | 1946940840               |
| SNP_P4_124821_33799 | NW_004515852.1 | Scaffold352 | 33799                   | GG                              | AA              | 1946940842               |
| SNP_P4_124822_48651 | NW_004515852.1 | Scaffold352 | 48651                   | GG                              | AA              | 1946940844               |
| SNP_P4_124823_48673 | NW_004515852.1 | Scaffold352 | 48673                   | CC                              | GG              | 1946940847               |
| SNP_P4_124824_48759 | NW_004515852.1 | Scaffold352 | 48759                   | GG                              | AA              | 1946940849               |
| SNP_P4_124825_48783 | NW_004515852.1 | Scaffold352 | 48783                   | TT                              | AA              | 1946940851               |
| SNP_P4_124826_48787 | NW_004515852.1 | Scaffold352 | 48787                   | GG                              | AA              | 1946940853               |
| SNP_P4_124827_53740 | NW_004515852.1 | Scaffold352 | 53740                   | TT                              | CC              | 1946940855               |
| SNP_P4_124828_54515 | NW_004515852.1 | Scaffold352 | 54515                   | TT                              | CC              | 1946940857               |

| SNPs IDs             | Chromosome IDs | Chromosomes | Physical positions (bp) | CDC Frontier (Reference genome) | (ILWC46 & LPNB) | NCBI SNPdb Accession IDs |
|----------------------|----------------|-------------|-------------------------|---------------------------------|-----------------|--------------------------|
| SNP_P4_124829_54815  | NW_004515852.1 | Scaffold352 | 54815                   | GG                              | AA              | 1946940859               |
| SNP_P4_124830_54883  | NW_004515852.1 | Scaffold352 | 54883                   | AA                              | TT              | 1946940861               |
| SNP_P4_124831_58131  | NW_004515852.1 | Scaffold352 | 58131                   | GG                              | AA              | 1946940863               |
| SNP_P4_124832_58132  | NW_004515852.1 | Scaffold352 | 58132                   | CC                              | AA              | 1946940865               |
| SNP_P4_124833_63811  | NW_004515852.1 | Scaffold352 | 63811                   | TT                              | CC              | 1946940867               |
| SNP_P4_124834_64135  | NW_004515852.1 | Scaffold352 | 64135                   | TT                              | GG              | 1946940869               |
| SNP_P4_124835_75705  | NW_004515852.1 | Scaffold352 | 75705                   | AA                              | GG              | 1946940871               |
| SNP_P4_124836_83243  | NW_004515852.1 | Scaffold352 | 83243                   | TT                              | CC              | 1946940873               |
| SNP_P4_124837_83314  | NW_004515852.1 | Scaffold352 | 83314                   | GG                              | AA              | 1946940875               |
| SNP_P4_124838_86021  | NW_004515852.1 | Scaffold352 | 86021                   | AA                              | GG              | 1946940877               |
| SNP_P4_124839_106677 | NW_004515852.1 | Scaffold352 | 106677                  | TT                              | CC              | 1946940879               |
| SNP_P4_124840_106684 | NW_004515852.1 | Scaffold352 | 106684                  | GG                              | TT              | 1946940881               |
| SNP_P4_124841_106685 | NW_004515852.1 | Scaffold352 | 106685                  | GG                              | CC              | 1946940883               |
| SNP_P4_124842_106702 | NW_004515852.1 | Scaffold352 | 106702                  | GG                              | TT              | 1946940885               |
| SNP_P4_124843_106721 | NW_004515852.1 | Scaffold352 | 106721                  | TT                              | GG              | 1946940887               |
| SNP_P4_124844_106773 | NW_004515852.1 | Scaffold352 | 106773                  | TT                              | CC              | 1946940889               |
| SNP_P4_124845_106775 | NW_004515852.1 | Scaffold352 | 106775                  | GG                              | TT              | 1946940891               |
| SNP_P4_124846_106820 | NW_004515852.1 | Scaffold352 | 106820                  | AA                              | GG              | 1946940893               |
| SNP_P4_124847_106832 | NW_004515852.1 | Scaffold352 | 106832                  | CC                              | GG              | 1946940895               |
| SNP_P4_124848_107908 | NW_004515852.1 | Scaffold352 | 107908                  | CC                              | TT              | 1946940897               |
| SNP_P4_124849_109087 | NW_004515852.1 | Scaffold352 | 109087                  | AA                              | TT              | 1946940899               |
| SNP_P4_124850_121103 | NW_004515852.1 | Scaffold352 | 121103                  | GG                              | CC              | 1946940901               |
| SNP_P4_124851_133447 | NW_004515852.1 | Scaffold352 | 133447                  | TT                              | AA              | 1946940903               |
| SNP_P4_124853_133603 | NW_004515852.1 | Scaffold352 | 133603                  | GG                              | CC              | 1946940905               |
| SNP_P4_124854_133606 | NW_004515852.1 | Scaffold352 | 133606                  | GG                              | AA              | 1946940907               |
| SNP_P4_124855_133918 | NW_004515852.1 | Scaffold352 | 133918                  | AA                              | TT              | 1946940909               |
| SNP_P4_124856_148978 | NW_004515852.1 | Scaffold352 | 148978                  | CC                              | AA              | 1946940910               |
| SNP_P4_124857_154136 | NW_004515852.1 | Scaffold352 | 154136                  | CC                              | TT              | 1946940912               |
| SNP_P4_124858_154599 | NW_004515852.1 | Scaffold352 | 154599                  | CC                              | TT              | 1946940914               |
| SNP_P4_124859_154633 | NW_004515852.1 | Scaffold352 | 154633                  | AA                              | GG              | 1946940917               |
| SNP_P4_124860_154652 | NW_004515852.1 | Scaffold352 | 154652                  | TT                              | CC              | 1946940919               |
| SNP_P4_124861_154654 | NW_004515852.1 | Scaffold352 | 154654                  | CC                              | AA              | 1946940921               |
| SNP_P4_124862_154676 | NW_004515852.1 | Scaffold352 | 154676                  | TT                              | GG              | 1946940923               |
| SNP_P4_124863_172571 | NW_004515852.1 | Scaffold352 | 172571                  | AA                              | CC              | 1946940925               |
| SNP_P4_124864_172572 | NW_004515852.1 | Scaffold352 | 172572                  | TT                              | CC              | 1946940927               |
| SNP_P4_124865_172637 | NW_004515852.1 | Scaffold352 | 172637                  | CC                              | TT              | 1946940929               |
| SNP_P4_124866_172666 | NW_004515852.1 | Scaffold352 | 172666                  | TT                              | GG              | 1946940931               |
| SNP_P4_124867_172727 | NW_004515852.1 | Scaffold352 | 172727                  | GG                              | AA              | 1946940933               |
| SNP_P4_124868_174548 | NW_004515852.1 | Scaffold352 | 174548                  | CC                              | GG              | 1946940935               |
| SNP_P4_124869_177507 | NW_004515852.1 | Scaffold352 | 177507                  | GG                              | AA              | 1946940937               |
| SNP_P4_124870_177578 | NW_004515852.1 | Scaffold352 | 177578                  | CC                              | TT              | 1946940939               |
| SNP_P4_124871_177643 | NW_004515852.1 | Scaffold352 | 177643                  | TT                              | CC              | 1946940941               |

| SNPs IDs             | Chromosome IDs | Chromosomes | Physical positions (bp) | CDC Frontier (Reference genome) | (ILWC46 & LPNB) | NCBI SNPdb Accession IDs |
|----------------------|----------------|-------------|-------------------------|---------------------------------|-----------------|--------------------------|
| SNP_P4_124872_177875 | NW_004515852.1 | Scaffold352 | 177875                  | AA                              | GG              | 1946940943               |
| SNP_P4_124873_177908 | NW_004515852.1 | Scaffold352 | 177908                  | CC                              | TT              | 1946940945               |
| SNP_P4_124874_177951 | NW_004515852.1 | Scaffold352 | 177951                  | CC                              | TT              | 1946940947               |
| SNP_P4_124877_178129 | NW_004515852.1 | Scaffold352 | 178129                  | AA                              | GG              | 1946940949               |
| SNP_P4_124878_178191 | NW_004515852.1 | Scaffold352 | 178191                  | CC                              | GG              | 1946940951               |
| SNP_P4_124879_178247 | NW_004515852.1 | Scaffold352 | 178247                  | GG                              | CC              | 1946940953               |
| SNP_P4_124880_178351 | NW_004515852.1 | Scaffold352 | 178351                  | TT                              | GG              | 1946940955               |
| SNP_P4_124881_178473 | NW_004515852.1 | Scaffold352 | 178473                  | TT                              | GG              | 1946940957               |
| SNP_P4_124882_178478 | NW_004515852.1 | Scaffold352 | 178478                  | CC                              | GG              | 1946940959               |
| SNP_P4_124884_178720 | NW_004515852.1 | Scaffold352 | 178720                  | GG                              | CC              | 1946940961               |
| SNP_P4_124885_178739 | NW_004515852.1 | Scaffold352 | 178739                  | GG                              | CC              | 1946940963               |
| SNP_P4_124886_178807 | NW_004515852.1 | Scaffold352 | 178807                  | TT                              | CC              | 1946940965               |
| SNP_P4_124887_178874 | NW_004515852.1 | Scaffold352 | 178874                  | CC                              | TT              | 1946940967               |
| SNP_P4_124888_179013 | NW_004515852.1 | Scaffold352 | 179013                  | TT                              | CC              | 1946940969               |
| SNP_P4_124889_179142 | NW_004515852.1 | Scaffold352 | 179142                  | GG                              | AA              | 1946940971               |
| SNP_P4_124890_179147 | NW_004515852.1 | Scaffold352 | 179147                  | TT                              | CC              | 1946940973               |
| SNP_P4_124891_179374 | NW_004515852.1 | Scaffold352 | 179374                  | GG                              | TT              | 1946940975               |
| SNP_P4_124892_179385 | NW_004515852.1 | Scaffold352 | 179385                  | TT                              | CC              | 1946940977               |
| SNP_P4_124893_179389 | NW_004515852.1 | Scaffold352 | 179389                  | TT                              | CC              | 1946940979               |
| SNP_P4_124894_179436 | NW_004515852.1 | Scaffold352 | 179436                  | CC                              | TT              | 1946940981               |
| SNP_P4_124897_179738 | NW_004515852.1 | Scaffold352 | 179738                  | TT                              | CC              | 1946940983               |
| SNP_P4_124898_179741 | NW_004515852.1 | Scaffold352 | 179741                  | CC                              | TT              | 1946940985               |
| SNP_P4_124899_180829 | NW_004515852.1 | Scaffold352 | 180829                  | AA                              | GG              | 1946940987               |
| SNP_P4_124900_188321 | NW_004515852.1 | Scaffold352 | 188321                  | TT                              | AA              | 1946940989               |
| SNP_P4_124901_188959 | NW_004515852.1 | Scaffold352 | 188959                  | GG                              | TT              | 1946940991               |
| SNP_P4_124902_191517 | NW_004515852.1 | Scaffold352 | 191517                  | TT                              | CC              | 1946940993               |
| SNP_P4_124903_191539 | NW_004515852.1 | Scaffold352 | 191539                  | GG                              | AA              | 1946940995               |
| SNP_P4_124904_191678 | NW_004515852.1 | Scaffold352 | 191678                  | GG                              | AA              | 1946940997               |
| SNP_P4_124905_191709 | NW_004515852.1 | Scaffold352 | 191709                  | AA                              | GG              | 1946940999               |
| SNP_P4_124906_191887 | NW_004515852.1 | Scaffold352 | 191887                  | GG                              | AA              | 1946941001               |
| SNP_P4_124907_192059 | NW_004515852.1 | Scaffold352 | 192059                  | GG                              | AA              | 1946941003               |
| SNP_P4_124908_193088 | NW_004515852.1 | Scaffold352 | 193088                  | TT                              | CC              | 1946941005               |
| SNP_P4_124909_194116 | NW_004515852.1 | Scaffold352 | 194116                  | CC                              | TT              | 1946941007               |
| SNP_P4_124910_194338 | NW_004515852.1 | Scaffold352 | 194338                  | AA                              | TT              | 1946941009               |
| SNP_P4_124911_194412 | NW_004515852.1 | Scaffold352 | 194412                  | TT                              | AA              | 1946941011               |
| SNP_P4_124912_194555 | NW_004515852.1 | Scaffold352 | 194555                  | CC                              | TT              | 1946941013               |
| SNP_P4_124913_6827   | NW_004515853.1 | Scaffold353 | 6827                    | TT                              | CC              | 1946941015               |
| SNP_P4_124914_13077  | NW_004515853.1 | Scaffold353 | 13077                   | GG                              | AA              | 1946941017               |
| SNP_P4_124915_13079  | NW_004515853.1 | Scaffold353 | 13079                   | TT                              | AA              | 1946941019               |
| SNP_P4_124916_14507  | NW_004515853.1 | Scaffold353 | 14507                   | AA                              | GG              | 1946941022               |
| SNP_P4_124917_19096  | NW_004515853.1 | Scaffold353 | 19096                   | GG                              | TT              | 1946941024               |
| SNP_P4_124918_27834  | NW_004515853.1 | Scaffold353 | 27834                   | TT                              | GG              | 1946941026               |

| SNPs IDs            | Chromosome IDs | Chromosomes | Physical positions (bp) | CDC Frontier (Reference genome) | (ILWC46 & LPNB) | NCBI SNPdb Accession IDs |
|---------------------|----------------|-------------|-------------------------|---------------------------------|-----------------|--------------------------|
| SNP_P4_124919_28098 | NW_004515853.1 | Scaffold353 | 28098                   | AA                              | GG              | 1946941028               |
| SNP_P4_124920_28215 | NW_004515853.1 | Scaffold353 | 28215                   | GG                              | CC              | 1946941030               |
| SNP_P4_124921_31072 | NW_004515853.1 | Scaffold353 | 31072                   | AA                              | GG              | 1946941032               |
| SNP_P4_124922_31097 | NW_004515853.1 | Scaffold353 | 31097                   | CC                              | GG              | 1946941034               |
| SNP_P4_124923_31113 | NW_004515853.1 | Scaffold353 | 31113                   | AA                              | GG              | 1946941036               |
| SNP_P4_124924_31152 | NW_004515853.1 | Scaffold353 | 31152                   | AA                              | GG              | 1946941038               |
| SNP_P4_124925_57577 | NW_004515853.1 | Scaffold353 | 57577                   | CC                              | GG              | 1946941040               |
| SNP_P4_124926_59153 | NW_004515853.1 | Scaffold353 | 59153                   | TT                              | CC              | 1946941042               |
| SNP_P4_124927_59182 | NW_004515853.1 | Scaffold353 | 59182                   | GG                              | AA              | 1946941044               |
| SNP_P4_124928_59269 | NW_004515853.1 | Scaffold353 | 59269                   | AA                              | CC              | 1946941046               |
| SNP_P4_124929_59972 | NW_004515853.1 | Scaffold353 | 59972                   | AA                              | GG              | 1946941048               |
| SNP_P4_124931_904   | NW_004515855.1 | Scaffold355 | 904                     | CC                              | GG              | 1946941050               |
| SNP_P4_124933_999   | NW_004515855.1 | Scaffold355 | 999                     | AA                              | CC              | 1946941052               |
| SNP_P4_124934_1064  | NW_004515855.1 | Scaffold355 | 1064                    | TT                              | CC              | 1946941054               |
| SNP_P4_124935_1078  | NW_004515855.1 | Scaffold355 | 1078                    | AA                              | TT              | 1946941056               |
| SNP_P4_124936_1115  | NW_004515855.1 | Scaffold355 | 1115                    | AA                              | CC              | 1946941058               |
| SNP_P4_124937_1144  | NW_004515855.1 | Scaffold355 | 1144                    | AA                              | GG              | 1946941060               |
| SNP_P4_124938_1202  | NW_004515855.1 | Scaffold355 | 1202                    | TT                              | GG              | 1946941062               |
| SNP_P4_124940_1446  | NW_004515855.1 | Scaffold355 | 1446                    | GG                              | AA              | 1946941064               |
| SNP_P4_124941_5942  | NW_004515855.1 | Scaffold355 | 5942                    | TT                              | CC              | 1946941066               |
| SNP_P4_124942_8907  | NW_004515855.1 | Scaffold355 | 8907                    | GG                              | AA              | 1946941068               |
| SNP_P4_124943_13551 | NW_004515855.1 | Scaffold355 | 13551                   | TT                              | CC              | 1946941070               |
| SNP_P4_124944_13629 | NW_004515855.1 | Scaffold355 | 13629                   | TT                              | AA              | 1946941072               |
| SNP_P4_124945_15759 | NW_004515855.1 | Scaffold355 | 15759                   | CC                              | AA              | 1946941074               |
| SNP_P4_124946_15862 | NW_004515855.1 | Scaffold355 | 15862                   | GG                              | CC              | 1946941076               |
| SNP_P4_124947_16039 | NW_004515855.1 | Scaffold355 | 16039                   | CC                              | TT              | 1946941078               |
| SNP_P4_124948_16048 | NW_004515855.1 | Scaffold355 | 16048                   | AA                              | TT              | 1946941080               |
| SNP_P4_124949_16082 | NW_004515855.1 | Scaffold355 | 16082                   | TT                              | CC              | 1946941082               |
| SNP_P4_124950_16100 | NW_004515855.1 | Scaffold355 | 16100                   | CC                              | TT              | 1946941084               |
| SNP_P4_124951_16483 | NW_004515855.1 | Scaffold355 | 16483                   | GG                              | CC              | 1946941086               |
| SNP_P4_124952_26828 | NW_004515855.1 | Scaffold355 | 26828                   | AA                              | GG              | 1946941088               |
| SNP_P4_124953_44830 | NW_004515855.1 | Scaffold355 | 44830                   | GG                              | AA              | 1946941090               |
| SNP_P4_124954_51901 | NW_004515855.1 | Scaffold355 | 51901                   | AA                              | GG              | 1946941092               |
| SNP_P4_124955_52285 | NW_004515855.1 | Scaffold355 | 52285                   | CC                              | TT              | 1946941094               |
| SNP_P4_124956_66635 | NW_004515855.1 | Scaffold355 | 66635                   | GG                              | TT              | 1946941096               |
| SNP_P4_124957_75962 | NW_004515855.1 | Scaffold355 | 75962                   | CC                              | TT              | 1946941098               |
| SNP_P4_124958_77761 | NW_004515855.1 | Scaffold355 | 77761                   | CC                              | AA              | 1946941100               |
| SNP_P4_124959_79112 | NW_004515855.1 | Scaffold355 | 79112                   | TT                              | CC              | 1946941102               |
| SNP_P4_124960_79120 | NW_004515855.1 | Scaffold355 | 79120                   | TT                              | AA              | 1946941104               |
| SNP_P4_124961_86434 | NW_004515855.1 | Scaffold355 | 86434                   | AA                              | GG              | 1946941106               |
| SNP_P4_124962_86555 | NW_004515855.1 | Scaffold355 | 86555                   | TT                              | CC              | 1946941108               |
| SNP_P4_124963_86567 | NW_004515855.1 | Scaffold355 | 86567                   | AA                              | GG              | 1946941110               |

| SNPs IDs            | Chromosome IDs | Chromosomes | Physical positions (bp) | CDC Frontier (Reference genome) | (ILWC46 & LPNB) | NCBI SNPdb Accession IDs |
|---------------------|----------------|-------------|-------------------------|---------------------------------|-----------------|--------------------------|
| SNP_P4_124964_86570 | NW_004515855.1 | Scaffold355 | 86570                   | CC                              | GG              | 1946941112               |
| SNP_P4_124965_86659 | NW_004515855.1 | Scaffold355 | 86659                   | AA                              | CC              | 1946941114               |
| SNP_P4_124966_86698 | NW_004515855.1 | Scaffold355 | 86698                   | TT                              | CC              | 1946941116               |
| SNP_P4_124967_86724 | NW_004515855.1 | Scaffold355 | 86724                   | AA                              | GG              | 1946941118               |
| SNP_P4_124968_87056 | NW_004515855.1 | Scaffold355 | 87056                   | TT                              | AA              | 1946941120               |
| SNP_P4_124969_88179 | NW_004515855.1 | Scaffold355 | 88179                   | GG                              | TT              | 1946941122               |
| SNP_P4_124970_88592 | NW_004515855.1 | Scaffold355 | 88592                   | CC                              | AA              | 1946941124               |
| SNP_P4_124971_88609 | NW_004515855.1 | Scaffold355 | 88609                   | AA                              | GG              | 1946941127               |
| SNP_P4_124972_88619 | NW_004515855.1 | Scaffold355 | 88619                   | TT                              | CC              | 1946941129               |
| SNP_P4_124973_88620 | NW_004515855.1 | Scaffold355 | 88620                   | CC                              | TT              | 1946941131               |
| SNP_P4_124974_88629 | NW_004515855.1 | Scaffold355 | 88629                   | TT                              | CC              | 1946941133               |
| SNP_P4_124975_88630 | NW_004515855.1 | Scaffold355 | 88630                   | CC                              | GG              | 1946941135               |
| SNP_P4_124976_88647 | NW_004515855.1 | Scaffold355 | 88647                   | TT                              | CC              | 1946941137               |
| SNP_P4_124977_88694 | NW_004515855.1 | Scaffold355 | 88694                   | AA                              | GG              | 1946941139               |
| SNP_P4_124978_88725 | NW_004515855.1 | Scaffold355 | 88725                   | AA                              | GG              | 1946941141               |
| SNP_P4_124979_88726 | NW_004515855.1 | Scaffold355 | 88726                   | AA                              | CC              | 1946941143               |
| SNP_P4_124980_378   | NW_004515856.1 | Scaffold357 | 378                     | GG                              | AA              | 1946941145               |
| SNP_P4_124981_604   | NW_004515856.1 | Scaffold357 | 604                     | CC                              | GG              | 1946941147               |
| SNP_P4_124982_1284  | NW_004515856.1 | Scaffold357 | 1284                    | TT                              | CC              | 1946941149               |
| SNP_P4_124983_1287  | NW_004515856.1 | Scaffold357 | 1287                    | CC                              | GG              | 1946941151               |
| SNP_P4_124984_1315  | NW_004515856.1 | Scaffold357 | 1315                    | CC                              | AA              | 1946941153               |
| SNP_P4_124985_1327  | NW_004515856.1 | Scaffold357 | 1327                    | AA                              | GG              | 1946941155               |
| SNP_P4_124986_1558  | NW_004515856.1 | Scaffold357 | 1558                    | CC                              | GG              | 1946941157               |
| SNP_P4_124987_1635  | NW_004515856.1 | Scaffold357 | 1635                    | CC                              | TT              | 1946941159               |
| SNP_P4_124988_1651  | NW_004515856.1 | Scaffold357 | 1651                    | CC                              | AA              | 1946941161               |
| SNP_P4_124989_1656  | NW_004515856.1 | Scaffold357 | 1656                    | CC                              | GG              | 1946941163               |
| SNP_P4_124990_1661  | NW_004515856.1 | Scaffold357 | 1661                    | CC                              | AA              | 1946941165               |
| SNP_P4_124991_1712  | NW_004515856.1 | Scaffold357 | 1712                    | AA                              | TT              | 1946941167               |
| SNP_P4_124992_1763  | NW_004515856.1 | Scaffold357 | 1763                    | AA                              | TT              | 1946941169               |
| SNP_P4_124993_1854  | NW_004515856.1 | Scaffold357 | 1854                    | GG                              | AA              | 1946941171               |
| SNP_P4_124994_1860  | NW_004515856.1 | Scaffold357 | 1860                    | TT                              | GG              | 1946941173               |
| SNP_P4_124995_1885  | NW_004515856.1 | Scaffold357 | 1885                    | AA                              | GG              | 1946941175               |
| SNP_P4_124996_1963  | NW_004515856.1 | Scaffold357 | 1963                    | TT                              | AA              | 1946941177               |
| SNP_P4_124997_3995  | NW_004515856.1 | Scaffold357 | 3995                    | AA                              | TT              | 1946941179               |
| SNP_P4_124998_7972  | NW_004515856.1 | Scaffold357 | 7972                    | GG                              | TT              | 1946941181               |
| SNP_P4_124999_7999  | NW_004515856.1 | Scaffold357 | 7999                    | TT                              | CC              | 1946941183               |
| SNP_P4_125000_8017  | NW_004515856.1 | Scaffold357 | 8017                    | CC                              | GG              | 1946941186               |
| SNP_P4_125001_8018  | NW_004515856.1 | Scaffold357 | 8018                    | AA                              | GG              | 1946941188               |
| SNP_P4_125002_8019  | NW_004515856.1 | Scaffold357 | 8019                    | AA                              | TT              | 1946941190               |
| SNP_P4_125003_4316  | NW_004515858.1 | Scaffold362 | 4316                    | AA                              | GG              | 1946941192               |
| SNP_P4_125004_4325  | NW_004515858.1 | Scaffold362 | 4325                    | TT                              | GG              | 1946941194               |
| SNP_P4_125005_14159 | NW_004515858.1 | Scaffold362 | 14159                   | TT                              | CC              | 1946941196               |

| SNPs IDs             | Chromosome IDs | Chromosomes | Physical positions (bp) | CDC Frontier (Reference genome) | (ILWC46 & LPNB) | NCBI SNPdb Accession IDs |
|----------------------|----------------|-------------|-------------------------|---------------------------------|-----------------|--------------------------|
| SNP_P4_125006_15085  | NW_004515858.1 | Scaffold362 | 15085                   | TT                              | CC              | 1946941198               |
| SNP_P4_125007_15088  | NW_004515858.1 | Scaffold362 | 15088                   | TT                              | CC              | 1946941200               |
| SNP_P4_125009_20174  | NW_004515858.1 | Scaffold362 | 20174                   | CC                              | TT              | 1946941202               |
| SNP_P4_125010_43495  | NW_004515858.1 | Scaffold362 | 43495                   | AA                              | GG              | 1946941204               |
| SNP_P4_125011_75441  | NW_004515858.1 | Scaffold362 | 75441                   | TT                              | CC              | 1946941206               |
| SNP_P4_125012_78628  | NW_004515858.1 | Scaffold362 | 78628                   | CC                              | TT              | 1946941208               |
| SNP_P4_125013_78643  | NW_004515858.1 | Scaffold362 | 78643                   | TT                              | CC              | 1946941210               |
| SNP_P4_125014_80535  | NW_004515858.1 | Scaffold362 | 80535                   | CC                              | TT              | 1946941212               |
| SNP_P4_125015_80662  | NW_004515858.1 | Scaffold362 | 80662                   | TT                              | CC              | 1946941214               |
| SNP_P4_125016_80714  | NW_004515858.1 | Scaffold362 | 80714                   | TT                              | CC              | 1946941216               |
| SNP_P4_125017_80880  | NW_004515858.1 | Scaffold362 | 80880                   | TT                              | CC              | 1946941218               |
| SNP_P4_125018_80883  | NW_004515858.1 | Scaffold362 | 80883                   | GG                              | AA              | 1946941220               |
| SNP_P4_125019_80911  | NW_004515858.1 | Scaffold362 | 80911                   | AA                              | GG              | 1946941222               |
| SNP_P4_125020_80977  | NW_004515858.1 | Scaffold362 | 80977                   | GG                              | TT              | 1946941224               |
| SNP_P4_125021_80978  | NW_004515858.1 | Scaffold362 | 80978                   | GG                              | CC              | 1946941226               |
| SNP_P4_125022_81003  | NW_004515858.1 | Scaffold362 | 81003                   | CC                              | TT              | 1946941228               |
| SNP_P4_125023_81024  | NW_004515858.1 | Scaffold362 | 81024                   | CC                              | TT              | 1946941230               |
| SNP_P4_125024_81057  | NW_004515858.1 | Scaffold362 | 81057                   | CC                              | AA              | 1946941232               |
| SNP_P4_125025_81070  | NW_004515858.1 | Scaffold362 | 81070                   | AA                              | GG              | 1946941234               |
| SNP_P4_125026_81089  | NW_004515858.1 | Scaffold362 | 81089                   | TT                              | CC              | 1946941236               |
| SNP_P4_125027_81104  | NW_004515858.1 | Scaffold362 | 81104                   | AA                              | CC              | 1946941238               |
| SNP_P4_125028_81116  | NW_004515858.1 | Scaffold362 | 81116                   | CC                              | TT              | 1946941240               |
| SNP_P4_125030_98616  | NW_004515858.1 | Scaffold362 | 98616                   | AA                              | GG              | 1946941242               |
| SNP_P4_125031_131232 | NW_004515858.1 | Scaffold362 | 131232                  | GG                              | AA              | 1946941244               |
| SNP_P4_125033_137727 | NW_004515858.1 | Scaffold362 | 137727                  | GG                              | AA              | 1946941246               |
| SNP_P4_125034_166063 | NW_004515858.1 | Scaffold362 | 166063                  | CC                              | AA              | 1946941248               |
| SNP_P4_125035_166240 | NW_004515858.1 | Scaffold362 | 166240                  | AA                              | CC              | 1946941250               |
| SNP_P4_125036_166243 | NW_004515858.1 | Scaffold362 | 166243                  | TT                              | AA              | 1946941252               |
| SNP_P4_125037_166319 | NW_004515858.1 | Scaffold362 | 166319                  | TT                              | GG              | 1946941254               |
| SNP_P4_125038_166399 | NW_004515858.1 | Scaffold362 | 166399                  | GG                              | TT              | 1946941256               |
| SNP_P4_125040_166457 | NW_004515858.1 | Scaffold362 | 166457                  | AA                              | GG              | 1946941258               |
| SNP_P4_125041_166535 | NW_004515858.1 | Scaffold362 | 166535                  | CC                              | AA              | 1946941260               |
| SNP_P4_125042_166584 | NW_004515858.1 | Scaffold362 | 166584                  | TT                              | AA              | 1946941262               |
| SNP_P4_125043_166636 | NW_004515858.1 | Scaffold362 | 166636                  | AA                              | GG              | 1946941264               |
| SNP_P4_125044_170209 | NW_004515858.1 | Scaffold362 | 170209                  | AA                              | GG              | 1946941266               |
| SNP_P4_125045_179845 | NW_004515858.1 | Scaffold362 | 179845                  | TT                              | CC              | 1946941268               |
| SNP_P4_125046_180022 | NW_004515858.1 | Scaffold362 | 180022                  | TT                              | CC              | 1946941271               |
| SNP_P4_125047_261828 | NW_004515858.1 | Scaffold362 | 261828                  | AA                              | TT              | 1946941273               |
| SNP_P4_125048_261829 | NW_004515858.1 | Scaffold362 | 261829                  | AA                              | GG              | 1946941275               |
| SNP_P4_125049_263828 | NW_004515858.1 | Scaffold362 | 263828                  | AA                              | GG              | 1946941277               |
| SNP_P4_125050_263833 | NW_004515858.1 | Scaffold362 | 263833                  | AA                              | CC              | 1946941279               |
| SNP_P4_125051_263891 | NW_004515858.1 | Scaffold362 | 263891                  | CC                              | AA              | 1946941281               |

| SNPs IDs             | Chromosome IDs | Chromosomes | Physical positions (bp) | CDC Frontier (Reference genome) | (ILWC46 & LPNB) | NCBI SNPdb Accession IDs |
|----------------------|----------------|-------------|-------------------------|---------------------------------|-----------------|--------------------------|
| SNP_P4_125052_264263 | NW_004515858.1 | Scaffold362 | 264263                  | GG                              | TT              | 1946941283               |
| SNP_P4_125053_265923 | NW_004515858.1 | Scaffold362 | 265923                  | TT                              | GG              | 1946941285               |
| SNP_P4_125054_267511 | NW_004515858.1 | Scaffold362 | 267511                  | AA                              | CC              | 1946941287               |
| SNP_P4_125056_268462 | NW_004515858.1 | Scaffold362 | 268462                  | AA                              | TT              | 1946941289               |
| SNP_P4_125057_292288 | NW_004515858.1 | Scaffold362 | 292288                  | TT                              | AA              | 1946941291               |
| SNP_P4_125058_301765 | NW_004515858.1 | Scaffold362 | 301765                  | GG                              | TT              | 1946941293               |
| SNP_P4_125059_318991 | NW_004515858.1 | Scaffold362 | 318991                  | AA                              | GG              | 1946941295               |
| SNP_P4_125063_329344 | NW_004515858.1 | Scaffold362 | 329344                  | TT                              | CC              | 1946941297               |
| SNP_P4_125064_349187 | NW_004515858.1 | Scaffold362 | 349187                  | TT                              | CC              | 1946941299               |
| SNP_P4_125065_349441 | NW_004515858.1 | Scaffold362 | 349441                  | AA                              | GG              | 1946941301               |
| SNP_P4_125066_349470 | NW_004515858.1 | Scaffold362 | 349470                  | TT                              | CC              | 1946941303               |
| SNP_P4_125067_350452 | NW_004515858.1 | Scaffold362 | 350452                  | TT                              | AA              | 1946941305               |
| SNP_P4_125068_365087 | NW_004515858.1 | Scaffold362 | 365087                  | TT                              | CC              | 1946941307               |
| SNP_P4_125069_366629 | NW_004515858.1 | Scaffold362 | 366629                  | CC                              | TT              | 1946941309               |
| SNP_P4_125070_374736 | NW_004515858.1 | Scaffold362 | 374736                  | TT                              | AA              | 1946941311               |
| SNP_P4_125071_374761 | NW_004515858.1 | Scaffold362 | 374761                  | GG                              | TT              | 1946941313               |
| SNP_P4_125072_392125 | NW_004515858.1 | Scaffold362 | 392125                  | TT                              | CC              | 1946941315               |
| SNP_P4_125073_215    | NW_004515859.1 | Scaffold363 | 215                     | GG                              | AA              | 1946941317               |
| SNP_P4_125074_257    | NW_004515859.1 | Scaffold363 | 257                     | TT                              | CC              | 1946941319               |
| SNP_P4_125075_271    | NW_004515859.1 | Scaffold363 | 271                     | GG                              | AA              | 1946941321               |
| SNP_P4_125076_334    | NW_004515859.1 | Scaffold363 | 334                     | CC                              | GG              | 1946941323               |
| SNP_P4_125077_368    | NW_004515859.1 | Scaffold363 | 368                     | GG                              | AA              | 1946941325               |
| SNP_P4_125078_535    | NW_004515859.1 | Scaffold363 | 535                     | AA                              | GG              | 1946941327               |
| SNP_P4_125079_724    | NW_004515859.1 | Scaffold363 | 724                     | GG                              | TT              | 1946941329               |
| SNP_P4_125080_734    | NW_004515859.1 | Scaffold363 | 734                     | CC                              | TT              | 1946941331               |
| SNP_P4_125081_25256  | NW_004515859.1 | Scaffold363 | 25256                   | AA                              | GG              | 1946941333               |
| SNP_P4_125082_32978  | NW_004515859.1 | Scaffold363 | 32978                   | CC                              | AA              | 1946941335               |
| SNP_P4_125083_80995  | NW_004515859.1 | Scaffold363 | 80995                   | CC                              | GG              | 1946941337               |
| SNP_P4_125085_83732  | NW_004515859.1 | Scaffold363 | 83732                   | CC                              | AA              | 1946941339               |
| SNP_P4_125086_85000  | NW_004515859.1 | Scaffold363 | 85000                   | TT                              | GG              | 1946941341               |
| SNP_P4_125087_85727  | NW_004515859.1 | Scaffold363 | 85727                   | CC                              | GG              | 1946941343               |
| SNP_P4_125088_85772  | NW_004515859.1 | Scaffold363 | 85772                   | AA                              | GG              | 1946941345               |
| SNP_P4_125089_85864  | NW_004515859.1 | Scaffold363 | 85864                   | TT                              | GG              | 1946941347               |
| SNP_P4_125090_96420  | NW_004515859.1 | Scaffold363 | 96420                   | TT                              | CC              | 1946941349               |
| SNP_P4_125091_96421  | NW_004515859.1 | Scaffold363 | 96421                   | GG                              | TT              | 1946941351               |
| SNP_P4_125092_96455  | NW_004515859.1 | Scaffold363 | 96455                   | AA                              | GG              | 1946941353               |
| SNP_P4_125093_96461  | NW_004515859.1 | Scaffold363 | 96461                   | TT                              | AA              | 1946941356               |
| SNP_P4_125094_96468  | NW_004515859.1 | Scaffold363 | 96468                   | TT                              | CC              | 1946941358               |
| SNP_P4_125095_96477  | NW_004515859.1 | Scaffold363 | 96477                   | GG                              | TT              | 1946941360               |
| SNP_P4_125096_96501  | NW_004515859.1 | Scaffold363 | 96501                   | AA                              | TT              | 1946941362               |
| SNP_P4_125097_96515  | NW_004515859.1 | Scaffold363 | 96515                   | CC                              | TT              | 1946941364               |
| SNP_P4_125098_96553  | NW_004515859.1 | Scaffold363 | 96553                   | AA                              | GG              | 1946941366               |



| SNPs IDs             | Chromosome IDs | Chromosomes | Physical positions (bp) | CDC Frontier (Reference genome) | (ILWC46 & LPNB) | NCBI SNPdb Accession IDs |
|----------------------|----------------|-------------|-------------------------|---------------------------------|-----------------|--------------------------|
| SNP_P4_125099_96556  | NW_004515859.1 | Scaffold363 | 96556                   | TT                              | CC              | 1946941368               |
| SNP_P4_125100_96560  | NW_004515859.1 | Scaffold363 | 96560                   | GG                              | AA              | 1946941370               |
| SNP_P4_125101_96561  | NW_004515859.1 | Scaffold363 | 96561                   | CC                              | TT              | 1946941372               |
| SNP_P4_125102_96566  | NW_004515859.1 | Scaffold363 | 96566                   | CC                              | TT              | 1946941374               |
| SNP_P4_125103_96581  | NW_004515859.1 | Scaffold363 | 96581                   | TT                              | CC              | 1946941376               |
| SNP_P4_125104_96583  | NW_004515859.1 | Scaffold363 | 96583                   | CC                              | TT              | 1946941378               |
| SNP_P4_125105_96587  | NW_004515859.1 | Scaffold363 | 96587                   | AA                              | GG              | 1946941380               |
| SNP_P4_125106_96602  | NW_004515859.1 | Scaffold363 | 96602                   | TT                              | AA              | 1946941382               |
| SNP_P4_125109_96730  | NW_004515859.1 | Scaffold363 | 96730                   | GG                              | AA              | 1946941384               |
| SNP_P4_125110_96768  | NW_004515859.1 | Scaffold363 | 96768                   | TT                              | CC              | 1946941386               |
| SNP_P4_125111_96776  | NW_004515859.1 | Scaffold363 | 96776                   | TT                              | CC              | 1946941388               |
| SNP_P4_125112_96900  | NW_004515859.1 | Scaffold363 | 96900                   | TT                              | GG              | 1946941390               |
| SNP_P4_125113_96909  | NW_004515859.1 | Scaffold363 | 96909                   | CC                              | TT              | 1946941392               |
| SNP_P4_125114_96914  | NW_004515859.1 | Scaffold363 | 96914                   | CC                              | TT              | 1946941394               |
| SNP_P4_125115_96919  | NW_004515859.1 | Scaffold363 | 96919                   | TT                              | CC              | 1946941396               |
| SNP_P4_125116_97011  | NW_004515859.1 | Scaffold363 | 97011                   | GG                              | CC              | 1946941398               |
| SNP_P4_125117_97044  | NW_004515859.1 | Scaffold363 | 97044                   | CC                              | GG              | 1946941400               |
| SNP_P4_125118_97059  | NW_004515859.1 | Scaffold363 | 97059                   | CC                              | TT              | 1946941402               |
| SNP_P4_125120_33402  | NW_004515861.1 | Scaffold366 | 33402                   | AA                              | TT              | 1946941404               |
| SNP_P4_125121_34322  | NW_004515861.1 | Scaffold366 | 34322                   | AA                              | GG              | 1946941406               |
| SNP_P4_125122_49515  | NW_004515861.1 | Scaffold366 | 49515                   | CC                              | TT              | 1946941408               |
| SNP_P4_125124_61566  | NW_004515861.1 | Scaffold366 | 61566                   | CC                              | TT              | 1946941410               |
| SNP_P4_125125_61576  | NW_004515861.1 | Scaffold366 | 61576                   | CC                              | AA              | 1946941412               |
| SNP_P4_125126_68216  | NW_004515861.1 | Scaffold366 | 68216                   | CC                              | TT              | 1946941414               |
| SNP_P4_125127_68468  | NW_004515861.1 | Scaffold366 | 68468                   | TT                              | CC              | 1946941416               |
| SNP_P4_125128_70768  | NW_004515861.1 | Scaffold366 | 70768                   | GG                              | AA              | 1946941418               |
| SNP_P4_125130_107525 | NW_004515861.1 | Scaffold366 | 107525                  | CC                              | TT              | 1946941420               |
| SNP_P4_125131_107629 | NW_004515861.1 | Scaffold366 | 107629                  | AA                              | GG              | 1946941422               |
| SNP_P4_125132_107639 | NW_004515861.1 | Scaffold366 | 107639                  | CC                              | GG              | 1946941424               |
| SNP_P4_125133_107712 | NW_004515861.1 | Scaffold366 | 107712                  | TT                              | CC              | 1946941426               |
| SNP_P4_125134_107727 | NW_004515861.1 | Scaffold366 | 107727                  | TT                              | CC              | 1946941428               |
| SNP_P4_125135_107728 | NW_004515861.1 | Scaffold366 | 107728                  | TT                              | CC              | 1946941430               |
| SNP_P4_125136_107729 | NW_004515861.1 | Scaffold366 | 107729                  | GG                              | TT              | 1946941432               |
| SNP_P4_125137_107915 | NW_004515861.1 | Scaffold366 | 107915                  | TT                              | CC              | 1946941434               |
| SNP_P4_125138_107946 | NW_004515861.1 | Scaffold366 | 107946                  | GG                              | TT              | 1946941436               |
| SNP_P4_125139_108021 | NW_004515861.1 | Scaffold366 | 108021                  | CC                              | TT              | 1946941438               |
| SNP_P4_125140_108079 | NW_004515861.1 | Scaffold366 | 108079                  | CC                              | TT              | 1946941440               |
| SNP_P4_125141_108082 | NW_004515861.1 | Scaffold366 | 108082                  | GG                              | AA              | 1946941442               |
| SNP_P4_125142_115926 | NW_004515861.1 | Scaffold366 | 115926                  | TT                              | CC              | 1946941444               |
| SNP_P4_125143_115937 | NW_004515861.1 | Scaffold366 | 115937                  | TT                              | CC              | 1946941446               |
| SNP_P4_125144_116264 | NW_004515861.1 | Scaffold366 | 116264                  | GG                              | AA              | 1946941448               |
| SNP_P4_125145_116322 | NW_004515861.1 | Scaffold366 | 116322                  | CC                              | GG              | 1946941450               |

| SNPs IDs             | Chromosome IDs | Chromosomes | Physical positions (bp) | CDC Frontier (Reference genome) | (ILWC46 & LPNB) | NCBI SNPdb Accession IDs |
|----------------------|----------------|-------------|-------------------------|---------------------------------|-----------------|--------------------------|
| SNP_P4_125146_139155 | NW_004515861.1 | Scaffold366 | 139155                  | AA                              | CC              | 1946941452               |
| SNP_P4_125147_139164 | NW_004515861.1 | Scaffold366 | 139164                  | GG                              | AA              | 1946941454               |
| SNP_P4_125148_139191 | NW_004515861.1 | Scaffold366 | 139191                  | AA                              | TT              | 1946941456               |
| SNP_P4_125149_156016 | NW_004515861.1 | Scaffold366 | 156016                  | CC                              | TT              | 1946941458               |
| SNP_P4_125150_156023 | NW_004515861.1 | Scaffold366 | 156023                  | AA                              | TT              | 1946941460               |
| SNP_P4_125151_156163 | NW_004515861.1 | Scaffold366 | 156163                  | TT                              | CC              | 1946941462               |
| SNP_P4_125152_156167 | NW_004515861.1 | Scaffold366 | 156167                  | GG                              | AA              | 1946941464               |
| SNP_P4_125153_2644   | NW_004515862.1 | Scaffold367 | 2644                    | TT                              | CC              | 1946941466               |
| SNP_P4_125154_5433   | NW_004515862.1 | Scaffold367 | 5433                    | AA                              | CC              | 1946941468               |
| SNP_P4_125155_5456   | NW_004515862.1 | Scaffold367 | 5456                    | CC                              | TT              | 1946941470               |
| SNP_P4_125156_6311   | NW_004515862.1 | Scaffold367 | 6311                    | AA                              | CC              | 1946941472               |
| SNP_P4_125158_6461   | NW_004515862.1 | Scaffold367 | 6461                    | CC                              | TT              | 1946941474               |
| SNP_P4_125159_6505   | NW_004515862.1 | Scaffold367 | 6505                    | AA                              | CC              | 1946941476               |
| SNP_P4_125160_6556   | NW_004515862.1 | Scaffold367 | 6556                    | AA                              | GG              | 1946941478               |
| SNP_P4_125161_12273  | NW_004515862.1 | Scaffold367 | 12273                   | AA                              | TT              | 1946941480               |
| SNP_P4_125162_19728  | NW_004515862.1 | Scaffold367 | 19728                   | CC                              | TT              | 1946941482               |
| SNP_P4_125163_20090  | NW_004515862.1 | Scaffold367 | 20090                   | TT                              | CC              | 1946941484               |
| SNP_P4_125164_20095  | NW_004515862.1 | Scaffold367 | 20095                   | TT                              | CC              | 1946941486               |
| SNP_P4_125165_20110  | NW_004515862.1 | Scaffold367 | 20110                   | GG                              | AA              | 1946941488               |
| SNP_P4_125166_20119  | NW_004515862.1 | Scaffold367 | 20119                   | TT                              | CC              | 1946941490               |
| SNP_P4_125167_20164  | NW_004515862.1 | Scaffold367 | 20164                   | TT                              | CC              | 1946941492               |
| SNP_P4_125168_20205  | NW_004515862.1 | Scaffold367 | 20205                   | TT                              | AA              | 1946941494               |
| SNP_P4_125169_20215  | NW_004515862.1 | Scaffold367 | 20215                   | CC                              | AA              | 1946941496               |
| SNP_P4_125170_24553  | NW_004515862.1 | Scaffold367 | 24553                   | GG                              | CC              | 1946941498               |
| SNP_P4_125171_24636  | NW_004515862.1 | Scaffold367 | 24636                   | AA                              | GG              | 1946941500               |
| SNP_P4_125172_24851  | NW_004515862.1 | Scaffold367 | 24851                   | TT                              | GG              | 1946941502               |
| SNP_P4_125173_25068  | NW_004515862.1 | Scaffold367 | 25068                   | TT                              | CC              | 1946941504               |
| SNP_P4_125174_25112  | NW_004515862.1 | Scaffold367 | 25112                   | TT                              | CC              | 1946941506               |
| SNP_P4_125175_25126  | NW_004515862.1 | Scaffold367 | 25126                   | TT                              | AA              | 1946941508               |
| SNP_P4_125176_25200  | NW_004515862.1 | Scaffold367 | 25200                   | TT                              | CC              | 1946941510               |
| SNP_P4_125177_25222  | NW_004515862.1 | Scaffold367 | 25222                   | TT                              | CC              | 1946941512               |
| SNP_P4_125178_32642  | NW_004515862.1 | Scaffold367 | 32642                   | TT                              | AA              | 1946941514               |
| SNP_P4_125179_32647  | NW_004515862.1 | Scaffold367 | 32647                   | TT                              | CC              | 1946941516               |
| SNP_P4_125180_32715  | NW_004515862.1 | Scaffold367 | 32715                   | TT                              | CC              | 1946941518               |
| SNP_P4_125181_34550  | NW_004515862.1 | Scaffold367 | 34550                   | CC                              | TT              | 1946941520               |
| SNP_P4_125182_34559  | NW_004515862.1 | Scaffold367 | 34559                   | CC                              | TT              | 1946941522               |
| SNP_P4_125183_34572  | NW_004515862.1 | Scaffold367 | 34572                   | GG                              | AA              | 1946941524               |
| SNP_P4_125184_36468  | NW_004515862.1 | Scaffold367 | 36468                   | AA                              | GG              | 1946941526               |
| SNP_P4_125185_45185  | NW_004515862.1 | Scaffold367 | 45185                   | TT                              | CC              | 1946941528               |
| SNP_P4_125186_45300  | NW_004515862.1 | Scaffold367 | 45300                   | AA                              | GG              | 1946941530               |
| SNP_P4_125187_45307  | NW_004515862.1 | Scaffold367 | 45307                   | CC                              | AA              | 1946941532               |
| SNP_P4_125188_45403  | NW_004515862.1 | Scaffold367 | 45403                   | TT                              | GG              | 1946941534               |

| SNPs IDs            | Chromosome IDs | Chromosomes | Physical positions (bp) | CDC Frontier (Reference genome) | (ILWC46 & LPNB) | NCBI SNPdb Accession IDs |
|---------------------|----------------|-------------|-------------------------|---------------------------------|-----------------|--------------------------|
| SNP_P4_125189_45413 | NW_004515862.1 | Scaffold367 | 45413                   | AA                              | GG              | 1946941536               |
| SNP_P4_125190_45636 | NW_004515862.1 | Scaffold367 | 45636                   | AA                              | GG              | 1946941538               |
| SNP_P4_125191_45740 | NW_004515862.1 | Scaffold367 | 45740                   | CC                              | GG              | 1946941540               |
| SNP_P4_125192_51439 | NW_004515862.1 | Scaffold367 | 51439                   | TT                              | GG              | 1946941542               |
| SNP_P4_125193_51452 | NW_004515862.1 | Scaffold367 | 51452                   | AA                              | CC              | 1946941544               |
| SNP_P4_125194_51465 | NW_004515862.1 | Scaffold367 | 51465                   | GG                              | AA              | 1946941546               |
| SNP_P4_125195_51474 | NW_004515862.1 | Scaffold367 | 51474                   | GG                              | TT              | 1946941549               |
| SNP_P4_125196_51493 | NW_004515862.1 | Scaffold367 | 51493                   | CC                              | TT              | 1946941551               |
| SNP_P4_125197_51519 | NW_004515862.1 | Scaffold367 | 51519                   | CC                              | TT              | 1946941553               |
| SNP_P4_125198_51521 | NW_004515862.1 | Scaffold367 | 51521                   | CC                              | TT              | 1946941555               |
| SNP_P4_125199_51552 | NW_004515862.1 | Scaffold367 | 51552                   | TT                              | AA              | 1946941557               |
| SNP_P4_125200_51565 | NW_004515862.1 | Scaffold367 | 51565                   | GG                              | CC              | 1946941559               |
| SNP_P4_125201_51567 | NW_004515862.1 | Scaffold367 | 51567                   | GG                              | AA              | 1946941561               |
| SNP_P4_125202_51613 | NW_004515862.1 | Scaffold367 | 51613                   | TT                              | CC              | 1946941563               |
| SNP_P4_125203_51651 | NW_004515862.1 | Scaffold367 | 51651                   | TT                              | CC              | 1946941565               |
| SNP_P4_125204_51714 | NW_004515862.1 | Scaffold367 | 51714                   | TT                              | AA              | 1946941567               |
| SNP_P4_125205_51716 | NW_004515862.1 | Scaffold367 | 51716                   | GG                              | AA              | 1946941569               |
| SNP_P4_125206_52116 | NW_004515862.1 | Scaffold367 | 52116                   | CC                              | TT              | 1946941571               |
| SNP_P4_125207_52450 | NW_004515862.1 | Scaffold367 | 52450                   | AA                              | GG              | 1946941573               |
| SNP_P4_125208_52497 | NW_004515862.1 | Scaffold367 | 52497                   | TT                              | AA              | 1946941575               |
| SNP_P4_125209_52539 | NW_004515862.1 | Scaffold367 | 52539                   | GG                              | CC              | 1946941577               |
| SNP_P4_125210_55349 | NW_004515862.1 | Scaffold367 | 55349                   | TT                              | CC              | 1946941579               |
| SNP_P4_125211_55744 | NW_004515862.1 | Scaffold367 | 55744                   | AA                              | CC              | 1946941581               |
| SNP_P4_125212_55811 | NW_004515862.1 | Scaffold367 | 55811                   | TT                              | CC              | 1946941583               |
| SNP_P4_125213_61872 | NW_004515862.1 | Scaffold367 | 61872                   | CC                              | TT              | 1946941585               |
| SNP_P4_125214_62720 | NW_004515862.1 | Scaffold367 | 62720                   | TT                              | AA              | 1946941587               |
| SNP_P4_125215_62750 | NW_004515862.1 | Scaffold367 | 62750                   | TT                              | CC              | 1946941589               |
| SNP_P4_125216_67302 | NW_004515862.1 | Scaffold367 | 67302                   | TT                              | CC              | 1946941591               |
| SNP_P4_125217_67661 | NW_004515862.1 | Scaffold367 | 67661                   | TT                              | CC              | 1946941593               |
| SNP_P4_125218_72151 | NW_004515862.1 | Scaffold367 | 72151                   | AA                              | TT              | 1946941595               |
| SNP_P4_125219_72175 | NW_004515862.1 | Scaffold367 | 72175                   | CC                              | GG              | 1946941597               |
| SNP_P4_125220_72195 | NW_004515862.1 | Scaffold367 | 72195                   | AA                              | CC              | 1946941599               |
| SNP_P4_125221_72278 | NW_004515862.1 | Scaffold367 | 72278                   | AA                              | GG              | 1946941601               |
| SNP_P4_125222_72284 | NW_004515862.1 | Scaffold367 | 72284                   | TT                              | CC              | 1946941603               |
| SNP_P4_125223_72306 | NW_004515862.1 | Scaffold367 | 72306                   | TT                              | CC              | 1946941605               |
| SNP_P4_125224_72307 | NW_004515862.1 | Scaffold367 | 72307                   | GG                              | AA              | 1946941607               |
| SNP_P4_125225_78255 | NW_004515862.1 | Scaffold367 | 78255                   | CC                              | TT              | 1946941609               |
| SNP_P4_125226_78950 | NW_004515862.1 | Scaffold367 | 78950                   | TT                              | CC              | 1946941611               |
| SNP_P4_125227_79302 | NW_004515862.1 | Scaffold367 | 79302                   | AA                              | GG              | 1946941613               |
| SNP_P4_125228_79352 | NW_004515862.1 | Scaffold367 | 79352                   | AA                              | GG              | 1946941615               |
| SNP_P4_125229_82072 | NW_004515862.1 | Scaffold367 | 82072                   | CC                              | AA              | 1946941617               |
| SNP_P4_125230_82075 | NW_004515862.1 | Scaffold367 | 82075                   | AA                              | TT              | 1946941619               |

| SNPs IDs             | Chromosome IDs | Chromosomes | Physical positions (bp) | CDC Frontier (Reference genome) | (ILWC46 & LPNB) | NCBI SNPdb Accession IDs |
|----------------------|----------------|-------------|-------------------------|---------------------------------|-----------------|--------------------------|
| SNP_P4_125233_86246  | NW_004515862.1 | Scaffold367 | 86246                   | AA                              | GG              | 1946941621               |
| SNP_P4_125234_86291  | NW_004515862.1 | Scaffold367 | 86291                   | TT                              | CC              | 1946941623               |
| SNP_P4_125235_86297  | NW_004515862.1 | Scaffold367 | 86297                   | CC                              | TT              | 1946941625               |
| SNP_P4_125236_86315  | NW_004515862.1 | Scaffold367 | 86315                   | TT                              | GG              | 1946941627               |
| SNP_P4_125237_86322  | NW_004515862.1 | Scaffold367 | 86322                   | CC                              | TT              | 1946941629               |
| SNP_P4_125238_86330  | NW_004515862.1 | Scaffold367 | 86330                   | GG                              | AA              | 1946941631               |
| SNP_P4_125239_86371  | NW_004515862.1 | Scaffold367 | 86371                   | CC                              | GG              | 1946941633               |
| SNP_P4_125240_92566  | NW_004515862.1 | Scaffold367 | 92566                   | GG                              | AA              | 1946941635               |
| SNP_P4_125241_92766  | NW_004515862.1 | Scaffold367 | 92766                   | CC                              | TT              | 1946941637               |
| SNP_P4_125242_92781  | NW_004515862.1 | Scaffold367 | 92781                   | CC                              | TT              | 1946941639               |
| SNP_P4_125243_92869  | NW_004515862.1 | Scaffold367 | 92869                   | TT                              | GG              | 1946941641               |
| SNP_P4_125244_92871  | NW_004515862.1 | Scaffold367 | 92871                   | TT                              | AA              | 1946941643               |
| SNP_P4_125245_92883  | NW_004515862.1 | Scaffold367 | 92883                   | AA                              | GG              | 1946941645               |
| SNP_P4_125246_101069 | NW_004515862.1 | Scaffold367 | 101069                  | AA                              | GG              | 1946941647               |
| SNP_P4_125247_118802 | NW_004515862.1 | Scaffold367 | 118802                  | GG                              | TT              | 1946941649               |
| SNP_P4_125248_119040 | NW_004515862.1 | Scaffold367 | 119040                  | CC                              | TT              | 1946941651               |
| SNP_P4_125249_119101 | NW_004515862.1 | Scaffold367 | 119101                  | CC                              | TT              | 1946941653               |
| SNP_P4_125250_119108 | NW_004515862.1 | Scaffold367 | 119108                  | TT                              | CC              | 1946941655               |
| SNP_P4_125251_119132 | NW_004515862.1 | Scaffold367 | 119132                  | AA                              | TT              | 1946941657               |
| SNP_P4_125252_119149 | NW_004515862.1 | Scaffold367 | 119149                  | TT                              | AA              | 1946941659               |
| SNP_P4_125253_119179 | NW_004515862.1 | Scaffold367 | 119179                  | TT                              | CC              | 1946941661               |
| SNP_P4_125254_119777 | NW_004515862.1 | Scaffold367 | 119777                  | TT                              | CC              | 1946941663               |
| SNP_P4_125255_119784 | NW_004515862.1 | Scaffold367 | 119784                  | TT                              | GG              | 1946941665               |
| SNP_P4_125256_119791 | NW_004515862.1 | Scaffold367 | 119791                  | AA                              | GG              | 1946941667               |
| SNP_P4_125257_119802 | NW_004515862.1 | Scaffold367 | 119802                  | GG                              | AA              | 1946941669               |
| SNP_P4_125258_119827 | NW_004515862.1 | Scaffold367 | 119827                  | CC                              | AA              | 1946941671               |
| SNP_P4_125259_119831 | NW_004515862.1 | Scaffold367 | 119831                  | TT                              | GG              | 1946941673               |
| SNP_P4_125260_128668 | NW_004515862.1 | Scaffold367 | 128668                  | CC                              | TT              | 1946941675               |
| SNP_P4_125261_133841 | NW_004515862.1 | Scaffold367 | 133841                  | AA                              | GG              | 1946941677               |
| SNP_P4_125262_134133 | NW_004515862.1 | Scaffold367 | 134133                  | AA                              | CC              | 1946941679               |
| SNP_P4_125263_137135 | NW_004515862.1 | Scaffold367 | 137135                  | TT                              | AA              | 1946941681               |
| SNP_P4_125264_137347 | NW_004515862.1 | Scaffold367 | 137347                  | AA                              | TT              | 1946941683               |
| SNP_P4_125265_137351 | NW_004515862.1 | Scaffold367 | 137351                  | GG                              | AA              | 1946941685               |
| SNP_P4_125266_145817 | NW_004515862.1 | Scaffold367 | 145817                  | AA                              | GG              | 1946941687               |
| SNP_P4_125267_146413 | NW_004515862.1 | Scaffold367 | 146413                  | AA                              | GG              | 1946941689               |
| SNP_P4_125268_146414 | NW_004515862.1 | Scaffold367 | 146414                  | GG                              | AA              | 1946941691               |
| SNP_P4_125269_149303 | NW_004515862.1 | Scaffold367 | 149303                  | AA                              | TT              | 1946941693               |
| SNP_P4_125270_149351 | NW_004515862.1 | Scaffold367 | 149351                  | GG                              | AA              | 1946941695               |
| SNP_P4_125271_149352 | NW_004515862.1 | Scaffold367 | 149352                  | AA                              | GG              | 1946941697               |
| SNP_P4_125272_149373 | NW_004515862.1 | Scaffold367 | 149373                  | TT                              | AA              | 1946941699               |
| SNP_P4_125273_149394 | NW_004515862.1 | Scaffold367 | 149394                  | CC                              | GG              | 1946941701               |
| SNP_P4_125274_149401 | NW_004515862.1 | Scaffold367 | 149401                  | AA                              | GG              | 1946941703               |

| SNPs IDs             | Chromosome IDs | Chromosomes | Physical positions (bp) | CDC Frontier (Reference genome) | (ILWC46 & LPNB) | NCBI SNPdb Accession IDs |
|----------------------|----------------|-------------|-------------------------|---------------------------------|-----------------|--------------------------|
| SNP_P4_125275_149421 | NW_004515862.1 | Scaffold367 | 149421                  | CC                              | GG              | 1946941705               |
| SNP_P4_125276_149427 | NW_004515862.1 | Scaffold367 | 149427                  | GG                              | TT              | 1946941707               |
| SNP_P4_125277_149526 | NW_004515862.1 | Scaffold367 | 149526                  | TT                              | AA              | 1946941709               |
| SNP_P4_125278_149632 | NW_004515862.1 | Scaffold367 | 149632                  | AA                              | TT              | 1946941711               |
| SNP_P4_125279_157833 | NW_004515862.1 | Scaffold367 | 157833                  | AA                              | CC              | 1946941713               |
| SNP_P4_125280_157839 | NW_004515862.1 | Scaffold367 | 157839                  | TT                              | CC              | 1946941715               |
| SNP_P4_125281_158212 | NW_004515862.1 | Scaffold367 | 158212                  | AA                              | GG              | 1946941717               |
| SNP_P4_125282_158228 | NW_004515862.1 | Scaffold367 | 158228                  | TT                              | CC              | 1946941719               |
| SNP_P4_125285_11430  | NW_004515863.1 | Scaffold369 | 11430                   | CC                              | AA              | 1946941721               |
| SNP_P4_125286_15892  | NW_004515863.1 | Scaffold369 | 15892                   | CC                              | TT              | 1946941723               |
| SNP_P4_125287_19216  | NW_004515863.1 | Scaffold369 | 19216                   | CC                              | TT              | 1946941724               |
| SNP_P4_125288_28989  | NW_004515863.1 | Scaffold369 | 28989                   | AA                              | GG              | 1946941726               |
| SNP_P4_125289_29001  | NW_004515863.1 | Scaffold369 | 29001                   | AA                              | TT              | 1946941728               |
| SNP_P4_125290_44434  | NW_004515863.1 | Scaffold369 | 44434                   | CC                              | TT              | 1946941730               |
| SNP_P4_125292_48588  | NW_004515863.1 | Scaffold369 | 48588                   | GG                              | AA              | 1946941732               |
| SNP_P4_125293_48594  | NW_004515863.1 | Scaffold369 | 48594                   | AA                              | GG              | 1946941734               |
| SNP_P4_125294_48599  | NW_004515863.1 | Scaffold369 | 48599                   | GG                              | CC              | 1946941736               |
| SNP_P4_125295_48606  | NW_004515863.1 | Scaffold369 | 48606                   | AA                              | GG              | 1946941738               |
| SNP_P4_125296_48658  | NW_004515863.1 | Scaffold369 | 48658                   | TT                              | CC              | 1946941740               |
| SNP_P4_125298_100123 | NW_004515863.1 | Scaffold369 | 100123                  | CC                              | TT              | 1946941742               |
| SNP_P4_125301_157763 | NW_004515863.1 | Scaffold369 | 157763                  | GG                              | AA              | 1946941744               |
| SNP_P4_125302_183894 | NW_004515863.1 | Scaffold369 | 183894                  | CC                              | GG              | 1946941746               |
| SNP_P4_125303_183903 | NW_004515863.1 | Scaffold369 | 183903                  | TT                              | CC              | 1946941748               |
| SNP_P4_125304_184089 | NW_004515863.1 | Scaffold369 | 184089                  | AA                              | GG              | 1946941750               |
| SNP_P4_125305_17207  | NW_004515864.1 | Scaffold370 | 17207                   | GG                              | AA              | 1946941752               |
| SNP_P4_125306_23051  | NW_004515864.1 | Scaffold370 | 23051                   | AA                              | GG              | 1946941754               |
| SNP_P4_125307_23426  | NW_004515864.1 | Scaffold370 | 23426                   | AA                              | TT              | 1946941756               |
| SNP_P4_125308_23499  | NW_004515864.1 | Scaffold370 | 23499                   | GG                              | AA              | 1946941758               |
| SNP_P4_125309_23510  | NW_004515864.1 | Scaffold370 | 23510                   | CC                              | AA              | 1946941760               |
| SNP_P4_125310_23549  | NW_004515864.1 | Scaffold370 | 23549                   | GG                              | CC              | 1946941762               |
| SNP_P4_125311_23734  | NW_004515864.1 | Scaffold370 | 23734                   | TT                              | AA              | 1946941764               |
| SNP_P4_125312_23798  | NW_004515864.1 | Scaffold370 | 23798                   | TT                              | CC              | 1946941766               |
| SNP_P4_125313_23822  | NW_004515864.1 | Scaffold370 | 23822                   | AA                              | TT              | 1946941768               |
| SNP_P4_125314_23833  | NW_004515864.1 | Scaffold370 | 23833                   | CC                              | AA              | 1946941770               |
| SNP_P4_125315_23878  | NW_004515864.1 | Scaffold370 | 23878                   | TT                              | CC              | 1946941772               |
| SNP_P4_125316_25701  | NW_004515864.1 | Scaffold370 | 25701                   | AA                              | CC              | 1946941774               |
| SNP_P4_125317_26972  | NW_004515864.1 | Scaffold370 | 26972                   | TT                              | CC              | 1946941777               |
| SNP_P4_125318_27063  | NW_004515864.1 | Scaffold370 | 27063                   | GG                              | CC              | 1946941779               |
| SNP_P4_125319_28971  | NW_004515864.1 | Scaffold370 | 28971                   | CC                              | TT              | 1946941781               |
| SNP_P4_125320_28972  | NW_004515864.1 | Scaffold370 | 28972                   | AA                              | GG              | 1946941783               |
| SNP_P4_125321_28995  | NW_004515864.1 | Scaffold370 | 28995                   | TT                              | CC              | 1946941785               |
| SNP_P4_125322_29007  | NW_004515864.1 | Scaffold370 | 29007                   | TT                              | AA              | 1946941787               |

| SNPs IDs            | Chromosome IDs | Chromosomes | Physical positions (bp) | CDC Frontier (Reference genome) | (ILWC46 & LPNB) | NCBI SNPdb Accession IDs |
|---------------------|----------------|-------------|-------------------------|---------------------------------|-----------------|--------------------------|
| SNP_P4_125323_29075 | NW_004515864.1 | Scaffold370 | 29075                   | GG                              | AA              | 1946941789               |
| SNP_P4_125324_29081 | NW_004515864.1 | Scaffold370 | 29081                   | TT                              | CC              | 1946941791               |
| SNP_P4_125325_29170 | NW_004515864.1 | Scaffold370 | 29170                   | CC                              | TT              | 1946941793               |
| SNP_P4_125326_29315 | NW_004515864.1 | Scaffold370 | 29315                   | GG                              | CC              | 1946941795               |
| SNP_P4_125327_29353 | NW_004515864.1 | Scaffold370 | 29353                   | CC                              | TT              | 1946941797               |
| SNP_P4_125328_29522 | NW_004515864.1 | Scaffold370 | 29522                   | AA                              | TT              | 1946941800               |
| SNP_P4_125329_29593 | NW_004515864.1 | Scaffold370 | 29593                   | AA                              | GG              | 1946941802               |
| SNP_P4_125330_29599 | NW_004515864.1 | Scaffold370 | 29599                   | AA                              | GG              | 1946941804               |
| SNP_P4_125331_29606 | NW_004515864.1 | Scaffold370 | 29606                   | CC                              | TT              | 1946941806               |
| SNP_P4_125332_29753 | NW_004515864.1 | Scaffold370 | 29753                   | AA                              | GG              | 1946941808               |
| SNP_P4_125333_29815 | NW_004515864.1 | Scaffold370 | 29815                   | CC                              | AA              | 1946941810               |
| SNP_P4_125334_29975 | NW_004515864.1 | Scaffold370 | 29975                   | CC                              | AA              | 1946941812               |
| SNP_P4_125335_31759 | NW_004515864.1 | Scaffold370 | 31759                   | TT                              | CC              | 1946941814               |
| SNP_P4_125336_31845 | NW_004515864.1 | Scaffold370 | 31845                   | AA                              | GG              | 1946941817               |
| SNP_P4_125337_32002 | NW_004515864.1 | Scaffold370 | 32002                   | TT                              | CC              | 1946941819               |
| SNP_P4_125338_32087 | NW_004515864.1 | Scaffold370 | 32087                   | AA                              | TT              | 1946941821               |
| SNP_P4_125339_32120 | NW_004515864.1 | Scaffold370 | 32120                   | AA                              | GG              | 1946941823               |
| SNP_P4_125340_32347 | NW_004515864.1 | Scaffold370 | 32347                   | AA                              | GG              | 1946941825               |
| SNP_P4_125341_32362 | NW_004515864.1 | Scaffold370 | 32362                   | TT                              | CC              | 1946941827               |
| SNP_P4_125342_32385 | NW_004515864.1 | Scaffold370 | 32385                   | CC                              | TT              | 1946941829               |
| SNP_P4_125343_32400 | NW_004515864.1 | Scaffold370 | 32400                   | TT                              | CC              | 1946941831               |
| SNP_P4_125344_32405 | NW_004515864.1 | Scaffold370 | 32405                   | CC                              | GG              | 1946941833               |
| SNP_P4_125345_32419 | NW_004515864.1 | Scaffold370 | 32419                   | AA                              | GG              | 1946941835               |
| SNP_P4_125346_32429 | NW_004515864.1 | Scaffold370 | 32429                   | CC                              | AA              | 1946941837               |
| SNP_P4_125347_32430 | NW_004515864.1 | Scaffold370 | 32430                   | CC                              | AA              | 1946941839               |
| SNP_P4_125348_32591 | NW_004515864.1 | Scaffold370 | 32591                   | AA                              | GG              | 1946941841               |
| SNP_P4_125349_32593 | NW_004515864.1 | Scaffold370 | 32593                   | AA                              | GG              | 1946941843               |
| SNP_P4_125350_32613 | NW_004515864.1 | Scaffold370 | 32613                   | TT                              | GG              | 1946941845               |
| SNP_P4_125351_32646 | NW_004515864.1 | Scaffold370 | 32646                   | GG                              | AA              | 1946941847               |
| SNP_P4_125352_32648 | NW_004515864.1 | Scaffold370 | 32648                   | CC                              | TT              | 1946941849               |
| SNP_P4_125353_32757 | NW_004515864.1 | Scaffold370 | 32757                   | AA                              | GG              | 1946941851               |
| SNP_P4_125354_34053 | NW_004515864.1 | Scaffold370 | 34053                   | CC                              | TT              | 1946941853               |
| SNP_P4_125355_34087 | NW_004515864.1 | Scaffold370 | 34087                   | GG                              | TT              | 1946941855               |
| SNP_P4_125356_34192 | NW_004515864.1 | Scaffold370 | 34192                   | GG                              | AA              | 1946941857               |
| SNP_P4_125357_34327 | NW_004515864.1 | Scaffold370 | 34327                   | GG                              | CC              | 1946941859               |
| SNP_P4_125358_34353 | NW_004515864.1 | Scaffold370 | 34353                   | TT                              | AA              | 1946941861               |
| SNP_P4_125359_34388 | NW_004515864.1 | Scaffold370 | 34388                   | AA                              | TT              | 1946941863               |
| SNP_P4_125360_34442 | NW_004515864.1 | Scaffold370 | 34442                   | CC                              | TT              | 1946941866               |
| SNP_P4_125361_34479 | NW_004515864.1 | Scaffold370 | 34479                   | CC                              | TT              | 1946941868               |
| SNP_P4_125362_34504 | NW_004515864.1 | Scaffold370 | 34504                   | CC                              | TT              | 1946941870               |
| SNP_P4_125363_34610 | NW_004515864.1 | Scaffold370 | 34610                   | TT                              | CC              | 1946941872               |
| SNP_P4_125364_34678 | NW_004515864.1 | Scaffold370 | 34678                   | CC                              | TT              | 1946941874               |

| SNPs IDs            | Chromosome IDs | Chromosomes | Physical positions (bp) | CDC Frontier (Reference genome) | (ILWC46 & LPNB) | NCBI SNPdb Accession IDs |
|---------------------|----------------|-------------|-------------------------|---------------------------------|-----------------|--------------------------|
| SNP_P4_125365_34746 | NW_004515864.1 | Scaffold370 | 34746                   | TT                              | GG              | 1946941876               |
| SNP_P4_125366_34754 | NW_004515864.1 | Scaffold370 | 34754                   | CC                              | GG              | 1946941878               |
| SNP_P4_125367_34773 | NW_004515864.1 | Scaffold370 | 34773                   | TT                              | CC              | 1946941880               |
| SNP_P4_125368_34971 | NW_004515864.1 | Scaffold370 | 34971                   | GG                              | CC              | 1946941882               |
| SNP_P4_125369_34979 | NW_004515864.1 | Scaffold370 | 34979                   | CC                              | AA              | 1946941884               |
| SNP_P4_125370_35001 | NW_004515864.1 | Scaffold370 | 35001                   | GG                              | AA              | 1946941886               |
| SNP_P4_125371_35081 | NW_004515864.1 | Scaffold370 | 35081                   | GG                              | AA              | 1946941888               |
| SNP_P4_125372_35277 | NW_004515864.1 | Scaffold370 | 35277                   | TT                              | GG              | 1946941890               |
| SNP_P4_125373_35288 | NW_004515864.1 | Scaffold370 | 35288                   | TT                              | GG              | 1946941892               |
| SNP_P4_125374_35363 | NW_004515864.1 | Scaffold370 | 35363                   | CC                              | TT              | 1946941894               |
| SNP_P4_125375_35420 | NW_004515864.1 | Scaffold370 | 35420                   | CC                              | TT              | 1946941896               |
| SNP_P4_125376_35461 | NW_004515864.1 | Scaffold370 | 35461                   | AA                              | CC              | 1946941898               |
| SNP_P4_125377_35479 | NW_004515864.1 | Scaffold370 | 35479                   | AA                              | GG              | 1946941900               |
| SNP_P4_125378_35705 | NW_004515864.1 | Scaffold370 | 35705                   | AA                              | CC              | 1946941902               |
| SNP_P4_125379_35708 | NW_004515864.1 | Scaffold370 | 35708                   | AA                              | GG              | 1946941904               |
| SNP_P4_125380_35741 | NW_004515864.1 | Scaffold370 | 35741                   | GG                              | TT              | 1946941906               |
| SNP_P4_125381_35752 | NW_004515864.1 | Scaffold370 | 35752                   | AA                              | CC              | 1946941908               |
| SNP_P4_125382_35824 | NW_004515864.1 | Scaffold370 | 35824                   | GG                              | AA              | 1946941910               |
| SNP_P4_125383_35865 | NW_004515864.1 | Scaffold370 | 35865                   | CC                              | TT              | 1946941912               |
| SNP_P4_125384_35868 | NW_004515864.1 | Scaffold370 | 35868                   | TT                              | CC              | 1946941914               |
| SNP_P4_125385_36003 | NW_004515864.1 | Scaffold370 | 36003                   | TT                              | CC              | 1946941916               |
| SNP_P4_125386_36056 | NW_004515864.1 | Scaffold370 | 36056                   | GG                              | TT              | 1946941918               |
| SNP_P4_125387_36728 | NW_004515864.1 | Scaffold370 | 36728                   | CC                              | TT              | 1946941920               |
| SNP_P4_125388_36757 | NW_004515864.1 | Scaffold370 | 36757                   | AA                              | GG              | 1946941922               |
| SNP_P4_125389_36843 | NW_004515864.1 | Scaffold370 | 36843                   | CC                              | AA              | 1946941924               |
| SNP_P4_125390_36881 | NW_004515864.1 | Scaffold370 | 36881                   | AA                              | GG              | 1946941926               |
| SNP_P4_125391_36922 | NW_004515864.1 | Scaffold370 | 36922                   | CC                              | TT              | 1946941928               |
| SNP_P4_125392_37008 | NW_004515864.1 | Scaffold370 | 37008                   | AA                              | CC              | 1946941930               |
| SNP_P4_125393_37065 | NW_004515864.1 | Scaffold370 | 37065                   | TT                              | CC              | 1946941932               |
| SNP_P4_125394_37073 | NW_004515864.1 | Scaffold370 | 37073                   | AA                              | GG              | 1946941934               |
| SNP_P4_125395_37122 | NW_004515864.1 | Scaffold370 | 37122                   | TT                              | CC              | 1946941936               |
| SNP_P4_125396_37273 | NW_004515864.1 | Scaffold370 | 37273                   | GG                              | AA              | 1946941938               |
| SNP_P4_125397_37310 | NW_004515864.1 | Scaffold370 | 37310                   | TT                              | GG              | 1946941939               |
| SNP_P4_125398_37316 | NW_004515864.1 | Scaffold370 | 37316                   | CC                              | TT              | 1946941941               |
| SNP_P4_125399_37532 | NW_004515864.1 | Scaffold370 | 37532                   | AA                              | GG              | 1946941943               |
| SNP_P4_125400_37565 | NW_004515864.1 | Scaffold370 | 37565                   | TT                              | AA              | 1946941945               |
| SNP_P4_125401_37738 | NW_004515864.1 | Scaffold370 | 37738                   | GG                              | AA              | 1946941947               |
| SNP_P4_125402_37882 | NW_004515864.1 | Scaffold370 | 37882                   | AA                              | CC              | 1946941949               |
| SNP_P4_125403_37912 | NW_004515864.1 | Scaffold370 | 37912                   | GG                              | AA              | 1946941951               |
| SNP_P4_125404_37913 | NW_004515864.1 | Scaffold370 | 37913                   | GG                              | AA              | 1946941953               |
| SNP_P4_125405_37928 | NW_004515864.1 | Scaffold370 | 37928                   | TT                              | AA              | 1946941955               |
| SNP_P4_125406_37950 | NW_004515864.1 | Scaffold370 | 37950                   | CC                              | TT              | 1946941957               |

| SNPs IDs            | Chromosome IDs | Chromosomes | Physical positions (bp) | CDC Frontier (Reference genome) | (ILWC46 & LPNB) | NCBI SNPdb Accession IDs |
|---------------------|----------------|-------------|-------------------------|---------------------------------|-----------------|--------------------------|
| SNP_P4_125407_38006 | NW_004515864.1 | Scaffold370 | 38006                   | AA                              | TT              | 1946941959               |
| SNP_P4_125408_38053 | NW_004515864.1 | Scaffold370 | 38053                   | CC                              | TT              | 1946941961               |
| SNP_P4_125409_38054 | NW_004515864.1 | Scaffold370 | 38054                   | TT                              | CC              | 1946941963               |
| SNP_P4_125410_38065 | NW_004515864.1 | Scaffold370 | 38065                   | GG                              | TT              | 1946941965               |
| SNP_P4_125411_38069 | NW_004515864.1 | Scaffold370 | 38069                   | CC                              | AA              | 1946941967               |
| SNP_P4_125412_38071 | NW_004515864.1 | Scaffold370 | 38071                   | TT                              | AA              | 1946941969               |
| SNP_P4_125413_38074 | NW_004515864.1 | Scaffold370 | 38074                   | TT                              | GG              | 1946941971               |
| SNP_P4_125414_38099 | NW_004515864.1 | Scaffold370 | 38099                   | GG                              | CC              | 1946941973               |
| SNP_P4_125415_38121 | NW_004515864.1 | Scaffold370 | 38121                   | CC                              | TT              | 1946941975               |
| SNP_P4_125416_38145 | NW_004515864.1 | Scaffold370 | 38145                   | TT                              | AA              | 1946941977               |
| SNP_P4_125417_38157 | NW_004515864.1 | Scaffold370 | 38157                   | TT                              | CC              | 1946941979               |
| SNP_P4_125418_38159 | NW_004515864.1 | Scaffold370 | 38159                   | AA                              | TT              | 1946941981               |
| SNP_P4_125419_38180 | NW_004515864.1 | Scaffold370 | 38180                   | TT                              | AA              | 1946941983               |
| SNP_P4_125420_38192 | NW_004515864.1 | Scaffold370 | 38192                   | TT                              | CC              | 1946941986               |
| SNP_P4_125421_38261 | NW_004515864.1 | Scaffold370 | 38261                   | GG                              | TT              | 1946941988               |
| SNP_P4_125422_38263 | NW_004515864.1 | Scaffold370 | 38263                   | TT                              | CC              | 1946941990               |
| SNP_P4_125423_38349 | NW_004515864.1 | Scaffold370 | 38349                   | TT                              | CC              | 1946941992               |
| SNP_P4_125424_38352 | NW_004515864.1 | Scaffold370 | 38352                   | GG                              | AA              | 1946941994               |
| SNP_P4_125425_38391 | NW_004515864.1 | Scaffold370 | 38391                   | CC                              | GG              | 1946941996               |
| SNP_P4_125426_38430 | NW_004515864.1 | Scaffold370 | 38430                   | TT                              | CC              | 1946941998               |
| SNP_P4_125427_38477 | NW_004515864.1 | Scaffold370 | 38477                   | TT                              | CC              | 1946942000               |
| SNP_P4_125428_38565 | NW_004515864.1 | Scaffold370 | 38565                   | CC                              | AA              | 1946942002               |
| SNP_P4_125429_38573 | NW_004515864.1 | Scaffold370 | 38573                   | AA                              | GG              | 1946942004               |
| SNP_P4_125430_38598 | NW_004515864.1 | Scaffold370 | 38598                   | TT                              | CC              | 1946942006               |
| SNP_P4_125431_38868 | NW_004515864.1 | Scaffold370 | 38868                   | CC                              | TT              | 1946942008               |
| SNP_P4_125432_38957 | NW_004515864.1 | Scaffold370 | 38957                   | CC                              | TT              | 1946942010               |
| SNP_P4_125433_39269 | NW_004515864.1 | Scaffold370 | 39269                   | AA                              | CC              | 1946942012               |
| SNP_P4_125434_39306 | NW_004515864.1 | Scaffold370 | 39306                   | TT                              | CC              | 1946942014               |
| SNP_P4_125435_39992 | NW_004515864.1 | Scaffold370 | 39992                   | GG                              | TT              | 1946942016               |
| SNP_P4_125436_40009 | NW_004515864.1 | Scaffold370 | 40009                   | GG                              | CC              | 1946942018               |
| SNP_P4_125437_40024 | NW_004515864.1 | Scaffold370 | 40024                   | TT                              | GG              | 1946942020               |
| SNP_P4_125438_40196 | NW_004515864.1 | Scaffold370 | 40196                   | AA                              | GG              | 1946942022               |
| SNP_P4_125439_40215 | NW_004515864.1 | Scaffold370 | 40215                   | TT                              | CC              | 1946942024               |
| SNP_P4_125440_40257 | NW_004515864.1 | Scaffold370 | 40257                   | TT                              | CC              | 1946942026               |
| SNP_P4_125441_40351 | NW_004515864.1 | Scaffold370 | 40351                   | AA                              | GG              | 1946942028               |
| SNP_P4_125442_40404 | NW_004515864.1 | Scaffold370 | 40404                   | TT                              | CC              | 1946942030               |
| SNP_P4_125443_40440 | NW_004515864.1 | Scaffold370 | 40440                   | CC                              | GG              | 1946942032               |
| SNP_P4_125444_40442 | NW_004515864.1 | Scaffold370 | 40442                   | CC                              | TT              | 1946942034               |
| SNP_P4_125445_40445 | NW_004515864.1 | Scaffold370 | 40445                   | TT                              | CC              | 1946942036               |
| SNP_P4_125446_40458 | NW_004515864.1 | Scaffold370 | 40458                   | TT                              | AA              | 1946942038               |
| SNP_P4_125447_43528 | NW_004515864.1 | Scaffold370 | 43528                   | TT                              | GG              | 1946942040               |
| SNP_P4_125448_43547 | NW_004515864.1 | Scaffold370 | 43547                   | AA                              | GG              | 1946942042               |



| SNPs IDs            | Chromosome IDs | Chromosomes | Physical positions (bp) | CDC Frontier (Reference genome) | (ILWC46 & LPNB) | NCBI SNPdb Accession IDs |
|---------------------|----------------|-------------|-------------------------|---------------------------------|-----------------|--------------------------|
| SNP_P4_125449_43609 | NW_004515864.1 | Scaffold370 | 43609                   | GG                              | AA              | 1946942044               |
| SNP_P4_125450_43631 | NW_004515864.1 | Scaffold370 | 43631                   | TT                              | CC              | 1946942046               |
| SNP_P4_125451_43644 | NW_004515864.1 | Scaffold370 | 43644                   | TT                              | CC              | 1946942048               |
| SNP_P4_125452_43844 | NW_004515864.1 | Scaffold370 | 43844                   | AA                              | GG              | 1946942050               |
| SNP_P4_125453_43849 | NW_004515864.1 | Scaffold370 | 43849                   | GG                              | AA              | 1946942052               |
| SNP_P4_125454_43889 | NW_004515864.1 | Scaffold370 | 43889                   | CC                              | TT              | 1946942054               |
| SNP_P4_125455_44052 | NW_004515864.1 | Scaffold370 | 44052                   | CC                              | GG              | 1946942056               |
| SNP_P4_125456_45128 | NW_004515864.1 | Scaffold370 | 45128                   | GG                              | TT              | 1946942058               |
| SNP_P4_125457_45144 | NW_004515864.1 | Scaffold370 | 45144                   | CC                              | TT              | 1946942060               |
| SNP_P4_125458_45266 | NW_004515864.1 | Scaffold370 | 45266                   | CC                              | TT              | 1946942062               |
| SNP_P4_125459_45364 | NW_004515864.1 | Scaffold370 | 45364                   | AA                              | TT              | 1946942065               |
| SNP_P4_125460_45386 | NW_004515864.1 | Scaffold370 | 45386                   | TT                              | AA              | 1946942067               |
| SNP_P4_125461_45467 | NW_004515864.1 | Scaffold370 | 45467                   | GG                              | AA              | 1946942069               |
| SNP_P4_125462_45477 | NW_004515864.1 | Scaffold370 | 45477                   | CC                              | AA              | 1946942071               |
| SNP_P4_125463_45481 | NW_004515864.1 | Scaffold370 | 45481                   | GG                              | AA              | 1946942073               |
| SNP_P4_125464_45516 | NW_004515864.1 | Scaffold370 | 45516                   | CC                              | AA              | 1946942075               |
| SNP_P4_125465_45567 | NW_004515864.1 | Scaffold370 | 45567                   | CC                              | AA              | 1946942077               |
| SNP_P4_125466_45593 | NW_004515864.1 | Scaffold370 | 45593                   | TT                              | CC              | 1946942079               |
| SNP_P4_125467_45606 | NW_004515864.1 | Scaffold370 | 45606                   | GG                              | AA              | 1946942081               |
| SNP_P4_125468_45607 | NW_004515864.1 | Scaffold370 | 45607                   | GG                              | TT              | 1946942083               |
| SNP_P4_125469_45628 | NW_004515864.1 | Scaffold370 | 45628                   | TT                              | CC              | 1946942085               |
| SNP_P4_125470_45648 | NW_004515864.1 | Scaffold370 | 45648                   | CC                              | TT              | 1946942087               |
| SNP_P4_125471_45695 | NW_004515864.1 | Scaffold370 | 45695                   | AA                              | GG              | 1946942089               |
| SNP_P4_125472_45699 | NW_004515864.1 | Scaffold370 | 45699                   | GG                              | TT              | 1946942091               |
| SNP_P4_125473_45719 | NW_004515864.1 | Scaffold370 | 45719                   | AA                              | GG              | 1946942093               |
| SNP_P4_125474_45731 | NW_004515864.1 | Scaffold370 | 45731                   | AA                              | CC              | 1946942095               |
| SNP_P4_125475_45739 | NW_004515864.1 | Scaffold370 | 45739                   | GG                              | AA              | 1946942097               |
| SNP_P4_125476_45785 | NW_004515864.1 | Scaffold370 | 45785                   | CC                              | TT              | 1946942099               |
| SNP_P4_125477_45844 | NW_004515864.1 | Scaffold370 | 45844                   | GG                              | CC              | 1946942101               |
| SNP_P4_125478_45945 | NW_004515864.1 | Scaffold370 | 45945                   | GG                              | AA              | 1946942103               |
| SNP_P4_125479_46036 | NW_004515864.1 | Scaffold370 | 46036                   | CC                              | TT              | 1946942105               |
| SNP_P4_125480_46088 | NW_004515864.1 | Scaffold370 | 46088                   | AA                              | TT              | 1946942107               |
| SNP_P4_125481_46119 | NW_004515864.1 | Scaffold370 | 46119                   | AA                              | GG              | 1946942109               |
| SNP_P4_125482_46171 | NW_004515864.1 | Scaffold370 | 46171                   | CC                              | GG              | 1946942111               |
| SNP_P4_125483_46217 | NW_004515864.1 | Scaffold370 | 46217                   | GG                              | AA              | 1946942113               |
| SNP_P4_125484_46219 | NW_004515864.1 | Scaffold370 | 46219                   | CC                              | AA              | 1946942115               |
| SNP_P4_125485_46327 | NW_004515864.1 | Scaffold370 | 46327                   | TT                              | GG              | 1946942117               |
| SNP_P4_125486_46358 | NW_004515864.1 | Scaffold370 | 46358                   | TT                              | CC              | 1946942119               |
| SNP_P4_125487_48935 | NW_004515864.1 | Scaffold370 | 48935                   | AA                              | TT              | 1946942121               |
| SNP_P4_125488_49010 | NW_004515864.1 | Scaffold370 | 49010                   | TT                              | AA              | 1946942123               |
| SNP_P4_125489_49062 | NW_004515864.1 | Scaffold370 | 49062                   | TT                              | CC              | 1946942125               |
| SNP_P4_125490_49064 | NW_004515864.1 | Scaffold370 | 49064                   | AA                              | GG              | 1946942127               |

| SNPs IDs            | Chromosome IDs | Chromosomes | Physical positions (bp) | CDC Frontier (Reference genome) | (ILWC46 & LPNB) | NCBI SNPdb Accession IDs |
|---------------------|----------------|-------------|-------------------------|---------------------------------|-----------------|--------------------------|
| SNP_P4_125491_49952 | NW_004515864.1 | Scaffold370 | 49952                   | TT                              | AA              | 1946942129               |
| SNP_P4_125492_50613 | NW_004515864.1 | Scaffold370 | 50613                   | CC                              | AA              | 1946942131               |
| SNP_P4_125493_50636 | NW_004515864.1 | Scaffold370 | 50636                   | TT                              | CC              | 1946942133               |
| SNP_P4_125494_50765 | NW_004515864.1 | Scaffold370 | 50765                   | CC                              | TT              | 1946942135               |
| SNP_P4_125495_50796 | NW_004515864.1 | Scaffold370 | 50796                   | GG                              | CC              | 1946942137               |
| SNP_P4_125496_51144 | NW_004515864.1 | Scaffold370 | 51144                   | TT                              | AA              | 1946942139               |
| SNP_P4_125497_52172 | NW_004515864.1 | Scaffold370 | 52172                   | CC                              | AA              | 1946942141               |
| SNP_P4_125498_52299 | NW_004515864.1 | Scaffold370 | 52299                   | TT                              | AA              | 1946942143               |
| SNP_P4_125499_52661 | NW_004515864.1 | Scaffold370 | 52661                   | TT                              | AA              | 1946942145               |
| SNP_P4_125500_52678 | NW_004515864.1 | Scaffold370 | 52678                   | TT                              | CC              | 1946942147               |
| SNP_P4_125501_52693 | NW_004515864.1 | Scaffold370 | 52693                   | TT                              | AA              | 1946942149               |
| SNP_P4_125503_56308 | NW_004515864.1 | Scaffold370 | 56308                   | AA                              | TT              | 1946942151               |
| SNP_P4_125504_56344 | NW_004515864.1 | Scaffold370 | 56344                   | TT                              | GG              | 1946942153               |
| SNP_P4_125505_56614 | NW_004515864.1 | Scaffold370 | 56614                   | GG                              | TT              | 1946942155               |
| SNP_P4_125506_56737 | NW_004515864.1 | Scaffold370 | 56737                   | TT                              | GG              | 1946942157               |
| SNP_P4_125507_56738 | NW_004515864.1 | Scaffold370 | 56738                   | CC                              | TT              | 1946942159               |
| SNP_P4_125508_56744 | NW_004515864.1 | Scaffold370 | 56744                   | AA                              | GG              | 1946942161               |
| SNP_P4_125509_56814 | NW_004515864.1 | Scaffold370 | 56814                   | TT                              | AA              | 1946942163               |
| SNP_P4_125510_56840 | NW_004515864.1 | Scaffold370 | 56840                   | CC                              | GG              | 1946942165               |
| SNP_P4_125511_56981 | NW_004515864.1 | Scaffold370 | 56981                   | AA                              | TT              | 1946942167               |
| SNP_P4_125512_56984 | NW_004515864.1 | Scaffold370 | 56984                   | AA                              | GG              | 1946942169               |
| SNP_P4_125513_57068 | NW_004515864.1 | Scaffold370 | 57068                   | TT                              | CC              | 1946942171               |
| SNP_P4_125514_57103 | NW_004515864.1 | Scaffold370 | 57103                   | TT                              | CC              | 1946942173               |
| SNP_P4_125515_57109 | NW_004515864.1 | Scaffold370 | 57109                   | AA                              | TT              | 1946942176               |
| SNP_P4_125516_57128 | NW_004515864.1 | Scaffold370 | 57128                   | TT                              | CC              | 1946942178               |
| SNP_P4_125517_57185 | NW_004515864.1 | Scaffold370 | 57185                   | TT                              | CC              | 1946942180               |
| SNP_P4_125518_57246 | NW_004515864.1 | Scaffold370 | 57246                   | GG                              | AA              | 1946942182               |
| SNP_P4_125519_57250 | NW_004515864.1 | Scaffold370 | 57250                   | GG                              | TT              | 1946942184               |
| SNP_P4_125520_57253 | NW_004515864.1 | Scaffold370 | 57253                   | AA                              | CC              | 1946942186               |
| SNP_P4_125521_57254 | NW_004515864.1 | Scaffold370 | 57254                   | AA                              | CC              | 1946942188               |
| SNP_P4_125522_57623 | NW_004515864.1 | Scaffold370 | 57623                   | CC                              | AA              | 1946942190               |
| SNP_P4_125523_57802 | NW_004515864.1 | Scaffold370 | 57802                   | TT                              | CC              | 1946942192               |
| SNP_P4_125524_57911 | NW_004515864.1 | Scaffold370 | 57911                   | GG                              | CC              | 1946942194               |
| SNP_P4_125525_58108 | NW_004515864.1 | Scaffold370 | 58108                   | GG                              | AA              | 1946942196               |
| SNP_P4_125526_58119 | NW_004515864.1 | Scaffold370 | 58119                   | AA                              | GG              | 1946942198               |
| SNP_P4_125527_58128 | NW_004515864.1 | Scaffold370 | 58128                   | AA                              | CC              | 1946942200               |
| SNP_P4_125529_58205 | NW_004515864.1 | Scaffold370 | 58205                   | CC                              | TT              | 1946942202               |
| SNP_P4_125530_58235 | NW_004515864.1 | Scaffold370 | 58235                   | CC                              | TT              | 1946942204               |
| SNP_P4_125531_58275 | NW_004515864.1 | Scaffold370 | 58275                   | CC                              | TT              | 1946942206               |
| SNP_P4_125532_58280 | NW_004515864.1 | Scaffold370 | 58280                   | CC                              | TT              | 1946942209               |
| SNP_P4_125533_58286 | NW_004515864.1 | Scaffold370 | 58286                   | CC                              | TT              | 1946942211               |
| SNP_P4_125534_58330 | NW_004515864.1 | Scaffold370 | 58330                   | AA                              | CC              | 1946942213               |

| SNPs IDs            | Chromosome IDs | Chromosomes | Physical positions (bp) | CDC Frontier (Reference genome) | (ILWC46 & LPNB) | NCBI SNPdb Accession IDs |
|---------------------|----------------|-------------|-------------------------|---------------------------------|-----------------|--------------------------|
| SNP_P4_125535_58364 | NW_004515864.1 | Scaffold370 | 58364                   | CC                              | AA              | 1946942215               |
| SNP_P4_125536_58386 | NW_004515864.1 | Scaffold370 | 58386                   | AA                              | CC              | 1946942217               |
| SNP_P4_125537_58666 | NW_004515864.1 | Scaffold370 | 58666                   | TT                              | AA              | 1946942219               |
| SNP_P4_125538_58671 | NW_004515864.1 | Scaffold370 | 58671                   | CC                              | GG              | 1946942221               |
| SNP_P4_125539_58865 | NW_004515864.1 | Scaffold370 | 58865                   | AA                              | GG              | 1946942223               |
| SNP_P4_125540_58897 | NW_004515864.1 | Scaffold370 | 58897                   | TT                              | CC              | 1946942225               |
| SNP_P4_125541_58956 | NW_004515864.1 | Scaffold370 | 58956                   | CC                              | GG              | 1946942227               |
| SNP_P4_125542_58971 | NW_004515864.1 | Scaffold370 | 58971                   | AA                              | GG              | 1946942230               |
| SNP_P4_125543_59015 | NW_004515864.1 | Scaffold370 | 59015                   | TT                              | CC              | 1946942232               |
| SNP_P4_125544_59099 | NW_004515864.1 | Scaffold370 | 59099                   | TT                              | AA              | 1946942234               |
| SNP_P4_125545_59123 | NW_004515864.1 | Scaffold370 | 59123                   | GG                              | CC              | 1946942236               |
| SNP_P4_125546_59166 | NW_004515864.1 | Scaffold370 | 59166                   | CC                              | TT              | 1946942238               |
| SNP_P4_125547_59179 | NW_004515864.1 | Scaffold370 | 59179                   | CC                              | TT              | 1946942240               |
| SNP_P4_125548_59223 | NW_004515864.1 | Scaffold370 | 59223                   | TT                              | AA              | 1946942242               |
| SNP_P4_125549_59426 | NW_004515864.1 | Scaffold370 | 59426                   | AA                              | GG              | 1946942244               |
| SNP_P4_125550_59440 | NW_004515864.1 | Scaffold370 | 59440                   | AA                              | GG              | 1946942246               |
| SNP_P4_125551_59459 | NW_004515864.1 | Scaffold370 | 59459                   | CC                              | AA              | 1946942248               |
| SNP_P4_125552_59473 | NW_004515864.1 | Scaffold370 | 59473                   | GG                              | AA              | 1946942250               |
| SNP_P4_125553_59498 | NW_004515864.1 | Scaffold370 | 59498                   | AA                              | CC              | 1946942252               |
| SNP_P4_125554_59683 | NW_004515864.1 | Scaffold370 | 59683                   | GG                              | AA              | 1946942254               |
| SNP_P4_125555_59704 | NW_004515864.1 | Scaffold370 | 59704                   | TT                              | AA              | 1946942256               |
| SNP_P4_125556_59744 | NW_004515864.1 | Scaffold370 | 59744                   | TT                              | AA              | 1946942258               |
| SNP_P4_125557_60075 | NW_004515864.1 | Scaffold370 | 60075                   | CC                              | AA              | 1946942260               |
| SNP_P4_125558_60089 | NW_004515864.1 | Scaffold370 | 60089                   | AA                              | GG              | 1946942262               |
| SNP_P4_125559_62480 | NW_004515864.1 | Scaffold370 | 62480                   | AA                              | CC              | 1946942264               |
| SNP_P4_125560_62545 | NW_004515864.1 | Scaffold370 | 62545                   | TT                              | CC              | 1946942266               |
| SNP_P4_125561_62870 | NW_004515864.1 | Scaffold370 | 62870                   | GG                              | AA              | 1946942268               |
| SNP_P4_125562_62945 | NW_004515864.1 | Scaffold370 | 62945                   | CC                              | TT              | 1946942270               |
| SNP_P4_125563_62997 | NW_004515864.1 | Scaffold370 | 62997                   | GG                              | AA              | 1946942272               |
| SNP_P4_125564_62999 | NW_004515864.1 | Scaffold370 | 62999                   | AA                              | TT              | 1946942274               |
| SNP_P4_125565_63076 | NW_004515864.1 | Scaffold370 | 63076                   | TT                              | AA              | 1946942276               |
| SNP_P4_125566_63117 | NW_004515864.1 | Scaffold370 | 63117                   | GG                              | TT              | 1946942278               |
| SNP_P4_125567_63226 | NW_004515864.1 | Scaffold370 | 63226                   | CC                              | TT              | 1946942280               |
| SNP_P4_125568_63254 | NW_004515864.1 | Scaffold370 | 63254                   | CC                              | AA              | 1946942282               |
| SNP_P4_125569_63280 | NW_004515864.1 | Scaffold370 | 63280                   | TT                              | CC              | 1946942284               |
| SNP_P4_125570_63309 | NW_004515864.1 | Scaffold370 | 63309                   | AA                              | GG              | 1946942286               |
| SNP_P4_125571_63382 | NW_004515864.1 | Scaffold370 | 63382                   | CC                              | GG              | 1946942288               |
| SNP_P4_125572_63575 | NW_004515864.1 | Scaffold370 | 63575                   | TT                              | AA              | 1946942290               |
| SNP_P4_125573_63598 | NW_004515864.1 | Scaffold370 | 63598                   | TT                              | AA              | 1946942292               |
| SNP_P4_125574_63605 | NW_004515864.1 | Scaffold370 | 63605                   | GG                              | TT              | 1946942294               |
| SNP_P4_125575_63680 | NW_004515864.1 | Scaffold370 | 63680                   | GG                              | AA              | 1946942296               |
| SNP_P4_125576_63711 | NW_004515864.1 | Scaffold370 | 63711                   | CC                              | TT              | 1946942298               |

| SNPs IDs            | Chromosome IDs | Chromosomes | Physical positions (bp) | CDC Frontier (Reference genome) | (ILWC46 & LPNB) | NCBI SNPdb Accession IDs |
|---------------------|----------------|-------------|-------------------------|---------------------------------|-----------------|--------------------------|
| SNP_P4_125577_63783 | NW_004515864.1 | Scaffold370 | 63783                   | CC                              | TT              | 1946942300               |
| SNP_P4_125578_63810 | NW_004515864.1 | Scaffold370 | 63810                   | CC                              | TT              | 1946942302               |
| SNP_P4_125579_63812 | NW_004515864.1 | Scaffold370 | 63812                   | AA                              | TT              | 1946942304               |
| SNP_P4_125580_63822 | NW_004515864.1 | Scaffold370 | 63822                   | TT                              | GG              | 1946942306               |
| SNP_P4_125581_63828 | NW_004515864.1 | Scaffold370 | 63828                   | AA                              | TT              | 1946942308               |
| SNP_P4_125582_63867 | NW_004515864.1 | Scaffold370 | 63867                   | AA                              | GG              | 1946942310               |
| SNP_P4_125583_63962 | NW_004515864.1 | Scaffold370 | 63962                   | AA                              | TT              | 1946942312               |
| SNP_P4_125584_63990 | NW_004515864.1 | Scaffold370 | 63990                   | GG                              | AA              | 1946942314               |
| SNP_P4_125585_64010 | NW_004515864.1 | Scaffold370 | 64010                   | TT                              | GG              | 1946942316               |
| SNP_P4_125586_64026 | NW_004515864.1 | Scaffold370 | 64026                   | TT                              | GG              | 1946942318               |
| SNP_P4_125587_64055 | NW_004515864.1 | Scaffold370 | 64055                   | CC                              | TT              | 1946942320               |
| SNP_P4_125588_64099 | NW_004515864.1 | Scaffold370 | 64099                   | TT                              | CC              | 1946942322               |
| SNP_P4_125589_64103 | NW_004515864.1 | Scaffold370 | 64103                   | CC                              | GG              | 1946942325               |
| SNP_P4_125590_64173 | NW_004515864.1 | Scaffold370 | 64173                   | AA                              | GG              | 1946942327               |
| SNP_P4_125591_64263 | NW_004515864.1 | Scaffold370 | 64263                   | GG                              | TT              | 1946942329               |
| SNP_P4_125592_64285 | NW_004515864.1 | Scaffold370 | 64285                   | CC                              | GG              | 1946942331               |
| SNP_P4_125593_64365 | NW_004515864.1 | Scaffold370 | 64365                   | TT                              | CC              | 1946942333               |
| SNP_P4_125594_64448 | NW_004515864.1 | Scaffold370 | 64448                   | TT                              | CC              | 1946942335               |
| SNP_P4_125595_64473 | NW_004515864.1 | Scaffold370 | 64473                   | GG                              | AA              | 1946942337               |
| SNP_P4_125596_64521 | NW_004515864.1 | Scaffold370 | 64521                   | TT                              | CC              | 1946942339               |
| SNP_P4_125597_64536 | NW_004515864.1 | Scaffold370 | 64536                   | TT                              | CC              | 1946942341               |
| SNP_P4_125598_64586 | NW_004515864.1 | Scaffold370 | 64586                   | CC                              | TT              | 1946942343               |
| SNP_P4_125599_64622 | NW_004515864.1 | Scaffold370 | 64622                   | CC                              | TT              | 1946942345               |
| SNP_P4_125600_64632 | NW_004515864.1 | Scaffold370 | 64632                   | GG                              | AA              | 1946942347               |
| SNP_P4_125601_64637 | NW_004515864.1 | Scaffold370 | 64637                   | GG                              | AA              | 1946942349               |
| SNP_P4_125602_64804 | NW_004515864.1 | Scaffold370 | 64804                   | CC                              | TT              | 1946942351               |
| SNP_P4_125603_64920 | NW_004515864.1 | Scaffold370 | 64920                   | AA                              | GG              | 1946942353               |
| SNP_P4_125604_64933 | NW_004515864.1 | Scaffold370 | 64933                   | TT                              | GG              | 1946942355               |
| SNP_P4_125605_64945 | NW_004515864.1 | Scaffold370 | 64945                   | AA                              | TT              | 1946942357               |
| SNP_P4_125606_65046 | NW_004515864.1 | Scaffold370 | 65046                   | GG                              | TT              | 1946942359               |
| SNP_P4_125607_65489 | NW_004515864.1 | Scaffold370 | 65489                   | CC                              | AA              | 1946942361               |
| SNP_P4_125608_65492 | NW_004515864.1 | Scaffold370 | 65492                   | GG                              | CC              | 1946942363               |
| SNP_P4_125609_65509 | NW_004515864.1 | Scaffold370 | 65509                   | GG                              | TT              | 1946942365               |
| SNP_P4_125610_65769 | NW_004515864.1 | Scaffold370 | 65769                   | GG                              | CC              | 1946942367               |
| SNP_P4_125611_66081 | NW_004515864.1 | Scaffold370 | 66081                   | AA                              | GG              | 1946942369               |
| SNP_P4_125612_66087 | NW_004515864.1 | Scaffold370 | 66087                   | GG                              | AA              | 1946942371               |
| SNP_P4_125613_66209 | NW_004515864.1 | Scaffold370 | 66209                   | CC                              | TT              | 1946942373               |
| SNP_P4_125614_66210 | NW_004515864.1 | Scaffold370 | 66210                   | CC                              | TT              | 1946942375               |
| SNP_P4_125615_66332 | NW_004515864.1 | Scaffold370 | 66332                   | CC                              | GG              | 1946942377               |
| SNP_P4_125616_66403 | NW_004515864.1 | Scaffold370 | 66403                   | GG                              | AA              | 1946942379               |
| SNP_P4_125617_66432 | NW_004515864.1 | Scaffold370 | 66432                   | TT                              | GG              | 1946942381               |
| SNP_P4_125618_66510 | NW_004515864.1 | Scaffold370 | 66510                   | AA                              | GG              | 1946942383               |

| SNPs IDs            | Chromosome IDs | Chromosomes | Physical positions (bp) | CDC Frontier (Reference genome) | (ILWC46 & LPNB) | NCBI SNPdb Accession IDs |
|---------------------|----------------|-------------|-------------------------|---------------------------------|-----------------|--------------------------|
| SNP_P4_125619_66534 | NW_004515864.1 | Scaffold370 | 66534                   | GG                              | CC              | 1946942385               |
| SNP_P4_125620_66589 | NW_004515864.1 | Scaffold370 | 66589                   | CC                              | GG              | 1946942388               |
| SNP_P4_125621_66594 | NW_004515864.1 | Scaffold370 | 66594                   | GG                              | TT              | 1946942390               |
| SNP_P4_125622_66665 | NW_004515864.1 | Scaffold370 | 66665                   | TT                              | CC              | 1946942392               |
| SNP_P4_125623_66715 | NW_004515864.1 | Scaffold370 | 66715                   | AA                              | TT              | 1946942394               |
| SNP_P4_125624_66782 | NW_004515864.1 | Scaffold370 | 66782                   | TT                              | GG              | 1946942396               |
| SNP_P4_125625_66812 | NW_004515864.1 | Scaffold370 | 66812                   | TT                              | AA              | 1946942398               |
| SNP_P4_125626_66846 | NW_004515864.1 | Scaffold370 | 66846                   | GG                              | TT              | 1946942400               |
| SNP_P4_125627_66887 | NW_004515864.1 | Scaffold370 | 66887                   | GG                              | AA              | 1946942402               |
| SNP_P4_125628_66893 | NW_004515864.1 | Scaffold370 | 66893                   | GG                              | AA              | 1946942404               |
| SNP_P4_125629_66902 | NW_004515864.1 | Scaffold370 | 66902                   | AA                              | CC              | 1946942406               |
| SNP_P4_125630_66932 | NW_004515864.1 | Scaffold370 | 66932                   | AA                              | GG              | 1946942408               |
| SNP_P4_125631_66981 | NW_004515864.1 | Scaffold370 | 66981                   | AA                              | TT              | 1946942410               |
| SNP_P4_125632_66988 | NW_004515864.1 | Scaffold370 | 66988                   | TT                              | CC              | 1946942412               |
| SNP_P4_125633_67010 | NW_004515864.1 | Scaffold370 | 67010                   | GG                              | AA              | 1946942414               |
| SNP_P4_125634_67029 | NW_004515864.1 | Scaffold370 | 67029                   | CC                              | AA              | 1946942417               |
| SNP_P4_125635_67037 | NW_004515864.1 | Scaffold370 | 67037                   | TT                              | GG              | 1946942419               |
| SNP_P4_125636_67084 | NW_004515864.1 | Scaffold370 | 67084                   | GG                              | AA              | 1946942421               |
| SNP_P4_125637_67242 | NW_004515864.1 | Scaffold370 | 67242                   | AA                              | GG              | 1946942423               |
| SNP_P4_125638_67338 | NW_004515864.1 | Scaffold370 | 67338                   | TT                              | AA              | 1946942425               |
| SNP_P4_125639_67375 | NW_004515864.1 | Scaffold370 | 67375                   | AA                              | GG              | 1946942427               |
| SNP_P4_125640_70848 | NW_004515864.1 | Scaffold370 | 70848                   | CC                              | TT              | 1946942429               |
| SNP_P4_125641_71015 | NW_004515864.1 | Scaffold370 | 71015                   | AA                              | TT              | 1946942431               |
| SNP_P4_125642_71257 | NW_004515864.1 | Scaffold370 | 71257                   | AA                              | TT              | 1946942433               |
| SNP_P4_125643_74350 | NW_004515864.1 | Scaffold370 | 74350                   | AA                              | TT              | 1946942435               |
| SNP_P4_125644_74405 | NW_004515864.1 | Scaffold370 | 74405                   | GG                              | TT              | 1946942437               |
| SNP_P4_125645_74552 | NW_004515864.1 | Scaffold370 | 74552                   | AA                              | TT              | 1946942439               |
| SNP_P4_125646_74596 | NW_004515864.1 | Scaffold370 | 74596                   | AA                              | GG              | 1946942441               |
| SNP_P4_125647_74665 | NW_004515864.1 | Scaffold370 | 74665                   | TT                              | CC              | 1946942443               |
| SNP_P4_125648_74811 | NW_004515864.1 | Scaffold370 | 74811                   | AA                              | CC              | 1946942445               |
| SNP_P4_125650_74885 | NW_004515864.1 | Scaffold370 | 74885                   | AA                              | GG              | 1946942447               |
| SNP_P4_125651_74898 | NW_004515864.1 | Scaffold370 | 74898                   | CC                              | TT              | 1946942449               |
| SNP_P4_125652_74918 | NW_004515864.1 | Scaffold370 | 74918                   | GG                              | TT              | 1946942451               |
| SNP_P4_125653_74982 | NW_004515864.1 | Scaffold370 | 74982                   | CC                              | TT              | 1946942453               |
| SNP_P4_125654_74995 | NW_004515864.1 | Scaffold370 | 74995                   | TT                              | AA              | 1946942455               |
| SNP_P4_125655_75018 | NW_004515864.1 | Scaffold370 | 75018                   | CC                              | TT              | 1946942458               |
| SNP_P4_125656_75019 | NW_004515864.1 | Scaffold370 | 75019                   | GG                              | TT              | 1946942460               |
| SNP_P4_125657_75060 | NW_004515864.1 | Scaffold370 | 75060                   | AA                              | TT              | 1946942462               |
| SNP_P4_125659_75181 | NW_004515864.1 | Scaffold370 | 75181                   | TT                              | CC              | 1946942464               |
| SNP_P4_125660_75183 | NW_004515864.1 | Scaffold370 | 75183                   | AA                              | GG              | 1946942466               |
| SNP_P4_125661_75222 | NW_004515864.1 | Scaffold370 | 75222                   | TT                              | GG              | 1946942468               |
| SNP_P4_125662_75268 | NW_004515864.1 | Scaffold370 | 75268                   | GG                              | CC              | 1946942470               |

| SNPs IDs            | Chromosome IDs | Chromosomes | Physical positions (bp) | CDC Frontier (Reference genome) | (ILWC46 & LPNB) | NCBI SNPdb Accession IDs |
|---------------------|----------------|-------------|-------------------------|---------------------------------|-----------------|--------------------------|
| SNP_P4_125663_75304 | NW_004515864.1 | Scaffold370 | 75304                   | GG                              | AA              | 1946942472               |
| SNP_P4_125664_75324 | NW_004515864.1 | Scaffold370 | 75324                   | GG                              | CC              | 1946942474               |
| SNP_P4_125665_75395 | NW_004515864.1 | Scaffold370 | 75395                   | GG                              | AA              | 1946942476               |
| SNP_P4_125666_75396 | NW_004515864.1 | Scaffold370 | 75396                   | GG                              | AA              | 1946942477               |
| SNP_P4_125667_75399 | NW_004515864.1 | Scaffold370 | 75399                   | CC                              | GG              | 1946942479               |
| SNP_P4_125668_75412 | NW_004515864.1 | Scaffold370 | 75412                   | GG                              | AA              | 1946942481               |
| SNP_P4_125669_75435 | NW_004515864.1 | Scaffold370 | 75435                   | GG                              | CC              | 1946942483               |
| SNP_P4_125670_75444 | NW_004515864.1 | Scaffold370 | 75444                   | CC                              | AA              | 1946942485               |
| SNP_P4_125671_75453 | NW_004515864.1 | Scaffold370 | 75453                   | TT                              | GG              | 1946942487               |
| SNP_P4_125672_75460 | NW_004515864.1 | Scaffold370 | 75460                   | GG                              | AA              | 1946942489               |
| SNP_P4_125673_75605 | NW_004515864.1 | Scaffold370 | 75605                   | GG                              | CC              | 1946942491               |
| SNP_P4_125674_75672 | NW_004515864.1 | Scaffold370 | 75672                   | AA                              | GG              | 1946942493               |
| SNP_P4_125675_76732 | NW_004515864.1 | Scaffold370 | 76732                   | TT                              | AA              | 1946942495               |
| SNP_P4_125676_76803 | NW_004515864.1 | Scaffold370 | 76803                   | TT                              | GG              | 1946942497               |
| SNP_P4_125677_76894 | NW_004515864.1 | Scaffold370 | 76894                   | GG                              | AA              | 1946942499               |
| SNP_P4_125678_77144 | NW_004515864.1 | Scaffold370 | 77144                   | TT                              | AA              | 1946942501               |
| SNP_P4_125679_77161 | NW_004515864.1 | Scaffold370 | 77161                   | AA                              | GG              | 1946942502               |
| SNP_P4_125680_77181 | NW_004515864.1 | Scaffold370 | 77181                   | TT                              | AA              | 1946942504               |
| SNP_P4_125681_77183 | NW_004515864.1 | Scaffold370 | 77183                   | CC                              | AA              | 1946942505               |
| SNP_P4_125682_77267 | NW_004515864.1 | Scaffold370 | 77267                   | AA                              | CC              | 1946942506               |
| SNP_P4_125683_77327 | NW_004515864.1 | Scaffold370 | 77327                   | AA                              | TT              | 1946942507               |
| SNP_P4_125684_77345 | NW_004515864.1 | Scaffold370 | 77345                   | TT                              | CC              | 1946942508               |
| SNP_P4_125685_77368 | NW_004515864.1 | Scaffold370 | 77368                   | AA                              | TT              | 1946942509               |
| SNP_P4_125686_77658 | NW_004515864.1 | Scaffold370 | 77658                   | CC                              | AA              | 1946942510               |
| SNP_P4_125687_77667 | NW_004515864.1 | Scaffold370 | 77667                   | AA                              | GG              | 1946942512               |
| SNP_P4_125688_77673 | NW_004515864.1 | Scaffold370 | 77673                   | CC                              | TT              | 1946942513               |
| SNP_P4_125689_77832 | NW_004515864.1 | Scaffold370 | 77832                   | AA                              | GG              | 1946942515               |
| SNP_P4_125690_77836 | NW_004515864.1 | Scaffold370 | 77836                   | CC                              | TT              | 1946942517               |
| SNP_P4_125691_77952 | NW_004515864.1 | Scaffold370 | 77952                   | CC                              | TT              | 1946942519               |
| SNP_P4_125692_78254 | NW_004515864.1 | Scaffold370 | 78254                   | AA                              | TT              | 1946942521               |
| SNP_P4_125693_78259 | NW_004515864.1 | Scaffold370 | 78259                   | AA                              | TT              | 1946942523               |
| SNP_P4_125694_78383 | NW_004515864.1 | Scaffold370 | 78383                   | TT                              | CC              | 1946942525               |
| SNP_P4_125695_78419 | NW_004515864.1 | Scaffold370 | 78419                   | CC                              | TT              | 1946942527               |
| SNP_P4_125696_78421 | NW_004515864.1 | Scaffold370 | 78421                   | CC                              | AA              | 1946942529               |
| SNP_P4_125697_78585 | NW_004515864.1 | Scaffold370 | 78585                   | AA                              | GG              | 1946942531               |
| SNP_P4_125698_78593 | NW_004515864.1 | Scaffold370 | 78593                   | AA                              | GG              | 1946942533               |
| SNP_P4_125699_79782 | NW_004515864.1 | Scaffold370 | 79782                   | GG                              | AA              | 1946942535               |
| SNP_P4_125700_79822 | NW_004515864.1 | Scaffold370 | 79822                   | CC                              | TT              | 1946942537               |
| SNP_P4_125701_79891 | NW_004515864.1 | Scaffold370 | 79891                   | TT                              | CC              | 1946942539               |
| SNP_P4_125702_79928 | NW_004515864.1 | Scaffold370 | 79928                   | TT                              | CC              | 1946942541               |
| SNP_P4_125703_80014 | NW_004515864.1 | Scaffold370 | 80014                   | CC                              | TT              | 1946942542               |
| SNP_P4_125704_80020 | NW_004515864.1 | Scaffold370 | 80020                   | TT                              | AA              | 1946942544               |

| SNPs IDs            | Chromosome IDs | Chromosomes | Physical positions (bp) | CDC Frontier (Reference genome) | (ILWC46 & LPNB) | NCBI SNPdb Accession IDs |
|---------------------|----------------|-------------|-------------------------|---------------------------------|-----------------|--------------------------|
| SNP_P4_125705_80101 | NW_004515864.1 | Scaffold370 | 80101                   | GG                              | TT              | 1946942546               |
| SNP_P4_125706_80490 | NW_004515864.1 | Scaffold370 | 80490                   | GG                              | CC              | 1946942548               |
| SNP_P4_125707_80590 | NW_004515864.1 | Scaffold370 | 80590                   | AA                              | GG              | 1946942550               |
| SNP_P4_125708_80955 | NW_004515864.1 | Scaffold370 | 80955                   | GG                              | CC              | 1946942552               |
| SNP_P4_125709_80996 | NW_004515864.1 | Scaffold370 | 80996                   | CC                              | TT              | 1946942554               |
| SNP_P4_125710_81036 | NW_004515864.1 | Scaffold370 | 81036                   | CC                              | GG              | 1946942556               |
| SNP_P4_125711_81202 | NW_004515864.1 | Scaffold370 | 81202                   | TT                              | AA              | 1946942558               |
| SNP_P4_125712_81208 | NW_004515864.1 | Scaffold370 | 81208                   | CC                              | GG              | 1946942560               |
| SNP_P4_125713_81234 | NW_004515864.1 | Scaffold370 | 81234                   | AA                              | CC              | 1946942562               |
| SNP_P4_125714_81296 | NW_004515864.1 | Scaffold370 | 81296                   | GG                              | TT              | 1946942564               |
| SNP_P4_125715_81311 | NW_004515864.1 | Scaffold370 | 81311                   | TT                              | CC              | 1946942566               |
| SNP_P4_125716_81387 | NW_004515864.1 | Scaffold370 | 81387                   | AA                              | CC              | 1946942568               |
| SNP_P4_125717_81396 | NW_004515864.1 | Scaffold370 | 81396                   | AA                              | GG              | 1946942570               |
| SNP_P4_125718_81488 | NW_004515864.1 | Scaffold370 | 81488                   | GG                              | AA              | 1946942572               |
| SNP_P4_125719_81500 | NW_004515864.1 | Scaffold370 | 81500                   | GG                              | CC              | 1946942574               |
| SNP_P4_125720_81528 | NW_004515864.1 | Scaffold370 | 81528                   | GG                              | AA              | 1946942576               |
| SNP_P4_125721_81581 | NW_004515864.1 | Scaffold370 | 81581                   | CC                              | TT              | 1946942578               |
| SNP_P4_125722_81594 | NW_004515864.1 | Scaffold370 | 81594                   | TT                              | AA              | 1946942580               |
| SNP_P4_125723_81601 | NW_004515864.1 | Scaffold370 | 81601                   | CC                              | AA              | 1946942582               |
| SNP_P4_125724_81636 | NW_004515864.1 | Scaffold370 | 81636                   | AA                              | TT              | 1946942584               |
| SNP_P4_125725_81668 | NW_004515864.1 | Scaffold370 | 81668                   | GG                              | TT              | 1946942586               |
| SNP_P4_125726_81833 | NW_004515864.1 | Scaffold370 | 81833                   | AA                              | CC              | 1946942588               |
| SNP_P4_125727_81855 | NW_004515864.1 | Scaffold370 | 81855                   | GG                              | CC              | 1946942590               |
| SNP_P4_125728_81865 | NW_004515864.1 | Scaffold370 | 81865                   | TT                              | CC              | 1946942592               |
| SNP_P4_125729_82072 | NW_004515864.1 | Scaffold370 | 82072                   | GG                              | AA              | 1946942594               |
| SNP_P4_125730_82092 | NW_004515864.1 | Scaffold370 | 82092                   | TT                              | CC              | 1946942596               |
| SNP_P4_125731_82461 | NW_004515864.1 | Scaffold370 | 82461                   | TT                              | CC              | 1946942598               |
| SNP_P4_125732_82728 | NW_004515864.1 | Scaffold370 | 82728                   | TT                              | CC              | 1946942599               |
| SNP_P4_125733_82730 | NW_004515864.1 | Scaffold370 | 82730                   | CC                              | TT              | 1946942601               |
| SNP_P4_125734_82940 | NW_004515864.1 | Scaffold370 | 82940                   | CC                              | GG              | 1946942603               |
| SNP_P4_125736_83467 | NW_004515864.1 | Scaffold370 | 83467                   | AA                              | TT              | 1946942605               |
| SNP_P4_125737_83509 | NW_004515864.1 | Scaffold370 | 83509                   | AA                              | TT              | 1946942607               |
| SNP_P4_125738_83827 | NW_004515864.1 | Scaffold370 | 83827                   | TT                              | CC              | 1946942609               |
| SNP_P4_125739_83848 | NW_004515864.1 | Scaffold370 | 83848                   | TT                              | AA              | 1946942611               |
| SNP_P4_125740_85189 | NW_004515864.1 | Scaffold370 | 85189                   | GG                              | AA              | 1946942613               |
| SNP_P4_125741_85280 | NW_004515864.1 | Scaffold370 | 85280                   | CC                              | TT              | 1946942615               |
| SNP_P4_125742_85455 | NW_004515864.1 | Scaffold370 | 85455                   | TT                              | CC              | 1946942617               |
| SNP_P4_125743_85595 | NW_004515864.1 | Scaffold370 | 85595                   | TT                              | CC              | 1946942618               |
| SNP_P4_125744_85625 | NW_004515864.1 | Scaffold370 | 85625                   | TT                              | GG              | 1946942620               |
| SNP_P4_125745_85697 | NW_004515864.1 | Scaffold370 | 85697                   | CC                              | AA              | 1946942622               |
| SNP_P4_125746_86323 | NW_004515864.1 | Scaffold370 | 86323                   | AA                              | TT              | 1946942624               |
| SNP_P4_125747_86335 | NW_004515864.1 | Scaffold370 | 86335                   | TT                              | CC              | 1946942626               |

| SNPs IDs            | Chromosome IDs | Chromosomes | Physical positions (bp) | CDC Frontier (Reference genome) | (ILWC46 & LPNB) | NCBI SNPdb Accession IDs |
|---------------------|----------------|-------------|-------------------------|---------------------------------|-----------------|--------------------------|
| SNP_P4_125748_86568 | NW_004515864.1 | Scaffold370 | 86568                   | TT                              | CC              | 1946942628               |
| SNP_P4_125749_86593 | NW_004515864.1 | Scaffold370 | 86593                   | AA                              | TT              | 1946942630               |
| SNP_P4_125750_86596 | NW_004515864.1 | Scaffold370 | 86596                   | AA                              | GG              | 1946942632               |
| SNP_P4_125751_86976 | NW_004515864.1 | Scaffold370 | 86976                   | TT                              | CC              | 1946942634               |
| SNP_P4_125752_86983 | NW_004515864.1 | Scaffold370 | 86983                   | GG                              | AA              | 1946942636               |
| SNP_P4_125753_87725 | NW_004515864.1 | Scaffold370 | 87725                   | GG                              | AA              | 1946942638               |
| SNP_P4_125754_87802 | NW_004515864.1 | Scaffold370 | 87802                   | GG                              | AA              | 1946942640               |
| SNP_P4_125755_87919 | NW_004515864.1 | Scaffold370 | 87919                   | TT                              | AA              | 1946942642               |
| SNP_P4_125756_88028 | NW_004515864.1 | Scaffold370 | 88028                   | AA                              | GG              | 1946942644               |
| SNP_P4_125757_88240 | NW_004515864.1 | Scaffold370 | 88240                   | AA                              | GG              | 1946942646               |
| SNP_P4_125758_88272 | NW_004515864.1 | Scaffold370 | 88272                   | AA                              | GG              | 1946942648               |
| SNP_P4_125759_88288 | NW_004515864.1 | Scaffold370 | 88288                   | TT                              | GG              | 1946942650               |
| SNP_P4_125760_88299 | NW_004515864.1 | Scaffold370 | 88299                   | AA                              | GG              | 1946942652               |
| SNP_P4_125761_88448 | NW_004515864.1 | Scaffold370 | 88448                   | CC                              | TT              | 1946942654               |
| SNP_P4_125762_88476 | NW_004515864.1 | Scaffold370 | 88476                   | TT                              | CC              | 1946942656               |
| SNP_P4_125763_88590 | NW_004515864.1 | Scaffold370 | 88590                   | AA                              | CC              | 1946942658               |
| SNP_P4_125764_88622 | NW_004515864.1 | Scaffold370 | 88622                   | GG                              | AA              | 1946942660               |
| SNP_P4_125765_88685 | NW_004515864.1 | Scaffold370 | 88685                   | TT                              | CC              | 1946942662               |
| SNP_P4_125766_88754 | NW_004515864.1 | Scaffold370 | 88754                   | TT                              | GG              | 1946942664               |
| SNP_P4_125767_89184 | NW_004515864.1 | Scaffold370 | 89184                   | GG                              | AA              | 1946942666               |
| SNP_P4_125768_89238 | NW_004515864.1 | Scaffold370 | 89238                   | CC                              | GG              | 1946942668               |
| SNP_P4_125769_89291 | NW_004515864.1 | Scaffold370 | 89291                   | TT                              | CC              | 1946942670               |
| SNP_P4_125770_89299 | NW_004515864.1 | Scaffold370 | 89299                   | TT                              | CC              | 1946942672               |
| SNP_P4_125771_89338 | NW_004515864.1 | Scaffold370 | 89338                   | TT                              | CC              | 1946942674               |
| SNP_P4_125772_89358 | NW_004515864.1 | Scaffold370 | 89358                   | AA                              | GG              | 1946942676               |
| SNP_P4_125773_89413 | NW_004515864.1 | Scaffold370 | 89413                   | CC                              | AA              | 1946942678               |
| SNP_P4_125774_89460 | NW_004515864.1 | Scaffold370 | 89460                   | TT                              | CC              | 1946942680               |
| SNP_P4_125775_89500 | NW_004515864.1 | Scaffold370 | 89500                   | AA                              | TT              | 1946942682               |
| SNP_P4_125776_89601 | NW_004515864.1 | Scaffold370 | 89601                   | GG                              | AA              | 1946942684               |
| SNP_P4_125777_89703 | NW_004515864.1 | Scaffold370 | 89703                   | AA                              | TT              | 1946942686               |
| SNP_P4_125778_89749 | NW_004515864.1 | Scaffold370 | 89749                   | GG                              | AA              | 1946942688               |
| SNP_P4_125779_89808 | NW_004515864.1 | Scaffold370 | 89808                   | GG                              | AA              | 1946942690               |
| SNP_P4_125780_89864 | NW_004515864.1 | Scaffold370 | 89864                   | CC                              | TT              | 1946942692               |
| SNP_P4_125781_90044 | NW_004515864.1 | Scaffold370 | 90044                   | TT                              | AA              | 1946942694               |
| SNP_P4_125782_90065 | NW_004515864.1 | Scaffold370 | 90065                   | CC                              | TT              | 1946942696               |
| SNP_P4_125783_90250 | NW_004515864.1 | Scaffold370 | 90250                   | TT                              | GG              | 1946942698               |
| SNP_P4_125784_90296 | NW_004515864.1 | Scaffold370 | 90296                   | GG                              | TT              | 1946942700               |
| SNP_P4_125785_90343 | NW_004515864.1 | Scaffold370 | 90343                   | AA                              | GG              | 1946942702               |
| SNP_P4_125786_90386 | NW_004515864.1 | Scaffold370 | 90386                   | TT                              | AA              | 1946942704               |
| SNP_P4_125787_90593 | NW_004515864.1 | Scaffold370 | 90593                   | TT                              | CC              | 1946942706               |
| SNP_P4_125788_90622 | NW_004515864.1 | Scaffold370 | 90622                   | GG                              | AA              | 1946942708               |
| SNP_P4_125789_92651 | NW_004515864.1 | Scaffold370 | 92651                   | AA                              | CC              | 1946942709               |



| SNPs IDs             | Chromosome IDs | Chromosomes | Physical positions (bp) | CDC Frontier (Reference genome) | (ILWC46 & LPNB) | NCBI SNPdb Accession IDs |
|----------------------|----------------|-------------|-------------------------|---------------------------------|-----------------|--------------------------|
| SNP_P4_125790_92780  | NW_004515864.1 | Scaffold370 | 92780                   | GG                              | TT              | 1946942711               |
| SNP_P4_125791_92818  | NW_004515864.1 | Scaffold370 | 92818                   | CC                              | TT              | 1946942713               |
| SNP_P4_125792_92909  | NW_004515864.1 | Scaffold370 | 92909                   | TT                              | CC              | 1946942715               |
| SNP_P4_125793_92931  | NW_004515864.1 | Scaffold370 | 92931                   | AA                              | GG              | 1946942717               |
| SNP_P4_125794_92988  | NW_004515864.1 | Scaffold370 | 92988                   | CC                              | TT              | 1946942719               |
| SNP_P4_125795_93058  | NW_004515864.1 | Scaffold370 | 93058                   | CC                              | TT              | 1946942721               |
| SNP_P4_125796_93085  | NW_004515864.1 | Scaffold370 | 93085                   | GG                              | AA              | 1946942724               |
| SNP_P4_125797_93113  | NW_004515864.1 | Scaffold370 | 93113                   | TT                              | GG              | 1946942726               |
| SNP_P4_125798_93135  | NW_004515864.1 | Scaffold370 | 93135                   | AA                              | CC              | 1946942728               |
| SNP_P4_125799_93185  | NW_004515864.1 | Scaffold370 | 93185                   | TT                              | CC              | 1946942730               |
| SNP_P4_125800_93760  | NW_004515864.1 | Scaffold370 | 93760                   | CC                              | TT              | 1946942732               |
| SNP_P4_125801_93771  | NW_004515864.1 | Scaffold370 | 93771                   | GG                              | AA              | 1946942734               |
| SNP_P4_125802_94081  | NW_004515864.1 | Scaffold370 | 94081                   | GG                              | AA              | 1946942736               |
| SNP_P4_125803_94702  | NW_004515864.1 | Scaffold370 | 94702                   | AA                              | TT              | 1946942738               |
| SNP_P4_125804_94806  | NW_004515864.1 | Scaffold370 | 94806                   | TT                              | GG              | 1946942740               |
| SNP_P4_125805_95297  | NW_004515864.1 | Scaffold370 | 95297                   | TT                              | CC              | 1946942742               |
| SNP_P4_125806_95483  | NW_004515864.1 | Scaffold370 | 95483                   | GG                              | TT              | 1946942744               |
| SNP_P4_125807_95504  | NW_004515864.1 | Scaffold370 | 95504                   | GG                              | CC              | 1946942746               |
| SNP_P4_125808_99867  | NW_004515864.1 | Scaffold370 | 99867                   | CC                              | TT              | 1946942748               |
| SNP_P4_125809_99887  | NW_004515864.1 | Scaffold370 | 99887                   | GG                              | TT              | 1946942750               |
| SNP_P4_125810_99909  | NW_004515864.1 | Scaffold370 | 99909                   | GG                              | TT              | 1946942752               |
| SNP_P4_125811_99930  | NW_004515864.1 | Scaffold370 | 99930                   | GG                              | AA              | 1946942754               |
| SNP_P4_125812_99945  | NW_004515864.1 | Scaffold370 | 99945                   | TT                              | AA              | 1946942756               |
| SNP_P4_125813_99968  | NW_004515864.1 | Scaffold370 | 99968                   | AA                              | CC              | 1946942758               |
| SNP_P4_125814_100022 | NW_004515864.1 | Scaffold370 | 100022                  | TT                              | GG              | 1946942760               |
| SNP_P4_125815_100184 | NW_004515864.1 | Scaffold370 | 100184                  | AA                              | TT              | 1946942762               |
| SNP_P4_125816_100207 | NW_004515864.1 | Scaffold370 | 100207                  | TT                              | CC              | 1946942764               |
| SNP_P4_125817_100319 | NW_004515864.1 | Scaffold370 | 100319                  | CC                              | AA              | 1946942766               |
| SNP_P4_125818_100324 | NW_004515864.1 | Scaffold370 | 100324                  | AA                              | CC              | 1946942768               |
| SNP_P4_125819_100333 | NW_004515864.1 | Scaffold370 | 100333                  | TT                              | GG              | 1946942770               |
| SNP_P4_125820_100339 | NW_004515864.1 | Scaffold370 | 100339                  | AA                              | GG              | 1946942772               |
| SNP_P4_125821_100388 | NW_004515864.1 | Scaffold370 | 100388                  | CC                              | AA              | 1946942774               |
| SNP_P4_125822_100389 | NW_004515864.1 | Scaffold370 | 100389                  | AA                              | TT              | 1946942776               |
| SNP_P4_125823_100396 | NW_004515864.1 | Scaffold370 | 100396                  | GG                              | AA              | 1946942778               |
| SNP_P4_125824_100403 | NW_004515864.1 | Scaffold370 | 100403                  | GG                              | AA              | 1946942780               |
| SNP_P4_125825_100404 | NW_004515864.1 | Scaffold370 | 100404                  | TT                              | AA              | 1946942782               |
| SNP_P4_125826_100510 | NW_004515864.1 | Scaffold370 | 100510                  | GG                              | AA              | 1946942783               |
| SNP_P4_125827_100606 | NW_004515864.1 | Scaffold370 | 100606                  | AA                              | GG              | 1946942785               |
| SNP_P4_125828_100854 | NW_004515864.1 | Scaffold370 | 100854                  | TT                              | GG              | 1946942787               |
| SNP_P4_125829_100862 | NW_004515864.1 | Scaffold370 | 100862                  | CC                              | AA              | 1946942789               |
| SNP_P4_125830_100882 | NW_004515864.1 | Scaffold370 | 100882                  | TT                              | CC              | 1946942791               |
| SNP_P4_125831_100883 | NW_004515864.1 | Scaffold370 | 100883                  | TT                              | AA              | 1946942793               |

| SNPs IDs             | Chromosome IDs | Chromosomes | Physical positions (bp) | CDC Frontier (Reference genome) | (ILWC46 & LPNB) | NCBI SNPdb Accession IDs |
|----------------------|----------------|-------------|-------------------------|---------------------------------|-----------------|--------------------------|
| SNP_P4_125832_100898 | NW_004515864.1 | Scaffold370 | 100898                  | GG                              | AA              | 1946942795               |
| SNP_P4_125833_100922 | NW_004515864.1 | Scaffold370 | 100922                  | GG                              | TT              | 1946942797               |
| SNP_P4_125834_101009 | NW_004515864.1 | Scaffold370 | 101009                  | AA                              | GG              | 1946942799               |
| SNP_P4_125835_101021 | NW_004515864.1 | Scaffold370 | 101021                  | CC                              | AA              | 1946942801               |
| SNP_P4_125836_101031 | NW_004515864.1 | Scaffold370 | 101031                  | TT                              | CC              | 1946942803               |
| SNP_P4_125837_101101 | NW_004515864.1 | Scaffold370 | 101101                  | AA                              | GG              | 1946942805               |
| SNP_P4_125838_101133 | NW_004515864.1 | Scaffold370 | 101133                  | CC                              | AA              | 1946942807               |
| SNP_P4_125839_102378 | NW_004515864.1 | Scaffold370 | 102378                  | TT                              | CC              | 1946942809               |
| SNP_P4_125840_102515 | NW_004515864.1 | Scaffold370 | 102515                  | GG                              | AA              | 1946942811               |
| SNP_P4_125841_102561 | NW_004515864.1 | Scaffold370 | 102561                  | AA                              | GG              | 1946942813               |
| SNP_P4_125842_102571 | NW_004515864.1 | Scaffold370 | 102571                  | TT                              | GG              | 1946942815               |
| SNP_P4_125843_102572 | NW_004515864.1 | Scaffold370 | 102572                  | GG                              | AA              | 1946942817               |
| SNP_P4_125844_102579 | NW_004515864.1 | Scaffold370 | 102579                  | AA                              | CC              | 1946942819               |
| SNP_P4_125845_102614 | NW_004515864.1 | Scaffold370 | 102614                  | TT                              | AA              | 1946942821               |
| SNP_P4_125846_102637 | NW_004515864.1 | Scaffold370 | 102637                  | CC                              | TT              | 1946942823               |
| SNP_P4_125847_102942 | NW_004515864.1 | Scaffold370 | 102942                  | AA                              | GG              | 1946942825               |
| SNP_P4_125848_102945 | NW_004515864.1 | Scaffold370 | 102945                  | AA                              | GG              | 1946942827               |
| SNP_P4_125849_103099 | NW_004515864.1 | Scaffold370 | 103099                  | AA                              | GG              | 1946942829               |
| SNP_P4_125850_103457 | NW_004515864.1 | Scaffold370 | 103457                  | TT                              | CC              | 1946942831               |
| SNP_P4_125851_103473 | NW_004515864.1 | Scaffold370 | 103473                  | AA                              | CC              | 1946942833               |
| SNP_P4_125852_103512 | NW_004515864.1 | Scaffold370 | 103512                  | TT                              | GG              | 1946942835               |
| SNP_P4_125853_104598 | NW_004515864.1 | Scaffold370 | 104598                  | CC                              | AA              | 1946942837               |
| SNP_P4_125854_104618 | NW_004515864.1 | Scaffold370 | 104618                  | CC                              | TT              | 1946942839               |
| SNP_P4_125855_104635 | NW_004515864.1 | Scaffold370 | 104635                  | GG                              | AA              | 1946942841               |
| SNP_P4_125856_104636 | NW_004515864.1 | Scaffold370 | 104636                  | GG                              | AA              | 1946942843               |
| SNP_P4_125857_104883 | NW_004515864.1 | Scaffold370 | 104883                  | AA                              | TT              | 1946942845               |
| SNP_P4_125858_104884 | NW_004515864.1 | Scaffold370 | 104884                  | GG                              | TT              | 1946942847               |
| SNP_P4_125859_104982 | NW_004515864.1 | Scaffold370 | 104982                  | TT                              | CC              | 1946942849               |
| SNP_P4_125860_105953 | NW_004515864.1 | Scaffold370 | 105953                  | AA                              | GG              | 1946942851               |
| SNP_P4_125861_106039 | NW_004515864.1 | Scaffold370 | 106039                  | AA                              | TT              | 1946942853               |
| SNP_P4_125862_106089 | NW_004515864.1 | Scaffold370 | 106089                  | CC                              | TT              | 1946942855               |
| SNP_P4_125863_106184 | NW_004515864.1 | Scaffold370 | 106184                  | TT                              | AA              | 1946942857               |
| SNP_P4_125864_106204 | NW_004515864.1 | Scaffold370 | 106204                  | AA                              | CC              | 1946942859               |
| SNP_P4_125865_106562 | NW_004515864.1 | Scaffold370 | 106562                  | CC                              | GG              | 1946942861               |
| SNP_P4_125866_106630 | NW_004515864.1 | Scaffold370 | 106630                  | AA                              | TT              | 1946942863               |
| SNP_P4_125867_106631 | NW_004515864.1 | Scaffold370 | 106631                  | AA                              | CC              | 1946942865               |
| SNP_P4_125868_106907 | NW_004515864.1 | Scaffold370 | 106907                  | TT                              | AA              | 1946942867               |
| SNP_P4_125869_106916 | NW_004515864.1 | Scaffold370 | 106916                  | AA                              | TT              | 1946942869               |
| SNP_P4_125870_106918 | NW_004515864.1 | Scaffold370 | 106918                  | TT                              | CC              | 1946942871               |
| SNP_P4_125871_106942 | NW_004515864.1 | Scaffold370 | 106942                  | AA                              | CC              | 1946942873               |
| SNP_P4_125872_107126 | NW_004515864.1 | Scaffold370 | 107126                  | CC                              | TT              | 1946942875               |
| SNP_P4_125873_107129 | NW_004515864.1 | Scaffold370 | 107129                  | CC                              | GG              | 1946942877               |

| SNPs IDs             | Chromosome IDs | Chromosomes | Physical positions (bp) | CDC Frontier (Reference genome) | (ILWC46 & LPNB) | NCBI SNPdb Accession IDs |
|----------------------|----------------|-------------|-------------------------|---------------------------------|-----------------|--------------------------|
| SNP_P4_125874_107213 | NW_004515864.1 | Scaffold370 | 107213                  | CC                              | TT              | 1946942879               |
| SNP_P4_125875_107238 | NW_004515864.1 | Scaffold370 | 107238                  | AA                              | GG              | 1946942881               |
| SNP_P4_125876_107409 | NW_004515864.1 | Scaffold370 | 107409                  | AA                              | TT              | 1946942883               |
| SNP_P4_125877_107445 | NW_004515864.1 | Scaffold370 | 107445                  | GG                              | TT              | 1946942885               |
| SNP_P4_125878_107450 | NW_004515864.1 | Scaffold370 | 107450                  | TT                              | CC              | 1946942887               |
| SNP_P4_125879_107456 | NW_004515864.1 | Scaffold370 | 107456                  | AA                              | GG              | 1946942889               |
| SNP_P4_125880_107492 | NW_004515864.1 | Scaffold370 | 107492                  | TT                              | AA              | 1946942891               |
| SNP_P4_125881_107664 | NW_004515864.1 | Scaffold370 | 107664                  | TT                              | CC              | 1946942893               |
| SNP_P4_125882_107725 | NW_004515864.1 | Scaffold370 | 107725                  | AA                              | TT              | 1946942895               |
| SNP_P4_125883_107726 | NW_004515864.1 | Scaffold370 | 107726                  | TT                              | AA              | 1946942897               |
| SNP_P4_125884_107739 | NW_004515864.1 | Scaffold370 | 107739                  | TT                              | GG              | 1946942899               |
| SNP_P4_125885_107856 | NW_004515864.1 | Scaffold370 | 107856                  | CC                              | AA              | 1946942901               |
| SNP_P4_125886_107941 | NW_004515864.1 | Scaffold370 | 107941                  | GG                              | AA              | 1946942903               |
| SNP_P4_125887_108013 | NW_004515864.1 | Scaffold370 | 108013                  | TT                              | CC              | 1946942905               |
| SNP_P4_125888_108143 | NW_004515864.1 | Scaffold370 | 108143                  | GG                              | TT              | 1946942907               |
| SNP_P4_125889_108166 | NW_004515864.1 | Scaffold370 | 108166                  | TT                              | GG              | 1946942909               |
| SNP_P4_125890_108180 | NW_004515864.1 | Scaffold370 | 108180                  | GG                              | AA              | 1946942911               |
| SNP_P4_125891_109478 | NW_004515864.1 | Scaffold370 | 109478                  | GG                              | AA              | 1946942913               |
| SNP_P4_125892_110511 | NW_004515864.1 | Scaffold370 | 110511                  | GG                              | AA              | 1946942915               |
| SNP_P4_125893_110612 | NW_004515864.1 | Scaffold370 | 110612                  | GG                              | AA              | 1946942917               |
| SNP_P4_125894_110656 | NW_004515864.1 | Scaffold370 | 110656                  | TT                              | CC              | 1946942919               |
| SNP_P4_125895_110675 | NW_004515864.1 | Scaffold370 | 110675                  | GG                              | TT              | 1946942921               |
| SNP_P4_125896_110712 | NW_004515864.1 | Scaffold370 | 110712                  | GG                              | AA              | 1946942923               |
| SNP_P4_125897_112405 | NW_004515864.1 | Scaffold370 | 112405                  | AA                              | TT              | 1946942925               |
| SNP_P4_125898_114027 | NW_004515864.1 | Scaffold370 | 114027                  | GG                              | AA              | 1946942927               |
| SNP_P4_125899_114343 | NW_004515864.1 | Scaffold370 | 114343                  | CC                              | GG              | 1946942929               |
| SNP_P4_125900_114952 | NW_004515864.1 | Scaffold370 | 114952                  | CC                              | TT              | 1946942931               |
| SNP_P4_125901_116528 | NW_004515864.1 | Scaffold370 | 116528                  | CC                              | TT              | 1946942933               |
| SNP_P4_125902_123108 | NW_004515864.1 | Scaffold370 | 123108                  | TT                              | CC              | 1946942935               |
| SNP_P4_125903_123172 | NW_004515864.1 | Scaffold370 | 123172                  | CC                              | TT              | 1946942937               |
| SNP_P4_125904_123174 | NW_004515864.1 | Scaffold370 | 123174                  | GG                              | AA              | 1946942939               |
| SNP_P4_125905_123181 | NW_004515864.1 | Scaffold370 | 123181                  | TT                              | GG              | 1946942941               |
| SNP_P4_125906_125478 | NW_004515864.1 | Scaffold370 | 125478                  | AA                              | TT              | 1946942943               |
| SNP_P4_125907_125512 | NW_004515864.1 | Scaffold370 | 125512                  | AA                              | GG              | 1946942945               |
| SNP_P4_125908_125554 | NW_004515864.1 | Scaffold370 | 125554                  | AA                              | GG              | 1946942947               |
| SNP_P4_125909_137460 | NW_004515864.1 | Scaffold370 | 137460                  | TT                              | CC              | 1946942949               |
| SNP_P4_125910_137525 | NW_004515864.1 | Scaffold370 | 137525                  | AA                              | CC              | 1946942951               |
| SNP_P4_125911_137864 | NW_004515864.1 | Scaffold370 | 137864                  | GG                              | AA              | 1946942953               |
| SNP_P4_125912_141303 | NW_004515864.1 | Scaffold370 | 141303                  | AA                              | CC              | 1946942955               |
| SNP_P4_125913_141468 | NW_004515864.1 | Scaffold370 | 141468                  | AA                              | GG              | 1946942957               |
| SNP_P4_125914_144977 | NW_004515864.1 | Scaffold370 | 144977                  | AA                              | GG              | 1946942959               |
| SNP_P4_125915_159245 | NW_004515864.1 | Scaffold370 | 159245                  | AA                              | GG              | 1946942962               |

| SNPs IDs             | Chromosome IDs | Chromosomes | Physical positions (bp) | CDC Frontier (Reference genome) | (ILWC46 & LPNB) | NCBI SNPdb Accession IDs |
|----------------------|----------------|-------------|-------------------------|---------------------------------|-----------------|--------------------------|
| SNP_P4_125916_159316 | NW_004515864.1 | Scaffold370 | 159316                  | CC                              | TT              | 1946942964               |
| SNP_P4_125917_159384 | NW_004515864.1 | Scaffold370 | 159384                  | CC                              | TT              | 1946942966               |
| SNP_P4_125918_159393 | NW_004515864.1 | Scaffold370 | 159393                  | GG                              | CC              | 1946942968               |
| SNP_P4_125919_160278 | NW_004515864.1 | Scaffold370 | 160278                  | TT                              | AA              | 1946942970               |
| SNP_P4_125920_161181 | NW_004515864.1 | Scaffold370 | 161181                  | GG                              | AA              | 1946942972               |
| SNP_P4_125922_164318 | NW_004515864.1 | Scaffold370 | 164318                  | TT                              | GG              | 1946942974               |
| SNP_P4_125923_164468 | NW_004515864.1 | Scaffold370 | 164468                  | TT                              | CC              | 1946942976               |
| SNP_P4_125924_164825 | NW_004515864.1 | Scaffold370 | 164825                  | TT                              | CC              | 1946942978               |
| SNP_P4_125925_164937 | NW_004515864.1 | Scaffold370 | 164937                  | TT                              | CC              | 1946942980               |
| SNP_P4_125926_166499 | NW_004515864.1 | Scaffold370 | 166499                  | GG                              | AA              | 1946942982               |
| SNP_P4_125927_166523 | NW_004515864.1 | Scaffold370 | 166523                  | CC                              | TT              | 1946942984               |
| SNP_P4_125928_166841 | NW_004515864.1 | Scaffold370 | 166841                  | CC                              | TT              | 1946942986               |
| SNP_P4_125929_166876 | NW_004515864.1 | Scaffold370 | 166876                  | TT                              | CC              | 1946942988               |
| SNP_P4_125930_173330 | NW_004515864.1 | Scaffold370 | 173330                  | GG                              | CC              | 1946942990               |
| SNP_P4_125932_180842 | NW_004515864.1 | Scaffold370 | 180842                  | TT                              | CC              | 1946942992               |
| SNP_P4_125933_181573 | NW_004515864.1 | Scaffold370 | 181573                  | CC                              | TT              | 1946942994               |
| SNP_P4_125934_181592 | NW_004515864.1 | Scaffold370 | 181592                  | AA                              | GG              | 1946942996               |
| SNP_P4_125935_181612 | NW_004515864.1 | Scaffold370 | 181612                  | GG                              | CC              | 1946942998               |
| SNP_P4_125936_181644 | NW_004515864.1 | Scaffold370 | 181644                  | CC                              | TT              | 1946943000               |
| SNP_P4_125937_181712 | NW_004515864.1 | Scaffold370 | 181712                  | TT                              | CC              | 1946943002               |
| SNP_P4_125938_181747 | NW_004515864.1 | Scaffold370 | 181747                  | CC                              | AA              | 1946943004               |
| SNP_P4_125939_181785 | NW_004515864.1 | Scaffold370 | 181785                  | GG                              | TT              | 1946943006               |
| SNP_P4_125940_181792 | NW_004515864.1 | Scaffold370 | 181792                  | AA                              | CC              | 1946943008               |
| SNP_P4_125941_181952 | NW_004515864.1 | Scaffold370 | 181952                  | GG                              | AA              | 1946943010               |
| SNP_P4_125942_181994 | NW_004515864.1 | Scaffold370 | 181994                  | TT                              | CC              | 1946943012               |
| SNP_P4_125943_182130 | NW_004515864.1 | Scaffold370 | 182130                  | TT                              | CC              | 1946943014               |
| SNP_P4_125944_182133 | NW_004515864.1 | Scaffold370 | 182133                  | TT                              | AA              | 1946943016               |
| SNP_P4_125945_182255 | NW_004515864.1 | Scaffold370 | 182255                  | AA                              | GG              | 1946943018               |
| SNP_P4_125946_182405 | NW_004515864.1 | Scaffold370 | 182405                  | TT                              | CC              | 1946943020               |
| SNP_P4_125947_182444 | NW_004515864.1 | Scaffold370 | 182444                  | CC                              | TT              | 1946943022               |
| SNP_P4_125948_182520 | NW_004515864.1 | Scaffold370 | 182520                  | TT                              | CC              | 1946943024               |
| SNP_P4_125949_182671 | NW_004515864.1 | Scaffold370 | 182671                  | GG                              | TT              | 1946943026               |
| SNP_P4_125950_188605 | NW_004515864.1 | Scaffold370 | 188605                  | GG                              | AA              | 1946943028               |
| SNP_P4_125951_192337 | NW_004515864.1 | Scaffold370 | 192337                  | AA                              | GG              | 1946943030               |
| SNP_P4_125952_192376 | NW_004515864.1 | Scaffold370 | 192376                  | CC                              | TT              | 1946943032               |
| SNP_P4_125953_192469 | NW_004515864.1 | Scaffold370 | 192469                  | AA                              | TT              | 1946943034               |
| SNP_P4_125954_198519 | NW_004515864.1 | Scaffold370 | 198519                  | CC                              | TT              | 1946943036               |
| SNP_P4_125955_198520 | NW_004515864.1 | Scaffold370 | 198520                  | CC                              | TT              | 1946943038               |
| SNP_P4_125956_198564 | NW_004515864.1 | Scaffold370 | 198564                  | CC                              | TT              | 1946943040               |
| SNP_P4_125957_837    | NW_004515865.1 | Scaffold373 | 837                     | CC                              | TT              | 1946943042               |
| SNP_P4_125958_978    | NW_004515865.1 | Scaffold373 | 978                     | TT                              | GG              | 1946943044               |
| SNP_P4_125959_1110   | NW_004515865.1 | Scaffold373 | 1110                    | TT                              | CC              | 1946943046               |

| SNPs IDs            | Chromosome IDs | Chromosomes | Physical positions (bp) | CDC Frontier (Reference genome) | (ILWC46 & LPNB) | NCBI SNPdb Accession IDs |
|---------------------|----------------|-------------|-------------------------|---------------------------------|-----------------|--------------------------|
| SNP_P4_125960_1413  | NW_004515865.1 | Scaffold373 | 1413                    | TT                              | CC              | 1946943048               |
| SNP_P4_125961_1428  | NW_004515865.1 | Scaffold373 | 1428                    | AA                              | GG              | 1946943050               |
| SNP_P4_125962_1603  | NW_004515865.1 | Scaffold373 | 1603                    | TT                              | GG              | 1946943052               |
| SNP_P4_125963_4458  | NW_004515865.1 | Scaffold373 | 4458                    | TT                              | AA              | 1946943054               |
| SNP_P4_125964_4465  | NW_004515865.1 | Scaffold373 | 4465                    | AA                              | TT              | 1946943056               |
| SNP_P4_125965_4651  | NW_004515865.1 | Scaffold373 | 4651                    | TT                              | CC              | 1946943058               |
| SNP_P4_125966_4993  | NW_004515865.1 | Scaffold373 | 4993                    | GG                              | TT              | 1946943060               |
| SNP_P4_125967_5015  | NW_004515865.1 | Scaffold373 | 5015                    | CC                              | TT              | 1946943062               |
| SNP_P4_125968_5021  | NW_004515865.1 | Scaffold373 | 5021                    | AA                              | GG              | 1946943064               |
| SNP_P4_125969_5022  | NW_004515865.1 | Scaffold373 | 5022                    | AA                              | GG              | 1946943066               |
| SNP_P4_125970_5160  | NW_004515865.1 | Scaffold373 | 5160                    | GG                              | AA              | 1946943068               |
| SNP_P4_125971_5285  | NW_004515865.1 | Scaffold373 | 5285                    | CC                              | GG              | 1946943070               |
| SNP_P4_125972_9896  | NW_004515865.1 | Scaffold373 | 9896                    | AA                              | CC              | 1946943072               |
| SNP_P4_125973_20684 | NW_004515865.1 | Scaffold373 | 20684                   | AA                              | CC              | 1946943074               |
| SNP_P4_125974_20687 | NW_004515865.1 | Scaffold373 | 20687                   | AA                              | GG              | 1946943076               |
| SNP_P4_125975_20702 | NW_004515865.1 | Scaffold373 | 20702                   | GG                              | TT              | 1946943078               |
| SNP_P4_125976_23911 | NW_004515865.1 | Scaffold373 | 23911                   | CC                              | AA              | 1946943080               |
| SNP_P4_125977_25372 | NW_004515865.1 | Scaffold373 | 25372                   | AA                              | GG              | 1946943082               |
| SNP_P4_125978_25373 | NW_004515865.1 | Scaffold373 | 25373                   | GG                              | AA              | 1946943084               |
| SNP_P4_125979_25461 | NW_004515865.1 | Scaffold373 | 25461                   | TT                              | AA              | 1946943086               |
| SNP_P4_125980_25686 | NW_004515865.1 | Scaffold373 | 25686                   | AA                              | TT              | 1946943088               |
| SNP_P4_125981_25690 | NW_004515865.1 | Scaffold373 | 25690                   | AA                              | TT              | 1946943090               |
| SNP_P4_125982_25701 | NW_004515865.1 | Scaffold373 | 25701                   | TT                              | GG              | 1946943092               |
| SNP_P4_125983_25767 | NW_004515865.1 | Scaffold373 | 25767                   | AA                              | CC              | 1946943094               |
| SNP_P4_125985_25908 | NW_004515865.1 | Scaffold373 | 25908                   | TT                              | CC              | 1946943096               |
| SNP_P4_125986_27689 | NW_004515865.1 | Scaffold373 | 27689                   | CC                              | AA              | 1946943097               |
| SNP_P4_125987_27699 | NW_004515865.1 | Scaffold373 | 27699                   | GG                              | AA              | 1946943100               |
| SNP_P4_125988_34741 | NW_004515865.1 | Scaffold373 | 34741                   | GG                              | AA              | 1946943102               |
| SNP_P4_125989_41154 | NW_004515865.1 | Scaffold373 | 41154                   | AA                              | GG              | 1946943104               |
| SNP_P4_125990_41159 | NW_004515865.1 | Scaffold373 | 41159                   | AA                              | GG              | 1946943105               |
| SNP_P4_125991_50151 | NW_004515865.1 | Scaffold373 | 50151                   | AA                              | TT              | 1946943108               |
| SNP_P4_125992_58785 | NW_004515865.1 | Scaffold373 | 58785                   | CC                              | AA              | 1946943110               |
| SNP_P4_125993_1579  | NW_004515866.1 | Scaffold374 | 1579                    | CC                              | TT              | 1946943112               |
| SNP_P4_125994_2231  | NW_004515866.1 | Scaffold374 | 2231                    | CC                              | TT              | 1946943114               |
| SNP_P4_125995_12991 | NW_004515866.1 | Scaffold374 | 12991                   | AA                              | GG              | 1946943116               |
| SNP_P4_125997_23912 | NW_004515866.1 | Scaffold374 | 23912                   | AA                              | GG              | 1946943117               |
| SNP_P4_125998_41075 | NW_004515866.1 | Scaffold374 | 41075                   | TT                              | CC              | 1946943119               |
| SNP_P4_125999_47694 | NW_004515866.1 | Scaffold374 | 47694                   | TT                              | CC              | 1946943121               |
| SNP_P4_126000_47715 | NW_004515866.1 | Scaffold374 | 47715                   | AA                              | GG              | 1946943123               |
| SNP_P4_126001_47730 | NW_004515866.1 | Scaffold374 | 47730                   | TT                              | GG              | 1946943125               |
| SNP_P4_126002_47811 | NW_004515866.1 | Scaffold374 | 47811                   | AA                              | GG              | 1946943127               |
| SNP_P4_126003_47826 | NW_004515866.1 | Scaffold374 | 47826                   | AA                              | GG              | 1946943129               |

| SNPs IDs             | Chromosome IDs | Chromosomes | Physical positions (bp) | CDC Frontier (Reference genome) | (ILWC46 & LPNB) | NCBI SNPdb Accession IDs |
|----------------------|----------------|-------------|-------------------------|---------------------------------|-----------------|--------------------------|
| SNP_P4_126004_47881  | NW_004515866.1 | Scaffold374 | 47881                   | AA                              | GG              | 1946943132               |
| SNP_P4_126005_47921  | NW_004515866.1 | Scaffold374 | 47921                   | AA                              | GG              | 1946943134               |
| SNP_P4_126006_47967  | NW_004515866.1 | Scaffold374 | 47967                   | AA                              | GG              | 1946943135               |
| SNP_P4_126007_47971  | NW_004515866.1 | Scaffold374 | 47971                   | TT                              | GG              | 1946943137               |
| SNP_P4_126008_48262  | NW_004515866.1 | Scaffold374 | 48262                   | TT                              | GG              | 1946943139               |
| SNP_P4_126009_52881  | NW_004515866.1 | Scaffold374 | 52881                   | AA                              | CC              | 1946943141               |
| SNP_P4_126010_52918  | NW_004515866.1 | Scaffold374 | 52918                   | GG                              | AA              | 1946943144               |
| SNP_P4_126011_52935  | NW_004515866.1 | Scaffold374 | 52935                   | GG                              | AA              | 1946943146               |
| SNP_P4_126012_52952  | NW_004515866.1 | Scaffold374 | 52952                   | CC                              | TT              | 1946943148               |
| SNP_P4_126013_52997  | NW_004515866.1 | Scaffold374 | 52997                   | AA                              | GG              | 1946943150               |
| SNP_P4_126014_53002  | NW_004515866.1 | Scaffold374 | 53002                   | AA                              | GG              | 1946943152               |
| SNP_P4_126015_53011  | NW_004515866.1 | Scaffold374 | 53011                   | GG                              | AA              | 1946943154               |
| SNP_P4_126016_53045  | NW_004515866.1 | Scaffold374 | 53045                   | AA                              | CC              | 1946943156               |
| SNP_P4_126017_53334  | NW_004515866.1 | Scaffold374 | 53334                   | CC                              | TT              | 1946943158               |
| SNP_P4_126018_53353  | NW_004515866.1 | Scaffold374 | 53353                   | AA                              | GG              | 1946943160               |
| SNP_P4_126019_67026  | NW_004515866.1 | Scaffold374 | 67026                   | AA                              | GG              | 1946943161               |
| SNP_P4_126020_67028  | NW_004515866.1 | Scaffold374 | 67028                   | GG                              | AA              | 1946943163               |
| SNP_P4_126021_67043  | NW_004515866.1 | Scaffold374 | 67043                   | CC                              | TT              | 1946943165               |
| SNP_P4_126022_74654  | NW_004515866.1 | Scaffold374 | 74654                   | AA                              | GG              | 1946943167               |
| SNP_P4_126023_77034  | NW_004515866.1 | Scaffold374 | 77034                   | CC                              | TT              | 1946943169               |
| SNP_P4_126024_77035  | NW_004515866.1 | Scaffold374 | 77035                   | CC                              | TT              | 1946943171               |
| SNP_P4_126025_77110  | NW_004515866.1 | Scaffold374 | 77110                   | GG                              | AA              | 1946943173               |
| SNP_P4_126026_77170  | NW_004515866.1 | Scaffold374 | 77170                   | TT                              | AA              | 1946943175               |
| SNP_P4_126027_77182  | NW_004515866.1 | Scaffold374 | 77182                   | GG                              | AA              | 1946943177               |
| SNP_P4_126028_77591  | NW_004515866.1 | Scaffold374 | 77591                   | CC                              | GG              | 1946943179               |
| SNP_P4_126029_77643  | NW_004515866.1 | Scaffold374 | 77643                   | TT                              | GG              | 1946943181               |
| SNP_P4_126030_118531 | NW_004515866.1 | Scaffold374 | 118531                  | GG                              | AA              | 1946943183               |
| SNP_P4_126031_118558 | NW_004515866.1 | Scaffold374 | 118558                  | TT                              | GG              | 1946943185               |
| SNP_P4_126032_119076 | NW_004515866.1 | Scaffold374 | 119076                  | AA                              | TT              | 1946943187               |
| SNP_P4_126033_119097 | NW_004515866.1 | Scaffold374 | 119097                  | CC                              | TT              | 1946943190               |
| SNP_P4_126034_119656 | NW_004515866.1 | Scaffold374 | 119656                  | TT                              | CC              | 1946943192               |
| SNP_P4_126035_119688 | NW_004515866.1 | Scaffold374 | 119688                  | CC                              | TT              | 1946943194               |
| SNP_P4_126036_119690 | NW_004515866.1 | Scaffold374 | 119690                  | GG                              | AA              | 1946943196               |
| SNP_P4_126037_119822 | NW_004515866.1 | Scaffold374 | 119822                  | GG                              | AA              | 1946943198               |
| SNP_P4_126038_120068 | NW_004515866.1 | Scaffold374 | 120068                  | AA                              | GG              | 1946943200               |
| SNP_P4_126039_120070 | NW_004515866.1 | Scaffold374 | 120070                  | TT                              | GG              | 1946943202               |
| SNP_P4_126040_120162 | NW_004515866.1 | Scaffold374 | 120162                  | CC                              | TT              | 1946943204               |
| SNP_P4_126041_120220 | NW_004515866.1 | Scaffold374 | 120220                  | CC                              | TT              | 1946943206               |
| SNP_P4_126042_120234 | NW_004515866.1 | Scaffold374 | 120234                  | TT                              | CC              | 1946943208               |
| SNP_P4_126043_120250 | NW_004515866.1 | Scaffold374 | 120250                  | TT                              | CC              | 1946943210               |
| SNP_P4_126044_120273 | NW_004515866.1 | Scaffold374 | 120273                  | CC                              | AA              | 1946943212               |
| SNP_P4_126045_121259 | NW_004515866.1 | Scaffold374 | 121259                  | TT                              | CC              | 1946943214               |

| SNPs IDs             | Chromosome IDs | Chromosomes | Physical positions (bp) | CDC Frontier (Reference genome) | (ILWC46 & LPNB) | NCBI SNPdb Accession IDs |
|----------------------|----------------|-------------|-------------------------|---------------------------------|-----------------|--------------------------|
| SNP_P4_126046_121543 | NW_004515866.1 | Scaffold374 | 121543                  | AA                              | CC              | 1946943216               |
| SNP_P4_126047_121853 | NW_004515866.1 | Scaffold374 | 121853                  | CC                              | AA              | 1946943218               |
| SNP_P4_126048_121859 | NW_004515866.1 | Scaffold374 | 121859                  | TT                              | AA              | 1946943220               |
| SNP_P4_126049_121892 | NW_004515866.1 | Scaffold374 | 121892                  | TT                              | GG              | 1946943222               |
| SNP_P4_126050_121899 | NW_004515866.1 | Scaffold374 | 121899                  | CC                              | TT              | 1946943224               |
| SNP_P4_126051_121914 | NW_004515866.1 | Scaffold374 | 121914                  | TT                              | AA              | 1946943226               |
| SNP_P4_126052_122170 | NW_004515866.1 | Scaffold374 | 122170                  | GG                              | AA              | 1946943228               |
| SNP_P4_126053_128794 | NW_004515866.1 | Scaffold374 | 128794                  | TT                              | CC              | 1946943230               |
| SNP_P4_126054_128831 | NW_004515866.1 | Scaffold374 | 128831                  | CC                              | TT              | 1946943232               |
| SNP_P4_126055_128836 | NW_004515866.1 | Scaffold374 | 128836                  | CC                              | AA              | 1946943234               |
| SNP_P4_126056_128860 | NW_004515866.1 | Scaffold374 | 128860                  | CC                              | TT              | 1946943236               |
| SNP_P4_126057_128879 | NW_004515866.1 | Scaffold374 | 128879                  | TT                              | CC              | 1946943238               |
| SNP_P4_126058_128887 | NW_004515866.1 | Scaffold374 | 128887                  | GG                              | AA              | 1946943240               |
| SNP_P4_126059_128891 | NW_004515866.1 | Scaffold374 | 128891                  | TT                              | AA              | 1946943242               |
| SNP_P4_126060_128915 | NW_004515866.1 | Scaffold374 | 128915                  | TT                              | CC              | 1946943245               |
| SNP_P4_126061_128924 | NW_004515866.1 | Scaffold374 | 128924                  | CC                              | TT              | 1946943247               |
| SNP_P4_126062_128929 | NW_004515866.1 | Scaffold374 | 128929                  | GG                              | AA              | 1946943249               |
| SNP_P4_126063_128930 | NW_004515866.1 | Scaffold374 | 128930                  | GG                              | AA              | 1946943251               |
| SNP_P4_126064_128948 | NW_004515866.1 | Scaffold374 | 128948                  | CC                              | TT              | 1946943253               |
| SNP_P4_126065_129092 | NW_004515866.1 | Scaffold374 | 129092                  | TT                              | CC              | 1946943255               |
| SNP_P4_126066_129093 | NW_004515866.1 | Scaffold374 | 129093                  | CC                              | TT              | 1946943257               |
| SNP_P4_126067_129136 | NW_004515866.1 | Scaffold374 | 129136                  | GG                              | AA              | 1946943259               |
| SNP_P4_126068_129152 | NW_004515866.1 | Scaffold374 | 129152                  | TT                              | GG              | 1946943261               |
| SNP_P4_126069_131546 | NW_004515866.1 | Scaffold374 | 131546                  | TT                              | CC              | 1946943263               |
| SNP_P4_126070_135172 | NW_004515866.1 | Scaffold374 | 135172                  | GG                              | AA              | 1946943266               |
| SNP_P4_126071_141975 | NW_004515866.1 | Scaffold374 | 141975                  | AA                              | TT              | 1946943268               |
| SNP_P4_126072_141992 | NW_004515866.1 | Scaffold374 | 141992                  | CC                              | TT              | 1946943270               |
| SNP_P4_126074_142015 | NW_004515866.1 | Scaffold374 | 142015                  | AA                              | GG              | 1946943272               |
| SNP_P4_126075_142046 | NW_004515866.1 | Scaffold374 | 142046                  | CC                              | TT              | 1946943274               |
| SNP_P4_126076_142057 | NW_004515866.1 | Scaffold374 | 142057                  | AA                              | TT              | 1946943276               |
| SNP_P4_126078_142062 | NW_004515866.1 | Scaffold374 | 142062                  | CC                              | AA              | 1946943279               |
| SNP_P4_126079_142072 | NW_004515866.1 | Scaffold374 | 142072                  | AA                              | TT              | 1946943281               |
| SNP_P4_126080_142080 | NW_004515866.1 | Scaffold374 | 142080                  | TT                              | AA              | 1946943283               |
| SNP_P4_126081_142125 | NW_004515866.1 | Scaffold374 | 142125                  | TT                              | GG              | 1946943285               |
| SNP_P4_126082_142141 | NW_004515866.1 | Scaffold374 | 142141                  | GG                              | AA              | 1946943287               |
| SNP_P4_126083_142142 | NW_004515866.1 | Scaffold374 | 142142                  | TT                              | CC              | 1946943289               |
| SNP_P4_126084_142359 | NW_004515866.1 | Scaffold374 | 142359                  | TT                              | AA              | 1946943291               |
| SNP_P4_126085_147200 | NW_004515866.1 | Scaffold374 | 147200                  | TT                              | CC              | 1946943293               |
| SNP_P4_126086_147232 | NW_004515866.1 | Scaffold374 | 147232                  | AA                              | GG              | 1946943295               |
| SNP_P4_126087_147247 | NW_004515866.1 | Scaffold374 | 147247                  | TT                              | AA              | 1946943297               |
| SNP_P4_126088_147305 | NW_004515866.1 | Scaffold374 | 147305                  | TT                              | CC              | 1946943299               |
| SNP_P4_126089_147327 | NW_004515866.1 | Scaffold374 | 147327                  | GG                              | AA              | 1946943301               |

| SNPs IDs             | Chromosome IDs | Chromosomes | Physical positions (bp) | CDC Frontier (Reference genome) | (ILWC46 & LPNB) | NCBI SNPdb Accession IDs |
|----------------------|----------------|-------------|-------------------------|---------------------------------|-----------------|--------------------------|
| SNP_P4_126090_147336 | NW_004515866.1 | Scaffold374 | 147336                  | AA                              | TT              | 1946943303               |
| SNP_P4_126091_147379 | NW_004515866.1 | Scaffold374 | 147379                  | TT                              | AA              | 1946943306               |
| SNP_P4_126092_149255 | NW_004515866.1 | Scaffold374 | 149255                  | CC                              | AA              | 1946943308               |
| SNP_P4_126093_149256 | NW_004515866.1 | Scaffold374 | 149256                  | CC                              | TT              | 1946943310               |
| SNP_P4_126094_149275 | NW_004515866.1 | Scaffold374 | 149275                  | GG                              | AA              | 1946943312               |
| SNP_P4_126095_149311 | NW_004515866.1 | Scaffold374 | 149311                  | CC                              | TT              | 1946943314               |
| SNP_P4_126096_149313 | NW_004515866.1 | Scaffold374 | 149313                  | TT                              | AA              | 1946943316               |
| SNP_P4_126097_149315 | NW_004515866.1 | Scaffold374 | 149315                  | AA                              | GG              | 1946943318               |
| SNP_P4_126098_149341 | NW_004515866.1 | Scaffold374 | 149341                  | GG                              | CC              | 1946943320               |
| SNP_P4_126099_149359 | NW_004515866.1 | Scaffold374 | 149359                  | CC                              | TT              | 1946943322               |
| SNP_P4_126100_149565 | NW_004515866.1 | Scaffold374 | 149565                  | TT                              | CC              | 1946943325               |
| SNP_P4_126101_149601 | NW_004515866.1 | Scaffold374 | 149601                  | AA                              | GG              | 1946943327               |
| SNP_P4_126102_149626 | NW_004515866.1 | Scaffold374 | 149626                  | TT                              | CC              | 1946943329               |
| SNP_P4_126103_154652 | NW_004515866.1 | Scaffold374 | 154652                  | TT                              | GG              | 1946943331               |
| SNP_P4_126105_154757 | NW_004515866.1 | Scaffold374 | 154757                  | AA                              | CC              | 1946943333               |
| SNP_P4_126106_154813 | NW_004515866.1 | Scaffold374 | 154813                  | GG                              | AA              | 1946943335               |
| SNP_P4_126107_155119 | NW_004515866.1 | Scaffold374 | 155119                  | AA                              | TT              | 1946943338               |
| SNP_P4_126108_156625 | NW_004515866.1 | Scaffold374 | 156625                  | CC                              | TT              | 1946943340               |
| SNP_P4_126109_156704 | NW_004515866.1 | Scaffold374 | 156704                  | TT                              | GG              | 1946943342               |
| SNP_P4_126110_156728 | NW_004515866.1 | Scaffold374 | 156728                  | AA                              | GG              | 1946943344               |
| SNP_P4_126111_156901 | NW_004515866.1 | Scaffold374 | 156901                  | CC                              | TT              | 1946943346               |
| SNP_P4_126112_157118 | NW_004515866.1 | Scaffold374 | 157118                  | AA                              | GG              | 1946943348               |
| SNP_P4_126113_157366 | NW_004515866.1 | Scaffold374 | 157366                  | TT                              | CC              | 1946943350               |
| SNP_P4_126115_188346 | NW_004515866.1 | Scaffold374 | 188346                  | AA                              | GG              | 1946943352               |
| SNP_P4_126116_199959 | NW_004515866.1 | Scaffold374 | 199959                  | TT                              | CC              | 1946943354               |
| SNP_P4_126117_200180 | NW_004515866.1 | Scaffold374 | 200180                  | AA                              | TT              | 1946943356               |
| SNP_P4_126118_202399 | NW_004515866.1 | Scaffold374 | 202399                  | CC                              | TT              | 1946943359               |
| SNP_P4_126119_202772 | NW_004515866.1 | Scaffold374 | 202772                  | CC                              | AA              | 1946943361               |
| SNP_P4_126120_202814 | NW_004515866.1 | Scaffold374 | 202814                  | CC                              | TT              | 1946943363               |
| SNP_P4_126121_203047 | NW_004515866.1 | Scaffold374 | 203047                  | CC                              | TT              | 1946943365               |
| SNP_P4_126122_203052 | NW_004515866.1 | Scaffold374 | 203052                  | TT                              | CC              | 1946943367               |
| SNP_P4_126123_203451 | NW_004515866.1 | Scaffold374 | 203451                  | CC                              | GG              | 1946943369               |
| SNP_P4_126124_204002 | NW_004515866.1 | Scaffold374 | 204002                  | AA                              | CC              | 1946943371               |
| SNP_P4_126125_205502 | NW_004515866.1 | Scaffold374 | 205502                  | AA                              | TT              | 1946943374               |
| SNP_P4_126127_206219 | NW_004515866.1 | Scaffold374 | 206219                  | TT                              | AA              | 1946943376               |
| SNP_P4_126128_206222 | NW_004515866.1 | Scaffold374 | 206222                  | GG                              | AA              | 1946943378               |
| SNP_P4_126129_206403 | NW_004515866.1 | Scaffold374 | 206403                  | CC                              | TT              | 1946943381               |
| SNP_P4_126130_206412 | NW_004515866.1 | Scaffold374 | 206412                  | AA                              | GG              | 1946943383               |
| SNP_P4_126131_7454   | NW_004515867.1 | Scaffold377 | 7454                    | TT                              | AA              | 1946943385               |
| SNP_P4_126132_7964   | NW_004515867.1 | Scaffold377 | 7964                    | GG                              | AA              | 1946943387               |
| SNP_P4_126133_28470  | NW_004515867.1 | Scaffold377 | 28470                   | GG                              | AA              | 1946943389               |
| SNP_P4_126134_30513  | NW_004515867.1 | Scaffold377 | 30513                   | CC                              | TT              | 1946943392               |



| SNPs IDs             | Chromosome IDs | Chromosomes | Physical positions (bp) | CDC Frontier (Reference genome) | (ILWC46 & LPNB) | NCBI SNPdb Accession IDs |
|----------------------|----------------|-------------|-------------------------|---------------------------------|-----------------|--------------------------|
| SNP_P4_126135_30646  | NW_004515867.1 | Scaffold377 | 30646                   | AA                              | GG              | 1946943394               |
| SNP_P4_126136_30671  | NW_004515867.1 | Scaffold377 | 30671                   | CC                              | TT              | 1946943396               |
| SNP_P4_126137_30744  | NW_004515867.1 | Scaffold377 | 30744                   | GG                              | AA              | 1946943398               |
| SNP_P4_126138_30780  | NW_004515867.1 | Scaffold377 | 30780                   | AA                              | GG              | 1946943400               |
| SNP_P4_126139_30814  | NW_004515867.1 | Scaffold377 | 30814                   | CC                              | TT              | 1946943402               |
| SNP_P4_126140_30885  | NW_004515867.1 | Scaffold377 | 30885                   | AA                              | GG              | 1946943405               |
| SNP_P4_126141_30902  | NW_004515867.1 | Scaffold377 | 30902                   | CC                              | TT              | 1946943407               |
| SNP_P4_126142_31186  | NW_004515867.1 | Scaffold377 | 31186                   | AA                              | GG              | 1946943409               |
| SNP_P4_126143_75249  | NW_004515867.1 | Scaffold377 | 75249                   | GG                              | AA              | 1946943411               |
| SNP_P4_126145_75551  | NW_004515867.1 | Scaffold377 | 75551                   | AA                              | GG              | 1946943413               |
| SNP_P4_126146_75561  | NW_004515867.1 | Scaffold377 | 75561                   | TT                              | AA              | 1946943415               |
| SNP_P4_126147_75569  | NW_004515867.1 | Scaffold377 | 75569                   | CC                              | AA              | 1946943417               |
| SNP_P4_126148_75637  | NW_004515867.1 | Scaffold377 | 75637                   | AA                              | CC              | 1946943420               |
| SNP_P4_126149_76481  | NW_004515867.1 | Scaffold377 | 76481                   | TT                              | CC              | 1946943422               |
| SNP_P4_126150_91225  | NW_004515867.1 | Scaffold377 | 91225                   | AA                              | TT              | 1946943424               |
| SNP_P4_126151_94995  | NW_004515867.1 | Scaffold377 | 94995                   | TT                              | AA              | 1946943426               |
| SNP_P4_126152_98792  | NW_004515867.1 | Scaffold377 | 98792                   | TT                              | CC              | 1946943428               |
| SNP_P4_126154_98852  | NW_004515867.1 | Scaffold377 | 98852                   | CC                              | TT              | 1946943430               |
| SNP_P4_126155_98914  | NW_004515867.1 | Scaffold377 | 98914                   | TT                              | AA              | 1946943432               |
| SNP_P4_126156_114751 | NW_004515867.1 | Scaffold377 | 114751                  | CC                              | TT              | 1946943434               |
| SNP_P4_126158_161881 | NW_004515867.1 | Scaffold377 | 161881                  | GG                              | AA              | 1946943437               |
| SNP_P4_126159_182308 | NW_004515867.1 | Scaffold377 | 182308                  | TT                              | CC              | 1946943439               |
| SNP_P4_126160_182512 | NW_004515867.1 | Scaffold377 | 182512                  | AA                              | GG              | 1946943441               |
| SNP_P4_126161_182585 | NW_004515867.1 | Scaffold377 | 182585                  | TT                              | CC              | 1946943443               |
| SNP_P4_126162_182602 | NW_004515867.1 | Scaffold377 | 182602                  | TT                              | GG              | 1946943445               |
| SNP_P4_126163_191612 | NW_004515867.1 | Scaffold377 | 191612                  | GG                              | AA              | 1946943447               |
| SNP_P4_126164_191620 | NW_004515867.1 | Scaffold377 | 191620                  | AA                              | GG              | 1946943449               |
| SNP_P4_126165_191627 | NW_004515867.1 | Scaffold377 | 191627                  | AA                              | TT              | 1946943452               |
| SNP_P4_126166_191656 | NW_004515867.1 | Scaffold377 | 191656                  | TT                              | GG              | 1946943454               |
| SNP_P4_126167_191662 | NW_004515867.1 | Scaffold377 | 191662                  | AA                              | GG              | 1946943456               |
| SNP_P4_126168_191692 | NW_004515867.1 | Scaffold377 | 191692                  | CC                              | TT              | 1946943458               |
| SNP_P4_126169_214561 | NW_004515867.1 | Scaffold377 | 214561                  | GG                              | AA              | 1946943460               |
| SNP_P4_126170_214946 | NW_004515867.1 | Scaffold377 | 214946                  | TT                              | GG              | 1946943462               |
| SNP_P4_126171_218657 | NW_004515867.1 | Scaffold377 | 218657                  | CC                              | TT              | 1946943464               |
| SNP_P4_126172_218660 | NW_004515867.1 | Scaffold377 | 218660                  | CC                              | AA              | 1946943466               |
| SNP_P4_126173_218787 | NW_004515867.1 | Scaffold377 | 218787                  | TT                              | CC              | 1946943469               |
| SNP_P4_126175_251358 | NW_004515867.1 | Scaffold377 | 251358                  | GG                              | AA              | 1946943471               |
| SNP_P4_126176_251392 | NW_004515867.1 | Scaffold377 | 251392                  | GG                              | AA              | 1946943473               |
| SNP_P4_126177_251395 | NW_004515867.1 | Scaffold377 | 251395                  | AA                              | TT              | 1946943475               |
| SNP_P4_126178_251401 | NW_004515867.1 | Scaffold377 | 251401                  | GG                              | AA              | 1946943477               |
| SNP_P4_126179_251465 | NW_004515867.1 | Scaffold377 | 251465                  | AA                              | GG              | 1946943479               |
| SNP_P4_126180_251489 | NW_004515867.1 | Scaffold377 | 251489                  | GG                              | AA              | 1946943481               |

| SNPs IDs             | Chromosome IDs | Chromosomes | Physical positions (bp) | CDC Frontier (Reference genome) | (ILWC46 & LPNB) | NCBI SNPdb Accession IDs |
|----------------------|----------------|-------------|-------------------------|---------------------------------|-----------------|--------------------------|
| SNP_P4_126181_261578 | NW_004515867.1 | Scaffold377 | 261578                  | TT                              | AA              | 1946943483               |
| SNP_P4_126182_261583 | NW_004515867.1 | Scaffold377 | 261583                  | AA                              | GG              | 1946943485               |
| SNP_P4_126184_264023 | NW_004515867.1 | Scaffold377 | 264023                  | AA                              | TT              | 1946943487               |
| SNP_P4_126185_286551 | NW_004515867.1 | Scaffold377 | 286551                  | CC                              | AA              | 1946943489               |
| SNP_P4_126186_301111 | NW_004515867.1 | Scaffold377 | 301111                  | TT                              | CC              | 1946943491               |
| SNP_P4_126187_301116 | NW_004515867.1 | Scaffold377 | 301116                  | CC                              | AA              | 1946943493               |
| SNP_P4_126188_324942 | NW_004515867.1 | Scaffold377 | 324942                  | GG                              | AA              | 1946943495               |
| SNP_P4_126189_326730 | NW_004515867.1 | Scaffold377 | 326730                  | AA                              | TT              | 1946943497               |
| SNP_P4_126190_331009 | NW_004515867.1 | Scaffold377 | 331009                  | CC                              | AA              | 1946943499               |
| SNP_P4_126191_331048 | NW_004515867.1 | Scaffold377 | 331048                  | CC                              | TT              | 1946943501               |
| SNP_P4_126192_331055 | NW_004515867.1 | Scaffold377 | 331055                  | GG                              | AA              | 1946943503               |
| SNP_P4_126193_331083 | NW_004515867.1 | Scaffold377 | 331083                  | AA                              | TT              | 1946943505               |
| SNP_P4_126194_337398 | NW_004515867.1 | Scaffold377 | 337398                  | GG                              | CC              | 1946943508               |
| SNP_P4_126195_343204 | NW_004515867.1 | Scaffold377 | 343204                  | AA                              | TT              | 1946943510               |
| SNP_P4_126196_349966 | NW_004515867.1 | Scaffold377 | 349966                  | CC                              | AA              | 1946943512               |
| SNP_P4_126197_393554 | NW_004515867.1 | Scaffold377 | 393554                  | TT                              | CC              | 1946943514               |
| SNP_P4_126198_393624 | NW_004515867.1 | Scaffold377 | 393624                  | AA                              | GG              | 1946943516               |
| SNP_P4_126199_394431 | NW_004515867.1 | Scaffold377 | 394431                  | TT                              | CC              | 1946943518               |
| SNP_P4_126200_397320 | NW_004515867.1 | Scaffold377 | 397320                  | CC                              | TT              | 1946943520               |
| SNP_P4_126201_397324 | NW_004515867.1 | Scaffold377 | 397324                  | AA                              | GG              | 1946943522               |
| SNP_P4_126202_397333 | NW_004515867.1 | Scaffold377 | 397333                  | TT                              | AA              | 1946943524               |
| SNP_P4_126203_397583 | NW_004515867.1 | Scaffold377 | 397583                  | CC                              | TT              | 1946943526               |
| SNP_P4_126204_400093 | NW_004515867.1 | Scaffold377 | 400093                  | GG                              | AA              | 1946943528               |
| SNP_P4_126206_400204 | NW_004515867.1 | Scaffold377 | 400204                  | GG                              | AA              | 1946943530               |
| SNP_P4_126209_400329 | NW_004515867.1 | Scaffold377 | 400329                  | TT                              | CC              | 1946943532               |
| SNP_P4_126210_400330 | NW_004515867.1 | Scaffold377 | 400330                  | GG                              | AA              | 1946943534               |
| SNP_P4_126211_400426 | NW_004515867.1 | Scaffold377 | 400426                  | AA                              | GG              | 1946943536               |
| SNP_P4_126212_400450 | NW_004515867.1 | Scaffold377 | 400450                  | AA                              | GG              | 1946943538               |
| SNP_P4_126213_400509 | NW_004515867.1 | Scaffold377 | 400509                  | GG                              | AA              | 1946943540               |
| SNP_P4_126214_400563 | NW_004515867.1 | Scaffold377 | 400563                  | AA                              | GG              | 1946943542               |
| SNP_P4_126215_404899 | NW_004515867.1 | Scaffold377 | 404899                  | GG                              | TT              | 1946943544               |
| SNP_P4_126216_405173 | NW_004515867.1 | Scaffold377 | 405173                  | TT                              | GG              | 1946943546               |
| SNP_P4_126217_419071 | NW_004515867.1 | Scaffold377 | 419071                  | GG                              | TT              | 1946943548               |
| SNP_P4_126218_419104 | NW_004515867.1 | Scaffold377 | 419104                  | TT                              | CC              | 1946943550               |
| SNP_P4_126219_426514 | NW_004515867.1 | Scaffold377 | 426514                  | CC                              | TT              | 1946943552               |
| SNP_P4_126220_431991 | NW_004515867.1 | Scaffold377 | 431991                  | TT                              | CC              | 1946943554               |
| SNP_P4_126221_432342 | NW_004515867.1 | Scaffold377 | 432342                  | TT                              | GG              | 1946943556               |
| SNP_P4_126222_433630 | NW_004515867.1 | Scaffold377 | 433630                  | CC                              | AA              | 1946943557               |
| SNP_P4_126223_434815 | NW_004515867.1 | Scaffold377 | 434815                  | CC                              | TT              | 1946943558               |
| SNP_P4_126224_5170   | NW_004515869.1 | Scaffold379 | 5170                    | CC                              | TT              | 1946943559               |
| SNP_P4_126225_9427   | NW_004515869.1 | Scaffold379 | 9427                    | CC                              | TT              | 1946943561               |
| SNP_P4_126226_22745  | NW_004515869.1 | Scaffold379 | 22745                   | AA                              | CC              | 1946943563               |

| SNPs IDs             | Chromosome IDs | Chromosomes | Physical positions (bp) | CDC Frontier (Reference genome) | (ILWC46 & LPNB) | NCBI SNPdb Accession IDs |
|----------------------|----------------|-------------|-------------------------|---------------------------------|-----------------|--------------------------|
| SNP_P4_126227_36879  | NW_004515869.1 | Scaffold379 | 36879                   | CC                              | TT              | 1946943565               |
| SNP_P4_126228_80522  | NW_004515869.1 | Scaffold379 | 80522                   | TT                              | AA              | 1946943567               |
| SNP_P4_126230_91586  | NW_004515869.1 | Scaffold379 | 91586                   | AA                              | GG              | 1946943569               |
| SNP_P4_126231_108286 | NW_004515869.1 | Scaffold379 | 108286                  | TT                              | GG              | 1946943570               |
| SNP_P4_126232_108310 | NW_004515869.1 | Scaffold379 | 108310                  | GG                              | AA              | 1946943572               |
| SNP_P4_126233_108328 | NW_004515869.1 | Scaffold379 | 108328                  | GG                              | AA              | 1946943574               |
| SNP_P4_126234_135818 | NW_004515869.1 | Scaffold379 | 135818                  | AA                              | TT              | 1946943576               |
| SNP_P4_126235_135875 | NW_004515869.1 | Scaffold379 | 135875                  | CC                              | GG              | 1946943578               |
| SNP_P4_126237_136237 | NW_004515869.1 | Scaffold379 | 136237                  | AA                              | GG              | 1946943580               |
| SNP_P4_126238_136238 | NW_004515869.1 | Scaffold379 | 136238                  | CC                              | TT              | 1946943582               |
| SNP_P4_126239_136256 | NW_004515869.1 | Scaffold379 | 136256                  | AA                              | TT              | 1946943584               |
| SNP_P4_126240_136337 | NW_004515869.1 | Scaffold379 | 136337                  | TT                              | CC              | 1946943586               |
| SNP_P4_126241_136339 | NW_004515869.1 | Scaffold379 | 136339                  | TT                              | AA              | 1946943588               |
| SNP_P4_126242_136398 | NW_004515869.1 | Scaffold379 | 136398                  | GG                              | AA              | 1946943590               |
| SNP_P4_126243_162899 | NW_004515869.1 | Scaffold379 | 162899                  | TT                              | AA              | 1946943592               |
| SNP_P4_126244_162900 | NW_004515869.1 | Scaffold379 | 162900                  | AA                              | TT              | 1946943594               |
| SNP_P4_126246_176523 | NW_004515869.1 | Scaffold379 | 176523                  | TT                              | GG              | 1946943596               |
| SNP_P4_126247_176772 | NW_004515869.1 | Scaffold379 | 176772                  | AA                              | GG              | 1946943598               |
| SNP_P4_126249_5466   | NW_004515870.1 | Scaffold381 | 5466                    | AA                              | GG              | 1946943600               |
| SNP_P4_126250_5538   | NW_004515870.1 | Scaffold381 | 5538                    | TT                              | CC              | 1946943602               |
| SNP_P4_126251_6077   | NW_004515870.1 | Scaffold381 | 6077                    | TT                              | AA              | 1946943604               |
| SNP_P4_126253_6568   | NW_004515870.1 | Scaffold381 | 6568                    | CC                              | GG              | 1946943606               |
| SNP_P4_126254_6571   | NW_004515870.1 | Scaffold381 | 6571                    | TT                              | AA              | 1946943608               |
| SNP_P4_126255_6668   | NW_004515870.1 | Scaffold381 | 6668                    | TT                              | AA              | 1946943610               |
| SNP_P4_126256_6691   | NW_004515870.1 | Scaffold381 | 6691                    | GG                              | AA              | 1946943612               |
| SNP_P4_126258_6698   | NW_004515870.1 | Scaffold381 | 6698                    | GG                              | TT              | 1946943614               |
| SNP_P4_126259_6735   | NW_004515870.1 | Scaffold381 | 6735                    | TT                              | GG              | 1946943616               |
| SNP_P4_126260_6741   | NW_004515870.1 | Scaffold381 | 6741                    | AA                              | GG              | 1946943618               |
| SNP_P4_126261_6742   | NW_004515870.1 | Scaffold381 | 6742                    | CC                              | TT              | 1946943620               |
| SNP_P4_126263_6929   | NW_004515870.1 | Scaffold381 | 6929                    | AA                              | TT              | 1946943622               |
| SNP_P4_126265_8526   | NW_004515870.1 | Scaffold381 | 8526                    | GG                              | TT              | 1946943624               |
| SNP_P4_126266_8585   | NW_004515870.1 | Scaffold381 | 8585                    | GG                              | AA              | 1946943626               |
| SNP_P4_126267_8824   | NW_004515870.1 | Scaffold381 | 8824                    | CC                              | GG              | 1946943628               |
| SNP_P4_126268_9958   | NW_004515870.1 | Scaffold381 | 9958                    | CC                              | AA              | 1946943630               |
| SNP_P4_126269_9983   | NW_004515870.1 | Scaffold381 | 9983                    | TT                              | CC              | 1946943632               |
| SNP_P4_126270_10024  | NW_004515870.1 | Scaffold381 | 10024                   | AA                              | GG              | 1946943634               |
| SNP_P4_126271_10168  | NW_004515870.1 | Scaffold381 | 10168                   | TT                              | GG              | 1946943636               |
| SNP_P4_126272_10185  | NW_004515870.1 | Scaffold381 | 10185                   | TT                              | AA              | 1946943638               |
| SNP_P4_126273_10189  | NW_004515870.1 | Scaffold381 | 10189                   | AA                              | GG              | 1946943640               |
| SNP_P4_126274_10191  | NW_004515870.1 | Scaffold381 | 10191                   | TT                              | GG              | 1946943642               |
| SNP_P4_126275_10287  | NW_004515870.1 | Scaffold381 | 10287                   | CC                              | TT              | 1946943644               |
| SNP_P4_126276_10341  | NW_004515870.1 | Scaffold381 | 10341                   | GG                              | TT              | 1946943646               |

| SNPs IDs             | Chromosome IDs | Chromosomes | Physical positions (bp) | CDC Frontier (Reference genome) | (ILWC46 & LPNB) | NCBI SNPdb Accession IDs |
|----------------------|----------------|-------------|-------------------------|---------------------------------|-----------------|--------------------------|
| SNP_P4_126277_12157  | NW_004515870.1 | Scaffold381 | 12157                   | CC                              | GG              | 1946943648               |
| SNP_P4_126278_12211  | NW_004515870.1 | Scaffold381 | 12211                   | AA                              | GG              | 1946943650               |
| SNP_P4_126279_21418  | NW_004515871.1 | Scaffold382 | 21418                   | CC                              | TT              | 1946943652               |
| SNP_P4_126280_22488  | NW_004515871.1 | Scaffold382 | 22488                   | AA                              | GG              | 1946943654               |
| SNP_P4_126281_22763  | NW_004515871.1 | Scaffold382 | 22763                   | CC                              | AA              | 1946943656               |
| SNP_P4_126282_22838  | NW_004515871.1 | Scaffold382 | 22838                   | TT                              | CC              | 1946943658               |
| SNP_P4_126283_24801  | NW_004515871.1 | Scaffold382 | 24801                   | GG                              | AA              | 1946943661               |
| SNP_P4_126284_24838  | NW_004515871.1 | Scaffold382 | 24838                   | AA                              | TT              | 1946943663               |
| SNP_P4_126285_24874  | NW_004515871.1 | Scaffold382 | 24874                   | TT                              | AA              | 1946943665               |
| SNP_P4_126286_25038  | NW_004515871.1 | Scaffold382 | 25038                   | AA                              | GG              | 1946943667               |
| SNP_P4_126287_25195  | NW_004515871.1 | Scaffold382 | 25195                   | AA                              | TT              | 1946943669               |
| SNP_P4_126288_25202  | NW_004515871.1 | Scaffold382 | 25202                   | GG                              | AA              | 1946943671               |
| SNP_P4_126289_25844  | NW_004515871.1 | Scaffold382 | 25844                   | AA                              | GG              | 1946943673               |
| SNP_P4_126290_26494  | NW_004515871.1 | Scaffold382 | 26494                   | TT                              | CC              | 1946943675               |
| SNP_P4_126291_26547  | NW_004515871.1 | Scaffold382 | 26547                   | GG                              | AA              | 1946943677               |
| SNP_P4_126292_27174  | NW_004515871.1 | Scaffold382 | 27174                   | CC                              | TT              | 1946943679               |
| SNP_P4_126293_64045  | NW_004515871.1 | Scaffold382 | 64045                   | CC                              | AA              | 1946943681               |
| SNP_P4_126294_65322  | NW_004515871.1 | Scaffold382 | 65322                   | GG                              | CC              | 1946943683               |
| SNP_P4_126295_65369  | NW_004515871.1 | Scaffold382 | 65369                   | TT                              | CC              | 1946943685               |
| SNP_P4_126296_65508  | NW_004515871.1 | Scaffold382 | 65508                   | GG                              | AA              | 1946943687               |
| SNP_P4_126297_65509  | NW_004515871.1 | Scaffold382 | 65509                   | TT                              | CC              | 1946943689               |
| SNP_P4_126298_69204  | NW_004515871.1 | Scaffold382 | 69204                   | TT                              | CC              | 1946943691               |
| SNP_P4_126299_77500  | NW_004515871.1 | Scaffold382 | 77500                   | AA                              | TT              | 1946943693               |
| SNP_P4_126300_77590  | NW_004515871.1 | Scaffold382 | 77590                   | AA                              | GG              | 1946943695               |
| SNP_P4_126301_77747  | NW_004515871.1 | Scaffold382 | 77747                   | TT                              | AA              | 1946943697               |
| SNP_P4_126302_77838  | NW_004515871.1 | Scaffold382 | 77838                   | AA                              | GG              | 1946943699               |
| SNP_P4_126303_77843  | NW_004515871.1 | Scaffold382 | 77843                   | GG                              | AA              | 1946943701               |
| SNP_P4_126304_90507  | NW_004515871.1 | Scaffold382 | 90507                   | TT                              | AA              | 1946943703               |
| SNP_P4_126305_90785  | NW_004515871.1 | Scaffold382 | 90785                   | AA                              | GG              | 1946943705               |
| SNP_P4_126306_90807  | NW_004515871.1 | Scaffold382 | 90807                   | CC                              | TT              | 1946943707               |
| SNP_P4_126307_90823  | NW_004515871.1 | Scaffold382 | 90823                   | CC                              | TT              | 1946943709               |
| SNP_P4_126308_90925  | NW_004515871.1 | Scaffold382 | 90925                   | TT                              | GG              | 1946943711               |
| SNP_P4_126309_90928  | NW_004515871.1 | Scaffold382 | 90928                   | AA                              | TT              | 1946943713               |
| SNP_P4_126310_90933  | NW_004515871.1 | Scaffold382 | 90933                   | GG                              | CC              | 1946943715               |
| SNP_P4_126311_90950  | NW_004515871.1 | Scaffold382 | 90950                   | AA                              | GG              | 1946943717               |
| SNP_P4_126312_90984  | NW_004515871.1 | Scaffold382 | 90984                   | CC                              | GG              | 1946943719               |
| SNP_P4_126313_91129  | NW_004515871.1 | Scaffold382 | 91129                   | TT                              | CC              | 1946943721               |
| SNP_P4_126314_91295  | NW_004515871.1 | Scaffold382 | 91295                   | GG                              | AA              | 1946943723               |
| SNP_P4_126315_91332  | NW_004515871.1 | Scaffold382 | 91332                   | GG                              | CC              | 1946943725               |
| SNP_P4_126316_104713 | NW_004515871.1 | Scaffold382 | 104713                  | TT                              | CC              | 1946943727               |
| SNP_P4_126317_104900 | NW_004515871.1 | Scaffold382 | 104900                  | AA                              | CC              | 1946943729               |
| SNP_P4_126318_105474 | NW_004515871.1 | Scaffold382 | 105474                  | TT                              | CC              | 1946943731               |

| SNPs IDs             | Chromosome IDs | Chromosomes | Physical positions (bp) | CDC Frontier (Reference genome) | (ILWC46 & LPNB) | NCBI SNPdb Accession IDs |
|----------------------|----------------|-------------|-------------------------|---------------------------------|-----------------|--------------------------|
| SNP_P4_126319_105480 | NW_004515871.1 | Scaffold382 | 105480                  | GG                              | TT              | 1946943733               |
| SNP_P4_126320_9695   | NW_004515872.1 | Scaffold383 | 9695                    | CC                              | TT              | 1946943735               |
| SNP_P4_126321_9788   | NW_004515872.1 | Scaffold383 | 9788                    | TT                              | CC              | 1946943737               |
| SNP_P4_126322_9805   | NW_004515872.1 | Scaffold383 | 9805                    | TT                              | CC              | 1946943739               |
| SNP_P4_126323_9807   | NW_004515872.1 | Scaffold383 | 9807                    | GG                              | AA              | 1946943741               |
| SNP_P4_126324_9808   | NW_004515872.1 | Scaffold383 | 9808                    | AA                              | TT              | 1946943744               |
| SNP_P4_126325_9867   | NW_004515872.1 | Scaffold383 | 9867                    | AA                              | CC              | 1946943746               |
| SNP_P4_126326_9877   | NW_004515872.1 | Scaffold383 | 9877                    | TT                              | CC              | 1946943748               |
| SNP_P4_126327_9878   | NW_004515872.1 | Scaffold383 | 9878                    | GG                              | AA              | 1946943750               |
| SNP_P4_126328_9882   | NW_004515872.1 | Scaffold383 | 9882                    | AA                              | GG              | 1946943752               |
| SNP_P4_126329_9932   | NW_004515872.1 | Scaffold383 | 9932                    | TT                              | CC              | 1946943754               |
| SNP_P4_126330_14581  | NW_004515872.1 | Scaffold383 | 14581                   | TT                              | AA              | 1946943756               |
| SNP_P4_126331_17300  | NW_004515872.1 | Scaffold383 | 17300                   | GG                              | AA              | 1946943758               |
| SNP_P4_126332_17444  | NW_004515872.1 | Scaffold383 | 17444                   | GG                              | CC              | 1946943760               |
| SNP_P4_126333_17454  | NW_004515872.1 | Scaffold383 | 17454                   | TT                              | GG              | 1946943762               |
| SNP_P4_126334_17501  | NW_004515872.1 | Scaffold383 | 17501                   | TT                              | CC              | 1946943763               |
| SNP_P4_126335_19794  | NW_004515872.1 | Scaffold383 | 19794                   | TT                              | GG              | 1946943765               |
| SNP_P4_126336_21079  | NW_004515872.1 | Scaffold383 | 21079                   | GG                              | AA              | 1946943767               |
| SNP_P4_126337_21521  | NW_004515872.1 | Scaffold383 | 21521                   | CC                              | TT              | 1946943769               |
| SNP_P4_126338_26907  | NW_004515872.1 | Scaffold383 | 26907                   | CC                              | TT              | 1946943771               |
| SNP_P4_126339_33860  | NW_004515872.1 | Scaffold383 | 33860                   | AA                              | GG              | 1946943773               |
| SNP_P4_126340_40412  | NW_004515872.1 | Scaffold383 | 40412                   | GG                              | AA              | 1946943775               |
| SNP_P4_126341_40565  | NW_004515872.1 | Scaffold383 | 40565                   | AA                              | TT              | 1946943777               |
| SNP_P4_126342_60015  | NW_004515872.1 | Scaffold383 | 60015                   | CC                              | TT              | 1946943780               |
| SNP_P4_126343_61198  | NW_004515872.1 | Scaffold383 | 61198                   | CC                              | TT              | 1946943782               |
| SNP_P4_126344_77220  | NW_004515872.1 | Scaffold383 | 77220                   | CC                              | AA              | 1946943784               |
| SNP_P4_126345_77250  | NW_004515872.1 | Scaffold383 | 77250                   | AA                              | GG              | 1946943786               |
| SNP_P4_126346_77343  | NW_004515872.1 | Scaffold383 | 77343                   | TT                              | CC              | 1946943787               |
| SNP_P4_126348_80210  | NW_004515872.1 | Scaffold383 | 80210                   | TT                              | GG              | 1946943789               |
| SNP_P4_126349_80228  | NW_004515872.1 | Scaffold383 | 80228                   | CC                              | TT              | 1946943791               |
| SNP_P4_126350_81317  | NW_004515872.1 | Scaffold383 | 81317                   | AA                              | GG              | 1946943793               |
| SNP_P4_126353_81403  | NW_004515872.1 | Scaffold383 | 81403                   | TT                              | CC              | 1946943795               |
| SNP_P4_126354_81457  | NW_004515872.1 | Scaffold383 | 81457                   | GG                              | AA              | 1946943797               |
| SNP_P4_126355_81482  | NW_004515872.1 | Scaffold383 | 81482                   | GG                              | AA              | 1946943799               |
| SNP_P4_126356_81485  | NW_004515872.1 | Scaffold383 | 81485                   | AA                              | GG              | 1946943801               |
| SNP_P4_126357_81495  | NW_004515872.1 | Scaffold383 | 81495                   | CC                              | TT              | 1946943803               |
| SNP_P4_126358_81528  | NW_004515872.1 | Scaffold383 | 81528                   | GG                              | AA              | 1946943805               |
| SNP_P4_126359_81530  | NW_004515872.1 | Scaffold383 | 81530                   | CC                              | TT              | 1946943807               |
| SNP_P4_126360_81646  | NW_004515872.1 | Scaffold383 | 81646                   | TT                              | GG              | 1946943809               |
| SNP_P4_126361_81811  | NW_004515872.1 | Scaffold383 | 81811                   | GG                              | AA              | 1946943811               |
| SNP_P4_126362_81879  | NW_004515872.1 | Scaffold383 | 81879                   | TT                              | CC              | 1946943813               |
| SNP_P4_126363_87845  | NW_004515872.1 | Scaffold383 | 87845                   | CC                              | TT              | 1946943815               |

| SNPs IDs             | Chromosome IDs | Chromosomes | Physical positions (bp) | CDC Frontier (Reference genome) | (ILWC46 & LPNB) | NCBI SNPdb Accession IDs |
|----------------------|----------------|-------------|-------------------------|---------------------------------|-----------------|--------------------------|
| SNP_P4_126364_88241  | NW_004515872.1 | Scaffold383 | 88241                   | GG                              | AA              | 1946943817               |
| SNP_P4_126365_93384  | NW_004515872.1 | Scaffold383 | 93384                   | GG                              | AA              | 1946943819               |
| SNP_P4_126366_94144  | NW_004515872.1 | Scaffold383 | 94144                   | TT                              | CC              | 1946943821               |
| SNP_P4_126367_118578 | NW_004515872.1 | Scaffold383 | 118578                  | TT                              | AA              | 1946943823               |
| SNP_P4_126368_118579 | NW_004515872.1 | Scaffold383 | 118579                  | GG                              | TT              | 1946943825               |
| SNP_P4_126369_118698 | NW_004515872.1 | Scaffold383 | 118698                  | TT                              | AA              | 1946943827               |
| SNP_P4_126370_118733 | NW_004515872.1 | Scaffold383 | 118733                  | CC                              | GG              | 1946943829               |
| SNP_P4_126371_118755 | NW_004515872.1 | Scaffold383 | 118755                  | AA                              | GG              | 1946943831               |
| SNP_P4_126372_119116 | NW_004515872.1 | Scaffold383 | 119116                  | AA                              | GG              | 1946943833               |
| SNP_P4_126373_128458 | NW_004515872.1 | Scaffold383 | 128458                  | GG                              | AA              | 1946943835               |
| SNP_P4_126374_128494 | NW_004515872.1 | Scaffold383 | 128494                  | CC                              | TT              | 1946943837               |
| SNP_P4_126375_128545 | NW_004515872.1 | Scaffold383 | 128545                  | AA                              | GG              | 1946943839               |
| SNP_P4_126376_133731 | NW_004515872.1 | Scaffold383 | 133731                  | CC                              | AA              | 1946943841               |
| SNP_P4_126377_133935 | NW_004515872.1 | Scaffold383 | 133935                  | GG                              | TT              | 1946943843               |
| SNP_P4_126379_137382 | NW_004515872.1 | Scaffold383 | 137382                  | TT                              | AA              | 1946943845               |
| SNP_P4_126380_137452 | NW_004515872.1 | Scaffold383 | 137452                  | AA                              | GG              | 1946943847               |
| SNP_P4_126381_137468 | NW_004515872.1 | Scaffold383 | 137468                  | GG                              | TT              | 1946943849               |
| SNP_P4_126382_137483 | NW_004515872.1 | Scaffold383 | 137483                  | CC                              | GG              | 1946943851               |
| SNP_P4_126383_137514 | NW_004515872.1 | Scaffold383 | 137514                  | GG                              | TT              | 1946943853               |
| SNP_P4_126384_175810 | NW_004515872.1 | Scaffold383 | 175810                  | TT                              | GG              | 1946943855               |
| SNP_P4_126385_175851 | NW_004515872.1 | Scaffold383 | 175851                  | GG                              | AA              | 1946943857               |
| SNP_P4_126386_182214 | NW_004515872.1 | Scaffold383 | 182214                  | AA                              | GG              | 1946943859               |
| SNP_P4_126387_182244 | NW_004515872.1 | Scaffold383 | 182244                  | CC                              | TT              | 1946943861               |
| SNP_P4_126389_195739 | NW_004515872.1 | Scaffold383 | 195739                  | GG                              | AA              | 1946943863               |
| SNP_P4_126390_195796 | NW_004515872.1 | Scaffold383 | 195796                  | CC                              | TT              | 1946943865               |
| SNP_P4_126391_205386 | NW_004515872.1 | Scaffold383 | 205386                  | AA                              | GG              | 1946943867               |
| SNP_P4_126392_205404 | NW_004515872.1 | Scaffold383 | 205404                  | TT                              | CC              | 1946943869               |
| SNP_P4_126393_205607 | NW_004515872.1 | Scaffold383 | 205607                  | GG                              | TT              | 1946943871               |
| SNP_P4_126396_210001 | NW_004515872.1 | Scaffold383 | 210001                  | AA                              | GG              | 1946943873               |
| SNP_P4_126397_210106 | NW_004515872.1 | Scaffold383 | 210106                  | CC                              | AA              | 1946943875               |
| SNP_P4_126398_210253 | NW_004515872.1 | Scaffold383 | 210253                  | TT                              | AA              | 1946943877               |
| SNP_P4_126399_210364 | NW_004515872.1 | Scaffold383 | 210364                  | GG                              | AA              | 1946943879               |
| SNP_P4_126400_237204 | NW_004515872.1 | Scaffold383 | 237204                  | TT                              | CC              | 1946943881               |
| SNP_P4_126401_237625 | NW_004515872.1 | Scaffold383 | 237625                  | TT                              | CC              | 1946943883               |
| SNP_P4_126402_237630 | NW_004515872.1 | Scaffold383 | 237630                  | AA                              | CC              | 1946943885               |
| SNP_P4_126403_248150 | NW_004515872.1 | Scaffold383 | 248150                  | CC                              | GG              | 1946943887               |
| SNP_P4_126404_2509   | NW_004515873.1 | Scaffold387 | 2509                    | TT                              | GG              | 1946943889               |
| SNP_P4_126405_2667   | NW_004515873.1 | Scaffold387 | 2667                    | GG                              | TT              | 1946943891               |
| SNP_P4_126407_2764   | NW_004515873.1 | Scaffold387 | 2764                    | GG                              | TT              | 1946943893               |
| SNP_P4_126408_5862   | NW_004515873.1 | Scaffold387 | 5862                    | AA                              | TT              | 1946943895               |
| SNP_P4_126409_15677  | NW_004515873.1 | Scaffold387 | 15677                   | AA                              | GG              | 1946943897               |
| SNP_P4_126410_15761  | NW_004515873.1 | Scaffold387 | 15761                   | AA                              | TT              | 1946943899               |

| SNPs IDs            | Chromosome IDs | Chromosomes | Physical positions (bp) | CDC Frontier (Reference genome) | (ILWC46 & LPNB) | NCBI SNPdb Accession IDs |
|---------------------|----------------|-------------|-------------------------|---------------------------------|-----------------|--------------------------|
| SNP_P4_126411_15809 | NW_004515873.1 | Scaffold387 | 15809                   | AA                              | GG              | 1946943901               |
| SNP_P4_126412_15856 | NW_004515873.1 | Scaffold387 | 15856                   | CC                              | TT              | 1946943904               |
| SNP_P4_126413_15888 | NW_004515873.1 | Scaffold387 | 15888                   | GG                              | TT              | 1946943906               |
| SNP_P4_126414_15911 | NW_004515873.1 | Scaffold387 | 15911                   | AA                              | CC              | 1946943908               |
| SNP_P4_126415_15946 | NW_004515873.1 | Scaffold387 | 15946                   | AA                              | TT              | 1946943910               |
| SNP_P4_126416_15990 | NW_004515873.1 | Scaffold387 | 15990                   | TT                              | CC              | 1946943912               |
| SNP_P4_126417_16000 | NW_004515873.1 | Scaffold387 | 16000                   | TT                              | AA              | 1946943914               |
| SNP_P4_126419_16114 | NW_004515873.1 | Scaffold387 | 16114                   | TT                              | CC              | 1946943916               |
| SNP_P4_126420_16158 | NW_004515873.1 | Scaffold387 | 16158                   | TT                              | GG              | 1946943918               |
| SNP_P4_126421_16197 | NW_004515873.1 | Scaffold387 | 16197                   | GG                              | TT              | 1946943920               |
| SNP_P4_126422_16288 | NW_004515873.1 | Scaffold387 | 16288                   | CC                              | TT              | 1946943922               |
| SNP_P4_126423_16297 | NW_004515873.1 | Scaffold387 | 16297                   | GG                              | AA              | 1946943924               |
| SNP_P4_126424_16341 | NW_004515873.1 | Scaffold387 | 16341                   | AA                              | CC              | 1946943926               |
| SNP_P4_126425_16368 | NW_004515873.1 | Scaffold387 | 16368                   | GG                              | AA              | 1946943928               |
| SNP_P4_126426_16441 | NW_004515873.1 | Scaffold387 | 16441                   | TT                              | AA              | 1946943930               |
| SNP_P4_126427_16452 | NW_004515873.1 | Scaffold387 | 16452                   | CC                              | GG              | 1946943932               |
| SNP_P4_126428_16491 | NW_004515873.1 | Scaffold387 | 16491                   | CC                              | TT              | 1946943934               |
| SNP_P4_126429_16494 | NW_004515873.1 | Scaffold387 | 16494                   | TT                              | CC              | 1946943936               |
| SNP_P4_126430_16605 | NW_004515873.1 | Scaffold387 | 16605                   | GG                              | AA              | 1946943938               |
| SNP_P4_126431_16629 | NW_004515873.1 | Scaffold387 | 16629                   | GG                              | TT              | 1946943940               |
| SNP_P4_126432_16636 | NW_004515873.1 | Scaffold387 | 16636                   | TT                              | GG              | 1946943942               |
| SNP_P4_126433_16668 | NW_004515873.1 | Scaffold387 | 16668                   | TT                              | CC              | 1946943944               |
| SNP_P4_126434_16679 | NW_004515873.1 | Scaffold387 | 16679                   | AA                              | GG              | 1946943946               |
| SNP_P4_126435_16692 | NW_004515873.1 | Scaffold387 | 16692                   | GG                              | CC              | 1946943948               |
| SNP_P4_126436_16703 | NW_004515873.1 | Scaffold387 | 16703                   | TT                              | AA              | 1946943950               |
| SNP_P4_126437_16760 | NW_004515873.1 | Scaffold387 | 16760                   | CC                              | TT              | 1946943952               |
| SNP_P4_126438_16789 | NW_004515873.1 | Scaffold387 | 16789                   | GG                              | AA              | 1946943954               |
| SNP_P4_126439_16816 | NW_004515873.1 | Scaffold387 | 16816                   | AA                              | GG              | 1946943956               |
| SNP_P4_126440_16827 | NW_004515873.1 | Scaffold387 | 16827                   | AA                              | GG              | 1946943958               |
| SNP_P4_126441_16842 | NW_004515873.1 | Scaffold387 | 16842                   | TT                              | CC              | 1946943960               |
| SNP_P4_126442_16891 | NW_004515873.1 | Scaffold387 | 16891                   | CC                              | TT              | 1946943962               |
| SNP_P4_126443_16897 | NW_004515873.1 | Scaffold387 | 16897                   | GG                              | TT              | 1946943964               |
| SNP_P4_126444_17537 | NW_004515873.1 | Scaffold387 | 17537                   | CC                              | TT              | 1946943966               |
| SNP_P4_126445_17560 | NW_004515873.1 | Scaffold387 | 17560                   | GG                              | AA              | 1946943968               |
| SNP_P4_126446_17613 | NW_004515873.1 | Scaffold387 | 17613                   | CC                              | AA              | 1946943970               |
| SNP_P4_126447_17619 | NW_004515873.1 | Scaffold387 | 17619                   | AA                              | GG              | 1946943972               |
| SNP_P4_126448_17629 | NW_004515873.1 | Scaffold387 | 17629                   | GG                              | CC              | 1946943974               |
| SNP_P4_126449_17718 | NW_004515873.1 | Scaffold387 | 17718                   | CC                              | TT              | 1946943976               |
| SNP_P4_126450_17872 | NW_004515873.1 | Scaffold387 | 17872                   | AA                              | GG              | 1946943978               |
| SNP_P4_126451_17924 | NW_004515873.1 | Scaffold387 | 17924                   | TT                              | GG              | 1946943980               |
| SNP_P4_126452_18101 | NW_004515873.1 | Scaffold387 | 18101                   | AA                              | TT              | 1946943982               |
| SNP_P4_126453_18107 | NW_004515873.1 | Scaffold387 | 18107                   | GG                              | AA              | 1946943984               |

| SNPs IDs            | Chromosome IDs | Chromosomes | Physical positions (bp) | CDC Frontier (Reference genome) | (ILWC46 & LPNB) | NCBI SNPdb Accession IDs |
|---------------------|----------------|-------------|-------------------------|---------------------------------|-----------------|--------------------------|
| SNP_P4_126454_18154 | NW_004515873.1 | Scaffold387 | 18154                   | CC                              | TT              | 1946943986               |
| SNP_P4_126455_18171 | NW_004515873.1 | Scaffold387 | 18171                   | TT                              | AA              | 1946943988               |
| SNP_P4_126456_18463 | NW_004515873.1 | Scaffold387 | 18463                   | CC                              | AA              | 1946943990               |
| SNP_P4_126457_18486 | NW_004515873.1 | Scaffold387 | 18486                   | CC                              | TT              | 1946943992               |
| SNP_P4_126458_18495 | NW_004515873.1 | Scaffold387 | 18495                   | AA                              | GG              | 1946943994               |
| SNP_P4_126459_18496 | NW_004515873.1 | Scaffold387 | 18496                   | TT                              | CC              | 1946943996               |
| SNP_P4_126460_18587 | NW_004515873.1 | Scaffold387 | 18587                   | AA                              | GG              | 1946943998               |
| SNP_P4_126461_18606 | NW_004515873.1 | Scaffold387 | 18606                   | GG                              | AA              | 1946944000               |
| SNP_P4_126462_18676 | NW_004515873.1 | Scaffold387 | 18676                   | AA                              | GG              | 1946944002               |
| SNP_P4_126463_18703 | NW_004515873.1 | Scaffold387 | 18703                   | CC                              | GG              | 1946944004               |
| SNP_P4_126464_18704 | NW_004515873.1 | Scaffold387 | 18704                   | AA                              | GG              | 1946944006               |
| SNP_P4_126465_18732 | NW_004515873.1 | Scaffold387 | 18732                   | TT                              | CC              | 1946944008               |
| SNP_P4_126466_18780 | NW_004515873.1 | Scaffold387 | 18780                   | CC                              | TT              | 1946944010               |
| SNP_P4_126467_18910 | NW_004515873.1 | Scaffold387 | 18910                   | TT                              | CC              | 1946944012               |
| SNP_P4_126468_18916 | NW_004515873.1 | Scaffold387 | 18916                   | CC                              | AA              | 1946944014               |
| SNP_P4_126469_18943 | NW_004515873.1 | Scaffold387 | 18943                   | AA                              | CC              | 1946944016               |
| SNP_P4_126470_18944 | NW_004515873.1 | Scaffold387 | 18944                   | AA                              | TT              | 1946944018               |
| SNP_P4_126471_18989 | NW_004515873.1 | Scaffold387 | 18989                   | GG                              | TT              | 1946944020               |
| SNP_P4_126472_19010 | NW_004515873.1 | Scaffold387 | 19010                   | AA                              | GG              | 1946944022               |
| SNP_P4_126473_19020 | NW_004515873.1 | Scaffold387 | 19020                   | GG                              | AA              | 1946944024               |
| SNP_P4_126474_19068 | NW_004515873.1 | Scaffold387 | 19068                   | CC                              | AA              | 1946944026               |
| SNP_P4_126475_19175 | NW_004515873.1 | Scaffold387 | 19175                   | AA                              | GG              | 1946944028               |
| SNP_P4_126476_19178 | NW_004515873.1 | Scaffold387 | 19178                   | AA                              | CC              | 1946944030               |
| SNP_P4_126477_19247 | NW_004515873.1 | Scaffold387 | 19247                   | TT                              | AA              | 1946944032               |
| SNP_P4_126478_19284 | NW_004515873.1 | Scaffold387 | 19284                   | GG                              | TT              | 1946944034               |
| SNP_P4_126479_19395 | NW_004515873.1 | Scaffold387 | 19395                   | CC                              | TT              | 1946944036               |
| SNP_P4_126480_19467 | NW_004515873.1 | Scaffold387 | 19467                   | TT                              | GG              | 1946944038               |
| SNP_P4_126481_19545 | NW_004515873.1 | Scaffold387 | 19545                   | CC                              | AA              | 1946944040               |
| SNP_P4_126482_20794 | NW_004515873.1 | Scaffold387 | 20794                   | TT                              | CC              | 1946944042               |
| SNP_P4_126484_20802 | NW_004515873.1 | Scaffold387 | 20802                   | TT                              | GG              | 1946944044               |
| SNP_P4_126485_22841 | NW_004515873.1 | Scaffold387 | 22841                   | GG                              | AA              | 1946944046               |
| SNP_P4_126486_22907 | NW_004515873.1 | Scaffold387 | 22907                   | GG                              | TT              | 1946944048               |
| SNP_P4_126487_22932 | NW_004515873.1 | Scaffold387 | 22932                   | AA                              | CC              | 1946944050               |
| SNP_P4_126489_23003 | NW_004515873.1 | Scaffold387 | 23003                   | TT                              | GG              | 1946944052               |
| SNP_P4_126490_23028 | NW_004515873.1 | Scaffold387 | 23028                   | GG                              | AA              | 1946944054               |
| SNP_P4_126491_23087 | NW_004515873.1 | Scaffold387 | 23087                   | GG                              | AA              | 1946944056               |
| SNP_P4_126493_23481 | NW_004515873.1 | Scaffold387 | 23481                   | GG                              | AA              | 1946944058               |
| SNP_P4_126495_23519 | NW_004515873.1 | Scaffold387 | 23519                   | AA                              | CC              | 1946944060               |
| SNP_P4_126496_23531 | NW_004515873.1 | Scaffold387 | 23531                   | TT                              | AA              | 1946944062               |
| SNP_P4_126497_23538 | NW_004515873.1 | Scaffold387 | 23538                   | GG                              | AA              | 1946944064               |
| SNP_P4_126499_23612 | NW_004515873.1 | Scaffold387 | 23612                   | TT                              | AA              | 1946944066               |
| SNP_P4_126500_23691 | NW_004515873.1 | Scaffold387 | 23691                   | GG                              | AA              | 1946944068               |



| SNPs IDs             | Chromosome IDs | Chromosomes | Physical positions (bp) | CDC Frontier (Reference genome) | (ILWC46 & LPNB) | NCBI SNPdb Accession IDs |
|----------------------|----------------|-------------|-------------------------|---------------------------------|-----------------|--------------------------|
| SNP_P4_126501_23705  | NW_004515873.1 | Scaffold387 | 23705                   | TT                              | CC              | 1946944070               |
| SNP_P4_126502_23792  | NW_004515873.1 | Scaffold387 | 23792                   | GG                              | AA              | 1946944072               |
| SNP_P4_126503_23799  | NW_004515873.1 | Scaffold387 | 23799                   | CC                              | TT              | 1946944074               |
| SNP_P4_126504_23828  | NW_004515873.1 | Scaffold387 | 23828                   | CC                              | AA              | 1946944076               |
| SNP_P4_126505_23985  | NW_004515873.1 | Scaffold387 | 23985                   | GG                              | TT              | 1946944078               |
| SNP_P4_126506_24028  | NW_004515873.1 | Scaffold387 | 24028                   | AA                              | TT              | 1946944080               |
| SNP_P4_126507_24314  | NW_004515873.1 | Scaffold387 | 24314                   | CC                              | TT              | 1946944082               |
| SNP_P4_126508_24322  | NW_004515873.1 | Scaffold387 | 24322                   | GG                              | AA              | 1946944084               |
| SNP_P4_126509_24348  | NW_004515873.1 | Scaffold387 | 24348                   | TT                              | AA              | 1946944086               |
| SNP_P4_126510_24824  | NW_004515873.1 | Scaffold387 | 24824                   | TT                              | CC              | 1946944088               |
| SNP_P4_126511_24856  | NW_004515873.1 | Scaffold387 | 24856                   | GG                              | TT              | 1946944090               |
| SNP_P4_126512_24908  | NW_004515873.1 | Scaffold387 | 24908                   | TT                              | CC              | 1946944092               |
| SNP_P4_126513_24954  | NW_004515873.1 | Scaffold387 | 24954                   | GG                              | AA              | 1946944094               |
| SNP_P4_126514_24960  | NW_004515873.1 | Scaffold387 | 24960                   | TT                              | CC              | 1946944096               |
| SNP_P4_126515_24989  | NW_004515873.1 | Scaffold387 | 24989                   | TT                              | AA              | 1946944098               |
| SNP_P4_126516_25158  | NW_004515873.1 | Scaffold387 | 25158                   | TT                              | GG              | 1946944100               |
| SNP_P4_126517_59154  | NW_004515873.1 | Scaffold387 | 59154                   | AA                              | GG              | 1946944102               |
| SNP_P4_126518_68603  | NW_004515873.1 | Scaffold387 | 68603                   | GG                              | AA              | 1946944104               |
| SNP_P4_126519_96422  | NW_004515873.1 | Scaffold387 | 96422                   | GG                              | AA              | 1946944106               |
| SNP_P4_126520_97506  | NW_004515873.1 | Scaffold387 | 97506                   | TT                              | CC              | 1946944108               |
| SNP_P4_126521_99281  | NW_004515873.1 | Scaffold387 | 99281                   | TT                              | GG              | 1946944110               |
| SNP_P4_126522_99324  | NW_004515873.1 | Scaffold387 | 99324                   | AA                              | TT              | 1946944112               |
| SNP_P4_126523_99576  | NW_004515873.1 | Scaffold387 | 99576                   | TT                              | AA              | 1946944114               |
| SNP_P4_126524_100082 | NW_004515873.1 | Scaffold387 | 100082                  | GG                              | AA              | 1946944116               |
| SNP_P4_126525_105188 | NW_004515873.1 | Scaffold387 | 105188                  | TT                              | GG              | 1946944118               |
| SNP_P4_126526_105233 | NW_004515873.1 | Scaffold387 | 105233                  | AA                              | TT              | 1946944120               |
| SNP_P4_126527_105247 | NW_004515873.1 | Scaffold387 | 105247                  | AA                              | GG              | 1946944122               |
| SNP_P4_126528_105248 | NW_004515873.1 | Scaffold387 | 105248                  | AA                              | CC              | 1946944125               |
| SNP_P4_126531_119959 | NW_004515873.1 | Scaffold387 | 119959                  | TT                              | CC              | 1946944127               |
| SNP_P4_126532_119963 | NW_004515873.1 | Scaffold387 | 119963                  | GG                              | CC              | 1946944129               |
| SNP_P4_126533_119992 | NW_004515873.1 | Scaffold387 | 119992                  | TT                              | AA              | 1946944131               |
| SNP_P4_126534_120055 | NW_004515873.1 | Scaffold387 | 120055                  | AA                              | GG              | 1946944133               |
| SNP_P4_126535_120858 | NW_004515873.1 | Scaffold387 | 120858                  | CC                              | GG              | 1946944134               |
| SNP_P4_126536_121166 | NW_004515873.1 | Scaffold387 | 121166                  | TT                              | CC              | 1946944137               |
| SNP_P4_126537_123913 | NW_004515873.1 | Scaffold387 | 123913                  | GG                              | AA              | 1946944139               |
| SNP_P4_126538_123939 | NW_004515873.1 | Scaffold387 | 123939                  | CC                              | TT              | 1946944141               |
| SNP_P4_126539_123944 | NW_004515873.1 | Scaffold387 | 123944                  | AA                              | GG              | 1946944143               |
| SNP_P4_126540_123969 | NW_004515873.1 | Scaffold387 | 123969                  | AA                              | GG              | 1946944145               |
| SNP_P4_126541_123974 | NW_004515873.1 | Scaffold387 | 123974                  | GG                              | AA              | 1946944147               |
| SNP_P4_126542_124196 | NW_004515873.1 | Scaffold387 | 124196                  | AA                              | CC              | 1946944149               |
| SNP_P4_126543_154392 | NW_004515873.1 | Scaffold387 | 154392                  | CC                              | GG              | 1946944151               |
| SNP_P4_126544_154418 | NW_004515873.1 | Scaffold387 | 154418                  | CC                              | TT              | 1946944153               |

| SNPs IDs             | Chromosome IDs | Chromosomes | Physical positions (bp) | CDC Frontier (Reference genome) | (ILWC46 & LPNB) | NCBI SNPdb Accession IDs |
|----------------------|----------------|-------------|-------------------------|---------------------------------|-----------------|--------------------------|
| SNP_P4_126545_154456 | NW_004515873.1 | Scaffold387 | 154456                  | CC                              | TT              | 1946944155               |
| SNP_P4_126546_154509 | NW_004515873.1 | Scaffold387 | 154509                  | CC                              | TT              | 1946944157               |
| SNP_P4_126547_154514 | NW_004515873.1 | Scaffold387 | 154514                  | AA                              | GG              | 1946944159               |
| SNP_P4_126548_159554 | NW_004515873.1 | Scaffold387 | 159554                  | TT                              | CC              | 1946944161               |
| SNP_P4_126549_159563 | NW_004515873.1 | Scaffold387 | 159563                  | TT                              | AA              | 1946944163               |
| SNP_P4_126550_160628 | NW_004515873.1 | Scaffold387 | 160628                  | GG                              | TT              | 1946944165               |
| SNP_P4_126551_160796 | NW_004515873.1 | Scaffold387 | 160796                  | AA                              | CC              | 1946944167               |
| SNP_P4_126552_160836 | NW_004515873.1 | Scaffold387 | 160836                  | CC                              | TT              | 1946944169               |
| SNP_P4_126553_160844 | NW_004515873.1 | Scaffold387 | 160844                  | TT                              | CC              | 1946944171               |
| SNP_P4_126554_160846 | NW_004515873.1 | Scaffold387 | 160846                  | GG                              | AA              | 1946944173               |
| SNP_P4_126555_160916 | NW_004515873.1 | Scaffold387 | 160916                  | CC                              | GG              | 1946944175               |
| SNP_P4_126556_160947 | NW_004515873.1 | Scaffold387 | 160947                  | CC                              | TT              | 1946944177               |
| SNP_P4_126557_160959 | NW_004515873.1 | Scaffold387 | 160959                  | AA                              | TT              | 1946944179               |
| SNP_P4_126559_161031 | NW_004515873.1 | Scaffold387 | 161031                  | AA                              | GG              | 1946944181               |
| SNP_P4_126560_161103 | NW_004515873.1 | Scaffold387 | 161103                  | AA                              | GG              | 1946944183               |
| SNP_P4_126561_161136 | NW_004515873.1 | Scaffold387 | 161136                  | GG                              | AA              | 1946944185               |
| SNP_P4_126562_161141 | NW_004515873.1 | Scaffold387 | 161141                  | AA                              | GG              | 1946944187               |
| SNP_P4_126563_161207 | NW_004515873.1 | Scaffold387 | 161207                  | GG                              | AA              | 1946944189               |
| SNP_P4_126564_161211 | NW_004515873.1 | Scaffold387 | 161211                  | AA                              | TT              | 1946944191               |
| SNP_P4_126565_161283 | NW_004515873.1 | Scaffold387 | 161283                  | AA                              | GG              | 1946944193               |
| SNP_P4_126566_161353 | NW_004515873.1 | Scaffold387 | 161353                  | AA                              | CC              | 1946944195               |
| SNP_P4_126568_161425 | NW_004515873.1 | Scaffold387 | 161425                  | AA                              | GG              | 1946944197               |
| SNP_P4_126570_161446 | NW_004515873.1 | Scaffold387 | 161446                  | TT                              | CC              | 1946944199               |
| SNP_P4_126571_161509 | NW_004515873.1 | Scaffold387 | 161509                  | CC                              | TT              | 1946944201               |
| SNP_P4_126572_161543 | NW_004515873.1 | Scaffold387 | 161543                  | TT                              | CC              | 1946944203               |
| SNP_P4_126573_161560 | NW_004515873.1 | Scaffold387 | 161560                  | TT                              | AA              | 1946944205               |
| SNP_P4_126574_2249   | NW_004515874.1 | Scaffold388 | 2249                    | TT                              | CC              | 1946944207               |
| SNP_P4_126576_11509  | NW_004515874.1 | Scaffold388 | 11509                   | CC                              | TT              | 1946944209               |
| SNP_P4_126577_12259  | NW_004515874.1 | Scaffold388 | 12259                   | CC                              | AA              | 1946944211               |
| SNP_P4_126578_22116  | NW_004515874.1 | Scaffold388 | 22116                   | GG                              | CC              | 1946944213               |
| SNP_P4_126579_23523  | NW_004515874.1 | Scaffold388 | 23523                   | AA                              | CC              | 1946944215               |
| SNP_P4_126580_24650  | NW_004515874.1 | Scaffold388 | 24650                   | AA                              | TT              | 1946944217               |
| SNP_P4_126581_26885  | NW_004515874.1 | Scaffold388 | 26885                   | AA                              | GG              | 1946944219               |
| SNP_P4_126582_27034  | NW_004515874.1 | Scaffold388 | 27034                   | GG                              | AA              | 1946944221               |
| SNP_P4_126583_30224  | NW_004515874.1 | Scaffold388 | 30224                   | CC                              | TT              | 1946944223               |
| SNP_P4_126584_30375  | NW_004515874.1 | Scaffold388 | 30375                   | CC                              | TT              | 1946944225               |
| SNP_P4_126585_30377  | NW_004515874.1 | Scaffold388 | 30377                   | GG                              | AA              | 1946944227               |
| SNP_P4_126586_30398  | NW_004515874.1 | Scaffold388 | 30398                   | CC                              | TT              | 1946944229               |
| SNP_P4_126587_30436  | NW_004515874.1 | Scaffold388 | 30436                   | AA                              | GG              | 1946944231               |
| SNP_P4_126588_30653  | NW_004515874.1 | Scaffold388 | 30653                   | AA                              | GG              | 1946944233               |
| SNP_P4_126589_30832  | NW_004515874.1 | Scaffold388 | 30832                   | AA                              | CC              | 1946944235               |
| SNP_P4_126590_31879  | NW_004515874.1 | Scaffold388 | 31879                   | CC                              | TT              | 1946944237               |

| SNPs IDs            | Chromosome IDs | Chromosomes | Physical positions (bp) | CDC Frontier (Reference genome) | (ILWC46 & LPNB) | NCBI SNPdb Accession IDs |
|---------------------|----------------|-------------|-------------------------|---------------------------------|-----------------|--------------------------|
| SNP_P4_126591_32743 | NW_004515874.1 | Scaffold388 | 32743                   | CC                              | TT              | 1946944239               |
| SNP_P4_126592_34011 | NW_004515874.1 | Scaffold388 | 34011                   | AA                              | GG              | 1946944241               |
| SNP_P4_126593_34647 | NW_004515874.1 | Scaffold388 | 34647                   | TT                              | CC              | 1946944243               |
| SNP_P4_126594_35255 | NW_004515874.1 | Scaffold388 | 35255                   | AA                              | TT              | 1946944246               |
| SNP_P4_126595_35278 | NW_004515874.1 | Scaffold388 | 35278                   | GG                              | AA              | 1946944248               |
| SNP_P4_126596_39163 | NW_004515874.1 | Scaffold388 | 39163                   | CC                              | TT              | 1946944250               |
| SNP_P4_126597_42612 | NW_004515874.1 | Scaffold388 | 42612                   | CC                              | TT              | 1946944252               |
| SNP_P4_126598_42629 | NW_004515874.1 | Scaffold388 | 42629                   | TT                              | GG              | 1946944254               |
| SNP_P4_126599_45606 | NW_004515874.1 | Scaffold388 | 45606                   | TT                              | AA              | 1946944256               |
| SNP_P4_126600_45612 | NW_004515874.1 | Scaffold388 | 45612                   | GG                              | TT              | 1946944258               |
| SNP_P4_126601_45613 | NW_004515874.1 | Scaffold388 | 45613                   | TT                              | AA              | 1946944260               |
| SNP_P4_126602_45615 | NW_004515874.1 | Scaffold388 | 45615                   | CC                              | TT              | 1946944262               |
| SNP_P4_126603_47016 | NW_004515874.1 | Scaffold388 | 47016                   | TT                              | CC              | 1946944264               |
| SNP_P4_126604_47130 | NW_004515874.1 | Scaffold388 | 47130                   | AA                              | TT              | 1946944266               |
| SNP_P4_126605_47874 | NW_004515874.1 | Scaffold388 | 47874                   | AA                              | CC              | 1946944268               |
| SNP_P4_126606_48330 | NW_004515874.1 | Scaffold388 | 48330                   | AA                              | TT              | 1946944270               |
| SNP_P4_126607_50595 | NW_004515874.1 | Scaffold388 | 50595                   | AA                              | TT              | 1946944272               |
| SNP_P4_126608_50914 | NW_004515874.1 | Scaffold388 | 50914                   | GG                              | CC              | 1946944274               |
| SNP_P4_126609_51215 | NW_004515874.1 | Scaffold388 | 51215                   | TT                              | CC              | 1946944276               |
| SNP_P4_126610_51246 | NW_004515874.1 | Scaffold388 | 51246                   | GG                              | TT              | 1946944278               |
| SNP_P4_126611_51472 | NW_004515874.1 | Scaffold388 | 51472                   | AA                              | GG              | 1946944280               |
| SNP_P4_126612_51492 | NW_004515874.1 | Scaffold388 | 51492                   | AA                              | TT              | 1946944282               |
| SNP_P4_126613_435   | NW_004515878.1 | Scaffold393 | 435                     | CC                              | TT              | 1946944284               |
| SNP_P4_126614_6979  | NW_004515879.1 | Scaffold395 | 6979                    | CC                              | TT              | 1946944286               |
| SNP_P4_126615_7289  | NW_004515879.1 | Scaffold395 | 7289                    | CC                              | GG              | 1946944288               |
| SNP_P4_126616_7302  | NW_004515879.1 | Scaffold395 | 7302                    | AA                              | GG              | 1946944290               |
| SNP_P4_126617_7305  | NW_004515879.1 | Scaffold395 | 7305                    | TT                              | CC              | 1946944292               |
| SNP_P4_126618_7335  | NW_004515879.1 | Scaffold395 | 7335                    | CC                              | GG              | 1946944293               |
| SNP_P4_126619_8113  | NW_004515879.1 | Scaffold395 | 8113                    | GG                              | AA              | 1946944295               |
| SNP_P4_126620_8126  | NW_004515879.1 | Scaffold395 | 8126                    | TT                              | CC              | 1946944297               |
| SNP_P4_126621_8129  | NW_004515879.1 | Scaffold395 | 8129                    | AA                              | TT              | 1946944299               |
| SNP_P4_126622_8137  | NW_004515879.1 | Scaffold395 | 8137                    | GG                              | AA              | 1946944301               |
| SNP_P4_126623_8149  | NW_004515879.1 | Scaffold395 | 8149                    | AA                              | GG              | 1946944303               |
| SNP_P4_126624_8170  | NW_004515879.1 | Scaffold395 | 8170                    | GG                              | AA              | 1946944305               |
| SNP_P4_126625_8171  | NW_004515879.1 | Scaffold395 | 8171                    | GG                              | CC              | 1946944307               |
| SNP_P4_126626_8197  | NW_004515879.1 | Scaffold395 | 8197                    | TT                              | AA              | 1946944309               |
| SNP_P4_126628_21644 | NW_004515879.1 | Scaffold395 | 21644                   | CC                              | TT              | 1946944311               |
| SNP_P4_126629_21705 | NW_004515879.1 | Scaffold395 | 21705                   | CC                              | TT              | 1946944313               |
| SNP_P4_126630_31259 | NW_004515879.1 | Scaffold395 | 31259                   | TT                              | AA              | 1946944314               |
| SNP_P4_126631_31645 | NW_004515879.1 | Scaffold395 | 31645                   | TT                              | AA              | 1946944316               |
| SNP_P4_126632_31941 | NW_004515879.1 | Scaffold395 | 31941                   | TT                              | AA              | 1946944318               |
| SNP_P4_126633_32289 | NW_004515879.1 | Scaffold395 | 32289                   | AA                              | GG              | 1946944320               |

| SNPs IDs             | Chromosome IDs | Chromosomes | Physical positions (bp) | CDC Frontier (Reference genome) | (ILWC46 & LPNB) | NCBI SNPdb Accession IDs |
|----------------------|----------------|-------------|-------------------------|---------------------------------|-----------------|--------------------------|
| SNP_P4_126634_32290  | NW_004515879.1 | Scaffold395 | 32290                   | TT                              | GG              | 1946944322               |
| SNP_P4_126635_32332  | NW_004515879.1 | Scaffold395 | 32332                   | TT                              | AA              | 1946944324               |
| SNP_P4_126636_52644  | NW_004515879.1 | Scaffold395 | 52644                   | TT                              | CC              | 1946944326               |
| SNP_P4_126638_93557  | NW_004515879.1 | Scaffold395 | 93557                   | CC                              | TT              | 1946944328               |
| SNP_P4_126639_94684  | NW_004515879.1 | Scaffold395 | 94684                   | CC                              | TT              | 1946944330               |
| SNP_P4_126640_107044 | NW_004515879.1 | Scaffold395 | 107044                  | GG                              | AA              | 1946944332               |
| SNP_P4_126641_107571 | NW_004515879.1 | Scaffold395 | 107571                  | CC                              | TT              | 1946944334               |
| SNP_P4_126642_107572 | NW_004515879.1 | Scaffold395 | 107572                  | CC                              | AA              | 1946944336               |
| SNP_P4_126643_107587 | NW_004515879.1 | Scaffold395 | 107587                  | CC                              | GG              | 1946944338               |
| SNP_P4_126644_107631 | NW_004515879.1 | Scaffold395 | 107631                  | CC                              | TT              | 1946944340               |
| SNP_P4_126645_125672 | NW_004515879.1 | Scaffold395 | 125672                  | TT                              | AA              | 1946944342               |
| SNP_P4_126646_125685 | NW_004515879.1 | Scaffold395 | 125685                  | CC                              | AA              | 1946944344               |
| SNP_P4_126647_125702 | NW_004515879.1 | Scaffold395 | 125702                  | TT                              | CC              | 1946944346               |
| SNP_P4_126648_125705 | NW_004515879.1 | Scaffold395 | 125705                  | AA                              | GG              | 1946944348               |
| SNP_P4_126649_125714 | NW_004515879.1 | Scaffold395 | 125714                  | CC                              | TT              | 1946944350               |
| SNP_P4_126650_125765 | NW_004515879.1 | Scaffold395 | 125765                  | TT                              | CC              | 1946944352               |
| SNP_P4_126651_125767 | NW_004515879.1 | Scaffold395 | 125767                  | AA                              | GG              | 1946944354               |
| SNP_P4_126652_125795 | NW_004515879.1 | Scaffold395 | 125795                  | AA                              | GG              | 1946944356               |
| SNP_P4_126653_125925 | NW_004515879.1 | Scaffold395 | 125925                  | CC                              | TT              | 1946944358               |
| SNP_P4_126654_125968 | NW_004515879.1 | Scaffold395 | 125968                  | TT                              | CC              | 1946944360               |
| SNP_P4_126655_125970 | NW_004515879.1 | Scaffold395 | 125970                  | TT                              | CC              | 1946944362               |
| SNP_P4_126656_125975 | NW_004515879.1 | Scaffold395 | 125975                  | TT                              | CC              | 1946944364               |
| SNP_P4_126657_125997 | NW_004515879.1 | Scaffold395 | 125997                  | GG                              | TT              | 1946944366               |
| SNP_P4_126658_126030 | NW_004515879.1 | Scaffold395 | 126030                  | CC                              | TT              | 1946944368               |
| SNP_P4_126659_126138 | NW_004515879.1 | Scaffold395 | 126138                  | AA                              | GG              | 1946944370               |
| SNP_P4_126660_126657 | NW_004515879.1 | Scaffold395 | 126657                  | TT                              | CC              | 1946944372               |
| SNP_P4_126661_126771 | NW_004515879.1 | Scaffold395 | 126771                  | AA                              | GG              | 1946944374               |
| SNP_P4_126662_126783 | NW_004515879.1 | Scaffold395 | 126783                  | AA                              | GG              | 1946944375               |
| SNP_P4_126663_126831 | NW_004515879.1 | Scaffold395 | 126831                  | CC                              | TT              | 1946944377               |
| SNP_P4_126664_126840 | NW_004515879.1 | Scaffold395 | 126840                  | TT                              | CC              | 1946944379               |
| SNP_P4_126665_126842 | NW_004515879.1 | Scaffold395 | 126842                  | GG                              | AA              | 1946944381               |
| SNP_P4_126666_127042 | NW_004515879.1 | Scaffold395 | 127042                  | AA                              | GG              | 1946944383               |
| SNP_P4_126667_127053 | NW_004515879.1 | Scaffold395 | 127053                  | TT                              | CC              | 1946944385               |
| SNP_P4_126668_127066 | NW_004515879.1 | Scaffold395 | 127066                  | GG                              | TT              | 1946944387               |
| SNP_P4_126669_127072 | NW_004515879.1 | Scaffold395 | 127072                  | TT                              | CC              | 1946944389               |
| SNP_P4_126670_127078 | NW_004515879.1 | Scaffold395 | 127078                  | CC                              | TT              | 1946944391               |
| SNP_P4_126671_127091 | NW_004515879.1 | Scaffold395 | 127091                  | CC                              | TT              | 1946944393               |
| SNP_P4_126672_130988 | NW_004515879.1 | Scaffold395 | 130988                  | TT                              | CC              | 1946944395               |
| SNP_P4_126673_131099 | NW_004515879.1 | Scaffold395 | 131099                  | CC                              | TT              | 1946944397               |
| SNP_P4_126675_131341 | NW_004515879.1 | Scaffold395 | 131341                  | GG                              | AA              | 1946944399               |
| SNP_P4_126676_161465 | NW_004515879.1 | Scaffold395 | 161465                  | TT                              | AA              | 1946944401               |
| SNP_P4_126677_169538 | NW_004515879.1 | Scaffold395 | 169538                  | CC                              | TT              | 1946944403               |

| SNPs IDs             | Chromosome IDs | Chromosomes | Physical positions (bp) | CDC Frontier (Reference genome) | (ILWC46 & LPNB) | NCBI SNPdb Accession IDs |
|----------------------|----------------|-------------|-------------------------|---------------------------------|-----------------|--------------------------|
| SNP_P4_126678_169609 | NW_004515879.1 | Scaffold395 | 169609                  | TT                              | CC              | 1946944405               |
| SNP_P4_126679_178544 | NW_004515879.1 | Scaffold395 | 178544                  | AA                              | GG              | 1946944407               |
| SNP_P4_126681_224692 | NW_004515879.1 | Scaffold395 | 224692                  | CC                              | AA              | 1946944409               |
| SNP_P4_126684_253828 | NW_004515879.1 | Scaffold395 | 253828                  | AA                              | TT              | 1946944411               |
| SNP_P4_126685_297244 | NW_004515879.1 | Scaffold395 | 297244                  | AA                              | GG              | 1946944413               |
| SNP_P4_126686_327321 | NW_004515879.1 | Scaffold395 | 327321                  | TT                              | GG              | 1946944414               |
| SNP_P4_126687_327340 | NW_004515879.1 | Scaffold395 | 327340                  | AA                              | GG              | 1946944416               |
| SNP_P4_126688_327375 | NW_004515879.1 | Scaffold395 | 327375                  | CC                              | TT              | 1946944418               |
| SNP_P4_126689_327447 | NW_004515879.1 | Scaffold395 | 327447                  | TT                              | CC              | 1946944420               |
| SNP_P4_126690_327549 | NW_004515879.1 | Scaffold395 | 327549                  | AA                              | GG              | 1946944422               |
| SNP_P4_126691_328024 | NW_004515879.1 | Scaffold395 | 328024                  | AA                              | GG              | 1946944424               |
| SNP_P4_126692_328091 | NW_004515879.1 | Scaffold395 | 328091                  | TT                              | CC              | 1946944426               |
| SNP_P4_126693_328144 | NW_004515879.1 | Scaffold395 | 328144                  | CC                              | TT              | 1946944428               |
| SNP_P4_126694_328156 | NW_004515879.1 | Scaffold395 | 328156                  | TT                              | CC              | 1946944430               |
| SNP_P4_126695_328190 | NW_004515879.1 | Scaffold395 | 328190                  | TT                              | CC              | 1946944432               |
| SNP_P4_126696_328411 | NW_004515879.1 | Scaffold395 | 328411                  | AA                              | GG              | 1946944434               |
| SNP_P4_126697_328534 | NW_004515879.1 | Scaffold395 | 328534                  | AA                              | GG              | 1946944436               |
| SNP_P4_126698_331762 | NW_004515879.1 | Scaffold395 | 331762                  | AA                              | GG              | 1946944438               |
| SNP_P4_126699_331786 | NW_004515879.1 | Scaffold395 | 331786                  | AA                              | CC              | 1946944440               |
| SNP_P4_126701_2788   | NW_004515880.1 | Scaffold396 | 2788                    | GG                              | TT              | 1946944442               |
| SNP_P4_126702_6186   | NW_004515880.1 | Scaffold396 | 6186                    | GG                              | AA              | 1946944444               |
| SNP_P4_126703_6213   | NW_004515880.1 | Scaffold396 | 6213                    | CC                              | TT              | 1946944446               |
| SNP_P4_126704_6234   | NW_004515880.1 | Scaffold396 | 6234                    | AA                              | GG              | 1946944448               |
| SNP_P4_126705_6530   | NW_004515880.1 | Scaffold396 | 6530                    | AA                              | TT              | 1946944450               |
| SNP_P4_126706_42290  | NW_004515880.1 | Scaffold396 | 42290                   | CC                              | TT              | 1946944452               |
| SNP_P4_126707_42299  | NW_004515880.1 | Scaffold396 | 42299                   | TT                              | CC              | 1946944454               |
| SNP_P4_126708_47842  | NW_004515880.1 | Scaffold396 | 47842                   | GG                              | CC              | 1946944456               |
| SNP_P4_126710_130677 | NW_004515880.1 | Scaffold396 | 130677                  | TT                              | CC              | 1946944457               |
| SNP_P4_126711_144210 | NW_004515880.1 | Scaffold396 | 144210                  | TT                              | CC              | 1946944459               |
| SNP_P4_126712_165849 | NW_004515880.1 | Scaffold396 | 165849                  | AA                              | TT              | 1946944461               |
| SNP_P4_126713_173650 | NW_004515880.1 | Scaffold396 | 173650                  | GG                              | AA              | 1946944463               |
| SNP_P4_126714_227008 | NW_004515880.1 | Scaffold396 | 227008                  | TT                              | CC              | 1946944465               |
| SNP_P4_126715_228548 | NW_004515880.1 | Scaffold396 | 228548                  | GG                              | TT              | 1946944467               |
| SNP_P4_126716_275414 | NW_004515880.1 | Scaffold396 | 275414                  | AA                              | TT              | 1946944469               |
| SNP_P4_126717_275466 | NW_004515880.1 | Scaffold396 | 275466                  | TT                              | AA              | 1946944471               |
| SNP_P4_126718_275468 | NW_004515880.1 | Scaffold396 | 275468                  | GG                              | AA              | 1946944473               |
| SNP_P4_126719_275530 | NW_004515880.1 | Scaffold396 | 275530                  | GG                              | TT              | 1946944475               |
| SNP_P4_126720_275545 | NW_004515880.1 | Scaffold396 | 275545                  | AA                              | CC              | 1946944477               |
| SNP_P4_126721_275569 | NW_004515880.1 | Scaffold396 | 275569                  | GG                              | AA              | 1946944479               |
| SNP_P4_126723_275825 | NW_004515880.1 | Scaffold396 | 275825                  | TT                              | GG              | 1946944480               |
| SNP_P4_126724_275853 | NW_004515880.1 | Scaffold396 | 275853                  | CC                              | TT              | 1946944482               |
| SNP_P4_126725_279066 | NW_004515880.1 | Scaffold396 | 279066                  | CC                              | GG              | 1946944484               |

| SNPs IDs             | Chromosome IDs | Chromosomes | Physical positions (bp) | CDC Frontier (Reference genome) | (ILWC46 & LPNB) | NCBI SNPdb Accession IDs |
|----------------------|----------------|-------------|-------------------------|---------------------------------|-----------------|--------------------------|
| SNP_P4_126726_324300 | NW_004515880.1 | Scaffold396 | 324300                  | AA                              | GG              | 1946944486               |
| SNP_P4_126727_330776 | NW_004515880.1 | Scaffold396 | 330776                  | CC                              | TT              | 1946944488               |
| SNP_P4_126730_376944 | NW_004515880.1 | Scaffold396 | 376944                  | GG                              | CC              | 1946944490               |
| SNP_P4_126731_377005 | NW_004515880.1 | Scaffold396 | 377005                  | AA                              | GG              | 1946944492               |
| SNP_P4_126732_377297 | NW_004515880.1 | Scaffold396 | 377297                  | TT                              | CC              | 1946944494               |
| SNP_P4_126733_377339 | NW_004515880.1 | Scaffold396 | 377339                  | AA                              | GG              | 1946944496               |
| SNP_P4_126734_389125 | NW_004515880.1 | Scaffold396 | 389125                  | TT                              | CC              | 1946944498               |
| SNP_P4_126735_408540 | NW_004515880.1 | Scaffold396 | 408540                  | TT                              | CC              | 1946944500               |
| SNP_P4_126736_409631 | NW_004515880.1 | Scaffold396 | 409631                  | TT                              | AA              | 1946944501               |
| SNP_P4_126737_409808 | NW_004515880.1 | Scaffold396 | 409808                  | TT                              | AA              | 1946944503               |
| SNP_P4_126738_421741 | NW_004515880.1 | Scaffold396 | 421741                  | TT                              | AA              | 1946944505               |
| SNP_P4_126739_421799 | NW_004515880.1 | Scaffold396 | 421799                  | GG                              | TT              | 1946944507               |
| SNP_P4_126740_422647 | NW_004515880.1 | Scaffold396 | 422647                  | GG                              | AA              | 1946944509               |
| SNP_P4_126741_422656 | NW_004515880.1 | Scaffold396 | 422656                  | AA                              | GG              | 1946944511               |
| SNP_P4_126743_425408 | NW_004515880.1 | Scaffold396 | 425408                  | TT                              | AA              | 1946944513               |
| SNP_P4_126744_440135 | NW_004515880.1 | Scaffold396 | 440135                  | GG                              | TT              | 1946944515               |
| SNP_P4_126745_440366 | NW_004515880.1 | Scaffold396 | 440366                  | TT                              | CC              | 1946944517               |
| SNP_P4_126746_448961 | NW_004515880.1 | Scaffold396 | 448961                  | TT                              | CC              | 1946944519               |
| SNP_P4_126747_467510 | NW_004515880.1 | Scaffold396 | 467510                  | AA                              | GG              | 1946944521               |
| SNP_P4_126748_467514 | NW_004515880.1 | Scaffold396 | 467514                  | GG                              | TT              | 1946944523               |
| SNP_P4_126749_468666 | NW_004515880.1 | Scaffold396 | 468666                  | TT                              | AA              | 1946944525               |
| SNP_P4_126750_468676 | NW_004515880.1 | Scaffold396 | 468676                  | CC                              | TT              | 1946944527               |
| SNP_P4_126751_477322 | NW_004515880.1 | Scaffold396 | 477322                  | AA                              | GG              | 1946944529               |
| SNP_P4_126752_477326 | NW_004515880.1 | Scaffold396 | 477326                  | CC                              | AA              | 1946944531               |
| SNP_P4_126753_477363 | NW_004515880.1 | Scaffold396 | 477363                  | AA                              | GG              | 1946944533               |
| SNP_P4_126754_477504 | NW_004515880.1 | Scaffold396 | 477504                  | TT                              | CC              | 1946944535               |
| SNP_P4_126755_477564 | NW_004515880.1 | Scaffold396 | 477564                  | GG                              | CC              | 1946944537               |
| SNP_P4_126756_477585 | NW_004515880.1 | Scaffold396 | 477585                  | TT                              | GG              | 1946944539               |
| SNP_P4_126757_477628 | NW_004515880.1 | Scaffold396 | 477628                  | AA                              | GG              | 1946944541               |
| SNP_P4_126758_477879 | NW_004515880.1 | Scaffold396 | 477879                  | GG                              | AA              | 1946944543               |
| SNP_P4_126760_520008 | NW_004515880.1 | Scaffold396 | 520008                  | CC                              | TT              | 1946944545               |
| SNP_P4_126761_520378 | NW_004515880.1 | Scaffold396 | 520378                  | TT                              | CC              | 1946944547               |
| SNP_P4_126762_520413 | NW_004515880.1 | Scaffold396 | 520413                  | TT                              | GG              | 1946944549               |
| SNP_P4_126763_520785 | NW_004515880.1 | Scaffold396 | 520785                  | CC                              | AA              | 1946944551               |
| SNP_P4_126764_522948 | NW_004515880.1 | Scaffold396 | 522948                  | CC                              | TT              | 1946944553               |
| SNP_P4_126765_524443 | NW_004515880.1 | Scaffold396 | 524443                  | GG                              | AA              | 1946944555               |
| SNP_P4_126766_525239 | NW_004515880.1 | Scaffold396 | 525239                  | TT                              | CC              | 1946944557               |
| SNP_P4_126767_525244 | NW_004515880.1 | Scaffold396 | 525244                  | CC                              | TT              | 1946944559               |
| SNP_P4_126768_525265 | NW_004515880.1 | Scaffold396 | 525265                  | GG                              | TT              | 1946944561               |
| SNP_P4_126769_525270 | NW_004515880.1 | Scaffold396 | 525270                  | CC                              | TT              | 1946944563               |
| SNP_P4_126770_525550 | NW_004515880.1 | Scaffold396 | 525550                  | AA                              | GG              | 1946944564               |
| SNP_P4_126771_525563 | NW_004515880.1 | Scaffold396 | 525563                  | TT                              | CC              | 1946944566               |

| SNPs IDs             | Chromosome IDs | Chromosomes | Physical positions (bp) | CDC Frontier (Reference genome) | (ILWC46 & LPNB) | NCBI SNPdb Accession IDs |
|----------------------|----------------|-------------|-------------------------|---------------------------------|-----------------|--------------------------|
| SNP_P4_126772_525599 | NW_004515880.1 | Scaffold396 | 525599                  | CC                              | AA              | 1946944568               |
| SNP_P4_126773_525641 | NW_004515880.1 | Scaffold396 | 525641                  | AA                              | GG              | 1946944570               |
| SNP_P4_126774_525662 | NW_004515880.1 | Scaffold396 | 525662                  | CC                              | TT              | 1946944572               |
| SNP_P4_126775_528994 | NW_004515880.1 | Scaffold396 | 528994                  | AA                              | GG              | 1946944574               |
| SNP_P4_126776_529186 | NW_004515880.1 | Scaffold396 | 529186                  | CC                              | GG              | 1946944576               |
| SNP_P4_126777_529197 | NW_004515880.1 | Scaffold396 | 529197                  | CC                              | TT              | 1946944578               |
| SNP_P4_126778_529354 | NW_004515880.1 | Scaffold396 | 529354                  | TT                              | GG              | 1946944580               |
| SNP_P4_126779_529363 | NW_004515880.1 | Scaffold396 | 529363                  | AA                              | GG              | 1946944582               |
| SNP_P4_126780_529378 | NW_004515880.1 | Scaffold396 | 529378                  | CC                              | GG              | 1946944584               |
| SNP_P4_126781_529453 | NW_004515880.1 | Scaffold396 | 529453                  | AA                              | CC              | 1946944586               |
| SNP_P4_126782_529454 | NW_004515880.1 | Scaffold396 | 529454                  | TT                              | AA              | 1946944588               |
| SNP_P4_126783_529602 | NW_004515880.1 | Scaffold396 | 529602                  | GG                              | AA              | 1946944590               |
| SNP_P4_126784_555966 | NW_004515880.1 | Scaffold396 | 555966                  | CC                              | AA              | 1946944592               |
| SNP_P4_126785_556115 | NW_004515880.1 | Scaffold396 | 556115                  | CC                              | TT              | 1946944594               |
| SNP_P4_126786_556214 | NW_004515880.1 | Scaffold396 | 556214                  | CC                              | GG              | 1946944596               |
| SNP_P4_126787_556343 | NW_004515880.1 | Scaffold396 | 556343                  | AA                              | TT              | 1946944597               |
| SNP_P4_126788_577392 | NW_004515880.1 | Scaffold396 | 577392                  | TT                              | GG              | 1946944599               |
| SNP_P4_126789_577476 | NW_004515880.1 | Scaffold396 | 577476                  | AA                              | GG              | 1946944601               |
| SNP_P4_126790_577481 | NW_004515880.1 | Scaffold396 | 577481                  | AA                              | CC              | 1946944603               |
| SNP_P4_126791_577493 | NW_004515880.1 | Scaffold396 | 577493                  | AA                              | CC              | 1946944605               |
| SNP_P4_126792_577497 | NW_004515880.1 | Scaffold396 | 577497                  | AA                              | TT              | 1946944607               |
| SNP_P4_126793_577498 | NW_004515880.1 | Scaffold396 | 577498                  | AA                              | GG              | 1946944609               |
| SNP_P4_126795_577615 | NW_004515880.1 | Scaffold396 | 577615                  | TT                              | GG              | 1946944611               |
| SNP_P4_126797_578842 | NW_004515880.1 | Scaffold396 | 578842                  | TT                              | AA              | 1946944613               |
| SNP_P4_126798_579227 | NW_004515880.1 | Scaffold396 | 579227                  | TT                              | CC              | 1946944615               |
| SNP_P4_126799_581893 | NW_004515880.1 | Scaffold396 | 581893                  | AA                              | GG              | 1946944617               |
| SNP_P4_126800_588535 | NW_004515880.1 | Scaffold396 | 588535                  | TT                              | AA              | 1946944618               |
| SNP_P4_126801_592937 | NW_004515880.1 | Scaffold396 | 592937                  | TT                              | CC              | 1946944620               |
| SNP_P4_126802_593087 | NW_004515880.1 | Scaffold396 | 593087                  | TT                              | CC              | 1946944622               |
| SNP_P4_126803_593190 | NW_004515880.1 | Scaffold396 | 593190                  | TT                              | AA              | 1946944624               |
| SNP_P4_126804_593209 | NW_004515880.1 | Scaffold396 | 593209                  | AA                              | CC              | 1946944626               |
| SNP_P4_126805_593216 | NW_004515880.1 | Scaffold396 | 593216                  | TT                              | AA              | 1946944628               |
| SNP_P4_126806_593454 | NW_004515880.1 | Scaffold396 | 593454                  | TT                              | AA              | 1946944630               |
| SNP_P4_126807_598671 | NW_004515880.1 | Scaffold396 | 598671                  | TT                              | GG              | 1946944632               |
| SNP_P4_126808_598725 | NW_004515880.1 | Scaffold396 | 598725                  | CC                              | TT              | 1946944634               |
| SNP_P4_126809_602021 | NW_004515880.1 | Scaffold396 | 602021                  | CC                              | TT              | 1946944636               |
| SNP_P4_126810_5172   | NW_004515881.1 | Scaffold397 | 5172                    | AA                              | GG              | 1946944638               |
| SNP_P4_126811_6800   | NW_004515881.1 | Scaffold397 | 6800                    | GG                              | AA              | 1946944640               |
| SNP_P4_126812_8111   | NW_004515881.1 | Scaffold397 | 8111                    | TT                              | AA              | 1946944642               |
| SNP_P4_126813_20082  | NW_004515881.1 | Scaffold397 | 20082                   | TT                              | GG              | 1946944644               |
| SNP_P4_126814_22789  | NW_004515881.1 | Scaffold397 | 22789                   | GG                              | CC              | 1946944646               |
| SNP_P4_126817_23771  | NW_004515881.1 | Scaffold397 | 23771                   | TT                              | CC              | 1946944648               |

| SNPs IDs             | Chromosome IDs | Chromosomes | Physical positions (bp) | CDC Frontier (Reference genome) | (ILWC46 & LPNB) | NCBI SNPdb Accession IDs |
|----------------------|----------------|-------------|-------------------------|---------------------------------|-----------------|--------------------------|
| SNP_P4_126819_54854  | NW_004515881.1 | Scaffold397 | 54854                   | AA                              | CC              | 1946944650               |
| SNP_P4_126820_87186  | NW_004515881.1 | Scaffold397 | 87186                   | AA                              | TT              | 1946944652               |
| SNP_P4_126822_96180  | NW_004515881.1 | Scaffold397 | 96180                   | GG                              | TT              | 1946944654               |
| SNP_P4_126823_98198  | NW_004515881.1 | Scaffold397 | 98198                   | GG                              | AA              | 1946944656               |
| SNP_P4_126824_98243  | NW_004515881.1 | Scaffold397 | 98243                   | TT                              | AA              | 1946944658               |
| SNP_P4_126825_98248  | NW_004515881.1 | Scaffold397 | 98248                   | TT                              | CC              | 1946944660               |
| SNP_P4_126826_102562 | NW_004515881.1 | Scaffold397 | 102562                  | TT                              | GG              | 1946944662               |
| SNP_P4_126827_102857 | NW_004515881.1 | Scaffold397 | 102857                  | GG                              | TT              | 1946944664               |
| SNP_P4_126828_102862 | NW_004515881.1 | Scaffold397 | 102862                  | TT                              | GG              | 1946944666               |
| SNP_P4_126829_102867 | NW_004515881.1 | Scaffold397 | 102867                  | CC                              | TT              | 1946944668               |
| SNP_P4_126830_102966 | NW_004515881.1 | Scaffold397 | 102966                  | CC                              | TT              | 1946944670               |
| SNP_P4_126831_130381 | NW_004515881.1 | Scaffold397 | 130381                  | AA                              | TT              | 1946944671               |
| SNP_P4_126832_131112 | NW_004515881.1 | Scaffold397 | 131112                  | TT                              | CC              | 1946944673               |
| SNP_P4_126833_131113 | NW_004515881.1 | Scaffold397 | 131113                  | TT                              | CC              | 1946944675               |
| SNP_P4_126834_131144 | NW_004515881.1 | Scaffold397 | 131144                  | CC                              | TT              | 1946944677               |
| SNP_P4_126835_131201 | NW_004515881.1 | Scaffold397 | 131201                  | CC                              | GG              | 1946944679               |
| SNP_P4_126836_143429 | NW_004515881.1 | Scaffold397 | 143429                  | CC                              | TT              | 1946944681               |
| SNP_P4_126837_143448 | NW_004515881.1 | Scaffold397 | 143448                  | GG                              | TT              | 1946944683               |
| SNP_P4_126838_143763 | NW_004515881.1 | Scaffold397 | 143763                  | AA                              | GG              | 1946944685               |
| SNP_P4_126839_143776 | NW_004515881.1 | Scaffold397 | 143776                  | TT                              | CC              | 1946944686               |
| SNP_P4_126840_143803 | NW_004515881.1 | Scaffold397 | 143803                  | AA                              | GG              | 1946944688               |
| SNP_P4_126841_143806 | NW_004515881.1 | Scaffold397 | 143806                  | TT                              | CC              | 1946944690               |
| SNP_P4_126842_143815 | NW_004515881.1 | Scaffold397 | 143815                  | AA                              | GG              | 1946944692               |
| SNP_P4_126843_143831 | NW_004515881.1 | Scaffold397 | 143831                  | AA                              | GG              | 1946944694               |
| SNP_P4_126844_143848 | NW_004515881.1 | Scaffold397 | 143848                  | GG                              | AA              | 1946944696               |
| SNP_P4_126845_143863 | NW_004515881.1 | Scaffold397 | 143863                  | CC                              | TT              | 1946944698               |
| SNP_P4_126846_143881 | NW_004515881.1 | Scaffold397 | 143881                  | AA                              | GG              | 1946944700               |
| SNP_P4_126847_143911 | NW_004515881.1 | Scaffold397 | 143911                  | TT                              | CC              | 1946944702               |
| SNP_P4_126848_143913 | NW_004515881.1 | Scaffold397 | 143913                  | GG                              | TT              | 1946944704               |
| SNP_P4_126849_143914 | NW_004515881.1 | Scaffold397 | 143914                  | CC                              | TT              | 1946944706               |
| SNP_P4_126850_143932 | NW_004515881.1 | Scaffold397 | 143932                  | CC                              | TT              | 1946944707               |
| SNP_P4_126851_143935 | NW_004515881.1 | Scaffold397 | 143935                  | TT                              | CC              | 1946944709               |
| SNP_P4_126852_143939 | NW_004515881.1 | Scaffold397 | 143939                  | AA                              | GG              | 1946944711               |
| SNP_P4_126853_143947 | NW_004515881.1 | Scaffold397 | 143947                  | TT                              | CC              | 1946944713               |
| SNP_P4_126854_143968 | NW_004515881.1 | Scaffold397 | 143968                  | TT                              | CC              | 1946944715               |
| SNP_P4_126855_143983 | NW_004515881.1 | Scaffold397 | 143983                  | AA                              | CC              | 1946944717               |
| SNP_P4_126856_144790 | NW_004515881.1 | Scaffold397 | 144790                  | CC                              | TT              | 1946944719               |
| SNP_P4_126858_146245 | NW_004515881.1 | Scaffold397 | 146245                  | TT                              | AA              | 1946944721               |
| SNP_P4_126859_146259 | NW_004515881.1 | Scaffold397 | 146259                  | TT                              | AA              | 1946944723               |
| SNP_P4_126861_154468 | NW_004515881.1 | Scaffold397 | 154468                  | CC                              | TT              | 1946944725               |
| SNP_P4_126862_160270 | NW_004515881.1 | Scaffold397 | 160270                  | CC                              | AA              | 1946944727               |
| SNP_P4_126863_167197 | NW_004515881.1 | Scaffold397 | 167197                  | AA                              | CC              | 1946944729               |



| SNPs IDs             | Chromosome IDs | Chromosomes | Physical positions (bp) | CDC Frontier (Reference genome) | (ILWC46 & LPNB) | NCBI SNPdb Accession IDs |
|----------------------|----------------|-------------|-------------------------|---------------------------------|-----------------|--------------------------|
| SNP_P4_126865_185107 | NW_004515881.1 | Scaffold397 | 185107                  | AA                              | GG              | 1946944731               |
| SNP_P4_126866_185133 | NW_004515881.1 | Scaffold397 | 185133                  | AA                              | TT              | 1946944733               |
| SNP_P4_126867_185153 | NW_004515881.1 | Scaffold397 | 185153                  | AA                              | GG              | 1946944735               |
| SNP_P4_126868_185160 | NW_004515881.1 | Scaffold397 | 185160                  | CC                              | TT              | 1946944737               |
| SNP_P4_126869_185373 | NW_004515881.1 | Scaffold397 | 185373                  | TT                              | CC              | 1946944739               |
| SNP_P4_126870_185414 | NW_004515881.1 | Scaffold397 | 185414                  | CC                              | AA              | 1946944741               |
| SNP_P4_126871_185474 | NW_004515881.1 | Scaffold397 | 185474                  | TT                              | CC              | 1946944742               |
| SNP_P4_126872_186186 | NW_004515881.1 | Scaffold397 | 186186                  | TT                              | GG              | 1946944744               |
| SNP_P4_126873_186263 | NW_004515881.1 | Scaffold397 | 186263                  | GG                              | AA              | 1946944746               |
| SNP_P4_126874_186408 | NW_004515881.1 | Scaffold397 | 186408                  | TT                              | GG              | 1946944748               |
| SNP_P4_126875_191095 | NW_004515881.1 | Scaffold397 | 191095                  | AA                              | CC              | 1946944750               |
| SNP_P4_126877_194819 | NW_004515881.1 | Scaffold397 | 194819                  | GG                              | AA              | 1946944752               |
| SNP_P4_126878_195205 | NW_004515881.1 | Scaffold397 | 195205                  | TT                              | AA              | 1946944754               |
| SNP_P4_126879_195269 | NW_004515881.1 | Scaffold397 | 195269                  | CC                              | TT              | 1946944756               |
| SNP_P4_126880_208118 | NW_004515881.1 | Scaffold397 | 208118                  | CC                              | GG              | 1946944758               |
| SNP_P4_126881_221988 | NW_004515881.1 | Scaffold397 | 221988                  | TT                              | CC              | 1946944760               |
| SNP_P4_126882_260645 | NW_004515881.1 | Scaffold397 | 260645                  | TT                              | CC              | 1946944762               |
| SNP_P4_126883_261735 | NW_004515881.1 | Scaffold397 | 261735                  | TT                              | AA              | 1946944764               |
| SNP_P4_126884_331264 | NW_004515881.1 | Scaffold397 | 331264                  | AA                              | GG              | 1946944766               |
| SNP_P4_126885_331289 | NW_004515881.1 | Scaffold397 | 331289                  | CC                              | TT              | 1946944768               |
| SNP_P4_126886_331309 | NW_004515881.1 | Scaffold397 | 331309                  | AA                              | CC              | 1946944770               |
| SNP_P4_126887_331310 | NW_004515881.1 | Scaffold397 | 331310                  | AA                              | CC              | 1946944772               |
| SNP_P4_126888_331586 | NW_004515881.1 | Scaffold397 | 331586                  | CC                              | TT              | 1946944774               |
| SNP_P4_126889_331596 | NW_004515881.1 | Scaffold397 | 331596                  | CC                              | TT              | 1946944776               |
| SNP_P4_126890_331604 | NW_004515881.1 | Scaffold397 | 331604                  | AA                              | TT              | 1946944778               |
| SNP_P4_126891_331612 | NW_004515881.1 | Scaffold397 | 331612                  | TT                              | AA              | 1946944780               |
| SNP_P4_126892_335037 | NW_004515881.1 | Scaffold397 | 335037                  | AA                              | CC              | 1946944782               |
| SNP_P4_126893_343394 | NW_004515881.1 | Scaffold397 | 343394                  | CC                              | GG              | 1946944784               |
| SNP_P4_126894_348472 | NW_004515881.1 | Scaffold397 | 348472                  | CC                              | TT              | 1946944786               |
| SNP_P4_126895_348483 | NW_004515881.1 | Scaffold397 | 348483                  | GG                              | AA              | 1946944788               |
| SNP_P4_126896_350791 | NW_004515881.1 | Scaffold397 | 350791                  | CC                              | TT              | 1946944790               |
| SNP_P4_126897_350861 | NW_004515881.1 | Scaffold397 | 350861                  | TT                              | CC              | 1946944792               |
| SNP_P4_126899_365928 | NW_004515881.1 | Scaffold397 | 365928                  | AA                              | GG              | 1946944794               |
| SNP_P4_126900_373523 | NW_004515881.1 | Scaffold397 | 373523                  | CC                              | TT              | 1946944796               |
| SNP_P4_126901_389081 | NW_004515881.1 | Scaffold397 | 389081                  | GG                              | AA              | 1946944798               |
| SNP_P4_126902_389085 | NW_004515881.1 | Scaffold397 | 389085                  | TT                              | CC              | 1946944800               |
| SNP_P4_126903_389121 | NW_004515881.1 | Scaffold397 | 389121                  | GG                              | CC              | 1946944802               |
| SNP_P4_126904_389492 | NW_004515881.1 | Scaffold397 | 389492                  | TT                              | CC              | 1946944804               |
| SNP_P4_126905_396555 | NW_004515881.1 | Scaffold397 | 396555                  | TT                              | GG              | 1946944806               |
| SNP_P4_126907_422492 | NW_004515881.1 | Scaffold397 | 422492                  | CC                              | TT              | 1946944808               |
| SNP_P4_126908_436067 | NW_004515881.1 | Scaffold397 | 436067                  | AA                              | TT              | 1946944809               |
| SNP_P4_126909_436101 | NW_004515881.1 | Scaffold397 | 436101                  | CC                              | AA              | 1946944811               |

| SNPs IDs             | Chromosome IDs | Chromosomes | Physical positions (bp) | CDC Frontier (Reference genome) | (ILWC46 & LPNB) | NCBI SNPdb Accession IDs |
|----------------------|----------------|-------------|-------------------------|---------------------------------|-----------------|--------------------------|
| SNP_P4_126910_436144 | NW_004515881.1 | Scaffold397 | 436144                  | AA                              | TT              | 1946944813               |
| SNP_P4_126911_436230 | NW_004515881.1 | Scaffold397 | 436230                  | TT                              | CC              | 1946944815               |
| SNP_P4_126912_436241 | NW_004515881.1 | Scaffold397 | 436241                  | GG                              | CC              | 1946944817               |
| SNP_P4_126913_436260 | NW_004515881.1 | Scaffold397 | 436260                  | TT                              | AA              | 1946944819               |
| SNP_P4_126914_436616 | NW_004515881.1 | Scaffold397 | 436616                  | CC                              | TT              | 1946944821               |
| SNP_P4_126915_440931 | NW_004515881.1 | Scaffold397 | 440931                  | TT                              | CC              | 1946944823               |
| SNP_P4_126916_440937 | NW_004515881.1 | Scaffold397 | 440937                  | CC                              | TT              | 1946944826               |
| SNP_P4_126917_441441 | NW_004515881.1 | Scaffold397 | 441441                  | AA                              | GG              | 1946944828               |
| SNP_P4_126918_446429 | NW_004515881.1 | Scaffold397 | 446429                  | TT                              | GG              | 1946944830               |
| SNP_P4_126919_453773 | NW_004515881.1 | Scaffold397 | 453773                  | GG                              | AA              | 1946944832               |
| SNP_P4_126920_455891 | NW_004515881.1 | Scaffold397 | 455891                  | AA                              | TT              | 1946944833               |
| SNP_P4_126922_3043   | NW_004515882.1 | Scaffold398 | 3043                    | TT                              | AA              | 1946944835               |
| SNP_P4_126923_3132   | NW_004515882.1 | Scaffold398 | 3132                    | AA                              | GG              | 1946944838               |
| SNP_P4_126924_12238  | NW_004515882.1 | Scaffold398 | 12238                   | AA                              | TT              | 1946944840               |
| SNP_P4_126925_13106  | NW_004515882.1 | Scaffold398 | 13106                   | GG                              | AA              | 1946944842               |
| SNP_P4_126927_18073  | NW_004515882.1 | Scaffold398 | 18073                   | CC                              | AA              | 1946944844               |
| SNP_P4_126928_19130  | NW_004515882.1 | Scaffold398 | 19130                   | AA                              | GG              | 1946944846               |
| SNP_P4_126929_21248  | NW_004515882.1 | Scaffold398 | 21248                   | AA                              | GG              | 1946944847               |
| SNP_P4_126930_21254  | NW_004515882.1 | Scaffold398 | 21254                   | AA                              | GG              | 1946944850               |
| SNP_P4_126931_21265  | NW_004515882.1 | Scaffold398 | 21265                   | GG                              | AA              | 1946944852               |
| SNP_P4_126932_21266  | NW_004515882.1 | Scaffold398 | 21266                   | CC                              | TT              | 1946944854               |
| SNP_P4_126933_21281  | NW_004515882.1 | Scaffold398 | 21281                   | GG                              | AA              | 1946944855               |
| SNP_P4_126934_21287  | NW_004515882.1 | Scaffold398 | 21287                   | CC                              | TT              | 1946944857               |
| SNP_P4_126935_21293  | NW_004515882.1 | Scaffold398 | 21293                   | TT                              | CC              | 1946944859               |
| SNP_P4_126936_21301  | NW_004515882.1 | Scaffold398 | 21301                   | GG                              | CC              | 1946944861               |
| SNP_P4_126937_21314  | NW_004515882.1 | Scaffold398 | 21314                   | AA                              | CC              | 1946944863               |
| SNP_P4_126938_21323  | NW_004515882.1 | Scaffold398 | 21323                   | AA                              | CC              | 1946944865               |
| SNP_P4_126939_21374  | NW_004515882.1 | Scaffold398 | 21374                   | GG                              | AA              | 1946944867               |
| SNP_P4_126940_21380  | NW_004515882.1 | Scaffold398 | 21380                   | AA                              | GG              | 1946944869               |
| SNP_P4_126941_21396  | NW_004515882.1 | Scaffold398 | 21396                   | CC                              | TT              | 1946944871               |
| SNP_P4_126942_21449  | NW_004515882.1 | Scaffold398 | 21449                   | CC                              | TT              | 1946944873               |
| SNP_P4_126943_21452  | NW_004515882.1 | Scaffold398 | 21452                   | CC                              | TT              | 1946944875               |
| SNP_P4_126944_21458  | NW_004515882.1 | Scaffold398 | 21458                   | AA                              | TT              | 1946944877               |
| SNP_P4_126945_21464  | NW_004515882.1 | Scaffold398 | 21464                   | AA                              | CC              | 1946944879               |
| SNP_P4_126946_21465  | NW_004515882.1 | Scaffold398 | 21465                   | GG                              | TT              | 1946944881               |
| SNP_P4_126947_21470  | NW_004515882.1 | Scaffold398 | 21470                   | CC                              | AA              | 1946944883               |
| SNP_P4_126948_21762  | NW_004515882.1 | Scaffold398 | 21762                   | CC                              | TT              | 1946944884               |
| SNP_P4_126951_25277  | NW_004515882.1 | Scaffold398 | 25277                   | TT                              | GG              | 1946944886               |
| SNP_P4_126953_25704  | NW_004515882.1 | Scaffold398 | 25704                   | CC                              | TT              | 1946944888               |
| SNP_P4_126955_28653  | NW_004515882.1 | Scaffold398 | 28653                   | AA                              | TT              | 1946944890               |
| SNP_P4_126956_33266  | NW_004515882.1 | Scaffold398 | 33266                   | AA                              | GG              | 1946944892               |
| SNP_P4_126957_33381  | NW_004515882.1 | Scaffold398 | 33381                   | GG                              | AA              | 1946944894               |

| SNPs IDs            | Chromosome IDs | Chromosomes | Physical positions (bp) | CDC Frontier (Reference genome) | (ILWC46 & LPNB) | NCBI SNPdb Accession IDs |
|---------------------|----------------|-------------|-------------------------|---------------------------------|-----------------|--------------------------|
| SNP_P4_126958_33386 | NW_004515882.1 | Scaffold398 | 33386                   | AA                              | GG              | 1946944896               |
| SNP_P4_126959_33497 | NW_004515882.1 | Scaffold398 | 33497                   | AA                              | GG              | 1946944898               |
| SNP_P4_126961_33534 | NW_004515882.1 | Scaffold398 | 33534                   | TT                              | GG              | 1946944900               |
| SNP_P4_126962_33553 | NW_004515882.1 | Scaffold398 | 33553                   | CC                              | AA              | 1946944902               |
| SNP_P4_126963_33560 | NW_004515882.1 | Scaffold398 | 33560                   | CC                              | TT              | 1946944904               |
| SNP_P4_126964_33595 | NW_004515882.1 | Scaffold398 | 33595                   | AA                              | TT              | 1946944906               |
| SNP_P4_126965_33695 | NW_004515882.1 | Scaffold398 | 33695                   | TT                              | CC              | 1946944908               |
| SNP_P4_126968_33943 | NW_004515882.1 | Scaffold398 | 33943                   | TT                              | AA              | 1946944910               |
| SNP_P4_126969_34039 | NW_004515882.1 | Scaffold398 | 34039                   | GG                              | TT              | 1946944911               |
| SNP_P4_126970_34102 | NW_004515882.1 | Scaffold398 | 34102                   | GG                              | AA              | 1946944913               |
| SNP_P4_126971_36239 | NW_004515882.1 | Scaffold398 | 36239                   | TT                              | AA              | 1946944915               |
| SNP_P4_126972_37220 | NW_004515882.1 | Scaffold398 | 37220                   | AA                              | CC              | 1946944917               |
| SNP_P4_126973_37415 | NW_004515882.1 | Scaffold398 | 37415                   | AA                              | CC              | 1946944919               |
| SNP_P4_126974_37649 | NW_004515882.1 | Scaffold398 | 37649                   | TT                              | CC              | 1946944921               |
| SNP_P4_126976_45099 | NW_004515882.1 | Scaffold398 | 45099                   | GG                              | AA              | 1946944923               |
| SNP_P4_126977_47356 | NW_004515882.1 | Scaffold398 | 47356                   | GG                              | AA              | 1946944925               |
| SNP_P4_126979_50481 | NW_004515882.1 | Scaffold398 | 50481                   | CC                              | TT              | 1946944927               |
| SNP_P4_126980_51114 | NW_004515882.1 | Scaffold398 | 51114                   | GG                              | AA              | 1946944929               |
| SNP_P4_126982_52328 | NW_004515882.1 | Scaffold398 | 52328                   | AA                              | GG              | 1946944931               |
| SNP_P4_126983_56608 | NW_004515882.1 | Scaffold398 | 56608                   | AA                              | GG              | 1946944933               |
| SNP_P4_126984_62751 | NW_004515882.1 | Scaffold398 | 62751                   | AA                              | GG              | 1946944935               |
| SNP_P4_126985_62796 | NW_004515882.1 | Scaffold398 | 62796                   | TT                              | CC              | 1946944937               |
| SNP_P4_126986_63477 | NW_004515882.1 | Scaffold398 | 63477                   | TT                              | GG              | 1946944939               |
| SNP_P4_126987_68140 | NW_004515882.1 | Scaffold398 | 68140                   | AA                              | GG              | 1946944941               |
| SNP_P4_126988_68422 | NW_004515882.1 | Scaffold398 | 68422                   | AA                              | GG              | 1946944943               |
| SNP_P4_126989_68701 | NW_004515882.1 | Scaffold398 | 68701                   | CC                              | AA              | 1946944945               |
| SNP_P4_126990_68706 | NW_004515882.1 | Scaffold398 | 68706                   | TT                              | CC              | 1946944947               |
| SNP_P4_126991_68709 | NW_004515882.1 | Scaffold398 | 68709                   | TT                              | GG              | 1946944949               |
| SNP_P4_126992_68712 | NW_004515882.1 | Scaffold398 | 68712                   | TT                              | CC              | 1946944951               |
| SNP_P4_126993_69694 | NW_004515882.1 | Scaffold398 | 69694                   | GG                              | TT              | 1946944952               |
| SNP_P4_126994_69697 | NW_004515882.1 | Scaffold398 | 69697                   | AA                              | GG              | 1946944954               |
| SNP_P4_126996_69807 | NW_004515882.1 | Scaffold398 | 69807                   | AA                              | TT              | 1946944956               |
| SNP_P4_126997_70797 | NW_004515882.1 | Scaffold398 | 70797                   | CC                              | TT              | 1946944958               |
| SNP_P4_126998_71199 | NW_004515882.1 | Scaffold398 | 71199                   | TT                              | AA              | 1946944960               |
| SNP_P4_126999_73980 | NW_004515882.1 | Scaffold398 | 73980                   | GG                              | AA              | 1946944962               |
| SNP_P4_127000_74471 | NW_004515882.1 | Scaffold398 | 74471                   | TT                              | CC              | 1946944964               |
| SNP_P4_127002_77285 | NW_004515882.1 | Scaffold398 | 77285                   | CC                              | TT              | 1946944966               |
| SNP_P4_127003_77429 | NW_004515882.1 | Scaffold398 | 77429                   | CC                              | TT              | 1946944968               |
| SNP_P4_127004_79380 | NW_004515882.1 | Scaffold398 | 79380                   | TT                              | CC              | 1946944970               |
| SNP_P4_127005_89626 | NW_004515882.1 | Scaffold398 | 89626                   | AA                              | GG              | 1946944972               |
| SNP_P4_127006_91458 | NW_004515882.1 | Scaffold398 | 91458                   | GG                              | AA              | 1946944974               |
| SNP_P4_127007_92505 | NW_004515882.1 | Scaffold398 | 92505                   | GG                              | AA              | 1946944976               |

| SNPs IDs             | Chromosome IDs | Chromosomes | Physical positions (bp) | CDC Frontier (Reference genome) | (ILWC46 & LPNB) | NCBI SNPdb Accession IDs |
|----------------------|----------------|-------------|-------------------------|---------------------------------|-----------------|--------------------------|
| SNP_P4_127009_106217 | NW_004515882.1 | Scaffold398 | 106217                  | CC                              | TT              | 1946944978               |
| SNP_P4_127010_110526 | NW_004515882.1 | Scaffold398 | 110526                  | AA                              | TT              | 1946944980               |
| SNP_P4_127011_110603 | NW_004515882.1 | Scaffold398 | 110603                  | GG                              | AA              | 1946944982               |
| SNP_P4_127012_112576 | NW_004515882.1 | Scaffold398 | 112576                  | CC                              | TT              | 1946944984               |
| SNP_P4_127013_115457 | NW_004515882.1 | Scaffold398 | 115457                  | CC                              | TT              | 1946944986               |
| SNP_P4_127014_115476 | NW_004515882.1 | Scaffold398 | 115476                  | CC                              | AA              | 1946944988               |
| SNP_P4_127016_116836 | NW_004515882.1 | Scaffold398 | 116836                  | AA                              | CC              | 1946944990               |
| SNP_P4_127017_117758 | NW_004515882.1 | Scaffold398 | 117758                  | GG                              | AA              | 1946944992               |
| SNP_P4_127018_117775 | NW_004515882.1 | Scaffold398 | 117775                  | AA                              | CC              | 1946944994               |
| SNP_P4_127019_121579 | NW_004515882.1 | Scaffold398 | 121579                  | GG                              | CC              | 1946944996               |
| SNP_P4_127020_123921 | NW_004515882.1 | Scaffold398 | 123921                  | TT                              | CC              | 1946944998               |
| SNP_P4_127021_124937 | NW_004515882.1 | Scaffold398 | 124937                  | CC                              | TT              | 1946945000               |
| SNP_P4_127022_129429 | NW_004515882.1 | Scaffold398 | 129429                  | GG                              | TT              | 1946945002               |
| SNP_P4_127023_131497 | NW_004515882.1 | Scaffold398 | 131497                  | GG                              | AA              | 1946945004               |
| SNP_P4_127024_131706 | NW_004515882.1 | Scaffold398 | 131706                  | GG                              | AA              | 1946945006               |
| SNP_P4_127025_132592 | NW_004515882.1 | Scaffold398 | 132592                  | AA                              | GG              | 1946945008               |
| SNP_P4_127026_132607 | NW_004515882.1 | Scaffold398 | 132607                  | TT                              | CC              | 1946945010               |
| SNP_P4_127027_133040 | NW_004515882.1 | Scaffold398 | 133040                  | AA                              | TT              | 1946945012               |
| SNP_P4_127028_144281 | NW_004515882.1 | Scaffold398 | 144281                  | AA                              | GG              | 1946945014               |
| SNP_P4_127029_148409 | NW_004515882.1 | Scaffold398 | 148409                  | CC                              | TT              | 1946945016               |
| SNP_P4_127030_154062 | NW_004515882.1 | Scaffold398 | 154062                  | GG                              | AA              | 1946945018               |
| SNP_P4_127031_159868 | NW_004515882.1 | Scaffold398 | 159868                  | TT                              | AA              | 1946945020               |
| SNP_P4_127032_162394 | NW_004515882.1 | Scaffold398 | 162394                  | AA                              | GG              | 1946945022               |
| SNP_P4_127033_163135 | NW_004515882.1 | Scaffold398 | 163135                  | GG                              | AA              | 1946945025               |
| SNP_P4_127034_171836 | NW_004515882.1 | Scaffold398 | 171836                  | TT                              | CC              | 1946945027               |
| SNP_P4_127035_174263 | NW_004515882.1 | Scaffold398 | 174263                  | TT                              | AA              | 1946945029               |
| SNP_P4_127037_182144 | NW_004515882.1 | Scaffold398 | 182144                  | GG                              | CC              | 1946945031               |
| SNP_P4_127038_184311 | NW_004515882.1 | Scaffold398 | 184311                  | AA                              | TT              | 1946945033               |
| SNP_P4_127039_188660 | NW_004515882.1 | Scaffold398 | 188660                  | GG                              | AA              | 1946945035               |
| SNP_P4_127040_192900 | NW_004515882.1 | Scaffold398 | 192900                  | GG                              | AA              | 1946945037               |
| SNP_P4_127041_195088 | NW_004515882.1 | Scaffold398 | 195088                  | TT                              | CC              | 1946945039               |
| SNP_P4_127042_201094 | NW_004515882.1 | Scaffold398 | 201094                  | GG                              | CC              | 1946945041               |
| SNP_P4_127043_202231 | NW_004515882.1 | Scaffold398 | 202231                  | AA                              | GG              | 1946945043               |
| SNP_P4_127045_204025 | NW_004515882.1 | Scaffold398 | 204025                  | AA                              | GG              | 1946945045               |
| SNP_P4_127046_204026 | NW_004515882.1 | Scaffold398 | 204026                  | AA                              | CC              | 1946945047               |
| SNP_P4_127048_206408 | NW_004515882.1 | Scaffold398 | 206408                  | AA                              | CC              | 1946945049               |
| SNP_P4_127049_206571 | NW_004515882.1 | Scaffold398 | 206571                  | CC                              | TT              | 1946945051               |
| SNP_P4_127050_207781 | NW_004515882.1 | Scaffold398 | 207781                  | TT                              | AA              | 1946945053               |
| SNP_P4_127051_207786 | NW_004515882.1 | Scaffold398 | 207786                  | GG                              | AA              | 1946945055               |
| SNP_P4_127052_208423 | NW_004515882.1 | Scaffold398 | 208423                  | AA                              | GG              | 1946945057               |
| SNP_P4_127053_208456 | NW_004515882.1 | Scaffold398 | 208456                  | AA                              | TT              | 1946945059               |
| SNP_P4_127054_208691 | NW_004515882.1 | Scaffold398 | 208691                  | TT                              | CC              | 1946945061               |

| SNPs IDs             | Chromosome IDs | Chromosomes | Physical positions (bp) | CDC Frontier (Reference genome) | (ILWC46 & LPNB) | NCBI SNPdb Accession IDs |
|----------------------|----------------|-------------|-------------------------|---------------------------------|-----------------|--------------------------|
| SNP_P4_127055_208746 | NW_004515882.1 | Scaffold398 | 208746                  | AA                              | GG              | 1946945063               |
| SNP_P4_127056_209532 | NW_004515882.1 | Scaffold398 | 209532                  | CC                              | AA              | 1946945065               |
| SNP_P4_127057_209548 | NW_004515882.1 | Scaffold398 | 209548                  | AA                              | CC              | 1946945067               |
| SNP_P4_127058_209852 | NW_004515882.1 | Scaffold398 | 209852                  | AA                              | CC              | 1946945069               |
| SNP_P4_127059_211055 | NW_004515882.1 | Scaffold398 | 211055                  | CC                              | TT              | 1946945071               |
| SNP_P4_127060_211934 | NW_004515882.1 | Scaffold398 | 211934                  | TT                              | CC              | 1946945073               |
| SNP_P4_127061_211965 | NW_004515882.1 | Scaffold398 | 211965                  | CC                              | TT              | 1946945075               |
| SNP_P4_127062_213188 | NW_004515882.1 | Scaffold398 | 213188                  | CC                              | TT              | 1946945077               |
| SNP_P4_127063_213193 | NW_004515882.1 | Scaffold398 | 213193                  | TT                              | AA              | 1946945079               |
| SNP_P4_127064_214613 | NW_004515882.1 | Scaffold398 | 214613                  | AA                              | GG              | 1946945081               |
| SNP_P4_127065_214629 | NW_004515882.1 | Scaffold398 | 214629                  | GG                              | AA              | 1946945083               |
| SNP_P4_127066_215214 | NW_004515882.1 | Scaffold398 | 215214                  | TT                              | GG              | 1946945085               |
| SNP_P4_127067_215821 | NW_004515882.1 | Scaffold398 | 215821                  | CC                              | TT              | 1946945087               |
| SNP_P4_127068_216158 | NW_004515882.1 | Scaffold398 | 216158                  | GG                              | TT              | 1946945089               |
| SNP_P4_127069_216455 | NW_004515882.1 | Scaffold398 | 216455                  | GG                              | AA              | 1946945091               |
| SNP_P4_127071_216683 | NW_004515882.1 | Scaffold398 | 216683                  | GG                              | AA              | 1946945093               |
| SNP_P4_127072_216688 | NW_004515882.1 | Scaffold398 | 216688                  | AA                              | CC              | 1946945095               |
| SNP_P4_127073_216768 | NW_004515882.1 | Scaffold398 | 216768                  | AA                              | TT              | 1946945097               |
| SNP_P4_127074_247663 | NW_004515882.1 | Scaffold398 | 247663                  | AA                              | GG              | 1946945099               |
| SNP_P4_127075_247664 | NW_004515882.1 | Scaffold398 | 247664                  | GG                              | AA              | 1946945101               |
| SNP_P4_127076_247850 | NW_004515882.1 | Scaffold398 | 247850                  | AA                              | TT              | 1946945104               |
| SNP_P4_127077_247868 | NW_004515882.1 | Scaffold398 | 247868                  | TT                              | AA              | 1946945106               |
| SNP_P4_127078_247874 | NW_004515882.1 | Scaffold398 | 247874                  | AA                              | GG              | 1946945108               |
| SNP_P4_127079_248243 | NW_004515882.1 | Scaffold398 | 248243                  | AA                              | GG              | 1946945110               |
| SNP_P4_127081_248297 | NW_004515882.1 | Scaffold398 | 248297                  | GG                              | AA              | 1946945112               |
| SNP_P4_127082_248311 | NW_004515882.1 | Scaffold398 | 248311                  | TT                              | AA              | 1946945114               |
| SNP_P4_127084_248615 | NW_004515882.1 | Scaffold398 | 248615                  | GG                              | AA              | 1946945116               |
| SNP_P4_127085_252749 | NW_004515882.1 | Scaffold398 | 252749                  | AA                              | GG              | 1946945118               |
| SNP_P4_127086_261556 | NW_004515882.1 | Scaffold398 | 261556                  | AA                              | CC              | 1946945120               |
| SNP_P4_127087_266593 | NW_004515882.1 | Scaffold398 | 266593                  | GG                              | AA              | 1946945122               |
| SNP_P4_127088_267212 | NW_004515882.1 | Scaffold398 | 267212                  | AA                              | GG              | 1946945123               |
| SNP_P4_127089_268557 | NW_004515882.1 | Scaffold398 | 268557                  | CC                              | TT              | 1946945124               |
| SNP_P4_127090_268884 | NW_004515882.1 | Scaffold398 | 268884                  | GG                              | TT              | 1946945125               |
| SNP_P4_127092_269173 | NW_004515882.1 | Scaffold398 | 269173                  | AA                              | GG              | 1946945127               |
| SNP_P4_127096_269990 | NW_004515882.1 | Scaffold398 | 269990                  | AA                              | TT              | 1946945129               |
| SNP_P4_127099_271609 | NW_004515882.1 | Scaffold398 | 271609                  | TT                              | AA              | 1946945131               |
| SNP_P4_127100_272179 | NW_004515882.1 | Scaffold398 | 272179                  | TT                              | CC              | 1946945133               |
| SNP_P4_127102_274081 | NW_004515882.1 | Scaffold398 | 274081                  | CC                              | GG              | 1946945135               |
| SNP_P4_127103_275315 | NW_004515882.1 | Scaffold398 | 275315                  | TT                              | AA              | 1946945137               |
| SNP_P4_127105_275954 | NW_004515882.1 | Scaffold398 | 275954                  | CC                              | TT              | 1946945139               |
| SNP_P4_127106_276001 | NW_004515882.1 | Scaffold398 | 276001                  | GG                              | AA              | 1946945141               |
| SNP_P4_127107_278607 | NW_004515882.1 | Scaffold398 | 278607                  | GG                              | TT              | 1946945143               |

| SNPs IDs             | Chromosome IDs | Chromosomes | Physical positions (bp) | CDC Frontier (Reference genome) | (ILWC46 & LPNB) | NCBI SNPdb Accession IDs |
|----------------------|----------------|-------------|-------------------------|---------------------------------|-----------------|--------------------------|
| SNP_P4_127108_282679 | NW_004515882.1 | Scaffold398 | 282679                  | CC                              | TT              | 1946945145               |
| SNP_P4_127109_282759 | NW_004515882.1 | Scaffold398 | 282759                  | CC                              | AA              | 1946945147               |
| SNP_P4_127110_285033 | NW_004515882.1 | Scaffold398 | 285033                  | AA                              | GG              | 1946945149               |
| SNP_P4_127111_288429 | NW_004515882.1 | Scaffold398 | 288429                  | CC                              | TT              | 1946945151               |
| SNP_P4_127112_290320 | NW_004515882.1 | Scaffold398 | 290320                  | CC                              | AA              | 1946945153               |
| SNP_P4_127113_291170 | NW_004515882.1 | Scaffold398 | 291170                  | CC                              | TT              | 1946945155               |
| SNP_P4_127115_292324 | NW_004515882.1 | Scaffold398 | 292324                  | AA                              | GG              | 1946945157               |
| SNP_P4_127116_292325 | NW_004515882.1 | Scaffold398 | 292325                  | TT                              | CC              | 1946945159               |
| SNP_P4_127117_297458 | NW_004515882.1 | Scaffold398 | 297458                  | CC                              | TT              | 1946945160               |
| SNP_P4_127118_300009 | NW_004515882.1 | Scaffold398 | 300009                  | CC                              | AA              | 1946945162               |
| SNP_P4_127120_304250 | NW_004515882.1 | Scaffold398 | 304250                  | CC                              | GG              | 1946945164               |
| SNP_P4_127121_306539 | NW_004515882.1 | Scaffold398 | 306539                  | GG                              | AA              | 1946945166               |
| SNP_P4_127123_306882 | NW_004515882.1 | Scaffold398 | 306882                  | GG                              | AA              | 1946945168               |
| SNP_P4_127124_306914 | NW_004515882.1 | Scaffold398 | 306914                  | CC                              | TT              | 1946945170               |
| SNP_P4_127125_308652 | NW_004515882.1 | Scaffold398 | 308652                  | GG                              | AA              | 1946945172               |
| SNP_P4_127126_308902 | NW_004515882.1 | Scaffold398 | 308902                  | CC                              | AA              | 1946945174               |
| SNP_P4_127128_315351 | NW_004515882.1 | Scaffold398 | 315351                  | TT                              | AA              | 1946945176               |
| SNP_P4_127129_318299 | NW_004515882.1 | Scaffold398 | 318299                  | CC                              | AA              | 1946945178               |
| SNP_P4_127131_328960 | NW_004515882.1 | Scaffold398 | 328960                  | AA                              | GG              | 1946945180               |
| SNP_P4_127132_329855 | NW_004515882.1 | Scaffold398 | 329855                  | AA                              | GG              | 1946945182               |
| SNP_P4_127133_330363 | NW_004515882.1 | Scaffold398 | 330363                  | TT                              | GG              | 1946945183               |
| SNP_P4_127134_330387 | NW_004515882.1 | Scaffold398 | 330387                  | AA                              | GG              | 1946945185               |
| SNP_P4_127135_330401 | NW_004515882.1 | Scaffold398 | 330401                  | AA                              | GG              | 1946945187               |
| SNP_P4_127136_330732 | NW_004515882.1 | Scaffold398 | 330732                  | GG                              | AA              | 1946945189               |
| SNP_P4_127137_330853 | NW_004515882.1 | Scaffold398 | 330853                  | TT                              | CC              | 1946945191               |
| SNP_P4_127138_331082 | NW_004515882.1 | Scaffold398 | 331082                  | AA                              | GG              | 1946945193               |
| SNP_P4_127139_331130 | NW_004515882.1 | Scaffold398 | 331130                  | CC                              | TT              | 1946945195               |
| SNP_P4_127140_331176 | NW_004515882.1 | Scaffold398 | 331176                  | CC                              | TT              | 1946945197               |
| SNP_P4_127141_331415 | NW_004515882.1 | Scaffold398 | 331415                  | GG                              | TT              | 1946945199               |
| SNP_P4_127142_331433 | NW_004515882.1 | Scaffold398 | 331433                  | CC                              | TT              | 1946945201               |
| SNP_P4_127143_331673 | NW_004515882.1 | Scaffold398 | 331673                  | GG                              | TT              | 1946945203               |
| SNP_P4_127144_332525 | NW_004515882.1 | Scaffold398 | 332525                  | AA                              | GG              | 1946945205               |
| SNP_P4_127145_333547 | NW_004515882.1 | Scaffold398 | 333547                  | TT                              | CC              | 1946945207               |
| SNP_P4_127146_333649 | NW_004515882.1 | Scaffold398 | 333649                  | TT                              | AA              | 1946945209               |
| SNP_P4_127147_333830 | NW_004515882.1 | Scaffold398 | 333830                  | GG                              | TT              | 1946945211               |
| SNP_P4_127148_334332 | NW_004515882.1 | Scaffold398 | 334332                  | AA                              | GG              | 1946945213               |
| SNP_P4_127149_335359 | NW_004515882.1 | Scaffold398 | 335359                  | AA                              | GG              | 1946945215               |
| SNP_P4_127150_335629 | NW_004515882.1 | Scaffold398 | 335629                  | CC                              | TT              | 1946945217               |
| SNP_P4_127151_335744 | NW_004515882.1 | Scaffold398 | 335744                  | AA                              | GG              | 1946945219               |
| SNP_P4_127152_335749 | NW_004515882.1 | Scaffold398 | 335749                  | CC                              | TT              | 1946945221               |
| SNP_P4_127153_336133 | NW_004515882.1 | Scaffold398 | 336133                  | TT                              | CC              | 1946945223               |
| SNP_P4_127154_336186 | NW_004515882.1 | Scaffold398 | 336186                  | GG                              | AA              | 1946945225               |

| SNPs IDs             | Chromosome IDs | Chromosomes | Physical positions (bp) | CDC Frontier (Reference genome) | (ILWC46 & LPNB) | NCBI SNPdb Accession IDs |
|----------------------|----------------|-------------|-------------------------|---------------------------------|-----------------|--------------------------|
| SNP_P4_127155_336207 | NW_004515882.1 | Scaffold398 | 336207                  | TT                              | CC              | 1946945227               |
| SNP_P4_127156_336220 | NW_004515882.1 | Scaffold398 | 336220                  | CC                              | TT              | 1946945229               |
| SNP_P4_127158_339546 | NW_004515882.1 | Scaffold398 | 339546                  | GG                              | AA              | 1946945231               |
| SNP_P4_127159_339558 | NW_004515882.1 | Scaffold398 | 339558                  | TT                              | CC              | 1946945233               |
| SNP_P4_127160_339923 | NW_004515882.1 | Scaffold398 | 339923                  | AA                              | GG              | 1946945235               |
| SNP_P4_127163_340705 | NW_004515882.1 | Scaffold398 | 340705                  | GG                              | AA              | 1946945237               |
| SNP_P4_127164_344000 | NW_004515882.1 | Scaffold398 | 344000                  | AA                              | TT              | 1946945238               |
| SNP_P4_127165_344699 | NW_004515882.1 | Scaffold398 | 344699                  | CC                              | TT              | 1946945240               |
| SNP_P4_127166_344714 | NW_004515882.1 | Scaffold398 | 344714                  | AA                              | TT              | 1946945242               |
| SNP_P4_127167_345338 | NW_004515882.1 | Scaffold398 | 345338                  | CC                              | GG              | 1946945244               |
| SNP_P4_127169_346456 | NW_004515882.1 | Scaffold398 | 346456                  | CC                              | TT              | 1946945246               |
| SNP_P4_127171_347034 | NW_004515882.1 | Scaffold398 | 347034                  | GG                              | AA              | 1946945248               |
| SNP_P4_127172_347060 | NW_004515882.1 | Scaffold398 | 347060                  | GG                              | AA              | 1946945250               |
| SNP_P4_127173_347374 | NW_004515882.1 | Scaffold398 | 347374                  | CC                              | AA              | 1946945252               |
| SNP_P4_127174_347386 | NW_004515882.1 | Scaffold398 | 347386                  | CC                              | TT              | 1946945254               |
| SNP_P4_127175_347557 | NW_004515882.1 | Scaffold398 | 347557                  | AA                              | TT              | 1946945256               |
| SNP_P4_127177_348236 | NW_004515882.1 | Scaffold398 | 348236                  | AA                              | GG              | 1946945258               |
| SNP_P4_127178_348244 | NW_004515882.1 | Scaffold398 | 348244                  | AA                              | GG              | 1946945260               |
| SNP_P4_127179_348267 | NW_004515882.1 | Scaffold398 | 348267                  | TT                              | GG              | 1946945262               |
| SNP_P4_127180_348273 | NW_004515882.1 | Scaffold398 | 348273                  | CC                              | TT              | 1946945264               |
| SNP_P4_127181_348292 | NW_004515882.1 | Scaffold398 | 348292                  | CC                              | AA              | 1946945265               |
| SNP_P4_127182_348406 | NW_004515882.1 | Scaffold398 | 348406                  | TT                              | CC              | 1946945267               |
| SNP_P4_127183_348596 | NW_004515882.1 | Scaffold398 | 348596                  | GG                              | AA              | 1946945269               |
| SNP_P4_127184_348771 | NW_004515882.1 | Scaffold398 | 348771                  | TT                              | CC              | 1946945271               |
| SNP_P4_127185_348773 | NW_004515882.1 | Scaffold398 | 348773                  | GG                              | AA              | 1946945273               |
| SNP_P4_127187_349220 | NW_004515882.1 | Scaffold398 | 349220                  | CC                              | TT              | 1946945275               |
| SNP_P4_127188_349265 | NW_004515882.1 | Scaffold398 | 349265                  | GG                              | TT              | 1946945277               |
| SNP_P4_127189_350391 | NW_004515882.1 | Scaffold398 | 350391                  | TT                              | CC              | 1946945279               |
| SNP_P4_127190_350393 | NW_004515882.1 | Scaffold398 | 350393                  | GG                              | CC              | 1946945281               |
| SNP_P4_127191_350396 | NW_004515882.1 | Scaffold398 | 350396                  | TT                              | GG              | 1946945283               |
| SNP_P4_127192_350688 | NW_004515882.1 | Scaffold398 | 350688                  | TT                              | CC              | 1946945285               |
| SNP_P4_127193_350744 | NW_004515882.1 | Scaffold398 | 350744                  | TT                              | CC              | 1946945287               |
| SNP_P4_127194_351446 | NW_004515882.1 | Scaffold398 | 351446                  | GG                              | AA              | 1946945289               |
| SNP_P4_127195_351447 | NW_004515882.1 | Scaffold398 | 351447                  | GG                              | AA              | 1946945291               |
| SNP_P4_127196_351525 | NW_004515882.1 | Scaffold398 | 351525                  | AA                              | GG              | 1946945293               |
| SNP_P4_127197_352183 | NW_004515882.1 | Scaffold398 | 352183                  | AA                              | GG              | 1946945295               |
| SNP_P4_127198_352188 | NW_004515882.1 | Scaffold398 | 352188                  | CC                              | TT              | 1946945297               |
| SNP_P4_127199_352192 | NW_004515882.1 | Scaffold398 | 352192                  | GG                              | TT              | 1946945299               |
| SNP_P4_127200_352204 | NW_004515882.1 | Scaffold398 | 352204                  | TT                              | CC              | 1946945301               |
| SNP_P4_127201_352210 | NW_004515882.1 | Scaffold398 | 352210                  | CC                              | TT              | 1946945303               |
| SNP_P4_127202_352243 | NW_004515882.1 | Scaffold398 | 352243                  | CC                              | TT              | 1946945305               |
| SNP_P4_127203_352249 | NW_004515882.1 | Scaffold398 | 352249                  | GG                              | AA              | 1946945307               |

| SNPs IDs             | Chromosome IDs | Chromosomes | Physical positions (bp) | CDC Frontier (Reference genome) | (ILWC46 & LPNB) | NCBI SNPdb Accession IDs |
|----------------------|----------------|-------------|-------------------------|---------------------------------|-----------------|--------------------------|
| SNP_P4_127204_352285 | NW_004515882.1 | Scaffold398 | 352285                  | GG                              | CC              | 1946945309               |
| SNP_P4_127205_352303 | NW_004515882.1 | Scaffold398 | 352303                  | CC                              | TT              | 1946945311               |
| SNP_P4_127206_352507 | NW_004515882.1 | Scaffold398 | 352507                  | TT                              | GG              | 1946945313               |
| SNP_P4_127207_353199 | NW_004515882.1 | Scaffold398 | 353199                  | TT                              | AA              | 1946945315               |
| SNP_P4_127208_353239 | NW_004515882.1 | Scaffold398 | 353239                  | CC                              | TT              | 1946945317               |
| SNP_P4_127209_353606 | NW_004515882.1 | Scaffold398 | 353606                  | AA                              | GG              | 1946945319               |
| SNP_P4_127210_355365 | NW_004515882.1 | Scaffold398 | 355365                  | TT                              | CC              | 1946945321               |
| SNP_P4_127211_355371 | NW_004515882.1 | Scaffold398 | 355371                  | GG                              | AA              | 1946945323               |
| SNP_P4_127212_360541 | NW_004515882.1 | Scaffold398 | 360541                  | TT                              | CC              | 1946945325               |
| SNP_P4_127213_360562 | NW_004515882.1 | Scaffold398 | 360562                  | AA                              | GG              | 1946945327               |
| SNP_P4_127214_360581 | NW_004515882.1 | Scaffold398 | 360581                  | AA                              | GG              | 1946945329               |
| SNP_P4_127215_360589 | NW_004515882.1 | Scaffold398 | 360589                  | GG                              | AA              | 1946945331               |
| SNP_P4_127216_364739 | NW_004515882.1 | Scaffold398 | 364739                  | CC                              | TT              | 1946945333               |
| SNP_P4_127217_364822 | NW_004515882.1 | Scaffold398 | 364822                  | AA                              | GG              | 1946945335               |
| SNP_P4_127218_365015 | NW_004515882.1 | Scaffold398 | 365015                  | CC                              | TT              | 1946945337               |
| SNP_P4_127219_365026 | NW_004515882.1 | Scaffold398 | 365026                  | GG                              | AA              | 1946945339               |
| SNP_P4_127220_366783 | NW_004515882.1 | Scaffold398 | 366783                  | AA                              | TT              | 1946945341               |
| SNP_P4_127221_366946 | NW_004515882.1 | Scaffold398 | 366946                  | AA                              | TT              | 1946945343               |
| SNP_P4_127222_366979 | NW_004515882.1 | Scaffold398 | 366979                  | CC                              | TT              | 1946945345               |
| SNP_P4_127223_367035 | NW_004515882.1 | Scaffold398 | 367035                  | TT                              | CC              | 1946945347               |
| SNP_P4_127224_368597 | NW_004515882.1 | Scaffold398 | 368597                  | AA                              | TT              | 1946945349               |
| SNP_P4_127226_373810 | NW_004515882.1 | Scaffold398 | 373810                  | TT                              | CC              | 1946945351               |
| SNP_P4_127228_376980 | NW_004515882.1 | Scaffold398 | 376980                  | TT                              | GG              | 1946945353               |
| SNP_P4_127229_377078 | NW_004515882.1 | Scaffold398 | 377078                  | GG                              | TT              | 1946945355               |
| SNP_P4_127230_377143 | NW_004515882.1 | Scaffold398 | 377143                  | GG                              | AA              | 1946945357               |
| SNP_P4_127231_377144 | NW_004515882.1 | Scaffold398 | 377144                  | GG                              | AA              | 1946945359               |
| SNP_P4_127232_378674 | NW_004515882.1 | Scaffold398 | 378674                  | AA                              | GG              | 1946945361               |
| SNP_P4_127233_378703 | NW_004515882.1 | Scaffold398 | 378703                  | TT                              | CC              | 1946945363               |
| SNP_P4_127234_378713 | NW_004515882.1 | Scaffold398 | 378713                  | AA                              | GG              | 1946945365               |
| SNP_P4_127235_378801 | NW_004515882.1 | Scaffold398 | 378801                  | AA                              | GG              | 1946945367               |
| SNP_P4_127236_378810 | NW_004515882.1 | Scaffold398 | 378810                  | AA                              | GG              | 1946945369               |
| SNP_P4_127237_378827 | NW_004515882.1 | Scaffold398 | 378827                  | AA                              | GG              | 1946945371               |
| SNP_P4_127238_378869 | NW_004515882.1 | Scaffold398 | 378869                  | GG                              | AA              | 1946945373               |
| SNP_P4_127239_378990 | NW_004515882.1 | Scaffold398 | 378990                  | AA                              | CC              | 1946945375               |
| SNP_P4_127240_379026 | NW_004515882.1 | Scaffold398 | 379026                  | CC                              | TT              | 1946945377               |
| SNP_P4_127241_379041 | NW_004515882.1 | Scaffold398 | 379041                  | CC                              | TT              | 1946945379               |
| SNP_P4_127243_379155 | NW_004515882.1 | Scaffold398 | 379155                  | AA                              | TT              | 1946945381               |
| SNP_P4_127244_382682 | NW_004515882.1 | Scaffold398 | 382682                  | AA                              | CC              | 1946945383               |
| SNP_P4_127245_384123 | NW_004515882.1 | Scaffold398 | 384123                  | AA                              | TT              | 1946945385               |
| SNP_P4_127246_384153 | NW_004515882.1 | Scaffold398 | 384153                  | AA                              | GG              | 1946945387               |
| SNP_P4_127247_384210 | NW_004515882.1 | Scaffold398 | 384210                  | GG                              | TT              | 1946945389               |
| SNP_P4_127248_384309 | NW_004515882.1 | Scaffold398 | 384309                  | TT                              | CC              | 1946945391               |



| SNPs IDs             | Chromosome IDs | Chromosomes | Physical positions (bp) | CDC Frontier (Reference genome) | (ILWC46 & LPNB) | NCBI SNPdb Accession IDs |
|----------------------|----------------|-------------|-------------------------|---------------------------------|-----------------|--------------------------|
| SNP_P4_127249_384375 | NW_004515882.1 | Scaffold398 | 384375                  | CC                              | AA              | 1946945393               |
| SNP_P4_127250_389945 | NW_004515882.1 | Scaffold398 | 389945                  | AA                              | GG              | 1946945395               |
| SNP_P4_127251_390090 | NW_004515882.1 | Scaffold398 | 390090                  | CC                              | TT              | 1946945397               |
| SNP_P4_127252_390120 | NW_004515882.1 | Scaffold398 | 390120                  | GG                              | AA              | 1946945399               |
| SNP_P4_127253_390135 | NW_004515882.1 | Scaffold398 | 390135                  | AA                              | CC              | 1946945401               |
| SNP_P4_127254_390280 | NW_004515882.1 | Scaffold398 | 390280                  | AA                              | GG              | 1946945403               |
| SNP_P4_127255_390284 | NW_004515882.1 | Scaffold398 | 390284                  | AA                              | CC              | 1946945405               |
| SNP_P4_127256_390475 | NW_004515882.1 | Scaffold398 | 390475                  | TT                              | GG              | 1946945407               |
| SNP_P4_127257_390482 | NW_004515882.1 | Scaffold398 | 390482                  | GG                              | TT              | 1946945409               |
| SNP_P4_127258_390506 | NW_004515882.1 | Scaffold398 | 390506                  | TT                              | CC              | 1946945411               |
| SNP_P4_127259_390530 | NW_004515882.1 | Scaffold398 | 390530                  | TT                              | CC              | 1946945414               |
| SNP_P4_127261_390552 | NW_004515882.1 | Scaffold398 | 390552                  | GG                              | AA              | 1946945416               |
| SNP_P4_127262_390600 | NW_004515882.1 | Scaffold398 | 390600                  | CC                              | TT              | 1946945418               |
| SNP_P4_127264_392083 | NW_004515882.1 | Scaffold398 | 392083                  | TT                              | AA              | 1946945420               |
| SNP_P4_127265_395623 | NW_004515882.1 | Scaffold398 | 395623                  | AA                              | GG              | 1946945422               |
| SNP_P4_127266_396621 | NW_004515882.1 | Scaffold398 | 396621                  | GG                              | TT              | 1946945424               |
| SNP_P4_127267_396636 | NW_004515882.1 | Scaffold398 | 396636                  | GG                              | AA              | 1946945426               |
| SNP_P4_127268_397008 | NW_004515882.1 | Scaffold398 | 397008                  | CC                              | AA              | 1946945428               |
| SNP_P4_127269_400858 | NW_004515882.1 | Scaffold398 | 400858                  | GG                              | TT              | 1946945430               |
| SNP_P4_127270_402612 | NW_004515882.1 | Scaffold398 | 402612                  | TT                              | CC              | 1946945432               |
| SNP_P4_127271_402945 | NW_004515882.1 | Scaffold398 | 402945                  | TT                              | CC              | 1946945434               |
| SNP_P4_127272_402973 | NW_004515882.1 | Scaffold398 | 402973                  | GG                              | CC              | 1946945436               |
| SNP_P4_127273_403877 | NW_004515882.1 | Scaffold398 | 403877                  | AA                              | GG              | 1946945438               |
| SNP_P4_127274_403885 | NW_004515882.1 | Scaffold398 | 403885                  | CC                              | TT              | 1946945440               |
| SNP_P4_127275_404214 | NW_004515882.1 | Scaffold398 | 404214                  | TT                              | CC              | 1946945442               |
| SNP_P4_127276_404608 | NW_004515882.1 | Scaffold398 | 404608                  | GG                              | AA              | 1946945444               |
| SNP_P4_127277_404755 | NW_004515882.1 | Scaffold398 | 404755                  | GG                              | AA              | 1946945446               |
| SNP_P4_127278_405612 | NW_004515882.1 | Scaffold398 | 405612                  | GG                              | TT              | 1946945448               |
| SNP_P4_127279_409209 | NW_004515882.1 | Scaffold398 | 409209                  | AA                              | GG              | 1946945450               |
| SNP_P4_127280_409232 | NW_004515882.1 | Scaffold398 | 409232                  | AA                              | GG              | 1946945452               |
| SNP_P4_127281_413968 | NW_004515882.1 | Scaffold398 | 413968                  | GG                              | TT              | 1946945454               |
| SNP_P4_127282_413994 | NW_004515882.1 | Scaffold398 | 413994                  | AA                              | GG              | 1946945456               |
| SNP_P4_127283_414048 | NW_004515882.1 | Scaffold398 | 414048                  | GG                              | AA              | 1946945458               |
| SNP_P4_127284_414824 | NW_004515882.1 | Scaffold398 | 414824                  | GG                              | AA              | 1946945460               |
| SNP_P4_127285_418219 | NW_004515882.1 | Scaffold398 | 418219                  | CC                              | TT              | 1946945462               |
| SNP_P4_127286_418324 | NW_004515882.1 | Scaffold398 | 418324                  | CC                              | GG              | 1946945464               |
| SNP_P4_127287_418495 | NW_004515882.1 | Scaffold398 | 418495                  | AA                              | TT              | 1946945466               |
| SNP_P4_127288_419464 | NW_004515882.1 | Scaffold398 | 419464                  | CC                              | TT              | 1946945468               |
| SNP_P4_127289_419546 | NW_004515882.1 | Scaffold398 | 419546                  | TT                              | GG              | 1946945470               |
| SNP_P4_127290_420881 | NW_004515882.1 | Scaffold398 | 420881                  | TT                              | CC              | 1946945472               |
| SNP_P4_127291_422765 | NW_004515882.1 | Scaffold398 | 422765                  | GG                              | AA              | 1946945474               |
| SNP_P4_127292_427009 | NW_004515882.1 | Scaffold398 | 427009                  | AA                              | CC              | 1946945475               |

| SNPs IDs             | Chromosome IDs | Chromosomes | Physical positions (bp) | CDC Frontier (Reference genome) | (ILWC46 & LPNB) | NCBI SNPdb Accession IDs |
|----------------------|----------------|-------------|-------------------------|---------------------------------|-----------------|--------------------------|
| SNP_P4_127293_427238 | NW_004515882.1 | Scaffold398 | 427238                  | TT                              | CC              | 1946945477               |
| SNP_P4_127294_427353 | NW_004515882.1 | Scaffold398 | 427353                  | CC                              | TT              | 1946945479               |
| SNP_P4_127295_427617 | NW_004515882.1 | Scaffold398 | 427617                  | GG                              | TT              | 1946945481               |
| SNP_P4_127296_427794 | NW_004515882.1 | Scaffold398 | 427794                  | TT                              | GG              | 1946945483               |
| SNP_P4_127297_430325 | NW_004515882.1 | Scaffold398 | 430325                  | CC                              | GG              | 1946945485               |
| SNP_P4_127298_430333 | NW_004515882.1 | Scaffold398 | 430333                  | TT                              | CC              | 1946945487               |
| SNP_P4_127299_430348 | NW_004515882.1 | Scaffold398 | 430348                  | AA                              | GG              | 1946945489               |
| SNP_P4_127300_430516 | NW_004515882.1 | Scaffold398 | 430516                  | GG                              | AA              | 1946945491               |
| SNP_P4_127301_430709 | NW_004515882.1 | Scaffold398 | 430709                  | TT                              | CC              | 1946945493               |
| SNP_P4_127302_431210 | NW_004515882.1 | Scaffold398 | 431210                  | TT                              | CC              | 1946945495               |
| SNP_P4_127303_432900 | NW_004515882.1 | Scaffold398 | 432900                  | CC                              | TT              | 1946945497               |
| SNP_P4_127304_434904 | NW_004515882.1 | Scaffold398 | 434904                  | GG                              | AA              | 1946945499               |
| SNP_P4_127305_436872 | NW_004515882.1 | Scaffold398 | 436872                  | TT                              | CC              | 1946945501               |
| SNP_P4_127306_441176 | NW_004515882.1 | Scaffold398 | 441176                  | GG                              | AA              | 1946945503               |
| SNP_P4_127307_449257 | NW_004515882.1 | Scaffold398 | 449257                  | AA                              | GG              | 1946945505               |
| SNP_P4_127309_452033 | NW_004515882.1 | Scaffold398 | 452033                  | AA                              | GG              | 1946945507               |
| SNP_P4_127310_452557 | NW_004515882.1 | Scaffold398 | 452557                  | GG                              | AA              | 1946945509               |
| SNP_P4_127311_453562 | NW_004515882.1 | Scaffold398 | 453562                  | TT                              | AA              | 1946945511               |
| SNP_P4_127312_458186 | NW_004515882.1 | Scaffold398 | 458186                  | AA                              | GG              | 1946945513               |
| SNP_P4_127313_458794 | NW_004515882.1 | Scaffold398 | 458794                  | TT                              | CC              | 1946945515               |
| SNP_P4_127314_459529 | NW_004515882.1 | Scaffold398 | 459529                  | TT                              | AA              | 1946945517               |
| SNP_P4_127316_459631 | NW_004515882.1 | Scaffold398 | 459631                  | TT                              | GG              | 1946945519               |
| SNP_P4_127317_461847 | NW_004515882.1 | Scaffold398 | 461847                  | GG                              | AA              | 1946945521               |
| SNP_P4_127318_461859 | NW_004515882.1 | Scaffold398 | 461859                  | AA                              | GG              | 1946945523               |
| SNP_P4_127319_462162 | NW_004515882.1 | Scaffold398 | 462162                  | GG                              | AA              | 1946945525               |
| SNP_P4_127320_463299 | NW_004515882.1 | Scaffold398 | 463299                  | AA                              | GG              | 1946945527               |
| SNP_P4_127322_464764 | NW_004515882.1 | Scaffold398 | 464764                  | AA                              | GG              | 1946945529               |
| SNP_P4_127323_465866 | NW_004515882.1 | Scaffold398 | 465866                  | CC                              | TT              | 1946945531               |
| SNP_P4_127324_465882 | NW_004515882.1 | Scaffold398 | 465882                  | AA                              | CC              | 1946945533               |
| SNP_P4_127325_465988 | NW_004515882.1 | Scaffold398 | 465988                  | AA                              | GG              | 1946945536               |
| SNP_P4_127327_467524 | NW_004515882.1 | Scaffold398 | 467524                  | AA                              | TT              | 1946945538               |
| SNP_P4_127328_470387 | NW_004515882.1 | Scaffold398 | 470387                  | TT                              | GG              | 1946945540               |
| SNP_P4_127329_470964 | NW_004515882.1 | Scaffold398 | 470964                  | CC                              | TT              | 1946945542               |
| SNP_P4_127331_475248 | NW_004515882.1 | Scaffold398 | 475248                  | GG                              | AA              | 1946945544               |
| SNP_P4_127332_476310 | NW_004515882.1 | Scaffold398 | 476310                  | AA                              | GG              | 1946945546               |
| SNP_P4_127333_477103 | NW_004515882.1 | Scaffold398 | 477103                  | GG                              | AA              | 1946945548               |
| SNP_P4_127334_477471 | NW_004515882.1 | Scaffold398 | 477471                  | AA                              | GG              | 1946945550               |
| SNP_P4_127335_480191 | NW_004515882.1 | Scaffold398 | 480191                  | AA                              | GG              | 1946945552               |
| SNP_P4_127336_480885 | NW_004515882.1 | Scaffold398 | 480885                  | CC                              | TT              | 1946945554               |
| SNP_P4_127337_480931 | NW_004515882.1 | Scaffold398 | 480931                  | TT                              | CC              | 1946945556               |
| SNP_P4_127338_483412 | NW_004515882.1 | Scaffold398 | 483412                  | GG                              | AA              | 1946945558               |
| SNP_P4_127339_486242 | NW_004515882.1 | Scaffold398 | 486242                  | TT                              | AA              | 1946945560               |

| SNPs IDs             | Chromosome IDs | Chromosomes | Physical positions (bp) | CDC Frontier (Reference genome) | (ILWC46 & LPNB) | NCBI SNPdb Accession IDs |
|----------------------|----------------|-------------|-------------------------|---------------------------------|-----------------|--------------------------|
| SNP_P4_127342_491080 | NW_004515882.1 | Scaffold398 | 491080                  | CC                              | AA              | 1946945562               |
| SNP_P4_127343_491110 | NW_004515882.1 | Scaffold398 | 491110                  | GG                              | CC              | 1946945565               |
| SNP_P4_127344_491711 | NW_004515882.1 | Scaffold398 | 491711                  | CC                              | TT              | 1946945567               |
| SNP_P4_127345_491737 | NW_004515882.1 | Scaffold398 | 491737                  | GG                              | AA              | 1946945569               |
| SNP_P4_127346_491978 | NW_004515882.1 | Scaffold398 | 491978                  | GG                              | AA              | 1946945571               |
| SNP_P4_127347_492416 | NW_004515882.1 | Scaffold398 | 492416                  | TT                              | CC              | 1946945573               |
| SNP_P4_127349_492578 | NW_004515882.1 | Scaffold398 | 492578                  | AA                              | TT              | 1946945575               |
| SNP_P4_127350_492770 | NW_004515882.1 | Scaffold398 | 492770                  | TT                              | CC              | 1946945577               |
| SNP_P4_127351_494137 | NW_004515882.1 | Scaffold398 | 494137                  | AA                              | GG              | 1946945579               |
| SNP_P4_127352_494496 | NW_004515882.1 | Scaffold398 | 494496                  | AA                              | GG              | 1946945581               |
| SNP_P4_127353_494799 | NW_004515882.1 | Scaffold398 | 494799                  | TT                              | CC              | 1946945583               |
| SNP_P4_127355_494984 | NW_004515882.1 | Scaffold398 | 494984                  | CC                              | TT              | 1946945585               |
| SNP_P4_127356_495796 | NW_004515882.1 | Scaffold398 | 495796                  | CC                              | TT              | 1946945587               |
| SNP_P4_127357_495798 | NW_004515882.1 | Scaffold398 | 495798                  | CC                              | TT              | 1946945589               |
| SNP_P4_127358_496385 | NW_004515882.1 | Scaffold398 | 496385                  | CC                              | TT              | 1946945591               |
| SNP_P4_127359_29456  | NW_004515883.1 | Scaffold399 | 29456                   | GG                              | AA              | 1946945593               |
| SNP_P4_127360_29468  | NW_004515883.1 | Scaffold399 | 29468                   | AA                              | GG              | 1946945595               |
| SNP_P4_127361_29476  | NW_004515883.1 | Scaffold399 | 29476                   | GG                              | CC              | 1946945597               |
| SNP_P4_127362_44351  | NW_004515883.1 | Scaffold399 | 44351                   | AA                              | TT              | 1946945599               |
| SNP_P4_127363_49518  | NW_004515883.1 | Scaffold399 | 49518                   | TT                              | AA              | 1946945601               |
| SNP_P4_127364_72236  | NW_004515883.1 | Scaffold399 | 72236                   | TT                              | CC              | 1946945604               |
| SNP_P4_127365_72247  | NW_004515883.1 | Scaffold399 | 72247                   | CC                              | AA              | 1946945606               |
| SNP_P4_127366_74227  | NW_004515883.1 | Scaffold399 | 74227                   | AA                              | GG              | 1946945608               |
| SNP_P4_127367_74228  | NW_004515883.1 | Scaffold399 | 74228                   | AA                              | CC              | 1946945610               |
| SNP_P4_127368_74236  | NW_004515883.1 | Scaffold399 | 74236                   | GG                              | TT              | 1946945612               |
| SNP_P4_127369_81299  | NW_004515883.1 | Scaffold399 | 81299                   | AA                              | GG              | 1946945614               |
| SNP_P4_127370_81810  | NW_004515883.1 | Scaffold399 | 81810                   | AA                              | GG              | 1946945616               |
| SNP_P4_127371_82474  | NW_004515883.1 | Scaffold399 | 82474                   | GG                              | TT              | 1946945618               |
| SNP_P4_127372_82523  | NW_004515883.1 | Scaffold399 | 82523                   | CC                              | AA              | 1946945620               |
| SNP_P4_127373_82533  | NW_004515883.1 | Scaffold399 | 82533                   | AA                              | GG              | 1946945622               |
| SNP_P4_127374_82565  | NW_004515883.1 | Scaffold399 | 82565                   | TT                              | AA              | 1946945624               |
| SNP_P4_127375_94738  | NW_004515883.1 | Scaffold399 | 94738                   | TT                              | GG              | 1946945626               |
| SNP_P4_127376_94758  | NW_004515883.1 | Scaffold399 | 94758                   | CC                              | TT              | 1946945628               |
| SNP_P4_127377_94774  | NW_004515883.1 | Scaffold399 | 94774                   | TT                              | CC              | 1946945630               |
| SNP_P4_127378_94776  | NW_004515883.1 | Scaffold399 | 94776                   | AA                              | CC              | 1946945632               |
| SNP_P4_127379_104581 | NW_004515883.1 | Scaffold399 | 104581                  | CC                              | TT              | 1946945634               |
| SNP_P4_127380_111173 | NW_004515883.1 | Scaffold399 | 111173                  | AA                              | GG              | 1946945636               |
| SNP_P4_127381_364    | NW_004515884.1 | Scaffold400 | 364                     | TT                              | GG              | 1946945638               |
| SNP_P4_127382_403    | NW_004515884.1 | Scaffold400 | 403                     | AA                              | GG              | 1946945640               |
| SNP_P4_127385_6364   | NW_004515884.1 | Scaffold400 | 6364                    | GG                              | AA              | 1946945642               |
| SNP_P4_127387_17157  | NW_004515884.1 | Scaffold400 | 17157                   | CC                              | TT              | 1946945644               |
| SNP_P4_127388_17166  | NW_004515884.1 | Scaffold400 | 17166                   | GG                              | CC              | 1946945646               |

| SNPs IDs            | Chromosome IDs | Chromosomes | Physical positions (bp) | CDC Frontier (Reference genome) | (ILWC46 & LPNB) | NCBI SNPdb Accession IDs |
|---------------------|----------------|-------------|-------------------------|---------------------------------|-----------------|--------------------------|
| SNP_P4_127389_17170 | NW_004515884.1 | Scaffold400 | 17170                   | CC                              | TT              | 1946945648               |
| SNP_P4_127390_25252 | NW_004515884.1 | Scaffold400 | 25252                   | AA                              | GG              | 1946945650               |
| SNP_P4_127391_25282 | NW_004515884.1 | Scaffold400 | 25282                   | AA                              | CC              | 1946945652               |
| SNP_P4_127393_41412 | NW_004515884.1 | Scaffold400 | 41412                   | TT                              | CC              | 1946945654               |
| SNP_P4_127394_41428 | NW_004515884.1 | Scaffold400 | 41428                   | TT                              | AA              | 1946945656               |
| SNP_P4_127395_41693 | NW_004515884.1 | Scaffold400 | 41693                   | TT                              | CC              | 1946945658               |
| SNP_P4_127396_41696 | NW_004515884.1 | Scaffold400 | 41696                   | GG                              | AA              | 1946945660               |
| SNP_P4_127397_41714 | NW_004515884.1 | Scaffold400 | 41714                   | TT                              | CC              | 1946945662               |
| SNP_P4_127398_41718 | NW_004515884.1 | Scaffold400 | 41718                   | CC                              | TT              | 1946945664               |
| SNP_P4_127399_41730 | NW_004515884.1 | Scaffold400 | 41730                   | TT                              | CC              | 1946945666               |
| SNP_P4_127400_41800 | NW_004515884.1 | Scaffold400 | 41800                   | AA                              | CC              | 1946945668               |
| SNP_P4_127401_41853 | NW_004515884.1 | Scaffold400 | 41853                   | GG                              | AA              | 1946945670               |
| SNP_P4_127402_41876 | NW_004515884.1 | Scaffold400 | 41876                   | GG                              | CC              | 1946945672               |
| SNP_P4_127403_41894 | NW_004515884.1 | Scaffold400 | 41894                   | TT                              | CC              | 1946945674               |
| SNP_P4_127404_41895 | NW_004515884.1 | Scaffold400 | 41895                   | GG                              | TT              | 1946945676               |
| SNP_P4_127405_41930 | NW_004515884.1 | Scaffold400 | 41930                   | CC                              | AA              | 1946945678               |
| SNP_P4_127406_41938 | NW_004515884.1 | Scaffold400 | 41938                   | TT                              | AA              | 1946945680               |
| SNP_P4_127407_41948 | NW_004515884.1 | Scaffold400 | 41948                   | GG                              | AA              | 1946945682               |
| SNP_P4_127408_42027 | NW_004515884.1 | Scaffold400 | 42027                   | GG                              | AA              | 1946945684               |
| SNP_P4_127409_42075 | NW_004515884.1 | Scaffold400 | 42075                   | CC                              | AA              | 1946945686               |
| SNP_P4_127410_42090 | NW_004515884.1 | Scaffold400 | 42090                   | AA                              | TT              | 1946945688               |
| SNP_P4_127411_42099 | NW_004515884.1 | Scaffold400 | 42099                   | GG                              | AA              | 1946945690               |
| SNP_P4_127412_42101 | NW_004515884.1 | Scaffold400 | 42101                   | CC                              | TT              | 1946945692               |
| SNP_P4_127413_42115 | NW_004515884.1 | Scaffold400 | 42115                   | TT                              | CC              | 1946945694               |
| SNP_P4_127414_42184 | NW_004515884.1 | Scaffold400 | 42184                   | AA                              | TT              | 1946945696               |
| SNP_P4_127415_42193 | NW_004515884.1 | Scaffold400 | 42193                   | TT                              | AA              | 1946945698               |
| SNP_P4_127416_42194 | NW_004515884.1 | Scaffold400 | 42194                   | AA                              | TT              | 1946945700               |
| SNP_P4_127417_42196 | NW_004515884.1 | Scaffold400 | 42196                   | GG                              | CC              | 1946945702               |
| SNP_P4_127418_42255 | NW_004515884.1 | Scaffold400 | 42255                   | GG                              | TT              | 1946945704               |
| SNP_P4_127419_42273 | NW_004515884.1 | Scaffold400 | 42273                   | CC                              | TT              | 1946945706               |
| SNP_P4_127420_42291 | NW_004515884.1 | Scaffold400 | 42291                   | TT                              | CC              | 1946945708               |
| SNP_P4_127421_42373 | NW_004515884.1 | Scaffold400 | 42373                   | TT                              | GG              | 1946945710               |
| SNP_P4_127422_42433 | NW_004515884.1 | Scaffold400 | 42433                   | TT                              | CC              | 1946945712               |
| SNP_P4_127423_42441 | NW_004515884.1 | Scaffold400 | 42441                   | AA                              | TT              | 1946945714               |
| SNP_P4_127424_42459 | NW_004515884.1 | Scaffold400 | 42459                   | CC                              | TT              | 1946945716               |
| SNP_P4_127425_42503 | NW_004515884.1 | Scaffold400 | 42503                   | TT                              | CC              | 1946945718               |
| SNP_P4_127426_42544 | NW_004515884.1 | Scaffold400 | 42544                   | TT                              | AA              | 1946945720               |
| SNP_P4_127427_42806 | NW_004515884.1 | Scaffold400 | 42806                   | CC                              | TT              | 1946945722               |
| SNP_P4_127428_42818 | NW_004515884.1 | Scaffold400 | 42818                   | TT                              | CC              | 1946945724               |
| SNP_P4_127429_42846 | NW_004515884.1 | Scaffold400 | 42846                   | TT                              | GG              | 1946945726               |
| SNP_P4_127430_43070 | NW_004515884.1 | Scaffold400 | 43070                   | CC                              | GG              | 1946945728               |
| SNP_P4_127431_43194 | NW_004515884.1 | Scaffold400 | 43194                   | CC                              | AA              | 1946945730               |

| SNPs IDs             | Chromosome IDs | Chromosomes | Physical positions (bp) | CDC Frontier (Reference genome) | (ILWC46 & LPNB) | NCBI SNPdb Accession IDs |
|----------------------|----------------|-------------|-------------------------|---------------------------------|-----------------|--------------------------|
| SNP_P4_127432_43238  | NW_004515884.1 | Scaffold400 | 43238                   | CC                              | AA              | 1946945732               |
| SNP_P4_127433_43463  | NW_004515884.1 | Scaffold400 | 43463                   | TT                              | AA              | 1946945734               |
| SNP_P4_127434_43529  | NW_004515884.1 | Scaffold400 | 43529                   | CC                              | TT              | 1946945736               |
| SNP_P4_127436_43620  | NW_004515884.1 | Scaffold400 | 43620                   | CC                              | TT              | 1946945738               |
| SNP_P4_127437_43636  | NW_004515884.1 | Scaffold400 | 43636                   | AA                              | GG              | 1946945740               |
| SNP_P4_127438_43649  | NW_004515884.1 | Scaffold400 | 43649                   | CC                              | GG              | 1946945742               |
| SNP_P4_127439_62760  | NW_004515884.1 | Scaffold400 | 62760                   | GG                              | AA              | 1946945744               |
| SNP_P4_127440_62808  | NW_004515884.1 | Scaffold400 | 62808                   | AA                              | GG              | 1946945746               |
| SNP_P4_127441_66610  | NW_004515884.1 | Scaffold400 | 66610                   | AA                              | GG              | 1946945748               |
| SNP_P4_127442_66860  | NW_004515884.1 | Scaffold400 | 66860                   | AA                              | TT              | 1946945750               |
| SNP_P4_127443_66878  | NW_004515884.1 | Scaffold400 | 66878                   | AA                              | GG              | 1946945752               |
| SNP_P4_127444_66914  | NW_004515884.1 | Scaffold400 | 66914                   | AA                              | GG              | 1946945754               |
| SNP_P4_127445_67155  | NW_004515884.1 | Scaffold400 | 67155                   | AA                              | TT              | 1946945756               |
| SNP_P4_127446_69435  | NW_004515884.1 | Scaffold400 | 69435                   | TT                              | CC              | 1946945758               |
| SNP_P4_127447_69799  | NW_004515884.1 | Scaffold400 | 69799                   | AA                              | GG              | 1946945760               |
| SNP_P4_127448_11899  | NW_004515885.1 | Scaffold401 | 11899                   | TT                              | GG              | 1946945762               |
| SNP_P4_127449_22252  | NW_004515885.1 | Scaffold401 | 22252                   | TT                              | AA              | 1946945764               |
| SNP_P4_127450_33879  | NW_004515885.1 | Scaffold401 | 33879                   | AA                              | GG              | 1946945766               |
| SNP_P4_127451_45121  | NW_004515885.1 | Scaffold401 | 45121                   | CC                              | TT              | 1946945768               |
| SNP_P4_127452_53298  | NW_004515885.1 | Scaffold401 | 53298                   | TT                              | GG              | 1946945770               |
| SNP_P4_127454_81194  | NW_004515885.1 | Scaffold401 | 81194                   | AA                              | GG              | 1946945772               |
| SNP_P4_127455_81199  | NW_004515885.1 | Scaffold401 | 81199                   | TT                              | AA              | 1946945774               |
| SNP_P4_127457_100495 | NW_004515885.1 | Scaffold401 | 100495                  | AA                              | GG              | 1946945777               |
| SNP_P4_127458_102059 | NW_004515885.1 | Scaffold401 | 102059                  | AA                              | CC              | 1946945779               |
| SNP_P4_127459_102072 | NW_004515885.1 | Scaffold401 | 102072                  | GG                              | CC              | 1946945781               |
| SNP_P4_127460_102107 | NW_004515885.1 | Scaffold401 | 102107                  | CC                              | AA              | 1946945783               |
| SNP_P4_127461_102112 | NW_004515885.1 | Scaffold401 | 102112                  | CC                              | AA              | 1946945785               |
| SNP_P4_127462_102160 | NW_004515885.1 | Scaffold401 | 102160                  | CC                              | TT              | 1946945787               |
| SNP_P4_127463_102164 | NW_004515885.1 | Scaffold401 | 102164                  | TT                              | CC              | 1946945789               |
| SNP_P4_127464_102417 | NW_004515885.1 | Scaffold401 | 102417                  | TT                              | GG              | 1946945791               |
| SNP_P4_127465_102424 | NW_004515885.1 | Scaffold401 | 102424                  | TT                              | CC              | 1946945793               |
| SNP_P4_127466_102467 | NW_004515885.1 | Scaffold401 | 102467                  | AA                              | GG              | 1946945795               |
| SNP_P4_127467_104994 | NW_004515885.1 | Scaffold401 | 104994                  | CC                              | TT              | 1946945797               |
| SNP_P4_127468_105007 | NW_004515885.1 | Scaffold401 | 105007                  | TT                              | AA              | 1946945799               |
| SNP_P4_127469_123632 | NW_004515885.1 | Scaffold401 | 123632                  | GG                              | TT              | 1946945801               |
| SNP_P4_127470_128357 | NW_004515885.1 | Scaffold401 | 128357                  | AA                              | TT              | 1946945803               |
| SNP_P4_127471_128358 | NW_004515885.1 | Scaffold401 | 128358                  | TT                              | AA              | 1946945805               |
| SNP_P4_127472_149300 | NW_004515885.1 | Scaffold401 | 149300                  | TT                              | AA              | 1946945807               |
| SNP_P4_127474_151228 | NW_004515885.1 | Scaffold401 | 151228                  | GG                              | CC              | 1946945809               |
| SNP_P4_127475_166656 | NW_004515885.1 | Scaffold401 | 166656                  | TT                              | CC              | 1946945811               |
| SNP_P4_127476_166657 | NW_004515885.1 | Scaffold401 | 166657                  | TT                              | GG              | 1946945813               |
| SNP_P4_127477_166668 | NW_004515885.1 | Scaffold401 | 166668                  | AA                              | GG              | 1946945815               |

| SNPs IDs             | Chromosome IDs | Chromosomes | Physical positions (bp) | CDC Frontier (Reference genome) | (ILWC46 & LPNB) | NCBI SNPdb Accession IDs |
|----------------------|----------------|-------------|-------------------------|---------------------------------|-----------------|--------------------------|
| SNP_P4_127478_166924 | NW_004515885.1 | Scaffold401 | 166924                  | TT                              | AA              | 1946945817               |
| SNP_P4_127479_167002 | NW_004515885.1 | Scaffold401 | 167002                  | TT                              | CC              | 1946945819               |
| SNP_P4_127480_167073 | NW_004515885.1 | Scaffold401 | 167073                  | AA                              | GG              | 1946945821               |
| SNP_P4_127481_167086 | NW_004515885.1 | Scaffold401 | 167086                  | TT                              | GG              | 1946945823               |
| SNP_P4_127482_169029 | NW_004515885.1 | Scaffold401 | 169029                  | AA                              | TT              | 1946945826               |
| SNP_P4_127483_169032 | NW_004515885.1 | Scaffold401 | 169032                  | TT                              | GG              | 1946945828               |
| SNP_P4_127484_172151 | NW_004515885.1 | Scaffold401 | 172151                  | CC                              | TT              | 1946945830               |
| SNP_P4_127485_172467 | NW_004515885.1 | Scaffold401 | 172467                  | TT                              | CC              | 1946945832               |
| SNP_P4_127487_202112 | NW_004515885.1 | Scaffold401 | 202112                  | TT                              | CC              | 1946945834               |
| SNP_P4_127488_215463 | NW_004515885.1 | Scaffold401 | 215463                  | TT                              | CC              | 1946945836               |
| SNP_P4_127489_215763 | NW_004515885.1 | Scaffold401 | 215763                  | AA                              | GG              | 1946945838               |
| SNP_P4_127490_221041 | NW_004515885.1 | Scaffold401 | 221041                  | TT                              | CC              | 1946945840               |
| SNP_P4_127491_223188 | NW_004515885.1 | Scaffold401 | 223188                  | GG                              | TT              | 1946945842               |
| SNP_P4_127492_223190 | NW_004515885.1 | Scaffold401 | 223190                  | GG                              | AA              | 1946945844               |
| SNP_P4_127493_223198 | NW_004515885.1 | Scaffold401 | 223198                  | CC                              | TT              | 1946945846               |
| SNP_P4_127494_223199 | NW_004515885.1 | Scaffold401 | 223199                  | CC                              | AA              | 1946945848               |
| SNP_P4_127495_2225   | NW_004515886.1 | Scaffold404 | 2225                    | AA                              | TT              | 1946945850               |
| SNP_P4_127496_2443   | NW_004515886.1 | Scaffold404 | 2443                    | AA                              | CC              | 1946945852               |
| SNP_P4_127497_2667   | NW_004515886.1 | Scaffold404 | 2667                    | AA                              | GG              | 1946945854               |
| SNP_P4_127498_2727   | NW_004515886.1 | Scaffold404 | 2727                    | AA                              | TT              | 1946945856               |
| SNP_P4_127499_2753   | NW_004515886.1 | Scaffold404 | 2753                    | AA                              | CC              | 1946945858               |
| SNP_P4_127500_2830   | NW_004515886.1 | Scaffold404 | 2830                    | AA                              | GG              | 1946945860               |
| SNP_P4_127501_6493   | NW_004515886.1 | Scaffold404 | 6493                    | GG                              | CC              | 1946945862               |
| SNP_P4_127502_6627   | NW_004515886.1 | Scaffold404 | 6627                    | TT                              | AA              | 1946945864               |
| SNP_P4_127503_6630   | NW_004515886.1 | Scaffold404 | 6630                    | TT                              | AA              | 1946945866               |
| SNP_P4_127504_6638   | NW_004515886.1 | Scaffold404 | 6638                    | TT                              | AA              | 1946945868               |
| SNP_P4_127505_6786   | NW_004515886.1 | Scaffold404 | 6786                    | AA                              | CC              | 1946945870               |
| SNP_P4_127506_6824   | NW_004515886.1 | Scaffold404 | 6824                    | TT                              | AA              | 1946945872               |
| SNP_P4_127508_7214   | NW_004515886.1 | Scaffold404 | 7214                    | AA                              | TT              | 1946945874               |
| SNP_P4_127509_7503   | NW_004515886.1 | Scaffold404 | 7503                    | TT                              | GG              | 1946945876               |
| SNP_P4_127510_13061  | NW_004515886.1 | Scaffold404 | 13061                   | GG                              | TT              | 1946945878               |
| SNP_P4_127511_13110  | NW_004515886.1 | Scaffold404 | 13110                   | AA                              | GG              | 1946945880               |
| SNP_P4_127512_14522  | NW_004515886.1 | Scaffold404 | 14522                   | AA                              | TT              | 1946945882               |
| SNP_P4_127513_14532  | NW_004515886.1 | Scaffold404 | 14532                   | CC                              | GG              | 1946945884               |
| SNP_P4_127514_15281  | NW_004515886.1 | Scaffold404 | 15281                   | TT                              | AA              | 1946945886               |
| SNP_P4_127515_18382  | NW_004515886.1 | Scaffold404 | 18382                   | AA                              | TT              | 1946945888               |
| SNP_P4_127516_23747  | NW_004515886.1 | Scaffold404 | 23747                   | CC                              | GG              | 1946945890               |
| SNP_P4_127517_23773  | NW_004515886.1 | Scaffold404 | 23773                   | TT                              | CC              | 1946945892               |
| SNP_P4_127518_23775  | NW_004515886.1 | Scaffold404 | 23775                   | GG                              | AA              | 1946945894               |
| SNP_P4_127519_23823  | NW_004515886.1 | Scaffold404 | 23823                   | TT                              | AA              | 1946945896               |
| SNP_P4_127520_23830  | NW_004515886.1 | Scaffold404 | 23830                   | CC                              | AA              | 1946945898               |
| SNP_P4_127521_24107  | NW_004515886.1 | Scaffold404 | 24107                   | TT                              | AA              | 1946945900               |

| SNPs IDs            | Chromosome IDs | Chromosomes | Physical positions (bp) | CDC Frontier (Reference genome) | (ILWC46 & LPNB) | NCBI SNPdb Accession IDs |
|---------------------|----------------|-------------|-------------------------|---------------------------------|-----------------|--------------------------|
| SNP_P4_127522_25500 | NW_004515886.1 | Scaffold404 | 25500                   | CC                              | GG              | 1946945902               |
| SNP_P4_127523_25508 | NW_004515886.1 | Scaffold404 | 25508                   | GG                              | AA              | 1946945904               |
| SNP_P4_127524_25612 | NW_004515886.1 | Scaffold404 | 25612                   | CC                              | TT              | 1946945906               |
| SNP_P4_127525_25619 | NW_004515886.1 | Scaffold404 | 25619                   | GG                              | AA              | 1946945908               |
| SNP_P4_127526_25667 | NW_004515886.1 | Scaffold404 | 25667                   | TT                              | GG              | 1946945910               |
| SNP_P4_127527_25709 | NW_004515886.1 | Scaffold404 | 25709                   | AA                              | GG              | 1946945912               |
| SNP_P4_127528_25717 | NW_004515886.1 | Scaffold404 | 25717                   | TT                              | CC              | 1946945914               |
| SNP_P4_127529_25840 | NW_004515886.1 | Scaffold404 | 25840                   | TT                              | AA              | 1946945916               |
| SNP_P4_127530_25848 | NW_004515886.1 | Scaffold404 | 25848                   | TT                              | GG              | 1946945918               |
| SNP_P4_127531_25849 | NW_004515886.1 | Scaffold404 | 25849                   | AA                              | GG              | 1946945920               |
| SNP_P4_127532_25867 | NW_004515886.1 | Scaffold404 | 25867                   | AA                              | GG              | 1946945922               |
| SNP_P4_127533_25909 | NW_004515886.1 | Scaffold404 | 25909                   | TT                              | CC              | 1946945924               |
| SNP_P4_127534_25933 | NW_004515886.1 | Scaffold404 | 25933                   | AA                              | TT              | 1946945926               |
| SNP_P4_127535_25943 | NW_004515886.1 | Scaffold404 | 25943                   | AA                              | GG              | 1946945928               |
| SNP_P4_127536_25978 | NW_004515886.1 | Scaffold404 | 25978                   | TT                              | CC              | 1946945930               |
| SNP_P4_127537_26044 | NW_004515886.1 | Scaffold404 | 26044                   | AA                              | CC              | 1946945932               |
| SNP_P4_127538_26074 | NW_004515886.1 | Scaffold404 | 26074                   | TT                              | CC              | 1946945934               |
| SNP_P4_127539_26153 | NW_004515886.1 | Scaffold404 | 26153                   | CC                              | AA              | 1946945936               |
| SNP_P4_127540_26172 | NW_004515886.1 | Scaffold404 | 26172                   | TT                              | AA              | 1946945938               |
| SNP_P4_127541_33664 | NW_004515886.1 | Scaffold404 | 33664                   | GG                              | TT              | 1946945940               |
| SNP_P4_127542_35473 | NW_004515886.1 | Scaffold404 | 35473                   | TT                              | CC              | 1946945942               |
| SNP_P4_127543_35530 | NW_004515886.1 | Scaffold404 | 35530                   | CC                              | GG              | 1946945944               |
| SNP_P4_127544_37925 | NW_004515886.1 | Scaffold404 | 37925                   | TT                              | CC              | 1946945946               |
| SNP_P4_127545_38214 | NW_004515886.1 | Scaffold404 | 38214                   | GG                              | TT              | 1946945949               |
| SNP_P4_127546_38222 | NW_004515886.1 | Scaffold404 | 38222                   | AA                              | GG              | 1946945951               |
| SNP_P4_127547_40134 | NW_004515886.1 | Scaffold404 | 40134                   | CC                              | GG              | 1946945953               |
| SNP_P4_127548_43900 | NW_004515886.1 | Scaffold404 | 43900                   | TT                              | CC              | 1946945955               |
| SNP_P4_127549_43902 | NW_004515886.1 | Scaffold404 | 43902                   | GG                              | AA              | 1946945957               |
| SNP_P4_127550_44041 | NW_004515886.1 | Scaffold404 | 44041                   | AA                              | GG              | 1946945959               |
| SNP_P4_127551_44129 | NW_004515886.1 | Scaffold404 | 44129                   | TT                              | GG              | 1946945961               |
| SNP_P4_127552_44173 | NW_004515886.1 | Scaffold404 | 44173                   | AA                              | TT              | 1946945963               |
| SNP_P4_127553_44190 | NW_004515886.1 | Scaffold404 | 44190                   | TT                              | GG              | 1946945965               |
| SNP_P4_127554_44294 | NW_004515886.1 | Scaffold404 | 44294                   | TT                              | CC              | 1946945967               |
| SNP_P4_127555_44412 | NW_004515886.1 | Scaffold404 | 44412                   | GG                              | AA              | 1946945969               |
| SNP_P4_127556_44433 | NW_004515886.1 | Scaffold404 | 44433                   | TT                              | CC              | 1946945971               |
| SNP_P4_127557_44791 | NW_004515886.1 | Scaffold404 | 44791                   | CC                              | TT              | 1946945973               |
| SNP_P4_127558_44825 | NW_004515886.1 | Scaffold404 | 44825                   | AA                              | TT              | 1946945975               |
| SNP_P4_127559_44838 | NW_004515886.1 | Scaffold404 | 44838                   | GG                              | TT              | 1946945977               |
| SNP_P4_127560_44840 | NW_004515886.1 | Scaffold404 | 44840                   | GG                              | TT              | 1946945979               |
| SNP_P4_127561_44854 | NW_004515886.1 | Scaffold404 | 44854                   | AA                              | TT              | 1946945981               |
| SNP_P4_127562_44937 | NW_004515886.1 | Scaffold404 | 44937                   | GG                              | TT              | 1946945983               |
| SNP_P4_127563_45145 | NW_004515886.1 | Scaffold404 | 45145                   | TT                              | CC              | 1946945985               |

| SNPs IDs             | Chromosome IDs | Chromosomes | Physical positions (bp) | CDC Frontier (Reference genome) | (ILWC46 & LPNB) | NCBI SNPdb Accession IDs |
|----------------------|----------------|-------------|-------------------------|---------------------------------|-----------------|--------------------------|
| SNP_P4_127564_45189  | NW_004515886.1 | Scaffold404 | 45189                   | TT                              | CC              | 1946945987               |
| SNP_P4_127565_46595  | NW_004515886.1 | Scaffold404 | 46595                   | AA                              | GG              | 1946945989               |
| SNP_P4_127566_46836  | NW_004515886.1 | Scaffold404 | 46836                   | GG                              | AA              | 1946945991               |
| SNP_P4_127567_50057  | NW_004515886.1 | Scaffold404 | 50057                   | TT                              | AA              | 1946945993               |
| SNP_P4_127568_55664  | NW_004515886.1 | Scaffold404 | 55664                   | TT                              | CC              | 1946945995               |
| SNP_P4_127569_61652  | NW_004515886.1 | Scaffold404 | 61652                   | CC                              | GG              | 1946945997               |
| SNP_P4_127570_62267  | NW_004515886.1 | Scaffold404 | 62267                   | CC                              | TT              | 1946945999               |
| SNP_P4_127571_63567  | NW_004515886.1 | Scaffold404 | 63567                   | AA                              | GG              | 1946946001               |
| SNP_P4_127572_63650  | NW_004515886.1 | Scaffold404 | 63650                   | AA                              | TT              | 1946946003               |
| SNP_P4_127573_63960  | NW_004515886.1 | Scaffold404 | 63960                   | AA                              | GG              | 1946946005               |
| SNP_P4_127574_63963  | NW_004515886.1 | Scaffold404 | 63963                   | TT                              | CC              | 1946946007               |
| SNP_P4_127575_64017  | NW_004515886.1 | Scaffold404 | 64017                   | TT                              | AA              | 1946946009               |
| SNP_P4_127576_64113  | NW_004515886.1 | Scaffold404 | 64113                   | AA                              | CC              | 1946946011               |
| SNP_P4_127577_64209  | NW_004515886.1 | Scaffold404 | 64209                   | AA                              | TT              | 1946946013               |
| SNP_P4_127578_64260  | NW_004515886.1 | Scaffold404 | 64260                   | AA                              | CC              | 1946946015               |
| SNP_P4_127579_64304  | NW_004515886.1 | Scaffold404 | 64304                   | AA                              | GG              | 1946946017               |
| SNP_P4_127580_64704  | NW_004515886.1 | Scaffold404 | 64704                   | AA                              | TT              | 1946946019               |
| SNP_P4_127581_64707  | NW_004515886.1 | Scaffold404 | 64707                   | TT                              | AA              | 1946946021               |
| SNP_P4_127582_64797  | NW_004515886.1 | Scaffold404 | 64797                   | CC                              | TT              | 1946946023               |
| SNP_P4_127583_64802  | NW_004515886.1 | Scaffold404 | 64802                   | GG                              | TT              | 1946946025               |
| SNP_P4_127584_64809  | NW_004515886.1 | Scaffold404 | 64809                   | GG                              | AA              | 1946946027               |
| SNP_P4_127585_64832  | NW_004515886.1 | Scaffold404 | 64832                   | AA                              | GG              | 1946946029               |
| SNP_P4_127586_71350  | NW_004515886.1 | Scaffold404 | 71350                   | AA                              | TT              | 1946946031               |
| SNP_P4_127587_80083  | NW_004515886.1 | Scaffold404 | 80083                   | GG                              | CC              | 1946946033               |
| SNP_P4_127588_111637 | NW_004515886.1 | Scaffold404 | 111637                  | TT                              | CC              | 1946946035               |
| SNP_P4_127589_114665 | NW_004515886.1 | Scaffold404 | 114665                  | GG                              | AA              | 1946946037               |
| SNP_P4_127590_119682 | NW_004515886.1 | Scaffold404 | 119682                  | TT                              | GG              | 1946946039               |
| SNP_P4_127591_119693 | NW_004515886.1 | Scaffold404 | 119693                  | TT                              | CC              | 1946946041               |
| SNP_P4_127592_119695 | NW_004515886.1 | Scaffold404 | 119695                  | TT                              | CC              | 1946946043               |
| SNP_P4_127593_126347 | NW_004515886.1 | Scaffold404 | 126347                  | AA                              | GG              | 1946946045               |
| SNP_P4_127594_126367 | NW_004515886.1 | Scaffold404 | 126367                  | CC                              | AA              | 1946946047               |
| SNP_P4_127595_126513 | NW_004515886.1 | Scaffold404 | 126513                  | TT                              | CC              | 1946946049               |
| SNP_P4_127596_137210 | NW_004515886.1 | Scaffold404 | 137210                  | TT                              | GG              | 1946946051               |
| SNP_P4_127597_143204 | NW_004515886.1 | Scaffold404 | 143204                  | TT                              | CC              | 1946946053               |
| SNP_P4_127598_143387 | NW_004515886.1 | Scaffold404 | 143387                  | TT                              | GG              | 1946946055               |
| SNP_P4_127599_143549 | NW_004515886.1 | Scaffold404 | 143549                  | TT                              | GG              | 1946946057               |
| SNP_P4_127600_143559 | NW_004515886.1 | Scaffold404 | 143559                  | CC                              | TT              | 1946946059               |
| SNP_P4_127601_149879 | NW_004515886.1 | Scaffold404 | 149879                  | AA                              | GG              | 1946946062               |
| SNP_P4_127602_155493 | NW_004515886.1 | Scaffold404 | 155493                  | CC                              | TT              | 1946946064               |
| SNP_P4_127603_156433 | NW_004515886.1 | Scaffold404 | 156433                  | TT                              | CC              | 1946946066               |
| SNP_P4_127604_156437 | NW_004515886.1 | Scaffold404 | 156437                  | GG                              | AA              | 1946946068               |
| SNP_P4_127605_156442 | NW_004515886.1 | Scaffold404 | 156442                  | GG                              | AA              | 1946946070               |



| SNPs IDs             | Chromosome IDs | Chromosomes | Physical positions (bp) | CDC Frontier (Reference genome) | (ILWC46 & LPNB) | NCBI SNPdb Accession IDs |
|----------------------|----------------|-------------|-------------------------|---------------------------------|-----------------|--------------------------|
| SNP_P4_127606_156460 | NW_004515886.1 | Scaffold404 | 156460                  | TT                              | AA              | 1946946072               |
| SNP_P4_127607_156467 | NW_004515886.1 | Scaffold404 | 156467                  | GG                              | AA              | 1946946074               |
| SNP_P4_127608_156504 | NW_004515886.1 | Scaffold404 | 156504                  | TT                              | CC              | 1946946076               |
| SNP_P4_127609_156517 | NW_004515886.1 | Scaffold404 | 156517                  | GG                              | TT              | 1946946078               |
| SNP_P4_127610_161379 | NW_004515886.1 | Scaffold404 | 161379                  | AA                              | GG              | 1946946080               |
| SNP_P4_127611_161868 | NW_004515886.1 | Scaffold404 | 161868                  | AA                              | GG              | 1946946082               |
| SNP_P4_127612_164166 | NW_004515886.1 | Scaffold404 | 164166                  | AA                              | TT              | 1946946084               |
| SNP_P4_127613_164221 | NW_004515886.1 | Scaffold404 | 164221                  | GG                              | AA              | 1946946086               |
| SNP_P4_127615_171380 | NW_004515886.1 | Scaffold404 | 171380                  | TT                              | CC              | 1946946088               |
| SNP_P4_127616_171414 | NW_004515886.1 | Scaffold404 | 171414                  | CC                              | GG              | 1946946090               |
| SNP_P4_127617_178988 | NW_004515886.1 | Scaffold404 | 178988                  | GG                              | AA              | 1946946092               |
| SNP_P4_127618_180599 | NW_004515886.1 | Scaffold404 | 180599                  | GG                              | TT              | 1946946094               |
| SNP_P4_127619_181169 | NW_004515886.1 | Scaffold404 | 181169                  | TT                              | CC              | 1946946096               |
| SNP_P4_127620_181569 | NW_004515886.1 | Scaffold404 | 181569                  | TT                              | CC              | 1946946098               |
| SNP_P4_127621_181570 | NW_004515886.1 | Scaffold404 | 181570                  | TT                              | CC              | 1946946100               |
| SNP_P4_127622_181596 | NW_004515886.1 | Scaffold404 | 181596                  | AA                              | TT              | 1946946102               |
| SNP_P4_127623_181601 | NW_004515886.1 | Scaffold404 | 181601                  | AA                              | GG              | 1946946104               |
| SNP_P4_127624_181602 | NW_004515886.1 | Scaffold404 | 181602                  | TT                              | AA              | 1946946106               |
| SNP_P4_127625_181862 | NW_004515886.1 | Scaffold404 | 181862                  | GG                              | AA              | 1946946108               |
| SNP_P4_127626_181878 | NW_004515886.1 | Scaffold404 | 181878                  | CC                              | GG              | 1946946110               |
| SNP_P4_127627_183812 | NW_004515886.1 | Scaffold404 | 183812                  | TT                              | CC              | 1946946112               |
| SNP_P4_127628_183911 | NW_004515886.1 | Scaffold404 | 183911                  | GG                              | CC              | 1946946114               |
| SNP_P4_127629_183959 | NW_004515886.1 | Scaffold404 | 183959                  | CC                              | TT              | 1946946116               |
| SNP_P4_127630_184064 | NW_004515886.1 | Scaffold404 | 184064                  | GG                              | CC              | 1946946118               |
| SNP_P4_127631_184196 | NW_004515886.1 | Scaffold404 | 184196                  | AA                              | GG              | 1946946120               |
| SNP_P4_127632_184227 | NW_004515886.1 | Scaffold404 | 184227                  | GG                              | AA              | 1946946122               |
| SNP_P4_127633_184308 | NW_004515886.1 | Scaffold404 | 184308                  | TT                              | GG              | 1946946124               |
| SNP_P4_127634_184368 | NW_004515886.1 | Scaffold404 | 184368                  | TT                              | CC              | 1946946126               |
| SNP_P4_127635_184393 | NW_004515886.1 | Scaffold404 | 184393                  | TT                              | AA              | 1946946128               |
| SNP_P4_127636_184423 | NW_004515886.1 | Scaffold404 | 184423                  | TT                              | CC              | 1946946130               |
| SNP_P4_127637_185472 | NW_004515886.1 | Scaffold404 | 185472                  | AA                              | GG              | 1946946132               |
| SNP_P4_127638_185507 | NW_004515886.1 | Scaffold404 | 185507                  | TT                              | CC              | 1946946134               |
| SNP_P4_127639_185529 | NW_004515886.1 | Scaffold404 | 185529                  | CC                              | TT              | 1946946136               |
| SNP_P4_127640_185699 | NW_004515886.1 | Scaffold404 | 185699                  | AA                              | GG              | 1946946138               |
| SNP_P4_127641_185706 | NW_004515886.1 | Scaffold404 | 185706                  | GG                              | CC              | 1946946140               |
| SNP_P4_127642_185765 | NW_004515886.1 | Scaffold404 | 185765                  | AA                              | GG              | 1946946142               |
| SNP_P4_127643_185766 | NW_004515886.1 | Scaffold404 | 185766                  | TT                              | CC              | 1946946144               |
| SNP_P4_127644_185783 | NW_004515886.1 | Scaffold404 | 185783                  | GG                              | TT              | 1946946146               |
| SNP_P4_127645_185794 | NW_004515886.1 | Scaffold404 | 185794                  | CC                              | TT              | 1946946148               |
| SNP_P4_127646_186000 | NW_004515886.1 | Scaffold404 | 186000                  | GG                              | TT              | 1946946150               |
| SNP_P4_127647_186001 | NW_004515886.1 | Scaffold404 | 186001                  | TT                              | GG              | 1946946151               |
| SNP_P4_127648_186050 | NW_004515886.1 | Scaffold404 | 186050                  | CC                              | TT              | 1946946152               |

| SNPs IDs             | Chromosome IDs | Chromosomes | Physical positions (bp) | CDC Frontier (Reference genome) | (ILWC46 & LPNB) | NCBI SNPdb Accession IDs |
|----------------------|----------------|-------------|-------------------------|---------------------------------|-----------------|--------------------------|
| SNP_P4_127649_186059 | NW_004515886.1 | Scaffold404 | 186059                  | TT                              | CC              | 1946946153               |
| SNP_P4_127650_186130 | NW_004515886.1 | Scaffold404 | 186130                  | GG                              | AA              | 1946946154               |
| SNP_P4_127652_204043 | NW_004515886.1 | Scaffold404 | 204043                  | AA                              | TT              | 1946946155               |
| SNP_P4_127653_204110 | NW_004515886.1 | Scaffold404 | 204110                  | AA                              | TT              | 1946946156               |
| SNP_P4_127654_204318 | NW_004515886.1 | Scaffold404 | 204318                  | GG                              | AA              | 1946946158               |
| SNP_P4_127655_204329 | NW_004515886.1 | Scaffold404 | 204329                  | CC                              | TT              | 1946946160               |
| SNP_P4_127656_204426 | NW_004515886.1 | Scaffold404 | 204426                  | CC                              | TT              | 1946946162               |
| SNP_P4_127657_204993 | NW_004515886.1 | Scaffold404 | 204993                  | CC                              | TT              | 1946946164               |
| SNP_P4_127658_230060 | NW_004515886.1 | Scaffold404 | 230060                  | AA                              | GG              | 1946946166               |
| SNP_P4_127659_235191 | NW_004515886.1 | Scaffold404 | 235191                  | CC                              | TT              | 1946946168               |
| SNP_P4_127662_263989 | NW_004515886.1 | Scaffold404 | 263989                  | TT                              | CC              | 1946946170               |
| SNP_P4_127664_272141 | NW_004515886.1 | Scaffold404 | 272141                  | GG                              | AA              | 1946946172               |
| SNP_P4_127665_279596 | NW_004515886.1 | Scaffold404 | 279596                  | GG                              | TT              | 1946946174               |
| SNP_P4_127666_350108 | NW_004515886.1 | Scaffold404 | 350108                  | CC                              | TT              | 1946946176               |
| SNP_P4_127667_350136 | NW_004515886.1 | Scaffold404 | 350136                  | AA                              | TT              | 1946946178               |
| SNP_P4_127668_356780 | NW_004515886.1 | Scaffold404 | 356780                  | CC                              | TT              | 1946946180               |
| SNP_P4_127669_357184 | NW_004515886.1 | Scaffold404 | 357184                  | CC                              | TT              | 1946946182               |
| SNP_P4_127670_383883 | NW_004515886.1 | Scaffold404 | 383883                  | AA                              | GG              | 1946946184               |
| SNP_P4_127671_383917 | NW_004515886.1 | Scaffold404 | 383917                  | GG                              | TT              | 1946946186               |
| SNP_P4_127672_386406 | NW_004515886.1 | Scaffold404 | 386406                  | AA                              | GG              | 1946946188               |
| SNP_P4_127673_386735 | NW_004515886.1 | Scaffold404 | 386735                  | GG                              | AA              | 1946946190               |
| SNP_P4_127675_988    | NW_004515887.1 | Scaffold408 | 988                     | AA                              | TT              | 1946946192               |
| SNP_P4_127676_1001   | NW_004515887.1 | Scaffold408 | 1001                    | TT                              | CC              | 1946946194               |
| SNP_P4_127677_1195   | NW_004515887.1 | Scaffold408 | 1195                    | TT                              | AA              | 1946946196               |
| SNP_P4_127678_1196   | NW_004515887.1 | Scaffold408 | 1196                    | GG                              | TT              | 1946946198               |
| SNP_P4_127679_1446   | NW_004515887.1 | Scaffold408 | 1446                    | TT                              | CC              | 1946946200               |
| SNP_P4_127680_1760   | NW_004515887.1 | Scaffold408 | 1760                    | CC                              | TT              | 1946946202               |
| SNP_P4_127681_2527   | NW_004515887.1 | Scaffold408 | 2527                    | GG                              | AA              | 1946946205               |
| SNP_P4_127682_2573   | NW_004515887.1 | Scaffold408 | 2573                    | AA                              | CC              | 1946946207               |
| SNP_P4_127683_3043   | NW_004515887.1 | Scaffold408 | 3043                    | GG                              | AA              | 1946946209               |
| SNP_P4_127684_3084   | NW_004515887.1 | Scaffold408 | 3084                    | AA                              | GG              | 1946946211               |
| SNP_P4_127685_3231   | NW_004515887.1 | Scaffold408 | 3231                    | CC                              | AA              | 1946946213               |
| SNP_P4_127687_3542   | NW_004515887.1 | Scaffold408 | 3542                    | TT                              | CC              | 1946946215               |
| SNP_P4_127689_3615   | NW_004515887.1 | Scaffold408 | 3615                    | CC                              | AA              | 1946946217               |
| SNP_P4_127690_7615   | NW_004515887.1 | Scaffold408 | 7615                    | TT                              | GG              | 1946946219               |
| SNP_P4_127691_7621   | NW_004515887.1 | Scaffold408 | 7621                    | TT                              | CC              | 1946946221               |
| SNP_P4_127692_7627   | NW_004515887.1 | Scaffold408 | 7627                    | GG                              | AA              | 1946946223               |
| SNP_P4_127693_12211  | NW_004515887.1 | Scaffold408 | 12211                   | CC                              | GG              | 1946946225               |
| SNP_P4_127694_12234  | NW_004515887.1 | Scaffold408 | 12234                   | TT                              | GG              | 1946946227               |
| SNP_P4_127695_12448  | NW_004515887.1 | Scaffold408 | 12448                   | TT                              | AA              | 1946946229               |
| SNP_P4_127696_12475  | NW_004515887.1 | Scaffold408 | 12475                   | GG                              | AA              | 1946946231               |
| SNP_P4_127697_12490  | NW_004515887.1 | Scaffold408 | 12490                   | GG                              | AA              | 1946946233               |

| SNPs IDs             | Chromosome IDs | Chromosomes | Physical positions (bp) | CDC Frontier (Reference genome) | (ILWC46 & LPNB) | NCBI SNPdb Accession IDs |
|----------------------|----------------|-------------|-------------------------|---------------------------------|-----------------|--------------------------|
| SNP_P4_127698_12613  | NW_004515887.1 | Scaffold408 | 12613                   | TT                              | AA              | 1946946235               |
| SNP_P4_127699_12706  | NW_004515887.1 | Scaffold408 | 12706                   | CC                              | TT              | 1946946237               |
| SNP_P4_127700_19427  | NW_004515887.1 | Scaffold408 | 19427                   | TT                              | CC              | 1946946239               |
| SNP_P4_127701_20453  | NW_004515887.1 | Scaffold408 | 20453                   | TT                              | CC              | 1946946241               |
| SNP_P4_127702_20483  | NW_004515887.1 | Scaffold408 | 20483                   | GG                              | CC              | 1946946243               |
| SNP_P4_127703_20490  | NW_004515887.1 | Scaffold408 | 20490                   | CC                              | TT              | 1946946245               |
| SNP_P4_127704_20533  | NW_004515887.1 | Scaffold408 | 20533                   | AA                              | TT              | 1946946247               |
| SNP_P4_127705_20548  | NW_004515887.1 | Scaffold408 | 20548                   | AA                              | GG              | 1946946249               |
| SNP_P4_127706_20880  | NW_004515887.1 | Scaffold408 | 20880                   | CC                              | TT              | 1946946251               |
| SNP_P4_127707_20940  | NW_004515887.1 | Scaffold408 | 20940                   | AA                              | GG              | 1946946253               |
| SNP_P4_127708_20964  | NW_004515887.1 | Scaffold408 | 20964                   | AA                              | TT              | 1946946254               |
| SNP_P4_127709_21200  | NW_004515887.1 | Scaffold408 | 21200                   | AA                              | GG              | 1946946255               |
| SNP_P4_127710_21203  | NW_004515887.1 | Scaffold408 | 21203                   | AA                              | TT              | 1946946256               |
| SNP_P4_127711_21239  | NW_004515887.1 | Scaffold408 | 21239                   | TT                              | CC              | 1946946257               |
| SNP_P4_127712_21302  | NW_004515887.1 | Scaffold408 | 21302                   | TT                              | AA              | 1946946259               |
| SNP_P4_127713_21323  | NW_004515887.1 | Scaffold408 | 21323                   | AA                              | GG              | 1946946261               |
| SNP_P4_127716_45718  | NW_004515887.1 | Scaffold408 | 45718                   | AA                              | GG              | 1946946263               |
| SNP_P4_127717_51031  | NW_004515887.1 | Scaffold408 | 51031                   | AA                              | GG              | 1946946265               |
| SNP_P4_127719_84403  | NW_004515887.1 | Scaffold408 | 84403                   | TT                              | GG              | 1946946267               |
| SNP_P4_127720_84413  | NW_004515887.1 | Scaffold408 | 84413                   | AA                              | CC              | 1946946269               |
| SNP_P4_127721_84481  | NW_004515887.1 | Scaffold408 | 84481                   | AA                              | GG              | 1946946271               |
| SNP_P4_127722_84652  | NW_004515887.1 | Scaffold408 | 84652                   | GG                              | CC              | 1946946273               |
| SNP_P4_127723_84702  | NW_004515887.1 | Scaffold408 | 84702                   | AA                              | CC              | 1946946275               |
| SNP_P4_127724_84715  | NW_004515887.1 | Scaffold408 | 84715                   | TT                              | CC              | 1946946277               |
| SNP_P4_127725_84786  | NW_004515887.1 | Scaffold408 | 84786                   | CC                              | TT              | 1946946279               |
| SNP_P4_127726_84814  | NW_004515887.1 | Scaffold408 | 84814                   | GG                              | AA              | 1946946281               |
| SNP_P4_127727_84864  | NW_004515887.1 | Scaffold408 | 84864                   | TT                              | GG              | 1946946283               |
| SNP_P4_127728_87158  | NW_004515887.1 | Scaffold408 | 87158                   | GG                              | TT              | 1946946285               |
| SNP_P4_127729_92543  | NW_004515887.1 | Scaffold408 | 92543                   | TT                              | CC              | 1946946287               |
| SNP_P4_127730_130476 | NW_004515887.1 | Scaffold408 | 130476                  | TT                              | CC              | 1946946289               |
| SNP_P4_127731_130498 | NW_004515887.1 | Scaffold408 | 130498                  | GG                              | AA              | 1946946291               |
| SNP_P4_127732_130914 | NW_004515887.1 | Scaffold408 | 130914                  | AA                              | GG              | 1946946293               |
| SNP_P4_127733_130929 | NW_004515887.1 | Scaffold408 | 130929                  | TT                              | AA              | 1946946295               |
| SNP_P4_127734_130936 | NW_004515887.1 | Scaffold408 | 130936                  | GG                              | TT              | 1946946297               |
| SNP_P4_127737_131049 | NW_004515887.1 | Scaffold408 | 131049                  | GG                              | AA              | 1946946299               |
| SNP_P4_127738_131124 | NW_004515887.1 | Scaffold408 | 131124                  | GG                              | AA              | 1946946301               |
| SNP_P4_127739_131161 | NW_004515887.1 | Scaffold408 | 131161                  | AA                              | TT              | 1946946303               |
| SNP_P4_127740_131180 | NW_004515887.1 | Scaffold408 | 131180                  | AA                              | GG              | 1946946305               |
| SNP_P4_127741_131272 | NW_004515887.1 | Scaffold408 | 131272                  | TT                              | AA              | 1946946307               |
| SNP_P4_127742_131308 | NW_004515887.1 | Scaffold408 | 131308                  | AA                              | TT              | 1946946309               |
| SNP_P4_127743_131370 | NW_004515887.1 | Scaffold408 | 131370                  | GG                              | AA              | 1946946311               |
| SNP_P4_127744_131371 | NW_004515887.1 | Scaffold408 | 131371                  | CC                              | TT              | 1946946313               |

| SNPs IDs             | Chromosome IDs | Chromosomes | Physical positions (bp) | CDC Frontier (Reference genome) | (ILWC46 & LPNB) | NCBI SNPdb Accession IDs |
|----------------------|----------------|-------------|-------------------------|---------------------------------|-----------------|--------------------------|
| SNP_P4_127745_131372 | NW_004515887.1 | Scaffold408 | 131372                  | GG                              | CC              | 1946946315               |
| SNP_P4_127746_131376 | NW_004515887.1 | Scaffold408 | 131376                  | TT                              | GG              | 1946946317               |
| SNP_P4_127747_131379 | NW_004515887.1 | Scaffold408 | 131379                  | CC                              | TT              | 1946946319               |
| SNP_P4_127748_2424   | NW_004515888.1 | Scaffold409 | 2424                    | CC                              | TT              | 1946946321               |
| SNP_P4_127749_2483   | NW_004515888.1 | Scaffold409 | 2483                    | AA                              | GG              | 1946946323               |
| SNP_P4_127750_2573   | NW_004515888.1 | Scaffold409 | 2573                    | TT                              | CC              | 1946946325               |
| SNP_P4_127751_2604   | NW_004515888.1 | Scaffold409 | 2604                    | CC                              | TT              | 1946946327               |
| SNP_P4_127753_2630   | NW_004515888.1 | Scaffold409 | 2630                    | TT                              | CC              | 1946946329               |
| SNP_P4_127754_2631   | NW_004515888.1 | Scaffold409 | 2631                    | CC                              | AA              | 1946946331               |
| SNP_P4_127755_2673   | NW_004515888.1 | Scaffold409 | 2673                    | GG                              | AA              | 1946946333               |
| SNP_P4_127756_34728  | NW_004515888.1 | Scaffold409 | 34728                   | TT                              | AA              | 1946946335               |
| SNP_P4_127757_34730  | NW_004515888.1 | Scaffold409 | 34730                   | TT                              | GG              | 1946946337               |
| SNP_P4_127758_34743  | NW_004515888.1 | Scaffold409 | 34743                   | TT                              | AA              | 1946946339               |
| SNP_P4_127760_36598  | NW_004515888.1 | Scaffold409 | 36598                   | CC                              | TT              | 1946946341               |
| SNP_P4_127761_36607  | NW_004515888.1 | Scaffold409 | 36607                   | AA                              | GG              | 1946946343               |
| SNP_P4_127762_36633  | NW_004515888.1 | Scaffold409 | 36633                   | TT                              | CC              | 1946946345               |
| SNP_P4_127763_36644  | NW_004515888.1 | Scaffold409 | 36644                   | GG                              | AA              | 1946946347               |
| SNP_P4_127764_36840  | NW_004515888.1 | Scaffold409 | 36840                   | CC                              | AA              | 1946946349               |
| SNP_P4_127765_36882  | NW_004515888.1 | Scaffold409 | 36882                   | TT                              | AA              | 1946946351               |
| SNP_P4_127767_35981  | NW_004515889.1 | Scaffold411 | 35981                   | CC                              | TT              | 1946946353               |
| SNP_P4_127768_41661  | NW_004515889.1 | Scaffold411 | 41661                   | GG                              | AA              | 1946946355               |
| SNP_P4_127769_41671  | NW_004515889.1 | Scaffold411 | 41671                   | CC                              | TT              | 1946946357               |
| SNP_P4_127770_41678  | NW_004515889.1 | Scaffold411 | 41678                   | CC                              | TT              | 1946946359               |
| SNP_P4_127771_41679  | NW_004515889.1 | Scaffold411 | 41679                   | GG                              | AA              | 1946946361               |
| SNP_P4_127772_41681  | NW_004515889.1 | Scaffold411 | 41681                   | TT                              | GG              | 1946946363               |
| SNP_P4_127773_41686  | NW_004515889.1 | Scaffold411 | 41686                   | TT                              | CC              | 1946946365               |
| SNP_P4_127774_41687  | NW_004515889.1 | Scaffold411 | 41687                   | AA                              | GG              | 1946946367               |
| SNP_P4_127775_41694  | NW_004515889.1 | Scaffold411 | 41694                   | AA                              | GG              | 1946946369               |
| SNP_P4_127776_41703  | NW_004515889.1 | Scaffold411 | 41703                   | GG                              | AA              | 1946946371               |
| SNP_P4_127777_41705  | NW_004515889.1 | Scaffold411 | 41705                   | TT                              | AA              | 1946946373               |
| SNP_P4_127778_41738  | NW_004515889.1 | Scaffold411 | 41738                   | AA                              | GG              | 1946946375               |
| SNP_P4_127779_41833  | NW_004515889.1 | Scaffold411 | 41833                   | GG                              | AA              | 1946946377               |
| SNP_P4_127780_41887  | NW_004515889.1 | Scaffold411 | 41887                   | GG                              | AA              | 1946946379               |
| SNP_P4_127781_42280  | NW_004515889.1 | Scaffold411 | 42280                   | TT                              | GG              | 1946946381               |
| SNP_P4_127782_42475  | NW_004515889.1 | Scaffold411 | 42475                   | AA                              | GG              | 1946946383               |
| SNP_P4_127783_42664  | NW_004515889.1 | Scaffold411 | 42664                   | GG                              | AA              | 1946946385               |
| SNP_P4_127784_42714  | NW_004515889.1 | Scaffold411 | 42714                   | TT                              | CC              | 1946946387               |
| SNP_P4_127785_42753  | NW_004515889.1 | Scaffold411 | 42753                   | TT                              | GG              | 1946946389               |
| SNP_P4_127786_42790  | NW_004515889.1 | Scaffold411 | 42790                   | TT                              | AA              | 1946946391               |
| SNP_P4_127787_42864  | NW_004515889.1 | Scaffold411 | 42864                   | TT                              | AA              | 1946946393               |
| SNP_P4_127788_43191  | NW_004515889.1 | Scaffold411 | 43191                   | TT                              | GG              | 1946946395               |
| SNP_P4_127789_60190  | NW_004515889.1 | Scaffold411 | 60190                   | TT                              | AA              | 1946946397               |

| SNPs IDs             | Chromosome IDs | Chromosomes | Physical positions (bp) | CDC Frontier (Reference genome) | (ILWC46 & LPNB) | NCBI SNPdb Accession IDs |
|----------------------|----------------|-------------|-------------------------|---------------------------------|-----------------|--------------------------|
| SNP_P4_127790_73658  | NW_004515889.1 | Scaffold411 | 73658                   | GG                              | AA              | 1946946400               |
| SNP_P4_127791_73664  | NW_004515889.1 | Scaffold411 | 73664                   | AA                              | TT              | 1946946402               |
| SNP_P4_127792_73884  | NW_004515889.1 | Scaffold411 | 73884                   | AA                              | CC              | 1946946404               |
| SNP_P4_127793_73886  | NW_004515889.1 | Scaffold411 | 73886                   | GG                              | AA              | 1946946406               |
| SNP_P4_127794_73903  | NW_004515889.1 | Scaffold411 | 73903                   | TT                              | CC              | 1946946408               |
| SNP_P4_127795_73913  | NW_004515889.1 | Scaffold411 | 73913                   | TT                              | CC              | 1946946410               |
| SNP_P4_127796_74036  | NW_004515889.1 | Scaffold411 | 74036                   | AA                              | TT              | 1946946412               |
| SNP_P4_127797_74044  | NW_004515889.1 | Scaffold411 | 74044                   | GG                              | AA              | 1946946414               |
| SNP_P4_127798_74091  | NW_004515889.1 | Scaffold411 | 74091                   | GG                              | AA              | 1946946416               |
| SNP_P4_127799_77170  | NW_004515889.1 | Scaffold411 | 77170                   | GG                              | CC              | 1946946418               |
| SNP_P4_127800_93404  | NW_004515889.1 | Scaffold411 | 93404                   | TT                              | AA              | 1946946420               |
| SNP_P4_127801_96029  | NW_004515889.1 | Scaffold411 | 96029                   | GG                              | CC              | 1946946422               |
| SNP_P4_127802_96390  | NW_004515889.1 | Scaffold411 | 96390                   | AA                              | GG              | 1946946424               |
| SNP_P4_127803_96423  | NW_004515889.1 | Scaffold411 | 96423                   | TT                              | CC              | 1946946426               |
| SNP_P4_127804_120380 | NW_004515889.1 | Scaffold411 | 120380                  | CC                              | GG              | 1946946428               |
| SNP_P4_127805_123365 | NW_004515889.1 | Scaffold411 | 123365                  | CC                              | TT              | 1946946431               |
| SNP_P4_127806_123397 | NW_004515889.1 | Scaffold411 | 123397                  | AA                              | GG              | 1946946433               |
| SNP_P4_127807_123463 | NW_004515889.1 | Scaffold411 | 123463                  | GG                              | CC              | 1946946435               |
| SNP_P4_127808_124422 | NW_004515889.1 | Scaffold411 | 124422                  | CC                              | AA              | 1946946437               |
| SNP_P4_127809_124488 | NW_004515889.1 | Scaffold411 | 124488                  | CC                              | TT              | 1946946439               |
| SNP_P4_127810_124491 | NW_004515889.1 | Scaffold411 | 124491                  | CC                              | AA              | 1946946441               |
| SNP_P4_127811_125407 | NW_004515889.1 | Scaffold411 | 125407                  | CC                              | AA              | 1946946443               |
| SNP_P4_127812_125430 | NW_004515889.1 | Scaffold411 | 125430                  | AA                              | CC              | 1946946445               |
| SNP_P4_127813_156919 | NW_004515889.1 | Scaffold411 | 156919                  | TT                              | CC              | 1946946447               |
| SNP_P4_127814_156922 | NW_004515889.1 | Scaffold411 | 156922                  | GG                              | AA              | 1946946449               |
| SNP_P4_127815_203938 | NW_004515889.1 | Scaffold411 | 203938                  | AA                              | GG              | 1946946451               |
| SNP_P4_127816_230423 | NW_004515889.1 | Scaffold411 | 230423                  | AA                              | GG              | 1946946453               |
| SNP_P4_127817_230913 | NW_004515889.1 | Scaffold411 | 230913                  | TT                              | GG              | 1946946455               |
| SNP_P4_127818_231481 | NW_004515889.1 | Scaffold411 | 231481                  | TT                              | CC              | 1946946457               |
| SNP_P4_127819_231671 | NW_004515889.1 | Scaffold411 | 231671                  | TT                              | GG              | 1946946460               |
| SNP_P4_127820_231677 | NW_004515889.1 | Scaffold411 | 231677                  | AA                              | GG              | 1946946462               |
| SNP_P4_127821_231680 | NW_004515889.1 | Scaffold411 | 231680                  | AA                              | GG              | 1946946464               |
| SNP_P4_127822_231897 | NW_004515889.1 | Scaffold411 | 231897                  | AA                              | GG              | 1946946466               |
| SNP_P4_127824_259232 | NW_004515889.1 | Scaffold411 | 259232                  | AA                              | GG              | 1946946468               |
| SNP_P4_127825_259241 | NW_004515889.1 | Scaffold411 | 259241                  | CC                              | AA              | 1946946470               |
| SNP_P4_127826_259253 | NW_004515889.1 | Scaffold411 | 259253                  | AA                              | TT              | 1946946472               |
| SNP_P4_127827_259257 | NW_004515889.1 | Scaffold411 | 259257                  | GG                              | TT              | 1946946475               |
| SNP_P4_127828_259308 | NW_004515889.1 | Scaffold411 | 259308                  | TT                              | CC              | 1946946477               |
| SNP_P4_127829_282156 | NW_004515889.1 | Scaffold411 | 282156                  | GG                              | TT              | 1946946479               |
| SNP_P4_127830_298109 | NW_004515889.1 | Scaffold411 | 298109                  | AA                              | CC              | 1946946481               |
| SNP_P4_127831_298120 | NW_004515889.1 | Scaffold411 | 298120                  | GG                              | CC              | 1946946483               |
| SNP_P4_127832_298443 | NW_004515889.1 | Scaffold411 | 298443                  | GG                              | AA              | 1946946485               |

| SNPs IDs             | Chromosome IDs | Chromosomes | Physical positions (bp) | CDC Frontier (Reference genome) | (ILWC46 & LPNB) | NCBI SNPdb Accession IDs |
|----------------------|----------------|-------------|-------------------------|---------------------------------|-----------------|--------------------------|
| SNP_P4_127834_298529 | NW_004515889.1 | Scaffold411 | 298529                  | TT                              | CC              | 1946946487               |
| SNP_P4_127835_298615 | NW_004515889.1 | Scaffold411 | 298615                  | CC                              | GG              | 1946946489               |
| SNP_P4_127836_308553 | NW_004515889.1 | Scaffold411 | 308553                  | AA                              | CC              | 1946946491               |
| SNP_P4_127837_308572 | NW_004515889.1 | Scaffold411 | 308572                  | GG                              | AA              | 1946946493               |
| SNP_P4_127838_308579 | NW_004515889.1 | Scaffold411 | 308579                  | GG                              | AA              | 1946946495               |
| SNP_P4_127839_308765 | NW_004515889.1 | Scaffold411 | 308765                  | AA                              | GG              | 1946946497               |
| SNP_P4_127840_308782 | NW_004515889.1 | Scaffold411 | 308782                  | AA                              | GG              | 1946946499               |
| SNP_P4_127841_310204 | NW_004515889.1 | Scaffold411 | 310204                  | TT                              | CC              | 1946946501               |
| SNP_P4_127842_323140 | NW_004515889.1 | Scaffold411 | 323140                  | TT                              | GG              | 1946946503               |
| SNP_P4_127843_330057 | NW_004515889.1 | Scaffold411 | 330057                  | AA                              | TT              | 1946946505               |
| SNP_P4_127844_334311 | NW_004515889.1 | Scaffold411 | 334311                  | TT                              | CC              | 1946946507               |
| SNP_P4_127845_334524 | NW_004515889.1 | Scaffold411 | 334524                  | TT                              | CC              | 1946946509               |
| SNP_P4_127846_335195 | NW_004515889.1 | Scaffold411 | 335195                  | AA                              | TT              | 1946946511               |
| SNP_P4_127847_335376 | NW_004515889.1 | Scaffold411 | 335376                  | TT                              | AA              | 1946946513               |
| SNP_P4_127848_336425 | NW_004515889.1 | Scaffold411 | 336425                  | CC                              | AA              | 1946946515               |
| SNP_P4_127850_353468 | NW_004515889.1 | Scaffold411 | 353468                  | GG                              | AA              | 1946946517               |
| SNP_P4_127851_369200 | NW_004515889.1 | Scaffold411 | 369200                  | GG                              | AA              | 1946946519               |
| SNP_P4_127852_369214 | NW_004515889.1 | Scaffold411 | 369214                  | CC                              | TT              | 1946946521               |
| SNP_P4_127853_369239 | NW_004515889.1 | Scaffold411 | 369239                  | GG                              | AA              | 1946946523               |
| SNP_P4_127854_369305 | NW_004515889.1 | Scaffold411 | 369305                  | TT                              | CC              | 1946946526               |
| SNP_P4_127855_369336 | NW_004515889.1 | Scaffold411 | 369336                  | TT                              | CC              | 1946946528               |
| SNP_P4_127856_369366 | NW_004515889.1 | Scaffold411 | 369366                  | AA                              | GG              | 1946946530               |
| SNP_P4_127857_369585 | NW_004515889.1 | Scaffold411 | 369585                  | CC                              | TT              | 1946946532               |
| SNP_P4_127859_377587 | NW_004515889.1 | Scaffold411 | 377587                  | CC                              | TT              | 1946946534               |
| SNP_P4_127860_377831 | NW_004515889.1 | Scaffold411 | 377831                  | CC                              | TT              | 1946946536               |
| SNP_P4_127861_377884 | NW_004515889.1 | Scaffold411 | 377884                  | TT                              | CC              | 1946946538               |
| SNP_P4_127862_377888 | NW_004515889.1 | Scaffold411 | 377888                  | CC                              | TT              | 1946946540               |
| SNP_P4_127863_377893 | NW_004515889.1 | Scaffold411 | 377893                  | GG                              | AA              | 1946946542               |
| SNP_P4_127864_377942 | NW_004515889.1 | Scaffold411 | 377942                  | TT                              | CC              | 1946946544               |
| SNP_P4_127865_422306 | NW_004515889.1 | Scaffold411 | 422306                  | CC                              | TT              | 1946946546               |
| SNP_P4_127866_429609 | NW_004515889.1 | Scaffold411 | 429609                  | CC                              | GG              | 1946946548               |
| SNP_P4_127867_429620 | NW_004515889.1 | Scaffold411 | 429620                  | TT                              | CC              | 1946946550               |
| SNP_P4_127868_429907 | NW_004515889.1 | Scaffold411 | 429907                  | CC                              | TT              | 1946946552               |
| SNP_P4_127869_429926 | NW_004515889.1 | Scaffold411 | 429926                  | GG                              | AA              | 1946946554               |
| SNP_P4_127871_436057 | NW_004515889.1 | Scaffold411 | 436057                  | TT                              | CC              | 1946946556               |
| SNP_P4_127872_436537 | NW_004515889.1 | Scaffold411 | 436537                  | CC                              | GG              | 1946946558               |
| SNP_P4_127873_437498 | NW_004515889.1 | Scaffold411 | 437498                  | TT                              | AA              | 1946946560               |
| SNP_P4_127874_437524 | NW_004515889.1 | Scaffold411 | 437524                  | CC                              | AA              | 1946946562               |
| SNP_P4_127875_4645   | NW_004515890.1 | Scaffold413 | 4645                    | TT                              | CC              | 1946946564               |
| SNP_P4_127876_4915   | NW_004515890.1 | Scaffold413 | 4915                    | GG                              | AA              | 1946946566               |
| SNP_P4_127877_6122   | NW_004515890.1 | Scaffold413 | 6122                    | AA                              | CC              | 1946946568               |
| SNP_P4_127878_6509   | NW_004515890.1 | Scaffold413 | 6509                    | AA                              | GG              | 1946946570               |

| SNPs IDs            | Chromosome IDs | Chromosomes | Physical positions (bp) | CDC Frontier (Reference genome) | (ILWC46 & LPNB) | NCBI SNPdb Accession IDs |
|---------------------|----------------|-------------|-------------------------|---------------------------------|-----------------|--------------------------|
| SNP_P4_127879_7185  | NW_004515890.1 | Scaffold413 | 7185                    | GG                              | CC              | 1946946572               |
| SNP_P4_127880_7235  | NW_004515890.1 | Scaffold413 | 7235                    | AA                              | GG              | 1946946574               |
| SNP_P4_127881_7362  | NW_004515890.1 | Scaffold413 | 7362                    | CC                              | GG              | 1946946576               |
| SNP_P4_127882_7377  | NW_004515890.1 | Scaffold413 | 7377                    | TT                              | CC              | 1946946578               |
| SNP_P4_127883_7454  | NW_004515890.1 | Scaffold413 | 7454                    | GG                              | AA              | 1946946580               |
| SNP_P4_127884_7482  | NW_004515890.1 | Scaffold413 | 7482                    | TT                              | CC              | 1946946582               |
| SNP_P4_127885_7721  | NW_004515890.1 | Scaffold413 | 7721                    | TT                              | CC              | 1946946584               |
| SNP_P4_127886_4008  | NW_004515891.1 | Scaffold414 | 4008                    | TT                              | CC              | 1946946586               |
| SNP_P4_127887_5334  | NW_004515891.1 | Scaffold414 | 5334                    | AA                              | TT              | 1946946588               |
| SNP_P4_127888_5363  | NW_004515891.1 | Scaffold414 | 5363                    | GG                              | TT              | 1946946590               |
| SNP_P4_127889_5501  | NW_004515891.1 | Scaffold414 | 5501                    | GG                              | AA              | 1946946592               |
| SNP_P4_127890_5513  | NW_004515891.1 | Scaffold414 | 5513                    | GG                              | TT              | 1946946594               |
| SNP_P4_127891_5660  | NW_004515891.1 | Scaffold414 | 5660                    | AA                              | CC              | 1946946596               |
| SNP_P4_127892_6783  | NW_004515891.1 | Scaffold414 | 6783                    | TT                              | AA              | 1946946598               |
| SNP_P4_127893_6785  | NW_004515891.1 | Scaffold414 | 6785                    | AA                              | GG              | 1946946600               |
| SNP_P4_127894_6787  | NW_004515891.1 | Scaffold414 | 6787                    | TT                              | AA              | 1946946602               |
| SNP_P4_127895_6790  | NW_004515891.1 | Scaffold414 | 6790                    | TT                              | AA              | 1946946604               |
| SNP_P4_127896_6791  | NW_004515891.1 | Scaffold414 | 6791                    | GG                              | CC              | 1946946606               |
| SNP_P4_127897_6792  | NW_004515891.1 | Scaffold414 | 6792                    | TT                              | AA              | 1946946608               |
| SNP_P4_127898_6795  | NW_004515891.1 | Scaffold414 | 6795                    | TT                              | AA              | 1946946610               |
| SNP_P4_127899_6797  | NW_004515891.1 | Scaffold414 | 6797                    | CC                              | TT              | 1946946613               |
| SNP_P4_127900_6799  | NW_004515891.1 | Scaffold414 | 6799                    | TT                              | AA              | 1946946615               |
| SNP_P4_127901_6827  | NW_004515891.1 | Scaffold414 | 6827                    | AA                              | GG              | 1946946617               |
| SNP_P4_127902_7055  | NW_004515891.1 | Scaffold414 | 7055                    | TT                              | CC              | 1946946619               |
| SNP_P4_127903_8072  | NW_004515891.1 | Scaffold414 | 8072                    | TT                              | AA              | 1946946621               |
| SNP_P4_127904_8446  | NW_004515891.1 | Scaffold414 | 8446                    | AA                              | TT              | 1946946623               |
| SNP_P4_127905_8447  | NW_004515891.1 | Scaffold414 | 8447                    | GG                              | AA              | 1946946625               |
| SNP_P4_127906_8453  | NW_004515891.1 | Scaffold414 | 8453                    | CC                              | AA              | 1946946627               |
| SNP_P4_127907_8512  | NW_004515891.1 | Scaffold414 | 8512                    | GG                              | AA              | 1946946629               |
| SNP_P4_127908_8708  | NW_004515891.1 | Scaffold414 | 8708                    | TT                              | GG              | 1946946631               |
| SNP_P4_127909_8722  | NW_004515891.1 | Scaffold414 | 8722                    | GG                              | CC              | 1946946633               |
| SNP_P4_127910_8735  | NW_004515891.1 | Scaffold414 | 8735                    | TT                              | AA              | 1946946635               |
| SNP_P4_127911_8747  | NW_004515891.1 | Scaffold414 | 8747                    | TT                              | GG              | 1946946637               |
| SNP_P4_127912_17573 | NW_004515891.1 | Scaffold414 | 17573                   | TT                              | CC              | 1946946639               |
| SNP_P4_127913_21862 | NW_004515891.1 | Scaffold414 | 21862                   | AA                              | TT              | 1946946641               |
| SNP_P4_127915_22109 | NW_004515891.1 | Scaffold414 | 22109                   | CC                              | TT              | 1946946644               |
| SNP_P4_127916_22233 | NW_004515891.1 | Scaffold414 | 22233                   | TT                              | CC              | 1946946646               |
| SNP_P4_127917_22252 | NW_004515891.1 | Scaffold414 | 22252                   | CC                              | AA              | 1946946648               |
| SNP_P4_127918_22268 | NW_004515891.1 | Scaffold414 | 22268                   | GG                              | TT              | 1946946650               |
| SNP_P4_127919_22270 | NW_004515891.1 | Scaffold414 | 22270                   | AA                              | TT              | 1946946652               |
| SNP_P4_127920_22299 | NW_004515891.1 | Scaffold414 | 22299                   | GG                              | AA              | 1946946654               |
| SNP_P4_127921_22428 | NW_004515891.1 | Scaffold414 | 22428                   | GG                              | AA              | 1946946656               |

| SNPs IDs            | Chromosome IDs | Chromosomes | Physical positions (bp) | CDC Frontier (Reference genome) | (ILWC46 & LPNB) | NCBI SNPdb Accession IDs |
|---------------------|----------------|-------------|-------------------------|---------------------------------|-----------------|--------------------------|
| SNP_P4_127922_23045 | NW_004515891.1 | Scaffold414 | 23045                   | AA                              | CC              | 1946946658               |
| SNP_P4_127923_23064 | NW_004515891.1 | Scaffold414 | 23064                   | AA                              | GG              | 1946946660               |
| SNP_P4_127924_23254 | NW_004515891.1 | Scaffold414 | 23254                   | CC                              | AA              | 1946946662               |
| SNP_P4_127925_37429 | NW_004515891.1 | Scaffold414 | 37429                   | CC                              | TT              | 1946946664               |
| SNP_P4_127926_42053 | NW_004515891.1 | Scaffold414 | 42053                   | TT                              | CC              | 1946946665               |
| SNP_P4_127927_53470 | NW_004515891.1 | Scaffold414 | 53470                   | TT                              | CC              | 1946946667               |
| SNP_P4_127928_53866 | NW_004515891.1 | Scaffold414 | 53866                   | GG                              | AA              | 1946946669               |
| SNP_P4_127929_53988 | NW_004515891.1 | Scaffold414 | 53988                   | AA                              | GG              | 1946946671               |
| SNP_P4_127930_54097 | NW_004515891.1 | Scaffold414 | 54097                   | TT                              | CC              | 1946946673               |
| SNP_P4_127931_54136 | NW_004515891.1 | Scaffold414 | 54136                   | TT                              | AA              | 1946946675               |
| SNP_P4_127932_54258 | NW_004515891.1 | Scaffold414 | 54258                   | CC                              | TT              | 1946946677               |
| SNP_P4_127933_631   | NW_004515892.1 | Scaffold415 | 631                     | GG                              | AA              | 1946946679               |
| SNP_P4_127934_993   | NW_004515892.1 | Scaffold415 | 993                     | TT                              | CC              | 1946946681               |
| SNP_P4_127935_1013  | NW_004515892.1 | Scaffold415 | 1013                    | TT                              | AA              | 1946946683               |
| SNP_P4_127936_1041  | NW_004515892.1 | Scaffold415 | 1041                    | GG                              | AA              | 1946946685               |
| SNP_P4_127937_1322  | NW_004515892.1 | Scaffold415 | 1322                    | TT                              | CC              | 1946946687               |
| SNP_P4_127938_1384  | NW_004515892.1 | Scaffold415 | 1384                    | TT                              | CC              | 1946946689               |
| SNP_P4_127939_1413  | NW_004515892.1 | Scaffold415 | 1413                    | AA                              | GG              | 1946946691               |
| SNP_P4_127940_9372  | NW_004515892.1 | Scaffold415 | 9372                    | AA                              | CC              | 1946946693               |
| SNP_P4_127941_9385  | NW_004515892.1 | Scaffold415 | 9385                    | AA                              | GG              | 1946946695               |
| SNP_P4_127942_9634  | NW_004515892.1 | Scaffold415 | 9634                    | AA                              | TT              | 1946946697               |
| SNP_P4_127944_9549  | NW_004515893.1 | Scaffold418 | 9549                    | GG                              | AA              | 1946946699               |
| SNP_P4_127946_9659  | NW_004515893.1 | Scaffold418 | 9659                    | GG                              | CC              | 1946946701               |
| SNP_P4_127947_9660  | NW_004515893.1 | Scaffold418 | 9660                    | AA                              | GG              | 1946946703               |
| SNP_P4_127948_9724  | NW_004515893.1 | Scaffold418 | 9724                    | CC                              | AA              | 1946946705               |
| SNP_P4_127949_10060 | NW_004515893.1 | Scaffold418 | 10060                   | AA                              | TT              | 1946946707               |
| SNP_P4_127950_10076 | NW_004515893.1 | Scaffold418 | 10076                   | AA                              | GG              | 1946946709               |
| SNP_P4_127951_32173 | NW_004515893.1 | Scaffold418 | 32173                   | AA                              | CC              | 1946946711               |
| SNP_P4_127953_38051 | NW_004515893.1 | Scaffold418 | 38051                   | CC                              | TT              | 1946946713               |
| SNP_P4_127954_41482 | NW_004515893.1 | Scaffold418 | 41482                   | CC                              | TT              | 1946946715               |
| SNP_P4_127955_41490 | NW_004515893.1 | Scaffold418 | 41490                   | CC                              | TT              | 1946946717               |
| SNP_P4_127956_50487 | NW_004515893.1 | Scaffold418 | 50487                   | TT                              | AA              | 1946946719               |
| SNP_P4_127959_71108 | NW_004515893.1 | Scaffold418 | 71108                   | CC                              | TT              | 1946946722               |
| SNP_P4_127960_81786 | NW_004515893.1 | Scaffold418 | 81786                   | CC                              | TT              | 1946946724               |
| SNP_P4_127961_81787 | NW_004515893.1 | Scaffold418 | 81787                   | CC                              | GG              | 1946946726               |
| SNP_P4_127962_82022 | NW_004515893.1 | Scaffold418 | 82022                   | CC                              | TT              | 1946946728               |
| SNP_P4_127963_82032 | NW_004515893.1 | Scaffold418 | 82032                   | CC                              | AA              | 1946946730               |
| SNP_P4_127964_82285 | NW_004515893.1 | Scaffold418 | 82285                   | AA                              | GG              | 1946946732               |
| SNP_P4_127965_82343 | NW_004515893.1 | Scaffold418 | 82343                   | TT                              | CC              | 1946946734               |
| SNP_P4_127966_82367 | NW_004515893.1 | Scaffold418 | 82367                   | TT                              | CC              | 1946946736               |
| SNP_P4_127967_82546 | NW_004515893.1 | Scaffold418 | 82546                   | TT                              | AA              | 1946946738               |
| SNP_P4_127968_82652 | NW_004515893.1 | Scaffold418 | 82652                   | AA                              | GG              | 1946946740               |



| SNPs IDs             | Chromosome IDs | Chromosomes | Physical positions (bp) | CDC Frontier (Reference genome) | (ILWC46 & LPNB) | NCBI SNPdb Accession IDs |
|----------------------|----------------|-------------|-------------------------|---------------------------------|-----------------|--------------------------|
| SNP_P4_127969_82748  | NW_004515893.1 | Scaffold418 | 82748                   | GG                              | TT              | 1946946742               |
| SNP_P4_127970_82753  | NW_004515893.1 | Scaffold418 | 82753                   | AA                              | TT              | 1946946744               |
| SNP_P4_127971_82794  | NW_004515893.1 | Scaffold418 | 82794                   | GG                              | TT              | 1946946746               |
| SNP_P4_127972_82802  | NW_004515893.1 | Scaffold418 | 82802                   | TT                              | CC              | 1946946748               |
| SNP_P4_127973_82863  | NW_004515893.1 | Scaffold418 | 82863                   | AA                              | CC              | 1946946750               |
| SNP_P4_127974_83126  | NW_004515893.1 | Scaffold418 | 83126                   | CC                              | TT              | 1946946752               |
| SNP_P4_127975_83127  | NW_004515893.1 | Scaffold418 | 83127                   | AA                              | GG              | 1946946754               |
| SNP_P4_127976_83135  | NW_004515893.1 | Scaffold418 | 83135                   | TT                              | AA              | 1946946756               |
| SNP_P4_127977_83163  | NW_004515893.1 | Scaffold418 | 83163                   | TT                              | CC              | 1946946759               |
| SNP_P4_127978_83179  | NW_004515893.1 | Scaffold418 | 83179                   | AA                              | CC              | 1946946761               |
| SNP_P4_127979_83195  | NW_004515893.1 | Scaffold418 | 83195                   | AA                              | GG              | 1946946762               |
| SNP_P4_127980_83230  | NW_004515893.1 | Scaffold418 | 83230                   | TT                              | CC              | 1946946763               |
| SNP_P4_127981_113876 | NW_004515893.1 | Scaffold418 | 113876                  | TT                              | CC              | 1946946764               |
| SNP_P4_127982_136032 | NW_004515893.1 | Scaffold418 | 136032                  | GG                              | AA              | 1946946765               |
| SNP_P4_127983_138167 | NW_004515893.1 | Scaffold418 | 138167                  | CC                              | GG              | 1946946766               |
| SNP_P4_127984_138307 | NW_004515893.1 | Scaffold418 | 138307                  | TT                              | CC              | 1946946767               |
| SNP_P4_127985_141157 | NW_004515893.1 | Scaffold418 | 141157                  | AA                              | GG              | 1946946768               |
| SNP_P4_127986_141383 | NW_004515893.1 | Scaffold418 | 141383                  | TT                              | CC              | 1946946769               |
| SNP_P4_127987_142035 | NW_004515893.1 | Scaffold418 | 142035                  | AA                              | GG              | 1946946770               |
| SNP_P4_127988_148513 | NW_004515893.1 | Scaffold418 | 148513                  | TT                              | CC              | 1946946771               |
| SNP_P4_127991_1015   | NW_004515894.1 | Scaffold419 | 1015                    | CC                              | TT              | 1946946772               |
| SNP_P4_127993_31121  | NW_004515894.1 | Scaffold419 | 31121                   | GG                              | AA              | 1946946773               |
| SNP_P4_127994_95392  | NW_004515894.1 | Scaffold419 | 95392                   | AA                              | TT              | 1946946774               |
| SNP_P4_127996_97864  | NW_004515894.1 | Scaffold419 | 97864                   | CC                              | AA              | 1946946775               |
| SNP_P4_127997_117616 | NW_004515894.1 | Scaffold419 | 117616                  | GG                              | AA              | 1946946776               |
| SNP_P4_128000_148591 | NW_004515894.1 | Scaffold419 | 148591                  | CC                              | TT              | 1946946777               |
| SNP_P4_128004_219681 | NW_004515894.1 | Scaffold419 | 219681                  | AA                              | TT              | 1946946778               |
| SNP_P4_128005_219694 | NW_004515894.1 | Scaffold419 | 219694                  | CC                              | TT              | 1946946779               |
| SNP_P4_128006_239879 | NW_004515894.1 | Scaffold419 | 239879                  | GG                              | AA              | 1946946780               |
| SNP_P4_128007_239880 | NW_004515894.1 | Scaffold419 | 239880                  | TT                              | AA              | 1946946781               |
| SNP_P4_128008_242216 | NW_004515894.1 | Scaffold419 | 242216                  | GG                              | TT              | 1946946782               |
| SNP_P4_128009_244179 | NW_004515894.1 | Scaffold419 | 244179                  | TT                              | GG              | 1946946783               |
| SNP_P4_128010_244799 | NW_004515894.1 | Scaffold419 | 244799                  | AA                              | TT              | 1946946784               |
| SNP_P4_128011_244820 | NW_004515894.1 | Scaffold419 | 244820                  | AA                              | TT              | 1946946785               |
| SNP_P4_128014_315199 | NW_004515894.1 | Scaffold419 | 315199                  | CC                              | TT              | 1946946786               |
| SNP_P4_128015_323709 | NW_004515894.1 | Scaffold419 | 323709                  | TT                              | CC              | 1946946787               |
| SNP_P4_128016_334077 | NW_004515894.1 | Scaffold419 | 334077                  | CC                              | TT              | 1946946788               |
| SNP_P4_128017_340990 | NW_004515894.1 | Scaffold419 | 340990                  | GG                              | TT              | 1946946789               |
| SNP_P4_128018_341215 | NW_004515894.1 | Scaffold419 | 341215                  | TT                              | AA              | 1946946790               |
| SNP_P4_128019_341256 | NW_004515894.1 | Scaffold419 | 341256                  | TT                              | CC              | 1946946791               |
| SNP_P4_128020_8585   | NW_004515895.1 | Scaffold420 | 8585                    | TT                              | GG              | 1946946792               |
| SNP_P4_128021_8630   | NW_004515895.1 | Scaffold420 | 8630                    | AA                              | TT              | 1946946793               |

| SNPs IDs             | Chromosome IDs | Chromosomes | Physical positions (bp) | CDC Frontier (Reference genome) | (ILWC46 & LPNB) | NCBI SNPdb Accession IDs |
|----------------------|----------------|-------------|-------------------------|---------------------------------|-----------------|--------------------------|
| SNP_P4_128022_15712  | NW_004515895.1 | Scaffold420 | 15712                   | GG                              | AA              | 1946946794               |
| SNP_P4_128023_64660  | NW_004515895.1 | Scaffold420 | 64660                   | TT                              | GG              | 1946946795               |
| SNP_P4_128024_69568  | NW_004515895.1 | Scaffold420 | 69568                   | AA                              | GG              | 1946946796               |
| SNP_P4_128026_69678  | NW_004515895.1 | Scaffold420 | 69678                   | GG                              | TT              | 1946946797               |
| SNP_P4_128027_69690  | NW_004515895.1 | Scaffold420 | 69690                   | CC                              | TT              | 1946946798               |
| SNP_P4_128028_69786  | NW_004515895.1 | Scaffold420 | 69786                   | AA                              | GG              | 1946946799               |
| SNP_P4_128029_69922  | NW_004515895.1 | Scaffold420 | 69922                   | AA                              | GG              | 1946946800               |
| SNP_P4_128030_69934  | NW_004515895.1 | Scaffold420 | 69934                   | AA                              | GG              | 1946946801               |
| SNP_P4_128031_70000  | NW_004515895.1 | Scaffold420 | 70000                   | AA                              | GG              | 1946946802               |
| SNP_P4_128032_70035  | NW_004515895.1 | Scaffold420 | 70035                   | TT                              | GG              | 1946946803               |
| SNP_P4_128034_78364  | NW_004515895.1 | Scaffold420 | 78364                   | AA                              | CC              | 1946946804               |
| SNP_P4_128035_78369  | NW_004515895.1 | Scaffold420 | 78369                   | TT                              | CC              | 1946946805               |
| SNP_P4_128036_78464  | NW_004515895.1 | Scaffold420 | 78464                   | TT                              | GG              | 1946946806               |
| SNP_P4_128037_78514  | NW_004515895.1 | Scaffold420 | 78514                   | TT                              | CC              | 1946946807               |
| SNP_P4_128038_78522  | NW_004515895.1 | Scaffold420 | 78522                   | AA                              | GG              | 1946946808               |
| SNP_P4_128039_78748  | NW_004515895.1 | Scaffold420 | 78748                   | CC                              | TT              | 1946946809               |
| SNP_P4_128040_78777  | NW_004515895.1 | Scaffold420 | 78777                   | AA                              | GG              | 1946946810               |
| SNP_P4_128041_78850  | NW_004515895.1 | Scaffold420 | 78850                   | GG                              | AA              | 1946946811               |
| SNP_P4_128043_87244  | NW_004515895.1 | Scaffold420 | 87244                   | AA                              | GG              | 1946946812               |
| SNP_P4_128044_87263  | NW_004515895.1 | Scaffold420 | 87263                   | TT                              | AA              | 1946946813               |
| SNP_P4_128045_87880  | NW_004515895.1 | Scaffold420 | 87880                   | TT                              | CC              | 1946946814               |
| SNP_P4_128046_87896  | NW_004515895.1 | Scaffold420 | 87896                   | TT                              | AA              | 1946946815               |
| SNP_P4_128047_87993  | NW_004515895.1 | Scaffold420 | 87993                   | CC                              | TT              | 1946946816               |
| SNP_P4_128048_92812  | NW_004515895.1 | Scaffold420 | 92812                   | GG                              | CC              | 1946946817               |
| SNP_P4_128049_95041  | NW_004515895.1 | Scaffold420 | 95041                   | GG                              | TT              | 1946946818               |
| SNP_P4_128050_141360 | NW_004515895.1 | Scaffold420 | 141360                  | TT                              | GG              | 1946946819               |
| SNP_P4_128051_141362 | NW_004515895.1 | Scaffold420 | 141362                  | CC                              | AA              | 1946946820               |
| SNP_P4_128052_182226 | NW_004515895.1 | Scaffold420 | 182226                  | GG                              | CC              | 1946946821               |
| SNP_P4_128053_203907 | NW_004515895.1 | Scaffold420 | 203907                  | GG                              | TT              | 1946946822               |
| SNP_P4_128054_206306 | NW_004515895.1 | Scaffold420 | 206306                  | AA                              | GG              | 1946946824               |
| SNP_P4_128055_210375 | NW_004515895.1 | Scaffold420 | 210375                  | AA                              | CC              | 1946946826               |
| SNP_P4_128057_211032 | NW_004515895.1 | Scaffold420 | 211032                  | TT                              | CC              | 1946946828               |
| SNP_P4_128058_211051 | NW_004515895.1 | Scaffold420 | 211051                  | GG                              | TT              | 1946946830               |
| SNP_P4_128059_215849 | NW_004515895.1 | Scaffold420 | 215849                  | TT                              | CC              | 1946946832               |
| SNP_P4_128060_215866 | NW_004515895.1 | Scaffold420 | 215866                  | CC                              | TT              | 1946946834               |
| SNP_P4_128062_224159 | NW_004515895.1 | Scaffold420 | 224159                  | TT                              | AA              | 1946946836               |
| SNP_P4_128063_224179 | NW_004515895.1 | Scaffold420 | 224179                  | AA                              | CC              | 1946946838               |
| SNP_P4_128064_249310 | NW_004515895.1 | Scaffold420 | 249310                  | CC                              | TT              | 1946946840               |
| SNP_P4_128065_249376 | NW_004515895.1 | Scaffold420 | 249376                  | TT                              | CC              | 1946946842               |
| SNP_P4_128066_249523 | NW_004515895.1 | Scaffold420 | 249523                  | AA                              | CC              | 1946946844               |
| SNP_P4_128067_249710 | NW_004515895.1 | Scaffold420 | 249710                  | TT                              | CC              | 1946946846               |
| SNP_P4_128068_249829 | NW_004515895.1 | Scaffold420 | 249829                  | AA                              | GG              | 1946946848               |

| SNPs IDs             | Chromosome IDs | Chromosomes   | Physical positions (bp) | CDC Frontier (Reference genome) | (ILWC46 & LPNB) | NCBI SNPdb Accession IDs |
|----------------------|----------------|---------------|-------------------------|---------------------------------|-----------------|--------------------------|
| SNP_P4_128069_249986 | NW_004515895.1 | Scaffold420   | 249986                  | TT                              | CC              | 1946946850               |
| SNP_P4_128070_250355 | NW_004515895.1 | Scaffold420   | 250355                  | AA                              | CC              | 1946946852               |
| SNP_P4_128072_266376 | NW_004515895.1 | Scaffold420   | 266376                  | CC                              | GG              | 1946946855               |
| SNP_P4_128073_266401 | NW_004515895.1 | Scaffold420   | 266401                  | AA                              | CC              | 1946946857               |
| SNP_P4_128074_266407 | NW_004515895.1 | Scaffold420   | 266407                  | AA                              | GG              | 1946946859               |
| SNP_P4_128075_266432 | NW_004515895.1 | Scaffold420   | 266432                  | GG                              | AA              | 1946946861               |
| SNP_P4_128076_266572 | NW_004515895.1 | Scaffold420   | 266572                  | TT                              | GG              | 1946946863               |
| SNP_P4_128077_266680 | NW_004515895.1 | Scaffold420   | 266680                  | CC                              | AA              | 1946946865               |
| SNP_P4_128078_266772 | NW_004515895.1 | Scaffold420   | 266772                  | GG                              | TT              | 1946946867               |
| SNP_P4_128079_268711 | NW_004515895.1 | Scaffold420   | 268711                  | AA                              | GG              | 1946946869               |
| SNP_P4_128080_270994 | NW_004515895.1 | Scaffold420   | 270994                  | GG                              | AA              | 1946946871               |
| SNP_P4_128081_299199 | NW_004515895.1 | Scaffold420   | 299199                  | TT                              | CC              | 1946946873               |
| SNP_P4_128082_324411 | NW_004515895.1 | Scaffold420   | 324411                  | TT                              | GG              | 1946946875               |
| SNP_P4_128083_324438 | NW_004515895.1 | Scaffold420   | 324438                  | TT                              | CC              | 1946946877               |
| SNP_P4_128084_324484 | NW_004515895.1 | Scaffold420   | 324484                  | AA                              | CC              | 1946946879               |
| SNP_P4_128085_324523 | NW_004515895.1 | Scaffold420   | 324523                  | AA                              | GG              | 1946946881               |
| SNP_P4_128086_324530 | NW_004515895.1 | Scaffold420   | 324530                  | TT                              | CC              | 1946946883               |
| SNP_P4_128087_324616 | NW_004515895.1 | Scaffold420   | 324616                  | AA                              | GG              | 1946946885               |
| SNP_P4_128088_324631 | NW_004515895.1 | Scaffold420   | 324631                  | TT                              | AA              | 1946946887               |
| SNP_P4_128089_324662 | NW_004515895.1 | Scaffold420   | 324662                  | TT                              | CC              | 1946946889               |
| SNP_P4_128090_324713 | NW_004515895.1 | Scaffold420   | 324713                  | AA                              | GG              | 1946946891               |
| SNP_P4_128091_324872 | NW_004515895.1 | Scaffold420   | 324872                  | AA                              | GG              | 1946946893               |
| SNP_P4_128093_1146   | NW_004515896.1 | Scaffold421_2 | 1146                    | AA                              | GG              | 1946946895               |
| SNP_P4_128094_1162   | NW_004515896.1 | Scaffold421_2 | 1162                    | CC                              | TT              | 1946946897               |
| SNP_P4_128095_1163   | NW_004515896.1 | Scaffold421_2 | 1163                    | GG                              | AA              | 1946946899               |
| SNP_P4_128096_43117  | NW_004515896.1 | Scaffold421_2 | 43117                   | CC                              | TT              | 1946946901               |
| SNP_P4_128097_43119  | NW_004515896.1 | Scaffold421_2 | 43119                   | CC                              | TT              | 1946946903               |
| SNP_P4_128098_45484  | NW_004515896.1 | Scaffold421_2 | 45484                   | TT                              | AA              | 1946946905               |
| SNP_P4_128099_45548  | NW_004515896.1 | Scaffold421_2 | 45548                   | CC                              | TT              | 1946946907               |
| SNP_P4_128100_45557  | NW_004515896.1 | Scaffold421_2 | 45557                   | AA                              | TT              | 1946946909               |
| SNP_P4_128101_45599  | NW_004515896.1 | Scaffold421_2 | 45599                   | AA                              | GG              | 1946946911               |
| SNP_P4_128102_45620  | NW_004515896.1 | Scaffold421_2 | 45620                   | TT                              | AA              | 1946946913               |
| SNP_P4_128103_45648  | NW_004515896.1 | Scaffold421_2 | 45648                   | AA                              | GG              | 1946946915               |
| SNP_P4_128104_45827  | NW_004515896.1 | Scaffold421_2 | 45827                   | TT                              | AA              | 1946946917               |
| SNP_P4_128105_45857  | NW_004515896.1 | Scaffold421_2 | 45857                   | AA                              | CC              | 1946946919               |
| SNP_P4_128106_45862  | NW_004515896.1 | Scaffold421_2 | 45862                   | CC                              | AA              | 1946946921               |
| SNP_P4_128108_45899  | NW_004515896.1 | Scaffold421_2 | 45899                   | AA                              | GG              | 1946946923               |
| SNP_P4_128109_58585  | NW_004515896.1 | Scaffold421_2 | 58585                   | GG                              | AA              | 1946946925               |
| SNP_P4_128111_77969  | NW_004515896.1 | Scaffold421_2 | 77969                   | GG                              | AA              | 1946946927               |
| SNP_P4_128113_149868 | NW_004515896.1 | Scaffold421_2 | 149868                  | TT                              | CC              | 1946946929               |
| SNP_P4_128114_162679 | NW_004515896.1 | Scaffold421_2 | 162679                  | TT                              | CC              | 1946946931               |
| SNP_P4_128115_165179 | NW_004515896.1 | Scaffold421_2 | 165179                  | AA                              | GG              | 1946946933               |

| SNPs IDs             | Chromosome IDs | Chromosomes   | Physical positions (bp) | CDC Frontier (Reference genome) | (ILWC46 & LPNB) | NCBI SNPdb Accession IDs |
|----------------------|----------------|---------------|-------------------------|---------------------------------|-----------------|--------------------------|
| SNP_P4_128116_165187 | NW_004515896.1 | Scaffold421_2 | 165187                  | TT                              | GG              | 1946946935               |
| SNP_P4_128117_176080 | NW_004515896.1 | Scaffold421_2 | 176080                  | TT                              | AA              | 1946946937               |
| SNP_P4_128118_200655 | NW_004515896.1 | Scaffold421_2 | 200655                  | AA                              | GG              | 1946946939               |
| SNP_P4_128119_232685 | NW_004515896.1 | Scaffold421_2 | 232685                  | AA                              | GG              | 1946946941               |
| SNP_P4_128122_249626 | NW_004515896.1 | Scaffold421_2 | 249626                  | CC                              | TT              | 1946946943               |
| SNP_P4_128123_249627 | NW_004515896.1 | Scaffold421_2 | 249627                  | AA                              | GG              | 1946946945               |
| SNP_P4_128124_249638 | NW_004515896.1 | Scaffold421_2 | 249638                  | CC                              | TT              | 1946946947               |
| SNP_P4_128125_249715 | NW_004515896.1 | Scaffold421_2 | 249715                  | CC                              | TT              | 1946946949               |
| SNP_P4_128126_249738 | NW_004515896.1 | Scaffold421_2 | 249738                  | GG                              | AA              | 1946946951               |
| SNP_P4_128127_249740 | NW_004515896.1 | Scaffold421_2 | 249740                  | TT                              | CC              | 1946946953               |
| SNP_P4_128128_249830 | NW_004515896.1 | Scaffold421_2 | 249830                  | TT                              | CC              | 1946946955               |
| SNP_P4_128129_249849 | NW_004515896.1 | Scaffold421_2 | 249849                  | AA                              | CC              | 1946946957               |
| SNP_P4_128130_249853 | NW_004515896.1 | Scaffold421_2 | 249853                  | TT                              | CC              | 1946946959               |
| SNP_P4_128131_249871 | NW_004515896.1 | Scaffold421_2 | 249871                  | TT                              | CC              | 1946946961               |
| SNP_P4_128132_249872 | NW_004515896.1 | Scaffold421_2 | 249872                  | AA                              | GG              | 1946946963               |
| SNP_P4_128133_249911 | NW_004515896.1 | Scaffold421_2 | 249911                  | TT                              | GG              | 1946946965               |
| SNP_P4_128134_249958 | NW_004515896.1 | Scaffold421_2 | 249958                  | AA                              | GG              | 1946946967               |
| SNP_P4_128135_249969 | NW_004515896.1 | Scaffold421_2 | 249969                  | AA                              | GG              | 1946946969               |
| SNP_P4_128136_250044 | NW_004515896.1 | Scaffold421_2 | 250044                  | AA                              | CC              | 1946946971               |
| SNP_P4_128137_274800 | NW_004515896.1 | Scaffold421_2 | 274800                  | CC                              | TT              | 1946946973               |
| SNP_P4_128138_274821 | NW_004515896.1 | Scaffold421_2 | 274821                  | TT                              | CC              | 1946946975               |
| SNP_P4_128139_274852 | NW_004515896.1 | Scaffold421_2 | 274852                  | GG                              | AA              | 1946946977               |
| SNP_P4_128140_275252 | NW_004515896.1 | Scaffold421_2 | 275252                  | AA                              | GG              | 1946946979               |
| SNP_P4_128141_275273 | NW_004515896.1 | Scaffold421_2 | 275273                  | GG                              | TT              | 1946946981               |
| SNP_P4_128142_275328 | NW_004515896.1 | Scaffold421_2 | 275328                  | TT                              | CC              | 1946946983               |
| SNP_P4_128143_306072 | NW_004515896.1 | Scaffold421_2 | 306072                  | TT                              | GG              | 1946946985               |
| SNP_P4_128144_311962 | NW_004515896.1 | Scaffold421_2 | 311962                  | TT                              | GG              | 1946946987               |
| SNP_P4_128145_311990 | NW_004515896.1 | Scaffold421_2 | 311990                  | CC                              | AA              | 1946946989               |
| SNP_P4_128146_318808 | NW_004515896.1 | Scaffold421_2 | 318808                  | GG                              | AA              | 1946946991               |
| SNP_P4_128147_318845 | NW_004515896.1 | Scaffold421_2 | 318845                  | GG                              | TT              | 1946946993               |
| SNP_P4_128148_323165 | NW_004515896.1 | Scaffold421_2 | 323165                  | TT                              | GG              | 1946946995               |
| SNP_P4_128149_323553 | NW_004515896.1 | Scaffold421_2 | 323553                  | AA                              | GG              | 1946946997               |
| SNP_P4_128150_349225 | NW_004515896.1 | Scaffold421_2 | 349225                  | CC                              | TT              | 1946946999               |
| SNP_P4_128151_349612 | NW_004515896.1 | Scaffold421_2 | 349612                  | GG                              | AA              | 1946947001               |
| SNP_P4_128152_350173 | NW_004515896.1 | Scaffold421_2 | 350173                  | AA                              | GG              | 1946947003               |
| SNP_P4_128153_352658 | NW_004515896.1 | Scaffold421_2 | 352658                  | CC                              | TT              | 1946947005               |
| SNP_P4_128154_352675 | NW_004515896.1 | Scaffold421_2 | 352675                  | AA                              | GG              | 1946947007               |
| SNP_P4_128155_355031 | NW_004515896.1 | Scaffold421_2 | 355031                  | GG                              | AA              | 1946947009               |
| SNP_P4_128156_363813 | NW_004515896.1 | Scaffold421_2 | 363813                  | TT                              | CC              | 1946947011               |
| SNP_P4_128157_374873 | NW_004515896.1 | Scaffold421_2 | 374873                  | AA                              | GG              | 1946947014               |
| SNP_P4_128158_374874 | NW_004515896.1 | Scaffold421_2 | 374874                  | GG                              | AA              | 1946947016               |
| SNP_P4_128159_396443 | NW_004515896.1 | Scaffold421_2 | 396443                  | TT                              | CC              | 1946947018               |

| SNPs IDs             | Chromosome IDs | Chromosomes   | Physical positions (bp) | CDC Frontier (Reference genome) | (ILWC46 & LPNB) | NCBI SNPdb Accession IDs |
|----------------------|----------------|---------------|-------------------------|---------------------------------|-----------------|--------------------------|
| SNP_P4_128160_396507 | NW_004515896.1 | Scaffold421_2 | 396507                  | TT                              | CC              | 1946947020               |
| SNP_P4_128161_397757 | NW_004515896.1 | Scaffold421_2 | 397757                  | TT                              | GG              | 1946947022               |
| SNP_P4_128162_412576 | NW_004515896.1 | Scaffold421_2 | 412576                  | GG                              | CC              | 1946947024               |
| SNP_P4_128163_414292 | NW_004515896.1 | Scaffold421_2 | 414292                  | TT                              | AA              | 1946947026               |
| SNP_P4_128164_416811 | NW_004515896.1 | Scaffold421_2 | 416811                  | GG                              | AA              | 1946947028               |
| SNP_P4_128165_416998 | NW_004515896.1 | Scaffold421_2 | 416998                  | GG                              | AA              | 1946947030               |
| SNP_P4_128166_417764 | NW_004515896.1 | Scaffold421_2 | 417764                  | TT                              | CC              | 1946947032               |
| SNP_P4_128167_421654 | NW_004515896.1 | Scaffold421_2 | 421654                  | CC                              | AA              | 1946947034               |
| SNP_P4_128168_444853 | NW_004515896.1 | Scaffold421_2 | 444853                  | AA                              | GG              | 1946947036               |
| SNP_P4_128169_447754 | NW_004515896.1 | Scaffold421_2 | 447754                  | GG                              | AA              | 1946947038               |
| SNP_P4_128170_447986 | NW_004515896.1 | Scaffold421_2 | 447986                  | CC                              | AA              | 1946947040               |
| SNP_P4_128171_448625 | NW_004515896.1 | Scaffold421_2 | 448625                  | TT                              | GG              | 1946947042               |
| SNP_P4_128172_455690 | NW_004515896.1 | Scaffold421_2 | 455690                  | AA                              | GG              | 1946947044               |
| SNP_P4_128174_456068 | NW_004515896.1 | Scaffold421_2 | 456068                  | AA                              | TT              | 1946947046               |
| SNP_P4_128175_462450 | NW_004515896.1 | Scaffold421_2 | 462450                  | AA                              | TT              | 1946947048               |
| SNP_P4_128176_465639 | NW_004515896.1 | Scaffold421_2 | 465639                  | AA                              | GG              | 1946947050               |
| SNP_P4_128177_468925 | NW_004515896.1 | Scaffold421_2 | 468925                  | TT                              | CC              | 1946947052               |
| SNP_P4_128178_488781 | NW_004515896.1 | Scaffold421_2 | 488781                  | CC                              | TT              | 1946947054               |
| SNP_P4_128179_501581 | NW_004515896.1 | Scaffold421_2 | 501581                  | AA                              | GG              | 1946947056               |
| SNP_P4_128180_501599 | NW_004515896.1 | Scaffold421_2 | 501599                  | TT                              | GG              | 1946947058               |
| SNP_P4_128181_501630 | NW_004515896.1 | Scaffold421_2 | 501630                  | TT                              | CC              | 1946947060               |
| SNP_P4_128184_525737 | NW_004515896.1 | Scaffold421_2 | 525737                  | AA                              | GG              | 1946947062               |
| SNP_P4_128185_571373 | NW_004515896.1 | Scaffold421_2 | 571373                  | AA                              | TT              | 1946947064               |
| SNP_P4_128186_571933 | NW_004515896.1 | Scaffold421_2 | 571933                  | CC                              | AA              | 1946947066               |
| SNP_P4_128187_581356 | NW_004515896.1 | Scaffold421_2 | 581356                  | TT                              | CC              | 1946947068               |
| SNP_P4_128188_581410 | NW_004515896.1 | Scaffold421_2 | 581410                  | TT                              | CC              | 1946947070               |
| SNP_P4_128189_581782 | NW_004515896.1 | Scaffold421_2 | 581782                  | GG                              | AA              | 1946947072               |
| SNP_P4_128190_581794 | NW_004515896.1 | Scaffold421_2 | 581794                  | AA                              | CC              | 1946947074               |
| SNP_P4_128191_581851 | NW_004515896.1 | Scaffold421_2 | 581851                  | TT                              | CC              | 1946947076               |
| SNP_P4_128192_581884 | NW_004515896.1 | Scaffold421_2 | 581884                  | AA                              | TT              | 1946947078               |
| SNP_P4_128193_581961 | NW_004515896.1 | Scaffold421_2 | 581961                  | GG                              | AA              | 1946947080               |
| SNP_P4_128194_581968 | NW_004515896.1 | Scaffold421_2 | 581968                  | TT                              | CC              | 1946947082               |
| SNP_P4_128195_581970 | NW_004515896.1 | Scaffold421_2 | 581970                  | CC                              | AA              | 1946947084               |
| SNP_P4_128196_582146 | NW_004515896.1 | Scaffold421_2 | 582146                  | CC                              | AA              | 1946947086               |
| SNP_P4_128197_582160 | NW_004515896.1 | Scaffold421_2 | 582160                  | AA                              | TT              | 1946947088               |
| SNP_P4_128198_582187 | NW_004515896.1 | Scaffold421_2 | 582187                  | TT                              | GG              | 1946947090               |
| SNP_P4_128199_582192 | NW_004515896.1 | Scaffold421_2 | 582192                  | TT                              | AA              | 1946947092               |
| SNP_P4_128200_583132 | NW_004515896.1 | Scaffold421_2 | 583132                  | CC                              | TT              | 1946947094               |
| SNP_P4_128201_583134 | NW_004515896.1 | Scaffold421_2 | 583134                  | TT                              | CC              | 1946947096               |
| SNP_P4_128202_594102 | NW_004515896.1 | Scaffold421_2 | 594102                  | GG                              | AA              | 1946947098               |
| SNP_P4_128203_597535 | NW_004515896.1 | Scaffold421_2 | 597535                  | AA                              | CC              | 1946947100               |
| SNP_P4_128204_597542 | NW_004515896.1 | Scaffold421_2 | 597542                  | AA                              | CC              | 1946947102               |

| SNPs IDs             | Chromosome IDs | Chromosomes   | Physical positions (bp) | CDC Frontier (Reference genome) | (ILWC46 & LPNB) | NCBI SNPdb Accession IDs |
|----------------------|----------------|---------------|-------------------------|---------------------------------|-----------------|--------------------------|
| SNP_P4_128205_597562 | NW_004515896.1 | Scaffold421_2 | 597562                  | TT                              | CC              | 1946947104               |
| SNP_P4_128206_597587 | NW_004515896.1 | Scaffold421_2 | 597587                  | GG                              | AA              | 1946947106               |
| SNP_P4_128207_597801 | NW_004515896.1 | Scaffold421_2 | 597801                  | CC                              | TT              | 1946947108               |
| SNP_P4_128208_597864 | NW_004515896.1 | Scaffold421_2 | 597864                  | TT                              | CC              | 1946947110               |
| SNP_P4_128209_597883 | NW_004515896.1 | Scaffold421_2 | 597883                  | AA                              | TT              | 1946947112               |
| SNP_P4_128210_597904 | NW_004515896.1 | Scaffold421_2 | 597904                  | TT                              | AA              | 1946947114               |
| SNP_P4_128211_598054 | NW_004515896.1 | Scaffold421_2 | 598054                  | CC                              | TT              | 1946947116               |
| SNP_P4_128212_598055 | NW_004515896.1 | Scaffold421_2 | 598055                  | AA                              | GG              | 1946947118               |
| SNP_P4_128213_598065 | NW_004515896.1 | Scaffold421_2 | 598065                  | CC                              | AA              | 1946947120               |
| SNP_P4_128215_66     | NW_004515897.1 | Scaffold421_1 | 66                      | CC                              | TT              | 1946947122               |
| SNP_P4_128216_284    | NW_004515897.1 | Scaffold421_1 | 284                     | AA                              | CC              | 1946947124               |
| SNP_P4_128217_300    | NW_004515897.1 | Scaffold421_1 | 300                     | CC                              | AA              | 1946947127               |
| SNP_P4_128218_2616   | NW_004515897.1 | Scaffold421_1 | 2616                    | GG                              | AA              | 1946947129               |
| SNP_P4_128219_2835   | NW_004515897.1 | Scaffold421_1 | 2835                    | AA                              | CC              | 1946947131               |
| SNP_P4_128221_2945   | NW_004515897.1 | Scaffold421_1 | 2945                    | GG                              | CC              | 1946947133               |
| SNP_P4_128222_3012   | NW_004515897.1 | Scaffold421_1 | 3012                    | CC                              | AA              | 1946947135               |
| SNP_P4_128223_3033   | NW_004515897.1 | Scaffold421_1 | 3033                    | CC                              | TT              | 1946947137               |
| SNP_P4_128224_3227   | NW_004515897.1 | Scaffold421_1 | 3227                    | GG                              | AA              | 1946947139               |
| SNP_P4_128225_3290   | NW_004515897.1 | Scaffold421_1 | 3290                    | CC                              | GG              | 1946947141               |
| SNP_P4_128227_4529   | NW_004515897.1 | Scaffold421_1 | 4529                    | AA                              | GG              | 1946947143               |
| SNP_P4_128228_4641   | NW_004515897.1 | Scaffold421_1 | 4641                    | CC                              | TT              | 1946947145               |
| SNP_P4_128229_4929   | NW_004515897.1 | Scaffold421_1 | 4929                    | GG                              | AA              | 1946947147               |
| SNP_P4_128231_6244   | NW_004515897.1 | Scaffold421_1 | 6244                    | CC                              | TT              | 1946947149               |
| SNP_P4_128232_6328   | NW_004515897.1 | Scaffold421_1 | 6328                    | CC                              | TT              | 1946947151               |
| SNP_P4_128233_18035  | NW_004515897.1 | Scaffold421_1 | 18035                   | CC                              | TT              | 1946947153               |
| SNP_P4_128234_33697  | NW_004515897.1 | Scaffold421_1 | 33697                   | GG                              | AA              | 1946947155               |
| SNP_P4_128236_62076  | NW_004515897.1 | Scaffold421_1 | 62076                   | CC                              | TT              | 1946947157               |
| SNP_P4_128237_63372  | NW_004515897.1 | Scaffold421_1 | 63372                   | GG                              | AA              | 1946947159               |
| SNP_P4_128238_79208  | NW_004515897.1 | Scaffold421_1 | 79208                   | CC                              | TT              | 1946947161               |
| SNP_P4_128239_97196  | NW_004515897.1 | Scaffold421_1 | 97196                   | GG                              | AA              | 1946947163               |
| SNP_P4_128240_97471  | NW_004515897.1 | Scaffold421_1 | 97471                   | AA                              | GG              | 1946947165               |
| SNP_P4_128241_97894  | NW_004515897.1 | Scaffold421_1 | 97894                   | GG                              | AA              | 1946947167               |
| SNP_P4_128242_98288  | NW_004515897.1 | Scaffold421_1 | 98288                   | GG                              | AA              | 1946947169               |
| SNP_P4_128243_98438  | NW_004515897.1 | Scaffold421_1 | 98438                   | GG                              | TT              | 1946947171               |
| SNP_P4_128244_98647  | NW_004515897.1 | Scaffold421_1 | 98647                   | AA                              | GG              | 1946947173               |
| SNP_P4_128245_98652  | NW_004515897.1 | Scaffold421_1 | 98652                   | AA                              | CC              | 1946947175               |
| SNP_P4_128246_98653  | NW_004515897.1 | Scaffold421_1 | 98653                   | TT                              | AA              | 1946947177               |
| SNP_P4_128248_99165  | NW_004515897.1 | Scaffold421_1 | 99165                   | GG                              | CC              | 1946947179               |
| SNP_P4_128249_99173  | NW_004515897.1 | Scaffold421_1 | 99173                   | CC                              | TT              | 1946947181               |
| SNP_P4_128251_99250  | NW_004515897.1 | Scaffold421_1 | 99250                   | AA                              | GG              | 1946947183               |
| SNP_P4_128252_99264  | NW_004515897.1 | Scaffold421_1 | 99264                   | AA                              | GG              | 1946947185               |
| SNP_P4_128253_16760  | NW_004515898.1 | Scaffold423   | 16760                   | AA                              | GG              | 1946947187               |

| SNPs IDs            | Chromosome IDs | Chromosomes | Physical positions (bp) | CDC Frontier (Reference genome) | (ILWC46 & LPNB) | NCBI SNPdb Accession IDs |
|---------------------|----------------|-------------|-------------------------|---------------------------------|-----------------|--------------------------|
| SNP_P4_128254_16762 | NW_004515898.1 | Scaffold423 | 16762                   | GG                              | TT              | 1946947189               |
| SNP_P4_128255_16866 | NW_004515898.1 | Scaffold423 | 16866                   | TT                              | AA              | 1946947191               |
| SNP_P4_128256_16988 | NW_004515898.1 | Scaffold423 | 16988                   | AA                              | GG              | 1946947193               |
| SNP_P4_128257_17000 | NW_004515898.1 | Scaffold423 | 17000                   | AA                              | TT              | 1946947195               |
| SNP_P4_128258_17027 | NW_004515898.1 | Scaffold423 | 17027                   | AA                              | TT              | 1946947197               |
| SNP_P4_128259_17322 | NW_004515898.1 | Scaffold423 | 17322                   | TT                              | CC              | 1946947199               |
| SNP_P4_128260_15226 | NW_004515899.1 | Scaffold424 | 15226                   | CC                              | AA              | 1946947201               |
| SNP_P4_128261_15238 | NW_004515899.1 | Scaffold424 | 15238                   | AA                              | GG              | 1946947203               |
| SNP_P4_128262_15457 | NW_004515899.1 | Scaffold424 | 15457                   | TT                              | GG              | 1946947205               |
| SNP_P4_128263_19150 | NW_004515899.1 | Scaffold424 | 19150                   | TT                              | CC              | 1946947207               |
| SNP_P4_128264_25942 | NW_004515899.1 | Scaffold424 | 25942                   | TT                              | CC              | 1946947209               |
| SNP_P4_128265_29515 | NW_004515899.1 | Scaffold424 | 29515                   | AA                              | GG              | 1946947211               |
| SNP_P4_128266_29599 | NW_004515899.1 | Scaffold424 | 29599                   | GG                              | AA              | 1946947213               |
| SNP_P4_128267_29617 | NW_004515899.1 | Scaffold424 | 29617                   | GG                              | AA              | 1946947215               |
| SNP_P4_128268_29624 | NW_004515899.1 | Scaffold424 | 29624                   | TT                              | CC              | 1946947217               |
| SNP_P4_128269_30229 | NW_004515899.1 | Scaffold424 | 30229                   | GG                              | TT              | 1946947219               |
| SNP_P4_128270_30231 | NW_004515899.1 | Scaffold424 | 30231                   | TT                              | CC              | 1946947221               |
| SNP_P4_128271_35479 | NW_004515899.1 | Scaffold424 | 35479                   | GG                              | TT              | 1946947223               |
| SNP_P4_128272_39863 | NW_004515899.1 | Scaffold424 | 39863                   | TT                              | CC              | 1946947225               |
| SNP_P4_128273_40016 | NW_004515899.1 | Scaffold424 | 40016                   | GG                              | CC              | 1946947227               |
| SNP_P4_128274_40019 | NW_004515899.1 | Scaffold424 | 40019                   | AA                              | TT              | 1946947229               |
| SNP_P4_128275_40714 | NW_004515899.1 | Scaffold424 | 40714                   | GG                              | CC              | 1946947231               |
| SNP_P4_128276_40945 | NW_004515899.1 | Scaffold424 | 40945                   | TT                              | AA              | 1946947233               |
| SNP_P4_128277_40951 | NW_004515899.1 | Scaffold424 | 40951                   | TT                              | AA              | 1946947235               |
| SNP_P4_128278_41004 | NW_004515899.1 | Scaffold424 | 41004                   | GG                              | AA              | 1946947237               |
| SNP_P4_128279_44740 | NW_004515899.1 | Scaffold424 | 44740                   | AA                              | TT              | 1946947239               |
| SNP_P4_128280_44741 | NW_004515899.1 | Scaffold424 | 44741                   | AA                              | CC              | 1946947241               |
| SNP_P4_128281_56051 | NW_004515899.1 | Scaffold424 | 56051                   | TT                              | CC              | 1946947243               |
| SNP_P4_128282_61225 | NW_004515899.1 | Scaffold424 | 61225                   | TT                              | CC              | 1946947245               |
| SNP_P4_128283_61393 | NW_004515899.1 | Scaffold424 | 61393                   | CC                              | TT              | 1946947247               |
| SNP_P4_128284_61428 | NW_004515899.1 | Scaffold424 | 61428                   | TT                              | CC              | 1946947249               |
| SNP_P4_128285_61429 | NW_004515899.1 | Scaffold424 | 61429                   | AA                              | GG              | 1946947251               |
| SNP_P4_128286_61521 | NW_004515899.1 | Scaffold424 | 61521                   | AA                              | GG              | 1946947253               |
| SNP_P4_128287_63209 | NW_004515899.1 | Scaffold424 | 63209                   | AA                              | CC              | 1946947255               |
| SNP_P4_128288_63593 | NW_004515899.1 | Scaffold424 | 63593                   | TT                              | CC              | 1946947257               |
| SNP_P4_128290_65737 | NW_004515899.1 | Scaffold424 | 65737                   | GG                              | TT              | 1946947259               |
| SNP_P4_128291_72411 | NW_004515899.1 | Scaffold424 | 72411                   | GG                              | AA              | 1946947261               |
| SNP_P4_128292_74757 | NW_004515899.1 | Scaffold424 | 74757                   | GG                              | TT              | 1946947263               |
| SNP_P4_128293_77080 | NW_004515899.1 | Scaffold424 | 77080                   | AA                              | GG              | 1946947265               |
| SNP_P4_128294_77129 | NW_004515899.1 | Scaffold424 | 77129                   | TT                              | CC              | 1946947267               |
| SNP_P4_128295_77131 | NW_004515899.1 | Scaffold424 | 77131                   | AA                              | GG              | 1946947269               |
| SNP_P4_128296_78326 | NW_004515899.1 | Scaffold424 | 78326                   | TT                              | CC              | 1946947271               |

| SNPs IDs             | Chromosome IDs | Chromosomes | Physical positions (bp) | CDC Frontier (Reference genome) | (ILWC46 & LPNB) | NCBI SNPdb Accession IDs |
|----------------------|----------------|-------------|-------------------------|---------------------------------|-----------------|--------------------------|
| SNP_P4_128297_85822  | NW_004515899.1 | Scaffold424 | 85822                   | TT                              | CC              | 1946947273               |
| SNP_P4_128298_86142  | NW_004515899.1 | Scaffold424 | 86142                   | TT                              | AA              | 1946947275               |
| SNP_P4_128299_88524  | NW_004515899.1 | Scaffold424 | 88524                   | CC                              | TT              | 1946947277               |
| SNP_P4_128300_88582  | NW_004515899.1 | Scaffold424 | 88582                   | AA                              | CC              | 1946947279               |
| SNP_P4_128301_88778  | NW_004515899.1 | Scaffold424 | 88778                   | TT                              | AA              | 1946947281               |
| SNP_P4_128302_88794  | NW_004515899.1 | Scaffold424 | 88794                   | TT                              | GG              | 1946947283               |
| SNP_P4_128303_88819  | NW_004515899.1 | Scaffold424 | 88819                   | AA                              | CC              | 1946947285               |
| SNP_P4_128304_90467  | NW_004515899.1 | Scaffold424 | 90467                   | AA                              | TT              | 1946947287               |
| SNP_P4_128305_92161  | NW_004515899.1 | Scaffold424 | 92161                   | CC                              | AA              | 1946947289               |
| SNP_P4_128306_92298  | NW_004515899.1 | Scaffold424 | 92298                   | TT                              | CC              | 1946947291               |
| SNP_P4_128307_95018  | NW_004515899.1 | Scaffold424 | 95018                   | CC                              | TT              | 1946947293               |
| SNP_P4_128308_102580 | NW_004515899.1 | Scaffold424 | 102580                  | GG                              | CC              | 1946947295               |
| SNP_P4_128309_104192 | NW_004515899.1 | Scaffold424 | 104192                  | AA                              | GG              | 1946947297               |
| SNP_P4_128310_104331 | NW_004515899.1 | Scaffold424 | 104331                  | CC                              | AA              | 1946947299               |
| SNP_P4_128311_104356 | NW_004515899.1 | Scaffold424 | 104356                  | CC                              | GG              | 1946947301               |
| SNP_P4_128312_104393 | NW_004515899.1 | Scaffold424 | 104393                  | TT                              | CC              | 1946947303               |
| SNP_P4_128313_104530 | NW_004515899.1 | Scaffold424 | 104530                  | TT                              | GG              | 1946947305               |
| SNP_P4_128314_105689 | NW_004515899.1 | Scaffold424 | 105689                  | TT                              | CC              | 1946947307               |
| SNP_P4_128315_106321 | NW_004515899.1 | Scaffold424 | 106321                  | GG                              | TT              | 1946947310               |
| SNP_P4_128316_106449 | NW_004515899.1 | Scaffold424 | 106449                  | CC                              | AA              | 1946947312               |
| SNP_P4_128317_106500 | NW_004515899.1 | Scaffold424 | 106500                  | AA                              | GG              | 1946947314               |
| SNP_P4_128318_106599 | NW_004515899.1 | Scaffold424 | 106599                  | AA                              | TT              | 1946947316               |
| SNP_P4_128319_106657 | NW_004515899.1 | Scaffold424 | 106657                  | GG                              | AA              | 1946947318               |
| SNP_P4_128320_109344 | NW_004515899.1 | Scaffold424 | 109344                  | AA                              | TT              | 1946947320               |
| SNP_P4_128321_109391 | NW_004515899.1 | Scaffold424 | 109391                  | AA                              | TT              | 1946947322               |
| SNP_P4_128322_109853 | NW_004515899.1 | Scaffold424 | 109853                  | TT                              | AA              | 1946947324               |
| SNP_P4_128323_110094 | NW_004515899.1 | Scaffold424 | 110094                  | AA                              | GG              | 1946947326               |
| SNP_P4_128324_112280 | NW_004515899.1 | Scaffold424 | 112280                  | TT                              | AA              | 1946947328               |
| SNP_P4_128325_112399 | NW_004515899.1 | Scaffold424 | 112399                  | TT                              | GG              | 1946947330               |
| SNP_P4_128326_112404 | NW_004515899.1 | Scaffold424 | 112404                  | AA                              | GG              | 1946947332               |
| SNP_P4_128327_112472 | NW_004515899.1 | Scaffold424 | 112472                  | AA                              | TT              | 1946947334               |
| SNP_P4_128328_112527 | NW_004515899.1 | Scaffold424 | 112527                  | TT                              | CC              | 1946947335               |
| SNP_P4_128329_112607 | NW_004515899.1 | Scaffold424 | 112607                  | CC                              | TT              | 1946947337               |
| SNP_P4_128330_112702 | NW_004515899.1 | Scaffold424 | 112702                  | CC                              | GG              | 1946947339               |
| SNP_P4_128331_113082 | NW_004515899.1 | Scaffold424 | 113082                  | GG                              | AA              | 1946947341               |
| SNP_P4_128332_113135 | NW_004515899.1 | Scaffold424 | 113135                  | TT                              | CC              | 1946947343               |
| SNP_P4_128333_113207 | NW_004515899.1 | Scaffold424 | 113207                  | CC                              | GG              | 1946947345               |
| SNP_P4_128334_113228 | NW_004515899.1 | Scaffold424 | 113228                  | TT                              | AA              | 1946947347               |
| SNP_P4_128335_113489 | NW_004515899.1 | Scaffold424 | 113489                  | AA                              | TT              | 1946947349               |
| SNP_P4_128336_113494 | NW_004515899.1 | Scaffold424 | 113494                  | CC                              | AA              | 1946947351               |
| SNP_P4_128337_115342 | NW_004515899.1 | Scaffold424 | 115342                  | AA                              | GG              | 1946947353               |
| SNP_P4_128338_122435 | NW_004515899.1 | Scaffold424 | 122435                  | CC                              | GG              | 1946947355               |



| SNPs IDs             | Chromosome IDs | Chromosomes | Physical positions (bp) | CDC Frontier (Reference genome) | (ILWC46 & LPNB) | NCBI SNPdb Accession IDs |
|----------------------|----------------|-------------|-------------------------|---------------------------------|-----------------|--------------------------|
| SNP_P4_128339_122999 | NW_004515899.1 | Scaffold424 | 122999                  | AA                              | TT              | 1946947357               |
| SNP_P4_128340_124326 | NW_004515899.1 | Scaffold424 | 124326                  | TT                              | GG              | 1946947359               |
| SNP_P4_128341_124389 | NW_004515899.1 | Scaffold424 | 124389                  | AA                              | TT              | 1946947361               |
| SNP_P4_128342_124394 | NW_004515899.1 | Scaffold424 | 124394                  | AA                              | TT              | 1946947363               |
| SNP_P4_128343_502    | NW_004515900.1 | Scaffold425 | 502                     | TT                              | CC              | 1946947365               |
| SNP_P4_128344_690    | NW_004515900.1 | Scaffold425 | 690                     | CC                              | TT              | 1946947367               |
| SNP_P4_128345_695    | NW_004515900.1 | Scaffold425 | 695                     | TT                              | GG              | 1946947368               |
| SNP_P4_128346_717    | NW_004515900.1 | Scaffold425 | 717                     | AA                              | CC              | 1946947371               |
| SNP_P4_128347_755    | NW_004515900.1 | Scaffold425 | 755                     | AA                              | CC              | 1946947373               |
| SNP_P4_128348_759    | NW_004515900.1 | Scaffold425 | 759                     | TT                              | CC              | 1946947375               |
| SNP_P4_128349_796    | NW_004515900.1 | Scaffold425 | 796                     | CC                              | AA              | 1946947377               |
| SNP_P4_128350_805    | NW_004515900.1 | Scaffold425 | 805                     | AA                              | GG              | 1946947379               |
| SNP_P4_128351_13475  | NW_004515901.1 | Scaffold427 | 13475                   | TT                              | GG              | 1946947381               |
| SNP_P4_128352_14228  | NW_004515901.1 | Scaffold427 | 14228                   | AA                              | GG              | 1946947383               |
| SNP_P4_128353_15736  | NW_004515901.1 | Scaffold427 | 15736                   | CC                              | AA              | 1946947385               |
| SNP_P4_128354_15755  | NW_004515901.1 | Scaffold427 | 15755                   | GG                              | TT              | 1946947387               |
| SNP_P4_128355_15825  | NW_004515901.1 | Scaffold427 | 15825                   | CC                              | AA              | 1946947389               |
| SNP_P4_128356_15968  | NW_004515901.1 | Scaffold427 | 15968                   | TT                              | AA              | 1946947391               |
| SNP_P4_128357_16060  | NW_004515901.1 | Scaffold427 | 16060                   | TT                              | AA              | 1946947393               |
| SNP_P4_128358_16097  | NW_004515901.1 | Scaffold427 | 16097                   | AA                              | TT              | 1946947395               |
| SNP_P4_128359_29720  | NW_004515901.1 | Scaffold427 | 29720                   | AA                              | GG              | 1946947397               |
| SNP_P4_128360_49681  | NW_004515901.1 | Scaffold427 | 49681                   | AA                              | CC              | 1946947399               |
| SNP_P4_128361_61067  | NW_004515901.1 | Scaffold427 | 61067                   | TT                              | GG              | 1946947401               |
| SNP_P4_128362_61076  | NW_004515901.1 | Scaffold427 | 61076                   | TT                              | AA              | 1946947403               |
| SNP_P4_128363_61403  | NW_004515901.1 | Scaffold427 | 61403                   | AA                              | GG              | 1946947405               |
| SNP_P4_128364_64458  | NW_004515901.1 | Scaffold427 | 64458                   | GG                              | AA              | 1946947407               |
| SNP_P4_128365_72475  | NW_004515901.1 | Scaffold427 | 72475                   | GG                              | AA              | 1946947409               |
| SNP_P4_128366_82747  | NW_004515901.1 | Scaffold427 | 82747                   | TT                              | CC              | 1946947411               |
| SNP_P4_128367_82973  | NW_004515901.1 | Scaffold427 | 82973                   | TT                              | CC              | 1946947413               |
| SNP_P4_128368_83008  | NW_004515901.1 | Scaffold427 | 83008                   | AA                              | GG              | 1946947415               |
| SNP_P4_128369_83070  | NW_004515901.1 | Scaffold427 | 83070                   | CC                              | GG              | 1946947417               |
| SNP_P4_128370_83133  | NW_004515901.1 | Scaffold427 | 83133                   | TT                              | AA              | 1946947419               |
| SNP_P4_128371_83661  | NW_004515901.1 | Scaffold427 | 83661                   | TT                              | AA              | 1946947421               |
| SNP_P4_128372_83745  | NW_004515901.1 | Scaffold427 | 83745                   | AA                              | GG              | 1946947423               |
| SNP_P4_128373_100338 | NW_004515901.1 | Scaffold427 | 100338                  | CC                              | TT              | 1946947425               |
| SNP_P4_128374_103726 | NW_004515901.1 | Scaffold427 | 103726                  | TT                              | AA              | 1946947427               |
| SNP_P4_128375_105107 | NW_004515901.1 | Scaffold427 | 105107                  | AA                              | TT              | 1946947429               |
| SNP_P4_128376_105113 | NW_004515901.1 | Scaffold427 | 105113                  | AA                              | TT              | 1946947431               |
| SNP_P4_128377_105120 | NW_004515901.1 | Scaffold427 | 105120                  | AA                              | CC              | 1946947433               |
| SNP_P4_128378_105124 | NW_004515901.1 | Scaffold427 | 105124                  | CC                              | AA              | 1946947435               |
| SNP_P4_128379_107641 | NW_004515901.1 | Scaffold427 | 107641                  | CC                              | TT              | 1946947437               |
| SNP_P4_128380_121860 | NW_004515901.1 | Scaffold427 | 121860                  | GG                              | CC              | 1946947439               |

| SNPs IDs            | Chromosome IDs | Chromosomes | Physical positions (bp) | CDC Frontier (Reference genome) | (ILWC46 & LPNB) | NCBI SNPdb Accession IDs |
|---------------------|----------------|-------------|-------------------------|---------------------------------|-----------------|--------------------------|
| SNP_P4_128382_19851 | NW_004515902.1 | Scaffold428 | 19851                   | AA                              | GG              | 1946947441               |
| SNP_P4_128383_19963 | NW_004515902.1 | Scaffold428 | 19963                   | AA                              | GG              | 1946947443               |
| SNP_P4_128384_20004 | NW_004515902.1 | Scaffold428 | 20004                   | AA                              | GG              | 1946947446               |
| SNP_P4_128385_20055 | NW_004515902.1 | Scaffold428 | 20055                   | AA                              | GG              | 1946947448               |
| SNP_P4_128386_20118 | NW_004515902.1 | Scaffold428 | 20118                   | AA                              | GG              | 1946947450               |
| SNP_P4_128387_20138 | NW_004515902.1 | Scaffold428 | 20138                   | TT                              | CC              | 1946947452               |
| SNP_P4_128388_20333 | NW_004515902.1 | Scaffold428 | 20333                   | AA                              | GG              | 1946947454               |
| SNP_P4_128389_20343 | NW_004515902.1 | Scaffold428 | 20343                   | TT                              | CC              | 1946947456               |
| SNP_P4_128390_263   | NW_004515903.1 | Scaffold429 | 263                     | AA                              | GG              | 1946947458               |
| SNP_P4_128391_268   | NW_004515903.1 | Scaffold429 | 268                     | CC                              | GG              | 1946947460               |
| SNP_P4_128392_323   | NW_004515903.1 | Scaffold429 | 323                     | AA                              | TT              | 1946947462               |
| SNP_P4_128393_391   | NW_004515903.1 | Scaffold429 | 391                     | CC                              | TT              | 1946947464               |
| SNP_P4_128394_393   | NW_004515903.1 | Scaffold429 | 393                     | TT                              | CC              | 1946947466               |
| SNP_P4_128395_410   | NW_004515903.1 | Scaffold429 | 410                     | CC                              | AA              | 1946947468               |
| SNP_P4_128396_497   | NW_004515903.1 | Scaffold429 | 497                     | GG                              | CC              | 1946947470               |
| SNP_P4_128397_684   | NW_004515903.1 | Scaffold429 | 684                     | CC                              | TT              | 1946947472               |
| SNP_P4_128398_687   | NW_004515903.1 | Scaffold429 | 687                     | AA                              | TT              | 1946947474               |
| SNP_P4_128399_2846  | NW_004515903.1 | Scaffold429 | 2846                    | TT                              | AA              | 1946947476               |
| SNP_P4_128400_6071  | NW_004515903.1 | Scaffold429 | 6071                    | CC                              | GG              | 1946947478               |
| SNP_P4_128401_6084  | NW_004515903.1 | Scaffold429 | 6084                    | AA                              | TT              | 1946947480               |
| SNP_P4_128402_6536  | NW_004515903.1 | Scaffold429 | 6536                    | TT                              | GG              | 1946947482               |
| SNP_P4_128403_8141  | NW_004515903.1 | Scaffold429 | 8141                    | GG                              | AA              | 1946947484               |
| SNP_P4_128404_8144  | NW_004515903.1 | Scaffold429 | 8144                    | TT                              | AA              | 1946947486               |
| SNP_P4_128405_8222  | NW_004515903.1 | Scaffold429 | 8222                    | AA                              | GG              | 1946947488               |
| SNP_P4_128406_8262  | NW_004515903.1 | Scaffold429 | 8262                    | AA                              | TT              | 1946947490               |
| SNP_P4_128407_8317  | NW_004515903.1 | Scaffold429 | 8317                    | GG                              | AA              | 1946947492               |
| SNP_P4_128408_8334  | NW_004515903.1 | Scaffold429 | 8334                    | GG                              | CC              | 1946947494               |
| SNP_P4_128409_8343  | NW_004515903.1 | Scaffold429 | 8343                    | AA                              | GG              | 1946947496               |
| SNP_P4_128410_8405  | NW_004515903.1 | Scaffold429 | 8405                    | AA                              | TT              | 1946947497               |
| SNP_P4_128411_8422  | NW_004515903.1 | Scaffold429 | 8422                    | AA                              | TT              | 1946947499               |
| SNP_P4_128412_8459  | NW_004515903.1 | Scaffold429 | 8459                    | AA                              | TT              | 1946947501               |
| SNP_P4_128413_8478  | NW_004515903.1 | Scaffold429 | 8478                    | CC                              | AA              | 1946947503               |
| SNP_P4_128414_8577  | NW_004515903.1 | Scaffold429 | 8577                    | CC                              | GG              | 1946947505               |
| SNP_P4_128415_8583  | NW_004515903.1 | Scaffold429 | 8583                    | AA                              | GG              | 1946947507               |
| SNP_P4_128416_8605  | NW_004515903.1 | Scaffold429 | 8605                    | GG                              | AA              | 1946947509               |
| SNP_P4_128417_8617  | NW_004515903.1 | Scaffold429 | 8617                    | AA                              | GG              | 1946947511               |
| SNP_P4_128418_8628  | NW_004515903.1 | Scaffold429 | 8628                    | TT                              | CC              | 1946947513               |
| SNP_P4_128419_8760  | NW_004515903.1 | Scaffold429 | 8760                    | TT                              | GG              | 1946947515               |
| SNP_P4_128420_8826  | NW_004515903.1 | Scaffold429 | 8826                    | GG                              | CC              | 1946947517               |
| SNP_P4_128421_8841  | NW_004515903.1 | Scaffold429 | 8841                    | CC                              | AA              | 1946947518               |
| SNP_P4_128422_8966  | NW_004515903.1 | Scaffold429 | 8966                    | GG                              | TT              | 1946947520               |
| SNP_P4_128423_9006  | NW_004515903.1 | Scaffold429 | 9006                    | TT                              | GG              | 1946947522               |

| SNPs IDs            | Chromosome IDs | Chromosomes | Physical positions (bp) | CDC Frontier (Reference genome) | (ILWC46 & LPNB) | NCBI SNPdb Accession IDs |
|---------------------|----------------|-------------|-------------------------|---------------------------------|-----------------|--------------------------|
| SNP_P4_128424_9015  | NW_004515903.1 | Scaffold429 | 9015                    | TT                              | CC              | 1946947524               |
| SNP_P4_128425_9025  | NW_004515903.1 | Scaffold429 | 9025                    | GG                              | TT              | 1946947526               |
| SNP_P4_128426_9031  | NW_004515903.1 | Scaffold429 | 9031                    | GG                              | AA              | 1946947528               |
| SNP_P4_128427_9108  | NW_004515903.1 | Scaffold429 | 9108                    | CC                              | TT              | 1946947530               |
| SNP_P4_128428_9119  | NW_004515903.1 | Scaffold429 | 9119                    | TT                              | GG              | 1946947532               |
| SNP_P4_128429_9120  | NW_004515903.1 | Scaffold429 | 9120                    | TT                              | AA              | 1946947534               |
| SNP_P4_128430_9319  | NW_004515903.1 | Scaffold429 | 9319                    | TT                              | GG              | 1946947536               |
| SNP_P4_128431_9320  | NW_004515903.1 | Scaffold429 | 9320                    | TT                              | AA              | 1946947538               |
| SNP_P4_128432_9367  | NW_004515903.1 | Scaffold429 | 9367                    | AA                              | GG              | 1946947539               |
| SNP_P4_128433_9615  | NW_004515903.1 | Scaffold429 | 9615                    | TT                              | GG              | 1946947541               |
| SNP_P4_128434_9728  | NW_004515903.1 | Scaffold429 | 9728                    | TT                              | CC              | 1946947543               |
| SNP_P4_128435_9779  | NW_004515903.1 | Scaffold429 | 9779                    | GG                              | TT              | 1946947545               |
| SNP_P4_128436_11002 | NW_004515903.1 | Scaffold429 | 11002                   | GG                              | AA              | 1946947547               |
| SNP_P4_128437_11558 | NW_004515903.1 | Scaffold429 | 11558                   | AA                              | TT              | 1946947549               |
| SNP_P4_128438_13461 | NW_004515903.1 | Scaffold429 | 13461                   | GG                              | AA              | 1946947551               |
| SNP_P4_128441_14478 | NW_004515903.1 | Scaffold429 | 14478                   | TT                              | CC              | 1946947553               |
| SNP_P4_128442_15472 | NW_004515903.1 | Scaffold429 | 15472                   | TT                              | CC              | 1946947555               |
| SNP_P4_128443_15504 | NW_004515903.1 | Scaffold429 | 15504                   | TT                              | CC              | 1946947557               |
| SNP_P4_128444_15519 | NW_004515903.1 | Scaffold429 | 15519                   | CC                              | TT              | 1946947559               |
| SNP_P4_128445_15567 | NW_004515903.1 | Scaffold429 | 15567                   | AA                              | GG              | 1946947561               |
| SNP_P4_128446_15703 | NW_004515903.1 | Scaffold429 | 15703                   | AA                              | GG              | 1946947562               |
| SNP_P4_128447_15709 | NW_004515903.1 | Scaffold429 | 15709                   | TT                              | GG              | 1946947564               |
| SNP_P4_128448_15737 | NW_004515903.1 | Scaffold429 | 15737                   | AA                              | CC              | 1946947566               |
| SNP_P4_128449_15752 | NW_004515903.1 | Scaffold429 | 15752                   | AA                              | GG              | 1946947568               |
| SNP_P4_128450_15772 | NW_004515903.1 | Scaffold429 | 15772                   | CC                              | TT              | 1946947570               |
| SNP_P4_128451_15783 | NW_004515903.1 | Scaffold429 | 15783                   | GG                              | CC              | 1946947572               |
| SNP_P4_128452_15807 | NW_004515903.1 | Scaffold429 | 15807                   | CC                              | TT              | 1946947574               |
| SNP_P4_128453_15841 | NW_004515903.1 | Scaffold429 | 15841                   | CC                              | TT              | 1946947576               |
| SNP_P4_128454_15860 | NW_004515903.1 | Scaffold429 | 15860                   | AA                              | GG              | 1946947578               |
| SNP_P4_128455_28697 | NW_004515903.1 | Scaffold429 | 28697                   | AA                              | GG              | 1946947580               |
| SNP_P4_128456_29245 | NW_004515903.1 | Scaffold429 | 29245                   | CC                              | TT              | 1946947582               |
| SNP_P4_128457_29257 | NW_004515903.1 | Scaffold429 | 29257                   | GG                              | CC              | 1946947583               |
| SNP_P4_128458_29376 | NW_004515903.1 | Scaffold429 | 29376                   | GG                              | TT              | 1946947585               |
| SNP_P4_128459_29389 | NW_004515903.1 | Scaffold429 | 29389                   | TT                              | CC              | 1946947587               |
| SNP_P4_128460_29529 | NW_004515903.1 | Scaffold429 | 29529                   | CC                              | AA              | 1946947589               |
| SNP_P4_128461_29552 | NW_004515903.1 | Scaffold429 | 29552                   | AA                              | GG              | 1946947591               |
| SNP_P4_128462_29554 | NW_004515903.1 | Scaffold429 | 29554                   | TT                              | CC              | 1946947593               |
| SNP_P4_128463_29610 | NW_004515903.1 | Scaffold429 | 29610                   | TT                              | CC              | 1946947595               |
| SNP_P4_128464_29640 | NW_004515903.1 | Scaffold429 | 29640                   | TT                              | AA              | 1946947597               |
| SNP_P4_128465_29755 | NW_004515903.1 | Scaffold429 | 29755                   | AA                              | TT              | 1946947599               |
| SNP_P4_128466_29775 | NW_004515903.1 | Scaffold429 | 29775                   | AA                              | CC              | 1946947601               |
| SNP_P4_128467_29777 | NW_004515903.1 | Scaffold429 | 29777                   | GG                              | AA              | 1946947603               |

| SNPs IDs            | Chromosome IDs | Chromosomes | Physical positions (bp) | CDC Frontier (Reference genome) | (ILWC46 & LPNB) | NCBI SNPdb Accession IDs |
|---------------------|----------------|-------------|-------------------------|---------------------------------|-----------------|--------------------------|
| SNP_P4_128468_31422 | NW_004515903.1 | Scaffold429 | 31422                   | GG                              | AA              | 1946947605               |
| SNP_P4_128469_31494 | NW_004515903.1 | Scaffold429 | 31494                   | AA                              | CC              | 1946947607               |
| SNP_P4_128470_41653 | NW_004515903.1 | Scaffold429 | 41653                   | AA                              | GG              | 1946947609               |
| SNP_P4_128471_45530 | NW_004515903.1 | Scaffold429 | 45530                   | CC                              | TT              | 1946947611               |
| SNP_P4_128472_45533 | NW_004515903.1 | Scaffold429 | 45533                   | CC                              | AA              | 1946947613               |
| SNP_P4_128473_45576 | NW_004515903.1 | Scaffold429 | 45576                   | AA                              | CC              | 1946947615               |
| SNP_P4_128474_48016 | NW_004515903.1 | Scaffold429 | 48016                   | CC                              | AA              | 1946947617               |
| SNP_P4_128475_58226 | NW_004515903.1 | Scaffold429 | 58226                   | AA                              | TT              | 1946947619               |
| SNP_P4_128476_59341 | NW_004515903.1 | Scaffold429 | 59341                   | AA                              | CC              | 1946947620               |
| SNP_P4_128477_59384 | NW_004515903.1 | Scaffold429 | 59384                   | AA                              | GG              | 1946947622               |
| SNP_P4_128478_59394 | NW_004515903.1 | Scaffold429 | 59394                   | GG                              | TT              | 1946947624               |
| SNP_P4_128479_59754 | NW_004515903.1 | Scaffold429 | 59754                   | TT                              | CC              | 1946947626               |
| SNP_P4_128480_59995 | NW_004515903.1 | Scaffold429 | 59995                   | AA                              | TT              | 1946947628               |
| SNP_P4_128481_67088 | NW_004515903.1 | Scaffold429 | 67088                   | AA                              | CC              | 1946947630               |
| SNP_P4_128482_67095 | NW_004515903.1 | Scaffold429 | 67095                   | AA                              | TT              | 1946947632               |
| SNP_P4_128483_67121 | NW_004515903.1 | Scaffold429 | 67121                   | CC                              | TT              | 1946947634               |
| SNP_P4_128484_68966 | NW_004515903.1 | Scaffold429 | 68966                   | AA                              | GG              | 1946947636               |
| SNP_P4_128485_69048 | NW_004515903.1 | Scaffold429 | 69048                   | AA                              | GG              | 1946947638               |
| SNP_P4_128486_69273 | NW_004515903.1 | Scaffold429 | 69273                   | TT                              | CC              | 1946947640               |
| SNP_P4_128487_69352 | NW_004515903.1 | Scaffold429 | 69352                   | AA                              | CC              | 1946947712               |
| SNP_P4_128488_69771 | NW_004515903.1 | Scaffold429 | 69771                   | TT                              | CC              | 1946947714               |
| SNP_P4_128489_69781 | NW_004515903.1 | Scaffold429 | 69781                   | AA                              | TT              | 1946947716               |
| SNP_P4_128490_69789 | NW_004515903.1 | Scaffold429 | 69789                   | TT                              | AA              | 1946947718               |
| SNP_P4_128491_69792 | NW_004515903.1 | Scaffold429 | 69792                   | AA                              | GG              | 1946947720               |
| SNP_P4_128493_72563 | NW_004515903.1 | Scaffold429 | 72563                   | GG                              | AA              | 1946947722               |
| SNP_P4_128494_72568 | NW_004515903.1 | Scaffold429 | 72568                   | TT                              | CC              | 1946947724               |
| SNP_P4_128495_73190 | NW_004515903.1 | Scaffold429 | 73190                   | CC                              | TT              | 1946947726               |
| SNP_P4_128496_73202 | NW_004515903.1 | Scaffold429 | 73202                   | GG                              | TT              | 1946947728               |
| SNP_P4_128497_73203 | NW_004515903.1 | Scaffold429 | 73203                   | AA                              | GG              | 1946947730               |
| SNP_P4_128498_73204 | NW_004515903.1 | Scaffold429 | 73204                   | CC                              | AA              | 1946947732               |
| SNP_P4_128499_76486 | NW_004515903.1 | Scaffold429 | 76486                   | CC                              | TT              | 1946947734               |
| SNP_P4_128500_76494 | NW_004515903.1 | Scaffold429 | 76494                   | GG                              | AA              | 1946947736               |
| SNP_P4_128502_76498 | NW_004515903.1 | Scaffold429 | 76498                   | GG                              | TT              | 1946947737               |
| SNP_P4_128503_78480 | NW_004515903.1 | Scaffold429 | 78480                   | GG                              | AA              | 1946947739               |
| SNP_P4_128504_82363 | NW_004515903.1 | Scaffold429 | 82363                   | AA                              | GG              | 1946947741               |
| SNP_P4_128505_88905 | NW_004515903.1 | Scaffold429 | 88905                   | CC                              | AA              | 1946947743               |
| SNP_P4_128506_96208 | NW_004515903.1 | Scaffold429 | 96208                   | TT                              | GG              | 1946947745               |
| SNP_P4_128507_96300 | NW_004515903.1 | Scaffold429 | 96300                   | TT                              | GG              | 1946947747               |
| SNP_P4_128508_96584 | NW_004515903.1 | Scaffold429 | 96584                   | TT                              | CC              | 1946947749               |
| SNP_P4_128509_96586 | NW_004515903.1 | Scaffold429 | 96586                   | AA                              | GG              | 1946947751               |
| SNP_P4_128510_96638 | NW_004515903.1 | Scaffold429 | 96638                   | TT                              | AA              | 1946947753               |
| SNP_P4_128511_96690 | NW_004515903.1 | Scaffold429 | 96690                   | TT                              | CC              | 1946947755               |

| SNPs IDs             | Chromosome IDs | Chromosomes | Physical positions (bp) | CDC Frontier (Reference genome) | (ILWC46 & LPNB) | NCBI SNPdb Accession IDs |
|----------------------|----------------|-------------|-------------------------|---------------------------------|-----------------|--------------------------|
| SNP_P4_128512_96700  | NW_004515903.1 | Scaffold429 | 96700                   | GG                              | AA              | 1946947757               |
| SNP_P4_128513_96712  | NW_004515903.1 | Scaffold429 | 96712                   | TT                              | CC              | 1946947758               |
| SNP_P4_128514_96754  | NW_004515903.1 | Scaffold429 | 96754                   | AA                              | GG              | 1946947760               |
| SNP_P4_128515_96779  | NW_004515903.1 | Scaffold429 | 96779                   | TT                              | CC              | 1946947762               |
| SNP_P4_128516_96811  | NW_004515903.1 | Scaffold429 | 96811                   | AA                              | GG              | 1946947764               |
| SNP_P4_128517_97072  | NW_004515903.1 | Scaffold429 | 97072                   | CC                              | AA              | 1946947766               |
| SNP_P4_128518_97076  | NW_004515903.1 | Scaffold429 | 97076                   | CC                              | TT              | 1946947768               |
| SNP_P4_128519_111774 | NW_004515903.1 | Scaffold429 | 111774                  | TT                              | CC              | 1946947770               |
| SNP_P4_128520_115229 | NW_004515903.1 | Scaffold429 | 115229                  | GG                              | TT              | 1946947772               |
| SNP_P4_128521_117301 | NW_004515903.1 | Scaffold429 | 117301                  | TT                              | AA              | 1946947774               |
| SNP_P4_128522_121790 | NW_004515903.1 | Scaffold429 | 121790                  | GG                              | CC              | 1946947776               |
| SNP_P4_128524_128714 | NW_004515903.1 | Scaffold429 | 128714                  | GG                              | AA              | 1946947778               |
| SNP_P4_128525_128717 | NW_004515903.1 | Scaffold429 | 128717                  | AA                              | TT              | 1946947780               |
| SNP_P4_128526_128834 | NW_004515903.1 | Scaffold429 | 128834                  | GG                              | CC              | 1946947782               |
| SNP_P4_128527_128851 | NW_004515903.1 | Scaffold429 | 128851                  | TT                              | AA              | 1946947784               |
| SNP_P4_128528_129086 | NW_004515903.1 | Scaffold429 | 129086                  | AA                              | TT              | 1946947786               |
| SNP_P4_128529_129153 | NW_004515903.1 | Scaffold429 | 129153                  | CC                              | TT              | 1946947788               |
| SNP_P4_128530_129215 | NW_004515903.1 | Scaffold429 | 129215                  | TT                              | GG              | 1946947790               |
| SNP_P4_128531_129646 | NW_004515903.1 | Scaffold429 | 129646                  | AA                              | TT              | 1946947792               |
| SNP_P4_128532_129696 | NW_004515903.1 | Scaffold429 | 129696                  | GG                              | TT              | 1946947794               |
| SNP_P4_128533_131869 | NW_004515903.1 | Scaffold429 | 131869                  | AA                              | TT              | 1946947796               |
| SNP_P4_128534_132611 | NW_004515903.1 | Scaffold429 | 132611                  | AA                              | TT              | 1946947798               |
| SNP_P4_128535_141398 | NW_004515903.1 | Scaffold429 | 141398                  | TT                              | GG              | 1946947800               |
| SNP_P4_128536_141462 | NW_004515903.1 | Scaffold429 | 141462                  | AA                              | CC              | 1946947801               |
| SNP_P4_128537_141631 | NW_004515903.1 | Scaffold429 | 141631                  | CC                              | AA              | 1946947803               |
| SNP_P4_128538_141644 | NW_004515903.1 | Scaffold429 | 141644                  | GG                              | AA              | 1946947805               |
| SNP_P4_128539_141713 | NW_004515903.1 | Scaffold429 | 141713                  | AA                              | TT              | 1946947807               |
| SNP_P4_128540_141720 | NW_004515903.1 | Scaffold429 | 141720                  | TT                              | CC              | 1946947809               |
| SNP_P4_128541_141723 | NW_004515903.1 | Scaffold429 | 141723                  | TT                              | AA              | 1946947811               |
| SNP_P4_128542_146422 | NW_004515903.1 | Scaffold429 | 146422                  | AA                              | GG              | 1946947813               |
| SNP_P4_128543_146440 | NW_004515903.1 | Scaffold429 | 146440                  | TT                              | AA              | 1946947815               |
| SNP_P4_128544_146454 | NW_004515903.1 | Scaffold429 | 146454                  | CC                              | TT              | 1946947817               |
| SNP_P4_128545_146476 | NW_004515903.1 | Scaffold429 | 146476                  | TT                              | CC              | 1946947819               |
| SNP_P4_128546_149076 | NW_004515903.1 | Scaffold429 | 149076                  | TT                              | CC              | 1946947821               |
| SNP_P4_128547_149128 | NW_004515903.1 | Scaffold429 | 149128                  | CC                              | TT              | 1946947823               |
| SNP_P4_128548_156384 | NW_004515903.1 | Scaffold429 | 156384                  | GG                              | CC              | 1946947825               |
| SNP_P4_128549_175392 | NW_004515903.1 | Scaffold429 | 175392                  | TT                              | CC              | 1946947827               |
| SNP_P4_128550_176612 | NW_004515903.1 | Scaffold429 | 176612                  | AA                              | GG              | 1946947829               |
| SNP_P4_128551_178920 | NW_004515903.1 | Scaffold429 | 178920                  | TT                              | AA              | 1946947831               |
| SNP_P4_128552_178991 | NW_004515903.1 | Scaffold429 | 178991                  | CC                              | AA              | 1946947833               |
| SNP_P4_128554_181400 | NW_004515903.1 | Scaffold429 | 181400                  | TT                              | GG              | 1946947835               |
| SNP_P4_128555_181411 | NW_004515903.1 | Scaffold429 | 181411                  | AA                              | GG              | 1946947837               |

| SNPs IDs             | Chromosome IDs | Chromosomes | Physical positions (bp) | CDC Frontier (Reference genome) | (ILWC46 & LPNB) | NCBI SNPdb Accession IDs |
|----------------------|----------------|-------------|-------------------------|---------------------------------|-----------------|--------------------------|
| SNP_P4_128556_181433 | NW_004515903.1 | Scaffold429 | 181433                  | AA                              | GG              | 1946947839               |
| SNP_P4_128557_181500 | NW_004515903.1 | Scaffold429 | 181500                  | AA                              | GG              | 1946947841               |
| SNP_P4_128558_181805 | NW_004515903.1 | Scaffold429 | 181805                  | GG                              | AA              | 1946947843               |
| SNP_P4_128559_32     | NW_004515904.1 | Scaffold430 | 32                      | CC                              | AA              | 1946947845               |
| SNP_P4_128560_686    | NW_004515904.1 | Scaffold430 | 686                     | AA                              | GG              | 1946947847               |
| SNP_P4_128561_2156   | NW_004515905.1 | Scaffold432 | 2156                    | AA                              | TT              | 1946947849               |
| SNP_P4_128562_2211   | NW_004515905.1 | Scaffold432 | 2211                    | AA                              | GG              | 1946947851               |
| SNP_P4_128563_2399   | NW_004515905.1 | Scaffold432 | 2399                    | TT                              | CC              | 1946947853               |
| SNP_P4_128564_2669   | NW_004515905.1 | Scaffold432 | 2669                    | GG                              | AA              | 1946947855               |
| SNP_P4_128565_2737   | NW_004515905.1 | Scaffold432 | 2737                    | TT                              | CC              | 1946947857               |
| SNP_P4_128566_4048   | NW_004515905.1 | Scaffold432 | 4048                    | GG                              | AA              | 1946947859               |
| SNP_P4_128567_4423   | NW_004515905.1 | Scaffold432 | 4423                    | AA                              | TT              | 1946947861               |
| SNP_P4_128568_4645   | NW_004515905.1 | Scaffold432 | 4645                    | TT                              | CC              | 1946947863               |
| SNP_P4_128569_4766   | NW_004515905.1 | Scaffold432 | 4766                    | AA                              | CC              | 1946947864               |
| SNP_P4_128570_7435   | NW_004515905.1 | Scaffold432 | 7435                    | AA                              | CC              | 1946947866               |
| SNP_P4_128571_7673   | NW_004515905.1 | Scaffold432 | 7673                    | CC                              | TT              | 1946947868               |
| SNP_P4_128572_10716  | NW_004515905.1 | Scaffold432 | 10716                   | GG                              | AA              | 1946947870               |
| SNP_P4_128573_16019  | NW_004515905.1 | Scaffold432 | 16019                   | CC                              | TT              | 1946947872               |
| SNP_P4_128574_16039  | NW_004515905.1 | Scaffold432 | 16039                   | TT                              | AA              | 1946947874               |
| SNP_P4_128575_16063  | NW_004515905.1 | Scaffold432 | 16063                   | AA                              | GG              | 1946947876               |
| SNP_P4_128576_16077  | NW_004515905.1 | Scaffold432 | 16077                   | CC                              | TT              | 1946947878               |
| SNP_P4_128577_16142  | NW_004515905.1 | Scaffold432 | 16142                   | AA                              | TT              | 1946947880               |
| SNP_P4_128578_16332  | NW_004515905.1 | Scaffold432 | 16332                   | GG                              | AA              | 1946947882               |
| SNP_P4_128579_16352  | NW_004515905.1 | Scaffold432 | 16352                   | TT                              | AA              | 1946947884               |
| SNP_P4_128580_16395  | NW_004515905.1 | Scaffold432 | 16395                   | GG                              | AA              | 1946947886               |
| SNP_P4_128581_16401  | NW_004515905.1 | Scaffold432 | 16401                   | CC                              | TT              | 1946947888               |
| SNP_P4_128582_16728  | NW_004515905.1 | Scaffold432 | 16728                   | TT                              | CC              | 1946947890               |
| SNP_P4_128583_16926  | NW_004515905.1 | Scaffold432 | 16926                   | TT                              | CC              | 1946947892               |
| SNP_P4_128584_16927  | NW_004515905.1 | Scaffold432 | 16927                   | CC                              | TT              | 1946947894               |
| SNP_P4_128585_16937  | NW_004515905.1 | Scaffold432 | 16937                   | TT                              | CC              | 1946947896               |
| SNP_P4_128586_17736  | NW_004515905.1 | Scaffold432 | 17736                   | AA                              | GG              | 1946947898               |
| SNP_P4_128587_17835  | NW_004515905.1 | Scaffold432 | 17835                   | AA                              | TT              | 1946947900               |
| SNP_P4_128588_17863  | NW_004515905.1 | Scaffold432 | 17863                   | GG                              | TT              | 1946947902               |
| SNP_P4_128589_17884  | NW_004515905.1 | Scaffold432 | 17884                   | AA                              | TT              | 1946947904               |
| SNP_P4_128590_17908  | NW_004515905.1 | Scaffold432 | 17908                   | AA                              | CC              | 1946947906               |
| SNP_P4_128591_17987  | NW_004515905.1 | Scaffold432 | 17987                   | GG                              | AA              | 1946947908               |
| SNP_P4_128592_18085  | NW_004515905.1 | Scaffold432 | 18085                   | AA                              | TT              | 1946947910               |
| SNP_P4_128593_18112  | NW_004515905.1 | Scaffold432 | 18112                   | CC                              | TT              | 1946947911               |
| SNP_P4_128594_18137  | NW_004515905.1 | Scaffold432 | 18137                   | AA                              | CC              | 1946947913               |
| SNP_P4_128595_18149  | NW_004515905.1 | Scaffold432 | 18149                   | CC                              | TT              | 1946947915               |
| SNP_P4_128596_18161  | NW_004515905.1 | Scaffold432 | 18161                   | TT                              | CC              | 1946947917               |
| SNP_P4_128597_18642  | NW_004515905.1 | Scaffold432 | 18642                   | TT                              | GG              | 1946947919               |

| SNPs IDs            | Chromosome IDs | Chromosomes | Physical positions (bp) | CDC Frontier (Reference genome) | (ILWC46 & LPNB) | NCBI SNPdb Accession IDs |
|---------------------|----------------|-------------|-------------------------|---------------------------------|-----------------|--------------------------|
| SNP_P4_128599_19007 | NW_004515905.1 | Scaffold432 | 19007                   | CC                              | AA              | 1946947921               |
| SNP_P4_128600_19009 | NW_004515905.1 | Scaffold432 | 19009                   | AA                              | TT              | 1946947923               |
| SNP_P4_128601_19070 | NW_004515905.1 | Scaffold432 | 19070                   | AA                              | TT              | 1946947925               |
| SNP_P4_128602_19086 | NW_004515905.1 | Scaffold432 | 19086                   | GG                              | AA              | 1946947927               |
| SNP_P4_128603_5016  | NW_004515906.1 | Scaffold433 | 5016                    | TT                              | CC              | 1946947929               |
| SNP_P4_128604_8056  | NW_004515906.1 | Scaffold433 | 8056                    | AA                              | TT              | 1946947931               |
| SNP_P4_128606_11146 | NW_004515906.1 | Scaffold433 | 11146                   | AA                              | GG              | 1946947933               |
| SNP_P4_128607_11413 | NW_004515906.1 | Scaffold433 | 11413                   | CC                              | AA              | 1946947935               |
| SNP_P4_128608_11418 | NW_004515906.1 | Scaffold433 | 11418                   | GG                              | AA              | 1946947937               |
| SNP_P4_128609_11829 | NW_004515906.1 | Scaffold433 | 11829                   | AA                              | GG              | 1946947939               |
| SNP_P4_128610_12040 | NW_004515906.1 | Scaffold433 | 12040                   | GG                              | AA              | 1946947941               |
| SNP_P4_128611_12226 | NW_004515906.1 | Scaffold433 | 12226                   | CC                              | TT              | 1946947943               |
| SNP_P4_128612_12401 | NW_004515906.1 | Scaffold433 | 12401                   | AA                              | GG              | 1946947945               |
| SNP_P4_128614_13857 | NW_004515906.1 | Scaffold433 | 13857                   | GG                              | AA              | 1946947947               |
| SNP_P4_128615_13936 | NW_004515906.1 | Scaffold433 | 13936                   | GG                              | AA              | 1946947949               |
| SNP_P4_128616_13968 | NW_004515906.1 | Scaffold433 | 13968                   | CC                              | TT              | 1946947951               |
| SNP_P4_128617_14298 | NW_004515906.1 | Scaffold433 | 14298                   | TT                              | AA              | 1946947953               |
| SNP_P4_128619_15782 | NW_004515906.1 | Scaffold433 | 15782                   | GG                              | AA              | 1946947955               |
| SNP_P4_128620_16129 | NW_004515906.1 | Scaffold433 | 16129                   | TT                              | CC              | 1946947957               |
| SNP_P4_128621_16131 | NW_004515906.1 | Scaffold433 | 16131                   | TT                              | CC              | 1946947959               |
| SNP_P4_128622_16861 | NW_004515906.1 | Scaffold433 | 16861                   | TT                              | CC              | 1946947960               |
| SNP_P4_128623_16878 | NW_004515906.1 | Scaffold433 | 16878                   | GG                              | AA              | 1946947962               |
| SNP_P4_128624_16923 | NW_004515906.1 | Scaffold433 | 16923                   | CC                              | TT              | 1946947964               |
| SNP_P4_128625_17252 | NW_004515906.1 | Scaffold433 | 17252                   | CC                              | GG              | 1946947966               |
| SNP_P4_128627_21466 | NW_004515906.1 | Scaffold433 | 21466                   | GG                              | AA              | 1946947968               |
| SNP_P4_128628_22641 | NW_004515906.1 | Scaffold433 | 22641                   | TT                              | CC              | 1946947970               |
| SNP_P4_128629_22651 | NW_004515906.1 | Scaffold433 | 22651                   | AA                              | GG              | 1946947972               |
| SNP_P4_128630_24847 | NW_004515906.1 | Scaffold433 | 24847                   | CC                              | TT              | 1946947974               |
| SNP_P4_128631_24857 | NW_004515906.1 | Scaffold433 | 24857                   | TT                              | GG              | 1946947976               |
| SNP_P4_128632_25731 | NW_004515906.1 | Scaffold433 | 25731                   | TT                              | CC              | 1946947977               |
| SNP_P4_128633_25868 | NW_004515906.1 | Scaffold433 | 25868                   | GG                              | AA              | 1946947979               |
| SNP_P4_128634_29088 | NW_004515906.1 | Scaffold433 | 29088                   | GG                              | AA              | 1946947981               |
| SNP_P4_128635_29095 | NW_004515906.1 | Scaffold433 | 29095                   | TT                              | CC              | 1946947983               |
| SNP_P4_128636_29106 | NW_004515906.1 | Scaffold433 | 29106                   | TT                              | AA              | 1946947985               |
| SNP_P4_128637_29111 | NW_004515906.1 | Scaffold433 | 29111                   | AA                              | GG              | 1946947987               |
| SNP_P4_128638_29170 | NW_004515906.1 | Scaffold433 | 29170                   | TT                              | AA              | 1946947989               |
| SNP_P4_128639_29194 | NW_004515906.1 | Scaffold433 | 29194                   | TT                              | CC              | 1946947991               |
| SNP_P4_128640_29199 | NW_004515906.1 | Scaffold433 | 29199                   | CC                              | TT              | 1946947993               |
| SNP_P4_128641_29205 | NW_004515906.1 | Scaffold433 | 29205                   | AA                              | TT              | 1946947995               |
| SNP_P4_128642_29222 | NW_004515906.1 | Scaffold433 | 29222                   | CC                              | GG              | 1946947996               |
| SNP_P4_128643_29239 | NW_004515906.1 | Scaffold433 | 29239                   | GG                              | TT              | 1946947998               |
| SNP_P4_128644_29263 | NW_004515906.1 | Scaffold433 | 29263                   | AA                              | TT              | 1946948000               |

| SNPs IDs             | Chromosome IDs | Chromosomes | Physical positions (bp) | CDC Frontier (Reference genome) | (ILWC46 & LPNB) | NCBI SNPdb Accession IDs |
|----------------------|----------------|-------------|-------------------------|---------------------------------|-----------------|--------------------------|
| SNP_P4_128645_29347  | NW_004515906.1 | Scaffold433 | 29347                   | AA                              | GG              | 1946948002               |
| SNP_P4_128646_32296  | NW_004515906.1 | Scaffold433 | 32296                   | AA                              | GG              | 1946948004               |
| SNP_P4_128647_32692  | NW_004515906.1 | Scaffold433 | 32692                   | CC                              | TT              | 1946948006               |
| SNP_P4_128648_36044  | NW_004515906.1 | Scaffold433 | 36044                   | AA                              | GG              | 1946948008               |
| SNP_P4_128649_36072  | NW_004515906.1 | Scaffold433 | 36072                   | CC                              | AA              | 1946948010               |
| SNP_P4_128650_36086  | NW_004515906.1 | Scaffold433 | 36086                   | GG                              | AA              | 1946948012               |
| SNP_P4_128651_36179  | NW_004515906.1 | Scaffold433 | 36179                   | CC                              | AA              | 1946948013               |
| SNP_P4_128652_36189  | NW_004515906.1 | Scaffold433 | 36189                   | TT                              | AA              | 1946948015               |
| SNP_P4_128653_41149  | NW_004515906.1 | Scaffold433 | 41149                   | CC                              | AA              | 1946948017               |
| SNP_P4_128654_46745  | NW_004515906.1 | Scaffold433 | 46745                   | CC                              | TT              | 1946948019               |
| SNP_P4_128655_46764  | NW_004515906.1 | Scaffold433 | 46764                   | GG                              | CC              | 1946948021               |
| SNP_P4_128656_46788  | NW_004515906.1 | Scaffold433 | 46788                   | GG                              | TT              | 1946948023               |
| SNP_P4_128657_46963  | NW_004515906.1 | Scaffold433 | 46963                   | CC                              | TT              | 1946948025               |
| SNP_P4_128658_53411  | NW_004515906.1 | Scaffold433 | 53411                   | GG                              | AA              | 1946948027               |
| SNP_P4_128659_54094  | NW_004515906.1 | Scaffold433 | 54094                   | GG                              | AA              | 1946948028               |
| SNP_P4_128660_56368  | NW_004515906.1 | Scaffold433 | 56368                   | AA                              | CC              | 1946948030               |
| SNP_P4_128661_59667  | NW_004515906.1 | Scaffold433 | 59667                   | TT                              | AA              | 1946948032               |
| SNP_P4_128662_60238  | NW_004515906.1 | Scaffold433 | 60238                   | GG                              | AA              | 1946948034               |
| SNP_P4_128663_64818  | NW_004515906.1 | Scaffold433 | 64818                   | AA                              | TT              | 1946948036               |
| SNP_P4_128664_65942  | NW_004515906.1 | Scaffold433 | 65942                   | GG                              | AA              | 1946948038               |
| SNP_P4_128667_71668  | NW_004515906.1 | Scaffold433 | 71668                   | AA                              | GG              | 1946948040               |
| SNP_P4_128668_71677  | NW_004515906.1 | Scaffold433 | 71677                   | CC                              | TT              | 1946948042               |
| SNP_P4_128669_71936  | NW_004515906.1 | Scaffold433 | 71936                   | CC                              | TT              | 1946948044               |
| SNP_P4_128670_73468  | NW_004515906.1 | Scaffold433 | 73468                   | CC                              | TT              | 1946948046               |
| SNP_P4_128671_86242  | NW_004515906.1 | Scaffold433 | 86242                   | AA                              | GG              | 1946948047               |
| SNP_P4_128673_86401  | NW_004515906.1 | Scaffold433 | 86401                   | AA                              | TT              | 1946948049               |
| SNP_P4_128674_88822  | NW_004515906.1 | Scaffold433 | 88822                   | CC                              | GG              | 1946948051               |
| SNP_P4_128675_98044  | NW_004515906.1 | Scaffold433 | 98044                   | TT                              | CC              | 1946948053               |
| SNP_P4_128676_106751 | NW_004515906.1 | Scaffold433 | 106751                  | TT                              | CC              | 1946948055               |
| SNP_P4_128677_111372 | NW_004515906.1 | Scaffold433 | 111372                  | TT                              | CC              | 1946948057               |
| SNP_P4_128678_112355 | NW_004515906.1 | Scaffold433 | 112355                  | AA                              | CC              | 1946948059               |
| SNP_P4_128679_112382 | NW_004515906.1 | Scaffold433 | 112382                  | GG                              | CC              | 1946948061               |
| SNP_P4_128680_112624 | NW_004515906.1 | Scaffold433 | 112624                  | CC                              | TT              | 1946948063               |
| SNP_P4_128681_113351 | NW_004515906.1 | Scaffold433 | 113351                  | GG                              | AA              | 1946948065               |
| SNP_P4_128682_113790 | NW_004515906.1 | Scaffold433 | 113790                  | TT                              | CC              | 1946948067               |
| SNP_P4_128683_116081 | NW_004515906.1 | Scaffold433 | 116081                  | AA                              | TT              | 1946948068               |
| SNP_P4_128684_116379 | NW_004515906.1 | Scaffold433 | 116379                  | CC                              | TT              | 1946948070               |
| SNP_P4_128685_126886 | NW_004515906.1 | Scaffold433 | 126886                  | CC                              | AA              | 1946948072               |
| SNP_P4_128686_127206 | NW_004515906.1 | Scaffold433 | 127206                  | AA                              | GG              | 1946948074               |
| SNP_P4_128687_127271 | NW_004515906.1 | Scaffold433 | 127271                  | AA                              | GG              | 1946948076               |
| SNP_P4_128688_128905 | NW_004515906.1 | Scaffold433 | 128905                  | GG                              | AA              | 1946948078               |
| SNP_P4_128689_129355 | NW_004515906.1 | Scaffold433 | 129355                  | CC                              | TT              | 1946948080               |



| SNPs IDs             | Chromosome IDs | Chromosomes | Physical positions (bp) | CDC Frontier (Reference genome) | (ILWC46 & LPNB) | NCBI SNPdb Accession IDs |
|----------------------|----------------|-------------|-------------------------|---------------------------------|-----------------|--------------------------|
| SNP_P4_128690_130096 | NW_004515906.1 | Scaffold433 | 130096                  | AA                              | GG              | 1946948082               |
| SNP_P4_128691_131534 | NW_004515906.1 | Scaffold433 | 131534                  | CC                              | TT              | 1946948084               |
| SNP_P4_128692_132778 | NW_004515906.1 | Scaffold433 | 132778                  | GG                              | AA              | 1946948086               |
| SNP_P4_128693_132808 | NW_004515906.1 | Scaffold433 | 132808                  | CC                              | AA              | 1946948088               |
| SNP_P4_128694_132815 | NW_004515906.1 | Scaffold433 | 132815                  | GG                              | TT              | 1946948089               |
| SNP_P4_128695_132817 | NW_004515906.1 | Scaffold433 | 132817                  | GG                              | CC              | 1946948091               |
| SNP_P4_128696_132865 | NW_004515906.1 | Scaffold433 | 132865                  | GG                              | AA              | 1946948093               |
| SNP_P4_128697_141002 | NW_004515906.1 | Scaffold433 | 141002                  | CC                              | AA              | 1946948095               |
| SNP_P4_128699_141273 | NW_004515906.1 | Scaffold433 | 141273                  | CC                              | TT              | 1946948097               |
| SNP_P4_128700_141599 | NW_004515906.1 | Scaffold433 | 141599                  | GG                              | TT              | 1946948099               |
| SNP_P4_128701_142727 | NW_004515906.1 | Scaffold433 | 142727                  | GG                              | TT              | 1946948101               |
| SNP_P4_128702_142744 | NW_004515906.1 | Scaffold433 | 142744                  | TT                              | CC              | 1946948103               |
| SNP_P4_128705_146157 | NW_004515906.1 | Scaffold433 | 146157                  | TT                              | GG              | 1946948105               |
| SNP_P4_128707_146392 | NW_004515906.1 | Scaffold433 | 146392                  | AA                              | TT              | 1946948107               |
| SNP_P4_128708_146451 | NW_004515906.1 | Scaffold433 | 146451                  | AA                              | TT              | 1946948109               |
| SNP_P4_128709_146566 | NW_004515906.1 | Scaffold433 | 146566                  | AA                              | TT              | 1946948110               |
| SNP_P4_128710_146777 | NW_004515906.1 | Scaffold433 | 146777                  | CC                              | TT              | 1946948112               |
| SNP_P4_128712_147298 | NW_004515906.1 | Scaffold433 | 147298                  | AA                              | CC              | 1946948114               |
| SNP_P4_128713_148608 | NW_004515906.1 | Scaffold433 | 148608                  | TT                              | CC              | 1946948116               |
| SNP_P4_128714_148924 | NW_004515906.1 | Scaffold433 | 148924                  | CC                              | TT              | 1946948118               |
| SNP_P4_128715_148963 | NW_004515906.1 | Scaffold433 | 148963                  | AA                              | GG              | 1946948120               |
| SNP_P4_128716_148982 | NW_004515906.1 | Scaffold433 | 148982                  | AA                              | GG              | 1946948122               |
| SNP_P4_128717_149004 | NW_004515906.1 | Scaffold433 | 149004                  | TT                              | CC              | 1946948124               |
| SNP_P4_128718_150765 | NW_004515906.1 | Scaffold433 | 150765                  | GG                              | CC              | 1946948126               |
| SNP_P4_128719_150791 | NW_004515906.1 | Scaffold433 | 150791                  | CC                              | TT              | 1946948128               |
| SNP_P4_128720_151164 | NW_004515906.1 | Scaffold433 | 151164                  | TT                              | CC              | 1946948130               |
| SNP_P4_128721_151678 | NW_004515906.1 | Scaffold433 | 151678                  | GG                              | TT              | 1946948132               |
| SNP_P4_128722_151709 | NW_004515906.1 | Scaffold433 | 151709                  | GG                              | AA              | 1946948134               |
| SNP_P4_128723_151715 | NW_004515906.1 | Scaffold433 | 151715                  | AA                              | GG              | 1946948136               |
| SNP_P4_128724_151736 | NW_004515906.1 | Scaffold433 | 151736                  | GG                              | AA              | 1946948138               |
| SNP_P4_128725_151740 | NW_004515906.1 | Scaffold433 | 151740                  | TT                              | CC              | 1946948140               |
| SNP_P4_128726_151741 | NW_004515906.1 | Scaffold433 | 151741                  | CC                              | TT              | 1946948142               |
| SNP_P4_128727_152091 | NW_004515906.1 | Scaffold433 | 152091                  | CC                              | TT              | 1946948144               |
| SNP_P4_128728_152212 | NW_004515906.1 | Scaffold433 | 152212                  | AA                              | GG              | 1946948146               |
| SNP_P4_128729_152244 | NW_004515906.1 | Scaffold433 | 152244                  | GG                              | TT              | 1946948148               |
| SNP_P4_128730_152427 | NW_004515906.1 | Scaffold433 | 152427                  | GG                              | AA              | 1946948150               |
| SNP_P4_128731_152505 | NW_004515906.1 | Scaffold433 | 152505                  | AA                              | GG              | 1946948152               |
| SNP_P4_128732_152597 | NW_004515906.1 | Scaffold433 | 152597                  | GG                              | TT              | 1946948154               |
| SNP_P4_128733_155186 | NW_004515906.1 | Scaffold433 | 155186                  | TT                              | GG              | 1946948156               |
| SNP_P4_128734_155246 | NW_004515906.1 | Scaffold433 | 155246                  | CC                              | TT              | 1946948158               |
| SNP_P4_128735_155264 | NW_004515906.1 | Scaffold433 | 155264                  | GG                              | AA              | 1946948160               |
| SNP_P4_128736_155394 | NW_004515906.1 | Scaffold433 | 155394                  | AA                              | CC              | 1946948162               |

| SNPs IDs             | Chromosome IDs | Chromosomes | Physical positions (bp) | CDC Frontier (Reference genome) | (ILWC46 & LPNB) | NCBI SNPdb Accession IDs |
|----------------------|----------------|-------------|-------------------------|---------------------------------|-----------------|--------------------------|
| SNP_P4_128737_155405 | NW_004515906.1 | Scaffold433 | 155405                  | AA                              | GG              | 1946948164               |
| SNP_P4_128738_155414 | NW_004515906.1 | Scaffold433 | 155414                  | CC                              | GG              | 1946948166               |
| SNP_P4_128739_155432 | NW_004515906.1 | Scaffold433 | 155432                  | CC                              | TT              | 1946948168               |
| SNP_P4_128740_155895 | NW_004515906.1 | Scaffold433 | 155895                  | CC                              | TT              | 1946948170               |
| SNP_P4_128741_155955 | NW_004515906.1 | Scaffold433 | 155955                  | AA                              | GG              | 1946948172               |
| SNP_P4_128742_157189 | NW_004515906.1 | Scaffold433 | 157189                  | GG                              | AA              | 1946948174               |
| SNP_P4_128743_157391 | NW_004515906.1 | Scaffold433 | 157391                  | CC                              | AA              | 1946948176               |
| SNP_P4_128744_157514 | NW_004515906.1 | Scaffold433 | 157514                  | TT                              | CC              | 1946948178               |
| SNP_P4_128745_157529 | NW_004515906.1 | Scaffold433 | 157529                  | CC                              | GG              | 1946948180               |
| SNP_P4_128747_157683 | NW_004515906.1 | Scaffold433 | 157683                  | TT                              | GG              | 1946948182               |
| SNP_P4_128748_157701 | NW_004515906.1 | Scaffold433 | 157701                  | CC                              | TT              | 1946948184               |
| SNP_P4_128749_157730 | NW_004515906.1 | Scaffold433 | 157730                  | AA                              | CC              | 1946948186               |
| SNP_P4_128750_158035 | NW_004515906.1 | Scaffold433 | 158035                  | AA                              | CC              | 1946948187               |
| SNP_P4_128751_158112 | NW_004515906.1 | Scaffold433 | 158112                  | GG                              | AA              | 1946948189               |
| SNP_P4_128752_158200 | NW_004515906.1 | Scaffold433 | 158200                  | TT                              | CC              | 1946948191               |
| SNP_P4_128753_158206 | NW_004515906.1 | Scaffold433 | 158206                  | AA                              | GG              | 1946948193               |
| SNP_P4_128754_158404 | NW_004515906.1 | Scaffold433 | 158404                  | TT                              | CC              | 1946948195               |
| SNP_P4_128755_158426 | NW_004515906.1 | Scaffold433 | 158426                  | TT                              | CC              | 1946948197               |
| SNP_P4_128756_158441 | NW_004515906.1 | Scaffold433 | 158441                  | CC                              | TT              | 1946948199               |
| SNP_P4_128757_158633 | NW_004515906.1 | Scaffold433 | 158633                  | TT                              | AA              | 1946948201               |
| SNP_P4_128759_160048 | NW_004515906.1 | Scaffold433 | 160048                  | CC                              | GG              | 1946948203               |
| SNP_P4_128760_161368 | NW_004515906.1 | Scaffold433 | 161368                  | GG                              | AA              | 1946948205               |
| SNP_P4_128761_161434 | NW_004515906.1 | Scaffold433 | 161434                  | GG                              | AA              | 1946948207               |
| SNP_P4_128762_161444 | NW_004515906.1 | Scaffold433 | 161444                  | TT                              | AA              | 1946948209               |
| SNP_P4_128763_161513 | NW_004515906.1 | Scaffold433 | 161513                  | CC                              | AA              | 1946948211               |
| SNP_P4_128764_161610 | NW_004515906.1 | Scaffold433 | 161610                  | GG                              | AA              | 1946948213               |
| SNP_P4_128765_162012 | NW_004515906.1 | Scaffold433 | 162012                  | CC                              | TT              | 1946948215               |
| SNP_P4_128766_162252 | NW_004515906.1 | Scaffold433 | 162252                  | TT                              | CC              | 1946948217               |
| SNP_P4_128767_163463 | NW_004515906.1 | Scaffold433 | 163463                  | CC                              | TT              | 1946948219               |
| SNP_P4_128768_165765 | NW_004515906.1 | Scaffold433 | 165765                  | AA                              | CC              | 1946948221               |
| SNP_P4_128769_165876 | NW_004515906.1 | Scaffold433 | 165876                  | CC                              | TT              | 1946948223               |
| SNP_P4_128770_165888 | NW_004515906.1 | Scaffold433 | 165888                  | TT                              | CC              | 1946948225               |
| SNP_P4_128771_165900 | NW_004515906.1 | Scaffold433 | 165900                  | TT                              | CC              | 1946948227               |
| SNP_P4_128772_165935 | NW_004515906.1 | Scaffold433 | 165935                  | GG                              | CC              | 1946948229               |
| SNP_P4_128774_165985 | NW_004515906.1 | Scaffold433 | 165985                  | GG                              | AA              | 1946948231               |
| SNP_P4_128775_166027 | NW_004515906.1 | Scaffold433 | 166027                  | AA                              | CC              | 1946948233               |
| SNP_P4_128776_166030 | NW_004515906.1 | Scaffold433 | 166030                  | CC                              | TT              | 1946948235               |
| SNP_P4_128777_166031 | NW_004515906.1 | Scaffold433 | 166031                  | GG                              | AA              | 1946948237               |
| SNP_P4_128778_166084 | NW_004515906.1 | Scaffold433 | 166084                  | GG                              | AA              | 1946948239               |
| SNP_P4_128779_166179 | NW_004515906.1 | Scaffold433 | 166179                  | CC                              | TT              | 1946948241               |
| SNP_P4_128780_166187 | NW_004515906.1 | Scaffold433 | 166187                  | CC                              | AA              | 1946948243               |
| SNP_P4_128781_166362 | NW_004515906.1 | Scaffold433 | 166362                  | GG                              | AA              | 1946948245               |

| SNPs IDs             | Chromosome IDs | Chromosomes | Physical positions (bp) | CDC Frontier (Reference genome) | (ILWC46 & LPNB) | NCBI SNPdb Accession IDs |
|----------------------|----------------|-------------|-------------------------|---------------------------------|-----------------|--------------------------|
| SNP_P4_128782_166516 | NW_004515906.1 | Scaffold433 | 166516                  | AA                              | CC              | 1946948247               |
| SNP_P4_128783_166582 | NW_004515906.1 | Scaffold433 | 166582                  | GG                              | CC              | 1946948249               |
| SNP_P4_128784_166595 | NW_004515906.1 | Scaffold433 | 166595                  | CC                              | TT              | 1946948251               |
| SNP_P4_128785_166648 | NW_004515906.1 | Scaffold433 | 166648                  | GG                              | AA              | 1946948253               |
| SNP_P4_128786_166672 | NW_004515906.1 | Scaffold433 | 166672                  | TT                              | CC              | 1946948255               |
| SNP_P4_128787_166676 | NW_004515906.1 | Scaffold433 | 166676                  | TT                              | GG              | 1946948257               |
| SNP_P4_128788_166739 | NW_004515906.1 | Scaffold433 | 166739                  | GG                              | AA              | 1946948259               |
| SNP_P4_128789_166798 | NW_004515906.1 | Scaffold433 | 166798                  | GG                              | TT              | 1946948261               |
| SNP_P4_128790_166823 | NW_004515906.1 | Scaffold433 | 166823                  | TT                              | CC              | 1946948263               |
| SNP_P4_128791_166860 | NW_004515906.1 | Scaffold433 | 166860                  | AA                              | TT              | 1946948265               |
| SNP_P4_128792_168975 | NW_004515906.1 | Scaffold433 | 168975                  | AA                              | GG              | 1946948267               |
| SNP_P4_128793_169253 | NW_004515906.1 | Scaffold433 | 169253                  | CC                              | AA              | 1946948269               |
| SNP_P4_128794_169461 | NW_004515906.1 | Scaffold433 | 169461                  | AA                              | GG              | 1946948271               |
| SNP_P4_128796_169505 | NW_004515906.1 | Scaffold433 | 169505                  | GG                              | AA              | 1946948273               |
| SNP_P4_128797_169519 | NW_004515906.1 | Scaffold433 | 169519                  | TT                              | CC              | 1946948275               |
| SNP_P4_128798_169587 | NW_004515906.1 | Scaffold433 | 169587                  | GG                              | AA              | 1946948277               |
| SNP_P4_128799_169851 | NW_004515906.1 | Scaffold433 | 169851                  | CC                              | GG              | 1946948279               |
| SNP_P4_128800_169880 | NW_004515906.1 | Scaffold433 | 169880                  | TT                              | CC              | 1946948281               |
| SNP_P4_128801_1910   | NW_004515908.1 | Scaffold435 | 1910                    | GG                              | AA              | 1946948283               |
| SNP_P4_128802_5816   | NW_004515908.1 | Scaffold435 | 5816                    | AA                              | CC              | 1946948285               |
| SNP_P4_128803_5818   | NW_004515908.1 | Scaffold435 | 5818                    | CC                              | TT              | 1946948287               |
| SNP_P4_128804_6072   | NW_004515908.1 | Scaffold435 | 6072                    | GG                              | AA              | 1946948289               |
| SNP_P4_128805_33709  | NW_004515908.1 | Scaffold435 | 33709                   | CC                              | AA              | 1946948291               |
| SNP_P4_128806_36641  | NW_004515908.1 | Scaffold435 | 36641                   | CC                              | TT              | 1946948293               |
| SNP_P4_128807_40898  | NW_004515908.1 | Scaffold435 | 40898                   | AA                              | GG              | 1946948295               |
| SNP_P4_128808_50112  | NW_004515908.1 | Scaffold435 | 50112                   | TT                              | AA              | 1946948298               |
| SNP_P4_128809_50123  | NW_004515908.1 | Scaffold435 | 50123                   | TT                              | CC              | 1946948300               |
| SNP_P4_128810_50124  | NW_004515908.1 | Scaffold435 | 50124                   | TT                              | AA              | 1946948302               |
| SNP_P4_128812_76315  | NW_004515908.1 | Scaffold435 | 76315                   | CC                              | TT              | 1946948304               |
| SNP_P4_128813_89041  | NW_004515908.1 | Scaffold435 | 89041                   | TT                              | AA              | 1946948306               |
| SNP_P4_128815_109050 | NW_004515908.1 | Scaffold435 | 109050                  | TT                              | CC              | 1946948308               |
| SNP_P4_128816_109064 | NW_004515908.1 | Scaffold435 | 109064                  | CC                              | TT              | 1946948310               |
| SNP_P4_128817_109108 | NW_004515908.1 | Scaffold435 | 109108                  | CC                              | TT              | 1946948312               |
| SNP_P4_128818_109127 | NW_004515908.1 | Scaffold435 | 109127                  | TT                              | CC              | 1946948314               |
| SNP_P4_128819_109377 | NW_004515908.1 | Scaffold435 | 109377                  | AA                              | TT              | 1946948316               |
| SNP_P4_128820_109387 | NW_004515908.1 | Scaffold435 | 109387                  | CC                              | AA              | 1946948318               |
| SNP_P4_128821_109426 | NW_004515908.1 | Scaffold435 | 109426                  | TT                              | CC              | 1946948320               |
| SNP_P4_128822_109438 | NW_004515908.1 | Scaffold435 | 109438                  | CC                              | AA              | 1946948322               |
| SNP_P4_128823_109503 | NW_004515908.1 | Scaffold435 | 109503                  | CC                              | AA              | 1946948324               |
| SNP_P4_128824_134876 | NW_004515908.1 | Scaffold435 | 134876                  | TT                              | CC              | 1946948326               |
| SNP_P4_128825_1163   | NW_004515909.1 | Scaffold436 | 1163                    | TT                              | CC              | 1946948328               |
| SNP_P4_128826_1260   | NW_004515909.1 | Scaffold436 | 1260                    | TT                              | AA              | 1946948330               |

| SNPs IDs            | Chromosome IDs | Chromosomes | Physical positions (bp) | CDC Frontier (Reference genome) | (ILWC46 & LPNB) | NCBI SNPdb Accession IDs |
|---------------------|----------------|-------------|-------------------------|---------------------------------|-----------------|--------------------------|
| SNP_P4_128827_1526  | NW_004515909.1 | Scaffold436 | 1526                    | CC                              | GG              | 1946948332               |
| SNP_P4_128828_1552  | NW_004515909.1 | Scaffold436 | 1552                    | CC                              | TT              | 1946948334               |
| SNP_P4_128829_1595  | NW_004515909.1 | Scaffold436 | 1595                    | CC                              | TT              | 1946948336               |
| SNP_P4_128830_1685  | NW_004515909.1 | Scaffold436 | 1685                    | AA                              | TT              | 1946948338               |
| SNP_P4_128831_2290  | NW_004515909.1 | Scaffold436 | 2290                    | GG                              | TT              | 1946948340               |
| SNP_P4_128832_2302  | NW_004515909.1 | Scaffold436 | 2302                    | AA                              | TT              | 1946948342               |
| SNP_P4_128833_2311  | NW_004515909.1 | Scaffold436 | 2311                    | AA                              | TT              | 1946948344               |
| SNP_P4_128834_2314  | NW_004515909.1 | Scaffold436 | 2314                    | AA                              | TT              | 1946948346               |
| SNP_P4_128835_2363  | NW_004515909.1 | Scaffold436 | 2363                    | GG                              | AA              | 1946948348               |
| SNP_P4_128836_2431  | NW_004515909.1 | Scaffold436 | 2431                    | TT                              | CC              | 1946948350               |
| SNP_P4_128837_2563  | NW_004515909.1 | Scaffold436 | 2563                    | CC                              | TT              | 1946948352               |
| SNP_P4_128838_2697  | NW_004515909.1 | Scaffold436 | 2697                    | AA                              | TT              | 1946948354               |
| SNP_P4_128839_2720  | NW_004515909.1 | Scaffold436 | 2720                    | CC                              | TT              | 1946948356               |
| SNP_P4_128840_3767  | NW_004515909.1 | Scaffold436 | 3767                    | AA                              | GG              | 1946948358               |
| SNP_P4_128841_3918  | NW_004515909.1 | Scaffold436 | 3918                    | GG                              | CC              | 1946948360               |
| SNP_P4_128842_4177  | NW_004515909.1 | Scaffold436 | 4177                    | AA                              | CC              | 1946948362               |
| SNP_P4_128843_4413  | NW_004515909.1 | Scaffold436 | 4413                    | GG                              | TT              | 1946948364               |
| SNP_P4_128844_4498  | NW_004515909.1 | Scaffold436 | 4498                    | AA                              | TT              | 1946948366               |
| SNP_P4_128845_4507  | NW_004515909.1 | Scaffold436 | 4507                    | GG                              | AA              | 1946948368               |
| SNP_P4_128846_5591  | NW_004515909.1 | Scaffold436 | 5591                    | AA                              | TT              | 1946948370               |
| SNP_P4_128847_5901  | NW_004515909.1 | Scaffold436 | 5901                    | GG                              | TT              | 1946948372               |
| SNP_P4_128848_5911  | NW_004515909.1 | Scaffold436 | 5911                    | CC                              | AA              | 1946948374               |
| SNP_P4_128849_5935  | NW_004515909.1 | Scaffold436 | 5935                    | AA                              | GG              | 1946948376               |
| SNP_P4_128850_6066  | NW_004515909.1 | Scaffold436 | 6066                    | TT                              | AA              | 1946948378               |
| SNP_P4_128851_9910  | NW_004515909.1 | Scaffold436 | 9910                    | TT                              | AA              | 1946948381               |
| SNP_P4_128852_9930  | NW_004515909.1 | Scaffold436 | 9930                    | GG                              | CC              | 1946948383               |
| SNP_P4_128853_9938  | NW_004515909.1 | Scaffold436 | 9938                    | TT                              | CC              | 1946948385               |
| SNP_P4_128854_10241 | NW_004515909.1 | Scaffold436 | 10241                   | AA                              | GG              | 1946948387               |
| SNP_P4_128855_19862 | NW_004515909.1 | Scaffold436 | 19862                   | GG                              | AA              | 1946948389               |
| SNP_P4_128856_20165 | NW_004515909.1 | Scaffold436 | 20165                   | AA                              | TT              | 1946948390               |
| SNP_P4_128857_34175 | NW_004515909.1 | Scaffold436 | 34175                   | AA                              | GG              | 1946948392               |
| SNP_P4_128858_34184 | NW_004515909.1 | Scaffold436 | 34184                   | GG                              | AA              | 1946948394               |
| SNP_P4_128859_35324 | NW_004515909.1 | Scaffold436 | 35324                   | TT                              | CC              | 1946948396               |
| SNP_P4_128860_35633 | NW_004515909.1 | Scaffold436 | 35633                   | AA                              | GG              | 1946948398               |
| SNP_P4_128861_38060 | NW_004515909.1 | Scaffold436 | 38060                   | GG                              | AA              | 1946948400               |
| SNP_P4_128862_38067 | NW_004515909.1 | Scaffold436 | 38067                   | TT                              | GG              | 1946948402               |
| SNP_P4_128863_38123 | NW_004515909.1 | Scaffold436 | 38123                   | TT                              | CC              | 1946948404               |
| SNP_P4_128864_55472 | NW_004515909.1 | Scaffold436 | 55472                   | GG                              | AA              | 1946948406               |
| SNP_P4_128865_55519 | NW_004515909.1 | Scaffold436 | 55519                   | AA                              | GG              | 1946948408               |
| SNP_P4_128866_58711 | NW_004515909.1 | Scaffold436 | 58711                   | TT                              | CC              | 1946948410               |
| SNP_P4_128868_60697 | NW_004515909.1 | Scaffold436 | 60697                   | AA                              | CC              | 1946948412               |
| SNP_P4_128869_65639 | NW_004515909.1 | Scaffold436 | 65639                   | CC                              | AA              | 1946948414               |

| SNPs IDs            | Chromosome IDs | Chromosomes | Physical positions (bp) | CDC Frontier (Reference genome) | (ILWC46 & LPNB) | NCBI SNPdb Accession IDs |
|---------------------|----------------|-------------|-------------------------|---------------------------------|-----------------|--------------------------|
| SNP_P4_128871_67153 | NW_004515909.1 | Scaffold436 | 67153                   | GG                              | AA              | 1946948416               |
| SNP_P4_128873_68789 | NW_004515909.1 | Scaffold436 | 68789                   | AA                              | GG              | 1946948418               |
| SNP_P4_128874_73971 | NW_004515909.1 | Scaffold436 | 73971                   | CC                              | TT              | 1946948420               |
| SNP_P4_128875_74019 | NW_004515909.1 | Scaffold436 | 74019                   | CC                              | TT              | 1946948422               |
| SNP_P4_128876_74072 | NW_004515909.1 | Scaffold436 | 74072                   | GG                              | AA              | 1946948424               |
| SNP_P4_128877_74081 | NW_004515909.1 | Scaffold436 | 74081                   | TT                              | AA              | 1946948426               |
| SNP_P4_128878_74352 | NW_004515909.1 | Scaffold436 | 74352                   | TT                              | CC              | 1946948428               |
| SNP_P4_128879_74355 | NW_004515909.1 | Scaffold436 | 74355                   | CC                              | AA              | 1946948429               |
| SNP_P4_128880_2226  | NW_004515910.1 | Scaffold437 | 2226                    | AA                              | GG              | 1946948431               |
| SNP_P4_128881_2379  | NW_004515910.1 | Scaffold437 | 2379                    | TT                              | GG              | 1946948433               |
| SNP_P4_128882_2550  | NW_004515910.1 | Scaffold437 | 2550                    | GG                              | AA              | 1946948435               |
| SNP_P4_128883_2737  | NW_004515910.1 | Scaffold437 | 2737                    | AA                              | GG              | 1946948437               |
| SNP_P4_128884_2744  | NW_004515910.1 | Scaffold437 | 2744                    | CC                              | TT              | 1946948439               |
| SNP_P4_128885_2770  | NW_004515910.1 | Scaffold437 | 2770                    | AA                              | GG              | 1946948441               |
| SNP_P4_128887_3005  | NW_004515910.1 | Scaffold437 | 3005                    | CC                              | AA              | 1946948443               |
| SNP_P4_128888_3046  | NW_004515910.1 | Scaffold437 | 3046                    | TT                              | CC              | 1946948445               |
| SNP_P4_128889_3076  | NW_004515910.1 | Scaffold437 | 3076                    | AA                              | GG              | 1946948447               |
| SNP_P4_128890_3975  | NW_004515910.1 | Scaffold437 | 3975                    | CC                              | TT              | 1946948449               |
| SNP_P4_128891_4086  | NW_004515910.1 | Scaffold437 | 4086                    | AA                              | GG              | 1946948451               |
| SNP_P4_128892_4090  | NW_004515910.1 | Scaffold437 | 4090                    | TT                              | AA              | 1946948452               |
| SNP_P4_128893_4101  | NW_004515910.1 | Scaffold437 | 4101                    | TT                              | AA              | 1946948454               |
| SNP_P4_128894_4103  | NW_004515910.1 | Scaffold437 | 4103                    | TT                              | CC              | 1946948456               |
| SNP_P4_128895_4119  | NW_004515910.1 | Scaffold437 | 4119                    | TT                              | CC              | 1946948458               |
| SNP_P4_128896_4502  | NW_004515910.1 | Scaffold437 | 4502                    | AA                              | TT              | 1946948460               |
| SNP_P4_128897_4525  | NW_004515910.1 | Scaffold437 | 4525                    | TT                              | GG              | 1946948462               |
| SNP_P4_128898_4640  | NW_004515910.1 | Scaffold437 | 4640                    | AA                              | CC              | 1946948464               |
| SNP_P4_128899_4688  | NW_004515910.1 | Scaffold437 | 4688                    | TT                              | CC              | 1946948466               |
| SNP_P4_128900_4758  | NW_004515910.1 | Scaffold437 | 4758                    | AA                              | GG              | 1946948468               |
| SNP_P4_128901_4767  | NW_004515910.1 | Scaffold437 | 4767                    | CC                              | GG              | 1946948470               |
| SNP_P4_128902_4801  | NW_004515910.1 | Scaffold437 | 4801                    | CC                              | AA              | 1946948472               |
| SNP_P4_128903_15134 | NW_004515910.1 | Scaffold437 | 15134                   | CC                              | GG              | 1946948474               |
| SNP_P4_128904_21131 | NW_004515910.1 | Scaffold437 | 21131                   | AA                              | GG              | 1946948476               |
| SNP_P4_128906_24504 | NW_004515910.1 | Scaffold437 | 24504                   | TT                              | CC              | 1946948478               |
| SNP_P4_128907_26615 | NW_004515910.1 | Scaffold437 | 26615                   | GG                              | AA              | 1946948480               |
| SNP_P4_128908_26616 | NW_004515910.1 | Scaffold437 | 26616                   | AA                              | CC              | 1946948482               |
| SNP_P4_128909_27208 | NW_004515910.1 | Scaffold437 | 27208                   | GG                              | AA              | 1946948484               |
| SNP_P4_128910_28236 | NW_004515910.1 | Scaffold437 | 28236                   | TT                              | AA              | 1946948486               |
| SNP_P4_128911_28280 | NW_004515910.1 | Scaffold437 | 28280                   | TT                              | AA              | 1946948488               |
| SNP_P4_128912_28283 | NW_004515910.1 | Scaffold437 | 28283                   | TT                              | AA              | 1946948490               |
| SNP_P4_128913_28295 | NW_004515910.1 | Scaffold437 | 28295                   | AA                              | GG              | 1946948492               |
| SNP_P4_128914_28331 | NW_004515910.1 | Scaffold437 | 28331                   | AA                              | GG              | 1946948494               |
| SNP_P4_128915_28347 | NW_004515910.1 | Scaffold437 | 28347                   | CC                              | TT              | 1946948496               |

| SNPs IDs            | Chromosome IDs | Chromosomes | Physical positions (bp) | CDC Frontier (Reference genome) | (ILWC46 & LPNB) | NCBI SNPdb Accession IDs |
|---------------------|----------------|-------------|-------------------------|---------------------------------|-----------------|--------------------------|
| SNP_P4_128916_28366 | NW_004515910.1 | Scaffold437 | 28366                   | TT                              | AA              | 1946948498               |
| SNP_P4_128917_28403 | NW_004515910.1 | Scaffold437 | 28403                   | TT                              | AA              | 1946948500               |
| SNP_P4_128918_28618 | NW_004515910.1 | Scaffold437 | 28618                   | GG                              | AA              | 1946948502               |
| SNP_P4_128919_28623 | NW_004515910.1 | Scaffold437 | 28623                   | GG                              | AA              | 1946948504               |
| SNP_P4_128920_28635 | NW_004515910.1 | Scaffold437 | 28635                   | GG                              | TT              | 1946948506               |
| SNP_P4_128921_30934 | NW_004515910.1 | Scaffold437 | 30934                   | AA                              | TT              | 1946948508               |
| SNP_P4_128922_34629 | NW_004515910.1 | Scaffold437 | 34629                   | GG                              | AA              | 1946948510               |
| SNP_P4_128923_34631 | NW_004515910.1 | Scaffold437 | 34631                   | AA                              | GG              | 1946948512               |
| SNP_P4_128924_34868 | NW_004515910.1 | Scaffold437 | 34868                   | CC                              | AA              | 1946948514               |
| SNP_P4_128925_34869 | NW_004515910.1 | Scaffold437 | 34869                   | AA                              | TT              | 1946948516               |
| SNP_P4_128926_34870 | NW_004515910.1 | Scaffold437 | 34870                   | TT                              | AA              | 1946948518               |
| SNP_P4_128927_34926 | NW_004515910.1 | Scaffold437 | 34926                   | GG                              | AA              | 1946948520               |
| SNP_P4_128928_34962 | NW_004515910.1 | Scaffold437 | 34962                   | TT                              | CC              | 1946948522               |
| SNP_P4_128929_34963 | NW_004515910.1 | Scaffold437 | 34963                   | CC                              | AA              | 1946948524               |
| SNP_P4_128930_34986 | NW_004515910.1 | Scaffold437 | 34986                   | TT                              | CC              | 1946948526               |
| SNP_P4_128931_35033 | NW_004515910.1 | Scaffold437 | 35033                   | CC                              | TT              | 1946948528               |
| SNP_P4_128932_35056 | NW_004515910.1 | Scaffold437 | 35056                   | TT                              | CC              | 1946948530               |
| SNP_P4_128933_35090 | NW_004515910.1 | Scaffold437 | 35090                   | AA                              | GG              | 1946948531               |
| SNP_P4_128934_35128 | NW_004515910.1 | Scaffold437 | 35128                   | TT                              | CC              | 1946948533               |
| SNP_P4_128935_35145 | NW_004515910.1 | Scaffold437 | 35145                   | AA                              | GG              | 1946948535               |
| SNP_P4_128936_35173 | NW_004515910.1 | Scaffold437 | 35173                   | AA                              | GG              | 1946948537               |
| SNP_P4_128937_35202 | NW_004515910.1 | Scaffold437 | 35202                   | TT                              | CC              | 1946948539               |
| SNP_P4_128938_35665 | NW_004515910.1 | Scaffold437 | 35665                   | AA                              | CC              | 1946948541               |
| SNP_P4_128939_35673 | NW_004515910.1 | Scaffold437 | 35673                   | GG                              | TT              | 1946948543               |
| SNP_P4_128940_35674 | NW_004515910.1 | Scaffold437 | 35674                   | TT                              | AA              | 1946948545               |
| SNP_P4_128941_35693 | NW_004515910.1 | Scaffold437 | 35693                   | AA                              | TT              | 1946948547               |
| SNP_P4_128942_35742 | NW_004515910.1 | Scaffold437 | 35742                   | TT                              | AA              | 1946948549               |
| SNP_P4_128943_35759 | NW_004515910.1 | Scaffold437 | 35759                   | CC                              | TT              | 1946948551               |
| SNP_P4_128944_35763 | NW_004515910.1 | Scaffold437 | 35763                   | TT                              | CC              | 1946948552               |
| SNP_P4_128945_37779 | NW_004515910.1 | Scaffold437 | 37779                   | CC                              | TT              | 1946948554               |
| SNP_P4_128946_39234 | NW_004515910.1 | Scaffold437 | 39234                   | CC                              | TT              | 1946948556               |
| SNP_P4_128947_41462 | NW_004515910.1 | Scaffold437 | 41462                   | TT                              | AA              | 1946948558               |
| SNP_P4_128948_42294 | NW_004515910.1 | Scaffold437 | 42294                   | CC                              | TT              | 1946948560               |
| SNP_P4_128949_45212 | NW_004515910.1 | Scaffold437 | 45212                   | CC                              | TT              | 1946948562               |
| SNP_P4_128951_50133 | NW_004515910.1 | Scaffold437 | 50133                   | GG                              | AA              | 1946948564               |
| SNP_P4_128952_50625 | NW_004515910.1 | Scaffold437 | 50625                   | AA                              | GG              | 1946948566               |
| SNP_P4_128953_50648 | NW_004515910.1 | Scaffold437 | 50648                   | CC                              | TT              | 1946948568               |
| SNP_P4_128954_50649 | NW_004515910.1 | Scaffold437 | 50649                   | AA                              | TT              | 1946948570               |
| SNP_P4_128955_50655 | NW_004515910.1 | Scaffold437 | 50655                   | AA                              | CC              | 1946948572               |
| SNP_P4_128956_52276 | NW_004515910.1 | Scaffold437 | 52276                   | GG                              | AA              | 1946948574               |
| SNP_P4_128957_52314 | NW_004515910.1 | Scaffold437 | 52314                   | TT                              | CC              | 1946948576               |
| SNP_P4_128958_52330 | NW_004515910.1 | Scaffold437 | 52330                   | GG                              | TT              | 1946948578               |

| SNPs IDs            | Chromosome IDs | Chromosomes | Physical positions (bp) | CDC Frontier (Reference genome) | (ILWC46 & LPNB) | NCBI SNPdb Accession IDs |
|---------------------|----------------|-------------|-------------------------|---------------------------------|-----------------|--------------------------|
| SNP_P4_128959_52331 | NW_004515910.1 | Scaffold437 | 52331                   | CC                              | TT              | 1946948580               |
| SNP_P4_128960_57241 | NW_004515910.1 | Scaffold437 | 57241                   | AA                              | CC              | 1946948582               |
| SNP_P4_128961_57246 | NW_004515910.1 | Scaffold437 | 57246                   | TT                              | CC              | 1946948584               |
| SNP_P4_128962_60347 | NW_004515910.1 | Scaffold437 | 60347                   | GG                              | TT              | 1946948586               |
| SNP_P4_128963_60348 | NW_004515910.1 | Scaffold437 | 60348                   | TT                              | CC              | 1946948588               |
| SNP_P4_128964_60389 | NW_004515910.1 | Scaffold437 | 60389                   | AA                              | CC              | 1946948590               |
| SNP_P4_128965_60494 | NW_004515910.1 | Scaffold437 | 60494                   | TT                              | AA              | 1946948592               |
| SNP_P4_128966_60497 | NW_004515910.1 | Scaffold437 | 60497                   | GG                              | AA              | 1946948594               |
| SNP_P4_128967_63475 | NW_004515910.1 | Scaffold437 | 63475                   | CC                              | AA              | 1946948596               |
| SNP_P4_128970_70252 | NW_004515910.1 | Scaffold437 | 70252                   | AA                              | TT              | 1946948598               |
| SNP_P4_128971_70352 | NW_004515910.1 | Scaffold437 | 70352                   | TT                              | CC              | 1946948600               |
| SNP_P4_128972_72340 | NW_004515910.1 | Scaffold437 | 72340                   | CC                              | TT              | 1946948601               |
| SNP_P4_128974_482   | NW_004515911.1 | Scaffold438 | 482                     | CC                              | TT              | 1946948603               |
| SNP_P4_128975_932   | NW_004515911.1 | Scaffold438 | 932                     | TT                              | GG              | 1946948605               |
| SNP_P4_128976_1633  | NW_004515911.1 | Scaffold438 | 1633                    | AA                              | GG              | 1946948607               |
| SNP_P4_128977_1639  | NW_004515911.1 | Scaffold438 | 1639                    | TT                              | CC              | 1946948609               |
| SNP_P4_128978_1657  | NW_004515911.1 | Scaffold438 | 1657                    | GG                              | AA              | 1946948611               |
| SNP_P4_128979_1669  | NW_004515911.1 | Scaffold438 | 1669                    | AA                              | GG              | 1946948613               |
| SNP_P4_128980_1697  | NW_004515911.1 | Scaffold438 | 1697                    | TT                              | CC              | 1946948615               |
| SNP_P4_128981_1789  | NW_004515911.1 | Scaffold438 | 1789                    | AA                              | GG              | 1946948617               |
| SNP_P4_128982_1855  | NW_004515911.1 | Scaffold438 | 1855                    | CC                              | TT              | 1946948619               |
| SNP_P4_128983_1870  | NW_004515911.1 | Scaffold438 | 1870                    | GG                              | TT              | 1946948621               |
| SNP_P4_128984_1969  | NW_004515911.1 | Scaffold438 | 1969                    | AA                              | GG              | 1946948623               |
| SNP_P4_128985_2125  | NW_004515911.1 | Scaffold438 | 2125                    | TT                              | GG              | 1946948625               |
| SNP_P4_128986_2193  | NW_004515911.1 | Scaffold438 | 2193                    | AA                              | GG              | 1946948627               |
| SNP_P4_128987_3670  | NW_004515911.1 | Scaffold438 | 3670                    | TT                              | AA              | 1946948629               |
| SNP_P4_128988_3693  | NW_004515911.1 | Scaffold438 | 3693                    | TT                              | GG              | 1946948631               |
| SNP_P4_128989_3726  | NW_004515911.1 | Scaffold438 | 3726                    | TT                              | CC              | 1946948633               |
| SNP_P4_128990_3736  | NW_004515911.1 | Scaffold438 | 3736                    | CC                              | TT              | 1946948635               |
| SNP_P4_128991_3874  | NW_004515911.1 | Scaffold438 | 3874                    | CC                              | TT              | 1946948637               |
| SNP_P4_128992_3954  | NW_004515911.1 | Scaffold438 | 3954                    | TT                              | GG              | 1946948639               |
| SNP_P4_128993_3984  | NW_004515911.1 | Scaffold438 | 3984                    | AA                              | GG              | 1946948641               |
| SNP_P4_128994_5766  | NW_004515911.1 | Scaffold438 | 5766                    | AA                              | GG              | 1946948643               |
| SNP_P4_128995_6766  | NW_004515911.1 | Scaffold438 | 6766                    | CC                              | TT              | 1946948645               |
| SNP_P4_128996_6768  | NW_004515911.1 | Scaffold438 | 6768                    | GG                              | AA              | 1946948647               |
| SNP_P4_128997_6779  | NW_004515911.1 | Scaffold438 | 6779                    | GG                              | AA              | 1946948649               |
| SNP_P4_128998_6804  | NW_004515911.1 | Scaffold438 | 6804                    | AA                              | TT              | 1946948650               |
| SNP_P4_128999_6807  | NW_004515911.1 | Scaffold438 | 6807                    | CC                              | TT              | 1946948652               |
| SNP_P4_129000_6819  | NW_004515911.1 | Scaffold438 | 6819                    | AA                              | GG              | 1946948654               |
| SNP_P4_129001_6821  | NW_004515911.1 | Scaffold438 | 6821                    | CC                              | TT              | 1946948656               |
| SNP_P4_129002_6879  | NW_004515911.1 | Scaffold438 | 6879                    | AA                              | TT              | 1946948658               |
| SNP_P4_129003_6934  | NW_004515911.1 | Scaffold438 | 6934                    | CC                              | TT              | 1946948660               |

| SNPs IDs            | Chromosome IDs | Chromosomes | Physical positions (bp) | CDC Frontier (Reference genome) | (ILWC46 & LPNB) | NCBI SNPdb Accession IDs |
|---------------------|----------------|-------------|-------------------------|---------------------------------|-----------------|--------------------------|
| SNP_P4_129004_13869 | NW_004515911.1 | Scaffold438 | 13869                   | TT                              | CC              | 1946948662               |
| SNP_P4_129005_14071 | NW_004515911.1 | Scaffold438 | 14071                   | AA                              | GG              | 1946948664               |
| SNP_P4_129006_48072 | NW_004515911.1 | Scaffold438 | 48072                   | CC                              | GG              | 1946948666               |
| SNP_P4_129007_48964 | NW_004515911.1 | Scaffold438 | 48964                   | CC                              | AA              | 1946948668               |
| SNP_P4_129008_48965 | NW_004515911.1 | Scaffold438 | 48965                   | CC                              | TT              | 1946948670               |
| SNP_P4_129010_68637 | NW_004515911.1 | Scaffold438 | 68637                   | TT                              | CC              | 1946948672               |
| SNP_P4_129011_72362 | NW_004515911.1 | Scaffold438 | 72362                   | TT                              | GG              | 1946948674               |
| SNP_P4_129012_74860 | NW_004515911.1 | Scaffold438 | 74860                   | CC                              | AA              | 1946948676               |
| SNP_P4_129013_74862 | NW_004515911.1 | Scaffold438 | 74862                   | AA                              | GG              | 1946948678               |
| SNP_P4_129014_74936 | NW_004515911.1 | Scaffold438 | 74936                   | AA                              | TT              | 1946948680               |
| SNP_P4_129015_74963 | NW_004515911.1 | Scaffold438 | 74963                   | TT                              | GG              | 1946948682               |
| SNP_P4_129016_74994 | NW_004515911.1 | Scaffold438 | 74994                   | TT                              | CC              | 1946948684               |
| SNP_P4_129017_75021 | NW_004515911.1 | Scaffold438 | 75021                   | AA                              | GG              | 1946948686               |
| SNP_P4_129018_75051 | NW_004515911.1 | Scaffold438 | 75051                   | TT                              | CC              | 1946948688               |
| SNP_P4_129019_75053 | NW_004515911.1 | Scaffold438 | 75053                   | AA                              | CC              | 1946948690               |
| SNP_P4_129020_75078 | NW_004515911.1 | Scaffold438 | 75078                   | AA                              | GG              | 1946948692               |
| SNP_P4_129021_75087 | NW_004515911.1 | Scaffold438 | 75087                   | AA                              | GG              | 1946948694               |
| SNP_P4_129022_76867 | NW_004515911.1 | Scaffold438 | 76867                   | CC                              | AA              | 1946948696               |
| SNP_P4_129023_76901 | NW_004515911.1 | Scaffold438 | 76901                   | TT                              | GG              | 1946948698               |
| SNP_P4_129024_82204 | NW_004515911.1 | Scaffold438 | 82204                   | CC                              | TT              | 1946948700               |
| SNP_P4_129025_93386 | NW_004515911.1 | Scaffold438 | 93386                   | AA                              | GG              | 1946948702               |
| SNP_P4_129026_93472 | NW_004515911.1 | Scaffold438 | 93472                   | CC                              | TT              | 1946948704               |
| SNP_P4_129027_97942 | NW_004515911.1 | Scaffold438 | 97942                   | CC                              | TT              | 1946948706               |
| SNP_P4_129028_97943 | NW_004515911.1 | Scaffold438 | 97943                   | AA                              | TT              | 1946948708               |
| SNP_P4_129029_98004 | NW_004515911.1 | Scaffold438 | 98004                   | TT                              | CC              | 1946948710               |
| SNP_P4_129030_98010 | NW_004515911.1 | Scaffold438 | 98010                   | CC                              | TT              | 1946948711               |
| SNP_P4_129031_98011 | NW_004515911.1 | Scaffold438 | 98011                   | AA                              | GG              | 1946948713               |
| SNP_P4_129032_98015 | NW_004515911.1 | Scaffold438 | 98015                   | AA                              | CC              | 1946948715               |
| SNP_P4_129033_98024 | NW_004515911.1 | Scaffold438 | 98024                   | GG                              | CC              | 1946948717               |
| SNP_P4_129034_98097 | NW_004515911.1 | Scaffold438 | 98097                   | CC                              | GG              | 1946948719               |
| SNP_P4_129035_98168 | NW_004515911.1 | Scaffold438 | 98168                   | TT                              | GG              | 1946948721               |
| SNP_P4_129036_98204 | NW_004515911.1 | Scaffold438 | 98204                   | CC                              | TT              | 1946948723               |
| SNP_P4_129037_98217 | NW_004515911.1 | Scaffold438 | 98217                   | TT                              | AA              | 1946948725               |
| SNP_P4_129038_98218 | NW_004515911.1 | Scaffold438 | 98218                   | TT                              | CC              | 1946948727               |
| SNP_P4_129039_98220 | NW_004515911.1 | Scaffold438 | 98220                   | TT                              | AA              | 1946948729               |
| SNP_P4_129040_98258 | NW_004515911.1 | Scaffold438 | 98258                   | AA                              | GG              | 1946948731               |
| SNP_P4_129041_98261 | NW_004515911.1 | Scaffold438 | 98261                   | GG                              | TT              | 1946948733               |
| SNP_P4_129042_98277 | NW_004515911.1 | Scaffold438 | 98277                   | CC                              | TT              | 1946948735               |
| SNP_P4_129043_98286 | NW_004515911.1 | Scaffold438 | 98286                   | TT                              | GG              | 1946948737               |
| SNP_P4_129044_98300 | NW_004515911.1 | Scaffold438 | 98300                   | CC                              | GG              | 1946948739               |
| SNP_P4_129045_98522 | NW_004515911.1 | Scaffold438 | 98522                   | AA                              | GG              | 1946948741               |
| SNP_P4_129046_98542 | NW_004515911.1 | Scaffold438 | 98542                   | CC                              | TT              | 1946948743               |



| SNPs IDs             | Chromosome IDs | Chromosomes | Physical positions (bp) | CDC Frontier (Reference genome) | (ILWC46 & LPNB) | NCBI SNPdb Accession IDs |
|----------------------|----------------|-------------|-------------------------|---------------------------------|-----------------|--------------------------|
| SNP_P4_129047_98553  | NW_004515911.1 | Scaffold438 | 98553                   | CC                              | TT              | 1946948744               |
| SNP_P4_129048_99588  | NW_004515911.1 | Scaffold438 | 99588                   | CC                              | TT              | 1946948746               |
| SNP_P4_129049_108034 | NW_004515911.1 | Scaffold438 | 108034                  | AA                              | GG              | 1946948748               |
| SNP_P4_129050_8190   | NW_004515912.1 | Scaffold440 | 8190                    | TT                              | AA              | 1946948750               |
| SNP_P4_129051_8196   | NW_004515912.1 | Scaffold440 | 8196                    | TT                              | CC              | 1946948752               |
| SNP_P4_129053_12069  | NW_004515912.1 | Scaffold440 | 12069                   | GG                              | AA              | 1946948754               |
| SNP_P4_129055_20649  | NW_004515912.1 | Scaffold440 | 20649                   | AA                              | GG              | 1946948756               |
| SNP_P4_129056_20675  | NW_004515912.1 | Scaffold440 | 20675                   | TT                              | GG              | 1946948758               |
| SNP_P4_129057_20709  | NW_004515912.1 | Scaffold440 | 20709                   | TT                              | CC              | 1946948760               |
| SNP_P4_129058_20719  | NW_004515912.1 | Scaffold440 | 20719                   | TT                              | GG              | 1946948762               |
| SNP_P4_129059_23172  | NW_004515912.1 | Scaffold440 | 23172                   | GG                              | CC              | 1946948764               |
| SNP_P4_129060_30117  | NW_004515912.1 | Scaffold440 | 30117                   | CC                              | AA              | 1946948766               |
| SNP_P4_129061_30165  | NW_004515912.1 | Scaffold440 | 30165                   | AA                              | GG              | 1946948768               |
| SNP_P4_129062_30196  | NW_004515912.1 | Scaffold440 | 30196                   | CC                              | AA              | 1946948770               |
| SNP_P4_129064_30308  | NW_004515912.1 | Scaffold440 | 30308                   | GG                              | TT              | 1946948772               |
| SNP_P4_129065_30455  | NW_004515912.1 | Scaffold440 | 30455                   | CC                              | GG              | 1946948774               |
| SNP_P4_129066_30473  | NW_004515912.1 | Scaffold440 | 30473                   | GG                              | TT              | 1946948777               |
| SNP_P4_129068_30542  | NW_004515912.1 | Scaffold440 | 30542                   | CC                              | TT              | 1946948779               |
| SNP_P4_129069_30553  | NW_004515912.1 | Scaffold440 | 30553                   | GG                              | CC              | 1946948781               |
| SNP_P4_129070_30584  | NW_004515912.1 | Scaffold440 | 30584                   | AA                              | CC              | 1946948783               |
| SNP_P4_129071_31335  | NW_004515912.1 | Scaffold440 | 31335                   | GG                              | AA              | 1946948785               |
| SNP_P4_129072_32582  | NW_004515912.1 | Scaffold440 | 32582                   | AA                              | CC              | 1946948787               |
| SNP_P4_129073_32593  | NW_004515912.1 | Scaffold440 | 32593                   | AA                              | GG              | 1946948789               |
| SNP_P4_129074_43800  | NW_004515912.1 | Scaffold440 | 43800                   | GG                              | CC              | 1946948791               |
| SNP_P4_129076_47380  | NW_004515912.1 | Scaffold440 | 47380                   | TT                              | GG              | 1946948793               |
| SNP_P4_129077_14418  | NW_004515913.1 | Scaffold441 | 14418                   | CC                              | TT              | 1946948795               |
| SNP_P4_129078_14419  | NW_004515913.1 | Scaffold441 | 14419                   | AA                              | GG              | 1946948797               |
| SNP_P4_129079_14569  | NW_004515913.1 | Scaffold441 | 14569                   | TT                              | AA              | 1946948799               |
| SNP_P4_129080_14705  | NW_004515913.1 | Scaffold441 | 14705                   | TT                              | CC              | 1946948802               |
| SNP_P4_129081_14745  | NW_004515913.1 | Scaffold441 | 14745                   | GG                              | AA              | 1946948804               |
| SNP_P4_129082_21308  | NW_004515913.1 | Scaffold441 | 21308                   | CC                              | AA              | 1946948806               |
| SNP_P4_129083_21346  | NW_004515913.1 | Scaffold441 | 21346                   | AA                              | TT              | 1946948808               |
| SNP_P4_129084_33549  | NW_004515913.1 | Scaffold441 | 33549                   | AA                              | CC              | 1946948810               |
| SNP_P4_129085_33743  | NW_004515913.1 | Scaffold441 | 33743                   | CC                              | AA              | 1946948812               |
| SNP_P4_129086_34043  | NW_004515913.1 | Scaffold441 | 34043                   | CC                              | AA              | 1946948814               |
| SNP_P4_129087_34048  | NW_004515913.1 | Scaffold441 | 34048                   | TT                              | AA              | 1946948816               |
| SNP_P4_129088_34127  | NW_004515913.1 | Scaffold441 | 34127                   | GG                              | AA              | 1946948818               |
| SNP_P4_129089_11005  | NW_004515914.1 | Scaffold442 | 11005                   | GG                              | AA              | 1946948820               |
| SNP_P4_129090_14513  | NW_004515914.1 | Scaffold442 | 14513                   | AA                              | CC              | 1946948822               |
| SNP_P4_129091_14719  | NW_004515914.1 | Scaffold442 | 14719                   | TT                              | CC              | 1946948824               |
| SNP_P4_129092_14823  | NW_004515914.1 | Scaffold442 | 14823                   | GG                              | AA              | 1946948826               |
| SNP_P4_129094_21746  | NW_004515914.1 | Scaffold442 | 21746                   | CC                              | AA              | 1946948828               |

| SNPs IDs            | Chromosome IDs | Chromosomes | Physical positions (bp) | CDC Frontier (Reference genome) | (ILWC46 & LPNB) | NCBI SNPdb Accession IDs |
|---------------------|----------------|-------------|-------------------------|---------------------------------|-----------------|--------------------------|
| SNP_P4_129095_21763 | NW_004515914.1 | Scaffold442 | 21763                   | AA                              | CC              | 1946948830               |
| SNP_P4_129096_21764 | NW_004515914.1 | Scaffold442 | 21764                   | TT                              | AA              | 1946948832               |
| SNP_P4_129097_21769 | NW_004515914.1 | Scaffold442 | 21769                   | GG                              | CC              | 1946948834               |
| SNP_P4_129098_21779 | NW_004515914.1 | Scaffold442 | 21779                   | CC                              | AA              | 1946948836               |
| SNP_P4_129099_22083 | NW_004515914.1 | Scaffold442 | 22083                   | AA                              | GG              | 1946948838               |
| SNP_P4_129100_22087 | NW_004515914.1 | Scaffold442 | 22087                   | TT                              | AA              | 1946948840               |
| SNP_P4_129101_35007 | NW_004515914.1 | Scaffold442 | 35007                   | GG                              | AA              | 1946948842               |
| SNP_P4_129102_35605 | NW_004515914.1 | Scaffold442 | 35605                   | CC                              | TT              | 1946948844               |
| SNP_P4_129103_35606 | NW_004515914.1 | Scaffold442 | 35606                   | GG                              | TT              | 1946948846               |
| SNP_P4_129104_36427 | NW_004515914.1 | Scaffold442 | 36427                   | CC                              | TT              | 1946948848               |
| SNP_P4_129105_36428 | NW_004515914.1 | Scaffold442 | 36428                   | TT                              | GG              | 1946948850               |
| SNP_P4_129106_36448 | NW_004515914.1 | Scaffold442 | 36448                   | AA                              | CC              | 1946948852               |
| SNP_P4_129107_36721 | NW_004515914.1 | Scaffold442 | 36721                   | TT                              | CC              | 1946948854               |
| SNP_P4_129108_36811 | NW_004515914.1 | Scaffold442 | 36811                   | TT                              | AA              | 1946948856               |
| SNP_P4_129109_36812 | NW_004515914.1 | Scaffold442 | 36812                   | AA                              | TT              | 1946948858               |
| SNP_P4_129110_36964 | NW_004515914.1 | Scaffold442 | 36964                   | AA                              | GG              | 1946948860               |
| SNP_P4_129111_37093 | NW_004515914.1 | Scaffold442 | 37093                   | CC                              | TT              | 1946948862               |
| SNP_P4_129113_37203 | NW_004515914.1 | Scaffold442 | 37203                   | CC                              | AA              | 1946948864               |
| SNP_P4_129114_41529 | NW_004515914.1 | Scaffold442 | 41529                   | GG                              | AA              | 1946948866               |
| SNP_P4_129115_41619 | NW_004515914.1 | Scaffold442 | 41619                   | CC                              | TT              | 1946948868               |
| SNP_P4_129116_42664 | NW_004515914.1 | Scaffold442 | 42664                   | AA                              | GG              | 1946948870               |
| SNP_P4_129117_43377 | NW_004515914.1 | Scaffold442 | 43377                   | TT                              | AA              | 1946948872               |
| SNP_P4_129118_43420 | NW_004515914.1 | Scaffold442 | 43420                   | AA                              | GG              | 1946948874               |
| SNP_P4_129119_50129 | NW_004515914.1 | Scaffold442 | 50129                   | CC                              | TT              | 1946948876               |
| SNP_P4_129120_50873 | NW_004515914.1 | Scaffold442 | 50873                   | CC                              | GG              | 1946948878               |
| SNP_P4_129121_55728 | NW_004515914.1 | Scaffold442 | 55728                   | GG                              | AA              | 1946948880               |
| SNP_P4_129122_61993 | NW_004515914.1 | Scaffold442 | 61993                   | TT                              | CC              | 1946948882               |
| SNP_P4_129123_61995 | NW_004515914.1 | Scaffold442 | 61995                   | TT                              | AA              | 1946948884               |
| SNP_P4_129124_62008 | NW_004515914.1 | Scaffold442 | 62008                   | CC                              | AA              | 1946948886               |
| SNP_P4_129125_62022 | NW_004515914.1 | Scaffold442 | 62022                   | AA                              | TT              | 1946948888               |
| SNP_P4_129126_62023 | NW_004515914.1 | Scaffold442 | 62023                   | CC                              | TT              | 1946948890               |
| SNP_P4_129127_62606 | NW_004515914.1 | Scaffold442 | 62606                   | GG                              | AA              | 1946948892               |
| SNP_P4_129128_62925 | NW_004515914.1 | Scaffold442 | 62925                   | CC                              | TT              | 1946948894               |
| SNP_P4_129129_71407 | NW_004515914.1 | Scaffold442 | 71407                   | TT                              | GG              | 1946948896               |
| SNP_P4_129130_71565 | NW_004515914.1 | Scaffold442 | 71565                   | TT                              | CC              | 1946948898               |
| SNP_P4_129131_82654 | NW_004515914.1 | Scaffold442 | 82654                   | AA                              | TT              | 1946948900               |
| SNP_P4_129132_2565  | NW_004515916.1 | Scaffold446 | 2565                    | TT                              | AA              | 1946948902               |
| SNP_P4_129133_2589  | NW_004515916.1 | Scaffold446 | 2589                    | TT                              | AA              | 1946948904               |
| SNP_P4_129134_2622  | NW_004515916.1 | Scaffold446 | 2622                    | TT                              | AA              | 1946948906               |
| SNP_P4_129135_2643  | NW_004515916.1 | Scaffold446 | 2643                    | GG                              | CC              | 1946948908               |
| SNP_P4_129136_2650  | NW_004515916.1 | Scaffold446 | 2650                    | AA                              | CC              | 1946948910               |
| SNP_P4_129137_2885  | NW_004515916.1 | Scaffold446 | 2885                    | TT                              | CC              | 1946948912               |

| SNPs IDs            | Chromosome IDs | Chromosomes | Physical positions (bp) | CDC Frontier (Reference genome) | (ILWC46 & LPNB) | NCBI SNPdb Accession IDs |
|---------------------|----------------|-------------|-------------------------|---------------------------------|-----------------|--------------------------|
| SNP_P4_129138_9823  | NW_004515916.1 | Scaffold446 | 9823                    | GG                              | TT              | 1946948913               |
| SNP_P4_129139_12783 | NW_004515916.1 | Scaffold446 | 12783                   | GG                              | AA              | 1946948915               |
| SNP_P4_129140_12786 | NW_004515916.1 | Scaffold446 | 12786                   | GG                              | AA              | 1946948917               |
| SNP_P4_129141_12792 | NW_004515916.1 | Scaffold446 | 12792                   | CC                              | TT              | 1946948919               |
| SNP_P4_129142_12795 | NW_004515916.1 | Scaffold446 | 12795                   | AA                              | GG              | 1946948921               |
| SNP_P4_129143_12807 | NW_004515916.1 | Scaffold446 | 12807                   | AA                              | GG              | 1946948923               |
| SNP_P4_129144_12837 | NW_004515916.1 | Scaffold446 | 12837                   | CC                              | TT              | 1946948925               |
| SNP_P4_129145_12861 | NW_004515916.1 | Scaffold446 | 12861                   | TT                              | CC              | 1946948927               |
| SNP_P4_129146_12880 | NW_004515916.1 | Scaffold446 | 12880                   | TT                              | AA              | 1946948929               |
| SNP_P4_129147_12900 | NW_004515916.1 | Scaffold446 | 12900                   | AA                              | TT              | 1946948931               |
| SNP_P4_129148_12961 | NW_004515916.1 | Scaffold446 | 12961                   | TT                              | AA              | 1946948933               |
| SNP_P4_129149_13047 | NW_004515916.1 | Scaffold446 | 13047                   | GG                              | TT              | 1946948935               |
| SNP_P4_129150_13285 | NW_004515916.1 | Scaffold446 | 13285                   | GG                              | AA              | 1946948937               |
| SNP_P4_129151_13297 | NW_004515916.1 | Scaffold446 | 13297                   | GG                              | AA              | 1946948939               |
| SNP_P4_129152_13327 | NW_004515916.1 | Scaffold446 | 13327                   | GG                              | AA              | 1946948941               |
| SNP_P4_129153_13372 | NW_004515916.1 | Scaffold446 | 13372                   | AA                              | TT              | 1946948943               |
| SNP_P4_129154_13374 | NW_004515916.1 | Scaffold446 | 13374                   | GG                              | AA              | 1946948945               |
| SNP_P4_129155_13375 | NW_004515916.1 | Scaffold446 | 13375                   | GG                              | AA              | 1946948947               |
| SNP_P4_129156_14415 | NW_004515916.1 | Scaffold446 | 14415                   | TT                              | CC              | 1946948949               |
| SNP_P4_129157_20351 | NW_004515916.1 | Scaffold446 | 20351                   | GG                              | TT              | 1946948951               |
| SNP_P4_129158_20368 | NW_004515916.1 | Scaffold446 | 20368                   | CC                              | GG              | 1946948953               |
| SNP_P4_129159_34216 | NW_004515916.1 | Scaffold446 | 34216                   | TT                              | AA              | 1946948955               |
| SNP_P4_129160_34229 | NW_004515916.1 | Scaffold446 | 34229                   | GG                              | AA              | 1946948957               |
| SNP_P4_129161_34236 | NW_004515916.1 | Scaffold446 | 34236                   | AA                              | TT              | 1946948959               |
| SNP_P4_129162_34445 | NW_004515916.1 | Scaffold446 | 34445                   | AA                              | GG              | 1946948961               |
| SNP_P4_129163_34450 | NW_004515916.1 | Scaffold446 | 34450                   | TT                              | CC              | 1946948963               |
| SNP_P4_129164_36452 | NW_004515916.1 | Scaffold446 | 36452                   | AA                              | CC              | 1946948965               |
| SNP_P4_129165_36461 | NW_004515916.1 | Scaffold446 | 36461                   | AA                              | TT              | 1946948967               |
| SNP_P4_129166_44634 | NW_004515916.1 | Scaffold446 | 44634                   | TT                              | GG              | 1946948969               |
| SNP_P4_129167_50715 | NW_004515916.1 | Scaffold446 | 50715                   | GG                              | AA              | 1946948971               |
| SNP_P4_129168_54617 | NW_004515916.1 | Scaffold446 | 54617                   | AA                              | TT              | 1946948973               |
| SNP_P4_129169_54620 | NW_004515916.1 | Scaffold446 | 54620                   | CC                              | TT              | 1946948975               |
| SNP_P4_129171_65404 | NW_004515916.1 | Scaffold446 | 65404                   | AA                              | GG              | 1946948977               |
| SNP_P4_129172_65751 | NW_004515916.1 | Scaffold446 | 65751                   | GG                              | AA              | 1946948979               |
| SNP_P4_129173_65922 | NW_004515916.1 | Scaffold446 | 65922                   | TT                              | GG              | 1946948981               |
| SNP_P4_129174_65983 | NW_004515916.1 | Scaffold446 | 65983                   | CC                              | TT              | 1946948983               |
| SNP_P4_129175_66062 | NW_004515916.1 | Scaffold446 | 66062                   | GG                              | TT              | 1946948985               |
| SNP_P4_129176_66066 | NW_004515916.1 | Scaffold446 | 66066                   | TT                              | CC              | 1946948987               |
| SNP_P4_129177_66127 | NW_004515916.1 | Scaffold446 | 66127                   | TT                              | AA              | 1946948989               |
| SNP_P4_129178_66134 | NW_004515916.1 | Scaffold446 | 66134                   | TT                              | CC              | 1946948991               |
| SNP_P4_129179_66181 | NW_004515916.1 | Scaffold446 | 66181                   | AA                              | CC              | 1946948993               |
| SNP_P4_129180_66188 | NW_004515916.1 | Scaffold446 | 66188                   | CC                              | AA              | 1946948995               |

| SNPs IDs            | Chromosome IDs | Chromosomes | Physical positions (bp) | CDC Frontier (Reference genome) | (ILWC46 & LPNB) | NCBI SNPdb Accession IDs |
|---------------------|----------------|-------------|-------------------------|---------------------------------|-----------------|--------------------------|
| SNP_P4_129181_66211 | NW_004515916.1 | Scaffold446 | 66211                   | AA                              | CC              | 1946948997               |
| SNP_P4_129182_66216 | NW_004515916.1 | Scaffold446 | 66216                   | GG                              | AA              | 1946948999               |
| SNP_P4_129183_66222 | NW_004515916.1 | Scaffold446 | 66222                   | CC                              | AA              | 1946949001               |
| SNP_P4_129184_66248 | NW_004515916.1 | Scaffold446 | 66248                   | CC                              | AA              | 1946949003               |
| SNP_P4_129185_66249 | NW_004515916.1 | Scaffold446 | 66249                   | TT                              | CC              | 1946949005               |
| SNP_P4_129186_66259 | NW_004515916.1 | Scaffold446 | 66259                   | AA                              | CC              | 1946949007               |
| SNP_P4_129187_66275 | NW_004515916.1 | Scaffold446 | 66275                   | TT                              | CC              | 1946949009               |
| SNP_P4_129188_66285 | NW_004515916.1 | Scaffold446 | 66285                   | CC                              | AA              | 1946949011               |
| SNP_P4_129189_66385 | NW_004515916.1 | Scaffold446 | 66385                   | CC                              | GG              | 1946949013               |
| SNP_P4_129190_66435 | NW_004515916.1 | Scaffold446 | 66435                   | GG                              | CC              | 1946949016               |
| SNP_P4_129191_66510 | NW_004515916.1 | Scaffold446 | 66510                   | CC                              | AA              | 1946949018               |
| SNP_P4_129192_66598 | NW_004515916.1 | Scaffold446 | 66598                   | TT                              | AA              | 1946949020               |
| SNP_P4_129193_66600 | NW_004515916.1 | Scaffold446 | 66600                   | GG                              | TT              | 1946949022               |
| SNP_P4_129194_66695 | NW_004515916.1 | Scaffold446 | 66695                   | TT                              | AA              | 1946949024               |
| SNP_P4_129195_66699 | NW_004515916.1 | Scaffold446 | 66699                   | AA                              | GG              | 1946949026               |
| SNP_P4_129196_67577 | NW_004515916.1 | Scaffold446 | 67577                   | CC                              | AA              | 1946949028               |
| SNP_P4_129197_67629 | NW_004515916.1 | Scaffold446 | 67629                   | CC                              | AA              | 1946949030               |
| SNP_P4_129198_67638 | NW_004515916.1 | Scaffold446 | 67638                   | CC                              | AA              | 1946949032               |
| SNP_P4_129199_67709 | NW_004515916.1 | Scaffold446 | 67709                   | GG                              | AA              | 1946949034               |
| SNP_P4_129200_67774 | NW_004515916.1 | Scaffold446 | 67774                   | TT                              | CC              | 1946949036               |
| SNP_P4_129202_67848 | NW_004515916.1 | Scaffold446 | 67848                   | AA                              | TT              | 1946949038               |
| SNP_P4_129203_67862 | NW_004515916.1 | Scaffold446 | 67862                   | AA                              | TT              | 1946949040               |
| SNP_P4_129204_67874 | NW_004515916.1 | Scaffold446 | 67874                   | TT                              | AA              | 1946949042               |
| SNP_P4_129205_67888 | NW_004515916.1 | Scaffold446 | 67888                   | AA                              | TT              | 1946949044               |
| SNP_P4_129206_67948 | NW_004515916.1 | Scaffold446 | 67948                   | TT                              | AA              | 1946949046               |
| SNP_P4_129207_67960 | NW_004515916.1 | Scaffold446 | 67960                   | AA                              | TT              | 1946949048               |
| SNP_P4_129208_67971 | NW_004515916.1 | Scaffold446 | 67971                   | AA                              | TT              | 1946949050               |
| SNP_P4_129209_67985 | NW_004515916.1 | Scaffold446 | 67985                   | AA                              | TT              | 1946949052               |
| SNP_P4_129210_68014 | NW_004515916.1 | Scaffold446 | 68014                   | TT                              | AA              | 1946949053               |
| SNP_P4_129211_68106 | NW_004515916.1 | Scaffold446 | 68106                   | TT                              | AA              | 1946949055               |
| SNP_P4_129212_68213 | NW_004515916.1 | Scaffold446 | 68213                   | AA                              | TT              | 1946949057               |
| SNP_P4_129213_68239 | NW_004515916.1 | Scaffold446 | 68239                   | TT                              | CC              | 1946949059               |
| SNP_P4_129214_79085 | NW_004515916.1 | Scaffold446 | 79085                   | TT                              | GG              | 1946949061               |
| SNP_P4_129215_80090 | NW_004515916.1 | Scaffold446 | 80090                   | GG                              | CC              | 1946949063               |
| SNP_P4_129216_80515 | NW_004515916.1 | Scaffold446 | 80515                   | TT                              | CC              | 1946949065               |
| SNP_P4_129217_80764 | NW_004515916.1 | Scaffold446 | 80764                   | TT                              | AA              | 1946949067               |
| SNP_P4_129218_80765 | NW_004515916.1 | Scaffold446 | 80765                   | CC                              | GG              | 1946949069               |
| SNP_P4_129219_80787 | NW_004515916.1 | Scaffold446 | 80787                   | AA                              | CC              | 1946949071               |
| SNP_P4_129220_80825 | NW_004515916.1 | Scaffold446 | 80825                   | AA                              | GG              | 1946949073               |
| SNP_P4_129221_80836 | NW_004515916.1 | Scaffold446 | 80836                   | TT                              | CC              | 1946949075               |
| SNP_P4_129222_81427 | NW_004515916.1 | Scaffold446 | 81427                   | TT                              | CC              | 1946949077               |
| SNP_P4_129223_82047 | NW_004515916.1 | Scaffold446 | 82047                   | AA                              | CC              | 1946949079               |

| SNPs IDs             | Chromosome IDs | Chromosomes | Physical positions (bp) | CDC Frontier (Reference genome) | (ILWC46 & LPNB) | NCBI SNPdb Accession IDs |
|----------------------|----------------|-------------|-------------------------|---------------------------------|-----------------|--------------------------|
| SNP_P4_129225_82052  | NW_004515916.1 | Scaffold446 | 82052                   | AA                              | CC              | 1946949081               |
| SNP_P4_129226_82151  | NW_004515916.1 | Scaffold446 | 82151                   | CC                              | TT              | 1946949083               |
| SNP_P4_129227_82176  | NW_004515916.1 | Scaffold446 | 82176                   | AA                              | TT              | 1946949085               |
| SNP_P4_129228_82320  | NW_004515916.1 | Scaffold446 | 82320                   | GG                              | TT              | 1946949087               |
| SNP_P4_129229_82534  | NW_004515916.1 | Scaffold446 | 82534                   | AA                              | CC              | 1946949089               |
| SNP_P4_129230_84380  | NW_004515916.1 | Scaffold446 | 84380                   | CC                              | AA              | 1946949091               |
| SNP_P4_129231_84623  | NW_004515916.1 | Scaffold446 | 84623                   | CC                              | TT              | 1946949093               |
| SNP_P4_129232_84626  | NW_004515916.1 | Scaffold446 | 84626                   | CC                              | GG              | 1946949095               |
| SNP_P4_129233_85453  | NW_004515916.1 | Scaffold446 | 85453                   | CC                              | GG              | 1946949097               |
| SNP_P4_129234_85489  | NW_004515916.1 | Scaffold446 | 85489                   | GG                              | AA              | 1946949099               |
| SNP_P4_129235_85764  | NW_004515916.1 | Scaffold446 | 85764                   | CC                              | AA              | 1946949101               |
| SNP_P4_129236_91877  | NW_004515916.1 | Scaffold446 | 91877                   | GG                              | AA              | 1946949102               |
| SNP_P4_129237_92257  | NW_004515916.1 | Scaffold446 | 92257                   | TT                              | CC              | 1946949104               |
| SNP_P4_129238_94878  | NW_004515916.1 | Scaffold446 | 94878                   | GG                              | AA              | 1946949106               |
| SNP_P4_129239_95550  | NW_004515916.1 | Scaffold446 | 95550                   | CC                              | TT              | 1946949108               |
| SNP_P4_129240_98651  | NW_004515916.1 | Scaffold446 | 98651                   | TT                              | CC              | 1946949110               |
| SNP_P4_129241_99238  | NW_004515916.1 | Scaffold446 | 99238                   | GG                              | AA              | 1946949112               |
| SNP_P4_129242_99326  | NW_004515916.1 | Scaffold446 | 99326                   | AA                              | CC              | 1946949114               |
| SNP_P4_129243_99328  | NW_004515916.1 | Scaffold446 | 99328                   | GG                              | AA              | 1946949116               |
| SNP_P4_129244_99338  | NW_004515916.1 | Scaffold446 | 99338                   | CC                              | TT              | 1946949118               |
| SNP_P4_129245_99372  | NW_004515916.1 | Scaffold446 | 99372                   | CC                              | TT              | 1946949120               |
| SNP_P4_129246_99397  | NW_004515916.1 | Scaffold446 | 99397                   | TT                              | CC              | 1946949122               |
| SNP_P4_129247_99435  | NW_004515916.1 | Scaffold446 | 99435                   | GG                              | AA              | 1946949124               |
| SNP_P4_129248_99464  | NW_004515916.1 | Scaffold446 | 99464                   | TT                              | AA              | 1946949126               |
| SNP_P4_129249_99479  | NW_004515916.1 | Scaffold446 | 99479                   | GG                              | AA              | 1946949128               |
| SNP_P4_129250_99536  | NW_004515916.1 | Scaffold446 | 99536                   | AA                              | CC              | 1946949130               |
| SNP_P4_129251_99592  | NW_004515916.1 | Scaffold446 | 99592                   | GG                              | AA              | 1946949132               |
| SNP_P4_129252_99680  | NW_004515916.1 | Scaffold446 | 99680                   | CC                              | TT              | 1946949133               |
| SNP_P4_129253_99684  | NW_004515916.1 | Scaffold446 | 99684                   | TT                              | GG              | 1946949135               |
| SNP_P4_129254_99748  | NW_004515916.1 | Scaffold446 | 99748                   | AA                              | GG              | 1946949137               |
| SNP_P4_129255_99751  | NW_004515916.1 | Scaffold446 | 99751                   | AA                              | GG              | 1946949139               |
| SNP_P4_129256_100701 | NW_004515916.1 | Scaffold446 | 100701                  | CC                              | AA              | 1946949141               |
| SNP_P4_129257_102135 | NW_004515916.1 | Scaffold446 | 102135                  | GG                              | CC              | 1946949143               |
| SNP_P4_129258_102615 | NW_004515916.1 | Scaffold446 | 102615                  | GG                              | CC              | 1946949145               |
| SNP_P4_129259_106575 | NW_004515916.1 | Scaffold446 | 106575                  | AA                              | GG              | 1946949147               |
| SNP_P4_129260_106598 | NW_004515916.1 | Scaffold446 | 106598                  | TT                              | CC              | 1946949149               |
| SNP_P4_129261_109650 | NW_004515916.1 | Scaffold446 | 109650                  | GG                              | CC              | 1946949151               |
| SNP_P4_129262_109831 | NW_004515916.1 | Scaffold446 | 109831                  | TT                              | CC              | 1946949153               |
| SNP_P4_129263_109858 | NW_004515916.1 | Scaffold446 | 109858                  | CC                              | TT              | 1946949155               |
| SNP_P4_129264_109902 | NW_004515916.1 | Scaffold446 | 109902                  | AA                              | CC              | 1946949157               |
| SNP_P4_129265_110186 | NW_004515916.1 | Scaffold446 | 110186                  | TT                              | AA              | 1946949159               |
| SNP_P4_129266_110343 | NW_004515916.1 | Scaffold446 | 110343                  | AA                              | TT              | 1946949161               |

| SNPs IDs             | Chromosome IDs | Chromosomes | Physical positions (bp) | CDC Frontier (Reference genome) | (ILWC46 & LPNB) | NCBI SNPdb Accession IDs |
|----------------------|----------------|-------------|-------------------------|---------------------------------|-----------------|--------------------------|
| SNP_P4_129267_117998 | NW_004515916.1 | Scaffold446 | 117998                  | TT                              | CC              | 1946949163               |
| SNP_P4_129268_118052 | NW_004515916.1 | Scaffold446 | 118052                  | GG                              | CC              | 1946949165               |
| SNP_P4_129269_118071 | NW_004515916.1 | Scaffold446 | 118071                  | CC                              | TT              | 1946949167               |
| SNP_P4_129270_118085 | NW_004515916.1 | Scaffold446 | 118085                  | TT                              | CC              | 1946949169               |
| SNP_P4_129271_118849 | NW_004515916.1 | Scaffold446 | 118849                  | AA                              | GG              | 1946949171               |
| SNP_P4_129272_122676 | NW_004515916.1 | Scaffold446 | 122676                  | AA                              | CC              | 1946949173               |
| SNP_P4_129273_124912 | NW_004515916.1 | Scaffold446 | 124912                  | GG                              | AA              | 1946949175               |
| SNP_P4_129274_124928 | NW_004515916.1 | Scaffold446 | 124928                  | TT                              | GG              | 1946949177               |
| SNP_P4_129275_124942 | NW_004515916.1 | Scaffold446 | 124942                  | GG                              | AA              | 1946949179               |
| SNP_P4_129276_133667 | NW_004515916.1 | Scaffold446 | 133667                  | GG                              | TT              | 1946949181               |
| SNP_P4_129277_133692 | NW_004515916.1 | Scaffold446 | 133692                  | AA                              | GG              | 1946949183               |
| SNP_P4_129278_133701 | NW_004515916.1 | Scaffold446 | 133701                  | AA                              | GG              | 1946949185               |
| SNP_P4_129279_133783 | NW_004515916.1 | Scaffold446 | 133783                  | TT                              | GG              | 1946949187               |
| SNP_P4_129280_133807 | NW_004515916.1 | Scaffold446 | 133807                  | TT                              | CC              | 1946949189               |
| SNP_P4_129281_133888 | NW_004515916.1 | Scaffold446 | 133888                  | AA                              | TT              | 1946949191               |
| SNP_P4_129282_133892 | NW_004515916.1 | Scaffold446 | 133892                  | GG                              | CC              | 1946949193               |
| SNP_P4_129283_133896 | NW_004515916.1 | Scaffold446 | 133896                  | GG                              | AA              | 1946949195               |
| SNP_P4_129284_133897 | NW_004515916.1 | Scaffold446 | 133897                  | AA                              | GG              | 1946949197               |
| SNP_P4_129285_134096 | NW_004515916.1 | Scaffold446 | 134096                  | AA                              | GG              | 1946949199               |
| SNP_P4_129286_134174 | NW_004515916.1 | Scaffold446 | 134174                  | CC                              | AA              | 1946949201               |
| SNP_P4_129287_134213 | NW_004515916.1 | Scaffold446 | 134213                  | GG                              | TT              | 1946949203               |
| SNP_P4_129288_135780 | NW_004515916.1 | Scaffold446 | 135780                  | AA                              | TT              | 1946949205               |
| SNP_P4_129289_135790 | NW_004515916.1 | Scaffold446 | 135790                  | TT                              | AA              | 1946949207               |
| SNP_P4_129290_136202 | NW_004515916.1 | Scaffold446 | 136202                  | AA                              | TT              | 1946949209               |
| SNP_P4_129291_144042 | NW_004515916.1 | Scaffold446 | 144042                  | CC                              | TT              | 1946949211               |
| SNP_P4_129292_144044 | NW_004515916.1 | Scaffold446 | 144044                  | AA                              | CC              | 1946949213               |
| SNP_P4_129293_144194 | NW_004515916.1 | Scaffold446 | 144194                  | TT                              | CC              | 1946949215               |
| SNP_P4_129294_144220 | NW_004515916.1 | Scaffold446 | 144220                  | AA                              | GG              | 1946949217               |
| SNP_P4_129295_145008 | NW_004515916.1 | Scaffold446 | 145008                  | GG                              | CC              | 1946949219               |
| SNP_P4_129296_145185 | NW_004515916.1 | Scaffold446 | 145185                  | AA                              | GG              | 1946949221               |
| SNP_P4_129297_151235 | NW_004515916.1 | Scaffold446 | 151235                  | TT                              | AA              | 1946949223               |
| SNP_P4_129298_151373 | NW_004515916.1 | Scaffold446 | 151373                  | TT                              | AA              | 1946949225               |
| SNP_P4_129299_151374 | NW_004515916.1 | Scaffold446 | 151374                  | AA                              | TT              | 1946949227               |
| SNP_P4_129300_151620 | NW_004515916.1 | Scaffold446 | 151620                  | CC                              | TT              | 1946949229               |
| SNP_P4_129301_153752 | NW_004515916.1 | Scaffold446 | 153752                  | CC                              | TT              | 1946949231               |
| SNP_P4_129302_153794 | NW_004515916.1 | Scaffold446 | 153794                  | TT                              | AA              | 1946949233               |
| SNP_P4_129303_153830 | NW_004515916.1 | Scaffold446 | 153830                  | CC                              | TT              | 1946949235               |
| SNP_P4_129304_153836 | NW_004515916.1 | Scaffold446 | 153836                  | AA                              | CC              | 1946949237               |
| SNP_P4_129305_156864 | NW_004515916.1 | Scaffold446 | 156864                  | TT                              | CC              | 1946949239               |
| SNP_P4_129306_156956 | NW_004515916.1 | Scaffold446 | 156956                  | CC                              | TT              | 1946949241               |
| SNP_P4_129307_156999 | NW_004515916.1 | Scaffold446 | 156999                  | TT                              | CC              | 1946949243               |
| SNP_P4_129308_157027 | NW_004515916.1 | Scaffold446 | 157027                  | AA                              | TT              | 1946949245               |

| SNPs IDs             | Chromosome IDs | Chromosomes | Physical positions (bp) | CDC Frontier (Reference genome) | (ILWC46 & LPNB) | NCBI SNPdb Accession IDs |
|----------------------|----------------|-------------|-------------------------|---------------------------------|-----------------|--------------------------|
| SNP_P4_129309_157035 | NW_004515916.1 | Scaffold446 | 157035                  | CC                              | TT              | 1946949247               |
| SNP_P4_129310_157055 | NW_004515916.1 | Scaffold446 | 157055                  | TT                              | GG              | 1946949249               |
| SNP_P4_129311_157109 | NW_004515916.1 | Scaffold446 | 157109                  | GG                              | AA              | 1946949251               |
| SNP_P4_129312_157112 | NW_004515916.1 | Scaffold446 | 157112                  | AA                              | TT              | 1946949254               |
| SNP_P4_129313_157139 | NW_004515916.1 | Scaffold446 | 157139                  | GG                              | TT              | 1946949256               |
| SNP_P4_129314_157145 | NW_004515916.1 | Scaffold446 | 157145                  | CC                              | TT              | 1946949258               |
| SNP_P4_129315_157357 | NW_004515916.1 | Scaffold446 | 157357                  | GG                              | AA              | 1946949260               |
| SNP_P4_129316_157382 | NW_004515916.1 | Scaffold446 | 157382                  | CC                              | GG              | 1946949262               |
| SNP_P4_129317_157480 | NW_004515916.1 | Scaffold446 | 157480                  | TT                              | CC              | 1946949264               |
| SNP_P4_129318_161089 | NW_004515916.1 | Scaffold446 | 161089                  | AA                              | GG              | 1946949266               |
| SNP_P4_129319_161470 | NW_004515916.1 | Scaffold446 | 161470                  | AA                              | GG              | 1946949268               |
| SNP_P4_129320_161516 | NW_004515916.1 | Scaffold446 | 161516                  | CC                              | TT              | 1946949270               |
| SNP_P4_129321_163449 | NW_004515916.1 | Scaffold446 | 163449                  | CC                              | TT              | 1946949272               |
| SNP_P4_129322_163487 | NW_004515916.1 | Scaffold446 | 163487                  | CC                              | TT              | 1946949274               |
| SNP_P4_129324_163765 | NW_004515916.1 | Scaffold446 | 163765                  | TT                              | GG              | 1946949276               |
| SNP_P4_129325_163774 | NW_004515916.1 | Scaffold446 | 163774                  | CC                              | TT              | 1946949278               |
| SNP_P4_129326_163783 | NW_004515916.1 | Scaffold446 | 163783                  | TT                              | CC              | 1946949280               |
| SNP_P4_129327_163790 | NW_004515916.1 | Scaffold446 | 163790                  | TT                              | CC              | 1946949282               |
| SNP_P4_129328_163805 | NW_004515916.1 | Scaffold446 | 163805                  | CC                              | TT              | 1946949284               |
| SNP_P4_129329_163831 | NW_004515916.1 | Scaffold446 | 163831                  | AA                              | GG              | 1946949286               |
| SNP_P4_129330_163873 | NW_004515916.1 | Scaffold446 | 163873                  | AA                              | GG              | 1946949288               |
| SNP_P4_129331_164280 | NW_004515916.1 | Scaffold446 | 164280                  | TT                              | CC              | 1946949290               |
| SNP_P4_129332_164317 | NW_004515916.1 | Scaffold446 | 164317                  | AA                              | GG              | 1946949292               |
| SNP_P4_129333_164354 | NW_004515916.1 | Scaffold446 | 164354                  | GG                              | TT              | 1946949294               |
| SNP_P4_129334_164380 | NW_004515916.1 | Scaffold446 | 164380                  | TT                              | AA              | 1946949296               |
| SNP_P4_129335_164387 | NW_004515916.1 | Scaffold446 | 164387                  | TT                              | CC              | 1946949298               |
| SNP_P4_129336_165014 | NW_004515916.1 | Scaffold446 | 165014                  | GG                              | AA              | 1946949300               |
| SNP_P4_129337_165044 | NW_004515916.1 | Scaffold446 | 165044                  | TT                              | CC              | 1946949302               |
| SNP_P4_129338_165388 | NW_004515916.1 | Scaffold446 | 165388                  | GG                              | TT              | 1946949304               |
| SNP_P4_129339_165435 | NW_004515916.1 | Scaffold446 | 165435                  | TT                              | CC              | 1946949306               |
| SNP_P4_129340_165543 | NW_004515916.1 | Scaffold446 | 165543                  | GG                              | TT              | 1946949308               |
| SNP_P4_129341_165850 | NW_004515916.1 | Scaffold446 | 165850                  | TT                              | AA              | 1946949310               |
| SNP_P4_129342_166119 | NW_004515916.1 | Scaffold446 | 166119                  | GG                              | AA              | 1946949312               |
| SNP_P4_129343_166749 | NW_004515916.1 | Scaffold446 | 166749                  | AA                              | GG              | 1946949314               |
| SNP_P4_129344_166775 | NW_004515916.1 | Scaffold446 | 166775                  | TT                              | CC              | 1946949316               |
| SNP_P4_129345_166779 | NW_004515916.1 | Scaffold446 | 166779                  | TT                              | CC              | 1946949318               |
| SNP_P4_129346_166789 | NW_004515916.1 | Scaffold446 | 166789                  | TT                              | CC              | 1946949320               |
| SNP_P4_129347_166790 | NW_004515916.1 | Scaffold446 | 166790                  | TT                              | CC              | 1946949322               |
| SNP_P4_129348_166815 | NW_004515916.1 | Scaffold446 | 166815                  | AA                              | TT              | 1946949324               |
| SNP_P4_129349_166884 | NW_004515916.1 | Scaffold446 | 166884                  | AA                              | GG              | 1946949326               |
| SNP_P4_129350_167601 | NW_004515916.1 | Scaffold446 | 167601                  | CC                              | AA              | 1946949328               |
| SNP_P4_129351_168020 | NW_004515916.1 | Scaffold446 | 168020                  | AA                              | CC              | 1946949330               |

| SNPs IDs             | Chromosome IDs | Chromosomes | Physical positions (bp) | CDC Frontier (Reference genome) | (ILWC46 & LPNB) | NCBI SNPdb Accession IDs |
|----------------------|----------------|-------------|-------------------------|---------------------------------|-----------------|--------------------------|
| SNP_P4_129352_171621 | NW_004515916.1 | Scaffold446 | 171621                  | CC                              | TT              | 1946949332               |
| SNP_P4_129353_171673 | NW_004515916.1 | Scaffold446 | 171673                  | GG                              | AA              | 1946949334               |
| SNP_P4_129354_171680 | NW_004515916.1 | Scaffold446 | 171680                  | GG                              | AA              | 1946949336               |
| SNP_P4_129355_171681 | NW_004515916.1 | Scaffold446 | 171681                  | CC                              | TT              | 1946949338               |
| SNP_P4_129356_171884 | NW_004515916.1 | Scaffold446 | 171884                  | GG                              | AA              | 1946949340               |
| SNP_P4_129357_171955 | NW_004515916.1 | Scaffold446 | 171955                  | TT                              | CC              | 1946949342               |
| SNP_P4_129358_172029 | NW_004515916.1 | Scaffold446 | 172029                  | GG                              | AA              | 1946949344               |
| SNP_P4_129359_177224 | NW_004515916.1 | Scaffold446 | 177224                  | TT                              | AA              | 1946949346               |
| SNP_P4_129360_177238 | NW_004515916.1 | Scaffold446 | 177238                  | TT                              | GG              | 1946949348               |
| SNP_P4_129361_177258 | NW_004515916.1 | Scaffold446 | 177258                  | GG                              | TT              | 1946949350               |
| SNP_P4_129362_177300 | NW_004515916.1 | Scaffold446 | 177300                  | GG                              | CC              | 1946949352               |
| SNP_P4_129363_177303 | NW_004515916.1 | Scaffold446 | 177303                  | GG                              | AA              | 1946949354               |
| SNP_P4_129364_177487 | NW_004515916.1 | Scaffold446 | 177487                  | GG                              | TT              | 1946949356               |
| SNP_P4_129365_177500 | NW_004515916.1 | Scaffold446 | 177500                  | TT                              | CC              | 1946949358               |
| SNP_P4_129366_177530 | NW_004515916.1 | Scaffold446 | 177530                  | GG                              | TT              | 1946949360               |
| SNP_P4_129367_177565 | NW_004515916.1 | Scaffold446 | 177565                  | AA                              | CC              | 1946949362               |
| SNP_P4_129368_181102 | NW_004515916.1 | Scaffold446 | 181102                  | TT                              | AA              | 1946949364               |
| SNP_P4_129369_181379 | NW_004515916.1 | Scaffold446 | 181379                  | TT                              | CC              | 1946949366               |
| SNP_P4_129370_181380 | NW_004515916.1 | Scaffold446 | 181380                  | AA                              | CC              | 1946949368               |
| SNP_P4_129371_181590 | NW_004515916.1 | Scaffold446 | 181590                  | AA                              | GG              | 1946949370               |
| SNP_P4_129372_185256 | NW_004515916.1 | Scaffold446 | 185256                  | TT                              | AA              | 1946949372               |
| SNP_P4_129373_186598 | NW_004515916.1 | Scaffold446 | 186598                  | AA                              | TT              | 1946949374               |
| SNP_P4_129374_186616 | NW_004515916.1 | Scaffold446 | 186616                  | GG                              | AA              | 1946949376               |
| SNP_P4_129376_195330 | NW_004515916.1 | Scaffold446 | 195330                  | AA                              | TT              | 1946949378               |
| SNP_P4_129377_195331 | NW_004515916.1 | Scaffold446 | 195331                  | TT                              | AA              | 1946949380               |
| SNP_P4_129378_201037 | NW_004515916.1 | Scaffold446 | 201037                  | CC                              | GG              | 1946949382               |
| SNP_P4_129379_201043 | NW_004515916.1 | Scaffold446 | 201043                  | AA                              | TT              | 1946949384               |
| SNP_P4_129380_202451 | NW_004515916.1 | Scaffold446 | 202451                  | AA                              | GG              | 1946949386               |
| SNP_P4_129381_213446 | NW_004515916.1 | Scaffold446 | 213446                  | GG                              | AA              | 1946949388               |
| SNP_P4_129382_215587 | NW_004515916.1 | Scaffold446 | 215587                  | TT                              | GG              | 1946949390               |
| SNP_P4_129384_224789 | NW_004515916.1 | Scaffold446 | 224789                  | TT                              | CC              | 1946949392               |
| SNP_P4_129385_224811 | NW_004515916.1 | Scaffold446 | 224811                  | GG                              | TT              | 1946949394               |
| SNP_P4_129386_224814 | NW_004515916.1 | Scaffold446 | 224814                  | GG                              | CC              | 1946949396               |
| SNP_P4_129387_227923 | NW_004515916.1 | Scaffold446 | 227923                  | TT                              | CC              | 1946949399               |
| SNP_P4_129388_232535 | NW_004515916.1 | Scaffold446 | 232535                  | AA                              | CC              | 1946949401               |
| SNP_P4_129389_232609 | NW_004515916.1 | Scaffold446 | 232609                  | TT                              | AA              | 1946949403               |
| SNP_P4_129390_232773 | NW_004515916.1 | Scaffold446 | 232773                  | AA                              | GG              | 1946949405               |
| SNP_P4_129391_232801 | NW_004515916.1 | Scaffold446 | 232801                  | GG                              | AA              | 1946949407               |
| SNP_P4_129392_233142 | NW_004515916.1 | Scaffold446 | 233142                  | AA                              | TT              | 1946949409               |
| SNP_P4_129393_233189 | NW_004515916.1 | Scaffold446 | 233189                  | AA                              | GG              | 1946949411               |
| SNP_P4_129394_233375 | NW_004515916.1 | Scaffold446 | 233375                  | CC                              | TT              | 1946949413               |
| SNP_P4_129395_233376 | NW_004515916.1 | Scaffold446 | 233376                  | AA                              | GG              | 1946949415               |



| SNPs IDs             | Chromosome IDs | Chromosomes | Physical positions (bp) | CDC Frontier (Reference genome) | (ILWC46 & LPNB) | NCBI SNPdb Accession IDs |
|----------------------|----------------|-------------|-------------------------|---------------------------------|-----------------|--------------------------|
| SNP_P4_129397_235004 | NW_004515916.1 | Scaffold446 | 235004                  | AA                              | TT              | 1946949417               |
| SNP_P4_129398_235007 | NW_004515916.1 | Scaffold446 | 235007                  | AA                              | TT              | 1946949419               |
| SNP_P4_129399_235018 | NW_004515916.1 | Scaffold446 | 235018                  | TT                              | CC              | 1946949421               |
| SNP_P4_129400_235311 | NW_004515916.1 | Scaffold446 | 235311                  | GG                              | AA              | 1946949423               |
| SNP_P4_129401_235319 | NW_004515916.1 | Scaffold446 | 235319                  | TT                              | CC              | 1946949425               |
| SNP_P4_129403_235753 | NW_004515916.1 | Scaffold446 | 235753                  | TT                              | CC              | 1946949427               |
| SNP_P4_129404_245341 | NW_004515916.1 | Scaffold446 | 245341                  | GG                              | TT              | 1946949429               |
| SNP_P4_129405_245391 | NW_004515916.1 | Scaffold446 | 245391                  | AA                              | GG              | 1946949431               |
| SNP_P4_129406_250299 | NW_004515916.1 | Scaffold446 | 250299                  | AA                              | GG              | 1946949433               |
| SNP_P4_129407_250952 | NW_004515916.1 | Scaffold446 | 250952                  | AA                              | GG              | 1946949435               |
| SNP_P4_129408_255937 | NW_004515916.1 | Scaffold446 | 255937                  | TT                              | CC              | 1946949437               |
| SNP_P4_129409_256473 | NW_004515916.1 | Scaffold446 | 256473                  | TT                              | AA              | 1946949439               |
| SNP_P4_129410_256488 | NW_004515916.1 | Scaffold446 | 256488                  | CC                              | AA              | 1946949441               |
| SNP_P4_129411_256518 | NW_004515916.1 | Scaffold446 | 256518                  | CC                              | TT              | 1946949443               |
| SNP_P4_129412_260340 | NW_004515916.1 | Scaffold446 | 260340                  | TT                              | AA              | 1946949445               |
| SNP_P4_129413_260484 | NW_004515916.1 | Scaffold446 | 260484                  | TT                              | CC              | 1946949447               |
| SNP_P4_129414_260614 | NW_004515916.1 | Scaffold446 | 260614                  | TT                              | AA              | 1946949449               |
| SNP_P4_129415_260631 | NW_004515916.1 | Scaffold446 | 260631                  | AA                              | TT              | 1946949451               |
| SNP_P4_129416_260648 | NW_004515916.1 | Scaffold446 | 260648                  | TT                              | AA              | 1946949453               |
| SNP_P4_129417_260875 | NW_004515916.1 | Scaffold446 | 260875                  | GG                              | AA              | 1946949455               |
| SNP_P4_129418_260930 | NW_004515916.1 | Scaffold446 | 260930                  | TT                              | GG              | 1946949457               |
| SNP_P4_129419_260939 | NW_004515916.1 | Scaffold446 | 260939                  | AA                              | CC              | 1946949459               |
| SNP_P4_129421_267440 | NW_004515916.1 | Scaffold446 | 267440                  | GG                              | AA              | 1946949461               |
| SNP_P4_129422_267571 | NW_004515916.1 | Scaffold446 | 267571                  | CC                              | AA              | 1946949463               |
| SNP_P4_129423_267595 | NW_004515916.1 | Scaffold446 | 267595                  | CC                              | TT              | 1946949465               |
| SNP_P4_129424_267597 | NW_004515916.1 | Scaffold446 | 267597                  | AA                              | GG              | 1946949467               |
| SNP_P4_129425_267616 | NW_004515916.1 | Scaffold446 | 267616                  | TT                              | CC              | 1946949469               |
| SNP_P4_129426_273660 | NW_004515916.1 | Scaffold446 | 273660                  | TT                              | AA              | 1946949471               |
| SNP_P4_129427_273725 | NW_004515916.1 | Scaffold446 | 273725                  | TT                              | AA              | 1946949473               |
| SNP_P4_129428_28901  | NW_004515917.1 | Scaffold450 | 28901                   | GG                              | TT              | 1946949475               |
| SNP_P4_129429_66559  | NW_004515917.1 | Scaffold450 | 66559                   | GG                              | AA              | 1946949477               |
| SNP_P4_129430_66722  | NW_004515917.1 | Scaffold450 | 66722                   | AA                              | GG              | 1946949479               |
| SNP_P4_129431_66723  | NW_004515917.1 | Scaffold450 | 66723                   | CC                              | TT              | 1946949481               |
| SNP_P4_129432_72900  | NW_004515917.1 | Scaffold450 | 72900                   | GG                              | AA              | 1946949483               |
| SNP_P4_129433_77408  | NW_004515917.1 | Scaffold450 | 77408                   | AA                              | GG              | 1946949485               |
| SNP_P4_129434_93026  | NW_004515917.1 | Scaffold450 | 93026                   | GG                              | AA              | 1946949487               |
| SNP_P4_129435_104339 | NW_004515917.1 | Scaffold450 | 104339                  | TT                              | CC              | 1946949489               |
| SNP_P4_129436_104560 | NW_004515917.1 | Scaffold450 | 104560                  | AA                              | GG              | 1946949491               |
| SNP_P4_129437_105160 | NW_004515917.1 | Scaffold450 | 105160                  | AA                              | GG              | 1946949492               |
| SNP_P4_129438_105205 | NW_004515917.1 | Scaffold450 | 105205                  | GG                              | AA              | 1946949494               |
| SNP_P4_129439_108470 | NW_004515917.1 | Scaffold450 | 108470                  | TT                              | CC              | 1946949496               |
| SNP_P4_129441_108913 | NW_004515917.1 | Scaffold450 | 108913                  | TT                              | CC              | 1946949498               |

| SNPs IDs             | Chromosome IDs | Chromosomes | Physical positions (bp) | CDC Frontier (Reference genome) | (ILWC46 & LPNB) | NCBI SNPdb Accession IDs |
|----------------------|----------------|-------------|-------------------------|---------------------------------|-----------------|--------------------------|
| SNP_P4_129442_108927 | NW_004515917.1 | Scaffold450 | 108927                  | CC                              | TT              | 1946949500               |
| SNP_P4_129443_108929 | NW_004515917.1 | Scaffold450 | 108929                  | TT                              | GG              | 1946949502               |
| SNP_P4_129444_119353 | NW_004515917.1 | Scaffold450 | 119353                  | TT                              | GG              | 1946949504               |
| SNP_P4_129445_129957 | NW_004515917.1 | Scaffold450 | 129957                  | AA                              | CC              | 1946949506               |
| SNP_P4_129446_133781 | NW_004515917.1 | Scaffold450 | 133781                  | CC                              | AA              | 1946949508               |
| SNP_P4_129447_133790 | NW_004515917.1 | Scaffold450 | 133790                  | TT                              | GG              | 1946949510               |
| SNP_P4_129449_133829 | NW_004515917.1 | Scaffold450 | 133829                  | AA                              | TT              | 1946949512               |
| SNP_P4_129450_134006 | NW_004515917.1 | Scaffold450 | 134006                  | AA                              | GG              | 1946949514               |
| SNP_P4_129451_134024 | NW_004515917.1 | Scaffold450 | 134024                  | AA                              | CC              | 1946949516               |
| SNP_P4_129452_134367 | NW_004515917.1 | Scaffold450 | 134367                  | TT                              | CC              | 1946949518               |
| SNP_P4_129453_143927 | NW_004515917.1 | Scaffold450 | 143927                  | GG                              | CC              | 1946949520               |
| SNP_P4_129454_152961 | NW_004515917.1 | Scaffold450 | 152961                  | TT                              | CC              | 1946949522               |
| SNP_P4_129455_162200 | NW_004515917.1 | Scaffold450 | 162200                  | GG                              | AA              | 1946949524               |
| SNP_P4_129456_177801 | NW_004515917.1 | Scaffold450 | 177801                  | TT                              | GG              | 1946949526               |
| SNP_P4_129457_178222 | NW_004515917.1 | Scaffold450 | 178222                  | AA                              | GG              | 1946949528               |
| SNP_P4_129458_178256 | NW_004515917.1 | Scaffold450 | 178256                  | TT                              | CC              | 1946949530               |
| SNP_P4_129459_190896 | NW_004515917.1 | Scaffold450 | 190896                  | TT                              | AA              | 1946949532               |
| SNP_P4_129460_193202 | NW_004515917.1 | Scaffold450 | 193202                  | GG                              | AA              | 1946949534               |
| SNP_P4_129461_193238 | NW_004515917.1 | Scaffold450 | 193238                  | CC                              | GG              | 1946949536               |
| SNP_P4_129462_197097 | NW_004515917.1 | Scaffold450 | 197097                  | CC                              | TT              | 1946949538               |
| SNP_P4_129463_202733 | NW_004515917.1 | Scaffold450 | 202733                  | CC                              | TT              | 1946949540               |
| SNP_P4_129464_202868 | NW_004515917.1 | Scaffold450 | 202868                  | CC                              | GG              | 1946949542               |
| SNP_P4_129465_205044 | NW_004515917.1 | Scaffold450 | 205044                  | AA                              | TT              | 1946949544               |
| SNP_P4_129467_205092 | NW_004515917.1 | Scaffold450 | 205092                  | GG                              | AA              | 1946949546               |
| SNP_P4_129469_235342 | NW_004515917.1 | Scaffold450 | 235342                  | AA                              | CC              | 1946949548               |
| SNP_P4_129470_235369 | NW_004515917.1 | Scaffold450 | 235369                  | CC                              | AA              | 1946949550               |
| SNP_P4_129471_235436 | NW_004515917.1 | Scaffold450 | 235436                  | AA                              | GG              | 1946949552               |
| SNP_P4_129472_235449 | NW_004515917.1 | Scaffold450 | 235449                  | AA                              | GG              | 1946949554               |
| SNP_P4_129473_235459 | NW_004515917.1 | Scaffold450 | 235459                  | CC                              | AA              | 1946949556               |
| SNP_P4_129474_235488 | NW_004515917.1 | Scaffold450 | 235488                  | GG                              | AA              | 1946949558               |
| SNP_P4_129475_235727 | NW_004515917.1 | Scaffold450 | 235727                  | AA                              | GG              | 1946949560               |
| SNP_P4_129476_235752 | NW_004515917.1 | Scaffold450 | 235752                  | CC                              | GG              | 1946949562               |
| SNP_P4_129477_235789 | NW_004515917.1 | Scaffold450 | 235789                  | TT                              | CC              | 1946949564               |
| SNP_P4_129478_235811 | NW_004515917.1 | Scaffold450 | 235811                  | AA                              | GG              | 1946949566               |
| SNP_P4_129479_235851 | NW_004515917.1 | Scaffold450 | 235851                  | TT                              | AA              | 1946949568               |
| SNP_P4_129480_235857 | NW_004515917.1 | Scaffold450 | 235857                  | AA                              | TT              | 1946949570               |
| SNP_P4_129481_235859 | NW_004515917.1 | Scaffold450 | 235859                  | TT                              | GG              | 1946949572               |
| SNP_P4_129482_236242 | NW_004515917.1 | Scaffold450 | 236242                  | CC                              | AA              | 1946949574               |
| SNP_P4_129483_241307 | NW_004515917.1 | Scaffold450 | 241307                  | AA                              | GG              | 1946949576               |
| SNP_P4_129484_241310 | NW_004515917.1 | Scaffold450 | 241310                  | AA                              | CC              | 1946949578               |
| SNP_P4_129485_241627 | NW_004515917.1 | Scaffold450 | 241627                  | TT                              | CC              | 1946949580               |
| SNP_P4_129486_313585 | NW_004515917.1 | Scaffold450 | 313585                  | TT                              | GG              | 1946949582               |

| SNPs IDs             | Chromosome IDs | Chromosomes | Physical positions (bp) | CDC Frontier (Reference genome) | (ILWC46 & LPNB) | NCBI SNPdb Accession IDs |
|----------------------|----------------|-------------|-------------------------|---------------------------------|-----------------|--------------------------|
| SNP_P4_129487_407901 | NW_004515917.1 | Scaffold450 | 407901                  | CC                              | TT              | 1946949584               |
| SNP_P4_129488_415897 | NW_004515917.1 | Scaffold450 | 415897                  | TT                              | GG              | 1946949587               |
| SNP_P4_129489_427885 | NW_004515917.1 | Scaffold450 | 427885                  | TT                              | CC              | 1946949589               |
| SNP_P4_129490_431953 | NW_004515917.1 | Scaffold450 | 431953                  | TT                              | CC              | 1946949591               |
| SNP_P4_129491_431984 | NW_004515917.1 | Scaffold450 | 431984                  | AA                              | CC              | 1946949593               |
| SNP_P4_129492_459242 | NW_004515917.1 | Scaffold450 | 459242                  | TT                              | CC              | 1946949595               |
| SNP_P4_129493_459459 | NW_004515917.1 | Scaffold450 | 459459                  | TT                              | GG              | 1946949597               |
| SNP_P4_129494_459500 | NW_004515917.1 | Scaffold450 | 459500                  | AA                              | TT              | 1946949599               |
| SNP_P4_129495_459507 | NW_004515917.1 | Scaffold450 | 459507                  | TT                              | GG              | 1946949601               |
| SNP_P4_129496_470142 | NW_004515917.1 | Scaffold450 | 470142                  | CC                              | TT              | 1946949603               |
| SNP_P4_129497_471020 | NW_004515917.1 | Scaffold450 | 471020                  | AA                              | GG              | 1946949605               |
| SNP_P4_129498_471102 | NW_004515917.1 | Scaffold450 | 471102                  | AA                              | CC              | 1946949607               |
| SNP_P4_129499_476131 | NW_004515917.1 | Scaffold450 | 476131                  | AA                              | GG              | 1946949609               |
| SNP_P4_129500_478022 | NW_004515917.1 | Scaffold450 | 478022                  | AA                              | CC              | 1946949611               |
| SNP_P4_129501_482331 | NW_004515917.1 | Scaffold450 | 482331                  | CC                              | TT              | 1946949612               |
| SNP_P4_129502_482361 | NW_004515917.1 | Scaffold450 | 482361                  | GG                              | CC              | 1946949614               |
| SNP_P4_129503_482624 | NW_004515917.1 | Scaffold450 | 482624                  | AA                              | CC              | 1946949616               |
| SNP_P4_129504_496319 | NW_004515917.1 | Scaffold450 | 496319                  | GG                              | AA              | 1946949618               |
| SNP_P4_129505_497825 | NW_004515917.1 | Scaffold450 | 497825                  | TT                              | AA              | 1946949620               |
| SNP_P4_129506_498689 | NW_004515917.1 | Scaffold450 | 498689                  | TT                              | AA              | 1946949622               |
| SNP_P4_129507_509691 | NW_004515917.1 | Scaffold450 | 509691                  | AA                              | TT              | 1946949624               |
| SNP_P4_129508_509727 | NW_004515917.1 | Scaffold450 | 509727                  | TT                              | CC              | 1946949626               |
| SNP_P4_129509_509740 | NW_004515917.1 | Scaffold450 | 509740                  | AA                              | CC              | 1946949628               |
| SNP_P4_129510_509958 | NW_004515917.1 | Scaffold450 | 509958                  | CC                              | TT              | 1946949630               |
| SNP_P4_129511_509959 | NW_004515917.1 | Scaffold450 | 509959                  | AA                              | GG              | 1946949632               |
| SNP_P4_129512_510026 | NW_004515917.1 | Scaffold450 | 510026                  | CC                              | TT              | 1946949634               |
| SNP_P4_129513_510045 | NW_004515917.1 | Scaffold450 | 510045                  | CC                              | GG              | 1946949636               |
| SNP_P4_129514_510080 | NW_004515917.1 | Scaffold450 | 510080                  | TT                              | AA              | 1946949638               |
| SNP_P4_129515_510397 | NW_004515917.1 | Scaffold450 | 510397                  | AA                              | GG              | 1946949639               |
| SNP_P4_129516_510474 | NW_004515917.1 | Scaffold450 | 510474                  | AA                              | TT              | 1946949641               |
| SNP_P4_129517_510519 | NW_004515917.1 | Scaffold450 | 510519                  | AA                              | GG              | 1946949643               |
| SNP_P4_129518_510520 | NW_004515917.1 | Scaffold450 | 510520                  | AA                              | TT              | 1946949645               |
| SNP_P4_129519_510549 | NW_004515917.1 | Scaffold450 | 510549                  | GG                              | TT              | 1946949647               |
| SNP_P4_129520_510564 | NW_004515917.1 | Scaffold450 | 510564                  | CC                              | GG              | 1946949649               |
| SNP_P4_129521_510601 | NW_004515917.1 | Scaffold450 | 510601                  | CC                              | AA              | 1946949651               |
| SNP_P4_129522_510610 | NW_004515917.1 | Scaffold450 | 510610                  | CC                              | GG              | 1946949653               |
| SNP_P4_129523_511163 | NW_004515917.1 | Scaffold450 | 511163                  | AA                              | TT              | 1946949655               |
| SNP_P4_129525_517418 | NW_004515917.1 | Scaffold450 | 517418                  | TT                              | AA              | 1946949657               |
| SNP_P4_129526_517807 | NW_004515917.1 | Scaffold450 | 517807                  | TT                              | CC              | 1946949659               |
| SNP_P4_129527_518133 | NW_004515917.1 | Scaffold450 | 518133                  | GG                              | TT              | 1946949661               |
| SNP_P4_129528_518135 | NW_004515917.1 | Scaffold450 | 518135                  | CC                              | TT              | 1946949663               |
| SNP_P4_129529_518148 | NW_004515917.1 | Scaffold450 | 518148                  | TT                              | CC              | 1946949665               |

| SNPs IDs             | Chromosome IDs | Chromosomes | Physical positions (bp) | CDC Frontier (Reference genome) | (ILWC46 & LPNB) | NCBI SNPdb Accession IDs |
|----------------------|----------------|-------------|-------------------------|---------------------------------|-----------------|--------------------------|
| SNP_P4_129530_518418 | NW_004515917.1 | Scaffold450 | 518418                  | CC                              | TT              | 1946949667               |
| SNP_P4_129531_518460 | NW_004515917.1 | Scaffold450 | 518460                  | AA                              | GG              | 1946949669               |
| SNP_P4_129532_518517 | NW_004515917.1 | Scaffold450 | 518517                  | CC                              | AA              | 1946949671               |
| SNP_P4_129533_518542 | NW_004515917.1 | Scaffold450 | 518542                  | AA                              | GG              | 1946949673               |
| SNP_P4_129534_518661 | NW_004515917.1 | Scaffold450 | 518661                  | TT                              | CC              | 1946949675               |
| SNP_P4_129535_518791 | NW_004515917.1 | Scaffold450 | 518791                  | CC                              | TT              | 1946949677               |
| SNP_P4_129536_518792 | NW_004515917.1 | Scaffold450 | 518792                  | GG                              | AA              | 1946949679               |
| SNP_P4_129537_518820 | NW_004515917.1 | Scaffold450 | 518820                  | TT                              | GG              | 1946949681               |
| SNP_P4_129538_522272 | NW_004515917.1 | Scaffold450 | 522272                  | AA                              | GG              | 1946949682               |
| SNP_P4_129539_1328   | NW_004515918.1 | Scaffold451 | 1328                    | TT                              | CC              | 1946949684               |
| SNP_P4_129540_5224   | NW_004515918.1 | Scaffold451 | 5224                    | AA                              | GG              | 1946949686               |
| SNP_P4_129541_11190  | NW_004515918.1 | Scaffold451 | 11190                   | TT                              | GG              | 1946949688               |
| SNP_P4_129542_19210  | NW_004515918.1 | Scaffold451 | 19210                   | AA                              | GG              | 1946949690               |
| SNP_P4_129543_19950  | NW_004515918.1 | Scaffold451 | 19950                   | AA                              | TT              | 1946949692               |
| SNP_P4_129544_21267  | NW_004515918.1 | Scaffold451 | 21267                   | AA                              | CC              | 1946949694               |
| SNP_P4_129545_21281  | NW_004515918.1 | Scaffold451 | 21281                   | AA                              | GG              | 1946949696               |
| SNP_P4_129546_22435  | NW_004515918.1 | Scaffold451 | 22435                   | TT                              | CC              | 1946949698               |
| SNP_P4_129547_23622  | NW_004515918.1 | Scaffold451 | 23622                   | TT                              | AA              | 1946949700               |
| SNP_P4_129548_23942  | NW_004515918.1 | Scaffold451 | 23942                   | CC                              | TT              | 1946949702               |
| SNP_P4_129549_28419  | NW_004515918.1 | Scaffold451 | 28419                   | CC                              | TT              | 1946949704               |
| SNP_P4_129550_28430  | NW_004515918.1 | Scaffold451 | 28430                   | CC                              | TT              | 1946949706               |
| SNP_P4_129551_28622  | NW_004515918.1 | Scaffold451 | 28622                   | GG                              | AA              | 1946949708               |
| SNP_P4_129553_30234  | NW_004515918.1 | Scaffold451 | 30234                   | CC                              | TT              | 1946949710               |
| SNP_P4_129555_35283  | NW_004515918.1 | Scaffold451 | 35283                   | GG                              | TT              | 1946949712               |
| SNP_P4_129556_35319  | NW_004515918.1 | Scaffold451 | 35319                   | TT                              | GG              | 1946949713               |
| SNP_P4_129557_38613  | NW_004515918.1 | Scaffold451 | 38613                   | TT                              | AA              | 1946949715               |
| SNP_P4_129558_60882  | NW_004515918.1 | Scaffold451 | 60882                   | TT                              | CC              | 1946949717               |
| SNP_P4_129559_61228  | NW_004515918.1 | Scaffold451 | 61228                   | AA                              | CC              | 1946949719               |
| SNP_P4_129560_61920  | NW_004515918.1 | Scaffold451 | 61920                   | AA                              | GG              | 1946949721               |
| SNP_P4_129561_65275  | NW_004515918.1 | Scaffold451 | 65275                   | TT                              | CC              | 1946949723               |
| SNP_P4_129562_65291  | NW_004515918.1 | Scaffold451 | 65291                   | TT                              | CC              | 1946949725               |
| SNP_P4_129564_65509  | NW_004515918.1 | Scaffold451 | 65509                   | TT                              | GG              | 1946949727               |
| SNP_P4_129565_67286  | NW_004515918.1 | Scaffold451 | 67286                   | TT                              | AA              | 1946949729               |
| SNP_P4_129566_74148  | NW_004515918.1 | Scaffold451 | 74148                   | TT                              | CC              | 1946949731               |
| SNP_P4_129567_77803  | NW_004515918.1 | Scaffold451 | 77803                   | AA                              | GG              | 1946949733               |
| SNP_P4_129568_78357  | NW_004515918.1 | Scaffold451 | 78357                   | TT                              | CC              | 1946949735               |
| SNP_P4_129569_78426  | NW_004515918.1 | Scaffold451 | 78426                   | AA                              | GG              | 1946949737               |
| SNP_P4_129571_111962 | NW_004515918.1 | Scaffold451 | 111962                  | TT                              | AA              | 1946949739               |
| SNP_P4_129572_111965 | NW_004515918.1 | Scaffold451 | 111965                  | AA                              | TT              | 1946949741               |
| SNP_P4_129573_134656 | NW_004515918.1 | Scaffold451 | 134656                  | TT                              | CC              | 1946949742               |
| SNP_P4_129574_135299 | NW_004515918.1 | Scaffold451 | 135299                  | CC                              | TT              | 1946949744               |
| SNP_P4_129575_142890 | NW_004515918.1 | Scaffold451 | 142890                  | AA                              | GG              | 1946949746               |

| SNPs IDs             | Chromosome IDs | Chromosomes | Physical positions (bp) | CDC Frontier (Reference genome) | (ILWC46 & LPNB) | NCBI SNPdb Accession IDs |
|----------------------|----------------|-------------|-------------------------|---------------------------------|-----------------|--------------------------|
| SNP_P4_129576_199652 | NW_004515918.1 | Scaffold451 | 199652                  | CC                              | AA              | 1946949748               |
| SNP_P4_129577_199830 | NW_004515918.1 | Scaffold451 | 199830                  | TT                              | CC              | 1946949750               |
| SNP_P4_129578_199966 | NW_004515918.1 | Scaffold451 | 199966                  | GG                              | AA              | 1946949752               |
| SNP_P4_129579_205938 | NW_004515918.1 | Scaffold451 | 205938                  | TT                              | AA              | 1946949754               |
| SNP_P4_129580_205944 | NW_004515918.1 | Scaffold451 | 205944                  | AA                              | TT              | 1946949756               |
| SNP_P4_129581_281028 | NW_004515918.1 | Scaffold451 | 281028                  | TT                              | CC              | 1946949758               |
| SNP_P4_129583_289713 | NW_004515918.1 | Scaffold451 | 289713                  | AA                              | CC              | 1946949760               |
| SNP_P4_129584_300188 | NW_004515918.1 | Scaffold451 | 300188                  | TT                              | GG              | 1946949762               |
| SNP_P4_129585_320597 | NW_004515918.1 | Scaffold451 | 320597                  | TT                              | GG              | 1946949764               |
| SNP_P4_129586_326460 | NW_004515918.1 | Scaffold451 | 326460                  | CC                              | TT              | 1946949766               |
| SNP_P4_129587_326510 | NW_004515918.1 | Scaffold451 | 326510                  | CC                              | TT              | 1946949768               |
| SNP_P4_129588_326681 | NW_004515918.1 | Scaffold451 | 326681                  | GG                              | TT              | 1946949769               |
| SNP_P4_129589_326690 | NW_004515918.1 | Scaffold451 | 326690                  | TT                              | GG              | 1946949771               |
| SNP_P4_129590_326739 | NW_004515918.1 | Scaffold451 | 326739                  | AA                              | GG              | 1946949773               |
| SNP_P4_129591_349649 | NW_004515918.1 | Scaffold451 | 349649                  | CC                              | AA              | 1946949775               |
| SNP_P4_129592_349655 | NW_004515918.1 | Scaffold451 | 349655                  | GG                              | TT              | 1946949777               |
| SNP_P4_129593_349656 | NW_004515918.1 | Scaffold451 | 349656                  | TT                              | AA              | 1946949779               |
| SNP_P4_129594_349698 | NW_004515918.1 | Scaffold451 | 349698                  | AA                              | GG              | 1946949781               |
| SNP_P4_129595_349746 | NW_004515918.1 | Scaffold451 | 349746                  | AA                              | TT              | 1946949783               |
| SNP_P4_129596_349758 | NW_004515918.1 | Scaffold451 | 349758                  | TT                              | CC              | 1946949785               |
| SNP_P4_129597_349791 | NW_004515918.1 | Scaffold451 | 349791                  | TT                              | AA              | 1946949787               |
| SNP_P4_129598_349805 | NW_004515918.1 | Scaffold451 | 349805                  | TT                              | AA              | 1946949789               |
| SNP_P4_129599_349812 | NW_004515918.1 | Scaffold451 | 349812                  | GG                              | AA              | 1946949791               |
| SNP_P4_129600_349823 | NW_004515918.1 | Scaffold451 | 349823                  | TT                              | CC              | 1946949793               |
| SNP_P4_129601_379451 | NW_004515918.1 | Scaffold451 | 379451                  | GG                              | AA              | 1946949795               |
| SNP_P4_129602_379469 | NW_004515918.1 | Scaffold451 | 379469                  | GG                              | TT              | 1946949797               |
| SNP_P4_129603_379502 | NW_004515918.1 | Scaffold451 | 379502                  | TT                              | CC              | 1946949799               |
| SNP_P4_129605_382302 | NW_004515918.1 | Scaffold451 | 382302                  | GG                              | TT              | 1946949801               |
| SNP_P4_129606_382576 | NW_004515918.1 | Scaffold451 | 382576                  | GG                              | AA              | 1946949803               |
| SNP_P4_129607_388867 | NW_004515918.1 | Scaffold451 | 388867                  | TT                              | AA              | 1946949805               |
| SNP_P4_129609_390325 | NW_004515918.1 | Scaffold451 | 390325                  | GG                              | TT              | 1946949807               |
| SNP_P4_129610_390364 | NW_004515918.1 | Scaffold451 | 390364                  | CC                              | AA              | 1946949809               |
| SNP_P4_129611_390443 | NW_004515918.1 | Scaffold451 | 390443                  | CC                              | TT              | 1946949811               |
| SNP_P4_129612_390546 | NW_004515918.1 | Scaffold451 | 390546                  | TT                              | CC              | 1946949813               |
| SNP_P4_129614_390693 | NW_004515918.1 | Scaffold451 | 390693                  | CC                              | TT              | 1946949814               |
| SNP_P4_129615_390709 | NW_004515918.1 | Scaffold451 | 390709                  | AA                              | CC              | 1946949816               |
| SNP_P4_129616_394571 | NW_004515918.1 | Scaffold451 | 394571                  | TT                              | GG              | 1946949818               |
| SNP_P4_129617_403727 | NW_004515918.1 | Scaffold451 | 403727                  | AA                              | CC              | 1946949820               |
| SNP_P4_129618_429783 | NW_004515918.1 | Scaffold451 | 429783                  | GG                              | TT              | 1946949822               |
| SNP_P4_129620_469893 | NW_004515918.1 | Scaffold451 | 469893                  | AA                              | GG              | 1946949824               |
| SNP_P4_129621_480658 | NW_004515918.1 | Scaffold451 | 480658                  | GG                              | AA              | 1946949826               |
| SNP_P4_129623_490998 | NW_004515918.1 | Scaffold451 | 490998                  | AA                              | CC              | 1946949828               |

| SNPs IDs             | Chromosome IDs | Chromosomes | Physical positions (bp) | CDC Frontier (Reference genome) | (ILWC46 & LPNB) | NCBI SNPdb Accession IDs |
|----------------------|----------------|-------------|-------------------------|---------------------------------|-----------------|--------------------------|
| SNP_P4_129624_491084 | NW_004515918.1 | Scaffold451 | 491084                  | TT                              | CC              | 1946949830               |
| SNP_P4_129625_491356 | NW_004515918.1 | Scaffold451 | 491356                  | CC                              | TT              | 1946949832               |
| SNP_P4_129626_491408 | NW_004515918.1 | Scaffold451 | 491408                  | TT                              | CC              | 1946949834               |
| SNP_P4_129627_491458 | NW_004515918.1 | Scaffold451 | 491458                  | TT                              | CC              | 1946949836               |
| SNP_P4_129628_492164 | NW_004515918.1 | Scaffold451 | 492164                  | GG                              | AA              | 1946949838               |
| SNP_P4_129629_513840 | NW_004515918.1 | Scaffold451 | 513840                  | AA                              | CC              | 1946949839               |
| SNP_P4_129630_513842 | NW_004515918.1 | Scaffold451 | 513842                  | AA                              | GG              | 1946949841               |
| SNP_P4_129632_518514 | NW_004515918.1 | Scaffold451 | 518514                  | AA                              | TT              | 1946949843               |
| SNP_P4_129633_519463 | NW_004515918.1 | Scaffold451 | 519463                  | GG                              | AA              | 1946949845               |
| SNP_P4_129634_519514 | NW_004515918.1 | Scaffold451 | 519514                  | CC                              | TT              | 1946949847               |
| SNP_P4_129635_608    | NW_004515919.1 | Scaffold452 | 608                     | TT                              | CC              | 1946949849               |
| SNP_P4_129636_1752   | NW_004515919.1 | Scaffold452 | 1752                    | TT                              | AA              | 1946949851               |
| SNP_P4_129637_2564   | NW_004515919.1 | Scaffold452 | 2564                    | TT                              | CC              | 1946949853               |
| SNP_P4_129638_2880   | NW_004515919.1 | Scaffold452 | 2880                    | CC                              | AA              | 1946949855               |
| SNP_P4_129639_3163   | NW_004515919.1 | Scaffold452 | 3163                    | TT                              | CC              | 1946949857               |
| SNP_P4_129640_4618   | NW_004515919.1 | Scaffold452 | 4618                    | AA                              | TT              | 1946949859               |
| SNP_P4_129641_4843   | NW_004515919.1 | Scaffold452 | 4843                    | TT                              | CC              | 1946949861               |
| SNP_P4_129642_4864   | NW_004515919.1 | Scaffold452 | 4864                    | CC                              | TT              | 1946949863               |
| SNP_P4_129643_6251   | NW_004515919.1 | Scaffold452 | 6251                    | CC                              | TT              | 1946949865               |
| SNP_P4_129644_228    | NW_004515920.1 | Scaffold453 | 228                     | TT                              | GG              | 1946949867               |
| SNP_P4_129645_9603   | NW_004515920.1 | Scaffold453 | 9603                    | CC                              | AA              | 1946949869               |
| SNP_P4_129646_13138  | NW_004515920.1 | Scaffold453 | 13138                   | CC                              | TT              | 1946949871               |
| SNP_P4_129647_20104  | NW_004515920.1 | Scaffold453 | 20104                   | TT                              | GG              | 1946949873               |
| SNP_P4_129648_20156  | NW_004515920.1 | Scaffold453 | 20156                   | AA                              | GG              | 1946949875               |
| SNP_P4_129649_20248  | NW_004515920.1 | Scaffold453 | 20248                   | AA                              | CC              | 1946949877               |
| SNP_P4_129650_20253  | NW_004515920.1 | Scaffold453 | 20253                   | TT                              | CC              | 1946949878               |
| SNP_P4_129651_36962  | NW_004515920.1 | Scaffold453 | 36962                   | TT                              | CC              | 1946949879               |
| SNP_P4_129652_76821  | NW_004515920.1 | Scaffold453 | 76821                   | CC                              | TT              | 1946949880               |
| SNP_P4_129653_76958  | NW_004515920.1 | Scaffold453 | 76958                   | GG                              | AA              | 1946949881               |
| SNP_P4_129654_77253  | NW_004515920.1 | Scaffold453 | 77253                   | GG                              | AA              | 1946949882               |
| SNP_P4_129656_79708  | NW_004515920.1 | Scaffold453 | 79708                   | AA                              | CC              | 1946949883               |
| SNP_P4_129657_79728  | NW_004515920.1 | Scaffold453 | 79728                   | AA                              | CC              | 1946949884               |
| SNP_P4_129659_80263  | NW_004515920.1 | Scaffold453 | 80263                   | AA                              | GG              | 1946949885               |
| SNP_P4_129660_80296  | NW_004515920.1 | Scaffold453 | 80296                   | TT                              | AA              | 1946949886               |
| SNP_P4_129661_80350  | NW_004515920.1 | Scaffold453 | 80350                   | AA                              | CC              | 1946949887               |
| SNP_P4_129662_80407  | NW_004515920.1 | Scaffold453 | 80407                   | GG                              | AA              | 1946949889               |
| SNP_P4_129663_80420  | NW_004515920.1 | Scaffold453 | 80420                   | TT                              | CC              | 1946949891               |
| SNP_P4_129664_84962  | NW_004515920.1 | Scaffold453 | 84962                   | TT                              | CC              | 1946949893               |
| SNP_P4_129665_107779 | NW_004515920.1 | Scaffold453 | 107779                  | AA                              | GG              | 1946949895               |
| SNP_P4_129666_109546 | NW_004515920.1 | Scaffold453 | 109546                  | GG                              | TT              | 1946949897               |
| SNP_P4_129667_120863 | NW_004515920.1 | Scaffold453 | 120863                  | GG                              | AA              | 1946949899               |
| SNP_P4_129668_134614 | NW_004515920.1 | Scaffold453 | 134614                  | TT                              | CC              | 1946949901               |

| SNPs IDs             | Chromosome IDs | Chromosomes | Physical positions (bp) | CDC Frontier (Reference genome) | (ILWC46 & LPNB) | NCBI SNPdb Accession IDs |
|----------------------|----------------|-------------|-------------------------|---------------------------------|-----------------|--------------------------|
| SNP_P4_129669_137049 | NW_004515920.1 | Scaffold453 | 137049                  | CC                              | TT              | 1946949902               |
| SNP_P4_129670_146663 | NW_004515920.1 | Scaffold453 | 146663                  | GG                              | AA              | 1946949904               |
| SNP_P4_129672_167092 | NW_004515920.1 | Scaffold453 | 167092                  | AA                              | GG              | 1946949906               |
| SNP_P4_129673_168111 | NW_004515920.1 | Scaffold453 | 168111                  | TT                              | CC              | 1946949908               |
| SNP_P4_129674_206282 | NW_004515920.1 | Scaffold453 | 206282                  | TT                              | GG              | 1946949910               |
| SNP_P4_129675_206421 | NW_004515920.1 | Scaffold453 | 206421                  | TT                              | GG              | 1946949912               |
| SNP_P4_129676_206524 | NW_004515920.1 | Scaffold453 | 206524                  | AA                              | TT              | 1946949914               |
| SNP_P4_129677_206585 | NW_004515920.1 | Scaffold453 | 206585                  | AA                              | GG              | 1946949916               |
| SNP_P4_129678_206599 | NW_004515920.1 | Scaffold453 | 206599                  | CC                              | TT              | 1946949918               |
| SNP_P4_129679_235200 | NW_004515920.1 | Scaffold453 | 235200                  | GG                              | TT              | 1946949920               |
| SNP_P4_129681_273978 | NW_004515920.1 | Scaffold453 | 273978                  | AA                              | GG              | 1946949922               |
| SNP_P4_129682_282215 | NW_004515920.1 | Scaffold453 | 282215                  | GG                              | AA              | 1946949924               |
| SNP_P4_129683_295829 | NW_004515920.1 | Scaffold453 | 295829                  | TT                              | AA              | 1946949926               |
| SNP_P4_129684_296103 | NW_004515920.1 | Scaffold453 | 296103                  | AA                              | GG              | 1946949928               |
| SNP_P4_129686_296589 | NW_004515920.1 | Scaffold453 | 296589                  | TT                              | GG              | 1946949930               |
| SNP_P4_129687_306440 | NW_004515920.1 | Scaffold453 | 306440                  | AA                              | TT              | 1946949932               |
| SNP_P4_129689_338976 | NW_004515920.1 | Scaffold453 | 338976                  | AA                              | GG              | 1946949934               |
| SNP_P4_129690_338981 | NW_004515920.1 | Scaffold453 | 338981                  | AA                              | CC              | 1946949936               |
| SNP_P4_129691_346028 | NW_004515920.1 | Scaffold453 | 346028                  | GG                              | AA              | 1946949938               |
| SNP_P4_129692_359747 | NW_004515920.1 | Scaffold453 | 359747                  | AA                              | TT              | 1946949939               |
| SNP_P4_129694_385600 | NW_004515920.1 | Scaffold453 | 385600                  | AA                              | GG              | 1946949941               |
| SNP_P4_129695_385607 | NW_004515920.1 | Scaffold453 | 385607                  | CC                              | TT              | 1946949943               |
| SNP_P4_129696_385639 | NW_004515920.1 | Scaffold453 | 385639                  | AA                              | GG              | 1946949945               |
| SNP_P4_129697_386158 | NW_004515920.1 | Scaffold453 | 386158                  | AA                              | GG              | 1946949947               |
| SNP_P4_129698_386375 | NW_004515920.1 | Scaffold453 | 386375                  | AA                              | CC              | 1946949949               |
| SNP_P4_129699_386389 | NW_004515920.1 | Scaffold453 | 386389                  | TT                              | CC              | 1946949951               |
| SNP_P4_129700_386630 | NW_004515920.1 | Scaffold453 | 386630                  | CC                              | TT              | 1946949953               |
| SNP_P4_129701_388887 | NW_004515920.1 | Scaffold453 | 388887                  | GG                              | AA              | 1946949955               |
| SNP_P4_129702_401919 | NW_004515920.1 | Scaffold453 | 401919                  | TT                              | AA              | 1946949957               |
| SNP_P4_129703_425936 | NW_004515920.1 | Scaffold453 | 425936                  | CC                              | TT              | 1946949959               |
| SNP_P4_129704_441377 | NW_004515920.1 | Scaffold453 | 441377                  | TT                              | CC              | 1946949961               |
| SNP_P4_129705_441684 | NW_004515920.1 | Scaffold453 | 441684                  | CC                              | TT              | 1946949963               |
| SNP_P4_129706_441783 | NW_004515920.1 | Scaffold453 | 441783                  | TT                              | AA              | 1946949965               |
| SNP_P4_129707_456340 | NW_004515920.1 | Scaffold453 | 456340                  | CC                              | TT              | 1946949967               |
| SNP_P4_129709_476570 | NW_004515920.1 | Scaffold453 | 476570                  | TT                              | CC              | 1946949969               |
| SNP_P4_129710_476617 | NW_004515920.1 | Scaffold453 | 476617                  | GG                              | AA              | 1946949971               |
| SNP_P4_129711_481203 | NW_004515920.1 | Scaffold453 | 481203                  | AA                              | GG              | 1946949973               |
| SNP_P4_129712_490927 | NW_004515920.1 | Scaffold453 | 490927                  | CC                              | TT              | 1946949975               |
| SNP_P4_129713_495562 | NW_004515920.1 | Scaffold453 | 495562                  | GG                              | AA              | 1946949977               |
| SNP_P4_129714_496017 | NW_004515920.1 | Scaffold453 | 496017                  | AA                              | GG              | 1946949979               |
| SNP_P4_129717_497912 | NW_004515920.1 | Scaffold453 | 497912                  | CC                              | TT              | 1946949981               |
| SNP_P4_129718_498045 | NW_004515920.1 | Scaffold453 | 498045                  | AA                              | GG              | 1946949983               |

| SNPs IDs             | Chromosome IDs | Chromosomes | Physical positions (bp) | CDC Frontier (Reference genome) | (ILWC46 & LPNB) | NCBI SNPdb Accession IDs |
|----------------------|----------------|-------------|-------------------------|---------------------------------|-----------------|--------------------------|
| SNP_P4_129719_498704 | NW_004515920.1 | Scaffold453 | 498704                  | CC                              | TT              | 1946949985               |
| SNP_P4_129721_500386 | NW_004515920.1 | Scaffold453 | 500386                  | AA                              | TT              | 1946949987               |
| SNP_P4_129722_500811 | NW_004515920.1 | Scaffold453 | 500811                  | AA                              | TT              | 1946949989               |
| SNP_P4_129723_500828 | NW_004515920.1 | Scaffold453 | 500828                  | TT                              | AA              | 1946949991               |
| SNP_P4_129724_501839 | NW_004515920.1 | Scaffold453 | 501839                  | TT                              | CC              | 1946949992               |
| SNP_P4_129725_501986 | NW_004515920.1 | Scaffold453 | 501986                  | TT                              | GG              | 1946949994               |
| SNP_P4_129726_502243 | NW_004515920.1 | Scaffold453 | 502243                  | CC                              | AA              | 1946949996               |
| SNP_P4_129727_502622 | NW_004515920.1 | Scaffold453 | 502622                  | TT                              | CC              | 1946949998               |
| SNP_P4_129728_502837 | NW_004515920.1 | Scaffold453 | 502837                  | CC                              | TT              | 1946950000               |
| SNP_P4_129729_502854 | NW_004515920.1 | Scaffold453 | 502854                  | TT                              | GG              | 1946950002               |
| SNP_P4_129730_502977 | NW_004515920.1 | Scaffold453 | 502977                  | GG                              | AA              | 1946950004               |
| SNP_P4_129731_503019 | NW_004515920.1 | Scaffold453 | 503019                  | AA                              | GG              | 1946950006               |
| SNP_P4_129732_503064 | NW_004515920.1 | Scaffold453 | 503064                  | CC                              | TT              | 1946950008               |
| SNP_P4_129733_503156 | NW_004515920.1 | Scaffold453 | 503156                  | GG                              | TT              | 1946950010               |
| SNP_P4_129734_503305 | NW_004515920.1 | Scaffold453 | 503305                  | AA                              | GG              | 1946950012               |
| SNP_P4_129736_503731 | NW_004515920.1 | Scaffold453 | 503731                  | GG                              | TT              | 1946950014               |
| SNP_P4_129737_503744 | NW_004515920.1 | Scaffold453 | 503744                  | CC                              | TT              | 1946950015               |
| SNP_P4_129738_503919 | NW_004515920.1 | Scaffold453 | 503919                  | CC                              | TT              | 1946950017               |
| SNP_P4_129740_504117 | NW_004515920.1 | Scaffold453 | 504117                  | AA                              | GG              | 1946950019               |
| SNP_P4_129742_524164 | NW_004515920.1 | Scaffold453 | 524164                  | GG                              | CC              | 1946950021               |
| SNP_P4_129744_526247 | NW_004515920.1 | Scaffold453 | 526247                  | CC                              | TT              | 1946950023               |
| SNP_P4_129745_526268 | NW_004515920.1 | Scaffold453 | 526268                  | CC                              | TT              | 1946950025               |
| SNP_P4_129746_526496 | NW_004515920.1 | Scaffold453 | 526496                  | GG                              | AA              | 1946950027               |
| SNP_P4_129747_526518 | NW_004515920.1 | Scaffold453 | 526518                  | TT                              | CC              | 1946950029               |
| SNP_P4_129748_526533 | NW_004515920.1 | Scaffold453 | 526533                  | TT                              | GG              | 1946950031               |
| SNP_P4_129749_526592 | NW_004515920.1 | Scaffold453 | 526592                  | TT                              | CC              | 1946950032               |
| SNP_P4_129750_529834 | NW_004515920.1 | Scaffold453 | 529834                  | GG                              | AA              | 1946950034               |
| SNP_P4_129751_529915 | NW_004515920.1 | Scaffold453 | 529915                  | GG                              | AA              | 1946950036               |
| SNP_P4_129752_530214 | NW_004515920.1 | Scaffold453 | 530214                  | TT                              | AA              | 1946950038               |
| SNP_P4_129753_557    | NW_004515921.1 | Scaffold454 | 557                     | TT                              | GG              | 1946950040               |
| SNP_P4_129754_673    | NW_004515921.1 | Scaffold454 | 673                     | GG                              | CC              | 1946950042               |
| SNP_P4_129755_907    | NW_004515921.1 | Scaffold454 | 907                     | AA                              | CC              | 1946950044               |
| SNP_P4_129756_1101   | NW_004515921.1 | Scaffold454 | 1101                    | CC                              | TT              | 1946950046               |
| SNP_P4_129757_1189   | NW_004515921.1 | Scaffold454 | 1189                    | AA                              | TT              | 1946950048               |
| SNP_P4_129758_3279   | NW_004515921.1 | Scaffold454 | 3279                    | AA                              | GG              | 1946950050               |
| SNP_P4_129759_3553   | NW_004515921.1 | Scaffold454 | 3553                    | CC                              | TT              | 1946950052               |
| SNP_P4_129760_3569   | NW_004515921.1 | Scaffold454 | 3569                    | CC                              | TT              | 1946950054               |
| SNP_P4_129761_3899   | NW_004515921.1 | Scaffold454 | 3899                    | TT                              | GG              | 1946950056               |
| SNP_P4_129762_3974   | NW_004515921.1 | Scaffold454 | 3974                    | CC                              | TT              | 1946950058               |
| SNP_P4_129763_3984   | NW_004515921.1 | Scaffold454 | 3984                    | AA                              | TT              | 1946950060               |
| SNP_P4_129764_4084   | NW_004515921.1 | Scaffold454 | 4084                    | TT                              | GG              | 1946950062               |
| SNP_P4_129765_9043   | NW_004515923.1 | Scaffold456 | 9043                    | TT                              | CC              | 1946950064               |



| SNPs IDs            | Chromosome IDs | Chromosomes | Physical positions (bp) | CDC Frontier (Reference genome) | (ILWC46 & LPNB) | NCBI SNPdb Accession IDs |
|---------------------|----------------|-------------|-------------------------|---------------------------------|-----------------|--------------------------|
| SNP_P4_129766_9119  | NW_004515923.1 | Scaffold456 | 9119                    | AA                              | GG              | 1946950066               |
| SNP_P4_129767_9125  | NW_004515923.1 | Scaffold456 | 9125                    | TT                              | CC              | 1946950068               |
| SNP_P4_129768_3490  | NW_004515926.1 | Scaffold461 | 3490                    | TT                              | AA              | 1946950070               |
| SNP_P4_129769_3918  | NW_004515926.1 | Scaffold461 | 3918                    | TT                              | CC              | 1946950072               |
| SNP_P4_129770_3957  | NW_004515926.1 | Scaffold461 | 3957                    | AA                              | GG              | 1946950074               |
| SNP_P4_129771_5231  | NW_004515926.1 | Scaffold461 | 5231                    | CC                              | GG              | 1946950077               |
| SNP_P4_129772_5236  | NW_004515926.1 | Scaffold461 | 5236                    | AA                              | GG              | 1946950079               |
| SNP_P4_129773_5250  | NW_004515926.1 | Scaffold461 | 5250                    | GG                              | AA              | 1946950081               |
| SNP_P4_129774_5253  | NW_004515926.1 | Scaffold461 | 5253                    | GG                              | AA              | 1946950083               |
| SNP_P4_129775_5456  | NW_004515926.1 | Scaffold461 | 5456                    | TT                              | AA              | 1946950085               |
| SNP_P4_129776_20157 | NW_004515926.1 | Scaffold461 | 20157                   | TT                              | CC              | 1946950087               |
| SNP_P4_129777_22566 | NW_004515926.1 | Scaffold461 | 22566                   | AA                              | TT              | 1946950089               |
| SNP_P4_129778_22619 | NW_004515926.1 | Scaffold461 | 22619                   | TT                              | CC              | 1946950091               |
| SNP_P4_129779_22878 | NW_004515926.1 | Scaffold461 | 22878                   | AA                              | TT              | 1946950093               |
| SNP_P4_129780_22886 | NW_004515926.1 | Scaffold461 | 22886                   | TT                              | CC              | 1946950095               |
| SNP_P4_129781_22894 | NW_004515926.1 | Scaffold461 | 22894                   | TT                              | CC              | 1946950097               |
| SNP_P4_129782_22896 | NW_004515926.1 | Scaffold461 | 22896                   | CC                              | TT              | 1946950099               |
| SNP_P4_129783_22992 | NW_004515926.1 | Scaffold461 | 22992                   | CC                              | TT              | 1946950100               |
| SNP_P4_129784_23012 | NW_004515926.1 | Scaffold461 | 23012                   | GG                              | TT              | 1946950102               |
| SNP_P4_129785_23018 | NW_004515926.1 | Scaffold461 | 23018                   | TT                              | GG              | 1946950104               |
| SNP_P4_129786_23019 | NW_004515926.1 | Scaffold461 | 23019                   | GG                              | AA              | 1946950106               |
| SNP_P4_129787_26170 | NW_004515926.1 | Scaffold461 | 26170                   | CC                              | TT              | 1946950108               |
| SNP_P4_129788_26208 | NW_004515926.1 | Scaffold461 | 26208                   | CC                              | GG              | 1946950110               |
| SNP_P4_129789_26227 | NW_004515926.1 | Scaffold461 | 26227                   | CC                              | AA              | 1946950112               |
| SNP_P4_129790_26325 | NW_004515926.1 | Scaffold461 | 26325                   | TT                              | GG              | 1946950114               |
| SNP_P4_129791_26373 | NW_004515926.1 | Scaffold461 | 26373                   | AA                              | TT              | 1946950115               |
| SNP_P4_129792_26393 | NW_004515926.1 | Scaffold461 | 26393                   | AA                              | TT              | 1946950117               |
| SNP_P4_129793_6992  | NW_004515928.1 | Scaffold464 | 6992                    | GG                              | AA              | 1946950119               |
| SNP_P4_129794_548   | NW_004515930.1 | Scaffold466 | 548                     | GG                              | TT              | 1946950121               |
| SNP_P4_129795_552   | NW_004515930.1 | Scaffold466 | 552                     | AA                              | GG              | 1946950123               |
| SNP_P4_129796_565   | NW_004515930.1 | Scaffold466 | 565                     | TT                              | CC              | 1946950125               |
| SNP_P4_129797_614   | NW_004515930.1 | Scaffold466 | 614                     | GG                              | CC              | 1946950127               |
| SNP_P4_129798_629   | NW_004515930.1 | Scaffold466 | 629                     | GG                              | AA              | 1946950129               |
| SNP_P4_129799_631   | NW_004515930.1 | Scaffold466 | 631                     | TT                              | GG              | 1946950131               |
| SNP_P4_129800_780   | NW_004515930.1 | Scaffold466 | 780                     | TT                              | AA              | 1946950133               |
| SNP_P4_129801_3858  | NW_004515930.1 | Scaffold466 | 3858                    | CC                              | AA              | 1946950135               |
| SNP_P4_129802_10021 | NW_004515930.1 | Scaffold466 | 10021                   | CC                              | AA              | 1946950137               |
| SNP_P4_129803_10038 | NW_004515930.1 | Scaffold466 | 10038                   | TT                              | CC              | 1946950139               |
| SNP_P4_129805_12183 | NW_004515930.1 | Scaffold466 | 12183                   | GG                              | AA              | 1946950141               |
| SNP_P4_129806_12218 | NW_004515930.1 | Scaffold466 | 12218                   | GG                              | AA              | 1946950143               |
| SNP_P4_129807_12402 | NW_004515930.1 | Scaffold466 | 12402                   | AA                              | CC              | 1946950145               |
| SNP_P4_129808_12553 | NW_004515930.1 | Scaffold466 | 12553                   | TT                              | CC              | 1946950147               |

| SNPs IDs             | Chromosome IDs | Chromosomes | Physical positions (bp) | CDC Frontier (Reference genome) | (ILWC46 & LPNB) | NCBI SNPdb Accession IDs |
|----------------------|----------------|-------------|-------------------------|---------------------------------|-----------------|--------------------------|
| SNP_P4_129809_13505  | NW_004515930.1 | Scaffold466 | 13505                   | GG                              | AA              | 1946950148               |
| SNP_P4_129810_13993  | NW_004515930.1 | Scaffold466 | 13993                   | TT                              | CC              | 1946950150               |
| SNP_P4_129811_14873  | NW_004515930.1 | Scaffold466 | 14873                   | GG                              | AA              | 1946950152               |
| SNP_P4_129812_18803  | NW_004515930.1 | Scaffold466 | 18803                   | TT                              | CC              | 1946950154               |
| SNP_P4_129813_18809  | NW_004515930.1 | Scaffold466 | 18809                   | AA                              | TT              | 1946950156               |
| SNP_P4_129814_23635  | NW_004515930.1 | Scaffold466 | 23635                   | TT                              | AA              | 1946950158               |
| SNP_P4_129815_32911  | NW_004515930.1 | Scaffold466 | 32911                   | TT                              | AA              | 1946950160               |
| SNP_P4_129816_32912  | NW_004515930.1 | Scaffold466 | 32912                   | AA                              | GG              | 1946950162               |
| SNP_P4_129817_38987  | NW_004515930.1 | Scaffold466 | 38987                   | AA                              | GG              | 1946950164               |
| SNP_P4_129818_39047  | NW_004515930.1 | Scaffold466 | 39047                   | GG                              | AA              | 1946950166               |
| SNP_P4_129819_39048  | NW_004515930.1 | Scaffold466 | 39048                   | TT                              | CC              | 1946950168               |
| SNP_P4_129820_39099  | NW_004515930.1 | Scaffold466 | 39099                   | TT                              | CC              | 1946950170               |
| SNP_P4_129821_41314  | NW_004515930.1 | Scaffold466 | 41314                   | GG                              | CC              | 1946950172               |
| SNP_P4_129822_43261  | NW_004515930.1 | Scaffold466 | 43261                   | TT                              | GG              | 1946950174               |
| SNP_P4_129823_49255  | NW_004515930.1 | Scaffold466 | 49255                   | GG                              | CC              | 1946950176               |
| SNP_P4_129824_60172  | NW_004515930.1 | Scaffold466 | 60172                   | CC                              | AA              | 1946950178               |
| SNP_P4_129825_66245  | NW_004515930.1 | Scaffold466 | 66245                   | CC                              | TT              | 1946950180               |
| SNP_P4_129826_72461  | NW_004515930.1 | Scaffold466 | 72461                   | AA                              | GG              | 1946950182               |
| SNP_P4_129828_72785  | NW_004515930.1 | Scaffold466 | 72785                   | TT                              | CC              | 1946950183               |
| SNP_P4_129829_74062  | NW_004515930.1 | Scaffold466 | 74062                   | GG                              | TT              | 1946950184               |
| SNP_P4_129830_74064  | NW_004515930.1 | Scaffold466 | 74064                   | TT                              | AA              | 1946950185               |
| SNP_P4_129831_80638  | NW_004515930.1 | Scaffold466 | 80638                   | GG                              | AA              | 1946950186               |
| SNP_P4_129832_80641  | NW_004515930.1 | Scaffold466 | 80641                   | GG                              | TT              | 1946950188               |
| SNP_P4_129833_80937  | NW_004515930.1 | Scaffold466 | 80937                   | TT                              | GG              | 1946950190               |
| SNP_P4_129834_80938  | NW_004515930.1 | Scaffold466 | 80938                   | GG                              | AA              | 1946950192               |
| SNP_P4_129835_101146 | NW_004515930.1 | Scaffold466 | 101146                  | AA                              | TT              | 1946950194               |
| SNP_P4_129836_101157 | NW_004515930.1 | Scaffold466 | 101157                  | CC                              | TT              | 1946950196               |
| SNP_P4_129837_102747 | NW_004515930.1 | Scaffold466 | 102747                  | TT                              | CC              | 1946950198               |
| SNP_P4_129838_102856 | NW_004515930.1 | Scaffold466 | 102856                  | TT                              | CC              | 1946950200               |
| SNP_P4_129839_102876 | NW_004515930.1 | Scaffold466 | 102876                  | TT                              | CC              | 1946950202               |
| SNP_P4_129840_103131 | NW_004515930.1 | Scaffold466 | 103131                  | TT                              | GG              | 1946950204               |
| SNP_P4_129841_103147 | NW_004515930.1 | Scaffold466 | 103147                  | CC                              | TT              | 1946950205               |
| SNP_P4_129842_110834 | NW_004515930.1 | Scaffold466 | 110834                  | TT                              | AA              | 1946950207               |
| SNP_P4_129843_112523 | NW_004515930.1 | Scaffold466 | 112523                  | CC                              | TT              | 1946950209               |
| SNP_P4_129844_132863 | NW_004515930.1 | Scaffold466 | 132863                  | GG                              | AA              | 1946950211               |
| SNP_P4_129845_133235 | NW_004515930.1 | Scaffold466 | 133235                  | AA                              | GG              | 1946950213               |
| SNP_P4_129846_133491 | NW_004515930.1 | Scaffold466 | 133491                  | CC                              | TT              | 1946950215               |
| SNP_P4_129847_133555 | NW_004515930.1 | Scaffold466 | 133555                  | AA                              | GG              | 1946950217               |
| SNP_P4_129848_164008 | NW_004515930.1 | Scaffold466 | 164008                  | AA                              | GG              | 1946950219               |
| SNP_P4_129849_164013 | NW_004515930.1 | Scaffold466 | 164013                  | TT                              | CC              | 1946950221               |
| SNP_P4_129850_164074 | NW_004515930.1 | Scaffold466 | 164074                  | TT                              | AA              | 1946950223               |
| SNP_P4_129851_164081 | NW_004515930.1 | Scaffold466 | 164081                  | TT                              | CC              | 1946950225               |

| SNPs IDs             | Chromosome IDs | Chromosomes | Physical positions (bp) | CDC Frontier (Reference genome) | (ILWC46 & LPNB) | NCBI SNPdb Accession IDs |
|----------------------|----------------|-------------|-------------------------|---------------------------------|-----------------|--------------------------|
| SNP_P4_129852_164094 | NW_004515930.1 | Scaffold466 | 164094                  | TT                              | CC              | 1946950227               |
| SNP_P4_129853_164106 | NW_004515930.1 | Scaffold466 | 164106                  | AA                              | GG              | 1946950229               |
| SNP_P4_129854_164172 | NW_004515930.1 | Scaffold466 | 164172                  | CC                              | TT              | 1946950231               |
| SNP_P4_129855_164175 | NW_004515930.1 | Scaffold466 | 164175                  | TT                              | CC              | 1946950233               |
| SNP_P4_129856_164214 | NW_004515930.1 | Scaffold466 | 164214                  | TT                              | CC              | 1946950235               |
| SNP_P4_129857_164265 | NW_004515930.1 | Scaffold466 | 164265                  | TT                              | CC              | 1946950237               |
| SNP_P4_129858_164281 | NW_004515930.1 | Scaffold466 | 164281                  | AA                              | GG              | 1946950239               |
| SNP_P4_129859_164292 | NW_004515930.1 | Scaffold466 | 164292                  | AA                              | GG              | 1946950241               |
| SNP_P4_129860_164293 | NW_004515930.1 | Scaffold466 | 164293                  | CC                              | TT              | 1946950243               |
| SNP_P4_129861_164295 | NW_004515930.1 | Scaffold466 | 164295                  | AA                              | GG              | 1946950245               |
| SNP_P4_129862_164301 | NW_004515930.1 | Scaffold466 | 164301                  | TT                              | GG              | 1946950247               |
| SNP_P4_129863_164304 | NW_004515930.1 | Scaffold466 | 164304                  | TT                              | AA              | 1946950249               |
| SNP_P4_129864_164337 | NW_004515930.1 | Scaffold466 | 164337                  | TT                              | CC              | 1946950251               |
| SNP_P4_129865_164353 | NW_004515930.1 | Scaffold466 | 164353                  | CC                              | GG              | 1946950253               |
| SNP_P4_129866_164358 | NW_004515930.1 | Scaffold466 | 164358                  | TT                              | GG              | 1946950255               |
| SNP_P4_129867_164381 | NW_004515930.1 | Scaffold466 | 164381                  | AA                              | GG              | 1946950257               |
| SNP_P4_129868_164387 | NW_004515930.1 | Scaffold466 | 164387                  | AA                              | GG              | 1946950259               |
| SNP_P4_129869_164398 | NW_004515930.1 | Scaffold466 | 164398                  | AA                              | GG              | 1946950261               |
| SNP_P4_129870_164410 | NW_004515930.1 | Scaffold466 | 164410                  | AA                              | GG              | 1946950263               |
| SNP_P4_129871_164417 | NW_004515930.1 | Scaffold466 | 164417                  | TT                              | CC              | 1946950265               |
| SNP_P4_129872_164575 | NW_004515930.1 | Scaffold466 | 164575                  | TT                              | CC              | 1946950267               |
| SNP_P4_129873_164591 | NW_004515930.1 | Scaffold466 | 164591                  | AA                              | GG              | 1946950269               |
| SNP_P4_129874_164597 | NW_004515930.1 | Scaffold466 | 164597                  | TT                              | CC              | 1946950271               |
| SNP_P4_129875_164648 | NW_004515930.1 | Scaffold466 | 164648                  | GG                              | TT              | 1946950273               |
| SNP_P4_129876_164716 | NW_004515930.1 | Scaffold466 | 164716                  | AA                              | CC              | 1946950275               |
| SNP_P4_129877_164823 | NW_004515930.1 | Scaffold466 | 164823                  | CC                              | TT              | 1946950277               |
| SNP_P4_129878_164826 | NW_004515930.1 | Scaffold466 | 164826                  | AA                              | CC              | 1946950279               |
| SNP_P4_129879_165681 | NW_004515930.1 | Scaffold466 | 165681                  | CC                              | TT              | 1946950281               |
| SNP_P4_129880_165695 | NW_004515930.1 | Scaffold466 | 165695                  | AA                              | CC              | 1946950283               |
| SNP_P4_129881_165780 | NW_004515930.1 | Scaffold466 | 165780                  | TT                              | CC              | 1946950285               |
| SNP_P4_129882_165844 | NW_004515930.1 | Scaffold466 | 165844                  | TT                              | CC              | 1946950287               |
| SNP_P4_129883_165964 | NW_004515930.1 | Scaffold466 | 165964                  | GG                              | CC              | 1946950289               |
| SNP_P4_129884_165965 | NW_004515930.1 | Scaffold466 | 165965                  | GG                              | AA              | 1946950291               |
| SNP_P4_129885_165968 | NW_004515930.1 | Scaffold466 | 165968                  | GG                              | TT              | 1946950293               |
| SNP_P4_129886_165973 | NW_004515930.1 | Scaffold466 | 165973                  | TT                              | CC              | 1946950295               |
| SNP_P4_129887_165977 | NW_004515930.1 | Scaffold466 | 165977                  | GG                              | AA              | 1946950297               |
| SNP_P4_129888_165983 | NW_004515930.1 | Scaffold466 | 165983                  | TT                              | CC              | 1946950299               |
| SNP_P4_129889_166114 | NW_004515930.1 | Scaffold466 | 166114                  | AA                              | GG              | 1946950301               |
| SNP_P4_129890_166175 | NW_004515930.1 | Scaffold466 | 166175                  | TT                              | CC              | 1946950303               |
| SNP_P4_129891_166211 | NW_004515930.1 | Scaffold466 | 166211                  | CC                              | TT              | 1946950305               |
| SNP_P4_129892_166248 | NW_004515930.1 | Scaffold466 | 166248                  | TT                              | CC              | 1946950307               |
| SNP_P4_129893_166249 | NW_004515930.1 | Scaffold466 | 166249                  | GG                              | CC              | 1946950309               |

| SNPs IDs             | Chromosome IDs | Chromosomes | Physical positions (bp) | CDC Frontier (Reference genome) | (ILWC46 & LPNB) | NCBI SNPdb Accession IDs |
|----------------------|----------------|-------------|-------------------------|---------------------------------|-----------------|--------------------------|
| SNP_P4_129894_166266 | NW_004515930.1 | Scaffold466 | 166266                  | AA                              | GG              | 1946950311               |
| SNP_P4_129896_166343 | NW_004515930.1 | Scaffold466 | 166343                  | TT                              | CC              | 1946950313               |
| SNP_P4_129897_166680 | NW_004515930.1 | Scaffold466 | 166680                  | AA                              | CC              | 1946950315               |
| SNP_P4_129898_166703 | NW_004515930.1 | Scaffold466 | 166703                  | TT                              | CC              | 1946950317               |
| SNP_P4_129899_166788 | NW_004515930.1 | Scaffold466 | 166788                  | TT                              | CC              | 1946950319               |
| SNP_P4_129900_166792 | NW_004515930.1 | Scaffold466 | 166792                  | AA                              | GG              | 1946950321               |
| SNP_P4_129901_166836 | NW_004515930.1 | Scaffold466 | 166836                  | GG                              | AA              | 1946950323               |
| SNP_P4_129902_166845 | NW_004515930.1 | Scaffold466 | 166845                  | AA                              | GG              | 1946950325               |
| SNP_P4_129903_166850 | NW_004515930.1 | Scaffold466 | 166850                  | TT                              | CC              | 1946950327               |
| SNP_P4_129904_166888 | NW_004515930.1 | Scaffold466 | 166888                  | TT                              | CC              | 1946950329               |
| SNP_P4_129905_166916 | NW_004515930.1 | Scaffold466 | 166916                  | AA                              | TT              | 1946950331               |
| SNP_P4_129906_166937 | NW_004515930.1 | Scaffold466 | 166937                  | AA                              | GG              | 1946950333               |
| SNP_P4_129907_166993 | NW_004515930.1 | Scaffold466 | 166993                  | AA                              | GG              | 1946950335               |
| SNP_P4_129908_167565 | NW_004515930.1 | Scaffold466 | 167565                  | GG                              | AA              | 1946950337               |
| SNP_P4_129909_167614 | NW_004515930.1 | Scaffold466 | 167614                  | AA                              | GG              | 1946950339               |
| SNP_P4_129910_167633 | NW_004515930.1 | Scaffold466 | 167633                  | AA                              | GG              | 1946950341               |
| SNP_P4_129911_167640 | NW_004515930.1 | Scaffold466 | 167640                  | GG                              | CC              | 1946950343               |
| SNP_P4_129912_167806 | NW_004515930.1 | Scaffold466 | 167806                  | AA                              | GG              | 1946950345               |
| SNP_P4_129913_169627 | NW_004515930.1 | Scaffold466 | 169627                  | AA                              | CC              | 1946950347               |
| SNP_P4_129914_169636 | NW_004515930.1 | Scaffold466 | 169636                  | GG                              | CC              | 1946950349               |
| SNP_P4_129915_169640 | NW_004515930.1 | Scaffold466 | 169640                  | TT                              | AA              | 1946950351               |
| SNP_P4_129916_169652 | NW_004515930.1 | Scaffold466 | 169652                  | TT                              | AA              | 1946950353               |
| SNP_P4_129917_169654 | NW_004515930.1 | Scaffold466 | 169654                  | GG                              | AA              | 1946950355               |
| SNP_P4_129918_169680 | NW_004515930.1 | Scaffold466 | 169680                  | AA                              | GG              | 1946950357               |
| SNP_P4_129919_169690 | NW_004515930.1 | Scaffold466 | 169690                  | GG                              | AA              | 1946950359               |
| SNP_P4_129921_169767 | NW_004515930.1 | Scaffold466 | 169767                  | TT                              | CC              | 1946950360               |
| SNP_P4_129922_169801 | NW_004515930.1 | Scaffold466 | 169801                  | AA                              | GG              | 1946950362               |
| SNP_P4_129923_169804 | NW_004515930.1 | Scaffold466 | 169804                  | AA                              | GG              | 1946950364               |
| SNP_P4_129924_169819 | NW_004515930.1 | Scaffold466 | 169819                  | AA                              | TT              | 1946950366               |
| SNP_P4_129925_169820 | NW_004515930.1 | Scaffold466 | 169820                  | TT                              | AA              | 1946950368               |
| SNP_P4_129926_169821 | NW_004515930.1 | Scaffold466 | 169821                  | AA                              | CC              | 1946950370               |
| SNP_P4_129927_169830 | NW_004515930.1 | Scaffold466 | 169830                  | AA                              | GG              | 1946950372               |
| SNP_P4_129928_169831 | NW_004515930.1 | Scaffold466 | 169831                  | AA                              | GG              | 1946950374               |
| SNP_P4_129929_169835 | NW_004515930.1 | Scaffold466 | 169835                  | TT                              | GG              | 1946950376               |
| SNP_P4_129930_169836 | NW_004515930.1 | Scaffold466 | 169836                  | TT                              | CC              | 1946950378               |
| SNP_P4_129931_169841 | NW_004515930.1 | Scaffold466 | 169841                  | AA                              | GG              | 1946950380               |
| SNP_P4_129932_169856 | NW_004515930.1 | Scaffold466 | 169856                  | AA                              | CC              | 1946950382               |
| SNP_P4_129933_169875 | NW_004515930.1 | Scaffold466 | 169875                  | AA                              | GG              | 1946950384               |
| SNP_P4_129935_171062 | NW_004515930.1 | Scaffold466 | 171062                  | TT                              | GG              | 1946950386               |
| SNP_P4_129936_171285 | NW_004515930.1 | Scaffold466 | 171285                  | AA                              | GG              | 1946950388               |
| SNP_P4_129937_171289 | NW_004515930.1 | Scaffold466 | 171289                  | TT                              | CC              | 1946950390               |
| SNP_P4_129938_171305 | NW_004515930.1 | Scaffold466 | 171305                  | AA                              | GG              | 1946950392               |

| SNPs IDs             | Chromosome IDs | Chromosomes | Physical positions (bp) | CDC Frontier (Reference genome) | (ILWC46 & LPNB) | NCBI SNPdb Accession IDs |
|----------------------|----------------|-------------|-------------------------|---------------------------------|-----------------|--------------------------|
| SNP_P4_129939_171333 | NW_004515930.1 | Scaffold466 | 171333                  | AA                              | GG              | 1946950394               |
| SNP_P4_129940_171347 | NW_004515930.1 | Scaffold466 | 171347                  | GG                              | AA              | 1946950395               |
| SNP_P4_129941_171350 | NW_004515930.1 | Scaffold466 | 171350                  | TT                              | AA              | 1946950397               |
| SNP_P4_129942_171363 | NW_004515930.1 | Scaffold466 | 171363                  | GG                              | CC              | 1946950399               |
| SNP_P4_129943_171497 | NW_004515930.1 | Scaffold466 | 171497                  | TT                              | GG              | 1946950401               |
| SNP_P4_129944_171665 | NW_004515930.1 | Scaffold466 | 171665                  | CC                              | TT              | 1946950403               |
| SNP_P4_129945_186142 | NW_004515930.1 | Scaffold466 | 186142                  | GG                              | CC              | 1946950405               |
| SNP_P4_129946_190268 | NW_004515930.1 | Scaffold466 | 190268                  | TT                              | GG              | 1946950407               |
| SNP_P4_129947_190278 | NW_004515930.1 | Scaffold466 | 190278                  | CC                              | TT              | 1946950409               |
| SNP_P4_129948_201329 | NW_004515930.1 | Scaffold466 | 201329                  | TT                              | CC              | 1946950411               |
| SNP_P4_129949_211926 | NW_004515930.1 | Scaffold466 | 211926                  | CC                              | GG              | 1946950413               |
| SNP_P4_129950_211999 | NW_004515930.1 | Scaffold466 | 211999                  | AA                              | GG              | 1946950415               |
| SNP_P4_129951_212000 | NW_004515930.1 | Scaffold466 | 212000                  | TT                              | CC              | 1946950417               |
| SNP_P4_129952_212029 | NW_004515930.1 | Scaffold466 | 212029                  | GG                              | TT              | 1946950419               |
| SNP_P4_129953_212210 | NW_004515930.1 | Scaffold466 | 212210                  | GG                              | AA              | 1946950421               |
| SNP_P4_129954_212218 | NW_004515930.1 | Scaffold466 | 212218                  | GG                              | AA              | 1946950423               |
| SNP_P4_129955_212228 | NW_004515930.1 | Scaffold466 | 212228                  | AA                              | GG              | 1946950425               |
| SNP_P4_129956_220395 | NW_004515930.1 | Scaffold466 | 220395                  | CC                              | TT              | 1946950427               |
| SNP_P4_129957_241237 | NW_004515930.1 | Scaffold466 | 241237                  | TT                              | CC              | 1946950429               |
| SNP_P4_129958_241851 | NW_004515930.1 | Scaffold466 | 241851                  | GG                              | TT              | 1946950431               |
| SNP_P4_129959_254285 | NW_004515930.1 | Scaffold466 | 254285                  | AA                              | TT              | 1946950433               |
| SNP_P4_129961_254315 | NW_004515930.1 | Scaffold466 | 254315                  | AA                              | TT              | 1946950434               |
| SNP_P4_129962_268697 | NW_004515930.1 | Scaffold466 | 268697                  | CC                              | TT              | 1946950436               |
| SNP_P4_129963_268735 | NW_004515930.1 | Scaffold466 | 268735                  | CC                              | TT              | 1946950438               |
| SNP_P4_129964_271024 | NW_004515930.1 | Scaffold466 | 271024                  | TT                              | AA              | 1946950440               |
| SNP_P4_129965_272769 | NW_004515930.1 | Scaffold466 | 272769                  | CC                              | TT              | 1946950442               |
| SNP_P4_129966_278840 | NW_004515930.1 | Scaffold466 | 278840                  | TT                              | GG              | 1946950444               |
| SNP_P4_129968_292784 | NW_004515930.1 | Scaffold466 | 292784                  | TT                              | CC              | 1946950446               |
| SNP_P4_129969_292880 | NW_004515930.1 | Scaffold466 | 292880                  | GG                              | AA              | 1946950448               |
| SNP_P4_129970_292899 | NW_004515930.1 | Scaffold466 | 292899                  | AA                              | GG              | 1946950450               |
| SNP_P4_129971_292969 | NW_004515930.1 | Scaffold466 | 292969                  | CC                              | AA              | 1946950452               |
| SNP_P4_129972_292970 | NW_004515930.1 | Scaffold466 | 292970                  | CC                              | TT              | 1946950454               |
| SNP_P4_129973_2538   | NW_004515931.1 | Scaffold467 | 2538                    | GG                              | AA              | 1946950456               |
| SNP_P4_129974_3482   | NW_004515931.1 | Scaffold467 | 3482                    | CC                              | AA              | 1946950458               |
| SNP_P4_129975_3490   | NW_004515931.1 | Scaffold467 | 3490                    | CC                              | GG              | 1946950460               |
| SNP_P4_129976_3844   | NW_004515931.1 | Scaffold467 | 3844                    | AA                              | TT              | 1946950462               |
| SNP_P4_129977_5007   | NW_004515931.1 | Scaffold467 | 5007                    | CC                              | AA              | 1946950464               |
| SNP_P4_129978_6422   | NW_004515931.1 | Scaffold467 | 6422                    | AA                              | GG              | 1946950466               |
| SNP_P4_129979_18417  | NW_004515932.1 | Scaffold469 | 18417                   | CC                              | AA              | 1946950468               |
| SNP_P4_129980_18597  | NW_004515932.1 | Scaffold469 | 18597                   | AA                              | TT              | 1946950470               |
| SNP_P4_129981_19265  | NW_004515932.1 | Scaffold469 | 19265                   | AA                              | GG              | 1946950472               |
| SNP_P4_129982_19296  | NW_004515932.1 | Scaffold469 | 19296                   | GG                              | AA              | 1946950474               |

| SNPs IDs             | Chromosome IDs | Chromosomes | Physical positions (bp) | CDC Frontier (Reference genome) | (ILWC46 & LPNB) | NCBI SNPdb Accession IDs |
|----------------------|----------------|-------------|-------------------------|---------------------------------|-----------------|--------------------------|
| SNP_P4_129983_19320  | NW_004515932.1 | Scaffold469 | 19320                   | AA                              | GG              | 1946950476               |
| SNP_P4_129984_19328  | NW_004515932.1 | Scaffold469 | 19328                   | AA                              | CC              | 1946950478               |
| SNP_P4_129985_19339  | NW_004515932.1 | Scaffold469 | 19339                   | AA                              | GG              | 1946950480               |
| SNP_P4_129986_19341  | NW_004515932.1 | Scaffold469 | 19341                   | AA                              | CC              | 1946950482               |
| SNP_P4_129987_19376  | NW_004515932.1 | Scaffold469 | 19376                   | AA                              | TT              | 1946950484               |
| SNP_P4_129988_19391  | NW_004515932.1 | Scaffold469 | 19391                   | AA                              | CC              | 1946950486               |
| SNP_P4_129989_19404  | NW_004515932.1 | Scaffold469 | 19404                   | TT                              | GG              | 1946950488               |
| SNP_P4_129990_19798  | NW_004515932.1 | Scaffold469 | 19798                   | TT                              | CC              | 1946950490               |
| SNP_P4_129991_19808  | NW_004515932.1 | Scaffold469 | 19808                   | GG                              | AA              | 1946950492               |
| SNP_P4_129993_51994  | NW_004515932.1 | Scaffold469 | 51994                   | GG                              | TT              | 1946950494               |
| SNP_P4_129994_58098  | NW_004515932.1 | Scaffold469 | 58098                   | CC                              | AA              | 1946950496               |
| SNP_P4_129995_58154  | NW_004515932.1 | Scaffold469 | 58154                   | AA                              | GG              | 1946950498               |
| SNP_P4_129996_58200  | NW_004515932.1 | Scaffold469 | 58200                   | TT                              | CC              | 1946950500               |
| SNP_P4_129997_58252  | NW_004515932.1 | Scaffold469 | 58252                   | GG                              | TT              | 1946950502               |
| SNP_P4_129999_77552  | NW_004515932.1 | Scaffold469 | 77552                   | AA                              | GG              | 1946950504               |
| SNP_P4_130000_80724  | NW_004515932.1 | Scaffold469 | 80724                   | TT                              | GG              | 1946950506               |
| SNP_P4_130001_135864 | NW_004515932.1 | Scaffold469 | 135864                  | TT                              | CC              | 1946950508               |
| SNP_P4_130002_135866 | NW_004515932.1 | Scaffold469 | 135866                  | AA                              | GG              | 1946950510               |
| SNP_P4_130003_136412 | NW_004515932.1 | Scaffold469 | 136412                  | GG                              | AA              | 1946950512               |
| SNP_P4_130004_148264 | NW_004515932.1 | Scaffold469 | 148264                  | AA                              | GG              | 1946950514               |
| SNP_P4_130005_148269 | NW_004515932.1 | Scaffold469 | 148269                  | TT                              | AA              | 1946950516               |
| SNP_P4_130006_164629 | NW_004515932.1 | Scaffold469 | 164629                  | TT                              | CC              | 1946950518               |
| SNP_P4_130007_168698 | NW_004515932.1 | Scaffold469 | 168698                  | TT                              | AA              | 1946950520               |
| SNP_P4_130009_193258 | NW_004515932.1 | Scaffold469 | 193258                  | TT                              | CC              | 1946950522               |
| SNP_P4_130010_208019 | NW_004515932.1 | Scaffold469 | 208019                  | CC                              | TT              | 1946950524               |
| SNP_P4_130011_208043 | NW_004515932.1 | Scaffold469 | 208043                  | GG                              | CC              | 1946950526               |
| SNP_P4_130012_208201 | NW_004515932.1 | Scaffold469 | 208201                  | AA                              | CC              | 1946950528               |
| SNP_P4_130013_208278 | NW_004515932.1 | Scaffold469 | 208278                  | AA                              | TT              | 1946950530               |
| SNP_P4_130014_208315 | NW_004515932.1 | Scaffold469 | 208315                  | AA                              | CC              | 1946950532               |
| SNP_P4_130015_208379 | NW_004515932.1 | Scaffold469 | 208379                  | GG                              | TT              | 1946950534               |
| SNP_P4_130016_208381 | NW_004515932.1 | Scaffold469 | 208381                  | AA                              | TT              | 1946950536               |
| SNP_P4_130017_208392 | NW_004515932.1 | Scaffold469 | 208392                  | GG                              | AA              | 1946950538               |
| SNP_P4_130018_208504 | NW_004515932.1 | Scaffold469 | 208504                  | TT                              | CC              | 1946950540               |
| SNP_P4_130019_219462 | NW_004515932.1 | Scaffold469 | 219462                  | TT                              | CC              | 1946950542               |
| SNP_P4_130020_219939 | NW_004515932.1 | Scaffold469 | 219939                  | GG                              | AA              | 1946950544               |
| SNP_P4_130021_219942 | NW_004515932.1 | Scaffold469 | 219942                  | TT                              | GG              | 1946950546               |
| SNP_P4_130022_220199 | NW_004515932.1 | Scaffold469 | 220199                  | TT                              | AA              | 1946950548               |
| SNP_P4_130023_222747 | NW_004515932.1 | Scaffold469 | 222747                  | GG                              | TT              | 1946950550               |
| SNP_P4_130024_328    | NW_004515933.1 | Scaffold470 | 328                     | CC                              | TT              | 1946950552               |
| SNP_P4_130025_25444  | NW_004515933.1 | Scaffold470 | 25444                   | GG                              | TT              | 1946950554               |
| SNP_P4_130026_25842  | NW_004515933.1 | Scaffold470 | 25842                   | AA                              | GG              | 1946950556               |
| SNP_P4_130027_42718  | NW_004515933.1 | Scaffold470 | 42718                   | GG                              | AA              | 1946950558               |

| SNPs IDs             | Chromosome IDs | Chromosomes | Physical positions (bp) | CDC Frontier (Reference genome) | (ILWC46 & LPNB) | NCBI SNPdb Accession IDs |
|----------------------|----------------|-------------|-------------------------|---------------------------------|-----------------|--------------------------|
| SNP_P4_130028_42978  | NW_004515933.1 | Scaffold470 | 42978                   | TT                              | AA              | 1946950560               |
| SNP_P4_130029_43097  | NW_004515933.1 | Scaffold470 | 43097                   | TT                              | CC              | 1946950561               |
| SNP_P4_130030_43228  | NW_004515933.1 | Scaffold470 | 43228                   | AA                              | GG              | 1946950563               |
| SNP_P4_130031_43278  | NW_004515933.1 | Scaffold470 | 43278                   | CC                              | GG              | 1946950565               |
| SNP_P4_130032_83370  | NW_004515933.1 | Scaffold470 | 83370                   | CC                              | TT              | 1946950567               |
| SNP_P4_130033_114012 | NW_004515933.1 | Scaffold470 | 114012                  | CC                              | TT              | 1946950569               |
| SNP_P4_130034_117232 | NW_004515933.1 | Scaffold470 | 117232                  | AA                              | TT              | 1946950571               |
| SNP_P4_130035_126335 | NW_004515933.1 | Scaffold470 | 126335                  | GG                              | TT              | 1946950573               |
| SNP_P4_130036_128098 | NW_004515933.1 | Scaffold470 | 128098                  | AA                              | GG              | 1946950575               |
| SNP_P4_130038_185956 | NW_004515933.1 | Scaffold470 | 185956                  | AA                              | TT              | 1946950577               |
| SNP_P4_130039_186026 | NW_004515933.1 | Scaffold470 | 186026                  | GG                              | AA              | 1946950579               |
| SNP_P4_130041_186141 | NW_004515933.1 | Scaffold470 | 186141                  | TT                              | AA              | 1946950581               |
| SNP_P4_130042_224172 | NW_004515933.1 | Scaffold470 | 224172                  | AA                              | GG              | 1946950583               |
| SNP_P4_130044_253644 | NW_004515933.1 | Scaffold470 | 253644                  | TT                              | CC              | 1946950585               |
| SNP_P4_130045_253645 | NW_004515933.1 | Scaffold470 | 253645                  | GG                              | TT              | 1946950587               |
| SNP_P4_130046_287604 | NW_004515933.1 | Scaffold470 | 287604                  | AA                              | GG              | 1946950589               |
| SNP_P4_130047_287644 | NW_004515933.1 | Scaffold470 | 287644                  | AA                              | CC              | 1946950590               |
| SNP_P4_130048_287863 | NW_004515933.1 | Scaffold470 | 287863                  | GG                              | TT              | 1946950592               |
| SNP_P4_130049_321728 | NW_004515933.1 | Scaffold470 | 321728                  | AA                              | GG              | 1946950594               |
| SNP_P4_130050_322009 | NW_004515933.1 | Scaffold470 | 322009                  | AA                              | TT              | 1946950596               |
| SNP_P4_130051_322090 | NW_004515933.1 | Scaffold470 | 322090                  | GG                              | AA              | 1946950598               |
| SNP_P4_130052_322114 | NW_004515933.1 | Scaffold470 | 322114                  | CC                              | AA              | 1946950600               |
| SNP_P4_130053_322115 | NW_004515933.1 | Scaffold470 | 322115                  | AA                              | GG              | 1946950602               |
| SNP_P4_130054_322116 | NW_004515933.1 | Scaffold470 | 322116                  | TT                              | AA              | 1946950604               |
| SNP_P4_130055_336035 | NW_004515933.1 | Scaffold470 | 336035                  | CC                              | TT              | 1946950606               |
| SNP_P4_130056_336075 | NW_004515933.1 | Scaffold470 | 336075                  | TT                              | CC              | 1946950608               |
| SNP_P4_130057_336090 | NW_004515933.1 | Scaffold470 | 336090                  | GG                              | AA              | 1946950609               |
| SNP_P4_130058_336106 | NW_004515933.1 | Scaffold470 | 336106                  | GG                              | AA              | 1946950611               |
| SNP_P4_130059_336119 | NW_004515933.1 | Scaffold470 | 336119                  | AA                              | TT              | 1946950613               |
| SNP_P4_130060_336127 | NW_004515933.1 | Scaffold470 | 336127                  | CC                              | TT              | 1946950615               |
| SNP_P4_130061_336172 | NW_004515933.1 | Scaffold470 | 336172                  | CC                              | TT              | 1946950617               |
| SNP_P4_130062_336193 | NW_004515933.1 | Scaffold470 | 336193                  | AA                              | TT              | 1946950619               |
| SNP_P4_130063_336208 | NW_004515933.1 | Scaffold470 | 336208                  | AA                              | GG              | 1946950620               |
| SNP_P4_130064_336246 | NW_004515933.1 | Scaffold470 | 336246                  | AA                              | TT              | 1946950622               |
| SNP_P4_130065_336252 | NW_004515933.1 | Scaffold470 | 336252                  | AA                              | TT              | 1946950624               |
| SNP_P4_130067_336375 | NW_004515933.1 | Scaffold470 | 336375                  | GG                              | TT              | 1946950626               |
| SNP_P4_130068_336393 | NW_004515933.1 | Scaffold470 | 336393                  | AA                              | TT              | 1946950628               |
| SNP_P4_130069_336417 | NW_004515933.1 | Scaffold470 | 336417                  | TT                              | AA              | 1946950630               |
| SNP_P4_130070_336450 | NW_004515933.1 | Scaffold470 | 336450                  | TT                              | CC              | 1946950632               |
| SNP_P4_130071_336559 | NW_004515933.1 | Scaffold470 | 336559                  | GG                              | AA              | 1946950634               |
| SNP_P4_130072_336560 | NW_004515933.1 | Scaffold470 | 336560                  | AA                              | TT              | 1946950636               |
| SNP_P4_130073_336672 | NW_004515933.1 | Scaffold470 | 336672                  | GG                              | AA              | 1946950638               |

| SNPs IDs             | Chromosome IDs | Chromosomes | Physical positions (bp) | CDC Frontier (Reference genome) | (ILWC46 & LPNB) | NCBI SNPdb Accession IDs |
|----------------------|----------------|-------------|-------------------------|---------------------------------|-----------------|--------------------------|
| SNP_P4_130074_336871 | NW_004515933.1 | Scaffold470 | 336871                  | AA                              | TT              | 1946950640               |
| SNP_P4_130075_336928 | NW_004515933.1 | Scaffold470 | 336928                  | TT                              | AA              | 1946950642               |
| SNP_P4_130076_336957 | NW_004515933.1 | Scaffold470 | 336957                  | TT                              | CC              | 1946950644               |
| SNP_P4_130077_336958 | NW_004515933.1 | Scaffold470 | 336958                  | GG                              | AA              | 1946950646               |
| SNP_P4_130078_337671 | NW_004515933.1 | Scaffold470 | 337671                  | GG                              | AA              | 1946950648               |
| SNP_P4_130079_337674 | NW_004515933.1 | Scaffold470 | 337674                  | GG                              | AA              | 1946950650               |
| SNP_P4_130080_343061 | NW_004515933.1 | Scaffold470 | 343061                  | GG                              | AA              | 1946950652               |
| SNP_P4_130081_343092 | NW_004515933.1 | Scaffold470 | 343092                  | TT                              | CC              | 1946950654               |
| SNP_P4_130082_347232 | NW_004515933.1 | Scaffold470 | 347232                  | CC                              | GG              | 1946950656               |
| SNP_P4_130083_348038 | NW_004515933.1 | Scaffold470 | 348038                  | CC                              | TT              | 1946950658               |
| SNP_P4_130084_348139 | NW_004515933.1 | Scaffold470 | 348139                  | GG                              | AA              | 1946950660               |
| SNP_P4_130085_348184 | NW_004515933.1 | Scaffold470 | 348184                  | TT                              | CC              | 1946950662               |
| SNP_P4_130086_348242 | NW_004515933.1 | Scaffold470 | 348242                  | CC                              | AA              | 1946950664               |
| SNP_P4_130087_348369 | NW_004515933.1 | Scaffold470 | 348369                  | TT                              | CC              | 1946950665               |
| SNP_P4_130088_348445 | NW_004515933.1 | Scaffold470 | 348445                  | AA                              | GG              | 1946950667               |
| SNP_P4_130089_348471 | NW_004515933.1 | Scaffold470 | 348471                  | TT                              | GG              | 1946950669               |
| SNP_P4_130090_348475 | NW_004515933.1 | Scaffold470 | 348475                  | AA                              | CC              | 1946950671               |
| SNP_P4_130091_349186 | NW_004515933.1 | Scaffold470 | 349186                  | TT                              | GG              | 1946950673               |
| SNP_P4_130092_349268 | NW_004515933.1 | Scaffold470 | 349268                  | AA                              | CC              | 1946950675               |
| SNP_P4_130093_349488 | NW_004515933.1 | Scaffold470 | 349488                  | TT                              | CC              | 1946950677               |
| SNP_P4_130094_349582 | NW_004515933.1 | Scaffold470 | 349582                  | TT                              | CC              | 1946950679               |
| SNP_P4_130095_356305 | NW_004515933.1 | Scaffold470 | 356305                  | GG                              | TT              | 1946950681               |
| SNP_P4_130096_362049 | NW_004515933.1 | Scaffold470 | 362049                  | GG                              | AA              | 1946950683               |
| SNP_P4_130097_362055 | NW_004515933.1 | Scaffold470 | 362055                  | AA                              | GG              | 1946950685               |
| SNP_P4_130099_367614 | NW_004515933.1 | Scaffold470 | 367614                  | AA                              | GG              | 1946950687               |
| SNP_P4_130100_368685 | NW_004515933.1 | Scaffold470 | 368685                  | GG                              | AA              | 1946950689               |
| SNP_P4_130101_369179 | NW_004515933.1 | Scaffold470 | 369179                  | TT                              | GG              | 1946950691               |
| SNP_P4_130102_369250 | NW_004515933.1 | Scaffold470 | 369250                  | TT                              | CC              | 1946950693               |
| SNP_P4_130103_369656 | NW_004515933.1 | Scaffold470 | 369656                  | TT                              | GG              | 1946950695               |
| SNP_P4_130104_370478 | NW_004515933.1 | Scaffold470 | 370478                  | GG                              | AA              | 1946950697               |
| SNP_P4_130105_370639 | NW_004515933.1 | Scaffold470 | 370639                  | GG                              | AA              | 1946950699               |
| SNP_P4_130107_370833 | NW_004515933.1 | Scaffold470 | 370833                  | AA                              | GG              | 1946950701               |
| SNP_P4_130108_370908 | NW_004515933.1 | Scaffold470 | 370908                  | AA                              | TT              | 1946950703               |
| SNP_P4_130109_371308 | NW_004515933.1 | Scaffold470 | 371308                  | TT                              | CC              | 1946950705               |
| SNP_P4_130110_372246 | NW_004515933.1 | Scaffold470 | 372246                  | TT                              | CC              | 1946950707               |
| SNP_P4_130111_372407 | NW_004515933.1 | Scaffold470 | 372407                  | CC                              | TT              | 1946950709               |
| SNP_P4_130112_372610 | NW_004515933.1 | Scaffold470 | 372610                  | CC                              | TT              | 1946950711               |
| SNP_P4_130114_372805 | NW_004515933.1 | Scaffold470 | 372805                  | CC                              | TT              | 1946950713               |
| SNP_P4_130115_373041 | NW_004515933.1 | Scaffold470 | 373041                  | TT                              | CC              | 1946950715               |
| SNP_P4_130116_373101 | NW_004515933.1 | Scaffold470 | 373101                  | TT                              | GG              | 1946950717               |
| SNP_P4_130117_373103 | NW_004515933.1 | Scaffold470 | 373103                  | TT                              | AA              | 1946950719               |
| SNP_P4_130118_373290 | NW_004515933.1 | Scaffold470 | 373290                  | CC                              | GG              | 1946950721               |



| SNPs IDs             | Chromosome IDs | Chromosomes | Physical positions (bp) | CDC Frontier (Reference genome) | (ILWC46 & LPNB) | NCBI SNPdb Accession IDs |
|----------------------|----------------|-------------|-------------------------|---------------------------------|-----------------|--------------------------|
| SNP_P4_130119_373971 | NW_004515933.1 | Scaffold470 | 373971                  | TT                              | CC              | 1946950723               |
| SNP_P4_130120_374262 | NW_004515933.1 | Scaffold470 | 374262                  | CC                              | AA              | 1946950725               |
| SNP_P4_130121_374414 | NW_004515933.1 | Scaffold470 | 374414                  | CC                              | TT              | 1946950726               |
| SNP_P4_130122_375854 | NW_004515933.1 | Scaffold470 | 375854                  | TT                              | CC              | 1946950728               |
| SNP_P4_130124_377042 | NW_004515933.1 | Scaffold470 | 377042                  | CC                              | TT              | 1946950730               |
| SNP_P4_130125_377105 | NW_004515933.1 | Scaffold470 | 377105                  | GG                              | AA              | 1946950732               |
| SNP_P4_130126_377536 | NW_004515933.1 | Scaffold470 | 377536                  | GG                              | AA              | 1946950734               |
| SNP_P4_130127_377631 | NW_004515933.1 | Scaffold470 | 377631                  | GG                              | TT              | 1946950736               |
| SNP_P4_130128_377812 | NW_004515933.1 | Scaffold470 | 377812                  | CC                              | TT              | 1946950738               |
| SNP_P4_130129_379789 | NW_004515933.1 | Scaffold470 | 379789                  | TT                              | CC              | 1946950740               |
| SNP_P4_130130_380298 | NW_004515933.1 | Scaffold470 | 380298                  | TT                              | CC              | 1946950742               |
| SNP_P4_130131_382476 | NW_004515933.1 | Scaffold470 | 382476                  | AA                              | TT              | 1946950744               |
| SNP_P4_130132_383895 | NW_004515933.1 | Scaffold470 | 383895                  | GG                              | CC              | 1946950746               |
| SNP_P4_130133_385999 | NW_004515933.1 | Scaffold470 | 385999                  | CC                              | TT              | 1946950748               |
| SNP_P4_130134_386302 | NW_004515933.1 | Scaffold470 | 386302                  | TT                              | CC              | 1946950750               |
| SNP_P4_130135_387140 | NW_004515933.1 | Scaffold470 | 387140                  | GG                              | AA              | 1946950752               |
| SNP_P4_130136_389623 | NW_004515933.1 | Scaffold470 | 389623                  | TT                              | CC              | 1946950754               |
| SNP_P4_130137_389700 | NW_004515933.1 | Scaffold470 | 389700                  | TT                              | CC              | 1946950756               |
| SNP_P4_130138_389750 | NW_004515933.1 | Scaffold470 | 389750                  | TT                              | GG              | 1946950758               |
| SNP_P4_130139_389794 | NW_004515933.1 | Scaffold470 | 389794                  | TT                              | CC              | 1946950760               |
| SNP_P4_130140_390002 | NW_004515933.1 | Scaffold470 | 390002                  | CC                              | TT              | 1946950762               |
| SNP_P4_130141_390007 | NW_004515933.1 | Scaffold470 | 390007                  | TT                              | CC              | 1946950763               |
| SNP_P4_130142_390093 | NW_004515933.1 | Scaffold470 | 390093                  | GG                              | CC              | 1946950765               |
| SNP_P4_130143_1382   | NW_004515934.1 | Scaffold471 | 1382                    | GG                              | AA              | 1946950767               |
| SNP_P4_130144_1387   | NW_004515934.1 | Scaffold471 | 1387                    | CC                              | AA              | 1946950769               |
| SNP_P4_130145_3653   | NW_004515935.1 | Scaffold473 | 3653                    | GG                              | AA              | 1946950771               |
| SNP_P4_130146_4677   | NW_004515935.1 | Scaffold473 | 4677                    | GG                              | AA              | 1946950773               |
| SNP_P4_130147_5883   | NW_004515935.1 | Scaffold473 | 5883                    | CC                              | GG              | 1946950775               |
| SNP_P4_130148_6180   | NW_004515935.1 | Scaffold473 | 6180                    | AA                              | GG              | 1946950777               |
| SNP_P4_130149_6306   | NW_004515935.1 | Scaffold473 | 6306                    | AA                              | GG              | 1946950779               |
| SNP_P4_130150_6328   | NW_004515935.1 | Scaffold473 | 6328                    | CC                              | AA              | 1946950781               |
| SNP_P4_130151_6335   | NW_004515935.1 | Scaffold473 | 6335                    | AA                              | GG              | 1946950783               |
| SNP_P4_130152_12705  | NW_004515935.1 | Scaffold473 | 12705                   | AA                              | TT              | 1946950785               |
| SNP_P4_130153_12826  | NW_004515935.1 | Scaffold473 | 12826                   | GG                              | AA              | 1946950787               |
| SNP_P4_130154_12843  | NW_004515935.1 | Scaffold473 | 12843                   | TT                              | GG              | 1946950789               |
| SNP_P4_130155_12871  | NW_004515935.1 | Scaffold473 | 12871                   | GG                              | AA              | 1946950791               |
| SNP_P4_130156_12918  | NW_004515935.1 | Scaffold473 | 12918                   | GG                              | TT              | 1946950793               |
| SNP_P4_130157_12997  | NW_004515935.1 | Scaffold473 | 12997                   | GG                              | CC              | 1946950795               |
| SNP_P4_130158_13092  | NW_004515935.1 | Scaffold473 | 13092                   | AA                              | GG              | 1946950797               |
| SNP_P4_130159_13098  | NW_004515935.1 | Scaffold473 | 13098                   | AA                              | TT              | 1946950799               |
| SNP_P4_130160_13099  | NW_004515935.1 | Scaffold473 | 13099                   | CC                              | GG              | 1946950801               |
| SNP_P4_130161_13215  | NW_004515935.1 | Scaffold473 | 13215                   | TT                              | AA              | 1946950803               |

| SNPs IDs             | Chromosome IDs | Chromosomes | Physical positions (bp) | CDC Frontier (Reference genome) | (ILWC46 & LPNB) | NCBI SNPdb Accession IDs |
|----------------------|----------------|-------------|-------------------------|---------------------------------|-----------------|--------------------------|
| SNP_P4_130162_13253  | NW_004515935.1 | Scaffold473 | 13253                   | AA                              | CC              | 1946950805               |
| SNP_P4_130163_13323  | NW_004515935.1 | Scaffold473 | 13323                   | AA                              | GG              | 1946950806               |
| SNP_P4_130164_13331  | NW_004515935.1 | Scaffold473 | 13331                   | AA                              | GG              | 1946950808               |
| SNP_P4_130165_30356  | NW_004515935.1 | Scaffold473 | 30356                   | GG                              | TT              | 1946950810               |
| SNP_P4_130166_19719  | NW_004515936.1 | Scaffold475 | 19719                   | GG                              | AA              | 1946950812               |
| SNP_P4_130167_20221  | NW_004515936.1 | Scaffold475 | 20221                   | TT                              | CC              | 1946950814               |
| SNP_P4_130168_20255  | NW_004515936.1 | Scaffold475 | 20255                   | AA                              | GG              | 1946950816               |
| SNP_P4_130169_35130  | NW_004515936.1 | Scaffold475 | 35130                   | TT                              | AA              | 1946950818               |
| SNP_P4_130170_36385  | NW_004515936.1 | Scaffold475 | 36385                   | TT                              | CC              | 1946950820               |
| SNP_P4_130171_36390  | NW_004515936.1 | Scaffold475 | 36390                   | AA                              | TT              | 1946950822               |
| SNP_P4_130172_36446  | NW_004515936.1 | Scaffold475 | 36446                   | AA                              | TT              | 1946950824               |
| SNP_P4_130173_36713  | NW_004515936.1 | Scaffold475 | 36713                   | AA                              | CC              | 1946950826               |
| SNP_P4_130174_36714  | NW_004515936.1 | Scaffold475 | 36714                   | TT                              | CC              | 1946950828               |
| SNP_P4_130175_36715  | NW_004515936.1 | Scaffold475 | 36715                   | GG                              | AA              | 1946950830               |
| SNP_P4_130176_39572  | NW_004515936.1 | Scaffold475 | 39572                   | GG                              | AA              | 1946950832               |
| SNP_P4_130177_56675  | NW_004515936.1 | Scaffold475 | 56675                   | GG                              | CC              | 1946950834               |
| SNP_P4_130178_56695  | NW_004515936.1 | Scaffold475 | 56695                   | AA                              | CC              | 1946950836               |
| SNP_P4_130179_60302  | NW_004515936.1 | Scaffold475 | 60302                   | GG                              | AA              | 1946950838               |
| SNP_P4_130180_80920  | NW_004515936.1 | Scaffold475 | 80920                   | TT                              | CC              | 1946950840               |
| SNP_P4_130181_84150  | NW_004515936.1 | Scaffold475 | 84150                   | TT                              | GG              | 1946950842               |
| SNP_P4_130182_84366  | NW_004515936.1 | Scaffold475 | 84366                   | TT                              | AA              | 1946950844               |
| SNP_P4_130183_88872  | NW_004515936.1 | Scaffold475 | 88872                   | AA                              | GG              | 1946950846               |
| SNP_P4_130184_89244  | NW_004515936.1 | Scaffold475 | 89244                   | GG                              | AA              | 1946950847               |
| SNP_P4_130185_89266  | NW_004515936.1 | Scaffold475 | 89266                   | TT                              | CC              | 1946950849               |
| SNP_P4_130186_89286  | NW_004515936.1 | Scaffold475 | 89286                   | TT                              | CC              | 1946950851               |
| SNP_P4_130187_89304  | NW_004515936.1 | Scaffold475 | 89304                   | GG                              | AA              | 1946950853               |
| SNP_P4_130188_93052  | NW_004515936.1 | Scaffold475 | 93052                   | AA                              | CC              | 1946950855               |
| SNP_P4_130189_93464  | NW_004515936.1 | Scaffold475 | 93464                   | CC                              | GG              | 1946950857               |
| SNP_P4_130190_93466  | NW_004515936.1 | Scaffold475 | 93466                   | AA                              | GG              | 1946950859               |
| SNP_P4_130191_121504 | NW_004515936.1 | Scaffold475 | 121504                  | TT                              | CC              | 1946950861               |
| SNP_P4_130192_121561 | NW_004515936.1 | Scaffold475 | 121561                  | AA                              | GG              | 1946950863               |
| SNP_P4_130193_130700 | NW_004515936.1 | Scaffold475 | 130700                  | TT                              | GG              | 1946950865               |
| SNP_P4_130194_141031 | NW_004515936.1 | Scaffold475 | 141031                  | TT                              | CC              | 1946950867               |
| SNP_P4_130195_141120 | NW_004515936.1 | Scaffold475 | 141120                  | AA                              | GG              | 1946950869               |
| SNP_P4_130197_141418 | NW_004515936.1 | Scaffold475 | 141418                  | TT                              | CC              | 1946950871               |
| SNP_P4_130198_141419 | NW_004515936.1 | Scaffold475 | 141419                  | AA                              | TT              | 1946950873               |
| SNP_P4_130199_141448 | NW_004515936.1 | Scaffold475 | 141448                  | TT                              | CC              | 1946950875               |
| SNP_P4_130200_141487 | NW_004515936.1 | Scaffold475 | 141487                  | CC                              | TT              | 1946950877               |
| SNP_P4_130201_141497 | NW_004515936.1 | Scaffold475 | 141497                  | GG                              | AA              | 1946950879               |
| SNP_P4_130202_141506 | NW_004515936.1 | Scaffold475 | 141506                  | TT                              | CC              | 1946950881               |
| SNP_P4_130203_144184 | NW_004515936.1 | Scaffold475 | 144184                  | AA                              | GG              | 1946950883               |
| SNP_P4_130204_144346 | NW_004515936.1 | Scaffold475 | 144346                  | TT                              | CC              | 1946950885               |

| SNPs IDs             | Chromosome IDs | Chromosomes | Physical positions (bp) | CDC Frontier (Reference genome) | (ILWC46 & LPNB) | NCBI SNPdb Accession IDs |
|----------------------|----------------|-------------|-------------------------|---------------------------------|-----------------|--------------------------|
| SNP_P4_130205_144470 | NW_004515936.1 | Scaffold475 | 144470                  | AA                              | TT              | 1946950887               |
| SNP_P4_130206_144483 | NW_004515936.1 | Scaffold475 | 144483                  | GG                              | CC              | 1946950889               |
| SNP_P4_130207_144507 | NW_004515936.1 | Scaffold475 | 144507                  | TT                              | CC              | 1946950891               |
| SNP_P4_130208_144509 | NW_004515936.1 | Scaffold475 | 144509                  | AA                              | CC              | 1946950893               |
| SNP_P4_130209_144902 | NW_004515936.1 | Scaffold475 | 144902                  | TT                              | CC              | 1946950895               |
| SNP_P4_130210_144920 | NW_004515936.1 | Scaffold475 | 144920                  | AA                              | CC              | 1946950897               |
| SNP_P4_130211_144942 | NW_004515936.1 | Scaffold475 | 144942                  | TT                              | AA              | 1946950899               |
| SNP_P4_130212_144995 | NW_004515936.1 | Scaffold475 | 144995                  | CC                              | TT              | 1946950901               |
| SNP_P4_130213_145006 | NW_004515936.1 | Scaffold475 | 145006                  | TT                              | AA              | 1946950903               |
| SNP_P4_130214_145013 | NW_004515936.1 | Scaffold475 | 145013                  | AA                              | GG              | 1946950905               |
| SNP_P4_130215_145025 | NW_004515936.1 | Scaffold475 | 145025                  | TT                              | GG              | 1946950907               |
| SNP_P4_130216_145070 | NW_004515936.1 | Scaffold475 | 145070                  | AA                              | GG              | 1946950909               |
| SNP_P4_130217_145178 | NW_004515936.1 | Scaffold475 | 145178                  | AA                              | GG              | 1946950911               |
| SNP_P4_130218_145201 | NW_004515936.1 | Scaffold475 | 145201                  | AA                              | GG              | 1946950913               |
| SNP_P4_130219_145386 | NW_004515936.1 | Scaffold475 | 145386                  | TT                              | CC              | 1946950915               |
| SNP_P4_130220_145389 | NW_004515936.1 | Scaffold475 | 145389                  | GG                              | CC              | 1946950916               |
| SNP_P4_130221_145454 | NW_004515936.1 | Scaffold475 | 145454                  | AA                              | GG              | 1946950918               |
| SNP_P4_130222_148753 | NW_004515936.1 | Scaffold475 | 148753                  | TT                              | CC              | 1946950920               |
| SNP_P4_130223_148775 | NW_004515936.1 | Scaffold475 | 148775                  | AA                              | GG              | 1946950922               |
| SNP_P4_130224_148796 | NW_004515936.1 | Scaffold475 | 148796                  | AA                              | GG              | 1946950924               |
| SNP_P4_130225_148798 | NW_004515936.1 | Scaffold475 | 148798                  | AA                              | GG              | 1946950926               |
| SNP_P4_130226_161031 | NW_004515936.1 | Scaffold475 | 161031                  | GG                              | AA              | 1946950928               |
| SNP_P4_130227_162576 | NW_004515936.1 | Scaffold475 | 162576                  | GG                              | AA              | 1946950930               |
| SNP_P4_130228_163046 | NW_004515936.1 | Scaffold475 | 163046                  | AA                              | CC              | 1946950932               |
| SNP_P4_130229_163120 | NW_004515936.1 | Scaffold475 | 163120                  | AA                              | GG              | 1946950934               |
| SNP_P4_130230_163134 | NW_004515936.1 | Scaffold475 | 163134                  | TT                              | GG              | 1946950936               |
| SNP_P4_130231_163218 | NW_004515936.1 | Scaffold475 | 163218                  | TT                              | CC              | 1946950938               |
| SNP_P4_130232_163225 | NW_004515936.1 | Scaffold475 | 163225                  | AA                              | GG              | 1946950940               |
| SNP_P4_130233_163253 | NW_004515936.1 | Scaffold475 | 163253                  | TT                              | GG              | 1946950942               |
| SNP_P4_130234_163296 | NW_004515936.1 | Scaffold475 | 163296                  | AA                              | CC              | 1946950944               |
| SNP_P4_130235_163316 | NW_004515936.1 | Scaffold475 | 163316                  | GG                              | CC              | 1946950946               |
| SNP_P4_130236_163332 | NW_004515936.1 | Scaffold475 | 163332                  | TT                              | CC              | 1946950948               |
| SNP_P4_130237_163367 | NW_004515936.1 | Scaffold475 | 163367                  | GG                              | CC              | 1946950950               |
| SNP_P4_130238_163389 | NW_004515936.1 | Scaffold475 | 163389                  | TT                              | CC              | 1946950952               |
| SNP_P4_130239_163424 | NW_004515936.1 | Scaffold475 | 163424                  | AA                              | GG              | 1946950954               |
| SNP_P4_130240_163438 | NW_004515936.1 | Scaffold475 | 163438                  | TT                              | CC              | 1946950956               |
| SNP_P4_130241_163458 | NW_004515936.1 | Scaffold475 | 163458                  | TT                              | CC              | 1946950958               |
| SNP_P4_130242_163467 | NW_004515936.1 | Scaffold475 | 163467                  | TT                              | GG              | 1946950960               |
| SNP_P4_130244_163514 | NW_004515936.1 | Scaffold475 | 163514                  | AA                              | GG              | 1946950962               |
| SNP_P4_130245_163559 | NW_004515936.1 | Scaffold475 | 163559                  | TT                              | CC              | 1946950963               |
| SNP_P4_130246_163616 | NW_004515936.1 | Scaffold475 | 163616                  | TT                              | CC              | 1946950965               |
| SNP_P4_130247_163688 | NW_004515936.1 | Scaffold475 | 163688                  | AA                              | GG              | 1946950967               |

| SNPs IDs             | Chromosome IDs | Chromosomes | Physical positions (bp) | CDC Frontier (Reference genome) | (ILWC46 & LPNB) | NCBI SNPdb Accession IDs |
|----------------------|----------------|-------------|-------------------------|---------------------------------|-----------------|--------------------------|
| SNP_P4_130248_163755 | NW_004515936.1 | Scaffold475 | 163755                  | CC                              | AA              | 1946950969               |
| SNP_P4_130249_163786 | NW_004515936.1 | Scaffold475 | 163786                  | TT                              | CC              | 1946950971               |
| SNP_P4_130250_163787 | NW_004515936.1 | Scaffold475 | 163787                  | AA                              | GG              | 1946950973               |
| SNP_P4_130251_163824 | NW_004515936.1 | Scaffold475 | 163824                  | CC                              | TT              | 1946950975               |
| SNP_P4_130252_163825 | NW_004515936.1 | Scaffold475 | 163825                  | AA                              | GG              | 1946950977               |
| SNP_P4_130253_163850 | NW_004515936.1 | Scaffold475 | 163850                  | TT                              | GG              | 1946950979               |
| SNP_P4_130254_163886 | NW_004515936.1 | Scaffold475 | 163886                  | AA                              | CC              | 1946950981               |
| SNP_P4_130255_164152 | NW_004515936.1 | Scaffold475 | 164152                  | TT                              | CC              | 1946950983               |
| SNP_P4_130256_164259 | NW_004515936.1 | Scaffold475 | 164259                  | TT                              | CC              | 1946950985               |
| SNP_P4_130257_164291 | NW_004515936.1 | Scaffold475 | 164291                  | AA                              | GG              | 1946950987               |
| SNP_P4_130258_167552 | NW_004515936.1 | Scaffold475 | 167552                  | TT                              | CC              | 1946950989               |
| SNP_P4_130259_167620 | NW_004515936.1 | Scaffold475 | 167620                  | AA                              | GG              | 1946950991               |
| SNP_P4_130260_167625 | NW_004515936.1 | Scaffold475 | 167625                  | CC                              | GG              | 1946950993               |
| SNP_P4_130262_174726 | NW_004515936.1 | Scaffold475 | 174726                  | AA                              | TT              | 1946950995               |
| SNP_P4_130263_174744 | NW_004515936.1 | Scaffold475 | 174744                  | AA                              | TT              | 1946950997               |
| SNP_P4_130264_174775 | NW_004515936.1 | Scaffold475 | 174775                  | AA                              | TT              | 1946950999               |
| SNP_P4_130265_175023 | NW_004515936.1 | Scaffold475 | 175023                  | AA                              | GG              | 1946951001               |
| SNP_P4_130266_175193 | NW_004515936.1 | Scaffold475 | 175193                  | AA                              | CC              | 1946951003               |
| SNP_P4_130267_175341 | NW_004515936.1 | Scaffold475 | 175341                  | AA                              | CC              | 1946951005               |
| SNP_P4_130268_175353 | NW_004515936.1 | Scaffold475 | 175353                  | TT                              | GG              | 1946951007               |
| SNP_P4_130269_176749 | NW_004515936.1 | Scaffold475 | 176749                  | TT                              | GG              | 1946951009               |
| SNP_P4_130270_177072 | NW_004515936.1 | Scaffold475 | 177072                  | AA                              | GG              | 1946951011               |
| SNP_P4_130271_177073 | NW_004515936.1 | Scaffold475 | 177073                  | AA                              | TT              | 1946951013               |
| SNP_P4_130272_177112 | NW_004515936.1 | Scaffold475 | 177112                  | TT                              | CC              | 1946951015               |
| SNP_P4_130273_177151 | NW_004515936.1 | Scaffold475 | 177151                  | TT                              | CC              | 1946951017               |
| SNP_P4_130274_177153 | NW_004515936.1 | Scaffold475 | 177153                  | GG                              | CC              | 1946951019               |
| SNP_P4_130275_177523 | NW_004515936.1 | Scaffold475 | 177523                  | GG                              | TT              | 1946951021               |
| SNP_P4_130276_181510 | NW_004515936.1 | Scaffold475 | 181510                  | TT                              | CC              | 1946951023               |
| SNP_P4_130277_183796 | NW_004515936.1 | Scaffold475 | 183796                  | GG                              | CC              | 1946951025               |
| SNP_P4_130278_184580 | NW_004515936.1 | Scaffold475 | 184580                  | TT                              | CC              | 1946951027               |
| SNP_P4_130279_189681 | NW_004515936.1 | Scaffold475 | 189681                  | GG                              | TT              | 1946951029               |
| SNP_P4_130280_189685 | NW_004515936.1 | Scaffold475 | 189685                  | AA                              | CC              | 1946951031               |
| SNP_P4_130281_189701 | NW_004515936.1 | Scaffold475 | 189701                  | AA                              | GG              | 1946951033               |
| SNP_P4_130282_189731 | NW_004515936.1 | Scaffold475 | 189731                  | TT                              | AA              | 1946951035               |
| SNP_P4_130283_189778 | NW_004515936.1 | Scaffold475 | 189778                  | TT                              | AA              | 1946951037               |
| SNP_P4_130284_189810 | NW_004515936.1 | Scaffold475 | 189810                  | AA                              | TT              | 1946951039               |
| SNP_P4_130285_189828 | NW_004515936.1 | Scaffold475 | 189828                  | CC                              | AA              | 1946951041               |
| SNP_P4_130286_189860 | NW_004515936.1 | Scaffold475 | 189860                  | AA                              | TT              | 1946951043               |
| SNP_P4_130287_190083 | NW_004515936.1 | Scaffold475 | 190083                  | AA                              | GG              | 1946951045               |
| SNP_P4_130288_190153 | NW_004515936.1 | Scaffold475 | 190153                  | CC                              | TT              | 1946951047               |
| SNP_P4_130289_190491 | NW_004515936.1 | Scaffold475 | 190491                  | AA                              | GG              | 1946951049               |
| SNP_P4_130290_120    | NW_004515937.1 | Scaffold476 | 120                     | CC                              | TT              | 1946951050               |

| SNPs IDs            | Chromosome IDs | Chromosomes | Physical positions (bp) | CDC Frontier (Reference genome) | (ILWC46 & LPNB) | NCBI SNPdb Accession IDs |
|---------------------|----------------|-------------|-------------------------|---------------------------------|-----------------|--------------------------|
| SNP_P4_130291_172   | NW_004515937.1 | Scaffold476 | 172                     | AA                              | TT              | 1946951052               |
| SNP_P4_130292_224   | NW_004515937.1 | Scaffold476 | 224                     | TT                              | CC              | 1946951054               |
| SNP_P4_130293_295   | NW_004515937.1 | Scaffold476 | 295                     | CC                              | TT              | 1946951056               |
| SNP_P4_130294_308   | NW_004515937.1 | Scaffold476 | 308                     | TT                              | CC              | 1946951058               |
| SNP_P4_130295_376   | NW_004515937.1 | Scaffold476 | 376                     | AA                              | TT              | 1946951060               |
| SNP_P4_130296_388   | NW_004515937.1 | Scaffold476 | 388                     | TT                              | CC              | 1946951062               |
| SNP_P4_130297_420   | NW_004515937.1 | Scaffold476 | 420                     | CC                              | TT              | 1946951064               |
| SNP_P4_130298_604   | NW_004515937.1 | Scaffold476 | 604                     | AA                              | TT              | 1946951066               |
| SNP_P4_130299_645   | NW_004515937.1 | Scaffold476 | 645                     | GG                              | AA              | 1946951068               |
| SNP_P4_130300_724   | NW_004515937.1 | Scaffold476 | 724                     | AA                              | CC              | 1946951070               |
| SNP_P4_130301_742   | NW_004515937.1 | Scaffold476 | 742                     | GG                              | AA              | 1946951072               |
| SNP_P4_130302_763   | NW_004515937.1 | Scaffold476 | 763                     | AA                              | GG              | 1946951074               |
| SNP_P4_130303_814   | NW_004515937.1 | Scaffold476 | 814                     | TT                              | CC              | 1946951076               |
| SNP_P4_130304_1007  | NW_004515937.1 | Scaffold476 | 1007                    | GG                              | TT              | 1946951078               |
| SNP_P4_130305_1069  | NW_004515937.1 | Scaffold476 | 1069                    | GG                              | TT              | 1946951080               |
| SNP_P4_130306_1083  | NW_004515937.1 | Scaffold476 | 1083                    | GG                              | AA              | 1946951082               |
| SNP_P4_130307_1183  | NW_004515937.1 | Scaffold476 | 1183                    | AA                              | CC              | 1946951084               |
| SNP_P4_130308_1223  | NW_004515937.1 | Scaffold476 | 1223                    | TT                              | GG              | 1946951086               |
| SNP_P4_130309_1350  | NW_004515937.1 | Scaffold476 | 1350                    | TT                              | GG              | 1946951088               |
| SNP_P4_130310_1370  | NW_004515937.1 | Scaffold476 | 1370                    | TT                              | AA              | 1946951090               |
| SNP_P4_130311_1567  | NW_004515937.1 | Scaffold476 | 1567                    | TT                              | CC              | 1946951092               |
| SNP_P4_130312_4215  | NW_004515937.1 | Scaffold476 | 4215                    | AA                              | GG              | 1946951094               |
| SNP_P4_130313_4219  | NW_004515937.1 | Scaffold476 | 4219                    | TT                              | CC              | 1946951095               |
| SNP_P4_130314_4252  | NW_004515937.1 | Scaffold476 | 4252                    | GG                              | CC              | 1946951097               |
| SNP_P4_130315_4531  | NW_004515937.1 | Scaffold476 | 4531                    | TT                              | CC              | 1946951099               |
| SNP_P4_130316_9119  | NW_004515937.1 | Scaffold476 | 9119                    | TT                              | CC              | 1946951101               |
| SNP_P4_130317_9877  | NW_004515937.1 | Scaffold476 | 9877                    | GG                              | AA              | 1946951102               |
| SNP_P4_130318_9883  | NW_004515937.1 | Scaffold476 | 9883                    | CC                              | TT              | 1946951104               |
| SNP_P4_130319_9888  | NW_004515937.1 | Scaffold476 | 9888                    | CC                              | TT              | 1946951106               |
| SNP_P4_130320_10250 | NW_004515937.1 | Scaffold476 | 10250                   | TT                              | GG              | 1946951108               |
| SNP_P4_130321_10548 | NW_004515937.1 | Scaffold476 | 10548                   | GG                              | AA              | 1946951110               |
| SNP_P4_130322_10640 | NW_004515937.1 | Scaffold476 | 10640                   | TT                              | CC              | 1946951112               |
| SNP_P4_130323_10775 | NW_004515937.1 | Scaffold476 | 10775                   | CC                              | GG              | 1946951114               |
| SNP_P4_130324_10856 | NW_004515937.1 | Scaffold476 | 10856                   | AA                              | GG              | 1946951116               |
| SNP_P4_130325_10929 | NW_004515937.1 | Scaffold476 | 10929                   | TT                              | CC              | 1946951117               |
| SNP_P4_130326_10930 | NW_004515937.1 | Scaffold476 | 10930                   | TT                              | CC              | 1946951119               |
| SNP_P4_130327_10961 | NW_004515937.1 | Scaffold476 | 10961                   | AA                              | GG              | 1946951121               |
| SNP_P4_130328_11018 | NW_004515937.1 | Scaffold476 | 11018                   | AA                              | GG              | 1946951123               |
| SNP_P4_130329_11423 | NW_004515937.1 | Scaffold476 | 11423                   | GG                              | AA              | 1946951125               |
| SNP_P4_130330_11426 | NW_004515937.1 | Scaffold476 | 11426                   | GG                              | AA              | 1946951127               |
| SNP_P4_130331_11440 | NW_004515937.1 | Scaffold476 | 11440                   | AA                              | GG              | 1946951129               |
| SNP_P4_130332_11472 | NW_004515937.1 | Scaffold476 | 11472                   | CC                              | GG              | 1946951131               |

| SNPs IDs            | Chromosome IDs | Chromosomes | Physical positions (bp) | CDC Frontier (Reference genome) | (ILWC46 & LPNB) | NCBI SNPdb Accession IDs |
|---------------------|----------------|-------------|-------------------------|---------------------------------|-----------------|--------------------------|
| SNP_P4_130333_11553 | NW_004515937.1 | Scaffold476 | 11553                   | CC                              | AA              | 1946951133               |
| SNP_P4_130334_11554 | NW_004515937.1 | Scaffold476 | 11554                   | TT                              | CC              | 1946951135               |
| SNP_P4_130335_11560 | NW_004515937.1 | Scaffold476 | 11560                   | CC                              | GG              | 1946951137               |
| SNP_P4_130336_372   | NW_004515938.1 | Scaffold477 | 372                     | AA                              | GG              | 1946951139               |
| SNP_P4_130337_410   | NW_004515938.1 | Scaffold477 | 410                     | GG                              | AA              | 1946951141               |
| SNP_P4_130338_582   | NW_004515938.1 | Scaffold477 | 582                     | TT                              | AA              | 1946951143               |
| SNP_P4_130339_583   | NW_004515938.1 | Scaffold477 | 583                     | CC                              | AA              | 1946951145               |
| SNP_P4_130340_867   | NW_004515938.1 | Scaffold477 | 867                     | GG                              | AA              | 1946951147               |
| SNP_P4_130341_4124  | NW_004515938.1 | Scaffold477 | 4124                    | GG                              | CC              | 1946951149               |
| SNP_P4_130342_4449  | NW_004515938.1 | Scaffold477 | 4449                    | TT                              | CC              | 1946951151               |
| SNP_P4_130343_4705  | NW_004515938.1 | Scaffold477 | 4705                    | CC                              | GG              | 1946951153               |
| SNP_P4_130344_5406  | NW_004515938.1 | Scaffold477 | 5406                    | CC                              | GG              | 1946951155               |
| SNP_P4_130345_6452  | NW_004515938.1 | Scaffold477 | 6452                    | CC                              | TT              | 1946951157               |
| SNP_P4_130346_6510  | NW_004515938.1 | Scaffold477 | 6510                    | CC                              | TT              | 1946951159               |
| SNP_P4_130347_6705  | NW_004515938.1 | Scaffold477 | 6705                    | AA                              | GG              | 1946951161               |
| SNP_P4_130348_7622  | NW_004515938.1 | Scaffold477 | 7622                    | TT                              | CC              | 1946951163               |
| SNP_P4_130349_8790  | NW_004515938.1 | Scaffold477 | 8790                    | TT                              | CC              | 1946951165               |
| SNP_P4_130350_9157  | NW_004515938.1 | Scaffold477 | 9157                    | AA                              | GG              | 1946951167               |
| SNP_P4_130351_9381  | NW_004515938.1 | Scaffold477 | 9381                    | CC                              | GG              | 1946951169               |
| SNP_P4_130352_9416  | NW_004515938.1 | Scaffold477 | 9416                    | CC                              | GG              | 1946951171               |
| SNP_P4_130353_9466  | NW_004515938.1 | Scaffold477 | 9466                    | CC                              | AA              | 1946951173               |
| SNP_P4_130354_9779  | NW_004515938.1 | Scaffold477 | 9779                    | CC                              | GG              | 1946951175               |
| SNP_P4_130355_9929  | NW_004515938.1 | Scaffold477 | 9929                    | GG                              | AA              | 1946951177               |
| SNP_P4_130356_10133 | NW_004515938.1 | Scaffold477 | 10133                   | GG                              | TT              | 1946951179               |
| SNP_P4_130357_10141 | NW_004515938.1 | Scaffold477 | 10141                   | TT                              | CC              | 1946951181               |
| SNP_P4_130358_10229 | NW_004515938.1 | Scaffold477 | 10229                   | AA                              | TT              | 1946951183               |
| SNP_P4_130359_10326 | NW_004515938.1 | Scaffold477 | 10326                   | GG                              | TT              | 1946951185               |
| SNP_P4_130360_10333 | NW_004515938.1 | Scaffold477 | 10333                   | TT                              | GG              | 1946951187               |
| SNP_P4_130361_10402 | NW_004515938.1 | Scaffold477 | 10402                   | AA                              | GG              | 1946951189               |
| SNP_P4_130362_10601 | NW_004515938.1 | Scaffold477 | 10601                   | TT                              | AA              | 1946951191               |
| SNP_P4_130363_10738 | NW_004515938.1 | Scaffold477 | 10738                   | GG                              | AA              | 1946951193               |
| SNP_P4_130364_10766 | NW_004515938.1 | Scaffold477 | 10766                   | CC                              | GG              | 1946951195               |
| SNP_P4_130365_10822 | NW_004515938.1 | Scaffold477 | 10822                   | TT                              | AA              | 1946951197               |
| SNP_P4_130366_10839 | NW_004515938.1 | Scaffold477 | 10839                   | TT                              | AA              | 1946951200               |
| SNP_P4_130367_11193 | NW_004515938.1 | Scaffold477 | 11193                   | GG                              | AA              | 1946951202               |
| SNP_P4_130368_11248 | NW_004515938.1 | Scaffold477 | 11248                   | AA                              | TT              | 1946951203               |
| SNP_P4_130370_11634 | NW_004515938.1 | Scaffold477 | 11634                   | AA                              | GG              | 1946951205               |
| SNP_P4_130371_11713 | NW_004515938.1 | Scaffold477 | 11713                   | GG                              | AA              | 1946951207               |
| SNP_P4_130372_11738 | NW_004515938.1 | Scaffold477 | 11738                   | AA                              | TT              | 1946951209               |
| SNP_P4_130373_11795 | NW_004515938.1 | Scaffold477 | 11795                   | AA                              | GG              | 1946951211               |
| SNP_P4_130374_11830 | NW_004515938.1 | Scaffold477 | 11830                   | AA                              | GG              | 1946951213               |
| SNP_P4_130375_11850 | NW_004515938.1 | Scaffold477 | 11850                   | CC                              | GG              | 1946951215               |

| SNPs IDs            | Chromosome IDs | Chromosomes | Physical positions (bp) | CDC Frontier (Reference genome) | (ILWC46 & LPNB) | NCBI SNPdb Accession IDs |
|---------------------|----------------|-------------|-------------------------|---------------------------------|-----------------|--------------------------|
| SNP_P4_130376_11855 | NW_004515938.1 | Scaffold477 | 11855                   | GG                              | AA              | 1946951217               |
| SNP_P4_130377_11901 | NW_004515938.1 | Scaffold477 | 11901                   | TT                              | GG              | 1946951219               |
| SNP_P4_130378_11910 | NW_004515938.1 | Scaffold477 | 11910                   | CC                              | TT              | 1946951221               |
| SNP_P4_130379_11954 | NW_004515938.1 | Scaffold477 | 11954                   | TT                              | AA              | 1946951223               |
| SNP_P4_130380_11983 | NW_004515938.1 | Scaffold477 | 11983                   | GG                              | AA              | 1946951225               |
| SNP_P4_130381_11985 | NW_004515938.1 | Scaffold477 | 11985                   | TT                              | CC              | 1946951226               |
| SNP_P4_130382_12038 | NW_004515938.1 | Scaffold477 | 12038                   | TT                              | CC              | 1946951228               |
| SNP_P4_130383_12074 | NW_004515938.1 | Scaffold477 | 12074                   | CC                              | GG              | 1946951230               |
| SNP_P4_130384_12208 | NW_004515938.1 | Scaffold477 | 12208                   | AA                              | CC              | 1946951232               |
| SNP_P4_130385_12225 | NW_004515938.1 | Scaffold477 | 12225                   | TT                              | CC              | 1946951234               |
| SNP_P4_130386_12276 | NW_004515938.1 | Scaffold477 | 12276                   | GG                              | CC              | 1946951236               |
| SNP_P4_130387_12390 | NW_004515938.1 | Scaffold477 | 12390                   | GG                              | AA              | 1946951238               |
| SNP_P4_130388_12648 | NW_004515938.1 | Scaffold477 | 12648                   | CC                              | AA              | 1946951240               |
| SNP_P4_130389_12664 | NW_004515938.1 | Scaffold477 | 12664                   | CC                              | TT              | 1946951242               |
| SNP_P4_130390_12822 | NW_004515938.1 | Scaffold477 | 12822                   | CC                              | AA              | 1946951244               |
| SNP_P4_130391_13004 | NW_004515938.1 | Scaffold477 | 13004                   | GG                              | TT              | 1946951246               |
| SNP_P4_130392_13398 | NW_004515938.1 | Scaffold477 | 13398                   | AA                              | GG              | 1946951248               |
| SNP_P4_130393_13483 | NW_004515938.1 | Scaffold477 | 13483                   | GG                              | TT              | 1946951250               |
| SNP_P4_130394_13532 | NW_004515938.1 | Scaffold477 | 13532                   | GG                              | TT              | 1946951252               |
| SNP_P4_130395_13569 | NW_004515938.1 | Scaffold477 | 13569                   | GG                              | AA              | 1946951254               |
| SNP_P4_130396_14418 | NW_004515938.1 | Scaffold477 | 14418                   | AA                              | TT              | 1946951256               |
| SNP_P4_130397_14445 | NW_004515938.1 | Scaffold477 | 14445                   | TT                              | CC              | 1946951258               |
| SNP_P4_130398_14492 | NW_004515938.1 | Scaffold477 | 14492                   | TT                              | GG              | 1946951260               |
| SNP_P4_130399_14617 | NW_004515938.1 | Scaffold477 | 14617                   | TT                              | AA              | 1946951262               |
| SNP_P4_130400_15351 | NW_004515938.1 | Scaffold477 | 15351                   | CC                              | TT              | 1946951264               |
| SNP_P4_130401_15469 | NW_004515938.1 | Scaffold477 | 15469                   | CC                              | AA              | 1946951266               |
| SNP_P4_130402_15667 | NW_004515938.1 | Scaffold477 | 15667                   | CC                              | AA              | 1946951268               |
| SNP_P4_130403_15676 | NW_004515938.1 | Scaffold477 | 15676                   | CC                              | TT              | 1946951270               |
| SNP_P4_130404_15892 | NW_004515938.1 | Scaffold477 | 15892                   | GG                              | AA              | 1946951272               |
| SNP_P4_130405_16326 | NW_004515938.1 | Scaffold477 | 16326                   | AA                              | GG              | 1946951274               |
| SNP_P4_130406_16335 | NW_004515938.1 | Scaffold477 | 16335                   | TT                              | CC              | 1946951276               |
| SNP_P4_130407_16680 | NW_004515938.1 | Scaffold477 | 16680                   | GG                              | AA              | 1946951278               |
| SNP_P4_130408_16808 | NW_004515938.1 | Scaffold477 | 16808                   | CC                              | TT              | 1946951280               |
| SNP_P4_130409_17366 | NW_004515938.1 | Scaffold477 | 17366                   | CC                              | AA              | 1946951282               |
| SNP_P4_130410_17370 | NW_004515938.1 | Scaffold477 | 17370                   | AA                              | TT              | 1946951284               |
| SNP_P4_130411_17713 | NW_004515938.1 | Scaffold477 | 17713                   | TT                              | AA              | 1946951286               |
| SNP_P4_130412_17719 | NW_004515938.1 | Scaffold477 | 17719                   | GG                              | AA              | 1946951288               |
| SNP_P4_130413_17800 | NW_004515938.1 | Scaffold477 | 17800                   | CC                              | TT              | 1946951290               |
| SNP_P4_130414_17926 | NW_004515938.1 | Scaffold477 | 17926                   | GG                              | AA              | 1946951292               |
| SNP_P4_130415_19490 | NW_004515938.1 | Scaffold477 | 19490                   | GG                              | AA              | 1946951294               |
| SNP_P4_130417_20125 | NW_004515938.1 | Scaffold477 | 20125                   | TT                              | CC              | 1946951296               |
| SNP_P4_130418_20371 | NW_004515938.1 | Scaffold477 | 20371                   | TT                              | GG              | 1946951298               |

| SNPs IDs            | Chromosome IDs | Chromosomes | Physical positions (bp) | CDC Frontier (Reference genome) | (ILWC46 & LPNB) | NCBI SNPdb Accession IDs |
|---------------------|----------------|-------------|-------------------------|---------------------------------|-----------------|--------------------------|
| SNP_P4_130419_20448 | NW_004515938.1 | Scaffold477 | 20448                   | TT                              | CC              | 1946951300               |
| SNP_P4_130420_20648 | NW_004515938.1 | Scaffold477 | 20648                   | AA                              | GG              | 1946951302               |
| SNP_P4_130422_20997 | NW_004515938.1 | Scaffold477 | 20997                   | TT                              | CC              | 1946951304               |
| SNP_P4_130423_21170 | NW_004515938.1 | Scaffold477 | 21170                   | CC                              | TT              | 1946951306               |
| SNP_P4_130424_21409 | NW_004515938.1 | Scaffold477 | 21409                   | TT                              | CC              | 1946951308               |
| SNP_P4_130425_21533 | NW_004515938.1 | Scaffold477 | 21533                   | AA                              | CC              | 1946951310               |
| SNP_P4_130426_22472 | NW_004515938.1 | Scaffold477 | 22472                   | TT                              | GG              | 1946951312               |
| SNP_P4_130427_22617 | NW_004515938.1 | Scaffold477 | 22617                   | AA                              | GG              | 1946951314               |
| SNP_P4_130428_22639 | NW_004515938.1 | Scaffold477 | 22639                   | GG                              | TT              | 1946951316               |
| SNP_P4_130429_22677 | NW_004515938.1 | Scaffold477 | 22677                   | TT                              | CC              | 1946951318               |
| SNP_P4_130430_22692 | NW_004515938.1 | Scaffold477 | 22692                   | TT                              | GG              | 1946951320               |
| SNP_P4_130431_22907 | NW_004515938.1 | Scaffold477 | 22907                   | GG                              | AA              | 1946951322               |
| SNP_P4_130432_23335 | NW_004515938.1 | Scaffold477 | 23335                   | AA                              | CC              | 1946951324               |
| SNP_P4_130433_23614 | NW_004515938.1 | Scaffold477 | 23614                   | TT                              | CC              | 1946951326               |
| SNP_P4_130435_28447 | NW_004515938.1 | Scaffold477 | 28447                   | CC                              | TT              | 1946951328               |
| SNP_P4_130436_28779 | NW_004515938.1 | Scaffold477 | 28779                   | GG                              | CC              | 1946951330               |
| SNP_P4_130437_29182 | NW_004515938.1 | Scaffold477 | 29182                   | AA                              | TT              | 1946951332               |
| SNP_P4_130438_29183 | NW_004515938.1 | Scaffold477 | 29183                   | CC                              | TT              | 1946951334               |
| SNP_P4_130439_29399 | NW_004515938.1 | Scaffold477 | 29399                   | AA                              | TT              | 1946951336               |
| SNP_P4_130440_30368 | NW_004515938.1 | Scaffold477 | 30368                   | AA                              | GG              | 1946951338               |
| SNP_P4_130441_30824 | NW_004515938.1 | Scaffold477 | 30824                   | CC                              | GG              | 1946951340               |
| SNP_P4_130442_31469 | NW_004515938.1 | Scaffold477 | 31469                   | GG                              | TT              | 1946951342               |
| SNP_P4_130443_32151 | NW_004515938.1 | Scaffold477 | 32151                   | TT                              | GG              | 1946951344               |
| SNP_P4_130444_32359 | NW_004515938.1 | Scaffold477 | 32359                   | TT                              | CC              | 1946951346               |
| SNP_P4_130445_32466 | NW_004515938.1 | Scaffold477 | 32466                   | GG                              | AA              | 1946951348               |
| SNP_P4_130446_33553 | NW_004515938.1 | Scaffold477 | 33553                   | AA                              | TT              | 1946951350               |
| SNP_P4_130447_33649 | NW_004515938.1 | Scaffold477 | 33649                   | TT                              | CC              | 1946951352               |
| SNP_P4_130448_33965 | NW_004515938.1 | Scaffold477 | 33965                   | TT                              | CC              | 1946951354               |
| SNP_P4_130449_34349 | NW_004515938.1 | Scaffold477 | 34349                   | TT                              | GG              | 1946951356               |
| SNP_P4_130450_34476 | NW_004515938.1 | Scaffold477 | 34476                   | TT                              | GG              | 1946951358               |
| SNP_P4_130451_34558 | NW_004515938.1 | Scaffold477 | 34558                   | AA                              | GG              | 1946951360               |
| SNP_P4_130452_35104 | NW_004515938.1 | Scaffold477 | 35104                   | AA                              | CC              | 1946951362               |
| SNP_P4_130453_35106 | NW_004515938.1 | Scaffold477 | 35106                   | AA                              | TT              | 1946951364               |
| SNP_P4_130454_35822 | NW_004515938.1 | Scaffold477 | 35822                   | CC                              | TT              | 1946951366               |
| SNP_P4_130455_35843 | NW_004515938.1 | Scaffold477 | 35843                   | AA                              | TT              | 1946951368               |
| SNP_P4_130456_35896 | NW_004515938.1 | Scaffold477 | 35896                   | TT                              | AA              | 1946951370               |
| SNP_P4_130457_37244 | NW_004515938.1 | Scaffold477 | 37244                   | TT                              | CC              | 1946951372               |
| SNP_P4_130458_37291 | NW_004515938.1 | Scaffold477 | 37291                   | TT                              | GG              | 1946951374               |
| SNP_P4_130459_43429 | NW_004515938.1 | Scaffold477 | 43429                   | CC                              | AA              | 1946951376               |
| SNP_P4_130460_43907 | NW_004515938.1 | Scaffold477 | 43907                   | CC                              | TT              | 1946951378               |
| SNP_P4_130461_43934 | NW_004515938.1 | Scaffold477 | 43934                   | TT                              | CC              | 1946951380               |
| SNP_P4_130462_44019 | NW_004515938.1 | Scaffold477 | 44019                   | TT                              | CC              | 1946951382               |



| SNPs IDs            | Chromosome IDs | Chromosomes | Physical positions (bp) | CDC Frontier (Reference genome) | (ILWC46 & LPNB) | NCBI SNPdb Accession IDs |
|---------------------|----------------|-------------|-------------------------|---------------------------------|-----------------|--------------------------|
| SNP_P4_130463_44296 | NW_004515938.1 | Scaffold477 | 44296                   | GG                              | TT              | 1946951384               |
| SNP_P4_130464_44658 | NW_004515938.1 | Scaffold477 | 44658                   | AA                              | CC              | 1946951386               |
| SNP_P4_130466_45182 | NW_004515938.1 | Scaffold477 | 45182                   | GG                              | AA              | 1946951388               |
| SNP_P4_130467_45183 | NW_004515938.1 | Scaffold477 | 45183                   | AA                              | GG              | 1946951390               |
| SNP_P4_130468_45997 | NW_004515938.1 | Scaffold477 | 45997                   | AA                              | TT              | 1946951392               |
| SNP_P4_130469_46082 | NW_004515938.1 | Scaffold477 | 46082                   | CC                              | AA              | 1946951394               |
| SNP_P4_130470_46088 | NW_004515938.1 | Scaffold477 | 46088                   | TT                              | GG              | 1946951396               |
| SNP_P4_130471_46488 | NW_004515938.1 | Scaffold477 | 46488                   | CC                              | TT              | 1946951398               |
| SNP_P4_130473_46907 | NW_004515938.1 | Scaffold477 | 46907                   | GG                              | AA              | 1946951400               |
| SNP_P4_130474_47168 | NW_004515938.1 | Scaffold477 | 47168                   | AA                              | CC              | 1946951402               |
| SNP_P4_130475_47207 | NW_004515938.1 | Scaffold477 | 47207                   | TT                              | CC              | 1946951404               |
| SNP_P4_130476_47251 | NW_004515938.1 | Scaffold477 | 47251                   | AA                              | CC              | 1946951406               |
| SNP_P4_130477_47381 | NW_004515938.1 | Scaffold477 | 47381                   | GG                              | AA              | 1946951408               |
| SNP_P4_130478_47423 | NW_004515938.1 | Scaffold477 | 47423                   | TT                              | AA              | 1946951410               |
| SNP_P4_130479_47488 | NW_004515938.1 | Scaffold477 | 47488                   | AA                              | TT              | 1946951411               |
| SNP_P4_130480_47566 | NW_004515938.1 | Scaffold477 | 47566                   | TT                              | AA              | 1946951413               |
| SNP_P4_130481_47588 | NW_004515938.1 | Scaffold477 | 47588                   | CC                              | AA              | 1946951415               |
| SNP_P4_130482_47626 | NW_004515938.1 | Scaffold477 | 47626                   | CC                              | TT              | 1946951417               |
| SNP_P4_130483_47817 | NW_004515938.1 | Scaffold477 | 47817                   | GG                              | AA              | 1946951419               |
| SNP_P4_130484_47841 | NW_004515938.1 | Scaffold477 | 47841                   | GG                              | AA              | 1946951421               |
| SNP_P4_130485_47865 | NW_004515938.1 | Scaffold477 | 47865                   | TT                              | CC              | 1946951423               |
| SNP_P4_130486_47891 | NW_004515938.1 | Scaffold477 | 47891                   | AA                              | GG              | 1946951425               |
| SNP_P4_130487_48893 | NW_004515938.1 | Scaffold477 | 48893                   | TT                              | CC              | 1946951427               |
| SNP_P4_130489_49665 | NW_004515938.1 | Scaffold477 | 49665                   | TT                              | CC              | 1946951429               |
| SNP_P4_130490_52358 | NW_004515938.1 | Scaffold477 | 52358                   | AA                              | GG              | 1946951431               |
| SNP_P4_130491_52408 | NW_004515938.1 | Scaffold477 | 52408                   | TT                              | CC              | 1946951433               |
| SNP_P4_130492_52979 | NW_004515938.1 | Scaffold477 | 52979                   | TT                              | AA              | 1946951435               |
| SNP_P4_130493_53082 | NW_004515938.1 | Scaffold477 | 53082                   | AA                              | CC              | 1946951437               |
| SNP_P4_130494_53456 | NW_004515938.1 | Scaffold477 | 53456                   | AA                              | GG              | 1946951439               |
| SNP_P4_130495_53517 | NW_004515938.1 | Scaffold477 | 53517                   | CC                              | TT              | 1946951441               |
| SNP_P4_130496_53526 | NW_004515938.1 | Scaffold477 | 53526                   | GG                              | AA              | 1946951443               |
| SNP_P4_130497_55110 | NW_004515938.1 | Scaffold477 | 55110                   | AA                              | GG              | 1946951445               |
| SNP_P4_130498_55129 | NW_004515938.1 | Scaffold477 | 55129                   | GG                              | AA              | 1946951447               |
| SNP_P4_130499_55248 | NW_004515938.1 | Scaffold477 | 55248                   | AA                              | GG              | 1946951449               |
| SNP_P4_130500_55386 | NW_004515938.1 | Scaffold477 | 55386                   | TT                              | CC              | 1946951451               |
| SNP_P4_130501_55449 | NW_004515938.1 | Scaffold477 | 55449                   | TT                              | CC              | 1946951453               |
| SNP_P4_130502_55728 | NW_004515938.1 | Scaffold477 | 55728                   | AA                              | GG              | 1946951455               |
| SNP_P4_130503_55871 | NW_004515938.1 | Scaffold477 | 55871                   | TT                              | CC              | 1946951457               |
| SNP_P4_130504_55911 | NW_004515938.1 | Scaffold477 | 55911                   | AA                              | GG              | 1946951459               |
| SNP_P4_130505_55994 | NW_004515938.1 | Scaffold477 | 55994                   | GG                              | AA              | 1946951460               |
| SNP_P4_130506_56733 | NW_004515938.1 | Scaffold477 | 56733                   | TT                              | CC              | 1946951462               |
| SNP_P4_130507_57038 | NW_004515938.1 | Scaffold477 | 57038                   | TT                              | CC              | 1946951464               |

| SNPs IDs            | Chromosome IDs | Chromosomes | Physical positions (bp) | CDC Frontier (Reference genome) | (ILWC46 & LPNB) | NCBI SNPdb Accession IDs |
|---------------------|----------------|-------------|-------------------------|---------------------------------|-----------------|--------------------------|
| SNP_P4_130508_59192 | NW_004515938.1 | Scaffold477 | 59192                   | CC                              | AA              | 1946951466               |
| SNP_P4_130509_59336 | NW_004515938.1 | Scaffold477 | 59336                   | CC                              | TT              | 1946951468               |
| SNP_P4_130510_60774 | NW_004515938.1 | Scaffold477 | 60774                   | AA                              | GG              | 1946951470               |
| SNP_P4_130511_60882 | NW_004515938.1 | Scaffold477 | 60882                   | TT                              | GG              | 1946951472               |
| SNP_P4_130512_62439 | NW_004515938.1 | Scaffold477 | 62439                   | CC                              | AA              | 1946951474               |
| SNP_P4_130513_62474 | NW_004515938.1 | Scaffold477 | 62474                   | AA                              | TT              | 1946951476               |
| SNP_P4_130514_62526 | NW_004515938.1 | Scaffold477 | 62526                   | GG                              | TT              | 1946951478               |
| SNP_P4_130515_65338 | NW_004515938.1 | Scaffold477 | 65338                   | GG                              | AA              | 1946951480               |
| SNP_P4_130516_65356 | NW_004515938.1 | Scaffold477 | 65356                   | TT                              | AA              | 1946951482               |
| SNP_P4_130517_65579 | NW_004515938.1 | Scaffold477 | 65579                   | GG                              | AA              | 1946951484               |
| SNP_P4_130518_6026  | NW_004515940.1 | Scaffold479 | 6026                    | TT                              | AA              | 1946951486               |
| SNP_P4_130519_6054  | NW_004515940.1 | Scaffold479 | 6054                    | CC                              | GG              | 1946951488               |
| SNP_P4_130520_6597  | NW_004515940.1 | Scaffold479 | 6597                    | GG                              | TT              | 1946951490               |
| SNP_P4_130521_6980  | NW_004515940.1 | Scaffold479 | 6980                    | AA                              | GG              | 1946951492               |
| SNP_P4_130522_6999  | NW_004515940.1 | Scaffold479 | 6999                    | TT                              | GG              | 1946951494               |
| SNP_P4_130523_7123  | NW_004515940.1 | Scaffold479 | 7123                    | TT                              | AA              | 1946951496               |
| SNP_P4_130524_7453  | NW_004515940.1 | Scaffold479 | 7453                    | TT                              | AA              | 1946951498               |
| SNP_P4_130526_7697  | NW_004515940.1 | Scaffold479 | 7697                    | TT                              | AA              | 1946951500               |
| SNP_P4_130527_11909 | NW_004515940.1 | Scaffold479 | 11909                   | GG                              | AA              | 1946951501               |
| SNP_P4_130528_15426 | NW_004515940.1 | Scaffold479 | 15426                   | GG                              | AA              | 1946951503               |
| SNP_P4_130529_15435 | NW_004515940.1 | Scaffold479 | 15435                   | AA                              | GG              | 1946951505               |
| SNP_P4_130530_15471 | NW_004515940.1 | Scaffold479 | 15471                   | TT                              | GG              | 1946951506               |
| SNP_P4_130531_16336 | NW_004515940.1 | Scaffold479 | 16336                   | AA                              | TT              | 1946951507               |
| SNP_P4_130532_16477 | NW_004515940.1 | Scaffold479 | 16477                   | TT                              | CC              | 1946951508               |
| SNP_P4_130533_16585 | NW_004515940.1 | Scaffold479 | 16585                   | AA                              | GG              | 1946951509               |
| SNP_P4_130534_16599 | NW_004515940.1 | Scaffold479 | 16599                   | CC                              | GG              | 1946951510               |
| SNP_P4_130535_16690 | NW_004515940.1 | Scaffold479 | 16690                   | AA                              | GG              | 1946951511               |
| SNP_P4_130536_16741 | NW_004515940.1 | Scaffold479 | 16741                   | AA                              | GG              | 1946951512               |
| SNP_P4_130538_16821 | NW_004515940.1 | Scaffold479 | 16821                   | AA                              | GG              | 1946951513               |
| SNP_P4_130539_16835 | NW_004515940.1 | Scaffold479 | 16835                   | GG                              | AA              | 1946951515               |
| SNP_P4_130540_16933 | NW_004515940.1 | Scaffold479 | 16933                   | AA                              | GG              | 1946951517               |
| SNP_P4_130541_17004 | NW_004515940.1 | Scaffold479 | 17004                   | TT                              | AA              | 1946951519               |
| SNP_P4_130542_17005 | NW_004515940.1 | Scaffold479 | 17005                   | AA                              | TT              | 1946951521               |
| SNP_P4_130543_17050 | NW_004515940.1 | Scaffold479 | 17050                   | AA                              | CC              | 1946951522               |
| SNP_P4_130544_17133 | NW_004515940.1 | Scaffold479 | 17133                   | TT                              | CC              | 1946951524               |
| SNP_P4_130545_17618 | NW_004515940.1 | Scaffold479 | 17618                   | TT                              | GG              | 1946951526               |
| SNP_P4_130546_17699 | NW_004515940.1 | Scaffold479 | 17699                   | AA                              | GG              | 1946951528               |
| SNP_P4_130547_17939 | NW_004515940.1 | Scaffold479 | 17939                   | GG                              | TT              | 1946951530               |
| SNP_P4_130548_17959 | NW_004515940.1 | Scaffold479 | 17959                   | AA                              | GG              | 1946951532               |
| SNP_P4_130549_17999 | NW_004515940.1 | Scaffold479 | 17999                   | CC                              | TT              | 1946951534               |
| SNP_P4_130550_18046 | NW_004515940.1 | Scaffold479 | 18046                   | TT                              | CC              | 1946951536               |
| SNP_P4_130551_18254 | NW_004515940.1 | Scaffold479 | 18254                   | GG                              | AA              | 1946951538               |

| SNPs IDs            | Chromosome IDs | Chromosomes | Physical positions (bp) | CDC Frontier (Reference genome) | (ILWC46 & LPNB) | NCBI SNPdb Accession IDs |
|---------------------|----------------|-------------|-------------------------|---------------------------------|-----------------|--------------------------|
| SNP_P4_130552_18276 | NW_004515940.1 | Scaffold479 | 18276                   | AA                              | GG              | 1946951540               |
| SNP_P4_130553_20257 | NW_004515940.1 | Scaffold479 | 20257                   | TT                              | CC              | 1946951542               |
| SNP_P4_130554_20334 | NW_004515940.1 | Scaffold479 | 20334                   | CC                              | TT              | 1946951544               |
| SNP_P4_130555_20336 | NW_004515940.1 | Scaffold479 | 20336                   | CC                              | AA              | 1946951546               |
| SNP_P4_130556_20352 | NW_004515940.1 | Scaffold479 | 20352                   | AA                              | CC              | 1946951548               |
| SNP_P4_130557_20409 | NW_004515940.1 | Scaffold479 | 20409                   | CC                              | TT              | 1946951549               |
| SNP_P4_130558_20445 | NW_004515940.1 | Scaffold479 | 20445                   | TT                              | CC              | 1946951551               |
| SNP_P4_130559_20448 | NW_004515940.1 | Scaffold479 | 20448                   | GG                              | AA              | 1946951553               |
| SNP_P4_130560_31540 | NW_004515940.1 | Scaffold479 | 31540                   | CC                              | TT              | 1946951555               |
| SNP_P4_130561_31588 | NW_004515940.1 | Scaffold479 | 31588                   | TT                              | AA              | 1946951557               |
| SNP_P4_130562_31591 | NW_004515940.1 | Scaffold479 | 31591                   | TT                              | AA              | 1946951559               |
| SNP_P4_130563_31620 | NW_004515940.1 | Scaffold479 | 31620                   | AA                              | TT              | 1946951561               |
| SNP_P4_130564_31859 | NW_004515940.1 | Scaffold479 | 31859                   | TT                              | CC              | 1946951563               |
| SNP_P4_130565_31866 | NW_004515940.1 | Scaffold479 | 31866                   | GG                              | AA              | 1946951565               |
| SNP_P4_130566_31903 | NW_004515940.1 | Scaffold479 | 31903                   | TT                              | CC              | 1946951567               |
| SNP_P4_130567_31916 | NW_004515940.1 | Scaffold479 | 31916                   | GG                              | CC              | 1946951569               |
| SNP_P4_130568_31935 | NW_004515940.1 | Scaffold479 | 31935                   | AA                              | GG              | 1946951571               |
| SNP_P4_130569_37971 | NW_004515940.1 | Scaffold479 | 37971                   | TT                              | CC              | 1946951573               |
| SNP_P4_130570_37975 | NW_004515940.1 | Scaffold479 | 37975                   | CC                              | AA              | 1946951575               |
| SNP_P4_130571_47330 | NW_004515940.1 | Scaffold479 | 47330                   | AA                              | CC              | 1946951577               |
| SNP_P4_130572_47360 | NW_004515940.1 | Scaffold479 | 47360                   | TT                              | GG              | 1946951579               |
| SNP_P4_130573_47361 | NW_004515940.1 | Scaffold479 | 47361                   | CC                              | AA              | 1946951581               |
| SNP_P4_130574_47380 | NW_004515940.1 | Scaffold479 | 47380                   | AA                              | TT              | 1946951582               |
| SNP_P4_130575_47386 | NW_004515940.1 | Scaffold479 | 47386                   | TT                              | CC              | 1946951584               |
| SNP_P4_130576_47390 | NW_004515940.1 | Scaffold479 | 47390                   | AA                              | GG              | 1946951586               |
| SNP_P4_130577_47399 | NW_004515940.1 | Scaffold479 | 47399                   | AA                              | TT              | 1946951588               |
| SNP_P4_130578_48735 | NW_004515940.1 | Scaffold479 | 48735                   | TT                              | CC              | 1946951590               |
| SNP_P4_130579_48778 | NW_004515940.1 | Scaffold479 | 48778                   | CC                              | TT              | 1946951592               |
| SNP_P4_130580_48809 | NW_004515940.1 | Scaffold479 | 48809                   | TT                              | CC              | 1946951594               |
| SNP_P4_130581_48930 | NW_004515940.1 | Scaffold479 | 48930                   | GG                              | AA              | 1946951596               |
| SNP_P4_130582_48932 | NW_004515940.1 | Scaffold479 | 48932                   | TT                              | GG              | 1946951598               |
| SNP_P4_130583_55097 | NW_004515940.1 | Scaffold479 | 55097                   | CC                              | AA              | 1946951600               |
| SNP_P4_130584_55382 | NW_004515940.1 | Scaffold479 | 55382                   | AA                              | TT              | 1946951602               |
| SNP_P4_130585_55395 | NW_004515940.1 | Scaffold479 | 55395                   | AA                              | TT              | 1946951604               |
| SNP_P4_130586_55445 | NW_004515940.1 | Scaffold479 | 55445                   | TT                              | AA              | 1946951606               |
| SNP_P4_130587_55474 | NW_004515940.1 | Scaffold479 | 55474                   | TT                              | CC              | 1946951608               |
| SNP_P4_130588_55543 | NW_004515940.1 | Scaffold479 | 55543                   | TT                              | GG              | 1946951610               |
| SNP_P4_130589_55582 | NW_004515940.1 | Scaffold479 | 55582                   | AA                              | TT              | 1946951612               |
| SNP_P4_130590_55592 | NW_004515940.1 | Scaffold479 | 55592                   | CC                              | GG              | 1946951613               |
| SNP_P4_130591_55609 | NW_004515940.1 | Scaffold479 | 55609                   | GG                              | TT              | 1946951615               |
| SNP_P4_130592_56624 | NW_004515940.1 | Scaffold479 | 56624                   | TT                              | AA              | 1946951617               |
| SNP_P4_130593_62961 | NW_004515940.1 | Scaffold479 | 62961                   | GG                              | TT              | 1946951619               |

| SNPs IDs             | Chromosome IDs | Chromosomes | Physical positions (bp) | CDC Frontier (Reference genome) | (ILWC46 & LPNB) | NCBI SNPdb Accession IDs |
|----------------------|----------------|-------------|-------------------------|---------------------------------|-----------------|--------------------------|
| SNP_P4_130594_73483  | NW_004515940.1 | Scaffold479 | 73483                   | TT                              | GG              | 1946951621               |
| SNP_P4_130595_73511  | NW_004515940.1 | Scaffold479 | 73511                   | CC                              | TT              | 1946951623               |
| SNP_P4_130596_78116  | NW_004515940.1 | Scaffold479 | 78116                   | CC                              | AA              | 1946951625               |
| SNP_P4_130597_79540  | NW_004515940.1 | Scaffold479 | 79540                   | AA                              | TT              | 1946951627               |
| SNP_P4_130598_79556  | NW_004515940.1 | Scaffold479 | 79556                   | TT                              | CC              | 1946951629               |
| SNP_P4_130599_79568  | NW_004515940.1 | Scaffold479 | 79568                   | CC                              | AA              | 1946951631               |
| SNP_P4_130600_87565  | NW_004515940.1 | Scaffold479 | 87565                   | AA                              | GG              | 1946951633               |
| SNP_P4_130601_87631  | NW_004515940.1 | Scaffold479 | 87631                   | CC                              | TT              | 1946951635               |
| SNP_P4_130602_87670  | NW_004515940.1 | Scaffold479 | 87670                   | TT                              | CC              | 1946951637               |
| SNP_P4_130603_88001  | NW_004515940.1 | Scaffold479 | 88001                   | GG                              | AA              | 1946951639               |
| SNP_P4_130604_88017  | NW_004515940.1 | Scaffold479 | 88017                   | AA                              | TT              | 1946951641               |
| SNP_P4_130605_88018  | NW_004515940.1 | Scaffold479 | 88018                   | TT                              | GG              | 1946951643               |
| SNP_P4_130606_88019  | NW_004515940.1 | Scaffold479 | 88019                   | GG                              | AA              | 1946951645               |
| SNP_P4_130607_88215  | NW_004515940.1 | Scaffold479 | 88215                   | AA                              | CC              | 1946951647               |
| SNP_P4_130608_88230  | NW_004515940.1 | Scaffold479 | 88230                   | GG                              | TT              | 1946951649               |
| SNP_P4_130609_88247  | NW_004515940.1 | Scaffold479 | 88247                   | TT                              | AA              | 1946951651               |
| SNP_P4_130610_88276  | NW_004515940.1 | Scaffold479 | 88276                   | AA                              | CC              | 1946951653               |
| SNP_P4_130611_97863  | NW_004515940.1 | Scaffold479 | 97863                   | TT                              | AA              | 1946951655               |
| SNP_P4_130612_97890  | NW_004515940.1 | Scaffold479 | 97890                   | CC                              | GG              | 1946951657               |
| SNP_P4_130613_97899  | NW_004515940.1 | Scaffold479 | 97899                   | CC                              | AA              | 1946951659               |
| SNP_P4_130614_108647 | NW_004515940.1 | Scaffold479 | 108647                  | GG                              | TT              | 1946951661               |
| SNP_P4_130615_108994 | NW_004515940.1 | Scaffold479 | 108994                  | GG                              | AA              | 1946951663               |
| SNP_P4_130616_110172 | NW_004515940.1 | Scaffold479 | 110172                  | TT                              | CC              | 1946951665               |
| SNP_P4_130617_116985 | NW_004515940.1 | Scaffold479 | 116985                  | CC                              | AA              | 1946951667               |
| SNP_P4_130618_117041 | NW_004515940.1 | Scaffold479 | 117041                  | TT                              | GG              | 1946951669               |
| SNP_P4_130619_117740 | NW_004515940.1 | Scaffold479 | 117740                  | TT                              | CC              | 1946951671               |
| SNP_P4_130620_120137 | NW_004515940.1 | Scaffold479 | 120137                  | TT                              | GG              | 1946951673               |
| SNP_P4_130621_121997 | NW_004515940.1 | Scaffold479 | 121997                  | TT                              | AA              | 1946951675               |
| SNP_P4_130622_122036 | NW_004515940.1 | Scaffold479 | 122036                  | TT                              | CC              | 1946951677               |
| SNP_P4_130623_122037 | NW_004515940.1 | Scaffold479 | 122037                  | TT                              | AA              | 1946951679               |
| SNP_P4_130625_125189 | NW_004515940.1 | Scaffold479 | 125189                  | GG                              | CC              | 1946951681               |
| SNP_P4_130626_125261 | NW_004515940.1 | Scaffold479 | 125261                  | TT                              | CC              | 1946951683               |
| SNP_P4_130628_125425 | NW_004515940.1 | Scaffold479 | 125425                  | TT                              | AA              | 1946951685               |
| SNP_P4_130629_125573 | NW_004515940.1 | Scaffold479 | 125573                  | TT                              | CC              | 1946951686               |
| SNP_P4_130630_125574 | NW_004515940.1 | Scaffold479 | 125574                  | GG                              | AA              | 1946951688               |
| SNP_P4_130631_125578 | NW_004515940.1 | Scaffold479 | 125578                  | TT                              | AA              | 1946951690               |
| SNP_P4_130632_125591 | NW_004515940.1 | Scaffold479 | 125591                  | TT                              | CC              | 1946951692               |
| SNP_P4_130633_125640 | NW_004515940.1 | Scaffold479 | 125640                  | AA                              | GG              | 1946951694               |
| SNP_P4_130634_125660 | NW_004515940.1 | Scaffold479 | 125660                  | GG                              | AA              | 1946951696               |
| SNP_P4_130635_125664 | NW_004515940.1 | Scaffold479 | 125664                  | TT                              | CC              | 1946951698               |
| SNP_P4_130636_125682 | NW_004515940.1 | Scaffold479 | 125682                  | GG                              | TT              | 1946951700               |
| SNP_P4_130637_125906 | NW_004515940.1 | Scaffold479 | 125906                  | AA                              | CC              | 1946951702               |

| SNPs IDs             | Chromosome IDs | Chromosomes | Physical positions (bp) | CDC Frontier (Reference genome) | (ILWC46 & LPNB) | NCBI SNPdb Accession IDs |
|----------------------|----------------|-------------|-------------------------|---------------------------------|-----------------|--------------------------|
| SNP_P4_130638_126076 | NW_004515940.1 | Scaffold479 | 126076                  | TT                              | AA              | 1946951704               |
| SNP_P4_130639_129289 | NW_004515940.1 | Scaffold479 | 129289                  | CC                              | TT              | 1946951706               |
| SNP_P4_130640_129342 | NW_004515940.1 | Scaffold479 | 129342                  | GG                              | TT              | 1946951708               |
| SNP_P4_130641_129399 | NW_004515940.1 | Scaffold479 | 129399                  | CC                              | TT              | 1946951710               |
| SNP_P4_130642_130250 | NW_004515940.1 | Scaffold479 | 130250                  | CC                              | TT              | 1946951712               |
| SNP_P4_130643_130498 | NW_004515940.1 | Scaffold479 | 130498                  | CC                              | TT              | 1946951714               |
| SNP_P4_130644_130504 | NW_004515940.1 | Scaffold479 | 130504                  | AA                              | TT              | 1946951716               |
| SNP_P4_130645_130529 | NW_004515940.1 | Scaffold479 | 130529                  | CC                              | AA              | 1946951718               |
| SNP_P4_130646_130575 | NW_004515940.1 | Scaffold479 | 130575                  | TT                              | GG              | 1946951720               |
| SNP_P4_130647_130586 | NW_004515940.1 | Scaffold479 | 130586                  | GG                              | CC              | 1946951722               |
| SNP_P4_130648_130607 | NW_004515940.1 | Scaffold479 | 130607                  | TT                              | GG              | 1946951724               |
| SNP_P4_130649_130639 | NW_004515940.1 | Scaffold479 | 130639                  | TT                              | CC              | 1946951726               |
| SNP_P4_130650_130670 | NW_004515940.1 | Scaffold479 | 130670                  | CC                              | AA              | 1946951728               |
| SNP_P4_130651_130715 | NW_004515940.1 | Scaffold479 | 130715                  | TT                              | CC              | 1946951730               |
| SNP_P4_130652_130884 | NW_004515940.1 | Scaffold479 | 130884                  | TT                              | AA              | 1946951732               |
| SNP_P4_130653_130956 | NW_004515940.1 | Scaffold479 | 130956                  | AA                              | CC              | 1946951734               |
| SNP_P4_130654_130961 | NW_004515940.1 | Scaffold479 | 130961                  | GG                              | AA              | 1946951736               |
| SNP_P4_130655_130969 | NW_004515940.1 | Scaffold479 | 130969                  | AA                              | CC              | 1946951738               |
| SNP_P4_130656_130971 | NW_004515940.1 | Scaffold479 | 130971                  | AA                              | GG              | 1946951740               |
| SNP_P4_130657_131012 | NW_004515940.1 | Scaffold479 | 131012                  | AA                              | TT              | 1946951742               |
| SNP_P4_130658_131033 | NW_004515940.1 | Scaffold479 | 131033                  | TT                              | CC              | 1946951744               |
| SNP_P4_130659_131047 | NW_004515940.1 | Scaffold479 | 131047                  | TT                              | AA              | 1946951746               |
| SNP_P4_130660_131127 | NW_004515940.1 | Scaffold479 | 131127                  | TT                              | GG              | 1946951748               |
| SNP_P4_130661_131888 | NW_004515940.1 | Scaffold479 | 131888                  | TT                              | AA              | 1946951750               |
| SNP_P4_130662_136055 | NW_004515940.1 | Scaffold479 | 136055                  | TT                              | AA              | 1946951752               |
| SNP_P4_130663_138964 | NW_004515940.1 | Scaffold479 | 138964                  | AA                              | GG              | 1946951754               |
| SNP_P4_130664_139206 | NW_004515940.1 | Scaffold479 | 139206                  | GG                              | TT              | 1946951756               |
| SNP_P4_130665_139218 | NW_004515940.1 | Scaffold479 | 139218                  | AA                              | GG              | 1946951758               |
| SNP_P4_130666_139230 | NW_004515940.1 | Scaffold479 | 139230                  | GG                              | TT              | 1946951760               |
| SNP_P4_130667_139234 | NW_004515940.1 | Scaffold479 | 139234                  | TT                              | GG              | 1946951762               |
| SNP_P4_130668_139259 | NW_004515940.1 | Scaffold479 | 139259                  | TT                              | GG              | 1946951764               |
| SNP_P4_130669_139290 | NW_004515940.1 | Scaffold479 | 139290                  | TT                              | CC              | 1946951766               |
| SNP_P4_130670_139314 | NW_004515940.1 | Scaffold479 | 139314                  | AA                              | CC              | 1946951768               |
| SNP_P4_130671_139345 | NW_004515940.1 | Scaffold479 | 139345                  | TT                              | GG              | 1946951770               |
| SNP_P4_130672_139347 | NW_004515940.1 | Scaffold479 | 139347                  | TT                              | AA              | 1946951772               |
| SNP_P4_130673_139365 | NW_004515940.1 | Scaffold479 | 139365                  | TT                              | CC              | 1946951774               |
| SNP_P4_130674_139366 | NW_004515940.1 | Scaffold479 | 139366                  | CC                              | TT              | 1946951776               |
| SNP_P4_130675_139377 | NW_004515940.1 | Scaffold479 | 139377                  | GG                              | TT              | 1946951778               |
| SNP_P4_130676_143059 | NW_004515940.1 | Scaffold479 | 143059                  | GG                              | AA              | 1946951780               |
| SNP_P4_130677_148277 | NW_004515940.1 | Scaffold479 | 148277                  | TT                              | GG              | 1946951782               |
| SNP_P4_130678_151260 | NW_004515940.1 | Scaffold479 | 151260                  | TT                              | GG              | 1946951784               |
| SNP_P4_130679_151282 | NW_004515940.1 | Scaffold479 | 151282                  | CC                              | TT              | 1946951786               |

| SNPs IDs             | Chromosome IDs | Chromosomes | Physical positions (bp) | CDC Frontier (Reference genome) | (ILWC46 & LPNB) | NCBI SNPdb Accession IDs |
|----------------------|----------------|-------------|-------------------------|---------------------------------|-----------------|--------------------------|
| SNP_P4_130680_151283 | NW_004515940.1 | Scaffold479 | 151283                  | GG                              | AA              | 1946951788               |
| SNP_P4_130681_153990 | NW_004515940.1 | Scaffold479 | 153990                  | TT                              | CC              | 1946951790               |
| SNP_P4_130682_153998 | NW_004515940.1 | Scaffold479 | 153998                  | TT                              | GG              | 1946951792               |
| SNP_P4_130683_154377 | NW_004515940.1 | Scaffold479 | 154377                  | TT                              | CC              | 1946951794               |
| SNP_P4_130684_154718 | NW_004515940.1 | Scaffold479 | 154718                  | GG                              | TT              | 1946951796               |
| SNP_P4_130685_154748 | NW_004515940.1 | Scaffold479 | 154748                  | CC                              | TT              | 1946951798               |
| SNP_P4_130686_154771 | NW_004515940.1 | Scaffold479 | 154771                  | AA                              | GG              | 1946951800               |
| SNP_P4_130687_154781 | NW_004515940.1 | Scaffold479 | 154781                  | AA                              | TT              | 1946951802               |
| SNP_P4_130688_154848 | NW_004515940.1 | Scaffold479 | 154848                  | TT                              | CC              | 1946951804               |
| SNP_P4_130689_154857 | NW_004515940.1 | Scaffold479 | 154857                  | TT                              | GG              | 1946951806               |
| SNP_P4_130690_154868 | NW_004515940.1 | Scaffold479 | 154868                  | TT                              | AA              | 1946951808               |
| SNP_P4_130691_154951 | NW_004515940.1 | Scaffold479 | 154951                  | CC                              | TT              | 1946951810               |
| SNP_P4_130692_154976 | NW_004515940.1 | Scaffold479 | 154976                  | CC                              | GG              | 1946951812               |
| SNP_P4_130693_156323 | NW_004515940.1 | Scaffold479 | 156323                  | GG                              | AA              | 1946951814               |
| SNP_P4_130694_156360 | NW_004515940.1 | Scaffold479 | 156360                  | TT                              | CC              | 1946951816               |
| SNP_P4_130695_156363 | NW_004515940.1 | Scaffold479 | 156363                  | TT                              | CC              | 1946951818               |
| SNP_P4_130697_33645  | NW_004515941.1 | Scaffold480 | 33645                   | TT                              | CC              | 1946951820               |
| SNP_P4_130698_33688  | NW_004515941.1 | Scaffold480 | 33688                   | CC                              | AA              | 1946951822               |
| SNP_P4_130699_33724  | NW_004515941.1 | Scaffold480 | 33724                   | CC                              | TT              | 1946951824               |
| SNP_P4_130700_33729  | NW_004515941.1 | Scaffold480 | 33729                   | AA                              | GG              | 1946951826               |
| SNP_P4_130701_33735  | NW_004515941.1 | Scaffold480 | 33735                   | AA                              | CC              | 1946951828               |
| SNP_P4_130702_33762  | NW_004515941.1 | Scaffold480 | 33762                   | AA                              | GG              | 1946951830               |
| SNP_P4_130703_33772  | NW_004515941.1 | Scaffold480 | 33772                   | AA                              | GG              | 1946951832               |
| SNP_P4_130704_34472  | NW_004515941.1 | Scaffold480 | 34472                   | AA                              | GG              | 1946951834               |
| SNP_P4_130706_34569  | NW_004515941.1 | Scaffold480 | 34569                   | TT                              | AA              | 1946951836               |
| SNP_P4_130707_43084  | NW_004515941.1 | Scaffold480 | 43084                   | GG                              | AA              | 1946951838               |
| SNP_P4_130708_43093  | NW_004515941.1 | Scaffold480 | 43093                   | AA                              | GG              | 1946951840               |
| SNP_P4_130710_43226  | NW_004515941.1 | Scaffold480 | 43226                   | TT                              | CC              | 1946951842               |
| SNP_P4_130711_43416  | NW_004515941.1 | Scaffold480 | 43416                   | GG                              | AA              | 1946951844               |
| SNP_P4_130712_43428  | NW_004515941.1 | Scaffold480 | 43428                   | CC                              | AA              | 1946951846               |
| SNP_P4_130713_43460  | NW_004515941.1 | Scaffold480 | 43460                   | CC                              | TT              | 1946951848               |
| SNP_P4_130714_43461  | NW_004515941.1 | Scaffold480 | 43461                   | TT                              | CC              | 1946951850               |
| SNP_P4_130715_43464  | NW_004515941.1 | Scaffold480 | 43464                   | TT                              | GG              | 1946951852               |
| SNP_P4_130716_43542  | NW_004515941.1 | Scaffold480 | 43542                   | AA                              | GG              | 1946951854               |
| SNP_P4_130717_43569  | NW_004515941.1 | Scaffold480 | 43569                   | AA                              | GG              | 1946951856               |
| SNP_P4_130718_43588  | NW_004515941.1 | Scaffold480 | 43588                   | AA                              | GG              | 1946951858               |
| SNP_P4_130719_43630  | NW_004515941.1 | Scaffold480 | 43630                   | TT                              | CC              | 1946951860               |
| SNP_P4_130720_69910  | NW_004515941.1 | Scaffold480 | 69910                   | AA                              | GG              | 1946951862               |
| SNP_P4_130721_71555  | NW_004515941.1 | Scaffold480 | 71555                   | CC                              | TT              | 1946951864               |
| SNP_P4_130722_72517  | NW_004515941.1 | Scaffold480 | 72517                   | CC                              | AA              | 1946951866               |
| SNP_P4_130723_78144  | NW_004515941.1 | Scaffold480 | 78144                   | CC                              | TT              | 1946951868               |
| SNP_P4_130724_78178  | NW_004515941.1 | Scaffold480 | 78178                   | CC                              | GG              | 1946951870               |

| SNPs IDs             | Chromosome IDs | Chromosomes | Physical positions (bp) | CDC Frontier (Reference genome) | (ILWC46 & LPNB) | NCBI SNPdb Accession IDs |
|----------------------|----------------|-------------|-------------------------|---------------------------------|-----------------|--------------------------|
| SNP_P4_130725_86559  | NW_004515941.1 | Scaffold480 | 86559                   | GG                              | CC              | 1946951872               |
| SNP_P4_130726_187    | NW_004515942.1 | Scaffold481 | 187                     | GG                              | TT              | 1946951874               |
| SNP_P4_130727_249    | NW_004515942.1 | Scaffold481 | 249                     | TT                              | CC              | 1946951876               |
| SNP_P4_130728_470    | NW_004515942.1 | Scaffold481 | 470                     | AA                              | GG              | 1946951878               |
| SNP_P4_130729_8839   | NW_004515942.1 | Scaffold481 | 8839                    | AA                              | TT              | 1946951880               |
| SNP_P4_130730_15344  | NW_004515944.1 | Scaffold484 | 15344                   | GG                              | TT              | 1946951882               |
| SNP_P4_130731_15348  | NW_004515944.1 | Scaffold484 | 15348                   | CC                              | AA              | 1946951884               |
| SNP_P4_130732_15349  | NW_004515944.1 | Scaffold484 | 15349                   | AA                              | CC              | 1946951886               |
| SNP_P4_130733_26104  | NW_004515944.1 | Scaffold484 | 26104                   | CC                              | TT              | 1946951888               |
| SNP_P4_130734_27388  | NW_004515944.1 | Scaffold484 | 27388                   | TT                              | CC              | 1946951890               |
| SNP_P4_130735_27515  | NW_004515944.1 | Scaffold484 | 27515                   | CC                              | GG              | 1946951892               |
| SNP_P4_130736_27606  | NW_004515944.1 | Scaffold484 | 27606                   | GG                              | AA              | 1946951894               |
| SNP_P4_130737_27651  | NW_004515944.1 | Scaffold484 | 27651                   | CC                              | AA              | 1946951896               |
| SNP_P4_130738_27818  | NW_004515944.1 | Scaffold484 | 27818                   | CC                              | AA              | 1946951898               |
| SNP_P4_130739_27862  | NW_004515944.1 | Scaffold484 | 27862                   | CC                              | TT              | 1946951900               |
| SNP_P4_130740_27880  | NW_004515944.1 | Scaffold484 | 27880                   | AA                              | GG              | 1946951902               |
| SNP_P4_130741_27911  | NW_004515944.1 | Scaffold484 | 27911                   | TT                              | CC              | 1946951904               |
| SNP_P4_130742_34494  | NW_004515944.1 | Scaffold484 | 34494                   | AA                              | CC              | 1946951906               |
| SNP_P4_130743_34906  | NW_004515944.1 | Scaffold484 | 34906                   | TT                              | CC              | 1946951908               |
| SNP_P4_130744_37430  | NW_004515944.1 | Scaffold484 | 37430                   | TT                              | CC              | 1946951910               |
| SNP_P4_130745_38770  | NW_004515944.1 | Scaffold484 | 38770                   | TT                              | CC              | 1946951912               |
| SNP_P4_130746_39856  | NW_004515944.1 | Scaffold484 | 39856                   | TT                              | CC              | 1946951914               |
| SNP_P4_130747_54554  | NW_004515944.1 | Scaffold484 | 54554                   | GG                              | TT              | 1946951916               |
| SNP_P4_130749_79643  | NW_004515944.1 | Scaffold484 | 79643                   | AA                              | GG              | 1946951918               |
| SNP_P4_130750_80021  | NW_004515944.1 | Scaffold484 | 80021                   | GG                              | AA              | 1946951920               |
| SNP_P4_130751_85910  | NW_004515944.1 | Scaffold484 | 85910                   | AA                              | GG              | 1946951922               |
| SNP_P4_130752_95332  | NW_004515944.1 | Scaffold484 | 95332                   | GG                              | AA              | 1946951924               |
| SNP_P4_130753_96220  | NW_004515944.1 | Scaffold484 | 96220                   | TT                              | CC              | 1946951926               |
| SNP_P4_130754_136295 | NW_004515944.1 | Scaffold484 | 136295                  | AA                              | GG              | 1946951928               |
| SNP_P4_130756_154492 | NW_004515944.1 | Scaffold484 | 154492                  | TT                              | AA              | 1946951930               |
| SNP_P4_130757_154498 | NW_004515944.1 | Scaffold484 | 154498                  | GG                              | AA              | 1946951932               |
| SNP_P4_130758_154505 | NW_004515944.1 | Scaffold484 | 154505                  | AA                              | GG              | 1946951934               |
| SNP_P4_130759_154529 | NW_004515944.1 | Scaffold484 | 154529                  | CC                              | AA              | 1946951936               |
| SNP_P4_130760_154538 | NW_004515944.1 | Scaffold484 | 154538                  | AA                              | GG              | 1946951938               |
| SNP_P4_130761_154554 | NW_004515944.1 | Scaffold484 | 154554                  | TT                              | CC              | 1946951940               |
| SNP_P4_130762_172484 | NW_004515944.1 | Scaffold484 | 172484                  | AA                              | TT              | 1946951942               |
| SNP_P4_130763_179933 | NW_004515944.1 | Scaffold484 | 179933                  | CC                              | GG              | 1946951944               |
| SNP_P4_130764_205392 | NW_004515944.1 | Scaffold484 | 205392                  | CC                              | TT              | 1946951946               |
| SNP_P4_130765_227776 | NW_004515944.1 | Scaffold484 | 227776                  | GG                              | TT              | 1946951948               |
| SNP_P4_130766_228833 | NW_004515944.1 | Scaffold484 | 228833                  | TT                              | CC              | 1946951950               |
| SNP_P4_130767_247010 | NW_004515944.1 | Scaffold484 | 247010                  | GG                              | TT              | 1946951952               |
| SNP_P4_130768_247512 | NW_004515944.1 | Scaffold484 | 247512                  | GG                              | CC              | 1946951954               |

| SNPs IDs             | Chromosome IDs | Chromosomes | Physical positions (bp) | CDC Frontier (Reference genome) | (ILWC46 & LPNB) | NCBI SNPdb Accession IDs |
|----------------------|----------------|-------------|-------------------------|---------------------------------|-----------------|--------------------------|
| SNP_P4_130769_262749 | NW_004515944.1 | Scaffold484 | 262749                  | TT                              | CC              | 1946951956               |
| SNP_P4_130770_262783 | NW_004515944.1 | Scaffold484 | 262783                  | TT                              | CC              | 1946951958               |
| SNP_P4_130771_271545 | NW_004515944.1 | Scaffold484 | 271545                  | TT                              | CC              | 1946951960               |
| SNP_P4_130772_271616 | NW_004515944.1 | Scaffold484 | 271616                  | AA                              | GG              | 1946951962               |
| SNP_P4_130773_271922 | NW_004515944.1 | Scaffold484 | 271922                  | AA                              | GG              | 1946951964               |
| SNP_P4_130774_271975 | NW_004515944.1 | Scaffold484 | 271975                  | TT                              | CC              | 1946951966               |
| SNP_P4_130775_271982 | NW_004515944.1 | Scaffold484 | 271982                  | TT                              | GG              | 1946951968               |
| SNP_P4_130776_271995 | NW_004515944.1 | Scaffold484 | 271995                  | GG                              | TT              | 1946951970               |
| SNP_P4_130777_271996 | NW_004515944.1 | Scaffold484 | 271996                  | TT                              | AA              | 1946951972               |
| SNP_P4_130778_273857 | NW_004515944.1 | Scaffold484 | 273857                  | CC                              | TT              | 1946951974               |
| SNP_P4_130779_275465 | NW_004515944.1 | Scaffold484 | 275465                  | TT                              | AA              | 1946951976               |
| SNP_P4_130780_275474 | NW_004515944.1 | Scaffold484 | 275474                  | AA                              | TT              | 1946951978               |
| SNP_P4_130781_276158 | NW_004515944.1 | Scaffold484 | 276158                  | CC                              | TT              | 1946951980               |
| SNP_P4_130782_297812 | NW_004515944.1 | Scaffold484 | 297812                  | GG                              | TT              | 1946951982               |
| SNP_P4_130783_298483 | NW_004515944.1 | Scaffold484 | 298483                  | GG                              | TT              | 1946951984               |
| SNP_P4_130784_300118 | NW_004515944.1 | Scaffold484 | 300118                  | TT                              | AA              | 1946951986               |
| SNP_P4_130785_306190 | NW_004515944.1 | Scaffold484 | 306190                  | AA                              | GG              | 1946951988               |
| SNP_P4_130786_307761 | NW_004515944.1 | Scaffold484 | 307761                  | AA                              | TT              | 1946951990               |
| SNP_P4_130788_320580 | NW_004515944.1 | Scaffold484 | 320580                  | CC                              | TT              | 1946951992               |
| SNP_P4_130790_326795 | NW_004515944.1 | Scaffold484 | 326795                  | CC                              | GG              | 1946951994               |
| SNP_P4_130791_326804 | NW_004515944.1 | Scaffold484 | 326804                  | AA                              | TT              | 1946951996               |
| SNP_P4_130792_334967 | NW_004515944.1 | Scaffold484 | 334967                  | TT                              | AA              | 1946951998               |
| SNP_P4_130793_334977 | NW_004515944.1 | Scaffold484 | 334977                  | GG                              | AA              | 1946952000               |
| SNP_P4_130794_334996 | NW_004515944.1 | Scaffold484 | 334996                  | CC                              | TT              | 1946952002               |
| SNP_P4_130795_369160 | NW_004515944.1 | Scaffold484 | 369160                  | TT                              | CC              | 1946952004               |
| SNP_P4_130796_371303 | NW_004515944.1 | Scaffold484 | 371303                  | TT                              | CC              | 1946952006               |
| SNP_P4_130797_379342 | NW_004515944.1 | Scaffold484 | 379342                  | AA                              | GG              | 1946952008               |
| SNP_P4_130798_384550 | NW_004515944.1 | Scaffold484 | 384550                  | TT                              | GG              | 1946952010               |
| SNP_P4_130799_384554 | NW_004515944.1 | Scaffold484 | 384554                  | TT                              | AA              | 1946952012               |
| SNP_P4_130800_384568 | NW_004515944.1 | Scaffold484 | 384568                  | CC                              | AA              | 1946952014               |
| SNP_P4_130801_391308 | NW_004515944.1 | Scaffold484 | 391308                  | TT                              | GG              | 1946952016               |
| SNP_P4_130802_394520 | NW_004515944.1 | Scaffold484 | 394520                  | AA                              | GG              | 1946952018               |
| SNP_P4_130803_394534 | NW_004515944.1 | Scaffold484 | 394534                  | TT                              | CC              | 1946952020               |
| SNP_P4_130804_394560 | NW_004515944.1 | Scaffold484 | 394560                  | AA                              | GG              | 1946952022               |
| SNP_P4_130805_394571 | NW_004515944.1 | Scaffold484 | 394571                  | CC                              | GG              | 1946952024               |
| SNP_P4_130806_394648 | NW_004515944.1 | Scaffold484 | 394648                  | AA                              | TT              | 1946952026               |
| SNP_P4_130807_394971 | NW_004515944.1 | Scaffold484 | 394971                  | CC                              | TT              | 1946952028               |
| SNP_P4_130808_437102 | NW_004515944.1 | Scaffold484 | 437102                  | GG                              | AA              | 1946952030               |
| SNP_P4_130809_441542 | NW_004515944.1 | Scaffold484 | 441542                  | AA                              | CC              | 1946952032               |
| SNP_P4_130810_444755 | NW_004515944.1 | Scaffold484 | 444755                  | TT                              | CC              | 1946952034               |
| SNP_P4_130811_449079 | NW_004515944.1 | Scaffold484 | 449079                  | AA                              | CC              | 1946952036               |
| SNP_P4_130812_449110 | NW_004515944.1 | Scaffold484 | 449110                  | CC                              | TT              | 1946952038               |



| SNPs IDs             | Chromosome IDs | Chromosomes | Physical positions (bp) | CDC Frontier (Reference genome) | (ILWC46 & LPNB) | NCBI SNPdb Accession IDs |
|----------------------|----------------|-------------|-------------------------|---------------------------------|-----------------|--------------------------|
| SNP_P4_130813_449161 | NW_004515944.1 | Scaffold484 | 449161                  | AA                              | GG              | 1946952040               |
| SNP_P4_130814_452928 | NW_004515944.1 | Scaffold484 | 452928                  | GG                              | TT              | 1946952042               |
| SNP_P4_130815_452958 | NW_004515944.1 | Scaffold484 | 452958                  | AA                              | GG              | 1946952044               |
| SNP_P4_130816_452978 | NW_004515944.1 | Scaffold484 | 452978                  | CC                              | TT              | 1946952046               |
| SNP_P4_130817_453061 | NW_004515944.1 | Scaffold484 | 453061                  | AA                              | GG              | 1946952048               |
| SNP_P4_130818_453217 | NW_004515944.1 | Scaffold484 | 453217                  | AA                              | GG              | 1946952050               |
| SNP_P4_130819_453335 | NW_004515944.1 | Scaffold484 | 453335                  | AA                              | TT              | 1946952052               |
| SNP_P4_130820_453336 | NW_004515944.1 | Scaffold484 | 453336                  | AA                              | GG              | 1946952054               |
| SNP_P4_130821_453362 | NW_004515944.1 | Scaffold484 | 453362                  | TT                              | AA              | 1946952056               |
| SNP_P4_130822_458471 | NW_004515944.1 | Scaffold484 | 458471                  | GG                              | TT              | 1946952058               |
| SNP_P4_130823_458512 | NW_004515944.1 | Scaffold484 | 458512                  | AA                              | GG              | 1946952060               |
| SNP_P4_130824_458946 | NW_004515944.1 | Scaffold484 | 458946                  | GG                              | AA              | 1946952062               |
| SNP_P4_130825_463881 | NW_004515944.1 | Scaffold484 | 463881                  | TT                              | AA              | 1946952064               |
| SNP_P4_130826_464274 | NW_004515944.1 | Scaffold484 | 464274                  | AA                              | GG              | 1946952066               |
| SNP_P4_130827_484863 | NW_004515944.1 | Scaffold484 | 484863                  | TT                              | CC              | 1946952068               |
| SNP_P4_130828_490608 | NW_004515944.1 | Scaffold484 | 490608                  | AA                              | CC              | 1946952070               |
| SNP_P4_130829_505088 | NW_004515944.1 | Scaffold484 | 505088                  | CC                              | TT              | 1946952072               |
| SNP_P4_130830_506239 | NW_004515944.1 | Scaffold484 | 506239                  | CC                              | TT              | 1946952074               |
| SNP_P4_130831_510117 | NW_004515944.1 | Scaffold484 | 510117                  | AA                              | GG              | 1946952076               |
| SNP_P4_130832_532302 | NW_004515944.1 | Scaffold484 | 532302                  | GG                              | AA              | 1946952078               |
| SNP_P4_130833_561077 | NW_004515944.1 | Scaffold484 | 561077                  | TT                              | CC              | 1946952080               |
| SNP_P4_130834_561734 | NW_004515944.1 | Scaffold484 | 561734                  | CC                              | TT              | 1946952082               |
| SNP_P4_130835_578014 | NW_004515944.1 | Scaffold484 | 578014                  | AA                              | TT              | 1946952084               |
| SNP_P4_130836_578018 | NW_004515944.1 | Scaffold484 | 578018                  | TT                              | AA              | 1946952086               |
| SNP_P4_130837_578043 | NW_004515944.1 | Scaffold484 | 578043                  | GG                              | TT              | 1946952088               |
| SNP_P4_130838_578148 | NW_004515944.1 | Scaffold484 | 578148                  | CC                              | TT              | 1946952090               |
| SNP_P4_130839_578154 | NW_004515944.1 | Scaffold484 | 578154                  | TT                              | CC              | 1946952092               |
| SNP_P4_130840_578163 | NW_004515944.1 | Scaffold484 | 578163                  | TT                              | CC              | 1946952094               |
| SNP_P4_130841_578294 | NW_004515944.1 | Scaffold484 | 578294                  | CC                              | TT              | 1946952096               |
| SNP_P4_130842_578384 | NW_004515944.1 | Scaffold484 | 578384                  | TT                              | CC              | 1946952098               |
| SNP_P4_130843_578435 | NW_004515944.1 | Scaffold484 | 578435                  | TT                              | GG              | 1946952100               |
| SNP_P4_130844_578447 | NW_004515944.1 | Scaffold484 | 578447                  | AA                              | TT              | 1946952102               |
| SNP_P4_130845_578476 | NW_004515944.1 | Scaffold484 | 578476                  | TT                              | CC              | 1946952104               |
| SNP_P4_130846_578913 | NW_004515944.1 | Scaffold484 | 578913                  | GG                              | AA              | 1946952106               |
| SNP_P4_130847_584625 | NW_004515944.1 | Scaffold484 | 584625                  | AA                              | TT              | 1946952108               |
| SNP_P4_130848_587026 | NW_004515944.1 | Scaffold484 | 587026                  | GG                              | AA              | 1946952110               |
| SNP_P4_130849_587424 | NW_004515944.1 | Scaffold484 | 587424                  | TT                              | GG              | 1946952112               |
| SNP_P4_130850_591336 | NW_004515944.1 | Scaffold484 | 591336                  | AA                              | GG              | 1946952114               |
| SNP_P4_130851_591401 | NW_004515944.1 | Scaffold484 | 591401                  | AA                              | GG              | 1946952116               |
| SNP_P4_130852_591565 | NW_004515944.1 | Scaffold484 | 591565                  | AA                              | TT              | 1946952118               |
| SNP_P4_130853_591712 | NW_004515944.1 | Scaffold484 | 591712                  | GG                              | AA              | 1946952120               |
| SNP_P4_130854_591759 | NW_004515944.1 | Scaffold484 | 591759                  | AA                              | CC              | 1946952122               |

| SNPs IDs             | Chromosome IDs | Chromosomes | Physical positions (bp) | CDC Frontier (Reference genome) | (ILWC46 & LPNB) | NCBI SNPdb Accession IDs |
|----------------------|----------------|-------------|-------------------------|---------------------------------|-----------------|--------------------------|
| SNP_P4_130855_591794 | NW_004515944.1 | Scaffold484 | 591794                  | TT                              | AA              | 1946952124               |
| SNP_P4_130856_592064 | NW_004515944.1 | Scaffold484 | 592064                  | TT                              | GG              | 1946952126               |
| SNP_P4_130857_592190 | NW_004515944.1 | Scaffold484 | 592190                  | AA                              | GG              | 1946952128               |
| SNP_P4_130858_632821 | NW_004515944.1 | Scaffold484 | 632821                  | CC                              | TT              | 1946952130               |
| SNP_P4_130859_632912 | NW_004515944.1 | Scaffold484 | 632912                  | AA                              | GG              | 1946952132               |
| SNP_P4_130860_633101 | NW_004515944.1 | Scaffold484 | 633101                  | AA                              | TT              | 1946952134               |
| SNP_P4_130861_633122 | NW_004515944.1 | Scaffold484 | 633122                  | CC                              | TT              | 1946952136               |
| SNP_P4_130862_641013 | NW_004515944.1 | Scaffold484 | 641013                  | GG                              | AA              | 1946952138               |
| SNP_P4_130863_646927 | NW_004515944.1 | Scaffold484 | 646927                  | TT                              | CC              | 1946952140               |
| SNP_P4_130864_656599 | NW_004515944.1 | Scaffold484 | 656599                  | TT                              | CC              | 1946952142               |
| SNP_P4_130866_656803 | NW_004515944.1 | Scaffold484 | 656803                  | AA                              | GG              | 1946952144               |
| SNP_P4_130867_656897 | NW_004515944.1 | Scaffold484 | 656897                  | TT                              | GG              | 1946952146               |
| SNP_P4_130869_704490 | NW_004515944.1 | Scaffold484 | 704490                  | GG                              | AA              | 1946952148               |
| SNP_P4_130870_704491 | NW_004515944.1 | Scaffold484 | 704491                  | AA                              | GG              | 1946952150               |
| SNP_P4_130871_704588 | NW_004515944.1 | Scaffold484 | 704588                  | TT                              | AA              | 1946952152               |
| SNP_P4_130872_704632 | NW_004515944.1 | Scaffold484 | 704632                  | CC                              | TT              | 1946952154               |
| SNP_P4_130873_704641 | NW_004515944.1 | Scaffold484 | 704641                  | CC                              | TT              | 1946952156               |
| SNP_P4_130875_704674 | NW_004515944.1 | Scaffold484 | 704674                  | GG                              | AA              | 1946952158               |
| SNP_P4_130876_704869 | NW_004515944.1 | Scaffold484 | 704869                  | AA                              | GG              | 1946952160               |
| SNP_P4_130877_704888 | NW_004515944.1 | Scaffold484 | 704888                  | AA                              | GG              | 1946952162               |
| SNP_P4_130878_704909 | NW_004515944.1 | Scaffold484 | 704909                  | GG                              | AA              | 1946952164               |
| SNP_P4_130879_704932 | NW_004515944.1 | Scaffold484 | 704932                  | TT                              | AA              | 1946952166               |
| SNP_P4_130880_704984 | NW_004515944.1 | Scaffold484 | 704984                  | AA                              | GG              | 1946952168               |
| SNP_P4_130881_719776 | NW_004515944.1 | Scaffold484 | 719776                  | CC                              | TT              | 1946952170               |
| SNP_P4_130882_722011 | NW_004515944.1 | Scaffold484 | 722011                  | CC                              | TT              | 1946952172               |
| SNP_P4_130883_736535 | NW_004515944.1 | Scaffold484 | 736535                  | GG                              | AA              | 1946952174               |
| SNP_P4_130884_736714 | NW_004515944.1 | Scaffold484 | 736714                  | CC                              | TT              | 1946952176               |
| SNP_P4_130886_736766 | NW_004515944.1 | Scaffold484 | 736766                  | AA                              | CC              | 1946952178               |
| SNP_P4_130887_736784 | NW_004515944.1 | Scaffold484 | 736784                  | CC                              | TT              | 1946952180               |
| SNP_P4_130889_742907 | NW_004515944.1 | Scaffold484 | 742907                  | CC                              | TT              | 1946952182               |
| SNP_P4_130890_763677 | NW_004515944.1 | Scaffold484 | 763677                  | AA                              | GG              | 1946952184               |
| SNP_P4_130891_763827 | NW_004515944.1 | Scaffold484 | 763827                  | AA                              | GG              | 1946952186               |
| SNP_P4_130892_764000 | NW_004515944.1 | Scaffold484 | 764000                  | AA                              | GG              | 1946952188               |
| SNP_P4_130894_764018 | NW_004515944.1 | Scaffold484 | 764018                  | AA                              | TT              | 1946952190               |
| SNP_P4_130895_764082 | NW_004515944.1 | Scaffold484 | 764082                  | AA                              | GG              | 1946952192               |
| SNP_P4_130896_764106 | NW_004515944.1 | Scaffold484 | 764106                  | AA                              | CC              | 1946952194               |
| SNP_P4_130897_794508 | NW_004515944.1 | Scaffold484 | 794508                  | GG                              | AA              | 1946952196               |
| SNP_P4_130898_794521 | NW_004515944.1 | Scaffold484 | 794521                  | AA                              | TT              | 1946952198               |
| SNP_P4_130899_794522 | NW_004515944.1 | Scaffold484 | 794522                  | TT                              | GG              | 1946952200               |
| SNP_P4_130900_794538 | NW_004515944.1 | Scaffold484 | 794538                  | TT                              | AA              | 1946952202               |
| SNP_P4_130901_794571 | NW_004515944.1 | Scaffold484 | 794571                  | TT                              | CC              | 1946952204               |
| SNP_P4_130902_794572 | NW_004515944.1 | Scaffold484 | 794572                  | AA                              | CC              | 1946952206               |

| SNPs IDs             | Chromosome IDs | Chromosomes | Physical positions (bp) | CDC Frontier (Reference genome) | (ILWC46 & LPNB) | NCBI SNPdb Accession IDs |
|----------------------|----------------|-------------|-------------------------|---------------------------------|-----------------|--------------------------|
| SNP_P4_130903_794576 | NW_004515944.1 | Scaffold484 | 794576                  | CC                              | TT              | 1946952208               |
| SNP_P4_130904_794579 | NW_004515944.1 | Scaffold484 | 794579                  | AA                              | GG              | 1946952210               |
| SNP_P4_130905_794595 | NW_004515944.1 | Scaffold484 | 794595                  | CC                              | TT              | 1946952212               |
| SNP_P4_130906_794820 | NW_004515944.1 | Scaffold484 | 794820                  | AA                              | GG              | 1946952214               |
| SNP_P4_130907_4397   | NW_004515945.1 | Scaffold485 | 4397                    | TT                              | CC              | 1946952216               |
| SNP_P4_130909_53693  | NW_004515945.1 | Scaffold485 | 53693                   | GG                              | AA              | 1946952218               |
| SNP_P4_130910_88806  | NW_004515945.1 | Scaffold485 | 88806                   | TT                              | GG              | 1946952220               |
| SNP_P4_130911_93140  | NW_004515945.1 | Scaffold485 | 93140                   | AA                              | GG              | 1946952222               |
| SNP_P4_130912_104738 | NW_004515945.1 | Scaffold485 | 104738                  | TT                              | CC              | 1946952224               |
| SNP_P4_130913_112126 | NW_004515945.1 | Scaffold485 | 112126                  | CC                              | AA              | 1946952226               |
| SNP_P4_130914_121386 | NW_004515945.1 | Scaffold485 | 121386                  | TT                              | CC              | 1946952228               |
| SNP_P4_130915_130283 | NW_004515945.1 | Scaffold485 | 130283                  | GG                              | AA              | 1946952230               |
| SNP_P4_130916_130335 | NW_004515945.1 | Scaffold485 | 130335                  | AA                              | GG              | 1946952232               |
| SNP_P4_130917_133168 | NW_004515945.1 | Scaffold485 | 133168                  | AA                              | GG              | 1946952234               |
| SNP_P4_130918_134850 | NW_004515945.1 | Scaffold485 | 134850                  | CC                              | TT              | 1946952236               |
| SNP_P4_130919_134878 | NW_004515945.1 | Scaffold485 | 134878                  | CC                              | AA              | 1946952238               |
| SNP_P4_130920_134879 | NW_004515945.1 | Scaffold485 | 134879                  | CC                              | AA              | 1946952240               |
| SNP_P4_130921_134886 | NW_004515945.1 | Scaffold485 | 134886                  | AA                              | CC              | 1946952242               |
| SNP_P4_130922_134887 | NW_004515945.1 | Scaffold485 | 134887                  | GG                              | AA              | 1946952244               |
| SNP_P4_130924_153769 | NW_004515945.1 | Scaffold485 | 153769                  | TT                              | AA              | 1946952246               |
| SNP_P4_130925_165370 | NW_004515945.1 | Scaffold485 | 165370                  | TT                              | CC              | 1946952248               |
| SNP_P4_130926_165642 | NW_004515945.1 | Scaffold485 | 165642                  | GG                              | AA              | 1946952250               |
| SNP_P4_130927_165722 | NW_004515945.1 | Scaffold485 | 165722                  | AA                              | GG              | 1946952252               |
| SNP_P4_130928_165749 | NW_004515945.1 | Scaffold485 | 165749                  | TT                              | GG              | 1946952254               |
| SNP_P4_130929_165765 | NW_004515945.1 | Scaffold485 | 165765                  | GG                              | AA              | 1946952256               |
| SNP_P4_130930_165780 | NW_004515945.1 | Scaffold485 | 165780                  | GG                              | AA              | 1946952258               |
| SNP_P4_130931_165965 | NW_004515945.1 | Scaffold485 | 165965                  | GG                              | AA              | 1946952260               |
| SNP_P4_130932_165967 | NW_004515945.1 | Scaffold485 | 165967                  | AA                              | CC              | 1946952262               |
| SNP_P4_130933_165977 | NW_004515945.1 | Scaffold485 | 165977                  | TT                              | CC              | 1946952264               |
| SNP_P4_130934_165982 | NW_004515945.1 | Scaffold485 | 165982                  | CC                              | AA              | 1946952266               |
| SNP_P4_130935_165995 | NW_004515945.1 | Scaffold485 | 165995                  | GG                              | AA              | 1946952269               |
| SNP_P4_130936_166030 | NW_004515945.1 | Scaffold485 | 166030                  | AA                              | TT              | 1946952271               |
| SNP_P4_130937_166031 | NW_004515945.1 | Scaffold485 | 166031                  | AA                              | TT              | 1946952273               |
| SNP_P4_130938_166097 | NW_004515945.1 | Scaffold485 | 166097                  | AA                              | GG              | 1946952275               |
| SNP_P4_130939_166098 | NW_004515945.1 | Scaffold485 | 166098                  | AA                              | TT              | 1946952277               |
| SNP_P4_130940_166104 | NW_004515945.1 | Scaffold485 | 166104                  | GG                              | AA              | 1946952279               |
| SNP_P4_130941_170326 | NW_004515945.1 | Scaffold485 | 170326                  | AA                              | TT              | 1946952281               |
| SNP_P4_130942_174210 | NW_004515945.1 | Scaffold485 | 174210                  | GG                              | AA              | 1946952283               |
| SNP_P4_130943_174367 | NW_004515945.1 | Scaffold485 | 174367                  | TT                              | CC              | 1946952285               |
| SNP_P4_130944_189447 | NW_004515945.1 | Scaffold485 | 189447                  | GG                              | AA              | 1946952287               |
| SNP_P4_130945_3804   | NW_004515946.1 | Scaffold486 | 3804                    | AA                              | TT              | 1946952289               |
| SNP_P4_130946_9310   | NW_004515946.1 | Scaffold486 | 9310                    | GG                              | AA              | 1946952291               |

| SNPs IDs             | Chromosome IDs | Chromosomes | Physical positions (bp) | CDC Frontier (Reference genome) | (ILWC46 & LPNB) | NCBI SNPdb Accession IDs |
|----------------------|----------------|-------------|-------------------------|---------------------------------|-----------------|--------------------------|
| SNP_P4_130947_9357   | NW_004515946.1 | Scaffold486 | 9357                    | TT                              | CC              | 1946952293               |
| SNP_P4_130948_9399   | NW_004515946.1 | Scaffold486 | 9399                    | GG                              | AA              | 1946952295               |
| SNP_P4_130949_9705   | NW_004515946.1 | Scaffold486 | 9705                    | TT                              | AA              | 1946952297               |
| SNP_P4_130950_9746   | NW_004515946.1 | Scaffold486 | 9746                    | CC                              | TT              | 1946952299               |
| SNP_P4_130951_9764   | NW_004515946.1 | Scaffold486 | 9764                    | AA                              | GG              | 1946952301               |
| SNP_P4_130952_9767   | NW_004515946.1 | Scaffold486 | 9767                    | AA                              | GG              | 1946952303               |
| SNP_P4_130953_9786   | NW_004515946.1 | Scaffold486 | 9786                    | AA                              | GG              | 1946952305               |
| SNP_P4_130954_9802   | NW_004515946.1 | Scaffold486 | 9802                    | AA                              | TT              | 1946952307               |
| SNP_P4_130955_9803   | NW_004515946.1 | Scaffold486 | 9803                    | TT                              | GG              | 1946952309               |
| SNP_P4_130956_9823   | NW_004515946.1 | Scaffold486 | 9823                    | CC                              | TT              | 1946952311               |
| SNP_P4_130957_19801  | NW_004515946.1 | Scaffold486 | 19801                   | GG                              | CC              | 1946952313               |
| SNP_P4_130958_19806  | NW_004515946.1 | Scaffold486 | 19806                   | AA                              | GG              | 1946952315               |
| SNP_P4_130959_26870  | NW_004515946.1 | Scaffold486 | 26870                   | TT                              | AA              | 1946952317               |
| SNP_P4_130960_26879  | NW_004515946.1 | Scaffold486 | 26879                   | GG                              | AA              | 1946952319               |
| SNP_P4_130961_26881  | NW_004515946.1 | Scaffold486 | 26881                   | AA                              | TT              | 1946952321               |
| SNP_P4_130962_26935  | NW_004515946.1 | Scaffold486 | 26935                   | CC                              | TT              | 1946952323               |
| SNP_P4_130963_33121  | NW_004515946.1 | Scaffold486 | 33121                   | AA                              | GG              | 1946952325               |
| SNP_P4_130964_33338  | NW_004515946.1 | Scaffold486 | 33338                   | CC                              | TT              | 1946952327               |
| SNP_P4_130965_33364  | NW_004515946.1 | Scaffold486 | 33364                   | TT                              | CC              | 1946952329               |
| SNP_P4_130966_34591  | NW_004515946.1 | Scaffold486 | 34591                   | TT                              | CC              | 1946952331               |
| SNP_P4_130967_34910  | NW_004515946.1 | Scaffold486 | 34910                   | GG                              | AA              | 1946952333               |
| SNP_P4_130969_40899  | NW_004515946.1 | Scaffold486 | 40899                   | TT                              | GG              | 1946952335               |
| SNP_P4_130970_40945  | NW_004515946.1 | Scaffold486 | 40945                   | TT                              | CC              | 1946952337               |
| SNP_P4_130971_45336  | NW_004515946.1 | Scaffold486 | 45336                   | TT                              | CC              | 1946952339               |
| SNP_P4_130972_51924  | NW_004515946.1 | Scaffold486 | 51924                   | GG                              | AA              | 1946952341               |
| SNP_P4_130973_52209  | NW_004515946.1 | Scaffold486 | 52209                   | TT                              | CC              | 1946952343               |
| SNP_P4_130974_52241  | NW_004515946.1 | Scaffold486 | 52241                   | CC                              | AA              | 1946952345               |
| SNP_P4_130975_78810  | NW_004515946.1 | Scaffold486 | 78810                   | GG                              | TT              | 1946952347               |
| SNP_P4_130976_100715 | NW_004515946.1 | Scaffold486 | 100715                  | TT                              | AA              | 1946952349               |
| SNP_P4_130977_102151 | NW_004515946.1 | Scaffold486 | 102151                  | AA                              | GG              | 1946952351               |
| SNP_P4_130978_103043 | NW_004515946.1 | Scaffold486 | 103043                  | CC                              | TT              | 1946952353               |
| SNP_P4_130979_103997 | NW_004515946.1 | Scaffold486 | 103997                  | TT                              | GG              | 1946952355               |
| SNP_P4_130980_109417 | NW_004515946.1 | Scaffold486 | 109417                  | AA                              | CC              | 1946952357               |
| SNP_P4_130981_109428 | NW_004515946.1 | Scaffold486 | 109428                  | GG                              | TT              | 1946952359               |
| SNP_P4_130982_109431 | NW_004515946.1 | Scaffold486 | 109431                  | TT                              | AA              | 1946952361               |
| SNP_P4_130983_109453 | NW_004515946.1 | Scaffold486 | 109453                  | AA                              | TT              | 1946952363               |
| SNP_P4_130984_110593 | NW_004515946.1 | Scaffold486 | 110593                  | AA                              | GG              | 1946952365               |
| SNP_P4_130985_116530 | NW_004515946.1 | Scaffold486 | 116530                  | TT                              | CC              | 1946952367               |
| SNP_P4_130986_118828 | NW_004515946.1 | Scaffold486 | 118828                  | GG                              | AA              | 1946952369               |
| SNP_P4_130987_118969 | NW_004515946.1 | Scaffold486 | 118969                  | GG                              | TT              | 1946952371               |
| SNP_P4_130988_119287 | NW_004515946.1 | Scaffold486 | 119287                  | CC                              | TT              | 1946952373               |
| SNP_P4_130989_119302 | NW_004515946.1 | Scaffold486 | 119302                  | AA                              | GG              | 1946952375               |

| SNPs IDs             | Chromosome IDs | Chromosomes | Physical positions (bp) | CDC Frontier (Reference genome) | (ILWC46 & LPNB) | NCBI SNPdb Accession IDs |
|----------------------|----------------|-------------|-------------------------|---------------------------------|-----------------|--------------------------|
| SNP_P4_130990_128685 | NW_004515946.1 | Scaffold486 | 128685                  | AA                              | GG              | 1946952377               |
| SNP_P4_130991_129643 | NW_004515946.1 | Scaffold486 | 129643                  | CC                              | AA              | 1946952379               |
| SNP_P4_130992_156511 | NW_004515946.1 | Scaffold486 | 156511                  | AA                              | GG              | 1946952381               |
| SNP_P4_130993_156890 | NW_004515946.1 | Scaffold486 | 156890                  | TT                              | CC              | 1946952383               |
| SNP_P4_130994_204534 | NW_004515946.1 | Scaffold486 | 204534                  | CC                              | GG              | 1946952385               |
| SNP_P4_130995_209687 | NW_004515946.1 | Scaffold486 | 209687                  | CC                              | TT              | 1946952387               |
| SNP_P4_130996_209796 | NW_004515946.1 | Scaffold486 | 209796                  | AA                              | CC              | 1946952389               |
| SNP_P4_130997_209823 | NW_004515946.1 | Scaffold486 | 209823                  | CC                              | TT              | 1946952391               |
| SNP_P4_130998_216278 | NW_004515946.1 | Scaffold486 | 216278                  | AA                              | GG              | 1946952393               |
| SNP_P4_130999_222673 | NW_004515946.1 | Scaffold486 | 222673                  | TT                              | CC              | 1946952395               |
| SNP_P4_131000_223241 | NW_004515946.1 | Scaffold486 | 223241                  | AA                              | GG              | 1946952397               |
| SNP_P4_131001_1685   | NW_004515947.1 | Scaffold487 | 1685                    | AA                              | CC              | 1946952399               |
| SNP_P4_131002_1704   | NW_004515947.1 | Scaffold487 | 1704                    | GG                              | CC              | 1946952401               |
| SNP_P4_131003_1740   | NW_004515947.1 | Scaffold487 | 1740                    | TT                              | CC              | 1946952403               |
| SNP_P4_131004_1851   | NW_004515947.1 | Scaffold487 | 1851                    | TT                              | CC              | 1946952405               |
| SNP_P4_131005_1855   | NW_004515947.1 | Scaffold487 | 1855                    | CC                              | TT              | 1946952407               |
| SNP_P4_131006_1890   | NW_004515947.1 | Scaffold487 | 1890                    | CC                              | TT              | 1946952409               |
| SNP_P4_131007_1899   | NW_004515947.1 | Scaffold487 | 1899                    | GG                              | AA              | 1946952411               |
| SNP_P4_131008_1940   | NW_004515947.1 | Scaffold487 | 1940                    | AA                              | GG              | 1946952413               |
| SNP_P4_131009_2093   | NW_004515947.1 | Scaffold487 | 2093                    | GG                              | AA              | 1946952415               |
| SNP_P4_131010_2096   | NW_004515947.1 | Scaffold487 | 2096                    | GG                              | AA              | 1946952417               |
| SNP_P4_131011_2100   | NW_004515947.1 | Scaffold487 | 2100                    | CC                              | TT              | 1946952419               |
| SNP_P4_131012_2130   | NW_004515947.1 | Scaffold487 | 2130                    | AA                              | CC              | 1946952421               |
| SNP_P4_131013_2253   | NW_004515947.1 | Scaffold487 | 2253                    | GG                              | AA              | 1946952423               |
| SNP_P4_131014_2302   | NW_004515947.1 | Scaffold487 | 2302                    | TT                              | CC              | 1946952425               |
| SNP_P4_131015_2346   | NW_004515947.1 | Scaffold487 | 2346                    | CC                              | AA              | 1946952427               |
| SNP_P4_131016_2425   | NW_004515947.1 | Scaffold487 | 2425                    | TT                              | CC              | 1946952429               |
| SNP_P4_131017_2583   | NW_004515947.1 | Scaffold487 | 2583                    | TT                              | AA              | 1946952431               |
| SNP_P4_131018_3046   | NW_004515947.1 | Scaffold487 | 3046                    | CC                              | TT              | 1946952433               |
| SNP_P4_131020_10095  | NW_004515947.1 | Scaffold487 | 10095                   | GG                              | CC              | 1946952435               |
| SNP_P4_131021_10099  | NW_004515947.1 | Scaffold487 | 10099                   | TT                              | AA              | 1946952437               |
| SNP_P4_131022_10100  | NW_004515947.1 | Scaffold487 | 10100                   | GG                              | TT              | 1946952439               |
| SNP_P4_131023_10292  | NW_004515947.1 | Scaffold487 | 10292                   | TT                              | AA              | 1946952441               |
| SNP_P4_131024_10375  | NW_004515947.1 | Scaffold487 | 10375                   | CC                              | TT              | 1946952443               |
| SNP_P4_131025_10429  | NW_004515947.1 | Scaffold487 | 10429                   | TT                              | CC              | 1946952445               |
| SNP_P4_131026_10446  | NW_004515947.1 | Scaffold487 | 10446                   | GG                              | AA              | 1946952447               |
| SNP_P4_131027_10549  | NW_004515947.1 | Scaffold487 | 10549                   | AA                              | GG              | 1946952449               |
| SNP_P4_131028_10561  | NW_004515947.1 | Scaffold487 | 10561                   | AA                              | GG              | 1946952451               |
| SNP_P4_131029_10585  | NW_004515947.1 | Scaffold487 | 10585                   | GG                              | AA              | 1946952453               |
| SNP_P4_131030_14898  | NW_004515947.1 | Scaffold487 | 14898                   | AA                              | TT              | 1946952455               |
| SNP_P4_131031_15093  | NW_004515947.1 | Scaffold487 | 15093                   | GG                              | CC              | 1946952457               |
| SNP_P4_131032_30286  | NW_004515947.1 | Scaffold487 | 30286                   | TT                              | CC              | 1946952459               |

| SNPs IDs            | Chromosome IDs | Chromosomes | Physical positions (bp) | CDC Frontier (Reference genome) | (ILWC46 & LPNB) | NCBI SNPdb Accession IDs |
|---------------------|----------------|-------------|-------------------------|---------------------------------|-----------------|--------------------------|
| SNP_P4_131033_30648 | NW_004515947.1 | Scaffold487 | 30648                   | CC                              | TT              | 1946952461               |
| SNP_P4_131034_30687 | NW_004515947.1 | Scaffold487 | 30687                   | CC                              | TT              | 1946952463               |
| SNP_P4_131035_31026 | NW_004515947.1 | Scaffold487 | 31026                   | TT                              | CC              | 1946952465               |
| SNP_P4_131036_40423 | NW_004515947.1 | Scaffold487 | 40423                   | TT                              | CC              | 1946952467               |
| SNP_P4_131037_40499 | NW_004515947.1 | Scaffold487 | 40499                   | TT                              | AA              | 1946952469               |
| SNP_P4_131038_40581 | NW_004515947.1 | Scaffold487 | 40581                   | TT                              | GG              | 1946952471               |
| SNP_P4_131039_40627 | NW_004515947.1 | Scaffold487 | 40627                   | TT                              | CC              | 1946952473               |
| SNP_P4_131040_40674 | NW_004515947.1 | Scaffold487 | 40674                   | TT                              | CC              | 1946952476               |
| SNP_P4_131041_40691 | NW_004515947.1 | Scaffold487 | 40691                   | CC                              | GG              | 1946952478               |
| SNP_P4_131042_40726 | NW_004515947.1 | Scaffold487 | 40726                   | CC                              | TT              | 1946952480               |
| SNP_P4_131043_40728 | NW_004515947.1 | Scaffold487 | 40728                   | TT                              | AA              | 1946952482               |
| SNP_P4_131044_40818 | NW_004515947.1 | Scaffold487 | 40818                   | CC                              | TT              | 1946952484               |
| SNP_P4_131045_40885 | NW_004515947.1 | Scaffold487 | 40885                   | AA                              | GG              | 1946952486               |
| SNP_P4_131046_40929 | NW_004515947.1 | Scaffold487 | 40929                   | TT                              | AA              | 1946952488               |
| SNP_P4_131047_40938 | NW_004515947.1 | Scaffold487 | 40938                   | TT                              | CC              | 1946952490               |
| SNP_P4_131048_40960 | NW_004515947.1 | Scaffold487 | 40960                   | CC                              | AA              | 1946952492               |
| SNP_P4_131049_40981 | NW_004515947.1 | Scaffold487 | 40981                   | TT                              | CC              | 1946952494               |
| SNP_P4_131050_51233 | NW_004515947.1 | Scaffold487 | 51233                   | TT                              | CC              | 1946952496               |
| SNP_P4_131051_51310 | NW_004515947.1 | Scaffold487 | 51310                   | GG                              | AA              | 1946952498               |
| SNP_P4_131052_53536 | NW_004515947.1 | Scaffold487 | 53536                   | GG                              | CC              | 1946952500               |
| SNP_P4_131053_61257 | NW_004515947.1 | Scaffold487 | 61257                   | AA                              | TT              | 1946952502               |
| SNP_P4_131054_61666 | NW_004515947.1 | Scaffold487 | 61666                   | GG                              | AA              | 1946952504               |
| SNP_P4_131055_61667 | NW_004515947.1 | Scaffold487 | 61667                   | AA                              | GG              | 1946952506               |
| SNP_P4_131056_61704 | NW_004515947.1 | Scaffold487 | 61704                   | TT                              | CC              | 1946952508               |
| SNP_P4_131057_68737 | NW_004515947.1 | Scaffold487 | 68737                   | GG                              | AA              | 1946952510               |
| SNP_P4_131058_73881 | NW_004515947.1 | Scaffold487 | 73881                   | TT                              | CC              | 1946952512               |
| SNP_P4_131059_79818 | NW_004515947.1 | Scaffold487 | 79818                   | GG                              | AA              | 1946952514               |
| SNP_P4_131060_80272 | NW_004515947.1 | Scaffold487 | 80272                   | TT                              | AA              | 1946952516               |
| SNP_P4_131061_81957 | NW_004515947.1 | Scaffold487 | 81957                   | TT                              | CC              | 1946952518               |
| SNP_P4_131062_81962 | NW_004515947.1 | Scaffold487 | 81962                   | GG                              | CC              | 1946952520               |
| SNP_P4_131063_83690 | NW_004515947.1 | Scaffold487 | 83690                   | CC                              | AA              | 1946952522               |
| SNP_P4_131064_83694 | NW_004515947.1 | Scaffold487 | 83694                   | GG                              | AA              | 1946952524               |
| SNP_P4_131065_83699 | NW_004515947.1 | Scaffold487 | 83699                   | GG                              | AA              | 1946952526               |
| SNP_P4_131066_83718 | NW_004515947.1 | Scaffold487 | 83718                   | AA                              | TT              | 1946952528               |
| SNP_P4_131067_83728 | NW_004515947.1 | Scaffold487 | 83728                   | CC                              | TT              | 1946952530               |
| SNP_P4_131068_83750 | NW_004515947.1 | Scaffold487 | 83750                   | TT                              | GG              | 1946952532               |
| SNP_P4_131069_83754 | NW_004515947.1 | Scaffold487 | 83754                   | CC                              | TT              | 1946952534               |
| SNP_P4_131070_84110 | NW_004515947.1 | Scaffold487 | 84110                   | GG                              | TT              | 1946952536               |
| SNP_P4_131071_84532 | NW_004515947.1 | Scaffold487 | 84532                   | GG                              | AA              | 1946952538               |
| SNP_P4_131072_85052 | NW_004515947.1 | Scaffold487 | 85052                   | AA                              | CC              | 1946952540               |
| SNP_P4_131074_88103 | NW_004515947.1 | Scaffold487 | 88103                   | TT                              | CC              | 1946952542               |
| SNP_P4_131075_88246 | NW_004515947.1 | Scaffold487 | 88246                   | CC                              | TT              | 1946952544               |

| SNPs IDs            | Chromosome IDs | Chromosomes | Physical positions (bp) | CDC Frontier (Reference genome) | (ILWC46 & LPNB) | NCBI SNPdb Accession IDs |
|---------------------|----------------|-------------|-------------------------|---------------------------------|-----------------|--------------------------|
| SNP_P4_131076_414   | NW_004515950.1 | Scaffold491 | 414                     | TT                              | AA              | 1946952546               |
| SNP_P4_131077_2474  | NW_004515950.1 | Scaffold491 | 2474                    | GG                              | AA              | 1946952548               |
| SNP_P4_131078_2517  | NW_004515950.1 | Scaffold491 | 2517                    | TT                              | CC              | 1946952550               |
| SNP_P4_131079_8756  | NW_004515950.1 | Scaffold491 | 8756                    | AA                              | CC              | 1946952552               |
| SNP_P4_131080_8757  | NW_004515950.1 | Scaffold491 | 8757                    | GG                              | CC              | 1946952554               |
| SNP_P4_131081_9036  | NW_004515950.1 | Scaffold491 | 9036                    | TT                              | AA              | 1946952556               |
| SNP_P4_131082_9037  | NW_004515950.1 | Scaffold491 | 9037                    | GG                              | AA              | 1946952558               |
| SNP_P4_131083_9053  | NW_004515950.1 | Scaffold491 | 9053                    | TT                              | AA              | 1946952560               |
| SNP_P4_131084_9283  | NW_004515950.1 | Scaffold491 | 9283                    | GG                              | CC              | 1946952562               |
| SNP_P4_131085_11282 | NW_004515950.1 | Scaffold491 | 11282                   | CC                              | AA              | 1946952564               |
| SNP_P4_131086_11390 | NW_004515950.1 | Scaffold491 | 11390                   | CC                              | AA              | 1946952566               |
| SNP_P4_131087_11412 | NW_004515950.1 | Scaffold491 | 11412                   | AA                              | GG              | 1946952568               |
| SNP_P4_131088_11423 | NW_004515950.1 | Scaffold491 | 11423                   | TT                              | CC              | 1946952570               |
| SNP_P4_131089_11457 | NW_004515950.1 | Scaffold491 | 11457                   | CC                              | GG              | 1946952572               |
| SNP_P4_131090_11727 | NW_004515950.1 | Scaffold491 | 11727                   | CC                              | TT              | 1946952574               |
| SNP_P4_131091_11771 | NW_004515950.1 | Scaffold491 | 11771                   | CC                              | GG              | 1946952576               |
| SNP_P4_131092_11888 | NW_004515950.1 | Scaffold491 | 11888                   | AA                              | CC              | 1946952578               |
| SNP_P4_131093_11904 | NW_004515950.1 | Scaffold491 | 11904                   | TT                              | CC              | 1946952580               |
| SNP_P4_131094_12086 | NW_004515950.1 | Scaffold491 | 12086                   | TT                              | AA              | 1946952582               |
| SNP_P4_131095_12091 | NW_004515950.1 | Scaffold491 | 12091                   | TT                              | CC              | 1946952584               |
| SNP_P4_131096_12517 | NW_004515950.1 | Scaffold491 | 12517                   | AA                              | GG              | 1946952586               |
| SNP_P4_131097_15760 | NW_004515950.1 | Scaffold491 | 15760                   | TT                              | AA              | 1946952588               |
| SNP_P4_131098_20298 | NW_004515950.1 | Scaffold491 | 20298                   | TT                              | CC              | 1946952590               |
| SNP_P4_131099_20308 | NW_004515950.1 | Scaffold491 | 20308                   | GG                              | AA              | 1946952592               |
| SNP_P4_131100_20780 | NW_004515950.1 | Scaffold491 | 20780                   | AA                              | GG              | 1946952594               |
| SNP_P4_131101_21389 | NW_004515950.1 | Scaffold491 | 21389                   | TT                              | CC              | 1946952596               |
| SNP_P4_131102_21861 | NW_004515950.1 | Scaffold491 | 21861                   | AA                              | GG              | 1946952598               |
| SNP_P4_131103_21862 | NW_004515950.1 | Scaffold491 | 21862                   | GG                              | TT              | 1946952600               |
| SNP_P4_131104_22549 | NW_004515950.1 | Scaffold491 | 22549                   | TT                              | CC              | 1946952602               |
| SNP_P4_131105_22654 | NW_004515950.1 | Scaffold491 | 22654                   | AA                              | GG              | 1946952604               |
| SNP_P4_131106_22657 | NW_004515950.1 | Scaffold491 | 22657                   | GG                              | TT              | 1946952606               |
| SNP_P4_131107_22728 | NW_004515950.1 | Scaffold491 | 22728                   | TT                              | AA              | 1946952608               |
| SNP_P4_131108_22823 | NW_004515950.1 | Scaffold491 | 22823                   | TT                              | CC              | 1946952610               |
| SNP_P4_131109_23029 | NW_004515950.1 | Scaffold491 | 23029                   | AA                              | GG              | 1946952612               |
| SNP_P4_131110_23072 | NW_004515950.1 | Scaffold491 | 23072                   | AA                              | GG              | 1946952614               |
| SNP_P4_131111_23368 | NW_004515950.1 | Scaffold491 | 23368                   | CC                              | TT              | 1946952616               |
| SNP_P4_131112_23653 | NW_004515950.1 | Scaffold491 | 23653                   | TT                              | GG              | 1946952618               |
| SNP_P4_131113_23669 | NW_004515950.1 | Scaffold491 | 23669                   | GG                              | AA              | 1946952620               |
| SNP_P4_131114_26923 | NW_004515950.1 | Scaffold491 | 26923                   | GG                              | CC              | 1946952622               |
| SNP_P4_131115_27248 | NW_004515950.1 | Scaffold491 | 27248                   | CC                              | AA              | 1946952624               |
| SNP_P4_131116_29174 | NW_004515950.1 | Scaffold491 | 29174                   | AA                              | GG              | 1946952626               |
| SNP_P4_131118_29492 | NW_004515950.1 | Scaffold491 | 29492                   | AA                              | GG              | 1946952628               |

| SNPs IDs            | Chromosome IDs | Chromosomes | Physical positions (bp) | CDC Frontier (Reference genome) | (ILWC46 & LPNB) | NCBI SNPdb Accession IDs |
|---------------------|----------------|-------------|-------------------------|---------------------------------|-----------------|--------------------------|
| SNP_P4_131119_684   | NW_004515951.1 | Scaffold492 | 684                     | CC                              | AA              | 1946952630               |
| SNP_P4_131120_737   | NW_004515951.1 | Scaffold492 | 737                     | AA                              | GG              | 1946952632               |
| SNP_P4_131121_751   | NW_004515951.1 | Scaffold492 | 751                     | CC                              | AA              | 1946952634               |
| SNP_P4_131122_850   | NW_004515951.1 | Scaffold492 | 850                     | CC                              | AA              | 1946952636               |
| SNP_P4_131123_1195  | NW_004515951.1 | Scaffold492 | 1195                    | GG                              | AA              | 1946952638               |
| SNP_P4_131124_1342  | NW_004515951.1 | Scaffold492 | 1342                    | AA                              | GG              | 1946952640               |
| SNP_P4_131125_1495  | NW_004515951.1 | Scaffold492 | 1495                    | TT                              | CC              | 1946952642               |
| SNP_P4_131126_1785  | NW_004515951.1 | Scaffold492 | 1785                    | CC                              | AA              | 1946952644               |
| SNP_P4_131127_2752  | NW_004515951.1 | Scaffold492 | 2752                    | GG                              | AA              | 1946952646               |
| SNP_P4_131128_5917  | NW_004515951.1 | Scaffold492 | 5917                    | CC                              | GG              | 1946952648               |
| SNP_P4_131129_5920  | NW_004515951.1 | Scaffold492 | 5920                    | TT                              | CC              | 1946952650               |
| SNP_P4_131130_5934  | NW_004515951.1 | Scaffold492 | 5934                    | GG                              | AA              | 1946952652               |
| SNP_P4_131131_5939  | NW_004515951.1 | Scaffold492 | 5939                    | CC                              | AA              | 1946952654               |
| SNP_P4_131132_5955  | NW_004515951.1 | Scaffold492 | 5955                    | GG                              | AA              | 1946952656               |
| SNP_P4_131133_5972  | NW_004515951.1 | Scaffold492 | 5972                    | TT                              | AA              | 1946952658               |
| SNP_P4_131134_5992  | NW_004515951.1 | Scaffold492 | 5992                    | GG                              | CC              | 1946952660               |
| SNP_P4_131135_15069 | NW_004515951.1 | Scaffold492 | 15069                   | GG                              | TT              | 1946952662               |
| SNP_P4_131136_15083 | NW_004515951.1 | Scaffold492 | 15083                   | GG                              | TT              | 1946952664               |
| SNP_P4_131137_15103 | NW_004515951.1 | Scaffold492 | 15103                   | AA                              | TT              | 1946952666               |
| SNP_P4_131138_15115 | NW_004515951.1 | Scaffold492 | 15115                   | GG                              | AA              | 1946952668               |
| SNP_P4_131139_15284 | NW_004515951.1 | Scaffold492 | 15284                   | AA                              | TT              | 1946952670               |
| SNP_P4_131140_15291 | NW_004515951.1 | Scaffold492 | 15291                   | CC                              | TT              | 1946952672               |
| SNP_P4_131141_15411 | NW_004515951.1 | Scaffold492 | 15411                   | CC                              | TT              | 1946952674               |
| SNP_P4_131142_15496 | NW_004515951.1 | Scaffold492 | 15496                   | AA                              | GG              | 1946952676               |
| SNP_P4_131143_15506 | NW_004515951.1 | Scaffold492 | 15506                   | AA                              | TT              | 1946952678               |
| SNP_P4_131144_15548 | NW_004515951.1 | Scaffold492 | 15548                   | AA                              | GG              | 1946952680               |
| SNP_P4_131145_15571 | NW_004515951.1 | Scaffold492 | 15571                   | AA                              | GG              | 1946952682               |
| SNP_P4_131146_23536 | NW_004515951.1 | Scaffold492 | 23536                   | CC                              | TT              | 1946952684               |
| SNP_P4_131147_23565 | NW_004515951.1 | Scaffold492 | 23565                   | CC                              | GG              | 1946952686               |
| SNP_P4_131148_27550 | NW_004515951.1 | Scaffold492 | 27550                   | TT                              | CC              | 1946952688               |
| SNP_P4_131149_27729 | NW_004515951.1 | Scaffold492 | 27729                   | TT                              | CC              | 1946952690               |
| SNP_P4_131150_35256 | NW_004515951.1 | Scaffold492 | 35256                   | GG                              | CC              | 1946952692               |
| SNP_P4_131151_35745 | NW_004515951.1 | Scaffold492 | 35745                   | GG                              | AA              | 1946952694               |
| SNP_P4_131153_35988 | NW_004515951.1 | Scaffold492 | 35988                   | GG                              | TT              | 1946952696               |
| SNP_P4_131154_36132 | NW_004515951.1 | Scaffold492 | 36132                   | CC                              | TT              | 1946952698               |
| SNP_P4_131155_36135 | NW_004515951.1 | Scaffold492 | 36135                   | GG                              | CC              | 1946952700               |
| SNP_P4_131156_36205 | NW_004515951.1 | Scaffold492 | 36205                   | GG                              | AA              | 1946952702               |
| SNP_P4_131157_36477 | NW_004515951.1 | Scaffold492 | 36477                   | GG                              | TT              | 1946952704               |
| SNP_P4_131158_36568 | NW_004515951.1 | Scaffold492 | 36568                   | CC                              | TT              | 1946952706               |
| SNP_P4_131160_36848 | NW_004515951.1 | Scaffold492 | 36848                   | GG                              | TT              | 1946952708               |
| SNP_P4_131161_36980 | NW_004515951.1 | Scaffold492 | 36980                   | TT                              | GG              | 1946952710               |
| SNP_P4_131162_36985 | NW_004515951.1 | Scaffold492 | 36985                   | CC                              | TT              | 1946952712               |



| SNPs IDs            | Chromosome IDs | Chromosomes | Physical positions (bp) | CDC Frontier (Reference genome) | (ILWC46 & LPNB) | NCBI SNPdb Accession IDs |
|---------------------|----------------|-------------|-------------------------|---------------------------------|-----------------|--------------------------|
| SNP_P4_131164_45069 | NW_004515952.1 | Scaffold493 | 45069                   | TT                              | CC              | 1946952714               |
| SNP_P4_131165_45083 | NW_004515952.1 | Scaffold493 | 45083                   | TT                              | CC              | 1946952716               |
| SNP_P4_131166_45165 | NW_004515952.1 | Scaffold493 | 45165                   | AA                              | GG              | 1946952718               |
| SNP_P4_131167_45181 | NW_004515952.1 | Scaffold493 | 45181                   | AA                              | CC              | 1946952720               |
| SNP_P4_131168_45216 | NW_004515952.1 | Scaffold493 | 45216                   | TT                              | CC              | 1946952722               |
| SNP_P4_131169_45263 | NW_004515952.1 | Scaffold493 | 45263                   | TT                              | CC              | 1946952724               |
| SNP_P4_131170_47343 | NW_004515952.1 | Scaffold493 | 47343                   | TT                              | CC              | 1946952726               |
| SNP_P4_131171_47513 | NW_004515952.1 | Scaffold493 | 47513                   | GG                              | AA              | 1946952728               |
| SNP_P4_131172_47598 | NW_004515952.1 | Scaffold493 | 47598                   | CC                              | TT              | 1946952730               |
| SNP_P4_131173_47664 | NW_004515952.1 | Scaffold493 | 47664                   | GG                              | CC              | 1946952732               |
| SNP_P4_131174_47697 | NW_004515952.1 | Scaffold493 | 47697                   | GG                              | AA              | 1946952734               |
| SNP_P4_131175_47716 | NW_004515952.1 | Scaffold493 | 47716                   | CC                              | GG              | 1946952737               |
| SNP_P4_131176_47717 | NW_004515952.1 | Scaffold493 | 47717                   | CC                              | TT              | 1946952739               |
| SNP_P4_131177_47727 | NW_004515952.1 | Scaffold493 | 47727                   | CC                              | TT              | 1946952741               |
| SNP_P4_131178_47757 | NW_004515952.1 | Scaffold493 | 47757                   | TT                              | CC              | 1946952743               |
| SNP_P4_131179_47831 | NW_004515952.1 | Scaffold493 | 47831                   | AA                              | GG              | 1946952745               |
| SNP_P4_131180_49530 | NW_004515952.1 | Scaffold493 | 49530                   | TT                              | CC              | 1946952747               |
| SNP_P4_131181_50578 | NW_004515952.1 | Scaffold493 | 50578                   | AA                              | GG              | 1946952749               |
| SNP_P4_131182_52081 | NW_004515952.1 | Scaffold493 | 52081                   | TT                              | CC              | 1946952751               |
| SNP_P4_131183_57205 | NW_004515952.1 | Scaffold493 | 57205                   | CC                              | AA              | 1946952753               |
| SNP_P4_131184_59414 | NW_004515952.1 | Scaffold493 | 59414                   | GG                              | AA              | 1946952755               |
| SNP_P4_131185_62028 | NW_004515952.1 | Scaffold493 | 62028                   | AA                              | GG              | 1946952757               |
| SNP_P4_131186_70647 | NW_004515952.1 | Scaffold493 | 70647                   | AA                              | GG              | 1946952759               |
| SNP_P4_131187_70649 | NW_004515952.1 | Scaffold493 | 70649                   | CC                              | TT              | 1946952761               |
| SNP_P4_131188_70959 | NW_004515952.1 | Scaffold493 | 70959                   | GG                              | AA              | 1946952763               |
| SNP_P4_131189_71003 | NW_004515952.1 | Scaffold493 | 71003                   | TT                              | CC              | 1946952765               |
| SNP_P4_131190_71013 | NW_004515952.1 | Scaffold493 | 71013                   | CC                              | TT              | 1946952767               |
| SNP_P4_131191_71247 | NW_004515952.1 | Scaffold493 | 71247                   | GG                              | TT              | 1946952769               |
| SNP_P4_131192_84496 | NW_004515952.1 | Scaffold493 | 84496                   | TT                              | CC              | 1946952771               |
| SNP_P4_131193_84504 | NW_004515952.1 | Scaffold493 | 84504                   | TT                              | AA              | 1946952773               |
| SNP_P4_131194_84546 | NW_004515952.1 | Scaffold493 | 84546                   | TT                              | CC              | 1946952775               |
| SNP_P4_131195_84558 | NW_004515952.1 | Scaffold493 | 84558                   | AA                              | TT              | 1946952777               |
| SNP_P4_131196_84588 | NW_004515952.1 | Scaffold493 | 84588                   | AA                              | TT              | 1946952779               |
| SNP_P4_131197_87138 | NW_004515952.1 | Scaffold493 | 87138                   | CC                              | TT              | 1946952781               |
| SNP_P4_131198_87171 | NW_004515952.1 | Scaffold493 | 87171                   | TT                              | CC              | 1946952783               |
| SNP_P4_131199_87209 | NW_004515952.1 | Scaffold493 | 87209                   | AA                              | GG              | 1946952785               |
| SNP_P4_131200_87547 | NW_004515952.1 | Scaffold493 | 87547                   | AA                              | TT              | 1946952787               |
| SNP_P4_131201_87603 | NW_004515952.1 | Scaffold493 | 87603                   | TT                              | CC              | 1946952789               |
| SNP_P4_131202_87715 | NW_004515952.1 | Scaffold493 | 87715                   | AA                              | CC              | 1946952791               |
| SNP_P4_131203_87921 | NW_004515952.1 | Scaffold493 | 87921                   | TT                              | CC              | 1946952793               |
| SNP_P4_131204_87959 | NW_004515952.1 | Scaffold493 | 87959                   | TT                              | CC              | 1946952795               |
| SNP_P4_131205_87961 | NW_004515952.1 | Scaffold493 | 87961                   | AA                              | GG              | 1946952797               |

| SNPs IDs             | Chromosome IDs | Chromosomes | Physical positions (bp) | CDC Frontier (Reference genome) | (ILWC46 & LPNB) | NCBI SNPdb Accession IDs |
|----------------------|----------------|-------------|-------------------------|---------------------------------|-----------------|--------------------------|
| SNP_P4_131206_87969  | NW_004515952.1 | Scaffold493 | 87969                   | GG                              | CC              | 1946952799               |
| SNP_P4_131207_87998  | NW_004515952.1 | Scaffold493 | 87998                   | AA                              | GG              | 1946952801               |
| SNP_P4_131208_88063  | NW_004515952.1 | Scaffold493 | 88063                   | GG                              | AA              | 1946952803               |
| SNP_P4_131209_88099  | NW_004515952.1 | Scaffold493 | 88099                   | AA                              | GG              | 1946952805               |
| SNP_P4_131210_88390  | NW_004515952.1 | Scaffold493 | 88390                   | GG                              | AA              | 1946952807               |
| SNP_P4_131211_88423  | NW_004515952.1 | Scaffold493 | 88423                   | TT                              | CC              | 1946952809               |
| SNP_P4_131212_88424  | NW_004515952.1 | Scaffold493 | 88424                   | CC                              | AA              | 1946952811               |
| SNP_P4_131213_88425  | NW_004515952.1 | Scaffold493 | 88425                   | TT                              | CC              | 1946952813               |
| SNP_P4_131214_88429  | NW_004515952.1 | Scaffold493 | 88429                   | AA                              | GG              | 1946952815               |
| SNP_P4_131215_88456  | NW_004515952.1 | Scaffold493 | 88456                   | TT                              | GG              | 1946952817               |
| SNP_P4_131216_88503  | NW_004515952.1 | Scaffold493 | 88503                   | CC                              | AA              | 1946952819               |
| SNP_P4_131217_88505  | NW_004515952.1 | Scaffold493 | 88505                   | TT                              | AA              | 1946952821               |
| SNP_P4_131218_88510  | NW_004515952.1 | Scaffold493 | 88510                   | AA                              | GG              | 1946952823               |
| SNP_P4_131219_88517  | NW_004515952.1 | Scaffold493 | 88517                   | AA                              | GG              | 1946952825               |
| SNP_P4_131220_88544  | NW_004515952.1 | Scaffold493 | 88544                   | AA                              | GG              | 1946952827               |
| SNP_P4_131221_93789  | NW_004515952.1 | Scaffold493 | 93789                   | AA                              | GG              | 1946952829               |
| SNP_P4_131222_93853  | NW_004515952.1 | Scaffold493 | 93853                   | CC                              | TT              | 1946952831               |
| SNP_P4_131223_94320  | NW_004515952.1 | Scaffold493 | 94320                   | CC                              | TT              | 1946952833               |
| SNP_P4_131224_94338  | NW_004515952.1 | Scaffold493 | 94338                   | CC                              | GG              | 1946952835               |
| SNP_P4_131225_94339  | NW_004515952.1 | Scaffold493 | 94339                   | AA                              | GG              | 1946952837               |
| SNP_P4_131226_101069 | NW_004515952.1 | Scaffold493 | 101069                  | TT                              | CC              | 1946952839               |
| SNP_P4_131227_102736 | NW_004515952.1 | Scaffold493 | 102736                  | TT                              | GG              | 1946952841               |
| SNP_P4_131228_106598 | NW_004515952.1 | Scaffold493 | 106598                  | AA                              | GG              | 1946952843               |
| SNP_P4_131230_113942 | NW_004515952.1 | Scaffold493 | 113942                  | TT                              | AA              | 1946952845               |
| SNP_P4_131231_124028 | NW_004515952.1 | Scaffold493 | 124028                  | GG                              | AA              | 1946952847               |
| SNP_P4_131233_124100 | NW_004515952.1 | Scaffold493 | 124100                  | CC                              | TT              | 1946952849               |
| SNP_P4_131234_124120 | NW_004515952.1 | Scaffold493 | 124120                  | CC                              | TT              | 1946952851               |
| SNP_P4_131235_124241 | NW_004515952.1 | Scaffold493 | 124241                  | AA                              | TT              | 1946952853               |
| SNP_P4_131236_124463 | NW_004515952.1 | Scaffold493 | 124463                  | TT                              | AA              | 1946952855               |
| SNP_P4_131237_125061 | NW_004515952.1 | Scaffold493 | 125061                  | TT                              | CC              | 1946952857               |
| SNP_P4_131238_125103 | NW_004515952.1 | Scaffold493 | 125103                  | AA                              | GG              | 1946952859               |
| SNP_P4_131239_125185 | NW_004515952.1 | Scaffold493 | 125185                  | GG                              | TT              | 1946952861               |
| SNP_P4_131240_125202 | NW_004515952.1 | Scaffold493 | 125202                  | GG                              | AA              | 1946952863               |
| SNP_P4_131241_125528 | NW_004515952.1 | Scaffold493 | 125528                  | CC                              | TT              | 1946952865               |
| SNP_P4_131242_125836 | NW_004515952.1 | Scaffold493 | 125836                  | TT                              | CC              | 1946952867               |
| SNP_P4_131243_132718 | NW_004515952.1 | Scaffold493 | 132718                  | GG                              | TT              | 1946952868               |
| SNP_P4_131244_138187 | NW_004515952.1 | Scaffold493 | 138187                  | AA                              | GG              | 1946952870               |
| SNP_P4_131245_142741 | NW_004515952.1 | Scaffold493 | 142741                  | AA                              | CC              | 1946952872               |
| SNP_P4_131246_142759 | NW_004515952.1 | Scaffold493 | 142759                  | CC                              | TT              | 1946952874               |
| SNP_P4_131247_142770 | NW_004515952.1 | Scaffold493 | 142770                  | TT                              | CC              | 1946952876               |
| SNP_P4_131248_142836 | NW_004515952.1 | Scaffold493 | 142836                  | TT                              | AA              | 1946952878               |
| SNP_P4_131249_144384 | NW_004515952.1 | Scaffold493 | 144384                  | AA                              | GG              | 1946952880               |

| SNPs IDs             | Chromosome IDs | Chromosomes | Physical positions (bp) | CDC Frontier (Reference genome) | (ILWC46 & LPNB) | NCBI SNPdb Accession IDs |
|----------------------|----------------|-------------|-------------------------|---------------------------------|-----------------|--------------------------|
| SNP_P4_131250_144394 | NW_004515952.1 | Scaffold493 | 144394                  | TT                              | CC              | 1946952882               |
| SNP_P4_131251_170523 | NW_004515952.1 | Scaffold493 | 170523                  | CC                              | TT              | 1946952884               |
| SNP_P4_131252_175027 | NW_004515952.1 | Scaffold493 | 175027                  | CC                              | TT              | 1946952886               |
| SNP_P4_131253_184492 | NW_004515952.1 | Scaffold493 | 184492                  | AA                              | GG              | 1946952888               |
| SNP_P4_131254_184530 | NW_004515952.1 | Scaffold493 | 184530                  | GG                              | AA              | 1946952890               |
| SNP_P4_131255_184553 | NW_004515952.1 | Scaffold493 | 184553                  | AA                              | CC              | 1946952892               |
| SNP_P4_131256_185046 | NW_004515952.1 | Scaffold493 | 185046                  | TT                              | CC              | 1946952894               |
| SNP_P4_131257_185064 | NW_004515952.1 | Scaffold493 | 185064                  | GG                              | TT              | 1946952896               |
| SNP_P4_131258_185176 | NW_004515952.1 | Scaffold493 | 185176                  | AA                              | GG              | 1946952898               |
| SNP_P4_131259_185476 | NW_004515952.1 | Scaffold493 | 185476                  | TT                              | CC              | 1946952900               |
| SNP_P4_131260_186668 | NW_004515952.1 | Scaffold493 | 186668                  | GG                              | TT              | 1946952902               |
| SNP_P4_131261_196941 | NW_004515952.1 | Scaffold493 | 196941                  | CC                              | TT              | 1946952904               |
| SNP_P4_131262_196960 | NW_004515952.1 | Scaffold493 | 196960                  | AA                              | GG              | 1946952905               |
| SNP_P4_131263_217353 | NW_004515952.1 | Scaffold493 | 217353                  | CC                              | TT              | 1946952907               |
| SNP_P4_131264_217771 | NW_004515952.1 | Scaffold493 | 217771                  | AA                              | TT              | 1946952909               |
| SNP_P4_131265_218220 | NW_004515952.1 | Scaffold493 | 218220                  | AA                              | TT              | 1946952911               |
| SNP_P4_131266_218221 | NW_004515952.1 | Scaffold493 | 218221                  | TT                              | AA              | 1946952913               |
| SNP_P4_131267_222128 | NW_004515952.1 | Scaffold493 | 222128                  | AA                              | GG              | 1946952915               |
| SNP_P4_131269_244226 | NW_004515952.1 | Scaffold493 | 244226                  | GG                              | AA              | 1946952917               |
| SNP_P4_131270_257001 | NW_004515952.1 | Scaffold493 | 257001                  | GG                              | AA              | 1946952919               |
| SNP_P4_131271_283307 | NW_004515952.1 | Scaffold493 | 283307                  | TT                              | AA              | 1946952921               |
| SNP_P4_131272_283322 | NW_004515952.1 | Scaffold493 | 283322                  | CC                              | AA              | 1946952923               |
| SNP_P4_131273_283504 | NW_004515952.1 | Scaffold493 | 283504                  | AA                              | CC              | 1946952925               |
| SNP_P4_131274_293443 | NW_004515952.1 | Scaffold493 | 293443                  | CC                              | TT              | 1946952926               |
| SNP_P4_131275_297262 | NW_004515952.1 | Scaffold493 | 297262                  | GG                              | TT              | 1946952928               |
| SNP_P4_131276_297284 | NW_004515952.1 | Scaffold493 | 297284                  | GG                              | AA              | 1946952930               |
| SNP_P4_131277_297332 | NW_004515952.1 | Scaffold493 | 297332                  | TT                              | AA              | 1946952932               |
| SNP_P4_131278_297334 | NW_004515952.1 | Scaffold493 | 297334                  | AA                              | GG              | 1946952934               |
| SNP_P4_131279_297453 | NW_004515952.1 | Scaffold493 | 297453                  | CC                              | TT              | 1946952936               |
| SNP_P4_131280_651    | NW_004515953.1 | Scaffold495 | 651                     | TT                              | CC              | 1946952938               |
| SNP_P4_131281_2815   | NW_004515953.1 | Scaffold495 | 2815                    | CC                              | TT              | 1946952940               |
| SNP_P4_131282_10499  | NW_004515953.1 | Scaffold495 | 10499                   | CC                              | TT              | 1946952942               |
| SNP_P4_131283_12172  | NW_004515953.1 | Scaffold495 | 12172                   | TT                              | CC              | 1946952944               |
| SNP_P4_131285_15471  | NW_004515953.1 | Scaffold495 | 15471                   | AA                              | CC              | 1946952946               |
| SNP_P4_131286_19784  | NW_004515953.1 | Scaffold495 | 19784                   | GG                              | TT              | 1946952948               |
| SNP_P4_131288_26815  | NW_004515953.1 | Scaffold495 | 26815                   | AA                              | GG              | 1946952950               |
| SNP_P4_131289_27152  | NW_004515953.1 | Scaffold495 | 27152                   | GG                              | TT              | 1946952952               |
| SNP_P4_131290_27178  | NW_004515953.1 | Scaffold495 | 27178                   | CC                              | TT              | 1946952954               |
| SNP_P4_131291_28694  | NW_004515953.1 | Scaffold495 | 28694                   | TT                              | CC              | 1946952956               |
| SNP_P4_131292_28824  | NW_004515953.1 | Scaffold495 | 28824                   | CC                              | TT              | 1946952958               |
| SNP_P4_131293_29378  | NW_004515953.1 | Scaffold495 | 29378                   | GG                              | TT              | 1946952960               |
| SNP_P4_131294_30174  | NW_004515953.1 | Scaffold495 | 30174                   | GG                              | AA              | 1946952962               |

| SNPs IDs             | Chromosome IDs | Chromosomes | Physical positions (bp) | CDC Frontier (Reference genome) | (ILWC46 & LPNB) | NCBI SNPdb Accession IDs |
|----------------------|----------------|-------------|-------------------------|---------------------------------|-----------------|--------------------------|
| SNP_P4_131295_31988  | NW_004515953.1 | Scaffold495 | 31988                   | TT                              | CC              | 1946952964               |
| SNP_P4_131296_34194  | NW_004515953.1 | Scaffold495 | 34194                   | GG                              | AA              | 1946952966               |
| SNP_P4_131297_35192  | NW_004515953.1 | Scaffold495 | 35192                   | GG                              | AA              | 1946952968               |
| SNP_P4_131298_35255  | NW_004515953.1 | Scaffold495 | 35255                   | CC                              | TT              | 1946952970               |
| SNP_P4_131299_36303  | NW_004515953.1 | Scaffold495 | 36303                   | AA                              | GG              | 1946952972               |
| SNP_P4_131300_36335  | NW_004515953.1 | Scaffold495 | 36335                   | GG                              | AA              | 1946952974               |
| SNP_P4_131301_37154  | NW_004515953.1 | Scaffold495 | 37154                   | TT                              | GG              | 1946952976               |
| SNP_P4_131302_50595  | NW_004515953.1 | Scaffold495 | 50595                   | AA                              | CC              | 1946952978               |
| SNP_P4_131303_53324  | NW_004515953.1 | Scaffold495 | 53324                   | CC                              | TT              | 1946952980               |
| SNP_P4_131304_63932  | NW_004515953.1 | Scaffold495 | 63932                   | AA                              | GG              | 1946952982               |
| SNP_P4_131305_64425  | NW_004515953.1 | Scaffold495 | 64425                   | TT                              | CC              | 1946952984               |
| SNP_P4_131306_65058  | NW_004515953.1 | Scaffold495 | 65058                   | TT                              | AA              | 1946952986               |
| SNP_P4_131307_66170  | NW_004515953.1 | Scaffold495 | 66170                   | CC                              | AA              | 1946952988               |
| SNP_P4_131308_70080  | NW_004515953.1 | Scaffold495 | 70080                   | CC                              | AA              | 1946952990               |
| SNP_P4_131309_70101  | NW_004515953.1 | Scaffold495 | 70101                   | AA                              | TT              | 1946952992               |
| SNP_P4_131310_70102  | NW_004515953.1 | Scaffold495 | 70102                   | TT                              | GG              | 1946952994               |
| SNP_P4_131311_70153  | NW_004515953.1 | Scaffold495 | 70153                   | AA                              | TT              | 1946952996               |
| SNP_P4_131312_70170  | NW_004515953.1 | Scaffold495 | 70170                   | AA                              | GG              | 1946952998               |
| SNP_P4_131313_70256  | NW_004515953.1 | Scaffold495 | 70256                   | TT                              | AA              | 1946953000               |
| SNP_P4_131314_70482  | NW_004515953.1 | Scaffold495 | 70482                   | GG                              | AA              | 1946953002               |
| SNP_P4_131315_71410  | NW_004515953.1 | Scaffold495 | 71410                   | AA                              | GG              | 1946953004               |
| SNP_P4_131316_84291  | NW_004515953.1 | Scaffold495 | 84291                   | TT                              | CC              | 1946953006               |
| SNP_P4_131317_84293  | NW_004515953.1 | Scaffold495 | 84293                   | AA                              | TT              | 1946953079               |
| SNP_P4_131318_84296  | NW_004515953.1 | Scaffold495 | 84296                   | TT                              | AA              | 1946953081               |
| SNP_P4_131319_84298  | NW_004515953.1 | Scaffold495 | 84298                   | AA                              | TT              | 1946953083               |
| SNP_P4_131320_108411 | NW_004515953.1 | Scaffold495 | 108411                  | TT                              | CC              | 1946953085               |
| SNP_P4_131321_110937 | NW_004515953.1 | Scaffold495 | 110937                  | GG                              | CC              | 1946953087               |
| SNP_P4_131323_112129 | NW_004515953.1 | Scaffold495 | 112129                  | CC                              | TT              | 1946953089               |
| SNP_P4_131324_112258 | NW_004515953.1 | Scaffold495 | 112258                  | CC                              | TT              | 1946953091               |
| SNP_P4_131326_113185 | NW_004515953.1 | Scaffold495 | 113185                  | TT                              | GG              | 1946953093               |
| SNP_P4_131327_113268 | NW_004515953.1 | Scaffold495 | 113268                  | GG                              | CC              | 1946953095               |
| SNP_P4_131328_113287 | NW_004515953.1 | Scaffold495 | 113287                  | CC                              | AA              | 1946953097               |
| SNP_P4_131329_113296 | NW_004515953.1 | Scaffold495 | 113296                  | CC                              | GG              | 1946953099               |
| SNP_P4_131330_119913 | NW_004515953.1 | Scaffold495 | 119913                  | TT                              | CC              | 1946953101               |
| SNP_P4_131331_120262 | NW_004515953.1 | Scaffold495 | 120262                  | AA                              | CC              | 1946953103               |
| SNP_P4_131333_123537 | NW_004515953.1 | Scaffold495 | 123537                  | AA                              | TT              | 1946953105               |
| SNP_P4_131334_125917 | NW_004515953.1 | Scaffold495 | 125917                  | TT                              | CC              | 1946953107               |
| SNP_P4_131335_126274 | NW_004515953.1 | Scaffold495 | 126274                  | GG                              | AA              | 1946953109               |
| SNP_P4_131336_126277 | NW_004515953.1 | Scaffold495 | 126277                  | TT                              | CC              | 1946953111               |
| SNP_P4_131337_130347 | NW_004515953.1 | Scaffold495 | 130347                  | TT                              | CC              | 1946953113               |
| SNP_P4_131338_130536 | NW_004515953.1 | Scaffold495 | 130536                  | AA                              | TT              | 1946953115               |
| SNP_P4_131340_132063 | NW_004515953.1 | Scaffold495 | 132063                  | AA                              | TT              | 1946953117               |

| SNPs IDs             | Chromosome IDs | Chromosomes | Physical positions (bp) | CDC Frontier (Reference genome) | (ILWC46 & LPNB) | NCBI SNPdb Accession IDs |
|----------------------|----------------|-------------|-------------------------|---------------------------------|-----------------|--------------------------|
| SNP_P4_131341_132610 | NW_004515953.1 | Scaffold495 | 132610                  | CC                              | AA              | 1946953119               |
| SNP_P4_131342_132749 | NW_004515953.1 | Scaffold495 | 132749                  | AA                              | TT              | 1946953121               |
| SNP_P4_131343_132779 | NW_004515953.1 | Scaffold495 | 132779                  | TT                              | AA              | 1946953122               |
| SNP_P4_131344_132838 | NW_004515953.1 | Scaffold495 | 132838                  | TT                              | AA              | 1946953124               |
| SNP_P4_131345_132853 | NW_004515953.1 | Scaffold495 | 132853                  | GG                              | TT              | 1946953126               |
| SNP_P4_131346_132930 | NW_004515953.1 | Scaffold495 | 132930                  | TT                              | CC              | 1946953128               |
| SNP_P4_131347_132975 | NW_004515953.1 | Scaffold495 | 132975                  | CC                              | TT              | 1946953130               |
| SNP_P4_131348_133397 | NW_004515953.1 | Scaffold495 | 133397                  | GG                              | TT              | 1946953132               |
| SNP_P4_131350_134728 | NW_004515953.1 | Scaffold495 | 134728                  | AA                              | GG              | 1946953134               |
| SNP_P4_131353_139212 | NW_004515953.1 | Scaffold495 | 139212                  | TT                              | GG              | 1946953136               |
| SNP_P4_131354_142398 | NW_004515953.1 | Scaffold495 | 142398                  | GG                              | AA              | 1946953138               |
| SNP_P4_131355_11195  | NW_004515954.1 | Scaffold496 | 11195                   | AA                              | TT              | 1946953140               |
| SNP_P4_131356_11196  | NW_004515954.1 | Scaffold496 | 11196                   | GG                              | AA              | 1946953142               |
| SNP_P4_131357_11201  | NW_004515954.1 | Scaffold496 | 11201                   | AA                              | CC              | 1946953144               |
| SNP_P4_131358_11203  | NW_004515954.1 | Scaffold496 | 11203                   | TT                              | CC              | 1946953146               |
| SNP_P4_131359_11517  | NW_004515954.1 | Scaffold496 | 11517                   | CC                              | GG              | 1946953148               |
| SNP_P4_131360_11555  | NW_004515954.1 | Scaffold496 | 11555                   | AA                              | CC              | 1946953150               |
| SNP_P4_131361_11565  | NW_004515954.1 | Scaffold496 | 11565                   | AA                              | GG              | 1946953152               |
| SNP_P4_131362_11591  | NW_004515954.1 | Scaffold496 | 11591                   | AA                              | CC              | 1946953154               |
| SNP_P4_131363_11627  | NW_004515954.1 | Scaffold496 | 11627                   | AA                              | GG              | 1946953156               |
| SNP_P4_131364_11842  | NW_004515954.1 | Scaffold496 | 11842                   | AA                              | GG              | 1946953158               |
| SNP_P4_131365_11847  | NW_004515954.1 | Scaffold496 | 11847                   | TT                              | CC              | 1946953159               |
| SNP_P4_131366_11848  | NW_004515954.1 | Scaffold496 | 11848                   | TT                              | CC              | 1946953161               |
| SNP_P4_131367_11896  | NW_004515954.1 | Scaffold496 | 11896                   | AA                              | CC              | 1946953163               |
| SNP_P4_131368_22585  | NW_004515954.1 | Scaffold496 | 22585                   | TT                              | GG              | 1946953165               |
| SNP_P4_131369_22653  | NW_004515954.1 | Scaffold496 | 22653                   | TT                              | CC              | 1946953167               |
| SNP_P4_131370_23892  | NW_004515954.1 | Scaffold496 | 23892                   | AA                              | GG              | 1946953169               |
| SNP_P4_131372_31462  | NW_004515954.1 | Scaffold496 | 31462                   | TT                              | GG              | 1946953171               |
| SNP_P4_131373_31467  | NW_004515954.1 | Scaffold496 | 31467                   | AA                              | GG              | 1946953173               |
| SNP_P4_131374_31667  | NW_004515954.1 | Scaffold496 | 31667                   | TT                              | GG              | 1946953175               |
| SNP_P4_131375_31713  | NW_004515954.1 | Scaffold496 | 31713                   | AA                              | GG              | 1946953176               |
| SNP_P4_131376_34108  | NW_004515954.1 | Scaffold496 | 34108                   | TT                              | CC              | 1946953178               |
| SNP_P4_131377_34142  | NW_004515954.1 | Scaffold496 | 34142                   | CC                              | TT              | 1946953180               |
| SNP_P4_131378_34430  | NW_004515954.1 | Scaffold496 | 34430                   | AA                              | GG              | 1946953182               |
| SNP_P4_131379_37598  | NW_004515954.1 | Scaffold496 | 37598                   | CC                              | GG              | 1946953184               |
| SNP_P4_131380_41949  | NW_004515954.1 | Scaffold496 | 41949                   | CC                              | AA              | 1946953186               |
| SNP_P4_131381_41951  | NW_004515954.1 | Scaffold496 | 41951                   | AA                              | GG              | 1946953188               |
| SNP_P4_131382_41959  | NW_004515954.1 | Scaffold496 | 41959                   | TT                              | CC              | 1946953190               |
| SNP_P4_131383_42051  | NW_004515954.1 | Scaffold496 | 42051                   | AA                              | GG              | 1946953191               |
| SNP_P4_131384_42139  | NW_004515954.1 | Scaffold496 | 42139                   | AA                              | GG              | 1946953193               |
| SNP_P4_131385_42147  | NW_004515954.1 | Scaffold496 | 42147                   | AA                              | TT              | 1946953195               |
| SNP_P4_131386_42246  | NW_004515954.1 | Scaffold496 | 42246                   | TT                              | CC              | 1946953197               |

| SNPs IDs             | Chromosome IDs | Chromosomes | Physical positions (bp) | CDC Frontier (Reference genome) | (ILWC46 & LPNB) | NCBI SNPdb Accession IDs |
|----------------------|----------------|-------------|-------------------------|---------------------------------|-----------------|--------------------------|
| SNP_P4_131388_42338  | NW_004515954.1 | Scaffold496 | 42338                   | AA                              | GG              | 1946953199               |
| SNP_P4_131389_42365  | NW_004515954.1 | Scaffold496 | 42365                   | AA                              | TT              | 1946953201               |
| SNP_P4_131390_42406  | NW_004515954.1 | Scaffold496 | 42406                   | CC                              | TT              | 1946953203               |
| SNP_P4_131391_42490  | NW_004515954.1 | Scaffold496 | 42490                   | AA                              | GG              | 1946953205               |
| SNP_P4_131393_42583  | NW_004515954.1 | Scaffold496 | 42583                   | CC                              | TT              | 1946953207               |
| SNP_P4_131394_42598  | NW_004515954.1 | Scaffold496 | 42598                   | AA                              | CC              | 1946953209               |
| SNP_P4_131395_48237  | NW_004515954.1 | Scaffold496 | 48237                   | TT                              | AA              | 1946953211               |
| SNP_P4_131396_48253  | NW_004515954.1 | Scaffold496 | 48253                   | GG                              | AA              | 1946953213               |
| SNP_P4_131397_54821  | NW_004515954.1 | Scaffold496 | 54821                   | AA                              | GG              | 1946953215               |
| SNP_P4_131398_55006  | NW_004515954.1 | Scaffold496 | 55006                   | AA                              | GG              | 1946953217               |
| SNP_P4_131399_55054  | NW_004515954.1 | Scaffold496 | 55054                   | AA                              | GG              | 1946953219               |
| SNP_P4_131400_55055  | NW_004515954.1 | Scaffold496 | 55055                   | AA                              | TT              | 1946953221               |
| SNP_P4_131401_55056  | NW_004515954.1 | Scaffold496 | 55056                   | TT                              | GG              | 1946953223               |
| SNP_P4_131402_55057  | NW_004515954.1 | Scaffold496 | 55057                   | GG                              | TT              | 1946953225               |
| SNP_P4_131403_55102  | NW_004515954.1 | Scaffold496 | 55102                   | AA                              | TT              | 1946953227               |
| SNP_P4_131404_55103  | NW_004515954.1 | Scaffold496 | 55103                   | AA                              | GG              | 1946953229               |
| SNP_P4_131405_55121  | NW_004515954.1 | Scaffold496 | 55121                   | CC                              | TT              | 1946953231               |
| SNP_P4_131406_55131  | NW_004515954.1 | Scaffold496 | 55131                   | TT                              | CC              | 1946953233               |
| SNP_P4_131407_55139  | NW_004515954.1 | Scaffold496 | 55139                   | TT                              | CC              | 1946953235               |
| SNP_P4_131408_77868  | NW_004515954.1 | Scaffold496 | 77868                   | TT                              | GG              | 1946953237               |
| SNP_P4_131409_78481  | NW_004515954.1 | Scaffold496 | 78481                   | TT                              | CC              | 1946953239               |
| SNP_P4_131410_80225  | NW_004515954.1 | Scaffold496 | 80225                   | TT                              | AA              | 1946953241               |
| SNP_P4_131411_86202  | NW_004515954.1 | Scaffold496 | 86202                   | CC                              | TT              | 1946953243               |
| SNP_P4_131412_86237  | NW_004515954.1 | Scaffold496 | 86237                   | GG                              | TT              | 1946953244               |
| SNP_P4_131413_86440  | NW_004515954.1 | Scaffold496 | 86440                   | AA                              | TT              | 1946953246               |
| SNP_P4_131414_86497  | NW_004515954.1 | Scaffold496 | 86497                   | AA                              | GG              | 1946953248               |
| SNP_P4_131415_86871  | NW_004515954.1 | Scaffold496 | 86871                   | GG                              | CC              | 1946953250               |
| SNP_P4_131416_97052  | NW_004515954.1 | Scaffold496 | 97052                   | CC                              | TT              | 1946953252               |
| SNP_P4_131417_116279 | NW_004515954.1 | Scaffold496 | 116279                  | CC                              | TT              | 1946953254               |
| SNP_P4_131418_116467 | NW_004515954.1 | Scaffold496 | 116467                  | AA                              | TT              | 1946953256               |
| SNP_P4_131420_121781 | NW_004515954.1 | Scaffold496 | 121781                  | AA                              | GG              | 1946953258               |
| SNP_P4_131421_121815 | NW_004515954.1 | Scaffold496 | 121815                  | GG                              | AA              | 1946953260               |
| SNP_P4_131422_121933 | NW_004515954.1 | Scaffold496 | 121933                  | CC                              | TT              | 1946953262               |
| SNP_P4_131423_122201 | NW_004515954.1 | Scaffold496 | 122201                  | GG                              | TT              | 1946953264               |
| SNP_P4_131424_122231 | NW_004515954.1 | Scaffold496 | 122231                  | GG                              | AA              | 1946953266               |
| SNP_P4_131425_122449 | NW_004515954.1 | Scaffold496 | 122449                  | GG                              | AA              | 1946953268               |
| SNP_P4_131426_122467 | NW_004515954.1 | Scaffold496 | 122467                  | AA                              | GG              | 1946953270               |
| SNP_P4_131427_122482 | NW_004515954.1 | Scaffold496 | 122482                  | GG                              | TT              | 1946953272               |
| SNP_P4_131428_122500 | NW_004515954.1 | Scaffold496 | 122500                  | GG                              | TT              | 1946953274               |
| SNP_P4_131429_122526 | NW_004515954.1 | Scaffold496 | 122526                  | TT                              | CC              | 1946953276               |
| SNP_P4_131430_122565 | NW_004515954.1 | Scaffold496 | 122565                  | TT                              | AA              | 1946953278               |
| SNP_P4_131431_122720 | NW_004515954.1 | Scaffold496 | 122720                  | CC                              | GG              | 1946953280               |

| SNPs IDs             | Chromosome IDs | Chromosomes | Physical positions (bp) | CDC Frontier (Reference genome) | (ILWC46 & LPNB) | NCBI SNPdb Accession IDs |
|----------------------|----------------|-------------|-------------------------|---------------------------------|-----------------|--------------------------|
| SNP_P4_131432_122812 | NW_004515954.1 | Scaffold496 | 122812                  | TT                              | AA              | 1946953282               |
| SNP_P4_131433_122815 | NW_004515954.1 | Scaffold496 | 122815                  | AA                              | TT              | 1946953284               |
| SNP_P4_131434_123075 | NW_004515954.1 | Scaffold496 | 123075                  | CC                              | TT              | 1946953286               |
| SNP_P4_131435_123095 | NW_004515954.1 | Scaffold496 | 123095                  | TT                              | CC              | 1946953288               |
| SNP_P4_131436_123125 | NW_004515954.1 | Scaffold496 | 123125                  | TT                              | CC              | 1946953290               |
| SNP_P4_131437_123163 | NW_004515954.1 | Scaffold496 | 123163                  | AA                              | GG              | 1946953292               |
| SNP_P4_131438_123178 | NW_004515954.1 | Scaffold496 | 123178                  | CC                              | TT              | 1946953294               |
| SNP_P4_131439_123473 | NW_004515954.1 | Scaffold496 | 123473                  | AA                              | CC              | 1946953296               |
| SNP_P4_131440_123500 | NW_004515954.1 | Scaffold496 | 123500                  | TT                              | CC              | 1946953298               |
| SNP_P4_131441_123512 | NW_004515954.1 | Scaffold496 | 123512                  | TT                              | CC              | 1946953300               |
| SNP_P4_131442_123533 | NW_004515954.1 | Scaffold496 | 123533                  | GG                              | CC              | 1946953302               |
| SNP_P4_131443_123948 | NW_004515954.1 | Scaffold496 | 123948                  | AA                              | GG              | 1946953304               |
| SNP_P4_131444_124011 | NW_004515954.1 | Scaffold496 | 124011                  | TT                              | CC              | 1946953306               |
| SNP_P4_131445_124377 | NW_004515954.1 | Scaffold496 | 124377                  | AA                              | GG              | 1946953308               |
| SNP_P4_131446_126693 | NW_004515954.1 | Scaffold496 | 126693                  | AA                              | GG              | 1946953310               |
| SNP_P4_131447_126699 | NW_004515954.1 | Scaffold496 | 126699                  | AA                              | TT              | 1946953312               |
| SNP_P4_131448_126865 | NW_004515954.1 | Scaffold496 | 126865                  | CC                              | TT              | 1946953314               |
| SNP_P4_131449_127010 | NW_004515954.1 | Scaffold496 | 127010                  | AA                              | GG              | 1946953316               |
| SNP_P4_131450_127285 | NW_004515954.1 | Scaffold496 | 127285                  | TT                              | GG              | 1946953318               |
| SNP_P4_131451_129099 | NW_004515954.1 | Scaffold496 | 129099                  | GG                              | AA              | 1946953320               |
| SNP_P4_131452_129147 | NW_004515954.1 | Scaffold496 | 129147                  | CC                              | TT              | 1946953322               |
| SNP_P4_131453_129166 | NW_004515954.1 | Scaffold496 | 129166                  | CC                              | GG              | 1946953324               |
| SNP_P4_131454_144746 | NW_004515954.1 | Scaffold496 | 144746                  | TT                              | CC              | 1946953326               |
| SNP_P4_131455_144761 | NW_004515954.1 | Scaffold496 | 144761                  | TT                              | CC              | 1946953328               |
| SNP_P4_131456_145132 | NW_004515954.1 | Scaffold496 | 145132                  | CC                              | GG              | 1946953330               |
| SNP_P4_131457_149788 | NW_004515954.1 | Scaffold496 | 149788                  | TT                              | GG              | 1946953332               |
| SNP_P4_131458_149845 | NW_004515954.1 | Scaffold496 | 149845                  | AA                              | TT              | 1946953334               |
| SNP_P4_131459_165746 | NW_004515954.1 | Scaffold496 | 165746                  | TT                              | CC              | 1946953335               |
| SNP_P4_131460_165793 | NW_004515954.1 | Scaffold496 | 165793                  | TT                              | CC              | 1946953337               |
| SNP_P4_131461_166014 | NW_004515954.1 | Scaffold496 | 166014                  | AA                              | GG              | 1946953339               |
| SNP_P4_131462_171753 | NW_004515954.1 | Scaffold496 | 171753                  | AA                              | CC              | 1946953341               |
| SNP_P4_131463_171802 | NW_004515954.1 | Scaffold496 | 171802                  | TT                              | AA              | 1946953343               |
| SNP_P4_131464_184641 | NW_004515954.1 | Scaffold496 | 184641                  | TT                              | CC              | 1946953344               |
| SNP_P4_131465_184695 | NW_004515954.1 | Scaffold496 | 184695                  | GG                              | TT              | 1946953346               |
| SNP_P4_131466_184705 | NW_004515954.1 | Scaffold496 | 184705                  | TT                              | AA              | 1946953348               |
| SNP_P4_131467_184762 | NW_004515954.1 | Scaffold496 | 184762                  | CC                              | AA              | 1946953350               |
| SNP_P4_131468_186439 | NW_004515954.1 | Scaffold496 | 186439                  | TT                              | CC              | 1946953352               |
| SNP_P4_131469_186505 | NW_004515954.1 | Scaffold496 | 186505                  | TT                              | CC              | 1946953354               |
| SNP_P4_131470_186836 | NW_004515954.1 | Scaffold496 | 186836                  | TT                              | CC              | 1946953356               |
| SNP_P4_131471_190768 | NW_004515954.1 | Scaffold496 | 190768                  | TT                              | GG              | 1946953358               |
| SNP_P4_131472_190775 | NW_004515954.1 | Scaffold496 | 190775                  | AA                              | GG              | 1946953360               |
| SNP_P4_131473_190812 | NW_004515954.1 | Scaffold496 | 190812                  | TT                              | CC              | 1946953362               |

| SNPs IDs             | Chromosome IDs | Chromosomes | Physical positions (bp) | CDC Frontier (Reference genome) | (ILWC46 & LPNB) | NCBI SNPdb Accession IDs |
|----------------------|----------------|-------------|-------------------------|---------------------------------|-----------------|--------------------------|
| SNP_P4_131474_190826 | NW_004515954.1 | Scaffold496 | 190826                  | AA                              | GG              | 1946953364               |
| SNP_P4_131475_190837 | NW_004515954.1 | Scaffold496 | 190837                  | CC                              | AA              | 1946953366               |
| SNP_P4_131476_190860 | NW_004515954.1 | Scaffold496 | 190860                  | GG                              | AA              | 1946953368               |
| SNP_P4_131477_190863 | NW_004515954.1 | Scaffold496 | 190863                  | TT                              | GG              | 1946953370               |
| SNP_P4_131478_190875 | NW_004515954.1 | Scaffold496 | 190875                  | GG                              | AA              | 1946953372               |
| SNP_P4_131479_191232 | NW_004515954.1 | Scaffold496 | 191232                  | CC                              | GG              | 1946953374               |
| SNP_P4_131480_193746 | NW_004515954.1 | Scaffold496 | 193746                  | GG                              | TT              | 1946953376               |
| SNP_P4_131481_197293 | NW_004515954.1 | Scaffold496 | 197293                  | AA                              | GG              | 1946953378               |
| SNP_P4_131482_197498 | NW_004515954.1 | Scaffold496 | 197498                  | TT                              | CC              | 1946953380               |
| SNP_P4_131483_197527 | NW_004515954.1 | Scaffold496 | 197527                  | TT                              | CC              | 1946953382               |
| SNP_P4_131484_205217 | NW_004515954.1 | Scaffold496 | 205217                  | TT                              | CC              | 1946953384               |
| SNP_P4_131485_205287 | NW_004515954.1 | Scaffold496 | 205287                  | TT                              | CC              | 1946953386               |
| SNP_P4_131486_206206 | NW_004515954.1 | Scaffold496 | 206206                  | GG                              | AA              | 1946953388               |
| SNP_P4_131487_206451 | NW_004515954.1 | Scaffold496 | 206451                  | GG                              | CC              | 1946953390               |
| SNP_P4_131489_212755 | NW_004515954.1 | Scaffold496 | 212755                  | TT                              | CC              | 1946953392               |
| SNP_P4_131490_219548 | NW_004515954.1 | Scaffold496 | 219548                  | AA                              | GG              | 1946953394               |
| SNP_P4_131492_220832 | NW_004515954.1 | Scaffold496 | 220832                  | TT                              | CC              | 1946953396               |
| SNP_P4_131493_221032 | NW_004515954.1 | Scaffold496 | 221032                  | GG                              | AA              | 1946953398               |
| SNP_P4_131494_221193 | NW_004515954.1 | Scaffold496 | 221193                  | GG                              | AA              | 1946953400               |
| SNP_P4_131495_221314 | NW_004515954.1 | Scaffold496 | 221314                  | TT                              | CC              | 1946953402               |
| SNP_P4_131496_226920 | NW_004515954.1 | Scaffold496 | 226920                  | GG                              | CC              | 1946953404               |
| SNP_P4_131497_228049 | NW_004515954.1 | Scaffold496 | 228049                  | GG                              | AA              | 1946953406               |
| SNP_P4_131498_228050 | NW_004515954.1 | Scaffold496 | 228050                  | CC                              | GG              | 1946953408               |
| SNP_P4_131499_228051 | NW_004515954.1 | Scaffold496 | 228051                  | AA                              | GG              | 1946953410               |
| SNP_P4_131500_228399 | NW_004515954.1 | Scaffold496 | 228399                  | TT                              | GG              | 1946953412               |
| SNP_P4_131501_228407 | NW_004515954.1 | Scaffold496 | 228407                  | TT                              | CC              | 1946953414               |
| SNP_P4_131502_237399 | NW_004515954.1 | Scaffold496 | 237399                  | CC                              | AA              | 1946953416               |
| SNP_P4_131503_243332 | NW_004515954.1 | Scaffold496 | 243332                  | TT                              | CC              | 1946953418               |
| SNP_P4_131504_243398 | NW_004515954.1 | Scaffold496 | 243398                  | AA                              | GG              | 1946953419               |
| SNP_P4_131505_243427 | NW_004515954.1 | Scaffold496 | 243427                  | TT                              | CC              | 1946953421               |
| SNP_P4_131506_243717 | NW_004515954.1 | Scaffold496 | 243717                  | GG                              | TT              | 1946953423               |
| SNP_P4_131507_244566 | NW_004515954.1 | Scaffold496 | 244566                  | TT                              | CC              | 1946953425               |
| SNP_P4_131508_244573 | NW_004515954.1 | Scaffold496 | 244573                  | TT                              | AA              | 1946953426               |
| SNP_P4_131509_244636 | NW_004515954.1 | Scaffold496 | 244636                  | CC                              | TT              | 1946953427               |
| SNP_P4_131510_244684 | NW_004515954.1 | Scaffold496 | 244684                  | TT                              | CC              | 1946953428               |
| SNP_P4_131511_245960 | NW_004515954.1 | Scaffold496 | 245960                  | GG                              | CC              | 1946953430               |
| SNP_P4_131512_245969 | NW_004515954.1 | Scaffold496 | 245969                  | AA                              | GG              | 1946953432               |
| SNP_P4_131513_245979 | NW_004515954.1 | Scaffold496 | 245979                  | TT                              | CC              | 1946953434               |
| SNP_P4_131514_246233 | NW_004515954.1 | Scaffold496 | 246233                  | AA                              | TT              | 1946953436               |
| SNP_P4_131515_263396 | NW_004515954.1 | Scaffold496 | 263396                  | TT                              | AA              | 1946953438               |
| SNP_P4_131516_264208 | NW_004515954.1 | Scaffold496 | 264208                  | AA                              | CC              | 1946953440               |
| SNP_P4_131517_264509 | NW_004515954.1 | Scaffold496 | 264509                  | AA                              | TT              | 1946953442               |



| SNPs IDs             | Chromosome IDs | Chromosomes | Physical positions (bp) | CDC Frontier (Reference genome) | (ILWC46 & LPNB) | NCBI SNPdb Accession IDs |
|----------------------|----------------|-------------|-------------------------|---------------------------------|-----------------|--------------------------|
| SNP_P4_131518_264521 | NW_004515954.1 | Scaffold496 | 264521                  | AA                              | GG              | 1946953444               |
| SNP_P4_131519_264545 | NW_004515954.1 | Scaffold496 | 264545                  | AA                              | GG              | 1946953446               |
| SNP_P4_131520_264813 | NW_004515954.1 | Scaffold496 | 264813                  | CC                              | GG              | 1946953448               |
| SNP_P4_131521_264933 | NW_004515954.1 | Scaffold496 | 264933                  | GG                              | AA              | 1946953450               |
| SNP_P4_131522_267082 | NW_004515954.1 | Scaffold496 | 267082                  | TT                              | GG              | 1946953452               |
| SNP_P4_131523_270435 | NW_004515954.1 | Scaffold496 | 270435                  | AA                              | GG              | 1946953454               |
| SNP_P4_131524_278790 | NW_004515954.1 | Scaffold496 | 278790                  | AA                              | GG              | 1946953456               |
| SNP_P4_131525_43280  | NW_004515955.1 | Scaffold497 | 43280                   | CC                              | TT              | 1946953458               |
| SNP_P4_131526_44947  | NW_004515955.1 | Scaffold497 | 44947                   | AA                              | GG              | 1946953460               |
| SNP_P4_131527_44990  | NW_004515955.1 | Scaffold497 | 44990                   | GG                              | TT              | 1946953462               |
| SNP_P4_131528_45102  | NW_004515955.1 | Scaffold497 | 45102                   | TT                              | AA              | 1946953464               |
| SNP_P4_131529_45107  | NW_004515955.1 | Scaffold497 | 45107                   | AA                              | TT              | 1946953466               |
| SNP_P4_131530_45156  | NW_004515955.1 | Scaffold497 | 45156                   | TT                              | GG              | 1946953468               |
| SNP_P4_131531_46951  | NW_004515955.1 | Scaffold497 | 46951                   | GG                              | AA              | 1946953470               |
| SNP_P4_131532_47012  | NW_004515955.1 | Scaffold497 | 47012                   | TT                              | GG              | 1946953472               |
| SNP_P4_131533_47015  | NW_004515955.1 | Scaffold497 | 47015                   | GG                              | CC              | 1946953474               |
| SNP_P4_131535_59972  | NW_004515955.1 | Scaffold497 | 59972                   | AA                              | TT              | 1946953476               |
| SNP_P4_131536_59985  | NW_004515955.1 | Scaffold497 | 59985                   | CC                              | TT              | 1946953478               |
| SNP_P4_131537_60280  | NW_004515955.1 | Scaffold497 | 60280                   | TT                              | CC              | 1946953480               |
| SNP_P4_131538_60307  | NW_004515955.1 | Scaffold497 | 60307                   | GG                              | TT              | 1946953482               |
| SNP_P4_131539_60318  | NW_004515955.1 | Scaffold497 | 60318                   | GG                              | AA              | 1946953484               |
| SNP_P4_131540_60322  | NW_004515955.1 | Scaffold497 | 60322                   | GG                              | AA              | 1946953486               |
| SNP_P4_131541_60345  | NW_004515955.1 | Scaffold497 | 60345                   | AA                              | CC              | 1946953488               |
| SNP_P4_131542_62917  | NW_004515955.1 | Scaffold497 | 62917                   | CC                              | GG              | 1946953490               |
| SNP_P4_131543_63054  | NW_004515955.1 | Scaffold497 | 63054                   | TT                              | CC              | 1946953492               |
| SNP_P4_131544_63089  | NW_004515955.1 | Scaffold497 | 63089                   | TT                              | CC              | 1946953493               |
| SNP_P4_131545_63107  | NW_004515955.1 | Scaffold497 | 63107                   | GG                              | TT              | 1946953495               |
| SNP_P4_131546_63114  | NW_004515955.1 | Scaffold497 | 63114                   | AA                              | GG              | 1946953497               |
| SNP_P4_131547_63118  | NW_004515955.1 | Scaffold497 | 63118                   | TT                              | CC              | 1946953499               |
| SNP_P4_131548_63346  | NW_004515955.1 | Scaffold497 | 63346                   | AA                              | GG              | 1946953501               |
| SNP_P4_131549_63402  | NW_004515955.1 | Scaffold497 | 63402                   | GG                              | TT              | 1946953503               |
| SNP_P4_131550_68003  | NW_004515955.1 | Scaffold497 | 68003                   | AA                              | TT              | 1946953505               |
| SNP_P4_131551_68007  | NW_004515955.1 | Scaffold497 | 68007                   | TT                              | CC              | 1946953507               |
| SNP_P4_131552_68039  | NW_004515955.1 | Scaffold497 | 68039                   | GG                              | AA              | 1946953509               |
| SNP_P4_131553_68332  | NW_004515955.1 | Scaffold497 | 68332                   | CC                              | TT              | 1946953511               |
| SNP_P4_131554_69243  | NW_004515955.1 | Scaffold497 | 69243                   | CC                              | AA              | 1946953513               |
| SNP_P4_131555_69244  | NW_004515955.1 | Scaffold497 | 69244                   | TT                              | AA              | 1946953515               |
| SNP_P4_131556_69282  | NW_004515955.1 | Scaffold497 | 69282                   | GG                              | AA              | 1946953517               |
| SNP_P4_131558_69332  | NW_004515955.1 | Scaffold497 | 69332                   | TT                              | AA              | 1946953519               |
| SNP_P4_131559_69341  | NW_004515955.1 | Scaffold497 | 69341                   | AA                              | TT              | 1946953521               |
| SNP_P4_131560_69440  | NW_004515955.1 | Scaffold497 | 69440                   | TT                              | AA              | 1946953523               |
| SNP_P4_131562_69571  | NW_004515955.1 | Scaffold497 | 69571                   | TT                              | AA              | 1946953525               |

| SNPs IDs            | Chromosome IDs | Chromosomes | Physical positions (bp) | CDC Frontier (Reference genome) | (ILWC46 & LPNB) | NCBI SNPdb Accession IDs |
|---------------------|----------------|-------------|-------------------------|---------------------------------|-----------------|--------------------------|
| SNP_P4_131563_69651 | NW_004515955.1 | Scaffold497 | 69651                   | AA                              | TT              | 1946953527               |
| SNP_P4_131564_69659 | NW_004515955.1 | Scaffold497 | 69659                   | AA                              | TT              | 1946953529               |
| SNP_P4_131565_69943 | NW_004515955.1 | Scaffold497 | 69943                   | TT                              | GG              | 1946953531               |
| SNP_P4_131566_69966 | NW_004515955.1 | Scaffold497 | 69966                   | AA                              | TT              | 1946953533               |
| SNP_P4_131567_69975 | NW_004515955.1 | Scaffold497 | 69975                   | AA                              | GG              | 1946953535               |
| SNP_P4_131568_69976 | NW_004515955.1 | Scaffold497 | 69976                   | AA                              | TT              | 1946953537               |
| SNP_P4_131569_69977 | NW_004515955.1 | Scaffold497 | 69977                   | TT                              | AA              | 1946953539               |
| SNP_P4_131570_69980 | NW_004515955.1 | Scaffold497 | 69980                   | CC                              | TT              | 1946953541               |
| SNP_P4_131573_70095 | NW_004515955.1 | Scaffold497 | 70095                   | CC                              | TT              | 1946953543               |
| SNP_P4_131574_70112 | NW_004515955.1 | Scaffold497 | 70112                   | GG                              | CC              | 1946953544               |
| SNP_P4_131575_71741 | NW_004515955.1 | Scaffold497 | 71741                   | AA                              | GG              | 1946953546               |
| SNP_P4_131576_71775 | NW_004515955.1 | Scaffold497 | 71775                   | AA                              | CC              | 1946953548               |
| SNP_P4_131577_72106 | NW_004515955.1 | Scaffold497 | 72106                   | AA                              | GG              | 1946953550               |
| SNP_P4_131578_72107 | NW_004515955.1 | Scaffold497 | 72107                   | GG                              | CC              | 1946953552               |
| SNP_P4_131579_72122 | NW_004515955.1 | Scaffold497 | 72122                   | AA                              | CC              | 1946953554               |
| SNP_P4_131580_72152 | NW_004515955.1 | Scaffold497 | 72152                   | CC                              | TT              | 1946953556               |
| SNP_P4_131581_72153 | NW_004515955.1 | Scaffold497 | 72153                   | AA                              | GG              | 1946953558               |
| SNP_P4_131582_72202 | NW_004515955.1 | Scaffold497 | 72202                   | CC                              | AA              | 1946953560               |
| SNP_P4_131583_72368 | NW_004515955.1 | Scaffold497 | 72368                   | GG                              | CC              | 1946953562               |
| SNP_P4_131584_72390 | NW_004515955.1 | Scaffold497 | 72390                   | TT                              | CC              | 1946953564               |
| SNP_P4_131585_72420 | NW_004515955.1 | Scaffold497 | 72420                   | GG                              | TT              | 1946953566               |
| SNP_P4_131586_72497 | NW_004515955.1 | Scaffold497 | 72497                   | GG                              | TT              | 1946953568               |
| SNP_P4_131587_72631 | NW_004515955.1 | Scaffold497 | 72631                   | TT                              | AA              | 1946953570               |
| SNP_P4_131588_72634 | NW_004515955.1 | Scaffold497 | 72634                   | TT                              | CC              | 1946953572               |
| SNP_P4_131589_72663 | NW_004515955.1 | Scaffold497 | 72663                   | TT                              | GG              | 1946953574               |
| SNP_P4_131591_73428 | NW_004515955.1 | Scaffold497 | 73428                   | AA                              | CC              | 1946953576               |
| SNP_P4_131592_73435 | NW_004515955.1 | Scaffold497 | 73435                   | GG                              | TT              | 1946953578               |
| SNP_P4_131594_73500 | NW_004515955.1 | Scaffold497 | 73500                   | GG                              | AA              | 1946953580               |
| SNP_P4_131595_73507 | NW_004515955.1 | Scaffold497 | 73507                   | AA                              | TT              | 1946953582               |
| SNP_P4_131596_73528 | NW_004515955.1 | Scaffold497 | 73528                   | AA                              | CC              | 1946953584               |
| SNP_P4_131597_73584 | NW_004515955.1 | Scaffold497 | 73584                   | AA                              | CC              | 1946953586               |
| SNP_P4_131598_73632 | NW_004515955.1 | Scaffold497 | 73632                   | AA                              | GG              | 1946953588               |
| SNP_P4_131600_73682 | NW_004515955.1 | Scaffold497 | 73682                   | AA                              | GG              | 1946953590               |
| SNP_P4_131601_73710 | NW_004515955.1 | Scaffold497 | 73710                   | TT                              | CC              | 1946953592               |
| SNP_P4_131602_73744 | NW_004515955.1 | Scaffold497 | 73744                   | GG                              | TT              | 1946953594               |
| SNP_P4_131603_73804 | NW_004515955.1 | Scaffold497 | 73804                   | AA                              | GG              | 1946953596               |
| SNP_P4_131604_73831 | NW_004515955.1 | Scaffold497 | 73831                   | GG                              | AA              | 1946953598               |
| SNP_P4_131605_73852 | NW_004515955.1 | Scaffold497 | 73852                   | TT                              | GG              | 1946953600               |
| SNP_P4_131606_73909 | NW_004515955.1 | Scaffold497 | 73909                   | AA                              | TT              | 1946953602               |
| SNP_P4_131607_82987 | NW_004515955.1 | Scaffold497 | 82987                   | AA                              | GG              | 1946953604               |
| SNP_P4_131608_83068 | NW_004515955.1 | Scaffold497 | 83068                   | AA                              | GG              | 1946953605               |
| SNP_P4_131609_84209 | NW_004515955.1 | Scaffold497 | 84209                   | CC                              | GG              | 1946953607               |

| SNPs IDs             | Chromosome IDs | Chromosomes | Physical positions (bp) | CDC Frontier (Reference genome) | (ILWC46 & LPNB) | NCBI SNPdb Accession IDs |
|----------------------|----------------|-------------|-------------------------|---------------------------------|-----------------|--------------------------|
| SNP_P4_131610_84255  | NW_004515955.1 | Scaffold497 | 84255                   | GG                              | CC              | 1946953609               |
| SNP_P4_131611_84688  | NW_004515955.1 | Scaffold497 | 84688                   | AA                              | CC              | 1946953611               |
| SNP_P4_131612_84776  | NW_004515955.1 | Scaffold497 | 84776                   | TT                              | AA              | 1946953613               |
| SNP_P4_131613_85015  | NW_004515955.1 | Scaffold497 | 85015                   | TT                              | AA              | 1946953615               |
| SNP_P4_131614_85095  | NW_004515955.1 | Scaffold497 | 85095                   | TT                              | AA              | 1946953617               |
| SNP_P4_131615_85225  | NW_004515955.1 | Scaffold497 | 85225                   | AA                              | GG              | 1946953619               |
| SNP_P4_131616_87994  | NW_004515955.1 | Scaffold497 | 87994                   | AA                              | TT              | 1946953621               |
| SNP_P4_131617_88022  | NW_004515955.1 | Scaffold497 | 88022                   | GG                              | CC              | 1946953623               |
| SNP_P4_131619_88065  | NW_004515955.1 | Scaffold497 | 88065                   | GG                              | AA              | 1946953625               |
| SNP_P4_131620_92143  | NW_004515955.1 | Scaffold497 | 92143                   | TT                              | AA              | 1946953627               |
| SNP_P4_131621_92403  | NW_004515955.1 | Scaffold497 | 92403                   | TT                              | CC              | 1946953629               |
| SNP_P4_131622_92464  | NW_004515955.1 | Scaffold497 | 92464                   | CC                              | TT              | 1946953631               |
| SNP_P4_131623_93983  | NW_004515955.1 | Scaffold497 | 93983                   | TT                              | CC              | 1946953633               |
| SNP_P4_131624_94907  | NW_004515955.1 | Scaffold497 | 94907                   | TT                              | GG              | 1946953635               |
| SNP_P4_131625_94983  | NW_004515955.1 | Scaffold497 | 94983                   | AA                              | TT              | 1946953637               |
| SNP_P4_131626_95006  | NW_004515955.1 | Scaffold497 | 95006                   | GG                              | AA              | 1946953639               |
| SNP_P4_131627_95042  | NW_004515955.1 | Scaffold497 | 95042                   | AA                              | TT              | 1946953641               |
| SNP_P4_131628_95048  | NW_004515955.1 | Scaffold497 | 95048                   | TT                              | CC              | 1946953643               |
| SNP_P4_131629_95099  | NW_004515955.1 | Scaffold497 | 95099                   | TT                              | GG              | 1946953645               |
| SNP_P4_131630_95143  | NW_004515955.1 | Scaffold497 | 95143                   | AA                              | TT              | 1946953647               |
| SNP_P4_131631_95178  | NW_004515955.1 | Scaffold497 | 95178                   | AA                              | GG              | 1946953649               |
| SNP_P4_131632_100486 | NW_004515955.1 | Scaffold497 | 100486                  | TT                              | CC              | 1946953651               |
| SNP_P4_131633_100533 | NW_004515955.1 | Scaffold497 | 100533                  | GG                              | AA              | 1946953653               |
| SNP_P4_131634_100632 | NW_004515955.1 | Scaffold497 | 100632                  | TT                              | AA              | 1946953655               |
| SNP_P4_131635_25771  | NW_004515956.1 | Scaffold498 | 25771                   | CC                              | TT              | 1946953657               |
| SNP_P4_131636_25787  | NW_004515956.1 | Scaffold498 | 25787                   | TT                              | GG              | 1946953659               |
| SNP_P4_131637_25788  | NW_004515956.1 | Scaffold498 | 25788                   | CC                              | TT              | 1946953661               |
| SNP_P4_131638_35908  | NW_004515956.1 | Scaffold498 | 35908                   | AA                              | GG              | 1946953663               |
| SNP_P4_131639_43294  | NW_004515956.1 | Scaffold498 | 43294                   | TT                              | CC              | 1946953665               |
| SNP_P4_131640_43590  | NW_004515956.1 | Scaffold498 | 43590                   | TT                              | AA              | 1946953667               |
| SNP_P4_131641_43615  | NW_004515956.1 | Scaffold498 | 43615                   | AA                              | GG              | 1946953669               |
| SNP_P4_131643_48803  | NW_004515956.1 | Scaffold498 | 48803                   | AA                              | GG              | 1946953671               |
| SNP_P4_131644_48822  | NW_004515956.1 | Scaffold498 | 48822                   | GG                              | AA              | 1946953673               |
| SNP_P4_131645_48911  | NW_004515956.1 | Scaffold498 | 48911                   | GG                              | AA              | 1946953675               |
| SNP_P4_131646_48926  | NW_004515956.1 | Scaffold498 | 48926                   | GG                              | AA              | 1946953677               |
| SNP_P4_131647_62814  | NW_004515956.1 | Scaffold498 | 62814                   | AA                              | TT              | 1946953679               |
| SNP_P4_131649_104249 | NW_004515956.1 | Scaffold498 | 104249                  | CC                              | TT              | 1946953681               |
| SNP_P4_131650_193466 | NW_004515956.1 | Scaffold498 | 193466                  | TT                              | CC              | 1946953683               |
| SNP_P4_131651_193533 | NW_004515956.1 | Scaffold498 | 193533                  | CC                              | TT              | 1946953685               |
| SNP_P4_131652_194088 | NW_004515956.1 | Scaffold498 | 194088                  | CC                              | TT              | 1946953687               |
| SNP_P4_131653_198625 | NW_004515956.1 | Scaffold498 | 198625                  | TT                              | AA              | 1946953690               |
| SNP_P4_131654_198640 | NW_004515956.1 | Scaffold498 | 198640                  | AA                              | TT              | 1946953692               |

| SNPs IDs             | Chromosome IDs | Chromosomes | Physical positions (bp) | CDC Frontier (Reference genome) | (ILWC46 & LPNB) | NCBI SNPdb Accession IDs |
|----------------------|----------------|-------------|-------------------------|---------------------------------|-----------------|--------------------------|
| SNP_P4_131655_198652 | NW_004515956.1 | Scaffold498 | 198652                  | GG                              | TT              | 1946953694               |
| SNP_P4_131656_198700 | NW_004515956.1 | Scaffold498 | 198700                  | TT                              | AA              | 1946953696               |
| SNP_P4_131657_198703 | NW_004515956.1 | Scaffold498 | 198703                  | CC                              | TT              | 1946953698               |
| SNP_P4_131658_198708 | NW_004515956.1 | Scaffold498 | 198708                  | TT                              | GG              | 1946953700               |
| SNP_P4_131659_198809 | NW_004515956.1 | Scaffold498 | 198809                  | AA                              | GG              | 1946953702               |
| SNP_P4_131660_198810 | NW_004515956.1 | Scaffold498 | 198810                  | TT                              | CC              | 1946953704               |
| SNP_P4_131661_198811 | NW_004515956.1 | Scaffold498 | 198811                  | AA                              | GG              | 1946953706               |
| SNP_P4_131662_198880 | NW_004515956.1 | Scaffold498 | 198880                  | CC                              | TT              | 1946953708               |
| SNP_P4_131663_198905 | NW_004515956.1 | Scaffold498 | 198905                  | TT                              | AA              | 1946953710               |
| SNP_P4_131664_198910 | NW_004515956.1 | Scaffold498 | 198910                  | GG                              | TT              | 1946953712               |
| SNP_P4_131665_198916 | NW_004515956.1 | Scaffold498 | 198916                  | TT                              | CC              | 1946953714               |
| SNP_P4_131666_198919 | NW_004515956.1 | Scaffold498 | 198919                  | TT                              | CC              | 1946953716               |
| SNP_P4_131667_198922 | NW_004515956.1 | Scaffold498 | 198922                  | TT                              | CC              | 1946953718               |
| SNP_P4_131668_199024 | NW_004515956.1 | Scaffold498 | 199024                  | GG                              | CC              | 1946953720               |
| SNP_P4_131669_199108 | NW_004515956.1 | Scaffold498 | 199108                  | TT                              | CC              | 1946953722               |
| SNP_P4_131670_199174 | NW_004515956.1 | Scaffold498 | 199174                  | TT                              | CC              | 1946953724               |
| SNP_P4_131671_199211 | NW_004515956.1 | Scaffold498 | 199211                  | AA                              | GG              | 1946953726               |
| SNP_P4_131672_205175 | NW_004515956.1 | Scaffold498 | 205175                  | AA                              | CC              | 1946953728               |
| SNP_P4_131673_205321 | NW_004515956.1 | Scaffold498 | 205321                  | CC                              | TT              | 1946953730               |
| SNP_P4_131674_205425 | NW_004515956.1 | Scaffold498 | 205425                  | CC                              | TT              | 1946953732               |
| SNP_P4_131675_205619 | NW_004515956.1 | Scaffold498 | 205619                  | GG                              | AA              | 1946953734               |
| SNP_P4_131676_205631 | NW_004515956.1 | Scaffold498 | 205631                  | TT                              | CC              | 1946953736               |
| SNP_P4_131677_205637 | NW_004515956.1 | Scaffold498 | 205637                  | TT                              | CC              | 1946953738               |
| SNP_P4_131678_205803 | NW_004515956.1 | Scaffold498 | 205803                  | AA                              | GG              | 1946953740               |
| SNP_P4_131679_205879 | NW_004515956.1 | Scaffold498 | 205879                  | TT                              | CC              | 1946953742               |
| SNP_P4_131680_205924 | NW_004515956.1 | Scaffold498 | 205924                  | CC                              | TT              | 1946953744               |
| SNP_P4_131682_209845 | NW_004515956.1 | Scaffold498 | 209845                  | GG                              | TT              | 1946953746               |
| SNP_P4_131683_211783 | NW_004515956.1 | Scaffold498 | 211783                  | TT                              | CC              | 1946953748               |
| SNP_P4_131684_212085 | NW_004515956.1 | Scaffold498 | 212085                  | AA                              | GG              | 1946953750               |
| SNP_P4_131685_212139 | NW_004515956.1 | Scaffold498 | 212139                  | AA                              | GG              | 1946953752               |
| SNP_P4_131686_212216 | NW_004515956.1 | Scaffold498 | 212216                  | GG                              | TT              | 1946953754               |
| SNP_P4_131687_212630 | NW_004515956.1 | Scaffold498 | 212630                  | TT                              | CC              | 1946953756               |
| SNP_P4_131688_212655 | NW_004515956.1 | Scaffold498 | 212655                  | AA                              | CC              | 1946953758               |
| SNP_P4_131689_213430 | NW_004515956.1 | Scaffold498 | 213430                  | AA                              | CC              | 1946953760               |
| SNP_P4_131690_213706 | NW_004515956.1 | Scaffold498 | 213706                  | GG                              | TT              | 1946953762               |
| SNP_P4_131691_213900 | NW_004515956.1 | Scaffold498 | 213900                  | TT                              | CC              | 1946953764               |
| SNP_P4_131692_213949 | NW_004515956.1 | Scaffold498 | 213949                  | GG                              | AA              | 1946953766               |
| SNP_P4_131696_214320 | NW_004515956.1 | Scaffold498 | 214320                  | CC                              | TT              | 1946953768               |
| SNP_P4_131697_214452 | NW_004515956.1 | Scaffold498 | 214452                  | CC                              | TT              | 1946953770               |
| SNP_P4_131699_214627 | NW_004515956.1 | Scaffold498 | 214627                  | GG                              | AA              | 1946953772               |
| SNP_P4_131700_214678 | NW_004515956.1 | Scaffold498 | 214678                  | CC                              | AA              | 1946953774               |
| SNP_P4_131701_214742 | NW_004515956.1 | Scaffold498 | 214742                  | TT                              | CC              | 1946953776               |

| SNPs IDs             | Chromosome IDs | Chromosomes | Physical positions (bp) | CDC Frontier (Reference genome) | (ILWC46 & LPNB) | NCBI SNPdb Accession IDs |
|----------------------|----------------|-------------|-------------------------|---------------------------------|-----------------|--------------------------|
| SNP_P4_131702_214827 | NW_004515956.1 | Scaffold498 | 214827                  | AA                              | GG              | 1946953778               |
| SNP_P4_131703_215037 | NW_004515956.1 | Scaffold498 | 215037                  | AA                              | GG              | 1946953780               |
| SNP_P4_131704_215043 | NW_004515956.1 | Scaffold498 | 215043                  | AA                              | GG              | 1946953782               |
| SNP_P4_131705_215101 | NW_004515956.1 | Scaffold498 | 215101                  | AA                              | CC              | 1946953784               |
| SNP_P4_131706_215250 | NW_004515956.1 | Scaffold498 | 215250                  | GG                              | AA              | 1946953786               |
| SNP_P4_131707_215258 | NW_004515956.1 | Scaffold498 | 215258                  | CC                              | AA              | 1946953788               |
| SNP_P4_131708_215506 | NW_004515956.1 | Scaffold498 | 215506                  | AA                              | GG              | 1946953790               |
| SNP_P4_131709_215521 | NW_004515956.1 | Scaffold498 | 215521                  | AA                              | GG              | 1946953792               |
| SNP_P4_131710_215559 | NW_004515956.1 | Scaffold498 | 215559                  | GG                              | AA              | 1946953794               |
| SNP_P4_131711_215825 | NW_004515956.1 | Scaffold498 | 215825                  | CC                              | AA              | 1946953796               |
| SNP_P4_131712_215864 | NW_004515956.1 | Scaffold498 | 215864                  | CC                              | TT              | 1946953798               |
| SNP_P4_131713_215878 | NW_004515956.1 | Scaffold498 | 215878                  | AA                              | GG              | 1946953800               |
| SNP_P4_131714_215903 | NW_004515956.1 | Scaffold498 | 215903                  | CC                              | GG              | 1946953802               |
| SNP_P4_131715_216067 | NW_004515956.1 | Scaffold498 | 216067                  | CC                              | AA              | 1946953804               |
| SNP_P4_131716_216171 | NW_004515956.1 | Scaffold498 | 216171                  | AA                              | GG              | 1946953806               |
| SNP_P4_131717_216210 | NW_004515956.1 | Scaffold498 | 216210                  | CC                              | TT              | 1946953808               |
| SNP_P4_131718_216254 | NW_004515956.1 | Scaffold498 | 216254                  | TT                              | CC              | 1946953810               |
| SNP_P4_131719_216372 | NW_004515956.1 | Scaffold498 | 216372                  | TT                              | AA              | 1946953812               |
| SNP_P4_131720_216375 | NW_004515956.1 | Scaffold498 | 216375                  | GG                              | AA              | 1946953814               |
| SNP_P4_131721_216460 | NW_004515956.1 | Scaffold498 | 216460                  | CC                              | TT              | 1946953816               |
| SNP_P4_131722_1199   | NW_004515958.1 | Scaffold501 | 1199                    | CC                              | TT              | 1946953818               |
| SNP_P4_131723_1581   | NW_004515958.1 | Scaffold501 | 1581                    | AA                              | TT              | 1946953820               |
| SNP_P4_131724_1772   | NW_004515958.1 | Scaffold501 | 1772                    | CC                              | AA              | 1946953822               |
| SNP_P4_131725_9279   | NW_004515958.1 | Scaffold501 | 9279                    | AA                              | CC              | 1946953824               |
| SNP_P4_131726_9335   | NW_004515958.1 | Scaffold501 | 9335                    | AA                              | CC              | 1946953826               |
| SNP_P4_131727_9336   | NW_004515958.1 | Scaffold501 | 9336                    | AA                              | CC              | 1946953828               |
| SNP_P4_131728_9337   | NW_004515958.1 | Scaffold501 | 9337                    | AA                              | TT              | 1946953830               |
| SNP_P4_131729_11018  | NW_004515958.1 | Scaffold501 | 11018                   | AA                              | GG              | 1946953832               |
| SNP_P4_131730_11045  | NW_004515958.1 | Scaffold501 | 11045                   | GG                              | CC              | 1946953834               |
| SNP_P4_131731_11050  | NW_004515958.1 | Scaffold501 | 11050                   | AA                              | CC              | 1946953836               |
| SNP_P4_131732_11055  | NW_004515958.1 | Scaffold501 | 11055                   | TT                              | GG              | 1946953838               |
| SNP_P4_131733_11159  | NW_004515958.1 | Scaffold501 | 11159                   | CC                              | TT              | 1946953840               |
| SNP_P4_131734_11259  | NW_004515958.1 | Scaffold501 | 11259                   | CC                              | TT              | 1946953842               |
| SNP_P4_131735_11395  | NW_004515958.1 | Scaffold501 | 11395                   | GG                              | AA              | 1946953844               |
| SNP_P4_131736_11497  | NW_004515958.1 | Scaffold501 | 11497                   | AA                              | CC              | 1946953846               |
| SNP_P4_131737_11584  | NW_004515958.1 | Scaffold501 | 11584                   | AA                              | GG              | 1946953848               |
| SNP_P4_131738_12976  | NW_004515958.1 | Scaffold501 | 12976                   | TT                              | AA              | 1946953850               |
| SNP_P4_131739_13814  | NW_004515958.1 | Scaffold501 | 13814                   | TT                              | CC              | 1946953852               |
| SNP_P4_131740_14003  | NW_004515958.1 | Scaffold501 | 14003                   | GG                              | CC              | 1946953854               |
| SNP_P4_131741_14031  | NW_004515958.1 | Scaffold501 | 14031                   | TT                              | CC              | 1946953856               |
| SNP_P4_131742_14104  | NW_004515958.1 | Scaffold501 | 14104                   | AA                              | TT              | 1946953858               |
| SNP_P4_131743_14141  | NW_004515958.1 | Scaffold501 | 14141                   | GG                              | AA              | 1946953860               |

| SNPs IDs            | Chromosome IDs | Chromosomes | Physical positions (bp) | CDC Frontier (Reference genome) | (ILWC46 & LPNB) | NCBI SNPdb Accession IDs |
|---------------------|----------------|-------------|-------------------------|---------------------------------|-----------------|--------------------------|
| SNP_P4_131744_14151 | NW_004515958.1 | Scaffold501 | 14151                   | GG                              | AA              | 1946953862               |
| SNP_P4_131745_14191 | NW_004515958.1 | Scaffold501 | 14191                   | AA                              | GG              | 1946953864               |
| SNP_P4_131746_14398 | NW_004515958.1 | Scaffold501 | 14398                   | AA                              | CC              | 1946953866               |
| SNP_P4_131747_60881 | NW_004515958.1 | Scaffold501 | 60881                   | CC                              | TT              | 1946953868               |
| SNP_P4_131748_78463 | NW_004515958.1 | Scaffold501 | 78463                   | CC                              | GG              | 1946953870               |
| SNP_P4_131749_78476 | NW_004515958.1 | Scaffold501 | 78476                   | AA                              | GG              | 1946953872               |
| SNP_P4_131751_87760 | NW_004515958.1 | Scaffold501 | 87760                   | TT                              | CC              | 1946953874               |
| SNP_P4_131752_88323 | NW_004515958.1 | Scaffold501 | 88323                   | TT                              | AA              | 1946953876               |
| SNP_P4_131753_88949 | NW_004515958.1 | Scaffold501 | 88949                   | AA                              | CC              | 1946953878               |
| SNP_P4_131754_89042 | NW_004515958.1 | Scaffold501 | 89042                   | AA                              | GG              | 1946953880               |
| SNP_P4_131755_89124 | NW_004515958.1 | Scaffold501 | 89124                   | TT                              | GG              | 1946953882               |
| SNP_P4_131756_89194 | NW_004515958.1 | Scaffold501 | 89194                   | TT                              | AA              | 1946953884               |
| SNP_P4_131757_89213 | NW_004515958.1 | Scaffold501 | 89213                   | AA                              | CC              | 1946953886               |
| SNP_P4_131758_89233 | NW_004515958.1 | Scaffold501 | 89233                   | GG                              | TT              | 1946953888               |
| SNP_P4_131759_89244 | NW_004515958.1 | Scaffold501 | 89244                   | TT                              | AA              | 1946953890               |
| SNP_P4_131760_89296 | NW_004515958.1 | Scaffold501 | 89296                   | TT                              | GG              | 1946953892               |
| SNP_P4_131761_89313 | NW_004515958.1 | Scaffold501 | 89313                   | TT                              | GG              | 1946953894               |
| SNP_P4_131762_89405 | NW_004515958.1 | Scaffold501 | 89405                   | TT                              | CC              | 1946953896               |
| SNP_P4_131763_89432 | NW_004515958.1 | Scaffold501 | 89432                   | CC                              | AA              | 1946953898               |
| SNP_P4_131764_89455 | NW_004515958.1 | Scaffold501 | 89455                   | GG                              | AA              | 1946953900               |
| SNP_P4_131765_89495 | NW_004515958.1 | Scaffold501 | 89495                   | GG                              | TT              | 1946953902               |
| SNP_P4_131766_89525 | NW_004515958.1 | Scaffold501 | 89525                   | AA                              | GG              | 1946953904               |
| SNP_P4_131767_89604 | NW_004515958.1 | Scaffold501 | 89604                   | CC                              | AA              | 1946953906               |
| SNP_P4_131768_89658 | NW_004515958.1 | Scaffold501 | 89658                   | AA                              | TT              | 1946953908               |
| SNP_P4_131769_89694 | NW_004515958.1 | Scaffold501 | 89694                   | AA                              | GG              | 1946953910               |
| SNP_P4_131770_89724 | NW_004515958.1 | Scaffold501 | 89724                   | TT                              | CC              | 1946953912               |
| SNP_P4_131771_89818 | NW_004515958.1 | Scaffold501 | 89818                   | CC                              | AA              | 1946953914               |
| SNP_P4_131772_89925 | NW_004515958.1 | Scaffold501 | 89925                   | AA                              | GG              | 1946953916               |
| SNP_P4_131773_89933 | NW_004515958.1 | Scaffold501 | 89933                   | AA                              | TT              | 1946953918               |
| SNP_P4_131774_89999 | NW_004515958.1 | Scaffold501 | 89999                   | AA                              | TT              | 1946953920               |
| SNP_P4_131775_90002 | NW_004515958.1 | Scaffold501 | 90002                   | GG                              | AA              | 1946953922               |
| SNP_P4_131776_90052 | NW_004515958.1 | Scaffold501 | 90052                   | CC                              | TT              | 1946953924               |
| SNP_P4_131777_90061 | NW_004515958.1 | Scaffold501 | 90061                   | AA                              | TT              | 1946953926               |
| SNP_P4_131778_90080 | NW_004515958.1 | Scaffold501 | 90080                   | AA                              | GG              | 1946953928               |
| SNP_P4_131779_90097 | NW_004515958.1 | Scaffold501 | 90097                   | TT                              | GG              | 1946953930               |
| SNP_P4_131780_90110 | NW_004515958.1 | Scaffold501 | 90110                   | AA                              | CC              | 1946953932               |
| SNP_P4_131781_90213 | NW_004515958.1 | Scaffold501 | 90213                   | TT                              | AA              | 1946953934               |
| SNP_P4_131782_94083 | NW_004515958.1 | Scaffold501 | 94083                   | CC                              | TT              | 1946953936               |
| SNP_P4_131783_94176 | NW_004515958.1 | Scaffold501 | 94176                   | TT                              | GG              | 1946953938               |
| SNP_P4_131784_94220 | NW_004515958.1 | Scaffold501 | 94220                   | TT                              | AA              | 1946953940               |
| SNP_P4_131785_94321 | NW_004515958.1 | Scaffold501 | 94321                   | TT                              | CC              | 1946953942               |
| SNP_P4_131786_96732 | NW_004515958.1 | Scaffold501 | 96732                   | AA                              | GG              | 1946953944               |

| SNPs IDs             | Chromosome IDs | Chromosomes | Physical positions (bp) | CDC Frontier (Reference genome) | (ILWC46 & LPNB) | NCBI SNPdb Accession IDs |
|----------------------|----------------|-------------|-------------------------|---------------------------------|-----------------|--------------------------|
| SNP_P4_131787_96823  | NW_004515958.1 | Scaffold501 | 96823                   | AA                              | CC              | 1946953946               |
| SNP_P4_131788_96840  | NW_004515958.1 | Scaffold501 | 96840                   | CC                              | TT              | 1946953948               |
| SNP_P4_131789_96841  | NW_004515958.1 | Scaffold501 | 96841                   | AA                              | GG              | 1946953950               |
| SNP_P4_131790_96842  | NW_004515958.1 | Scaffold501 | 96842                   | AA                              | TT              | 1946953951               |
| SNP_P4_131791_96844  | NW_004515958.1 | Scaffold501 | 96844                   | CC                              | TT              | 1946953953               |
| SNP_P4_131792_96902  | NW_004515958.1 | Scaffold501 | 96902                   | CC                              | GG              | 1946953955               |
| SNP_P4_131793_97577  | NW_004515958.1 | Scaffold501 | 97577                   | CC                              | AA              | 1946953957               |
| SNP_P4_131794_98511  | NW_004515958.1 | Scaffold501 | 98511                   | CC                              | AA              | 1946953959               |
| SNP_P4_131795_103448 | NW_004515958.1 | Scaffold501 | 103448                  | CC                              | GG              | 1946953961               |
| SNP_P4_131796_103567 | NW_004515958.1 | Scaffold501 | 103567                  | AA                              | CC              | 1946953963               |
| SNP_P4_131797_103872 | NW_004515958.1 | Scaffold501 | 103872                  | CC                              | GG              | 1946953965               |
| SNP_P4_131798_104067 | NW_004515958.1 | Scaffold501 | 104067                  | GG                              | AA              | 1946953967               |
| SNP_P4_131799_104095 | NW_004515958.1 | Scaffold501 | 104095                  | CC                              | AA              | 1946953969               |
| SNP_P4_131800_104107 | NW_004515958.1 | Scaffold501 | 104107                  | TT                              | GG              | 1946953971               |
| SNP_P4_131801_104243 | NW_004515958.1 | Scaffold501 | 104243                  | CC                              | GG              | 1946953973               |
| SNP_P4_131802_104300 | NW_004515958.1 | Scaffold501 | 104300                  | TT                              | CC              | 1946953975               |
| SNP_P4_131803_104306 | NW_004515958.1 | Scaffold501 | 104306                  | TT                              | GG              | 1946953977               |
| SNP_P4_131804_104332 | NW_004515958.1 | Scaffold501 | 104332                  | CC                              | AA              | 1946953979               |
| SNP_P4_131805_104386 | NW_004515958.1 | Scaffold501 | 104386                  | TT                              | CC              | 1946953981               |
| SNP_P4_131806_104561 | NW_004515958.1 | Scaffold501 | 104561                  | CC                              | TT              | 1946953983               |
| SNP_P4_131807_106665 | NW_004515958.1 | Scaffold501 | 106665                  | TT                              | AA              | 1946953985               |
| SNP_P4_131808_108518 | NW_004515958.1 | Scaffold501 | 108518                  | GG                              | TT              | 1946953988               |
| SNP_P4_131809_108601 | NW_004515958.1 | Scaffold501 | 108601                  | AA                              | GG              | 1946953990               |
| SNP_P4_131810_108763 | NW_004515958.1 | Scaffold501 | 108763                  | AA                              | TT              | 1946953992               |
| SNP_P4_131811_110370 | NW_004515958.1 | Scaffold501 | 110370                  | CC                              | TT              | 1946953994               |
| SNP_P4_131812_110415 | NW_004515958.1 | Scaffold501 | 110415                  | AA                              | GG              | 1946953996               |
| SNP_P4_131813_115787 | NW_004515958.1 | Scaffold501 | 115787                  | GG                              | AA              | 1946953997               |
| SNP_P4_131814_115845 | NW_004515958.1 | Scaffold501 | 115845                  | AA                              | TT              | 1946953999               |
| SNP_P4_131815_116263 | NW_004515958.1 | Scaffold501 | 116263                  | AA                              | GG              | 1946954002               |
| SNP_P4_131816_116532 | NW_004515958.1 | Scaffold501 | 116532                  | TT                              | GG              | 1946954004               |
| SNP_P4_131817_116535 | NW_004515958.1 | Scaffold501 | 116535                  | TT                              | CC              | 1946954006               |
| SNP_P4_131818_116548 | NW_004515958.1 | Scaffold501 | 116548                  | CC                              | TT              | 1946954008               |
| SNP_P4_131819_117552 | NW_004515958.1 | Scaffold501 | 117552                  | CC                              | TT              | 1946954010               |
| SNP_P4_131820_117565 | NW_004515958.1 | Scaffold501 | 117565                  | AA                              | TT              | 1946954012               |
| SNP_P4_131821_117571 | NW_004515958.1 | Scaffold501 | 117571                  | CC                              | TT              | 1946954014               |
| SNP_P4_131822_117613 | NW_004515958.1 | Scaffold501 | 117613                  | CC                              | AA              | 1946954016               |
| SNP_P4_131823_117655 | NW_004515958.1 | Scaffold501 | 117655                  | CC                              | AA              | 1946954019               |
| SNP_P4_131824_117668 | NW_004515958.1 | Scaffold501 | 117668                  | CC                              | AA              | 1946954021               |
| SNP_P4_131825_117686 | NW_004515958.1 | Scaffold501 | 117686                  | CC                              | TT              | 1946954023               |
| SNP_P4_131826_117702 | NW_004515958.1 | Scaffold501 | 117702                  | CC                              | TT              | 1946954025               |
| SNP_P4_131827_117729 | NW_004515958.1 | Scaffold501 | 117729                  | TT                              | CC              | 1946954027               |
| SNP_P4_131828_117873 | NW_004515958.1 | Scaffold501 | 117873                  | AA                              | GG              | 1946954029               |

| SNPs IDs             | Chromosome IDs | Chromosomes | Physical positions (bp) | CDC Frontier (Reference genome) | (ILWC46 & LPNB) | NCBI SNPdb Accession IDs |
|----------------------|----------------|-------------|-------------------------|---------------------------------|-----------------|--------------------------|
| SNP_P4_131830_118064 | NW_004515958.1 | Scaffold501 | 118064                  | AA                              | TT              | 1946954031               |
| SNP_P4_131831_1238   | NW_004515959.1 | Scaffold505 | 1238                    | TT                              | AA              | 1946954033               |
| SNP_P4_131832_1294   | NW_004515959.1 | Scaffold505 | 1294                    | TT                              | CC              | 1946954035               |
| SNP_P4_131833_1360   | NW_004515959.1 | Scaffold505 | 1360                    | CC                              | AA              | 1946954037               |
| SNP_P4_131834_2115   | NW_004515959.1 | Scaffold505 | 2115                    | TT                              | GG              | 1946954039               |
| SNP_P4_131835_2596   | NW_004515959.1 | Scaffold505 | 2596                    | AA                              | CC              | 1946954041               |
| SNP_P4_131836_2642   | NW_004515959.1 | Scaffold505 | 2642                    | CC                              | GG              | 1946954043               |
| SNP_P4_131837_2649   | NW_004515959.1 | Scaffold505 | 2649                    | TT                              | AA              | 1946954045               |
| SNP_P4_131838_2824   | NW_004515959.1 | Scaffold505 | 2824                    | AA                              | GG              | 1946954047               |
| SNP_P4_131839_2875   | NW_004515959.1 | Scaffold505 | 2875                    | AA                              | CC              | 1946954049               |
| SNP_P4_131840_2880   | NW_004515959.1 | Scaffold505 | 2880                    | GG                              | TT              | 1946954052               |
| SNP_P4_131841_3047   | NW_004515959.1 | Scaffold505 | 3047                    | GG                              | TT              | 1946954054               |
| SNP_P4_131842_18989  | NW_004515959.1 | Scaffold505 | 18989                   | CC                              | TT              | 1946954056               |
| SNP_P4_131843_18996  | NW_004515959.1 | Scaffold505 | 18996                   | TT                              | GG              | 1946954058               |
| SNP_P4_131844_19008  | NW_004515959.1 | Scaffold505 | 19008                   | AA                              | GG              | 1946954060               |
| SNP_P4_131845_19349  | NW_004515959.1 | Scaffold505 | 19349                   | AA                              | GG              | 1946954062               |
| SNP_P4_131846_19357  | NW_004515959.1 | Scaffold505 | 19357                   | TT                              | AA              | 1946954064               |
| SNP_P4_131847_19405  | NW_004515959.1 | Scaffold505 | 19405                   | CC                              | TT              | 1946954066               |
| SNP_P4_131848_19414  | NW_004515959.1 | Scaffold505 | 19414                   | CC                              | TT              | 1946954068               |
| SNP_P4_131849_20867  | NW_004515959.1 | Scaffold505 | 20867                   | GG                              | TT              | 1946954070               |
| SNP_P4_131850_20922  | NW_004515959.1 | Scaffold505 | 20922                   | AA                              | GG              | 1946954072               |
| SNP_P4_131851_27572  | NW_004515959.1 | Scaffold505 | 27572                   | AA                              | TT              | 1946954074               |
| SNP_P4_131852_27592  | NW_004515959.1 | Scaffold505 | 27592                   | GG                              | AA              | 1946954076               |
| SNP_P4_131853_27992  | NW_004515959.1 | Scaffold505 | 27992                   | AA                              | GG              | 1946954078               |
| SNP_P4_131854_28004  | NW_004515959.1 | Scaffold505 | 28004                   | AA                              | GG              | 1946954080               |
| SNP_P4_131855_29540  | NW_004515959.1 | Scaffold505 | 29540                   | AA                              | TT              | 1946954081               |
| SNP_P4_131856_29543  | NW_004515959.1 | Scaffold505 | 29543                   | GG                              | CC              | 1946954083               |
| SNP_P4_131857_29546  | NW_004515959.1 | Scaffold505 | 29546                   | AA                              | GG              | 1946954085               |
| SNP_P4_131858_29556  | NW_004515959.1 | Scaffold505 | 29556                   | AA                              | TT              | 1946954087               |
| SNP_P4_131859_29810  | NW_004515959.1 | Scaffold505 | 29810                   | AA                              | GG              | 1946954089               |
| SNP_P4_131860_40623  | NW_004515959.1 | Scaffold505 | 40623                   | CC                              | TT              | 1946954091               |
| SNP_P4_131861_45269  | NW_004515959.1 | Scaffold505 | 45269                   | TT                              | GG              | 1946954093               |
| SNP_P4_131862_48219  | NW_004515959.1 | Scaffold505 | 48219                   | TT                              | CC              | 1946954095               |
| SNP_P4_131864_929    | NW_004515960.1 | Scaffold506 | 929                     | TT                              | CC              | 1946954097               |
| SNP_P4_131865_1424   | NW_004515960.1 | Scaffold506 | 1424                    | TT                              | AA              | 1946954099               |
| SNP_P4_131866_1450   | NW_004515960.1 | Scaffold506 | 1450                    | TT                              | CC              | 1946954101               |
| SNP_P4_131867_1537   | NW_004515960.1 | Scaffold506 | 1537                    | AA                              | CC              | 1946954103               |
| SNP_P4_131869_1972   | NW_004515960.1 | Scaffold506 | 1972                    | AA                              | TT              | 1946954105               |
| SNP_P4_131870_6452   | NW_004515960.1 | Scaffold506 | 6452                    | CC                              | TT              | 1946954107               |
| SNP_P4_131871_6534   | NW_004515960.1 | Scaffold506 | 6534                    | AA                              | GG              | 1946954109               |
| SNP_P4_131872_6739   | NW_004515960.1 | Scaffold506 | 6739                    | CC                              | AA              | 1946954111               |
| SNP_P4_131873_6815   | NW_004515960.1 | Scaffold506 | 6815                    | AA                              | TT              | 1946954113               |



| SNPs IDs            | Chromosome IDs | Chromosomes | Physical positions (bp) | CDC Frontier (Reference genome) | (ILWC46 & LPNB) | NCBI SNPdb Accession IDs |
|---------------------|----------------|-------------|-------------------------|---------------------------------|-----------------|--------------------------|
| SNP_P4_131874_7957  | NW_004515960.1 | Scaffold506 | 7957                    | AA                              | GG              | 1946954115               |
| SNP_P4_131875_8352  | NW_004515960.1 | Scaffold506 | 8352                    | TT                              | CC              | 1946954117               |
| SNP_P4_131876_8571  | NW_004515960.1 | Scaffold506 | 8571                    | CC                              | AA              | 1946954119               |
| SNP_P4_131877_8660  | NW_004515960.1 | Scaffold506 | 8660                    | GG                              | AA              | 1946954121               |
| SNP_P4_131878_9290  | NW_004515960.1 | Scaffold506 | 9290                    | CC                              | TT              | 1946954123               |
| SNP_P4_131879_9897  | NW_004515960.1 | Scaffold506 | 9897                    | GG                              | AA              | 1946954125               |
| SNP_P4_131880_17676 | NW_004515960.1 | Scaffold506 | 17676                   | TT                              | CC              | 1946954127               |
| SNP_P4_131881_17752 | NW_004515960.1 | Scaffold506 | 17752                   | TT                              | CC              | 1946954129               |
| SNP_P4_131882_17945 | NW_004515960.1 | Scaffold506 | 17945                   | TT                              | AA              | 1946954131               |
| SNP_P4_131884_18397 | NW_004515960.1 | Scaffold506 | 18397                   | AA                              | GG              | 1946954132               |
| SNP_P4_131885_18820 | NW_004515960.1 | Scaffold506 | 18820                   | GG                              | TT              | 1946954135               |
| SNP_P4_131887_19149 | NW_004515960.1 | Scaffold506 | 19149                   | GG                              | AA              | 1946954137               |
| SNP_P4_131888_19326 | NW_004515960.1 | Scaffold506 | 19326                   | CC                              | TT              | 1946954139               |
| SNP_P4_131889_20191 | NW_004515960.1 | Scaffold506 | 20191                   | TT                              | CC              | 1946954141               |
| SNP_P4_131890_24641 | NW_004515960.1 | Scaffold506 | 24641                   | TT                              | AA              | 1946954143               |
| SNP_P4_131891_25599 | NW_004515960.1 | Scaffold506 | 25599                   | GG                              | CC              | 1946954145               |
| SNP_P4_131892_26658 | NW_004515960.1 | Scaffold506 | 26658                   | GG                              | AA              | 1946954147               |
| SNP_P4_131893_26682 | NW_004515960.1 | Scaffold506 | 26682                   | TT                              | CC              | 1946954149               |
| SNP_P4_131894_26983 | NW_004515960.1 | Scaffold506 | 26983                   | TT                              | CC              | 1946954151               |
| SNP_P4_131895_27130 | NW_004515960.1 | Scaffold506 | 27130                   | TT                              | CC              | 1946954153               |
| SNP_P4_131896_28363 | NW_004515960.1 | Scaffold506 | 28363                   | TT                              | CC              | 1946954155               |
| SNP_P4_131897_28611 | NW_004515960.1 | Scaffold506 | 28611                   | CC                              | TT              | 1946954157               |
| SNP_P4_131898_29546 | NW_004515960.1 | Scaffold506 | 29546                   | CC                              | TT              | 1946954159               |
| SNP_P4_131899_30225 | NW_004515960.1 | Scaffold506 | 30225                   | CC                              | GG              | 1946954161               |
| SNP_P4_131900_30332 | NW_004515960.1 | Scaffold506 | 30332                   | AA                              | GG              | 1946954163               |
| SNP_P4_131901_31189 | NW_004515960.1 | Scaffold506 | 31189                   | GG                              | AA              | 1946954165               |
| SNP_P4_131902_31836 | NW_004515960.1 | Scaffold506 | 31836                   | GG                              | AA              | 1946954167               |
| SNP_P4_131903_33667 | NW_004515960.1 | Scaffold506 | 33667                   | GG                              | AA              | 1946954169               |
| SNP_P4_131904_34451 | NW_004515960.1 | Scaffold506 | 34451                   | AA                              | CC              | 1946954171               |
| SNP_P4_131905_35371 | NW_004515960.1 | Scaffold506 | 35371                   | TT                              | AA              | 1946954173               |
| SNP_P4_131906_35372 | NW_004515960.1 | Scaffold506 | 35372                   | AA                              | CC              | 1946954175               |
| SNP_P4_131907_36335 | NW_004515960.1 | Scaffold506 | 36335                   | AA                              | GG              | 1946954177               |
| SNP_P4_131908_36875 | NW_004515960.1 | Scaffold506 | 36875                   | TT                              | CC              | 1946954179               |
| SNP_P4_131909_36886 | NW_004515960.1 | Scaffold506 | 36886                   | TT                              | AA              | 1946954180               |
| SNP_P4_131910_37335 | NW_004515960.1 | Scaffold506 | 37335                   | CC                              | TT              | 1946954182               |
| SNP_P4_131911_38594 | NW_004515960.1 | Scaffold506 | 38594                   | GG                              | AA              | 1946954184               |
| SNP_P4_131913_39702 | NW_004515960.1 | Scaffold506 | 39702                   | CC                              | AA              | 1946954186               |
| SNP_P4_131914_39764 | NW_004515960.1 | Scaffold506 | 39764                   | CC                              | GG              | 1946954188               |
| SNP_P4_131915_2338  | NW_004515961.1 | Scaffold507 | 2338                    | CC                              | AA              | 1946954190               |
| SNP_P4_131916_11526 | NW_004515961.1 | Scaffold507 | 11526                   | AA                              | TT              | 1946954193               |
| SNP_P4_131917_11810 | NW_004515961.1 | Scaffold507 | 11810                   | GG                              | TT              | 1946954195               |
| SNP_P4_131918_11811 | NW_004515961.1 | Scaffold507 | 11811                   | TT                              | GG              | 1946954197               |

| SNPs IDs             | Chromosome IDs | Chromosomes | Physical positions (bp) | CDC Frontier (Reference genome) | (ILWC46 & LPNB) | NCBI SNPdb Accession IDs |
|----------------------|----------------|-------------|-------------------------|---------------------------------|-----------------|--------------------------|
| SNP_P4_131919_12114  | NW_004515961.1 | Scaffold507 | 12114                   | GG                              | AA              | 1946954199               |
| SNP_P4_131920_12228  | NW_004515961.1 | Scaffold507 | 12228                   | CC                              | GG              | 1946954201               |
| SNP_P4_131921_12273  | NW_004515961.1 | Scaffold507 | 12273                   | GG                              | CC              | 1946954203               |
| SNP_P4_131922_12569  | NW_004515961.1 | Scaffold507 | 12569                   | CC                              | TT              | 1946954205               |
| SNP_P4_131923_19155  | NW_004515961.1 | Scaffold507 | 19155                   | GG                              | TT              | 1946954207               |
| SNP_P4_131924_13780  | NW_004515962.1 | Scaffold509 | 13780                   | TT                              | AA              | 1946954209               |
| SNP_P4_131925_15225  | NW_004515962.1 | Scaffold509 | 15225                   | GG                              | AA              | 1946954211               |
| SNP_P4_131926_16434  | NW_004515962.1 | Scaffold509 | 16434                   | AA                              | GG              | 1946954213               |
| SNP_P4_131927_16466  | NW_004515962.1 | Scaffold509 | 16466                   | AA                              | CC              | 1946954215               |
| SNP_P4_131928_42186  | NW_004515962.1 | Scaffold509 | 42186                   | TT                              | CC              | 1946954217               |
| SNP_P4_131929_50733  | NW_004515962.1 | Scaffold509 | 50733                   | TT                              | CC              | 1946954219               |
| SNP_P4_131930_51248  | NW_004515962.1 | Scaffold509 | 51248                   | AA                              | TT              | 1946954220               |
| SNP_P4_131931_60984  | NW_004515962.1 | Scaffold509 | 60984                   | TT                              | CC              | 1946954223               |
| SNP_P4_131932_75725  | NW_004515962.1 | Scaffold509 | 75725                   | AA                              | GG              | 1946954225               |
| SNP_P4_131933_78156  | NW_004515962.1 | Scaffold509 | 78156                   | CC                              | TT              | 1946954227               |
| SNP_P4_131934_78411  | NW_004515962.1 | Scaffold509 | 78411                   | GG                              | AA              | 1946954229               |
| SNP_P4_131935_78433  | NW_004515962.1 | Scaffold509 | 78433                   | TT                              | CC              | 1946954231               |
| SNP_P4_131936_78478  | NW_004515962.1 | Scaffold509 | 78478                   | GG                              | TT              | 1946954233               |
| SNP_P4_131937_95306  | NW_004515962.1 | Scaffold509 | 95306                   | TT                              | CC              | 1946954235               |
| SNP_P4_131938_122690 | NW_004515962.1 | Scaffold509 | 122690                  | TT                              | CC              | 1946954237               |
| SNP_P4_131939_122769 | NW_004515962.1 | Scaffold509 | 122769                  | GG                              | AA              | 1946954239               |
| SNP_P4_131940_123161 | NW_004515962.1 | Scaffold509 | 123161                  | TT                              | GG              | 1946954241               |
| SNP_P4_131941_128885 | NW_004515962.1 | Scaffold509 | 128885                  | CC                              | TT              | 1946954243               |
| SNP_P4_131942_130357 | NW_004515962.1 | Scaffold509 | 130357                  | GG                              | AA              | 1946954245               |
| SNP_P4_131943_132490 | NW_004515962.1 | Scaffold509 | 132490                  | CC                              | AA              | 1946954247               |
| SNP_P4_131944_132492 | NW_004515962.1 | Scaffold509 | 132492                  | TT                              | AA              | 1946954249               |
| SNP_P4_131945_132509 | NW_004515962.1 | Scaffold509 | 132509                  | GG                              | CC              | 1946954251               |
| SNP_P4_131946_132514 | NW_004515962.1 | Scaffold509 | 132514                  | AA                              | GG              | 1946954253               |
| SNP_P4_131947_132518 | NW_004515962.1 | Scaffold509 | 132518                  | CC                              | GG              | 1946954255               |
| SNP_P4_131948_132520 | NW_004515962.1 | Scaffold509 | 132520                  | GG                              | AA              | 1946954257               |
| SNP_P4_131949_132530 | NW_004515962.1 | Scaffold509 | 132530                  | GG                              | CC              | 1946954259               |
| SNP_P4_131950_132533 | NW_004515962.1 | Scaffold509 | 132533                  | TT                              | CC              | 1946954262               |
| SNP_P4_131951_132541 | NW_004515962.1 | Scaffold509 | 132541                  | TT                              | AA              | 1946954264               |
| SNP_P4_131952_157646 | NW_004515962.1 | Scaffold509 | 157646                  | AA                              | GG              | 1946954266               |
| SNP_P4_131953_157967 | NW_004515962.1 | Scaffold509 | 157967                  | AA                              | GG              | 1946954268               |
| SNP_P4_131954_158083 | NW_004515962.1 | Scaffold509 | 158083                  | TT                              | AA              | 1946954270               |
| SNP_P4_131955_158088 | NW_004515962.1 | Scaffold509 | 158088                  | GG                              | TT              | 1946954272               |
| SNP_P4_131956_158094 | NW_004515962.1 | Scaffold509 | 158094                  | TT                              | CC              | 1946954274               |
| SNP_P4_131957_170444 | NW_004515962.1 | Scaffold509 | 170444                  | GG                              | AA              | 1946954277               |
| SNP_P4_131958_172648 | NW_004515962.1 | Scaffold509 | 172648                  | GG                              | AA              | 1946954279               |
| SNP_P4_131959_172651 | NW_004515962.1 | Scaffold509 | 172651                  | CC                              | TT              | 1946954281               |
| SNP_P4_131961_172921 | NW_004515962.1 | Scaffold509 | 172921                  | AA                              | GG              | 1946954283               |

| SNPs IDs             | Chromosome IDs | Chromosomes | Physical positions (bp) | CDC Frontier (Reference genome) | (ILWC46 & LPNB) | NCBI SNPdb Accession IDs |
|----------------------|----------------|-------------|-------------------------|---------------------------------|-----------------|--------------------------|
| SNP_P4_131962_173708 | NW_004515962.1 | Scaffold509 | 173708                  | CC                              | TT              | 1946954285               |
| SNP_P4_131963_175416 | NW_004515962.1 | Scaffold509 | 175416                  | AA                              | GG              | 1946954287               |
| SNP_P4_131964_175431 | NW_004515962.1 | Scaffold509 | 175431                  | TT                              | CC              | 1946954289               |
| SNP_P4_131965_176936 | NW_004515962.1 | Scaffold509 | 176936                  | AA                              | GG              | 1946954291               |
| SNP_P4_131966_179515 | NW_004515962.1 | Scaffold509 | 179515                  | GG                              | CC              | 1946954293               |
| SNP_P4_131967_179689 | NW_004515962.1 | Scaffold509 | 179689                  | CC                              | TT              | 1946954295               |
| SNP_P4_131968_179734 | NW_004515962.1 | Scaffold509 | 179734                  | TT                              | CC              | 1946954297               |
| SNP_P4_131969_179886 | NW_004515962.1 | Scaffold509 | 179886                  | CC                              | AA              | 1946954299               |
| SNP_P4_131970_179924 | NW_004515962.1 | Scaffold509 | 179924                  | CC                              | TT              | 1946954300               |
| SNP_P4_131971_179945 | NW_004515962.1 | Scaffold509 | 179945                  | TT                              | CC              | 1946954302               |
| SNP_P4_131972_180007 | NW_004515962.1 | Scaffold509 | 180007                  | AA                              | CC              | 1946954304               |
| SNP_P4_131973_180085 | NW_004515962.1 | Scaffold509 | 180085                  | CC                              | GG              | 1946954306               |
| SNP_P4_131974_180098 | NW_004515962.1 | Scaffold509 | 180098                  | AA                              | CC              | 1946954308               |
| SNP_P4_131975_181136 | NW_004515962.1 | Scaffold509 | 181136                  | AA                              | CC              | 1946954310               |
| SNP_P4_131976_181150 | NW_004515962.1 | Scaffold509 | 181150                  | AA                              | GG              | 1946954312               |
| SNP_P4_131977_181779 | NW_004515962.1 | Scaffold509 | 181779                  | TT                              | AA              | 1946954315               |
| SNP_P4_131978_188832 | NW_004515962.1 | Scaffold509 | 188832                  | TT                              | AA              | 1946954317               |
| SNP_P4_131979_189040 | NW_004515962.1 | Scaffold509 | 189040                  | AA                              | GG              | 1946954319               |
| SNP_P4_131980_196589 | NW_004515962.1 | Scaffold509 | 196589                  | TT                              | CC              | 1946954321               |
| SNP_P4_131981_196592 | NW_004515962.1 | Scaffold509 | 196592                  | AA                              | TT              | 1946954323               |
| SNP_P4_131982_196595 | NW_004515962.1 | Scaffold509 | 196595                  | CC                              | AA              | 1946954325               |
| SNP_P4_131983_209205 | NW_004515962.1 | Scaffold509 | 209205                  | AA                              | GG              | 1946954326               |
| SNP_P4_131984_209253 | NW_004515962.1 | Scaffold509 | 209253                  | GG                              | AA              | 1946954328               |
| SNP_P4_131985_212878 | NW_004515962.1 | Scaffold509 | 212878                  | CC                              | TT              | 1946954330               |
| SNP_P4_131986_215689 | NW_004515962.1 | Scaffold509 | 215689                  | TT                              | AA              | 1946954332               |
| SNP_P4_131987_215844 | NW_004515962.1 | Scaffold509 | 215844                  | CC                              | TT              | 1946954335               |
| SNP_P4_131988_216357 | NW_004515962.1 | Scaffold509 | 216357                  | TT                              | CC              | 1946954337               |
| SNP_P4_131989_218752 | NW_004515962.1 | Scaffold509 | 218752                  | AA                              | CC              | 1946954339               |
| SNP_P4_131990_218756 | NW_004515962.1 | Scaffold509 | 218756                  | CC                              | TT              | 1946954341               |
| SNP_P4_131991_218779 | NW_004515962.1 | Scaffold509 | 218779                  | CC                              | GG              | 1946954343               |
| SNP_P4_131992_218780 | NW_004515962.1 | Scaffold509 | 218780                  | TT                              | CC              | 1946954345               |
| SNP_P4_131993_218810 | NW_004515962.1 | Scaffold509 | 218810                  | TT                              | GG              | 1946954346               |
| SNP_P4_131994_218813 | NW_004515962.1 | Scaffold509 | 218813                  | TT                              | CC              | 1946954348               |
| SNP_P4_131995_218819 | NW_004515962.1 | Scaffold509 | 218819                  | TT                              | GG              | 1946954350               |
| SNP_P4_131996_218844 | NW_004515962.1 | Scaffold509 | 218844                  | GG                              | AA              | 1946954352               |
| SNP_P4_131997_218849 | NW_004515962.1 | Scaffold509 | 218849                  | AA                              | TT              | 1946954354               |
| SNP_P4_131998_218855 | NW_004515962.1 | Scaffold509 | 218855                  | TT                              | AA              | 1946954356               |
| SNP_P4_131999_218906 | NW_004515962.1 | Scaffold509 | 218906                  | TT                              | GG              | 1946954358               |
| SNP_P4_132000_218910 | NW_004515962.1 | Scaffold509 | 218910                  | TT                              | GG              | 1946954360               |
| SNP_P4_132001_218924 | NW_004515962.1 | Scaffold509 | 218924                  | CC                              | TT              | 1946954362               |
| SNP_P4_132002_218925 | NW_004515962.1 | Scaffold509 | 218925                  | GG                              | TT              | 1946954364               |
| SNP_P4_132003_218929 | NW_004515962.1 | Scaffold509 | 218929                  | TT                              | GG              | 1946954366               |

| SNPs IDs             | Chromosome IDs | Chromosomes | Physical positions (bp) | CDC Frontier (Reference genome) | (ILWC46 & LPNB) | NCBI SNPdb Accession IDs |
|----------------------|----------------|-------------|-------------------------|---------------------------------|-----------------|--------------------------|
| SNP_P4_132005_225063 | NW_004515962.1 | Scaffold509 | 225063                  | CC                              | TT              | 1946954368               |
| SNP_P4_132006_225200 | NW_004515962.1 | Scaffold509 | 225200                  | AA                              | GG              | 1946954370               |
| SNP_P4_132007_225203 | NW_004515962.1 | Scaffold509 | 225203                  | AA                              | TT              | 1946954372               |
| SNP_P4_132008_225204 | NW_004515962.1 | Scaffold509 | 225204                  | AA                              | GG              | 1946954374               |
| SNP_P4_132009_225206 | NW_004515962.1 | Scaffold509 | 225206                  | CC                              | GG              | 1946954375               |
| SNP_P4_132010_225215 | NW_004515962.1 | Scaffold509 | 225215                  | CC                              | TT              | 1946954377               |
| SNP_P4_132011_225219 | NW_004515962.1 | Scaffold509 | 225219                  | TT                              | CC              | 1946954379               |
| SNP_P4_132012_225225 | NW_004515962.1 | Scaffold509 | 225225                  | AA                              | GG              | 1946954381               |
| SNP_P4_132013_225518 | NW_004515962.1 | Scaffold509 | 225518                  | CC                              | TT              | 1946954383               |
| SNP_P4_132014_228425 | NW_004515962.1 | Scaffold509 | 228425                  | AA                              | GG              | 1946954385               |
| SNP_P4_132015_228520 | NW_004515962.1 | Scaffold509 | 228520                  | TT                              | AA              | 1946954387               |
| SNP_P4_132016_228797 | NW_004515962.1 | Scaffold509 | 228797                  | AA                              | GG              | 1946954389               |
| SNP_P4_132017_228834 | NW_004515962.1 | Scaffold509 | 228834                  | AA                              | CC              | 1946954391               |
| SNP_P4_132018_228883 | NW_004515962.1 | Scaffold509 | 228883                  | TT                              | CC              | 1946954393               |
| SNP_P4_132019_228889 | NW_004515962.1 | Scaffold509 | 228889                  | AA                              | GG              | 1946954395               |
| SNP_P4_132020_228897 | NW_004515962.1 | Scaffold509 | 228897                  | CC                              | TT              | 1946954397               |
| SNP_P4_132021_228913 | NW_004515962.1 | Scaffold509 | 228913                  | GG                              | CC              | 1946954399               |
| SNP_P4_132022_228923 | NW_004515962.1 | Scaffold509 | 228923                  | GG                              | AA              | 1946954401               |
| SNP_P4_132023_240125 | NW_004515962.1 | Scaffold509 | 240125                  | TT                              | GG              | 1946954403               |
| SNP_P4_132024_240139 | NW_004515962.1 | Scaffold509 | 240139                  | TT                              | GG              | 1946954405               |
| SNP_P4_132025_240178 | NW_004515962.1 | Scaffold509 | 240178                  | AA                              | GG              | 1946954407               |
| SNP_P4_132026_244657 | NW_004515962.1 | Scaffold509 | 244657                  | GG                              | TT              | 1946954409               |
| SNP_P4_132027_250111 | NW_004515962.1 | Scaffold509 | 250111                  | CC                              | TT              | 1946954410               |
| SNP_P4_132028_251277 | NW_004515962.1 | Scaffold509 | 251277                  | AA                              | TT              | 1946954412               |
| SNP_P4_132029_266410 | NW_004515962.1 | Scaffold509 | 266410                  | TT                              | AA              | 1946954414               |
| SNP_P4_132030_266429 | NW_004515962.1 | Scaffold509 | 266429                  | TT                              | AA              | 1946954416               |
| SNP_P4_132031_266475 | NW_004515962.1 | Scaffold509 | 266475                  | GG                              | CC              | 1946954418               |
| SNP_P4_132032_266484 | NW_004515962.1 | Scaffold509 | 266484                  | GG                              | TT              | 1946954420               |
| SNP_P4_132033_266605 | NW_004515962.1 | Scaffold509 | 266605                  | AA                              | GG              | 1946954422               |
| SNP_P4_132034_266613 | NW_004515962.1 | Scaffold509 | 266613                  | AA                              | GG              | 1946954423               |
| SNP_P4_132035_266614 | NW_004515962.1 | Scaffold509 | 266614                  | TT                              | GG              | 1946954425               |
| SNP_P4_132036_266717 | NW_004515962.1 | Scaffold509 | 266717                  | TT                              | CC              | 1946954427               |
| SNP_P4_132037_266778 | NW_004515962.1 | Scaffold509 | 266778                  | GG                              | TT              | 1946954429               |
| SNP_P4_132039_266885 | NW_004515962.1 | Scaffold509 | 266885                  | CC                              | AA              | 1946954431               |
| SNP_P4_132040_273203 | NW_004515962.1 | Scaffold509 | 273203                  | TT                              | CC              | 1946954433               |
| SNP_P4_132041_273487 | NW_004515962.1 | Scaffold509 | 273487                  | AA                              | GG              | 1946954435               |
| SNP_P4_132042_286543 | NW_004515962.1 | Scaffold509 | 286543                  | CC                              | TT              | 1946954437               |
| SNP_P4_132043_286560 | NW_004515962.1 | Scaffold509 | 286560                  | GG                              | AA              | 1946954439               |
| SNP_P4_132044_286895 | NW_004515962.1 | Scaffold509 | 286895                  | TT                              | GG              | 1946954441               |
| SNP_P4_132045_290251 | NW_004515962.1 | Scaffold509 | 290251                  | TT                              | CC              | 1946954443               |
| SNP_P4_132046_291227 | NW_004515962.1 | Scaffold509 | 291227                  | CC                              | TT              | 1946954445               |
| SNP_P4_132048_322214 | NW_004515962.1 | Scaffold509 | 322214                  | GG                              | TT              | 1946954447               |

| SNPs IDs             | Chromosome IDs | Chromosomes | Physical positions (bp) | CDC Frontier (Reference genome) | (ILWC46 & LPNB) | NCBI SNPdb Accession IDs |
|----------------------|----------------|-------------|-------------------------|---------------------------------|-----------------|--------------------------|
| SNP_P4_132049_322269 | NW_004515962.1 | Scaffold509 | 322269                  | GG                              | AA              | 1946954449               |
| SNP_P4_132050_322330 | NW_004515962.1 | Scaffold509 | 322330                  | AA                              | TT              | 1946954451               |
| SNP_P4_132051_322332 | NW_004515962.1 | Scaffold509 | 322332                  | GG                              | CC              | 1946954453               |
| SNP_P4_132052_322726 | NW_004515962.1 | Scaffold509 | 322726                  | CC                              | TT              | 1946954455               |
| SNP_P4_132054_2140   | NW_004515963.1 | Scaffold510 | 2140                    | TT                              | CC              | 1946954457               |
| SNP_P4_132055_2526   | NW_004515963.1 | Scaffold510 | 2526                    | TT                              | CC              | 1946954459               |
| SNP_P4_132056_9242   | NW_004515963.1 | Scaffold510 | 9242                    | AA                              | GG              | 1946954461               |
| SNP_P4_132057_9255   | NW_004515963.1 | Scaffold510 | 9255                    | CC                              | TT              | 1946954463               |
| SNP_P4_132059_14361  | NW_004515963.1 | Scaffold510 | 14361                   | AA                              | GG              | 1946954465               |
| SNP_P4_132060_14403  | NW_004515963.1 | Scaffold510 | 14403                   | GG                              | TT              | 1946954467               |
| SNP_P4_132061_15472  | NW_004515963.1 | Scaffold510 | 15472                   | AA                              | GG              | 1946954469               |
| SNP_P4_132062_17912  | NW_004515963.1 | Scaffold510 | 17912                   | TT                              | CC              | 1946954471               |
| SNP_P4_132063_17922  | NW_004515963.1 | Scaffold510 | 17922                   | CC                              | TT              | 1946954473               |
| SNP_P4_132064_17923  | NW_004515963.1 | Scaffold510 | 17923                   | TT                              | CC              | 1946954474               |
| SNP_P4_132065_24282  | NW_004515963.1 | Scaffold510 | 24282                   | GG                              | TT              | 1946954476               |
| SNP_P4_132066_24633  | NW_004515963.1 | Scaffold510 | 24633                   | TT                              | CC              | 1946954478               |
| SNP_P4_132067_24706  | NW_004515963.1 | Scaffold510 | 24706                   | AA                              | GG              | 1946954480               |
| SNP_P4_132068_25091  | NW_004515963.1 | Scaffold510 | 25091                   | TT                              | CC              | 1946954482               |
| SNP_P4_132069_25149  | NW_004515963.1 | Scaffold510 | 25149                   | CC                              | TT              | 1946954484               |
| SNP_P4_132070_25590  | NW_004515963.1 | Scaffold510 | 25590                   | GG                              | AA              | 1946954486               |
| SNP_P4_132071_25623  | NW_004515963.1 | Scaffold510 | 25623                   | AA                              | CC              | 1946954488               |
| SNP_P4_132072_30278  | NW_004515963.1 | Scaffold510 | 30278                   | TT                              | GG              | 1946954490               |
| SNP_P4_132073_30281  | NW_004515963.1 | Scaffold510 | 30281                   | AA                              | GG              | 1946954492               |
| SNP_P4_132074_30286  | NW_004515963.1 | Scaffold510 | 30286                   | GG                              | AA              | 1946954494               |
| SNP_P4_132075_39945  | NW_004515963.1 | Scaffold510 | 39945                   | CC                              | TT              | 1946954496               |
| SNP_P4_132076_40371  | NW_004515963.1 | Scaffold510 | 40371                   | AA                              | GG              | 1946954497               |
| SNP_P4_132077_40379  | NW_004515963.1 | Scaffold510 | 40379                   | GG                              | TT              | 1946954499               |
| SNP_P4_132078_40946  | NW_004515963.1 | Scaffold510 | 40946                   | AA                              | TT              | 1946954501               |
| SNP_P4_132079_47136  | NW_004515963.1 | Scaffold510 | 47136                   | AA                              | TT              | 1946954503               |
| SNP_P4_132080_47162  | NW_004515963.1 | Scaffold510 | 47162                   | TT                              | GG              | 1946954505               |
| SNP_P4_132081_47179  | NW_004515963.1 | Scaffold510 | 47179                   | AA                              | TT              | 1946954507               |
| SNP_P4_132082_47499  | NW_004515963.1 | Scaffold510 | 47499                   | AA                              | GG              | 1946954509               |
| SNP_P4_132083_47989  | NW_004515963.1 | Scaffold510 | 47989                   | AA                              | TT              | 1946954511               |
| SNP_P4_132084_48039  | NW_004515963.1 | Scaffold510 | 48039                   | TT                              | CC              | 1946954513               |
| SNP_P4_132085_48141  | NW_004515963.1 | Scaffold510 | 48141                   | AA                              | TT              | 1946954515               |
| SNP_P4_132086_48168  | NW_004515963.1 | Scaffold510 | 48168                   | GG                              | TT              | 1946954517               |
| SNP_P4_132087_48216  | NW_004515963.1 | Scaffold510 | 48216                   | AA                              | GG              | 1946954519               |
| SNP_P4_132088_48444  | NW_004515963.1 | Scaffold510 | 48444                   | AA                              | TT              | 1946954521               |
| SNP_P4_132089_54941  | NW_004515963.1 | Scaffold510 | 54941                   | AA                              | GG              | 1946954523               |
| SNP_P4_132090_54982  | NW_004515963.1 | Scaffold510 | 54982                   | TT                              | CC              | 1946954525               |
| SNP_P4_132091_54996  | NW_004515963.1 | Scaffold510 | 54996                   | CC                              | TT              | 1946954527               |
| SNP_P4_132092_58998  | NW_004515963.1 | Scaffold510 | 58998                   | TT                              | GG              | 1946954529               |

| SNPs IDs            | Chromosome IDs | Chromosomes | Physical positions (bp) | CDC Frontier (Reference genome) | (ILWC46 & LPNB) | NCBI SNPdb Accession IDs |
|---------------------|----------------|-------------|-------------------------|---------------------------------|-----------------|--------------------------|
| SNP_P4_132093_59112 | NW_004515963.1 | Scaffold510 | 59112                   | AA                              | GG              | 1946954530               |
| SNP_P4_132094_59163 | NW_004515963.1 | Scaffold510 | 59163                   | TT                              | CC              | 1946954532               |
| SNP_P4_132095_59192 | NW_004515963.1 | Scaffold510 | 59192                   | CC                              | TT              | 1946954534               |
| SNP_P4_132096_71173 | NW_004515963.1 | Scaffold510 | 71173                   | TT                              | AA              | 1946954536               |
| SNP_P4_132097_71183 | NW_004515963.1 | Scaffold510 | 71183                   | AA                              | TT              | 1946954538               |
| SNP_P4_132098_79322 | NW_004515963.1 | Scaffold510 | 79322                   | AA                              | GG              | 1946954540               |
| SNP_P4_132099_80797 | NW_004515963.1 | Scaffold510 | 80797                   | CC                              | AA              | 1946954542               |
| SNP_P4_132100_80918 | NW_004515963.1 | Scaffold510 | 80918                   | AA                              | GG              | 1946954544               |
| SNP_P4_132101_81719 | NW_004515963.1 | Scaffold510 | 81719                   | GG                              | AA              | 1946954546               |
| SNP_P4_132102_81748 | NW_004515963.1 | Scaffold510 | 81748                   | AA                              | CC              | 1946954548               |
| SNP_P4_132103_81764 | NW_004515963.1 | Scaffold510 | 81764                   | CC                              | TT              | 1946954550               |
| SNP_P4_132104_81874 | NW_004515963.1 | Scaffold510 | 81874                   | CC                              | TT              | 1946954552               |
| SNP_P4_132105_81952 | NW_004515963.1 | Scaffold510 | 81952                   | CC                              | TT              | 1946954554               |
| SNP_P4_132106_82056 | NW_004515963.1 | Scaffold510 | 82056                   | TT                              | GG              | 1946954556               |
| SNP_P4_132107_82097 | NW_004515963.1 | Scaffold510 | 82097                   | GG                              | AA              | 1946954557               |
| SNP_P4_132108_82134 | NW_004515963.1 | Scaffold510 | 82134                   | AA                              | TT              | 1946954559               |
| SNP_P4_132109_82190 | NW_004515963.1 | Scaffold510 | 82190                   | TT                              | GG              | 1946954561               |
| SNP_P4_132110_82263 | NW_004515963.1 | Scaffold510 | 82263                   | CC                              | GG              | 1946954563               |
| SNP_P4_132111_85241 | NW_004515963.1 | Scaffold510 | 85241                   | GG                              | TT              | 1946954565               |
| SNP_P4_132112_85313 | NW_004515963.1 | Scaffold510 | 85313                   | CC                              | GG              | 1946954567               |
| SNP_P4_132113_85358 | NW_004515963.1 | Scaffold510 | 85358                   | GG                              | CC              | 1946954568               |
| SNP_P4_132114_85392 | NW_004515963.1 | Scaffold510 | 85392                   | TT                              | AA              | 1946954570               |
| SNP_P4_132115_85409 | NW_004515963.1 | Scaffold510 | 85409                   | GG                              | TT              | 1946954572               |
| SNP_P4_132116_85495 | NW_004515963.1 | Scaffold510 | 85495                   | GG                              | AA              | 1946954574               |
| SNP_P4_132117_85592 | NW_004515963.1 | Scaffold510 | 85592                   | AA                              | CC              | 1946954576               |
| SNP_P4_132119_85654 | NW_004515963.1 | Scaffold510 | 85654                   | TT                              | GG              | 1946954578               |
| SNP_P4_132120_85666 | NW_004515963.1 | Scaffold510 | 85666                   | CC                              | GG              | 1946954580               |
| SNP_P4_132121_85674 | NW_004515963.1 | Scaffold510 | 85674                   | TT                              | CC              | 1946954582               |
| SNP_P4_132122_85718 | NW_004515963.1 | Scaffold510 | 85718                   | AA                              | TT              | 1946954584               |
| SNP_P4_132123_85789 | NW_004515963.1 | Scaffold510 | 85789                   | AA                              | CC              | 1946954586               |
| SNP_P4_132124_85852 | NW_004515963.1 | Scaffold510 | 85852                   | TT                              | CC              | 1946954587               |
| SNP_P4_132125_85936 | NW_004515963.1 | Scaffold510 | 85936                   | TT                              | AA              | 1946954589               |
| SNP_P4_132126_85937 | NW_004515963.1 | Scaffold510 | 85937                   | AA                              | GG              | 1946954591               |
| SNP_P4_132127_85958 | NW_004515963.1 | Scaffold510 | 85958                   | TT                              | CC              | 1946954593               |
| SNP_P4_132128_85967 | NW_004515963.1 | Scaffold510 | 85967                   | GG                              | CC              | 1946954595               |
| SNP_P4_132129_85981 | NW_004515963.1 | Scaffold510 | 85981                   | CC                              | AA              | 1946954596               |
| SNP_P4_132130_85987 | NW_004515963.1 | Scaffold510 | 85987                   | CC                              | GG              | 1946954598               |
| SNP_P4_132131_86002 | NW_004515963.1 | Scaffold510 | 86002                   | TT                              | GG              | 1946954600               |
| SNP_P4_132132_86035 | NW_004515963.1 | Scaffold510 | 86035                   | CC                              | GG              | 1946954602               |
| SNP_P4_132133_86036 | NW_004515963.1 | Scaffold510 | 86036                   | TT                              | AA              | 1946954604               |
| SNP_P4_132134_86058 | NW_004515963.1 | Scaffold510 | 86058                   | CC                              | TT              | 1946954605               |
| SNP_P4_132135_86059 | NW_004515963.1 | Scaffold510 | 86059                   | AA                              | GG              | 1946954607               |

| SNPs IDs            | Chromosome IDs | Chromosomes | Physical positions (bp) | CDC Frontier (Reference genome) | (ILWC46 & LPNB) | NCBI SNPdb Accession IDs |
|---------------------|----------------|-------------|-------------------------|---------------------------------|-----------------|--------------------------|
| SNP_P4_132136_86062 | NW_004515963.1 | Scaffold510 | 86062                   | TT                              | CC              | 1946954609               |
| SNP_P4_132137_86084 | NW_004515963.1 | Scaffold510 | 86084                   | CC                              | TT              | 1946954611               |
| SNP_P4_132138_86107 | NW_004515963.1 | Scaffold510 | 86107                   | TT                              | GG              | 1946954613               |
| SNP_P4_132139_86113 | NW_004515963.1 | Scaffold510 | 86113                   | AA                              | TT              | 1946954615               |
| SNP_P4_132140_86127 | NW_004515963.1 | Scaffold510 | 86127                   | GG                              | TT              | 1946954616               |
| SNP_P4_132141_86146 | NW_004515963.1 | Scaffold510 | 86146                   | AA                              | CC              | 1946954618               |
| SNP_P4_132142_86148 | NW_004515963.1 | Scaffold510 | 86148                   | AA                              | TT              | 1946954620               |
| SNP_P4_132143_86203 | NW_004515963.1 | Scaffold510 | 86203                   | CC                              | AA              | 1946954622               |
| SNP_P4_132144_86237 | NW_004515963.1 | Scaffold510 | 86237                   | GG                              | TT              | 1946954624               |
| SNP_P4_132145_86327 | NW_004515963.1 | Scaffold510 | 86327                   | TT                              | AA              | 1946954626               |
| SNP_P4_132146_86335 | NW_004515963.1 | Scaffold510 | 86335                   | AA                              | TT              | 1946954628               |
| SNP_P4_132147_86371 | NW_004515963.1 | Scaffold510 | 86371                   | TT                              | GG              | 1946954630               |
| SNP_P4_132148_86564 | NW_004515963.1 | Scaffold510 | 86564                   | CC                              | TT              | 1946954632               |
| SNP_P4_132149_86750 | NW_004515963.1 | Scaffold510 | 86750                   | TT                              | CC              | 1946954634               |
| SNP_P4_132150_86858 | NW_004515963.1 | Scaffold510 | 86858                   | TT                              | CC              | 1946954636               |
| SNP_P4_132151_90793 | NW_004515963.1 | Scaffold510 | 90793                   | TT                              | GG              | 1946954638               |
| SNP_P4_132152_92176 | NW_004515963.1 | Scaffold510 | 92176                   | TT                              | AA              | 1946954640               |
| SNP_P4_132153_1952  | NW_004515964.1 | Scaffold511 | 1952                    | AA                              | GG              | 1946954642               |
| SNP_P4_132154_1956  | NW_004515964.1 | Scaffold511 | 1956                    | CC                              | GG              | 1946954644               |
| SNP_P4_132155_2207  | NW_004515964.1 | Scaffold511 | 2207                    | CC                              | AA              | 1946954646               |
| SNP_P4_132156_2229  | NW_004515964.1 | Scaffold511 | 2229                    | GG                              | AA              | 1946954648               |
| SNP_P4_132157_2249  | NW_004515964.1 | Scaffold511 | 2249                    | GG                              | TT              | 1946954650               |
| SNP_P4_132158_2251  | NW_004515964.1 | Scaffold511 | 2251                    | TT                              | CC              | 1946954652               |
| SNP_P4_132159_2293  | NW_004515964.1 | Scaffold511 | 2293                    | GG                              | AA              | 1946954654               |
| SNP_P4_132160_2473  | NW_004515964.1 | Scaffold511 | 2473                    | AA                              | CC              | 1946954656               |
| SNP_P4_132161_2526  | NW_004515964.1 | Scaffold511 | 2526                    | CC                              | TT              | 1946954658               |
| SNP_P4_132162_3336  | NW_004515964.1 | Scaffold511 | 3336                    | AA                              | CC              | 1946954660               |
| SNP_P4_132163_3358  | NW_004515964.1 | Scaffold511 | 3358                    | TT                              | CC              | 1946954662               |
| SNP_P4_132164_3392  | NW_004515964.1 | Scaffold511 | 3392                    | TT                              | CC              | 1946954664               |
| SNP_P4_132165_3393  | NW_004515964.1 | Scaffold511 | 3393                    | AA                              | TT              | 1946954665               |
| SNP_P4_132166_3780  | NW_004515964.1 | Scaffold511 | 3780                    | AA                              | CC              | 1946954667               |
| SNP_P4_132167_14367 | NW_004515964.1 | Scaffold511 | 14367                   | TT                              | GG              | 1946954669               |
| SNP_P4_132168_14371 | NW_004515964.1 | Scaffold511 | 14371                   | GG                              | AA              | 1946954671               |
| SNP_P4_132169_14406 | NW_004515964.1 | Scaffold511 | 14406                   | AA                              | TT              | 1946954673               |
| SNP_P4_132170_14410 | NW_004515964.1 | Scaffold511 | 14410                   | AA                              | GG              | 1946954675               |
| SNP_P4_132171_14417 | NW_004515964.1 | Scaffold511 | 14417                   | GG                              | AA              | 1946954677               |
| SNP_P4_132172_14433 | NW_004515964.1 | Scaffold511 | 14433                   | AA                              | GG              | 1946954679               |
| SNP_P4_132173_40319 | NW_004515964.1 | Scaffold511 | 40319                   | CC                              | TT              | 1946954681               |
| SNP_P4_132174_40342 | NW_004515964.1 | Scaffold511 | 40342                   | AA                              | GG              | 1946954683               |
| SNP_P4_132175_40439 | NW_004515964.1 | Scaffold511 | 40439                   | GG                              | AA              | 1946954684               |
| SNP_P4_132176_40529 | NW_004515964.1 | Scaffold511 | 40529                   | AA                              | GG              | 1946954685               |
| SNP_P4_132177_40582 | NW_004515964.1 | Scaffold511 | 40582                   | TT                              | CC              | 1946954686               |

| SNPs IDs             | Chromosome IDs | Chromosomes | Physical positions (bp) | CDC Frontier (Reference genome) | (ILWC46 & LPNB) | NCBI SNPdb Accession IDs |
|----------------------|----------------|-------------|-------------------------|---------------------------------|-----------------|--------------------------|
| SNP_P4_132178_40991  | NW_004515964.1 | Scaffold511 | 40991                   | AA                              | GG              | 1946954687               |
| SNP_P4_132179_42738  | NW_004515964.1 | Scaffold511 | 42738                   | GG                              | CC              | 1946954688               |
| SNP_P4_132180_42945  | NW_004515964.1 | Scaffold511 | 42945                   | AA                              | GG              | 1946954689               |
| SNP_P4_132181_42972  | NW_004515964.1 | Scaffold511 | 42972                   | GG                              | TT              | 1946954690               |
| SNP_P4_132182_43002  | NW_004515964.1 | Scaffold511 | 43002                   | CC                              | TT              | 1946954692               |
| SNP_P4_132183_43029  | NW_004515964.1 | Scaffold511 | 43029                   | AA                              | GG              | 1946954694               |
| SNP_P4_132184_43062  | NW_004515964.1 | Scaffold511 | 43062                   | AA                              | CC              | 1946954696               |
| SNP_P4_132185_47417  | NW_004515964.1 | Scaffold511 | 47417                   | AA                              | GG              | 1946954698               |
| SNP_P4_132186_48423  | NW_004515964.1 | Scaffold511 | 48423                   | AA                              | GG              | 1946954700               |
| SNP_P4_132187_53638  | NW_004515964.1 | Scaffold511 | 53638                   | AA                              | TT              | 1946954702               |
| SNP_P4_132188_54403  | NW_004515964.1 | Scaffold511 | 54403                   | TT                              | GG              | 1946954704               |
| SNP_P4_132189_54409  | NW_004515964.1 | Scaffold511 | 54409                   | GG                              | TT              | 1946954706               |
| SNP_P4_132190_55660  | NW_004515964.1 | Scaffold511 | 55660                   | CC                              | TT              | 1946954708               |
| SNP_P4_132191_55674  | NW_004515964.1 | Scaffold511 | 55674                   | GG                              | AA              | 1946954709               |
| SNP_P4_132192_55686  | NW_004515964.1 | Scaffold511 | 55686                   | GG                              | AA              | 1946954711               |
| SNP_P4_132193_75266  | NW_004515964.1 | Scaffold511 | 75266                   | GG                              | AA              | 1946954713               |
| SNP_P4_132194_75346  | NW_004515964.1 | Scaffold511 | 75346                   | GG                              | AA              | 1946954715               |
| SNP_P4_132195_97205  | NW_004515964.1 | Scaffold511 | 97205                   | CC                              | TT              | 1946954716               |
| SNP_P4_132196_97206  | NW_004515964.1 | Scaffold511 | 97206                   | AA                              | GG              | 1946954718               |
| SNP_P4_132197_97303  | NW_004515964.1 | Scaffold511 | 97303                   | AA                              | TT              | 1946954720               |
| SNP_P4_132198_97314  | NW_004515964.1 | Scaffold511 | 97314                   | CC                              | TT              | 1946954722               |
| SNP_P4_132199_97513  | NW_004515964.1 | Scaffold511 | 97513                   | AA                              | GG              | 1946954723               |
| SNP_P4_132200_97530  | NW_004515964.1 | Scaffold511 | 97530                   | GG                              | AA              | 1946954725               |
| SNP_P4_132201_98130  | NW_004515964.1 | Scaffold511 | 98130                   | TT                              | GG              | 1946954727               |
| SNP_P4_132202_98439  | NW_004515964.1 | Scaffold511 | 98439                   | CC                              | TT              | 1946954729               |
| SNP_P4_132203_98462  | NW_004515964.1 | Scaffold511 | 98462                   | AA                              | CC              | 1946954731               |
| SNP_P4_132205_102926 | NW_004515964.1 | Scaffold511 | 102926                  | AA                              | GG              | 1946954733               |
| SNP_P4_132206_103294 | NW_004515964.1 | Scaffold511 | 103294                  | GG                              | AA              | 1946954735               |
| SNP_P4_132207_106495 | NW_004515964.1 | Scaffold511 | 106495                  | GG                              | AA              | 1946954737               |
| SNP_P4_132208_125721 | NW_004515964.1 | Scaffold511 | 125721                  | CC                              | GG              | 1946954739               |
| SNP_P4_132209_128222 | NW_004515964.1 | Scaffold511 | 128222                  | GG                              | AA              | 1946954740               |
| SNP_P4_132210_129715 | NW_004515964.1 | Scaffold511 | 129715                  | TT                              | CC              | 1946954742               |
| SNP_P4_132211_134977 | NW_004515964.1 | Scaffold511 | 134977                  | GG                              | AA              | 1946954744               |
| SNP_P4_132212_147531 | NW_004515964.1 | Scaffold511 | 147531                  | CC                              | AA              | 1946954746               |
| SNP_P4_132213_148194 | NW_004515964.1 | Scaffold511 | 148194                  | CC                              | GG              | 1946954748               |
| SNP_P4_132214_148217 | NW_004515964.1 | Scaffold511 | 148217                  | AA                              | CC              | 1946954750               |
| SNP_P4_132215_148233 | NW_004515964.1 | Scaffold511 | 148233                  | CC                              | GG              | 1946954752               |
| SNP_P4_132216_148239 | NW_004515964.1 | Scaffold511 | 148239                  | TT                              | CC              | 1946954754               |
| SNP_P4_132217_148245 | NW_004515964.1 | Scaffold511 | 148245                  | TT                              | AA              | 1946954756               |
| SNP_P4_132218_148246 | NW_004515964.1 | Scaffold511 | 148246                  | CC                              | TT              | 1946954758               |
| SNP_P4_132219_148248 | NW_004515964.1 | Scaffold511 | 148248                  | AA                              | TT              | 1946954760               |
| SNP_P4_132220_148278 | NW_004515964.1 | Scaffold511 | 148278                  | TT                              | CC              | 1946954762               |



| SNPs IDs             | Chromosome IDs | Chromosomes | Physical positions (bp) | CDC Frontier (Reference genome) | (ILWC46 & LPNB) | NCBI SNPdb Accession IDs |
|----------------------|----------------|-------------|-------------------------|---------------------------------|-----------------|--------------------------|
| SNP_P4_132221_148299 | NW_004515964.1 | Scaffold511 | 148299                  | TT                              | CC              | 1946954764               |
| SNP_P4_132222_149950 | NW_004515964.1 | Scaffold511 | 149950                  | TT                              | CC              | 1946954766               |
| SNP_P4_132223_152056 | NW_004515964.1 | Scaffold511 | 152056                  | AA                              | GG              | 1946954768               |
| SNP_P4_132224_162091 | NW_004515964.1 | Scaffold511 | 162091                  | CC                              | TT              | 1946954769               |
| SNP_P4_132225_175080 | NW_004515964.1 | Scaffold511 | 175080                  | CC                              | TT              | 1946954771               |
| SNP_P4_132226_179181 | NW_004515964.1 | Scaffold511 | 179181                  | GG                              | AA              | 1946954773               |
| SNP_P4_132227_179210 | NW_004515964.1 | Scaffold511 | 179210                  | AA                              | GG              | 1946954775               |
| SNP_P4_132228_179213 | NW_004515964.1 | Scaffold511 | 179213                  | TT                              | AA              | 1946954777               |
| SNP_P4_132229_179676 | NW_004515964.1 | Scaffold511 | 179676                  | AA                              | CC              | 1946954779               |
| SNP_P4_132230_185687 | NW_004515964.1 | Scaffold511 | 185687                  | CC                              | TT              | 1946954781               |
| SNP_P4_132231_186117 | NW_004515964.1 | Scaffold511 | 186117                  | GG                              | TT              | 1946954783               |
| SNP_P4_132232_191001 | NW_004515964.1 | Scaffold511 | 191001                  | CC                              | TT              | 1946954784               |
| SNP_P4_132233_192867 | NW_004515964.1 | Scaffold511 | 192867                  | TT                              | AA              | 1946954786               |
| SNP_P4_132234_192912 | NW_004515964.1 | Scaffold511 | 192912                  | AA                              | GG              | 1946954788               |
| SNP_P4_132235_192925 | NW_004515964.1 | Scaffold511 | 192925                  | AA                              | GG              | 1946954790               |
| SNP_P4_132236_192951 | NW_004515964.1 | Scaffold511 | 192951                  | GG                              | AA              | 1946954792               |
| SNP_P4_132237_192994 | NW_004515964.1 | Scaffold511 | 192994                  | TT                              | CC              | 1946954794               |
| SNP_P4_132239_193141 | NW_004515964.1 | Scaffold511 | 193141                  | AA                              | TT              | 1946954796               |
| SNP_P4_132240_193179 | NW_004515964.1 | Scaffold511 | 193179                  | TT                              | GG              | 1946954798               |
| SNP_P4_132241_193242 | NW_004515964.1 | Scaffold511 | 193242                  | CC                              | TT              | 1946954800               |
| SNP_P4_132242_193286 | NW_004515964.1 | Scaffold511 | 193286                  | GG                              | AA              | 1946954802               |
| SNP_P4_132243_193308 | NW_004515964.1 | Scaffold511 | 193308                  | TT                              | GG              | 1946954804               |
| SNP_P4_132244_193352 | NW_004515964.1 | Scaffold511 | 193352                  | AA                              | GG              | 1946954805               |
| SNP_P4_132245_193355 | NW_004515964.1 | Scaffold511 | 193355                  | TT                              | GG              | 1946954807               |
| SNP_P4_132246_194369 | NW_004515964.1 | Scaffold511 | 194369                  | CC                              | TT              | 1946954809               |
| SNP_P4_132247_194402 | NW_004515964.1 | Scaffold511 | 194402                  | TT                              | CC              | 1946954811               |
| SNP_P4_132248_194423 | NW_004515964.1 | Scaffold511 | 194423                  | TT                              | CC              | 1946954813               |
| SNP_P4_132249_194443 | NW_004515964.1 | Scaffold511 | 194443                  | AA                              | GG              | 1946954815               |
| SNP_P4_132250_194475 | NW_004515964.1 | Scaffold511 | 194475                  | TT                              | AA              | 1946954817               |
| SNP_P4_132251_194479 | NW_004515964.1 | Scaffold511 | 194479                  | TT                              | GG              | 1946954819               |
| SNP_P4_132253_194504 | NW_004515964.1 | Scaffold511 | 194504                  | AA                              | CC              | 1946954821               |
| SNP_P4_132255_194545 | NW_004515964.1 | Scaffold511 | 194545                  | GG                              | AA              | 1946954823               |
| SNP_P4_132256_194598 | NW_004515964.1 | Scaffold511 | 194598                  | AA                              | CC              | 1946954825               |
| SNP_P4_132258_194660 | NW_004515964.1 | Scaffold511 | 194660                  | TT                              | CC              | 1946954826               |
| SNP_P4_132259_194700 | NW_004515964.1 | Scaffold511 | 194700                  | CC                              | TT              | 1946954828               |
| SNP_P4_132260_194707 | NW_004515964.1 | Scaffold511 | 194707                  | TT                              | CC              | 1946954830               |
| SNP_P4_132261_194830 | NW_004515964.1 | Scaffold511 | 194830                  | CC                              | TT              | 1946954832               |
| SNP_P4_132262_194860 | NW_004515964.1 | Scaffold511 | 194860                  | GG                              | AA              | 1946954834               |
| SNP_P4_132263_194873 | NW_004515964.1 | Scaffold511 | 194873                  | GG                              | TT              | 1946954836               |
| SNP_P4_132264_194889 | NW_004515964.1 | Scaffold511 | 194889                  | CC                              | TT              | 1946954838               |
| SNP_P4_132265_224513 | NW_004515964.1 | Scaffold511 | 224513                  | GG                              | TT              | 1946954840               |
| SNP_P4_132266_224528 | NW_004515964.1 | Scaffold511 | 224528                  | TT                              | CC              | 1946954842               |

| SNPs IDs             | Chromosome IDs | Chromosomes | Physical positions (bp) | CDC Frontier (Reference genome) | (ILWC46 & LPNB) | NCBI SNPdb Accession IDs |
|----------------------|----------------|-------------|-------------------------|---------------------------------|-----------------|--------------------------|
| SNP_P4_132267_224531 | NW_004515964.1 | Scaffold511 | 224531                  | CC                              | GG              | 1946954844               |
| SNP_P4_132268_224659 | NW_004515964.1 | Scaffold511 | 224659                  | AA                              | GG              | 1946954845               |
| SNP_P4_132269_226177 | NW_004515964.1 | Scaffold511 | 226177                  | GG                              | AA              | 1946954848               |
| SNP_P4_132270_226416 | NW_004515964.1 | Scaffold511 | 226416                  | AA                              | TT              | 1946954850               |
| SNP_P4_132271_226687 | NW_004515964.1 | Scaffold511 | 226687                  | TT                              | GG              | 1946954852               |
| SNP_P4_132272_235430 | NW_004515964.1 | Scaffold511 | 235430                  | GG                              | AA              | 1946954853               |
| SNP_P4_132273_235653 | NW_004515964.1 | Scaffold511 | 235653                  | AA                              | TT              | 1946954855               |
| SNP_P4_132274_235689 | NW_004515964.1 | Scaffold511 | 235689                  | GG                              | AA              | 1946954857               |
| SNP_P4_132275_235949 | NW_004515964.1 | Scaffold511 | 235949                  | AA                              | TT              | 1946954859               |
| SNP_P4_132276_235965 | NW_004515964.1 | Scaffold511 | 235965                  | TT                              | CC              | 1946954861               |
| SNP_P4_132277_236007 | NW_004515964.1 | Scaffold511 | 236007                  | AA                              | CC              | 1946954863               |
| SNP_P4_132278_236008 | NW_004515964.1 | Scaffold511 | 236008                  | TT                              | CC              | 1946954865               |
| SNP_P4_132279_238695 | NW_004515964.1 | Scaffold511 | 238695                  | CC                              | GG              | 1946954867               |
| SNP_P4_132281_238720 | NW_004515964.1 | Scaffold511 | 238720                  | GG                              | AA              | 1946954869               |
| SNP_P4_132282_239275 | NW_004515964.1 | Scaffold511 | 239275                  | TT                              | AA              | 1946954871               |
| SNP_P4_132283_687    | NW_004515965.1 | Scaffold512 | 687                     | AA                              | GG              | 1946954873               |
| SNP_P4_132284_718    | NW_004515965.1 | Scaffold512 | 718                     | TT                              | CC              | 1946954875               |
| SNP_P4_132285_721    | NW_004515965.1 | Scaffold512 | 721                     | GG                              | AA              | 1946954877               |
| SNP_P4_132286_732    | NW_004515965.1 | Scaffold512 | 732                     | TT                              | GG              | 1946954879               |
| SNP_P4_132287_931    | NW_004515965.1 | Scaffold512 | 931                     | AA                              | TT              | 1946954881               |
| SNP_P4_132288_21626  | NW_004515965.1 | Scaffold512 | 21626                   | AA                              | TT              | 1946954883               |
| SNP_P4_132289_21726  | NW_004515965.1 | Scaffold512 | 21726                   | GG                              | AA              | 1946954885               |
| SNP_P4_132290_21824  | NW_004515965.1 | Scaffold512 | 21824                   | GG                              | CC              | 1946954887               |
| SNP_P4_132291_34039  | NW_004515965.1 | Scaffold512 | 34039                   | GG                              | AA              | 1946954889               |
| SNP_P4_132292_34112  | NW_004515965.1 | Scaffold512 | 34112                   | TT                              | AA              | 1946954891               |
| SNP_P4_132293_38943  | NW_004515965.1 | Scaffold512 | 38943                   | CC                              | TT              | 1946954894               |
| SNP_P4_132294_39143  | NW_004515965.1 | Scaffold512 | 39143                   | TT                              | AA              | 1946954896               |
| SNP_P4_132295_39538  | NW_004515965.1 | Scaffold512 | 39538                   | AA                              | TT              | 1946954898               |
| SNP_P4_132296_40426  | NW_004515965.1 | Scaffold512 | 40426                   | AA                              | GG              | 1946954900               |
| SNP_P4_132297_41131  | NW_004515965.1 | Scaffold512 | 41131                   | GG                              | AA              | 1946954902               |
| SNP_P4_132298_42239  | NW_004515965.1 | Scaffold512 | 42239                   | AA                              | GG              | 1946954904               |
| SNP_P4_132299_42656  | NW_004515965.1 | Scaffold512 | 42656                   | TT                              | CC              | 1946954906               |
| SNP_P4_132300_49559  | NW_004515965.1 | Scaffold512 | 49559                   | CC                              | GG              | 1946954908               |
| SNP_P4_132301_49590  | NW_004515965.1 | Scaffold512 | 49590                   | AA                              | TT              | 1946954910               |
| SNP_P4_132302_51279  | NW_004515965.1 | Scaffold512 | 51279                   | TT                              | GG              | 1946954912               |
| SNP_P4_132303_55707  | NW_004515965.1 | Scaffold512 | 55707                   | TT                              | GG              | 1946954914               |
| SNP_P4_132304_60171  | NW_004515965.1 | Scaffold512 | 60171                   | TT                              | CC              | 1946954916               |
| SNP_P4_132305_60223  | NW_004515965.1 | Scaffold512 | 60223                   | TT                              | CC              | 1946954918               |
| SNP_P4_132306_83214  | NW_004515965.1 | Scaffold512 | 83214                   | AA                              | CC              | 1946954920               |
| SNP_P4_132307_83265  | NW_004515965.1 | Scaffold512 | 83265                   | TT                              | CC              | 1946954922               |
| SNP_P4_132308_83283  | NW_004515965.1 | Scaffold512 | 83283                   | TT                              | GG              | 1946954924               |
| SNP_P4_132309_83369  | NW_004515965.1 | Scaffold512 | 83369                   | CC                              | TT              | 1946954926               |

| SNPs IDs             | Chromosome IDs | Chromosomes | Physical positions (bp) | CDC Frontier (Reference genome) | (ILWC46 & LPNB) | NCBI SNPdb Accession IDs |
|----------------------|----------------|-------------|-------------------------|---------------------------------|-----------------|--------------------------|
| SNP_P4_132310_84310  | NW_004515965.1 | Scaffold512 | 84310                   | AA                              | TT              | 1946954928               |
| SNP_P4_132311_85160  | NW_004515965.1 | Scaffold512 | 85160                   | TT                              | GG              | 1946954930               |
| SNP_P4_132312_85174  | NW_004515965.1 | Scaffold512 | 85174                   | GG                              | CC              | 1946954932               |
| SNP_P4_132313_85227  | NW_004515965.1 | Scaffold512 | 85227                   | AA                              | CC              | 1946954934               |
| SNP_P4_132314_85240  | NW_004515965.1 | Scaffold512 | 85240                   | CC                              | TT              | 1946954936               |
| SNP_P4_132315_88803  | NW_004515965.1 | Scaffold512 | 88803                   | CC                              | TT              | 1946954938               |
| SNP_P4_132316_89095  | NW_004515965.1 | Scaffold512 | 89095                   | CC                              | TT              | 1946954940               |
| SNP_P4_132317_98433  | NW_004515965.1 | Scaffold512 | 98433                   | CC                              | GG              | 1946954942               |
| SNP_P4_132318_98599  | NW_004515965.1 | Scaffold512 | 98599                   | AA                              | TT              | 1946954944               |
| SNP_P4_132319_98609  | NW_004515965.1 | Scaffold512 | 98609                   | TT                              | CC              | 1946954946               |
| SNP_P4_132320_98735  | NW_004515965.1 | Scaffold512 | 98735                   | TT                              | CC              | 1946954948               |
| SNP_P4_132321_98749  | NW_004515965.1 | Scaffold512 | 98749                   | AA                              | TT              | 1946954950               |
| SNP_P4_132322_98770  | NW_004515965.1 | Scaffold512 | 98770                   | AA                              | TT              | 1946954952               |
| SNP_P4_132323_98865  | NW_004515965.1 | Scaffold512 | 98865                   | CC                              | TT              | 1946954954               |
| SNP_P4_132324_98907  | NW_004515965.1 | Scaffold512 | 98907                   | AA                              | GG              | 1946954956               |
| SNP_P4_132325_100662 | NW_004515965.1 | Scaffold512 | 100662                  | AA                              | CC              | 1946954958               |
| SNP_P4_132326_105479 | NW_004515965.1 | Scaffold512 | 105479                  | GG                              | AA              | 1946954960               |
| SNP_P4_132327_105489 | NW_004515965.1 | Scaffold512 | 105489                  | GG                              | AA              | 1946954962               |
| SNP_P4_132328_105490 | NW_004515965.1 | Scaffold512 | 105490                  | AA                              | GG              | 1946954964               |
| SNP_P4_132329_105530 | NW_004515965.1 | Scaffold512 | 105530                  | AA                              | GG              | 1946954966               |
| SNP_P4_132330_105773 | NW_004515965.1 | Scaffold512 | 105773                  | TT                              | GG              | 1946954968               |
| SNP_P4_132331_105811 | NW_004515965.1 | Scaffold512 | 105811                  | TT                              | AA              | 1946954970               |
| SNP_P4_132332_106210 | NW_004515965.1 | Scaffold512 | 106210                  | TT                              | GG              | 1946954972               |
| SNP_P4_132333_107657 | NW_004515965.1 | Scaffold512 | 107657                  | CC                              | TT              | 1946954974               |
| SNP_P4_132334_111429 | NW_004515965.1 | Scaffold512 | 111429                  | TT                              | CC              | 1946954976               |
| SNP_P4_132335_111924 | NW_004515965.1 | Scaffold512 | 111924                  | CC                              | TT              | 1946954978               |
| SNP_P4_132336_113026 | NW_004515965.1 | Scaffold512 | 113026                  | GG                              | AA              | 1946954980               |
| SNP_P4_132337_115677 | NW_004515965.1 | Scaffold512 | 115677                  | AA                              | TT              | 1946954982               |
| SNP_P4_132338_116719 | NW_004515965.1 | Scaffold512 | 116719                  | TT                              | AA              | 1946954984               |
| SNP_P4_132339_116723 | NW_004515965.1 | Scaffold512 | 116723                  | AA                              | TT              | 1946954986               |
| SNP_P4_132340_116724 | NW_004515965.1 | Scaffold512 | 116724                  | AA                              | TT              | 1946954988               |
| SNP_P4_132341_116725 | NW_004515965.1 | Scaffold512 | 116725                  | AA                              | GG              | 1946954990               |
| SNP_P4_132342_116726 | NW_004515965.1 | Scaffold512 | 116726                  | AA                              | TT              | 1946954992               |
| SNP_P4_132343_125963 | NW_004515965.1 | Scaffold512 | 125963                  | TT                              | CC              | 1946954994               |
| SNP_P4_132344_125978 | NW_004515965.1 | Scaffold512 | 125978                  | TT                              | AA              | 1946954996               |
| SNP_P4_132345_126011 | NW_004515965.1 | Scaffold512 | 126011                  | CC                              | TT              | 1946954998               |
| SNP_P4_132346_126020 | NW_004515965.1 | Scaffold512 | 126020                  | GG                              | AA              | 1946955000               |
| SNP_P4_132347_126032 | NW_004515965.1 | Scaffold512 | 126032                  | TT                              | AA              | 1946955002               |
| SNP_P4_132348_126056 | NW_004515965.1 | Scaffold512 | 126056                  | GG                              | AA              | 1946955004               |
| SNP_P4_132349_126062 | NW_004515965.1 | Scaffold512 | 126062                  | GG                              | AA              | 1946955006               |
| SNP_P4_132350_126068 | NW_004515965.1 | Scaffold512 | 126068                  | CC                              | TT              | 1946955008               |
| SNP_P4_132351_126119 | NW_004515965.1 | Scaffold512 | 126119                  | AA                              | CC              | 1946955010               |

| SNPs IDs             | Chromosome IDs | Chromosomes | Physical positions (bp) | CDC Frontier (Reference genome) | (ILWC46 & LPNB) | NCBI SNPdb Accession IDs |
|----------------------|----------------|-------------|-------------------------|---------------------------------|-----------------|--------------------------|
| SNP_P4_132352_126125 | NW_004515965.1 | Scaffold512 | 126125                  | TT                              | CC              | 1946955012               |
| SNP_P4_132353_126137 | NW_004515965.1 | Scaffold512 | 126137                  | AA                              | CC              | 1946955014               |
| SNP_P4_132354_126149 | NW_004515965.1 | Scaffold512 | 126149                  | TT                              | CC              | 1946955016               |
| SNP_P4_132355_126155 | NW_004515965.1 | Scaffold512 | 126155                  | GG                              | TT              | 1946955018               |
| SNP_P4_132356_126158 | NW_004515965.1 | Scaffold512 | 126158                  | CC                              | TT              | 1946955020               |
| SNP_P4_132357_126167 | NW_004515965.1 | Scaffold512 | 126167                  | AA                              | TT              | 1946955022               |
| SNP_P4_132358_126182 | NW_004515965.1 | Scaffold512 | 126182                  | AA                              | TT              | 1946955024               |
| SNP_P4_132359_126230 | NW_004515965.1 | Scaffold512 | 126230                  | GG                              | AA              | 1946955026               |
| SNP_P4_132360_126246 | NW_004515965.1 | Scaffold512 | 126246                  | TT                              | CC              | 1946955028               |
| SNP_P4_132361_126249 | NW_004515965.1 | Scaffold512 | 126249                  | GG                              | AA              | 1946955030               |
| SNP_P4_132362_126288 | NW_004515965.1 | Scaffold512 | 126288                  | GG                              | AA              | 1946955032               |
| SNP_P4_132363_126320 | NW_004515965.1 | Scaffold512 | 126320                  | GG                              | CC              | 1946955034               |
| SNP_P4_132365_126348 | NW_004515965.1 | Scaffold512 | 126348                  | TT                              | CC              | 1946955036               |
| SNP_P4_132366_126354 | NW_004515965.1 | Scaffold512 | 126354                  | CC                              | TT              | 1946955039               |
| SNP_P4_132367_126360 | NW_004515965.1 | Scaffold512 | 126360                  | AA                              | TT              | 1946955041               |
| SNP_P4_132368_126367 | NW_004515965.1 | Scaffold512 | 126367                  | AA                              | TT              | 1946955043               |
| SNP_P4_132369_126390 | NW_004515965.1 | Scaffold512 | 126390                  | AA                              | GG              | 1946955045               |
| SNP_P4_132370_126445 | NW_004515965.1 | Scaffold512 | 126445                  | AA                              | TT              | 1946955047               |
| SNP_P4_132371_126446 | NW_004515965.1 | Scaffold512 | 126446                  | AA                              | TT              | 1946955049               |
| SNP_P4_132372_129928 | NW_004515965.1 | Scaffold512 | 129928                  | TT                              | CC              | 1946955051               |
| SNP_P4_132373_131831 | NW_004515965.1 | Scaffold512 | 131831                  | AA                              | GG              | 1946955053               |
| SNP_P4_132374_136290 | NW_004515965.1 | Scaffold512 | 136290                  | AA                              | GG              | 1946955055               |
| SNP_P4_132375_137646 | NW_004515965.1 | Scaffold512 | 137646                  | AA                              | GG              | 1946955057               |
| SNP_P4_132376_138399 | NW_004515965.1 | Scaffold512 | 138399                  | TT                              | GG              | 1946955059               |
| SNP_P4_132377_138418 | NW_004515965.1 | Scaffold512 | 138418                  | CC                              | AA              | 1946955061               |
| SNP_P4_132378_138421 | NW_004515965.1 | Scaffold512 | 138421                  | TT                              | CC              | 1946955062               |
| SNP_P4_132379_138428 | NW_004515965.1 | Scaffold512 | 138428                  | AA                              | CC              | 1946955064               |
| SNP_P4_132380_138430 | NW_004515965.1 | Scaffold512 | 138430                  | GG                              | AA              | 1946955066               |
| SNP_P4_132381_138432 | NW_004515965.1 | Scaffold512 | 138432                  | AA                              | CC              | 1946955068               |
| SNP_P4_132382_138434 | NW_004515965.1 | Scaffold512 | 138434                  | AA                              | TT              | 1946955070               |
| SNP_P4_132383_138438 | NW_004515965.1 | Scaffold512 | 138438                  | AA                              | TT              | 1946955072               |
| SNP_P4_132384_138441 | NW_004515965.1 | Scaffold512 | 138441                  | AA                              | CC              | 1946955074               |
| SNP_P4_132385_138444 | NW_004515965.1 | Scaffold512 | 138444                  | CC                              | GG              | 1946955076               |
| SNP_P4_132386_138498 | NW_004515965.1 | Scaffold512 | 138498                  | AA                              | TT              | 1946955078               |
| SNP_P4_132387_138511 | NW_004515965.1 | Scaffold512 | 138511                  | CC                              | TT              | 1946955080               |
| SNP_P4_132388_138553 | NW_004515965.1 | Scaffold512 | 138553                  | GG                              | AA              | 1946955082               |
| SNP_P4_132389_138792 | NW_004515965.1 | Scaffold512 | 138792                  | CC                              | GG              | 1946955084               |
| SNP_P4_132390_139628 | NW_004515965.1 | Scaffold512 | 139628                  | GG                              | AA              | 1946955086               |
| SNP_P4_132391_139642 | NW_004515965.1 | Scaffold512 | 139642                  | CC                              | GG              | 1946955088               |
| SNP_P4_132392_139861 | NW_004515965.1 | Scaffold512 | 139861                  | CC                              | AA              | 1946955090               |
| SNP_P4_132393_139879 | NW_004515965.1 | Scaffold512 | 139879                  | AA                              | GG              | 1946955092               |
| SNP_P4_132394_141696 | NW_004515965.1 | Scaffold512 | 141696                  | TT                              | CC              | 1946955094               |

| SNPs IDs             | Chromosome IDs | Chromosomes | Physical positions (bp) | CDC Frontier (Reference genome) | (ILWC46 & LPNB) | NCBI SNPdb Accession IDs |
|----------------------|----------------|-------------|-------------------------|---------------------------------|-----------------|--------------------------|
| SNP_P4_132395_142641 | NW_004515965.1 | Scaffold512 | 142641                  | CC                              | TT              | 1946955096               |
| SNP_P4_132396_147775 | NW_004515965.1 | Scaffold512 | 147775                  | GG                              | AA              | 1946955098               |
| SNP_P4_132398_155595 | NW_004515965.1 | Scaffold512 | 155595                  | GG                              | CC              | 1946955100               |
| SNP_P4_132399_155608 | NW_004515965.1 | Scaffold512 | 155608                  | AA                              | CC              | 1946955102               |
| SNP_P4_132400_155609 | NW_004515965.1 | Scaffold512 | 155609                  | GG                              | AA              | 1946955104               |
| SNP_P4_132401_155624 | NW_004515965.1 | Scaffold512 | 155624                  | AA                              | GG              | 1946955105               |
| SNP_P4_132402_155733 | NW_004515965.1 | Scaffold512 | 155733                  | TT                              | AA              | 1946955107               |
| SNP_P4_132403_155785 | NW_004515965.1 | Scaffold512 | 155785                  | GG                              | AA              | 1946955109               |
| SNP_P4_132404_161956 | NW_004515965.1 | Scaffold512 | 161956                  | TT                              | GG              | 1946955111               |
| SNP_P4_132405_162215 | NW_004515965.1 | Scaffold512 | 162215                  | AA                              | TT              | 1946955113               |
| SNP_P4_132406_162392 | NW_004515965.1 | Scaffold512 | 162392                  | GG                              | TT              | 1946955115               |
| SNP_P4_132407_162483 | NW_004515965.1 | Scaffold512 | 162483                  | TT                              | CC              | 1946955117               |
| SNP_P4_132408_166690 | NW_004515965.1 | Scaffold512 | 166690                  | CC                              | AA              | 1946955119               |
| SNP_P4_132409_169982 | NW_004515965.1 | Scaffold512 | 169982                  | CC                              | GG              | 1946955121               |
| SNP_P4_132410_170218 | NW_004515965.1 | Scaffold512 | 170218                  | TT                              | GG              | 1946955122               |
| SNP_P4_132411_175597 | NW_004515965.1 | Scaffold512 | 175597                  | AA                              | GG              | 1946955124               |
| SNP_P4_132412_180334 | NW_004515965.1 | Scaffold512 | 180334                  | CC                              | TT              | 1946955126               |
| SNP_P4_132413_180335 | NW_004515965.1 | Scaffold512 | 180335                  | CC                              | AA              | 1946955128               |
| SNP_P4_132414_180366 | NW_004515965.1 | Scaffold512 | 180366                  | GG                              | TT              | 1946955130               |
| SNP_P4_132415_180429 | NW_004515965.1 | Scaffold512 | 180429                  | TT                              | CC              | 1946955132               |
| SNP_P4_132416_180645 | NW_004515965.1 | Scaffold512 | 180645                  | AA                              | GG              | 1946955134               |
| SNP_P4_132417_180683 | NW_004515965.1 | Scaffold512 | 180683                  | CC                              | TT              | 1946955136               |
| SNP_P4_132418_191702 | NW_004515965.1 | Scaffold512 | 191702                  | TT                              | CC              | 1946955138               |
| SNP_P4_132419_191740 | NW_004515965.1 | Scaffold512 | 191740                  | CC                              | AA              | 1946955140               |
| SNP_P4_132420_191775 | NW_004515965.1 | Scaffold512 | 191775                  | AA                              | GG              | 1946955142               |
| SNP_P4_132421_192350 | NW_004515965.1 | Scaffold512 | 192350                  | TT                              | GG              | 1946955144               |
| SNP_P4_132422_194060 | NW_004515965.1 | Scaffold512 | 194060                  | GG                              | TT              | 1946955146               |
| SNP_P4_132423_194268 | NW_004515965.1 | Scaffold512 | 194268                  | CC                              | AA              | 1946955148               |
| SNP_P4_132424_202    | NW_004515966.1 | Scaffold513 | 202                     | TT                              | CC              | 1946955150               |
| SNP_P4_132425_205    | NW_004515966.1 | Scaffold513 | 205                     | CC                              | TT              | 1946955152               |
| SNP_P4_132428_300    | NW_004515966.1 | Scaffold513 | 300                     | AA                              | TT              | 1946955154               |
| SNP_P4_132429_385    | NW_004515966.1 | Scaffold513 | 385                     | AA                              | TT              | 1946955155               |
| SNP_P4_132430_420    | NW_004515966.1 | Scaffold513 | 420                     | AA                              | TT              | 1946955157               |
| SNP_P4_132431_429    | NW_004515966.1 | Scaffold513 | 429                     | AA                              | GG              | 1946955159               |
| SNP_P4_132432_584    | NW_004515966.1 | Scaffold513 | 584                     | TT                              | CC              | 1946955161               |
| SNP_P4_132433_644    | NW_004515966.1 | Scaffold513 | 644                     | AA                              | GG              | 1946955163               |
| SNP_P4_132434_1452   | NW_004515966.1 | Scaffold513 | 1452                    | GG                              | AA              | 1946955165               |
| SNP_P4_132435_1617   | NW_004515966.1 | Scaffold513 | 1617                    | TT                              | CC              | 1946955168               |
| SNP_P4_132436_2463   | NW_004515966.1 | Scaffold513 | 2463                    | TT                              | CC              | 1946955169               |
| SNP_P4_132437_7241   | NW_004515966.1 | Scaffold513 | 7241                    | TT                              | CC              | 1946955171               |
| SNP_P4_132438_7296   | NW_004515966.1 | Scaffold513 | 7296                    | GG                              | AA              | 1946955173               |
| SNP_P4_132439_7752   | NW_004515966.1 | Scaffold513 | 7752                    | AA                              | GG              | 1946955175               |

| SNPs IDs            | Chromosome IDs | Chromosomes | Physical positions (bp) | CDC Frontier (Reference genome) | (ILWC46 & LPNB) | NCBI SNPdb Accession IDs |
|---------------------|----------------|-------------|-------------------------|---------------------------------|-----------------|--------------------------|
| SNP_P4_132440_9330  | NW_004515966.1 | Scaffold513 | 9330                    | TT                              | GG              | 1946955177               |
| SNP_P4_132441_10660 | NW_004515966.1 | Scaffold513 | 10660                   | AA                              | GG              | 1946955179               |
| SNP_P4_132442_16908 | NW_004515966.1 | Scaffold513 | 16908                   | AA                              | GG              | 1946955181               |
| SNP_P4_132443_17096 | NW_004515966.1 | Scaffold513 | 17096                   | CC                              | TT              | 1946955183               |
| SNP_P4_132444_17324 | NW_004515966.1 | Scaffold513 | 17324                   | CC                              | AA              | 1946955185               |
| SNP_P4_132445_17632 | NW_004515966.1 | Scaffold513 | 17632                   | GG                              | AA              | 1946955187               |
| SNP_P4_132446_82    | NW_004515967.1 | Scaffold515 | 82                      | TT                              | CC              | 1946955189               |
| SNP_P4_132447_105   | NW_004515967.1 | Scaffold515 | 105                     | TT                              | CC              | 1946955191               |
| SNP_P4_132449_177   | NW_004515967.1 | Scaffold515 | 177                     | AA                              | GG              | 1946955193               |
| SNP_P4_132450_408   | NW_004515967.1 | Scaffold515 | 408                     | TT                              | CC              | 1946955194               |
| SNP_P4_132451_430   | NW_004515967.1 | Scaffold515 | 430                     | AA                              | GG              | 1946955196               |
| SNP_P4_132452_517   | NW_004515967.1 | Scaffold515 | 517                     | CC                              | AA              | 1946955198               |
| SNP_P4_132453_523   | NW_004515967.1 | Scaffold515 | 523                     | CC                              | AA              | 1946955200               |
| SNP_P4_132454_1081  | NW_004515967.1 | Scaffold515 | 1081                    | AA                              | GG              | 1946955202               |
| SNP_P4_132455_1108  | NW_004515967.1 | Scaffold515 | 1108                    | GG                              | AA              | 1946955204               |
| SNP_P4_132456_1132  | NW_004515967.1 | Scaffold515 | 1132                    | AA                              | TT              | 1946955206               |
| SNP_P4_132457_1187  | NW_004515967.1 | Scaffold515 | 1187                    | CC                              | TT              | 1946955208               |
| SNP_P4_132458_1226  | NW_004515967.1 | Scaffold515 | 1226                    | AA                              | GG              | 1946955210               |
| SNP_P4_132459_1272  | NW_004515967.1 | Scaffold515 | 1272                    | CC                              | TT              | 1946955212               |
| SNP_P4_132460_1326  | NW_004515967.1 | Scaffold515 | 1326                    | AA                              | GG              | 1946955214               |
| SNP_P4_132461_1373  | NW_004515967.1 | Scaffold515 | 1373                    | GG                              | TT              | 1946955215               |
| SNP_P4_132462_8655  | NW_004515967.1 | Scaffold515 | 8655                    | TT                              | GG              | 1946955217               |
| SNP_P4_132463_8665  | NW_004515967.1 | Scaffold515 | 8665                    | TT                              | GG              | 1946955219               |
| SNP_P4_132464_8935  | NW_004515967.1 | Scaffold515 | 8935                    | GG                              | CC              | 1946955221               |
| SNP_P4_132465_8987  | NW_004515967.1 | Scaffold515 | 8987                    | TT                              | GG              | 1946955223               |
| SNP_P4_132466_9034  | NW_004515967.1 | Scaffold515 | 9034                    | GG                              | TT              | 1946955224               |
| SNP_P4_132467_9036  | NW_004515967.1 | Scaffold515 | 9036                    | CC                              | AA              | 1946955226               |
| SNP_P4_132468_9069  | NW_004515967.1 | Scaffold515 | 9069                    | GG                              | TT              | 1946955228               |
| SNP_P4_132469_9218  | NW_004515967.1 | Scaffold515 | 9218                    | GG                              | AA              | 1946955230               |
| SNP_P4_132470_9266  | NW_004515967.1 | Scaffold515 | 9266                    | CC                              | TT              | 1946955232               |
| SNP_P4_132471_9440  | NW_004515967.1 | Scaffold515 | 9440                    | CC                              | TT              | 1946955234               |
| SNP_P4_132472_9468  | NW_004515967.1 | Scaffold515 | 9468                    | AA                              | GG              | 1946955236               |
| SNP_P4_132473_9476  | NW_004515967.1 | Scaffold515 | 9476                    | TT                              | AA              | 1946955238               |
| SNP_P4_132474_9524  | NW_004515967.1 | Scaffold515 | 9524                    | AA                              | GG              | 1946955240               |
| SNP_P4_132475_9551  | NW_004515967.1 | Scaffold515 | 9551                    | TT                              | CC              | 1946955242               |
| SNP_P4_132476_9592  | NW_004515967.1 | Scaffold515 | 9592                    | TT                              | GG              | 1946955244               |
| SNP_P4_132477_9593  | NW_004515967.1 | Scaffold515 | 9593                    | GG                              | AA              | 1946955246               |
| SNP_P4_132478_9609  | NW_004515967.1 | Scaffold515 | 9609                    | TT                              | CC              | 1946955248               |
| SNP_P4_132479_9667  | NW_004515967.1 | Scaffold515 | 9667                    | GG                              | CC              | 1946955250               |
| SNP_P4_132480_9716  | NW_004515967.1 | Scaffold515 | 9716                    | AA                              | CC              | 1946955252               |
| SNP_P4_132481_9811  | NW_004515967.1 | Scaffold515 | 9811                    | AA                              | GG              | 1946955254               |
| SNP_P4_132482_9861  | NW_004515967.1 | Scaffold515 | 9861                    | AA                              | GG              | 1946955256               |

| SNPs IDs            | Chromosome IDs | Chromosomes | Physical positions (bp) | CDC Frontier (Reference genome) | (ILWC46 & LPNB) | NCBI SNPdb Accession IDs |
|---------------------|----------------|-------------|-------------------------|---------------------------------|-----------------|--------------------------|
| SNP_P4_132483_9866  | NW_004515967.1 | Scaffold515 | 9866                    | TT                              | CC              | 1946955258               |
| SNP_P4_132484_9985  | NW_004515967.1 | Scaffold515 | 9985                    | GG                              | AA              | 1946955260               |
| SNP_P4_132485_9998  | NW_004515967.1 | Scaffold515 | 9998                    | CC                              | GG              | 1946955262               |
| SNP_P4_132486_10015 | NW_004515967.1 | Scaffold515 | 10015                   | TT                              | AA              | 1946955264               |
| SNP_P4_132487_10099 | NW_004515967.1 | Scaffold515 | 10099                   | TT                              | GG              | 1946955266               |
| SNP_P4_132488_10114 | NW_004515967.1 | Scaffold515 | 10114                   | AA                              | GG              | 1946955268               |
| SNP_P4_132489_10174 | NW_004515967.1 | Scaffold515 | 10174                   | GG                              | TT              | 1946955270               |
| SNP_P4_132490_10264 | NW_004515967.1 | Scaffold515 | 10264                   | CC                              | TT              | 1946955272               |
| SNP_P4_132491_10478 | NW_004515967.1 | Scaffold515 | 10478                   | CC                              | AA              | 1946955274               |
| SNP_P4_132492_10479 | NW_004515967.1 | Scaffold515 | 10479                   | TT                              | GG              | 1946955276               |
| SNP_P4_132493_10535 | NW_004515967.1 | Scaffold515 | 10535                   | GG                              | CC              | 1946955278               |
| SNP_P4_132494_10723 | NW_004515967.1 | Scaffold515 | 10723                   | GG                              | TT              | 1946955280               |
| SNP_P4_132495_10791 | NW_004515967.1 | Scaffold515 | 10791                   | TT                              | CC              | 1946955282               |
| SNP_P4_132496_10812 | NW_004515967.1 | Scaffold515 | 10812                   | GG                              | AA              | 1946955284               |
| SNP_P4_132497_10893 | NW_004515967.1 | Scaffold515 | 10893                   | CC                              | TT              | 1946955286               |
| SNP_P4_132498_10907 | NW_004515967.1 | Scaffold515 | 10907                   | AA                              | GG              | 1946955288               |
| SNP_P4_132499_10931 | NW_004515967.1 | Scaffold515 | 10931                   | TT                              | CC              | 1946955290               |
| SNP_P4_132500_10950 | NW_004515967.1 | Scaffold515 | 10950                   | CC                              | GG              | 1946955292               |
| SNP_P4_132501_10990 | NW_004515967.1 | Scaffold515 | 10990                   | TT                              | CC              | 1946955294               |
| SNP_P4_132502_11016 | NW_004515967.1 | Scaffold515 | 11016                   | CC                              | TT              | 1946955296               |
| SNP_P4_132503_11018 | NW_004515967.1 | Scaffold515 | 11018                   | AA                              | TT              | 1946955298               |
| SNP_P4_132504_11069 | NW_004515967.1 | Scaffold515 | 11069                   | TT                              | CC              | 1946955300               |
| SNP_P4_132505_11070 | NW_004515967.1 | Scaffold515 | 11070                   | CC                              | GG              | 1946955302               |
| SNP_P4_132506_12032 | NW_004515967.1 | Scaffold515 | 12032                   | GG                              | AA              | 1946955304               |
| SNP_P4_132507_12206 | NW_004515967.1 | Scaffold515 | 12206                   | TT                              | AA              | 1946955306               |
| SNP_P4_132508_12635 | NW_004515967.1 | Scaffold515 | 12635                   | TT                              | CC              | 1946955308               |
| SNP_P4_132509_12687 | NW_004515967.1 | Scaffold515 | 12687                   | CC                              | GG              | 1946955311               |
| SNP_P4_132510_12753 | NW_004515967.1 | Scaffold515 | 12753                   | AA                              | GG              | 1946955313               |
| SNP_P4_132511_12807 | NW_004515967.1 | Scaffold515 | 12807                   | CC                              | AA              | 1946955314               |
| SNP_P4_132512_12819 | NW_004515967.1 | Scaffold515 | 12819                   | AA                              | GG              | 1946955316               |
| SNP_P4_132513_12917 | NW_004515967.1 | Scaffold515 | 12917                   | GG                              | TT              | 1946955318               |
| SNP_P4_132514_13044 | NW_004515967.1 | Scaffold515 | 13044                   | TT                              | CC              | 1946955320               |
| SNP_P4_132515_13124 | NW_004515967.1 | Scaffold515 | 13124                   | AA                              | GG              | 1946955322               |
| SNP_P4_132516_13132 | NW_004515967.1 | Scaffold515 | 13132                   | CC                              | TT              | 1946955324               |
| SNP_P4_132517_13301 | NW_004515967.1 | Scaffold515 | 13301                   | AA                              | GG              | 1946955327               |
| SNP_P4_132518_13333 | NW_004515967.1 | Scaffold515 | 13333                   | CC                              | TT              | 1946955329               |
| SNP_P4_132519_15601 | NW_004515967.1 | Scaffold515 | 15601                   | TT                              | GG              | 1946955330               |
| SNP_P4_132520_15623 | NW_004515967.1 | Scaffold515 | 15623                   | GG                              | TT              | 1946955333               |
| SNP_P4_132521_15784 | NW_004515967.1 | Scaffold515 | 15784                   | TT                              | CC              | 1946955335               |
| SNP_P4_132522_15801 | NW_004515967.1 | Scaffold515 | 15801                   | GG                              | AA              | 1946955336               |
| SNP_P4_132524_15852 | NW_004515967.1 | Scaffold515 | 15852                   | CC                              | AA              | 1946955338               |
| SNP_P4_132525_15858 | NW_004515967.1 | Scaffold515 | 15858                   | GG                              | TT              | 1946955339               |

| SNPs IDs            | Chromosome IDs | Chromosomes | Physical positions (bp) | CDC Frontier (Reference genome) | (ILWC46 & LPNB) | NCBI SNPdb Accession IDs |
|---------------------|----------------|-------------|-------------------------|---------------------------------|-----------------|--------------------------|
| SNP_P4_132526_16176 | NW_004515967.1 | Scaffold515 | 16176                   | GG                              | TT              | 1946955340               |
| SNP_P4_132527_16208 | NW_004515967.1 | Scaffold515 | 16208                   | GG                              | CC              | 1946955341               |
| SNP_P4_132528_16216 | NW_004515967.1 | Scaffold515 | 16216                   | CC                              | AA              | 1946955342               |
| SNP_P4_132529_16820 | NW_004515967.1 | Scaffold515 | 16820                   | AA                              | GG              | 1946955343               |
| SNP_P4_132530_16825 | NW_004515967.1 | Scaffold515 | 16825                   | CC                              | TT              | 1946955345               |
| SNP_P4_132531_19607 | NW_004515967.1 | Scaffold515 | 19607                   | TT                              | AA              | 1946955347               |
| SNP_P4_132532_19622 | NW_004515967.1 | Scaffold515 | 19622                   | AA                              | TT              | 1946955349               |
| SNP_P4_132533_19650 | NW_004515967.1 | Scaffold515 | 19650                   | TT                              | GG              | 1946955351               |
| SNP_P4_132534_19653 | NW_004515967.1 | Scaffold515 | 19653                   | TT                              | CC              | 1946955353               |
| SNP_P4_132535_19664 | NW_004515967.1 | Scaffold515 | 19664                   | GG                              | TT              | 1946955354               |
| SNP_P4_132536_20045 | NW_004515967.1 | Scaffold515 | 20045                   | GG                              | TT              | 1946955356               |
| SNP_P4_132537_20056 | NW_004515967.1 | Scaffold515 | 20056                   | AA                              | CC              | 1946955359               |
| SNP_P4_132538_21809 | NW_004515967.1 | Scaffold515 | 21809                   | TT                              | CC              | 1946955361               |
| SNP_P4_132539_21839 | NW_004515967.1 | Scaffold515 | 21839                   | AA                              | CC              | 1946955363               |
| SNP_P4_132540_22105 | NW_004515967.1 | Scaffold515 | 22105                   | AA                              | TT              | 1946955365               |
| SNP_P4_132541_22106 | NW_004515967.1 | Scaffold515 | 22106                   | CC                              | TT              | 1946955367               |
| SNP_P4_132542_22110 | NW_004515967.1 | Scaffold515 | 22110                   | TT                              | AA              | 1946955369               |
| SNP_P4_132543_22174 | NW_004515967.1 | Scaffold515 | 22174                   | TT                              | CC              | 1946955371               |
| SNP_P4_132544_22191 | NW_004515967.1 | Scaffold515 | 22191                   | AA                              | GG              | 1946955373               |
| SNP_P4_132545_22195 | NW_004515967.1 | Scaffold515 | 22195                   | TT                              | CC              | 1946955375               |
| SNP_P4_132546_22205 | NW_004515967.1 | Scaffold515 | 22205                   | AA                              | GG              | 1946955377               |
| SNP_P4_132547_24383 | NW_004515967.1 | Scaffold515 | 24383                   | TT                              | AA              | 1946955379               |
| SNP_P4_132548_24392 | NW_004515967.1 | Scaffold515 | 24392                   | GG                              | TT              | 1946955381               |
| SNP_P4_132549_25071 | NW_004515967.1 | Scaffold515 | 25071                   | AA                              | TT              | 1946955383               |
| SNP_P4_132550_25290 | NW_004515967.1 | Scaffold515 | 25290                   | AA                              | GG              | 1946955385               |
| SNP_P4_132551_26076 | NW_004515967.1 | Scaffold515 | 26076                   | TT                              | AA              | 1946955387               |
| SNP_P4_132552_26189 | NW_004515967.1 | Scaffold515 | 26189                   | CC                              | TT              | 1946955389               |
| SNP_P4_132553_26419 | NW_004515967.1 | Scaffold515 | 26419                   | CC                              | TT              | 1946955391               |
| SNP_P4_132554_26454 | NW_004515967.1 | Scaffold515 | 26454                   | TT                              | GG              | 1946955394               |
| SNP_P4_132555_26485 | NW_004515967.1 | Scaffold515 | 26485                   | TT                              | CC              | 1946955396               |
| SNP_P4_132556_27886 | NW_004515967.1 | Scaffold515 | 27886                   | CC                              | TT              | 1946955398               |
| SNP_P4_132557_27910 | NW_004515967.1 | Scaffold515 | 27910                   | GG                              | AA              | 1946955400               |
| SNP_P4_132559_28305 | NW_004515967.1 | Scaffold515 | 28305                   | TT                              | GG              | 1946955402               |
| SNP_P4_132560_28327 | NW_004515967.1 | Scaffold515 | 28327                   | GG                              | AA              | 1946955404               |
| SNP_P4_132561_28367 | NW_004515967.1 | Scaffold515 | 28367                   | CC                              | TT              | 1946955406               |
| SNP_P4_132562_28390 | NW_004515967.1 | Scaffold515 | 28390                   | AA                              | GG              | 1946955408               |
| SNP_P4_132563_28423 | NW_004515967.1 | Scaffold515 | 28423                   | AA                              | GG              | 1946955410               |
| SNP_P4_132564_28463 | NW_004515967.1 | Scaffold515 | 28463                   | GG                              | AA              | 1946955412               |
| SNP_P4_132565_28510 | NW_004515967.1 | Scaffold515 | 28510                   | CC                              | GG              | 1946955414               |
| SNP_P4_132566_28524 | NW_004515967.1 | Scaffold515 | 28524                   | AA                              | GG              | 1946955416               |
| SNP_P4_132567_28678 | NW_004515967.1 | Scaffold515 | 28678                   | TT                              | GG              | 1946955418               |
| SNP_P4_132568_28713 | NW_004515967.1 | Scaffold515 | 28713                   | GG                              | AA              | 1946955420               |



| SNPs IDs            | Chromosome IDs | Chromosomes | Physical positions (bp) | CDC Frontier (Reference genome) | (ILWC46 & LPNB) | NCBI SNPdb Accession IDs |
|---------------------|----------------|-------------|-------------------------|---------------------------------|-----------------|--------------------------|
| SNP_P4_132569_28915 | NW_004515967.1 | Scaffold515 | 28915                   | CC                              | TT              | 1946955422               |
| SNP_P4_132570_29042 | NW_004515967.1 | Scaffold515 | 29042                   | GG                              | CC              | 1946955424               |
| SNP_P4_132571_29043 | NW_004515967.1 | Scaffold515 | 29043                   | AA                              | GG              | 1946955427               |
| SNP_P4_132572_29141 | NW_004515967.1 | Scaffold515 | 29141                   | TT                              | CC              | 1946955429               |
| SNP_P4_132573_29143 | NW_004515967.1 | Scaffold515 | 29143                   | TT                              | GG              | 1946955431               |
| SNP_P4_132574_29173 | NW_004515967.1 | Scaffold515 | 29173                   | CC                              | TT              | 1946955433               |
| SNP_P4_132575_29265 | NW_004515967.1 | Scaffold515 | 29265                   | GG                              | CC              | 1946955435               |
| SNP_P4_132576_29353 | NW_004515967.1 | Scaffold515 | 29353                   | TT                              | AA              | 1946955437               |
| SNP_P4_132577_29374 | NW_004515967.1 | Scaffold515 | 29374                   | GG                              | CC              | 1946955439               |
| SNP_P4_132578_29495 | NW_004515967.1 | Scaffold515 | 29495                   | TT                              | CC              | 1946955441               |
| SNP_P4_132579_29729 | NW_004515967.1 | Scaffold515 | 29729                   | TT                              | CC              | 1946955443               |
| SNP_P4_132580_29736 | NW_004515967.1 | Scaffold515 | 29736                   | CC                              | TT              | 1946955446               |
| SNP_P4_132581_29772 | NW_004515967.1 | Scaffold515 | 29772                   | AA                              | CC              | 1946955448               |
| SNP_P4_132582_29790 | NW_004515967.1 | Scaffold515 | 29790                   | TT                              | CC              | 1946955450               |
| SNP_P4_132583_29791 | NW_004515967.1 | Scaffold515 | 29791                   | TT                              | CC              | 1946955452               |
| SNP_P4_132584_30130 | NW_004515967.1 | Scaffold515 | 30130                   | CC                              | TT              | 1946955454               |
| SNP_P4_132585_30253 | NW_004515967.1 | Scaffold515 | 30253                   | CC                              | TT              | 1946955456               |
| SNP_P4_132586_30287 | NW_004515967.1 | Scaffold515 | 30287                   | AA                              | GG              | 1946955458               |
| SNP_P4_132587_30302 | NW_004515967.1 | Scaffold515 | 30302                   | CC                              | AA              | 1946955460               |
| SNP_P4_132588_30351 | NW_004515967.1 | Scaffold515 | 30351                   | AA                              | CC              | 1946955463               |
| SNP_P4_132589_30356 | NW_004515967.1 | Scaffold515 | 30356                   | GG                              | TT              | 1946955465               |
| SNP_P4_132590_30368 | NW_004515967.1 | Scaffold515 | 30368                   | GG                              | TT              | 1946955467               |
| SNP_P4_132591_30419 | NW_004515967.1 | Scaffold515 | 30419                   | AA                              | GG              | 1946955469               |
| SNP_P4_132592_30467 | NW_004515967.1 | Scaffold515 | 30467                   | TT                              | AA              | 1946955471               |
| SNP_P4_132593_30468 | NW_004515967.1 | Scaffold515 | 30468                   | TT                              | CC              | 1946955473               |
| SNP_P4_132594_30472 | NW_004515967.1 | Scaffold515 | 30472                   | AA                              | CC              | 1946955475               |
| SNP_P4_132595_30497 | NW_004515967.1 | Scaffold515 | 30497                   | TT                              | CC              | 1946955477               |
| SNP_P4_132596_30498 | NW_004515967.1 | Scaffold515 | 30498                   | CC                              | TT              | 1946955479               |
| SNP_P4_132597_30544 | NW_004515967.1 | Scaffold515 | 30544                   | CC                              | AA              | 1946955481               |
| SNP_P4_132598_30578 | NW_004515967.1 | Scaffold515 | 30578                   | GG                              | AA              | 1946955483               |
| SNP_P4_132599_30580 | NW_004515967.1 | Scaffold515 | 30580                   | AA                              | CC              | 1946955485               |
| SNP_P4_132600_30582 | NW_004515967.1 | Scaffold515 | 30582                   | GG                              | TT              | 1946955487               |
| SNP_P4_132601_30587 | NW_004515967.1 | Scaffold515 | 30587                   | GG                              | AA              | 1946955489               |
| SNP_P4_132602_30655 | NW_004515967.1 | Scaffold515 | 30655                   | GG                              | AA              | 1946955491               |
| SNP_P4_132603_30684 | NW_004515967.1 | Scaffold515 | 30684                   | TT                              | CC              | 1946955494               |
| SNP_P4_132604_30697 | NW_004515967.1 | Scaffold515 | 30697                   | GG                              | CC              | 1946955496               |
| SNP_P4_132605_30701 | NW_004515967.1 | Scaffold515 | 30701                   | AA                              | GG              | 1946955498               |
| SNP_P4_132606_30715 | NW_004515967.1 | Scaffold515 | 30715                   | GG                              | TT              | 1946955500               |
| SNP_P4_132607_30759 | NW_004515967.1 | Scaffold515 | 30759                   | AA                              | GG              | 1946955502               |
| SNP_P4_132608_30788 | NW_004515967.1 | Scaffold515 | 30788                   | AA                              | TT              | 1946955504               |
| SNP_P4_132609_30796 | NW_004515967.1 | Scaffold515 | 30796                   | AA                              | CC              | 1946955507               |
| SNP_P4_132610_30799 | NW_004515967.1 | Scaffold515 | 30799                   | CC                              | GG              | 1946955509               |

| SNPs IDs            | Chromosome IDs | Chromosomes | Physical positions (bp) | CDC Frontier (Reference genome) | (ILWC46 & LPNB) | NCBI SNPdb Accession IDs |
|---------------------|----------------|-------------|-------------------------|---------------------------------|-----------------|--------------------------|
| SNP_P4_132611_30800 | NW_004515967.1 | Scaffold515 | 30800                   | GG                              | AA              | 1946955511               |
| SNP_P4_132612_30819 | NW_004515967.1 | Scaffold515 | 30819                   | AA                              | CC              | 1946955513               |
| SNP_P4_132613_30868 | NW_004515967.1 | Scaffold515 | 30868                   | AA                              | GG              | 1946955515               |
| SNP_P4_132614_30872 | NW_004515967.1 | Scaffold515 | 30872                   | GG                              | TT              | 1946955517               |
| SNP_P4_132615_30882 | NW_004515967.1 | Scaffold515 | 30882                   | AA                              | GG              | 1946955519               |
| SNP_P4_132616_30938 | NW_004515967.1 | Scaffold515 | 30938                   | AA                              | GG              | 1946955521               |
| SNP_P4_132617_30994 | NW_004515967.1 | Scaffold515 | 30994                   | TT                              | CC              | 1946955523               |
| SNP_P4_132618_31072 | NW_004515967.1 | Scaffold515 | 31072                   | CC                              | TT              | 1946955525               |
| SNP_P4_132619_31126 | NW_004515967.1 | Scaffold515 | 31126                   | GG                              | AA              | 1946955528               |
| SNP_P4_132620_31237 | NW_004515967.1 | Scaffold515 | 31237                   | GG                              | TT              | 1946955530               |
| SNP_P4_132621_31279 | NW_004515967.1 | Scaffold515 | 31279                   | CC                              | TT              | 1946955532               |
| SNP_P4_132622_31314 | NW_004515967.1 | Scaffold515 | 31314                   | CC                              | TT              | 1946955534               |
| SNP_P4_132623_31376 | NW_004515967.1 | Scaffold515 | 31376                   | GG                              | AA              | 1946955536               |
| SNP_P4_132624_31390 | NW_004515967.1 | Scaffold515 | 31390                   | AA                              | GG              | 1946955539               |
| SNP_P4_132625_31531 | NW_004515967.1 | Scaffold515 | 31531                   | AA                              | CC              | 1946955541               |
| SNP_P4_132626_31564 | NW_004515967.1 | Scaffold515 | 31564                   | GG                              | CC              | 1946955543               |
| SNP_P4_132627_31671 | NW_004515967.1 | Scaffold515 | 31671                   | AA                              | TT              | 1946955545               |
| SNP_P4_132629_31784 | NW_004515967.1 | Scaffold515 | 31784                   | CC                              | TT              | 1946955547               |
| SNP_P4_132630_31848 | NW_004515967.1 | Scaffold515 | 31848                   | TT                              | CC              | 1946955550               |
| SNP_P4_132631_31865 | NW_004515967.1 | Scaffold515 | 31865                   | CC                              | GG              | 1946955552               |
| SNP_P4_132632_31976 | NW_004515967.1 | Scaffold515 | 31976                   | AA                              | GG              | 1946955554               |
| SNP_P4_132633_32272 | NW_004515967.1 | Scaffold515 | 32272                   | AA                              | TT              | 1946955556               |
| SNP_P4_132634_32350 | NW_004515967.1 | Scaffold515 | 32350                   | CC                              | GG              | 1946955558               |
| SNP_P4_132635_32364 | NW_004515967.1 | Scaffold515 | 32364                   | GG                              | CC              | 1946955560               |
| SNP_P4_132636_32483 | NW_004515967.1 | Scaffold515 | 32483                   | TT                              | GG              | 1946955562               |
| SNP_P4_132637_32488 | NW_004515967.1 | Scaffold515 | 32488                   | TT                              | CC              | 1946955564               |
| SNP_P4_132638_32694 | NW_004515967.1 | Scaffold515 | 32694                   | TT                              | GG              | 1946955566               |
| SNP_P4_132639_33093 | NW_004515967.1 | Scaffold515 | 33093                   | AA                              | TT              | 1946955568               |
| SNP_P4_132640_33147 | NW_004515967.1 | Scaffold515 | 33147                   | TT                              | CC              | 1946955570               |
| SNP_P4_132641_33148 | NW_004515967.1 | Scaffold515 | 33148                   | CC                              | TT              | 1946955572               |
| SNP_P4_132642_33155 | NW_004515967.1 | Scaffold515 | 33155                   | AA                              | GG              | 1946955574               |
| SNP_P4_132643_33186 | NW_004515967.1 | Scaffold515 | 33186                   | TT                              | CC              | 1946955576               |
| SNP_P4_132644_33216 | NW_004515967.1 | Scaffold515 | 33216                   | TT                              | CC              | 1946955578               |
| SNP_P4_132645_33244 | NW_004515967.1 | Scaffold515 | 33244                   | AA                              | GG              | 1946955580               |
| SNP_P4_132646_33320 | NW_004515967.1 | Scaffold515 | 33320                   | GG                              | AA              | 1946955582               |
| SNP_P4_132647_33342 | NW_004515967.1 | Scaffold515 | 33342                   | AA                              | TT              | 1946955583               |
| SNP_P4_132648_33391 | NW_004515967.1 | Scaffold515 | 33391                   | TT                              | CC              | 1946955586               |
| SNP_P4_132649_33397 | NW_004515967.1 | Scaffold515 | 33397                   | AA                              | TT              | 1946955587               |
| SNP_P4_132650_33402 | NW_004515967.1 | Scaffold515 | 33402                   | GG                              | AA              | 1946955589               |
| SNP_P4_132651_33423 | NW_004515967.1 | Scaffold515 | 33423                   | GG                              | AA              | 1946955591               |
| SNP_P4_132652_33483 | NW_004515967.1 | Scaffold515 | 33483                   | GG                              | AA              | 1946955593               |
| SNP_P4_132653_33496 | NW_004515967.1 | Scaffold515 | 33496                   | TT                              | AA              | 1946955595               |

| SNPs IDs            | Chromosome IDs | Chromosomes | Physical positions (bp) | CDC Frontier (Reference genome) | (ILWC46 & LPNB) | NCBI SNPdb Accession IDs |
|---------------------|----------------|-------------|-------------------------|---------------------------------|-----------------|--------------------------|
| SNP_P4_132654_33879 | NW_004515967.1 | Scaffold515 | 33879                   | CC                              | AA              | 1946955598               |
| SNP_P4_132655_33953 | NW_004515967.1 | Scaffold515 | 33953                   | TT                              | AA              | 1946955600               |
| SNP_P4_132656_33968 | NW_004515967.1 | Scaffold515 | 33968                   | TT                              | CC              | 1946955602               |
| SNP_P4_132657_34028 | NW_004515967.1 | Scaffold515 | 34028                   | AA                              | TT              | 1946955604               |
| SNP_P4_132658_34300 | NW_004515967.1 | Scaffold515 | 34300                   | GG                              | AA              | 1946955606               |
| SNP_P4_132659_34319 | NW_004515967.1 | Scaffold515 | 34319                   | TT                              | CC              | 1946955608               |
| SNP_P4_132660_34501 | NW_004515967.1 | Scaffold515 | 34501                   | TT                              | GG              | 1946955610               |
| SNP_P4_132661_34519 | NW_004515967.1 | Scaffold515 | 34519                   | TT                              | CC              | 1946955612               |
| SNP_P4_132662_34603 | NW_004515967.1 | Scaffold515 | 34603                   | CC                              | GG              | 1946955614               |
| SNP_P4_132663_34609 | NW_004515967.1 | Scaffold515 | 34609                   | GG                              | AA              | 1946955616               |
| SNP_P4_132664_34685 | NW_004515967.1 | Scaffold515 | 34685                   | CC                              | AA              | 1946955618               |
| SNP_P4_132665_36422 | NW_004515967.1 | Scaffold515 | 36422                   | TT                              | CC              | 1946955620               |
| SNP_P4_132666_36425 | NW_004515967.1 | Scaffold515 | 36425                   | TT                              | CC              | 1946955622               |
| SNP_P4_132667_36565 | NW_004515967.1 | Scaffold515 | 36565                   | GG                              | TT              | 1946955624               |
| SNP_P4_132668_36587 | NW_004515967.1 | Scaffold515 | 36587                   | TT                              | CC              | 1946955626               |
| SNP_P4_132669_36602 | NW_004515967.1 | Scaffold515 | 36602                   | TT                              | CC              | 1946955628               |
| SNP_P4_132670_36611 | NW_004515967.1 | Scaffold515 | 36611                   | AA                              | GG              | 1946955630               |
| SNP_P4_132671_36618 | NW_004515967.1 | Scaffold515 | 36618                   | GG                              | TT              | 1946955632               |
| SNP_P4_132672_36622 | NW_004515967.1 | Scaffold515 | 36622                   | GG                              | CC              | 1946955634               |
| SNP_P4_132673_37008 | NW_004515967.1 | Scaffold515 | 37008                   | TT                              | AA              | 1946955636               |
| SNP_P4_132674_38600 | NW_004515967.1 | Scaffold515 | 38600                   | GG                              | TT              | 1946955638               |
| SNP_P4_132675_38887 | NW_004515967.1 | Scaffold515 | 38887                   | AA                              | GG              | 1946955641               |
| SNP_P4_132676_38909 | NW_004515967.1 | Scaffold515 | 38909                   | TT                              | CC              | 1946955643               |
| SNP_P4_132677_38994 | NW_004515967.1 | Scaffold515 | 38994                   | AA                              | TT              | 1946955645               |
| SNP_P4_132678_39160 | NW_004515967.1 | Scaffold515 | 39160                   | GG                              | AA              | 1946955647               |
| SNP_P4_132679_39278 | NW_004515967.1 | Scaffold515 | 39278                   | TT                              | AA              | 1946955649               |
| SNP_P4_132680_39507 | NW_004515967.1 | Scaffold515 | 39507                   | AA                              | CC              | 1946955651               |
| SNP_P4_132681_41099 | NW_004515967.1 | Scaffold515 | 41099                   | CC                              | TT              | 1946955653               |
| SNP_P4_132682_41884 | NW_004515967.1 | Scaffold515 | 41884                   | GG                              | TT              | 1946955655               |
| SNP_P4_132683_42056 | NW_004515967.1 | Scaffold515 | 42056                   | TT                              | AA              | 1946955657               |
| SNP_P4_132684_42569 | NW_004515967.1 | Scaffold515 | 42569                   | CC                              | AA              | 1946955659               |
| SNP_P4_132685_42581 | NW_004515967.1 | Scaffold515 | 42581                   | CC                              | TT              | 1946955661               |
| SNP_P4_132686_42634 | NW_004515967.1 | Scaffold515 | 42634                   | CC                              | TT              | 1946955664               |
| SNP_P4_132687_42671 | NW_004515967.1 | Scaffold515 | 42671                   | TT                              | CC              | 1946955666               |
| SNP_P4_132688_42843 | NW_004515967.1 | Scaffold515 | 42843                   | AA                              | GG              | 1946955668               |
| SNP_P4_132689_42851 | NW_004515967.1 | Scaffold515 | 42851                   | TT                              | CC              | 1946955670               |
| SNP_P4_132690_42885 | NW_004515967.1 | Scaffold515 | 42885                   | TT                              | CC              | 1946955672               |
| SNP_P4_132691_42968 | NW_004515967.1 | Scaffold515 | 42968                   | TT                              | CC              | 1946955674               |
| SNP_P4_132692_42992 | NW_004515967.1 | Scaffold515 | 42992                   | CC                              | TT              | 1946955676               |
| SNP_P4_132694_43118 | NW_004515967.1 | Scaffold515 | 43118                   | CC                              | TT              | 1946955678               |
| SNP_P4_132695_43131 | NW_004515967.1 | Scaffold515 | 43131                   | CC                              | TT              | 1946955680               |
| SNP_P4_132696_43271 | NW_004515967.1 | Scaffold515 | 43271                   | TT                              | CC              | 1946955682               |

| SNPs IDs            | Chromosome IDs | Chromosomes | Physical positions (bp) | CDC Frontier (Reference genome) | (ILWC46 & LPNB) | NCBI SNPdb Accession IDs |
|---------------------|----------------|-------------|-------------------------|---------------------------------|-----------------|--------------------------|
| SNP_P4_132697_43506 | NW_004515967.1 | Scaffold515 | 43506                   | GG                              | AA              | 1946955684               |
| SNP_P4_132698_43581 | NW_004515967.1 | Scaffold515 | 43581                   | TT                              | GG              | 1946955685               |
| SNP_P4_132699_43594 | NW_004515967.1 | Scaffold515 | 43594                   | TT                              | CC              | 1946955687               |
| SNP_P4_132700_43699 | NW_004515967.1 | Scaffold515 | 43699                   | GG                              | TT              | 1946955689               |
| SNP_P4_132701_44595 | NW_004515967.1 | Scaffold515 | 44595                   | TT                              | CC              | 1946955691               |
| SNP_P4_132702_44624 | NW_004515967.1 | Scaffold515 | 44624                   | AA                              | GG              | 1946955693               |
| SNP_P4_132703_44632 | NW_004515967.1 | Scaffold515 | 44632                   | GG                              | TT              | 1946955696               |
| SNP_P4_132704_44640 | NW_004515967.1 | Scaffold515 | 44640                   | AA                              | CC              | 1946955698               |
| SNP_P4_132705_44644 | NW_004515967.1 | Scaffold515 | 44644                   | TT                              | CC              | 1946955700               |
| SNP_P4_132706_44751 | NW_004515967.1 | Scaffold515 | 44751                   | AA                              | TT              | 1946955702               |
| SNP_P4_132707_44756 | NW_004515967.1 | Scaffold515 | 44756                   | CC                              | TT              | 1946955705               |
| SNP_P4_132708_44762 | NW_004515967.1 | Scaffold515 | 44762                   | TT                              | AA              | 1946955707               |
| SNP_P4_132709_44777 | NW_004515967.1 | Scaffold515 | 44777                   | CC                              | TT              | 1946955709               |
| SNP_P4_132710_44779 | NW_004515967.1 | Scaffold515 | 44779                   | AA                              | GG              | 1946955711               |
| SNP_P4_132711_44843 | NW_004515967.1 | Scaffold515 | 44843                   | TT                              | CC              | 1946955713               |
| SNP_P4_132712_44961 | NW_004515967.1 | Scaffold515 | 44961                   | AA                              | CC              | 1946955715               |
| SNP_P4_132713_45022 | NW_004515967.1 | Scaffold515 | 45022                   | CC                              | TT              | 1946955717               |
| SNP_P4_132714_45033 | NW_004515967.1 | Scaffold515 | 45033                   | GG                              | TT              | 1946955719               |
| SNP_P4_132715_45097 | NW_004515967.1 | Scaffold515 | 45097                   | AA                              | TT              | 1946955721               |
| SNP_P4_132716_45126 | NW_004515967.1 | Scaffold515 | 45126                   | TT                              | CC              | 1946955723               |
| SNP_P4_132717_45265 | NW_004515967.1 | Scaffold515 | 45265                   | CC                              | GG              | 1946955725               |
| SNP_P4_132718_45463 | NW_004515967.1 | Scaffold515 | 45463                   | AA                              | GG              | 1946955727               |
| SNP_P4_132719_45476 | NW_004515967.1 | Scaffold515 | 45476                   | GG                              | AA              | 1946955729               |
| SNP_P4_132720_45654 | NW_004515967.1 | Scaffold515 | 45654                   | TT                              | CC              | 1946955731               |
| SNP_P4_132721_45789 | NW_004515967.1 | Scaffold515 | 45789                   | AA                              | GG              | 1946955733               |
| SNP_P4_132722_45819 | NW_004515967.1 | Scaffold515 | 45819                   | AA                              | TT              | 1946955735               |
| SNP_P4_132723_45845 | NW_004515967.1 | Scaffold515 | 45845                   | CC                              | GG              | 1946955737               |
| SNP_P4_132724_45989 | NW_004515967.1 | Scaffold515 | 45989                   | CC                              | TT              | 1946955739               |
| SNP_P4_132725_45994 | NW_004515967.1 | Scaffold515 | 45994                   | CC                              | TT              | 1946955741               |
| SNP_P4_132726_46020 | NW_004515967.1 | Scaffold515 | 46020                   | GG                              | CC              | 1946955743               |
| SNP_P4_132727_46106 | NW_004515967.1 | Scaffold515 | 46106                   | CC                              | AA              | 1946955745               |
| SNP_P4_132728_46114 | NW_004515967.1 | Scaffold515 | 46114                   | AA                              | GG              | 1946955747               |
| SNP_P4_132729_46299 | NW_004515967.1 | Scaffold515 | 46299                   | AA                              | CC              | 1946955749               |
| SNP_P4_132730_46374 | NW_004515967.1 | Scaffold515 | 46374                   | AA                              | GG              | 1946955751               |
| SNP_P4_132731_46398 | NW_004515967.1 | Scaffold515 | 46398                   | TT                              | CC              | 1946955753               |
| SNP_P4_132732_46421 | NW_004515967.1 | Scaffold515 | 46421                   | CC                              | AA              | 1946955755               |
| SNP_P4_132733_46452 | NW_004515967.1 | Scaffold515 | 46452                   | CC                              | TT              | 1946955757               |
| SNP_P4_132734_46496 | NW_004515967.1 | Scaffold515 | 46496                   | AA                              | CC              | 1946955759               |
| SNP_P4_132735_46861 | NW_004515967.1 | Scaffold515 | 46861                   | CC                              | AA              | 1946955761               |
| SNP_P4_132736_47215 | NW_004515967.1 | Scaffold515 | 47215                   | CC                              | TT              | 1946955763               |
| SNP_P4_132737_47251 | NW_004515967.1 | Scaffold515 | 47251                   | CC                              | TT              | 1946955765               |
| SNP_P4_132738_47279 | NW_004515967.1 | Scaffold515 | 47279                   | CC                              | TT              | 1946955767               |

| SNPs IDs            | Chromosome IDs | Chromosomes | Physical positions (bp) | CDC Frontier (Reference genome) | (ILWC46 & LPNB) | NCBI SNPdb Accession IDs |
|---------------------|----------------|-------------|-------------------------|---------------------------------|-----------------|--------------------------|
| SNP_P4_132739_47326 | NW_004515967.1 | Scaffold515 | 47326                   | TT                              | GG              | 1946955769               |
| SNP_P4_132740_47356 | NW_004515967.1 | Scaffold515 | 47356                   | AA                              | GG              | 1946955771               |
| SNP_P4_132741_47430 | NW_004515967.1 | Scaffold515 | 47430                   | GG                              | AA              | 1946955773               |
| SNP_P4_132742_47434 | NW_004515967.1 | Scaffold515 | 47434                   | CC                              | GG              | 1946955775               |
| SNP_P4_132743_47499 | NW_004515967.1 | Scaffold515 | 47499                   | TT                              | CC              | 1946955777               |
| SNP_P4_132744_47620 | NW_004515967.1 | Scaffold515 | 47620                   | CC                              | TT              | 1946955779               |
| SNP_P4_132745_47734 | NW_004515967.1 | Scaffold515 | 47734                   | CC                              | TT              | 1946955781               |
| SNP_P4_132746_61043 | NW_004515967.1 | Scaffold515 | 61043                   | TT                              | GG              | 1946955783               |
| SNP_P4_132747_61084 | NW_004515967.1 | Scaffold515 | 61084                   | AA                              | GG              | 1946955785               |
| SNP_P4_132748_61170 | NW_004515967.1 | Scaffold515 | 61170                   | GG                              | AA              | 1946955787               |
| SNP_P4_132749_61186 | NW_004515967.1 | Scaffold515 | 61186                   | TT                              | AA              | 1946955789               |
| SNP_P4_132750_61187 | NW_004515967.1 | Scaffold515 | 61187                   | TT                              | AA              | 1946955792               |
| SNP_P4_132751_61201 | NW_004515967.1 | Scaffold515 | 61201                   | AA                              | GG              | 1946955794               |
| SNP_P4_132752_61285 | NW_004515967.1 | Scaffold515 | 61285                   | GG                              | AA              | 1946955796               |
| SNP_P4_132753_61571 | NW_004515967.1 | Scaffold515 | 61571                   | CC                              | TT              | 1946955798               |
| SNP_P4_132754_61578 | NW_004515967.1 | Scaffold515 | 61578                   | TT                              | CC              | 1946955799               |
| SNP_P4_132755_61585 | NW_004515967.1 | Scaffold515 | 61585                   | AA                              | CC              | 1946955801               |
| SNP_P4_132756_61624 | NW_004515967.1 | Scaffold515 | 61624                   | TT                              | GG              | 1946955803               |
| SNP_P4_132757_61675 | NW_004515967.1 | Scaffold515 | 61675                   | CC                              | AA              | 1946955805               |
| SNP_P4_132758_61727 | NW_004515967.1 | Scaffold515 | 61727                   | AA                              | TT              | 1946955807               |
| SNP_P4_132760_61835 | NW_004515967.1 | Scaffold515 | 61835                   | GG                              | AA              | 1946955809               |
| SNP_P4_132761_61917 | NW_004515967.1 | Scaffold515 | 61917                   | CC                              | AA              | 1946955811               |
| SNP_P4_132762_61950 | NW_004515967.1 | Scaffold515 | 61950                   | GG                              | AA              | 1946955813               |
| SNP_P4_132763_61959 | NW_004515967.1 | Scaffold515 | 61959                   | GG                              | TT              | 1946955815               |
| SNP_P4_132764_62034 | NW_004515967.1 | Scaffold515 | 62034                   | AA                              | GG              | 1946955817               |
| SNP_P4_132765_62055 | NW_004515967.1 | Scaffold515 | 62055                   | CC                              | TT              | 1946955819               |
| SNP_P4_132766_62056 | NW_004515967.1 | Scaffold515 | 62056                   | TT                              | CC              | 1946955821               |
| SNP_P4_132767_62138 | NW_004515967.1 | Scaffold515 | 62138                   | AA                              | TT              | 1946955823               |
| SNP_P4_132768_62139 | NW_004515967.1 | Scaffold515 | 62139                   | CC                              | TT              | 1946955825               |
| SNP_P4_132769_62152 | NW_004515967.1 | Scaffold515 | 62152                   | GG                              | AA              | 1946955827               |
| SNP_P4_132770_62354 | NW_004515967.1 | Scaffold515 | 62354                   | AA                              | TT              | 1946955829               |
| SNP_P4_132771_62381 | NW_004515967.1 | Scaffold515 | 62381                   | CC                              | GG              | 1946955831               |
| SNP_P4_132772_62527 | NW_004515967.1 | Scaffold515 | 62527                   | TT                              | CC              | 1946955833               |
| SNP_P4_132773_62879 | NW_004515967.1 | Scaffold515 | 62879                   | CC                              | AA              | 1946955835               |
| SNP_P4_132774_63066 | NW_004515967.1 | Scaffold515 | 63066                   | CC                              | GG              | 1946955837               |
| SNP_P4_132775_67497 | NW_004515967.1 | Scaffold515 | 67497                   | GG                              | CC              | 1946955839               |
| SNP_P4_132776_72603 | NW_004515967.1 | Scaffold515 | 72603                   | GG                              | TT              | 1946955841               |
| SNP_P4_132777_72625 | NW_004515967.1 | Scaffold515 | 72625                   | TT                              | CC              | 1946955843               |
| SNP_P4_132778_72647 | NW_004515967.1 | Scaffold515 | 72647                   | AA                              | GG              | 1946955845               |
| SNP_P4_132779_72674 | NW_004515967.1 | Scaffold515 | 72674                   | GG                              | CC              | 1946955847               |
| SNP_P4_132780_72678 | NW_004515967.1 | Scaffold515 | 72678                   | AA                              | CC              | 1946955849               |
| SNP_P4_132781_72680 | NW_004515967.1 | Scaffold515 | 72680                   | GG                              | AA              | 1946955851               |

| SNPs IDs             | Chromosome IDs | Chromosomes | Physical positions (bp) | CDC Frontier (Reference genome) | (ILWC46 & LPNB) | NCBI SNPdb Accession IDs |
|----------------------|----------------|-------------|-------------------------|---------------------------------|-----------------|--------------------------|
| SNP_P4_132782_72685  | NW_004515967.1 | Scaffold515 | 72685                   | GG                              | AA              | 1946955853               |
| SNP_P4_132783_72686  | NW_004515967.1 | Scaffold515 | 72686                   | AA                              | GG              | 1946955855               |
| SNP_P4_132784_72722  | NW_004515967.1 | Scaffold515 | 72722                   | CC                              | AA              | 1946955857               |
| SNP_P4_132785_72733  | NW_004515967.1 | Scaffold515 | 72733                   | TT                              | CC              | 1946955859               |
| SNP_P4_132786_72736  | NW_004515967.1 | Scaffold515 | 72736                   | GG                              | AA              | 1946955861               |
| SNP_P4_132787_72756  | NW_004515967.1 | Scaffold515 | 72756                   | TT                              | CC              | 1946955863               |
| SNP_P4_132788_72786  | NW_004515967.1 | Scaffold515 | 72786                   | AA                              | CC              | 1946955865               |
| SNP_P4_132789_72806  | NW_004515967.1 | Scaffold515 | 72806                   | TT                              | CC              | 1946955867               |
| SNP_P4_132790_72843  | NW_004515967.1 | Scaffold515 | 72843                   | TT                              | GG              | 1946955869               |
| SNP_P4_132791_74593  | NW_004515967.1 | Scaffold515 | 74593                   | AA                              | CC              | 1946955871               |
| SNP_P4_132792_74753  | NW_004515967.1 | Scaffold515 | 74753                   | TT                              | AA              | 1946955873               |
| SNP_P4_132793_80866  | NW_004515967.1 | Scaffold515 | 80866                   | AA                              | TT              | 1946955875               |
| SNP_P4_132794_82205  | NW_004515967.1 | Scaffold515 | 82205                   | GG                              | TT              | 1946955877               |
| SNP_P4_132795_82245  | NW_004515967.1 | Scaffold515 | 82245                   | AA                              | CC              | 1946955879               |
| SNP_P4_132796_82255  | NW_004515967.1 | Scaffold515 | 82255                   | TT                              | CC              | 1946955881               |
| SNP_P4_132797_82469  | NW_004515967.1 | Scaffold515 | 82469                   | CC                              | TT              | 1946955883               |
| SNP_P4_132798_82478  | NW_004515967.1 | Scaffold515 | 82478                   | GG                              | AA              | 1946955885               |
| SNP_P4_132799_82481  | NW_004515967.1 | Scaffold515 | 82481                   | CC                              | GG              | 1946955887               |
| SNP_P4_132800_82520  | NW_004515967.1 | Scaffold515 | 82520                   | GG                              | AA              | 1946955889               |
| SNP_P4_132801_82556  | NW_004515967.1 | Scaffold515 | 82556                   | TT                              | CC              | 1946955891               |
| SNP_P4_132802_82923  | NW_004515967.1 | Scaffold515 | 82923                   | TT                              | GG              | 1946955893               |
| SNP_P4_132803_89350  | NW_004515967.1 | Scaffold515 | 89350                   | AA                              | GG              | 1946955895               |
| SNP_P4_132804_89851  | NW_004515967.1 | Scaffold515 | 89851                   | TT                              | AA              | 1946955897               |
| SNP_P4_132805_92332  | NW_004515967.1 | Scaffold515 | 92332                   | AA                              | TT              | 1946955900               |
| SNP_P4_132806_92335  | NW_004515967.1 | Scaffold515 | 92335                   | TT                              | CC              | 1946955902               |
| SNP_P4_132807_93785  | NW_004515967.1 | Scaffold515 | 93785                   | TT                              | AA              | 1946955904               |
| SNP_P4_132808_93801  | NW_004515967.1 | Scaffold515 | 93801                   | TT                              | CC              | 1946955906               |
| SNP_P4_132810_100195 | NW_004515967.1 | Scaffold515 | 100195                  | AA                              | GG              | 1946955908               |
| SNP_P4_132811_100203 | NW_004515967.1 | Scaffold515 | 100203                  | TT                              | CC              | 1946955910               |
| SNP_P4_132812_100243 | NW_004515967.1 | Scaffold515 | 100243                  | GG                              | AA              | 1946955912               |
| SNP_P4_132813_100461 | NW_004515967.1 | Scaffold515 | 100461                  | AA                              | GG              | 1946955915               |
| SNP_P4_132814_100466 | NW_004515967.1 | Scaffold515 | 100466                  | AA                              | GG              | 1946955917               |
| SNP_P4_132815_100539 | NW_004515967.1 | Scaffold515 | 100539                  | TT                              | CC              | 1946955919               |
| SNP_P4_132816_100545 | NW_004515967.1 | Scaffold515 | 100545                  | GG                              | AA              | 1946955921               |
| SNP_P4_132818_113010 | NW_004515967.1 | Scaffold515 | 113010                  | TT                              | CC              | 1946955923               |
| SNP_P4_132819_113868 | NW_004515967.1 | Scaffold515 | 113868                  | CC                              | GG              | 1946955925               |
| SNP_P4_132820_137905 | NW_004515967.1 | Scaffold515 | 137905                  | TT                              | GG              | 1946955927               |
| SNP_P4_132821_143292 | NW_004515967.1 | Scaffold515 | 143292                  | GG                              | AA              | 1946955929               |
| SNP_P4_132822_149886 | NW_004515967.1 | Scaffold515 | 149886                  | GG                              | AA              | 1946955931               |
| SNP_P4_132823_160768 | NW_004515967.1 | Scaffold515 | 160768                  | GG                              | AA              | 1946955933               |
| SNP_P4_132824_161183 | NW_004515967.1 | Scaffold515 | 161183                  | AA                              | TT              | 1946955935               |
| SNP_P4_132825_170586 | NW_004515967.1 | Scaffold515 | 170586                  | CC                              | AA              | 1946955937               |

| SNPs IDs             | Chromosome IDs | Chromosomes | Physical positions (bp) | CDC Frontier (Reference genome) | (ILWC46 & LPNB) | NCBI SNPdb Accession IDs |
|----------------------|----------------|-------------|-------------------------|---------------------------------|-----------------|--------------------------|
| SNP_P4_132826_170604 | NW_004515967.1 | Scaffold515 | 170604                  | AA                              | CC              | 1946955939               |
| SNP_P4_132827_170634 | NW_004515967.1 | Scaffold515 | 170634                  | GG                              | AA              | 1946955941               |
| SNP_P4_132828_174441 | NW_004515967.1 | Scaffold515 | 174441                  | TT                              | CC              | 1946955943               |
| SNP_P4_132829_174920 | NW_004515967.1 | Scaffold515 | 174920                  | GG                              | AA              | 1946955945               |
| SNP_P4_132830_174944 | NW_004515967.1 | Scaffold515 | 174944                  | TT                              | GG              | 1946955947               |
| SNP_P4_132831_174972 | NW_004515967.1 | Scaffold515 | 174972                  | TT                              | GG              | 1946955949               |
| SNP_P4_132832_175214 | NW_004515967.1 | Scaffold515 | 175214                  | TT                              | GG              | 1946955951               |
| SNP_P4_132833_175278 | NW_004515967.1 | Scaffold515 | 175278                  | GG                              | TT              | 1946955953               |
| SNP_P4_132834_175713 | NW_004515967.1 | Scaffold515 | 175713                  | TT                              | AA              | 1946955955               |
| SNP_P4_132835_175714 | NW_004515967.1 | Scaffold515 | 175714                  | AA                              | CC              | 1946955957               |
| SNP_P4_132836_179022 | NW_004515967.1 | Scaffold515 | 179022                  | TT                              | CC              | 1946955959               |
| SNP_P4_132837_187504 | NW_004515967.1 | Scaffold515 | 187504                  | CC                              | AA              | 1946955961               |
| SNP_P4_132838_187547 | NW_004515967.1 | Scaffold515 | 187547                  | GG                              | CC              | 1946955963               |
| SNP_P4_132839_187551 | NW_004515967.1 | Scaffold515 | 187551                  | TT                              | CC              | 1946955965               |
| SNP_P4_132840_187559 | NW_004515967.1 | Scaffold515 | 187559                  | GG                              | CC              | 1946955967               |
| SNP_P4_132841_189892 | NW_004515967.1 | Scaffold515 | 189892                  | AA                              | TT              | 1946955969               |
| SNP_P4_132842_194155 | NW_004515967.1 | Scaffold515 | 194155                  | TT                              | CC              | 1946955971               |
| SNP_P4_132843_194521 | NW_004515967.1 | Scaffold515 | 194521                  | GG                              | TT              | 1946955974               |
| SNP_P4_132844_194533 | NW_004515967.1 | Scaffold515 | 194533                  | TT                              | AA              | 1946955976               |
| SNP_P4_132845_194615 | NW_004515967.1 | Scaffold515 | 194615                  | CC                              | AA              | 1946955978               |
| SNP_P4_132846_194689 | NW_004515967.1 | Scaffold515 | 194689                  | AA                              | CC              | 1946955980               |
| SNP_P4_132847_194713 | NW_004515967.1 | Scaffold515 | 194713                  | CC                              | GG              | 1946955982               |
| SNP_P4_132848_194728 | NW_004515967.1 | Scaffold515 | 194728                  | GG                              | AA              | 1946955984               |
| SNP_P4_132849_198071 | NW_004515967.1 | Scaffold515 | 198071                  | TT                              | AA              | 1946955986               |
| SNP_P4_132850_198085 | NW_004515967.1 | Scaffold515 | 198085                  | AA                              | GG              | 1946955988               |
| SNP_P4_132851_198375 | NW_004515967.1 | Scaffold515 | 198375                  | CC                              | TT              | 1946955990               |
| SNP_P4_132852_198437 | NW_004515967.1 | Scaffold515 | 198437                  | AA                              | TT              | 1946955992               |
| SNP_P4_132853_198459 | NW_004515967.1 | Scaffold515 | 198459                  | GG                              | AA              | 1946955994               |
| SNP_P4_132854_198476 | NW_004515967.1 | Scaffold515 | 198476                  | TT                              | CC              | 1946955996               |
| SNP_P4_132855_198504 | NW_004515967.1 | Scaffold515 | 198504                  | CC                              | TT              | 1946955998               |
| SNP_P4_132856_198749 | NW_004515967.1 | Scaffold515 | 198749                  | AA                              | GG              | 1946956000               |
| SNP_P4_132857_198762 | NW_004515967.1 | Scaffold515 | 198762                  | TT                              | CC              | 1946956002               |
| SNP_P4_132858_198812 | NW_004515967.1 | Scaffold515 | 198812                  | TT                              | GG              | 1946956004               |
| SNP_P4_132859_198988 | NW_004515967.1 | Scaffold515 | 198988                  | TT                              | CC              | 1946956006               |
| SNP_P4_132860_199194 | NW_004515967.1 | Scaffold515 | 199194                  | AA                              | GG              | 1946956008               |
| SNP_P4_132861_199411 | NW_004515967.1 | Scaffold515 | 199411                  | TT                              | AA              | 1946956010               |
| SNP_P4_132862_208751 | NW_004515967.1 | Scaffold515 | 208751                  | CC                              | TT              | 1946956012               |
| SNP_P4_132863_209191 | NW_004515967.1 | Scaffold515 | 209191                  | TT                              | AA              | 1946956014               |
| SNP_P4_132864_209201 | NW_004515967.1 | Scaffold515 | 209201                  | CC                              | TT              | 1946956016               |
| SNP_P4_132865_209204 | NW_004515967.1 | Scaffold515 | 209204                  | GG                              | TT              | 1946956018               |
| SNP_P4_132866_216811 | NW_004515967.1 | Scaffold515 | 216811                  | AA                              | GG              | 1946956020               |
| SNP_P4_132867_217073 | NW_004515967.1 | Scaffold515 | 217073                  | GG                              | AA              | 1946956022               |

| SNPs IDs             | Chromosome IDs | Chromosomes | Physical positions (bp) | CDC Frontier (Reference genome) | (ILWC46 & LPNB) | NCBI SNPdb Accession IDs |
|----------------------|----------------|-------------|-------------------------|---------------------------------|-----------------|--------------------------|
| SNP_P4_132868_225106 | NW_004515967.1 | Scaffold515 | 225106                  | GG                              | AA              | 1946956025               |
| SNP_P4_132869_225130 | NW_004515967.1 | Scaffold515 | 225130                  | GG                              | AA              | 1946956027               |
| SNP_P4_132870_225135 | NW_004515967.1 | Scaffold515 | 225135                  | CC                              | TT              | 1946956028               |
| SNP_P4_132871_226052 | NW_004515967.1 | Scaffold515 | 226052                  | GG                              | AA              | 1946956030               |
| SNP_P4_132872_233189 | NW_004515967.1 | Scaffold515 | 233189                  | CC                              | TT              | 1946956032               |
| SNP_P4_132873_233283 | NW_004515967.1 | Scaffold515 | 233283                  | TT                              | CC              | 1946956034               |
| SNP_P4_132874_233380 | NW_004515967.1 | Scaffold515 | 233380                  | CC                              | AA              | 1946956036               |
| SNP_P4_132875_233505 | NW_004515967.1 | Scaffold515 | 233505                  | TT                              | GG              | 1946956038               |
| SNP_P4_132876_233586 | NW_004515967.1 | Scaffold515 | 233586                  | AA                              | TT              | 1946956040               |
| SNP_P4_132877_234979 | NW_004515967.1 | Scaffold515 | 234979                  | GG                              | AA              | 1946956042               |
| SNP_P4_132878_235053 | NW_004515967.1 | Scaffold515 | 235053                  | AA                              | GG              | 1946956044               |
| SNP_P4_132879_235066 | NW_004515967.1 | Scaffold515 | 235066                  | GG                              | AA              | 1946956046               |
| SNP_P4_132880_235393 | NW_004515967.1 | Scaffold515 | 235393                  | AA                              | TT              | 1946956048               |
| SNP_P4_132881_235439 | NW_004515967.1 | Scaffold515 | 235439                  | AA                              | GG              | 1946956049               |
| SNP_P4_132882_235449 | NW_004515967.1 | Scaffold515 | 235449                  | AA                              | CC              | 1946956051               |
| SNP_P4_132883_235534 | NW_004515967.1 | Scaffold515 | 235534                  | GG                              | AA              | 1946956053               |
| SNP_P4_132884_242099 | NW_004515967.1 | Scaffold515 | 242099                  | TT                              | CC              | 1946956055               |
| SNP_P4_132885_242138 | NW_004515967.1 | Scaffold515 | 242138                  | TT                              | CC              | 1946956057               |
| SNP_P4_132887_242156 | NW_004515967.1 | Scaffold515 | 242156                  | CC                              | TT              | 1946956059               |
| SNP_P4_132888_242331 | NW_004515967.1 | Scaffold515 | 242331                  | AA                              | GG              | 1946956061               |
| SNP_P4_132889_242426 | NW_004515967.1 | Scaffold515 | 242426                  | AA                              | GG              | 1946956063               |
| SNP_P4_132890_242566 | NW_004515967.1 | Scaffold515 | 242566                  | GG                              | AA              | 1946956065               |
| SNP_P4_132891_242568 | NW_004515967.1 | Scaffold515 | 242568                  | AA                              | CC              | 1946956067               |
| SNP_P4_132892_242574 | NW_004515967.1 | Scaffold515 | 242574                  | AA                              | GG              | 1946956069               |
| SNP_P4_132893_253407 | NW_004515967.1 | Scaffold515 | 253407                  | CC                              | TT              | 1946956070               |
| SNP_P4_132894_253476 | NW_004515967.1 | Scaffold515 | 253476                  | TT                              | CC              | 1946956072               |
| SNP_P4_132895_266007 | NW_004515967.1 | Scaffold515 | 266007                  | GG                              | AA              | 1946956074               |
| SNP_P4_132896_266178 | NW_004515967.1 | Scaffold515 | 266178                  | AA                              | TT              | 1946956076               |
| SNP_P4_132897_266468 | NW_004515967.1 | Scaffold515 | 266468                  | GG                              | AA              | 1946956078               |
| SNP_P4_132898_266505 | NW_004515967.1 | Scaffold515 | 266505                  | AA                              | GG              | 1946956080               |
| SNP_P4_132899_266513 | NW_004515967.1 | Scaffold515 | 266513                  | CC                              | GG              | 1946956082               |
| SNP_P4_132900_266564 | NW_004515967.1 | Scaffold515 | 266564                  | TT                              | AA              | 1946956084               |
| SNP_P4_132901_272459 | NW_004515967.1 | Scaffold515 | 272459                  | GG                              | TT              | 1946956086               |
| SNP_P4_132902_272482 | NW_004515967.1 | Scaffold515 | 272482                  | TT                              | CC              | 1946956088               |
| SNP_P4_132903_272568 | NW_004515967.1 | Scaffold515 | 272568                  | AA                              | TT              | 1946956090               |
| SNP_P4_132904_272641 | NW_004515967.1 | Scaffold515 | 272641                  | AA                              | GG              | 1946956092               |
| SNP_P4_132905_272665 | NW_004515967.1 | Scaffold515 | 272665                  | AA                              | CC              | 1946956094               |
| SNP_P4_132906_272682 | NW_004515967.1 | Scaffold515 | 272682                  | CC                              | AA              | 1946956096               |
| SNP_P4_132907_272696 | NW_004515967.1 | Scaffold515 | 272696                  | TT                              | GG              | 1946956098               |
| SNP_P4_132908_275498 | NW_004515967.1 | Scaffold515 | 275498                  | TT                              | GG              | 1946956100               |
| SNP_P4_132909_276985 | NW_004515967.1 | Scaffold515 | 276985                  | GG                              | AA              | 1946956102               |
| SNP_P4_132910_277033 | NW_004515967.1 | Scaffold515 | 277033                  | AA                              | TT              | 1946956104               |



| SNPs IDs             | Chromosome IDs | Chromosomes | Physical positions (bp) | CDC Frontier (Reference genome) | (ILWC46 & LPNB) | NCBI SNPdb Accession IDs |
|----------------------|----------------|-------------|-------------------------|---------------------------------|-----------------|--------------------------|
| SNP_P4_132911_277258 | NW_004515967.1 | Scaffold515 | 277258                  | TT                              | CC              | 1946956106               |
| SNP_P4_132912_277283 | NW_004515967.1 | Scaffold515 | 277283                  | AA                              | GG              | 1946956107               |
| SNP_P4_132913_277323 | NW_004515967.1 | Scaffold515 | 277323                  | TT                              | GG              | 1946956109               |
| SNP_P4_132914_277336 | NW_004515967.1 | Scaffold515 | 277336                  | TT                              | AA              | 1946956111               |
| SNP_P4_132915_277374 | NW_004515967.1 | Scaffold515 | 277374                  | AA                              | GG              | 1946956113               |
| SNP_P4_132916_277378 | NW_004515967.1 | Scaffold515 | 277378                  | AA                              | CC              | 1946956115               |
| SNP_P4_132917_280764 | NW_004515967.1 | Scaffold515 | 280764                  | TT                              | CC              | 1946956117               |
| SNP_P4_132918_280814 | NW_004515967.1 | Scaffold515 | 280814                  | TT                              | AA              | 1946956119               |
| SNP_P4_132919_281072 | NW_004515967.1 | Scaffold515 | 281072                  | CC                              | AA              | 1946956120               |
| SNP_P4_132920_281074 | NW_004515967.1 | Scaffold515 | 281074                  | CC                              | GG              | 1946956122               |
| SNP_P4_132921_281094 | NW_004515967.1 | Scaffold515 | 281094                  | CC                              | AA              | 1946956124               |
| SNP_P4_132922_281115 | NW_004515967.1 | Scaffold515 | 281115                  | CC                              | AA              | 1946956126               |
| SNP_P4_132923_281179 | NW_004515967.1 | Scaffold515 | 281179                  | CC                              | TT              | 1946956128               |
| SNP_P4_132924_281197 | NW_004515967.1 | Scaffold515 | 281197                  | AA                              | TT              | 1946956130               |
| SNP_P4_132925_186    | NW_004515968.1 | Scaffold520 | 186                     | CC                              | TT              | 1946956132               |
| SNP_P4_132926_293    | NW_004515968.1 | Scaffold520 | 293                     | AA                              | GG              | 1946956134               |
| SNP_P4_132927_368    | NW_004515968.1 | Scaffold520 | 368                     | CC                              | TT              | 1946956136               |
| SNP_P4_132928_700    | NW_004515968.1 | Scaffold520 | 700                     | CC                              | AA              | 1946956138               |
| SNP_P4_132929_717    | NW_004515968.1 | Scaffold520 | 717                     | TT                              | GG              | 1946956140               |
| SNP_P4_132930_718    | NW_004515968.1 | Scaffold520 | 718                     | AA                              | TT              | 1946956142               |
| SNP_P4_132931_738    | NW_004515968.1 | Scaffold520 | 738                     | AA                              | GG              | 1946956144               |
| SNP_P4_132932_917    | NW_004515968.1 | Scaffold520 | 917                     | GG                              | AA              | 1946956146               |
| SNP_P4_132933_1022   | NW_004515968.1 | Scaffold520 | 1022                    | TT                              | AA              | 1946956148               |
| SNP_P4_132934_5602   | NW_004515968.1 | Scaffold520 | 5602                    | AA                              | GG              | 1946956150               |
| SNP_P4_132935_22111  | NW_004515968.1 | Scaffold520 | 22111                   | GG                              | AA              | 1946956152               |
| SNP_P4_132936_22117  | NW_004515968.1 | Scaffold520 | 22117                   | TT                              | GG              | 1946956154               |
| SNP_P4_132937_22135  | NW_004515968.1 | Scaffold520 | 22135                   | CC                              | TT              | 1946956156               |
| SNP_P4_132938_22159  | NW_004515968.1 | Scaffold520 | 22159                   | GG                              | AA              | 1946956158               |
| SNP_P4_132939_22162  | NW_004515968.1 | Scaffold520 | 22162                   | TT                              | CC              | 1946956160               |
| SNP_P4_132940_22194  | NW_004515968.1 | Scaffold520 | 22194                   | AA                              | GG              | 1946956162               |
| SNP_P4_132941_22208  | NW_004515968.1 | Scaffold520 | 22208                   | AA                              | TT              | 1946956164               |
| SNP_P4_132942_23620  | NW_004515968.1 | Scaffold520 | 23620                   | GG                              | AA              | 1946956166               |
| SNP_P4_132943_23656  | NW_004515968.1 | Scaffold520 | 23656                   | AA                              | GG              | 1946956168               |
| SNP_P4_132944_23657  | NW_004515968.1 | Scaffold520 | 23657                   | GG                              | AA              | 1946956170               |
| SNP_P4_132945_25436  | NW_004515968.1 | Scaffold520 | 25436                   | AA                              | GG              | 1946956172               |
| SNP_P4_132946_25803  | NW_004515968.1 | Scaffold520 | 25803                   | TT                              | GG              | 1946956174               |
| SNP_P4_132947_25881  | NW_004515968.1 | Scaffold520 | 25881                   | AA                              | GG              | 1946956176               |
| SNP_P4_132948_26319  | NW_004515968.1 | Scaffold520 | 26319                   | AA                              | GG              | 1946956178               |
| SNP_P4_132949_26320  | NW_004515968.1 | Scaffold520 | 26320                   | AA                              | TT              | 1946956180               |
| SNP_P4_132950_31031  | NW_004515968.1 | Scaffold520 | 31031                   | CC                              | AA              | 1946956182               |
| SNP_P4_132951_31092  | NW_004515968.1 | Scaffold520 | 31092                   | TT                              | CC              | 1946956184               |
| SNP_P4_132952_31144  | NW_004515968.1 | Scaffold520 | 31144                   | GG                              | CC              | 1946956186               |

| SNPs IDs             | Chromosome IDs | Chromosomes | Physical positions (bp) | CDC Frontier (Reference genome) | (ILWC46 & LPNB) | NCBI SNPdb Accession IDs |
|----------------------|----------------|-------------|-------------------------|---------------------------------|-----------------|--------------------------|
| SNP_P4_132953_31334  | NW_004515968.1 | Scaffold520 | 31334                   | TT                              | CC              | 1946956188               |
| SNP_P4_132954_33949  | NW_004515968.1 | Scaffold520 | 33949                   | GG                              | AA              | 1946956190               |
| SNP_P4_132955_33991  | NW_004515968.1 | Scaffold520 | 33991                   | TT                              | AA              | 1946956192               |
| SNP_P4_132956_34288  | NW_004515968.1 | Scaffold520 | 34288                   | AA                              | GG              | 1946956193               |
| SNP_P4_132957_37096  | NW_004515968.1 | Scaffold520 | 37096                   | GG                              | AA              | 1946956195               |
| SNP_P4_132958_37545  | NW_004515968.1 | Scaffold520 | 37545                   | AA                              | TT              | 1946956197               |
| SNP_P4_132959_37549  | NW_004515968.1 | Scaffold520 | 37549                   | CC                              | TT              | 1946956199               |
| SNP_P4_132960_37950  | NW_004515968.1 | Scaffold520 | 37950                   | AA                              | CC              | 1946956201               |
| SNP_P4_132961_45872  | NW_004515968.1 | Scaffold520 | 45872                   | AA                              | GG              | 1946956203               |
| SNP_P4_132962_45913  | NW_004515968.1 | Scaffold520 | 45913                   | TT                              | CC              | 1946956205               |
| SNP_P4_132963_46303  | NW_004515968.1 | Scaffold520 | 46303                   | AA                              | CC              | 1946956207               |
| SNP_P4_132964_60074  | NW_004515968.1 | Scaffold520 | 60074                   | AA                              | TT              | 1946956209               |
| SNP_P4_132965_60204  | NW_004515968.1 | Scaffold520 | 60204                   | CC                              | TT              | 1946956211               |
| SNP_P4_132966_62206  | NW_004515968.1 | Scaffold520 | 62206                   | TT                              | CC              | 1946956213               |
| SNP_P4_132967_62215  | NW_004515968.1 | Scaffold520 | 62215                   | CC                              | GG              | 1946956215               |
| SNP_P4_132968_65186  | NW_004515968.1 | Scaffold520 | 65186                   | GG                              | AA              | 1946956217               |
| SNP_P4_132969_66499  | NW_004515968.1 | Scaffold520 | 66499                   | GG                              | AA              | 1946956219               |
| SNP_P4_132970_70690  | NW_004515968.1 | Scaffold520 | 70690                   | AA                              | TT              | 1946956221               |
| SNP_P4_132971_70706  | NW_004515968.1 | Scaffold520 | 70706                   | AA                              | TT              | 1946956223               |
| SNP_P4_132972_71973  | NW_004515968.1 | Scaffold520 | 71973                   | AA                              | TT              | 1946956225               |
| SNP_P4_132973_77985  | NW_004515968.1 | Scaffold520 | 77985                   | TT                              | AA              | 1946956227               |
| SNP_P4_132974_96117  | NW_004515968.1 | Scaffold520 | 96117                   | AA                              | CC              | 1946956229               |
| SNP_P4_132976_96611  | NW_004515968.1 | Scaffold520 | 96611                   | GG                              | CC              | 1946956231               |
| SNP_P4_132977_105350 | NW_004515968.1 | Scaffold520 | 105350                  | TT                              | AA              | 1946956233               |
| SNP_P4_132978_105402 | NW_004515968.1 | Scaffold520 | 105402                  | GG                              | TT              | 1946956234               |
| SNP_P4_132979_105579 | NW_004515968.1 | Scaffold520 | 105579                  | AA                              | GG              | 1946956236               |
| SNP_P4_132980_105600 | NW_004515968.1 | Scaffold520 | 105600                  | TT                              | GG              | 1946956238               |
| SNP_P4_132981_105674 | NW_004515968.1 | Scaffold520 | 105674                  | GG                              | AA              | 1946956240               |
| SNP_P4_132982_113878 | NW_004515968.1 | Scaffold520 | 113878                  | TT                              | GG              | 1946956242               |
| SNP_P4_132983_118471 | NW_004515968.1 | Scaffold520 | 118471                  | TT                              | CC              | 1946956244               |
| SNP_P4_132984_118772 | NW_004515968.1 | Scaffold520 | 118772                  | AA                              | GG              | 1946956247               |
| SNP_P4_132985_120008 | NW_004515968.1 | Scaffold520 | 120008                  | AA                              | CC              | 1946956249               |
| SNP_P4_132986_120018 | NW_004515968.1 | Scaffold520 | 120018                  | TT                              | CC              | 1946956251               |
| SNP_P4_132987_120049 | NW_004515968.1 | Scaffold520 | 120049                  | GG                              | AA              | 1946956253               |
| SNP_P4_132988_120236 | NW_004515968.1 | Scaffold520 | 120236                  | TT                              | CC              | 1946956255               |
| SNP_P4_132989_120399 | NW_004515968.1 | Scaffold520 | 120399                  | AA                              | GG              | 1946956257               |
| SNP_P4_132990_120436 | NW_004515968.1 | Scaffold520 | 120436                  | TT                              | CC              | 1946956258               |
| SNP_P4_132991_120511 | NW_004515968.1 | Scaffold520 | 120511                  | TT                              | CC              | 1946956260               |
| SNP_P4_132992_120517 | NW_004515968.1 | Scaffold520 | 120517                  | TT                              | AA              | 1946956262               |
| SNP_P4_132993_120520 | NW_004515968.1 | Scaffold520 | 120520                  | TT                              | CC              | 1946956264               |
| SNP_P4_132994_129465 | NW_004515968.1 | Scaffold520 | 129465                  | AA                              | GG              | 1946956266               |
| SNP_P4_132995_129703 | NW_004515968.1 | Scaffold520 | 129703                  | TT                              | AA              | 1946956268               |

| SNPs IDs             | Chromosome IDs | Chromosomes | Physical positions (bp) | CDC Frontier (Reference genome) | (ILWC46 & LPNB) | NCBI SNPdb Accession IDs |
|----------------------|----------------|-------------|-------------------------|---------------------------------|-----------------|--------------------------|
| SNP_P4_132996_129866 | NW_004515968.1 | Scaffold520 | 129866                  | AA                              | TT              | 1946956270               |
| SNP_P4_132997_129951 | NW_004515968.1 | Scaffold520 | 129951                  | AA                              | TT              | 1946956272               |
| SNP_P4_132998_142696 | NW_004515968.1 | Scaffold520 | 142696                  | TT                              | CC              | 1946956274               |
| SNP_P4_132999_142804 | NW_004515968.1 | Scaffold520 | 142804                  | GG                              | CC              | 1946956275               |
| SNP_P4_133000_142888 | NW_004515968.1 | Scaffold520 | 142888                  | TT                              | CC              | 1946956277               |
| SNP_P4_133001_142926 | NW_004515968.1 | Scaffold520 | 142926                  | TT                              | CC              | 1946956279               |
| SNP_P4_133002_142968 | NW_004515968.1 | Scaffold520 | 142968                  | CC                              | TT              | 1946956281               |
| SNP_P4_133003_142997 | NW_004515968.1 | Scaffold520 | 142997                  | GG                              | AA              | 1946956283               |
| SNP_P4_133004_143120 | NW_004515968.1 | Scaffold520 | 143120                  | TT                              | CC              | 1946956285               |
| SNP_P4_133005_143128 | NW_004515968.1 | Scaffold520 | 143128                  | TT                              | CC              | 1946956287               |
| SNP_P4_133006_143149 | NW_004515968.1 | Scaffold520 | 143149                  | TT                              | CC              | 1946956288               |
| SNP_P4_133007_143317 | NW_004515968.1 | Scaffold520 | 143317                  | TT                              | AA              | 1946956290               |
| SNP_P4_133008_143339 | NW_004515968.1 | Scaffold520 | 143339                  | AA                              | GG              | 1946956292               |
| SNP_P4_133009_143357 | NW_004515968.1 | Scaffold520 | 143357                  | GG                              | AA              | 1946956294               |
| SNP_P4_133010_143366 | NW_004515968.1 | Scaffold520 | 143366                  | GG                              | AA              | 1946956296               |
| SNP_P4_133011_143367 | NW_004515968.1 | Scaffold520 | 143367                  | AA                              | GG              | 1946956298               |
| SNP_P4_133012_143377 | NW_004515968.1 | Scaffold520 | 143377                  | TT                              | CC              | 1946956300               |
| SNP_P4_133013_143424 | NW_004515968.1 | Scaffold520 | 143424                  | CC                              | GG              | 1946956301               |
| SNP_P4_133014_144850 | NW_004515968.1 | Scaffold520 | 144850                  | TT                              | CC              | 1946956303               |
| SNP_P4_133015_146271 | NW_004515968.1 | Scaffold520 | 146271                  | CC                              | TT              | 1946956305               |
| SNP_P4_133016_160972 | NW_004515968.1 | Scaffold520 | 160972                  | TT                              | GG              | 1946956307               |
| SNP_P4_133017_161523 | NW_004515968.1 | Scaffold520 | 161523                  | CC                              | TT              | 1946956309               |
| SNP_P4_133018_161551 | NW_004515968.1 | Scaffold520 | 161551                  | CC                              | TT              | 1946956311               |
| SNP_P4_133019_163660 | NW_004515968.1 | Scaffold520 | 163660                  | TT                              | CC              | 1946956313               |
| SNP_P4_133020_165417 | NW_004515968.1 | Scaffold520 | 165417                  | TT                              | CC              | 1946956315               |
| SNP_P4_133021_165835 | NW_004515968.1 | Scaffold520 | 165835                  | TT                              | AA              | 1946956317               |
| SNP_P4_133022_165860 | NW_004515968.1 | Scaffold520 | 165860                  | GG                              | TT              | 1946956319               |
| SNP_P4_133023_167828 | NW_004515968.1 | Scaffold520 | 167828                  | AA                              | GG              | 1946956321               |
| SNP_P4_133024_182237 | NW_004515968.1 | Scaffold520 | 182237                  | GG                              | AA              | 1946956323               |
| SNP_P4_133025_182242 | NW_004515968.1 | Scaffold520 | 182242                  | GG                              | AA              | 1946956325               |
| SNP_P4_133026_185390 | NW_004515968.1 | Scaffold520 | 185390                  | TT                              | AA              | 1946956327               |
| SNP_P4_133027_195425 | NW_004515968.1 | Scaffold520 | 195425                  | CC                              | TT              | 1946956329               |
| SNP_P4_133028_198125 | NW_004515968.1 | Scaffold520 | 198125                  | CC                              | TT              | 1946956331               |
| SNP_P4_133029_204610 | NW_004515968.1 | Scaffold520 | 204610                  | GG                              | AA              | 1946956333               |
| SNP_P4_133030_205733 | NW_004515968.1 | Scaffold520 | 205733                  | AA                              | GG              | 1946956335               |
| SNP_P4_133031_206274 | NW_004515968.1 | Scaffold520 | 206274                  | TT                              | AA              | 1946956337               |
| SNP_P4_133032_208991 | NW_004515968.1 | Scaffold520 | 208991                  | AA                              | GG              | 1946956339               |
| SNP_P4_133033_229860 | NW_004515968.1 | Scaffold520 | 229860                  | AA                              | GG              | 1946956341               |
| SNP_P4_133034_229870 | NW_004515968.1 | Scaffold520 | 229870                  | AA                              | CC              | 1946956343               |
| SNP_P4_133035_229872 | NW_004515968.1 | Scaffold520 | 229872                  | GG                              | AA              | 1946956345               |
| SNP_P4_133036_230828 | NW_004515968.1 | Scaffold520 | 230828                  | GG                              | AA              | 1946956347               |
| SNP_P4_133037_230856 | NW_004515968.1 | Scaffold520 | 230856                  | CC                              | AA              | 1946956349               |

| SNPs IDs             | Chromosome IDs | Chromosomes | Physical positions (bp) | CDC Frontier (Reference genome) | (ILWC46 & LPNB) | NCBI SNPdb Accession IDs |
|----------------------|----------------|-------------|-------------------------|---------------------------------|-----------------|--------------------------|
| SNP_P4_133038_230969 | NW_004515968.1 | Scaffold520 | 230969                  | GG                              | AA              | 1946956350               |
| SNP_P4_133039_231016 | NW_004515968.1 | Scaffold520 | 231016                  | CC                              | TT              | 1946956352               |
| SNP_P4_133040_231841 | NW_004515968.1 | Scaffold520 | 231841                  | AA                              | GG              | 1946956354               |
| SNP_P4_133041_231856 | NW_004515968.1 | Scaffold520 | 231856                  | GG                              | AA              | 1946956356               |
| SNP_P4_133042_231930 | NW_004515968.1 | Scaffold520 | 231930                  | CC                              | GG              | 1946956358               |
| SNP_P4_133043_1853   | NW_004515969.1 | Scaffold523 | 1853                    | TT                              | CC              | 1946956360               |
| SNP_P4_133044_12444  | NW_004515969.1 | Scaffold523 | 12444                   | AA                              | CC              | 1946956362               |
| SNP_P4_133045_12632  | NW_004515969.1 | Scaffold523 | 12632                   | CC                              | AA              | 1946956364               |
| SNP_P4_133046_12655  | NW_004515969.1 | Scaffold523 | 12655                   | GG                              | AA              | 1946956366               |
| SNP_P4_133047_12820  | NW_004515969.1 | Scaffold523 | 12820                   | AA                              | GG              | 1946956368               |
| SNP_P4_133048_12821  | NW_004515969.1 | Scaffold523 | 12821                   | CC                              | GG              | 1946956370               |
| SNP_P4_133049_14235  | NW_004515969.1 | Scaffold523 | 14235                   | AA                              | GG              | 1946956372               |
| SNP_P4_133050_14261  | NW_004515969.1 | Scaffold523 | 14261                   | AA                              | CC              | 1946956375               |
| SNP_P4_133051_14519  | NW_004515969.1 | Scaffold523 | 14519                   | CC                              | AA              | 1946956377               |
| SNP_P4_133052_14539  | NW_004515969.1 | Scaffold523 | 14539                   | TT                              | CC              | 1946956378               |
| SNP_P4_133053_14560  | NW_004515969.1 | Scaffold523 | 14560                   | AA                              | CC              | 1946956381               |
| SNP_P4_133054_14604  | NW_004515969.1 | Scaffold523 | 14604                   | TT                              | CC              | 1946956383               |
| SNP_P4_133055_14606  | NW_004515969.1 | Scaffold523 | 14606                   | AA                              | CC              | 1946956385               |
| SNP_P4_133056_14617  | NW_004515969.1 | Scaffold523 | 14617                   | AA                              | GG              | 1946956387               |
| SNP_P4_133057_14672  | NW_004515969.1 | Scaffold523 | 14672                   | CC                              | TT              | 1946956389               |
| SNP_P4_133058_57945  | NW_004515969.1 | Scaffold523 | 57945                   | AA                              | CC              | 1946956391               |
| SNP_P4_133060_1052   | NW_004515971.1 | Scaffold526 | 1052                    | TT                              | CC              | 1946956393               |
| SNP_P4_133061_21213  | NW_004515971.1 | Scaffold526 | 21213                   | GG                              | AA              | 1946956395               |
| SNP_P4_133062_21218  | NW_004515971.1 | Scaffold526 | 21218                   | TT                              | GG              | 1946956398               |
| SNP_P4_133063_21235  | NW_004515971.1 | Scaffold526 | 21235                   | GG                              | AA              | 1946956399               |
| SNP_P4_133064_31458  | NW_004515971.1 | Scaffold526 | 31458                   | TT                              | GG              | 1946956402               |
| SNP_P4_133065_32877  | NW_004515971.1 | Scaffold526 | 32877                   | TT                              | AA              | 1946956404               |
| SNP_P4_133066_32884  | NW_004515971.1 | Scaffold526 | 32884                   | CC                              | AA              | 1946956406               |
| SNP_P4_133067_32890  | NW_004515971.1 | Scaffold526 | 32890                   | TT                              | AA              | 1946956407               |
| SNP_P4_133068_33090  | NW_004515971.1 | Scaffold526 | 33090                   | CC                              | AA              | 1946956410               |
| SNP_P4_133069_33143  | NW_004515971.1 | Scaffold526 | 33143                   | GG                              | AA              | 1946956412               |
| SNP_P4_133070_33153  | NW_004515971.1 | Scaffold526 | 33153                   | GG                              | AA              | 1946956414               |
| SNP_P4_133071_33181  | NW_004515971.1 | Scaffold526 | 33181                   | TT                              | GG              | 1946956416               |
| SNP_P4_133072_44786  | NW_004515971.1 | Scaffold526 | 44786                   | CC                              | GG              | 1946956418               |
| SNP_P4_133073_44833  | NW_004515971.1 | Scaffold526 | 44833                   | AA                              | CC              | 1946956420               |
| SNP_P4_133074_44834  | NW_004515971.1 | Scaffold526 | 44834                   | CC                              | TT              | 1946956422               |
| SNP_P4_133075_44851  | NW_004515971.1 | Scaffold526 | 44851                   | TT                              | GG              | 1946956424               |
| SNP_P4_133076_45007  | NW_004515971.1 | Scaffold526 | 45007                   | GG                              | TT              | 1946956426               |
| SNP_P4_133077_45148  | NW_004515971.1 | Scaffold526 | 45148                   | AA                              | TT              | 1946956428               |
| SNP_P4_133078_47623  | NW_004515971.1 | Scaffold526 | 47623                   | TT                              | CC              | 1946956430               |
| SNP_P4_133079_47786  | NW_004515971.1 | Scaffold526 | 47786                   | TT                              | CC              | 1946956432               |
| SNP_P4_133080_51752  | NW_004515971.1 | Scaffold526 | 51752                   | CC                              | GG              | 1946956434               |

| SNPs IDs            | Chromosome IDs | Chromosomes | Physical positions (bp) | CDC Frontier (Reference genome) | (ILWC46 & LPNB) | NCBI SNPdb Accession IDs |
|---------------------|----------------|-------------|-------------------------|---------------------------------|-----------------|--------------------------|
| SNP_P4_133081_52011 | NW_004515971.1 | Scaffold526 | 52011                   | GG                              | CC              | 1946956436               |
| SNP_P4_133082_54828 | NW_004515971.1 | Scaffold526 | 54828                   | AA                              | GG              | 1946956438               |
| SNP_P4_133083_56040 | NW_004515971.1 | Scaffold526 | 56040                   | AA                              | CC              | 1946956440               |
| SNP_P4_133084_58798 | NW_004515971.1 | Scaffold526 | 58798                   | GG                              | AA              | 1946956442               |
| SNP_P4_133085_58805 | NW_004515971.1 | Scaffold526 | 58805                   | TT                              | CC              | 1946956444               |
| SNP_P4_133086_58831 | NW_004515971.1 | Scaffold526 | 58831                   | AA                              | TT              | 1946956446               |
| SNP_P4_133087_58848 | NW_004515971.1 | Scaffold526 | 58848                   | AA                              | GG              | 1946956448               |
| SNP_P4_133088_58849 | NW_004515971.1 | Scaffold526 | 58849                   | TT                              | GG              | 1946956450               |
| SNP_P4_133089_58852 | NW_004515971.1 | Scaffold526 | 58852                   | CC                              | GG              | 1946956452               |
| SNP_P4_133090_58882 | NW_004515971.1 | Scaffold526 | 58882                   | AA                              | GG              | 1946956454               |
| SNP_P4_133091_58929 | NW_004515971.1 | Scaffold526 | 58929                   | GG                              | AA              | 1946956456               |
| SNP_P4_133092_58933 | NW_004515971.1 | Scaffold526 | 58933                   | TT                              | CC              | 1946956458               |
| SNP_P4_133093_58980 | NW_004515971.1 | Scaffold526 | 58980                   | TT                              | AA              | 1946956460               |
| SNP_P4_133094_58984 | NW_004515971.1 | Scaffold526 | 58984                   | AA                              | GG              | 1946956462               |
| SNP_P4_133095_59287 | NW_004515971.1 | Scaffold526 | 59287                   | CC                              | TT              | 1946956464               |
| SNP_P4_133096_59293 | NW_004515971.1 | Scaffold526 | 59293                   | TT                              | CC              | 1946956466               |
| SNP_P4_133097_59338 | NW_004515971.1 | Scaffold526 | 59338                   | CC                              | TT              | 1946956468               |
| SNP_P4_133098_70520 | NW_004515971.1 | Scaffold526 | 70520                   | TT                              | AA              | 1946956470               |
| SNP_P4_133099_71126 | NW_004515971.1 | Scaffold526 | 71126                   | AA                              | GG              | 1946956472               |
| SNP_P4_133100_71286 | NW_004515971.1 | Scaffold526 | 71286                   | GG                              | AA              | 1946956474               |
| SNP_P4_133101_71288 | NW_004515971.1 | Scaffold526 | 71288                   | TT                              | CC              | 1946956476               |
| SNP_P4_133102_71328 | NW_004515971.1 | Scaffold526 | 71328                   | CC                              | TT              | 1946956478               |
| SNP_P4_133103_71341 | NW_004515971.1 | Scaffold526 | 71341                   | AA                              | TT              | 1946956480               |
| SNP_P4_133104_71515 | NW_004515971.1 | Scaffold526 | 71515                   | GG                              | CC              | 1946956482               |
| SNP_P4_133105_71523 | NW_004515971.1 | Scaffold526 | 71523                   | CC                              | AA              | 1946956484               |
| SNP_P4_133106_71524 | NW_004515971.1 | Scaffold526 | 71524                   | TT                              | CC              | 1946956486               |
| SNP_P4_133107_71532 | NW_004515971.1 | Scaffold526 | 71532                   | CC                              | AA              | 1946956488               |
| SNP_P4_133108_71540 | NW_004515971.1 | Scaffold526 | 71540                   | TT                              | AA              | 1946956490               |
| SNP_P4_133109_71551 | NW_004515971.1 | Scaffold526 | 71551                   | AA                              | GG              | 1946956492               |
| SNP_P4_133110_71556 | NW_004515971.1 | Scaffold526 | 71556                   | TT                              | GG              | 1946956494               |
| SNP_P4_133111_71557 | NW_004515971.1 | Scaffold526 | 71557                   | AA                              | GG              | 1946956496               |
| SNP_P4_133112_71854 | NW_004515971.1 | Scaffold526 | 71854                   | GG                              | AA              | 1946956498               |
| SNP_P4_133113_73175 | NW_004515971.1 | Scaffold526 | 73175                   | AA                              | TT              | 1946956500               |
| SNP_P4_133114_73194 | NW_004515971.1 | Scaffold526 | 73194                   | AA                              | CC              | 1946956502               |
| SNP_P4_133115_79756 | NW_004515971.1 | Scaffold526 | 79756                   | CC                              | TT              | 1946956504               |
| SNP_P4_133116_84340 | NW_004515971.1 | Scaffold526 | 84340                   | GG                              | TT              | 1946956506               |
| SNP_P4_133117_84365 | NW_004515971.1 | Scaffold526 | 84365                   | AA                              | TT              | 1946956508               |
| SNP_P4_133118_84630 | NW_004515971.1 | Scaffold526 | 84630                   | TT                              | AA              | 1946956510               |
| SNP_P4_133119_90867 | NW_004515971.1 | Scaffold526 | 90867                   | CC                              | AA              | 1946956512               |
| SNP_P4_133120_91115 | NW_004515971.1 | Scaffold526 | 91115                   | GG                              | AA              | 1946956514               |
| SNP_P4_133121_91154 | NW_004515971.1 | Scaffold526 | 91154                   | AA                              | TT              | 1946956515               |
| SNP_P4_133122_93003 | NW_004515971.1 | Scaffold526 | 93003                   | AA                              | GG              | 1946956516               |

| SNPs IDs             | Chromosome IDs | Chromosomes | Physical positions (bp) | CDC Frontier (Reference genome) | (ILWC46 & LPNB) | NCBI SNPdb Accession IDs |
|----------------------|----------------|-------------|-------------------------|---------------------------------|-----------------|--------------------------|
| SNP_P4_133123_93008  | NW_004515971.1 | Scaffold526 | 93008                   | CC                              | GG              | 1946956517               |
| SNP_P4_133124_93011  | NW_004515971.1 | Scaffold526 | 93011                   | AA                              | GG              | 1946956519               |
| SNP_P4_133125_93302  | NW_004515971.1 | Scaffold526 | 93302                   | AA                              | CC              | 1946956521               |
| SNP_P4_133126_101130 | NW_004515971.1 | Scaffold526 | 101130                  | AA                              | TT              | 1946956523               |
| SNP_P4_133127_101917 | NW_004515971.1 | Scaffold526 | 101917                  | AA                              | GG              | 1946956525               |
| SNP_P4_133128_101918 | NW_004515971.1 | Scaffold526 | 101918                  | GG                              | CC              | 1946956527               |
| SNP_P4_133129_102287 | NW_004515971.1 | Scaffold526 | 102287                  | AA                              | CC              | 1946956529               |
| SNP_P4_133130_102795 | NW_004515971.1 | Scaffold526 | 102795                  | CC                              | GG              | 1946956531               |
| SNP_P4_133131_105670 | NW_004515971.1 | Scaffold526 | 105670                  | TT                              | GG              | 1946956533               |
| SNP_P4_133132_108022 | NW_004515971.1 | Scaffold526 | 108022                  | AA                              | GG              | 1946956535               |
| SNP_P4_133133_117995 | NW_004515971.1 | Scaffold526 | 117995                  | GG                              | AA              | 1946956537               |
| SNP_P4_133134_129142 | NW_004515971.1 | Scaffold526 | 129142                  | CC                              | TT              | 1946956539               |
| SNP_P4_133135_129793 | NW_004515971.1 | Scaffold526 | 129793                  | AA                              | CC              | 1946956541               |
| SNP_P4_133136_672    | NW_004515972.1 | Scaffold527 | 672                     | GG                              | CC              | 1946956543               |
| SNP_P4_133137_690    | NW_004515972.1 | Scaffold527 | 690                     | GG                              | AA              | 1946956545               |
| SNP_P4_133139_1179   | NW_004515972.1 | Scaffold527 | 1179                    | GG                              | AA              | 1946956546               |
| SNP_P4_133140_1267   | NW_004515972.1 | Scaffold527 | 1267                    | AA                              | CC              | 1946956548               |
| SNP_P4_133141_1744   | NW_004515972.1 | Scaffold527 | 1744                    | TT                              | CC              | 1946956550               |
| SNP_P4_133142_1753   | NW_004515972.1 | Scaffold527 | 1753                    | AA                              | TT              | 1946956552               |
| SNP_P4_133143_1850   | NW_004515972.1 | Scaffold527 | 1850                    | CC                              | TT              | 1946956554               |
| SNP_P4_133144_2037   | NW_004515972.1 | Scaffold527 | 2037                    | GG                              | AA              | 1946956556               |
| SNP_P4_133145_2041   | NW_004515972.1 | Scaffold527 | 2041                    | GG                              | AA              | 1946956558               |
| SNP_P4_133147_2104   | NW_004515972.1 | Scaffold527 | 2104                    | TT                              | GG              | 1946956560               |
| SNP_P4_133148_2110   | NW_004515972.1 | Scaffold527 | 2110                    | GG                              | AA              | 1946956562               |
| SNP_P4_133149_2154   | NW_004515972.1 | Scaffold527 | 2154                    | CC                              | GG              | 1946956564               |
| SNP_P4_133150_2186   | NW_004515972.1 | Scaffold527 | 2186                    | AA                              | TT              | 1946956566               |
| SNP_P4_133151_2187   | NW_004515972.1 | Scaffold527 | 2187                    | TT                              | CC              | 1946956568               |
| SNP_P4_133152_2502   | NW_004515972.1 | Scaffold527 | 2502                    | AA                              | TT              | 1946956570               |
| SNP_P4_133153_2520   | NW_004515972.1 | Scaffold527 | 2520                    | TT                              | GG              | 1946956572               |
| SNP_P4_133154_2549   | NW_004515972.1 | Scaffold527 | 2549                    | TT                              | AA              | 1946956574               |
| SNP_P4_133155_2582   | NW_004515972.1 | Scaffold527 | 2582                    | GG                              | TT              | 1946956576               |
| SNP_P4_133156_2688   | NW_004515972.1 | Scaffold527 | 2688                    | GG                              | AA              | 1946956577               |
| SNP_P4_133157_2708   | NW_004515972.1 | Scaffold527 | 2708                    | CC                              | TT              | 1946956579               |
| SNP_P4_133158_2781   | NW_004515972.1 | Scaffold527 | 2781                    | GG                              | TT              | 1946956581               |
| SNP_P4_133159_2811   | NW_004515972.1 | Scaffold527 | 2811                    | GG                              | TT              | 1946956584               |
| SNP_P4_133160_2869   | NW_004515972.1 | Scaffold527 | 2869                    | TT                              | CC              | 1946956585               |
| SNP_P4_133161_2966   | NW_004515972.1 | Scaffold527 | 2966                    | AA                              | CC              | 1946956587               |
| SNP_P4_133162_2989   | NW_004515972.1 | Scaffold527 | 2989                    | CC                              | AA              | 1946956589               |
| SNP_P4_133163_3012   | NW_004515972.1 | Scaffold527 | 3012                    | TT                              | CC              | 1946956591               |
| SNP_P4_133164_3181   | NW_004515972.1 | Scaffold527 | 3181                    | GG                              | TT              | 1946956593               |
| SNP_P4_133165_3182   | NW_004515972.1 | Scaffold527 | 3182                    | CC                              | TT              | 1946956595               |
| SNP_P4_133166_3224   | NW_004515972.1 | Scaffold527 | 3224                    | AA                              | TT              | 1946956597               |

| SNPs IDs            | Chromosome IDs | Chromosomes | Physical positions (bp) | CDC Frontier (Reference genome) | (ILWC46 & LPNB) | NCBI SNPdb Accession IDs |
|---------------------|----------------|-------------|-------------------------|---------------------------------|-----------------|--------------------------|
| SNP_P4_133167_3225  | NW_004515972.1 | Scaffold527 | 3225                    | AA                              | GG              | 1946956599               |
| SNP_P4_133168_3619  | NW_004515972.1 | Scaffold527 | 3619                    | CC                              | TT              | 1946956601               |
| SNP_P4_133169_3621  | NW_004515972.1 | Scaffold527 | 3621                    | TT                              | CC              | 1946956603               |
| SNP_P4_133170_3816  | NW_004515972.1 | Scaffold527 | 3816                    | TT                              | CC              | 1946956605               |
| SNP_P4_133171_3848  | NW_004515972.1 | Scaffold527 | 3848                    | GG                              | AA              | 1946956607               |
| SNP_P4_133172_3962  | NW_004515972.1 | Scaffold527 | 3962                    | CC                              | TT              | 1946956609               |
| SNP_P4_133173_3976  | NW_004515972.1 | Scaffold527 | 3976                    | CC                              | TT              | 1946956611               |
| SNP_P4_133174_4016  | NW_004515972.1 | Scaffold527 | 4016                    | AA                              | CC              | 1946956613               |
| SNP_P4_133175_4054  | NW_004515972.1 | Scaffold527 | 4054                    | CC                              | TT              | 1946956615               |
| SNP_P4_133176_4077  | NW_004515972.1 | Scaffold527 | 4077                    | AA                              | TT              | 1946956617               |
| SNP_P4_133177_4099  | NW_004515972.1 | Scaffold527 | 4099                    | CC                              | GG              | 1946956618               |
| SNP_P4_133178_4103  | NW_004515972.1 | Scaffold527 | 4103                    | AA                              | CC              | 1946956620               |
| SNP_P4_133179_4121  | NW_004515972.1 | Scaffold527 | 4121                    | TT                              | CC              | 1946956622               |
| SNP_P4_133180_4185  | NW_004515972.1 | Scaffold527 | 4185                    | AA                              | CC              | 1946956624               |
| SNP_P4_133181_4200  | NW_004515972.1 | Scaffold527 | 4200                    | CC                              | TT              | 1946956626               |
| SNP_P4_133182_4224  | NW_004515972.1 | Scaffold527 | 4224                    | TT                              | GG              | 1946956628               |
| SNP_P4_133183_4340  | NW_004515972.1 | Scaffold527 | 4340                    | AA                              | CC              | 1946956630               |
| SNP_P4_133184_4364  | NW_004515972.1 | Scaffold527 | 4364                    | CC                              | TT              | 1946956632               |
| SNP_P4_133185_4540  | NW_004515972.1 | Scaffold527 | 4540                    | AA                              | TT              | 1946956635               |
| SNP_P4_133186_4557  | NW_004515972.1 | Scaffold527 | 4557                    | GG                              | CC              | 1946956637               |
| SNP_P4_133187_4569  | NW_004515972.1 | Scaffold527 | 4569                    | TT                              | CC              | 1946956639               |
| SNP_P4_133188_4717  | NW_004515972.1 | Scaffold527 | 4717                    | TT                              | GG              | 1946956641               |
| SNP_P4_133189_4755  | NW_004515972.1 | Scaffold527 | 4755                    | AA                              | GG              | 1946956643               |
| SNP_P4_133190_4772  | NW_004515972.1 | Scaffold527 | 4772                    | TT                              | AA              | 1946956645               |
| SNP_P4_133192_4835  | NW_004515972.1 | Scaffold527 | 4835                    | AA                              | GG              | 1946956646               |
| SNP_P4_133193_4865  | NW_004515972.1 | Scaffold527 | 4865                    | AA                              | TT              | 1946956648               |
| SNP_P4_133194_4866  | NW_004515972.1 | Scaffold527 | 4866                    | GG                              | TT              | 1946956650               |
| SNP_P4_133195_4952  | NW_004515972.1 | Scaffold527 | 4952                    | GG                              | TT              | 1946956652               |
| SNP_P4_133196_4989  | NW_004515972.1 | Scaffold527 | 4989                    | CC                              | AA              | 1946956654               |
| SNP_P4_133197_5068  | NW_004515972.1 | Scaffold527 | 5068                    | TT                              | AA              | 1946956657               |
| SNP_P4_133198_5074  | NW_004515972.1 | Scaffold527 | 5074                    | GG                              | AA              | 1946956659               |
| SNP_P4_133199_5136  | NW_004515972.1 | Scaffold527 | 5136                    | GG                              | TT              | 1946956661               |
| SNP_P4_133200_6486  | NW_004515972.1 | Scaffold527 | 6486                    | GG                              | TT              | 1946956663               |
| SNP_P4_133201_23842 | NW_004515972.1 | Scaffold527 | 23842                   | TT                              | AA              | 1946956665               |
| SNP_P4_133202_43707 | NW_004515972.1 | Scaffold527 | 43707                   | GG                              | AA              | 1946956667               |
| SNP_P4_133203_53205 | NW_004515972.1 | Scaffold527 | 53205                   | GG                              | TT              | 1946956669               |
| SNP_P4_133204_65558 | NW_004515972.1 | Scaffold527 | 65558                   | CC                              | TT              | 1946956671               |
| SNP_P4_133205_67734 | NW_004515972.1 | Scaffold527 | 67734                   | TT                              | AA              | 1946956673               |
| SNP_P4_133206_67742 | NW_004515972.1 | Scaffold527 | 67742                   | GG                              | TT              | 1946956675               |
| SNP_P4_133207_71315 | NW_004515972.1 | Scaffold527 | 71315                   | AA                              | CC              | 1946956677               |
| SNP_P4_133209_82391 | NW_004515972.1 | Scaffold527 | 82391                   | AA                              | CC              | 1946956679               |
| SNP_P4_133210_82409 | NW_004515972.1 | Scaffold527 | 82409                   | TT                              | CC              | 1946956681               |

| SNPs IDs             | Chromosome IDs | Chromosomes | Physical positions (bp) | CDC Frontier (Reference genome) | (ILWC46 & LPNB) | NCBI SNPdb Accession IDs |
|----------------------|----------------|-------------|-------------------------|---------------------------------|-----------------|--------------------------|
| SNP_P4_133211_82469  | NW_004515972.1 | Scaffold527 | 82469                   | CC                              | TT              | 1946956683               |
| SNP_P4_133212_82922  | NW_004515972.1 | Scaffold527 | 82922                   | CC                              | GG              | 1946956685               |
| SNP_P4_133214_119923 | NW_004515972.1 | Scaffold527 | 119923                  | AA                              | CC              | 1946956687               |
| SNP_P4_133215_120310 | NW_004515972.1 | Scaffold527 | 120310                  | GG                              | AA              | 1946956689               |
| SNP_P4_133216_120316 | NW_004515972.1 | Scaffold527 | 120316                  | TT                              | CC              | 1946956691               |
| SNP_P4_133217_120645 | NW_004515972.1 | Scaffold527 | 120645                  | TT                              | CC              | 1946956693               |
| SNP_P4_133218_121990 | NW_004515972.1 | Scaffold527 | 121990                  | TT                              | CC              | 1946956695               |
| SNP_P4_133219_129172 | NW_004515972.1 | Scaffold527 | 129172                  | AA                              | GG              | 1946956697               |
| SNP_P4_133220_142824 | NW_004515972.1 | Scaffold527 | 142824                  | AA                              | GG              | 1946956699               |
| SNP_P4_133221_142825 | NW_004515972.1 | Scaffold527 | 142825                  | AA                              | GG              | 1946956701               |
| SNP_P4_133222_143004 | NW_004515972.1 | Scaffold527 | 143004                  | AA                              | GG              | 1946956704               |
| SNP_P4_133223_29022  | NW_004515973.1 | Scaffold528 | 29022                   | CC                              | GG              | 1946956706               |
| SNP_P4_133224_32485  | NW_004515973.1 | Scaffold528 | 32485                   | TT                              | CC              | 1946956708               |
| SNP_P4_133225_63507  | NW_004515973.1 | Scaffold528 | 63507                   | TT                              | CC              | 1946956710               |
| SNP_P4_133226_63599  | NW_004515973.1 | Scaffold528 | 63599                   | CC                              | GG              | 1946956712               |
| SNP_P4_133227_66234  | NW_004515973.1 | Scaffold528 | 66234                   | AA                              | TT              | 1946956714               |
| SNP_P4_133229_72118  | NW_004515973.1 | Scaffold528 | 72118                   | AA                              | GG              | 1946956716               |
| SNP_P4_133230_72182  | NW_004515973.1 | Scaffold528 | 72182                   | CC                              | TT              | 1946956718               |
| SNP_P4_133231_72187  | NW_004515973.1 | Scaffold528 | 72187                   | CC                              | AA              | 1946956721               |
| SNP_P4_133232_72370  | NW_004515973.1 | Scaffold528 | 72370                   | TT                              | CC              | 1946956723               |
| SNP_P4_133233_72381  | NW_004515973.1 | Scaffold528 | 72381                   | TT                              | CC              | 1946956725               |
| SNP_P4_133234_72397  | NW_004515973.1 | Scaffold528 | 72397                   | CC                              | TT              | 1946956727               |
| SNP_P4_133235_72413  | NW_004515973.1 | Scaffold528 | 72413                   | GG                              | TT              | 1946956729               |
| SNP_P4_133236_72417  | NW_004515973.1 | Scaffold528 | 72417                   | GG                              | AA              | 1946956731               |
| SNP_P4_133237_72422  | NW_004515973.1 | Scaffold528 | 72422                   | CC                              | GG              | 1946956733               |
| SNP_P4_133238_74460  | NW_004515973.1 | Scaffold528 | 74460                   | CC                              | TT              | 1946956735               |
| SNP_P4_133239_74475  | NW_004515973.1 | Scaffold528 | 74475                   | GG                              | AA              | 1946956737               |
| SNP_P4_133240_74482  | NW_004515973.1 | Scaffold528 | 74482                   | TT                              | CC              | 1946956739               |
| SNP_P4_133241_74507  | NW_004515973.1 | Scaffold528 | 74507                   | AA                              | GG              | 1946956741               |
| SNP_P4_133242_77791  | NW_004515973.1 | Scaffold528 | 77791                   | AA                              | CC              | 1946956743               |
| SNP_P4_133243_104292 | NW_004515973.1 | Scaffold528 | 104292                  | GG                              | TT              | 1946956745               |
| SNP_P4_133244_126710 | NW_004515973.1 | Scaffold528 | 126710                  | TT                              | CC              | 1946956747               |
| SNP_P4_133245_126728 | NW_004515973.1 | Scaffold528 | 126728                  | TT                              | CC              | 1946956749               |
| SNP_P4_133246_126772 | NW_004515973.1 | Scaffold528 | 126772                  | TT                              | GG              | 1946956751               |
| SNP_P4_133247_126954 | NW_004515973.1 | Scaffold528 | 126954                  | CC                              | TT              | 1946956753               |
| SNP_P4_133248_126956 | NW_004515973.1 | Scaffold528 | 126956                  | AA                              | GG              | 1946956755               |
| SNP_P4_133249_127083 | NW_004515973.1 | Scaffold528 | 127083                  | CC                              | AA              | 1946956757               |
| SNP_P4_133250_127148 | NW_004515973.1 | Scaffold528 | 127148                  | AA                              | TT              | 1946956759               |
| SNP_P4_133251_143831 | NW_004515973.1 | Scaffold528 | 143831                  | CC                              | TT              | 1946956760               |
| SNP_P4_133252_159467 | NW_004515973.1 | Scaffold528 | 159467                  | GG                              | AA              | 1946956762               |
| SNP_P4_133253_160496 | NW_004515973.1 | Scaffold528 | 160496                  | CC                              | AA              | 1946956764               |
| SNP_P4_133254_164960 | NW_004515973.1 | Scaffold528 | 164960                  | AA                              | GG              | 1946956766               |



| SNPs IDs             | Chromosome IDs | Chromosomes | Physical positions (bp) | CDC Frontier (Reference genome) | (ILWC46 & LPNB) | NCBI SNPdb Accession IDs |
|----------------------|----------------|-------------|-------------------------|---------------------------------|-----------------|--------------------------|
| SNP_P4_133255_164967 | NW_004515973.1 | Scaffold528 | 164967                  | AA                              | TT              | 1946956768               |
| SNP_P4_133256_165145 | NW_004515973.1 | Scaffold528 | 165145                  | GG                              | TT              | 1946956770               |
| SNP_P4_133257_165201 | NW_004515973.1 | Scaffold528 | 165201                  | TT                              | CC              | 1946956772               |
| SNP_P4_133259_215715 | NW_004515973.1 | Scaffold528 | 215715                  | CC                              | AA              | 1946956774               |
| SNP_P4_133260_215763 | NW_004515973.1 | Scaffold528 | 215763                  | AA                              | CC              | 1946956776               |
| SNP_P4_133261_226193 | NW_004515973.1 | Scaffold528 | 226193                  | GG                              | TT              | 1946956778               |
| SNP_P4_133262_249378 | NW_004515973.1 | Scaffold528 | 249378                  | TT                              | CC              | 1946956780               |
| SNP_P4_133263_285735 | NW_004515973.1 | Scaffold528 | 285735                  | TT                              | GG              | 1946956782               |
| SNP_P4_133264_285749 | NW_004515973.1 | Scaffold528 | 285749                  | GG                              | AA              | 1946956784               |
| SNP_P4_133265_285758 | NW_004515973.1 | Scaffold528 | 285758                  | GG                              | AA              | 1946956786               |
| SNP_P4_133266_285794 | NW_004515973.1 | Scaffold528 | 285794                  | CC                              | AA              | 1946956788               |
| SNP_P4_133267_287446 | NW_004515973.1 | Scaffold528 | 287446                  | GG                              | TT              | 1946956790               |
| SNP_P4_133268_287939 | NW_004515973.1 | Scaffold528 | 287939                  | CC                              | AA              | 1946956792               |
| SNP_P4_133269_289976 | NW_004515973.1 | Scaffold528 | 289976                  | TT                              | GG              | 1946956794               |
| SNP_P4_133270_294811 | NW_004515973.1 | Scaffold528 | 294811                  | CC                              | TT              | 1946956796               |
| SNP_P4_133271_304874 | NW_004515973.1 | Scaffold528 | 304874                  | TT                              | AA              | 1946956798               |
| SNP_P4_133272_319849 | NW_004515973.1 | Scaffold528 | 319849                  | AA                              | GG              | 1946956800               |
| SNP_P4_133273_326876 | NW_004515973.1 | Scaffold528 | 326876                  | CC                              | TT              | 1946956802               |
| SNP_P4_133274_326881 | NW_004515973.1 | Scaffold528 | 326881                  | AA                              | CC              | 1946956804               |
| SNP_P4_133275_326891 | NW_004515973.1 | Scaffold528 | 326891                  | AA                              | CC              | 1946956806               |
| SNP_P4_133276_326893 | NW_004515973.1 | Scaffold528 | 326893                  | CC                              | AA              | 1946956808               |
| SNP_P4_133277_338728 | NW_004515973.1 | Scaffold528 | 338728                  | AA                              | TT              | 1946956809               |
| SNP_P4_133278_338734 | NW_004515973.1 | Scaffold528 | 338734                  | CC                              | AA              | 1946956811               |
| SNP_P4_133279_338742 | NW_004515973.1 | Scaffold528 | 338742                  | TT                              | CC              | 1946956813               |
| SNP_P4_133280_215    | NW_004515974.1 | Scaffold530 | 215                     | TT                              | GG              | 1946956815               |
| SNP_P4_133281_330    | NW_004515974.1 | Scaffold530 | 330                     | CC                              | TT              | 1946956817               |
| SNP_P4_133283_558    | NW_004515974.1 | Scaffold530 | 558                     | TT                              | CC              | 1946956819               |
| SNP_P4_133284_609    | NW_004515974.1 | Scaffold530 | 609                     | CC                              | AA              | 1946956821               |
| SNP_P4_133286_4155   | NW_004515974.1 | Scaffold530 | 4155                    | AA                              | GG              | 1946956823               |
| SNP_P4_133287_4180   | NW_004515974.1 | Scaffold530 | 4180                    | AA                              | TT              | 1946956825               |
| SNP_P4_133288_4188   | NW_004515974.1 | Scaffold530 | 4188                    | GG                              | AA              | 1946956826               |
| SNP_P4_133289_4201   | NW_004515974.1 | Scaffold530 | 4201                    | GG                              | AA              | 1946956828               |
| SNP_P4_133290_4222   | NW_004515974.1 | Scaffold530 | 4222                    | CC                              | GG              | 1946956830               |
| SNP_P4_133291_4229   | NW_004515974.1 | Scaffold530 | 4229                    | TT                              | AA              | 1946956832               |
| SNP_P4_133292_4232   | NW_004515974.1 | Scaffold530 | 4232                    | AA                              | CC              | 1946956834               |
| SNP_P4_133293_4245   | NW_004515974.1 | Scaffold530 | 4245                    | GG                              | AA              | 1946956836               |
| SNP_P4_133294_4252   | NW_004515974.1 | Scaffold530 | 4252                    | AA                              | CC              | 1946956838               |
| SNP_P4_133295_4269   | NW_004515974.1 | Scaffold530 | 4269                    | GG                              | CC              | 1946956840               |
| SNP_P4_133296_4282   | NW_004515974.1 | Scaffold530 | 4282                    | GG                              | AA              | 1946956842               |
| SNP_P4_133297_4297   | NW_004515974.1 | Scaffold530 | 4297                    | CC                              | GG              | 1946956844               |
| SNP_P4_133298_4386   | NW_004515974.1 | Scaffold530 | 4386                    | TT                              | AA              | 1946956846               |
| SNP_P4_133300_10684  | NW_004515974.1 | Scaffold530 | 10684                   | GG                              | AA              | 1946956848               |

| SNPs IDs            | Chromosome IDs | Chromosomes | Physical positions (bp) | CDC Frontier (Reference genome) | (ILWC46 & LPNB) | NCBI SNPdb Accession IDs |
|---------------------|----------------|-------------|-------------------------|---------------------------------|-----------------|--------------------------|
| SNP_P4_133301_10773 | NW_004515974.1 | Scaffold530 | 10773                   | AA                              | GG              | 1946956850               |
| SNP_P4_133302_10942 | NW_004515974.1 | Scaffold530 | 10942                   | TT                              | CC              | 1946956852               |
| SNP_P4_133303_11063 | NW_004515974.1 | Scaffold530 | 11063                   | AA                              | CC              | 1946956854               |
| SNP_P4_133304_11298 | NW_004515974.1 | Scaffold530 | 11298                   | GG                              | AA              | 1946956856               |
| SNP_P4_133305_11337 | NW_004515974.1 | Scaffold530 | 11337                   | TT                              | CC              | 1946956858               |
| SNP_P4_133306_13863 | NW_004515974.1 | Scaffold530 | 13863                   | GG                              | CC              | 1946956859               |
| SNP_P4_133308_29735 | NW_004515974.1 | Scaffold530 | 29735                   | AA                              | GG              | 1946956861               |
| SNP_P4_133309_29757 | NW_004515974.1 | Scaffold530 | 29757                   | GG                              | TT              | 1946956863               |
| SNP_P4_133310_29794 | NW_004515974.1 | Scaffold530 | 29794                   | CC                              | GG              | 1946956865               |
| SNP_P4_133311_29804 | NW_004515974.1 | Scaffold530 | 29804                   | AA                              | CC              | 1946956867               |
| SNP_P4_133312_30093 | NW_004515974.1 | Scaffold530 | 30093                   | AA                              | CC              | 1946956869               |
| SNP_P4_133313_44607 | NW_004515974.1 | Scaffold530 | 44607                   | GG                              | TT              | 1946956871               |
| SNP_P4_133314_1236  | NW_004515975.1 | Scaffold531 | 1236                    | GG                              | AA              | 1946956873               |
| SNP_P4_133315_4845  | NW_004515975.1 | Scaffold531 | 4845                    | AA                              | CC              | 1946956875               |
| SNP_P4_133316_4866  | NW_004515975.1 | Scaffold531 | 4866                    | TT                              | AA              | 1946956877               |
| SNP_P4_133317_4877  | NW_004515975.1 | Scaffold531 | 4877                    | GG                              | AA              | 1946956879               |
| SNP_P4_133318_4889  | NW_004515975.1 | Scaffold531 | 4889                    | AA                              | TT              | 1946956881               |
| SNP_P4_133319_4890  | NW_004515975.1 | Scaffold531 | 4890                    | TT                              | AA              | 1946956883               |
| SNP_P4_133320_4911  | NW_004515975.1 | Scaffold531 | 4911                    | CC                              | AA              | 1946956884               |
| SNP_P4_133321_5578  | NW_004515975.1 | Scaffold531 | 5578                    | AA                              | CC              | 1946956886               |
| SNP_P4_133322_7768  | NW_004515975.1 | Scaffold531 | 7768                    | CC                              | TT              | 1946956888               |
| SNP_P4_133323_11840 | NW_004515975.1 | Scaffold531 | 11840                   | TT                              | CC              | 1946956890               |
| SNP_P4_133324_11868 | NW_004515975.1 | Scaffold531 | 11868                   | AA                              | TT              | 1946956892               |
| SNP_P4_133326_11926 | NW_004515975.1 | Scaffold531 | 11926                   | CC                              | GG              | 1946956894               |
| SNP_P4_133327_11961 | NW_004515975.1 | Scaffold531 | 11961                   | AA                              | GG              | 1946956896               |
| SNP_P4_133328_12206 | NW_004515975.1 | Scaffold531 | 12206                   | AA                              | GG              | 1946956898               |
| SNP_P4_133329_12295 | NW_004515975.1 | Scaffold531 | 12295                   | CC                              | TT              | 1946956900               |
| SNP_P4_133330_12307 | NW_004515975.1 | Scaffold531 | 12307                   | CC                              | TT              | 1946956902               |
| SNP_P4_133331_12319 | NW_004515975.1 | Scaffold531 | 12319                   | TT                              | GG              | 1946956904               |
| SNP_P4_133332_12530 | NW_004515975.1 | Scaffold531 | 12530                   | TT                              | AA              | 1946956906               |
| SNP_P4_133334_12601 | NW_004515975.1 | Scaffold531 | 12601                   | GG                              | AA              | 1946956907               |
| SNP_P4_133335_12626 | NW_004515975.1 | Scaffold531 | 12626                   | AA                              | CC              | 1946956909               |
| SNP_P4_133336_13134 | NW_004515975.1 | Scaffold531 | 13134                   | GG                              | TT              | 1946956911               |
| SNP_P4_133337_13207 | NW_004515975.1 | Scaffold531 | 13207                   | CC                              | GG              | 1946956913               |
| SNP_P4_133338_13369 | NW_004515975.1 | Scaffold531 | 13369                   | TT                              | AA              | 1946956915               |
| SNP_P4_133339_13379 | NW_004515975.1 | Scaffold531 | 13379                   | TT                              | CC              | 1946956917               |
| SNP_P4_133340_13442 | NW_004515975.1 | Scaffold531 | 13442                   | TT                              | CC              | 1946956919               |
| SNP_P4_133341_13508 | NW_004515975.1 | Scaffold531 | 13508                   | GG                              | AA              | 1946956921               |
| SNP_P4_133342_13532 | NW_004515975.1 | Scaffold531 | 13532                   | CC                              | AA              | 1946956923               |
| SNP_P4_133343_13579 | NW_004515975.1 | Scaffold531 | 13579                   | GG                              | AA              | 1946956925               |
| SNP_P4_133344_13660 | NW_004515975.1 | Scaffold531 | 13660                   | TT                              | GG              | 1946956927               |
| SNP_P4_133345_13664 | NW_004515975.1 | Scaffold531 | 13664                   | TT                              | CC              | 1946956929               |

| SNPs IDs             | Chromosome IDs | Chromosomes | Physical positions (bp) | CDC Frontier (Reference genome) | (ILWC46 & LPNB) | NCBI SNPdb Accession IDs |
|----------------------|----------------|-------------|-------------------------|---------------------------------|-----------------|--------------------------|
| SNP_P4_133346_52004  | NW_004515975.1 | Scaffold531 | 52004                   | AA                              | TT              | 1946956931               |
| SNP_P4_133347_58324  | NW_004515975.1 | Scaffold531 | 58324                   | TT                              | CC              | 1946956933               |
| SNP_P4_133348_58544  | NW_004515975.1 | Scaffold531 | 58544                   | CC                              | GG              | 1946956935               |
| SNP_P4_133349_60073  | NW_004515975.1 | Scaffold531 | 60073                   | TT                              | GG              | 1946956937               |
| SNP_P4_133350_60075  | NW_004515975.1 | Scaffold531 | 60075                   | AA                              | TT              | 1946956939               |
| SNP_P4_133351_60449  | NW_004515975.1 | Scaffold531 | 60449                   | TT                              | GG              | 1946956941               |
| SNP_P4_133352_60522  | NW_004515975.1 | Scaffold531 | 60522                   | AA                              | GG              | 1946956943               |
| SNP_P4_133353_78028  | NW_004515975.1 | Scaffold531 | 78028                   | AA                              | GG              | 1946956944               |
| SNP_P4_133354_83643  | NW_004515975.1 | Scaffold531 | 83643                   | CC                              | TT              | 1946956946               |
| SNP_P4_133356_90234  | NW_004515975.1 | Scaffold531 | 90234                   | TT                              | CC              | 1946956948               |
| SNP_P4_133357_90238  | NW_004515975.1 | Scaffold531 | 90238                   | AA                              | GG              | 1946956950               |
| SNP_P4_133358_104185 | NW_004515975.1 | Scaffold531 | 104185                  | CC                              | TT              | 1946956952               |
| SNP_P4_133359_114700 | NW_004515975.1 | Scaffold531 | 114700                  | GG                              | AA              | 1946956954               |
| SNP_P4_133360_114731 | NW_004515975.1 | Scaffold531 | 114731                  | GG                              | AA              | 1946956956               |
| SNP_P4_133361_124858 | NW_004515975.1 | Scaffold531 | 124858                  | CC                              | TT              | 1946956958               |
| SNP_P4_133362_125251 | NW_004515975.1 | Scaffold531 | 125251                  | CC                              | TT              | 1946956960               |
| SNP_P4_133363_129677 | NW_004515975.1 | Scaffold531 | 129677                  | CC                              | AA              | 1946956962               |
| SNP_P4_133364_160242 | NW_004515975.1 | Scaffold531 | 160242                  | TT                              | AA              | 1946956964               |
| SNP_P4_133365_163981 | NW_004515975.1 | Scaffold531 | 163981                  | CC                              | TT              | 1946956966               |
| SNP_P4_133366_206309 | NW_004515975.1 | Scaffold531 | 206309                  | CC                              | TT              | 1946956968               |
| SNP_P4_133367_206319 | NW_004515975.1 | Scaffold531 | 206319                  | AA                              | TT              | 1946956970               |
| SNP_P4_133368_206338 | NW_004515975.1 | Scaffold531 | 206338                  | CC                              | TT              | 1946956972               |
| SNP_P4_133369_206342 | NW_004515975.1 | Scaffold531 | 206342                  | TT                              | AA              | 1946956974               |
| SNP_P4_133370_206362 | NW_004515975.1 | Scaffold531 | 206362                  | AA                              | TT              | 1946956976               |
| SNP_P4_133371_206369 | NW_004515975.1 | Scaffold531 | 206369                  | TT                              | AA              | 1946956977               |
| SNP_P4_133372_206393 | NW_004515975.1 | Scaffold531 | 206393                  | AA                              | TT              | 1946956979               |
| SNP_P4_133374_206454 | NW_004515975.1 | Scaffold531 | 206454                  | AA                              | TT              | 1946956981               |
| SNP_P4_133375_206611 | NW_004515975.1 | Scaffold531 | 206611                  | CC                              | TT              | 1946956983               |
| SNP_P4_133376_207274 | NW_004515975.1 | Scaffold531 | 207274                  | AA                              | GG              | 1946956985               |
| SNP_P4_133377_207669 | NW_004515975.1 | Scaffold531 | 207669                  | CC                              | TT              | 1946956987               |
| SNP_P4_133378_1798   | NW_004515976.1 | Scaffold532 | 1798                    | TT                              | GG              | 1946956989               |
| SNP_P4_133379_1829   | NW_004515976.1 | Scaffold532 | 1829                    | TT                              | CC              | 1946956991               |
| SNP_P4_133380_1873   | NW_004515976.1 | Scaffold532 | 1873                    | AA                              | GG              | 1946956993               |
| SNP_P4_133381_8031   | NW_004515977.1 | Scaffold533 | 8031                    | TT                              | GG              | 1946956995               |
| SNP_P4_133382_8691   | NW_004515977.1 | Scaffold533 | 8691                    | AA                              | TT              | 1946956997               |
| SNP_P4_133383_8904   | NW_004515977.1 | Scaffold533 | 8904                    | AA                              | TT              | 1946956999               |
| SNP_P4_133384_8919   | NW_004515977.1 | Scaffold533 | 8919                    | CC                              | GG              | 1946957001               |
| SNP_P4_133385_8927   | NW_004515977.1 | Scaffold533 | 8927                    | CC                              | TT              | 1946957003               |
| SNP_P4_133386_8953   | NW_004515977.1 | Scaffold533 | 8953                    | AA                              | CC              | 1946957005               |
| SNP_P4_133387_8992   | NW_004515977.1 | Scaffold533 | 8992                    | CC                              | TT              | 1946957006               |
| SNP_P4_133388_9015   | NW_004515977.1 | Scaffold533 | 9015                    | AA                              | CC              | 1946957008               |
| SNP_P4_133389_9031   | NW_004515977.1 | Scaffold533 | 9031                    | TT                              | CC              | 1946957010               |

| SNPs IDs             | Chromosome IDs | Chromosomes | Physical positions (bp) | CDC Frontier (Reference genome) | (ILWC46 & LPNB) | NCBI SNPdb Accession IDs |
|----------------------|----------------|-------------|-------------------------|---------------------------------|-----------------|--------------------------|
| SNP_P4_133390_19634  | NW_004515977.1 | Scaffold533 | 19634                   | AA                              | CC              | 1946957012               |
| SNP_P4_133391_21382  | NW_004515977.1 | Scaffold533 | 21382                   | GG                              | AA              | 1946957014               |
| SNP_P4_133392_23570  | NW_004515977.1 | Scaffold533 | 23570                   | AA                              | CC              | 1946957016               |
| SNP_P4_133393_23615  | NW_004515977.1 | Scaffold533 | 23615                   | AA                              | GG              | 1946957018               |
| SNP_P4_133394_23645  | NW_004515977.1 | Scaffold533 | 23645                   | AA                              | TT              | 1946957020               |
| SNP_P4_133395_24201  | NW_004515977.1 | Scaffold533 | 24201                   | TT                              | AA              | 1946957022               |
| SNP_P4_133396_24219  | NW_004515977.1 | Scaffold533 | 24219                   | CC                              | TT              | 1946957024               |
| SNP_P4_133397_24262  | NW_004515977.1 | Scaffold533 | 24262                   | AA                              | TT              | 1946957026               |
| SNP_P4_133398_24276  | NW_004515977.1 | Scaffold533 | 24276                   | CC                              | TT              | 1946957028               |
| SNP_P4_133399_24582  | NW_004515977.1 | Scaffold533 | 24582                   | GG                              | CC              | 1946957030               |
| SNP_P4_133400_24729  | NW_004515977.1 | Scaffold533 | 24729                   | CC                              | TT              | 1946957032               |
| SNP_P4_133401_22611  | NW_004515978.1 | Scaffold535 | 22611                   | CC                              | TT              | 1946957034               |
| SNP_P4_133402_49296  | NW_004515978.1 | Scaffold535 | 49296                   | TT                              | GG              | 1946957036               |
| SNP_P4_133403_49823  | NW_004515978.1 | Scaffold535 | 49823                   | AA                              | CC              | 1946957038               |
| SNP_P4_133404_68489  | NW_004515978.1 | Scaffold535 | 68489                   | CC                              | AA              | 1946957040               |
| SNP_P4_133405_68490  | NW_004515978.1 | Scaffold535 | 68490                   | AA                              | TT              | 1946957042               |
| SNP_P4_133406_68639  | NW_004515978.1 | Scaffold535 | 68639                   | AA                              | CC              | 1946957044               |
| SNP_P4_133407_68976  | NW_004515978.1 | Scaffold535 | 68976                   | TT                              | GG              | 1946957046               |
| SNP_P4_133408_69245  | NW_004515978.1 | Scaffold535 | 69245                   | AA                              | GG              | 1946957048               |
| SNP_P4_133409_69249  | NW_004515978.1 | Scaffold535 | 69249                   | TT                              | GG              | 1946957050               |
| SNP_P4_133410_69264  | NW_004515978.1 | Scaffold535 | 69264                   | GG                              | AA              | 1946957052               |
| SNP_P4_133411_70131  | NW_004515978.1 | Scaffold535 | 70131                   | AA                              | GG              | 1946957054               |
| SNP_P4_133413_95062  | NW_004515978.1 | Scaffold535 | 95062                   | AA                              | TT              | 1946957056               |
| SNP_P4_133414_102324 | NW_004515978.1 | Scaffold535 | 102324                  | CC                              | TT              | 1946957058               |
| SNP_P4_133415_117234 | NW_004515978.1 | Scaffold535 | 117234                  | TT                              | CC              | 1946957060               |
| SNP_P4_133416_125735 | NW_004515978.1 | Scaffold535 | 125735                  | GG                              | AA              | 1946957062               |
| SNP_P4_133418_1623   | NW_004515979.1 | Scaffold536 | 1623                    | AA                              | TT              | 1946957064               |
| SNP_P4_133419_13085  | NW_004515980.1 | Scaffold537 | 13085                   | AA                              | CC              | 1946957066               |
| SNP_P4_133420_13100  | NW_004515980.1 | Scaffold537 | 13100                   | CC                              | TT              | 1946957068               |
| SNP_P4_133421_13110  | NW_004515980.1 | Scaffold537 | 13110                   | GG                              | AA              | 1946957070               |
| SNP_P4_133422_17659  | NW_004515980.1 | Scaffold537 | 17659                   | AA                              | CC              | 1946957072               |
| SNP_P4_133423_17714  | NW_004515980.1 | Scaffold537 | 17714                   | AA                              | TT              | 1946957074               |
| SNP_P4_133424_22906  | NW_004515980.1 | Scaffold537 | 22906                   | AA                              | GG              | 1946957076               |
| SNP_P4_133425_24661  | NW_004515980.1 | Scaffold537 | 24661                   | AA                              | CC              | 1946957078               |
| SNP_P4_133426_26571  | NW_004515980.1 | Scaffold537 | 26571                   | TT                              | CC              | 1946957080               |
| SNP_P4_133427_31458  | NW_004515980.1 | Scaffold537 | 31458                   | AA                              | TT              | 1946957082               |
| SNP_P4_133428_31464  | NW_004515980.1 | Scaffold537 | 31464                   | AA                              | CC              | 1946957084               |
| SNP_P4_133429_31491  | NW_004515980.1 | Scaffold537 | 31491                   | TT                              | GG              | 1946957086               |
| SNP_P4_133430_31527  | NW_004515980.1 | Scaffold537 | 31527                   | AA                              | GG              | 1946957088               |
| SNP_P4_133431_31584  | NW_004515980.1 | Scaffold537 | 31584                   | TT                              | GG              | 1946957090               |
| SNP_P4_133432_31585  | NW_004515980.1 | Scaffold537 | 31585                   | GG                              | TT              | 1946957092               |
| SNP_P4_133433_31810  | NW_004515980.1 | Scaffold537 | 31810                   | TT                              | AA              | 1946957094               |

| SNPs IDs            | Chromosome IDs | Chromosomes | Physical positions (bp) | CDC Frontier (Reference genome) | (ILWC46 & LPNB) | NCBI SNPdb Accession IDs |
|---------------------|----------------|-------------|-------------------------|---------------------------------|-----------------|--------------------------|
| SNP_P4_133434_31885 | NW_004515980.1 | Scaffold537 | 31885                   | TT                              | CC              | 1946957096               |
| SNP_P4_133435_31944 | NW_004515980.1 | Scaffold537 | 31944                   | GG                              | CC              | 1946957098               |
| SNP_P4_133436_32048 | NW_004515980.1 | Scaffold537 | 32048                   | CC                              | TT              | 1946957100               |
| SNP_P4_133437_32066 | NW_004515980.1 | Scaffold537 | 32066                   | AA                              | GG              | 1946957102               |
| SNP_P4_133438_33802 | NW_004515980.1 | Scaffold537 | 33802                   | GG                              | TT              | 1946957104               |
| SNP_P4_133439_35364 | NW_004515980.1 | Scaffold537 | 35364                   | GG                              | TT              | 1946957106               |
| SNP_P4_133440_35731 | NW_004515980.1 | Scaffold537 | 35731                   | CC                              | GG              | 1946957108               |
| SNP_P4_133441_35740 | NW_004515980.1 | Scaffold537 | 35740                   | TT                              | CC              | 1946957110               |
| SNP_P4_133442_35744 | NW_004515980.1 | Scaffold537 | 35744                   | TT                              | GG              | 1946957112               |
| SNP_P4_133443_58790 | NW_004515980.1 | Scaffold537 | 58790                   | AA                              | GG              | 1946957114               |
| SNP_P4_133444_60898 | NW_004515980.1 | Scaffold537 | 60898                   | TT                              | AA              | 1946957116               |
| SNP_P4_133445_69723 | NW_004515980.1 | Scaffold537 | 69723                   | GG                              | AA              | 1946957118               |
| SNP_P4_133446_77522 | NW_004515980.1 | Scaffold537 | 77522                   | CC                              | AA              | 1946957120               |
| SNP_P4_133447_78562 | NW_004515980.1 | Scaffold537 | 78562                   | TT                              | CC              | 1946957122               |
| SNP_P4_133448_78641 | NW_004515980.1 | Scaffold537 | 78641                   | AA                              | CC              | 1946957124               |
| SNP_P4_133449_78715 | NW_004515980.1 | Scaffold537 | 78715                   | TT                              | CC              | 1946957126               |
| SNP_P4_133450_78722 | NW_004515980.1 | Scaffold537 | 78722                   | TT                              | CC              | 1946957128               |
| SNP_P4_133451_78771 | NW_004515980.1 | Scaffold537 | 78771                   | AA                              | CC              | 1946957130               |
| SNP_P4_133452_78856 | NW_004515980.1 | Scaffold537 | 78856                   | AA                              | GG              | 1946957132               |
| SNP_P4_133453_78860 | NW_004515980.1 | Scaffold537 | 78860                   | AA                              | GG              | 1946957134               |
| SNP_P4_133454_78877 | NW_004515980.1 | Scaffold537 | 78877                   | AA                              | GG              | 1946957136               |
| SNP_P4_133455_78882 | NW_004515980.1 | Scaffold537 | 78882                   | TT                              | AA              | 1946957138               |
| SNP_P4_133456_78904 | NW_004515980.1 | Scaffold537 | 78904                   | AA                              | CC              | 1946957140               |
| SNP_P4_133457_78942 | NW_004515980.1 | Scaffold537 | 78942                   | TT                              | CC              | 1946957142               |
| SNP_P4_133458_78972 | NW_004515980.1 | Scaffold537 | 78972                   | AA                              | GG              | 1946957144               |
| SNP_P4_133459_78985 | NW_004515980.1 | Scaffold537 | 78985                   | AA                              | CC              | 1946957146               |
| SNP_P4_133460_78986 | NW_004515980.1 | Scaffold537 | 78986                   | AA                              | GG              | 1946957148               |
| SNP_P4_133461_78988 | NW_004515980.1 | Scaffold537 | 78988                   | AA                              | CC              | 1946957150               |
| SNP_P4_133462_78996 | NW_004515980.1 | Scaffold537 | 78996                   | AA                              | GG              | 1946957152               |
| SNP_P4_133463_79002 | NW_004515980.1 | Scaffold537 | 79002                   | TT                              | GG              | 1946957154               |
| SNP_P4_133464_79006 | NW_004515980.1 | Scaffold537 | 79006                   | TT                              | CC              | 1946957156               |
| SNP_P4_133465_81093 | NW_004515980.1 | Scaffold537 | 81093                   | GG                              | AA              | 1946957158               |
| SNP_P4_133466_82286 | NW_004515980.1 | Scaffold537 | 82286                   | AA                              | TT              | 1946957160               |
| SNP_P4_133467_82292 | NW_004515980.1 | Scaffold537 | 82292                   | AA                              | CC              | 1946957162               |
| SNP_P4_133468_82295 | NW_004515980.1 | Scaffold537 | 82295                   | AA                              | GG              | 1946957164               |
| SNP_P4_133469_82318 | NW_004515980.1 | Scaffold537 | 82318                   | AA                              | TT              | 1946957166               |
| SNP_P4_133470_82393 | NW_004515980.1 | Scaffold537 | 82393                   | AA                              | GG              | 1946957168               |
| SNP_P4_133471_82430 | NW_004515980.1 | Scaffold537 | 82430                   | AA                              | GG              | 1946957170               |
| SNP_P4_133472_82449 | NW_004515980.1 | Scaffold537 | 82449                   | GG                              | AA              | 1946957172               |
| SNP_P4_133474_82853 | NW_004515980.1 | Scaffold537 | 82853                   | CC                              | GG              | 1946957175               |
| SNP_P4_133475_84598 | NW_004515980.1 | Scaffold537 | 84598                   | TT                              | AA              | 1946957177               |
| SNP_P4_133476_84656 | NW_004515980.1 | Scaffold537 | 84656                   | TT                              | AA              | 1946957179               |

| SNPs IDs             | Chromosome IDs | Chromosomes | Physical positions (bp) | CDC Frontier (Reference genome) | (ILWC46 & LPNB) | NCBI SNPdb Accession IDs |
|----------------------|----------------|-------------|-------------------------|---------------------------------|-----------------|--------------------------|
| SNP_P4_133477_85075  | NW_004515980.1 | Scaffold537 | 85075                   | GG                              | CC              | 1946957181               |
| SNP_P4_133478_85150  | NW_004515980.1 | Scaffold537 | 85150                   | TT                              | AA              | 1946957183               |
| SNP_P4_133479_85172  | NW_004515980.1 | Scaffold537 | 85172                   | TT                              | CC              | 1946957185               |
| SNP_P4_133480_85178  | NW_004515980.1 | Scaffold537 | 85178                   | AA                              | GG              | 1946957187               |
| SNP_P4_133481_85183  | NW_004515980.1 | Scaffold537 | 85183                   | CC                              | AA              | 1946957189               |
| SNP_P4_133482_85230  | NW_004515980.1 | Scaffold537 | 85230                   | TT                              | GG              | 1946957191               |
| SNP_P4_133483_85258  | NW_004515980.1 | Scaffold537 | 85258                   | CC                              | TT              | 1946957193               |
| SNP_P4_133484_85259  | NW_004515980.1 | Scaffold537 | 85259                   | GG                              | AA              | 1946957195               |
| SNP_P4_133485_85308  | NW_004515980.1 | Scaffold537 | 85308                   | TT                              | AA              | 1946957197               |
| SNP_P4_133486_85349  | NW_004515980.1 | Scaffold537 | 85349                   | AA                              | GG              | 1946957198               |
| SNP_P4_133487_85692  | NW_004515980.1 | Scaffold537 | 85692                   | AA                              | TT              | 1946957200               |
| SNP_P4_133489_142817 | NW_004515980.1 | Scaffold537 | 142817                  | TT                              | CC              | 1946957202               |
| SNP_P4_133490_161876 | NW_004515980.1 | Scaffold537 | 161876                  | CC                              | GG              | 1946957205               |
| SNP_P4_133491_165074 | NW_004515980.1 | Scaffold537 | 165074                  | TT                              | CC              | 1946957207               |
| SNP_P4_133492_167092 | NW_004515980.1 | Scaffold537 | 167092                  | AA                              | CC              | 1946957209               |
| SNP_P4_133494_226796 | NW_004515980.1 | Scaffold537 | 226796                  | TT                              | GG              | 1946957211               |
| SNP_P4_133495_226800 | NW_004515980.1 | Scaffold537 | 226800                  | AA                              | GG              | 1946957213               |
| SNP_P4_133497_270642 | NW_004515980.1 | Scaffold537 | 270642                  | CC                              | TT              | 1946957215               |
| SNP_P4_133498_270715 | NW_004515980.1 | Scaffold537 | 270715                  | AA                              | GG              | 1946957217               |
| SNP_P4_133499_270865 | NW_004515980.1 | Scaffold537 | 270865                  | AA                              | GG              | 1946957219               |
| SNP_P4_133500_270925 | NW_004515980.1 | Scaffold537 | 270925                  | CC                              | AA              | 1946957221               |
| SNP_P4_133501_270958 | NW_004515980.1 | Scaffold537 | 270958                  | CC                              | TT              | 1946957223               |
| SNP_P4_133502_271014 | NW_004515980.1 | Scaffold537 | 271014                  | TT                              | GG              | 1946957225               |
| SNP_P4_133503_271058 | NW_004515980.1 | Scaffold537 | 271058                  | AA                              | GG              | 1946957227               |
| SNP_P4_133504_271207 | NW_004515980.1 | Scaffold537 | 271207                  | CC                              | TT              | 1946957229               |
| SNP_P4_133505_1324   | NW_004515982.1 | Scaffold542 | 1324                    | AA                              | GG              | 1946957231               |
| SNP_P4_133506_1329   | NW_004515982.1 | Scaffold542 | 1329                    | AA                              | TT              | 1946957233               |
| SNP_P4_133507_3712   | NW_004515983.1 | Scaffold543 | 3712                    | TT                              | AA              | 1946957235               |
| SNP_P4_133508_19441  | NW_004515983.1 | Scaffold543 | 19441                   | TT                              | CC              | 1946957237               |
| SNP_P4_133509_19445  | NW_004515983.1 | Scaffold543 | 19445                   | CC                              | TT              | 1946957239               |
| SNP_P4_133510_20526  | NW_004515983.1 | Scaffold543 | 20526                   | TT                              | GG              | 1946957241               |
| SNP_P4_133511_20569  | NW_004515983.1 | Scaffold543 | 20569                   | AA                              | TT              | 1946957243               |
| SNP_P4_133512_20577  | NW_004515983.1 | Scaffold543 | 20577                   | AA                              | CC              | 1946957245               |
| SNP_P4_133513_20606  | NW_004515983.1 | Scaffold543 | 20606                   | GG                              | AA              | 1946957247               |
| SNP_P4_133514_20913  | NW_004515983.1 | Scaffold543 | 20913                   | AA                              | TT              | 1946957249               |
| SNP_P4_133515_20914  | NW_004515983.1 | Scaffold543 | 20914                   | AA                              | TT              | 1946957251               |
| SNP_P4_133516_20944  | NW_004515983.1 | Scaffold543 | 20944                   | AA                              | CC              | 1946957253               |
| SNP_P4_133517_28275  | NW_004515983.1 | Scaffold543 | 28275                   | AA                              | GG              | 1946957255               |
| SNP_P4_133519_28674  | NW_004515983.1 | Scaffold543 | 28674                   | AA                              | CC              | 1946957257               |
| SNP_P4_133520_31226  | NW_004515983.1 | Scaffold543 | 31226                   | AA                              | GG              | 1946957259               |
| SNP_P4_133521_31246  | NW_004515983.1 | Scaffold543 | 31246                   | TT                              | GG              | 1946957261               |
| SNP_P4_133522_31255  | NW_004515983.1 | Scaffold543 | 31255                   | AA                              | TT              | 1946957263               |

| SNPs IDs             | Chromosome IDs | Chromosomes | Physical positions (bp) | CDC Frontier (Reference genome) | (ILWC46 & LPNB) | NCBI SNPdb Accession IDs |
|----------------------|----------------|-------------|-------------------------|---------------------------------|-----------------|--------------------------|
| SNP_P4_133523_31277  | NW_004515983.1 | Scaffold543 | 31277                   | TT                              | CC              | 1946957265               |
| SNP_P4_133524_31658  | NW_004515983.1 | Scaffold543 | 31658                   | AA                              | CC              | 1946957267               |
| SNP_P4_133525_31799  | NW_004515983.1 | Scaffold543 | 31799                   | GG                              | AA              | 1946957269               |
| SNP_P4_133526_32529  | NW_004515983.1 | Scaffold543 | 32529                   | AA                              | GG              | 1946957271               |
| SNP_P4_133527_32584  | NW_004515983.1 | Scaffold543 | 32584                   | TT                              | AA              | 1946957273               |
| SNP_P4_133528_32614  | NW_004515983.1 | Scaffold543 | 32614                   | TT                              | CC              | 1946957275               |
| SNP_P4_133530_52979  | NW_004515983.1 | Scaffold543 | 52979                   | GG                              | AA              | 1946957277               |
| SNP_P4_133531_54434  | NW_004515983.1 | Scaffold543 | 54434                   | TT                              | CC              | 1946957279               |
| SNP_P4_133533_65982  | NW_004515983.1 | Scaffold543 | 65982                   | CC                              | TT              | 1946957281               |
| SNP_P4_133534_65985  | NW_004515983.1 | Scaffold543 | 65985                   | CC                              | TT              | 1946957283               |
| SNP_P4_133535_65988  | NW_004515983.1 | Scaffold543 | 65988                   | CC                              | TT              | 1946957285               |
| SNP_P4_133536_66267  | NW_004515983.1 | Scaffold543 | 66267                   | AA                              | GG              | 1946957287               |
| SNP_P4_133537_66282  | NW_004515983.1 | Scaffold543 | 66282                   | AA                              | GG              | 1946957289               |
| SNP_P4_133538_68702  | NW_004515983.1 | Scaffold543 | 68702                   | CC                              | TT              | 1946957291               |
| SNP_P4_133540_68884  | NW_004515983.1 | Scaffold543 | 68884                   | TT                              | CC              | 1946957293               |
| SNP_P4_133541_68922  | NW_004515983.1 | Scaffold543 | 68922                   | TT                              | GG              | 1946957295               |
| SNP_P4_133543_69038  | NW_004515983.1 | Scaffold543 | 69038                   | AA                              | GG              | 1946957297               |
| SNP_P4_133546_82816  | NW_004515983.1 | Scaffold543 | 82816                   | TT                              | AA              | 1946957299               |
| SNP_P4_133547_100788 | NW_004515983.1 | Scaffold543 | 100788                  | AA                              | GG              | 1946957301               |
| SNP_P4_133549_100845 | NW_004515983.1 | Scaffold543 | 100845                  | TT                              | CC              | 1946957303               |
| SNP_P4_133550_106831 | NW_004515983.1 | Scaffold543 | 106831                  | AA                              | GG              | 1946957305               |
| SNP_P4_133551_144299 | NW_004515983.1 | Scaffold543 | 144299                  | GG                              | CC              | 1946957307               |
| SNP_P4_133552_144372 | NW_004515983.1 | Scaffold543 | 144372                  | TT                              | CC              | 1946957309               |
| SNP_P4_133553_155217 | NW_004515983.1 | Scaffold543 | 155217                  | GG                              | TT              | 1946957311               |
| SNP_P4_133554_159927 | NW_004515983.1 | Scaffold543 | 159927                  | TT                              | CC              | 1946957313               |
| SNP_P4_133555_159950 | NW_004515983.1 | Scaffold543 | 159950                  | AA                              | GG              | 1946957315               |
| SNP_P4_133556_159953 | NW_004515983.1 | Scaffold543 | 159953                  | CC                              | TT              | 1946957317               |
| SNP_P4_133557_159963 | NW_004515983.1 | Scaffold543 | 159963                  | AA                              | TT              | 1946957319               |
| SNP_P4_133558_159966 | NW_004515983.1 | Scaffold543 | 159966                  | CC                              | GG              | 1946957321               |
| SNP_P4_133559_160045 | NW_004515983.1 | Scaffold543 | 160045                  | AA                              | GG              | 1946957323               |
| SNP_P4_133560_160112 | NW_004515983.1 | Scaffold543 | 160112                  | CC                              | TT              | 1946957325               |
| SNP_P4_133561_160297 | NW_004515983.1 | Scaffold543 | 160297                  | TT                              | CC              | 1946957327               |
| SNP_P4_133562_160320 | NW_004515983.1 | Scaffold543 | 160320                  | GG                              | AA              | 1946957329               |
| SNP_P4_133563_160418 | NW_004515983.1 | Scaffold543 | 160418                  | CC                              | TT              | 1946957331               |
| SNP_P4_133564_184144 | NW_004515983.1 | Scaffold543 | 184144                  | TT                              | CC              | 1946957333               |
| SNP_P4_133565_184163 | NW_004515983.1 | Scaffold543 | 184163                  | GG                              | AA              | 1946957335               |
| SNP_P4_133566_187417 | NW_004515983.1 | Scaffold543 | 187417                  | CC                              | TT              | 1946957337               |
| SNP_P4_133567_188821 | NW_004515983.1 | Scaffold543 | 188821                  | AA                              | GG              | 1946957339               |
| SNP_P4_133568_191670 | NW_004515983.1 | Scaffold543 | 191670                  | GG                              | AA              | 1946957341               |
| SNP_P4_133569_221722 | NW_004515983.1 | Scaffold543 | 221722                  | GG                              | TT              | 1946957343               |
| SNP_P4_133570_224124 | NW_004515983.1 | Scaffold543 | 224124                  | TT                              | CC              | 1946957345               |
| SNP_P4_133571_224127 | NW_004515983.1 | Scaffold543 | 224127                  | TT                              | CC              | 1946957348               |

| SNPs IDs             | Chromosome IDs | Chromosomes | Physical positions (bp) | CDC Frontier (Reference genome) | (ILWC46 & LPNB) | NCBI SNPdb Accession IDs |
|----------------------|----------------|-------------|-------------------------|---------------------------------|-----------------|--------------------------|
| SNP_P4_133572_224484 | NW_004515983.1 | Scaffold543 | 224484                  | AA                              | GG              | 1946957350               |
| SNP_P4_133573_224497 | NW_004515983.1 | Scaffold543 | 224497                  | CC                              | TT              | 1946957352               |
| SNP_P4_133574_224524 | NW_004515983.1 | Scaffold543 | 224524                  | TT                              | CC              | 1946957354               |
| SNP_P4_133575_224538 | NW_004515983.1 | Scaffold543 | 224538                  | TT                              | CC              | 1946957356               |
| SNP_P4_133576_224541 | NW_004515983.1 | Scaffold543 | 224541                  | AA                              | GG              | 1946957358               |
| SNP_P4_133577_225582 | NW_004515983.1 | Scaffold543 | 225582                  | GG                              | TT              | 1946957360               |
| SNP_P4_133578_225626 | NW_004515983.1 | Scaffold543 | 225626                  | CC                              | GG              | 1946957362               |
| SNP_P4_133579_226069 | NW_004515983.1 | Scaffold543 | 226069                  | AA                              | GG              | 1946957364               |
| SNP_P4_133580_226076 | NW_004515983.1 | Scaffold543 | 226076                  | AA                              | GG              | 1946957366               |
| SNP_P4_133581_226088 | NW_004515983.1 | Scaffold543 | 226088                  | AA                              | TT              | 1946957368               |
| SNP_P4_133582_226091 | NW_004515983.1 | Scaffold543 | 226091                  | CC                              | AA              | 1946957370               |
| SNP_P4_133583_226101 | NW_004515983.1 | Scaffold543 | 226101                  | AA                              | GG              | 1946957372               |
| SNP_P4_133584_226115 | NW_004515983.1 | Scaffold543 | 226115                  | AA                              | TT              | 1946957374               |
| SNP_P4_133585_226130 | NW_004515983.1 | Scaffold543 | 226130                  | TT                              | AA              | 1946957376               |
| SNP_P4_133586_226152 | NW_004515983.1 | Scaffold543 | 226152                  | TT                              | GG              | 1946957378               |
| SNP_P4_133587_226178 | NW_004515983.1 | Scaffold543 | 226178                  | GG                              | AA              | 1946957380               |
| SNP_P4_133588_226205 | NW_004515983.1 | Scaffold543 | 226205                  | CC                              | TT              | 1946957383               |
| SNP_P4_133589_226209 | NW_004515983.1 | Scaffold543 | 226209                  | GG                              | CC              | 1946957385               |
| SNP_P4_133590_226295 | NW_004515983.1 | Scaffold543 | 226295                  | AA                              | GG              | 1946957387               |
| SNP_P4_133591_226447 | NW_004515983.1 | Scaffold543 | 226447                  | TT                              | CC              | 1946957389               |
| SNP_P4_133592_226544 | NW_004515983.1 | Scaffold543 | 226544                  | AA                              | TT              | 1946957391               |
| SNP_P4_133593_226579 | NW_004515983.1 | Scaffold543 | 226579                  | TT                              | CC              | 1946957393               |
| SNP_P4_133594_229396 | NW_004515983.1 | Scaffold543 | 229396                  | AA                              | GG              | 1946957395               |
| SNP_P4_133595_229399 | NW_004515983.1 | Scaffold543 | 229399                  | CC                              | TT              | 1946957397               |
| SNP_P4_133596_229401 | NW_004515983.1 | Scaffold543 | 229401                  | AA                              | TT              | 1946957399               |
| SNP_P4_133597_229402 | NW_004515983.1 | Scaffold543 | 229402                  | AA                              | TT              | 1946957401               |
| SNP_P4_133599_229617 | NW_004515983.1 | Scaffold543 | 229617                  | AA                              | CC              | 1946957403               |
| SNP_P4_133600_229661 | NW_004515983.1 | Scaffold543 | 229661                  | GG                              | AA              | 1946957405               |
| SNP_P4_133601_229662 | NW_004515983.1 | Scaffold543 | 229662                  | AA                              | TT              | 1946957407               |
| SNP_P4_133602_229664 | NW_004515983.1 | Scaffold543 | 229664                  | TT                              | CC              | 1946957409               |
| SNP_P4_133603_242893 | NW_004515983.1 | Scaffold543 | 242893                  | TT                              | GG              | 1946957411               |
| SNP_P4_133604_242960 | NW_004515983.1 | Scaffold543 | 242960                  | GG                              | AA              | 1946957413               |
| SNP_P4_133605_243070 | NW_004515983.1 | Scaffold543 | 243070                  | AA                              | CC              | 1946957415               |
| SNP_P4_133606_243140 | NW_004515983.1 | Scaffold543 | 243140                  | TT                              | CC              | 1946957417               |
| SNP_P4_133607_243189 | NW_004515983.1 | Scaffold543 | 243189                  | AA                              | GG              | 1946957419               |
| SNP_P4_133608_243275 | NW_004515983.1 | Scaffold543 | 243275                  | TT                              | CC              | 1946957421               |
| SNP_P4_133609_243302 | NW_004515983.1 | Scaffold543 | 243302                  | CC                              | TT              | 1946957423               |
| SNP_P4_133610_243313 | NW_004515983.1 | Scaffold543 | 243313                  | AA                              | GG              | 1946957425               |
| SNP_P4_133611_243402 | NW_004515983.1 | Scaffold543 | 243402                  | GG                              | AA              | 1946957427               |
| SNP_P4_133612_243414 | NW_004515983.1 | Scaffold543 | 243414                  | TT                              | CC              | 1946957429               |
| SNP_P4_133613_243452 | NW_004515983.1 | Scaffold543 | 243452                  | AA                              | GG              | 1946957431               |
| SNP_P4_133615_292357 | NW_004515983.1 | Scaffold543 | 292357                  | TT                              | CC              | 1946957433               |



| SNPs IDs             | Chromosome IDs | Chromosomes | Physical positions (bp) | CDC Frontier (Reference genome) | (ILWC46 & LPNB) | NCBI SNPdb Accession IDs |
|----------------------|----------------|-------------|-------------------------|---------------------------------|-----------------|--------------------------|
| SNP_P4_133616_300813 | NW_004515983.1 | Scaffold543 | 300813                  | GG                              | AA              | 1946957435               |
| SNP_P4_133617_698    | NW_004515984.1 | Scaffold544 | 698                     | TT                              | AA              | 1946957437               |
| SNP_P4_133618_766    | NW_004515984.1 | Scaffold544 | 766                     | GG                              | AA              | 1946957439               |
| SNP_P4_133619_779    | NW_004515984.1 | Scaffold544 | 779                     | GG                              | AA              | 1946957441               |
| SNP_P4_133620_1309   | NW_004515984.1 | Scaffold544 | 1309                    | TT                              | AA              | 1946957443               |
| SNP_P4_133621_1894   | NW_004515984.1 | Scaffold544 | 1894                    | AA                              | GG              | 1946957445               |
| SNP_P4_133622_1895   | NW_004515984.1 | Scaffold544 | 1895                    | TT                              | AA              | 1946957447               |
| SNP_P4_133623_2857   | NW_004515984.1 | Scaffold544 | 2857                    | TT                              | CC              | 1946957449               |
| SNP_P4_133624_2882   | NW_004515984.1 | Scaffold544 | 2882                    | GG                              | AA              | 1946957451               |
| SNP_P4_133625_2925   | NW_004515984.1 | Scaffold544 | 2925                    | GG                              | TT              | 1946957453               |
| SNP_P4_133626_3683   | NW_004515984.1 | Scaffold544 | 3683                    | AA                              | CC              | 1946957455               |
| SNP_P4_133627_3908   | NW_004515984.1 | Scaffold544 | 3908                    | CC                              | AA              | 1946957457               |
| SNP_P4_133628_4220   | NW_004515984.1 | Scaffold544 | 4220                    | GG                              | AA              | 1946957459               |
| SNP_P4_133629_6761   | NW_004515984.1 | Scaffold544 | 6761                    | AA                              | CC              | 1946957462               |
| SNP_P4_133630_6927   | NW_004515984.1 | Scaffold544 | 6927                    | AA                              | GG              | 1946957464               |
| SNP_P4_133631_7080   | NW_004515984.1 | Scaffold544 | 7080                    | GG                              | AA              | 1946957466               |
| SNP_P4_133632_7086   | NW_004515984.1 | Scaffold544 | 7086                    | GG                              | TT              | 1946957468               |
| SNP_P4_133633_7148   | NW_004515984.1 | Scaffold544 | 7148                    | AA                              | CC              | 1946957470               |
| SNP_P4_133634_7171   | NW_004515984.1 | Scaffold544 | 7171                    | GG                              | CC              | 1946957472               |
| SNP_P4_133635_7197   | NW_004515984.1 | Scaffold544 | 7197                    | AA                              | GG              | 1946957474               |
| SNP_P4_133636_7231   | NW_004515984.1 | Scaffold544 | 7231                    | CC                              | TT              | 1946957476               |
| SNP_P4_133637_8037   | NW_004515984.1 | Scaffold544 | 8037                    | CC                              | AA              | 1946957478               |
| SNP_P4_133638_9216   | NW_004515984.1 | Scaffold544 | 9216                    | GG                              | TT              | 1946957480               |
| SNP_P4_133639_9327   | NW_004515984.1 | Scaffold544 | 9327                    | AA                              | GG              | 1946957482               |
| SNP_P4_133640_9367   | NW_004515984.1 | Scaffold544 | 9367                    | AA                              | GG              | 1946957484               |
| SNP_P4_133641_14312  | NW_004515984.1 | Scaffold544 | 14312                   | GG                              | AA              | 1946957486               |
| SNP_P4_133642_16148  | NW_004515984.1 | Scaffold544 | 16148                   | CC                              | TT              | 1946957488               |
| SNP_P4_133643_16163  | NW_004515984.1 | Scaffold544 | 16163                   | AA                              | CC              | 1946957490               |
| SNP_P4_133644_16359  | NW_004515984.1 | Scaffold544 | 16359                   | AA                              | TT              | 1946957492               |
| SNP_P4_133645_16442  | NW_004515984.1 | Scaffold544 | 16442                   | TT                              | GG              | 1946957494               |
| SNP_P4_133646_16453  | NW_004515984.1 | Scaffold544 | 16453                   | TT                              | CC              | 1946957496               |
| SNP_P4_133647_17014  | NW_004515984.1 | Scaffold544 | 17014                   | GG                              | TT              | 1946957498               |
| SNP_P4_133648_17100  | NW_004515984.1 | Scaffold544 | 17100                   | CC                              | GG              | 1946957500               |
| SNP_P4_133649_17203  | NW_004515984.1 | Scaffold544 | 17203                   | CC                              | TT              | 1946957502               |
| SNP_P4_133650_18190  | NW_004515984.1 | Scaffold544 | 18190                   | CC                              | AA              | 1946957504               |
| SNP_P4_133651_18778  | NW_004515984.1 | Scaffold544 | 18778                   | CC                              | TT              | 1946957506               |
| SNP_P4_133652_18867  | NW_004515984.1 | Scaffold544 | 18867                   | CC                              | TT              | 1946957508               |
| SNP_P4_133653_21329  | NW_004515984.1 | Scaffold544 | 21329                   | CC                              | TT              | 1946957510               |
| SNP_P4_133654_22652  | NW_004515984.1 | Scaffold544 | 22652                   | TT                              | GG              | 1946957512               |
| SNP_P4_133655_22654  | NW_004515984.1 | Scaffold544 | 22654                   | AA                              | GG              | 1946957514               |
| SNP_P4_133657_37119  | NW_004515984.1 | Scaffold544 | 37119                   | CC                              | TT              | 1946957516               |
| SNP_P4_133660_46375  | NW_004515984.1 | Scaffold544 | 46375                   | CC                              | TT              | 1946957518               |

| SNPs IDs            | Chromosome IDs | Chromosomes | Physical positions (bp) | CDC Frontier (Reference genome) | (ILWC46 & LPNB) | NCBI SNPdb Accession IDs |
|---------------------|----------------|-------------|-------------------------|---------------------------------|-----------------|--------------------------|
| SNP_P4_133661_48107 | NW_004515984.1 | Scaffold544 | 48107                   | TT                              | CC              | 1946957520               |
| SNP_P4_133662_48452 | NW_004515984.1 | Scaffold544 | 48452                   | AA                              | CC              | 1946957522               |
| SNP_P4_133663_48791 | NW_004515984.1 | Scaffold544 | 48791                   | CC                              | AA              | 1946957524               |
| SNP_P4_133664_50913 | NW_004515984.1 | Scaffold544 | 50913                   | CC                              | GG              | 1946957526               |
| SNP_P4_133665_51277 | NW_004515984.1 | Scaffold544 | 51277                   | TT                              | GG              | 1946957528               |
| SNP_P4_133666_51302 | NW_004515984.1 | Scaffold544 | 51302                   | AA                              | GG              | 1946957530               |
| SNP_P4_133667_51395 | NW_004515984.1 | Scaffold544 | 51395                   | GG                              | CC              | 1946957532               |
| SNP_P4_133668_51401 | NW_004515984.1 | Scaffold544 | 51401                   | AA                              | GG              | 1946957534               |
| SNP_P4_133669_51456 | NW_004515984.1 | Scaffold544 | 51456                   | CC                              | TT              | 1946957536               |
| SNP_P4_133670_51732 | NW_004515984.1 | Scaffold544 | 51732                   | GG                              | AA              | 1946957538               |
| SNP_P4_133671_51782 | NW_004515984.1 | Scaffold544 | 51782                   | GG                              | AA              | 1946957540               |
| SNP_P4_133672_51878 | NW_004515984.1 | Scaffold544 | 51878                   | AA                              | TT              | 1946957542               |
| SNP_P4_133673_51907 | NW_004515984.1 | Scaffold544 | 51907                   | TT                              | CC              | 1946957544               |
| SNP_P4_133674_51973 | NW_004515984.1 | Scaffold544 | 51973                   | GG                              | CC              | 1946957546               |
| SNP_P4_133675_52482 | NW_004515984.1 | Scaffold544 | 52482                   | GG                              | CC              | 1946957548               |
| SNP_P4_133676_52872 | NW_004515984.1 | Scaffold544 | 52872                   | TT                              | CC              | 1946957550               |
| SNP_P4_133677_52913 | NW_004515984.1 | Scaffold544 | 52913                   | TT                              | CC              | 1946957552               |
| SNP_P4_133678_53144 | NW_004515984.1 | Scaffold544 | 53144                   | CC                              | TT              | 1946957554               |
| SNP_P4_133679_53281 | NW_004515984.1 | Scaffold544 | 53281                   | TT                              | CC              | 1946957556               |
| SNP_P4_133680_53972 | NW_004515984.1 | Scaffold544 | 53972                   | TT                              | CC              | 1946957558               |
| SNP_P4_133681_54371 | NW_004515984.1 | Scaffold544 | 54371                   | GG                              | AA              | 1946957560               |
| SNP_P4_133682_54384 | NW_004515984.1 | Scaffold544 | 54384                   | AA                              | GG              | 1946957562               |
| SNP_P4_133683_54716 | NW_004515984.1 | Scaffold544 | 54716                   | AA                              | GG              | 1946957564               |
| SNP_P4_133684_54772 | NW_004515984.1 | Scaffold544 | 54772                   | GG                              | TT              | 1946957566               |
| SNP_P4_133685_55233 | NW_004515984.1 | Scaffold544 | 55233                   | AA                              | GG              | 1946957568               |
| SNP_P4_133686_55436 | NW_004515984.1 | Scaffold544 | 55436                   | TT                              | CC              | 1946957570               |
| SNP_P4_133687_55579 | NW_004515984.1 | Scaffold544 | 55579                   | AA                              | TT              | 1946957572               |
| SNP_P4_133688_56072 | NW_004515984.1 | Scaffold544 | 56072                   | GG                              | AA              | 1946957574               |
| SNP_P4_133689_56579 | NW_004515984.1 | Scaffold544 | 56579                   | GG                              | AA              | 1946957576               |
| SNP_P4_133690_56783 | NW_004515984.1 | Scaffold544 | 56783                   | GG                              | TT              | 1946957578               |
| SNP_P4_133691_56827 | NW_004515984.1 | Scaffold544 | 56827                   | GG                              | AA              | 1946957580               |
| SNP_P4_133692_56868 | NW_004515984.1 | Scaffold544 | 56868                   | TT                              | AA              | 1946957582               |
| SNP_P4_133693_57046 | NW_004515984.1 | Scaffold544 | 57046                   | TT                              | AA              | 1946957584               |
| SNP_P4_133694_57187 | NW_004515984.1 | Scaffold544 | 57187                   | AA                              | CC              | 1946957586               |
| SNP_P4_133696_58198 | NW_004515984.1 | Scaffold544 | 58198                   | CC                              | AA              | 1946957588               |
| SNP_P4_133697_58228 | NW_004515984.1 | Scaffold544 | 58228                   | CC                              | AA              | 1946957590               |
| SNP_P4_133698_58230 | NW_004515984.1 | Scaffold544 | 58230                   | TT                              | AA              | 1946957592               |
| SNP_P4_133699_58248 | NW_004515984.1 | Scaffold544 | 58248                   | AA                              | CC              | 1946957594               |
| SNP_P4_133700_58444 | NW_004515984.1 | Scaffold544 | 58444                   | TT                              | CC              | 1946957596               |
| SNP_P4_133701_58647 | NW_004515984.1 | Scaffold544 | 58647                   | AA                              | TT              | 1946957598               |
| SNP_P4_133702_58742 | NW_004515984.1 | Scaffold544 | 58742                   | GG                              | CC              | 1946957600               |
| SNP_P4_133703_58769 | NW_004515984.1 | Scaffold544 | 58769                   | TT                              | AA              | 1946957602               |

| SNPs IDs            | Chromosome IDs | Chromosomes | Physical positions (bp) | CDC Frontier (Reference genome) | (ILWC46 & LPNB) | NCBI SNPdb Accession IDs |
|---------------------|----------------|-------------|-------------------------|---------------------------------|-----------------|--------------------------|
| SNP_P4_133704_59142 | NW_004515984.1 | Scaffold544 | 59142                   | CC                              | TT              | 1946957604               |
| SNP_P4_133705_59155 | NW_004515984.1 | Scaffold544 | 59155                   | TT                              | AA              | 1946957606               |
| SNP_P4_133706_59836 | NW_004515984.1 | Scaffold544 | 59836                   | CC                              | GG              | 1946957608               |
| SNP_P4_133707_59955 | NW_004515984.1 | Scaffold544 | 59955                   | TT                              | AA              | 1946957610               |
| SNP_P4_133708_60052 | NW_004515984.1 | Scaffold544 | 60052                   | GG                              | AA              | 1946957612               |
| SNP_P4_133709_60152 | NW_004515984.1 | Scaffold544 | 60152                   | GG                              | AA              | 1946957614               |
| SNP_P4_133710_60196 | NW_004515984.1 | Scaffold544 | 60196                   | TT                              | GG              | 1946957616               |
| SNP_P4_133711_60264 | NW_004515984.1 | Scaffold544 | 60264                   | AA                              | GG              | 1946957618               |
| SNP_P4_133712_60568 | NW_004515984.1 | Scaffold544 | 60568                   | AA                              | GG              | 1946957620               |
| SNP_P4_133713_60593 | NW_004515984.1 | Scaffold544 | 60593                   | TT                              | CC              | 1946957622               |
| SNP_P4_133714_60651 | NW_004515984.1 | Scaffold544 | 60651                   | TT                              | AA              | 1946957624               |
| SNP_P4_133715_60703 | NW_004515984.1 | Scaffold544 | 60703                   | AA                              | GG              | 1946957626               |
| SNP_P4_133716_60913 | NW_004515984.1 | Scaffold544 | 60913                   | CC                              | GG              | 1946957628               |
| SNP_P4_133717_61062 | NW_004515984.1 | Scaffold544 | 61062                   | AA                              | GG              | 1946957630               |
| SNP_P4_133718_61167 | NW_004515984.1 | Scaffold544 | 61167                   | GG                              | TT              | 1946957632               |
| SNP_P4_133719_61225 | NW_004515984.1 | Scaffold544 | 61225                   | TT                              | GG              | 1946957634               |
| SNP_P4_133720_61422 | NW_004515984.1 | Scaffold544 | 61422                   | AA                              | TT              | 1946957636               |
| SNP_P4_133721_61611 | NW_004515984.1 | Scaffold544 | 61611                   | AA                              | GG              | 1946957638               |
| SNP_P4_133722_62489 | NW_004515984.1 | Scaffold544 | 62489                   | TT                              | AA              | 1946957640               |
| SNP_P4_133723_62600 | NW_004515984.1 | Scaffold544 | 62600                   | AA                              | TT              | 1946957642               |
| SNP_P4_133724_63062 | NW_004515984.1 | Scaffold544 | 63062                   | TT                              | GG              | 1946957644               |
| SNP_P4_133725_63114 | NW_004515984.1 | Scaffold544 | 63114                   | AA                              | GG              | 1946957646               |
| SNP_P4_133726_63148 | NW_004515984.1 | Scaffold544 | 63148                   | CC                              | GG              | 1946957648               |
| SNP_P4_133727_63161 | NW_004515984.1 | Scaffold544 | 63161                   | AA                              | GG              | 1946957650               |
| SNP_P4_133728_63190 | NW_004515984.1 | Scaffold544 | 63190                   | AA                              | GG              | 1946957652               |
| SNP_P4_133729_63331 | NW_004515984.1 | Scaffold544 | 63331                   | AA                              | GG              | 1946957654               |
| SNP_P4_133730_63341 | NW_004515984.1 | Scaffold544 | 63341                   | CC                              | TT              | 1946957656               |
| SNP_P4_133731_63397 | NW_004515984.1 | Scaffold544 | 63397                   | AA                              | GG              | 1946957658               |
| SNP_P4_133732_66553 | NW_004515984.1 | Scaffold544 | 66553                   | GG                              | CC              | 1946957660               |
| SNP_P4_133733_66564 | NW_004515984.1 | Scaffold544 | 66564                   | CC                              | AA              | 1946957663               |
| SNP_P4_133734_66609 | NW_004515984.1 | Scaffold544 | 66609                   | TT                              | AA              | 1946957665               |
| SNP_P4_133735_66754 | NW_004515984.1 | Scaffold544 | 66754                   | GG                              | AA              | 1946957667               |
| SNP_P4_133736_66956 | NW_004515984.1 | Scaffold544 | 66956                   | CC                              | AA              | 1946957669               |
| SNP_P4_133737_67016 | NW_004515984.1 | Scaffold544 | 67016                   | TT                              | AA              | 1946957671               |
| SNP_P4_133739_67556 | NW_004515984.1 | Scaffold544 | 67556                   | GG                              | CC              | 1946957673               |
| SNP_P4_133740_67681 | NW_004515984.1 | Scaffold544 | 67681                   | TT                              | GG              | 1946957675               |
| SNP_P4_133741_67746 | NW_004515984.1 | Scaffold544 | 67746                   | CC                              | AA              | 1946957677               |
| SNP_P4_133742_67844 | NW_004515984.1 | Scaffold544 | 67844                   | TT                              | CC              | 1946957679               |
| SNP_P4_133743_67982 | NW_004515984.1 | Scaffold544 | 67982                   | AA                              | TT              | 1946957681               |
| SNP_P4_133744_67994 | NW_004515984.1 | Scaffold544 | 67994                   | CC                              | AA              | 1946957683               |
| SNP_P4_133745_69509 | NW_004515984.1 | Scaffold544 | 69509                   | TT                              | CC              | 1946957685               |
| SNP_P4_133746_69598 | NW_004515984.1 | Scaffold544 | 69598                   | CC                              | TT              | 1946957687               |

| SNPs IDs            | Chromosome IDs | Chromosomes | Physical positions (bp) | CDC Frontier (Reference genome) | (ILWC46 & LPNB) | NCBI SNPdb Accession IDs |
|---------------------|----------------|-------------|-------------------------|---------------------------------|-----------------|--------------------------|
| SNP_P4_133747_69653 | NW_004515984.1 | Scaffold544 | 69653                   | TT                              | AA              | 1946957689               |
| SNP_P4_133748_69808 | NW_004515984.1 | Scaffold544 | 69808                   | TT                              | CC              | 1946957691               |
| SNP_P4_133749_70337 | NW_004515984.1 | Scaffold544 | 70337                   | TT                              | AA              | 1946957693               |
| SNP_P4_133750_70434 | NW_004515984.1 | Scaffold544 | 70434                   | TT                              | AA              | 1946957695               |
| SNP_P4_133751_70446 | NW_004515984.1 | Scaffold544 | 70446                   | TT                              | AA              | 1946957697               |
| SNP_P4_133752_70517 | NW_004515984.1 | Scaffold544 | 70517                   | TT                              | GG              | 1946957699               |
| SNP_P4_133753_70521 | NW_004515984.1 | Scaffold544 | 70521                   | AA                              | TT              | 1946957701               |
| SNP_P4_133754_70522 | NW_004515984.1 | Scaffold544 | 70522                   | AA                              | CC              | 1946957703               |
| SNP_P4_133755_70527 | NW_004515984.1 | Scaffold544 | 70527                   | TT                              | GG              | 1946957705               |
| SNP_P4_133756_70561 | NW_004515984.1 | Scaffold544 | 70561                   | TT                              | GG              | 1946957707               |
| SNP_P4_133757_70568 | NW_004515984.1 | Scaffold544 | 70568                   | CC                              | AA              | 1946957709               |
| SNP_P4_133758_70597 | NW_004515984.1 | Scaffold544 | 70597                   | GG                              | CC              | 1946957711               |
| SNP_P4_133759_75659 | NW_004515984.1 | Scaffold544 | 75659                   | TT                              | GG              | 1946957713               |
| SNP_P4_133760_76575 | NW_004515984.1 | Scaffold544 | 76575                   | AA                              | TT              | 1946957715               |
| SNP_P4_133761_76648 | NW_004515984.1 | Scaffold544 | 76648                   | TT                              | GG              | 1946957717               |
| SNP_P4_133762_76701 | NW_004515984.1 | Scaffold544 | 76701                   | TT                              | CC              | 1946957719               |
| SNP_P4_133763_76761 | NW_004515984.1 | Scaffold544 | 76761                   | AA                              | CC              | 1946957721               |
| SNP_P4_133764_76802 | NW_004515984.1 | Scaffold544 | 76802                   | AA                              | CC              | 1946957723               |
| SNP_P4_133765_77345 | NW_004515984.1 | Scaffold544 | 77345                   | TT                              | AA              | 1946957725               |
| SNP_P4_133766_81671 | NW_004515984.1 | Scaffold544 | 81671                   | AA                              | GG              | 1946957727               |
| SNP_P4_133767_81732 | NW_004515984.1 | Scaffold544 | 81732                   | TT                              | AA              | 1946957729               |
| SNP_P4_133768_81763 | NW_004515984.1 | Scaffold544 | 81763                   | AA                              | GG              | 1946957731               |
| SNP_P4_133769_82305 | NW_004515984.1 | Scaffold544 | 82305                   | CC                              | AA              | 1946957733               |
| SNP_P4_133770_83379 | NW_004515984.1 | Scaffold544 | 83379                   | GG                              | AA              | 1946957735               |
| SNP_P4_133771_84031 | NW_004515984.1 | Scaffold544 | 84031                   | AA                              | GG              | 1946957737               |
| SNP_P4_133772_84138 | NW_004515984.1 | Scaffold544 | 84138                   | CC                              | TT              | 1946957739               |
| SNP_P4_133773_84622 | NW_004515984.1 | Scaffold544 | 84622                   | GG                              | AA              | 1946957741               |
| SNP_P4_133774_84739 | NW_004515984.1 | Scaffold544 | 84739                   | AA                              | CC              | 1946957743               |
| SNP_P4_133775_84815 | NW_004515984.1 | Scaffold544 | 84815                   | GG                              | AA              | 1946957745               |
| SNP_P4_133776_85326 | NW_004515984.1 | Scaffold544 | 85326                   | GG                              | AA              | 1946957747               |
| SNP_P4_133777_85538 | NW_004515984.1 | Scaffold544 | 85538                   | AA                              | CC              | 1946957749               |
| SNP_P4_133779_85796 | NW_004515984.1 | Scaffold544 | 85796                   | CC                              | TT              | 1946957751               |
| SNP_P4_133780_86007 | NW_004515984.1 | Scaffold544 | 86007                   | GG                              | CC              | 1946957753               |
| SNP_P4_133781_86816 | NW_004515984.1 | Scaffold544 | 86816                   | TT                              | CC              | 1946957755               |
| SNP_P4_133782_87367 | NW_004515984.1 | Scaffold544 | 87367                   | TT                              | CC              | 1946957757               |
| SNP_P4_133783_88599 | NW_004515984.1 | Scaffold544 | 88599                   | AA                              | GG              | 1946957759               |
| SNP_P4_133784_90354 | NW_004515984.1 | Scaffold544 | 90354                   | AA                              | CC              | 1946957761               |
| SNP_P4_133785_92604 | NW_004515984.1 | Scaffold544 | 92604                   | AA                              | GG              | 1946957764               |
| SNP_P4_133786_93443 | NW_004515984.1 | Scaffold544 | 93443                   | AA                              | GG              | 1946957766               |
| SNP_P4_133787_93444 | NW_004515984.1 | Scaffold544 | 93444                   | CC                              | GG              | 1946957768               |
| SNP_P4_133788_96496 | NW_004515984.1 | Scaffold544 | 96496                   | TT                              | GG              | 1946957770               |
| SNP_P4_133789_96504 | NW_004515984.1 | Scaffold544 | 96504                   | TT                              | CC              | 1946957772               |

| SNPs IDs             | Chromosome IDs | Chromosomes | Physical positions (bp) | CDC Frontier (Reference genome) | (ILWC46 & LPNB) | NCBI SNPdb Accession IDs |
|----------------------|----------------|-------------|-------------------------|---------------------------------|-----------------|--------------------------|
| SNP_P4_133790_96507  | NW_004515984.1 | Scaffold544 | 96507                   | TT                              | AA              | 1946957774               |
| SNP_P4_133791_96786  | NW_004515984.1 | Scaffold544 | 96786                   | AA                              | GG              | 1946957776               |
| SNP_P4_133792_99852  | NW_004515984.1 | Scaffold544 | 99852                   | AA                              | CC              | 1946957778               |
| SNP_P4_133793_99885  | NW_004515984.1 | Scaffold544 | 99885                   | TT                              | AA              | 1946957780               |
| SNP_P4_133794_105111 | NW_004515984.1 | Scaffold544 | 105111                  | TT                              | AA              | 1946957782               |
| SNP_P4_133796_105485 | NW_004515984.1 | Scaffold544 | 105485                  | TT                              | CC              | 1946957784               |
| SNP_P4_133797_105584 | NW_004515984.1 | Scaffold544 | 105584                  | TT                              | GG              | 1946957786               |
| SNP_P4_133798_105687 | NW_004515984.1 | Scaffold544 | 105687                  | GG                              | AA              | 1946957788               |
| SNP_P4_133799_105804 | NW_004515984.1 | Scaffold544 | 105804                  | AA                              | CC              | 1946957790               |
| SNP_P4_133800_110532 | NW_004515984.1 | Scaffold544 | 110532                  | GG                              | CC              | 1946957792               |
| SNP_P4_133801_111076 | NW_004515984.1 | Scaffold544 | 111076                  | CC                              | AA              | 1946957794               |
| SNP_P4_133803_115378 | NW_004515984.1 | Scaffold544 | 115378                  | GG                              | AA              | 1946957796               |
| SNP_P4_133804_118052 | NW_004515984.1 | Scaffold544 | 118052                  | TT                              | CC              | 1946957798               |
| SNP_P4_133805_118329 | NW_004515984.1 | Scaffold544 | 118329                  | GG                              | AA              | 1946957800               |
| SNP_P4_133806_120230 | NW_004515984.1 | Scaffold544 | 120230                  | AA                              | TT              | 1946957802               |
| SNP_P4_133807_120232 | NW_004515984.1 | Scaffold544 | 120232                  | TT                              | CC              | 1946957804               |
| SNP_P4_133808_123360 | NW_004515984.1 | Scaffold544 | 123360                  | GG                              | AA              | 1946957806               |
| SNP_P4_133809_123365 | NW_004515984.1 | Scaffold544 | 123365                  | GG                              | AA              | 1946957807               |
| SNP_P4_133810_123370 | NW_004515984.1 | Scaffold544 | 123370                  | AA                              | GG              | 1946957809               |
| SNP_P4_133811_123450 | NW_004515984.1 | Scaffold544 | 123450                  | AA                              | GG              | 1946957811               |
| SNP_P4_133812_123459 | NW_004515984.1 | Scaffold544 | 123459                  | AA                              | TT              | 1946957813               |
| SNP_P4_133813_123479 | NW_004515984.1 | Scaffold544 | 123479                  | TT                              | AA              | 1946957815               |
| SNP_P4_133814_123502 | NW_004515984.1 | Scaffold544 | 123502                  | AA                              | CC              | 1946957817               |
| SNP_P4_133815_123519 | NW_004515984.1 | Scaffold544 | 123519                  | AA                              | CC              | 1946957819               |
| SNP_P4_133816_123991 | NW_004515984.1 | Scaffold544 | 123991                  | CC                              | TT              | 1946957821               |
| SNP_P4_133817_124217 | NW_004515984.1 | Scaffold544 | 124217                  | AA                              | GG              | 1946957823               |
| SNP_P4_133818_124218 | NW_004515984.1 | Scaffold544 | 124218                  | AA                              | CC              | 1946957825               |
| SNP_P4_133819_125387 | NW_004515984.1 | Scaffold544 | 125387                  | CC                              | TT              | 1946957827               |
| SNP_P4_133820_125394 | NW_004515984.1 | Scaffold544 | 125394                  | CC                              | TT              | 1946957829               |
| SNP_P4_133821_125609 | NW_004515984.1 | Scaffold544 | 125609                  | TT                              | AA              | 1946957830               |
| SNP_P4_133822_125694 | NW_004515984.1 | Scaffold544 | 125694                  | AA                              | GG              | 1946957832               |
| SNP_P4_133823_125707 | NW_004515984.1 | Scaffold544 | 125707                  | GG                              | TT              | 1946957834               |
| SNP_P4_133824_125732 | NW_004515984.1 | Scaffold544 | 125732                  | AA                              | GG              | 1946957836               |
| SNP_P4_133825_125814 | NW_004515984.1 | Scaffold544 | 125814                  | TT                              | AA              | 1946957838               |
| SNP_P4_133826_125819 | NW_004515984.1 | Scaffold544 | 125819                  | CC                              | TT              | 1946957840               |
| SNP_P4_133827_125923 | NW_004515984.1 | Scaffold544 | 125923                  | AA                              | GG              | 1946957842               |
| SNP_P4_133828_125978 | NW_004515984.1 | Scaffold544 | 125978                  | AA                              | GG              | 1946957844               |
| SNP_P4_133829_126028 | NW_004515984.1 | Scaffold544 | 126028                  | GG                              | AA              | 1946957846               |
| SNP_P4_133830_126032 | NW_004515984.1 | Scaffold544 | 126032                  | GG                              | TT              | 1946957848               |
| SNP_P4_133831_126038 | NW_004515984.1 | Scaffold544 | 126038                  | GG                              | AA              | 1946957849               |
| SNP_P4_133832_126139 | NW_004515984.1 | Scaffold544 | 126139                  | GG                              | AA              | 1946957851               |
| SNP_P4_133833_126197 | NW_004515984.1 | Scaffold544 | 126197                  | CC                              | TT              | 1946957853               |

| SNPs IDs             | Chromosome IDs | Chromosomes | Physical positions (bp) | CDC Frontier (Reference genome) | (ILWC46 & LPNB) | NCBI SNPdb Accession IDs |
|----------------------|----------------|-------------|-------------------------|---------------------------------|-----------------|--------------------------|
| SNP_P4_133834_126207 | NW_004515984.1 | Scaffold544 | 126207                  | GG                              | CC              | 1946957855               |
| SNP_P4_133835_126266 | NW_004515984.1 | Scaffold544 | 126266                  | CC                              | AA              | 1946957857               |
| SNP_P4_133836_126284 | NW_004515984.1 | Scaffold544 | 126284                  | CC                              | AA              | 1946957859               |
| SNP_P4_133837_126328 | NW_004515984.1 | Scaffold544 | 126328                  | CC                              | GG              | 1946957861               |
| SNP_P4_133838_126373 | NW_004515984.1 | Scaffold544 | 126373                  | CC                              | GG              | 1946957863               |
| SNP_P4_133839_126484 | NW_004515984.1 | Scaffold544 | 126484                  | AA                              | TT              | 1946957865               |
| SNP_P4_133840_128090 | NW_004515984.1 | Scaffold544 | 128090                  | GG                              | AA              | 1946957867               |
| SNP_P4_133841_128115 | NW_004515984.1 | Scaffold544 | 128115                  | GG                              | AA              | 1946957869               |
| SNP_P4_133842_128362 | NW_004515984.1 | Scaffold544 | 128362                  | TT                              | AA              | 1946957871               |
| SNP_P4_133843_129509 | NW_004515984.1 | Scaffold544 | 129509                  | TT                              | AA              | 1946957873               |
| SNP_P4_133844_129590 | NW_004515984.1 | Scaffold544 | 129590                  | GG                              | CC              | 1946957875               |
| SNP_P4_133845_130552 | NW_004515984.1 | Scaffold544 | 130552                  | TT                              | AA              | 1946957877               |
| SNP_P4_133846_130684 | NW_004515984.1 | Scaffold544 | 130684                  | CC                              | TT              | 1946957879               |
| SNP_P4_133847_130712 | NW_004515984.1 | Scaffold544 | 130712                  | TT                              | AA              | 1946957881               |
| SNP_P4_133848_130883 | NW_004515984.1 | Scaffold544 | 130883                  | CC                              | TT              | 1946957883               |
| SNP_P4_133849_130940 | NW_004515984.1 | Scaffold544 | 130940                  | AA                              | GG              | 1946957885               |
| SNP_P4_133850_130954 | NW_004515984.1 | Scaffold544 | 130954                  | AA                              | GG              | 1946957887               |
| SNP_P4_133851_132673 | NW_004515984.1 | Scaffold544 | 132673                  | CC                              | TT              | 1946957889               |
| SNP_P4_133852_132699 | NW_004515984.1 | Scaffold544 | 132699                  | CC                              | GG              | 1946957891               |
| SNP_P4_133853_132953 | NW_004515984.1 | Scaffold544 | 132953                  | GG                              | CC              | 1946957894               |
| SNP_P4_133854_133003 | NW_004515984.1 | Scaffold544 | 133003                  | TT                              | CC              | 1946957896               |
| SNP_P4_133855_133051 | NW_004515984.1 | Scaffold544 | 133051                  | GG                              | AA              | 1946957898               |
| SNP_P4_133856_133654 | NW_004515984.1 | Scaffold544 | 133654                  | CC                              | TT              | 1946957900               |
| SNP_P4_133858_134609 | NW_004515984.1 | Scaffold544 | 134609                  | AA                              | CC              | 1946957902               |
| SNP_P4_133859_134656 | NW_004515984.1 | Scaffold544 | 134656                  | TT                              | CC              | 1946957904               |
| SNP_P4_133860_134847 | NW_004515984.1 | Scaffold544 | 134847                  | TT                              | AA              | 1946957906               |
| SNP_P4_133861_136266 | NW_004515984.1 | Scaffold544 | 136266                  | TT                              | AA              | 1946957908               |
| SNP_P4_133862_136267 | NW_004515984.1 | Scaffold544 | 136267                  | TT                              | AA              | 1946957910               |
| SNP_P4_133863_137171 | NW_004515984.1 | Scaffold544 | 137171                  | AA                              | TT              | 1946957912               |
| SNP_P4_133864_137545 | NW_004515984.1 | Scaffold544 | 137545                  | TT                              | GG              | 1946957914               |
| SNP_P4_133865_137617 | NW_004515984.1 | Scaffold544 | 137617                  | GG                              | CC              | 1946957916               |
| SNP_P4_133866_144449 | NW_004515984.1 | Scaffold544 | 144449                  | AA                              | TT              | 1946957918               |
| SNP_P4_133867_146316 | NW_004515984.1 | Scaffold544 | 146316                  | GG                              | AA              | 1946957920               |
| SNP_P4_133870_150332 | NW_004515984.1 | Scaffold544 | 150332                  | AA                              | GG              | 1946957922               |
| SNP_P4_133871_150549 | NW_004515984.1 | Scaffold544 | 150549                  | CC                              | AA              | 1946957925               |
| SNP_P4_133872_167853 | NW_004515984.1 | Scaffold544 | 167853                  | GG                              | AA              | 1946957927               |
| SNP_P4_133873_167855 | NW_004515984.1 | Scaffold544 | 167855                  | CC                              | AA              | 1946957929               |
| SNP_P4_133874_168463 | NW_004515984.1 | Scaffold544 | 168463                  | AA                              | TT              | 1946957931               |
| SNP_P4_133875_173079 | NW_004515984.1 | Scaffold544 | 173079                  | TT                              | CC              | 1946957933               |
| SNP_P4_133876_176904 | NW_004515984.1 | Scaffold544 | 176904                  | CC                              | TT              | 1946957935               |
| SNP_P4_133877_177029 | NW_004515984.1 | Scaffold544 | 177029                  | AA                              | CC              | 1946957937               |
| SNP_P4_133878_177055 | NW_004515984.1 | Scaffold544 | 177055                  | AA                              | GG              | 1946957939               |

| SNPs IDs             | Chromosome IDs | Chromosomes | Physical positions (bp) | CDC Frontier (Reference genome) | (ILWC46 & LPNB) | NCBI SNPdb Accession IDs |
|----------------------|----------------|-------------|-------------------------|---------------------------------|-----------------|--------------------------|
| SNP_P4_133879_177090 | NW_004515984.1 | Scaffold544 | 177090                  | AA                              | TT              | 1946957941               |
| SNP_P4_133880_180900 | NW_004515984.1 | Scaffold544 | 180900                  | TT                              | CC              | 1946957943               |
| SNP_P4_133881_181226 | NW_004515984.1 | Scaffold544 | 181226                  | GG                              | AA              | 1946957945               |
| SNP_P4_133882_181230 | NW_004515984.1 | Scaffold544 | 181230                  | CC                              | TT              | 1946957947               |
| SNP_P4_133883_181260 | NW_004515984.1 | Scaffold544 | 181260                  | CC                              | TT              | 1946957949               |
| SNP_P4_133884_181318 | NW_004515984.1 | Scaffold544 | 181318                  | TT                              | CC              | 1946957951               |
| SNP_P4_133885_181549 | NW_004515984.1 | Scaffold544 | 181549                  | AA                              | TT              | 1946957953               |
| SNP_P4_133886_181553 | NW_004515984.1 | Scaffold544 | 181553                  | TT                              | CC              | 1946957955               |
| SNP_P4_133887_181945 | NW_004515984.1 | Scaffold544 | 181945                  | AA                              | TT              | 1946957957               |
| SNP_P4_133888_182054 | NW_004515984.1 | Scaffold544 | 182054                  | GG                              | AA              | 1946957959               |
| SNP_P4_133889_182089 | NW_004515984.1 | Scaffold544 | 182089                  | GG                              | AA              | 1946957961               |
| SNP_P4_133890_182475 | NW_004515984.1 | Scaffold544 | 182475                  | TT                              | CC              | 1946957963               |
| SNP_P4_133891_182550 | NW_004515984.1 | Scaffold544 | 182550                  | AA                              | GG              | 1946957965               |
| SNP_P4_133892_191059 | NW_004515984.1 | Scaffold544 | 191059                  | TT                              | GG              | 1946957967               |
| SNP_P4_133894_193582 | NW_004515984.1 | Scaffold544 | 193582                  | AA                              | GG              | 1946957969               |
| SNP_P4_133895_195351 | NW_004515984.1 | Scaffold544 | 195351                  | CC                              | GG              | 1946957971               |
| SNP_P4_133896_195446 | NW_004515984.1 | Scaffold544 | 195446                  | TT                              | AA              | 1946957973               |
| SNP_P4_133897_196248 | NW_004515984.1 | Scaffold544 | 196248                  | AA                              | CC              | 1946957975               |
| SNP_P4_133898_208803 | NW_004515984.1 | Scaffold544 | 208803                  | AA                              | GG              | 1946957977               |
| SNP_P4_133899_211161 | NW_004515984.1 | Scaffold544 | 211161                  | AA                              | TT              | 1946957979               |
| SNP_P4_133900_211334 | NW_004515984.1 | Scaffold544 | 211334                  | TT                              | GG              | 1946957981               |
| SNP_P4_133901_211638 | NW_004515984.1 | Scaffold544 | 211638                  | GG                              | AA              | 1946957983               |
| SNP_P4_133902_211727 | NW_004515984.1 | Scaffold544 | 211727                  | AA                              | CC              | 1946957985               |
| SNP_P4_133903_212748 | NW_004515984.1 | Scaffold544 | 212748                  | AA                              | TT              | 1946957987               |
| SNP_P4_133904_212793 | NW_004515984.1 | Scaffold544 | 212793                  | CC                              | AA              | 1946957989               |
| SNP_P4_133905_214773 | NW_004515984.1 | Scaffold544 | 214773                  | CC                              | AA              | 1946957991               |
| SNP_P4_133906_215101 | NW_004515984.1 | Scaffold544 | 215101                  | GG                              | AA              | 1946957993               |
| SNP_P4_133907_215102 | NW_004515984.1 | Scaffold544 | 215102                  | GG                              | CC              | 1946957995               |
| SNP_P4_133908_215129 | NW_004515984.1 | Scaffold544 | 215129                  | GG                              | AA              | 1946957997               |
| SNP_P4_133909_215131 | NW_004515984.1 | Scaffold544 | 215131                  | GG                              | AA              | 1946957999               |
| SNP_P4_133910_217025 | NW_004515984.1 | Scaffold544 | 217025                  | TT                              | GG              | 1946958001               |
| SNP_P4_133911_217430 | NW_004515984.1 | Scaffold544 | 217430                  | AA                              | TT              | 1946958003               |
| SNP_P4_133912_221531 | NW_004515984.1 | Scaffold544 | 221531                  | AA                              | CC              | 1946958005               |
| SNP_P4_133913_221548 | NW_004515984.1 | Scaffold544 | 221548                  | AA                              | GG              | 1946958007               |
| SNP_P4_133916_228197 | NW_004515984.1 | Scaffold544 | 228197                  | CC                              | TT              | 1946958009               |
| SNP_P4_133917_228550 | NW_004515984.1 | Scaffold544 | 228550                  | CC                              | TT              | 1946958011               |
| SNP_P4_133918_228598 | NW_004515984.1 | Scaffold544 | 228598                  | AA                              | GG              | 1946958013               |
| SNP_P4_133919_231301 | NW_004515984.1 | Scaffold544 | 231301                  | GG                              | AA              | 1946958015               |
| SNP_P4_133920_231974 | NW_004515984.1 | Scaffold544 | 231974                  | AA                              | GG              | 1946958017               |
| SNP_P4_133921_232595 | NW_004515984.1 | Scaffold544 | 232595                  | TT                              | AA              | 1946958019               |
| SNP_P4_133922_232808 | NW_004515984.1 | Scaffold544 | 232808                  | AA                              | GG              | 1946958021               |
| SNP_P4_133923_232893 | NW_004515984.1 | Scaffold544 | 232893                  | AA                              | TT              | 1946958023               |

| SNPs IDs             | Chromosome IDs | Chromosomes | Physical positions (bp) | CDC Frontier (Reference genome) | (ILWC46 & LPNB) | NCBI SNPdb Accession IDs |
|----------------------|----------------|-------------|-------------------------|---------------------------------|-----------------|--------------------------|
| SNP_P4_133924_233789 | NW_004515984.1 | Scaffold544 | 233789                  | AA                              | TT              | 1946958025               |
| SNP_P4_133925_233936 | NW_004515984.1 | Scaffold544 | 233936                  | TT                              | CC              | 1946958027               |
| SNP_P4_133926_236419 | NW_004515984.1 | Scaffold544 | 236419                  | GG                              | TT              | 1946958029               |
| SNP_P4_133927_237321 | NW_004515984.1 | Scaffold544 | 237321                  | TT                              | CC              | 1946958031               |
| SNP_P4_133930_238909 | NW_004515984.1 | Scaffold544 | 238909                  | AA                              | CC              | 1946958033               |
| SNP_P4_133931_238929 | NW_004515984.1 | Scaffold544 | 238929                  | CC                              | TT              | 1946958035               |
| SNP_P4_133932_241136 | NW_004515984.1 | Scaffold544 | 241136                  | GG                              | TT              | 1946958037               |
| SNP_P4_133933_241261 | NW_004515984.1 | Scaffold544 | 241261                  | CC                              | TT              | 1946958039               |
| SNP_P4_133934_241432 | NW_004515984.1 | Scaffold544 | 241432                  | CC                              | AA              | 1946958041               |
| SNP_P4_133935_241591 | NW_004515984.1 | Scaffold544 | 241591                  | CC                              | TT              | 1946958043               |
| SNP_P4_133936_241649 | NW_004515984.1 | Scaffold544 | 241649                  | TT                              | CC              | 1946958045               |
| SNP_P4_133937_244059 | NW_004515984.1 | Scaffold544 | 244059                  | GG                              | TT              | 1946958047               |
| SNP_P4_133938_244178 | NW_004515984.1 | Scaffold544 | 244178                  | GG                              | AA              | 1946958049               |
| SNP_P4_133939_247025 | NW_004515984.1 | Scaffold544 | 247025                  | CC                              | TT              | 1946958051               |
| SNP_P4_133940_248219 | NW_004515984.1 | Scaffold544 | 248219                  | CC                              | TT              | 1946958053               |
| SNP_P4_133941_248555 | NW_004515984.1 | Scaffold544 | 248555                  | TT                              | CC              | 1946958055               |
| SNP_P4_133942_258884 | NW_004515984.1 | Scaffold544 | 258884                  | GG                              | TT              | 1946958057               |
| SNP_P4_133943_259726 | NW_004515984.1 | Scaffold544 | 259726                  | GG                              | AA              | 1946958059               |
| SNP_P4_133944_261847 | NW_004515984.1 | Scaffold544 | 261847                  | CC                              | TT              | 1946958062               |
| SNP_P4_133945_264939 | NW_004515984.1 | Scaffold544 | 264939                  | GG                              | CC              | 1946958064               |
| SNP_P4_133946_265141 | NW_004515984.1 | Scaffold544 | 265141                  | TT                              | CC              | 1946958066               |
| SNP_P4_133948_266924 | NW_004515984.1 | Scaffold544 | 266924                  | GG                              | TT              | 1946958068               |
| SNP_P4_133950_269320 | NW_004515984.1 | Scaffold544 | 269320                  | AA                              | GG              | 1946958070               |
| SNP_P4_133951_269360 | NW_004515984.1 | Scaffold544 | 269360                  | AA                              | GG              | 1946958072               |
| SNP_P4_133953_277289 | NW_004515984.1 | Scaffold544 | 277289                  | GG                              | TT              | 1946958074               |
| SNP_P4_133954_279267 | NW_004515984.1 | Scaffold544 | 279267                  | GG                              | AA              | 1946958076               |
| SNP_P4_133955_279309 | NW_004515984.1 | Scaffold544 | 279309                  | AA                              | GG              | 1946958078               |
| SNP_P4_133956_286710 | NW_004515984.1 | Scaffold544 | 286710                  | GG                              | TT              | 1946958081               |
| SNP_P4_133957_286833 | NW_004515984.1 | Scaffold544 | 286833                  | TT                              | CC              | 1946958083               |
| SNP_P4_133958_286868 | NW_004515984.1 | Scaffold544 | 286868                  | CC                              | GG              | 1946958085               |
| SNP_P4_133959_286902 | NW_004515984.1 | Scaffold544 | 286902                  | CC                              | TT              | 1946958087               |
| SNP_P4_133960_287417 | NW_004515984.1 | Scaffold544 | 287417                  | GG                              | CC              | 1946958089               |
| SNP_P4_133961_287425 | NW_004515984.1 | Scaffold544 | 287425                  | CC                              | TT              | 1946958091               |
| SNP_P4_133962_287520 | NW_004515984.1 | Scaffold544 | 287520                  | GG                              | AA              | 1946958093               |
| SNP_P4_133963_287527 | NW_004515984.1 | Scaffold544 | 287527                  | CC                              | AA              | 1946958095               |
| SNP_P4_133964_291292 | NW_004515984.1 | Scaffold544 | 291292                  | TT                              | CC              | 1946958097               |
| SNP_P4_133965_296659 | NW_004515984.1 | Scaffold544 | 296659                  | CC                              | AA              | 1946958099               |
| SNP_P4_133966_296676 | NW_004515984.1 | Scaffold544 | 296676                  | AA                              | CC              | 1946958101               |
| SNP_P4_133967_303725 | NW_004515984.1 | Scaffold544 | 303725                  | GG                              | TT              | 1946958103               |
| SNP_P4_133968_304009 | NW_004515984.1 | Scaffold544 | 304009                  | CC                              | TT              | 1946958105               |
| SNP_P4_133969_312777 | NW_004515984.1 | Scaffold544 | 312777                  | TT                              | CC              | 1946958107               |
| SNP_P4_133970_316726 | NW_004515984.1 | Scaffold544 | 316726                  | TT                              | GG              | 1946958109               |



| SNPs IDs             | Chromosome IDs | Chromosomes | Physical positions (bp) | CDC Frontier (Reference genome) | (ILWC46 & LPNB) | NCBI SNPdb Accession IDs |
|----------------------|----------------|-------------|-------------------------|---------------------------------|-----------------|--------------------------|
| SNP_P4_133972_317155 | NW_004515984.1 | Scaffold544 | 317155                  | CC                              | AA              | 1946958111               |
| SNP_P4_133973_318317 | NW_004515984.1 | Scaffold544 | 318317                  | GG                              | AA              | 1946958113               |
| SNP_P4_133974_318435 | NW_004515984.1 | Scaffold544 | 318435                  | TT                              | AA              | 1946958115               |
| SNP_P4_133975_318505 | NW_004515984.1 | Scaffold544 | 318505                  | GG                              | TT              | 1946958117               |
| SNP_P4_133976_318662 | NW_004515984.1 | Scaffold544 | 318662                  | TT                              | CC              | 1946958119               |
| SNP_P4_133977_318787 | NW_004515984.1 | Scaffold544 | 318787                  | CC                              | TT              | 1946958121               |
| SNP_P4_133978_318832 | NW_004515984.1 | Scaffold544 | 318832                  | AA                              | CC              | 1946958123               |
| SNP_P4_133979_318850 | NW_004515984.1 | Scaffold544 | 318850                  | TT                              | AA              | 1946958125               |
| SNP_P4_133980_320233 | NW_004515984.1 | Scaffold544 | 320233                  | GG                              | AA              | 1946958127               |
| SNP_P4_133981_320362 | NW_004515984.1 | Scaffold544 | 320362                  | CC                              | TT              | 1946958129               |
| SNP_P4_133982_320400 | NW_004515984.1 | Scaffold544 | 320400                  | CC                              | TT              | 1946958131               |
| SNP_P4_133983_320472 | NW_004515984.1 | Scaffold544 | 320472                  | AA                              | GG              | 1946958133               |
| SNP_P4_133984_320582 | NW_004515984.1 | Scaffold544 | 320582                  | TT                              | CC              | 1946958135               |
| SNP_P4_133985_320736 | NW_004515984.1 | Scaffold544 | 320736                  | TT                              | CC              | 1946958137               |
| SNP_P4_133986_327790 | NW_004515984.1 | Scaffold544 | 327790                  | TT                              | CC              | 1946958139               |
| SNP_P4_133987_327940 | NW_004515984.1 | Scaffold544 | 327940                  | TT                              | CC              | 1946958141               |
| SNP_P4_133988_329108 | NW_004515984.1 | Scaffold544 | 329108                  | TT                              | GG              | 1946958143               |
| SNP_P4_133989_329893 | NW_004515984.1 | Scaffold544 | 329893                  | TT                              | AA              | 1946958145               |
| SNP_P4_133990_331550 | NW_004515984.1 | Scaffold544 | 331550                  | AA                              | CC              | 1946958147               |
| SNP_P4_133991_331981 | NW_004515984.1 | Scaffold544 | 331981                  | GG                              | AA              | 1946958149               |
| SNP_P4_133992_333106 | NW_004515984.1 | Scaffold544 | 333106                  | TT                              | GG              | 1946958151               |
| SNP_P4_133993_333440 | NW_004515984.1 | Scaffold544 | 333440                  | CC                              | TT              | 1946958153               |
| SNP_P4_133994_338581 | NW_004515984.1 | Scaffold544 | 338581                  | CC                              | GG              | 1946958155               |
| SNP_P4_133995_339022 | NW_004515984.1 | Scaffold544 | 339022                  | TT                              | AA              | 1946958157               |
| SNP_P4_133996_339331 | NW_004515984.1 | Scaffold544 | 339331                  | TT                              | CC              | 1946958159               |
| SNP_P4_133997_341349 | NW_004515984.1 | Scaffold544 | 341349                  | CC                              | TT              | 1946958161               |
| SNP_P4_133998_341391 | NW_004515984.1 | Scaffold544 | 341391                  | GG                              | AA              | 1946958163               |
| SNP_P4_133999_341586 | NW_004515984.1 | Scaffold544 | 341586                  | TT                              | AA              | 1946958165               |
| SNP_P4_134000_341655 | NW_004515984.1 | Scaffold544 | 341655                  | TT                              | CC              | 1946958167               |
| SNP_P4_134003_344541 | NW_004515984.1 | Scaffold544 | 344541                  | CC                              | AA              | 1946958169               |
| SNP_P4_134004_355898 | NW_004515984.1 | Scaffold544 | 355898                  | TT                              | AA              | 1946958171               |
| SNP_P4_134005_355899 | NW_004515984.1 | Scaffold544 | 355899                  | TT                              | CC              | 1946958173               |
| SNP_P4_134006_357050 | NW_004515984.1 | Scaffold544 | 357050                  | TT                              | AA              | 1946958175               |
| SNP_P4_134007_357837 | NW_004515984.1 | Scaffold544 | 357837                  | TT                              | GG              | 1946958177               |
| SNP_P4_134008_742    | NW_004515985.1 | Scaffold545 | 742                     | TT                              | GG              | 1946958179               |
| SNP_P4_134009_11453  | NW_004515985.1 | Scaffold545 | 11453                   | TT                              | CC              | 1946958181               |
| SNP_P4_134010_11462  | NW_004515985.1 | Scaffold545 | 11462                   | AA                              | GG              | 1946958183               |
| SNP_P4_134011_11485  | NW_004515985.1 | Scaffold545 | 11485                   | AA                              | CC              | 1946958185               |
| SNP_P4_134012_11549  | NW_004515985.1 | Scaffold545 | 11549                   | TT                              | CC              | 1946958187               |
| SNP_P4_134013_11552  | NW_004515985.1 | Scaffold545 | 11552                   | CC                              | TT              | 1946958189               |
| SNP_P4_134014_11568  | NW_004515985.1 | Scaffold545 | 11568                   | AA                              | GG              | 1946958191               |
| SNP_P4_134015_11573  | NW_004515985.1 | Scaffold545 | 11573                   | CC                              | AA              | 1946958193               |

| SNPs IDs             | Chromosome IDs | Chromosomes | Physical positions (bp) | CDC Frontier (Reference genome) | (ILWC46 & LPNB) | NCBI SNPdb Accession IDs |
|----------------------|----------------|-------------|-------------------------|---------------------------------|-----------------|--------------------------|
| SNP_P4_134016_11575  | NW_004515985.1 | Scaffold545 | 11575                   | AA                              | GG              | 1946958195               |
| SNP_P4_134017_12776  | NW_004515985.1 | Scaffold545 | 12776                   | AA                              | CC              | 1946958197               |
| SNP_P4_134018_12944  | NW_004515985.1 | Scaffold545 | 12944                   | TT                              | CC              | 1946958199               |
| SNP_P4_134019_12993  | NW_004515985.1 | Scaffold545 | 12993                   | CC                              | TT              | 1946958201               |
| SNP_P4_134020_28361  | NW_004515985.1 | Scaffold545 | 28361                   | CC                              | GG              | 1946958204               |
| SNP_P4_134021_56244  | NW_004515985.1 | Scaffold545 | 56244                   | AA                              | GG              | 1946958206               |
| SNP_P4_134022_56248  | NW_004515985.1 | Scaffold545 | 56248                   | TT                              | CC              | 1946958208               |
| SNP_P4_134023_73691  | NW_004515985.1 | Scaffold545 | 73691                   | AA                              | CC              | 1946958210               |
| SNP_P4_134024_155804 | NW_004515985.1 | Scaffold545 | 155804                  | TT                              | CC              | 1946958212               |
| SNP_P4_134025_156705 | NW_004515985.1 | Scaffold545 | 156705                  | GG                              | AA              | 1946958214               |
| SNP_P4_134027_158514 | NW_004515985.1 | Scaffold545 | 158514                  | CC                              | TT              | 1946958216               |
| SNP_P4_134028_171729 | NW_004515985.1 | Scaffold545 | 171729                  | CC                              | TT              | 1946958218               |
| SNP_P4_134029_178819 | NW_004515985.1 | Scaffold545 | 178819                  | CC                              | AA              | 1946958220               |
| SNP_P4_134030_183768 | NW_004515985.1 | Scaffold545 | 183768                  | TT                              | CC              | 1946958222               |
| SNP_P4_134031_183787 | NW_004515985.1 | Scaffold545 | 183787                  | AA                              | GG              | 1946958224               |
| SNP_P4_134032_183948 | NW_004515985.1 | Scaffold545 | 183948                  | CC                              | AA              | 1946958226               |
| SNP_P4_134033_192228 | NW_004515985.1 | Scaffold545 | 192228                  | AA                              | GG              | 1946958228               |
| SNP_P4_134034_192264 | NW_004515985.1 | Scaffold545 | 192264                  | GG                              | TT              | 1946958230               |
| SNP_P4_134035_192272 | NW_004515985.1 | Scaffold545 | 192272                  | AA                              | GG              | 1946958232               |
| SNP_P4_134037_197496 | NW_004515985.1 | Scaffold545 | 197496                  | AA                              | TT              | 1946958234               |
| SNP_P4_134039_235550 | NW_004515985.1 | Scaffold545 | 235550                  | GG                              | AA              | 1946958236               |
| SNP_P4_134040_253128 | NW_004515985.1 | Scaffold545 | 253128                  | CC                              | AA              | 1946958238               |
| SNP_P4_134041_256459 | NW_004515985.1 | Scaffold545 | 256459                  | AA                              | TT              | 1946958240               |
| SNP_P4_134042_256956 | NW_004515985.1 | Scaffold545 | 256956                  | AA                              | CC              | 1946958242               |
| SNP_P4_134043_268085 | NW_004515985.1 | Scaffold545 | 268085                  | CC                              | TT              | 1946958244               |
| SNP_P4_134044_279505 | NW_004515985.1 | Scaffold545 | 279505                  | AA                              | GG              | 1946958246               |
| SNP_P4_134045_279530 | NW_004515985.1 | Scaffold545 | 279530                  | GG                              | AA              | 1946958248               |
| SNP_P4_134046_279532 | NW_004515985.1 | Scaffold545 | 279532                  | GG                              | AA              | 1946958250               |
| SNP_P4_134047_279687 | NW_004515985.1 | Scaffold545 | 279687                  | TT                              | CC              | 1946958252               |
| SNP_P4_134048_279700 | NW_004515985.1 | Scaffold545 | 279700                  | AA                              | CC              | 1946958254               |
| SNP_P4_134049_279706 | NW_004515985.1 | Scaffold545 | 279706                  | AA                              | GG              | 1946958256               |
| SNP_P4_134050_279739 | NW_004515985.1 | Scaffold545 | 279739                  | TT                              | CC              | 1946958258               |
| SNP_P4_134051_279759 | NW_004515985.1 | Scaffold545 | 279759                  | TT                              | CC              | 1946958260               |
| SNP_P4_134052_279775 | NW_004515985.1 | Scaffold545 | 279775                  | AA                              | GG              | 1946958262               |
| SNP_P4_134053_281233 | NW_004515985.1 | Scaffold545 | 281233                  | GG                              | AA              | 1946958264               |
| SNP_P4_134054_281268 | NW_004515985.1 | Scaffold545 | 281268                  | TT                              | CC              | 1946958266               |
| SNP_P4_134055_281317 | NW_004515985.1 | Scaffold545 | 281317                  | GG                              | AA              | 1946958268               |
| SNP_P4_134056_281529 | NW_004515985.1 | Scaffold545 | 281529                  | TT                              | CC              | 1946958270               |
| SNP_P4_134057_1186   | NW_004515986.1 | Scaffold546 | 1186                    | TT                              | CC              | 1946958272               |
| SNP_P4_134058_4557   | NW_004515986.1 | Scaffold546 | 4557                    | GG                              | CC              | 1946958274               |
| SNP_P4_134059_4649   | NW_004515986.1 | Scaffold546 | 4649                    | AA                              | CC              | 1946958276               |
| SNP_P4_134060_12265  | NW_004515986.1 | Scaffold546 | 12265                   | TT                              | AA              | 1946958278               |

| SNPs IDs            | Chromosome IDs | Chromosomes | Physical positions (bp) | CDC Frontier (Reference genome) | (ILWC46 & LPNB) | NCBI SNPdb Accession IDs |
|---------------------|----------------|-------------|-------------------------|---------------------------------|-----------------|--------------------------|
| SNP_P4_134061_12272 | NW_004515986.1 | Scaffold546 | 12272                   | CC                              | TT              | 1946958280               |
| SNP_P4_134062_27143 | NW_004515986.1 | Scaffold546 | 27143                   | TT                              | GG              | 1946958282               |
| SNP_P4_134063_40614 | NW_004515986.1 | Scaffold546 | 40614                   | AA                              | TT              | 1946958284               |
| SNP_P4_134064_40623 | NW_004515986.1 | Scaffold546 | 40623                   | TT                              | AA              | 1946958286               |
| SNP_P4_134065_40696 | NW_004515986.1 | Scaffold546 | 40696                   | AA                              | TT              | 1946958288               |
| SNP_P4_134066_45307 | NW_004515986.1 | Scaffold546 | 45307                   | AA                              | CC              | 1946958290               |
| SNP_P4_134067_45351 | NW_004515986.1 | Scaffold546 | 45351                   | AA                              | CC              | 1946958292               |
| SNP_P4_134069_54885 | NW_004515986.1 | Scaffold546 | 54885                   | AA                              | TT              | 1946958294               |
| SNP_P4_134070_55185 | NW_004515986.1 | Scaffold546 | 55185                   | TT                              | AA              | 1946958296               |
| SNP_P4_134071_55190 | NW_004515986.1 | Scaffold546 | 55190                   | GG                              | TT              | 1946958298               |
| SNP_P4_134072_55229 | NW_004515986.1 | Scaffold546 | 55229                   | TT                              | GG              | 1946958300               |
| SNP_P4_134073_55273 | NW_004515986.1 | Scaffold546 | 55273                   | CC                              | GG              | 1946958302               |
| SNP_P4_134074_55274 | NW_004515986.1 | Scaffold546 | 55274                   | CC                              | TT              | 1946958304               |
| SNP_P4_134075_55337 | NW_004515986.1 | Scaffold546 | 55337                   | CC                              | GG              | 1946958306               |
| SNP_P4_134076_55413 | NW_004515986.1 | Scaffold546 | 55413                   | GG                              | AA              | 1946958308               |
| SNP_P4_134077_55421 | NW_004515986.1 | Scaffold546 | 55421                   | CC                              | TT              | 1946958310               |
| SNP_P4_134078_55465 | NW_004515986.1 | Scaffold546 | 55465                   | CC                              | AA              | 1946958312               |
| SNP_P4_134079_55469 | NW_004515986.1 | Scaffold546 | 55469                   | TT                              | GG              | 1946958314               |
| SNP_P4_134080_55475 | NW_004515986.1 | Scaffold546 | 55475                   | TT                              | CC              | 1946958316               |
| SNP_P4_134081_55490 | NW_004515986.1 | Scaffold546 | 55490                   | CC                              | AA              | 1946958318               |
| SNP_P4_134082_55511 | NW_004515986.1 | Scaffold546 | 55511                   | CC                              | GG              | 1946958320               |
| SNP_P4_134083_55548 | NW_004515986.1 | Scaffold546 | 55548                   | AA                              | TT              | 1946958322               |
| SNP_P4_134084_55561 | NW_004515986.1 | Scaffold546 | 55561                   | CC                              | AA              | 1946958324               |
| SNP_P4_134085_55625 | NW_004515986.1 | Scaffold546 | 55625                   | AA                              | CC              | 1946958326               |
| SNP_P4_134086_55632 | NW_004515986.1 | Scaffold546 | 55632                   | GG                              | CC              | 1946958328               |
| SNP_P4_134087_55633 | NW_004515986.1 | Scaffold546 | 55633                   | TT                              | AA              | 1946958330               |
| SNP_P4_134088_55690 | NW_004515986.1 | Scaffold546 | 55690                   | GG                              | TT              | 1946958332               |
| SNP_P4_134089_55708 | NW_004515986.1 | Scaffold546 | 55708                   | AA                              | TT              | 1946958334               |
| SNP_P4_134090_55709 | NW_004515986.1 | Scaffold546 | 55709                   | AA                              | CC              | 1946958336               |
| SNP_P4_134091_55713 | NW_004515986.1 | Scaffold546 | 55713                   | GG                              | CC              | 1946958338               |
| SNP_P4_134092_55777 | NW_004515986.1 | Scaffold546 | 55777                   | CC                              | AA              | 1946958340               |
| SNP_P4_134093_55805 | NW_004515986.1 | Scaffold546 | 55805                   | AA                              | CC              | 1946958342               |
| SNP_P4_134094_55811 | NW_004515986.1 | Scaffold546 | 55811                   | GG                              | AA              | 1946958344               |
| SNP_P4_134095_55963 | NW_004515986.1 | Scaffold546 | 55963                   | AA                              | CC              | 1946958345               |
| SNP_P4_134096_55995 | NW_004515986.1 | Scaffold546 | 55995                   | TT                              | AA              | 1946958347               |
| SNP_P4_134097_55998 | NW_004515986.1 | Scaffold546 | 55998                   | GG                              | TT              | 1946958349               |
| SNP_P4_134098_56065 | NW_004515986.1 | Scaffold546 | 56065                   | CC                              | TT              | 1946958351               |
| SNP_P4_134099_56070 | NW_004515986.1 | Scaffold546 | 56070                   | GG                              | AA              | 1946958353               |
| SNP_P4_134100_56081 | NW_004515986.1 | Scaffold546 | 56081                   | TT                              | GG              | 1946958355               |
| SNP_P4_134101_66794 | NW_004515986.1 | Scaffold546 | 66794                   | GG                              | TT              | 1946958357               |
| SNP_P4_134102_66807 | NW_004515986.1 | Scaffold546 | 66807                   | CC                              | AA              | 1946958359               |
| SNP_P4_134103_67483 | NW_004515986.1 | Scaffold546 | 67483                   | AA                              | CC              | 1946958361               |

| SNPs IDs            | Chromosome IDs | Chromosomes | Physical positions (bp) | CDC Frontier (Reference genome) | (ILWC46 & LPNB) | NCBI SNPdb Accession IDs |
|---------------------|----------------|-------------|-------------------------|---------------------------------|-----------------|--------------------------|
| SNP_P4_134104_67632 | NW_004515986.1 | Scaffold546 | 67632                   | GG                              | AA              | 1946958363               |
| SNP_P4_134105_67687 | NW_004515986.1 | Scaffold546 | 67687                   | TT                              | AA              | 1946958365               |
| SNP_P4_134106_67864 | NW_004515986.1 | Scaffold546 | 67864                   | TT                              | CC              | 1946958367               |
| SNP_P4_134107_67865 | NW_004515986.1 | Scaffold546 | 67865                   | AA                              | TT              | 1946958369               |
| SNP_P4_134108_67893 | NW_004515986.1 | Scaffold546 | 67893                   | GG                              | TT              | 1946958371               |
| SNP_P4_134109_68199 | NW_004515986.1 | Scaffold546 | 68199                   | CC                              | TT              | 1946958373               |
| SNP_P4_134110_68267 | NW_004515986.1 | Scaffold546 | 68267                   | GG                              | TT              | 1946958375               |
| SNP_P4_134111_72456 | NW_004515986.1 | Scaffold546 | 72456                   | CC                              | TT              | 1946958377               |
| SNP_P4_134112_72777 | NW_004515986.1 | Scaffold546 | 72777                   | CC                              | TT              | 1946958379               |
| SNP_P4_134113_72822 | NW_004515986.1 | Scaffold546 | 72822                   | TT                              | CC              | 1946958381               |
| SNP_P4_134114_72851 | NW_004515986.1 | Scaffold546 | 72851                   | CC                              | TT              | 1946958383               |
| SNP_P4_134115_72887 | NW_004515986.1 | Scaffold546 | 72887                   | GG                              | CC              | 1946958385               |
| SNP_P4_134116_73043 | NW_004515986.1 | Scaffold546 | 73043                   | GG                              | AA              | 1946958387               |
| SNP_P4_134117_73066 | NW_004515986.1 | Scaffold546 | 73066                   | GG                              | TT              | 1946958389               |
| SNP_P4_134118_73067 | NW_004515986.1 | Scaffold546 | 73067                   | GG                              | AA              | 1946958391               |
| SNP_P4_134119_73117 | NW_004515986.1 | Scaffold546 | 73117                   | TT                              | GG              | 1946958393               |
| SNP_P4_134120_73174 | NW_004515986.1 | Scaffold546 | 73174                   | AA                              | CC              | 1946958395               |
| SNP_P4_134121_74767 | NW_004515986.1 | Scaffold546 | 74767                   | GG                              | AA              | 1946958397               |
| SNP_P4_134122_74782 | NW_004515986.1 | Scaffold546 | 74782                   | GG                              | AA              | 1946958399               |
| SNP_P4_134123_74835 | NW_004515986.1 | Scaffold546 | 74835                   | CC                              | AA              | 1946958401               |
| SNP_P4_134124_79010 | NW_004515986.1 | Scaffold546 | 79010                   | GG                              | TT              | 1946958403               |
| SNP_P4_134125_79379 | NW_004515986.1 | Scaffold546 | 79379                   | GG                              | TT              | 1946958405               |
| SNP_P4_134126_82108 | NW_004515986.1 | Scaffold546 | 82108                   | AA                              | GG              | 1946958407               |
| SNP_P4_134127_82113 | NW_004515986.1 | Scaffold546 | 82113                   | AA                              | GG              | 1946958409               |
| SNP_P4_134128_83116 | NW_004515986.1 | Scaffold546 | 83116                   | GG                              | TT              | 1946958411               |
| SNP_P4_134129_84535 | NW_004515986.1 | Scaffold546 | 84535                   | TT                              | GG              | 1946958413               |
| SNP_P4_134130_84779 | NW_004515986.1 | Scaffold546 | 84779                   | CC                              | TT              | 1946958415               |
| SNP_P4_134131_84929 | NW_004515986.1 | Scaffold546 | 84929                   | AA                              | GG              | 1946958417               |
| SNP_P4_134132_84931 | NW_004515986.1 | Scaffold546 | 84931                   | TT                              | GG              | 1946958419               |
| SNP_P4_134133_84965 | NW_004515986.1 | Scaffold546 | 84965                   | AA                              | TT              | 1946958421               |
| SNP_P4_134134_85101 | NW_004515986.1 | Scaffold546 | 85101                   | AA                              | GG              | 1946958423               |
| SNP_P4_134135_86210 | NW_004515986.1 | Scaffold546 | 86210                   | TT                              | GG              | 1946958425               |
| SNP_P4_134136_86487 | NW_004515986.1 | Scaffold546 | 86487                   | AA                              | GG              | 1946958427               |
| SNP_P4_134137_86491 | NW_004515986.1 | Scaffold546 | 86491                   | TT                              | CC              | 1946958429               |
| SNP_P4_134138_86755 | NW_004515986.1 | Scaffold546 | 86755                   | TT                              | AA              | 1946958431               |
| SNP_P4_134139_86789 | NW_004515986.1 | Scaffold546 | 86789                   | CC                              | TT              | 1946958433               |
| SNP_P4_134140_86842 | NW_004515986.1 | Scaffold546 | 86842                   | GG                              | AA              | 1946958435               |
| SNP_P4_134141_86869 | NW_004515986.1 | Scaffold546 | 86869                   | TT                              | CC              | 1946958437               |
| SNP_P4_134142_86999 | NW_004515986.1 | Scaffold546 | 86999                   | AA                              | CC              | 1946958439               |
| SNP_P4_134143_87121 | NW_004515986.1 | Scaffold546 | 87121                   | AA                              | GG              | 1946958441               |
| SNP_P4_134144_87161 | NW_004515986.1 | Scaffold546 | 87161                   | TT                              | CC              | 1946958443               |
| SNP_P4_134145_87184 | NW_004515986.1 | Scaffold546 | 87184                   | AA                              | GG              | 1946958445               |

| SNPs IDs            | Chromosome IDs | Chromosomes | Physical positions (bp) | CDC Frontier (Reference genome) | (ILWC46 & LPNB) | NCBI SNPdb Accession IDs |
|---------------------|----------------|-------------|-------------------------|---------------------------------|-----------------|--------------------------|
| SNP_P4_134146_87186 | NW_004515986.1 | Scaffold546 | 87186                   | TT                              | GG              | 1946958447               |
| SNP_P4_134147_1682  | NW_004515987.1 | Scaffold547 | 1682                    | AA                              | GG              | 1946958449               |
| SNP_P4_134148_1683  | NW_004515987.1 | Scaffold547 | 1683                    | AA                              | GG              | 1946958451               |
| SNP_P4_134149_1779  | NW_004515987.1 | Scaffold547 | 1779                    | AA                              | GG              | 1946958453               |
| SNP_P4_134150_1870  | NW_004515987.1 | Scaffold547 | 1870                    | TT                              | CC              | 1946958455               |
| SNP_P4_134151_1924  | NW_004515987.1 | Scaffold547 | 1924                    | TT                              | CC              | 1946958457               |
| SNP_P4_134152_1946  | NW_004515987.1 | Scaffold547 | 1946                    | CC                              | TT              | 1946958459               |
| SNP_P4_134153_2013  | NW_004515987.1 | Scaffold547 | 2013                    | TT                              | AA              | 1946958461               |
| SNP_P4_134154_2045  | NW_004515987.1 | Scaffold547 | 2045                    | GG                              | AA              | 1946958463               |
| SNP_P4_134155_2061  | NW_004515987.1 | Scaffold547 | 2061                    | TT                              | CC              | 1946958465               |
| SNP_P4_134156_2350  | NW_004515987.1 | Scaffold547 | 2350                    | GG                              | TT              | 1946958467               |
| SNP_P4_134157_2382  | NW_004515987.1 | Scaffold547 | 2382                    | AA                              | TT              | 1946958469               |
| SNP_P4_134158_6830  | NW_004515987.1 | Scaffold547 | 6830                    | AA                              | TT              | 1946958471               |
| SNP_P4_134159_6831  | NW_004515987.1 | Scaffold547 | 6831                    | GG                              | AA              | 1946958473               |
| SNP_P4_134160_6900  | NW_004515987.1 | Scaffold547 | 6900                    | AA                              | GG              | 1946958475               |
| SNP_P4_134161_6944  | NW_004515987.1 | Scaffold547 | 6944                    | GG                              | AA              | 1946958477               |
| SNP_P4_134162_7030  | NW_004515987.1 | Scaffold547 | 7030                    | CC                              | TT              | 1946958479               |
| SNP_P4_134163_7070  | NW_004515987.1 | Scaffold547 | 7070                    | TT                              | GG              | 1946958481               |
| SNP_P4_134164_11389 | NW_004515987.1 | Scaffold547 | 11389                   | TT                              | CC              | 1946958483               |
| SNP_P4_134165_11452 | NW_004515987.1 | Scaffold547 | 11452                   | AA                              | GG              | 1946958485               |
| SNP_P4_134166_11488 | NW_004515987.1 | Scaffold547 | 11488                   | GG                              | AA              | 1946958487               |
| SNP_P4_134167_11506 | NW_004515987.1 | Scaffold547 | 11506                   | GG                              | AA              | 1946958489               |
| SNP_P4_134168_11528 | NW_004515987.1 | Scaffold547 | 11528                   | AA                              | GG              | 1946958491               |
| SNP_P4_134169_11543 | NW_004515987.1 | Scaffold547 | 11543                   | CC                              | TT              | 1946958493               |
| SNP_P4_134170_11757 | NW_004515987.1 | Scaffold547 | 11757                   | TT                              | AA              | 1946958495               |
| SNP_P4_134171_11933 | NW_004515987.1 | Scaffold547 | 11933                   | CC                              | TT              | 1946958497               |
| SNP_P4_134172_12367 | NW_004515987.1 | Scaffold547 | 12367                   | AA                              | GG              | 1946958499               |
| SNP_P4_134173_12442 | NW_004515987.1 | Scaffold547 | 12442                   | GG                              | CC              | 1946958501               |
| SNP_P4_134174_12443 | NW_004515987.1 | Scaffold547 | 12443                   | AA                              | GG              | 1946958503               |
| SNP_P4_134175_12477 | NW_004515987.1 | Scaffold547 | 12477                   | AA                              | CC              | 1946958505               |
| SNP_P4_134176_12505 | NW_004515987.1 | Scaffold547 | 12505                   | CC                              | TT              | 1946958507               |
| SNP_P4_134177_12534 | NW_004515987.1 | Scaffold547 | 12534                   | AA                              | TT              | 1946958509               |
| SNP_P4_134178_13615 | NW_004515987.1 | Scaffold547 | 13615                   | AA                              | CC              | 1946958511               |
| SNP_P4_134179_13659 | NW_004515987.1 | Scaffold547 | 13659                   | TT                              | CC              | 1946958512               |
| SNP_P4_134180_13690 | NW_004515987.1 | Scaffold547 | 13690                   | TT                              | GG              | 1946958514               |
| SNP_P4_134181_14138 | NW_004515987.1 | Scaffold547 | 14138                   | GG                              | TT              | 1946958516               |
| SNP_P4_134182_14163 | NW_004515987.1 | Scaffold547 | 14163                   | AA                              | GG              | 1946958518               |
| SNP_P4_134183_14178 | NW_004515987.1 | Scaffold547 | 14178                   | CC                              | AA              | 1946958520               |
| SNP_P4_134184_14987 | NW_004515987.1 | Scaffold547 | 14987                   | AA                              | TT              | 1946958522               |
| SNP_P4_134185_20961 | NW_004515987.1 | Scaffold547 | 20961                   | AA                              | GG              | 1946958524               |
| SNP_P4_134186_20970 | NW_004515987.1 | Scaffold547 | 20970                   | AA                              | CC              | 1946958526               |
| SNP_P4_134187_21037 | NW_004515987.1 | Scaffold547 | 21037                   | TT                              | CC              | 1946958528               |

| SNPs IDs            | Chromosome IDs | Chromosomes | Physical positions (bp) | CDC Frontier (Reference genome) | (ILWC46 & LPNB) | NCBI SNPdb Accession IDs |
|---------------------|----------------|-------------|-------------------------|---------------------------------|-----------------|--------------------------|
| SNP_P4_134188_21094 | NW_004515987.1 | Scaffold547 | 21094                   | AA                              | TT              | 1946958530               |
| SNP_P4_134189_21471 | NW_004515987.1 | Scaffold547 | 21471                   | GG                              | AA              | 1946958532               |
| SNP_P4_134190_21473 | NW_004515987.1 | Scaffold547 | 21473                   | CC                              | TT              | 1946958534               |
| SNP_P4_134191_27347 | NW_004515987.1 | Scaffold547 | 27347                   | GG                              | AA              | 1946958536               |
| SNP_P4_134192_27378 | NW_004515987.1 | Scaffold547 | 27378                   | CC                              | TT              | 1946958537               |
| SNP_P4_134193_27404 | NW_004515987.1 | Scaffold547 | 27404                   | CC                              | AA              | 1946958539               |
| SNP_P4_134194_27448 | NW_004515987.1 | Scaffold547 | 27448                   | TT                              | CC              | 1946958541               |
| SNP_P4_134195_27460 | NW_004515987.1 | Scaffold547 | 27460                   | TT                              | GG              | 1946958543               |
| SNP_P4_134196_27465 | NW_004515987.1 | Scaffold547 | 27465                   | GG                              | AA              | 1946958545               |
| SNP_P4_134197_27488 | NW_004515987.1 | Scaffold547 | 27488                   | CC                              | TT              | 1946958547               |
| SNP_P4_134198_27500 | NW_004515987.1 | Scaffold547 | 27500                   | TT                              | GG              | 1946958549               |
| SNP_P4_134199_30456 | NW_004515987.1 | Scaffold547 | 30456                   | TT                              | CC              | 1946958551               |
| SNP_P4_134200_30475 | NW_004515987.1 | Scaffold547 | 30475                   | AA                              | TT              | 1946958553               |
| SNP_P4_134201_30535 | NW_004515987.1 | Scaffold547 | 30535                   | TT                              | CC              | 1946958555               |
| SNP_P4_134202_30755 | NW_004515987.1 | Scaffold547 | 30755                   | GG                              | AA              | 1946958557               |
| SNP_P4_134203_30763 | NW_004515987.1 | Scaffold547 | 30763                   | CC                              | AA              | 1946958559               |
| SNP_P4_134204_46339 | NW_004515987.1 | Scaffold547 | 46339                   | TT                              | CC              | 1946958561               |
| SNP_P4_134205_69509 | NW_004515987.1 | Scaffold547 | 69509                   | CC                              | AA              | 1946958563               |
| SNP_P4_134206_69511 | NW_004515987.1 | Scaffold547 | 69511                   | AA                              | GG              | 1946958565               |
| SNP_P4_134207_70611 | NW_004515987.1 | Scaffold547 | 70611                   | CC                              | TT              | 1946958567               |
| SNP_P4_134208_74383 | NW_004515987.1 | Scaffold547 | 74383                   | TT                              | CC              | 1946958569               |
| SNP_P4_134209_74791 | NW_004515987.1 | Scaffold547 | 74791                   | CC                              | TT              | 1946958571               |
| SNP_P4_134210_74799 | NW_004515987.1 | Scaffold547 | 74799                   | TT                              | CC              | 1946958573               |
| SNP_P4_134211_78119 | NW_004515987.1 | Scaffold547 | 78119                   | CC                              | AA              | 1946958575               |
| SNP_P4_134212_78130 | NW_004515987.1 | Scaffold547 | 78130                   | CC                              | AA              | 1946958576               |
| SNP_P4_134213_78160 | NW_004515987.1 | Scaffold547 | 78160                   | CC                              | AA              | 1946958578               |
| SNP_P4_134214_78174 | NW_004515987.1 | Scaffold547 | 78174                   | CC                              | TT              | 1946958580               |
| SNP_P4_134215_78188 | NW_004515987.1 | Scaffold547 | 78188                   | TT                              | CC              | 1946958582               |
| SNP_P4_134216_81055 | NW_004515987.1 | Scaffold547 | 81055                   | TT                              | GG              | 1946958584               |
| SNP_P4_134217_82183 | NW_004515987.1 | Scaffold547 | 82183                   | CC                              | TT              | 1946958586               |
| SNP_P4_134218_82187 | NW_004515987.1 | Scaffold547 | 82187                   | CC                              | TT              | 1946958588               |
| SNP_P4_134219_82237 | NW_004515987.1 | Scaffold547 | 82237                   | AA                              | TT              | 1946958590               |
| SNP_P4_134220_82245 | NW_004515987.1 | Scaffold547 | 82245                   | CC                              | AA              | 1946958592               |
| SNP_P4_134221_83150 | NW_004515987.1 | Scaffold547 | 83150                   | GG                              | TT              | 1946958594               |
| SNP_P4_134222_83638 | NW_004515987.1 | Scaffold547 | 83638                   | AA                              | TT              | 1946958596               |
| SNP_P4_134223_84317 | NW_004515987.1 | Scaffold547 | 84317                   | AA                              | GG              | 1946958597               |
| SNP_P4_134224_95835 | NW_004515987.1 | Scaffold547 | 95835                   | TT                              | CC              | 1946958599               |
| SNP_P4_134225_95927 | NW_004515987.1 | Scaffold547 | 95927                   | AA                              | GG              | 1946958601               |
| SNP_P4_134226_96375 | NW_004515987.1 | Scaffold547 | 96375                   | GG                              | TT              | 1946958603               |
| SNP_P4_134227_96420 | NW_004515987.1 | Scaffold547 | 96420                   | GG                              | CC              | 1946958605               |
| SNP_P4_134228_96532 | NW_004515987.1 | Scaffold547 | 96532                   | CC                              | GG              | 1946958607               |
| SNP_P4_134229_96537 | NW_004515987.1 | Scaffold547 | 96537                   | TT                              | CC              | 1946958609               |

| SNPs IDs             | Chromosome IDs | Chromosomes | Physical positions (bp) | CDC Frontier (Reference genome) | (ILWC46 & LPNB) | NCBI SNPdb Accession IDs |
|----------------------|----------------|-------------|-------------------------|---------------------------------|-----------------|--------------------------|
| SNP_P4_134230_96753  | NW_004515987.1 | Scaffold547 | 96753                   | GG                              | AA              | 1946958611               |
| SNP_P4_134231_96766  | NW_004515987.1 | Scaffold547 | 96766                   | TT                              | CC              | 1946958613               |
| SNP_P4_134232_96815  | NW_004515987.1 | Scaffold547 | 96815                   | CC                              | TT              | 1946958615               |
| SNP_P4_134233_96918  | NW_004515987.1 | Scaffold547 | 96918                   | TT                              | AA              | 1946958616               |
| SNP_P4_134234_96930  | NW_004515987.1 | Scaffold547 | 96930                   | TT                              | AA              | 1946958618               |
| SNP_P4_134235_96947  | NW_004515987.1 | Scaffold547 | 96947                   | GG                              | AA              | 1946958620               |
| SNP_P4_134236_96972  | NW_004515987.1 | Scaffold547 | 96972                   | CC                              | TT              | 1946958622               |
| SNP_P4_134238_97047  | NW_004515987.1 | Scaffold547 | 97047                   | AA                              | GG              | 1946958624               |
| SNP_P4_134239_97058  | NW_004515987.1 | Scaffold547 | 97058                   | AA                              | CC              | 1946958626               |
| SNP_P4_134240_97082  | NW_004515987.1 | Scaffold547 | 97082                   | GG                              | AA              | 1946958628               |
| SNP_P4_134241_97162  | NW_004515987.1 | Scaffold547 | 97162                   | AA                              | TT              | 1946958630               |
| SNP_P4_134242_97306  | NW_004515987.1 | Scaffold547 | 97306                   | GG                              | AA              | 1946958632               |
| SNP_P4_134243_97688  | NW_004515987.1 | Scaffold547 | 97688                   | AA                              | TT              | 1946958634               |
| SNP_P4_134244_97720  | NW_004515987.1 | Scaffold547 | 97720                   | CC                              | TT              | 1946958636               |
| SNP_P4_134245_97781  | NW_004515987.1 | Scaffold547 | 97781                   | TT                              | AA              | 1946958638               |
| SNP_P4_134246_97783  | NW_004515987.1 | Scaffold547 | 97783                   | CC                              | TT              | 1946958640               |
| SNP_P4_134247_97809  | NW_004515987.1 | Scaffold547 | 97809                   | CC                              | TT              | 1946958642               |
| SNP_P4_134248_98650  | NW_004515987.1 | Scaffold547 | 98650                   | GG                              | TT              | 1946958644               |
| SNP_P4_134249_110651 | NW_004515987.1 | Scaffold547 | 110651                  | GG                              | AA              | 1946958646               |
| SNP_P4_134250_113667 | NW_004515987.1 | Scaffold547 | 113667                  | AA                              | GG              | 1946958648               |
| SNP_P4_134251_114788 | NW_004515987.1 | Scaffold547 | 114788                  | TT                              | AA              | 1946958650               |
| SNP_P4_134252_114803 | NW_004515987.1 | Scaffold547 | 114803                  | AA                              | CC              | 1946958652               |
| SNP_P4_134253_114834 | NW_004515987.1 | Scaffold547 | 114834                  | AA                              | GG              | 1946958654               |
| SNP_P4_134254_115111 | NW_004515987.1 | Scaffold547 | 115111                  | GG                              | AA              | 1946958656               |
| SNP_P4_134255_115129 | NW_004515987.1 | Scaffold547 | 115129                  | CC                              | AA              | 1946958658               |
| SNP_P4_134256_117141 | NW_004515987.1 | Scaffold547 | 117141                  | GG                              | AA              | 1946958660               |
| SNP_P4_134257_117181 | NW_004515987.1 | Scaffold547 | 117181                  | GG                              | TT              | 1946958662               |
| SNP_P4_134258_117202 | NW_004515987.1 | Scaffold547 | 117202                  | AA                              | TT              | 1946958664               |
| SNP_P4_134259_122872 | NW_004515987.1 | Scaffold547 | 122872                  | TT                              | CC              | 1946958666               |
| SNP_P4_134260_123014 | NW_004515987.1 | Scaffold547 | 123014                  | GG                              | CC              | 1946958668               |
| SNP_P4_134261_123174 | NW_004515987.1 | Scaffold547 | 123174                  | AA                              | GG              | 1946958670               |
| SNP_P4_134262_124382 | NW_004515987.1 | Scaffold547 | 124382                  | TT                              | GG              | 1946958672               |
| SNP_P4_134263_138092 | NW_004515987.1 | Scaffold547 | 138092                  | TT                              | CC              | 1946958674               |
| SNP_P4_134264_138094 | NW_004515987.1 | Scaffold547 | 138094                  | CC                              | GG              | 1946958676               |
| SNP_P4_134265_138098 | NW_004515987.1 | Scaffold547 | 138098                  | TT                              | GG              | 1946958678               |
| SNP_P4_134266_138099 | NW_004515987.1 | Scaffold547 | 138099                  | AA                              | TT              | 1946958680               |
| SNP_P4_134267_138196 | NW_004515987.1 | Scaffold547 | 138196                  | TT                              | CC              | 1946958682               |
| SNP_P4_134268_147817 | NW_004515987.1 | Scaffold547 | 147817                  | GG                              | TT              | 1946958684               |
| SNP_P4_134269_153334 | NW_004515987.1 | Scaffold547 | 153334                  | AA                              | GG              | 1946958686               |
| SNP_P4_134270_155875 | NW_004515987.1 | Scaffold547 | 155875                  | TT                              | GG              | 1946958688               |
| SNP_P4_134271_155882 | NW_004515987.1 | Scaffold547 | 155882                  | TT                              | GG              | 1946958690               |
| SNP_P4_134273_155947 | NW_004515987.1 | Scaffold547 | 155947                  | AA                              | TT              | 1946958692               |

| SNPs IDs             | Chromosome IDs | Chromosomes | Physical positions (bp) | CDC Frontier (Reference genome) | (ILWC46 & LPNB) | NCBI SNPdb Accession IDs |
|----------------------|----------------|-------------|-------------------------|---------------------------------|-----------------|--------------------------|
| SNP_P4_134275_158366 | NW_004515987.1 | Scaffold547 | 158366                  | CC                              | AA              | 1946958694               |
| SNP_P4_134276_158661 | NW_004515987.1 | Scaffold547 | 158661                  | AA                              | GG              | 1946958696               |
| SNP_P4_134277_163125 | NW_004515987.1 | Scaffold547 | 163125                  | AA                              | GG              | 1946958698               |
| SNP_P4_134278_163144 | NW_004515987.1 | Scaffold547 | 163144                  | AA                              | CC              | 1946958700               |
| SNP_P4_134279_163193 | NW_004515987.1 | Scaffold547 | 163193                  | TT                              | CC              | 1946958702               |
| SNP_P4_134280_163199 | NW_004515987.1 | Scaffold547 | 163199                  | TT                              | CC              | 1946958704               |
| SNP_P4_134281_163208 | NW_004515987.1 | Scaffold547 | 163208                  | TT                              | GG              | 1946958706               |
| SNP_P4_134282_164704 | NW_004515987.1 | Scaffold547 | 164704                  | GG                              | AA              | 1946958708               |
| SNP_P4_134283_164892 | NW_004515987.1 | Scaffold547 | 164892                  | GG                              | CC              | 1946958710               |
| SNP_P4_134284_164927 | NW_004515987.1 | Scaffold547 | 164927                  | GG                              | TT              | 1946958712               |
| SNP_P4_134285_164947 | NW_004515987.1 | Scaffold547 | 164947                  | GG                              | CC              | 1946958714               |
| SNP_P4_134286_165032 | NW_004515987.1 | Scaffold547 | 165032                  | TT                              | AA              | 1946958716               |
| SNP_P4_134287_165272 | NW_004515987.1 | Scaffold547 | 165272                  | TT                              | GG              | 1946958718               |
| SNP_P4_134288_165329 | NW_004515987.1 | Scaffold547 | 165329                  | CC                              | TT              | 1946958720               |
| SNP_P4_134289_165463 | NW_004515987.1 | Scaffold547 | 165463                  | AA                              | GG              | 1946958722               |
| SNP_P4_134290_168254 | NW_004515987.1 | Scaffold547 | 168254                  | TT                              | CC              | 1946958724               |
| SNP_P4_134291_171890 | NW_004515987.1 | Scaffold547 | 171890                  | CC                              | AA              | 1946958726               |
| SNP_P4_134292_172176 | NW_004515987.1 | Scaffold547 | 172176                  | TT                              | CC              | 1946958728               |
| SNP_P4_134293_172206 | NW_004515987.1 | Scaffold547 | 172206                  | CC                              | GG              | 1946958730               |
| SNP_P4_134294_180951 | NW_004515987.1 | Scaffold547 | 180951                  | GG                              | AA              | 1946958732               |
| SNP_P4_134295_181003 | NW_004515987.1 | Scaffold547 | 181003                  | AA                              | GG              | 1946958734               |
| SNP_P4_134296_181357 | NW_004515987.1 | Scaffold547 | 181357                  | TT                              | GG              | 1946958736               |
| SNP_P4_134297_181358 | NW_004515987.1 | Scaffold547 | 181358                  | GG                              | TT              | 1946958738               |
| SNP_P4_134298_181366 | NW_004515987.1 | Scaffold547 | 181366                  | GG                              | CC              | 1946958740               |
| SNP_P4_134299_185129 | NW_004515987.1 | Scaffold547 | 185129                  | TT                              | CC              | 1946958742               |
| SNP_P4_134300_185609 | NW_004515987.1 | Scaffold547 | 185609                  | TT                              | AA              | 1946958744               |
| SNP_P4_134302_192542 | NW_004515987.1 | Scaffold547 | 192542                  | GG                              | AA              | 1946958746               |
| SNP_P4_134303_192554 | NW_004515987.1 | Scaffold547 | 192554                  | AA                              | GG              | 1946958748               |
| SNP_P4_134305_46545  | NW_004515988.1 | Scaffold548 | 46545                   | TT                              | CC              | 1946958750               |
| SNP_P4_134306_46561  | NW_004515988.1 | Scaffold548 | 46561                   | CC                              | TT              | 1946958752               |
| SNP_P4_134307_53474  | NW_004515988.1 | Scaffold548 | 53474                   | AA                              | GG              | 1946958753               |
| SNP_P4_134308_59565  | NW_004515988.1 | Scaffold548 | 59565                   | GG                              | AA              | 1946958755               |
| SNP_P4_134309_59592  | NW_004515988.1 | Scaffold548 | 59592                   | CC                              | AA              | 1946958757               |
| SNP_P4_134310_60155  | NW_004515988.1 | Scaffold548 | 60155                   | TT                              | CC              | 1946958759               |
| SNP_P4_134311_61774  | NW_004515988.1 | Scaffold548 | 61774                   | GG                              | TT              | 1946958761               |
| SNP_P4_134312_114112 | NW_004515988.1 | Scaffold548 | 114112                  | TT                              | CC              | 1946958763               |
| SNP_P4_134313_114115 | NW_004515988.1 | Scaffold548 | 114115                  | GG                              | TT              | 1946958765               |
| SNP_P4_134315_157736 | NW_004515988.1 | Scaffold548 | 157736                  | AA                              | CC              | 1946958767               |
| SNP_P4_134316_160082 | NW_004515988.1 | Scaffold548 | 160082                  | GG                              | AA              | 1946958769               |
| SNP_P4_134317_169859 | NW_004515988.1 | Scaffold548 | 169859                  | AA                              | TT              | 1946958771               |
| SNP_P4_134318_169878 | NW_004515988.1 | Scaffold548 | 169878                  | AA                              | CC              | 1946958773               |
| SNP_P4_134319_169945 | NW_004515988.1 | Scaffold548 | 169945                  | TT                              | AA              | 1946958775               |



| SNPs IDs             | Chromosome IDs | Chromosomes | Physical positions (bp) | CDC Frontier (Reference genome) | (ILWC46 & LPNB) | NCBI SNPdb Accession IDs |
|----------------------|----------------|-------------|-------------------------|---------------------------------|-----------------|--------------------------|
| SNP_P4_134320_169953 | NW_004515988.1 | Scaffold548 | 169953                  | TT                              | CC              | 1946958777               |
| SNP_P4_134321_169986 | NW_004515988.1 | Scaffold548 | 169986                  | TT                              | CC              | 1946958779               |
| SNP_P4_134322_196314 | NW_004515988.1 | Scaffold548 | 196314                  | GG                              | AA              | 1946958781               |
| SNP_P4_134323_206751 | NW_004515988.1 | Scaffold548 | 206751                  | GG                              | CC              | 1946958783               |
| SNP_P4_134324_209807 | NW_004515988.1 | Scaffold548 | 209807                  | GG                              | TT              | 1946958785               |
| SNP_P4_134325_211870 | NW_004515988.1 | Scaffold548 | 211870                  | GG                              | AA              | 1946958787               |
| SNP_P4_134327_212804 | NW_004515988.1 | Scaffold548 | 212804                  | GG                              | TT              | 1946958789               |
| SNP_P4_134328_212887 | NW_004515988.1 | Scaffold548 | 212887                  | AA                              | GG              | 1946958791               |
| SNP_P4_134329_213006 | NW_004515988.1 | Scaffold548 | 213006                  | AA                              | GG              | 1946958793               |
| SNP_P4_134330_213237 | NW_004515988.1 | Scaffold548 | 213237                  | GG                              | TT              | 1946958795               |
| SNP_P4_134331_213318 | NW_004515988.1 | Scaffold548 | 213318                  | TT                              | CC              | 1946958797               |
| SNP_P4_134332_213364 | NW_004515988.1 | Scaffold548 | 213364                  | GG                              | TT              | 1946958799               |
| SNP_P4_134333_233038 | NW_004515988.1 | Scaffold548 | 233038                  | AA                              | GG              | 1946958801               |
| SNP_P4_134334_233092 | NW_004515988.1 | Scaffold548 | 233092                  | GG                              | AA              | 1946958803               |
| SNP_P4_134335_233539 | NW_004515988.1 | Scaffold548 | 233539                  | CC                              | TT              | 1946958805               |
| SNP_P4_134336_233540 | NW_004515988.1 | Scaffold548 | 233540                  | AA                              | GG              | 1946958807               |
| SNP_P4_134337_233559 | NW_004515988.1 | Scaffold548 | 233559                  | GG                              | CC              | 1946958809               |
| SNP_P4_134338_239876 | NW_004515988.1 | Scaffold548 | 239876                  | AA                              | GG              | 1946958811               |
| SNP_P4_134339_240914 | NW_004515988.1 | Scaffold548 | 240914                  | CC                              | TT              | 1946958813               |
| SNP_P4_134340_241033 | NW_004515988.1 | Scaffold548 | 241033                  | GG                              | AA              | 1946958815               |
| SNP_P4_134341_245406 | NW_004515988.1 | Scaffold548 | 245406                  | TT                              | CC              | 1946958817               |
| SNP_P4_134342_245425 | NW_004515988.1 | Scaffold548 | 245425                  | GG                              | AA              | 1946958819               |
| SNP_P4_134343_245543 | NW_004515988.1 | Scaffold548 | 245543                  | AA                              | GG              | 1946958821               |
| SNP_P4_134344_245566 | NW_004515988.1 | Scaffold548 | 245566                  | CC                              | TT              | 1946958823               |
| SNP_P4_134345_245588 | NW_004515988.1 | Scaffold548 | 245588                  | AA                              | GG              | 1946958825               |
| SNP_P4_134346_245602 | NW_004515988.1 | Scaffold548 | 245602                  | CC                              | TT              | 1946958827               |
| SNP_P4_134348_274265 | NW_004515988.1 | Scaffold548 | 274265                  | GG                              | AA              | 1946958829               |
| SNP_P4_134349_274271 | NW_004515988.1 | Scaffold548 | 274271                  | AA                              | TT              | 1946958831               |
| SNP_P4_134350_274281 | NW_004515988.1 | Scaffold548 | 274281                  | GG                              | CC              | 1946958833               |
| SNP_P4_134351_274340 | NW_004515988.1 | Scaffold548 | 274340                  | CC                              | TT              | 1946958836               |
| SNP_P4_134352_274341 | NW_004515988.1 | Scaffold548 | 274341                  | CC                              | GG              | 1946958838               |
| SNP_P4_134353_308754 | NW_004515988.1 | Scaffold548 | 308754                  | TT                              | CC              | 1946958840               |
| SNP_P4_134354_308768 | NW_004515988.1 | Scaffold548 | 308768                  | GG                              | TT              | 1946958842               |
| SNP_P4_134355_322703 | NW_004515988.1 | Scaffold548 | 322703                  | TT                              | CC              | 1946958844               |
| SNP_P4_134356_323607 | NW_004515988.1 | Scaffold548 | 323607                  | TT                              | AA              | 1946958846               |
| SNP_P4_134357_329774 | NW_004515988.1 | Scaffold548 | 329774                  | AA                              | CC              | 1946958848               |
| SNP_P4_134358_329814 | NW_004515988.1 | Scaffold548 | 329814                  | AA                              | GG              | 1946958850               |
| SNP_P4_134359_333450 | NW_004515988.1 | Scaffold548 | 333450                  | TT                              | GG              | 1946958852               |
| SNP_P4_134362_376578 | NW_004515988.1 | Scaffold548 | 376578                  | GG                              | TT              | 1946958854               |
| SNP_P4_134363_381303 | NW_004515988.1 | Scaffold548 | 381303                  | TT                              | CC              | 1946958856               |
| SNP_P4_134364_381592 | NW_004515988.1 | Scaffold548 | 381592                  | TT                              | CC              | 1946958858               |
| SNP_P4_134365_381618 | NW_004515988.1 | Scaffold548 | 381618                  | CC                              | TT              | 1946958860               |

| SNPs IDs             | Chromosome IDs | Chromosomes | Physical positions (bp) | CDC Frontier (Reference genome) | (ILWC46 & LPNB) | NCBI SNPdb Accession IDs |
|----------------------|----------------|-------------|-------------------------|---------------------------------|-----------------|--------------------------|
| SNP_P4_134366_381625 | NW_004515988.1 | Scaffold548 | 381625                  | TT                              | CC              | 1946958862               |
| SNP_P4_134367_381651 | NW_004515988.1 | Scaffold548 | 381651                  | AA                              | GG              | 1946958864               |
| SNP_P4_134368_384003 | NW_004515988.1 | Scaffold548 | 384003                  | CC                              | TT              | 1946958866               |
| SNP_P4_134369_384072 | NW_004515988.1 | Scaffold548 | 384072                  | TT                              | CC              | 1946958868               |
| SNP_P4_134370_402180 | NW_004515988.1 | Scaffold548 | 402180                  | TT                              | CC              | 1946958870               |
| SNP_P4_134371_402788 | NW_004515988.1 | Scaffold548 | 402788                  | CC                              | TT              | 1946958872               |
| SNP_P4_134372_402792 | NW_004515988.1 | Scaffold548 | 402792                  | AA                              | GG              | 1946958874               |
| SNP_P4_134373_428534 | NW_004515988.1 | Scaffold548 | 428534                  | GG                              | AA              | 1946958876               |
| SNP_P4_134375_446572 | NW_004515988.1 | Scaffold548 | 446572                  | CC                              | TT              | 1946958878               |
| SNP_P4_134377_480512 | NW_004515988.1 | Scaffold548 | 480512                  | TT                              | GG              | 1946958880               |
| SNP_P4_134378_480522 | NW_004515988.1 | Scaffold548 | 480522                  | TT                              | CC              | 1946958882               |
| SNP_P4_134379_480580 | NW_004515988.1 | Scaffold548 | 480580                  | AA                              | GG              | 1946958884               |
| SNP_P4_134380_480735 | NW_004515988.1 | Scaffold548 | 480735                  | AA                              | TT              | 1946958887               |
| SNP_P4_134381_480808 | NW_004515988.1 | Scaffold548 | 480808                  | CC                              | GG              | 1946958889               |
| SNP_P4_134382_480817 | NW_004515988.1 | Scaffold548 | 480817                  | TT                              | GG              | 1946958891               |
| SNP_P4_134383_480880 | NW_004515988.1 | Scaffold548 | 480880                  | TT                              | CC              | 1946958893               |
| SNP_P4_134384_480890 | NW_004515988.1 | Scaffold548 | 480890                  | AA                              | GG              | 1946958895               |
| SNP_P4_134385_480937 | NW_004515988.1 | Scaffold548 | 480937                  | CC                              | TT              | 1946958897               |
| SNP_P4_134386_480967 | NW_004515988.1 | Scaffold548 | 480967                  | TT                              | GG              | 1946958899               |
| SNP_P4_134387_481028 | NW_004515988.1 | Scaffold548 | 481028                  | CC                              | TT              | 1946958901               |
| SNP_P4_134388_481366 | NW_004515988.1 | Scaffold548 | 481366                  | TT                              | CC              | 1946958903               |
| SNP_P4_134389_481428 | NW_004515988.1 | Scaffold548 | 481428                  | CC                              | TT              | 1946958905               |
| SNP_P4_134390_483096 | NW_004515988.1 | Scaffold548 | 483096                  | GG                              | CC              | 1946958907               |
| SNP_P4_134391_489172 | NW_004515988.1 | Scaffold548 | 489172                  | CC                              | AA              | 1946958909               |
| SNP_P4_134392_490604 | NW_004515988.1 | Scaffold548 | 490604                  | CC                              | TT              | 1946958911               |
| SNP_P4_134393_490610 | NW_004515988.1 | Scaffold548 | 490610                  | AA                              | GG              | 1946958913               |
| SNP_P4_134394_490615 | NW_004515988.1 | Scaffold548 | 490615                  | AA                              | TT              | 1946958915               |
| SNP_P4_134395_490766 | NW_004515988.1 | Scaffold548 | 490766                  | CC                              | TT              | 1946958917               |
| SNP_P4_134396_491177 | NW_004515988.1 | Scaffold548 | 491177                  | CC                              | TT              | 1946958919               |
| SNP_P4_134397_491250 | NW_004515988.1 | Scaffold548 | 491250                  | TT                              | CC              | 1946958921               |
| SNP_P4_134398_491515 | NW_004515988.1 | Scaffold548 | 491515                  | CC                              | TT              | 1946958923               |
| SNP_P4_134399_491540 | NW_004515988.1 | Scaffold548 | 491540                  | GG                              | AA              | 1946958925               |
| SNP_P4_134400_491576 | NW_004515988.1 | Scaffold548 | 491576                  | TT                              | CC              | 1946958927               |
| SNP_P4_134401_505021 | NW_004515988.1 | Scaffold548 | 505021                  | AA                              | GG              | 1946958929               |
| SNP_P4_134403_543001 | NW_004515988.1 | Scaffold548 | 543001                  | CC                              | TT              | 1946958931               |
| SNP_P4_134404_575427 | NW_004515988.1 | Scaffold548 | 575427                  | TT                              | AA              | 1946958933               |
| SNP_P4_134405_575482 | NW_004515988.1 | Scaffold548 | 575482                  | TT                              | GG              | 1946958935               |
| SNP_P4_134408_593459 | NW_004515988.1 | Scaffold548 | 593459                  | GG                              | TT              | 1946958937               |
| SNP_P4_134409_593474 | NW_004515988.1 | Scaffold548 | 593474                  | CC                              | TT              | 1946958938               |
| SNP_P4_134410_593483 | NW_004515988.1 | Scaffold548 | 593483                  | GG                              | AA              | 1946958940               |
| SNP_P4_134411_593485 | NW_004515988.1 | Scaffold548 | 593485                  | CC                              | TT              | 1946958942               |
| SNP_P4_134412_593489 | NW_004515988.1 | Scaffold548 | 593489                  | TT                              | AA              | 1946958944               |

| SNPs IDs             | Chromosome IDs | Chromosomes | Physical positions (bp) | CDC Frontier (Reference genome) | (ILWC46 & LPNB) | NCBI SNPdb Accession IDs |
|----------------------|----------------|-------------|-------------------------|---------------------------------|-----------------|--------------------------|
| SNP_P4_134413_593514 | NW_004515988.1 | Scaffold548 | 593514                  | AA                              | GG              | 1946958946               |
| SNP_P4_134414_593519 | NW_004515988.1 | Scaffold548 | 593519                  | TT                              | CC              | 1946958948               |
| SNP_P4_134415_593542 | NW_004515988.1 | Scaffold548 | 593542                  | TT                              | CC              | 1946958950               |
| SNP_P4_134416_593559 | NW_004515988.1 | Scaffold548 | 593559                  | CC                              | TT              | 1946958952               |
| SNP_P4_134417_593565 | NW_004515988.1 | Scaffold548 | 593565                  | GG                              | TT              | 1946958954               |
| SNP_P4_134418_593581 | NW_004515988.1 | Scaffold548 | 593581                  | CC                              | TT              | 1946958956               |
| SNP_P4_134419_593582 | NW_004515988.1 | Scaffold548 | 593582                  | CC                              | TT              | 1946958958               |
| SNP_P4_134420_610061 | NW_004515988.1 | Scaffold548 | 610061                  | CC                              | GG              | 1946958960               |
| SNP_P4_134421_612318 | NW_004515988.1 | Scaffold548 | 612318                  | TT                              | CC              | 1946958962               |
| SNP_P4_134422_612330 | NW_004515988.1 | Scaffold548 | 612330                  | AA                              | GG              | 1946958964               |
| SNP_P4_134423_612367 | NW_004515988.1 | Scaffold548 | 612367                  | AA                              | GG              | 1946958966               |
| SNP_P4_134424_612369 | NW_004515988.1 | Scaffold548 | 612369                  | GG                              | AA              | 1946958968               |
| SNP_P4_134425_612391 | NW_004515988.1 | Scaffold548 | 612391                  | TT                              | GG              | 1946958970               |
| SNP_P4_134426_612418 | NW_004515988.1 | Scaffold548 | 612418                  | CC                              | TT              | 1946958972               |
| SNP_P4_134427_612464 | NW_004515988.1 | Scaffold548 | 612464                  | CC                              | TT              | 1946958974               |
| SNP_P4_134428_612469 | NW_004515988.1 | Scaffold548 | 612469                  | AA                              | TT              | 1946958976               |
| SNP_P4_134429_612477 | NW_004515988.1 | Scaffold548 | 612477                  | GG                              | TT              | 1946958978               |
| SNP_P4_134431_612858 | NW_004515988.1 | Scaffold548 | 612858                  | AA                              | TT              | 1946958980               |
| SNP_P4_134432_612896 | NW_004515988.1 | Scaffold548 | 612896                  | TT                              | CC              | 1946958982               |
| SNP_P4_134433_614754 | NW_004515988.1 | Scaffold548 | 614754                  | AA                              | TT              | 1946958984               |
| SNP_P4_134434_616385 | NW_004515988.1 | Scaffold548 | 616385                  | AA                              | GG              | 1946958986               |
| SNP_P4_134435_616410 | NW_004515988.1 | Scaffold548 | 616410                  | TT                              | CC              | 1946958988               |
| SNP_P4_134436_616454 | NW_004515988.1 | Scaffold548 | 616454                  | AA                              | GG              | 1946958990               |
| SNP_P4_134437_616814 | NW_004515988.1 | Scaffold548 | 616814                  | AA                              | GG              | 1946958992               |
| SNP_P4_134438_616848 | NW_004515988.1 | Scaffold548 | 616848                  | TT                              | GG              | 1946958994               |
| SNP_P4_134439_616872 | NW_004515988.1 | Scaffold548 | 616872                  | TT                              | CC              | 1946958996               |
| SNP_P4_134440_616891 | NW_004515988.1 | Scaffold548 | 616891                  | AA                              | GG              | 1946958998               |
| SNP_P4_134441_634732 | NW_004515988.1 | Scaffold548 | 634732                  | TT                              | AA              | 1946959000               |
| SNP_P4_134442_635410 | NW_004515988.1 | Scaffold548 | 635410                  | AA                              | GG              | 1946959002               |
| SNP_P4_134443_635422 | NW_004515988.1 | Scaffold548 | 635422                  | GG                              | AA              | 1946959004               |
| SNP_P4_134444_653411 | NW_004515988.1 | Scaffold548 | 653411                  | CC                              | TT              | 1946959006               |
| SNP_P4_134445_666575 | NW_004515988.1 | Scaffold548 | 666575                  | GG                              | TT              | 1946959008               |
| SNP_P4_134446_683794 | NW_004515988.1 | Scaffold548 | 683794                  | TT                              | CC              | 1946959010               |
| SNP_P4_134447_683896 | NW_004515988.1 | Scaffold548 | 683896                  | TT                              | GG              | 1946959012               |
| SNP_P4_134448_684591 | NW_004515988.1 | Scaffold548 | 684591                  | TT                              | AA              | 1946959014               |
| SNP_P4_134449_684624 | NW_004515988.1 | Scaffold548 | 684624                  | GG                              | CC              | 1946959016               |
| SNP_P4_134450_685423 | NW_004515988.1 | Scaffold548 | 685423                  | AA                              | GG              | 1946959018               |
| SNP_P4_134451_685479 | NW_004515988.1 | Scaffold548 | 685479                  | AA                              | GG              | 1946959020               |
| SNP_P4_134452_685570 | NW_004515988.1 | Scaffold548 | 685570                  | GG                              | AA              | 1946959022               |
| SNP_P4_134453_4223   | NW_004515989.1 | Scaffold549 | 4223                    | CC                              | TT              | 1946959024               |
| SNP_P4_134454_22018  | NW_004515989.1 | Scaffold549 | 22018                   | TT                              | CC              | 1946959026               |
| SNP_P4_134455_22378  | NW_004515989.1 | Scaffold549 | 22378                   | TT                              | AA              | 1946959028               |

| SNPs IDs            | Chromosome IDs | Chromosomes | Physical positions (bp) | CDC Frontier (Reference genome) | (ILWC46 & LPNB) | NCBI SNPdb Accession IDs |
|---------------------|----------------|-------------|-------------------------|---------------------------------|-----------------|--------------------------|
| SNP_P4_134456_38242 | NW_004515989.1 | Scaffold549 | 38242                   | TT                              | CC              | 1946959030               |
| SNP_P4_134457_38331 | NW_004515989.1 | Scaffold549 | 38331                   | CC                              | AA              | 1946959032               |
| SNP_P4_134458_38459 | NW_004515989.1 | Scaffold549 | 38459                   | GG                              | TT              | 1946959034               |
| SNP_P4_134459_38503 | NW_004515989.1 | Scaffold549 | 38503                   | TT                              | AA              | 1946959036               |
| SNP_P4_134460_38505 | NW_004515989.1 | Scaffold549 | 38505                   | AA                              | TT              | 1946959038               |
| SNP_P4_134461_38510 | NW_004515989.1 | Scaffold549 | 38510                   | GG                              | AA              | 1946959040               |
| SNP_P4_134462_38522 | NW_004515989.1 | Scaffold549 | 38522                   | CC                              | TT              | 1946959042               |
| SNP_P4_134463_41059 | NW_004515989.1 | Scaffold549 | 41059                   | GG                              | AA              | 1946959044               |
| SNP_P4_134464_41607 | NW_004515989.1 | Scaffold549 | 41607                   | TT                              | CC              | 1946959046               |
| SNP_P4_134465_41636 | NW_004515989.1 | Scaffold549 | 41636                   | CC                              | GG              | 1946959048               |
| SNP_P4_134466_42061 | NW_004515989.1 | Scaffold549 | 42061                   | GG                              | AA              | 1946959050               |
| SNP_P4_134468_45179 | NW_004515989.1 | Scaffold549 | 45179                   | AA                              | GG              | 1946959052               |
| SNP_P4_134469_45185 | NW_004515989.1 | Scaffold549 | 45185                   | AA                              | TT              | 1946959054               |
| SNP_P4_134470_51655 | NW_004515989.1 | Scaffold549 | 51655                   | AA                              | CC              | 1946959056               |
| SNP_P4_134471_51687 | NW_004515989.1 | Scaffold549 | 51687                   | AA                              | GG              | 1946959058               |
| SNP_P4_134472_56075 | NW_004515989.1 | Scaffold549 | 56075                   | AA                              | TT              | 1946959060               |
| SNP_P4_134473_58821 | NW_004515989.1 | Scaffold549 | 58821                   | GG                              | AA              | 1946959062               |
| SNP_P4_134474_60473 | NW_004515989.1 | Scaffold549 | 60473                   | CC                              | TT              | 1946959064               |
| SNP_P4_134476_61028 | NW_004515989.1 | Scaffold549 | 61028                   | TT                              | CC              | 1946959066               |
| SNP_P4_134477_61538 | NW_004515989.1 | Scaffold549 | 61538                   | TT                              | CC              | 1946959068               |
| SNP_P4_134478_61551 | NW_004515989.1 | Scaffold549 | 61551                   | AA                              | GG              | 1946959070               |
| SNP_P4_134479_61579 | NW_004515989.1 | Scaffold549 | 61579                   | CC                              | TT              | 1946959072               |
| SNP_P4_134480_61893 | NW_004515989.1 | Scaffold549 | 61893                   | TT                              | AA              | 1946959074               |
| SNP_P4_134481_61912 | NW_004515989.1 | Scaffold549 | 61912                   | CC                              | TT              | 1946959076               |
| SNP_P4_134482_671   | NW_004515990.1 | Scaffold552 | 671                     | TT                              | AA              | 1946959078               |
| SNP_P4_134483_1296  | NW_004515990.1 | Scaffold552 | 1296                    | GG                              | CC              | 1946959080               |
| SNP_P4_134484_1300  | NW_004515990.1 | Scaffold552 | 1300                    | TT                              | CC              | 1946959082               |
| SNP_P4_134485_546   | NW_004515991.1 | Scaffold553 | 546                     | TT                              | CC              | 1946959084               |
| SNP_P4_134486_2394  | NW_004515991.1 | Scaffold553 | 2394                    | CC                              | GG              | 1946959086               |
| SNP_P4_134487_2542  | NW_004515991.1 | Scaffold553 | 2542                    | TT                              | AA              | 1946959088               |
| SNP_P4_134490_2966  | NW_004515991.1 | Scaffold553 | 2966                    | TT                              | GG              | 1946959090               |
| SNP_P4_134491_3244  | NW_004515991.1 | Scaffold553 | 3244                    | AA                              | CC              | 1946959092               |
| SNP_P4_134492_3408  | NW_004515991.1 | Scaffold553 | 3408                    | TT                              | GG              | 1946959094               |
| SNP_P4_134493_3477  | NW_004515991.1 | Scaffold553 | 3477                    | TT                              | AA              | 1946959096               |
| SNP_P4_134494_3496  | NW_004515991.1 | Scaffold553 | 3496                    | CC                              | AA              | 1946959098               |
| SNP_P4_134495_4936  | NW_004515991.1 | Scaffold553 | 4936                    | AA                              | CC              | 1946959100               |
| SNP_P4_134496_4974  | NW_004515991.1 | Scaffold553 | 4974                    | AA                              | CC              | 1946959102               |
| SNP_P4_134497_5037  | NW_004515991.1 | Scaffold553 | 5037                    | CC                              | AA              | 1946959104               |
| SNP_P4_134498_5146  | NW_004515991.1 | Scaffold553 | 5146                    | TT                              | CC              | 1946959106               |
| SNP_P4_134499_5220  | NW_004515991.1 | Scaffold553 | 5220                    | TT                              | GG              | 1946959108               |
| SNP_P4_134500_5224  | NW_004515991.1 | Scaffold553 | 5224                    | GG                              | AA              | 1946959110               |
| SNP_P4_134501_20805 | NW_004515991.1 | Scaffold553 | 20805                   | AA                              | TT              | 1946959112               |

| SNPs IDs            | Chromosome IDs | Chromosomes | Physical positions (bp) | CDC Frontier (Reference genome) | (ILWC46 & LPNB) | NCBI SNPdb Accession IDs |
|---------------------|----------------|-------------|-------------------------|---------------------------------|-----------------|--------------------------|
| SNP_P4_134502_24120 | NW_004515991.1 | Scaffold553 | 24120                   | CC                              | TT              | 1946959114               |
| SNP_P4_134503_24186 | NW_004515991.1 | Scaffold553 | 24186                   | CC                              | TT              | 1946959116               |
| SNP_P4_134504_24202 | NW_004515991.1 | Scaffold553 | 24202                   | CC                              | TT              | 1946959118               |
| SNP_P4_134505_24221 | NW_004515991.1 | Scaffold553 | 24221                   | TT                              | CC              | 1946959120               |
| SNP_P4_134506_24784 | NW_004515991.1 | Scaffold553 | 24784                   | CC                              | TT              | 1946959122               |
| SNP_P4_134507_25049 | NW_004515991.1 | Scaffold553 | 25049                   | CC                              | GG              | 1946959124               |
| SNP_P4_134508_33524 | NW_004515991.1 | Scaffold553 | 33524                   | AA                              | GG              | 1946959126               |
| SNP_P4_134509_33527 | NW_004515991.1 | Scaffold553 | 33527                   | GG                              | AA              | 1946959128               |
| SNP_P4_134510_33534 | NW_004515991.1 | Scaffold553 | 33534                   | AA                              | GG              | 1946959130               |
| SNP_P4_134511_33537 | NW_004515991.1 | Scaffold553 | 33537                   | TT                              | GG              | 1946959132               |
| SNP_P4_134512_33542 | NW_004515991.1 | Scaffold553 | 33542                   | TT                              | CC              | 1946959134               |
| SNP_P4_134513_33566 | NW_004515991.1 | Scaffold553 | 33566                   | AA                              | GG              | 1946959136               |
| SNP_P4_134514_33575 | NW_004515991.1 | Scaffold553 | 33575                   | GG                              | AA              | 1946959138               |
| SNP_P4_134515_33596 | NW_004515991.1 | Scaffold553 | 33596                   | CC                              | TT              | 1946959140               |
| SNP_P4_134516_33617 | NW_004515991.1 | Scaffold553 | 33617                   | GG                              | AA              | 1946959142               |
| SNP_P4_134517_33618 | NW_004515991.1 | Scaffold553 | 33618                   | CC                              | TT              | 1946959144               |
| SNP_P4_134518_33626 | NW_004515991.1 | Scaffold553 | 33626                   | TT                              | CC              | 1946959146               |
| SNP_P4_134519_33629 | NW_004515991.1 | Scaffold553 | 33629                   | TT                              | CC              | 1946959148               |
| SNP_P4_134520_33632 | NW_004515991.1 | Scaffold553 | 33632                   | CC                              | TT              | 1946959150               |
| SNP_P4_134521_33641 | NW_004515991.1 | Scaffold553 | 33641                   | GG                              | TT              | 1946959152               |
| SNP_P4_134522_33644 | NW_004515991.1 | Scaffold553 | 33644                   | TT                              | CC              | 1946959154               |
| SNP_P4_134523_33652 | NW_004515991.1 | Scaffold553 | 33652                   | AA                              | GG              | 1946959156               |
| SNP_P4_134524_36597 | NW_004515991.1 | Scaffold553 | 36597                   | AA                              | GG              | 1946959158               |
| SNP_P4_134525_36611 | NW_004515991.1 | Scaffold553 | 36611                   | CC                              | GG              | 1946959160               |
| SNP_P4_134526_36619 | NW_004515991.1 | Scaffold553 | 36619                   | TT                              | GG              | 1946959162               |
| SNP_P4_134527_36633 | NW_004515991.1 | Scaffold553 | 36633                   | TT                              | CC              | 1946959164               |
| SNP_P4_134528_36634 | NW_004515991.1 | Scaffold553 | 36634                   | TT                              | CC              | 1946959166               |
| SNP_P4_134529_39329 | NW_004515991.1 | Scaffold553 | 39329                   | TT                              | CC              | 1946959168               |
| SNP_P4_134530_41896 | NW_004515991.1 | Scaffold553 | 41896                   | CC                              | TT              | 1946959170               |
| SNP_P4_134531_41897 | NW_004515991.1 | Scaffold553 | 41897                   | GG                              | AA              | 1946959172               |
| SNP_P4_134532_41930 | NW_004515991.1 | Scaffold553 | 41930                   | GG                              | AA              | 1946959174               |
| SNP_P4_134533_41931 | NW_004515991.1 | Scaffold553 | 41931                   | GG                              | CC              | 1946959176               |
| SNP_P4_134534_41953 | NW_004515991.1 | Scaffold553 | 41953                   | AA                              | TT              | 1946959178               |
| SNP_P4_134535_41956 | NW_004515991.1 | Scaffold553 | 41956                   | GG                              | AA              | 1946959180               |
| SNP_P4_134536_69768 | NW_004515991.1 | Scaffold553 | 69768                   | CC                              | AA              | 1946959182               |
| SNP_P4_134537_69824 | NW_004515991.1 | Scaffold553 | 69824                   | GG                              | AA              | 1946959184               |
| SNP_P4_134538_70723 | NW_004515991.1 | Scaffold553 | 70723                   | TT                              | CC              | 1946959186               |
| SNP_P4_134539_70743 | NW_004515991.1 | Scaffold553 | 70743                   | TT                              | CC              | 1946959188               |
| SNP_P4_134541_73479 | NW_004515991.1 | Scaffold553 | 73479                   | GG                              | AA              | 1946959190               |
| SNP_P4_134543_92411 | NW_004515991.1 | Scaffold553 | 92411                   | GG                              | AA              | 1946959192               |
| SNP_P4_134544_92447 | NW_004515991.1 | Scaffold553 | 92447                   | CC                              | GG              | 1946959194               |
| SNP_P4_134545_92469 | NW_004515991.1 | Scaffold553 | 92469                   | TT                              | GG              | 1946959196               |

| SNPs IDs             | Chromosome IDs | Chromosomes | Physical positions (bp) | CDC Frontier (Reference genome) | (ILWC46 & LPNB) | NCBI SNPdb Accession IDs |
|----------------------|----------------|-------------|-------------------------|---------------------------------|-----------------|--------------------------|
| SNP_P4_134546_92598  | NW_004515991.1 | Scaffold553 | 92598                   | AA                              | GG              | 1946959198               |
| SNP_P4_134547_92610  | NW_004515991.1 | Scaffold553 | 92610                   | CC                              | TT              | 1946959200               |
| SNP_P4_134548_92617  | NW_004515991.1 | Scaffold553 | 92617                   | GG                              | TT              | 1946959202               |
| SNP_P4_134549_93006  | NW_004515991.1 | Scaffold553 | 93006                   | GG                              | TT              | 1946959204               |
| SNP_P4_134550_93113  | NW_004515991.1 | Scaffold553 | 93113                   | TT                              | CC              | 1946959206               |
| SNP_P4_134551_93740  | NW_004515991.1 | Scaffold553 | 93740                   | TT                              | CC              | 1946959208               |
| SNP_P4_134552_102381 | NW_004515991.1 | Scaffold553 | 102381                  | TT                              | AA              | 1946959210               |
| SNP_P4_134554_126872 | NW_004515991.1 | Scaffold553 | 126872                  | TT                              | AA              | 1946959212               |
| SNP_P4_134556_145717 | NW_004515991.1 | Scaffold553 | 145717                  | GG                              | AA              | 1946959214               |
| SNP_P4_134557_164129 | NW_004515991.1 | Scaffold553 | 164129                  | CC                              | TT              | 1946959216               |
| SNP_P4_134558_166233 | NW_004515991.1 | Scaffold553 | 166233                  | AA                              | GG              | 1946959218               |
| SNP_P4_134559_166235 | NW_004515991.1 | Scaffold553 | 166235                  | TT                              | CC              | 1946959220               |
| SNP_P4_134560_167801 | NW_004515991.1 | Scaffold553 | 167801                  | AA                              | TT              | 1946959222               |
| SNP_P4_134561_184778 | NW_004515991.1 | Scaffold553 | 184778                  | AA                              | GG              | 1946959224               |
| SNP_P4_134562_200954 | NW_004515991.1 | Scaffold553 | 200954                  | CC                              | TT              | 1946959226               |
| SNP_P4_134563_201089 | NW_004515991.1 | Scaffold553 | 201089                  | TT                              | CC              | 1946959228               |
| SNP_P4_134564_201091 | NW_004515991.1 | Scaffold553 | 201091                  | TT                              | AA              | 1946959230               |
| SNP_P4_134565_265026 | NW_004515991.1 | Scaffold553 | 265026                  | GG                              | CC              | 1946959232               |
| SNP_P4_134566_265083 | NW_004515991.1 | Scaffold553 | 265083                  | AA                              | TT              | 1946959234               |
| SNP_P4_134567_268307 | NW_004515991.1 | Scaffold553 | 268307                  | AA                              | GG              | 1946959236               |
| SNP_P4_134568_276511 | NW_004515991.1 | Scaffold553 | 276511                  | AA                              | GG              | 1946959238               |
| SNP_P4_134569_276524 | NW_004515991.1 | Scaffold553 | 276524                  | AA                              | GG              | 1946959240               |
| SNP_P4_134570_276531 | NW_004515991.1 | Scaffold553 | 276531                  | CC                              | TT              | 1946959242               |
| SNP_P4_134571_276675 | NW_004515991.1 | Scaffold553 | 276675                  | AA                              | GG              | 1946959244               |
| SNP_P4_134572_276906 | NW_004515991.1 | Scaffold553 | 276906                  | AA                              | CC              | 1946959246               |
| SNP_P4_134573_276989 | NW_004515991.1 | Scaffold553 | 276989                  | TT                              | CC              | 1946959248               |
| SNP_P4_134574_277009 | NW_004515991.1 | Scaffold553 | 277009                  | AA                              | GG              | 1946959250               |
| SNP_P4_134575_277018 | NW_004515991.1 | Scaffold553 | 277018                  | TT                              | CC              | 1946959252               |
| SNP_P4_134576_277051 | NW_004515991.1 | Scaffold553 | 277051                  | AA                              | GG              | 1946959254               |
| SNP_P4_134577_277069 | NW_004515991.1 | Scaffold553 | 277069                  | AA                              | GG              | 1946959256               |
| SNP_P4_134578_277085 | NW_004515991.1 | Scaffold553 | 277085                  | TT                              | CC              | 1946959258               |
| SNP_P4_134580_313997 | NW_004515991.1 | Scaffold553 | 313997                  | TT                              | CC              | 1946959260               |
| SNP_P4_134582_325577 | NW_004515991.1 | Scaffold553 | 325577                  | AA                              | CC              | 1946959262               |
| SNP_P4_134583_325602 | NW_004515991.1 | Scaffold553 | 325602                  | CC                              | GG              | 1946959264               |
| SNP_P4_134584_325643 | NW_004515991.1 | Scaffold553 | 325643                  | TT                              | AA              | 1946959266               |
| SNP_P4_134585_364079 | NW_004515991.1 | Scaffold553 | 364079                  | AA                              | GG              | 1946959268               |
| SNP_P4_134586_386533 | NW_004515991.1 | Scaffold553 | 386533                  | AA                              | GG              | 1946959270               |
| SNP_P4_134587_386534 | NW_004515991.1 | Scaffold553 | 386534                  | TT                              | CC              | 1946959272               |
| SNP_P4_134588_386535 | NW_004515991.1 | Scaffold553 | 386535                  | TT                              | AA              | 1946959274               |
| SNP_P4_134589_386536 | NW_004515991.1 | Scaffold553 | 386536                  | CC                              | TT              | 1946959276               |
| SNP_P4_134590_386537 | NW_004515991.1 | Scaffold553 | 386537                  | TT                              | CC              | 1946959278               |
| SNP_P4_134591_403181 | NW_004515991.1 | Scaffold553 | 403181                  | AA                              | CC              | 1946959280               |

| SNPs IDs             | Chromosome IDs | Chromosomes | Physical positions (bp) | CDC Frontier (Reference genome) | (ILWC46 & LPNB) | NCBI SNPdb Accession IDs |
|----------------------|----------------|-------------|-------------------------|---------------------------------|-----------------|--------------------------|
| SNP_P4_134592_403205 | NW_004515991.1 | Scaffold553 | 403205                  | AA                              | GG              | 1946959282               |
| SNP_P4_134593_403310 | NW_004515991.1 | Scaffold553 | 403310                  | AA                              | GG              | 1946959284               |
| SNP_P4_134594_403346 | NW_004515991.1 | Scaffold553 | 403346                  | TT                              | GG              | 1946959286               |
| SNP_P4_134595_403389 | NW_004515991.1 | Scaffold553 | 403389                  | AA                              | CC              | 1946959288               |
| SNP_P4_134596_403398 | NW_004515991.1 | Scaffold553 | 403398                  | CC                              | TT              | 1946959290               |
| SNP_P4_134597_403416 | NW_004515991.1 | Scaffold553 | 403416                  | GG                              | AA              | 1946959292               |
| SNP_P4_134598_403440 | NW_004515991.1 | Scaffold553 | 403440                  | GG                              | AA              | 1946959294               |
| SNP_P4_134599_403627 | NW_004515991.1 | Scaffold553 | 403627                  | GG                              | AA              | 1946959296               |
| SNP_P4_134600_403638 | NW_004515991.1 | Scaffold553 | 403638                  | TT                              | GG              | 1946959298               |
| SNP_P4_134601_403695 | NW_004515991.1 | Scaffold553 | 403695                  | GG                              | CC              | 1946959300               |
| SNP_P4_134602_422916 | NW_004515991.1 | Scaffold553 | 422916                  | AA                              | GG              | 1946959302               |
| SNP_P4_134603_434907 | NW_004515991.1 | Scaffold553 | 434907                  | TT                              | CC              | 1946959304               |
| SNP_P4_134605_464052 | NW_004515991.1 | Scaffold553 | 464052                  | AA                              | GG              | 1946959306               |
| SNP_P4_134606_464055 | NW_004515991.1 | Scaffold553 | 464055                  | TT                              | GG              | 1946959308               |
| SNP_P4_134607_464071 | NW_004515991.1 | Scaffold553 | 464071                  | TT                              | AA              | 1946959310               |
| SNP_P4_134608_464362 | NW_004515991.1 | Scaffold553 | 464362                  | AA                              | GG              | 1946959312               |
| SNP_P4_134609_475941 | NW_004515991.1 | Scaffold553 | 475941                  | TT                              | CC              | 1946959314               |
| SNP_P4_134610_475948 | NW_004515991.1 | Scaffold553 | 475948                  | TT                              | CC              | 1946959316               |
| SNP_P4_134611_475975 | NW_004515991.1 | Scaffold553 | 475975                  | CC                              | TT              | 1946959318               |
| SNP_P4_134612_475994 | NW_004515991.1 | Scaffold553 | 475994                  | TT                              | CC              | 1946959320               |
| SNP_P4_134614_476026 | NW_004515991.1 | Scaffold553 | 476026                  | TT                              | GG              | 1946959322               |
| SNP_P4_134615_476174 | NW_004515991.1 | Scaffold553 | 476174                  | AA                              | GG              | 1946959324               |
| SNP_P4_134616_476193 | NW_004515991.1 | Scaffold553 | 476193                  | AA                              | GG              | 1946959326               |
| SNP_P4_134617_476239 | NW_004515991.1 | Scaffold553 | 476239                  | TT                              | CC              | 1946959328               |
| SNP_P4_134618_476352 | NW_004515991.1 | Scaffold553 | 476352                  | AA                              | CC              | 1946959330               |
| SNP_P4_134619_476377 | NW_004515991.1 | Scaffold553 | 476377                  | CC                              | TT              | 1946959332               |
| SNP_P4_134620_476385 | NW_004515991.1 | Scaffold553 | 476385                  | AA                              | TT              | 1946959334               |
| SNP_P4_134621_476386 | NW_004515991.1 | Scaffold553 | 476386                  | AA                              | CC              | 1946959336               |
| SNP_P4_134622_476491 | NW_004515991.1 | Scaffold553 | 476491                  | CC                              | TT              | 1946959338               |
| SNP_P4_134623_476513 | NW_004515991.1 | Scaffold553 | 476513                  | TT                              | CC              | 1946959340               |
| SNP_P4_134624_476521 | NW_004515991.1 | Scaffold553 | 476521                  | TT                              | GG              | 1946959342               |
| SNP_P4_134625_476553 | NW_004515991.1 | Scaffold553 | 476553                  | AA                              | GG              | 1946959344               |
| SNP_P4_134626_476562 | NW_004515991.1 | Scaffold553 | 476562                  | AA                              | GG              | 1946959346               |
| SNP_P4_134627_480177 | NW_004515991.1 | Scaffold553 | 480177                  | GG                              | AA              | 1946959348               |
| SNP_P4_134628_480236 | NW_004515991.1 | Scaffold553 | 480236                  | AA                              | GG              | 1946959350               |
| SNP_P4_134629_480405 | NW_004515991.1 | Scaffold553 | 480405                  | CC                              | AA              | 1946959352               |
| SNP_P4_134630_480458 | NW_004515991.1 | Scaffold553 | 480458                  | CC                              | TT              | 1946959354               |
| SNP_P4_134631_480465 | NW_004515991.1 | Scaffold553 | 480465                  | TT                              | CC              | 1946959356               |
| SNP_P4_134632_487405 | NW_004515991.1 | Scaffold553 | 487405                  | AA                              | GG              | 1946959358               |
| SNP_P4_134633_487407 | NW_004515991.1 | Scaffold553 | 487407                  | CC                              | AA              | 1946959360               |
| SNP_P4_134634_515452 | NW_004515991.1 | Scaffold553 | 515452                  | AA                              | GG              | 1946959362               |
| SNP_P4_134635_520137 | NW_004515991.1 | Scaffold553 | 520137                  | CC                              | AA              | 1946959364               |

| SNPs IDs             | Chromosome IDs | Chromosomes | Physical positions (bp) | CDC Frontier (Reference genome) | (ILWC46 & LPNB) | NCBI SNPdb Accession IDs |
|----------------------|----------------|-------------|-------------------------|---------------------------------|-----------------|--------------------------|
| SNP_P4_134636_522530 | NW_004515991.1 | Scaffold553 | 522530                  | CC                              | TT              | 1946959366               |
| SNP_P4_134637_522552 | NW_004515991.1 | Scaffold553 | 522552                  | GG                              | TT              | 1946959368               |
| SNP_P4_134638_526556 | NW_004515991.1 | Scaffold553 | 526556                  | AA                              | GG              | 1946959370               |
| SNP_P4_134639_527036 | NW_004515991.1 | Scaffold553 | 527036                  | TT                              | CC              | 1946959372               |
| SNP_P4_134641_529627 | NW_004515991.1 | Scaffold553 | 529627                  | TT                              | GG              | 1946959374               |
| SNP_P4_134642_583102 | NW_004515991.1 | Scaffold553 | 583102                  | TT                              | CC              | 1946959376               |
| SNP_P4_134645_583476 | NW_004515991.1 | Scaffold553 | 583476                  | AA                              | CC              | 1946959378               |
| SNP_P4_134646_656307 | NW_004515991.1 | Scaffold553 | 656307                  | TT                              | CC              | 1946959380               |
| SNP_P4_134647_680726 | NW_004515991.1 | Scaffold553 | 680726                  | TT                              | CC              | 1946959382               |
| SNP_P4_134648_687536 | NW_004515991.1 | Scaffold553 | 687536                  | CC                              | TT              | 1946959384               |
| SNP_P4_134649_692983 | NW_004515991.1 | Scaffold553 | 692983                  | AA                              | TT              | 1946959386               |
| SNP_P4_134650_697398 | NW_004515991.1 | Scaffold553 | 697398                  | CC                              | GG              | 1946959388               |
| SNP_P4_134651_739140 | NW_004515991.1 | Scaffold553 | 739140                  | GG                              | AA              | 1946959390               |
| SNP_P4_134652_746428 | NW_004515991.1 | Scaffold553 | 746428                  | TT                              | GG              | 1946959392               |
| SNP_P4_134653_746429 | NW_004515991.1 | Scaffold553 | 746429                  | AA                              | TT              | 1946959394               |
| SNP_P4_134654_751576 | NW_004515991.1 | Scaffold553 | 751576                  | TT                              | CC              | 1946959396               |
| SNP_P4_134655_757110 | NW_004515991.1 | Scaffold553 | 757110                  | AA                              | CC              | 1946959398               |
| SNP_P4_134656_764489 | NW_004515991.1 | Scaffold553 | 764489                  | AA                              | CC              | 1946959400               |
| SNP_P4_134657_766770 | NW_004515991.1 | Scaffold553 | 766770                  | AA                              | GG              | 1946959402               |
| SNP_P4_134658_766771 | NW_004515991.1 | Scaffold553 | 766771                  | GG                              | CC              | 1946959404               |
| SNP_P4_134659_766812 | NW_004515991.1 | Scaffold553 | 766812                  | TT                              | CC              | 1946959406               |
| SNP_P4_134660_766896 | NW_004515991.1 | Scaffold553 | 766896                  | GG                              | AA              | 1946959408               |
| SNP_P4_134661_766924 | NW_004515991.1 | Scaffold553 | 766924                  | AA                              | GG              | 1946959410               |
| SNP_P4_134662_766946 | NW_004515991.1 | Scaffold553 | 766946                  | AA                              | GG              | 1946959412               |
| SNP_P4_134663_766984 | NW_004515991.1 | Scaffold553 | 766984                  | TT                              | CC              | 1946959414               |
| SNP_P4_134664_766985 | NW_004515991.1 | Scaffold553 | 766985                  | CC                              | TT              | 1946959416               |
| SNP_P4_134665_766986 | NW_004515991.1 | Scaffold553 | 766986                  | CC                              | TT              | 1946959418               |
| SNP_P4_134666_768334 | NW_004515991.1 | Scaffold553 | 768334                  | GG                              | AA              | 1946959420               |
| SNP_P4_134667_775272 | NW_004515991.1 | Scaffold553 | 775272                  | TT                              | CC              | 1946959422               |
| SNP_P4_134668_779267 | NW_004515991.1 | Scaffold553 | 779267                  | TT                              | GG              | 1946959424               |
| SNP_P4_134669_779268 | NW_004515991.1 | Scaffold553 | 779268                  | TT                              | AA              | 1946959426               |
| SNP_P4_134670_790908 | NW_004515991.1 | Scaffold553 | 790908                  | GG                              | AA              | 1946959428               |
| SNP_P4_134672_801976 | NW_004515991.1 | Scaffold553 | 801976                  | AA                              | GG              | 1946959431               |
| SNP_P4_134673_812439 | NW_004515991.1 | Scaffold553 | 812439                  | AA                              | TT              | 1946959433               |
| SNP_P4_134674_818852 | NW_004515991.1 | Scaffold553 | 818852                  | GG                              | AA              | 1946959435               |
| SNP_P4_134675_818888 | NW_004515991.1 | Scaffold553 | 818888                  | GG                              | AA              | 1946959437               |
| SNP_P4_134676_818967 | NW_004515991.1 | Scaffold553 | 818967                  | CC                              | AA              | 1946959439               |
| SNP_P4_134677_823198 | NW_004515991.1 | Scaffold553 | 823198                  | TT                              | CC              | 1946959441               |
| SNP_P4_134678_839443 | NW_004515991.1 | Scaffold553 | 839443                  | AA                              | CC              | 1946959443               |
| SNP_P4_134679_839460 | NW_004515991.1 | Scaffold553 | 839460                  | TT                              | CC              | 1946959445               |
| SNP_P4_134680_839480 | NW_004515991.1 | Scaffold553 | 839480                  | TT                              | CC              | 1946959447               |
| SNP_P4_134681_841264 | NW_004515991.1 | Scaffold553 | 841264                  | TT                              | CC              | 1946959449               |



| SNPs IDs             | Chromosome IDs | Chromosomes | Physical positions (bp) | CDC Frontier (Reference genome) | (ILWC46 & LPNB) | NCBI SNPdb Accession IDs |
|----------------------|----------------|-------------|-------------------------|---------------------------------|-----------------|--------------------------|
| SNP_P4_134682_841296 | NW_004515991.1 | Scaffold553 | 841296                  | AA                              | GG              | 1946959451               |
| SNP_P4_134683_841308 | NW_004515991.1 | Scaffold553 | 841308                  | AA                              | GG              | 1946959453               |
| SNP_P4_134684_842152 | NW_004515991.1 | Scaffold553 | 842152                  | TT                              | CC              | 1946959455               |
| SNP_P4_134685_842185 | NW_004515991.1 | Scaffold553 | 842185                  | GG                              | AA              | 1946959457               |
| SNP_P4_134686_842197 | NW_004515991.1 | Scaffold553 | 842197                  | TT                              | CC              | 1946959459               |
| SNP_P4_134687_868367 | NW_004515991.1 | Scaffold553 | 868367                  | TT                              | CC              | 1946959461               |
| SNP_P4_134688_880131 | NW_004515991.1 | Scaffold553 | 880131                  | TT                              | CC              | 1946959463               |
| SNP_P4_134689_895918 | NW_004515991.1 | Scaffold553 | 895918                  | CC                              | TT              | 1946959465               |
| SNP_P4_134690_906968 | NW_004515991.1 | Scaffold553 | 906968                  | AA                              | CC              | 1946959467               |
| SNP_P4_134691_923791 | NW_004515991.1 | Scaffold553 | 923791                  | GG                              | CC              | 1946959469               |
| SNP_P4_134692_923824 | NW_004515991.1 | Scaffold553 | 923824                  | TT                              | AA              | 1946959471               |
| SNP_P4_134693_923831 | NW_004515991.1 | Scaffold553 | 923831                  | AA                              | CC              | 1946959473               |
| SNP_P4_134694_923833 | NW_004515991.1 | Scaffold553 | 923833                  | CC                              | TT              | 1946959475               |
| SNP_P4_134695_923861 | NW_004515991.1 | Scaffold553 | 923861                  | AA                              | CC              | 1946959477               |
| SNP_P4_134696_924171 | NW_004515991.1 | Scaffold553 | 924171                  | CC                              | TT              | 1946959479               |
| SNP_P4_134697_924183 | NW_004515991.1 | Scaffold553 | 924183                  | GG                              | AA              | 1946959481               |
| SNP_P4_134698_924318 | NW_004515991.1 | Scaffold553 | 924318                  | CC                              | GG              | 1946959483               |
| SNP_P4_134701_927437 | NW_004515991.1 | Scaffold553 | 927437                  | AA                              | CC              | 1946959485               |
| SNP_P4_134702_927438 | NW_004515991.1 | Scaffold553 | 927438                  | CC                              | AA              | 1946959487               |
| SNP_P4_134703_947245 | NW_004515991.1 | Scaffold553 | 947245                  | AA                              | TT              | 1946959489               |
| SNP_P4_134704_824    | NW_004515992.1 | Scaffold556 | 824                     | TT                              | AA              | 1946959491               |
| SNP_P4_134705_863    | NW_004515992.1 | Scaffold556 | 863                     | TT                              | AA              | 1946959493               |
| SNP_P4_134706_885    | NW_004515992.1 | Scaffold556 | 885                     | TT                              | CC              | 1946959495               |
| SNP_P4_134707_906    | NW_004515992.1 | Scaffold556 | 906                     | AA                              | CC              | 1946959497               |
| SNP_P4_134708_948    | NW_004515992.1 | Scaffold556 | 948                     | AA                              | TT              | 1946959499               |
| SNP_P4_134709_960    | NW_004515992.1 | Scaffold556 | 960                     | TT                              | GG              | 1946959501               |
| SNP_P4_134710_1059   | NW_004515992.1 | Scaffold556 | 1059                    | TT                              | AA              | 1946959503               |
| SNP_P4_134711_1105   | NW_004515992.1 | Scaffold556 | 1105                    | CC                              | GG              | 1946959505               |
| SNP_P4_134712_1109   | NW_004515992.1 | Scaffold556 | 1109                    | GG                              | TT              | 1946959507               |
| SNP_P4_134713_1120   | NW_004515992.1 | Scaffold556 | 1120                    | TT                              | GG              | 1946959509               |
| SNP_P4_134714_1123   | NW_004515992.1 | Scaffold556 | 1123                    | AA                              | GG              | 1946959511               |
| SNP_P4_134715_1129   | NW_004515992.1 | Scaffold556 | 1129                    | TT                              | GG              | 1946959513               |
| SNP_P4_134716_1182   | NW_004515992.1 | Scaffold556 | 1182                    | AA                              | TT              | 1946959515               |
| SNP_P4_134717_1199   | NW_004515992.1 | Scaffold556 | 1199                    | GG                              | AA              | 1946959517               |
| SNP_P4_134718_1290   | NW_004515992.1 | Scaffold556 | 1290                    | AA                              | GG              | 1946959519               |
| SNP_P4_134719_1376   | NW_004515992.1 | Scaffold556 | 1376                    | GG                              | TT              | 1946959521               |
| SNP_P4_134721_1545   | NW_004515992.1 | Scaffold556 | 1545                    | TT                              | CC              | 1946959523               |
| SNP_P4_134722_1666   | NW_004515992.1 | Scaffold556 | 1666                    | GG                              | TT              | 1946959526               |
| SNP_P4_134723_1810   | NW_004515992.1 | Scaffold556 | 1810                    | TT                              | CC              | 1946959528               |
| SNP_P4_134724_1821   | NW_004515992.1 | Scaffold556 | 1821                    | CC                              | GG              | 1946959530               |
| SNP_P4_134725_2614   | NW_004515992.1 | Scaffold556 | 2614                    | GG                              | CC              | 1946959532               |
| SNP_P4_134726_2750   | NW_004515992.1 | Scaffold556 | 2750                    | TT                              | AA              | 1946959534               |

| SNPs IDs            | Chromosome IDs | Chromosomes | Physical positions (bp) | CDC Frontier (Reference genome) | (ILWC46 & LPNB) | NCBI SNPdb Accession IDs |
|---------------------|----------------|-------------|-------------------------|---------------------------------|-----------------|--------------------------|
| SNP_P4_134727_2804  | NW_004515992.1 | Scaffold556 | 2804                    | CC                              | TT              | 1946959536               |
| SNP_P4_134729_2901  | NW_004515992.1 | Scaffold556 | 2901                    | AA                              | TT              | 1946959538               |
| SNP_P4_134730_2931  | NW_004515992.1 | Scaffold556 | 2931                    | AA                              | TT              | 1946959540               |
| SNP_P4_134731_2934  | NW_004515992.1 | Scaffold556 | 2934                    | TT                              | GG              | 1946959542               |
| SNP_P4_134732_2946  | NW_004515992.1 | Scaffold556 | 2946                    | TT                              | AA              | 1946959544               |
| SNP_P4_134733_3010  | NW_004515992.1 | Scaffold556 | 3010                    | TT                              | CC              | 1946959546               |
| SNP_P4_134734_3041  | NW_004515992.1 | Scaffold556 | 3041                    | CC                              | TT              | 1946959548               |
| SNP_P4_134735_3083  | NW_004515992.1 | Scaffold556 | 3083                    | TT                              | AA              | 1946959550               |
| SNP_P4_134736_3292  | NW_004515992.1 | Scaffold556 | 3292                    | GG                              | CC              | 1946959552               |
| SNP_P4_134737_3368  | NW_004515992.1 | Scaffold556 | 3368                    | AA                              | TT              | 1946959554               |
| SNP_P4_134738_3369  | NW_004515992.1 | Scaffold556 | 3369                    | TT                              | GG              | 1946959556               |
| SNP_P4_134739_3404  | NW_004515992.1 | Scaffold556 | 3404                    | AA                              | TT              | 1946959558               |
| SNP_P4_134740_3405  | NW_004515992.1 | Scaffold556 | 3405                    | TT                              | CC              | 1946959560               |
| SNP_P4_134741_3600  | NW_004515992.1 | Scaffold556 | 3600                    | AA                              | TT              | 1946959562               |
| SNP_P4_134742_3657  | NW_004515992.1 | Scaffold556 | 3657                    | CC                              | TT              | 1946959564               |
| SNP_P4_134743_1496  | NW_004515993.1 | Scaffold557 | 1496                    | TT                              | GG              | 1946959566               |
| SNP_P4_134744_4778  | NW_004515993.1 | Scaffold557 | 4778                    | GG                              | AA              | 1946959568               |
| SNP_P4_134745_5091  | NW_004515993.1 | Scaffold557 | 5091                    | GG                              | TT              | 1946959570               |
| SNP_P4_134746_11465 | NW_004515995.1 | Scaffold559 | 11465                   | TT                              | CC              | 1946959572               |
| SNP_P4_134747_28639 | NW_004515995.1 | Scaffold559 | 28639                   | AA                              | GG              | 1946959574               |
| SNP_P4_134748_34350 | NW_004515995.1 | Scaffold559 | 34350                   | AA                              | CC              | 1946959576               |
| SNP_P4_134749_35249 | NW_004515995.1 | Scaffold559 | 35249                   | CC                              | TT              | 1946959578               |
| SNP_P4_134750_35294 | NW_004515995.1 | Scaffold559 | 35294                   | CC                              | TT              | 1946959580               |
| SNP_P4_134751_42738 | NW_004515995.1 | Scaffold559 | 42738                   | AA                              | GG              | 1946959582               |
| SNP_P4_134752_42756 | NW_004515995.1 | Scaffold559 | 42756                   | CC                              | TT              | 1946959584               |
| SNP_P4_134753_52977 | NW_004515995.1 | Scaffold559 | 52977                   | TT                              | GG              | 1946959586               |
| SNP_P4_134754_61710 | NW_004515995.1 | Scaffold559 | 61710                   | GG                              | AA              | 1946959588               |
| SNP_P4_134755_61714 | NW_004515995.1 | Scaffold559 | 61714                   | GG                              | CC              | 1946959590               |
| SNP_P4_134756_61748 | NW_004515995.1 | Scaffold559 | 61748                   | CC                              | GG              | 1946959592               |
| SNP_P4_134757_61815 | NW_004515995.1 | Scaffold559 | 61815                   | TT                              | GG              | 1946959594               |
| SNP_P4_134758_61823 | NW_004515995.1 | Scaffold559 | 61823                   | GG                              | TT              | 1946959596               |
| SNP_P4_134759_61992 | NW_004515995.1 | Scaffold559 | 61992                   | AA                              | TT              | 1946959598               |
| SNP_P4_134760_62011 | NW_004515995.1 | Scaffold559 | 62011                   | CC                              | TT              | 1946959600               |
| SNP_P4_134761_62522 | NW_004515995.1 | Scaffold559 | 62522                   | AA                              | GG              | 1946959602               |
| SNP_P4_134762_62534 | NW_004515995.1 | Scaffold559 | 62534                   | TT                              | AA              | 1946959604               |
| SNP_P4_134763_62553 | NW_004515995.1 | Scaffold559 | 62553                   | CC                              | GG              | 1946959606               |
| SNP_P4_134764_62583 | NW_004515995.1 | Scaffold559 | 62583                   | TT                              | GG              | 1946959608               |
| SNP_P4_134765_62587 | NW_004515995.1 | Scaffold559 | 62587                   | AA                              | GG              | 1946959610               |
| SNP_P4_134766_62751 | NW_004515995.1 | Scaffold559 | 62751                   | AA                              | TT              | 1946959612               |
| SNP_P4_134767_62758 | NW_004515995.1 | Scaffold559 | 62758                   | GG                              | TT              | 1946959614               |
| SNP_P4_134768_62794 | NW_004515995.1 | Scaffold559 | 62794                   | TT                              | AA              | 1946959616               |
| SNP_P4_134769_62916 | NW_004515995.1 | Scaffold559 | 62916                   | GG                              | TT              | 1946959618               |

| SNPs IDs             | Chromosome IDs | Chromosomes | Physical positions (bp) | CDC Frontier (Reference genome) | (ILWC46 & LPNB) | NCBI SNPdb Accession IDs |
|----------------------|----------------|-------------|-------------------------|---------------------------------|-----------------|--------------------------|
| SNP_P4_134770_62928  | NW_004515995.1 | Scaffold559 | 62928                   | CC                              | TT              | 1946959620               |
| SNP_P4_134771_62932  | NW_004515995.1 | Scaffold559 | 62932                   | GG                              | TT              | 1946959622               |
| SNP_P4_134772_62938  | NW_004515995.1 | Scaffold559 | 62938                   | GG                              | TT              | 1946959624               |
| SNP_P4_134773_66069  | NW_004515995.1 | Scaffold559 | 66069                   | CC                              | TT              | 1946959626               |
| SNP_P4_134774_74715  | NW_004515995.1 | Scaffold559 | 74715                   | AA                              | CC              | 1946959628               |
| SNP_P4_134775_74716  | NW_004515995.1 | Scaffold559 | 74716                   | TT                              | AA              | 1946959630               |
| SNP_P4_134776_74720  | NW_004515995.1 | Scaffold559 | 74720                   | GG                              | CC              | 1946959632               |
| SNP_P4_134777_75088  | NW_004515995.1 | Scaffold559 | 75088                   | AA                              | CC              | 1946959634               |
| SNP_P4_134778_75117  | NW_004515995.1 | Scaffold559 | 75117                   | CC                              | AA              | 1946959636               |
| SNP_P4_134779_75131  | NW_004515995.1 | Scaffold559 | 75131                   | AA                              | TT              | 1946959638               |
| SNP_P4_134781_77435  | NW_004515995.1 | Scaffold559 | 77435                   | AA                              | GG              | 1946959640               |
| SNP_P4_134782_78506  | NW_004515995.1 | Scaffold559 | 78506                   | CC                              | GG              | 1946959642               |
| SNP_P4_134783_78564  | NW_004515995.1 | Scaffold559 | 78564                   | AA                              | CC              | 1946959644               |
| SNP_P4_134784_89595  | NW_004515995.1 | Scaffold559 | 89595                   | AA                              | GG              | 1946959646               |
| SNP_P4_134785_92943  | NW_004515995.1 | Scaffold559 | 92943                   | CC                              | TT              | 1946959647               |
| SNP_P4_134786_92953  | NW_004515995.1 | Scaffold559 | 92953                   | CC                              | TT              | 1946959648               |
| SNP_P4_134788_93260  | NW_004515995.1 | Scaffold559 | 93260                   | AA                              | GG              | 1946959649               |
| SNP_P4_134789_94145  | NW_004515995.1 | Scaffold559 | 94145                   | AA                              | TT              | 1946959651               |
| SNP_P4_134790_1669   | NW_004515996.1 | Scaffold560 | 1669                    | TT                              | CC              | 1946959653               |
| SNP_P4_134791_14555  | NW_004515996.1 | Scaffold560 | 14555                   | AA                              | GG              | 1946959655               |
| SNP_P4_134792_14677  | NW_004515996.1 | Scaffold560 | 14677                   | GG                              | TT              | 1946959657               |
| SNP_P4_134793_14961  | NW_004515996.1 | Scaffold560 | 14961                   | CC                              | GG              | 1946959659               |
| SNP_P4_134794_20504  | NW_004515996.1 | Scaffold560 | 20504                   | GG                              | AA              | 1946959661               |
| SNP_P4_134795_26364  | NW_004515996.1 | Scaffold560 | 26364                   | CC                              | TT              | 1946959663               |
| SNP_P4_134797_35835  | NW_004515996.1 | Scaffold560 | 35835                   | CC                              | TT              | 1946959665               |
| SNP_P4_134798_65960  | NW_004515996.1 | Scaffold560 | 65960                   | AA                              | GG              | 1946959667               |
| SNP_P4_134799_65982  | NW_004515996.1 | Scaffold560 | 65982                   | AA                              | CC              | 1946959669               |
| SNP_P4_134800_65985  | NW_004515996.1 | Scaffold560 | 65985                   | AA                              | TT              | 1946959671               |
| SNP_P4_134801_66363  | NW_004515996.1 | Scaffold560 | 66363                   | TT                              | AA              | 1946959673               |
| SNP_P4_134802_97324  | NW_004515996.1 | Scaffold560 | 97324                   | GG                              | AA              | 1946959675               |
| SNP_P4_134803_117490 | NW_004515996.1 | Scaffold560 | 117490                  | AA                              | GG              | 1946959677               |
| SNP_P4_134804_117492 | NW_004515996.1 | Scaffold560 | 117492                  | GG                              | AA              | 1946959679               |
| SNP_P4_134805_117499 | NW_004515996.1 | Scaffold560 | 117499                  | GG                              | AA              | 1946959681               |
| SNP_P4_134806_117523 | NW_004515996.1 | Scaffold560 | 117523                  | TT                              | CC              | 1946959683               |
| SNP_P4_134807_117529 | NW_004515996.1 | Scaffold560 | 117529                  | CC                              | TT              | 1946959685               |
| SNP_P4_134808_117532 | NW_004515996.1 | Scaffold560 | 117532                  | CC                              | TT              | 1946959687               |
| SNP_P4_134809_117535 | NW_004515996.1 | Scaffold560 | 117535                  | GG                              | AA              | 1946959689               |
| SNP_P4_134810_117584 | NW_004515996.1 | Scaffold560 | 117584                  | CC                              | AA              | 1946959691               |
| SNP_P4_134811_117593 | NW_004515996.1 | Scaffold560 | 117593                  | TT                              | CC              | 1946959693               |
| SNP_P4_134812_117595 | NW_004515996.1 | Scaffold560 | 117595                  | AA                              | GG              | 1946959694               |
| SNP_P4_134813_117596 | NW_004515996.1 | Scaffold560 | 117596                  | GG                              | AA              | 1946959696               |
| SNP_P4_134814_117598 | NW_004515996.1 | Scaffold560 | 117598                  | GG                              | TT              | 1946959698               |

| SNPs IDs             | Chromosome IDs | Chromosomes | Physical positions (bp) | CDC Frontier (Reference genome) | (ILWC46 & LPNB) | NCBI SNPdb Accession IDs |
|----------------------|----------------|-------------|-------------------------|---------------------------------|-----------------|--------------------------|
| SNP_P4_134815_117601 | NW_004515996.1 | Scaffold560 | 117601                  | TT                              | GG              | 1946959699               |
| SNP_P4_134816_117613 | NW_004515996.1 | Scaffold560 | 117613                  | TT                              | CC              | 1946959701               |
| SNP_P4_134817_117619 | NW_004515996.1 | Scaffold560 | 117619                  | TT                              | CC              | 1946959703               |
| SNP_P4_134818_117622 | NW_004515996.1 | Scaffold560 | 117622                  | CC                              | TT              | 1946959705               |
| SNP_P4_134819_117628 | NW_004515996.1 | Scaffold560 | 117628                  | AA                              | GG              | 1946959707               |
| SNP_P4_134820_117650 | NW_004515996.1 | Scaffold560 | 117650                  | AA                              | GG              | 1946959709               |
| SNP_P4_134821_117892 | NW_004515996.1 | Scaffold560 | 117892                  | TT                              | CC              | 1946959711               |
| SNP_P4_134822_129767 | NW_004515996.1 | Scaffold560 | 129767                  | TT                              | AA              | 1946959713               |
| SNP_P4_134824_137480 | NW_004515996.1 | Scaffold560 | 137480                  | TT                              | GG              | 1946959715               |
| SNP_P4_134827_160637 | NW_004515996.1 | Scaffold560 | 160637                  | CC                              | TT              | 1946959716               |
| SNP_P4_134828_160692 | NW_004515996.1 | Scaffold560 | 160692                  | TT                              | AA              | 1946959718               |
| SNP_P4_134829_160895 | NW_004515996.1 | Scaffold560 | 160895                  | TT                              | CC              | 1946959720               |
| SNP_P4_134830_25045  | NW_004515997.1 | Scaffold561 | 25045                   | CC                              | AA              | 1946959722               |
| SNP_P4_134831_25227  | NW_004515997.1 | Scaffold561 | 25227                   | CC                              | TT              | 1946959724               |
| SNP_P4_134832_25380  | NW_004515997.1 | Scaffold561 | 25380                   | AA                              | CC              | 1946959726               |
| SNP_P4_134834_28320  | NW_004515997.1 | Scaffold561 | 28320                   | TT                              | GG              | 1946959728               |
| SNP_P4_134835_28372  | NW_004515997.1 | Scaffold561 | 28372                   | GG                              | TT              | 1946959730               |
| SNP_P4_134836_28620  | NW_004515997.1 | Scaffold561 | 28620                   | CC                              | GG              | 1946959732               |
| SNP_P4_134837_28651  | NW_004515997.1 | Scaffold561 | 28651                   | CC                              | TT              | 1946959734               |
| SNP_P4_134838_28713  | NW_004515997.1 | Scaffold561 | 28713                   | CC                              | GG              | 1946959736               |
| SNP_P4_134839_31365  | NW_004515997.1 | Scaffold561 | 31365                   | TT                              | AA              | 1946959738               |
| SNP_P4_134840_39578  | NW_004515997.1 | Scaffold561 | 39578                   | TT                              | CC              | 1946959739               |
| SNP_P4_134841_39615  | NW_004515997.1 | Scaffold561 | 39615                   | GG                              | AA              | 1946959740               |
| SNP_P4_134842_39759  | NW_004515997.1 | Scaffold561 | 39759                   | AA                              | GG              | 1946959741               |
| SNP_P4_134843_39764  | NW_004515997.1 | Scaffold561 | 39764                   | AA                              | GG              | 1946959743               |
| SNP_P4_134845_83384  | NW_004515997.1 | Scaffold561 | 83384                   | AA                              | GG              | 1946959745               |
| SNP_P4_134846_84129  | NW_004515997.1 | Scaffold561 | 84129                   | AA                              | GG              | 1946959747               |
| SNP_P4_134848_86062  | NW_004515997.1 | Scaffold561 | 86062                   | GG                              | AA              | 1946959749               |
| SNP_P4_134850_156204 | NW_004515997.1 | Scaffold561 | 156204                  | AA                              | GG              | 1946959751               |
| SNP_P4_134851_176603 | NW_004515997.1 | Scaffold561 | 176603                  | GG                              | AA              | 1946959753               |
| SNP_P4_134852_176850 | NW_004515997.1 | Scaffold561 | 176850                  | CC                              | TT              | 1946959755               |
| SNP_P4_134853_176855 | NW_004515997.1 | Scaffold561 | 176855                  | TT                              | CC              | 1946959757               |
| SNP_P4_134854_176940 | NW_004515997.1 | Scaffold561 | 176940                  | TT                              | CC              | 1946959759               |
| SNP_P4_134855_183396 | NW_004515997.1 | Scaffold561 | 183396                  | GG                              | AA              | 1946959761               |
| SNP_P4_134856_205877 | NW_004515997.1 | Scaffold561 | 205877                  | CC                              | TT              | 1946959763               |
| SNP_P4_134857_32277  | NW_004515998.1 | Scaffold562 | 32277                   | TT                              | AA              | 1946959765               |
| SNP_P4_134858_48325  | NW_004515998.1 | Scaffold562 | 48325                   | AA                              | TT              | 1946959767               |
| SNP_P4_134859_72189  | NW_004515998.1 | Scaffold562 | 72189                   | GG                              | AA              | 1946959769               |
| SNP_P4_134860_120476 | NW_004515998.1 | Scaffold562 | 120476                  | AA                              | GG              | 1946959771               |
| SNP_P4_134861_149905 | NW_004515998.1 | Scaffold562 | 149905                  | CC                              | TT              | 1946959773               |
| SNP_P4_134862_149951 | NW_004515998.1 | Scaffold562 | 149951                  | AA                              | CC              | 1946959775               |
| SNP_P4_134864_205786 | NW_004515998.1 | Scaffold562 | 205786                  | GG                              | AA              | 1946959777               |

| SNPs IDs             | Chromosome IDs | Chromosomes | Physical positions (bp) | CDC Frontier (Reference genome) | (ILWC46 & LPNB) | NCBI SNPdb Accession IDs |
|----------------------|----------------|-------------|-------------------------|---------------------------------|-----------------|--------------------------|
| SNP_P4_134865_214404 | NW_004515998.1 | Scaffold562 | 214404                  | GG                              | CC              | 1946959779               |
| SNP_P4_134866_219459 | NW_004515998.1 | Scaffold562 | 219459                  | TT                              | CC              | 1946959781               |
| SNP_P4_134867_219483 | NW_004515998.1 | Scaffold562 | 219483                  | TT                              | CC              | 1946959783               |
| SNP_P4_134868_219581 | NW_004515998.1 | Scaffold562 | 219581                  | TT                              | AA              | 1946959785               |
| SNP_P4_134869_221395 | NW_004515998.1 | Scaffold562 | 221395                  | TT                              | CC              | 1946959787               |
| SNP_P4_134870_221429 | NW_004515998.1 | Scaffold562 | 221429                  | TT                              | GG              | 1946959789               |
| SNP_P4_134871_221452 | NW_004515998.1 | Scaffold562 | 221452                  | TT                              | CC              | 1946959791               |
| SNP_P4_134872_221475 | NW_004515998.1 | Scaffold562 | 221475                  | AA                              | GG              | 1946959793               |
| SNP_P4_134873_221482 | NW_004515998.1 | Scaffold562 | 221482                  | CC                              | TT              | 1946959795               |
| SNP_P4_134874_221730 | NW_004515998.1 | Scaffold562 | 221730                  | CC                              | GG              | 1946959797               |
| SNP_P4_134875_221777 | NW_004515998.1 | Scaffold562 | 221777                  | AA                              | GG              | 1946959799               |
| SNP_P4_134876_223120 | NW_004515998.1 | Scaffold562 | 223120                  | TT                              | CC              | 1946959801               |
| SNP_P4_134878_240790 | NW_004515998.1 | Scaffold562 | 240790                  | GG                              | AA              | 1946959803               |
| SNP_P4_134879_256797 | NW_004515998.1 | Scaffold562 | 256797                  | CC                              | TT              | 1946959804               |
| SNP_P4_134880_256813 | NW_004515998.1 | Scaffold562 | 256813                  | TT                              | CC              | 1946959806               |
| SNP_P4_134881_256878 | NW_004515998.1 | Scaffold562 | 256878                  | TT                              | CC              | 1946959808               |
| SNP_P4_134882_256881 | NW_004515998.1 | Scaffold562 | 256881                  | CC                              | TT              | 1946959810               |
| SNP_P4_134883_256902 | NW_004515998.1 | Scaffold562 | 256902                  | TT                              | AA              | 1946959812               |
| SNP_P4_134884_256912 | NW_004515998.1 | Scaffold562 | 256912                  | TT                              | CC              | 1946959814               |
| SNP_P4_134885_257009 | NW_004515998.1 | Scaffold562 | 257009                  | TT                              | AA              | 1946959816               |
| SNP_P4_134886_257031 | NW_004515998.1 | Scaffold562 | 257031                  | GG                              | TT              | 1946959818               |
| SNP_P4_134887_257034 | NW_004515998.1 | Scaffold562 | 257034                  | GG                              | AA              | 1946959820               |
| SNP_P4_134888_257105 | NW_004515998.1 | Scaffold562 | 257105                  | GG                              | AA              | 1946959822               |
| SNP_P4_134889_257237 | NW_004515998.1 | Scaffold562 | 257237                  | CC                              | AA              | 1946959824               |
| SNP_P4_134890_257238 | NW_004515998.1 | Scaffold562 | 257238                  | AA                              | CC              | 1946959826               |
| SNP_P4_134891_257244 | NW_004515998.1 | Scaffold562 | 257244                  | TT                              | AA              | 1946959828               |
| SNP_P4_134892_257255 | NW_004515998.1 | Scaffold562 | 257255                  | TT                              | GG              | 1946959830               |
| SNP_P4_134893_257260 | NW_004515998.1 | Scaffold562 | 257260                  | TT                              | CC              | 1946959832               |
| SNP_P4_134894_257288 | NW_004515998.1 | Scaffold562 | 257288                  | GG                              | CC              | 1946959834               |
| SNP_P4_134895_257318 | NW_004515998.1 | Scaffold562 | 257318                  | CC                              | GG              | 1946959836               |
| SNP_P4_134896_257340 | NW_004515998.1 | Scaffold562 | 257340                  | GG                              | AA              | 1946959838               |
| SNP_P4_134897_257367 | NW_004515998.1 | Scaffold562 | 257367                  | CC                              | AA              | 1946959840               |
| SNP_P4_134898_273275 | NW_004515998.1 | Scaffold562 | 273275                  | AA                              | GG              | 1946959842               |
| SNP_P4_134899_273278 | NW_004515998.1 | Scaffold562 | 273278                  | TT                              | GG              | 1946959844               |
| SNP_P4_134900_273303 | NW_004515998.1 | Scaffold562 | 273303                  | TT                              | CC              | 1946959846               |
| SNP_P4_134901_291577 | NW_004515998.1 | Scaffold562 | 291577                  | AA                              | GG              | 1946959848               |
| SNP_P4_134902_294940 | NW_004515998.1 | Scaffold562 | 294940                  | CC                              | TT              | 1946959850               |
| SNP_P4_134904_302169 | NW_004515998.1 | Scaffold562 | 302169                  | AA                              | TT              | 1946959852               |
| SNP_P4_134905_302386 | NW_004515998.1 | Scaffold562 | 302386                  | TT                              | AA              | 1946959854               |
| SNP_P4_134906_302948 | NW_004515998.1 | Scaffold562 | 302948                  | TT                              | CC              | 1946959855               |
| SNP_P4_134907_303091 | NW_004515998.1 | Scaffold562 | 303091                  | CC                              | TT              | 1946959857               |
| SNP_P4_134908_303114 | NW_004515998.1 | Scaffold562 | 303114                  | GG                              | AA              | 1946959859               |

| SNPs IDs             | Chromosome IDs | Chromosomes | Physical positions (bp) | CDC Frontier (Reference genome) | (ILWC46 & LPNB) | NCBI SNPdb Accession IDs |
|----------------------|----------------|-------------|-------------------------|---------------------------------|-----------------|--------------------------|
| SNP_P4_134909_334350 | NW_004515998.1 | Scaffold562 | 334350                  | TT                              | GG              | 1946959861               |
| SNP_P4_134910_340924 | NW_004515998.1 | Scaffold562 | 340924                  | TT                              | GG              | 1946959862               |
| SNP_P4_134911_2956   | NW_004515999.1 | Scaffold563 | 2956                    | CC                              | TT              | 1946959863               |
| SNP_P4_134912_3070   | NW_004515999.1 | Scaffold563 | 3070                    | GG                              | AA              | 1946959864               |
| SNP_P4_134913_9111   | NW_004515999.1 | Scaffold563 | 9111                    | AA                              | GG              | 1946959865               |
| SNP_P4_134914_15801  | NW_004515999.1 | Scaffold563 | 15801                   | TT                              | CC              | 1946959866               |
| SNP_P4_134915_15816  | NW_004515999.1 | Scaffold563 | 15816                   | GG                              | AA              | 1946959867               |
| SNP_P4_134916_15838  | NW_004515999.1 | Scaffold563 | 15838                   | AA                              | TT              | 1946959869               |
| SNP_P4_134917_18454  | NW_004515999.1 | Scaffold563 | 18454                   | GG                              | AA              | 1946959871               |
| SNP_P4_134919_22789  | NW_004515999.1 | Scaffold563 | 22789                   | TT                              | CC              | 1946959873               |
| SNP_P4_134920_23125  | NW_004515999.1 | Scaffold563 | 23125                   | AA                              | GG              | 1946959875               |
| SNP_P4_134921_23150  | NW_004515999.1 | Scaffold563 | 23150                   | CC                              | AA              | 1946959877               |
| SNP_P4_134922_23171  | NW_004515999.1 | Scaffold563 | 23171                   | CC                              | AA              | 1946959879               |
| SNP_P4_134923_23489  | NW_004515999.1 | Scaffold563 | 23489                   | GG                              | AA              | 1946959881               |
| SNP_P4_134924_23554  | NW_004515999.1 | Scaffold563 | 23554                   | GG                              | AA              | 1946959883               |
| SNP_P4_134925_23570  | NW_004515999.1 | Scaffold563 | 23570                   | TT                              | CC              | 1946959885               |
| SNP_P4_134926_2239   | NW_004516000.1 | Scaffold564 | 2239                    | TT                              | CC              | 1946959887               |
| SNP_P4_134927_2620   | NW_004516000.1 | Scaffold564 | 2620                    | AA                              | TT              | 1946959889               |
| SNP_P4_134929_2711   | NW_004516000.1 | Scaffold564 | 2711                    | CC                              | GG              | 1946959891               |
| SNP_P4_134930_2712   | NW_004516000.1 | Scaffold564 | 2712                    | TT                              | AA              | 1946959893               |
| SNP_P4_134931_2716   | NW_004516000.1 | Scaffold564 | 2716                    | GG                              | TT              | 1946959895               |
| SNP_P4_134932_2734   | NW_004516000.1 | Scaffold564 | 2734                    | CC                              | GG              | 1946959897               |
| SNP_P4_134933_2991   | NW_004516000.1 | Scaffold564 | 2991                    | CC                              | TT              | 1946959898               |
| SNP_P4_134934_3050   | NW_004516000.1 | Scaffold564 | 3050                    | AA                              | TT              | 1946959900               |
| SNP_P4_134935_3267   | NW_004516000.1 | Scaffold564 | 3267                    | GG                              | AA              | 1946959902               |
| SNP_P4_134936_3279   | NW_004516000.1 | Scaffold564 | 3279                    | TT                              | CC              | 1946959904               |
| SNP_P4_134937_3332   | NW_004516000.1 | Scaffold564 | 3332                    | TT                              | CC              | 1946959906               |
| SNP_P4_134938_3347   | NW_004516000.1 | Scaffold564 | 3347                    | AA                              | GG              | 1946959908               |
| SNP_P4_134939_3390   | NW_004516000.1 | Scaffold564 | 3390                    | AA                              | GG              | 1946959910               |
| SNP_P4_134940_3440   | NW_004516000.1 | Scaffold564 | 3440                    | CC                              | TT              | 1946959912               |
| SNP_P4_134941_3447   | NW_004516000.1 | Scaffold564 | 3447                    | CC                              | TT              | 1946959914               |
| SNP_P4_134942_3449   | NW_004516000.1 | Scaffold564 | 3449                    | TT                              | GG              | 1946959916               |
| SNP_P4_134943_3468   | NW_004516000.1 | Scaffold564 | 3468                    | TT                              | CC              | 1946959918               |
| SNP_P4_134944_3469   | NW_004516000.1 | Scaffold564 | 3469                    | CC                              | TT              | 1946959920               |
| SNP_P4_134945_3541   | NW_004516000.1 | Scaffold564 | 3541                    | CC                              | GG              | 1946959922               |
| SNP_P4_134946_3586   | NW_004516000.1 | Scaffold564 | 3586                    | GG                              | AA              | 1946959924               |
| SNP_P4_134947_3722   | NW_004516000.1 | Scaffold564 | 3722                    | AA                              | GG              | 1946959926               |
| SNP_P4_134948_3770   | NW_004516000.1 | Scaffold564 | 3770                    | CC                              | TT              | 1946959928               |
| SNP_P4_134949_3943   | NW_004516000.1 | Scaffold564 | 3943                    | GG                              | CC              | 1946959930               |
| SNP_P4_134950_3991   | NW_004516000.1 | Scaffold564 | 3991                    | AA                              | CC              | 1946959932               |
| SNP_P4_134951_4137   | NW_004516000.1 | Scaffold564 | 4137                    | TT                              | CC              | 1946959934               |
| SNP_P4_134952_4790   | NW_004516000.1 | Scaffold564 | 4790                    | TT                              | GG              | 1946959936               |

| SNPs IDs            | Chromosome IDs | Chromosomes | Physical positions (bp) | CDC Frontier (Reference genome) | (ILWC46 & LPNB) | NCBI SNPdb Accession IDs |
|---------------------|----------------|-------------|-------------------------|---------------------------------|-----------------|--------------------------|
| SNP_P4_134953_4820  | NW_004516000.1 | Scaffold564 | 4820                    | GG                              | AA              | 1946959938               |
| SNP_P4_134954_4873  | NW_004516000.1 | Scaffold564 | 4873                    | AA                              | GG              | 1946959940               |
| SNP_P4_134955_4940  | NW_004516000.1 | Scaffold564 | 4940                    | AA                              | TT              | 1946959942               |
| SNP_P4_134957_5084  | NW_004516000.1 | Scaffold564 | 5084                    | CC                              | TT              | 1946959944               |
| SNP_P4_134958_5104  | NW_004516000.1 | Scaffold564 | 5104                    | TT                              | AA              | 1946959946               |
| SNP_P4_134959_5105  | NW_004516000.1 | Scaffold564 | 5105                    | TT                              | AA              | 1946959948               |
| SNP_P4_134960_5108  | NW_004516000.1 | Scaffold564 | 5108                    | TT                              | CC              | 1946959950               |
| SNP_P4_134961_5127  | NW_004516000.1 | Scaffold564 | 5127                    | TT                              | AA              | 1946959952               |
| SNP_P4_134962_5186  | NW_004516000.1 | Scaffold564 | 5186                    | CC                              | TT              | 1946959955               |
| SNP_P4_134964_5299  | NW_004516000.1 | Scaffold564 | 5299                    | AA                              | TT              | 1946959957               |
| SNP_P4_134965_5314  | NW_004516000.1 | Scaffold564 | 5314                    | AA                              | CC              | 1946959959               |
| SNP_P4_134966_5401  | NW_004516000.1 | Scaffold564 | 5401                    | GG                              | TT              | 1946959961               |
| SNP_P4_134967_5451  | NW_004516000.1 | Scaffold564 | 5451                    | TT                              | CC              | 1946959963               |
| SNP_P4_134968_5539  | NW_004516000.1 | Scaffold564 | 5539                    | GG                              | AA              | 1946959965               |
| SNP_P4_134969_5758  | NW_004516000.1 | Scaffold564 | 5758                    | AA                              | GG              | 1946959967               |
| SNP_P4_134970_5850  | NW_004516000.1 | Scaffold564 | 5850                    | TT                              | CC              | 1946959969               |
| SNP_P4_134971_6018  | NW_004516000.1 | Scaffold564 | 6018                    | TT                              | GG              | 1946959971               |
| SNP_P4_134972_6175  | NW_004516000.1 | Scaffold564 | 6175                    | TT                              | AA              | 1946959973               |
| SNP_P4_134973_6190  | NW_004516000.1 | Scaffold564 | 6190                    | TT                              | GG              | 1946959975               |
| SNP_P4_134974_6195  | NW_004516000.1 | Scaffold564 | 6195                    | GG                              | CC              | 1946959977               |
| SNP_P4_134975_7199  | NW_004516000.1 | Scaffold564 | 7199                    | AA                              | TT              | 1946959979               |
| SNP_P4_134976_7237  | NW_004516000.1 | Scaffold564 | 7237                    | AA                              | GG              | 1946959981               |
| SNP_P4_134977_7275  | NW_004516000.1 | Scaffold564 | 7275                    | TT                              | CC              | 1946959983               |
| SNP_P4_134978_7367  | NW_004516000.1 | Scaffold564 | 7367                    | GG                              | AA              | 1946959985               |
| SNP_P4_134979_7384  | NW_004516000.1 | Scaffold564 | 7384                    | AA                              | CC              | 1946959987               |
| SNP_P4_134980_7402  | NW_004516000.1 | Scaffold564 | 7402                    | TT                              | CC              | 1946959989               |
| SNP_P4_134981_7420  | NW_004516000.1 | Scaffold564 | 7420                    | CC                              | GG              | 1946959991               |
| SNP_P4_134982_7447  | NW_004516000.1 | Scaffold564 | 7447                    | AA                              | GG              | 1946959992               |
| SNP_P4_134983_7580  | NW_004516000.1 | Scaffold564 | 7580                    | AA                              | TT              | 1946959994               |
| SNP_P4_134984_7617  | NW_004516000.1 | Scaffold564 | 7617                    | TT                              | AA              | 1946959996               |
| SNP_P4_134985_8223  | NW_004516000.1 | Scaffold564 | 8223                    | TT                              | CC              | 1946959998               |
| SNP_P4_134986_8228  | NW_004516000.1 | Scaffold564 | 8228                    | GG                              | AA              | 1946960000               |
| SNP_P4_134987_8270  | NW_004516000.1 | Scaffold564 | 8270                    | AA                              | GG              | 1946960002               |
| SNP_P4_134989_8416  | NW_004516000.1 | Scaffold564 | 8416                    | CC                              | AA              | 1946960004               |
| SNP_P4_134990_8417  | NW_004516000.1 | Scaffold564 | 8417                    | AA                              | CC              | 1946960006               |
| SNP_P4_134991_8541  | NW_004516000.1 | Scaffold564 | 8541                    | AA                              | TT              | 1946960008               |
| SNP_P4_134992_8545  | NW_004516000.1 | Scaffold564 | 8545                    | AA                              | CC              | 1946960010               |
| SNP_P4_134993_8568  | NW_004516000.1 | Scaffold564 | 8568                    | TT                              | CC              | 1946960012               |
| SNP_P4_134994_8801  | NW_004516000.1 | Scaffold564 | 8801                    | AA                              | GG              | 1946960014               |
| SNP_P4_134995_9057  | NW_004516000.1 | Scaffold564 | 9057                    | CC                              | TT              | 1946960016               |
| SNP_P4_134996_9386  | NW_004516000.1 | Scaffold564 | 9386                    | CC                              | TT              | 1946960018               |
| SNP_P4_134997_10285 | NW_004516000.1 | Scaffold564 | 10285                   | AA                              | GG              | 1946960020               |

| SNPs IDs            | Chromosome IDs | Chromosomes | Physical positions (bp) | CDC Frontier (Reference genome) | (ILWC46 & LPNB) | NCBI SNPdb Accession IDs |
|---------------------|----------------|-------------|-------------------------|---------------------------------|-----------------|--------------------------|
| SNP_P4_134998_10339 | NW_004516000.1 | Scaffold564 | 10339                   | TT                              | CC              | 1946960022               |
| SNP_P4_134999_10341 | NW_004516000.1 | Scaffold564 | 10341                   | GG                              | AA              | 1946960024               |
| SNP_P4_135000_10391 | NW_004516000.1 | Scaffold564 | 10391                   | TT                              | GG              | 1946960026               |
| SNP_P4_135001_10546 | NW_004516000.1 | Scaffold564 | 10546                   | GG                              | AA              | 1946960028               |
| SNP_P4_135002_10885 | NW_004516000.1 | Scaffold564 | 10885                   | CC                              | TT              | 1946960030               |
| SNP_P4_135003_11067 | NW_004516000.1 | Scaffold564 | 11067                   | GG                              | CC              | 1946960032               |
| SNP_P4_135004_11095 | NW_004516000.1 | Scaffold564 | 11095                   | AA                              | CC              | 1946960033               |
| SNP_P4_135005_11161 | NW_004516000.1 | Scaffold564 | 11161                   | CC                              | TT              | 1946960035               |
| SNP_P4_135006_11342 | NW_004516000.1 | Scaffold564 | 11342                   | GG                              | AA              | 1946960037               |
| SNP_P4_135007_11347 | NW_004516000.1 | Scaffold564 | 11347                   | GG                              | TT              | 1946960039               |
| SNP_P4_135008_11684 | NW_004516000.1 | Scaffold564 | 11684                   | GG                              | AA              | 1946960041               |
| SNP_P4_135009_11730 | NW_004516000.1 | Scaffold564 | 11730                   | GG                              | CC              | 1946960043               |
| SNP_P4_135010_11904 | NW_004516000.1 | Scaffold564 | 11904                   | TT                              | CC              | 1946960045               |
| SNP_P4_135012_12317 | NW_004516000.1 | Scaffold564 | 12317                   | CC                              | TT              | 1946960047               |
| SNP_P4_135013_12363 | NW_004516000.1 | Scaffold564 | 12363                   | CC                              | AA              | 1946960049               |
| SNP_P4_135014_12612 | NW_004516000.1 | Scaffold564 | 12612                   | GG                              | AA              | 1946960051               |
| SNP_P4_135015_12642 | NW_004516000.1 | Scaffold564 | 12642                   | TT                              | GG              | 1946960052               |
| SNP_P4_135016_12770 | NW_004516000.1 | Scaffold564 | 12770                   | TT                              | GG              | 1946960054               |
| SNP_P4_135017_12831 | NW_004516000.1 | Scaffold564 | 12831                   | AA                              | CC              | 1946960056               |
| SNP_P4_135018_12928 | NW_004516000.1 | Scaffold564 | 12928                   | AA                              | GG              | 1946960058               |
| SNP_P4_135019_13386 | NW_004516000.1 | Scaffold564 | 13386                   | CC                              | TT              | 1946960060               |
| SNP_P4_135020_13521 | NW_004516000.1 | Scaffold564 | 13521                   | TT                              | CC              | 1946960062               |
| SNP_P4_135021_13580 | NW_004516000.1 | Scaffold564 | 13580                   | AA                              | GG              | 1946960064               |
| SNP_P4_135022_13934 | NW_004516000.1 | Scaffold564 | 13934                   | TT                              | AA              | 1946960066               |
| SNP_P4_135023_14168 | NW_004516000.1 | Scaffold564 | 14168                   | GG                              | AA              | 1946960068               |
| SNP_P4_135024_14202 | NW_004516000.1 | Scaffold564 | 14202                   | GG                              | AA              | 1946960070               |
| SNP_P4_135027_15264 | NW_004516000.1 | Scaffold564 | 15264                   | TT                              | CC              | 1946960071               |
| SNP_P4_135028_15306 | NW_004516000.1 | Scaffold564 | 15306                   | CC                              | TT              | 1946960073               |
| SNP_P4_135029_15450 | NW_004516000.1 | Scaffold564 | 15450                   | AA                              | TT              | 1946960075               |
| SNP_P4_135030_15525 | NW_004516000.1 | Scaffold564 | 15525                   | AA                              | CC              | 1946960077               |
| SNP_P4_135031_17933 | NW_004516000.1 | Scaffold564 | 17933                   | AA                              | TT              | 1946960079               |
| SNP_P4_135032_21023 | NW_004516000.1 | Scaffold564 | 21023                   | CC                              | TT              | 1946960081               |
| SNP_P4_135033_21511 | NW_004516000.1 | Scaffold564 | 21511                   | CC                              | TT              | 1946960083               |
| SNP_P4_135034_23248 | NW_004516000.1 | Scaffold564 | 23248                   | AA                              | CC              | 1946960085               |
| SNP_P4_135035_23323 | NW_004516000.1 | Scaffold564 | 23323                   | AA                              | GG              | 1946960087               |
| SNP_P4_135036_23599 | NW_004516000.1 | Scaffold564 | 23599                   | AA                              | GG              | 1946960089               |
| SNP_P4_135037_23617 | NW_004516000.1 | Scaffold564 | 23617                   | AA                              | TT              | 1946960091               |
| SNP_P4_135038_23687 | NW_004516000.1 | Scaffold564 | 23687                   | AA                              | GG              | 1946960093               |
| SNP_P4_135039_24219 | NW_004516000.1 | Scaffold564 | 24219                   | GG                              | AA              | 1946960095               |
| SNP_P4_135040_25801 | NW_004516000.1 | Scaffold564 | 25801                   | GG                              | CC              | 1946960097               |
| SNP_P4_135041_25890 | NW_004516000.1 | Scaffold564 | 25890                   | GG                              | AA              | 1946960099               |
| SNP_P4_135042_25896 | NW_004516000.1 | Scaffold564 | 25896                   | TT                              | GG              | 1946960101               |



| SNPs IDs            | Chromosome IDs | Chromosomes | Physical positions (bp) | CDC Frontier (Reference genome) | (ILWC46 & LPNB) | NCBI SNPdb Accession IDs |
|---------------------|----------------|-------------|-------------------------|---------------------------------|-----------------|--------------------------|
| SNP_P4_135045_26166 | NW_004516000.1 | Scaffold564 | 26166                   | GG                              | AA              | 1946960103               |
| SNP_P4_135046_26212 | NW_004516000.1 | Scaffold564 | 26212                   | GG                              | AA              | 1946960105               |
| SNP_P4_135047_26247 | NW_004516000.1 | Scaffold564 | 26247                   | TT                              | AA              | 1946960107               |
| SNP_P4_135048_26249 | NW_004516000.1 | Scaffold564 | 26249                   | AA                              | TT              | 1946960109               |
| SNP_P4_135049_26444 | NW_004516000.1 | Scaffold564 | 26444                   | AA                              | TT              | 1946960111               |
| SNP_P4_135050_26504 | NW_004516000.1 | Scaffold564 | 26504                   | CC                              | TT              | 1946960113               |
| SNP_P4_135051_26694 | NW_004516000.1 | Scaffold564 | 26694                   | CC                              | TT              | 1946960115               |
| SNP_P4_135052_30151 | NW_004516000.1 | Scaffold564 | 30151                   | TT                              | CC              | 1946960117               |
| SNP_P4_135053_64    | NW_004516001.1 | Scaffold566 | 64                      | AA                              | GG              | 1946960119               |
| SNP_P4_135054_65    | NW_004516001.1 | Scaffold566 | 65                      | AA                              | GG              | 1946960121               |
| SNP_P4_135055_3775  | NW_004516002.1 | Scaffold568 | 3775                    | CC                              | GG              | 1946960122               |
| SNP_P4_135056_3960  | NW_004516002.1 | Scaffold568 | 3960                    | TT                              | CC              | 1946960124               |
| SNP_P4_135057_4106  | NW_004516002.1 | Scaffold568 | 4106                    | GG                              | TT              | 1946960126               |
| SNP_P4_135058_4170  | NW_004516002.1 | Scaffold568 | 4170                    | TT                              | CC              | 1946960128               |
| SNP_P4_135059_4393  | NW_004516002.1 | Scaffold568 | 4393                    | GG                              | AA              | 1946960130               |
| SNP_P4_135060_4463  | NW_004516002.1 | Scaffold568 | 4463                    | TT                              | AA              | 1946960132               |
| SNP_P4_135061_4585  | NW_004516002.1 | Scaffold568 | 4585                    | AA                              | CC              | 1946960134               |
| SNP_P4_135062_4588  | NW_004516002.1 | Scaffold568 | 4588                    | TT                              | GG              | 1946960136               |
| SNP_P4_135063_4604  | NW_004516002.1 | Scaffold568 | 4604                    | TT                              | AA              | 1946960138               |
| SNP_P4_135064_4671  | NW_004516002.1 | Scaffold568 | 4671                    | CC                              | GG              | 1946960140               |
| SNP_P4_135065_4678  | NW_004516002.1 | Scaffold568 | 4678                    | TT                              | GG              | 1946960142               |
| SNP_P4_135066_6521  | NW_004516002.1 | Scaffold568 | 6521                    | GG                              | AA              | 1946960144               |
| SNP_P4_135067_6553  | NW_004516002.1 | Scaffold568 | 6553                    | AA                              | GG              | 1946960146               |
| SNP_P4_135068_6573  | NW_004516002.1 | Scaffold568 | 6573                    | CC                              | GG              | 1946960148               |
| SNP_P4_135069_6664  | NW_004516002.1 | Scaffold568 | 6664                    | AA                              | GG              | 1946960150               |
| SNP_P4_135070_6803  | NW_004516002.1 | Scaffold568 | 6803                    | GG                              | AA              | 1946960152               |
| SNP_P4_135071_6843  | NW_004516002.1 | Scaffold568 | 6843                    | AA                              | GG              | 1946960154               |
| SNP_P4_135072_7136  | NW_004516002.1 | Scaffold568 | 7136                    | AA                              | TT              | 1946960156               |
| SNP_P4_135073_7221  | NW_004516002.1 | Scaffold568 | 7221                    | AA                              | TT              | 1946960158               |
| SNP_P4_135074_7240  | NW_004516002.1 | Scaffold568 | 7240                    | TT                              | CC              | 1946960160               |
| SNP_P4_135075_7253  | NW_004516002.1 | Scaffold568 | 7253                    | AA                              | GG              | 1946960162               |
| SNP_P4_135076_9501  | NW_004516002.1 | Scaffold568 | 9501                    | AA                              | CC              | 1946960163               |
| SNP_P4_135077_9569  | NW_004516002.1 | Scaffold568 | 9569                    | CC                              | GG              | 1946960164               |
| SNP_P4_135078_9631  | NW_004516002.1 | Scaffold568 | 9631                    | GG                              | AA              | 1946960165               |
| SNP_P4_135079_9841  | NW_004516002.1 | Scaffold568 | 9841                    | TT                              | AA              | 1946960166               |
| SNP_P4_135080_10248 | NW_004516002.1 | Scaffold568 | 10248                   | TT                              | GG              | 1946960167               |
| SNP_P4_135081_12131 | NW_004516002.1 | Scaffold568 | 12131                   | AA                              | GG              | 1946960168               |
| SNP_P4_135082_12470 | NW_004516002.1 | Scaffold568 | 12470                   | CC                              | TT              | 1946960170               |
| SNP_P4_135083_12939 | NW_004516002.1 | Scaffold568 | 12939                   | GG                              | CC              | 1946960172               |
| SNP_P4_135084_12941 | NW_004516002.1 | Scaffold568 | 12941                   | AA                              | CC              | 1946960174               |
| SNP_P4_135085_15804 | NW_004516002.1 | Scaffold568 | 15804                   | TT                              | GG              | 1946960176               |
| SNP_P4_135086_15826 | NW_004516002.1 | Scaffold568 | 15826                   | TT                              | GG              | 1946960178               |

| SNPs IDs            | Chromosome IDs | Chromosomes | Physical positions (bp) | CDC Frontier (Reference genome) | (ILWC46 & LPNB) | NCBI SNPdb Accession IDs |
|---------------------|----------------|-------------|-------------------------|---------------------------------|-----------------|--------------------------|
| SNP_P4_135087_15838 | NW_004516002.1 | Scaffold568 | 15838                   | AA                              | GG              | 1946960180               |
| SNP_P4_135088_15845 | NW_004516002.1 | Scaffold568 | 15845                   | GG                              | TT              | 1946960182               |
| SNP_P4_135089_18049 | NW_004516002.1 | Scaffold568 | 18049                   | TT                              | CC              | 1946960184               |
| SNP_P4_135090_18292 | NW_004516002.1 | Scaffold568 | 18292                   | AA                              | TT              | 1946960186               |
| SNP_P4_135091_18355 | NW_004516002.1 | Scaffold568 | 18355                   | GG                              | AA              | 1946960188               |
| SNP_P4_135092_18620 | NW_004516002.1 | Scaffold568 | 18620                   | AA                              | TT              | 1946960190               |
| SNP_P4_135093_18686 | NW_004516002.1 | Scaffold568 | 18686                   | TT                              | CC              | 1946960192               |
| SNP_P4_135094_19486 | NW_004516002.1 | Scaffold568 | 19486                   | CC                              | GG              | 1946960194               |
| SNP_P4_135096_19571 | NW_004516002.1 | Scaffold568 | 19571                   | TT                              | AA              | 1946960196               |
| SNP_P4_135097_19776 | NW_004516002.1 | Scaffold568 | 19776                   | GG                              | TT              | 1946960198               |
| SNP_P4_135098_19797 | NW_004516002.1 | Scaffold568 | 19797                   | AA                              | TT              | 1946960200               |
| SNP_P4_135100_25642 | NW_004516002.1 | Scaffold568 | 25642                   | AA                              | TT              | 1946960202               |
| SNP_P4_135101_28773 | NW_004516002.1 | Scaffold568 | 28773                   | AA                              | GG              | 1946960204               |
| SNP_P4_135102_29026 | NW_004516002.1 | Scaffold568 | 29026                   | CC                              | GG              | 1946960206               |
| SNP_P4_135103_29049 | NW_004516002.1 | Scaffold568 | 29049                   | GG                              | CC              | 1946960208               |
| SNP_P4_135104_29503 | NW_004516002.1 | Scaffold568 | 29503                   | TT                              | CC              | 1946960209               |
| SNP_P4_135105_29508 | NW_004516002.1 | Scaffold568 | 29508                   | TT                              | CC              | 1946960211               |
| SNP_P4_135106_31924 | NW_004516002.1 | Scaffold568 | 31924                   | AA                              | GG              | 1946960213               |
| SNP_P4_135107_31985 | NW_004516002.1 | Scaffold568 | 31985                   | CC                              | GG              | 1946960215               |
| SNP_P4_135108_32005 | NW_004516002.1 | Scaffold568 | 32005                   | AA                              | TT              | 1946960217               |
| SNP_P4_135109_32026 | NW_004516002.1 | Scaffold568 | 32026                   | GG                              | AA              | 1946960219               |
| SNP_P4_135110_32047 | NW_004516002.1 | Scaffold568 | 32047                   | TT                              | GG              | 1946960221               |
| SNP_P4_135111_32216 | NW_004516002.1 | Scaffold568 | 32216                   | GG                              | CC              | 1946960223               |
| SNP_P4_135112_32316 | NW_004516002.1 | Scaffold568 | 32316                   | GG                              | CC              | 1946960225               |
| SNP_P4_135113_32371 | NW_004516002.1 | Scaffold568 | 32371                   | TT                              | CC              | 1946960226               |
| SNP_P4_135114_32658 | NW_004516002.1 | Scaffold568 | 32658                   | TT                              | AA              | 1946960227               |
| SNP_P4_135115_32680 | NW_004516002.1 | Scaffold568 | 32680                   | TT                              | CC              | 1946960228               |
| SNP_P4_135116_34465 | NW_004516002.1 | Scaffold568 | 34465                   | GG                              | AA              | 1946960229               |
| SNP_P4_135117_34505 | NW_004516002.1 | Scaffold568 | 34505                   | CC                              | GG              | 1946960230               |
| SNP_P4_135118_34506 | NW_004516002.1 | Scaffold568 | 34506                   | AA                              | GG              | 1946960231               |
| SNP_P4_135119_34730 | NW_004516002.1 | Scaffold568 | 34730                   | AA                              | GG              | 1946960233               |
| SNP_P4_135120_34740 | NW_004516002.1 | Scaffold568 | 34740                   | GG                              | CC              | 1946960235               |
| SNP_P4_135121_34875 | NW_004516002.1 | Scaffold568 | 34875                   | AA                              | GG              | 1946960237               |
| SNP_P4_135122_34881 | NW_004516002.1 | Scaffold568 | 34881                   | AA                              | CC              | 1946960239               |
| SNP_P4_135123_34986 | NW_004516002.1 | Scaffold568 | 34986                   | TT                              | GG              | 1946960241               |
| SNP_P4_135124_34987 | NW_004516002.1 | Scaffold568 | 34987                   | GG                              | CC              | 1946960243               |
| SNP_P4_135125_34995 | NW_004516002.1 | Scaffold568 | 34995                   | AA                              | TT              | 1946960245               |
| SNP_P4_135126_35001 | NW_004516002.1 | Scaffold568 | 35001                   | GG                              | AA              | 1946960247               |
| SNP_P4_135127_35691 | NW_004516002.1 | Scaffold568 | 35691                   | TT                              | CC              | 1946960249               |
| SNP_P4_135128_35696 | NW_004516002.1 | Scaffold568 | 35696                   | TT                              | CC              | 1946960251               |
| SNP_P4_135129_36083 | NW_004516002.1 | Scaffold568 | 36083                   | GG                              | AA              | 1946960253               |
| SNP_P4_135130_36520 | NW_004516002.1 | Scaffold568 | 36520                   | AA                              | TT              | 1946960255               |

| SNPs IDs            | Chromosome IDs | Chromosomes | Physical positions (bp) | CDC Frontier (Reference genome) | (ILWC46 & LPNB) | NCBI SNPdb Accession IDs |
|---------------------|----------------|-------------|-------------------------|---------------------------------|-----------------|--------------------------|
| SNP_P4_135131_36928 | NW_004516002.1 | Scaffold568 | 36928                   | AA                              | TT              | 1946960257               |
| SNP_P4_135132_36997 | NW_004516002.1 | Scaffold568 | 36997                   | TT                              | CC              | 1946960259               |
| SNP_P4_135133_37024 | NW_004516002.1 | Scaffold568 | 37024                   | CC                              | AA              | 1946960261               |
| SNP_P4_135134_37313 | NW_004516002.1 | Scaffold568 | 37313                   | AA                              | TT              | 1946960263               |
| SNP_P4_135135_37356 | NW_004516002.1 | Scaffold568 | 37356                   | CC                              | TT              | 1946960265               |
| SNP_P4_135136_38028 | NW_004516002.1 | Scaffold568 | 38028                   | TT                              | AA              | 1946960267               |
| SNP_P4_135137_38058 | NW_004516002.1 | Scaffold568 | 38058                   | TT                              | AA              | 1946960269               |
| SNP_P4_135138_1682  | NW_004516004.1 | Scaffold571 | 1682                    | TT                              | CC              | 1946960271               |
| SNP_P4_135139_11784 | NW_004516004.1 | Scaffold571 | 11784                   | AA                              | CC              | 1946960273               |
| SNP_P4_135140_11794 | NW_004516004.1 | Scaffold571 | 11794                   | GG                              | TT              | 1946960275               |
| SNP_P4_135141_11833 | NW_004516004.1 | Scaffold571 | 11833                   | AA                              | TT              | 1946960277               |
| SNP_P4_135142_11845 | NW_004516004.1 | Scaffold571 | 11845                   | AA                              | CC              | 1946960279               |
| SNP_P4_135143_11851 | NW_004516004.1 | Scaffold571 | 11851                   | TT                              | CC              | 1946960281               |
| SNP_P4_135145_11918 | NW_004516004.1 | Scaffold571 | 11918                   | AA                              | GG              | 1946960283               |
| SNP_P4_135146_11924 | NW_004516004.1 | Scaffold571 | 11924                   | GG                              | AA              | 1946960285               |
| SNP_P4_135147_11988 | NW_004516004.1 | Scaffold571 | 11988                   | AA                              | CC              | 1946960287               |
| SNP_P4_135148_12201 | NW_004516004.1 | Scaffold571 | 12201                   | CC                              | TT              | 1946960289               |
| SNP_P4_135149_12235 | NW_004516004.1 | Scaffold571 | 12235                   | CC                              | AA              | 1946960291               |
| SNP_P4_135150_12431 | NW_004516004.1 | Scaffold571 | 12431                   | CC                              | TT              | 1946960293               |
| SNP_P4_135151_17812 | NW_004516004.1 | Scaffold571 | 17812                   | TT                              | CC              | 1946960295               |
| SNP_P4_135152_17845 | NW_004516004.1 | Scaffold571 | 17845                   | TT                              | AA              | 1946960297               |
| SNP_P4_135153_18072 | NW_004516004.1 | Scaffold571 | 18072                   | AA                              | TT              | 1946960299               |
| SNP_P4_135154_18095 | NW_004516004.1 | Scaffold571 | 18095                   | GG                              | TT              | 1946960301               |
| SNP_P4_135155_18118 | NW_004516004.1 | Scaffold571 | 18118                   | GG                              | AA              | 1946960303               |
| SNP_P4_135157_18182 | NW_004516004.1 | Scaffold571 | 18182                   | CC                              | TT              | 1946960305               |
| SNP_P4_135158_18302 | NW_004516004.1 | Scaffold571 | 18302                   | CC                              | TT              | 1946960307               |
| SNP_P4_135159_18371 | NW_004516004.1 | Scaffold571 | 18371                   | AA                              | TT              | 1946960309               |
| SNP_P4_135160_24471 | NW_004516004.1 | Scaffold571 | 24471                   | TT                              | CC              | 1946960311               |
| SNP_P4_135161_25208 | NW_004516004.1 | Scaffold571 | 25208                   | TT                              | CC              | 1946960313               |
| SNP_P4_135162_26397 | NW_004516004.1 | Scaffold571 | 26397                   | AA                              | TT              | 1946960315               |
| SNP_P4_135163_26933 | NW_004516004.1 | Scaffold571 | 26933                   | AA                              | GG              | 1946960317               |
| SNP_P4_135164_31157 | NW_004516004.1 | Scaffold571 | 31157                   | CC                              | TT              | 1946960319               |
| SNP_P4_135165_31180 | NW_004516004.1 | Scaffold571 | 31180                   | TT                              | AA              | 1946960321               |
| SNP_P4_135166_31199 | NW_004516004.1 | Scaffold571 | 31199                   | GG                              | TT              | 1946960323               |
| SNP_P4_135167_31442 | NW_004516004.1 | Scaffold571 | 31442                   | CC                              | GG              | 1946960325               |
| SNP_P4_135168_31450 | NW_004516004.1 | Scaffold571 | 31450                   | GG                              | CC              | 1946960327               |
| SNP_P4_135169_31457 | NW_004516004.1 | Scaffold571 | 31457                   | TT                              | CC              | 1946960329               |
| SNP_P4_135170_31477 | NW_004516004.1 | Scaffold571 | 31477                   | TT                              | CC              | 1946960331               |
| SNP_P4_135171_31487 | NW_004516004.1 | Scaffold571 | 31487                   | TT                              | AA              | 1946960333               |
| SNP_P4_135172_31500 | NW_004516004.1 | Scaffold571 | 31500                   | GG                              | AA              | 1946960335               |
| SNP_P4_135173_31512 | NW_004516004.1 | Scaffold571 | 31512                   | AA                              | TT              | 1946960337               |
| SNP_P4_135174_33628 | NW_004516004.1 | Scaffold571 | 33628                   | AA                              | CC              | 1946960339               |

| SNPs IDs             | Chromosome IDs | Chromosomes | Physical positions (bp) | CDC Frontier (Reference genome) | (ILWC46 & LPNB) | NCBI SNPdb Accession IDs |
|----------------------|----------------|-------------|-------------------------|---------------------------------|-----------------|--------------------------|
| SNP_P4_135175_37568  | NW_004516004.1 | Scaffold571 | 37568                   | GG                              | AA              | 1946960341               |
| SNP_P4_135176_37916  | NW_004516004.1 | Scaffold571 | 37916                   | CC                              | TT              | 1946960343               |
| SNP_P4_135177_40583  | NW_004516004.1 | Scaffold571 | 40583                   | GG                              | AA              | 1946960345               |
| SNP_P4_135178_40786  | NW_004516004.1 | Scaffold571 | 40786                   | GG                              | AA              | 1946960347               |
| SNP_P4_135179_40825  | NW_004516004.1 | Scaffold571 | 40825                   | GG                              | TT              | 1946960349               |
| SNP_P4_135180_40857  | NW_004516004.1 | Scaffold571 | 40857                   | TT                              | CC              | 1946960351               |
| SNP_P4_135181_40858  | NW_004516004.1 | Scaffold571 | 40858                   | CC                              | TT              | 1946960353               |
| SNP_P4_135182_40922  | NW_004516004.1 | Scaffold571 | 40922                   | AA                              | GG              | 1946960355               |
| SNP_P4_135183_41058  | NW_004516004.1 | Scaffold571 | 41058                   | TT                              | AA              | 1946960357               |
| SNP_P4_135184_41171  | NW_004516004.1 | Scaffold571 | 41171                   | CC                              | TT              | 1946960359               |
| SNP_P4_135185_41244  | NW_004516004.1 | Scaffold571 | 41244                   | GG                              | TT              | 1946960361               |
| SNP_P4_135186_47887  | NW_004516004.1 | Scaffold571 | 47887                   | AA                              | TT              | 1946960363               |
| SNP_P4_135187_53868  | NW_004516004.1 | Scaffold571 | 53868                   | AA                              | GG              | 1946960365               |
| SNP_P4_135188_53975  | NW_004516004.1 | Scaffold571 | 53975                   | AA                              | GG              | 1946960367               |
| SNP_P4_135189_62585  | NW_004516004.1 | Scaffold571 | 62585                   | AA                              | CC              | 1946960369               |
| SNP_P4_135190_62673  | NW_004516004.1 | Scaffold571 | 62673                   | AA                              | TT              | 1946960371               |
| SNP_P4_135191_62680  | NW_004516004.1 | Scaffold571 | 62680                   | AA                              | CC              | 1946960373               |
| SNP_P4_135192_62711  | NW_004516004.1 | Scaffold571 | 62711                   | CC                              | TT              | 1946960375               |
| SNP_P4_135193_62736  | NW_004516004.1 | Scaffold571 | 62736                   | AA                              | GG              | 1946960377               |
| SNP_P4_135194_62782  | NW_004516004.1 | Scaffold571 | 62782                   | CC                              | TT              | 1946960379               |
| SNP_P4_135195_62950  | NW_004516004.1 | Scaffold571 | 62950                   | TT                              | GG              | 1946960381               |
| SNP_P4_135196_63088  | NW_004516004.1 | Scaffold571 | 63088                   | GG                              | AA              | 1946960383               |
| SNP_P4_135197_69120  | NW_004516004.1 | Scaffold571 | 69120                   | GG                              | TT              | 1946960385               |
| SNP_P4_135199_80950  | NW_004516004.1 | Scaffold571 | 80950                   | AA                              | GG              | 1946960387               |
| SNP_P4_135200_85776  | NW_004516004.1 | Scaffold571 | 85776                   | AA                              | GG              | 1946960389               |
| SNP_P4_135201_92652  | NW_004516004.1 | Scaffold571 | 92652                   | CC                              | TT              | 1946960390               |
| SNP_P4_135202_105566 | NW_004516004.1 | Scaffold571 | 105566                  | CC                              | TT              | 1946960392               |
| SNP_P4_135203_123505 | NW_004516004.1 | Scaffold571 | 123505                  | AA                              | TT              | 1946960394               |
| SNP_P4_135204_293    | NW_004516006.1 | Scaffold573 | 293                     | CC                              | TT              | 1946960396               |
| SNP_P4_135205_695    | NW_004516006.1 | Scaffold573 | 695                     | AA                              | GG              | 1946960398               |
| SNP_P4_135206_24683  | NW_004516007.1 | Scaffold574 | 24683                   | TT                              | CC              | 1946960400               |
| SNP_P4_135207_31995  | NW_004516007.1 | Scaffold574 | 31995                   | CC                              | TT              | 1946960402               |
| SNP_P4_135208_32234  | NW_004516007.1 | Scaffold574 | 32234                   | TT                              | CC              | 1946960404               |
| SNP_P4_135209_32235  | NW_004516007.1 | Scaffold574 | 32235                   | TT                              | CC              | 1946960406               |
| SNP_P4_135210_32250  | NW_004516007.1 | Scaffold574 | 32250                   | GG                              | TT              | 1946960408               |
| SNP_P4_135211_32254  | NW_004516007.1 | Scaffold574 | 32254                   | CC                              | GG              | 1946960410               |
| SNP_P4_135212_32327  | NW_004516007.1 | Scaffold574 | 32327                   | GG                              | TT              | 1946960412               |
| SNP_P4_135213_79758  | NW_004516007.1 | Scaffold574 | 79758                   | CC                              | TT              | 1946960414               |
| SNP_P4_135214_79824  | NW_004516007.1 | Scaffold574 | 79824                   | CC                              | TT              | 1946960416               |
| SNP_P4_135215_80166  | NW_004516007.1 | Scaffold574 | 80166                   | AA                              | GG              | 1946960418               |
| SNP_P4_135216_80297  | NW_004516007.1 | Scaffold574 | 80297                   | GG                              | CC              | 1946960420               |
| SNP_P4_135217_80298  | NW_004516007.1 | Scaffold574 | 80298                   | TT                              | AA              | 1946960423               |

| SNPs IDs            | Chromosome IDs | Chromosomes | Physical positions (bp) | CDC Frontier (Reference genome) | (ILWC46 & LPNB) | NCBI SNPdb Accession IDs |
|---------------------|----------------|-------------|-------------------------|---------------------------------|-----------------|--------------------------|
| SNP_P4_135218_93740 | NW_004516007.1 | Scaffold574 | 93740                   | GG                              | TT              | 1946960425               |
| SNP_P4_135219_93823 | NW_004516007.1 | Scaffold574 | 93823                   | AA                              | TT              | 1946960427               |
| SNP_P4_135220_94506 | NW_004516007.1 | Scaffold574 | 94506                   | AA                              | GG              | 1946960429               |
| SNP_P4_135221_94518 | NW_004516007.1 | Scaffold574 | 94518                   | AA                              | GG              | 1946960431               |
| SNP_P4_135222_94519 | NW_004516007.1 | Scaffold574 | 94519                   | CC                              | TT              | 1946960433               |
| SNP_P4_135223_94530 | NW_004516007.1 | Scaffold574 | 94530                   | GG                              | TT              | 1946960435               |
| SNP_P4_135224_94532 | NW_004516007.1 | Scaffold574 | 94532                   | TT                              | AA              | 1946960437               |
| SNP_P4_135226_47286 | NW_004516008.1 | Scaffold575 | 47286                   | TT                              | CC              | 1946960439               |
| SNP_P4_135227_47707 | NW_004516008.1 | Scaffold575 | 47707                   | AA                              | GG              | 1946960441               |
| SNP_P4_135228_47775 | NW_004516008.1 | Scaffold575 | 47775                   | TT                              | CC              | 1946960443               |
| SNP_P4_135229_48089 | NW_004516008.1 | Scaffold575 | 48089                   | AA                              | CC              | 1946960445               |
| SNP_P4_135230_64946 | NW_004516008.1 | Scaffold575 | 64946                   | AA                              | GG              | 1946960447               |
| SNP_P4_135231_65002 | NW_004516008.1 | Scaffold575 | 65002                   | GG                              | AA              | 1946960449               |
| SNP_P4_135232_65101 | NW_004516008.1 | Scaffold575 | 65101                   | GG                              | TT              | 1946960451               |
| SNP_P4_135234_65168 | NW_004516008.1 | Scaffold575 | 65168                   | GG                              | AA              | 1946960453               |
| SNP_P4_135235_65182 | NW_004516008.1 | Scaffold575 | 65182                   | TT                              | GG              | 1946960455               |
| SNP_P4_135236_65237 | NW_004516008.1 | Scaffold575 | 65237                   | TT                              | GG              | 1946960457               |
| SNP_P4_135237_65246 | NW_004516008.1 | Scaffold575 | 65246                   | TT                              | CC              | 1946960459               |
| SNP_P4_135238_65375 | NW_004516008.1 | Scaffold575 | 65375                   | AA                              | GG              | 1946960461               |
| SNP_P4_135239_65442 | NW_004516008.1 | Scaffold575 | 65442                   | GG                              | AA              | 1946960463               |
| SNP_P4_135240_65466 | NW_004516008.1 | Scaffold575 | 65466                   | TT                              | GG              | 1946960465               |
| SNP_P4_135241_65563 | NW_004516008.1 | Scaffold575 | 65563                   | GG                              | AA              | 1946960467               |
| SNP_P4_135242_65696 | NW_004516008.1 | Scaffold575 | 65696                   | CC                              | AA              | 1946960469               |
| SNP_P4_135243_65784 | NW_004516008.1 | Scaffold575 | 65784                   | CC                              | TT              | 1946960471               |
| SNP_P4_135244_65832 | NW_004516008.1 | Scaffold575 | 65832                   | GG                              | AA              | 1946960473               |
| SNP_P4_135245_65842 | NW_004516008.1 | Scaffold575 | 65842                   | AA                              | CC              | 1946960475               |
| SNP_P4_135246_65847 | NW_004516008.1 | Scaffold575 | 65847                   | TT                              | GG              | 1946960477               |
| SNP_P4_135247_65882 | NW_004516008.1 | Scaffold575 | 65882                   | TT                              | CC              | 1946960479               |
| SNP_P4_135248_65973 | NW_004516008.1 | Scaffold575 | 65973                   | CC                              | AA              | 1946960481               |
| SNP_P4_135249_66388 | NW_004516008.1 | Scaffold575 | 66388                   | CC                              | TT              | 1946960483               |
| SNP_P4_135250_66415 | NW_004516008.1 | Scaffold575 | 66415                   | AA                              | CC              | 1946960485               |
| SNP_P4_135251_66450 | NW_004516008.1 | Scaffold575 | 66450                   | AA                              | CC              | 1946960487               |
| SNP_P4_135252_66494 | NW_004516008.1 | Scaffold575 | 66494                   | CC                              | TT              | 1946960489               |
| SNP_P4_135253_66495 | NW_004516008.1 | Scaffold575 | 66495                   | GG                              | AA              | 1946960491               |
| SNP_P4_135254_66529 | NW_004516008.1 | Scaffold575 | 66529                   | TT                              | GG              | 1946960493               |
| SNP_P4_135255_66624 | NW_004516008.1 | Scaffold575 | 66624                   | AA                              | GG              | 1946960495               |
| SNP_P4_135256_66626 | NW_004516008.1 | Scaffold575 | 66626                   | TT                              | GG              | 1946960497               |
| SNP_P4_135257_66644 | NW_004516008.1 | Scaffold575 | 66644                   | CC                              | TT              | 1946960499               |
| SNP_P4_135258_66685 | NW_004516008.1 | Scaffold575 | 66685                   | GG                              | AA              | 1946960501               |
| SNP_P4_135259_66697 | NW_004516008.1 | Scaffold575 | 66697                   | TT                              | CC              | 1946960503               |
| SNP_P4_135260_66729 | NW_004516008.1 | Scaffold575 | 66729                   | AA                              | GG              | 1946960505               |
| SNP_P4_135261_66764 | NW_004516008.1 | Scaffold575 | 66764                   | TT                              | CC              | 1946960507               |

| SNPs IDs            | Chromosome IDs | Chromosomes | Physical positions (bp) | CDC Frontier (Reference genome) | (ILWC46 & LPNB) | NCBI SNPdb Accession IDs |
|---------------------|----------------|-------------|-------------------------|---------------------------------|-----------------|--------------------------|
| SNP_P4_135262_66775 | NW_004516008.1 | Scaffold575 | 66775                   | AA                              | GG              | 1946960509               |
| SNP_P4_135264_66864 | NW_004516008.1 | Scaffold575 | 66864                   | GG                              | AA              | 1946960511               |
| SNP_P4_135266_67047 | NW_004516008.1 | Scaffold575 | 67047                   | TT                              | GG              | 1946960513               |
| SNP_P4_135267_67272 | NW_004516008.1 | Scaffold575 | 67272                   | TT                              | GG              | 1946960515               |
| SNP_P4_135268_67296 | NW_004516008.1 | Scaffold575 | 67296                   | GG                              | TT              | 1946960517               |
| SNP_P4_135269_67327 | NW_004516008.1 | Scaffold575 | 67327                   | TT                              | CC              | 1946960519               |
| SNP_P4_135270_67333 | NW_004516008.1 | Scaffold575 | 67333                   | GG                              | TT              | 1946960521               |
| SNP_P4_135271_67580 | NW_004516008.1 | Scaffold575 | 67580                   | GG                              | TT              | 1946960523               |
| SNP_P4_135272_67611 | NW_004516008.1 | Scaffold575 | 67611                   | TT                              | CC              | 1946960525               |
| SNP_P4_135273_67617 | NW_004516008.1 | Scaffold575 | 67617                   | GG                              | TT              | 1946960527               |
| SNP_P4_135274_67636 | NW_004516008.1 | Scaffold575 | 67636                   | TT                              | GG              | 1946960529               |
| SNP_P4_135275_67637 | NW_004516008.1 | Scaffold575 | 67637                   | GG                              | AA              | 1946960531               |
| SNP_P4_135276_67724 | NW_004516008.1 | Scaffold575 | 67724                   | CC                              | TT              | 1946960533               |
| SNP_P4_135277_67751 | NW_004516008.1 | Scaffold575 | 67751                   | TT                              | AA              | 1946960535               |
| SNP_P4_135278_67766 | NW_004516008.1 | Scaffold575 | 67766                   | AA                              | GG              | 1946960537               |
| SNP_P4_135279_67790 | NW_004516008.1 | Scaffold575 | 67790                   | AA                              | GG              | 1946960539               |
| SNP_P4_135281_67889 | NW_004516008.1 | Scaffold575 | 67889                   | TT                              | GG              | 1946960541               |
| SNP_P4_135282_67932 | NW_004516008.1 | Scaffold575 | 67932                   | TT                              | CC              | 1946960543               |
| SNP_P4_135283_67973 | NW_004516008.1 | Scaffold575 | 67973                   | AA                              | GG              | 1946960545               |
| SNP_P4_135284_68048 | NW_004516008.1 | Scaffold575 | 68048                   | CC                              | AA              | 1946960547               |
| SNP_P4_135285_68062 | NW_004516008.1 | Scaffold575 | 68062                   | AA                              | GG              | 1946960549               |
| SNP_P4_135286_68063 | NW_004516008.1 | Scaffold575 | 68063                   | AA                              | GG              | 1946960551               |
| SNP_P4_135287_68088 | NW_004516008.1 | Scaffold575 | 68088                   | TT                              | AA              | 1946960553               |
| SNP_P4_135288_68105 | NW_004516008.1 | Scaffold575 | 68105                   | AA                              | TT              | 1946960556               |
| SNP_P4_135289_68154 | NW_004516008.1 | Scaffold575 | 68154                   | GG                              | AA              | 1946960558               |
| SNP_P4_135290_68156 | NW_004516008.1 | Scaffold575 | 68156                   | CC                              | AA              | 1946960560               |
| SNP_P4_135291_68160 | NW_004516008.1 | Scaffold575 | 68160                   | TT                              | AA              | 1946960562               |
| SNP_P4_135292_68169 | NW_004516008.1 | Scaffold575 | 68169                   | GG                              | TT              | 1946960564               |
| SNP_P4_135293_69569 | NW_004516008.1 | Scaffold575 | 69569                   | CC                              | TT              | 1946960566               |
| SNP_P4_135294_69584 | NW_004516008.1 | Scaffold575 | 69584                   | AA                              | CC              | 1946960568               |
| SNP_P4_135295_71009 | NW_004516008.1 | Scaffold575 | 71009                   | TT                              | GG              | 1946960570               |
| SNP_P4_135296_71470 | NW_004516008.1 | Scaffold575 | 71470                   | CC                              | TT              | 1946960572               |
| SNP_P4_135297_71592 | NW_004516008.1 | Scaffold575 | 71592                   | CC                              | TT              | 1946960574               |
| SNP_P4_135298_71665 | NW_004516008.1 | Scaffold575 | 71665                   | GG                              | AA              | 1946960576               |
| SNP_P4_135299_71923 | NW_004516008.1 | Scaffold575 | 71923                   | GG                              | AA              | 1946960578               |
| SNP_P4_135300_73493 | NW_004516008.1 | Scaffold575 | 73493                   | AA                              | CC              | 1946960580               |
| SNP_P4_135301_73677 | NW_004516008.1 | Scaffold575 | 73677                   | CC                              | AA              | 1946960582               |
| SNP_P4_135302_73940 | NW_004516008.1 | Scaffold575 | 73940                   | GG                              | TT              | 1946960584               |
| SNP_P4_135303_73992 | NW_004516008.1 | Scaffold575 | 73992                   | TT                              | CC              | 1946960586               |
| SNP_P4_135304_74097 | NW_004516008.1 | Scaffold575 | 74097                   | CC                              | GG              | 1946960588               |
| SNP_P4_135305_74393 | NW_004516008.1 | Scaffold575 | 74393                   | CC                              | AA              | 1946960590               |
| SNP_P4_135306_80327 | NW_004516008.1 | Scaffold575 | 80327                   | TT                              | CC              | 1946960592               |

| SNPs IDs            | Chromosome IDs | Chromosomes | Physical positions (bp) | CDC Frontier (Reference genome) | (ILWC46 & LPNB) | NCBI SNPdb Accession IDs |
|---------------------|----------------|-------------|-------------------------|---------------------------------|-----------------|--------------------------|
| SNP_P4_135307_80625 | NW_004516008.1 | Scaffold575 | 80625                   | GG                              | AA              | 1946960594               |
| SNP_P4_135308_80649 | NW_004516008.1 | Scaffold575 | 80649                   | CC                              | AA              | 1946960596               |
| SNP_P4_135309_80672 | NW_004516008.1 | Scaffold575 | 80672                   | GG                              | TT              | 1946960598               |
| SNP_P4_135310_80763 | NW_004516008.1 | Scaffold575 | 80763                   | CC                              | TT              | 1946960600               |
| SNP_P4_135311_82372 | NW_004516008.1 | Scaffold575 | 82372                   | GG                              | AA              | 1946960602               |
| SNP_P4_135312_82389 | NW_004516008.1 | Scaffold575 | 82389                   | GG                              | AA              | 1946960604               |
| SNP_P4_135313_82540 | NW_004516008.1 | Scaffold575 | 82540                   | GG                              | AA              | 1946960606               |
| SNP_P4_135315_82643 | NW_004516008.1 | Scaffold575 | 82643                   | AA                              | GG              | 1946960608               |
| SNP_P4_135316_82655 | NW_004516008.1 | Scaffold575 | 82655                   | CC                              | TT              | 1946960610               |
| SNP_P4_135317_82667 | NW_004516008.1 | Scaffold575 | 82667                   | AA                              | GG              | 1946960612               |
| SNP_P4_135318_82772 | NW_004516008.1 | Scaffold575 | 82772                   | AA                              | GG              | 1946960614               |
| SNP_P4_135319_82776 | NW_004516008.1 | Scaffold575 | 82776                   | CC                              | GG              | 1946960616               |
| SNP_P4_135320_82786 | NW_004516008.1 | Scaffold575 | 82786                   | AA                              | TT              | 1946960618               |
| SNP_P4_135321_82789 | NW_004516008.1 | Scaffold575 | 82789                   | AA                              | GG              | 1946960620               |
| SNP_P4_135322_82882 | NW_004516008.1 | Scaffold575 | 82882                   | TT                              | GG              | 1946960622               |
| SNP_P4_135324_82973 | NW_004516008.1 | Scaffold575 | 82973                   | AA                              | TT              | 1946960624               |
| SNP_P4_135325_83080 | NW_004516008.1 | Scaffold575 | 83080                   | AA                              | GG              | 1946960626               |
| SNP_P4_135326_83081 | NW_004516008.1 | Scaffold575 | 83081                   | AA                              | GG              | 1946960628               |
| SNP_P4_135327_84943 | NW_004516008.1 | Scaffold575 | 84943                   | GG                              | AA              | 1946960630               |
| SNP_P4_135328_89854 | NW_004516008.1 | Scaffold575 | 89854                   | TT                              | CC              | 1946960632               |
| SNP_P4_135329_89883 | NW_004516008.1 | Scaffold575 | 89883                   | TT                              | GG              | 1946960634               |
| SNP_P4_135330_89903 | NW_004516008.1 | Scaffold575 | 89903                   | TT                              | AA              | 1946960636               |
| SNP_P4_135332_89974 | NW_004516008.1 | Scaffold575 | 89974                   | CC                              | TT              | 1946960638               |
| SNP_P4_135333_90078 | NW_004516008.1 | Scaffold575 | 90078                   | AA                              | TT              | 1946960640               |
| SNP_P4_135334_90084 | NW_004516008.1 | Scaffold575 | 90084                   | GG                              | AA              | 1946960642               |
| SNP_P4_135335_90115 | NW_004516008.1 | Scaffold575 | 90115                   | TT                              | GG              | 1946960644               |
| SNP_P4_135336_90151 | NW_004516008.1 | Scaffold575 | 90151                   | TT                              | CC              | 1946960646               |
| SNP_P4_135338_90365 | NW_004516008.1 | Scaffold575 | 90365                   | TT                              | CC              | 1946960648               |
| SNP_P4_135339_90491 | NW_004516008.1 | Scaffold575 | 90491                   | TT                              | CC              | 1946960650               |
| SNP_P4_135341_90926 | NW_004516008.1 | Scaffold575 | 90926                   | GG                              | AA              | 1946960652               |
| SNP_P4_135342_90959 | NW_004516008.1 | Scaffold575 | 90959                   | TT                              | AA              | 1946960654               |
| SNP_P4_135344_91159 | NW_004516008.1 | Scaffold575 | 91159                   | GG                              | AA              | 1946960656               |
| SNP_P4_135345_91197 | NW_004516008.1 | Scaffold575 | 91197                   | GG                              | AA              | 1946960658               |
| SNP_P4_135346_91247 | NW_004516008.1 | Scaffold575 | 91247                   | TT                              | AA              | 1946960660               |
| SNP_P4_135347_91253 | NW_004516008.1 | Scaffold575 | 91253                   | CC                              | AA              | 1946960662               |
| SNP_P4_135348_91326 | NW_004516008.1 | Scaffold575 | 91326                   | CC                              | TT              | 1946960664               |
| SNP_P4_135350_91887 | NW_004516008.1 | Scaffold575 | 91887                   | GG                              | AA              | 1946960666               |
| SNP_P4_135351_92155 | NW_004516008.1 | Scaffold575 | 92155                   | AA                              | GG              | 1946960668               |
| SNP_P4_135352_92157 | NW_004516008.1 | Scaffold575 | 92157                   | AA                              | GG              | 1946960670               |
| SNP_P4_135353_92163 | NW_004516008.1 | Scaffold575 | 92163                   | TT                              | GG              | 1946960672               |
| SNP_P4_135354_92184 | NW_004516008.1 | Scaffold575 | 92184                   | GG                              | CC              | 1946960674               |
| SNP_P4_135355_92187 | NW_004516008.1 | Scaffold575 | 92187                   | CC                              | AA              | 1946960675               |

| SNPs IDs            | Chromosome IDs | Chromosomes | Physical positions (bp) | CDC Frontier (Reference genome) | (ILWC46 & LPNB) | NCBI SNPdb Accession IDs |
|---------------------|----------------|-------------|-------------------------|---------------------------------|-----------------|--------------------------|
| SNP_P4_135356_92202 | NW_004516008.1 | Scaffold575 | 92202                   | TT                              | CC              | 1946960677               |
| SNP_P4_135357_92211 | NW_004516008.1 | Scaffold575 | 92211                   | GG                              | AA              | 1946960679               |
| SNP_P4_135358_92242 | NW_004516008.1 | Scaffold575 | 92242                   | AA                              | GG              | 1946960681               |
| SNP_P4_135359_92255 | NW_004516008.1 | Scaffold575 | 92255                   | CC                              | TT              | 1946960683               |
| SNP_P4_135360_92748 | NW_004516008.1 | Scaffold575 | 92748                   | TT                              | GG              | 1946960685               |
| SNP_P4_135361_92798 | NW_004516008.1 | Scaffold575 | 92798                   | AA                              | TT              | 1946960687               |
| SNP_P4_135362_92804 | NW_004516008.1 | Scaffold575 | 92804                   | TT                              | CC              | 1946960689               |
| SNP_P4_135363_92840 | NW_004516008.1 | Scaffold575 | 92840                   | TT                              | CC              | 1946960691               |
| SNP_P4_135364_92864 | NW_004516008.1 | Scaffold575 | 92864                   | TT                              | GG              | 1946960693               |
| SNP_P4_135366_92982 | NW_004516008.1 | Scaffold575 | 92982                   | GG                              | TT              | 1946960695               |
| SNP_P4_135367_92985 | NW_004516008.1 | Scaffold575 | 92985                   | TT                              | CC              | 1946960696               |
| SNP_P4_135368_92998 | NW_004516008.1 | Scaffold575 | 92998                   | AA                              | GG              | 1946960697               |
| SNP_P4_135369_92999 | NW_004516008.1 | Scaffold575 | 92999                   | TT                              | CC              | 1946960698               |
| SNP_P4_135370_93012 | NW_004516008.1 | Scaffold575 | 93012                   | TT                              | CC              | 1946960699               |
| SNP_P4_135371_93030 | NW_004516008.1 | Scaffold575 | 93030                   | AA                              | GG              | 1946960700               |
| SNP_P4_135372_96165 | NW_004516008.1 | Scaffold575 | 96165                   | TT                              | CC              | 1946960701               |
| SNP_P4_135373_96180 | NW_004516008.1 | Scaffold575 | 96180                   | CC                              | TT              | 1946960702               |
| SNP_P4_135374_96193 | NW_004516008.1 | Scaffold575 | 96193                   | CC                              | TT              | 1946960703               |
| SNP_P4_135375_96353 | NW_004516008.1 | Scaffold575 | 96353                   | CC                              | TT              | 1946960704               |
| SNP_P4_135376_96361 | NW_004516008.1 | Scaffold575 | 96361                   | CC                              | TT              | 1946960705               |
| SNP_P4_135377_96366 | NW_004516008.1 | Scaffold575 | 96366                   | GG                              | AA              | 1946960706               |
| SNP_P4_135378_96400 | NW_004516008.1 | Scaffold575 | 96400                   | GG                              | AA              | 1946960707               |
| SNP_P4_135379_96430 | NW_004516008.1 | Scaffold575 | 96430                   | CC                              | AA              | 1946960708               |
| SNP_P4_135380_96561 | NW_004516008.1 | Scaffold575 | 96561                   | AA                              | CC              | 1946960709               |
| SNP_P4_135381_96575 | NW_004516008.1 | Scaffold575 | 96575                   | AA                              | GG              | 1946960710               |
| SNP_P4_135383_98481 | NW_004516008.1 | Scaffold575 | 98481                   | AA                              | GG              | 1946960711               |
| SNP_P4_135384_98491 | NW_004516008.1 | Scaffold575 | 98491                   | GG                              | AA              | 1946960712               |
| SNP_P4_135385_98557 | NW_004516008.1 | Scaffold575 | 98557                   | CC                              | TT              | 1946960713               |
| SNP_P4_135386_98560 | NW_004516008.1 | Scaffold575 | 98560                   | GG                              | TT              | 1946960714               |
| SNP_P4_135387_98598 | NW_004516008.1 | Scaffold575 | 98598                   | TT                              | GG              | 1946960715               |
| SNP_P4_135388_98610 | NW_004516008.1 | Scaffold575 | 98610                   | AA                              | GG              | 1946960716               |
| SNP_P4_135389_98683 | NW_004516008.1 | Scaffold575 | 98683                   | TT                              | CC              | 1946960717               |
| SNP_P4_135390_98734 | NW_004516008.1 | Scaffold575 | 98734                   | GG                              | AA              | 1946960718               |
| SNP_P4_135391_98754 | NW_004516008.1 | Scaffold575 | 98754                   | AA                              | GG              | 1946960719               |
| SNP_P4_135393_98888 | NW_004516008.1 | Scaffold575 | 98888                   | AA                              | TT              | 1946960720               |
| SNP_P4_135394_98901 | NW_004516008.1 | Scaffold575 | 98901                   | AA                              | GG              | 1946960721               |
| SNP_P4_135395_98910 | NW_004516008.1 | Scaffold575 | 98910                   | TT                              | GG              | 1946960722               |
| SNP_P4_135397_98930 | NW_004516008.1 | Scaffold575 | 98930                   | CC                              | TT              | 1946960723               |
| SNP_P4_135398_98965 | NW_004516008.1 | Scaffold575 | 98965                   | GG                              | TT              | 1946960724               |
| SNP_P4_135399_99040 | NW_004516008.1 | Scaffold575 | 99040                   | AA                              | GG              | 1946960725               |
| SNP_P4_135400_99119 | NW_004516008.1 | Scaffold575 | 99119                   | TT                              | AA              | 1946960726               |
| SNP_P4_135401_99120 | NW_004516008.1 | Scaffold575 | 99120                   | TT                              | GG              | 1946960727               |



| SNPs IDs             | Chromosome IDs | Chromosomes | Physical positions (bp) | CDC Frontier (Reference genome) | (ILWC46 & LPNB) | NCBI SNPdb Accession IDs |
|----------------------|----------------|-------------|-------------------------|---------------------------------|-----------------|--------------------------|
| SNP_P4_135402_99124  | NW_004516008.1 | Scaffold575 | 99124                   | AA                              | CC              | 1946960728               |
| SNP_P4_135403_99129  | NW_004516008.1 | Scaffold575 | 99129                   | TT                              | CC              | 1946960729               |
| SNP_P4_135404_99133  | NW_004516008.1 | Scaffold575 | 99133                   | CC                              | TT              | 1946960730               |
| SNP_P4_135405_99155  | NW_004516008.1 | Scaffold575 | 99155                   | TT                              | CC              | 1946960731               |
| SNP_P4_135406_99173  | NW_004516008.1 | Scaffold575 | 99173                   | TT                              | CC              | 1946960732               |
| SNP_P4_135407_99179  | NW_004516008.1 | Scaffold575 | 99179                   | TT                              | CC              | 1946960733               |
| SNP_P4_135409_99205  | NW_004516008.1 | Scaffold575 | 99205                   | AA                              | GG              | 1946960734               |
| SNP_P4_135410_99320  | NW_004516008.1 | Scaffold575 | 99320                   | AA                              | GG              | 1946960735               |
| SNP_P4_135412_99375  | NW_004516008.1 | Scaffold575 | 99375                   | AA                              | GG              | 1946960736               |
| SNP_P4_135413_99378  | NW_004516008.1 | Scaffold575 | 99378                   | CC                              | TT              | 1946960737               |
| SNP_P4_135414_99447  | NW_004516008.1 | Scaffold575 | 99447                   | CC                              | AA              | 1946960738               |
| SNP_P4_135415_99449  | NW_004516008.1 | Scaffold575 | 99449                   | GG                              | AA              | 1946960739               |
| SNP_P4_135416_99481  | NW_004516008.1 | Scaffold575 | 99481                   | GG                              | TT              | 1946960740               |
| SNP_P4_135417_99483  | NW_004516008.1 | Scaffold575 | 99483                   | AA                              | TT              | 1946960741               |
| SNP_P4_135418_99494  | NW_004516008.1 | Scaffold575 | 99494                   | AA                              | GG              | 1946960742               |
| SNP_P4_135420_99728  | NW_004516008.1 | Scaffold575 | 99728                   | AA                              | GG              | 1946960743               |
| SNP_P4_135421_99762  | NW_004516008.1 | Scaffold575 | 99762                   | GG                              | CC              | 1946960744               |
| SNP_P4_135422_99766  | NW_004516008.1 | Scaffold575 | 99766                   | TT                              | CC              | 1946960745               |
| SNP_P4_135423_99809  | NW_004516008.1 | Scaffold575 | 99809                   | AA                              | GG              | 1946960746               |
| SNP_P4_135424_99810  | NW_004516008.1 | Scaffold575 | 99810                   | AA                              | GG              | 1946960747               |
| SNP_P4_135425_99825  | NW_004516008.1 | Scaffold575 | 99825                   | AA                              | GG              | 1946960748               |
| SNP_P4_135426_99867  | NW_004516008.1 | Scaffold575 | 99867                   | GG                              | AA              | 1946960749               |
| SNP_P4_135427_99882  | NW_004516008.1 | Scaffold575 | 99882                   | AA                              | CC              | 1946960750               |
| SNP_P4_135428_99924  | NW_004516008.1 | Scaffold575 | 99924                   | TT                              | GG              | 1946960751               |
| SNP_P4_135429_99925  | NW_004516008.1 | Scaffold575 | 99925                   | AA                              | CC              | 1946960752               |
| SNP_P4_135430_99955  | NW_004516008.1 | Scaffold575 | 99955                   | CC                              | TT              | 1946960753               |
| SNP_P4_135431_99959  | NW_004516008.1 | Scaffold575 | 99959                   | AA                              | GG              | 1946960754               |
| SNP_P4_135432_99980  | NW_004516008.1 | Scaffold575 | 99980                   | TT                              | AA              | 1946960755               |
| SNP_P4_135433_100001 | NW_004516008.1 | Scaffold575 | 100001                  | AA                              | CC              | 1946960756               |
| SNP_P4_135434_100023 | NW_004516008.1 | Scaffold575 | 100023                  | AA                              | GG              | 1946960757               |
| SNP_P4_135435_100070 | NW_004516008.1 | Scaffold575 | 100070                  | CC                              | GG              | 1946960758               |
| SNP_P4_135436_100097 | NW_004516008.1 | Scaffold575 | 100097                  | TT                              | CC              | 1946960759               |
| SNP_P4_135437_100175 | NW_004516008.1 | Scaffold575 | 100175                  | AA                              | GG              | 1946960760               |
| SNP_P4_135438_100191 | NW_004516008.1 | Scaffold575 | 100191                  | AA                              | CC              | 1946960761               |
| SNP_P4_135439_100197 | NW_004516008.1 | Scaffold575 | 100197                  | TT                              | CC              | 1946960762               |
| SNP_P4_135440_100200 | NW_004516008.1 | Scaffold575 | 100200                  | AA                              | GG              | 1946960763               |
| SNP_P4_135441_100227 | NW_004516008.1 | Scaffold575 | 100227                  | CC                              | AA              | 1946960764               |
| SNP_P4_135442_100278 | NW_004516008.1 | Scaffold575 | 100278                  | AA                              | CC              | 1946960765               |
| SNP_P4_135443_100297 | NW_004516008.1 | Scaffold575 | 100297                  | AA                              | CC              | 1946960766               |
| SNP_P4_135444_100353 | NW_004516008.1 | Scaffold575 | 100353                  | TT                              | GG              | 1946960767               |
| SNP_P4_135445_100391 | NW_004516008.1 | Scaffold575 | 100391                  | AA                              | CC              | 1946960768               |
| SNP_P4_135447_100481 | NW_004516008.1 | Scaffold575 | 100481                  | TT                              | CC              | 1946960769               |

| SNPs IDs             | Chromosome IDs | Chromosomes | Physical positions (bp) | CDC Frontier (Reference genome) | (ILWC46 & LPNB) | NCBI SNPdb Accession IDs |
|----------------------|----------------|-------------|-------------------------|---------------------------------|-----------------|--------------------------|
| SNP_P4_135448_100551 | NW_004516008.1 | Scaffold575 | 100551                  | TT                              | CC              | 1946960770               |
| SNP_P4_135449_100576 | NW_004516008.1 | Scaffold575 | 100576                  | GG                              | AA              | 1946960771               |
| SNP_P4_135450_100603 | NW_004516008.1 | Scaffold575 | 100603                  | AA                              | GG              | 1946960772               |
| SNP_P4_135451_100611 | NW_004516008.1 | Scaffold575 | 100611                  | TT                              | GG              | 1946960773               |
| SNP_P4_135452_100619 | NW_004516008.1 | Scaffold575 | 100619                  | TT                              | GG              | 1946960774               |
| SNP_P4_135453_100632 | NW_004516008.1 | Scaffold575 | 100632                  | AA                              | GG              | 1946960775               |
| SNP_P4_135454_100639 | NW_004516008.1 | Scaffold575 | 100639                  | AA                              | GG              | 1946960776               |
| SNP_P4_135455_100648 | NW_004516008.1 | Scaffold575 | 100648                  | AA                              | GG              | 1946960777               |
| SNP_P4_135456_100709 | NW_004516008.1 | Scaffold575 | 100709                  | CC                              | AA              | 1946960778               |
| SNP_P4_135457_100983 | NW_004516008.1 | Scaffold575 | 100983                  | AA                              | GG              | 1946960779               |
| SNP_P4_135458_101000 | NW_004516008.1 | Scaffold575 | 101000                  | AA                              | CC              | 1946960780               |
| SNP_P4_135459_101011 | NW_004516008.1 | Scaffold575 | 101011                  | AA                              | GG              | 1946960781               |
| SNP_P4_135460_101032 | NW_004516008.1 | Scaffold575 | 101032                  | TT                              | CC              | 1946960782               |
| SNP_P4_135461_101056 | NW_004516008.1 | Scaffold575 | 101056                  | TT                              | AA              | 1946960783               |
| SNP_P4_135462_101129 | NW_004516008.1 | Scaffold575 | 101129                  | AA                              | CC              | 1946960784               |
| SNP_P4_135463_101132 | NW_004516008.1 | Scaffold575 | 101132                  | GG                              | CC              | 1946960785               |
| SNP_P4_135464_101175 | NW_004516008.1 | Scaffold575 | 101175                  | AA                              | GG              | 1946960786               |
| SNP_P4_135465_101180 | NW_004516008.1 | Scaffold575 | 101180                  | AA                              | CC              | 1946960787               |
| SNP_P4_135466_101188 | NW_004516008.1 | Scaffold575 | 101188                  | AA                              | GG              | 1946960788               |
| SNP_P4_135467_101340 | NW_004516008.1 | Scaffold575 | 101340                  | TT                              | CC              | 1946960789               |
| SNP_P4_135468_101439 | NW_004516008.1 | Scaffold575 | 101439                  | AA                              | GG              | 1946960790               |
| SNP_P4_135469_101443 | NW_004516008.1 | Scaffold575 | 101443                  | CC                              | TT              | 1946960791               |
| SNP_P4_135470_101492 | NW_004516008.1 | Scaffold575 | 101492                  | AA                              | CC              | 1946960792               |
| SNP_P4_135471_101530 | NW_004516008.1 | Scaffold575 | 101530                  | AA                              | CC              | 1946960793               |
| SNP_P4_135472_101539 | NW_004516008.1 | Scaffold575 | 101539                  | TT                              | CC              | 1946960794               |
| SNP_P4_135473_101540 | NW_004516008.1 | Scaffold575 | 101540                  | TT                              | GG              | 1946960795               |
| SNP_P4_135474_101544 | NW_004516008.1 | Scaffold575 | 101544                  | AA                              | GG              | 1946960796               |
| SNP_P4_135475_101546 | NW_004516008.1 | Scaffold575 | 101546                  | AA                              | GG              | 1946960797               |
| SNP_P4_135476_101565 | NW_004516008.1 | Scaffold575 | 101565                  | TT                              | AA              | 1946960798               |
| SNP_P4_135477_101586 | NW_004516008.1 | Scaffold575 | 101586                  | AA                              | GG              | 1946960799               |
| SNP_P4_135478_101595 | NW_004516008.1 | Scaffold575 | 101595                  | GG                              | CC              | 1946960800               |
| SNP_P4_135479_101598 | NW_004516008.1 | Scaffold575 | 101598                  | TT                              | CC              | 1946960801               |
| SNP_P4_135480_101640 | NW_004516008.1 | Scaffold575 | 101640                  | AA                              | GG              | 1946960803               |
| SNP_P4_135481_101643 | NW_004516008.1 | Scaffold575 | 101643                  | TT                              | GG              | 1946960805               |
| SNP_P4_135482_101654 | NW_004516008.1 | Scaffold575 | 101654                  | AA                              | GG              | 1946960807               |
| SNP_P4_135483_101711 | NW_004516008.1 | Scaffold575 | 101711                  | AA                              | CC              | 1946960809               |
| SNP_P4_135484_101718 | NW_004516008.1 | Scaffold575 | 101718                  | TT                              | CC              | 1946960811               |
| SNP_P4_135485_101737 | NW_004516008.1 | Scaffold575 | 101737                  | TT                              | GG              | 1946960813               |
| SNP_P4_135486_101744 | NW_004516008.1 | Scaffold575 | 101744                  | AA                              | GG              | 1946960815               |
| SNP_P4_135487_101755 | NW_004516008.1 | Scaffold575 | 101755                  | TT                              | CC              | 1946960817               |
| SNP_P4_135488_101760 | NW_004516008.1 | Scaffold575 | 101760                  | TT                              | CC              | 1946960819               |
| SNP_P4_135489_101836 | NW_004516008.1 | Scaffold575 | 101836                  | TT                              | CC              | 1946960821               |

| SNPs IDs             | Chromosome IDs | Chromosomes | Physical positions (bp) | CDC Frontier (Reference genome) | (ILWC46 & LPNB) | NCBI SNPdb Accession IDs |
|----------------------|----------------|-------------|-------------------------|---------------------------------|-----------------|--------------------------|
| SNP_P4_135490_101851 | NW_004516008.1 | Scaffold575 | 101851                  | AA                              | GG              | 1946960823               |
| SNP_P4_135491_101899 | NW_004516008.1 | Scaffold575 | 101899                  | AA                              | GG              | 1946960825               |
| SNP_P4_135492_102097 | NW_004516008.1 | Scaffold575 | 102097                  | TT                              | CC              | 1946960827               |
| SNP_P4_135493_102108 | NW_004516008.1 | Scaffold575 | 102108                  | TT                              | GG              | 1946960829               |
| SNP_P4_135494_102122 | NW_004516008.1 | Scaffold575 | 102122                  | GG                              | AA              | 1946960831               |
| SNP_P4_135495_102155 | NW_004516008.1 | Scaffold575 | 102155                  | GG                              | CC              | 1946960833               |
| SNP_P4_135496_102204 | NW_004516008.1 | Scaffold575 | 102204                  | TT                              | GG              | 1946960835               |
| SNP_P4_135497_102213 | NW_004516008.1 | Scaffold575 | 102213                  | AA                              | GG              | 1946960837               |
| SNP_P4_135498_102725 | NW_004516008.1 | Scaffold575 | 102725                  | TT                              | CC              | 1946960839               |
| SNP_P4_135499_102808 | NW_004516008.1 | Scaffold575 | 102808                  | TT                              | GG              | 1946960841               |
| SNP_P4_135500_102840 | NW_004516008.1 | Scaffold575 | 102840                  | TT                              | CC              | 1946960843               |
| SNP_P4_135501_102880 | NW_004516008.1 | Scaffold575 | 102880                  | AA                              | GG              | 1946960845               |
| SNP_P4_135502_102904 | NW_004516008.1 | Scaffold575 | 102904                  | AA                              | GG              | 1946960847               |
| SNP_P4_135503_102908 | NW_004516008.1 | Scaffold575 | 102908                  | TT                              | CC              | 1946960849               |
| SNP_P4_135504_102922 | NW_004516008.1 | Scaffold575 | 102922                  | AA                              | GG              | 1946960851               |
| SNP_P4_135505_103116 | NW_004516008.1 | Scaffold575 | 103116                  | AA                              | CC              | 1946960853               |
| SNP_P4_135506_103125 | NW_004516008.1 | Scaffold575 | 103125                  | CC                              | TT              | 1946960855               |
| SNP_P4_135507_103144 | NW_004516008.1 | Scaffold575 | 103144                  | AA                              | TT              | 1946960857               |
| SNP_P4_135508_103153 | NW_004516008.1 | Scaffold575 | 103153                  | AA                              | GG              | 1946960859               |
| SNP_P4_135509_103194 | NW_004516008.1 | Scaffold575 | 103194                  | TT                              | CC              | 1946960861               |
| SNP_P4_135510_103196 | NW_004516008.1 | Scaffold575 | 103196                  | AA                              | TT              | 1946960863               |
| SNP_P4_135511_103197 | NW_004516008.1 | Scaffold575 | 103197                  | TT                              | CC              | 1946960865               |
| SNP_P4_135512_103227 | NW_004516008.1 | Scaffold575 | 103227                  | AA                              | GG              | 1946960867               |
| SNP_P4_135514_103301 | NW_004516008.1 | Scaffold575 | 103301                  | TT                              | CC              | 1946960869               |
| SNP_P4_135515_103318 | NW_004516008.1 | Scaffold575 | 103318                  | AA                              | GG              | 1946960871               |
| SNP_P4_135516_103428 | NW_004516008.1 | Scaffold575 | 103428                  | AA                              | CC              | 1946960873               |
| SNP_P4_135517_103456 | NW_004516008.1 | Scaffold575 | 103456                  | TT                              | CC              | 1946960875               |
| SNP_P4_135518_103457 | NW_004516008.1 | Scaffold575 | 103457                  | AA                              | GG              | 1946960877               |
| SNP_P4_135519_103565 | NW_004516008.1 | Scaffold575 | 103565                  | AA                              | GG              | 1946960879               |
| SNP_P4_135520_103567 | NW_004516008.1 | Scaffold575 | 103567                  | CC                              | TT              | 1946960881               |
| SNP_P4_135521_103629 | NW_004516008.1 | Scaffold575 | 103629                  | TT                              | CC              | 1946960883               |
| SNP_P4_135523_103696 | NW_004516008.1 | Scaffold575 | 103696                  | TT                              | CC              | 1946960885               |
| SNP_P4_135524_103706 | NW_004516008.1 | Scaffold575 | 103706                  | GG                              | TT              | 1946960887               |
| SNP_P4_135526_103711 | NW_004516008.1 | Scaffold575 | 103711                  | TT                              | CC              | 1946960889               |
| SNP_P4_135527_103750 | NW_004516008.1 | Scaffold575 | 103750                  | AA                              | GG              | 1946960891               |
| SNP_P4_135528_103774 | NW_004516008.1 | Scaffold575 | 103774                  | AA                              | GG              | 1946960893               |
| SNP_P4_135529_103799 | NW_004516008.1 | Scaffold575 | 103799                  | TT                              | GG              | 1946960895               |
| SNP_P4_135531_103825 | NW_004516008.1 | Scaffold575 | 103825                  | TT                              | GG              | 1946960897               |
| SNP_P4_135532_103834 | NW_004516008.1 | Scaffold575 | 103834                  | AA                              | GG              | 1946960899               |
| SNP_P4_135533_103855 | NW_004516008.1 | Scaffold575 | 103855                  | TT                              | CC              | 1946960901               |
| SNP_P4_135534_104015 | NW_004516008.1 | Scaffold575 | 104015                  | AA                              | GG              | 1946960903               |
| SNP_P4_135535_104035 | NW_004516008.1 | Scaffold575 | 104035                  | TT                              | CC              | 1946960905               |

| SNPs IDs             | Chromosome IDs | Chromosomes | Physical positions (bp) | CDC Frontier (Reference genome) | (ILWC46 & LPNB) | NCBI SNPdb Accession IDs |
|----------------------|----------------|-------------|-------------------------|---------------------------------|-----------------|--------------------------|
| SNP_P4_135536_104076 | NW_004516008.1 | Scaffold575 | 104076                  | TT                              | CC              | 1946960907               |
| SNP_P4_135537_104079 | NW_004516008.1 | Scaffold575 | 104079                  | GG                              | AA              | 1946960909               |
| SNP_P4_135538_104125 | NW_004516008.1 | Scaffold575 | 104125                  | TT                              | CC              | 1946960911               |
| SNP_P4_135539_104131 | NW_004516008.1 | Scaffold575 | 104131                  | AA                              | CC              | 1946960914               |
| SNP_P4_135540_104161 | NW_004516008.1 | Scaffold575 | 104161                  | AA                              | CC              | 1946960916               |
| SNP_P4_135541_104170 | NW_004516008.1 | Scaffold575 | 104170                  | TT                              | CC              | 1946960918               |
| SNP_P4_135542_104196 | NW_004516008.1 | Scaffold575 | 104196                  | TT                              | CC              | 1946960920               |
| SNP_P4_135543_104278 | NW_004516008.1 | Scaffold575 | 104278                  | TT                              | GG              | 1946960922               |
| SNP_P4_135544_104355 | NW_004516008.1 | Scaffold575 | 104355                  | TT                              | GG              | 1946960924               |
| SNP_P4_135545_104365 | NW_004516008.1 | Scaffold575 | 104365                  | TT                              | CC              | 1946960925               |
| SNP_P4_135546_104372 | NW_004516008.1 | Scaffold575 | 104372                  | TT                              | CC              | 1946960926               |
| SNP_P4_135547_104384 | NW_004516008.1 | Scaffold575 | 104384                  | AA                              | GG              | 1946960927               |
| SNP_P4_135548_104398 | NW_004516008.1 | Scaffold575 | 104398                  | CC                              | TT              | 1946960928               |
| SNP_P4_135549_104417 | NW_004516008.1 | Scaffold575 | 104417                  | AA                              | GG              | 1946960929               |
| SNP_P4_135550_104437 | NW_004516008.1 | Scaffold575 | 104437                  | AA                              | CC              | 1946960930               |
| SNP_P4_135551_104441 | NW_004516008.1 | Scaffold575 | 104441                  | AA                              | GG              | 1946960931               |
| SNP_P4_135552_104456 | NW_004516008.1 | Scaffold575 | 104456                  | AA                              | CC              | 1946960932               |
| SNP_P4_135553_105930 | NW_004516008.1 | Scaffold575 | 105930                  | TT                              | CC              | 1946960933               |
| SNP_P4_135554_105931 | NW_004516008.1 | Scaffold575 | 105931                  | TT                              | CC              | 1946960934               |
| SNP_P4_135555_107137 | NW_004516008.1 | Scaffold575 | 107137                  | CC                              | TT              | 1946960935               |
| SNP_P4_135556_107143 | NW_004516008.1 | Scaffold575 | 107143                  | AA                              | CC              | 1946960936               |
| SNP_P4_135557_107214 | NW_004516008.1 | Scaffold575 | 107214                  | AA                              | TT              | 1946960937               |
| SNP_P4_135558_109407 | NW_004516008.1 | Scaffold575 | 109407                  | GG                              | TT              | 1946960938               |
| SNP_P4_135559_109689 | NW_004516008.1 | Scaffold575 | 109689                  | GG                              | TT              | 1946960939               |
| SNP_P4_135560_109787 | NW_004516008.1 | Scaffold575 | 109787                  | CC                              | TT              | 1946960940               |
| SNP_P4_135561_109890 | NW_004516008.1 | Scaffold575 | 109890                  | TT                              | AA              | 1946960941               |
| SNP_P4_135562_109941 | NW_004516008.1 | Scaffold575 | 109941                  | TT                              | CC              | 1946960942               |
| SNP_P4_135563_109949 | NW_004516008.1 | Scaffold575 | 109949                  | TT                              | GG              | 1946960943               |
| SNP_P4_135564_109969 | NW_004516008.1 | Scaffold575 | 109969                  | AA                              | TT              | 1946960944               |
| SNP_P4_135565_109987 | NW_004516008.1 | Scaffold575 | 109987                  | CC                              | TT              | 1946960945               |
| SNP_P4_135566_110006 | NW_004516008.1 | Scaffold575 | 110006                  | CC                              | AA              | 1946960946               |
| SNP_P4_135567_110068 | NW_004516008.1 | Scaffold575 | 110068                  | AA                              | CC              | 1946960947               |
| SNP_P4_135568_110156 | NW_004516008.1 | Scaffold575 | 110156                  | TT                              | CC              | 1946960948               |
| SNP_P4_135569_110239 | NW_004516008.1 | Scaffold575 | 110239                  | TT                              | CC              | 1946960949               |
| SNP_P4_135570_110242 | NW_004516008.1 | Scaffold575 | 110242                  | TT                              | CC              | 1946960950               |
| SNP_P4_135571_110280 | NW_004516008.1 | Scaffold575 | 110280                  | AA                              | CC              | 1946960951               |
| SNP_P4_135572_110308 | NW_004516008.1 | Scaffold575 | 110308                  | AA                              | CC              | 1946960952               |
| SNP_P4_135573_110362 | NW_004516008.1 | Scaffold575 | 110362                  | AA                              | GG              | 1946960953               |
| SNP_P4_135574_110442 | NW_004516008.1 | Scaffold575 | 110442                  | AA                              | CC              | 1946960954               |
| SNP_P4_135575_110466 | NW_004516008.1 | Scaffold575 | 110466                  | AA                              | CC              | 1946960955               |
| SNP_P4_135576_110481 | NW_004516008.1 | Scaffold575 | 110481                  | AA                              | GG              | 1946960956               |
| SNP_P4_135579_110519 | NW_004516008.1 | Scaffold575 | 110519                  | TT                              | CC              | 1946960957               |

| SNPs IDs             | Chromosome IDs | Chromosomes | Physical positions (bp) | CDC Frontier (Reference genome) | (ILWC46 & LPNB) | NCBI SNPdb Accession IDs |
|----------------------|----------------|-------------|-------------------------|---------------------------------|-----------------|--------------------------|
| SNP_P4_135580_110521 | NW_004516008.1 | Scaffold575 | 110521                  | TT                              | AA              | 1946960958               |
| SNP_P4_135581_110581 | NW_004516008.1 | Scaffold575 | 110581                  | AA                              | CC              | 1946960959               |
| SNP_P4_135582_110605 | NW_004516008.1 | Scaffold575 | 110605                  | AA                              | CC              | 1946960960               |
| SNP_P4_135583_110620 | NW_004516008.1 | Scaffold575 | 110620                  | AA                              | GG              | 1946960961               |
| SNP_P4_135584_110644 | NW_004516008.1 | Scaffold575 | 110644                  | TT                              | GG              | 1946960962               |
| SNP_P4_135585_110660 | NW_004516008.1 | Scaffold575 | 110660                  | TT                              | CC              | 1946960963               |
| SNP_P4_135586_110663 | NW_004516008.1 | Scaffold575 | 110663                  | TT                              | CC              | 1946960964               |
| SNP_P4_135587_110753 | NW_004516008.1 | Scaffold575 | 110753                  | AA                              | GG              | 1946960965               |
| SNP_P4_135588_110759 | NW_004516008.1 | Scaffold575 | 110759                  | TT                              | CC              | 1946960966               |
| SNP_P4_135589_110765 | NW_004516008.1 | Scaffold575 | 110765                  | TT                              | CC              | 1946960967               |
| SNP_P4_135590_110772 | NW_004516008.1 | Scaffold575 | 110772                  | TT                              | GG              | 1946960968               |
| SNP_P4_135591_110830 | NW_004516008.1 | Scaffold575 | 110830                  | TT                              | AA              | 1946960969               |
| SNP_P4_135592_110886 | NW_004516008.1 | Scaffold575 | 110886                  | TT                              | CC              | 1946960970               |
| SNP_P4_135593_110910 | NW_004516008.1 | Scaffold575 | 110910                  | TT                              | CC              | 1946960971               |
| SNP_P4_135594_110920 | NW_004516008.1 | Scaffold575 | 110920                  | CC                              | GG              | 1946960972               |
| SNP_P4_135595_110949 | NW_004516008.1 | Scaffold575 | 110949                  | CC                              | TT              | 1946960973               |
| SNP_P4_135596_111000 | NW_004516008.1 | Scaffold575 | 111000                  | TT                              | CC              | 1946960974               |
| SNP_P4_135597_111030 | NW_004516008.1 | Scaffold575 | 111030                  | TT                              | CC              | 1946960975               |
| SNP_P4_135598_111035 | NW_004516008.1 | Scaffold575 | 111035                  | TT                              | CC              | 1946960976               |
| SNP_P4_135599_111056 | NW_004516008.1 | Scaffold575 | 111056                  | AA                              | GG              | 1946960977               |
| SNP_P4_135600_111135 | NW_004516008.1 | Scaffold575 | 111135                  | AA                              | GG              | 1946960978               |
| SNP_P4_135601_111178 | NW_004516008.1 | Scaffold575 | 111178                  | CC                              | AA              | 1946960979               |
| SNP_P4_135602_111188 | NW_004516008.1 | Scaffold575 | 111188                  | TT                              | CC              | 1946960980               |
| SNP_P4_135603_111193 | NW_004516008.1 | Scaffold575 | 111193                  | AA                              | GG              | 1946960981               |
| SNP_P4_135604_111203 | NW_004516008.1 | Scaffold575 | 111203                  | AA                              | GG              | 1946960982               |
| SNP_P4_135605_111235 | NW_004516008.1 | Scaffold575 | 111235                  | GG                              | TT              | 1946960983               |
| SNP_P4_135606_111239 | NW_004516008.1 | Scaffold575 | 111239                  | TT                              | CC              | 1946960985               |
| SNP_P4_135607_111240 | NW_004516008.1 | Scaffold575 | 111240                  | TT                              | CC              | 1946960987               |
| SNP_P4_135608_111295 | NW_004516008.1 | Scaffold575 | 111295                  | TT                              | CC              | 1946960989               |
| SNP_P4_135609_111313 | NW_004516008.1 | Scaffold575 | 111313                  | GG                              | CC              | 1946960990               |
| SNP_P4_135610_111338 | NW_004516008.1 | Scaffold575 | 111338                  | AA                              | CC              | 1946960992               |
| SNP_P4_135611_111354 | NW_004516008.1 | Scaffold575 | 111354                  | GG                              | AA              | 1946960994               |
| SNP_P4_135612_111356 | NW_004516008.1 | Scaffold575 | 111356                  | TT                              | GG              | 1946960996               |
| SNP_P4_135613_111381 | NW_004516008.1 | Scaffold575 | 111381                  | GG                              | AA              | 1946960997               |
| SNP_P4_135614_111396 | NW_004516008.1 | Scaffold575 | 111396                  | AA                              | GG              | 1946960999               |
| SNP_P4_135615_111408 | NW_004516008.1 | Scaffold575 | 111408                  | TT                              | CC              | 1946961001               |
| SNP_P4_135616_111454 | NW_004516008.1 | Scaffold575 | 111454                  | AA                              | CC              | 1946961003               |
| SNP_P4_135617_111507 | NW_004516008.1 | Scaffold575 | 111507                  | TT                              | AA              | 1946961005               |
| SNP_P4_135618_111513 | NW_004516008.1 | Scaffold575 | 111513                  | AA                              | CC              | 1946961007               |
| SNP_P4_135619_111527 | NW_004516008.1 | Scaffold575 | 111527                  | GG                              | CC              | 1946961009               |
| SNP_P4_135620_111542 | NW_004516008.1 | Scaffold575 | 111542                  | TT                              | CC              | 1946961011               |
| SNP_P4_135621_111556 | NW_004516008.1 | Scaffold575 | 111556                  | CC                              | TT              | 1946961013               |

| SNPs IDs             | Chromosome IDs | Chromosomes | Physical positions (bp) | CDC Frontier (Reference genome) | (ILWC46 & LPNB) | NCBI SNPdb Accession IDs |
|----------------------|----------------|-------------|-------------------------|---------------------------------|-----------------|--------------------------|
| SNP_P4_135622_111567 | NW_004516008.1 | Scaffold575 | 111567                  | TT                              | GG              | 1946961015               |
| SNP_P4_135623_111586 | NW_004516008.1 | Scaffold575 | 111586                  | AA                              | GG              | 1946961017               |
| SNP_P4_135625_111698 | NW_004516008.1 | Scaffold575 | 111698                  | AA                              | GG              | 1946961019               |
| SNP_P4_135626_111725 | NW_004516008.1 | Scaffold575 | 111725                  | TT                              | CC              | 1946961021               |
| SNP_P4_135627_111743 | NW_004516008.1 | Scaffold575 | 111743                  | AA                              | CC              | 1946961023               |
| SNP_P4_135628_111796 | NW_004516008.1 | Scaffold575 | 111796                  | TT                              | AA              | 1946961025               |
| SNP_P4_135629_111831 | NW_004516008.1 | Scaffold575 | 111831                  | TT                              | CC              | 1946961027               |
| SNP_P4_135630_111856 | NW_004516008.1 | Scaffold575 | 111856                  | TT                              | GG              | 1946961029               |
| SNP_P4_135631_111861 | NW_004516008.1 | Scaffold575 | 111861                  | AA                              | GG              | 1946961031               |
| SNP_P4_135632_111875 | NW_004516008.1 | Scaffold575 | 111875                  | AA                              | GG              | 1946961033               |
| SNP_P4_135633_111907 | NW_004516008.1 | Scaffold575 | 111907                  | AA                              | GG              | 1946961035               |
| SNP_P4_135634_111923 | NW_004516008.1 | Scaffold575 | 111923                  | CC                              | GG              | 1946961037               |
| SNP_P4_135635_111945 | NW_004516008.1 | Scaffold575 | 111945                  | AA                              | GG              | 1946961039               |
| SNP_P4_135636_111950 | NW_004516008.1 | Scaffold575 | 111950                  | TT                              | CC              | 1946961041               |
| SNP_P4_135637_111999 | NW_004516008.1 | Scaffold575 | 111999                  | TT                              | CC              | 1946961043               |
| SNP_P4_135638_112004 | NW_004516008.1 | Scaffold575 | 112004                  | AA                              | CC              | 1946961045               |
| SNP_P4_135639_112060 | NW_004516008.1 | Scaffold575 | 112060                  | TT                              | CC              | 1946961047               |
| SNP_P4_135640_112145 | NW_004516008.1 | Scaffold575 | 112145                  | AA                              | CC              | 1946961049               |
| SNP_P4_135641_112166 | NW_004516008.1 | Scaffold575 | 112166                  | AA                              | GG              | 1946961051               |
| SNP_P4_135642_112172 | NW_004516008.1 | Scaffold575 | 112172                  | TT                              | GG              | 1946961053               |
| SNP_P4_135643_112198 | NW_004516008.1 | Scaffold575 | 112198                  | AA                              | GG              | 1946961055               |
| SNP_P4_135644_112212 | NW_004516008.1 | Scaffold575 | 112212                  | TT                              | GG              | 1946961057               |
| SNP_P4_135645_112326 | NW_004516008.1 | Scaffold575 | 112326                  | CC                              | TT              | 1946961059               |
| SNP_P4_135646_112328 | NW_004516008.1 | Scaffold575 | 112328                  | TT                              | GG              | 1946961131               |
| SNP_P4_135647_112341 | NW_004516008.1 | Scaffold575 | 112341                  | TT                              | CC              | 1946961133               |
| SNP_P4_135648_112365 | NW_004516008.1 | Scaffold575 | 112365                  | CC                              | TT              | 1946961135               |
| SNP_P4_135649_112383 | NW_004516008.1 | Scaffold575 | 112383                  | AA                              | GG              | 1946961137               |
| SNP_P4_135650_112400 | NW_004516008.1 | Scaffold575 | 112400                  | CC                              | AA              | 1946961139               |
| SNP_P4_135651_112424 | NW_004516008.1 | Scaffold575 | 112424                  | AA                              | GG              | 1946961141               |
| SNP_P4_135652_112451 | NW_004516008.1 | Scaffold575 | 112451                  | GG                              | AA              | 1946961143               |
| SNP_P4_135653_112523 | NW_004516008.1 | Scaffold575 | 112523                  | TT                              | CC              | 1946961145               |
| SNP_P4_135654_112535 | NW_004516008.1 | Scaffold575 | 112535                  | TT                              | CC              | 1946961147               |
| SNP_P4_135655_112557 | NW_004516008.1 | Scaffold575 | 112557                  | AA                              | CC              | 1946961149               |
| SNP_P4_135656_112589 | NW_004516008.1 | Scaffold575 | 112589                  | TT                              | CC              | 1946961151               |
| SNP_P4_135657_112618 | NW_004516008.1 | Scaffold575 | 112618                  | CC                              | TT              | 1946961153               |
| SNP_P4_135658_112629 | NW_004516008.1 | Scaffold575 | 112629                  | TT                              | CC              | 1946961155               |
| SNP_P4_135659_112682 | NW_004516008.1 | Scaffold575 | 112682                  | TT                              | CC              | 1946961157               |
| SNP_P4_135660_112725 | NW_004516008.1 | Scaffold575 | 112725                  | CC                              | AA              | 1946961159               |
| SNP_P4_135661_112751 | NW_004516008.1 | Scaffold575 | 112751                  | TT                              | AA              | 1946961161               |
| SNP_P4_135663_112848 | NW_004516008.1 | Scaffold575 | 112848                  | CC                              | GG              | 1946961163               |
| SNP_P4_135664_112865 | NW_004516008.1 | Scaffold575 | 112865                  | TT                              | CC              | 1946961165               |
| SNP_P4_135665_112869 | NW_004516008.1 | Scaffold575 | 112869                  | GG                              | AA              | 1946961167               |

| SNPs IDs             | Chromosome IDs | Chromosomes | Physical positions (bp) | CDC Frontier (Reference genome) | (ILWC46 & LPNB) | NCBI SNPdb Accession IDs |
|----------------------|----------------|-------------|-------------------------|---------------------------------|-----------------|--------------------------|
| SNP_P4_135667_113131 | NW_004516008.1 | Scaffold575 | 113131                  | GG                              | AA              | 1946961169               |
| SNP_P4_135668_113132 | NW_004516008.1 | Scaffold575 | 113132                  | CC                              | TT              | 1946961171               |
| SNP_P4_135669_113134 | NW_004516008.1 | Scaffold575 | 113134                  | AA                              | GG              | 1946961173               |
| SNP_P4_135670_113141 | NW_004516008.1 | Scaffold575 | 113141                  | GG                              | AA              | 1946961175               |
| SNP_P4_135671_113147 | NW_004516008.1 | Scaffold575 | 113147                  | AA                              | GG              | 1946961177               |
| SNP_P4_135672_113215 | NW_004516008.1 | Scaffold575 | 113215                  | AA                              | GG              | 1946961179               |
| SNP_P4_135673_113240 | NW_004516008.1 | Scaffold575 | 113240                  | CC                              | TT              | 1946961181               |
| SNP_P4_135676_113404 | NW_004516008.1 | Scaffold575 | 113404                  | TT                              | CC              | 1946961183               |
| SNP_P4_135677_113413 | NW_004516008.1 | Scaffold575 | 113413                  | GG                              | TT              | 1946961185               |
| SNP_P4_135678_113439 | NW_004516008.1 | Scaffold575 | 113439                  | GG                              | AA              | 1946961187               |
| SNP_P4_135679_113444 | NW_004516008.1 | Scaffold575 | 113444                  | AA                              | GG              | 1946961189               |
| SNP_P4_135682_113533 | NW_004516008.1 | Scaffold575 | 113533                  | GG                              | AA              | 1946961191               |
| SNP_P4_135684_113944 | NW_004516008.1 | Scaffold575 | 113944                  | AA                              | GG              | 1946961193               |
| SNP_P4_135685_113961 | NW_004516008.1 | Scaffold575 | 113961                  | TT                              | GG              | 1946961195               |
| SNP_P4_135686_113971 | NW_004516008.1 | Scaffold575 | 113971                  | TT                              | GG              | 1946961197               |
| SNP_P4_135687_113977 | NW_004516008.1 | Scaffold575 | 113977                  | GG                              | CC              | 1946961199               |
| SNP_P4_135688_114022 | NW_004516008.1 | Scaffold575 | 114022                  | AA                              | GG              | 1946961201               |
| SNP_P4_135690_114148 | NW_004516008.1 | Scaffold575 | 114148                  | AA                              | GG              | 1946961203               |
| SNP_P4_135691_114200 | NW_004516008.1 | Scaffold575 | 114200                  | TT                              | CC              | 1946961205               |
| SNP_P4_135692_114231 | NW_004516008.1 | Scaffold575 | 114231                  | TT                              | CC              | 1946961207               |
| SNP_P4_135693_114285 | NW_004516008.1 | Scaffold575 | 114285                  | GG                              | TT              | 1946961209               |
| SNP_P4_135694_114356 | NW_004516008.1 | Scaffold575 | 114356                  | AA                              | CC              | 1946961211               |
| SNP_P4_135695_114403 | NW_004516008.1 | Scaffold575 | 114403                  | TT                              | CC              | 1946961213               |
| SNP_P4_135696_114419 | NW_004516008.1 | Scaffold575 | 114419                  | AA                              | GG              | 1946961216               |
| SNP_P4_135697_114425 | NW_004516008.1 | Scaffold575 | 114425                  | AA                              | GG              | 1946961218               |
| SNP_P4_135699_114751 | NW_004516008.1 | Scaffold575 | 114751                  | AA                              | CC              | 1946961220               |
| SNP_P4_135700_114798 | NW_004516008.1 | Scaffold575 | 114798                  | TT                              | CC              | 1946961222               |
| SNP_P4_135701_114814 | NW_004516008.1 | Scaffold575 | 114814                  | AA                              | GG              | 1946961224               |
| SNP_P4_135702_114820 | NW_004516008.1 | Scaffold575 | 114820                  | AA                              | GG              | 1946961226               |
| SNP_P4_135703_114882 | NW_004516008.1 | Scaffold575 | 114882                  | CC                              | TT              | 1946961228               |
| SNP_P4_135704_114919 | NW_004516008.1 | Scaffold575 | 114919                  | AA                              | GG              | 1946961230               |
| SNP_P4_135705_114937 | NW_004516008.1 | Scaffold575 | 114937                  | TT                              | CC              | 1946961232               |
| SNP_P4_135706_115113 | NW_004516008.1 | Scaffold575 | 115113                  | AA                              | CC              | 1946961234               |
| SNP_P4_135707_115117 | NW_004516008.1 | Scaffold575 | 115117                  | AA                              | GG              | 1946961236               |
| SNP_P4_135708_115163 | NW_004516008.1 | Scaffold575 | 115163                  | TT                              | AA              | 1946961238               |
| SNP_P4_135709_115171 | NW_004516008.1 | Scaffold575 | 115171                  | AA                              | GG              | 1946961240               |
| SNP_P4_135710_115239 | NW_004516008.1 | Scaffold575 | 115239                  | AA                              | GG              | 1946961242               |
| SNP_P4_135711_115250 | NW_004516008.1 | Scaffold575 | 115250                  | AA                              | GG              | 1946961244               |
| SNP_P4_135712_115255 | NW_004516008.1 | Scaffold575 | 115255                  | TT                              | CC              | 1946961246               |
| SNP_P4_135713_115269 | NW_004516008.1 | Scaffold575 | 115269                  | TT                              | CC              | 1946961248               |
| SNP_P4_135714_115273 | NW_004516008.1 | Scaffold575 | 115273                  | AA                              | GG              | 1946961250               |
| SNP_P4_135715_115298 | NW_004516008.1 | Scaffold575 | 115298                  | TT                              | GG              | 1946961252               |

| SNPs IDs             | Chromosome IDs | Chromosomes | Physical positions (bp) | CDC Frontier (Reference genome) | (ILWC46 & LPNB) | NCBI SNPdb Accession IDs |
|----------------------|----------------|-------------|-------------------------|---------------------------------|-----------------|--------------------------|
| SNP_P4_135716_115608 | NW_004516008.1 | Scaffold575 | 115608                  | AA                              | GG              | 1946961254               |
| SNP_P4_135717_115675 | NW_004516008.1 | Scaffold575 | 115675                  | AA                              | GG              | 1946961256               |
| SNP_P4_135718_115693 | NW_004516008.1 | Scaffold575 | 115693                  | TT                              | GG              | 1946961258               |
| SNP_P4_135719_115727 | NW_004516008.1 | Scaffold575 | 115727                  | TT                              | AA              | 1946961260               |
| SNP_P4_135720_115766 | NW_004516008.1 | Scaffold575 | 115766                  | TT                              | GG              | 1946961262               |
| SNP_P4_135721_115770 | NW_004516008.1 | Scaffold575 | 115770                  | TT                              | CC              | 1946961264               |
| SNP_P4_135722_115787 | NW_004516008.1 | Scaffold575 | 115787                  | GG                              | TT              | 1946961266               |
| SNP_P4_135723_115836 | NW_004516008.1 | Scaffold575 | 115836                  | TT                              | CC              | 1946961268               |
| SNP_P4_135724_115844 | NW_004516008.1 | Scaffold575 | 115844                  | TT                              | GG              | 1946961270               |
| SNP_P4_135725_115868 | NW_004516008.1 | Scaffold575 | 115868                  | CC                              | TT              | 1946961272               |
| SNP_P4_135726_115874 | NW_004516008.1 | Scaffold575 | 115874                  | TT                              | CC              | 1946961274               |
| SNP_P4_135727_115940 | NW_004516008.1 | Scaffold575 | 115940                  | TT                              | CC              | 1946961276               |
| SNP_P4_135728_115990 | NW_004516008.1 | Scaffold575 | 115990                  | AA                              | TT              | 1946961278               |
| SNP_P4_135729_116019 | NW_004516008.1 | Scaffold575 | 116019                  | AA                              | CC              | 1946961280               |
| SNP_P4_135730_116070 | NW_004516008.1 | Scaffold575 | 116070                  | AA                              | GG              | 1946961282               |
| SNP_P4_135731_116086 | NW_004516008.1 | Scaffold575 | 116086                  | AA                              | CC              | 1946961284               |
| SNP_P4_135732_116139 | NW_004516008.1 | Scaffold575 | 116139                  | CC                              | TT              | 1946961286               |
| SNP_P4_135733_116157 | NW_004516008.1 | Scaffold575 | 116157                  | AA                              | GG              | 1946961357               |
| SNP_P4_135734_116228 | NW_004516008.1 | Scaffold575 | 116228                  | TT                              | GG              | 1946961360               |
| SNP_P4_135735_116236 | NW_004516008.1 | Scaffold575 | 116236                  | AA                              | TT              | 1946961362               |
| SNP_P4_135736_116260 | NW_004516008.1 | Scaffold575 | 116260                  | CC                              | GG              | 1946961364               |
| SNP_P4_135737_116320 | NW_004516008.1 | Scaffold575 | 116320                  | TT                              | GG              | 1946961366               |
| SNP_P4_135738_116364 | NW_004516008.1 | Scaffold575 | 116364                  | TT                              | CC              | 1946961368               |
| SNP_P4_135739_116365 | NW_004516008.1 | Scaffold575 | 116365                  | AA                              | GG              | 1946961370               |
| SNP_P4_135740_116381 | NW_004516008.1 | Scaffold575 | 116381                  | AA                              | GG              | 1946961372               |
| SNP_P4_135741_116391 | NW_004516008.1 | Scaffold575 | 116391                  | CC                              | TT              | 1946961374               |
| SNP_P4_135742_116432 | NW_004516008.1 | Scaffold575 | 116432                  | TT                              | AA              | 1946961376               |
| SNP_P4_135743_116451 | NW_004516008.1 | Scaffold575 | 116451                  | AA                              | GG              | 1946961378               |
| SNP_P4_135744_116466 | NW_004516008.1 | Scaffold575 | 116466                  | AA                              | CC              | 1946961380               |
| SNP_P4_135745_116467 | NW_004516008.1 | Scaffold575 | 116467                  | CC                              | AA              | 1946961382               |
| SNP_P4_135746_116499 | NW_004516008.1 | Scaffold575 | 116499                  | CC                              | AA              | 1946961384               |
| SNP_P4_135747_116500 | NW_004516008.1 | Scaffold575 | 116500                  | TT                              | GG              | 1946961386               |
| SNP_P4_135748_116502 | NW_004516008.1 | Scaffold575 | 116502                  | CC                              | TT              | 1946961388               |
| SNP_P4_135749_116508 | NW_004516008.1 | Scaffold575 | 116508                  | TT                              | CC              | 1946961390               |
| SNP_P4_135750_116509 | NW_004516008.1 | Scaffold575 | 116509                  | TT                              | CC              | 1946961392               |
| SNP_P4_135751_116846 | NW_004516008.1 | Scaffold575 | 116846                  | TT                              | CC              | 1946961394               |
| SNP_P4_135752_116864 | NW_004516008.1 | Scaffold575 | 116864                  | TT                              | CC              | 1946961396               |
| SNP_P4_135753_116879 | NW_004516008.1 | Scaffold575 | 116879                  | CC                              | TT              | 1946961398               |
| SNP_P4_135754_116880 | NW_004516008.1 | Scaffold575 | 116880                  | AA                              | GG              | 1946961400               |
| SNP_P4_135755_116925 | NW_004516008.1 | Scaffold575 | 116925                  | AA                              | GG              | 1946961402               |
| SNP_P4_135756_116957 | NW_004516008.1 | Scaffold575 | 116957                  | AA                              | CC              | 1946961404               |
| SNP_P4_135757_116972 | NW_004516008.1 | Scaffold575 | 116972                  | AA                              | TT              | 1946961406               |



| SNPs IDs             | Chromosome IDs | Chromosomes | Physical positions (bp) | CDC Frontier (Reference genome) | (ILWC46 & LPNB) | NCBI SNPdb Accession IDs |
|----------------------|----------------|-------------|-------------------------|---------------------------------|-----------------|--------------------------|
| SNP_P4_135758_116978 | NW_004516008.1 | Scaffold575 | 116978                  | TT                              | CC              | 1946961408               |
| SNP_P4_135759_116989 | NW_004516008.1 | Scaffold575 | 116989                  | TT                              | GG              | 1946961411               |
| SNP_P4_135760_117063 | NW_004516008.1 | Scaffold575 | 117063                  | AA                              | GG              | 1946961413               |
| SNP_P4_135761_117080 | NW_004516008.1 | Scaffold575 | 117080                  | TT                              | CC              | 1946961415               |
| SNP_P4_135762_117098 | NW_004516008.1 | Scaffold575 | 117098                  | CC                              | TT              | 1946961417               |
| SNP_P4_135763_117144 | NW_004516008.1 | Scaffold575 | 117144                  | AA                              | GG              | 1946961419               |
| SNP_P4_135764_117167 | NW_004516008.1 | Scaffold575 | 117167                  | TT                              | CC              | 1946961421               |
| SNP_P4_135765_117186 | NW_004516008.1 | Scaffold575 | 117186                  | AA                              | GG              | 1946961423               |
| SNP_P4_135766_117187 | NW_004516008.1 | Scaffold575 | 117187                  | AA                              | TT              | 1946961425               |
| SNP_P4_135767_117213 | NW_004516008.1 | Scaffold575 | 117213                  | AA                              | GG              | 1946961427               |
| SNP_P4_135768_117221 | NW_004516008.1 | Scaffold575 | 117221                  | AA                              | GG              | 1946961429               |
| SNP_P4_135769_117249 | NW_004516008.1 | Scaffold575 | 117249                  | CC                              | TT              | 1946961431               |
| SNP_P4_135770_117282 | NW_004516008.1 | Scaffold575 | 117282                  | AA                              | CC              | 1946961433               |
| SNP_P4_135771_117305 | NW_004516008.1 | Scaffold575 | 117305                  | GG                              | AA              | 1946961435               |
| SNP_P4_135772_117333 | NW_004516008.1 | Scaffold575 | 117333                  | AA                              | GG              | 1946961437               |
| SNP_P4_135773_117338 | NW_004516008.1 | Scaffold575 | 117338                  | TT                              | CC              | 1946961439               |
| SNP_P4_135774_117357 | NW_004516008.1 | Scaffold575 | 117357                  | CC                              | TT              | 1946961457               |
| SNP_P4_135775_117379 | NW_004516008.1 | Scaffold575 | 117379                  | TT                              | AA              | 1946961458               |
| SNP_P4_135776_117386 | NW_004516008.1 | Scaffold575 | 117386                  | AA                              | GG              | 1946961459               |
| SNP_P4_135777_117399 | NW_004516008.1 | Scaffold575 | 117399                  | AA                              | GG              | 1946961460               |
| SNP_P4_135778_117424 | NW_004516008.1 | Scaffold575 | 117424                  | AA                              | TT              | 1946961461               |
| SNP_P4_135779_117437 | NW_004516008.1 | Scaffold575 | 117437                  | TT                              | CC              | 1946961462               |
| SNP_P4_135780_117466 | NW_004516008.1 | Scaffold575 | 117466                  | TT                              | GG              | 1946961463               |
| SNP_P4_135781_117475 | NW_004516008.1 | Scaffold575 | 117475                  | TT                              | GG              | 1946961464               |
| SNP_P4_135782_117532 | NW_004516008.1 | Scaffold575 | 117532                  | AA                              | GG              | 1946961465               |
| SNP_P4_135783_117603 | NW_004516008.1 | Scaffold575 | 117603                  | GG                              | AA              | 1946961466               |
| SNP_P4_135784_117616 | NW_004516008.1 | Scaffold575 | 117616                  | AA                              | GG              | 1946961467               |
| SNP_P4_135785_117628 | NW_004516008.1 | Scaffold575 | 117628                  | TT                              | GG              | 1946961468               |
| SNP_P4_135786_117692 | NW_004516008.1 | Scaffold575 | 117692                  | AA                              | CC              | 1946961469               |
| SNP_P4_135787_117701 | NW_004516008.1 | Scaffold575 | 117701                  | TT                              | CC              | 1946961470               |
| SNP_P4_135788_117720 | NW_004516008.1 | Scaffold575 | 117720                  | AA                              | CC              | 1946961471               |
| SNP_P4_135789_117732 | NW_004516008.1 | Scaffold575 | 117732                  | TT                              | GG              | 1946961472               |
| SNP_P4_135790_117752 | NW_004516008.1 | Scaffold575 | 117752                  | TT                              | CC              | 1946961473               |
| SNP_P4_135791_117763 | NW_004516008.1 | Scaffold575 | 117763                  | TT                              | CC              | 1946961474               |
| SNP_P4_135792_117775 | NW_004516008.1 | Scaffold575 | 117775                  | AA                              | TT              | 1946961476               |
| SNP_P4_135793_117834 | NW_004516008.1 | Scaffold575 | 117834                  | TT                              | CC              | 1946961478               |
| SNP_P4_135794_117865 | NW_004516008.1 | Scaffold575 | 117865                  | TT                              | GG              | 1946961480               |
| SNP_P4_135795_117900 | NW_004516008.1 | Scaffold575 | 117900                  | AA                              | GG              | 1946961482               |
| SNP_P4_135796_117964 | NW_004516008.1 | Scaffold575 | 117964                  | AA                              | CC              | 1946961484               |
| SNP_P4_135797_117999 | NW_004516008.1 | Scaffold575 | 117999                  | AA                              | CC              | 1946961486               |
| SNP_P4_135798_118014 | NW_004516008.1 | Scaffold575 | 118014                  | AA                              | GG              | 1946961488               |
| SNP_P4_135799_118141 | NW_004516008.1 | Scaffold575 | 118141                  | AA                              | GG              | 1946961490               |

| SNPs IDs             | Chromosome IDs | Chromosomes | Physical positions (bp) | CDC Frontier (Reference genome) | (ILWC46 & LPNB) | NCBI SNPdb Accession IDs |
|----------------------|----------------|-------------|-------------------------|---------------------------------|-----------------|--------------------------|
| SNP_P4_135800_118153 | NW_004516008.1 | Scaffold575 | 118153                  | TT                              | CC              | 1946961492               |
| SNP_P4_135801_118180 | NW_004516008.1 | Scaffold575 | 118180                  | AA                              | GG              | 1946961494               |
| SNP_P4_135802_118188 | NW_004516008.1 | Scaffold575 | 118188                  | AA                              | GG              | 1946961496               |
| SNP_P4_135804_118286 | NW_004516008.1 | Scaffold575 | 118286                  | TT                              | AA              | 1946961498               |
| SNP_P4_135805_118299 | NW_004516008.1 | Scaffold575 | 118299                  | AA                              | CC              | 1946961500               |
| SNP_P4_135806_118352 | NW_004516008.1 | Scaffold575 | 118352                  | AA                              | GG              | 1946961502               |
| SNP_P4_135807_118374 | NW_004516008.1 | Scaffold575 | 118374                  | TT                              | GG              | 1946961504               |
| SNP_P4_135808_118409 | NW_004516008.1 | Scaffold575 | 118409                  | TT                              | CC              | 1946961506               |
| SNP_P4_135809_118414 | NW_004516008.1 | Scaffold575 | 118414                  | AA                              | GG              | 1946961508               |
| SNP_P4_135810_118475 | NW_004516008.1 | Scaffold575 | 118475                  | AA                              | GG              | 1946961510               |
| SNP_P4_135811_118481 | NW_004516008.1 | Scaffold575 | 118481                  | AA                              | GG              | 1946961512               |
| SNP_P4_135812_118525 | NW_004516008.1 | Scaffold575 | 118525                  | AA                              | GG              | 1946961514               |
| SNP_P4_135813_119050 | NW_004516008.1 | Scaffold575 | 119050                  | CC                              | TT              | 1946961516               |
| SNP_P4_135814_120028 | NW_004516008.1 | Scaffold575 | 120028                  | GG                              | AA              | 1946961518               |
| SNP_P4_135815_120111 | NW_004516008.1 | Scaffold575 | 120111                  | AA                              | GG              | 1946961520               |
| SNP_P4_135816_120184 | NW_004516008.1 | Scaffold575 | 120184                  | AA                              | GG              | 1946961522               |
| SNP_P4_135817_120187 | NW_004516008.1 | Scaffold575 | 120187                  | TT                              | GG              | 1946961524               |
| SNP_P4_135818_120201 | NW_004516008.1 | Scaffold575 | 120201                  | AA                              | CC              | 1946961526               |
| SNP_P4_135819_120203 | NW_004516008.1 | Scaffold575 | 120203                  | TT                              | CC              | 1946961528               |
| SNP_P4_135820_120270 | NW_004516008.1 | Scaffold575 | 120270                  | AA                              | CC              | 1946961530               |
| SNP_P4_135822_120501 | NW_004516008.1 | Scaffold575 | 120501                  | TT                              | CC              | 1946961532               |
| SNP_P4_135823_120523 | NW_004516008.1 | Scaffold575 | 120523                  | GG                              | TT              | 1946961534               |
| SNP_P4_135824_121595 | NW_004516008.1 | Scaffold575 | 121595                  | GG                              | AA              | 1946961536               |
| SNP_P4_135825_121613 | NW_004516008.1 | Scaffold575 | 121613                  | TT                              | CC              | 1946961538               |
| SNP_P4_135826_121624 | NW_004516008.1 | Scaffold575 | 121624                  | GG                              | AA              | 1946961540               |
| SNP_P4_135827_121689 | NW_004516008.1 | Scaffold575 | 121689                  | CC                              | AA              | 1946961542               |
| SNP_P4_135828_121717 | NW_004516008.1 | Scaffold575 | 121717                  | CC                              | TT              | 1946961544               |
| SNP_P4_135829_121728 | NW_004516008.1 | Scaffold575 | 121728                  | AA                              | GG              | 1946961546               |
| SNP_P4_135830_121741 | NW_004516008.1 | Scaffold575 | 121741                  | GG                              | AA              | 1946961548               |
| SNP_P4_135831_121867 | NW_004516008.1 | Scaffold575 | 121867                  | GG                              | TT              | 1946961550               |
| SNP_P4_135832_121874 | NW_004516008.1 | Scaffold575 | 121874                  | TT                              | CC              | 1946961552               |
| SNP_P4_135833_121879 | NW_004516008.1 | Scaffold575 | 121879                  | CC                              | TT              | 1946961554               |
| SNP_P4_135834_121910 | NW_004516008.1 | Scaffold575 | 121910                  | CC                              | AA              | 1946961556               |
| SNP_P4_135835_121914 | NW_004516008.1 | Scaffold575 | 121914                  | TT                              | CC              | 1946961558               |
| SNP_P4_135836_121944 | NW_004516008.1 | Scaffold575 | 121944                  | CC                              | GG              | 1946961560               |
| SNP_P4_135837_121963 | NW_004516008.1 | Scaffold575 | 121963                  | TT                              | AA              | 1946961562               |
| SNP_P4_135838_122019 | NW_004516008.1 | Scaffold575 | 122019                  | AA                              | GG              | 1946961564               |
| SNP_P4_135839_122024 | NW_004516008.1 | Scaffold575 | 122024                  | GG                              | TT              | 1946961566               |
| SNP_P4_135840_122038 | NW_004516008.1 | Scaffold575 | 122038                  | AA                              | GG              | 1946961568               |
| SNP_P4_135841_122056 | NW_004516008.1 | Scaffold575 | 122056                  | AA                              | CC              | 1946961570               |
| SNP_P4_135842_122059 | NW_004516008.1 | Scaffold575 | 122059                  | TT                              | CC              | 1946961572               |
| SNP_P4_135843_122061 | NW_004516008.1 | Scaffold575 | 122061                  | TT                              | CC              | 1946961574               |

| SNPs IDs             | Chromosome IDs | Chromosomes | Physical positions (bp) | CDC Frontier (Reference genome) | (ILWC46 & LPNB) | NCBI SNPdb Accession IDs |
|----------------------|----------------|-------------|-------------------------|---------------------------------|-----------------|--------------------------|
| SNP_P4_135844_122067 | NW_004516008.1 | Scaffold575 | 122067                  | TT                              | GG              | 1946961576               |
| SNP_P4_135845_122081 | NW_004516008.1 | Scaffold575 | 122081                  | GG                              | CC              | 1946961578               |
| SNP_P4_135846_122102 | NW_004516008.1 | Scaffold575 | 122102                  | AA                              | GG              | 1946961580               |
| SNP_P4_135847_122121 | NW_004516008.1 | Scaffold575 | 122121                  | TT                              | CC              | 1946961582               |
| SNP_P4_135848_122126 | NW_004516008.1 | Scaffold575 | 122126                  | GG                              | AA              | 1946961584               |
| SNP_P4_135849_122138 | NW_004516008.1 | Scaffold575 | 122138                  | AA                              | GG              | 1946961586               |
| SNP_P4_135850_122151 | NW_004516008.1 | Scaffold575 | 122151                  | CC                              | AA              | 1946961588               |
| SNP_P4_135851_122203 | NW_004516008.1 | Scaffold575 | 122203                  | AA                              | CC              | 1946961590               |
| SNP_P4_135852_122312 | NW_004516008.1 | Scaffold575 | 122312                  | TT                              | CC              | 1946961592               |
| SNP_P4_135853_122366 | NW_004516008.1 | Scaffold575 | 122366                  | AA                              | GG              | 1946961594               |
| SNP_P4_135854_122368 | NW_004516008.1 | Scaffold575 | 122368                  | TT                              | CC              | 1946961596               |
| SNP_P4_135855_122409 | NW_004516008.1 | Scaffold575 | 122409                  | TT                              | CC              | 1946961598               |
| SNP_P4_135856_122473 | NW_004516008.1 | Scaffold575 | 122473                  | GG                              | CC              | 1946961600               |
| SNP_P4_135857_122480 | NW_004516008.1 | Scaffold575 | 122480                  | TT                              | CC              | 1946961602               |
| SNP_P4_135858_122518 | NW_004516008.1 | Scaffold575 | 122518                  | AA                              | CC              | 1946961604               |
| SNP_P4_135859_122574 | NW_004516008.1 | Scaffold575 | 122574                  | TT                              | GG              | 1946961606               |
| SNP_P4_135860_122647 | NW_004516008.1 | Scaffold575 | 122647                  | CC                              | AA              | 1946961608               |
| SNP_P4_135861_123990 | NW_004516008.1 | Scaffold575 | 123990                  | TT                              | GG              | 1946961610               |
| SNP_P4_135862_124018 | NW_004516008.1 | Scaffold575 | 124018                  | AA                              | GG              | 1946961612               |
| SNP_P4_135863_124053 | NW_004516008.1 | Scaffold575 | 124053                  | CC                              | AA              | 1946961614               |
| SNP_P4_135864_124064 | NW_004516008.1 | Scaffold575 | 124064                  | TT                              | CC              | 1946961616               |
| SNP_P4_135865_124076 | NW_004516008.1 | Scaffold575 | 124076                  | CC                              | AA              | 1946961618               |
| SNP_P4_135866_124092 | NW_004516008.1 | Scaffold575 | 124092                  | AA                              | GG              | 1946961620               |
| SNP_P4_135867_124230 | NW_004516008.1 | Scaffold575 | 124230                  | AA                              | CC              | 1946961622               |
| SNP_P4_135868_124258 | NW_004516008.1 | Scaffold575 | 124258                  | TT                              | CC              | 1946961624               |
| SNP_P4_135869_124262 | NW_004516008.1 | Scaffold575 | 124262                  | GG                              | AA              | 1946961626               |
| SNP_P4_135870_124324 | NW_004516008.1 | Scaffold575 | 124324                  | CC                              | TT              | 1946961628               |
| SNP_P4_135871_124344 | NW_004516008.1 | Scaffold575 | 124344                  | AA                              | CC              | 1946961630               |
| SNP_P4_135872_124353 | NW_004516008.1 | Scaffold575 | 124353                  | GG                              | AA              | 1946961632               |
| SNP_P4_135873_124354 | NW_004516008.1 | Scaffold575 | 124354                  | GG                              | AA              | 1946961634               |
| SNP_P4_135874_124420 | NW_004516008.1 | Scaffold575 | 124420                  | GG                              | AA              | 1946961636               |
| SNP_P4_135875_124505 | NW_004516008.1 | Scaffold575 | 124505                  | TT                              | CC              | 1946961638               |
| SNP_P4_135876_124536 | NW_004516008.1 | Scaffold575 | 124536                  | GG                              | AA              | 1946961640               |
| SNP_P4_135877_124560 | NW_004516008.1 | Scaffold575 | 124560                  | AA                              | GG              | 1946961642               |
| SNP_P4_135878_124651 | NW_004516008.1 | Scaffold575 | 124651                  | TT                              | CC              | 1946961644               |
| SNP_P4_135879_124783 | NW_004516008.1 | Scaffold575 | 124783                  | AA                              | GG              | 1946961646               |
| SNP_P4_135880_124853 | NW_004516008.1 | Scaffold575 | 124853                  | CC                              | TT              | 1946961648               |
| SNP_P4_135881_124856 | NW_004516008.1 | Scaffold575 | 124856                  | TT                              | CC              | 1946961650               |
| SNP_P4_135882_124862 | NW_004516008.1 | Scaffold575 | 124862                  | TT                              | CC              | 1946961652               |
| SNP_P4_135883_124867 | NW_004516008.1 | Scaffold575 | 124867                  | GG                              | AA              | 1946961654               |
| SNP_P4_135884_124886 | NW_004516008.1 | Scaffold575 | 124886                  | TT                              | CC              | 1946961656               |
| SNP_P4_135885_124888 | NW_004516008.1 | Scaffold575 | 124888                  | AA                              | CC              | 1946961658               |

| SNPs IDs             | Chromosome IDs | Chromosomes | Physical positions (bp) | CDC Frontier (Reference genome) | (ILWC46 & LPNB) | NCBI SNPdb Accession IDs |
|----------------------|----------------|-------------|-------------------------|---------------------------------|-----------------|--------------------------|
| SNP_P4_135886_124895 | NW_004516008.1 | Scaffold575 | 124895                  | GG                              | AA              | 1946961660               |
| SNP_P4_135887_124921 | NW_004516008.1 | Scaffold575 | 124921                  | TT                              | CC              | 1946961663               |
| SNP_P4_135888_124940 | NW_004516008.1 | Scaffold575 | 124940                  | GG                              | AA              | 1946961665               |
| SNP_P4_135889_124983 | NW_004516008.1 | Scaffold575 | 124983                  | GG                              | CC              | 1946961667               |
| SNP_P4_135890_124998 | NW_004516008.1 | Scaffold575 | 124998                  | TT                              | CC              | 1946961669               |
| SNP_P4_135891_125005 | NW_004516008.1 | Scaffold575 | 125005                  | AA                              | GG              | 1946961671               |
| SNP_P4_135892_125014 | NW_004516008.1 | Scaffold575 | 125014                  | AA                              | GG              | 1946961673               |
| SNP_P4_135893_125083 | NW_004516008.1 | Scaffold575 | 125083                  | AA                              | CC              | 1946961675               |
| SNP_P4_135894_125174 | NW_004516008.1 | Scaffold575 | 125174                  | TT                              | CC              | 1946961677               |
| SNP_P4_135895_125217 | NW_004516008.1 | Scaffold575 | 125217                  | TT                              | AA              | 1946961679               |
| SNP_P4_135896_125245 | NW_004516008.1 | Scaffold575 | 125245                  | TT                              | CC              | 1946961681               |
| SNP_P4_135897_125301 | NW_004516008.1 | Scaffold575 | 125301                  | GG                              | TT              | 1946961683               |
| SNP_P4_135898_125327 | NW_004516008.1 | Scaffold575 | 125327                  | AA                              | GG              | 1946961685               |
| SNP_P4_135899_125368 | NW_004516008.1 | Scaffold575 | 125368                  | GG                              | AA              | 1946961687               |
| SNP_P4_135900_125384 | NW_004516008.1 | Scaffold575 | 125384                  | TT                              | CC              | 1946961689               |
| SNP_P4_135901_125400 | NW_004516008.1 | Scaffold575 | 125400                  | TT                              | CC              | 1946961691               |
| SNP_P4_135902_125413 | NW_004516008.1 | Scaffold575 | 125413                  | AA                              | GG              | 1946961693               |
| SNP_P4_135903_125448 | NW_004516008.1 | Scaffold575 | 125448                  | AA                              | GG              | 1946961695               |
| SNP_P4_135904_125449 | NW_004516008.1 | Scaffold575 | 125449                  | TT                              | GG              | 1946961697               |
| SNP_P4_135905_125466 | NW_004516008.1 | Scaffold575 | 125466                  | AA                              | TT              | 1946961699               |
| SNP_P4_135906_125492 | NW_004516008.1 | Scaffold575 | 125492                  | TT                              | CC              | 1946961701               |
| SNP_P4_135907_125518 | NW_004516008.1 | Scaffold575 | 125518                  | TT                              | CC              | 1946961703               |
| SNP_P4_135908_125519 | NW_004516008.1 | Scaffold575 | 125519                  | TT                              | CC              | 1946961705               |
| SNP_P4_135909_125561 | NW_004516008.1 | Scaffold575 | 125561                  | AA                              | GG              | 1946961707               |
| SNP_P4_135910_125582 | NW_004516008.1 | Scaffold575 | 125582                  | AA                              | GG              | 1946961709               |
| SNP_P4_135911_125595 | NW_004516008.1 | Scaffold575 | 125595                  | AA                              | TT              | 1946961711               |
| SNP_P4_135912_125599 | NW_004516008.1 | Scaffold575 | 125599                  | TT                              | CC              | 1946961713               |
| SNP_P4_135913_125604 | NW_004516008.1 | Scaffold575 | 125604                  | AA                              | GG              | 1946961715               |
| SNP_P4_135914_125612 | NW_004516008.1 | Scaffold575 | 125612                  | TT                              | GG              | 1946961717               |
| SNP_P4_135915_125654 | NW_004516008.1 | Scaffold575 | 125654                  | TT                              | CC              | 1946961719               |
| SNP_P4_135916_125684 | NW_004516008.1 | Scaffold575 | 125684                  | TT                              | CC              | 1946961721               |
| SNP_P4_135917_125742 | NW_004516008.1 | Scaffold575 | 125742                  | TT                              | CC              | 1946961723               |
| SNP_P4_135918_125748 | NW_004516008.1 | Scaffold575 | 125748                  | CC                              | TT              | 1946961725               |
| SNP_P4_135919_125760 | NW_004516008.1 | Scaffold575 | 125760                  | AA                              | GG              | 1946961727               |
| SNP_P4_135920_125762 | NW_004516008.1 | Scaffold575 | 125762                  | AA                              | GG              | 1946961729               |
| SNP_P4_135921_125841 | NW_004516008.1 | Scaffold575 | 125841                  | TT                              | CC              | 1946961731               |
| SNP_P4_135922_125866 | NW_004516008.1 | Scaffold575 | 125866                  | TT                              | GG              | 1946961733               |
| SNP_P4_135923_125876 | NW_004516008.1 | Scaffold575 | 125876                  | TT                              | CC              | 1946961735               |
| SNP_P4_135924_125905 | NW_004516008.1 | Scaffold575 | 125905                  | AA                              | GG              | 1946961737               |
| SNP_P4_135925_125912 | NW_004516008.1 | Scaffold575 | 125912                  | TT                              | CC              | 1946961739               |
| SNP_P4_135926_125914 | NW_004516008.1 | Scaffold575 | 125914                  | AA                              | GG              | 1946961741               |
| SNP_P4_135927_125985 | NW_004516008.1 | Scaffold575 | 125985                  | AA                              | GG              | 1946961743               |

| SNPs IDs             | Chromosome IDs | Chromosomes | Physical positions (bp) | CDC Frontier (Reference genome) | (ILWC46 & LPNB) | NCBI SNPdb Accession IDs |
|----------------------|----------------|-------------|-------------------------|---------------------------------|-----------------|--------------------------|
| SNP_P4_135928_125986 | NW_004516008.1 | Scaffold575 | 125986                  | TT                              | GG              | 1946961745               |
| SNP_P4_135929_126000 | NW_004516008.1 | Scaffold575 | 126000                  | AA                              | GG              | 1946961747               |
| SNP_P4_135930_126042 | NW_004516008.1 | Scaffold575 | 126042                  | AA                              | CC              | 1946961749               |
| SNP_P4_135931_126053 | NW_004516008.1 | Scaffold575 | 126053                  | GG                              | TT              | 1946961751               |
| SNP_P4_135932_126058 | NW_004516008.1 | Scaffold575 | 126058                  | CC                              | TT              | 1946961753               |
| SNP_P4_135933_126118 | NW_004516008.1 | Scaffold575 | 126118                  | TT                              | CC              | 1946961755               |
| SNP_P4_135934_126155 | NW_004516008.1 | Scaffold575 | 126155                  | TT                              | CC              | 1946961757               |
| SNP_P4_135935_126164 | NW_004516008.1 | Scaffold575 | 126164                  | CC                              | GG              | 1946961759               |
| SNP_P4_135936_126175 | NW_004516008.1 | Scaffold575 | 126175                  | GG                              | AA              | 1946961761               |
| SNP_P4_135937_126255 | NW_004516008.1 | Scaffold575 | 126255                  | TT                              | CC              | 1946961763               |
| SNP_P4_135938_126258 | NW_004516008.1 | Scaffold575 | 126258                  | AA                              | TT              | 1946961765               |
| SNP_P4_135939_126260 | NW_004516008.1 | Scaffold575 | 126260                  | TT                              | GG              | 1946961767               |
| SNP_P4_135941_126345 | NW_004516008.1 | Scaffold575 | 126345                  | TT                              | CC              | 1946961769               |
| SNP_P4_135942_126379 | NW_004516008.1 | Scaffold575 | 126379                  | TT                              | CC              | 1946961771               |
| SNP_P4_135943_126393 | NW_004516008.1 | Scaffold575 | 126393                  | AA                              | GG              | 1946961773               |
| SNP_P4_135944_126407 | NW_004516008.1 | Scaffold575 | 126407                  | TT                              | CC              | 1946961775               |
| SNP_P4_135945_126409 | NW_004516008.1 | Scaffold575 | 126409                  | GG                              | AA              | 1946961777               |
| SNP_P4_135946_126517 | NW_004516008.1 | Scaffold575 | 126517                  | TT                              | CC              | 1946961779               |
| SNP_P4_135947_126518 | NW_004516008.1 | Scaffold575 | 126518                  | TT                              | CC              | 1946961781               |
| SNP_P4_135948_126549 | NW_004516008.1 | Scaffold575 | 126549                  | AA                              | CC              | 1946961783               |
| SNP_P4_135949_126582 | NW_004516008.1 | Scaffold575 | 126582                  | AA                              | GG              | 1946961785               |
| SNP_P4_135950_126604 | NW_004516008.1 | Scaffold575 | 126604                  | GG                              | TT              | 1946961787               |
| SNP_P4_135951_126609 | NW_004516008.1 | Scaffold575 | 126609                  | TT                              | CC              | 1946961789               |
| SNP_P4_135952_126651 | NW_004516008.1 | Scaffold575 | 126651                  | TT                              | GG              | 1946961791               |
| SNP_P4_135953_126718 | NW_004516008.1 | Scaffold575 | 126718                  | TT                              | AA              | 1946961793               |
| SNP_P4_135954_126759 | NW_004516008.1 | Scaffold575 | 126759                  | GG                              | AA              | 1946961795               |
| SNP_P4_135955_126803 | NW_004516008.1 | Scaffold575 | 126803                  | AA                              | GG              | 1946961797               |
| SNP_P4_135956_126809 | NW_004516008.1 | Scaffold575 | 126809                  | AA                              | GG              | 1946961799               |
| SNP_P4_135957_126816 | NW_004516008.1 | Scaffold575 | 126816                  | AA                              | CC              | 1946961801               |
| SNP_P4_135958_126819 | NW_004516008.1 | Scaffold575 | 126819                  | AA                              | GG              | 1946961803               |
| SNP_P4_135959_126846 | NW_004516008.1 | Scaffold575 | 126846                  | AA                              | GG              | 1946961805               |
| SNP_P4_135960_126860 | NW_004516008.1 | Scaffold575 | 126860                  | TT                              | CC              | 1946961807               |
| SNP_P4_135961_126875 | NW_004516008.1 | Scaffold575 | 126875                  | TT                              | CC              | 1946961809               |
| SNP_P4_135962_126882 | NW_004516008.1 | Scaffold575 | 126882                  | TT                              | GG              | 1946961811               |
| SNP_P4_135963_126886 | NW_004516008.1 | Scaffold575 | 126886                  | AA                              | GG              | 1946961813               |
| SNP_P4_135964_126937 | NW_004516008.1 | Scaffold575 | 126937                  | AA                              | CC              | 1946961815               |
| SNP_P4_135965_127005 | NW_004516008.1 | Scaffold575 | 127005                  | AA                              | CC              | 1946961817               |
| SNP_P4_135966_127027 | NW_004516008.1 | Scaffold575 | 127027                  | TT                              | CC              | 1946961819               |
| SNP_P4_135967_127030 | NW_004516008.1 | Scaffold575 | 127030                  | AA                              | GG              | 1946961820               |
| SNP_P4_135968_127031 | NW_004516008.1 | Scaffold575 | 127031                  | AA                              | CC              | 1946961822               |
| SNP_P4_135969_127077 | NW_004516008.1 | Scaffold575 | 127077                  | AA                              | GG              | 1946961824               |
| SNP_P4_135970_127124 | NW_004516008.1 | Scaffold575 | 127124                  | TT                              | GG              | 1946961826               |

| SNPs IDs             | Chromosome IDs | Chromosomes | Physical positions (bp) | CDC Frontier (Reference genome) | (ILWC46 & LPNB) | NCBI SNPdb Accession IDs |
|----------------------|----------------|-------------|-------------------------|---------------------------------|-----------------|--------------------------|
| SNP_P4_135971_127135 | NW_004516008.1 | Scaffold575 | 127135                  | TT                              | AA              | 1946961828               |
| SNP_P4_135972_127245 | NW_004516008.1 | Scaffold575 | 127245                  | CC                              | GG              | 1946961830               |
| SNP_P4_135973_127256 | NW_004516008.1 | Scaffold575 | 127256                  | AA                              | CC              | 1946961832               |
| SNP_P4_135974_127291 | NW_004516008.1 | Scaffold575 | 127291                  | AA                              | GG              | 1946961834               |
| SNP_P4_135975_130744 | NW_004516008.1 | Scaffold575 | 130744                  | AA                              | TT              | 1946961836               |
| SNP_P4_135976_131225 | NW_004516008.1 | Scaffold575 | 131225                  | AA                              | GG              | 1946961838               |
| SNP_P4_135977_4381   | NW_004516009.1 | Scaffold577 | 4381                    | CC                              | AA              | 1946961840               |
| SNP_P4_135978_8143   | NW_004516009.1 | Scaffold577 | 8143                    | TT                              | CC              | 1946961842               |
| SNP_P4_135979_8154   | NW_004516009.1 | Scaffold577 | 8154                    | AA                              | GG              | 1946961844               |
| SNP_P4_135980_8203   | NW_004516009.1 | Scaffold577 | 8203                    | GG                              | TT              | 1946961846               |
| SNP_P4_135981_8565   | NW_004516009.1 | Scaffold577 | 8565                    | GG                              | AA              | 1946961848               |
| SNP_P4_135982_16675  | NW_004516009.1 | Scaffold577 | 16675                   | CC                              | TT              | 1946961850               |
| SNP_P4_135983_16779  | NW_004516009.1 | Scaffold577 | 16779                   | GG                              | AA              | 1946961852               |
| SNP_P4_135984_16818  | NW_004516009.1 | Scaffold577 | 16818                   | AA                              | GG              | 1946961854               |
| SNP_P4_135985_17146  | NW_004516009.1 | Scaffold577 | 17146                   | GG                              | AA              | 1946961856               |
| SNP_P4_135986_17260  | NW_004516009.1 | Scaffold577 | 17260                   | GG                              | AA              | 1946961858               |
| SNP_P4_135987_17270  | NW_004516009.1 | Scaffold577 | 17270                   | TT                              | GG              | 1946961860               |
| SNP_P4_135988_22493  | NW_004516009.1 | Scaffold577 | 22493                   | TT                              | CC              | 1946961862               |
| SNP_P4_135989_25662  | NW_004516009.1 | Scaffold577 | 25662                   | AA                              | TT              | 1946961864               |
| SNP_P4_135990_26081  | NW_004516009.1 | Scaffold577 | 26081                   | GG                              | AA              | 1946961866               |
| SNP_P4_135991_26642  | NW_004516009.1 | Scaffold577 | 26642                   | TT                              | CC              | 1946961868               |
| SNP_P4_135992_26858  | NW_004516009.1 | Scaffold577 | 26858                   | CC                              | AA              | 1946961870               |
| SNP_P4_135993_30854  | NW_004516009.1 | Scaffold577 | 30854                   | CC                              | TT              | 1946961872               |
| SNP_P4_135994_31026  | NW_004516009.1 | Scaffold577 | 31026                   | AA                              | GG              | 1946961874               |
| SNP_P4_135995_31219  | NW_004516009.1 | Scaffold577 | 31219                   | TT                              | CC              | 1946961876               |
| SNP_P4_135996_31905  | NW_004516009.1 | Scaffold577 | 31905                   | GG                              | AA              | 1946961878               |
| SNP_P4_135997_35066  | NW_004516009.1 | Scaffold577 | 35066                   | AA                              | GG              | 1946961880               |
| SNP_P4_135998_35307  | NW_004516009.1 | Scaffold577 | 35307                   | AA                              | CC              | 1946961882               |
| SNP_P4_135999_35342  | NW_004516009.1 | Scaffold577 | 35342                   | TT                              | AA              | 1946961884               |
| SNP_P4_136000_35894  | NW_004516009.1 | Scaffold577 | 35894                   | AA                              | TT              | 1946961886               |
| SNP_P4_136001_41037  | NW_004516009.1 | Scaffold577 | 41037                   | AA                              | TT              | 1946961888               |
| SNP_P4_136002_41147  | NW_004516009.1 | Scaffold577 | 41147                   | CC                              | TT              | 1946961889               |
| SNP_P4_136003_41660  | NW_004516009.1 | Scaffold577 | 41660                   | CC                              | AA              | 1946961891               |
| SNP_P4_136004_41901  | NW_004516009.1 | Scaffold577 | 41901                   | AA                              | GG              | 1946961893               |
| SNP_P4_136005_42120  | NW_004516009.1 | Scaffold577 | 42120                   | AA                              | GG              | 1946961895               |
| SNP_P4_136006_42220  | NW_004516009.1 | Scaffold577 | 42220                   | GG                              | AA              | 1946961897               |
| SNP_P4_136007_42253  | NW_004516009.1 | Scaffold577 | 42253                   | GG                              | AA              | 1946961899               |
| SNP_P4_136008_42270  | NW_004516009.1 | Scaffold577 | 42270                   | TT                              | GG              | 1946961901               |
| SNP_P4_136009_42415  | NW_004516009.1 | Scaffold577 | 42415                   | GG                              | CC              | 1946961903               |
| SNP_P4_136010_42444  | NW_004516009.1 | Scaffold577 | 42444                   | AA                              | TT              | 1946961905               |
| SNP_P4_136011_42596  | NW_004516009.1 | Scaffold577 | 42596                   | AA                              | GG              | 1946961907               |
| SNP_P4_136012_55294  | NW_004516009.1 | Scaffold577 | 55294                   | AA                              | GG              | 1946961909               |

| SNPs IDs             | Chromosome IDs | Chromosomes | Physical positions (bp) | CDC Frontier (Reference genome) | (ILWC46 & LPNB) | NCBI SNPdb Accession IDs |
|----------------------|----------------|-------------|-------------------------|---------------------------------|-----------------|--------------------------|
| SNP_P4_136013_55646  | NW_004516009.1 | Scaffold577 | 55646                   | CC                              | AA              | 1946961911               |
| SNP_P4_136014_56043  | NW_004516009.1 | Scaffold577 | 56043                   | AA                              | TT              | 1946961913               |
| SNP_P4_136015_56054  | NW_004516009.1 | Scaffold577 | 56054                   | GG                              | AA              | 1946961915               |
| SNP_P4_136016_56089  | NW_004516009.1 | Scaffold577 | 56089                   | CC                              | AA              | 1946961917               |
| SNP_P4_136017_64428  | NW_004516009.1 | Scaffold577 | 64428                   | CC                              | TT              | 1946961920               |
| SNP_P4_136018_64567  | NW_004516009.1 | Scaffold577 | 64567                   | TT                              | CC              | 1946961922               |
| SNP_P4_136019_64752  | NW_004516009.1 | Scaffold577 | 64752                   | TT                              | GG              | 1946961924               |
| SNP_P4_136020_64924  | NW_004516009.1 | Scaffold577 | 64924                   | CC                              | GG              | 1946961926               |
| SNP_P4_136021_64957  | NW_004516009.1 | Scaffold577 | 64957                   | CC                              | GG              | 1946961928               |
| SNP_P4_136022_65037  | NW_004516009.1 | Scaffold577 | 65037                   | AA                              | GG              | 1946961930               |
| SNP_P4_136023_65134  | NW_004516009.1 | Scaffold577 | 65134                   | GG                              | CC              | 1946961931               |
| SNP_P4_136024_65199  | NW_004516009.1 | Scaffold577 | 65199                   | GG                              | AA              | 1946961933               |
| SNP_P4_136025_65434  | NW_004516009.1 | Scaffold577 | 65434                   | CC                              | TT              | 1946961935               |
| SNP_P4_136026_65445  | NW_004516009.1 | Scaffold577 | 65445                   | GG                              | CC              | 1946961937               |
| SNP_P4_136027_65839  | NW_004516009.1 | Scaffold577 | 65839                   | TT                              | CC              | 1946961939               |
| SNP_P4_136028_66005  | NW_004516009.1 | Scaffold577 | 66005                   | AA                              | GG              | 1946961941               |
| SNP_P4_136029_66375  | NW_004516009.1 | Scaffold577 | 66375                   | AA                              | CC              | 1946961943               |
| SNP_P4_136030_66720  | NW_004516009.1 | Scaffold577 | 66720                   | CC                              | AA              | 1946961945               |
| SNP_P4_136031_69695  | NW_004516009.1 | Scaffold577 | 69695                   | CC                              | AA              | 1946961947               |
| SNP_P4_136032_69949  | NW_004516009.1 | Scaffold577 | 69949                   | TT                              | CC              | 1946961949               |
| SNP_P4_136033_70293  | NW_004516009.1 | Scaffold577 | 70293                   | AA                              | GG              | 1946961951               |
| SNP_P4_136034_71064  | NW_004516009.1 | Scaffold577 | 71064                   | TT                              | GG              | 1946961953               |
| SNP_P4_136035_71260  | NW_004516009.1 | Scaffold577 | 71260                   | GG                              | CC              | 1946961955               |
| SNP_P4_136036_74339  | NW_004516009.1 | Scaffold577 | 74339                   | GG                              | TT              | 1946961957               |
| SNP_P4_136037_74506  | NW_004516009.1 | Scaffold577 | 74506                   | CC                              | TT              | 1946961959               |
| SNP_P4_136038_74675  | NW_004516009.1 | Scaffold577 | 74675                   | TT                              | GG              | 1946961961               |
| SNP_P4_136039_74688  | NW_004516009.1 | Scaffold577 | 74688                   | TT                              | CC              | 1946961963               |
| SNP_P4_136040_74776  | NW_004516009.1 | Scaffold577 | 74776                   | GG                              | CC              | 1946961965               |
| SNP_P4_136041_81697  | NW_004516009.1 | Scaffold577 | 81697                   | CC                              | TT              | 1946961967               |
| SNP_P4_136042_84386  | NW_004516009.1 | Scaffold577 | 84386                   | GG                              | CC              | 1946961969               |
| SNP_P4_136043_84661  | NW_004516009.1 | Scaffold577 | 84661                   | GG                              | TT              | 1946961971               |
| SNP_P4_136044_84751  | NW_004516009.1 | Scaffold577 | 84751                   | AA                              | GG              | 1946961973               |
| SNP_P4_136045_84782  | NW_004516009.1 | Scaffold577 | 84782                   | AA                              | TT              | 1946961975               |
| SNP_P4_136046_85236  | NW_004516009.1 | Scaffold577 | 85236                   | TT                              | GG              | 1946961977               |
| SNP_P4_136047_85623  | NW_004516009.1 | Scaffold577 | 85623                   | CC                              | GG              | 1946961979               |
| SNP_P4_136048_97252  | NW_004516009.1 | Scaffold577 | 97252                   | GG                              | AA              | 1946961981               |
| SNP_P4_136049_103671 | NW_004516009.1 | Scaffold577 | 103671                  | AA                              | TT              | 1946961983               |
| SNP_P4_136050_105867 | NW_004516009.1 | Scaffold577 | 105867                  | TT                              | AA              | 1946961985               |
| SNP_P4_136051_106266 | NW_004516009.1 | Scaffold577 | 106266                  | CC                              | TT              | 1946961987               |
| SNP_P4_136052_106267 | NW_004516009.1 | Scaffold577 | 106267                  | AA                              | TT              | 1946961989               |
| SNP_P4_136053_106273 | NW_004516009.1 | Scaffold577 | 106273                  | CC                              | TT              | 1946961991               |
| SNP_P4_136054_106801 | NW_004516009.1 | Scaffold577 | 106801                  | CC                              | TT              | 1946961993               |

| SNPs IDs             | Chromosome IDs | Chromosomes | Physical positions (bp) | CDC Frontier (Reference genome) | (ILWC46 & LPNB) | NCBI SNPdb Accession IDs |
|----------------------|----------------|-------------|-------------------------|---------------------------------|-----------------|--------------------------|
| SNP_P4_136055_111830 | NW_004516009.1 | Scaffold577 | 111830                  | TT                              | CC              | 1946961995               |
| SNP_P4_136056_111851 | NW_004516009.1 | Scaffold577 | 111851                  | AA                              | GG              | 1946961997               |
| SNP_P4_136057_111853 | NW_004516009.1 | Scaffold577 | 111853                  | GG                              | AA              | 1946961999               |
| SNP_P4_136058_111883 | NW_004516009.1 | Scaffold577 | 111883                  | GG                              | AA              | 1946962001               |
| SNP_P4_136059_111894 | NW_004516009.1 | Scaffold577 | 111894                  | AA                              | GG              | 1946962003               |
| SNP_P4_136060_121305 | NW_004516009.1 | Scaffold577 | 121305                  | CC                              | TT              | 1946962005               |
| SNP_P4_136061_121615 | NW_004516009.1 | Scaffold577 | 121615                  | AA                              | GG              | 1946962007               |
| SNP_P4_136062_121858 | NW_004516009.1 | Scaffold577 | 121858                  | GG                              | AA              | 1946962009               |
| SNP_P4_136063_2737   | NW_004516010.1 | Scaffold578 | 2737                    | TT                              | CC              | 1946962011               |
| SNP_P4_136064_7775   | NW_004516010.1 | Scaffold578 | 7775                    | TT                              | CC              | 1946962013               |
| SNP_P4_136065_7834   | NW_004516010.1 | Scaffold578 | 7834                    | CC                              | TT              | 1946962015               |
| SNP_P4_136066_7844   | NW_004516010.1 | Scaffold578 | 7844                    | TT                              | GG              | 1946962017               |
| SNP_P4_136067_7860   | NW_004516010.1 | Scaffold578 | 7860                    | AA                              | TT              | 1946962019               |
| SNP_P4_136068_7951   | NW_004516010.1 | Scaffold578 | 7951                    | CC                              | GG              | 1946962021               |
| SNP_P4_136069_7959   | NW_004516010.1 | Scaffold578 | 7959                    | AA                              | GG              | 1946962023               |
| SNP_P4_136070_7996   | NW_004516010.1 | Scaffold578 | 7996                    | TT                              | CC              | 1946962025               |
| SNP_P4_136071_8035   | NW_004516010.1 | Scaffold578 | 8035                    | AA                              | GG              | 1946962027               |
| SNP_P4_136072_8073   | NW_004516010.1 | Scaffold578 | 8073                    | TT                              | GG              | 1946962029               |
| SNP_P4_136073_8084   | NW_004516010.1 | Scaffold578 | 8084                    | AA                              | CC              | 1946962031               |
| SNP_P4_136074_8183   | NW_004516010.1 | Scaffold578 | 8183                    | TT                              | AA              | 1946962033               |
| SNP_P4_136075_11454  | NW_004516010.1 | Scaffold578 | 11454                   | AA                              | GG              | 1946962035               |
| SNP_P4_136076_11465  | NW_004516010.1 | Scaffold578 | 11465                   | GG                              | CC              | 1946962037               |
| SNP_P4_136077_11536  | NW_004516010.1 | Scaffold578 | 11536                   | AA                              | CC              | 1946962039               |
| SNP_P4_136078_11607  | NW_004516010.1 | Scaffold578 | 11607                   | GG                              | AA              | 1946962041               |
| SNP_P4_136080_11716  | NW_004516010.1 | Scaffold578 | 11716                   | GG                              | CC              | 1946962043               |
| SNP_P4_136081_11747  | NW_004516010.1 | Scaffold578 | 11747                   | TT                              | AA              | 1946962045               |
| SNP_P4_136082_11775  | NW_004516010.1 | Scaffold578 | 11775                   | TT                              | GG              | 1946962047               |
| SNP_P4_136083_11778  | NW_004516010.1 | Scaffold578 | 11778                   | GG                              | AA              | 1946962049               |
| SNP_P4_136084_11782  | NW_004516010.1 | Scaffold578 | 11782                   | CC                              | TT              | 1946962051               |
| SNP_P4_136085_11924  | NW_004516010.1 | Scaffold578 | 11924                   | CC                              | TT              | 1946962053               |
| SNP_P4_136086_12730  | NW_004516010.1 | Scaffold578 | 12730                   | GG                              | AA              | 1946962055               |
| SNP_P4_136087_19631  | NW_004516010.1 | Scaffold578 | 19631                   | TT                              | AA              | 1946962057               |
| SNP_P4_136088_19673  | NW_004516010.1 | Scaffold578 | 19673                   | GG                              | CC              | 1946962059               |
| SNP_P4_136089_19761  | NW_004516010.1 | Scaffold578 | 19761                   | GG                              | AA              | 1946962061               |
| SNP_P4_136090_19768  | NW_004516010.1 | Scaffold578 | 19768                   | GG                              | CC              | 1946962063               |
| SNP_P4_136091_19783  | NW_004516010.1 | Scaffold578 | 19783                   | AA                              | TT              | 1946962065               |
| SNP_P4_136092_19922  | NW_004516010.1 | Scaffold578 | 19922                   | CC                              | GG              | 1946962067               |
| SNP_P4_136093_19926  | NW_004516010.1 | Scaffold578 | 19926                   | AA                              | GG              | 1946962069               |
| SNP_P4_136094_19932  | NW_004516010.1 | Scaffold578 | 19932                   | AA                              | CC              | 1946962071               |
| SNP_P4_136095_19967  | NW_004516010.1 | Scaffold578 | 19967                   | CC                              | TT              | 1946962073               |
| SNP_P4_136096_19971  | NW_004516010.1 | Scaffold578 | 19971                   | GG                              | AA              | 1946962075               |
| SNP_P4_136097_20015  | NW_004516010.1 | Scaffold578 | 20015                   | TT                              | CC              | 1946962078               |



| SNPs IDs            | Chromosome IDs | Chromosomes | Physical positions (bp) | CDC Frontier (Reference genome) | (ILWC46 & LPNB) | NCBI SNPdb Accession IDs |
|---------------------|----------------|-------------|-------------------------|---------------------------------|-----------------|--------------------------|
| SNP_P4_136098_20038 | NW_004516010.1 | Scaffold578 | 20038                   | GG                              | AA              | 1946962080               |
| SNP_P4_136099_20039 | NW_004516010.1 | Scaffold578 | 20039                   | AA                              | GG              | 1946962082               |
| SNP_P4_136100_20112 | NW_004516010.1 | Scaffold578 | 20112                   | GG                              | AA              | 1946962084               |
| SNP_P4_136101_20207 | NW_004516010.1 | Scaffold578 | 20207                   | CC                              | TT              | 1946962086               |
| SNP_P4_136102_20208 | NW_004516010.1 | Scaffold578 | 20208                   | GG                              | AA              | 1946962088               |
| SNP_P4_136103_20225 | NW_004516010.1 | Scaffold578 | 20225                   | GG                              | AA              | 1946962090               |
| SNP_P4_136104_20263 | NW_004516010.1 | Scaffold578 | 20263                   | TT                              | GG              | 1946962092               |
| SNP_P4_136105_20267 | NW_004516010.1 | Scaffold578 | 20267                   | TT                              | CC              | 1946962094               |
| SNP_P4_136106_20281 | NW_004516010.1 | Scaffold578 | 20281                   | CC                              | TT              | 1946962096               |
| SNP_P4_136107_20283 | NW_004516010.1 | Scaffold578 | 20283                   | AA                              | GG              | 1946962098               |
| SNP_P4_136108_20598 | NW_004516010.1 | Scaffold578 | 20598                   | CC                              | AA              | 1946962100               |
| SNP_P4_136109_20620 | NW_004516010.1 | Scaffold578 | 20620                   | TT                              | AA              | 1946962102               |
| SNP_P4_136110_20650 | NW_004516010.1 | Scaffold578 | 20650                   | CC                              | GG              | 1946962104               |
| SNP_P4_136111_20754 | NW_004516010.1 | Scaffold578 | 20754                   | AA                              | TT              | 1946962106               |
| SNP_P4_136112_20848 | NW_004516010.1 | Scaffold578 | 20848                   | GG                              | AA              | 1946962108               |
| SNP_P4_136113_20923 | NW_004516010.1 | Scaffold578 | 20923                   | CC                              | TT              | 1946962110               |
| SNP_P4_136114_20931 | NW_004516010.1 | Scaffold578 | 20931                   | TT                              | GG              | 1946962112               |
| SNP_P4_136115_20945 | NW_004516010.1 | Scaffold578 | 20945                   | AA                              | GG              | 1946962114               |
| SNP_P4_136116_20967 | NW_004516010.1 | Scaffold578 | 20967                   | CC                              | GG              | 1946962116               |
| SNP_P4_136117_21009 | NW_004516010.1 | Scaffold578 | 21009                   | GG                              | TT              | 1946962118               |
| SNP_P4_136118_23930 | NW_004516010.1 | Scaffold578 | 23930                   | AA                              | TT              | 1946962120               |
| SNP_P4_136119_23980 | NW_004516010.1 | Scaffold578 | 23980                   | AA                              | GG              | 1946962122               |
| SNP_P4_136120_33482 | NW_004516010.1 | Scaffold578 | 33482                   | TT                              | CC              | 1946962124               |
| SNP_P4_136121_33501 | NW_004516010.1 | Scaffold578 | 33501                   | AA                              | GG              | 1946962126               |
| SNP_P4_136122_37052 | NW_004516010.1 | Scaffold578 | 37052                   | TT                              | GG              | 1946962128               |
| SNP_P4_136123_37177 | NW_004516010.1 | Scaffold578 | 37177                   | GG                              | AA              | 1946962130               |
| SNP_P4_136124_37232 | NW_004516010.1 | Scaffold578 | 37232                   | AA                              | GG              | 1946962132               |
| SNP_P4_136125_37237 | NW_004516010.1 | Scaffold578 | 37237                   | GG                              | AA              | 1946962134               |
| SNP_P4_136126_37252 | NW_004516010.1 | Scaffold578 | 37252                   | TT                              | GG              | 1946962136               |
| SNP_P4_136127_37331 | NW_004516010.1 | Scaffold578 | 37331                   | AA                              | CC              | 1946962138               |
| SNP_P4_136128_37332 | NW_004516010.1 | Scaffold578 | 37332                   | AA                              | CC              | 1946962140               |
| SNP_P4_136129_37361 | NW_004516010.1 | Scaffold578 | 37361                   | TT                              | AA              | 1946962142               |
| SNP_P4_136130_37455 | NW_004516010.1 | Scaffold578 | 37455                   | CC                              | TT              | 1946962144               |
| SNP_P4_136131_37469 | NW_004516010.1 | Scaffold578 | 37469                   | GG                              | AA              | 1946962146               |
| SNP_P4_136132_37473 | NW_004516010.1 | Scaffold578 | 37473                   | CC                              | TT              | 1946962148               |
| SNP_P4_136133_37484 | NW_004516010.1 | Scaffold578 | 37484                   | GG                              | AA              | 1946962150               |
| SNP_P4_136134_37569 | NW_004516010.1 | Scaffold578 | 37569                   | TT                              | CC              | 1946962152               |
| SNP_P4_136135_37596 | NW_004516010.1 | Scaffold578 | 37596                   | GG                              | TT              | 1946962154               |
| SNP_P4_136136_37809 | NW_004516010.1 | Scaffold578 | 37809                   | TT                              | GG              | 1946962156               |
| SNP_P4_136137_37816 | NW_004516010.1 | Scaffold578 | 37816                   | AA                              | TT              | 1946962158               |
| SNP_P4_136138_37887 | NW_004516010.1 | Scaffold578 | 37887                   | CC                              | GG              | 1946962160               |
| SNP_P4_136140_38120 | NW_004516010.1 | Scaffold578 | 38120                   | TT                              | CC              | 1946962162               |

| SNPs IDs            | Chromosome IDs | Chromosomes | Physical positions (bp) | CDC Frontier (Reference genome) | (ILWC46 & LPNB) | NCBI SNPdb Accession IDs |
|---------------------|----------------|-------------|-------------------------|---------------------------------|-----------------|--------------------------|
| SNP_P4_136142_53696 | NW_004516010.1 | Scaffold578 | 53696                   | TT                              | CC              | 1946962164               |
| SNP_P4_136143_53706 | NW_004516010.1 | Scaffold578 | 53706                   | GG                              | AA              | 1946962166               |
| SNP_P4_136144_54609 | NW_004516010.1 | Scaffold578 | 54609                   | TT                              | CC              | 1946962168               |
| SNP_P4_136145_59749 | NW_004516010.1 | Scaffold578 | 59749                   | GG                              | TT              | 1946962170               |
| SNP_P4_136146_59852 | NW_004516010.1 | Scaffold578 | 59852                   | AA                              | GG              | 1946962172               |
| SNP_P4_136147_62792 | NW_004516010.1 | Scaffold578 | 62792                   | CC                              | TT              | 1946962174               |
| SNP_P4_136148_62826 | NW_004516010.1 | Scaffold578 | 62826                   | CC                              | GG              | 1946962176               |
| SNP_P4_136149_63607 | NW_004516010.1 | Scaffold578 | 63607                   | GG                              | AA              | 1946962178               |
| SNP_P4_136150_63641 | NW_004516010.1 | Scaffold578 | 63641                   | AA                              | GG              | 1946962180               |
| SNP_P4_136151_63670 | NW_004516010.1 | Scaffold578 | 63670                   | TT                              | GG              | 1946962182               |
| SNP_P4_136152_63721 | NW_004516010.1 | Scaffold578 | 63721                   | TT                              | AA              | 1946962184               |
| SNP_P4_136153_63897 | NW_004516010.1 | Scaffold578 | 63897                   | AA                              | CC              | 1946962186               |
| SNP_P4_136154_63922 | NW_004516010.1 | Scaffold578 | 63922                   | CC                              | AA              | 1946962188               |
| SNP_P4_136155_64324 | NW_004516010.1 | Scaffold578 | 64324                   | GG                              | TT              | 1946962190               |
| SNP_P4_136156_1057  | NW_004516012.1 | Scaffold582 | 1057                    | AA                              | TT              | 1946962192               |
| SNP_P4_136157_1150  | NW_004516012.1 | Scaffold582 | 1150                    | AA                              | CC              | 1946962194               |
| SNP_P4_136158_1177  | NW_004516012.1 | Scaffold582 | 1177                    | TT                              | CC              | 1946962196               |
| SNP_P4_136159_1329  | NW_004516012.1 | Scaffold582 | 1329                    | CC                              | AA              | 1946962198               |
| SNP_P4_136160_13337 | NW_004516012.1 | Scaffold582 | 13337                   | AA                              | GG              | 1946962200               |
| SNP_P4_136161_13517 | NW_004516012.1 | Scaffold582 | 13517                   | TT                              | CC              | 1946962202               |
| SNP_P4_136162_13556 | NW_004516012.1 | Scaffold582 | 13556                   | GG                              | AA              | 1946962204               |
| SNP_P4_136163_13595 | NW_004516012.1 | Scaffold582 | 13595                   | TT                              | AA              | 1946962206               |
| SNP_P4_136164_13615 | NW_004516012.1 | Scaffold582 | 13615                   | TT                              | GG              | 1946962208               |
| SNP_P4_136165_13638 | NW_004516012.1 | Scaffold582 | 13638                   | GG                              | AA              | 1946962210               |
| SNP_P4_136166_15001 | NW_004516012.1 | Scaffold582 | 15001                   | AA                              | GG              | 1946962212               |
| SNP_P4_136167_16327 | NW_004516012.1 | Scaffold582 | 16327                   | TT                              | CC              | 1946962214               |
| SNP_P4_136168_16347 | NW_004516012.1 | Scaffold582 | 16347                   | AA                              | CC              | 1946962216               |
| SNP_P4_136169_24078 | NW_004516012.1 | Scaffold582 | 24078                   | TT                              | GG              | 1946962218               |
| SNP_P4_136170_24185 | NW_004516012.1 | Scaffold582 | 24185                   | GG                              | TT              | 1946962220               |
| SNP_P4_136171_24201 | NW_004516012.1 | Scaffold582 | 24201                   | AA                              | GG              | 1946962222               |
| SNP_P4_136172_24294 | NW_004516012.1 | Scaffold582 | 24294                   | CC                              | TT              | 1946962224               |
| SNP_P4_136173_24668 | NW_004516012.1 | Scaffold582 | 24668                   | TT                              | AA              | 1946962226               |
| SNP_P4_136174_24799 | NW_004516012.1 | Scaffold582 | 24799                   | AA                              | GG              | 1946962228               |
| SNP_P4_136175_24937 | NW_004516012.1 | Scaffold582 | 24937                   | AA                              | TT              | 1946962230               |
| SNP_P4_136176_24962 | NW_004516012.1 | Scaffold582 | 24962                   | CC                              | AA              | 1946962232               |
| SNP_P4_136177_24965 | NW_004516012.1 | Scaffold582 | 24965                   | GG                              | CC              | 1946962234               |
| SNP_P4_136178_25068 | NW_004516012.1 | Scaffold582 | 25068                   | CC                              | TT              | 1946962236               |
| SNP_P4_136179_25209 | NW_004516012.1 | Scaffold582 | 25209                   | CC                              | TT              | 1946962238               |
| SNP_P4_136180_25212 | NW_004516012.1 | Scaffold582 | 25212                   | AA                              | TT              | 1946962240               |
| SNP_P4_136181_29954 | NW_004516012.1 | Scaffold582 | 29954                   | AA                              | GG              | 1946962242               |
| SNP_P4_136182_30387 | NW_004516012.1 | Scaffold582 | 30387                   | CC                              | GG              | 1946962244               |
| SNP_P4_136183_30448 | NW_004516012.1 | Scaffold582 | 30448                   | AA                              | CC              | 1946962246               |

| SNPs IDs            | Chromosome IDs | Chromosomes | Physical positions (bp) | CDC Frontier (Reference genome) | (ILWC46 & LPNB) | NCBI SNPdb Accession IDs |
|---------------------|----------------|-------------|-------------------------|---------------------------------|-----------------|--------------------------|
| SNP_P4_136184_30515 | NW_004516012.1 | Scaffold582 | 30515                   | CC                              | GG              | 1946962248               |
| SNP_P4_136185_30568 | NW_004516012.1 | Scaffold582 | 30568                   | CC                              | TT              | 1946962250               |
| SNP_P4_136186_30690 | NW_004516012.1 | Scaffold582 | 30690                   | AA                              | TT              | 1946962252               |
| SNP_P4_136187_377   | NW_004516013.1 | Scaffold583 | 377                     | AA                              | GG              | 1946962254               |
| SNP_P4_136188_378   | NW_004516013.1 | Scaffold583 | 378                     | AA                              | TT              | 1946962256               |
| SNP_P4_136189_472   | NW_004516013.1 | Scaffold583 | 472                     | AA                              | CC              | 1946962258               |
| SNP_P4_136190_478   | NW_004516013.1 | Scaffold583 | 478                     | CC                              | TT              | 1946962260               |
| SNP_P4_136191_566   | NW_004516013.1 | Scaffold583 | 566                     | AA                              | GG              | 1946962262               |
| SNP_P4_136192_639   | NW_004516013.1 | Scaffold583 | 639                     | AA                              | GG              | 1946962264               |
| SNP_P4_136193_1722  | NW_004516013.1 | Scaffold583 | 1722                    | AA                              | TT              | 1946962266               |
| SNP_P4_136194_2066  | NW_004516013.1 | Scaffold583 | 2066                    | TT                              | AA              | 1946962268               |
| SNP_P4_136195_3878  | NW_004516013.1 | Scaffold583 | 3878                    | CC                              | AA              | 1946962270               |
| SNP_P4_136196_3917  | NW_004516013.1 | Scaffold583 | 3917                    | TT                              | CC              | 1946962272               |
| SNP_P4_136197_4006  | NW_004516013.1 | Scaffold583 | 4006                    | GG                              | AA              | 1946962274               |
| SNP_P4_136198_4069  | NW_004516013.1 | Scaffold583 | 4069                    | GG                              | AA              | 1946962276               |
| SNP_P4_136199_4097  | NW_004516013.1 | Scaffold583 | 4097                    | AA                              | GG              | 1946962278               |
| SNP_P4_136200_4168  | NW_004516013.1 | Scaffold583 | 4168                    | AA                              | CC              | 1946962280               |
| SNP_P4_136201_4187  | NW_004516013.1 | Scaffold583 | 4187                    | GG                              | AA              | 1946962282               |
| SNP_P4_136202_4226  | NW_004516013.1 | Scaffold583 | 4226                    | TT                              | CC              | 1946962284               |
| SNP_P4_136203_4302  | NW_004516013.1 | Scaffold583 | 4302                    | TT                              | CC              | 1946962286               |
| SNP_P4_136204_4330  | NW_004516013.1 | Scaffold583 | 4330                    | TT                              | CC              | 1946962288               |
| SNP_P4_136205_4348  | NW_004516013.1 | Scaffold583 | 4348                    | TT                              | CC              | 1946962290               |
| SNP_P4_136206_4369  | NW_004516013.1 | Scaffold583 | 4369                    | TT                              | GG              | 1946962292               |
| SNP_P4_136207_4400  | NW_004516013.1 | Scaffold583 | 4400                    | TT                              | CC              | 1946962294               |
| SNP_P4_136208_4458  | NW_004516013.1 | Scaffold583 | 4458                    | AA                              | TT              | 1946962296               |
| SNP_P4_136209_9047  | NW_004516013.1 | Scaffold583 | 9047                    | AA                              | CC              | 1946962298               |
| SNP_P4_136210_11110 | NW_004516013.1 | Scaffold583 | 11110                   | CC                              | GG              | 1946962300               |
| SNP_P4_136211_11263 | NW_004516013.1 | Scaffold583 | 11263                   | TT                              | CC              | 1946962302               |
| SNP_P4_136212_11289 | NW_004516013.1 | Scaffold583 | 11289                   | GG                              | AA              | 1946962304               |
| SNP_P4_136213_11299 | NW_004516013.1 | Scaffold583 | 11299                   | CC                              | TT              | 1946962306               |
| SNP_P4_136214_11300 | NW_004516013.1 | Scaffold583 | 11300                   | TT                              | CC              | 1946962308               |
| SNP_P4_136215_11302 | NW_004516013.1 | Scaffold583 | 11302                   | AA                              | GG              | 1946962310               |
| SNP_P4_136216_11382 | NW_004516013.1 | Scaffold583 | 11382                   | AA                              | GG              | 1946962312               |
| SNP_P4_136217_11390 | NW_004516013.1 | Scaffold583 | 11390                   | CC                              | TT              | 1946962314               |
| SNP_P4_136218_11410 | NW_004516013.1 | Scaffold583 | 11410                   | GG                              | AA              | 1946962316               |
| SNP_P4_136219_11447 | NW_004516013.1 | Scaffold583 | 11447                   | CC                              | TT              | 1946962318               |
| SNP_P4_136220_11465 | NW_004516013.1 | Scaffold583 | 11465                   | CC                              | TT              | 1946962320               |
| SNP_P4_136221_11543 | NW_004516013.1 | Scaffold583 | 11543                   | GG                              | AA              | 1946962322               |
| SNP_P4_136222_11715 | NW_004516013.1 | Scaffold583 | 11715                   | TT                              | CC              | 1946962324               |
| SNP_P4_136223_11814 | NW_004516013.1 | Scaffold583 | 11814                   | TT                              | CC              | 1946962326               |
| SNP_P4_136224_12132 | NW_004516013.1 | Scaffold583 | 12132                   | AA                              | TT              | 1946962328               |
| SNP_P4_136225_15187 | NW_004516013.1 | Scaffold583 | 15187                   | TT                              | GG              | 1946962330               |

| SNPs IDs             | Chromosome IDs | Chromosomes | Physical positions (bp) | CDC Frontier (Reference genome) | (ILWC46 & LPNB) | NCBI SNPdb Accession IDs |
|----------------------|----------------|-------------|-------------------------|---------------------------------|-----------------|--------------------------|
| SNP_P4_136226_15498  | NW_004516013.1 | Scaffold583 | 15498                   | CC                              | TT              | 1946962332               |
| SNP_P4_136227_18505  | NW_004516013.1 | Scaffold583 | 18505                   | CC                              | TT              | 1946962335               |
| SNP_P4_136228_18806  | NW_004516013.1 | Scaffold583 | 18806                   | AA                              | GG              | 1946962337               |
| SNP_P4_136229_26301  | NW_004516013.1 | Scaffold583 | 26301                   | GG                              | TT              | 1946962339               |
| SNP_P4_136230_26321  | NW_004516013.1 | Scaffold583 | 26321                   | AA                              | GG              | 1946962341               |
| SNP_P4_136231_31156  | NW_004516013.1 | Scaffold583 | 31156                   | GG                              | AA              | 1946962343               |
| SNP_P4_136232_42131  | NW_004516013.1 | Scaffold583 | 42131                   | TT                              | AA              | 1946962345               |
| SNP_P4_136233_45978  | NW_004516013.1 | Scaffold583 | 45978                   | TT                              | CC              | 1946962347               |
| SNP_P4_136234_46068  | NW_004516013.1 | Scaffold583 | 46068                   | TT                              | CC              | 1946962349               |
| SNP_P4_136235_46086  | NW_004516013.1 | Scaffold583 | 46086                   | CC                              | TT              | 1946962351               |
| SNP_P4_136236_46093  | NW_004516013.1 | Scaffold583 | 46093                   | GG                              | CC              | 1946962353               |
| SNP_P4_136237_46105  | NW_004516013.1 | Scaffold583 | 46105                   | CC                              | TT              | 1946962355               |
| SNP_P4_136238_46121  | NW_004516013.1 | Scaffold583 | 46121                   | AA                              | TT              | 1946962357               |
| SNP_P4_136239_46360  | NW_004516013.1 | Scaffold583 | 46360                   | AA                              | TT              | 1946962359               |
| SNP_P4_136240_46405  | NW_004516013.1 | Scaffold583 | 46405                   | TT                              | AA              | 1946962361               |
| SNP_P4_136241_46457  | NW_004516013.1 | Scaffold583 | 46457                   | TT                              | AA              | 1946962363               |
| SNP_P4_136242_47871  | NW_004516013.1 | Scaffold583 | 47871                   | TT                              | GG              | 1946962365               |
| SNP_P4_136243_47886  | NW_004516013.1 | Scaffold583 | 47886                   | GG                              | TT              | 1946962367               |
| SNP_P4_136244_47902  | NW_004516013.1 | Scaffold583 | 47902                   | TT                              | GG              | 1946962369               |
| SNP_P4_136245_47928  | NW_004516013.1 | Scaffold583 | 47928                   | CC                              | TT              | 1946962371               |
| SNP_P4_136247_72038  | NW_004516013.1 | Scaffold583 | 72038                   | AA                              | GG              | 1946962373               |
| SNP_P4_136248_72289  | NW_004516013.1 | Scaffold583 | 72289                   | CC                              | TT              | 1946962375               |
| SNP_P4_136249_72339  | NW_004516013.1 | Scaffold583 | 72339                   | CC                              | TT              | 1946962377               |
| SNP_P4_136250_72347  | NW_004516013.1 | Scaffold583 | 72347                   | AA                              | TT              | 1946962379               |
| SNP_P4_136251_72352  | NW_004516013.1 | Scaffold583 | 72352                   | GG                              | CC              | 1946962381               |
| SNP_P4_136252_73886  | NW_004516013.1 | Scaffold583 | 73886                   | AA                              | TT              | 1946962383               |
| SNP_P4_136253_80974  | NW_004516013.1 | Scaffold583 | 80974                   | GG                              | AA              | 1946962384               |
| SNP_P4_136254_86242  | NW_004516013.1 | Scaffold583 | 86242                   | AA                              | TT              | 1946962386               |
| SNP_P4_136256_89397  | NW_004516013.1 | Scaffold583 | 89397                   | AA                              | GG              | 1946962388               |
| SNP_P4_136257_89623  | NW_004516013.1 | Scaffold583 | 89623                   | CC                              | TT              | 1946962390               |
| SNP_P4_136258_94760  | NW_004516013.1 | Scaffold583 | 94760                   | CC                              | TT              | 1946962392               |
| SNP_P4_136259_105765 | NW_004516013.1 | Scaffold583 | 105765                  | GG                              | AA              | 1946962394               |
| SNP_P4_136260_105834 | NW_004516013.1 | Scaffold583 | 105834                  | AA                              | GG              | 1946962396               |
| SNP_P4_136261_105894 | NW_004516013.1 | Scaffold583 | 105894                  | GG                              | TT              | 1946962398               |
| SNP_P4_136263_105990 | NW_004516013.1 | Scaffold583 | 105990                  | CC                              | TT              | 1946962400               |
| SNP_P4_136264_106183 | NW_004516013.1 | Scaffold583 | 106183                  | AA                              | GG              | 1946962402               |
| SNP_P4_136265_106880 | NW_004516013.1 | Scaffold583 | 106880                  | AA                              | GG              | 1946962404               |
| SNP_P4_136267_107005 | NW_004516013.1 | Scaffold583 | 107005                  | GG                              | AA              | 1946962406               |
| SNP_P4_136268_119328 | NW_004516013.1 | Scaffold583 | 119328                  | CC                              | TT              | 1946962408               |
| SNP_P4_136269_119845 | NW_004516013.1 | Scaffold583 | 119845                  | TT                              | CC              | 1946962410               |
| SNP_P4_136271_135407 | NW_004516013.1 | Scaffold583 | 135407                  | AA                              | CC              | 1946962412               |
| SNP_P4_136273_136317 | NW_004516013.1 | Scaffold583 | 136317                  | GG                              | AA              | 1946962414               |

| SNPs IDs             | Chromosome IDs | Chromosomes | Physical positions (bp) | CDC Frontier (Reference genome) | (ILWC46 & LPNB) | NCBI SNPdb Accession IDs |
|----------------------|----------------|-------------|-------------------------|---------------------------------|-----------------|--------------------------|
| SNP_P4_136274_136362 | NW_004516013.1 | Scaffold583 | 136362                  | TT                              | AA              | 1946962416               |
| SNP_P4_136275_136369 | NW_004516013.1 | Scaffold583 | 136369                  | GG                              | TT              | 1946962418               |
| SNP_P4_136276_136382 | NW_004516013.1 | Scaffold583 | 136382                  | TT                              | CC              | 1946962420               |
| SNP_P4_136277_136418 | NW_004516013.1 | Scaffold583 | 136418                  | AA                              | GG              | 1946962422               |
| SNP_P4_136278_136433 | NW_004516013.1 | Scaffold583 | 136433                  | TT                              | CC              | 1946962424               |
| SNP_P4_136279_136435 | NW_004516013.1 | Scaffold583 | 136435                  | AA                              | GG              | 1946962427               |
| SNP_P4_136280_136441 | NW_004516013.1 | Scaffold583 | 136441                  | AA                              | CC              | 1946962429               |
| SNP_P4_136281_136470 | NW_004516013.1 | Scaffold583 | 136470                  | TT                              | AA              | 1946962431               |
| SNP_P4_136282_136521 | NW_004516013.1 | Scaffold583 | 136521                  | GG                              | CC              | 1946962433               |
| SNP_P4_136283_136695 | NW_004516013.1 | Scaffold583 | 136695                  | CC                              | TT              | 1946962435               |
| SNP_P4_136284_136697 | NW_004516013.1 | Scaffold583 | 136697                  | AA                              | GG              | 1946962437               |
| SNP_P4_136285_136761 | NW_004516013.1 | Scaffold583 | 136761                  | TT                              | GG              | 1946962439               |
| SNP_P4_136286_136769 | NW_004516013.1 | Scaffold583 | 136769                  | GG                              | AA              | 1946962441               |
| SNP_P4_136287_136787 | NW_004516013.1 | Scaffold583 | 136787                  | GG                              | AA              | 1946962443               |
| SNP_P4_136288_136797 | NW_004516013.1 | Scaffold583 | 136797                  | AA                              | GG              | 1946962445               |
| SNP_P4_136289_136822 | NW_004516013.1 | Scaffold583 | 136822                  | CC                              | AA              | 1946962447               |
| SNP_P4_136290_136853 | NW_004516013.1 | Scaffold583 | 136853                  | AA                              | GG              | 1946962449               |
| SNP_P4_136291_136870 | NW_004516013.1 | Scaffold583 | 136870                  | GG                              | TT              | 1946962451               |
| SNP_P4_136293_147509 | NW_004516013.1 | Scaffold583 | 147509                  | GG                              | TT              | 1946962453               |
| SNP_P4_136294_147552 | NW_004516013.1 | Scaffold583 | 147552                  | AA                              | TT              | 1946962455               |
| SNP_P4_136296_164340 | NW_004516013.1 | Scaffold583 | 164340                  | GG                              | TT              | 1946962457               |
| SNP_P4_136297_168848 | NW_004516013.1 | Scaffold583 | 168848                  | AA                              | TT              | 1946962459               |
| SNP_P4_136298_168854 | NW_004516013.1 | Scaffold583 | 168854                  | CC                              | GG              | 1946962461               |
| SNP_P4_136299_168884 | NW_004516013.1 | Scaffold583 | 168884                  | CC                              | GG              | 1946962463               |
| SNP_P4_136300_169161 | NW_004516013.1 | Scaffold583 | 169161                  | CC                              | AA              | 1946962465               |
| SNP_P4_136301_972    | NW_004516014.1 | Scaffold584 | 972                     | AA                              | CC              | 1946962468               |
| SNP_P4_136302_993    | NW_004516014.1 | Scaffold584 | 993                     | GG                              | CC              | 1946962470               |
| SNP_P4_136303_1011   | NW_004516014.1 | Scaffold584 | 1011                    | GG                              | AA              | 1946962472               |
| SNP_P4_136304_5597   | NW_004516014.1 | Scaffold584 | 5597                    | TT                              | CC              | 1946962474               |
| SNP_P4_136305_5810   | NW_004516014.1 | Scaffold584 | 5810                    | TT                              | GG              | 1946962476               |
| SNP_P4_136306_5819   | NW_004516014.1 | Scaffold584 | 5819                    | GG                              | AA              | 1946962478               |
| SNP_P4_136307_6502   | NW_004516014.1 | Scaffold584 | 6502                    | CC                              | TT              | 1946962480               |
| SNP_P4_136308_7875   | NW_004516014.1 | Scaffold584 | 7875                    | AA                              | GG              | 1946962482               |
| SNP_P4_136309_11681  | NW_004516014.1 | Scaffold584 | 11681                   | GG                              | AA              | 1946962484               |
| SNP_P4_136310_11792  | NW_004516014.1 | Scaffold584 | 11792                   | AA                              | GG              | 1946962486               |
| SNP_P4_136311_12014  | NW_004516014.1 | Scaffold584 | 12014                   | CC                              | AA              | 1946962488               |
| SNP_P4_136312_12015  | NW_004516014.1 | Scaffold584 | 12015                   | CC                              | AA              | 1946962490               |
| SNP_P4_136313_12030  | NW_004516014.1 | Scaffold584 | 12030                   | GG                              | CC              | 1946962492               |
| SNP_P4_136314_12046  | NW_004516014.1 | Scaffold584 | 12046                   | TT                              | AA              | 1946962494               |
| SNP_P4_136315_12047  | NW_004516014.1 | Scaffold584 | 12047                   | AA                              | GG              | 1946962497               |
| SNP_P4_136316_12048  | NW_004516014.1 | Scaffold584 | 12048                   | AA                              | GG              | 1946962499               |
| SNP_P4_136317_12102  | NW_004516014.1 | Scaffold584 | 12102                   | GG                              | TT              | 1946962501               |

| SNPs IDs             | Chromosome IDs | Chromosomes | Physical positions (bp) | CDC Frontier (Reference genome) | (ILWC46 & LPNB) | NCBI SNPdb Accession IDs |
|----------------------|----------------|-------------|-------------------------|---------------------------------|-----------------|--------------------------|
| SNP_P4_136318_12104  | NW_004516014.1 | Scaffold584 | 12104                   | CC                              | TT              | 1946962503               |
| SNP_P4_136319_12144  | NW_004516014.1 | Scaffold584 | 12144                   | AA                              | TT              | 1946962505               |
| SNP_P4_136320_12193  | NW_004516014.1 | Scaffold584 | 12193                   | AA                              | GG              | 1946962507               |
| SNP_P4_136321_12257  | NW_004516014.1 | Scaffold584 | 12257                   | CC                              | AA              | 1946962509               |
| SNP_P4_136322_12261  | NW_004516014.1 | Scaffold584 | 12261                   | AA                              | CC              | 1946962511               |
| SNP_P4_136324_12285  | NW_004516014.1 | Scaffold584 | 12285                   | AA                              | GG              | 1946962513               |
| SNP_P4_136325_12289  | NW_004516014.1 | Scaffold584 | 12289                   | CC                              | AA              | 1946962515               |
| SNP_P4_136328_74826  | NW_004516014.1 | Scaffold584 | 74826                   | CC                              | TT              | 1946962517               |
| SNP_P4_136331_82330  | NW_004516014.1 | Scaffold584 | 82330                   | AA                              | CC              | 1946962519               |
| SNP_P4_136332_82349  | NW_004516014.1 | Scaffold584 | 82349                   | AA                              | TT              | 1946962521               |
| SNP_P4_136333_94808  | NW_004516014.1 | Scaffold584 | 94808                   | CC                              | TT              | 1946962523               |
| SNP_P4_136334_119767 | NW_004516014.1 | Scaffold584 | 119767                  | AA                              | TT              | 1946962525               |
| SNP_P4_136335_119778 | NW_004516014.1 | Scaffold584 | 119778                  | CC                              | TT              | 1946962527               |
| SNP_P4_136336_120430 | NW_004516014.1 | Scaffold584 | 120430                  | TT                              | CC              | 1946962529               |
| SNP_P4_136337_120469 | NW_004516014.1 | Scaffold584 | 120469                  | CC                              | AA              | 1946962531               |
| SNP_P4_136338_131114 | NW_004516014.1 | Scaffold584 | 131114                  | CC                              | TT              | 1946962533               |
| SNP_P4_136339_131115 | NW_004516014.1 | Scaffold584 | 131115                  | GG                              | AA              | 1946962535               |
| SNP_P4_136340_179435 | NW_004516014.1 | Scaffold584 | 179435                  | TT                              | CC              | 1946962537               |
| SNP_P4_136341_203442 | NW_004516014.1 | Scaffold584 | 203442                  | TT                              | CC              | 1946962539               |
| SNP_P4_136342_223325 | NW_004516014.1 | Scaffold584 | 223325                  | GG                              | AA              | 1946962541               |
| SNP_P4_136343_223883 | NW_004516014.1 | Scaffold584 | 223883                  | TT                              | GG              | 1946962543               |
| SNP_P4_136344_223904 | NW_004516014.1 | Scaffold584 | 223904                  | TT                              | CC              | 1946962545               |
| SNP_P4_136345_223913 | NW_004516014.1 | Scaffold584 | 223913                  | TT                              | AA              | 1946962547               |
| SNP_P4_136346_223915 | NW_004516014.1 | Scaffold584 | 223915                  | AA                              | GG              | 1946962549               |
| SNP_P4_136347_223936 | NW_004516014.1 | Scaffold584 | 223936                  | CC                              | TT              | 1946962551               |
| SNP_P4_136348_224028 | NW_004516014.1 | Scaffold584 | 224028                  | CC                              | AA              | 1946962553               |
| SNP_P4_136349_224305 | NW_004516014.1 | Scaffold584 | 224305                  | TT                              | CC              | 1946962555               |
| SNP_P4_136350_249436 | NW_004516014.1 | Scaffold584 | 249436                  | TT                              | AA              | 1946962557               |
| SNP_P4_136351_254717 | NW_004516014.1 | Scaffold584 | 254717                  | TT                              | AA              | 1946962559               |
| SNP_P4_136352_266773 | NW_004516014.1 | Scaffold584 | 266773                  | GG                              | TT              | 1946962561               |
| SNP_P4_136353_269038 | NW_004516014.1 | Scaffold584 | 269038                  | TT                              | CC              | 1946962563               |
| SNP_P4_136354_270500 | NW_004516014.1 | Scaffold584 | 270500                  | GG                              | TT              | 1946962565               |
| SNP_P4_136355_272857 | NW_004516014.1 | Scaffold584 | 272857                  | TT                              | GG              | 1946962567               |
| SNP_P4_136356_276681 | NW_004516014.1 | Scaffold584 | 276681                  | TT                              | AA              | 1946962569               |
| SNP_P4_136357_296184 | NW_004516014.1 | Scaffold584 | 296184                  | TT                              | GG              | 1946962571               |
| SNP_P4_136358_296446 | NW_004516014.1 | Scaffold584 | 296446                  | AA                              | TT              | 1946962573               |
| SNP_P4_136359_314092 | NW_004516014.1 | Scaffold584 | 314092                  | TT                              | CC              | 1946962575               |
| SNP_P4_136360_314791 | NW_004516014.1 | Scaffold584 | 314791                  | TT                              | CC              | 1946962577               |
| SNP_P4_136361_319458 | NW_004516014.1 | Scaffold584 | 319458                  | AA                              | TT              | 1946962579               |
| SNP_P4_136362_320022 | NW_004516014.1 | Scaffold584 | 320022                  | CC                              | GG              | 1946962581               |
| SNP_P4_136363_320032 | NW_004516014.1 | Scaffold584 | 320032                  | AA                              | GG              | 1946962583               |
| SNP_P4_136364_322282 | NW_004516014.1 | Scaffold584 | 322282                  | TT                              | AA              | 1946962585               |

| SNPs IDs             | Chromosome IDs | Chromosomes | Physical positions (bp) | CDC Frontier (Reference genome) | (ILWC46 & LPNB) | NCBI SNPdb Accession IDs |
|----------------------|----------------|-------------|-------------------------|---------------------------------|-----------------|--------------------------|
| SNP_P4_136365_330045 | NW_004516014.1 | Scaffold584 | 330045                  | GG                              | AA              | 1946962587               |
| SNP_P4_136366_330048 | NW_004516014.1 | Scaffold584 | 330048                  | GG                              | AA              | 1946962589               |
| SNP_P4_136367_330050 | NW_004516014.1 | Scaffold584 | 330050                  | GG                              | AA              | 1946962591               |
| SNP_P4_136368_330362 | NW_004516014.1 | Scaffold584 | 330362                  | TT                              | CC              | 1946962593               |
| SNP_P4_136369_330731 | NW_004516014.1 | Scaffold584 | 330731                  | GG                              | TT              | 1946962595               |
| SNP_P4_136370_330732 | NW_004516014.1 | Scaffold584 | 330732                  | TT                              | GG              | 1946962597               |
| SNP_P4_136371_332636 | NW_004516014.1 | Scaffold584 | 332636                  | CC                              | TT              | 1946962599               |
| SNP_P4_136372_332703 | NW_004516014.1 | Scaffold584 | 332703                  | TT                              | GG              | 1946962601               |
| SNP_P4_136373_332964 | NW_004516014.1 | Scaffold584 | 332964                  | GG                              | AA              | 1946962603               |
| SNP_P4_136374_332990 | NW_004516014.1 | Scaffold584 | 332990                  | GG                              | CC              | 1946962605               |
| SNP_P4_136375_335770 | NW_004516014.1 | Scaffold584 | 335770                  | CC                              | GG              | 1946962607               |
| SNP_P4_136377_5032   | NW_004516016.1 | Scaffold586 | 5032                    | TT                              | AA              | 1946962608               |
| SNP_P4_136378_6802   | NW_004516016.1 | Scaffold586 | 6802                    | CC                              | TT              | 1946962609               |
| SNP_P4_136379_6844   | NW_004516016.1 | Scaffold586 | 6844                    | TT                              | GG              | 1946962610               |
| SNP_P4_136380_6940   | NW_004516016.1 | Scaffold586 | 6940                    | AA                              | GG              | 1946962612               |
| SNP_P4_136381_6941   | NW_004516016.1 | Scaffold586 | 6941                    | GG                              | TT              | 1946962614               |
| SNP_P4_136382_7144   | NW_004516016.1 | Scaffold586 | 7144                    | CC                              | TT              | 1946962616               |
| SNP_P4_136383_7259   | NW_004516016.1 | Scaffold586 | 7259                    | GG                              | TT              | 1946962618               |
| SNP_P4_136384_7264   | NW_004516016.1 | Scaffold586 | 7264                    | GG                              | AA              | 1946962620               |
| SNP_P4_136385_7279   | NW_004516016.1 | Scaffold586 | 7279                    | TT                              | CC              | 1946962622               |
| SNP_P4_136386_7327   | NW_004516016.1 | Scaffold586 | 7327                    | CC                              | GG              | 1946962624               |
| SNP_P4_136387_7356   | NW_004516016.1 | Scaffold586 | 7356                    | AA                              | TT              | 1946962626               |
| SNP_P4_136388_7422   | NW_004516016.1 | Scaffold586 | 7422                    | GG                              | AA              | 1946962628               |
| SNP_P4_136389_7624   | NW_004516016.1 | Scaffold586 | 7624                    | TT                              | AA              | 1946962630               |
| SNP_P4_136390_7693   | NW_004516016.1 | Scaffold586 | 7693                    | CC                              | GG              | 1946962632               |
| SNP_P4_136391_7700   | NW_004516016.1 | Scaffold586 | 7700                    | GG                              | CC              | 1946962634               |
| SNP_P4_136392_7707   | NW_004516016.1 | Scaffold586 | 7707                    | TT                              | CC              | 1946962636               |
| SNP_P4_136393_7709   | NW_004516016.1 | Scaffold586 | 7709                    | AA                              | CC              | 1946962638               |
| SNP_P4_136394_7749   | NW_004516016.1 | Scaffold586 | 7749                    | AA                              | GG              | 1946962640               |
| SNP_P4_136395_7792   | NW_004516016.1 | Scaffold586 | 7792                    | GG                              | AA              | 1946962642               |
| SNP_P4_136396_7801   | NW_004516016.1 | Scaffold586 | 7801                    | TT                              | AA              | 1946962644               |
| SNP_P4_136397_10175  | NW_004516016.1 | Scaffold586 | 10175                   | AA                              | CC              | 1946962646               |
| SNP_P4_136398_10177  | NW_004516016.1 | Scaffold586 | 10177                   | AA                              | CC              | 1946962648               |
| SNP_P4_136399_20285  | NW_004516016.1 | Scaffold586 | 20285                   | CC                              | TT              | 1946962650               |
| SNP_P4_136400_20338  | NW_004516016.1 | Scaffold586 | 20338                   | TT                              | CC              | 1946962652               |
| SNP_P4_136401_20696  | NW_004516016.1 | Scaffold586 | 20696                   | AA                              | GG              | 1946962654               |
| SNP_P4_136402_21757  | NW_004516016.1 | Scaffold586 | 21757                   | CC                              | TT              | 1946962656               |
| SNP_P4_136403_21892  | NW_004516016.1 | Scaffold586 | 21892                   | GG                              | AA              | 1946962658               |
| SNP_P4_136404_21904  | NW_004516016.1 | Scaffold586 | 21904                   | CC                              | TT              | 1946962660               |
| SNP_P4_136405_21967  | NW_004516016.1 | Scaffold586 | 21967                   | GG                              | AA              | 1946962662               |
| SNP_P4_136406_21976  | NW_004516016.1 | Scaffold586 | 21976                   | GG                              | AA              | 1946962664               |
| SNP_P4_136407_21981  | NW_004516016.1 | Scaffold586 | 21981                   | TT                              | AA              | 1946962666               |

| SNPs IDs            | Chromosome IDs | Chromosomes | Physical positions (bp) | CDC Frontier (Reference genome) | (ILWC46 & LPNB) | NCBI SNPdb Accession IDs |
|---------------------|----------------|-------------|-------------------------|---------------------------------|-----------------|--------------------------|
| SNP_P4_136408_22210 | NW_004516016.1 | Scaffold586 | 22210                   | AA                              | GG              | 1946962668               |
| SNP_P4_136409_22320 | NW_004516016.1 | Scaffold586 | 22320                   | TT                              | CC              | 1946962670               |
| SNP_P4_136410_22324 | NW_004516016.1 | Scaffold586 | 22324                   | TT                              | CC              | 1946962672               |
| SNP_P4_136411_22848 | NW_004516016.1 | Scaffold586 | 22848                   | GG                              | AA              | 1946962675               |
| SNP_P4_136412_22922 | NW_004516016.1 | Scaffold586 | 22922                   | TT                              | GG              | 1946962677               |
| SNP_P4_136413_23007 | NW_004516016.1 | Scaffold586 | 23007                   | CC                              | TT              | 1946962679               |
| SNP_P4_136414_23468 | NW_004516016.1 | Scaffold586 | 23468                   | CC                              | GG              | 1946962681               |
| SNP_P4_136415_23615 | NW_004516016.1 | Scaffold586 | 23615                   | CC                              | AA              | 1946962683               |
| SNP_P4_136416_23699 | NW_004516016.1 | Scaffold586 | 23699                   | AA                              | CC              | 1946962685               |
| SNP_P4_136417_738   | NW_004516017.1 | Scaffold587 | 738                     | TT                              | CC              | 1946962687               |
| SNP_P4_136418_815   | NW_004516017.1 | Scaffold587 | 815                     | GG                              | AA              | 1946962689               |
| SNP_P4_136419_979   | NW_004516017.1 | Scaffold587 | 979                     | AA                              | GG              | 1946962691               |
| SNP_P4_136420_1079  | NW_004516017.1 | Scaffold587 | 1079                    | AA                              | GG              | 1946962694               |
| SNP_P4_136421_4192  | NW_004516017.1 | Scaffold587 | 4192                    | CC                              | TT              | 1946962696               |
| SNP_P4_136422_4222  | NW_004516017.1 | Scaffold587 | 4222                    | AA                              | TT              | 1946962698               |
| SNP_P4_136423_4454  | NW_004516017.1 | Scaffold587 | 4454                    | AA                              | GG              | 1946962700               |
| SNP_P4_136424_4573  | NW_004516017.1 | Scaffold587 | 4573                    | TT                              | CC              | 1946962702               |
| SNP_P4_136425_4576  | NW_004516017.1 | Scaffold587 | 4576                    | TT                              | AA              | 1946962704               |
| SNP_P4_136426_4850  | NW_004516017.1 | Scaffold587 | 4850                    | TT                              | CC              | 1946962706               |
| SNP_P4_136428_5028  | NW_004516017.1 | Scaffold587 | 5028                    | TT                              | GG              | 1946962709               |
| SNP_P4_136429_5049  | NW_004516017.1 | Scaffold587 | 5049                    | AA                              | GG              | 1946962711               |
| SNP_P4_136430_5119  | NW_004516017.1 | Scaffold587 | 5119                    | AA                              | GG              | 1946962713               |
| SNP_P4_136431_5226  | NW_004516017.1 | Scaffold587 | 5226                    | AA                              | GG              | 1946962715               |
| SNP_P4_136432_5244  | NW_004516017.1 | Scaffold587 | 5244                    | TT                              | AA              | 1946962717               |
| SNP_P4_136433_5304  | NW_004516017.1 | Scaffold587 | 5304                    | GG                              | AA              | 1946962719               |
| SNP_P4_136434_5325  | NW_004516017.1 | Scaffold587 | 5325                    | AA                              | GG              | 1946962721               |
| SNP_P4_136436_5946  | NW_004516017.1 | Scaffold587 | 5946                    | CC                              | GG              | 1946962723               |
| SNP_P4_136437_5950  | NW_004516017.1 | Scaffold587 | 5950                    | CC                              | AA              | 1946962725               |
| SNP_P4_136438_6825  | NW_004516017.1 | Scaffold587 | 6825                    | CC                              | GG              | 1946962727               |
| SNP_P4_136439_6839  | NW_004516017.1 | Scaffold587 | 6839                    | GG                              | AA              | 1946962729               |
| SNP_P4_136442_7630  | NW_004516017.1 | Scaffold587 | 7630                    | AA                              | TT              | 1946962731               |
| SNP_P4_136443_8069  | NW_004516017.1 | Scaffold587 | 8069                    | TT                              | AA              | 1946962733               |
| SNP_P4_136444_8111  | NW_004516017.1 | Scaffold587 | 8111                    | AA                              | TT              | 1946962735               |
| SNP_P4_136445_8173  | NW_004516017.1 | Scaffold587 | 8173                    | CC                              | AA              | 1946962737               |
| SNP_P4_136446_9025  | NW_004516017.1 | Scaffold587 | 9025                    | TT                              | AA              | 1946962739               |
| SNP_P4_136447_9032  | NW_004516017.1 | Scaffold587 | 9032                    | AA                              | TT              | 1946962741               |
| SNP_P4_136448_9034  | NW_004516017.1 | Scaffold587 | 9034                    | AA                              | CC              | 1946962743               |
| SNP_P4_136449_9077  | NW_004516017.1 | Scaffold587 | 9077                    | AA                              | GG              | 1946962745               |
| SNP_P4_136450_9078  | NW_004516017.1 | Scaffold587 | 9078                    | GG                              | TT              | 1946962747               |
| SNP_P4_136451_9099  | NW_004516017.1 | Scaffold587 | 9099                    | CC                              | TT              | 1946962749               |
| SNP_P4_136452_9122  | NW_004516017.1 | Scaffold587 | 9122                    | AA                              | GG              | 1946962751               |
| SNP_P4_136453_9126  | NW_004516017.1 | Scaffold587 | 9126                    | GG                              | AA              | 1946962753               |



| SNPs IDs            | Chromosome IDs | Chromosomes | Physical positions (bp) | CDC Frontier (Reference genome) | (ILWC46 & LPNB) | NCBI SNPdb Accession IDs |
|---------------------|----------------|-------------|-------------------------|---------------------------------|-----------------|--------------------------|
| SNP_P4_136454_9137  | NW_004516017.1 | Scaffold587 | 9137                    | GG                              | TT              | 1946962755               |
| SNP_P4_136455_9140  | NW_004516017.1 | Scaffold587 | 9140                    | TT                              | GG              | 1946962757               |
| SNP_P4_136456_9161  | NW_004516017.1 | Scaffold587 | 9161                    | AA                              | CC              | 1946962759               |
| SNP_P4_136457_9289  | NW_004516017.1 | Scaffold587 | 9289                    | AA                              | GG              | 1946962761               |
| SNP_P4_136458_9352  | NW_004516017.1 | Scaffold587 | 9352                    | TT                              | CC              | 1946962763               |
| SNP_P4_136459_9441  | NW_004516017.1 | Scaffold587 | 9441                    | AA                              | CC              | 1946962765               |
| SNP_P4_136460_9444  | NW_004516017.1 | Scaffold587 | 9444                    | GG                              | AA              | 1946962767               |
| SNP_P4_136461_9749  | NW_004516017.1 | Scaffold587 | 9749                    | TT                              | AA              | 1946962769               |
| SNP_P4_136462_10103 | NW_004516017.1 | Scaffold587 | 10103                   | GG                              | AA              | 1946962771               |
| SNP_P4_136463_10106 | NW_004516017.1 | Scaffold587 | 10106                   | CC                              | AA              | 1946962773               |
| SNP_P4_136464_10266 | NW_004516017.1 | Scaffold587 | 10266                   | TT                              | CC              | 1946962775               |
| SNP_P4_136465_10286 | NW_004516017.1 | Scaffold587 | 10286                   | GG                              | AA              | 1946962777               |
| SNP_P4_136466_10330 | NW_004516017.1 | Scaffold587 | 10330                   | AA                              | CC              | 1946962779               |
| SNP_P4_136467_10517 | NW_004516017.1 | Scaffold587 | 10517                   | TT                              | AA              | 1946962781               |
| SNP_P4_136468_10652 | NW_004516017.1 | Scaffold587 | 10652                   | AA                              | CC              | 1946962783               |
| SNP_P4_136469_10665 | NW_004516017.1 | Scaffold587 | 10665                   | AA                              | GG              | 1946962785               |
| SNP_P4_136470_10677 | NW_004516017.1 | Scaffold587 | 10677                   | TT                              | AA              | 1946962787               |
| SNP_P4_136471_10956 | NW_004516017.1 | Scaffold587 | 10956                   | CC                              | TT              | 1946962789               |
| SNP_P4_136472_10998 | NW_004516017.1 | Scaffold587 | 10998                   | TT                              | CC              | 1946962791               |
| SNP_P4_136473_12926 | NW_004516017.1 | Scaffold587 | 12926                   | TT                              | AA              | 1946962793               |
| SNP_P4_136474_13081 | NW_004516017.1 | Scaffold587 | 13081                   | CC                              | GG              | 1946962795               |
| SNP_P4_136475_13173 | NW_004516017.1 | Scaffold587 | 13173                   | GG                              | TT              | 1946962797               |
| SNP_P4_136476_13487 | NW_004516017.1 | Scaffold587 | 13487                   | AA                              | GG              | 1946962799               |
| SNP_P4_136477_13539 | NW_004516017.1 | Scaffold587 | 13539                   | TT                              | GG              | 1946962801               |
| SNP_P4_136478_13589 | NW_004516017.1 | Scaffold587 | 13589                   | AA                              | CC              | 1946962803               |
| SNP_P4_136479_13949 | NW_004516017.1 | Scaffold587 | 13949                   | TT                              | AA              | 1946962805               |
| SNP_P4_136480_15050 | NW_004516017.1 | Scaffold587 | 15050                   | TT                              | AA              | 1946962806               |
| SNP_P4_136481_15223 | NW_004516017.1 | Scaffold587 | 15223                   | AA                              | CC              | 1946962807               |
| SNP_P4_136482_15224 | NW_004516017.1 | Scaffold587 | 15224                   | AA                              | TT              | 1946962809               |
| SNP_P4_136483_15232 | NW_004516017.1 | Scaffold587 | 15232                   | GG                              | TT              | 1946962811               |
| SNP_P4_136485_15431 | NW_004516017.1 | Scaffold587 | 15431                   | AA                              | CC              | 1946962813               |
| SNP_P4_136486_15514 | NW_004516017.1 | Scaffold587 | 15514                   | CC                              | GG              | 1946962815               |
| SNP_P4_136487_15652 | NW_004516017.1 | Scaffold587 | 15652                   | TT                              | AA              | 1946962817               |
| SNP_P4_136488_15797 | NW_004516017.1 | Scaffold587 | 15797                   | CC                              | TT              | 1946962819               |
| SNP_P4_136489_16027 | NW_004516017.1 | Scaffold587 | 16027                   | CC                              | GG              | 1946962821               |
| SNP_P4_136490_16091 | NW_004516017.1 | Scaffold587 | 16091                   | GG                              | AA              | 1946962823               |
| SNP_P4_136491_16096 | NW_004516017.1 | Scaffold587 | 16096                   | TT                              | CC              | 1946962825               |
| SNP_P4_136492_16143 | NW_004516017.1 | Scaffold587 | 16143                   | TT                              | GG              | 1946962827               |
| SNP_P4_136493_16218 | NW_004516017.1 | Scaffold587 | 16218                   | TT                              | CC              | 1946962829               |
| SNP_P4_136494_16227 | NW_004516017.1 | Scaffold587 | 16227                   | AA                              | GG              | 1946962831               |
| SNP_P4_136495_16290 | NW_004516017.1 | Scaffold587 | 16290                   | CC                              | AA              | 1946962833               |
| SNP_P4_136496_16362 | NW_004516017.1 | Scaffold587 | 16362                   | AA                              | CC              | 1946962835               |

| SNPs IDs            | Chromosome IDs | Chromosomes | Physical positions (bp) | CDC Frontier (Reference genome) | (ILWC46 & LPNB) | NCBI SNPdb Accession IDs |
|---------------------|----------------|-------------|-------------------------|---------------------------------|-----------------|--------------------------|
| SNP_P4_136497_16495 | NW_004516017.1 | Scaffold587 | 16495                   | CC                              | GG              | 1946962837               |
| SNP_P4_136498_16525 | NW_004516017.1 | Scaffold587 | 16525                   | AA                              | CC              | 1946962839               |
| SNP_P4_136499_16662 | NW_004516017.1 | Scaffold587 | 16662                   | TT                              | CC              | 1946962841               |
| SNP_P4_136500_16754 | NW_004516017.1 | Scaffold587 | 16754                   | TT                              | AA              | 1946962843               |
| SNP_P4_136501_16766 | NW_004516017.1 | Scaffold587 | 16766                   | TT                              | CC              | 1946962845               |
| SNP_P4_136502_17131 | NW_004516017.1 | Scaffold587 | 17131                   | TT                              | CC              | 1946962847               |
| SNP_P4_136503_17150 | NW_004516017.1 | Scaffold587 | 17150                   | CC                              | TT              | 1946962849               |
| SNP_P4_136505_17249 | NW_004516017.1 | Scaffold587 | 17249                   | CC                              | TT              | 1946962851               |
| SNP_P4_136506_17334 | NW_004516017.1 | Scaffold587 | 17334                   | GG                              | TT              | 1946962853               |
| SNP_P4_136507_17462 | NW_004516017.1 | Scaffold587 | 17462                   | CC                              | TT              | 1946962855               |
| SNP_P4_136508_17515 | NW_004516017.1 | Scaffold587 | 17515                   | GG                              | AA              | 1946962857               |
| SNP_P4_136509_17537 | NW_004516017.1 | Scaffold587 | 17537                   | TT                              | GG              | 1946962859               |
| SNP_P4_136510_17570 | NW_004516017.1 | Scaffold587 | 17570                   | AA                              | CC              | 1946962861               |
| SNP_P4_136511_17591 | NW_004516017.1 | Scaffold587 | 17591                   | CC                              | TT              | 1946962863               |
| SNP_P4_136512_17603 | NW_004516017.1 | Scaffold587 | 17603                   | CC                              | TT              | 1946962865               |
| SNP_P4_136513_17625 | NW_004516017.1 | Scaffold587 | 17625                   | AA                              | GG              | 1946962867               |
| SNP_P4_136514_17965 | NW_004516017.1 | Scaffold587 | 17965                   | CC                              | GG              | 1946962869               |
| SNP_P4_136515_18045 | NW_004516017.1 | Scaffold587 | 18045                   | GG                              | TT              | 1946962871               |
| SNP_P4_136516_18046 | NW_004516017.1 | Scaffold587 | 18046                   | AA                              | GG              | 1946962873               |
| SNP_P4_136518_19432 | NW_004516017.1 | Scaffold587 | 19432                   | CC                              | AA              | 1946962875               |
| SNP_P4_136519_19638 | NW_004516017.1 | Scaffold587 | 19638                   | AA                              | CC              | 1946962877               |
| SNP_P4_136520_19641 | NW_004516017.1 | Scaffold587 | 19641                   | AA                              | TT              | 1946962879               |
| SNP_P4_136521_19702 | NW_004516017.1 | Scaffold587 | 19702                   | TT                              | CC              | 1946962881               |
| SNP_P4_136522_19737 | NW_004516017.1 | Scaffold587 | 19737                   | GG                              | AA              | 1946962883               |
| SNP_P4_136523_19755 | NW_004516017.1 | Scaffold587 | 19755                   | CC                              | TT              | 1946962885               |
| SNP_P4_136524_19757 | NW_004516017.1 | Scaffold587 | 19757                   | AA                              | GG              | 1946962887               |
| SNP_P4_136525_19821 | NW_004516017.1 | Scaffold587 | 19821                   | CC                              | TT              | 1946962889               |
| SNP_P4_136526_19841 | NW_004516017.1 | Scaffold587 | 19841                   | AA                              | GG              | 1946962891               |
| SNP_P4_136527_19854 | NW_004516017.1 | Scaffold587 | 19854                   | GG                              | AA              | 1946962893               |
| SNP_P4_136528_19868 | NW_004516017.1 | Scaffold587 | 19868                   | CC                              | AA              | 1946962895               |
| SNP_P4_136529_19869 | NW_004516017.1 | Scaffold587 | 19869                   | AA                              | CC              | 1946962897               |
| SNP_P4_136530_19901 | NW_004516017.1 | Scaffold587 | 19901                   | TT                              | CC              | 1946962899               |
| SNP_P4_136531_19930 | NW_004516017.1 | Scaffold587 | 19930                   | TT                              | GG              | 1946962901               |
| SNP_P4_136532_22406 | NW_004516017.1 | Scaffold587 | 22406                   | TT                              | CC              | 1946962903               |
| SNP_P4_136533_22408 | NW_004516017.1 | Scaffold587 | 22408                   | AA                              | GG              | 1946962905               |
| SNP_P4_136534_22430 | NW_004516017.1 | Scaffold587 | 22430                   | GG                              | TT              | 1946962907               |
| SNP_P4_136535_22442 | NW_004516017.1 | Scaffold587 | 22442                   | GG                              | AA              | 1946962909               |
| SNP_P4_136536_22486 | NW_004516017.1 | Scaffold587 | 22486                   | CC                              | TT              | 1946962911               |
| SNP_P4_136537_22498 | NW_004516017.1 | Scaffold587 | 22498                   | CC                              | TT              | 1946962913               |
| SNP_P4_136538_22508 | NW_004516017.1 | Scaffold587 | 22508                   | AA                              | TT              | 1946962915               |
| SNP_P4_136539_22544 | NW_004516017.1 | Scaffold587 | 22544                   | CC                              | TT              | 1946962917               |
| SNP_P4_136540_22611 | NW_004516017.1 | Scaffold587 | 22611                   | AA                              | GG              | 1946962919               |

| SNPs IDs            | Chromosome IDs | Chromosomes | Physical positions (bp) | CDC Frontier (Reference genome) | (ILWC46 & LPNB) | NCBI SNPdb Accession IDs |
|---------------------|----------------|-------------|-------------------------|---------------------------------|-----------------|--------------------------|
| SNP_P4_136541_22699 | NW_004516017.1 | Scaffold587 | 22699                   | TT                              | GG              | 1946962922               |
| SNP_P4_136542_22718 | NW_004516017.1 | Scaffold587 | 22718                   | TT                              | GG              | 1946962924               |
| SNP_P4_136543_22726 | NW_004516017.1 | Scaffold587 | 22726                   | AA                              | GG              | 1946962926               |
| SNP_P4_136544_22821 | NW_004516017.1 | Scaffold587 | 22821                   | GG                              | AA              | 1946962928               |
| SNP_P4_136545_22837 | NW_004516017.1 | Scaffold587 | 22837                   | CC                              | TT              | 1946962930               |
| SNP_P4_136546_22934 | NW_004516017.1 | Scaffold587 | 22934                   | GG                              | AA              | 1946962932               |
| SNP_P4_136547_22948 | NW_004516017.1 | Scaffold587 | 22948                   | TT                              | AA              | 1946962934               |
| SNP_P4_136548_27767 | NW_004516017.1 | Scaffold587 | 27767                   | AA                              | GG              | 1946962936               |
| SNP_P4_136549_27868 | NW_004516017.1 | Scaffold587 | 27868                   | GG                              | AA              | 1946962938               |
| SNP_P4_136550_27876 | NW_004516017.1 | Scaffold587 | 27876                   | AA                              | TT              | 1946962940               |
| SNP_P4_136551_28052 | NW_004516017.1 | Scaffold587 | 28052                   | AA                              | CC              | 1946962942               |
| SNP_P4_136552_28385 | NW_004516017.1 | Scaffold587 | 28385                   | AA                              | GG              | 1946962944               |
| SNP_P4_136553_28405 | NW_004516017.1 | Scaffold587 | 28405                   | AA                              | CC              | 1946962946               |
| SNP_P4_136554_28611 | NW_004516017.1 | Scaffold587 | 28611                   | AA                              | GG              | 1946962948               |
| SNP_P4_136556_29465 | NW_004516017.1 | Scaffold587 | 29465                   | AA                              | GG              | 1946962950               |
| SNP_P4_136557_29489 | NW_004516017.1 | Scaffold587 | 29489                   | AA                              | GG              | 1946962952               |
| SNP_P4_136558_29857 | NW_004516017.1 | Scaffold587 | 29857                   | AA                              | GG              | 1946962954               |
| SNP_P4_136559_30689 | NW_004516017.1 | Scaffold587 | 30689                   | AA                              | TT              | 1946962956               |
| SNP_P4_136560_30714 | NW_004516017.1 | Scaffold587 | 30714                   | CC                              | TT              | 1946962958               |
| SNP_P4_136561_30848 | NW_004516017.1 | Scaffold587 | 30848                   | AA                              | TT              | 1946962960               |
| SNP_P4_136562_30850 | NW_004516017.1 | Scaffold587 | 30850                   | GG                              | AA              | 1946962962               |
| SNP_P4_136563_30915 | NW_004516017.1 | Scaffold587 | 30915                   | GG                              | CC              | 1946962964               |
| SNP_P4_136564_30994 | NW_004516017.1 | Scaffold587 | 30994                   | CC                              | GG              | 1946962966               |
| SNP_P4_136565_31024 | NW_004516017.1 | Scaffold587 | 31024                   | AA                              | GG              | 1946962968               |
| SNP_P4_136566_31073 | NW_004516017.1 | Scaffold587 | 31073                   | CC                              | TT              | 1946962970               |
| SNP_P4_136567_31128 | NW_004516017.1 | Scaffold587 | 31128                   | AA                              | TT              | 1946962972               |
| SNP_P4_136568_31130 | NW_004516017.1 | Scaffold587 | 31130                   | AA                              | CC              | 1946962974               |
| SNP_P4_136569_31149 | NW_004516017.1 | Scaffold587 | 31149                   | AA                              | GG              | 1946962976               |
| SNP_P4_136570_31156 | NW_004516017.1 | Scaffold587 | 31156                   | CC                              | TT              | 1946962978               |
| SNP_P4_136571_31637 | NW_004516017.1 | Scaffold587 | 31637                   | AA                              | TT              | 1946962980               |
| SNP_P4_136572_31669 | NW_004516017.1 | Scaffold587 | 31669                   | AA                              | CC              | 1946962982               |
| SNP_P4_136573_31828 | NW_004516017.1 | Scaffold587 | 31828                   | AA                              | TT              | 1946962984               |
| SNP_P4_136574_31874 | NW_004516017.1 | Scaffold587 | 31874                   | AA                              | GG              | 1946962986               |
| SNP_P4_136575_31885 | NW_004516017.1 | Scaffold587 | 31885                   | CC                              | TT              | 1946962988               |
| SNP_P4_136576_31894 | NW_004516017.1 | Scaffold587 | 31894                   | CC                              | GG              | 1946962990               |
| SNP_P4_136577_31972 | NW_004516017.1 | Scaffold587 | 31972                   | TT                              | GG              | 1946962992               |
| SNP_P4_136578_32018 | NW_004516017.1 | Scaffold587 | 32018                   | TT                              | CC              | 1946962994               |
| SNP_P4_136579_32062 | NW_004516017.1 | Scaffold587 | 32062                   | TT                              | CC              | 1946962996               |
| SNP_P4_136580_32294 | NW_004516017.1 | Scaffold587 | 32294                   | AA                              | GG              | 1946962998               |
| SNP_P4_136581_34659 | NW_004516017.1 | Scaffold587 | 34659                   | CC                              | TT              | 1946963000               |
| SNP_P4_136582_34994 | NW_004516017.1 | Scaffold587 | 34994                   | TT                              | CC              | 1946963002               |
| SNP_P4_136583_35064 | NW_004516017.1 | Scaffold587 | 35064                   | TT                              | CC              | 1946963004               |

| SNPs IDs            | Chromosome IDs | Chromosomes | Physical positions (bp) | CDC Frontier (Reference genome) | (ILWC46 & LPNB) | NCBI SNPdb Accession IDs |
|---------------------|----------------|-------------|-------------------------|---------------------------------|-----------------|--------------------------|
| SNP_P4_136585_35309 | NW_004516017.1 | Scaffold587 | 35309                   | CC                              | GG              | 1946963006               |
| SNP_P4_136586_35401 | NW_004516017.1 | Scaffold587 | 35401                   | TT                              | GG              | 1946963008               |
| SNP_P4_136587_35403 | NW_004516017.1 | Scaffold587 | 35403                   | TT                              | GG              | 1946963010               |
| SNP_P4_136588_35474 | NW_004516017.1 | Scaffold587 | 35474                   | GG                              | TT              | 1946963012               |
| SNP_P4_136589_36276 | NW_004516017.1 | Scaffold587 | 36276                   | AA                              | TT              | 1946963014               |
| SNP_P4_136590_36290 | NW_004516017.1 | Scaffold587 | 36290                   | CC                              | AA              | 1946963016               |
| SNP_P4_136591_36549 | NW_004516017.1 | Scaffold587 | 36549                   | TT                              | CC              | 1946963018               |
| SNP_P4_136592_36854 | NW_004516017.1 | Scaffold587 | 36854                   | GG                              | AA              | 1946963020               |
| SNP_P4_136593_36904 | NW_004516017.1 | Scaffold587 | 36904                   | AA                              | GG              | 1946963022               |
| SNP_P4_136594_37035 | NW_004516017.1 | Scaffold587 | 37035                   | AA                              | TT              | 1946963024               |
| SNP_P4_136595_37037 | NW_004516017.1 | Scaffold587 | 37037                   | AA                              | CC              | 1946963026               |
| SNP_P4_136596_37301 | NW_004516017.1 | Scaffold587 | 37301                   | TT                              | AA              | 1946963028               |
| SNP_P4_136597_38299 | NW_004516017.1 | Scaffold587 | 38299                   | AA                              | GG              | 1946963030               |
| SNP_P4_136598_38683 | NW_004516017.1 | Scaffold587 | 38683                   | AA                              | GG              | 1946963032               |
| SNP_P4_136599_38703 | NW_004516017.1 | Scaffold587 | 38703                   | TT                              | GG              | 1946963034               |
| SNP_P4_136600_38935 | NW_004516017.1 | Scaffold587 | 38935                   | AA                              | GG              | 1946963036               |
| SNP_P4_136601_38987 | NW_004516017.1 | Scaffold587 | 38987                   | GG                              | AA              | 1946963038               |
| SNP_P4_136602_38990 | NW_004516017.1 | Scaffold587 | 38990                   | GG                              | CC              | 1946963040               |
| SNP_P4_136603_39028 | NW_004516017.1 | Scaffold587 | 39028                   | AA                              | GG              | 1946963042               |
| SNP_P4_136604_39056 | NW_004516017.1 | Scaffold587 | 39056                   | GG                              | CC              | 1946963044               |
| SNP_P4_136605_39057 | NW_004516017.1 | Scaffold587 | 39057                   | GG                              | AA              | 1946963046               |
| SNP_P4_136606_40532 | NW_004516017.1 | Scaffold587 | 40532                   | CC                              | GG              | 1946963048               |
| SNP_P4_136607_40553 | NW_004516017.1 | Scaffold587 | 40553                   | AA                              | GG              | 1946963050               |
| SNP_P4_136608_40578 | NW_004516017.1 | Scaffold587 | 40578                   | TT                              | CC              | 1946963052               |
| SNP_P4_136609_40712 | NW_004516017.1 | Scaffold587 | 40712                   | AA                              | CC              | 1946963054               |
| SNP_P4_136610_40813 | NW_004516017.1 | Scaffold587 | 40813                   | TT                              | CC              | 1946963056               |
| SNP_P4_136611_40836 | NW_004516017.1 | Scaffold587 | 40836                   | AA                              | GG              | 1946963058               |
| SNP_P4_136612_40990 | NW_004516017.1 | Scaffold587 | 40990                   | GG                              | TT              | 1946963060               |
| SNP_P4_136613_41073 | NW_004516017.1 | Scaffold587 | 41073                   | AA                              | GG              | 1946963062               |
| SNP_P4_136614_41177 | NW_004516017.1 | Scaffold587 | 41177                   | AA                              | GG              | 1946963064               |
| SNP_P4_136615_41214 | NW_004516017.1 | Scaffold587 | 41214                   | CC                              | TT              | 1946963066               |
| SNP_P4_136616_41215 | NW_004516017.1 | Scaffold587 | 41215                   | GG                              | AA              | 1946963068               |
| SNP_P4_136617_41221 | NW_004516017.1 | Scaffold587 | 41221                   | CC                              | TT              | 1946963070               |
| SNP_P4_136618_41277 | NW_004516017.1 | Scaffold587 | 41277                   | AA                              | GG              | 1946963072               |
| SNP_P4_136619_41294 | NW_004516017.1 | Scaffold587 | 41294                   | TT                              | CC              | 1946963074               |
| SNP_P4_136620_41617 | NW_004516017.1 | Scaffold587 | 41617                   | AA                              | GG              | 1946963076               |
| SNP_P4_136621_41967 | NW_004516017.1 | Scaffold587 | 41967                   | AA                              | TT              | 1946963078               |
| SNP_P4_136622_41973 | NW_004516017.1 | Scaffold587 | 41973                   | AA                              | TT              | 1946963080               |
| SNP_P4_136623_42772 | NW_004516017.1 | Scaffold587 | 42772                   | GG                              | AA              | 1946963082               |
| SNP_P4_136624_43021 | NW_004516017.1 | Scaffold587 | 43021                   | CC                              | TT              | 1946963084               |
| SNP_P4_136625_45288 | NW_004516017.1 | Scaffold587 | 45288                   | TT                              | AA              | 1946963086               |
| SNP_P4_136626_45303 | NW_004516017.1 | Scaffold587 | 45303                   | AA                              | GG              | 1946963088               |

| SNPs IDs            | Chromosome IDs | Chromosomes | Physical positions (bp) | CDC Frontier (Reference genome) | (ILWC46 & LPNB) | NCBI SNPdb Accession IDs |
|---------------------|----------------|-------------|-------------------------|---------------------------------|-----------------|--------------------------|
| SNP_P4_136627_45357 | NW_004516017.1 | Scaffold587 | 45357                   | TT                              | AA              | 1946963090               |
| SNP_P4_136628_45359 | NW_004516017.1 | Scaffold587 | 45359                   | AA                              | GG              | 1946963092               |
| SNP_P4_136629_45362 | NW_004516017.1 | Scaffold587 | 45362                   | GG                              | CC              | 1946963094               |
| SNP_P4_136630_45406 | NW_004516017.1 | Scaffold587 | 45406                   | TT                              | AA              | 1946963096               |
| SNP_P4_136631_45438 | NW_004516017.1 | Scaffold587 | 45438                   | CC                              | GG              | 1946963098               |
| SNP_P4_136632_45521 | NW_004516017.1 | Scaffold587 | 45521                   | TT                              | CC              | 1946963100               |
| SNP_P4_136633_45523 | NW_004516017.1 | Scaffold587 | 45523                   | TT                              | GG              | 1946963102               |
| SNP_P4_136634_45657 | NW_004516017.1 | Scaffold587 | 45657                   | CC                              | TT              | 1946963104               |
| SNP_P4_136635_45663 | NW_004516017.1 | Scaffold587 | 45663                   | GG                              | TT              | 1946963106               |
| SNP_P4_136636_46881 | NW_004516017.1 | Scaffold587 | 46881                   | AA                              | CC              | 1946963108               |
| SNP_P4_136637_47166 | NW_004516017.1 | Scaffold587 | 47166                   | CC                              | TT              | 1946963110               |
| SNP_P4_136638_47168 | NW_004516017.1 | Scaffold587 | 47168                   | CC                              | TT              | 1946963112               |
| SNP_P4_136639_47234 | NW_004516017.1 | Scaffold587 | 47234                   | TT                              | CC              | 1946963114               |
| SNP_P4_136640_47277 | NW_004516017.1 | Scaffold587 | 47277                   | AA                              | GG              | 1946963116               |
| SNP_P4_136641_47281 | NW_004516017.1 | Scaffold587 | 47281                   | CC                              | AA              | 1946963118               |
| SNP_P4_136642_47295 | NW_004516017.1 | Scaffold587 | 47295                   | CC                              | AA              | 1946963120               |
| SNP_P4_136643_47301 | NW_004516017.1 | Scaffold587 | 47301                   | TT                              | CC              | 1946963122               |
| SNP_P4_136644_47306 | NW_004516017.1 | Scaffold587 | 47306                   | TT                              | CC              | 1946963124               |
| SNP_P4_136645_47321 | NW_004516017.1 | Scaffold587 | 47321                   | TT                              | CC              | 1946963126               |
| SNP_P4_136646_47325 | NW_004516017.1 | Scaffold587 | 47325                   | TT                              | GG              | 1946963128               |
| SNP_P4_136647_47339 | NW_004516017.1 | Scaffold587 | 47339                   | AA                              | CC              | 1946963130               |
| SNP_P4_136648_47340 | NW_004516017.1 | Scaffold587 | 47340                   | TT                              | CC              | 1946963132               |
| SNP_P4_136649_47364 | NW_004516017.1 | Scaffold587 | 47364                   | AA                              | GG              | 1946963134               |
| SNP_P4_136650_47526 | NW_004516017.1 | Scaffold587 | 47526                   | AA                              | CC              | 1946963136               |
| SNP_P4_136651_47569 | NW_004516017.1 | Scaffold587 | 47569                   | AA                              | GG              | 1946963138               |
| SNP_P4_136652_47666 | NW_004516017.1 | Scaffold587 | 47666                   | TT                              | AA              | 1946963140               |
| SNP_P4_136653_48527 | NW_004516017.1 | Scaffold587 | 48527                   | GG                              | AA              | 1946963142               |
| SNP_P4_136654_48531 | NW_004516017.1 | Scaffold587 | 48531                   | TT                              | AA              | 1946963144               |
| SNP_P4_136655_48604 | NW_004516017.1 | Scaffold587 | 48604                   | GG                              | CC              | 1946963146               |
| SNP_P4_136656_48693 | NW_004516017.1 | Scaffold587 | 48693                   | TT                              | CC              | 1946963148               |
| SNP_P4_136657_48714 | NW_004516017.1 | Scaffold587 | 48714                   | TT                              | CC              | 1946963150               |
| SNP_P4_136658_48852 | NW_004516017.1 | Scaffold587 | 48852                   | AA                              | GG              | 1946963152               |
| SNP_P4_136659_48865 | NW_004516017.1 | Scaffold587 | 48865                   | AA                              | TT              | 1946963154               |
| SNP_P4_136660_49049 | NW_004516017.1 | Scaffold587 | 49049                   | AA                              | GG              | 1946963156               |
| SNP_P4_136661_49341 | NW_004516017.1 | Scaffold587 | 49341                   | CC                              | TT              | 1946963158               |
| SNP_P4_136662_49368 | NW_004516017.1 | Scaffold587 | 49368                   | AA                              | GG              | 1946963160               |
| SNP_P4_136663_49564 | NW_004516017.1 | Scaffold587 | 49564                   | GG                              | AA              | 1946963162               |
| SNP_P4_136664_50338 | NW_004516017.1 | Scaffold587 | 50338                   | AA                              | CC              | 1946963164               |
| SNP_P4_136665_50467 | NW_004516017.1 | Scaffold587 | 50467                   | TT                              | GG              | 1946963166               |
| SNP_P4_136666_50507 | NW_004516017.1 | Scaffold587 | 50507                   | TT                              | GG              | 1946963168               |
| SNP_P4_136667_50512 | NW_004516017.1 | Scaffold587 | 50512                   | GG                              | AA              | 1946963170               |
| SNP_P4_136668_50529 | NW_004516017.1 | Scaffold587 | 50529                   | AA                              | TT              | 1946963172               |

| SNPs IDs            | Chromosome IDs | Chromosomes | Physical positions (bp) | CDC Frontier (Reference genome) | (ILWC46 & LPNB) | NCBI SNPdb Accession IDs |
|---------------------|----------------|-------------|-------------------------|---------------------------------|-----------------|--------------------------|
| SNP_P4_136669_50530 | NW_004516017.1 | Scaffold587 | 50530                   | AA                              | TT              | 1946963174               |
| SNP_P4_136670_50590 | NW_004516017.1 | Scaffold587 | 50590                   | GG                              | AA              | 1946963176               |
| SNP_P4_136671_50673 | NW_004516017.1 | Scaffold587 | 50673                   | AA                              | GG              | 1946963178               |
| SNP_P4_136672_50710 | NW_004516017.1 | Scaffold587 | 50710                   | AA                              | GG              | 1946963180               |
| SNP_P4_136673_50760 | NW_004516017.1 | Scaffold587 | 50760                   | AA                              | GG              | 1946963182               |
| SNP_P4_136674_50763 | NW_004516017.1 | Scaffold587 | 50763                   | GG                              | AA              | 1946963184               |
| SNP_P4_136675_50771 | NW_004516017.1 | Scaffold587 | 50771                   | GG                              | AA              | 1946963186               |
| SNP_P4_136677_50913 | NW_004516017.1 | Scaffold587 | 50913                   | CC                              | TT              | 1946963188               |
| SNP_P4_136678_50929 | NW_004516017.1 | Scaffold587 | 50929                   | TT                              | GG              | 1946963190               |
| SNP_P4_136679_50966 | NW_004516017.1 | Scaffold587 | 50966                   | CC                              | TT              | 1946963192               |
| SNP_P4_136680_50984 | NW_004516017.1 | Scaffold587 | 50984                   | AA                              | GG              | 1946963194               |
| SNP_P4_136682_51095 | NW_004516017.1 | Scaffold587 | 51095                   | AA                              | GG              | 1946963196               |
| SNP_P4_136683_51151 | NW_004516017.1 | Scaffold587 | 51151                   | AA                              | GG              | 1946963198               |
| SNP_P4_136684_51181 | NW_004516017.1 | Scaffold587 | 51181                   | TT                              | CC              | 1946963200               |
| SNP_P4_136685_51213 | NW_004516017.1 | Scaffold587 | 51213                   | GG                              | AA              | 1946963202               |
| SNP_P4_136686_51231 | NW_004516017.1 | Scaffold587 | 51231                   | GG                              | TT              | 1946963204               |
| SNP_P4_136687_51258 | NW_004516017.1 | Scaffold587 | 51258                   | AA                              | GG              | 1946963206               |
| SNP_P4_136688_52638 | NW_004516017.1 | Scaffold587 | 52638                   | GG                              | AA              | 1946963208               |
| SNP_P4_136689_52660 | NW_004516017.1 | Scaffold587 | 52660                   | AA                              | GG              | 1946963210               |
| SNP_P4_136690_52714 | NW_004516017.1 | Scaffold587 | 52714                   | TT                              | AA              | 1946963212               |
| SNP_P4_136691_52735 | NW_004516017.1 | Scaffold587 | 52735                   | AA                              | GG              | 1946963214               |
| SNP_P4_136692_52826 | NW_004516017.1 | Scaffold587 | 52826                   | AA                              | GG              | 1946963216               |
| SNP_P4_136693_52871 | NW_004516017.1 | Scaffold587 | 52871                   | CC                              | TT              | 1946963218               |
| SNP_P4_136694_53010 | NW_004516017.1 | Scaffold587 | 53010                   | TT                              | CC              | 1946963220               |
| SNP_P4_136696_53152 | NW_004516017.1 | Scaffold587 | 53152                   | CC                              | TT              | 1946963222               |
| SNP_P4_136697_53548 | NW_004516017.1 | Scaffold587 | 53548                   | AA                              | GG              | 1946963224               |
| SNP_P4_136698_53581 | NW_004516017.1 | Scaffold587 | 53581                   | AA                              | GG              | 1946963226               |
| SNP_P4_136699_53585 | NW_004516017.1 | Scaffold587 | 53585                   | CC                              | TT              | 1946963228               |
| SNP_P4_136700_53587 | NW_004516017.1 | Scaffold587 | 53587                   | AA                              | GG              | 1946963230               |
| SNP_P4_136701_53589 | NW_004516017.1 | Scaffold587 | 53589                   | AA                              | CC              | 1946963232               |
| SNP_P4_136702_53624 | NW_004516017.1 | Scaffold587 | 53624                   | AA                              | CC              | 1946963234               |
| SNP_P4_136703_53664 | NW_004516017.1 | Scaffold587 | 53664                   | CC                              | TT              | 1946963236               |
| SNP_P4_136704_53669 | NW_004516017.1 | Scaffold587 | 53669                   | AA                              | GG              | 1946963238               |
| SNP_P4_136705_53705 | NW_004516017.1 | Scaffold587 | 53705                   | GG                              | AA              | 1946963240               |
| SNP_P4_136706_53903 | NW_004516017.1 | Scaffold587 | 53903                   | AA                              | GG              | 1946963242               |
| SNP_P4_136708_53968 | NW_004516017.1 | Scaffold587 | 53968                   | AA                              | GG              | 1946963244               |
| SNP_P4_136709_54311 | NW_004516017.1 | Scaffold587 | 54311                   | GG                              | TT              | 1946963246               |
| SNP_P4_136710_54330 | NW_004516017.1 | Scaffold587 | 54330                   | CC                              | TT              | 1946963248               |
| SNP_P4_136711_54331 | NW_004516017.1 | Scaffold587 | 54331                   | TT                              | CC              | 1946963250               |
| SNP_P4_136712_54359 | NW_004516017.1 | Scaffold587 | 54359                   | AA                              | GG              | 1946963252               |
| SNP_P4_136713_54594 | NW_004516017.1 | Scaffold587 | 54594                   | AA                              | GG              | 1946963254               |
| SNP_P4_136714_54635 | NW_004516017.1 | Scaffold587 | 54635                   | TT                              | CC              | 1946963256               |

| SNPs IDs            | Chromosome IDs | Chromosomes | Physical positions (bp) | CDC Frontier (Reference genome) | (ILWC46 & LPNB) | NCBI SNPdb Accession IDs |
|---------------------|----------------|-------------|-------------------------|---------------------------------|-----------------|--------------------------|
| SNP_P4_136715_54685 | NW_004516017.1 | Scaffold587 | 54685                   | TT                              | CC              | 1946963258               |
| SNP_P4_136717_54955 | NW_004516017.1 | Scaffold587 | 54955                   | AA                              | TT              | 1946963260               |
| SNP_P4_136718_55015 | NW_004516017.1 | Scaffold587 | 55015                   | GG                              | AA              | 1946963262               |
| SNP_P4_136719_55223 | NW_004516017.1 | Scaffold587 | 55223                   | GG                              | TT              | 1946963264               |
| SNP_P4_136720_55245 | NW_004516017.1 | Scaffold587 | 55245                   | TT                              | GG              | 1946963266               |
| SNP_P4_136721_55260 | NW_004516017.1 | Scaffold587 | 55260                   | GG                              | AA              | 1946963268               |
| SNP_P4_136722_55317 | NW_004516017.1 | Scaffold587 | 55317                   | GG                              | AA              | 1946963270               |
| SNP_P4_136723_55435 | NW_004516017.1 | Scaffold587 | 55435                   | GG                              | TT              | 1946963272               |
| SNP_P4_136724_55525 | NW_004516017.1 | Scaffold587 | 55525                   | CC                              | GG              | 1946963274               |
| SNP_P4_136726_55547 | NW_004516017.1 | Scaffold587 | 55547                   | TT                              | CC              | 1946963276               |
| SNP_P4_136727_55645 | NW_004516017.1 | Scaffold587 | 55645                   | TT                              | GG              | 1946963278               |
| SNP_P4_136728_55671 | NW_004516017.1 | Scaffold587 | 55671                   | CC                              | TT              | 1946963280               |
| SNP_P4_136729_55747 | NW_004516017.1 | Scaffold587 | 55747                   | CC                              | TT              | 1946963282               |
| SNP_P4_136730_55963 | NW_004516017.1 | Scaffold587 | 55963                   | AA                              | GG              | 1946963284               |
| SNP_P4_136731_56042 | NW_004516017.1 | Scaffold587 | 56042                   | GG                              | AA              | 1946963286               |
| SNP_P4_136733_61439 | NW_004516017.1 | Scaffold587 | 61439                   | AA                              | TT              | 1946963288               |
| SNP_P4_136734_61883 | NW_004516017.1 | Scaffold587 | 61883                   | AA                              | TT              | 1946963290               |
| SNP_P4_136735_70167 | NW_004516017.1 | Scaffold587 | 70167                   | AA                              | TT              | 1946963292               |
| SNP_P4_136736_70270 | NW_004516017.1 | Scaffold587 | 70270                   | CC                              | TT              | 1946963294               |
| SNP_P4_136737_70337 | NW_004516017.1 | Scaffold587 | 70337                   | GG                              | CC              | 1946963296               |
| SNP_P4_136738_70386 | NW_004516017.1 | Scaffold587 | 70386                   | GG                              | TT              | 1946963298               |
| SNP_P4_136739_70503 | NW_004516017.1 | Scaffold587 | 70503                   | AA                              | CC              | 1946963300               |
| SNP_P4_136740_70522 | NW_004516017.1 | Scaffold587 | 70522                   | GG                              | AA              | 1946963302               |
| SNP_P4_136741_70658 | NW_004516017.1 | Scaffold587 | 70658                   | CC                              | GG              | 1946963304               |
| SNP_P4_136742_70978 | NW_004516017.1 | Scaffold587 | 70978                   | AA                              | GG              | 1946963306               |
| SNP_P4_136743_71203 | NW_004516017.1 | Scaffold587 | 71203                   | TT                              | CC              | 1946963308               |
| SNP_P4_136744_13809 | NW_004516018.1 | Scaffold588 | 13809                   | AA                              | TT              | 1946963310               |
| SNP_P4_136745_13927 | NW_004516018.1 | Scaffold588 | 13927                   | CC                              | GG              | 1946963312               |
| SNP_P4_136746_14337 | NW_004516018.1 | Scaffold588 | 14337                   | AA                              | GG              | 1946963314               |
| SNP_P4_136747_14354 | NW_004516018.1 | Scaffold588 | 14354                   | GG                              | AA              | 1946963316               |
| SNP_P4_136748_14381 | NW_004516018.1 | Scaffold588 | 14381                   | CC                              | GG              | 1946963318               |
| SNP_P4_136749_14415 | NW_004516018.1 | Scaffold588 | 14415                   | CC                              | TT              | 1946963320               |
| SNP_P4_136750_14436 | NW_004516018.1 | Scaffold588 | 14436                   | CC                              | GG              | 1946963322               |
| SNP_P4_136751_14474 | NW_004516018.1 | Scaffold588 | 14474                   | TT                              | CC              | 1946963324               |
| SNP_P4_136752_14482 | NW_004516018.1 | Scaffold588 | 14482                   | TT                              | GG              | 1946963326               |
| SNP_P4_136753_14581 | NW_004516018.1 | Scaffold588 | 14581                   | GG                              | AA              | 1946963328               |
| SNP_P4_136754_14983 | NW_004516018.1 | Scaffold588 | 14983                   | GG                              | AA              | 1946963330               |
| SNP_P4_136757_16702 | NW_004516019.1 | Scaffold589 | 16702                   | GG                              | TT              | 1946963332               |
| SNP_P4_136758_29526 | NW_004516019.1 | Scaffold589 | 29526                   | AA                              | CC              | 1946963334               |
| SNP_P4_136759_43992 | NW_004516019.1 | Scaffold589 | 43992                   | GG                              | AA              | 1946963336               |
| SNP_P4_136760_43997 | NW_004516019.1 | Scaffold589 | 43997                   | CC                              | GG              | 1946963339               |
| SNP_P4_136761_49029 | NW_004516019.1 | Scaffold589 | 49029                   | CC                              | TT              | 1946963341               |

| SNPs IDs            | Chromosome IDs | Chromosomes | Physical positions (bp) | CDC Frontier (Reference genome) | (ILWC46 & LPNB) | NCBI SNPdb Accession IDs |
|---------------------|----------------|-------------|-------------------------|---------------------------------|-----------------|--------------------------|
| SNP_P4_136762_49031 | NW_004516019.1 | Scaffold589 | 49031                   | TT                              | GG              | 1946963343               |
| SNP_P4_136763_49112 | NW_004516019.1 | Scaffold589 | 49112                   | TT                              | CC              | 1946963345               |
| SNP_P4_136764_49185 | NW_004516019.1 | Scaffold589 | 49185                   | CC                              | TT              | 1946963347               |
| SNP_P4_136765_49197 | NW_004516019.1 | Scaffold589 | 49197                   | AA                              | GG              | 1946963349               |
| SNP_P4_136766_49238 | NW_004516019.1 | Scaffold589 | 49238                   | GG                              | AA              | 1946963351               |
| SNP_P4_136767_49241 | NW_004516019.1 | Scaffold589 | 49241                   | AA                              | CC              | 1946963353               |
| SNP_P4_136768_49302 | NW_004516019.1 | Scaffold589 | 49302                   | AA                              | TT              | 1946963355               |
| SNP_P4_136769_49414 | NW_004516019.1 | Scaffold589 | 49414                   | AA                              | TT              | 1946963357               |
| SNP_P4_136770_49439 | NW_004516019.1 | Scaffold589 | 49439                   | TT                              | CC              | 1946963359               |
| SNP_P4_136771_51327 | NW_004516019.1 | Scaffold589 | 51327                   | TT                              | AA              | 1946963361               |
| SNP_P4_136772_51363 | NW_004516019.1 | Scaffold589 | 51363                   | CC                              | TT              | 1946963363               |
| SNP_P4_136773_65221 | NW_004516019.1 | Scaffold589 | 65221                   | AA                              | TT              | 1946963365               |
| SNP_P4_136774_65410 | NW_004516019.1 | Scaffold589 | 65410                   | CC                              | TT              | 1946963367               |
| SNP_P4_136775_65417 | NW_004516019.1 | Scaffold589 | 65417                   | CC                              | TT              | 1946963369               |
| SNP_P4_136776_65440 | NW_004516019.1 | Scaffold589 | 65440                   | CC                              | TT              | 1946963371               |
| SNP_P4_136777_65442 | NW_004516019.1 | Scaffold589 | 65442                   | TT                              | AA              | 1946963373               |
| SNP_P4_136778_65447 | NW_004516019.1 | Scaffold589 | 65447                   | CC                              | TT              | 1946963375               |
| SNP_P4_136779_65567 | NW_004516019.1 | Scaffold589 | 65567                   | AA                              | GG              | 1946963377               |
| SNP_P4_136780_66437 | NW_004516019.1 | Scaffold589 | 66437                   | GG                              | AA              | 1946963379               |
| SNP_P4_136781_70289 | NW_004516019.1 | Scaffold589 | 70289                   | CC                              | TT              | 1946963381               |
| SNP_P4_136782_75672 | NW_004516019.1 | Scaffold589 | 75672                   | GG                              | AA              | 1946963383               |
| SNP_P4_136783_75673 | NW_004516019.1 | Scaffold589 | 75673                   | CC                              | TT              | 1946963385               |
| SNP_P4_136786_80222 | NW_004516019.1 | Scaffold589 | 80222                   | AA                              | GG              | 1946963387               |
| SNP_P4_136787_80228 | NW_004516019.1 | Scaffold589 | 80228                   | AA                              | GG              | 1946963389               |
| SNP_P4_136788_80251 | NW_004516019.1 | Scaffold589 | 80251                   | TT                              | CC              | 1946963391               |
| SNP_P4_136789_80286 | NW_004516019.1 | Scaffold589 | 80286                   | TT                              | CC              | 1946963393               |
| SNP_P4_136790_80353 | NW_004516019.1 | Scaffold589 | 80353                   | TT                              | CC              | 1946963395               |
| SNP_P4_136791_80395 | NW_004516019.1 | Scaffold589 | 80395                   | GG                              | AA              | 1946963397               |
| SNP_P4_136792_80400 | NW_004516019.1 | Scaffold589 | 80400                   | GG                              | TT              | 1946963399               |
| SNP_P4_136793_81668 | NW_004516019.1 | Scaffold589 | 81668                   | TT                              | CC              | 1946963401               |
| SNP_P4_136794_82585 | NW_004516019.1 | Scaffold589 | 82585                   | GG                              | AA              | 1946963403               |
| SNP_P4_136795_82684 | NW_004516019.1 | Scaffold589 | 82684                   | TT                              | CC              | 1946963405               |
| SNP_P4_136796_83209 | NW_004516019.1 | Scaffold589 | 83209                   | GG                              | TT              | 1946963407               |
| SNP_P4_136797_83283 | NW_004516019.1 | Scaffold589 | 83283                   | AA                              | GG              | 1946963409               |
| SNP_P4_136798_83474 | NW_004516019.1 | Scaffold589 | 83474                   | TT                              | CC              | 1946963411               |
| SNP_P4_136799_83497 | NW_004516019.1 | Scaffold589 | 83497                   | AA                              | CC              | 1946963412               |
| SNP_P4_136800_83500 | NW_004516019.1 | Scaffold589 | 83500                   | AA                              | GG              | 1946963414               |
| SNP_P4_136801_83537 | NW_004516019.1 | Scaffold589 | 83537                   | CC                              | TT              | 1946963416               |
| SNP_P4_136802_83551 | NW_004516019.1 | Scaffold589 | 83551                   | CC                              | TT              | 1946963418               |
| SNP_P4_136803_83554 | NW_004516019.1 | Scaffold589 | 83554                   | TT                              | CC              | 1946963420               |
| SNP_P4_136804_83566 | NW_004516019.1 | Scaffold589 | 83566                   | TT                              | CC              | 1946963422               |
| SNP_P4_136805_83599 | NW_004516019.1 | Scaffold589 | 83599                   | CC                              | TT              | 1946963424               |



| SNPs IDs             | Chromosome IDs | Chromosomes | Physical positions (bp) | CDC Frontier (Reference genome) | (ILWC46 & LPNB) | NCBI SNPdb Accession IDs |
|----------------------|----------------|-------------|-------------------------|---------------------------------|-----------------|--------------------------|
| SNP_P4_136806_83602  | NW_004516019.1 | Scaffold589 | 83602                   | AA                              | CC              | 1946963426               |
| SNP_P4_136807_83604  | NW_004516019.1 | Scaffold589 | 83604                   | AA                              | CC              | 1946963428               |
| SNP_P4_136808_83640  | NW_004516019.1 | Scaffold589 | 83640                   | AA                              | CC              | 1946963430               |
| SNP_P4_136810_83665  | NW_004516019.1 | Scaffold589 | 83665                   | TT                              | AA              | 1946963432               |
| SNP_P4_136812_95320  | NW_004516019.1 | Scaffold589 | 95320                   | GG                              | AA              | 1946963434               |
| SNP_P4_136813_100528 | NW_004516019.1 | Scaffold589 | 100528                  | CC                              | TT              | 1946963436               |
| SNP_P4_136814_100814 | NW_004516019.1 | Scaffold589 | 100814                  | AA                              | CC              | 1946963438               |
| SNP_P4_136815_100827 | NW_004516019.1 | Scaffold589 | 100827                  | GG                              | TT              | 1946963440               |
| SNP_P4_136816_100831 | NW_004516019.1 | Scaffold589 | 100831                  | CC                              | TT              | 1946963442               |
| SNP_P4_136817_100903 | NW_004516019.1 | Scaffold589 | 100903                  | AA                              | CC              | 1946963444               |
| SNP_P4_136820_107396 | NW_004516019.1 | Scaffold589 | 107396                  | AA                              | TT              | 1946963446               |
| SNP_P4_136821_116530 | NW_004516019.1 | Scaffold589 | 116530                  | CC                              | AA              | 1946963448               |
| SNP_P4_136822_116649 | NW_004516019.1 | Scaffold589 | 116649                  | GG                              | CC              | 1946963450               |
| SNP_P4_136823_128139 | NW_004516019.1 | Scaffold589 | 128139                  | CC                              | AA              | 1946963452               |
| SNP_P4_136824_128228 | NW_004516019.1 | Scaffold589 | 128228                  | GG                              | AA              | 1946963454               |
| SNP_P4_136825_129184 | NW_004516019.1 | Scaffold589 | 129184                  | TT                              | CC              | 1946963456               |
| SNP_P4_136826_138110 | NW_004516019.1 | Scaffold589 | 138110                  | CC                              | AA              | 1946963458               |
| SNP_P4_136827_138158 | NW_004516019.1 | Scaffold589 | 138158                  | GG                              | AA              | 1946963460               |
| SNP_P4_136828_138690 | NW_004516019.1 | Scaffold589 | 138690                  | CC                              | TT              | 1946963462               |
| SNP_P4_136829_188707 | NW_004516019.1 | Scaffold589 | 188707                  | GG                              | AA              | 1946963464               |
| SNP_P4_136831_208939 | NW_004516019.1 | Scaffold589 | 208939                  | AA                              | CC              | 1946963466               |
| SNP_P4_136832_208971 | NW_004516019.1 | Scaffold589 | 208971                  | TT                              | CC              | 1946963468               |
| SNP_P4_136833_209355 | NW_004516019.1 | Scaffold589 | 209355                  | TT                              | GG              | 1946963470               |
| SNP_P4_136835_231445 | NW_004516019.1 | Scaffold589 | 231445                  | CC                              | TT              | 1946963472               |
| SNP_P4_136836_238411 | NW_004516019.1 | Scaffold589 | 238411                  | GG                              | AA              | 1946963474               |
| SNP_P4_136837_238419 | NW_004516019.1 | Scaffold589 | 238419                  | TT                              | GG              | 1946963476               |
| SNP_P4_136838_245152 | NW_004516019.1 | Scaffold589 | 245152                  | CC                              | TT              | 1946963478               |
| SNP_P4_136839_245205 | NW_004516019.1 | Scaffold589 | 245205                  | AA                              | CC              | 1946963480               |
| SNP_P4_136840_245214 | NW_004516019.1 | Scaffold589 | 245214                  | CC                              | TT              | 1946963482               |
| SNP_P4_136841_245223 | NW_004516019.1 | Scaffold589 | 245223                  | TT                              | AA              | 1946963484               |
| SNP_P4_136842_245278 | NW_004516019.1 | Scaffold589 | 245278                  | CC                              | AA              | 1946963486               |
| SNP_P4_136843_245382 | NW_004516019.1 | Scaffold589 | 245382                  | CC                              | TT              | 1946963488               |
| SNP_P4_136844_245390 | NW_004516019.1 | Scaffold589 | 245390                  | AA                              | GG              | 1946963490               |
| SNP_P4_136845_245429 | NW_004516019.1 | Scaffold589 | 245429                  | AA                              | GG              | 1946963492               |
| SNP_P4_136846_245457 | NW_004516019.1 | Scaffold589 | 245457                  | TT                              | CC              | 1946963494               |
| SNP_P4_136847_245494 | NW_004516019.1 | Scaffold589 | 245494                  | GG                              | AA              | 1946963496               |
| SNP_P4_136848_245519 | NW_004516019.1 | Scaffold589 | 245519                  | AA                              | GG              | 1946963498               |
| SNP_P4_136849_245524 | NW_004516019.1 | Scaffold589 | 245524                  | CC                              | AA              | 1946963500               |
| SNP_P4_136850_245544 | NW_004516019.1 | Scaffold589 | 245544                  | AA                              | GG              | 1946963502               |
| SNP_P4_136851_245587 | NW_004516019.1 | Scaffold589 | 245587                  | AA                              | GG              | 1946963504               |
| SNP_P4_136852_245594 | NW_004516019.1 | Scaffold589 | 245594                  | AA                              | GG              | 1946963506               |
| SNP_P4_136853_245634 | NW_004516019.1 | Scaffold589 | 245634                  | TT                              | GG              | 1946963508               |

| SNPs IDs             | Chromosome IDs | Chromosomes | Physical positions (bp) | CDC Frontier (Reference genome) | (ILWC46 & LPNB) | NCBI SNPdb Accession IDs |
|----------------------|----------------|-------------|-------------------------|---------------------------------|-----------------|--------------------------|
| SNP_P4_136854_245755 | NW_004516019.1 | Scaffold589 | 245755                  | TT                              | AA              | 1946963510               |
| SNP_P4_136855_245797 | NW_004516019.1 | Scaffold589 | 245797                  | TT                              | CC              | 1946963512               |
| SNP_P4_136856_256178 | NW_004516019.1 | Scaffold589 | 256178                  | CC                              | TT              | 1946963514               |
| SNP_P4_136857_278689 | NW_004516019.1 | Scaffold589 | 278689                  | CC                              | TT              | 1946963516               |
| SNP_P4_136858_278691 | NW_004516019.1 | Scaffold589 | 278691                  | AA                              | GG              | 1946963518               |
| SNP_P4_136859_278988 | NW_004516019.1 | Scaffold589 | 278988                  | CC                              | TT              | 1946963520               |
| SNP_P4_136860_292470 | NW_004516019.1 | Scaffold589 | 292470                  | AA                              | GG              | 1946963591               |
| SNP_P4_136861_292471 | NW_004516019.1 | Scaffold589 | 292471                  | TT                              | CC              | 1946963593               |
| SNP_P4_136862_292758 | NW_004516019.1 | Scaffold589 | 292758                  | GG                              | TT              | 1946963595               |
| SNP_P4_136863_292841 | NW_004516019.1 | Scaffold589 | 292841                  | GG                              | AA              | 1946963597               |
| SNP_P4_136864_304809 | NW_004516019.1 | Scaffold589 | 304809                  | TT                              | GG              | 1946963599               |
| SNP_P4_136865_304889 | NW_004516019.1 | Scaffold589 | 304889                  | TT                              | GG              | 1946963601               |
| SNP_P4_136866_305138 | NW_004516019.1 | Scaffold589 | 305138                  | AA                              | TT              | 1946963603               |
| SNP_P4_136867_305188 | NW_004516019.1 | Scaffold589 | 305188                  | AA                              | GG              | 1946963605               |
| SNP_P4_136868_306209 | NW_004516019.1 | Scaffold589 | 306209                  | CC                              | GG              | 1946963607               |
| SNP_P4_136869_307302 | NW_004516019.1 | Scaffold589 | 307302                  | GG                              | AA              | 1946963609               |
| SNP_P4_136870_309088 | NW_004516019.1 | Scaffold589 | 309088                  | TT                              | AA              | 1946963611               |
| SNP_P4_136872_322458 | NW_004516019.1 | Scaffold589 | 322458                  | TT                              | CC              | 1946963613               |
| SNP_P4_136873_322923 | NW_004516019.1 | Scaffold589 | 322923                  | CC                              | GG              | 1946963615               |
| SNP_P4_136874_322943 | NW_004516019.1 | Scaffold589 | 322943                  | AA                              | GG              | 1946963617               |
| SNP_P4_136875_322955 | NW_004516019.1 | Scaffold589 | 322955                  | CC                              | TT              | 1946963619               |
| SNP_P4_136876_323153 | NW_004516019.1 | Scaffold589 | 323153                  | AA                              | GG              | 1946963621               |
| SNP_P4_136877_323323 | NW_004516019.1 | Scaffold589 | 323323                  | GG                              | AA              | 1946963623               |
| SNP_P4_136878_323440 | NW_004516019.1 | Scaffold589 | 323440                  | TT                              | CC              | 1946963625               |
| SNP_P4_136879_323507 | NW_004516019.1 | Scaffold589 | 323507                  | AA                              | CC              | 1946963627               |
| SNP_P4_136881_323537 | NW_004516019.1 | Scaffold589 | 323537                  | CC                              | GG              | 1946963629               |
| SNP_P4_136882_323550 | NW_004516019.1 | Scaffold589 | 323550                  | GG                              | AA              | 1946963631               |
| SNP_P4_136884_332463 | NW_004516019.1 | Scaffold589 | 332463                  | CC                              | TT              | 1946963633               |
| SNP_P4_136885_332662 | NW_004516019.1 | Scaffold589 | 332662                  | TT                              | CC              | 1946963635               |
| SNP_P4_136886_332710 | NW_004516019.1 | Scaffold589 | 332710                  | TT                              | CC              | 1946963637               |
| SNP_P4_136888_3600   | NW_004516020.1 | Scaffold590 | 3600                    | AA                              | CC              | 1946963639               |
| SNP_P4_136889_3643   | NW_004516020.1 | Scaffold590 | 3643                    | TT                              | CC              | 1946963641               |
| SNP_P4_136890_3646   | NW_004516020.1 | Scaffold590 | 3646                    | TT                              | AA              | 1946963643               |
| SNP_P4_136891_3723   | NW_004516020.1 | Scaffold590 | 3723                    | GG                              | AA              | 1946963645               |
| SNP_P4_136892_3737   | NW_004516020.1 | Scaffold590 | 3737                    | GG                              | AA              | 1946963647               |
| SNP_P4_136893_3771   | NW_004516020.1 | Scaffold590 | 3771                    | GG                              | AA              | 1946963649               |
| SNP_P4_136894_3784   | NW_004516020.1 | Scaffold590 | 3784                    | GG                              | TT              | 1946963651               |
| SNP_P4_136895_3786   | NW_004516020.1 | Scaffold590 | 3786                    | CC                              | AA              | 1946963653               |
| SNP_P4_136896_3861   | NW_004516020.1 | Scaffold590 | 3861                    | GG                              | TT              | 1946963655               |
| SNP_P4_136897_4528   | NW_004516020.1 | Scaffold590 | 4528                    | GG                              | AA              | 1946963657               |
| SNP_P4_136898_4908   | NW_004516020.1 | Scaffold590 | 4908                    | TT                              | AA              | 1946963659               |
| SNP_P4_136899_4930   | NW_004516020.1 | Scaffold590 | 4930                    | GG                              | AA              | 1946963661               |

| SNPs IDs            | Chromosome IDs | Chromosomes | Physical positions (bp) | CDC Frontier (Reference genome) | (ILWC46 & LPNB) | NCBI SNPdb Accession IDs |
|---------------------|----------------|-------------|-------------------------|---------------------------------|-----------------|--------------------------|
| SNP_P4_136900_7996  | NW_004516020.1 | Scaffold590 | 7996                    | TT                              | CC              | 1946963663               |
| SNP_P4_136901_8014  | NW_004516020.1 | Scaffold590 | 8014                    | AA                              | GG              | 1946963665               |
| SNP_P4_136902_12939 | NW_004516020.1 | Scaffold590 | 12939                   | CC                              | TT              | 1946963667               |
| SNP_P4_136903_13175 | NW_004516020.1 | Scaffold590 | 13175                   | TT                              | GG              | 1946963669               |
| SNP_P4_136904_13206 | NW_004516020.1 | Scaffold590 | 13206                   | TT                              | AA              | 1946963671               |
| SNP_P4_136905_14109 | NW_004516020.1 | Scaffold590 | 14109                   | AA                              | CC              | 1946963673               |
| SNP_P4_136906_16816 | NW_004516020.1 | Scaffold590 | 16816                   | AA                              | CC              | 1946963675               |
| SNP_P4_136907_16887 | NW_004516020.1 | Scaffold590 | 16887                   | CC                              | AA              | 1946963677               |
| SNP_P4_136909_19016 | NW_004516020.1 | Scaffold590 | 19016                   | TT                              | CC              | 1946963679               |
| SNP_P4_136910_19098 | NW_004516020.1 | Scaffold590 | 19098                   | CC                              | TT              | 1946963681               |
| SNP_P4_136911_19173 | NW_004516020.1 | Scaffold590 | 19173                   | TT                              | CC              | 1946963683               |
| SNP_P4_136914_19347 | NW_004516020.1 | Scaffold590 | 19347                   | TT                              | GG              | 1946963685               |
| SNP_P4_136915_19399 | NW_004516020.1 | Scaffold590 | 19399                   | GG                              | AA              | 1946963687               |
| SNP_P4_136916_19440 | NW_004516020.1 | Scaffold590 | 19440                   | TT                              | CC              | 1946963689               |
| SNP_P4_136917_19443 | NW_004516020.1 | Scaffold590 | 19443                   | AA                              | CC              | 1946963691               |
| SNP_P4_136918_19448 | NW_004516020.1 | Scaffold590 | 19448                   | TT                              | AA              | 1946963693               |
| SNP_P4_136920_19480 | NW_004516020.1 | Scaffold590 | 19480                   | AA                              | TT              | 1946963695               |
| SNP_P4_136921_19508 | NW_004516020.1 | Scaffold590 | 19508                   | CC                              | AA              | 1946963697               |
| SNP_P4_136922_19552 | NW_004516020.1 | Scaffold590 | 19552                   | AA                              | GG              | 1946963699               |
| SNP_P4_136923_19572 | NW_004516020.1 | Scaffold590 | 19572                   | GG                              | CC              | 1946963701               |
| SNP_P4_136924_19619 | NW_004516020.1 | Scaffold590 | 19619                   | AA                              | CC              | 1946963703               |
| SNP_P4_136925_44108 | NW_004516020.1 | Scaffold590 | 44108                   | AA                              | GG              | 1946963705               |
| SNP_P4_136926_44756 | NW_004516020.1 | Scaffold590 | 44756                   | AA                              | GG              | 1946963706               |
| SNP_P4_136927_44815 | NW_004516020.1 | Scaffold590 | 44815                   | CC                              | TT              | 1946963708               |
| SNP_P4_136928_45628 | NW_004516020.1 | Scaffold590 | 45628                   | CC                              | AA              | 1946963710               |
| SNP_P4_136929_46475 | NW_004516020.1 | Scaffold590 | 46475                   | AA                              | GG              | 1946963712               |
| SNP_P4_136930_46479 | NW_004516020.1 | Scaffold590 | 46479                   | AA                              | GG              | 1946963714               |
| SNP_P4_136931_46500 | NW_004516020.1 | Scaffold590 | 46500                   | TT                              | CC              | 1946963716               |
| SNP_P4_136933_46773 | NW_004516020.1 | Scaffold590 | 46773                   | TT                              | CC              | 1946963718               |
| SNP_P4_136934_61241 | NW_004516020.1 | Scaffold590 | 61241                   | TT                              | CC              | 1946963720               |
| SNP_P4_136935_61249 | NW_004516020.1 | Scaffold590 | 61249                   | TT                              | AA              | 1946963722               |
| SNP_P4_136936_61269 | NW_004516020.1 | Scaffold590 | 61269                   | AA                              | GG              | 1946963724               |
| SNP_P4_136937_61272 | NW_004516020.1 | Scaffold590 | 61272                   | TT                              | CC              | 1946963726               |
| SNP_P4_136938_61273 | NW_004516020.1 | Scaffold590 | 61273                   | AA                              | CC              | 1946963728               |
| SNP_P4_136939_61300 | NW_004516020.1 | Scaffold590 | 61300                   | TT                              | CC              | 1946963730               |
| SNP_P4_136940_61332 | NW_004516020.1 | Scaffold590 | 61332                   | TT                              | CC              | 1946963732               |
| SNP_P4_136941_61335 | NW_004516020.1 | Scaffold590 | 61335                   | GG                              | TT              | 1946963734               |
| SNP_P4_136942_61402 | NW_004516020.1 | Scaffold590 | 61402                   | AA                              | CC              | 1946963736               |
| SNP_P4_136943_63846 | NW_004516020.1 | Scaffold590 | 63846                   | GG                              | CC              | 1946963738               |
| SNP_P4_136944_80534 | NW_004516020.1 | Scaffold590 | 80534                   | AA                              | GG              | 1946963740               |
| SNP_P4_136945_89033 | NW_004516020.1 | Scaffold590 | 89033                   | TT                              | GG              | 1946963742               |
| SNP_P4_136946_89298 | NW_004516020.1 | Scaffold590 | 89298                   | GG                              | AA              | 1946963744               |

| SNPs IDs             | Chromosome IDs | Chromosomes | Physical positions (bp) | CDC Frontier (Reference genome) | (ILWC46 & LPNB) | NCBI SNPdb Accession IDs |
|----------------------|----------------|-------------|-------------------------|---------------------------------|-----------------|--------------------------|
| SNP_P4_136947_102768 | NW_004516020.1 | Scaffold590 | 102768                  | GG                              | AA              | 1946963746               |
| SNP_P4_136948_103211 | NW_004516020.1 | Scaffold590 | 103211                  | CC                              | TT              | 1946963748               |
| SNP_P4_136949_106353 | NW_004516020.1 | Scaffold590 | 106353                  | GG                              | AA              | 1946963750               |
| SNP_P4_136950_107892 | NW_004516020.1 | Scaffold590 | 107892                  | GG                              | AA              | 1946963752               |
| SNP_P4_136951_112515 | NW_004516020.1 | Scaffold590 | 112515                  | GG                              | AA              | 1946963754               |
| SNP_P4_136952_114880 | NW_004516020.1 | Scaffold590 | 114880                  | AA                              | GG              | 1946963756               |
| SNP_P4_136953_114957 | NW_004516020.1 | Scaffold590 | 114957                  | AA                              | CC              | 1946963758               |
| SNP_P4_136954_115864 | NW_004516020.1 | Scaffold590 | 115864                  | GG                              | TT              | 1946963760               |
| SNP_P4_136955_115898 | NW_004516020.1 | Scaffold590 | 115898                  | AA                              | GG              | 1946963762               |
| SNP_P4_136956_115913 | NW_004516020.1 | Scaffold590 | 115913                  | TT                              | CC              | 1946963764               |
| SNP_P4_136957_115961 | NW_004516020.1 | Scaffold590 | 115961                  | GG                              | AA              | 1946963766               |
| SNP_P4_136958_115975 | NW_004516020.1 | Scaffold590 | 115975                  | TT                              | GG              | 1946963768               |
| SNP_P4_136959_134363 | NW_004516020.1 | Scaffold590 | 134363                  | TT                              | GG              | 1946963770               |
| SNP_P4_136960_134614 | NW_004516020.1 | Scaffold590 | 134614                  | AA                              | CC              | 1946963772               |
| SNP_P4_136961_134625 | NW_004516020.1 | Scaffold590 | 134625                  | TT                              | CC              | 1946963774               |
| SNP_P4_136962_134735 | NW_004516020.1 | Scaffold590 | 134735                  | GG                              | AA              | 1946963776               |
| SNP_P4_136963_134740 | NW_004516020.1 | Scaffold590 | 134740                  | CC                              | AA              | 1946963778               |
| SNP_P4_136964_134977 | NW_004516020.1 | Scaffold590 | 134977                  | AA                              | GG              | 1946963779               |
| SNP_P4_136965_134980 | NW_004516020.1 | Scaffold590 | 134980                  | AA                              | GG              | 1946963781               |
| SNP_P4_136966_141141 | NW_004516020.1 | Scaffold590 | 141141                  | AA                              | GG              | 1946963783               |
| SNP_P4_136967_146190 | NW_004516020.1 | Scaffold590 | 146190                  | GG                              | AA              | 1946963785               |
| SNP_P4_136968_146201 | NW_004516020.1 | Scaffold590 | 146201                  | AA                              | GG              | 1946963787               |
| SNP_P4_136969_146205 | NW_004516020.1 | Scaffold590 | 146205                  | GG                              | AA              | 1946963789               |
| SNP_P4_136970_146207 | NW_004516020.1 | Scaffold590 | 146207                  | GG                              | AA              | 1946963791               |
| SNP_P4_136971_146208 | NW_004516020.1 | Scaffold590 | 146208                  | TT                              | CC              | 1946963793               |
| SNP_P4_136972_146211 | NW_004516020.1 | Scaffold590 | 146211                  | CC                              | TT              | 1946963795               |
| SNP_P4_136973_152972 | NW_004516020.1 | Scaffold590 | 152972                  | TT                              | AA              | 1946963797               |
| SNP_P4_136974_175334 | NW_004516020.1 | Scaffold590 | 175334                  | GG                              | AA              | 1946963799               |
| SNP_P4_136975_175627 | NW_004516020.1 | Scaffold590 | 175627                  | GG                              | AA              | 1946963801               |
| SNP_P4_136976_175630 | NW_004516020.1 | Scaffold590 | 175630                  | TT                              | AA              | 1946963803               |
| SNP_P4_136977_175634 | NW_004516020.1 | Scaffold590 | 175634                  | CC                              | TT              | 1946963805               |
| SNP_P4_136978_175643 | NW_004516020.1 | Scaffold590 | 175643                  | AA                              | CC              | 1946963807               |
| SNP_P4_136979_175655 | NW_004516020.1 | Scaffold590 | 175655                  | AA                              | GG              | 1946963809               |
| SNP_P4_136980_175668 | NW_004516020.1 | Scaffold590 | 175668                  | AA                              | CC              | 1946963811               |
| SNP_P4_136981_175675 | NW_004516020.1 | Scaffold590 | 175675                  | AA                              | GG              | 1946963813               |
| SNP_P4_136982_175680 | NW_004516020.1 | Scaffold590 | 175680                  | TT                              | CC              | 1946963815               |
| SNP_P4_136983_175809 | NW_004516020.1 | Scaffold590 | 175809                  | TT                              | CC              | 1946963817               |
| SNP_P4_136984_177716 | NW_004516020.1 | Scaffold590 | 177716                  | AA                              | GG              | 1946963820               |
| SNP_P4_136985_177721 | NW_004516020.1 | Scaffold590 | 177721                  | CC                              | TT              | 1946963822               |
| SNP_P4_136986_177752 | NW_004516020.1 | Scaffold590 | 177752                  | TT                              | GG              | 1946963824               |
| SNP_P4_136987_177784 | NW_004516020.1 | Scaffold590 | 177784                  | AA                              | GG              | 1946963826               |
| SNP_P4_136988_177797 | NW_004516020.1 | Scaffold590 | 177797                  | GG                              | TT              | 1946963828               |

| SNPs IDs             | Chromosome IDs | Chromosomes | Physical positions (bp) | CDC Frontier (Reference genome) | (ILWC46 & LPNB) | NCBI SNPdb Accession IDs |
|----------------------|----------------|-------------|-------------------------|---------------------------------|-----------------|--------------------------|
| SNP_P4_136989_220659 | NW_004516020.1 | Scaffold590 | 220659                  | TT                              | CC              | 1946963830               |
| SNP_P4_136990_220689 | NW_004516020.1 | Scaffold590 | 220689                  | AA                              | GG              | 1946963832               |
| SNP_P4_136991_220754 | NW_004516020.1 | Scaffold590 | 220754                  | TT                              | CC              | 1946963834               |
| SNP_P4_136992_220760 | NW_004516020.1 | Scaffold590 | 220760                  | TT                              | CC              | 1946963836               |
| SNP_P4_136993_220809 | NW_004516020.1 | Scaffold590 | 220809                  | AA                              | GG              | 1946963838               |
| SNP_P4_136994_220837 | NW_004516020.1 | Scaffold590 | 220837                  | CC                              | AA              | 1946963840               |
| SNP_P4_136995_220981 | NW_004516020.1 | Scaffold590 | 220981                  | GG                              | AA              | 1946963842               |
| SNP_P4_136996_221001 | NW_004516020.1 | Scaffold590 | 221001                  | CC                              | TT              | 1946963844               |
| SNP_P4_136997_221007 | NW_004516020.1 | Scaffold590 | 221007                  | AA                              | GG              | 1946963846               |
| SNP_P4_136998_221011 | NW_004516020.1 | Scaffold590 | 221011                  | TT                              | CC              | 1946963848               |
| SNP_P4_136999_221033 | NW_004516020.1 | Scaffold590 | 221033                  | GG                              | AA              | 1946963850               |
| SNP_P4_137000_221115 | NW_004516020.1 | Scaffold590 | 221115                  | AA                              | GG              | 1946963852               |
| SNP_P4_137001_222064 | NW_004516020.1 | Scaffold590 | 222064                  | GG                              | AA              | 1946963854               |
| SNP_P4_137002_222160 | NW_004516020.1 | Scaffold590 | 222160                  | CC                              | TT              | 1946963856               |
| SNP_P4_137003_222169 | NW_004516020.1 | Scaffold590 | 222169                  | CC                              | TT              | 1946963858               |
| SNP_P4_137004_222175 | NW_004516020.1 | Scaffold590 | 222175                  | GG                              | AA              | 1946963860               |
| SNP_P4_137005_222265 | NW_004516020.1 | Scaffold590 | 222265                  | CC                              | TT              | 1946963862               |
| SNP_P4_137006_222418 | NW_004516020.1 | Scaffold590 | 222418                  | CC                              | TT              | 1946963864               |
| SNP_P4_137007_222439 | NW_004516020.1 | Scaffold590 | 222439                  | AA                              | TT              | 1946963866               |
| SNP_P4_137008_222442 | NW_004516020.1 | Scaffold590 | 222442                  | TT                              | CC              | 1946963868               |
| SNP_P4_137009_222451 | NW_004516020.1 | Scaffold590 | 222451                  | AA                              | TT              | 1946963870               |
| SNP_P4_137010_222457 | NW_004516020.1 | Scaffold590 | 222457                  | AA                              | GG              | 1946963872               |
| SNP_P4_137011_222474 | NW_004516020.1 | Scaffold590 | 222474                  | CC                              | TT              | 1946963873               |
| SNP_P4_137012_222496 | NW_004516020.1 | Scaffold590 | 222496                  | AA                              | GG              | 1946963875               |
| SNP_P4_137013_222514 | NW_004516020.1 | Scaffold590 | 222514                  | CC                              | TT              | 1946963877               |
| SNP_P4_137014_222526 | NW_004516020.1 | Scaffold590 | 222526                  | AA                              | TT              | 1946963879               |
| SNP_P4_137015_222532 | NW_004516020.1 | Scaffold590 | 222532                  | TT                              | AA              | 1946963881               |
| SNP_P4_137016_222681 | NW_004516020.1 | Scaffold590 | 222681                  | TT                              | GG              | 1946963883               |
| SNP_P4_137017_222685 | NW_004516020.1 | Scaffold590 | 222685                  | TT                              | CC              | 1946963885               |
| SNP_P4_137018_233763 | NW_004516020.1 | Scaffold590 | 233763                  | AA                              | CC              | 1946963887               |
| SNP_P4_137019_235402 | NW_004516020.1 | Scaffold590 | 235402                  | TT                              | AA              | 1946963889               |
| SNP_P4_137020_235411 | NW_004516020.1 | Scaffold590 | 235411                  | CC                              | TT              | 1946963891               |
| SNP_P4_137021_235815 | NW_004516020.1 | Scaffold590 | 235815                  | TT                              | CC              | 1946963893               |
| SNP_P4_137022_241326 | NW_004516020.1 | Scaffold590 | 241326                  | TT                              | GG              | 1946963895               |
| SNP_P4_137023_241675 | NW_004516020.1 | Scaffold590 | 241675                  | CC                              | TT              | 1946963897               |
| SNP_P4_137024_241711 | NW_004516020.1 | Scaffold590 | 241711                  | TT                              | CC              | 1946963899               |
| SNP_P4_137025_295295 | NW_004516020.1 | Scaffold590 | 295295                  | GG                              | TT              | 1946963901               |
| SNP_P4_137026_295323 | NW_004516020.1 | Scaffold590 | 295323                  | GG                              | AA              | 1946963903               |
| SNP_P4_137027_8245   | NW_004516022.1 | Scaffold592 | 8245                    | CC                              | GG              | 1946963905               |
| SNP_P4_137028_8267   | NW_004516022.1 | Scaffold592 | 8267                    | AA                              | TT              | 1946963907               |
| SNP_P4_137029_8317   | NW_004516022.1 | Scaffold592 | 8317                    | TT                              | CC              | 1946963909               |
| SNP_P4_137030_8337   | NW_004516022.1 | Scaffold592 | 8337                    | CC                              | TT              | 1946963911               |

| SNPs IDs            | Chromosome IDs | Chromosomes | Physical positions (bp) | CDC Frontier (Reference genome) | (ILWC46 & LPNB) | NCBI SNPdb Accession IDs |
|---------------------|----------------|-------------|-------------------------|---------------------------------|-----------------|--------------------------|
| SNP_P4_137031_8375  | NW_004516022.1 | Scaffold592 | 8375                    | TT                              | CC              | 1946963913               |
| SNP_P4_137032_8425  | NW_004516022.1 | Scaffold592 | 8425                    | GG                              | AA              | 1946963915               |
| SNP_P4_137033_8504  | NW_004516022.1 | Scaffold592 | 8504                    | GG                              | TT              | 1946963917               |
| SNP_P4_137034_8575  | NW_004516022.1 | Scaffold592 | 8575                    | TT                              | CC              | 1946963919               |
| SNP_P4_137035_8578  | NW_004516022.1 | Scaffold592 | 8578                    | TT                              | CC              | 1946963921               |
| SNP_P4_137036_8614  | NW_004516022.1 | Scaffold592 | 8614                    | CC                              | TT              | 1946963923               |
| SNP_P4_137037_8707  | NW_004516022.1 | Scaffold592 | 8707                    | AA                              | TT              | 1946963925               |
| SNP_P4_137038_8816  | NW_004516022.1 | Scaffold592 | 8816                    | CC                              | TT              | 1946963927               |
| SNP_P4_137039_8891  | NW_004516022.1 | Scaffold592 | 8891                    | CC                              | TT              | 1946963929               |
| SNP_P4_137040_10312 | NW_004516022.1 | Scaffold592 | 10312                   | AA                              | TT              | 1946963931               |
| SNP_P4_137041_10883 | NW_004516022.1 | Scaffold592 | 10883                   | TT                              | GG              | 1946963933               |
| SNP_P4_137042_15430 | NW_004516022.1 | Scaffold592 | 15430                   | CC                              | TT              | 1946963935               |
| SNP_P4_137043_15567 | NW_004516022.1 | Scaffold592 | 15567                   | TT                              | CC              | 1946963937               |
| SNP_P4_137044_15766 | NW_004516022.1 | Scaffold592 | 15766                   | TT                              | AA              | 1946963939               |
| SNP_P4_137045_15794 | NW_004516022.1 | Scaffold592 | 15794                   | CC                              | GG              | 1946963941               |
| SNP_P4_137046_16012 | NW_004516022.1 | Scaffold592 | 16012                   | CC                              | GG              | 1946963943               |
| SNP_P4_137047_16060 | NW_004516022.1 | Scaffold592 | 16060                   | GG                              | AA              | 1946963945               |
| SNP_P4_137048_16964 | NW_004516022.1 | Scaffold592 | 16964                   | GG                              | TT              | 1946963947               |
| SNP_P4_137049_20295 | NW_004516022.1 | Scaffold592 | 20295                   | CC                              | AA              | 1946963949               |
| SNP_P4_137050_20768 | NW_004516022.1 | Scaffold592 | 20768                   | GG                              | AA              | 1946963951               |
| SNP_P4_137051_20780 | NW_004516022.1 | Scaffold592 | 20780                   | AA                              | TT              | 1946963953               |
| SNP_P4_137052_21423 | NW_004516022.1 | Scaffold592 | 21423                   | TT                              | CC              | 1946963955               |
| SNP_P4_137053_21432 | NW_004516022.1 | Scaffold592 | 21432                   | GG                              | TT              | 1946963957               |
| SNP_P4_137054_21456 | NW_004516022.1 | Scaffold592 | 21456                   | TT                              | AA              | 1946963959               |
| SNP_P4_137055_21590 | NW_004516022.1 | Scaffold592 | 21590                   | TT                              | CC              | 1946963961               |
| SNP_P4_137056_21698 | NW_004516022.1 | Scaffold592 | 21698                   | GG                              | AA              | 1946963963               |
| SNP_P4_137057_21848 | NW_004516022.1 | Scaffold592 | 21848                   | CC                              | TT              | 1946963965               |
| SNP_P4_137058_21936 | NW_004516022.1 | Scaffold592 | 21936                   | TT                              | CC              | 1946963967               |
| SNP_P4_137059_22788 | NW_004516022.1 | Scaffold592 | 22788                   | TT                              | AA              | 1946963969               |
| SNP_P4_137060_25680 | NW_004516022.1 | Scaffold592 | 25680                   | TT                              | AA              | 1946963971               |
| SNP_P4_137061_25715 | NW_004516022.1 | Scaffold592 | 25715                   | CC                              | GG              | 1946963973               |
| SNP_P4_137063_42427 | NW_004516022.1 | Scaffold592 | 42427                   | CC                              | TT              | 1946963975               |
| SNP_P4_137064_42459 | NW_004516022.1 | Scaffold592 | 42459                   | CC                              | GG              | 1946963977               |
| SNP_P4_137067_10458 | NW_004516023.1 | Scaffold593 | 10458                   | AA                              | TT              | 1946963979               |
| SNP_P4_137068_10477 | NW_004516023.1 | Scaffold593 | 10477                   | TT                              | GG              | 1946963981               |
| SNP_P4_137069_10609 | NW_004516023.1 | Scaffold593 | 10609                   | CC                              | TT              | 1946963983               |
| SNP_P4_137070_10638 | NW_004516023.1 | Scaffold593 | 10638                   | CC                              | TT              | 1946963985               |
| SNP_P4_137071_10641 | NW_004516023.1 | Scaffold593 | 10641                   | GG                              | AA              | 1946963987               |
| SNP_P4_137072_10840 | NW_004516023.1 | Scaffold593 | 10840                   | AA                              | GG              | 1946963989               |
| SNP_P4_137073_10947 | NW_004516023.1 | Scaffold593 | 10947                   | AA                              | GG              | 1946963991               |
| SNP_P4_137074_11016 | NW_004516023.1 | Scaffold593 | 11016                   | AA                              | CC              | 1946963993               |
| SNP_P4_137075_20018 | NW_004516023.1 | Scaffold593 | 20018                   | GG                              | CC              | 1946963995               |

| SNPs IDs             | Chromosome IDs | Chromosomes | Physical positions (bp) | CDC Frontier (Reference genome) | (ILWC46 & LPNB) | NCBI SNPdb Accession IDs |
|----------------------|----------------|-------------|-------------------------|---------------------------------|-----------------|--------------------------|
| SNP_P4_137076_20041  | NW_004516023.1 | Scaffold593 | 20041                   | GG                              | AA              | 1946963997               |
| SNP_P4_137077_28180  | NW_004516023.1 | Scaffold593 | 28180                   | TT                              | AA              | 1946963999               |
| SNP_P4_137078_28724  | NW_004516023.1 | Scaffold593 | 28724                   | GG                              | AA              | 1946964001               |
| SNP_P4_137081_126982 | NW_004516023.1 | Scaffold593 | 126982                  | GG                              | AA              | 1946964003               |
| SNP_P4_137082_134749 | NW_004516023.1 | Scaffold593 | 134749                  | AA                              | GG              | 1946964005               |
| SNP_P4_137083_145674 | NW_004516023.1 | Scaffold593 | 145674                  | AA                              | GG              | 1946964007               |
| SNP_P4_137084_177860 | NW_004516023.1 | Scaffold593 | 177860                  | AA                              | TT              | 1946964009               |
| SNP_P4_137085_192631 | NW_004516023.1 | Scaffold593 | 192631                  | GG                              | AA              | 1946964011               |
| SNP_P4_137086_192652 | NW_004516023.1 | Scaffold593 | 192652                  | GG                              | AA              | 1946964013               |
| SNP_P4_137087_192673 | NW_004516023.1 | Scaffold593 | 192673                  | AA                              | CC              | 1946964015               |
| SNP_P4_137088_194825 | NW_004516023.1 | Scaffold593 | 194825                  | CC                              | TT              | 1946964017               |
| SNP_P4_137089_194935 | NW_004516023.1 | Scaffold593 | 194935                  | AA                              | GG              | 1946964019               |
| SNP_P4_137090_194946 | NW_004516023.1 | Scaffold593 | 194946                  | CC                              | TT              | 1946964021               |
| SNP_P4_137091_196703 | NW_004516023.1 | Scaffold593 | 196703                  | CC                              | TT              | 1946964023               |
| SNP_P4_137092_198199 | NW_004516023.1 | Scaffold593 | 198199                  | AA                              | TT              | 1946964025               |
| SNP_P4_137093_201060 | NW_004516023.1 | Scaffold593 | 201060                  | GG                              | AA              | 1946964027               |
| SNP_P4_137094_201063 | NW_004516023.1 | Scaffold593 | 201063                  | GG                              | AA              | 1946964029               |
| SNP_P4_137095_208876 | NW_004516023.1 | Scaffold593 | 208876                  | TT                              | GG              | 1946964031               |
| SNP_P4_137096_208927 | NW_004516023.1 | Scaffold593 | 208927                  | TT                              | CC              | 1946964033               |
| SNP_P4_137097_208960 | NW_004516023.1 | Scaffold593 | 208960                  | CC                              | TT              | 1946964035               |
| SNP_P4_137098_208980 | NW_004516023.1 | Scaffold593 | 208980                  | GG                              | CC              | 1946964037               |
| SNP_P4_137099_209018 | NW_004516023.1 | Scaffold593 | 209018                  | AA                              | TT              | 1946964039               |
| SNP_P4_137100_209024 | NW_004516023.1 | Scaffold593 | 209024                  | TT                              | CC              | 1946964041               |
| SNP_P4_137101_209043 | NW_004516023.1 | Scaffold593 | 209043                  | TT                              | CC              | 1946964043               |
| SNP_P4_137102_209056 | NW_004516023.1 | Scaffold593 | 209056                  | CC                              | AA              | 1946964045               |
| SNP_P4_137103_209065 | NW_004516023.1 | Scaffold593 | 209065                  | CC                              | AA              | 1946964047               |
| SNP_P4_137104_209071 | NW_004516023.1 | Scaffold593 | 209071                  | CC                              | AA              | 1946964048               |
| SNP_P4_137105_209093 | NW_004516023.1 | Scaffold593 | 209093                  | GG                              | AA              | 1946964050               |
| SNP_P4_137106_209096 | NW_004516023.1 | Scaffold593 | 209096                  | AA                              | GG              | 1946964052               |
| SNP_P4_137107_209100 | NW_004516023.1 | Scaffold593 | 209100                  | TT                              | CC              | 1946964054               |
| SNP_P4_137108_209102 | NW_004516023.1 | Scaffold593 | 209102                  | GG                              | AA              | 1946964056               |
| SNP_P4_137109_209121 | NW_004516023.1 | Scaffold593 | 209121                  | CC                              | AA              | 1946964058               |
| SNP_P4_137110_209152 | NW_004516023.1 | Scaffold593 | 209152                  | TT                              | CC              | 1946964060               |
| SNP_P4_137111_209211 | NW_004516023.1 | Scaffold593 | 209211                  | CC                              | TT              | 1946964062               |
| SNP_P4_137112_209220 | NW_004516023.1 | Scaffold593 | 209220                  | CC                              | TT              | 1946964064               |
| SNP_P4_137114_209306 | NW_004516023.1 | Scaffold593 | 209306                  | CC                              | AA              | 1946964066               |
| SNP_P4_137115_209312 | NW_004516023.1 | Scaffold593 | 209312                  | AA                              | TT              | 1946964067               |
| SNP_P4_137116_209326 | NW_004516023.1 | Scaffold593 | 209326                  | AA                              | TT              | 1946964069               |
| SNP_P4_137117_209366 | NW_004516023.1 | Scaffold593 | 209366                  | GG                              | AA              | 1946964071               |
| SNP_P4_137118_209368 | NW_004516023.1 | Scaffold593 | 209368                  | AA                              | GG              | 1946964073               |
| SNP_P4_137119_209463 | NW_004516023.1 | Scaffold593 | 209463                  | GG                              | AA              | 1946964075               |
| SNP_P4_137121_209483 | NW_004516023.1 | Scaffold593 | 209483                  | CC                              | TT              | 1946964076               |

| SNPs IDs             | Chromosome IDs | Chromosomes | Physical positions (bp) | CDC Frontier (Reference genome) | (ILWC46 & LPNB) | NCBI SNPdb Accession IDs |
|----------------------|----------------|-------------|-------------------------|---------------------------------|-----------------|--------------------------|
| SNP_P4_137122_209509 | NW_004516023.1 | Scaffold593 | 209509                  | CC                              | AA              | 1946964078               |
| SNP_P4_137123_209513 | NW_004516023.1 | Scaffold593 | 209513                  | TT                              | GG              | 1946964080               |
| SNP_P4_137124_209551 | NW_004516023.1 | Scaffold593 | 209551                  | AA                              | TT              | 1946964082               |
| SNP_P4_137125_209608 | NW_004516023.1 | Scaffold593 | 209608                  | GG                              | AA              | 1946964084               |
| SNP_P4_137126_209633 | NW_004516023.1 | Scaffold593 | 209633                  | CC                              | AA              | 1946964086               |
| SNP_P4_137127_209661 | NW_004516023.1 | Scaffold593 | 209661                  | TT                              | CC              | 1946964087               |
| SNP_P4_137128_209684 | NW_004516023.1 | Scaffold593 | 209684                  | CC                              | TT              | 1946964089               |
| SNP_P4_137130_209718 | NW_004516023.1 | Scaffold593 | 209718                  | TT                              | CC              | 1946964091               |
| SNP_P4_137131_209735 | NW_004516023.1 | Scaffold593 | 209735                  | AA                              | CC              | 1946964093               |
| SNP_P4_137132_209927 | NW_004516023.1 | Scaffold593 | 209927                  | GG                              | AA              | 1946964095               |
| SNP_P4_137133_209934 | NW_004516023.1 | Scaffold593 | 209934                  | AA                              | TT              | 1946964097               |
| SNP_P4_137134_209936 | NW_004516023.1 | Scaffold593 | 209936                  | GG                              | AA              | 1946964099               |
| SNP_P4_137136_210112 | NW_004516023.1 | Scaffold593 | 210112                  | AA                              | GG              | 1946964101               |
| SNP_P4_137137_210127 | NW_004516023.1 | Scaffold593 | 210127                  | CC                              | TT              | 1946964103               |
| SNP_P4_137138_210149 | NW_004516023.1 | Scaffold593 | 210149                  | AA                              | GG              | 1946964105               |
| SNP_P4_137139_210156 | NW_004516023.1 | Scaffold593 | 210156                  | CC                              | TT              | 1946964107               |
| SNP_P4_137140_210192 | NW_004516023.1 | Scaffold593 | 210192                  | TT                              | AA              | 1946964109               |
| SNP_P4_137141_210203 | NW_004516023.1 | Scaffold593 | 210203                  | CC                              | AA              | 1946964111               |
| SNP_P4_137142_210217 | NW_004516023.1 | Scaffold593 | 210217                  | CC                              | AA              | 1946964113               |
| SNP_P4_137143_210235 | NW_004516023.1 | Scaffold593 | 210235                  | AA                              | GG              | 1946964115               |
| SNP_P4_137144_210290 | NW_004516023.1 | Scaffold593 | 210290                  | GG                              | CC              | 1946964117               |
| SNP_P4_137145_210315 | NW_004516023.1 | Scaffold593 | 210315                  | GG                              | CC              | 1946964119               |
| SNP_P4_137146_210347 | NW_004516023.1 | Scaffold593 | 210347                  | AA                              | GG              | 1946964121               |
| SNP_P4_137147_210811 | NW_004516023.1 | Scaffold593 | 210811                  | CC                              | GG              | 1946964123               |
| SNP_P4_137148_211521 | NW_004516023.1 | Scaffold593 | 211521                  | AA                              | TT              | 1946964125               |
| SNP_P4_137149_211606 | NW_004516023.1 | Scaffold593 | 211606                  | TT                              | AA              | 1946964127               |
| SNP_P4_137150_211609 | NW_004516023.1 | Scaffold593 | 211609                  | CC                              | TT              | 1946964129               |
| SNP_P4_137152_211749 | NW_004516023.1 | Scaffold593 | 211749                  | TT                              | CC              | 1946964131               |
| SNP_P4_137153_211834 | NW_004516023.1 | Scaffold593 | 211834                  | AA                              | GG              | 1946964133               |
| SNP_P4_137154_211859 | NW_004516023.1 | Scaffold593 | 211859                  | CC                              | TT              | 1946964135               |
| SNP_P4_137155_2343   | NW_004516024.1 | Scaffold594 | 2343                    | CC                              | AA              | 1946964137               |
| SNP_P4_137156_3487   | NW_004516024.1 | Scaffold594 | 3487                    | GG                              | TT              | 1946964139               |
| SNP_P4_137157_3812   | NW_004516024.1 | Scaffold594 | 3812                    | AA                              | GG              | 1946964141               |
| SNP_P4_137158_6921   | NW_004516028.1 | Scaffold598 | 6921                    | TT                              | AA              | 1946964143               |
| SNP_P4_137159_7807   | NW_004516028.1 | Scaffold598 | 7807                    | CC                              | AA              | 1946964145               |
| SNP_P4_137160_7872   | NW_004516028.1 | Scaffold598 | 7872                    | GG                              | AA              | 1946964147               |
| SNP_P4_137161_21895  | NW_004516028.1 | Scaffold598 | 21895                   | AA                              | TT              | 1946964149               |
| SNP_P4_137162_21968  | NW_004516028.1 | Scaffold598 | 21968                   | GG                              | TT              | 1946964151               |
| SNP_P4_137163_21991  | NW_004516028.1 | Scaffold598 | 21991                   | CC                              | TT              | 1946964153               |
| SNP_P4_137164_21993  | NW_004516028.1 | Scaffold598 | 21993                   | TT                              | AA              | 1946964155               |
| SNP_P4_137165_22032  | NW_004516028.1 | Scaffold598 | 22032                   | CC                              | TT              | 1946964157               |
| SNP_P4_137166_22039  | NW_004516028.1 | Scaffold598 | 22039                   | AA                              | CC              | 1946964159               |



| SNPs IDs             | Chromosome IDs | Chromosomes | Physical positions (bp) | CDC Frontier (Reference genome) | (ILWC46 & LPNB) | NCBI SNPdb Accession IDs |
|----------------------|----------------|-------------|-------------------------|---------------------------------|-----------------|--------------------------|
| SNP_P4_137167_22041  | NW_004516028.1 | Scaffold598 | 22041                   | CC                              | AA              | 1946964161               |
| SNP_P4_137168_22045  | NW_004516028.1 | Scaffold598 | 22045                   | AA                              | TT              | 1946964163               |
| SNP_P4_137169_22129  | NW_004516028.1 | Scaffold598 | 22129                   | GG                              | TT              | 1946964165               |
| SNP_P4_137170_37042  | NW_004516028.1 | Scaffold598 | 37042                   | AA                              | GG              | 1946964167               |
| SNP_P4_137171_37047  | NW_004516028.1 | Scaffold598 | 37047                   | AA                              | GG              | 1946964169               |
| SNP_P4_137172_38065  | NW_004516028.1 | Scaffold598 | 38065                   | GG                              | AA              | 1946964171               |
| SNP_P4_137173_38202  | NW_004516028.1 | Scaffold598 | 38202                   | GG                              | AA              | 1946964173               |
| SNP_P4_137174_46153  | NW_004516028.1 | Scaffold598 | 46153                   | CC                              | TT              | 1946964175               |
| SNP_P4_137175_78628  | NW_004516028.1 | Scaffold598 | 78628                   | GG                              | AA              | 1946964177               |
| SNP_P4_137176_78629  | NW_004516028.1 | Scaffold598 | 78629                   | TT                              | CC              | 1946964179               |
| SNP_P4_137177_78631  | NW_004516028.1 | Scaffold598 | 78631                   | GG                              | TT              | 1946964181               |
| SNP_P4_137178_79003  | NW_004516028.1 | Scaffold598 | 79003                   | TT                              | GG              | 1946964182               |
| SNP_P4_137179_84135  | NW_004516028.1 | Scaffold598 | 84135                   | TT                              | AA              | 1946964184               |
| SNP_P4_137181_89243  | NW_004516028.1 | Scaffold598 | 89243                   | AA                              | GG              | 1946964186               |
| SNP_P4_137182_89504  | NW_004516028.1 | Scaffold598 | 89504                   | GG                              | TT              | 1946964188               |
| SNP_P4_137185_95951  | NW_004516028.1 | Scaffold598 | 95951                   | AA                              | TT              | 1946964190               |
| SNP_P4_137187_116189 | NW_004516028.1 | Scaffold598 | 116189                  | TT                              | CC              | 1946964192               |
| SNP_P4_137188_125584 | NW_004516028.1 | Scaffold598 | 125584                  | TT                              | CC              | 1946964194               |
| SNP_P4_137189_126025 | NW_004516028.1 | Scaffold598 | 126025                  | CC                              | TT              | 1946964196               |
| SNP_P4_137190_126078 | NW_004516028.1 | Scaffold598 | 126078                  | TT                              | CC              | 1946964198               |
| SNP_P4_137191_126090 | NW_004516028.1 | Scaffold598 | 126090                  | AA                              | TT              | 1946964200               |
| SNP_P4_137192_126091 | NW_004516028.1 | Scaffold598 | 126091                  | TT                              | AA              | 1946964202               |
| SNP_P4_137193_126104 | NW_004516028.1 | Scaffold598 | 126104                  | CC                              | AA              | 1946964204               |
| SNP_P4_137194_131993 | NW_004516028.1 | Scaffold598 | 131993                  | AA                              | TT              | 1946964206               |
| SNP_P4_137195_138174 | NW_004516028.1 | Scaffold598 | 138174                  | CC                              | TT              | 1946964208               |
| SNP_P4_137196_158273 | NW_004516028.1 | Scaffold598 | 158273                  | AA                              | GG              | 1946964210               |
| SNP_P4_137197_159975 | NW_004516028.1 | Scaffold598 | 159975                  | TT                              | CC              | 1946964212               |
| SNP_P4_137198_176943 | NW_004516028.1 | Scaffold598 | 176943                  | GG                              | AA              | 1946964214               |
| SNP_P4_137199_183254 | NW_004516028.1 | Scaffold598 | 183254                  | GG                              | AA              | 1946964216               |
| SNP_P4_137200_183575 | NW_004516028.1 | Scaffold598 | 183575                  | GG                              | AA              | 1946964218               |
| SNP_P4_137202_210635 | NW_004516028.1 | Scaffold598 | 210635                  | GG                              | TT              | 1946964220               |
| SNP_P4_137203_215575 | NW_004516028.1 | Scaffold598 | 215575                  | AA                              | CC              | 1946964222               |
| SNP_P4_137204_219052 | NW_004516028.1 | Scaffold598 | 219052                  | CC                              | TT              | 1946964224               |
| SNP_P4_137205_223649 | NW_004516028.1 | Scaffold598 | 223649                  | TT                              | CC              | 1946964226               |
| SNP_P4_137206_231064 | NW_004516028.1 | Scaffold598 | 231064                  | GG                              | AA              | 1946964228               |
| SNP_P4_137207_231232 | NW_004516028.1 | Scaffold598 | 231232                  | CC                              | TT              | 1946964230               |
| SNP_P4_137208_231246 | NW_004516028.1 | Scaffold598 | 231246                  | AA                              | TT              | 1946964232               |
| SNP_P4_137209_231380 | NW_004516028.1 | Scaffold598 | 231380                  | AA                              | GG              | 1946964234               |
| SNP_P4_137210_231425 | NW_004516028.1 | Scaffold598 | 231425                  | TT                              | CC              | 1946964236               |
| SNP_P4_137211_231429 | NW_004516028.1 | Scaffold598 | 231429                  | AA                              | CC              | 1946964238               |
| SNP_P4_137212_231434 | NW_004516028.1 | Scaffold598 | 231434                  | TT                              | CC              | 1946964240               |
| SNP_P4_137213_231454 | NW_004516028.1 | Scaffold598 | 231454                  | AA                              | CC              | 1946964242               |

| SNPs IDs             | Chromosome IDs | Chromosomes | Physical positions (bp) | CDC Frontier (Reference genome) | (ILWC46 & LPNB) | NCBI SNPdb Accession IDs |
|----------------------|----------------|-------------|-------------------------|---------------------------------|-----------------|--------------------------|
| SNP_P4_137214_231473 | NW_004516028.1 | Scaffold598 | 231473                  | TT                              | AA              | 1946964244               |
| SNP_P4_137215_231521 | NW_004516028.1 | Scaffold598 | 231521                  | TT                              | CC              | 1946964246               |
| SNP_P4_137216_232949 | NW_004516028.1 | Scaffold598 | 232949                  | AA                              | CC              | 1946964248               |
| SNP_P4_137217_236900 | NW_004516028.1 | Scaffold598 | 236900                  | AA                              | GG              | 1946964250               |
| SNP_P4_137218_237519 | NW_004516028.1 | Scaffold598 | 237519                  | GG                              | TT              | 1946964252               |
| SNP_P4_137219_237559 | NW_004516028.1 | Scaffold598 | 237559                  | GG                              | AA              | 1946964253               |
| SNP_P4_137220_237811 | NW_004516028.1 | Scaffold598 | 237811                  | TT                              | GG              | 1946964255               |
| SNP_P4_137222_245326 | NW_004516028.1 | Scaffold598 | 245326                  | AA                              | TT              | 1946964257               |
| SNP_P4_137223_245344 | NW_004516028.1 | Scaffold598 | 245344                  | GG                              | AA              | 1946964259               |
| SNP_P4_137225_263850 | NW_004516028.1 | Scaffold598 | 263850                  | AA                              | GG              | 1946964261               |
| SNP_P4_137226_268438 | NW_004516028.1 | Scaffold598 | 268438                  | CC                              | TT              | 1946964263               |
| SNP_P4_137227_268805 | NW_004516028.1 | Scaffold598 | 268805                  | TT                              | CC              | 1946964265               |
| SNP_P4_137228_269160 | NW_004516028.1 | Scaffold598 | 269160                  | TT                              | CC              | 1946964267               |
| SNP_P4_137230_275705 | NW_004516028.1 | Scaffold598 | 275705                  | GG                              | TT              | 1946964269               |
| SNP_P4_137232_280739 | NW_004516028.1 | Scaffold598 | 280739                  | TT                              | GG              | 1946964271               |
| SNP_P4_137233_281552 | NW_004516028.1 | Scaffold598 | 281552                  | AA                              | GG              | 1946964273               |
| SNP_P4_137234_283422 | NW_004516028.1 | Scaffold598 | 283422                  | AA                              | TT              | 1946964275               |
| SNP_P4_137235_302579 | NW_004516028.1 | Scaffold598 | 302579                  | AA                              | TT              | 1946964277               |
| SNP_P4_137236_304090 | NW_004516028.1 | Scaffold598 | 304090                  | TT                              | CC              | 1946964279               |
| SNP_P4_137237_304093 | NW_004516028.1 | Scaffold598 | 304093                  | CC                              | TT              | 1946964281               |
| SNP_P4_137239_312318 | NW_004516028.1 | Scaffold598 | 312318                  | CC                              | GG              | 1946964283               |
| SNP_P4_137240_315097 | NW_004516028.1 | Scaffold598 | 315097                  | CC                              | AA              | 1946964285               |
| SNP_P4_137241_315216 | NW_004516028.1 | Scaffold598 | 315216                  | TT                              | CC              | 1946964287               |
| SNP_P4_137242_315335 | NW_004516028.1 | Scaffold598 | 315335                  | GG                              | CC              | 1946964289               |
| SNP_P4_137243_315355 | NW_004516028.1 | Scaffold598 | 315355                  | AA                              | TT              | 1946964291               |
| SNP_P4_137244_315375 | NW_004516028.1 | Scaffold598 | 315375                  | TT                              | GG              | 1946964293               |
| SNP_P4_137245_315403 | NW_004516028.1 | Scaffold598 | 315403                  | GG                              | AA              | 1946964295               |
| SNP_P4_137246_328750 | NW_004516028.1 | Scaffold598 | 328750                  | TT                              | GG              | 1946964297               |
| SNP_P4_137247_330525 | NW_004516028.1 | Scaffold598 | 330525                  | TT                              | CC              | 1946964299               |
| SNP_P4_137248_355856 | NW_004516028.1 | Scaffold598 | 355856                  | GG                              | AA              | 1946964301               |
| SNP_P4_137249_356272 | NW_004516028.1 | Scaffold598 | 356272                  | AA                              | CC              | 1946964303               |
| SNP_P4_137250_357172 | NW_004516028.1 | Scaffold598 | 357172                  | TT                              | CC              | 1946964305               |
| SNP_P4_137251_357630 | NW_004516028.1 | Scaffold598 | 357630                  | TT                              | AA              | 1946964307               |
| SNP_P4_137252_358084 | NW_004516028.1 | Scaffold598 | 358084                  | TT                              | CC              | 1946964309               |
| SNP_P4_137253_360748 | NW_004516028.1 | Scaffold598 | 360748                  | GG                              | AA              | 1946964311               |
| SNP_P4_137254_361176 | NW_004516028.1 | Scaffold598 | 361176                  | CC                              | TT              | 1946964313               |
| SNP_P4_137255_364195 | NW_004516028.1 | Scaffold598 | 364195                  | CC                              | TT              | 1946964315               |
| SNP_P4_137256_367067 | NW_004516028.1 | Scaffold598 | 367067                  | TT                              | CC              | 1946964317               |
| SNP_P4_137257_374435 | NW_004516028.1 | Scaffold598 | 374435                  | AA                              | TT              | 1946964319               |
| SNP_P4_137258_374451 | NW_004516028.1 | Scaffold598 | 374451                  | GG                              | AA              | 1946964321               |
| SNP_P4_137259_377003 | NW_004516028.1 | Scaffold598 | 377003                  | TT                              | GG              | 1946964322               |
| SNP_P4_137260_380756 | NW_004516028.1 | Scaffold598 | 380756                  | TT                              | CC              | 1946964324               |

| SNPs IDs             | Chromosome IDs | Chromosomes | Physical positions (bp) | CDC Frontier (Reference genome) | (ILWC46 & LPNB) | NCBI SNPdb Accession IDs |
|----------------------|----------------|-------------|-------------------------|---------------------------------|-----------------|--------------------------|
| SNP_P4_137261_383944 | NW_004516028.1 | Scaffold598 | 383944                  | CC                              | TT              | 1946964326               |
| SNP_P4_137263_392343 | NW_004516028.1 | Scaffold598 | 392343                  | GG                              | AA              | 1946964328               |
| SNP_P4_137264_392724 | NW_004516028.1 | Scaffold598 | 392724                  | CC                              | AA              | 1946964330               |
| SNP_P4_137265_394800 | NW_004516028.1 | Scaffold598 | 394800                  | GG                              | CC              | 1946964332               |
| SNP_P4_137266_401706 | NW_004516028.1 | Scaffold598 | 401706                  | GG                              | AA              | 1946964334               |
| SNP_P4_137267_409231 | NW_004516028.1 | Scaffold598 | 409231                  | GG                              | AA              | 1946964336               |
| SNP_P4_137268_409717 | NW_004516028.1 | Scaffold598 | 409717                  | TT                              | AA              | 1946964338               |
| SNP_P4_137270_423734 | NW_004516028.1 | Scaffold598 | 423734                  | CC                              | AA              | 1946964340               |
| SNP_P4_137271_423772 | NW_004516028.1 | Scaffold598 | 423772                  | TT                              | AA              | 1946964342               |
| SNP_P4_137272_423779 | NW_004516028.1 | Scaffold598 | 423779                  | GG                              | TT              | 1946964344               |
| SNP_P4_137273_424459 | NW_004516028.1 | Scaffold598 | 424459                  | TT                              | AA              | 1946964346               |
| SNP_P4_137274_434225 | NW_004516028.1 | Scaffold598 | 434225                  | GG                              | AA              | 1946964348               |
| SNP_P4_137275_434231 | NW_004516028.1 | Scaffold598 | 434231                  | GG                              | AA              | 1946964350               |
| SNP_P4_137276_434246 | NW_004516028.1 | Scaffold598 | 434246                  | CC                              | TT              | 1946964352               |
| SNP_P4_137277_434253 | NW_004516028.1 | Scaffold598 | 434253                  | AA                              | TT              | 1946964354               |
| SNP_P4_137278_434294 | NW_004516028.1 | Scaffold598 | 434294                  | GG                              | AA              | 1946964356               |
| SNP_P4_137279_436840 | NW_004516028.1 | Scaffold598 | 436840                  | CC                              | TT              | 1946964358               |
| SNP_P4_137280_441471 | NW_004516028.1 | Scaffold598 | 441471                  | TT                              | CC              | 1946964360               |
| SNP_P4_137281_445378 | NW_004516028.1 | Scaffold598 | 445378                  | TT                              | CC              | 1946964362               |
| SNP_P4_137282_445449 | NW_004516028.1 | Scaffold598 | 445449                  | TT                              | CC              | 1946964364               |
| SNP_P4_137283_445495 | NW_004516028.1 | Scaffold598 | 445495                  | AA                              | GG              | 1946964366               |
| SNP_P4_137284_445592 | NW_004516028.1 | Scaffold598 | 445592                  | TT                              | GG              | 1946964368               |
| SNP_P4_137285_446236 | NW_004516028.1 | Scaffold598 | 446236                  | CC                              | AA              | 1946964370               |
| SNP_P4_137286_446327 | NW_004516028.1 | Scaffold598 | 446327                  | CC                              | TT              | 1946964372               |
| SNP_P4_137287_451179 | NW_004516028.1 | Scaffold598 | 451179                  | CC                              | TT              | 1946964374               |
| SNP_P4_137288_451191 | NW_004516028.1 | Scaffold598 | 451191                  | AA                              | CC              | 1946964375               |
| SNP_P4_137289_451214 | NW_004516028.1 | Scaffold598 | 451214                  | GG                              | AA              | 1946964377               |
| SNP_P4_137290_455130 | NW_004516028.1 | Scaffold598 | 455130                  | CC                              | TT              | 1946964379               |
| SNP_P4_137291_455163 | NW_004516028.1 | Scaffold598 | 455163                  | AA                              | TT              | 1946964381               |
| SNP_P4_137292_455172 | NW_004516028.1 | Scaffold598 | 455172                  | AA                              | GG              | 1946964383               |
| SNP_P4_137294_455307 | NW_004516028.1 | Scaffold598 | 455307                  | TT                              | AA              | 1946964385               |
| SNP_P4_137295_455415 | NW_004516028.1 | Scaffold598 | 455415                  | CC                              | TT              | 1946964387               |
| SNP_P4_137296_455427 | NW_004516028.1 | Scaffold598 | 455427                  | AA                              | TT              | 1946964389               |
| SNP_P4_137297_455433 | NW_004516028.1 | Scaffold598 | 455433                  | TT                              | CC              | 1946964391               |
| SNP_P4_137298_455445 | NW_004516028.1 | Scaffold598 | 455445                  | TT                              | CC              | 1946964393               |
| SNP_P4_137299_455457 | NW_004516028.1 | Scaffold598 | 455457                  | CC                              | TT              | 1946964395               |
| SNP_P4_137301_455511 | NW_004516028.1 | Scaffold598 | 455511                  | AA                              | GG              | 1946964397               |
| SNP_P4_137302_456460 | NW_004516028.1 | Scaffold598 | 456460                  | GG                              | AA              | 1946964399               |
| SNP_P4_137303_456637 | NW_004516028.1 | Scaffold598 | 456637                  | AA                              | GG              | 1946964401               |
| SNP_P4_137304_456712 | NW_004516028.1 | Scaffold598 | 456712                  | CC                              | TT              | 1946964403               |
| SNP_P4_137305_456715 | NW_004516028.1 | Scaffold598 | 456715                  | TT                              | CC              | 1946964405               |
| SNP_P4_137306_456727 | NW_004516028.1 | Scaffold598 | 456727                  | TT                              | CC              | 1946964407               |

| SNPs IDs             | Chromosome IDs | Chromosomes | Physical positions (bp) | CDC Frontier (Reference genome) | (ILWC46 & LPNB) | NCBI SNPdb Accession IDs |
|----------------------|----------------|-------------|-------------------------|---------------------------------|-----------------|--------------------------|
| SNP_P4_137307_459198 | NW_004516028.1 | Scaffold598 | 459198                  | GG                              | AA              | 1946964409               |
| SNP_P4_137308_465590 | NW_004516028.1 | Scaffold598 | 465590                  | AA                              | GG              | 1946964411               |
| SNP_P4_137309_465624 | NW_004516028.1 | Scaffold598 | 465624                  | TT                              | AA              | 1946964413               |
| SNP_P4_137310_466034 | NW_004516028.1 | Scaffold598 | 466034                  | AA                              | GG              | 1946964415               |
| SNP_P4_137312_473071 | NW_004516028.1 | Scaffold598 | 473071                  | AA                              | CC              | 1946964417               |
| SNP_P4_137313_473642 | NW_004516028.1 | Scaffold598 | 473642                  | CC                              | TT              | 1946964419               |
| SNP_P4_137314_475292 | NW_004516028.1 | Scaffold598 | 475292                  | TT                              | CC              | 1946964421               |
| SNP_P4_137315_478016 | NW_004516028.1 | Scaffold598 | 478016                  | AA                              | GG              | 1946964423               |
| SNP_P4_137317_487873 | NW_004516028.1 | Scaffold598 | 487873                  | AA                              | GG              | 1946964425               |
| SNP_P4_137319_531304 | NW_004516028.1 | Scaffold598 | 531304                  | CC                              | AA              | 1946964427               |
| SNP_P4_137320_533190 | NW_004516028.1 | Scaffold598 | 533190                  | GG                              | TT              | 1946964429               |
| SNP_P4_137321_537658 | NW_004516028.1 | Scaffold598 | 537658                  | TT                              | AA              | 1946964431               |
| SNP_P4_137322_539284 | NW_004516028.1 | Scaffold598 | 539284                  | TT                              | CC              | 1946964433               |
| SNP_P4_137323_547593 | NW_004516028.1 | Scaffold598 | 547593                  | TT                              | AA              | 1946964435               |
| SNP_P4_137324_547594 | NW_004516028.1 | Scaffold598 | 547594                  | TT                              | AA              | 1946964437               |
| SNP_P4_137325_561325 | NW_004516028.1 | Scaffold598 | 561325                  | TT                              | AA              | 1946964439               |
| SNP_P4_137326_563088 | NW_004516028.1 | Scaffold598 | 563088                  | CC                              | TT              | 1946964441               |
| SNP_P4_137327_563965 | NW_004516028.1 | Scaffold598 | 563965                  | TT                              | CC              | 1946964443               |
| SNP_P4_137328_565340 | NW_004516028.1 | Scaffold598 | 565340                  | GG                              | AA              | 1946964445               |
| SNP_P4_137329_565444 | NW_004516028.1 | Scaffold598 | 565444                  | TT                              | CC              | 1946964447               |
| SNP_P4_137330_565946 | NW_004516028.1 | Scaffold598 | 565946                  | GG                              | AA              | 1946964449               |
| SNP_P4_137331_568491 | NW_004516028.1 | Scaffold598 | 568491                  | TT                              | CC              | 1946964451               |
| SNP_P4_137333_7971   | NW_004516029.1 | Scaffold599 | 7971                    | CC                              | GG              | 1946964453               |
| SNP_P4_137334_8021   | NW_004516029.1 | Scaffold599 | 8021                    | TT                              | AA              | 1946964455               |
| SNP_P4_137335_9658   | NW_004516029.1 | Scaffold599 | 9658                    | TT                              | CC              | 1946964457               |
| SNP_P4_137336_9749   | NW_004516029.1 | Scaffold599 | 9749                    | CC                              | AA              | 1946964459               |
| SNP_P4_137337_9980   | NW_004516029.1 | Scaffold599 | 9980                    | CC                              | AA              | 1946964461               |
| SNP_P4_137338_9983   | NW_004516029.1 | Scaffold599 | 9983                    | CC                              | TT              | 1946964463               |
| SNP_P4_137339_10084  | NW_004516029.1 | Scaffold599 | 10084                   | TT                              | AA              | 1946964465               |
| SNP_P4_137340_10097  | NW_004516029.1 | Scaffold599 | 10097                   | GG                              | AA              | 1946964467               |
| SNP_P4_137341_10167  | NW_004516029.1 | Scaffold599 | 10167                   | CC                              | GG              | 1946964469               |
| SNP_P4_137342_10170  | NW_004516029.1 | Scaffold599 | 10170                   | GG                              | CC              | 1946964471               |
| SNP_P4_137343_10251  | NW_004516029.1 | Scaffold599 | 10251                   | CC                              | TT              | 1946964473               |
| SNP_P4_137344_10262  | NW_004516029.1 | Scaffold599 | 10262                   | TT                              | AA              | 1946964475               |
| SNP_P4_137345_10731  | NW_004516029.1 | Scaffold599 | 10731                   | GG                              | AA              | 1946964477               |
| SNP_P4_137346_11125  | NW_004516029.1 | Scaffold599 | 11125                   | GG                              | AA              | 1946964479               |
| SNP_P4_137347_11309  | NW_004516029.1 | Scaffold599 | 11309                   | AA                              | TT              | 1946964481               |
| SNP_P4_137348_12806  | NW_004516029.1 | Scaffold599 | 12806                   | CC                              | TT              | 1946964483               |
| SNP_P4_137349_12968  | NW_004516029.1 | Scaffold599 | 12968                   | CC                              | TT              | 1946964485               |
| SNP_P4_137350_13635  | NW_004516029.1 | Scaffold599 | 13635                   | TT                              | AA              | 1946964487               |
| SNP_P4_137351_22093  | NW_004516029.1 | Scaffold599 | 22093                   | AA                              | CC              | 1946964489               |
| SNP_P4_137352_22365  | NW_004516029.1 | Scaffold599 | 22365                   | TT                              | CC              | 1946964491               |

| SNPs IDs            | Chromosome IDs | Chromosomes | Physical positions (bp) | CDC Frontier (Reference genome) | (ILWC46 & LPNB) | NCBI SNPdb Accession IDs |
|---------------------|----------------|-------------|-------------------------|---------------------------------|-----------------|--------------------------|
| SNP_P4_137353_22988 | NW_004516029.1 | Scaffold599 | 22988                   | TT                              | CC              | 1946964493               |
| SNP_P4_137354_23825 | NW_004516029.1 | Scaffold599 | 23825                   | GG                              | AA              | 1946964494               |
| SNP_P4_137355_24656 | NW_004516029.1 | Scaffold599 | 24656                   | CC                              | AA              | 1946964496               |
| SNP_P4_137356_25270 | NW_004516029.1 | Scaffold599 | 25270                   | TT                              | GG              | 1946964498               |
| SNP_P4_137357_25273 | NW_004516029.1 | Scaffold599 | 25273                   | TT                              | GG              | 1946964500               |
| SNP_P4_137358_25392 | NW_004516029.1 | Scaffold599 | 25392                   | TT                              | CC              | 1946964502               |
| SNP_P4_137359_25845 | NW_004516029.1 | Scaffold599 | 25845                   | AA                              | GG              | 1946964504               |
| SNP_P4_137360_26776 | NW_004516029.1 | Scaffold599 | 26776                   | AA                              | CC              | 1946964506               |
| SNP_P4_137361_26833 | NW_004516029.1 | Scaffold599 | 26833                   | TT                              | CC              | 1946964507               |
| SNP_P4_137362_27801 | NW_004516029.1 | Scaffold599 | 27801                   | CC                              | TT              | 1946964509               |
| SNP_P4_137363_28734 | NW_004516029.1 | Scaffold599 | 28734                   | CC                              | TT              | 1946964511               |
| SNP_P4_137364_29021 | NW_004516029.1 | Scaffold599 | 29021                   | CC                              | AA              | 1946964513               |
| SNP_P4_137365_29267 | NW_004516029.1 | Scaffold599 | 29267                   | CC                              | AA              | 1946964515               |
| SNP_P4_137367_39395 | NW_004516029.1 | Scaffold599 | 39395                   | AA                              | TT              | 1946964517               |
| SNP_P4_137368_39423 | NW_004516029.1 | Scaffold599 | 39423                   | AA                              | TT              | 1946964519               |
| SNP_P4_137370_39441 | NW_004516029.1 | Scaffold599 | 39441                   | AA                              | GG              | 1946964521               |
| SNP_P4_137371_39448 | NW_004516029.1 | Scaffold599 | 39448                   | AA                              | TT              | 1946964523               |
| SNP_P4_137372_42193 | NW_004516029.1 | Scaffold599 | 42193                   | GG                              | TT              | 1946964525               |
| SNP_P4_137373_42377 | NW_004516029.1 | Scaffold599 | 42377                   | TT                              | CC              | 1946964527               |
| SNP_P4_137374_42393 | NW_004516029.1 | Scaffold599 | 42393                   | GG                              | AA              | 1946964529               |
| SNP_P4_137375_42868 | NW_004516029.1 | Scaffold599 | 42868                   | CC                              | TT              | 1946964531               |
| SNP_P4_137377_51197 | NW_004516029.1 | Scaffold599 | 51197                   | TT                              | CC              | 1946964533               |
| SNP_P4_137378_51252 | NW_004516029.1 | Scaffold599 | 51252                   | TT                              | CC              | 1946964535               |
| SNP_P4_137379_51275 | NW_004516029.1 | Scaffold599 | 51275                   | AA                              | TT              | 1946964537               |
| SNP_P4_137380_52443 | NW_004516029.1 | Scaffold599 | 52443                   | TT                              | GG              | 1946964539               |
| SNP_P4_137381_52465 | NW_004516029.1 | Scaffold599 | 52465                   | CC                              | GG              | 1946964541               |
| SNP_P4_137382_52965 | NW_004516029.1 | Scaffold599 | 52965                   | AA                              | CC              | 1946964543               |
| SNP_P4_137383_54334 | NW_004516029.1 | Scaffold599 | 54334                   | CC                              | AA              | 1946964545               |
| SNP_P4_137385_55368 | NW_004516029.1 | Scaffold599 | 55368                   | AA                              | TT              | 1946964547               |
| SNP_P4_137386_55374 | NW_004516029.1 | Scaffold599 | 55374                   | AA                              | TT              | 1946964549               |
| SNP_P4_137387_55375 | NW_004516029.1 | Scaffold599 | 55375                   | CC                              | TT              | 1946964551               |
| SNP_P4_137388_55379 | NW_004516029.1 | Scaffold599 | 55379                   | GG                              | AA              | 1946964553               |
| SNP_P4_137389_55389 | NW_004516029.1 | Scaffold599 | 55389                   | CC                              | TT              | 1946964555               |
| SNP_P4_137390_55395 | NW_004516029.1 | Scaffold599 | 55395                   | CC                              | TT              | 1946964557               |
| SNP_P4_137391_56239 | NW_004516029.1 | Scaffold599 | 56239                   | CC                              | AA              | 1946964559               |
| SNP_P4_137392_56457 | NW_004516029.1 | Scaffold599 | 56457                   | AA                              | GG              | 1946964561               |
| SNP_P4_137394_57011 | NW_004516029.1 | Scaffold599 | 57011                   | GG                              | AA              | 1946964563               |
| SNP_P4_137395_57012 | NW_004516029.1 | Scaffold599 | 57012                   | TT                              | GG              | 1946964565               |
| SNP_P4_137396_57016 | NW_004516029.1 | Scaffold599 | 57016                   | TT                              | CC              | 1946964567               |
| SNP_P4_137397_57025 | NW_004516029.1 | Scaffold599 | 57025                   | AA                              | GG              | 1946964569               |
| SNP_P4_137398_57027 | NW_004516029.1 | Scaffold599 | 57027                   | TT                              | CC              | 1946964571               |
| SNP_P4_137399_57056 | NW_004516029.1 | Scaffold599 | 57056                   | AA                              | CC              | 1946964573               |

| SNPs IDs             | Chromosome IDs | Chromosomes | Physical positions (bp) | CDC Frontier (Reference genome) | (ILWC46 & LPNB) | NCBI SNPdb Accession IDs |
|----------------------|----------------|-------------|-------------------------|---------------------------------|-----------------|--------------------------|
| SNP_P4_137400_57069  | NW_004516029.1 | Scaffold599 | 57069                   | AA                              | GG              | 1946964575               |
| SNP_P4_137402_57584  | NW_004516029.1 | Scaffold599 | 57584                   | CC                              | GG              | 1946964577               |
| SNP_P4_137403_58380  | NW_004516029.1 | Scaffold599 | 58380                   | GG                              | TT              | 1946964579               |
| SNP_P4_137404_58576  | NW_004516029.1 | Scaffold599 | 58576                   | GG                              | AA              | 1946964581               |
| SNP_P4_137405_58872  | NW_004516029.1 | Scaffold599 | 58872                   | GG                              | CC              | 1946964583               |
| SNP_P4_137406_59085  | NW_004516029.1 | Scaffold599 | 59085                   | TT                              | AA              | 1946964585               |
| SNP_P4_137407_65977  | NW_004516029.1 | Scaffold599 | 65977                   | CC                              | GG              | 1946964587               |
| SNP_P4_137408_74700  | NW_004516029.1 | Scaffold599 | 74700                   | GG                              | AA              | 1946964589               |
| SNP_P4_137409_75719  | NW_004516029.1 | Scaffold599 | 75719                   | CC                              | AA              | 1946964591               |
| SNP_P4_137410_76580  | NW_004516029.1 | Scaffold599 | 76580                   | CC                              | TT              | 1946964593               |
| SNP_P4_137411_76588  | NW_004516029.1 | Scaffold599 | 76588                   | CC                              | TT              | 1946964595               |
| SNP_P4_137415_84200  | NW_004516029.1 | Scaffold599 | 84200                   | CC                              | TT              | 1946964597               |
| SNP_P4_137416_87778  | NW_004516029.1 | Scaffold599 | 87778                   | AA                              | GG              | 1946964599               |
| SNP_P4_137417_88019  | NW_004516029.1 | Scaffold599 | 88019                   | TT                              | CC              | 1946964601               |
| SNP_P4_137418_90626  | NW_004516029.1 | Scaffold599 | 90626                   | TT                              | CC              | 1946964603               |
| SNP_P4_137419_91439  | NW_004516029.1 | Scaffold599 | 91439                   | AA                              | TT              | 1946964605               |
| SNP_P4_137420_93335  | NW_004516029.1 | Scaffold599 | 93335                   | AA                              | CC              | 1946964607               |
| SNP_P4_137421_94367  | NW_004516029.1 | Scaffold599 | 94367                   | AA                              | TT              | 1946964609               |
| SNP_P4_137423_103023 | NW_004516029.1 | Scaffold599 | 103023                  | AA                              | GG              | 1946964610               |
| SNP_P4_137424_103271 | NW_004516029.1 | Scaffold599 | 103271                  | TT                              | CC              | 1946964611               |
| SNP_P4_137425_103885 | NW_004516029.1 | Scaffold599 | 103885                  | CC                              | TT              | 1946964612               |
| SNP_P4_137426_104003 | NW_004516029.1 | Scaffold599 | 104003                  | CC                              | AA              | 1946964614               |
| SNP_P4_137427_107036 | NW_004516029.1 | Scaffold599 | 107036                  | TT                              | AA              | 1946964615               |
| SNP_P4_137428_114517 | NW_004516029.1 | Scaffold599 | 114517                  | TT                              | CC              | 1946964617               |
| SNP_P4_137429_126137 | NW_004516029.1 | Scaffold599 | 126137                  | AA                              | GG              | 1946964619               |
| SNP_P4_137430_126185 | NW_004516029.1 | Scaffold599 | 126185                  | GG                              | AA              | 1946964621               |
| SNP_P4_137431_126188 | NW_004516029.1 | Scaffold599 | 126188                  | CC                              | TT              | 1946964623               |
| SNP_P4_137432_126199 | NW_004516029.1 | Scaffold599 | 126199                  | AA                              | GG              | 1946964625               |
| SNP_P4_137433_132152 | NW_004516029.1 | Scaffold599 | 132152                  | AA                              | TT              | 1946964627               |
| SNP_P4_137434_132154 | NW_004516029.1 | Scaffold599 | 132154                  | TT                              | GG              | 1946964629               |
| SNP_P4_137435_156042 | NW_004516029.1 | Scaffold599 | 156042                  | CC                              | AA              | 1946964631               |
| SNP_P4_137436_157811 | NW_004516029.1 | Scaffold599 | 157811                  | AA                              | GG              | 1946964633               |
| SNP_P4_137437_158549 | NW_004516029.1 | Scaffold599 | 158549                  | CC                              | TT              | 1946964635               |
| SNP_P4_137438_158718 | NW_004516029.1 | Scaffold599 | 158718                  | TT                              | AA              | 1946964637               |
| SNP_P4_137439_159189 | NW_004516029.1 | Scaffold599 | 159189                  | AA                              | TT              | 1946964639               |
| SNP_P4_137440_169637 | NW_004516029.1 | Scaffold599 | 169637                  | GG                              | AA              | 1946964641               |
| SNP_P4_137442_176221 | NW_004516029.1 | Scaffold599 | 176221                  | TT                              | AA              | 1946964642               |
| SNP_P4_137443_182283 | NW_004516029.1 | Scaffold599 | 182283                  | GG                              | AA              | 1946964644               |
| SNP_P4_137444_184103 | NW_004516029.1 | Scaffold599 | 184103                  | TT                              | CC              | 1946964646               |
| SNP_P4_137445_184342 | NW_004516029.1 | Scaffold599 | 184342                  | AA                              | CC              | 1946964648               |
| SNP_P4_137446_187588 | NW_004516029.1 | Scaffold599 | 187588                  | AA                              | GG              | 1946964650               |
| SNP_P4_137448_187808 | NW_004516029.1 | Scaffold599 | 187808                  | GG                              | AA              | 1946964652               |

| SNPs IDs             | Chromosome IDs | Chromosomes | Physical positions (bp) | CDC Frontier (Reference genome) | (ILWC46 & LPNB) | NCBI SNPdb Accession IDs |
|----------------------|----------------|-------------|-------------------------|---------------------------------|-----------------|--------------------------|
| SNP_P4_137449_188113 | NW_004516029.1 | Scaffold599 | 188113                  | AA                              | GG              | 1946964654               |
| SNP_P4_137450_188176 | NW_004516029.1 | Scaffold599 | 188176                  | AA                              | GG              | 1946964656               |
| SNP_P4_137451_188193 | NW_004516029.1 | Scaffold599 | 188193                  | GG                              | AA              | 1946964658               |
| SNP_P4_137452_188800 | NW_004516029.1 | Scaffold599 | 188800                  | GG                              | AA              | 1946964660               |
| SNP_P4_137453_189512 | NW_004516029.1 | Scaffold599 | 189512                  | AA                              | GG              | 1946964662               |
| SNP_P4_137454_190268 | NW_004516029.1 | Scaffold599 | 190268                  | TT                              | GG              | 1946964664               |
| SNP_P4_137455_190736 | NW_004516029.1 | Scaffold599 | 190736                  | TT                              | CC              | 1946964666               |
| SNP_P4_137456_190870 | NW_004516029.1 | Scaffold599 | 190870                  | CC                              | TT              | 1946964668               |
| SNP_P4_137457_194056 | NW_004516029.1 | Scaffold599 | 194056                  | AA                              | TT              | 1946964670               |
| SNP_P4_137458_196382 | NW_004516029.1 | Scaffold599 | 196382                  | CC                              | TT              | 1946964672               |
| SNP_P4_137459_204673 | NW_004516029.1 | Scaffold599 | 204673                  | GG                              | AA              | 1946964674               |
| SNP_P4_137460_207699 | NW_004516029.1 | Scaffold599 | 207699                  | TT                              | CC              | 1946964676               |
| SNP_P4_137461_208871 | NW_004516029.1 | Scaffold599 | 208871                  | GG                              | AA              | 1946964678               |
| SNP_P4_137462_230452 | NW_004516029.1 | Scaffold599 | 230452                  | AA                              | GG              | 1946964680               |
| SNP_P4_137463_230470 | NW_004516029.1 | Scaffold599 | 230470                  | CC                              | TT              | 1946964682               |
| SNP_P4_137464_230472 | NW_004516029.1 | Scaffold599 | 230472                  | AA                              | TT              | 1946964684               |
| SNP_P4_137466_234613 | NW_004516029.1 | Scaffold599 | 234613                  | AA                              | CC              | 1946964686               |
| SNP_P4_137467_234645 | NW_004516029.1 | Scaffold599 | 234645                  | TT                              | GG              | 1946964688               |
| SNP_P4_137468_234656 | NW_004516029.1 | Scaffold599 | 234656                  | CC                              | TT              | 1946964690               |
| SNP_P4_137469_234668 | NW_004516029.1 | Scaffold599 | 234668                  | CC                              | AA              | 1946964692               |
| SNP_P4_137470_234873 | NW_004516029.1 | Scaffold599 | 234873                  | TT                              | GG              | 1946964694               |
| SNP_P4_137471_234907 | NW_004516029.1 | Scaffold599 | 234907                  | AA                              | CC              | 1946964696               |
| SNP_P4_137472_234939 | NW_004516029.1 | Scaffold599 | 234939                  | AA                              | GG              | 1946964698               |
| SNP_P4_137473_234961 | NW_004516029.1 | Scaffold599 | 234961                  | CC                              | AA              | 1946964700               |
| SNP_P4_137475_242527 | NW_004516029.1 | Scaffold599 | 242527                  | GG                              | TT              | 1946964702               |
| SNP_P4_137476_242955 | NW_004516029.1 | Scaffold599 | 242955                  | AA                              | TT              | 1946964704               |
| SNP_P4_137477_243417 | NW_004516029.1 | Scaffold599 | 243417                  | GG                              | AA              | 1946964706               |
| SNP_P4_137478_245072 | NW_004516029.1 | Scaffold599 | 245072                  | AA                              | GG              | 1946964708               |
| SNP_P4_137479_246822 | NW_004516029.1 | Scaffold599 | 246822                  | GG                              | AA              | 1946964710               |
| SNP_P4_137482_249752 | NW_004516029.1 | Scaffold599 | 249752                  | TT                              | CC              | 1946964712               |
| SNP_P4_137483_251049 | NW_004516029.1 | Scaffold599 | 251049                  | GG                              | AA              | 1946964714               |
| SNP_P4_137484_251266 | NW_004516029.1 | Scaffold599 | 251266                  | CC                              | TT              | 1946964716               |
| SNP_P4_137486_255853 | NW_004516029.1 | Scaffold599 | 255853                  | TT                              | CC              | 1946964718               |
| SNP_P4_137487_255862 | NW_004516029.1 | Scaffold599 | 255862                  | AA                              | TT              | 1946964720               |
| SNP_P4_137489_267980 | NW_004516029.1 | Scaffold599 | 267980                  | CC                              | TT              | 1946964722               |
| SNP_P4_137491_271978 | NW_004516029.1 | Scaffold599 | 271978                  | CC                              | TT              | 1946964724               |
| SNP_P4_137492_272683 | NW_004516029.1 | Scaffold599 | 272683                  | TT                              | CC              | 1946964726               |
| SNP_P4_137493_279003 | NW_004516029.1 | Scaffold599 | 279003                  | AA                              | GG              | 1946964728               |
| SNP_P4_137494_279334 | NW_004516029.1 | Scaffold599 | 279334                  | AA                              | CC              | 1946964730               |
| SNP_P4_137495_282967 | NW_004516029.1 | Scaffold599 | 282967                  | TT                              | CC              | 1946964731               |
| SNP_P4_137496_283566 | NW_004516029.1 | Scaffold599 | 283566                  | AA                              | GG              | 1946964733               |
| SNP_P4_137497_284501 | NW_004516029.1 | Scaffold599 | 284501                  | AA                              | GG              | 1946964735               |

| SNPs IDs             | Chromosome IDs | Chromosomes | Physical positions (bp) | CDC Frontier (Reference genome) | (ILWC46 & LPNB) | NCBI SNPdb Accession IDs |
|----------------------|----------------|-------------|-------------------------|---------------------------------|-----------------|--------------------------|
| SNP_P4_137498_284600 | NW_004516029.1 | Scaffold599 | 284600                  | AA                              | TT              | 1946964737               |
| SNP_P4_137499_284637 | NW_004516029.1 | Scaffold599 | 284637                  | CC                              | TT              | 1946964739               |
| SNP_P4_137501_284709 | NW_004516029.1 | Scaffold599 | 284709                  | CC                              | TT              | 1946964741               |
| SNP_P4_137502_284956 | NW_004516029.1 | Scaffold599 | 284956                  | AA                              | GG              | 1946964743               |
| SNP_P4_137503_285955 | NW_004516029.1 | Scaffold599 | 285955                  | TT                              | GG              | 1946964745               |
| SNP_P4_137504_285997 | NW_004516029.1 | Scaffold599 | 285997                  | TT                              | CC              | 1946964747               |
| SNP_P4_137505_286324 | NW_004516029.1 | Scaffold599 | 286324                  | GG                              | CC              | 1946964749               |
| SNP_P4_137507_287177 | NW_004516029.1 | Scaffold599 | 287177                  | CC                              | AA              | 1946964751               |
| SNP_P4_137508_291347 | NW_004516029.1 | Scaffold599 | 291347                  | GG                              | AA              | 1946964753               |
| SNP_P4_137510_291775 | NW_004516029.1 | Scaffold599 | 291775                  | AA                              | GG              | 1946964754               |
| SNP_P4_137511_292521 | NW_004516029.1 | Scaffold599 | 292521                  | GG                              | AA              | 1946964756               |
| SNP_P4_137512_292547 | NW_004516029.1 | Scaffold599 | 292547                  | AA                              | GG              | 1946964758               |
| SNP_P4_137513_292976 | NW_004516029.1 | Scaffold599 | 292976                  | AA                              | GG              | 1946964760               |
| SNP_P4_137514_293976 | NW_004516029.1 | Scaffold599 | 293976                  | TT                              | AA              | 1946964762               |
| SNP_P4_137515_294425 | NW_004516029.1 | Scaffold599 | 294425                  | GG                              | CC              | 1946964764               |
| SNP_P4_137516_294511 | NW_004516029.1 | Scaffold599 | 294511                  | TT                              | CC              | 1946964766               |
| SNP_P4_137517_295104 | NW_004516029.1 | Scaffold599 | 295104                  | CC                              | AA              | 1946964768               |
| SNP_P4_137518_295464 | NW_004516029.1 | Scaffold599 | 295464                  | TT                              | CC              | 1946964770               |
| SNP_P4_137519_296785 | NW_004516029.1 | Scaffold599 | 296785                  | AA                              | GG              | 1946964772               |
| SNP_P4_137520_297364 | NW_004516029.1 | Scaffold599 | 297364                  | AA                              | CC              | 1946964774               |
| SNP_P4_137521_297509 | NW_004516029.1 | Scaffold599 | 297509                  | AA                              | CC              | 1946964776               |
| SNP_P4_137522_298259 | NW_004516029.1 | Scaffold599 | 298259                  | AA                              | CC              | 1946964778               |
| SNP_P4_137523_298283 | NW_004516029.1 | Scaffold599 | 298283                  | CC                              | TT              | 1946964780               |
| SNP_P4_137524_299195 | NW_004516029.1 | Scaffold599 | 299195                  | TT                              | CC              | 1946964782               |
| SNP_P4_137525_299395 | NW_004516029.1 | Scaffold599 | 299395                  | AA                              | GG              | 1946964784               |
| SNP_P4_137526_300980 | NW_004516029.1 | Scaffold599 | 300980                  | CC                              | TT              | 1946964786               |
| SNP_P4_137527_302118 | NW_004516029.1 | Scaffold599 | 302118                  | CC                              | TT              | 1946964788               |
| SNP_P4_137528_302989 | NW_004516029.1 | Scaffold599 | 302989                  | GG                              | TT              | 1946964790               |
| SNP_P4_137529_303328 | NW_004516029.1 | Scaffold599 | 303328                  | TT                              | CC              | 1946964792               |
| SNP_P4_137530_305149 | NW_004516029.1 | Scaffold599 | 305149                  | CC                              | TT              | 1946964794               |
| SNP_P4_137531_305581 | NW_004516029.1 | Scaffold599 | 305581                  | GG                              | AA              | 1946964796               |
| SNP_P4_137532_306774 | NW_004516029.1 | Scaffold599 | 306774                  | TT                              | GG              | 1946964798               |
| SNP_P4_137536_307731 | NW_004516029.1 | Scaffold599 | 307731                  | CC                              | AA              | 1946964800               |
| SNP_P4_137538_308834 | NW_004516029.1 | Scaffold599 | 308834                  | AA                              | TT              | 1946964802               |
| SNP_P4_137539_310641 | NW_004516029.1 | Scaffold599 | 310641                  | TT                              | CC              | 1946964804               |
| SNP_P4_137540_310690 | NW_004516029.1 | Scaffold599 | 310690                  | TT                              | AA              | 1946964806               |
| SNP_P4_137541_310692 | NW_004516029.1 | Scaffold599 | 310692                  | CC                              | TT              | 1946964808               |
| SNP_P4_137542_310693 | NW_004516029.1 | Scaffold599 | 310693                  | CC                              | TT              | 1946964810               |
| SNP_P4_137543_310903 | NW_004516029.1 | Scaffold599 | 310903                  | TT                              | CC              | 1946964812               |
| SNP_P4_137544_310940 | NW_004516029.1 | Scaffold599 | 310940                  | GG                              | AA              | 1946964814               |
| SNP_P4_137545_310973 | NW_004516029.1 | Scaffold599 | 310973                  | AA                              | GG              | 1946964816               |
| SNP_P4_137546_310992 | NW_004516029.1 | Scaffold599 | 310992                  | GG                              | CC              | 1946964818               |



| SNPs IDs             | Chromosome IDs | Chromosomes | Physical positions (bp) | CDC Frontier (Reference genome) | (ILWC46 & LPNB) | NCBI SNPdb Accession IDs |
|----------------------|----------------|-------------|-------------------------|---------------------------------|-----------------|--------------------------|
| SNP_P4_137547_311421 | NW_004516029.1 | Scaffold599 | 311421                  | AA                              | TT              | 1946964820               |
| SNP_P4_137548_311822 | NW_004516029.1 | Scaffold599 | 311822                  | TT                              | AA              | 1946964822               |
| SNP_P4_137551_314472 | NW_004516029.1 | Scaffold599 | 314472                  | TT                              | CC              | 1946964824               |
| SNP_P4_137552_315058 | NW_004516029.1 | Scaffold599 | 315058                  | TT                              | AA              | 1946964826               |
| SNP_P4_137553_315306 | NW_004516029.1 | Scaffold599 | 315306                  | CC                              | TT              | 1946964828               |
| SNP_P4_137554_315356 | NW_004516029.1 | Scaffold599 | 315356                  | TT                              | AA              | 1946964830               |
| SNP_P4_137555_315699 | NW_004516029.1 | Scaffold599 | 315699                  | TT                              | GG              | 1946964831               |
| SNP_P4_137556_315792 | NW_004516029.1 | Scaffold599 | 315792                  | AA                              | GG              | 1946964833               |
| SNP_P4_137557_315815 | NW_004516029.1 | Scaffold599 | 315815                  | AA                              | GG              | 1946964835               |
| SNP_P4_137558_316144 | NW_004516029.1 | Scaffold599 | 316144                  | AA                              | CC              | 1946964837               |
| SNP_P4_137559_316380 | NW_004516029.1 | Scaffold599 | 316380                  | CC                              | TT              | 1946964839               |
| SNP_P4_137560_316525 | NW_004516029.1 | Scaffold599 | 316525                  | TT                              | AA              | 1946964841               |
| SNP_P4_137561_316791 | NW_004516029.1 | Scaffold599 | 316791                  | CC                              | TT              | 1946964843               |
| SNP_P4_137562_317261 | NW_004516029.1 | Scaffold599 | 317261                  | GG                              | AA              | 1946964845               |
| SNP_P4_137563_317351 | NW_004516029.1 | Scaffold599 | 317351                  | TT                              | GG              | 1946964847               |
| SNP_P4_137564_317387 | NW_004516029.1 | Scaffold599 | 317387                  | AA                              | TT              | 1946964849               |
| SNP_P4_137565_317399 | NW_004516029.1 | Scaffold599 | 317399                  | AA                              | TT              | 1946964851               |
| SNP_P4_137566_317405 | NW_004516029.1 | Scaffold599 | 317405                  | AA                              | TT              | 1946964853               |
| SNP_P4_137567_318533 | NW_004516029.1 | Scaffold599 | 318533                  | CC                              | TT              | 1946964855               |
| SNP_P4_137570_320413 | NW_004516029.1 | Scaffold599 | 320413                  | TT                              | CC              | 1946964857               |
| SNP_P4_137571_320834 | NW_004516029.1 | Scaffold599 | 320834                  | TT                              | AA              | 1946964859               |
| SNP_P4_137572_321498 | NW_004516029.1 | Scaffold599 | 321498                  | GG                              | AA              | 1946964861               |
| SNP_P4_137573_321909 | NW_004516029.1 | Scaffold599 | 321909                  | AA                              | GG              | 1946964863               |
| SNP_P4_137575_322874 | NW_004516029.1 | Scaffold599 | 322874                  | AA                              | TT              | 1946964865               |
| SNP_P4_137576_323209 | NW_004516029.1 | Scaffold599 | 323209                  | GG                              | AA              | 1946964867               |
| SNP_P4_137579_324304 | NW_004516029.1 | Scaffold599 | 324304                  | AA                              | CC              | 1946964869               |
| SNP_P4_137580_324397 | NW_004516029.1 | Scaffold599 | 324397                  | GG                              | AA              | 1946964871               |
| SNP_P4_137581_324549 | NW_004516029.1 | Scaffold599 | 324549                  | GG                              | TT              | 1946964873               |
| SNP_P4_137582_327319 | NW_004516029.1 | Scaffold599 | 327319                  | CC                              | TT              | 1946964875               |
| SNP_P4_137583_327605 | NW_004516029.1 | Scaffold599 | 327605                  | TT                              | CC              | 1946964877               |
| SNP_P4_137585_329046 | NW_004516029.1 | Scaffold599 | 329046                  | GG                              | AA              | 1946964879               |
| SNP_P4_137586_329145 | NW_004516029.1 | Scaffold599 | 329145                  | TT                              | CC              | 1946964880               |
| SNP_P4_137587_329222 | NW_004516029.1 | Scaffold599 | 329222                  | AA                              | TT              | 1946964882               |
| SNP_P4_137589_329444 | NW_004516029.1 | Scaffold599 | 329444                  | CC                              | AA              | 1946964884               |
| SNP_P4_137590_330602 | NW_004516029.1 | Scaffold599 | 330602                  | TT                              | CC              | 1946964886               |
| SNP_P4_137591_331001 | NW_004516029.1 | Scaffold599 | 331001                  | GG                              | AA              | 1946964888               |
| SNP_P4_137592_331507 | NW_004516029.1 | Scaffold599 | 331507                  | TT                              | GG              | 1946964890               |
| SNP_P4_137593_331711 | NW_004516029.1 | Scaffold599 | 331711                  | GG                              | AA              | 1946964892               |
| SNP_P4_137594_333481 | NW_004516029.1 | Scaffold599 | 333481                  | CC                              | TT              | 1946964894               |
| SNP_P4_137595_333792 | NW_004516029.1 | Scaffold599 | 333792                  | TT                              | CC              | 1946964896               |
| SNP_P4_137596_333793 | NW_004516029.1 | Scaffold599 | 333793                  | CC                              | TT              | 1946964898               |
| SNP_P4_137597_335120 | NW_004516029.1 | Scaffold599 | 335120                  | AA                              | GG              | 1946964900               |

| SNPs IDs             | Chromosome IDs | Chromosomes | Physical positions (bp) | CDC Frontier (Reference genome) | (ILWC46 & LPNB) | NCBI SNPdb Accession IDs |
|----------------------|----------------|-------------|-------------------------|---------------------------------|-----------------|--------------------------|
| SNP_P4_137598_335187 | NW_004516029.1 | Scaffold599 | 335187                  | TT                              | GG              | 1946964902               |
| SNP_P4_137601_337307 | NW_004516029.1 | Scaffold599 | 337307                  | TT                              | CC              | 1946964904               |
| SNP_P4_137602_338098 | NW_004516029.1 | Scaffold599 | 338098                  | GG                              | AA              | 1946964906               |
| SNP_P4_137603_338631 | NW_004516029.1 | Scaffold599 | 338631                  | AA                              | GG              | 1946964908               |
| SNP_P4_137604_338964 | NW_004516029.1 | Scaffold599 | 338964                  | AA                              | TT              | 1946964910               |
| SNP_P4_137605_339234 | NW_004516029.1 | Scaffold599 | 339234                  | TT                              | AA              | 1946964912               |
| SNP_P4_137606_339598 | NW_004516029.1 | Scaffold599 | 339598                  | TT                              | GG              | 1946964914               |
| SNP_P4_137607_339612 | NW_004516029.1 | Scaffold599 | 339612                  | AA                              | TT              | 1946964916               |
| SNP_P4_137608_339653 | NW_004516029.1 | Scaffold599 | 339653                  | CC                              | TT              | 1946964918               |
| SNP_P4_137609_339675 | NW_004516029.1 | Scaffold599 | 339675                  | CC                              | GG              | 1946964920               |
| SNP_P4_137610_339890 | NW_004516029.1 | Scaffold599 | 339890                  | GG                              | AA              | 1946964922               |
| SNP_P4_137611_339897 | NW_004516029.1 | Scaffold599 | 339897                  | GG                              | AA              | 1946964924               |
| SNP_P4_137614_349941 | NW_004516029.1 | Scaffold599 | 349941                  | CC                              | TT              | 1946964926               |
| SNP_P4_137615_350331 | NW_004516029.1 | Scaffold599 | 350331                  | CC                              | AA              | 1946964928               |
| SNP_P4_137618_352302 | NW_004516029.1 | Scaffold599 | 352302                  | AA                              | CC              | 1946964930               |
| SNP_P4_137620_352492 | NW_004516029.1 | Scaffold599 | 352492                  | CC                              | TT              | 1946964932               |
| SNP_P4_137621_352801 | NW_004516029.1 | Scaffold599 | 352801                  | CC                              | TT              | 1946964934               |
| SNP_P4_137622_353342 | NW_004516029.1 | Scaffold599 | 353342                  | GG                              | AA              | 1946964936               |
| SNP_P4_137623_353375 | NW_004516029.1 | Scaffold599 | 353375                  | CC                              | TT              | 1946964938               |
| SNP_P4_137624_354269 | NW_004516029.1 | Scaffold599 | 354269                  | TT                              | AA              | 1946964940               |
| SNP_P4_137625_354866 | NW_004516029.1 | Scaffold599 | 354866                  | AA                              | GG              | 1946964942               |
| SNP_P4_137626_355180 | NW_004516029.1 | Scaffold599 | 355180                  | GG                              | TT              | 1946964944               |
| SNP_P4_137627_355547 | NW_004516029.1 | Scaffold599 | 355547                  | CC                              | GG              | 1946964946               |
| SNP_P4_137628_356963 | NW_004516029.1 | Scaffold599 | 356963                  | GG                              | CC              | 1946964948               |
| SNP_P4_137629_357014 | NW_004516029.1 | Scaffold599 | 357014                  | GG                              | AA              | 1946964950               |
| SNP_P4_137630_357475 | NW_004516029.1 | Scaffold599 | 357475                  | GG                              | AA              | 1946964951               |
| SNP_P4_137632_358458 | NW_004516029.1 | Scaffold599 | 358458                  | AA                              | TT              | 1946964952               |
| SNP_P4_137633_358497 | NW_004516029.1 | Scaffold599 | 358497                  | AA                              | TT              | 1946964953               |
| SNP_P4_137634_358637 | NW_004516029.1 | Scaffold599 | 358637                  | TT                              | CC              | 1946964954               |
| SNP_P4_137635_358713 | NW_004516029.1 | Scaffold599 | 358713                  | AA                              | TT              | 1946964956               |
| SNP_P4_137636_359630 | NW_004516029.1 | Scaffold599 | 359630                  | TT                              | AA              | 1946964958               |
| SNP_P4_137637_359746 | NW_004516029.1 | Scaffold599 | 359746                  | GG                              | TT              | 1946964960               |
| SNP_P4_137638_360016 | NW_004516029.1 | Scaffold599 | 360016                  | CC                              | TT              | 1946964962               |
| SNP_P4_137639_360019 | NW_004516029.1 | Scaffold599 | 360019                  | AA                              | GG              | 1946964964               |
| SNP_P4_137640_360346 | NW_004516029.1 | Scaffold599 | 360346                  | GG                              | AA              | 1946964967               |
| SNP_P4_137641_361301 | NW_004516029.1 | Scaffold599 | 361301                  | CC                              | TT              | 1946964969               |
| SNP_P4_137642_361821 | NW_004516029.1 | Scaffold599 | 361821                  | TT                              | CC              | 1946964971               |
| SNP_P4_137643_362090 | NW_004516029.1 | Scaffold599 | 362090                  | AA                              | GG              | 1946964973               |
| SNP_P4_137644_362115 | NW_004516029.1 | Scaffold599 | 362115                  | GG                              | CC              | 1946964975               |
| SNP_P4_137645_363515 | NW_004516029.1 | Scaffold599 | 363515                  | TT                              | CC              | 1946964977               |
| SNP_P4_137646_363794 | NW_004516029.1 | Scaffold599 | 363794                  | TT                              | CC              | 1946964979               |
| SNP_P4_137647_363798 | NW_004516029.1 | Scaffold599 | 363798                  | TT                              | AA              | 1946964981               |

| SNPs IDs             | Chromosome IDs | Chromosomes | Physical positions (bp) | CDC Frontier (Reference genome) | (ILWC46 & LPNB) | NCBI SNPdb Accession IDs |
|----------------------|----------------|-------------|-------------------------|---------------------------------|-----------------|--------------------------|
| SNP_P4_137650_366890 | NW_004516029.1 | Scaffold599 | 366890                  | TT                              | CC              | 1946964983               |
| SNP_P4_137651_367063 | NW_004516029.1 | Scaffold599 | 367063                  | CC                              | GG              | 1946964985               |
| SNP_P4_137652_367214 | NW_004516029.1 | Scaffold599 | 367214                  | CC                              | GG              | 1946964987               |
| SNP_P4_137653_368147 | NW_004516029.1 | Scaffold599 | 368147                  | AA                              | CC              | 1946964989               |
| SNP_P4_137654_368255 | NW_004516029.1 | Scaffold599 | 368255                  | GG                              | TT              | 1946964991               |
| SNP_P4_137655_368492 | NW_004516029.1 | Scaffold599 | 368492                  | AA                              | CC              | 1946964993               |
| SNP_P4_137656_368888 | NW_004516029.1 | Scaffold599 | 368888                  | GG                              | CC              | 1946964995               |
| SNP_P4_137657_369198 | NW_004516029.1 | Scaffold599 | 369198                  | GG                              | AA              | 1946964997               |
| SNP_P4_137658_369270 | NW_004516029.1 | Scaffold599 | 369270                  | AA                              | TT              | 1946964999               |
| SNP_P4_137659_369371 | NW_004516029.1 | Scaffold599 | 369371                  | TT                              | CC              | 1946965001               |
| SNP_P4_137660_369439 | NW_004516029.1 | Scaffold599 | 369439                  | TT                              | CC              | 1946965003               |
| SNP_P4_137661_369440 | NW_004516029.1 | Scaffold599 | 369440                  | GG                              | AA              | 1946965005               |
| SNP_P4_137662_369469 | NW_004516029.1 | Scaffold599 | 369469                  | GG                              | AA              | 1946965007               |
| SNP_P4_137663_369513 | NW_004516029.1 | Scaffold599 | 369513                  | CC                              | TT              | 1946965009               |
| SNP_P4_137664_369557 | NW_004516029.1 | Scaffold599 | 369557                  | CC                              | AA              | 1946965011               |
| SNP_P4_137665_369565 | NW_004516029.1 | Scaffold599 | 369565                  | CC                              | TT              | 1946965013               |
| SNP_P4_137666_369611 | NW_004516029.1 | Scaffold599 | 369611                  | CC                              | TT              | 1946965015               |
| SNP_P4_137667_369763 | NW_004516029.1 | Scaffold599 | 369763                  | AA                              | GG              | 1946965017               |
| SNP_P4_137668_369809 | NW_004516029.1 | Scaffold599 | 369809                  | TT                              | CC              | 1946965019               |
| SNP_P4_137671_372255 | NW_004516029.1 | Scaffold599 | 372255                  | AA                              | GG              | 1946965021               |
| SNP_P4_137672_372305 | NW_004516029.1 | Scaffold599 | 372305                  | AA                              | TT              | 1946965023               |
| SNP_P4_137673_373318 | NW_004516029.1 | Scaffold599 | 373318                  | AA                              | GG              | 1946965025               |
| SNP_P4_137675_374269 | NW_004516029.1 | Scaffold599 | 374269                  | TT                              | CC              | 1946965027               |
| SNP_P4_137676_375401 | NW_004516029.1 | Scaffold599 | 375401                  | CC                              | TT              | 1946965029               |
| SNP_P4_137677_375501 | NW_004516029.1 | Scaffold599 | 375501                  | AA                              | GG              | 1946965031               |
| SNP_P4_137678_375740 | NW_004516029.1 | Scaffold599 | 375740                  | CC                              | TT              | 1946965033               |
| SNP_P4_137679_375763 | NW_004516029.1 | Scaffold599 | 375763                  | TT                              | CC              | 1946965035               |
| SNP_P4_137680_384783 | NW_004516029.1 | Scaffold599 | 384783                  | AA                              | TT              | 1946965037               |
| SNP_P4_137681_385378 | NW_004516029.1 | Scaffold599 | 385378                  | GG                              | CC              | 1946965039               |
| SNP_P4_137682_385392 | NW_004516029.1 | Scaffold599 | 385392                  | GG                              | AA              | 1946965041               |
| SNP_P4_137683_386616 | NW_004516029.1 | Scaffold599 | 386616                  | TT                              | GG              | 1946965043               |
| SNP_P4_137684_387537 | NW_004516029.1 | Scaffold599 | 387537                  | TT                              | AA              | 1946965045               |
| SNP_P4_137685_387677 | NW_004516029.1 | Scaffold599 | 387677                  | GG                              | AA              | 1946965047               |
| SNP_P4_137686_387765 | NW_004516029.1 | Scaffold599 | 387765                  | AA                              | GG              | 1946965049               |
| SNP_P4_137687_387855 | NW_004516029.1 | Scaffold599 | 387855                  | GG                              | TT              | 1946965051               |
| SNP_P4_137690_391315 | NW_004516029.1 | Scaffold599 | 391315                  | GG                              | AA              | 1946965053               |
| SNP_P4_137692_391899 | NW_004516029.1 | Scaffold599 | 391899                  | GG                              | TT              | 1946965055               |
| SNP_P4_137694_392773 | NW_004516029.1 | Scaffold599 | 392773                  | AA                              | TT              | 1946965057               |
| SNP_P4_137696_392849 | NW_004516029.1 | Scaffold599 | 392849                  | TT                              | CC              | 1946965059               |
| SNP_P4_137697_393849 | NW_004516029.1 | Scaffold599 | 393849                  | TT                              | CC              | 1946965061               |
| SNP_P4_137698_394426 | NW_004516029.1 | Scaffold599 | 394426                  | CC                              | TT              | 1946965063               |
| SNP_P4_137699_394637 | NW_004516029.1 | Scaffold599 | 394637                  | AA                              | CC              | 1946965065               |

| SNPs IDs             | Chromosome IDs | Chromosomes | Physical positions (bp) | CDC Frontier (Reference genome) | (ILWC46 & LPNB) | NCBI SNPdb Accession IDs |
|----------------------|----------------|-------------|-------------------------|---------------------------------|-----------------|--------------------------|
| SNP_P4_137700_394704 | NW_004516029.1 | Scaffold599 | 394704                  | TT                              | GG              | 1946965067               |
| SNP_P4_137701_395321 | NW_004516029.1 | Scaffold599 | 395321                  | TT                              | CC              | 1946965069               |
| SNP_P4_137702_396304 | NW_004516029.1 | Scaffold599 | 396304                  | AA                              | GG              | 1946965071               |
| SNP_P4_137703_396318 | NW_004516029.1 | Scaffold599 | 396318                  | AA                              | GG              | 1946965073               |
| SNP_P4_137704_396581 | NW_004516029.1 | Scaffold599 | 396581                  | GG                              | AA              | 1946965075               |
| SNP_P4_137705_396664 | NW_004516029.1 | Scaffold599 | 396664                  | AA                              | TT              | 1946965077               |
| SNP_P4_137706_397155 | NW_004516029.1 | Scaffold599 | 397155                  | TT                              | CC              | 1946965079               |
| SNP_P4_137707_397170 | NW_004516029.1 | Scaffold599 | 397170                  | AA                              | TT              | 1946965081               |
| SNP_P4_137708_397171 | NW_004516029.1 | Scaffold599 | 397171                  | AA                              | TT              | 1946965083               |
| SNP_P4_137709_397540 | NW_004516029.1 | Scaffold599 | 397540                  | TT                              | CC              | 1946965085               |
| SNP_P4_137710_397782 | NW_004516029.1 | Scaffold599 | 397782                  | CC                              | TT              | 1946965087               |
| SNP_P4_137711_398416 | NW_004516029.1 | Scaffold599 | 398416                  | TT                              | CC              | 1946965089               |
| SNP_P4_137712_398919 | NW_004516029.1 | Scaffold599 | 398919                  | AA                              | GG              | 1946965091               |
| SNP_P4_137713_399162 | NW_004516029.1 | Scaffold599 | 399162                  | AA                              | CC              | 1946965093               |
| SNP_P4_137714_400034 | NW_004516029.1 | Scaffold599 | 400034                  | CC                              | AA              | 1946965095               |
| SNP_P4_137715_401886 | NW_004516029.1 | Scaffold599 | 401886                  | GG                              | AA              | 1946965097               |
| SNP_P4_137716_401890 | NW_004516029.1 | Scaffold599 | 401890                  | TT                              | GG              | 1946965099               |
| SNP_P4_137717_402042 | NW_004516029.1 | Scaffold599 | 402042                  | AA                              | GG              | 1946965101               |
| SNP_P4_137718_402481 | NW_004516029.1 | Scaffold599 | 402481                  | TT                              | GG              | 1946965103               |
| SNP_P4_137719_402756 | NW_004516029.1 | Scaffold599 | 402756                  | CC                              | TT              | 1946965105               |
| SNP_P4_137720_403129 | NW_004516029.1 | Scaffold599 | 403129                  | TT                              | GG              | 1946965107               |
| SNP_P4_137721_403260 | NW_004516029.1 | Scaffold599 | 403260                  | GG                              | TT              | 1946965109               |
| SNP_P4_137722_403716 | NW_004516029.1 | Scaffold599 | 403716                  | TT                              | AA              | 1946965111               |
| SNP_P4_137723_404158 | NW_004516029.1 | Scaffold599 | 404158                  | CC                              | AA              | 1946965113               |
| SNP_P4_137724_404253 | NW_004516029.1 | Scaffold599 | 404253                  | AA                              | CC              | 1946965115               |
| SNP_P4_137725_404742 | NW_004516029.1 | Scaffold599 | 404742                  | AA                              | CC              | 1946965117               |
| SNP_P4_137726_405497 | NW_004516029.1 | Scaffold599 | 405497                  | CC                              | AA              | 1946965119               |
| SNP_P4_137727_406095 | NW_004516029.1 | Scaffold599 | 406095                  | CC                              | TT              | 1946965121               |
| SNP_P4_137728_406789 | NW_004516029.1 | Scaffold599 | 406789                  | CC                              | TT              | 1946965123               |
| SNP_P4_137729_407602 | NW_004516029.1 | Scaffold599 | 407602                  | CC                              | TT              | 1946965125               |
| SNP_P4_137730_407684 | NW_004516029.1 | Scaffold599 | 407684                  | AA                              | GG              | 1946965127               |
| SNP_P4_137731_409409 | NW_004516029.1 | Scaffold599 | 409409                  | TT                              | CC              | 1946965129               |
| SNP_P4_137732_409570 | NW_004516029.1 | Scaffold599 | 409570                  | TT                              | GG              | 1946965131               |
| SNP_P4_137734_410095 | NW_004516029.1 | Scaffold599 | 410095                  | CC                              | AA              | 1946965133               |
| SNP_P4_137735_410238 | NW_004516029.1 | Scaffold599 | 410238                  | AA                              | CC              | 1946965135               |
| SNP_P4_137736_12021  | NW_004516030.1 | Scaffold601 | 12021                   | CC                              | TT              | 1946965137               |
| SNP_P4_137737_12032  | NW_004516030.1 | Scaffold601 | 12032                   | TT                              | GG              | 1946965139               |
| SNP_P4_137738_12275  | NW_004516030.1 | Scaffold601 | 12275                   | AA                              | GG              | 1946965141               |
| SNP_P4_137739_27693  | NW_004516030.1 | Scaffold601 | 27693                   | AA                              | GG              | 1946965143               |
| SNP_P4_137740_43844  | NW_004516030.1 | Scaffold601 | 43844                   | AA                              | GG              | 1946965145               |
| SNP_P4_137741_44204  | NW_004516030.1 | Scaffold601 | 44204                   | CC                              | TT              | 1946965147               |
| SNP_P4_137742_44206  | NW_004516030.1 | Scaffold601 | 44206                   | TT                              | AA              | 1946965149               |

| SNPs IDs             | Chromosome IDs | Chromosomes | Physical positions (bp) | CDC Frontier (Reference genome) | (ILWC46 & LPNB) | NCBI SNPdb Accession IDs |
|----------------------|----------------|-------------|-------------------------|---------------------------------|-----------------|--------------------------|
| SNP_P4_137744_52366  | NW_004516030.1 | Scaffold601 | 52366                   | TT                              | GG              | 1946965151               |
| SNP_P4_137745_52378  | NW_004516030.1 | Scaffold601 | 52378                   | TT                              | CC              | 1946965154               |
| SNP_P4_137746_52415  | NW_004516030.1 | Scaffold601 | 52415                   | TT                              | GG              | 1946965156               |
| SNP_P4_137747_52433  | NW_004516030.1 | Scaffold601 | 52433                   | GG                              | CC              | 1946965158               |
| SNP_P4_137748_52763  | NW_004516030.1 | Scaffold601 | 52763                   | AA                              | GG              | 1946965160               |
| SNP_P4_137749_93730  | NW_004516030.1 | Scaffold601 | 93730                   | TT                              | AA              | 1946965162               |
| SNP_P4_137750_97542  | NW_004516030.1 | Scaffold601 | 97542                   | GG                              | CC              | 1946965164               |
| SNP_P4_137751_108089 | NW_004516030.1 | Scaffold601 | 108089                  | AA                              | GG              | 1946965166               |
| SNP_P4_137752_108449 | NW_004516030.1 | Scaffold601 | 108449                  | TT                              | CC              | 1946965168               |
| SNP_P4_137753_109292 | NW_004516030.1 | Scaffold601 | 109292                  | TT                              | CC              | 1946965170               |
| SNP_P4_137754_110204 | NW_004516030.1 | Scaffold601 | 110204                  | CC                              | TT              | 1946965172               |
| SNP_P4_137755_110208 | NW_004516030.1 | Scaffold601 | 110208                  | AA                              | GG              | 1946965174               |
| SNP_P4_137756_110218 | NW_004516030.1 | Scaffold601 | 110218                  | GG                              | CC              | 1946965176               |
| SNP_P4_137757_110229 | NW_004516030.1 | Scaffold601 | 110229                  | TT                              | CC              | 1946965178               |
| SNP_P4_137758_110230 | NW_004516030.1 | Scaffold601 | 110230                  | TT                              | CC              | 1946965180               |
| SNP_P4_137759_110231 | NW_004516030.1 | Scaffold601 | 110231                  | TT                              | CC              | 1946965182               |
| SNP_P4_137760_110237 | NW_004516030.1 | Scaffold601 | 110237                  | TT                              | CC              | 1946965184               |
| SNP_P4_137761_110262 | NW_004516030.1 | Scaffold601 | 110262                  | GG                              | AA              | 1946965186               |
| SNP_P4_137762_110264 | NW_004516030.1 | Scaffold601 | 110264                  | GG                              | AA              | 1946965188               |
| SNP_P4_137763_110265 | NW_004516030.1 | Scaffold601 | 110265                  | GG                              | AA              | 1946965190               |
| SNP_P4_137764_110275 | NW_004516030.1 | Scaffold601 | 110275                  | TT                              | CC              | 1946965192               |
| SNP_P4_137765_110295 | NW_004516030.1 | Scaffold601 | 110295                  | AA                              | TT              | 1946965194               |
| SNP_P4_137766_110300 | NW_004516030.1 | Scaffold601 | 110300                  | AA                              | GG              | 1946965196               |
| SNP_P4_137767_110312 | NW_004516030.1 | Scaffold601 | 110312                  | TT                              | CC              | 1946965198               |
| SNP_P4_137768_110318 | NW_004516030.1 | Scaffold601 | 110318                  | AA                              | GG              | 1946965200               |
| SNP_P4_137769_110706 | NW_004516030.1 | Scaffold601 | 110706                  | GG                              | AA              | 1946965202               |
| SNP_P4_137770_133037 | NW_004516030.1 | Scaffold601 | 133037                  | TT                              | GG              | 1946965204               |
| SNP_P4_137772_143368 | NW_004516030.1 | Scaffold601 | 143368                  | AA                              | CC              | 1946965206               |
| SNP_P4_137773_1268   | NW_004516031.1 | Scaffold602 | 1268                    | AA                              | GG              | 1946965208               |
| SNP_P4_137774_1382   | NW_004516031.1 | Scaffold602 | 1382                    | GG                              | AA              | 1946965210               |
| SNP_P4_137775_1386   | NW_004516031.1 | Scaffold602 | 1386                    | TT                              | CC              | 1946965212               |
| SNP_P4_137776_1394   | NW_004516031.1 | Scaffold602 | 1394                    | TT                              | AA              | 1946965214               |
| SNP_P4_137777_3233   | NW_004516032.1 | Scaffold604 | 3233                    | CC                              | TT              | 1946965216               |
| SNP_P4_137778_7240   | NW_004516032.1 | Scaffold604 | 7240                    | TT                              | AA              | 1946965218               |
| SNP_P4_137779_7259   | NW_004516032.1 | Scaffold604 | 7259                    | AA                              | GG              | 1946965220               |
| SNP_P4_137780_7614   | NW_004516032.1 | Scaffold604 | 7614                    | GG                              | AA              | 1946965222               |
| SNP_P4_137781_7624   | NW_004516032.1 | Scaffold604 | 7624                    | GG                              | AA              | 1946965224               |
| SNP_P4_137782_7747   | NW_004516032.1 | Scaffold604 | 7747                    | CC                              | TT              | 1946965226               |
| SNP_P4_137783_7835   | NW_004516032.1 | Scaffold604 | 7835                    | GG                              | AA              | 1946965228               |
| SNP_P4_137784_7865   | NW_004516032.1 | Scaffold604 | 7865                    | CC                              | TT              | 1946965230               |
| SNP_P4_137785_8150   | NW_004516032.1 | Scaffold604 | 8150                    | AA                              | TT              | 1946965232               |
| SNP_P4_137786_8190   | NW_004516032.1 | Scaffold604 | 8190                    | AA                              | GG              | 1946965234               |

| SNPs IDs            | Chromosome IDs | Chromosomes | Physical positions (bp) | CDC Frontier (Reference genome) | (ILWC46 & LPNB) | NCBI SNPdb Accession IDs |
|---------------------|----------------|-------------|-------------------------|---------------------------------|-----------------|--------------------------|
| SNP_P4_137787_8859  | NW_004516032.1 | Scaffold604 | 8859                    | TT                              | AA              | 1946965236               |
| SNP_P4_137788_8997  | NW_004516032.1 | Scaffold604 | 8997                    | TT                              | CC              | 1946965238               |
| SNP_P4_137789_9040  | NW_004516032.1 | Scaffold604 | 9040                    | CC                              | AA              | 1946965240               |
| SNP_P4_137790_9084  | NW_004516032.1 | Scaffold604 | 9084                    | TT                              | AA              | 1946965242               |
| SNP_P4_137791_9112  | NW_004516032.1 | Scaffold604 | 9112                    | AA                              | TT              | 1946965244               |
| SNP_P4_137792_9237  | NW_004516032.1 | Scaffold604 | 9237                    | TT                              | CC              | 1946965246               |
| SNP_P4_137793_9290  | NW_004516032.1 | Scaffold604 | 9290                    | AA                              | GG              | 1946965248               |
| SNP_P4_137794_9471  | NW_004516032.1 | Scaffold604 | 9471                    | TT                              | AA              | 1946965250               |
| SNP_P4_137795_9698  | NW_004516032.1 | Scaffold604 | 9698                    | GG                              | AA              | 1946965252               |
| SNP_P4_137796_12999 | NW_004516032.1 | Scaffold604 | 12999                   | GG                              | AA              | 1946965254               |
| SNP_P4_137797_14667 | NW_004516032.1 | Scaffold604 | 14667                   | CC                              | TT              | 1946965256               |
| SNP_P4_137798_15113 | NW_004516032.1 | Scaffold604 | 15113                   | AA                              | GG              | 1946965258               |
| SNP_P4_137799_16025 | NW_004516032.1 | Scaffold604 | 16025                   | AA                              | TT              | 1946965260               |
| SNP_P4_137800_16450 | NW_004516032.1 | Scaffold604 | 16450                   | TT                              | CC              | 1946965262               |
| SNP_P4_137801_16641 | NW_004516032.1 | Scaffold604 | 16641                   | AA                              | CC              | 1946965264               |
| SNP_P4_137802_16682 | NW_004516032.1 | Scaffold604 | 16682                   | CC                              | GG              | 1946965266               |
| SNP_P4_137803_16830 | NW_004516032.1 | Scaffold604 | 16830                   | TT                              | CC              | 1946965268               |
| SNP_P4_137804_16910 | NW_004516032.1 | Scaffold604 | 16910                   | TT                              | CC              | 1946965270               |
| SNP_P4_137805_19046 | NW_004516032.1 | Scaffold604 | 19046                   | TT                              | CC              | 1946965272               |
| SNP_P4_137806_19122 | NW_004516032.1 | Scaffold604 | 19122                   | GG                              | AA              | 1946965274               |
| SNP_P4_137807_19158 | NW_004516032.1 | Scaffold604 | 19158                   | GG                              | CC              | 1946965276               |
| SNP_P4_137808_19175 | NW_004516032.1 | Scaffold604 | 19175                   | AA                              | GG              | 1946965278               |
| SNP_P4_137809_19179 | NW_004516032.1 | Scaffold604 | 19179                   | AA                              | GG              | 1946965280               |
| SNP_P4_137810_19186 | NW_004516032.1 | Scaffold604 | 19186                   | TT                              | CC              | 1946965282               |
| SNP_P4_137811_19581 | NW_004516032.1 | Scaffold604 | 19581                   | TT                              | CC              | 1946965284               |
| SNP_P4_137812_19614 | NW_004516032.1 | Scaffold604 | 19614                   | AA                              | GG              | 1946965286               |
| SNP_P4_137813_19620 | NW_004516032.1 | Scaffold604 | 19620                   | AA                              | GG              | 1946965288               |
| SNP_P4_137814_22650 | NW_004516032.1 | Scaffold604 | 22650                   | CC                              | GG              | 1946965290               |
| SNP_P4_137815_22669 | NW_004516032.1 | Scaffold604 | 22669                   | CC                              | AA              | 1946965292               |
| SNP_P4_137816_22734 | NW_004516032.1 | Scaffold604 | 22734                   | TT                              | AA              | 1946965294               |
| SNP_P4_137817_26028 | NW_004516032.1 | Scaffold604 | 26028                   | CC                              | TT              | 1946965296               |
| SNP_P4_137820_39918 | NW_004516032.1 | Scaffold604 | 39918                   | TT                              | GG              | 1946965298               |
| SNP_P4_137821_52015 | NW_004516032.1 | Scaffold604 | 52015                   | CC                              | TT              | 1946965300               |
| SNP_P4_137822_59566 | NW_004516032.1 | Scaffold604 | 59566                   | GG                              | CC              | 1946965302               |
| SNP_P4_137823_59644 | NW_004516032.1 | Scaffold604 | 59644                   | AA                              | CC              | 1946965304               |
| SNP_P4_137824_63398 | NW_004516032.1 | Scaffold604 | 63398                   | TT                              | CC              | 1946965306               |
| SNP_P4_137825_66979 | NW_004516032.1 | Scaffold604 | 66979                   | CC                              | TT              | 1946965308               |
| SNP_P4_137826_67299 | NW_004516032.1 | Scaffold604 | 67299                   | TT                              | AA              | 1946965310               |
| SNP_P4_137827_72039 | NW_004516032.1 | Scaffold604 | 72039                   | GG                              | AA              | 1946965312               |
| SNP_P4_137828_73905 | NW_004516032.1 | Scaffold604 | 73905                   | AA                              | CC              | 1946965314               |
| SNP_P4_137829_74341 | NW_004516032.1 | Scaffold604 | 74341                   | CC                              | TT              | 1946965316               |
| SNP_P4_137830_74399 | NW_004516032.1 | Scaffold604 | 74399                   | AA                              | GG              | 1946965318               |

| SNPs IDs            | Chromosome IDs | Chromosomes | Physical positions (bp) | CDC Frontier (Reference genome) | (ILWC46 & LPNB) | NCBI SNPdb Accession IDs |
|---------------------|----------------|-------------|-------------------------|---------------------------------|-----------------|--------------------------|
| SNP_P4_137831_77003 | NW_004516032.1 | Scaffold604 | 77003                   | AA                              | GG              | 1946965320               |
| SNP_P4_137832_1270  | NW_004516033.1 | Scaffold605 | 1270                    | TT                              | CC              | 1946965322               |
| SNP_P4_137834_1288  | NW_004516033.1 | Scaffold605 | 1288                    | AA                              | GG              | 1946965324               |
| SNP_P4_137835_1289  | NW_004516033.1 | Scaffold605 | 1289                    | AA                              | GG              | 1946965326               |
| SNP_P4_137836_5761  | NW_004516033.1 | Scaffold605 | 5761                    | AA                              | GG              | 1946965328               |
| SNP_P4_137837_19031 | NW_004516033.1 | Scaffold605 | 19031                   | TT                              | CC              | 1946965330               |
| SNP_P4_137838_19460 | NW_004516033.1 | Scaffold605 | 19460                   | GG                              | AA              | 1946965332               |
| SNP_P4_137839_19574 | NW_004516033.1 | Scaffold605 | 19574                   | GG                              | AA              | 1946965334               |
| SNP_P4_137840_24781 | NW_004516033.1 | Scaffold605 | 24781                   | TT                              | CC              | 1946965336               |
| SNP_P4_137844_71320 | NW_004516033.1 | Scaffold605 | 71320                   | TT                              | AA              | 1946965338               |
| SNP_P4_137845_71324 | NW_004516033.1 | Scaffold605 | 71324                   | CC                              | AA              | 1946965340               |
| SNP_P4_137846_73969 | NW_004516033.1 | Scaffold605 | 73969                   | TT                              | CC              | 1946965342               |
| SNP_P4_137847_78912 | NW_004516033.1 | Scaffold605 | 78912                   | GG                              | TT              | 1946965344               |
| SNP_P4_137848_78917 | NW_004516033.1 | Scaffold605 | 78917                   | TT                              | CC              | 1946965346               |
| SNP_P4_137850_4302  | NW_004516036.1 | Scaffold611 | 4302                    | GG                              | AA              | 1946965348               |
| SNP_P4_137851_5075  | NW_004516036.1 | Scaffold611 | 5075                    | GG                              | TT              | 1946965350               |
| SNP_P4_137852_6285  | NW_004516036.1 | Scaffold611 | 6285                    | AA                              | GG              | 1946965352               |
| SNP_P4_137853_6288  | NW_004516036.1 | Scaffold611 | 6288                    | GG                              | CC              | 1946965354               |
| SNP_P4_137854_6428  | NW_004516036.1 | Scaffold611 | 6428                    | TT                              | CC              | 1946965356               |
| SNP_P4_137855_6738  | NW_004516036.1 | Scaffold611 | 6738                    | TT                              | AA              | 1946965358               |
| SNP_P4_137856_6763  | NW_004516036.1 | Scaffold611 | 6763                    | GG                              | AA              | 1946965360               |
| SNP_P4_137857_10457 | NW_004516036.1 | Scaffold611 | 10457                   | AA                              | GG              | 1946965362               |
| SNP_P4_137858_23518 | NW_004516036.1 | Scaffold611 | 23518                   | TT                              | CC              | 1946965365               |
| SNP_P4_137859_23519 | NW_004516036.1 | Scaffold611 | 23519                   | GG                              | AA              | 1946965367               |
| SNP_P4_137860_23520 | NW_004516036.1 | Scaffold611 | 23520                   | AA                              | CC              | 1946965369               |
| SNP_P4_137862_23553 | NW_004516036.1 | Scaffold611 | 23553                   | CC                              | TT              | 1946965371               |
| SNP_P4_137863_23576 | NW_004516036.1 | Scaffold611 | 23576                   | CC                              | AA              | 1946965373               |
| SNP_P4_137864_23584 | NW_004516036.1 | Scaffold611 | 23584                   | AA                              | GG              | 1946965375               |
| SNP_P4_137865_23621 | NW_004516036.1 | Scaffold611 | 23621                   | TT                              | AA              | 1946965377               |
| SNP_P4_137866_23623 | NW_004516036.1 | Scaffold611 | 23623                   | TT                              | AA              | 1946965379               |
| SNP_P4_137867_23632 | NW_004516036.1 | Scaffold611 | 23632                   | TT                              | GG              | 1946965381               |
| SNP_P4_137868_23638 | NW_004516036.1 | Scaffold611 | 23638                   | TT                              | GG              | 1946965383               |
| SNP_P4_137869_23643 | NW_004516036.1 | Scaffold611 | 23643                   | TT                              | GG              | 1946965385               |
| SNP_P4_137870_568   | NW_004516037.1 | Scaffold612 | 568                     | AA                              | TT              | 1946965387               |
| SNP_P4_137871_2023  | NW_004516037.1 | Scaffold612 | 2023                    | CC                              | TT              | 1946965389               |
| SNP_P4_137872_2031  | NW_004516037.1 | Scaffold612 | 2031                    | TT                              | AA              | 1946965391               |
| SNP_P4_137873_2096  | NW_004516037.1 | Scaffold612 | 2096                    | TT                              | AA              | 1946965393               |
| SNP_P4_137874_2119  | NW_004516037.1 | Scaffold612 | 2119                    | CC                              | TT              | 1946965395               |
| SNP_P4_137875_2121  | NW_004516037.1 | Scaffold612 | 2121                    | CC                              | GG              | 1946965397               |
| SNP_P4_137876_2130  | NW_004516037.1 | Scaffold612 | 2130                    | TT                              | AA              | 1946965399               |
| SNP_P4_137877_2979  | NW_004516037.1 | Scaffold612 | 2979                    | CC                              | AA              | 1946965401               |
| SNP_P4_137878_3022  | NW_004516037.1 | Scaffold612 | 3022                    | TT                              | AA              | 1946965403               |

| SNPs IDs            | Chromosome IDs | Chromosomes | Physical positions (bp) | CDC Frontier (Reference genome) | (ILWC46 & LPNB) | NCBI SNPdb Accession IDs |
|---------------------|----------------|-------------|-------------------------|---------------------------------|-----------------|--------------------------|
| SNP_P4_137879_3040  | NW_004516037.1 | Scaffold612 | 3040                    | CC                              | TT              | 1946965405               |
| SNP_P4_137880_3097  | NW_004516037.1 | Scaffold612 | 3097                    | CC                              | TT              | 1946965407               |
| SNP_P4_137881_3120  | NW_004516037.1 | Scaffold612 | 3120                    | CC                              | GG              | 1946965409               |
| SNP_P4_137882_3194  | NW_004516037.1 | Scaffold612 | 3194                    | GG                              | AA              | 1946965411               |
| SNP_P4_137883_3195  | NW_004516037.1 | Scaffold612 | 3195                    | TT                              | CC              | 1946965413               |
| SNP_P4_137884_3297  | NW_004516037.1 | Scaffold612 | 3297                    | GG                              | AA              | 1946965415               |
| SNP_P4_137885_3323  | NW_004516037.1 | Scaffold612 | 3323                    | TT                              | CC              | 1946965417               |
| SNP_P4_137887_3416  | NW_004516037.1 | Scaffold612 | 3416                    | AA                              | CC              | 1946965419               |
| SNP_P4_137889_3455  | NW_004516037.1 | Scaffold612 | 3455                    | GG                              | AA              | 1946965421               |
| SNP_P4_137890_3512  | NW_004516037.1 | Scaffold612 | 3512                    | TT                              | GG              | 1946965423               |
| SNP_P4_137891_3552  | NW_004516037.1 | Scaffold612 | 3552                    | CC                              | GG              | 1946965425               |
| SNP_P4_137892_3596  | NW_004516037.1 | Scaffold612 | 3596                    | CC                              | TT              | 1946965427               |
| SNP_P4_137894_17439 | NW_004516037.1 | Scaffold612 | 17439                   | AA                              | TT              | 1946965429               |
| SNP_P4_137895_17756 | NW_004516037.1 | Scaffold612 | 17756                   | AA                              | GG              | 1946965431               |
| SNP_P4_137896_17829 | NW_004516037.1 | Scaffold612 | 17829                   | AA                              | GG              | 1946965433               |
| SNP_P4_137897_17831 | NW_004516037.1 | Scaffold612 | 17831                   | AA                              | TT              | 1946965435               |
| SNP_P4_137898_18613 | NW_004516037.1 | Scaffold612 | 18613                   | TT                              | AA              | 1946965437               |
| SNP_P4_137899_18622 | NW_004516037.1 | Scaffold612 | 18622                   | GG                              | TT              | 1946965439               |
| SNP_P4_137900_19944 | NW_004516037.1 | Scaffold612 | 19944                   | GG                              | TT              | 1946965441               |
| SNP_P4_137901_20273 | NW_004516037.1 | Scaffold612 | 20273                   | AA                              | GG              | 1946965443               |
| SNP_P4_137902_20613 | NW_004516037.1 | Scaffold612 | 20613                   | TT                              | CC              | 1946965445               |
| SNP_P4_137903_21971 | NW_004516037.1 | Scaffold612 | 21971                   | AA                              | CC              | 1946965448               |
| SNP_P4_137904_22047 | NW_004516037.1 | Scaffold612 | 22047                   | CC                              | TT              | 1946965450               |
| SNP_P4_137905_22114 | NW_004516037.1 | Scaffold612 | 22114                   | GG                              | AA              | 1946965452               |
| SNP_P4_137906_22549 | NW_004516037.1 | Scaffold612 | 22549                   | AA                              | GG              | 1946965454               |
| SNP_P4_137907_22674 | NW_004516037.1 | Scaffold612 | 22674                   | GG                              | CC              | 1946965456               |
| SNP_P4_137908_22779 | NW_004516037.1 | Scaffold612 | 22779                   | TT                              | GG              | 1946965458               |
| SNP_P4_137909_22786 | NW_004516037.1 | Scaffold612 | 22786                   | GG                              | TT              | 1946965460               |
| SNP_P4_137910_23052 | NW_004516037.1 | Scaffold612 | 23052                   | AA                              | GG              | 1946965462               |
| SNP_P4_137911_23073 | NW_004516037.1 | Scaffold612 | 23073                   | AA                              | TT              | 1946965464               |
| SNP_P4_137912_24959 | NW_004516037.1 | Scaffold612 | 24959                   | GG                              | TT              | 1946965466               |
| SNP_P4_137913_25277 | NW_004516037.1 | Scaffold612 | 25277                   | GG                              | AA              | 1946965468               |
| SNP_P4_137914_25591 | NW_004516037.1 | Scaffold612 | 25591                   | GG                              | AA              | 1946965470               |
| SNP_P4_137915_25749 | NW_004516037.1 | Scaffold612 | 25749                   | AA                              | GG              | 1946965472               |
| SNP_P4_137916_26703 | NW_004516037.1 | Scaffold612 | 26703                   | TT                              | CC              | 1946965474               |
| SNP_P4_137917_26704 | NW_004516037.1 | Scaffold612 | 26704                   | GG                              | AA              | 1946965476               |
| SNP_P4_137918_28238 | NW_004516037.1 | Scaffold612 | 28238                   | AA                              | GG              | 1946965478               |
| SNP_P4_137919_28455 | NW_004516037.1 | Scaffold612 | 28455                   | GG                              | AA              | 1946965480               |
| SNP_P4_137920_28543 | NW_004516037.1 | Scaffold612 | 28543                   | CC                              | TT              | 1946965482               |
| SNP_P4_137922_28609 | NW_004516037.1 | Scaffold612 | 28609                   | TT                              | CC              | 1946965484               |
| SNP_P4_137923_28742 | NW_004516037.1 | Scaffold612 | 28742                   | AA                              | GG              | 1946965486               |
| SNP_P4_137924_28852 | NW_004516037.1 | Scaffold612 | 28852                   | AA                              | GG              | 1946965488               |



| SNPs IDs            | Chromosome IDs | Chromosomes | Physical positions (bp) | CDC Frontier (Reference genome) | (ILWC46 & LPNB) | NCBI SNPdb Accession IDs |
|---------------------|----------------|-------------|-------------------------|---------------------------------|-----------------|--------------------------|
| SNP_P4_137925_28867 | NW_004516037.1 | Scaffold612 | 28867                   | AA                              | TT              | 1946965490               |
| SNP_P4_137926_28927 | NW_004516037.1 | Scaffold612 | 28927                   | AA                              | CC              | 1946965492               |
| SNP_P4_137927_29090 | NW_004516037.1 | Scaffold612 | 29090                   | GG                              | AA              | 1946965494               |
| SNP_P4_137928_29390 | NW_004516037.1 | Scaffold612 | 29390                   | AA                              | GG              | 1946965496               |
| SNP_P4_137929_29412 | NW_004516037.1 | Scaffold612 | 29412                   | CC                              | GG              | 1946965498               |
| SNP_P4_137930_29465 | NW_004516037.1 | Scaffold612 | 29465                   | CC                              | TT              | 1946965500               |
| SNP_P4_137931_29512 | NW_004516037.1 | Scaffold612 | 29512                   | GG                              | AA              | 1946965502               |
| SNP_P4_137932_38725 | NW_004516037.1 | Scaffold612 | 38725                   | GG                              | AA              | 1946965504               |
| SNP_P4_137933_38732 | NW_004516037.1 | Scaffold612 | 38732                   | CC                              | TT              | 1946965506               |
| SNP_P4_137934_38739 | NW_004516037.1 | Scaffold612 | 38739                   | AA                              | GG              | 1946965508               |
| SNP_P4_137935_38746 | NW_004516037.1 | Scaffold612 | 38746                   | TT                              | AA              | 1946965510               |
| SNP_P4_137936_38960 | NW_004516037.1 | Scaffold612 | 38960                   | GG                              | CC              | 1946965512               |
| SNP_P4_137937_38973 | NW_004516037.1 | Scaffold612 | 38973                   | AA                              | TT              | 1946965514               |
| SNP_P4_137938_39213 | NW_004516037.1 | Scaffold612 | 39213                   | CC                              | TT              | 1946965515               |
| SNP_P4_137939_39267 | NW_004516037.1 | Scaffold612 | 39267                   | CC                              | TT              | 1946965517               |
| SNP_P4_137940_49252 | NW_004516037.1 | Scaffold612 | 49252                   | AA                              | CC              | 1946965519               |
| SNP_P4_137941_64    | NW_004516038.1 | Scaffold613 | 64                      | CC                              | GG              | 1946965521               |
| SNP_P4_137943_6908  | NW_004516038.1 | Scaffold613 | 6908                    | AA                              | CC              | 1946965523               |
| SNP_P4_137944_24694 | NW_004516038.1 | Scaffold613 | 24694                   | GG                              | AA              | 1946965525               |
| SNP_P4_137945_25596 | NW_004516038.1 | Scaffold613 | 25596                   | TT                              | AA              | 1946965527               |
| SNP_P4_137946_25940 | NW_004516038.1 | Scaffold613 | 25940                   | GG                              | TT              | 1946965529               |
| SNP_P4_137947_79388 | NW_004516038.1 | Scaffold613 | 79388                   | TT                              | CC              | 1946965531               |
| SNP_P4_137948_79801 | NW_004516038.1 | Scaffold613 | 79801                   | TT                              | CC              | 1946965533               |
| SNP_P4_137949_1090  | NW_004516041.1 | Scaffold617 | 1090                    | TT                              | AA              | 1946965535               |
| SNP_P4_137950_1092  | NW_004516041.1 | Scaffold617 | 1092                    | TT                              | GG              | 1946965537               |
| SNP_P4_137951_1173  | NW_004516041.1 | Scaffold617 | 1173                    | GG                              | AA              | 1946965539               |
| SNP_P4_137952_1191  | NW_004516041.1 | Scaffold617 | 1191                    | AA                              | GG              | 1946965541               |
| SNP_P4_137953_1261  | NW_004516041.1 | Scaffold617 | 1261                    | AA                              | GG              | 1946965543               |
| SNP_P4_137954_1498  | NW_004516041.1 | Scaffold617 | 1498                    | CC                              | TT              | 1946965545               |
| SNP_P4_137955_1782  | NW_004516041.1 | Scaffold617 | 1782                    | CC                              | AA              | 1946965547               |
| SNP_P4_137956_8565  | NW_004516041.1 | Scaffold617 | 8565                    | CC                              | TT              | 1946965549               |
| SNP_P4_137957_8581  | NW_004516041.1 | Scaffold617 | 8581                    | TT                              | CC              | 1946965551               |
| SNP_P4_137958_8775  | NW_004516041.1 | Scaffold617 | 8775                    | TT                              | AA              | 1946965553               |
| SNP_P4_137959_8847  | NW_004516041.1 | Scaffold617 | 8847                    | GG                              | AA              | 1946965555               |
| SNP_P4_137960_8859  | NW_004516041.1 | Scaffold617 | 8859                    | TT                              | GG              | 1946965557               |
| SNP_P4_137961_8869  | NW_004516041.1 | Scaffold617 | 8869                    | CC                              | AA              | 1946965559               |
| SNP_P4_137962_8876  | NW_004516041.1 | Scaffold617 | 8876                    | AA                              | CC              | 1946965561               |
| SNP_P4_137964_8901  | NW_004516041.1 | Scaffold617 | 8901                    | CC                              | AA              | 1946965563               |
| SNP_P4_137965_8908  | NW_004516041.1 | Scaffold617 | 8908                    | CC                              | AA              | 1946965565               |
| SNP_P4_137966_8984  | NW_004516041.1 | Scaffold617 | 8984                    | AA                              | GG              | 1946965567               |
| SNP_P4_137967_5239  | NW_004516042.1 | Scaffold618 | 5239                    | AA                              | TT              | 1946965568               |
| SNP_P4_137968_5251  | NW_004516042.1 | Scaffold618 | 5251                    | TT                              | CC              | 1946965570               |

| SNPs IDs             | Chromosome IDs | Chromosomes | Physical positions (bp) | CDC Frontier (Reference genome) | (ILWC46 & LPNB) | NCBI SNPdb Accession IDs |
|----------------------|----------------|-------------|-------------------------|---------------------------------|-----------------|--------------------------|
| SNP_P4_137969_5325   | NW_004516042.1 | Scaffold618 | 5325                    | CC                              | TT              | 1946965572               |
| SNP_P4_137970_5395   | NW_004516042.1 | Scaffold618 | 5395                    | AA                              | GG              | 1946965574               |
| SNP_P4_137971_5397   | NW_004516042.1 | Scaffold618 | 5397                    | AA                              | CC              | 1946965576               |
| SNP_P4_137972_6110   | NW_004516042.1 | Scaffold618 | 6110                    | CC                              | AA              | 1946965578               |
| SNP_P4_137973_8671   | NW_004516042.1 | Scaffold618 | 8671                    | TT                              | CC              | 1946965580               |
| SNP_P4_137974_9071   | NW_004516042.1 | Scaffold618 | 9071                    | GG                              | AA              | 1946965582               |
| SNP_P4_137975_13901  | NW_004516042.1 | Scaffold618 | 13901                   | GG                              | AA              | 1946965584               |
| SNP_P4_137976_13903  | NW_004516042.1 | Scaffold618 | 13903                   | CC                              | TT              | 1946965586               |
| SNP_P4_137977_14219  | NW_004516042.1 | Scaffold618 | 14219                   | GG                              | AA              | 1946965588               |
| SNP_P4_137978_14225  | NW_004516042.1 | Scaffold618 | 14225                   | TT                              | AA              | 1946965590               |
| SNP_P4_137979_14227  | NW_004516042.1 | Scaffold618 | 14227                   | GG                              | AA              | 1946965592               |
| SNP_P4_137980_14245  | NW_004516042.1 | Scaffold618 | 14245                   | AA                              | GG              | 1946965594               |
| SNP_P4_137981_18453  | NW_004516042.1 | Scaffold618 | 18453                   | CC                              | AA              | 1946965596               |
| SNP_P4_137982_55149  | NW_004516042.1 | Scaffold618 | 55149                   | AA                              | GG              | 1946965598               |
| SNP_P4_137983_55151  | NW_004516042.1 | Scaffold618 | 55151                   | TT                              | AA              | 1946965600               |
| SNP_P4_137984_55176  | NW_004516042.1 | Scaffold618 | 55176                   | AA                              | CC              | 1946965602               |
| SNP_P4_137985_55232  | NW_004516042.1 | Scaffold618 | 55232                   | AA                              | GG              | 1946965603               |
| SNP_P4_137986_55237  | NW_004516042.1 | Scaffold618 | 55237                   | AA                              | GG              | 1946965605               |
| SNP_P4_137987_58135  | NW_004516042.1 | Scaffold618 | 58135                   | CC                              | TT              | 1946965607               |
| SNP_P4_137988_58142  | NW_004516042.1 | Scaffold618 | 58142                   | AA                              | TT              | 1946965609               |
| SNP_P4_137989_58145  | NW_004516042.1 | Scaffold618 | 58145                   | GG                              | TT              | 1946965611               |
| SNP_P4_137990_58932  | NW_004516042.1 | Scaffold618 | 58932                   | TT                              | CC              | 1946965613               |
| SNP_P4_137991_58937  | NW_004516042.1 | Scaffold618 | 58937                   | AA                              | TT              | 1946965615               |
| SNP_P4_137992_58954  | NW_004516042.1 | Scaffold618 | 58954                   | TT                              | CC              | 1946965617               |
| SNP_P4_137993_58973  | NW_004516042.1 | Scaffold618 | 58973                   | TT                              | CC              | 1946965619               |
| SNP_P4_137994_59130  | NW_004516042.1 | Scaffold618 | 59130                   | CC                              | AA              | 1946965621               |
| SNP_P4_137995_59316  | NW_004516042.1 | Scaffold618 | 59316                   | AA                              | GG              | 1946965623               |
| SNP_P4_137996_59434  | NW_004516042.1 | Scaffold618 | 59434                   | AA                              | TT              | 1946965625               |
| SNP_P4_137997_59435  | NW_004516042.1 | Scaffold618 | 59435                   | CC                              | GG              | 1946965627               |
| SNP_P4_137998_59447  | NW_004516042.1 | Scaffold618 | 59447                   | TT                              | AA              | 1946965629               |
| SNP_P4_137999_59502  | NW_004516042.1 | Scaffold618 | 59502                   | TT                              | CC              | 1946965631               |
| SNP_P4_138000_59506  | NW_004516042.1 | Scaffold618 | 59506                   | TT                              | CC              | 1946965633               |
| SNP_P4_138001_59559  | NW_004516042.1 | Scaffold618 | 59559                   | AA                              | GG              | 1946965635               |
| SNP_P4_138002_59778  | NW_004516042.1 | Scaffold618 | 59778                   | CC                              | TT              | 1946965637               |
| SNP_P4_138003_60608  | NW_004516042.1 | Scaffold618 | 60608                   | TT                              | CC              | 1946965639               |
| SNP_P4_138004_60685  | NW_004516042.1 | Scaffold618 | 60685                   | AA                              | GG              | 1946965641               |
| SNP_P4_138005_62356  | NW_004516042.1 | Scaffold618 | 62356                   | GG                              | AA              | 1946965643               |
| SNP_P4_138006_62371  | NW_004516042.1 | Scaffold618 | 62371                   | TT                              | CC              | 1946965645               |
| SNP_P4_138007_62626  | NW_004516042.1 | Scaffold618 | 62626                   | AA                              | CC              | 1946965647               |
| SNP_P4_138008_62982  | NW_004516042.1 | Scaffold618 | 62982                   | AA                              | TT              | 1946965649               |
| SNP_P4_138010_147069 | NW_004516042.1 | Scaffold618 | 147069                  | GG                              | AA              | 1946965651               |
| SNP_P4_138011_152478 | NW_004516042.1 | Scaffold618 | 152478                  | TT                              | CC              | 1946965653               |

| SNPs IDs             | Chromosome IDs | Chromosomes | Physical positions (bp) | CDC Frontier (Reference genome) | (ILWC46 & LPNB) | NCBI SNPdb Accession IDs |
|----------------------|----------------|-------------|-------------------------|---------------------------------|-----------------|--------------------------|
| SNP_P4_138012_152893 | NW_004516042.1 | Scaffold618 | 152893                  | TT                              | CC              | 1946965655               |
| SNP_P4_138013_156061 | NW_004516042.1 | Scaffold618 | 156061                  | TT                              | CC              | 1946965657               |
| SNP_P4_138014_164687 | NW_004516042.1 | Scaffold618 | 164687                  | CC                              | TT              | 1946965659               |
| SNP_P4_138015_172451 | NW_004516042.1 | Scaffold618 | 172451                  | AA                              | GG              | 1946965661               |
| SNP_P4_138016_200890 | NW_004516042.1 | Scaffold618 | 200890                  | AA                              | GG              | 1946965663               |
| SNP_P4_138017_200925 | NW_004516042.1 | Scaffold618 | 200925                  | GG                              | AA              | 1946965665               |
| SNP_P4_138018_216482 | NW_004516042.1 | Scaffold618 | 216482                  | GG                              | TT              | 1946965667               |
| SNP_P4_138019_216624 | NW_004516042.1 | Scaffold618 | 216624                  | GG                              | TT              | 1946965669               |
| SNP_P4_138020_216646 | NW_004516042.1 | Scaffold618 | 216646                  | AA                              | GG              | 1946965671               |
| SNP_P4_138021_218321 | NW_004516042.1 | Scaffold618 | 218321                  | GG                              | AA              | 1946965673               |
| SNP_P4_138022_34000  | NW_004516043.1 | Scaffold619 | 34000                   | GG                              | AA              | 1946965675               |
| SNP_P4_138023_34488  | NW_004516043.1 | Scaffold619 | 34488                   | TT                              | CC              | 1946965677               |
| SNP_P4_138024_34490  | NW_004516043.1 | Scaffold619 | 34490                   | TT                              | GG              | 1946965679               |
| SNP_P4_138025_46871  | NW_004516043.1 | Scaffold619 | 46871                   | AA                              | CC              | 1946965681               |
| SNP_P4_138026_47036  | NW_004516043.1 | Scaffold619 | 47036                   | AA                              | GG              | 1946965683               |
| SNP_P4_138027_47053  | NW_004516043.1 | Scaffold619 | 47053                   | TT                              | CC              | 1946965685               |
| SNP_P4_138028_47054  | NW_004516043.1 | Scaffold619 | 47054                   | TT                              | CC              | 1946965686               |
| SNP_P4_138029_47128  | NW_004516043.1 | Scaffold619 | 47128                   | GG                              | CC              | 1946965688               |
| SNP_P4_138030_47140  | NW_004516043.1 | Scaffold619 | 47140                   | AA                              | CC              | 1946965690               |
| SNP_P4_138031_88     | NW_004516044.1 | Scaffold620 | 88                      | AA                              | TT              | 1946965692               |
| SNP_P4_138032_1001   | NW_004516045.1 | Scaffold622 | 1001                    | AA                              | GG              | 1946965694               |
| SNP_P4_138033_2803   | NW_004516045.1 | Scaffold622 | 2803                    | GG                              | AA              | 1946965696               |
| SNP_P4_138034_4669   | NW_004516045.1 | Scaffold622 | 4669                    | CC                              | TT              | 1946965698               |
| SNP_P4_138035_4937   | NW_004516045.1 | Scaffold622 | 4937                    | AA                              | TT              | 1946965700               |
| SNP_P4_138036_4948   | NW_004516045.1 | Scaffold622 | 4948                    | AA                              | GG              | 1946965702               |
| SNP_P4_138037_7544   | NW_004516045.1 | Scaffold622 | 7544                    | AA                              | GG              | 1946965704               |
| SNP_P4_138038_7739   | NW_004516045.1 | Scaffold622 | 7739                    | TT                              | GG              | 1946965705               |
| SNP_P4_138039_8628   | NW_004516045.1 | Scaffold622 | 8628                    | CC                              | GG              | 1946965707               |
| SNP_P4_138040_8636   | NW_004516045.1 | Scaffold622 | 8636                    | CC                              | AA              | 1946965709               |
| SNP_P4_138041_8794   | NW_004516045.1 | Scaffold622 | 8794                    | CC                              | AA              | 1946965711               |
| SNP_P4_138042_9400   | NW_004516045.1 | Scaffold622 | 9400                    | GG                              | AA              | 1946965713               |
| SNP_P4_138043_9806   | NW_004516045.1 | Scaffold622 | 9806                    | TT                              | GG              | 1946965715               |
| SNP_P4_138044_9826   | NW_004516045.1 | Scaffold622 | 9826                    | AA                              | GG              | 1946965717               |
| SNP_P4_138045_10064  | NW_004516045.1 | Scaffold622 | 10064                   | AA                              | GG              | 1946965719               |
| SNP_P4_138047_10320  | NW_004516045.1 | Scaffold622 | 10320                   | CC                              | GG              | 1946965721               |
| SNP_P4_138048_10326  | NW_004516045.1 | Scaffold622 | 10326                   | CC                              | GG              | 1946965723               |
| SNP_P4_138049_10460  | NW_004516045.1 | Scaffold622 | 10460                   | AA                              | TT              | 1946965725               |
| SNP_P4_138050_10552  | NW_004516045.1 | Scaffold622 | 10552                   | CC                              | GG              | 1946965727               |
| SNP_P4_138051_10642  | NW_004516045.1 | Scaffold622 | 10642                   | CC                              | TT              | 1946965729               |
| SNP_P4_138052_10795  | NW_004516045.1 | Scaffold622 | 10795                   | CC                              | TT              | 1946965731               |
| SNP_P4_138053_10835  | NW_004516045.1 | Scaffold622 | 10835                   | TT                              | AA              | 1946965733               |
| SNP_P4_138055_20984  | NW_004516045.1 | Scaffold622 | 20984                   | AA                              | GG              | 1946965735               |

| SNPs IDs            | Chromosome IDs | Chromosomes | Physical positions (bp) | CDC Frontier (Reference genome) | (ILWC46 & LPNB) | NCBI SNPdb Accession IDs |
|---------------------|----------------|-------------|-------------------------|---------------------------------|-----------------|--------------------------|
| SNP_P4_138056_21010 | NW_004516045.1 | Scaffold622 | 21010                   | TT                              | AA              | 1946965736               |
| SNP_P4_138057_22074 | NW_004516045.1 | Scaffold622 | 22074                   | AA                              | GG              | 1946965738               |
| SNP_P4_138058_22094 | NW_004516045.1 | Scaffold622 | 22094                   | TT                              | CC              | 1946965740               |
| SNP_P4_138059_22106 | NW_004516045.1 | Scaffold622 | 22106                   | CC                              | TT              | 1946965742               |
| SNP_P4_138060_22495 | NW_004516045.1 | Scaffold622 | 22495                   | CC                              | GG              | 1946965744               |
| SNP_P4_138061_22501 | NW_004516045.1 | Scaffold622 | 22501                   | CC                              | AA              | 1946965746               |
| SNP_P4_138062_22525 | NW_004516045.1 | Scaffold622 | 22525                   | AA                              | TT              | 1946965748               |
| SNP_P4_138064_23541 | NW_004516045.1 | Scaffold622 | 23541                   | AA                              | GG              | 1946965750               |
| SNP_P4_138065_24165 | NW_004516045.1 | Scaffold622 | 24165                   | GG                              | AA              | 1946965752               |
| SNP_P4_138066_24197 | NW_004516045.1 | Scaffold622 | 24197                   | AA                              | GG              | 1946965754               |
| SNP_P4_138067_24598 | NW_004516045.1 | Scaffold622 | 24598                   | AA                              | GG              | 1946965756               |
| SNP_P4_138068_24639 | NW_004516045.1 | Scaffold622 | 24639                   | GG                              | CC              | 1946965758               |
| SNP_P4_138069_24737 | NW_004516045.1 | Scaffold622 | 24737                   | AA                              | GG              | 1946965760               |
| SNP_P4_138070_24745 | NW_004516045.1 | Scaffold622 | 24745                   | AA                              | CC              | 1946965762               |
| SNP_P4_138071_24827 | NW_004516045.1 | Scaffold622 | 24827                   | GG                              | TT              | 1946965764               |
| SNP_P4_138072_24928 | NW_004516045.1 | Scaffold622 | 24928                   | AA                              | TT              | 1946965766               |
| SNP_P4_138073_24930 | NW_004516045.1 | Scaffold622 | 24930                   | AA                              | GG              | 1946965768               |
| SNP_P4_138074_24962 | NW_004516045.1 | Scaffold622 | 24962                   | CC                              | AA              | 1946965770               |
| SNP_P4_138075_25187 | NW_004516045.1 | Scaffold622 | 25187                   | TT                              | GG              | 1946965772               |
| SNP_P4_138076_25698 | NW_004516045.1 | Scaffold622 | 25698                   | GG                              | TT              | 1946965774               |
| SNP_P4_138077_25947 | NW_004516045.1 | Scaffold622 | 25947                   | AA                              | CC              | 1946965776               |
| SNP_P4_138078_26069 | NW_004516045.1 | Scaffold622 | 26069                   | AA                              | GG              | 1946965778               |
| SNP_P4_138079_26304 | NW_004516045.1 | Scaffold622 | 26304                   | TT                              | CC              | 1946965780               |
| SNP_P4_138080_26375 | NW_004516045.1 | Scaffold622 | 26375                   | TT                              | AA              | 1946965782               |
| SNP_P4_138081_26605 | NW_004516045.1 | Scaffold622 | 26605                   | CC                              | AA              | 1946965784               |
| SNP_P4_138084_30918 | NW_004516045.1 | Scaffold622 | 30918                   | TT                              | CC              | 1946965786               |
| SNP_P4_138085_31042 | NW_004516045.1 | Scaffold622 | 31042                   | TT                              | GG              | 1946965788               |
| SNP_P4_138086_31199 | NW_004516045.1 | Scaffold622 | 31199                   | GG                              | CC              | 1946965790               |
| SNP_P4_138087_31288 | NW_004516045.1 | Scaffold622 | 31288                   | CC                              | AA              | 1946965792               |
| SNP_P4_138088_31309 | NW_004516045.1 | Scaffold622 | 31309                   | TT                              | GG              | 1946965794               |
| SNP_P4_138089_31322 | NW_004516045.1 | Scaffold622 | 31322                   | TT                              | AA              | 1946965796               |
| SNP_P4_138090_35325 | NW_004516045.1 | Scaffold622 | 35325                   | TT                              | AA              | 1946965798               |
| SNP_P4_138091_35389 | NW_004516045.1 | Scaffold622 | 35389                   | CC                              | TT              | 1946965800               |
| SNP_P4_138092_35390 | NW_004516045.1 | Scaffold622 | 35390                   | AA                              | GG              | 1946965802               |
| SNP_P4_138093_35391 | NW_004516045.1 | Scaffold622 | 35391                   | CC                              | AA              | 1946965804               |
| SNP_P4_138094_35785 | NW_004516045.1 | Scaffold622 | 35785                   | AA                              | CC              | 1946965806               |
| SNP_P4_138095_35813 | NW_004516045.1 | Scaffold622 | 35813                   | GG                              | CC              | 1946965808               |
| SNP_P4_138096_35823 | NW_004516045.1 | Scaffold622 | 35823                   | TT                              | CC              | 1946965810               |
| SNP_P4_138097_35866 | NW_004516045.1 | Scaffold622 | 35866                   | AA                              | TT              | 1946965812               |
| SNP_P4_138098_35894 | NW_004516045.1 | Scaffold622 | 35894                   | AA                              | CC              | 1946965814               |
| SNP_P4_138099_35984 | NW_004516045.1 | Scaffold622 | 35984                   | CC                              | TT              | 1946965816               |
| SNP_P4_138100_36082 | NW_004516045.1 | Scaffold622 | 36082                   | CC                              | GG              | 1946965818               |

| SNPs IDs            | Chromosome IDs | Chromosomes | Physical positions (bp) | CDC Frontier (Reference genome) | (ILWC46 & LPNB) | NCBI SNPdb Accession IDs |
|---------------------|----------------|-------------|-------------------------|---------------------------------|-----------------|--------------------------|
| SNP_P4_138101_36091 | NW_004516045.1 | Scaffold622 | 36091                   | AA                              | TT              | 1946965820               |
| SNP_P4_138102_36103 | NW_004516045.1 | Scaffold622 | 36103                   | AA                              | TT              | 1946965822               |
| SNP_P4_138103_36138 | NW_004516045.1 | Scaffold622 | 36138                   | GG                              | TT              | 1946965824               |
| SNP_P4_138104_36187 | NW_004516045.1 | Scaffold622 | 36187                   | GG                              | CC              | 1946965826               |
| SNP_P4_138105_36249 | NW_004516045.1 | Scaffold622 | 36249                   | GG                              | CC              | 1946965828               |
| SNP_P4_138106_36278 | NW_004516045.1 | Scaffold622 | 36278                   | GG                              | CC              | 1946965830               |
| SNP_P4_138107_36621 | NW_004516045.1 | Scaffold622 | 36621                   | GG                              | AA              | 1946965832               |
| SNP_P4_138108_36641 | NW_004516045.1 | Scaffold622 | 36641                   | AA                              | TT              | 1946965834               |
| SNP_P4_138109_40747 | NW_004516045.1 | Scaffold622 | 40747                   | GG                              | AA              | 1946965836               |
| SNP_P4_138110_41115 | NW_004516045.1 | Scaffold622 | 41115                   | TT                              | GG              | 1946965838               |
| SNP_P4_138111_41363 | NW_004516045.1 | Scaffold622 | 41363                   | GG                              | AA              | 1946965840               |
| SNP_P4_138112_41460 | NW_004516045.1 | Scaffold622 | 41460                   | AA                              | GG              | 1946965842               |
| SNP_P4_138114_44565 | NW_004516045.1 | Scaffold622 | 44565                   | AA                              | GG              | 1946965844               |
| SNP_P4_138115_45118 | NW_004516045.1 | Scaffold622 | 45118                   | AA                              | TT              | 1946965846               |
| SNP_P4_138116_45256 | NW_004516045.1 | Scaffold622 | 45256                   | AA                              | CC              | 1946965848               |
| SNP_P4_138117_45308 | NW_004516045.1 | Scaffold622 | 45308                   | TT                              | CC              | 1946965850               |
| SNP_P4_138118_45565 | NW_004516045.1 | Scaffold622 | 45565                   | AA                              | CC              | 1946965852               |
| SNP_P4_138119_45810 | NW_004516045.1 | Scaffold622 | 45810                   | TT                              | AA              | 1946965854               |
| SNP_P4_138120_45948 | NW_004516045.1 | Scaffold622 | 45948                   | TT                              | AA              | 1946965856               |
| SNP_P4_138121_47878 | NW_004516045.1 | Scaffold622 | 47878                   | AA                              | TT              | 1946965858               |
| SNP_P4_138122_48012 | NW_004516045.1 | Scaffold622 | 48012                   | TT                              | AA              | 1946965860               |
| SNP_P4_138123_48048 | NW_004516045.1 | Scaffold622 | 48048                   | CC                              | GG              | 1946965862               |
| SNP_P4_138124_48085 | NW_004516045.1 | Scaffold622 | 48085                   | GG                              | AA              | 1946965864               |
| SNP_P4_138126_48271 | NW_004516045.1 | Scaffold622 | 48271                   | TT                              | GG              | 1946965866               |
| SNP_P4_138127_48306 | NW_004516045.1 | Scaffold622 | 48306                   | TT                              | AA              | 1946965868               |
| SNP_P4_138128_48851 | NW_004516045.1 | Scaffold622 | 48851                   | TT                              | AA              | 1946965870               |
| SNP_P4_138129_48910 | NW_004516045.1 | Scaffold622 | 48910                   | CC                              | AA              | 1946965872               |
| SNP_P4_138130_48925 | NW_004516045.1 | Scaffold622 | 48925                   | CC                              | AA              | 1946965874               |
| SNP_P4_138131_56563 | NW_004516045.1 | Scaffold622 | 56563                   | AA                              | GG              | 1946965876               |
| SNP_P4_138132_56577 | NW_004516045.1 | Scaffold622 | 56577                   | AA                              | CC              | 1946965878               |
| SNP_P4_138133_56706 | NW_004516045.1 | Scaffold622 | 56706                   | AA                              | GG              | 1946965880               |
| SNP_P4_138134_56846 | NW_004516045.1 | Scaffold622 | 56846                   | CC                              | TT              | 1946965882               |
| SNP_P4_138135_56869 | NW_004516045.1 | Scaffold622 | 56869                   | CC                              | GG              | 1946965884               |
| SNP_P4_138136_57087 | NW_004516045.1 | Scaffold622 | 57087                   | AA                              | TT              | 1946965886               |
| SNP_P4_138137_57101 | NW_004516045.1 | Scaffold622 | 57101                   | CC                              | GG              | 1946965888               |
| SNP_P4_138138_57121 | NW_004516045.1 | Scaffold622 | 57121                   | AA                              | TT              | 1946965890               |
| SNP_P4_138139_57207 | NW_004516045.1 | Scaffold622 | 57207                   | TT                              | GG              | 1946965892               |
| SNP_P4_138140_57277 | NW_004516045.1 | Scaffold622 | 57277                   | CC                              | TT              | 1946965894               |
| SNP_P4_138141_57279 | NW_004516045.1 | Scaffold622 | 57279                   | AA                              | GG              | 1946965896               |
| SNP_P4_138142_57291 | NW_004516045.1 | Scaffold622 | 57291                   | GG                              | AA              | 1946965898               |
| SNP_P4_138143_59729 | NW_004516045.1 | Scaffold622 | 59729                   | TT                              | GG              | 1946965900               |
| SNP_P4_138144_59774 | NW_004516045.1 | Scaffold622 | 59774                   | TT                              | AA              | 1946965902               |

| SNPs IDs            | Chromosome IDs | Chromosomes | Physical positions (bp) | CDC Frontier (Reference genome) | (ILWC46 & LPNB) | NCBI SNPdb Accession IDs |
|---------------------|----------------|-------------|-------------------------|---------------------------------|-----------------|--------------------------|
| SNP_P4_138145_59799 | NW_004516045.1 | Scaffold622 | 59799                   | AA                              | GG              | 1946965904               |
| SNP_P4_138146_59838 | NW_004516045.1 | Scaffold622 | 59838                   | AA                              | GG              | 1946965906               |
| SNP_P4_138147_59881 | NW_004516045.1 | Scaffold622 | 59881                   | CC                              | GG              | 1946965908               |
| SNP_P4_138148_59951 | NW_004516045.1 | Scaffold622 | 59951                   | AA                              | GG              | 1946965910               |
| SNP_P4_138149_61628 | NW_004516045.1 | Scaffold622 | 61628                   | TT                              | CC              | 1946965912               |
| SNP_P4_138150_61629 | NW_004516045.1 | Scaffold622 | 61629                   | GG                              | TT              | 1946965914               |
| SNP_P4_138151_61637 | NW_004516045.1 | Scaffold622 | 61637                   | CC                              | TT              | 1946965916               |
| SNP_P4_138152_61698 | NW_004516045.1 | Scaffold622 | 61698                   | CC                              | TT              | 1946965918               |
| SNP_P4_138154_62298 | NW_004516045.1 | Scaffold622 | 62298                   | GG                              | TT              | 1946965920               |
| SNP_P4_138155_63863 | NW_004516045.1 | Scaffold622 | 63863                   | AA                              | GG              | 1946965922               |
| SNP_P4_138156_63889 | NW_004516045.1 | Scaffold622 | 63889                   | GG                              | AA              | 1946965924               |
| SNP_P4_138157_64090 | NW_004516045.1 | Scaffold622 | 64090                   | AA                              | GG              | 1946965926               |
| SNP_P4_138158_64352 | NW_004516045.1 | Scaffold622 | 64352                   | GG                              | CC              | 1946965928               |
| SNP_P4_138159_64439 | NW_004516045.1 | Scaffold622 | 64439                   | GG                              | CC              | 1946965930               |
| SNP_P4_138160_64484 | NW_004516045.1 | Scaffold622 | 64484                   | GG                              | AA              | 1946965932               |
| SNP_P4_138161_64663 | NW_004516045.1 | Scaffold622 | 64663                   | CC                              | TT              | 1946965934               |
| SNP_P4_138162_65601 | NW_004516045.1 | Scaffold622 | 65601                   | GG                              | TT              | 1946965936               |
| SNP_P4_138163_65654 | NW_004516045.1 | Scaffold622 | 65654                   | GG                              | TT              | 1946965938               |
| SNP_P4_138164_65829 | NW_004516045.1 | Scaffold622 | 65829                   | GG                              | CC              | 1946965940               |
| SNP_P4_138165_68551 | NW_004516045.1 | Scaffold622 | 68551                   | TT                              | AA              | 1946965942               |
| SNP_P4_138166_71693 | NW_004516045.1 | Scaffold622 | 71693                   | GG                              | CC              | 1946965944               |
| SNP_P4_138167_71732 | NW_004516045.1 | Scaffold622 | 71732                   | AA                              | GG              | 1946965946               |
| SNP_P4_138168_71823 | NW_004516045.1 | Scaffold622 | 71823                   | CC                              | GG              | 1946965948               |
| SNP_P4_138169_71952 | NW_004516045.1 | Scaffold622 | 71952                   | AA                              | CC              | 1946965950               |
| SNP_P4_138170_71958 | NW_004516045.1 | Scaffold622 | 71958                   | TT                              | GG              | 1946965952               |
| SNP_P4_138172_73322 | NW_004516045.1 | Scaffold622 | 73322                   | CC                              | AA              | 1946965954               |
| SNP_P4_138173_73350 | NW_004516045.1 | Scaffold622 | 73350                   | AA                              | GG              | 1946965956               |
| SNP_P4_138174_73721 | NW_004516045.1 | Scaffold622 | 73721                   | CC                              | GG              | 1946965958               |
| SNP_P4_138175_75112 | NW_004516045.1 | Scaffold622 | 75112                   | CC                              | TT              | 1946965960               |
| SNP_P4_138176_75769 | NW_004516045.1 | Scaffold622 | 75769                   | GG                              | AA              | 1946965962               |
| SNP_P4_138177_77360 | NW_004516045.1 | Scaffold622 | 77360                   | TT                              | AA              | 1946965964               |
| SNP_P4_138179_79417 | NW_004516045.1 | Scaffold622 | 79417                   | TT                              | GG              | 1946965966               |
| SNP_P4_138180_82406 | NW_004516045.1 | Scaffold622 | 82406                   | CC                              | AA              | 1946965968               |
| SNP_P4_138181_83836 | NW_004516045.1 | Scaffold622 | 83836                   | AA                              | GG              | 1946965970               |
| SNP_P4_138182_84185 | NW_004516045.1 | Scaffold622 | 84185                   | AA                              | TT              | 1946965972               |
| SNP_P4_138183_86025 | NW_004516045.1 | Scaffold622 | 86025                   | TT                              | CC              | 1946965974               |
| SNP_P4_138184_86070 | NW_004516045.1 | Scaffold622 | 86070                   | TT                              | GG              | 1946965976               |
| SNP_P4_138185_86370 | NW_004516045.1 | Scaffold622 | 86370                   | CC                              | AA              | 1946965979               |
| SNP_P4_138186_87311 | NW_004516045.1 | Scaffold622 | 87311                   | AA                              | TT              | 1946965981               |
| SNP_P4_138187_88873 | NW_004516045.1 | Scaffold622 | 88873                   | TT                              | AA              | 1946965983               |
| SNP_P4_138188_89797 | NW_004516045.1 | Scaffold622 | 89797                   | TT                              | AA              | 1946965985               |
| SNP_P4_138189_89798 | NW_004516045.1 | Scaffold622 | 89798                   | AA                              | TT              | 1946965987               |

| SNPs IDs             | Chromosome IDs | Chromosomes | Physical positions (bp) | CDC Frontier (Reference genome) | (ILWC46 & LPNB) | NCBI SNPdb Accession IDs |
|----------------------|----------------|-------------|-------------------------|---------------------------------|-----------------|--------------------------|
| SNP_P4_138190_89853  | NW_004516045.1 | Scaffold622 | 89853                   | TT                              | GG              | 1946965989               |
| SNP_P4_138191_89857  | NW_004516045.1 | Scaffold622 | 89857                   | AA                              | GG              | 1946965991               |
| SNP_P4_138192_10415  | NW_004516047.1 | Scaffold624 | 10415                   | AA                              | CC              | 1946965993               |
| SNP_P4_138193_10617  | NW_004516047.1 | Scaffold624 | 10617                   | TT                              | CC              | 1946965995               |
| SNP_P4_138194_12751  | NW_004516047.1 | Scaffold624 | 12751                   | GG                              | AA              | 1946965997               |
| SNP_P4_138195_12760  | NW_004516047.1 | Scaffold624 | 12760                   | TT                              | CC              | 1946965999               |
| SNP_P4_138196_12772  | NW_004516047.1 | Scaffold624 | 12772                   | TT                              | CC              | 1946966001               |
| SNP_P4_138197_14883  | NW_004516047.1 | Scaffold624 | 14883                   | TT                              | CC              | 1946966003               |
| SNP_P4_138198_14887  | NW_004516047.1 | Scaffold624 | 14887                   | CC                              | TT              | 1946966005               |
| SNP_P4_138199_15377  | NW_004516047.1 | Scaffold624 | 15377                   | TT                              | CC              | 1946966007               |
| SNP_P4_138200_15397  | NW_004516047.1 | Scaffold624 | 15397                   | TT                              | CC              | 1946966009               |
| SNP_P4_138201_66983  | NW_004516047.1 | Scaffold624 | 66983                   | AA                              | GG              | 1946966011               |
| SNP_P4_138202_67971  | NW_004516047.1 | Scaffold624 | 67971                   | CC                              | TT              | 1946966013               |
| SNP_P4_138203_68386  | NW_004516047.1 | Scaffold624 | 68386                   | TT                              | AA              | 1946966015               |
| SNP_P4_138204_68481  | NW_004516047.1 | Scaffold624 | 68481                   | TT                              | CC              | 1946966017               |
| SNP_P4_138205_68983  | NW_004516047.1 | Scaffold624 | 68983                   | TT                              | CC              | 1946966019               |
| SNP_P4_138206_70055  | NW_004516047.1 | Scaffold624 | 70055                   | AA                              | CC              | 1946966021               |
| SNP_P4_138207_70393  | NW_004516047.1 | Scaffold624 | 70393                   | AA                              | CC              | 1946966023               |
| SNP_P4_138208_70404  | NW_004516047.1 | Scaffold624 | 70404                   | TT                              | GG              | 1946966025               |
| SNP_P4_138209_107666 | NW_004516047.1 | Scaffold624 | 107666                  | AA                              | TT              | 1946966027               |
| SNP_P4_138210_112192 | NW_004516047.1 | Scaffold624 | 112192                  | CC                              | TT              | 1946966029               |
| SNP_P4_138211_112337 | NW_004516047.1 | Scaffold624 | 112337                  | GG                              | AA              | 1946966031               |
| SNP_P4_138212_112355 | NW_004516047.1 | Scaffold624 | 112355                  | CC                              | AA              | 1946966033               |
| SNP_P4_138214_112419 | NW_004516047.1 | Scaffold624 | 112419                  | GG                              | AA              | 1946966035               |
| SNP_P4_138216_112596 | NW_004516047.1 | Scaffold624 | 112596                  | CC                              | TT              | 1946966037               |
| SNP_P4_138217_114359 | NW_004516047.1 | Scaffold624 | 114359                  | TT                              | CC              | 1946966039               |
| SNP_P4_138218_114374 | NW_004516047.1 | Scaffold624 | 114374                  | CC                              | TT              | 1946966041               |
| SNP_P4_138219_146219 | NW_004516047.1 | Scaffold624 | 146219                  | CC                              | AA              | 1946966043               |
| SNP_P4_138221_149069 | NW_004516047.1 | Scaffold624 | 149069                  | CC                              | TT              | 1946966045               |
| SNP_P4_138222_159713 | NW_004516047.1 | Scaffold624 | 159713                  | GG                              | TT              | 1946966047               |
| SNP_P4_138223_171472 | NW_004516047.1 | Scaffold624 | 171472                  | GG                              | AA              | 1946966049               |
| SNP_P4_138224_171955 | NW_004516047.1 | Scaffold624 | 171955                  | CC                              | GG              | 1946966051               |
| SNP_P4_138225_187688 | NW_004516047.1 | Scaffold624 | 187688                  | GG                              | AA              | 1946966053               |
| SNP_P4_138226_187702 | NW_004516047.1 | Scaffold624 | 187702                  | TT                              | CC              | 1946966055               |
| SNP_P4_138227_188058 | NW_004516047.1 | Scaffold624 | 188058                  | AA                              | GG              | 1946966057               |
| SNP_P4_138228_188070 | NW_004516047.1 | Scaffold624 | 188070                  | GG                              | AA              | 1946966059               |
| SNP_P4_138229_188201 | NW_004516047.1 | Scaffold624 | 188201                  | GG                              | AA              | 1946966061               |
| SNP_P4_138231_188285 | NW_004516047.1 | Scaffold624 | 188285                  | TT                              | CC              | 1946966063               |
| SNP_P4_138232_212031 | NW_004516047.1 | Scaffold624 | 212031                  | AA                              | GG              | 1946966065               |
| SNP_P4_138233_223622 | NW_004516047.1 | Scaffold624 | 223622                  | AA                              | GG              | 1946966067               |
| SNP_P4_138234_223638 | NW_004516047.1 | Scaffold624 | 223638                  | GG                              | AA              | 1946966069               |
| SNP_P4_138235_223678 | NW_004516047.1 | Scaffold624 | 223678                  | AA                              | GG              | 1946966071               |

| SNPs IDs             | Chromosome IDs | Chromosomes | Physical positions (bp) | CDC Frontier (Reference genome) | (ILWC46 & LPNB) | NCBI SNPdb Accession IDs |
|----------------------|----------------|-------------|-------------------------|---------------------------------|-----------------|--------------------------|
| SNP_P4_138236_223683 | NW_004516047.1 | Scaffold624 | 223683                  | GG                              | TT              | 1946966073               |
| SNP_P4_138237_241016 | NW_004516047.1 | Scaffold624 | 241016                  | TT                              | AA              | 1946966075               |
| SNP_P4_138238_244253 | NW_004516047.1 | Scaffold624 | 244253                  | CC                              | AA              | 1946966077               |
| SNP_P4_138239_255402 | NW_004516047.1 | Scaffold624 | 255402                  | AA                              | GG              | 1946966079               |
| SNP_P4_138240_255452 | NW_004516047.1 | Scaffold624 | 255452                  | AA                              | GG              | 1946966081               |
| SNP_P4_138241_255772 | NW_004516047.1 | Scaffold624 | 255772                  | AA                              | GG              | 1946966083               |
| SNP_P4_138242_257567 | NW_004516047.1 | Scaffold624 | 257567                  | TT                              | CC              | 1946966085               |
| SNP_P4_138243_307920 | NW_004516047.1 | Scaffold624 | 307920                  | AA                              | CC              | 1946966087               |
| SNP_P4_138244_308100 | NW_004516047.1 | Scaffold624 | 308100                  | TT                              | AA              | 1946966089               |
| SNP_P4_138245_308210 | NW_004516047.1 | Scaffold624 | 308210                  | AA                              | TT              | 1946966091               |
| SNP_P4_138246_310390 | NW_004516047.1 | Scaffold624 | 310390                  | AA                              | TT              | 1946966093               |
| SNP_P4_138247_310519 | NW_004516047.1 | Scaffold624 | 310519                  | GG                              | TT              | 1946966095               |
| SNP_P4_138248_310716 | NW_004516047.1 | Scaffold624 | 310716                  | CC                              | AA              | 1946966097               |
| SNP_P4_138249_310742 | NW_004516047.1 | Scaffold624 | 310742                  | TT                              | AA              | 1946966099               |
| SNP_P4_138250_24898  | NW_004516048.1 | Scaffold625 | 24898                   | GG                              | AA              | 1946966101               |
| SNP_P4_138251_24924  | NW_004516048.1 | Scaffold625 | 24924                   | GG                              | AA              | 1946966103               |
| SNP_P4_138252_24935  | NW_004516048.1 | Scaffold625 | 24935                   | TT                              | CC              | 1946966105               |
| SNP_P4_138253_25167  | NW_004516048.1 | Scaffold625 | 25167                   | AA                              | TT              | 1946966107               |
| SNP_P4_138254_25169  | NW_004516048.1 | Scaffold625 | 25169                   | TT                              | GG              | 1946966109               |
| SNP_P4_138255_25219  | NW_004516048.1 | Scaffold625 | 25219                   | GG                              | TT              | 1946966111               |
| SNP_P4_138256_25453  | NW_004516048.1 | Scaffold625 | 25453                   | CC                              | AA              | 1946966113               |
| SNP_P4_138257_25523  | NW_004516048.1 | Scaffold625 | 25523                   | TT                              | CC              | 1946966115               |
| SNP_P4_138258_5455   | NW_004516049.1 | Scaffold626 | 5455                    | TT                              | AA              | 1946966117               |
| SNP_P4_138259_5489   | NW_004516049.1 | Scaffold626 | 5489                    | AA                              | TT              | 1946966119               |
| SNP_P4_138260_6007   | NW_004516049.1 | Scaffold626 | 6007                    | CC                              | TT              | 1946966121               |
| SNP_P4_138261_6009   | NW_004516049.1 | Scaffold626 | 6009                    | AA                              | GG              | 1946966123               |
| SNP_P4_138262_6068   | NW_004516049.1 | Scaffold626 | 6068                    | AA                              | GG              | 1946966125               |
| SNP_P4_138263_6082   | NW_004516049.1 | Scaffold626 | 6082                    | AA                              | GG              | 1946966127               |
| SNP_P4_138264_6102   | NW_004516049.1 | Scaffold626 | 6102                    | AA                              | TT              | 1946966129               |
| SNP_P4_138265_6330   | NW_004516049.1 | Scaffold626 | 6330                    | TT                              | CC              | 1946966131               |
| SNP_P4_138266_6340   | NW_004516049.1 | Scaffold626 | 6340                    | AA                              | GG              | 1946966133               |
| SNP_P4_138267_6446   | NW_004516049.1 | Scaffold626 | 6446                    | AA                              | TT              | 1946966135               |
| SNP_P4_138268_6454   | NW_004516049.1 | Scaffold626 | 6454                    | CC                              | TT              | 1946966138               |
| SNP_P4_138269_12137  | NW_004516049.1 | Scaffold626 | 12137                   | TT                              | AA              | 1946966140               |
| SNP_P4_138270_12145  | NW_004516049.1 | Scaffold626 | 12145                   | TT                              | CC              | 1946966142               |
| SNP_P4_138271_12357  | NW_004516049.1 | Scaffold626 | 12357                   | CC                              | TT              | 1946966144               |
| SNP_P4_138272_12517  | NW_004516049.1 | Scaffold626 | 12517                   | GG                              | CC              | 1946966146               |
| SNP_P4_138273_12531  | NW_004516049.1 | Scaffold626 | 12531                   | AA                              | GG              | 1946966148               |
| SNP_P4_138274_15504  | NW_004516049.1 | Scaffold626 | 15504                   | CC                              | TT              | 1946966150               |
| SNP_P4_138275_18151  | NW_004516049.1 | Scaffold626 | 18151                   | CC                              | GG              | 1946966152               |
| SNP_P4_138276_18188  | NW_004516049.1 | Scaffold626 | 18188                   | TT                              | CC              | 1946966154               |
| SNP_P4_138277_18222  | NW_004516049.1 | Scaffold626 | 18222                   | GG                              | AA              | 1946966156               |



| SNPs IDs             | Chromosome IDs | Chromosomes | Physical positions (bp) | CDC Frontier (Reference genome) | (ILWC46 & LPNB) | NCBI SNPdb Accession IDs |
|----------------------|----------------|-------------|-------------------------|---------------------------------|-----------------|--------------------------|
| SNP_P4_138278_18237  | NW_004516049.1 | Scaffold626 | 18237                   | TT                              | AA              | 1946966158               |
| SNP_P4_138279_18324  | NW_004516049.1 | Scaffold626 | 18324                   | GG                              | CC              | 1946966160               |
| SNP_P4_138280_18602  | NW_004516049.1 | Scaffold626 | 18602                   | TT                              | CC              | 1946966163               |
| SNP_P4_138281_18688  | NW_004516049.1 | Scaffold626 | 18688                   | CC                              | GG              | 1946966165               |
| SNP_P4_138282_23815  | NW_004516049.1 | Scaffold626 | 23815                   | TT                              | CC              | 1946966167               |
| SNP_P4_138283_23952  | NW_004516049.1 | Scaffold626 | 23952                   | AA                              | CC              | 1946966169               |
| SNP_P4_138284_24073  | NW_004516049.1 | Scaffold626 | 24073                   | TT                              | CC              | 1946966171               |
| SNP_P4_138285_27405  | NW_004516049.1 | Scaffold626 | 27405                   | AA                              | GG              | 1946966173               |
| SNP_P4_138286_27884  | NW_004516049.1 | Scaffold626 | 27884                   | TT                              | GG              | 1946966175               |
| SNP_P4_138288_39950  | NW_004516049.1 | Scaffold626 | 39950                   | AA                              | GG              | 1946966177               |
| SNP_P4_138289_48267  | NW_004516049.1 | Scaffold626 | 48267                   | TT                              | CC              | 1946966179               |
| SNP_P4_138290_48270  | NW_004516049.1 | Scaffold626 | 48270                   | TT                              | CC              | 1946966181               |
| SNP_P4_138291_48277  | NW_004516049.1 | Scaffold626 | 48277                   | TT                              | CC              | 1946966183               |
| SNP_P4_138292_48278  | NW_004516049.1 | Scaffold626 | 48278                   | CC                              | TT              | 1946966185               |
| SNP_P4_138293_48653  | NW_004516049.1 | Scaffold626 | 48653                   | GG                              | TT              | 1946966187               |
| SNP_P4_138294_53865  | NW_004516049.1 | Scaffold626 | 53865                   | GG                              | AA              | 1946966189               |
| SNP_P4_138295_53926  | NW_004516049.1 | Scaffold626 | 53926                   | AA                              | GG              | 1946966191               |
| SNP_P4_138297_55652  | NW_004516049.1 | Scaffold626 | 55652                   | AA                              | GG              | 1946966193               |
| SNP_P4_138298_56017  | NW_004516049.1 | Scaffold626 | 56017                   | AA                              | CC              | 1946966195               |
| SNP_P4_138299_63014  | NW_004516049.1 | Scaffold626 | 63014                   | GG                              | AA              | 1946966197               |
| SNP_P4_138300_70263  | NW_004516049.1 | Scaffold626 | 70263                   | TT                              | GG              | 1946966199               |
| SNP_P4_138301_70818  | NW_004516049.1 | Scaffold626 | 70818                   | CC                              | TT              | 1946966201               |
| SNP_P4_138302_72008  | NW_004516049.1 | Scaffold626 | 72008                   | AA                              | GG              | 1946966203               |
| SNP_P4_138303_72202  | NW_004516049.1 | Scaffold626 | 72202                   | CC                              | TT              | 1946966205               |
| SNP_P4_138304_72214  | NW_004516049.1 | Scaffold626 | 72214                   | TT                              | AA              | 1946966207               |
| SNP_P4_138305_72261  | NW_004516049.1 | Scaffold626 | 72261                   | AA                              | CC              | 1946966209               |
| SNP_P4_138306_72271  | NW_004516049.1 | Scaffold626 | 72271                   | AA                              | GG              | 1946966211               |
| SNP_P4_138307_80604  | NW_004516049.1 | Scaffold626 | 80604                   | TT                              | CC              | 1946966213               |
| SNP_P4_138308_82117  | NW_004516049.1 | Scaffold626 | 82117                   | GG                              | TT              | 1946966215               |
| SNP_P4_138309_85568  | NW_004516049.1 | Scaffold626 | 85568                   | CC                              | GG              | 1946966217               |
| SNP_P4_138310_85664  | NW_004516049.1 | Scaffold626 | 85664                   | AA                              | TT              | 1946966219               |
| SNP_P4_138311_85670  | NW_004516049.1 | Scaffold626 | 85670                   | AA                              | TT              | 1946966221               |
| SNP_P4_138312_85929  | NW_004516049.1 | Scaffold626 | 85929                   | TT                              | CC              | 1946966223               |
| SNP_P4_138313_86049  | NW_004516049.1 | Scaffold626 | 86049                   | CC                              | GG              | 1946966225               |
| SNP_P4_138314_88303  | NW_004516049.1 | Scaffold626 | 88303                   | GG                              | CC              | 1946966227               |
| SNP_P4_138315_94370  | NW_004516049.1 | Scaffold626 | 94370                   | TT                              | AA              | 1946966229               |
| SNP_P4_138316_94378  | NW_004516049.1 | Scaffold626 | 94378                   | TT                              | GG              | 1946966231               |
| SNP_P4_138317_94448  | NW_004516049.1 | Scaffold626 | 94448                   | TT                              | GG              | 1946966233               |
| SNP_P4_138319_95036  | NW_004516049.1 | Scaffold626 | 95036                   | AA                              | TT              | 1946966235               |
| SNP_P4_138320_100399 | NW_004516049.1 | Scaffold626 | 100399                  | AA                              | CC              | 1946966237               |
| SNP_P4_138321_105853 | NW_004516049.1 | Scaffold626 | 105853                  | GG                              | AA              | 1946966239               |
| SNP_P4_138322_105877 | NW_004516049.1 | Scaffold626 | 105877                  | GG                              | CC              | 1946966241               |

| SNPs IDs             | Chromosome IDs | Chromosomes | Physical positions (bp) | CDC Frontier (Reference genome) | (ILWC46 & LPNB) | NCBI SNPdb Accession IDs |
|----------------------|----------------|-------------|-------------------------|---------------------------------|-----------------|--------------------------|
| SNP_P4_138323_105913 | NW_004516049.1 | Scaffold626 | 105913                  | CC                              | TT              | 1946966243               |
| SNP_P4_138324_114693 | NW_004516049.1 | Scaffold626 | 114693                  | AA                              | GG              | 1946966245               |
| SNP_P4_138325_117248 | NW_004516049.1 | Scaffold626 | 117248                  | AA                              | GG              | 1946966247               |
| SNP_P4_138326_117274 | NW_004516049.1 | Scaffold626 | 117274                  | AA                              | TT              | 1946966249               |
| SNP_P4_138327_117847 | NW_004516049.1 | Scaffold626 | 117847                  | AA                              | CC              | 1946966251               |
| SNP_P4_138328_117858 | NW_004516049.1 | Scaffold626 | 117858                  | TT                              | GG              | 1946966253               |
| SNP_P4_138329_118558 | NW_004516049.1 | Scaffold626 | 118558                  | GG                              | CC              | 1946966255               |
| SNP_P4_138330_121390 | NW_004516049.1 | Scaffold626 | 121390                  | GG                              | AA              | 1946966257               |
| SNP_P4_138331_121395 | NW_004516049.1 | Scaffold626 | 121395                  | AA                              | TT              | 1946966259               |
| SNP_P4_138332_123302 | NW_004516049.1 | Scaffold626 | 123302                  | TT                              | AA              | 1946966261               |
| SNP_P4_138333_135674 | NW_004516049.1 | Scaffold626 | 135674                  | AA                              | TT              | 1946966263               |
| SNP_P4_138334_135675 | NW_004516049.1 | Scaffold626 | 135675                  | TT                              | GG              | 1946966265               |
| SNP_P4_138335_135677 | NW_004516049.1 | Scaffold626 | 135677                  | GG                              | AA              | 1946966267               |
| SNP_P4_138336_135717 | NW_004516049.1 | Scaffold626 | 135717                  | GG                              | AA              | 1946966269               |
| SNP_P4_138337_137782 | NW_004516049.1 | Scaffold626 | 137782                  | GG                              | TT              | 1946966271               |
| SNP_P4_138338_137799 | NW_004516049.1 | Scaffold626 | 137799                  | TT                              | CC              | 1946966273               |
| SNP_P4_138339_147870 | NW_004516049.1 | Scaffold626 | 147870                  | TT                              | CC              | 1946966275               |
| SNP_P4_138340_147873 | NW_004516049.1 | Scaffold626 | 147873                  | GG                              | TT              | 1946966277               |
| SNP_P4_138341_147892 | NW_004516049.1 | Scaffold626 | 147892                  | TT                              | GG              | 1946966279               |
| SNP_P4_138342_147925 | NW_004516049.1 | Scaffold626 | 147925                  | AA                              | TT              | 1946966281               |
| SNP_P4_138343_148202 | NW_004516049.1 | Scaffold626 | 148202                  | CC                              | AA              | 1946966283               |
| SNP_P4_138344_148225 | NW_004516049.1 | Scaffold626 | 148225                  | CC                              | TT              | 1946966285               |
| SNP_P4_138345_151885 | NW_004516049.1 | Scaffold626 | 151885                  | GG                              | AA              | 1946966287               |
| SNP_P4_138346_159652 | NW_004516049.1 | Scaffold626 | 159652                  | TT                              | CC              | 1946966289               |
| SNP_P4_138347_161768 | NW_004516049.1 | Scaffold626 | 161768                  | TT                              | CC              | 1946966291               |
| SNP_P4_138348_161884 | NW_004516049.1 | Scaffold626 | 161884                  | TT                              | CC              | 1946966293               |
| SNP_P4_138349_162101 | NW_004516049.1 | Scaffold626 | 162101                  | GG                              | CC              | 1946966295               |
| SNP_P4_138350_163329 | NW_004516049.1 | Scaffold626 | 163329                  | AA                              | GG              | 1946966297               |
| SNP_P4_138351_170134 | NW_004516049.1 | Scaffold626 | 170134                  | CC                              | TT              | 1946966299               |
| SNP_P4_138352_170137 | NW_004516049.1 | Scaffold626 | 170137                  | TT                              | CC              | 1946966301               |
| SNP_P4_138353_171963 | NW_004516049.1 | Scaffold626 | 171963                  | TT                              | GG              | 1946966303               |
| SNP_P4_138354_171994 | NW_004516049.1 | Scaffold626 | 171994                  | AA                              | CC              | 1946966305               |
| SNP_P4_138355_172623 | NW_004516049.1 | Scaffold626 | 172623                  | GG                              | AA              | 1946966307               |
| SNP_P4_138356_172713 | NW_004516049.1 | Scaffold626 | 172713                  | CC                              | TT              | 1946966309               |
| SNP_P4_138358_172789 | NW_004516049.1 | Scaffold626 | 172789                  | AA                              | GG              | 1946966311               |
| SNP_P4_138359_172869 | NW_004516049.1 | Scaffold626 | 172869                  | CC                              | TT              | 1946966313               |
| SNP_P4_138360_173147 | NW_004516049.1 | Scaffold626 | 173147                  | GG                              | AA              | 1946966315               |
| SNP_P4_138361_173281 | NW_004516049.1 | Scaffold626 | 173281                  | TT                              | CC              | 1946966317               |
| SNP_P4_138362_174140 | NW_004516049.1 | Scaffold626 | 174140                  | GG                              | TT              | 1946966319               |
| SNP_P4_138363_174165 | NW_004516049.1 | Scaffold626 | 174165                  | GG                              | AA              | 1946966321               |
| SNP_P4_138364_178967 | NW_004516049.1 | Scaffold626 | 178967                  | AA                              | GG              | 1946966323               |
| SNP_P4_138365_189507 | NW_004516049.1 | Scaffold626 | 189507                  | CC                              | AA              | 1946966325               |

| SNPs IDs             | Chromosome IDs | Chromosomes | Physical positions (bp) | CDC Frontier (Reference genome) | (ILWC46 & LPNB) | NCBI SNPdb Accession IDs |
|----------------------|----------------|-------------|-------------------------|---------------------------------|-----------------|--------------------------|
| SNP_P4_138366_194131 | NW_004516049.1 | Scaffold626 | 194131                  | GG                              | TT              | 1946966326               |
| SNP_P4_138367_202285 | NW_004516049.1 | Scaffold626 | 202285                  | TT                              | CC              | 1946966327               |
| SNP_P4_138368_205778 | NW_004516049.1 | Scaffold626 | 205778                  | GG                              | AA              | 1946966328               |
| SNP_P4_138369_205825 | NW_004516049.1 | Scaffold626 | 205825                  | AA                              | TT              | 1946966329               |
| SNP_P4_138370_206102 | NW_004516049.1 | Scaffold626 | 206102                  | CC                              | TT              | 1946966330               |
| SNP_P4_138371_208865 | NW_004516049.1 | Scaffold626 | 208865                  | AA                              | GG              | 1946966331               |
| SNP_P4_138372_209560 | NW_004516049.1 | Scaffold626 | 209560                  | CC                              | TT              | 1946966333               |
| SNP_P4_138373_209618 | NW_004516049.1 | Scaffold626 | 209618                  | GG                              | AA              | 1946966335               |
| SNP_P4_138374_210133 | NW_004516049.1 | Scaffold626 | 210133                  | GG                              | AA              | 1946966337               |
| SNP_P4_138375_210166 | NW_004516049.1 | Scaffold626 | 210166                  | AA                              | CC              | 1946966339               |
| SNP_P4_138376_210182 | NW_004516049.1 | Scaffold626 | 210182                  | AA                              | GG              | 1946966341               |
| SNP_P4_138377_210183 | NW_004516049.1 | Scaffold626 | 210183                  | TT                              | AA              | 1946966343               |
| SNP_P4_138378_210254 | NW_004516049.1 | Scaffold626 | 210254                  | AA                              | CC              | 1946966345               |
| SNP_P4_138379_210509 | NW_004516049.1 | Scaffold626 | 210509                  | CC                              | TT              | 1946966347               |
| SNP_P4_138380_210759 | NW_004516049.1 | Scaffold626 | 210759                  | CC                              | TT              | 1946966349               |
| SNP_P4_138381_211005 | NW_004516049.1 | Scaffold626 | 211005                  | TT                              | GG              | 1946966351               |
| SNP_P4_138382_211350 | NW_004516049.1 | Scaffold626 | 211350                  | GG                              | AA              | 1946966353               |
| SNP_P4_138383_212917 | NW_004516049.1 | Scaffold626 | 212917                  | CC                              | TT              | 1946966355               |
| SNP_P4_138384_213029 | NW_004516049.1 | Scaffold626 | 213029                  | AA                              | GG              | 1946966357               |
| SNP_P4_138385_213316 | NW_004516049.1 | Scaffold626 | 213316                  | AA                              | CC              | 1946966359               |
| SNP_P4_138386_213443 | NW_004516049.1 | Scaffold626 | 213443                  | CC                              | TT              | 1946966361               |
| SNP_P4_138387_214921 | NW_004516049.1 | Scaffold626 | 214921                  | CC                              | TT              | 1946966363               |
| SNP_P4_138388_216620 | NW_004516049.1 | Scaffold626 | 216620                  | AA                              | TT              | 1946966365               |
| SNP_P4_138389_216863 | NW_004516049.1 | Scaffold626 | 216863                  | CC                              | GG              | 1946966367               |
| SNP_P4_138390_216954 | NW_004516049.1 | Scaffold626 | 216954                  | AA                              | TT              | 1946966368               |
| SNP_P4_138391_216984 | NW_004516049.1 | Scaffold626 | 216984                  | AA                              | CC              | 1946966370               |
| SNP_P4_138392_218510 | NW_004516049.1 | Scaffold626 | 218510                  | TT                              | AA              | 1946966372               |
| SNP_P4_138393_218715 | NW_004516049.1 | Scaffold626 | 218715                  | TT                              | CC              | 1946966374               |
| SNP_P4_138394_218989 | NW_004516049.1 | Scaffold626 | 218989                  | AA                              | TT              | 1946966376               |
| SNP_P4_138396_219303 | NW_004516049.1 | Scaffold626 | 219303                  | TT                              | GG              | 1946966378               |
| SNP_P4_138397_219481 | NW_004516049.1 | Scaffold626 | 219481                  | AA                              | GG              | 1946966380               |
| SNP_P4_138398_219544 | NW_004516049.1 | Scaffold626 | 219544                  | TT                              | AA              | 1946966382               |
| SNP_P4_138399_219547 | NW_004516049.1 | Scaffold626 | 219547                  | AA                              | TT              | 1946966384               |
| SNP_P4_138400_219578 | NW_004516049.1 | Scaffold626 | 219578                  | TT                              | CC              | 1946966386               |
| SNP_P4_138401_219681 | NW_004516049.1 | Scaffold626 | 219681                  | CC                              | AA              | 1946966388               |
| SNP_P4_138402_219881 | NW_004516049.1 | Scaffold626 | 219881                  | AA                              | GG              | 1946966390               |
| SNP_P4_138403_220078 | NW_004516049.1 | Scaffold626 | 220078                  | TT                              | AA              | 1946966391               |
| SNP_P4_138404_220110 | NW_004516049.1 | Scaffold626 | 220110                  | TT                              | CC              | 1946966393               |
| SNP_P4_138405_220181 | NW_004516049.1 | Scaffold626 | 220181                  | TT                              | CC              | 1946966395               |
| SNP_P4_138406_220281 | NW_004516049.1 | Scaffold626 | 220281                  | TT                              | AA              | 1946966397               |
| SNP_P4_138407_220282 | NW_004516049.1 | Scaffold626 | 220282                  | CC                              | TT              | 1946966399               |
| SNP_P4_138408_220316 | NW_004516049.1 | Scaffold626 | 220316                  | GG                              | AA              | 1946966401               |

| SNPs IDs             | Chromosome IDs | Chromosomes | Physical positions (bp) | CDC Frontier (Reference genome) | (ILWC46 & LPNB) | NCBI SNPdb Accession IDs |
|----------------------|----------------|-------------|-------------------------|---------------------------------|-----------------|--------------------------|
| SNP_P4_138409_220395 | NW_004516049.1 | Scaffold626 | 220395                  | AA                              | GG              | 1946966403               |
| SNP_P4_138410_220467 | NW_004516049.1 | Scaffold626 | 220467                  | CC                              | TT              | 1946966405               |
| SNP_P4_138411_220576 | NW_004516049.1 | Scaffold626 | 220576                  | TT                              | AA              | 1946966406               |
| SNP_P4_138412_220600 | NW_004516049.1 | Scaffold626 | 220600                  | GG                              | CC              | 1946966408               |
| SNP_P4_138413_220687 | NW_004516049.1 | Scaffold626 | 220687                  | TT                              | CC              | 1946966410               |
| SNP_P4_138414_220689 | NW_004516049.1 | Scaffold626 | 220689                  | GG                              | TT              | 1946966412               |
| SNP_P4_138415_220724 | NW_004516049.1 | Scaffold626 | 220724                  | TT                              | GG              | 1946966414               |
| SNP_P4_138416_220789 | NW_004516049.1 | Scaffold626 | 220789                  | TT                              | CC              | 1946966416               |
| SNP_P4_138417_221048 | NW_004516049.1 | Scaffold626 | 221048                  | TT                              | CC              | 1946966418               |
| SNP_P4_138418_221064 | NW_004516049.1 | Scaffold626 | 221064                  | CC                              | TT              | 1946966420               |
| SNP_P4_138419_222073 | NW_004516049.1 | Scaffold626 | 222073                  | GG                              | TT              | 1946966422               |
| SNP_P4_138420_222119 | NW_004516049.1 | Scaffold626 | 222119                  | CC                              | AA              | 1946966424               |
| SNP_P4_138421_222190 | NW_004516049.1 | Scaffold626 | 222190                  | GG                              | AA              | 1946966426               |
| SNP_P4_138422_222214 | NW_004516049.1 | Scaffold626 | 222214                  | TT                              | CC              | 1946966428               |
| SNP_P4_138423_222448 | NW_004516049.1 | Scaffold626 | 222448                  | CC                              | AA              | 1946966430               |
| SNP_P4_138424_222467 | NW_004516049.1 | Scaffold626 | 222467                  | CC                              | TT              | 1946966432               |
| SNP_P4_138425_222490 | NW_004516049.1 | Scaffold626 | 222490                  | GG                              | AA              | 1946966434               |
| SNP_P4_138426_222525 | NW_004516049.1 | Scaffold626 | 222525                  | TT                              | AA              | 1946966436               |
| SNP_P4_138427_222557 | NW_004516049.1 | Scaffold626 | 222557                  | CC                              | TT              | 1946966437               |
| SNP_P4_138428_223215 | NW_004516049.1 | Scaffold626 | 223215                  | CC                              | TT              | 1946966439               |
| SNP_P4_138429_223740 | NW_004516049.1 | Scaffold626 | 223740                  | GG                              | AA              | 1946966441               |
| SNP_P4_138430_223745 | NW_004516049.1 | Scaffold626 | 223745                  | TT                              | GG              | 1946966443               |
| SNP_P4_138431_223816 | NW_004516049.1 | Scaffold626 | 223816                  | AA                              | GG              | 1946966445               |
| SNP_P4_138432_224202 | NW_004516049.1 | Scaffold626 | 224202                  | TT                              | GG              | 1946966447               |
| SNP_P4_138433_224450 | NW_004516049.1 | Scaffold626 | 224450                  | CC                              | TT              | 1946966449               |
| SNP_P4_138434_224469 | NW_004516049.1 | Scaffold626 | 224469                  | GG                              | TT              | 1946966451               |
| SNP_P4_138435_224482 | NW_004516049.1 | Scaffold626 | 224482                  | TT                              | GG              | 1946966453               |
| SNP_P4_138436_224627 | NW_004516049.1 | Scaffold626 | 224627                  | TT                              | CC              | 1946966454               |
| SNP_P4_138437_224630 | NW_004516049.1 | Scaffold626 | 224630                  | AA                              | CC              | 1946966456               |
| SNP_P4_138438_224662 | NW_004516049.1 | Scaffold626 | 224662                  | TT                              | AA              | 1946966458               |
| SNP_P4_138439_224768 | NW_004516049.1 | Scaffold626 | 224768                  | AA                              | TT              | 1946966460               |
| SNP_P4_138440_224794 | NW_004516049.1 | Scaffold626 | 224794                  | GG                              | AA              | 1946966462               |
| SNP_P4_138441_224803 | NW_004516049.1 | Scaffold626 | 224803                  | AA                              | GG              | 1946966464               |
| SNP_P4_138442_224944 | NW_004516049.1 | Scaffold626 | 224944                  | TT                              | CC              | 1946966466               |
| SNP_P4_138443_224957 | NW_004516049.1 | Scaffold626 | 224957                  | AA                              | GG              | 1946966468               |
| SNP_P4_138445_225356 | NW_004516049.1 | Scaffold626 | 225356                  | AA                              | GG              | 1946966470               |
| SNP_P4_138446_225532 | NW_004516049.1 | Scaffold626 | 225532                  | CC                              | TT              | 1946966472               |
| SNP_P4_138447_225604 | NW_004516049.1 | Scaffold626 | 225604                  | CC                              | AA              | 1946966474               |
| SNP_P4_138448_225781 | NW_004516049.1 | Scaffold626 | 225781                  | TT                              | CC              | 1946966476               |
| SNP_P4_138449_226164 | NW_004516049.1 | Scaffold626 | 226164                  | GG                              | AA              | 1946966478               |
| SNP_P4_138450_227034 | NW_004516049.1 | Scaffold626 | 227034                  | GG                              | AA              | 1946966480               |
| SNP_P4_138451_227538 | NW_004516049.1 | Scaffold626 | 227538                  | AA                              | CC              | 1946966482               |

| SNPs IDs             | Chromosome IDs | Chromosomes | Physical positions (bp) | CDC Frontier (Reference genome) | (ILWC46 & LPNB) | NCBI SNPdb Accession IDs |
|----------------------|----------------|-------------|-------------------------|---------------------------------|-----------------|--------------------------|
| SNP_P4_138452_227607 | NW_004516049.1 | Scaffold626 | 227607                  | GG                              | AA              | 1946966484               |
| SNP_P4_138453_227799 | NW_004516049.1 | Scaffold626 | 227799                  | TT                              | CC              | 1946966486               |
| SNP_P4_138454_227875 | NW_004516049.1 | Scaffold626 | 227875                  | GG                              | CC              | 1946966488               |
| SNP_P4_138455_227921 | NW_004516049.1 | Scaffold626 | 227921                  | GG                              | AA              | 1946966490               |
| SNP_P4_138456_227964 | NW_004516049.1 | Scaffold626 | 227964                  | AA                              | TT              | 1946966492               |
| SNP_P4_138457_228029 | NW_004516049.1 | Scaffold626 | 228029                  | CC                              | AA              | 1946966494               |
| SNP_P4_138458_228046 | NW_004516049.1 | Scaffold626 | 228046                  | TT                              | CC              | 1946966496               |
| SNP_P4_138459_228096 | NW_004516049.1 | Scaffold626 | 228096                  | TT                              | AA              | 1946966498               |
| SNP_P4_138460_228112 | NW_004516049.1 | Scaffold626 | 228112                  | TT                              | CC              | 1946966500               |
| SNP_P4_138461_228479 | NW_004516049.1 | Scaffold626 | 228479                  | TT                              | CC              | 1946966502               |
| SNP_P4_138462_228521 | NW_004516049.1 | Scaffold626 | 228521                  | TT                              | CC              | 1946966504               |
| SNP_P4_138463_228746 | NW_004516049.1 | Scaffold626 | 228746                  | CC                              | AA              | 1946966506               |
| SNP_P4_138464_228749 | NW_004516049.1 | Scaffold626 | 228749                  | TT                              | AA              | 1946966508               |
| SNP_P4_138465_228972 | NW_004516049.1 | Scaffold626 | 228972                  | GG                              | AA              | 1946966510               |
| SNP_P4_138466_229059 | NW_004516049.1 | Scaffold626 | 229059                  | CC                              | AA              | 1946966512               |
| SNP_P4_138467_229268 | NW_004516049.1 | Scaffold626 | 229268                  | CC                              | TT              | 1946966514               |
| SNP_P4_138468_229306 | NW_004516049.1 | Scaffold626 | 229306                  | CC                              | TT              | 1946966516               |
| SNP_P4_138469_229336 | NW_004516049.1 | Scaffold626 | 229336                  | AA                              | GG              | 1946966518               |
| SNP_P4_138470_229381 | NW_004516049.1 | Scaffold626 | 229381                  | GG                              | AA              | 1946966520               |
| SNP_P4_138471_233303 | NW_004516049.1 | Scaffold626 | 233303                  | CC                              | TT              | 1946966523               |
| SNP_P4_138472_233989 | NW_004516049.1 | Scaffold626 | 233989                  | CC                              | GG              | 1946966525               |
| SNP_P4_138473_234060 | NW_004516049.1 | Scaffold626 | 234060                  | GG                              | AA              | 1946966527               |
| SNP_P4_138474_234325 | NW_004516049.1 | Scaffold626 | 234325                  | TT                              | CC              | 1946966529               |
| SNP_P4_138475_234361 | NW_004516049.1 | Scaffold626 | 234361                  | CC                              | AA              | 1946966531               |
| SNP_P4_138476_235613 | NW_004516049.1 | Scaffold626 | 235613                  | CC                              | TT              | 1946966533               |
| SNP_P4_138477_235621 | NW_004516049.1 | Scaffold626 | 235621                  | GG                              | TT              | 1946966535               |
| SNP_P4_138478_235626 | NW_004516049.1 | Scaffold626 | 235626                  | CC                              | AA              | 1946966537               |
| SNP_P4_138479_235631 | NW_004516049.1 | Scaffold626 | 235631                  | CC                              | TT              | 1946966539               |
| SNP_P4_138480_235647 | NW_004516049.1 | Scaffold626 | 235647                  | TT                              | CC              | 1946966541               |
| SNP_P4_138481_235895 | NW_004516049.1 | Scaffold626 | 235895                  | TT                              | CC              | 1946966543               |
| SNP_P4_138482_236055 | NW_004516049.1 | Scaffold626 | 236055                  | TT                              | AA              | 1946966545               |
| SNP_P4_138483_236065 | NW_004516049.1 | Scaffold626 | 236065                  | AA                              | GG              | 1946966547               |
| SNP_P4_138484_236232 | NW_004516049.1 | Scaffold626 | 236232                  | CC                              | GG              | 1946966549               |
| SNP_P4_138485_236233 | NW_004516049.1 | Scaffold626 | 236233                  | TT                              | AA              | 1946966551               |
| SNP_P4_138486_236236 | NW_004516049.1 | Scaffold626 | 236236                  | TT                              | AA              | 1946966553               |
| SNP_P4_138487_236240 | NW_004516049.1 | Scaffold626 | 236240                  | CC                              | GG              | 1946966555               |
| SNP_P4_138488_236437 | NW_004516049.1 | Scaffold626 | 236437                  | CC                              | TT              | 1946966557               |
| SNP_P4_138489_236458 | NW_004516049.1 | Scaffold626 | 236458                  | GG                              | AA              | 1946966559               |
| SNP_P4_138490_236520 | NW_004516049.1 | Scaffold626 | 236520                  | AA                              | GG              | 1946966561               |
| SNP_P4_138491_236581 | NW_004516049.1 | Scaffold626 | 236581                  | GG                              | CC              | 1946966563               |
| SNP_P4_138492_236592 | NW_004516049.1 | Scaffold626 | 236592                  | GG                              | AA              | 1946966565               |
| SNP_P4_138493_236623 | NW_004516049.1 | Scaffold626 | 236623                  | CC                              | TT              | 1946966567               |

| SNPs IDs             | Chromosome IDs | Chromosomes | Physical positions (bp) | CDC Frontier (Reference genome) | (ILWC46 & LPNB) | NCBI SNPdb Accession IDs |
|----------------------|----------------|-------------|-------------------------|---------------------------------|-----------------|--------------------------|
| SNP_P4_138494_236711 | NW_004516049.1 | Scaffold626 | 236711                  | TT                              | GG              | 1946966569               |
| SNP_P4_138495_236763 | NW_004516049.1 | Scaffold626 | 236763                  | TT                              | CC              | 1946966571               |
| SNP_P4_138496_236836 | NW_004516049.1 | Scaffold626 | 236836                  | AA                              | CC              | 1946966573               |
| SNP_P4_138497_236852 | NW_004516049.1 | Scaffold626 | 236852                  | TT                              | GG              | 1946966575               |
| SNP_P4_138499_236956 | NW_004516049.1 | Scaffold626 | 236956                  | CC                              | GG              | 1946966577               |
| SNP_P4_138500_236994 | NW_004516049.1 | Scaffold626 | 236994                  | TT                              | GG              | 1946966579               |
| SNP_P4_138501_237099 | NW_004516049.1 | Scaffold626 | 237099                  | TT                              | AA              | 1946966581               |
| SNP_P4_138502_237129 | NW_004516049.1 | Scaffold626 | 237129                  | GG                              | AA              | 1946966583               |
| SNP_P4_138503_237145 | NW_004516049.1 | Scaffold626 | 237145                  | CC                              | GG              | 1946966585               |
| SNP_P4_138504_237170 | NW_004516049.1 | Scaffold626 | 237170                  | CC                              | TT              | 1946966587               |
| SNP_P4_138505_237290 | NW_004516049.1 | Scaffold626 | 237290                  | TT                              | CC              | 1946966589               |
| SNP_P4_138506_237397 | NW_004516049.1 | Scaffold626 | 237397                  | GG                              | AA              | 1946966591               |
| SNP_P4_138507_237490 | NW_004516049.1 | Scaffold626 | 237490                  | AA                              | GG              | 1946966593               |
| SNP_P4_138508_237632 | NW_004516049.1 | Scaffold626 | 237632                  | CC                              | TT              | 1946966595               |
| SNP_P4_138509_237875 | NW_004516049.1 | Scaffold626 | 237875                  | TT                              | GG              | 1946966597               |
| SNP_P4_138510_237882 | NW_004516049.1 | Scaffold626 | 237882                  | TT                              | AA              | 1946966599               |
| SNP_P4_138511_237962 | NW_004516049.1 | Scaffold626 | 237962                  | AA                              | GG              | 1946966601               |
| SNP_P4_138512_238225 | NW_004516049.1 | Scaffold626 | 238225                  | CC                              | TT              | 1946966603               |
| SNP_P4_138513_238287 | NW_004516049.1 | Scaffold626 | 238287                  | AA                              | CC              | 1946966605               |
| SNP_P4_138514_238331 | NW_004516049.1 | Scaffold626 | 238331                  | TT                              | CC              | 1946966607               |
| SNP_P4_138515_239336 | NW_004516049.1 | Scaffold626 | 239336                  | AA                              | TT              | 1946966609               |
| SNP_P4_138516_239732 | NW_004516049.1 | Scaffold626 | 239732                  | GG                              | AA              | 1946966611               |
| SNP_P4_138517_239757 | NW_004516049.1 | Scaffold626 | 239757                  | TT                              | CC              | 1946966613               |
| SNP_P4_138518_239784 | NW_004516049.1 | Scaffold626 | 239784                  | TT                              | AA              | 1946966615               |
| SNP_P4_138519_239916 | NW_004516049.1 | Scaffold626 | 239916                  | TT                              | AA              | 1946966617               |
| SNP_P4_138520_240442 | NW_004516049.1 | Scaffold626 | 240442                  | AA                              | GG              | 1946966619               |
| SNP_P4_138521_240453 | NW_004516049.1 | Scaffold626 | 240453                  | CC                              | AA              | 1946966621               |
| SNP_P4_138522_240458 | NW_004516049.1 | Scaffold626 | 240458                  | CC                              | TT              | 1946966623               |
| SNP_P4_138523_240822 | NW_004516049.1 | Scaffold626 | 240822                  | TT                              | AA              | 1946966625               |
| SNP_P4_138524_240912 | NW_004516049.1 | Scaffold626 | 240912                  | TT                              | CC              | 1946966627               |
| SNP_P4_138525_240914 | NW_004516049.1 | Scaffold626 | 240914                  | TT                              | AA              | 1946966629               |
| SNP_P4_138526_240989 | NW_004516049.1 | Scaffold626 | 240989                  | TT                              | AA              | 1946966631               |
| SNP_P4_138527_241047 | NW_004516049.1 | Scaffold626 | 241047                  | AA                              | GG              | 1946966633               |
| SNP_P4_138528_241098 | NW_004516049.1 | Scaffold626 | 241098                  | TT                              | CC              | 1946966635               |
| SNP_P4_138529_241130 | NW_004516049.1 | Scaffold626 | 241130                  | AA                              | GG              | 1946966637               |
| SNP_P4_138530_241252 | NW_004516049.1 | Scaffold626 | 241252                  | TT                              | GG              | 1946966639               |
| SNP_P4_138531_241350 | NW_004516049.1 | Scaffold626 | 241350                  | CC                              | TT              | 1946966641               |
| SNP_P4_138532_241790 | NW_004516049.1 | Scaffold626 | 241790                  | GG                              | CC              | 1946966643               |
| SNP_P4_138533_241881 | NW_004516049.1 | Scaffold626 | 241881                  | TT                              | GG              | 1946966645               |
| SNP_P4_138534_242060 | NW_004516049.1 | Scaffold626 | 242060                  | GG                              | CC              | 1946966647               |
| SNP_P4_138535_242072 | NW_004516049.1 | Scaffold626 | 242072                  | AA                              | CC              | 1946966649               |
| SNP_P4_138538_252740 | NW_004516049.1 | Scaffold626 | 252740                  | TT                              | CC              | 1946966651               |

| SNPs IDs             | Chromosome IDs | Chromosomes | Physical positions (bp) | CDC Frontier (Reference genome) | (ILWC46 & LPNB) | NCBI SNPdb Accession IDs |
|----------------------|----------------|-------------|-------------------------|---------------------------------|-----------------|--------------------------|
| SNP_P4_138539_254549 | NW_004516049.1 | Scaffold626 | 254549                  | TT                              | CC              | 1946966653               |
| SNP_P4_138540_255024 | NW_004516049.1 | Scaffold626 | 255024                  | AA                              | CC              | 1946966655               |
| SNP_P4_138541_255213 | NW_004516049.1 | Scaffold626 | 255213                  | AA                              | GG              | 1946966657               |
| SNP_P4_138542_255550 | NW_004516049.1 | Scaffold626 | 255550                  | TT                              | AA              | 1946966659               |
| SNP_P4_138543_255589 | NW_004516049.1 | Scaffold626 | 255589                  | CC                              | TT              | 1946966661               |
| SNP_P4_138544_256189 | NW_004516049.1 | Scaffold626 | 256189                  | GG                              | CC              | 1946966663               |
| SNP_P4_138545_257626 | NW_004516049.1 | Scaffold626 | 257626                  | CC                              | TT              | 1946966665               |
| SNP_P4_138546_257753 | NW_004516049.1 | Scaffold626 | 257753                  | GG                              | TT              | 1946966668               |
| SNP_P4_138547_257757 | NW_004516049.1 | Scaffold626 | 257757                  | TT                              | GG              | 1946966670               |
| SNP_P4_138548_257787 | NW_004516049.1 | Scaffold626 | 257787                  | GG                              | CC              | 1946966672               |
| SNP_P4_138549_257791 | NW_004516049.1 | Scaffold626 | 257791                  | CC                              | TT              | 1946966674               |
| SNP_P4_138550_257876 | NW_004516049.1 | Scaffold626 | 257876                  | TT                              | CC              | 1946966676               |
| SNP_P4_138551_257908 | NW_004516049.1 | Scaffold626 | 257908                  | TT                              | CC              | 1946966678               |
| SNP_P4_138552_257928 | NW_004516049.1 | Scaffold626 | 257928                  | GG                              | AA              | 1946966680               |
| SNP_P4_138553_257943 | NW_004516049.1 | Scaffold626 | 257943                  | CC                              | TT              | 1946966682               |
| SNP_P4_138554_257998 | NW_004516049.1 | Scaffold626 | 257998                  | GG                              | CC              | 1946966684               |
| SNP_P4_138555_258136 | NW_004516049.1 | Scaffold626 | 258136                  | AA                              | TT              | 1946966686               |
| SNP_P4_138556_258223 | NW_004516049.1 | Scaffold626 | 258223                  | GG                              | TT              | 1946966688               |
| SNP_P4_138557_259176 | NW_004516049.1 | Scaffold626 | 259176                  | GG                              | TT              | 1946966690               |
| SNP_P4_138558_259187 | NW_004516049.1 | Scaffold626 | 259187                  | CC                              | AA              | 1946966692               |
| SNP_P4_138559_259207 | NW_004516049.1 | Scaffold626 | 259207                  | CC                              | TT              | 1946966694               |
| SNP_P4_138560_259754 | NW_004516049.1 | Scaffold626 | 259754                  | TT                              | GG              | 1946966696               |
| SNP_P4_138561_259815 | NW_004516049.1 | Scaffold626 | 259815                  | CC                              | GG              | 1946966698               |
| SNP_P4_138562_260651 | NW_004516049.1 | Scaffold626 | 260651                  | TT                              | CC              | 1946966700               |
| SNP_P4_138563_260744 | NW_004516049.1 | Scaffold626 | 260744                  | AA                              | GG              | 1946966702               |
| SNP_P4_138564_260771 | NW_004516049.1 | Scaffold626 | 260771                  | GG                              | AA              | 1946966703               |
| SNP_P4_138565_260816 | NW_004516049.1 | Scaffold626 | 260816                  | AA                              | GG              | 1946966705               |
| SNP_P4_138566_260826 | NW_004516049.1 | Scaffold626 | 260826                  | TT                              | CC              | 1946966707               |
| SNP_P4_138567_260947 | NW_004516049.1 | Scaffold626 | 260947                  | CC                              | TT              | 1946966709               |
| SNP_P4_138568_260974 | NW_004516049.1 | Scaffold626 | 260974                  | GG                              | AA              | 1946966711               |
| SNP_P4_138569_261054 | NW_004516049.1 | Scaffold626 | 261054                  | TT                              | AA              | 1946966713               |
| SNP_P4_138570_261093 | NW_004516049.1 | Scaffold626 | 261093                  | CC                              | TT              | 1946966715               |
| SNP_P4_138571_267976 | NW_004516049.1 | Scaffold626 | 267976                  | AA                              | GG              | 1946966717               |
| SNP_P4_138573_268265 | NW_004516049.1 | Scaffold626 | 268265                  | GG                              | TT              | 1946966719               |
| SNP_P4_138574_268401 | NW_004516049.1 | Scaffold626 | 268401                  | AA                              | CC              | 1946966721               |
| SNP_P4_138575_268477 | NW_004516049.1 | Scaffold626 | 268477                  | AA                              | GG              | 1946966723               |
| SNP_P4_138576_268602 | NW_004516049.1 | Scaffold626 | 268602                  | GG                              | AA              | 1946966725               |
| SNP_P4_138577_268669 | NW_004516049.1 | Scaffold626 | 268669                  | GG                              | AA              | 1946966727               |
| SNP_P4_138578_268864 | NW_004516049.1 | Scaffold626 | 268864                  | CC                              | GG              | 1946966729               |
| SNP_P4_138579_269830 | NW_004516049.1 | Scaffold626 | 269830                  | CC                              | TT              | 1946966731               |
| SNP_P4_138580_270224 | NW_004516049.1 | Scaffold626 | 270224                  | TT                              | AA              | 1946966733               |
| SNP_P4_138582_270420 | NW_004516049.1 | Scaffold626 | 270420                  | CC                              | AA              | 1946966735               |

| SNPs IDs             | Chromosome IDs | Chromosomes | Physical positions (bp) | CDC Frontier (Reference genome) | (ILWC46 & LPNB) | NCBI SNPdb Accession IDs |
|----------------------|----------------|-------------|-------------------------|---------------------------------|-----------------|--------------------------|
| SNP_P4_138583_270450 | NW_004516049.1 | Scaffold626 | 270450                  | GG                              | AA              | 1946966737               |
| SNP_P4_138584_270475 | NW_004516049.1 | Scaffold626 | 270475                  | GG                              | CC              | 1946966739               |
| SNP_P4_138585_270530 | NW_004516049.1 | Scaffold626 | 270530                  | CC                              | TT              | 1946966741               |
| SNP_P4_138586_270544 | NW_004516049.1 | Scaffold626 | 270544                  | GG                              | AA              | 1946966743               |
| SNP_P4_138587_270568 | NW_004516049.1 | Scaffold626 | 270568                  | AA                              | GG              | 1946966745               |
| SNP_P4_138588_270613 | NW_004516049.1 | Scaffold626 | 270613                  | TT                              | AA              | 1946966747               |
| SNP_P4_138589_270614 | NW_004516049.1 | Scaffold626 | 270614                  | AA                              | TT              | 1946966749               |
| SNP_P4_138590_270760 | NW_004516049.1 | Scaffold626 | 270760                  | TT                              | GG              | 1946966751               |
| SNP_P4_138591_270841 | NW_004516049.1 | Scaffold626 | 270841                  | CC                              | GG              | 1946966753               |
| SNP_P4_138592_270972 | NW_004516049.1 | Scaffold626 | 270972                  | TT                              | GG              | 1946966755               |
| SNP_P4_138593_271010 | NW_004516049.1 | Scaffold626 | 271010                  | CC                              | TT              | 1946966757               |
| SNP_P4_138594_271074 | NW_004516049.1 | Scaffold626 | 271074                  | TT                              | AA              | 1946966759               |
| SNP_P4_138595_271219 | NW_004516049.1 | Scaffold626 | 271219                  | AA                              | GG              | 1946966761               |
| SNP_P4_138596_271541 | NW_004516049.1 | Scaffold626 | 271541                  | CC                              | TT              | 1946966763               |
| SNP_P4_138597_271542 | NW_004516049.1 | Scaffold626 | 271542                  | TT                              | GG              | 1946966765               |
| SNP_P4_138598_271670 | NW_004516049.1 | Scaffold626 | 271670                  | AA                              | TT              | 1946966767               |
| SNP_P4_138599_271943 | NW_004516049.1 | Scaffold626 | 271943                  | AA                              | GG              | 1946966769               |
| SNP_P4_138600_272096 | NW_004516049.1 | Scaffold626 | 272096                  | TT                              | CC              | 1946966771               |
| SNP_P4_138601_272114 | NW_004516049.1 | Scaffold626 | 272114                  | CC                              | TT              | 1946966773               |
| SNP_P4_138602_272681 | NW_004516049.1 | Scaffold626 | 272681                  | TT                              | AA              | 1946966775               |
| SNP_P4_138603_273439 | NW_004516049.1 | Scaffold626 | 273439                  | CC                              | TT              | 1946966777               |
| SNP_P4_138604_273698 | NW_004516049.1 | Scaffold626 | 273698                  | CC                              | TT              | 1946966779               |
| SNP_P4_138605_273757 | NW_004516049.1 | Scaffold626 | 273757                  | GG                              | TT              | 1946966781               |
| SNP_P4_138606_274440 | NW_004516049.1 | Scaffold626 | 274440                  | CC                              | TT              | 1946966783               |
| SNP_P4_138607_274444 | NW_004516049.1 | Scaffold626 | 274444                  | AA                              | GG              | 1946966785               |
| SNP_P4_138608_274487 | NW_004516049.1 | Scaffold626 | 274487                  | CC                              | TT              | 1946966787               |
| SNP_P4_138610_274936 | NW_004516049.1 | Scaffold626 | 274936                  | AA                              | GG              | 1946966789               |
| SNP_P4_138611_275234 | NW_004516049.1 | Scaffold626 | 275234                  | TT                              | AA              | 1946966791               |
| SNP_P4_138613_275561 | NW_004516049.1 | Scaffold626 | 275561                  | CC                              | TT              | 1946966793               |
| SNP_P4_138614_275562 | NW_004516049.1 | Scaffold626 | 275562                  | CC                              | TT              | 1946966795               |
| SNP_P4_138615_275563 | NW_004516049.1 | Scaffold626 | 275563                  | GG                              | AA              | 1946966797               |
| SNP_P4_138616_275595 | NW_004516049.1 | Scaffold626 | 275595                  | AA                              | TT              | 1946966799               |
| SNP_P4_138617_275719 | NW_004516049.1 | Scaffold626 | 275719                  | AA                              | GG              | 1946966801               |
| SNP_P4_138618_275745 | NW_004516049.1 | Scaffold626 | 275745                  | AA                              | GG              | 1946966803               |
| SNP_P4_138619_275775 | NW_004516049.1 | Scaffold626 | 275775                  | TT                              | CC              | 1946966805               |
| SNP_P4_138620_276204 | NW_004516049.1 | Scaffold626 | 276204                  | TT                              | CC              | 1946966807               |
| SNP_P4_138621_276385 | NW_004516049.1 | Scaffold626 | 276385                  | GG                              | CC              | 1946966809               |
| SNP_P4_138622_278600 | NW_004516049.1 | Scaffold626 | 278600                  | GG                              | AA              | 1946966811               |
| SNP_P4_138623_278601 | NW_004516049.1 | Scaffold626 | 278601                  | AA                              | TT              | 1946966813               |
| SNP_P4_138624_278618 | NW_004516049.1 | Scaffold626 | 278618                  | TT                              | GG              | 1946966815               |
| SNP_P4_138625_278646 | NW_004516049.1 | Scaffold626 | 278646                  | TT                              | CC              | 1946966817               |
| SNP_P4_138626_279899 | NW_004516049.1 | Scaffold626 | 279899                  | AA                              | CC              | 1946966819               |



| SNPs IDs             | Chromosome IDs | Chromosomes | Physical positions (bp) | CDC Frontier (Reference genome) | (ILWC46 & LPNB) | NCBI SNPdb Accession IDs |
|----------------------|----------------|-------------|-------------------------|---------------------------------|-----------------|--------------------------|
| SNP_P4_138627_280221 | NW_004516049.1 | Scaffold626 | 280221                  | CC                              | GG              | 1946966821               |
| SNP_P4_138628_280240 | NW_004516049.1 | Scaffold626 | 280240                  | CC                              | GG              | 1946966823               |
| SNP_P4_138629_281247 | NW_004516049.1 | Scaffold626 | 281247                  | AA                              | GG              | 1946966825               |
| SNP_P4_138630_281429 | NW_004516049.1 | Scaffold626 | 281429                  | GG                              | AA              | 1946966827               |
| SNP_P4_138631_281468 | NW_004516049.1 | Scaffold626 | 281468                  | CC                              | AA              | 1946966829               |
| SNP_P4_138632_281476 | NW_004516049.1 | Scaffold626 | 281476                  | AA                              | CC              | 1946966831               |
| SNP_P4_138633_281478 | NW_004516049.1 | Scaffold626 | 281478                  | GG                              | AA              | 1946966833               |
| SNP_P4_138634_281570 | NW_004516049.1 | Scaffold626 | 281570                  | AA                              | TT              | 1946966835               |
| SNP_P4_138635_281612 | NW_004516049.1 | Scaffold626 | 281612                  | CC                              | TT              | 1946966837               |
| SNP_P4_138636_281623 | NW_004516049.1 | Scaffold626 | 281623                  | TT                              | AA              | 1946966839               |
| SNP_P4_138637_281636 | NW_004516049.1 | Scaffold626 | 281636                  | AA                              | GG              | 1946966841               |
| SNP_P4_138638_281728 | NW_004516049.1 | Scaffold626 | 281728                  | AA                              | CC              | 1946966843               |
| SNP_P4_138639_281761 | NW_004516049.1 | Scaffold626 | 281761                  | AA                              | TT              | 1946966845               |
| SNP_P4_138640_282809 | NW_004516049.1 | Scaffold626 | 282809                  | TT                              | AA              | 1946966847               |
| SNP_P4_138641_283121 | NW_004516049.1 | Scaffold626 | 283121                  | AA                              | TT              | 1946966849               |
| SNP_P4_138642_283251 | NW_004516049.1 | Scaffold626 | 283251                  | TT                              | AA              | 1946966851               |
| SNP_P4_138643_290887 | NW_004516049.1 | Scaffold626 | 290887                  | AA                              | GG              | 1946966853               |
| SNP_P4_138644_292517 | NW_004516049.1 | Scaffold626 | 292517                  | CC                              | TT              | 1946966855               |
| SNP_P4_138645_296059 | NW_004516049.1 | Scaffold626 | 296059                  | CC                              | TT              | 1946966857               |
| SNP_P4_138646_296083 | NW_004516049.1 | Scaffold626 | 296083                  | CC                              | TT              | 1946966859               |
| SNP_P4_138647_296095 | NW_004516049.1 | Scaffold626 | 296095                  | CC                              | TT              | 1946966861               |
| SNP_P4_138648_296448 | NW_004516049.1 | Scaffold626 | 296448                  | TT                              | CC              | 1946966863               |
| SNP_P4_138649_302544 | NW_004516049.1 | Scaffold626 | 302544                  | CC                              | TT              | 1946966865               |
| SNP_P4_138650_302569 | NW_004516049.1 | Scaffold626 | 302569                  | CC                              | TT              | 1946966867               |
| SNP_P4_138651_311345 | NW_004516049.1 | Scaffold626 | 311345                  | TT                              | AA              | 1946966869               |
| SNP_P4_138652_324587 | NW_004516049.1 | Scaffold626 | 324587                  | TT                              | CC              | 1946966871               |
| SNP_P4_138653_328622 | NW_004516049.1 | Scaffold626 | 328622                  | TT                              | AA              | 1946966873               |
| SNP_P4_138654_335480 | NW_004516049.1 | Scaffold626 | 335480                  | GG                              | AA              | 1946966875               |
| SNP_P4_138655_335491 | NW_004516049.1 | Scaffold626 | 335491                  | GG                              | AA              | 1946966877               |
| SNP_P4_138656_340638 | NW_004516049.1 | Scaffold626 | 340638                  | GG                              | AA              | 1946966879               |
| SNP_P4_138657_340771 | NW_004516049.1 | Scaffold626 | 340771                  | AA                              | TT              | 1946966881               |
| SNP_P4_138658_347589 | NW_004516049.1 | Scaffold626 | 347589                  | CC                              | TT              | 1946966883               |
| SNP_P4_138659_351712 | NW_004516049.1 | Scaffold626 | 351712                  | GG                              | AA              | 1946966885               |
| SNP_P4_138660_351725 | NW_004516049.1 | Scaffold626 | 351725                  | TT                              | CC              | 1946966887               |
| SNP_P4_138661_351746 | NW_004516049.1 | Scaffold626 | 351746                  | CC                              | TT              | 1946966889               |
| SNP_P4_138662_351752 | NW_004516049.1 | Scaffold626 | 351752                  | AA                              | GG              | 1946966892               |
| SNP_P4_138663_351764 | NW_004516049.1 | Scaffold626 | 351764                  | GG                              | AA              | 1946966894               |
| SNP_P4_138664_351778 | NW_004516049.1 | Scaffold626 | 351778                  | GG                              | CC              | 1946966896               |
| SNP_P4_138665_351781 | NW_004516049.1 | Scaffold626 | 351781                  | GG                              | AA              | 1946966898               |
| SNP_P4_138666_351808 | NW_004516049.1 | Scaffold626 | 351808                  | CC                              | AA              | 1946966900               |
| SNP_P4_138667_351983 | NW_004516049.1 | Scaffold626 | 351983                  | TT                              | GG              | 1946966902               |
| SNP_P4_138668_352112 | NW_004516049.1 | Scaffold626 | 352112                  | CC                              | TT              | 1946966904               |

| SNPs IDs             | Chromosome IDs | Chromosomes | Physical positions (bp) | CDC Frontier (Reference genome) | (ILWC46 & LPNB) | NCBI SNPdb Accession IDs |
|----------------------|----------------|-------------|-------------------------|---------------------------------|-----------------|--------------------------|
| SNP_P4_138671_356106 | NW_004516049.1 | Scaffold626 | 356106                  | GG                              | AA              | 1946966906               |
| SNP_P4_138672_356345 | NW_004516049.1 | Scaffold626 | 356345                  | TT                              | CC              | 1946966908               |
| SNP_P4_138673_356358 | NW_004516049.1 | Scaffold626 | 356358                  | TT                              | CC              | 1946966910               |
| SNP_P4_138674_356359 | NW_004516049.1 | Scaffold626 | 356359                  | GG                              | AA              | 1946966912               |
| SNP_P4_138675_356394 | NW_004516049.1 | Scaffold626 | 356394                  | GG                              | CC              | 1946966914               |
| SNP_P4_138676_357406 | NW_004516049.1 | Scaffold626 | 357406                  | AA                              | TT              | 1946966916               |
| SNP_P4_138677_365530 | NW_004516049.1 | Scaffold626 | 365530                  | AA                              | CC              | 1946966918               |
| SNP_P4_138678_365886 | NW_004516049.1 | Scaffold626 | 365886                  | CC                              | TT              | 1946966920               |
| SNP_P4_138679_366790 | NW_004516049.1 | Scaffold626 | 366790                  | AA                              | GG              | 1946966922               |
| SNP_P4_138680_368053 | NW_004516049.1 | Scaffold626 | 368053                  | GG                              | TT              | 1946966924               |
| SNP_P4_138681_371611 | NW_004516049.1 | Scaffold626 | 371611                  | GG                              | TT              | 1946966926               |
| SNP_P4_138682_371624 | NW_004516049.1 | Scaffold626 | 371624                  | GG                              | TT              | 1946966928               |
| SNP_P4_138683_374839 | NW_004516049.1 | Scaffold626 | 374839                  | AA                              | TT              | 1946966930               |
| SNP_P4_138684_376649 | NW_004516049.1 | Scaffold626 | 376649                  | CC                              | TT              | 1946966932               |
| SNP_P4_138685_376736 | NW_004516049.1 | Scaffold626 | 376736                  | TT                              | AA              | 1946966934               |
| SNP_P4_138686_376745 | NW_004516049.1 | Scaffold626 | 376745                  | GG                              | TT              | 1946966936               |
| SNP_P4_138687_376749 | NW_004516049.1 | Scaffold626 | 376749                  | AA                              | TT              | 1946966938               |
| SNP_P4_138688_377046 | NW_004516049.1 | Scaffold626 | 377046                  | GG                              | TT              | 1946966940               |
| SNP_P4_138689_377108 | NW_004516049.1 | Scaffold626 | 377108                  | GG                              | AA              | 1946966942               |
| SNP_P4_138690_386051 | NW_004516049.1 | Scaffold626 | 386051                  | AA                              | CC              | 1946966944               |
| SNP_P4_138691_386058 | NW_004516049.1 | Scaffold626 | 386058                  | TT                              | CC              | 1946966946               |
| SNP_P4_138692_386268 | NW_004516049.1 | Scaffold626 | 386268                  | AA                              | GG              | 1946966948               |
| SNP_P4_138693_386307 | NW_004516049.1 | Scaffold626 | 386307                  | TT                              | CC              | 1946966950               |
| SNP_P4_138694_386312 | NW_004516049.1 | Scaffold626 | 386312                  | TT                              | AA              | 1946966952               |
| SNP_P4_138695_386374 | NW_004516049.1 | Scaffold626 | 386374                  | AA                              | GG              | 1946966954               |
| SNP_P4_138696_386569 | NW_004516049.1 | Scaffold626 | 386569                  | TT                              | CC              | 1946966956               |
| SNP_P4_138697_386632 | NW_004516049.1 | Scaffold626 | 386632                  | GG                              | CC              | 1946966958               |
| SNP_P4_138698_386649 | NW_004516049.1 | Scaffold626 | 386649                  | AA                              | GG              | 1946966960               |
| SNP_P4_138699_387750 | NW_004516049.1 | Scaffold626 | 387750                  | AA                              | GG              | 1946966962               |
| SNP_P4_138700_387784 | NW_004516049.1 | Scaffold626 | 387784                  | AA                              | GG              | 1946966964               |
| SNP_P4_138701_387794 | NW_004516049.1 | Scaffold626 | 387794                  | GG                              | TT              | 1946966966               |
| SNP_P4_138702_387840 | NW_004516049.1 | Scaffold626 | 387840                  | AA                              | TT              | 1946966968               |
| SNP_P4_138703_387876 | NW_004516049.1 | Scaffold626 | 387876                  | GG                              | AA              | 1946966970               |
| SNP_P4_138704_387882 | NW_004516049.1 | Scaffold626 | 387882                  | TT                              | AA              | 1946966972               |
| SNP_P4_138705_387916 | NW_004516049.1 | Scaffold626 | 387916                  | AA                              | TT              | 1946966974               |
| SNP_P4_138706_387917 | NW_004516049.1 | Scaffold626 | 387917                  | TT                              | AA              | 1946966976               |
| SNP_P4_138708_387925 | NW_004516049.1 | Scaffold626 | 387925                  | TT                              | AA              | 1946966978               |
| SNP_P4_138709_388151 | NW_004516049.1 | Scaffold626 | 388151                  | TT                              | AA              | 1946966980               |
| SNP_P4_138710_388429 | NW_004516049.1 | Scaffold626 | 388429                  | AA                              | GG              | 1946966982               |
| SNP_P4_138711_388453 | NW_004516049.1 | Scaffold626 | 388453                  | AA                              | CC              | 1946966984               |
| SNP_P4_138712_388458 | NW_004516049.1 | Scaffold626 | 388458                  | GG                              | AA              | 1946966986               |
| SNP_P4_138713_388535 | NW_004516049.1 | Scaffold626 | 388535                  | AA                              | TT              | 1946966988               |

| SNPs IDs             | Chromosome IDs | Chromosomes | Physical positions (bp) | CDC Frontier (Reference genome) | (ILWC46 & LPNB) | NCBI SNPdb Accession IDs |
|----------------------|----------------|-------------|-------------------------|---------------------------------|-----------------|--------------------------|
| SNP_P4_138714_388543 | NW_004516049.1 | Scaffold626 | 388543                  | TT                              | GG              | 1946966990               |
| SNP_P4_138715_391864 | NW_004516049.1 | Scaffold626 | 391864                  | AA                              | GG              | 1946966992               |
| SNP_P4_138716_392157 | NW_004516049.1 | Scaffold626 | 392157                  | CC                              | AA              | 1946966994               |
| SNP_P4_138717_392268 | NW_004516049.1 | Scaffold626 | 392268                  | GG                              | AA              | 1946966996               |
| SNP_P4_138718_392329 | NW_004516049.1 | Scaffold626 | 392329                  | AA                              | GG              | 1946966998               |
| SNP_P4_138719_393456 | NW_004516049.1 | Scaffold626 | 393456                  | AA                              | GG              | 1946967000               |
| SNP_P4_138720_393509 | NW_004516049.1 | Scaffold626 | 393509                  | AA                              | CC              | 1946967002               |
| SNP_P4_138721_393533 | NW_004516049.1 | Scaffold626 | 393533                  | GG                              | TT              | 1946967004               |
| SNP_P4_138722_393778 | NW_004516049.1 | Scaffold626 | 393778                  | CC                              | TT              | 1946967006               |
| SNP_P4_138723_393857 | NW_004516049.1 | Scaffold626 | 393857                  | AA                              | CC              | 1946967008               |
| SNP_P4_138724_396249 | NW_004516049.1 | Scaffold626 | 396249                  | AA                              | GG              | 1946967010               |
| SNP_P4_138725_400492 | NW_004516049.1 | Scaffold626 | 400492                  | CC                              | TT              | 1946967012               |
| SNP_P4_138726_414918 | NW_004516049.1 | Scaffold626 | 414918                  | TT                              | GG              | 1946967014               |
| SNP_P4_138727_420714 | NW_004516049.1 | Scaffold626 | 420714                  | AA                              | CC              | 1946967016               |
| SNP_P4_138728_420740 | NW_004516049.1 | Scaffold626 | 420740                  | AA                              | GG              | 1946967018               |
| SNP_P4_138729_424212 | NW_004516049.1 | Scaffold626 | 424212                  | AA                              | GG              | 1946967020               |
| SNP_P4_138730_424479 | NW_004516049.1 | Scaffold626 | 424479                  | AA                              | GG              | 1946967022               |
| SNP_P4_138731_424519 | NW_004516049.1 | Scaffold626 | 424519                  | TT                              | CC              | 1946967024               |
| SNP_P4_138732_424547 | NW_004516049.1 | Scaffold626 | 424547                  | AA                              | GG              | 1946967026               |
| SNP_P4_138733_425327 | NW_004516049.1 | Scaffold626 | 425327                  | GG                              | AA              | 1946967028               |
| SNP_P4_138734_429165 | NW_004516049.1 | Scaffold626 | 429165                  | AA                              | TT              | 1946967030               |
| SNP_P4_138735_451256 | NW_004516049.1 | Scaffold626 | 451256                  | TT                              | CC              | 1946967032               |
| SNP_P4_138736_451404 | NW_004516049.1 | Scaffold626 | 451404                  | GG                              | TT              | 1946967034               |
| SNP_P4_138737_451546 | NW_004516049.1 | Scaffold626 | 451546                  | CC                              | TT              | 1946967036               |
| SNP_P4_138738_451660 | NW_004516049.1 | Scaffold626 | 451660                  | CC                              | GG              | 1946967038               |
| SNP_P4_138739_451724 | NW_004516049.1 | Scaffold626 | 451724                  | GG                              | CC              | 1946967040               |
| SNP_P4_138741_452145 | NW_004516049.1 | Scaffold626 | 452145                  | TT                              | CC              | 1946967042               |
| SNP_P4_138742_452241 | NW_004516049.1 | Scaffold626 | 452241                  | AA                              | CC              | 1946967044               |
| SNP_P4_138743_452379 | NW_004516049.1 | Scaffold626 | 452379                  | TT                              | AA              | 1946967046               |
| SNP_P4_138744_452390 | NW_004516049.1 | Scaffold626 | 452390                  | CC                              | TT              | 1946967048               |
| SNP_P4_138745_452401 | NW_004516049.1 | Scaffold626 | 452401                  | TT                              | GG              | 1946967050               |
| SNP_P4_138747_453190 | NW_004516049.1 | Scaffold626 | 453190                  | CC                              | AA              | 1946967052               |
| SNP_P4_138748_453234 | NW_004516049.1 | Scaffold626 | 453234                  | AA                              | TT              | 1946967054               |
| SNP_P4_138749_453366 | NW_004516049.1 | Scaffold626 | 453366                  | AA                              | GG              | 1946967056               |
| SNP_P4_138750_453456 | NW_004516049.1 | Scaffold626 | 453456                  | CC                              | TT              | 1946967058               |
| SNP_P4_138751_453615 | NW_004516049.1 | Scaffold626 | 453615                  | CC                              | TT              | 1946967060               |
| SNP_P4_138752_453658 | NW_004516049.1 | Scaffold626 | 453658                  | CC                              | TT              | 1946967062               |
| SNP_P4_138753_453711 | NW_004516049.1 | Scaffold626 | 453711                  | GG                              | AA              | 1946967064               |
| SNP_P4_138754_453753 | NW_004516049.1 | Scaffold626 | 453753                  | CC                              | TT              | 1946967066               |
| SNP_P4_138755_453761 | NW_004516049.1 | Scaffold626 | 453761                  | GG                              | AA              | 1946967068               |
| SNP_P4_138756_453811 | NW_004516049.1 | Scaffold626 | 453811                  | TT                              | CC              | 1946967070               |
| SNP_P4_138757_453854 | NW_004516049.1 | Scaffold626 | 453854                  | GG                              | TT              | 1946967072               |

| SNPs IDs             | Chromosome IDs | Chromosomes | Physical positions (bp) | CDC Frontier (Reference genome) | (ILWC46 & LPNB) | NCBI SNPdb Accession IDs |
|----------------------|----------------|-------------|-------------------------|---------------------------------|-----------------|--------------------------|
| SNP_P4_138758_453913 | NW_004516049.1 | Scaffold626 | 453913                  | AA                              | GG              | 1946967074               |
| SNP_P4_138759_453936 | NW_004516049.1 | Scaffold626 | 453936                  | AA                              | TT              | 1946967076               |
| SNP_P4_138760_453997 | NW_004516049.1 | Scaffold626 | 453997                  | CC                              | GG              | 1946967078               |
| SNP_P4_138761_454100 | NW_004516049.1 | Scaffold626 | 454100                  | GG                              | CC              | 1946967080               |
| SNP_P4_138762_454113 | NW_004516049.1 | Scaffold626 | 454113                  | CC                              | TT              | 1946967082               |
| SNP_P4_138763_454170 | NW_004516049.1 | Scaffold626 | 454170                  | AA                              | GG              | 1946967084               |
| SNP_P4_138764_454224 | NW_004516049.1 | Scaffold626 | 454224                  | AA                              | GG              | 1946967086               |
| SNP_P4_138765_454264 | NW_004516049.1 | Scaffold626 | 454264                  | AA                              | TT              | 1946967088               |
| SNP_P4_138766_454430 | NW_004516049.1 | Scaffold626 | 454430                  | AA                              | TT              | 1946967090               |
| SNP_P4_138768_454619 | NW_004516049.1 | Scaffold626 | 454619                  | CC                              | TT              | 1946967092               |
| SNP_P4_138769_454699 | NW_004516049.1 | Scaffold626 | 454699                  | GG                              | AA              | 1946967094               |
| SNP_P4_138770_456763 | NW_004516049.1 | Scaffold626 | 456763                  | CC                              | TT              | 1946967096               |
| SNP_P4_138771_460544 | NW_004516049.1 | Scaffold626 | 460544                  | TT                              | AA              | 1946967098               |
| SNP_P4_138772_461051 | NW_004516049.1 | Scaffold626 | 461051                  | TT                              | AA              | 1946967100               |
| SNP_P4_138773_461357 | NW_004516049.1 | Scaffold626 | 461357                  | TT                              | AA              | 1946967102               |
| SNP_P4_138774_461629 | NW_004516049.1 | Scaffold626 | 461629                  | TT                              | CC              | 1946967104               |
| SNP_P4_138775_461645 | NW_004516049.1 | Scaffold626 | 461645                  | AA                              | TT              | 1946967107               |
| SNP_P4_138776_461763 | NW_004516049.1 | Scaffold626 | 461763                  | AA                              | CC              | 1946967109               |
| SNP_P4_138777_461900 | NW_004516049.1 | Scaffold626 | 461900                  | CC                              | TT              | 1946967111               |
| SNP_P4_138778_462036 | NW_004516049.1 | Scaffold626 | 462036                  | TT                              | CC              | 1946967113               |
| SNP_P4_138779_463145 | NW_004516049.1 | Scaffold626 | 463145                  | AA                              | TT              | 1946967115               |
| SNP_P4_138780_463306 | NW_004516049.1 | Scaffold626 | 463306                  | TT                              | GG              | 1946967117               |
| SNP_P4_138781_463450 | NW_004516049.1 | Scaffold626 | 463450                  | GG                              | TT              | 1946967119               |
| SNP_P4_138782_463459 | NW_004516049.1 | Scaffold626 | 463459                  | GG                              | AA              | 1946967121               |
| SNP_P4_138783_463581 | NW_004516049.1 | Scaffold626 | 463581                  | GG                              | TT              | 1946967123               |
| SNP_P4_138784_463656 | NW_004516049.1 | Scaffold626 | 463656                  | AA                              | CC              | 1946967125               |
| SNP_P4_138785_463724 | NW_004516049.1 | Scaffold626 | 463724                  | TT                              | AA              | 1946967127               |
| SNP_P4_138786_463757 | NW_004516049.1 | Scaffold626 | 463757                  | CC                              | TT              | 1946967129               |
| SNP_P4_138787_463829 | NW_004516049.1 | Scaffold626 | 463829                  | GG                              | AA              | 1946967131               |
| SNP_P4_138788_463845 | NW_004516049.1 | Scaffold626 | 463845                  | AA                              | GG              | 1946967133               |
| SNP_P4_138789_463930 | NW_004516049.1 | Scaffold626 | 463930                  | AA                              | GG              | 1946967135               |
| SNP_P4_138790_464062 | NW_004516049.1 | Scaffold626 | 464062                  | CC                              | AA              | 1946967137               |
| SNP_P4_138791_464081 | NW_004516049.1 | Scaffold626 | 464081                  | TT                              | CC              | 1946967139               |
| SNP_P4_138792_464088 | NW_004516049.1 | Scaffold626 | 464088                  | CC                              | TT              | 1946967141               |
| SNP_P4_138793_464195 | NW_004516049.1 | Scaffold626 | 464195                  | GG                              | AA              | 1946967143               |
| SNP_P4_138794_464307 | NW_004516049.1 | Scaffold626 | 464307                  | GG                              | TT              | 1946967145               |
| SNP_P4_138795_464595 | NW_004516049.1 | Scaffold626 | 464595                  | GG                              | CC              | 1946967148               |
| SNP_P4_138796_465011 | NW_004516049.1 | Scaffold626 | 465011                  | TT                              | GG              | 1946967150               |
| SNP_P4_138797_465303 | NW_004516049.1 | Scaffold626 | 465303                  | TT                              | CC              | 1946967152               |
| SNP_P4_138798_465312 | NW_004516049.1 | Scaffold626 | 465312                  | CC                              | TT              | 1946967154               |
| SNP_P4_138799_465383 | NW_004516049.1 | Scaffold626 | 465383                  | CC                              | AA              | 1946967156               |
| SNP_P4_138800_465393 | NW_004516049.1 | Scaffold626 | 465393                  | GG                              | CC              | 1946967158               |

| SNPs IDs             | Chromosome IDs | Chromosomes | Physical positions (bp) | CDC Frontier (Reference genome) | (ILWC46 & LPNB) | NCBI SNPdb Accession IDs |
|----------------------|----------------|-------------|-------------------------|---------------------------------|-----------------|--------------------------|
| SNP_P4_138801_467212 | NW_004516049.1 | Scaffold626 | 467212                  | GG                              | TT              | 1946967160               |
| SNP_P4_138802_467266 | NW_004516049.1 | Scaffold626 | 467266                  | AA                              | CC              | 1946967162               |
| SNP_P4_138803_467421 | NW_004516049.1 | Scaffold626 | 467421                  | CC                              | TT              | 1946967164               |
| SNP_P4_138804_467489 | NW_004516049.1 | Scaffold626 | 467489                  | AA                              | CC              | 1946967166               |
| SNP_P4_138805_467499 | NW_004516049.1 | Scaffold626 | 467499                  | AA                              | GG              | 1946967168               |
| SNP_P4_138806_467554 | NW_004516049.1 | Scaffold626 | 467554                  | CC                              | TT              | 1946967170               |
| SNP_P4_138807_467674 | NW_004516049.1 | Scaffold626 | 467674                  | CC                              | AA              | 1946967172               |
| SNP_P4_138808_467677 | NW_004516049.1 | Scaffold626 | 467677                  | CC                              | AA              | 1946967174               |
| SNP_P4_138809_467679 | NW_004516049.1 | Scaffold626 | 467679                  | CC                              | TT              | 1946967176               |
| SNP_P4_138810_470190 | NW_004516049.1 | Scaffold626 | 470190                  | CC                              | AA              | 1946967178               |
| SNP_P4_138811_475473 | NW_004516049.1 | Scaffold626 | 475473                  | AA                              | GG              | 1946967180               |
| SNP_P4_138812_476333 | NW_004516049.1 | Scaffold626 | 476333                  | TT                              | GG              | 1946967182               |
| SNP_P4_138813_476413 | NW_004516049.1 | Scaffold626 | 476413                  | TT                              | CC              | 1946967184               |
| SNP_P4_138814_477279 | NW_004516049.1 | Scaffold626 | 477279                  | TT                              | AA              | 1946967186               |
| SNP_P4_138815_477314 | NW_004516049.1 | Scaffold626 | 477314                  | AA                              | CC              | 1946967188               |
| SNP_P4_138816_477437 | NW_004516049.1 | Scaffold626 | 477437                  | CC                              | TT              | 1946967190               |
| SNP_P4_138817_477458 | NW_004516049.1 | Scaffold626 | 477458                  | GG                              | TT              | 1946967192               |
| SNP_P4_138818_477635 | NW_004516049.1 | Scaffold626 | 477635                  | CC                              | TT              | 1946967194               |
| SNP_P4_138819_477779 | NW_004516049.1 | Scaffold626 | 477779                  | TT                              | CC              | 1946967196               |
| SNP_P4_138820_477780 | NW_004516049.1 | Scaffold626 | 477780                  | GG                              | AA              | 1946967198               |
| SNP_P4_138821_477784 | NW_004516049.1 | Scaffold626 | 477784                  | CC                              | TT              | 1946967200               |
| SNP_P4_138822_477815 | NW_004516049.1 | Scaffold626 | 477815                  | GG                              | AA              | 1946967202               |
| SNP_P4_138823_477987 | NW_004516049.1 | Scaffold626 | 477987                  | TT                              | GG              | 1946967204               |
| SNP_P4_138824_478347 | NW_004516049.1 | Scaffold626 | 478347                  | GG                              | AA              | 1946967206               |
| SNP_P4_138825_478672 | NW_004516049.1 | Scaffold626 | 478672                  | CC                              | GG              | 1946967208               |
| SNP_P4_138826_478906 | NW_004516049.1 | Scaffold626 | 478906                  | TT                              | GG              | 1946967210               |
| SNP_P4_138827_479546 | NW_004516049.1 | Scaffold626 | 479546                  | AA                              | GG              | 1946967212               |
| SNP_P4_138828_479915 | NW_004516049.1 | Scaffold626 | 479915                  | AA                              | GG              | 1946967214               |
| SNP_P4_138829_480081 | NW_004516049.1 | Scaffold626 | 480081                  | AA                              | GG              | 1946967216               |
| SNP_P4_138830_480397 | NW_004516049.1 | Scaffold626 | 480397                  | CC                              | TT              | 1946967218               |
| SNP_P4_138831_480524 | NW_004516049.1 | Scaffold626 | 480524                  | TT                              | CC              | 1946967220               |
| SNP_P4_138832_480542 | NW_004516049.1 | Scaffold626 | 480542                  | GG                              | CC              | 1946967222               |
| SNP_P4_138833_480760 | NW_004516049.1 | Scaffold626 | 480760                  | TT                              | CC              | 1946967224               |
| SNP_P4_138834_480783 | NW_004516049.1 | Scaffold626 | 480783                  | AA                              | GG              | 1946967226               |
| SNP_P4_138835_480881 | NW_004516049.1 | Scaffold626 | 480881                  | CC                              | TT              | 1946967228               |
| SNP_P4_138836_480953 | NW_004516049.1 | Scaffold626 | 480953                  | CC                              | GG              | 1946967230               |
| SNP_P4_138837_483269 | NW_004516049.1 | Scaffold626 | 483269                  | AA                              | GG              | 1946967232               |
| SNP_P4_138838_483314 | NW_004516049.1 | Scaffold626 | 483314                  | GG                              | AA              | 1946967234               |
| SNP_P4_138839_483322 | NW_004516049.1 | Scaffold626 | 483322                  | CC                              | TT              | 1946967236               |
| SNP_P4_138840_483365 | NW_004516049.1 | Scaffold626 | 483365                  | TT                              | AA              | 1946967238               |
| SNP_P4_138841_483431 | NW_004516049.1 | Scaffold626 | 483431                  | AA                              | CC              | 1946967240               |
| SNP_P4_138842_483525 | NW_004516049.1 | Scaffold626 | 483525                  | GG                              | CC              | 1946967242               |

| SNPs IDs             | Chromosome IDs | Chromosomes | Physical positions (bp) | CDC Frontier (Reference genome) | (ILWC46 & LPNB) | NCBI SNPdb Accession IDs |
|----------------------|----------------|-------------|-------------------------|---------------------------------|-----------------|--------------------------|
| SNP_P4_138843_483580 | NW_004516049.1 | Scaffold626 | 483580                  | AA                              | CC              | 1946967244               |
| SNP_P4_138844_483689 | NW_004516049.1 | Scaffold626 | 483689                  | TT                              | GG              | 1946967246               |
| SNP_P4_138845_483829 | NW_004516049.1 | Scaffold626 | 483829                  | CC                              | AA              | 1946967248               |
| SNP_P4_138846_483886 | NW_004516049.1 | Scaffold626 | 483886                  | GG                              | AA              | 1946967250               |
| SNP_P4_138847_483942 | NW_004516049.1 | Scaffold626 | 483942                  | AA                              | GG              | 1946967252               |
| SNP_P4_138848_483957 | NW_004516049.1 | Scaffold626 | 483957                  | GG                              | AA              | 1946967254               |
| SNP_P4_138849_484076 | NW_004516049.1 | Scaffold626 | 484076                  | GG                              | TT              | 1946967256               |
| SNP_P4_138850_484093 | NW_004516049.1 | Scaffold626 | 484093                  | TT                              | GG              | 1946967258               |
| SNP_P4_138851_484202 | NW_004516049.1 | Scaffold626 | 484202                  | TT                              | CC              | 1946967260               |
| SNP_P4_138852_484233 | NW_004516049.1 | Scaffold626 | 484233                  | GG                              | AA              | 1946967262               |
| SNP_P4_138853_484305 | NW_004516049.1 | Scaffold626 | 484305                  | GG                              | AA              | 1946967264               |
| SNP_P4_138854_484346 | NW_004516049.1 | Scaffold626 | 484346                  | TT                              | CC              | 1946967266               |
| SNP_P4_138855_484606 | NW_004516049.1 | Scaffold626 | 484606                  | CC                              | TT              | 1946967268               |
| SNP_P4_138856_484743 | NW_004516049.1 | Scaffold626 | 484743                  | TT                              | GG              | 1946967270               |
| SNP_P4_138857_485037 | NW_004516049.1 | Scaffold626 | 485037                  | CC                              | TT              | 1946967272               |
| SNP_P4_138858_485063 | NW_004516049.1 | Scaffold626 | 485063                  | CC                              | AA              | 1946967274               |
| SNP_P4_138859_485183 | NW_004516049.1 | Scaffold626 | 485183                  | GG                              | TT              | 1946967276               |
| SNP_P4_138860_485256 | NW_004516049.1 | Scaffold626 | 485256                  | CC                              | TT              | 1946967278               |
| SNP_P4_138861_485383 | NW_004516049.1 | Scaffold626 | 485383                  | GG                              | AA              | 1946967280               |
| SNP_P4_138862_485596 | NW_004516049.1 | Scaffold626 | 485596                  | TT                              | AA              | 1946967282               |
| SNP_P4_138863_485847 | NW_004516049.1 | Scaffold626 | 485847                  | CC                              | TT              | 1946967284               |
| SNP_P4_138864_485959 | NW_004516049.1 | Scaffold626 | 485959                  | CC                              | TT              | 1946967286               |
| SNP_P4_138865_486056 | NW_004516049.1 | Scaffold626 | 486056                  | AA                              | GG              | 1946967288               |
| SNP_P4_138867_487625 | NW_004516049.1 | Scaffold626 | 487625                  | CC                              | AA              | 1946967290               |
| SNP_P4_138868_488177 | NW_004516049.1 | Scaffold626 | 488177                  | TT                              | CC              | 1946967292               |
| SNP_P4_138869_488414 | NW_004516049.1 | Scaffold626 | 488414                  | TT                              | CC              | 1946967294               |
| SNP_P4_138870_488496 | NW_004516049.1 | Scaffold626 | 488496                  | TT                              | CC              | 1946967296               |
| SNP_P4_138871_488507 | NW_004516049.1 | Scaffold626 | 488507                  | AA                              | TT              | 1946967298               |
| SNP_P4_138872_488516 | NW_004516049.1 | Scaffold626 | 488516                  | CC                              | TT              | 1946967300               |
| SNP_P4_138873_488688 | NW_004516049.1 | Scaffold626 | 488688                  | AA                              | TT              | 1946967302               |
| SNP_P4_138874_488696 | NW_004516049.1 | Scaffold626 | 488696                  | CC                              | TT              | 1946967304               |
| SNP_P4_138875_488705 | NW_004516049.1 | Scaffold626 | 488705                  | GG                              | TT              | 1946967306               |
| SNP_P4_138876_488731 | NW_004516049.1 | Scaffold626 | 488731                  | TT                              | GG              | 1946967308               |
| SNP_P4_138877_488893 | NW_004516049.1 | Scaffold626 | 488893                  | AA                              | TT              | 1946967310               |
| SNP_P4_138878_490135 | NW_004516049.1 | Scaffold626 | 490135                  | TT                              | AA              | 1946967312               |
| SNP_P4_138879_490597 | NW_004516049.1 | Scaffold626 | 490597                  | TT                              | CC              | 1946967314               |
| SNP_P4_138880_490608 | NW_004516049.1 | Scaffold626 | 490608                  | TT                              | AA              | 1946967316               |
| SNP_P4_138881_490715 | NW_004516049.1 | Scaffold626 | 490715                  | GG                              | AA              | 1946967318               |
| SNP_P4_138882_491107 | NW_004516049.1 | Scaffold626 | 491107                  | TT                              | CC              | 1946967320               |
| SNP_P4_138883_491138 | NW_004516049.1 | Scaffold626 | 491138                  | GG                              | AA              | 1946967322               |
| SNP_P4_138884_503109 | NW_004516049.1 | Scaffold626 | 503109                  | TT                              | GG              | 1946967324               |
| SNP_P4_138885_504533 | NW_004516049.1 | Scaffold626 | 504533                  | GG                              | AA              | 1946967326               |

| SNPs IDs             | Chromosome IDs | Chromosomes | Physical positions (bp) | CDC Frontier (Reference genome) | (ILWC46 & LPNB) | NCBI SNPdb Accession IDs |
|----------------------|----------------|-------------|-------------------------|---------------------------------|-----------------|--------------------------|
| SNP_P4_138886_504659 | NW_004516049.1 | Scaffold626 | 504659                  | TT                              | CC              | 1946967328               |
| SNP_P4_138887_504936 | NW_004516049.1 | Scaffold626 | 504936                  | AA                              | GG              | 1946967330               |
| SNP_P4_138888_505024 | NW_004516049.1 | Scaffold626 | 505024                  | CC                              | TT              | 1946967332               |
| SNP_P4_138889_505046 | NW_004516049.1 | Scaffold626 | 505046                  | TT                              | CC              | 1946967334               |
| SNP_P4_138890_505118 | NW_004516049.1 | Scaffold626 | 505118                  | GG                              | AA              | 1946967336               |
| SNP_P4_138891_505256 | NW_004516049.1 | Scaffold626 | 505256                  | AA                              | GG              | 1946967338               |
| SNP_P4_138892_505273 | NW_004516049.1 | Scaffold626 | 505273                  | GG                              | CC              | 1946967340               |
| SNP_P4_138893_505839 | NW_004516049.1 | Scaffold626 | 505839                  | CC                              | GG              | 1946967342               |
| SNP_P4_138894_507097 | NW_004516049.1 | Scaffold626 | 507097                  | TT                              | CC              | 1946967344               |
| SNP_P4_138895_507099 | NW_004516049.1 | Scaffold626 | 507099                  | GG                              | AA              | 1946967346               |
| SNP_P4_138896_507118 | NW_004516049.1 | Scaffold626 | 507118                  | GG                              | AA              | 1946967348               |
| SNP_P4_138897_507131 | NW_004516049.1 | Scaffold626 | 507131                  | CC                              | TT              | 1946967350               |
| SNP_P4_138898_507326 | NW_004516049.1 | Scaffold626 | 507326                  | AA                              | TT              | 1946967352               |
| SNP_P4_138899_509286 | NW_004516049.1 | Scaffold626 | 509286                  | TT                              | GG              | 1946967354               |
| SNP_P4_138900_509485 | NW_004516049.1 | Scaffold626 | 509485                  | AA                              | TT              | 1946967356               |
| SNP_P4_138901_509586 | NW_004516049.1 | Scaffold626 | 509586                  | AA                              | GG              | 1946967358               |
| SNP_P4_138902_509686 | NW_004516049.1 | Scaffold626 | 509686                  | GG                              | CC              | 1946967360               |
| SNP_P4_138903_509952 | NW_004516049.1 | Scaffold626 | 509952                  | GG                              | AA              | 1946967362               |
| SNP_P4_138904_510003 | NW_004516049.1 | Scaffold626 | 510003                  | CC                              | TT              | 1946967364               |
| SNP_P4_138905_510069 | NW_004516049.1 | Scaffold626 | 510069                  | TT                              | CC              | 1946967366               |
| SNP_P4_138906_510117 | NW_004516049.1 | Scaffold626 | 510117                  | GG                              | AA              | 1946967368               |
| SNP_P4_138907_510164 | NW_004516049.1 | Scaffold626 | 510164                  | CC                              | GG              | 1946967370               |
| SNP_P4_138908_510205 | NW_004516049.1 | Scaffold626 | 510205                  | CC                              | TT              | 1946967372               |
| SNP_P4_138909_510206 | NW_004516049.1 | Scaffold626 | 510206                  | TT                              | AA              | 1946967374               |
| SNP_P4_138911_510280 | NW_004516049.1 | Scaffold626 | 510280                  | TT                              | CC              | 1946967376               |
| SNP_P4_138912_510370 | NW_004516049.1 | Scaffold626 | 510370                  | CC                              | TT              | 1946967378               |
| SNP_P4_138913_510402 | NW_004516049.1 | Scaffold626 | 510402                  | CC                              | AA              | 1946967380               |
| SNP_P4_138914_510426 | NW_004516049.1 | Scaffold626 | 510426                  | GG                              | AA              | 1946967382               |
| SNP_P4_138915_510476 | NW_004516049.1 | Scaffold626 | 510476                  | GG                              | AA              | 1946967384               |
| SNP_P4_138916_512545 | NW_004516049.1 | Scaffold626 | 512545                  | AA                              | GG              | 1946967386               |
| SNP_P4_138918_512674 | NW_004516049.1 | Scaffold626 | 512674                  | CC                              | TT              | 1946967388               |
| SNP_P4_138919_512850 | NW_004516049.1 | Scaffold626 | 512850                  | TT                              | CC              | 1946967390               |
| SNP_P4_138920_514409 | NW_004516049.1 | Scaffold626 | 514409                  | TT                              | AA              | 1946967392               |
| SNP_P4_138922_515388 | NW_004516049.1 | Scaffold626 | 515388                  | TT                              | CC              | 1946967395               |
| SNP_P4_138923_515412 | NW_004516049.1 | Scaffold626 | 515412                  | AA                              | GG              | 1946967397               |
| SNP_P4_138924_515438 | NW_004516049.1 | Scaffold626 | 515438                  | AA                              | TT              | 1946967399               |
| SNP_P4_138925_515496 | NW_004516049.1 | Scaffold626 | 515496                  | AA                              | TT              | 1946967401               |
| SNP_P4_138926_515605 | NW_004516049.1 | Scaffold626 | 515605                  | AA                              | CC              | 1946967403               |
| SNP_P4_138927_515662 | NW_004516049.1 | Scaffold626 | 515662                  | TT                              | CC              | 1946967405               |
| SNP_P4_138928_515666 | NW_004516049.1 | Scaffold626 | 515666                  | AA                              | GG              | 1946967407               |
| SNP_P4_138929_515683 | NW_004516049.1 | Scaffold626 | 515683                  | CC                              | TT              | 1946967409               |
| SNP_P4_138930_515719 | NW_004516049.1 | Scaffold626 | 515719                  | CC                              | TT              | 1946967410               |

| SNPs IDs             | Chromosome IDs | Chromosomes | Physical positions (bp) | CDC Frontier (Reference genome) | (ILWC46 & LPNB) | NCBI SNPdb Accession IDs |
|----------------------|----------------|-------------|-------------------------|---------------------------------|-----------------|--------------------------|
| SNP_P4_138931_515817 | NW_004516049.1 | Scaffold626 | 515817                  | CC                              | TT              | 1946967411               |
| SNP_P4_138932_516955 | NW_004516049.1 | Scaffold626 | 516955                  | AA                              | GG              | 1946967412               |
| SNP_P4_138933_517125 | NW_004516049.1 | Scaffold626 | 517125                  | GG                              | AA              | 1946967413               |
| SNP_P4_138934_517182 | NW_004516049.1 | Scaffold626 | 517182                  | TT                              | GG              | 1946967414               |
| SNP_P4_138935_517291 | NW_004516049.1 | Scaffold626 | 517291                  | AA                              | GG              | 1946967415               |
| SNP_P4_138936_517501 | NW_004516049.1 | Scaffold626 | 517501                  | CC                              | GG              | 1946967416               |
| SNP_P4_138937_517894 | NW_004516049.1 | Scaffold626 | 517894                  | GG                              | AA              | 1946967417               |
| SNP_P4_138938_517927 | NW_004516049.1 | Scaffold626 | 517927                  | GG                              | AA              | 1946967418               |
| SNP_P4_138939_517928 | NW_004516049.1 | Scaffold626 | 517928                  | TT                              | GG              | 1946967420               |
| SNP_P4_138940_518086 | NW_004516049.1 | Scaffold626 | 518086                  | AA                              | CC              | 1946967422               |
| SNP_P4_138941_519121 | NW_004516049.1 | Scaffold626 | 519121                  | CC                              | TT              | 1946967424               |
| SNP_P4_138942_519300 | NW_004516049.1 | Scaffold626 | 519300                  | AA                              | TT              | 1946967426               |
| SNP_P4_138943_519323 | NW_004516049.1 | Scaffold626 | 519323                  | GG                              | CC              | 1946967428               |
| SNP_P4_138944_519347 | NW_004516049.1 | Scaffold626 | 519347                  | GG                              | TT              | 1946967430               |
| SNP_P4_138945_519351 | NW_004516049.1 | Scaffold626 | 519351                  | CC                              | GG              | 1946967432               |
| SNP_P4_138946_519409 | NW_004516049.1 | Scaffold626 | 519409                  | GG                              | TT              | 1946967434               |
| SNP_P4_138947_519428 | NW_004516049.1 | Scaffold626 | 519428                  | TT                              | CC              | 1946967436               |
| SNP_P4_138948_519529 | NW_004516049.1 | Scaffold626 | 519529                  | CC                              | GG              | 1946967438               |
| SNP_P4_138949_519541 | NW_004516049.1 | Scaffold626 | 519541                  | AA                              | CC              | 1946967440               |
| SNP_P4_138950_519734 | NW_004516049.1 | Scaffold626 | 519734                  | GG                              | TT              | 1946967442               |
| SNP_P4_138951_519787 | NW_004516049.1 | Scaffold626 | 519787                  | CC                              | AA              | 1946967444               |
| SNP_P4_138952_520339 | NW_004516049.1 | Scaffold626 | 520339                  | CC                              | TT              | 1946967446               |
| SNP_P4_138953_520344 | NW_004516049.1 | Scaffold626 | 520344                  | CC                              | GG              | 1946967448               |
| SNP_P4_138955_520426 | NW_004516049.1 | Scaffold626 | 520426                  | AA                              | TT              | 1946967450               |
| SNP_P4_138956_520696 | NW_004516049.1 | Scaffold626 | 520696                  | TT                              | CC              | 1946967452               |
| SNP_P4_138957_521148 | NW_004516049.1 | Scaffold626 | 521148                  | AA                              | TT              | 1946967455               |
| SNP_P4_138958_521180 | NW_004516049.1 | Scaffold626 | 521180                  | GG                              | AA              | 1946967457               |
| SNP_P4_138959_521192 | NW_004516049.1 | Scaffold626 | 521192                  | TT                              | GG              | 1946967459               |
| SNP_P4_138960_521470 | NW_004516049.1 | Scaffold626 | 521470                  | TT                              | AA              | 1946967461               |
| SNP_P4_138961_521632 | NW_004516049.1 | Scaffold626 | 521632                  | GG                              | TT              | 1946967463               |
| SNP_P4_138962_521721 | NW_004516049.1 | Scaffold626 | 521721                  | CC                              | GG              | 1946967465               |
| SNP_P4_138963_521766 | NW_004516049.1 | Scaffold626 | 521766                  | AA                              | GG              | 1946967467               |
| SNP_P4_138964_522012 | NW_004516049.1 | Scaffold626 | 522012                  | TT                              | AA              | 1946967469               |
| SNP_P4_138965_522226 | NW_004516049.1 | Scaffold626 | 522226                  | AA                              | TT              | 1946967471               |
| SNP_P4_138966_522279 | NW_004516049.1 | Scaffold626 | 522279                  | GG                              | AA              | 1946967473               |
| SNP_P4_138967_522327 | NW_004516049.1 | Scaffold626 | 522327                  | AA                              | GG              | 1946967475               |
| SNP_P4_138968_522349 | NW_004516049.1 | Scaffold626 | 522349                  | GG                              | TT              | 1946967477               |
| SNP_P4_138970_522445 | NW_004516049.1 | Scaffold626 | 522445                  | GG                              | AA              | 1946967479               |
| SNP_P4_138971_522582 | NW_004516049.1 | Scaffold626 | 522582                  | TT                              | CC              | 1946967481               |
| SNP_P4_138972_522616 | NW_004516049.1 | Scaffold626 | 522616                  | CC                              | TT              | 1946967483               |
| SNP_P4_138973_522878 | NW_004516049.1 | Scaffold626 | 522878                  | GG                              | AA              | 1946967485               |
| SNP_P4_138974_522892 | NW_004516049.1 | Scaffold626 | 522892                  | GG                              | AA              | 1946967487               |



| SNPs IDs             | Chromosome IDs | Chromosomes | Physical positions (bp) | CDC Frontier (Reference genome) | (ILWC46 & LPNB) | NCBI SNPdb Accession IDs |
|----------------------|----------------|-------------|-------------------------|---------------------------------|-----------------|--------------------------|
| SNP_P4_138975_522970 | NW_004516049.1 | Scaffold626 | 522970                  | TT                              | GG              | 1946967489               |
| SNP_P4_138976_522994 | NW_004516049.1 | Scaffold626 | 522994                  | TT                              | CC              | 1946967491               |
| SNP_P4_138977_523098 | NW_004516049.1 | Scaffold626 | 523098                  | TT                              | AA              | 1946967493               |
| SNP_P4_138978_523844 | NW_004516049.1 | Scaffold626 | 523844                  | CC                              | TT              | 1946967495               |
| SNP_P4_138979_524134 | NW_004516049.1 | Scaffold626 | 524134                  | TT                              | GG              | 1946967497               |
| SNP_P4_138980_524231 | NW_004516049.1 | Scaffold626 | 524231                  | TT                              | CC              | 1946967499               |
| SNP_P4_138981_524239 | NW_004516049.1 | Scaffold626 | 524239                  | AA                              | TT              | 1946967501               |
| SNP_P4_138982_524287 | NW_004516049.1 | Scaffold626 | 524287                  | AA                              | GG              | 1946967503               |
| SNP_P4_138983_524312 | NW_004516049.1 | Scaffold626 | 524312                  | CC                              | TT              | 1946967505               |
| SNP_P4_138984_524495 | NW_004516049.1 | Scaffold626 | 524495                  | TT                              | CC              | 1946967507               |
| SNP_P4_138985_524512 | NW_004516049.1 | Scaffold626 | 524512                  | GG                              | AA              | 1946967509               |
| SNP_P4_138987_524763 | NW_004516049.1 | Scaffold626 | 524763                  | CC                              | TT              | 1946967511               |
| SNP_P4_138988_525038 | NW_004516049.1 | Scaffold626 | 525038                  | AA                              | GG              | 1946967513               |
| SNP_P4_138989_525610 | NW_004516049.1 | Scaffold626 | 525610                  | AA                              | CC              | 1946967515               |
| SNP_P4_138990_525668 | NW_004516049.1 | Scaffold626 | 525668                  | AA                              | TT              | 1946967517               |
| SNP_P4_138991_525673 | NW_004516049.1 | Scaffold626 | 525673                  | CC                              | TT              | 1946967519               |
| SNP_P4_138992_525691 | NW_004516049.1 | Scaffold626 | 525691                  | GG                              | AA              | 1946967521               |
| SNP_P4_138993_525736 | NW_004516049.1 | Scaffold626 | 525736                  | GG                              | TT              | 1946967523               |
| SNP_P4_138994_525765 | NW_004516049.1 | Scaffold626 | 525765                  | TT                              | CC              | 1946967525               |
| SNP_P4_138995_525891 | NW_004516049.1 | Scaffold626 | 525891                  | TT                              | GG              | 1946967527               |
| SNP_P4_138996_525951 | NW_004516049.1 | Scaffold626 | 525951                  | CC                              | AA              | 1946967529               |
| SNP_P4_138997_525952 | NW_004516049.1 | Scaffold626 | 525952                  | GG                              | TT              | 1946967531               |
| SNP_P4_138998_525999 | NW_004516049.1 | Scaffold626 | 525999                  | TT                              | GG              | 1946967533               |
| SNP_P4_138999_526156 | NW_004516049.1 | Scaffold626 | 526156                  | CC                              | TT              | 1946967535               |
| SNP_P4_139000_526167 | NW_004516049.1 | Scaffold626 | 526167                  | GG                              | TT              | 1946967537               |
| SNP_P4_139001_526239 | NW_004516049.1 | Scaffold626 | 526239                  | TT                              | GG              | 1946967539               |
| SNP_P4_139002_526293 | NW_004516049.1 | Scaffold626 | 526293                  | AA                              | CC              | 1946967541               |
| SNP_P4_139003_526836 | NW_004516049.1 | Scaffold626 | 526836                  | TT                              | CC              | 1946967543               |
| SNP_P4_139004_526862 | NW_004516049.1 | Scaffold626 | 526862                  | TT                              | AA              | 1946967545               |
| SNP_P4_139005_526867 | NW_004516049.1 | Scaffold626 | 526867                  | GG                              | AA              | 1946967547               |
| SNP_P4_139006_526899 | NW_004516049.1 | Scaffold626 | 526899                  | TT                              | CC              | 1946967549               |
| SNP_P4_139007_526925 | NW_004516049.1 | Scaffold626 | 526925                  | AA                              | TT              | 1946967551               |
| SNP_P4_139008_526952 | NW_004516049.1 | Scaffold626 | 526952                  | AA                              | TT              | 1946967553               |
| SNP_P4_139009_527003 | NW_004516049.1 | Scaffold626 | 527003                  | GG                              | CC              | 1946967555               |
| SNP_P4_139010_527024 | NW_004516049.1 | Scaffold626 | 527024                  | TT                              | CC              | 1946967557               |
| SNP_P4_139011_527063 | NW_004516049.1 | Scaffold626 | 527063                  | GG                              | AA              | 1946967559               |
| SNP_P4_139012_527065 | NW_004516049.1 | Scaffold626 | 527065                  | GG                              | AA              | 1946967561               |
| SNP_P4_139013_527079 | NW_004516049.1 | Scaffold626 | 527079                  | AA                              | GG              | 1946967563               |
| SNP_P4_139014_527320 | NW_004516049.1 | Scaffold626 | 527320                  | AA                              | CC              | 1946967565               |
| SNP_P4_139015_527363 | NW_004516049.1 | Scaffold626 | 527363                  | CC                              | TT              | 1946967567               |
| SNP_P4_139016_527365 | NW_004516049.1 | Scaffold626 | 527365                  | TT                              | CC              | 1946967569               |
| SNP_P4_139017_527434 | NW_004516049.1 | Scaffold626 | 527434                  | CC                              | GG              | 1946967571               |

| SNPs IDs             | Chromosome IDs | Chromosomes | Physical positions (bp) | CDC Frontier (Reference genome) | (ILWC46 & LPNB) | NCBI SNPdb Accession IDs |
|----------------------|----------------|-------------|-------------------------|---------------------------------|-----------------|--------------------------|
| SNP_P4_139019_527853 | NW_004516049.1 | Scaffold626 | 527853                  | GG                              | AA              | 1946967573               |
| SNP_P4_139020_528056 | NW_004516049.1 | Scaffold626 | 528056                  | CC                              | AA              | 1946967575               |
| SNP_P4_139021_529196 | NW_004516049.1 | Scaffold626 | 529196                  | TT                              | GG              | 1946967577               |
| SNP_P4_139022_529221 | NW_004516049.1 | Scaffold626 | 529221                  | GG                              | AA              | 1946967579               |
| SNP_P4_139023_529956 | NW_004516049.1 | Scaffold626 | 529956                  | TT                              | GG              | 1946967581               |
| SNP_P4_139024_530127 | NW_004516049.1 | Scaffold626 | 530127                  | AA                              | GG              | 1946967583               |
| SNP_P4_139025_531150 | NW_004516049.1 | Scaffold626 | 531150                  | AA                              | GG              | 1946967585               |
| SNP_P4_139026_531319 | NW_004516049.1 | Scaffold626 | 531319                  | CC                              | AA              | 1946967587               |
| SNP_P4_139027_533127 | NW_004516049.1 | Scaffold626 | 533127                  | GG                              | AA              | 1946967589               |
| SNP_P4_139028_533151 | NW_004516049.1 | Scaffold626 | 533151                  | TT                              | AA              | 1946967591               |
| SNP_P4_139029_533551 | NW_004516049.1 | Scaffold626 | 533551                  | TT                              | AA              | 1946967593               |
| SNP_P4_139030_533605 | NW_004516049.1 | Scaffold626 | 533605                  | CC                              | GG              | 1946967595               |
| SNP_P4_139031_533765 | NW_004516049.1 | Scaffold626 | 533765                  | GG                              | CC              | 1946967597               |
| SNP_P4_139032_538994 | NW_004516049.1 | Scaffold626 | 538994                  | TT                              | CC              | 1946967599               |
| SNP_P4_139033_539280 | NW_004516049.1 | Scaffold626 | 539280                  | CC                              | AA              | 1946967601               |
| SNP_P4_139034_539304 | NW_004516049.1 | Scaffold626 | 539304                  | AA                              | GG              | 1946967603               |
| SNP_P4_139035_539330 | NW_004516049.1 | Scaffold626 | 539330                  | CC                              | GG              | 1946967605               |
| SNP_P4_139037_542727 | NW_004516049.1 | Scaffold626 | 542727                  | TT                              | CC              | 1946967607               |
| SNP_P4_139038_542978 | NW_004516049.1 | Scaffold626 | 542978                  | CC                              | TT              | 1946967609               |
| SNP_P4_139039_542980 | NW_004516049.1 | Scaffold626 | 542980                  | GG                              | CC              | 1946967611               |
| SNP_P4_139040_543052 | NW_004516049.1 | Scaffold626 | 543052                  | GG                              | AA              | 1946967613               |
| SNP_P4_139041_543266 | NW_004516049.1 | Scaffold626 | 543266                  | CC                              | GG              | 1946967615               |
| SNP_P4_139042_544565 | NW_004516049.1 | Scaffold626 | 544565                  | CC                              | GG              | 1946967617               |
| SNP_P4_139043_544712 | NW_004516049.1 | Scaffold626 | 544712                  | GG                              | AA              | 1946967619               |
| SNP_P4_139044_544758 | NW_004516049.1 | Scaffold626 | 544758                  | GG                              | AA              | 1946967621               |
| SNP_P4_139045_544759 | NW_004516049.1 | Scaffold626 | 544759                  | CC                              | AA              | 1946967623               |
| SNP_P4_139046_545000 | NW_004516049.1 | Scaffold626 | 545000                  | CC                              | GG              | 1946967625               |
| SNP_P4_139047_545762 | NW_004516049.1 | Scaffold626 | 545762                  | AA                              | TT              | 1946967627               |
| SNP_P4_139048_545888 | NW_004516049.1 | Scaffold626 | 545888                  | AA                              | GG              | 1946967629               |
| SNP_P4_139049_545930 | NW_004516049.1 | Scaffold626 | 545930                  | CC                              | TT              | 1946967631               |
| SNP_P4_139050_545995 | NW_004516049.1 | Scaffold626 | 545995                  | AA                              | GG              | 1946967633               |
| SNP_P4_139051_546029 | NW_004516049.1 | Scaffold626 | 546029                  | CC                              | AA              | 1946967635               |
| SNP_P4_139052_546158 | NW_004516049.1 | Scaffold626 | 546158                  | AA                              | GG              | 1946967637               |
| SNP_P4_139053_546341 | NW_004516049.1 | Scaffold626 | 546341                  | AA                              | GG              | 1946967639               |
| SNP_P4_139054_546576 | NW_004516049.1 | Scaffold626 | 546576                  | CC                              | AA              | 1946967641               |
| SNP_P4_139055_546704 | NW_004516049.1 | Scaffold626 | 546704                  | CC                              | TT              | 1946967643               |
| SNP_P4_139056_549832 | NW_004516049.1 | Scaffold626 | 549832                  | TT                              | CC              | 1946967645               |
| SNP_P4_139057_550269 | NW_004516049.1 | Scaffold626 | 550269                  | GG                              | TT              | 1946967647               |
| SNP_P4_139058_551496 | NW_004516049.1 | Scaffold626 | 551496                  | GG                              | AA              | 1946967649               |
| SNP_P4_139059_551801 | NW_004516049.1 | Scaffold626 | 551801                  | CC                              | TT              | 1946967651               |
| SNP_P4_139060_551912 | NW_004516049.1 | Scaffold626 | 551912                  | TT                              | CC              | 1946967653               |
| SNP_P4_139061_551976 | NW_004516049.1 | Scaffold626 | 551976                  | GG                              | AA              | 1946967655               |

| SNPs IDs             | Chromosome IDs | Chromosomes | Physical positions (bp) | CDC Frontier (Reference genome) | (ILWC46 & LPNB) | NCBI SNPdb Accession IDs |
|----------------------|----------------|-------------|-------------------------|---------------------------------|-----------------|--------------------------|
| SNP_P4_139062_551982 | NW_004516049.1 | Scaffold626 | 551982                  | TT                              | GG              | 1946967657               |
| SNP_P4_139063_552193 | NW_004516049.1 | Scaffold626 | 552193                  | TT                              | CC              | 1946967659               |
| SNP_P4_139064_552209 | NW_004516049.1 | Scaffold626 | 552209                  | GG                              | CC              | 1946967661               |
| SNP_P4_139065_552275 | NW_004516049.1 | Scaffold626 | 552275                  | TT                              | CC              | 1946967663               |
| SNP_P4_139066_552316 | NW_004516049.1 | Scaffold626 | 552316                  | GG                              | TT              | 1946967665               |
| SNP_P4_139067_552361 | NW_004516049.1 | Scaffold626 | 552361                  | AA                              | TT              | 1946967667               |
| SNP_P4_139068_552397 | NW_004516049.1 | Scaffold626 | 552397                  | CC                              | AA              | 1946967669               |
| SNP_P4_139069_552537 | NW_004516049.1 | Scaffold626 | 552537                  | CC                              | GG              | 1946967671               |
| SNP_P4_139070_552547 | NW_004516049.1 | Scaffold626 | 552547                  | GG                              | CC              | 1946967673               |
| SNP_P4_139071_552615 | NW_004516049.1 | Scaffold626 | 552615                  | AA                              | TT              | 1946967675               |
| SNP_P4_139072_552682 | NW_004516049.1 | Scaffold626 | 552682                  | GG                              | AA              | 1946967677               |
| SNP_P4_139073_552729 | NW_004516049.1 | Scaffold626 | 552729                  | CC                              | TT              | 1946967679               |
| SNP_P4_139074_552756 | NW_004516049.1 | Scaffold626 | 552756                  | CC                              | TT              | 1946967681               |
| SNP_P4_139075_552765 | NW_004516049.1 | Scaffold626 | 552765                  | TT                              | CC              | 1946967683               |
| SNP_P4_139076_552960 | NW_004516049.1 | Scaffold626 | 552960                  | TT                              | CC              | 1946967685               |
| SNP_P4_139077_553158 | NW_004516049.1 | Scaffold626 | 553158                  | GG                              | CC              | 1946967687               |
| SNP_P4_139079_553195 | NW_004516049.1 | Scaffold626 | 553195                  | CC                              | GG              | 1946967689               |
| SNP_P4_139080_553311 | NW_004516049.1 | Scaffold626 | 553311                  | TT                              | CC              | 1946967691               |
| SNP_P4_139081_553396 | NW_004516049.1 | Scaffold626 | 553396                  | GG                              | AA              | 1946967693               |
| SNP_P4_139082_553636 | NW_004516049.1 | Scaffold626 | 553636                  | TT                              | CC              | 1946967695               |
| SNP_P4_139084_553941 | NW_004516049.1 | Scaffold626 | 553941                  | AA                              | GG              | 1946967697               |
| SNP_P4_139085_553992 | NW_004516049.1 | Scaffold626 | 553992                  | GG                              | TT              | 1946967698               |
| SNP_P4_139086_554561 | NW_004516049.1 | Scaffold626 | 554561                  | CC                              | TT              | 1946967700               |
| SNP_P4_139088_554748 | NW_004516049.1 | Scaffold626 | 554748                  | TT                              | CC              | 1946967702               |
| SNP_P4_139089_555043 | NW_004516049.1 | Scaffold626 | 555043                  | GG                              | AA              | 1946967704               |
| SNP_P4_139090_555108 | NW_004516049.1 | Scaffold626 | 555108                  | TT                              | GG              | 1946967706               |
| SNP_P4_139091_555320 | NW_004516049.1 | Scaffold626 | 555320                  | GG                              | AA              | 1946967708               |
| SNP_P4_139092_556170 | NW_004516049.1 | Scaffold626 | 556170                  | TT                              | CC              | 1946967710               |
| SNP_P4_139093_556472 | NW_004516049.1 | Scaffold626 | 556472                  | AA                              | TT              | 1946967712               |
| SNP_P4_139094_556487 | NW_004516049.1 | Scaffold626 | 556487                  | GG                              | TT              | 1946967714               |
| SNP_P4_139095_556521 | NW_004516049.1 | Scaffold626 | 556521                  | AA                              | GG              | 1946967716               |
| SNP_P4_139096_556772 | NW_004516049.1 | Scaffold626 | 556772                  | CC                              | TT              | 1946967718               |
| SNP_P4_139097_556790 | NW_004516049.1 | Scaffold626 | 556790                  | CC                              | GG              | 1946967720               |
| SNP_P4_139098_557120 | NW_004516049.1 | Scaffold626 | 557120                  | CC                              | TT              | 1946967722               |
| SNP_P4_139099_557634 | NW_004516049.1 | Scaffold626 | 557634                  | GG                              | AA              | 1946967724               |
| SNP_P4_139100_557682 | NW_004516049.1 | Scaffold626 | 557682                  | AA                              | CC              | 1946967726               |
| SNP_P4_139101_557683 | NW_004516049.1 | Scaffold626 | 557683                  | AA                              | CC              | 1946967728               |
| SNP_P4_139102_557766 | NW_004516049.1 | Scaffold626 | 557766                  | GG                              | TT              | 1946967730               |
| SNP_P4_139103_558479 | NW_004516049.1 | Scaffold626 | 558479                  | GG                              | AA              | 1946967732               |
| SNP_P4_139104_558920 | NW_004516049.1 | Scaffold626 | 558920                  | TT                              | AA              | 1946967734               |
| SNP_P4_139105_559566 | NW_004516049.1 | Scaffold626 | 559566                  | CC                              | TT              | 1946967736               |
| SNP_P4_139106_561171 | NW_004516049.1 | Scaffold626 | 561171                  | AA                              | GG              | 1946967738               |

| SNPs IDs             | Chromosome IDs | Chromosomes | Physical positions (bp) | CDC Frontier (Reference genome) | (ILWC46 & LPNB) | NCBI SNPdb Accession IDs |
|----------------------|----------------|-------------|-------------------------|---------------------------------|-----------------|--------------------------|
| SNP_P4_139107_561186 | NW_004516049.1 | Scaffold626 | 561186                  | CC                              | GG              | 1946967740               |
| SNP_P4_139108_561205 | NW_004516049.1 | Scaffold626 | 561205                  | TT                              | CC              | 1946967742               |
| SNP_P4_139109_561295 | NW_004516049.1 | Scaffold626 | 561295                  | AA                              | GG              | 1946967744               |
| SNP_P4_139110_561348 | NW_004516049.1 | Scaffold626 | 561348                  | TT                              | AA              | 1946967746               |
| SNP_P4_139111_561382 | NW_004516049.1 | Scaffold626 | 561382                  | AA                              | TT              | 1946967748               |
| SNP_P4_139112_561474 | NW_004516049.1 | Scaffold626 | 561474                  | GG                              | CC              | 1946967750               |
| SNP_P4_139113_561537 | NW_004516049.1 | Scaffold626 | 561537                  | CC                              | TT              | 1946967752               |
| SNP_P4_139115_561584 | NW_004516049.1 | Scaffold626 | 561584                  | TT                              | CC              | 1946967754               |
| SNP_P4_139116_561618 | NW_004516049.1 | Scaffold626 | 561618                  | TT                              | GG              | 1946967756               |
| SNP_P4_139117_561654 | NW_004516049.1 | Scaffold626 | 561654                  | CC                              | TT              | 1946967758               |
| SNP_P4_139118_561666 | NW_004516049.1 | Scaffold626 | 561666                  | TT                              | AA              | 1946967761               |
| SNP_P4_139119_561747 | NW_004516049.1 | Scaffold626 | 561747                  | GG                              | TT              | 1946967763               |
| SNP_P4_139120_561770 | NW_004516049.1 | Scaffold626 | 561770                  | CC                              | AA              | 1946967765               |
| SNP_P4_139121_561794 | NW_004516049.1 | Scaffold626 | 561794                  | CC                              | TT              | 1946967767               |
| SNP_P4_139122_561837 | NW_004516049.1 | Scaffold626 | 561837                  | CC                              | TT              | 1946967769               |
| SNP_P4_139123_561847 | NW_004516049.1 | Scaffold626 | 561847                  | TT                              | CC              | 1946967771               |
| SNP_P4_139124_561868 | NW_004516049.1 | Scaffold626 | 561868                  | GG                              | AA              | 1946967773               |
| SNP_P4_139125_561906 | NW_004516049.1 | Scaffold626 | 561906                  | TT                              | CC              | 1946967775               |
| SNP_P4_139126_561934 | NW_004516049.1 | Scaffold626 | 561934                  | CC                              | GG              | 1946967777               |
| SNP_P4_139127_561988 | NW_004516049.1 | Scaffold626 | 561988                  | GG                              | TT              | 1946967780               |
| SNP_P4_139128_562035 | NW_004516049.1 | Scaffold626 | 562035                  | TT                              | GG              | 1946967782               |
| SNP_P4_139129_562036 | NW_004516049.1 | Scaffold626 | 562036                  | CC                              | AA              | 1946967784               |
| SNP_P4_139130_562882 | NW_004516049.1 | Scaffold626 | 562882                  | GG                              | CC              | 1946967786               |
| SNP_P4_139131_565698 | NW_004516049.1 | Scaffold626 | 565698                  | AA                              | GG              | 1946967788               |
| SNP_P4_139132_569818 | NW_004516049.1 | Scaffold626 | 569818                  | GG                              | AA              | 1946967790               |
| SNP_P4_139133_569854 | NW_004516049.1 | Scaffold626 | 569854                  | TT                              | CC              | 1946967792               |
| SNP_P4_139134_569915 | NW_004516049.1 | Scaffold626 | 569915                  | AA                              | TT              | 1946967794               |
| SNP_P4_139135_570169 | NW_004516049.1 | Scaffold626 | 570169                  | CC                              | TT              | 1946967796               |
| SNP_P4_139136_571653 | NW_004516049.1 | Scaffold626 | 571653                  | TT                              | CC              | 1946967798               |
| SNP_P4_139137_571973 | NW_004516049.1 | Scaffold626 | 571973                  | GG                              | AA              | 1946967800               |
| SNP_P4_139138_571980 | NW_004516049.1 | Scaffold626 | 571980                  | AA                              | GG              | 1946967802               |
| SNP_P4_139139_572203 | NW_004516049.1 | Scaffold626 | 572203                  | TT                              | GG              | 1946967804               |
| SNP_P4_139140_572212 | NW_004516049.1 | Scaffold626 | 572212                  | GG                              | TT              | 1946967806               |
| SNP_P4_139141_572307 | NW_004516049.1 | Scaffold626 | 572307                  | TT                              | GG              | 1946967808               |
| SNP_P4_139142_573308 | NW_004516049.1 | Scaffold626 | 573308                  | AA                              | GG              | 1946967810               |
| SNP_P4_139143_574319 | NW_004516049.1 | Scaffold626 | 574319                  | AA                              | GG              | 1946967812               |
| SNP_P4_139144_574595 | NW_004516049.1 | Scaffold626 | 574595                  | AA                              | CC              | 1946967814               |
| SNP_P4_139145_575002 | NW_004516049.1 | Scaffold626 | 575002                  | GG                              | TT              | 1946967816               |
| SNP_P4_139146_576218 | NW_004516049.1 | Scaffold626 | 576218                  | TT                              | GG              | 1946967818               |
| SNP_P4_139147_576441 | NW_004516049.1 | Scaffold626 | 576441                  | GG                              | AA              | 1946967820               |
| SNP_P4_139148_576509 | NW_004516049.1 | Scaffold626 | 576509                  | GG                              | AA              | 1946967822               |
| SNP_P4_139149_580584 | NW_004516049.1 | Scaffold626 | 580584                  | GG                              | CC              | 1946967824               |

| SNPs IDs             | Chromosome IDs | Chromosomes | Physical positions (bp) | CDC Frontier (Reference genome) | (ILWC46 & LPNB) | NCBI SNPdb Accession IDs |
|----------------------|----------------|-------------|-------------------------|---------------------------------|-----------------|--------------------------|
| SNP_P4_139150_580654 | NW_004516049.1 | Scaffold626 | 580654                  | CC                              | AA              | 1946967826               |
| SNP_P4_139151_580958 | NW_004516049.1 | Scaffold626 | 580958                  | CC                              | AA              | 1946967828               |
| SNP_P4_139152_580960 | NW_004516049.1 | Scaffold626 | 580960                  | GG                              | AA              | 1946967830               |
| SNP_P4_139153_580995 | NW_004516049.1 | Scaffold626 | 580995                  | CC                              | TT              | 1946967833               |
| SNP_P4_139154_581811 | NW_004516049.1 | Scaffold626 | 581811                  | CC                              | TT              | 1946967835               |
| SNP_P4_139155_581835 | NW_004516049.1 | Scaffold626 | 581835                  | GG                              | AA              | 1946967837               |
| SNP_P4_139156_582112 | NW_004516049.1 | Scaffold626 | 582112                  | CC                              | TT              | 1946967839               |
| SNP_P4_139157_586962 | NW_004516049.1 | Scaffold626 | 586962                  | AA                              | TT              | 1946967841               |
| SNP_P4_139158_589763 | NW_004516049.1 | Scaffold626 | 589763                  | TT                              | AA              | 1946967843               |
| SNP_P4_139159_589773 | NW_004516049.1 | Scaffold626 | 589773                  | CC                              | AA              | 1946967845               |
| SNP_P4_139160_590445 | NW_004516049.1 | Scaffold626 | 590445                  | CC                              | TT              | 1946967847               |
| SNP_P4_139161_590448 | NW_004516049.1 | Scaffold626 | 590448                  | AA                              | GG              | 1946967849               |
| SNP_P4_139162_590531 | NW_004516049.1 | Scaffold626 | 590531                  | TT                              | AA              | 1946967851               |
| SNP_P4_139163_590538 | NW_004516049.1 | Scaffold626 | 590538                  | CC                              | TT              | 1946967853               |
| SNP_P4_139164_590540 | NW_004516049.1 | Scaffold626 | 590540                  | AA                              | GG              | 1946967855               |
| SNP_P4_139165_590555 | NW_004516049.1 | Scaffold626 | 590555                  | CC                              | TT              | 1946967857               |
| SNP_P4_139166_591085 | NW_004516049.1 | Scaffold626 | 591085                  | AA                              | GG              | 1946967859               |
| SNP_P4_139167_591655 | NW_004516049.1 | Scaffold626 | 591655                  | TT                              | AA              | 1946967861               |
| SNP_P4_139168_591898 | NW_004516049.1 | Scaffold626 | 591898                  | CC                              | TT              | 1946967863               |
| SNP_P4_139169_592206 | NW_004516049.1 | Scaffold626 | 592206                  | GG                              | CC              | 1946967865               |
| SNP_P4_139170_592208 | NW_004516049.1 | Scaffold626 | 592208                  | GG                              | TT              | 1946967867               |
| SNP_P4_139171_592270 | NW_004516049.1 | Scaffold626 | 592270                  | AA                              | GG              | 1946967869               |
| SNP_P4_139172_592550 | NW_004516049.1 | Scaffold626 | 592550                  | GG                              | CC              | 1946967871               |
| SNP_P4_139173_593127 | NW_004516049.1 | Scaffold626 | 593127                  | GG                              | AA              | 1946967873               |
| SNP_P4_139174_593306 | NW_004516049.1 | Scaffold626 | 593306                  | TT                              | AA              | 1946967875               |
| SNP_P4_139175_593541 | NW_004516049.1 | Scaffold626 | 593541                  | CC                              | TT              | 1946967877               |
| SNP_P4_139176_610475 | NW_004516049.1 | Scaffold626 | 610475                  | TT                              | GG              | 1946967879               |
| SNP_P4_139177_631288 | NW_004516049.1 | Scaffold626 | 631288                  | TT                              | AA              | 1946967881               |
| SNP_P4_139178_631365 | NW_004516049.1 | Scaffold626 | 631365                  | AA                              | TT              | 1946967883               |
| SNP_P4_139179_631378 | NW_004516049.1 | Scaffold626 | 631378                  | AA                              | GG              | 1946967885               |
| SNP_P4_139181_634697 | NW_004516049.1 | Scaffold626 | 634697                  | CC                              | AA              | 1946967887               |
| SNP_P4_139182_3059   | NW_004516050.1 | Scaffold627 | 3059                    | TT                              | AA              | 1946967889               |
| SNP_P4_139184_41140  | NW_004516050.1 | Scaffold627 | 41140                   | GG                              | AA              | 1946967891               |
| SNP_P4_139185_45807  | NW_004516050.1 | Scaffold627 | 45807                   | TT                              | CC              | 1946967893               |
| SNP_P4_139186_45812  | NW_004516050.1 | Scaffold627 | 45812                   | GG                              | TT              | 1946967895               |
| SNP_P4_139187_49761  | NW_004516050.1 | Scaffold627 | 49761                   | AA                              | GG              | 1946967897               |
| SNP_P4_139188_60833  | NW_004516050.1 | Scaffold627 | 60833                   | TT                              | CC              | 1946967899               |
| SNP_P4_139189_61020  | NW_004516050.1 | Scaffold627 | 61020                   | GG                              | AA              | 1946967901               |
| SNP_P4_139190_61045  | NW_004516050.1 | Scaffold627 | 61045                   | AA                              | TT              | 1946967903               |
| SNP_P4_139191_61048  | NW_004516050.1 | Scaffold627 | 61048                   | TT                              | AA              | 1946967905               |
| SNP_P4_139192_61050  | NW_004516050.1 | Scaffold627 | 61050                   | TT                              | AA              | 1946967907               |
| SNP_P4_139193_61074  | NW_004516050.1 | Scaffold627 | 61074                   | TT                              | CC              | 1946967909               |

| SNPs IDs            | Chromosome IDs | Chromosomes | Physical positions (bp) | CDC Frontier (Reference genome) | (ILWC46 & LPNB) | NCBI SNPdb Accession IDs |
|---------------------|----------------|-------------|-------------------------|---------------------------------|-----------------|--------------------------|
| SNP_P4_139194_61277 | NW_004516050.1 | Scaffold627 | 61277                   | AA                              | GG              | 1946967911               |
| SNP_P4_139195_61284 | NW_004516050.1 | Scaffold627 | 61284                   | AA                              | CC              | 1946967913               |
| SNP_P4_139196_61515 | NW_004516050.1 | Scaffold627 | 61515                   | CC                              | AA              | 1946967915               |
| SNP_P4_139197_66277 | NW_004516050.1 | Scaffold627 | 66277                   | GG                              | TT              | 1946967917               |
| SNP_P4_139198_70100 | NW_004516050.1 | Scaffold627 | 70100                   | CC                              | TT              | 1946967919               |
| SNP_P4_139199_79659 | NW_004516050.1 | Scaffold627 | 79659                   | AA                              | CC              | 1946967921               |
| SNP_P4_139200_79733 | NW_004516050.1 | Scaffold627 | 79733                   | AA                              | CC              | 1946967923               |
| SNP_P4_139201_94809 | NW_004516050.1 | Scaffold627 | 94809                   | AA                              | TT              | 1946967925               |
| SNP_P4_139202_221   | NW_004516051.1 | Scaffold629 | 221                     | TT                              | AA              | 1946967927               |
| SNP_P4_139203_1191  | NW_004516051.1 | Scaffold629 | 1191                    | CC                              | TT              | 1946967929               |
| SNP_P4_139204_12626 | NW_004516051.1 | Scaffold629 | 12626                   | AA                              | GG              | 1946967932               |
| SNP_P4_139205_12644 | NW_004516051.1 | Scaffold629 | 12644                   | AA                              | TT              | 1946967934               |
| SNP_P4_139206_12648 | NW_004516051.1 | Scaffold629 | 12648                   | TT                              | AA              | 1946967936               |
| SNP_P4_139207_12657 | NW_004516051.1 | Scaffold629 | 12657                   | TT                              | GG              | 1946967938               |
| SNP_P4_139208_12666 | NW_004516051.1 | Scaffold629 | 12666                   | AA                              | GG              | 1946967940               |
| SNP_P4_139209_12675 | NW_004516051.1 | Scaffold629 | 12675                   | AA                              | CC              | 1946967942               |
| SNP_P4_139210_12683 | NW_004516051.1 | Scaffold629 | 12683                   | AA                              | GG              | 1946967944               |
| SNP_P4_139211_13036 | NW_004516051.1 | Scaffold629 | 13036                   | AA                              | TT              | 1946967946               |
| SNP_P4_139212_14576 | NW_004516051.1 | Scaffold629 | 14576                   | TT                              | CC              | 1946967948               |
| SNP_P4_139213_15007 | NW_004516051.1 | Scaffold629 | 15007                   | TT                              | AA              | 1946967950               |
| SNP_P4_139214_20457 | NW_004516051.1 | Scaffold629 | 20457                   | TT                              | AA              | 1946967952               |
| SNP_P4_139215_20472 | NW_004516051.1 | Scaffold629 | 20472                   | AA                              | GG              | 1946967954               |
| SNP_P4_139217_30653 | NW_004516051.1 | Scaffold629 | 30653                   | CC                              | TT              | 1946967956               |
| SNP_P4_139218_30689 | NW_004516051.1 | Scaffold629 | 30689                   | CC                              | TT              | 1946967958               |
| SNP_P4_139219_30734 | NW_004516051.1 | Scaffold629 | 30734                   | GG                              | AA              | 1946967960               |
| SNP_P4_139220_30968 | NW_004516051.1 | Scaffold629 | 30968                   | TT                              | AA              | 1946967962               |
| SNP_P4_139221_31034 | NW_004516051.1 | Scaffold629 | 31034                   | TT                              | CC              | 1946967964               |
| SNP_P4_139222_31047 | NW_004516051.1 | Scaffold629 | 31047                   | AA                              | GG              | 1946967966               |
| SNP_P4_139223_31805 | NW_004516051.1 | Scaffold629 | 31805                   | TT                              | CC              | 1946967968               |
| SNP_P4_139224_32185 | NW_004516051.1 | Scaffold629 | 32185                   | TT                              | CC              | 1946967970               |
| SNP_P4_139225_38913 | NW_004516051.1 | Scaffold629 | 38913                   | TT                              | AA              | 1946967972               |
| SNP_P4_139226_38917 | NW_004516051.1 | Scaffold629 | 38917                   | TT                              | AA              | 1946967974               |
| SNP_P4_139227_39063 | NW_004516051.1 | Scaffold629 | 39063                   | AA                              | GG              | 1946967976               |
| SNP_P4_139228_56116 | NW_004516051.1 | Scaffold629 | 56116                   | TT                              | CC              | 1946967978               |
| SNP_P4_139229_56206 | NW_004516051.1 | Scaffold629 | 56206                   | GG                              | AA              | 1946967980               |
| SNP_P4_139230_56512 | NW_004516051.1 | Scaffold629 | 56512                   | TT                              | AA              | 1946967982               |
| SNP_P4_139231_56526 | NW_004516051.1 | Scaffold629 | 56526                   | AA                              | TT              | 1946967984               |
| SNP_P4_139232_56576 | NW_004516051.1 | Scaffold629 | 56576                   | GG                              | AA              | 1946967986               |
| SNP_P4_139233_56580 | NW_004516051.1 | Scaffold629 | 56580                   | AA                              | GG              | 1946967988               |
| SNP_P4_139234_56593 | NW_004516051.1 | Scaffold629 | 56593                   | TT                              | CC              | 1946967989               |
| SNP_P4_139235_56731 | NW_004516051.1 | Scaffold629 | 56731                   | CC                              | TT              | 1946967991               |
| SNP_P4_139236_58567 | NW_004516051.1 | Scaffold629 | 58567                   | AA                              | GG              | 1946967993               |

| SNPs IDs            | Chromosome IDs | Chromosomes | Physical positions (bp) | CDC Frontier (Reference genome) | (ILWC46 & LPNB) | NCBI SNPdb Accession IDs |
|---------------------|----------------|-------------|-------------------------|---------------------------------|-----------------|--------------------------|
| SNP_P4_139237_77702 | NW_004516051.1 | Scaffold629 | 77702                   | TT                              | GG              | 1946967995               |
| SNP_P4_139239_1024  | NW_004516052.1 | Scaffold631 | 1024                    | CC                              | GG              | 1946967997               |
| SNP_P4_139240_1378  | NW_004516052.1 | Scaffold631 | 1378                    | CC                              | TT              | 1946967999               |
| SNP_P4_139241_11969 | NW_004516052.1 | Scaffold631 | 11969                   | CC                              | TT              | 1946968001               |
| SNP_P4_139242_11986 | NW_004516052.1 | Scaffold631 | 11986                   | AA                              | TT              | 1946968003               |
| SNP_P4_139243_12962 | NW_004516052.1 | Scaffold631 | 12962                   | AA                              | GG              | 1946968005               |
| SNP_P4_139244_13141 | NW_004516052.1 | Scaffold631 | 13141                   | AA                              | GG              | 1946968007               |
| SNP_P4_139245_13170 | NW_004516052.1 | Scaffold631 | 13170                   | AA                              | GG              | 1946968009               |
| SNP_P4_139246_22518 | NW_004516052.1 | Scaffold631 | 22518                   | GG                              | TT              | 1946968011               |
| SNP_P4_139247_22767 | NW_004516052.1 | Scaffold631 | 22767                   | TT                              | CC              | 1946968013               |
| SNP_P4_139248_22792 | NW_004516052.1 | Scaffold631 | 22792                   | AA                              | GG              | 1946968015               |
| SNP_P4_139249_32415 | NW_004516052.1 | Scaffold631 | 32415                   | GG                              | AA              | 1946968017               |
| SNP_P4_139250_44615 | NW_004516052.1 | Scaffold631 | 44615                   | AA                              | CC              | 1946968019               |
| SNP_P4_139251_45048 | NW_004516052.1 | Scaffold631 | 45048                   | AA                              | CC              | 1946968021               |
| SNP_P4_139252_46428 | NW_004516052.1 | Scaffold631 | 46428                   | TT                              | AA              | 1946968023               |
| SNP_P4_139253_46436 | NW_004516052.1 | Scaffold631 | 46436                   | AA                              | GG              | 1946968025               |
| SNP_P4_139254_52886 | NW_004516052.1 | Scaffold631 | 52886                   | TT                              | AA              | 1946968027               |
| SNP_P4_139255_52968 | NW_004516052.1 | Scaffold631 | 52968                   | TT                              | CC              | 1946968029               |
| SNP_P4_139257_53770 | NW_004516052.1 | Scaffold631 | 53770                   | CC                              | AA              | 1946968031               |
| SNP_P4_139258_54026 | NW_004516052.1 | Scaffold631 | 54026                   | AA                              | GG              | 1946968033               |
| SNP_P4_139259_56909 | NW_004516052.1 | Scaffold631 | 56909                   | AA                              | CC              | 1946968035               |
| SNP_P4_139260_56910 | NW_004516052.1 | Scaffold631 | 56910                   | TT                              | CC              | 1946968037               |
| SNP_P4_139261_58607 | NW_004516052.1 | Scaffold631 | 58607                   | GG                              | CC              | 1946968039               |
| SNP_P4_139262_67613 | NW_004516052.1 | Scaffold631 | 67613                   | TT                              | AA              | 1946968041               |
| SNP_P4_139263_67626 | NW_004516052.1 | Scaffold631 | 67626                   | AA                              | GG              | 1946968043               |
| SNP_P4_139264_67676 | NW_004516052.1 | Scaffold631 | 67676                   | AA                              | GG              | 1946968045               |
| SNP_P4_139265_67771 | NW_004516052.1 | Scaffold631 | 67771                   | TT                              | CC              | 1946968047               |
| SNP_P4_139266_67777 | NW_004516052.1 | Scaffold631 | 67777                   | TT                              | AA              | 1946968049               |
| SNP_P4_139267_67849 | NW_004516052.1 | Scaffold631 | 67849                   | AA                              | TT              | 1946968051               |
| SNP_P4_139268_67876 | NW_004516052.1 | Scaffold631 | 67876                   | GG                              | AA              | 1946968053               |
| SNP_P4_139269_67914 | NW_004516052.1 | Scaffold631 | 67914                   | CC                              | TT              | 1946968055               |
| SNP_P4_139270_68188 | NW_004516052.1 | Scaffold631 | 68188                   | AA                              | TT              | 1946968058               |
| SNP_P4_139271_68191 | NW_004516052.1 | Scaffold631 | 68191                   | GG                              | TT              | 1946968060               |
| SNP_P4_139272_68399 | NW_004516052.1 | Scaffold631 | 68399                   | GG                              | CC              | 1946968062               |
| SNP_P4_139273_68404 | NW_004516052.1 | Scaffold631 | 68404                   | AA                              | TT              | 1946968064               |
| SNP_P4_139274_68463 | NW_004516052.1 | Scaffold631 | 68463                   | CC                              | GG              | 1946968066               |
| SNP_P4_139275_68606 | NW_004516052.1 | Scaffold631 | 68606                   | CC                              | TT              | 1946968068               |
| SNP_P4_139276_68641 | NW_004516052.1 | Scaffold631 | 68641                   | GG                              | AA              | 1946968070               |
| SNP_P4_139277_68725 | NW_004516052.1 | Scaffold631 | 68725                   | CC                              | TT              | 1946968072               |
| SNP_P4_139278_69050 | NW_004516052.1 | Scaffold631 | 69050                   | AA                              | CC              | 1946968074               |
| SNP_P4_139279_69076 | NW_004516052.1 | Scaffold631 | 69076                   | AA                              | CC              | 1946968076               |
| SNP_P4_139280_69170 | NW_004516052.1 | Scaffold631 | 69170                   | TT                              | AA              | 1946968078               |

| SNPs IDs            | Chromosome IDs | Chromosomes | Physical positions (bp) | CDC Frontier (Reference genome) | (ILWC46 & LPNB) | NCBI SNPdb Accession IDs |
|---------------------|----------------|-------------|-------------------------|---------------------------------|-----------------|--------------------------|
| SNP_P4_139281_69218 | NW_004516052.1 | Scaffold631 | 69218                   | AA                              | TT              | 1946968080               |
| SNP_P4_139282_69333 | NW_004516052.1 | Scaffold631 | 69333                   | GG                              | CC              | 1946968082               |
| SNP_P4_139283_70274 | NW_004516052.1 | Scaffold631 | 70274                   | CC                              | AA              | 1946968084               |
| SNP_P4_139284_70359 | NW_004516052.1 | Scaffold631 | 70359                   | AA                              | GG              | 1946968086               |
| SNP_P4_139285_70405 | NW_004516052.1 | Scaffold631 | 70405                   | GG                              | AA              | 1946968088               |
| SNP_P4_139286_70567 | NW_004516052.1 | Scaffold631 | 70567                   | CC                              | GG              | 1946968090               |
| SNP_P4_139287_70574 | NW_004516052.1 | Scaffold631 | 70574                   | TT                              | CC              | 1946968092               |
| SNP_P4_139288_70584 | NW_004516052.1 | Scaffold631 | 70584                   | AA                              | TT              | 1946968094               |
| SNP_P4_139289_70886 | NW_004516052.1 | Scaffold631 | 70886                   | GG                              | AA              | 1946968096               |
| SNP_P4_139290_71111 | NW_004516052.1 | Scaffold631 | 71111                   | AA                              | CC              | 1946968098               |
| SNP_P4_139291_71400 | NW_004516052.1 | Scaffold631 | 71400                   | TT                              | GG              | 1946968100               |
| SNP_P4_139292_71413 | NW_004516052.1 | Scaffold631 | 71413                   | TT                              | AA              | 1946968102               |
| SNP_P4_139293_71457 | NW_004516052.1 | Scaffold631 | 71457                   | TT                              | CC              | 1946968104               |
| SNP_P4_139294_73864 | NW_004516052.1 | Scaffold631 | 73864                   | AA                              | GG              | 1946968106               |
| SNP_P4_139295_74039 | NW_004516052.1 | Scaffold631 | 74039                   | TT                              | CC              | 1946968108               |
| SNP_P4_139296_74221 | NW_004516052.1 | Scaffold631 | 74221                   | TT                              | AA              | 1946968110               |
| SNP_P4_139297_74265 | NW_004516052.1 | Scaffold631 | 74265                   | TT                              | CC              | 1946968112               |
| SNP_P4_139298_74473 | NW_004516052.1 | Scaffold631 | 74473                   | GG                              | TT              | 1946968114               |
| SNP_P4_139299_74479 | NW_004516052.1 | Scaffold631 | 74479                   | TT                              | GG              | 1946968116               |
| SNP_P4_139300_74719 | NW_004516052.1 | Scaffold631 | 74719                   | AA                              | TT              | 1946968118               |
| SNP_P4_139301_74735 | NW_004516052.1 | Scaffold631 | 74735                   | GG                              | AA              | 1946968120               |
| SNP_P4_139302_74806 | NW_004516052.1 | Scaffold631 | 74806                   | CC                              | TT              | 1946968122               |
| SNP_P4_139303_74911 | NW_004516052.1 | Scaffold631 | 74911                   | CC                              | AA              | 1946968125               |
| SNP_P4_139304_74997 | NW_004516052.1 | Scaffold631 | 74997                   | GG                              | AA              | 1946968127               |
| SNP_P4_139305_75017 | NW_004516052.1 | Scaffold631 | 75017                   | AA                              | CC              | 1946968129               |
| SNP_P4_139306_75022 | NW_004516052.1 | Scaffold631 | 75022                   | AA                              | TT              | 1946968131               |
| SNP_P4_139307_75024 | NW_004516052.1 | Scaffold631 | 75024                   | TT                              | GG              | 1946968133               |
| SNP_P4_139308_75381 | NW_004516052.1 | Scaffold631 | 75381                   | AA                              | CC              | 1946968135               |
| SNP_P4_139309_590   | NW_004516053.1 | Scaffold632 | 590                     | CC                              | TT              | 1946968137               |
| SNP_P4_139310_733   | NW_004516053.1 | Scaffold632 | 733                     | CC                              | GG              | 1946968139               |
| SNP_P4_139312_787   | NW_004516053.1 | Scaffold632 | 787                     | TT                              | CC              | 1946968141               |
| SNP_P4_139313_805   | NW_004516053.1 | Scaffold632 | 805                     | AA                              | TT              | 1946968143               |
| SNP_P4_139314_812   | NW_004516053.1 | Scaffold632 | 812                     | TT                              | AA              | 1946968145               |
| SNP_P4_139315_2830  | NW_004516053.1 | Scaffold632 | 2830                    | TT                              | GG              | 1946968147               |
| SNP_P4_139316_4911  | NW_004516053.1 | Scaffold632 | 4911                    | GG                              | AA              | 1946968149               |
| SNP_P4_139317_4930  | NW_004516053.1 | Scaffold632 | 4930                    | CC                              | AA              | 1946968151               |
| SNP_P4_139318_4984  | NW_004516053.1 | Scaffold632 | 4984                    | GG                              | CC              | 1946968153               |
| SNP_P4_139319_4987  | NW_004516053.1 | Scaffold632 | 4987                    | CC                              | AA              | 1946968155               |
| SNP_P4_139320_4996  | NW_004516053.1 | Scaffold632 | 4996                    | AA                              | TT              | 1946968157               |
| SNP_P4_139321_5167  | NW_004516053.1 | Scaffold632 | 5167                    | TT                              | AA              | 1946968159               |
| SNP_P4_139322_13322 | NW_004516053.1 | Scaffold632 | 13322                   | GG                              | TT              | 1946968161               |
| SNP_P4_139323_13993 | NW_004516053.1 | Scaffold632 | 13993                   | GG                              | AA              | 1946968163               |



| SNPs IDs             | Chromosome IDs | Chromosomes | Physical positions (bp) | CDC Frontier (Reference genome) | (ILWC46 & LPNB) | NCBI SNPdb Accession IDs |
|----------------------|----------------|-------------|-------------------------|---------------------------------|-----------------|--------------------------|
| SNP_P4_139325_17819  | NW_004516053.1 | Scaffold632 | 17819                   | AA                              | TT              | 1946968165               |
| SNP_P4_139326_17837  | NW_004516053.1 | Scaffold632 | 17837                   | AA                              | TT              | 1946968167               |
| SNP_P4_139327_18149  | NW_004516053.1 | Scaffold632 | 18149                   | AA                              | GG              | 1946968169               |
| SNP_P4_139328_435    | NW_004516054.1 | Scaffold633 | 435                     | AA                              | GG              | 1946968171               |
| SNP_P4_139329_750    | NW_004516054.1 | Scaffold633 | 750                     | AA                              | CC              | 1946968173               |
| SNP_P4_139330_521    | NW_004516055.1 | Scaffold635 | 521                     | CC                              | AA              | 1946968175               |
| SNP_P4_139331_9621   | NW_004516057.1 | Scaffold637 | 9621                    | CC                              | TT              | 1946968177               |
| SNP_P4_139332_9666   | NW_004516057.1 | Scaffold637 | 9666                    | CC                              | TT              | 1946968178               |
| SNP_P4_139333_9692   | NW_004516057.1 | Scaffold637 | 9692                    | CC                              | GG              | 1946968180               |
| SNP_P4_139334_9716   | NW_004516057.1 | Scaffold637 | 9716                    | AA                              | CC              | 1946968182               |
| SNP_P4_139335_9727   | NW_004516057.1 | Scaffold637 | 9727                    | AA                              | GG              | 1946968184               |
| SNP_P4_139336_9757   | NW_004516057.1 | Scaffold637 | 9757                    | AA                              | GG              | 1946968186               |
| SNP_P4_139337_14610  | NW_004516057.1 | Scaffold637 | 14610                   | AA                              | GG              | 1946968188               |
| SNP_P4_139338_14643  | NW_004516057.1 | Scaffold637 | 14643                   | CC                              | TT              | 1946968190               |
| SNP_P4_139339_62232  | NW_004516057.1 | Scaffold637 | 62232                   | CC                              | TT              | 1946968192               |
| SNP_P4_139340_67790  | NW_004516057.1 | Scaffold637 | 67790                   | TT                              | CC              | 1946968194               |
| SNP_P4_139342_69443  | NW_004516057.1 | Scaffold637 | 69443                   | TT                              | CC              | 1946968196               |
| SNP_P4_139343_69700  | NW_004516057.1 | Scaffold637 | 69700                   | CC                              | AA              | 1946968198               |
| SNP_P4_139344_90792  | NW_004516057.1 | Scaffold637 | 90792                   | GG                              | TT              | 1946968200               |
| SNP_P4_139345_90924  | NW_004516057.1 | Scaffold637 | 90924                   | GG                              | AA              | 1946968202               |
| SNP_P4_139348_124038 | NW_004516057.1 | Scaffold637 | 124038                  | CC                              | AA              | 1946968204               |
| SNP_P4_139349_124041 | NW_004516057.1 | Scaffold637 | 124041                  | GG                              | AA              | 1946968206               |
| SNP_P4_139350_124050 | NW_004516057.1 | Scaffold637 | 124050                  | AA                              | GG              | 1946968208               |
| SNP_P4_139351_124483 | NW_004516057.1 | Scaffold637 | 124483                  | GG                              | AA              | 1946968210               |
| SNP_P4_139352_124636 | NW_004516057.1 | Scaffold637 | 124636                  | CC                              | TT              | 1946968212               |
| SNP_P4_139353_124701 | NW_004516057.1 | Scaffold637 | 124701                  | TT                              | AA              | 1946968214               |
| SNP_P4_139354_124713 | NW_004516057.1 | Scaffold637 | 124713                  | GG                              | AA              | 1946968216               |
| SNP_P4_139355_128285 | NW_004516057.1 | Scaffold637 | 128285                  | AA                              | GG              | 1946968218               |
| SNP_P4_139356_142086 | NW_004516057.1 | Scaffold637 | 142086                  | TT                              | CC              | 1946968220               |
| SNP_P4_139357_142114 | NW_004516057.1 | Scaffold637 | 142114                  | AA                              | GG              | 1946968222               |
| SNP_P4_139358_145264 | NW_004516057.1 | Scaffold637 | 145264                  | TT                              | CC              | 1946968224               |
| SNP_P4_139359_145265 | NW_004516057.1 | Scaffold637 | 145265                  | CC                              | TT              | 1946968226               |
| SNP_P4_139360_145266 | NW_004516057.1 | Scaffold637 | 145266                  | TT                              | AA              | 1946968228               |
| SNP_P4_139361_145285 | NW_004516057.1 | Scaffold637 | 145285                  | GG                              | AA              | 1946968230               |
| SNP_P4_139362_145313 | NW_004516057.1 | Scaffold637 | 145313                  | CC                              | TT              | 1946968232               |
| SNP_P4_139363_145314 | NW_004516057.1 | Scaffold637 | 145314                  | AA                              | GG              | 1946968234               |
| SNP_P4_139364_145363 | NW_004516057.1 | Scaffold637 | 145363                  | CC                              | AA              | 1946968236               |
| SNP_P4_139365_145753 | NW_004516057.1 | Scaffold637 | 145753                  | TT                              | CC              | 1946968238               |
| SNP_P4_139366_162144 | NW_004516057.1 | Scaffold637 | 162144                  | AA                              | GG              | 1946968240               |
| SNP_P4_139367_162644 | NW_004516057.1 | Scaffold637 | 162644                  | AA                              | GG              | 1946968242               |
| SNP_P4_139368_163005 | NW_004516057.1 | Scaffold637 | 163005                  | GG                              | CC              | 1946968244               |
| SNP_P4_139369_163116 | NW_004516057.1 | Scaffold637 | 163116                  | TT                              | CC              | 1946968246               |

| SNPs IDs             | Chromosome IDs | Chromosomes | Physical positions (bp) | CDC Frontier (Reference genome) | (ILWC46 & LPNB) | NCBI SNPdb Accession IDs |
|----------------------|----------------|-------------|-------------------------|---------------------------------|-----------------|--------------------------|
| SNP_P4_139370_163129 | NW_004516057.1 | Scaffold637 | 163129                  | CC                              | TT              | 1946968248               |
| SNP_P4_139371_163158 | NW_004516057.1 | Scaffold637 | 163158                  | AA                              | GG              | 1946968250               |
| SNP_P4_139372_169092 | NW_004516057.1 | Scaffold637 | 169092                  | CC                              | TT              | 1946968252               |
| SNP_P4_139373_169935 | NW_004516057.1 | Scaffold637 | 169935                  | AA                              | GG              | 1946968254               |
| SNP_P4_139374_170221 | NW_004516057.1 | Scaffold637 | 170221                  | GG                              | CC              | 1946968256               |
| SNP_P4_139375_173979 | NW_004516057.1 | Scaffold637 | 173979                  | CC                              | TT              | 1946968258               |
| SNP_P4_139376_182799 | NW_004516057.1 | Scaffold637 | 182799                  | CC                              | TT              | 1946968260               |
| SNP_P4_139377_188012 | NW_004516057.1 | Scaffold637 | 188012                  | TT                              | AA              | 1946968262               |
| SNP_P4_139378_188072 | NW_004516057.1 | Scaffold637 | 188072                  | CC                              | GG              | 1946968264               |
| SNP_P4_139379_188149 | NW_004516057.1 | Scaffold637 | 188149                  | CC                              | AA              | 1946968266               |
| SNP_P4_139380_188150 | NW_004516057.1 | Scaffold637 | 188150                  | AA                              | TT              | 1946968268               |
| SNP_P4_139381_188153 | NW_004516057.1 | Scaffold637 | 188153                  | GG                              | AA              | 1946968270               |
| SNP_P4_139382_188171 | NW_004516057.1 | Scaffold637 | 188171                  | AA                              | CC              | 1946968272               |
| SNP_P4_139383_191857 | NW_004516057.1 | Scaffold637 | 191857                  | TT                              | CC              | 1946968274               |
| SNP_P4_139384_4040   | NW_004516058.1 | Scaffold639 | 4040                    | GG                              | AA              | 1946968276               |
| SNP_P4_139385_6832   | NW_004516058.1 | Scaffold639 | 6832                    | CC                              | TT              | 1946968278               |
| SNP_P4_139386_6905   | NW_004516058.1 | Scaffold639 | 6905                    | GG                              | TT              | 1946968280               |
| SNP_P4_139387_7066   | NW_004516058.1 | Scaffold639 | 7066                    | CC                              | TT              | 1946968282               |
| SNP_P4_139388_7454   | NW_004516058.1 | Scaffold639 | 7454                    | CC                              | AA              | 1946968283               |
| SNP_P4_139389_8412   | NW_004516058.1 | Scaffold639 | 8412                    | GG                              | TT              | 1946968285               |
| SNP_P4_139390_8419   | NW_004516058.1 | Scaffold639 | 8419                    | CC                              | TT              | 1946968287               |
| SNP_P4_139391_8588   | NW_004516058.1 | Scaffold639 | 8588                    | CC                              | TT              | 1946968289               |
| SNP_P4_139392_8677   | NW_004516058.1 | Scaffold639 | 8677                    | TT                              | CC              | 1946968291               |
| SNP_P4_139393_9001   | NW_004516058.1 | Scaffold639 | 9001                    | CC                              | TT              | 1946968293               |
| SNP_P4_139394_9083   | NW_004516058.1 | Scaffold639 | 9083                    | CC                              | AA              | 1946968295               |
| SNP_P4_139395_9203   | NW_004516058.1 | Scaffold639 | 9203                    | TT                              | AA              | 1946968297               |
| SNP_P4_139396_9309   | NW_004516058.1 | Scaffold639 | 9309                    | TT                              | AA              | 1946968299               |
| SNP_P4_139398_11686  | NW_004516058.1 | Scaffold639 | 11686                   | AA                              | TT              | 1946968301               |
| SNP_P4_139399_13390  | NW_004516058.1 | Scaffold639 | 13390                   | AA                              | CC              | 1946968303               |
| SNP_P4_139400_13800  | NW_004516058.1 | Scaffold639 | 13800                   | AA                              | GG              | 1946968305               |
| SNP_P4_139401_13837  | NW_004516058.1 | Scaffold639 | 13837                   | GG                              | TT              | 1946968307               |
| SNP_P4_139402_17924  | NW_004516058.1 | Scaffold639 | 17924                   | TT                              | AA              | 1946968309               |
| SNP_P4_139403_18614  | NW_004516058.1 | Scaffold639 | 18614                   | TT                              | AA              | 1946968311               |
| SNP_P4_139404_18907  | NW_004516058.1 | Scaffold639 | 18907                   | AA                              | TT              | 1946968313               |
| SNP_P4_139405_18908  | NW_004516058.1 | Scaffold639 | 18908                   | AA                              | CC              | 1946968315               |
| SNP_P4_139406_18910  | NW_004516058.1 | Scaffold639 | 18910                   | AA                              | TT              | 1946968317               |
| SNP_P4_139407_18911  | NW_004516058.1 | Scaffold639 | 18911                   | TT                              | GG              | 1946968319               |
| SNP_P4_139408_19026  | NW_004516058.1 | Scaffold639 | 19026                   | AA                              | GG              | 1946968321               |
| SNP_P4_139409_19058  | NW_004516058.1 | Scaffold639 | 19058                   | TT                              | GG              | 1946968323               |
| SNP_P4_139410_19066  | NW_004516058.1 | Scaffold639 | 19066                   | TT                              | CC              | 1946968325               |
| SNP_P4_139411_21688  | NW_004516058.1 | Scaffold639 | 21688                   | AA                              | GG              | 1946968327               |
| SNP_P4_139412_22437  | NW_004516058.1 | Scaffold639 | 22437                   | TT                              | GG              | 1946968329               |

| SNPs IDs             | Chromosome IDs | Chromosomes | Physical positions (bp) | CDC Frontier (Reference genome) | (ILWC46 & LPNB) | NCBI SNPdb Accession IDs |
|----------------------|----------------|-------------|-------------------------|---------------------------------|-----------------|--------------------------|
| SNP_P4_139413_29604  | NW_004516058.1 | Scaffold639 | 29604                   | TT                              | GG              | 1946968331               |
| SNP_P4_139414_29610  | NW_004516058.1 | Scaffold639 | 29610                   | GG                              | AA              | 1946968333               |
| SNP_P4_139415_31699  | NW_004516058.1 | Scaffold639 | 31699                   | TT                              | CC              | 1946968335               |
| SNP_P4_139416_31860  | NW_004516058.1 | Scaffold639 | 31860                   | AA                              | GG              | 1946968337               |
| SNP_P4_139417_31967  | NW_004516058.1 | Scaffold639 | 31967                   | TT                              | AA              | 1946968339               |
| SNP_P4_139418_31985  | NW_004516058.1 | Scaffold639 | 31985                   | GG                              | AA              | 1946968341               |
| SNP_P4_139419_32132  | NW_004516058.1 | Scaffold639 | 32132                   | AA                              | TT              | 1946968343               |
| SNP_P4_139420_33159  | NW_004516058.1 | Scaffold639 | 33159                   | AA                              | TT              | 1946968345               |
| SNP_P4_139421_33195  | NW_004516058.1 | Scaffold639 | 33195                   | TT                              | GG              | 1946968347               |
| SNP_P4_139422_33196  | NW_004516058.1 | Scaffold639 | 33196                   | TT                              | CC              | 1946968349               |
| SNP_P4_139423_34244  | NW_004516058.1 | Scaffold639 | 34244                   | AA                              | TT              | 1946968351               |
| SNP_P4_139424_34264  | NW_004516058.1 | Scaffold639 | 34264                   | TT                              | CC              | 1946968353               |
| SNP_P4_139425_40434  | NW_004516058.1 | Scaffold639 | 40434                   | AA                              | TT              | 1946968355               |
| SNP_P4_139426_43870  | NW_004516058.1 | Scaffold639 | 43870                   | TT                              | GG              | 1946968357               |
| SNP_P4_139427_44226  | NW_004516058.1 | Scaffold639 | 44226                   | CC                              | TT              | 1946968359               |
| SNP_P4_139428_47749  | NW_004516058.1 | Scaffold639 | 47749                   | AA                              | GG              | 1946968361               |
| SNP_P4_139429_47812  | NW_004516058.1 | Scaffold639 | 47812                   | AA                              | GG              | 1946968363               |
| SNP_P4_139430_47882  | NW_004516058.1 | Scaffold639 | 47882                   | TT                              | GG              | 1946968365               |
| SNP_P4_139431_48097  | NW_004516058.1 | Scaffold639 | 48097                   | GG                              | CC              | 1946968367               |
| SNP_P4_139432_48120  | NW_004516058.1 | Scaffold639 | 48120                   | AA                              | CC              | 1946968369               |
| SNP_P4_139433_67742  | NW_004516058.1 | Scaffold639 | 67742                   | GG                              | AA              | 1946968371               |
| SNP_P4_139434_69646  | NW_004516058.1 | Scaffold639 | 69646                   | CC                              | AA              | 1946968373               |
| SNP_P4_139435_69808  | NW_004516058.1 | Scaffold639 | 69808                   | GG                              | AA              | 1946968375               |
| SNP_P4_139436_69817  | NW_004516058.1 | Scaffold639 | 69817                   | AA                              | GG              | 1946968377               |
| SNP_P4_139437_71970  | NW_004516058.1 | Scaffold639 | 71970                   | GG                              | AA              | 1946968379               |
| SNP_P4_139438_72074  | NW_004516058.1 | Scaffold639 | 72074                   | GG                              | AA              | 1946968381               |
| SNP_P4_139439_73266  | NW_004516058.1 | Scaffold639 | 73266                   | AA                              | TT              | 1946968383               |
| SNP_P4_139440_73297  | NW_004516058.1 | Scaffold639 | 73297                   | TT                              | AA              | 1946968385               |
| SNP_P4_139442_82529  | NW_004516058.1 | Scaffold639 | 82529                   | CC                              | TT              | 1946968387               |
| SNP_P4_139443_88666  | NW_004516058.1 | Scaffold639 | 88666                   | TT                              | CC              | 1946968389               |
| SNP_P4_139444_92137  | NW_004516058.1 | Scaffold639 | 92137                   | AA                              | GG              | 1946968391               |
| SNP_P4_139445_92143  | NW_004516058.1 | Scaffold639 | 92143                   | TT                              | CC              | 1946968393               |
| SNP_P4_139446_92406  | NW_004516058.1 | Scaffold639 | 92406                   | TT                              | CC              | 1946968395               |
| SNP_P4_139447_92425  | NW_004516058.1 | Scaffold639 | 92425                   | CC                              | TT              | 1946968397               |
| SNP_P4_139448_92453  | NW_004516058.1 | Scaffold639 | 92453                   | TT                              | CC              | 1946968399               |
| SNP_P4_139449_92473  | NW_004516058.1 | Scaffold639 | 92473                   | AA                              | CC              | 1946968401               |
| SNP_P4_139450_94781  | NW_004516058.1 | Scaffold639 | 94781                   | GG                              | CC              | 1946968403               |
| SNP_P4_139451_98682  | NW_004516058.1 | Scaffold639 | 98682                   | CC                              | AA              | 1946968405               |
| SNP_P4_139452_102581 | NW_004516058.1 | Scaffold639 | 102581                  | GG                              | AA              | 1946968407               |
| SNP_P4_139453_102604 | NW_004516058.1 | Scaffold639 | 102604                  | TT                              | CC              | 1946968409               |
| SNP_P4_139455_102631 | NW_004516058.1 | Scaffold639 | 102631                  | TT                              | AA              | 1946968411               |
| SNP_P4_139456_102651 | NW_004516058.1 | Scaffold639 | 102651                  | GG                              | TT              | 1946968413               |

| SNPs IDs             | Chromosome IDs | Chromosomes | Physical positions (bp) | CDC Frontier (Reference genome) | (ILWC46 & LPNB) | NCBI SNPdb Accession IDs |
|----------------------|----------------|-------------|-------------------------|---------------------------------|-----------------|--------------------------|
| SNP_P4_139457_102672 | NW_004516058.1 | Scaffold639 | 102672                  | AA                              | CC              | 1946968415               |
| SNP_P4_139458_102675 | NW_004516058.1 | Scaffold639 | 102675                  | AA                              | GG              | 1946968417               |
| SNP_P4_139459_102685 | NW_004516058.1 | Scaffold639 | 102685                  | GG                              | AA              | 1946968419               |
| SNP_P4_139461_104990 | NW_004516058.1 | Scaffold639 | 104990                  | GG                              | CC              | 1946968421               |
| SNP_P4_139462_113576 | NW_004516058.1 | Scaffold639 | 113576                  | AA                              | GG              | 1946968423               |
| SNP_P4_139463_113676 | NW_004516058.1 | Scaffold639 | 113676                  | TT                              | CC              | 1946968425               |
| SNP_P4_139464_113718 | NW_004516058.1 | Scaffold639 | 113718                  | GG                              | AA              | 1946968427               |
| SNP_P4_139465_113806 | NW_004516058.1 | Scaffold639 | 113806                  | TT                              | AA              | 1946968429               |
| SNP_P4_139466_113937 | NW_004516058.1 | Scaffold639 | 113937                  | GG                              | AA              | 1946968431               |
| SNP_P4_139467_113949 | NW_004516058.1 | Scaffold639 | 113949                  | CC                              | TT              | 1946968433               |
| SNP_P4_139468_114136 | NW_004516058.1 | Scaffold639 | 114136                  | AA                              | GG              | 1946968435               |
| SNP_P4_139469_114341 | NW_004516058.1 | Scaffold639 | 114341                  | AA                              | CC              | 1946968437               |
| SNP_P4_139470_114346 | NW_004516058.1 | Scaffold639 | 114346                  | GG                              | TT              | 1946968439               |
| SNP_P4_139471_114355 | NW_004516058.1 | Scaffold639 | 114355                  | TT                              | CC              | 1946968442               |
| SNP_P4_139472_114430 | NW_004516058.1 | Scaffold639 | 114430                  | GG                              | TT              | 1946968444               |
| SNP_P4_139473_114506 | NW_004516058.1 | Scaffold639 | 114506                  | GG                              | AA              | 1946968446               |
| SNP_P4_139474_114518 | NW_004516058.1 | Scaffold639 | 114518                  | AA                              | TT              | 1946968448               |
| SNP_P4_139475_114677 | NW_004516058.1 | Scaffold639 | 114677                  | AA                              | TT              | 1946968450               |
| SNP_P4_139476_114683 | NW_004516058.1 | Scaffold639 | 114683                  | GG                              | AA              | 1946968452               |
| SNP_P4_139477_114763 | NW_004516058.1 | Scaffold639 | 114763                  | AA                              | GG              | 1946968454               |
| SNP_P4_139478_114937 | NW_004516058.1 | Scaffold639 | 114937                  | AA                              | GG              | 1946968456               |
| SNP_P4_139479_119875 | NW_004516058.1 | Scaffold639 | 119875                  | CC                              | TT              | 1946968458               |
| SNP_P4_139480_120191 | NW_004516058.1 | Scaffold639 | 120191                  | AA                              | GG              | 1946968460               |
| SNP_P4_139481_120314 | NW_004516058.1 | Scaffold639 | 120314                  | AA                              | TT              | 1946968462               |
| SNP_P4_139482_127432 | NW_004516058.1 | Scaffold639 | 127432                  | GG                              | AA              | 1946968464               |
| SNP_P4_139483_133681 | NW_004516058.1 | Scaffold639 | 133681                  | AA                              | TT              | 1946968466               |
| SNP_P4_139484_133720 | NW_004516058.1 | Scaffold639 | 133720                  | GG                              | AA              | 1946968468               |
| SNP_P4_139485_134037 | NW_004516058.1 | Scaffold639 | 134037                  | CC                              | TT              | 1946968470               |
| SNP_P4_139486_134178 | NW_004516058.1 | Scaffold639 | 134178                  | GG                              | AA              | 1946968472               |
| SNP_P4_139488_172448 | NW_004516058.1 | Scaffold639 | 172448                  | CC                              | AA              | 1946968474               |
| SNP_P4_139489_172770 | NW_004516058.1 | Scaffold639 | 172770                  | AA                              | GG              | 1946968476               |
| SNP_P4_139490_172785 | NW_004516058.1 | Scaffold639 | 172785                  | AA                              | GG              | 1946968478               |
| SNP_P4_139491_172790 | NW_004516058.1 | Scaffold639 | 172790                  | AA                              | CC              | 1946968480               |
| SNP_P4_139492_172841 | NW_004516058.1 | Scaffold639 | 172841                  | TT                              | CC              | 1946968482               |
| SNP_P4_139493_172871 | NW_004516058.1 | Scaffold639 | 172871                  | GG                              | TT              | 1946968484               |
| SNP_P4_139494_172944 | NW_004516058.1 | Scaffold639 | 172944                  | TT                              | CC              | 1946968486               |
| SNP_P4_139495_172955 | NW_004516058.1 | Scaffold639 | 172955                  | GG                              | TT              | 1946968488               |
| SNP_P4_139496_172958 | NW_004516058.1 | Scaffold639 | 172958                  | GG                              | AA              | 1946968490               |
| SNP_P4_139497_173112 | NW_004516058.1 | Scaffold639 | 173112                  | GG                              | AA              | 1946968492               |
| SNP_P4_139498_173341 | NW_004516058.1 | Scaffold639 | 173341                  | TT                              | CC              | 1946968494               |
| SNP_P4_139499_173389 | NW_004516058.1 | Scaffold639 | 173389                  | CC                              | TT              | 1946968496               |
| SNP_P4_139500_182220 | NW_004516058.1 | Scaffold639 | 182220                  | AA                              | TT              | 1946968498               |

| SNPs IDs             | Chromosome IDs | Chromosomes | Physical positions (bp) | CDC Frontier (Reference genome) | (ILWC46 & LPNB) | NCBI SNPdb Accession IDs |
|----------------------|----------------|-------------|-------------------------|---------------------------------|-----------------|--------------------------|
| SNP_P4_139501_183171 | NW_004516058.1 | Scaffold639 | 183171                  | AA                              | TT              | 1946968500               |
| SNP_P4_139502_183231 | NW_004516058.1 | Scaffold639 | 183231                  | TT                              | CC              | 1946968502               |
| SNP_P4_139503_183289 | NW_004516058.1 | Scaffold639 | 183289                  | CC                              | TT              | 1946968504               |
| SNP_P4_139504_183320 | NW_004516058.1 | Scaffold639 | 183320                  | AA                              | GG              | 1946968506               |
| SNP_P4_139505_183324 | NW_004516058.1 | Scaffold639 | 183324                  | CC                              | TT              | 1946968508               |
| SNP_P4_139506_183333 | NW_004516058.1 | Scaffold639 | 183333                  | AA                              | GG              | 1946968510               |
| SNP_P4_139507_183335 | NW_004516058.1 | Scaffold639 | 183335                  | TT                              | CC              | 1946968512               |
| SNP_P4_139508_184046 | NW_004516058.1 | Scaffold639 | 184046                  | AA                              | TT              | 1946968514               |
| SNP_P4_139509_184238 | NW_004516058.1 | Scaffold639 | 184238                  | TT                              | GG              | 1946968516               |
| SNP_P4_139510_184318 | NW_004516058.1 | Scaffold639 | 184318                  | TT                              | GG              | 1946968518               |
| SNP_P4_139511_184483 | NW_004516058.1 | Scaffold639 | 184483                  | AA                              | TT              | 1946968520               |
| SNP_P4_139512_184648 | NW_004516058.1 | Scaffold639 | 184648                  | TT                              | CC              | 1946968522               |
| SNP_P4_139513_577    | NW_004516059.1 | Scaffold641 | 577                     | CC                              | TT              | 1946968524               |
| SNP_P4_139514_3136   | NW_004516059.1 | Scaffold641 | 3136                    | GG                              | AA              | 1946968526               |
| SNP_P4_139515_3364   | NW_004516059.1 | Scaffold641 | 3364                    | GG                              | TT              | 1946968528               |
| SNP_P4_139516_20412  | NW_004516059.1 | Scaffold641 | 20412                   | CC                              | AA              | 1946968530               |
| SNP_P4_139518_17390  | NW_004516060.1 | Scaffold642 | 17390                   | GG                              | AA              | 1946968532               |
| SNP_P4_139521_27496  | NW_004516060.1 | Scaffold642 | 27496                   | AA                              | GG              | 1946968534               |
| SNP_P4_139522_35582  | NW_004516060.1 | Scaffold642 | 35582                   | CC                              | AA              | 1946968536               |
| SNP_P4_139526_62014  | NW_004516060.1 | Scaffold642 | 62014                   | GG                              | TT              | 1946968538               |
| SNP_P4_139527_62496  | NW_004516060.1 | Scaffold642 | 62496                   | CC                              | AA              | 1946968540               |
| SNP_P4_139528_67860  | NW_004516060.1 | Scaffold642 | 67860                   | TT                              | CC              | 1946968542               |
| SNP_P4_139529_110530 | NW_004516060.1 | Scaffold642 | 110530                  | CC                              | TT              | 1946968544               |
| SNP_P4_139530_147548 | NW_004516060.1 | Scaffold642 | 147548                  | AA                              | GG              | 1946968546               |
| SNP_P4_139531_147691 | NW_004516060.1 | Scaffold642 | 147691                  | CC                              | TT              | 1946968548               |
| SNP_P4_139532_147697 | NW_004516060.1 | Scaffold642 | 147697                  | GG                              | AA              | 1946968550               |
| SNP_P4_139533_147711 | NW_004516060.1 | Scaffold642 | 147711                  | TT                              | GG              | 1946968552               |
| SNP_P4_139534_147894 | NW_004516060.1 | Scaffold642 | 147894                  | AA                              | GG              | 1946968554               |
| SNP_P4_139535_147909 | NW_004516060.1 | Scaffold642 | 147909                  | GG                              | AA              | 1946968556               |
| SNP_P4_139536_148015 | NW_004516060.1 | Scaffold642 | 148015                  | AA                              | CC              | 1946968558               |
| SNP_P4_139537_149959 | NW_004516060.1 | Scaffold642 | 149959                  | CC                              | TT              | 1946968560               |
| SNP_P4_139538_152918 | NW_004516060.1 | Scaffold642 | 152918                  | CC                              | TT              | 1946968562               |
| SNP_P4_139539_154158 | NW_004516060.1 | Scaffold642 | 154158                  | TT                              | CC              | 1946968564               |
| SNP_P4_139540_173907 | NW_004516060.1 | Scaffold642 | 173907                  | TT                              | CC              | 1946968566               |
| SNP_P4_139541_179018 | NW_004516060.1 | Scaffold642 | 179018                  | AA                              | GG              | 1946968568               |
| SNP_P4_139542_179278 | NW_004516060.1 | Scaffold642 | 179278                  | CC                              | GG              | 1946968570               |
| SNP_P4_139543_180155 | NW_004516060.1 | Scaffold642 | 180155                  | AA                              | GG              | 1946968572               |
| SNP_P4_139544_189607 | NW_004516060.1 | Scaffold642 | 189607                  | GG                              | TT              | 1946968574               |
| SNP_P4_139545_205325 | NW_004516060.1 | Scaffold642 | 205325                  | GG                              | AA              | 1946968576               |
| SNP_P4_139547_289135 | NW_004516060.1 | Scaffold642 | 289135                  | CC                              | AA              | 1946968578               |
| SNP_P4_139551_320235 | NW_004516060.1 | Scaffold642 | 320235                  | CC                              | TT              | 1946968580               |
| SNP_P4_139552_320420 | NW_004516060.1 | Scaffold642 | 320420                  | GG                              | TT              | 1946968582               |

| SNPs IDs             | Chromosome IDs | Chromosomes | Physical positions (bp) | CDC Frontier (Reference genome) | (ILWC46 & LPNB) | NCBI SNPdb Accession IDs |
|----------------------|----------------|-------------|-------------------------|---------------------------------|-----------------|--------------------------|
| SNP_P4_139553_320431 | NW_004516060.1 | Scaffold642 | 320431                  | GG                              | AA              | 1946968584               |
| SNP_P4_139554_320472 | NW_004516060.1 | Scaffold642 | 320472                  | GG                              | AA              | 1946968586               |
| SNP_P4_139555_320695 | NW_004516060.1 | Scaffold642 | 320695                  | AA                              | GG              | 1946968588               |
| SNP_P4_139556_320838 | NW_004516060.1 | Scaffold642 | 320838                  | CC                              | TT              | 1946968590               |
| SNP_P4_139557_331500 | NW_004516060.1 | Scaffold642 | 331500                  | CC                              | AA              | 1946968592               |
| SNP_P4_139558_334143 | NW_004516060.1 | Scaffold642 | 334143                  | CC                              | AA              | 1946968594               |
| SNP_P4_139559_334144 | NW_004516060.1 | Scaffold642 | 334144                  | GG                              | AA              | 1946968596               |
| SNP_P4_139560_334160 | NW_004516060.1 | Scaffold642 | 334160                  | TT                              | AA              | 1946968598               |
| SNP_P4_139561_334166 | NW_004516060.1 | Scaffold642 | 334166                  | TT                              | AA              | 1946968600               |
| SNP_P4_139562_334208 | NW_004516060.1 | Scaffold642 | 334208                  | GG                              | AA              | 1946968602               |
| SNP_P4_139563_334251 | NW_004516060.1 | Scaffold642 | 334251                  | CC                              | TT              | 1946968604               |
| SNP_P4_139564_334500 | NW_004516060.1 | Scaffold642 | 334500                  | AA                              | GG              | 1946968606               |
| SNP_P4_139566_337459 | NW_004516060.1 | Scaffold642 | 337459                  | AA                              | GG              | 1946968608               |
| SNP_P4_139567_337836 | NW_004516060.1 | Scaffold642 | 337836                  | GG                              | AA              | 1946968610               |
| SNP_P4_139568_337907 | NW_004516060.1 | Scaffold642 | 337907                  | GG                              | TT              | 1946968612               |
| SNP_P4_139569_338478 | NW_004516060.1 | Scaffold642 | 338478                  | AA                              | GG              | 1946968614               |
| SNP_P4_139570_350804 | NW_004516060.1 | Scaffold642 | 350804                  | AA                              | GG              | 1946968616               |
| SNP_P4_139571_350977 | NW_004516060.1 | Scaffold642 | 350977                  | CC                              | TT              | 1946968618               |
| SNP_P4_139572_351283 | NW_004516060.1 | Scaffold642 | 351283                  | CC                              | TT              | 1946968620               |
| SNP_P4_139573_351301 | NW_004516060.1 | Scaffold642 | 351301                  | TT                              | CC              | 1946968622               |
| SNP_P4_139574_351304 | NW_004516060.1 | Scaffold642 | 351304                  | CC                              | TT              | 1946968624               |
| SNP_P4_139575_351324 | NW_004516060.1 | Scaffold642 | 351324                  | TT                              | CC              | 1946968626               |
| SNP_P4_139576_351412 | NW_004516060.1 | Scaffold642 | 351412                  | CC                              | TT              | 1946968628               |
| SNP_P4_139577_351519 | NW_004516060.1 | Scaffold642 | 351519                  | AA                              | GG              | 1946968630               |
| SNP_P4_139578_352000 | NW_004516060.1 | Scaffold642 | 352000                  | AA                              | GG              | 1946968632               |
| SNP_P4_139579_352052 | NW_004516060.1 | Scaffold642 | 352052                  | GG                              | TT              | 1946968634               |
| SNP_P4_139580_352126 | NW_004516060.1 | Scaffold642 | 352126                  | AA                              | TT              | 1946968636               |
| SNP_P4_139581_352133 | NW_004516060.1 | Scaffold642 | 352133                  | CC                              | GG              | 1946968638               |
| SNP_P4_139582_352202 | NW_004516060.1 | Scaffold642 | 352202                  | AA                              | GG              | 1946968640               |
| SNP_P4_139583_352276 | NW_004516060.1 | Scaffold642 | 352276                  | GG                              | CC              | 1946968642               |
| SNP_P4_139584_352335 | NW_004516060.1 | Scaffold642 | 352335                  | GG                              | AA              | 1946968644               |
| SNP_P4_139585_352602 | NW_004516060.1 | Scaffold642 | 352602                  | AA                              | GG              | 1946968646               |
| SNP_P4_139586_352668 | NW_004516060.1 | Scaffold642 | 352668                  | TT                              | CC              | 1946968648               |
| SNP_P4_139587_363211 | NW_004516060.1 | Scaffold642 | 363211                  | GG                              | CC              | 1946968650               |
| SNP_P4_139588_363435 | NW_004516060.1 | Scaffold642 | 363435                  | CC                              | TT              | 1946968652               |
| SNP_P4_139589_378557 | NW_004516060.1 | Scaffold642 | 378557                  | AA                              | TT              | 1946968654               |
| SNP_P4_139591_395482 | NW_004516060.1 | Scaffold642 | 395482                  | CC                              | AA              | 1946968656               |
| SNP_P4_139592_399871 | NW_004516060.1 | Scaffold642 | 399871                  | CC                              | TT              | 1946968658               |
| SNP_P4_139595_429840 | NW_004516060.1 | Scaffold642 | 429840                  | CC                              | TT              | 1946968660               |
| SNP_P4_139597_433558 | NW_004516060.1 | Scaffold642 | 433558                  | TT                              | CC              | 1946968662               |
| SNP_P4_139600_472249 | NW_004516060.1 | Scaffold642 | 472249                  | CC                              | AA              | 1946968664               |
| SNP_P4_139601_473172 | NW_004516060.1 | Scaffold642 | 473172                  | GG                              | AA              | 1946968666               |

| SNPs IDs             | Chromosome IDs | Chromosomes | Physical positions (bp) | CDC Frontier (Reference genome) | (ILWC46 & LPNB) | NCBI SNPdb Accession IDs |
|----------------------|----------------|-------------|-------------------------|---------------------------------|-----------------|--------------------------|
| SNP_P4_139602_489726 | NW_004516060.1 | Scaffold642 | 489726                  | GG                              | CC              | 1946968668               |
| SNP_P4_139603_489823 | NW_004516060.1 | Scaffold642 | 489823                  | CC                              | TT              | 1946968670               |
| SNP_P4_139604_502222 | NW_004516060.1 | Scaffold642 | 502222                  | TT                              | AA              | 1946968671               |
| SNP_P4_139605_502809 | NW_004516060.1 | Scaffold642 | 502809                  | AA                              | TT              | 1946968673               |
| SNP_P4_139606_507832 | NW_004516060.1 | Scaffold642 | 507832                  | AA                              | TT              | 1946968675               |
| SNP_P4_139607_507861 | NW_004516060.1 | Scaffold642 | 507861                  | AA                              | CC              | 1946968677               |
| SNP_P4_139609_507981 | NW_004516060.1 | Scaffold642 | 507981                  | TT                              | GG              | 1946968679               |
| SNP_P4_139611_562049 | NW_004516060.1 | Scaffold642 | 562049                  | AA                              | CC              | 1946968681               |
| SNP_P4_139612_590294 | NW_004516060.1 | Scaffold642 | 590294                  | AA                              | CC              | 1946968683               |
| SNP_P4_139614_601477 | NW_004516060.1 | Scaffold642 | 601477                  | TT                              | GG              | 1946968685               |
| SNP_P4_139615_601479 | NW_004516060.1 | Scaffold642 | 601479                  | AA                              | CC              | 1946968687               |
| SNP_P4_139616_640715 | NW_004516060.1 | Scaffold642 | 640715                  | CC                              | TT              | 1946968689               |
| SNP_P4_139617_652661 | NW_004516060.1 | Scaffold642 | 652661                  | AA                              | GG              | 1946968691               |
| SNP_P4_139618_677656 | NW_004516060.1 | Scaffold642 | 677656                  | TT                              | AA              | 1946968693               |
| SNP_P4_139619_677924 | NW_004516060.1 | Scaffold642 | 677924                  | TT                              | CC              | 1946968695               |
| SNP_P4_139620_683421 | NW_004516060.1 | Scaffold642 | 683421                  | TT                              | CC              | 1946968697               |
| SNP_P4_139621_685629 | NW_004516060.1 | Scaffold642 | 685629                  | GG                              | AA              | 1946968699               |
| SNP_P4_139622_685972 | NW_004516060.1 | Scaffold642 | 685972                  | TT                              | AA              | 1946968701               |
| SNP_P4_139623_686028 | NW_004516060.1 | Scaffold642 | 686028                  | AA                              | GG              | 1946968703               |
| SNP_P4_139625_698076 | NW_004516060.1 | Scaffold642 | 698076                  | TT                              | GG              | 1946968705               |
| SNP_P4_139626_698079 | NW_004516060.1 | Scaffold642 | 698079                  | AA                              | GG              | 1946968707               |
| SNP_P4_139627_698144 | NW_004516060.1 | Scaffold642 | 698144                  | TT                              | CC              | 1946968709               |
| SNP_P4_139628_703391 | NW_004516060.1 | Scaffold642 | 703391                  | CC                              | TT              | 1946968711               |
| SNP_P4_139629_43686  | NW_004516061.1 | Scaffold643 | 43686                   | CC                              | TT              | 1946968713               |
| SNP_P4_139630_56392  | NW_004516061.1 | Scaffold643 | 56392                   | AA                              | CC              | 1946968715               |
| SNP_P4_139631_56497  | NW_004516061.1 | Scaffold643 | 56497                   | AA                              | CC              | 1946968717               |
| SNP_P4_139632_56524  | NW_004516061.1 | Scaffold643 | 56524                   | GG                              | AA              | 1946968719               |
| SNP_P4_139633_61616  | NW_004516061.1 | Scaffold643 | 61616                   | CC                              | TT              | 1946968721               |
| SNP_P4_139634_61623  | NW_004516061.1 | Scaffold643 | 61623                   | GG                              | AA              | 1946968723               |
| SNP_P4_139635_61630  | NW_004516061.1 | Scaffold643 | 61630                   | AA                              | GG              | 1946968725               |
| SNP_P4_139636_61632  | NW_004516061.1 | Scaffold643 | 61632                   | GG                              | AA              | 1946968727               |
| SNP_P4_139637_69101  | NW_004516061.1 | Scaffold643 | 69101                   | TT                              | CC              | 1946968729               |
| SNP_P4_139638_71169  | NW_004516061.1 | Scaffold643 | 71169                   | GG                              | AA              | 1946968730               |
| SNP_P4_139640_71258  | NW_004516061.1 | Scaffold643 | 71258                   | GG                              | AA              | 1946968732               |
| SNP_P4_139641_71269  | NW_004516061.1 | Scaffold643 | 71269                   | TT                              | CC              | 1946968734               |
| SNP_P4_139642_71308  | NW_004516061.1 | Scaffold643 | 71308                   | TT                              | CC              | 1946968736               |
| SNP_P4_139643_71315  | NW_004516061.1 | Scaffold643 | 71315                   | TT                              | CC              | 1946968738               |
| SNP_P4_139644_71349  | NW_004516061.1 | Scaffold643 | 71349                   | AA                              | GG              | 1946968740               |
| SNP_P4_139645_71374  | NW_004516061.1 | Scaffold643 | 71374                   | GG                              | AA              | 1946968742               |
| SNP_P4_139646_71572  | NW_004516061.1 | Scaffold643 | 71572                   | CC                              | TT              | 1946968744               |
| SNP_P4_139647_71635  | NW_004516061.1 | Scaffold643 | 71635                   | GG                              | AA              | 1946968746               |
| SNP_P4_139648_71661  | NW_004516061.1 | Scaffold643 | 71661                   | TT                              | GG              | 1946968748               |

| SNPs IDs            | Chromosome IDs | Chromosomes | Physical positions (bp) | CDC Frontier (Reference genome) | (ILWC46 & LPNB) | NCBI SNPdb Accession IDs |
|---------------------|----------------|-------------|-------------------------|---------------------------------|-----------------|--------------------------|
| SNP_P4_139649_71671 | NW_004516061.1 | Scaffold643 | 71671                   | TT                              | CC              | 1946968750               |
| SNP_P4_139650_75534 | NW_004516061.1 | Scaffold643 | 75534                   | CC                              | TT              | 1946968752               |
| SNP_P4_139651_77336 | NW_004516061.1 | Scaffold643 | 77336                   | TT                              | CC              | 1946968754               |
| SNP_P4_139652_12489 | NW_004516062.1 | Scaffold645 | 12489                   | TT                              | AA              | 1946968756               |
| SNP_P4_139653_21023 | NW_004516062.1 | Scaffold645 | 21023                   | CC                              | TT              | 1946968758               |
| SNP_P4_139654_23864 | NW_004516062.1 | Scaffold645 | 23864                   | TT                              | AA              | 1946968760               |
| SNP_P4_139655_23873 | NW_004516062.1 | Scaffold645 | 23873                   | TT                              | CC              | 1946968762               |
| SNP_P4_139656_23876 | NW_004516062.1 | Scaffold645 | 23876                   | AA                              | TT              | 1946968764               |
| SNP_P4_139657_23877 | NW_004516062.1 | Scaffold645 | 23877                   | TT                              | AA              | 1946968766               |
| SNP_P4_139658_23942 | NW_004516062.1 | Scaffold645 | 23942                   | TT                              | GG              | 1946968768               |
| SNP_P4_139659_23943 | NW_004516062.1 | Scaffold645 | 23943                   | GG                              | TT              | 1946968770               |
| SNP_P4_139660_37842 | NW_004516062.1 | Scaffold645 | 37842                   | TT                              | AA              | 1946968772               |
| SNP_P4_139661_51186 | NW_004516062.1 | Scaffold645 | 51186                   | TT                              | CC              | 1946968774               |
| SNP_P4_139663_71867 | NW_004516062.1 | Scaffold645 | 71867                   | GG                              | AA              | 1946968776               |
| SNP_P4_139664_71961 | NW_004516062.1 | Scaffold645 | 71961                   | AA                              | TT              | 1946968778               |
| SNP_P4_139665_72033 | NW_004516062.1 | Scaffold645 | 72033                   | AA                              | GG              | 1946968780               |
| SNP_P4_139666_72129 | NW_004516062.1 | Scaffold645 | 72129                   | TT                              | AA              | 1946968781               |
| SNP_P4_139667_72138 | NW_004516062.1 | Scaffold645 | 72138                   | GG                              | AA              | 1946968782               |
| SNP_P4_139668_72210 | NW_004516062.1 | Scaffold645 | 72210                   | TT                              | GG              | 1946968784               |
| SNP_P4_139669_72267 | NW_004516062.1 | Scaffold645 | 72267                   | GG                              | AA              | 1946968786               |
| SNP_P4_139670_73150 | NW_004516062.1 | Scaffold645 | 73150                   | GG                              | AA              | 1946968788               |
| SNP_P4_139671_73153 | NW_004516062.1 | Scaffold645 | 73153                   | GG                              | AA              | 1946968790               |
| SNP_P4_139672_73193 | NW_004516062.1 | Scaffold645 | 73193                   | GG                              | AA              | 1946968792               |
| SNP_P4_139673_73199 | NW_004516062.1 | Scaffold645 | 73199                   | CC                              | AA              | 1946968794               |
| SNP_P4_139674_73209 | NW_004516062.1 | Scaffold645 | 73209                   | GG                              | AA              | 1946968796               |
| SNP_P4_139675_73221 | NW_004516062.1 | Scaffold645 | 73221                   | GG                              | AA              | 1946968798               |
| SNP_P4_139676_73247 | NW_004516062.1 | Scaffold645 | 73247                   | AA                              | CC              | 1946968800               |
| SNP_P4_139677_73248 | NW_004516062.1 | Scaffold645 | 73248                   | GG                              | AA              | 1946968802               |
| SNP_P4_139678_73590 | NW_004516062.1 | Scaffold645 | 73590                   | CC                              | TT              | 1946968804               |
| SNP_P4_139679_73621 | NW_004516062.1 | Scaffold645 | 73621                   | TT                              | GG              | 1946968806               |
| SNP_P4_139680_73811 | NW_004516062.1 | Scaffold645 | 73811                   | CC                              | TT              | 1946968808               |
| SNP_P4_139681_73864 | NW_004516062.1 | Scaffold645 | 73864                   | AA                              | CC              | 1946968810               |
| SNP_P4_139684_74046 | NW_004516062.1 | Scaffold645 | 74046                   | GG                              | AA              | 1946968812               |
| SNP_P4_139686_93786 | NW_004516062.1 | Scaffold645 | 93786                   | CC                              | GG              | 1946968813               |
| SNP_P4_139687_93810 | NW_004516062.1 | Scaffold645 | 93810                   | AA                              | CC              | 1946968815               |
| SNP_P4_139688_93949 | NW_004516062.1 | Scaffold645 | 93949                   | GG                              | CC              | 1946968817               |
| SNP_P4_139689_93977 | NW_004516062.1 | Scaffold645 | 93977                   | TT                              | CC              | 1946968819               |
| SNP_P4_139690_93998 | NW_004516062.1 | Scaffold645 | 93998                   | TT                              | CC              | 1946968821               |
| SNP_P4_139691_94012 | NW_004516062.1 | Scaffold645 | 94012                   | AA                              | TT              | 1946968823               |
| SNP_P4_139692_94016 | NW_004516062.1 | Scaffold645 | 94016                   | CC                              | TT              | 1946968825               |
| SNP_P4_139693_94036 | NW_004516062.1 | Scaffold645 | 94036                   | AA                              | GG              | 1946968827               |
| SNP_P4_139694_94047 | NW_004516062.1 | Scaffold645 | 94047                   | AA                              | TT              | 1946968829               |



| SNPs IDs             | Chromosome IDs | Chromosomes | Physical positions (bp) | CDC Frontier (Reference genome) | (ILWC46 & LPNB) | NCBI SNPdb Accession IDs |
|----------------------|----------------|-------------|-------------------------|---------------------------------|-----------------|--------------------------|
| SNP_P4_139695_94360  | NW_004516062.1 | Scaffold645 | 94360                   | GG                              | TT              | 1946968831               |
| SNP_P4_139696_129965 | NW_004516062.1 | Scaffold645 | 129965                  | AA                              | GG              | 1946968833               |
| SNP_P4_139697_140346 | NW_004516062.1 | Scaffold645 | 140346                  | CC                              | GG              | 1946968835               |
| SNP_P4_139698_146955 | NW_004516062.1 | Scaffold645 | 146955                  | GG                              | TT              | 1946968837               |
| SNP_P4_139699_147557 | NW_004516062.1 | Scaffold645 | 147557                  | AA                              | CC              | 1946968839               |
| SNP_P4_139700_160633 | NW_004516062.1 | Scaffold645 | 160633                  | TT                              | CC              | 1946968841               |
| SNP_P4_139701_160783 | NW_004516062.1 | Scaffold645 | 160783                  | AA                              | GG              | 1946968843               |
| SNP_P4_139702_161374 | NW_004516062.1 | Scaffold645 | 161374                  | GG                              | AA              | 1946968845               |
| SNP_P4_139703_162907 | NW_004516062.1 | Scaffold645 | 162907                  | CC                              | TT              | 1946968847               |
| SNP_P4_139704_163221 | NW_004516062.1 | Scaffold645 | 163221                  | TT                              | CC              | 1946968849               |
| SNP_P4_139705_167307 | NW_004516062.1 | Scaffold645 | 167307                  | TT                              | GG              | 1946968851               |
| SNP_P4_139706_169986 | NW_004516062.1 | Scaffold645 | 169986                  | AA                              | GG              | 1946968853               |
| SNP_P4_139707_176152 | NW_004516062.1 | Scaffold645 | 176152                  | TT                              | AA              | 1946968855               |
| SNP_P4_139708_189501 | NW_004516062.1 | Scaffold645 | 189501                  | TT                              | GG              | 1946968857               |
| SNP_P4_139709_191234 | NW_004516062.1 | Scaffold645 | 191234                  | AA                              | GG              | 1946968859               |
| SNP_P4_139710_192667 | NW_004516062.1 | Scaffold645 | 192667                  | AA                              | GG              | 1946968861               |
| SNP_P4_139711_192683 | NW_004516062.1 | Scaffold645 | 192683                  | CC                              | TT              | 1946968863               |
| SNP_P4_139712_192798 | NW_004516062.1 | Scaffold645 | 192798                  | GG                              | CC              | 1946968865               |
| SNP_P4_139713_192815 | NW_004516062.1 | Scaffold645 | 192815                  | CC                              | TT              | 1946968867               |
| SNP_P4_139714_192825 | NW_004516062.1 | Scaffold645 | 192825                  | TT                              | CC              | 1946968868               |
| SNP_P4_139715_193261 | NW_004516062.1 | Scaffold645 | 193261                  | AA                              | GG              | 1946968870               |
| SNP_P4_139716_193277 | NW_004516062.1 | Scaffold645 | 193277                  | CC                              | TT              | 1946968872               |
| SNP_P4_139718_225614 | NW_004516062.1 | Scaffold645 | 225614                  | AA                              | GG              | 1946968874               |
| SNP_P4_139719_225958 | NW_004516062.1 | Scaffold645 | 225958                  | AA                              | GG              | 1946968876               |
| SNP_P4_139720_225990 | NW_004516062.1 | Scaffold645 | 225990                  | CC                              | TT              | 1946968878               |
| SNP_P4_139723_265467 | NW_004516062.1 | Scaffold645 | 265467                  | CC                              | TT              | 1946968880               |
| SNP_P4_139724_274187 | NW_004516062.1 | Scaffold645 | 274187                  | TT                              | AA              | 1946968882               |
| SNP_P4_139725_279931 | NW_004516062.1 | Scaffold645 | 279931                  | AA                              | TT              | 1946968884               |
| SNP_P4_139726_279935 | NW_004516062.1 | Scaffold645 | 279935                  | CC                              | TT              | 1946968886               |
| SNP_P4_139727_280515 | NW_004516062.1 | Scaffold645 | 280515                  | AA                              | TT              | 1946968888               |
| SNP_P4_139728_282391 | NW_004516062.1 | Scaffold645 | 282391                  | TT                              | CC              | 1946968889               |
| SNP_P4_139729_282914 | NW_004516062.1 | Scaffold645 | 282914                  | AA                              | TT              | 1946968891               |
| SNP_P4_139730_285332 | NW_004516062.1 | Scaffold645 | 285332                  | TT                              | CC              | 1946968893               |
| SNP_P4_139731_285336 | NW_004516062.1 | Scaffold645 | 285336                  | GG                              | CC              | 1946968895               |
| SNP_P4_139732_285372 | NW_004516062.1 | Scaffold645 | 285372                  | AA                              | CC              | 1946968897               |
| SNP_P4_139733_285583 | NW_004516062.1 | Scaffold645 | 285583                  | CC                              | AA              | 1946968899               |
| SNP_P4_139734_285625 | NW_004516062.1 | Scaffold645 | 285625                  | AA                              | GG              | 1946968901               |
| SNP_P4_139735_285804 | NW_004516062.1 | Scaffold645 | 285804                  | TT                              | AA              | 1946968903               |
| SNP_P4_139736_286980 | NW_004516062.1 | Scaffold645 | 286980                  | TT                              | CC              | 1946968905               |
| SNP_P4_139737_286993 | NW_004516062.1 | Scaffold645 | 286993                  | AA                              | GG              | 1946968907               |
| SNP_P4_139738_287014 | NW_004516062.1 | Scaffold645 | 287014                  | AA                              | GG              | 1946968909               |
| SNP_P4_139739_287061 | NW_004516062.1 | Scaffold645 | 287061                  | TT                              | GG              | 1946968911               |

| SNPs IDs             | Chromosome IDs | Chromosomes | Physical positions (bp) | CDC Frontier (Reference genome) | (ILWC46 & LPNB) | NCBI SNPdb Accession IDs |
|----------------------|----------------|-------------|-------------------------|---------------------------------|-----------------|--------------------------|
| SNP_P4_139740_287067 | NW_004516062.1 | Scaffold645 | 287067                  | AA                              | GG              | 1946968913               |
| SNP_P4_139741_287270 | NW_004516062.1 | Scaffold645 | 287270                  | TT                              | GG              | 1946968915               |
| SNP_P4_139742_287294 | NW_004516062.1 | Scaffold645 | 287294                  | AA                              | TT              | 1946968917               |
| SNP_P4_139744_287312 | NW_004516062.1 | Scaffold645 | 287312                  | AA                              | CC              | 1946968919               |
| SNP_P4_139745_287317 | NW_004516062.1 | Scaffold645 | 287317                  | GG                              | CC              | 1946968921               |
| SNP_P4_139746_287380 | NW_004516062.1 | Scaffold645 | 287380                  | AA                              | CC              | 1946968923               |
| SNP_P4_139747_287464 | NW_004516062.1 | Scaffold645 | 287464                  | CC                              | AA              | 1946968925               |
| SNP_P4_139748_287465 | NW_004516062.1 | Scaffold645 | 287465                  | AA                              | TT              | 1946968927               |
| SNP_P4_139749_287603 | NW_004516062.1 | Scaffold645 | 287603                  | TT                              | AA              | 1946968929               |
| SNP_P4_139750_287651 | NW_004516062.1 | Scaffold645 | 287651                  | CC                              | TT              | 1946968931               |
| SNP_P4_139751_287698 | NW_004516062.1 | Scaffold645 | 287698                  | CC                              | AA              | 1946968933               |
| SNP_P4_139753_287940 | NW_004516062.1 | Scaffold645 | 287940                  | CC                              | TT              | 1946968935               |
| SNP_P4_139754_288026 | NW_004516062.1 | Scaffold645 | 288026                  | TT                              | GG              | 1946968937               |
| SNP_P4_139755_288208 | NW_004516062.1 | Scaffold645 | 288208                  | GG                              | TT              | 1946968939               |
| SNP_P4_139756_288303 | NW_004516062.1 | Scaffold645 | 288303                  | GG                              | TT              | 1946968941               |
| SNP_P4_139757_289142 | NW_004516062.1 | Scaffold645 | 289142                  | AA                              | CC              | 1946968943               |
| SNP_P4_139758_289421 | NW_004516062.1 | Scaffold645 | 289421                  | GG                              | CC              | 1946968945               |
| SNP_P4_139759_289515 | NW_004516062.1 | Scaffold645 | 289515                  | GG                              | AA              | 1946968947               |
| SNP_P4_139760_289958 | NW_004516062.1 | Scaffold645 | 289958                  | TT                              | AA              | 1946968949               |
| SNP_P4_139761_296604 | NW_004516062.1 | Scaffold645 | 296604                  | TT                              | GG              | 1946968951               |
| SNP_P4_139762_298221 | NW_004516062.1 | Scaffold645 | 298221                  | AA                              | GG              | 1946968953               |
| SNP_P4_139763_299449 | NW_004516062.1 | Scaffold645 | 299449                  | CC                              | TT              | 1946968955               |
| SNP_P4_139764_300148 | NW_004516062.1 | Scaffold645 | 300148                  | AA                              | GG              | 1946968957               |
| SNP_P4_139765_301221 | NW_004516062.1 | Scaffold645 | 301221                  | AA                              | GG              | 1946968959               |
| SNP_P4_139766_303912 | NW_004516062.1 | Scaffold645 | 303912                  | TT                              | CC              | 1946968961               |
| SNP_P4_139767_303924 | NW_004516062.1 | Scaffold645 | 303924                  | TT                              | GG              | 1946968963               |
| SNP_P4_139768_752    | NW_004516064.1 | Scaffold647 | 752                     | CC                              | TT              | 1946968965               |
| SNP_P4_139769_984    | NW_004516064.1 | Scaffold647 | 984                     | TT                              | GG              | 1946968967               |
| SNP_P4_139770_1047   | NW_004516064.1 | Scaffold647 | 1047                    | TT                              | CC              | 1946968969               |
| SNP_P4_139771_7329   | NW_004516064.1 | Scaffold647 | 7329                    | TT                              | CC              | 1946968971               |
| SNP_P4_139772_7367   | NW_004516064.1 | Scaffold647 | 7367                    | TT                              | AA              | 1946968973               |
| SNP_P4_139773_7466   | NW_004516064.1 | Scaffold647 | 7466                    | TT                              | CC              | 1946968975               |
| SNP_P4_139774_7540   | NW_004516064.1 | Scaffold647 | 7540                    | AA                              | CC              | 1946968977               |
| SNP_P4_139775_7574   | NW_004516064.1 | Scaffold647 | 7574                    | AA                              | GG              | 1946968979               |
| SNP_P4_139776_7674   | NW_004516064.1 | Scaffold647 | 7674                    | GG                              | AA              | 1946968981               |
| SNP_P4_139777_12832  | NW_004516064.1 | Scaffold647 | 12832                   | AA                              | CC              | 1946968983               |
| SNP_P4_139778_16372  | NW_004516064.1 | Scaffold647 | 16372                   | GG                              | TT              | 1946968985               |
| SNP_P4_139779_20225  | NW_004516064.1 | Scaffold647 | 20225                   | TT                              | CC              | 1946968987               |
| SNP_P4_139780_20859  | NW_004516064.1 | Scaffold647 | 20859                   | AA                              | GG              | 1946968989               |
| SNP_P4_139781_21371  | NW_004516064.1 | Scaffold647 | 21371                   | GG                              | AA              | 1946968991               |
| SNP_P4_139782_21420  | NW_004516064.1 | Scaffold647 | 21420                   | AA                              | GG              | 1946968993               |
| SNP_P4_139783_21456  | NW_004516064.1 | Scaffold647 | 21456                   | GG                              | AA              | 1946968995               |

| SNPs IDs            | Chromosome IDs | Chromosomes | Physical positions (bp) | CDC Frontier (Reference genome) | (ILWC46 & LPNB) | NCBI SNPdb Accession IDs |
|---------------------|----------------|-------------|-------------------------|---------------------------------|-----------------|--------------------------|
| SNP_P4_139784_22975 | NW_004516064.1 | Scaffold647 | 22975                   | CC                              | TT              | 1946968997               |
| SNP_P4_139785_23333 | NW_004516064.1 | Scaffold647 | 23333                   | TT                              | AA              | 1946968999               |
| SNP_P4_139786_23337 | NW_004516064.1 | Scaffold647 | 23337                   | TT                              | GG              | 1946969001               |
| SNP_P4_139787_23381 | NW_004516064.1 | Scaffold647 | 23381                   | AA                              | CC              | 1946969003               |
| SNP_P4_139788_29848 | NW_004516064.1 | Scaffold647 | 29848                   | GG                              | CC              | 1946969005               |
| SNP_P4_139789_29890 | NW_004516064.1 | Scaffold647 | 29890                   | CC                              | TT              | 1946969007               |
| SNP_P4_139790_29985 | NW_004516064.1 | Scaffold647 | 29985                   | AA                              | CC              | 1946969009               |
| SNP_P4_139791_29986 | NW_004516064.1 | Scaffold647 | 29986                   | TT                              | AA              | 1946969011               |
| SNP_P4_139792_29987 | NW_004516064.1 | Scaffold647 | 29987                   | AA                              | GG              | 1946969013               |
| SNP_P4_139793_30125 | NW_004516064.1 | Scaffold647 | 30125                   | GG                              | TT              | 1946969015               |
| SNP_P4_139794_30493 | NW_004516064.1 | Scaffold647 | 30493                   | GG                              | CC              | 1946969017               |
| SNP_P4_139795_30525 | NW_004516064.1 | Scaffold647 | 30525                   | GG                              | AA              | 1946969019               |
| SNP_P4_139796_30923 | NW_004516064.1 | Scaffold647 | 30923                   | GG                              | CC              | 1946969021               |
| SNP_P4_139797_35924 | NW_004516064.1 | Scaffold647 | 35924                   | GG                              | AA              | 1946969023               |
| SNP_P4_139798_35931 | NW_004516064.1 | Scaffold647 | 35931                   | GG                              | AA              | 1946969025               |
| SNP_P4_139799_35932 | NW_004516064.1 | Scaffold647 | 35932                   | GG                              | CC              | 1946969027               |
| SNP_P4_139800_35968 | NW_004516064.1 | Scaffold647 | 35968                   | TT                              | AA              | 1946969029               |
| SNP_P4_139801_40442 | NW_004516064.1 | Scaffold647 | 40442                   | GG                              | AA              | 1946969031               |
| SNP_P4_139802_40466 | NW_004516064.1 | Scaffold647 | 40466                   | GG                              | AA              | 1946969033               |
| SNP_P4_139803_40477 | NW_004516064.1 | Scaffold647 | 40477                   | TT                              | GG              | 1946969035               |
| SNP_P4_139804_40552 | NW_004516064.1 | Scaffold647 | 40552                   | TT                              | AA              | 1946969037               |
| SNP_P4_139805_40572 | NW_004516064.1 | Scaffold647 | 40572                   | AA                              | GG              | 1946969039               |
| SNP_P4_139806_40583 | NW_004516064.1 | Scaffold647 | 40583                   | TT                              | GG              | 1946969041               |
| SNP_P4_139807_40594 | NW_004516064.1 | Scaffold647 | 40594                   | CC                              | TT              | 1946969043               |
| SNP_P4_139808_40604 | NW_004516064.1 | Scaffold647 | 40604                   | CC                              | AA              | 1946969045               |
| SNP_P4_139809_46851 | NW_004516064.1 | Scaffold647 | 46851                   | GG                              | AA              | 1946969047               |
| SNP_P4_139810_47232 | NW_004516064.1 | Scaffold647 | 47232                   | GG                              | AA              | 1946969049               |
| SNP_P4_139811_47268 | NW_004516064.1 | Scaffold647 | 47268                   | AA                              | TT              | 1946969051               |
| SNP_P4_139812_48939 | NW_004516064.1 | Scaffold647 | 48939                   | AA                              | GG              | 1946969053               |
| SNP_P4_139813_49945 | NW_004516064.1 | Scaffold647 | 49945                   | TT                              | CC              | 1946969055               |
| SNP_P4_139814_49960 | NW_004516064.1 | Scaffold647 | 49960                   | TT                              | CC              | 1946969057               |
| SNP_P4_139815_55468 | NW_004516064.1 | Scaffold647 | 55468                   | GG                              | TT              | 1946969059               |
| SNP_P4_139816_71274 | NW_004516064.1 | Scaffold647 | 71274                   | TT                              | CC              | 1946969061               |
| SNP_P4_139817_71419 | NW_004516064.1 | Scaffold647 | 71419                   | TT                              | CC              | 1946969063               |
| SNP_P4_139818_71764 | NW_004516064.1 | Scaffold647 | 71764                   | AA                              | CC              | 1946969065               |
| SNP_P4_139819_71827 | NW_004516064.1 | Scaffold647 | 71827                   | TT                              | GG              | 1946969067               |
| SNP_P4_139820_71870 | NW_004516064.1 | Scaffold647 | 71870                   | GG                              | TT              | 1946969069               |
| SNP_P4_139821_71891 | NW_004516064.1 | Scaffold647 | 71891                   | TT                              | CC              | 1946969071               |
| SNP_P4_139822_71911 | NW_004516064.1 | Scaffold647 | 71911                   | TT                              | CC              | 1946969073               |
| SNP_P4_139823_73794 | NW_004516064.1 | Scaffold647 | 73794                   | TT                              | AA              | 1946969075               |
| SNP_P4_139824_74415 | NW_004516064.1 | Scaffold647 | 74415                   | TT                              | CC              | 1946969077               |
| SNP_P4_139825_82379 | NW_004516064.1 | Scaffold647 | 82379                   | AA                              | GG              | 1946969079               |

| SNPs IDs             | Chromosome IDs | Chromosomes | Physical positions (bp) | CDC Frontier (Reference genome) | (ILWC46 & LPNB) | NCBI SNPdb Accession IDs |
|----------------------|----------------|-------------|-------------------------|---------------------------------|-----------------|--------------------------|
| SNP_P4_139826_86437  | NW_004516064.1 | Scaffold647 | 86437                   | AA                              | GG              | 1946969081               |
| SNP_P4_139827_86738  | NW_004516064.1 | Scaffold647 | 86738                   | TT                              | CC              | 1946969083               |
| SNP_P4_139828_92977  | NW_004516064.1 | Scaffold647 | 92977                   | CC                              | TT              | 1946969085               |
| SNP_P4_139829_93246  | NW_004516064.1 | Scaffold647 | 93246                   | AA                              | TT              | 1946969087               |
| SNP_P4_139830_93393  | NW_004516064.1 | Scaffold647 | 93393                   | GG                              | TT              | 1946969089               |
| SNP_P4_139831_93395  | NW_004516064.1 | Scaffold647 | 93395                   | GG                              | TT              | 1946969091               |
| SNP_P4_139832_93558  | NW_004516064.1 | Scaffold647 | 93558                   | TT                              | GG              | 1946969093               |
| SNP_P4_139833_95317  | NW_004516064.1 | Scaffold647 | 95317                   | CC                              | TT              | 1946969095               |
| SNP_P4_139834_95337  | NW_004516064.1 | Scaffold647 | 95337                   | CC                              | TT              | 1946969097               |
| SNP_P4_139835_95596  | NW_004516064.1 | Scaffold647 | 95596                   | CC                              | TT              | 1946969099               |
| SNP_P4_139836_99045  | NW_004516064.1 | Scaffold647 | 99045                   | TT                              | CC              | 1946969101               |
| SNP_P4_139837_120567 | NW_004516064.1 | Scaffold647 | 120567                  | CC                              | TT              | 1946969103               |
| SNP_P4_139838_120809 | NW_004516064.1 | Scaffold647 | 120809                  | CC                              | AA              | 1946969105               |
| SNP_P4_139839_124031 | NW_004516064.1 | Scaffold647 | 124031                  | CC                              | AA              | 1946969107               |
| SNP_P4_139840_126289 | NW_004516064.1 | Scaffold647 | 126289                  | GG                              | AA              | 1946969109               |
| SNP_P4_139841_132964 | NW_004516064.1 | Scaffold647 | 132964                  | CC                              | TT              | 1946969111               |
| SNP_P4_139842_133209 | NW_004516064.1 | Scaffold647 | 133209                  | TT                              | CC              | 1946969113               |
| SNP_P4_139843_133400 | NW_004516064.1 | Scaffold647 | 133400                  | AA                              | GG              | 1946969115               |
| SNP_P4_139844_147136 | NW_004516064.1 | Scaffold647 | 147136                  | AA                              | CC              | 1946969117               |
| SNP_P4_139845_147475 | NW_004516064.1 | Scaffold647 | 147475                  | TT                              | GG              | 1946969119               |
| SNP_P4_139846_147479 | NW_004516064.1 | Scaffold647 | 147479                  | AA                              | TT              | 1946969121               |
| SNP_P4_139847_152917 | NW_004516064.1 | Scaffold647 | 152917                  | TT                              | CC              | 1946969123               |
| SNP_P4_139848_162054 | NW_004516064.1 | Scaffold647 | 162054                  | AA                              | GG              | 1946969125               |
| SNP_P4_139849_162341 | NW_004516064.1 | Scaffold647 | 162341                  | AA                              | GG              | 1946969127               |
| SNP_P4_139850_162391 | NW_004516064.1 | Scaffold647 | 162391                  | AA                              | GG              | 1946969129               |
| SNP_P4_139851_169186 | NW_004516064.1 | Scaffold647 | 169186                  | TT                              | AA              | 1946969130               |
| SNP_P4_139852_181909 | NW_004516064.1 | Scaffold647 | 181909                  | GG                              | AA              | 1946969132               |
| SNP_P4_139853_189861 | NW_004516064.1 | Scaffold647 | 189861                  | TT                              | CC              | 1946969134               |
| SNP_P4_139854_191363 | NW_004516064.1 | Scaffold647 | 191363                  | TT                              | CC              | 1946969136               |
| SNP_P4_139855_191646 | NW_004516064.1 | Scaffold647 | 191646                  | CC                              | TT              | 1946969138               |
| SNP_P4_139856_193238 | NW_004516064.1 | Scaffold647 | 193238                  | TT                              | AA              | 1946969140               |
| SNP_P4_139857_193239 | NW_004516064.1 | Scaffold647 | 193239                  | GG                              | AA              | 1946969142               |
| SNP_P4_139858_200337 | NW_004516064.1 | Scaffold647 | 200337                  | GG                              | TT              | 1946969144               |
| SNP_P4_139860_200862 | NW_004516064.1 | Scaffold647 | 200862                  | AA                              | GG              | 1946969146               |
| SNP_P4_139861_201225 | NW_004516064.1 | Scaffold647 | 201225                  | TT                              | CC              | 1946969148               |
| SNP_P4_139862_201226 | NW_004516064.1 | Scaffold647 | 201226                  | AA                              | GG              | 1946969150               |
| SNP_P4_139863_201256 | NW_004516064.1 | Scaffold647 | 201256                  | TT                              | CC              | 1946969152               |
| SNP_P4_139864_201266 | NW_004516064.1 | Scaffold647 | 201266                  | AA                              | GG              | 1946969154               |
| SNP_P4_139865_201276 | NW_004516064.1 | Scaffold647 | 201276                  | TT                              | AA              | 1946969156               |
| SNP_P4_139866_201328 | NW_004516064.1 | Scaffold647 | 201328                  | GG                              | AA              | 1946969158               |
| SNP_P4_139867_201519 | NW_004516064.1 | Scaffold647 | 201519                  | AA                              | TT              | 1946969160               |
| SNP_P4_139868_201663 | NW_004516064.1 | Scaffold647 | 201663                  | TT                              | CC              | 1946969162               |

| SNPs IDs             | Chromosome IDs | Chromosomes | Physical positions (bp) | CDC Frontier (Reference genome) | (ILWC46 & LPNB) | NCBI SNPdb Accession IDs |
|----------------------|----------------|-------------|-------------------------|---------------------------------|-----------------|--------------------------|
| SNP_P4_139869_201749 | NW_004516064.1 | Scaffold647 | 201749                  | AA                              | TT              | 1946969164               |
| SNP_P4_139870_201762 | NW_004516064.1 | Scaffold647 | 201762                  | GG                              | AA              | 1946969166               |
| SNP_P4_139871_201779 | NW_004516064.1 | Scaffold647 | 201779                  | TT                              | CC              | 1946969168               |
| SNP_P4_139872_201781 | NW_004516064.1 | Scaffold647 | 201781                  | AA                              | GG              | 1946969170               |
| SNP_P4_139873_201786 | NW_004516064.1 | Scaffold647 | 201786                  | GG                              | AA              | 1946969172               |
| SNP_P4_139874_201789 | NW_004516064.1 | Scaffold647 | 201789                  | CC                              | TT              | 1946969174               |
| SNP_P4_139875_201798 | NW_004516064.1 | Scaffold647 | 201798                  | GG                              | AA              | 1946969176               |
| SNP_P4_139876_201850 | NW_004516064.1 | Scaffold647 | 201850                  | TT                              | GG              | 1946969178               |
| SNP_P4_139877_212415 | NW_004516064.1 | Scaffold647 | 212415                  | TT                              | CC              | 1946969180               |
| SNP_P4_139878_212569 | NW_004516064.1 | Scaffold647 | 212569                  | TT                              | CC              | 1946969182               |
| SNP_P4_139879_212602 | NW_004516064.1 | Scaffold647 | 212602                  | TT                              | GG              | 1946969184               |
| SNP_P4_139880_212606 | NW_004516064.1 | Scaffold647 | 212606                  | TT                              | CC              | 1946969186               |
| SNP_P4_139881_212627 | NW_004516064.1 | Scaffold647 | 212627                  | TT                              | GG              | 1946969188               |
| SNP_P4_139882_212699 | NW_004516064.1 | Scaffold647 | 212699                  | AA                              | GG              | 1946969190               |
| SNP_P4_139883_212735 | NW_004516064.1 | Scaffold647 | 212735                  | TT                              | CC              | 1946969192               |
| SNP_P4_139884_212769 | NW_004516064.1 | Scaffold647 | 212769                  | TT                              | CC              | 1946969194               |
| SNP_P4_139885_212778 | NW_004516064.1 | Scaffold647 | 212778                  | GG                              | CC              | 1946969196               |
| SNP_P4_139886_212821 | NW_004516064.1 | Scaffold647 | 212821                  | GG                              | CC              | 1946969198               |
| SNP_P4_139887_212865 | NW_004516064.1 | Scaffold647 | 212865                  | AA                              | GG              | 1946969200               |
| SNP_P4_139888_212866 | NW_004516064.1 | Scaffold647 | 212866                  | CC                              | TT              | 1946969202               |
| SNP_P4_139889_212872 | NW_004516064.1 | Scaffold647 | 212872                  | AA                              | TT              | 1946969204               |
| SNP_P4_139890_212877 | NW_004516064.1 | Scaffold647 | 212877                  | TT                              | CC              | 1946969206               |
| SNP_P4_139891_526    | NW_004516065.1 | Scaffold648 | 526                     | GG                              | TT              | 1946969208               |
| SNP_P4_139892_730    | NW_004516065.1 | Scaffold648 | 730                     | AA                              | CC              | 1946969210               |
| SNP_P4_139893_904    | NW_004516065.1 | Scaffold648 | 904                     | CC                              | TT              | 1946969212               |
| SNP_P4_139894_1063   | NW_004516065.1 | Scaffold648 | 1063                    | AA                              | GG              | 1946969214               |
| SNP_P4_139895_1319   | NW_004516065.1 | Scaffold648 | 1319                    | GG                              | AA              | 1946969216               |
| SNP_P4_139896_1337   | NW_004516065.1 | Scaffold648 | 1337                    | TT                              | AA              | 1946969218               |
| SNP_P4_139897_1620   | NW_004516065.1 | Scaffold648 | 1620                    | AA                              | GG              | 1946969220               |
| SNP_P4_139898_1634   | NW_004516065.1 | Scaffold648 | 1634                    | GG                              | AA              | 1946969222               |
| SNP_P4_139899_1659   | NW_004516065.1 | Scaffold648 | 1659                    | AA                              | GG              | 1946969224               |
| SNP_P4_139900_2497   | NW_004516065.1 | Scaffold648 | 2497                    | TT                              | AA              | 1946969226               |
| SNP_P4_139901_19303  | NW_004516065.1 | Scaffold648 | 19303                   | GG                              | CC              | 1946969228               |
| SNP_P4_139902_21736  | NW_004516065.1 | Scaffold648 | 21736                   | GG                              | AA              | 1946969230               |
| SNP_P4_139903_25861  | NW_004516065.1 | Scaffold648 | 25861                   | GG                              | AA              | 1946969232               |
| SNP_P4_139904_30363  | NW_004516065.1 | Scaffold648 | 30363                   | AA                              | CC              | 1946969234               |
| SNP_P4_139905_2230   | NW_004516067.1 | Scaffold651 | 2230                    | TT                              | CC              | 1946969236               |
| SNP_P4_139906_2412   | NW_004516067.1 | Scaffold651 | 2412                    | GG                              | AA              | 1946969238               |
| SNP_P4_139907_2529   | NW_004516067.1 | Scaffold651 | 2529                    | TT                              | GG              | 1946969240               |
| SNP_P4_139908_4972   | NW_004516067.1 | Scaffold651 | 4972                    | TT                              | AA              | 1946969242               |
| SNP_P4_139909_4994   | NW_004516067.1 | Scaffold651 | 4994                    | GG                              | TT              | 1946969244               |
| SNP_P4_139910_4998   | NW_004516067.1 | Scaffold651 | 4998                    | GG                              | TT              | 1946969246               |

| SNPs IDs             | Chromosome IDs | Chromosomes | Physical positions (bp) | CDC Frontier (Reference genome) | (ILWC46 & LPNB) | NCBI SNPdb Accession IDs |
|----------------------|----------------|-------------|-------------------------|---------------------------------|-----------------|--------------------------|
| SNP_P4_139911_5000   | NW_004516067.1 | Scaffold651 | 5000                    | GG                              | AA              | 1946969248               |
| SNP_P4_139912_5023   | NW_004516067.1 | Scaffold651 | 5023                    | AA                              | TT              | 1946969250               |
| SNP_P4_139913_7595   | NW_004516067.1 | Scaffold651 | 7595                    | AA                              | CC              | 1946969252               |
| SNP_P4_139914_7721   | NW_004516067.1 | Scaffold651 | 7721                    | GG                              | TT              | 1946969254               |
| SNP_P4_139915_7738   | NW_004516067.1 | Scaffold651 | 7738                    | CC                              | AA              | 1946969256               |
| SNP_P4_139916_7780   | NW_004516067.1 | Scaffold651 | 7780                    | TT                              | AA              | 1946969258               |
| SNP_P4_139917_7833   | NW_004516067.1 | Scaffold651 | 7833                    | CC                              | TT              | 1946969260               |
| SNP_P4_139918_7843   | NW_004516067.1 | Scaffold651 | 7843                    | TT                              | AA              | 1946969262               |
| SNP_P4_139919_7917   | NW_004516067.1 | Scaffold651 | 7917                    | TT                              | GG              | 1946969264               |
| SNP_P4_139920_9512   | NW_004516067.1 | Scaffold651 | 9512                    | AA                              | TT              | 1946969266               |
| SNP_P4_139921_16544  | NW_004516067.1 | Scaffold651 | 16544                   | GG                              | CC              | 1946969268               |
| SNP_P4_139922_16793  | NW_004516067.1 | Scaffold651 | 16793                   | AA                              | GG              | 1946969270               |
| SNP_P4_139923_17012  | NW_004516067.1 | Scaffold651 | 17012                   | TT                              | GG              | 1946969272               |
| SNP_P4_139925_35586  | NW_004516067.1 | Scaffold651 | 35586                   | AA                              | CC              | 1946969274               |
| SNP_P4_139926_38566  | NW_004516067.1 | Scaffold651 | 38566                   | AA                              | GG              | 1946969276               |
| SNP_P4_139927_41249  | NW_004516067.1 | Scaffold651 | 41249                   | GG                              | CC              | 1946969278               |
| SNP_P4_139928_41416  | NW_004516067.1 | Scaffold651 | 41416                   | AA                              | GG              | 1946969280               |
| SNP_P4_139929_42283  | NW_004516067.1 | Scaffold651 | 42283                   | GG                              | AA              | 1946969282               |
| SNP_P4_139930_46652  | NW_004516067.1 | Scaffold651 | 46652                   | AA                              | GG              | 1946969284               |
| SNP_P4_139931_47561  | NW_004516067.1 | Scaffold651 | 47561                   | CC                              | TT              | 1946969286               |
| SNP_P4_139932_58904  | NW_004516067.1 | Scaffold651 | 58904                   | TT                              | AA              | 1946969288               |
| SNP_P4_139933_58910  | NW_004516067.1 | Scaffold651 | 58910                   | GG                              | CC              | 1946969290               |
| SNP_P4_139934_58942  | NW_004516067.1 | Scaffold651 | 58942                   | AA                              | GG              | 1946969292               |
| SNP_P4_139936_485    | NW_004516068.1 | Scaffold652 | 485                     | TT                              | CC              | 1946969294               |
| SNP_P4_139937_1634   | NW_004516068.1 | Scaffold652 | 1634                    | GG                              | AA              | 1946969296               |
| SNP_P4_139938_9570   | NW_004516069.1 | Scaffold653 | 9570                    | TT                              | AA              | 1946969298               |
| SNP_P4_139939_13352  | NW_004516069.1 | Scaffold653 | 13352                   | GG                              | CC              | 1946969300               |
| SNP_P4_139940_13383  | NW_004516069.1 | Scaffold653 | 13383                   | TT                              | GG              | 1946969302               |
| SNP_P4_139941_19005  | NW_004516069.1 | Scaffold653 | 19005                   | CC                              | TT              | 1946969304               |
| SNP_P4_139943_40593  | NW_004516069.1 | Scaffold653 | 40593                   | CC                              | TT              | 1946969306               |
| SNP_P4_139944_42844  | NW_004516069.1 | Scaffold653 | 42844                   | AA                              | CC              | 1946969308               |
| SNP_P4_139947_136862 | NW_004516069.1 | Scaffold653 | 136862                  | GG                              | AA              | 1946969310               |
| SNP_P4_139948_171120 | NW_004516069.1 | Scaffold653 | 171120                  | GG                              | AA              | 1946969311               |
| SNP_P4_139949_171191 | NW_004516069.1 | Scaffold653 | 171191                  | CC                              | TT              | 1946969313               |
| SNP_P4_139951_172671 | NW_004516069.1 | Scaffold653 | 172671                  | GG                              | AA              | 1946969315               |
| SNP_P4_139952_172688 | NW_004516069.1 | Scaffold653 | 172688                  | CC                              | TT              | 1946969318               |
| SNP_P4_139953_172732 | NW_004516069.1 | Scaffold653 | 172732                  | AA                              | GG              | 1946969320               |
| SNP_P4_139954_172998 | NW_004516069.1 | Scaffold653 | 172998                  | TT                              | AA              | 1946969322               |
| SNP_P4_139955_173042 | NW_004516069.1 | Scaffold653 | 173042                  | CC                              | TT              | 1946969324               |
| SNP_P4_139956_173962 | NW_004516069.1 | Scaffold653 | 173962                  | CC                              | TT              | 1946969326               |
| SNP_P4_139957_174045 | NW_004516069.1 | Scaffold653 | 174045                  | AA                              | GG              | 1946969328               |
| SNP_P4_139958_174265 | NW_004516069.1 | Scaffold653 | 174265                  | GG                              | AA              | 1946969330               |

| SNPs IDs             | Chromosome IDs | Chromosomes | Physical positions (bp) | CDC Frontier (Reference genome) | (ILWC46 & LPNB) | NCBI SNPdb Accession IDs |
|----------------------|----------------|-------------|-------------------------|---------------------------------|-----------------|--------------------------|
| SNP_P4_139959_174278 | NW_004516069.1 | Scaffold653 | 174278                  | GG                              | AA              | 1946969332               |
| SNP_P4_139960_174368 | NW_004516069.1 | Scaffold653 | 174368                  | TT                              | CC              | 1946969334               |
| SNP_P4_139961_174384 | NW_004516069.1 | Scaffold653 | 174384                  | CC                              | AA              | 1946969336               |
| SNP_P4_139962_174391 | NW_004516069.1 | Scaffold653 | 174391                  | GG                              | AA              | 1946969338               |
| SNP_P4_139963_174819 | NW_004516069.1 | Scaffold653 | 174819                  | AA                              | GG              | 1946969340               |
| SNP_P4_139964_174873 | NW_004516069.1 | Scaffold653 | 174873                  | GG                              | AA              | 1946969342               |
| SNP_P4_139965_174875 | NW_004516069.1 | Scaffold653 | 174875                  | AA                              | GG              | 1946969344               |
| SNP_P4_139966_175180 | NW_004516069.1 | Scaffold653 | 175180                  | GG                              | AA              | 1946969346               |
| SNP_P4_139967_175373 | NW_004516069.1 | Scaffold653 | 175373                  | CC                              | TT              | 1946969348               |
| SNP_P4_139968_175633 | NW_004516069.1 | Scaffold653 | 175633                  | CC                              | AA              | 1946969350               |
| SNP_P4_139969_176368 | NW_004516069.1 | Scaffold653 | 176368                  | TT                              | GG              | 1946969352               |
| SNP_P4_139970_177592 | NW_004516069.1 | Scaffold653 | 177592                  | GG                              | TT              | 1946969354               |
| SNP_P4_139971_177832 | NW_004516069.1 | Scaffold653 | 177832                  | TT                              | CC              | 1946969356               |
| SNP_P4_139972_178096 | NW_004516069.1 | Scaffold653 | 178096                  | CC                              | TT              | 1946969358               |
| SNP_P4_139973_178105 | NW_004516069.1 | Scaffold653 | 178105                  | AA                              | TT              | 1946969360               |
| SNP_P4_139974_178137 | NW_004516069.1 | Scaffold653 | 178137                  | CC                              | TT              | 1946969362               |
| SNP_P4_139975_178430 | NW_004516069.1 | Scaffold653 | 178430                  | CC                              | TT              | 1946969364               |
| SNP_P4_139976_178431 | NW_004516069.1 | Scaffold653 | 178431                  | AA                              | GG              | 1946969366               |
| SNP_P4_139977_178828 | NW_004516069.1 | Scaffold653 | 178828                  | TT                              | GG              | 1946969368               |
| SNP_P4_139978_178841 | NW_004516069.1 | Scaffold653 | 178841                  | CC                              | TT              | 1946969370               |
| SNP_P4_139979_179048 | NW_004516069.1 | Scaffold653 | 179048                  | TT                              | GG              | 1946969372               |
| SNP_P4_139980_179258 | NW_004516069.1 | Scaffold653 | 179258                  | AA                              | CC              | 1946969374               |
| SNP_P4_139981_179379 | NW_004516069.1 | Scaffold653 | 179379                  | TT                              | CC              | 1946969376               |
| SNP_P4_139982_179512 | NW_004516069.1 | Scaffold653 | 179512                  | AA                              | GG              | 1946969378               |
| SNP_P4_139983_181269 | NW_004516069.1 | Scaffold653 | 181269                  | TT                              | CC              | 1946969380               |
| SNP_P4_139984_181293 | NW_004516069.1 | Scaffold653 | 181293                  | AA                              | CC              | 1946969382               |
| SNP_P4_139985_181308 | NW_004516069.1 | Scaffold653 | 181308                  | AA                              | CC              | 1946969384               |
| SNP_P4_139986_182116 | NW_004516069.1 | Scaffold653 | 182116                  | TT                              | GG              | 1946969386               |
| SNP_P4_139987_182407 | NW_004516069.1 | Scaffold653 | 182407                  | TT                              | CC              | 1946969388               |
| SNP_P4_139988_182616 | NW_004516069.1 | Scaffold653 | 182616                  | AA                              | GG              | 1946969390               |
| SNP_P4_139989_182645 | NW_004516069.1 | Scaffold653 | 182645                  | CC                              | AA              | 1946969392               |
| SNP_P4_139990_182861 | NW_004516069.1 | Scaffold653 | 182861                  | AA                              | CC              | 1946969394               |
| SNP_P4_139991_182877 | NW_004516069.1 | Scaffold653 | 182877                  | GG                              | CC              | 1946969396               |
| SNP_P4_139992_197101 | NW_004516069.1 | Scaffold653 | 197101                  | TT                              | GG              | 1946969398               |
| SNP_P4_139993_197122 | NW_004516069.1 | Scaffold653 | 197122                  | TT                              | CC              | 1946969400               |
| SNP_P4_139994_197130 | NW_004516069.1 | Scaffold653 | 197130                  | TT                              | CC              | 1946969402               |
| SNP_P4_139995_197133 | NW_004516069.1 | Scaffold653 | 197133                  | CC                              | AA              | 1946969404               |
| SNP_P4_139996_200646 | NW_004516069.1 | Scaffold653 | 200646                  | CC                              | AA              | 1946969406               |
| SNP_P4_139997_200649 | NW_004516069.1 | Scaffold653 | 200649                  | GG                              | TT              | 1946969408               |
| SNP_P4_139998_200715 | NW_004516069.1 | Scaffold653 | 200715                  | GG                              | AA              | 1946969410               |
| SNP_P4_139999_200728 | NW_004516069.1 | Scaffold653 | 200728                  | AA                              | GG              | 1946969412               |
| SNP_P4_140001_200800 | NW_004516069.1 | Scaffold653 | 200800                  | AA                              | GG              | 1946969414               |

| SNPs IDs             | Chromosome IDs | Chromosomes | Physical positions (bp) | CDC Frontier (Reference genome) | (ILWC46 & LPNB) | NCBI SNPdb Accession IDs |
|----------------------|----------------|-------------|-------------------------|---------------------------------|-----------------|--------------------------|
| SNP_P4_140002_200803 | NW_004516069.1 | Scaffold653 | 200803                  | CC                              | AA              | 1946969416               |
| SNP_P4_140003_200811 | NW_004516069.1 | Scaffold653 | 200811                  | CC                              | TT              | 1946969418               |
| SNP_P4_140004_200821 | NW_004516069.1 | Scaffold653 | 200821                  | GG                              | AA              | 1946969420               |
| SNP_P4_140005_200837 | NW_004516069.1 | Scaffold653 | 200837                  | AA                              | GG              | 1946969422               |
| SNP_P4_140006_200859 | NW_004516069.1 | Scaffold653 | 200859                  | CC                              | TT              | 1946969424               |
| SNP_P4_140007_200882 | NW_004516069.1 | Scaffold653 | 200882                  | AA                              | GG              | 1946969426               |
| SNP_P4_140008_200892 | NW_004516069.1 | Scaffold653 | 200892                  | AA                              | TT              | 1946969428               |
| SNP_P4_140009_200896 | NW_004516069.1 | Scaffold653 | 200896                  | AA                              | GG              | 1946969430               |
| SNP_P4_140010_200984 | NW_004516069.1 | Scaffold653 | 200984                  | TT                              | AA              | 1946969432               |
| SNP_P4_140011_201044 | NW_004516069.1 | Scaffold653 | 201044                  | AA                              | CC              | 1946969434               |
| SNP_P4_140012_201064 | NW_004516069.1 | Scaffold653 | 201064                  | CC                              | TT              | 1946969436               |
| SNP_P4_140013_201104 | NW_004516069.1 | Scaffold653 | 201104                  | GG                              | TT              | 1946969438               |
| SNP_P4_140014_201152 | NW_004516069.1 | Scaffold653 | 201152                  | CC                              | TT              | 1946969440               |
| SNP_P4_140015_202731 | NW_004516069.1 | Scaffold653 | 202731                  | GG                              | AA              | 1946969442               |
| SNP_P4_140016_908    | NW_004516070.1 | Scaffold654 | 908                     | AA                              | GG              | 1946969443               |
| SNP_P4_140017_1028   | NW_004516070.1 | Scaffold654 | 1028                    | AA                              | CC              | 1946969445               |
| SNP_P4_140018_1280   | NW_004516070.1 | Scaffold654 | 1280                    | AA                              | TT              | 1946969447               |
| SNP_P4_140019_1321   | NW_004516070.1 | Scaffold654 | 1321                    | TT                              | AA              | 1946969449               |
| SNP_P4_140020_1393   | NW_004516070.1 | Scaffold654 | 1393                    | TT                              | CC              | 1946969451               |
| SNP_P4_140021_1395   | NW_004516070.1 | Scaffold654 | 1395                    | TT                              | GG              | 1946969453               |
| SNP_P4_140023_8675   | NW_004516070.1 | Scaffold654 | 8675                    | GG                              | TT              | 1946969455               |
| SNP_P4_140024_11602  | NW_004516070.1 | Scaffold654 | 11602                   | CC                              | TT              | 1946969457               |
| SNP_P4_140025_11619  | NW_004516070.1 | Scaffold654 | 11619                   | AA                              | CC              | 1946969459               |
| SNP_P4_140026_11640  | NW_004516070.1 | Scaffold654 | 11640                   | AA                              | TT              | 1946969461               |
| SNP_P4_140027_12658  | NW_004516070.1 | Scaffold654 | 12658                   | AA                              | TT              | 1946969463               |
| SNP_P4_140028_21239  | NW_004516070.1 | Scaffold654 | 21239                   | AA                              | GG              | 1946969465               |
| SNP_P4_140029_28291  | NW_004516070.1 | Scaffold654 | 28291                   | AA                              | TT              | 1946969467               |
| SNP_P4_140030_43763  | NW_004516070.1 | Scaffold654 | 43763                   | TT                              | CC              | 1946969469               |
| SNP_P4_140031_44560  | NW_004516070.1 | Scaffold654 | 44560                   | CC                              | AA              | 1946969471               |
| SNP_P4_140032_48177  | NW_004516070.1 | Scaffold654 | 48177                   | CC                              | GG              | 1946969473               |
| SNP_P4_140034_14811  | NW_004516075.1 | Scaffold661 | 14811                   | TT                              | CC              | 1946969475               |
| SNP_P4_140035_15035  | NW_004516075.1 | Scaffold661 | 15035                   | AA                              | GG              | 1946969477               |
| SNP_P4_140036_22372  | NW_004516075.1 | Scaffold661 | 22372                   | TT                              | AA              | 1946969479               |
| SNP_P4_140037_22678  | NW_004516075.1 | Scaffold661 | 22678                   | GG                              | CC              | 1946969481               |
| SNP_P4_140039_25568  | NW_004516075.1 | Scaffold661 | 25568                   | CC                              | TT              | 1946969483               |
| SNP_P4_140040_26611  | NW_004516075.1 | Scaffold661 | 26611                   | GG                              | AA              | 1946969485               |
| SNP_P4_140041_29950  | NW_004516075.1 | Scaffold661 | 29950                   | AA                              | GG              | 1946969487               |
| SNP_P4_140042_30451  | NW_004516075.1 | Scaffold661 | 30451                   | CC                              | TT              | 1946969489               |
| SNP_P4_140043_52218  | NW_004516075.1 | Scaffold661 | 52218                   | AA                              | CC              | 1946969491               |
| SNP_P4_140044_84708  | NW_004516075.1 | Scaffold661 | 84708                   | AA                              | GG              | 1946969493               |
| SNP_P4_140045_85102  | NW_004516075.1 | Scaffold661 | 85102                   | TT                              | GG              | 1946969495               |
| SNP_P4_140046_85111  | NW_004516075.1 | Scaffold661 | 85111                   | CC                              | TT              | 1946969497               |



| SNPs IDs             | Chromosome IDs | Chromosomes | Physical positions (bp) | CDC Frontier (Reference genome) | (ILWC46 & LPNB) | NCBI SNPdb Accession IDs |
|----------------------|----------------|-------------|-------------------------|---------------------------------|-----------------|--------------------------|
| SNP_P4_140047_131812 | NW_004516075.1 | Scaffold661 | 131812                  | TT                              | CC              | 1946969499               |
| SNP_P4_140048_131814 | NW_004516075.1 | Scaffold661 | 131814                  | CC                              | TT              | 1946969501               |
| SNP_P4_140049_132154 | NW_004516075.1 | Scaffold661 | 132154                  | TT                              | CC              | 1946969503               |
| SNP_P4_140050_132156 | NW_004516075.1 | Scaffold661 | 132156                  | AA                              | GG              | 1946969505               |
| SNP_P4_140051_133093 | NW_004516075.1 | Scaffold661 | 133093                  | AA                              | GG              | 1946969507               |
| SNP_P4_140052_133313 | NW_004516075.1 | Scaffold661 | 133313                  | AA                              | CC              | 1946969509               |
| SNP_P4_140053_133318 | NW_004516075.1 | Scaffold661 | 133318                  | AA                              | CC              | 1946969511               |
| SNP_P4_140054_133339 | NW_004516075.1 | Scaffold661 | 133339                  | AA                              | GG              | 1946969513               |
| SNP_P4_140055_133351 | NW_004516075.1 | Scaffold661 | 133351                  | AA                              | CC              | 1946969515               |
| SNP_P4_140056_133359 | NW_004516075.1 | Scaffold661 | 133359                  | TT                              | CC              | 1946969517               |
| SNP_P4_140057_139670 | NW_004516075.1 | Scaffold661 | 139670                  | TT                              | AA              | 1946969519               |
| SNP_P4_140058_157574 | NW_004516075.1 | Scaffold661 | 157574                  | TT                              | GG              | 1946969521               |
| SNP_P4_140059_158260 | NW_004516075.1 | Scaffold661 | 158260                  | CC                              | TT              | 1946969523               |
| SNP_P4_140060_175748 | NW_004516075.1 | Scaffold661 | 175748                  | GG                              | AA              | 1946969525               |
| SNP_P4_140061_175752 | NW_004516075.1 | Scaffold661 | 175752                  | CC                              | TT              | 1946969527               |
| SNP_P4_140062_176111 | NW_004516075.1 | Scaffold661 | 176111                  | AA                              | GG              | 1946969529               |
| SNP_P4_140063_176126 | NW_004516075.1 | Scaffold661 | 176126                  | AA                              | GG              | 1946969531               |
| SNP_P4_140064_176132 | NW_004516075.1 | Scaffold661 | 176132                  | GG                              | AA              | 1946969533               |
| SNP_P4_140065_176145 | NW_004516075.1 | Scaffold661 | 176145                  | GG                              | CC              | 1946969535               |
| SNP_P4_140066_176159 | NW_004516075.1 | Scaffold661 | 176159                  | TT                              | CC              | 1946969537               |
| SNP_P4_140067_176188 | NW_004516075.1 | Scaffold661 | 176188                  | TT                              | CC              | 1946969539               |
| SNP_P4_140068_176198 | NW_004516075.1 | Scaffold661 | 176198                  | TT                              | CC              | 1946969541               |
| SNP_P4_140069_177243 | NW_004516075.1 | Scaffold661 | 177243                  | AA                              | CC              | 1946969543               |
| SNP_P4_140070_177248 | NW_004516075.1 | Scaffold661 | 177248                  | GG                              | AA              | 1946969545               |
| SNP_P4_140071_178348 | NW_004516075.1 | Scaffold661 | 178348                  | AA                              | CC              | 1946969547               |
| SNP_P4_140072_195553 | NW_004516075.1 | Scaffold661 | 195553                  | TT                              | GG              | 1946969549               |
| SNP_P4_140073_195890 | NW_004516075.1 | Scaffold661 | 195890                  | TT                              | AA              | 1946969551               |
| SNP_P4_140074_195894 | NW_004516075.1 | Scaffold661 | 195894                  | GG                              | AA              | 1946969553               |
| SNP_P4_140075_195927 | NW_004516075.1 | Scaffold661 | 195927                  | CC                              | TT              | 1946969555               |
| SNP_P4_140076_201397 | NW_004516075.1 | Scaffold661 | 201397                  | CC                              | GG              | 1946969557               |
| SNP_P4_140078_226410 | NW_004516075.1 | Scaffold661 | 226410                  | CC                              | TT              | 1946969559               |
| SNP_P4_140079_229629 | NW_004516075.1 | Scaffold661 | 229629                  | GG                              | TT              | 1946969561               |
| SNP_P4_140080_233043 | NW_004516075.1 | Scaffold661 | 233043                  | TT                              | AA              | 1946969563               |
| SNP_P4_140081_233060 | NW_004516075.1 | Scaffold661 | 233060                  | AA                              | GG              | 1946969565               |
| SNP_P4_140082_233067 | NW_004516075.1 | Scaffold661 | 233067                  | GG                              | AA              | 1946969567               |
| SNP_P4_140083_233079 | NW_004516075.1 | Scaffold661 | 233079                  | GG                              | AA              | 1946969569               |
| SNP_P4_140084_233089 | NW_004516075.1 | Scaffold661 | 233089                  | AA                              | TT              | 1946969571               |
| SNP_P4_140085_272044 | NW_004516075.1 | Scaffold661 | 272044                  | AA                              | GG              | 1946969573               |
| SNP_P4_140086_272100 | NW_004516075.1 | Scaffold661 | 272100                  | TT                              | CC              | 1946969575               |
| SNP_P4_140087_272172 | NW_004516075.1 | Scaffold661 | 272172                  | CC                              | TT              | 1946969577               |
| SNP_P4_140088_272173 | NW_004516075.1 | Scaffold661 | 272173                  | CC                              | TT              | 1946969579               |
| SNP_P4_140089_272443 | NW_004516075.1 | Scaffold661 | 272443                  | TT                              | CC              | 1946969581               |

| SNPs IDs             | Chromosome IDs | Chromosomes | Physical positions (bp) | CDC Frontier (Reference genome) | (ILWC46 & LPNB) | NCBI SNPdb Accession IDs |
|----------------------|----------------|-------------|-------------------------|---------------------------------|-----------------|--------------------------|
| SNP_P4_140090_272525 | NW_004516075.1 | Scaffold661 | 272525                  | CC                              | TT              | 1946969583               |
| SNP_P4_140091_277291 | NW_004516075.1 | Scaffold661 | 277291                  | TT                              | GG              | 1946969585               |
| SNP_P4_140092_277422 | NW_004516075.1 | Scaffold661 | 277422                  | TT                              | GG              | 1946969587               |
| SNP_P4_140093_277436 | NW_004516075.1 | Scaffold661 | 277436                  | CC                              | TT              | 1946969589               |
| SNP_P4_140094_277465 | NW_004516075.1 | Scaffold661 | 277465                  | TT                              | CC              | 1946969591               |
| SNP_P4_140095_281744 | NW_004516075.1 | Scaffold661 | 281744                  | AA                              | TT              | 1946969593               |
| SNP_P4_140096_283449 | NW_004516075.1 | Scaffold661 | 283449                  | AA                              | TT              | 1946969595               |
| SNP_P4_140097_287161 | NW_004516075.1 | Scaffold661 | 287161                  | GG                              | AA              | 1946969597               |
| SNP_P4_140098_292787 | NW_004516075.1 | Scaffold661 | 292787                  | CC                              | AA              | 1946969599               |
| SNP_P4_140100_293104 | NW_004516075.1 | Scaffold661 | 293104                  | AA                              | GG              | 1946969601               |
| SNP_P4_140101_293107 | NW_004516075.1 | Scaffold661 | 293107                  | AA                              | GG              | 1946969603               |
| SNP_P4_140102_305791 | NW_004516075.1 | Scaffold661 | 305791                  | CC                              | AA              | 1946969605               |
| SNP_P4_140103_327335 | NW_004516075.1 | Scaffold661 | 327335                  | TT                              | GG              | 1946969607               |
| SNP_P4_140104_339176 | NW_004516075.1 | Scaffold661 | 339176                  | CC                              | GG              | 1946969609               |
| SNP_P4_140105_340519 | NW_004516075.1 | Scaffold661 | 340519                  | AA                              | GG              | 1946969611               |
| SNP_P4_140106_340612 | NW_004516075.1 | Scaffold661 | 340612                  | AA                              | CC              | 1946969613               |
| SNP_P4_140107_340644 | NW_004516075.1 | Scaffold661 | 340644                  | AA                              | GG              | 1946969615               |
| SNP_P4_140108_340687 | NW_004516075.1 | Scaffold661 | 340687                  | GG                              | TT              | 1946969617               |
| SNP_P4_140109_340726 | NW_004516075.1 | Scaffold661 | 340726                  | AA                              | GG              | 1946969619               |
| SNP_P4_140110_340734 | NW_004516075.1 | Scaffold661 | 340734                  | CC                              | GG              | 1946969621               |
| SNP_P4_140111_418319 | NW_004516075.1 | Scaffold661 | 418319                  | AA                              | CC              | 1946969623               |
| SNP_P4_140112_418339 | NW_004516075.1 | Scaffold661 | 418339                  | GG                              | AA              | 1946969625               |
| SNP_P4_140113_429484 | NW_004516075.1 | Scaffold661 | 429484                  | AA                              | CC              | 1946969627               |
| SNP_P4_140114_429506 | NW_004516075.1 | Scaffold661 | 429506                  | TT                              | GG              | 1946969629               |
| SNP_P4_140115_430611 | NW_004516075.1 | Scaffold661 | 430611                  | AA                              | GG              | 1946969631               |
| SNP_P4_140116_434653 | NW_004516075.1 | Scaffold661 | 434653                  | TT                              | CC              | 1946969633               |
| SNP_P4_140117_466719 | NW_004516075.1 | Scaffold661 | 466719                  | TT                              | AA              | 1946969635               |
| SNP_P4_140118_466741 | NW_004516075.1 | Scaffold661 | 466741                  | AA                              | TT              | 1946969637               |
| SNP_P4_140119_474010 | NW_004516075.1 | Scaffold661 | 474010                  | TT                              | CC              | 1946969639               |
| SNP_P4_140120_474045 | NW_004516075.1 | Scaffold661 | 474045                  | TT                              | CC              | 1946969641               |
| SNP_P4_140121_474435 | NW_004516075.1 | Scaffold661 | 474435                  | AA                              | CC              | 1946969643               |
| SNP_P4_140122_474486 | NW_004516075.1 | Scaffold661 | 474486                  | GG                              | CC              | 1946969645               |
| SNP_P4_140124_476749 | NW_004516075.1 | Scaffold661 | 476749                  | GG                              | AA              | 1946969647               |
| SNP_P4_140125_476808 | NW_004516075.1 | Scaffold661 | 476808                  | TT                              | CC              | 1946969649               |
| SNP_P4_140126_476809 | NW_004516075.1 | Scaffold661 | 476809                  | GG                              | AA              | 1946969651               |
| SNP_P4_140127_480566 | NW_004516075.1 | Scaffold661 | 480566                  | AA                              | CC              | 1946969653               |
| SNP_P4_140128_480676 | NW_004516075.1 | Scaffold661 | 480676                  | TT                              | CC              | 1946969655               |
| SNP_P4_140129_480680 | NW_004516075.1 | Scaffold661 | 480680                  | GG                              | AA              | 1946969657               |
| SNP_P4_140130_480745 | NW_004516075.1 | Scaffold661 | 480745                  | TT                              | CC              | 1946969659               |
| SNP_P4_140131_480768 | NW_004516075.1 | Scaffold661 | 480768                  | CC                              | AA              | 1946969661               |
| SNP_P4_140132_480809 | NW_004516075.1 | Scaffold661 | 480809                  | AA                              | CC              | 1946969663               |
| SNP_P4_140133_480816 | NW_004516075.1 | Scaffold661 | 480816                  | TT                              | CC              | 1946969665               |

| SNPs IDs             | Chromosome IDs | Chromosomes | Physical positions (bp) | CDC Frontier (Reference genome) | (ILWC46 & LPNB) | NCBI SNPdb Accession IDs |
|----------------------|----------------|-------------|-------------------------|---------------------------------|-----------------|--------------------------|
| SNP_P4_140134_480837 | NW_004516075.1 | Scaffold661 | 480837                  | GG                              | AA              | 1946969667               |
| SNP_P4_140135_480842 | NW_004516075.1 | Scaffold661 | 480842                  | AA                              | GG              | 1946969669               |
| SNP_P4_140136_480846 | NW_004516075.1 | Scaffold661 | 480846                  | TT                              | CC              | 1946969671               |
| SNP_P4_140137_480875 | NW_004516075.1 | Scaffold661 | 480875                  | AA                              | GG              | 1946969673               |
| SNP_P4_140138_480892 | NW_004516075.1 | Scaffold661 | 480892                  | TT                              | AA              | 1946969675               |
| SNP_P4_140139_480909 | NW_004516075.1 | Scaffold661 | 480909                  | TT                              | CC              | 1946969677               |
| SNP_P4_140140_481818 | NW_004516075.1 | Scaffold661 | 481818                  | AA                              | GG              | 1946969679               |
| SNP_P4_140141_481907 | NW_004516075.1 | Scaffold661 | 481907                  | AA                              | TT              | 1946969681               |
| SNP_P4_140142_481908 | NW_004516075.1 | Scaffold661 | 481908                  | TT                              | GG              | 1946969683               |
| SNP_P4_140143_482203 | NW_004516075.1 | Scaffold661 | 482203                  | TT                              | CC              | 1946969685               |
| SNP_P4_140144_482213 | NW_004516075.1 | Scaffold661 | 482213                  | CC                              | TT              | 1946969687               |
| SNP_P4_140145_482255 | NW_004516075.1 | Scaffold661 | 482255                  | TT                              | CC              | 1946969689               |
| SNP_P4_140146_526067 | NW_004516075.1 | Scaffold661 | 526067                  | CC                              | AA              | 1946969691               |
| SNP_P4_140147_542063 | NW_004516075.1 | Scaffold661 | 542063                  | CC                              | TT              | 1946969693               |
| SNP_P4_140148_542744 | NW_004516075.1 | Scaffold661 | 542744                  | AA                              | TT              | 1946969695               |
| SNP_P4_140149_561612 | NW_004516075.1 | Scaffold661 | 561612                  | AA                              | TT              | 1946969697               |
| SNP_P4_140150_608681 | NW_004516075.1 | Scaffold661 | 608681                  | GG                              | AA              | 1946969699               |
| SNP_P4_140151_621015 | NW_004516075.1 | Scaffold661 | 621015                  | TT                              | CC              | 1946969701               |
| SNP_P4_140152_666624 | NW_004516075.1 | Scaffold661 | 666624                  | AA                              | GG              | 1946969703               |
| SNP_P4_140153_666850 | NW_004516075.1 | Scaffold661 | 666850                  | AA                              | CC              | 1946969705               |
| SNP_P4_140154_671757 | NW_004516075.1 | Scaffold661 | 671757                  | AA                              | GG              | 1946969707               |
| SNP_P4_140155_671780 | NW_004516075.1 | Scaffold661 | 671780                  | CC                              | TT              | 1946969709               |
| SNP_P4_140156_671783 | NW_004516075.1 | Scaffold661 | 671783                  | AA                              | GG              | 1946969711               |
| SNP_P4_140157_671798 | NW_004516075.1 | Scaffold661 | 671798                  | TT                              | CC              | 1946969713               |
| SNP_P4_140158_671801 | NW_004516075.1 | Scaffold661 | 671801                  | AA                              | GG              | 1946969715               |
| SNP_P4_140159_671837 | NW_004516075.1 | Scaffold661 | 671837                  | CC                              | GG              | 1946969717               |
| SNP_P4_140160_671869 | NW_004516075.1 | Scaffold661 | 671869                  | AA                              | GG              | 1946969719               |
| SNP_P4_140161_672063 | NW_004516075.1 | Scaffold661 | 672063                  | TT                              | CC              | 1946969721               |
| SNP_P4_140163_707856 | NW_004516075.1 | Scaffold661 | 707856                  | AA                              | GG              | 1946969723               |
| SNP_P4_140164_707975 | NW_004516075.1 | Scaffold661 | 707975                  | AA                              | TT              | 1946969725               |
| SNP_P4_140165_707996 | NW_004516075.1 | Scaffold661 | 707996                  | AA                              | GG              | 1946969727               |
| SNP_P4_140166_708015 | NW_004516075.1 | Scaffold661 | 708015                  | AA                              | GG              | 1946969729               |
| SNP_P4_140167_710871 | NW_004516075.1 | Scaffold661 | 710871                  | AA                              | GG              | 1946969731               |
| SNP_P4_140168_718239 | NW_004516075.1 | Scaffold661 | 718239                  | CC                              | TT              | 1946969733               |
| SNP_P4_140169_718364 | NW_004516075.1 | Scaffold661 | 718364                  | GG                              | AA              | 1946969735               |
| SNP_P4_140170_725026 | NW_004516075.1 | Scaffold661 | 725026                  | TT                              | GG              | 1946969737               |
| SNP_P4_140171_726484 | NW_004516075.1 | Scaffold661 | 726484                  | GG                              | CC              | 1946969739               |
| SNP_P4_140172_727191 | NW_004516075.1 | Scaffold661 | 727191                  | GG                              | TT              | 1946969741               |
| SNP_P4_140173_727225 | NW_004516075.1 | Scaffold661 | 727225                  | CC                              | GG              | 1946969743               |
| SNP_P4_140174_727526 | NW_004516075.1 | Scaffold661 | 727526                  | GG                              | CC              | 1946969745               |
| SNP_P4_140175_727568 | NW_004516075.1 | Scaffold661 | 727568                  | CC                              | TT              | 1946969747               |
| SNP_P4_140176_1157   | NW_004516076.1 | Scaffold662 | 1157                    | TT                              | GG              | 1946969749               |

| SNPs IDs             | Chromosome IDs | Chromosomes | Physical positions (bp) | CDC Frontier (Reference genome) | (ILWC46 & LPNB) | NCBI SNPdb Accession IDs |
|----------------------|----------------|-------------|-------------------------|---------------------------------|-----------------|--------------------------|
| SNP_P4_140177_16640  | NW_004516076.1 | Scaffold662 | 16640                   | CC                              | AA              | 1946969751               |
| SNP_P4_140178_18247  | NW_004516076.1 | Scaffold662 | 18247                   | AA                              | TT              | 1946969752               |
| SNP_P4_140179_18625  | NW_004516076.1 | Scaffold662 | 18625                   | TT                              | CC              | 1946969753               |
| SNP_P4_140180_18627  | NW_004516076.1 | Scaffold662 | 18627                   | CC                              | TT              | 1946969754               |
| SNP_P4_140181_18628  | NW_004516076.1 | Scaffold662 | 18628                   | GG                              | AA              | 1946969755               |
| SNP_P4_140182_22743  | NW_004516076.1 | Scaffold662 | 22743                   | CC                              | GG              | 1946969758               |
| SNP_P4_140183_22750  | NW_004516076.1 | Scaffold662 | 22750                   | AA                              | TT              | 1946969760               |
| SNP_P4_140184_24905  | NW_004516076.1 | Scaffold662 | 24905                   | AA                              | CC              | 1946969762               |
| SNP_P4_140185_32315  | NW_004516076.1 | Scaffold662 | 32315                   | GG                              | AA              | 1946969764               |
| SNP_P4_140187_43780  | NW_004516076.1 | Scaffold662 | 43780                   | CC                              | TT              | 1946969766               |
| SNP_P4_140189_56077  | NW_004516076.1 | Scaffold662 | 56077                   | CC                              | AA              | 1946969768               |
| SNP_P4_140190_56079  | NW_004516076.1 | Scaffold662 | 56079                   | CC                              | TT              | 1946969770               |
| SNP_P4_140191_56090  | NW_004516076.1 | Scaffold662 | 56090                   | GG                              | AA              | 1946969772               |
| SNP_P4_140192_72933  | NW_004516076.1 | Scaffold662 | 72933                   | CC                              | GG              | 1946969774               |
| SNP_P4_140193_89418  | NW_004516076.1 | Scaffold662 | 89418                   | TT                              | AA              | 1946969776               |
| SNP_P4_140194_94619  | NW_004516076.1 | Scaffold662 | 94619                   | TT                              | AA              | 1946969778               |
| SNP_P4_140195_98556  | NW_004516076.1 | Scaffold662 | 98556                   | AA                              | TT              | 1946969780               |
| SNP_P4_140196_98583  | NW_004516076.1 | Scaffold662 | 98583                   | GG                              | TT              | 1946969782               |
| SNP_P4_140197_98660  | NW_004516076.1 | Scaffold662 | 98660                   | TT                              | CC              | 1946969784               |
| SNP_P4_140198_108135 | NW_004516076.1 | Scaffold662 | 108135                  | CC                              | TT              | 1946969786               |
| SNP_P4_140199_110588 | NW_004516076.1 | Scaffold662 | 110588                  | GG                              | AA              | 1946969788               |
| SNP_P4_140200_110616 | NW_004516076.1 | Scaffold662 | 110616                  | CC                              | TT              | 1946969790               |
| SNP_P4_140201_144392 | NW_004516076.1 | Scaffold662 | 144392                  | CC                              | TT              | 1946969792               |
| SNP_P4_140202_147647 | NW_004516076.1 | Scaffold662 | 147647                  | AA                              | TT              | 1946969794               |
| SNP_P4_140203_147661 | NW_004516076.1 | Scaffold662 | 147661                  | GG                              | TT              | 1946969796               |
| SNP_P4_140204_147975 | NW_004516076.1 | Scaffold662 | 147975                  | AA                              | GG              | 1946969798               |
| SNP_P4_140205_155161 | NW_004516076.1 | Scaffold662 | 155161                  | TT                              | GG              | 1946969800               |
| SNP_P4_140206_9304   | NW_004516077.1 | Scaffold663 | 9304                    | GG                              | AA              | 1946969802               |
| SNP_P4_140207_22897  | NW_004516077.1 | Scaffold663 | 22897                   | CC                              | AA              | 1946969804               |
| SNP_P4_140208_23167  | NW_004516077.1 | Scaffold663 | 23167                   | AA                              | GG              | 1946969806               |
| SNP_P4_140209_23178  | NW_004516077.1 | Scaffold663 | 23178                   | AA                              | GG              | 1946969808               |
| SNP_P4_140210_23212  | NW_004516077.1 | Scaffold663 | 23212                   | AA                              | GG              | 1946969810               |
| SNP_P4_140211_23414  | NW_004516077.1 | Scaffold663 | 23414                   | TT                              | GG              | 1946969812               |
| SNP_P4_140212_23482  | NW_004516077.1 | Scaffold663 | 23482                   | GG                              | TT              | 1946969814               |
| SNP_P4_140213_23573  | NW_004516077.1 | Scaffold663 | 23573                   | AA                              | GG              | 1946969816               |
| SNP_P4_140214_23611  | NW_004516077.1 | Scaffold663 | 23611                   | TT                              | CC              | 1946969818               |
| SNP_P4_140215_49253  | NW_004516077.1 | Scaffold663 | 49253                   | AA                              | GG              | 1946969820               |
| SNP_P4_140216_55313  | NW_004516077.1 | Scaffold663 | 55313                   | AA                              | TT              | 1946969822               |
| SNP_P4_140217_55490  | NW_004516077.1 | Scaffold663 | 55490                   | GG                              | AA              | 1946969824               |
| SNP_P4_140218_63437  | NW_004516077.1 | Scaffold663 | 63437                   | AA                              | GG              | 1946969826               |
| SNP_P4_140219_63471  | NW_004516077.1 | Scaffold663 | 63471                   | AA                              | CC              | 1946969828               |
| SNP_P4_140220_63480  | NW_004516077.1 | Scaffold663 | 63480                   | AA                              | GG              | 1946969830               |

| SNPs IDs             | Chromosome IDs | Chromosomes | Physical positions (bp) | CDC Frontier (Reference genome) | (ILWC46 & LPNB) | NCBI SNPdb Accession IDs |
|----------------------|----------------|-------------|-------------------------|---------------------------------|-----------------|--------------------------|
| SNP_P4_140221_63517  | NW_004516077.1 | Scaffold663 | 63517                   | CC                              | GG              | 1946969832               |
| SNP_P4_140222_63658  | NW_004516077.1 | Scaffold663 | 63658                   | CC                              | TT              | 1946969834               |
| SNP_P4_140223_63764  | NW_004516077.1 | Scaffold663 | 63764                   | GG                              | TT              | 1946969836               |
| SNP_P4_140224_63855  | NW_004516077.1 | Scaffold663 | 63855                   | AA                              | GG              | 1946969838               |
| SNP_P4_140225_63901  | NW_004516077.1 | Scaffold663 | 63901                   | GG                              | TT              | 1946969840               |
| SNP_P4_140226_64004  | NW_004516077.1 | Scaffold663 | 64004                   | GG                              | TT              | 1946969842               |
| SNP_P4_140227_67482  | NW_004516077.1 | Scaffold663 | 67482                   | AA                              | GG              | 1946969844               |
| SNP_P4_140228_96004  | NW_004516077.1 | Scaffold663 | 96004                   | CC                              | TT              | 1946969846               |
| SNP_P4_140229_102986 | NW_004516077.1 | Scaffold663 | 102986                  | AA                              | TT              | 1946969848               |
| SNP_P4_140230_103058 | NW_004516077.1 | Scaffold663 | 103058                  | GG                              | TT              | 1946969850               |
| SNP_P4_140231_103725 | NW_004516077.1 | Scaffold663 | 103725                  | GG                              | AA              | 1946969852               |
| SNP_P4_140232_103781 | NW_004516077.1 | Scaffold663 | 103781                  | AA                              | TT              | 1946969854               |
| SNP_P4_140233_107055 | NW_004516077.1 | Scaffold663 | 107055                  | AA                              | GG              | 1946969856               |
| SNP_P4_140234_107057 | NW_004516077.1 | Scaffold663 | 107057                  | AA                              | GG              | 1946969858               |
| SNP_P4_140235_108293 | NW_004516077.1 | Scaffold663 | 108293                  | TT                              | CC              | 1946969860               |
| SNP_P4_140236_108294 | NW_004516077.1 | Scaffold663 | 108294                  | GG                              | AA              | 1946969862               |
| SNP_P4_140237_108991 | NW_004516077.1 | Scaffold663 | 108991                  | AA                              | CC              | 1946969864               |
| SNP_P4_140238_108997 | NW_004516077.1 | Scaffold663 | 108997                  | CC                              | TT              | 1946969866               |
| SNP_P4_140239_109018 | NW_004516077.1 | Scaffold663 | 109018                  | TT                              | GG              | 1946969868               |
| SNP_P4_140240_109021 | NW_004516077.1 | Scaffold663 | 109021                  | GG                              | AA              | 1946969870               |
| SNP_P4_140241_109022 | NW_004516077.1 | Scaffold663 | 109022                  | CC                              | TT              | 1946969872               |
| SNP_P4_140242_109023 | NW_004516077.1 | Scaffold663 | 109023                  | GG                              | CC              | 1946969873               |
| SNP_P4_140243_109027 | NW_004516077.1 | Scaffold663 | 109027                  | TT                              | CC              | 1946969874               |
| SNP_P4_140244_109036 | NW_004516077.1 | Scaffold663 | 109036                  | GG                              | AA              | 1946969876               |
| SNP_P4_140245_109129 | NW_004516077.1 | Scaffold663 | 109129                  | TT                              | GG              | 1946969878               |
| SNP_P4_140246_109156 | NW_004516077.1 | Scaffold663 | 109156                  | GG                              | AA              | 1946969880               |
| SNP_P4_140247_109158 | NW_004516077.1 | Scaffold663 | 109158                  | TT                              | CC              | 1946969882               |
| SNP_P4_140248_109162 | NW_004516077.1 | Scaffold663 | 109162                  | GG                              | AA              | 1946969884               |
| SNP_P4_140249_109171 | NW_004516077.1 | Scaffold663 | 109171                  | CC                              | GG              | 1946969886               |
| SNP_P4_140250_109174 | NW_004516077.1 | Scaffold663 | 109174                  | AA                              | CC              | 1946969888               |
| SNP_P4_140251_109182 | NW_004516077.1 | Scaffold663 | 109182                  | AA                              | GG              | 1946969890               |
| SNP_P4_140252_109189 | NW_004516077.1 | Scaffold663 | 109189                  | TT                              | GG              | 1946969892               |
| SNP_P4_140253_109192 | NW_004516077.1 | Scaffold663 | 109192                  | TT                              | CC              | 1946969894               |
| SNP_P4_140254_109198 | NW_004516077.1 | Scaffold663 | 109198                  | CC                              | TT              | 1946969896               |
| SNP_P4_140255_109207 | NW_004516077.1 | Scaffold663 | 109207                  | GG                              | AA              | 1946969898               |
| SNP_P4_140256_109247 | NW_004516077.1 | Scaffold663 | 109247                  | TT                              | AA              | 1946969900               |
| SNP_P4_140257_109271 | NW_004516077.1 | Scaffold663 | 109271                  | GG                              | AA              | 1946969902               |
| SNP_P4_140258_109283 | NW_004516077.1 | Scaffold663 | 109283                  | GG                              | AA              | 1946969904               |
| SNP_P4_140259_123257 | NW_004516077.1 | Scaffold663 | 123257                  | CC                              | AA              | 1946969906               |
| SNP_P4_140260_166938 | NW_004516077.1 | Scaffold663 | 166938                  | CC                              | TT              | 1946969908               |
| SNP_P4_140261_167137 | NW_004516077.1 | Scaffold663 | 167137                  | AA                              | GG              | 1946969910               |
| SNP_P4_140262_167176 | NW_004516077.1 | Scaffold663 | 167176                  | AA                              | TT              | 1946969912               |

| SNPs IDs            | Chromosome IDs | Chromosomes | Physical positions (bp) | CDC Frontier (Reference genome) | (ILWC46 & LPNB) | NCBI SNPdb Accession IDs |
|---------------------|----------------|-------------|-------------------------|---------------------------------|-----------------|--------------------------|
| SNP_P4_140263_275   | NW_004516079.1 | Scaffold665 | 275                     | TT                              | CC              | 1946969914               |
| SNP_P4_140264_442   | NW_004516079.1 | Scaffold665 | 442                     | AA                              | GG              | 1946969916               |
| SNP_P4_140265_711   | NW_004516079.1 | Scaffold665 | 711                     | AA                              | CC              | 1946969918               |
| SNP_P4_140266_793   | NW_004516079.1 | Scaffold665 | 793                     | CC                              | GG              | 1946969920               |
| SNP_P4_140267_2938  | NW_004516079.1 | Scaffold665 | 2938                    | CC                              | TT              | 1946969922               |
| SNP_P4_140268_3317  | NW_004516079.1 | Scaffold665 | 3317                    | CC                              | TT              | 1946969924               |
| SNP_P4_140269_3448  | NW_004516079.1 | Scaffold665 | 3448                    | TT                              | CC              | 1946969926               |
| SNP_P4_140270_12922 | NW_004516079.1 | Scaffold665 | 12922                   | TT                              | AA              | 1946969928               |
| SNP_P4_140271_16083 | NW_004516079.1 | Scaffold665 | 16083                   | AA                              | TT              | 1946969930               |
| SNP_P4_140272_16100 | NW_004516079.1 | Scaffold665 | 16100                   | AA                              | TT              | 1946969932               |
| SNP_P4_140273_16187 | NW_004516079.1 | Scaffold665 | 16187                   | GG                              | AA              | 1946969934               |
| SNP_P4_140275_16548 | NW_004516079.1 | Scaffold665 | 16548                   | CC                              | TT              | 1946969936               |
| SNP_P4_140276_16750 | NW_004516079.1 | Scaffold665 | 16750                   | AA                              | CC              | 1946969938               |
| SNP_P4_140277_17026 | NW_004516079.1 | Scaffold665 | 17026                   | AA                              | GG              | 1946969940               |
| SNP_P4_140278_17049 | NW_004516079.1 | Scaffold665 | 17049                   | AA                              | TT              | 1946969942               |
| SNP_P4_140279_17312 | NW_004516079.1 | Scaffold665 | 17312                   | AA                              | GG              | 1946969944               |
| SNP_P4_140280_17603 | NW_004516079.1 | Scaffold665 | 17603                   | GG                              | AA              | 1946969946               |
| SNP_P4_140281_17724 | NW_004516079.1 | Scaffold665 | 17724                   | GG                              | AA              | 1946969948               |
| SNP_P4_140282_11276 | NW_004516080.1 | Scaffold666 | 11276                   | GG                              | CC              | 1946969950               |
| SNP_P4_140283_2369  | NW_004516081.1 | Scaffold667 | 2369                    | AA                              | TT              | 1946969952               |
| SNP_P4_140284_2496  | NW_004516081.1 | Scaffold667 | 2496                    | CC                              | TT              | 1946969954               |
| SNP_P4_140285_2509  | NW_004516081.1 | Scaffold667 | 2509                    | GG                              | AA              | 1946969956               |
| SNP_P4_140286_2514  | NW_004516081.1 | Scaffold667 | 2514                    | TT                              | CC              | 1946969958               |
| SNP_P4_140287_2567  | NW_004516081.1 | Scaffold667 | 2567                    | GG                              | CC              | 1946969960               |
| SNP_P4_140288_64    | NW_004516082.1 | Scaffold668 | 64                      | TT                              | GG              | 1946969962               |
| SNP_P4_140289_65    | NW_004516082.1 | Scaffold668 | 65                      | AA                              | TT              | 1946969964               |
| SNP_P4_140290_527   | NW_004516082.1 | Scaffold668 | 527                     | GG                              | CC              | 1946969966               |
| SNP_P4_140291_538   | NW_004516082.1 | Scaffold668 | 538                     | AA                              | CC              | 1946969968               |
| SNP_P4_140292_602   | NW_004516082.1 | Scaffold668 | 602                     | GG                              | AA              | 1946969970               |
| SNP_P4_140293_1540  | NW_004516083.1 | Scaffold669 | 1540                    | AA                              | GG              | 1946969972               |
| SNP_P4_140294_4927  | NW_004516084.1 | Scaffold670 | 4927                    | CC                              | TT              | 1946969974               |
| SNP_P4_140295_5369  | NW_004516084.1 | Scaffold670 | 5369                    | TT                              | CC              | 1946969976               |
| SNP_P4_140296_10301 | NW_004516084.1 | Scaffold670 | 10301                   | AA                              | TT              | 1946969978               |
| SNP_P4_140297_17462 | NW_004516084.1 | Scaffold670 | 17462                   | TT                              | AA              | 1946969980               |
| SNP_P4_140298_17483 | NW_004516084.1 | Scaffold670 | 17483                   | CC                              | TT              | 1946969982               |
| SNP_P4_140299_17501 | NW_004516084.1 | Scaffold670 | 17501                   | TT                              | AA              | 1946969984               |
| SNP_P4_140300_17522 | NW_004516084.1 | Scaffold670 | 17522                   | GG                              | AA              | 1946969986               |
| SNP_P4_140301_17772 | NW_004516084.1 | Scaffold670 | 17772                   | TT                              | CC              | 1946969988               |
| SNP_P4_140302_17797 | NW_004516084.1 | Scaffold670 | 17797                   | CC                              | AA              | 1946969990               |
| SNP_P4_140303_18138 | NW_004516084.1 | Scaffold670 | 18138                   | CC                              | TT              | 1946969992               |
| SNP_P4_140304_21334 | NW_004516084.1 | Scaffold670 | 21334                   | TT                              | CC              | 1946969994               |
| SNP_P4_140305_21715 | NW_004516084.1 | Scaffold670 | 21715                   | GG                              | AA              | 1946969996               |

| SNPs IDs             | Chromosome IDs | Chromosomes | Physical positions (bp) | CDC Frontier (Reference genome) | (ILWC46 & LPNB) | NCBI SNPdb Accession IDs |
|----------------------|----------------|-------------|-------------------------|---------------------------------|-----------------|--------------------------|
| SNP_P4_140306_27901  | NW_004516084.1 | Scaffold670 | 27901                   | TT                              | CC              | 1946969998               |
| SNP_P4_140307_27965  | NW_004516084.1 | Scaffold670 | 27965                   | CC                              | TT              | 1946970000               |
| SNP_P4_140308_28012  | NW_004516084.1 | Scaffold670 | 28012                   | CC                              | TT              | 1946970002               |
| SNP_P4_140309_43599  | NW_004516084.1 | Scaffold670 | 43599                   | TT                              | CC              | 1946970004               |
| SNP_P4_140310_52410  | NW_004516084.1 | Scaffold670 | 52410                   | TT                              | AA              | 1946970006               |
| SNP_P4_140311_62887  | NW_004516084.1 | Scaffold670 | 62887                   | GG                              | TT              | 1946970008               |
| SNP_P4_140312_70602  | NW_004516084.1 | Scaffold670 | 70602                   | TT                              | AA              | 1946970010               |
| SNP_P4_140313_78505  | NW_004516084.1 | Scaffold670 | 78505                   | CC                              | GG              | 1946970012               |
| SNP_P4_140314_78528  | NW_004516084.1 | Scaffold670 | 78528                   | TT                              | CC              | 1946970014               |
| SNP_P4_140315_78543  | NW_004516084.1 | Scaffold670 | 78543                   | AA                              | GG              | 1946970016               |
| SNP_P4_140316_103744 | NW_004516084.1 | Scaffold670 | 103744                  | GG                              | TT              | 1946970018               |
| SNP_P4_140317_104132 | NW_004516084.1 | Scaffold670 | 104132                  | AA                              | TT              | 1946970020               |
| SNP_P4_140318_106861 | NW_004516084.1 | Scaffold670 | 106861                  | AA                              | TT              | 1946970022               |
| SNP_P4_140319_107005 | NW_004516084.1 | Scaffold670 | 107005                  | GG                              | AA              | 1946970024               |
| SNP_P4_140320_108729 | NW_004516084.1 | Scaffold670 | 108729                  | TT                              | CC              | 1946970026               |
| SNP_P4_140321_116278 | NW_004516084.1 | Scaffold670 | 116278                  | CC                              | TT              | 1946970028               |
| SNP_P4_140322_116376 | NW_004516084.1 | Scaffold670 | 116376                  | TT                              | AA              | 1946970030               |
| SNP_P4_140323_116638 | NW_004516084.1 | Scaffold670 | 116638                  | CC                              | TT              | 1946970032               |
| SNP_P4_140324_127865 | NW_004516084.1 | Scaffold670 | 127865                  | AA                              | GG              | 1946970034               |
| SNP_P4_140325_127887 | NW_004516084.1 | Scaffold670 | 127887                  | TT                              | AA              | 1946970036               |
| SNP_P4_140326_127907 | NW_004516084.1 | Scaffold670 | 127907                  | AA                              | GG              | 1946970038               |
| SNP_P4_140327_127948 | NW_004516084.1 | Scaffold670 | 127948                  | GG                              | TT              | 1946970040               |
| SNP_P4_140328_128273 | NW_004516084.1 | Scaffold670 | 128273                  | TT                              | AA              | 1946970042               |
| SNP_P4_140329_129203 | NW_004516084.1 | Scaffold670 | 129203                  | GG                              | AA              | 1946970044               |
| SNP_P4_140330_129502 | NW_004516084.1 | Scaffold670 | 129502                  | TT                              | AA              | 1946970046               |
| SNP_P4_140331_129899 | NW_004516084.1 | Scaffold670 | 129899                  | AA                              | GG              | 1946970048               |
| SNP_P4_140332_130092 | NW_004516084.1 | Scaffold670 | 130092                  | AA                              | TT              | 1946970050               |
| SNP_P4_140333_130130 | NW_004516084.1 | Scaffold670 | 130130                  | GG                              | AA              | 1946970052               |
| SNP_P4_140334_130159 | NW_004516084.1 | Scaffold670 | 130159                  | TT                              | GG              | 1946970054               |
| SNP_P4_140335_130760 | NW_004516084.1 | Scaffold670 | 130760                  | AA                              | TT              | 1946970056               |
| SNP_P4_140338_133611 | NW_004516084.1 | Scaffold670 | 133611                  | AA                              | CC              | 1946970058               |
| SNP_P4_140339_147980 | NW_004516084.1 | Scaffold670 | 147980                  | TT                              | CC              | 1946970060               |
| SNP_P4_140340_153839 | NW_004516084.1 | Scaffold670 | 153839                  | AA                              | TT              | 1946970062               |
| SNP_P4_140341_153855 | NW_004516084.1 | Scaffold670 | 153855                  | GG                              | AA              | 1946970064               |
| SNP_P4_140342_154371 | NW_004516084.1 | Scaffold670 | 154371                  | CC                              | TT              | 1946970066               |
| SNP_P4_140343_154392 | NW_004516084.1 | Scaffold670 | 154392                  | TT                              | CC              | 1946970068               |
| SNP_P4_140344_156607 | NW_004516084.1 | Scaffold670 | 156607                  | CC                              | TT              | 1946970070               |
| SNP_P4_140345_156676 | NW_004516084.1 | Scaffold670 | 156676                  | CC                              | TT              | 1946970072               |
| SNP_P4_140347_158928 | NW_004516084.1 | Scaffold670 | 158928                  | CC                              | TT              | 1946970074               |
| SNP_P4_140348_163229 | NW_004516084.1 | Scaffold670 | 163229                  | CC                              | GG              | 1946970076               |
| SNP_P4_140349_163423 | NW_004516084.1 | Scaffold670 | 163423                  | CC                              | TT              | 1946970078               |
| SNP_P4_140350_163503 | NW_004516084.1 | Scaffold670 | 163503                  | AA                              | GG              | 1946970080               |

| SNPs IDs             | Chromosome IDs | Chromosomes | Physical positions (bp) | CDC Frontier (Reference genome) | (ILWC46 & LPNB) | NCBI SNPdb Accession IDs |
|----------------------|----------------|-------------|-------------------------|---------------------------------|-----------------|--------------------------|
| SNP_P4_140351_163538 | NW_004516084.1 | Scaffold670 | 163538                  | TT                              | AA              | 1946970082               |
| SNP_P4_140352_163547 | NW_004516084.1 | Scaffold670 | 163547                  | GG                              | AA              | 1946970084               |
| SNP_P4_140353_163569 | NW_004516084.1 | Scaffold670 | 163569                  | TT                              | GG              | 1946970085               |
| SNP_P4_140354_163727 | NW_004516084.1 | Scaffold670 | 163727                  | TT                              | AA              | 1946970087               |
| SNP_P4_140355_163793 | NW_004516084.1 | Scaffold670 | 163793                  | AA                              | GG              | 1946970089               |
| SNP_P4_140356_163841 | NW_004516084.1 | Scaffold670 | 163841                  | GG                              | AA              | 1946970091               |
| SNP_P4_140357_163902 | NW_004516084.1 | Scaffold670 | 163902                  | GG                              | TT              | 1946970093               |
| SNP_P4_140358_164441 | NW_004516084.1 | Scaffold670 | 164441                  | GG                              | AA              | 1946970095               |
| SNP_P4_140359_164659 | NW_004516084.1 | Scaffold670 | 164659                  | TT                              | GG              | 1946970097               |
| SNP_P4_140360_164686 | NW_004516084.1 | Scaffold670 | 164686                  | TT                              | CC              | 1946970099               |
| SNP_P4_140361_186056 | NW_004516084.1 | Scaffold670 | 186056                  | AA                              | TT              | 1946970101               |
| SNP_P4_140362_186101 | NW_004516084.1 | Scaffold670 | 186101                  | TT                              | AA              | 1946970103               |
| SNP_P4_140363_186131 | NW_004516084.1 | Scaffold670 | 186131                  | AA                              | TT              | 1946970105               |
| SNP_P4_140364_186373 | NW_004516084.1 | Scaffold670 | 186373                  | CC                              | TT              | 1946970107               |
| SNP_P4_140365_186879 | NW_004516084.1 | Scaffold670 | 186879                  | TT                              | GG              | 1946970109               |
| SNP_P4_140366_186903 | NW_004516084.1 | Scaffold670 | 186903                  | GG                              | AA              | 1946970111               |
| SNP_P4_140367_187103 | NW_004516084.1 | Scaffold670 | 187103                  | TT                              | CC              | 1946970113               |
| SNP_P4_140368_187309 | NW_004516084.1 | Scaffold670 | 187309                  | TT                              | CC              | 1946970115               |
| SNP_P4_140369_190147 | NW_004516084.1 | Scaffold670 | 190147                  | CC                              | TT              | 1946970117               |
| SNP_P4_140370_190512 | NW_004516084.1 | Scaffold670 | 190512                  | AA                              | GG              | 1946970119               |
| SNP_P4_140371_194642 | NW_004516084.1 | Scaffold670 | 194642                  | TT                              | AA              | 1946970121               |
| SNP_P4_140372_194947 | NW_004516084.1 | Scaffold670 | 194947                  | AA                              | GG              | 1946970123               |
| SNP_P4_140373_194953 | NW_004516084.1 | Scaffold670 | 194953                  | AA                              | GG              | 1946970125               |
| SNP_P4_140374_194954 | NW_004516084.1 | Scaffold670 | 194954                  | AA                              | GG              | 1946970127               |
| SNP_P4_140375_194997 | NW_004516084.1 | Scaffold670 | 194997                  | TT                              | GG              | 1946970129               |
| SNP_P4_140376_195007 | NW_004516084.1 | Scaffold670 | 195007                  | AA                              | TT              | 1946970131               |
| SNP_P4_140377_197738 | NW_004516084.1 | Scaffold670 | 197738                  | GG                              | AA              | 1946970133               |
| SNP_P4_140378_197943 | NW_004516084.1 | Scaffold670 | 197943                  | TT                              | CC              | 1946970135               |
| SNP_P4_140380_198151 | NW_004516084.1 | Scaffold670 | 198151                  | TT                              | CC              | 1946970137               |
| SNP_P4_140381_200967 | NW_004516084.1 | Scaffold670 | 200967                  | AA                              | GG              | 1946970138               |
| SNP_P4_140382_201204 | NW_004516084.1 | Scaffold670 | 201204                  | TT                              | CC              | 1946970139               |
| SNP_P4_140383_201295 | NW_004516084.1 | Scaffold670 | 201295                  | TT                              | CC              | 1946970141               |
| SNP_P4_140384_201318 | NW_004516084.1 | Scaffold670 | 201318                  | AA                              | CC              | 1946970143               |
| SNP_P4_140385_202373 | NW_004516084.1 | Scaffold670 | 202373                  | TT                              | AA              | 1946970145               |
| SNP_P4_140386_202390 | NW_004516084.1 | Scaffold670 | 202390                  | AA                              | TT              | 1946970147               |
| SNP_P4_140387_202401 | NW_004516084.1 | Scaffold670 | 202401                  | AA                              | CC              | 1946970149               |
| SNP_P4_140388_219436 | NW_004516084.1 | Scaffold670 | 219436                  | AA                              | CC              | 1946970151               |
| SNP_P4_140389_224016 | NW_004516084.1 | Scaffold670 | 224016                  | TT                              | GG              | 1946970153               |
| SNP_P4_140390_227657 | NW_004516084.1 | Scaffold670 | 227657                  | TT                              | AA              | 1946970155               |
| SNP_P4_140392_227938 | NW_004516084.1 | Scaffold670 | 227938                  | AA                              | CC              | 1946970157               |
| SNP_P4_140393_227981 | NW_004516084.1 | Scaffold670 | 227981                  | TT                              | AA              | 1946970159               |
| SNP_P4_140394_230694 | NW_004516084.1 | Scaffold670 | 230694                  | TT                              | GG              | 1946970161               |



| SNPs IDs             | Chromosome IDs | Chromosomes | Physical positions (bp) | CDC Frontier (Reference genome) | (ILWC46 & LPNB) | NCBI SNPdb Accession IDs |
|----------------------|----------------|-------------|-------------------------|---------------------------------|-----------------|--------------------------|
| SNP_P4_140395_230894 | NW_004516084.1 | Scaffold670 | 230894                  | GG                              | CC              | 1946970163               |
| SNP_P4_140396_231049 | NW_004516084.1 | Scaffold670 | 231049                  | TT                              | AA              | 1946970165               |
| SNP_P4_140397_231053 | NW_004516084.1 | Scaffold670 | 231053                  | AA                              | GG              | 1946970167               |
| SNP_P4_140398_232391 | NW_004516084.1 | Scaffold670 | 232391                  | AA                              | CC              | 1946970169               |
| SNP_P4_140399_232599 | NW_004516084.1 | Scaffold670 | 232599                  | TT                              | CC              | 1946970171               |
| SNP_P4_140400_263386 | NW_004516084.1 | Scaffold670 | 263386                  | TT                              | CC              | 1946970173               |
| SNP_P4_140401_263400 | NW_004516084.1 | Scaffold670 | 263400                  | AA                              | TT              | 1946970175               |
| SNP_P4_140402_263416 | NW_004516084.1 | Scaffold670 | 263416                  | CC                              | GG              | 1946970177               |
| SNP_P4_140403_264003 | NW_004516084.1 | Scaffold670 | 264003                  | AA                              | GG              | 1946970179               |
| SNP_P4_140404_264026 | NW_004516084.1 | Scaffold670 | 264026                  | GG                              | AA              | 1946970181               |
| SNP_P4_140405_264037 | NW_004516084.1 | Scaffold670 | 264037                  | CC                              | TT              | 1946970183               |
| SNP_P4_140406_264041 | NW_004516084.1 | Scaffold670 | 264041                  | TT                              | AA              | 1946970185               |
| SNP_P4_140407_264269 | NW_004516084.1 | Scaffold670 | 264269                  | AA                              | GG              | 1946970187               |
| SNP_P4_140408_23943  | NW_004516085.1 | Scaffold672 | 23943                   | AA                              | TT              | 1946970189               |
| SNP_P4_140409_83629  | NW_004516085.1 | Scaffold672 | 83629                   | AA                              | GG              | 1946970191               |
| SNP_P4_140410_93247  | NW_004516085.1 | Scaffold672 | 93247                   | AA                              | GG              | 1946970193               |
| SNP_P4_140411_93299  | NW_004516085.1 | Scaffold672 | 93299                   | TT                              | CC              | 1946970195               |
| SNP_P4_140412_93310  | NW_004516085.1 | Scaffold672 | 93310                   | AA                              | CC              | 1946970197               |
| SNP_P4_140413_93659  | NW_004516085.1 | Scaffold672 | 93659                   | TT                              | AA              | 1946970199               |
| SNP_P4_140414_93686  | NW_004516085.1 | Scaffold672 | 93686                   | AA                              | GG              | 1946970201               |
| SNP_P4_140415_93882  | NW_004516085.1 | Scaffold672 | 93882                   | CC                              | GG              | 1946970203               |
| SNP_P4_140416_95295  | NW_004516085.1 | Scaffold672 | 95295                   | GG                              | AA              | 1946970205               |
| SNP_P4_140417_95315  | NW_004516085.1 | Scaffold672 | 95315                   | TT                              | CC              | 1946970207               |
| SNP_P4_140418_101807 | NW_004516085.1 | Scaffold672 | 101807                  | TT                              | CC              | 1946970209               |
| SNP_P4_140419_101942 | NW_004516085.1 | Scaffold672 | 101942                  | AA                              | CC              | 1946970211               |
| SNP_P4_140420_102003 | NW_004516085.1 | Scaffold672 | 102003                  | GG                              | AA              | 1946970213               |
| SNP_P4_140421_102137 | NW_004516085.1 | Scaffold672 | 102137                  | TT                              | CC              | 1946970215               |
| SNP_P4_140422_102403 | NW_004516085.1 | Scaffold672 | 102403                  | GG                              | TT              | 1946970217               |
| SNP_P4_140423_102446 | NW_004516085.1 | Scaffold672 | 102446                  | TT                              | CC              | 1946970219               |
| SNP_P4_140424_102798 | NW_004516085.1 | Scaffold672 | 102798                  | AA                              | GG              | 1946970221               |
| SNP_P4_140425_104213 | NW_004516085.1 | Scaffold672 | 104213                  | AA                              | CC              | 1946970223               |
| SNP_P4_140426_104254 | NW_004516085.1 | Scaffold672 | 104254                  | AA                              | GG              | 1946970225               |
| SNP_P4_140427_104264 | NW_004516085.1 | Scaffold672 | 104264                  | CC                              | TT              | 1946970227               |
| SNP_P4_140428_111405 | NW_004516085.1 | Scaffold672 | 111405                  | AA                              | GG              | 1946970229               |
| SNP_P4_140429_111429 | NW_004516085.1 | Scaffold672 | 111429                  | CC                              | TT              | 1946970231               |
| SNP_P4_140430_128275 | NW_004516085.1 | Scaffold672 | 128275                  | TT                              | GG              | 1946970233               |
| SNP_P4_140431_161674 | NW_004516085.1 | Scaffold672 | 161674                  | TT                              | GG              | 1946970235               |
| SNP_P4_140432_182353 | NW_004516085.1 | Scaffold672 | 182353                  | AA                              | TT              | 1946970237               |
| SNP_P4_140433_182554 | NW_004516085.1 | Scaffold672 | 182554                  | GG                              | TT              | 1946970239               |
| SNP_P4_140434_182981 | NW_004516085.1 | Scaffold672 | 182981                  | AA                              | GG              | 1946970241               |
| SNP_P4_140435_183265 | NW_004516085.1 | Scaffold672 | 183265                  | AA                              | GG              | 1946970243               |
| SNP_P4_140436_183279 | NW_004516085.1 | Scaffold672 | 183279                  | TT                              | GG              | 1946970245               |

| SNPs IDs             | Chromosome IDs | Chromosomes | Physical positions (bp) | CDC Frontier (Reference genome) | (ILWC46 & LPNB) | NCBI SNPdb Accession IDs |
|----------------------|----------------|-------------|-------------------------|---------------------------------|-----------------|--------------------------|
| SNP_P4_140437_191941 | NW_004516085.1 | Scaffold672 | 191941                  | CC                              | TT              | 1946970247               |
| SNP_P4_140438_192085 | NW_004516085.1 | Scaffold672 | 192085                  | AA                              | GG              | 1946970249               |
| SNP_P4_140439_193862 | NW_004516085.1 | Scaffold672 | 193862                  | AA                              | CC              | 1946970251               |
| SNP_P4_140440_202619 | NW_004516085.1 | Scaffold672 | 202619                  | AA                              | TT              | 1946970253               |
| SNP_P4_140441_205249 | NW_004516085.1 | Scaffold672 | 205249                  | CC                              | TT              | 1946970255               |
| SNP_P4_140442_205255 | NW_004516085.1 | Scaffold672 | 205255                  | GG                              | TT              | 1946970257               |
| SNP_P4_140443_206686 | NW_004516085.1 | Scaffold672 | 206686                  | AA                              | TT              | 1946970259               |
| SNP_P4_140444_206701 | NW_004516085.1 | Scaffold672 | 206701                  | TT                              | CC              | 1946970261               |
| SNP_P4_140445_206708 | NW_004516085.1 | Scaffold672 | 206708                  | AA                              | GG              | 1946970263               |
| SNP_P4_140447_207041 | NW_004516085.1 | Scaffold672 | 207041                  | CC                              | GG              | 1946970264               |
| SNP_P4_140448_207059 | NW_004516085.1 | Scaffold672 | 207059                  | TT                              | AA              | 1946970266               |
| SNP_P4_140449_215815 | NW_004516085.1 | Scaffold672 | 215815                  | AA                              | GG              | 1946970268               |
| SNP_P4_140450_217281 | NW_004516085.1 | Scaffold672 | 217281                  | TT                              | AA              | 1946970270               |
| SNP_P4_140451_218666 | NW_004516085.1 | Scaffold672 | 218666                  | AA                              | GG              | 1946970272               |
| SNP_P4_140452_219026 | NW_004516085.1 | Scaffold672 | 219026                  | AA                              | CC              | 1946970274               |
| SNP_P4_140453_223358 | NW_004516085.1 | Scaffold672 | 223358                  | GG                              | AA              | 1946970276               |
| SNP_P4_140454_232325 | NW_004516085.1 | Scaffold672 | 232325                  | AA                              | CC              | 1946970278               |
| SNP_P4_140455_232955 | NW_004516085.1 | Scaffold672 | 232955                  | GG                              | AA              | 1946970280               |
| SNP_P4_140456_233013 | NW_004516085.1 | Scaffold672 | 233013                  | GG                              | AA              | 1946970282               |
| SNP_P4_140457_233188 | NW_004516085.1 | Scaffold672 | 233188                  | AA                              | GG              | 1946970284               |
| SNP_P4_140458_4734   | NW_004516086.1 | Scaffold673 | 4734                    | AA                              | TT              | 1946970285               |
| SNP_P4_140459_10554  | NW_004516086.1 | Scaffold673 | 10554                   | CC                              | TT              | 1946970287               |
| SNP_P4_140461_14752  | NW_004516086.1 | Scaffold673 | 14752                   | TT                              | GG              | 1946970289               |
| SNP_P4_140462_17686  | NW_004516086.1 | Scaffold673 | 17686                   | AA                              | TT              | 1946970291               |
| SNP_P4_140463_5990   | NW_004516087.1 | Scaffold674 | 5990                    | CC                              | GG              | 1946970293               |
| SNP_P4_140464_6773   | NW_004516087.1 | Scaffold674 | 6773                    | TT                              | AA              | 1946970295               |
| SNP_P4_140465_7316   | NW_004516087.1 | Scaffold674 | 7316                    | AA                              | TT              | 1946970297               |
| SNP_P4_140467_13077  | NW_004516087.1 | Scaffold674 | 13077                   | CC                              | TT              | 1946970299               |
| SNP_P4_140468_13079  | NW_004516087.1 | Scaffold674 | 13079                   | TT                              | AA              | 1946970301               |
| SNP_P4_140470_16620  | NW_004516087.1 | Scaffold674 | 16620                   | AA                              | CC              | 1946970303               |
| SNP_P4_140471_17037  | NW_004516087.1 | Scaffold674 | 17037                   | AA                              | GG              | 1946970305               |
| SNP_P4_140472_18545  | NW_004516087.1 | Scaffold674 | 18545                   | TT                              | CC              | 1946970307               |
| SNP_P4_140474_18553  | NW_004516087.1 | Scaffold674 | 18553                   | TT                              | CC              | 1946970309               |
| SNP_P4_140475_18557  | NW_004516087.1 | Scaffold674 | 18557                   | AA                              | GG              | 1946970311               |
| SNP_P4_140476_18566  | NW_004516087.1 | Scaffold674 | 18566                   | AA                              | GG              | 1946970313               |
| SNP_P4_140477_18569  | NW_004516087.1 | Scaffold674 | 18569                   | TT                              | GG              | 1946970315               |
| SNP_P4_140478_18578  | NW_004516087.1 | Scaffold674 | 18578                   | TT                              | CC              | 1946970317               |
| SNP_P4_140479_18603  | NW_004516087.1 | Scaffold674 | 18603                   | GG                              | AA              | 1946970319               |
| SNP_P4_140480_18611  | NW_004516087.1 | Scaffold674 | 18611                   | CC                              | TT              | 1946970321               |
| SNP_P4_140481_18614  | NW_004516087.1 | Scaffold674 | 18614                   | AA                              | TT              | 1946970323               |
| SNP_P4_140482_18626  | NW_004516087.1 | Scaffold674 | 18626                   | AA                              | GG              | 1946970325               |
| SNP_P4_140483_18631  | NW_004516087.1 | Scaffold674 | 18631                   | AA                              | GG              | 1946970327               |

| SNPs IDs            | Chromosome IDs | Chromosomes | Physical positions (bp) | CDC Frontier (Reference genome) | (ILWC46 & LPNB) | NCBI SNPdb Accession IDs |
|---------------------|----------------|-------------|-------------------------|---------------------------------|-----------------|--------------------------|
| SNP_P4_140484_18645 | NW_004516087.1 | Scaffold674 | 18645                   | AA                              | GG              | 1946970329               |
| SNP_P4_140485_18654 | NW_004516087.1 | Scaffold674 | 18654                   | TT                              | CC              | 1946970331               |
| SNP_P4_140486_18659 | NW_004516087.1 | Scaffold674 | 18659                   | AA                              | GG              | 1946970333               |
| SNP_P4_140487_18686 | NW_004516087.1 | Scaffold674 | 18686                   | AA                              | GG              | 1946970335               |
| SNP_P4_140488_18695 | NW_004516087.1 | Scaffold674 | 18695                   | AA                              | GG              | 1946970337               |
| SNP_P4_140489_18703 | NW_004516087.1 | Scaffold674 | 18703                   | TT                              | CC              | 1946970339               |
| SNP_P4_140490_18707 | NW_004516087.1 | Scaffold674 | 18707                   | TT                              | CC              | 1946970341               |
| SNP_P4_140491_18713 | NW_004516087.1 | Scaffold674 | 18713                   | AA                              | GG              | 1946970343               |
| SNP_P4_140492_19300 | NW_004516087.1 | Scaffold674 | 19300                   | CC                              | TT              | 1946970346               |
| SNP_P4_140493_26883 | NW_004516087.1 | Scaffold674 | 26883                   | CC                              | GG              | 1946970348               |
| SNP_P4_140494_26889 | NW_004516087.1 | Scaffold674 | 26889                   | GG                              | TT              | 1946970350               |
| SNP_P4_140495_31283 | NW_004516087.1 | Scaffold674 | 31283                   | GG                              | AA              | 1946970352               |
| SNP_P4_140496_31343 | NW_004516087.1 | Scaffold674 | 31343                   | AA                              | CC              | 1946970354               |
| SNP_P4_140497_31657 | NW_004516087.1 | Scaffold674 | 31657                   | GG                              | AA              | 1946970356               |
| SNP_P4_140498_31995 | NW_004516087.1 | Scaffold674 | 31995                   | GG                              | AA              | 1946970359               |
| SNP_P4_140499_32293 | NW_004516087.1 | Scaffold674 | 32293                   | AA                              | GG              | 1946970361               |
| SNP_P4_140500_32418 | NW_004516087.1 | Scaffold674 | 32418                   | TT                              | CC              | 1946970363               |
| SNP_P4_140501_36533 | NW_004516087.1 | Scaffold674 | 36533                   | GG                              | AA              | 1946970365               |
| SNP_P4_140502_36598 | NW_004516087.1 | Scaffold674 | 36598                   | TT                              | AA              | 1946970367               |
| SNP_P4_140503_36948 | NW_004516087.1 | Scaffold674 | 36948                   | GG                              | AA              | 1946970369               |
| SNP_P4_140504_40215 | NW_004516087.1 | Scaffold674 | 40215                   | CC                              | TT              | 1946970371               |
| SNP_P4_140505_44624 | NW_004516087.1 | Scaffold674 | 44624                   | GG                              | TT              | 1946970374               |
| SNP_P4_140506_45313 | NW_004516087.1 | Scaffold674 | 45313                   | AA                              | GG              | 1946970376               |
| SNP_P4_140507_45865 | NW_004516087.1 | Scaffold674 | 45865                   | AA                              | CC              | 1946970378               |
| SNP_P4_140508_51897 | NW_004516087.1 | Scaffold674 | 51897                   | TT                              | CC              | 1946970380               |
| SNP_P4_140509_51984 | NW_004516087.1 | Scaffold674 | 51984                   | AA                              | GG              | 1946970382               |
| SNP_P4_140510_52308 | NW_004516087.1 | Scaffold674 | 52308                   | AA                              | TT              | 1946970384               |
| SNP_P4_140511_58432 | NW_004516087.1 | Scaffold674 | 58432                   | TT                              | AA              | 1946970386               |
| SNP_P4_140512_63686 | NW_004516087.1 | Scaffold674 | 63686                   | TT                              | AA              | 1946970388               |
| SNP_P4_140513_63687 | NW_004516087.1 | Scaffold674 | 63687                   | GG                              | TT              | 1946970390               |
| SNP_P4_140514_65480 | NW_004516087.1 | Scaffold674 | 65480                   | TT                              | AA              | 1946970392               |
| SNP_P4_140515_65491 | NW_004516087.1 | Scaffold674 | 65491                   | CC                              | AA              | 1946970394               |
| SNP_P4_140516_65673 | NW_004516087.1 | Scaffold674 | 65673                   | GG                              | TT              | 1946970396               |
| SNP_P4_140517_67399 | NW_004516087.1 | Scaffold674 | 67399                   | TT                              | AA              | 1946970398               |
| SNP_P4_140518_72360 | NW_004516087.1 | Scaffold674 | 72360                   | CC                              | TT              | 1946970400               |
| SNP_P4_140520_79549 | NW_004516087.1 | Scaffold674 | 79549                   | CC                              | TT              | 1946970402               |
| SNP_P4_140521_82432 | NW_004516087.1 | Scaffold674 | 82432                   | TT                              | AA              | 1946970404               |
| SNP_P4_140523_87139 | NW_004516087.1 | Scaffold674 | 87139                   | TT                              | CC              | 1946970406               |
| SNP_P4_140524_87145 | NW_004516087.1 | Scaffold674 | 87145                   | TT                              | CC              | 1946970408               |
| SNP_P4_140525_87170 | NW_004516087.1 | Scaffold674 | 87170                   | AA                              | GG              | 1946970410               |
| SNP_P4_140526_87173 | NW_004516087.1 | Scaffold674 | 87173                   | TT                              | CC              | 1946970412               |
| SNP_P4_140527_87227 | NW_004516087.1 | Scaffold674 | 87227                   | CC                              | AA              | 1946970414               |

| SNPs IDs             | Chromosome IDs | Chromosomes | Physical positions (bp) | CDC Frontier (Reference genome) | (ILWC46 & LPNB) | NCBI SNPdb Accession IDs |
|----------------------|----------------|-------------|-------------------------|---------------------------------|-----------------|--------------------------|
| SNP_P4_140528_90805  | NW_004516087.1 | Scaffold674 | 90805                   | TT                              | CC              | 1946970416               |
| SNP_P4_140530_96825  | NW_004516087.1 | Scaffold674 | 96825                   | GG                              | AA              | 1946970418               |
| SNP_P4_140531_96829  | NW_004516087.1 | Scaffold674 | 96829                   | AA                              | GG              | 1946970420               |
| SNP_P4_140532_97140  | NW_004516087.1 | Scaffold674 | 97140                   | TT                              | CC              | 1946970422               |
| SNP_P4_140533_99719  | NW_004516087.1 | Scaffold674 | 99719                   | AA                              | CC              | 1946970424               |
| SNP_P4_140534_109940 | NW_004516087.1 | Scaffold674 | 109940                  | TT                              | CC              | 1946970426               |
| SNP_P4_140535_114389 | NW_004516087.1 | Scaffold674 | 114389                  | TT                              | GG              | 1946970428               |
| SNP_P4_140536_124584 | NW_004516087.1 | Scaffold674 | 124584                  | GG                              | AA              | 1946970430               |
| SNP_P4_140537_124981 | NW_004516087.1 | Scaffold674 | 124981                  | AA                              | CC              | 1946970432               |
| SNP_P4_140538_126273 | NW_004516087.1 | Scaffold674 | 126273                  | AA                              | GG              | 1946970434               |
| SNP_P4_140539_127593 | NW_004516087.1 | Scaffold674 | 127593                  | TT                              | AA              | 1946970436               |
| SNP_P4_140540_128805 | NW_004516087.1 | Scaffold674 | 128805                  | CC                              | AA              | 1946970438               |
| SNP_P4_140541_131026 | NW_004516087.1 | Scaffold674 | 131026                  | AA                              | GG              | 1946970440               |
| SNP_P4_140542_131068 | NW_004516087.1 | Scaffold674 | 131068                  | TT                              | CC              | 1946970442               |
| SNP_P4_140543_131607 | NW_004516087.1 | Scaffold674 | 131607                  | TT                              | CC              | 1946970444               |
| SNP_P4_140547_139968 | NW_004516087.1 | Scaffold674 | 139968                  | CC                              | TT              | 1946970446               |
| SNP_P4_140548_141650 | NW_004516087.1 | Scaffold674 | 141650                  | GG                              | AA              | 1946970448               |
| SNP_P4_140549_144575 | NW_004516087.1 | Scaffold674 | 144575                  | CC                              | TT              | 1946970450               |
| SNP_P4_140550_148824 | NW_004516087.1 | Scaffold674 | 148824                  | TT                              | CC              | 1946970452               |
| SNP_P4_140552_150775 | NW_004516087.1 | Scaffold674 | 150775                  | TT                              | AA              | 1946970454               |
| SNP_P4_140553_151360 | NW_004516087.1 | Scaffold674 | 151360                  | CC                              | AA              | 1946970456               |
| SNP_P4_140554_155283 | NW_004516087.1 | Scaffold674 | 155283                  | GG                              | AA              | 1946970458               |
| SNP_P4_140556_155936 | NW_004516087.1 | Scaffold674 | 155936                  | TT                              | CC              | 1946970460               |
| SNP_P4_140559_157728 | NW_004516087.1 | Scaffold674 | 157728                  | GG                              | CC              | 1946970462               |
| SNP_P4_140560_159069 | NW_004516087.1 | Scaffold674 | 159069                  | TT                              | CC              | 1946970464               |
| SNP_P4_140563_179704 | NW_004516087.1 | Scaffold674 | 179704                  | TT                              | CC              | 1946970466               |
| SNP_P4_140564_181558 | NW_004516087.1 | Scaffold674 | 181558                  | GG                              | AA              | 1946970468               |
| SNP_P4_140565_181561 | NW_004516087.1 | Scaffold674 | 181561                  | GG                              | AA              | 1946970470               |
| SNP_P4_140566_181593 | NW_004516087.1 | Scaffold674 | 181593                  | TT                              | CC              | 1946970472               |
| SNP_P4_140567_181601 | NW_004516087.1 | Scaffold674 | 181601                  | TT                              | CC              | 1946970474               |
| SNP_P4_140568_181623 | NW_004516087.1 | Scaffold674 | 181623                  | GG                              | AA              | 1946970476               |
| SNP_P4_140569_181837 | NW_004516087.1 | Scaffold674 | 181837                  | CC                              | GG              | 1946970478               |
| SNP_P4_140571_184370 | NW_004516087.1 | Scaffold674 | 184370                  | AA                              | CC              | 1946970480               |
| SNP_P4_140572_184393 | NW_004516087.1 | Scaffold674 | 184393                  | CC                              | TT              | 1946970482               |
| SNP_P4_140573_187117 | NW_004516087.1 | Scaffold674 | 187117                  | TT                              | GG              | 1946970484               |
| SNP_P4_140574_198560 | NW_004516087.1 | Scaffold674 | 198560                  | AA                              | CC              | 1946970486               |
| SNP_P4_140575_202522 | NW_004516087.1 | Scaffold674 | 202522                  | TT                              | CC              | 1946970488               |
| SNP_P4_140576_202889 | NW_004516087.1 | Scaffold674 | 202889                  | TT                              | CC              | 1946970490               |
| SNP_P4_140577_202898 | NW_004516087.1 | Scaffold674 | 202898                  | TT                              | CC              | 1946970492               |
| SNP_P4_140578_202929 | NW_004516087.1 | Scaffold674 | 202929                  | AA                              | GG              | 1946970494               |
| SNP_P4_140579_219469 | NW_004516087.1 | Scaffold674 | 219469                  | GG                              | CC              | 1946970496               |
| SNP_P4_140580_219474 | NW_004516087.1 | Scaffold674 | 219474                  | GG                              | AA              | 1946970498               |

| SNPs IDs             | Chromosome IDs | Chromosomes | Physical positions (bp) | CDC Frontier (Reference genome) | (ILWC46 & LPNB) | NCBI SNPdb Accession IDs |
|----------------------|----------------|-------------|-------------------------|---------------------------------|-----------------|--------------------------|
| SNP_P4_140581_219478 | NW_004516087.1 | Scaffold674 | 219478                  | GG                              | CC              | 1946970500               |
| SNP_P4_140582_219972 | NW_004516087.1 | Scaffold674 | 219972                  | GG                              | AA              | 1946970502               |
| SNP_P4_140583_221205 | NW_004516087.1 | Scaffold674 | 221205                  | TT                              | CC              | 1946970503               |
| SNP_P4_140584_221346 | NW_004516087.1 | Scaffold674 | 221346                  | GG                              | AA              | 1946970505               |
| SNP_P4_140585_221372 | NW_004516087.1 | Scaffold674 | 221372                  | TT                              | AA              | 1946970507               |
| SNP_P4_140586_221388 | NW_004516087.1 | Scaffold674 | 221388                  | AA                              | GG              | 1946970509               |
| SNP_P4_140587_222037 | NW_004516087.1 | Scaffold674 | 222037                  | GG                              | TT              | 1946970511               |
| SNP_P4_140588_222305 | NW_004516087.1 | Scaffold674 | 222305                  | GG                              | AA              | 1946970513               |
| SNP_P4_140591_230500 | NW_004516087.1 | Scaffold674 | 230500                  | AA                              | TT              | 1946970515               |
| SNP_P4_140593_237260 | NW_004516087.1 | Scaffold674 | 237260                  | GG                              | AA              | 1946970517               |
| SNP_P4_140594_240080 | NW_004516087.1 | Scaffold674 | 240080                  | GG                              | TT              | 1946970519               |
| SNP_P4_140595_248051 | NW_004516087.1 | Scaffold674 | 248051                  | AA                              | GG              | 1946970521               |
| SNP_P4_140597_249213 | NW_004516087.1 | Scaffold674 | 249213                  | GG                              | AA              | 1946970523               |
| SNP_P4_140598_249301 | NW_004516087.1 | Scaffold674 | 249301                  | AA                              | GG              | 1946970525               |
| SNP_P4_140599_250220 | NW_004516087.1 | Scaffold674 | 250220                  | AA                              | GG              | 1946970527               |
| SNP_P4_140601_256148 | NW_004516087.1 | Scaffold674 | 256148                  | TT                              | GG              | 1946970529               |
| SNP_P4_140602_269698 | NW_004516087.1 | Scaffold674 | 269698                  | AA                              | GG              | 1946970531               |
| SNP_P4_140603_270266 | NW_004516087.1 | Scaffold674 | 270266                  | CC                              | AA              | 1946970533               |
| SNP_P4_140604_281531 | NW_004516087.1 | Scaffold674 | 281531                  | CC                              | TT              | 1946970535               |
| SNP_P4_140605_282017 | NW_004516087.1 | Scaffold674 | 282017                  | GG                              | TT              | 1946970537               |
| SNP_P4_140606_282100 | NW_004516087.1 | Scaffold674 | 282100                  | AA                              | GG              | 1946970539               |
| SNP_P4_140607_288627 | NW_004516087.1 | Scaffold674 | 288627                  | TT                              | CC              | 1946970541               |
| SNP_P4_140608_289485 | NW_004516087.1 | Scaffold674 | 289485                  | AA                              | TT              | 1946970543               |
| SNP_P4_140609_291168 | NW_004516087.1 | Scaffold674 | 291168                  | GG                              | AA              | 1946970545               |
| SNP_P4_140610_294119 | NW_004516087.1 | Scaffold674 | 294119                  | TT                              | CC              | 1946970547               |
| SNP_P4_140611_309725 | NW_004516087.1 | Scaffold674 | 309725                  | CC                              | TT              | 1946970549               |
| SNP_P4_140612_309847 | NW_004516087.1 | Scaffold674 | 309847                  | AA                              | GG              | 1946970551               |
| SNP_P4_140613_321559 | NW_004516087.1 | Scaffold674 | 321559                  | CC                              | AA              | 1946970553               |
| SNP_P4_140614_331754 | NW_004516087.1 | Scaffold674 | 331754                  | CC                              | AA              | 1946970555               |
| SNP_P4_140615_337474 | NW_004516087.1 | Scaffold674 | 337474                  | AA                              | GG              | 1946970557               |
| SNP_P4_140617_357159 | NW_004516087.1 | Scaffold674 | 357159                  | AA                              | GG              | 1946970559               |
| SNP_P4_140618_363679 | NW_004516087.1 | Scaffold674 | 363679                  | GG                              | CC              | 1946970561               |
| SNP_P4_140619_368584 | NW_004516087.1 | Scaffold674 | 368584                  | GG                              | TT              | 1946970563               |
| SNP_P4_140620_369743 | NW_004516087.1 | Scaffold674 | 369743                  | CC                              | TT              | 1946970565               |
| SNP_P4_140621_369797 | NW_004516087.1 | Scaffold674 | 369797                  | TT                              | CC              | 1946970567               |
| SNP_P4_140622_369889 | NW_004516087.1 | Scaffold674 | 369889                  | AA                              | GG              | 1946970569               |
| SNP_P4_140623_371369 | NW_004516087.1 | Scaffold674 | 371369                  | GG                              | TT              | 1946970571               |
| SNP_P4_140624_371399 | NW_004516087.1 | Scaffold674 | 371399                  | GG                              | AA              | 1946970573               |
| SNP_P4_140625_371541 | NW_004516087.1 | Scaffold674 | 371541                  | CC                              | AA              | 1946970575               |
| SNP_P4_140626_371785 | NW_004516087.1 | Scaffold674 | 371785                  | CC                              | AA              | 1946970577               |
| SNP_P4_140627_372529 | NW_004516087.1 | Scaffold674 | 372529                  | AA                              | GG              | 1946970579               |
| SNP_P4_140628_373880 | NW_004516087.1 | Scaffold674 | 373880                  | CC                              | TT              | 1946970581               |

| SNPs IDs             | Chromosome IDs | Chromosomes | Physical positions (bp) | CDC Frontier (Reference genome) | (ILWC46 & LPNB) | NCBI SNPdb Accession IDs |
|----------------------|----------------|-------------|-------------------------|---------------------------------|-----------------|--------------------------|
| SNP_P4_140629_374560 | NW_004516087.1 | Scaffold674 | 374560                  | GG                              | AA              | 1946970583               |
| SNP_P4_140630_375560 | NW_004516087.1 | Scaffold674 | 375560                  | AA                              | GG              | 1946970585               |
| SNP_P4_140631_376355 | NW_004516087.1 | Scaffold674 | 376355                  | GG                              | TT              | 1946970587               |
| SNP_P4_140632_377183 | NW_004516087.1 | Scaffold674 | 377183                  | CC                              | GG              | 1946970589               |
| SNP_P4_140633_378816 | NW_004516087.1 | Scaffold674 | 378816                  | CC                              | AA              | 1946970591               |
| SNP_P4_140634_389282 | NW_004516087.1 | Scaffold674 | 389282                  | TT                              | AA              | 1946970593               |
| SNP_P4_140635_392076 | NW_004516087.1 | Scaffold674 | 392076                  | CC                              | AA              | 1946970595               |
| SNP_P4_140636_392142 | NW_004516087.1 | Scaffold674 | 392142                  | CC                              | TT              | 1946970597               |
| SNP_P4_140637_396773 | NW_004516087.1 | Scaffold674 | 396773                  | AA                              | GG              | 1946970599               |
| SNP_P4_140638_396982 | NW_004516087.1 | Scaffold674 | 396982                  | AA                              | CC              | 1946970601               |
| SNP_P4_140639_400863 | NW_004516087.1 | Scaffold674 | 400863                  | TT                              | CC              | 1946970603               |
| SNP_P4_140640_400881 | NW_004516087.1 | Scaffold674 | 400881                  | AA                              | GG              | 1946970605               |
| SNP_P4_140641_400882 | NW_004516087.1 | Scaffold674 | 400882                  | TT                              | CC              | 1946970607               |
| SNP_P4_140642_401140 | NW_004516087.1 | Scaffold674 | 401140                  | GG                              | AA              | 1946970609               |
| SNP_P4_140643_401149 | NW_004516087.1 | Scaffold674 | 401149                  | TT                              | CC              | 1946970611               |
| SNP_P4_140644_401151 | NW_004516087.1 | Scaffold674 | 401151                  | GG                              | AA              | 1946970613               |
| SNP_P4_140645_401155 | NW_004516087.1 | Scaffold674 | 401155                  | CC                              | TT              | 1946970615               |
| SNP_P4_140646_401161 | NW_004516087.1 | Scaffold674 | 401161                  | AA                              | TT              | 1946970617               |
| SNP_P4_140649_401338 | NW_004516087.1 | Scaffold674 | 401338                  | TT                              | GG              | 1946970619               |
| SNP_P4_140650_401343 | NW_004516087.1 | Scaffold674 | 401343                  | CC                              | AA              | 1946970621               |
| SNP_P4_140651_401414 | NW_004516087.1 | Scaffold674 | 401414                  | GG                              | TT              | 1946970623               |
| SNP_P4_140652_401430 | NW_004516087.1 | Scaffold674 | 401430                  | AA                              | GG              | 1946970625               |
| SNP_P4_140653_401469 | NW_004516087.1 | Scaffold674 | 401469                  | GG                              | AA              | 1946970627               |
| SNP_P4_140655_401523 | NW_004516087.1 | Scaffold674 | 401523                  | GG                              | TT              | 1946970629               |
| SNP_P4_140656_401572 | NW_004516087.1 | Scaffold674 | 401572                  | TT                              | CC              | 1946970631               |
| SNP_P4_140657_401590 | NW_004516087.1 | Scaffold674 | 401590                  | TT                              | CC              | 1946970633               |
| SNP_P4_140658_404866 | NW_004516087.1 | Scaffold674 | 404866                  | TT                              | CC              | 1946970635               |
| SNP_P4_140661_405016 | NW_004516087.1 | Scaffold674 | 405016                  | CC                              | AA              | 1946970637               |
| SNP_P4_140662_406916 | NW_004516087.1 | Scaffold674 | 406916                  | TT                              | CC              | 1946970639               |
| SNP_P4_140663_409551 | NW_004516087.1 | Scaffold674 | 409551                  | AA                              | GG              | 1946970641               |
| SNP_P4_140664_413621 | NW_004516087.1 | Scaffold674 | 413621                  | AA                              | TT              | 1946970643               |
| SNP_P4_140666_416132 | NW_004516087.1 | Scaffold674 | 416132                  | TT                              | CC              | 1946970645               |
| SNP_P4_140667_416408 | NW_004516087.1 | Scaffold674 | 416408                  | AA                              | CC              | 1946970647               |
| SNP_P4_140668_426112 | NW_004516087.1 | Scaffold674 | 426112                  | GG                              | AA              | 1946970649               |
| SNP_P4_140669_426127 | NW_004516087.1 | Scaffold674 | 426127                  | AA                              | TT              | 1946970651               |
| SNP_P4_140670_426701 | NW_004516087.1 | Scaffold674 | 426701                  | AA                              | GG              | 1946970653               |
| SNP_P4_140671_428744 | NW_004516087.1 | Scaffold674 | 428744                  | AA                              | TT              | 1946970655               |
| SNP_P4_140672_428809 | NW_004516087.1 | Scaffold674 | 428809                  | TT                              | GG              | 1946970657               |
| SNP_P4_140673_435583 | NW_004516087.1 | Scaffold674 | 435583                  | AA                              | GG              | 1946970659               |
| SNP_P4_140674_436693 | NW_004516087.1 | Scaffold674 | 436693                  | TT                              | AA              | 1946970661               |
| SNP_P4_140675_437197 | NW_004516087.1 | Scaffold674 | 437197                  | AA                              | GG              | 1946970663               |
| SNP_P4_140676_442146 | NW_004516087.1 | Scaffold674 | 442146                  | AA                              | GG              | 1946970665               |

| SNPs IDs             | Chromosome IDs | Chromosomes | Physical positions (bp) | CDC Frontier (Reference genome) | (ILWC46 & LPNB) | NCBI SNPdb Accession IDs |
|----------------------|----------------|-------------|-------------------------|---------------------------------|-----------------|--------------------------|
| SNP_P4_140677_443116 | NW_004516087.1 | Scaffold674 | 443116                  | AA                              | GG              | 1946970667               |
| SNP_P4_140678_443119 | NW_004516087.1 | Scaffold674 | 443119                  | CC                              | TT              | 1946970669               |
| SNP_P4_140679_443436 | NW_004516087.1 | Scaffold674 | 443436                  | TT                              | AA              | 1946970671               |
| SNP_P4_140680_450497 | NW_004516087.1 | Scaffold674 | 450497                  | GG                              | AA              | 1946970673               |
| SNP_P4_140683_462690 | NW_004516087.1 | Scaffold674 | 462690                  | AA                              | GG              | 1946970675               |
| SNP_P4_140684_464125 | NW_004516087.1 | Scaffold674 | 464125                  | AA                              | TT              | 1946970677               |
| SNP_P4_140685_467056 | NW_004516087.1 | Scaffold674 | 467056                  | TT                              | CC              | 1946970679               |
| SNP_P4_140686_468806 | NW_004516087.1 | Scaffold674 | 468806                  | GG                              | CC              | 1946970681               |
| SNP_P4_140687_468811 | NW_004516087.1 | Scaffold674 | 468811                  | GG                              | AA              | 1946970683               |
| SNP_P4_140689_471873 | NW_004516087.1 | Scaffold674 | 471873                  | TT                              | CC              | 1946970685               |
| SNP_P4_140690_472096 | NW_004516087.1 | Scaffold674 | 472096                  | CC                              | TT              | 1946970687               |
| SNP_P4_140693_477977 | NW_004516087.1 | Scaffold674 | 477977                  | TT                              | GG              | 1946970689               |
| SNP_P4_140694_478480 | NW_004516087.1 | Scaffold674 | 478480                  | TT                              | CC              | 1946970691               |
| SNP_P4_140695_479484 | NW_004516087.1 | Scaffold674 | 479484                  | GG                              | CC              | 1946970693               |
| SNP_P4_140696_482868 | NW_004516087.1 | Scaffold674 | 482868                  | CC                              | TT              | 1946970695               |
| SNP_P4_140697_485635 | NW_004516087.1 | Scaffold674 | 485635                  | CC                              | TT              | 1946970697               |
| SNP_P4_140698_486422 | NW_004516087.1 | Scaffold674 | 486422                  | GG                              | AA              | 1946970699               |
| SNP_P4_140699_499132 | NW_004516087.1 | Scaffold674 | 499132                  | GG                              | AA              | 1946970701               |
| SNP_P4_140700_500787 | NW_004516087.1 | Scaffold674 | 500787                  | TT                              | CC              | 1946970703               |
| SNP_P4_140701_500799 | NW_004516087.1 | Scaffold674 | 500799                  | AA                              | TT              | 1946970705               |
| SNP_P4_140702_500800 | NW_004516087.1 | Scaffold674 | 500800                  | GG                              | AA              | 1946970707               |
| SNP_P4_140703_501085 | NW_004516087.1 | Scaffold674 | 501085                  | CC                              | TT              | 1946970709               |
| SNP_P4_140704_501105 | NW_004516087.1 | Scaffold674 | 501105                  | TT                              | AA              | 1946970711               |
| SNP_P4_140705_501126 | NW_004516087.1 | Scaffold674 | 501126                  | GG                              | TT              | 1946970713               |
| SNP_P4_140706_501637 | NW_004516087.1 | Scaffold674 | 501637                  | CC                              | TT              | 1946970715               |
| SNP_P4_140707_501916 | NW_004516087.1 | Scaffold674 | 501916                  | CC                              | TT              | 1946970717               |
| SNP_P4_140708_502019 | NW_004516087.1 | Scaffold674 | 502019                  | AA                              | GG              | 1946970719               |
| SNP_P4_140709_502031 | NW_004516087.1 | Scaffold674 | 502031                  | AA                              | CC              | 1946970721               |
| SNP_P4_140710_502033 | NW_004516087.1 | Scaffold674 | 502033                  | AA                              | GG              | 1946970723               |
| SNP_P4_140711_502037 | NW_004516087.1 | Scaffold674 | 502037                  | TT                              | CC              | 1946970725               |
| SNP_P4_140712_502038 | NW_004516087.1 | Scaffold674 | 502038                  | CC                              | TT              | 1946970727               |
| SNP_P4_140713_502320 | NW_004516087.1 | Scaffold674 | 502320                  | TT                              | CC              | 1946970729               |
| SNP_P4_140714_502968 | NW_004516087.1 | Scaffold674 | 502968                  | TT                              | CC              | 1946970731               |
| SNP_P4_140715_502983 | NW_004516087.1 | Scaffold674 | 502983                  | GG                              | CC              | 1946970733               |
| SNP_P4_140716_503960 | NW_004516087.1 | Scaffold674 | 503960                  | AA                              | GG              | 1946970735               |
| SNP_P4_140717_504076 | NW_004516087.1 | Scaffold674 | 504076                  | GG                              | CC              | 1946970737               |
| SNP_P4_140721_514812 | NW_004516087.1 | Scaffold674 | 514812                  | AA                              | TT              | 1946970739               |
| SNP_P4_140722_518490 | NW_004516087.1 | Scaffold674 | 518490                  | GG                              | AA              | 1946970741               |
| SNP_P4_140723_519495 | NW_004516087.1 | Scaffold674 | 519495                  | TT                              | CC              | 1946970743               |
| SNP_P4_140724_528031 | NW_004516087.1 | Scaffold674 | 528031                  | GG                              | AA              | 1946970745               |
| SNP_P4_140726_531127 | NW_004516087.1 | Scaffold674 | 531127                  | GG                              | AA              | 1946970747               |
| SNP_P4_140727_532634 | NW_004516087.1 | Scaffold674 | 532634                  | AA                              | GG              | 1946970749               |

| SNPs IDs             | Chromosome IDs | Chromosomes | Physical positions (bp) | CDC Frontier (Reference genome) | (ILWC46 & LPNB) | NCBI SNPdb Accession IDs |
|----------------------|----------------|-------------|-------------------------|---------------------------------|-----------------|--------------------------|
| SNP_P4_140728_534774 | NW_004516087.1 | Scaffold674 | 534774                  | TT                              | CC              | 1946970751               |
| SNP_P4_140729_536088 | NW_004516087.1 | Scaffold674 | 536088                  | AA                              | TT              | 1946970753               |
| SNP_P4_140730_542702 | NW_004516087.1 | Scaffold674 | 542702                  | AA                              | CC              | 1946970755               |
| SNP_P4_140731_544113 | NW_004516087.1 | Scaffold674 | 544113                  | CC                              | TT              | 1946970757               |
| SNP_P4_140732_545311 | NW_004516087.1 | Scaffold674 | 545311                  | AA                              | GG              | 1946970759               |
| SNP_P4_140733_548980 | NW_004516087.1 | Scaffold674 | 548980                  | TT                              | CC              | 1946970761               |
| SNP_P4_140734_549260 | NW_004516087.1 | Scaffold674 | 549260                  | TT                              | CC              | 1946970763               |
| SNP_P4_140735_549644 | NW_004516087.1 | Scaffold674 | 549644                  | AA                              | CC              | 1946970765               |
| SNP_P4_140736_551089 | NW_004516087.1 | Scaffold674 | 551089                  | CC                              | TT              | 1946970767               |
| SNP_P4_140737_551525 | NW_004516087.1 | Scaffold674 | 551525                  | GG                              | AA              | 1946970769               |
| SNP_P4_140739_556052 | NW_004516087.1 | Scaffold674 | 556052                  | GG                              | AA              | 1946970771               |
| SNP_P4_140740_556306 | NW_004516087.1 | Scaffold674 | 556306                  | AA                              | GG              | 1946970773               |
| SNP_P4_140741_556800 | NW_004516087.1 | Scaffold674 | 556800                  | GG                              | AA              | 1946970775               |
| SNP_P4_140743_559487 | NW_004516087.1 | Scaffold674 | 559487                  | AA                              | GG              | 1946970777               |
| SNP_P4_140744_560682 | NW_004516087.1 | Scaffold674 | 560682                  | CC                              | AA              | 1946970779               |
| SNP_P4_140745_562606 | NW_004516087.1 | Scaffold674 | 562606                  | TT                              | AA              | 1946970781               |
| SNP_P4_140746_567202 | NW_004516087.1 | Scaffold674 | 567202                  | TT                              | CC              | 1946970783               |
| SNP_P4_140747_569041 | NW_004516087.1 | Scaffold674 | 569041                  | TT                              | CC              | 1946970785               |
| SNP_P4_140748_571768 | NW_004516087.1 | Scaffold674 | 571768                  | TT                              | CC              | 1946970787               |
| SNP_P4_140749_574494 | NW_004516087.1 | Scaffold674 | 574494                  | CC                              | TT              | 1946970788               |
| SNP_P4_140750_582768 | NW_004516087.1 | Scaffold674 | 582768                  | TT                              | CC              | 1946970790               |
| SNP_P4_140751_589980 | NW_004516087.1 | Scaffold674 | 589980                  | GG                              | TT              | 1946970792               |
| SNP_P4_140752_591685 | NW_004516087.1 | Scaffold674 | 591685                  | CC                              | TT              | 1946970794               |
| SNP_P4_140755_595032 | NW_004516087.1 | Scaffold674 | 595032                  | TT                              | AA              | 1946970796               |
| SNP_P4_140756_598635 | NW_004516087.1 | Scaffold674 | 598635                  | GG                              | AA              | 1946970798               |
| SNP_P4_140757_601955 | NW_004516087.1 | Scaffold674 | 601955                  | AA                              | GG              | 1946970800               |
| SNP_P4_140758_602795 | NW_004516087.1 | Scaffold674 | 602795                  | CC                              | TT              | 1946970802               |
| SNP_P4_140759_603030 | NW_004516087.1 | Scaffold674 | 603030                  | AA                              | CC              | 1946970804               |
| SNP_P4_140760_617629 | NW_004516087.1 | Scaffold674 | 617629                  | GG                              | TT              | 1946970805               |
| SNP_P4_140761_618339 | NW_004516087.1 | Scaffold674 | 618339                  | AA                              | GG              | 1946970807               |
| SNP_P4_140762_619956 | NW_004516087.1 | Scaffold674 | 619956                  | AA                              | GG              | 1946970809               |
| SNP_P4_140763_620235 | NW_004516087.1 | Scaffold674 | 620235                  | GG                              | AA              | 1946970811               |
| SNP_P4_140764_620425 | NW_004516087.1 | Scaffold674 | 620425                  | AA                              | GG              | 1946970813               |
| SNP_P4_140767_628195 | NW_004516087.1 | Scaffold674 | 628195                  | TT                              | AA              | 1946970815               |
| SNP_P4_140768_629490 | NW_004516087.1 | Scaffold674 | 629490                  | AA                              | CC              | 1946970817               |
| SNP_P4_140771_635370 | NW_004516087.1 | Scaffold674 | 635370                  | GG                              | TT              | 1946970819               |
| SNP_P4_140772_635948 | NW_004516087.1 | Scaffold674 | 635948                  | AA                              | TT              | 1946970821               |
| SNP_P4_140774_649030 | NW_004516087.1 | Scaffold674 | 649030                  | CC                              | TT              | 1946970823               |
| SNP_P4_140775_649289 | NW_004516087.1 | Scaffold674 | 649289                  | AA                              | GG              | 1946970825               |
| SNP_P4_140776_657580 | NW_004516087.1 | Scaffold674 | 657580                  | AA                              | GG              | 1946970827               |
| SNP_P4_140777_657869 | NW_004516087.1 | Scaffold674 | 657869                  | TT                              | GG              | 1946970829               |
| SNP_P4_140778_660128 | NW_004516087.1 | Scaffold674 | 660128                  | GG                              | TT              | 1946970831               |



| SNPs IDs             | Chromosome IDs | Chromosomes | Physical positions (bp) | CDC Frontier (Reference genome) | (ILWC46 & LPNB) | NCBI SNPdb Accession IDs |
|----------------------|----------------|-------------|-------------------------|---------------------------------|-----------------|--------------------------|
| SNP_P4_140779_661581 | NW_004516087.1 | Scaffold674 | 661581                  | GG                              | AA              | 1946970833               |
| SNP_P4_140780_664574 | NW_004516087.1 | Scaffold674 | 664574                  | AA                              | GG              | 1946970835               |
| SNP_P4_140781_668184 | NW_004516087.1 | Scaffold674 | 668184                  | TT                              | CC              | 1946970837               |
| SNP_P4_140782_668370 | NW_004516087.1 | Scaffold674 | 668370                  | TT                              | CC              | 1946970838               |
| SNP_P4_140783_668475 | NW_004516087.1 | Scaffold674 | 668475                  | AA                              | GG              | 1946970840               |
| SNP_P4_140784_668805 | NW_004516087.1 | Scaffold674 | 668805                  | AA                              | GG              | 1946970842               |
| SNP_P4_140785_670973 | NW_004516087.1 | Scaffold674 | 670973                  | CC                              | TT              | 1946970844               |
| SNP_P4_140786_672865 | NW_004516087.1 | Scaffold674 | 672865                  | CC                              | AA              | 1946970846               |
| SNP_P4_140787_673403 | NW_004516087.1 | Scaffold674 | 673403                  | GG                              | AA              | 1946970849               |
| SNP_P4_140789_678310 | NW_004516087.1 | Scaffold674 | 678310                  | CC                              | TT              | 1946970851               |
| SNP_P4_140790_679763 | NW_004516087.1 | Scaffold674 | 679763                  | AA                              | GG              | 1946970853               |
| SNP_P4_140791_679780 | NW_004516087.1 | Scaffold674 | 679780                  | GG                              | CC              | 1946970855               |
| SNP_P4_140793_682290 | NW_004516087.1 | Scaffold674 | 682290                  | CC                              | AA              | 1946970857               |
| SNP_P4_140794_682522 | NW_004516087.1 | Scaffold674 | 682522                  | AA                              | TT              | 1946970859               |
| SNP_P4_140795_693083 | NW_004516087.1 | Scaffold674 | 693083                  | GG                              | CC              | 1946970861               |
| SNP_P4_140796_698853 | NW_004516087.1 | Scaffold674 | 698853                  | TT                              | AA              | 1946970863               |
| SNP_P4_140797_702546 | NW_004516087.1 | Scaffold674 | 702546                  | AA                              | TT              | 1946970865               |
| SNP_P4_140798_703056 | NW_004516087.1 | Scaffold674 | 703056                  | GG                              | TT              | 1946970867               |
| SNP_P4_140799_703062 | NW_004516087.1 | Scaffold674 | 703062                  | GG                              | CC              | 1946970869               |
| SNP_P4_140800_703364 | NW_004516087.1 | Scaffold674 | 703364                  | TT                              | CC              | 1946970871               |
| SNP_P4_140801_704031 | NW_004516087.1 | Scaffold674 | 704031                  | TT                              | CC              | 1946970873               |
| SNP_P4_140802_711894 | NW_004516087.1 | Scaffold674 | 711894                  | GG                              | AA              | 1946970875               |
| SNP_P4_140803_712597 | NW_004516087.1 | Scaffold674 | 712597                  | TT                              | AA              | 1946970877               |
| SNP_P4_140804_718777 | NW_004516087.1 | Scaffold674 | 718777                  | CC                              | TT              | 1946970879               |
| SNP_P4_140805_720293 | NW_004516087.1 | Scaffold674 | 720293                  | AA                              | GG              | 1946970881               |
| SNP_P4_140806_720874 | NW_004516087.1 | Scaffold674 | 720874                  | TT                              | CC              | 1946970883               |
| SNP_P4_140807_726819 | NW_004516087.1 | Scaffold674 | 726819                  | AA                              | GG              | 1946970885               |
| SNP_P4_140808_726820 | NW_004516087.1 | Scaffold674 | 726820                  | TT                              | CC              | 1946970887               |
| SNP_P4_140809_728225 | NW_004516087.1 | Scaffold674 | 728225                  | AA                              | TT              | 1946970889               |
| SNP_P4_140810_728228 | NW_004516087.1 | Scaffold674 | 728228                  | GG                              | TT              | 1946970891               |
| SNP_P4_140811_728371 | NW_004516087.1 | Scaffold674 | 728371                  | CC                              | AA              | 1946970893               |
| SNP_P4_140812_728536 | NW_004516087.1 | Scaffold674 | 728536                  | GG                              | AA              | 1946970895               |
| SNP_P4_140813_729638 | NW_004516087.1 | Scaffold674 | 729638                  | CC                              | TT              | 1946970897               |
| SNP_P4_140814_730613 | NW_004516087.1 | Scaffold674 | 730613                  | CC                              | TT              | 1946970899               |
| SNP_P4_140815_731696 | NW_004516087.1 | Scaffold674 | 731696                  | AA                              | CC              | 1946970901               |
| SNP_P4_140816_734179 | NW_004516087.1 | Scaffold674 | 734179                  | AA                              | GG              | 1946970903               |
| SNP_P4_140817_735498 | NW_004516087.1 | Scaffold674 | 735498                  | TT                              | CC              | 1946970905               |
| SNP_P4_140818_739559 | NW_004516087.1 | Scaffold674 | 739559                  | CC                              | AA              | 1946970907               |
| SNP_P4_140819_742138 | NW_004516087.1 | Scaffold674 | 742138                  | AA                              | GG              | 1946970909               |
| SNP_P4_140820_742461 | NW_004516087.1 | Scaffold674 | 742461                  | GG                              | TT              | 1946970911               |
| SNP_P4_140821_742515 | NW_004516087.1 | Scaffold674 | 742515                  | CC                              | TT              | 1946970913               |
| SNP_P4_140823_745507 | NW_004516087.1 | Scaffold674 | 745507                  | AA                              | GG              | 1946970915               |

| SNPs IDs             | Chromosome IDs | Chromosomes | Physical positions (bp) | CDC Frontier (Reference genome) | (ILWC46 & LPNB) | NCBI SNPdb Accession IDs |
|----------------------|----------------|-------------|-------------------------|---------------------------------|-----------------|--------------------------|
| SNP_P4_140824_758367 | NW_004516087.1 | Scaffold674 | 758367                  | TT                              | CC              | 1946970917               |
| SNP_P4_140825_758454 | NW_004516087.1 | Scaffold674 | 758454                  | GG                              | AA              | 1946970919               |
| SNP_P4_140826_758461 | NW_004516087.1 | Scaffold674 | 758461                  | GG                              | AA              | 1946970921               |
| SNP_P4_140827_760033 | NW_004516087.1 | Scaffold674 | 760033                  | TT                              | CC              | 1946970923               |
| SNP_P4_140828_760742 | NW_004516087.1 | Scaffold674 | 760742                  | TT                              | GG              | 1946970925               |
| SNP_P4_140829_761111 | NW_004516087.1 | Scaffold674 | 761111                  | CC                              | TT              | 1946970927               |
| SNP_P4_140831_772119 | NW_004516087.1 | Scaffold674 | 772119                  | GG                              | AA              | 1946970929               |
| SNP_P4_140832_773490 | NW_004516087.1 | Scaffold674 | 773490                  | AA                              | CC              | 1946970931               |
| SNP_P4_140833_775917 | NW_004516087.1 | Scaffold674 | 775917                  | AA                              | GG              | 1946970933               |
| SNP_P4_140834_777585 | NW_004516087.1 | Scaffold674 | 777585                  | TT                              | CC              | 1946970935               |
| SNP_P4_140835_780247 | NW_004516087.1 | Scaffold674 | 780247                  | CC                              | TT              | 1946970937               |
| SNP_P4_140836_783334 | NW_004516087.1 | Scaffold674 | 783334                  | AA                              | GG              | 1946970939               |
| SNP_P4_140837_783802 | NW_004516087.1 | Scaffold674 | 783802                  | TT                              | CC              | 1946970941               |
| SNP_P4_140838_784664 | NW_004516087.1 | Scaffold674 | 784664                  | TT                              | CC              | 1946970943               |
| SNP_P4_140839_785381 | NW_004516087.1 | Scaffold674 | 785381                  | CC                              | GG              | 1946970945               |
| SNP_P4_140840_788512 | NW_004516087.1 | Scaffold674 | 788512                  | GG                              | AA              | 1946970947               |
| SNP_P4_140841_788513 | NW_004516087.1 | Scaffold674 | 788513                  | CC                              | TT              | 1946970949               |
| SNP_P4_140842_789921 | NW_004516087.1 | Scaffold674 | 789921                  | TT                              | CC              | 1946970951               |
| SNP_P4_140843_797410 | NW_004516087.1 | Scaffold674 | 797410                  | TT                              | CC              | 1946970953               |
| SNP_P4_140844_797909 | NW_004516087.1 | Scaffold674 | 797909                  | AA                              | GG              | 1946970955               |
| SNP_P4_140845_827159 | NW_004516087.1 | Scaffold674 | 827159                  | AA                              | GG              | 1946970957               |
| SNP_P4_140846_829548 | NW_004516087.1 | Scaffold674 | 829548                  | CC                              | AA              | 1946970959               |
| SNP_P4_140847_829590 | NW_004516087.1 | Scaffold674 | 829590                  | AA                              | GG              | 1946970961               |
| SNP_P4_140848_829679 | NW_004516087.1 | Scaffold674 | 829679                  | GG                              | TT              | 1946970963               |
| SNP_P4_140849_829682 | NW_004516087.1 | Scaffold674 | 829682                  | TT                              | GG              | 1946970965               |
| SNP_P4_140850_829757 | NW_004516087.1 | Scaffold674 | 829757                  | TT                              | CC              | 1946970967               |
| SNP_P4_140851_829822 | NW_004516087.1 | Scaffold674 | 829822                  | GG                              | AA              | 1946970969               |
| SNP_P4_140852_829882 | NW_004516087.1 | Scaffold674 | 829882                  | CC                              | TT              | 1946970971               |
| SNP_P4_140853_829894 | NW_004516087.1 | Scaffold674 | 829894                  | TT                              | AA              | 1946970973               |
| SNP_P4_140854_829909 | NW_004516087.1 | Scaffold674 | 829909                  | TT                              | CC              | 1946970975               |
| SNP_P4_140855_829918 | NW_004516087.1 | Scaffold674 | 829918                  | CC                              | TT              | 1946970977               |
| SNP_P4_140856_829971 | NW_004516087.1 | Scaffold674 | 829971                  | AA                              | GG              | 1946970979               |
| SNP_P4_140858_830856 | NW_004516087.1 | Scaffold674 | 830856                  | GG                              | TT              | 1946970981               |
| SNP_P4_140859_838230 | NW_004516087.1 | Scaffold674 | 838230                  | CC                              | TT              | 1946970983               |
| SNP_P4_140861_840098 | NW_004516087.1 | Scaffold674 | 840098                  | GG                              | CC              | 1946970985               |
| SNP_P4_140862_841029 | NW_004516087.1 | Scaffold674 | 841029                  | CC                              | TT              | 1946970987               |
| SNP_P4_140863_842070 | NW_004516087.1 | Scaffold674 | 842070                  | CC                              | TT              | 1946970989               |
| SNP_P4_140864_842338 | NW_004516087.1 | Scaffold674 | 842338                  | CC                              | TT              | 1946970991               |
| SNP_P4_140865_842374 | NW_004516087.1 | Scaffold674 | 842374                  | AA                              | GG              | 1946970993               |
| SNP_P4_140866_842884 | NW_004516087.1 | Scaffold674 | 842884                  | AA                              | GG              | 1946970995               |
| SNP_P4_140867_843199 | NW_004516087.1 | Scaffold674 | 843199                  | TT                              | GG              | 1946970997               |
| SNP_P4_140868_843201 | NW_004516087.1 | Scaffold674 | 843201                  | TT                              | CC              | 1946970999               |

| SNPs IDs             | Chromosome IDs | Chromosomes | Physical positions (bp) | CDC Frontier (Reference genome) | (ILWC46 & LPNB) | NCBI SNPdb Accession IDs |
|----------------------|----------------|-------------|-------------------------|---------------------------------|-----------------|--------------------------|
| SNP_P4_140869_843280 | NW_004516087.1 | Scaffold674 | 843280                  | TT                              | CC              | 1946971001               |
| SNP_P4_140870_843374 | NW_004516087.1 | Scaffold674 | 843374                  | AA                              | TT              | 1946971003               |
| SNP_P4_140871_848609 | NW_004516087.1 | Scaffold674 | 848609                  | CC                              | AA              | 1946971005               |
| SNP_P4_140872_850246 | NW_004516087.1 | Scaffold674 | 850246                  | CC                              | TT              | 1946971007               |
| SNP_P4_140874_856002 | NW_004516087.1 | Scaffold674 | 856002                  | GG                              | AA              | 1946971009               |
| SNP_P4_140875_856667 | NW_004516087.1 | Scaffold674 | 856667                  | AA                              | GG              | 1946971011               |
| SNP_P4_140876_857769 | NW_004516087.1 | Scaffold674 | 857769                  | GG                              | AA              | 1946971013               |
| SNP_P4_140877_870385 | NW_004516087.1 | Scaffold674 | 870385                  | CC                              | TT              | 1946971015               |
| SNP_P4_140878_871622 | NW_004516087.1 | Scaffold674 | 871622                  | TT                              | AA              | 1946971017               |
| SNP_P4_140879_874393 | NW_004516087.1 | Scaffold674 | 874393                  | CC                              | TT              | 1946971019               |
| SNP_P4_140880_877116 | NW_004516087.1 | Scaffold674 | 877116                  | GG                              | AA              | 1946971021               |
| SNP_P4_140881_879418 | NW_004516087.1 | Scaffold674 | 879418                  | AA                              | TT              | 1946971023               |
| SNP_P4_140882_886143 | NW_004516087.1 | Scaffold674 | 886143                  | AA                              | CC              | 1946971025               |
| SNP_P4_140883_886152 | NW_004516087.1 | Scaffold674 | 886152                  | TT                              | CC              | 1946971027               |
| SNP_P4_140884_887603 | NW_004516087.1 | Scaffold674 | 887603                  | GG                              | AA              | 1946971029               |
| SNP_P4_140885_887678 | NW_004516087.1 | Scaffold674 | 887678                  | CC                              | TT              | 1946971031               |
| SNP_P4_140886_888054 | NW_004516087.1 | Scaffold674 | 888054                  | AA                              | TT              | 1946971033               |
| SNP_P4_140887_890176 | NW_004516087.1 | Scaffold674 | 890176                  | CC                              | AA              | 1946971035               |
| SNP_P4_140888_891252 | NW_004516087.1 | Scaffold674 | 891252                  | TT                              | CC              | 1946971037               |
| SNP_P4_140889_891327 | NW_004516087.1 | Scaffold674 | 891327                  | AA                              | GG              | 1946971039               |
| SNP_P4_140890_891400 | NW_004516087.1 | Scaffold674 | 891400                  | CC                              | TT              | 1946971041               |
| SNP_P4_140891_891413 | NW_004516087.1 | Scaffold674 | 891413                  | CC                              | TT              | 1946971043               |
| SNP_P4_140892_891415 | NW_004516087.1 | Scaffold674 | 891415                  | AA                              | TT              | 1946971045               |
| SNP_P4_140893_891680 | NW_004516087.1 | Scaffold674 | 891680                  | GG                              | TT              | 1946971047               |
| SNP_P4_140894_891682 | NW_004516087.1 | Scaffold674 | 891682                  | AA                              | GG              | 1946971049               |
| SNP_P4_140895_891705 | NW_004516087.1 | Scaffold674 | 891705                  | CC                              | GG              | 1946971051               |
| SNP_P4_140896_218    | NW_004516088.1 | Scaffold675 | 218                     | TT                              | CC              | 1946971053               |
| SNP_P4_140897_301    | NW_004516088.1 | Scaffold675 | 301                     | TT                              | CC              | 1946971055               |
| SNP_P4_140898_13946  | NW_004516088.1 | Scaffold675 | 13946                   | CC                              | TT              | 1946971057               |
| SNP_P4_140899_15215  | NW_004516088.1 | Scaffold675 | 15215                   | TT                              | CC              | 1946971059               |
| SNP_P4_140900_15263  | NW_004516088.1 | Scaffold675 | 15263                   | CC                              | TT              | 1946971061               |
| SNP_P4_140901_15365  | NW_004516088.1 | Scaffold675 | 15365                   | CC                              | TT              | 1946971063               |
| SNP_P4_140902_15366  | NW_004516088.1 | Scaffold675 | 15366                   | AA                              | GG              | 1946971065               |
| SNP_P4_140903_15451  | NW_004516088.1 | Scaffold675 | 15451                   | GG                              | TT              | 1946971067               |
| SNP_P4_140906_15708  | NW_004516088.1 | Scaffold675 | 15708                   | TT                              | CC              | 1946971069               |
| SNP_P4_140907_15717  | NW_004516088.1 | Scaffold675 | 15717                   | TT                              | AA              | 1946971071               |
| SNP_P4_140908_15722  | NW_004516088.1 | Scaffold675 | 15722                   | GG                              | CC              | 1946971073               |
| SNP_P4_140909_15874  | NW_004516088.1 | Scaffold675 | 15874                   | CC                              | GG              | 1946971075               |
| SNP_P4_140910_15880  | NW_004516088.1 | Scaffold675 | 15880                   | CC                              | TT              | 1946971077               |
| SNP_P4_140911_20111  | NW_004516088.1 | Scaffold675 | 20111                   | GG                              | TT              | 1946971079               |
| SNP_P4_140912_20140  | NW_004516088.1 | Scaffold675 | 20140                   | CC                              | TT              | 1946971081               |
| SNP_P4_140913_20284  | NW_004516088.1 | Scaffold675 | 20284                   | AA                              | GG              | 1946971083               |

| SNPs IDs             | Chromosome IDs | Chromosomes | Physical positions (bp) | CDC Frontier (Reference genome) | (ILWC46 & LPNB) | NCBI SNPdb Accession IDs |
|----------------------|----------------|-------------|-------------------------|---------------------------------|-----------------|--------------------------|
| SNP_P4_140914_20342  | NW_004516088.1 | Scaffold675 | 20342                   | TT                              | GG              | 1946971085               |
| SNP_P4_140915_20343  | NW_004516088.1 | Scaffold675 | 20343                   | AA                              | GG              | 1946971087               |
| SNP_P4_140916_60650  | NW_004516088.1 | Scaffold675 | 60650                   | AA                              | CC              | 1946971089               |
| SNP_P4_140917_60937  | NW_004516088.1 | Scaffold675 | 60937                   | TT                              | GG              | 1946971091               |
| SNP_P4_140918_60940  | NW_004516088.1 | Scaffold675 | 60940                   | CC                              | TT              | 1946971093               |
| SNP_P4_140919_60951  | NW_004516088.1 | Scaffold675 | 60951                   | TT                              | CC              | 1946971095               |
| SNP_P4_140920_73882  | NW_004516088.1 | Scaffold675 | 73882                   | TT                              | AA              | 1946971097               |
| SNP_P4_140923_82270  | NW_004516088.1 | Scaffold675 | 82270                   | AA                              | CC              | 1946971099               |
| SNP_P4_140925_82585  | NW_004516088.1 | Scaffold675 | 82585                   | CC                              | TT              | 1946971101               |
| SNP_P4_140926_82597  | NW_004516088.1 | Scaffold675 | 82597                   | GG                              | AA              | 1946971103               |
| SNP_P4_140927_89675  | NW_004516088.1 | Scaffold675 | 89675                   | TT                              | GG              | 1946971105               |
| SNP_P4_140928_89697  | NW_004516088.1 | Scaffold675 | 89697                   | TT                              | GG              | 1946971107               |
| SNP_P4_140930_90038  | NW_004516088.1 | Scaffold675 | 90038                   | AA                              | TT              | 1946971109               |
| SNP_P4_140931_90075  | NW_004516088.1 | Scaffold675 | 90075                   | CC                              | TT              | 1946971111               |
| SNP_P4_140932_90158  | NW_004516088.1 | Scaffold675 | 90158                   | AA                              | GG              | 1946971113               |
| SNP_P4_140934_90960  | NW_004516088.1 | Scaffold675 | 90960                   | AA                              | CC              | 1946971115               |
| SNP_P4_140935_90963  | NW_004516088.1 | Scaffold675 | 90963                   | AA                              | CC              | 1946971117               |
| SNP_P4_140936_90969  | NW_004516088.1 | Scaffold675 | 90969                   | TT                              | GG              | 1946971118               |
| SNP_P4_140937_103765 | NW_004516088.1 | Scaffold675 | 103765                  | CC                              | GG              | 1946971120               |
| SNP_P4_140938_104207 | NW_004516088.1 | Scaffold675 | 104207                  | AA                              | GG              | 1946971122               |
| SNP_P4_140939_115846 | NW_004516088.1 | Scaffold675 | 115846                  | CC                              | TT              | 1946971124               |
| SNP_P4_140940_131822 | NW_004516088.1 | Scaffold675 | 131822                  | CC                              | AA              | 1946971126               |
| SNP_P4_140941_132904 | NW_004516088.1 | Scaffold675 | 132904                  | TT                              | AA              | 1946971128               |
| SNP_P4_140942_133381 | NW_004516088.1 | Scaffold675 | 133381                  | GG                              | TT              | 1946971130               |
| SNP_P4_140943_149371 | NW_004516088.1 | Scaffold675 | 149371                  | TT                              | GG              | 1946971132               |
| SNP_P4_140944_13801  | NW_004516089.1 | Scaffold676 | 13801                   | GG                              | AA              | 1946971134               |
| SNP_P4_140945_14075  | NW_004516089.1 | Scaffold676 | 14075                   | CC                              | TT              | 1946971136               |
| SNP_P4_140946_14083  | NW_004516089.1 | Scaffold676 | 14083                   | CC                              | TT              | 1946971138               |
| SNP_P4_140947_14121  | NW_004516089.1 | Scaffold676 | 14121                   | TT                              | CC              | 1946971140               |
| SNP_P4_140948_14210  | NW_004516089.1 | Scaffold676 | 14210                   | AA                              | GG              | 1946971142               |
| SNP_P4_140950_14252  | NW_004516089.1 | Scaffold676 | 14252                   | CC                              | TT              | 1946971144               |
| SNP_P4_140951_14401  | NW_004516089.1 | Scaffold676 | 14401                   | AA                              | GG              | 1946971146               |
| SNP_P4_140952_14525  | NW_004516089.1 | Scaffold676 | 14525                   | AA                              | GG              | 1946971220               |
| SNP_P4_140953_14734  | NW_004516089.1 | Scaffold676 | 14734                   | GG                              | CC              | 1946971222               |
| SNP_P4_140955_14799  | NW_004516089.1 | Scaffold676 | 14799                   | CC                              | TT              | 1946971224               |
| SNP_P4_140956_14887  | NW_004516089.1 | Scaffold676 | 14887                   | CC                              | GG              | 1946971226               |
| SNP_P4_140957_14898  | NW_004516089.1 | Scaffold676 | 14898                   | CC                              | GG              | 1946971228               |
| SNP_P4_140958_20175  | NW_004516089.1 | Scaffold676 | 20175                   | TT                              | AA              | 1946971230               |
| SNP_P4_140959_20492  | NW_004516089.1 | Scaffold676 | 20492                   | TT                              | CC              | 1946971232               |
| SNP_P4_140960_20510  | NW_004516089.1 | Scaffold676 | 20510                   | AA                              | GG              | 1946971234               |
| SNP_P4_140961_20515  | NW_004516089.1 | Scaffold676 | 20515                   | CC                              | TT              | 1946971236               |
| SNP_P4_140962_23648  | NW_004516089.1 | Scaffold676 | 23648                   | CC                              | AA              | 1946971238               |

| SNPs IDs            | Chromosome IDs | Chromosomes | Physical positions (bp) | CDC Frontier (Reference genome) | (ILWC46 & LPNB) | NCBI SNPdb Accession IDs |
|---------------------|----------------|-------------|-------------------------|---------------------------------|-----------------|--------------------------|
| SNP_P4_140963_26818 | NW_004516089.1 | Scaffold676 | 26818                   | CC                              | TT              | 1946971240               |
| SNP_P4_140964_27053 | NW_004516089.1 | Scaffold676 | 27053                   | CC                              | AA              | 1946971242               |
| SNP_P4_140965_27378 | NW_004516089.1 | Scaffold676 | 27378                   | TT                              | AA              | 1946971244               |
| SNP_P4_140966_49646 | NW_004516089.1 | Scaffold676 | 49646                   | TT                              | AA              | 1946971246               |
| SNP_P4_140967_49655 | NW_004516089.1 | Scaffold676 | 49655                   | TT                              | AA              | 1946971248               |
| SNP_P4_140968_49796 | NW_004516089.1 | Scaffold676 | 49796                   | CC                              | TT              | 1946971250               |
| SNP_P4_140969_50070 | NW_004516089.1 | Scaffold676 | 50070                   | CC                              | TT              | 1946971252               |
| SNP_P4_140970_50143 | NW_004516089.1 | Scaffold676 | 50143                   | AA                              | CC              | 1946971254               |
| SNP_P4_140971_50159 | NW_004516089.1 | Scaffold676 | 50159                   | GG                              | CC              | 1946971256               |
| SNP_P4_140972_50420 | NW_004516089.1 | Scaffold676 | 50420                   | AA                              | GG              | 1946971258               |
| SNP_P4_140973_50430 | NW_004516089.1 | Scaffold676 | 50430                   | AA                              | CC              | 1946971260               |
| SNP_P4_140974_50434 | NW_004516089.1 | Scaffold676 | 50434                   | TT                              | CC              | 1946971263               |
| SNP_P4_140975_50457 | NW_004516089.1 | Scaffold676 | 50457                   | CC                              | GG              | 1946971265               |
| SNP_P4_140976_51093 | NW_004516089.1 | Scaffold676 | 51093                   | AA                              | TT              | 1946971267               |
| SNP_P4_140977_51617 | NW_004516089.1 | Scaffold676 | 51617                   | AA                              | GG              | 1946971269               |
| SNP_P4_140978_51645 | NW_004516089.1 | Scaffold676 | 51645                   | TT                              | CC              | 1946971271               |
| SNP_P4_140979_52648 | NW_004516089.1 | Scaffold676 | 52648                   | GG                              | AA              | 1946971274               |
| SNP_P4_140980_52672 | NW_004516089.1 | Scaffold676 | 52672                   | TT                              | CC              | 1946971276               |
| SNP_P4_140981_52674 | NW_004516089.1 | Scaffold676 | 52674                   | CC                              | AA              | 1946971278               |
| SNP_P4_140982_52763 | NW_004516089.1 | Scaffold676 | 52763                   | TT                              | AA              | 1946971280               |
| SNP_P4_140983_52772 | NW_004516089.1 | Scaffold676 | 52772                   | AA                              | CC              | 1946971282               |
| SNP_P4_140984_52966 | NW_004516089.1 | Scaffold676 | 52966                   | CC                              | TT              | 1946971284               |
| SNP_P4_140985_52978 | NW_004516089.1 | Scaffold676 | 52978                   | TT                              | GG              | 1946971286               |
| SNP_P4_140986_54062 | NW_004516089.1 | Scaffold676 | 54062                   | GG                              | AA              | 1946971288               |
| SNP_P4_140987_54542 | NW_004516089.1 | Scaffold676 | 54542                   | AA                              | CC              | 1946971290               |
| SNP_P4_140988_54607 | NW_004516089.1 | Scaffold676 | 54607                   | AA                              | GG              | 1946971292               |
| SNP_P4_140989_54613 | NW_004516089.1 | Scaffold676 | 54613                   | AA                              | TT              | 1946971294               |
| SNP_P4_140990_54990 | NW_004516089.1 | Scaffold676 | 54990                   | GG                              | AA              | 1946971296               |
| SNP_P4_140992_55381 | NW_004516089.1 | Scaffold676 | 55381                   | TT                              | AA              | 1946971298               |
| SNP_P4_140993_55404 | NW_004516089.1 | Scaffold676 | 55404                   | CC                              | AA              | 1946971300               |
| SNP_P4_140994_55408 | NW_004516089.1 | Scaffold676 | 55408                   | AA                              | TT              | 1946971302               |
| SNP_P4_140995_55640 | NW_004516089.1 | Scaffold676 | 55640                   | TT                              | CC              | 1946971304               |
| SNP_P4_140996_55774 | NW_004516089.1 | Scaffold676 | 55774                   | TT                              | GG              | 1946971306               |
| SNP_P4_140997_55900 | NW_004516089.1 | Scaffold676 | 55900                   | AA                              | CC              | 1946971308               |
| SNP_P4_140998_56047 | NW_004516089.1 | Scaffold676 | 56047                   | CC                              | TT              | 1946971310               |
| SNP_P4_140999_56110 | NW_004516089.1 | Scaffold676 | 56110                   | GG                              | CC              | 1946971312               |
| SNP_P4_141000_56144 | NW_004516089.1 | Scaffold676 | 56144                   | CC                              | TT              | 1946971314               |
| SNP_P4_141001_56173 | NW_004516089.1 | Scaffold676 | 56173                   | GG                              | TT              | 1946971316               |
| SNP_P4_141002_56353 | NW_004516089.1 | Scaffold676 | 56353                   | TT                              | AA              | 1946971317               |
| SNP_P4_141003_56448 | NW_004516089.1 | Scaffold676 | 56448                   | GG                              | CC              | 1946971319               |
| SNP_P4_141004_56611 | NW_004516089.1 | Scaffold676 | 56611                   | TT                              | GG              | 1946971321               |
| SNP_P4_141005_56613 | NW_004516089.1 | Scaffold676 | 56613                   | GG                              | TT              | 1946971323               |

| SNPs IDs            | Chromosome IDs | Chromosomes | Physical positions (bp) | CDC Frontier (Reference genome) | (ILWC46 & LPNB) | NCBI SNPdb Accession IDs |
|---------------------|----------------|-------------|-------------------------|---------------------------------|-----------------|--------------------------|
| SNP_P4_141006_56637 | NW_004516089.1 | Scaffold676 | 56637                   | TT                              | GG              | 1946971325               |
| SNP_P4_141007_56695 | NW_004516089.1 | Scaffold676 | 56695                   | CC                              | TT              | 1946971327               |
| SNP_P4_141008_56696 | NW_004516089.1 | Scaffold676 | 56696                   | GG                              | AA              | 1946971329               |
| SNP_P4_141009_56702 | NW_004516089.1 | Scaffold676 | 56702                   | TT                              | CC              | 1946971331               |
| SNP_P4_141010_56738 | NW_004516089.1 | Scaffold676 | 56738                   | GG                              | AA              | 1946971333               |
| SNP_P4_141011_56739 | NW_004516089.1 | Scaffold676 | 56739                   | GG                              | TT              | 1946971334               |
| SNP_P4_141012_56754 | NW_004516089.1 | Scaffold676 | 56754                   | AA                              | GG              | 1946971336               |
| SNP_P4_141013_56857 | NW_004516089.1 | Scaffold676 | 56857                   | AA                              | TT              | 1946971338               |
| SNP_P4_141014_56899 | NW_004516089.1 | Scaffold676 | 56899                   | CC                              | AA              | 1946971340               |
| SNP_P4_141015_56949 | NW_004516089.1 | Scaffold676 | 56949                   | GG                              | CC              | 1946971342               |
| SNP_P4_141016_59177 | NW_004516089.1 | Scaffold676 | 59177                   | GG                              | CC              | 1946971344               |
| SNP_P4_141017_59191 | NW_004516089.1 | Scaffold676 | 59191                   | GG                              | AA              | 1946971346               |
| SNP_P4_141018_59197 | NW_004516089.1 | Scaffold676 | 59197                   | GG                              | TT              | 1946971348               |
| SNP_P4_141019_59208 | NW_004516089.1 | Scaffold676 | 59208                   | CC                              | TT              | 1946971350               |
| SNP_P4_141020_59217 | NW_004516089.1 | Scaffold676 | 59217                   | AA                              | GG              | 1946971352               |
| SNP_P4_141021_59221 | NW_004516089.1 | Scaffold676 | 59221                   | TT                              | AA              | 1946971354               |
| SNP_P4_141022_59252 | NW_004516089.1 | Scaffold676 | 59252                   | CC                              | GG              | 1946971356               |
| SNP_P4_141023_64233 | NW_004516089.1 | Scaffold676 | 64233                   | TT                              | CC              | 1946971358               |
| SNP_P4_141024_64254 | NW_004516089.1 | Scaffold676 | 64254                   | CC                              | TT              | 1946971360               |
| SNP_P4_141025_64258 | NW_004516089.1 | Scaffold676 | 64258                   | AA                              | GG              | 1946971362               |
| SNP_P4_141026_64302 | NW_004516089.1 | Scaffold676 | 64302                   | GG                              | AA              | 1946971364               |
| SNP_P4_141027_64359 | NW_004516089.1 | Scaffold676 | 64359                   | TT                              | CC              | 1946971366               |
| SNP_P4_141028_64399 | NW_004516089.1 | Scaffold676 | 64399                   | GG                              | CC              | 1946971368               |
| SNP_P4_141029_66264 | NW_004516089.1 | Scaffold676 | 66264                   | CC                              | AA              | 1946971370               |
| SNP_P4_141030_66290 | NW_004516089.1 | Scaffold676 | 66290                   | GG                              | AA              | 1946971372               |
| SNP_P4_141031_66323 | NW_004516089.1 | Scaffold676 | 66323                   | CC                              | AA              | 1946971374               |
| SNP_P4_141032_66424 | NW_004516089.1 | Scaffold676 | 66424                   | AA                              | GG              | 1946971376               |
| SNP_P4_141033_66444 | NW_004516089.1 | Scaffold676 | 66444                   | AA                              | GG              | 1946971378               |
| SNP_P4_141034_66574 | NW_004516089.1 | Scaffold676 | 66574                   | GG                              | CC              | 1946971380               |
| SNP_P4_141035_67317 | NW_004516089.1 | Scaffold676 | 67317                   | AA                              | TT              | 1946971382               |
| SNP_P4_141036_68340 | NW_004516089.1 | Scaffold676 | 68340                   | AA                              | TT              | 1946971384               |
| SNP_P4_141037_68355 | NW_004516089.1 | Scaffold676 | 68355                   | AA                              | TT              | 1946971386               |
| SNP_P4_141038_68430 | NW_004516089.1 | Scaffold676 | 68430                   | TT                              | CC              | 1946971388               |
| SNP_P4_141039_68444 | NW_004516089.1 | Scaffold676 | 68444                   | TT                              | GG              | 1946971390               |
| SNP_P4_141040_68480 | NW_004516089.1 | Scaffold676 | 68480                   | AA                              | TT              | 1946971392               |
| SNP_P4_141041_68512 | NW_004516089.1 | Scaffold676 | 68512                   | AA                              | TT              | 1946971394               |
| SNP_P4_141042_68638 | NW_004516089.1 | Scaffold676 | 68638                   | AA                              | TT              | 1946971396               |
| SNP_P4_141043_68716 | NW_004516089.1 | Scaffold676 | 68716                   | CC                              | GG              | 1946971398               |
| SNP_P4_141044_68728 | NW_004516089.1 | Scaffold676 | 68728                   | TT                              | CC              | 1946971400               |
| SNP_P4_141045_68736 | NW_004516089.1 | Scaffold676 | 68736                   | AA                              | GG              | 1946971402               |
| SNP_P4_141046_68745 | NW_004516089.1 | Scaffold676 | 68745                   | CC                              | TT              | 1946971404               |
| SNP_P4_141047_68760 | NW_004516089.1 | Scaffold676 | 68760                   | TT                              | CC              | 1946971406               |

| SNPs IDs            | Chromosome IDs | Chromosomes | Physical positions (bp) | CDC Frontier (Reference genome) | (ILWC46 & LPNB) | NCBI SNPdb Accession IDs |
|---------------------|----------------|-------------|-------------------------|---------------------------------|-----------------|--------------------------|
| SNP_P4_141048_68802 | NW_004516089.1 | Scaffold676 | 68802                   | AA                              | GG              | 1946971408               |
| SNP_P4_141049_68877 | NW_004516089.1 | Scaffold676 | 68877                   | AA                              | CC              | 1946971410               |
| SNP_P4_141050_68897 | NW_004516089.1 | Scaffold676 | 68897                   | AA                              | CC              | 1946971412               |
| SNP_P4_141051_69270 | NW_004516089.1 | Scaffold676 | 69270                   | TT                              | CC              | 1946971414               |
| SNP_P4_141053_69580 | NW_004516089.1 | Scaffold676 | 69580                   | CC                              | AA              | 1946971416               |
| SNP_P4_141054_69657 | NW_004516089.1 | Scaffold676 | 69657                   | CC                              | TT              | 1946971418               |
| SNP_P4_141055_69880 | NW_004516089.1 | Scaffold676 | 69880                   | TT                              | GG              | 1946971420               |
| SNP_P4_141056_70122 | NW_004516089.1 | Scaffold676 | 70122                   | TT                              | CC              | 1946971422               |
| SNP_P4_141057_70146 | NW_004516089.1 | Scaffold676 | 70146                   | CC                              | TT              | 1946971424               |
| SNP_P4_141058_70367 | NW_004516089.1 | Scaffold676 | 70367                   | TT                              | AA              | 1946971426               |
| SNP_P4_141059_70409 | NW_004516089.1 | Scaffold676 | 70409                   | TT                              | GG              | 1946971428               |
| SNP_P4_141060_70504 | NW_004516089.1 | Scaffold676 | 70504                   | TT                              | CC              | 1946971430               |
| SNP_P4_141061_70511 | NW_004516089.1 | Scaffold676 | 70511                   | AA                              | CC              | 1946971432               |
| SNP_P4_141062_71273 | NW_004516089.1 | Scaffold676 | 71273                   | AA                              | GG              | 1946971434               |
| SNP_P4_141063_71303 | NW_004516089.1 | Scaffold676 | 71303                   | GG                              | AA              | 1946971436               |
| SNP_P4_141064_72171 | NW_004516089.1 | Scaffold676 | 72171                   | CC                              | TT              | 1946971438               |
| SNP_P4_141065_72626 | NW_004516089.1 | Scaffold676 | 72626                   | CC                              | TT              | 1946971440               |
| SNP_P4_141066_72694 | NW_004516089.1 | Scaffold676 | 72694                   | GG                              | AA              | 1946971442               |
| SNP_P4_141067_72697 | NW_004516089.1 | Scaffold676 | 72697                   | TT                              | GG              | 1946971444               |
| SNP_P4_141068_72801 | NW_004516089.1 | Scaffold676 | 72801                   | GG                              | AA              | 1946971446               |
| SNP_P4_141069_72876 | NW_004516089.1 | Scaffold676 | 72876                   | TT                              | GG              | 1946971448               |
| SNP_P4_141071_73257 | NW_004516089.1 | Scaffold676 | 73257                   | GG                              | TT              | 1946971450               |
| SNP_P4_141072_73621 | NW_004516089.1 | Scaffold676 | 73621                   | TT                              | CC              | 1946971452               |
| SNP_P4_141073_73668 | NW_004516089.1 | Scaffold676 | 73668                   | TT                              | CC              | 1946971454               |
| SNP_P4_141074_73695 | NW_004516089.1 | Scaffold676 | 73695                   | GG                              | AA              | 1946971456               |
| SNP_P4_141075_73763 | NW_004516089.1 | Scaffold676 | 73763                   | TT                              | CC              | 1946971458               |
| SNP_P4_141076_73796 | NW_004516089.1 | Scaffold676 | 73796                   | GG                              | CC              | 1946971460               |
| SNP_P4_141077_73808 | NW_004516089.1 | Scaffold676 | 73808                   | GG                              | CC              | 1946971462               |
| SNP_P4_141078_73830 | NW_004516089.1 | Scaffold676 | 73830                   | GG                              | AA              | 1946971464               |
| SNP_P4_141079_73831 | NW_004516089.1 | Scaffold676 | 73831                   | GG                              | AA              | 1946971466               |
| SNP_P4_141080_73834 | NW_004516089.1 | Scaffold676 | 73834                   | CC                              | AA              | 1946971468               |
| SNP_P4_141081_77519 | NW_004516089.1 | Scaffold676 | 77519                   | CC                              | TT              | 1946971470               |
| SNP_P4_141082_77545 | NW_004516089.1 | Scaffold676 | 77545                   | CC                              | TT              | 1946971472               |
| SNP_P4_141083_77546 | NW_004516089.1 | Scaffold676 | 77546                   | AA                              | GG              | 1946971474               |
| SNP_P4_141084_77552 | NW_004516089.1 | Scaffold676 | 77552                   | CC                              | TT              | 1946971476               |
| SNP_P4_141085_77562 | NW_004516089.1 | Scaffold676 | 77562                   | CC                              | AA              | 1946971478               |
| SNP_P4_141086_77614 | NW_004516089.1 | Scaffold676 | 77614                   | GG                              | CC              | 1946971480               |
| SNP_P4_141087_77642 | NW_004516089.1 | Scaffold676 | 77642                   | GG                              | AA              | 1946971482               |
| SNP_P4_141088_77667 | NW_004516089.1 | Scaffold676 | 77667                   | GG                              | AA              | 1946971484               |
| SNP_P4_141089_77733 | NW_004516089.1 | Scaffold676 | 77733                   | CC                              | AA              | 1946971486               |
| SNP_P4_141090_77776 | NW_004516089.1 | Scaffold676 | 77776                   | CC                              | GG              | 1946971488               |
| SNP_P4_141091_77932 | NW_004516089.1 | Scaffold676 | 77932                   | TT                              | GG              | 1946971490               |

| SNPs IDs            | Chromosome IDs | Chromosomes | Physical positions (bp) | CDC Frontier (Reference genome) | (ILWC46 & LPNB) | NCBI SNPdb Accession IDs |
|---------------------|----------------|-------------|-------------------------|---------------------------------|-----------------|--------------------------|
| SNP_P4_141092_78006 | NW_004516089.1 | Scaffold676 | 78006                   | CC                              | AA              | 1946971492               |
| SNP_P4_141093_78015 | NW_004516089.1 | Scaffold676 | 78015                   | TT                              | CC              | 1946971493               |
| SNP_P4_141094_78061 | NW_004516089.1 | Scaffold676 | 78061                   | GG                              | AA              | 1946971495               |
| SNP_P4_141095_78078 | NW_004516089.1 | Scaffold676 | 78078                   | AA                              | GG              | 1946971497               |
| SNP_P4_141096_78823 | NW_004516089.1 | Scaffold676 | 78823                   | AA                              | CC              | 1946971499               |
| SNP_P4_141097_78842 | NW_004516089.1 | Scaffold676 | 78842                   | AA                              | GG              | 1946971501               |
| SNP_P4_141098_79511 | NW_004516089.1 | Scaffold676 | 79511                   | CC                              | TT              | 1946971503               |
| SNP_P4_141099_79666 | NW_004516089.1 | Scaffold676 | 79666                   | TT                              | AA              | 1946971505               |
| SNP_P4_141100_79725 | NW_004516089.1 | Scaffold676 | 79725                   | CC                              | TT              | 1946971507               |
| SNP_P4_141101_79916 | NW_004516089.1 | Scaffold676 | 79916                   | CC                              | TT              | 1946971509               |
| SNP_P4_141102_79970 | NW_004516089.1 | Scaffold676 | 79970                   | TT                              | AA              | 1946971511               |
| SNP_P4_141103_79998 | NW_004516089.1 | Scaffold676 | 79998                   | TT                              | CC              | 1946971513               |
| SNP_P4_141104_80052 | NW_004516089.1 | Scaffold676 | 80052                   | AA                              | TT              | 1946971514               |
| SNP_P4_141105_80966 | NW_004516089.1 | Scaffold676 | 80966                   | CC                              | GG              | 1946971516               |
| SNP_P4_141106_81239 | NW_004516089.1 | Scaffold676 | 81239                   | GG                              | AA              | 1946971518               |
| SNP_P4_141107_81250 | NW_004516089.1 | Scaffold676 | 81250                   | AA                              | TT              | 1946971520               |
| SNP_P4_141108_81258 | NW_004516089.1 | Scaffold676 | 81258                   | AA                              | CC              | 1946971522               |
| SNP_P4_141109_83689 | NW_004516089.1 | Scaffold676 | 83689                   | GG                              | AA              | 1946971524               |
| SNP_P4_141110_83992 | NW_004516089.1 | Scaffold676 | 83992                   | AA                              | GG              | 1946971526               |
| SNP_P4_141111_84058 | NW_004516089.1 | Scaffold676 | 84058                   | CC                              | TT              | 1946971528               |
| SNP_P4_141113_84091 | NW_004516089.1 | Scaffold676 | 84091                   | GG                              | CC              | 1946971530               |
| SNP_P4_141114_84140 | NW_004516089.1 | Scaffold676 | 84140                   | TT                              | CC              | 1946971532               |
| SNP_P4_141115_84311 | NW_004516089.1 | Scaffold676 | 84311                   | GG                              | AA              | 1946971534               |
| SNP_P4_141116_84313 | NW_004516089.1 | Scaffold676 | 84313                   | CC                              | AA              | 1946971536               |
| SNP_P4_141117_84373 | NW_004516089.1 | Scaffold676 | 84373                   | AA                              | GG              | 1946971538               |
| SNP_P4_141118_84427 | NW_004516089.1 | Scaffold676 | 84427                   | GG                              | CC              | 1946971540               |
| SNP_P4_141119_84428 | NW_004516089.1 | Scaffold676 | 84428                   | TT                              | AA              | 1946971542               |
| SNP_P4_141120_84495 | NW_004516089.1 | Scaffold676 | 84495                   | GG                              | AA              | 1946971544               |
| SNP_P4_141122_84553 | NW_004516089.1 | Scaffold676 | 84553                   | TT                              | AA              | 1946971546               |
| SNP_P4_141123_84582 | NW_004516089.1 | Scaffold676 | 84582                   | AA                              | CC              | 1946971548               |
| SNP_P4_141124_85299 | NW_004516089.1 | Scaffold676 | 85299                   | CC                              | AA              | 1946971550               |
| SNP_P4_141125_85310 | NW_004516089.1 | Scaffold676 | 85310                   | TT                              | CC              | 1946971552               |
| SNP_P4_141126_85319 | NW_004516089.1 | Scaffold676 | 85319                   | GG                              | AA              | 1946971554               |
| SNP_P4_141127_85380 | NW_004516089.1 | Scaffold676 | 85380                   | AA                              | CC              | 1946971556               |
| SNP_P4_141128_85407 | NW_004516089.1 | Scaffold676 | 85407                   | CC                              | TT              | 1946971557               |
| SNP_P4_141129_85470 | NW_004516089.1 | Scaffold676 | 85470                   | TT                              | GG              | 1946971559               |
| SNP_P4_141130_85506 | NW_004516089.1 | Scaffold676 | 85506                   | GG                              | AA              | 1946971561               |
| SNP_P4_141131_85562 | NW_004516089.1 | Scaffold676 | 85562                   | CC                              | TT              | 1946971563               |
| SNP_P4_141132_85594 | NW_004516089.1 | Scaffold676 | 85594                   | AA                              | TT              | 1946971565               |
| SNP_P4_141133_85641 | NW_004516089.1 | Scaffold676 | 85641                   | TT                              | CC              | 1946971567               |
| SNP_P4_141134_85646 | NW_004516089.1 | Scaffold676 | 85646                   | AA                              | TT              | 1946971569               |
| SNP_P4_141135_85647 | NW_004516089.1 | Scaffold676 | 85647                   | CC                              | GG              | 1946971571               |



| SNPs IDs             | Chromosome IDs | Chromosomes | Physical positions (bp) | CDC Frontier (Reference genome) | (ILWC46 & LPNB) | NCBI SNPdb Accession IDs |
|----------------------|----------------|-------------|-------------------------|---------------------------------|-----------------|--------------------------|
| SNP_P4_141136_85660  | NW_004516089.1 | Scaffold676 | 85660                   | TT                              | GG              | 1946971573               |
| SNP_P4_141137_85664  | NW_004516089.1 | Scaffold676 | 85664                   | GG                              | TT              | 1946971575               |
| SNP_P4_141138_85717  | NW_004516089.1 | Scaffold676 | 85717                   | GG                              | AA              | 1946971577               |
| SNP_P4_141139_85772  | NW_004516089.1 | Scaffold676 | 85772                   | AA                              | CC              | 1946971579               |
| SNP_P4_141140_86004  | NW_004516089.1 | Scaffold676 | 86004                   | GG                              | TT              | 1946971580               |
| SNP_P4_141141_86028  | NW_004516089.1 | Scaffold676 | 86028                   | TT                              | CC              | 1946971582               |
| SNP_P4_141142_86404  | NW_004516089.1 | Scaffold676 | 86404                   | TT                              | CC              | 1946971584               |
| SNP_P4_141143_86437  | NW_004516089.1 | Scaffold676 | 86437                   | CC                              | TT              | 1946971586               |
| SNP_P4_141144_86538  | NW_004516089.1 | Scaffold676 | 86538                   | AA                              | GG              | 1946971588               |
| SNP_P4_141145_86549  | NW_004516089.1 | Scaffold676 | 86549                   | TT                              | CC              | 1946971590               |
| SNP_P4_141147_89389  | NW_004516089.1 | Scaffold676 | 89389                   | GG                              | AA              | 1946971592               |
| SNP_P4_141148_89392  | NW_004516089.1 | Scaffold676 | 89392                   | GG                              | AA              | 1946971594               |
| SNP_P4_141149_89794  | NW_004516089.1 | Scaffold676 | 89794                   | AA                              | GG              | 1946971596               |
| SNP_P4_141150_89804  | NW_004516089.1 | Scaffold676 | 89804                   | CC                              | AA              | 1946971598               |
| SNP_P4_141151_90214  | NW_004516089.1 | Scaffold676 | 90214                   | AA                              | GG              | 1946971600               |
| SNP_P4_141152_90560  | NW_004516089.1 | Scaffold676 | 90560                   | AA                              | GG              | 1946971602               |
| SNP_P4_141153_90832  | NW_004516089.1 | Scaffold676 | 90832                   | AA                              | TT              | 1946971604               |
| SNP_P4_141154_91268  | NW_004516089.1 | Scaffold676 | 91268                   | AA                              | GG              | 1946971606               |
| SNP_P4_141155_91456  | NW_004516089.1 | Scaffold676 | 91456                   | CC                              | AA              | 1946971608               |
| SNP_P4_141156_91499  | NW_004516089.1 | Scaffold676 | 91499                   | AA                              | TT              | 1946971610               |
| SNP_P4_141157_91506  | NW_004516089.1 | Scaffold676 | 91506                   | GG                              | AA              | 1946971612               |
| SNP_P4_141158_91788  | NW_004516089.1 | Scaffold676 | 91788                   | AA                              | TT              | 1946971613               |
| SNP_P4_141159_91822  | NW_004516089.1 | Scaffold676 | 91822                   | TT                              | AA              | 1946971615               |
| SNP_P4_141160_92640  | NW_004516089.1 | Scaffold676 | 92640                   | AA                              | GG              | 1946971617               |
| SNP_P4_141161_92979  | NW_004516089.1 | Scaffold676 | 92979                   | CC                              | GG              | 1946971619               |
| SNP_P4_141162_93256  | NW_004516089.1 | Scaffold676 | 93256                   | TT                              | AA              | 1946971621               |
| SNP_P4_141163_93307  | NW_004516089.1 | Scaffold676 | 93307                   | CC                              | TT              | 1946971623               |
| SNP_P4_141164_93785  | NW_004516089.1 | Scaffold676 | 93785                   | AA                              | GG              | 1946971625               |
| SNP_P4_141165_93795  | NW_004516089.1 | Scaffold676 | 93795                   | CC                              | TT              | 1946971627               |
| SNP_P4_141166_93812  | NW_004516089.1 | Scaffold676 | 93812                   | GG                              | TT              | 1946971629               |
| SNP_P4_141167_94066  | NW_004516089.1 | Scaffold676 | 94066                   | AA                              | GG              | 1946971631               |
| SNP_P4_141168_94067  | NW_004516089.1 | Scaffold676 | 94067                   | AA                              | TT              | 1946971633               |
| SNP_P4_141169_97246  | NW_004516089.1 | Scaffold676 | 97246                   | AA                              | CC              | 1946971635               |
| SNP_P4_141170_99299  | NW_004516089.1 | Scaffold676 | 99299                   | AA                              | CC              | 1946971637               |
| SNP_P4_141171_101053 | NW_004516089.1 | Scaffold676 | 101053                  | TT                              | CC              | 1946971639               |
| SNP_P4_141172_101078 | NW_004516089.1 | Scaffold676 | 101078                  | CC                              | AA              | 1946971641               |
| SNP_P4_141173_101212 | NW_004516089.1 | Scaffold676 | 101212                  | CC                              | TT              | 1946971643               |
| SNP_P4_141174_101249 | NW_004516089.1 | Scaffold676 | 101249                  | TT                              | CC              | 1946971645               |
| SNP_P4_141175_101282 | NW_004516089.1 | Scaffold676 | 101282                  | TT                              | CC              | 1946971647               |
| SNP_P4_141176_101393 | NW_004516089.1 | Scaffold676 | 101393                  | GG                              | AA              | 1946971649               |
| SNP_P4_141177_101485 | NW_004516089.1 | Scaffold676 | 101485                  | GG                              | AA              | 1946971651               |
| SNP_P4_141178_101511 | NW_004516089.1 | Scaffold676 | 101511                  | GG                              | AA              | 1946971653               |

| SNPs IDs             | Chromosome IDs | Chromosomes | Physical positions (bp) | CDC Frontier (Reference genome) | (ILWC46 & LPNB) | NCBI SNPdb Accession IDs |
|----------------------|----------------|-------------|-------------------------|---------------------------------|-----------------|--------------------------|
| SNP_P4_141179_101530 | NW_004516089.1 | Scaffold676 | 101530                  | TT                              | CC              | 1946971655               |
| SNP_P4_141180_101692 | NW_004516089.1 | Scaffold676 | 101692                  | TT                              | CC              | 1946971657               |
| SNP_P4_141181_101736 | NW_004516089.1 | Scaffold676 | 101736                  | TT                              | CC              | 1946971659               |
| SNP_P4_141182_102382 | NW_004516089.1 | Scaffold676 | 102382                  | TT                              | GG              | 1946971661               |
| SNP_P4_141183_102470 | NW_004516089.1 | Scaffold676 | 102470                  | TT                              | CC              | 1946971663               |
| SNP_P4_141184_102660 | NW_004516089.1 | Scaffold676 | 102660                  | CC                              | TT              | 1946971665               |
| SNP_P4_141185_103911 | NW_004516089.1 | Scaffold676 | 103911                  | CC                              | AA              | 1946971667               |
| SNP_P4_141186_103932 | NW_004516089.1 | Scaffold676 | 103932                  | CC                              | TT              | 1946971669               |
| SNP_P4_141187_104086 | NW_004516089.1 | Scaffold676 | 104086                  | TT                              | GG              | 1946971671               |
| SNP_P4_141188_104264 | NW_004516089.1 | Scaffold676 | 104264                  | GG                              | CC              | 1946971673               |
| SNP_P4_141189_104286 | NW_004516089.1 | Scaffold676 | 104286                  | TT                              | CC              | 1946971675               |
| SNP_P4_141190_104291 | NW_004516089.1 | Scaffold676 | 104291                  | AA                              | TT              | 1946971677               |
| SNP_P4_141191_104293 | NW_004516089.1 | Scaffold676 | 104293                  | TT                              | AA              | 1946971679               |
| SNP_P4_141192_104450 | NW_004516089.1 | Scaffold676 | 104450                  | CC                              | GG              | 1946971681               |
| SNP_P4_141193_104548 | NW_004516089.1 | Scaffold676 | 104548                  | TT                              | CC              | 1946971683               |
| SNP_P4_141194_104582 | NW_004516089.1 | Scaffold676 | 104582                  | CC                              | TT              | 1946971686               |
| SNP_P4_141195_104878 | NW_004516089.1 | Scaffold676 | 104878                  | AA                              | TT              | 1946971688               |
| SNP_P4_141196_105336 | NW_004516089.1 | Scaffold676 | 105336                  | TT                              | CC              | 1946971690               |
| SNP_P4_141197_105557 | NW_004516089.1 | Scaffold676 | 105557                  | CC                              | TT              | 1946971692               |
| SNP_P4_141198_105618 | NW_004516089.1 | Scaffold676 | 105618                  | CC                              | GG              | 1946971694               |
| SNP_P4_141199_105871 | NW_004516089.1 | Scaffold676 | 105871                  | TT                              | GG              | 1946971696               |
| SNP_P4_141200_105891 | NW_004516089.1 | Scaffold676 | 105891                  | AA                              | CC              | 1946971698               |
| SNP_P4_141201_109179 | NW_004516089.1 | Scaffold676 | 109179                  | AA                              | TT              | 1946971700               |
| SNP_P4_141202_109201 | NW_004516089.1 | Scaffold676 | 109201                  | CC                              | GG              | 1946971702               |
| SNP_P4_141203_109594 | NW_004516089.1 | Scaffold676 | 109594                  | AA                              | TT              | 1946971704               |
| SNP_P4_141204_110065 | NW_004516089.1 | Scaffold676 | 110065                  | AA                              | CC              | 1946971705               |
| SNP_P4_141205_121261 | NW_004516089.1 | Scaffold676 | 121261                  | AA                              | TT              | 1946971707               |
| SNP_P4_141206_124081 | NW_004516089.1 | Scaffold676 | 124081                  | TT                              | AA              | 1946971709               |
| SNP_P4_141207_125109 | NW_004516089.1 | Scaffold676 | 125109                  | TT                              | CC              | 1946971711               |
| SNP_P4_141208_125442 | NW_004516089.1 | Scaffold676 | 125442                  | AA                              | GG              | 1946971713               |
| SNP_P4_141209_130860 | NW_004516089.1 | Scaffold676 | 130860                  | CC                              | TT              | 1946971715               |
| SNP_P4_141210_131182 | NW_004516089.1 | Scaffold676 | 131182                  | TT                              | GG              | 1946971717               |
| SNP_P4_141211_134251 | NW_004516089.1 | Scaffold676 | 134251                  | AA                              | GG              | 1946971719               |
| SNP_P4_141212_134278 | NW_004516089.1 | Scaffold676 | 134278                  | AA                              | CC              | 1946971721               |
| SNP_P4_141213_134559 | NW_004516089.1 | Scaffold676 | 134559                  | CC                              | TT              | 1946971723               |
| SNP_P4_141214_134645 | NW_004516089.1 | Scaffold676 | 134645                  | GG                              | TT              | 1946971725               |
| SNP_P4_141215_135146 | NW_004516089.1 | Scaffold676 | 135146                  | CC                              | TT              | 1946971727               |
| SNP_P4_141216_136738 | NW_004516089.1 | Scaffold676 | 136738                  | CC                              | AA              | 1946971729               |
| SNP_P4_141217_136760 | NW_004516089.1 | Scaffold676 | 136760                  | TT                              | CC              | 1946971731               |
| SNP_P4_141218_136784 | NW_004516089.1 | Scaffold676 | 136784                  | TT                              | AA              | 1946971733               |
| SNP_P4_141219_137048 | NW_004516089.1 | Scaffold676 | 137048                  | AA                              | TT              | 1946971735               |
| SNP_P4_141220_137053 | NW_004516089.1 | Scaffold676 | 137053                  | GG                              | TT              | 1946971737               |

| SNPs IDs             | Chromosome IDs | Chromosomes | Physical positions (bp) | CDC Frontier (Reference genome) | (ILWC46 & LPNB) | NCBI SNPdb Accession IDs |
|----------------------|----------------|-------------|-------------------------|---------------------------------|-----------------|--------------------------|
| SNP_P4_141221_137119 | NW_004516089.1 | Scaffold676 | 137119                  | TT                              | CC              | 1946971739               |
| SNP_P4_141222_137416 | NW_004516089.1 | Scaffold676 | 137416                  | AA                              | GG              | 1946971741               |
| SNP_P4_141223_144123 | NW_004516089.1 | Scaffold676 | 144123                  | TT                              | CC              | 1946971743               |
| SNP_P4_141224_148602 | NW_004516089.1 | Scaffold676 | 148602                  | AA                              | GG              | 1946971745               |
| SNP_P4_141225_148640 | NW_004516089.1 | Scaffold676 | 148640                  | AA                              | GG              | 1946971747               |
| SNP_P4_141226_148658 | NW_004516089.1 | Scaffold676 | 148658                  | AA                              | GG              | 1946971749               |
| SNP_P4_141227_149226 | NW_004516089.1 | Scaffold676 | 149226                  | TT                              | GG              | 1946971751               |
| SNP_P4_141228_149236 | NW_004516089.1 | Scaffold676 | 149236                  | CC                              | AA              | 1946971753               |
| SNP_P4_141229_149267 | NW_004516089.1 | Scaffold676 | 149267                  | AA                              | TT              | 1946971755               |
| SNP_P4_141230_149367 | NW_004516089.1 | Scaffold676 | 149367                  | GG                              | AA              | 1946971757               |
| SNP_P4_141231_149434 | NW_004516089.1 | Scaffold676 | 149434                  | AA                              | GG              | 1946971759               |
| SNP_P4_141232_149468 | NW_004516089.1 | Scaffold676 | 149468                  | TT                              | AA              | 1946971761               |
| SNP_P4_141233_151714 | NW_004516089.1 | Scaffold676 | 151714                  | AA                              | GG              | 1946971763               |
| SNP_P4_141234_151856 | NW_004516089.1 | Scaffold676 | 151856                  | AA                              | GG              | 1946971765               |
| SNP_P4_141235_151948 | NW_004516089.1 | Scaffold676 | 151948                  | GG                              | AA              | 1946971767               |
| SNP_P4_141236_151998 | NW_004516089.1 | Scaffold676 | 151998                  | TT                              | CC              | 1946971769               |
| SNP_P4_141237_152014 | NW_004516089.1 | Scaffold676 | 152014                  | TT                              | AA              | 1946971771               |
| SNP_P4_141238_152074 | NW_004516089.1 | Scaffold676 | 152074                  | TT                              | CC              | 1946971773               |
| SNP_P4_141239_157576 | NW_004516089.1 | Scaffold676 | 157576                  | CC                              | TT              | 1946971775               |
| SNP_P4_141240_157676 | NW_004516089.1 | Scaffold676 | 157676                  | TT                              | CC              | 1946971777               |
| SNP_P4_141241_157771 | NW_004516089.1 | Scaffold676 | 157771                  | CC                              | TT              | 1946971779               |
| SNP_P4_141242_157792 | NW_004516089.1 | Scaffold676 | 157792                  | AA                              | GG              | 1946971781               |
| SNP_P4_141243_157969 | NW_004516089.1 | Scaffold676 | 157969                  | AA                              | CC              | 1946971783               |
| SNP_P4_141244_157999 | NW_004516089.1 | Scaffold676 | 157999                  | CC                              | GG              | 1946971784               |
| SNP_P4_141245_158013 | NW_004516089.1 | Scaffold676 | 158013                  | CC                              | TT              | 1946971786               |
| SNP_P4_141246_158031 | NW_004516089.1 | Scaffold676 | 158031                  | TT                              | AA              | 1946971788               |
| SNP_P4_141247_158207 | NW_004516089.1 | Scaffold676 | 158207                  | AA                              | CC              | 1946971790               |
| SNP_P4_141248_158274 | NW_004516089.1 | Scaffold676 | 158274                  | AA                              | GG              | 1946971792               |
| SNP_P4_141249_158368 | NW_004516089.1 | Scaffold676 | 158368                  | CC                              | TT              | 1946971794               |
| SNP_P4_141250_158689 | NW_004516089.1 | Scaffold676 | 158689                  | TT                              | CC              | 1946971796               |
| SNP_P4_141251_158757 | NW_004516089.1 | Scaffold676 | 158757                  | GG                              | AA              | 1946971798               |
| SNP_P4_141252_161846 | NW_004516089.1 | Scaffold676 | 161846                  | TT                              | CC              | 1946971800               |
| SNP_P4_141254_161919 | NW_004516089.1 | Scaffold676 | 161919                  | CC                              | AA              | 1946971802               |
| SNP_P4_141255_161921 | NW_004516089.1 | Scaffold676 | 161921                  | CC                              | TT              | 1946971804               |
| SNP_P4_141256_161942 | NW_004516089.1 | Scaffold676 | 161942                  | TT                              | CC              | 1946971806               |
| SNP_P4_141257_161954 | NW_004516089.1 | Scaffold676 | 161954                  | TT                              | AA              | 1946971808               |
| SNP_P4_141258_162021 | NW_004516089.1 | Scaffold676 | 162021                  | GG                              | TT              | 1946971810               |
| SNP_P4_141259_162084 | NW_004516089.1 | Scaffold676 | 162084                  | CC                              | AA              | 1946971812               |
| SNP_P4_141260_162257 | NW_004516089.1 | Scaffold676 | 162257                  | TT                              | CC              | 1946971814               |
| SNP_P4_141261_162291 | NW_004516089.1 | Scaffold676 | 162291                  | TT                              | AA              | 1946971816               |
| SNP_P4_141262_162295 | NW_004516089.1 | Scaffold676 | 162295                  | CC                              | TT              | 1946971818               |
| SNP_P4_141263_162308 | NW_004516089.1 | Scaffold676 | 162308                  | TT                              | CC              | 1946971820               |

| SNPs IDs             | Chromosome IDs | Chromosomes | Physical positions (bp) | CDC Frontier (Reference genome) | (ILWC46 & LPNB) | NCBI SNPdb Accession IDs |
|----------------------|----------------|-------------|-------------------------|---------------------------------|-----------------|--------------------------|
| SNP_P4_141264_162334 | NW_004516089.1 | Scaffold676 | 162334                  | TT                              | GG              | 1946971822               |
| SNP_P4_141265_5659   | NW_004516090.1 | Scaffold677 | 5659                    | CC                              | TT              | 1946971824               |
| SNP_P4_141266_347    | NW_004516091.1 | Scaffold678 | 347                     | TT                              | GG              | 1946971826               |
| SNP_P4_141267_355    | NW_004516091.1 | Scaffold678 | 355                     | CC                              | GG              | 1946971828               |
| SNP_P4_141268_383    | NW_004516091.1 | Scaffold678 | 383                     | CC                              | TT              | 1946971830               |
| SNP_P4_141269_424    | NW_004516091.1 | Scaffold678 | 424                     | GG                              | TT              | 1946971832               |
| SNP_P4_141270_7772   | NW_004516091.1 | Scaffold678 | 7772                    | AA                              | GG              | 1946971834               |
| SNP_P4_141271_11522  | NW_004516091.1 | Scaffold678 | 11522                   | CC                              | TT              | 1946971836               |
| SNP_P4_141272_11745  | NW_004516091.1 | Scaffold678 | 11745                   | AA                              | CC              | 1946971838               |
| SNP_P4_141273_12414  | NW_004516091.1 | Scaffold678 | 12414                   | TT                              | AA              | 1946971840               |
| SNP_P4_141274_12424  | NW_004516091.1 | Scaffold678 | 12424                   | GG                              | AA              | 1946971842               |
| SNP_P4_141275_12451  | NW_004516091.1 | Scaffold678 | 12451                   | AA                              | TT              | 1946971844               |
| SNP_P4_141276_12476  | NW_004516091.1 | Scaffold678 | 12476                   | TT                              | AA              | 1946971846               |
| SNP_P4_141277_12493  | NW_004516091.1 | Scaffold678 | 12493                   | CC                              | AA              | 1946971848               |
| SNP_P4_141278_12680  | NW_004516091.1 | Scaffold678 | 12680                   | GG                              | AA              | 1946971850               |
| SNP_P4_141279_12738  | NW_004516091.1 | Scaffold678 | 12738                   | AA                              | CC              | 1946971852               |
| SNP_P4_141280_12768  | NW_004516091.1 | Scaffold678 | 12768                   | AA                              | CC              | 1946971854               |
| SNP_P4_141282_37893  | NW_004516091.1 | Scaffold678 | 37893                   | TT                              | CC              | 1946971856               |
| SNP_P4_141283_39238  | NW_004516091.1 | Scaffold678 | 39238                   | TT                              | AA              | 1946971858               |
| SNP_P4_141284_39277  | NW_004516091.1 | Scaffold678 | 39277                   | AA                              | GG              | 1946971860               |
| SNP_P4_141285_39285  | NW_004516091.1 | Scaffold678 | 39285                   | CC                              | TT              | 1946971862               |
| SNP_P4_141286_39415  | NW_004516091.1 | Scaffold678 | 39415                   | GG                              | AA              | 1946971864               |
| SNP_P4_141287_39507  | NW_004516091.1 | Scaffold678 | 39507                   | AA                              | GG              | 1946971866               |
| SNP_P4_141288_39552  | NW_004516091.1 | Scaffold678 | 39552                   | GG                              | AA              | 1946971868               |
| SNP_P4_141289_39565  | NW_004516091.1 | Scaffold678 | 39565                   | CC                              | TT              | 1946971869               |
| SNP_P4_141290_39571  | NW_004516091.1 | Scaffold678 | 39571                   | GG                              | AA              | 1946971871               |
| SNP_P4_141291_39577  | NW_004516091.1 | Scaffold678 | 39577                   | CC                              | AA              | 1946971873               |
| SNP_P4_141292_39627  | NW_004516091.1 | Scaffold678 | 39627                   | TT                              | GG              | 1946971875               |
| SNP_P4_141293_39632  | NW_004516091.1 | Scaffold678 | 39632                   | AA                              | TT              | 1946971877               |
| SNP_P4_141294_39643  | NW_004516091.1 | Scaffold678 | 39643                   | GG                              | TT              | 1946971879               |
| SNP_P4_141295_39707  | NW_004516091.1 | Scaffold678 | 39707                   | GG                              | CC              | 1946971881               |
| SNP_P4_141296_39719  | NW_004516091.1 | Scaffold678 | 39719                   | CC                              | AA              | 1946971883               |
| SNP_P4_141297_39729  | NW_004516091.1 | Scaffold678 | 39729                   | AA                              | GG              | 1946971885               |
| SNP_P4_141299_39858  | NW_004516091.1 | Scaffold678 | 39858                   | AA                              | GG              | 1946971887               |
| SNP_P4_141300_39860  | NW_004516091.1 | Scaffold678 | 39860                   | CC                              | TT              | 1946971889               |
| SNP_P4_141301_39885  | NW_004516091.1 | Scaffold678 | 39885                   | AA                              | GG              | 1946971891               |
| SNP_P4_141302_39888  | NW_004516091.1 | Scaffold678 | 39888                   | CC                              | GG              | 1946971893               |
| SNP_P4_141303_39933  | NW_004516091.1 | Scaffold678 | 39933                   | CC                              | TT              | 1946971895               |
| SNP_P4_141304_39939  | NW_004516091.1 | Scaffold678 | 39939                   | CC                              | TT              | 1946971897               |
| SNP_P4_141305_39976  | NW_004516091.1 | Scaffold678 | 39976                   | CC                              | GG              | 1946971899               |
| SNP_P4_141306_40993  | NW_004516091.1 | Scaffold678 | 40993                   | TT                              | CC              | 1946971901               |
| SNP_P4_141308_41024  | NW_004516091.1 | Scaffold678 | 41024                   | AA                              | CC              | 1946971903               |

| SNPs IDs             | Chromosome IDs | Chromosomes | Physical positions (bp) | CDC Frontier (Reference genome) | (ILWC46 & LPNB) | NCBI SNPdb Accession IDs |
|----------------------|----------------|-------------|-------------------------|---------------------------------|-----------------|--------------------------|
| SNP_P4_141309_41042  | NW_004516091.1 | Scaffold678 | 41042                   | TT                              | GG              | 1946971905               |
| SNP_P4_141310_41059  | NW_004516091.1 | Scaffold678 | 41059                   | AA                              | TT              | 1946971907               |
| SNP_P4_141311_41091  | NW_004516091.1 | Scaffold678 | 41091                   | TT                              | AA              | 1946971909               |
| SNP_P4_141312_41215  | NW_004516091.1 | Scaffold678 | 41215                   | GG                              | CC              | 1946971911               |
| SNP_P4_141313_41269  | NW_004516091.1 | Scaffold678 | 41269                   | AA                              | TT              | 1946971913               |
| SNP_P4_141314_41321  | NW_004516091.1 | Scaffold678 | 41321                   | TT                              | GG              | 1946971915               |
| SNP_P4_141315_41323  | NW_004516091.1 | Scaffold678 | 41323                   | GG                              | AA              | 1946971917               |
| SNP_P4_141316_41361  | NW_004516091.1 | Scaffold678 | 41361                   | CC                              | AA              | 1946971919               |
| SNP_P4_141317_41440  | NW_004516091.1 | Scaffold678 | 41440                   | CC                              | TT              | 1946971921               |
| SNP_P4_141318_41848  | NW_004516091.1 | Scaffold678 | 41848                   | TT                              | CC              | 1946971923               |
| SNP_P4_141319_42352  | NW_004516091.1 | Scaffold678 | 42352                   | GG                              | AA              | 1946971925               |
| SNP_P4_141320_42356  | NW_004516091.1 | Scaffold678 | 42356                   | TT                              | AA              | 1946971927               |
| SNP_P4_141321_42370  | NW_004516091.1 | Scaffold678 | 42370                   | CC                              | AA              | 1946971929               |
| SNP_P4_141323_42476  | NW_004516091.1 | Scaffold678 | 42476                   | AA                              | CC              | 1946971931               |
| SNP_P4_141324_42533  | NW_004516091.1 | Scaffold678 | 42533                   | TT                              | CC              | 1946971933               |
| SNP_P4_141325_42696  | NW_004516091.1 | Scaffold678 | 42696                   | GG                              | AA              | 1946971935               |
| SNP_P4_141326_42704  | NW_004516091.1 | Scaffold678 | 42704                   | TT                              | AA              | 1946971937               |
| SNP_P4_141327_42761  | NW_004516091.1 | Scaffold678 | 42761                   | AA                              | CC              | 1946971939               |
| SNP_P4_141329_60298  | NW_004516091.1 | Scaffold678 | 60298                   | TT                              | AA              | 1946971941               |
| SNP_P4_141330_60690  | NW_004516091.1 | Scaffold678 | 60690                   | TT                              | GG              | 1946971943               |
| SNP_P4_141331_60697  | NW_004516091.1 | Scaffold678 | 60697                   | GG                              | CC              | 1946971945               |
| SNP_P4_141332_74078  | NW_004516091.1 | Scaffold678 | 74078                   | TT                              | AA              | 1946971947               |
| SNP_P4_141333_74079  | NW_004516091.1 | Scaffold678 | 74079                   | GG                              | AA              | 1946971949               |
| SNP_P4_141334_78222  | NW_004516091.1 | Scaffold678 | 78222                   | CC                              | GG              | 1946971951               |
| SNP_P4_141336_104693 | NW_004516091.1 | Scaffold678 | 104693                  | TT                              | GG              | 1946971953               |
| SNP_P4_141337_104755 | NW_004516091.1 | Scaffold678 | 104755                  | GG                              | AA              | 1946971955               |
| SNP_P4_141338_110805 | NW_004516091.1 | Scaffold678 | 110805                  | CC                              | GG              | 1946971957               |
| SNP_P4_141339_110924 | NW_004516091.1 | Scaffold678 | 110924                  | AA                              | GG              | 1946971959               |
| SNP_P4_141340_111288 | NW_004516091.1 | Scaffold678 | 111288                  | TT                              | CC              | 1946971961               |
| SNP_P4_141341_112505 | NW_004516091.1 | Scaffold678 | 112505                  | GG                              | CC              | 1946971963               |
| SNP_P4_141342_112892 | NW_004516091.1 | Scaffold678 | 112892                  | TT                              | CC              | 1946971965               |
| SNP_P4_141343_112904 | NW_004516091.1 | Scaffold678 | 112904                  | AA                              | GG              | 1946971967               |
| SNP_P4_141344_118107 | NW_004516091.1 | Scaffold678 | 118107                  | CC                              | TT              | 1946971969               |
| SNP_P4_141345_118119 | NW_004516091.1 | Scaffold678 | 118119                  | CC                              | TT              | 1946971971               |
| SNP_P4_141346_119077 | NW_004516091.1 | Scaffold678 | 119077                  | CC                              | AA              | 1946971973               |
| SNP_P4_141347_119614 | NW_004516091.1 | Scaffold678 | 119614                  | TT                              | AA              | 1946971975               |
| SNP_P4_141348_120403 | NW_004516091.1 | Scaffold678 | 120403                  | GG                              | AA              | 1946971977               |
| SNP_P4_141349_120643 | NW_004516091.1 | Scaffold678 | 120643                  | TT                              | AA              | 1946971979               |
| SNP_P4_141350_11730  | NW_004516093.1 | Scaffold681 | 11730                   | TT                              | CC              | 1946971981               |
| SNP_P4_141351_11748  | NW_004516093.1 | Scaffold681 | 11748                   | TT                              | CC              | 1946971983               |
| SNP_P4_141353_25454  | NW_004516093.1 | Scaffold681 | 25454                   | CC                              | TT              | 1946971985               |
| SNP_P4_141354_48207  | NW_004516093.1 | Scaffold681 | 48207                   | TT                              | GG              | 1946971987               |

| SNPs IDs             | Chromosome IDs | Chromosomes | Physical positions (bp) | CDC Frontier (Reference genome) | (ILWC46 & LPNB) | NCBI SNPdb Accession IDs |
|----------------------|----------------|-------------|-------------------------|---------------------------------|-----------------|--------------------------|
| SNP_P4_141355_51246  | NW_004516093.1 | Scaffold681 | 51246                   | TT                              | CC              | 1946971989               |
| SNP_P4_141356_51604  | NW_004516093.1 | Scaffold681 | 51604                   | AA                              | GG              | 1946971991               |
| SNP_P4_141357_51656  | NW_004516093.1 | Scaffold681 | 51656                   | TT                              | CC              | 1946971993               |
| SNP_P4_141358_9781   | NW_004516094.1 | Scaffold682 | 9781                    | TT                              | GG              | 1946971995               |
| SNP_P4_141359_11161  | NW_004516094.1 | Scaffold682 | 11161                   | AA                              | TT              | 1946971997               |
| SNP_P4_141360_23654  | NW_004516094.1 | Scaffold682 | 23654                   | CC                              | TT              | 1946971999               |
| SNP_P4_141362_78362  | NW_004516094.1 | Scaffold682 | 78362                   | GG                              | AA              | 1946972001               |
| SNP_P4_141363_78388  | NW_004516094.1 | Scaffold682 | 78388                   | TT                              | CC              | 1946972003               |
| SNP_P4_141364_78414  | NW_004516094.1 | Scaffold682 | 78414                   | CC                              | TT              | 1946972005               |
| SNP_P4_141365_78444  | NW_004516094.1 | Scaffold682 | 78444                   | TT                              | CC              | 1946972007               |
| SNP_P4_141366_82794  | NW_004516094.1 | Scaffold682 | 82794                   | CC                              | TT              | 1946972009               |
| SNP_P4_141367_82823  | NW_004516094.1 | Scaffold682 | 82823                   | CC                              | TT              | 1946972011               |
| SNP_P4_141368_82826  | NW_004516094.1 | Scaffold682 | 82826                   | CC                              | TT              | 1946972013               |
| SNP_P4_141369_82838  | NW_004516094.1 | Scaffold682 | 82838                   | TT                              | GG              | 1946972015               |
| SNP_P4_141370_82839  | NW_004516094.1 | Scaffold682 | 82839                   | AA                              | TT              | 1946972017               |
| SNP_P4_141372_134740 | NW_004516094.1 | Scaffold682 | 134740                  | TT                              | AA              | 1946972019               |
| SNP_P4_141373_136707 | NW_004516094.1 | Scaffold682 | 136707                  | TT                              | CC              | 1946972021               |
| SNP_P4_141374_162085 | NW_004516094.1 | Scaffold682 | 162085                  | GG                              | AA              | 1946972023               |
| SNP_P4_141376_190888 | NW_004516094.1 | Scaffold682 | 190888                  | CC                              | TT              | 1946972025               |
| SNP_P4_141377_190899 | NW_004516094.1 | Scaffold682 | 190899                  | GG                              | AA              | 1946972027               |
| SNP_P4_141378_190902 | NW_004516094.1 | Scaffold682 | 190902                  | CC                              | TT              | 1946972029               |
| SNP_P4_141379_196750 | NW_004516094.1 | Scaffold682 | 196750                  | TT                              | AA              | 1946972031               |
| SNP_P4_141380_196752 | NW_004516094.1 | Scaffold682 | 196752                  | AA                              | TT              | 1946972032               |
| SNP_P4_141381_202305 | NW_004516094.1 | Scaffold682 | 202305                  | GG                              | TT              | 1946972033               |
| SNP_P4_141382_208455 | NW_004516094.1 | Scaffold682 | 208455                  | AA                              | CC              | 1946972034               |
| SNP_P4_141383_208847 | NW_004516094.1 | Scaffold682 | 208847                  | GG                              | AA              | 1946972035               |
| SNP_P4_141384_216690 | NW_004516094.1 | Scaffold682 | 216690                  | AA                              | GG              | 1946972036               |
| SNP_P4_141385_220216 | NW_004516094.1 | Scaffold682 | 220216                  | CC                              | AA              | 1946972037               |
| SNP_P4_141386_220447 | NW_004516094.1 | Scaffold682 | 220447                  | AA                              | GG              | 1946972038               |
| SNP_P4_141387_222232 | NW_004516094.1 | Scaffold682 | 222232                  | GG                              | AA              | 1946972039               |
| SNP_P4_141388_223515 | NW_004516094.1 | Scaffold682 | 223515                  | AA                              | GG              | 1946972040               |
| SNP_P4_141389_225150 | NW_004516094.1 | Scaffold682 | 225150                  | TT                              | CC              | 1946972042               |
| SNP_P4_141390_232189 | NW_004516094.1 | Scaffold682 | 232189                  | TT                              | CC              | 1946972044               |
| SNP_P4_141391_232219 | NW_004516094.1 | Scaffold682 | 232219                  | GG                              | TT              | 1946972046               |
| SNP_P4_141392_232470 | NW_004516094.1 | Scaffold682 | 232470                  | AA                              | TT              | 1946972048               |
| SNP_P4_141393_232501 | NW_004516094.1 | Scaffold682 | 232501                  | TT                              | CC              | 1946972050               |
| SNP_P4_141394_232512 | NW_004516094.1 | Scaffold682 | 232512                  | CC                              | AA              | 1946972052               |
| SNP_P4_141395_232603 | NW_004516094.1 | Scaffold682 | 232603                  | AA                              | GG              | 1946972054               |
| SNP_P4_141396_232686 | NW_004516094.1 | Scaffold682 | 232686                  | CC                              | TT              | 1946972056               |
| SNP_P4_141397_232701 | NW_004516094.1 | Scaffold682 | 232701                  | TT                              | CC              | 1946972058               |
| SNP_P4_141398_239079 | NW_004516094.1 | Scaffold682 | 239079                  | TT                              | CC              | 1946972060               |
| SNP_P4_141399_239113 | NW_004516094.1 | Scaffold682 | 239113                  | GG                              | CC              | 1946972062               |

| SNPs IDs             | Chromosome IDs | Chromosomes | Physical positions (bp) | CDC Frontier (Reference genome) | (ILWC46 & LPNB) | NCBI SNPdb Accession IDs |
|----------------------|----------------|-------------|-------------------------|---------------------------------|-----------------|--------------------------|
| SNP_P4_141401_239256 | NW_004516094.1 | Scaffold682 | 239256                  | TT                              | CC              | 1946972064               |
| SNP_P4_141402_239267 | NW_004516094.1 | Scaffold682 | 239267                  | AA                              | GG              | 1946972066               |
| SNP_P4_141404_239342 | NW_004516094.1 | Scaffold682 | 239342                  | TT                              | CC              | 1946972067               |
| SNP_P4_141405_239441 | NW_004516094.1 | Scaffold682 | 239441                  | CC                              | AA              | 1946972069               |
| SNP_P4_141406_239601 | NW_004516094.1 | Scaffold682 | 239601                  | GG                              | AA              | 1946972071               |
| SNP_P4_141407_239663 | NW_004516094.1 | Scaffold682 | 239663                  | TT                              | CC              | 1946972073               |
| SNP_P4_141408_240581 | NW_004516094.1 | Scaffold682 | 240581                  | AA                              | TT              | 1946972075               |
| SNP_P4_141409_240628 | NW_004516094.1 | Scaffold682 | 240628                  | CC                              | TT              | 1946972077               |
| SNP_P4_141410_240641 | NW_004516094.1 | Scaffold682 | 240641                  | CC                              | GG              | 1946972079               |
| SNP_P4_141411_240901 | NW_004516094.1 | Scaffold682 | 240901                  | AA                              | GG              | 1946972081               |
| SNP_P4_141412_240932 | NW_004516094.1 | Scaffold682 | 240932                  | AA                              | GG              | 1946972083               |
| SNP_P4_141413_240943 | NW_004516094.1 | Scaffold682 | 240943                  | GG                              | AA              | 1946972085               |
| SNP_P4_141414_240952 | NW_004516094.1 | Scaffold682 | 240952                  | TT                              | CC              | 1946972087               |
| SNP_P4_141415_240953 | NW_004516094.1 | Scaffold682 | 240953                  | AA                              | CC              | 1946972089               |
| SNP_P4_141416_240973 | NW_004516094.1 | Scaffold682 | 240973                  | TT                              | AA              | 1946972091               |
| SNP_P4_141417_240987 | NW_004516094.1 | Scaffold682 | 240987                  | TT                              | GG              | 1946972093               |
| SNP_P4_141418_240997 | NW_004516094.1 | Scaffold682 | 240997                  | CC                              | AA              | 1946972095               |
| SNP_P4_141419_241058 | NW_004516094.1 | Scaffold682 | 241058                  | GG                              | AA              | 1946972097               |
| SNP_P4_141420_241117 | NW_004516094.1 | Scaffold682 | 241117                  | TT                              | GG              | 1946972099               |
| SNP_P4_141421_241139 | NW_004516094.1 | Scaffold682 | 241139                  | TT                              | CC              | 1946972101               |
| SNP_P4_141422_252335 | NW_004516094.1 | Scaffold682 | 252335                  | AA                              | TT              | 1946972103               |
| SNP_P4_141423_252676 | NW_004516094.1 | Scaffold682 | 252676                  | TT                              | GG              | 1946972105               |
| SNP_P4_141425_253056 | NW_004516094.1 | Scaffold682 | 253056                  | TT                              | AA              | 1946972107               |
| SNP_P4_141426_253286 | NW_004516094.1 | Scaffold682 | 253286                  | GG                              | CC              | 1946972109               |
| SNP_P4_141427_258454 | NW_004516094.1 | Scaffold682 | 258454                  | AA                              | TT              | 1946972111               |
| SNP_P4_141428_258470 | NW_004516094.1 | Scaffold682 | 258470                  | TT                              | GG              | 1946972113               |
| SNP_P4_141429_276188 | NW_004516094.1 | Scaffold682 | 276188                  | AA                              | GG              | 1946972115               |
| SNP_P4_141431_303363 | NW_004516094.1 | Scaffold682 | 303363                  | GG                              | AA              | 1946972117               |
| SNP_P4_141432_347768 | NW_004516094.1 | Scaffold682 | 347768                  | GG                              | AA              | 1946972119               |
| SNP_P4_141433_347951 | NW_004516094.1 | Scaffold682 | 347951                  | TT                              | CC              | 1946972121               |
| SNP_P4_141434_347962 | NW_004516094.1 | Scaffold682 | 347962                  | AA                              | GG              | 1946972123               |
| SNP_P4_141435_347974 | NW_004516094.1 | Scaffold682 | 347974                  | AA                              | GG              | 1946972125               |
| SNP_P4_141436_365422 | NW_004516094.1 | Scaffold682 | 365422                  | GG                              | AA              | 1946972127               |
| SNP_P4_141437_365506 | NW_004516094.1 | Scaffold682 | 365506                  | AA                              | GG              | 1946972129               |
| SNP_P4_141438_369730 | NW_004516094.1 | Scaffold682 | 369730                  | TT                              | CC              | 1946972131               |
| SNP_P4_141439_369736 | NW_004516094.1 | Scaffold682 | 369736                  | CC                              | TT              | 1946972133               |
| SNP_P4_141440_369740 | NW_004516094.1 | Scaffold682 | 369740                  | TT                              | CC              | 1946972135               |
| SNP_P4_141441_373599 | NW_004516094.1 | Scaffold682 | 373599                  | CC                              | AA              | 1946972137               |
| SNP_P4_141442_373682 | NW_004516094.1 | Scaffold682 | 373682                  | GG                              | TT              | 1946972139               |
| SNP_P4_141443_373837 | NW_004516094.1 | Scaffold682 | 373837                  | AA                              | GG              | 1946972141               |
| SNP_P4_141444_374974 | NW_004516094.1 | Scaffold682 | 374974                  | CC                              | TT              | 1946972143               |
| SNP_P4_141445_375045 | NW_004516094.1 | Scaffold682 | 375045                  | GG                              | AA              | 1946972145               |

| SNPs IDs             | Chromosome IDs | Chromosomes | Physical positions (bp) | CDC Frontier (Reference genome) | (ILWC46 & LPNB) | NCBI SNPdb Accession IDs |
|----------------------|----------------|-------------|-------------------------|---------------------------------|-----------------|--------------------------|
| SNP_P4_141446_375089 | NW_004516094.1 | Scaffold682 | 375089                  | AA                              | GG              | 1946972147               |
| SNP_P4_141447_375371 | NW_004516094.1 | Scaffold682 | 375371                  | GG                              | CC              | 1946972149               |
| SNP_P4_141448_376239 | NW_004516094.1 | Scaffold682 | 376239                  | GG                              | TT              | 1946972151               |
| SNP_P4_141449_426564 | NW_004516094.1 | Scaffold682 | 426564                  | CC                              | TT              | 1946972153               |
| SNP_P4_141450_436723 | NW_004516094.1 | Scaffold682 | 436723                  | TT                              | GG              | 1946972155               |
| SNP_P4_141451_436755 | NW_004516094.1 | Scaffold682 | 436755                  | GG                              | AA              | 1946972157               |
| SNP_P4_141452_436757 | NW_004516094.1 | Scaffold682 | 436757                  | AA                              | TT              | 1946972159               |
| SNP_P4_141453_436759 | NW_004516094.1 | Scaffold682 | 436759                  | AA                              | TT              | 1946972161               |
| SNP_P4_141454_436761 | NW_004516094.1 | Scaffold682 | 436761                  | AA                              | TT              | 1946972163               |
| SNP_P4_141455_436763 | NW_004516094.1 | Scaffold682 | 436763                  | AA                              | TT              | 1946972165               |
| SNP_P4_141456_436766 | NW_004516094.1 | Scaffold682 | 436766                  | GG                              | CC              | 1946972167               |
| SNP_P4_141457_436771 | NW_004516094.1 | Scaffold682 | 436771                  | TT                              | GG              | 1946972169               |
| SNP_P4_141458_463012 | NW_004516094.1 | Scaffold682 | 463012                  | AA                              | TT              | 1946972171               |
| SNP_P4_141459_463021 | NW_004516094.1 | Scaffold682 | 463021                  | TT                              | CC              | 1946972173               |
| SNP_P4_141460_463032 | NW_004516094.1 | Scaffold682 | 463032                  | GG                              | AA              | 1946972175               |
| SNP_P4_141461_463042 | NW_004516094.1 | Scaffold682 | 463042                  | TT                              | CC              | 1946972177               |
| SNP_P4_141462_463044 | NW_004516094.1 | Scaffold682 | 463044                  | CC                              | TT              | 1946972179               |
| SNP_P4_141463_463087 | NW_004516094.1 | Scaffold682 | 463087                  | TT                              | CC              | 1946972181               |
| SNP_P4_141464_463096 | NW_004516094.1 | Scaffold682 | 463096                  | TT                              | CC              | 1946972183               |
| SNP_P4_141465_463108 | NW_004516094.1 | Scaffold682 | 463108                  | CC                              | TT              | 1946972185               |
| SNP_P4_141466_463115 | NW_004516094.1 | Scaffold682 | 463115                  | AA                              | TT              | 1946972187               |
| SNP_P4_141467_463117 | NW_004516094.1 | Scaffold682 | 463117                  | CC                              | TT              | 1946972189               |
| SNP_P4_141468_463135 | NW_004516094.1 | Scaffold682 | 463135                  | TT                              | CC              | 1946972191               |
| SNP_P4_141469_463145 | NW_004516094.1 | Scaffold682 | 463145                  | AA                              | TT              | 1946972192               |
| SNP_P4_141470_463160 | NW_004516094.1 | Scaffold682 | 463160                  | AA                              | GG              | 1946972194               |
| SNP_P4_141471_463168 | NW_004516094.1 | Scaffold682 | 463168                  | AA                              | GG              | 1946972196               |
| SNP_P4_141472_463180 | NW_004516094.1 | Scaffold682 | 463180                  | TT                              | CC              | 1946972198               |
| SNP_P4_141473_463189 | NW_004516094.1 | Scaffold682 | 463189                  | TT                              | CC              | 1946972200               |
| SNP_P4_141474_463221 | NW_004516094.1 | Scaffold682 | 463221                  | AA                              | GG              | 1946972202               |
| SNP_P4_141475_463244 | NW_004516094.1 | Scaffold682 | 463244                  | TT                              | CC              | 1946972204               |
| SNP_P4_141476_463249 | NW_004516094.1 | Scaffold682 | 463249                  | TT                              | CC              | 1946972206               |
| SNP_P4_141477_463261 | NW_004516094.1 | Scaffold682 | 463261                  | TT                              | AA              | 1946972208               |
| SNP_P4_141478_463264 | NW_004516094.1 | Scaffold682 | 463264                  | GG                              | AA              | 1946972210               |
| SNP_P4_141479_463273 | NW_004516094.1 | Scaffold682 | 463273                  | CC                              | TT              | 1946972212               |
| SNP_P4_141480_468082 | NW_004516094.1 | Scaffold682 | 468082                  | CC                              | TT              | 1946972214               |
| SNP_P4_141481_471346 | NW_004516094.1 | Scaffold682 | 471346                  | CC                              | TT              | 1946972216               |
| SNP_P4_141482_471348 | NW_004516094.1 | Scaffold682 | 471348                  | AA                              | GG              | 1946972218               |
| SNP_P4_141483_471351 | NW_004516094.1 | Scaffold682 | 471351                  | GG                              | AA              | 1946972220               |
| SNP_P4_141484_482118 | NW_004516094.1 | Scaffold682 | 482118                  | AA                              | GG              | 1946972222               |
| SNP_P4_141486_498044 | NW_004516094.1 | Scaffold682 | 498044                  | AA                              | TT              | 1946972224               |
| SNP_P4_141487_498280 | NW_004516094.1 | Scaffold682 | 498280                  | AA                              | CC              | 1946972226               |
| SNP_P4_141488_498339 | NW_004516094.1 | Scaffold682 | 498339                  | CC                              | AA              | 1946972228               |



| SNPs IDs             | Chromosome IDs | Chromosomes | Physical positions (bp) | CDC Frontier (Reference genome) | (ILWC46 & LPNB) | NCBI SNPdb Accession IDs |
|----------------------|----------------|-------------|-------------------------|---------------------------------|-----------------|--------------------------|
| SNP_P4_141489_498344 | NW_004516094.1 | Scaffold682 | 498344                  | AA                              | CC              | 1946972230               |
| SNP_P4_141490_498353 | NW_004516094.1 | Scaffold682 | 498353                  | TT                              | CC              | 1946972232               |
| SNP_P4_141491_498434 | NW_004516094.1 | Scaffold682 | 498434                  | GG                              | TT              | 1946972234               |
| SNP_P4_141492_498473 | NW_004516094.1 | Scaffold682 | 498473                  | TT                              | CC              | 1946972236               |
| SNP_P4_141493_498546 | NW_004516094.1 | Scaffold682 | 498546                  | GG                              | AA              | 1946972238               |
| SNP_P4_141495_506149 | NW_004516094.1 | Scaffold682 | 506149                  | CC                              | GG              | 1946972240               |
| SNP_P4_141496_506158 | NW_004516094.1 | Scaffold682 | 506158                  | CC                              | AA              | 1946972242               |
| SNP_P4_141498_514864 | NW_004516094.1 | Scaffold682 | 514864                  | CC                              | TT              | 1946972244               |
| SNP_P4_141499_518826 | NW_004516094.1 | Scaffold682 | 518826                  | GG                              | TT              | 1946972246               |
| SNP_P4_141500_524563 | NW_004516094.1 | Scaffold682 | 524563                  | AA                              | GG              | 1946972248               |
| SNP_P4_141501_524576 | NW_004516094.1 | Scaffold682 | 524576                  | GG                              | AA              | 1946972250               |
| SNP_P4_141502_525737 | NW_004516094.1 | Scaffold682 | 525737                  | AA                              | GG              | 1946972252               |
| SNP_P4_141503_525769 | NW_004516094.1 | Scaffold682 | 525769                  | GG                              | AA              | 1946972254               |
| SNP_P4_141504_525770 | NW_004516094.1 | Scaffold682 | 525770                  | AA                              | CC              | 1946972256               |
| SNP_P4_141505_526564 | NW_004516094.1 | Scaffold682 | 526564                  | AA                              | CC              | 1946972258               |
| SNP_P4_141506_526788 | NW_004516094.1 | Scaffold682 | 526788                  | TT                              | CC              | 1946972260               |
| SNP_P4_141507_526846 | NW_004516094.1 | Scaffold682 | 526846                  | TT                              | GG              | 1946972262               |
| SNP_P4_141508_526860 | NW_004516094.1 | Scaffold682 | 526860                  | GG                              | AA              | 1946972264               |
| SNP_P4_141509_526869 | NW_004516094.1 | Scaffold682 | 526869                  | TT                              | CC              | 1946972266               |
| SNP_P4_141510_526878 | NW_004516094.1 | Scaffold682 | 526878                  | TT                              | CC              | 1946972268               |
| SNP_P4_141512_526903 | NW_004516094.1 | Scaffold682 | 526903                  | TT                              | GG              | 1946972270               |
| SNP_P4_141513_526935 | NW_004516094.1 | Scaffold682 | 526935                  | GG                              | AA              | 1946972272               |
| SNP_P4_141514_526976 | NW_004516094.1 | Scaffold682 | 526976                  | AA                              | GG              | 1946972274               |
| SNP_P4_141515_527001 | NW_004516094.1 | Scaffold682 | 527001                  | TT                              | AA              | 1946972276               |
| SNP_P4_141516_535897 | NW_004516094.1 | Scaffold682 | 535897                  | TT                              | CC              | 1946972278               |
| SNP_P4_141517_536171 | NW_004516094.1 | Scaffold682 | 536171                  | TT                              | CC              | 1946972280               |
| SNP_P4_141518_536174 | NW_004516094.1 | Scaffold682 | 536174                  | TT                              | CC              | 1946972282               |
| SNP_P4_141519_536213 | NW_004516094.1 | Scaffold682 | 536213                  | TT                              | CC              | 1946972284               |
| SNP_P4_141520_536244 | NW_004516094.1 | Scaffold682 | 536244                  | CC                              | TT              | 1946972286               |
| SNP_P4_141521_539823 | NW_004516094.1 | Scaffold682 | 539823                  | GG                              | AA              | 1946972288               |
| SNP_P4_141522_539838 | NW_004516094.1 | Scaffold682 | 539838                  | AA                              | TT              | 1946972290               |
| SNP_P4_141523_539839 | NW_004516094.1 | Scaffold682 | 539839                  | GG                              | TT              | 1946972292               |
| SNP_P4_141524_539849 | NW_004516094.1 | Scaffold682 | 539849                  | TT                              | CC              | 1946972294               |
| SNP_P4_141526_539945 | NW_004516094.1 | Scaffold682 | 539945                  | GG                              | TT              | 1946972296               |
| SNP_P4_141527_539961 | NW_004516094.1 | Scaffold682 | 539961                  | AA                              | CC              | 1946972298               |
| SNP_P4_141528_539983 | NW_004516094.1 | Scaffold682 | 539983                  | AA                              | GG              | 1946972300               |
| SNP_P4_141529_540018 | NW_004516094.1 | Scaffold682 | 540018                  | AA                              | GG              | 1946972302               |
| SNP_P4_141530_540019 | NW_004516094.1 | Scaffold682 | 540019                  | TT                              | CC              | 1946972304               |
| SNP_P4_141532_540093 | NW_004516094.1 | Scaffold682 | 540093                  | AA                              | GG              | 1946972306               |
| SNP_P4_141533_540126 | NW_004516094.1 | Scaffold682 | 540126                  | GG                              | AA              | 1946972308               |
| SNP_P4_141534_540141 | NW_004516094.1 | Scaffold682 | 540141                  | TT                              | CC              | 1946972310               |
| SNP_P4_141535_540168 | NW_004516094.1 | Scaffold682 | 540168                  | CC                              | TT              | 1946972312               |

| SNPs IDs             | Chromosome IDs | Chromosomes | Physical positions (bp) | CDC Frontier (Reference genome) | (ILWC46 & LPNB) | NCBI SNPdb Accession IDs |
|----------------------|----------------|-------------|-------------------------|---------------------------------|-----------------|--------------------------|
| SNP_P4_141536_540210 | NW_004516094.1 | Scaffold682 | 540210                  | AA                              | CC              | 1946972314               |
| SNP_P4_141537_540221 | NW_004516094.1 | Scaffold682 | 540221                  | AA                              | GG              | 1946972316               |
| SNP_P4_141538_540308 | NW_004516094.1 | Scaffold682 | 540308                  | AA                              | GG              | 1946972318               |
| SNP_P4_141539_540319 | NW_004516094.1 | Scaffold682 | 540319                  | GG                              | AA              | 1946972320               |
| SNP_P4_141540_540388 | NW_004516094.1 | Scaffold682 | 540388                  | CC                              | AA              | 1946972322               |
| SNP_P4_141542_540476 | NW_004516094.1 | Scaffold682 | 540476                  | TT                              | GG              | 1946972324               |
| SNP_P4_141543_540483 | NW_004516094.1 | Scaffold682 | 540483                  | TT                              | AA              | 1946972326               |
| SNP_P4_141544_540491 | NW_004516094.1 | Scaffold682 | 540491                  | GG                              | AA              | 1946972328               |
| SNP_P4_141545_540569 | NW_004516094.1 | Scaffold682 | 540569                  | GG                              | TT              | 1946972330               |
| SNP_P4_141546_540587 | NW_004516094.1 | Scaffold682 | 540587                  | TT                              | CC              | 1946972332               |
| SNP_P4_141548_540634 | NW_004516094.1 | Scaffold682 | 540634                  | TT                              | AA              | 1946972334               |
| SNP_P4_141550_540815 | NW_004516094.1 | Scaffold682 | 540815                  | TT                              | CC              | 1946972336               |
| SNP_P4_141551_540841 | NW_004516094.1 | Scaffold682 | 540841                  | TT                              | GG              | 1946972338               |
| SNP_P4_141553_540851 | NW_004516094.1 | Scaffold682 | 540851                  | AA                              | GG              | 1946972340               |
| SNP_P4_141554_540864 | NW_004516094.1 | Scaffold682 | 540864                  | GG                              | AA              | 1946972342               |
| SNP_P4_141555_540897 | NW_004516094.1 | Scaffold682 | 540897                  | GG                              | AA              | 1946972344               |
| SNP_P4_141556_540920 | NW_004516094.1 | Scaffold682 | 540920                  | TT                              | GG              | 1946972346               |
| SNP_P4_141558_541079 | NW_004516094.1 | Scaffold682 | 541079                  | AA                              | GG              | 1946972348               |
| SNP_P4_141559_541112 | NW_004516094.1 | Scaffold682 | 541112                  | AA                              | TT              | 1946972350               |
| SNP_P4_141560_541114 | NW_004516094.1 | Scaffold682 | 541114                  | TT                              | CC              | 1946972352               |
| SNP_P4_141561_541153 | NW_004516094.1 | Scaffold682 | 541153                  | GG                              | AA              | 1946972354               |
| SNP_P4_141562_541187 | NW_004516094.1 | Scaffold682 | 541187                  | TT                              | CC              | 1946972356               |
| SNP_P4_141563_541213 | NW_004516094.1 | Scaffold682 | 541213                  | CC                              | TT              | 1946972358               |
| SNP_P4_141564_541270 | NW_004516094.1 | Scaffold682 | 541270                  | TT                              | AA              | 1946972360               |
| SNP_P4_141565_541362 | NW_004516094.1 | Scaffold682 | 541362                  | GG                              | CC              | 1946972362               |
| SNP_P4_141566_541439 | NW_004516094.1 | Scaffold682 | 541439                  | AA                              | TT              | 1946972364               |
| SNP_P4_141567_541441 | NW_004516094.1 | Scaffold682 | 541441                  | AA                              | CC              | 1946972366               |
| SNP_P4_141568_541473 | NW_004516094.1 | Scaffold682 | 541473                  | GG                              | AA              | 1946972368               |
| SNP_P4_141569_541499 | NW_004516094.1 | Scaffold682 | 541499                  | GG                              | AA              | 1946972370               |
| SNP_P4_141570_541505 | NW_004516094.1 | Scaffold682 | 541505                  | TT                              | GG              | 1946972372               |
| SNP_P4_141571_541532 | NW_004516094.1 | Scaffold682 | 541532                  | CC                              | TT              | 1946972374               |
| SNP_P4_141572_541556 | NW_004516094.1 | Scaffold682 | 541556                  | AA                              | CC              | 1946972376               |
| SNP_P4_141573_541591 | NW_004516094.1 | Scaffold682 | 541591                  | TT                              | AA              | 1946972378               |
| SNP_P4_141575_541624 | NW_004516094.1 | Scaffold682 | 541624                  | GG                              | AA              | 1946972380               |
| SNP_P4_141576_541629 | NW_004516094.1 | Scaffold682 | 541629                  | AA                              | CC              | 1946972382               |
| SNP_P4_141577_541678 | NW_004516094.1 | Scaffold682 | 541678                  | AA                              | GG              | 1946972384               |
| SNP_P4_141578_541684 | NW_004516094.1 | Scaffold682 | 541684                  | GG                              | CC              | 1946972386               |
| SNP_P4_141579_541696 | NW_004516094.1 | Scaffold682 | 541696                  | GG                              | AA              | 1946972388               |
| SNP_P4_141580_541712 | NW_004516094.1 | Scaffold682 | 541712                  | GG                              | CC              | 1946972390               |
| SNP_P4_141581_541840 | NW_004516094.1 | Scaffold682 | 541840                  | GG                              | AA              | 1946972392               |
| SNP_P4_141582_541912 | NW_004516094.1 | Scaffold682 | 541912                  | CC                              | GG              | 1946972394               |
| SNP_P4_141583_541994 | NW_004516094.1 | Scaffold682 | 541994                  | TT                              | AA              | 1946972396               |

| SNPs IDs             | Chromosome IDs | Chromosomes | Physical positions (bp) | CDC Frontier (Reference genome) | (ILWC46 & LPNB) | NCBI SNPdb Accession IDs |
|----------------------|----------------|-------------|-------------------------|---------------------------------|-----------------|--------------------------|
| SNP_P4_141584_542027 | NW_004516094.1 | Scaffold682 | 542027                  | TT                              | CC              | 1946972398               |
| SNP_P4_141585_542039 | NW_004516094.1 | Scaffold682 | 542039                  | GG                              | AA              | 1946972400               |
| SNP_P4_141586_553590 | NW_004516094.1 | Scaffold682 | 553590                  | TT                              | GG              | 1946972402               |
| SNP_P4_141587_553591 | NW_004516094.1 | Scaffold682 | 553591                  | AA                              | TT              | 1946972404               |
| SNP_P4_141588_565525 | NW_004516094.1 | Scaffold682 | 565525                  | AA                              | GG              | 1946972406               |
| SNP_P4_141589_565542 | NW_004516094.1 | Scaffold682 | 565542                  | AA                              | TT              | 1946972408               |
| SNP_P4_141590_565544 | NW_004516094.1 | Scaffold682 | 565544                  | TT                              | CC              | 1946972410               |
| SNP_P4_141591_565587 | NW_004516094.1 | Scaffold682 | 565587                  | GG                              | AA              | 1946972412               |
| SNP_P4_141592_565593 | NW_004516094.1 | Scaffold682 | 565593                  | AA                              | GG              | 1946972414               |
| SNP_P4_141593_565595 | NW_004516094.1 | Scaffold682 | 565595                  | AA                              | GG              | 1946972416               |
| SNP_P4_141594_568322 | NW_004516094.1 | Scaffold682 | 568322                  | CC                              | GG              | 1946972418               |
| SNP_P4_141595_579793 | NW_004516094.1 | Scaffold682 | 579793                  | CC                              | AA              | 1946972420               |
| SNP_P4_141596_579804 | NW_004516094.1 | Scaffold682 | 579804                  | TT                              | CC              | 1946972422               |
| SNP_P4_141597_580013 | NW_004516094.1 | Scaffold682 | 580013                  | TT                              | AA              | 1946972424               |
| SNP_P4_141598_580665 | NW_004516094.1 | Scaffold682 | 580665                  | TT                              | CC              | 1946972426               |
| SNP_P4_141599_580678 | NW_004516094.1 | Scaffold682 | 580678                  | TT                              | CC              | 1946972428               |
| SNP_P4_141600_580814 | NW_004516094.1 | Scaffold682 | 580814                  | CC                              | TT              | 1946972430               |
| SNP_P4_141601_581413 | NW_004516094.1 | Scaffold682 | 581413                  | CC                              | TT              | 1946972432               |
| SNP_P4_141602_712    | NW_004516095.1 | Scaffold683 | 712                     | GG                              | CC              | 1946972434               |
| SNP_P4_141603_815    | NW_004516095.1 | Scaffold683 | 815                     | CC                              | GG              | 1946972436               |
| SNP_P4_141604_901    | NW_004516095.1 | Scaffold683 | 901                     | AA                              | CC              | 1946972438               |
| SNP_P4_141605_903    | NW_004516095.1 | Scaffold683 | 903                     | GG                              | AA              | 1946972440               |
| SNP_P4_141606_2870   | NW_004516095.1 | Scaffold683 | 2870                    | GG                              | TT              | 1946972442               |
| SNP_P4_141608_15561  | NW_004516095.1 | Scaffold683 | 15561                   | CC                              | AA              | 1946972444               |
| SNP_P4_141609_15727  | NW_004516095.1 | Scaffold683 | 15727                   | CC                              | TT              | 1946972446               |
| SNP_P4_141610_15737  | NW_004516095.1 | Scaffold683 | 15737                   | TT                              | CC              | 1946972448               |
| SNP_P4_141611_15758  | NW_004516095.1 | Scaffold683 | 15758                   | CC                              | AA              | 1946972450               |
| SNP_P4_141612_15985  | NW_004516095.1 | Scaffold683 | 15985                   | AA                              | TT              | 1946972452               |
| SNP_P4_141613_16063  | NW_004516095.1 | Scaffold683 | 16063                   | TT                              | AA              | 1946972454               |
| SNP_P4_141614_19484  | NW_004516095.1 | Scaffold683 | 19484                   | CC                              | TT              | 1946972456               |
| SNP_P4_141615_19498  | NW_004516095.1 | Scaffold683 | 19498                   | GG                              | TT              | 1946972458               |
| SNP_P4_141616_19502  | NW_004516095.1 | Scaffold683 | 19502                   | TT                              | CC              | 1946972460               |
| SNP_P4_141617_19725  | NW_004516095.1 | Scaffold683 | 19725                   | AA                              | CC              | 1946972462               |
| SNP_P4_141618_19794  | NW_004516095.1 | Scaffold683 | 19794                   | TT                              | AA              | 1946972464               |
| SNP_P4_141619_20404  | NW_004516095.1 | Scaffold683 | 20404                   | TT                              | CC              | 1946972466               |
| SNP_P4_141620_20409  | NW_004516095.1 | Scaffold683 | 20409                   | AA                              | CC              | 1946972468               |
| SNP_P4_141621_20479  | NW_004516095.1 | Scaffold683 | 20479                   | GG                              | AA              | 1946972470               |
| SNP_P4_141622_20501  | NW_004516095.1 | Scaffold683 | 20501                   | TT                              | CC              | 1946972472               |
| SNP_P4_141623_20505  | NW_004516095.1 | Scaffold683 | 20505                   | TT                              | GG              | 1946972474               |
| SNP_P4_141624_20536  | NW_004516095.1 | Scaffold683 | 20536                   | TT                              | GG              | 1946972476               |
| SNP_P4_141625_20543  | NW_004516095.1 | Scaffold683 | 20543                   | CC                              | GG              | 1946972478               |
| SNP_P4_141626_20566  | NW_004516095.1 | Scaffold683 | 20566                   | TT                              | CC              | 1946972480               |

| SNPs IDs            | Chromosome IDs | Chromosomes | Physical positions (bp) | CDC Frontier (Reference genome) | (ILWC46 & LPNB) | NCBI SNPdb Accession IDs |
|---------------------|----------------|-------------|-------------------------|---------------------------------|-----------------|--------------------------|
| SNP_P4_141627_20585 | NW_004516095.1 | Scaffold683 | 20585                   | GG                              | AA              | 1946972482               |
| SNP_P4_141628_20617 | NW_004516095.1 | Scaffold683 | 20617                   | AA                              | CC              | 1946972484               |
| SNP_P4_141629_20651 | NW_004516095.1 | Scaffold683 | 20651                   | GG                              | TT              | 1946972486               |
| SNP_P4_141630_20673 | NW_004516095.1 | Scaffold683 | 20673                   | TT                              | AA              | 1946972488               |
| SNP_P4_141632_20705 | NW_004516095.1 | Scaffold683 | 20705                   | CC                              | GG              | 1946972490               |
| SNP_P4_141633_20739 | NW_004516095.1 | Scaffold683 | 20739                   | AA                              | TT              | 1946972492               |
| SNP_P4_141634_20781 | NW_004516095.1 | Scaffold683 | 20781                   | AA                              | GG              | 1946972494               |
| SNP_P4_141635_20812 | NW_004516095.1 | Scaffold683 | 20812                   | TT                              | GG              | 1946972496               |
| SNP_P4_141636_20817 | NW_004516095.1 | Scaffold683 | 20817                   | TT                              | CC              | 1946972498               |
| SNP_P4_141637_20943 | NW_004516095.1 | Scaffold683 | 20943                   | GG                              | TT              | 1946972500               |
| SNP_P4_141638_20958 | NW_004516095.1 | Scaffold683 | 20958                   | CC                              | TT              | 1946972502               |
| SNP_P4_141639_21010 | NW_004516095.1 | Scaffold683 | 21010                   | TT                              | CC              | 1946972504               |
| SNP_P4_141640_25036 | NW_004516095.1 | Scaffold683 | 25036                   | TT                              | AA              | 1946972506               |
| SNP_P4_141641_25188 | NW_004516095.1 | Scaffold683 | 25188                   | GG                              | TT              | 1946972508               |
| SNP_P4_141642_25230 | NW_004516095.1 | Scaffold683 | 25230                   | TT                              | GG              | 1946972510               |
| SNP_P4_141643_25350 | NW_004516095.1 | Scaffold683 | 25350                   | AA                              | TT              | 1946972512               |
| SNP_P4_141644_25440 | NW_004516095.1 | Scaffold683 | 25440                   | CC                              | AA              | 1946972514               |
| SNP_P4_141646_25467 | NW_004516095.1 | Scaffold683 | 25467                   | CC                              | TT              | 1946972516               |
| SNP_P4_141647_25472 | NW_004516095.1 | Scaffold683 | 25472                   | GG                              | AA              | 1946972518               |
| SNP_P4_141648_25512 | NW_004516095.1 | Scaffold683 | 25512                   | TT                              | GG              | 1946972520               |
| SNP_P4_141649_25514 | NW_004516095.1 | Scaffold683 | 25514                   | TT                              | CC              | 1946972522               |
| SNP_P4_141650_25523 | NW_004516095.1 | Scaffold683 | 25523                   | TT                              | AA              | 1946972524               |
| SNP_P4_141651_25556 | NW_004516095.1 | Scaffold683 | 25556                   | CC                              | TT              | 1946972526               |
| SNP_P4_141652_25558 | NW_004516095.1 | Scaffold683 | 25558                   | AA                              | GG              | 1946972528               |
| SNP_P4_141653_25559 | NW_004516095.1 | Scaffold683 | 25559                   | GG                              | AA              | 1946972530               |
| SNP_P4_141654_25882 | NW_004516095.1 | Scaffold683 | 25882                   | AA                              | GG              | 1946972532               |
| SNP_P4_141655_26178 | NW_004516095.1 | Scaffold683 | 26178                   | AA                              | TT              | 1946972534               |
| SNP_P4_141656_26194 | NW_004516095.1 | Scaffold683 | 26194                   | TT                              | GG              | 1946972536               |
| SNP_P4_141657_26202 | NW_004516095.1 | Scaffold683 | 26202                   | CC                              | TT              | 1946972538               |
| SNP_P4_141658_26203 | NW_004516095.1 | Scaffold683 | 26203                   | AA                              | GG              | 1946972540               |
| SNP_P4_141659_26204 | NW_004516095.1 | Scaffold683 | 26204                   | CC                              | AA              | 1946972542               |
| SNP_P4_141660_26247 | NW_004516095.1 | Scaffold683 | 26247                   | TT                              | AA              | 1946972544               |
| SNP_P4_141661_4686  | NW_004516096.1 | Scaffold684 | 4686                    | AA                              | GG              | 1946972546               |
| SNP_P4_141662_4704  | NW_004516096.1 | Scaffold684 | 4704                    | AA                              | GG              | 1946972548               |
| SNP_P4_141663_4713  | NW_004516096.1 | Scaffold684 | 4713                    | GG                              | AA              | 1946972549               |
| SNP_P4_141664_4877  | NW_004516096.1 | Scaffold684 | 4877                    | CC                              | TT              | 1946972550               |
| SNP_P4_141665_4880  | NW_004516096.1 | Scaffold684 | 4880                    | TT                              | AA              | 1946972551               |
| SNP_P4_141666_4940  | NW_004516096.1 | Scaffold684 | 4940                    | GG                              | AA              | 1946972552               |
| SNP_P4_141667_4944  | NW_004516096.1 | Scaffold684 | 4944                    | AA                              | GG              | 1946972554               |
| SNP_P4_141668_4949  | NW_004516096.1 | Scaffold684 | 4949                    | AA                              | GG              | 1946972556               |
| SNP_P4_141669_4951  | NW_004516096.1 | Scaffold684 | 4951                    | GG                              | AA              | 1946972558               |
| SNP_P4_141670_4964  | NW_004516096.1 | Scaffold684 | 4964                    | GG                              | AA              | 1946972560               |

| SNPs IDs            | Chromosome IDs | Chromosomes | Physical positions (bp) | CDC Frontier (Reference genome) | (ILWC46 & LPNB) | NCBI SNPdb Accession IDs |
|---------------------|----------------|-------------|-------------------------|---------------------------------|-----------------|--------------------------|
| SNP_P4_141671_4967  | NW_004516096.1 | Scaffold684 | 4967                    | GG                              | AA              | 1946972562               |
| SNP_P4_141672_5008  | NW_004516096.1 | Scaffold684 | 5008                    | CC                              | AA              | 1946972564               |
| SNP_P4_141673_5509  | NW_004516096.1 | Scaffold684 | 5509                    | AA                              | GG              | 1946972566               |
| SNP_P4_141674_6577  | NW_004516096.1 | Scaffold684 | 6577                    | GG                              | AA              | 1946972568               |
| SNP_P4_141675_6612  | NW_004516096.1 | Scaffold684 | 6612                    | CC                              | AA              | 1946972570               |
| SNP_P4_141676_6904  | NW_004516096.1 | Scaffold684 | 6904                    | TT                              | CC              | 1946972572               |
| SNP_P4_141677_6954  | NW_004516096.1 | Scaffold684 | 6954                    | GG                              | AA              | 1946972574               |
| SNP_P4_141678_7050  | NW_004516096.1 | Scaffold684 | 7050                    | AA                              | GG              | 1946972576               |
| SNP_P4_141679_16346 | NW_004516096.1 | Scaffold684 | 16346                   | CC                              | GG              | 1946972579               |
| SNP_P4_141681_41338 | NW_004516096.1 | Scaffold684 | 41338                   | AA                              | GG              | 1946972581               |
| SNP_P4_141682_48352 | NW_004516096.1 | Scaffold684 | 48352                   | CC                              | GG              | 1946972583               |
| SNP_P4_141683_48386 | NW_004516096.1 | Scaffold684 | 48386                   | TT                              | GG              | 1946972585               |
| SNP_P4_141684_48412 | NW_004516096.1 | Scaffold684 | 48412                   | TT                              | CC              | 1946972587               |
| SNP_P4_141685_48419 | NW_004516096.1 | Scaffold684 | 48419                   | TT                              | CC              | 1946972589               |
| SNP_P4_141686_62515 | NW_004516096.1 | Scaffold684 | 62515                   | GG                              | AA              | 1946972591               |
| SNP_P4_141687_62712 | NW_004516096.1 | Scaffold684 | 62712                   | CC                              | AA              | 1946972593               |
| SNP_P4_141688_62727 | NW_004516096.1 | Scaffold684 | 62727                   | TT                              | CC              | 1946972595               |
| SNP_P4_141689_67814 | NW_004516096.1 | Scaffold684 | 67814                   | AA                              | GG              | 1946972597               |
| SNP_P4_141690_72115 | NW_004516096.1 | Scaffold684 | 72115                   | CC                              | TT              | 1946972599               |
| SNP_P4_141691_72172 | NW_004516096.1 | Scaffold684 | 72172                   | TT                              | CC              | 1946972601               |
| SNP_P4_141692_75464 | NW_004516096.1 | Scaffold684 | 75464                   | GG                              | AA              | 1946972603               |
| SNP_P4_141693_75474 | NW_004516096.1 | Scaffold684 | 75474                   | GG                              | AA              | 1946972605               |
| SNP_P4_141694_75520 | NW_004516096.1 | Scaffold684 | 75520                   | AA                              | TT              | 1946972607               |
| SNP_P4_141695_75529 | NW_004516096.1 | Scaffold684 | 75529                   | GG                              | TT              | 1946972609               |
| SNP_P4_141696_79000 | NW_004516096.1 | Scaffold684 | 79000                   | TT                              | CC              | 1946972611               |
| SNP_P4_141697_79027 | NW_004516096.1 | Scaffold684 | 79027                   | TT                              | CC              | 1946972613               |
| SNP_P4_141698_80910 | NW_004516096.1 | Scaffold684 | 80910                   | AA                              | GG              | 1946972615               |
| SNP_P4_141699_94438 | NW_004516096.1 | Scaffold684 | 94438                   | TT                              | CC              | 1946972617               |
| SNP_P4_141700_64    | NW_004516098.1 | Scaffold686 | 64                      | CC                              | TT              | 1946972619               |
| SNP_P4_141701_81    | NW_004516098.1 | Scaffold686 | 81                      | GG                              | AA              | 1946972621               |
| SNP_P4_141702_352   | NW_004516098.1 | Scaffold686 | 352                     | GG                              | AA              | 1946972623               |
| SNP_P4_141703_458   | NW_004516098.1 | Scaffold686 | 458                     | GG                              | AA              | 1946972625               |
| SNP_P4_141704_618   | NW_004516098.1 | Scaffold686 | 618                     | TT                              | AA              | 1946972627               |
| SNP_P4_141705_740   | NW_004516098.1 | Scaffold686 | 740                     | TT                              | AA              | 1946972629               |
| SNP_P4_141706_751   | NW_004516098.1 | Scaffold686 | 751                     | CC                              | TT              | 1946972631               |
| SNP_P4_141707_769   | NW_004516098.1 | Scaffold686 | 769                     | AA                              | CC              | 1946972633               |
| SNP_P4_141708_772   | NW_004516098.1 | Scaffold686 | 772                     | AA                              | TT              | 1946972635               |
| SNP_P4_141709_783   | NW_004516098.1 | Scaffold686 | 783                     | AA                              | GG              | 1946972637               |
| SNP_P4_141710_789   | NW_004516098.1 | Scaffold686 | 789                     | CC                              | TT              | 1946972639               |
| SNP_P4_141711_25746 | NW_004516098.1 | Scaffold686 | 25746                   | CC                              | GG              | 1946972641               |
| SNP_P4_141712_41594 | NW_004516098.1 | Scaffold686 | 41594                   | GG                              | TT              | 1946972643               |
| SNP_P4_141713_48351 | NW_004516098.1 | Scaffold686 | 48351                   | CC                              | AA              | 1946972645               |

| SNPs IDs             | Chromosome IDs | Chromosomes | Physical positions (bp) | CDC Frontier (Reference genome) | (ILWC46 & LPNB) | NCBI SNPdb Accession IDs |
|----------------------|----------------|-------------|-------------------------|---------------------------------|-----------------|--------------------------|
| SNP_P4_141714_59994  | NW_004516098.1 | Scaffold686 | 59994                   | TT                              | CC              | 1946972647               |
| SNP_P4_141715_60020  | NW_004516098.1 | Scaffold686 | 60020                   | TT                              | CC              | 1946972649               |
| SNP_P4_141716_60025  | NW_004516098.1 | Scaffold686 | 60025                   | CC                              | TT              | 1946972651               |
| SNP_P4_141717_60345  | NW_004516098.1 | Scaffold686 | 60345                   | AA                              | TT              | 1946972653               |
| SNP_P4_141718_71394  | NW_004516098.1 | Scaffold686 | 71394                   | TT                              | CC              | 1946972655               |
| SNP_P4_141720_85517  | NW_004516098.1 | Scaffold686 | 85517                   | TT                              | CC              | 1946972657               |
| SNP_P4_141721_85529  | NW_004516098.1 | Scaffold686 | 85529                   | AA                              | CC              | 1946972659               |
| SNP_P4_141722_85596  | NW_004516098.1 | Scaffold686 | 85596                   | AA                              | CC              | 1946972661               |
| SNP_P4_141723_85717  | NW_004516098.1 | Scaffold686 | 85717                   | AA                              | TT              | 1946972662               |
| SNP_P4_141724_85725  | NW_004516098.1 | Scaffold686 | 85725                   | CC                              | TT              | 1946972664               |
| SNP_P4_141725_86022  | NW_004516098.1 | Scaffold686 | 86022                   | GG                              | AA              | 1946972666               |
| SNP_P4_141726_86049  | NW_004516098.1 | Scaffold686 | 86049                   | CC                              | TT              | 1946972668               |
| SNP_P4_141727_89609  | NW_004516098.1 | Scaffold686 | 89609                   | TT                              | CC              | 1946972670               |
| SNP_P4_141728_90562  | NW_004516098.1 | Scaffold686 | 90562                   | TT                              | GG              | 1946972672               |
| SNP_P4_141729_90577  | NW_004516098.1 | Scaffold686 | 90577                   | TT                              | CC              | 1946972674               |
| SNP_P4_141730_90582  | NW_004516098.1 | Scaffold686 | 90582                   | AA                              | GG              | 1946972676               |
| SNP_P4_141731_90611  | NW_004516098.1 | Scaffold686 | 90611                   | TT                              | CC              | 1946972678               |
| SNP_P4_141732_90729  | NW_004516098.1 | Scaffold686 | 90729                   | GG                              | TT              | 1946972680               |
| SNP_P4_141733_90736  | NW_004516098.1 | Scaffold686 | 90736                   | TT                              | CC              | 1946972682               |
| SNP_P4_141734_90755  | NW_004516098.1 | Scaffold686 | 90755                   | AA                              | GG              | 1946972684               |
| SNP_P4_141735_90955  | NW_004516098.1 | Scaffold686 | 90955                   | TT                              | GG              | 1946972686               |
| SNP_P4_141736_90971  | NW_004516098.1 | Scaffold686 | 90971                   | GG                              | AA              | 1946972688               |
| SNP_P4_141737_91037  | NW_004516098.1 | Scaffold686 | 91037                   | GG                              | AA              | 1946972690               |
| SNP_P4_141738_91044  | NW_004516098.1 | Scaffold686 | 91044                   | GG                              | CC              | 1946972692               |
| SNP_P4_141739_91078  | NW_004516098.1 | Scaffold686 | 91078                   | TT                              | AA              | 1946972694               |
| SNP_P4_141741_97553  | NW_004516098.1 | Scaffold686 | 97553                   | GG                              | AA              | 1946972696               |
| SNP_P4_141742_104083 | NW_004516098.1 | Scaffold686 | 104083                  | GG                              | TT              | 1946972698               |
| SNP_P4_141743_104993 | NW_004516098.1 | Scaffold686 | 104993                  | GG                              | TT              | 1946972700               |
| SNP_P4_141745_107876 | NW_004516098.1 | Scaffold686 | 107876                  | AA                              | TT              | 1946972702               |
| SNP_P4_141746_107885 | NW_004516098.1 | Scaffold686 | 107885                  | CC                              | AA              | 1946972704               |
| SNP_P4_141747_107896 | NW_004516098.1 | Scaffold686 | 107896                  | CC                              | AA              | 1946972706               |
| SNP_P4_141748_108353 | NW_004516098.1 | Scaffold686 | 108353                  | CC                              | TT              | 1946972708               |
| SNP_P4_141749_108924 | NW_004516098.1 | Scaffold686 | 108924                  | AA                              | TT              | 1946972710               |
| SNP_P4_141751_109194 | NW_004516098.1 | Scaffold686 | 109194                  | TT                              | GG              | 1946972712               |
| SNP_P4_141752_111861 | NW_004516098.1 | Scaffold686 | 111861                  | TT                              | CC              | 1946972714               |
| SNP_P4_141753_111864 | NW_004516098.1 | Scaffold686 | 111864                  | GG                              | AA              | 1946972716               |
| SNP_P4_141754_111876 | NW_004516098.1 | Scaffold686 | 111876                  | CC                              | TT              | 1946972718               |
| SNP_P4_141755_111936 | NW_004516098.1 | Scaffold686 | 111936                  | GG                              | AA              | 1946972720               |
| SNP_P4_141756_112014 | NW_004516098.1 | Scaffold686 | 112014                  | CC                              | TT              | 1946972722               |
| SNP_P4_141757_112330 | NW_004516098.1 | Scaffold686 | 112330                  | CC                              | TT              | 1946972724               |
| SNP_P4_141758_112348 | NW_004516098.1 | Scaffold686 | 112348                  | TT                              | CC              | 1946972726               |
| SNP_P4_141759_112381 | NW_004516098.1 | Scaffold686 | 112381                  | GG                              | AA              | 1946972728               |

| SNPs IDs             | Chromosome IDs | Chromosomes | Physical positions (bp) | CDC Frontier (Reference genome) | (ILWC46 & LPNB) | NCBI SNPdb Accession IDs |
|----------------------|----------------|-------------|-------------------------|---------------------------------|-----------------|--------------------------|
| SNP_P4_141760_112393 | NW_004516098.1 | Scaffold686 | 112393                  | GG                              | AA              | 1946972730               |
| SNP_P4_141761_112398 | NW_004516098.1 | Scaffold686 | 112398                  | AA                              | GG              | 1946972732               |
| SNP_P4_141762_112411 | NW_004516098.1 | Scaffold686 | 112411                  | TT                              | CC              | 1946972734               |
| SNP_P4_141763_112413 | NW_004516098.1 | Scaffold686 | 112413                  | GG                              | AA              | 1946972736               |
| SNP_P4_141764_113800 | NW_004516098.1 | Scaffold686 | 113800                  | TT                              | AA              | 1946972738               |
| SNP_P4_141765_116178 | NW_004516098.1 | Scaffold686 | 116178                  | TT                              | AA              | 1946972740               |
| SNP_P4_141766_132145 | NW_004516098.1 | Scaffold686 | 132145                  | TT                              | CC              | 1946972742               |
| SNP_P4_141768_177548 | NW_004516098.1 | Scaffold686 | 177548                  | GG                              | TT              | 1946972744               |
| SNP_P4_141769_177848 | NW_004516098.1 | Scaffold686 | 177848                  | CC                              | TT              | 1946972746               |
| SNP_P4_141770_177896 | NW_004516098.1 | Scaffold686 | 177896                  | AA                              | GG              | 1946972748               |
| SNP_P4_141771_178029 | NW_004516098.1 | Scaffold686 | 178029                  | CC                              | TT              | 1946972750               |
| SNP_P4_141773_180855 | NW_004516098.1 | Scaffold686 | 180855                  | AA                              | TT              | 1946972752               |
| SNP_P4_141774_181407 | NW_004516098.1 | Scaffold686 | 181407                  | AA                              | GG              | 1946972754               |
| SNP_P4_141775_182141 | NW_004516098.1 | Scaffold686 | 182141                  | CC                              | TT              | 1946972756               |
| SNP_P4_141776_182167 | NW_004516098.1 | Scaffold686 | 182167                  | TT                              | AA              | 1946972758               |
| SNP_P4_141778_183542 | NW_004516098.1 | Scaffold686 | 183542                  | TT                              | CC              | 1946972760               |
| SNP_P4_141779_183720 | NW_004516098.1 | Scaffold686 | 183720                  | GG                              | TT              | 1946972762               |
| SNP_P4_141781_184111 | NW_004516098.1 | Scaffold686 | 184111                  | TT                              | AA              | 1946972764               |
| SNP_P4_141782_184179 | NW_004516098.1 | Scaffold686 | 184179                  | GG                              | AA              | 1946972766               |
| SNP_P4_141783_185855 | NW_004516098.1 | Scaffold686 | 185855                  | TT                              | CC              | 1946972768               |
| SNP_P4_141784_186124 | NW_004516098.1 | Scaffold686 | 186124                  | GG                              | CC              | 1946972770               |
| SNP_P4_141785_186280 | NW_004516098.1 | Scaffold686 | 186280                  | TT                              | GG              | 1946972772               |
| SNP_P4_141786_186427 | NW_004516098.1 | Scaffold686 | 186427                  | CC                              | TT              | 1946972774               |
| SNP_P4_141787_186482 | NW_004516098.1 | Scaffold686 | 186482                  | GG                              | TT              | 1946972776               |
| SNP_P4_141789_204721 | NW_004516098.1 | Scaffold686 | 204721                  | AA                              | CC              | 1946972778               |
| SNP_P4_141790_205190 | NW_004516098.1 | Scaffold686 | 205190                  | AA                              | GG              | 1946972780               |
| SNP_P4_141791_211168 | NW_004516098.1 | Scaffold686 | 211168                  | TT                              | CC              | 1946972782               |
| SNP_P4_141792_211231 | NW_004516098.1 | Scaffold686 | 211231                  | GG                              | AA              | 1946972784               |
| SNP_P4_141793_212763 | NW_004516098.1 | Scaffold686 | 212763                  | GG                              | AA              | 1946972786               |
| SNP_P4_141794_215918 | NW_004516098.1 | Scaffold686 | 215918                  | GG                              | AA              | 1946972788               |
| SNP_P4_141795_215924 | NW_004516098.1 | Scaffold686 | 215924                  | AA                              | GG              | 1946972790               |
| SNP_P4_141796_216016 | NW_004516098.1 | Scaffold686 | 216016                  | AA                              | GG              | 1946972792               |
| SNP_P4_141797_216040 | NW_004516098.1 | Scaffold686 | 216040                  | CC                              | TT              | 1946972794               |
| SNP_P4_141798_216049 | NW_004516098.1 | Scaffold686 | 216049                  | TT                              | CC              | 1946972796               |
| SNP_P4_141799_216054 | NW_004516098.1 | Scaffold686 | 216054                  | GG                              | AA              | 1946972798               |
| SNP_P4_141800_216069 | NW_004516098.1 | Scaffold686 | 216069                  | AA                              | GG              | 1946972800               |
| SNP_P4_141801_216094 | NW_004516098.1 | Scaffold686 | 216094                  | CC                              | TT              | 1946972802               |
| SNP_P4_141802_216099 | NW_004516098.1 | Scaffold686 | 216099                  | TT                              | CC              | 1946972804               |
| SNP_P4_141803_216105 | NW_004516098.1 | Scaffold686 | 216105                  | TT                              | CC              | 1946972806               |
| SNP_P4_141804_216106 | NW_004516098.1 | Scaffold686 | 216106                  | GG                              | AA              | 1946972808               |
| SNP_P4_141805_216111 | NW_004516098.1 | Scaffold686 | 216111                  | GG                              | CC              | 1946972810               |
| SNP_P4_141806_216121 | NW_004516098.1 | Scaffold686 | 216121                  | AA                              | GG              | 1946972812               |

| SNPs IDs             | Chromosome IDs | Chromosomes | Physical positions (bp) | CDC Frontier (Reference genome) | (ILWC46 & LPNB) | NCBI SNPdb Accession IDs |
|----------------------|----------------|-------------|-------------------------|---------------------------------|-----------------|--------------------------|
| SNP_P4_141807_216124 | NW_004516098.1 | Scaffold686 | 216124                  | CC                              | TT              | 1946972814               |
| SNP_P4_141808_216139 | NW_004516098.1 | Scaffold686 | 216139                  | GG                              | AA              | 1946972816               |
| SNP_P4_141809_216177 | NW_004516098.1 | Scaffold686 | 216177                  | AA                              | GG              | 1946972818               |
| SNP_P4_141810_216179 | NW_004516098.1 | Scaffold686 | 216179                  | GG                              | TT              | 1946972820               |
| SNP_P4_141811_216180 | NW_004516098.1 | Scaffold686 | 216180                  | AA                              | TT              | 1946972822               |
| SNP_P4_141812_216202 | NW_004516098.1 | Scaffold686 | 216202                  | TT                              | AA              | 1946972824               |
| SNP_P4_141813_216231 | NW_004516098.1 | Scaffold686 | 216231                  | AA                              | GG              | 1946972826               |
| SNP_P4_141814_216241 | NW_004516098.1 | Scaffold686 | 216241                  | AA                              | GG              | 1946972828               |
| SNP_P4_141815_216244 | NW_004516098.1 | Scaffold686 | 216244                  | CC                              | TT              | 1946972830               |
| SNP_P4_141816_216247 | NW_004516098.1 | Scaffold686 | 216247                  | AA                              | CC              | 1946972832               |
| SNP_P4_141817_216271 | NW_004516098.1 | Scaffold686 | 216271                  | CC                              | TT              | 1946972834               |
| SNP_P4_141818_216273 | NW_004516098.1 | Scaffold686 | 216273                  | TT                              | CC              | 1946972836               |
| SNP_P4_141819_216275 | NW_004516098.1 | Scaffold686 | 216275                  | CC                              | AA              | 1946972838               |
| SNP_P4_141820_219343 | NW_004516098.1 | Scaffold686 | 219343                  | CC                              | TT              | 1946972840               |
| SNP_P4_141821_223425 | NW_004516098.1 | Scaffold686 | 223425                  | CC                              | TT              | 1946972842               |
| SNP_P4_141822_223469 | NW_004516098.1 | Scaffold686 | 223469                  | AA                              | TT              | 1946972844               |
| SNP_P4_141823_223731 | NW_004516098.1 | Scaffold686 | 223731                  | AA                              | TT              | 1946972846               |
| SNP_P4_141824_223750 | NW_004516098.1 | Scaffold686 | 223750                  | TT                              | GG              | 1946972848               |
| SNP_P4_141825_223753 | NW_004516098.1 | Scaffold686 | 223753                  | AA                              | GG              | 1946972850               |
| SNP_P4_141826_223773 | NW_004516098.1 | Scaffold686 | 223773                  | CC                              | TT              | 1946972852               |
| SNP_P4_141827_223790 | NW_004516098.1 | Scaffold686 | 223790                  | GG                              | TT              | 1946972854               |
| SNP_P4_141828_223801 | NW_004516098.1 | Scaffold686 | 223801                  | CC                              | TT              | 1946972856               |
| SNP_P4_141829_223813 | NW_004516098.1 | Scaffold686 | 223813                  | TT                              | CC              | 1946972858               |
| SNP_P4_141831_226626 | NW_004516098.1 | Scaffold686 | 226626                  | TT                              | CC              | 1946972860               |
| SNP_P4_141832_226639 | NW_004516098.1 | Scaffold686 | 226639                  | AA                              | TT              | 1946972862               |
| SNP_P4_141833_226652 | NW_004516098.1 | Scaffold686 | 226652                  | CC                              | TT              | 1946972864               |
| SNP_P4_141834_229622 | NW_004516098.1 | Scaffold686 | 229622                  | CC                              | TT              | 1946972866               |
| SNP_P4_141835_229628 | NW_004516098.1 | Scaffold686 | 229628                  | AA                              | GG              | 1946972868               |
| SNP_P4_141836_229652 | NW_004516098.1 | Scaffold686 | 229652                  | TT                              | CC              | 1946972870               |
| SNP_P4_141838_259411 | NW_004516098.1 | Scaffold686 | 259411                  | TT                              | CC              | 1946972872               |
| SNP_P4_141839_270478 | NW_004516098.1 | Scaffold686 | 270478                  | AA                              | GG              | 1946972874               |
| SNP_P4_141840_278833 | NW_004516098.1 | Scaffold686 | 278833                  | TT                              | AA              | 1946972876               |
| SNP_P4_141841_1548   | NW_004516099.1 | Scaffold688 | 1548                    | CC                              | AA              | 1946972878               |
| SNP_P4_141842_1549   | NW_004516099.1 | Scaffold688 | 1549                    | AA                              | TT              | 1946972880               |
| SNP_P4_141843_1961   | NW_004516099.1 | Scaffold688 | 1961                    | AA                              | CC              | 1946972882               |
| SNP_P4_141844_2343   | NW_004516099.1 | Scaffold688 | 2343                    | GG                              | AA              | 1946972884               |
| SNP_P4_141846_2434   | NW_004516099.1 | Scaffold688 | 2434                    | GG                              | TT              | 1946972885               |
| SNP_P4_141847_2605   | NW_004516099.1 | Scaffold688 | 2605                    | CC                              | GG              | 1946972887               |
| SNP_P4_141848_2646   | NW_004516099.1 | Scaffold688 | 2646                    | AA                              | TT              | 1946972889               |
| SNP_P4_141849_2678   | NW_004516099.1 | Scaffold688 | 2678                    | AA                              | TT              | 1946972891               |
| SNP_P4_141850_2732   | NW_004516099.1 | Scaffold688 | 2732                    | AA                              | GG              | 1946972893               |
| SNP_P4_141851_2967   | NW_004516099.1 | Scaffold688 | 2967                    | GG                              | AA              | 1946972895               |



| SNPs IDs            | Chromosome IDs | Chromosomes | Physical positions (bp) | CDC Frontier (Reference genome) | (ILWC46 & LPNB) | NCBI SNPdb Accession IDs |
|---------------------|----------------|-------------|-------------------------|---------------------------------|-----------------|--------------------------|
| SNP_P4_141852_3001  | NW_004516099.1 | Scaffold688 | 3001                    | TT                              | AA              | 1946972897               |
| SNP_P4_141853_3058  | NW_004516099.1 | Scaffold688 | 3058                    | CC                              | GG              | 1946972899               |
| SNP_P4_141854_3071  | NW_004516099.1 | Scaffold688 | 3071                    | TT                              | AA              | 1946972901               |
| SNP_P4_141855_1670  | NW_004516101.1 | Scaffold690 | 1670                    | TT                              | CC              | 1946972903               |
| SNP_P4_141856_4384  | NW_004516101.1 | Scaffold690 | 4384                    | AA                              | TT              | 1946972905               |
| SNP_P4_141857_6581  | NW_004516101.1 | Scaffold690 | 6581                    | AA                              | CC              | 1946972907               |
| SNP_P4_141858_17198 | NW_004516102.1 | Scaffold692 | 17198                   | AA                              | GG              | 1946972909               |
| SNP_P4_141859_17261 | NW_004516102.1 | Scaffold692 | 17261                   | TT                              | GG              | 1946972911               |
| SNP_P4_141860_50539 | NW_004516102.1 | Scaffold692 | 50539                   | CC                              | TT              | 1946972913               |
| SNP_P4_141861_50639 | NW_004516102.1 | Scaffold692 | 50639                   | AA                              | TT              | 1946972915               |
| SNP_P4_141862_50669 | NW_004516102.1 | Scaffold692 | 50669                   | TT                              | CC              | 1946972917               |
| SNP_P4_141863_50821 | NW_004516102.1 | Scaffold692 | 50821                   | AA                              | CC              | 1946972919               |
| SNP_P4_141864_50839 | NW_004516102.1 | Scaffold692 | 50839                   | AA                              | TT              | 1946972921               |
| SNP_P4_141866_68902 | NW_004516102.1 | Scaffold692 | 68902                   | GG                              | AA              | 1946972923               |
| SNP_P4_141867_188   | NW_004516103.1 | Scaffold693 | 188                     | TT                              | CC              | 1946972925               |
| SNP_P4_141868_410   | NW_004516103.1 | Scaffold693 | 410                     | TT                              | CC              | 1946972927               |
| SNP_P4_141869_411   | NW_004516103.1 | Scaffold693 | 411                     | TT                              | CC              | 1946972929               |
| SNP_P4_141870_52    | NW_004516104.1 | Scaffold694 | 52                      | CC                              | TT              | 1946972931               |
| SNP_P4_141871_62    | NW_004516104.1 | Scaffold694 | 62                      | TT                              | GG              | 1946972933               |
| SNP_P4_141872_97    | NW_004516104.1 | Scaffold694 | 97                      | GG                              | TT              | 1946972935               |
| SNP_P4_141873_125   | NW_004516104.1 | Scaffold694 | 125                     | GG                              | AA              | 1946972937               |
| SNP_P4_141874_270   | NW_004516104.1 | Scaffold694 | 270                     | GG                              | AA              | 1946972939               |
| SNP_P4_141875_305   | NW_004516104.1 | Scaffold694 | 305                     | AA                              | TT              | 1946972941               |
| SNP_P4_141876_307   | NW_004516104.1 | Scaffold694 | 307                     | TT                              | CC              | 1946972943               |
| SNP_P4_141877_312   | NW_004516104.1 | Scaffold694 | 312                     | CC                              | TT              | 1946972945               |
| SNP_P4_141878_338   | NW_004516104.1 | Scaffold694 | 338                     | GG                              | AA              | 1946972947               |
| SNP_P4_141879_401   | NW_004516104.1 | Scaffold694 | 401                     | GG                              | AA              | 1946972949               |
| SNP_P4_141880_405   | NW_004516104.1 | Scaffold694 | 405                     | TT                              | CC              | 1946972951               |
| SNP_P4_141881_415   | NW_004516104.1 | Scaffold694 | 415                     | AA                              | GG              | 1946972953               |
| SNP_P4_141882_420   | NW_004516104.1 | Scaffold694 | 420                     | TT                              | CC              | 1946972955               |
| SNP_P4_141883_438   | NW_004516104.1 | Scaffold694 | 438                     | GG                              | CC              | 1946972957               |
| SNP_P4_141884_454   | NW_004516104.1 | Scaffold694 | 454                     | TT                              | CC              | 1946972959               |
| SNP_P4_141885_501   | NW_004516104.1 | Scaffold694 | 501                     | TT                              | GG              | 1946972961               |
| SNP_P4_141886_505   | NW_004516104.1 | Scaffold694 | 505                     | AA                              | GG              | 1946972963               |
| SNP_P4_141887_827   | NW_004516104.1 | Scaffold694 | 827                     | GG                              | TT              | 1946972965               |
| SNP_P4_141888_1016  | NW_004516104.1 | Scaffold694 | 1016                    | CC                              | AA              | 1946972967               |
| SNP_P4_141889_1209  | NW_004516104.1 | Scaffold694 | 1209                    | GG                              | TT              | 1946972969               |
| SNP_P4_141890_1212  | NW_004516104.1 | Scaffold694 | 1212                    | CC                              | AA              | 1946972971               |
| SNP_P4_141891_1247  | NW_004516104.1 | Scaffold694 | 1247                    | TT                              | CC              | 1946972973               |
| SNP_P4_141892_1258  | NW_004516104.1 | Scaffold694 | 1258                    | GG                              | AA              | 1946972975               |
| SNP_P4_141893_1572  | NW_004516104.1 | Scaffold694 | 1572                    | TT                              | CC              | 1946972977               |
| SNP_P4_141894_1706  | NW_004516104.1 | Scaffold694 | 1706                    | CC                              | TT              | 1946972979               |

| SNPs IDs           | Chromosome IDs | Chromosomes | Physical positions (bp) | CDC Frontier (Reference genome) | (ILWC46 & LPNB) | NCBI SNPdb Accession IDs |
|--------------------|----------------|-------------|-------------------------|---------------------------------|-----------------|--------------------------|
| SNP_P4_141895_2038 | NW_004516104.1 | Scaffold694 | 2038                    | TT                              | CC              | 1946972981               |
| SNP_P4_141896_2086 | NW_004516104.1 | Scaffold694 | 2086                    | CC                              | TT              | 1946972983               |
| SNP_P4_141897_4637 | NW_004516104.1 | Scaffold694 | 4637                    | GG                              | AA              | 1946972985               |
| SNP_P4_141898_4674 | NW_004516104.1 | Scaffold694 | 4674                    | TT                              | CC              | 1946972987               |
| SNP_P4_141899_4682 | NW_004516104.1 | Scaffold694 | 4682                    | TT                              | AA              | 1946972989               |
| SNP_P4_141900_4749 | NW_004516104.1 | Scaffold694 | 4749                    | GG                              | TT              | 1946972991               |
| SNP_P4_141901_4865 | NW_004516104.1 | Scaffold694 | 4865                    | AA                              | GG              | 1946972993               |
| SNP_P4_141902_6794 | NW_004516104.1 | Scaffold694 | 6794                    | CC                              | TT              | 1946972995               |
| SNP_P4_141903_6795 | NW_004516104.1 | Scaffold694 | 6795                    | AA                              | GG              | 1946972997               |
| SNP_P4_141904_6804 | NW_004516104.1 | Scaffold694 | 6804                    | TT                              | GG              | 1946972999               |
| SNP_P4_141905_6841 | NW_004516104.1 | Scaffold694 | 6841                    | CC                              | TT              | 1946973001               |
| SNP_P4_141906_7102 | NW_004516104.1 | Scaffold694 | 7102                    | AA                              | CC              | 1946973003               |
| SNP_P4_141907_7233 | NW_004516104.1 | Scaffold694 | 7233                    | TT                              | CC              | 1946973005               |
| SNP_P4_141908_7392 | NW_004516104.1 | Scaffold694 | 7392                    | AA                              | TT              | 1946973007               |
| SNP_P4_141909_7397 | NW_004516104.1 | Scaffold694 | 7397                    | GG                              | AA              | 1946973009               |
| SNP_P4_141910_7415 | NW_004516104.1 | Scaffold694 | 7415                    | CC                              | TT              | 1946973011               |
| SNP_P4_141911_7451 | NW_004516104.1 | Scaffold694 | 7451                    | GG                              | AA              | 1946973013               |
| SNP_P4_141912_7470 | NW_004516104.1 | Scaffold694 | 7470                    | TT                              | CC              | 1946973015               |
| SNP_P4_141913_7550 | NW_004516104.1 | Scaffold694 | 7550                    | AA                              | CC              | 1946973017               |
| SNP_P4_141914_7582 | NW_004516104.1 | Scaffold694 | 7582                    | AA                              | GG              | 1946973019               |
| SNP_P4_141915_7660 | NW_004516104.1 | Scaffold694 | 7660                    | TT                              | CC              | 1946973021               |
| SNP_P4_141916_7684 | NW_004516104.1 | Scaffold694 | 7684                    | AA                              | GG              | 1946973023               |
| SNP_P4_141917_7698 | NW_004516104.1 | Scaffold694 | 7698                    | TT                              | CC              | 1946973025               |
| SNP_P4_141918_7714 | NW_004516104.1 | Scaffold694 | 7714                    | CC                              | TT              | 1946973027               |
| SNP_P4_141919_7727 | NW_004516104.1 | Scaffold694 | 7727                    | CC                              | TT              | 1946973029               |
| SNP_P4_141920_7761 | NW_004516104.1 | Scaffold694 | 7761                    | GG                              | CC              | 1946973031               |
| SNP_P4_141921_7783 | NW_004516104.1 | Scaffold694 | 7783                    | TT                              | GG              | 1946973033               |
| SNP_P4_141922_7842 | NW_004516104.1 | Scaffold694 | 7842                    | GG                              | TT              | 1946973035               |
| SNP_P4_141923_7846 | NW_004516104.1 | Scaffold694 | 7846                    | GG                              | AA              | 1946973037               |
| SNP_P4_141924_7869 | NW_004516104.1 | Scaffold694 | 7869                    | CC                              | AA              | 1946973039               |
| SNP_P4_141925_7964 | NW_004516104.1 | Scaffold694 | 7964                    | CC                              | TT              | 1946973041               |
| SNP_P4_141926_8074 | NW_004516104.1 | Scaffold694 | 8074                    | GG                              | AA              | 1946973043               |
| SNP_P4_141927_8248 | NW_004516104.1 | Scaffold694 | 8248                    | AA                              | TT              | 1946973045               |
| SNP_P4_141928_8458 | NW_004516104.1 | Scaffold694 | 8458                    | CC                              | TT              | 1946973047               |
| SNP_P4_141929_8459 | NW_004516104.1 | Scaffold694 | 8459                    | AA                              | GG              | 1946973049               |
| SNP_P4_141930_8588 | NW_004516104.1 | Scaffold694 | 8588                    | AA                              | TT              | 1946973051               |
| SNP_P4_141931_8607 | NW_004516104.1 | Scaffold694 | 8607                    | TT                              | CC              | 1946973053               |
| SNP_P4_141932_8628 | NW_004516104.1 | Scaffold694 | 8628                    | GG                              | AA              | 1946973054               |
| SNP_P4_141933_8685 | NW_004516104.1 | Scaffold694 | 8685                    | GG                              | TT              | 1946973056               |
| SNP_P4_141934_8872 | NW_004516104.1 | Scaffold694 | 8872                    | AA                              | GG              | 1946973058               |
| SNP_P4_141935_9002 | NW_004516104.1 | Scaffold694 | 9002                    | GG                              | AA              | 1946973060               |
| SNP_P4_141936_9010 | NW_004516104.1 | Scaffold694 | 9010                    | TT                              | CC              | 1946973062               |

| SNPs IDs            | Chromosome IDs | Chromosomes | Physical positions (bp) | CDC Frontier (Reference genome) | (ILWC46 & LPNB) | NCBI SNPdb Accession IDs |
|---------------------|----------------|-------------|-------------------------|---------------------------------|-----------------|--------------------------|
| SNP_P4_141937_9038  | NW_004516104.1 | Scaffold694 | 9038                    | GG                              | AA              | 1946973064               |
| SNP_P4_141938_9054  | NW_004516104.1 | Scaffold694 | 9054                    | AA                              | TT              | 1946973066               |
| SNP_P4_141939_9120  | NW_004516104.1 | Scaffold694 | 9120                    | AA                              | GG              | 1946973068               |
| SNP_P4_141940_9123  | NW_004516104.1 | Scaffold694 | 9123                    | GG                              | TT              | 1946973070               |
| SNP_P4_141941_9136  | NW_004516104.1 | Scaffold694 | 9136                    | AA                              | GG              | 1946973072               |
| SNP_P4_141942_9196  | NW_004516104.1 | Scaffold694 | 9196                    | CC                              | TT              | 1946973074               |
| SNP_P4_141943_9269  | NW_004516104.1 | Scaffold694 | 9269                    | GG                              | TT              | 1946973076               |
| SNP_P4_141944_9596  | NW_004516104.1 | Scaffold694 | 9596                    | TT                              | AA              | 1946973077               |
| SNP_P4_141945_9645  | NW_004516104.1 | Scaffold694 | 9645                    | TT                              | CC              | 1946973079               |
| SNP_P4_141946_61    | NW_004516105.1 | Scaffold695 | 61                      | TT                              | CC              | 1946973081               |
| SNP_P4_141947_64    | NW_004516105.1 | Scaffold695 | 64                      | TT                              | CC              | 1946973083               |
| SNP_P4_141948_65    | NW_004516105.1 | Scaffold695 | 65                      | TT                              | CC              | 1946973085               |
| SNP_P4_141949_80    | NW_004516105.1 | Scaffold695 | 80                      | GG                              | AA              | 1946973087               |
| SNP_P4_141950_82    | NW_004516105.1 | Scaffold695 | 82                      | CC                              | TT              | 1946973089               |
| SNP_P4_141951_84    | NW_004516105.1 | Scaffold695 | 84                      | GG                              | CC              | 1946973091               |
| SNP_P4_141952_98    | NW_004516105.1 | Scaffold695 | 98                      | GG                              | AA              | 1946973093               |
| SNP_P4_141953_102   | NW_004516105.1 | Scaffold695 | 102                     | GG                              | CC              | 1946973095               |
| SNP_P4_141954_372   | NW_004516105.1 | Scaffold695 | 372                     | GG                              | CC              | 1946973097               |
| SNP_P4_141955_423   | NW_004516105.1 | Scaffold695 | 423                     | TT                              | GG              | 1946973099               |
| SNP_P4_141956_853   | NW_004516105.1 | Scaffold695 | 853                     | AA                              | CC              | 1946973101               |
| SNP_P4_141957_854   | NW_004516105.1 | Scaffold695 | 854                     | TT                              | GG              | 1946973103               |
| SNP_P4_141958_1201  | NW_004516105.1 | Scaffold695 | 1201                    | TT                              | CC              | 1946973105               |
| SNP_P4_141959_1218  | NW_004516105.1 | Scaffold695 | 1218                    | GG                              | AA              | 1946973107               |
| SNP_P4_141960_196   | NW_004516106.1 | Scaffold696 | 196                     | CC                              | TT              | 1946973109               |
| SNP_P4_141961_4597  | NW_004516106.1 | Scaffold696 | 4597                    | AA                              | GG              | 1946973111               |
| SNP_P4_141962_4611  | NW_004516106.1 | Scaffold696 | 4611                    | CC                              | GG              | 1946973113               |
| SNP_P4_141963_12510 | NW_004516106.1 | Scaffold696 | 12510                   | AA                              | CC              | 1946973115               |
| SNP_P4_141964_12516 | NW_004516106.1 | Scaffold696 | 12516                   | CC                              | TT              | 1946973117               |
| SNP_P4_141965_12705 | NW_004516106.1 | Scaffold696 | 12705                   | CC                              | TT              | 1946973119               |
| SNP_P4_141966_12802 | NW_004516106.1 | Scaffold696 | 12802                   | GG                              | AA              | 1946973121               |
| SNP_P4_141967_12836 | NW_004516106.1 | Scaffold696 | 12836                   | TT                              | AA              | 1946973123               |
| SNP_P4_141968_12845 | NW_004516106.1 | Scaffold696 | 12845                   | AA                              | GG              | 1946973125               |
| SNP_P4_141969_12875 | NW_004516106.1 | Scaffold696 | 12875                   | TT                              | CC              | 1946973127               |
| SNP_P4_141970_12888 | NW_004516106.1 | Scaffold696 | 12888                   | TT                              | CC              | 1946973129               |
| SNP_P4_141971_12919 | NW_004516106.1 | Scaffold696 | 12919                   | TT                              | CC              | 1946973131               |
| SNP_P4_141972_13080 | NW_004516106.1 | Scaffold696 | 13080                   | CC                              | AA              | 1946973133               |
| SNP_P4_141973_13395 | NW_004516106.1 | Scaffold696 | 13395                   | GG                              | TT              | 1946973135               |
| SNP_P4_141974_13498 | NW_004516106.1 | Scaffold696 | 13498                   | TT                              | CC              | 1946973137               |
| SNP_P4_141975_13557 | NW_004516106.1 | Scaffold696 | 13557                   | TT                              | CC              | 1946973139               |
| SNP_P4_141976_13726 | NW_004516106.1 | Scaffold696 | 13726                   | AA                              | GG              | 1946973141               |
| SNP_P4_141977_13995 | NW_004516106.1 | Scaffold696 | 13995                   | AA                              | CC              | 1946973143               |
| SNP_P4_141978_14044 | NW_004516106.1 | Scaffold696 | 14044                   | CC                              | TT              | 1946973145               |

| SNPs IDs            | Chromosome IDs | Chromosomes | Physical positions (bp) | CDC Frontier (Reference genome) | (ILWC46 & LPNB) | NCBI SNPdb Accession IDs |
|---------------------|----------------|-------------|-------------------------|---------------------------------|-----------------|--------------------------|
| SNP_P4_141979_14054 | NW_004516106.1 | Scaffold696 | 14054                   | AA                              | CC              | 1946973147               |
| SNP_P4_141980_23404 | NW_004516106.1 | Scaffold696 | 23404                   | TT                              | CC              | 1946973149               |
| SNP_P4_141981_23484 | NW_004516106.1 | Scaffold696 | 23484                   | GG                              | AA              | 1946973151               |
| SNP_P4_141983_25839 | NW_004516106.1 | Scaffold696 | 25839                   | GG                              | TT              | 1946973153               |
| SNP_P4_141985_25932 | NW_004516106.1 | Scaffold696 | 25932                   | TT                              | AA              | 1946973155               |
| SNP_P4_141986_26207 | NW_004516106.1 | Scaffold696 | 26207                   | GG                              | AA              | 1946973157               |
| SNP_P4_141987_27898 | NW_004516106.1 | Scaffold696 | 27898                   | GG                              | TT              | 1946973159               |
| SNP_P4_141988_27900 | NW_004516106.1 | Scaffold696 | 27900                   | AA                              | GG              | 1946973161               |
| SNP_P4_141989_27901 | NW_004516106.1 | Scaffold696 | 27901                   | GG                              | TT              | 1946973163               |
| SNP_P4_141990_28092 | NW_004516106.1 | Scaffold696 | 28092                   | AA                              | TT              | 1946973165               |
| SNP_P4_141991_28725 | NW_004516106.1 | Scaffold696 | 28725                   | GG                              | TT              | 1946973167               |
| SNP_P4_141992_29020 | NW_004516106.1 | Scaffold696 | 29020                   | TT                              | CC              | 1946973169               |
| SNP_P4_141993_29128 | NW_004516106.1 | Scaffold696 | 29128                   | GG                              | AA              | 1946973171               |
| SNP_P4_141994_29172 | NW_004516106.1 | Scaffold696 | 29172                   | AA                              | GG              | 1946973173               |
| SNP_P4_141995_29179 | NW_004516106.1 | Scaffold696 | 29179                   | GG                              | AA              | 1946973175               |
| SNP_P4_141996_29180 | NW_004516106.1 | Scaffold696 | 29180                   | GG                              | AA              | 1946973177               |
| SNP_P4_141997_29186 | NW_004516106.1 | Scaffold696 | 29186                   | GG                              | AA              | 1946973179               |
| SNP_P4_141998_32960 | NW_004516106.1 | Scaffold696 | 32960                   | TT                              | CC              | 1946973181               |
| SNP_P4_141999_33009 | NW_004516106.1 | Scaffold696 | 33009                   | TT                              | GG              | 1946973183               |
| SNP_P4_142000_33055 | NW_004516106.1 | Scaffold696 | 33055                   | AA                              | GG              | 1946973185               |
| SNP_P4_142001_33096 | NW_004516106.1 | Scaffold696 | 33096                   | AA                              | GG              | 1946973187               |
| SNP_P4_142002_33321 | NW_004516106.1 | Scaffold696 | 33321                   | AA                              | GG              | 1946973189               |
| SNP_P4_142003_33463 | NW_004516106.1 | Scaffold696 | 33463                   | GG                              | AA              | 1946973191               |
| SNP_P4_142004_33604 | NW_004516106.1 | Scaffold696 | 33604                   | TT                              | CC              | 1946973193               |
| SNP_P4_142005_39454 | NW_004516106.1 | Scaffold696 | 39454                   | CC                              | TT              | 1946973195               |
| SNP_P4_142006_39892 | NW_004516106.1 | Scaffold696 | 39892                   | GG                              | CC              | 1946973197               |
| SNP_P4_142007_40146 | NW_004516106.1 | Scaffold696 | 40146                   | CC                              | TT              | 1946973199               |
| SNP_P4_142008_40154 | NW_004516106.1 | Scaffold696 | 40154                   | TT                              | CC              | 1946973201               |
| SNP_P4_142009_43223 | NW_004516106.1 | Scaffold696 | 43223                   | GG                              | AA              | 1946973203               |
| SNP_P4_142010_43243 | NW_004516106.1 | Scaffold696 | 43243                   | AA                              | TT              | 1946973205               |
| SNP_P4_142011_43310 | NW_004516106.1 | Scaffold696 | 43310                   | TT                              | CC              | 1946973207               |
| SNP_P4_142012_43325 | NW_004516106.1 | Scaffold696 | 43325                   | CC                              | TT              | 1946973209               |
| SNP_P4_142013_43355 | NW_004516106.1 | Scaffold696 | 43355                   | CC                              | TT              | 1946973211               |
| SNP_P4_142014_43439 | NW_004516106.1 | Scaffold696 | 43439                   | GG                              | TT              | 1946973213               |
| SNP_P4_142015_43491 | NW_004516106.1 | Scaffold696 | 43491                   | AA                              | GG              | 1946973215               |
| SNP_P4_142016_52159 | NW_004516106.1 | Scaffold696 | 52159                   | AA                              | CC              | 1946973217               |
| SNP_P4_142017_52293 | NW_004516106.1 | Scaffold696 | 52293                   | AA                              | TT              | 1946973219               |
| SNP_P4_142019_52353 | NW_004516106.1 | Scaffold696 | 52353                   | GG                              | AA              | 1946973221               |
| SNP_P4_142020_52376 | NW_004516106.1 | Scaffold696 | 52376                   | CC                              | TT              | 1946973223               |
| SNP_P4_142021_52638 | NW_004516106.1 | Scaffold696 | 52638                   | TT                              | CC              | 1946973225               |
| SNP_P4_142022_53408 | NW_004516106.1 | Scaffold696 | 53408                   | GG                              | AA              | 1946973227               |
| SNP_P4_142023_53971 | NW_004516106.1 | Scaffold696 | 53971                   | CC                              | TT              | 1946973229               |

| SNPs IDs             | Chromosome IDs | Chromosomes | Physical positions (bp) | CDC Frontier (Reference genome) | (ILWC46 & LPNB) | NCBI SNPdb Accession IDs |
|----------------------|----------------|-------------|-------------------------|---------------------------------|-----------------|--------------------------|
| SNP_P4_142024_93589  | NW_004516106.1 | Scaffold696 | 93589                   | GG                              | AA              | 1946973231               |
| SNP_P4_142025_103640 | NW_004516106.1 | Scaffold696 | 103640                  | AA                              | CC              | 1946973233               |
| SNP_P4_142026_125885 | NW_004516106.1 | Scaffold696 | 125885                  | CC                              | TT              | 1946973235               |
| SNP_P4_142027_153887 | NW_004516106.1 | Scaffold696 | 153887                  | TT                              | CC              | 1946973237               |
| SNP_P4_142028_179679 | NW_004516106.1 | Scaffold696 | 179679                  | TT                              | AA              | 1946973239               |
| SNP_P4_142029_179732 | NW_004516106.1 | Scaffold696 | 179732                  | CC                              | AA              | 1946973241               |
| SNP_P4_142030_185137 | NW_004516106.1 | Scaffold696 | 185137                  | TT                              | CC              | 1946973243               |
| SNP_P4_142031_185193 | NW_004516106.1 | Scaffold696 | 185193                  | TT                              | CC              | 1946973245               |
| SNP_P4_142032_185518 | NW_004516106.1 | Scaffold696 | 185518                  | AA                              | GG              | 1946973247               |
| SNP_P4_142033_191814 | NW_004516106.1 | Scaffold696 | 191814                  | CC                              | AA              | 1946973249               |
| SNP_P4_142034_191844 | NW_004516106.1 | Scaffold696 | 191844                  | TT                              | CC              | 1946973251               |
| SNP_P4_142036_202755 | NW_004516106.1 | Scaffold696 | 202755                  | TT                              | CC              | 1946973253               |
| SNP_P4_142037_444    | NW_004516108.1 | Scaffold702 | 444                     | TT                              | GG              | 1946973255               |
| SNP_P4_142038_448    | NW_004516108.1 | Scaffold702 | 448                     | AA                              | TT              | 1946973257               |
| SNP_P4_142039_450    | NW_004516108.1 | Scaffold702 | 450                     | TT                              | CC              | 1946973259               |
| SNP_P4_142040_544    | NW_004516108.1 | Scaffold702 | 544                     | AA                              | GG              | 1946973261               |
| SNP_P4_142041_553    | NW_004516108.1 | Scaffold702 | 553                     | AA                              | CC              | 1946973263               |
| SNP_P4_142042_566    | NW_004516108.1 | Scaffold702 | 566                     | TT                              | CC              | 1946973265               |
| SNP_P4_142044_1173   | NW_004516108.1 | Scaffold702 | 1173                    | AA                              | GG              | 1946973267               |
| SNP_P4_142045_1259   | NW_004516108.1 | Scaffold702 | 1259                    | TT                              | CC              | 1946973269               |
| SNP_P4_142046_1530   | NW_004516108.1 | Scaffold702 | 1530                    | AA                              | GG              | 1946973271               |
| SNP_P4_142047_7119   | NW_004516108.1 | Scaffold702 | 7119                    | GG                              | AA              | 1946973273               |
| SNP_P4_142048_7711   | NW_004516108.1 | Scaffold702 | 7711                    | GG                              | TT              | 1946973275               |
| SNP_P4_142049_10144  | NW_004516108.1 | Scaffold702 | 10144                   | GG                              | TT              | 1946973276               |
| SNP_P4_142050_10211  | NW_004516108.1 | Scaffold702 | 10211                   | AA                              | TT              | 1946973278               |
| SNP_P4_142051_11899  | NW_004516108.1 | Scaffold702 | 11899                   | AA                              | CC              | 1946973280               |
| SNP_P4_142052_13954  | NW_004516108.1 | Scaffold702 | 13954                   | CC                              | TT              | 1946973282               |
| SNP_P4_142053_20211  | NW_004516108.1 | Scaffold702 | 20211                   | AA                              | CC              | 1946973284               |
| SNP_P4_142054_25112  | NW_004516108.1 | Scaffold702 | 25112                   | AA                              | GG              | 1946973286               |
| SNP_P4_142055_33228  | NW_004516108.1 | Scaffold702 | 33228                   | TT                              | CC              | 1946973288               |
| SNP_P4_142056_36601  | NW_004516108.1 | Scaffold702 | 36601                   | TT                              | GG              | 1946973290               |
| SNP_P4_142057_37257  | NW_004516108.1 | Scaffold702 | 37257                   | GG                              | AA              | 1946973292               |
| SNP_P4_142058_49785  | NW_004516108.1 | Scaffold702 | 49785                   | CC                              | AA              | 1946973294               |
| SNP_P4_142061_51185  | NW_004516108.1 | Scaffold702 | 51185                   | GG                              | AA              | 1946973296               |
| SNP_P4_142062_51195  | NW_004516108.1 | Scaffold702 | 51195                   | CC                              | GG              | 1946973298               |
| SNP_P4_142063_52313  | NW_004516108.1 | Scaffold702 | 52313                   | TT                              | AA              | 1946973300               |
| SNP_P4_142064_52928  | NW_004516108.1 | Scaffold702 | 52928                   | AA                              | TT              | 1946973302               |
| SNP_P4_142065_53003  | NW_004516108.1 | Scaffold702 | 53003                   | AA                              | GG              | 1946973304               |
| SNP_P4_142066_53019  | NW_004516108.1 | Scaffold702 | 53019                   | AA                              | GG              | 1946973306               |
| SNP_P4_142067_53023  | NW_004516108.1 | Scaffold702 | 53023                   | AA                              | GG              | 1946973308               |
| SNP_P4_142070_57845  | NW_004516108.1 | Scaffold702 | 57845                   | CC                              | AA              | 1946973310               |
| SNP_P4_142071_58359  | NW_004516108.1 | Scaffold702 | 58359                   | CC                              | AA              | 1946973312               |

| SNPs IDs             | Chromosome IDs | Chromosomes | Physical positions (bp) | CDC Frontier (Reference genome) | (ILWC46 & LPNB) | NCBI SNPdb Accession IDs |
|----------------------|----------------|-------------|-------------------------|---------------------------------|-----------------|--------------------------|
| SNP_P4_142072_58992  | NW_004516108.1 | Scaffold702 | 58992                   | AA                              | GG              | 1946973314               |
| SNP_P4_142075_67532  | NW_004516108.1 | Scaffold702 | 67532                   | AA                              | CC              | 1946973316               |
| SNP_P4_142076_69265  | NW_004516108.1 | Scaffold702 | 69265                   | TT                              | GG              | 1946973318               |
| SNP_P4_142077_72338  | NW_004516108.1 | Scaffold702 | 72338                   | CC                              | TT              | 1946973320               |
| SNP_P4_142078_77284  | NW_004516108.1 | Scaffold702 | 77284                   | AA                              | TT              | 1946973322               |
| SNP_P4_142079_80772  | NW_004516108.1 | Scaffold702 | 80772                   | CC                              | TT              | 1946973324               |
| SNP_P4_142080_81203  | NW_004516108.1 | Scaffold702 | 81203                   | AA                              | GG              | 1946973326               |
| SNP_P4_142081_82666  | NW_004516108.1 | Scaffold702 | 82666                   | GG                              | AA              | 1946973328               |
| SNP_P4_142083_99706  | NW_004516108.1 | Scaffold702 | 99706                   | TT                              | CC              | 1946973330               |
| SNP_P4_142084_99740  | NW_004516108.1 | Scaffold702 | 99740                   | TT                              | CC              | 1946973332               |
| SNP_P4_142085_99778  | NW_004516108.1 | Scaffold702 | 99778                   | AA                              | GG              | 1946973334               |
| SNP_P4_142087_105990 | NW_004516108.1 | Scaffold702 | 105990                  | AA                              | GG              | 1946973336               |
| SNP_P4_142088_105993 | NW_004516108.1 | Scaffold702 | 105993                  | TT                              | GG              | 1946973338               |
| SNP_P4_142089_106338 | NW_004516108.1 | Scaffold702 | 106338                  | TT                              | GG              | 1946973340               |
| SNP_P4_142090_114803 | NW_004516108.1 | Scaffold702 | 114803                  | TT                              | CC              | 1946973342               |
| SNP_P4_142092_118899 | NW_004516108.1 | Scaffold702 | 118899                  | GG                              | CC              | 1946973344               |
| SNP_P4_142093_122018 | NW_004516108.1 | Scaffold702 | 122018                  | AA                              | GG              | 1946973346               |
| SNP_P4_142094_122160 | NW_004516108.1 | Scaffold702 | 122160                  | AA                              | CC              | 1946973348               |
| SNP_P4_142096_124789 | NW_004516108.1 | Scaffold702 | 124789                  | AA                              | CC              | 1946973350               |
| SNP_P4_142097_124841 | NW_004516108.1 | Scaffold702 | 124841                  | TT                              | CC              | 1946973352               |
| SNP_P4_142098_135520 | NW_004516108.1 | Scaffold702 | 135520                  | TT                              | CC              | 1946973353               |
| SNP_P4_142099_138421 | NW_004516108.1 | Scaffold702 | 138421                  | AA                              | GG              | 1946973356               |
| SNP_P4_142100_140206 | NW_004516108.1 | Scaffold702 | 140206                  | AA                              | GG              | 1946973358               |
| SNP_P4_142101_141029 | NW_004516108.1 | Scaffold702 | 141029                  | GG                              | AA              | 1946973360               |
| SNP_P4_142102_147531 | NW_004516108.1 | Scaffold702 | 147531                  | AA                              | GG              | 1946973362               |
| SNP_P4_142103_153109 | NW_004516108.1 | Scaffold702 | 153109                  | TT                              | CC              | 1946973364               |
| SNP_P4_142104_153292 | NW_004516108.1 | Scaffold702 | 153292                  | CC                              | GG              | 1946973366               |
| SNP_P4_142106_162816 | NW_004516108.1 | Scaffold702 | 162816                  | AA                              | CC              | 1946973368               |
| SNP_P4_142107_165116 | NW_004516108.1 | Scaffold702 | 165116                  | GG                              | AA              | 1946973370               |
| SNP_P4_142108_173237 | NW_004516108.1 | Scaffold702 | 173237                  | TT                              | CC              | 1946973372               |
| SNP_P4_142109_174457 | NW_004516108.1 | Scaffold702 | 174457                  | AA                              | GG              | 1946973374               |
| SNP_P4_142110_175159 | NW_004516108.1 | Scaffold702 | 175159                  | AA                              | TT              | 1946973376               |
| SNP_P4_142111_175559 | NW_004516108.1 | Scaffold702 | 175559                  | AA                              | GG              | 1946973378               |
| SNP_P4_142112_176758 | NW_004516108.1 | Scaffold702 | 176758                  | GG                              | AA              | 1946973380               |
| SNP_P4_142114_184623 | NW_004516108.1 | Scaffold702 | 184623                  | TT                              | CC              | 1946973382               |
| SNP_P4_142115_184817 | NW_004516108.1 | Scaffold702 | 184817                  | GG                              | TT              | 1946973384               |
| SNP_P4_142116_186972 | NW_004516108.1 | Scaffold702 | 186972                  | AA                              | TT              | 1946973386               |
| SNP_P4_142117_187655 | NW_004516108.1 | Scaffold702 | 187655                  | AA                              | GG              | 1946973388               |
| SNP_P4_142118_187836 | NW_004516108.1 | Scaffold702 | 187836                  | CC                              | TT              | 1946973390               |
| SNP_P4_142119_207635 | NW_004516108.1 | Scaffold702 | 207635                  | AA                              | GG              | 1946973392               |
| SNP_P4_142120_207644 | NW_004516108.1 | Scaffold702 | 207644                  | AA                              | GG              | 1946973394               |
| SNP_P4_142121_207672 | NW_004516108.1 | Scaffold702 | 207672                  | AA                              | GG              | 1946973396               |

| SNPs IDs             | Chromosome IDs | Chromosomes | Physical positions (bp) | CDC Frontier (Reference genome) | (ILWC46 & LPNB) | NCBI SNPdb Accession IDs |
|----------------------|----------------|-------------|-------------------------|---------------------------------|-----------------|--------------------------|
| SNP_P4_142122_207853 | NW_004516108.1 | Scaffold702 | 207853                  | AA                              | TT              | 1946973398               |
| SNP_P4_142123_207875 | NW_004516108.1 | Scaffold702 | 207875                  | CC                              | GG              | 1946973400               |
| SNP_P4_142124_208661 | NW_004516108.1 | Scaffold702 | 208661                  | AA                              | GG              | 1946973402               |
| SNP_P4_142125_214527 | NW_004516108.1 | Scaffold702 | 214527                  | CC                              | TT              | 1946973404               |
| SNP_P4_142126_215693 | NW_004516108.1 | Scaffold702 | 215693                  | CC                              | AA              | 1946973406               |
| SNP_P4_142128_218152 | NW_004516108.1 | Scaffold702 | 218152                  | CC                              | GG              | 1946973408               |
| SNP_P4_142129_218174 | NW_004516108.1 | Scaffold702 | 218174                  | CC                              | TT              | 1946973410               |
| SNP_P4_142130_219037 | NW_004516108.1 | Scaffold702 | 219037                  | CC                              | GG              | 1946973412               |
| SNP_P4_142131_219039 | NW_004516108.1 | Scaffold702 | 219039                  | TT                              | CC              | 1946973414               |
| SNP_P4_142132_219078 | NW_004516108.1 | Scaffold702 | 219078                  | TT                              | GG              | 1946973416               |
| SNP_P4_142135_226215 | NW_004516108.1 | Scaffold702 | 226215                  | TT                              | CC              | 1946973418               |
| SNP_P4_142136_228785 | NW_004516108.1 | Scaffold702 | 228785                  | GG                              | AA              | 1946973420               |
| SNP_P4_142137_228818 | NW_004516108.1 | Scaffold702 | 228818                  | GG                              | TT              | 1946973422               |
| SNP_P4_142138_237935 | NW_004516108.1 | Scaffold702 | 237935                  | CC                              | TT              | 1946973424               |
| SNP_P4_142139_248052 | NW_004516108.1 | Scaffold702 | 248052                  | CC                              | TT              | 1946973426               |
| SNP_P4_142140_248954 | NW_004516108.1 | Scaffold702 | 248954                  | GG                              | AA              | 1946973428               |
| SNP_P4_142142_250431 | NW_004516108.1 | Scaffold702 | 250431                  | GG                              | AA              | 1946973430               |
| SNP_P4_142143_251515 | NW_004516108.1 | Scaffold702 | 251515                  | AA                              | CC              | 1946973432               |
| SNP_P4_142144_251557 | NW_004516108.1 | Scaffold702 | 251557                  | CC                              | GG              | 1946973434               |
| SNP_P4_142145_252522 | NW_004516108.1 | Scaffold702 | 252522                  | CC                              | TT              | 1946973436               |
| SNP_P4_142146_252656 | NW_004516108.1 | Scaffold702 | 252656                  | TT                              | AA              | 1946973438               |
| SNP_P4_142147_253325 | NW_004516108.1 | Scaffold702 | 253325                  | TT                              | GG              | 1946973440               |
| SNP_P4_142148_254209 | NW_004516108.1 | Scaffold702 | 254209                  | AA                              | GG              | 1946973442               |
| SNP_P4_142149_254221 | NW_004516108.1 | Scaffold702 | 254221                  | AA                              | GG              | 1946973444               |
| SNP_P4_142150_254495 | NW_004516108.1 | Scaffold702 | 254495                  | TT                              | CC              | 1946973446               |
| SNP_P4_142151_255255 | NW_004516108.1 | Scaffold702 | 255255                  | AA                              | GG              | 1946973448               |
| SNP_P4_142152_255305 | NW_004516108.1 | Scaffold702 | 255305                  | CC                              | TT              | 1946973450               |
| SNP_P4_142153_255400 | NW_004516108.1 | Scaffold702 | 255400                  | GG                              | AA              | 1946973452               |
| SNP_P4_142154_255406 | NW_004516108.1 | Scaffold702 | 255406                  | GG                              | AA              | 1946973454               |
| SNP_P4_142156_255920 | NW_004516108.1 | Scaffold702 | 255920                  | GG                              | AA              | 1946973456               |
| SNP_P4_142157_260909 | NW_004516108.1 | Scaffold702 | 260909                  | TT                              | GG              | 1946973458               |
| SNP_P4_142158_262381 | NW_004516108.1 | Scaffold702 | 262381                  | TT                              | AA              | 1946973460               |
| SNP_P4_142159_262430 | NW_004516108.1 | Scaffold702 | 262430                  | CC                              | TT              | 1946973462               |
| SNP_P4_142160_262432 | NW_004516108.1 | Scaffold702 | 262432                  | TT                              | AA              | 1946973464               |
| SNP_P4_142161_262463 | NW_004516108.1 | Scaffold702 | 262463                  | TT                              | GG              | 1946973466               |
| SNP_P4_142162_262487 | NW_004516108.1 | Scaffold702 | 262487                  | CC                              | TT              | 1946973468               |
| SNP_P4_142163_262563 | NW_004516108.1 | Scaffold702 | 262563                  | AA                              | CC              | 1946973470               |
| SNP_P4_142164_262749 | NW_004516108.1 | Scaffold702 | 262749                  | AA                              | GG              | 1946973472               |
| SNP_P4_142165_262771 | NW_004516108.1 | Scaffold702 | 262771                  | CC                              | TT              | 1946973474               |
| SNP_P4_142166_262775 | NW_004516108.1 | Scaffold702 | 262775                  | AA                              | GG              | 1946973476               |
| SNP_P4_142167_262837 | NW_004516108.1 | Scaffold702 | 262837                  | TT                              | CC              | 1946973478               |
| SNP_P4_142168_262995 | NW_004516108.1 | Scaffold702 | 262995                  | TT                              | CC              | 1946973480               |

| SNPs IDs             | Chromosome IDs | Chromosomes | Physical positions (bp) | CDC Frontier (Reference genome) | (ILWC46 & LPNB) | NCBI SNPdb Accession IDs |
|----------------------|----------------|-------------|-------------------------|---------------------------------|-----------------|--------------------------|
| SNP_P4_142169_263000 | NW_004516108.1 | Scaffold702 | 263000                  | CC                              | TT              | 1946973482               |
| SNP_P4_142170_263028 | NW_004516108.1 | Scaffold702 | 263028                  | TT                              | AA              | 1946973484               |
| SNP_P4_142171_263031 | NW_004516108.1 | Scaffold702 | 263031                  | CC                              | TT              | 1946973486               |
| SNP_P4_142172_263052 | NW_004516108.1 | Scaffold702 | 263052                  | AA                              | TT              | 1946973488               |
| SNP_P4_142173_263063 | NW_004516108.1 | Scaffold702 | 263063                  | TT                              | CC              | 1946973490               |
| SNP_P4_142174_263087 | NW_004516108.1 | Scaffold702 | 263087                  | AA                              | CC              | 1946973492               |
| SNP_P4_142176_263702 | NW_004516108.1 | Scaffold702 | 263702                  | AA                              | CC              | 1946973494               |
| SNP_P4_142177_263745 | NW_004516108.1 | Scaffold702 | 263745                  | AA                              | GG              | 1946973496               |
| SNP_P4_142178_263807 | NW_004516108.1 | Scaffold702 | 263807                  | AA                              | CC              | 1946973498               |
| SNP_P4_142179_263821 | NW_004516108.1 | Scaffold702 | 263821                  | TT                              | CC              | 1946973500               |
| SNP_P4_142180_263925 | NW_004516108.1 | Scaffold702 | 263925                  | CC                              | AA              | 1946973502               |
| SNP_P4_142181_263927 | NW_004516108.1 | Scaffold702 | 263927                  | GG                              | TT              | 1946973504               |
| SNP_P4_142182_266326 | NW_004516108.1 | Scaffold702 | 266326                  | AA                              | TT              | 1946973506               |
| SNP_P4_142183_271593 | NW_004516108.1 | Scaffold702 | 271593                  | TT                              | AA              | 1946973508               |
| SNP_P4_142184_272959 | NW_004516108.1 | Scaffold702 | 272959                  | GG                              | TT              | 1946973510               |
| SNP_P4_142186_273213 | NW_004516108.1 | Scaffold702 | 273213                  | AA                              | TT              | 1946973512               |
| SNP_P4_142188_273657 | NW_004516108.1 | Scaffold702 | 273657                  | CC                              | GG              | 1946973514               |
| SNP_P4_142190_276896 | NW_004516108.1 | Scaffold702 | 276896                  | CC                              | GG              | 1946973516               |
| SNP_P4_142191_280287 | NW_004516108.1 | Scaffold702 | 280287                  | TT                              | CC              | 1946973518               |
| SNP_P4_142192_281869 | NW_004516108.1 | Scaffold702 | 281869                  | TT                              | AA              | 1946973520               |
| SNP_P4_142193_282692 | NW_004516108.1 | Scaffold702 | 282692                  | AA                              | GG              | 1946973522               |
| SNP_P4_142194_283940 | NW_004516108.1 | Scaffold702 | 283940                  | AA                              | GG              | 1946973524               |
| SNP_P4_142195_284382 | NW_004516108.1 | Scaffold702 | 284382                  | CC                              | GG              | 1946973526               |
| SNP_P4_142196_286533 | NW_004516108.1 | Scaffold702 | 286533                  | TT                              | AA              | 1946973528               |
| SNP_P4_142197_286764 | NW_004516108.1 | Scaffold702 | 286764                  | GG                              | TT              | 1946973530               |
| SNP_P4_142198_286765 | NW_004516108.1 | Scaffold702 | 286765                  | AA                              | TT              | 1946973532               |
| SNP_P4_142199_288662 | NW_004516108.1 | Scaffold702 | 288662                  | CC                              | TT              | 1946973534               |
| SNP_P4_142200_288804 | NW_004516108.1 | Scaffold702 | 288804                  | CC                              | AA              | 1946973536               |
| SNP_P4_142202_290679 | NW_004516108.1 | Scaffold702 | 290679                  | GG                              | AA              | 1946973538               |
| SNP_P4_142203_291071 | NW_004516108.1 | Scaffold702 | 291071                  | AA                              | TT              | 1946973540               |
| SNP_P4_142204_291504 | NW_004516108.1 | Scaffold702 | 291504                  | GG                              | CC              | 1946973542               |
| SNP_P4_142205_291529 | NW_004516108.1 | Scaffold702 | 291529                  | AA                              | GG              | 1946973544               |
| SNP_P4_142206_291993 | NW_004516108.1 | Scaffold702 | 291993                  | CC                              | AA              | 1946973546               |
| SNP_P4_142207_294146 | NW_004516108.1 | Scaffold702 | 294146                  | GG                              | TT              | 1946973548               |
| SNP_P4_142208_296986 | NW_004516108.1 | Scaffold702 | 296986                  | CC                              | GG              | 1946973550               |
| SNP_P4_142209_301631 | NW_004516108.1 | Scaffold702 | 301631                  | CC                              | AA              | 1946973552               |
| SNP_P4_142210_1142   | NW_004516109.1 | Scaffold705 | 1142                    | AA                              | GG              | 1946973554               |
| SNP_P4_142211_3299   | NW_004516109.1 | Scaffold705 | 3299                    | TT                              | CC              | 1946973556               |
| SNP_P4_142212_3422   | NW_004516109.1 | Scaffold705 | 3422                    | AA                              | GG              | 1946973558               |
| SNP_P4_142213_5520   | NW_004516109.1 | Scaffold705 | 5520                    | CC                              | TT              | 1946973560               |
| SNP_P4_142214_5641   | NW_004516109.1 | Scaffold705 | 5641                    | CC                              | TT              | 1946973562               |
| SNP_P4_142215_5660   | NW_004516109.1 | Scaffold705 | 5660                    | AA                              | TT              | 1946973564               |



| SNPs IDs            | Chromosome IDs | Chromosomes | Physical positions (bp) | CDC Frontier (Reference genome) | (ILWC46 & LPNB) | NCBI SNPdb Accession IDs |
|---------------------|----------------|-------------|-------------------------|---------------------------------|-----------------|--------------------------|
| SNP_P4_142216_6413  | NW_004516109.1 | Scaffold705 | 6413                    | AA                              | TT              | 1946973567               |
| SNP_P4_142217_6417  | NW_004516109.1 | Scaffold705 | 6417                    | TT                              | AA              | 1946973569               |
| SNP_P4_142218_11516 | NW_004516109.1 | Scaffold705 | 11516                   | CC                              | TT              | 1946973571               |
| SNP_P4_142219_11782 | NW_004516109.1 | Scaffold705 | 11782                   | TT                              | CC              | 1946973572               |
| SNP_P4_142220_11813 | NW_004516109.1 | Scaffold705 | 11813                   | CC                              | AA              | 1946973573               |
| SNP_P4_142221_12143 | NW_004516109.1 | Scaffold705 | 12143                   | GG                              | AA              | 1946973574               |
| SNP_P4_142222_12232 | NW_004516109.1 | Scaffold705 | 12232                   | GG                              | CC              | 1946973576               |
| SNP_P4_142223_12433 | NW_004516109.1 | Scaffold705 | 12433                   | CC                              | AA              | 1946973578               |
| SNP_P4_142224_12761 | NW_004516109.1 | Scaffold705 | 12761                   | AA                              | TT              | 1946973580               |
| SNP_P4_142225_12833 | NW_004516109.1 | Scaffold705 | 12833                   | GG                              | AA              | 1946973582               |
| SNP_P4_142226_12893 | NW_004516109.1 | Scaffold705 | 12893                   | TT                              | AA              | 1946973584               |
| SNP_P4_142227_12900 | NW_004516109.1 | Scaffold705 | 12900                   | AA                              | GG              | 1946973586               |
| SNP_P4_142228_13107 | NW_004516109.1 | Scaffold705 | 13107                   | CC                              | GG              | 1946973588               |
| SNP_P4_142229_13875 | NW_004516109.1 | Scaffold705 | 13875                   | GG                              | AA              | 1946973590               |
| SNP_P4_142230_13907 | NW_004516109.1 | Scaffold705 | 13907                   | AA                              | GG              | 1946973592               |
| SNP_P4_142231_16476 | NW_004516109.1 | Scaffold705 | 16476                   | CC                              | GG              | 1946973594               |
| SNP_P4_142232_16516 | NW_004516109.1 | Scaffold705 | 16516                   | CC                              | GG              | 1946973596               |
| SNP_P4_142233_16586 | NW_004516109.1 | Scaffold705 | 16586                   | GG                              | TT              | 1946973598               |
| SNP_P4_142234_16625 | NW_004516109.1 | Scaffold705 | 16625                   | CC                              | TT              | 1946973600               |
| SNP_P4_142235_16627 | NW_004516109.1 | Scaffold705 | 16627                   | CC                              | TT              | 1946973603               |
| SNP_P4_142236_16655 | NW_004516109.1 | Scaffold705 | 16655                   | GG                              | AA              | 1946973605               |
| SNP_P4_142237_16745 | NW_004516109.1 | Scaffold705 | 16745                   | CC                              | AA              | 1946973607               |
| SNP_P4_142238_16761 | NW_004516109.1 | Scaffold705 | 16761                   | GG                              | AA              | 1946973609               |
| SNP_P4_142239_16775 | NW_004516109.1 | Scaffold705 | 16775                   | GG                              | TT              | 1946973611               |
| SNP_P4_142240_16845 | NW_004516109.1 | Scaffold705 | 16845                   | GG                              | CC              | 1946973613               |
| SNP_P4_142241_16860 | NW_004516109.1 | Scaffold705 | 16860                   | TT                              | CC              | 1946973615               |
| SNP_P4_142242_16891 | NW_004516109.1 | Scaffold705 | 16891                   | GG                              | TT              | 1946973617               |
| SNP_P4_142244_17218 | NW_004516109.1 | Scaffold705 | 17218                   | GG                              | AA              | 1946973619               |
| SNP_P4_142245_19202 | NW_004516109.1 | Scaffold705 | 19202                   | GG                              | TT              | 1946973621               |
| SNP_P4_142246_25027 | NW_004516109.1 | Scaffold705 | 25027                   | AA                              | GG              | 1946973623               |
| SNP_P4_142247_25065 | NW_004516109.1 | Scaffold705 | 25065                   | GG                              | TT              | 1946973625               |
| SNP_P4_142248_25257 | NW_004516109.1 | Scaffold705 | 25257                   | AA                              | TT              | 1946973627               |
| SNP_P4_142249_25263 | NW_004516109.1 | Scaffold705 | 25263                   | CC                              | GG              | 1946973629               |
| SNP_P4_142250_25270 | NW_004516109.1 | Scaffold705 | 25270                   | CC                              | GG              | 1946973631               |
| SNP_P4_142251_25335 | NW_004516109.1 | Scaffold705 | 25335                   | GG                              | AA              | 1946973633               |
| SNP_P4_142252_25336 | NW_004516109.1 | Scaffold705 | 25336                   | CC                              | TT              | 1946973635               |
| SNP_P4_142253_25377 | NW_004516109.1 | Scaffold705 | 25377                   | CC                              | TT              | 1946973637               |
| SNP_P4_142254_25973 | NW_004516109.1 | Scaffold705 | 25973                   | TT                              | CC              | 1946973639               |
| SNP_P4_142255_26925 | NW_004516109.1 | Scaffold705 | 26925                   | AA                              | GG              | 1946973641               |
| SNP_P4_142256_29648 | NW_004516109.1 | Scaffold705 | 29648                   | GG                              | CC              | 1946973643               |
| SNP_P4_142257_29671 | NW_004516109.1 | Scaffold705 | 29671                   | AA                              | GG              | 1946973645               |
| SNP_P4_142258_29680 | NW_004516109.1 | Scaffold705 | 29680                   | CC                              | TT              | 1946973647               |

| SNPs IDs            | Chromosome IDs | Chromosomes | Physical positions (bp) | CDC Frontier (Reference genome) | (ILWC46 & LPNB) | NCBI SNPdb Accession IDs |
|---------------------|----------------|-------------|-------------------------|---------------------------------|-----------------|--------------------------|
| SNP_P4_142259_29900 | NW_004516109.1 | Scaffold705 | 29900                   | TT                              | AA              | 1946973649               |
| SNP_P4_142260_29957 | NW_004516109.1 | Scaffold705 | 29957                   | GG                              | AA              | 1946973651               |
| SNP_P4_142261_30456 | NW_004516109.1 | Scaffold705 | 30456                   | CC                              | TT              | 1946973653               |
| SNP_P4_142263_31154 | NW_004516109.1 | Scaffold705 | 31154                   | TT                              | GG              | 1946973655               |
| SNP_P4_142264_32643 | NW_004516109.1 | Scaffold705 | 32643                   | CC                              | TT              | 1946973657               |
| SNP_P4_142265_33725 | NW_004516109.1 | Scaffold705 | 33725                   | AA                              | CC              | 1946973659               |
| SNP_P4_142266_33886 | NW_004516109.1 | Scaffold705 | 33886                   | TT                              | CC              | 1946973661               |
| SNP_P4_142267_34316 | NW_004516109.1 | Scaffold705 | 34316                   | TT                              | CC              | 1946973663               |
| SNP_P4_142268_34371 | NW_004516109.1 | Scaffold705 | 34371                   | AA                              | TT              | 1946973665               |
| SNP_P4_142269_34448 | NW_004516109.1 | Scaffold705 | 34448                   | CC                              | GG              | 1946973667               |
| SNP_P4_142270_34712 | NW_004516109.1 | Scaffold705 | 34712                   | TT                              | AA              | 1946973669               |
| SNP_P4_142272_34802 | NW_004516109.1 | Scaffold705 | 34802                   | AA                              | CC              | 1946973671               |
| SNP_P4_142273_34836 | NW_004516109.1 | Scaffold705 | 34836                   | GG                              | AA              | 1946973673               |
| SNP_P4_142274_34884 | NW_004516109.1 | Scaffold705 | 34884                   | GG                              | AA              | 1946973675               |
| SNP_P4_142275_34964 | NW_004516109.1 | Scaffold705 | 34964                   | CC                              | TT              | 1946973677               |
| SNP_P4_142276_34996 | NW_004516109.1 | Scaffold705 | 34996                   | AA                              | CC              | 1946973679               |
| SNP_P4_142277_35099 | NW_004516109.1 | Scaffold705 | 35099                   | TT                              | AA              | 1946973681               |
| SNP_P4_142278_35197 | NW_004516109.1 | Scaffold705 | 35197                   | AA                              | CC              | 1946973683               |
| SNP_P4_142279_35264 | NW_004516109.1 | Scaffold705 | 35264                   | AA                              | TT              | 1946973685               |
| SNP_P4_142280_35431 | NW_004516109.1 | Scaffold705 | 35431                   | GG                              | AA              | 1946973687               |
| SNP_P4_142281_42617 | NW_004516109.1 | Scaffold705 | 42617                   | TT                              | GG              | 1946973689               |
| SNP_P4_142283_45474 | NW_004516109.1 | Scaffold705 | 45474                   | CC                              | AA              | 1946973691               |
| SNP_P4_142284_45656 | NW_004516109.1 | Scaffold705 | 45656                   | AA                              | TT              | 1946973693               |
| SNP_P4_142285_45682 | NW_004516109.1 | Scaffold705 | 45682                   | AA                              | GG              | 1946973695               |
| SNP_P4_142286_45746 | NW_004516109.1 | Scaffold705 | 45746                   | GG                              | AA              | 1946973697               |
| SNP_P4_142287_46800 | NW_004516109.1 | Scaffold705 | 46800                   | TT                              | CC              | 1946973699               |
| SNP_P4_142288_47958 | NW_004516109.1 | Scaffold705 | 47958                   | GG                              | TT              | 1946973701               |
| SNP_P4_142289_48313 | NW_004516109.1 | Scaffold705 | 48313                   | TT                              | GG              | 1946973703               |
| SNP_P4_142290_48626 | NW_004516109.1 | Scaffold705 | 48626                   | TT                              | AA              | 1946973705               |
| SNP_P4_142291_55742 | NW_004516109.1 | Scaffold705 | 55742                   | AA                              | GG              | 1946973707               |
| SNP_P4_142292_55964 | NW_004516109.1 | Scaffold705 | 55964                   | GG                              | TT              | 1946973709               |
| SNP_P4_142293_56034 | NW_004516109.1 | Scaffold705 | 56034                   | AA                              | GG              | 1946973711               |
| SNP_P4_142294_56154 | NW_004516109.1 | Scaffold705 | 56154                   | CC                              | TT              | 1946973713               |
| SNP_P4_142295_56155 | NW_004516109.1 | Scaffold705 | 56155                   | TT                              | AA              | 1946973715               |
| SNP_P4_142296_56568 | NW_004516109.1 | Scaffold705 | 56568                   | GG                              | AA              | 1946973717               |
| SNP_P4_142297_57325 | NW_004516109.1 | Scaffold705 | 57325                   | GG                              | TT              | 1946973719               |
| SNP_P4_142298_57685 | NW_004516109.1 | Scaffold705 | 57685                   | GG                              | CC              | 1946973721               |
| SNP_P4_142299_64309 | NW_004516109.1 | Scaffold705 | 64309                   | TT                              | CC              | 1946973723               |
| SNP_P4_142300_64311 | NW_004516109.1 | Scaffold705 | 64311                   | GG                              | AA              | 1946973725               |
| SNP_P4_142301_64379 | NW_004516109.1 | Scaffold705 | 64379                   | GG                              | AA              | 1946973727               |
| SNP_P4_142302_64956 | NW_004516109.1 | Scaffold705 | 64956                   | CC                              | TT              | 1946973729               |
| SNP_P4_142303_64958 | NW_004516109.1 | Scaffold705 | 64958                   | CC                              | AA              | 1946973731               |

| SNPs IDs             | Chromosome IDs | Chromosomes | Physical positions (bp) | CDC Frontier (Reference genome) | (ILWC46 & LPNB) | NCBI SNPdb Accession IDs |
|----------------------|----------------|-------------|-------------------------|---------------------------------|-----------------|--------------------------|
| SNP_P4_142304_65152  | NW_004516109.1 | Scaffold705 | 65152                   | GG                              | AA              | 1946973733               |
| SNP_P4_142305_410    | NW_004516110.1 | Scaffold707 | 410                     | CC                              | GG              | 1946973735               |
| SNP_P4_142306_1002   | NW_004516110.1 | Scaffold707 | 1002                    | GG                              | AA              | 1946973737               |
| SNP_P4_142307_1502   | NW_004516110.1 | Scaffold707 | 1502                    | AA                              | GG              | 1946973739               |
| SNP_P4_142308_5120   | NW_004516110.1 | Scaffold707 | 5120                    | GG                              | AA              | 1946973741               |
| SNP_P4_142309_5393   | NW_004516110.1 | Scaffold707 | 5393                    | TT                              | CC              | 1946973743               |
| SNP_P4_142310_5500   | NW_004516110.1 | Scaffold707 | 5500                    | CC                              | TT              | 1946973745               |
| SNP_P4_142311_5581   | NW_004516110.1 | Scaffold707 | 5581                    | AA                              | GG              | 1946973747               |
| SNP_P4_142312_17970  | NW_004516110.1 | Scaffold707 | 17970                   | TT                              | GG              | 1946973749               |
| SNP_P4_142313_18053  | NW_004516110.1 | Scaffold707 | 18053                   | GG                              | AA              | 1946973751               |
| SNP_P4_142314_18092  | NW_004516110.1 | Scaffold707 | 18092                   | TT                              | CC              | 1946973753               |
| SNP_P4_142315_18203  | NW_004516110.1 | Scaffold707 | 18203                   | CC                              | TT              | 1946973755               |
| SNP_P4_142316_18223  | NW_004516110.1 | Scaffold707 | 18223                   | TT                              | CC              | 1946973757               |
| SNP_P4_142317_18245  | NW_004516110.1 | Scaffold707 | 18245                   | AA                              | TT              | 1946973759               |
| SNP_P4_142318_18347  | NW_004516110.1 | Scaffold707 | 18347                   | GG                              | AA              | 1946973761               |
| SNP_P4_142319_18351  | NW_004516110.1 | Scaffold707 | 18351                   | GG                              | AA              | 1946973763               |
| SNP_P4_142320_55039  | NW_004516110.1 | Scaffold707 | 55039                   | TT                              | CC              | 1946973765               |
| SNP_P4_142321_55046  | NW_004516110.1 | Scaffold707 | 55046                   | CC                              | AA              | 1946973767               |
| SNP_P4_142322_55076  | NW_004516110.1 | Scaffold707 | 55076                   | TT                              | AA              | 1946973769               |
| SNP_P4_142323_55126  | NW_004516110.1 | Scaffold707 | 55126                   | TT                              | CC              | 1946973771               |
| SNP_P4_142324_55519  | NW_004516110.1 | Scaffold707 | 55519                   | CC                              | TT              | 1946973773               |
| SNP_P4_142325_55534  | NW_004516110.1 | Scaffold707 | 55534                   | TT                              | GG              | 1946973774               |
| SNP_P4_142326_55550  | NW_004516110.1 | Scaffold707 | 55550                   | AA                              | TT              | 1946973776               |
| SNP_P4_142327_55580  | NW_004516110.1 | Scaffold707 | 55580                   | AA                              | GG              | 1946973778               |
| SNP_P4_142328_55611  | NW_004516110.1 | Scaffold707 | 55611                   | TT                              | CC              | 1946973780               |
| SNP_P4_142329_59670  | NW_004516110.1 | Scaffold707 | 59670                   | TT                              | CC              | 1946973782               |
| SNP_P4_142330_66710  | NW_004516110.1 | Scaffold707 | 66710                   | TT                              | GG              | 1946973784               |
| SNP_P4_142332_81310  | NW_004516110.1 | Scaffold707 | 81310                   | TT                              | AA              | 1946973786               |
| SNP_P4_142333_81547  | NW_004516110.1 | Scaffold707 | 81547                   | GG                              | TT              | 1946973788               |
| SNP_P4_142334_81847  | NW_004516110.1 | Scaffold707 | 81847                   | GG                              | AA              | 1946973790               |
| SNP_P4_142335_82103  | NW_004516110.1 | Scaffold707 | 82103                   | AA                              | GG              | 1946973792               |
| SNP_P4_142336_83183  | NW_004516110.1 | Scaffold707 | 83183                   | CC                              | AA              | 1946973794               |
| SNP_P4_142337_85616  | NW_004516110.1 | Scaffold707 | 85616                   | AA                              | GG              | 1946973796               |
| SNP_P4_142338_85642  | NW_004516110.1 | Scaffold707 | 85642                   | AA                              | GG              | 1946973798               |
| SNP_P4_142339_85643  | NW_004516110.1 | Scaffold707 | 85643                   | CC                              | TT              | 1946973800               |
| SNP_P4_142340_86032  | NW_004516110.1 | Scaffold707 | 86032                   | TT                              | GG              | 1946973802               |
| SNP_P4_142341_104027 | NW_004516110.1 | Scaffold707 | 104027                  | GG                              | AA              | 1946973804               |
| SNP_P4_142343_115350 | NW_004516110.1 | Scaffold707 | 115350                  | AA                              | GG              | 1946973805               |
| SNP_P4_142344_115351 | NW_004516110.1 | Scaffold707 | 115351                  | CC                              | TT              | 1946973807               |
| SNP_P4_142345_115408 | NW_004516110.1 | Scaffold707 | 115408                  | TT                              | AA              | 1946973809               |
| SNP_P4_142346_115658 | NW_004516110.1 | Scaffold707 | 115658                  | TT                              | CC              | 1946973811               |
| SNP_P4_142347_118913 | NW_004516110.1 | Scaffold707 | 118913                  | TT                              | AA              | 1946973813               |

| SNPs IDs             | Chromosome IDs | Chromosomes | Physical positions (bp) | CDC Frontier (Reference genome) | (ILWC46 & LPNB) | NCBI SNPdb Accession IDs |
|----------------------|----------------|-------------|-------------------------|---------------------------------|-----------------|--------------------------|
| SNP_P4_142348_118914 | NW_004516110.1 | Scaffold707 | 118914                  | GG                              | AA              | 1946973815               |
| SNP_P4_142349_119293 | NW_004516110.1 | Scaffold707 | 119293                  | TT                              | AA              | 1946973817               |
| SNP_P4_142350_119940 | NW_004516110.1 | Scaffold707 | 119940                  | AA                              | TT              | 1946973819               |
| SNP_P4_142351_121413 | NW_004516110.1 | Scaffold707 | 121413                  | TT                              | CC              | 1946973821               |
| SNP_P4_142352_121444 | NW_004516110.1 | Scaffold707 | 121444                  | TT                              | AA              | 1946973823               |
| SNP_P4_142353_121448 | NW_004516110.1 | Scaffold707 | 121448                  | AA                              | GG              | 1946973825               |
| SNP_P4_142354_121560 | NW_004516110.1 | Scaffold707 | 121560                  | AA                              | GG              | 1946973827               |
| SNP_P4_142355_121572 | NW_004516110.1 | Scaffold707 | 121572                  | GG                              | AA              | 1946973829               |
| SNP_P4_142356_121707 | NW_004516110.1 | Scaffold707 | 121707                  | CC                              | TT              | 1946973831               |
| SNP_P4_142358_121889 | NW_004516110.1 | Scaffold707 | 121889                  | AA                              | TT              | 1946973833               |
| SNP_P4_142359_121931 | NW_004516110.1 | Scaffold707 | 121931                  | AA                              | CC              | 1946973835               |
| SNP_P4_142360_121961 | NW_004516110.1 | Scaffold707 | 121961                  | GG                              | AA              | 1946973837               |
| SNP_P4_142361_121967 | NW_004516110.1 | Scaffold707 | 121967                  | CC                              | AA              | 1946973839               |
| SNP_P4_142362_121973 | NW_004516110.1 | Scaffold707 | 121973                  | AA                              | GG              | 1946973840               |
| SNP_P4_142363_122237 | NW_004516110.1 | Scaffold707 | 122237                  | CC                              | TT              | 1946973842               |
| SNP_P4_142364_122706 | NW_004516110.1 | Scaffold707 | 122706                  | CC                              | TT              | 1946973844               |
| SNP_P4_142365_126124 | NW_004516110.1 | Scaffold707 | 126124                  | GG                              | CC              | 1946973846               |
| SNP_P4_142366_128765 | NW_004516110.1 | Scaffold707 | 128765                  | AA                              | TT              | 1946973848               |
| SNP_P4_142367_128779 | NW_004516110.1 | Scaffold707 | 128779                  | CC                              | TT              | 1946973850               |
| SNP_P4_142368_135573 | NW_004516110.1 | Scaffold707 | 135573                  | AA                              | TT              | 1946973852               |
| SNP_P4_142369_135894 | NW_004516110.1 | Scaffold707 | 135894                  | TT                              | CC              | 1946973854               |
| SNP_P4_142370_135954 | NW_004516110.1 | Scaffold707 | 135954                  | AA                              | CC              | 1946973856               |
| SNP_P4_142371_136350 | NW_004516110.1 | Scaffold707 | 136350                  | AA                              | GG              | 1946973858               |
| SNP_P4_142373_136719 | NW_004516110.1 | Scaffold707 | 136719                  | CC                              | TT              | 1946973860               |
| SNP_P4_142374_136831 | NW_004516110.1 | Scaffold707 | 136831                  | GG                              | AA              | 1946973862               |
| SNP_P4_142375_139040 | NW_004516110.1 | Scaffold707 | 139040                  | CC                              | TT              | 1946973864               |
| SNP_P4_142376_148891 | NW_004516110.1 | Scaffold707 | 148891                  | GG                              | AA              | 1946973866               |
| SNP_P4_142377_153781 | NW_004516110.1 | Scaffold707 | 153781                  | TT                              | AA              | 1946973868               |
| SNP_P4_142378_154183 | NW_004516110.1 | Scaffold707 | 154183                  | TT                              | CC              | 1946973870               |
| SNP_P4_142379_157103 | NW_004516110.1 | Scaffold707 | 157103                  | AA                              | GG              | 1946973872               |
| SNP_P4_142380_157112 | NW_004516110.1 | Scaffold707 | 157112                  | GG                              | AA              | 1946973874               |
| SNP_P4_142381_4355   | NW_004516111.1 | Scaffold708 | 4355                    | CC                              | TT              | 1946973943               |
| SNP_P4_142382_4367   | NW_004516111.1 | Scaffold708 | 4367                    | CC                              | AA              | 1946973945               |
| SNP_P4_142383_10927  | NW_004516111.1 | Scaffold708 | 10927                   | TT                              | CC              | 1946973947               |
| SNP_P4_142384_10966  | NW_004516111.1 | Scaffold708 | 10966                   | TT                              | GG              | 1946973950               |
| SNP_P4_142385_10987  | NW_004516111.1 | Scaffold708 | 10987                   | TT                              | CC              | 1946973952               |
| SNP_P4_142386_10998  | NW_004516111.1 | Scaffold708 | 10998                   | CC                              | AA              | 1946973954               |
| SNP_P4_142387_11014  | NW_004516111.1 | Scaffold708 | 11014                   | TT                              | CC              | 1946973956               |
| SNP_P4_142388_11020  | NW_004516111.1 | Scaffold708 | 11020                   | GG                              | AA              | 1946973958               |
| SNP_P4_142389_11049  | NW_004516111.1 | Scaffold708 | 11049                   | AA                              | GG              | 1946973960               |
| SNP_P4_142390_11119  | NW_004516111.1 | Scaffold708 | 11119                   | AA                              | GG              | 1946973962               |
| SNP_P4_142391_11155  | NW_004516111.1 | Scaffold708 | 11155                   | AA                              | GG              | 1946973964               |

| SNPs IDs            | Chromosome IDs | Chromosomes | Physical positions (bp) | CDC Frontier (Reference genome) | (ILWC46 & LPNB) | NCBI SNPdb Accession IDs |
|---------------------|----------------|-------------|-------------------------|---------------------------------|-----------------|--------------------------|
| SNP_P4_142392_11181 | NW_004516111.1 | Scaffold708 | 11181                   | GG                              | TT              | 1946973966               |
| SNP_P4_142393_11200 | NW_004516111.1 | Scaffold708 | 11200                   | TT                              | AA              | 1946973968               |
| SNP_P4_142394_11229 | NW_004516111.1 | Scaffold708 | 11229                   | AA                              | GG              | 1946973970               |
| SNP_P4_142395_11230 | NW_004516111.1 | Scaffold708 | 11230                   | CC                              | AA              | 1946973972               |
| SNP_P4_142396_11263 | NW_004516111.1 | Scaffold708 | 11263                   | TT                              | CC              | 1946973974               |
| SNP_P4_142397_11287 | NW_004516111.1 | Scaffold708 | 11287                   | CC                              | TT              | 1946973976               |
| SNP_P4_142399_12452 | NW_004516111.1 | Scaffold708 | 12452                   | AA                              | CC              | 1946973978               |
| SNP_P4_142400_12482 | NW_004516111.1 | Scaffold708 | 12482                   | CC                              | TT              | 1946973980               |
| SNP_P4_142401_12563 | NW_004516111.1 | Scaffold708 | 12563                   | GG                              | AA              | 1946973982               |
| SNP_P4_142402_12884 | NW_004516111.1 | Scaffold708 | 12884                   | AA                              | GG              | 1946973984               |
| SNP_P4_142403_12904 | NW_004516111.1 | Scaffold708 | 12904                   | TT                              | CC              | 1946973986               |
| SNP_P4_142404_12968 | NW_004516111.1 | Scaffold708 | 12968                   | AA                              | CC              | 1946973988               |
| SNP_P4_142405_12991 | NW_004516111.1 | Scaffold708 | 12991                   | AA                              | CC              | 1946973990               |
| SNP_P4_142406_13003 | NW_004516111.1 | Scaffold708 | 13003                   | TT                              | CC              | 1946973992               |
| SNP_P4_142407_13107 | NW_004516111.1 | Scaffold708 | 13107                   | AA                              | GG              | 1946973994               |
| SNP_P4_142408_13117 | NW_004516111.1 | Scaffold708 | 13117                   | AA                              | CC              | 1946973996               |
| SNP_P4_142409_13119 | NW_004516111.1 | Scaffold708 | 13119                   | TT                              | AA              | 1946973999               |
| SNP_P4_142410_13172 | NW_004516111.1 | Scaffold708 | 13172                   | AA                              | GG              | 1946974001               |
| SNP_P4_142411_13187 | NW_004516111.1 | Scaffold708 | 13187                   | GG                              | TT              | 1946974003               |
| SNP_P4_142412_14235 | NW_004516111.1 | Scaffold708 | 14235                   | CC                              | TT              | 1946974005               |
| SNP_P4_142413_14447 | NW_004516111.1 | Scaffold708 | 14447                   | AA                              | GG              | 1946974007               |
| SNP_P4_142414_19468 | NW_004516111.1 | Scaffold708 | 19468                   | TT                              | CC              | 1946974009               |
| SNP_P4_142415_33374 | NW_004516111.1 | Scaffold708 | 33374                   | TT                              | GG              | 1946974012               |
| SNP_P4_142416_40746 | NW_004516111.1 | Scaffold708 | 40746                   | AA                              | TT              | 1946974014               |
| SNP_P4_142417_40777 | NW_004516111.1 | Scaffold708 | 40777                   | AA                              | TT              | 1946974016               |
| SNP_P4_142418_43934 | NW_004516111.1 | Scaffold708 | 43934                   | AA                              | GG              | 1946974018               |
| SNP_P4_142419_44009 | NW_004516111.1 | Scaffold708 | 44009                   | GG                              | CC              | 1946974020               |
| SNP_P4_142420_44012 | NW_004516111.1 | Scaffold708 | 44012                   | CC                              | GG              | 1946974022               |
| SNP_P4_142421_50137 | NW_004516111.1 | Scaffold708 | 50137                   | TT                              | CC              | 1946974024               |
| SNP_P4_142422_50234 | NW_004516111.1 | Scaffold708 | 50234                   | TT                              | CC              | 1946974026               |
| SNP_P4_142423_50293 | NW_004516111.1 | Scaffold708 | 50293                   | TT                              | CC              | 1946974028               |
| SNP_P4_142424_50311 | NW_004516111.1 | Scaffold708 | 50311                   | TT                              | CC              | 1946974030               |
| SNP_P4_142425_1320  | NW_004516112.1 | Scaffold709 | 1320                    | GG                              | TT              | 1946974032               |
| SNP_P4_142427_1890  | NW_004516112.1 | Scaffold709 | 1890                    | GG                              | CC              | 1946974034               |
| SNP_P4_142428_1971  | NW_004516112.1 | Scaffold709 | 1971                    | TT                              | AA              | 1946974036               |
| SNP_P4_142429_2009  | NW_004516112.1 | Scaffold709 | 2009                    | AA                              | TT              | 1946974039               |
| SNP_P4_142430_2014  | NW_004516112.1 | Scaffold709 | 2014                    | AA                              | GG              | 1946974041               |
| SNP_P4_142431_2046  | NW_004516112.1 | Scaffold709 | 2046                    | AA                              | TT              | 1946974043               |
| SNP_P4_142432_2097  | NW_004516112.1 | Scaffold709 | 2097                    | CC                              | GG              | 1946974045               |
| SNP_P4_142433_2233  | NW_004516112.1 | Scaffold709 | 2233                    | GG                              | AA              | 1946974047               |
| SNP_P4_142434_2243  | NW_004516112.1 | Scaffold709 | 2243                    | AA                              | GG              | 1946974049               |
| SNP_P4_142435_2285  | NW_004516112.1 | Scaffold709 | 2285                    | AA                              | GG              | 1946974052               |

| SNPs IDs             | Chromosome IDs | Chromosomes | Physical positions (bp) | CDC Frontier (Reference genome) | (ILWC46 & LPNB) | NCBI SNPdb Accession IDs |
|----------------------|----------------|-------------|-------------------------|---------------------------------|-----------------|--------------------------|
| SNP_P4_142436_2291   | NW_004516112.1 | Scaffold709 | 2291                    | AA                              | GG              | 1946974054               |
| SNP_P4_142437_2331   | NW_004516112.1 | Scaffold709 | 2331                    | TT                              | CC              | 1946974056               |
| SNP_P4_142438_2335   | NW_004516112.1 | Scaffold709 | 2335                    | AA                              | GG              | 1946974058               |
| SNP_P4_142439_2342   | NW_004516112.1 | Scaffold709 | 2342                    | AA                              | GG              | 1946974060               |
| SNP_P4_142440_4004   | NW_004516112.1 | Scaffold709 | 4004                    | TT                              | GG              | 1946974062               |
| SNP_P4_142443_7064   | NW_004516112.1 | Scaffold709 | 7064                    | AA                              | GG              | 1946974064               |
| SNP_P4_142444_7082   | NW_004516112.1 | Scaffold709 | 7082                    | TT                              | AA              | 1946974066               |
| SNP_P4_142445_7154   | NW_004516112.1 | Scaffold709 | 7154                    | AA                              | TT              | 1946974068               |
| SNP_P4_142446_7309   | NW_004516112.1 | Scaffold709 | 7309                    | GG                              | CC              | 1946974070               |
| SNP_P4_142447_7356   | NW_004516112.1 | Scaffold709 | 7356                    | GG                              | AA              | 1946974072               |
| SNP_P4_142448_7395   | NW_004516112.1 | Scaffold709 | 7395                    | CC                              | TT              | 1946974074               |
| SNP_P4_142449_7399   | NW_004516112.1 | Scaffold709 | 7399                    | GG                              | AA              | 1946974076               |
| SNP_P4_142450_7414   | NW_004516112.1 | Scaffold709 | 7414                    | TT                              | GG              | 1946974078               |
| SNP_P4_142451_7421   | NW_004516112.1 | Scaffold709 | 7421                    | GG                              | TT              | 1946974080               |
| SNP_P4_142452_7448   | NW_004516112.1 | Scaffold709 | 7448                    | CC                              | AA              | 1946974082               |
| SNP_P4_142453_7528   | NW_004516112.1 | Scaffold709 | 7528                    | GG                              | TT              | 1946974084               |
| SNP_P4_142454_7542   | NW_004516112.1 | Scaffold709 | 7542                    | CC                              | TT              | 1946974086               |
| SNP_P4_142455_7588   | NW_004516112.1 | Scaffold709 | 7588                    | GG                              | TT              | 1946974088               |
| SNP_P4_142456_7619   | NW_004516112.1 | Scaffold709 | 7619                    | TT                              | CC              | 1946974090               |
| SNP_P4_142457_7659   | NW_004516112.1 | Scaffold709 | 7659                    | TT                              | CC              | 1946974092               |
| SNP_P4_142458_7780   | NW_004516112.1 | Scaffold709 | 7780                    | GG                              | AA              | 1946974094               |
| SNP_P4_142459_7799   | NW_004516112.1 | Scaffold709 | 7799                    | CC                              | TT              | 1946974096               |
| SNP_P4_142461_11192  | NW_004516113.1 | Scaffold711 | 11192                   | TT                              | GG              | 1946974098               |
| SNP_P4_142462_36031  | NW_004516113.1 | Scaffold711 | 36031                   | AA                              | CC              | 1946974100               |
| SNP_P4_142463_36052  | NW_004516113.1 | Scaffold711 | 36052                   | AA                              | TT              | 1946974102               |
| SNP_P4_142464_36085  | NW_004516113.1 | Scaffold711 | 36085                   | GG                              | AA              | 1946974104               |
| SNP_P4_142465_36115  | NW_004516113.1 | Scaffold711 | 36115                   | CC                              | TT              | 1946974106               |
| SNP_P4_142467_36300  | NW_004516113.1 | Scaffold711 | 36300                   | AA                              | GG              | 1946974108               |
| SNP_P4_142468_36313  | NW_004516113.1 | Scaffold711 | 36313                   | GG                              | AA              | 1946974110               |
| SNP_P4_142469_36331  | NW_004516113.1 | Scaffold711 | 36331                   | CC                              | AA              | 1946974112               |
| SNP_P4_142470_36337  | NW_004516113.1 | Scaffold711 | 36337                   | CC                              | AA              | 1946974114               |
| SNP_P4_142471_36349  | NW_004516113.1 | Scaffold711 | 36349                   | CC                              | TT              | 1946974116               |
| SNP_P4_142472_36372  | NW_004516113.1 | Scaffold711 | 36372                   | GG                              | AA              | 1946974118               |
| SNP_P4_142473_39034  | NW_004516113.1 | Scaffold711 | 39034                   | CC                              | TT              | 1946974120               |
| SNP_P4_142474_40033  | NW_004516113.1 | Scaffold711 | 40033                   | CC                              | TT              | 1946974122               |
| SNP_P4_142476_79841  | NW_004516113.1 | Scaffold711 | 79841                   | GG                              | AA              | 1946974124               |
| SNP_P4_142478_120400 | NW_004516113.1 | Scaffold711 | 120400                  | TT                              | CC              | 1946974126               |
| SNP_P4_142479_134970 | NW_004516113.1 | Scaffold711 | 134970                  | GG                              | AA              | 1946974128               |
| SNP_P4_142480_148936 | NW_004516113.1 | Scaffold711 | 148936                  | TT                              | CC              | 1946974130               |
| SNP_P4_142481_148942 | NW_004516113.1 | Scaffold711 | 148942                  | CC                              | AA              | 1946974132               |
| SNP_P4_142482_148945 | NW_004516113.1 | Scaffold711 | 148945                  | AA                              | GG              | 1946974134               |
| SNP_P4_142483_149023 | NW_004516113.1 | Scaffold711 | 149023                  | AA                              | GG              | 1946974136               |

| SNPs IDs             | Chromosome IDs | Chromosomes | Physical positions (bp) | CDC Frontier (Reference genome) | (ILWC46 & LPNB) | NCBI SNPdb Accession IDs |
|----------------------|----------------|-------------|-------------------------|---------------------------------|-----------------|--------------------------|
| SNP_P4_142484_152422 | NW_004516113.1 | Scaffold711 | 152422                  | AA                              | GG              | 1946974138               |
| SNP_P4_142485_152450 | NW_004516113.1 | Scaffold711 | 152450                  | AA                              | TT              | 1946974140               |
| SNP_P4_142486_167921 | NW_004516113.1 | Scaffold711 | 167921                  | GG                              | CC              | 1946974142               |
| SNP_P4_142487_180696 | NW_004516113.1 | Scaffold711 | 180696                  | GG                              | TT              | 1946974144               |
| SNP_P4_142488_180705 | NW_004516113.1 | Scaffold711 | 180705                  | AA                              | TT              | 1946974146               |
| SNP_P4_142489_188252 | NW_004516113.1 | Scaffold711 | 188252                  | GG                              | AA              | 1946974148               |
| SNP_P4_142490_198449 | NW_004516113.1 | Scaffold711 | 198449                  | AA                              | TT              | 1946974150               |
| SNP_P4_142492_235609 | NW_004516113.1 | Scaffold711 | 235609                  | CC                              | TT              | 1946974152               |
| SNP_P4_142493_243182 | NW_004516113.1 | Scaffold711 | 243182                  | TT                              | CC              | 1946974154               |
| SNP_P4_142494_5181   | NW_004516114.1 | Scaffold712 | 5181                    | CC                              | TT              | 1946974156               |
| SNP_P4_142495_5652   | NW_004516114.1 | Scaffold712 | 5652                    | TT                              | GG              | 1946974158               |
| SNP_P4_142496_8140   | NW_004516114.1 | Scaffold712 | 8140                    | AA                              | TT              | 1946974160               |
| SNP_P4_142497_8161   | NW_004516114.1 | Scaffold712 | 8161                    | CC                              | AA              | 1946974162               |
| SNP_P4_142498_1074   | NW_004516115.1 | Scaffold715 | 1074                    | CC                              | TT              | 1946974164               |
| SNP_P4_142499_1234   | NW_004516115.1 | Scaffold715 | 1234                    | AA                              | GG              | 1946974166               |
| SNP_P4_142500_1540   | NW_004516115.1 | Scaffold715 | 1540                    | CC                              | AA              | 1946974168               |
| SNP_P4_142501_5483   | NW_004516115.1 | Scaffold715 | 5483                    | CC                              | TT              | 1946974170               |
| SNP_P4_142502_5514   | NW_004516115.1 | Scaffold715 | 5514                    | GG                              | AA              | 1946974172               |
| SNP_P4_142503_5284   | NW_004516116.1 | Scaffold716 | 5284                    | AA                              | GG              | 1946974174               |
| SNP_P4_142504_5314   | NW_004516116.1 | Scaffold716 | 5314                    | CC                              | AA              | 1946974176               |
| SNP_P4_142505_13799  | NW_004516116.1 | Scaffold716 | 13799                   | CC                              | AA              | 1946974178               |
| SNP_P4_142506_13829  | NW_004516116.1 | Scaffold716 | 13829                   | GG                              | TT              | 1946974180               |
| SNP_P4_142507_14179  | NW_004516116.1 | Scaffold716 | 14179                   | TT                              | CC              | 1946974182               |
| SNP_P4_142508_14233  | NW_004516116.1 | Scaffold716 | 14233                   | CC                              | TT              | 1946974183               |
| SNP_P4_142509_21694  | NW_004516116.1 | Scaffold716 | 21694                   | AA                              | GG              | 1946974185               |
| SNP_P4_142510_21726  | NW_004516116.1 | Scaffold716 | 21726                   | AA                              | GG              | 1946974187               |
| SNP_P4_142511_23248  | NW_004516116.1 | Scaffold716 | 23248                   | AA                              | GG              | 1946974189               |
| SNP_P4_142512_23279  | NW_004516116.1 | Scaffold716 | 23279                   | GG                              | AA              | 1946974191               |
| SNP_P4_142513_23340  | NW_004516116.1 | Scaffold716 | 23340                   | CC                              | TT              | 1946974193               |
| SNP_P4_142514_23467  | NW_004516116.1 | Scaffold716 | 23467                   | TT                              | AA              | 1946974195               |
| SNP_P4_142515_23553  | NW_004516116.1 | Scaffold716 | 23553                   | TT                              | CC              | 1946974197               |
| SNP_P4_142516_23580  | NW_004516116.1 | Scaffold716 | 23580                   | AA                              | GG              | 1946974199               |
| SNP_P4_142517_23622  | NW_004516116.1 | Scaffold716 | 23622                   | AA                              | GG              | 1946974201               |
| SNP_P4_142519_23755  | NW_004516116.1 | Scaffold716 | 23755                   | TT                              | CC              | 1946974203               |
| SNP_P4_142520_23764  | NW_004516116.1 | Scaffold716 | 23764                   | AA                              | TT              | 1946974205               |
| SNP_P4_142521_23790  | NW_004516116.1 | Scaffold716 | 23790                   | TT                              | CC              | 1946974207               |
| SNP_P4_142522_46053  | NW_004516116.1 | Scaffold716 | 46053                   | AA                              | TT              | 1946974209               |
| SNP_P4_142523_46217  | NW_004516116.1 | Scaffold716 | 46217                   | TT                              | GG              | 1946974211               |
| SNP_P4_142524_46223  | NW_004516116.1 | Scaffold716 | 46223                   | AA                              | GG              | 1946974213               |
| SNP_P4_142525_46419  | NW_004516116.1 | Scaffold716 | 46419                   | TT                              | AA              | 1946974215               |
| SNP_P4_142526_46469  | NW_004516116.1 | Scaffold716 | 46469                   | AA                              | GG              | 1946974217               |
| SNP_P4_142527_64436  | NW_004516116.1 | Scaffold716 | 64436                   | AA                              | CC              | 1946974219               |

| SNPs IDs             | Chromosome IDs | Chromosomes | Physical positions (bp) | CDC Frontier (Reference genome) | (ILWC46 & LPNB) | NCBI SNPdb Accession IDs |
|----------------------|----------------|-------------|-------------------------|---------------------------------|-----------------|--------------------------|
| SNP_P4_142528_64451  | NW_004516116.1 | Scaffold716 | 64451                   | GG                              | AA              | 1946974221               |
| SNP_P4_142529_64519  | NW_004516116.1 | Scaffold716 | 64519                   | CC                              | TT              | 1946974223               |
| SNP_P4_142530_64905  | NW_004516116.1 | Scaffold716 | 64905                   | GG                              | TT              | 1946974225               |
| SNP_P4_142531_66142  | NW_004516116.1 | Scaffold716 | 66142                   | AA                              | TT              | 1946974227               |
| SNP_P4_142532_66145  | NW_004516116.1 | Scaffold716 | 66145                   | TT                              | CC              | 1946974229               |
| SNP_P4_142533_66199  | NW_004516116.1 | Scaffold716 | 66199                   | CC                              | TT              | 1946974231               |
| SNP_P4_142534_66201  | NW_004516116.1 | Scaffold716 | 66201                   | AA                              | GG              | 1946974233               |
| SNP_P4_142535_66206  | NW_004516116.1 | Scaffold716 | 66206                   | AA                              | GG              | 1946974235               |
| SNP_P4_142537_66457  | NW_004516116.1 | Scaffold716 | 66457                   | CC                              | AA              | 1946974237               |
| SNP_P4_142538_83653  | NW_004516116.1 | Scaffold716 | 83653                   | GG                              | AA              | 1946974239               |
| SNP_P4_142539_89842  | NW_004516116.1 | Scaffold716 | 89842                   | TT                              | AA              | 1946974241               |
| SNP_P4_142540_89917  | NW_004516116.1 | Scaffold716 | 89917                   | AA                              | CC              | 1946974243               |
| SNP_P4_142541_109692 | NW_004516116.1 | Scaffold716 | 109692                  | TT                              | CC              | 1946974245               |
| SNP_P4_142542_109733 | NW_004516116.1 | Scaffold716 | 109733                  | AA                              | GG              | 1946974247               |
| SNP_P4_142543_109749 | NW_004516116.1 | Scaffold716 | 109749                  | CC                              | TT              | 1946974249               |
| SNP_P4_142544_109987 | NW_004516116.1 | Scaffold716 | 109987                  | CC                              | GG              | 1946974251               |
| SNP_P4_142545_109988 | NW_004516116.1 | Scaffold716 | 109988                  | TT                              | GG              | 1946974253               |
| SNP_P4_142546_110793 | NW_004516116.1 | Scaffold716 | 110793                  | CC                              | TT              | 1946974255               |
| SNP_P4_142548_116851 | NW_004516116.1 | Scaffold716 | 116851                  | TT                              | CC              | 1946974257               |
| SNP_P4_142550_117783 | NW_004516116.1 | Scaffold716 | 117783                  | TT                              | CC              | 1946974259               |
| SNP_P4_142551_117794 | NW_004516116.1 | Scaffold716 | 117794                  | TT                              | CC              | 1946974261               |
| SNP_P4_142552_117848 | NW_004516116.1 | Scaffold716 | 117848                  | AA                              | GG              | 1946974263               |
| SNP_P4_142553_117855 | NW_004516116.1 | Scaffold716 | 117855                  | TT                              | CC              | 1946974265               |
| SNP_P4_142554_117864 | NW_004516116.1 | Scaffold716 | 117864                  | GG                              | CC              | 1946974267               |
| SNP_P4_142555_117890 | NW_004516116.1 | Scaffold716 | 117890                  | TT                              | CC              | 1946974269               |
| SNP_P4_142556_118038 | NW_004516116.1 | Scaffold716 | 118038                  | GG                              | CC              | 1946974271               |
| SNP_P4_142557_118189 | NW_004516116.1 | Scaffold716 | 118189                  | TT                              | GG              | 1946974273               |
| SNP_P4_142558_118359 | NW_004516116.1 | Scaffold716 | 118359                  | AA                              | GG              | 1946974275               |
| SNP_P4_142559_118360 | NW_004516116.1 | Scaffold716 | 118360                  | AA                              | TT              | 1946974277               |
| SNP_P4_142560_118387 | NW_004516116.1 | Scaffold716 | 118387                  | TT                              | CC              | 1946974279               |
| SNP_P4_142561_119740 | NW_004516116.1 | Scaffold716 | 119740                  | GG                              | AA              | 1946974281               |
| SNP_P4_142562_119749 | NW_004516116.1 | Scaffold716 | 119749                  | GG                              | AA              | 1946974283               |
| SNP_P4_142563_121181 | NW_004516116.1 | Scaffold716 | 121181                  | GG                              | AA              | 1946974285               |
| SNP_P4_142564_131595 | NW_004516116.1 | Scaffold716 | 131595                  | CC                              | TT              | 1946974287               |
| SNP_P4_142566_156040 | NW_004516116.1 | Scaffold716 | 156040                  | TT                              | CC              | 1946974289               |
| SNP_P4_142567_161732 | NW_004516116.1 | Scaffold716 | 161732                  | GG                              | AA              | 1946974291               |
| SNP_P4_142568_163506 | NW_004516116.1 | Scaffold716 | 163506                  | AA                              | GG              | 1946974293               |
| SNP_P4_142570_164942 | NW_004516116.1 | Scaffold716 | 164942                  | GG                              | AA              | 1946974295               |
| SNP_P4_142571_168390 | NW_004516116.1 | Scaffold716 | 168390                  | AA                              | GG              | 1946974297               |
| SNP_P4_142572_168411 | NW_004516116.1 | Scaffold716 | 168411                  | AA                              | TT              | 1946974299               |
| SNP_P4_142573_171071 | NW_004516116.1 | Scaffold716 | 171071                  | GG                              | TT              | 1946974301               |
| SNP_P4_142574_172735 | NW_004516116.1 | Scaffold716 | 172735                  | TT                              | GG              | 1946974303               |



| SNPs IDs             | Chromosome IDs | Chromosomes | Physical positions (bp) | CDC Frontier (Reference genome) | (ILWC46 & LPNB) | NCBI SNPdb Accession IDs |
|----------------------|----------------|-------------|-------------------------|---------------------------------|-----------------|--------------------------|
| SNP_P4_142575_174128 | NW_004516116.1 | Scaffold716 | 174128                  | AA                              | GG              | 1946974305               |
| SNP_P4_142576_181428 | NW_004516116.1 | Scaffold716 | 181428                  | AA                              | TT              | 1946974307               |
| SNP_P4_142577_181435 | NW_004516116.1 | Scaffold716 | 181435                  | TT                              | CC              | 1946974309               |
| SNP_P4_142578_181438 | NW_004516116.1 | Scaffold716 | 181438                  | AA                              | TT              | 1946974311               |
| SNP_P4_142579_181450 | NW_004516116.1 | Scaffold716 | 181450                  | GG                              | TT              | 1946974313               |
| SNP_P4_142580_181453 | NW_004516116.1 | Scaffold716 | 181453                  | AA                              | CC              | 1946974315               |
| SNP_P4_142581_182741 | NW_004516116.1 | Scaffold716 | 182741                  | GG                              | AA              | 1946974317               |
| SNP_P4_142582_185897 | NW_004516116.1 | Scaffold716 | 185897                  | AA                              | GG              | 1946974319               |
| SNP_P4_142583_186277 | NW_004516116.1 | Scaffold716 | 186277                  | AA                              | GG              | 1946974321               |
| SNP_P4_142584_187106 | NW_004516116.1 | Scaffold716 | 187106                  | TT                              | CC              | 1946974323               |
| SNP_P4_142586_191163 | NW_004516116.1 | Scaffold716 | 191163                  | CC                              | AA              | 1946974325               |
| SNP_P4_142587_192635 | NW_004516116.1 | Scaffold716 | 192635                  | GG                              | AA              | 1946974327               |
| SNP_P4_142589_194136 | NW_004516116.1 | Scaffold716 | 194136                  | CC                              | TT              | 1946974329               |
| SNP_P4_142590_201175 | NW_004516116.1 | Scaffold716 | 201175                  | AA                              | GG              | 1946974331               |
| SNP_P4_142591_201604 | NW_004516116.1 | Scaffold716 | 201604                  | GG                              | AA              | 1946974333               |
| SNP_P4_142592_219826 | NW_004516116.1 | Scaffold716 | 219826                  | TT                              | GG              | 1946974335               |
| SNP_P4_142593_226643 | NW_004516116.1 | Scaffold716 | 226643                  | GG                              | AA              | 1946974337               |
| SNP_P4_142594_228761 | NW_004516116.1 | Scaffold716 | 228761                  | AA                              | GG              | 1946974339               |
| SNP_P4_142596_244842 | NW_004516116.1 | Scaffold716 | 244842                  | CC                              | TT              | 1946974341               |
| SNP_P4_142597_246281 | NW_004516116.1 | Scaffold716 | 246281                  | CC                              | GG              | 1946974343               |
| SNP_P4_142598_248082 | NW_004516116.1 | Scaffold716 | 248082                  | TT                              | GG              | 1946974345               |
| SNP_P4_142599_248084 | NW_004516116.1 | Scaffold716 | 248084                  | CC                              | TT              | 1946974347               |
| SNP_P4_142600_248106 | NW_004516116.1 | Scaffold716 | 248106                  | TT                              | AA              | 1946974348               |
| SNP_P4_142601_248115 | NW_004516116.1 | Scaffold716 | 248115                  | AA                              | GG              | 1946974350               |
| SNP_P4_142602_248119 | NW_004516116.1 | Scaffold716 | 248119                  | CC                              | TT              | 1946974352               |
| SNP_P4_142603_248147 | NW_004516116.1 | Scaffold716 | 248147                  | CC                              | TT              | 1946974354               |
| SNP_P4_142604_248150 | NW_004516116.1 | Scaffold716 | 248150                  | CC                              | AA              | 1946974356               |
| SNP_P4_142605_251593 | NW_004516116.1 | Scaffold716 | 251593                  | AA                              | GG              | 1946974358               |
| SNP_P4_142606_263312 | NW_004516116.1 | Scaffold716 | 263312                  | GG                              | AA              | 1946974360               |
| SNP_P4_142607_263466 | NW_004516116.1 | Scaffold716 | 263466                  | GG                              | TT              | 1946974362               |
| SNP_P4_142608_263547 | NW_004516116.1 | Scaffold716 | 263547                  | TT                              | CC              | 1946974364               |
| SNP_P4_142609_263621 | NW_004516116.1 | Scaffold716 | 263621                  | TT                              | CC              | 1946974366               |
| SNP_P4_142610_263629 | NW_004516116.1 | Scaffold716 | 263629                  | TT                              | AA              | 1946974368               |
| SNP_P4_142611_263663 | NW_004516116.1 | Scaffold716 | 263663                  | CC                              | TT              | 1946974370               |
| SNP_P4_142612_263670 | NW_004516116.1 | Scaffold716 | 263670                  | GG                              | AA              | 1946974371               |
| SNP_P4_142613_263739 | NW_004516116.1 | Scaffold716 | 263739                  | CC                              | TT              | 1946974373               |
| SNP_P4_142614_263740 | NW_004516116.1 | Scaffold716 | 263740                  | AA                              | GG              | 1946974375               |
| SNP_P4_142615_272974 | NW_004516116.1 | Scaffold716 | 272974                  | CC                              | TT              | 1946974377               |
| SNP_P4_142616_273007 | NW_004516116.1 | Scaffold716 | 273007                  | CC                              | TT              | 1946974379               |
| SNP_P4_142617_273015 | NW_004516116.1 | Scaffold716 | 273015                  | GG                              | AA              | 1946974381               |
| SNP_P4_142618_273045 | NW_004516116.1 | Scaffold716 | 273045                  | CC                              | TT              | 1946974383               |
| SNP_P4_142619_273066 | NW_004516116.1 | Scaffold716 | 273066                  | AA                              | GG              | 1946974385               |

| SNPs IDs             | Chromosome IDs | Chromosomes | Physical positions (bp) | CDC Frontier (Reference genome) | (ILWC46 & LPNB) | NCBI SNPdb Accession IDs |
|----------------------|----------------|-------------|-------------------------|---------------------------------|-----------------|--------------------------|
| SNP_P4_142620_273095 | NW_004516116.1 | Scaffold716 | 273095                  | CC                              | AA              | 1946974387               |
| SNP_P4_142621_274666 | NW_004516116.1 | Scaffold716 | 274666                  | TT                              | CC              | 1946974389               |
| SNP_P4_142622_274668 | NW_004516116.1 | Scaffold716 | 274668                  | TT                              | CC              | 1946974391               |
| SNP_P4_142623_280828 | NW_004516116.1 | Scaffold716 | 280828                  | AA                              | TT              | 1946974393               |
| SNP_P4_142624_313785 | NW_004516116.1 | Scaffold716 | 313785                  | CC                              | GG              | 1946974395               |
| SNP_P4_142625_314940 | NW_004516116.1 | Scaffold716 | 314940                  | AA                              | GG              | 1946974397               |
| SNP_P4_142626_320071 | NW_004516116.1 | Scaffold716 | 320071                  | CC                              | TT              | 1946974399               |
| SNP_P4_142627_345283 | NW_004516116.1 | Scaffold716 | 345283                  | GG                              | TT              | 1946974401               |
| SNP_P4_142628_351941 | NW_004516116.1 | Scaffold716 | 351941                  | CC                              | TT              | 1946974403               |
| SNP_P4_142630_390724 | NW_004516116.1 | Scaffold716 | 390724                  | AA                              | TT              | 1946974405               |
| SNP_P4_142631_397276 | NW_004516116.1 | Scaffold716 | 397276                  | TT                              | GG              | 1946974407               |
| SNP_P4_142632_397425 | NW_004516116.1 | Scaffold716 | 397425                  | CC                              | AA              | 1946974409               |
| SNP_P4_142633_397601 | NW_004516116.1 | Scaffold716 | 397601                  | CC                              | TT              | 1946974411               |
| SNP_P4_142634_397603 | NW_004516116.1 | Scaffold716 | 397603                  | GG                              | CC              | 1946974413               |
| SNP_P4_142635_397608 | NW_004516116.1 | Scaffold716 | 397608                  | GG                              | TT              | 1946974415               |
| SNP_P4_142636_397611 | NW_004516116.1 | Scaffold716 | 397611                  | GG                              | AA              | 1946974417               |
| SNP_P4_142637_397640 | NW_004516116.1 | Scaffold716 | 397640                  | TT                              | CC              | 1946974419               |
| SNP_P4_142638_397641 | NW_004516116.1 | Scaffold716 | 397641                  | TT                              | CC              | 1946974421               |
| SNP_P4_142639_397659 | NW_004516116.1 | Scaffold716 | 397659                  | AA                              | GG              | 1946974423               |
| SNP_P4_142640_397676 | NW_004516116.1 | Scaffold716 | 397676                  | AA                              | TT              | 1946974425               |
| SNP_P4_142641_397823 | NW_004516116.1 | Scaffold716 | 397823                  | TT                              | CC              | 1946974427               |
| SNP_P4_142642_397824 | NW_004516116.1 | Scaffold716 | 397824                  | AA                              | GG              | 1946974429               |
| SNP_P4_142643_405178 | NW_004516116.1 | Scaffold716 | 405178                  | GG                              | TT              | 1946974431               |
| SNP_P4_142644_405368 | NW_004516116.1 | Scaffold716 | 405368                  | CC                              | TT              | 1946974433               |
| SNP_P4_142645_2862   | NW_004516117.1 | Scaffold717 | 2862                    | AA                              | GG              | 1946974435               |
| SNP_P4_142646_2874   | NW_004516117.1 | Scaffold717 | 2874                    | TT                              | AA              | 1946974437               |
| SNP_P4_142648_2405   | NW_004516118.1 | Scaffold719 | 2405                    | TT                              | CC              | 1946974439               |
| SNP_P4_142649_8898   | NW_004516118.1 | Scaffold719 | 8898                    | AA                              | GG              | 1946974441               |
| SNP_P4_142650_8912   | NW_004516118.1 | Scaffold719 | 8912                    | TT                              | GG              | 1946974443               |
| SNP_P4_142651_9505   | NW_004516118.1 | Scaffold719 | 9505                    | AA                              | GG              | 1946974445               |
| SNP_P4_142652_9522   | NW_004516118.1 | Scaffold719 | 9522                    | GG                              | AA              | 1946974447               |
| SNP_P4_142653_9528   | NW_004516118.1 | Scaffold719 | 9528                    | AA                              | GG              | 1946974449               |
| SNP_P4_142654_9750   | NW_004516118.1 | Scaffold719 | 9750                    | AA                              | GG              | 1946974451               |
| SNP_P4_142655_9873   | NW_004516118.1 | Scaffold719 | 9873                    | GG                              | TT              | 1946974453               |
| SNP_P4_142656_9936   | NW_004516118.1 | Scaffold719 | 9936                    | AA                              | TT              | 1946974455               |
| SNP_P4_142657_9937   | NW_004516118.1 | Scaffold719 | 9937                    | TT                              | AA              | 1946974457               |
| SNP_P4_142658_10035  | NW_004516118.1 | Scaffold719 | 10035                   | GG                              | AA              | 1946974459               |
| SNP_P4_142659_10038  | NW_004516118.1 | Scaffold719 | 10038                   | AA                              | TT              | 1946974461               |
| SNP_P4_142660_12135  | NW_004516118.1 | Scaffold719 | 12135                   | GG                              | TT              | 1946974463               |
| SNP_P4_142662_12164  | NW_004516118.1 | Scaffold719 | 12164                   | CC                              | AA              | 1946974465               |
| SNP_P4_142663_12204  | NW_004516118.1 | Scaffold719 | 12204                   | TT                              | AA              | 1946974467               |
| SNP_P4_142664_12488  | NW_004516118.1 | Scaffold719 | 12488                   | GG                              | AA              | 1946974469               |

| SNPs IDs             | Chromosome IDs | Chromosomes | Physical positions (bp) | CDC Frontier (Reference genome) | (ILWC46 & LPNB) | NCBI SNPdb Accession IDs |
|----------------------|----------------|-------------|-------------------------|---------------------------------|-----------------|--------------------------|
| SNP_P4_142665_12498  | NW_004516118.1 | Scaffold719 | 12498                   | AA                              | GG              | 1946974471               |
| SNP_P4_142666_12499  | NW_004516118.1 | Scaffold719 | 12499                   | TT                              | CC              | 1946974473               |
| SNP_P4_142667_12519  | NW_004516118.1 | Scaffold719 | 12519                   | AA                              | CC              | 1946974475               |
| SNP_P4_142668_12577  | NW_004516118.1 | Scaffold719 | 12577                   | TT                              | CC              | 1946974477               |
| SNP_P4_142669_14849  | NW_004516118.1 | Scaffold719 | 14849                   | GG                              | AA              | 1946974479               |
| SNP_P4_142670_14924  | NW_004516118.1 | Scaffold719 | 14924                   | TT                              | GG              | 1946974481               |
| SNP_P4_142671_15297  | NW_004516118.1 | Scaffold719 | 15297                   | AA                              | CC              | 1946974483               |
| SNP_P4_142674_20794  | NW_004516118.1 | Scaffold719 | 20794                   | CC                              | TT              | 1946974485               |
| SNP_P4_142675_31756  | NW_004516118.1 | Scaffold719 | 31756                   | GG                              | AA              | 1946974487               |
| SNP_P4_142676_32264  | NW_004516118.1 | Scaffold719 | 32264                   | AA                              | CC              | 1946974489               |
| SNP_P4_142677_34180  | NW_004516118.1 | Scaffold719 | 34180                   | AA                              | GG              | 1946974491               |
| SNP_P4_142678_35226  | NW_004516118.1 | Scaffold719 | 35226                   | TT                              | AA              | 1946974493               |
| SNP_P4_142679_35229  | NW_004516118.1 | Scaffold719 | 35229                   | GG                              | TT              | 1946974495               |
| SNP_P4_142680_35231  | NW_004516118.1 | Scaffold719 | 35231                   | GG                              | AA              | 1946974497               |
| SNP_P4_142681_35905  | NW_004516118.1 | Scaffold719 | 35905                   | GG                              | TT              | 1946974499               |
| SNP_P4_142682_41821  | NW_004516118.1 | Scaffold719 | 41821                   | CC                              | GG              | 1946974501               |
| SNP_P4_142683_41968  | NW_004516118.1 | Scaffold719 | 41968                   | CC                              | TT              | 1946974503               |
| SNP_P4_142684_49642  | NW_004516118.1 | Scaffold719 | 49642                   | CC                              | TT              | 1946974505               |
| SNP_P4_142685_50335  | NW_004516118.1 | Scaffold719 | 50335                   | AA                              | TT              | 1946974507               |
| SNP_P4_142686_54082  | NW_004516118.1 | Scaffold719 | 54082                   | TT                              | CC              | 1946974509               |
| SNP_P4_142687_57800  | NW_004516118.1 | Scaffold719 | 57800                   | GG                              | AA              | 1946974511               |
| SNP_P4_142689_85036  | NW_004516118.1 | Scaffold719 | 85036                   | GG                              | TT              | 1946974513               |
| SNP_P4_142690_85076  | NW_004516118.1 | Scaffold719 | 85076                   | CC                              | TT              | 1946974515               |
| SNP_P4_142691_85091  | NW_004516118.1 | Scaffold719 | 85091                   | TT                              | AA              | 1946974517               |
| SNP_P4_142692_85107  | NW_004516118.1 | Scaffold719 | 85107                   | TT                              | CC              | 1946974519               |
| SNP_P4_142693_99399  | NW_004516118.1 | Scaffold719 | 99399                   | AA                              | GG              | 1946974521               |
| SNP_P4_142694_101418 | NW_004516118.1 | Scaffold719 | 101418                  | TT                              | CC              | 1946974523               |
| SNP_P4_142695_108799 | NW_004516118.1 | Scaffold719 | 108799                  | GG                              | AA              | 1946974525               |
| SNP_P4_142696_108819 | NW_004516118.1 | Scaffold719 | 108819                  | CC                              | GG              | 1946974527               |
| SNP_P4_142697_108837 | NW_004516118.1 | Scaffold719 | 108837                  | CC                              | TT              | 1946974529               |
| SNP_P4_142698_108847 | NW_004516118.1 | Scaffold719 | 108847                  | AA                              | GG              | 1946974531               |
| SNP_P4_142699_108858 | NW_004516118.1 | Scaffold719 | 108858                  | AA                              | GG              | 1946974533               |
| SNP_P4_142700_108891 | NW_004516118.1 | Scaffold719 | 108891                  | AA                              | TT              | 1946974535               |
| SNP_P4_142701_109107 | NW_004516118.1 | Scaffold719 | 109107                  | CC                              | AA              | 1946974537               |
| SNP_P4_142702_109643 | NW_004516118.1 | Scaffold719 | 109643                  | GG                              | AA              | 1946974539               |
| SNP_P4_142703_109684 | NW_004516118.1 | Scaffold719 | 109684                  | TT                              | AA              | 1946974541               |
| SNP_P4_142704_109692 | NW_004516118.1 | Scaffold719 | 109692                  | TT                              | AA              | 1946974543               |
| SNP_P4_142705_110015 | NW_004516118.1 | Scaffold719 | 110015                  | GG                              | TT              | 1946974545               |
| SNP_P4_142706_110034 | NW_004516118.1 | Scaffold719 | 110034                  | TT                              | CC              | 1946974547               |
| SNP_P4_142707_110440 | NW_004516118.1 | Scaffold719 | 110440                  | AA                              | TT              | 1946974549               |
| SNP_P4_142708_110496 | NW_004516118.1 | Scaffold719 | 110496                  | AA                              | GG              | 1946974551               |
| SNP_P4_142709_110601 | NW_004516118.1 | Scaffold719 | 110601                  | TT                              | CC              | 1946974553               |

| SNPs IDs             | Chromosome IDs | Chromosomes | Physical positions (bp) | CDC Frontier (Reference genome) | (ILWC46 & LPNB) | NCBI SNPdb Accession IDs |
|----------------------|----------------|-------------|-------------------------|---------------------------------|-----------------|--------------------------|
| SNP_P4_142710_110603 | NW_004516118.1 | Scaffold719 | 110603                  | TT                              | AA              | 1946974555               |
| SNP_P4_142711_110604 | NW_004516118.1 | Scaffold719 | 110604                  | AA                              | GG              | 1946974557               |
| SNP_P4_142712_110755 | NW_004516118.1 | Scaffold719 | 110755                  | AA                              | TT              | 1946974559               |
| SNP_P4_142713_123356 | NW_004516118.1 | Scaffold719 | 123356                  | AA                              | TT              | 1946974561               |
| SNP_P4_142714_123432 | NW_004516118.1 | Scaffold719 | 123432                  | TT                              | CC              | 1946974563               |
| SNP_P4_142715_123491 | NW_004516118.1 | Scaffold719 | 123491                  | CC                              | GG              | 1946974565               |
| SNP_P4_142716_123492 | NW_004516118.1 | Scaffold719 | 123492                  | TT                              | CC              | 1946974567               |
| SNP_P4_142717_123532 | NW_004516118.1 | Scaffold719 | 123532                  | TT                              | AA              | 1946974569               |
| SNP_P4_142718_123580 | NW_004516118.1 | Scaffold719 | 123580                  | GG                              | TT              | 1946974571               |
| SNP_P4_142719_123584 | NW_004516118.1 | Scaffold719 | 123584                  | AA                              | TT              | 1946974573               |
| SNP_P4_142720_123588 | NW_004516118.1 | Scaffold719 | 123588                  | TT                              | CC              | 1946974575               |
| SNP_P4_142721_123608 | NW_004516118.1 | Scaffold719 | 123608                  | TT                              | CC              | 1946974577               |
| SNP_P4_142722_123702 | NW_004516118.1 | Scaffold719 | 123702                  | AA                              | GG              | 1946974579               |
| SNP_P4_142724_123770 | NW_004516118.1 | Scaffold719 | 123770                  | CC                              | AA              | 1946974581               |
| SNP_P4_142725_123785 | NW_004516118.1 | Scaffold719 | 123785                  | AA                              | TT              | 1946974583               |
| SNP_P4_142726_123813 | NW_004516118.1 | Scaffold719 | 123813                  | GG                              | AA              | 1946974585               |
| SNP_P4_142727_123974 | NW_004516118.1 | Scaffold719 | 123974                  | TT                              | CC              | 1946974587               |
| SNP_P4_142728_124392 | NW_004516118.1 | Scaffold719 | 124392                  | GG                              | AA              | 1946974589               |
| SNP_P4_142729_125400 | NW_004516118.1 | Scaffold719 | 125400                  | GG                              | TT              | 1946974591               |
| SNP_P4_142730_125401 | NW_004516118.1 | Scaffold719 | 125401                  | AA                              | CC              | 1946974593               |
| SNP_P4_142731_125408 | NW_004516118.1 | Scaffold719 | 125408                  | GG                              | AA              | 1946974595               |
| SNP_P4_142732_125893 | NW_004516118.1 | Scaffold719 | 125893                  | GG                              | AA              | 1946974597               |
| SNP_P4_142733_127165 | NW_004516118.1 | Scaffold719 | 127165                  | AA                              | GG              | 1946974599               |
| SNP_P4_142734_127166 | NW_004516118.1 | Scaffold719 | 127166                  | AA                              | TT              | 1946974601               |
| SNP_P4_142735_127180 | NW_004516118.1 | Scaffold719 | 127180                  | AA                              | GG              | 1946974603               |
| SNP_P4_142736_127191 | NW_004516118.1 | Scaffold719 | 127191                  | AA                              | TT              | 1946974605               |
| SNP_P4_142737_127210 | NW_004516118.1 | Scaffold719 | 127210                  | CC                              | TT              | 1946974607               |
| SNP_P4_142738_127788 | NW_004516118.1 | Scaffold719 | 127788                  | AA                              | TT              | 1946974609               |
| SNP_P4_142739_128123 | NW_004516118.1 | Scaffold719 | 128123                  | GG                              | AA              | 1946974611               |
| SNP_P4_142740_128526 | NW_004516118.1 | Scaffold719 | 128526                  | TT                              | CC              | 1946974612               |
| SNP_P4_142741_128594 | NW_004516118.1 | Scaffold719 | 128594                  | TT                              | CC              | 1946974614               |
| SNP_P4_142742_128616 | NW_004516118.1 | Scaffold719 | 128616                  | AA                              | TT              | 1946974616               |
| SNP_P4_142743_128946 | NW_004516118.1 | Scaffold719 | 128946                  | CC                              | TT              | 1946974618               |
| SNP_P4_142744_887    | NW_004516119.1 | Scaffold720 | 887                     | CC                              | TT              | 1946974620               |
| SNP_P4_142745_961    | NW_004516119.1 | Scaffold720 | 961                     | CC                              | TT              | 1946974622               |
| SNP_P4_142746_963    | NW_004516119.1 | Scaffold720 | 963                     | AA                              | GG              | 1946974624               |
| SNP_P4_142747_1277   | NW_004516119.1 | Scaffold720 | 1277                    | TT                              | AA              | 1946974626               |
| SNP_P4_142748_1314   | NW_004516119.1 | Scaffold720 | 1314                    | AA                              | TT              | 1946974628               |
| SNP_P4_142749_1371   | NW_004516119.1 | Scaffold720 | 1371                    | CC                              | TT              | 1946974630               |
| SNP_P4_142750_18262  | NW_004516119.1 | Scaffold720 | 18262                   | TT                              | CC              | 1946974632               |
| SNP_P4_142751_18273  | NW_004516119.1 | Scaffold720 | 18273                   | GG                              | AA              | 1946974634               |
| SNP_P4_142752_18278  | NW_004516119.1 | Scaffold720 | 18278                   | GG                              | AA              | 1946974636               |

| SNPs IDs             | Chromosome IDs | Chromosomes | Physical positions (bp) | CDC Frontier (Reference genome) | (ILWC46 & LPNB) | NCBI SNPdb Accession IDs |
|----------------------|----------------|-------------|-------------------------|---------------------------------|-----------------|--------------------------|
| SNP_P4_142753_18291  | NW_004516119.1 | Scaffold720 | 18291                   | AA                              | TT              | 1946974638               |
| SNP_P4_142754_18985  | NW_004516119.1 | Scaffold720 | 18985                   | GG                              | CC              | 1946974640               |
| SNP_P4_142755_53725  | NW_004516119.1 | Scaffold720 | 53725                   | AA                              | GG              | 1946974642               |
| SNP_P4_142756_54782  | NW_004516119.1 | Scaffold720 | 54782                   | AA                              | TT              | 1946974644               |
| SNP_P4_142757_76938  | NW_004516119.1 | Scaffold720 | 76938                   | AA                              | GG              | 1946974646               |
| SNP_P4_142758_77066  | NW_004516119.1 | Scaffold720 | 77066                   | TT                              | AA              | 1946974648               |
| SNP_P4_142759_77108  | NW_004516119.1 | Scaffold720 | 77108                   | CC                              | GG              | 1946974650               |
| SNP_P4_142760_77184  | NW_004516119.1 | Scaffold720 | 77184                   | TT                              | CC              | 1946974652               |
| SNP_P4_142761_111479 | NW_004516119.1 | Scaffold720 | 111479                  | CC                              | AA              | 1946974654               |
| SNP_P4_142762_121859 | NW_004516119.1 | Scaffold720 | 121859                  | TT                              | AA              | 1946974656               |
| SNP_P4_142763_121975 | NW_004516119.1 | Scaffold720 | 121975                  | GG                              | TT              | 1946974658               |
| SNP_P4_142764_122024 | NW_004516119.1 | Scaffold720 | 122024                  | TT                              | CC              | 1946974660               |
| SNP_P4_142765_122265 | NW_004516119.1 | Scaffold720 | 122265                  | AA                              | GG              | 1946974662               |
| SNP_P4_142766_150574 | NW_004516119.1 | Scaffold720 | 150574                  | AA                              | CC              | 1946974664               |
| SNP_P4_142767_158120 | NW_004516119.1 | Scaffold720 | 158120                  | TT                              | AA              | 1946974666               |
| SNP_P4_142768_163244 | NW_004516119.1 | Scaffold720 | 163244                  | CC                              | AA              | 1946974668               |
| SNP_P4_142769_163276 | NW_004516119.1 | Scaffold720 | 163276                  | CC                              | TT              | 1946974670               |
| SNP_P4_142770_163693 | NW_004516119.1 | Scaffold720 | 163693                  | GG                              | CC              | 1946974672               |
| SNP_P4_142771_170335 | NW_004516119.1 | Scaffold720 | 170335                  | AA                              | GG              | 1946974674               |
| SNP_P4_142772_179269 | NW_004516119.1 | Scaffold720 | 179269                  | TT                              | AA              | 1946974676               |
| SNP_P4_142773_179437 | NW_004516119.1 | Scaffold720 | 179437                  | TT                              | CC              | 1946974678               |
| SNP_P4_142774_179438 | NW_004516119.1 | Scaffold720 | 179438                  | GG                              | CC              | 1946974680               |
| SNP_P4_142776_179581 | NW_004516119.1 | Scaffold720 | 179581                  | CC                              | TT              | 1946974682               |
| SNP_P4_142778_211326 | NW_004516119.1 | Scaffold720 | 211326                  | TT                              | AA              | 1946974684               |
| SNP_P4_142779_211338 | NW_004516119.1 | Scaffold720 | 211338                  | AA                              | GG              | 1946974686               |
| SNP_P4_142780_212750 | NW_004516119.1 | Scaffold720 | 212750                  | CC                              | TT              | 1946974688               |
| SNP_P4_142781_212752 | NW_004516119.1 | Scaffold720 | 212752                  | CC                              | AA              | 1946974690               |
| SNP_P4_142782_212794 | NW_004516119.1 | Scaffold720 | 212794                  | TT                              | CC              | 1946974692               |
| SNP_P4_142783_214155 | NW_004516119.1 | Scaffold720 | 214155                  | TT                              | AA              | 1946974694               |
| SNP_P4_142784_214200 | NW_004516119.1 | Scaffold720 | 214200                  | AA                              | TT              | 1946974696               |
| SNP_P4_142785_216827 | NW_004516119.1 | Scaffold720 | 216827                  | TT                              | CC              | 1946974698               |
| SNP_P4_142786_216830 | NW_004516119.1 | Scaffold720 | 216830                  | AA                              | GG              | 1946974700               |
| SNP_P4_142787_221336 | NW_004516119.1 | Scaffold720 | 221336                  | GG                              | TT              | 1946974702               |
| SNP_P4_142788_223203 | NW_004516119.1 | Scaffold720 | 223203                  | CC                              | AA              | 1946974704               |
| SNP_P4_142789_223684 | NW_004516119.1 | Scaffold720 | 223684                  | AA                              | GG              | 1946974706               |
| SNP_P4_142790_241777 | NW_004516119.1 | Scaffold720 | 241777                  | TT                              | GG              | 1946974708               |
| SNP_P4_142791_241779 | NW_004516119.1 | Scaffold720 | 241779                  | TT                              | CC              | 1946974710               |
| SNP_P4_142792_278111 | NW_004516119.1 | Scaffold720 | 278111                  | CC                              | TT              | 1946974712               |
| SNP_P4_142793_278152 | NW_004516119.1 | Scaffold720 | 278152                  | AA                              | GG              | 1946974714               |
| SNP_P4_142794_278350 | NW_004516119.1 | Scaffold720 | 278350                  | TT                              | CC              | 1946974716               |
| SNP_P4_142795_278711 | NW_004516119.1 | Scaffold720 | 278711                  | TT                              | CC              | 1946974718               |
| SNP_P4_142796_294861 | NW_004516119.1 | Scaffold720 | 294861                  | CC                              | TT              | 1946974720               |

| SNPs IDs             | Chromosome IDs | Chromosomes | Physical positions (bp) | CDC Frontier (Reference genome) | (ILWC46 & LPNB) | NCBI SNPdb Accession IDs |
|----------------------|----------------|-------------|-------------------------|---------------------------------|-----------------|--------------------------|
| SNP_P4_142797_296566 | NW_004516119.1 | Scaffold720 | 296566                  | AA                              | TT              | 1946974722               |
| SNP_P4_142798_296610 | NW_004516119.1 | Scaffold720 | 296610                  | GG                              | AA              | 1946974724               |
| SNP_P4_142799_296689 | NW_004516119.1 | Scaffold720 | 296689                  | TT                              | AA              | 1946974726               |
| SNP_P4_142800_296865 | NW_004516119.1 | Scaffold720 | 296865                  | AA                              | GG              | 1946974728               |
| SNP_P4_142801_296871 | NW_004516119.1 | Scaffold720 | 296871                  | TT                              | GG              | 1946974730               |
| SNP_P4_142802_297034 | NW_004516119.1 | Scaffold720 | 297034                  | CC                              | AA              | 1946974732               |
| SNP_P4_142803_297071 | NW_004516119.1 | Scaffold720 | 297071                  | TT                              | CC              | 1946974734               |
| SNP_P4_142804_297195 | NW_004516119.1 | Scaffold720 | 297195                  | AA                              | GG              | 1946974736               |
| SNP_P4_142805_297250 | NW_004516119.1 | Scaffold720 | 297250                  | AA                              | CC              | 1946974738               |
| SNP_P4_142806_297258 | NW_004516119.1 | Scaffold720 | 297258                  | CC                              | TT              | 1946974740               |
| SNP_P4_142807_297268 | NW_004516119.1 | Scaffold720 | 297268                  | AA                              | GG              | 1946974742               |
| SNP_P4_142808_297281 | NW_004516119.1 | Scaffold720 | 297281                  | GG                              | AA              | 1946974744               |
| SNP_P4_142809_297341 | NW_004516119.1 | Scaffold720 | 297341                  | AA                              | CC              | 1946974746               |
| SNP_P4_142810_297342 | NW_004516119.1 | Scaffold720 | 297342                  | GG                              | AA              | 1946974748               |
| SNP_P4_142811_297452 | NW_004516119.1 | Scaffold720 | 297452                  | CC                              | TT              | 1946974750               |
| SNP_P4_142812_297522 | NW_004516119.1 | Scaffold720 | 297522                  | AA                              | CC              | 1946974752               |
| SNP_P4_142813_297529 | NW_004516119.1 | Scaffold720 | 297529                  | AA                              | GG              | 1946974754               |
| SNP_P4_142814_297652 | NW_004516119.1 | Scaffold720 | 297652                  | GG                              | AA              | 1946974756               |
| SNP_P4_142815_297690 | NW_004516119.1 | Scaffold720 | 297690                  | GG                              | AA              | 1946974758               |
| SNP_P4_142816_297729 | NW_004516119.1 | Scaffold720 | 297729                  | CC                              | AA              | 1946974760               |
| SNP_P4_142817_297747 | NW_004516119.1 | Scaffold720 | 297747                  | AA                              | GG              | 1946974762               |
| SNP_P4_142818_297797 | NW_004516119.1 | Scaffold720 | 297797                  | AA                              | CC              | 1946974764               |
| SNP_P4_142819_297886 | NW_004516119.1 | Scaffold720 | 297886                  | TT                              | GG              | 1946974766               |
| SNP_P4_142820_297960 | NW_004516119.1 | Scaffold720 | 297960                  | AA                              | CC              | 1946974768               |
| SNP_P4_142821_298098 | NW_004516119.1 | Scaffold720 | 298098                  | CC                              | TT              | 1946974770               |
| SNP_P4_142822_298128 | NW_004516119.1 | Scaffold720 | 298128                  | CC                              | AA              | 1946974772               |
| SNP_P4_142823_298216 | NW_004516119.1 | Scaffold720 | 298216                  | GG                              | AA              | 1946974774               |
| SNP_P4_142824_298269 | NW_004516119.1 | Scaffold720 | 298269                  | GG                              | TT              | 1946974776               |
| SNP_P4_142825_298271 | NW_004516119.1 | Scaffold720 | 298271                  | CC                              | TT              | 1946974778               |
| SNP_P4_142826_298283 | NW_004516119.1 | Scaffold720 | 298283                  | TT                              | CC              | 1946974780               |
| SNP_P4_142827_299038 | NW_004516119.1 | Scaffold720 | 299038                  | GG                              | TT              | 1946974782               |
| SNP_P4_142828_299056 | NW_004516119.1 | Scaffold720 | 299056                  | TT                              | CC              | 1946974784               |
| SNP_P4_142829_299333 | NW_004516119.1 | Scaffold720 | 299333                  | GG                              | CC              | 1946974786               |
| SNP_P4_142830_326096 | NW_004516119.1 | Scaffold720 | 326096                  | GG                              | CC              | 1946974788               |
| SNP_P4_142831_327324 | NW_004516119.1 | Scaffold720 | 327324                  | CC                              | GG              | 1946974790               |
| SNP_P4_142832_327341 | NW_004516119.1 | Scaffold720 | 327341                  | GG                              | AA              | 1946974792               |
| SNP_P4_142833_327372 | NW_004516119.1 | Scaffold720 | 327372                  | CC                              | TT              | 1946974794               |
| SNP_P4_142834_327964 | NW_004516119.1 | Scaffold720 | 327964                  | CC                              | TT              | 1946974796               |
| SNP_P4_142835_329773 | NW_004516119.1 | Scaffold720 | 329773                  | GG                              | TT              | 1946974798               |
| SNP_P4_142837_330841 | NW_004516119.1 | Scaffold720 | 330841                  | CC                              | GG              | 1946974800               |
| SNP_P4_142838_330900 | NW_004516119.1 | Scaffold720 | 330900                  | AA                              | GG              | 1946974802               |
| SNP_P4_142839_330903 | NW_004516119.1 | Scaffold720 | 330903                  | GG                              | TT              | 1946974804               |

| SNPs IDs             | Chromosome IDs | Chromosomes | Physical positions (bp) | CDC Frontier (Reference genome) | (ILWC46 & LPNB) | NCBI SNPdb Accession IDs |
|----------------------|----------------|-------------|-------------------------|---------------------------------|-----------------|--------------------------|
| SNP_P4_142840_330926 | NW_004516119.1 | Scaffold720 | 330926                  | TT                              | AA              | 1946974806               |
| SNP_P4_142841_330991 | NW_004516119.1 | Scaffold720 | 330991                  | AA                              | TT              | 1946974808               |
| SNP_P4_142842_331016 | NW_004516119.1 | Scaffold720 | 331016                  | GG                              | TT              | 1946974810               |
| SNP_P4_142843_331025 | NW_004516119.1 | Scaffold720 | 331025                  | AA                              | TT              | 1946974812               |
| SNP_P4_142844_331170 | NW_004516119.1 | Scaffold720 | 331170                  | CC                              | TT              | 1946974814               |
| SNP_P4_142845_331171 | NW_004516119.1 | Scaffold720 | 331171                  | AA                              | GG              | 1946974816               |
| SNP_P4_142846_331172 | NW_004516119.1 | Scaffold720 | 331172                  | GG                              | AA              | 1946974818               |
| SNP_P4_142847_333020 | NW_004516119.1 | Scaffold720 | 333020                  | CC                              | TT              | 1946974820               |
| SNP_P4_142848_333026 | NW_004516119.1 | Scaffold720 | 333026                  | GG                              | AA              | 1946974822               |
| SNP_P4_142849_333055 | NW_004516119.1 | Scaffold720 | 333055                  | CC                              | GG              | 1946974824               |
| SNP_P4_142850_333062 | NW_004516119.1 | Scaffold720 | 333062                  | GG                              | CC              | 1946974826               |
| SNP_P4_142851_333312 | NW_004516119.1 | Scaffold720 | 333312                  | GG                              | TT              | 1946974828               |
| SNP_P4_142852_333409 | NW_004516119.1 | Scaffold720 | 333409                  | CC                              | TT              | 1946974830               |
| SNP_P4_142853_333436 | NW_004516119.1 | Scaffold720 | 333436                  | CC                              | AA              | 1946974832               |
| SNP_P4_142855_336874 | NW_004516119.1 | Scaffold720 | 336874                  | AA                              | GG              | 1946974835               |
| SNP_P4_142856_337076 | NW_004516119.1 | Scaffold720 | 337076                  | AA                              | TT              | 1946974837               |
| SNP_P4_142857_337210 | NW_004516119.1 | Scaffold720 | 337210                  | CC                              | TT              | 1946974839               |
| SNP_P4_142858_337262 | NW_004516119.1 | Scaffold720 | 337262                  | AA                              | TT              | 1946974841               |
| SNP_P4_142859_337391 | NW_004516119.1 | Scaffold720 | 337391                  | TT                              | CC              | 1946974843               |
| SNP_P4_142860_337456 | NW_004516119.1 | Scaffold720 | 337456                  | AA                              | GG              | 1946974845               |
| SNP_P4_142861_337546 | NW_004516119.1 | Scaffold720 | 337546                  | CC                              | TT              | 1946974847               |
| SNP_P4_142862_337844 | NW_004516119.1 | Scaffold720 | 337844                  | TT                              | CC              | 1946974849               |
| SNP_P4_142863_337890 | NW_004516119.1 | Scaffold720 | 337890                  | GG                              | TT              | 1946974851               |
| SNP_P4_142864_337929 | NW_004516119.1 | Scaffold720 | 337929                  | CC                              | TT              | 1946974853               |
| SNP_P4_142865_338153 | NW_004516119.1 | Scaffold720 | 338153                  | AA                              | GG              | 1946974855               |
| SNP_P4_142866_338192 | NW_004516119.1 | Scaffold720 | 338192                  | TT                              | GG              | 1946974857               |
| SNP_P4_142867_342300 | NW_004516119.1 | Scaffold720 | 342300                  | GG                              | AA              | 1946974859               |
| SNP_P4_142868_344937 | NW_004516119.1 | Scaffold720 | 344937                  | GG                              | AA              | 1946974861               |
| SNP_P4_142869_344946 | NW_004516119.1 | Scaffold720 | 344946                  | CC                              | TT              | 1946974863               |
| SNP_P4_142870_345034 | NW_004516119.1 | Scaffold720 | 345034                  | CC                              | TT              | 1946974865               |
| SNP_P4_142871_345039 | NW_004516119.1 | Scaffold720 | 345039                  | CC                              | TT              | 1946974867               |
| SNP_P4_142872_345052 | NW_004516119.1 | Scaffold720 | 345052                  | TT                              | AA              | 1946974869               |
| SNP_P4_142873_345062 | NW_004516119.1 | Scaffold720 | 345062                  | GG                              | AA              | 1946974871               |
| SNP_P4_142874_345138 | NW_004516119.1 | Scaffold720 | 345138                  | GG                              | TT              | 1946974873               |
| SNP_P4_142875_345201 | NW_004516119.1 | Scaffold720 | 345201                  | TT                              | CC              | 1946974875               |
| SNP_P4_142876_345202 | NW_004516119.1 | Scaffold720 | 345202                  | AA                              | GG              | 1946974877               |
| SNP_P4_142877_353463 | NW_004516119.1 | Scaffold720 | 353463                  | CC                              | TT              | 1946974879               |
| SNP_P4_142878_353464 | NW_004516119.1 | Scaffold720 | 353464                  | TT                              | AA              | 1946974881               |
| SNP_P4_142880_360595 | NW_004516119.1 | Scaffold720 | 360595                  | TT                              | CC              | 1946974883               |
| SNP_P4_142881_360726 | NW_004516119.1 | Scaffold720 | 360726                  | TT                              | CC              | 1946974885               |
| SNP_P4_142882_360863 | NW_004516119.1 | Scaffold720 | 360863                  | GG                              | AA              | 1946974887               |
| SNP_P4_142883_362699 | NW_004516119.1 | Scaffold720 | 362699                  | TT                              | CC              | 1946974889               |

| SNPs IDs             | Chromosome IDs | Chromosomes | Physical positions (bp) | CDC Frontier (Reference genome) | (ILWC46 & LPNB) | NCBI SNPdb Accession IDs |
|----------------------|----------------|-------------|-------------------------|---------------------------------|-----------------|--------------------------|
| SNP_P4_142884_362943 | NW_004516119.1 | Scaffold720 | 362943                  | AA                              | GG              | 1946974891               |
| SNP_P4_142885_362953 | NW_004516119.1 | Scaffold720 | 362953                  | AA                              | GG              | 1946974893               |
| SNP_P4_142886_362957 | NW_004516119.1 | Scaffold720 | 362957                  | AA                              | GG              | 1946974895               |
| SNP_P4_142887_362994 | NW_004516119.1 | Scaffold720 | 362994                  | AA                              | GG              | 1946974897               |
| SNP_P4_142888_363010 | NW_004516119.1 | Scaffold720 | 363010                  | CC                              | TT              | 1946974899               |
| SNP_P4_142889_364586 | NW_004516119.1 | Scaffold720 | 364586                  | TT                              | CC              | 1946974901               |
| SNP_P4_142890_364685 | NW_004516119.1 | Scaffold720 | 364685                  | CC                              | TT              | 1946974903               |
| SNP_P4_142891_364807 | NW_004516119.1 | Scaffold720 | 364807                  | AA                              | GG              | 1946974905               |
| SNP_P4_142892_365908 | NW_004516119.1 | Scaffold720 | 365908                  | CC                              | TT              | 1946974907               |
| SNP_P4_142893_365920 | NW_004516119.1 | Scaffold720 | 365920                  | TT                              | AA              | 1946974909               |
| SNP_P4_142894_366068 | NW_004516119.1 | Scaffold720 | 366068                  | GG                              | AA              | 1946974911               |
| SNP_P4_142895_366070 | NW_004516119.1 | Scaffold720 | 366070                  | AA                              | GG              | 1946974913               |
| SNP_P4_142896_366072 | NW_004516119.1 | Scaffold720 | 366072                  | TT                              | CC              | 1946974915               |
| SNP_P4_142897_369972 | NW_004516119.1 | Scaffold720 | 369972                  | GG                              | AA              | 1946974917               |
| SNP_P4_142898_370011 | NW_004516119.1 | Scaffold720 | 370011                  | GG                              | TT              | 1946974919               |
| SNP_P4_142899_370028 | NW_004516119.1 | Scaffold720 | 370028                  | GG                              | AA              | 1946974921               |
| SNP_P4_142900_370067 | NW_004516119.1 | Scaffold720 | 370067                  | AA                              | TT              | 1946974923               |
| SNP_P4_142901_370070 | NW_004516119.1 | Scaffold720 | 370070                  | AA                              | GG              | 1946974925               |
| SNP_P4_142902_370137 | NW_004516119.1 | Scaffold720 | 370137                  | TT                              | CC              | 1946974927               |
| SNP_P4_142904_370297 | NW_004516119.1 | Scaffold720 | 370297                  | CC                              | TT              | 1946974929               |
| SNP_P4_142905_370374 | NW_004516119.1 | Scaffold720 | 370374                  | TT                              | CC              | 1946974931               |
| SNP_P4_142906_370465 | NW_004516119.1 | Scaffold720 | 370465                  | TT                              | AA              | 1946974933               |
| SNP_P4_142907_370559 | NW_004516119.1 | Scaffold720 | 370559                  | GG                              | CC              | 1946974935               |
| SNP_P4_142908_370639 | NW_004516119.1 | Scaffold720 | 370639                  | TT                              | AA              | 1946974937               |
| SNP_P4_142910_370725 | NW_004516119.1 | Scaffold720 | 370725                  | AA                              | GG              | 1946974939               |
| SNP_P4_142911_370814 | NW_004516119.1 | Scaffold720 | 370814                  | GG                              | AA              | 1946974941               |
| SNP_P4_142912_370924 | NW_004516119.1 | Scaffold720 | 370924                  | CC                              | AA              | 1946974944               |
| SNP_P4_142913_371463 | NW_004516119.1 | Scaffold720 | 371463                  | AA                              | TT              | 1946974946               |
| SNP_P4_142914_371609 | NW_004516119.1 | Scaffold720 | 371609                  | TT                              | CC              | 1946974949               |
| SNP_P4_142915_371637 | NW_004516119.1 | Scaffold720 | 371637                  | GG                              | AA              | 1946974954               |
| SNP_P4_142916_371886 | NW_004516119.1 | Scaffold720 | 371886                  | GG                              | AA              | 1946974956               |
| SNP_P4_142918_13817  | NW_004516120.1 | Scaffold721 | 13817                   | AA                              | TT              | 1946974958               |
| SNP_P4_142919_15672  | NW_004516120.1 | Scaffold721 | 15672                   | TT                              | AA              | 1946974960               |
| SNP_P4_142920_15945  | NW_004516120.1 | Scaffold721 | 15945                   | AA                              | TT              | 1946974962               |
| SNP_P4_142921_16259  | NW_004516120.1 | Scaffold721 | 16259                   | TT                              | AA              | 1946974964               |
| SNP_P4_142922_28898  | NW_004516120.1 | Scaffold721 | 28898                   | TT                              | CC              | 1946974966               |
| SNP_P4_142923_34254  | NW_004516120.1 | Scaffold721 | 34254                   | TT                              | GG              | 1946974968               |
| SNP_P4_142924_35609  | NW_004516120.1 | Scaffold721 | 35609                   | GG                              | AA              | 1946974970               |
| SNP_P4_142925_61353  | NW_004516120.1 | Scaffold721 | 61353                   | AA                              | TT              | 1946974972               |
| SNP_P4_142926_77608  | NW_004516120.1 | Scaffold721 | 77608                   | TT                              | CC              | 1946974974               |
| SNP_P4_142927_77641  | NW_004516120.1 | Scaffold721 | 77641                   | TT                              | AA              | 1946974976               |
| SNP_P4_142928_77872  | NW_004516120.1 | Scaffold721 | 77872                   | TT                              | GG              | 1946974978               |



| SNPs IDs             | Chromosome IDs | Chromosomes | Physical positions (bp) | CDC Frontier (Reference genome) | (ILWC46 & LPNB) | NCBI SNPdb Accession IDs |
|----------------------|----------------|-------------|-------------------------|---------------------------------|-----------------|--------------------------|
| SNP_P4_142929_79090  | NW_004516120.1 | Scaffold721 | 79090                   | GG                              | AA              | 1946974980               |
| SNP_P4_142930_79101  | NW_004516120.1 | Scaffold721 | 79101                   | TT                              | CC              | 1946974982               |
| SNP_P4_142931_79106  | NW_004516120.1 | Scaffold721 | 79106                   | AA                              | TT              | 1946974984               |
| SNP_P4_142932_79197  | NW_004516120.1 | Scaffold721 | 79197                   | CC                              | TT              | 1946974986               |
| SNP_P4_142934_106496 | NW_004516120.1 | Scaffold721 | 106496                  | AA                              | GG              | 1946974988               |
| SNP_P4_142935_106546 | NW_004516120.1 | Scaffold721 | 106546                  | CC                              | TT              | 1946974990               |
| SNP_P4_142936_106748 | NW_004516120.1 | Scaffold721 | 106748                  | TT                              | CC              | 1946974992               |
| SNP_P4_142937_107074 | NW_004516120.1 | Scaffold721 | 107074                  | AA                              | GG              | 1946974994               |
| SNP_P4_142938_107085 | NW_004516120.1 | Scaffold721 | 107085                  | CC                              | TT              | 1946974996               |
| SNP_P4_142939_107349 | NW_004516120.1 | Scaffold721 | 107349                  | AA                              | GG              | 1946974998               |
| SNP_P4_142940_107367 | NW_004516120.1 | Scaffold721 | 107367                  | GG                              | AA              | 1946975000               |
| SNP_P4_142941_109087 | NW_004516120.1 | Scaffold721 | 109087                  | AA                              | GG              | 1946975002               |
| SNP_P4_142942_109821 | NW_004516120.1 | Scaffold721 | 109821                  | GG                              | AA              | 1946975004               |
| SNP_P4_142943_110878 | NW_004516120.1 | Scaffold721 | 110878                  | TT                              | GG              | 1946975006               |
| SNP_P4_142944_137470 | NW_004516120.1 | Scaffold721 | 137470                  | TT                              | CC              | 1946975008               |
| SNP_P4_142945_146307 | NW_004516120.1 | Scaffold721 | 146307                  | TT                              | CC              | 1946975010               |
| SNP_P4_142946_163428 | NW_004516120.1 | Scaffold721 | 163428                  | TT                              | AA              | 1946975012               |
| SNP_P4_142947_170575 | NW_004516120.1 | Scaffold721 | 170575                  | CC                              | TT              | 1946975014               |
| SNP_P4_142948_187782 | NW_004516120.1 | Scaffold721 | 187782                  | CC                              | GG              | 1946975016               |
| SNP_P4_142949_187844 | NW_004516120.1 | Scaffold721 | 187844                  | TT                              | CC              | 1946975018               |
| SNP_P4_142950_190511 | NW_004516120.1 | Scaffold721 | 190511                  | CC                              | TT              | 1946975020               |
| SNP_P4_142951_190681 | NW_004516120.1 | Scaffold721 | 190681                  | CC                              | TT              | 1946975022               |
| SNP_P4_142952_190695 | NW_004516120.1 | Scaffold721 | 190695                  | TT                              | CC              | 1946975024               |
| SNP_P4_142953_191055 | NW_004516120.1 | Scaffold721 | 191055                  | TT                              | GG              | 1946975026               |
| SNP_P4_142955_191451 | NW_004516120.1 | Scaffold721 | 191451                  | AA                              | CC              | 1946975028               |
| SNP_P4_142956_191783 | NW_004516120.1 | Scaffold721 | 191783                  | CC                              | GG              | 1946975030               |
| SNP_P4_142957_191792 | NW_004516120.1 | Scaffold721 | 191792                  | TT                              | AA              | 1946975032               |
| SNP_P4_142958_10731  | NW_004516121.1 | Scaffold723 | 10731                   | AA                              | GG              | 1946975034               |
| SNP_P4_142959_10739  | NW_004516121.1 | Scaffold723 | 10739                   | GG                              | AA              | 1946975036               |
| SNP_P4_142960_10788  | NW_004516121.1 | Scaffold723 | 10788                   | AA                              | CC              | 1946975038               |
| SNP_P4_142961_10791  | NW_004516121.1 | Scaffold723 | 10791                   | GG                              | CC              | 1946975040               |
| SNP_P4_142962_10803  | NW_004516121.1 | Scaffold723 | 10803                   | TT                              | GG              | 1946975042               |
| SNP_P4_142963_10845  | NW_004516121.1 | Scaffold723 | 10845                   | CC                              | AA              | 1946975044               |
| SNP_P4_142964_10855  | NW_004516121.1 | Scaffold723 | 10855                   | CC                              | AA              | 1946975046               |
| SNP_P4_142965_21415  | NW_004516122.1 | Scaffold724 | 21415                   | GG                              | CC              | 1946975048               |
| SNP_P4_142967_25019  | NW_004516122.1 | Scaffold724 | 25019                   | GG                              | AA              | 1946975050               |
| SNP_P4_142968_40923  | NW_004516122.1 | Scaffold724 | 40923                   | TT                              | CC              | 1946975052               |
| SNP_P4_142969_41016  | NW_004516122.1 | Scaffold724 | 41016                   | TT                              | CC              | 1946975054               |
| SNP_P4_142970_56752  | NW_004516122.1 | Scaffold724 | 56752                   | GG                              | AA              | 1946975056               |
| SNP_P4_142972_60116  | NW_004516122.1 | Scaffold724 | 60116                   | GG                              | AA              | 1946975058               |
| SNP_P4_142973_76467  | NW_004516122.1 | Scaffold724 | 76467                   | AA                              | GG              | 1946975060               |
| SNP_P4_142974_76487  | NW_004516122.1 | Scaffold724 | 76487                   | GG                              | TT              | 1946975061               |

| SNPs IDs             | Chromosome IDs | Chromosomes | Physical positions (bp) | CDC Frontier (Reference genome) | (ILWC46 & LPNB) | NCBI SNPdb Accession IDs |
|----------------------|----------------|-------------|-------------------------|---------------------------------|-----------------|--------------------------|
| SNP_P4_142975_76529  | NW_004516122.1 | Scaffold724 | 76529                   | TT                              | GG              | 1946975063               |
| SNP_P4_142976_99614  | NW_004516122.1 | Scaffold724 | 99614                   | TT                              | CC              | 1946975065               |
| SNP_P4_142977_99654  | NW_004516122.1 | Scaffold724 | 99654                   | AA                              | TT              | 1946975067               |
| SNP_P4_142978_99720  | NW_004516122.1 | Scaffold724 | 99720                   | TT                              | AA              | 1946975069               |
| SNP_P4_142979_99758  | NW_004516122.1 | Scaffold724 | 99758                   | TT                              | GG              | 1946975071               |
| SNP_P4_142980_100070 | NW_004516122.1 | Scaffold724 | 100070                  | GG                              | AA              | 1946975073               |
| SNP_P4_142983_100270 | NW_004516122.1 | Scaffold724 | 100270                  | TT                              | AA              | 1946975075               |
| SNP_P4_142985_100364 | NW_004516122.1 | Scaffold724 | 100364                  | CC                              | GG              | 1946975077               |
| SNP_P4_142986_100430 | NW_004516122.1 | Scaffold724 | 100430                  | TT                              | CC              | 1946975079               |
| SNP_P4_142987_100443 | NW_004516122.1 | Scaffold724 | 100443                  | AA                              | GG              | 1946975081               |
| SNP_P4_142988_100456 | NW_004516122.1 | Scaffold724 | 100456                  | AA                              | CC              | 1946975083               |
| SNP_P4_142989_100461 | NW_004516122.1 | Scaffold724 | 100461                  | AA                              | TT              | 1946975085               |
| SNP_P4_142991_100739 | NW_004516122.1 | Scaffold724 | 100739                  | GG                              | TT              | 1946975087               |
| SNP_P4_142993_101491 | NW_004516122.1 | Scaffold724 | 101491                  | CC                              | TT              | 1946975089               |
| SNP_P4_142994_101623 | NW_004516122.1 | Scaffold724 | 101623                  | TT                              | AA              | 1946975091               |
| SNP_P4_142995_103544 | NW_004516122.1 | Scaffold724 | 103544                  | GG                              | AA              | 1946975093               |
| SNP_P4_142996_103720 | NW_004516122.1 | Scaffold724 | 103720                  | AA                              | CC              | 1946975095               |
| SNP_P4_142997_104131 | NW_004516122.1 | Scaffold724 | 104131                  | CC                              | TT              | 1946975097               |
| SNP_P4_143000_108596 | NW_004516122.1 | Scaffold724 | 108596                  | TT                              | AA              | 1946975099               |
| SNP_P4_143001_108984 | NW_004516122.1 | Scaffold724 | 108984                  | AA                              | GG              | 1946975101               |
| SNP_P4_143002_112415 | NW_004516122.1 | Scaffold724 | 112415                  | CC                              | TT              | 1946975103               |
| SNP_P4_143003_112451 | NW_004516122.1 | Scaffold724 | 112451                  | CC                              | TT              | 1946975105               |
| SNP_P4_143004_126302 | NW_004516122.1 | Scaffold724 | 126302                  | CC                              | TT              | 1946975107               |
| SNP_P4_143005_126333 | NW_004516122.1 | Scaffold724 | 126333                  | CC                              | AA              | 1946975109               |
| SNP_P4_143006_126335 | NW_004516122.1 | Scaffold724 | 126335                  | AA                              | GG              | 1946975111               |
| SNP_P4_143007_126346 | NW_004516122.1 | Scaffold724 | 126346                  | AA                              | CC              | 1946975113               |
| SNP_P4_143008_126354 | NW_004516122.1 | Scaffold724 | 126354                  | CC                              | TT              | 1946975115               |
| SNP_P4_143009_126458 | NW_004516122.1 | Scaffold724 | 126458                  | TT                              | CC              | 1946975117               |
| SNP_P4_143010_126732 | NW_004516122.1 | Scaffold724 | 126732                  | TT                              | CC              | 1946975119               |
| SNP_P4_143011_126733 | NW_004516122.1 | Scaffold724 | 126733                  | CC                              | TT              | 1946975121               |
| SNP_P4_143013_126956 | NW_004516122.1 | Scaffold724 | 126956                  | CC                              | AA              | 1946975123               |
| SNP_P4_143014_126992 | NW_004516122.1 | Scaffold724 | 126992                  | CC                              | TT              | 1946975125               |
| SNP_P4_143015_127017 | NW_004516122.1 | Scaffold724 | 127017                  | CC                              | AA              | 1946975127               |
| SNP_P4_143017_94     | NW_004516123.1 | Scaffold725 | 94                      | AA                              | GG              | 1946975129               |
| SNP_P4_143018_122    | NW_004516123.1 | Scaffold725 | 122                     | AA                              | CC              | 1946975131               |
| SNP_P4_143019_191    | NW_004516123.1 | Scaffold725 | 191                     | AA                              | GG              | 1946975133               |
| SNP_P4_143020_340    | NW_004516123.1 | Scaffold725 | 340                     | GG                              | AA              | 1946975135               |
| SNP_P4_143021_400    | NW_004516123.1 | Scaffold725 | 400                     | AA                              | GG              | 1946975137               |
| SNP_P4_143022_922    | NW_004516123.1 | Scaffold725 | 922                     | GG                              | AA              | 1946975139               |
| SNP_P4_143023_923    | NW_004516123.1 | Scaffold725 | 923                     | AA                              | TT              | 1946975141               |
| SNP_P4_143024_1315   | NW_004516123.1 | Scaffold725 | 1315                    | CC                              | AA              | 1946975143               |
| SNP_P4_143025_17175  | NW_004516124.1 | Scaffold728 | 17175                   | TT                              | CC              | 1946975145               |

| SNPs IDs            | Chromosome IDs | Chromosomes | Physical positions (bp) | CDC Frontier (Reference genome) | (ILWC46 & LPNB) | NCBI SNPdb Accession IDs |
|---------------------|----------------|-------------|-------------------------|---------------------------------|-----------------|--------------------------|
| SNP_P4_143026_17516 | NW_004516124.1 | Scaffold728 | 17516                   | GG                              | AA              | 1946975147               |
| SNP_P4_143027_20314 | NW_004516124.1 | Scaffold728 | 20314                   | CC                              | TT              | 1946975149               |
| SNP_P4_143029_24379 | NW_004516124.1 | Scaffold728 | 24379                   | CC                              | TT              | 1946975151               |
| SNP_P4_143030_24388 | NW_004516124.1 | Scaffold728 | 24388                   | CC                              | TT              | 1946975153               |
| SNP_P4_143031_24505 | NW_004516124.1 | Scaffold728 | 24505                   | AA                              | GG              | 1946975155               |
| SNP_P4_143032_24513 | NW_004516124.1 | Scaffold728 | 24513                   | AA                              | GG              | 1946975157               |
| SNP_P4_143035_40657 | NW_004516124.1 | Scaffold728 | 40657                   | CC                              | AA              | 1946975160               |
| SNP_P4_143036_42006 | NW_004516124.1 | Scaffold728 | 42006                   | TT                              | CC              | 1946975161               |
| SNP_P4_143037_42041 | NW_004516124.1 | Scaffold728 | 42041                   | CC                              | TT              | 1946975163               |
| SNP_P4_143038_42076 | NW_004516124.1 | Scaffold728 | 42076                   | CC                              | TT              | 1946975165               |
| SNP_P4_143039_42401 | NW_004516124.1 | Scaffold728 | 42401                   | AA                              | CC              | 1946975167               |
| SNP_P4_143040_42583 | NW_004516124.1 | Scaffold728 | 42583                   | CC                              | AA              | 1946975169               |
| SNP_P4_143041_42650 | NW_004516124.1 | Scaffold728 | 42650                   | GG                              | AA              | 1946975171               |
| SNP_P4_143042_42741 | NW_004516124.1 | Scaffold728 | 42741                   | AA                              | TT              | 1946975173               |
| SNP_P4_143043_42803 | NW_004516124.1 | Scaffold728 | 42803                   | AA                              | GG              | 1946975175               |
| SNP_P4_143044_42866 | NW_004516124.1 | Scaffold728 | 42866                   | GG                              | AA              | 1946975177               |
| SNP_P4_143045_42883 | NW_004516124.1 | Scaffold728 | 42883                   | CC                              | TT              | 1946975180               |
| SNP_P4_143046_42921 | NW_004516124.1 | Scaffold728 | 42921                   | TT                              | CC              | 1946975182               |
| SNP_P4_143047_42971 | NW_004516124.1 | Scaffold728 | 42971                   | TT                              | CC              | 1946975184               |
| SNP_P4_143048_42974 | NW_004516124.1 | Scaffold728 | 42974                   | TT                              | CC              | 1946975186               |
| SNP_P4_143049_43055 | NW_004516124.1 | Scaffold728 | 43055                   | GG                              | AA              | 1946975188               |
| SNP_P4_143050_43184 | NW_004516124.1 | Scaffold728 | 43184                   | AA                              | CC              | 1946975190               |
| SNP_P4_143051_43271 | NW_004516124.1 | Scaffold728 | 43271                   | GG                              | TT              | 1946975192               |
| SNP_P4_143053_43728 | NW_004516124.1 | Scaffold728 | 43728                   | TT                              | CC              | 1946975194               |
| SNP_P4_143054_682   | NW_004516125.1 | Scaffold731 | 682                     | AA                              | GG              | 1946975196               |
| SNP_P4_143055_811   | NW_004516125.1 | Scaffold731 | 811                     | AA                              | GG              | 1946975198               |
| SNP_P4_143056_825   | NW_004516125.1 | Scaffold731 | 825                     | GG                              | TT              | 1946975200               |
| SNP_P4_143057_9946  | NW_004516125.1 | Scaffold731 | 9946                    | CC                              | TT              | 1946975202               |
| SNP_P4_143058_11545 | NW_004516125.1 | Scaffold731 | 11545                   | AA                              | GG              | 1946975204               |
| SNP_P4_143060_27384 | NW_004516125.1 | Scaffold731 | 27384                   | TT                              | CC              | 1946975206               |
| SNP_P4_143061_27395 | NW_004516125.1 | Scaffold731 | 27395                   | CC                              | TT              | 1946975208               |
| SNP_P4_143062_27417 | NW_004516125.1 | Scaffold731 | 27417                   | GG                              | CC              | 1946975210               |
| SNP_P4_143063_27426 | NW_004516125.1 | Scaffold731 | 27426                   | TT                              | CC              | 1946975212               |
| SNP_P4_143064_27446 | NW_004516125.1 | Scaffold731 | 27446                   | AA                              | CC              | 1946975214               |
| SNP_P4_143065_27649 | NW_004516125.1 | Scaffold731 | 27649                   | GG                              | AA              | 1946975216               |
| SNP_P4_143066_27796 | NW_004516125.1 | Scaffold731 | 27796                   | AA                              | TT              | 1946975219               |
| SNP_P4_143067_27874 | NW_004516125.1 | Scaffold731 | 27874                   | CC                              | AA              | 1946975221               |
| SNP_P4_143069_44691 | NW_004516125.1 | Scaffold731 | 44691                   | GG                              | AA              | 1946975223               |
| SNP_P4_143070_46260 | NW_004516125.1 | Scaffold731 | 46260                   | AA                              | GG              | 1946975225               |
| SNP_P4_143071_46484 | NW_004516125.1 | Scaffold731 | 46484                   | GG                              | AA              | 1946975227               |
| SNP_P4_143073_46500 | NW_004516125.1 | Scaffold731 | 46500                   | AA                              | TT              | 1946975229               |
| SNP_P4_143074_46528 | NW_004516125.1 | Scaffold731 | 46528                   | AA                              | TT              | 1946975231               |

| SNPs IDs             | Chromosome IDs | Chromosomes | Physical positions (bp) | CDC Frontier (Reference genome) | (ILWC46 & LPNB) | NCBI SNPdb Accession IDs |
|----------------------|----------------|-------------|-------------------------|---------------------------------|-----------------|--------------------------|
| SNP_P4_143075_46556  | NW_004516125.1 | Scaffold731 | 46556                   | TT                              | AA              | 1946975233               |
| SNP_P4_143076_46557  | NW_004516125.1 | Scaffold731 | 46557                   | AA                              | TT              | 1946975235               |
| SNP_P4_143077_49047  | NW_004516125.1 | Scaffold731 | 49047                   | TT                              | AA              | 1946975237               |
| SNP_P4_143078_49357  | NW_004516125.1 | Scaffold731 | 49357                   | TT                              | CC              | 1946975239               |
| SNP_P4_143079_49363  | NW_004516125.1 | Scaffold731 | 49363                   | AA                              | GG              | 1946975241               |
| SNP_P4_143080_49364  | NW_004516125.1 | Scaffold731 | 49364                   | TT                              | AA              | 1946975243               |
| SNP_P4_143081_49483  | NW_004516125.1 | Scaffold731 | 49483                   | AA                              | GG              | 1946975246               |
| SNP_P4_143082_49519  | NW_004516125.1 | Scaffold731 | 49519                   | TT                              | CC              | 1946975248               |
| SNP_P4_143083_49569  | NW_004516125.1 | Scaffold731 | 49569                   | GG                              | TT              | 1946975250               |
| SNP_P4_143084_49573  | NW_004516125.1 | Scaffold731 | 49573                   | CC                              | TT              | 1946975252               |
| SNP_P4_143086_62604  | NW_004516125.1 | Scaffold731 | 62604                   | CC                              | TT              | 1946975254               |
| SNP_P4_143087_75132  | NW_004516125.1 | Scaffold731 | 75132                   | TT                              | AA              | 1946975256               |
| SNP_P4_143090_94777  | NW_004516125.1 | Scaffold731 | 94777                   | TT                              | CC              | 1946975258               |
| SNP_P4_143091_102778 | NW_004516125.1 | Scaffold731 | 102778                  | TT                              | GG              | 1946975260               |
| SNP_P4_143092_135531 | NW_004516125.1 | Scaffold731 | 135531                  | TT                              | GG              | 1946975261               |
| SNP_P4_143093_135753 | NW_004516125.1 | Scaffold731 | 135753                  | TT                              | CC              | 1946975262               |
| SNP_P4_143094_135868 | NW_004516125.1 | Scaffold731 | 135868                  | CC                              | TT              | 1946975263               |
| SNP_P4_143095_135890 | NW_004516125.1 | Scaffold731 | 135890                  | CC                              | AA              | 1946975266               |
| SNP_P4_143096_136119 | NW_004516125.1 | Scaffold731 | 136119                  | AA                              | GG              | 1946975268               |
| SNP_P4_143097_136150 | NW_004516125.1 | Scaffold731 | 136150                  | TT                              | CC              | 1946975269               |
| SNP_P4_143098_136301 | NW_004516125.1 | Scaffold731 | 136301                  | AA                              | TT              | 1946975272               |
| SNP_P4_143099_139504 | NW_004516125.1 | Scaffold731 | 139504                  | TT                              | CC              | 1946975274               |
| SNP_P4_143100_139554 | NW_004516125.1 | Scaffold731 | 139554                  | TT                              | CC              | 1946975276               |
| SNP_P4_143101_145761 | NW_004516125.1 | Scaffold731 | 145761                  | AA                              | GG              | 1946975278               |
| SNP_P4_143102_145765 | NW_004516125.1 | Scaffold731 | 145765                  | CC                              | TT              | 1946975280               |
| SNP_P4_143103_148616 | NW_004516125.1 | Scaffold731 | 148616                  | GG                              | CC              | 1946975282               |
| SNP_P4_143104_148640 | NW_004516125.1 | Scaffold731 | 148640                  | TT                              | CC              | 1946975284               |
| SNP_P4_143105_169718 | NW_004516125.1 | Scaffold731 | 169718                  | AA                              | GG              | 1946975286               |
| SNP_P4_143106_170275 | NW_004516125.1 | Scaffold731 | 170275                  | AA                              | GG              | 1946975288               |
| SNP_P4_143107_174935 | NW_004516125.1 | Scaffold731 | 174935                  | CC                              | AA              | 1946975291               |
| SNP_P4_143108_183427 | NW_004516125.1 | Scaffold731 | 183427                  | AA                              | GG              | 1946975293               |
| SNP_P4_143109_197467 | NW_004516125.1 | Scaffold731 | 197467                  | CC                              | TT              | 1946975295               |
| SNP_P4_143110_197813 | NW_004516125.1 | Scaffold731 | 197813                  | TT                              | CC              | 1946975297               |
| SNP_P4_143111_205299 | NW_004516125.1 | Scaffold731 | 205299                  | GG                              | AA              | 1946975299               |
| SNP_P4_143112_205692 | NW_004516125.1 | Scaffold731 | 205692                  | TT                              | GG              | 1946975301               |
| SNP_P4_143113_205965 | NW_004516125.1 | Scaffold731 | 205965                  | AA                              | CC              | 1946975303               |
| SNP_P4_143114_206069 | NW_004516125.1 | Scaffold731 | 206069                  | GG                              | AA              | 1946975305               |
| SNP_P4_143115_206128 | NW_004516125.1 | Scaffold731 | 206128                  | TT                              | CC              | 1946975307               |
| SNP_P4_143116_216856 | NW_004516125.1 | Scaffold731 | 216856                  | AA                              | GG              | 1946975309               |
| SNP_P4_143117_224594 | NW_004516125.1 | Scaffold731 | 224594                  | GG                              | TT              | 1946975311               |
| SNP_P4_143118_224857 | NW_004516125.1 | Scaffold731 | 224857                  | AA                              | CC              | 1946975313               |
| SNP_P4_143119_229288 | NW_004516125.1 | Scaffold731 | 229288                  | AA                              | GG              | 1946975315               |

| SNPs IDs             | Chromosome IDs | Chromosomes | Physical positions (bp) | CDC Frontier (Reference genome) | (ILWC46 & LPNB) | NCBI SNPdb Accession IDs |
|----------------------|----------------|-------------|-------------------------|---------------------------------|-----------------|--------------------------|
| SNP_P4_143120_229291 | NW_004516125.1 | Scaffold731 | 229291                  | AA                              | GG              | 1946975317               |
| SNP_P4_143122_277636 | NW_004516125.1 | Scaffold731 | 277636                  | CC                              | AA              | 1946975319               |
| SNP_P4_143123_293863 | NW_004516125.1 | Scaffold731 | 293863                  | TT                              | CC              | 1946975321               |
| SNP_P4_143124_293906 | NW_004516125.1 | Scaffold731 | 293906                  | TT                              | GG              | 1946975323               |
| SNP_P4_143125_293916 | NW_004516125.1 | Scaffold731 | 293916                  | TT                              | GG              | 1946975325               |
| SNP_P4_143126_294098 | NW_004516125.1 | Scaffold731 | 294098                  | TT                              | CC              | 1946975327               |
| SNP_P4_143127_294124 | NW_004516125.1 | Scaffold731 | 294124                  | AA                              | GG              | 1946975330               |
| SNP_P4_143128_294509 | NW_004516125.1 | Scaffold731 | 294509                  | AA                              | GG              | 1946975332               |
| SNP_P4_143129_300660 | NW_004516125.1 | Scaffold731 | 300660                  | CC                              | TT              | 1946975333               |
| SNP_P4_143130_300679 | NW_004516125.1 | Scaffold731 | 300679                  | TT                              | CC              | 1946975335               |
| SNP_P4_143131_300969 | NW_004516125.1 | Scaffold731 | 300969                  | TT                              | CC              | 1946975337               |
| SNP_P4_143132_300985 | NW_004516125.1 | Scaffold731 | 300985                  | GG                              | TT              | 1946975339               |
| SNP_P4_143133_300990 | NW_004516125.1 | Scaffold731 | 300990                  | AA                              | GG              | 1946975341               |
| SNP_P4_143134_301065 | NW_004516125.1 | Scaffold731 | 301065                  | GG                              | CC              | 1946975343               |
| SNP_P4_143135_301067 | NW_004516125.1 | Scaffold731 | 301067                  | GG                              | AA              | 1946975345               |
| SNP_P4_143136_301938 | NW_004516125.1 | Scaffold731 | 301938                  | CC                              | TT              | 1946975347               |
| SNP_P4_143137_301939 | NW_004516125.1 | Scaffold731 | 301939                  | TT                              | CC              | 1946975349               |
| SNP_P4_143139_313056 | NW_004516125.1 | Scaffold731 | 313056                  | GG                              | AA              | 1946975351               |
| SNP_P4_143140_313093 | NW_004516125.1 | Scaffold731 | 313093                  | AA                              | GG              | 1946975353               |
| SNP_P4_143141_315329 | NW_004516125.1 | Scaffold731 | 315329                  | AA                              | CC              | 1946975355               |
| SNP_P4_143142_315344 | NW_004516125.1 | Scaffold731 | 315344                  | TT                              | CC              | 1946975357               |
| SNP_P4_143143_315398 | NW_004516125.1 | Scaffold731 | 315398                  | TT                              | GG              | 1946975359               |
| SNP_P4_143144_315530 | NW_004516125.1 | Scaffold731 | 315530                  | AA                              | CC              | 1946975361               |
| SNP_P4_143145_315563 | NW_004516125.1 | Scaffold731 | 315563                  | TT                              | CC              | 1946975363               |
| SNP_P4_143146_315575 | NW_004516125.1 | Scaffold731 | 315575                  | GG                              | TT              | 1946975365               |
| SNP_P4_143147_315606 | NW_004516125.1 | Scaffold731 | 315606                  | AA                              | GG              | 1946975367               |
| SNP_P4_143148_315607 | NW_004516125.1 | Scaffold731 | 315607                  | GG                              | CC              | 1946975369               |
| SNP_P4_143149_315859 | NW_004516125.1 | Scaffold731 | 315859                  | CC                              | AA              | 1946975371               |
| SNP_P4_143151_315913 | NW_004516125.1 | Scaffold731 | 315913                  | GG                              | AA              | 1946975372               |
| SNP_P4_143152_315925 | NW_004516125.1 | Scaffold731 | 315925                  | TT                              | GG              | 1946975374               |
| SNP_P4_143153_315953 | NW_004516125.1 | Scaffold731 | 315953                  | TT                              | GG              | 1946975376               |
| SNP_P4_143154_315987 | NW_004516125.1 | Scaffold731 | 315987                  | GG                              | AA              | 1946975378               |
| SNP_P4_143155_322711 | NW_004516125.1 | Scaffold731 | 322711                  | TT                              | GG              | 1946975380               |
| SNP_P4_143158_323252 | NW_004516125.1 | Scaffold731 | 323252                  | TT                              | AA              | 1946975382               |
| SNP_P4_143159_323507 | NW_004516125.1 | Scaffold731 | 323507                  | TT                              | CC              | 1946975384               |
| SNP_P4_143160_323652 | NW_004516125.1 | Scaffold731 | 323652                  | CC                              | GG              | 1946975386               |
| SNP_P4_143161_323699 | NW_004516125.1 | Scaffold731 | 323699                  | AA                              | GG              | 1946975388               |
| SNP_P4_143164_324500 | NW_004516125.1 | Scaffold731 | 324500                  | TT                              | AA              | 1946975390               |
| SNP_P4_143165_324503 | NW_004516125.1 | Scaffold731 | 324503                  | AA                              | GG              | 1946975392               |
| SNP_P4_143166_324504 | NW_004516125.1 | Scaffold731 | 324504                  | AA                              | GG              | 1946975394               |
| SNP_P4_143167_324506 | NW_004516125.1 | Scaffold731 | 324506                  | GG                              | CC              | 1946975396               |
| SNP_P4_143169_324604 | NW_004516125.1 | Scaffold731 | 324604                  | TT                              | GG              | 1946975398               |

| SNPs IDs             | Chromosome IDs | Chromosomes | Physical positions (bp) | CDC Frontier (Reference genome) | (ILWC46 & LPNB) | NCBI SNPdb Accession IDs |
|----------------------|----------------|-------------|-------------------------|---------------------------------|-----------------|--------------------------|
| SNP_P4_143171_334744 | NW_004516125.1 | Scaffold731 | 334744                  | TT                              | CC              | 1946975400               |
| SNP_P4_143172_334792 | NW_004516125.1 | Scaffold731 | 334792                  | AA                              | GG              | 1946975402               |
| SNP_P4_143174_335021 | NW_004516125.1 | Scaffold731 | 335021                  | AA                              | GG              | 1946975404               |
| SNP_P4_143175_335072 | NW_004516125.1 | Scaffold731 | 335072                  | GG                              | TT              | 1946975406               |
| SNP_P4_143176_339389 | NW_004516125.1 | Scaffold731 | 339389                  | AA                              | GG              | 1946975408               |
| SNP_P4_143177_339423 | NW_004516125.1 | Scaffold731 | 339423                  | GG                              | AA              | 1946975410               |
| SNP_P4_143179_340734 | NW_004516125.1 | Scaffold731 | 340734                  | CC                              | TT              | 1946975412               |
| SNP_P4_143180_340744 | NW_004516125.1 | Scaffold731 | 340744                  | TT                              | CC              | 1946975414               |
| SNP_P4_143181_340893 | NW_004516125.1 | Scaffold731 | 340893                  | TT                              | GG              | 1946975416               |
| SNP_P4_143182_340986 | NW_004516125.1 | Scaffold731 | 340986                  | TT                              | AA              | 1946975418               |
| SNP_P4_143183_341012 | NW_004516125.1 | Scaffold731 | 341012                  | AA                              | GG              | 1946975420               |
| SNP_P4_143184_341050 | NW_004516125.1 | Scaffold731 | 341050                  | AA                              | CC              | 1946975421               |
| SNP_P4_143185_341071 | NW_004516125.1 | Scaffold731 | 341071                  | TT                              | CC              | 1946975423               |
| SNP_P4_143186_341129 | NW_004516125.1 | Scaffold731 | 341129                  | AA                              | TT              | 1946975425               |
| SNP_P4_143187_341144 | NW_004516125.1 | Scaffold731 | 341144                  | GG                              | CC              | 1946975427               |
| SNP_P4_143188_341158 | NW_004516125.1 | Scaffold731 | 341158                  | CC                              | AA              | 1946975429               |
| SNP_P4_143189_341304 | NW_004516125.1 | Scaffold731 | 341304                  | AA                              | GG              | 1946975431               |
| SNP_P4_143190_342054 | NW_004516125.1 | Scaffold731 | 342054                  | GG                              | TT              | 1946975433               |
| SNP_P4_143191_342062 | NW_004516125.1 | Scaffold731 | 342062                  | TT                              | CC              | 1946975435               |
| SNP_P4_143192_342074 | NW_004516125.1 | Scaffold731 | 342074                  | AA                              | GG              | 1946975437               |
| SNP_P4_143194_343859 | NW_004516125.1 | Scaffold731 | 343859                  | CC                              | TT              | 1946975439               |
| SNP_P4_143195_343901 | NW_004516125.1 | Scaffold731 | 343901                  | GG                              | TT              | 1946975441               |
| SNP_P4_143196_343922 | NW_004516125.1 | Scaffold731 | 343922                  | AA                              | GG              | 1946975443               |
| SNP_P4_143197_347409 | NW_004516125.1 | Scaffold731 | 347409                  | CC                              | TT              | 1946975445               |
| SNP_P4_143198_347747 | NW_004516125.1 | Scaffold731 | 347747                  | CC                              | TT              | 1946975447               |
| SNP_P4_143199_347904 | NW_004516125.1 | Scaffold731 | 347904                  | CC                              | GG              | 1946975449               |
| SNP_P4_143200_347918 | NW_004516125.1 | Scaffold731 | 347918                  | TT                              | AA              | 1946975452               |
| SNP_P4_143201_347919 | NW_004516125.1 | Scaffold731 | 347919                  | TT                              | CC              | 1946975454               |
| SNP_P4_143203_347940 | NW_004516125.1 | Scaffold731 | 347940                  | GG                              | AA              | 1946975456               |
| SNP_P4_143204_347944 | NW_004516125.1 | Scaffold731 | 347944                  | GG                              | AA              | 1946975458               |
| SNP_P4_143205_348066 | NW_004516125.1 | Scaffold731 | 348066                  | GG                              | CC              | 1946975459               |
| SNP_P4_143206_348098 | NW_004516125.1 | Scaffold731 | 348098                  | TT                              | CC              | 1946975461               |
| SNP_P4_143207_348814 | NW_004516125.1 | Scaffold731 | 348814                  | GG                              | CC              | 1946975464               |
| SNP_P4_143208_349507 | NW_004516125.1 | Scaffold731 | 349507                  | AA                              | TT              | 1946975466               |
| SNP_P4_143209_349518 | NW_004516125.1 | Scaffold731 | 349518                  | AA                              | TT              | 1946975468               |
| SNP_P4_143210_349525 | NW_004516125.1 | Scaffold731 | 349525                  | CC                              | TT              | 1946975470               |
| SNP_P4_143211_349611 | NW_004516125.1 | Scaffold731 | 349611                  | AA                              | GG              | 1946975472               |
| SNP_P4_143212_354006 | NW_004516125.1 | Scaffold731 | 354006                  | GG                              | AA              | 1946975473               |
| SNP_P4_143215_355019 | NW_004516125.1 | Scaffold731 | 355019                  | CC                              | GG              | 1946975475               |
| SNP_P4_143216_361202 | NW_004516125.1 | Scaffold731 | 361202                  | TT                              | CC              | 1946975477               |
| SNP_P4_143217_361238 | NW_004516125.1 | Scaffold731 | 361238                  | AA                              | GG              | 1946975479               |
| SNP_P4_143218_361553 | NW_004516125.1 | Scaffold731 | 361553                  | CC                              | AA              | 1946975481               |

| SNPs IDs             | Chromosome IDs | Chromosomes | Physical positions (bp) | CDC Frontier (Reference genome) | (ILWC46 & LPNB) | NCBI SNPdb Accession IDs |
|----------------------|----------------|-------------|-------------------------|---------------------------------|-----------------|--------------------------|
| SNP_P4_143220_361626 | NW_004516125.1 | Scaffold731 | 361626                  | GG                              | TT              | 1946975483               |
| SNP_P4_143221_361644 | NW_004516125.1 | Scaffold731 | 361644                  | TT                              | AA              | 1946975485               |
| SNP_P4_143222_361786 | NW_004516125.1 | Scaffold731 | 361786                  | TT                              | GG              | 1946975487               |
| SNP_P4_143223_361818 | NW_004516125.1 | Scaffold731 | 361818                  | TT                              | CC              | 1946975489               |
| SNP_P4_143224_361834 | NW_004516125.1 | Scaffold731 | 361834                  | AA                              | GG              | 1946975491               |
| SNP_P4_143226_365644 | NW_004516125.1 | Scaffold731 | 365644                  | CC                              | TT              | 1946975493               |
| SNP_P4_143227_365654 | NW_004516125.1 | Scaffold731 | 365654                  | CC                              | TT              | 1946975495               |
| SNP_P4_143228_365663 | NW_004516125.1 | Scaffold731 | 365663                  | CC                              | AA              | 1946975497               |
| SNP_P4_143229_366011 | NW_004516125.1 | Scaffold731 | 366011                  | TT                              | CC              | 1946975499               |
| SNP_P4_143230_366051 | NW_004516125.1 | Scaffold731 | 366051                  | TT                              | CC              | 1946975501               |
| SNP_P4_143232_366126 | NW_004516125.1 | Scaffold731 | 366126                  | GG                              | CC              | 1946975503               |
| SNP_P4_143233_366156 | NW_004516125.1 | Scaffold731 | 366156                  | AA                              | GG              | 1946975505               |
| SNP_P4_143234_367380 | NW_004516125.1 | Scaffold731 | 367380                  | AA                              | TT              | 1946975507               |
| SNP_P4_143236_369529 | NW_004516125.1 | Scaffold731 | 369529                  | GG                              | AA              | 1946975509               |
| SNP_P4_143237_369646 | NW_004516125.1 | Scaffold731 | 369646                  | TT                              | CC              | 1946975511               |
| SNP_P4_143238_369674 | NW_004516125.1 | Scaffold731 | 369674                  | AA                              | GG              | 1946975513               |
| SNP_P4_143239_369686 | NW_004516125.1 | Scaffold731 | 369686                  | CC                              | TT              | 1946975515               |
| SNP_P4_143240_369696 | NW_004516125.1 | Scaffold731 | 369696                  | TT                              | CC              | 1946975517               |
| SNP_P4_143241_369697 | NW_004516125.1 | Scaffold731 | 369697                  | TT                              | CC              | 1946975519               |
| SNP_P4_143245_390566 | NW_004516125.1 | Scaffold731 | 390566                  | CC                              | AA              | 1946975520               |
| SNP_P4_143246_391657 | NW_004516125.1 | Scaffold731 | 391657                  | AA                              | GG              | 1946975522               |
| SNP_P4_143247_391708 | NW_004516125.1 | Scaffold731 | 391708                  | CC                              | TT              | 1946975524               |
| SNP_P4_143249_427673 | NW_004516125.1 | Scaffold731 | 427673                  | AA                              | TT              | 1946975526               |
| SNP_P4_143250_9640   | NW_004516127.1 | Scaffold735 | 9640                    | GG                              | AA              | 1946975528               |
| SNP_P4_143252_15560  | NW_004516127.1 | Scaffold735 | 15560                   | TT                              | CC              | 1946975530               |
| SNP_P4_143253_54213  | NW_004516127.1 | Scaffold735 | 54213                   | CC                              | TT              | 1946975532               |
| SNP_P4_143254_54469  | NW_004516127.1 | Scaffold735 | 54469                   | GG                              | AA              | 1946975534               |
| SNP_P4_143255_55473  | NW_004516127.1 | Scaffold735 | 55473                   | AA                              | TT              | 1946975536               |
| SNP_P4_143256_57041  | NW_004516127.1 | Scaffold735 | 57041                   | GG                              | AA              | 1946975538               |
| SNP_P4_143257_69995  | NW_004516127.1 | Scaffold735 | 69995                   | GG                              | AA              | 1946975540               |
| SNP_P4_143258_70035  | NW_004516127.1 | Scaffold735 | 70035                   | GG                              | AA              | 1946975542               |
| SNP_P4_143259_71629  | NW_004516127.1 | Scaffold735 | 71629                   | TT                              | CC              | 1946975544               |
| SNP_P4_143260_79138  | NW_004516127.1 | Scaffold735 | 79138                   | TT                              | CC              | 1946975546               |
| SNP_P4_143261_79202  | NW_004516127.1 | Scaffold735 | 79202                   | GG                              | AA              | 1946975547               |
| SNP_P4_143262_85953  | NW_004516127.1 | Scaffold735 | 85953                   | TT                              | CC              | 1946975550               |
| SNP_P4_143263_130734 | NW_004516127.1 | Scaffold735 | 130734                  | GG                              | CC              | 1946975551               |
| SNP_P4_143264_134846 | NW_004516127.1 | Scaffold735 | 134846                  | AA                              | TT              | 1946975553               |
| SNP_P4_143265_138124 | NW_004516127.1 | Scaffold735 | 138124                  | AA                              | TT              | 1946975555               |
| SNP_P4_143266_149714 | NW_004516127.1 | Scaffold735 | 149714                  | CC                              | TT              | 1946975557               |
| SNP_P4_143267_150034 | NW_004516127.1 | Scaffold735 | 150034                  | TT                              | CC              | 1946975559               |
| SNP_P4_143268_150097 | NW_004516127.1 | Scaffold735 | 150097                  | AA                              | CC              | 1946975561               |
| SNP_P4_143269_173160 | NW_004516127.1 | Scaffold735 | 173160                  | GG                              | AA              | 1946975563               |

| SNPs IDs             | Chromosome IDs | Chromosomes | Physical positions (bp) | CDC Frontier (Reference genome) | (ILWC46 & LPNB) | NCBI SNPdb Accession IDs |
|----------------------|----------------|-------------|-------------------------|---------------------------------|-----------------|--------------------------|
| SNP_P4_143271_180271 | NW_004516127.1 | Scaffold735 | 180271                  | TT                              | CC              | 1946975565               |
| SNP_P4_143272_180290 | NW_004516127.1 | Scaffold735 | 180290                  | GG                              | AA              | 1946975567               |
| SNP_P4_143273_186893 | NW_004516127.1 | Scaffold735 | 186893                  | TT                              | CC              | 1946975569               |
| SNP_P4_143274_187103 | NW_004516127.1 | Scaffold735 | 187103                  | AA                              | GG              | 1946975571               |
| SNP_P4_143275_187182 | NW_004516127.1 | Scaffold735 | 187182                  | CC                              | TT              | 1946975573               |
| SNP_P4_143276_187196 | NW_004516127.1 | Scaffold735 | 187196                  | CC                              | TT              | 1946975575               |
| SNP_P4_143277_187213 | NW_004516127.1 | Scaffold735 | 187213                  | GG                              | AA              | 1946975577               |
| SNP_P4_143278_187247 | NW_004516127.1 | Scaffold735 | 187247                  | GG                              | AA              | 1946975579               |
| SNP_P4_143280_193843 | NW_004516127.1 | Scaffold735 | 193843                  | CC                              | TT              | 1946975581               |
| SNP_P4_143281_221986 | NW_004516127.1 | Scaffold735 | 221986                  | CC                              | GG              | 1946975583               |
| SNP_P4_143282_292    | NW_004516128.1 | Scaffold736 | 292                     | TT                              | AA              | 1946975585               |
| SNP_P4_143283_296    | NW_004516128.1 | Scaffold736 | 296                     | AA                              | TT              | 1946975587               |
| SNP_P4_143284_1166   | NW_004516128.1 | Scaffold736 | 1166                    | CC                              | TT              | 1946975589               |
| SNP_P4_143285_1813   | NW_004516128.1 | Scaffold736 | 1813                    | TT                              | GG              | 1946975591               |
| SNP_P4_143286_1879   | NW_004516128.1 | Scaffold736 | 1879                    | GG                              | AA              | 1946975594               |
| SNP_P4_143287_1894   | NW_004516128.1 | Scaffold736 | 1894                    | CC                              | TT              | 1946975596               |
| SNP_P4_143288_2093   | NW_004516129.1 | Scaffold737 | 2093                    | AA                              | TT              | 1946975598               |
| SNP_P4_143289_64     | NW_004516130.1 | Scaffold738 | 64                      | AA                              | CC              | 1946975600               |
| SNP_P4_143290_127    | NW_004516130.1 | Scaffold738 | 127                     | TT                              | CC              | 1946975602               |
| SNP_P4_143291_282    | NW_004516130.1 | Scaffold738 | 282                     | TT                              | AA              | 1946975604               |
| SNP_P4_143292_331    | NW_004516130.1 | Scaffold738 | 331                     | AA                              | TT              | 1946975606               |
| SNP_P4_143293_377    | NW_004516130.1 | Scaffold738 | 377                     | AA                              | CC              | 1946975608               |
| SNP_P4_143294_442    | NW_004516130.1 | Scaffold738 | 442                     | CC                              | TT              | 1946975610               |
| SNP_P4_143295_474    | NW_004516130.1 | Scaffold738 | 474                     | GG                              | TT              | 1946975612               |
| SNP_P4_143296_578    | NW_004516130.1 | Scaffold738 | 578                     | AA                              | GG              | 1946975614               |
| SNP_P4_143297_639    | NW_004516130.1 | Scaffold738 | 639                     | CC                              | GG              | 1946975616               |
| SNP_P4_143298_881    | NW_004516130.1 | Scaffold738 | 881                     | AA                              | TT              | 1946975618               |
| SNP_P4_143299_895    | NW_004516130.1 | Scaffold738 | 895                     | GG                              | TT              | 1946975621               |
| SNP_P4_143300_899    | NW_004516130.1 | Scaffold738 | 899                     | AA                              | CC              | 1946975622               |
| SNP_P4_143301_974    | NW_004516130.1 | Scaffold738 | 974                     | AA                              | TT              | 1946975624               |
| SNP_P4_143302_980    | NW_004516130.1 | Scaffold738 | 980                     | TT                              | CC              | 1946975626               |
| SNP_P4_143303_1010   | NW_004516130.1 | Scaffold738 | 1010                    | CC                              | AA              | 1946975629               |
| SNP_P4_143304_1078   | NW_004516130.1 | Scaffold738 | 1078                    | GG                              | CC              | 1946975631               |
| SNP_P4_143305_1586   | NW_004516130.1 | Scaffold738 | 1586                    | GG                              | AA              | 1946975633               |
| SNP_P4_143306_1681   | NW_004516130.1 | Scaffold738 | 1681                    | AA                              | TT              | 1946975635               |
| SNP_P4_143307_2043   | NW_004516130.1 | Scaffold738 | 2043                    | TT                              | CC              | 1946975637               |
| SNP_P4_143308_2062   | NW_004516130.1 | Scaffold738 | 2062                    | CC                              | TT              | 1946975639               |
| SNP_P4_143309_2120   | NW_004516130.1 | Scaffold738 | 2120                    | GG                              | CC              | 1946975641               |
| SNP_P4_143311_2188   | NW_004516130.1 | Scaffold738 | 2188                    | GG                              | AA              | 1946975643               |
| SNP_P4_143312_2400   | NW_004516130.1 | Scaffold738 | 2400                    | TT                              | CC              | 1946975645               |
| SNP_P4_143313_2470   | NW_004516130.1 | Scaffold738 | 2470                    | GG                              | AA              | 1946975647               |
| SNP_P4_143314_2498   | NW_004516130.1 | Scaffold738 | 2498                    | TT                              | CC              | 1946975649               |



| SNPs IDs            | Chromosome IDs | Chromosomes | Physical positions (bp) | CDC Frontier (Reference genome) | (ILWC46 & LPNB) | NCBI SNPdb Accession IDs |
|---------------------|----------------|-------------|-------------------------|---------------------------------|-----------------|--------------------------|
| SNP_P4_143315_4168  | NW_004516130.1 | Scaffold738 | 4168                    | AA                              | TT              | 1946975651               |
| SNP_P4_143316_4358  | NW_004516130.1 | Scaffold738 | 4358                    | AA                              | CC              | 1946975653               |
| SNP_P4_143317_4407  | NW_004516130.1 | Scaffold738 | 4407                    | AA                              | GG              | 1946975655               |
| SNP_P4_143318_4469  | NW_004516130.1 | Scaffold738 | 4469                    | GG                              | AA              | 1946975657               |
| SNP_P4_143319_4569  | NW_004516130.1 | Scaffold738 | 4569                    | TT                              | CC              | 1946975659               |
| SNP_P4_143320_4601  | NW_004516130.1 | Scaffold738 | 4601                    | CC                              | TT              | 1946975661               |
| SNP_P4_143321_4846  | NW_004516130.1 | Scaffold738 | 4846                    | AA                              | GG              | 1946975663               |
| SNP_P4_143322_4901  | NW_004516130.1 | Scaffold738 | 4901                    | CC                              | TT              | 1946975665               |
| SNP_P4_143323_4924  | NW_004516130.1 | Scaffold738 | 4924                    | AA                              | GG              | 1946975667               |
| SNP_P4_143324_4928  | NW_004516130.1 | Scaffold738 | 4928                    | CC                              | AA              | 1946975669               |
| SNP_P4_143325_5045  | NW_004516130.1 | Scaffold738 | 5045                    | TT                              | GG              | 1946975672               |
| SNP_P4_143326_5071  | NW_004516130.1 | Scaffold738 | 5071                    | AA                              | CC              | 1946975674               |
| SNP_P4_143328_5355  | NW_004516130.1 | Scaffold738 | 5355                    | CC                              | TT              | 1946975676               |
| SNP_P4_143329_5526  | NW_004516130.1 | Scaffold738 | 5526                    | CC                              | TT              | 1946975677               |
| SNP_P4_143330_5803  | NW_004516130.1 | Scaffold738 | 5803                    | GG                              | AA              | 1946975679               |
| SNP_P4_143331_6266  | NW_004516130.1 | Scaffold738 | 6266                    | TT                              | GG              | 1946975681               |
| SNP_P4_143332_6312  | NW_004516130.1 | Scaffold738 | 6312                    | CC                              | TT              | 1946975684               |
| SNP_P4_143333_6576  | NW_004516130.1 | Scaffold738 | 6576                    | CC                              | GG              | 1946975686               |
| SNP_P4_143334_6834  | NW_004516130.1 | Scaffold738 | 6834                    | GG                              | AA              | 1946975688               |
| SNP_P4_143335_7019  | NW_004516130.1 | Scaffold738 | 7019                    | CC                              | AA              | 1946975689               |
| SNP_P4_143336_7023  | NW_004516130.1 | Scaffold738 | 7023                    | GG                              | TT              | 1946975691               |
| SNP_P4_143337_7060  | NW_004516130.1 | Scaffold738 | 7060                    | CC                              | GG              | 1946975693               |
| SNP_P4_143338_7093  | NW_004516130.1 | Scaffold738 | 7093                    | TT                              | GG              | 1946975695               |
| SNP_P4_143339_7106  | NW_004516130.1 | Scaffold738 | 7106                    | CC                              | GG              | 1946975697               |
| SNP_P4_143340_7621  | NW_004516130.1 | Scaffold738 | 7621                    | AA                              | GG              | 1946975699               |
| SNP_P4_143341_7654  | NW_004516130.1 | Scaffold738 | 7654                    | TT                              | AA              | 1946975701               |
| SNP_P4_143342_8708  | NW_004516130.1 | Scaffold738 | 8708                    | CC                              | TT              | 1946975703               |
| SNP_P4_143343_8760  | NW_004516130.1 | Scaffold738 | 8760                    | CC                              | GG              | 1946975706               |
| SNP_P4_143344_8877  | NW_004516130.1 | Scaffold738 | 8877                    | TT                              | CC              | 1946975708               |
| SNP_P4_143345_8878  | NW_004516130.1 | Scaffold738 | 8878                    | CC                              | TT              | 1946975710               |
| SNP_P4_143346_8970  | NW_004516130.1 | Scaffold738 | 8970                    | GG                              | AA              | 1946975712               |
| SNP_P4_143347_9038  | NW_004516130.1 | Scaffold738 | 9038                    | CC                              | TT              | 1946975714               |
| SNP_P4_143348_9158  | NW_004516130.1 | Scaffold738 | 9158                    | TT                              | AA              | 1946975716               |
| SNP_P4_143349_9247  | NW_004516130.1 | Scaffold738 | 9247                    | TT                              | CC              | 1946975718               |
| SNP_P4_143350_9265  | NW_004516130.1 | Scaffold738 | 9265                    | AA                              | CC              | 1946975720               |
| SNP_P4_143351_9296  | NW_004516130.1 | Scaffold738 | 9296                    | CC                              | TT              | 1946975722               |
| SNP_P4_143352_9299  | NW_004516130.1 | Scaffold738 | 9299                    | AA                              | GG              | 1946975724               |
| SNP_P4_143353_9404  | NW_004516130.1 | Scaffold738 | 9404                    | CC                              | TT              | 1946975726               |
| SNP_P4_143354_9423  | NW_004516130.1 | Scaffold738 | 9423                    | GG                              | CC              | 1946975728               |
| SNP_P4_143355_10422 | NW_004516130.1 | Scaffold738 | 10422                   | CC                              | TT              | 1946975730               |
| SNP_P4_143357_10786 | NW_004516130.1 | Scaffold738 | 10786                   | AA                              | GG              | 1946975732               |
| SNP_P4_143358_10825 | NW_004516130.1 | Scaffold738 | 10825                   | AA                              | GG              | 1946975734               |

| SNPs IDs            | Chromosome IDs | Chromosomes | Physical positions (bp) | CDC Frontier (Reference genome) | (ILWC46 & LPNB) | NCBI SNPdb Accession IDs |
|---------------------|----------------|-------------|-------------------------|---------------------------------|-----------------|--------------------------|
| SNP_P4_143359_10826 | NW_004516130.1 | Scaffold738 | 10826                   | AA                              | GG              | 1946975736               |
| SNP_P4_143360_10840 | NW_004516130.1 | Scaffold738 | 10840                   | AA                              | GG              | 1946975738               |
| SNP_P4_143361_10846 | NW_004516130.1 | Scaffold738 | 10846                   | TT                              | AA              | 1946975740               |
| SNP_P4_143362_10851 | NW_004516130.1 | Scaffold738 | 10851                   | CC                              | TT              | 1946975742               |
| SNP_P4_143363_10988 | NW_004516130.1 | Scaffold738 | 10988                   | TT                              | GG              | 1946975744               |
| SNP_P4_143364_11008 | NW_004516130.1 | Scaffold738 | 11008                   | CC                              | GG              | 1946975746               |
| SNP_P4_143365_11373 | NW_004516130.1 | Scaffold738 | 11373                   | TT                              | GG              | 1946975748               |
| SNP_P4_143366_5162  | NW_004516131.1 | Scaffold739 | 5162                    | TT                              | AA              | 1946975750               |
| SNP_P4_143367_12235 | NW_004516131.1 | Scaffold739 | 12235                   | AA                              | GG              | 1946975752               |
| SNP_P4_143368_12291 | NW_004516131.1 | Scaffold739 | 12291                   | CC                              | AA              | 1946975754               |
| SNP_P4_143369_12293 | NW_004516131.1 | Scaffold739 | 12293                   | GG                              | TT              | 1946975756               |
| SNP_P4_143370_12613 | NW_004516131.1 | Scaffold739 | 12613                   | AA                              | GG              | 1946975758               |
| SNP_P4_143371_466   | NW_004516133.1 | Scaffold741 | 466                     | GG                              | AA              | 1946975760               |
| SNP_P4_143372_851   | NW_004516133.1 | Scaffold741 | 851                     | CC                              | GG              | 1946975762               |
| SNP_P4_143373_6307  | NW_004516133.1 | Scaffold741 | 6307                    | CC                              | TT              | 1946975764               |
| SNP_P4_143375_9816  | NW_004516133.1 | Scaffold741 | 9816                    | AA                              | GG              | 1946975766               |
| SNP_P4_143376_9837  | NW_004516133.1 | Scaffold741 | 9837                    | CC                              | TT              | 1946975768               |
| SNP_P4_143377_10016 | NW_004516133.1 | Scaffold741 | 10016                   | TT                              | CC              | 1946975770               |
| SNP_P4_143378_11242 | NW_004516133.1 | Scaffold741 | 11242                   | CC                              | TT              | 1946975772               |
| SNP_P4_143379_13524 | NW_004516133.1 | Scaffold741 | 13524                   | AA                              | TT              | 1946975774               |
| SNP_P4_143380_25834 | NW_004516133.1 | Scaffold741 | 25834                   | TT                              | CC              | 1946975776               |
| SNP_P4_143381_3405  | NW_004516135.1 | Scaffold743 | 3405                    | CC                              | TT              | 1946975779               |
| SNP_P4_143382_6866  | NW_004516135.1 | Scaffold743 | 6866                    | TT                              | AA              | 1946975781               |
| SNP_P4_143383_9051  | NW_004516135.1 | Scaffold743 | 9051                    | AA                              | TT              | 1946975783               |
| SNP_P4_143384_9414  | NW_004516135.1 | Scaffold743 | 9414                    | CC                              | AA              | 1946975785               |
| SNP_P4_143385_9871  | NW_004516135.1 | Scaffold743 | 9871                    | GG                              | AA              | 1946975787               |
| SNP_P4_143386_9959  | NW_004516135.1 | Scaffold743 | 9959                    | GG                              | CC              | 1946975789               |
| SNP_P4_143387_10474 | NW_004516135.1 | Scaffold743 | 10474                   | GG                              | CC              | 1946975791               |
| SNP_P4_143388_10498 | NW_004516135.1 | Scaffold743 | 10498                   | GG                              | AA              | 1946975793               |
| SNP_P4_143389_13917 | NW_004516135.1 | Scaffold743 | 13917                   | TT                              | GG              | 1946975795               |
| SNP_P4_143390_14008 | NW_004516135.1 | Scaffold743 | 14008                   | CC                              | TT              | 1946975797               |
| SNP_P4_143392_14284 | NW_004516135.1 | Scaffold743 | 14284                   | TT                              | CC              | 1946975798               |
| SNP_P4_143393_102   | NW_004516136.1 | Scaffold745 | 102                     | GG                              | TT              | 1946975800               |
| SNP_P4_143394_1607  | NW_004516136.1 | Scaffold745 | 1607                    | CC                              | TT              | 1946975802               |
| SNP_P4_143395_1644  | NW_004516136.1 | Scaffold745 | 1644                    | TT                              | CC              | 1946975804               |
| SNP_P4_143396_1655  | NW_004516136.1 | Scaffold745 | 1655                    | CC                              | GG              | 1946975806               |
| SNP_P4_143397_5167  | NW_004516137.1 | Scaffold746 | 5167                    | TT                              | GG              | 1946975808               |
| SNP_P4_143398_5501  | NW_004516137.1 | Scaffold746 | 5501                    | GG                              | AA              | 1946975810               |
| SNP_P4_143400_2066  | NW_004516138.1 | Scaffold749 | 2066                    | AA                              | GG              | 1946975813               |
| SNP_P4_143401_2120  | NW_004516138.1 | Scaffold749 | 2120                    | AA                              | TT              | 1946975815               |
| SNP_P4_143402_2169  | NW_004516138.1 | Scaffold749 | 2169                    | CC                              | TT              | 1946975817               |
| SNP_P4_143403_2449  | NW_004516138.1 | Scaffold749 | 2449                    | GG                              | AA              | 1946975818               |

| SNPs IDs            | Chromosome IDs | Chromosomes | Physical positions (bp) | CDC Frontier (Reference genome) | (ILWC46 & LPNB) | NCBI SNPdb Accession IDs |
|---------------------|----------------|-------------|-------------------------|---------------------------------|-----------------|--------------------------|
| SNP_P4_143404_4516  | NW_004516138.1 | Scaffold749 | 4516                    | TT                              | GG              | 1946975820               |
| SNP_P4_143405_4695  | NW_004516138.1 | Scaffold749 | 4695                    | AA                              | TT              | 1946975822               |
| SNP_P4_143407_4746  | NW_004516138.1 | Scaffold749 | 4746                    | TT                              | CC              | 1946975824               |
| SNP_P4_143408_4842  | NW_004516138.1 | Scaffold749 | 4842                    | AA                              | TT              | 1946975826               |
| SNP_P4_143409_4873  | NW_004516138.1 | Scaffold749 | 4873                    | TT                              | CC              | 1946975828               |
| SNP_P4_143410_4932  | NW_004516138.1 | Scaffold749 | 4932                    | CC                              | TT              | 1946975830               |
| SNP_P4_143411_5011  | NW_004516138.1 | Scaffold749 | 5011                    | AA                              | CC              | 1946975832               |
| SNP_P4_143412_5012  | NW_004516138.1 | Scaffold749 | 5012                    | CC                              | AA              | 1946975834               |
| SNP_P4_143413_7975  | NW_004516138.1 | Scaffold749 | 7975                    | AA                              | CC              | 1946975836               |
| SNP_P4_143414_8836  | NW_004516138.1 | Scaffold749 | 8836                    | TT                              | CC              | 1946975838               |
| SNP_P4_143415_8837  | NW_004516138.1 | Scaffold749 | 8837                    | TT                              | GG              | 1946975840               |
| SNP_P4_143416_8950  | NW_004516138.1 | Scaffold749 | 8950                    | AA                              | CC              | 1946975843               |
| SNP_P4_143417_9167  | NW_004516138.1 | Scaffold749 | 9167                    | TT                              | GG              | 1946975844               |
| SNP_P4_143418_10558 | NW_004516138.1 | Scaffold749 | 10558                   | TT                              | CC              | 1946975846               |
| SNP_P4_143419_10777 | NW_004516138.1 | Scaffold749 | 10777                   | CC                              | GG              | 1946975848               |
| SNP_P4_143420_12457 | NW_004516138.1 | Scaffold749 | 12457                   | CC                              | GG              | 1946975850               |
| SNP_P4_143421_13772 | NW_004516138.1 | Scaffold749 | 13772                   | TT                              | AA              | 1946975852               |
| SNP_P4_143422_13821 | NW_004516138.1 | Scaffold749 | 13821                   | AA                              | GG              | 1946975854               |
| SNP_P4_143423_13903 | NW_004516138.1 | Scaffold749 | 13903                   | CC                              | TT              | 1946975856               |
| SNP_P4_143424_13932 | NW_004516138.1 | Scaffold749 | 13932                   | AA                              | CC              | 1946975858               |
| SNP_P4_143425_13961 | NW_004516138.1 | Scaffold749 | 13961                   | TT                              | CC              | 1946975860               |
| SNP_P4_143426_13962 | NW_004516138.1 | Scaffold749 | 13962                   | TT                              | AA              | 1946975862               |
| SNP_P4_143427_14036 | NW_004516138.1 | Scaffold749 | 14036                   | AA                              | TT              | 1946975864               |
| SNP_P4_143428_14124 | NW_004516138.1 | Scaffold749 | 14124                   | AA                              | GG              | 1946975866               |
| SNP_P4_143429_14131 | NW_004516138.1 | Scaffold749 | 14131                   | AA                              | GG              | 1946975868               |
| SNP_P4_143430_14194 | NW_004516138.1 | Scaffold749 | 14194                   | TT                              | AA              | 1946975870               |
| SNP_P4_143431_14203 | NW_004516138.1 | Scaffold749 | 14203                   | GG                              | AA              | 1946975872               |
| SNP_P4_143432_14236 | NW_004516138.1 | Scaffold749 | 14236                   | GG                              | AA              | 1946975874               |
| SNP_P4_143433_14283 | NW_004516138.1 | Scaffold749 | 14283                   | TT                              | GG              | 1946975876               |
| SNP_P4_143434_14301 | NW_004516138.1 | Scaffold749 | 14301                   | AA                              | CC              | 1946975878               |
| SNP_P4_143435_14305 | NW_004516138.1 | Scaffold749 | 14305                   | TT                              | CC              | 1946975880               |
| SNP_P4_143436_14324 | NW_004516138.1 | Scaffold749 | 14324                   | CC                              | TT              | 1946975882               |
| SNP_P4_143437_15150 | NW_004516138.1 | Scaffold749 | 15150                   | CC                              | GG              | 1946975884               |
| SNP_P4_143438_16414 | NW_004516138.1 | Scaffold749 | 16414                   | TT                              | GG              | 1946975886               |
| SNP_P4_143439_18330 | NW_004516138.1 | Scaffold749 | 18330                   | GG                              | AA              | 1946975888               |
| SNP_P4_143440_21145 | NW_004516138.1 | Scaffold749 | 21145                   | AA                              | CC              | 1946975890               |
| SNP_P4_143441_27449 | NW_004516138.1 | Scaffold749 | 27449                   | GG                              | TT              | 1946975892               |
| SNP_P4_143442_29355 | NW_004516138.1 | Scaffold749 | 29355                   | GG                              | AA              | 1946975894               |
| SNP_P4_143443_29727 | NW_004516138.1 | Scaffold749 | 29727                   | TT                              | GG              | 1946975896               |
| SNP_P4_143444_29741 | NW_004516138.1 | Scaffold749 | 29741                   | AA                              | TT              | 1946975898               |
| SNP_P4_143445_29752 | NW_004516138.1 | Scaffold749 | 29752                   | TT                              | AA              | 1946975900               |
| SNP_P4_143446_29794 | NW_004516138.1 | Scaffold749 | 29794                   | AA                              | GG              | 1946975902               |

| SNPs IDs            | Chromosome IDs | Chromosomes | Physical positions (bp) | CDC Frontier (Reference genome) | (ILWC46 & LPNB) | NCBI SNPdb Accession IDs |
|---------------------|----------------|-------------|-------------------------|---------------------------------|-----------------|--------------------------|
| SNP_P4_143447_29797 | NW_004516138.1 | Scaffold749 | 29797                   | AA                              | CC              | 1946975904               |
| SNP_P4_143448_30245 | NW_004516138.1 | Scaffold749 | 30245                   | TT                              | GG              | 1946975906               |
| SNP_P4_143449_30259 | NW_004516138.1 | Scaffold749 | 30259                   | TT                              | GG              | 1946975908               |
| SNP_P4_143450_30266 | NW_004516138.1 | Scaffold749 | 30266                   | TT                              | GG              | 1946975910               |
| SNP_P4_143451_30273 | NW_004516138.1 | Scaffold749 | 30273                   | TT                              | GG              | 1946975912               |
| SNP_P4_143452_30278 | NW_004516138.1 | Scaffold749 | 30278                   | GG                              | CC              | 1946975914               |
| SNP_P4_143453_30280 | NW_004516138.1 | Scaffold749 | 30280                   | TT                              | GG              | 1946975916               |
| SNP_P4_143454_30287 | NW_004516138.1 | Scaffold749 | 30287                   | TT                              | GG              | 1946975918               |
| SNP_P4_143455_30294 | NW_004516138.1 | Scaffold749 | 30294                   | TT                              | GG              | 1946975921               |
| SNP_P4_143456_30339 | NW_004516138.1 | Scaffold749 | 30339                   | CC                              | TT              | 1946975923               |
| SNP_P4_143457_30665 | NW_004516138.1 | Scaffold749 | 30665                   | TT                              | GG              | 1946975924               |
| SNP_P4_143458_30696 | NW_004516138.1 | Scaffold749 | 30696                   | AA                              | GG              | 1946975926               |
| SNP_P4_143459_35254 | NW_004516138.1 | Scaffold749 | 35254                   | CC                              | AA              | 1946975928               |
| SNP_P4_143460_35559 | NW_004516138.1 | Scaffold749 | 35559                   | CC                              | TT              | 1946975930               |
| SNP_P4_143461_36662 | NW_004516138.1 | Scaffold749 | 36662                   | GG                              | AA              | 1946975932               |
| SNP_P4_143462_38313 | NW_004516138.1 | Scaffold749 | 38313                   | TT                              | AA              | 1946975934               |
| SNP_P4_143463_40276 | NW_004516138.1 | Scaffold749 | 40276                   | GG                              | TT              | 1946975935               |
| SNP_P4_143464_52355 | NW_004516138.1 | Scaffold749 | 52355                   | GG                              | AA              | 1946975936               |
| SNP_P4_143465_52808 | NW_004516138.1 | Scaffold749 | 52808                   | GG                              | TT              | 1946975937               |
| SNP_P4_143466_55071 | NW_004516138.1 | Scaffold749 | 55071                   | TT                              | AA              | 1946975938               |
| SNP_P4_143467_55077 | NW_004516138.1 | Scaffold749 | 55077                   | GG                              | TT              | 1946975939               |
| SNP_P4_143468_59436 | NW_004516138.1 | Scaffold749 | 59436                   | CC                              | GG              | 1946975940               |
| SNP_P4_143469_59442 | NW_004516138.1 | Scaffold749 | 59442                   | TT                              | CC              | 1946975941               |
| SNP_P4_143470_59475 | NW_004516138.1 | Scaffold749 | 59475                   | AA                              | TT              | 1946975943               |
| SNP_P4_143471_59557 | NW_004516138.1 | Scaffold749 | 59557                   | TT                              | GG              | 1946975945               |
| SNP_P4_143472_59570 | NW_004516138.1 | Scaffold749 | 59570                   | TT                              | AA              | 1946975947               |
| SNP_P4_143473_59673 | NW_004516138.1 | Scaffold749 | 59673                   | TT                              | AA              | 1946975949               |
| SNP_P4_143474_59764 | NW_004516138.1 | Scaffold749 | 59764                   | TT                              | AA              | 1946975951               |
| SNP_P4_143475_59862 | NW_004516138.1 | Scaffold749 | 59862                   | TT                              | GG              | 1946975953               |
| SNP_P4_143476_60063 | NW_004516138.1 | Scaffold749 | 60063                   | GG                              | AA              | 1946975955               |
| SNP_P4_143477_61388 | NW_004516138.1 | Scaffold749 | 61388                   | CC                              | TT              | 1946975957               |
| SNP_P4_143478_61645 | NW_004516138.1 | Scaffold749 | 61645                   | GG                              | TT              | 1946975959               |
| SNP_P4_143480_1068  | NW_004516139.1 | Scaffold750 | 1068                    | AA                              | CC              | 1946975961               |
| SNP_P4_143481_1174  | NW_004516139.1 | Scaffold750 | 1174                    | TT                              | CC              | 1946975963               |
| SNP_P4_143482_1564  | NW_004516139.1 | Scaffold750 | 1564                    | TT                              | CC              | 1946975965               |
| SNP_P4_143483_5474  | NW_004516139.1 | Scaffold750 | 5474                    | AA                              | GG              | 1946975967               |
| SNP_P4_143485_7133  | NW_004516139.1 | Scaffold750 | 7133                    | AA                              | GG              | 1946975969               |
| SNP_P4_143486_10061 | NW_004516139.1 | Scaffold750 | 10061                   | GG                              | TT              | 1946975971               |
| SNP_P4_143487_10474 | NW_004516139.1 | Scaffold750 | 10474                   | TT                              | CC              | 1946975973               |
| SNP_P4_143488_13848 | NW_004516139.1 | Scaffold750 | 13848                   | CC                              | TT              | 1946975974               |
| SNP_P4_143489_19557 | NW_004516139.1 | Scaffold750 | 19557                   | TT                              | GG              | 1946975976               |
| SNP_P4_143490_20154 | NW_004516139.1 | Scaffold750 | 20154                   | TT                              | CC              | 1946975978               |

| SNPs IDs            | Chromosome IDs | Chromosomes | Physical positions (bp) | CDC Frontier (Reference genome) | (ILWC46 & LPNB) | NCBI SNPdb Accession IDs |
|---------------------|----------------|-------------|-------------------------|---------------------------------|-----------------|--------------------------|
| SNP_P4_143491_20188 | NW_004516139.1 | Scaffold750 | 20188                   | AA                              | GG              | 1946975980               |
| SNP_P4_143492_20225 | NW_004516139.1 | Scaffold750 | 20225                   | GG                              | TT              | 1946975982               |
| SNP_P4_143493_20228 | NW_004516139.1 | Scaffold750 | 20228                   | GG                              | TT              | 1946975984               |
| SNP_P4_143494_30574 | NW_004516139.1 | Scaffold750 | 30574                   | TT                              | CC              | 1946975985               |
| SNP_P4_143495_30677 | NW_004516139.1 | Scaffold750 | 30677                   | TT                              | CC              | 1946975986               |
| SNP_P4_143496_30750 | NW_004516139.1 | Scaffold750 | 30750                   | CC                              | AA              | 1946975987               |
| SNP_P4_143497_30811 | NW_004516139.1 | Scaffold750 | 30811                   | CC                              | AA              | 1946975989               |
| SNP_P4_143498_30817 | NW_004516139.1 | Scaffold750 | 30817                   | CC                              | TT              | 1946975991               |
| SNP_P4_143499_30819 | NW_004516139.1 | Scaffold750 | 30819                   | AA                              | GG              | 1946975993               |
| SNP_P4_143500_30844 | NW_004516139.1 | Scaffold750 | 30844                   | AA                              | TT              | 1946975995               |
| SNP_P4_143501_30886 | NW_004516139.1 | Scaffold750 | 30886                   | AA                              | GG              | 1946975997               |
| SNP_P4_143502_31069 | NW_004516139.1 | Scaffold750 | 31069                   | CC                              | TT              | 1946975999               |
| SNP_P4_143503_31086 | NW_004516139.1 | Scaffold750 | 31086                   | TT                              | CC              | 1946976001               |
| SNP_P4_143504_31126 | NW_004516139.1 | Scaffold750 | 31126                   | AA                              | GG              | 1946976002               |
| SNP_P4_143505_31525 | NW_004516139.1 | Scaffold750 | 31525                   | AA                              | GG              | 1946976004               |
| SNP_P4_143506_31731 | NW_004516139.1 | Scaffold750 | 31731                   | TT                              | GG              | 1946976006               |
| SNP_P4_143507_31752 | NW_004516139.1 | Scaffold750 | 31752                   | CC                              | AA              | 1946976008               |
| SNP_P4_143508_31756 | NW_004516139.1 | Scaffold750 | 31756                   | TT                              | CC              | 1946976010               |
| SNP_P4_143509_31797 | NW_004516139.1 | Scaffold750 | 31797                   | TT                              | CC              | 1946976012               |
| SNP_P4_143510_31817 | NW_004516139.1 | Scaffold750 | 31817                   | AA                              | TT              | 1946976014               |
| SNP_P4_143512_31870 | NW_004516139.1 | Scaffold750 | 31870                   | TT                              | AA              | 1946976017               |
| SNP_P4_143513_31881 | NW_004516139.1 | Scaffold750 | 31881                   | GG                              | CC              | 1946976019               |
| SNP_P4_143514_31899 | NW_004516139.1 | Scaffold750 | 31899                   | AA                              | GG              | 1946976020               |
| SNP_P4_143515_31903 | NW_004516139.1 | Scaffold750 | 31903                   | CC                              | TT              | 1946976022               |
| SNP_P4_143516_31928 | NW_004516139.1 | Scaffold750 | 31928                   | TT                              | CC              | 1946976024               |
| SNP_P4_143517_31946 | NW_004516139.1 | Scaffold750 | 31946                   | GG                              | CC              | 1946976026               |
| SNP_P4_143518_31965 | NW_004516139.1 | Scaffold750 | 31965                   | GG                              | AA              | 1946976028               |
| SNP_P4_143519_31981 | NW_004516139.1 | Scaffold750 | 31981                   | CC                              | TT              | 1946976030               |
| SNP_P4_143520_32003 | NW_004516139.1 | Scaffold750 | 32003                   | AA                              | GG              | 1946976032               |
| SNP_P4_143521_32040 | NW_004516139.1 | Scaffold750 | 32040                   | TT                              | AA              | 1946976034               |
| SNP_P4_143522_32347 | NW_004516139.1 | Scaffold750 | 32347                   | TT                              | AA              | 1946976036               |
| SNP_P4_143523_32349 | NW_004516139.1 | Scaffold750 | 32349                   | TT                              | AA              | 1946976038               |
| SNP_P4_143524_32355 | NW_004516139.1 | Scaffold750 | 32355                   | TT                              | GG              | 1946976040               |
| SNP_P4_143525_32369 | NW_004516139.1 | Scaffold750 | 32369                   | AA                              | CC              | 1946976041               |
| SNP_P4_143526_32425 | NW_004516139.1 | Scaffold750 | 32425                   | TT                              | CC              | 1946976043               |
| SNP_P4_143527_32550 | NW_004516139.1 | Scaffold750 | 32550                   | TT                              | GG              | 1946976045               |
| SNP_P4_143528_32583 | NW_004516139.1 | Scaffold750 | 32583                   | TT                              | AA              | 1946976047               |
| SNP_P4_143529_32607 | NW_004516139.1 | Scaffold750 | 32607                   | AA                              | GG              | 1946976049               |
| SNP_P4_143531_33068 | NW_004516139.1 | Scaffold750 | 33068                   | GG                              | TT              | 1946976051               |
| SNP_P4_143532_33082 | NW_004516139.1 | Scaffold750 | 33082                   | AA                              | GG              | 1946976053               |
| SNP_P4_143533_33106 | NW_004516139.1 | Scaffold750 | 33106                   | AA                              | CC              | 1946976055               |
| SNP_P4_143534_33205 | NW_004516139.1 | Scaffold750 | 33205                   | GG                              | AA              | 1946976057               |

| SNPs IDs            | Chromosome IDs | Chromosomes | Physical positions (bp) | CDC Frontier (Reference genome) | (ILWC46 & LPNB) | NCBI SNPdb Accession IDs |
|---------------------|----------------|-------------|-------------------------|---------------------------------|-----------------|--------------------------|
| SNP_P4_143535_33229 | NW_004516139.1 | Scaffold750 | 33229                   | AA                              | GG              | 1946976059               |
| SNP_P4_143536_33330 | NW_004516139.1 | Scaffold750 | 33330                   | GG                              | TT              | 1946976061               |
| SNP_P4_143537_33333 | NW_004516139.1 | Scaffold750 | 33333                   | TT                              | CC              | 1946976063               |
| SNP_P4_143538_33335 | NW_004516139.1 | Scaffold750 | 33335                   | TT                              | AA              | 1946976065               |
| SNP_P4_143539_33336 | NW_004516139.1 | Scaffold750 | 33336                   | TT                              | AA              | 1946976067               |
| SNP_P4_143540_33337 | NW_004516139.1 | Scaffold750 | 33337                   | TT                              | AA              | 1946976069               |
| SNP_P4_143541_33352 | NW_004516139.1 | Scaffold750 | 33352                   | AA                              | GG              | 1946976071               |
| SNP_P4_143542_33356 | NW_004516139.1 | Scaffold750 | 33356                   | AA                              | TT              | 1946976073               |
| SNP_P4_143543_33393 | NW_004516139.1 | Scaffold750 | 33393                   | AA                              | GG              | 1946976075               |
| SNP_P4_143544_33562 | NW_004516139.1 | Scaffold750 | 33562                   | AA                              | GG              | 1946976077               |
| SNP_P4_143545_33563 | NW_004516139.1 | Scaffold750 | 33563                   | CC                              | TT              | 1946976079               |
| SNP_P4_143546_33602 | NW_004516139.1 | Scaffold750 | 33602                   | CC                              | TT              | 1946976081               |
| SNP_P4_143547_33646 | NW_004516139.1 | Scaffold750 | 33646                   | TT                              | CC              | 1946976083               |
| SNP_P4_143548_33667 | NW_004516139.1 | Scaffold750 | 33667                   | GG                              | AA              | 1946976085               |
| SNP_P4_143549_33760 | NW_004516139.1 | Scaffold750 | 33760                   | GG                              | CC              | 1946976087               |
| SNP_P4_143550_33960 | NW_004516139.1 | Scaffold750 | 33960                   | AA                              | TT              | 1946976089               |
| SNP_P4_143551_33997 | NW_004516139.1 | Scaffold750 | 33997                   | GG                              | TT              | 1946976091               |
| SNP_P4_143552_34018 | NW_004516139.1 | Scaffold750 | 34018                   | GG                              | AA              | 1946976093               |
| SNP_P4_143553_34023 | NW_004516139.1 | Scaffold750 | 34023                   | TT                              | CC              | 1946976095               |
| SNP_P4_143554_34065 | NW_004516139.1 | Scaffold750 | 34065                   | AA                              | GG              | 1946976097               |
| SNP_P4_143555_34117 | NW_004516139.1 | Scaffold750 | 34117                   | CC                              | AA              | 1946976099               |
| SNP_P4_143556_34187 | NW_004516139.1 | Scaffold750 | 34187                   | GG                              | AA              | 1946976101               |
| SNP_P4_143557_34264 | NW_004516139.1 | Scaffold750 | 34264                   | TT                              | GG              | 1946976104               |
| SNP_P4_143558_34357 | NW_004516139.1 | Scaffold750 | 34357                   | GG                              | TT              | 1946976106               |
| SNP_P4_143559_34489 | NW_004516139.1 | Scaffold750 | 34489                   | AA                              | GG              | 1946976108               |
| SNP_P4_143560_34576 | NW_004516139.1 | Scaffold750 | 34576                   | CC                              | TT              | 1946976110               |
| SNP_P4_143561_34628 | NW_004516139.1 | Scaffold750 | 34628                   | GG                              | AA              | 1946976112               |
| SNP_P4_143562_34650 | NW_004516139.1 | Scaffold750 | 34650                   | GG                              | AA              | 1946976114               |
| SNP_P4_143563_34685 | NW_004516139.1 | Scaffold750 | 34685                   | GG                              | AA              | 1946976116               |
| SNP_P4_143564_34754 | NW_004516139.1 | Scaffold750 | 34754                   | TT                              | AA              | 1946976118               |
| SNP_P4_143565_34787 | NW_004516139.1 | Scaffold750 | 34787                   | TT                              | CC              | 1946976120               |
| SNP_P4_143566_34792 | NW_004516139.1 | Scaffold750 | 34792                   | CC                              | TT              | 1946976122               |
| SNP_P4_143567_34939 | NW_004516139.1 | Scaffold750 | 34939                   | TT                              | CC              | 1946976124               |
| SNP_P4_143568_34955 | NW_004516139.1 | Scaffold750 | 34955                   | TT                              | CC              | 1946976126               |
| SNP_P4_143569_34966 | NW_004516139.1 | Scaffold750 | 34966                   | CC                              | GG              | 1946976128               |
| SNP_P4_143570_34985 | NW_004516139.1 | Scaffold750 | 34985                   | GG                              | AA              | 1946976130               |
| SNP_P4_143571_34987 | NW_004516139.1 | Scaffold750 | 34987                   | TT                              | CC              | 1946976132               |
| SNP_P4_143572_34998 | NW_004516139.1 | Scaffold750 | 34998                   | AA                              | GG              | 1946976134               |
| SNP_P4_143573_35039 | NW_004516139.1 | Scaffold750 | 35039                   | AA                              | GG              | 1946976137               |
| SNP_P4_143574_35045 | NW_004516139.1 | Scaffold750 | 35045                   | GG                              | TT              | 1946976139               |
| SNP_P4_143575_35052 | NW_004516139.1 | Scaffold750 | 35052                   | CC                              | GG              | 1946976141               |
| SNP_P4_143576_35061 | NW_004516139.1 | Scaffold750 | 35061                   | CC                              | TT              | 1946976143               |

| SNPs IDs            | Chromosome IDs | Chromosomes | Physical positions (bp) | CDC Frontier (Reference genome) | (ILWC46 & LPNB) | NCBI SNPdb Accession IDs |
|---------------------|----------------|-------------|-------------------------|---------------------------------|-----------------|--------------------------|
| SNP_P4_143577_35093 | NW_004516139.1 | Scaffold750 | 35093                   | TT                              | AA              | 1946976145               |
| SNP_P4_143578_35125 | NW_004516139.1 | Scaffold750 | 35125                   | AA                              | TT              | 1946976147               |
| SNP_P4_143579_35153 | NW_004516139.1 | Scaffold750 | 35153                   | AA                              | CC              | 1946976149               |
| SNP_P4_143580_35173 | NW_004516139.1 | Scaffold750 | 35173                   | AA                              | GG              | 1946976151               |
| SNP_P4_143581_36796 | NW_004516139.1 | Scaffold750 | 36796                   | TT                              | CC              | 1946976153               |
| SNP_P4_143582_36845 | NW_004516139.1 | Scaffold750 | 36845                   | AA                              | GG              | 1946976155               |
| SNP_P4_143583_36877 | NW_004516139.1 | Scaffold750 | 36877                   | AA                              | CC              | 1946976157               |
| SNP_P4_143584_36880 | NW_004516139.1 | Scaffold750 | 36880                   | AA                              | GG              | 1946976159               |
| SNP_P4_143585_36923 | NW_004516139.1 | Scaffold750 | 36923                   | AA                              | TT              | 1946976161               |
| SNP_P4_143586_36925 | NW_004516139.1 | Scaffold750 | 36925                   | GG                              | AA              | 1946976163               |
| SNP_P4_143587_36930 | NW_004516139.1 | Scaffold750 | 36930                   | GG                              | AA              | 1946976165               |
| SNP_P4_143588_36933 | NW_004516139.1 | Scaffold750 | 36933                   | TT                              | CC              | 1946976167               |
| SNP_P4_143589_36935 | NW_004516139.1 | Scaffold750 | 36935                   | GG                              | AA              | 1946976169               |
| SNP_P4_143590_36986 | NW_004516139.1 | Scaffold750 | 36986                   | CC                              | TT              | 1946976172               |
| SNP_P4_143591_37036 | NW_004516139.1 | Scaffold750 | 37036                   | AA                              | GG              | 1946976174               |
| SNP_P4_143592_37051 | NW_004516139.1 | Scaffold750 | 37051                   | AA                              | GG              | 1946976176               |
| SNP_P4_143593_37062 | NW_004516139.1 | Scaffold750 | 37062                   | GG                              | TT              | 1946976178               |
| SNP_P4_143594_37106 | NW_004516139.1 | Scaffold750 | 37106                   | AA                              | GG              | 1946976180               |
| SNP_P4_143595_37158 | NW_004516139.1 | Scaffold750 | 37158                   | TT                              | GG              | 1946976182               |
| SNP_P4_143596_37232 | NW_004516139.1 | Scaffold750 | 37232                   | GG                              | AA              | 1946976184               |
| SNP_P4_143597_37273 | NW_004516139.1 | Scaffold750 | 37273                   | AA                              | GG              | 1946976186               |
| SNP_P4_143598_37339 | NW_004516139.1 | Scaffold750 | 37339                   | GG                              | AA              | 1946976188               |
| SNP_P4_143599_37392 | NW_004516139.1 | Scaffold750 | 37392                   | GG                              | AA              | 1946976190               |
| SNP_P4_143600_37593 | NW_004516139.1 | Scaffold750 | 37593                   | AA                              | TT              | 1946976192               |
| SNP_P4_143601_37599 | NW_004516139.1 | Scaffold750 | 37599                   | TT                              | CC              | 1946976194               |
| SNP_P4_143602_37600 | NW_004516139.1 | Scaffold750 | 37600                   | GG                              | TT              | 1946976197               |
| SNP_P4_143603_37601 | NW_004516139.1 | Scaffold750 | 37601                   | TT                              | CC              | 1946976199               |
| SNP_P4_143604_37602 | NW_004516139.1 | Scaffold750 | 37602                   | CC                              | TT              | 1946976201               |
| SNP_P4_143605_37649 | NW_004516139.1 | Scaffold750 | 37649                   | AA                              | CC              | 1946976203               |
| SNP_P4_143606_37727 | NW_004516139.1 | Scaffold750 | 37727                   | GG                              | TT              | 1946976205               |
| SNP_P4_143607_37751 | NW_004516139.1 | Scaffold750 | 37751                   | TT                              | CC              | 1946976207               |
| SNP_P4_143608_37757 | NW_004516139.1 | Scaffold750 | 37757                   | GG                              | CC              | 1946976209               |
| SNP_P4_143609_38014 | NW_004516139.1 | Scaffold750 | 38014                   | GG                              | AA              | 1946976211               |
| SNP_P4_143610_38090 | NW_004516139.1 | Scaffold750 | 38090                   | CC                              | TT              | 1946976213               |
| SNP_P4_143611_38354 | NW_004516139.1 | Scaffold750 | 38354                   | CC                              | TT              | 1946976215               |
| SNP_P4_143612_38374 | NW_004516139.1 | Scaffold750 | 38374                   | AA                              | GG              | 1946976217               |
| SNP_P4_143613_38431 | NW_004516139.1 | Scaffold750 | 38431                   | GG                              | TT              | 1946976219               |
| SNP_P4_143614_38462 | NW_004516139.1 | Scaffold750 | 38462                   | AA                              | TT              | 1946976221               |
| SNP_P4_143615_38496 | NW_004516139.1 | Scaffold750 | 38496                   | TT                              | AA              | 1946976224               |
| SNP_P4_143616_38573 | NW_004516139.1 | Scaffold750 | 38573                   | GG                              | TT              | 1946976226               |
| SNP_P4_143617_38648 | NW_004516139.1 | Scaffold750 | 38648                   | TT                              | CC              | 1946976228               |
| SNP_P4_143618_38663 | NW_004516139.1 | Scaffold750 | 38663                   | GG                              | TT              | 1946976230               |

| SNPs IDs            | Chromosome IDs | Chromosomes | Physical positions (bp) | CDC Frontier (Reference genome) | (ILWC46 & LPNB) | NCBI SNPdb Accession IDs |
|---------------------|----------------|-------------|-------------------------|---------------------------------|-----------------|--------------------------|
| SNP_P4_143619_38666 | NW_004516139.1 | Scaffold750 | 38666                   | GG                              | AA              | 1946976232               |
| SNP_P4_143620_38757 | NW_004516139.1 | Scaffold750 | 38757                   | TT                              | AA              | 1946976233               |
| SNP_P4_143621_38839 | NW_004516139.1 | Scaffold750 | 38839                   | AA                              | CC              | 1946976235               |
| SNP_P4_143622_38932 | NW_004516139.1 | Scaffold750 | 38932                   | AA                              | CC              | 1946976238               |
| SNP_P4_143623_38934 | NW_004516139.1 | Scaffold750 | 38934                   | GG                              | TT              | 1946976240               |
| SNP_P4_143625_39195 | NW_004516139.1 | Scaffold750 | 39195                   | TT                              | AA              | 1946976242               |
| SNP_P4_143626_39201 | NW_004516139.1 | Scaffold750 | 39201                   | AA                              | CC              | 1946976244               |
| SNP_P4_143627_39214 | NW_004516139.1 | Scaffold750 | 39214                   | TT                              | CC              | 1946976246               |
| SNP_P4_143628_39224 | NW_004516139.1 | Scaffold750 | 39224                   | AA                              | TT              | 1946976248               |
| SNP_P4_143629_39263 | NW_004516139.1 | Scaffold750 | 39263                   | TT                              | CC              | 1946976250               |
| SNP_P4_143630_39270 | NW_004516139.1 | Scaffold750 | 39270                   | CC                              | GG              | 1946976252               |
| SNP_P4_143631_39296 | NW_004516139.1 | Scaffold750 | 39296                   | GG                              | TT              | 1946976254               |
| SNP_P4_143632_39304 | NW_004516139.1 | Scaffold750 | 39304                   | CC                              | AA              | 1946976255               |
| SNP_P4_143633_39358 | NW_004516139.1 | Scaffold750 | 39358                   | GG                              | AA              | 1946976257               |
| SNP_P4_143634_39379 | NW_004516139.1 | Scaffold750 | 39379                   | AA                              | GG              | 1946976259               |
| SNP_P4_143635_39522 | NW_004516139.1 | Scaffold750 | 39522                   | CC                              | TT              | 1946976261               |
| SNP_P4_143636_39597 | NW_004516139.1 | Scaffold750 | 39597                   | GG                              | TT              | 1946976263               |
| SNP_P4_143637_39939 | NW_004516139.1 | Scaffold750 | 39939                   | CC                              | AA              | 1946976265               |
| SNP_P4_143638_44526 | NW_004516139.1 | Scaffold750 | 44526                   | GG                              | AA              | 1946976267               |
| SNP_P4_143639_58238 | NW_004516139.1 | Scaffold750 | 58238                   | CC                              | GG              | 1946976269               |
| SNP_P4_143640_58243 | NW_004516139.1 | Scaffold750 | 58243                   | GG                              | CC              | 1946976271               |
| SNP_P4_143641_58352 | NW_004516139.1 | Scaffold750 | 58352                   | TT                              | CC              | 1946976274               |
| SNP_P4_143642_58526 | NW_004516139.1 | Scaffold750 | 58526                   | CC                              | GG              | 1946976276               |
| SNP_P4_143643_58541 | NW_004516139.1 | Scaffold750 | 58541                   | GG                              | AA              | 1946976277               |
| SNP_P4_143644_58562 | NW_004516139.1 | Scaffold750 | 58562                   | CC                              | TT              | 1946976279               |
| SNP_P4_143645_58668 | NW_004516139.1 | Scaffold750 | 58668                   | GG                              | AA              | 1946976281               |
| SNP_P4_143646_58726 | NW_004516139.1 | Scaffold750 | 58726                   | AA                              | GG              | 1946976283               |
| SNP_P4_143647_58793 | NW_004516139.1 | Scaffold750 | 58793                   | GG                              | CC              | 1946976285               |
| SNP_P4_143648_58814 | NW_004516139.1 | Scaffold750 | 58814                   | GG                              | TT              | 1946976287               |
| SNP_P4_143649_58887 | NW_004516139.1 | Scaffold750 | 58887                   | TT                              | GG              | 1946976289               |
| SNP_P4_143650_58906 | NW_004516139.1 | Scaffold750 | 58906                   | TT                              | CC              | 1946976291               |
| SNP_P4_143651_58973 | NW_004516139.1 | Scaffold750 | 58973                   | GG                              | TT              | 1946976293               |
| SNP_P4_143653_59118 | NW_004516139.1 | Scaffold750 | 59118                   | CC                              | GG              | 1946976295               |
| SNP_P4_143654_59203 | NW_004516139.1 | Scaffold750 | 59203                   | GG                              | AA              | 1946976297               |
| SNP_P4_143655_59212 | NW_004516139.1 | Scaffold750 | 59212                   | CC                              | GG              | 1946976298               |
| SNP_P4_143657_59314 | NW_004516139.1 | Scaffold750 | 59314                   | TT                              | AA              | 1946976300               |
| SNP_P4_143658_59453 | NW_004516139.1 | Scaffold750 | 59453                   | GG                              | TT              | 1946976302               |
| SNP_P4_143659_59530 | NW_004516139.1 | Scaffold750 | 59530                   | GG                              | TT              | 1946976304               |
| SNP_P4_143660_59763 | NW_004516139.1 | Scaffold750 | 59763                   | AA                              | GG              | 1946976306               |
| SNP_P4_143662_59877 | NW_004516139.1 | Scaffold750 | 59877                   | GG                              | TT              | 1946976308               |
| SNP_P4_143663_59917 | NW_004516139.1 | Scaffold750 | 59917                   | TT                              | AA              | 1946976310               |
| SNP_P4_143664_60010 | NW_004516139.1 | Scaffold750 | 60010                   | GG                              | TT              | 1946976312               |



| SNPs IDs             | Chromosome IDs | Chromosomes | Physical positions (bp) | CDC Frontier (Reference genome) | (ILWC46 & LPNB) | NCBI SNPdb Accession IDs |
|----------------------|----------------|-------------|-------------------------|---------------------------------|-----------------|--------------------------|
| SNP_P4_143665_60066  | NW_004516139.1 | Scaffold750 | 60066                   | CC                              | TT              | 1946976314               |
| SNP_P4_143666_60075  | NW_004516139.1 | Scaffold750 | 60075                   | CC                              | TT              | 1946976316               |
| SNP_P4_143667_60092  | NW_004516139.1 | Scaffold750 | 60092                   | CC                              | AA              | 1946976318               |
| SNP_P4_143668_60131  | NW_004516139.1 | Scaffold750 | 60131                   | GG                              | TT              | 1946976320               |
| SNP_P4_143669_60161  | NW_004516139.1 | Scaffold750 | 60161                   | CC                              | TT              | 1946976322               |
| SNP_P4_143670_69057  | NW_004516139.1 | Scaffold750 | 69057                   | AA                              | GG              | 1946976324               |
| SNP_P4_143671_69063  | NW_004516139.1 | Scaffold750 | 69063                   | AA                              | CC              | 1946976326               |
| SNP_P4_143672_80620  | NW_004516139.1 | Scaffold750 | 80620                   | TT                              | CC              | 1946976328               |
| SNP_P4_143673_80626  | NW_004516139.1 | Scaffold750 | 80626                   | TT                              | CC              | 1946976330               |
| SNP_P4_143674_81662  | NW_004516139.1 | Scaffold750 | 81662                   | GG                              | AA              | 1946976332               |
| SNP_P4_143675_84816  | NW_004516139.1 | Scaffold750 | 84816                   | AA                              | GG              | 1946976334               |
| SNP_P4_143676_92899  | NW_004516139.1 | Scaffold750 | 92899                   | GG                              | TT              | 1946976336               |
| SNP_P4_143677_95184  | NW_004516139.1 | Scaffold750 | 95184                   | CC                              | TT              | 1946976338               |
| SNP_P4_143678_106491 | NW_004516139.1 | Scaffold750 | 106491                  | AA                              | CC              | 1946976340               |
| SNP_P4_143679_106498 | NW_004516139.1 | Scaffold750 | 106498                  | GG                              | CC              | 1946976343               |
| SNP_P4_143680_106550 | NW_004516139.1 | Scaffold750 | 106550                  | AA                              | CC              | 1946976345               |
| SNP_P4_143682_106922 | NW_004516139.1 | Scaffold750 | 106922                  | TT                              | CC              | 1946976347               |
| SNP_P4_143683_127426 | NW_004516139.1 | Scaffold750 | 127426                  | TT                              | CC              | 1946976349               |
| SNP_P4_143684_139771 | NW_004516139.1 | Scaffold750 | 139771                  | CC                              | AA              | 1946976351               |
| SNP_P4_143685_141287 | NW_004516139.1 | Scaffold750 | 141287                  | TT                              | AA              | 1946976353               |
| SNP_P4_143686_141288 | NW_004516139.1 | Scaffold750 | 141288                  | AA                              | TT              | 1946976355               |
| SNP_P4_143687_141306 | NW_004516139.1 | Scaffold750 | 141306                  | TT                              | CC              | 1946976357               |
| SNP_P4_143688_158900 | NW_004516139.1 | Scaffold750 | 158900                  | CC                              | TT              | 1946976359               |
| SNP_P4_143689_158903 | NW_004516139.1 | Scaffold750 | 158903                  | GG                              | AA              | 1946976361               |
| SNP_P4_143690_158932 | NW_004516139.1 | Scaffold750 | 158932                  | TT                              | GG              | 1946976364               |
| SNP_P4_143692_185265 | NW_004516139.1 | Scaffold750 | 185265                  | AA                              | TT              | 1946976366               |
| SNP_P4_143693_185298 | NW_004516139.1 | Scaffold750 | 185298                  | TT                              | CC              | 1946976368               |
| SNP_P4_143694_185311 | NW_004516139.1 | Scaffold750 | 185311                  | TT                              | CC              | 1946976370               |
| SNP_P4_143695_190485 | NW_004516139.1 | Scaffold750 | 190485                  | AA                              | GG              | 1946976372               |
| SNP_P4_143696_190499 | NW_004516139.1 | Scaffold750 | 190499                  | TT                              | CC              | 1946976374               |
| SNP_P4_143697_190518 | NW_004516139.1 | Scaffold750 | 190518                  | AA                              | TT              | 1946976376               |
| SNP_P4_143698_190521 | NW_004516139.1 | Scaffold750 | 190521                  | AA                              | GG              | 1946976378               |
| SNP_P4_143699_190522 | NW_004516139.1 | Scaffold750 | 190522                  | TT                              | GG              | 1946976380               |
| SNP_P4_143700_190862 | NW_004516139.1 | Scaffold750 | 190862                  | AA                              | GG              | 1946976381               |
| SNP_P4_143702_241030 | NW_004516139.1 | Scaffold750 | 241030                  | CC                              | GG              | 1946976383               |
| SNP_P4_143703_243018 | NW_004516139.1 | Scaffold750 | 243018                  | AA                              | CC              | 1946976386               |
| SNP_P4_143704_243198 | NW_004516139.1 | Scaffold750 | 243198                  | TT                              | CC              | 1946976388               |
| SNP_P4_143705_243212 | NW_004516139.1 | Scaffold750 | 243212                  | AA                              | TT              | 1946976389               |
| SNP_P4_143706_243249 | NW_004516139.1 | Scaffold750 | 243249                  | TT                              | CC              | 1946976391               |
| SNP_P4_143707_244876 | NW_004516139.1 | Scaffold750 | 244876                  | TT                              | AA              | 1946976393               |
| SNP_P4_143708_245636 | NW_004516139.1 | Scaffold750 | 245636                  | GG                              | AA              | 1946976395               |
| SNP_P4_143709_256829 | NW_004516139.1 | Scaffold750 | 256829                  | AA                              | CC              | 1946976397               |

| SNPs IDs             | Chromosome IDs | Chromosomes | Physical positions (bp) | CDC Frontier (Reference genome) | (ILWC46 & LPNB) | NCBI SNPdb Accession IDs |
|----------------------|----------------|-------------|-------------------------|---------------------------------|-----------------|--------------------------|
| SNP_P4_143710_256926 | NW_004516139.1 | Scaffold750 | 256926                  | TT                              | CC              | 1946976399               |
| SNP_P4_143711_257216 | NW_004516139.1 | Scaffold750 | 257216                  | AA                              | TT              | 1946976401               |
| SNP_P4_143712_257242 | NW_004516139.1 | Scaffold750 | 257242                  | AA                              | TT              | 1946976403               |
| SNP_P4_143713_257249 | NW_004516139.1 | Scaffold750 | 257249                  | TT                              | CC              | 1946976405               |
| SNP_P4_143714_257271 | NW_004516139.1 | Scaffold750 | 257271                  | TT                              | CC              | 1946976407               |
| SNP_P4_143715_258258 | NW_004516139.1 | Scaffold750 | 258258                  | TT                              | AA              | 1946976410               |
| SNP_P4_143716_264215 | NW_004516139.1 | Scaffold750 | 264215                  | CC                              | TT              | 1946976411               |
| SNP_P4_143718_267846 | NW_004516139.1 | Scaffold750 | 267846                  | TT                              | GG              | 1946976413               |
| SNP_P4_143719_267853 | NW_004516139.1 | Scaffold750 | 267853                  | GG                              | TT              | 1946976416               |
| SNP_P4_143720_267886 | NW_004516139.1 | Scaffold750 | 267886                  | AA                              | CC              | 1946976418               |
| SNP_P4_143721_268771 | NW_004516139.1 | Scaffold750 | 268771                  | CC                              | TT              | 1946976419               |
| SNP_P4_143722_268839 | NW_004516139.1 | Scaffold750 | 268839                  | GG                              | AA              | 1946976421               |
| SNP_P4_143723_268861 | NW_004516139.1 | Scaffold750 | 268861                  | TT                              | CC              | 1946976423               |
| SNP_P4_143724_268882 | NW_004516139.1 | Scaffold750 | 268882                  | TT                              | CC              | 1946976425               |
| SNP_P4_143725_268932 | NW_004516139.1 | Scaffold750 | 268932                  | AA                              | GG              | 1946976428               |
| SNP_P4_143726_269082 | NW_004516139.1 | Scaffold750 | 269082                  | CC                              | TT              | 1946976429               |
| SNP_P4_143727_269222 | NW_004516139.1 | Scaffold750 | 269222                  | CC                              | TT              | 1946976431               |
| SNP_P4_143728_269263 | NW_004516139.1 | Scaffold750 | 269263                  | GG                              | AA              | 1946976433               |
| SNP_P4_143729_271938 | NW_004516139.1 | Scaffold750 | 271938                  | CC                              | TT              | 1946976435               |
| SNP_P4_143730_272048 | NW_004516139.1 | Scaffold750 | 272048                  | TT                              | AA              | 1946976437               |
| SNP_P4_143731_273207 | NW_004516139.1 | Scaffold750 | 273207                  | TT                              | AA              | 1946976439               |
| SNP_P4_143732_273574 | NW_004516139.1 | Scaffold750 | 273574                  | TT                              | GG              | 1946976441               |
| SNP_P4_143734_273613 | NW_004516139.1 | Scaffold750 | 273613                  | AA                              | TT              | 1946976443               |
| SNP_P4_143735_273674 | NW_004516139.1 | Scaffold750 | 273674                  | TT                              | CC              | 1946976445               |
| SNP_P4_143736_273677 | NW_004516139.1 | Scaffold750 | 273677                  | AA                              | TT              | 1946976447               |
| SNP_P4_143737_273685 | NW_004516139.1 | Scaffold750 | 273685                  | TT                              | CC              | 1946976449               |
| SNP_P4_143738_273759 | NW_004516139.1 | Scaffold750 | 273759                  | CC                              | TT              | 1946976451               |
| SNP_P4_143739_278545 | NW_004516139.1 | Scaffold750 | 278545                  | AA                              | CC              | 1946976453               |
| SNP_P4_143740_278566 | NW_004516139.1 | Scaffold750 | 278566                  | TT                              | GG              | 1946976455               |
| SNP_P4_143741_279670 | NW_004516139.1 | Scaffold750 | 279670                  | AA                              | GG              | 1946976457               |
| SNP_P4_143742_337716 | NW_004516139.1 | Scaffold750 | 337716                  | GG                              | CC              | 1946976458               |
| SNP_P4_143743_347769 | NW_004516139.1 | Scaffold750 | 347769                  | CC                              | TT              | 1946976460               |
| SNP_P4_143744_347970 | NW_004516139.1 | Scaffold750 | 347970                  | CC                              | TT              | 1946976462               |
| SNP_P4_143745_348026 | NW_004516139.1 | Scaffold750 | 348026                  | AA                              | GG              | 1946976464               |
| SNP_P4_143746_348237 | NW_004516139.1 | Scaffold750 | 348237                  | TT                              | AA              | 1946976466               |
| SNP_P4_143747_360252 | NW_004516139.1 | Scaffold750 | 360252                  | CC                              | TT              | 1946976468               |
| SNP_P4_143749_360503 | NW_004516139.1 | Scaffold750 | 360503                  | TT                              | CC              | 1946976470               |
| SNP_P4_143750_360521 | NW_004516139.1 | Scaffold750 | 360521                  | AA                              | TT              | 1946976472               |
| SNP_P4_143751_360544 | NW_004516139.1 | Scaffold750 | 360544                  | AA                              | TT              | 1946976474               |
| SNP_P4_143752_360560 | NW_004516139.1 | Scaffold750 | 360560                  | AA                              | CC              | 1946976476               |
| SNP_P4_143753_360623 | NW_004516139.1 | Scaffold750 | 360623                  | GG                              | AA              | 1946976478               |
| SNP_P4_143754_360629 | NW_004516139.1 | Scaffold750 | 360629                  | GG                              | TT              | 1946976480               |

| SNPs IDs             | Chromosome IDs | Chromosomes | Physical positions (bp) | CDC Frontier (Reference genome) | (ILWC46 & LPNB) | NCBI SNPdb Accession IDs |
|----------------------|----------------|-------------|-------------------------|---------------------------------|-----------------|--------------------------|
| SNP_P4_143755_360630 | NW_004516139.1 | Scaffold750 | 360630                  | CC                              | AA              | 1946976482               |
| SNP_P4_143756_362244 | NW_004516139.1 | Scaffold750 | 362244                  | AA                              | GG              | 1946976484               |
| SNP_P4_143757_362273 | NW_004516139.1 | Scaffold750 | 362273                  | CC                              | GG              | 1946976486               |
| SNP_P4_143758_362276 | NW_004516139.1 | Scaffold750 | 362276                  | TT                              | CC              | 1946976488               |
| SNP_P4_143759_362293 | NW_004516139.1 | Scaffold750 | 362293                  | TT                              | GG              | 1946976490               |
| SNP_P4_143760_362295 | NW_004516139.1 | Scaffold750 | 362295                  | TT                              | AA              | 1946976492               |
| SNP_P4_143761_362321 | NW_004516139.1 | Scaffold750 | 362321                  | TT                              | AA              | 1946976494               |
| SNP_P4_143762_362349 | NW_004516139.1 | Scaffold750 | 362349                  | CC                              | TT              | 1946976496               |
| SNP_P4_143763_15539  | NW_004516140.1 | Scaffold752 | 15539                   | TT                              | CC              | 1946976498               |
| SNP_P4_143764_44183  | NW_004516140.1 | Scaffold752 | 44183                   | GG                              | AA              | 1946976500               |
| SNP_P4_143765_50188  | NW_004516140.1 | Scaffold752 | 50188                   | GG                              | AA              | 1946976502               |
| SNP_P4_143766_50482  | NW_004516140.1 | Scaffold752 | 50482                   | AA                              | GG              | 1946976504               |
| SNP_P4_143767_50536  | NW_004516140.1 | Scaffold752 | 50536                   | AA                              | GG              | 1946976506               |
| SNP_P4_143768_50554  | NW_004516140.1 | Scaffold752 | 50554                   | AA                              | GG              | 1946976508               |
| SNP_P4_143769_50581  | NW_004516140.1 | Scaffold752 | 50581                   | GG                              | AA              | 1946976510               |
| SNP_P4_143770_50611  | NW_004516140.1 | Scaffold752 | 50611                   | AA                              | CC              | 1946976512               |
| SNP_P4_143771_50640  | NW_004516140.1 | Scaffold752 | 50640                   | AA                              | TT              | 1946976514               |
| SNP_P4_143772_55946  | NW_004516140.1 | Scaffold752 | 55946                   | TT                              | CC              | 1946976516               |
| SNP_P4_143773_98840  | NW_004516140.1 | Scaffold752 | 98840                   | CC                              | TT              | 1946976518               |
| SNP_P4_143774_98844  | NW_004516140.1 | Scaffold752 | 98844                   | GG                              | AA              | 1946976520               |
| SNP_P4_143775_98959  | NW_004516140.1 | Scaffold752 | 98959                   | GG                              | TT              | 1946976522               |
| SNP_P4_143776_99166  | NW_004516140.1 | Scaffold752 | 99166                   | GG                              | AA              | 1946976523               |
| SNP_P4_143777_99199  | NW_004516140.1 | Scaffold752 | 99199                   | AA                              | GG              | 1946976525               |
| SNP_P4_143778_99231  | NW_004516140.1 | Scaffold752 | 99231                   | AA                              | GG              | 1946976527               |
| SNP_P4_143779_99263  | NW_004516140.1 | Scaffold752 | 99263                   | GG                              | CC              | 1946976530               |
| SNP_P4_143780_99289  | NW_004516140.1 | Scaffold752 | 99289                   | GG                              | AA              | 1946976532               |
| SNP_P4_143781_99293  | NW_004516140.1 | Scaffold752 | 99293                   | AA                              | GG              | 1946976534               |
| SNP_P4_143783_99378  | NW_004516140.1 | Scaffold752 | 99378                   | AA                              | GG              | 1946976536               |
| SNP_P4_143784_99388  | NW_004516140.1 | Scaffold752 | 99388                   | CC                              | TT              | 1946976538               |
| SNP_P4_143785_109943 | NW_004516140.1 | Scaffold752 | 109943                  | TT                              | CC              | 1946976540               |
| SNP_P4_143786_112851 | NW_004516140.1 | Scaffold752 | 112851                  | AA                              | TT              | 1946976542               |
| SNP_P4_143787_112875 | NW_004516140.1 | Scaffold752 | 112875                  | TT                              | CC              | 1946976544               |
| SNP_P4_143788_113213 | NW_004516140.1 | Scaffold752 | 113213                  | AA                              | CC              | 1946976546               |
| SNP_P4_143789_113259 | NW_004516140.1 | Scaffold752 | 113259                  | TT                              | CC              | 1946976547               |
| SNP_P4_143790_119058 | NW_004516140.1 | Scaffold752 | 119058                  | CC                              | TT              | 1946976549               |
| SNP_P4_143792_137842 | NW_004516140.1 | Scaffold752 | 137842                  | AA                              | GG              | 1946976551               |
| SNP_P4_143793_137895 | NW_004516140.1 | Scaffold752 | 137895                  | TT                              | AA              | 1946976553               |
| SNP_P4_143794_137896 | NW_004516140.1 | Scaffold752 | 137896                  | CC                              | AA              | 1946976555               |
| SNP_P4_143795_137903 | NW_004516140.1 | Scaffold752 | 137903                  | AA                              | CC              | 1946976557               |
| SNP_P4_143796_137905 | NW_004516140.1 | Scaffold752 | 137905                  | AA                              | CC              | 1946976559               |
| SNP_P4_143797_137931 | NW_004516140.1 | Scaffold752 | 137931                  | TT                              | GG              | 1946976561               |
| SNP_P4_143798_137936 | NW_004516140.1 | Scaffold752 | 137936                  | TT                              | AA              | 1946976563               |

| SNPs IDs             | Chromosome IDs | Chromosomes | Physical positions (bp) | CDC Frontier (Reference genome) | (ILWC46 & LPNB) | NCBI SNPdb Accession IDs |
|----------------------|----------------|-------------|-------------------------|---------------------------------|-----------------|--------------------------|
| SNP_P4_143799_137967 | NW_004516140.1 | Scaffold752 | 137967                  | TT                              | CC              | 1946976565               |
| SNP_P4_143800_137990 | NW_004516140.1 | Scaffold752 | 137990                  | AA                              | GG              | 1946976567               |
| SNP_P4_143801_138011 | NW_004516140.1 | Scaffold752 | 138011                  | GG                              | AA              | 1946976569               |
| SNP_P4_143802_138064 | NW_004516140.1 | Scaffold752 | 138064                  | AA                              | TT              | 1946976571               |
| SNP_P4_143803_138066 | NW_004516140.1 | Scaffold752 | 138066                  | AA                              | CC              | 1946976573               |
| SNP_P4_143804_138069 | NW_004516140.1 | Scaffold752 | 138069                  | CC                              | TT              | 1946976575               |
| SNP_P4_143805_150442 | NW_004516140.1 | Scaffold752 | 150442                  | AA                              | GG              | 1946976576               |
| SNP_P4_143806_150505 | NW_004516140.1 | Scaffold752 | 150505                  | AA                              | CC              | 1946976578               |
| SNP_P4_143807_150512 | NW_004516140.1 | Scaffold752 | 150512                  | AA                              | CC              | 1946976580               |
| SNP_P4_143808_150591 | NW_004516140.1 | Scaffold752 | 150591                  | TT                              | CC              | 1946976582               |
| SNP_P4_143809_150640 | NW_004516140.1 | Scaffold752 | 150640                  | AA                              | GG              | 1946976689               |
| SNP_P4_143810_150653 | NW_004516140.1 | Scaffold752 | 150653                  | GG                              | CC              | 1946976691               |
| SNP_P4_143811_152248 | NW_004516140.1 | Scaffold752 | 152248                  | CC                              | AA              | 1946976693               |
| SNP_P4_143812_152329 | NW_004516140.1 | Scaffold752 | 152329                  | CC                              | TT              | 1946976695               |
| SNP_P4_143813_152483 | NW_004516140.1 | Scaffold752 | 152483                  | AA                              | TT              | 1946976697               |
| SNP_P4_143814_152518 | NW_004516140.1 | Scaffold752 | 152518                  | AA                              | CC              | 1946976699               |
| SNP_P4_143815_152615 | NW_004516140.1 | Scaffold752 | 152615                  | TT                              | CC              | 1946976701               |
| SNP_P4_143816_159153 | NW_004516140.1 | Scaffold752 | 159153                  | GG                              | CC              | 1946976703               |
| SNP_P4_143818_209668 | NW_004516140.1 | Scaffold752 | 209668                  | AA                              | TT              | 1946976705               |
| SNP_P4_143819_210064 | NW_004516140.1 | Scaffold752 | 210064                  | TT                              | CC              | 1946976707               |
| SNP_P4_143820_210116 | NW_004516140.1 | Scaffold752 | 210116                  | AA                              | GG              | 1946976709               |
| SNP_P4_143821_211706 | NW_004516140.1 | Scaffold752 | 211706                  | TT                              | CC              | 1946976711               |
| SNP_P4_143822_211757 | NW_004516140.1 | Scaffold752 | 211757                  | GG                              | TT              | 1946976713               |
| SNP_P4_143823_211803 | NW_004516140.1 | Scaffold752 | 211803                  | GG                              | AA              | 1946976715               |
| SNP_P4_143824_212023 | NW_004516140.1 | Scaffold752 | 212023                  | AA                              | CC              | 1946976717               |
| SNP_P4_143825_212078 | NW_004516140.1 | Scaffold752 | 212078                  | AA                              | GG              | 1946976719               |
| SNP_P4_143826_213859 | NW_004516140.1 | Scaffold752 | 213859                  | GG                              | AA              | 1946976720               |
| SNP_P4_143827_213864 | NW_004516140.1 | Scaffold752 | 213864                  | CC                              | TT              | 1946976723               |
| SNP_P4_143829_222118 | NW_004516140.1 | Scaffold752 | 222118                  | GG                              | TT              | 1946976725               |
| SNP_P4_143830_222128 | NW_004516140.1 | Scaffold752 | 222128                  | AA                              | GG              | 1946976727               |
| SNP_P4_143831_222138 | NW_004516140.1 | Scaffold752 | 222138                  | GG                              | TT              | 1946976729               |
| SNP_P4_143832_222155 | NW_004516140.1 | Scaffold752 | 222155                  | CC                              | TT              | 1946976731               |
| SNP_P4_143833_222178 | NW_004516140.1 | Scaffold752 | 222178                  | CC                              | TT              | 1946976733               |
| SNP_P4_143834_222183 | NW_004516140.1 | Scaffold752 | 222183                  | GG                              | AA              | 1946976735               |
| SNP_P4_143836_227807 | NW_004516140.1 | Scaffold752 | 227807                  | AA                              | CC              | 1946976737               |
| SNP_P4_143837_228245 | NW_004516140.1 | Scaffold752 | 228245                  | GG                              | TT              | 1946976740               |
| SNP_P4_143838_231077 | NW_004516140.1 | Scaffold752 | 231077                  | CC                              | GG              | 1946976742               |
| SNP_P4_143839_231080 | NW_004516140.1 | Scaffold752 | 231080                  | GG                              | AA              | 1946976744               |
| SNP_P4_143840_231151 | NW_004516140.1 | Scaffold752 | 231151                  | TT                              | AA              | 1946976746               |
| SNP_P4_143841_231171 | NW_004516140.1 | Scaffold752 | 231171                  | TT                              | CC              | 1946976748               |
| SNP_P4_143842_231220 | NW_004516140.1 | Scaffold752 | 231220                  | AA                              | GG              | 1946976750               |
| SNP_P4_143843_231238 | NW_004516140.1 | Scaffold752 | 231238                  | GG                              | AA              | 1946976752               |

| SNPs IDs             | Chromosome IDs | Chromosomes | Physical positions (bp) | CDC Frontier (Reference genome) | (ILWC46 & LPNB) | NCBI SNPdb Accession IDs |
|----------------------|----------------|-------------|-------------------------|---------------------------------|-----------------|--------------------------|
| SNP_P4_143844_231259 | NW_004516140.1 | Scaffold752 | 231259                  | AA                              | GG              | 1946976755               |
| SNP_P4_143845_231264 | NW_004516140.1 | Scaffold752 | 231264                  | AA                              | GG              | 1946976757               |
| SNP_P4_143846_231289 | NW_004516140.1 | Scaffold752 | 231289                  | TT                              | CC              | 1946976759               |
| SNP_P4_143847_231458 | NW_004516140.1 | Scaffold752 | 231458                  | TT                              | CC              | 1946976761               |
| SNP_P4_143848_231477 | NW_004516140.1 | Scaffold752 | 231477                  | CC                              | TT              | 1946976763               |
| SNP_P4_143849_231484 | NW_004516140.1 | Scaffold752 | 231484                  | AA                              | CC              | 1946976765               |
| SNP_P4_143850_231499 | NW_004516140.1 | Scaffold752 | 231499                  | TT                              | GG              | 1946976767               |
| SNP_P4_143851_231500 | NW_004516140.1 | Scaffold752 | 231500                  | AA                              | GG              | 1946976769               |
| SNP_P4_143852_231509 | NW_004516140.1 | Scaffold752 | 231509                  | GG                              | AA              | 1946976771               |
| SNP_P4_143853_231542 | NW_004516140.1 | Scaffold752 | 231542                  | GG                              | AA              | 1946976772               |
| SNP_P4_143854_231554 | NW_004516140.1 | Scaffold752 | 231554                  | AA                              | GG              | 1946976774               |
| SNP_P4_143855_231611 | NW_004516140.1 | Scaffold752 | 231611                  | GG                              | AA              | 1946976776               |
| SNP_P4_143856_232476 | NW_004516140.1 | Scaffold752 | 232476                  | GG                              | AA              | 1946976778               |
| SNP_P4_143857_232532 | NW_004516140.1 | Scaffold752 | 232532                  | TT                              | GG              | 1946976780               |
| SNP_P4_143858_249767 | NW_004516140.1 | Scaffold752 | 249767                  | GG                              | AA              | 1946976782               |
| SNP_P4_143860_269485 | NW_004516140.1 | Scaffold752 | 269485                  | TT                              | CC              | 1946976784               |
| SNP_P4_143862_269644 | NW_004516140.1 | Scaffold752 | 269644                  | AA                              | CC              | 1946976786               |
| SNP_P4_143863_269712 | NW_004516140.1 | Scaffold752 | 269712                  | AA                              | GG              | 1946976788               |
| SNP_P4_143864_269932 | NW_004516140.1 | Scaffold752 | 269932                  | GG                              | AA              | 1946976790               |
| SNP_P4_143865_281702 | NW_004516140.1 | Scaffold752 | 281702                  | GG                              | AA              | 1946976792               |
| SNP_P4_143866_293890 | NW_004516140.1 | Scaffold752 | 293890                  | AA                              | GG              | 1946976794               |
| SNP_P4_143867_293949 | NW_004516140.1 | Scaffold752 | 293949                  | GG                              | AA              | 1946976796               |
| SNP_P4_143868_294033 | NW_004516140.1 | Scaffold752 | 294033                  | CC                              | AA              | 1946976798               |
| SNP_P4_143869_294267 | NW_004516140.1 | Scaffold752 | 294267                  | GG                              | AA              | 1946976800               |
| SNP_P4_143870_294817 | NW_004516140.1 | Scaffold752 | 294817                  | CC                              | AA              | 1946976802               |
| SNP_P4_143871_341249 | NW_004516140.1 | Scaffold752 | 341249                  | TT                              | CC              | 1946976804               |
| SNP_P4_143872_341671 | NW_004516140.1 | Scaffold752 | 341671                  | AA                              | GG              | 1946976806               |
| SNP_P4_143873_369624 | NW_004516140.1 | Scaffold752 | 369624                  | GG                              | CC              | 1946976808               |
| SNP_P4_143874_385760 | NW_004516140.1 | Scaffold752 | 385760                  | CC                              | TT              | 1946976809               |
| SNP_P4_143875_417323 | NW_004516140.1 | Scaffold752 | 417323                  | CC                              | TT              | 1946976811               |
| SNP_P4_143876_449129 | NW_004516140.1 | Scaffold752 | 449129                  | GG                              | AA              | 1946976813               |
| SNP_P4_143877_456537 | NW_004516140.1 | Scaffold752 | 456537                  | TT                              | CC              | 1946976815               |
| SNP_P4_143878_456958 | NW_004516140.1 | Scaffold752 | 456958                  | GG                              | CC              | 1946976817               |
| SNP_P4_143879_457410 | NW_004516140.1 | Scaffold752 | 457410                  | AA                              | CC              | 1946976819               |
| SNP_P4_143881_504930 | NW_004516140.1 | Scaffold752 | 504930                  | TT                              | CC              | 1946976821               |
| SNP_P4_143882_505004 | NW_004516140.1 | Scaffold752 | 505004                  | TT                              | GG              | 1946976823               |
| SNP_P4_143883_505027 | NW_004516140.1 | Scaffold752 | 505027                  | CC                              | TT              | 1946976825               |
| SNP_P4_143884_505082 | NW_004516140.1 | Scaffold752 | 505082                  | GG                              | CC              | 1946976827               |
| SNP_P4_143885_505096 | NW_004516140.1 | Scaffold752 | 505096                  | CC                              | TT              | 1946976829               |
| SNP_P4_143887_505290 | NW_004516140.1 | Scaffold752 | 505290                  | AA                              | GG              | 1946976830               |
| SNP_P4_143888_505333 | NW_004516140.1 | Scaffold752 | 505333                  | AA                              | TT              | 1946976832               |
| SNP_P4_143889_505401 | NW_004516140.1 | Scaffold752 | 505401                  | AA                              | CC              | 1946976834               |

| SNPs IDs             | Chromosome IDs | Chromosomes | Physical positions (bp) | CDC Frontier (Reference genome) | (ILWC46 & LPNB) | NCBI SNPdb Accession IDs |
|----------------------|----------------|-------------|-------------------------|---------------------------------|-----------------|--------------------------|
| SNP_P4_143890_33872  | NW_004516141.1 | Scaffold753 | 33872                   | AA                              | GG              | 1946976836               |
| SNP_P4_143891_75496  | NW_004516141.1 | Scaffold753 | 75496                   | TT                              | GG              | 1946976838               |
| SNP_P4_143892_84324  | NW_004516141.1 | Scaffold753 | 84324                   | TT                              | CC              | 1946976840               |
| SNP_P4_143893_84329  | NW_004516141.1 | Scaffold753 | 84329                   | TT                              | GG              | 1946976842               |
| SNP_P4_143894_84341  | NW_004516141.1 | Scaffold753 | 84341                   | AA                              | GG              | 1946976844               |
| SNP_P4_143895_84356  | NW_004516141.1 | Scaffold753 | 84356                   | AA                              | CC              | 1946976846               |
| SNP_P4_143896_84387  | NW_004516141.1 | Scaffold753 | 84387                   | AA                              | CC              | 1946976848               |
| SNP_P4_143897_84403  | NW_004516141.1 | Scaffold753 | 84403                   | AA                              | GG              | 1946976850               |
| SNP_P4_143898_84406  | NW_004516141.1 | Scaffold753 | 84406                   | TT                              | CC              | 1946976852               |
| SNP_P4_143899_94785  | NW_004516141.1 | Scaffold753 | 94785                   | TT                              | AA              | 1946976854               |
| SNP_P4_143900_118106 | NW_004516141.1 | Scaffold753 | 118106                  | CC                              | TT              | 1946976856               |
| SNP_P4_143901_123070 | NW_004516141.1 | Scaffold753 | 123070                  | CC                              | TT              | 1946976857               |
| SNP_P4_143902_123085 | NW_004516141.1 | Scaffold753 | 123085                  | GG                              | AA              | 1946976859               |
| SNP_P4_143903_123100 | NW_004516141.1 | Scaffold753 | 123100                  | TT                              | CC              | 1946976861               |
| SNP_P4_143904_150068 | NW_004516141.1 | Scaffold753 | 150068                  | AA                              | TT              | 1946976863               |
| SNP_P4_143905_150759 | NW_004516141.1 | Scaffold753 | 150759                  | AA                              | GG              | 1946976865               |
| SNP_P4_143906_150887 | NW_004516141.1 | Scaffold753 | 150887                  | AA                              | TT              | 1946976867               |
| SNP_P4_143907_164249 | NW_004516141.1 | Scaffold753 | 164249                  | TT                              | CC              | 1946976869               |
| SNP_P4_143908_205141 | NW_004516141.1 | Scaffold753 | 205141                  | AA                              | CC              | 1946976871               |
| SNP_P4_143909_223568 | NW_004516141.1 | Scaffold753 | 223568                  | AA                              | GG              | 1946976873               |
| SNP_P4_143910_228714 | NW_004516141.1 | Scaffold753 | 228714                  | AA                              | GG              | 1946976875               |
| SNP_P4_143911_228834 | NW_004516141.1 | Scaffold753 | 228834                  | AA                              | GG              | 1946976877               |
| SNP_P4_143912_228884 | NW_004516141.1 | Scaffold753 | 228884                  | TT                              | CC              | 1946976879               |
| SNP_P4_143913_228909 | NW_004516141.1 | Scaffold753 | 228909                  | AA                              | TT              | 1946976881               |
| SNP_P4_143914_228944 | NW_004516141.1 | Scaffold753 | 228944                  | AA                              | TT              | 1946976883               |
| SNP_P4_143915_228959 | NW_004516141.1 | Scaffold753 | 228959                  | GG                              | TT              | 1946976885               |
| SNP_P4_143916_229057 | NW_004516141.1 | Scaffold753 | 229057                  | TT                              | CC              | 1946976887               |
| SNP_P4_143917_229213 | NW_004516141.1 | Scaffold753 | 229213                  | CC                              | TT              | 1946976889               |
| SNP_P4_143918_229273 | NW_004516141.1 | Scaffold753 | 229273                  | CC                              | TT              | 1946976892               |
| SNP_P4_143919_268464 | NW_004516141.1 | Scaffold753 | 268464                  | AA                              | CC              | 1946976894               |
| SNP_P4_143920_270294 | NW_004516141.1 | Scaffold753 | 270294                  | CC                              | TT              | 1946976896               |
| SNP_P4_143921_276256 | NW_004516141.1 | Scaffold753 | 276256                  | AA                              | CC              | 1946976898               |
| SNP_P4_143922_276310 | NW_004516141.1 | Scaffold753 | 276310                  | GG                              | CC              | 1946976899               |
| SNP_P4_143924_286844 | NW_004516141.1 | Scaffold753 | 286844                  | AA                              | GG              | 1946976902               |
| SNP_P4_143925_286884 | NW_004516141.1 | Scaffold753 | 286884                  | AA                              | GG              | 1946976904               |
| SNP_P4_143926_311024 | NW_004516141.1 | Scaffold753 | 311024                  | GG                              | TT              | 1946976905               |
| SNP_P4_143929_6898   | NW_004516142.1 | Scaffold754 | 6898                    | GG                              | AA              | 1946976907               |
| SNP_P4_143930_15354  | NW_004516142.1 | Scaffold754 | 15354                   | AA                              | GG              | 1946976909               |
| SNP_P4_143931_25243  | NW_004516142.1 | Scaffold754 | 25243                   | CC                              | AA              | 1946976911               |
| SNP_P4_143932_25609  | NW_004516142.1 | Scaffold754 | 25609                   | TT                              | CC              | 1946976913               |
| SNP_P4_143933_25731  | NW_004516142.1 | Scaffold754 | 25731                   | GG                              | AA              | 1946976915               |
| SNP_P4_143934_25734  | NW_004516142.1 | Scaffold754 | 25734                   | TT                              | GG              | 1946976918               |

| SNPs IDs            | Chromosome IDs | Chromosomes | Physical positions (bp) | CDC Frontier (Reference genome) | (ILWC46 & LPNB) | NCBI SNPdb Accession IDs |
|---------------------|----------------|-------------|-------------------------|---------------------------------|-----------------|--------------------------|
| SNP_P4_143935_26027 | NW_004516142.1 | Scaffold754 | 26027                   | CC                              | TT              | 1946976920               |
| SNP_P4_143936_26324 | NW_004516142.1 | Scaffold754 | 26324                   | CC                              | GG              | 1946976922               |
| SNP_P4_143937_26326 | NW_004516142.1 | Scaffold754 | 26326                   | TT                              | CC              | 1946976924               |
| SNP_P4_143939_72824 | NW_004516144.1 | Scaffold757 | 72824                   | CC                              | TT              | 1946976926               |
| SNP_P4_143940_72867 | NW_004516144.1 | Scaffold757 | 72867                   | AA                              | GG              | 1946976928               |
| SNP_P4_143941_72922 | NW_004516144.1 | Scaffold757 | 72922                   | TT                              | CC              | 1946976930               |
| SNP_P4_143942_72928 | NW_004516144.1 | Scaffold757 | 72928                   | GG                              | AA              | 1946976932               |
| SNP_P4_143943_72937 | NW_004516144.1 | Scaffold757 | 72937                   | GG                              | AA              | 1946976934               |
| SNP_P4_143944_72971 | NW_004516144.1 | Scaffold757 | 72971                   | CC                              | TT              | 1946976936               |
| SNP_P4_143945_72988 | NW_004516144.1 | Scaffold757 | 72988                   | GG                              | AA              | 1946976938               |
| SNP_P4_143946_73004 | NW_004516144.1 | Scaffold757 | 73004                   | GG                              | AA              | 1946976940               |
| SNP_P4_143947_73034 | NW_004516144.1 | Scaffold757 | 73034                   | CC                              | AA              | 1946976942               |
| SNP_P4_143948_73089 | NW_004516144.1 | Scaffold757 | 73089                   | TT                              | AA              | 1946976944               |
| SNP_P4_143949_73122 | NW_004516144.1 | Scaffold757 | 73122                   | AA                              | GG              | 1946976946               |
| SNP_P4_143950_73123 | NW_004516144.1 | Scaffold757 | 73123                   | AA                              | GG              | 1946976948               |
| SNP_P4_143951_2130  | NW_004516145.1 | Scaffold758 | 2130                    | TT                              | CC              | 1946976950               |
| SNP_P4_143953_11072 | NW_004516145.1 | Scaffold758 | 11072                   | GG                              | TT              | 1946976952               |
| SNP_P4_143954_11096 | NW_004516145.1 | Scaffold758 | 11096                   | GG                              | TT              | 1946976954               |
| SNP_P4_143955_12009 | NW_004516145.1 | Scaffold758 | 12009                   | CC                              | GG              | 1946976956               |
| SNP_P4_143956_12017 | NW_004516145.1 | Scaffold758 | 12017                   | AA                              | TT              | 1946976958               |
| SNP_P4_143957_12604 | NW_004516145.1 | Scaffold758 | 12604                   | AA                              | GG              | 1946976960               |
| SNP_P4_143958_13233 | NW_004516145.1 | Scaffold758 | 13233                   | GG                              | AA              | 1946976962               |
| SNP_P4_143960_16503 | NW_004516145.1 | Scaffold758 | 16503                   | AA                              | GG              | 1946976964               |
| SNP_P4_143961_19559 | NW_004516145.1 | Scaffold758 | 19559                   | TT                              | GG              | 1946976966               |
| SNP_P4_143962_22138 | NW_004516145.1 | Scaffold758 | 22138                   | GG                              | AA              | 1946976968               |
| SNP_P4_143963_22272 | NW_004516145.1 | Scaffold758 | 22272                   | TT                              | CC              | 1946976970               |
| SNP_P4_143964_22273 | NW_004516145.1 | Scaffold758 | 22273                   | AA                              | GG              | 1946976972               |
| SNP_P4_143965_22297 | NW_004516145.1 | Scaffold758 | 22297                   | CC                              | AA              | 1946976974               |
| SNP_P4_143966_22320 | NW_004516145.1 | Scaffold758 | 22320                   | CC                              | TT              | 1946976977               |
| SNP_P4_143967_22331 | NW_004516145.1 | Scaffold758 | 22331                   | AA                              | GG              | 1946976979               |
| SNP_P4_143968_22356 | NW_004516145.1 | Scaffold758 | 22356                   | TT                              | CC              | 1946976980               |
| SNP_P4_143969_22392 | NW_004516145.1 | Scaffold758 | 22392                   | CC                              | TT              | 1946976983               |
| SNP_P4_143971_22606 | NW_004516145.1 | Scaffold758 | 22606                   | TT                              | CC              | 1946976985               |
| SNP_P4_143972_22623 | NW_004516145.1 | Scaffold758 | 22623                   | TT                              | CC              | 1946976987               |
| SNP_P4_143973_22627 | NW_004516145.1 | Scaffold758 | 22627                   | AA                              | CC              | 1946976989               |
| SNP_P4_143974_22631 | NW_004516145.1 | Scaffold758 | 22631                   | AA                              | GG              | 1946976991               |
| SNP_P4_143975_23747 | NW_004516145.1 | Scaffold758 | 23747                   | GG                              | CC              | 1946976993               |
| SNP_P4_143976_24025 | NW_004516145.1 | Scaffold758 | 24025                   | GG                              | AA              | 1946976995               |
| SNP_P4_143978_28680 | NW_004516145.1 | Scaffold758 | 28680                   | AA                              | CC              | 1946976997               |
| SNP_P4_143979_28709 | NW_004516145.1 | Scaffold758 | 28709                   | AA                              | CC              | 1946976999               |
| SNP_P4_143980_54342 | NW_004516145.1 | Scaffold758 | 54342                   | GG                              | AA              | 1946977001               |
| SNP_P4_143981_58861 | NW_004516145.1 | Scaffold758 | 58861                   | GG                              | AA              | 1946977003               |

| SNPs IDs             | Chromosome IDs | Chromosomes | Physical positions (bp) | CDC Frontier (Reference genome) | (ILWC46 & LPNB) | NCBI SNPdb Accession IDs |
|----------------------|----------------|-------------|-------------------------|---------------------------------|-----------------|--------------------------|
| SNP_P4_143982_60470  | NW_004516145.1 | Scaffold758 | 60470                   | AA                              | GG              | 1946977005               |
| SNP_P4_143983_60829  | NW_004516145.1 | Scaffold758 | 60829                   | AA                              | TT              | 1946977007               |
| SNP_P4_143984_60830  | NW_004516145.1 | Scaffold758 | 60830                   | AA                              | TT              | 1946977009               |
| SNP_P4_143985_60838  | NW_004516145.1 | Scaffold758 | 60838                   | GG                              | CC              | 1946977011               |
| SNP_P4_143986_80878  | NW_004516145.1 | Scaffold758 | 80878                   | GG                              | AA              | 1946977014               |
| SNP_P4_143987_115845 | NW_004516145.1 | Scaffold758 | 115845                  | AA                              | GG              | 1946977015               |
| SNP_P4_143988_116312 | NW_004516145.1 | Scaffold758 | 116312                  | GG                              | CC              | 1946977017               |
| SNP_P4_143989_116324 | NW_004516145.1 | Scaffold758 | 116324                  | TT                              | CC              | 1946977019               |
| SNP_P4_143990_116421 | NW_004516145.1 | Scaffold758 | 116421                  | TT                              | CC              | 1946977021               |
| SNP_P4_143991_116460 | NW_004516145.1 | Scaffold758 | 116460                  | GG                              | AA              | 1946977023               |
| SNP_P4_143992_116511 | NW_004516145.1 | Scaffold758 | 116511                  | GG                              | CC              | 1946977025               |
| SNP_P4_143993_116805 | NW_004516145.1 | Scaffold758 | 116805                  | AA                              | TT              | 1946977027               |
| SNP_P4_143994_119608 | NW_004516145.1 | Scaffold758 | 119608                  | CC                              | TT              | 1946977029               |
| SNP_P4_143995_119828 | NW_004516145.1 | Scaffold758 | 119828                  | TT                              | CC              | 1946977032               |
| SNP_P4_143996_119834 | NW_004516145.1 | Scaffold758 | 119834                  | TT                              | CC              | 1946977034               |
| SNP_P4_143997_120004 | NW_004516145.1 | Scaffold758 | 120004                  | AA                              | GG              | 1946977036               |
| SNP_P4_143998_120057 | NW_004516145.1 | Scaffold758 | 120057                  | AA                              | GG              | 1946977038               |
| SNP_P4_143999_120123 | NW_004516145.1 | Scaffold758 | 120123                  | TT                              | CC              | 1946977040               |
| SNP_P4_144000_1876   | NW_004516146.1 | Scaffold759 | 1876                    | CC                              | TT              | 1946977042               |
| SNP_P4_144001_3234   | NW_004516146.1 | Scaffold759 | 3234                    | TT                              | CC              | 1946977044               |
| SNP_P4_144002_6113   | NW_004516146.1 | Scaffold759 | 6113                    | TT                              | GG              | 1946977046               |
| SNP_P4_144003_6120   | NW_004516146.1 | Scaffold759 | 6120                    | CC                              | TT              | 1946977048               |
| SNP_P4_144004_6122   | NW_004516146.1 | Scaffold759 | 6122                    | CC                              | TT              | 1946977051               |
| SNP_P4_144005_6128   | NW_004516146.1 | Scaffold759 | 6128                    | TT                              | CC              | 1946977053               |
| SNP_P4_144006_6164   | NW_004516146.1 | Scaffold759 | 6164                    | TT                              | CC              | 1946977055               |
| SNP_P4_144007_6193   | NW_004516146.1 | Scaffold759 | 6193                    | AA                              | CC              | 1946977057               |
| SNP_P4_144008_6237   | NW_004516146.1 | Scaffold759 | 6237                    | CC                              | GG              | 1946977059               |
| SNP_P4_144009_6250   | NW_004516146.1 | Scaffold759 | 6250                    | AA                              | CC              | 1946977061               |
| SNP_P4_144010_6458   | NW_004516146.1 | Scaffold759 | 6458                    | GG                              | TT              | 1946977063               |
| SNP_P4_144011_6625   | NW_004516146.1 | Scaffold759 | 6625                    | GG                              | AA              | 1946977065               |
| SNP_P4_144012_6921   | NW_004516146.1 | Scaffold759 | 6921                    | TT                              | CC              | 1946977067               |
| SNP_P4_144013_6998   | NW_004516146.1 | Scaffold759 | 6998                    | GG                              | AA              | 1946977069               |
| SNP_P4_144014_7001   | NW_004516146.1 | Scaffold759 | 7001                    | GG                              | AA              | 1946977071               |
| SNP_P4_144015_7066   | NW_004516146.1 | Scaffold759 | 7066                    | AA                              | CC              | 1946977073               |
| SNP_P4_144016_7099   | NW_004516146.1 | Scaffold759 | 7099                    | TT                              | CC              | 1946977075               |
| SNP_P4_144017_7185   | NW_004516146.1 | Scaffold759 | 7185                    | TT                              | CC              | 1946977077               |
| SNP_P4_144018_7234   | NW_004516146.1 | Scaffold759 | 7234                    | AA                              | GG              | 1946977079               |
| SNP_P4_144019_7261   | NW_004516146.1 | Scaffold759 | 7261                    | GG                              | AA              | 1946977081               |
| SNP_P4_144020_7297   | NW_004516146.1 | Scaffold759 | 7297                    | TT                              | CC              | 1946977083               |
| SNP_P4_144021_7336   | NW_004516146.1 | Scaffold759 | 7336                    | TT                              | CC              | 1946977085               |
| SNP_P4_144022_7369   | NW_004516146.1 | Scaffold759 | 7369                    | GG                              | AA              | 1946977087               |
| SNP_P4_144023_16775  | NW_004516146.1 | Scaffold759 | 16775                   | GG                              | AA              | 1946977088               |



| SNPs IDs             | Chromosome IDs | Chromosomes | Physical positions (bp) | CDC Frontier (Reference genome) | (ILWC46 & LPNB) | NCBI SNPdb Accession IDs |
|----------------------|----------------|-------------|-------------------------|---------------------------------|-----------------|--------------------------|
| SNP_P4_144024_21170  | NW_004516146.1 | Scaffold759 | 21170                   | CC                              | TT              | 1946977090               |
| SNP_P4_144025_46631  | NW_004516146.1 | Scaffold759 | 46631                   | AA                              | GG              | 1946977092               |
| SNP_P4_144026_48115  | NW_004516146.1 | Scaffold759 | 48115                   | CC                              | GG              | 1946977094               |
| SNP_P4_144027_48123  | NW_004516146.1 | Scaffold759 | 48123                   | AA                              | TT              | 1946977096               |
| SNP_P4_144028_48124  | NW_004516146.1 | Scaffold759 | 48124                   | TT                              | AA              | 1946977098               |
| SNP_P4_144029_66712  | NW_004516146.1 | Scaffold759 | 66712                   | AA                              | GG              | 1946977100               |
| SNP_P4_144030_66759  | NW_004516146.1 | Scaffold759 | 66759                   | TT                              | CC              | 1946977102               |
| SNP_P4_144031_66810  | NW_004516146.1 | Scaffold759 | 66810                   | AA                              | GG              | 1946977104               |
| SNP_P4_144032_66981  | NW_004516146.1 | Scaffold759 | 66981                   | AA                              | TT              | 1946977106               |
| SNP_P4_144033_72958  | NW_004516146.1 | Scaffold759 | 72958                   | GG                              | TT              | 1946977108               |
| SNP_P4_144034_77069  | NW_004516146.1 | Scaffold759 | 77069                   | AA                              | GG              | 1946977110               |
| SNP_P4_144035_77203  | NW_004516146.1 | Scaffold759 | 77203                   | AA                              | TT              | 1946977112               |
| SNP_P4_144036_106907 | NW_004516146.1 | Scaffold759 | 106907                  | CC                              | AA              | 1946977114               |
| SNP_P4_144038_109740 | NW_004516146.1 | Scaffold759 | 109740                  | TT                              | CC              | 1946977116               |
| SNP_P4_144039_110061 | NW_004516146.1 | Scaffold759 | 110061                  | CC                              | TT              | 1946977117               |
| SNP_P4_144040_116906 | NW_004516146.1 | Scaffold759 | 116906                  | CC                              | GG              | 1946977119               |
| SNP_P4_144041_124658 | NW_004516146.1 | Scaffold759 | 124658                  | GG                              | AA              | 1946977121               |
| SNP_P4_144042_136158 | NW_004516146.1 | Scaffold759 | 136158                  | TT                              | AA              | 1946977122               |
| SNP_P4_144043_138315 | NW_004516146.1 | Scaffold759 | 138315                  | AA                              | TT              | 1946977123               |
| SNP_P4_144044_138567 | NW_004516146.1 | Scaffold759 | 138567                  | TT                              | GG              | 1946977124               |
| SNP_P4_144045_138600 | NW_004516146.1 | Scaffold759 | 138600                  | AA                              | GG              | 1946977125               |
| SNP_P4_144046_138619 | NW_004516146.1 | Scaffold759 | 138619                  | AA                              | TT              | 1946977127               |
| SNP_P4_144047_139016 | NW_004516146.1 | Scaffold759 | 139016                  | AA                              | GG              | 1946977129               |
| SNP_P4_144048_139753 | NW_004516146.1 | Scaffold759 | 139753                  | CC                              | TT              | 1946977131               |
| SNP_P4_144049_139958 | NW_004516146.1 | Scaffold759 | 139958                  | GG                              | TT              | 1946977133               |
| SNP_P4_144050_485    | NW_004516147.1 | Scaffold760 | 485                     | AA                              | GG              | 1946977135               |
| SNP_P4_144051_644    | NW_004516147.1 | Scaffold760 | 644                     | AA                              | CC              | 1946977137               |
| SNP_P4_144052_8630   | NW_004516147.1 | Scaffold760 | 8630                    | GG                              | AA              | 1946977139               |
| SNP_P4_144053_8683   | NW_004516147.1 | Scaffold760 | 8683                    | CC                              | GG              | 1946977140               |
| SNP_P4_144054_8968   | NW_004516147.1 | Scaffold760 | 8968                    | GG                              | CC              | 1946977143               |
| SNP_P4_144055_8992   | NW_004516147.1 | Scaffold760 | 8992                    | GG                              | AA              | 1946977145               |
| SNP_P4_144056_11258  | NW_004516147.1 | Scaffold760 | 11258                   | AA                              | GG              | 1946977147               |
| SNP_P4_144057_11261  | NW_004516147.1 | Scaffold760 | 11261                   | CC                              | TT              | 1946977149               |
| SNP_P4_144058_11642  | NW_004516147.1 | Scaffold760 | 11642                   | GG                              | TT              | 1946977151               |
| SNP_P4_144059_12520  | NW_004516147.1 | Scaffold760 | 12520                   | GG                              | AA              | 1946977153               |
| SNP_P4_144060_12660  | NW_004516147.1 | Scaffold760 | 12660                   | AA                              | GG              | 1946977155               |
| SNP_P4_144061_12846  | NW_004516147.1 | Scaffold760 | 12846                   | TT                              | AA              | 1946977157               |
| SNP_P4_144062_12850  | NW_004516147.1 | Scaffold760 | 12850                   | CC                              | GG              | 1946977159               |
| SNP_P4_144063_13033  | NW_004516147.1 | Scaffold760 | 13033                   | GG                              | AA              | 1946977161               |
| SNP_P4_144064_13074  | NW_004516147.1 | Scaffold760 | 13074                   | AA                              | GG              | 1946977163               |
| SNP_P4_144065_13235  | NW_004516147.1 | Scaffold760 | 13235                   | CC                              | TT              | 1946977165               |
| SNP_P4_144066_15470  | NW_004516147.1 | Scaffold760 | 15470                   | GG                              | AA              | 1946977167               |

| SNPs IDs             | Chromosome IDs | Chromosomes | Physical positions (bp) | CDC Frontier (Reference genome) | (ILWC46 & LPNB) | NCBI SNPdb Accession IDs |
|----------------------|----------------|-------------|-------------------------|---------------------------------|-----------------|--------------------------|
| SNP_P4_144067_16047  | NW_004516147.1 | Scaffold760 | 16047                   | CC                              | TT              | 1946977169               |
| SNP_P4_144068_16056  | NW_004516147.1 | Scaffold760 | 16056                   | GG                              | TT              | 1946977171               |
| SNP_P4_144069_16076  | NW_004516147.1 | Scaffold760 | 16076                   | CC                              | GG              | 1946977173               |
| SNP_P4_144070_16151  | NW_004516147.1 | Scaffold760 | 16151                   | CC                              | TT              | 1946977175               |
| SNP_P4_144071_2912   | NW_004516151.1 | Scaffold766 | 2912                    | CC                              | TT              | 1946977178               |
| SNP_P4_144072_2925   | NW_004516151.1 | Scaffold766 | 2925                    | TT                              | CC              | 1946977180               |
| SNP_P4_144073_3199   | NW_004516151.1 | Scaffold766 | 3199                    | GG                              | AA              | 1946977182               |
| SNP_P4_144074_3257   | NW_004516151.1 | Scaffold766 | 3257                    | AA                              | GG              | 1946977184               |
| SNP_P4_144075_3289   | NW_004516151.1 | Scaffold766 | 3289                    | GG                              | AA              | 1946977186               |
| SNP_P4_144076_4491   | NW_004516151.1 | Scaffold766 | 4491                    | AA                              | TT              | 1946977189               |
| SNP_P4_144077_4924   | NW_004516151.1 | Scaffold766 | 4924                    | TT                              | AA              | 1946977191               |
| SNP_P4_144078_4925   | NW_004516151.1 | Scaffold766 | 4925                    | TT                              | CC              | 1946977193               |
| SNP_P4_144079_5177   | NW_004516151.1 | Scaffold766 | 5177                    | TT                              | GG              | 1946977195               |
| SNP_P4_144080_5454   | NW_004516151.1 | Scaffold766 | 5454                    | TT                              | CC              | 1946977197               |
| SNP_P4_144081_5473   | NW_004516151.1 | Scaffold766 | 5473                    | AA                              | TT              | 1946977199               |
| SNP_P4_144083_18053  | NW_004516151.1 | Scaffold766 | 18053                   | TT                              | GG              | 1946977201               |
| SNP_P4_144084_25785  | NW_004516151.1 | Scaffold766 | 25785                   | GG                              | AA              | 1946977203               |
| SNP_P4_144085_27448  | NW_004516151.1 | Scaffold766 | 27448                   | TT                              | CC              | 1946977205               |
| SNP_P4_144086_27539  | NW_004516151.1 | Scaffold766 | 27539                   | GG                              | TT              | 1946977207               |
| SNP_P4_144087_27919  | NW_004516151.1 | Scaffold766 | 27919                   | CC                              | TT              | 1946977209               |
| SNP_P4_144088_30513  | NW_004516151.1 | Scaffold766 | 30513                   | AA                              | GG              | 1946977211               |
| SNP_P4_144091_79664  | NW_004516151.1 | Scaffold766 | 79664                   | AA                              | GG              | 1946977213               |
| SNP_P4_144092_79685  | NW_004516151.1 | Scaffold766 | 79685                   | GG                              | TT              | 1946977215               |
| SNP_P4_144093_79693  | NW_004516151.1 | Scaffold766 | 79693                   | CC                              | TT              | 1946977217               |
| SNP_P4_144094_89880  | NW_004516151.1 | Scaffold766 | 89880                   | CC                              | TT              | 1946977219               |
| SNP_P4_144095_138232 | NW_004516151.1 | Scaffold766 | 138232                  | GG                              | AA              | 1946977221               |
| SNP_P4_144097_144810 | NW_004516151.1 | Scaffold766 | 144810                  | AA                              | CC              | 1946977223               |
| SNP_P4_144099_188303 | NW_004516151.1 | Scaffold766 | 188303                  | CC                              | TT              | 1946977225               |
| SNP_P4_144100_188534 | NW_004516151.1 | Scaffold766 | 188534                  | AA                              | GG              | 1946977227               |
| SNP_P4_144101_188772 | NW_004516151.1 | Scaffold766 | 188772                  | TT                              | AA              | 1946977229               |
| SNP_P4_144102_188800 | NW_004516151.1 | Scaffold766 | 188800                  | GG                              | AA              | 1946977231               |
| SNP_P4_144103_189580 | NW_004516151.1 | Scaffold766 | 189580                  | AA                              | GG              | 1946977233               |
| SNP_P4_144104_189853 | NW_004516151.1 | Scaffold766 | 189853                  | TT                              | CC              | 1946977235               |
| SNP_P4_144105_189902 | NW_004516151.1 | Scaffold766 | 189902                  | TT                              | CC              | 1946977238               |
| SNP_P4_144106_189997 | NW_004516151.1 | Scaffold766 | 189997                  | AA                              | GG              | 1946977240               |
| SNP_P4_144107_190013 | NW_004516151.1 | Scaffold766 | 190013                  | GG                              | AA              | 1946977242               |
| SNP_P4_144108_200331 | NW_004516151.1 | Scaffold766 | 200331                  | TT                              | CC              | 1946977244               |
| SNP_P4_144109_200487 | NW_004516151.1 | Scaffold766 | 200487                  | AA                              | CC              | 1946977246               |
| SNP_P4_144110_200511 | NW_004516151.1 | Scaffold766 | 200511                  | AA                              | CC              | 1946977248               |
| SNP_P4_144111_200513 | NW_004516151.1 | Scaffold766 | 200513                  | TT                              | AA              | 1946977250               |
| SNP_P4_144113_214016 | NW_004516151.1 | Scaffold766 | 214016                  | GG                              | AA              | 1946977252               |
| SNP_P4_144114_214790 | NW_004516151.1 | Scaffold766 | 214790                  | AA                              | CC              | 1946977254               |

| SNPs IDs             | Chromosome IDs | Chromosomes | Physical positions (bp) | CDC Frontier (Reference genome) | (ILWC46 & LPNB) | NCBI SNPdb Accession IDs |
|----------------------|----------------|-------------|-------------------------|---------------------------------|-----------------|--------------------------|
| SNP_P4_144115_214957 | NW_004516151.1 | Scaffold766 | 214957                  | TT                              | CC              | 1946977256               |
| SNP_P4_144116_229976 | NW_004516151.1 | Scaffold766 | 229976                  | AA                              | GG              | 1946977258               |
| SNP_P4_144117_229988 | NW_004516151.1 | Scaffold766 | 229988                  | AA                              | GG              | 1946977260               |
| SNP_P4_144118_230001 | NW_004516151.1 | Scaffold766 | 230001                  | AA                              | GG              | 1946977317               |
| SNP_P4_144119_230026 | NW_004516151.1 | Scaffold766 | 230026                  | CC                              | AA              | 1946977319               |
| SNP_P4_144120_230041 | NW_004516151.1 | Scaffold766 | 230041                  | TT                              | CC              | 1946977321               |
| SNP_P4_144121_230050 | NW_004516151.1 | Scaffold766 | 230050                  | AA                              | GG              | 1946977324               |
| SNP_P4_144122_243503 | NW_004516151.1 | Scaffold766 | 243503                  | AA                              | TT              | 1946977326               |
| SNP_P4_144124_243854 | NW_004516151.1 | Scaffold766 | 243854                  | AA                              | GG              | 1946977328               |
| SNP_P4_144125_243954 | NW_004516151.1 | Scaffold766 | 243954                  | GG                              | AA              | 1946977330               |
| SNP_P4_144126_268899 | NW_004516151.1 | Scaffold766 | 268899                  | TT                              | GG              | 1946977332               |
| SNP_P4_144127_268919 | NW_004516151.1 | Scaffold766 | 268919                  | AA                              | GG              | 1946977334               |
| SNP_P4_144128_268920 | NW_004516151.1 | Scaffold766 | 268920                  | AA                              | GG              | 1946977336               |
| SNP_P4_144129_269147 | NW_004516151.1 | Scaffold766 | 269147                  | AA                              | CC              | 1946977338               |
| SNP_P4_144130_269199 | NW_004516151.1 | Scaffold766 | 269199                  | TT                              | AA              | 1946977341               |
| SNP_P4_144131_269203 | NW_004516151.1 | Scaffold766 | 269203                  | GG                              | AA              | 1946977343               |
| SNP_P4_144132_269243 | NW_004516151.1 | Scaffold766 | 269243                  | CC                              | TT              | 1946977345               |
| SNP_P4_144133_272930 | NW_004516151.1 | Scaffold766 | 272930                  | GG                              | AA              | 1946977347               |
| SNP_P4_144134_272941 | NW_004516151.1 | Scaffold766 | 272941                  | CC                              | TT              | 1946977349               |
| SNP_P4_144135_273061 | NW_004516151.1 | Scaffold766 | 273061                  | TT                              | CC              | 1946977351               |
| SNP_P4_144136_273232 | NW_004516151.1 | Scaffold766 | 273232                  | GG                              | AA              | 1946977353               |
| SNP_P4_144137_273354 | NW_004516151.1 | Scaffold766 | 273354                  | AA                              | TT              | 1946977355               |
| SNP_P4_144138_274570 | NW_004516151.1 | Scaffold766 | 274570                  | TT                              | CC              | 1946977357               |
| SNP_P4_144139_274615 | NW_004516151.1 | Scaffold766 | 274615                  | GG                              | AA              | 1946977359               |
| SNP_P4_144140_274965 | NW_004516151.1 | Scaffold766 | 274965                  | TT                              | GG              | 1946977361               |
| SNP_P4_144141_57     | NW_004516153.1 | Scaffold768 | 57                      | GG                              | TT              | 1946977363               |
| SNP_P4_144142_76     | NW_004516153.1 | Scaffold768 | 76                      | GG                              | AA              | 1946977365               |
| SNP_P4_144143_208    | NW_004516153.1 | Scaffold768 | 208                     | TT                              | AA              | 1946977367               |
| SNP_P4_144144_256    | NW_004516153.1 | Scaffold768 | 256                     | AA                              | TT              | 1946977369               |
| SNP_P4_144145_302    | NW_004516153.1 | Scaffold768 | 302                     | TT                              | AA              | 1946977372               |
| SNP_P4_144146_345    | NW_004516153.1 | Scaffold768 | 345                     | CC                              | TT              | 1946977374               |
| SNP_P4_144147_478    | NW_004516153.1 | Scaffold768 | 478                     | TT                              | CC              | 1946977376               |
| SNP_P4_144148_483    | NW_004516153.1 | Scaffold768 | 483                     | AA                              | GG              | 1946977378               |
| SNP_P4_144149_525    | NW_004516153.1 | Scaffold768 | 525                     | CC                              | GG              | 1946977380               |
| SNP_P4_144151_618    | NW_004516153.1 | Scaffold768 | 618                     | CC                              | AA              | 1946977382               |
| SNP_P4_144152_682    | NW_004516153.1 | Scaffold768 | 682                     | GG                              | AA              | 1946977384               |
| SNP_P4_144153_749    | NW_004516153.1 | Scaffold768 | 749                     | GG                              | AA              | 1946977386               |
| SNP_P4_144154_765    | NW_004516153.1 | Scaffold768 | 765                     | GG                              | AA              | 1946977388               |
| SNP_P4_144155_894    | NW_004516153.1 | Scaffold768 | 894                     | AA                              | GG              | 1946977391               |
| SNP_P4_144156_954    | NW_004516153.1 | Scaffold768 | 954                     | AA                              | TT              | 1946977393               |
| SNP_P4_144157_962    | NW_004516153.1 | Scaffold768 | 962                     | GG                              | AA              | 1946977395               |
| SNP_P4_144158_1007   | NW_004516153.1 | Scaffold768 | 1007                    | TT                              | AA              | 1946977397               |

| SNPs IDs             | Chromosome IDs | Chromosomes | Physical positions (bp) | CDC Frontier (Reference genome) | (ILWC46 & LPNB) | NCBI SNPdb Accession IDs |
|----------------------|----------------|-------------|-------------------------|---------------------------------|-----------------|--------------------------|
| SNP_P4_144159_1018   | NW_004516153.1 | Scaffold768 | 1018                    | AA                              | TT              | 1946977399               |
| SNP_P4_144161_1147   | NW_004516153.1 | Scaffold768 | 1147                    | CC                              | AA              | 1946977401               |
| SNP_P4_144162_64     | NW_004516154.1 | Scaffold769 | 64                      | GG                              | TT              | 1946977403               |
| SNP_P4_144163_81     | NW_004516154.1 | Scaffold769 | 81                      | AA                              | TT              | 1946977405               |
| SNP_P4_144165_177    | NW_004516154.1 | Scaffold769 | 177                     | GG                              | TT              | 1946977408               |
| SNP_P4_144166_209    | NW_004516154.1 | Scaffold769 | 209                     | AA                              | GG              | 1946977410               |
| SNP_P4_144167_429    | NW_004516154.1 | Scaffold769 | 429                     | TT                              | AA              | 1946977412               |
| SNP_P4_144168_542    | NW_004516154.1 | Scaffold769 | 542                     | TT                              | GG              | 1946977414               |
| SNP_P4_144169_930    | NW_004516154.1 | Scaffold769 | 930                     | TT                              | GG              | 1946977416               |
| SNP_P4_144171_1476   | NW_004516154.1 | Scaffold769 | 1476                    | GG                              | AA              | 1946977418               |
| SNP_P4_144172_1618   | NW_004516154.1 | Scaffold769 | 1618                    | TT                              | AA              | 1946977420               |
| SNP_P4_144173_1632   | NW_004516154.1 | Scaffold769 | 1632                    | AA                              | CC              | 1946977422               |
| SNP_P4_144174_1681   | NW_004516154.1 | Scaffold769 | 1681                    | AA                              | TT              | 1946977424               |
| SNP_P4_144175_1808   | NW_004516154.1 | Scaffold769 | 1808                    | TT                              | GG              | 1946977427               |
| SNP_P4_144176_1878   | NW_004516154.1 | Scaffold769 | 1878                    | GG                              | AA              | 1946977429               |
| SNP_P4_144178_2824   | NW_004516154.1 | Scaffold769 | 2824                    | CC                              | GG              | 1946977431               |
| SNP_P4_144179_2918   | NW_004516154.1 | Scaffold769 | 2918                    | AA                              | GG              | 1946977433               |
| SNP_P4_144180_2921   | NW_004516154.1 | Scaffold769 | 2921                    | GG                              | CC              | 1946977435               |
| SNP_P4_144181_3050   | NW_004516154.1 | Scaffold769 | 3050                    | GG                              | TT              | 1946977437               |
| SNP_P4_144182_3147   | NW_004516154.1 | Scaffold769 | 3147                    | GG                              | AA              | 1946977439               |
| SNP_P4_144184_3523   | NW_004516154.1 | Scaffold769 | 3523                    | CC                              | AA              | 1946977441               |
| SNP_P4_144185_3553   | NW_004516154.1 | Scaffold769 | 3553                    | CC                              | TT              | 1946977443               |
| SNP_P4_144186_5288   | NW_004516154.1 | Scaffold769 | 5288                    | AA                              | GG              | 1946977445               |
| SNP_P4_144187_5308   | NW_004516154.1 | Scaffold769 | 5308                    | TT                              | CC              | 1946977447               |
| SNP_P4_144191_27304  | NW_004516154.1 | Scaffold769 | 27304                   | AA                              | GG              | 1946977449               |
| SNP_P4_144192_28914  | NW_004516154.1 | Scaffold769 | 28914                   | AA                              | GG              | 1946977451               |
| SNP_P4_144193_28958  | NW_004516154.1 | Scaffold769 | 28958                   | CC                              | TT              | 1946977453               |
| SNP_P4_144194_29244  | NW_004516154.1 | Scaffold769 | 29244                   | AA                              | CC              | 1946977455               |
| SNP_P4_144196_29473  | NW_004516154.1 | Scaffold769 | 29473                   | AA                              | GG              | 1946977456               |
| SNP_P4_144197_29699  | NW_004516154.1 | Scaffold769 | 29699                   | CC                              | TT              | 1946977458               |
| SNP_P4_144198_29828  | NW_004516154.1 | Scaffold769 | 29828                   | AA                              | GG              | 1946977460               |
| SNP_P4_144199_29951  | NW_004516154.1 | Scaffold769 | 29951                   | AA                              | GG              | 1946977463               |
| SNP_P4_144200_82803  | NW_004516154.1 | Scaffold769 | 82803                   | AA                              | CC              | 1946977465               |
| SNP_P4_144202_108568 | NW_004516154.1 | Scaffold769 | 108568                  | GG                              | TT              | 1946977467               |
| SNP_P4_144203_116677 | NW_004516154.1 | Scaffold769 | 116677                  | AA                              | TT              | 1946977469               |
| SNP_P4_144204_116715 | NW_004516154.1 | Scaffold769 | 116715                  | TT                              | AA              | 1946977472               |
| SNP_P4_144205_116717 | NW_004516154.1 | Scaffold769 | 116717                  | AA                              | CC              | 1946977474               |
| SNP_P4_144206_117126 | NW_004516154.1 | Scaffold769 | 117126                  | CC                              | GG              | 1946977476               |
| SNP_P4_144207_117127 | NW_004516154.1 | Scaffold769 | 117127                  | GG                              | AA              | 1946977478               |
| SNP_P4_144209_117159 | NW_004516154.1 | Scaffold769 | 117159                  | TT                              | AA              | 1946977480               |
| SNP_P4_144210_117165 | NW_004516154.1 | Scaffold769 | 117165                  | GG                              | AA              | 1946977482               |
| SNP_P4_144211_43     | NW_004516155.1 | Scaffold771 | 43                      | GG                              | AA              | 1946977484               |

| SNPs IDs            | Chromosome IDs | Chromosomes | Physical positions (bp) | CDC Frontier (Reference genome) | (ILWC46 & LPNB) | NCBI SNPdb Accession IDs |
|---------------------|----------------|-------------|-------------------------|---------------------------------|-----------------|--------------------------|
| SNP_P4_144212_70    | NW_004516155.1 | Scaffold771 | 70                      | AA                              | TT              | 1946977486               |
| SNP_P4_144213_81    | NW_004516155.1 | Scaffold771 | 81                      | TT                              | GG              | 1946977488               |
| SNP_P4_144214_93    | NW_004516155.1 | Scaffold771 | 93                      | TT                              | AA              | 1946977490               |
| SNP_P4_144215_314   | NW_004516155.1 | Scaffold771 | 314                     | AA                              | GG              | 1946977492               |
| SNP_P4_144216_342   | NW_004516155.1 | Scaffold771 | 342                     | CC                              | TT              | 1946977494               |
| SNP_P4_144217_405   | NW_004516155.1 | Scaffold771 | 405                     | TT                              | CC              | 1946977496               |
| SNP_P4_144218_587   | NW_004516155.1 | Scaffold771 | 587                     | AA                              | TT              | 1946977498               |
| SNP_P4_144219_17762 | NW_004516155.1 | Scaffold771 | 17762                   | GG                              | TT              | 1946977500               |
| SNP_P4_144220_25767 | NW_004516155.1 | Scaffold771 | 25767                   | GG                              | AA              | 1946977502               |
| SNP_P4_144221_36412 | NW_004516155.1 | Scaffold771 | 36412                   | TT                              | CC              | 1946977504               |
| SNP_P4_144222_54712 | NW_004516155.1 | Scaffold771 | 54712                   | AA                              | GG              | 1946977507               |
| SNP_P4_144223_57458 | NW_004516155.1 | Scaffold771 | 57458                   | TT                              | AA              | 1946977509               |
| SNP_P4_144224_58302 | NW_004516155.1 | Scaffold771 | 58302                   | GG                              | AA              | 1946977510               |
| SNP_P4_144225_58320 | NW_004516155.1 | Scaffold771 | 58320                   | TT                              | CC              | 1946977512               |
| SNP_P4_144226_58335 | NW_004516155.1 | Scaffold771 | 58335                   | GG                              | AA              | 1946977515               |
| SNP_P4_144227_58336 | NW_004516155.1 | Scaffold771 | 58336                   | GG                              | CC              | 1946977516               |
| SNP_P4_144228_58344 | NW_004516155.1 | Scaffold771 | 58344                   | AA                              | TT              | 1946977519               |
| SNP_P4_144229_58355 | NW_004516155.1 | Scaffold771 | 58355                   | CC                              | AA              | 1946977521               |
| SNP_P4_144230_58769 | NW_004516155.1 | Scaffold771 | 58769                   | GG                              | AA              | 1946977523               |
| SNP_P4_144231_60817 | NW_004516155.1 | Scaffold771 | 60817                   | TT                              | CC              | 1946977525               |
| SNP_P4_144232_66411 | NW_004516155.1 | Scaffold771 | 66411                   | TT                              | CC              | 1946977527               |
| SNP_P4_144233_69254 | NW_004516155.1 | Scaffold771 | 69254                   | AA                              | GG              | 1946977529               |
| SNP_P4_144234_69290 | NW_004516155.1 | Scaffold771 | 69290                   | CC                              | TT              | 1946977530               |
| SNP_P4_144235_69294 | NW_004516155.1 | Scaffold771 | 69294                   | TT                              | GG              | 1946977532               |
| SNP_P4_144236_69295 | NW_004516155.1 | Scaffold771 | 69295                   | TT                              | AA              | 1946977534               |
| SNP_P4_144238_93428 | NW_004516155.1 | Scaffold771 | 93428                   | TT                              | AA              | 1946977536               |
| SNP_P4_144239_7562  | NW_004516156.1 | Scaffold772 | 7562                    | CC                              | TT              | 1946977538               |
| SNP_P4_144240_7582  | NW_004516156.1 | Scaffold772 | 7582                    | CC                              | TT              | 1946977541               |
| SNP_P4_144241_8420  | NW_004516156.1 | Scaffold772 | 8420                    | CC                              | TT              | 1946977543               |
| SNP_P4_144242_8524  | NW_004516156.1 | Scaffold772 | 8524                    | GG                              | TT              | 1946977545               |
| SNP_P4_144243_9106  | NW_004516156.1 | Scaffold772 | 9106                    | GG                              | AA              | 1946977547               |
| SNP_P4_144244_9191  | NW_004516156.1 | Scaffold772 | 9191                    | AA                              | TT              | 1946977549               |
| SNP_P4_144245_11443 | NW_004516156.1 | Scaffold772 | 11443                   | CC                              | AA              | 1946977551               |
| SNP_P4_144247_12163 | NW_004516156.1 | Scaffold772 | 12163                   | GG                              | TT              | 1946977553               |
| SNP_P4_144248_16803 | NW_004516156.1 | Scaffold772 | 16803                   | CC                              | TT              | 1946977555               |
| SNP_P4_144249_17138 | NW_004516156.1 | Scaffold772 | 17138                   | TT                              | CC              | 1946977557               |
| SNP_P4_144250_18060 | NW_004516156.1 | Scaffold772 | 18060                   | TT                              | CC              | 1946977559               |
| SNP_P4_144251_18081 | NW_004516156.1 | Scaffold772 | 18081                   | GG                              | TT              | 1946977561               |
| SNP_P4_144252_18089 | NW_004516156.1 | Scaffold772 | 18089                   | TT                              | CC              | 1946977563               |
| SNP_P4_144253_18104 | NW_004516156.1 | Scaffold772 | 18104                   | CC                              | TT              | 1946977565               |
| SNP_P4_144254_18141 | NW_004516156.1 | Scaffold772 | 18141                   | GG                              | AA              | 1946977567               |
| SNP_P4_144255_18151 | NW_004516156.1 | Scaffold772 | 18151                   | GG                              | AA              | 1946977569               |

| SNPs IDs             | Chromosome IDs | Chromosomes | Physical positions (bp) | CDC Frontier (Reference genome) | (ILWC46 & LPNB) | NCBI SNPdb Accession IDs |
|----------------------|----------------|-------------|-------------------------|---------------------------------|-----------------|--------------------------|
| SNP_P4_144256_18161  | NW_004516156.1 | Scaffold772 | 18161                   | TT                              | CC              | 1946977571               |
| SNP_P4_144257_18178  | NW_004516156.1 | Scaffold772 | 18178                   | TT                              | CC              | 1946977573               |
| SNP_P4_144258_18186  | NW_004516156.1 | Scaffold772 | 18186                   | TT                              | CC              | 1946977575               |
| SNP_P4_144259_18197  | NW_004516156.1 | Scaffold772 | 18197                   | AA                              | GG              | 1946977577               |
| SNP_P4_144260_18240  | NW_004516156.1 | Scaffold772 | 18240                   | AA                              | GG              | 1946977579               |
| SNP_P4_144261_18257  | NW_004516156.1 | Scaffold772 | 18257                   | CC                              | TT              | 1946977581               |
| SNP_P4_144262_18281  | NW_004516156.1 | Scaffold772 | 18281                   | AA                              | CC              | 1946977583               |
| SNP_P4_144263_18296  | NW_004516156.1 | Scaffold772 | 18296                   | AA                              | GG              | 1946977585               |
| SNP_P4_144264_18345  | NW_004516156.1 | Scaffold772 | 18345                   | AA                              | GG              | 1946977587               |
| SNP_P4_144265_18467  | NW_004516156.1 | Scaffold772 | 18467                   | AA                              | GG              | 1946977589               |
| SNP_P4_144266_18554  | NW_004516156.1 | Scaffold772 | 18554                   | TT                              | GG              | 1946977591               |
| SNP_P4_144267_18642  | NW_004516156.1 | Scaffold772 | 18642                   | AA                              | CC              | 1946977593               |
| SNP_P4_144268_21166  | NW_004516156.1 | Scaffold772 | 21166                   | TT                              | CC              | 1946977595               |
| SNP_P4_144270_24463  | NW_004516156.1 | Scaffold772 | 24463                   | AA                              | GG              | 1946977597               |
| SNP_P4_144271_33944  | NW_004516156.1 | Scaffold772 | 33944                   | TT                              | CC              | 1946977599               |
| SNP_P4_144272_38457  | NW_004516156.1 | Scaffold772 | 38457                   | TT                              | AA              | 1946977601               |
| SNP_P4_144274_39856  | NW_004516156.1 | Scaffold772 | 39856                   | TT                              | CC              | 1946977603               |
| SNP_P4_144275_43634  | NW_004516156.1 | Scaffold772 | 43634                   | AA                              | GG              | 1946977605               |
| SNP_P4_144276_46906  | NW_004516156.1 | Scaffold772 | 46906                   | AA                              | CC              | 1946977607               |
| SNP_P4_144277_74623  | NW_004516156.1 | Scaffold772 | 74623                   | CC                              | AA              | 1946977609               |
| SNP_P4_144278_74627  | NW_004516156.1 | Scaffold772 | 74627                   | GG                              | AA              | 1946977611               |
| SNP_P4_144279_78890  | NW_004516156.1 | Scaffold772 | 78890                   | AA                              | GG              | 1946977613               |
| SNP_P4_144280_78956  | NW_004516156.1 | Scaffold772 | 78956                   | TT                              | CC              | 1946977615               |
| SNP_P4_144281_84728  | NW_004516156.1 | Scaffold772 | 84728                   | AA                              | GG              | 1946977617               |
| SNP_P4_144282_84753  | NW_004516156.1 | Scaffold772 | 84753                   | TT                              | CC              | 1946977619               |
| SNP_P4_144283_84754  | NW_004516156.1 | Scaffold772 | 84754                   | TT                              | GG              | 1946977621               |
| SNP_P4_144284_89893  | NW_004516156.1 | Scaffold772 | 89893                   | AA                              | GG              | 1946977623               |
| SNP_P4_144285_103362 | NW_004516156.1 | Scaffold772 | 103362                  | GG                              | AA              | 1946977625               |
| SNP_P4_144286_103389 | NW_004516156.1 | Scaffold772 | 103389                  | TT                              | AA              | 1946977627               |
| SNP_P4_144287_105263 | NW_004516156.1 | Scaffold772 | 105263                  | AA                              | CC              | 1946977629               |
| SNP_P4_144288_105264 | NW_004516156.1 | Scaffold772 | 105264                  | TT                              | GG              | 1946977631               |
| SNP_P4_144289_105266 | NW_004516156.1 | Scaffold772 | 105266                  | TT                              | CC              | 1946977633               |
| SNP_P4_144290_107214 | NW_004516156.1 | Scaffold772 | 107214                  | GG                              | AA              | 1946977635               |
| SNP_P4_144291_108360 | NW_004516156.1 | Scaffold772 | 108360                  | TT                              | CC              | 1946977637               |
| SNP_P4_144292_110302 | NW_004516156.1 | Scaffold772 | 110302                  | AA                              | GG              | 1946977639               |
| SNP_P4_144294_120681 | NW_004516156.1 | Scaffold772 | 120681                  | TT                              | AA              | 1946977641               |
| SNP_P4_144295_132466 | NW_004516156.1 | Scaffold772 | 132466                  | AA                              | GG              | 1946977643               |
| SNP_P4_144296_132545 | NW_004516156.1 | Scaffold772 | 132545                  | CC                              | AA              | 1946977645               |
| SNP_P4_144297_137315 | NW_004516156.1 | Scaffold772 | 137315                  | TT                              | AA              | 1946977648               |
| SNP_P4_144298_139302 | NW_004516156.1 | Scaffold772 | 139302                  | TT                              | AA              | 1946977650               |
| SNP_P4_144299_139365 | NW_004516156.1 | Scaffold772 | 139365                  | GG                              | AA              | 1946977652               |
| SNP_P4_144300_139398 | NW_004516156.1 | Scaffold772 | 139398                  | GG                              | AA              | 1946977654               |

| SNPs IDs             | Chromosome IDs | Chromosomes | Physical positions (bp) | CDC Frontier (Reference genome) | (ILWC46 & LPNB) | NCBI SNPdb Accession IDs |
|----------------------|----------------|-------------|-------------------------|---------------------------------|-----------------|--------------------------|
| SNP_P4_144301_139480 | NW_004516156.1 | Scaffold772 | 139480                  | TT                              | CC              | 1946977656               |
| SNP_P4_144302_139772 | NW_004516156.1 | Scaffold772 | 139772                  | CC                              | AA              | 1946977658               |
| SNP_P4_144303_139773 | NW_004516156.1 | Scaffold772 | 139773                  | CC                              | TT              | 1946977660               |
| SNP_P4_144304_139777 | NW_004516156.1 | Scaffold772 | 139777                  | AA                              | TT              | 1946977663               |
| SNP_P4_144306_163268 | NW_004516156.1 | Scaffold772 | 163268                  | GG                              | TT              | 1946977665               |
| SNP_P4_144307_178735 | NW_004516156.1 | Scaffold772 | 178735                  | AA                              | CC              | 1946977667               |
| SNP_P4_144308_205779 | NW_004516156.1 | Scaffold772 | 205779                  | CC                              | TT              | 1946977668               |
| SNP_P4_144309_205833 | NW_004516156.1 | Scaffold772 | 205833                  | TT                              | GG              | 1946977671               |
| SNP_P4_144310_205846 | NW_004516156.1 | Scaffold772 | 205846                  | TT                              | CC              | 1946977673               |
| SNP_P4_144311_209659 | NW_004516156.1 | Scaffold772 | 209659                  | AA                              | GG              | 1946977675               |
| SNP_P4_144312_211395 | NW_004516156.1 | Scaffold772 | 211395                  | GG                              | AA              | 1946977677               |
| SNP_P4_144313_211480 | NW_004516156.1 | Scaffold772 | 211480                  | AA                              | CC              | 1946977679               |
| SNP_P4_144314_211497 | NW_004516156.1 | Scaffold772 | 211497                  | AA                              | GG              | 1946977682               |
| SNP_P4_144316_212531 | NW_004516156.1 | Scaffold772 | 212531                  | AA                              | GG              | 1946977684               |
| SNP_P4_144317_212960 | NW_004516156.1 | Scaffold772 | 212960                  | AA                              | CC              | 1946977686               |
| SNP_P4_144318_213601 | NW_004516156.1 | Scaffold772 | 213601                  | TT                              | CC              | 1946977688               |
| SNP_P4_144319_213631 | NW_004516156.1 | Scaffold772 | 213631                  | TT                              | CC              | 1946977690               |
| SNP_P4_144321_213670 | NW_004516156.1 | Scaffold772 | 213670                  | GG                              | AA              | 1946977692               |
| SNP_P4_144322_213730 | NW_004516156.1 | Scaffold772 | 213730                  | GG                              | AA              | 1946977694               |
| SNP_P4_144323_213740 | NW_004516156.1 | Scaffold772 | 213740                  | AA                              | TT              | 1946977696               |
| SNP_P4_144324_213744 | NW_004516156.1 | Scaffold772 | 213744                  | AA                              | CC              | 1946977698               |
| SNP_P4_144325_213851 | NW_004516156.1 | Scaffold772 | 213851                  | GG                              | TT              | 1946977700               |
| SNP_P4_144326_213948 | NW_004516156.1 | Scaffold772 | 213948                  | GG                              | TT              | 1946977702               |
| SNP_P4_144327_231827 | NW_004516156.1 | Scaffold772 | 231827                  | CC                              | TT              | 1946977704               |
| SNP_P4_144328_232947 | NW_004516156.1 | Scaffold772 | 232947                  | CC                              | TT              | 1946977706               |
| SNP_P4_144329_236011 | NW_004516156.1 | Scaffold772 | 236011                  | TT                              | GG              | 1946977709               |
| SNP_P4_144330_236012 | NW_004516156.1 | Scaffold772 | 236012                  | TT                              | AA              | 1946977711               |
| SNP_P4_144331_251665 | NW_004516156.1 | Scaffold772 | 251665                  | CC                              | TT              | 1946977713               |
| SNP_P4_144334_4837   | NW_004516157.1 | Scaffold774 | 4837                    | AA                              | CC              | 1946977715               |
| SNP_P4_144335_16686  | NW_004516157.1 | Scaffold774 | 16686                   | TT                              | CC              | 1946977717               |
| SNP_P4_144336_17272  | NW_004516157.1 | Scaffold774 | 17272                   | TT                              | AA              | 1946977720               |
| SNP_P4_144337_17790  | NW_004516157.1 | Scaffold774 | 17790                   | AA                              | TT              | 1946977722               |
| SNP_P4_144338_22426  | NW_004516157.1 | Scaffold774 | 22426                   | AA                              | GG              | 1946977724               |
| SNP_P4_144339_22448  | NW_004516157.1 | Scaffold774 | 22448                   | AA                              | CC              | 1946977726               |
| SNP_P4_144340_22786  | NW_004516157.1 | Scaffold774 | 22786                   | AA                              | TT              | 1946977728               |
| SNP_P4_144341_688    | NW_004516158.1 | Scaffold775 | 688                     | AA                              | GG              | 1946977731               |
| SNP_P4_144342_790    | NW_004516158.1 | Scaffold775 | 790                     | TT                              | GG              | 1946977733               |
| SNP_P4_144343_800    | NW_004516158.1 | Scaffold775 | 800                     | CC                              | TT              | 1946977735               |
| SNP_P4_144344_818    | NW_004516158.1 | Scaffold775 | 818                     | CC                              | TT              | 1946977737               |
| SNP_P4_144345_829    | NW_004516158.1 | Scaffold775 | 829                     | AA                              | GG              | 1946977739               |
| SNP_P4_144346_1040   | NW_004516158.1 | Scaffold775 | 1040                    | AA                              | GG              | 1946977741               |
| SNP_P4_144347_1047   | NW_004516158.1 | Scaffold775 | 1047                    | TT                              | AA              | 1946977743               |

| SNPs IDs             | Chromosome IDs | Chromosomes | Physical positions (bp) | CDC Frontier (Reference genome) | (ILWC46 & LPNB) | NCBI SNPdb Accession IDs |
|----------------------|----------------|-------------|-------------------------|---------------------------------|-----------------|--------------------------|
| SNP_P4_144348_1168   | NW_004516158.1 | Scaffold775 | 1168                    | TT                              | CC              | 1946977745               |
| SNP_P4_144349_12143  | NW_004516158.1 | Scaffold775 | 12143                   | TT                              | AA              | 1946977746               |
| SNP_P4_144350_13209  | NW_004516158.1 | Scaffold775 | 13209                   | CC                              | TT              | 1946977748               |
| SNP_P4_144351_16769  | NW_004516158.1 | Scaffold775 | 16769                   | GG                              | TT              | 1946977750               |
| SNP_P4_144352_16785  | NW_004516158.1 | Scaffold775 | 16785                   | CC                              | TT              | 1946977752               |
| SNP_P4_144353_16787  | NW_004516158.1 | Scaffold775 | 16787                   | TT                              | GG              | 1946977754               |
| SNP_P4_144354_16796  | NW_004516158.1 | Scaffold775 | 16796                   | AA                              | GG              | 1946977756               |
| SNP_P4_144355_17955  | NW_004516158.1 | Scaffold775 | 17955                   | GG                              | AA              | 1946977758               |
| SNP_P4_144356_18110  | NW_004516158.1 | Scaffold775 | 18110                   | AA                              | GG              | 1946977760               |
| SNP_P4_144357_22727  | NW_004516158.1 | Scaffold775 | 22727                   | CC                              | TT              | 1946977762               |
| SNP_P4_144358_80267  | NW_004516158.1 | Scaffold775 | 80267                   | GG                              | AA              | 1946977764               |
| SNP_P4_144359_80269  | NW_004516158.1 | Scaffold775 | 80269                   | GG                              | AA              | 1946977767               |
| SNP_P4_144360_84999  | NW_004516158.1 | Scaffold775 | 84999                   | TT                              | AA              | 1946977769               |
| SNP_P4_144361_85000  | NW_004516158.1 | Scaffold775 | 85000                   | AA                              | CC              | 1946977771               |
| SNP_P4_144362_86160  | NW_004516158.1 | Scaffold775 | 86160                   | GG                              | CC              | 1946977773               |
| SNP_P4_144363_99346  | NW_004516158.1 | Scaffold775 | 99346                   | CC                              | AA              | 1946977775               |
| SNP_P4_144364_99357  | NW_004516158.1 | Scaffold775 | 99357                   | AA                              | GG              | 1946977777               |
| SNP_P4_144365_99405  | NW_004516158.1 | Scaffold775 | 99405                   | TT                              | CC              | 1946977778               |
| SNP_P4_144366_100838 | NW_004516158.1 | Scaffold775 | 100838                  | TT                              | CC              | 1946977780               |
| SNP_P4_144367_101187 | NW_004516158.1 | Scaffold775 | 101187                  | AA                              | TT              | 1946977782               |
| SNP_P4_144368_101200 | NW_004516158.1 | Scaffold775 | 101200                  | AA                              | GG              | 1946977784               |
| SNP_P4_144369_101256 | NW_004516158.1 | Scaffold775 | 101256                  | TT                              | CC              | 1946977786               |
| SNP_P4_144370_101260 | NW_004516158.1 | Scaffold775 | 101260                  | GG                              | AA              | 1946977788               |
| SNP_P4_144371_101383 | NW_004516158.1 | Scaffold775 | 101383                  | TT                              | CC              | 1946977790               |
| SNP_P4_144372_101575 | NW_004516158.1 | Scaffold775 | 101575                  | GG                              | AA              | 1946977792               |
| SNP_P4_144373_101590 | NW_004516158.1 | Scaffold775 | 101590                  | TT                              | CC              | 1946977794               |
| SNP_P4_144374_101604 | NW_004516158.1 | Scaffold775 | 101604                  | AA                              | CC              | 1946977796               |
| SNP_P4_144375_101605 | NW_004516158.1 | Scaffold775 | 101605                  | CC                              | TT              | 1946977798               |
| SNP_P4_144376_101919 | NW_004516158.1 | Scaffold775 | 101919                  | AA                              | GG              | 1946977800               |
| SNP_P4_144377_101930 | NW_004516158.1 | Scaffold775 | 101930                  | AA                              | CC              | 1946977802               |
| SNP_P4_144378_104513 | NW_004516158.1 | Scaffold775 | 104513                  | GG                              | TT              | 1946977804               |
| SNP_P4_144381_119484 | NW_004516158.1 | Scaffold775 | 119484                  | TT                              | CC              | 1946977806               |
| SNP_P4_144382_119500 | NW_004516158.1 | Scaffold775 | 119500                  | TT                              | AA              | 1946977808               |
| SNP_P4_144383_119508 | NW_004516158.1 | Scaffold775 | 119508                  | GG                              | TT              | 1946977810               |
| SNP_P4_144384_119509 | NW_004516158.1 | Scaffold775 | 119509                  | TT                              | GG              | 1946977812               |
| SNP_P4_144385_119512 | NW_004516158.1 | Scaffold775 | 119512                  | TT                              | CC              | 1946977813               |
| SNP_P4_144386_124312 | NW_004516158.1 | Scaffold775 | 124312                  | CC                              | TT              | 1946977815               |
| SNP_P4_144387_125886 | NW_004516158.1 | Scaffold775 | 125886                  | AA                              | GG              | 1946977817               |
| SNP_P4_144388_126635 | NW_004516158.1 | Scaffold775 | 126635                  | GG                              | AA              | 1946977819               |
| SNP_P4_144390_155184 | NW_004516158.1 | Scaffold775 | 155184                  | AA                              | GG              | 1946977821               |
| SNP_P4_144391_159888 | NW_004516158.1 | Scaffold775 | 159888                  | TT                              | CC              | 1946977823               |
| SNP_P4_144392_178128 | NW_004516158.1 | Scaffold775 | 178128                  | GG                              | AA              | 1946977825               |



| SNPs IDs             | Chromosome IDs | Chromosomes | Physical positions (bp) | CDC Frontier (Reference genome) | (ILWC46 & LPNB) | NCBI SNPdb Accession IDs |
|----------------------|----------------|-------------|-------------------------|---------------------------------|-----------------|--------------------------|
| SNP_P4_144393_204837 | NW_004516158.1 | Scaffold775 | 204837                  | AA                              | TT              | 1946977827               |
| SNP_P4_144394_204841 | NW_004516158.1 | Scaffold775 | 204841                  | TT                              | AA              | 1946977829               |
| SNP_P4_144395_223424 | NW_004516158.1 | Scaffold775 | 223424                  | TT                              | CC              | 1946977831               |
| SNP_P4_144396_223453 | NW_004516158.1 | Scaffold775 | 223453                  | AA                              | GG              | 1946977833               |
| SNP_P4_144397_223459 | NW_004516158.1 | Scaffold775 | 223459                  | GG                              | AA              | 1946977835               |
| SNP_P4_144398_223469 | NW_004516158.1 | Scaffold775 | 223469                  | TT                              | CC              | 1946977837               |
| SNP_P4_144399_223495 | NW_004516158.1 | Scaffold775 | 223495                  | GG                              | AA              | 1946977839               |
| SNP_P4_144400_223520 | NW_004516158.1 | Scaffold775 | 223520                  | TT                              | GG              | 1946977841               |
| SNP_P4_144401_223552 | NW_004516158.1 | Scaffold775 | 223552                  | TT                              | GG              | 1946977843               |
| SNP_P4_144402_223570 | NW_004516158.1 | Scaffold775 | 223570                  | GG                              | AA              | 1946977845               |
| SNP_P4_144403_223616 | NW_004516158.1 | Scaffold775 | 223616                  | AA                              | GG              | 1946977847               |
| SNP_P4_144404_223694 | NW_004516158.1 | Scaffold775 | 223694                  | CC                              | TT              | 1946977849               |
| SNP_P4_144405_224005 | NW_004516158.1 | Scaffold775 | 224005                  | CC                              | GG              | 1946977851               |
| SNP_P4_144406_226149 | NW_004516158.1 | Scaffold775 | 226149                  | AA                              | CC              | 1946977853               |
| SNP_P4_144408_237212 | NW_004516158.1 | Scaffold775 | 237212                  | GG                              | CC              | 1946977855               |
| SNP_P4_144409_237241 | NW_004516158.1 | Scaffold775 | 237241                  | TT                              | GG              | 1946977857               |
| SNP_P4_144410_237252 | NW_004516158.1 | Scaffold775 | 237252                  | AA                              | CC              | 1946977859               |
| SNP_P4_144411_237259 | NW_004516158.1 | Scaffold775 | 237259                  | GG                              | AA              | 1946977861               |
| SNP_P4_144412_237260 | NW_004516158.1 | Scaffold775 | 237260                  | AA                              | CC              | 1946977863               |
| SNP_P4_144413_241754 | NW_004516158.1 | Scaffold775 | 241754                  | TT                              | CC              | 1946977865               |
| SNP_P4_144414_267227 | NW_004516158.1 | Scaffold775 | 267227                  | CC                              | TT              | 1946977867               |
| SNP_P4_144415_267279 | NW_004516158.1 | Scaffold775 | 267279                  | AA                              | GG              | 1946977870               |
| SNP_P4_144416_267415 | NW_004516158.1 | Scaffold775 | 267415                  | CC                              | AA              | 1946977872               |
| SNP_P4_144417_267485 | NW_004516158.1 | Scaffold775 | 267485                  | TT                              | CC              | 1946977874               |
| SNP_P4_144418_267624 | NW_004516158.1 | Scaffold775 | 267624                  | AA                              | TT              | 1946977876               |
| SNP_P4_144419_267629 | NW_004516158.1 | Scaffold775 | 267629                  | AA                              | TT              | 1946977878               |
| SNP_P4_144420_267636 | NW_004516158.1 | Scaffold775 | 267636                  | AA                              | GG              | 1946977880               |
| SNP_P4_144421_288570 | NW_004516158.1 | Scaffold775 | 288570                  | AA                              | GG              | 1946977882               |
| SNP_P4_144422_303481 | NW_004516158.1 | Scaffold775 | 303481                  | CC                              | TT              | 1946977884               |
| SNP_P4_144423_303923 | NW_004516158.1 | Scaffold775 | 303923                  | TT                              | CC              | 1946977886               |
| SNP_P4_144424_321960 | NW_004516158.1 | Scaffold775 | 321960                  | AA                              | CC              | 1946977888               |
| SNP_P4_144425_321966 | NW_004516158.1 | Scaffold775 | 321966                  | AA                              | TT              | 1946977890               |
| SNP_P4_144426_334299 | NW_004516158.1 | Scaffold775 | 334299                  | AA                              | GG              | 1946977892               |
| SNP_P4_144427_335539 | NW_004516158.1 | Scaffold775 | 335539                  | TT                              | CC              | 1946977895               |
| SNP_P4_144428_335563 | NW_004516158.1 | Scaffold775 | 335563                  | TT                              | GG              | 1946977897               |
| SNP_P4_144429_335636 | NW_004516158.1 | Scaffold775 | 335636                  | GG                              | TT              | 1946977899               |
| SNP_P4_144431_360190 | NW_004516158.1 | Scaffold775 | 360190                  | GG                              | AA              | 1946977900               |
| SNP_P4_144432_366657 | NW_004516158.1 | Scaffold775 | 366657                  | CC                              | TT              | 1946977903               |
| SNP_P4_144434_381649 | NW_004516158.1 | Scaffold775 | 381649                  | GG                              | CC              | 1946977904               |
| SNP_P4_144435_381652 | NW_004516158.1 | Scaffold775 | 381652                  | AA                              | CC              | 1946977906               |
| SNP_P4_144436_381743 | NW_004516158.1 | Scaffold775 | 381743                  | AA                              | TT              | 1946977908               |
| SNP_P4_144437_383624 | NW_004516158.1 | Scaffold775 | 383624                  | AA                              | GG              | 1946977910               |

| SNPs IDs             | Chromosome IDs | Chromosomes | Physical positions (bp) | CDC Frontier (Reference genome) | (ILWC46 & LPNB) | NCBI SNPdb Accession IDs |
|----------------------|----------------|-------------|-------------------------|---------------------------------|-----------------|--------------------------|
| SNP_P4_144438_383628 | NW_004516158.1 | Scaffold775 | 383628                  | GG                              | AA              | 1946977912               |
| SNP_P4_144439_383653 | NW_004516158.1 | Scaffold775 | 383653                  | CC                              | TT              | 1946977914               |
| SNP_P4_144442_383699 | NW_004516158.1 | Scaffold775 | 383699                  | CC                              | TT              | 1946977916               |
| SNP_P4_144443_383701 | NW_004516158.1 | Scaffold775 | 383701                  | GG                              | AA              | 1946977918               |
| SNP_P4_144444_387520 | NW_004516158.1 | Scaffold775 | 387520                  | TT                              | AA              | 1946977920               |
| SNP_P4_144445_387743 | NW_004516158.1 | Scaffold775 | 387743                  | CC                              | AA              | 1946977922               |
| SNP_P4_144448_424938 | NW_004516158.1 | Scaffold775 | 424938                  | TT                              | GG              | 1946977924               |
| SNP_P4_144449_424965 | NW_004516158.1 | Scaffold775 | 424965                  | AA                              | TT              | 1946977926               |
| SNP_P4_144450_425295 | NW_004516158.1 | Scaffold775 | 425295                  | GG                              | AA              | 1946977928               |
| SNP_P4_144451_430527 | NW_004516158.1 | Scaffold775 | 430527                  | GG                              | AA              | 1946977930               |
| SNP_P4_144452_430903 | NW_004516158.1 | Scaffold775 | 430903                  | AA                              | GG              | 1946977932               |
| SNP_P4_144453_441004 | NW_004516158.1 | Scaffold775 | 441004                  | AA                              | GG              | 1946977934               |
| SNP_P4_144454_443100 | NW_004516158.1 | Scaffold775 | 443100                  | TT                              | CC              | 1946977936               |
| SNP_P4_144456_446940 | NW_004516158.1 | Scaffold775 | 446940                  | TT                              | AA              | 1946977938               |
| SNP_P4_144457_447641 | NW_004516158.1 | Scaffold775 | 447641                  | TT                              | CC              | 1946977940               |
| SNP_P4_144458_448317 | NW_004516158.1 | Scaffold775 | 448317                  | GG                              | AA              | 1946977942               |
| SNP_P4_144459_449388 | NW_004516158.1 | Scaffold775 | 449388                  | CC                              | TT              | 1946977944               |
| SNP_P4_144461_449872 | NW_004516158.1 | Scaffold775 | 449872                  | CC                              | TT              | 1946977946               |
| SNP_P4_144462_450019 | NW_004516158.1 | Scaffold775 | 450019                  | AA                              | CC              | 1946977948               |
| SNP_P4_144463_450372 | NW_004516158.1 | Scaffold775 | 450372                  | TT                              | CC              | 1946977950               |
| SNP_P4_144465_450548 | NW_004516158.1 | Scaffold775 | 450548                  | TT                              | CC              | 1946977952               |
| SNP_P4_144466_463758 | NW_004516158.1 | Scaffold775 | 463758                  | TT                              | CC              | 1946977954               |
| SNP_P4_144467_472533 | NW_004516158.1 | Scaffold775 | 472533                  | GG                              | AA              | 1946977956               |
| SNP_P4_144468_473415 | NW_004516158.1 | Scaffold775 | 473415                  | TT                              | GG              | 1946977958               |
| SNP_P4_144469_473507 | NW_004516158.1 | Scaffold775 | 473507                  | TT                              | CC              | 1946977960               |
| SNP_P4_144470_473512 | NW_004516158.1 | Scaffold775 | 473512                  | AA                              | GG              | 1946977962               |
| SNP_P4_144471_473573 | NW_004516158.1 | Scaffold775 | 473573                  | AA                              | GG              | 1946977964               |
| SNP_P4_144472_473609 | NW_004516158.1 | Scaffold775 | 473609                  | GG                              | AA              | 1946977966               |
| SNP_P4_144473_473636 | NW_004516158.1 | Scaffold775 | 473636                  | CC                              | AA              | 1946977968               |
| SNP_P4_144474_473727 | NW_004516158.1 | Scaffold775 | 473727                  | GG                              | AA              | 1946977970               |
| SNP_P4_144475_473810 | NW_004516158.1 | Scaffold775 | 473810                  | TT                              | CC              | 1946977972               |
| SNP_P4_144476_473908 | NW_004516158.1 | Scaffold775 | 473908                  | AA                              | TT              | 1946977974               |
| SNP_P4_144477_473930 | NW_004516158.1 | Scaffold775 | 473930                  | TT                              | GG              | 1946977976               |
| SNP_P4_144478_474020 | NW_004516158.1 | Scaffold775 | 474020                  | AA                              | CC              | 1946977978               |
| SNP_P4_144479_476026 | NW_004516158.1 | Scaffold775 | 476026                  | AA                              | CC              | 1946977980               |
| SNP_P4_144480_476139 | NW_004516158.1 | Scaffold775 | 476139                  | TT                              | CC              | 1946977982               |
| SNP_P4_144481_476181 | NW_004516158.1 | Scaffold775 | 476181                  | CC                              | TT              | 1946977984               |
| SNP_P4_144482_476189 | NW_004516158.1 | Scaffold775 | 476189                  | TT                              | CC              | 1946977986               |
| SNP_P4_144483_476259 | NW_004516158.1 | Scaffold775 | 476259                  | CC                              | AA              | 1946977988               |
| SNP_P4_144484_476281 | NW_004516158.1 | Scaffold775 | 476281                  | AA                              | GG              | 1946977990               |
| SNP_P4_144485_476302 | NW_004516158.1 | Scaffold775 | 476302                  | CC                              | GG              | 1946977992               |
| SNP_P4_144486_476389 | NW_004516158.1 | Scaffold775 | 476389                  | GG                              | AA              | 1946977994               |

| SNPs IDs             | Chromosome IDs | Chromosomes | Physical positions (bp) | CDC Frontier (Reference genome) | (ILWC46 & LPNB) | NCBI SNPdb Accession IDs |
|----------------------|----------------|-------------|-------------------------|---------------------------------|-----------------|--------------------------|
| SNP_P4_144487_483752 | NW_004516158.1 | Scaffold775 | 483752                  | GG                              | AA              | 1946977996               |
| SNP_P4_144488_488847 | NW_004516158.1 | Scaffold775 | 488847                  | CC                              | TT              | 1946977998               |
| SNP_P4_144489_488880 | NW_004516158.1 | Scaffold775 | 488880                  | CC                              | TT              | 1946978000               |
| SNP_P4_144490_4850   | NW_004516159.1 | Scaffold776 | 4850                    | TT                              | CC              | 1946978002               |
| SNP_P4_144491_5950   | NW_004516159.1 | Scaffold776 | 5950                    | AA                              | TT              | 1946978004               |
| SNP_P4_144492_23614  | NW_004516159.1 | Scaffold776 | 23614                   | CC                              | TT              | 1946978006               |
| SNP_P4_144493_23649  | NW_004516159.1 | Scaffold776 | 23649                   | AA                              | TT              | 1946978008               |
| SNP_P4_144494_23850  | NW_004516159.1 | Scaffold776 | 23850                   | AA                              | GG              | 1946978010               |
| SNP_P4_144495_23925  | NW_004516159.1 | Scaffold776 | 23925                   | AA                              | TT              | 1946978012               |
| SNP_P4_144496_61207  | NW_004516159.1 | Scaffold776 | 61207                   | TT                              | CC              | 1946978014               |
| SNP_P4_144497_68095  | NW_004516159.1 | Scaffold776 | 68095                   | AA                              | GG              | 1946978016               |
| SNP_P4_144498_68102  | NW_004516159.1 | Scaffold776 | 68102                   | TT                              | CC              | 1946978017               |
| SNP_P4_144499_68506  | NW_004516159.1 | Scaffold776 | 68506                   | TT                              | CC              | 1946978019               |
| SNP_P4_144500_68558  | NW_004516159.1 | Scaffold776 | 68558                   | GG                              | TT              | 1946978021               |
| SNP_P4_144501_68569  | NW_004516159.1 | Scaffold776 | 68569                   | CC                              | TT              | 1946978023               |
| SNP_P4_144502_69927  | NW_004516159.1 | Scaffold776 | 69927                   | GG                              | AA              | 1946978025               |
| SNP_P4_144503_70112  | NW_004516159.1 | Scaffold776 | 70112                   | GG                              | AA              | 1946978027               |
| SNP_P4_144504_71609  | NW_004516159.1 | Scaffold776 | 71609                   | GG                              | AA              | 1946978029               |
| SNP_P4_144505_72024  | NW_004516159.1 | Scaffold776 | 72024                   | TT                              | AA              | 1946978031               |
| SNP_P4_144506_74636  | NW_004516159.1 | Scaffold776 | 74636                   | GG                              | AA              | 1946978033               |
| SNP_P4_144507_74721  | NW_004516159.1 | Scaffold776 | 74721                   | GG                              | TT              | 1946978035               |
| SNP_P4_144508_75152  | NW_004516159.1 | Scaffold776 | 75152                   | AA                              | CC              | 1946978037               |
| SNP_P4_144509_75153  | NW_004516159.1 | Scaffold776 | 75153                   | CC                              | AA              | 1946978039               |
| SNP_P4_144510_93268  | NW_004516159.1 | Scaffold776 | 93268                   | TT                              | GG              | 1946978041               |
| SNP_P4_144511_113509 | NW_004516159.1 | Scaffold776 | 113509                  | AA                              | GG              | 1946978043               |
| SNP_P4_144512_115064 | NW_004516159.1 | Scaffold776 | 115064                  | GG                              | AA              | 1946978045               |
| SNP_P4_144513_141790 | NW_004516159.1 | Scaffold776 | 141790                  | AA                              | TT              | 1946978047               |
| SNP_P4_144514_141791 | NW_004516159.1 | Scaffold776 | 141791                  | GG                              | TT              | 1946978049               |
| SNP_P4_144515_144044 | NW_004516159.1 | Scaffold776 | 144044                  | TT                              | GG              | 1946978051               |
| SNP_P4_144516_144069 | NW_004516159.1 | Scaffold776 | 144069                  | AA                              | GG              | 1946978053               |
| SNP_P4_144517_144070 | NW_004516159.1 | Scaffold776 | 144070                  | AA                              | TT              | 1946978055               |
| SNP_P4_144518_145497 | NW_004516159.1 | Scaffold776 | 145497                  | GG                              | TT              | 1946978057               |
| SNP_P4_144519_147538 | NW_004516159.1 | Scaffold776 | 147538                  | CC                              | GG              | 1946978059               |
| SNP_P4_144520_156755 | NW_004516159.1 | Scaffold776 | 156755                  | AA                              | GG              | 1946978062               |
| SNP_P4_144521_176062 | NW_004516159.1 | Scaffold776 | 176062                  | TT                              | AA              | 1946978064               |
| SNP_P4_144522_176378 | NW_004516159.1 | Scaffold776 | 176378                  | AA                              | GG              | 1946978066               |
| SNP_P4_144523_177745 | NW_004516159.1 | Scaffold776 | 177745                  | CC                              | TT              | 1946978068               |
| SNP_P4_144524_177796 | NW_004516159.1 | Scaffold776 | 177796                  | GG                              | CC              | 1946978070               |
| SNP_P4_144525_177904 | NW_004516159.1 | Scaffold776 | 177904                  | GG                              | AA              | 1946978072               |
| SNP_P4_144526_177906 | NW_004516159.1 | Scaffold776 | 177906                  | AA                              | GG              | 1946978074               |
| SNP_P4_144527_177944 | NW_004516159.1 | Scaffold776 | 177944                  | TT                              | GG              | 1946978076               |
| SNP_P4_144528_177961 | NW_004516159.1 | Scaffold776 | 177961                  | GG                              | AA              | 1946978078               |

| SNPs IDs             | Chromosome IDs | Chromosomes | Physical positions (bp) | CDC Frontier (Reference genome) | (ILWC46 & LPNB) | NCBI SNPdb Accession IDs |
|----------------------|----------------|-------------|-------------------------|---------------------------------|-----------------|--------------------------|
| SNP_P4_144529_178109 | NW_004516159.1 | Scaffold776 | 178109                  | GG                              | AA              | 1946978080               |
| SNP_P4_144530_178114 | NW_004516159.1 | Scaffold776 | 178114                  | AA                              | GG              | 1946978082               |
| SNP_P4_144531_178115 | NW_004516159.1 | Scaffold776 | 178115                  | TT                              | CC              | 1946978084               |
| SNP_P4_144532_178137 | NW_004516159.1 | Scaffold776 | 178137                  | TT                              | GG              | 1946978086               |
| SNP_P4_144533_206689 | NW_004516159.1 | Scaffold776 | 206689                  | AA                              | GG              | 1946978088               |
| SNP_P4_144534_206701 | NW_004516159.1 | Scaffold776 | 206701                  | AA                              | GG              | 1946978090               |
| SNP_P4_144535_206702 | NW_004516159.1 | Scaffold776 | 206702                  | TT                              | AA              | 1946978092               |
| SNP_P4_144536_207169 | NW_004516159.1 | Scaffold776 | 207169                  | CC                              | AA              | 1946978094               |
| SNP_P4_144537_216198 | NW_004516159.1 | Scaffold776 | 216198                  | TT                              | GG              | 1946978096               |
| SNP_P4_144538_216205 | NW_004516159.1 | Scaffold776 | 216205                  | GG                              | TT              | 1946978098               |
| SNP_P4_144539_216427 | NW_004516159.1 | Scaffold776 | 216427                  | TT                              | CC              | 1946978100               |
| SNP_P4_144540_216473 | NW_004516159.1 | Scaffold776 | 216473                  | TT                              | CC              | 1946978102               |
| SNP_P4_144541_216582 | NW_004516159.1 | Scaffold776 | 216582                  | CC                              | TT              | 1946978104               |
| SNP_P4_144542_216604 | NW_004516159.1 | Scaffold776 | 216604                  | CC                              | AA              | 1946978106               |
| SNP_P4_144543_218836 | NW_004516159.1 | Scaffold776 | 218836                  | CC                              | GG              | 1946978108               |
| SNP_P4_144544_218898 | NW_004516159.1 | Scaffold776 | 218898                  | GG                              | AA              | 1946978110               |
| SNP_P4_144545_218909 | NW_004516159.1 | Scaffold776 | 218909                  | AA                              | GG              | 1946978112               |
| SNP_P4_144546_219010 | NW_004516159.1 | Scaffold776 | 219010                  | TT                              | GG              | 1946978114               |
| SNP_P4_144547_219019 | NW_004516159.1 | Scaffold776 | 219019                  | GG                              | CC              | 1946978116               |
| SNP_P4_144548_219212 | NW_004516159.1 | Scaffold776 | 219212                  | AA                              | GG              | 1946978118               |
| SNP_P4_144549_219331 | NW_004516159.1 | Scaffold776 | 219331                  | TT                              | GG              | 1946978120               |
| SNP_P4_144550_219344 | NW_004516159.1 | Scaffold776 | 219344                  | TT                              | GG              | 1946978122               |
| SNP_P4_144551_219358 | NW_004516159.1 | Scaffold776 | 219358                  | CC                              | AA              | 1946978124               |
| SNP_P4_144552_219368 | NW_004516159.1 | Scaffold776 | 219368                  | TT                              | CC              | 1946978126               |
| SNP_P4_144553_219938 | NW_004516159.1 | Scaffold776 | 219938                  | AA                              | GG              | 1946978128               |
| SNP_P4_144554_220028 | NW_004516159.1 | Scaffold776 | 220028                  | AA                              | GG              | 1946978130               |
| SNP_P4_144555_220308 | NW_004516159.1 | Scaffold776 | 220308                  | AA                              | CC              | 1946978132               |
| SNP_P4_144556_220309 | NW_004516159.1 | Scaffold776 | 220309                  | TT                              | GG              | 1946978135               |
| SNP_P4_144557_220318 | NW_004516159.1 | Scaffold776 | 220318                  | TT                              | GG              | 1946978137               |
| SNP_P4_144558_220322 | NW_004516159.1 | Scaffold776 | 220322                  | TT                              | CC              | 1946978139               |
| SNP_P4_144559_220345 | NW_004516159.1 | Scaffold776 | 220345                  | AA                              | GG              | 1946978141               |
| SNP_P4_144560_222701 | NW_004516159.1 | Scaffold776 | 222701                  | TT                              | CC              | 1946978143               |
| SNP_P4_144561_222703 | NW_004516159.1 | Scaffold776 | 222703                  | AA                              | GG              | 1946978145               |
| SNP_P4_144563_256480 | NW_004516159.1 | Scaffold776 | 256480                  | GG                              | AA              | 1946978147               |
| SNP_P4_144564_572    | NW_004516160.1 | Scaffold778 | 572                     | GG                              | AA              | 1946978149               |
| SNP_P4_144565_580    | NW_004516160.1 | Scaffold778 | 580                     | AA                              | CC              | 1946978151               |
| SNP_P4_144566_331    | NW_004516161.1 | Scaffold779 | 331                     | TT                              | CC              | 1946978153               |
| SNP_P4_144567_943    | NW_004516161.1 | Scaffold779 | 943                     | TT                              | AA              | 1946978155               |
| SNP_P4_144568_994    | NW_004516161.1 | Scaffold779 | 994                     | CC                              | AA              | 1946978157               |
| SNP_P4_144569_1087   | NW_004516161.1 | Scaffold779 | 1087                    | AA                              | CC              | 1946978159               |
| SNP_P4_144570_1089   | NW_004516161.1 | Scaffold779 | 1089                    | AA                              | GG              | 1946978161               |
| SNP_P4_144571_1090   | NW_004516161.1 | Scaffold779 | 1090                    | AA                              | TT              | 1946978163               |

| SNPs IDs             | Chromosome IDs | Chromosomes | Physical positions (bp) | CDC Frontier (Reference genome) | (ILWC46 & LPNB) | NCBI SNPdb Accession IDs |
|----------------------|----------------|-------------|-------------------------|---------------------------------|-----------------|--------------------------|
| SNP_P4_144572_1199   | NW_004516161.1 | Scaffold779 | 1199                    | GG                              | CC              | 1946978165               |
| SNP_P4_144573_1211   | NW_004516161.1 | Scaffold779 | 1211                    | AA                              | GG              | 1946978167               |
| SNP_P4_144574_1271   | NW_004516161.1 | Scaffold779 | 1271                    | AA                              | GG              | 1946978169               |
| SNP_P4_144575_1339   | NW_004516161.1 | Scaffold779 | 1339                    | TT                              | AA              | 1946978171               |
| SNP_P4_144576_1345   | NW_004516161.1 | Scaffold779 | 1345                    | TT                              | CC              | 1946978173               |
| SNP_P4_144577_1412   | NW_004516161.1 | Scaffold779 | 1412                    | AA                              | GG              | 1946978175               |
| SNP_P4_144578_1417   | NW_004516161.1 | Scaffold779 | 1417                    | AA                              | GG              | 1946978177               |
| SNP_P4_144579_1425   | NW_004516161.1 | Scaffold779 | 1425                    | TT                              | AA              | 1946978179               |
| SNP_P4_144581_1569   | NW_004516161.1 | Scaffold779 | 1569                    | GG                              | AA              | 1946978181               |
| SNP_P4_144582_1607   | NW_004516161.1 | Scaffold779 | 1607                    | CC                              | TT              | 1946978183               |
| SNP_P4_144583_1635   | NW_004516161.1 | Scaffold779 | 1635                    | TT                              | AA              | 1946978185               |
| SNP_P4_144584_1667   | NW_004516161.1 | Scaffold779 | 1667                    | CC                              | GG              | 1946978187               |
| SNP_P4_144585_1724   | NW_004516161.1 | Scaffold779 | 1724                    | TT                              | GG              | 1946978189               |
| SNP_P4_144586_1744   | NW_004516161.1 | Scaffold779 | 1744                    | CC                              | GG              | 1946978192               |
| SNP_P4_144587_1762   | NW_004516161.1 | Scaffold779 | 1762                    | AA                              | GG              | 1946978194               |
| SNP_P4_144588_6191   | NW_004516161.1 | Scaffold779 | 6191                    | AA                              | GG              | 1946978196               |
| SNP_P4_144589_7160   | NW_004516161.1 | Scaffold779 | 7160                    | AA                              | GG              | 1946978198               |
| SNP_P4_144590_8121   | NW_004516161.1 | Scaffold779 | 8121                    | TT                              | AA              | 1946978200               |
| SNP_P4_144591_8770   | NW_004516161.1 | Scaffold779 | 8770                    | CC                              | TT              | 1946978202               |
| SNP_P4_144592_13885  | NW_004516161.1 | Scaffold779 | 13885                   | AA                              | GG              | 1946978204               |
| SNP_P4_144594_14852  | NW_004516161.1 | Scaffold779 | 14852                   | TT                              | AA              | 1946978206               |
| SNP_P4_144595_2653   | NW_004516162.1 | Scaffold781 | 2653                    | CC                              | GG              | 1946978209               |
| SNP_P4_144596_3009   | NW_004516162.1 | Scaffold781 | 3009                    | GG                              | AA              | 1946978210               |
| SNP_P4_144597_3010   | NW_004516162.1 | Scaffold781 | 3010                    | AA                              | TT              | 1946978212               |
| SNP_P4_144598_3015   | NW_004516162.1 | Scaffold781 | 3015                    | GG                              | TT              | 1946978214               |
| SNP_P4_144599_3018   | NW_004516162.1 | Scaffold781 | 3018                    | TT                              | GG              | 1946978216               |
| SNP_P4_144600_3652   | NW_004516162.1 | Scaffold781 | 3652                    | TT                              | AA              | 1946978218               |
| SNP_P4_144601_5060   | NW_004516162.1 | Scaffold781 | 5060                    | AA                              | GG              | 1946978220               |
| SNP_P4_144602_7382   | NW_004516162.1 | Scaffold781 | 7382                    | GG                              | AA              | 1946978222               |
| SNP_P4_144603_30409  | NW_004516162.1 | Scaffold781 | 30409                   | CC                              | TT              | 1946978224               |
| SNP_P4_144604_30708  | NW_004516162.1 | Scaffold781 | 30708                   | TT                              | CC              | 1946978226               |
| SNP_P4_144605_48     | NW_004516164.1 | Scaffold783 | 48                      | AA                              | GG              | 1946978228               |
| SNP_P4_144606_2210   | NW_004516164.1 | Scaffold783 | 2210                    | GG                              | AA              | 1946978230               |
| SNP_P4_144609_81645  | NW_004516164.1 | Scaffold783 | 81645                   | AA                              | TT              | 1946978232               |
| SNP_P4_144610_91943  | NW_004516164.1 | Scaffold783 | 91943                   | GG                              | AA              | 1946978234               |
| SNP_P4_144611_92133  | NW_004516164.1 | Scaffold783 | 92133                   | CC                              | TT              | 1946978236               |
| SNP_P4_144612_99089  | NW_004516164.1 | Scaffold783 | 99089                   | AA                              | GG              | 1946978238               |
| SNP_P4_144613_99097  | NW_004516164.1 | Scaffold783 | 99097                   | CC                              | TT              | 1946978241               |
| SNP_P4_144614_99107  | NW_004516164.1 | Scaffold783 | 99107                   | TT                              | CC              | 1946978243               |
| SNP_P4_144615_104243 | NW_004516164.1 | Scaffold783 | 104243                  | CC                              | TT              | 1946978245               |
| SNP_P4_144616_104244 | NW_004516164.1 | Scaffold783 | 104244                  | GG                              | AA              | 1946978246               |
| SNP_P4_144617_104297 | NW_004516164.1 | Scaffold783 | 104297                  | GG                              | TT              | 1946978248               |

| SNPs IDs             | Chromosome IDs | Chromosomes | Physical positions (bp) | CDC Frontier (Reference genome) | (ILWC46 & LPNB) | NCBI SNPdb Accession IDs |
|----------------------|----------------|-------------|-------------------------|---------------------------------|-----------------|--------------------------|
| SNP_P4_144620_104787 | NW_004516164.1 | Scaffold783 | 104787                  | CC                              | TT              | 1946978250               |
| SNP_P4_144622_120578 | NW_004516164.1 | Scaffold783 | 120578                  | GG                              | TT              | 1946978252               |
| SNP_P4_144623_128420 | NW_004516164.1 | Scaffold783 | 128420                  | GG                              | TT              | 1946978254               |
| SNP_P4_144624_128543 | NW_004516164.1 | Scaffold783 | 128543                  | TT                              | GG              | 1946978256               |
| SNP_P4_144625_128545 | NW_004516164.1 | Scaffold783 | 128545                  | TT                              | GG              | 1946978259               |
| SNP_P4_144627_128817 | NW_004516164.1 | Scaffold783 | 128817                  | GG                              | AA              | 1946978261               |
| SNP_P4_144628_128846 | NW_004516164.1 | Scaffold783 | 128846                  | CC                              | TT              | 1946978263               |
| SNP_P4_144629_128899 | NW_004516164.1 | Scaffold783 | 128899                  | AA                              | GG              | 1946978265               |
| SNP_P4_144630_128921 | NW_004516164.1 | Scaffold783 | 128921                  | TT                              | GG              | 1946978267               |
| SNP_P4_144631_128972 | NW_004516164.1 | Scaffold783 | 128972                  | CC                              | TT              | 1946978269               |
| SNP_P4_144632_131677 | NW_004516164.1 | Scaffold783 | 131677                  | CC                              | GG              | 1946978271               |
| SNP_P4_144633_169290 | NW_004516164.1 | Scaffold783 | 169290                  | AA                              | GG              | 1946978273               |
| SNP_P4_144634_179860 | NW_004516164.1 | Scaffold783 | 179860                  | TT                              | CC              | 1946978275               |
| SNP_P4_144635_180001 | NW_004516164.1 | Scaffold783 | 180001                  | AA                              | GG              | 1946978277               |
| SNP_P4_144636_180057 | NW_004516164.1 | Scaffold783 | 180057                  | GG                              | TT              | 1946978279               |
| SNP_P4_144637_180262 | NW_004516164.1 | Scaffold783 | 180262                  | CC                              | TT              | 1946978281               |
| SNP_P4_144638_180264 | NW_004516164.1 | Scaffold783 | 180264                  | TT                              | CC              | 1946978282               |
| SNP_P4_144639_180278 | NW_004516164.1 | Scaffold783 | 180278                  | GG                              | AA              | 1946978284               |
| SNP_P4_144640_181021 | NW_004516164.1 | Scaffold783 | 181021                  | GG                              | AA              | 1946978286               |
| SNP_P4_144641_181032 | NW_004516164.1 | Scaffold783 | 181032                  | CC                              | TT              | 1946978288               |
| SNP_P4_144642_181058 | NW_004516164.1 | Scaffold783 | 181058                  | AA                              | GG              | 1946978290               |
| SNP_P4_144643_181076 | NW_004516164.1 | Scaffold783 | 181076                  | TT                              | AA              | 1946978292               |
| SNP_P4_144644_196634 | NW_004516164.1 | Scaffold783 | 196634                  | GG                              | CC              | 1946978294               |
| SNP_P4_144645_208128 | NW_004516164.1 | Scaffold783 | 208128                  | TT                              | CC              | 1946978296               |
| SNP_P4_144646_208130 | NW_004516164.1 | Scaffold783 | 208130                  | GG                              | AA              | 1946978298               |
| SNP_P4_144647_208134 | NW_004516164.1 | Scaffold783 | 208134                  | CC                              | TT              | 1946978300               |
| SNP_P4_144648_208147 | NW_004516164.1 | Scaffold783 | 208147                  | TT                              | GG              | 1946978302               |
| SNP_P4_144649_208155 | NW_004516164.1 | Scaffold783 | 208155                  | GG                              | TT              | 1946978304               |
| SNP_P4_144650_208156 | NW_004516164.1 | Scaffold783 | 208156                  | GG                              | TT              | 1946978306               |
| SNP_P4_144651_208203 | NW_004516164.1 | Scaffold783 | 208203                  | AA                              | GG              | 1946978308               |
| SNP_P4_144652_208324 | NW_004516164.1 | Scaffold783 | 208324                  | TT                              | CC              | 1946978310               |
| SNP_P4_144653_208485 | NW_004516164.1 | Scaffold783 | 208485                  | TT                              | CC              | 1946978312               |
| SNP_P4_144654_208488 | NW_004516164.1 | Scaffold783 | 208488                  | GG                              | AA              | 1946978314               |
| SNP_P4_144655_208545 | NW_004516164.1 | Scaffold783 | 208545                  | AA                              | GG              | 1946978316               |
| SNP_P4_144656_208551 | NW_004516164.1 | Scaffold783 | 208551                  | TT                              | CC              | 1946978318               |
| SNP_P4_144657_208557 | NW_004516164.1 | Scaffold783 | 208557                  | CC                              | TT              | 1946978320               |
| SNP_P4_144658_208563 | NW_004516164.1 | Scaffold783 | 208563                  | GG                              | AA              | 1946978322               |
| SNP_P4_144659_208608 | NW_004516164.1 | Scaffold783 | 208608                  | CC                              | TT              | 1946978324               |
| SNP_P4_144660_217193 | NW_004516164.1 | Scaffold783 | 217193                  | TT                              | AA              | 1946978326               |
| SNP_P4_144661_358    | NW_004516168.1 | Scaffold787 | 358                     | CC                              | TT              | 1946978328               |
| SNP_P4_144662_1994   | NW_004516168.1 | Scaffold787 | 1994                    | AA                              | GG              | 1946978330               |
| SNP_P4_144663_4739   | NW_004516168.1 | Scaffold787 | 4739                    | AA                              | TT              | 1946978332               |

| SNPs IDs            | Chromosome IDs | Chromosomes | Physical positions (bp) | CDC Frontier (Reference genome) | (ILWC46 & LPNB) | NCBI SNPdb Accession IDs |
|---------------------|----------------|-------------|-------------------------|---------------------------------|-----------------|--------------------------|
| SNP_P4_144664_4801  | NW_004516168.1 | Scaffold787 | 4801                    | CC                              | AA              | 1946978334               |
| SNP_P4_144666_12744 | NW_004516168.1 | Scaffold787 | 12744                   | CC                              | TT              | 1946978336               |
| SNP_P4_144667_12755 | NW_004516168.1 | Scaffold787 | 12755                   | AA                              | GG              | 1946978338               |
| SNP_P4_144668_16507 | NW_004516168.1 | Scaffold787 | 16507                   | GG                              | AA              | 1946978340               |
| SNP_P4_144669_19134 | NW_004516168.1 | Scaffold787 | 19134                   | CC                              | TT              | 1946978342               |
| SNP_P4_144670_20982 | NW_004516168.1 | Scaffold787 | 20982                   | GG                              | CC              | 1946978344               |
| SNP_P4_144671_21084 | NW_004516168.1 | Scaffold787 | 21084                   | GG                              | AA              | 1946978346               |
| SNP_P4_144672_21478 | NW_004516168.1 | Scaffold787 | 21478                   | AA                              | GG              | 1946978348               |
| SNP_P4_144674_24873 | NW_004516168.1 | Scaffold787 | 24873                   | CC                              | TT              | 1946978350               |
| SNP_P4_144675_24973 | NW_004516168.1 | Scaffold787 | 24973                   | TT                              | GG              | 1946978352               |
| SNP_P4_144676_25074 | NW_004516168.1 | Scaffold787 | 25074                   | CC                              | AA              | 1946978354               |
| SNP_P4_144677_25116 | NW_004516168.1 | Scaffold787 | 25116                   | GG                              | CC              | 1946978356               |
| SNP_P4_144678_25627 | NW_004516168.1 | Scaffold787 | 25627                   | TT                              | CC              | 1946978358               |
| SNP_P4_144679_27790 | NW_004516168.1 | Scaffold787 | 27790                   | TT                              | AA              | 1946978360               |
| SNP_P4_144680_28839 | NW_004516168.1 | Scaffold787 | 28839                   | CC                              | AA              | 1946978362               |
| SNP_P4_144682_31251 | NW_004516168.1 | Scaffold787 | 31251                   | TT                              | AA              | 1946978364               |
| SNP_P4_144685_32906 | NW_004516168.1 | Scaffold787 | 32906                   | AA                              | TT              | 1946978366               |
| SNP_P4_144686_34511 | NW_004516168.1 | Scaffold787 | 34511                   | GG                              | TT              | 1946978368               |
| SNP_P4_144687_34808 | NW_004516168.1 | Scaffold787 | 34808                   | TT                              | CC              | 1946978370               |
| SNP_P4_144688_35509 | NW_004516168.1 | Scaffold787 | 35509                   | TT                              | AA              | 1946978372               |
| SNP_P4_144689_37147 | NW_004516168.1 | Scaffold787 | 37147                   | AA                              | GG              | 1946978374               |
| SNP_P4_144690_41623 | NW_004516168.1 | Scaffold787 | 41623                   | GG                              | AA              | 1946978376               |
| SNP_P4_144691_42378 | NW_004516168.1 | Scaffold787 | 42378                   | CC                              | GG              | 1946978378               |
| SNP_P4_144692_49682 | NW_004516168.1 | Scaffold787 | 49682                   | CC                              | TT              | 1946978380               |
| SNP_P4_144693_50101 | NW_004516168.1 | Scaffold787 | 50101                   | AA                              | CC              | 1946978382               |
| SNP_P4_144694_50377 | NW_004516168.1 | Scaffold787 | 50377                   | CC                              | AA              | 1946978384               |
| SNP_P4_144695_52635 | NW_004516168.1 | Scaffold787 | 52635                   | CC                              | AA              | 1946978386               |
| SNP_P4_144696_54188 | NW_004516168.1 | Scaffold787 | 54188                   | TT                              | CC              | 1946978388               |
| SNP_P4_144697_58684 | NW_004516168.1 | Scaffold787 | 58684                   | GG                              | AA              | 1946978390               |
| SNP_P4_144698_58685 | NW_004516168.1 | Scaffold787 | 58685                   | GG                              | AA              | 1946978392               |
| SNP_P4_144699_58689 | NW_004516168.1 | Scaffold787 | 58689                   | AA                              | TT              | 1946978394               |
| SNP_P4_144700_58765 | NW_004516168.1 | Scaffold787 | 58765                   | CC                              | TT              | 1946978396               |
| SNP_P4_144701_60908 | NW_004516168.1 | Scaffold787 | 60908                   | AA                              | TT              | 1946978398               |
| SNP_P4_144702_63103 | NW_004516168.1 | Scaffold787 | 63103                   | AA                              | TT              | 1946978400               |
| SNP_P4_144703_63698 | NW_004516168.1 | Scaffold787 | 63698                   | CC                              | TT              | 1946978402               |
| SNP_P4_144704_63712 | NW_004516168.1 | Scaffold787 | 63712                   | CC                              | TT              | 1946978404               |
| SNP_P4_144705_64009 | NW_004516168.1 | Scaffold787 | 64009                   | TT                              | AA              | 1946978406               |
| SNP_P4_144706_64010 | NW_004516168.1 | Scaffold787 | 64010                   | CC                              | TT              | 1946978408               |
| SNP_P4_144707_66354 | NW_004516168.1 | Scaffold787 | 66354                   | AA                              | CC              | 1946978410               |
| SNP_P4_144708_66693 | NW_004516168.1 | Scaffold787 | 66693                   | TT                              | AA              | 1946978412               |
| SNP_P4_144710_69847 | NW_004516168.1 | Scaffold787 | 69847                   | AA                              | TT              | 1946978414               |
| SNP_P4_144711_70137 | NW_004516168.1 | Scaffold787 | 70137                   | CC                              | TT              | 1946978416               |

| SNPs IDs            | Chromosome IDs | Chromosomes | Physical positions (bp) | CDC Frontier (Reference genome) | (ILWC46 & LPNB) | NCBI SNPdb Accession IDs |
|---------------------|----------------|-------------|-------------------------|---------------------------------|-----------------|--------------------------|
| SNP_P4_144712_70138 | NW_004516168.1 | Scaffold787 | 70138                   | CC                              | TT              | 1946978418               |
| SNP_P4_144713_70346 | NW_004516168.1 | Scaffold787 | 70346                   | TT                              | CC              | 1946978420               |
| SNP_P4_144714_70373 | NW_004516168.1 | Scaffold787 | 70373                   | AA                              | GG              | 1946978422               |
| SNP_P4_144715_73637 | NW_004516168.1 | Scaffold787 | 73637                   | TT                              | CC              | 1946978424               |
| SNP_P4_144716_73938 | NW_004516168.1 | Scaffold787 | 73938                   | CC                              | TT              | 1946978427               |
| SNP_P4_144717_73968 | NW_004516168.1 | Scaffold787 | 73968                   | TT                              | GG              | 1946978428               |
| SNP_P4_144718_73989 | NW_004516168.1 | Scaffold787 | 73989                   | TT                              | CC              | 1946978430               |
| SNP_P4_144719_74066 | NW_004516168.1 | Scaffold787 | 74066                   | CC                              | GG              | 1946978432               |
| SNP_P4_144720_74083 | NW_004516168.1 | Scaffold787 | 74083                   | GG                              | AA              | 1946978434               |
| SNP_P4_144721_74084 | NW_004516168.1 | Scaffold787 | 74084                   | TT                              | AA              | 1946978436               |
| SNP_P4_144722_75180 | NW_004516168.1 | Scaffold787 | 75180                   | GG                              | TT              | 1946978438               |
| SNP_P4_144723_75225 | NW_004516168.1 | Scaffold787 | 75225                   | CC                              | GG              | 1946978440               |
| SNP_P4_144724_75920 | NW_004516168.1 | Scaffold787 | 75920                   | TT                              | AA              | 1946978442               |
| SNP_P4_144726_75975 | NW_004516168.1 | Scaffold787 | 75975                   | CC                              | TT              | 1946978444               |
| SNP_P4_144727_76959 | NW_004516168.1 | Scaffold787 | 76959                   | TT                              | GG              | 1946978446               |
| SNP_P4_144728_77878 | NW_004516168.1 | Scaffold787 | 77878                   | AA                              | GG              | 1946978448               |
| SNP_P4_144729_77888 | NW_004516168.1 | Scaffold787 | 77888                   | AA                              | CC              | 1946978450               |
| SNP_P4_144730_77889 | NW_004516168.1 | Scaffold787 | 77889                   | AA                              | CC              | 1946978452               |
| SNP_P4_144731_77892 | NW_004516168.1 | Scaffold787 | 77892                   | AA                              | TT              | 1946978454               |
| SNP_P4_144732_77908 | NW_004516168.1 | Scaffold787 | 77908                   | CC                              | TT              | 1946978456               |
| SNP_P4_144733_77913 | NW_004516168.1 | Scaffold787 | 77913                   | GG                              | CC              | 1946978458               |
| SNP_P4_144734_78488 | NW_004516168.1 | Scaffold787 | 78488                   | CC                              | TT              | 1946978460               |
| SNP_P4_144735_78768 | NW_004516168.1 | Scaffold787 | 78768                   | TT                              | AA              | 1946978462               |
| SNP_P4_144736_78990 | NW_004516168.1 | Scaffold787 | 78990                   | AA                              | CC              | 1946978464               |
| SNP_P4_144737_79176 | NW_004516168.1 | Scaffold787 | 79176                   | TT                              | AA              | 1946978466               |
| SNP_P4_144738_79191 | NW_004516168.1 | Scaffold787 | 79191                   | TT                              | CC              | 1946978468               |
| SNP_P4_144739_79197 | NW_004516168.1 | Scaffold787 | 79197                   | AA                              | GG              | 1946978470               |
| SNP_P4_144740_79207 | NW_004516168.1 | Scaffold787 | 79207                   | CC                              | TT              | 1946978472               |
| SNP_P4_144741_79280 | NW_004516168.1 | Scaffold787 | 79280                   | TT                              | GG              | 1946978474               |
| SNP_P4_144742_79281 | NW_004516168.1 | Scaffold787 | 79281                   | TT                              | GG              | 1946978476               |
| SNP_P4_144743_79286 | NW_004516168.1 | Scaffold787 | 79286                   | AA                              | GG              | 1946978478               |
| SNP_P4_144744_79306 | NW_004516168.1 | Scaffold787 | 79306                   | GG                              | CC              | 1946978480               |
| SNP_P4_144745_79317 | NW_004516168.1 | Scaffold787 | 79317                   | GG                              | AA              | 1946978482               |
| SNP_P4_144746_79322 | NW_004516168.1 | Scaffold787 | 79322                   | TT                              | CC              | 1946978484               |
| SNP_P4_144747_79569 | NW_004516168.1 | Scaffold787 | 79569                   | CC                              | TT              | 1946978486               |
| SNP_P4_144748_85235 | NW_004516168.1 | Scaffold787 | 85235                   | AA                              | CC              | 1946978488               |
| SNP_P4_144749_85239 | NW_004516168.1 | Scaffold787 | 85239                   | CC                              | TT              | 1946978491               |
| SNP_P4_144750_86024 | NW_004516168.1 | Scaffold787 | 86024                   | AA                              | TT              | 1946978493               |
| SNP_P4_144751_87039 | NW_004516168.1 | Scaffold787 | 87039                   | AA                              | CC              | 1946978495               |
| SNP_P4_144752_87069 | NW_004516168.1 | Scaffold787 | 87069                   | AA                              | GG              | 1946978497               |
| SNP_P4_144753_87091 | NW_004516168.1 | Scaffold787 | 87091                   | CC                              | GG              | 1946978499               |
| SNP_P4_144754_87100 | NW_004516168.1 | Scaffold787 | 87100                   | GG                              | AA              | 1946978501               |



| SNPs IDs             | Chromosome IDs | Chromosomes | Physical positions (bp) | CDC Frontier (Reference genome) | (ILWC46 & LPNB) | NCBI SNPdb Accession IDs |
|----------------------|----------------|-------------|-------------------------|---------------------------------|-----------------|--------------------------|
| SNP_P4_144755_87186  | NW_004516168.1 | Scaffold787 | 87186                   | CC                              | TT              | 1946978503               |
| SNP_P4_144756_87263  | NW_004516168.1 | Scaffold787 | 87263                   | CC                              | AA              | 1946978505               |
| SNP_P4_144757_89500  | NW_004516168.1 | Scaffold787 | 89500                   | TT                              | GG              | 1946978508               |
| SNP_P4_144758_91729  | NW_004516168.1 | Scaffold787 | 91729                   | GG                              | AA              | 1946978510               |
| SNP_P4_144759_91732  | NW_004516168.1 | Scaffold787 | 91732                   | AA                              | TT              | 1946978512               |
| SNP_P4_144760_93206  | NW_004516168.1 | Scaffold787 | 93206                   | GG                              | TT              | 1946978514               |
| SNP_P4_144761_93549  | NW_004516168.1 | Scaffold787 | 93549                   | TT                              | CC              | 1946978516               |
| SNP_P4_144762_94603  | NW_004516168.1 | Scaffold787 | 94603                   | GG                              | AA              | 1946978518               |
| SNP_P4_144763_96294  | NW_004516168.1 | Scaffold787 | 96294                   | AA                              | CC              | 1946978520               |
| SNP_P4_144764_103673 | NW_004516168.1 | Scaffold787 | 103673                  | AA                              | TT              | 1946978522               |
| SNP_P4_144765_103810 | NW_004516168.1 | Scaffold787 | 103810                  | AA                              | CC              | 1946978524               |
| SNP_P4_144766_103853 | NW_004516168.1 | Scaffold787 | 103853                  | CC                              | TT              | 1946978526               |
| SNP_P4_144767_104094 | NW_004516168.1 | Scaffold787 | 104094                  | CC                              | TT              | 1946978528               |
| SNP_P4_144768_105172 | NW_004516168.1 | Scaffold787 | 105172                  | GG                              | AA              | 1946978530               |
| SNP_P4_144769_105456 | NW_004516168.1 | Scaffold787 | 105456                  | AA                              | GG              | 1946978532               |
| SNP_P4_144770_108729 | NW_004516168.1 | Scaffold787 | 108729                  | AA                              | TT              | 1946978534               |
| SNP_P4_144771_110967 | NW_004516168.1 | Scaffold787 | 110967                  | TT                              | CC              | 1946978536               |
| SNP_P4_144772_112413 | NW_004516168.1 | Scaffold787 | 112413                  | GG                              | AA              | 1946978538               |
| SNP_P4_144773_112415 | NW_004516168.1 | Scaffold787 | 112415                  | CC                              | GG              | 1946978540               |
| SNP_P4_144774_113908 | NW_004516168.1 | Scaffold787 | 113908                  | TT                              | AA              | 1946978542               |
| SNP_P4_144775_117186 | NW_004516168.1 | Scaffold787 | 117186                  | TT                              | GG              | 1946978544               |
| SNP_P4_144776_125825 | NW_004516168.1 | Scaffold787 | 125825                  | AA                              | GG              | 1946978546               |
| SNP_P4_144777_128468 | NW_004516168.1 | Scaffold787 | 128468                  | GG                              | AA              | 1946978548               |
| SNP_P4_144778_128487 | NW_004516168.1 | Scaffold787 | 128487                  | CC                              | TT              | 1946978550               |
| SNP_P4_144779_128501 | NW_004516168.1 | Scaffold787 | 128501                  | TT                              | CC              | 1946978552               |
| SNP_P4_144780_129109 | NW_004516168.1 | Scaffold787 | 129109                  | AA                              | GG              | 1946978554               |
| SNP_P4_144781_129384 | NW_004516168.1 | Scaffold787 | 129384                  | CC                              | GG              | 1946978556               |
| SNP_P4_144782_129550 | NW_004516168.1 | Scaffold787 | 129550                  | TT                              | CC              | 1946978558               |
| SNP_P4_144784_131328 | NW_004516168.1 | Scaffold787 | 131328                  | CC                              | AA              | 1946978560               |
| SNP_P4_144785_132011 | NW_004516168.1 | Scaffold787 | 132011                  | GG                              | AA              | 1946978562               |
| SNP_P4_144786_134127 | NW_004516168.1 | Scaffold787 | 134127                  | TT                              | CC              | 1946978564               |
| SNP_P4_144787_134314 | NW_004516168.1 | Scaffold787 | 134314                  | TT                              | AA              | 1946978566               |
| SNP_P4_144790_140851 | NW_004516168.1 | Scaffold787 | 140851                  | GG                              | AA              | 1946978568               |
| SNP_P4_144791_140942 | NW_004516168.1 | Scaffold787 | 140942                  | AA                              | GG              | 1946978570               |
| SNP_P4_144792_141047 | NW_004516168.1 | Scaffold787 | 141047                  | CC                              | AA              | 1946978573               |
| SNP_P4_144793_141856 | NW_004516168.1 | Scaffold787 | 141856                  | AA                              | TT              | 1946978575               |
| SNP_P4_144794_143942 | NW_004516168.1 | Scaffold787 | 143942                  | AA                              | GG              | 1946978577               |
| SNP_P4_144796_149581 | NW_004516168.1 | Scaffold787 | 149581                  | TT                              | GG              | 1946978579               |
| SNP_P4_144797_149833 | NW_004516168.1 | Scaffold787 | 149833                  | GG                              | AA              | 1946978581               |
| SNP_P4_144798_151892 | NW_004516168.1 | Scaffold787 | 151892                  | AA                              | GG              | 1946978583               |
| SNP_P4_144799_154120 | NW_004516168.1 | Scaffold787 | 154120                  | CC                              | TT              | 1946978585               |
| SNP_P4_144800_156215 | NW_004516168.1 | Scaffold787 | 156215                  | CC                              | TT              | 1946978587               |

| SNPs IDs             | Chromosome IDs | Chromosomes | Physical positions (bp) | CDC Frontier (Reference genome) | (ILWC46 & LPNB) | NCBI SNPdb Accession IDs |
|----------------------|----------------|-------------|-------------------------|---------------------------------|-----------------|--------------------------|
| SNP_P4_144801_170097 | NW_004516168.1 | Scaffold787 | 170097                  | CC                              | GG              | 1946978589               |
| SNP_P4_144802_170246 | NW_004516168.1 | Scaffold787 | 170246                  | CC                              | AA              | 1946978591               |
| SNP_P4_144803_170255 | NW_004516168.1 | Scaffold787 | 170255                  | CC                              | TT              | 1946978593               |
| SNP_P4_144804_170276 | NW_004516168.1 | Scaffold787 | 170276                  | GG                              | AA              | 1946978595               |
| SNP_P4_144805_237276 | NW_004516168.1 | Scaffold787 | 237276                  | CC                              | TT              | 1946978597               |
| SNP_P4_144806_268553 | NW_004516168.1 | Scaffold787 | 268553                  | TT                              | AA              | 1946978599               |
| SNP_P4_144807_268554 | NW_004516168.1 | Scaffold787 | 268554                  | GG                              | TT              | 1946978601               |
| SNP_P4_144808_271103 | NW_004516168.1 | Scaffold787 | 271103                  | TT                              | CC              | 1946978603               |
| SNP_P4_144809_271348 | NW_004516168.1 | Scaffold787 | 271348                  | TT                              | GG              | 1946978605               |
| SNP_P4_144810_272151 | NW_004516168.1 | Scaffold787 | 272151                  | TT                              | CC              | 1946978607               |
| SNP_P4_144811_273652 | NW_004516168.1 | Scaffold787 | 273652                  | AA                              | CC              | 1946978609               |
| SNP_P4_144812_273673 | NW_004516168.1 | Scaffold787 | 273673                  | GG                              | AA              | 1946978611               |
| SNP_P4_144814_274563 | NW_004516168.1 | Scaffold787 | 274563                  | TT                              | GG              | 1946978613               |
| SNP_P4_144815_274564 | NW_004516168.1 | Scaffold787 | 274564                  | TT                              | AA              | 1946978615               |
| SNP_P4_144816_278320 | NW_004516168.1 | Scaffold787 | 278320                  | GG                              | TT              | 1946978617               |
| SNP_P4_144817_280175 | NW_004516168.1 | Scaffold787 | 280175                  | AA                              | GG              | 1946978619               |
| SNP_P4_144818_280458 | NW_004516168.1 | Scaffold787 | 280458                  | GG                              | CC              | 1946978621               |
| SNP_P4_144819_281210 | NW_004516168.1 | Scaffold787 | 281210                  | GG                              | AA              | 1946978622               |
| SNP_P4_144820_281894 | NW_004516168.1 | Scaffold787 | 281894                  | TT                              | CC              | 1946978624               |
| SNP_P4_144821_281945 | NW_004516168.1 | Scaffold787 | 281945                  | CC                              | TT              | 1946978626               |
| SNP_P4_144822_281988 | NW_004516168.1 | Scaffold787 | 281988                  | GG                              | AA              | 1946978628               |
| SNP_P4_144823_283227 | NW_004516168.1 | Scaffold787 | 283227                  | GG                              | AA              | 1946978630               |
| SNP_P4_144824_287143 | NW_004516168.1 | Scaffold787 | 287143                  | AA                              | TT              | 1946978632               |
| SNP_P4_144825_288248 | NW_004516168.1 | Scaffold787 | 288248                  | AA                              | TT              | 1946978634               |
| SNP_P4_144828_289630 | NW_004516168.1 | Scaffold787 | 289630                  | AA                              | CC              | 1946978636               |
| SNP_P4_144829_290213 | NW_004516168.1 | Scaffold787 | 290213                  | AA                              | TT              | 1946978638               |
| SNP_P4_144830_290240 | NW_004516168.1 | Scaffold787 | 290240                  | GG                              | AA              | 1946978640               |
| SNP_P4_144831_290421 | NW_004516168.1 | Scaffold787 | 290421                  | AA                              | GG              | 1946978642               |
| SNP_P4_144832_290887 | NW_004516168.1 | Scaffold787 | 290887                  | AA                              | GG              | 1946978644               |
| SNP_P4_144833_292158 | NW_004516168.1 | Scaffold787 | 292158                  | GG                              | AA              | 1946978646               |
| SNP_P4_144834_300126 | NW_004516168.1 | Scaffold787 | 300126                  | TT                              | AA              | 1946978648               |
| SNP_P4_144835_300141 | NW_004516168.1 | Scaffold787 | 300141                  | CC                              | GG              | 1946978650               |
| SNP_P4_144838_308307 | NW_004516168.1 | Scaffold787 | 308307                  | CC                              | TT              | 1946978652               |
| SNP_P4_144839_309184 | NW_004516168.1 | Scaffold787 | 309184                  | GG                              | AA              | 1946978654               |
| SNP_P4_144840_309402 | NW_004516168.1 | Scaffold787 | 309402                  | CC                              | TT              | 1946978656               |
| SNP_P4_144841_316433 | NW_004516168.1 | Scaffold787 | 316433                  | CC                              | AA              | 1946978658               |
| SNP_P4_144842_316655 | NW_004516168.1 | Scaffold787 | 316655                  | CC                              | TT              | 1946978660               |
| SNP_P4_144843_318667 | NW_004516168.1 | Scaffold787 | 318667                  | TT                              | GG              | 1946978662               |
| SNP_P4_144844_319961 | NW_004516168.1 | Scaffold787 | 319961                  | TT                              | CC              | 1946978664               |
| SNP_P4_144845_320007 | NW_004516168.1 | Scaffold787 | 320007                  | CC                              | TT              | 1946978666               |
| SNP_P4_144846_331348 | NW_004516168.1 | Scaffold787 | 331348                  | TT                              | CC              | 1946978668               |
| SNP_P4_144847_332047 | NW_004516168.1 | Scaffold787 | 332047                  | AA                              | TT              | 1946978670               |

| SNPs IDs             | Chromosome IDs | Chromosomes | Physical positions (bp) | CDC Frontier (Reference genome) | (ILWC46 & LPNB) | NCBI SNPdb Accession IDs |
|----------------------|----------------|-------------|-------------------------|---------------------------------|-----------------|--------------------------|
| SNP_P4_144848_332081 | NW_004516168.1 | Scaffold787 | 332081                  | GG                              | AA              | 1946978672               |
| SNP_P4_144849_333420 | NW_004516168.1 | Scaffold787 | 333420                  | CC                              | AA              | 1946978674               |
| SNP_P4_144850_334171 | NW_004516168.1 | Scaffold787 | 334171                  | GG                              | AA              | 1946978676               |
| SNP_P4_144852_337269 | NW_004516168.1 | Scaffold787 | 337269                  | GG                              | TT              | 1946978678               |
| SNP_P4_144853_342023 | NW_004516168.1 | Scaffold787 | 342023                  | GG                              | CC              | 1946978680               |
| SNP_P4_144854_346340 | NW_004516168.1 | Scaffold787 | 346340                  | AA                              | GG              | 1946978682               |
| SNP_P4_144856_348457 | NW_004516168.1 | Scaffold787 | 348457                  | TT                              | GG              | 1946978684               |
| SNP_P4_144857_349614 | NW_004516168.1 | Scaffold787 | 349614                  | CC                              | TT              | 1946978686               |
| SNP_P4_144858_349699 | NW_004516168.1 | Scaffold787 | 349699                  | GG                              | AA              | 1946978689               |
| SNP_P4_144860_349873 | NW_004516168.1 | Scaffold787 | 349873                  | CC                              | TT              | 1946978691               |
| SNP_P4_144863_353573 | NW_004516168.1 | Scaffold787 | 353573                  | CC                              | TT              | 1946978693               |
| SNP_P4_144864_354180 | NW_004516168.1 | Scaffold787 | 354180                  | CC                              | TT              | 1946978695               |
| SNP_P4_144865_355096 | NW_004516168.1 | Scaffold787 | 355096                  | GG                              | TT              | 1946978696               |
| SNP_P4_144866_360453 | NW_004516168.1 | Scaffold787 | 360453                  | TT                              | CC              | 1946978699               |
| SNP_P4_144867_363151 | NW_004516168.1 | Scaffold787 | 363151                  | AA                              | GG              | 1946978700               |
| SNP_P4_144868_363152 | NW_004516168.1 | Scaffold787 | 363152                  | CC                              | AA              | 1946978702               |
| SNP_P4_144869_365016 | NW_004516168.1 | Scaffold787 | 365016                  | TT                              | CC              | 1946978704               |
| SNP_P4_144870_365142 | NW_004516168.1 | Scaffold787 | 365142                  | CC                              | TT              | 1946978706               |
| SNP_P4_144872_366140 | NW_004516168.1 | Scaffold787 | 366140                  | AA                              | GG              | 1946978708               |
| SNP_P4_144873_366338 | NW_004516168.1 | Scaffold787 | 366338                  | GG                              | AA              | 1946978710               |
| SNP_P4_144874_367240 | NW_004516168.1 | Scaffold787 | 367240                  | TT                              | CC              | 1946978712               |
| SNP_P4_144875_367510 | NW_004516168.1 | Scaffold787 | 367510                  | TT                              | GG              | 1946978714               |
| SNP_P4_144876_367521 | NW_004516168.1 | Scaffold787 | 367521                  | TT                              | CC              | 1946978716               |
| SNP_P4_144877_391415 | NW_004516168.1 | Scaffold787 | 391415                  | AA                              | TT              | 1946978718               |
| SNP_P4_144878_398123 | NW_004516168.1 | Scaffold787 | 398123                  | TT                              | GG              | 1946978720               |
| SNP_P4_144879_405713 | NW_004516168.1 | Scaffold787 | 405713                  | TT                              | AA              | 1946978722               |
| SNP_P4_144880_406021 | NW_004516168.1 | Scaffold787 | 406021                  | CC                              | TT              | 1946978724               |
| SNP_P4_144881_409467 | NW_004516168.1 | Scaffold787 | 409467                  | CC                              | TT              | 1946978726               |
| SNP_P4_144882_410087 | NW_004516168.1 | Scaffold787 | 410087                  | GG                              | AA              | 1946978728               |
| SNP_P4_144883_417427 | NW_004516168.1 | Scaffold787 | 417427                  | AA                              | GG              | 1946978730               |
| SNP_P4_144884_425413 | NW_004516168.1 | Scaffold787 | 425413                  | AA                              | TT              | 1946978732               |
| SNP_P4_144885_434197 | NW_004516168.1 | Scaffold787 | 434197                  | TT                              | AA              | 1946978734               |
| SNP_P4_144887_435346 | NW_004516168.1 | Scaffold787 | 435346                  | TT                              | CC              | 1946978736               |
| SNP_P4_144888_449655 | NW_004516168.1 | Scaffold787 | 449655                  | TT                              | CC              | 1946978738               |
| SNP_P4_144889_452409 | NW_004516168.1 | Scaffold787 | 452409                  | CC                              | TT              | 1946978740               |
| SNP_P4_144890_454249 | NW_004516168.1 | Scaffold787 | 454249                  | AA                              | GG              | 1946978742               |
| SNP_P4_144891_460119 | NW_004516168.1 | Scaffold787 | 460119                  | AA                              | GG              | 1946978744               |
| SNP_P4_144892_460171 | NW_004516168.1 | Scaffold787 | 460171                  | GG                              | AA              | 1946978746               |
| SNP_P4_144893_460233 | NW_004516168.1 | Scaffold787 | 460233                  | TT                              | GG              | 1946978748               |
| SNP_P4_144894_460259 | NW_004516168.1 | Scaffold787 | 460259                  | TT                              | CC              | 1946978750               |
| SNP_P4_144895_460367 | NW_004516168.1 | Scaffold787 | 460367                  | AA                              | TT              | 1946978752               |
| SNP_P4_144897_460579 | NW_004516168.1 | Scaffold787 | 460579                  | TT                              | CC              | 1946978754               |

| SNPs IDs             | Chromosome IDs | Chromosomes | Physical positions (bp) | CDC Frontier (Reference genome) | (ILWC46 & LPNB) | NCBI SNPdb Accession IDs |
|----------------------|----------------|-------------|-------------------------|---------------------------------|-----------------|--------------------------|
| SNP_P4_144898_460580 | NW_004516168.1 | Scaffold787 | 460580                  | TT                              | CC              | 1946978756               |
| SNP_P4_144899_460606 | NW_004516168.1 | Scaffold787 | 460606                  | GG                              | AA              | 1946978758               |
| SNP_P4_144901_462525 | NW_004516168.1 | Scaffold787 | 462525                  | GG                              | AA              | 1946978761               |
| SNP_P4_144902_462556 | NW_004516168.1 | Scaffold787 | 462556                  | AA                              | GG              | 1946978763               |
| SNP_P4_144904_463282 | NW_004516168.1 | Scaffold787 | 463282                  | CC                              | TT              | 1946978765               |
| SNP_P4_144905_463650 | NW_004516168.1 | Scaffold787 | 463650                  | CC                              | AA              | 1946978767               |
| SNP_P4_144907_464800 | NW_004516168.1 | Scaffold787 | 464800                  | GG                              | AA              | 1946978769               |
| SNP_P4_144908_465536 | NW_004516168.1 | Scaffold787 | 465536                  | GG                              | TT              | 1946978771               |
| SNP_P4_144909_466051 | NW_004516168.1 | Scaffold787 | 466051                  | AA                              | GG              | 1946978773               |
| SNP_P4_144910_466544 | NW_004516168.1 | Scaffold787 | 466544                  | AA                              | TT              | 1946978775               |
| SNP_P4_144911_469367 | NW_004516168.1 | Scaffold787 | 469367                  | CC                              | AA              | 1946978777               |
| SNP_P4_144912_469377 | NW_004516168.1 | Scaffold787 | 469377                  | AA                              | GG              | 1946978779               |
| SNP_P4_144913_469378 | NW_004516168.1 | Scaffold787 | 469378                  | CC                              | TT              | 1946978781               |
| SNP_P4_144915_469442 | NW_004516168.1 | Scaffold787 | 469442                  | CC                              | TT              | 1946978782               |
| SNP_P4_144917_469586 | NW_004516168.1 | Scaffold787 | 469586                  | AA                              | GG              | 1946978785               |
| SNP_P4_144918_469768 | NW_004516168.1 | Scaffold787 | 469768                  | GG                              | AA              | 1946978787               |
| SNP_P4_144919_470220 | NW_004516168.1 | Scaffold787 | 470220                  | GG                              | AA              | 1946978788               |
| SNP_P4_144920_470445 | NW_004516168.1 | Scaffold787 | 470445                  | TT                              | CC              | 1946978791               |
| SNP_P4_144921_470483 | NW_004516168.1 | Scaffold787 | 470483                  | TT                              | CC              | 1946978793               |
| SNP_P4_144922_470999 | NW_004516168.1 | Scaffold787 | 470999                  | GG                              | TT              | 1946978795               |
| SNP_P4_144923_471153 | NW_004516168.1 | Scaffold787 | 471153                  | TT                              | CC              | 1946978797               |
| SNP_P4_144925_2377   | NW_004516169.1 | Scaffold789 | 2377                    | AA                              | GG              | 1946978799               |
| SNP_P4_144926_5544   | NW_004516169.1 | Scaffold789 | 5544                    | CC                              | GG              | 1946978801               |
| SNP_P4_144927_8993   | NW_004516169.1 | Scaffold789 | 8993                    | GG                              | AA              | 1946978803               |
| SNP_P4_144928_9014   | NW_004516169.1 | Scaffold789 | 9014                    | AA                              | GG              | 1946978805               |
| SNP_P4_144929_9017   | NW_004516169.1 | Scaffold789 | 9017                    | TT                              | GG              | 1946978807               |
| SNP_P4_144930_9019   | NW_004516169.1 | Scaffold789 | 9019                    | AA                              | GG              | 1946978810               |
| SNP_P4_144931_13771  | NW_004516169.1 | Scaffold789 | 13771                   | TT                              | CC              | 1946978812               |
| SNP_P4_144932_13833  | NW_004516169.1 | Scaffold789 | 13833                   | AA                              | GG              | 1946978814               |
| SNP_P4_144933_13847  | NW_004516169.1 | Scaffold789 | 13847                   | GG                              | AA              | 1946978816               |
| SNP_P4_144934_13954  | NW_004516169.1 | Scaffold789 | 13954                   | GG                              | AA              | 1946978818               |
| SNP_P4_144935_14019  | NW_004516169.1 | Scaffold789 | 14019                   | AA                              | GG              | 1946978820               |
| SNP_P4_144936_14064  | NW_004516169.1 | Scaffold789 | 14064                   | GG                              | AA              | 1946978822               |
| SNP_P4_144937_14115  | NW_004516169.1 | Scaffold789 | 14115                   | AA                              | CC              | 1946978824               |
| SNP_P4_144938_14248  | NW_004516169.1 | Scaffold789 | 14248                   | GG                              | AA              | 1946978826               |
| SNP_P4_144939_14451  | NW_004516169.1 | Scaffold789 | 14451                   | TT                              | GG              | 1946978828               |
| SNP_P4_144940_17522  | NW_004516169.1 | Scaffold789 | 17522                   | GG                              | AA              | 1946978830               |
| SNP_P4_144941_17574  | NW_004516169.1 | Scaffold789 | 17574                   | AA                              | GG              | 1946978832               |
| SNP_P4_144942_17599  | NW_004516169.1 | Scaffold789 | 17599                   | TT                              | CC              | 1946978834               |
| SNP_P4_144943_17601  | NW_004516169.1 | Scaffold789 | 17601                   | TT                              | CC              | 1946978837               |
| SNP_P4_144944_17652  | NW_004516169.1 | Scaffold789 | 17652                   | TT                              | GG              | 1946978839               |
| SNP_P4_144945_17915  | NW_004516169.1 | Scaffold789 | 17915                   | TT                              | CC              | 1946978841               |

| SNPs IDs             | Chromosome IDs | Chromosomes | Physical positions (bp) | CDC Frontier (Reference genome) | (ILWC46 & LPNB) | NCBI SNPdb Accession IDs |
|----------------------|----------------|-------------|-------------------------|---------------------------------|-----------------|--------------------------|
| SNP_P4_144947_23121  | NW_004516169.1 | Scaffold789 | 23121                   | GG                              | TT              | 1946978842               |
| SNP_P4_144948_26855  | NW_004516169.1 | Scaffold789 | 26855                   | TT                              | GG              | 1946978845               |
| SNP_P4_144949_28580  | NW_004516169.1 | Scaffold789 | 28580                   | TT                              | GG              | 1946978847               |
| SNP_P4_144950_41777  | NW_004516169.1 | Scaffold789 | 41777                   | GG                              | AA              | 1946978849               |
| SNP_P4_144951_41780  | NW_004516169.1 | Scaffold789 | 41780                   | TT                              | CC              | 1946978851               |
| SNP_P4_144952_41782  | NW_004516169.1 | Scaffold789 | 41782                   | TT                              | GG              | 1946978853               |
| SNP_P4_144953_41794  | NW_004516169.1 | Scaffold789 | 41794                   | TT                              | CC              | 1946978855               |
| SNP_P4_144954_41807  | NW_004516169.1 | Scaffold789 | 41807                   | AA                              | GG              | 1946978857               |
| SNP_P4_144955_63528  | NW_004516169.1 | Scaffold789 | 63528                   | TT                              | AA              | 1946978859               |
| SNP_P4_144956_96     | NW_004516170.1 | Scaffold793 | 96                      | AA                              | CC              | 1946978861               |
| SNP_P4_144957_35894  | NW_004516170.1 | Scaffold793 | 35894                   | CC                              | TT              | 1946978863               |
| SNP_P4_144958_38998  | NW_004516170.1 | Scaffold793 | 38998                   | TT                              | AA              | 1946978865               |
| SNP_P4_144959_39055  | NW_004516170.1 | Scaffold793 | 39055                   | CC                              | AA              | 1946978867               |
| SNP_P4_144960_39105  | NW_004516170.1 | Scaffold793 | 39105                   | TT                              | AA              | 1946978869               |
| SNP_P4_144961_39145  | NW_004516170.1 | Scaffold793 | 39145                   | CC                              | TT              | 1946978871               |
| SNP_P4_144962_39298  | NW_004516170.1 | Scaffold793 | 39298                   | AA                              | GG              | 1946978873               |
| SNP_P4_144963_39305  | NW_004516170.1 | Scaffold793 | 39305                   | CC                              | TT              | 1946978875               |
| SNP_P4_144964_39379  | NW_004516170.1 | Scaffold793 | 39379                   | TT                              | CC              | 1946978877               |
| SNP_P4_144965_57056  | NW_004516170.1 | Scaffold793 | 57056                   | CC                              | TT              | 1946978879               |
| SNP_P4_144966_78972  | NW_004516170.1 | Scaffold793 | 78972                   | TT                              | GG              | 1946978881               |
| SNP_P4_144967_79493  | NW_004516170.1 | Scaffold793 | 79493                   | TT                              | CC              | 1946978883               |
| SNP_P4_144968_79510  | NW_004516170.1 | Scaffold793 | 79510                   | AA                              | GG              | 1946978885               |
| SNP_P4_144969_87597  | NW_004516170.1 | Scaffold793 | 87597                   | AA                              | GG              | 1946978887               |
| SNP_P4_144970_88215  | NW_004516170.1 | Scaffold793 | 88215                   | GG                              | AA              | 1946978889               |
| SNP_P4_144972_108214 | NW_004516170.1 | Scaffold793 | 108214                  | AA                              | TT              | 1946978891               |
| SNP_P4_144973_108277 | NW_004516170.1 | Scaffold793 | 108277                  | AA                              | TT              | 1946978893               |
| SNP_P4_144974_108285 | NW_004516170.1 | Scaffold793 | 108285                  | GG                              | AA              | 1946978895               |
| SNP_P4_144975_108438 | NW_004516170.1 | Scaffold793 | 108438                  | TT                              | CC              | 1946978897               |
| SNP_P4_144976_108447 | NW_004516170.1 | Scaffold793 | 108447                  | CC                              | TT              | 1946978899               |
| SNP_P4_144977_116541 | NW_004516170.1 | Scaffold793 | 116541                  | CC                              | TT              | 1946978901               |
| SNP_P4_144978_117931 | NW_004516170.1 | Scaffold793 | 117931                  | TT                              | GG              | 1946978904               |
| SNP_P4_144979_117932 | NW_004516170.1 | Scaffold793 | 117932                  | TT                              | AA              | 1946978906               |
| SNP_P4_144980_117933 | NW_004516170.1 | Scaffold793 | 117933                  | TT                              | GG              | 1946978908               |
| SNP_P4_144981_117934 | NW_004516170.1 | Scaffold793 | 117934                  | TT                              | AA              | 1946978909               |
| SNP_P4_144982_126641 | NW_004516170.1 | Scaffold793 | 126641                  | AA                              | GG              | 1946978911               |
| SNP_P4_144984_126937 | NW_004516170.1 | Scaffold793 | 126937                  | GG                              | CC              | 1946978913               |
| SNP_P4_144985_127209 | NW_004516170.1 | Scaffold793 | 127209                  | GG                              | CC              | 1946978916               |
| SNP_P4_144986_127461 | NW_004516170.1 | Scaffold793 | 127461                  | TT                              | AA              | 1946978918               |
| SNP_P4_144987_127479 | NW_004516170.1 | Scaffold793 | 127479                  | CC                              | TT              | 1946978920               |
| SNP_P4_144988_127559 | NW_004516170.1 | Scaffold793 | 127559                  | CC                              | TT              | 1946978922               |
| SNP_P4_144989_128331 | NW_004516170.1 | Scaffold793 | 128331                  | AA                              | GG              | 1946978924               |
| SNP_P4_144990_128386 | NW_004516170.1 | Scaffold793 | 128386                  | TT                              | CC              | 1946978926               |

| SNPs IDs             | Chromosome IDs | Chromosomes | Physical positions (bp) | CDC Frontier (Reference genome) | (ILWC46 & LPNB) | NCBI SNPdb Accession IDs |
|----------------------|----------------|-------------|-------------------------|---------------------------------|-----------------|--------------------------|
| SNP_P4_144991_129359 | NW_004516170.1 | Scaffold793 | 129359                  | GG                              | AA              | 1946978928               |
| SNP_P4_144992_129362 | NW_004516170.1 | Scaffold793 | 129362                  | CC                              | GG              | 1946978930               |
| SNP_P4_144993_130232 | NW_004516170.1 | Scaffold793 | 130232                  | TT                              | CC              | 1946978932               |
| SNP_P4_144994_130248 | NW_004516170.1 | Scaffold793 | 130248                  | CC                              | GG              | 1946978934               |
| SNP_P4_144995_139017 | NW_004516170.1 | Scaffold793 | 139017                  | CC                              | TT              | 1946978936               |
| SNP_P4_144997_158258 | NW_004516170.1 | Scaffold793 | 158258                  | AA                              | GG              | 1946978938               |
| SNP_P4_144998_158259 | NW_004516170.1 | Scaffold793 | 158259                  | TT                              | AA              | 1946978940               |
| SNP_P4_144999_178633 | NW_004516170.1 | Scaffold793 | 178633                  | TT                              | CC              | 1946978942               |
| SNP_P4_145000_192583 | NW_004516170.1 | Scaffold793 | 192583                  | GG                              | AA              | 1946978944               |
| SNP_P4_145001_192634 | NW_004516170.1 | Scaffold793 | 192634                  | CC                              | TT              | 1946978946               |
| SNP_P4_145002_192820 | NW_004516170.1 | Scaffold793 | 192820                  | GG                              | AA              | 1946978948               |
| SNP_P4_145003_193158 | NW_004516170.1 | Scaffold793 | 193158                  | TT                              | CC              | 1946978950               |
| SNP_P4_145004_194270 | NW_004516170.1 | Scaffold793 | 194270                  | CC                              | TT              | 1946978952               |
| SNP_P4_145005_194271 | NW_004516170.1 | Scaffold793 | 194271                  | AA                              | CC              | 1946978954               |
| SNP_P4_145006_194289 | NW_004516170.1 | Scaffold793 | 194289                  | TT                              | CC              | 1946978956               |
| SNP_P4_145007_194294 | NW_004516170.1 | Scaffold793 | 194294                  | AA                              | TT              | 1946978958               |
| SNP_P4_145008_194301 | NW_004516170.1 | Scaffold793 | 194301                  | TT                              | CC              | 1946978960               |
| SNP_P4_145009_194355 | NW_004516170.1 | Scaffold793 | 194355                  | CC                              | TT              | 1946978962               |
| SNP_P4_145010_194362 | NW_004516170.1 | Scaffold793 | 194362                  | AA                              | GG              | 1946978964               |
| SNP_P4_145011_199906 | NW_004516170.1 | Scaffold793 | 199906                  | TT                              | GG              | 1946978966               |
| SNP_P4_145013_208126 | NW_004516170.1 | Scaffold793 | 208126                  | AA                              | GG              | 1946978968               |
| SNP_P4_145014_208419 | NW_004516170.1 | Scaffold793 | 208419                  | AA                              | GG              | 1946978971               |
| SNP_P4_145015_210559 | NW_004516170.1 | Scaffold793 | 210559                  | CC                              | TT              | 1946978973               |
| SNP_P4_145016_215211 | NW_004516170.1 | Scaffold793 | 215211                  | CC                              | TT              | 1946978975               |
| SNP_P4_145017_248509 | NW_004516170.1 | Scaffold793 | 248509                  | CC                              | GG              | 1946978977               |
| SNP_P4_145018_254818 | NW_004516170.1 | Scaffold793 | 254818                  | AA                              | GG              | 1946978979               |
| SNP_P4_145019_30214  | NW_004516171.1 | Scaffold794 | 30214                   | AA                              | GG              | 1946978981               |
| SNP_P4_145021_59960  | NW_004516171.1 | Scaffold794 | 59960                   | AA                              | GG              | 1946978983               |
| SNP_P4_145023_79780  | NW_004516171.1 | Scaffold794 | 79780                   | CC                              | TT              | 1946978985               |
| SNP_P4_145024_79823  | NW_004516171.1 | Scaffold794 | 79823                   | GG                              | CC              | 1946978987               |
| SNP_P4_145025_79825  | NW_004516171.1 | Scaffold794 | 79825                   | AA                              | TT              | 1946978989               |
| SNP_P4_145026_81594  | NW_004516171.1 | Scaffold794 | 81594                   | AA                              | GG              | 1946978991               |
| SNP_P4_145027_81634  | NW_004516171.1 | Scaffold794 | 81634                   | GG                              | TT              | 1946978994               |
| SNP_P4_145028_81639  | NW_004516171.1 | Scaffold794 | 81639                   | GG                              | AA              | 1946978996               |
| SNP_P4_145029_108922 | NW_004516171.1 | Scaffold794 | 108922                  | AA                              | TT              | 1946978998               |
| SNP_P4_145030_114324 | NW_004516171.1 | Scaffold794 | 114324                  | GG                              | AA              | 1946979000               |
| SNP_P4_145031_137243 | NW_004516171.1 | Scaffold794 | 137243                  | AA                              | CC              | 1946979002               |
| SNP_P4_145032_137276 | NW_004516171.1 | Scaffold794 | 137276                  | AA                              | GG              | 1946979004               |
| SNP_P4_145033_137917 | NW_004516171.1 | Scaffold794 | 137917                  | CC                              | TT              | 1946979006               |
| SNP_P4_145034_137943 | NW_004516171.1 | Scaffold794 | 137943                  | TT                              | CC              | 1946979008               |
| SNP_P4_145035_138064 | NW_004516171.1 | Scaffold794 | 138064                  | GG                              | CC              | 1946979010               |
| SNP_P4_145036_138126 | NW_004516171.1 | Scaffold794 | 138126                  | GG                              | AA              | 1946979012               |

| SNPs IDs             | Chromosome IDs | Chromosomes | Physical positions (bp) | CDC Frontier (Reference genome) | (ILWC46 & LPNB) | NCBI SNPdb Accession IDs |
|----------------------|----------------|-------------|-------------------------|---------------------------------|-----------------|--------------------------|
| SNP_P4_145038_138149 | NW_004516171.1 | Scaffold794 | 138149                  | GG                              | AA              | 1946979014               |
| SNP_P4_145039_138195 | NW_004516171.1 | Scaffold794 | 138195                  | TT                              | CC              | 1946979016               |
| SNP_P4_145040_138281 | NW_004516171.1 | Scaffold794 | 138281                  | TT                              | CC              | 1946979018               |
| SNP_P4_145041_138338 | NW_004516171.1 | Scaffold794 | 138338                  | TT                              | CC              | 1946979020               |
| SNP_P4_145042_138367 | NW_004516171.1 | Scaffold794 | 138367                  | GG                              | AA              | 1946979022               |
| SNP_P4_145043_138370 | NW_004516171.1 | Scaffold794 | 138370                  | GG                              | AA              | 1946979025               |
| SNP_P4_145044_138502 | NW_004516171.1 | Scaffold794 | 138502                  | TT                              | GG              | 1946979027               |
| SNP_P4_145045_138532 | NW_004516171.1 | Scaffold794 | 138532                  | CC                              | TT              | 1946979029               |
| SNP_P4_145046_138548 | NW_004516171.1 | Scaffold794 | 138548                  | CC                              | TT              | 1946979031               |
| SNP_P4_145047_138562 | NW_004516171.1 | Scaffold794 | 138562                  | TT                              | CC              | 1946979033               |
| SNP_P4_145048_138587 | NW_004516171.1 | Scaffold794 | 138587                  | GG                              | TT              | 1946979035               |
| SNP_P4_145049_138611 | NW_004516171.1 | Scaffold794 | 138611                  | AA                              | TT              | 1946979037               |
| SNP_P4_145050_138626 | NW_004516171.1 | Scaffold794 | 138626                  | CC                              | TT              | 1946979039               |
| SNP_P4_145052_161436 | NW_004516171.1 | Scaffold794 | 161436                  | CC                              | TT              | 1946979041               |
| SNP_P4_145053_168913 | NW_004516171.1 | Scaffold794 | 168913                  | GG                              | AA              | 1946979043               |
| SNP_P4_145054_168960 | NW_004516171.1 | Scaffold794 | 168960                  | AA                              | GG              | 1946979045               |
| SNP_P4_145055_168977 | NW_004516171.1 | Scaffold794 | 168977                  | CC                              | TT              | 1946979047               |
| SNP_P4_145056_169062 | NW_004516171.1 | Scaffold794 | 169062                  | TT                              | AA              | 1946979049               |
| SNP_P4_145057_169354 | NW_004516171.1 | Scaffold794 | 169354                  | AA                              | CC              | 1946979051               |
| SNP_P4_145058_169376 | NW_004516171.1 | Scaffold794 | 169376                  | AA                              | CC              | 1946979053               |
| SNP_P4_145059_169415 | NW_004516171.1 | Scaffold794 | 169415                  | GG                              | TT              | 1946979055               |
| SNP_P4_145060_194866 | NW_004516171.1 | Scaffold794 | 194866                  | CC                              | TT              | 1946979057               |
| SNP_P4_145061_194868 | NW_004516171.1 | Scaffold794 | 194868                  | TT                              | GG              | 1946979060               |
| SNP_P4_145062_194916 | NW_004516171.1 | Scaffold794 | 194916                  | AA                              | TT              | 1946979062               |
| SNP_P4_145063_195005 | NW_004516171.1 | Scaffold794 | 195005                  | GG                              | CC              | 1946979064               |
| SNP_P4_145064_195032 | NW_004516171.1 | Scaffold794 | 195032                  | GG                              | CC              | 1946979066               |
| SNP_P4_145065_206209 | NW_004516171.1 | Scaffold794 | 206209                  | TT                              | AA              | 1946979068               |
| SNP_P4_145066_206221 | NW_004516171.1 | Scaffold794 | 206221                  | GG                              | AA              | 1946979070               |
| SNP_P4_145067_242480 | NW_004516171.1 | Scaffold794 | 242480                  | TT                              | AA              | 1946979072               |
| SNP_P4_145068_243067 | NW_004516171.1 | Scaffold794 | 243067                  | AA                              | GG              | 1946979074               |
| SNP_P4_145069_243264 | NW_004516171.1 | Scaffold794 | 243264                  | TT                              | AA              | 1946979076               |
| SNP_P4_145070_243412 | NW_004516171.1 | Scaffold794 | 243412                  | GG                              | TT              | 1946979077               |
| SNP_P4_145071_243417 | NW_004516171.1 | Scaffold794 | 243417                  | GG                              | TT              | 1946979079               |
| SNP_P4_145072_243514 | NW_004516171.1 | Scaffold794 | 243514                  | TT                              | GG              | 1946979081               |
| SNP_P4_145073_243679 | NW_004516171.1 | Scaffold794 | 243679                  | GG                              | CC              | 1946979083               |
| SNP_P4_145074_243686 | NW_004516171.1 | Scaffold794 | 243686                  | TT                              | CC              | 1946979085               |
| SNP_P4_145075_243809 | NW_004516171.1 | Scaffold794 | 243809                  | TT                              | CC              | 1946979087               |
| SNP_P4_145076_243810 | NW_004516171.1 | Scaffold794 | 243810                  | AA                              | TT              | 1946979089               |
| SNP_P4_145077_243814 | NW_004516171.1 | Scaffold794 | 243814                  | AA                              | GG              | 1946979091               |
| SNP_P4_145078_244414 | NW_004516171.1 | Scaffold794 | 244414                  | CC                              | TT              | 1946979093               |
| SNP_P4_145079_245451 | NW_004516171.1 | Scaffold794 | 245451                  | TT                              | AA              | 1946979095               |
| SNP_P4_145080_245539 | NW_004516171.1 | Scaffold794 | 245539                  | TT                              | GG              | 1946979097               |

| SNPs IDs             | Chromosome IDs | Chromosomes | Physical positions (bp) | CDC Frontier (Reference genome) | (ILWC46 & LPNB) | NCBI SNPdb Accession IDs |
|----------------------|----------------|-------------|-------------------------|---------------------------------|-----------------|--------------------------|
| SNP_P4_145081_245671 | NW_004516171.1 | Scaffold794 | 245671                  | TT                              | GG              | 1946979100               |
| SNP_P4_145082_245686 | NW_004516171.1 | Scaffold794 | 245686                  | AA                              | GG              | 1946979102               |
| SNP_P4_145083_245696 | NW_004516171.1 | Scaffold794 | 245696                  | TT                              | CC              | 1946979104               |
| SNP_P4_145084_245698 | NW_004516171.1 | Scaffold794 | 245698                  | CC                              | AA              | 1946979106               |
| SNP_P4_145085_245902 | NW_004516171.1 | Scaffold794 | 245902                  | GG                              | AA              | 1946979108               |
| SNP_P4_145086_245989 | NW_004516171.1 | Scaffold794 | 245989                  | AA                              | TT              | 1946979110               |
| SNP_P4_145087_246022 | NW_004516171.1 | Scaffold794 | 246022                  | CC                              | TT              | 1946979112               |
| SNP_P4_145088_258920 | NW_004516171.1 | Scaffold794 | 258920                  | CC                              | TT              | 1946979114               |
| SNP_P4_145089_258973 | NW_004516171.1 | Scaffold794 | 258973                  | AA                              | GG              | 1946979116               |
| SNP_P4_145090_259220 | NW_004516171.1 | Scaffold794 | 259220                  | TT                              | AA              | 1946979118               |
| SNP_P4_145091_259346 | NW_004516171.1 | Scaffold794 | 259346                  | TT                              | CC              | 1946979120               |
| SNP_P4_145092_259352 | NW_004516171.1 | Scaffold794 | 259352                  | AA                              | GG              | 1946979122               |
| SNP_P4_145093_7536   | NW_004516173.1 | Scaffold796 | 7536                    | TT                              | CC              | 1946979124               |
| SNP_P4_145094_7697   | NW_004516173.1 | Scaffold796 | 7697                    | TT                              | CC              | 1946979126               |
| SNP_P4_145095_11471  | NW_004516173.1 | Scaffold796 | 11471                   | CC                              | TT              | 1946979128               |
| SNP_P4_145097_16076  | NW_004516173.1 | Scaffold796 | 16076                   | AA                              | TT              | 1946979130               |
| SNP_P4_145098_17749  | NW_004516173.1 | Scaffold796 | 17749                   | AA                              | TT              | 1946979132               |
| SNP_P4_145099_18116  | NW_004516173.1 | Scaffold796 | 18116                   | TT                              | GG              | 1946979133               |
| SNP_P4_145100_20781  | NW_004516173.1 | Scaffold796 | 20781                   | CC                              | GG              | 1946979135               |
| SNP_P4_145101_22144  | NW_004516173.1 | Scaffold796 | 22144                   | GG                              | CC              | 1946979137               |
| SNP_P4_145102_24571  | NW_004516173.1 | Scaffold796 | 24571                   | CC                              | GG              | 1946979139               |
| SNP_P4_145104_28038  | NW_004516173.1 | Scaffold796 | 28038                   | AA                              | GG              | 1946979141               |
| SNP_P4_145105_32576  | NW_004516173.1 | Scaffold796 | 32576                   | GG                              | CC              | 1946979143               |
| SNP_P4_145106_33025  | NW_004516173.1 | Scaffold796 | 33025                   | TT                              | AA              | 1946979145               |
| SNP_P4_145107_35714  | NW_004516173.1 | Scaffold796 | 35714                   | AA                              | GG              | 1946979147               |
| SNP_P4_145108_14925  | NW_004516174.1 | Scaffold797 | 14925                   | GG                              | AA              | 1946979149               |
| SNP_P4_145110_53212  | NW_004516174.1 | Scaffold797 | 53212                   | TT                              | CC              | 1946979151               |
| SNP_P4_145111_53260  | NW_004516174.1 | Scaffold797 | 53260                   | AA                              | GG              | 1946979153               |
| SNP_P4_145112_53424  | NW_004516174.1 | Scaffold797 | 53424                   | GG                              | AA              | 1946979155               |
| SNP_P4_145113_53626  | NW_004516174.1 | Scaffold797 | 53626                   | CC                              | AA              | 1946979157               |
| SNP_P4_145114_53639  | NW_004516174.1 | Scaffold797 | 53639                   | CC                              | AA              | 1946979159               |
| SNP_P4_145115_53714  | NW_004516174.1 | Scaffold797 | 53714                   | TT                              | AA              | 1946979161               |
| SNP_P4_145116_53717  | NW_004516174.1 | Scaffold797 | 53717                   | GG                              | CC              | 1946979163               |
| SNP_P4_145117_53721  | NW_004516174.1 | Scaffold797 | 53721                   | CC                              | GG              | 1946979165               |
| SNP_P4_145118_53892  | NW_004516174.1 | Scaffold797 | 53892                   | CC                              | AA              | 1946979167               |
| SNP_P4_145119_53904  | NW_004516174.1 | Scaffold797 | 53904                   | GG                              | CC              | 1946979169               |
| SNP_P4_145120_53911  | NW_004516174.1 | Scaffold797 | 53911                   | TT                              | GG              | 1946979171               |
| SNP_P4_145121_54008  | NW_004516174.1 | Scaffold797 | 54008                   | AA                              | GG              | 1946979173               |
| SNP_P4_145122_54019  | NW_004516174.1 | Scaffold797 | 54019                   | AA                              | TT              | 1946979175               |
| SNP_P4_145123_54043  | NW_004516174.1 | Scaffold797 | 54043                   | CC                              | AA              | 1946979177               |
| SNP_P4_145124_58204  | NW_004516174.1 | Scaffold797 | 58204                   | TT                              | CC              | 1946979179               |
| SNP_P4_145125_59940  | NW_004516174.1 | Scaffold797 | 59940                   | TT                              | CC              | 1946979181               |



| SNPs IDs            | Chromosome IDs | Chromosomes | Physical positions (bp) | CDC Frontier (Reference genome) | (ILWC46 & LPNB) | NCBI SNPdb Accession IDs |
|---------------------|----------------|-------------|-------------------------|---------------------------------|-----------------|--------------------------|
| SNP_P4_145128_16567 | NW_004516175.1 | Scaffold798 | 16567                   | AA                              | GG              | 1946979183               |
| SNP_P4_145129_16568 | NW_004516175.1 | Scaffold798 | 16568                   | TT                              | GG              | 1946979185               |
| SNP_P4_145131_17310 | NW_004516175.1 | Scaffold798 | 17310                   | TT                              | CC              | 1946979187               |
| SNP_P4_145132_29525 | NW_004516175.1 | Scaffold798 | 29525                   | CC                              | TT              | 1946979189               |
| SNP_P4_145133_31986 | NW_004516175.1 | Scaffold798 | 31986                   | AA                              | TT              | 1946979191               |
| SNP_P4_145134_32223 | NW_004516175.1 | Scaffold798 | 32223                   | GG                              | AA              | 1946979193               |
| SNP_P4_145135_32244 | NW_004516175.1 | Scaffold798 | 32244                   | TT                              | CC              | 1946979195               |
| SNP_P4_145136_34876 | NW_004516175.1 | Scaffold798 | 34876                   | TT                              | AA              | 1946979197               |
| SNP_P4_145137_42044 | NW_004516175.1 | Scaffold798 | 42044                   | CC                              | GG              | 1946979198               |
| SNP_P4_145138_53148 | NW_004516175.1 | Scaffold798 | 53148                   | AA                              | GG              | 1946979200               |
| SNP_P4_145139_53155 | NW_004516175.1 | Scaffold798 | 53155                   | GG                              | AA              | 1946979202               |
| SNP_P4_145140_53167 | NW_004516175.1 | Scaffold798 | 53167                   | GG                              | AA              | 1946979204               |
| SNP_P4_145141_53169 | NW_004516175.1 | Scaffold798 | 53169                   | AA                              | GG              | 1946979206               |
| SNP_P4_145142_54154 | NW_004516175.1 | Scaffold798 | 54154                   | TT                              | AA              | 1946979208               |
| SNP_P4_145143_54240 | NW_004516175.1 | Scaffold798 | 54240                   | CC                              | AA              | 1946979210               |
| SNP_P4_145144_54245 | NW_004516175.1 | Scaffold798 | 54245                   | TT                              | GG              | 1946979212               |
| SNP_P4_145145_54260 | NW_004516175.1 | Scaffold798 | 54260                   | TT                              | AA              | 1946979214               |
| SNP_P4_145146_60561 | NW_004516175.1 | Scaffold798 | 60561                   | TT                              | AA              | 1946979216               |
| SNP_P4_145147_60721 | NW_004516175.1 | Scaffold798 | 60721                   | TT                              | CC              | 1946979218               |
| SNP_P4_145148_60785 | NW_004516175.1 | Scaffold798 | 60785                   | CC                              | AA              | 1946979220               |
| SNP_P4_145149_64015 | NW_004516175.1 | Scaffold798 | 64015                   | AA                              | CC              | 1946979222               |
| SNP_P4_145150_64021 | NW_004516175.1 | Scaffold798 | 64021                   | TT                              | AA              | 1946979224               |
| SNP_P4_145151_12244 | NW_004516176.1 | Scaffold799 | 12244                   | CC                              | AA              | 1946979226               |
| SNP_P4_145152_12312 | NW_004516176.1 | Scaffold799 | 12312                   | TT                              | CC              | 1946979228               |
| SNP_P4_145153_12565 | NW_004516176.1 | Scaffold799 | 12565                   | AA                              | GG              | 1946979230               |
| SNP_P4_145157_6380  | NW_004516178.1 | Scaffold801 | 6380                    | TT                              | CC              | 1946979232               |
| SNP_P4_145158_7019  | NW_004516178.1 | Scaffold801 | 7019                    | CC                              | AA              | 1946979234               |
| SNP_P4_145159_8809  | NW_004516178.1 | Scaffold801 | 8809                    | TT                              | CC              | 1946979236               |
| SNP_P4_145160_8869  | NW_004516178.1 | Scaffold801 | 8869                    | GG                              | AA              | 1946979237               |
| SNP_P4_145161_9060  | NW_004516178.1 | Scaffold801 | 9060                    | AA                              | CC              | 1946979239               |
| SNP_P4_145162_11105 | NW_004516178.1 | Scaffold801 | 11105                   | CC                              | GG              | 1946979241               |
| SNP_P4_145164_11479 | NW_004516178.1 | Scaffold801 | 11479                   | TT                              | CC              | 1946979243               |
| SNP_P4_145165_13169 | NW_004516178.1 | Scaffold801 | 13169                   | CC                              | TT              | 1946979245               |
| SNP_P4_145167_21074 | NW_004516178.1 | Scaffold801 | 21074                   | CC                              | TT              | 1946979248               |
| SNP_P4_145168_22720 | NW_004516178.1 | Scaffold801 | 22720                   | TT                              | CC              | 1946979250               |
| SNP_P4_145169_23846 | NW_004516178.1 | Scaffold801 | 23846                   | CC                              | TT              | 1946979252               |
| SNP_P4_145170_24468 | NW_004516178.1 | Scaffold801 | 24468                   | AA                              | CC              | 1946979253               |
| SNP_P4_145171_24823 | NW_004516178.1 | Scaffold801 | 24823                   | CC                              | AA              | 1946979256               |
| SNP_P4_145173_33686 | NW_004516178.1 | Scaffold801 | 33686                   | GG                              | TT              | 1946979258               |
| SNP_P4_145174_38182 | NW_004516178.1 | Scaffold801 | 38182                   | AA                              | CC              | 1946979260               |
| SNP_P4_145175_38195 | NW_004516178.1 | Scaffold801 | 38195                   | AA                              | GG              | 1946979262               |
| SNP_P4_145176_38203 | NW_004516178.1 | Scaffold801 | 38203                   | CC                              | AA              | 1946979264               |

| SNPs IDs             | Chromosome IDs | Chromosomes | Physical positions (bp) | CDC Frontier (Reference genome) | (ILWC46 & LPNB) | NCBI SNPdb Accession IDs |
|----------------------|----------------|-------------|-------------------------|---------------------------------|-----------------|--------------------------|
| SNP_P4_145177_38206  | NW_004516178.1 | Scaffold801 | 38206                   | AA                              | GG              | 1946979266               |
| SNP_P4_145178_38208  | NW_004516178.1 | Scaffold801 | 38208                   | GG                              | AA              | 1946979268               |
| SNP_P4_145179_38212  | NW_004516178.1 | Scaffold801 | 38212                   | CC                              | TT              | 1946979270               |
| SNP_P4_145180_38221  | NW_004516178.1 | Scaffold801 | 38221                   | AA                              | GG              | 1946979272               |
| SNP_P4_145181_38224  | NW_004516178.1 | Scaffold801 | 38224                   | CC                              | TT              | 1946979274               |
| SNP_P4_145182_38235  | NW_004516178.1 | Scaffold801 | 38235                   | TT                              | GG              | 1946979276               |
| SNP_P4_145183_38260  | NW_004516178.1 | Scaffold801 | 38260                   | CC                              | AA              | 1946979279               |
| SNP_P4_145184_38290  | NW_004516178.1 | Scaffold801 | 38290                   | AA                              | CC              | 1946979281               |
| SNP_P4_145185_38326  | NW_004516178.1 | Scaffold801 | 38326                   | CC                              | AA              | 1946979282               |
| SNP_P4_145186_38327  | NW_004516178.1 | Scaffold801 | 38327                   | AA                              | TT              | 1946979284               |
| SNP_P4_145187_38350  | NW_004516178.1 | Scaffold801 | 38350                   | AA                              | GG              | 1946979286               |
| SNP_P4_145188_38359  | NW_004516178.1 | Scaffold801 | 38359                   | TT                              | CC              | 1946979288               |
| SNP_P4_145189_38375  | NW_004516178.1 | Scaffold801 | 38375                   | CC                              | TT              | 1946979291               |
| SNP_P4_145190_40664  | NW_004516178.1 | Scaffold801 | 40664                   | TT                              | CC              | 1946979293               |
| SNP_P4_145191_41089  | NW_004516178.1 | Scaffold801 | 41089                   | AA                              | GG              | 1946979295               |
| SNP_P4_145192_45677  | NW_004516178.1 | Scaffold801 | 45677                   | AA                              | CC              | 1946979297               |
| SNP_P4_145194_47901  | NW_004516178.1 | Scaffold801 | 47901                   | CC                              | TT              | 1946979299               |
| SNP_P4_145195_48071  | NW_004516178.1 | Scaffold801 | 48071                   | TT                              | CC              | 1946979301               |
| SNP_P4_145196_48157  | NW_004516178.1 | Scaffold801 | 48157                   | AA                              | GG              | 1946979302               |
| SNP_P4_145198_56461  | NW_004516178.1 | Scaffold801 | 56461                   | TT                              | CC              | 1946979304               |
| SNP_P4_145199_65333  | NW_004516178.1 | Scaffold801 | 65333                   | AA                              | CC              | 1946979306               |
| SNP_P4_145201_73987  | NW_004516178.1 | Scaffold801 | 73987                   | GG                              | AA              | 1946979308               |
| SNP_P4_145204_79210  | NW_004516178.1 | Scaffold801 | 79210                   | CC                              | TT              | 1946979310               |
| SNP_P4_145206_91759  | NW_004516178.1 | Scaffold801 | 91759                   | TT                              | GG              | 1946979312               |
| SNP_P4_145207_92169  | NW_004516178.1 | Scaffold801 | 92169                   | AA                              | GG              | 1946979314               |
| SNP_P4_145208_95496  | NW_004516178.1 | Scaffold801 | 95496                   | AA                              | TT              | 1946979316               |
| SNP_P4_145209_95608  | NW_004516178.1 | Scaffold801 | 95608                   | AA                              | GG              | 1946979318               |
| SNP_P4_145210_95671  | NW_004516178.1 | Scaffold801 | 95671                   | CC                              | TT              | 1946979320               |
| SNP_P4_145211_95875  | NW_004516178.1 | Scaffold801 | 95875                   | TT                              | CC              | 1946979322               |
| SNP_P4_145212_96046  | NW_004516178.1 | Scaffold801 | 96046                   | TT                              | CC              | 1946979324               |
| SNP_P4_145213_96314  | NW_004516178.1 | Scaffold801 | 96314                   | TT                              | CC              | 1946979326               |
| SNP_P4_145214_96445  | NW_004516178.1 | Scaffold801 | 96445                   | TT                              | CC              | 1946979329               |
| SNP_P4_145215_96463  | NW_004516178.1 | Scaffold801 | 96463                   | GG                              | AA              | 1946979331               |
| SNP_P4_145216_96468  | NW_004516178.1 | Scaffold801 | 96468                   | CC                              | GG              | 1946979333               |
| SNP_P4_145217_96477  | NW_004516178.1 | Scaffold801 | 96477                   | TT                              | CC              | 1946979335               |
| SNP_P4_145218_96866  | NW_004516178.1 | Scaffold801 | 96866                   | TT                              | CC              | 1946979337               |
| SNP_P4_145219_96885  | NW_004516178.1 | Scaffold801 | 96885                   | TT                              | CC              | 1946979339               |
| SNP_P4_145220_96959  | NW_004516178.1 | Scaffold801 | 96959                   | GG                              | AA              | 1946979341               |
| SNP_P4_145221_96968  | NW_004516178.1 | Scaffold801 | 96968                   | AA                              | GG              | 1946979343               |
| SNP_P4_145222_97019  | NW_004516178.1 | Scaffold801 | 97019                   | CC                              | TT              | 1946979345               |
| SNP_P4_145223_97116  | NW_004516178.1 | Scaffold801 | 97116                   | TT                              | CC              | 1946979348               |
| SNP_P4_145224_111760 | NW_004516178.1 | Scaffold801 | 111760                  | CC                              | TT              | 1946979350               |

| SNPs IDs             | Chromosome IDs | Chromosomes | Physical positions (bp) | CDC Frontier (Reference genome) | (ILWC46 & LPNB) | NCBI SNPdb Accession IDs |
|----------------------|----------------|-------------|-------------------------|---------------------------------|-----------------|--------------------------|
| SNP_P4_145225_111993 | NW_004516178.1 | Scaffold801 | 111993                  | GG                              | AA              | 1946979352               |
| SNP_P4_145226_112618 | NW_004516178.1 | Scaffold801 | 112618                  | GG                              | AA              | 1946979354               |
| SNP_P4_145227_112681 | NW_004516178.1 | Scaffold801 | 112681                  | CC                              | TT              | 1946979356               |
| SNP_P4_145228_112906 | NW_004516178.1 | Scaffold801 | 112906                  | CC                              | TT              | 1946979358               |
| SNP_P4_145229_122343 | NW_004516178.1 | Scaffold801 | 122343                  | AA                              | GG              | 1946979360               |
| SNP_P4_145230_122466 | NW_004516178.1 | Scaffold801 | 122466                  | GG                              | TT              | 1946979362               |
| SNP_P4_145231_124319 | NW_004516178.1 | Scaffold801 | 124319                  | CC                              | TT              | 1946979364               |
| SNP_P4_145233_124923 | NW_004516178.1 | Scaffold801 | 124923                  | AA                              | CC              | 1946979366               |
| SNP_P4_145234_126634 | NW_004516178.1 | Scaffold801 | 126634                  | TT                              | AA              | 1946979368               |
| SNP_P4_145235_141699 | NW_004516178.1 | Scaffold801 | 141699                  | TT                              | CC              | 1946979370               |
| SNP_P4_145237_142522 | NW_004516178.1 | Scaffold801 | 142522                  | AA                              | TT              | 1946979372               |
| SNP_P4_145238_142524 | NW_004516178.1 | Scaffold801 | 142524                  | CC                              | AA              | 1946979374               |
| SNP_P4_145239_143745 | NW_004516178.1 | Scaffold801 | 143745                  | TT                              | AA              | 1946979376               |
| SNP_P4_145240_145680 | NW_004516178.1 | Scaffold801 | 145680                  | AA                              | GG              | 1946979378               |
| SNP_P4_145243_153667 | NW_004516178.1 | Scaffold801 | 153667                  | AA                              | GG              | 1946979380               |
| SNP_P4_145244_153720 | NW_004516178.1 | Scaffold801 | 153720                  | AA                              | TT              | 1946979382               |
| SNP_P4_145245_154204 | NW_004516178.1 | Scaffold801 | 154204                  | AA                              | GG              | 1946979384               |
| SNP_P4_145247_157220 | NW_004516178.1 | Scaffold801 | 157220                  | CC                              | GG              | 1946979386               |
| SNP_P4_145249_160350 | NW_004516178.1 | Scaffold801 | 160350                  | AA                              | GG              | 1946979388               |
| SNP_P4_145250_161270 | NW_004516178.1 | Scaffold801 | 161270                  | GG                              | AA              | 1946979390               |
| SNP_P4_145251_161837 | NW_004516178.1 | Scaffold801 | 161837                  | TT                              | CC              | 1946979392               |
| SNP_P4_145252_163940 | NW_004516178.1 | Scaffold801 | 163940                  | GG                              | CC              | 1946979394               |
| SNP_P4_145253_165617 | NW_004516178.1 | Scaffold801 | 165617                  | TT                              | CC              | 1946979396               |
| SNP_P4_145255_175139 | NW_004516178.1 | Scaffold801 | 175139                  | TT                              | GG              | 1946979398               |
| SNP_P4_145256_175150 | NW_004516178.1 | Scaffold801 | 175150                  | CC                              | GG              | 1946979400               |
| SNP_P4_145257_188062 | NW_004516178.1 | Scaffold801 | 188062                  | TT                              | GG              | 1946979402               |
| SNP_P4_145258_188064 | NW_004516178.1 | Scaffold801 | 188064                  | CC                              | TT              | 1946979404               |
| SNP_P4_145259_190241 | NW_004516178.1 | Scaffold801 | 190241                  | GG                              | TT              | 1946979406               |
| SNP_P4_145260_192081 | NW_004516178.1 | Scaffold801 | 192081                  | GG                              | AA              | 1946979408               |
| SNP_P4_145262_192456 | NW_004516178.1 | Scaffold801 | 192456                  | CC                              | TT              | 1946979410               |
| SNP_P4_145263_197491 | NW_004516178.1 | Scaffold801 | 197491                  | AA                              | TT              | 1946979412               |
| SNP_P4_145264_201267 | NW_004516178.1 | Scaffold801 | 201267                  | AA                              | GG              | 1946979414               |
| SNP_P4_145266_201835 | NW_004516178.1 | Scaffold801 | 201835                  | AA                              | TT              | 1946979416               |
| SNP_P4_145270_226212 | NW_004516178.1 | Scaffold801 | 226212                  | GG                              | AA              | 1946979417               |
| SNP_P4_145271_226499 | NW_004516178.1 | Scaffold801 | 226499                  | TT                              | CC              | 1946979419               |
| SNP_P4_145272_241858 | NW_004516178.1 | Scaffold801 | 241858                  | TT                              | AA              | 1946979422               |
| SNP_P4_145273_242194 | NW_004516178.1 | Scaffold801 | 242194                  | CC                              | TT              | 1946979423               |
| SNP_P4_145274_256706 | NW_004516178.1 | Scaffold801 | 256706                  | CC                              | TT              | 1946979425               |
| SNP_P4_145275_256772 | NW_004516178.1 | Scaffold801 | 256772                  | CC                              | TT              | 1946979427               |
| SNP_P4_145276_260855 | NW_004516178.1 | Scaffold801 | 260855                  | CC                              | AA              | 1946979429               |
| SNP_P4_145279_920    | NW_004516179.1 | Scaffold802 | 920                     | TT                              | GG              | 1946979431               |
| SNP_P4_145280_1081   | NW_004516179.1 | Scaffold802 | 1081                    | GG                              | TT              | 1946979433               |

| SNPs IDs            | Chromosome IDs | Chromosomes | Physical positions (bp) | CDC Frontier (Reference genome) | (ILWC46 & LPNB) | NCBI SNPdb Accession IDs |
|---------------------|----------------|-------------|-------------------------|---------------------------------|-----------------|--------------------------|
| SNP_P4_145281_1326  | NW_004516179.1 | Scaffold802 | 1326                    | GG                              | AA              | 1946979435               |
| SNP_P4_145282_1361  | NW_004516179.1 | Scaffold802 | 1361                    | AA                              | GG              | 1946979437               |
| SNP_P4_145283_1369  | NW_004516179.1 | Scaffold802 | 1369                    | TT                              | CC              | 1946979439               |
| SNP_P4_145284_1373  | NW_004516179.1 | Scaffold802 | 1373                    | AA                              | TT              | 1946979441               |
| SNP_P4_145285_1401  | NW_004516179.1 | Scaffold802 | 1401                    | AA                              | GG              | 1946979443               |
| SNP_P4_145286_1425  | NW_004516179.1 | Scaffold802 | 1425                    | AA                              | GG              | 1946979445               |
| SNP_P4_145287_4675  | NW_004516179.1 | Scaffold802 | 4675                    | AA                              | TT              | 1946979447               |
| SNP_P4_145288_8221  | NW_004516179.1 | Scaffold802 | 8221                    | TT                              | GG              | 1946979449               |
| SNP_P4_145289_29559 | NW_004516179.1 | Scaffold802 | 29559                   | GG                              | AA              | 1946979451               |
| SNP_P4_145291_30731 | NW_004516179.1 | Scaffold802 | 30731                   | TT                              | AA              | 1946979453               |
| SNP_P4_145292_30734 | NW_004516179.1 | Scaffold802 | 30734                   | AA                              | GG              | 1946979455               |
| SNP_P4_145293_32309 | NW_004516179.1 | Scaffold802 | 32309                   | TT                              | CC              | 1946979457               |
| SNP_P4_145294_32335 | NW_004516179.1 | Scaffold802 | 32335                   | TT                              | AA              | 1946979459               |
| SNP_P4_145295_2248  | NW_004516180.1 | Scaffold803 | 2248                    | AA                              | GG              | 1946979461               |
| SNP_P4_145296_2448  | NW_004516180.1 | Scaffold803 | 2448                    | CC                              | TT              | 1946979462               |
| SNP_P4_145297_22506 | NW_004516180.1 | Scaffold803 | 22506                   | TT                              | AA              | 1946979464               |
| SNP_P4_145298_22523 | NW_004516180.1 | Scaffold803 | 22523                   | TT                              | CC              | 1946979466               |
| SNP_P4_145299_39215 | NW_004516180.1 | Scaffold803 | 39215                   | CC                              | TT              | 1946979468               |
| SNP_P4_145300_47696 | NW_004516180.1 | Scaffold803 | 47696                   | AA                              | CC              | 1946979470               |
| SNP_P4_145301_48029 | NW_004516180.1 | Scaffold803 | 48029                   | AA                              | GG              | 1946979472               |
| SNP_P4_145302_52332 | NW_004516180.1 | Scaffold803 | 52332                   | AA                              | GG              | 1946979474               |
| SNP_P4_145303_62659 | NW_004516180.1 | Scaffold803 | 62659                   | CC                              | TT              | 1946979476               |
| SNP_P4_145304_212   | NW_004516181.1 | Scaffold806 | 212                     | TT                              | CC              | 1946979478               |
| SNP_P4_145305_705   | NW_004516181.1 | Scaffold806 | 705                     | AA                              | GG              | 1946979480               |
| SNP_P4_145306_1004  | NW_004516181.1 | Scaffold806 | 1004                    | CC                              | TT              | 1946979482               |
| SNP_P4_145307_1014  | NW_004516181.1 | Scaffold806 | 1014                    | TT                              | CC              | 1946979484               |
| SNP_P4_145308_1029  | NW_004516181.1 | Scaffold806 | 1029                    | CC                              | AA              | 1946979486               |
| SNP_P4_145309_1062  | NW_004516181.1 | Scaffold806 | 1062                    | TT                              | CC              | 1946979488               |
| SNP_P4_145310_2228  | NW_004516181.1 | Scaffold806 | 2228                    | GG                              | AA              | 1946979490               |
| SNP_P4_145311_14726 | NW_004516181.1 | Scaffold806 | 14726                   | TT                              | CC              | 1946979492               |
| SNP_P4_145312_14735 | NW_004516181.1 | Scaffold806 | 14735                   | GG                              | CC              | 1946979494               |
| SNP_P4_145313_21400 | NW_004516181.1 | Scaffold806 | 21400                   | AA                              | GG              | 1946979496               |
| SNP_P4_145314_28245 | NW_004516181.1 | Scaffold806 | 28245                   | GG                              | AA              | 1946979498               |
| SNP_P4_145315_28276 | NW_004516181.1 | Scaffold806 | 28276                   | TT                              | AA              | 1946979500               |
| SNP_P4_145316_36957 | NW_004516181.1 | Scaffold806 | 36957                   | TT                              | CC              | 1946979502               |
| SNP_P4_145317_45476 | NW_004516181.1 | Scaffold806 | 45476                   | GG                              | AA              | 1946979504               |
| SNP_P4_145318_45554 | NW_004516181.1 | Scaffold806 | 45554                   | CC                              | TT              | 1946979506               |
| SNP_P4_145319_46473 | NW_004516181.1 | Scaffold806 | 46473                   | CC                              | TT              | 1946979508               |
| SNP_P4_145320_49222 | NW_004516181.1 | Scaffold806 | 49222                   | GG                              | TT              | 1946979510               |
| SNP_P4_145321_49382 | NW_004516181.1 | Scaffold806 | 49382                   | CC                              | TT              | 1946979512               |
| SNP_P4_145322_49543 | NW_004516181.1 | Scaffold806 | 49543                   | TT                              | CC              | 1946979514               |
| SNP_P4_145323_49547 | NW_004516181.1 | Scaffold806 | 49547                   | TT                              | CC              | 1946979516               |

| SNPs IDs             | Chromosome IDs | Chromosomes | Physical positions (bp) | CDC Frontier (Reference genome) | (ILWC46 & LPNB) | NCBI SNPdb Accession IDs |
|----------------------|----------------|-------------|-------------------------|---------------------------------|-----------------|--------------------------|
| SNP_P4_145324_52149  | NW_004516181.1 | Scaffold806 | 52149                   | CC                              | GG              | 1946979518               |
| SNP_P4_145325_52154  | NW_004516181.1 | Scaffold806 | 52154                   | TT                              | CC              | 1946979519               |
| SNP_P4_145326_53036  | NW_004516181.1 | Scaffold806 | 53036                   | AA                              | TT              | 1946979520               |
| SNP_P4_145327_53997  | NW_004516181.1 | Scaffold806 | 53997                   | GG                              | AA              | 1946979522               |
| SNP_P4_145328_54123  | NW_004516181.1 | Scaffold806 | 54123                   | CC                              | TT              | 1946979524               |
| SNP_P4_145329_57819  | NW_004516181.1 | Scaffold806 | 57819                   | GG                              | CC              | 1946979526               |
| SNP_P4_145331_81716  | NW_004516181.1 | Scaffold806 | 81716                   | AA                              | CC              | 1946979528               |
| SNP_P4_145332_81718  | NW_004516181.1 | Scaffold806 | 81718                   | CC                              | TT              | 1946979530               |
| SNP_P4_145333_81790  | NW_004516181.1 | Scaffold806 | 81790                   | TT                              | CC              | 1946979532               |
| SNP_P4_145334_81815  | NW_004516181.1 | Scaffold806 | 81815                   | TT                              | CC              | 1946979534               |
| SNP_P4_145335_81968  | NW_004516181.1 | Scaffold806 | 81968                   | TT                              | CC              | 1946979536               |
| SNP_P4_145336_81974  | NW_004516181.1 | Scaffold806 | 81974                   | CC                              | AA              | 1946979538               |
| SNP_P4_145337_82111  | NW_004516181.1 | Scaffold806 | 82111                   | CC                              | TT              | 1946979540               |
| SNP_P4_145338_82121  | NW_004516181.1 | Scaffold806 | 82121                   | TT                              | GG              | 1946979542               |
| SNP_P4_145339_82127  | NW_004516181.1 | Scaffold806 | 82127                   | TT                              | CC              | 1946979544               |
| SNP_P4_145340_82134  | NW_004516181.1 | Scaffold806 | 82134                   | GG                              | AA              | 1946979546               |
| SNP_P4_145341_83374  | NW_004516181.1 | Scaffold806 | 83374                   | CC                              | TT              | 1946979548               |
| SNP_P4_145342_84272  | NW_004516181.1 | Scaffold806 | 84272                   | GG                              | AA              | 1946979550               |
| SNP_P4_145343_84936  | NW_004516181.1 | Scaffold806 | 84936                   | TT                              | AA              | 1946979553               |
| SNP_P4_145344_84942  | NW_004516181.1 | Scaffold806 | 84942                   | AA                              | GG              | 1946979555               |
| SNP_P4_145345_95286  | NW_004516181.1 | Scaffold806 | 95286                   | GG                              | CC              | 1946979557               |
| SNP_P4_145346_95455  | NW_004516181.1 | Scaffold806 | 95455                   | CC                              | AA              | 1946979558               |
| SNP_P4_145347_95470  | NW_004516181.1 | Scaffold806 | 95470                   | AA                              | GG              | 1946979560               |
| SNP_P4_145348_95899  | NW_004516181.1 | Scaffold806 | 95899                   | AA                              | CC              | 1946979562               |
| SNP_P4_145349_107556 | NW_004516181.1 | Scaffold806 | 107556                  | TT                              | GG              | 1946979564               |
| SNP_P4_145350_130996 | NW_004516181.1 | Scaffold806 | 130996                  | GG                              | AA              | 1946979566               |
| SNP_P4_145351_131457 | NW_004516181.1 | Scaffold806 | 131457                  | TT                              | CC              | 1946979568               |
| SNP_P4_145352_131464 | NW_004516181.1 | Scaffold806 | 131464                  | TT                              | CC              | 1946979570               |
| SNP_P4_145353_131501 | NW_004516181.1 | Scaffold806 | 131501                  | TT                              | GG              | 1946979573               |
| SNP_P4_145354_131513 | NW_004516181.1 | Scaffold806 | 131513                  | AA                              | GG              | 1946979575               |
| SNP_P4_145355_131537 | NW_004516181.1 | Scaffold806 | 131537                  | TT                              | AA              | 1946979577               |
| SNP_P4_145356_131583 | NW_004516181.1 | Scaffold806 | 131583                  | TT                              | GG              | 1946979579               |
| SNP_P4_145357_131704 | NW_004516181.1 | Scaffold806 | 131704                  | CC                              | TT              | 1946979581               |
| SNP_P4_145358_131807 | NW_004516181.1 | Scaffold806 | 131807                  | TT                              | CC              | 1946979583               |
| SNP_P4_145359_131817 | NW_004516181.1 | Scaffold806 | 131817                  | AA                              | CC              | 1946979585               |
| SNP_P4_145360_131899 | NW_004516181.1 | Scaffold806 | 131899                  | TT                              | CC              | 1946979587               |
| SNP_P4_145361_131964 | NW_004516181.1 | Scaffold806 | 131964                  | GG                              | TT              | 1946979589               |
| SNP_P4_145362_131971 | NW_004516181.1 | Scaffold806 | 131971                  | TT                              | CC              | 1946979591               |
| SNP_P4_145363_133312 | NW_004516181.1 | Scaffold806 | 133312                  | TT                              | GG              | 1946979593               |
| SNP_P4_145364_133338 | NW_004516181.1 | Scaffold806 | 133338                  | AA                              | GG              | 1946979595               |
| SNP_P4_145365_133344 | NW_004516181.1 | Scaffold806 | 133344                  | TT                              | CC              | 1946979597               |
| SNP_P4_145366_133353 | NW_004516181.1 | Scaffold806 | 133353                  | TT                              | CC              | 1946979599               |

| SNPs IDs             | Chromosome IDs | Chromosomes | Physical positions (bp) | CDC Frontier (Reference genome) | (ILWC46 & LPNB) | NCBI SNPdb Accession IDs |
|----------------------|----------------|-------------|-------------------------|---------------------------------|-----------------|--------------------------|
| SNP_P4_145367_133364 | NW_004516181.1 | Scaffold806 | 133364                  | AA                              | GG              | 1946979601               |
| SNP_P4_145368_133542 | NW_004516181.1 | Scaffold806 | 133542                  | TT                              | CC              | 1946979603               |
| SNP_P4_145369_133547 | NW_004516181.1 | Scaffold806 | 133547                  | CC                              | TT              | 1946979605               |
| SNP_P4_145370_133624 | NW_004516181.1 | Scaffold806 | 133624                  | GG                              | AA              | 1946979607               |
| SNP_P4_145371_133628 | NW_004516181.1 | Scaffold806 | 133628                  | AA                              | GG              | 1946979609               |
| SNP_P4_145372_133641 | NW_004516181.1 | Scaffold806 | 133641                  | TT                              | AA              | 1946979611               |
| SNP_P4_145373_133791 | NW_004516181.1 | Scaffold806 | 133791                  | GG                              | AA              | 1946979613               |
| SNP_P4_145374_3331   | NW_004516182.1 | Scaffold808 | 3331                    | TT                              | AA              | 1946979615               |
| SNP_P4_145375_3407   | NW_004516182.1 | Scaffold808 | 3407                    | GG                              | AA              | 1946979617               |
| SNP_P4_145376_3497   | NW_004516182.1 | Scaffold808 | 3497                    | AA                              | TT              | 1946979619               |
| SNP_P4_145377_3498   | NW_004516182.1 | Scaffold808 | 3498                    | TT                              | CC              | 1946979621               |
| SNP_P4_145379_4559   | NW_004516182.1 | Scaffold808 | 4559                    | GG                              | AA              | 1946979623               |
| SNP_P4_145380_4887   | NW_004516182.1 | Scaffold808 | 4887                    | AA                              | GG              | 1946979625               |
| SNP_P4_145381_5085   | NW_004516182.1 | Scaffold808 | 5085                    | GG                              | AA              | 1946979627               |
| SNP_P4_145382_5109   | NW_004516182.1 | Scaffold808 | 5109                    | AA                              | GG              | 1946979629               |
| SNP_P4_145383_5510   | NW_004516182.1 | Scaffold808 | 5510                    | GG                              | AA              | 1946979631               |
| SNP_P4_145384_5579   | NW_004516182.1 | Scaffold808 | 5579                    | AA                              | TT              | 1946979633               |
| SNP_P4_145385_5916   | NW_004516182.1 | Scaffold808 | 5916                    | CC                              | AA              | 1946979635               |
| SNP_P4_145387_48232  | NW_004516183.1 | Scaffold809 | 48232                   | CC                              | TT              | 1946979637               |
| SNP_P4_145388_56785  | NW_004516183.1 | Scaffold809 | 56785                   | AA                              | TT              | 1946979639               |
| SNP_P4_145389_73406  | NW_004516183.1 | Scaffold809 | 73406                   | AA                              | TT              | 1946979641               |
| SNP_P4_145390_89377  | NW_004516183.1 | Scaffold809 | 89377                   | TT                              | CC              | 1946979643               |
| SNP_P4_145391_89396  | NW_004516183.1 | Scaffold809 | 89396                   | CC                              | AA              | 1946979645               |
| SNP_P4_145393_100100 | NW_004516183.1 | Scaffold809 | 100100                  | CC                              | AA              | 1946979647               |
| SNP_P4_145394_100400 | NW_004516183.1 | Scaffold809 | 100400                  | CC                              | AA              | 1946979649               |
| SNP_P4_145395_108498 | NW_004516183.1 | Scaffold809 | 108498                  | CC                              | AA              | 1946979651               |
| SNP_P4_145396_115075 | NW_004516183.1 | Scaffold809 | 115075                  | TT                              | CC              | 1946979653               |
| SNP_P4_145397_115165 | NW_004516183.1 | Scaffold809 | 115165                  | TT                              | CC              | 1946979655               |
| SNP_P4_145398_115391 | NW_004516183.1 | Scaffold809 | 115391                  | TT                              | AA              | 1946979657               |
| SNP_P4_145399_115422 | NW_004516183.1 | Scaffold809 | 115422                  | AA                              | GG              | 1946979659               |
| SNP_P4_145400_133028 | NW_004516183.1 | Scaffold809 | 133028                  | AA                              | TT              | 1946979661               |
| SNP_P4_145401_140710 | NW_004516183.1 | Scaffold809 | 140710                  | AA                              | TT              | 1946979664               |
| SNP_P4_145402_143004 | NW_004516183.1 | Scaffold809 | 143004                  | GG                              | TT              | 1946979666               |
| SNP_P4_145403_148035 | NW_004516183.1 | Scaffold809 | 148035                  | TT                              | CC              | 1946979668               |
| SNP_P4_145404_54059  | NW_004516184.1 | Scaffold811 | 54059                   | TT                              | CC              | 1946979670               |
| SNP_P4_145406_73453  | NW_004516184.1 | Scaffold811 | 73453                   | GG                              | AA              | 1946979672               |
| SNP_P4_145407_75956  | NW_004516184.1 | Scaffold811 | 75956                   | CC                              | TT              | 1946979674               |
| SNP_P4_145408_91170  | NW_004516184.1 | Scaffold811 | 91170                   | TT                              | GG              | 1946979676               |
| SNP_P4_145409_91209  | NW_004516184.1 | Scaffold811 | 91209                   | AA                              | GG              | 1946979678               |
| SNP_P4_145410_91398  | NW_004516184.1 | Scaffold811 | 91398                   | TT                              | AA              | 1946979680               |
| SNP_P4_145411_102304 | NW_004516184.1 | Scaffold811 | 102304                  | AA                              | TT              | 1946979682               |
| SNP_P4_145412_107539 | NW_004516184.1 | Scaffold811 | 107539                  | CC                              | AA              | 1946979684               |

| SNPs IDs             | Chromosome IDs | Chromosomes | Physical positions (bp) | CDC Frontier (Reference genome) | (ILWC46 & LPNB) | NCBI SNPdb Accession IDs |
|----------------------|----------------|-------------|-------------------------|---------------------------------|-----------------|--------------------------|
| SNP_P4_145413_112271 | NW_004516184.1 | Scaffold811 | 112271                  | CC                              | GG              | 1946979686               |
| SNP_P4_145414_112300 | NW_004516184.1 | Scaffold811 | 112300                  | AA                              | GG              | 1946979688               |
| SNP_P4_145415_112320 | NW_004516184.1 | Scaffold811 | 112320                  | TT                              | AA              | 1946979691               |
| SNP_P4_145416_112325 | NW_004516184.1 | Scaffold811 | 112325                  | CC                              | AA              | 1946979693               |
| SNP_P4_145417_112356 | NW_004516184.1 | Scaffold811 | 112356                  | GG                              | AA              | 1946979694               |
| SNP_P4_145418_112359 | NW_004516184.1 | Scaffold811 | 112359                  | GG                              | AA              | 1946979697               |
| SNP_P4_145419_112371 | NW_004516184.1 | Scaffold811 | 112371                  | GG                              | AA              | 1946979699               |
| SNP_P4_145420_124185 | NW_004516184.1 | Scaffold811 | 124185                  | GG                              | AA              | 1946979701               |
| SNP_P4_145422_127678 | NW_004516184.1 | Scaffold811 | 127678                  | GG                              | TT              | 1946979703               |
| SNP_P4_145423_127755 | NW_004516184.1 | Scaffold811 | 127755                  | CC                              | TT              | 1946979705               |
| SNP_P4_145424_127998 | NW_004516184.1 | Scaffold811 | 127998                  | GG                              | TT              | 1946979706               |
| SNP_P4_145425_128006 | NW_004516184.1 | Scaffold811 | 128006                  | AA                              | GG              | 1946979708               |
| SNP_P4_145426_128021 | NW_004516184.1 | Scaffold811 | 128021                  | TT                              | CC              | 1946979710               |
| SNP_P4_145427_128046 | NW_004516184.1 | Scaffold811 | 128046                  | GG                              | AA              | 1946979712               |
| SNP_P4_145428_128051 | NW_004516184.1 | Scaffold811 | 128051                  | TT                              | CC              | 1946979714               |
| SNP_P4_145429_128069 | NW_004516184.1 | Scaffold811 | 128069                  | TT                              | CC              | 1946979716               |
| SNP_P4_145430_128110 | NW_004516184.1 | Scaffold811 | 128110                  | AA                              | TT              | 1946979719               |
| SNP_P4_145431_128119 | NW_004516184.1 | Scaffold811 | 128119                  | TT                              | AA              | 1946979721               |
| SNP_P4_145432_129676 | NW_004516184.1 | Scaffold811 | 129676                  | GG                              | AA              | 1946979723               |
| SNP_P4_145433_147785 | NW_004516184.1 | Scaffold811 | 147785                  | AA                              | TT              | 1946979725               |
| SNP_P4_145435_176430 | NW_004516184.1 | Scaffold811 | 176430                  | TT                              | CC              | 1946979727               |
| SNP_P4_145436_176788 | NW_004516184.1 | Scaffold811 | 176788                  | TT                              | GG              | 1946979729               |
| SNP_P4_145437_186161 | NW_004516184.1 | Scaffold811 | 186161                  | CC                              | TT              | 1946979731               |
| SNP_P4_145438_186184 | NW_004516184.1 | Scaffold811 | 186184                  | AA                              | TT              | 1946979733               |
| SNP_P4_145439_186316 | NW_004516184.1 | Scaffold811 | 186316                  | TT                              | AA              | 1946979735               |
| SNP_P4_145440_186326 | NW_004516184.1 | Scaffold811 | 186326                  | GG                              | CC              | 1946979737               |
| SNP_P4_145441_195931 | NW_004516184.1 | Scaffold811 | 195931                  | TT                              | CC              | 1946979739               |
| SNP_P4_145442_195967 | NW_004516184.1 | Scaffold811 | 195967                  | CC                              | TT              | 1946979741               |
| SNP_P4_145444_246449 | NW_004516184.1 | Scaffold811 | 246449                  | AA                              | TT              | 1946979743               |
| SNP_P4_145445_249180 | NW_004516184.1 | Scaffold811 | 249180                  | AA                              | CC              | 1946979745               |
| SNP_P4_145446_249235 | NW_004516184.1 | Scaffold811 | 249235                  | TT                              | CC              | 1946979747               |
| SNP_P4_145447_249590 | NW_004516184.1 | Scaffold811 | 249590                  | TT                              | CC              | 1946979749               |
| SNP_P4_145448_250769 | NW_004516184.1 | Scaffold811 | 250769                  | GG                              | AA              | 1946979751               |
| SNP_P4_145449_251085 | NW_004516184.1 | Scaffold811 | 251085                  | TT                              | AA              | 1946979753               |
| SNP_P4_145450_251698 | NW_004516184.1 | Scaffold811 | 251698                  | GG                              | TT              | 1946979755               |
| SNP_P4_145451_258308 | NW_004516184.1 | Scaffold811 | 258308                  | CC                              | AA              | 1946979757               |
| SNP_P4_145452_258869 | NW_004516184.1 | Scaffold811 | 258869                  | TT                              | CC              | 1946979759               |
| SNP_P4_145453_278993 | NW_004516184.1 | Scaffold811 | 278993                  | TT                              | AA              | 1946979761               |
| SNP_P4_145454_279069 | NW_004516184.1 | Scaffold811 | 279069                  | CC                              | AA              | 1946979763               |
| SNP_P4_145455_279185 | NW_004516184.1 | Scaffold811 | 279185                  | GG                              | TT              | 1946979765               |
| SNP_P4_145456_279431 | NW_004516184.1 | Scaffold811 | 279431                  | TT                              | CC              | 1946979767               |
| SNP_P4_145457_286430 | NW_004516184.1 | Scaffold811 | 286430                  | GG                              | TT              | 1946979769               |

| SNPs IDs             | Chromosome IDs | Chromosomes | Physical positions (bp) | CDC Frontier (Reference genome) | (ILWC46 & LPNB) | NCBI SNPdb Accession IDs |
|----------------------|----------------|-------------|-------------------------|---------------------------------|-----------------|--------------------------|
| SNP_P4_145458_287801 | NW_004516184.1 | Scaffold811 | 287801                  | TT                              | CC              | 1946979771               |
| SNP_P4_145459_287903 | NW_004516184.1 | Scaffold811 | 287903                  | CC                              | AA              | 1946979773               |
| SNP_P4_145461_294996 | NW_004516184.1 | Scaffold811 | 294996                  | TT                              | GG              | 1946979775               |
| SNP_P4_145462_296860 | NW_004516184.1 | Scaffold811 | 296860                  | AA                              | TT              | 1946979777               |
| SNP_P4_145463_299234 | NW_004516184.1 | Scaffold811 | 299234                  | CC                              | TT              | 1946979779               |
| SNP_P4_145464_302161 | NW_004516184.1 | Scaffold811 | 302161                  | TT                              | GG              | 1946979781               |
| SNP_P4_145465_303572 | NW_004516184.1 | Scaffold811 | 303572                  | GG                              | TT              | 1946979783               |
| SNP_P4_145466_306779 | NW_004516184.1 | Scaffold811 | 306779                  | TT                              | CC              | 1946979785               |
| SNP_P4_145467_306788 | NW_004516184.1 | Scaffold811 | 306788                  | CC                              | AA              | 1946979787               |
| SNP_P4_145468_306801 | NW_004516184.1 | Scaffold811 | 306801                  | CC                              | TT              | 1946979789               |
| SNP_P4_145469_306803 | NW_004516184.1 | Scaffold811 | 306803                  | AA                              | GG              | 1946979791               |
| SNP_P4_145470_306942 | NW_004516184.1 | Scaffold811 | 306942                  | TT                              | CC              | 1946979793               |
| SNP_P4_145471_307177 | NW_004516184.1 | Scaffold811 | 307177                  | GG                              | TT              | 1946979795               |
| SNP_P4_145472_307230 | NW_004516184.1 | Scaffold811 | 307230                  | TT                              | CC              | 1946979797               |
| SNP_P4_145473_307254 | NW_004516184.1 | Scaffold811 | 307254                  | TT                              | GG              | 1946979799               |
| SNP_P4_145474_308067 | NW_004516184.1 | Scaffold811 | 308067                  | CC                              | TT              | 1946979801               |
| SNP_P4_145475_316924 | NW_004516184.1 | Scaffold811 | 316924                  | TT                              | CC              | 1946979803               |
| SNP_P4_145476_316932 | NW_004516184.1 | Scaffold811 | 316932                  | AA                              | GG              | 1946979805               |
| SNP_P4_145477_12916  | NW_004516185.1 | Scaffold812 | 12916                   | GG                              | CC              | 1946979807               |
| SNP_P4_145478_13441  | NW_004516185.1 | Scaffold812 | 13441                   | TT                              | CC              | 1946979809               |
| SNP_P4_145479_33858  | NW_004516185.1 | Scaffold812 | 33858                   | GG                              | AA              | 1946979811               |
| SNP_P4_145480_35818  | NW_004516185.1 | Scaffold812 | 35818                   | TT                              | CC              | 1946979813               |
| SNP_P4_145481_41667  | NW_004516185.1 | Scaffold812 | 41667                   | AA                              | CC              | 1946979815               |
| SNP_P4_145482_60487  | NW_004516185.1 | Scaffold812 | 60487                   | TT                              | AA              | 1946979817               |
| SNP_P4_145483_66503  | NW_004516185.1 | Scaffold812 | 66503                   | AA                              | GG              | 1946979819               |
| SNP_P4_145484_66802  | NW_004516185.1 | Scaffold812 | 66802                   | TT                              | GG              | 1946979821               |
| SNP_P4_145485_67644  | NW_004516185.1 | Scaffold812 | 67644                   | AA                              | CC              | 1946979823               |
| SNP_P4_145486_82414  | NW_004516185.1 | Scaffold812 | 82414                   | TT                              | GG              | 1946979825               |
| SNP_P4_145487_82720  | NW_004516185.1 | Scaffold812 | 82720                   | AA                              | GG              | 1946979828               |
| SNP_P4_145488_82742  | NW_004516185.1 | Scaffold812 | 82742                   | TT                              | GG              | 1946979830               |
| SNP_P4_145489_82753  | NW_004516185.1 | Scaffold812 | 82753                   | GG                              | AA              | 1946979832               |
| SNP_P4_145490_92197  | NW_004516185.1 | Scaffold812 | 92197                   | TT                              | CC              | 1946979834               |
| SNP_P4_145491_92200  | NW_004516185.1 | Scaffold812 | 92200                   | TT                              | CC              | 1946979836               |
| SNP_P4_145492_92241  | NW_004516185.1 | Scaffold812 | 92241                   | TT                              | CC              | 1946979839               |
| SNP_P4_145493_92532  | NW_004516185.1 | Scaffold812 | 92532                   | TT                              | AA              | 1946979841               |
| SNP_P4_145494_92597  | NW_004516185.1 | Scaffold812 | 92597                   | AA                              | GG              | 1946979843               |
| SNP_P4_145495_94729  | NW_004516185.1 | Scaffold812 | 94729                   | CC                              | TT              | 1946979845               |
| SNP_P4_145496_95432  | NW_004516185.1 | Scaffold812 | 95432                   | CC                              | AA              | 1946979847               |
| SNP_P4_145497_95447  | NW_004516185.1 | Scaffold812 | 95447                   | TT                              | CC              | 1946979849               |
| SNP_P4_145498_95475  | NW_004516185.1 | Scaffold812 | 95475                   | CC                              | TT              | 1946979851               |
| SNP_P4_145500_105779 | NW_004516185.1 | Scaffold812 | 105779                  | GG                              | AA              | 1946979853               |
| SNP_P4_145501_106066 | NW_004516185.1 | Scaffold812 | 106066                  | CC                              | GG              | 1946979855               |



| SNPs IDs             | Chromosome IDs | Chromosomes | Physical positions (bp) | CDC Frontier (Reference genome) | (ILWC46 & LPNB) | NCBI SNPdb Accession IDs |
|----------------------|----------------|-------------|-------------------------|---------------------------------|-----------------|--------------------------|
| SNP_P4_145502_106759 | NW_004516185.1 | Scaffold812 | 106759                  | TT                              | GG              | 1946979857               |
| SNP_P4_145503_106764 | NW_004516185.1 | Scaffold812 | 106764                  | AA                              | CC              | 1946979859               |
| SNP_P4_145504_106765 | NW_004516185.1 | Scaffold812 | 106765                  | CC                              | AA              | 1946979861               |
| SNP_P4_145505_106769 | NW_004516185.1 | Scaffold812 | 106769                  | GG                              | AA              | 1946979863               |
| SNP_P4_145506_106866 | NW_004516185.1 | Scaffold812 | 106866                  | GG                              | TT              | 1946979866               |
| SNP_P4_145507_106872 | NW_004516185.1 | Scaffold812 | 106872                  | TT                              | GG              | 1946979868               |
| SNP_P4_145508_107020 | NW_004516185.1 | Scaffold812 | 107020                  | TT                              | GG              | 1946979871               |
| SNP_P4_145509_112029 | NW_004516185.1 | Scaffold812 | 112029                  | GG                              | TT              | 1946979873               |
| SNP_P4_145510_112073 | NW_004516185.1 | Scaffold812 | 112073                  | AA                              | TT              | 1946979875               |
| SNP_P4_145511_112084 | NW_004516185.1 | Scaffold812 | 112084                  | AA                              | TT              | 1946979877               |
| SNP_P4_145512_112085 | NW_004516185.1 | Scaffold812 | 112085                  | TT                              | GG              | 1946979879               |
| SNP_P4_145513_112372 | NW_004516185.1 | Scaffold812 | 112372                  | GG                              | TT              | 1946979881               |
| SNP_P4_145514_112423 | NW_004516185.1 | Scaffold812 | 112423                  | CC                              | TT              | 1946979883               |
| SNP_P4_145515_124490 | NW_004516185.1 | Scaffold812 | 124490                  | AA                              | CC              | 1946979885               |
| SNP_P4_145516_142884 | NW_004516185.1 | Scaffold812 | 142884                  | AA                              | CC              | 1946979887               |
| SNP_P4_145517_143236 | NW_004516185.1 | Scaffold812 | 143236                  | TT                              | CC              | 1946979889               |
| SNP_P4_145518_143252 | NW_004516185.1 | Scaffold812 | 143252                  | AA                              | CC              | 1946979891               |
| SNP_P4_145519_174274 | NW_004516185.1 | Scaffold812 | 174274                  | AA                              | GG              | 1946979893               |
| SNP_P4_145520_187306 | NW_004516185.1 | Scaffold812 | 187306                  | CC                              | TT              | 1946979895               |
| SNP_P4_145521_191224 | NW_004516185.1 | Scaffold812 | 191224                  | AA                              | GG              | 1946979897               |
| SNP_P4_145522_199603 | NW_004516185.1 | Scaffold812 | 199603                  | AA                              | TT              | 1946979899               |
| SNP_P4_145524_202960 | NW_004516185.1 | Scaffold812 | 202960                  | CC                              | GG              | 1946979901               |
| SNP_P4_145526_205432 | NW_004516185.1 | Scaffold812 | 205432                  | CC                              | TT              | 1946979903               |
| SNP_P4_145527_207876 | NW_004516185.1 | Scaffold812 | 207876                  | GG                              | TT              | 1946979905               |
| SNP_P4_145528_209911 | NW_004516185.1 | Scaffold812 | 209911                  | CC                              | TT              | 1946979907               |
| SNP_P4_145530_213240 | NW_004516185.1 | Scaffold812 | 213240                  | GG                              | TT              | 1946979909               |
| SNP_P4_145532_214692 | NW_004516185.1 | Scaffold812 | 214692                  | AA                              | GG              | 1946979911               |
| SNP_P4_145533_215173 | NW_004516185.1 | Scaffold812 | 215173                  | GG                              | AA              | 1946979913               |
| SNP_P4_145535_215592 | NW_004516185.1 | Scaffold812 | 215592                  | AA                              | GG              | 1946979915               |
| SNP_P4_145536_218961 | NW_004516185.1 | Scaffold812 | 218961                  | GG                              | AA              | 1946979917               |
| SNP_P4_145537_221271 | NW_004516185.1 | Scaffold812 | 221271                  | CC                              | TT              | 1946979919               |
| SNP_P4_145538_223199 | NW_004516185.1 | Scaffold812 | 223199                  | TT                              | CC              | 1946979921               |
| SNP_P4_145539_223568 | NW_004516185.1 | Scaffold812 | 223568                  | TT                              | GG              | 1946979924               |
| SNP_P4_145540_223717 | NW_004516185.1 | Scaffold812 | 223717                  | CC                              | TT              | 1946979926               |
| SNP_P4_145541_225610 | NW_004516185.1 | Scaffold812 | 225610                  | CC                              | TT              | 1946979928               |
| SNP_P4_145542_235759 | NW_004516185.1 | Scaffold812 | 235759                  | AA                              | GG              | 1946979930               |
| SNP_P4_145544_254440 | NW_004516185.1 | Scaffold812 | 254440                  | GG                              | TT              | 1946979932               |
| SNP_P4_145546_257430 | NW_004516185.1 | Scaffold812 | 257430                  | AA                              | CC              | 1946979934               |
| SNP_P4_145547_259215 | NW_004516185.1 | Scaffold812 | 259215                  | CC                              | TT              | 1946979936               |
| SNP_P4_145548_259722 | NW_004516185.1 | Scaffold812 | 259722                  | TT                              | CC              | 1946979938               |
| SNP_P4_145550_260975 | NW_004516185.1 | Scaffold812 | 260975                  | AA                              | GG              | 1946979940               |
| SNP_P4_145551_262711 | NW_004516185.1 | Scaffold812 | 262711                  | TT                              | CC              | 1946979942               |

| SNPs IDs             | Chromosome IDs | Chromosomes | Physical positions (bp) | CDC Frontier (Reference genome) | (ILWC46 & LPNB) | NCBI SNPdb Accession IDs |
|----------------------|----------------|-------------|-------------------------|---------------------------------|-----------------|--------------------------|
| SNP_P4_145552_263486 | NW_004516185.1 | Scaffold812 | 263486                  | AA                              | GG              | 1946979944               |
| SNP_P4_145553_265270 | NW_004516185.1 | Scaffold812 | 265270                  | AA                              | GG              | 1946979947               |
| SNP_P4_145554_269464 | NW_004516185.1 | Scaffold812 | 269464                  | CC                              | GG              | 1946979949               |
| SNP_P4_145555_274359 | NW_004516185.1 | Scaffold812 | 274359                  | GG                              | CC              | 1946979951               |
| SNP_P4_145556_278839 | NW_004516185.1 | Scaffold812 | 278839                  | CC                              | TT              | 1946979953               |
| SNP_P4_145557_278840 | NW_004516185.1 | Scaffold812 | 278840                  | AA                              | GG              | 1946979955               |
| SNP_P4_145558_278859 | NW_004516185.1 | Scaffold812 | 278859                  | AA                              | GG              | 1946979957               |
| SNP_P4_145561_279210 | NW_004516185.1 | Scaffold812 | 279210                  | AA                              | GG              | 1946979959               |
| SNP_P4_145562_283601 | NW_004516185.1 | Scaffold812 | 283601                  | GG                              | TT              | 1946979961               |
| SNP_P4_145563_285183 | NW_004516185.1 | Scaffold812 | 285183                  | GG                              | AA              | 1946979963               |
| SNP_P4_145564_286619 | NW_004516185.1 | Scaffold812 | 286619                  | AA                              | TT              | 1946979965               |
| SNP_P4_145565_287451 | NW_004516185.1 | Scaffold812 | 287451                  | AA                              | GG              | 1946979967               |
| SNP_P4_145566_287884 | NW_004516185.1 | Scaffold812 | 287884                  | AA                              | GG              | 1946979969               |
| SNP_P4_145567_287900 | NW_004516185.1 | Scaffold812 | 287900                  | GG                              | AA              | 1946979971               |
| SNP_P4_145568_294372 | NW_004516185.1 | Scaffold812 | 294372                  | GG                              | TT              | 1946979973               |
| SNP_P4_145569_295114 | NW_004516185.1 | Scaffold812 | 295114                  | AA                              | TT              | 1946979975               |
| SNP_P4_145570_295578 | NW_004516185.1 | Scaffold812 | 295578                  | GG                              | TT              | 1946979977               |
| SNP_P4_145571_296574 | NW_004516185.1 | Scaffold812 | 296574                  | GG                              | TT              | 1946979979               |
| SNP_P4_145572_297551 | NW_004516185.1 | Scaffold812 | 297551                  | TT                              | CC              | 1946979981               |
| SNP_P4_145573_297555 | NW_004516185.1 | Scaffold812 | 297555                  | TT                              | GG              | 1946979983               |
| SNP_P4_145574_300053 | NW_004516185.1 | Scaffold812 | 300053                  | AA                              | GG              | 1946979985               |
| SNP_P4_145575_307481 | NW_004516185.1 | Scaffold812 | 307481                  | CC                              | TT              | 1946979988               |
| SNP_P4_145576_309664 | NW_004516185.1 | Scaffold812 | 309664                  | TT                              | GG              | 1946979990               |
| SNP_P4_145577_309670 | NW_004516185.1 | Scaffold812 | 309670                  | AA                              | GG              | 1946979992               |
| SNP_P4_145578_310825 | NW_004516185.1 | Scaffold812 | 310825                  | GG                              | TT              | 1946979994               |
| SNP_P4_145579_310905 | NW_004516185.1 | Scaffold812 | 310905                  | AA                              | TT              | 1946979996               |
| SNP_P4_145581_315760 | NW_004516185.1 | Scaffold812 | 315760                  | AA                              | GG              | 1946979998               |
| SNP_P4_145582_320337 | NW_004516185.1 | Scaffold812 | 320337                  | TT                              | GG              | 1946980000               |
| SNP_P4_145583_322130 | NW_004516185.1 | Scaffold812 | 322130                  | TT                              | CC              | 1946980002               |
| SNP_P4_145584_324102 | NW_004516185.1 | Scaffold812 | 324102                  | CC                              | TT              | 1946980005               |
| SNP_P4_145585_324912 | NW_004516185.1 | Scaffold812 | 324912                  | TT                              | CC              | 1946980007               |
| SNP_P4_145586_324940 | NW_004516185.1 | Scaffold812 | 324940                  | GG                              | AA              | 1946980009               |
| SNP_P4_145587_326398 | NW_004516185.1 | Scaffold812 | 326398                  | GG                              | TT              | 1946980011               |
| SNP_P4_145588_329724 | NW_004516185.1 | Scaffold812 | 329724                  | CC                              | TT              | 1946980013               |
| SNP_P4_145589_329810 | NW_004516185.1 | Scaffold812 | 329810                  | TT                              | CC              | 1946980015               |
| SNP_P4_145590_329815 | NW_004516185.1 | Scaffold812 | 329815                  | TT                              | CC              | 1946980017               |
| SNP_P4_145591_330107 | NW_004516185.1 | Scaffold812 | 330107                  | CC                              | AA              | 1946980019               |
| SNP_P4_145592_334476 | NW_004516185.1 | Scaffold812 | 334476                  | TT                              | CC              | 1946980021               |
| SNP_P4_145593_335143 | NW_004516185.1 | Scaffold812 | 335143                  | TT                              | CC              | 1946980023               |
| SNP_P4_145594_335257 | NW_004516185.1 | Scaffold812 | 335257                  | CC                              | TT              | 1946980025               |
| SNP_P4_145595_338260 | NW_004516185.1 | Scaffold812 | 338260                  | CC                              | TT              | 1946980027               |
| SNP_P4_145596_342857 | NW_004516185.1 | Scaffold812 | 342857                  | GG                              | AA              | 1946980029               |

| SNPs IDs             | Chromosome IDs | Chromosomes | Physical positions (bp) | CDC Frontier (Reference genome) | (ILWC46 & LPNB) | NCBI SNPdb Accession IDs |
|----------------------|----------------|-------------|-------------------------|---------------------------------|-----------------|--------------------------|
| SNP_P4_145599_352165 | NW_004516185.1 | Scaffold812 | 352165                  | TT                              | CC              | 1946980032               |
| SNP_P4_145601_358708 | NW_004516185.1 | Scaffold812 | 358708                  | AA                              | TT              | 1946980034               |
| SNP_P4_145602_363466 | NW_004516185.1 | Scaffold812 | 363466                  | GG                              | CC              | 1946980036               |
| SNP_P4_145603_363812 | NW_004516185.1 | Scaffold812 | 363812                  | GG                              | TT              | 1946980038               |
| SNP_P4_145604_368324 | NW_004516185.1 | Scaffold812 | 368324                  | AA                              | GG              | 1946980040               |
| SNP_P4_145605_368697 | NW_004516185.1 | Scaffold812 | 368697                  | AA                              | GG              | 1946980042               |
| SNP_P4_145606_374054 | NW_004516185.1 | Scaffold812 | 374054                  | CC                              | TT              | 1946980044               |
| SNP_P4_145608_410773 | NW_004516185.1 | Scaffold812 | 410773                  | GG                              | CC              | 1946980046               |
| SNP_P4_145609_416529 | NW_004516185.1 | Scaffold812 | 416529                  | TT                              | CC              | 1946980049               |
| SNP_P4_145610_416815 | NW_004516185.1 | Scaffold812 | 416815                  | TT                              | CC              | 1946980051               |
| SNP_P4_145611_416921 | NW_004516185.1 | Scaffold812 | 416921                  | TT                              | AA              | 1946980053               |
| SNP_P4_145612_417513 | NW_004516185.1 | Scaffold812 | 417513                  | GG                              | AA              | 1946980055               |
| SNP_P4_145613_428295 | NW_004516185.1 | Scaffold812 | 428295                  | CC                              | GG              | 1946980057               |
| SNP_P4_145614_443969 | NW_004516185.1 | Scaffold812 | 443969                  | CC                              | TT              | 1946980059               |
| SNP_P4_145615_458432 | NW_004516185.1 | Scaffold812 | 458432                  | CC                              | TT              | 1946980061               |
| SNP_P4_145616_458433 | NW_004516185.1 | Scaffold812 | 458433                  | AA                              | GG              | 1946980062               |
| SNP_P4_145617_458471 | NW_004516185.1 | Scaffold812 | 458471                  | AA                              | GG              | 1946980064               |
| SNP_P4_145618_458657 | NW_004516185.1 | Scaffold812 | 458657                  | CC                              | AA              | 1946980066               |
| SNP_P4_145619_469412 | NW_004516185.1 | Scaffold812 | 469412                  | GG                              | CC              | 1946980068               |
| SNP_P4_145620_469760 | NW_004516185.1 | Scaffold812 | 469760                  | AA                              | GG              | 1946980070               |
| SNP_P4_145621_470770 | NW_004516185.1 | Scaffold812 | 470770                  | AA                              | GG              | 1946980072               |
| SNP_P4_145623_471645 | NW_004516185.1 | Scaffold812 | 471645                  | TT                              | CC              | 1946980074               |
| SNP_P4_145624_480922 | NW_004516185.1 | Scaffold812 | 480922                  | AA                              | GG              | 1946980076               |
| SNP_P4_145626_486981 | NW_004516185.1 | Scaffold812 | 486981                  | GG                              | CC              | 1946980078               |
| SNP_P4_145627_487058 | NW_004516185.1 | Scaffold812 | 487058                  | TT                              | CC              | 1946980080               |
| SNP_P4_145628_487068 | NW_004516185.1 | Scaffold812 | 487068                  | TT                              | CC              | 1946980082               |
| SNP_P4_145629_487152 | NW_004516185.1 | Scaffold812 | 487152                  | AA                              | TT              | 1946980084               |
| SNP_P4_145630_487198 | NW_004516185.1 | Scaffold812 | 487198                  | TT                              | CC              | 1946980085               |
| SNP_P4_145631_487318 | NW_004516185.1 | Scaffold812 | 487318                  | CC                              | GG              | 1946980087               |
| SNP_P4_145632_487327 | NW_004516185.1 | Scaffold812 | 487327                  | TT                              | CC              | 1946980089               |
| SNP_P4_145634_487375 | NW_004516185.1 | Scaffold812 | 487375                  | TT                              | AA              | 1946980091               |
| SNP_P4_145635_487403 | NW_004516185.1 | Scaffold812 | 487403                  | GG                              | AA              | 1946980093               |
| SNP_P4_145636_512732 | NW_004516185.1 | Scaffold812 | 512732                  | CC                              | TT              | 1946980095               |
| SNP_P4_145637_515558 | NW_004516185.1 | Scaffold812 | 515558                  | GG                              | AA              | 1946980097               |
| SNP_P4_145638_524059 | NW_004516185.1 | Scaffold812 | 524059                  | AA                              | GG              | 1946980099               |
| SNP_P4_145639_525899 | NW_004516185.1 | Scaffold812 | 525899                  | CC                              | TT              | 1946980101               |
| SNP_P4_145640_525952 | NW_004516185.1 | Scaffold812 | 525952                  | TT                              | AA              | 1946980103               |
| SNP_P4_145642_525993 | NW_004516185.1 | Scaffold812 | 525993                  | CC                              | TT              | 1946980105               |
| SNP_P4_145643_526012 | NW_004516185.1 | Scaffold812 | 526012                  | TT                              | CC              | 1946980107               |
| SNP_P4_145645_526260 | NW_004516185.1 | Scaffold812 | 526260                  | AA                              | TT              | 1946980109               |
| SNP_P4_145646_526344 | NW_004516185.1 | Scaffold812 | 526344                  | AA                              | TT              | 1946980111               |
| SNP_P4_145647_535195 | NW_004516185.1 | Scaffold812 | 535195                  | TT                              | AA              | 1946980113               |

| SNPs IDs             | Chromosome IDs | Chromosomes | Physical positions (bp) | CDC Frontier (Reference genome) | (ILWC46 & LPNB) | NCBI SNPdb Accession IDs |
|----------------------|----------------|-------------|-------------------------|---------------------------------|-----------------|--------------------------|
| SNP_P4_145648_535715 | NW_004516185.1 | Scaffold812 | 535715                  | AA                              | TT              | 1946980115               |
| SNP_P4_145650_548648 | NW_004516185.1 | Scaffold812 | 548648                  | AA                              | GG              | 1946980117               |
| SNP_P4_145651_548873 | NW_004516185.1 | Scaffold812 | 548873                  | CC                              | TT              | 1946980119               |
| SNP_P4_145652_548963 | NW_004516185.1 | Scaffold812 | 548963                  | GG                              | TT              | 1946980121               |
| SNP_P4_145653_549075 | NW_004516185.1 | Scaffold812 | 549075                  | TT                              | GG              | 1946980123               |
| SNP_P4_145654_549084 | NW_004516185.1 | Scaffold812 | 549084                  | AA                              | GG              | 1946980125               |
| SNP_P4_145655_551734 | NW_004516185.1 | Scaffold812 | 551734                  | CC                              | TT              | 1946980127               |
| SNP_P4_145656_2888   | NW_004516186.1 | Scaffold814 | 2888                    | TT                              | CC              | 1946980129               |
| SNP_P4_145657_3321   | NW_004516186.1 | Scaffold814 | 3321                    | TT                              | AA              | 1946980131               |
| SNP_P4_145658_3510   | NW_004516186.1 | Scaffold814 | 3510                    | GG                              | TT              | 1946980132               |
| SNP_P4_145659_12264  | NW_004516186.1 | Scaffold814 | 12264                   | GG                              | AA              | 1946980134               |
| SNP_P4_145660_12628  | NW_004516186.1 | Scaffold814 | 12628                   | TT                              | GG              | 1946980136               |
| SNP_P4_145661_35602  | NW_004516186.1 | Scaffold814 | 35602                   | CC                              | TT              | 1946980138               |
| SNP_P4_145662_35906  | NW_004516186.1 | Scaffold814 | 35906                   | TT                              | GG              | 1946980140               |
| SNP_P4_145663_39755  | NW_004516186.1 | Scaffold814 | 39755                   | AA                              | CC              | 1946980142               |
| SNP_P4_145664_39779  | NW_004516186.1 | Scaffold814 | 39779                   | AA                              | GG              | 1946980144               |
| SNP_P4_145665_39853  | NW_004516186.1 | Scaffold814 | 39853                   | TT                              | CC              | 1946980146               |
| SNP_P4_145666_39946  | NW_004516186.1 | Scaffold814 | 39946                   | TT                              | CC              | 1946980148               |
| SNP_P4_145667_40067  | NW_004516186.1 | Scaffold814 | 40067                   | AA                              | TT              | 1946980151               |
| SNP_P4_145668_40146  | NW_004516186.1 | Scaffold814 | 40146                   | CC                              | TT              | 1946980153               |
| SNP_P4_145669_41240  | NW_004516186.1 | Scaffold814 | 41240                   | AA                              | CC              | 1946980155               |
| SNP_P4_145670_41241  | NW_004516186.1 | Scaffold814 | 41241                   | GG                              | CC              | 1946980157               |
| SNP_P4_145671_41260  | NW_004516186.1 | Scaffold814 | 41260                   | AA                              | GG              | 1946980159               |
| SNP_P4_145672_41290  | NW_004516186.1 | Scaffold814 | 41290                   | AA                              | TT              | 1946980161               |
| SNP_P4_145673_41351  | NW_004516186.1 | Scaffold814 | 41351                   | GG                              | AA              | 1946980162               |
| SNP_P4_145674_41754  | NW_004516186.1 | Scaffold814 | 41754                   | TT                              | GG              | 1946980164               |
| SNP_P4_145675_46460  | NW_004516186.1 | Scaffold814 | 46460                   | GG                              | AA              | 1946980166               |
| SNP_P4_145676_46718  | NW_004516186.1 | Scaffold814 | 46718                   | GG                              | CC              | 1946980168               |
| SNP_P4_145677_46790  | NW_004516186.1 | Scaffold814 | 46790                   | AA                              | GG              | 1946980170               |
| SNP_P4_145678_3855   | NW_004516188.1 | Scaffold817 | 3855                    | GG                              | AA              | 1946980173               |
| SNP_P4_145679_4613   | NW_004516188.1 | Scaffold817 | 4613                    | GG                              | TT              | 1946980175               |
| SNP_P4_145681_4627   | NW_004516188.1 | Scaffold817 | 4627                    | TT                              | CC              | 1946980177               |
| SNP_P4_145682_4659   | NW_004516188.1 | Scaffold817 | 4659                    | AA                              | TT              | 1946980179               |
| SNP_P4_145683_4711   | NW_004516188.1 | Scaffold817 | 4711                    | GG                              | AA              | 1946980182               |
| SNP_P4_145684_4736   | NW_004516188.1 | Scaffold817 | 4736                    | AA                              | GG              | 1946980184               |
| SNP_P4_145685_4877   | NW_004516188.1 | Scaffold817 | 4877                    | CC                              | GG              | 1946980186               |
| SNP_P4_145686_5351   | NW_004516188.1 | Scaffold817 | 5351                    | CC                              | GG              | 1946980188               |
| SNP_P4_145687_11044  | NW_004516188.1 | Scaffold817 | 11044                   | CC                              | TT              | 1946980190               |
| SNP_P4_145688_1276   | NW_004516189.1 | Scaffold818 | 1276                    | CC                              | GG              | 1946980192               |
| SNP_P4_145689_1850   | NW_004516189.1 | Scaffold818 | 1850                    | CC                              | TT              | 1946980194               |
| SNP_P4_145690_2007   | NW_004516189.1 | Scaffold818 | 2007                    | CC                              | TT              | 1946980196               |
| SNP_P4_145691_2230   | NW_004516189.1 | Scaffold818 | 2230                    | GG                              | CC              | 1946980197               |

| SNPs IDs            | Chromosome IDs | Chromosomes | Physical positions (bp) | CDC Frontier (Reference genome) | (ILWC46 & LPNB) | NCBI SNPdb Accession IDs |
|---------------------|----------------|-------------|-------------------------|---------------------------------|-----------------|--------------------------|
| SNP_P4_145692_2267  | NW_004516189.1 | Scaffold818 | 2267                    | CC                              | TT              | 1946980199               |
| SNP_P4_145694_15487 | NW_004516191.1 | Scaffold820 | 15487                   | AA                              | GG              | 1946980201               |
| SNP_P4_145695_17722 | NW_004516191.1 | Scaffold820 | 17722                   | TT                              | GG              | 1946980203               |
| SNP_P4_145696_18670 | NW_004516191.1 | Scaffold820 | 18670                   | TT                              | CC              | 1946980205               |
| SNP_P4_145697_25318 | NW_004516191.1 | Scaffold820 | 25318                   | GG                              | AA              | 1946980207               |
| SNP_P4_145698_30402 | NW_004516191.1 | Scaffold820 | 30402                   | CC                              | GG              | 1946980209               |
| SNP_P4_145699_30417 | NW_004516191.1 | Scaffold820 | 30417                   | GG                              | AA              | 1946980211               |
| SNP_P4_145700_31875 | NW_004516191.1 | Scaffold820 | 31875                   | GG                              | AA              | 1946980213               |
| SNP_P4_145701_37300 | NW_004516191.1 | Scaffold820 | 37300                   | AA                              | GG              | 1946980215               |
| SNP_P4_145702_37303 | NW_004516191.1 | Scaffold820 | 37303                   | TT                              | GG              | 1946980217               |
| SNP_P4_145703_37486 | NW_004516191.1 | Scaffold820 | 37486                   | TT                              | CC              | 1946980220               |
| SNP_P4_145704_37490 | NW_004516191.1 | Scaffold820 | 37490                   | GG                              | AA              | 1946980222               |
| SNP_P4_145705_37494 | NW_004516191.1 | Scaffold820 | 37494                   | TT                              | AA              | 1946980224               |
| SNP_P4_145706_37526 | NW_004516191.1 | Scaffold820 | 37526                   | AA                              | GG              | 1946980226               |
| SNP_P4_145707_37550 | NW_004516191.1 | Scaffold820 | 37550                   | AA                              | GG              | 1946980228               |
| SNP_P4_145708_37553 | NW_004516191.1 | Scaffold820 | 37553                   | GG                              | AA              | 1946980229               |
| SNP_P4_145709_37564 | NW_004516191.1 | Scaffold820 | 37564                   | CC                              | TT              | 1946980232               |
| SNP_P4_145710_37872 | NW_004516191.1 | Scaffold820 | 37872                   | TT                              | CC              | 1946980233               |
| SNP_P4_145711_39739 | NW_004516191.1 | Scaffold820 | 39739                   | TT                              | CC              | 1946980235               |
| SNP_P4_145712_39773 | NW_004516191.1 | Scaffold820 | 39773                   | AA                              | GG              | 1946980238               |
| SNP_P4_145713_39936 | NW_004516191.1 | Scaffold820 | 39936                   | GG                              | AA              | 1946980240               |
| SNP_P4_145714_53846 | NW_004516191.1 | Scaffold820 | 53846                   | GG                              | AA              | 1946980242               |
| SNP_P4_145715_23206 | NW_004516193.1 | Scaffold822 | 23206                   | CC                              | AA              | 1946980244               |
| SNP_P4_145716_5317  | NW_004516194.1 | Scaffold823 | 5317                    | GG                              | TT              | 1946980246               |
| SNP_P4_145717_22865 | NW_004516194.1 | Scaffold823 | 22865                   | AA                              | TT              | 1946980248               |
| SNP_P4_145718_23191 | NW_004516194.1 | Scaffold823 | 23191                   | TT                              | CC              | 1946980250               |
| SNP_P4_145719_23204 | NW_004516194.1 | Scaffold823 | 23204                   | AA                              | TT              | 1946980252               |
| SNP_P4_145720_24535 | NW_004516194.1 | Scaffold823 | 24535                   | CC                              | GG              | 1946980254               |
| SNP_P4_145721_24618 | NW_004516194.1 | Scaffold823 | 24618                   | AA                              | GG              | 1946980256               |
| SNP_P4_145722_24635 | NW_004516194.1 | Scaffold823 | 24635                   | AA                              | TT              | 1946980257               |
| SNP_P4_145723_24718 | NW_004516194.1 | Scaffold823 | 24718                   | CC                              | TT              | 1946980258               |
| SNP_P4_145724_24744 | NW_004516194.1 | Scaffold823 | 24744                   | TT                              | AA              | 1946980259               |
| SNP_P4_145725_24746 | NW_004516194.1 | Scaffold823 | 24746                   | AA                              | GG              | 1946980261               |
| SNP_P4_145726_28092 | NW_004516194.1 | Scaffold823 | 28092                   | CC                              | TT              | 1946980263               |
| SNP_P4_145727_28296 | NW_004516194.1 | Scaffold823 | 28296                   | TT                              | CC              | 1946980265               |
| SNP_P4_145728_28344 | NW_004516194.1 | Scaffold823 | 28344                   | AA                              | CC              | 1946980266               |
| SNP_P4_145729_28358 | NW_004516194.1 | Scaffold823 | 28358                   | TT                              | CC              | 1946980268               |
| SNP_P4_145730_28360 | NW_004516194.1 | Scaffold823 | 28360                   | CC                              | TT              | 1946980270               |
| SNP_P4_145731_28386 | NW_004516194.1 | Scaffold823 | 28386                   | CC                              | TT              | 1946980272               |
| SNP_P4_145732_28415 | NW_004516194.1 | Scaffold823 | 28415                   | CC                              | AA              | 1946980274               |
| SNP_P4_145733_28439 | NW_004516194.1 | Scaffold823 | 28439                   | CC                              | AA              | 1946980276               |
| SNP_P4_145734_28464 | NW_004516194.1 | Scaffold823 | 28464                   | CC                              | AA              | 1946980278               |

| SNPs IDs            | Chromosome IDs | Chromosomes | Physical positions (bp) | CDC Frontier (Reference genome) | (ILWC46 & LPNB) | NCBI SNPdb Accession IDs |
|---------------------|----------------|-------------|-------------------------|---------------------------------|-----------------|--------------------------|
| SNP_P4_145735_28507 | NW_004516194.1 | Scaffold823 | 28507                   | TT                              | CC              | 1946980280               |
| SNP_P4_145736_28509 | NW_004516194.1 | Scaffold823 | 28509                   | AA                              | GG              | 1946980282               |
| SNP_P4_145737_28514 | NW_004516194.1 | Scaffold823 | 28514                   | TT                              | CC              | 1946980284               |
| SNP_P4_145738_28583 | NW_004516194.1 | Scaffold823 | 28583                   | AA                              | TT              | 1946980286               |
| SNP_P4_145739_28613 | NW_004516194.1 | Scaffold823 | 28613                   | GG                              | AA              | 1946980288               |
| SNP_P4_145740_28661 | NW_004516194.1 | Scaffold823 | 28661                   | TT                              | GG              | 1946980290               |
| SNP_P4_145741_28682 | NW_004516194.1 | Scaffold823 | 28682                   | CC                              | AA              | 1946980292               |
| SNP_P4_145742_28726 | NW_004516194.1 | Scaffold823 | 28726                   | AA                              | TT              | 1946980293               |
| SNP_P4_145743_28769 | NW_004516194.1 | Scaffold823 | 28769                   | GG                              | CC              | 1946980295               |
| SNP_P4_145744_28792 | NW_004516194.1 | Scaffold823 | 28792                   | GG                              | TT              | 1946980297               |
| SNP_P4_145745_35042 | NW_004516194.1 | Scaffold823 | 35042                   | AA                              | CC              | 1946980299               |
| SNP_P4_145746_35046 | NW_004516194.1 | Scaffold823 | 35046                   | AA                              | GG              | 1946980301               |
| SNP_P4_145747_44155 | NW_004516194.1 | Scaffold823 | 44155                   | GG                              | TT              | 1946980303               |
| SNP_P4_145748_44160 | NW_004516194.1 | Scaffold823 | 44160                   | TT                              | CC              | 1946980305               |
| SNP_P4_145749_47459 | NW_004516194.1 | Scaffold823 | 47459                   | GG                              | CC              | 1946980307               |
| SNP_P4_145750_47461 | NW_004516194.1 | Scaffold823 | 47461                   | CC                              | TT              | 1946980309               |
| SNP_P4_145751_47521 | NW_004516194.1 | Scaffold823 | 47521                   | CC                              | TT              | 1946980311               |
| SNP_P4_145752_47551 | NW_004516194.1 | Scaffold823 | 47551                   | AA                              | TT              | 1946980313               |
| SNP_P4_145753_47572 | NW_004516194.1 | Scaffold823 | 47572                   | GG                              | AA              | 1946980315               |
| SNP_P4_145754_47632 | NW_004516194.1 | Scaffold823 | 47632                   | CC                              | GG              | 1946980316               |
| SNP_P4_145755_47683 | NW_004516194.1 | Scaffold823 | 47683                   | TT                              | CC              | 1946980318               |
| SNP_P4_145756_47691 | NW_004516194.1 | Scaffold823 | 47691                   | TT                              | CC              | 1946980320               |
| SNP_P4_145757_47777 | NW_004516194.1 | Scaffold823 | 47777                   | TT                              | CC              | 1946980322               |
| SNP_P4_145758_47817 | NW_004516194.1 | Scaffold823 | 47817                   | TT                              | CC              | 1946980324               |
| SNP_P4_145759_47837 | NW_004516194.1 | Scaffold823 | 47837                   | AA                              | CC              | 1946980326               |
| SNP_P4_145760_47910 | NW_004516194.1 | Scaffold823 | 47910                   | TT                              | CC              | 1946980328               |
| SNP_P4_145761_47950 | NW_004516194.1 | Scaffold823 | 47950                   | CC                              | GG              | 1946980330               |
| SNP_P4_145762_47957 | NW_004516194.1 | Scaffold823 | 47957                   | AA                              | GG              | 1946980332               |
| SNP_P4_145763_47979 | NW_004516194.1 | Scaffold823 | 47979                   | GG                              | AA              | 1946980334               |
| SNP_P4_145764_48128 | NW_004516194.1 | Scaffold823 | 48128                   | TT                              | CC              | 1946980336               |
| SNP_P4_145765_48156 | NW_004516194.1 | Scaffold823 | 48156                   | TT                              | CC              | 1946980338               |
| SNP_P4_145766_48208 | NW_004516194.1 | Scaffold823 | 48208                   | AA                              | TT              | 1946980340               |
| SNP_P4_145767_48216 | NW_004516194.1 | Scaffold823 | 48216                   | AA                              | CC              | 1946980342               |
| SNP_P4_145768_48454 | NW_004516194.1 | Scaffold823 | 48454                   | TT                              | GG              | 1946980344               |
| SNP_P4_145769_49359 | NW_004516194.1 | Scaffold823 | 49359                   | AA                              | GG              | 1946980346               |
| SNP_P4_145770_49401 | NW_004516194.1 | Scaffold823 | 49401                   | TT                              | GG              | 1946980348               |
| SNP_P4_145771_49547 | NW_004516194.1 | Scaffold823 | 49547                   | GG                              | AA              | 1946980350               |
| SNP_P4_145772_49601 | NW_004516194.1 | Scaffold823 | 49601                   | AA                              | TT              | 1946980352               |
| SNP_P4_145773_49643 | NW_004516194.1 | Scaffold823 | 49643                   | AA                              | GG              | 1946980354               |
| SNP_P4_145774_49679 | NW_004516194.1 | Scaffold823 | 49679                   | GG                              | AA              | 1946980356               |
| SNP_P4_145775_53442 | NW_004516194.1 | Scaffold823 | 53442                   | GG                              | TT              | 1946980358               |
| SNP_P4_145776_53668 | NW_004516194.1 | Scaffold823 | 53668                   | CC                              | GG              | 1946980360               |

| SNPs IDs            | Chromosome IDs | Chromosomes | Physical positions (bp) | CDC Frontier (Reference genome) | (ILWC46 & LPNB) | NCBI SNPdb Accession IDs |
|---------------------|----------------|-------------|-------------------------|---------------------------------|-----------------|--------------------------|
| SNP_P4_145777_54085 | NW_004516194.1 | Scaffold823 | 54085                   | AA                              | GG              | 1946980362               |
| SNP_P4_145778_54211 | NW_004516194.1 | Scaffold823 | 54211                   | AA                              | CC              | 1946980364               |
| SNP_P4_145779_58243 | NW_004516194.1 | Scaffold823 | 58243                   | TT                              | AA              | 1946980366               |
| SNP_P4_145780_58544 | NW_004516194.1 | Scaffold823 | 58544                   | CC                              | TT              | 1946980368               |
| SNP_P4_145781_58800 | NW_004516194.1 | Scaffold823 | 58800                   | AA                              | GG              | 1946980370               |
| SNP_P4_145782_60166 | NW_004516194.1 | Scaffold823 | 60166                   | TT                              | CC              | 1946980372               |
| SNP_P4_145783_60461 | NW_004516194.1 | Scaffold823 | 60461                   | TT                              | CC              | 1946980374               |
| SNP_P4_145784_60481 | NW_004516194.1 | Scaffold823 | 60481                   | TT                              | CC              | 1946980376               |
| SNP_P4_145785_60509 | NW_004516194.1 | Scaffold823 | 60509                   | TT                              | AA              | 1946980377               |
| SNP_P4_145786_61833 | NW_004516194.1 | Scaffold823 | 61833                   | CC                              | AA              | 1946980379               |
| SNP_P4_145787_61969 | NW_004516194.1 | Scaffold823 | 61969                   | CC                              | TT              | 1946980381               |
| SNP_P4_145788_62011 | NW_004516194.1 | Scaffold823 | 62011                   | TT                              | AA              | 1946980383               |
| SNP_P4_145789_62045 | NW_004516194.1 | Scaffold823 | 62045                   | AA                              | TT              | 1946980385               |
| SNP_P4_145790_62073 | NW_004516194.1 | Scaffold823 | 62073                   | AA                              | GG              | 1946980387               |
| SNP_P4_145791_62131 | NW_004516194.1 | Scaffold823 | 62131                   | GG                              | AA              | 1946980389               |
| SNP_P4_145792_62138 | NW_004516194.1 | Scaffold823 | 62138                   | CC                              | TT              | 1946980391               |
| SNP_P4_145793_62270 | NW_004516194.1 | Scaffold823 | 62270                   | AA                              | CC              | 1946980393               |
| SNP_P4_145794_62364 | NW_004516194.1 | Scaffold823 | 62364                   | CC                              | TT              | 1946980395               |
| SNP_P4_145795_62425 | NW_004516194.1 | Scaffold823 | 62425                   | TT                              | AA              | 1946980397               |
| SNP_P4_145796_62432 | NW_004516194.1 | Scaffold823 | 62432                   | CC                              | TT              | 1946980399               |
| SNP_P4_145797_62675 | NW_004516194.1 | Scaffold823 | 62675                   | CC                              | TT              | 1946980401               |
| SNP_P4_145798_62680 | NW_004516194.1 | Scaffold823 | 62680                   | GG                              | AA              | 1946980402               |
| SNP_P4_145799_62709 | NW_004516194.1 | Scaffold823 | 62709                   | TT                              | AA              | 1946980404               |
| SNP_P4_145800_62826 | NW_004516194.1 | Scaffold823 | 62826                   | AA                              | TT              | 1946980406               |
| SNP_P4_145801_62839 | NW_004516194.1 | Scaffold823 | 62839                   | AA                              | GG              | 1946980408               |
| SNP_P4_145802_62933 | NW_004516194.1 | Scaffold823 | 62933                   | TT                              | CC              | 1946980410               |
| SNP_P4_145803_62965 | NW_004516194.1 | Scaffold823 | 62965                   | TT                              | AA              | 1946980412               |
| SNP_P4_145804_63040 | NW_004516194.1 | Scaffold823 | 63040                   | GG                              | AA              | 1946980414               |
| SNP_P4_145805_63076 | NW_004516194.1 | Scaffold823 | 63076                   | TT                              | AA              | 1946980416               |
| SNP_P4_145806_63320 | NW_004516194.1 | Scaffold823 | 63320                   | CC                              | GG              | 1946980418               |
| SNP_P4_145807_63541 | NW_004516194.1 | Scaffold823 | 63541                   | TT                              | AA              | 1946980420               |
| SNP_P4_145808_63544 | NW_004516194.1 | Scaffold823 | 63544                   | GG                              | AA              | 1946980422               |
| SNP_P4_145809_63631 | NW_004516194.1 | Scaffold823 | 63631                   | GG                              | TT              | 1946980424               |
| SNP_P4_145811_4616  | NW_004516195.1 | Scaffold824 | 4616                    | AA                              | TT              | 1946980426               |
| SNP_P4_145813_6142  | NW_004516195.1 | Scaffold824 | 6142                    | CC                              | GG              | 1946980428               |
| SNP_P4_145814_7112  | NW_004516195.1 | Scaffold824 | 7112                    | AA                              | TT              | 1946980429               |
| SNP_P4_145816_7136  | NW_004516195.1 | Scaffold824 | 7136                    | GG                              | TT              | 1946980431               |
| SNP_P4_145817_7155  | NW_004516195.1 | Scaffold824 | 7155                    | AA                              | CC              | 1946980433               |
| SNP_P4_145818_7219  | NW_004516195.1 | Scaffold824 | 7219                    | AA                              | GG              | 1946980435               |
| SNP_P4_145819_7224  | NW_004516195.1 | Scaffold824 | 7224                    | GG                              | TT              | 1946980437               |
| SNP_P4_145820_7281  | NW_004516195.1 | Scaffold824 | 7281                    | AA                              | TT              | 1946980439               |
| SNP_P4_145821_7289  | NW_004516195.1 | Scaffold824 | 7289                    | GG                              | TT              | 1946980441               |

| SNPs IDs            | Chromosome IDs | Chromosomes | Physical positions (bp) | CDC Frontier (Reference genome) | (ILWC46 & LPNB) | NCBI SNPdb Accession IDs |
|---------------------|----------------|-------------|-------------------------|---------------------------------|-----------------|--------------------------|
| SNP_P4_145822_7316  | NW_004516195.1 | Scaffold824 | 7316                    | GG                              | TT              | 1946980443               |
| SNP_P4_145823_7460  | NW_004516195.1 | Scaffold824 | 7460                    | CC                              | TT              | 1946980445               |
| SNP_P4_145824_11447 | NW_004516195.1 | Scaffold824 | 11447                   | TT                              | AA              | 1946980447               |
| SNP_P4_145825_11465 | NW_004516195.1 | Scaffold824 | 11465                   | CC                              | AA              | 1946980449               |
| SNP_P4_145826_11552 | NW_004516195.1 | Scaffold824 | 11552                   | GG                              | AA              | 1946980451               |
| SNP_P4_145827_11661 | NW_004516195.1 | Scaffold824 | 11661                   | AA                              | GG              | 1946980453               |
| SNP_P4_145828_11781 | NW_004516195.1 | Scaffold824 | 11781                   | CC                              | TT              | 1946980455               |
| SNP_P4_145829_11788 | NW_004516195.1 | Scaffold824 | 11788                   | GG                              | AA              | 1946980457               |
| SNP_P4_145830_11822 | NW_004516195.1 | Scaffold824 | 11822                   | AA                              | TT              | 1946980459               |
| SNP_P4_145831_12002 | NW_004516195.1 | Scaffold824 | 12002                   | CC                              | TT              | 1946980461               |
| SNP_P4_145832_12013 | NW_004516195.1 | Scaffold824 | 12013                   | AA                              | GG              | 1946980463               |
| SNP_P4_145833_13967 | NW_004516195.1 | Scaffold824 | 13967                   | AA                              | GG              | 1946980465               |
| SNP_P4_145834_15866 | NW_004516195.1 | Scaffold824 | 15866                   | GG                              | AA              | 1946980467               |
| SNP_P4_145835_20326 | NW_004516195.1 | Scaffold824 | 20326                   | AA                              | GG              | 1946980469               |
| SNP_P4_145836_20382 | NW_004516195.1 | Scaffold824 | 20382                   | AA                              | GG              | 1946980471               |
| SNP_P4_145837_20632 | NW_004516195.1 | Scaffold824 | 20632                   | AA                              | TT              | 1946980473               |
| SNP_P4_145838_21208 | NW_004516195.1 | Scaffold824 | 21208                   | TT                              | CC              | 1946980475               |
| SNP_P4_145839_21302 | NW_004516195.1 | Scaffold824 | 21302                   | TT                              | GG              | 1946980477               |
| SNP_P4_145840_21311 | NW_004516195.1 | Scaffold824 | 21311                   | CC                              | TT              | 1946980480               |
| SNP_P4_145841_4716  | NW_004516196.1 | Scaffold825 | 4716                    | TT                              | AA              | 1946980482               |
| SNP_P4_145842_7343  | NW_004516196.1 | Scaffold825 | 7343                    | AA                              | GG              | 1946980484               |
| SNP_P4_145843_15097 | NW_004516196.1 | Scaffold825 | 15097                   | AA                              | TT              | 1946980486               |
| SNP_P4_145844_1996  | NW_004516198.1 | Scaffold829 | 1996                    | TT                              | GG              | 1946980487               |
| SNP_P4_145845_2314  | NW_004516198.1 | Scaffold829 | 2314                    | AA                              | TT              | 1946980490               |
| SNP_P4_145846_5381  | NW_004516198.1 | Scaffold829 | 5381                    | GG                              | AA              | 1946980492               |
| SNP_P4_145847_8049  | NW_004516198.1 | Scaffold829 | 8049                    | GG                              | AA              | 1946980494               |
| SNP_P4_145848_8067  | NW_004516198.1 | Scaffold829 | 8067                    | GG                              | AA              | 1946980496               |
| SNP_P4_145849_8110  | NW_004516198.1 | Scaffold829 | 8110                    | CC                              | AA              | 1946980498               |
| SNP_P4_145851_8357  | NW_004516198.1 | Scaffold829 | 8357                    | GG                              | TT              | 1946980500               |
| SNP_P4_145852_8371  | NW_004516198.1 | Scaffold829 | 8371                    | TT                              | CC              | 1946980502               |
| SNP_P4_145853_8378  | NW_004516198.1 | Scaffold829 | 8378                    | GG                              | AA              | 1946980504               |
| SNP_P4_145854_8409  | NW_004516198.1 | Scaffold829 | 8409                    | CC                              | TT              | 1946980506               |
| SNP_P4_145855_8619  | NW_004516198.1 | Scaffold829 | 8619                    | AA                              | GG              | 1946980508               |
| SNP_P4_145856_8636  | NW_004516198.1 | Scaffold829 | 8636                    | TT                              | AA              | 1946980510               |
| SNP_P4_145857_8671  | NW_004516198.1 | Scaffold829 | 8671                    | TT                              | CC              | 1946980512               |
| SNP_P4_145858_8680  | NW_004516198.1 | Scaffold829 | 8680                    | TT                              | CC              | 1946980514               |
| SNP_P4_145859_8749  | NW_004516198.1 | Scaffold829 | 8749                    | GG                              | AA              | 1946980516               |
| SNP_P4_145860_8774  | NW_004516198.1 | Scaffold829 | 8774                    | CC                              | TT              | 1946980518               |
| SNP_P4_145861_8783  | NW_004516198.1 | Scaffold829 | 8783                    | CC                              | TT              | 1946980520               |
| SNP_P4_145862_8845  | NW_004516198.1 | Scaffold829 | 8845                    | CC                              | TT              | 1946980522               |
| SNP_P4_145863_8935  | NW_004516198.1 | Scaffold829 | 8935                    | GG                              | CC              | 1946980524               |
| SNP_P4_145864_8976  | NW_004516198.1 | Scaffold829 | 8976                    | AA                              | CC              | 1946980526               |



| SNPs IDs            | Chromosome IDs | Chromosomes | Physical positions (bp) | CDC Frontier (Reference genome) | (ILWC46 & LPNB) | NCBI SNPdb Accession IDs |
|---------------------|----------------|-------------|-------------------------|---------------------------------|-----------------|--------------------------|
| SNP_P4_145865_9026  | NW_004516198.1 | Scaffold829 | 9026                    | AA                              | CC              | 1946980528               |
| SNP_P4_145866_9041  | NW_004516198.1 | Scaffold829 | 9041                    | AA                              | GG              | 1946980530               |
| SNP_P4_145867_9045  | NW_004516198.1 | Scaffold829 | 9045                    | CC                              | GG              | 1946980532               |
| SNP_P4_145868_9145  | NW_004516198.1 | Scaffold829 | 9145                    | GG                              | CC              | 1946980533               |
| SNP_P4_145869_9148  | NW_004516198.1 | Scaffold829 | 9148                    | AA                              | GG              | 1946980535               |
| SNP_P4_145870_9151  | NW_004516198.1 | Scaffold829 | 9151                    | TT                              | AA              | 1946980537               |
| SNP_P4_145871_9256  | NW_004516198.1 | Scaffold829 | 9256                    | TT                              | CC              | 1946980539               |
| SNP_P4_145872_9263  | NW_004516198.1 | Scaffold829 | 9263                    | AA                              | GG              | 1946980541               |
| SNP_P4_145873_9287  | NW_004516198.1 | Scaffold829 | 9287                    | AA                              | GG              | 1946980543               |
| SNP_P4_145874_9361  | NW_004516198.1 | Scaffold829 | 9361                    | CC                              | TT              | 1946980545               |
| SNP_P4_145875_9363  | NW_004516198.1 | Scaffold829 | 9363                    | CC                              | GG              | 1946980547               |
| SNP_P4_145876_9850  | NW_004516198.1 | Scaffold829 | 9850                    | CC                              | TT              | 1946980549               |
| SNP_P4_145877_10145 | NW_004516198.1 | Scaffold829 | 10145                   | TT                              | GG              | 1946980551               |
| SNP_P4_145878_10623 | NW_004516198.1 | Scaffold829 | 10623                   | GG                              | AA              | 1946980552               |
| SNP_P4_145879_10624 | NW_004516198.1 | Scaffold829 | 10624                   | TT                              | AA              | 1946980554               |
| SNP_P4_145880_10773 | NW_004516198.1 | Scaffold829 | 10773                   | TT                              | GG              | 1946980556               |
| SNP_P4_145881_10779 | NW_004516198.1 | Scaffold829 | 10779                   | TT                              | GG              | 1946980558               |
| SNP_P4_145882_10818 | NW_004516198.1 | Scaffold829 | 10818                   | CC                              | TT              | 1946980560               |
| SNP_P4_145883_10904 | NW_004516198.1 | Scaffold829 | 10904                   | TT                              | AA              | 1946980562               |
| SNP_P4_145885_11096 | NW_004516198.1 | Scaffold829 | 11096                   | GG                              | AA              | 1946980564               |
| SNP_P4_145886_12295 | NW_004516198.1 | Scaffold829 | 12295                   | TT                              | AA              | 1946980565               |
| SNP_P4_145887_12375 | NW_004516198.1 | Scaffold829 | 12375                   | CC                              | TT              | 1946980567               |
| SNP_P4_145888_12475 | NW_004516198.1 | Scaffold829 | 12475                   | CC                              | TT              | 1946980569               |
| SNP_P4_145889_12477 | NW_004516198.1 | Scaffold829 | 12477                   | TT                              | CC              | 1946980571               |
| SNP_P4_145890_12529 | NW_004516198.1 | Scaffold829 | 12529                   | TT                              | GG              | 1946980573               |
| SNP_P4_145891_12611 | NW_004516198.1 | Scaffold829 | 12611                   | TT                              | CC              | 1946980575               |
| SNP_P4_145892_12630 | NW_004516198.1 | Scaffold829 | 12630                   | TT                              | AA              | 1946980577               |
| SNP_P4_145893_12702 | NW_004516198.1 | Scaffold829 | 12702                   | CC                              | TT              | 1946980579               |
| SNP_P4_145894_12712 | NW_004516198.1 | Scaffold829 | 12712                   | TT                              | AA              | 1946980581               |
| SNP_P4_145895_16250 | NW_004516198.1 | Scaffold829 | 16250                   | GG                              | TT              | 1946980583               |
| SNP_P4_145896_16548 | NW_004516198.1 | Scaffold829 | 16548                   | GG                              | AA              | 1946980585               |
| SNP_P4_145897_16766 | NW_004516198.1 | Scaffold829 | 16766                   | GG                              | AA              | 1946980587               |
| SNP_P4_145898_16769 | NW_004516198.1 | Scaffold829 | 16769                   | TT                              | GG              | 1946980589               |
| SNP_P4_145899_1356  | NW_004516199.1 | Scaffold831 | 1356                    | AA                              | GG              | 1946980591               |
| SNP_P4_145900_1769  | NW_004516199.1 | Scaffold831 | 1769                    | CC                              | TT              | 1946980593               |
| SNP_P4_145901_6138  | NW_004516199.1 | Scaffold831 | 6138                    | TT                              | AA              | 1946980594               |
| SNP_P4_145902_7625  | NW_004516199.1 | Scaffold831 | 7625                    | GG                              | AA              | 1946980596               |
| SNP_P4_145903_12194 | NW_004516199.1 | Scaffold831 | 12194                   | TT                              | CC              | 1946980598               |
| SNP_P4_145904_12528 | NW_004516199.1 | Scaffold831 | 12528                   | TT                              | CC              | 1946980600               |
| SNP_P4_145905_12558 | NW_004516199.1 | Scaffold831 | 12558                   | CC                              | TT              | 1946980602               |
| SNP_P4_145906_12615 | NW_004516199.1 | Scaffold831 | 12615                   | GG                              | AA              | 1946980604               |
| SNP_P4_145907_16088 | NW_004516199.1 | Scaffold831 | 16088                   | GG                              | AA              | 1946980606               |

| SNPs IDs            | Chromosome IDs | Chromosomes | Physical positions (bp) | CDC Frontier (Reference genome) | (ILWC46 & LPNB) | NCBI SNPdb Accession IDs |
|---------------------|----------------|-------------|-------------------------|---------------------------------|-----------------|--------------------------|
| SNP_P4_145908_16865 | NW_004516199.1 | Scaffold831 | 16865                   | GG                              | AA              | 1946980608               |
| SNP_P4_145909_19648 | NW_004516199.1 | Scaffold831 | 19648                   | AA                              | GG              | 1946980610               |
| SNP_P4_145910_19657 | NW_004516199.1 | Scaffold831 | 19657                   | GG                              | CC              | 1946980612               |
| SNP_P4_145911_20348 | NW_004516199.1 | Scaffold831 | 20348                   | AA                              | GG              | 1946980614               |
| SNP_P4_145912_34655 | NW_004516199.1 | Scaffold831 | 34655                   | TT                              | CC              | 1946980616               |
| SNP_P4_145913_43625 | NW_004516199.1 | Scaffold831 | 43625                   | AA                              | TT              | 1946980618               |
| SNP_P4_145914_43969 | NW_004516199.1 | Scaffold831 | 43969                   | TT                              | CC              | 1946980620               |
| SNP_P4_145915_43980 | NW_004516199.1 | Scaffold831 | 43980                   | CC                              | AA              | 1946980622               |
| SNP_P4_145916_49258 | NW_004516199.1 | Scaffold831 | 49258                   | AA                              | GG              | 1946980624               |
| SNP_P4_145918_52432 | NW_004516199.1 | Scaffold831 | 52432                   | GG                              | TT              | 1946980626               |
| SNP_P4_145919_52831 | NW_004516199.1 | Scaffold831 | 52831                   | AA                              | GG              | 1946980628               |
| SNP_P4_145920_52910 | NW_004516199.1 | Scaffold831 | 52910                   | TT                              | AA              | 1946980630               |
| SNP_P4_145921_53760 | NW_004516199.1 | Scaffold831 | 53760                   | GG                              | AA              | 1946980632               |
| SNP_P4_145922_53765 | NW_004516199.1 | Scaffold831 | 53765                   | TT                              | CC              | 1946980634               |
| SNP_P4_145923_53785 | NW_004516199.1 | Scaffold831 | 53785                   | CC                              | AA              | 1946980636               |
| SNP_P4_145924_54105 | NW_004516199.1 | Scaffold831 | 54105                   | CC                              | AA              | 1946980638               |
| SNP_P4_145925_54143 | NW_004516199.1 | Scaffold831 | 54143                   | AA                              | GG              | 1946980640               |
| SNP_P4_145926_56896 | NW_004516199.1 | Scaffold831 | 56896                   | TT                              | AA              | 1946980642               |
| SNP_P4_145927_56920 | NW_004516199.1 | Scaffold831 | 56920                   | CC                              | GG              | 1946980644               |
| SNP_P4_145928_57226 | NW_004516199.1 | Scaffold831 | 57226                   | TT                              | CC              | 1946980646               |
| SNP_P4_145929_57234 | NW_004516199.1 | Scaffold831 | 57234                   | GG                              | TT              | 1946980649               |
| SNP_P4_145930_57246 | NW_004516199.1 | Scaffold831 | 57246                   | CC                              | TT              | 1946980651               |
| SNP_P4_145931_59579 | NW_004516199.1 | Scaffold831 | 59579                   | AA                              | TT              | 1946980653               |
| SNP_P4_145932_65384 | NW_004516199.1 | Scaffold831 | 65384                   | GG                              | AA              | 1946980655               |
| SNP_P4_145933_65389 | NW_004516199.1 | Scaffold831 | 65389                   | TT                              | AA              | 1946980657               |
| SNP_P4_145934_70988 | NW_004516199.1 | Scaffold831 | 70988                   | CC                              | TT              | 1946980659               |
| SNP_P4_145935_71230 | NW_004516199.1 | Scaffold831 | 71230                   | CC                              | AA              | 1946980661               |
| SNP_P4_145936_80877 | NW_004516199.1 | Scaffold831 | 80877                   | GG                              | TT              | 1946980663               |
| SNP_P4_145937_80879 | NW_004516199.1 | Scaffold831 | 80879                   | CC                              | TT              | 1946980665               |
| SNP_P4_145938_86800 | NW_004516199.1 | Scaffold831 | 86800                   | AA                              | TT              | 1946980667               |
| SNP_P4_145939_6729  | NW_004516200.1 | Scaffold833 | 6729                    | AA                              | TT              | 1946980669               |
| SNP_P4_145940_11299 | NW_004516200.1 | Scaffold833 | 11299                   | GG                              | TT              | 1946980671               |
| SNP_P4_145941_13811 | NW_004516200.1 | Scaffold833 | 13811                   | TT                              | AA              | 1946980672               |
| SNP_P4_145942_14082 | NW_004516200.1 | Scaffold833 | 14082                   | AA                              | GG              | 1946980674               |
| SNP_P4_145943_17696 | NW_004516200.1 | Scaffold833 | 17696                   | GG                              | AA              | 1946980676               |
| SNP_P4_145944_18452 | NW_004516200.1 | Scaffold833 | 18452                   | AA                              | CC              | 1946980678               |
| SNP_P4_145945_19115 | NW_004516200.1 | Scaffold833 | 19115                   | CC                              | TT              | 1946980680               |
| SNP_P4_145946_123   | NW_004516203.1 | Scaffold837 | 123                     | AA                              | TT              | 1946980682               |
| SNP_P4_145947_546   | NW_004516205.1 | Scaffold840 | 546                     | GG                              | AA              | 1946980684               |
| SNP_P4_145948_548   | NW_004516205.1 | Scaffold840 | 548                     | TT                              | GG              | 1946980686               |
| SNP_P4_145949_64    | NW_004516206.1 | Scaffold841 | 64                      | AA                              | GG              | 1946980688               |
| SNP_P4_145950_65    | NW_004516206.1 | Scaffold841 | 65                      | CC                              | TT              | 1946980690               |

| SNPs IDs            | Chromosome IDs | Chromosomes | Physical positions (bp) | CDC Frontier (Reference genome) | (ILWC46 & LPNB) | NCBI SNPdb Accession IDs |
|---------------------|----------------|-------------|-------------------------|---------------------------------|-----------------|--------------------------|
| SNP_P4_145951_200   | NW_004516206.1 | Scaffold841 | 200                     | TT                              | CC              | 1946980692               |
| SNP_P4_145952_209   | NW_004516206.1 | Scaffold841 | 209                     | AA                              | TT              | 1946980694               |
| SNP_P4_145954_351   | NW_004516206.1 | Scaffold841 | 351                     | AA                              | GG              | 1946980696               |
| SNP_P4_145955_428   | NW_004516206.1 | Scaffold841 | 428                     | GG                              | TT              | 1946980699               |
| SNP_P4_145957_491   | NW_004516206.1 | Scaffold841 | 491                     | TT                              | AA              | 1946980701               |
| SNP_P4_145958_541   | NW_004516206.1 | Scaffold841 | 541                     | CC                              | TT              | 1946980703               |
| SNP_P4_145959_543   | NW_004516206.1 | Scaffold841 | 543                     | TT                              | AA              | 1946980705               |
| SNP_P4_145960_576   | NW_004516206.1 | Scaffold841 | 576                     | TT                              | AA              | 1946980707               |
| SNP_P4_145961_578   | NW_004516206.1 | Scaffold841 | 578                     | CC                              | AA              | 1946980709               |
| SNP_P4_145962_581   | NW_004516206.1 | Scaffold841 | 581                     | GG                              | AA              | 1946980711               |
| SNP_P4_145963_1189  | NW_004516206.1 | Scaffold841 | 1189                    | CC                              | TT              | 1946980713               |
| SNP_P4_145964_2860  | NW_004516206.1 | Scaffold841 | 2860                    | CC                              | TT              | 1946980715               |
| SNP_P4_145965_3123  | NW_004516206.1 | Scaffold841 | 3123                    | GG                              | AA              | 1946980717               |
| SNP_P4_145966_3365  | NW_004516206.1 | Scaffold841 | 3365                    | GG                              | AA              | 1946980719               |
| SNP_P4_145967_3498  | NW_004516206.1 | Scaffold841 | 3498                    | TT                              | CC              | 1946980721               |
| SNP_P4_145968_3514  | NW_004516206.1 | Scaffold841 | 3514                    | GG                              | CC              | 1946980724               |
| SNP_P4_145969_3537  | NW_004516206.1 | Scaffold841 | 3537                    | GG                              | AA              | 1946980726               |
| SNP_P4_145970_9694  | NW_004516206.1 | Scaffold841 | 9694                    | CC                              | AA              | 1946980728               |
| SNP_P4_145971_9704  | NW_004516206.1 | Scaffold841 | 9704                    | GG                              | CC              | 1946980730               |
| SNP_P4_145972_23721 | NW_004516206.1 | Scaffold841 | 23721                   | GG                              | TT              | 1946980732               |
| SNP_P4_145973_36062 | NW_004516206.1 | Scaffold841 | 36062                   | AA                              | GG              | 1946980734               |
| SNP_P4_145974_36460 | NW_004516206.1 | Scaffold841 | 36460                   | CC                              | TT              | 1946980736               |
| SNP_P4_145975_37098 | NW_004516206.1 | Scaffold841 | 37098                   | GG                              | TT              | 1946980739               |
| SNP_P4_145977_37439 | NW_004516206.1 | Scaffold841 | 37439                   | CC                              | AA              | 1946980741               |
| SNP_P4_145978_37647 | NW_004516206.1 | Scaffold841 | 37647                   | CC                              | GG              | 1946980743               |
| SNP_P4_145979_39082 | NW_004516206.1 | Scaffold841 | 39082                   | CC                              | AA              | 1946980745               |
| SNP_P4_145980_39532 | NW_004516206.1 | Scaffold841 | 39532                   | GG                              | TT              | 1946980747               |
| SNP_P4_145981_39750 | NW_004516206.1 | Scaffold841 | 39750                   | GG                              | TT              | 1946980749               |
| SNP_P4_145982_39770 | NW_004516206.1 | Scaffold841 | 39770                   | AA                              | TT              | 1946980751               |
| SNP_P4_145983_39773 | NW_004516206.1 | Scaffold841 | 39773                   | GG                              | TT              | 1946980753               |
| SNP_P4_145984_39784 | NW_004516206.1 | Scaffold841 | 39784                   | GG                              | TT              | 1946980755               |
| SNP_P4_145985_39785 | NW_004516206.1 | Scaffold841 | 39785                   | TT                              | GG              | 1946980756               |
| SNP_P4_145986_39787 | NW_004516206.1 | Scaffold841 | 39787                   | CC                              | TT              | 1946980757               |
| SNP_P4_145988_444   | NW_004516207.1 | Scaffold842 | 444                     | TT                              | CC              | 1946980758               |
| SNP_P4_145989_568   | NW_004516207.1 | Scaffold842 | 568                     | TT                              | CC              | 1946980759               |
| SNP_P4_145990_3678  | NW_004516207.1 | Scaffold842 | 3678                    | GG                              | CC              | 1946980760               |
| SNP_P4_145991_7274  | NW_004516207.1 | Scaffold842 | 7274                    | TT                              | AA              | 1946980762               |
| SNP_P4_145992_7320  | NW_004516207.1 | Scaffold842 | 7320                    | CC                              | AA              | 1946980764               |
| SNP_P4_145993_7684  | NW_004516207.1 | Scaffold842 | 7684                    | TT                              | AA              | 1946980766               |
| SNP_P4_145994_7762  | NW_004516207.1 | Scaffold842 | 7762                    | GG                              | AA              | 1946980768               |
| SNP_P4_145995_7771  | NW_004516207.1 | Scaffold842 | 7771                    | AA                              | GG              | 1946980770               |
| SNP_P4_145996_15715 | NW_004516207.1 | Scaffold842 | 15715                   | CC                              | TT              | 1946980772               |

| SNPs IDs            | Chromosome IDs | Chromosomes | Physical positions (bp) | CDC Frontier (Reference genome) | (ILWC46 & LPNB) | NCBI SNPdb Accession IDs |
|---------------------|----------------|-------------|-------------------------|---------------------------------|-----------------|--------------------------|
| SNP_P4_145998_16207 | NW_004516207.1 | Scaffold842 | 16207                   | GG                              | AA              | 1946980774               |
| SNP_P4_145999_20546 | NW_004516207.1 | Scaffold842 | 20546                   | GG                              | TT              | 1946980776               |
| SNP_P4_146000_20547 | NW_004516207.1 | Scaffold842 | 20547                   | GG                              | AA              | 1946980778               |
| SNP_P4_146001_20559 | NW_004516207.1 | Scaffold842 | 20559                   | GG                              | CC              | 1946980780               |
| SNP_P4_146002_20584 | NW_004516207.1 | Scaffold842 | 20584                   | GG                              | CC              | 1946980782               |
| SNP_P4_146004_20664 | NW_004516207.1 | Scaffold842 | 20664                   | GG                              | TT              | 1946980784               |
| SNP_P4_146005_20736 | NW_004516207.1 | Scaffold842 | 20736                   | AA                              | GG              | 1946980786               |
| SNP_P4_146006_20755 | NW_004516207.1 | Scaffold842 | 20755                   | TT                              | GG              | 1946980788               |
| SNP_P4_146007_21414 | NW_004516207.1 | Scaffold842 | 21414                   | TT                              | CC              | 1946980790               |
| SNP_P4_146008_29292 | NW_004516207.1 | Scaffold842 | 29292                   | AA                              | TT              | 1946980792               |
| SNP_P4_146009_29293 | NW_004516207.1 | Scaffold842 | 29293                   | TT                              | CC              | 1946980794               |
| SNP_P4_146010_29925 | NW_004516207.1 | Scaffold842 | 29925                   | CC                              | AA              | 1946980796               |
| SNP_P4_146011_36647 | NW_004516207.1 | Scaffold842 | 36647                   | AA                              | CC              | 1946980798               |
| SNP_P4_146012_36693 | NW_004516207.1 | Scaffold842 | 36693                   | AA                              | GG              | 1946980800               |
| SNP_P4_146013_36699 | NW_004516207.1 | Scaffold842 | 36699                   | CC                              | TT              | 1946980802               |
| SNP_P4_146014_39862 | NW_004516207.1 | Scaffold842 | 39862                   | TT                              | CC              | 1946980804               |
| SNP_P4_146015_39914 | NW_004516207.1 | Scaffold842 | 39914                   | TT                              | CC              | 1946980805               |
| SNP_P4_146016_1448  | NW_004516208.1 | Scaffold843 | 1448                    | GG                              | CC              | 1946980807               |
| SNP_P4_146017_1747  | NW_004516208.1 | Scaffold843 | 1747                    | CC                              | TT              | 1946980809               |
| SNP_P4_146018_1798  | NW_004516208.1 | Scaffold843 | 1798                    | CC                              | GG              | 1946980812               |
| SNP_P4_146019_1817  | NW_004516208.1 | Scaffold843 | 1817                    | CC                              | TT              | 1946980814               |
| SNP_P4_146021_2198  | NW_004516208.1 | Scaffold843 | 2198                    | TT                              | CC              | 1946980816               |
| SNP_P4_146022_2281  | NW_004516208.1 | Scaffold843 | 2281                    | CC                              | TT              | 1946980818               |
| SNP_P4_146023_2350  | NW_004516208.1 | Scaffold843 | 2350                    | GG                              | AA              | 1946980820               |
| SNP_P4_146024_2451  | NW_004516208.1 | Scaffold843 | 2451                    | CC                              | GG              | 1946980821               |
| SNP_P4_146025_2484  | NW_004516208.1 | Scaffold843 | 2484                    | GG                              | AA              | 1946980823               |
| SNP_P4_146026_2530  | NW_004516208.1 | Scaffold843 | 2530                    | TT                              | CC              | 1946980825               |
| SNP_P4_146027_2945  | NW_004516208.1 | Scaffold843 | 2945                    | CC                              | AA              | 1946980827               |
| SNP_P4_146028_3092  | NW_004516208.1 | Scaffold843 | 3092                    | CC                              | AA              | 1946980829               |
| SNP_P4_146029_3118  | NW_004516208.1 | Scaffold843 | 3118                    | GG                              | AA              | 1946980831               |
| SNP_P4_146030_3389  | NW_004516208.1 | Scaffold843 | 3389                    | TT                              | CC              | 1946980833               |
| SNP_P4_146031_3505  | NW_004516208.1 | Scaffold843 | 3505                    | GG                              | AA              | 1946980835               |
| SNP_P4_146032_4133  | NW_004516208.1 | Scaffold843 | 4133                    | AA                              | GG              | 1946980837               |
| SNP_P4_146033_4142  | NW_004516208.1 | Scaffold843 | 4142                    | GG                              | TT              | 1946980839               |
| SNP_P4_146034_4155  | NW_004516208.1 | Scaffold843 | 4155                    | TT                              | AA              | 1946980841               |
| SNP_P4_146035_4356  | NW_004516208.1 | Scaffold843 | 4356                    | TT                              | CC              | 1946980843               |
| SNP_P4_146036_4480  | NW_004516208.1 | Scaffold843 | 4480                    | AA                              | CC              | 1946980845               |
| SNP_P4_146037_4565  | NW_004516208.1 | Scaffold843 | 4565                    | AA                              | TT              | 1946980847               |
| SNP_P4_146038_6160  | NW_004516208.1 | Scaffold843 | 6160                    | TT                              | AA              | 1946980848               |
| SNP_P4_146039_7589  | NW_004516208.1 | Scaffold843 | 7589                    | TT                              | GG              | 1946980850               |
| SNP_P4_146040_25650 | NW_004516208.1 | Scaffold843 | 25650                   | GG                              | AA              | 1946980853               |
| SNP_P4_146041_26119 | NW_004516208.1 | Scaffold843 | 26119                   | TT                              | CC              | 1946980854               |

| SNPs IDs            | Chromosome IDs | Chromosomes | Physical positions (bp) | CDC Frontier (Reference genome) | (ILWC46 & LPNB) | NCBI SNPdb Accession IDs |
|---------------------|----------------|-------------|-------------------------|---------------------------------|-----------------|--------------------------|
| SNP_P4_146043_2958  | NW_004516210.1 | Scaffold845 | 2958                    | AA                              | CC              | 1946980856               |
| SNP_P4_146044_2977  | NW_004516210.1 | Scaffold845 | 2977                    | CC                              | TT              | 1946980858               |
| SNP_P4_146045_3305  | NW_004516210.1 | Scaffold845 | 3305                    | AA                              | GG              | 1946980860               |
| SNP_P4_146047_3824  | NW_004516210.1 | Scaffold845 | 3824                    | GG                              | TT              | 1946980862               |
| SNP_P4_146048_4952  | NW_004516210.1 | Scaffold845 | 4952                    | CC                              | TT              | 1946980863               |
| SNP_P4_146049_5598  | NW_004516210.1 | Scaffold845 | 5598                    | GG                              | AA              | 1946980865               |
| SNP_P4_146050_6334  | NW_004516210.1 | Scaffold845 | 6334                    | TT                              | CC              | 1946980867               |
| SNP_P4_146051_7286  | NW_004516210.1 | Scaffold845 | 7286                    | TT                              | AA              | 1946980869               |
| SNP_P4_146052_7300  | NW_004516210.1 | Scaffold845 | 7300                    | GG                              | CC              | 1946980871               |
| SNP_P4_146053_7389  | NW_004516210.1 | Scaffold845 | 7389                    | GG                              | TT              | 1946980873               |
| SNP_P4_146054_7508  | NW_004516210.1 | Scaffold845 | 7508                    | GG                              | TT              | 1946980875               |
| SNP_P4_146055_7640  | NW_004516210.1 | Scaffold845 | 7640                    | CC                              | TT              | 1946980877               |
| SNP_P4_146056_11831 | NW_004516210.1 | Scaffold845 | 11831                   | TT                              | CC              | 1946980879               |
| SNP_P4_146057_11886 | NW_004516210.1 | Scaffold845 | 11886                   | TT                              | CC              | 1946980881               |
| SNP_P4_146059_12457 | NW_004516210.1 | Scaffold845 | 12457                   | TT                              | GG              | 1946980883               |
| SNP_P4_146060_13332 | NW_004516210.1 | Scaffold845 | 13332                   | TT                              | CC              | 1946980885               |
| SNP_P4_146061_15780 | NW_004516210.1 | Scaffold845 | 15780                   | GG                              | AA              | 1946980887               |
| SNP_P4_146062_15795 | NW_004516210.1 | Scaffold845 | 15795                   | GG                              | AA              | 1946980889               |
| SNP_P4_146063_15864 | NW_004516210.1 | Scaffold845 | 15864                   | GG                              | AA              | 1946980890               |
| SNP_P4_146064_15869 | NW_004516210.1 | Scaffold845 | 15869                   | TT                              | AA              | 1946980892               |
| SNP_P4_146065_16856 | NW_004516210.1 | Scaffold845 | 16856                   | CC                              | AA              | 1946980894               |
| SNP_P4_146067_17269 | NW_004516210.1 | Scaffold845 | 17269                   | AA                              | GG              | 1946980896               |
| SNP_P4_146068_17285 | NW_004516210.1 | Scaffold845 | 17285                   | AA                              | CC              | 1946980898               |
| SNP_P4_146069_17288 | NW_004516210.1 | Scaffold845 | 17288                   | AA                              | TT              | 1946980901               |
| SNP_P4_146070_17351 | NW_004516210.1 | Scaffold845 | 17351                   | TT                              | CC              | 1946980903               |
| SNP_P4_146071_17396 | NW_004516210.1 | Scaffold845 | 17396                   | CC                              | AA              | 1946980905               |
| SNP_P4_146072_17443 | NW_004516210.1 | Scaffold845 | 17443                   | TT                              | AA              | 1946980907               |
| SNP_P4_146073_17468 | NW_004516210.1 | Scaffold845 | 17468                   | AA                              | GG              | 1946980908               |
| SNP_P4_146075_17568 | NW_004516210.1 | Scaffold845 | 17568                   | AA                              | GG              | 1946980910               |
| SNP_P4_146077_17963 | NW_004516210.1 | Scaffold845 | 17963                   | GG                              | CC              | 1946980913               |
| SNP_P4_146079_19129 | NW_004516210.1 | Scaffold845 | 19129                   | TT                              | CC              | 1946980915               |
| SNP_P4_146080_19279 | NW_004516210.1 | Scaffold845 | 19279                   | TT                              | CC              | 1946980916               |
| SNP_P4_146081_19285 | NW_004516210.1 | Scaffold845 | 19285                   | CC                              | TT              | 1946980919               |
| SNP_P4_146084_21811 | NW_004516210.1 | Scaffold845 | 21811                   | TT                              | CC              | 1946980921               |
| SNP_P4_146085_21998 | NW_004516210.1 | Scaffold845 | 21998                   | CC                              | TT              | 1946980923               |
| SNP_P4_146087_22218 | NW_004516210.1 | Scaffold845 | 22218                   | AA                              | GG              | 1946980925               |
| SNP_P4_146088_22266 | NW_004516210.1 | Scaffold845 | 22266                   | GG                              | TT              | 1946980927               |
| SNP_P4_146089_22267 | NW_004516210.1 | Scaffold845 | 22267                   | TT                              | AA              | 1946980930               |
| SNP_P4_146091_22344 | NW_004516210.1 | Scaffold845 | 22344                   | AA                              | GG              | 1946980932               |
| SNP_P4_146092_22557 | NW_004516210.1 | Scaffold845 | 22557                   | TT                              | CC              | 1946980934               |
| SNP_P4_146093_22596 | NW_004516210.1 | Scaffold845 | 22596                   | CC                              | TT              | 1946980936               |
| SNP_P4_146094_23021 | NW_004516210.1 | Scaffold845 | 23021                   | GG                              | AA              | 1946980938               |

| SNPs IDs            | Chromosome IDs | Chromosomes | Physical positions (bp) | CDC Frontier (Reference genome) | (ILWC46 & LPNB) | NCBI SNPdb Accession IDs |
|---------------------|----------------|-------------|-------------------------|---------------------------------|-----------------|--------------------------|
| SNP_P4_146095_23032 | NW_004516210.1 | Scaffold845 | 23032                   | TT                              | AA              | 1946980940               |
| SNP_P4_146097_23311 | NW_004516210.1 | Scaffold845 | 23311                   | AA                              | CC              | 1946980942               |
| SNP_P4_146098_23520 | NW_004516210.1 | Scaffold845 | 23520                   | TT                              | AA              | 1946980944               |
| SNP_P4_146099_23521 | NW_004516210.1 | Scaffold845 | 23521                   | AA                              | TT              | 1946980946               |
| SNP_P4_146100_23523 | NW_004516210.1 | Scaffold845 | 23523                   | CC                              | GG              | 1946980948               |
| SNP_P4_146101_23528 | NW_004516210.1 | Scaffold845 | 23528                   | CC                              | TT              | 1946980950               |
| SNP_P4_146102_23544 | NW_004516210.1 | Scaffold845 | 23544                   | CC                              | TT              | 1946980952               |
| SNP_P4_146104_23573 | NW_004516210.1 | Scaffold845 | 23573                   | TT                              | GG              | 1946980954               |
| SNP_P4_146105_24476 | NW_004516210.1 | Scaffold845 | 24476                   | CC                              | GG              | 1946980956               |
| SNP_P4_146106_24562 | NW_004516210.1 | Scaffold845 | 24562                   | GG                              | AA              | 1946980958               |
| SNP_P4_146107_24569 | NW_004516210.1 | Scaffold845 | 24569                   | CC                              | TT              | 1946980960               |
| SNP_P4_146108_24622 | NW_004516210.1 | Scaffold845 | 24622                   | TT                              | CC              | 1946980962               |
| SNP_P4_146109_24684 | NW_004516210.1 | Scaffold845 | 24684                   | AA                              | GG              | 1946980964               |
| SNP_P4_146110_24688 | NW_004516210.1 | Scaffold845 | 24688                   | CC                              | TT              | 1946980966               |
| SNP_P4_146111_24690 | NW_004516210.1 | Scaffold845 | 24690                   | AA                              | GG              | 1946980968               |
| SNP_P4_146113_25536 | NW_004516210.1 | Scaffold845 | 25536                   | TT                              | AA              | 1946980971               |
| SNP_P4_146114_25540 | NW_004516210.1 | Scaffold845 | 25540                   | AA                              | CC              | 1946980973               |
| SNP_P4_146115_25585 | NW_004516210.1 | Scaffold845 | 25585                   | TT                              | CC              | 1946980975               |
| SNP_P4_146116_25635 | NW_004516210.1 | Scaffold845 | 25635                   | GG                              | AA              | 1946980977               |
| SNP_P4_146117_25664 | NW_004516210.1 | Scaffold845 | 25664                   | TT                              | CC              | 1946980979               |
| SNP_P4_146118_25717 | NW_004516210.1 | Scaffold845 | 25717                   | GG                              | TT              | 1946980981               |
| SNP_P4_146119_26508 | NW_004516210.1 | Scaffold845 | 26508                   | AA                              | CC              | 1946980983               |
| SNP_P4_146120_26865 | NW_004516210.1 | Scaffold845 | 26865                   | GG                              | AA              | 1946980985               |
| SNP_P4_146121_26914 | NW_004516210.1 | Scaffold845 | 26914                   | CC                              | AA              | 1946980988               |
| SNP_P4_146122_26919 | NW_004516210.1 | Scaffold845 | 26919                   | CC                              | AA              | 1946980990               |
| SNP_P4_146123_26920 | NW_004516210.1 | Scaffold845 | 26920                   | TT                              | AA              | 1946980992               |
| SNP_P4_146125_28520 | NW_004516210.1 | Scaffold845 | 28520                   | AA                              | CC              | 1946980994               |
| SNP_P4_146126_28525 | NW_004516210.1 | Scaffold845 | 28525                   | TT                              | AA              | 1946980996               |
| SNP_P4_146127_28528 | NW_004516210.1 | Scaffold845 | 28528                   | AA                              | GG              | 1946980998               |
| SNP_P4_146128_29412 | NW_004516210.1 | Scaffold845 | 29412                   | CC                              | GG              | 1946981000               |
| SNP_P4_146130_29473 | NW_004516210.1 | Scaffold845 | 29473                   | TT                              | AA              | 1946981002               |
| SNP_P4_146131_29805 | NW_004516210.1 | Scaffold845 | 29805                   | TT                              | CC              | 1946981004               |
| SNP_P4_146132_31132 | NW_004516210.1 | Scaffold845 | 31132                   | TT                              | CC              | 1946981006               |
| SNP_P4_146133_31559 | NW_004516210.1 | Scaffold845 | 31559                   | TT                              | CC              | 1946981008               |
| SNP_P4_146135_32073 | NW_004516210.1 | Scaffold845 | 32073                   | TT                              | AA              | 1946981010               |
| SNP_P4_146136_32085 | NW_004516210.1 | Scaffold845 | 32085                   | TT                              | GG              | 1946981012               |
| SNP_P4_146138_32211 | NW_004516210.1 | Scaffold845 | 32211                   | CC                              | TT              | 1946981014               |
| SNP_P4_146139_32220 | NW_004516210.1 | Scaffold845 | 32220                   | CC                              | AA              | 1946981016               |
| SNP_P4_146140_32259 | NW_004516210.1 | Scaffold845 | 32259                   | TT                              | CC              | 1946981019               |
| SNP_P4_146141_32268 | NW_004516210.1 | Scaffold845 | 32268                   | TT                              | CC              | 1946981021               |
| SNP_P4_146142_32305 | NW_004516210.1 | Scaffold845 | 32305                   | TT                              | AA              | 1946981023               |
| SNP_P4_146143_32316 | NW_004516210.1 | Scaffold845 | 32316                   | CC                              | AA              | 1946981025               |

| SNPs IDs            | Chromosome IDs | Chromosomes | Physical positions (bp) | CDC Frontier (Reference genome) | (ILWC46 & LPNB) | NCBI SNPdb Accession IDs |
|---------------------|----------------|-------------|-------------------------|---------------------------------|-----------------|--------------------------|
| SNP_P4_146144_32334 | NW_004516210.1 | Scaffold845 | 32334                   | CC                              | TT              | 1946981027               |
| SNP_P4_146145_36268 | NW_004516210.1 | Scaffold845 | 36268                   | AA                              | GG              | 1946981030               |
| SNP_P4_146146_36273 | NW_004516210.1 | Scaffold845 | 36273                   | CC                              | AA              | 1946981032               |
| SNP_P4_146147_36280 | NW_004516210.1 | Scaffold845 | 36280                   | CC                              | AA              | 1946981034               |
| SNP_P4_146150_39302 | NW_004516210.1 | Scaffold845 | 39302                   | AA                              | TT              | 1946981036               |
| SNP_P4_146151_39304 | NW_004516210.1 | Scaffold845 | 39304                   | TT                              | CC              | 1946981039               |
| SNP_P4_146156_41735 | NW_004516210.1 | Scaffold845 | 41735                   | AA                              | TT              | 1946981041               |
| SNP_P4_146157_41738 | NW_004516210.1 | Scaffold845 | 41738                   | TT                              | AA              | 1946981043               |
| SNP_P4_146158_41990 | NW_004516210.1 | Scaffold845 | 41990                   | TT                              | CC              | 1946981045               |
| SNP_P4_146159_41991 | NW_004516210.1 | Scaffold845 | 41991                   | TT                              | AA              | 1946981047               |
| SNP_P4_146160_43658 | NW_004516210.1 | Scaffold845 | 43658                   | GG                              | TT              | 1946981049               |
| SNP_P4_146161_43679 | NW_004516210.1 | Scaffold845 | 43679                   | GG                              | TT              | 1946981051               |
| SNP_P4_146163_44173 | NW_004516210.1 | Scaffold845 | 44173                   | AA                              | GG              | 1946981053               |
| SNP_P4_146164_46358 | NW_004516210.1 | Scaffold845 | 46358                   | AA                              | TT              | 1946981055               |
| SNP_P4_146165_47678 | NW_004516210.1 | Scaffold845 | 47678                   | AA                              | TT              | 1946981057               |
| SNP_P4_146167_48005 | NW_004516210.1 | Scaffold845 | 48005                   | AA                              | GG              | 1946981059               |
| SNP_P4_146168_48013 | NW_004516210.1 | Scaffold845 | 48013                   | AA                              | TT              | 1946981061               |
| SNP_P4_146169_48041 | NW_004516210.1 | Scaffold845 | 48041                   | TT                              | CC              | 1946981063               |
| SNP_P4_146171_48853 | NW_004516210.1 | Scaffold845 | 48853                   | AA                              | CC              | 1946981065               |
| SNP_P4_146173_48956 | NW_004516210.1 | Scaffold845 | 48956                   | GG                              | AA              | 1946981067               |
| SNP_P4_146174_51256 | NW_004516210.1 | Scaffold845 | 51256                   | CC                              | TT              | 1946981069               |
| SNP_P4_146175_51302 | NW_004516210.1 | Scaffold845 | 51302                   | CC                              | TT              | 1946981071               |
| SNP_P4_146176_51540 | NW_004516210.1 | Scaffold845 | 51540                   | CC                              | GG              | 1946981074               |
| SNP_P4_146177_51569 | NW_004516210.1 | Scaffold845 | 51569                   | AA                              | CC              | 1946981076               |
| SNP_P4_146178_51722 | NW_004516210.1 | Scaffold845 | 51722                   | TT                              | CC              | 1946981079               |
| SNP_P4_146180_55061 | NW_004516210.1 | Scaffold845 | 55061                   | GG                              | AA              | 1946981081               |
| SNP_P4_146181_55194 | NW_004516210.1 | Scaffold845 | 55194                   | AA                              | TT              | 1946981083               |
| SNP_P4_146182_55197 | NW_004516210.1 | Scaffold845 | 55197                   | CC                              | TT              | 1946981086               |
| SNP_P4_146183_55569 | NW_004516210.1 | Scaffold845 | 55569                   | AA                              | GG              | 1946981088               |
| SNP_P4_146184_55968 | NW_004516210.1 | Scaffold845 | 55968                   | GG                              | TT              | 1946981089               |
| SNP_P4_146185_59943 | NW_004516210.1 | Scaffold845 | 59943                   | CC                              | TT              | 1946981091               |
| SNP_P4_146187_59989 | NW_004516210.1 | Scaffold845 | 59989                   | GG                              | CC              | 1946981094               |
| SNP_P4_146188_60645 | NW_004516210.1 | Scaffold845 | 60645                   | GG                              | AA              | 1946981096               |
| SNP_P4_146189_61826 | NW_004516210.1 | Scaffold845 | 61826                   | CC                              | AA              | 1946981098               |
| SNP_P4_146190_61971 | NW_004516210.1 | Scaffold845 | 61971                   | GG                              | AA              | 1946981100               |
| SNP_P4_146191_62855 | NW_004516210.1 | Scaffold845 | 62855                   | TT                              | AA              | 1946981102               |
| SNP_P4_146192_62899 | NW_004516210.1 | Scaffold845 | 62899                   | GG                              | TT              | 1946981104               |
| SNP_P4_146193_63110 | NW_004516210.1 | Scaffold845 | 63110                   | TT                              | GG              | 1946981106               |
| SNP_P4_146194_63114 | NW_004516210.1 | Scaffold845 | 63114                   | GG                              | AA              | 1946981108               |
| SNP_P4_146195_63115 | NW_004516210.1 | Scaffold845 | 63115                   | TT                              | CC              | 1946981110               |
| SNP_P4_146196_63180 | NW_004516210.1 | Scaffold845 | 63180                   | TT                              | CC              | 1946981112               |
| SNP_P4_146197_63218 | NW_004516210.1 | Scaffold845 | 63218                   | AA                              | TT              | 1946981114               |

| SNPs IDs            | Chromosome IDs | Chromosomes | Physical positions (bp) | CDC Frontier (Reference genome) | (ILWC46 & LPNB) | NCBI SNPdb Accession IDs |
|---------------------|----------------|-------------|-------------------------|---------------------------------|-----------------|--------------------------|
| SNP_P4_146198_63224 | NW_004516210.1 | Scaffold845 | 63224                   | TT                              | CC              | 1946981116               |
| SNP_P4_146199_63250 | NW_004516210.1 | Scaffold845 | 63250                   | GG                              | AA              | 1946981118               |
| SNP_P4_146200_63253 | NW_004516210.1 | Scaffold845 | 63253                   | AA                              | TT              | 1946981120               |
| SNP_P4_146201_63270 | NW_004516210.1 | Scaffold845 | 63270                   | CC                              | TT              | 1946981122               |
| SNP_P4_146202_63514 | NW_004516210.1 | Scaffold845 | 63514                   | AA                              | GG              | 1946981124               |
| SNP_P4_146203_63593 | NW_004516210.1 | Scaffold845 | 63593                   | CC                              | AA              | 1946981126               |
| SNP_P4_146204_63594 | NW_004516210.1 | Scaffold845 | 63594                   | AA                              | GG              | 1946981128               |
| SNP_P4_146206_64461 | NW_004516210.1 | Scaffold845 | 64461                   | TT                              | CC              | 1946981130               |
| SNP_P4_146207_64466 | NW_004516210.1 | Scaffold845 | 64466                   | TT                              | CC              | 1946981132               |
| SNP_P4_146208_64516 | NW_004516210.1 | Scaffold845 | 64516                   | AA                              | CC              | 1946981134               |
| SNP_P4_146209_64539 | NW_004516210.1 | Scaffold845 | 64539                   | CC                              | AA              | 1946981136               |
| SNP_P4_146210_66362 | NW_004516210.1 | Scaffold845 | 66362                   | CC                              | GG              | 1946981138               |
| SNP_P4_146211_66564 | NW_004516210.1 | Scaffold845 | 66564                   | TT                              | CC              | 1946981140               |
| SNP_P4_146212_66631 | NW_004516210.1 | Scaffold845 | 66631                   | AA                              | GG              | 1946981142               |
| SNP_P4_146214_66984 | NW_004516210.1 | Scaffold845 | 66984                   | TT                              | AA              | 1946981144               |
| SNP_P4_146215_66999 | NW_004516210.1 | Scaffold845 | 66999                   | TT                              | CC              | 1946981146               |
| SNP_P4_146216_67004 | NW_004516210.1 | Scaffold845 | 67004                   | CC                              | TT              | 1946981148               |
| SNP_P4_146218_69551 | NW_004516210.1 | Scaffold845 | 69551                   | GG                              | CC              | 1946981150               |
| SNP_P4_146219_69614 | NW_004516210.1 | Scaffold845 | 69614                   | TT                              | CC              | 1946981152               |
| SNP_P4_146220_69761 | NW_004516210.1 | Scaffold845 | 69761                   | AA                              | GG              | 1946981154               |
| SNP_P4_146221_70057 | NW_004516210.1 | Scaffold845 | 70057                   | AA                              | GG              | 1946981156               |
| SNP_P4_146222_70916 | NW_004516210.1 | Scaffold845 | 70916                   | CC                              | AA              | 1946981158               |
| SNP_P4_146223_71950 | NW_004516210.1 | Scaffold845 | 71950                   | AA                              | TT              | 1946981160               |
| SNP_P4_146224_71993 | NW_004516210.1 | Scaffold845 | 71993                   | CC                              | AA              | 1946981162               |
| SNP_P4_146225_75494 | NW_004516210.1 | Scaffold845 | 75494                   | TT                              | CC              | 1946981164               |
| SNP_P4_146226_76337 | NW_004516210.1 | Scaffold845 | 76337                   | AA                              | CC              | 1946981166               |
| SNP_P4_146227_76738 | NW_004516210.1 | Scaffold845 | 76738                   | TT                              | CC              | 1946981168               |
| SNP_P4_146228_80987 | NW_004516210.1 | Scaffold845 | 80987                   | TT                              | AA              | 1946981170               |
| SNP_P4_146229_80998 | NW_004516210.1 | Scaffold845 | 80998                   | GG                              | AA              | 1946981172               |
| SNP_P4_146230_81179 | NW_004516210.1 | Scaffold845 | 81179                   | GG                              | AA              | 1946981174               |
| SNP_P4_146231_81613 | NW_004516210.1 | Scaffold845 | 81613                   | AA                              | CC              | 1946981176               |
| SNP_P4_146232_81614 | NW_004516210.1 | Scaffold845 | 81614                   | TT                              | AA              | 1946981178               |
| SNP_P4_146233_81663 | NW_004516210.1 | Scaffold845 | 81663                   | CC                              | TT              | 1946981180               |
| SNP_P4_146234_81791 | NW_004516210.1 | Scaffold845 | 81791                   | TT                              | CC              | 1946981182               |
| SNP_P4_146236_81921 | NW_004516210.1 | Scaffold845 | 81921                   | GG                              | AA              | 1946981184               |
| SNP_P4_146237_81969 | NW_004516210.1 | Scaffold845 | 81969                   | CC                              | TT              | 1946981186               |
| SNP_P4_146238_81990 | NW_004516210.1 | Scaffold845 | 81990                   | AA                              | GG              | 1946981188               |
| SNP_P4_146239_81991 | NW_004516210.1 | Scaffold845 | 81991                   | CC                              | TT              | 1946981190               |
| SNP_P4_146240_82013 | NW_004516210.1 | Scaffold845 | 82013                   | TT                              | GG              | 1946981192               |
| SNP_P4_146241_82147 | NW_004516210.1 | Scaffold845 | 82147                   | TT                              | GG              | 1946981194               |
| SNP_P4_146242_82176 | NW_004516210.1 | Scaffold845 | 82176                   | CC                              | TT              | 1946981196               |
| SNP_P4_146243_82259 | NW_004516210.1 | Scaffold845 | 82259                   | TT                              | CC              | 1946981198               |



| SNPs IDs             | Chromosome IDs | Chromosomes | Physical positions (bp) | CDC Frontier (Reference genome) | (ILWC46 & LPNB) | NCBI SNPdb Accession IDs |
|----------------------|----------------|-------------|-------------------------|---------------------------------|-----------------|--------------------------|
| SNP_P4_146244_82272  | NW_004516210.1 | Scaffold845 | 82272                   | GG                              | CC              | 1946981201               |
| SNP_P4_146245_82319  | NW_004516210.1 | Scaffold845 | 82319                   | TT                              | GG              | 1946981203               |
| SNP_P4_146246_82333  | NW_004516210.1 | Scaffold845 | 82333                   | TT                              | CC              | 1946981205               |
| SNP_P4_146247_82337  | NW_004516210.1 | Scaffold845 | 82337                   | AA                              | TT              | 1946981207               |
| SNP_P4_146249_84384  | NW_004516210.1 | Scaffold845 | 84384                   | GG                              | TT              | 1946981209               |
| SNP_P4_146250_84660  | NW_004516210.1 | Scaffold845 | 84660                   | CC                              | AA              | 1946981211               |
| SNP_P4_146251_84834  | NW_004516210.1 | Scaffold845 | 84834                   | GG                              | AA              | 1946981213               |
| SNP_P4_146252_85453  | NW_004516210.1 | Scaffold845 | 85453                   | GG                              | CC              | 1946981215               |
| SNP_P4_146253_85652  | NW_004516210.1 | Scaffold845 | 85652                   | CC                              | TT              | 1946981218               |
| SNP_P4_146254_85688  | NW_004516210.1 | Scaffold845 | 85688                   | AA                              | CC              | 1946981220               |
| SNP_P4_146255_85696  | NW_004516210.1 | Scaffold845 | 85696                   | AA                              | GG              | 1946981222               |
| SNP_P4_146256_86184  | NW_004516210.1 | Scaffold845 | 86184                   | AA                              | TT              | 1946981224               |
| SNP_P4_146257_86512  | NW_004516210.1 | Scaffold845 | 86512                   | TT                              | CC              | 1946981226               |
| SNP_P4_146258_87283  | NW_004516210.1 | Scaffold845 | 87283                   | AA                              | GG              | 1946981227               |
| SNP_P4_146259_87550  | NW_004516210.1 | Scaffold845 | 87550                   | TT                              | CC              | 1946981229               |
| SNP_P4_146260_87565  | NW_004516210.1 | Scaffold845 | 87565                   | TT                              | AA              | 1946981231               |
| SNP_P4_146261_88312  | NW_004516210.1 | Scaffold845 | 88312                   | CC                              | GG              | 1946981233               |
| SNP_P4_146263_95132  | NW_004516210.1 | Scaffold845 | 95132                   | GG                              | AA              | 1946981235               |
| SNP_P4_146264_95260  | NW_004516210.1 | Scaffold845 | 95260                   | TT                              | CC              | 1946981237               |
| SNP_P4_146265_96242  | NW_004516210.1 | Scaffold845 | 96242                   | GG                              | AA              | 1946981239               |
| SNP_P4_146266_100646 | NW_004516210.1 | Scaffold845 | 100646                  | TT                              | CC              | 1946981241               |
| SNP_P4_146267_100789 | NW_004516210.1 | Scaffold845 | 100789                  | GG                              | AA              | 1946981243               |
| SNP_P4_146268_100879 | NW_004516210.1 | Scaffold845 | 100879                  | CC                              | TT              | 1946981245               |
| SNP_P4_146269_101068 | NW_004516210.1 | Scaffold845 | 101068                  | CC                              | TT              | 1946981247               |
| SNP_P4_146270_101199 | NW_004516210.1 | Scaffold845 | 101199                  | AA                              | GG              | 1946981249               |
| SNP_P4_146271_101347 | NW_004516210.1 | Scaffold845 | 101347                  | GG                              | AA              | 1946981251               |
| SNP_P4_146272_101670 | NW_004516210.1 | Scaffold845 | 101670                  | GG                              | TT              | 1946981253               |
| SNP_P4_146273_102151 | NW_004516210.1 | Scaffold845 | 102151                  | GG                              | AA              | 1946981255               |
| SNP_P4_146275_102453 | NW_004516210.1 | Scaffold845 | 102453                  | AA                              | CC              | 1946981257               |
| SNP_P4_146276_102579 | NW_004516210.1 | Scaffold845 | 102579                  | AA                              | GG              | 1946981259               |
| SNP_P4_146277_102818 | NW_004516210.1 | Scaffold845 | 102818                  | AA                              | TT              | 1946981261               |
| SNP_P4_146278_102990 | NW_004516210.1 | Scaffold845 | 102990                  | GG                              | AA              | 1946981263               |
| SNP_P4_146281_103676 | NW_004516210.1 | Scaffold845 | 103676                  | TT                              | AA              | 1946981265               |
| SNP_P4_146282_103739 | NW_004516210.1 | Scaffold845 | 103739                  | AA                              | TT              | 1946981267               |
| SNP_P4_146283_103891 | NW_004516210.1 | Scaffold845 | 103891                  | TT                              | CC              | 1946981270               |
| SNP_P4_146284_103986 | NW_004516210.1 | Scaffold845 | 103986                  | GG                              | AA              | 1946981272               |
| SNP_P4_146285_104118 | NW_004516210.1 | Scaffold845 | 104118                  | TT                              | GG              | 1946981274               |
| SNP_P4_146286_104138 | NW_004516210.1 | Scaffold845 | 104138                  | AA                              | GG              | 1946981276               |
| SNP_P4_146287_104144 | NW_004516210.1 | Scaffold845 | 104144                  | TT                              | GG              | 1946981278               |
| SNP_P4_146288_104146 | NW_004516210.1 | Scaffold845 | 104146                  | GG                              | AA              | 1946981280               |
| SNP_P4_146289_104148 | NW_004516210.1 | Scaffold845 | 104148                  | AA                              | GG              | 1946981281               |
| SNP_P4_146290_104159 | NW_004516210.1 | Scaffold845 | 104159                  | CC                              | TT              | 1946981283               |

| SNPs IDs             | Chromosome IDs | Chromosomes | Physical positions (bp) | CDC Frontier (Reference genome) | (ILWC46 & LPNB) | NCBI SNPdb Accession IDs |
|----------------------|----------------|-------------|-------------------------|---------------------------------|-----------------|--------------------------|
| SNP_P4_146291_104181 | NW_004516210.1 | Scaffold845 | 104181                  | GG                              | AA              | 1946981285               |
| SNP_P4_146292_104191 | NW_004516210.1 | Scaffold845 | 104191                  | CC                              | TT              | 1946981287               |
| SNP_P4_146293_104267 | NW_004516210.1 | Scaffold845 | 104267                  | CC                              | GG              | 1946981289               |
| SNP_P4_146294_104525 | NW_004516210.1 | Scaffold845 | 104525                  | CC                              | TT              | 1946981291               |
| SNP_P4_146295_105792 | NW_004516210.1 | Scaffold845 | 105792                  | CC                              | GG              | 1946981293               |
| SNP_P4_146296_105896 | NW_004516210.1 | Scaffold845 | 105896                  | AA                              | GG              | 1946981295               |
| SNP_P4_146297_106176 | NW_004516210.1 | Scaffold845 | 106176                  | GG                              | TT              | 1946981297               |
| SNP_P4_146298_106222 | NW_004516210.1 | Scaffold845 | 106222                  | AA                              | GG              | 1946981299               |
| SNP_P4_146299_106240 | NW_004516210.1 | Scaffold845 | 106240                  | CC                              | GG              | 1946981301               |
| SNP_P4_146300_110327 | NW_004516210.1 | Scaffold845 | 110327                  | GG                              | AA              | 1946981303               |
| SNP_P4_146301_110587 | NW_004516210.1 | Scaffold845 | 110587                  | GG                              | AA              | 1946981305               |
| SNP_P4_146302_111157 | NW_004516210.1 | Scaffold845 | 111157                  | GG                              | TT              | 1946981307               |
| SNP_P4_146303_111219 | NW_004516210.1 | Scaffold845 | 111219                  | GG                              | AA              | 1946981309               |
| SNP_P4_146305_111334 | NW_004516210.1 | Scaffold845 | 111334                  | GG                              | AA              | 1946981311               |
| SNP_P4_146306_111393 | NW_004516210.1 | Scaffold845 | 111393                  | TT                              | AA              | 1946981313               |
| SNP_P4_146307_112253 | NW_004516210.1 | Scaffold845 | 112253                  | TT                              | GG              | 1946981315               |
| SNP_P4_146308_112609 | NW_004516210.1 | Scaffold845 | 112609                  | TT                              | CC              | 1946981317               |
| SNP_P4_146309_113067 | NW_004516210.1 | Scaffold845 | 113067                  | TT                              | AA              | 1946981319               |
| SNP_P4_146310_114319 | NW_004516210.1 | Scaffold845 | 114319                  | GG                              | TT              | 1946981321               |
| SNP_P4_146311_114350 | NW_004516210.1 | Scaffold845 | 114350                  | TT                              | CC              | 1946981323               |
| SNP_P4_146312_115353 | NW_004516210.1 | Scaffold845 | 115353                  | AA                              | GG              | 1946981325               |
| SNP_P4_146315_116273 | NW_004516210.1 | Scaffold845 | 116273                  | AA                              | GG              | 1946981327               |
| SNP_P4_146316_116275 | NW_004516210.1 | Scaffold845 | 116275                  | AA                              | TT              | 1946981329               |
| SNP_P4_146317_116911 | NW_004516210.1 | Scaffold845 | 116911                  | TT                              | AA              | 1946981331               |
| SNP_P4_146318_116925 | NW_004516210.1 | Scaffold845 | 116925                  | TT                              | CC              | 1946981333               |
| SNP_P4_146319_117257 | NW_004516210.1 | Scaffold845 | 117257                  | GG                              | AA              | 1946981335               |
| SNP_P4_146320_119693 | NW_004516210.1 | Scaffold845 | 119693                  | AA                              | GG              | 1946981337               |
| SNP_P4_146321_120344 | NW_004516210.1 | Scaffold845 | 120344                  | GG                              | TT              | 1946981339               |
| SNP_P4_146322_120668 | NW_004516210.1 | Scaffold845 | 120668                  | TT                              | GG              | 1946981341               |
| SNP_P4_146324_126501 | NW_004516210.1 | Scaffold845 | 126501                  | TT                              | CC              | 1946981342               |
| SNP_P4_146325_126519 | NW_004516210.1 | Scaffold845 | 126519                  | AA                              | GG              | 1946981345               |
| SNP_P4_146326_126563 | NW_004516210.1 | Scaffold845 | 126563                  | GG                              | AA              | 1946981347               |
| SNP_P4_146328_128338 | NW_004516210.1 | Scaffold845 | 128338                  | TT                              | GG              | 1946981349               |
| SNP_P4_146329_128339 | NW_004516210.1 | Scaffold845 | 128339                  | AA                              | GG              | 1946981351               |
| SNP_P4_146330_128746 | NW_004516210.1 | Scaffold845 | 128746                  | AA                              | GG              | 1946981353               |
| SNP_P4_146331_128801 | NW_004516210.1 | Scaffold845 | 128801                  | CC                              | GG              | 1946981355               |
| SNP_P4_146332_130101 | NW_004516210.1 | Scaffold845 | 130101                  | CC                              | AA              | 1946981357               |
| SNP_P4_146333_131647 | NW_004516210.1 | Scaffold845 | 131647                  | TT                              | CC              | 1946981359               |
| SNP_P4_146334_132645 | NW_004516210.1 | Scaffold845 | 132645                  | TT                              | CC              | 1946981361               |
| SNP_P4_146335_132669 | NW_004516210.1 | Scaffold845 | 132669                  | CC                              | TT              | 1946981363               |
| SNP_P4_146337_132794 | NW_004516210.1 | Scaffold845 | 132794                  | GG                              | TT              | 1946981365               |
| SNP_P4_146339_132968 | NW_004516210.1 | Scaffold845 | 132968                  | CC                              | TT              | 1946981367               |

| SNPs IDs             | Chromosome IDs | Chromosomes | Physical positions (bp) | CDC Frontier (Reference genome) | (ILWC46 & LPNB) | NCBI SNPdb Accession IDs |
|----------------------|----------------|-------------|-------------------------|---------------------------------|-----------------|--------------------------|
| SNP_P4_146341_133028 | NW_004516210.1 | Scaffold845 | 133028                  | AA                              | GG              | 1946981369               |
| SNP_P4_146342_133279 | NW_004516210.1 | Scaffold845 | 133279                  | TT                              | GG              | 1946981371               |
| SNP_P4_146343_133339 | NW_004516210.1 | Scaffold845 | 133339                  | AA                              | GG              | 1946981373               |
| SNP_P4_146344_133516 | NW_004516210.1 | Scaffold845 | 133516                  | CC                              | TT              | 1946981376               |
| SNP_P4_146345_133523 | NW_004516210.1 | Scaffold845 | 133523                  | CC                              | AA              | 1946981377               |
| SNP_P4_146346_133531 | NW_004516210.1 | Scaffold845 | 133531                  | GG                              | AA              | 1946981379               |
| SNP_P4_146347_133554 | NW_004516210.1 | Scaffold845 | 133554                  | CC                              | AA              | 1946981382               |
| SNP_P4_146348_133560 | NW_004516210.1 | Scaffold845 | 133560                  | CC                              | TT              | 1946981384               |
| SNP_P4_146349_133695 | NW_004516210.1 | Scaffold845 | 133695                  | TT                              | GG              | 1946981386               |
| SNP_P4_146352_135130 | NW_004516210.1 | Scaffold845 | 135130                  | GG                              | AA              | 1946981388               |
| SNP_P4_146353_135152 | NW_004516210.1 | Scaffold845 | 135152                  | GG                              | AA              | 1946981390               |
| SNP_P4_146354_138050 | NW_004516210.1 | Scaffold845 | 138050                  | AA                              | GG              | 1946981392               |
| SNP_P4_146355_138081 | NW_004516210.1 | Scaffold845 | 138081                  | CC                              | AA              | 1946981394               |
| SNP_P4_146356_140342 | NW_004516210.1 | Scaffold845 | 140342                  | GG                              | AA              | 1946981396               |
| SNP_P4_146357_140372 | NW_004516210.1 | Scaffold845 | 140372                  | GG                              | CC              | 1946981398               |
| SNP_P4_146358_140906 | NW_004516210.1 | Scaffold845 | 140906                  | TT                              | CC              | 1946981400               |
| SNP_P4_146359_141012 | NW_004516210.1 | Scaffold845 | 141012                  | AA                              | CC              | 1946981402               |
| SNP_P4_146360_142552 | NW_004516210.1 | Scaffold845 | 142552                  | GG                              | AA              | 1946981404               |
| SNP_P4_146362_144099 | NW_004516210.1 | Scaffold845 | 144099                  | GG                              | AA              | 1946981407               |
| SNP_P4_146363_146829 | NW_004516210.1 | Scaffold845 | 146829                  | AA                              | GG              | 1946981409               |
| SNP_P4_146365_149315 | NW_004516210.1 | Scaffold845 | 149315                  | TT                              | AA              | 1946981411               |
| SNP_P4_146366_149333 | NW_004516210.1 | Scaffold845 | 149333                  | AA                              | GG              | 1946981413               |
| SNP_P4_146367_149336 | NW_004516210.1 | Scaffold845 | 149336                  | GG                              | TT              | 1946981415               |
| SNP_P4_146368_150366 | NW_004516210.1 | Scaffold845 | 150366                  | AA                              | TT              | 1946981416               |
| SNP_P4_146369_150867 | NW_004516210.1 | Scaffold845 | 150867                  | GG                              | AA              | 1946981418               |
| SNP_P4_146370_150918 | NW_004516210.1 | Scaffold845 | 150918                  | TT                              | GG              | 1946981420               |
| SNP_P4_146371_150957 | NW_004516210.1 | Scaffold845 | 150957                  | AA                              | GG              | 1946981423               |
| SNP_P4_146372_151905 | NW_004516210.1 | Scaffold845 | 151905                  | GG                              | AA              | 1946981424               |
| SNP_P4_146373_152001 | NW_004516210.1 | Scaffold845 | 152001                  | TT                              | CC              | 1946981426               |
| SNP_P4_146374_157894 | NW_004516210.1 | Scaffold845 | 157894                  | CC                              | TT              | 1946981428               |
| SNP_P4_146375_157987 | NW_004516210.1 | Scaffold845 | 157987                  | TT                              | AA              | 1946981430               |
| SNP_P4_146376_162499 | NW_004516210.1 | Scaffold845 | 162499                  | CC                              | AA              | 1946981432               |
| SNP_P4_146378_162853 | NW_004516210.1 | Scaffold845 | 162853                  | AA                              | GG              | 1946981434               |
| SNP_P4_146379_163122 | NW_004516210.1 | Scaffold845 | 163122                  | CC                              | TT              | 1946981436               |
| SNP_P4_146380_163437 | NW_004516210.1 | Scaffold845 | 163437                  | TT                              | GG              | 1946981438               |
| SNP_P4_146381_163463 | NW_004516210.1 | Scaffold845 | 163463                  | CC                              | TT              | 1946981440               |
| SNP_P4_146382_164810 | NW_004516210.1 | Scaffold845 | 164810                  | AA                              | GG              | 1946981442               |
| SNP_P4_146383_165841 | NW_004516210.1 | Scaffold845 | 165841                  | CC                              | TT              | 1946981444               |
| SNP_P4_146384_165843 | NW_004516210.1 | Scaffold845 | 165843                  | CC                              | TT              | 1946981446               |
| SNP_P4_146385_168801 | NW_004516210.1 | Scaffold845 | 168801                  | GG                              | AA              | 1946981448               |
| SNP_P4_146386_169541 | NW_004516210.1 | Scaffold845 | 169541                  | TT                              | CC              | 1946981450               |
| SNP_P4_146389_170646 | NW_004516210.1 | Scaffold845 | 170646                  | AA                              | TT              | 1946981452               |

| SNPs IDs             | Chromosome IDs | Chromosomes | Physical positions (bp) | CDC Frontier (Reference genome) | (ILWC46 & LPNB) | NCBI SNPdb Accession IDs |
|----------------------|----------------|-------------|-------------------------|---------------------------------|-----------------|--------------------------|
| SNP_P4_146390_170652 | NW_004516210.1 | Scaffold845 | 170652                  | CC                              | TT              | 1946981454               |
| SNP_P4_146391_171530 | NW_004516210.1 | Scaffold845 | 171530                  | GG                              | CC              | 1946981456               |
| SNP_P4_146393_171895 | NW_004516210.1 | Scaffold845 | 171895                  | CC                              | TT              | 1946981458               |
| SNP_P4_146394_171959 | NW_004516210.1 | Scaffold845 | 171959                  | AA                              | CC              | 1946981460               |
| SNP_P4_146395_172289 | NW_004516210.1 | Scaffold845 | 172289                  | GG                              | CC              | 1946981462               |
| SNP_P4_146396_172303 | NW_004516210.1 | Scaffold845 | 172303                  | CC                              | TT              | 1946981464               |
| SNP_P4_146397_173314 | NW_004516210.1 | Scaffold845 | 173314                  | CC                              | AA              | 1946981466               |
| SNP_P4_146398_173682 | NW_004516210.1 | Scaffold845 | 173682                  | CC                              | GG              | 1946981468               |
| SNP_P4_146399_173697 | NW_004516210.1 | Scaffold845 | 173697                  | CC                              | GG              | 1946981470               |
| SNP_P4_146400_173965 | NW_004516210.1 | Scaffold845 | 173965                  | AA                              | GG              | 1946981472               |
| SNP_P4_146401_173976 | NW_004516210.1 | Scaffold845 | 173976                  | AA                              | GG              | 1946981474               |
| SNP_P4_146403_175181 | NW_004516210.1 | Scaffold845 | 175181                  | CC                              | TT              | 1946981477               |
| SNP_P4_146404_175238 | NW_004516210.1 | Scaffold845 | 175238                  | GG                              | TT              | 1946981479               |
| SNP_P4_146405_175418 | NW_004516210.1 | Scaffold845 | 175418                  | GG                              | AA              | 1946981481               |
| SNP_P4_146406_175421 | NW_004516210.1 | Scaffold845 | 175421                  | CC                              | AA              | 1946981483               |
| SNP_P4_146408_199795 | NW_004516210.1 | Scaffold845 | 199795                  | AA                              | GG              | 1946981485               |
| SNP_P4_146409_212781 | NW_004516210.1 | Scaffold845 | 212781                  | GG                              | AA              | 1946981487               |
| SNP_P4_146410_223257 | NW_004516210.1 | Scaffold845 | 223257                  | AA                              | CC              | 1946981489               |
| SNP_P4_146411_230592 | NW_004516210.1 | Scaffold845 | 230592                  | GG                              | AA              | 1946981491               |
| SNP_P4_146412_230594 | NW_004516210.1 | Scaffold845 | 230594                  | GG                              | CC              | 1946981493               |
| SNP_P4_146413_230609 | NW_004516210.1 | Scaffold845 | 230609                  | GG                              | TT              | 1946981496               |
| SNP_P4_146414_230615 | NW_004516210.1 | Scaffold845 | 230615                  | CC                              | GG              | 1946981497               |
| SNP_P4_146415_231000 | NW_004516210.1 | Scaffold845 | 231000                  | TT                              | GG              | 1946981499               |
| SNP_P4_146416_231880 | NW_004516210.1 | Scaffold845 | 231880                  | GG                              | AA              | 1946981501               |
| SNP_P4_146417_245481 | NW_004516210.1 | Scaffold845 | 245481                  | CC                              | AA              | 1946981503               |
| SNP_P4_146418_257721 | NW_004516210.1 | Scaffold845 | 257721                  | GG                              | AA              | 1946981505               |
| SNP_P4_146419_259948 | NW_004516210.1 | Scaffold845 | 259948                  | GG                              | AA              | 1946981507               |
| SNP_P4_146420_264642 | NW_004516210.1 | Scaffold845 | 264642                  | CC                              | TT              | 1946981509               |
| SNP_P4_146421_266194 | NW_004516210.1 | Scaffold845 | 266194                  | CC                              | TT              | 1946981511               |
| SNP_P4_146422_266217 | NW_004516210.1 | Scaffold845 | 266217                  | TT                              | CC              | 1946981513               |
| SNP_P4_146423_266232 | NW_004516210.1 | Scaffold845 | 266232                  | AA                              | GG              | 1946981515               |
| SNP_P4_146424_266246 | NW_004516210.1 | Scaffold845 | 266246                  | AA                              | GG              | 1946981517               |
| SNP_P4_146425_266267 | NW_004516210.1 | Scaffold845 | 266267                  | CC                              | TT              | 1946981519               |
| SNP_P4_146428_292550 | NW_004516210.1 | Scaffold845 | 292550                  | AA                              | TT              | 1946981521               |
| SNP_P4_146429_312319 | NW_004516210.1 | Scaffold845 | 312319                  | CC                              | TT              | 1946981523               |
| SNP_P4_146431_330030 | NW_004516210.1 | Scaffold845 | 330030                  | CC                              | TT              | 1946981525               |
| SNP_P4_146432_330092 | NW_004516210.1 | Scaffold845 | 330092                  | AA                              | GG              | 1946981527               |
| SNP_P4_146433_330559 | NW_004516210.1 | Scaffold845 | 330559                  | CC                              | TT              | 1946981529               |
| SNP_P4_146434_331003 | NW_004516210.1 | Scaffold845 | 331003                  | TT                              | CC              | 1946981531               |
| SNP_P4_146435_331008 | NW_004516210.1 | Scaffold845 | 331008                  | TT                              | CC              | 1946981533               |
| SNP_P4_146437_331886 | NW_004516210.1 | Scaffold845 | 331886                  | AA                              | GG              | 1946981535               |
| SNP_P4_146439_331991 | NW_004516210.1 | Scaffold845 | 331991                  | CC                              | GG              | 1946981537               |

| SNPs IDs             | Chromosome IDs | Chromosomes | Physical positions (bp) | CDC Frontier (Reference genome) | (ILWC46 & LPNB) | NCBI SNPdb Accession IDs |
|----------------------|----------------|-------------|-------------------------|---------------------------------|-----------------|--------------------------|
| SNP_P4_146440_332163 | NW_004516210.1 | Scaffold845 | 332163                  | TT                              | CC              | 1946981539               |
| SNP_P4_146441_332193 | NW_004516210.1 | Scaffold845 | 332193                  | TT                              | CC              | 1946981541               |
| SNP_P4_146442_332243 | NW_004516210.1 | Scaffold845 | 332243                  | GG                              | CC              | 1946981543               |
| SNP_P4_146443_332518 | NW_004516210.1 | Scaffold845 | 332518                  | TT                              | GG              | 1946981545               |
| SNP_P4_146444_334986 | NW_004516210.1 | Scaffold845 | 334986                  | GG                              | AA              | 1946981547               |
| SNP_P4_146445_335165 | NW_004516210.1 | Scaffold845 | 335165                  | TT                              | GG              | 1946981550               |
| SNP_P4_146446_335214 | NW_004516210.1 | Scaffold845 | 335214                  | GG                              | CC              | 1946981552               |
| SNP_P4_146447_335486 | NW_004516210.1 | Scaffold845 | 335486                  | AA                              | GG              | 1946981554               |
| SNP_P4_146448_335574 | NW_004516210.1 | Scaffold845 | 335574                  | CC                              | TT              | 1946981556               |
| SNP_P4_146449_347505 | NW_004516210.1 | Scaffold845 | 347505                  | AA                              | GG              | 1946981558               |
| SNP_P4_146450_347628 | NW_004516210.1 | Scaffold845 | 347628                  | CC                              | TT              | 1946981560               |
| SNP_P4_146451_347639 | NW_004516210.1 | Scaffold845 | 347639                  | AA                              | GG              | 1946981562               |
| SNP_P4_146452_356685 | NW_004516210.1 | Scaffold845 | 356685                  | AA                              | CC              | 1946981564               |
| SNP_P4_146454_362843 | NW_004516210.1 | Scaffold845 | 362843                  | TT                              | CC              | 1946981566               |
| SNP_P4_146455_946    | NW_004516211.1 | Scaffold847 | 946                     | GG                              | TT              | 1946981568               |
| SNP_P4_146456_31676  | NW_004516211.1 | Scaffold847 | 31676                   | CC                              | TT              | 1946981569               |
| SNP_P4_146457_31706  | NW_004516211.1 | Scaffold847 | 31706                   | TT                              | CC              | 1946981571               |
| SNP_P4_146458_32094  | NW_004516211.1 | Scaffold847 | 32094                   | GG                              | AA              | 1946981573               |
| SNP_P4_146459_32231  | NW_004516211.1 | Scaffold847 | 32231                   | AA                              | TT              | 1946981575               |
| SNP_P4_146460_75571  | NW_004516211.1 | Scaffold847 | 75571                   | TT                              | CC              | 1946981577               |
| SNP_P4_146461_75629  | NW_004516211.1 | Scaffold847 | 75629                   | GG                              | AA              | 1946981579               |
| SNP_P4_146462_75977  | NW_004516211.1 | Scaffold847 | 75977                   | TT                              | CC              | 1946981581               |
| SNP_P4_146463_76016  | NW_004516211.1 | Scaffold847 | 76016                   | GG                              | AA              | 1946981583               |
| SNP_P4_146464_76023  | NW_004516211.1 | Scaffold847 | 76023                   | CC                              | TT              | 1946981585               |
| SNP_P4_146465_76085  | NW_004516211.1 | Scaffold847 | 76085                   | CC                              | TT              | 1946981587               |
| SNP_P4_146466_76100  | NW_004516211.1 | Scaffold847 | 76100                   | TT                              | AA              | 1946981589               |
| SNP_P4_146467_76109  | NW_004516211.1 | Scaffold847 | 76109                   | CC                              | TT              | 1946981591               |
| SNP_P4_146468_82561  | NW_004516211.1 | Scaffold847 | 82561                   | TT                              | CC              | 1946981593               |
| SNP_P4_146469_82579  | NW_004516211.1 | Scaffold847 | 82579                   | TT                              | CC              | 1946981596               |
| SNP_P4_146470_82627  | NW_004516211.1 | Scaffold847 | 82627                   | GG                              | TT              | 1946981597               |
| SNP_P4_146471_91512  | NW_004516211.1 | Scaffold847 | 91512                   | TT                              | GG              | 1946981599               |
| SNP_P4_146472_113644 | NW_004516211.1 | Scaffold847 | 113644                  | CC                              | TT              | 1946981602               |
| SNP_P4_146473_117214 | NW_004516211.1 | Scaffold847 | 117214                  | CC                              | TT              | 1946981603               |
| SNP_P4_146474_120950 | NW_004516211.1 | Scaffold847 | 120950                  | AA                              | GG              | 1946981605               |
| SNP_P4_146475_120952 | NW_004516211.1 | Scaffold847 | 120952                  | AA                              | GG              | 1946981608               |
| SNP_P4_146477_130062 | NW_004516211.1 | Scaffold847 | 130062                  | GG                              | AA              | 1946981610               |
| SNP_P4_146478_145576 | NW_004516211.1 | Scaffold847 | 145576                  | GG                              | TT              | 1946981612               |
| SNP_P4_146479_154093 | NW_004516211.1 | Scaffold847 | 154093                  | GG                              | AA              | 1946981614               |
| SNP_P4_146480_162830 | NW_004516211.1 | Scaffold847 | 162830                  | TT                              | AA              | 1946981616               |
| SNP_P4_146481_169010 | NW_004516211.1 | Scaffold847 | 169010                  | CC                              | TT              | 1946981618               |
| SNP_P4_146482_232146 | NW_004516211.1 | Scaffold847 | 232146                  | CC                              | TT              | 1946981620               |
| SNP_P4_146484_247448 | NW_004516211.1 | Scaffold847 | 247448                  | TT                              | CC              | 1946981623               |

| SNPs IDs             | Chromosome IDs | Chromosomes | Physical positions (bp) | CDC Frontier (Reference genome) | (ILWC46 & LPNB) | NCBI SNPdb Accession IDs |
|----------------------|----------------|-------------|-------------------------|---------------------------------|-----------------|--------------------------|
| SNP_P4_146485_248098 | NW_004516211.1 | Scaffold847 | 248098                  | CC                              | TT              | 1946981625               |
| SNP_P4_146486_248112 | NW_004516211.1 | Scaffold847 | 248112                  | GG                              | AA              | 1946981627               |
| SNP_P4_146487_251623 | NW_004516211.1 | Scaffold847 | 251623                  | TT                              | CC              | 1946981629               |
| SNP_P4_146488_289404 | NW_004516211.1 | Scaffold847 | 289404                  | AA                              | CC              | 1946981632               |
| SNP_P4_146489_289819 | NW_004516211.1 | Scaffold847 | 289819                  | AA                              | GG              | 1946981634               |
| SNP_P4_146490_290073 | NW_004516211.1 | Scaffold847 | 290073                  | AA                              | GG              | 1946981636               |
| SNP_P4_146491_290109 | NW_004516211.1 | Scaffold847 | 290109                  | GG                              | AA              | 1946981638               |
| SNP_P4_146492_301619 | NW_004516211.1 | Scaffold847 | 301619                  | TT                              | AA              | 1946981640               |
| SNP_P4_146493_340409 | NW_004516211.1 | Scaffold847 | 340409                  | AA                              | GG              | 1946981642               |
| SNP_P4_146494_340435 | NW_004516211.1 | Scaffold847 | 340435                  | CC                              | TT              | 1946981643               |
| SNP_P4_146495_343210 | NW_004516211.1 | Scaffold847 | 343210                  | CC                              | TT              | 1946981645               |
| SNP_P4_146496_347362 | NW_004516211.1 | Scaffold847 | 347362                  | GG                              | AA              | 1946981648               |
| SNP_P4_146497_347406 | NW_004516211.1 | Scaffold847 | 347406                  | GG                              | CC              | 1946981650               |
| SNP_P4_146498_4121   | NW_004516212.1 | Scaffold848 | 4121                    | GG                              | AA              | 1946981652               |
| SNP_P4_146499_6458   | NW_004516212.1 | Scaffold848 | 6458                    | AA                              | GG              | 1946981654               |
| SNP_P4_146500_23238  | NW_004516212.1 | Scaffold848 | 23238                   | AA                              | GG              | 1946981656               |
| SNP_P4_146501_23579  | NW_004516212.1 | Scaffold848 | 23579                   | TT                              | CC              | 1946981657               |
| SNP_P4_146502_23593  | NW_004516212.1 | Scaffold848 | 23593                   | CC                              | TT              | 1946981659               |
| SNP_P4_146503_23760  | NW_004516212.1 | Scaffold848 | 23760                   | GG                              | AA              | 1946981661               |
| SNP_P4_146504_23811  | NW_004516212.1 | Scaffold848 | 23811                   | AA                              | TT              | 1946981663               |
| SNP_P4_146505_23934  | NW_004516212.1 | Scaffold848 | 23934                   | AA                              | TT              | 1946981665               |
| SNP_P4_146506_23937  | NW_004516212.1 | Scaffold848 | 23937                   | CC                              | TT              | 1946981667               |
| SNP_P4_146508_24094  | NW_004516212.1 | Scaffold848 | 24094                   | CC                              | TT              | 1946981669               |
| SNP_P4_146509_24161  | NW_004516212.1 | Scaffold848 | 24161                   | CC                              | TT              | 1946981671               |
| SNP_P4_146510_24201  | NW_004516212.1 | Scaffold848 | 24201                   | TT                              | CC              | 1946981673               |
| SNP_P4_146511_45670  | NW_004516212.1 | Scaffold848 | 45670                   | TT                              | CC              | 1946981675               |
| SNP_P4_146512_64050  | NW_004516212.1 | Scaffold848 | 64050                   | GG                              | CC              | 1946981678               |
| SNP_P4_146513_75730  | NW_004516212.1 | Scaffold848 | 75730                   | CC                              | GG              | 1946981680               |
| SNP_P4_146514_75739  | NW_004516212.1 | Scaffold848 | 75739                   | CC                              | TT              | 1946981682               |
| SNP_P4_146515_102239 | NW_004516212.1 | Scaffold848 | 102239                  | CC                              | GG              | 1946981683               |
| SNP_P4_146517_155978 | NW_004516212.1 | Scaffold848 | 155978                  | TT                              | AA              | 1946981685               |
| SNP_P4_146518_180726 | NW_004516212.1 | Scaffold848 | 180726                  | AA                              | CC              | 1946981687               |
| SNP_P4_146519_180803 | NW_004516212.1 | Scaffold848 | 180803                  | AA                              | GG              | 1946981689               |
| SNP_P4_146521_234587 | NW_004516212.1 | Scaffold848 | 234587                  | TT                              | GG              | 1946981691               |
| SNP_P4_146522_1830   | NW_004516213.1 | Scaffold850 | 1830                    | GG                              | TT              | 1946981693               |
| SNP_P4_146523_472    | NW_004516215.1 | Scaffold853 | 472                     | TT                              | AA              | 1946981695               |
| SNP_P4_146524_11577  | NW_004516215.1 | Scaffold853 | 11577                   | CC                              | TT              | 1946981697               |
| SNP_P4_146525_11668  | NW_004516215.1 | Scaffold853 | 11668                   | CC                              | TT              | 1946981699               |
| SNP_P4_146526_11669  | NW_004516215.1 | Scaffold853 | 11669                   | TT                              | AA              | 1946981701               |
| SNP_P4_146527_5461   | NW_004516216.1 | Scaffold854 | 5461                    | GG                              | TT              | 1946981703               |
| SNP_P4_146528_5474   | NW_004516216.1 | Scaffold854 | 5474                    | GG                              | AA              | 1946981705               |
| SNP_P4_146529_5478   | NW_004516216.1 | Scaffold854 | 5478                    | GG                              | AA              | 1946981707               |

| SNPs IDs            | Chromosome IDs | Chromosomes | Physical positions (bp) | CDC Frontier (Reference genome) | (ILWC46 & LPNB) | NCBI SNPdb Accession IDs |
|---------------------|----------------|-------------|-------------------------|---------------------------------|-----------------|--------------------------|
| SNP_P4_146530_5529  | NW_004516216.1 | Scaffold854 | 5529                    | CC                              | TT              | 1946981709               |
| SNP_P4_146531_17397 | NW_004516217.1 | Scaffold855 | 17397                   | CC                              | TT              | 1946981711               |
| SNP_P4_146532_26782 | NW_004516217.1 | Scaffold855 | 26782                   | GG                              | AA              | 1946981713               |
| SNP_P4_146533_27078 | NW_004516217.1 | Scaffold855 | 27078                   | TT                              | CC              | 1946981715               |
| SNP_P4_146535_30940 | NW_004516217.1 | Scaffold855 | 30940                   | TT                              | AA              | 1946981716               |
| SNP_P4_146536_30944 | NW_004516217.1 | Scaffold855 | 30944                   | CC                              | TT              | 1946981718               |
| SNP_P4_146537_30980 | NW_004516217.1 | Scaffold855 | 30980                   | TT                              | CC              | 1946981720               |
| SNP_P4_146538_31035 | NW_004516217.1 | Scaffold855 | 31035                   | AA                              | TT              | 1946981722               |
| SNP_P4_146539_31043 | NW_004516217.1 | Scaffold855 | 31043                   | AA                              | GG              | 1946981724               |
| SNP_P4_146540_31066 | NW_004516217.1 | Scaffold855 | 31066                   | TT                              | CC              | 1946981726               |
| SNP_P4_146541_31084 | NW_004516217.1 | Scaffold855 | 31084                   | GG                              | CC              | 1946981728               |
| SNP_P4_146542_31111 | NW_004516217.1 | Scaffold855 | 31111                   | CC                              | TT              | 1946981731               |
| SNP_P4_146543_31124 | NW_004516217.1 | Scaffold855 | 31124                   | GG                              | TT              | 1946981733               |
| SNP_P4_146544_31143 | NW_004516217.1 | Scaffold855 | 31143                   | AA                              | GG              | 1946981735               |
| SNP_P4_146546_31223 | NW_004516217.1 | Scaffold855 | 31223                   | TT                              | CC              | 1946981737               |
| SNP_P4_146547_31228 | NW_004516217.1 | Scaffold855 | 31228                   | CC                              | TT              | 1946981739               |
| SNP_P4_146548_31264 | NW_004516217.1 | Scaffold855 | 31264                   | GG                              | CC              | 1946981741               |
| SNP_P4_146549_31272 | NW_004516217.1 | Scaffold855 | 31272                   | CC                              | TT              | 1946981743               |
| SNP_P4_146550_31289 | NW_004516217.1 | Scaffold855 | 31289                   | AA                              | GG              | 1946981745               |
| SNP_P4_146551_31304 | NW_004516217.1 | Scaffold855 | 31304                   | AA                              | CC              | 1946981747               |
| SNP_P4_146552_31335 | NW_004516217.1 | Scaffold855 | 31335                   | CC                              | TT              | 1946981749               |
| SNP_P4_146553_31367 | NW_004516217.1 | Scaffold855 | 31367                   | AA                              | GG              | 1946981751               |
| SNP_P4_146555_31533 | NW_004516217.1 | Scaffold855 | 31533                   | CC                              | TT              | 1946981754               |
| SNP_P4_146556_31555 | NW_004516217.1 | Scaffold855 | 31555                   | TT                              | CC              | 1946981756               |
| SNP_P4_146557_31696 | NW_004516217.1 | Scaffold855 | 31696                   | GG                              | TT              | 1946981758               |
| SNP_P4_146558_31740 | NW_004516217.1 | Scaffold855 | 31740                   | CC                              | AA              | 1946981760               |
| SNP_P4_146559_31753 | NW_004516217.1 | Scaffold855 | 31753                   | GG                              | TT              | 1946981762               |
| SNP_P4_146560_31810 | NW_004516217.1 | Scaffold855 | 31810                   | TT                              | AA              | 1946981763               |
| SNP_P4_146561_44238 | NW_004516217.1 | Scaffold855 | 44238                   | AA                              | GG              | 1946981766               |
| SNP_P4_146562_45667 | NW_004516217.1 | Scaffold855 | 45667                   | TT                              | CC              | 1946981768               |
| SNP_P4_146563_45795 | NW_004516217.1 | Scaffold855 | 45795                   | AA                              | TT              | 1946981770               |
| SNP_P4_146564_20801 | NW_004516218.1 | Scaffold856 | 20801                   | TT                              | CC              | 1946981771               |
| SNP_P4_146565_3649  | NW_004516219.1 | Scaffold857 | 3649                    | TT                              | CC              | 1946981773               |
| SNP_P4_146566_3842  | NW_004516219.1 | Scaffold857 | 3842                    | GG                              | TT              | 1946981775               |
| SNP_P4_146567_4117  | NW_004516219.1 | Scaffold857 | 4117                    | AA                              | GG              | 1946981777               |
| SNP_P4_146568_4149  | NW_004516219.1 | Scaffold857 | 4149                    | TT                              | CC              | 1946981779               |
| SNP_P4_146570_24221 | NW_004516219.1 | Scaffold857 | 24221                   | GG                              | AA              | 1946981782               |
| SNP_P4_146572_24415 | NW_004516219.1 | Scaffold857 | 24415                   | GG                              | TT              | 1946981784               |
| SNP_P4_146573_24420 | NW_004516219.1 | Scaffold857 | 24420                   | AA                              | TT              | 1946981786               |
| SNP_P4_146574_24454 | NW_004516219.1 | Scaffold857 | 24454                   | TT                              | GG              | 1946981788               |
| SNP_P4_146575_24455 | NW_004516219.1 | Scaffold857 | 24455                   | AA                              | GG              | 1946981790               |
| SNP_P4_146576_24528 | NW_004516219.1 | Scaffold857 | 24528                   | AA                              | GG              | 1946981792               |

| SNPs IDs             | Chromosome IDs | Chromosomes | Physical positions (bp) | CDC Frontier (Reference genome) | (ILWC46 & LPNB) | NCBI SNPdb Accession IDs |
|----------------------|----------------|-------------|-------------------------|---------------------------------|-----------------|--------------------------|
| SNP_P4_146577_26553  | NW_004516219.1 | Scaffold857 | 26553                   | AA                              | GG              | 1946981794               |
| SNP_P4_146578_26579  | NW_004516219.1 | Scaffold857 | 26579                   | TT                              | CC              | 1946981796               |
| SNP_P4_146579_26613  | NW_004516219.1 | Scaffold857 | 26613                   | TT                              | AA              | 1946981798               |
| SNP_P4_146580_26928  | NW_004516219.1 | Scaffold857 | 26928                   | TT                              | GG              | 1946981800               |
| SNP_P4_146581_27081  | NW_004516219.1 | Scaffold857 | 27081                   | TT                              | GG              | 1946981802               |
| SNP_P4_146582_19302  | NW_004516221.1 | Scaffold859 | 19302                   | CC                              | TT              | 1946981805               |
| SNP_P4_146585_26063  | NW_004516221.1 | Scaffold859 | 26063                   | CC                              | AA              | 1946981807               |
| SNP_P4_146586_26131  | NW_004516221.1 | Scaffold859 | 26131                   | AA                              | GG              | 1946981809               |
| SNP_P4_146587_26136  | NW_004516221.1 | Scaffold859 | 26136                   | GG                              | CC              | 1946981811               |
| SNP_P4_146589_27469  | NW_004516221.1 | Scaffold859 | 27469                   | GG                              | TT              | 1946981813               |
| SNP_P4_146590_27484  | NW_004516221.1 | Scaffold859 | 27484                   | GG                              | AA              | 1946981815               |
| SNP_P4_146591_27516  | NW_004516221.1 | Scaffold859 | 27516                   | AA                              | GG              | 1946981817               |
| SNP_P4_146593_63280  | NW_004516221.1 | Scaffold859 | 63280                   | GG                              | AA              | 1946981819               |
| SNP_P4_146594_63281  | NW_004516221.1 | Scaffold859 | 63281                   | AA                              | TT              | 1946981821               |
| SNP_P4_146595_65827  | NW_004516221.1 | Scaffold859 | 65827                   | TT                              | CC              | 1946981823               |
| SNP_P4_146596_68479  | NW_004516221.1 | Scaffold859 | 68479                   | GG                              | TT              | 1946981825               |
| SNP_P4_146597_68854  | NW_004516221.1 | Scaffold859 | 68854                   | CC                              | TT              | 1946981827               |
| SNP_P4_146598_68859  | NW_004516221.1 | Scaffold859 | 68859                   | AA                              | GG              | 1946981829               |
| SNP_P4_146599_85448  | NW_004516221.1 | Scaffold859 | 85448                   | TT                              | GG              | 1946981831               |
| SNP_P4_146600_85673  | NW_004516221.1 | Scaffold859 | 85673                   | GG                              | AA              | 1946981833               |
| SNP_P4_146601_85810  | NW_004516221.1 | Scaffold859 | 85810                   | GG                              | TT              | 1946981835               |
| SNP_P4_146602_85816  | NW_004516221.1 | Scaffold859 | 85816                   | TT                              | CC              | 1946981837               |
| SNP_P4_146604_86667  | NW_004516221.1 | Scaffold859 | 86667                   | GG                              | AA              | 1946981839               |
| SNP_P4_146605_86815  | NW_004516221.1 | Scaffold859 | 86815                   | AA                              | CC              | 1946981841               |
| SNP_P4_146607_120313 | NW_004516221.1 | Scaffold859 | 120313                  | AA                              | TT              | 1946981844               |
| SNP_P4_146608_3501   | NW_004516222.1 | Scaffold860 | 3501                    | CC                              | AA              | 1946981846               |
| SNP_P4_146609_3523   | NW_004516222.1 | Scaffold860 | 3523                    | GG                              | AA              | 1946981848               |
| SNP_P4_146610_3546   | NW_004516222.1 | Scaffold860 | 3546                    | AA                              | CC              | 1946981850               |
| SNP_P4_146611_3588   | NW_004516222.1 | Scaffold860 | 3588                    | TT                              | CC              | 1946981852               |
| SNP_P4_146612_3666   | NW_004516222.1 | Scaffold860 | 3666                    | CC                              | TT              | 1946981854               |
| SNP_P4_146613_3870   | NW_004516222.1 | Scaffold860 | 3870                    | AA                              | GG              | 1946981856               |
| SNP_P4_146614_4197   | NW_004516222.1 | Scaffold860 | 4197                    | GG                              | CC              | 1946981858               |
| SNP_P4_146615_10639  | NW_004516222.1 | Scaffold860 | 10639                   | AA                              | GG              | 1946981860               |
| SNP_P4_146616_2664   | NW_004516223.1 | Scaffold861 | 2664                    | AA                              | CC              | 1946981862               |
| SNP_P4_146617_2885   | NW_004516223.1 | Scaffold861 | 2885                    | CC                              | TT              | 1946981864               |
| SNP_P4_146618_170    | NW_004516224.1 | Scaffold862 | 170                     | AA                              | GG              | 1946981866               |
| SNP_P4_146619_196    | NW_004516224.1 | Scaffold862 | 196                     | CC                              | TT              | 1946981868               |
| SNP_P4_146620_309    | NW_004516224.1 | Scaffold862 | 309                     | AA                              | GG              | 1946981870               |
| SNP_P4_146621_389    | NW_004516224.1 | Scaffold862 | 389                     | TT                              | AA              | 1946981872               |
| SNP_P4_146622_517    | NW_004516224.1 | Scaffold862 | 517                     | CC                              | AA              | 1946981874               |
| SNP_P4_146623_547    | NW_004516224.1 | Scaffold862 | 547                     | CC                              | AA              | 1946981876               |
| SNP_P4_146624_18673  | NW_004516224.1 | Scaffold862 | 18673                   | GG                              | AA              | 1946981878               |



| SNPs IDs            | Chromosome IDs | Chromosomes | Physical positions (bp) | CDC Frontier (Reference genome) | (ILWC46 & LPNB) | NCBI SNPdb Accession IDs |
|---------------------|----------------|-------------|-------------------------|---------------------------------|-----------------|--------------------------|
| SNP_P4_146625_19163 | NW_004516224.1 | Scaffold862 | 19163                   | CC                              | TT              | 1946981880               |
| SNP_P4_146626_19421 | NW_004516224.1 | Scaffold862 | 19421                   | AA                              | GG              | 1946981882               |
| SNP_P4_146627_22403 | NW_004516224.1 | Scaffold862 | 22403                   | CC                              | AA              | 1946981884               |
| SNP_P4_146628_22699 | NW_004516224.1 | Scaffold862 | 22699                   | AA                              | GG              | 1946981886               |
| SNP_P4_146629_22726 | NW_004516224.1 | Scaffold862 | 22726                   | AA                              | TT              | 1946981888               |
| SNP_P4_146630_22787 | NW_004516224.1 | Scaffold862 | 22787                   | AA                              | CC              | 1946981890               |
| SNP_P4_146631_23160 | NW_004516224.1 | Scaffold862 | 23160                   | GG                              | AA              | 1946981892               |
| SNP_P4_146632_27948 | NW_004516224.1 | Scaffold862 | 27948                   | TT                              | GG              | 1946981894               |
| SNP_P4_146633_27951 | NW_004516224.1 | Scaffold862 | 27951                   | TT                              | CC              | 1946981896               |
| SNP_P4_146634_27962 | NW_004516224.1 | Scaffold862 | 27962                   | GG                              | TT              | 1946981898               |
| SNP_P4_146635_27977 | NW_004516224.1 | Scaffold862 | 27977                   | AA                              | CC              | 1946981900               |
| SNP_P4_146636_28164 | NW_004516224.1 | Scaffold862 | 28164                   | AA                              | GG              | 1946981902               |
| SNP_P4_146637_28418 | NW_004516224.1 | Scaffold862 | 28418                   | TT                              | AA              | 1946981904               |
| SNP_P4_146638_28421 | NW_004516224.1 | Scaffold862 | 28421                   | GG                              | AA              | 1946981906               |
| SNP_P4_146639_28926 | NW_004516224.1 | Scaffold862 | 28926                   | AA                              | GG              | 1946981908               |
| SNP_P4_146640_28992 | NW_004516224.1 | Scaffold862 | 28992                   | AA                              | CC              | 1946981910               |
| SNP_P4_146641_29004 | NW_004516224.1 | Scaffold862 | 29004                   | TT                              | CC              | 1946981912               |
| SNP_P4_146642_29013 | NW_004516224.1 | Scaffold862 | 29013                   | GG                              | TT              | 1946981914               |
| SNP_P4_146643_29141 | NW_004516224.1 | Scaffold862 | 29141                   | TT                              | CC              | 1946981916               |
| SNP_P4_146644_29169 | NW_004516224.1 | Scaffold862 | 29169                   | AA                              | GG              | 1946981918               |
| SNP_P4_146645_29171 | NW_004516224.1 | Scaffold862 | 29171                   | GG                              | CC              | 1946981920               |
| SNP_P4_146646_29186 | NW_004516224.1 | Scaffold862 | 29186                   | AA                              | CC              | 1946981922               |
| SNP_P4_146647_29191 | NW_004516224.1 | Scaffold862 | 29191                   | CC                              | AA              | 1946981924               |
| SNP_P4_146648_32490 | NW_004516224.1 | Scaffold862 | 32490                   | TT                              | CC              | 1946981926               |
| SNP_P4_146649_32501 | NW_004516224.1 | Scaffold862 | 32501                   | AA                              | GG              | 1946981929               |
| SNP_P4_146650_32509 | NW_004516224.1 | Scaffold862 | 32509                   | TT                              | CC              | 1946981931               |
| SNP_P4_146651_32551 | NW_004516224.1 | Scaffold862 | 32551                   | AA                              | GG              | 1946981932               |
| SNP_P4_146652_32783 | NW_004516224.1 | Scaffold862 | 32783                   | AA                              | TT              | 1946981934               |
| SNP_P4_146653_32980 | NW_004516224.1 | Scaffold862 | 32980                   | CC                              | TT              | 1946981936               |
| SNP_P4_146654_33166 | NW_004516224.1 | Scaffold862 | 33166                   | AA                              | CC              | 1946981938               |
| SNP_P4_146655_33257 | NW_004516224.1 | Scaffold862 | 33257                   | TT                              | GG              | 1946981940               |
| SNP_P4_146656_34416 | NW_004516224.1 | Scaffold862 | 34416                   | CC                              | TT              | 1946981942               |
| SNP_P4_146657_34615 | NW_004516224.1 | Scaffold862 | 34615                   | AA                              | TT              | 1946981944               |
| SNP_P4_146658_34747 | NW_004516224.1 | Scaffold862 | 34747                   | TT                              | GG              | 1946981946               |
| SNP_P4_146659_34787 | NW_004516224.1 | Scaffold862 | 34787                   | GG                              | TT              | 1946981948               |
| SNP_P4_146660_34865 | NW_004516224.1 | Scaffold862 | 34865                   | AA                              | GG              | 1946981950               |
| SNP_P4_146662_35019 | NW_004516224.1 | Scaffold862 | 35019                   | TT                              | GG              | 1946981952               |
| SNP_P4_146663_35026 | NW_004516224.1 | Scaffold862 | 35026                   | AA                              | GG              | 1946981954               |
| SNP_P4_146664_35030 | NW_004516224.1 | Scaffold862 | 35030                   | GG                              | TT              | 1946981956               |
| SNP_P4_146665_35058 | NW_004516224.1 | Scaffold862 | 35058                   | CC                              | TT              | 1946981958               |
| SNP_P4_146666_35059 | NW_004516224.1 | Scaffold862 | 35059                   | TT                              | CC              | 1946981960               |
| SNP_P4_146667_35060 | NW_004516224.1 | Scaffold862 | 35060                   | GG                              | TT              | 1946981962               |

| SNPs IDs            | Chromosome IDs | Chromosomes | Physical positions (bp) | CDC Frontier (Reference genome) | (ILWC46 & LPNB) | NCBI SNPdb Accession IDs |
|---------------------|----------------|-------------|-------------------------|---------------------------------|-----------------|--------------------------|
| SNP_P4_146668_35218 | NW_004516224.1 | Scaffold862 | 35218                   | AA                              | GG              | 1946981964               |
| SNP_P4_146669_35221 | NW_004516224.1 | Scaffold862 | 35221                   | CC                              | TT              | 1946981966               |
| SNP_P4_146670_35233 | NW_004516224.1 | Scaffold862 | 35233                   | TT                              | AA              | 1946981968               |
| SNP_P4_146671_35266 | NW_004516224.1 | Scaffold862 | 35266                   | CC                              | TT              | 1946981970               |
| SNP_P4_146672_35276 | NW_004516224.1 | Scaffold862 | 35276                   | TT                              | CC              | 1946981972               |
| SNP_P4_146673_35280 | NW_004516224.1 | Scaffold862 | 35280                   | AA                              | CC              | 1946981974               |
| SNP_P4_146674_35372 | NW_004516224.1 | Scaffold862 | 35372                   | TT                              | GG              | 1946981976               |
| SNP_P4_146675_35862 | NW_004516224.1 | Scaffold862 | 35862                   | GG                              | AA              | 1946981979               |
| SNP_P4_146676_35917 | NW_004516224.1 | Scaffold862 | 35917                   | TT                              | CC              | 1946981981               |
| SNP_P4_146677_35940 | NW_004516224.1 | Scaffold862 | 35940                   | AA                              | GG              | 1946981983               |
| SNP_P4_146678_35943 | NW_004516224.1 | Scaffold862 | 35943                   | CC                              | TT              | 1946981985               |
| SNP_P4_146679_36002 | NW_004516224.1 | Scaffold862 | 36002                   | CC                              | TT              | 1946981987               |
| SNP_P4_146680_36078 | NW_004516224.1 | Scaffold862 | 36078                   | TT                              | AA              | 1946981989               |
| SNP_P4_146681_36132 | NW_004516224.1 | Scaffold862 | 36132                   | AA                              | CC              | 1946981991               |
| SNP_P4_146682_36137 | NW_004516224.1 | Scaffold862 | 36137                   | AA                              | TT              | 1946981993               |
| SNP_P4_146683_36178 | NW_004516224.1 | Scaffold862 | 36178                   | AA                              | CC              | 1946981995               |
| SNP_P4_146684_36318 | NW_004516224.1 | Scaffold862 | 36318                   | GG                              | AA              | 1946981997               |
| SNP_P4_146685_36328 | NW_004516224.1 | Scaffold862 | 36328                   | TT                              | CC              | 1946981999               |
| SNP_P4_146686_36330 | NW_004516224.1 | Scaffold862 | 36330                   | GG                              | TT              | 1946982001               |
| SNP_P4_146687_36344 | NW_004516224.1 | Scaffold862 | 36344                   | GG                              | CC              | 1946982003               |
| SNP_P4_146688_37384 | NW_004516224.1 | Scaffold862 | 37384                   | AA                              | TT              | 1946982005               |
| SNP_P4_146689_41723 | NW_004516224.1 | Scaffold862 | 41723                   | CC                              | TT              | 1946982007               |
| SNP_P4_146690_41724 | NW_004516224.1 | Scaffold862 | 41724                   | AA                              | CC              | 1946982009               |
| SNP_P4_146691_41726 | NW_004516224.1 | Scaffold862 | 41726                   | GG                              | AA              | 1946982011               |
| SNP_P4_146692_41767 | NW_004516224.1 | Scaffold862 | 41767                   | GG                              | CC              | 1946982013               |
| SNP_P4_146693_42031 | NW_004516224.1 | Scaffold862 | 42031                   | AA                              | GG              | 1946982015               |
| SNP_P4_146694_44268 | NW_004516224.1 | Scaffold862 | 44268                   | AA                              | TT              | 1946982018               |
| SNP_P4_146695_44289 | NW_004516224.1 | Scaffold862 | 44289                   | TT                              | GG              | 1946982020               |
| SNP_P4_146696_44306 | NW_004516224.1 | Scaffold862 | 44306                   | CC                              | AA              | 1946982022               |
| SNP_P4_146697_44308 | NW_004516224.1 | Scaffold862 | 44308                   | TT                              | CC              | 1946982024               |
| SNP_P4_146698_44326 | NW_004516224.1 | Scaffold862 | 44326                   | GG                              | TT              | 1946982026               |
| SNP_P4_146699_44351 | NW_004516224.1 | Scaffold862 | 44351                   | GG                              | TT              | 1946982028               |
| SNP_P4_146700_44403 | NW_004516224.1 | Scaffold862 | 44403                   | TT                              | AA              | 1946982030               |
| SNP_P4_146701_44474 | NW_004516224.1 | Scaffold862 | 44474                   | CC                              | AA              | 1946982032               |
| SNP_P4_146702_44508 | NW_004516224.1 | Scaffold862 | 44508                   | TT                              | AA              | 1946982034               |
| SNP_P4_146703_44556 | NW_004516224.1 | Scaffold862 | 44556                   | AA                              | GG              | 1946982037               |
| SNP_P4_146704_44562 | NW_004516224.1 | Scaffold862 | 44562                   | CC                              | TT              | 1946982039               |
| SNP_P4_146705_44570 | NW_004516224.1 | Scaffold862 | 44570                   | GG                              | AA              | 1946982041               |
| SNP_P4_146706_44659 | NW_004516224.1 | Scaffold862 | 44659                   | GG                              | AA              | 1946982043               |
| SNP_P4_146707_44757 | NW_004516224.1 | Scaffold862 | 44757                   | AA                              | TT              | 1946982045               |
| SNP_P4_146708_44772 | NW_004516224.1 | Scaffold862 | 44772                   | TT                              | GG              | 1946982047               |
| SNP_P4_146709_45959 | NW_004516224.1 | Scaffold862 | 45959                   | AA                              | GG              | 1946982049               |

| SNPs IDs            | Chromosome IDs | Chromosomes | Physical positions (bp) | CDC Frontier (Reference genome) | (ILWC46 & LPNB) | NCBI SNPdb Accession IDs |
|---------------------|----------------|-------------|-------------------------|---------------------------------|-----------------|--------------------------|
| SNP_P4_146710_48873 | NW_004516224.1 | Scaffold862 | 48873                   | GG                              | AA              | 1946982051               |
| SNP_P4_146711_48875 | NW_004516224.1 | Scaffold862 | 48875                   | AA                              | GG              | 1946982053               |
| SNP_P4_146712_48916 | NW_004516224.1 | Scaffold862 | 48916                   | AA                              | CC              | 1946982055               |
| SNP_P4_146713_48949 | NW_004516224.1 | Scaffold862 | 48949                   | CC                              | TT              | 1946982057               |
| SNP_P4_146714_49157 | NW_004516224.1 | Scaffold862 | 49157                   | TT                              | AA              | 1946982060               |
| SNP_P4_146715_49250 | NW_004516224.1 | Scaffold862 | 49250                   | CC                              | AA              | 1946982062               |
| SNP_P4_146716_49289 | NW_004516224.1 | Scaffold862 | 49289                   | GG                              | TT              | 1946982064               |
| SNP_P4_146717_49391 | NW_004516224.1 | Scaffold862 | 49391                   | TT                              | AA              | 1946982066               |
| SNP_P4_146718_51094 | NW_004516224.1 | Scaffold862 | 51094                   | TT                              | AA              | 1946982068               |
| SNP_P4_146719_51105 | NW_004516224.1 | Scaffold862 | 51105                   | GG                              | TT              | 1946982070               |
| SNP_P4_146720_51140 | NW_004516224.1 | Scaffold862 | 51140                   | TT                              | CC              | 1946982072               |
| SNP_P4_146721_51170 | NW_004516224.1 | Scaffold862 | 51170                   | AA                              | GG              | 1946982074               |
| SNP_P4_146722_51302 | NW_004516224.1 | Scaffold862 | 51302                   | TT                              | CC              | 1946982076               |
| SNP_P4_146723_51305 | NW_004516224.1 | Scaffold862 | 51305                   | TT                              | AA              | 1946982078               |
| SNP_P4_146724_51410 | NW_004516224.1 | Scaffold862 | 51410                   | AA                              | GG              | 1946982080               |
| SNP_P4_146725_51631 | NW_004516224.1 | Scaffold862 | 51631                   | GG                              | AA              | 1946982082               |
| SNP_P4_146726_51741 | NW_004516224.1 | Scaffold862 | 51741                   | GG                              | CC              | 1946982084               |
| SNP_P4_146727_51874 | NW_004516224.1 | Scaffold862 | 51874                   | GG                              | TT              | 1946982086               |
| SNP_P4_146728_55727 | NW_004516224.1 | Scaffold862 | 55727                   | TT                              | CC              | 1946982088               |
| SNP_P4_146729_55754 | NW_004516224.1 | Scaffold862 | 55754                   | TT                              | CC              | 1946982090               |
| SNP_P4_146730_55832 | NW_004516224.1 | Scaffold862 | 55832                   | TT                              | GG              | 1946982092               |
| SNP_P4_146731_57409 | NW_004516224.1 | Scaffold862 | 57409                   | AA                              | GG              | 1946982094               |
| SNP_P4_146732_57456 | NW_004516224.1 | Scaffold862 | 57456                   | TT                              | CC              | 1946982096               |
| SNP_P4_146733_59838 | NW_004516224.1 | Scaffold862 | 59838                   | CC                              | TT              | 1946982098               |
| SNP_P4_146734_59853 | NW_004516224.1 | Scaffold862 | 59853                   | TT                              | GG              | 1946982100               |
| SNP_P4_146735_59897 | NW_004516224.1 | Scaffold862 | 59897                   | GG                              | CC              | 1946982102               |
| SNP_P4_146736_59898 | NW_004516224.1 | Scaffold862 | 59898                   | TT                              | GG              | 1946982104               |
| SNP_P4_146737_59957 | NW_004516224.1 | Scaffold862 | 59957                   | GG                              | TT              | 1946982106               |
| SNP_P4_146738_60085 | NW_004516224.1 | Scaffold862 | 60085                   | AA                              | CC              | 1946982108               |
| SNP_P4_146739_60100 | NW_004516224.1 | Scaffold862 | 60100                   | GG                              | TT              | 1946982110               |
| SNP_P4_146740_60101 | NW_004516224.1 | Scaffold862 | 60101                   | AA                              | GG              | 1946982112               |
| SNP_P4_146741_60121 | NW_004516224.1 | Scaffold862 | 60121                   | TT                              | GG              | 1946982114               |
| SNP_P4_146742_60156 | NW_004516224.1 | Scaffold862 | 60156                   | AA                              | GG              | 1946982116               |
| SNP_P4_146743_60300 | NW_004516224.1 | Scaffold862 | 60300                   | GG                              | AA              | 1946982118               |
| SNP_P4_146744_60304 | NW_004516224.1 | Scaffold862 | 60304                   | CC                              | TT              | 1946982120               |
| SNP_P4_146745_60350 | NW_004516224.1 | Scaffold862 | 60350                   | GG                              | AA              | 1946982122               |
| SNP_P4_146746_60362 | NW_004516224.1 | Scaffold862 | 60362                   | AA                              | TT              | 1946982124               |
| SNP_P4_146747_927   | NW_004516225.1 | Scaffold863 | 927                     | AA                              | GG              | 1946982126               |
| SNP_P4_146748_964   | NW_004516225.1 | Scaffold863 | 964                     | TT                              | CC              | 1946982128               |
| SNP_P4_146749_979   | NW_004516225.1 | Scaffold863 | 979                     | CC                              | GG              | 1946982130               |
| SNP_P4_146751_32047 | NW_004516226.1 | Scaffold864 | 32047                   | GG                              | AA              | 1946982132               |
| SNP_P4_146752_40294 | NW_004516226.1 | Scaffold864 | 40294                   | CC                              | TT              | 1946982134               |

| SNPs IDs             | Chromosome IDs | Chromosomes | Physical positions (bp) | CDC Frontier (Reference genome) | (ILWC46 & LPNB) | NCBI SNPdb Accession IDs |
|----------------------|----------------|-------------|-------------------------|---------------------------------|-----------------|--------------------------|
| SNP_P4_146753_40436  | NW_004516226.1 | Scaffold864 | 40436                   | AA                              | GG              | 1946982136               |
| SNP_P4_146754_40552  | NW_004516226.1 | Scaffold864 | 40552                   | TT                              | CC              | 1946982137               |
| SNP_P4_146755_40638  | NW_004516226.1 | Scaffold864 | 40638                   | CC                              | TT              | 1946982139               |
| SNP_P4_146756_40648  | NW_004516226.1 | Scaffold864 | 40648                   | GG                              | AA              | 1946982141               |
| SNP_P4_146757_40679  | NW_004516226.1 | Scaffold864 | 40679                   | AA                              | GG              | 1946982143               |
| SNP_P4_146758_40686  | NW_004516226.1 | Scaffold864 | 40686                   | TT                              | AA              | 1946982145               |
| SNP_P4_146759_40714  | NW_004516226.1 | Scaffold864 | 40714                   | GG                              | AA              | 1946982147               |
| SNP_P4_146760_40929  | NW_004516226.1 | Scaffold864 | 40929                   | CC                              | TT              | 1946982149               |
| SNP_P4_146761_49065  | NW_004516226.1 | Scaffold864 | 49065                   | CC                              | TT              | 1946982151               |
| SNP_P4_146762_50377  | NW_004516226.1 | Scaffold864 | 50377                   | AA                              | TT              | 1946982153               |
| SNP_P4_146763_53430  | NW_004516226.1 | Scaffold864 | 53430                   | AA                              | CC              | 1946982155               |
| SNP_P4_146764_53432  | NW_004516226.1 | Scaffold864 | 53432                   | GG                              | AA              | 1946982157               |
| SNP_P4_146765_53444  | NW_004516226.1 | Scaffold864 | 53444                   | CC                              | TT              | 1946982160               |
| SNP_P4_146766_77063  | NW_004516226.1 | Scaffold864 | 77063                   | GG                              | TT              | 1946982161               |
| SNP_P4_146767_77109  | NW_004516226.1 | Scaffold864 | 77109                   | GG                              | AA              | 1946982163               |
| SNP_P4_146768_77120  | NW_004516226.1 | Scaffold864 | 77120                   | AA                              | GG              | 1946982165               |
| SNP_P4_146769_77544  | NW_004516226.1 | Scaffold864 | 77544                   | TT                              | CC              | 1946982167               |
| SNP_P4_146770_77554  | NW_004516226.1 | Scaffold864 | 77554                   | TT                              | CC              | 1946982170               |
| SNP_P4_146771_77603  | NW_004516226.1 | Scaffold864 | 77603                   | TT                              | AA              | 1946982172               |
| SNP_P4_146772_77604  | NW_004516226.1 | Scaffold864 | 77604                   | TT                              | AA              | 1946982174               |
| SNP_P4_146773_77760  | NW_004516226.1 | Scaffold864 | 77760                   | AA                              | TT              | 1946982176               |
| SNP_P4_146774_78777  | NW_004516226.1 | Scaffold864 | 78777                   | GG                              | TT              | 1946982178               |
| SNP_P4_146775_79041  | NW_004516226.1 | Scaffold864 | 79041                   | CC                              | TT              | 1946982180               |
| SNP_P4_146776_96472  | NW_004516226.1 | Scaffold864 | 96472                   | TT                              | AA              | 1946982182               |
| SNP_P4_146777_96563  | NW_004516226.1 | Scaffold864 | 96563                   | AA                              | GG              | 1946982184               |
| SNP_P4_146778_102072 | NW_004516226.1 | Scaffold864 | 102072                  | TT                              | AA              | 1946982186               |
| SNP_P4_146779_105586 | NW_004516226.1 | Scaffold864 | 105586                  | CC                              | AA              | 1946982188               |
| SNP_P4_146780_105759 | NW_004516226.1 | Scaffold864 | 105759                  | CC                              | AA              | 1946982190               |
| SNP_P4_146781_105801 | NW_004516226.1 | Scaffold864 | 105801                  | CC                              | TT              | 1946982192               |
| SNP_P4_146782_105810 | NW_004516226.1 | Scaffold864 | 105810                  | CC                              | TT              | 1946982194               |
| SNP_P4_146783_119943 | NW_004516226.1 | Scaffold864 | 119943                  | CC                              | GG              | 1946982196               |
| SNP_P4_146784_120916 | NW_004516226.1 | Scaffold864 | 120916                  | GG                              | CC              | 1946982198               |
| SNP_P4_146786_143182 | NW_004516226.1 | Scaffold864 | 143182                  | AA                              | GG              | 1946982200               |
| SNP_P4_146787_158979 | NW_004516226.1 | Scaffold864 | 158979                  | AA                              | CC              | 1946982202               |
| SNP_P4_146788_168637 | NW_004516226.1 | Scaffold864 | 168637                  | TT                              | CC              | 1946982204               |
| SNP_P4_146789_168665 | NW_004516226.1 | Scaffold864 | 168665                  | GG                              | TT              | 1946982206               |
| SNP_P4_146790_168762 | NW_004516226.1 | Scaffold864 | 168762                  | GG                              | CC              | 1946982209               |
| SNP_P4_146791_187285 | NW_004516226.1 | Scaffold864 | 187285                  | AA                              | CC              | 1946982211               |
| SNP_P4_146792_211598 | NW_004516226.1 | Scaffold864 | 211598                  | AA                              | GG              | 1946982213               |
| SNP_P4_146793_213201 | NW_004516226.1 | Scaffold864 | 213201                  | AA                              | GG              | 1946982214               |
| SNP_P4_146794_225728 | NW_004516226.1 | Scaffold864 | 225728                  | CC                              | AA              | 1946982216               |
| SNP_P4_146795_238414 | NW_004516226.1 | Scaffold864 | 238414                  | TT                              | CC              | 1946982218               |

| SNPs IDs             | Chromosome IDs | Chromosomes | Physical positions (bp) | CDC Frontier (Reference genome) | (ILWC46 & LPNB) | NCBI SNPdb Accession IDs |
|----------------------|----------------|-------------|-------------------------|---------------------------------|-----------------|--------------------------|
| SNP_P4_146796_244309 | NW_004516226.1 | Scaffold864 | 244309                  | TT                              | GG              | 1946982221               |
| SNP_P4_146797_247766 | NW_004516226.1 | Scaffold864 | 247766                  | AA                              | GG              | 1946982222               |
| SNP_P4_146799_248165 | NW_004516226.1 | Scaffold864 | 248165                  | GG                              | TT              | 1946982224               |
| SNP_P4_146800_248243 | NW_004516226.1 | Scaffold864 | 248243                  | AA                              | CC              | 1946982226               |
| SNP_P4_146801_248259 | NW_004516226.1 | Scaffold864 | 248259                  | TT                              | AA              | 1946982228               |
| SNP_P4_146802_248269 | NW_004516226.1 | Scaffold864 | 248269                  | AA                              | GG              | 1946982230               |
| SNP_P4_146803_248468 | NW_004516226.1 | Scaffold864 | 248468                  | GG                              | AA              | 1946982232               |
| SNP_P4_146804_248686 | NW_004516226.1 | Scaffold864 | 248686                  | AA                              | CC              | 1946982234               |
| SNP_P4_146805_248707 | NW_004516226.1 | Scaffold864 | 248707                  | TT                              | CC              | 1946982236               |
| SNP_P4_146806_273373 | NW_004516226.1 | Scaffold864 | 273373                  | CC                              | TT              | 1946982238               |
| SNP_P4_146807_290579 | NW_004516226.1 | Scaffold864 | 290579                  | AA                              | CC              | 1946982240               |
| SNP_P4_146808_290589 | NW_004516226.1 | Scaffold864 | 290589                  | TT                              | AA              | 1946982242               |
| SNP_P4_146809_290641 | NW_004516226.1 | Scaffold864 | 290641                  | TT                              | CC              | 1946982244               |
| SNP_P4_146810_290883 | NW_004516226.1 | Scaffold864 | 290883                  | TT                              | AA              | 1946982246               |
| SNP_P4_146811_290949 | NW_004516226.1 | Scaffold864 | 290949                  | GG                              | AA              | 1946982248               |
| SNP_P4_146812_290958 | NW_004516226.1 | Scaffold864 | 290958                  | CC                              | TT              | 1946982250               |
| SNP_P4_146813_290964 | NW_004516226.1 | Scaffold864 | 290964                  | AA                              | GG              | 1946982252               |
| SNP_P4_146814_290969 | NW_004516226.1 | Scaffold864 | 290969                  | TT                              | CC              | 1946982254               |
| SNP_P4_146815_294755 | NW_004516226.1 | Scaffold864 | 294755                  | CC                              | TT              | 1946982255               |
| SNP_P4_146816_302753 | NW_004516226.1 | Scaffold864 | 302753                  | TT                              | AA              | 1946982257               |
| SNP_P4_146817_302985 | NW_004516226.1 | Scaffold864 | 302985                  | GG                              | AA              | 1946982259               |
| SNP_P4_146818_323047 | NW_004516226.1 | Scaffold864 | 323047                  | CC                              | TT              | 1946982262               |
| SNP_P4_146819_323086 | NW_004516226.1 | Scaffold864 | 323086                  | AA                              | GG              | 1946982264               |
| SNP_P4_146820_323089 | NW_004516226.1 | Scaffold864 | 323089                  | GG                              | AA              | 1946982266               |
| SNP_P4_146821_323735 | NW_004516226.1 | Scaffold864 | 323735                  | GG                              | AA              | 1946982268               |
| SNP_P4_146822_323797 | NW_004516226.1 | Scaffold864 | 323797                  | GG                              | AA              | 1946982270               |
| SNP_P4_146823_323867 | NW_004516226.1 | Scaffold864 | 323867                  | GG                              | TT              | 1946982272               |
| SNP_P4_146824_323875 | NW_004516226.1 | Scaffold864 | 323875                  | TT                              | CC              | 1946982274               |
| SNP_P4_146825_286    | NW_004516227.1 | Scaffold865 | 286                     | AA                              | GG              | 1946982276               |
| SNP_P4_146826_2359   | NW_004516227.1 | Scaffold865 | 2359                    | AA                              | GG              | 1946982278               |
| SNP_P4_146827_7502   | NW_004516227.1 | Scaffold865 | 7502                    | GG                              | TT              | 1946982280               |
| SNP_P4_146828_11817  | NW_004516227.1 | Scaffold865 | 11817                   | GG                              | TT              | 1946982281               |
| SNP_P4_146829_11867  | NW_004516227.1 | Scaffold865 | 11867                   | AA                              | GG              | 1946982284               |
| SNP_P4_146830_12265  | NW_004516227.1 | Scaffold865 | 12265                   | TT                              | GG              | 1946982286               |
| SNP_P4_146831_3358   | NW_004516228.1 | Scaffold866 | 3358                    | TT                              | GG              | 1946982288               |
| SNP_P4_146832_28042  | NW_004516228.1 | Scaffold866 | 28042                   | TT                              | CC              | 1946982290               |
| SNP_P4_146833_28517  | NW_004516228.1 | Scaffold866 | 28517                   | TT                              | CC              | 1946982292               |
| SNP_P4_146834_28821  | NW_004516228.1 | Scaffold866 | 28821                   | TT                              | CC              | 1946982294               |
| SNP_P4_146835_28853  | NW_004516228.1 | Scaffold866 | 28853                   | TT                              | CC              | 1946982296               |
| SNP_P4_146836_28864  | NW_004516228.1 | Scaffold866 | 28864                   | TT                              | AA              | 1946982298               |
| SNP_P4_146837_28873  | NW_004516228.1 | Scaffold866 | 28873                   | AA                              | GG              | 1946982300               |
| SNP_P4_146838_28888  | NW_004516228.1 | Scaffold866 | 28888                   | GG                              | AA              | 1946982302               |

| SNPs IDs             | Chromosome IDs | Chromosomes | Physical positions (bp) | CDC Frontier (Reference genome) | (ILWC46 & LPNB) | NCBI SNPdb Accession IDs |
|----------------------|----------------|-------------|-------------------------|---------------------------------|-----------------|--------------------------|
| SNP_P4_146839_35960  | NW_004516228.1 | Scaffold866 | 35960                   | GG                              | AA              | 1946982304               |
| SNP_P4_146841_37142  | NW_004516228.1 | Scaffold866 | 37142                   | TT                              | AA              | 1946982306               |
| SNP_P4_146843_64113  | NW_004516228.1 | Scaffold866 | 64113                   | CC                              | TT              | 1946982308               |
| SNP_P4_146844_69431  | NW_004516228.1 | Scaffold866 | 69431                   | GG                              | AA              | 1946982310               |
| SNP_P4_146845_72736  | NW_004516228.1 | Scaffold866 | 72736                   | CC                              | TT              | 1946982312               |
| SNP_P4_146846_72752  | NW_004516228.1 | Scaffold866 | 72752                   | CC                              | TT              | 1946982314               |
| SNP_P4_146847_72760  | NW_004516228.1 | Scaffold866 | 72760                   | CC                              | TT              | 1946982316               |
| SNP_P4_146848_72764  | NW_004516228.1 | Scaffold866 | 72764                   | CC                              | GG              | 1946982318               |
| SNP_P4_146849_92709  | NW_004516228.1 | Scaffold866 | 92709                   | GG                              | CC              | 1946982320               |
| SNP_P4_146851_142412 | NW_004516228.1 | Scaffold866 | 142412                  | GG                              | AA              | 1946982322               |
| SNP_P4_146852_142415 | NW_004516228.1 | Scaffold866 | 142415                  | TT                              | CC              | 1946982324               |
| SNP_P4_146853_142445 | NW_004516228.1 | Scaffold866 | 142445                  | GG                              | TT              | 1946982326               |
| SNP_P4_146854_142464 | NW_004516228.1 | Scaffold866 | 142464                  | TT                              | CC              | 1946982328               |
| SNP_P4_146855_142472 | NW_004516228.1 | Scaffold866 | 142472                  | GG                              | CC              | 1946982330               |
| SNP_P4_146857_142649 | NW_004516228.1 | Scaffold866 | 142649                  | AA                              | TT              | 1946982331               |
| SNP_P4_146858_142781 | NW_004516228.1 | Scaffold866 | 142781                  | TT                              | CC              | 1946982333               |
| SNP_P4_146859_142806 | NW_004516228.1 | Scaffold866 | 142806                  | TT                              | AA              | 1946982334               |
| SNP_P4_146860_142854 | NW_004516228.1 | Scaffold866 | 142854                  | AA                              | TT              | 1946982335               |
| SNP_P4_146861_142858 | NW_004516228.1 | Scaffold866 | 142858                  | AA                              | GG              | 1946982336               |
| SNP_P4_146862_142894 | NW_004516228.1 | Scaffold866 | 142894                  | GG                              | TT              | 1946982338               |
| SNP_P4_146863_142895 | NW_004516228.1 | Scaffold866 | 142895                  | TT                              | CC              | 1946982340               |
| SNP_P4_146864_142922 | NW_004516228.1 | Scaffold866 | 142922                  | GG                              | AA              | 1946982342               |
| SNP_P4_146865_142940 | NW_004516228.1 | Scaffold866 | 142940                  | CC                              | AA              | 1946982344               |
| SNP_P4_146867_142984 | NW_004516228.1 | Scaffold866 | 142984                  | CC                              | TT              | 1946982346               |
| SNP_P4_146868_143010 | NW_004516228.1 | Scaffold866 | 143010                  | AA                              | GG              | 1946982348               |
| SNP_P4_146869_143013 | NW_004516228.1 | Scaffold866 | 143013                  | CC                              | GG              | 1946982350               |
| SNP_P4_146870_143066 | NW_004516228.1 | Scaffold866 | 143066                  | TT                              | CC              | 1946982351               |
| SNP_P4_146871_145370 | NW_004516228.1 | Scaffold866 | 145370                  | CC                              | TT              | 1946982353               |
| SNP_P4_146872_148333 | NW_004516228.1 | Scaffold866 | 148333                  | CC                              | TT              | 1946982355               |
| SNP_P4_146873_210309 | NW_004516228.1 | Scaffold866 | 210309                  | AA                              | GG              | 1946982357               |
| SNP_P4_146874_5477   | NW_004516229.1 | Scaffold868 | 5477                    | GG                              | AA              | 1946982359               |
| SNP_P4_146875_5483   | NW_004516229.1 | Scaffold868 | 5483                    | GG                              | TT              | 1946982361               |
| SNP_P4_146876_5663   | NW_004516229.1 | Scaffold868 | 5663                    | AA                              | GG              | 1946982363               |
| SNP_P4_146877_5673   | NW_004516229.1 | Scaffold868 | 5673                    | TT                              | AA              | 1946982365               |
| SNP_P4_146878_5688   | NW_004516229.1 | Scaffold868 | 5688                    | GG                              | AA              | 1946982367               |
| SNP_P4_146879_5952   | NW_004516229.1 | Scaffold868 | 5952                    | GG                              | AA              | 1946982369               |
| SNP_P4_146880_21216  | NW_004516229.1 | Scaffold868 | 21216                   | GG                              | AA              | 1946982371               |
| SNP_P4_146881_21735  | NW_004516229.1 | Scaffold868 | 21735                   | GG                              | TT              | 1946982373               |
| SNP_P4_146882_22215  | NW_004516229.1 | Scaffold868 | 22215                   | TT                              | CC              | 1946982375               |
| SNP_P4_146883_22363  | NW_004516229.1 | Scaffold868 | 22363                   | AA                              | TT              | 1946982377               |
| SNP_P4_146884_24868  | NW_004516229.1 | Scaffold868 | 24868                   | CC                              | TT              | 1946982379               |
| SNP_P4_146885_24873  | NW_004516229.1 | Scaffold868 | 24873                   | GG                              | CC              | 1946982381               |

| SNPs IDs            | Chromosome IDs | Chromosomes | Physical positions (bp) | CDC Frontier (Reference genome) | (ILWC46 & LPNB) | NCBI SNPdb Accession IDs |
|---------------------|----------------|-------------|-------------------------|---------------------------------|-----------------|--------------------------|
| SNP_P4_146886_25443 | NW_004516229.1 | Scaffold868 | 25443                   | GG                              | TT              | 1946982383               |
| SNP_P4_146887_25542 | NW_004516229.1 | Scaffold868 | 25542                   | AA                              | GG              | 1946982385               |
| SNP_P4_146888_25614 | NW_004516229.1 | Scaffold868 | 25614                   | AA                              | CC              | 1946982387               |
| SNP_P4_146890_27228 | NW_004516229.1 | Scaffold868 | 27228                   | AA                              | TT              | 1946982389               |
| SNP_P4_146891_30331 | NW_004516229.1 | Scaffold868 | 30331                   | GG                              | AA              | 1946982392               |
| SNP_P4_146892_30365 | NW_004516229.1 | Scaffold868 | 30365                   | CC                              | TT              | 1946982394               |
| SNP_P4_146893_30381 | NW_004516229.1 | Scaffold868 | 30381                   | AA                              | GG              | 1946982396               |
| SNP_P4_146894_30423 | NW_004516229.1 | Scaffold868 | 30423                   | AA                              | TT              | 1946982398               |
| SNP_P4_146895_30433 | NW_004516229.1 | Scaffold868 | 30433                   | TT                              | CC              | 1946982400               |
| SNP_P4_146896_30469 | NW_004516229.1 | Scaffold868 | 30469                   | CC                              | TT              | 1946982402               |
| SNP_P4_146897_30591 | NW_004516229.1 | Scaffold868 | 30591                   | AA                              | GG              | 1946982404               |
| SNP_P4_146898_30655 | NW_004516229.1 | Scaffold868 | 30655                   | CC                              | GG              | 1946982406               |
| SNP_P4_146899_30672 | NW_004516229.1 | Scaffold868 | 30672                   | TT                              | CC              | 1946982408               |
| SNP_P4_146900_31259 | NW_004516229.1 | Scaffold868 | 31259                   | GG                              | AA              | 1946982410               |
| SNP_P4_146901_31278 | NW_004516229.1 | Scaffold868 | 31278                   | AA                              | TT              | 1946982411               |
| SNP_P4_146902_31621 | NW_004516229.1 | Scaffold868 | 31621                   | CC                              | GG              | 1946982413               |
| SNP_P4_146903_31684 | NW_004516229.1 | Scaffold868 | 31684                   | TT                              | CC              | 1946982415               |
| SNP_P4_146904_31692 | NW_004516229.1 | Scaffold868 | 31692                   | TT                              | AA              | 1946982417               |
| SNP_P4_146905_31693 | NW_004516229.1 | Scaffold868 | 31693                   | TT                              | CC              | 1946982419               |
| SNP_P4_146906_31944 | NW_004516229.1 | Scaffold868 | 31944                   | CC                              | GG              | 1946982421               |
| SNP_P4_146907_31947 | NW_004516229.1 | Scaffold868 | 31947                   | AA                              | TT              | 1946982423               |
| SNP_P4_146909_32107 | NW_004516229.1 | Scaffold868 | 32107                   | GG                              | TT              | 1946982425               |
| SNP_P4_146910_32113 | NW_004516229.1 | Scaffold868 | 32113                   | AA                              | TT              | 1946982427               |
| SNP_P4_146911_32114 | NW_004516229.1 | Scaffold868 | 32114                   | CC                              | TT              | 1946982429               |
| SNP_P4_146912_32116 | NW_004516229.1 | Scaffold868 | 32116                   | AA                              | GG              | 1946982431               |
| SNP_P4_146913_46681 | NW_004516229.1 | Scaffold868 | 46681                   | TT                              | CC              | 1946982432               |
| SNP_P4_146914_46725 | NW_004516229.1 | Scaffold868 | 46725                   | TT                              | AA              | 1946982434               |
| SNP_P4_146915_46741 | NW_004516229.1 | Scaffold868 | 46741                   | AA                              | TT              | 1946982436               |
| SNP_P4_146916_46964 | NW_004516229.1 | Scaffold868 | 46964                   | AA                              | GG              | 1946982438               |
| SNP_P4_146917_47014 | NW_004516229.1 | Scaffold868 | 47014                   | CC                              | TT              | 1946982440               |
| SNP_P4_146918_47037 | NW_004516229.1 | Scaffold868 | 47037                   | AA                              | CC              | 1946982442               |
| SNP_P4_146919_47067 | NW_004516229.1 | Scaffold868 | 47067                   | CC                              | GG              | 1946982444               |
| SNP_P4_146920_47119 | NW_004516229.1 | Scaffold868 | 47119                   | TT                              | GG              | 1946982445               |
| SNP_P4_146921_47120 | NW_004516229.1 | Scaffold868 | 47120                   | TT                              | CC              | 1946982447               |
| SNP_P4_146922_47240 | NW_004516229.1 | Scaffold868 | 47240                   | AA                              | CC              | 1946982449               |
| SNP_P4_146923_47250 | NW_004516229.1 | Scaffold868 | 47250                   | AA                              | TT              | 1946982451               |
| SNP_P4_146924_47257 | NW_004516229.1 | Scaffold868 | 47257                   | AA                              | TT              | 1946982453               |
| SNP_P4_146925_47260 | NW_004516229.1 | Scaffold868 | 47260                   | CC                              | AA              | 1946982455               |
| SNP_P4_146926_47263 | NW_004516229.1 | Scaffold868 | 47263                   | GG                              | AA              | 1946982457               |
| SNP_P4_146927_47317 | NW_004516229.1 | Scaffold868 | 47317                   | AA                              | CC              | 1946982459               |
| SNP_P4_146928_47319 | NW_004516229.1 | Scaffold868 | 47319                   | AA                              | CC              | 1946982461               |
| SNP_P4_146929_47353 | NW_004516229.1 | Scaffold868 | 47353                   | TT                              | CC              | 1946982463               |

| SNPs IDs            | Chromosome IDs | Chromosomes | Physical positions (bp) | CDC Frontier (Reference genome) | (ILWC46 & LPNB) | NCBI SNPdb Accession IDs |
|---------------------|----------------|-------------|-------------------------|---------------------------------|-----------------|--------------------------|
| SNP_P4_146930_47392 | NW_004516229.1 | Scaffold868 | 47392                   | CC                              | AA              | 1946982465               |
| SNP_P4_146931_47439 | NW_004516229.1 | Scaffold868 | 47439                   | AA                              | TT              | 1946982467               |
| SNP_P4_146932_47463 | NW_004516229.1 | Scaffold868 | 47463                   | GG                              | AA              | 1946982469               |
| SNP_P4_146933_47505 | NW_004516229.1 | Scaffold868 | 47505                   | CC                              | AA              | 1946982471               |
| SNP_P4_146934_47524 | NW_004516229.1 | Scaffold868 | 47524                   | TT                              | AA              | 1946982473               |
| SNP_P4_146935_47598 | NW_004516229.1 | Scaffold868 | 47598                   | GG                              | TT              | 1946982475               |
| SNP_P4_146936_47623 | NW_004516229.1 | Scaffold868 | 47623                   | AA                              | TT              | 1946982477               |
| SNP_P4_146937_47699 | NW_004516229.1 | Scaffold868 | 47699                   | AA                              | GG              | 1946982479               |
| SNP_P4_146938_47768 | NW_004516229.1 | Scaffold868 | 47768                   | GG                              | AA              | 1946982481               |
| SNP_P4_146939_47778 | NW_004516229.1 | Scaffold868 | 47778                   | AA                              | TT              | 1946982483               |
| SNP_P4_146940_47779 | NW_004516229.1 | Scaffold868 | 47779                   | TT                              | GG              | 1946982485               |
| SNP_P4_146941_47789 | NW_004516229.1 | Scaffold868 | 47789                   | AA                              | CC              | 1946982486               |
| SNP_P4_146942_47835 | NW_004516229.1 | Scaffold868 | 47835                   | AA                              | GG              | 1946982488               |
| SNP_P4_146943_47856 | NW_004516229.1 | Scaffold868 | 47856                   | CC                              | TT              | 1946982490               |
| SNP_P4_146944_47917 | NW_004516229.1 | Scaffold868 | 47917                   | TT                              | AA              | 1946982492               |
| SNP_P4_146945_54259 | NW_004516229.1 | Scaffold868 | 54259                   | AA                              | GG              | 1946982494               |
| SNP_P4_146947_56042 | NW_004516229.1 | Scaffold868 | 56042                   | CC                              | TT              | 1946982496               |
| SNP_P4_146948_69299 | NW_004516229.1 | Scaffold868 | 69299                   | GG                              | AA              | 1946982497               |
| SNP_P4_146949_69337 | NW_004516229.1 | Scaffold868 | 69337                   | AA                              | GG              | 1946982498               |
| SNP_P4_146950_69449 | NW_004516229.1 | Scaffold868 | 69449                   | GG                              | TT              | 1946982500               |
| SNP_P4_146951_69484 | NW_004516229.1 | Scaffold868 | 69484                   | AA                              | TT              | 1946982502               |
| SNP_P4_146952_69606 | NW_004516229.1 | Scaffold868 | 69606                   | GG                              | TT              | 1946982504               |
| SNP_P4_146953_1274  | NW_004516230.1 | Scaffold869 | 1274                    | GG                              | AA              | 1946982506               |
| SNP_P4_146954_5772  | NW_004516230.1 | Scaffold869 | 5772                    | GG                              | TT              | 1946982508               |
| SNP_P4_146955_11779 | NW_004516230.1 | Scaffold869 | 11779                   | GG                              | CC              | 1946982510               |
| SNP_P4_146956_16507 | NW_004516230.1 | Scaffold869 | 16507                   | CC                              | TT              | 1946982512               |
| SNP_P4_146958_28728 | NW_004516230.1 | Scaffold869 | 28728                   | TT                              | AA              | 1946982514               |
| SNP_P4_146959_29496 | NW_004516230.1 | Scaffold869 | 29496                   | TT                              | CC              | 1946982516               |
| SNP_P4_146960_29904 | NW_004516230.1 | Scaffold869 | 29904                   | GG                              | AA              | 1946982518               |
| SNP_P4_146961_45173 | NW_004516230.1 | Scaffold869 | 45173                   | AA                              | TT              | 1946982520               |
| SNP_P4_146962_56066 | NW_004516230.1 | Scaffold869 | 56066                   | CC                              | TT              | 1946982522               |
| SNP_P4_146963_69213 | NW_004516230.1 | Scaffold869 | 69213                   | TT                              | CC              | 1946982524               |
| SNP_P4_146964_73141 | NW_004516230.1 | Scaffold869 | 73141                   | AA                              | CC              | 1946982526               |
| SNP_P4_146965_73153 | NW_004516230.1 | Scaffold869 | 73153                   | CC                              | TT              | 1946982528               |
| SNP_P4_146966_73155 | NW_004516230.1 | Scaffold869 | 73155                   | GG                              | CC              | 1946982530               |
| SNP_P4_146967_73166 | NW_004516230.1 | Scaffold869 | 73166                   | GG                              | AA              | 1946982532               |
| SNP_P4_146968_73174 | NW_004516230.1 | Scaffold869 | 73174                   | AA                              | GG              | 1946982534               |
| SNP_P4_146969_73192 | NW_004516230.1 | Scaffold869 | 73192                   | GG                              | AA              | 1946982536               |
| SNP_P4_146970_73229 | NW_004516230.1 | Scaffold869 | 73229                   | CC                              | TT              | 1946982538               |
| SNP_P4_146971_73272 | NW_004516230.1 | Scaffold869 | 73272                   | GG                              | AA              | 1946982540               |
| SNP_P4_146972_73493 | NW_004516230.1 | Scaffold869 | 73493                   | TT                              | AA              | 1946982542               |
| SNP_P4_146974_78009 | NW_004516230.1 | Scaffold869 | 78009                   | GG                              | AA              | 1946982544               |



| SNPs IDs             | Chromosome IDs | Chromosomes | Physical positions (bp) | CDC Frontier (Reference genome) | (ILWC46 & LPNB) | NCBI SNPdb Accession IDs |
|----------------------|----------------|-------------|-------------------------|---------------------------------|-----------------|--------------------------|
| SNP_P4_146975_83954  | NW_004516230.1 | Scaffold869 | 83954                   | CC                              | AA              | 1946982546               |
| SNP_P4_146976_89408  | NW_004516230.1 | Scaffold869 | 89408                   | AA                              | GG              | 1946982548               |
| SNP_P4_146977_90341  | NW_004516230.1 | Scaffold869 | 90341                   | GG                              | AA              | 1946982549               |
| SNP_P4_146978_95353  | NW_004516230.1 | Scaffold869 | 95353                   | GG                              | AA              | 1946982551               |
| SNP_P4_146979_96716  | NW_004516230.1 | Scaffold869 | 96716                   | AA                              | GG              | 1946982553               |
| SNP_P4_146980_97697  | NW_004516230.1 | Scaffold869 | 97697                   | GG                              | AA              | 1946982555               |
| SNP_P4_146981_97805  | NW_004516230.1 | Scaffold869 | 97805                   | GG                              | AA              | 1946982557               |
| SNP_P4_146982_107192 | NW_004516230.1 | Scaffold869 | 107192                  | GG                              | AA              | 1946982559               |
| SNP_P4_146983_108693 | NW_004516230.1 | Scaffold869 | 108693                  | CC                              | TT              | 1946982560               |
| SNP_P4_146984_111907 | NW_004516230.1 | Scaffold869 | 111907                  | GG                              | AA              | 1946982562               |
| SNP_P4_146985_111994 | NW_004516230.1 | Scaffold869 | 111994                  | TT                              | AA              | 1946982564               |
| SNP_P4_146986_111996 | NW_004516230.1 | Scaffold869 | 111996                  | CC                              | TT              | 1946982566               |
| SNP_P4_146987_114754 | NW_004516230.1 | Scaffold869 | 114754                  | CC                              | TT              | 1946982568               |
| SNP_P4_146988_114898 | NW_004516230.1 | Scaffold869 | 114898                  | TT                              | CC              | 1946982570               |
| SNP_P4_146989_114905 | NW_004516230.1 | Scaffold869 | 114905                  | TT                              | CC              | 1946982572               |
| SNP_P4_146990_115165 | NW_004516230.1 | Scaffold869 | 115165                  | TT                              | GG              | 1946982574               |
| SNP_P4_146991_118224 | NW_004516230.1 | Scaffold869 | 118224                  | AA                              | GG              | 1946982575               |
| SNP_P4_146992_124076 | NW_004516230.1 | Scaffold869 | 124076                  | AA                              | CC              | 1946982577               |
| SNP_P4_146993_141532 | NW_004516230.1 | Scaffold869 | 141532                  | GG                              | AA              | 1946982579               |
| SNP_P4_146994_141533 | NW_004516230.1 | Scaffold869 | 141533                  | AA                              | GG              | 1946982581               |
| SNP_P4_146995_141601 | NW_004516230.1 | Scaffold869 | 141601                  | CC                              | TT              | 1946982583               |
| SNP_P4_146996_142893 | NW_004516230.1 | Scaffold869 | 142893                  | GG                              | AA              | 1946982585               |
| SNP_P4_146997_151601 | NW_004516230.1 | Scaffold869 | 151601                  | AA                              | GG              | 1946982586               |
| SNP_P4_146998_151619 | NW_004516230.1 | Scaffold869 | 151619                  | TT                              | CC              | 1946982588               |
| SNP_P4_146999_151638 | NW_004516230.1 | Scaffold869 | 151638                  | AA                              | GG              | 1946982590               |
| SNP_P4_147000_1277   | NW_004516231.1 | Scaffold870 | 1277                    | TT                              | GG              | 1946982592               |
| SNP_P4_147001_1668   | NW_004516231.1 | Scaffold870 | 1668                    | AA                              | CC              | 1946982594               |
| SNP_P4_147002_10525  | NW_004516231.1 | Scaffold870 | 10525                   | TT                              | CC              | 1946982596               |
| SNP_P4_147003_11307  | NW_004516231.1 | Scaffold870 | 11307                   | TT                              | AA              | 1946982598               |
| SNP_P4_147005_16879  | NW_004516231.1 | Scaffold870 | 16879                   | AA                              | TT              | 1946982600               |
| SNP_P4_147006_22479  | NW_004516231.1 | Scaffold870 | 22479                   | TT                              | CC              | 1946982602               |
| SNP_P4_147007_22531  | NW_004516231.1 | Scaffold870 | 22531                   | TT                              | CC              | 1946982604               |
| SNP_P4_147010_42714  | NW_004516231.1 | Scaffold870 | 42714                   | TT                              | CC              | 1946982606               |
| SNP_P4_147011_43000  | NW_004516231.1 | Scaffold870 | 43000                   | TT                              | CC              | 1946982608               |
| SNP_P4_147012_43175  | NW_004516231.1 | Scaffold870 | 43175                   | CC                              | AA              | 1946982610               |
| SNP_P4_147013_43449  | NW_004516231.1 | Scaffold870 | 43449                   | AA                              | GG              | 1946982612               |
| SNP_P4_147014_55150  | NW_004516231.1 | Scaffold870 | 55150                   | AA                              | CC              | 1946982614               |
| SNP_P4_147016_58507  | NW_004516231.1 | Scaffold870 | 58507                   | AA                              | CC              | 1946982616               |
| SNP_P4_147017_58513  | NW_004516231.1 | Scaffold870 | 58513                   | AA                              | GG              | 1946982617               |
| SNP_P4_147018_58516  | NW_004516231.1 | Scaffold870 | 58516                   | TT                              | CC              | 1946982619               |
| SNP_P4_147019_58520  | NW_004516231.1 | Scaffold870 | 58520                   | TT                              | CC              | 1946982621               |
| SNP_P4_147020_60361  | NW_004516231.1 | Scaffold870 | 60361                   | CC                              | TT              | 1946982623               |

| SNPs IDs             | Chromosome IDs | Chromosomes | Physical positions (bp) | CDC Frontier (Reference genome) | (ILWC46 & LPNB) | NCBI SNPdb Accession IDs |
|----------------------|----------------|-------------|-------------------------|---------------------------------|-----------------|--------------------------|
| SNP_P4_147021_73257  | NW_004516231.1 | Scaffold870 | 73257                   | TT                              | AA              | 1946982625               |
| SNP_P4_147022_73549  | NW_004516231.1 | Scaffold870 | 73549                   | CC                              | TT              | 1946982626               |
| SNP_P4_147024_73802  | NW_004516231.1 | Scaffold870 | 73802                   | AA                              | TT              | 1946982628               |
| SNP_P4_147025_73880  | NW_004516231.1 | Scaffold870 | 73880                   | AA                              | GG              | 1946982630               |
| SNP_P4_147026_76763  | NW_004516231.1 | Scaffold870 | 76763                   | AA                              | TT              | 1946982632               |
| SNP_P4_147027_76953  | NW_004516231.1 | Scaffold870 | 76953                   | TT                              | AA              | 1946982634               |
| SNP_P4_147028_77173  | NW_004516231.1 | Scaffold870 | 77173                   | TT                              | AA              | 1946982636               |
| SNP_P4_147029_82293  | NW_004516231.1 | Scaffold870 | 82293                   | TT                              | CC              | 1946982638               |
| SNP_P4_147030_82295  | NW_004516231.1 | Scaffold870 | 82295                   | AA                              | CC              | 1946982640               |
| SNP_P4_147031_82297  | NW_004516231.1 | Scaffold870 | 82297                   | GG                              | TT              | 1946982642               |
| SNP_P4_147033_82477  | NW_004516231.1 | Scaffold870 | 82477                   | CC                              | TT              | 1946982643               |
| SNP_P4_147034_82489  | NW_004516231.1 | Scaffold870 | 82489                   | GG                              | AA              | 1946982645               |
| SNP_P4_147035_82638  | NW_004516231.1 | Scaffold870 | 82638                   | AA                              | GG              | 1946982648               |
| SNP_P4_147036_82663  | NW_004516231.1 | Scaffold870 | 82663                   | GG                              | AA              | 1946982649               |
| SNP_P4_147037_87939  | NW_004516231.1 | Scaffold870 | 87939                   | TT                              | CC              | 1946982651               |
| SNP_P4_147038_188    | NW_004516232.1 | Scaffold872 | 188                     | GG                              | AA              | 1946982653               |
| SNP_P4_147039_5799   | NW_004516232.1 | Scaffold872 | 5799                    | AA                              | CC              | 1946982655               |
| SNP_P4_147040_16000  | NW_004516232.1 | Scaffold872 | 16000                   | AA                              | TT              | 1946982657               |
| SNP_P4_147041_16027  | NW_004516232.1 | Scaffold872 | 16027                   | AA                              | GG              | 1946982659               |
| SNP_P4_147042_69     | NW_004516233.1 | Scaffold873 | 69                      | CC                              | TT              | 1946982661               |
| SNP_P4_147043_116    | NW_004516233.1 | Scaffold873 | 116                     | TT                              | CC              | 1946982663               |
| SNP_P4_147044_132    | NW_004516233.1 | Scaffold873 | 132                     | TT                              | CC              | 1946982665               |
| SNP_P4_147045_320    | NW_004516233.1 | Scaffold873 | 320                     | TT                              | CC              | 1946982667               |
| SNP_P4_147046_9357   | NW_004516233.1 | Scaffold873 | 9357                    | AA                              | GG              | 1946982669               |
| SNP_P4_147047_9359   | NW_004516233.1 | Scaffold873 | 9359                    | GG                              | TT              | 1946982671               |
| SNP_P4_147048_9362   | NW_004516233.1 | Scaffold873 | 9362                    | AA                              | CC              | 1946982673               |
| SNP_P4_147049_9553   | NW_004516233.1 | Scaffold873 | 9553                    | AA                              | CC              | 1946982675               |
| SNP_P4_147054_82451  | NW_004516233.1 | Scaffold873 | 82451                   | AA                              | CC              | 1946982677               |
| SNP_P4_147055_88984  | NW_004516233.1 | Scaffold873 | 88984                   | CC                              | TT              | 1946982679               |
| SNP_P4_147057_99334  | NW_004516233.1 | Scaffold873 | 99334                   | TT                              | CC              | 1946982681               |
| SNP_P4_147059_163384 | NW_004516233.1 | Scaffold873 | 163384                  | CC                              | TT              | 1946982683               |
| SNP_P4_147060_194373 | NW_004516233.1 | Scaffold873 | 194373                  | TT                              | AA              | 1946982686               |
| SNP_P4_147062_215356 | NW_004516233.1 | Scaffold873 | 215356                  | CC                              | AA              | 1946982688               |
| SNP_P4_147063_242693 | NW_004516233.1 | Scaffold873 | 242693                  | TT                              | CC              | 1946982690               |
| SNP_P4_147064_242697 | NW_004516233.1 | Scaffold873 | 242697                  | TT                              | CC              | 1946982692               |
| SNP_P4_147065_242726 | NW_004516233.1 | Scaffold873 | 242726                  | AA                              | GG              | 1946982694               |
| SNP_P4_147066_242727 | NW_004516233.1 | Scaffold873 | 242727                  | GG                              | TT              | 1946982695               |
| SNP_P4_147067_242788 | NW_004516233.1 | Scaffold873 | 242788                  | CC                              | TT              | 1946982697               |
| SNP_P4_147068_242872 | NW_004516233.1 | Scaffold873 | 242872                  | GG                              | AA              | 1946982699               |
| SNP_P4_147069_242884 | NW_004516233.1 | Scaffold873 | 242884                  | AA                              | TT              | 1946982701               |
| SNP_P4_147070_243042 | NW_004516233.1 | Scaffold873 | 243042                  | AA                              | TT              | 1946982703               |
| SNP_P4_147071_252737 | NW_004516233.1 | Scaffold873 | 252737                  | AA                              | GG              | 1946982705               |

| SNPs IDs             | Chromosome IDs | Chromosomes | Physical positions (bp) | CDC Frontier (Reference genome) | (ILWC46 & LPNB) | NCBI SNPdb Accession IDs |
|----------------------|----------------|-------------|-------------------------|---------------------------------|-----------------|--------------------------|
| SNP_P4_147072_252800 | NW_004516233.1 | Scaffold873 | 252800                  | TT                              | GG              | 1946982707               |
| SNP_P4_147073_252815 | NW_004516233.1 | Scaffold873 | 252815                  | CC                              | TT              | 1946982709               |
| SNP_P4_147074_253013 | NW_004516233.1 | Scaffold873 | 253013                  | TT                              | CC              | 1946982711               |
| SNP_P4_147075_253014 | NW_004516233.1 | Scaffold873 | 253014                  | CC                              | AA              | 1946982713               |
| SNP_P4_147076_253081 | NW_004516233.1 | Scaffold873 | 253081                  | GG                              | AA              | 1946982715               |
| SNP_P4_147077_253082 | NW_004516233.1 | Scaffold873 | 253082                  | GG                              | AA              | 1946982717               |
| SNP_P4_147078_253090 | NW_004516233.1 | Scaffold873 | 253090                  | CC                              | AA              | 1946982720               |
| SNP_P4_147079_253109 | NW_004516233.1 | Scaffold873 | 253109                  | CC                              | TT              | 1946982722               |
| SNP_P4_147080_257238 | NW_004516233.1 | Scaffold873 | 257238                  | AA                              | GG              | 1946982724               |
| SNP_P4_147081_257240 | NW_004516233.1 | Scaffold873 | 257240                  | AA                              | TT              | 1946982726               |
| SNP_P4_147082_271925 | NW_004516233.1 | Scaffold873 | 271925                  | CC                              | TT              | 1946982727               |
| SNP_P4_147083_279002 | NW_004516233.1 | Scaffold873 | 279002                  | AA                              | CC              | 1946982729               |
| SNP_P4_147084_286764 | NW_004516233.1 | Scaffold873 | 286764                  | AA                              | GG              | 1946982731               |
| SNP_P4_147085_286797 | NW_004516233.1 | Scaffold873 | 286797                  | TT                              | CC              | 1946982733               |
| SNP_P4_147086_286864 | NW_004516233.1 | Scaffold873 | 286864                  | CC                              | TT              | 1946982735               |
| SNP_P4_147087_286869 | NW_004516233.1 | Scaffold873 | 286869                  | CC                              | TT              | 1946982737               |
| SNP_P4_147089_311620 | NW_004516233.1 | Scaffold873 | 311620                  | GG                              | AA              | 1946982739               |
| SNP_P4_147090_318657 | NW_004516233.1 | Scaffold873 | 318657                  | TT                              | CC              | 1946982741               |
| SNP_P4_147091_318677 | NW_004516233.1 | Scaffold873 | 318677                  | AA                              | CC              | 1946982743               |
| SNP_P4_147092_318679 | NW_004516233.1 | Scaffold873 | 318679                  | GG                              | AA              | 1946982745               |
| SNP_P4_147093_334567 | NW_004516233.1 | Scaffold873 | 334567                  | AA                              | CC              | 1946982747               |
| SNP_P4_147094_334680 | NW_004516233.1 | Scaffold873 | 334680                  | GG                              | AA              | 1946982749               |
| SNP_P4_147095_344709 | NW_004516233.1 | Scaffold873 | 344709                  | TT                              | CC              | 1946982751               |
| SNP_P4_147096_344775 | NW_004516233.1 | Scaffold873 | 344775                  | GG                              | AA              | 1946982753               |
| SNP_P4_147097_344805 | NW_004516233.1 | Scaffold873 | 344805                  | AA                              | GG              | 1946982755               |
| SNP_P4_147098_344806 | NW_004516233.1 | Scaffold873 | 344806                  | GG                              | AA              | 1946982757               |
| SNP_P4_147099_344827 | NW_004516233.1 | Scaffold873 | 344827                  | AA                              | CC              | 1946982759               |
| SNP_P4_147101_344960 | NW_004516233.1 | Scaffold873 | 344960                  | AA                              | GG              | 1946982761               |
| SNP_P4_147102_344967 | NW_004516233.1 | Scaffold873 | 344967                  | AA                              | GG              | 1946982762               |
| SNP_P4_147103_344982 | NW_004516233.1 | Scaffold873 | 344982                  | AA                              | GG              | 1946982764               |
| SNP_P4_147104_344983 | NW_004516233.1 | Scaffold873 | 344983                  | CC                              | AA              | 1946982766               |
| SNP_P4_147105_345021 | NW_004516233.1 | Scaffold873 | 345021                  | AA                              | GG              | 1946982768               |
| SNP_P4_147106_345050 | NW_004516233.1 | Scaffold873 | 345050                  | GG                              | AA              | 1946982770               |
| SNP_P4_147107_345278 | NW_004516233.1 | Scaffold873 | 345278                  | TT                              | AA              | 1946982772               |
| SNP_P4_147108_345308 | NW_004516233.1 | Scaffold873 | 345308                  | AA                              | GG              | 1946982774               |
| SNP_P4_147109_27532  | NW_004516234.1 | Scaffold875 | 27532                   | CC                              | TT              | 1946982777               |
| SNP_P4_147110_43033  | NW_004516234.1 | Scaffold875 | 43033                   | AA                              | CC              | 1946982779               |
| SNP_P4_147111_66548  | NW_004516234.1 | Scaffold875 | 66548                   | GG                              | AA              | 1946982781               |
| SNP_P4_147112_104088 | NW_004516234.1 | Scaffold875 | 104088                  | TT                              | GG              | 1946982783               |
| SNP_P4_147113_104927 | NW_004516234.1 | Scaffold875 | 104927                  | AA                              | TT              | 1946982785               |
| SNP_P4_147114_104949 | NW_004516234.1 | Scaffold875 | 104949                  | AA                              | TT              | 1946982787               |
| SNP_P4_147115_105016 | NW_004516234.1 | Scaffold875 | 105016                  | AA                              | GG              | 1946982789               |

| SNPs IDs             | Chromosome IDs | Chromosomes | Physical positions (bp) | CDC Frontier (Reference genome) | (ILWC46 & LPNB) | NCBI SNPdb Accession IDs |
|----------------------|----------------|-------------|-------------------------|---------------------------------|-----------------|--------------------------|
| SNP_P4_147116_108087 | NW_004516234.1 | Scaffold875 | 108087                  | GG                              | AA              | 1946982791               |
| SNP_P4_147117_108160 | NW_004516234.1 | Scaffold875 | 108160                  | AA                              | GG              | 1946982793               |
| SNP_P4_147118_108210 | NW_004516234.1 | Scaffold875 | 108210                  | AA                              | GG              | 1946982795               |
| SNP_P4_147119_108216 | NW_004516234.1 | Scaffold875 | 108216                  | TT                              | CC              | 1946982797               |
| SNP_P4_147120_108229 | NW_004516234.1 | Scaffold875 | 108229                  | CC                              | TT              | 1946982799               |
| SNP_P4_147121_108344 | NW_004516234.1 | Scaffold875 | 108344                  | AA                              | TT              | 1946982801               |
| SNP_P4_147122_108407 | NW_004516234.1 | Scaffold875 | 108407                  | TT                              | GG              | 1946982803               |
| SNP_P4_147123_108429 | NW_004516234.1 | Scaffold875 | 108429                  | CC                              | TT              | 1946982806               |
| SNP_P4_147124_108539 | NW_004516234.1 | Scaffold875 | 108539                  | CC                              | AA              | 1946982808               |
| SNP_P4_147125_3766   | NW_004516235.1 | Scaffold876 | 3766                    | GG                              | AA              | 1946982810               |
| SNP_P4_147126_3929   | NW_004516235.1 | Scaffold876 | 3929                    | CC                              | TT              | 1946982812               |
| SNP_P4_147127_5202   | NW_004516235.1 | Scaffold876 | 5202                    | AA                              | GG              | 1946982815               |
| SNP_P4_147129_5335   | NW_004516235.1 | Scaffold876 | 5335                    | GG                              | AA              | 1946982817               |
| SNP_P4_147130_5373   | NW_004516235.1 | Scaffold876 | 5373                    | CC                              | AA              | 1946982819               |
| SNP_P4_147133_26054  | NW_004516235.1 | Scaffold876 | 26054                   | AA                              | GG              | 1946982821               |
| SNP_P4_147134_45322  | NW_004516235.1 | Scaffold876 | 45322                   | AA                              | GG              | 1946982824               |
| SNP_P4_147135_52903  | NW_004516235.1 | Scaffold876 | 52903                   | GG                              | AA              | 1946982826               |
| SNP_P4_147136_53242  | NW_004516235.1 | Scaffold876 | 53242                   | AA                              | CC              | 1946982828               |
| SNP_P4_147137_53521  | NW_004516235.1 | Scaffold876 | 53521                   | CC                              | TT              | 1946982830               |
| SNP_P4_147138_57891  | NW_004516235.1 | Scaffold876 | 57891                   | TT                              | AA              | 1946982832               |
| SNP_P4_147139_58173  | NW_004516235.1 | Scaffold876 | 58173                   | TT                              | GG              | 1946982833               |
| SNP_P4_147140_66909  | NW_004516235.1 | Scaffold876 | 66909                   | GG                              | TT              | 1946982835               |
| SNP_P4_147142_84656  | NW_004516235.1 | Scaffold876 | 84656                   | CC                              | GG              | 1946982837               |
| SNP_P4_147143_91555  | NW_004516235.1 | Scaffold876 | 91555                   | AA                              | GG              | 1946982839               |
| SNP_P4_147144_91563  | NW_004516235.1 | Scaffold876 | 91563                   | AA                              | CC              | 1946982841               |
| SNP_P4_147145_94912  | NW_004516235.1 | Scaffold876 | 94912                   | TT                              | CC              | 1946982843               |
| SNP_P4_147146_97538  | NW_004516235.1 | Scaffold876 | 97538                   | TT                              | GG              | 1946982845               |
| SNP_P4_147147_97612  | NW_004516235.1 | Scaffold876 | 97612                   | TT                              | CC              | 1946982847               |
| SNP_P4_147148_100829 | NW_004516235.1 | Scaffold876 | 100829                  | AA                              | CC              | 1946982849               |
| SNP_P4_147149_101146 | NW_004516235.1 | Scaffold876 | 101146                  | CC                              | TT              | 1946982851               |
| SNP_P4_147150_101151 | NW_004516235.1 | Scaffold876 | 101151                  | TT                              | CC              | 1946982853               |
| SNP_P4_147151_101171 | NW_004516235.1 | Scaffold876 | 101171                  | TT                              | GG              | 1946982855               |
| SNP_P4_147152_101174 | NW_004516235.1 | Scaffold876 | 101174                  | AA                              | GG              | 1946982857               |
| SNP_P4_147153_101423 | NW_004516235.1 | Scaffold876 | 101423                  | AA                              | TT              | 1946982859               |
| SNP_P4_147154_105563 | NW_004516235.1 | Scaffold876 | 105563                  | AA                              | GG              | 1946982861               |
| SNP_P4_147158_152094 | NW_004516235.1 | Scaffold876 | 152094                  | TT                              | CC              | 1946982863               |
| SNP_P4_147159_152169 | NW_004516235.1 | Scaffold876 | 152169                  | CC                              | AA              | 1946982865               |
| SNP_P4_147160_152172 | NW_004516235.1 | Scaffold876 | 152172                  | AA                              | GG              | 1946982867               |
| SNP_P4_147161_152211 | NW_004516235.1 | Scaffold876 | 152211                  | GG                              | AA              | 1946982869               |
| SNP_P4_147162_152226 | NW_004516235.1 | Scaffold876 | 152226                  | CC                              | AA              | 1946982871               |
| SNP_P4_147163_173281 | NW_004516235.1 | Scaffold876 | 173281                  | TT                              | CC              | 1946982873               |
| SNP_P4_147164_173295 | NW_004516235.1 | Scaffold876 | 173295                  | CC                              | TT              | 1946982875               |

| SNPs IDs             | Chromosome IDs | Chromosomes | Physical positions (bp) | CDC Frontier (Reference genome) | (ILWC46 & LPNB) | NCBI SNPdb Accession IDs |
|----------------------|----------------|-------------|-------------------------|---------------------------------|-----------------|--------------------------|
| SNP_P4_147165_246348 | NW_004516235.1 | Scaffold876 | 246348                  | AA                              | GG              | 1946982876               |
| SNP_P4_147166_246546 | NW_004516235.1 | Scaffold876 | 246546                  | AA                              | GG              | 1946982878               |
| SNP_P4_147167_248385 | NW_004516235.1 | Scaffold876 | 248385                  | AA                              | CC              | 1946982880               |
| SNP_P4_147168_248547 | NW_004516235.1 | Scaffold876 | 248547                  | CC                              | TT              | 1946982882               |
| SNP_P4_147169_248558 | NW_004516235.1 | Scaffold876 | 248558                  | TT                              | CC              | 1946982884               |
| SNP_P4_147170_255167 | NW_004516235.1 | Scaffold876 | 255167                  | AA                              | GG              | 1946982887               |
| SNP_P4_147171_255210 | NW_004516235.1 | Scaffold876 | 255210                  | AA                              | TT              | 1946982889               |
| SNP_P4_147172_256452 | NW_004516235.1 | Scaffold876 | 256452                  | CC                              | TT              | 1946982891               |
| SNP_P4_147173_256507 | NW_004516235.1 | Scaffold876 | 256507                  | TT                              | GG              | 1946982893               |
| SNP_P4_147174_256512 | NW_004516235.1 | Scaffold876 | 256512                  | TT                              | CC              | 1946982895               |
| SNP_P4_147175_256535 | NW_004516235.1 | Scaffold876 | 256535                  | GG                              | TT              | 1946982897               |
| SNP_P4_147176_258302 | NW_004516235.1 | Scaffold876 | 258302                  | TT                              | AA              | 1946982899               |
| SNP_P4_147177_261561 | NW_004516235.1 | Scaffold876 | 261561                  | AA                              | CC              | 1946982901               |
| SNP_P4_147178_323577 | NW_004516235.1 | Scaffold876 | 323577                  | AA                              | CC              | 1946982903               |
| SNP_P4_147179_325558 | NW_004516235.1 | Scaffold876 | 325558                  | TT                              | GG              | 1946982905               |
| SNP_P4_147180_333470 | NW_004516235.1 | Scaffold876 | 333470                  | GG                              | AA              | 1946982907               |
| SNP_P4_147181_339839 | NW_004516235.1 | Scaffold876 | 339839                  | CC                              | TT              | 1946982909               |
| SNP_P4_147182_355476 | NW_004516235.1 | Scaffold876 | 355476                  | CC                              | TT              | 1946982910               |
| SNP_P4_147183_355827 | NW_004516235.1 | Scaffold876 | 355827                  | TT                              | GG              | 1946982911               |
| SNP_P4_147184_355894 | NW_004516235.1 | Scaffold876 | 355894                  | CC                              | TT              | 1946982912               |
| SNP_P4_147185_358845 | NW_004516235.1 | Scaffold876 | 358845                  | TT                              | CC              | 1946982914               |
| SNP_P4_147186_368776 | NW_004516235.1 | Scaffold876 | 368776                  | AA                              | GG              | 1946982916               |
| SNP_P4_147187_368826 | NW_004516235.1 | Scaffold876 | 368826                  | CC                              | TT              | 1946982918               |
| SNP_P4_147188_369454 | NW_004516235.1 | Scaffold876 | 369454                  | AA                              | GG              | 1946982920               |
| SNP_P4_147189_369587 | NW_004516235.1 | Scaffold876 | 369587                  | TT                              | CC              | 1946982922               |
| SNP_P4_147190_369633 | NW_004516235.1 | Scaffold876 | 369633                  | AA                              | TT              | 1946982923               |
| SNP_P4_147191_369637 | NW_004516235.1 | Scaffold876 | 369637                  | AA                              | GG              | 1946982925               |
| SNP_P4_147193_369809 | NW_004516235.1 | Scaffold876 | 369809                  | AA                              | TT              | 1946982928               |
| SNP_P4_147194_369862 | NW_004516235.1 | Scaffold876 | 369862                  | AA                              | GG              | 1946982930               |
| SNP_P4_147195_369881 | NW_004516235.1 | Scaffold876 | 369881                  | CC                              | AA              | 1946982932               |
| SNP_P4_147196_369888 | NW_004516235.1 | Scaffold876 | 369888                  | AA                              | CC              | 1946982934               |
| SNP_P4_147197_373639 | NW_004516235.1 | Scaffold876 | 373639                  | TT                              | GG              | 1946982936               |
| SNP_P4_147198_376766 | NW_004516235.1 | Scaffold876 | 376766                  | CC                              | TT              | 1946982938               |
| SNP_P4_147199_386264 | NW_004516235.1 | Scaffold876 | 386264                  | CC                              | TT              | 1946982940               |
| SNP_P4_147200_392146 | NW_004516235.1 | Scaffold876 | 392146                  | AA                              | GG              | 1946982942               |
| SNP_P4_147201_392448 | NW_004516235.1 | Scaffold876 | 392448                  | TT                              | CC              | 1946982944               |
| SNP_P4_147202_392479 | NW_004516235.1 | Scaffold876 | 392479                  | AA                              | GG              | 1946982946               |
| SNP_P4_147203_392521 | NW_004516235.1 | Scaffold876 | 392521                  | TT                              | CC              | 1946982948               |
| SNP_P4_147204_392524 | NW_004516235.1 | Scaffold876 | 392524                  | TT                              | CC              | 1946982950               |
| SNP_P4_147205_392660 | NW_004516235.1 | Scaffold876 | 392660                  | CC                              | TT              | 1946982952               |
| SNP_P4_147206_397291 | NW_004516235.1 | Scaffold876 | 397291                  | AA                              | GG              | 1946982954               |
| SNP_P4_147207_397525 | NW_004516235.1 | Scaffold876 | 397525                  | TT                              | CC              | 1946982956               |

| SNPs IDs             | Chromosome IDs | Chromosomes | Physical positions (bp) | CDC Frontier (Reference genome) | (ILWC46 & LPNB) | NCBI SNPdb Accession IDs |
|----------------------|----------------|-------------|-------------------------|---------------------------------|-----------------|--------------------------|
| SNP_P4_147208_397551 | NW_004516235.1 | Scaffold876 | 397551                  | TT                              | CC              | 1946982958               |
| SNP_P4_147209_400724 | NW_004516235.1 | Scaffold876 | 400724                  | AA                              | GG              | 1946982961               |
| SNP_P4_147210_404086 | NW_004516235.1 | Scaffold876 | 404086                  | AA                              | TT              | 1946982963               |
| SNP_P4_147212_432529 | NW_004516235.1 | Scaffold876 | 432529                  | AA                              | GG              | 1946982965               |
| SNP_P4_147213_437740 | NW_004516235.1 | Scaffold876 | 437740                  | AA                              | GG              | 1946982967               |
| SNP_P4_147214_437812 | NW_004516235.1 | Scaffold876 | 437812                  | GG                              | TT              | 1946982969               |
| SNP_P4_147215_437813 | NW_004516235.1 | Scaffold876 | 437813                  | CC                              | AA              | 1946982971               |
| SNP_P4_147216_437821 | NW_004516235.1 | Scaffold876 | 437821                  | AA                              | GG              | 1946982973               |
| SNP_P4_147217_437824 | NW_004516235.1 | Scaffold876 | 437824                  | TT                              | AA              | 1946982974               |
| SNP_P4_147218_437828 | NW_004516235.1 | Scaffold876 | 437828                  | TT                              | AA              | 1946982976               |
| SNP_P4_147219_437829 | NW_004516235.1 | Scaffold876 | 437829                  | AA                              | TT              | 1946982978               |
| SNP_P4_147220_438078 | NW_004516235.1 | Scaffold876 | 438078                  | TT                              | CC              | 1946982980               |
| SNP_P4_147221_438326 | NW_004516235.1 | Scaffold876 | 438326                  | AA                              | GG              | 1946982982               |
| SNP_P4_147222_438457 | NW_004516235.1 | Scaffold876 | 438457                  | CC                              | AA              | 1946982984               |
| SNP_P4_147223_438463 | NW_004516235.1 | Scaffold876 | 438463                  | AA                              | TT              | 1946982986               |
| SNP_P4_147224_438464 | NW_004516235.1 | Scaffold876 | 438464                  | CC                              | TT              | 1946982988               |
| SNP_P4_147225_438635 | NW_004516235.1 | Scaffold876 | 438635                  | TT                              | CC              | 1946982990               |
| SNP_P4_147226_438697 | NW_004516235.1 | Scaffold876 | 438697                  | TT                              | GG              | 1946982992               |
| SNP_P4_147227_438733 | NW_004516235.1 | Scaffold876 | 438733                  | TT                              | CC              | 1946982993               |
| SNP_P4_147228_438747 | NW_004516235.1 | Scaffold876 | 438747                  | TT                              | CC              | 1946982995               |
| SNP_P4_147229_438800 | NW_004516235.1 | Scaffold876 | 438800                  | CC                              | AA              | 1946982997               |
| SNP_P4_147230_438813 | NW_004516235.1 | Scaffold876 | 438813                  | AA                              | TT              | 1946982999               |
| SNP_P4_147231_442073 | NW_004516235.1 | Scaffold876 | 442073                  | AA                              | CC              | 1946983001               |
| SNP_P4_147232_442430 | NW_004516235.1 | Scaffold876 | 442430                  | AA                              | GG              | 1946983003               |
| SNP_P4_147233_442806 | NW_004516235.1 | Scaffold876 | 442806                  | CC                              | GG              | 1946983005               |
| SNP_P4_147234_442808 | NW_004516235.1 | Scaffold876 | 442808                  | TT                              | CC              | 1946983008               |
| SNP_P4_147235_443144 | NW_004516235.1 | Scaffold876 | 443144                  | GG                              | AA              | 1946983010               |
| SNP_P4_147236_443147 | NW_004516235.1 | Scaffold876 | 443147                  | CC                              | TT              | 1946983012               |
| SNP_P4_147237_443148 | NW_004516235.1 | Scaffold876 | 443148                  | GG                              | AA              | 1946983014               |
| SNP_P4_147238_446410 | NW_004516235.1 | Scaffold876 | 446410                  | AA                              | CC              | 1946983016               |
| SNP_P4_147239_446445 | NW_004516235.1 | Scaffold876 | 446445                  | CC                              | AA              | 1946983018               |
| SNP_P4_147240_447217 | NW_004516235.1 | Scaffold876 | 447217                  | AA                              | GG              | 1946983020               |
| SNP_P4_147241_447220 | NW_004516235.1 | Scaffold876 | 447220                  | AA                              | GG              | 1946983022               |
| SNP_P4_147242_447681 | NW_004516235.1 | Scaffold876 | 447681                  | GG                              | AA              | 1946983024               |
| SNP_P4_147243_453010 | NW_004516235.1 | Scaffold876 | 453010                  | TT                              | AA              | 1946983026               |
| SNP_P4_147244_458335 | NW_004516235.1 | Scaffold876 | 458335                  | AA                              | GG              | 1946983028               |
| SNP_P4_147245_469027 | NW_004516235.1 | Scaffold876 | 469027                  | AA                              | TT              | 1946983030               |
| SNP_P4_147246_474254 | NW_004516235.1 | Scaffold876 | 474254                  | GG                              | CC              | 1946983032               |
| SNP_P4_147247_474466 | NW_004516235.1 | Scaffold876 | 474466                  | AA                              | GG              | 1946983034               |
| SNP_P4_147248_474494 | NW_004516235.1 | Scaffold876 | 474494                  | AA                              | GG              | 1946983035               |
| SNP_P4_147249_474912 | NW_004516235.1 | Scaffold876 | 474912                  | TT                              | CC              | 1946983037               |
| SNP_P4_147250_475956 | NW_004516235.1 | Scaffold876 | 475956                  | AA                              | GG              | 1946983039               |

| SNPs IDs             | Chromosome IDs | Chromosomes | Physical positions (bp) | CDC Frontier (Reference genome) | (ILWC46 & LPNB) | NCBI SNPdb Accession IDs |
|----------------------|----------------|-------------|-------------------------|---------------------------------|-----------------|--------------------------|
| SNP_P4_147251_476064 | NW_004516235.1 | Scaffold876 | 476064                  | AA                              | GG              | 1946983041               |
| SNP_P4_147252_482106 | NW_004516235.1 | Scaffold876 | 482106                  | AA                              | GG              | 1946983043               |
| SNP_P4_147253_492412 | NW_004516235.1 | Scaffold876 | 492412                  | CC                              | TT              | 1946983045               |
| SNP_P4_147254_494024 | NW_004516235.1 | Scaffold876 | 494024                  | GG                              | AA              | 1946983048               |
| SNP_P4_147255_500476 | NW_004516235.1 | Scaffold876 | 500476                  | TT                              | GG              | 1946983050               |
| SNP_P4_147256_503084 | NW_004516235.1 | Scaffold876 | 503084                  | GG                              | TT              | 1946983052               |
| SNP_P4_147257_507655 | NW_004516235.1 | Scaffold876 | 507655                  | CC                              | TT              | 1946983054               |
| SNP_P4_147258_509450 | NW_004516235.1 | Scaffold876 | 509450                  | AA                              | TT              | 1946983056               |
| SNP_P4_147259_509548 | NW_004516235.1 | Scaffold876 | 509548                  | AA                              | GG              | 1946983058               |
| SNP_P4_147260_509788 | NW_004516235.1 | Scaffold876 | 509788                  | CC                              | TT              | 1946983060               |
| SNP_P4_147261_509824 | NW_004516235.1 | Scaffold876 | 509824                  | CC                              | TT              | 1946983062               |
| SNP_P4_147262_509914 | NW_004516235.1 | Scaffold876 | 509914                  | CC                              | TT              | 1946983063               |
| SNP_P4_147263_509917 | NW_004516235.1 | Scaffold876 | 509917                  | GG                              | AA              | 1946983065               |
| SNP_P4_147264_515950 | NW_004516235.1 | Scaffold876 | 515950                  | CC                              | GG              | 1946983067               |
| SNP_P4_147265_520815 | NW_004516235.1 | Scaffold876 | 520815                  | GG                              | AA              | 1946983069               |
| SNP_P4_147266_524775 | NW_004516235.1 | Scaffold876 | 524775                  | TT                              | CC              | 1946983071               |
| SNP_P4_147267_553268 | NW_004516235.1 | Scaffold876 | 553268                  | AA                              | TT              | 1946983073               |
| SNP_P4_147268_556620 | NW_004516235.1 | Scaffold876 | 556620                  | CC                              | AA              | 1946983075               |
| SNP_P4_147269_556631 | NW_004516235.1 | Scaffold876 | 556631                  | AA                              | GG              | 1946983077               |
| SNP_P4_147271_556671 | NW_004516235.1 | Scaffold876 | 556671                  | AA                              | GG              | 1946983080               |
| SNP_P4_147272_556690 | NW_004516235.1 | Scaffold876 | 556690                  | AA                              | GG              | 1946983082               |
| SNP_P4_147273_559100 | NW_004516235.1 | Scaffold876 | 559100                  | TT                              | AA              | 1946983084               |
| SNP_P4_147274_563235 | NW_004516235.1 | Scaffold876 | 563235                  | CC                              | TT              | 1946983086               |
| SNP_P4_147275_563237 | NW_004516235.1 | Scaffold876 | 563237                  | AA                              | GG              | 1946983088               |
| SNP_P4_147276_563240 | NW_004516235.1 | Scaffold876 | 563240                  | GG                              | AA              | 1946983090               |
| SNP_P4_147277_563360 | NW_004516235.1 | Scaffold876 | 563360                  | CC                              | TT              | 1946983092               |
| SNP_P4_147278_563613 | NW_004516235.1 | Scaffold876 | 563613                  | CC                              | TT              | 1946983094               |
| SNP_P4_147279_563615 | NW_004516235.1 | Scaffold876 | 563615                  | TT                              | GG              | 1946983096               |
| SNP_P4_147280_575088 | NW_004516235.1 | Scaffold876 | 575088                  | CC                              | TT              | 1946983098               |
| SNP_P4_147281_575099 | NW_004516235.1 | Scaffold876 | 575099                  | GG                              | AA              | 1946983100               |
| SNP_P4_147282_575125 | NW_004516235.1 | Scaffold876 | 575125                  | AA                              | CC              | 1946983102               |
| SNP_P4_147283_575236 | NW_004516235.1 | Scaffold876 | 575236                  | AA                              | CC              | 1946983105               |
| SNP_P4_147284_575335 | NW_004516235.1 | Scaffold876 | 575335                  | TT                              | CC              | 1946983107               |
| SNP_P4_147285_575343 | NW_004516235.1 | Scaffold876 | 575343                  | GG                              | AA              | 1946983109               |
| SNP_P4_147286_575463 | NW_004516235.1 | Scaffold876 | 575463                  | CC                              | AA              | 1946983111               |
| SNP_P4_147287_575494 | NW_004516235.1 | Scaffold876 | 575494                  | CC                              | AA              | 1946983113               |
| SNP_P4_147288_575503 | NW_004516235.1 | Scaffold876 | 575503                  | GG                              | AA              | 1946983115               |
| SNP_P4_147289_587065 | NW_004516235.1 | Scaffold876 | 587065                  | TT                              | CC              | 1946983117               |
| SNP_P4_147290_589374 | NW_004516235.1 | Scaffold876 | 589374                  | TT                              | CC              | 1946983119               |
| SNP_P4_147291_597512 | NW_004516235.1 | Scaffold876 | 597512                  | CC                              | AA              | 1946983121               |
| SNP_P4_147293_607197 | NW_004516235.1 | Scaffold876 | 607197                  | GG                              | AA              | 1946983123               |
| SNP_P4_147294_607882 | NW_004516235.1 | Scaffold876 | 607882                  | AA                              | TT              | 1946983125               |

| SNPs IDs             | Chromosome IDs | Chromosomes | Physical positions (bp) | CDC Frontier (Reference genome) | (ILWC46 & LPNB) | NCBI SNPdb Accession IDs |
|----------------------|----------------|-------------|-------------------------|---------------------------------|-----------------|--------------------------|
| SNP_P4_147295_608176 | NW_004516235.1 | Scaffold876 | 608176                  | CC                              | TT              | 1946983127               |
| SNP_P4_147296_613590 | NW_004516235.1 | Scaffold876 | 613590                  | TT                              | CC              | 1946983129               |
| SNP_P4_147297_614069 | NW_004516235.1 | Scaffold876 | 614069                  | TT                              | CC              | 1946983131               |
| SNP_P4_147299_622737 | NW_004516235.1 | Scaffold876 | 622737                  | GG                              | AA              | 1946983133               |
| SNP_P4_147300_622820 | NW_004516235.1 | Scaffold876 | 622820                  | GG                              | AA              | 1946983135               |
| SNP_P4_147301_93     | NW_004516236.1 | Scaffold877 | 93                      | TT                              | GG              | 1946983137               |
| SNP_P4_147302_115    | NW_004516236.1 | Scaffold877 | 115                     | AA                              | GG              | 1946983139               |
| SNP_P4_147303_130    | NW_004516236.1 | Scaffold877 | 130                     | GG                              | CC              | 1946983141               |
| SNP_P4_147304_272    | NW_004516236.1 | Scaffold877 | 272                     | AA                              | GG              | 1946983143               |
| SNP_P4_147305_279    | NW_004516236.1 | Scaffold877 | 279                     | GG                              | CC              | 1946983145               |
| SNP_P4_147306_358    | NW_004516236.1 | Scaffold877 | 358                     | TT                              | CC              | 1946983147               |
| SNP_P4_147307_390    | NW_004516236.1 | Scaffold877 | 390                     | CC                              | TT              | 1946983149               |
| SNP_P4_147308_692    | NW_004516236.1 | Scaffold877 | 692                     | TT                              | CC              | 1946983151               |
| SNP_P4_147309_10599  | NW_004516236.1 | Scaffold877 | 10599                   | GG                              | CC              | 1946983153               |
| SNP_P4_147310_10711  | NW_004516236.1 | Scaffold877 | 10711                   | AA                              | CC              | 1946983155               |
| SNP_P4_147311_10783  | NW_004516236.1 | Scaffold877 | 10783                   | AA                              | GG              | 1946983157               |
| SNP_P4_147313_10925  | NW_004516236.1 | Scaffold877 | 10925                   | TT                              | CC              | 1946983159               |
| SNP_P4_147314_11050  | NW_004516236.1 | Scaffold877 | 11050                   | AA                              | GG              | 1946983161               |
| SNP_P4_147316_11296  | NW_004516236.1 | Scaffold877 | 11296                   | AA                              | GG              | 1946983163               |
| SNP_P4_147317_11332  | NW_004516236.1 | Scaffold877 | 11332                   | AA                              | GG              | 1946983165               |
| SNP_P4_147318_11432  | NW_004516236.1 | Scaffold877 | 11432                   | CC                              | TT              | 1946983167               |
| SNP_P4_147319_11434  | NW_004516236.1 | Scaffold877 | 11434                   | AA                              | GG              | 1946983169               |
| SNP_P4_147320_11470  | NW_004516236.1 | Scaffold877 | 11470                   | GG                              | TT              | 1946983171               |
| SNP_P4_147321_11531  | NW_004516236.1 | Scaffold877 | 11531                   | AA                              | GG              | 1946983173               |
| SNP_P4_147322_11532  | NW_004516236.1 | Scaffold877 | 11532                   | AA                              | TT              | 1946983175               |
| SNP_P4_147323_11596  | NW_004516236.1 | Scaffold877 | 11596                   | TT                              | CC              | 1946983177               |
| SNP_P4_147324_11607  | NW_004516236.1 | Scaffold877 | 11607                   | AA                              | TT              | 1946983179               |
| SNP_P4_147325_11692  | NW_004516236.1 | Scaffold877 | 11692                   | AA                              | TT              | 1946983181               |
| SNP_P4_147326_11927  | NW_004516236.1 | Scaffold877 | 11927                   | TT                              | CC              | 1946983183               |
| SNP_P4_147327_11965  | NW_004516236.1 | Scaffold877 | 11965                   | AA                              | GG              | 1946983185               |
| SNP_P4_147328_14084  | NW_004516236.1 | Scaffold877 | 14084                   | GG                              | AA              | 1946983187               |
| SNP_P4_147329_14489  | NW_004516236.1 | Scaffold877 | 14489                   | TT                              | AA              | 1946983189               |
| SNP_P4_147330_14530  | NW_004516236.1 | Scaffold877 | 14530                   | AA                              | GG              | 1946983191               |
| SNP_P4_147331_14688  | NW_004516236.1 | Scaffold877 | 14688                   | CC                              | TT              | 1946983193               |
| SNP_P4_147332_14692  | NW_004516236.1 | Scaffold877 | 14692                   | TT                              | GG              | 1946983195               |
| SNP_P4_147333_14701  | NW_004516236.1 | Scaffold877 | 14701                   | GG                              | AA              | 1946983197               |
| SNP_P4_147334_14964  | NW_004516236.1 | Scaffold877 | 14964                   | TT                              | AA              | 1946983199               |
| SNP_P4_147335_15134  | NW_004516236.1 | Scaffold877 | 15134                   | AA                              | GG              | 1946983201               |
| SNP_P4_147336_16149  | NW_004516236.1 | Scaffold877 | 16149                   | CC                              | GG              | 1946983203               |
| SNP_P4_147337_16281  | NW_004516236.1 | Scaffold877 | 16281                   | AA                              | TT              | 1946983206               |
| SNP_P4_147338_16395  | NW_004516236.1 | Scaffold877 | 16395                   | GG                              | CC              | 1946983208               |
| SNP_P4_147339_16839  | NW_004516236.1 | Scaffold877 | 16839                   | TT                              | GG              | 1946983210               |



| SNPs IDs             | Chromosome IDs | Chromosomes | Physical positions (bp) | CDC Frontier (Reference genome) | (ILWC46 & LPNB) | NCBI SNPdb Accession IDs |
|----------------------|----------------|-------------|-------------------------|---------------------------------|-----------------|--------------------------|
| SNP_P4_147340_16884  | NW_004516236.1 | Scaffold877 | 16884                   | AA                              | GG              | 1946983212               |
| SNP_P4_147341_17107  | NW_004516236.1 | Scaffold877 | 17107                   | TT                              | CC              | 1946983214               |
| SNP_P4_147343_17472  | NW_004516236.1 | Scaffold877 | 17472                   | CC                              | AA              | 1946983216               |
| SNP_P4_147344_17525  | NW_004516236.1 | Scaffold877 | 17525                   | AA                              | CC              | 1946983218               |
| SNP_P4_147345_14119  | NW_004516237.1 | Scaffold878 | 14119                   | AA                              | GG              | 1946983219               |
| SNP_P4_147346_14705  | NW_004516237.1 | Scaffold878 | 14705                   | AA                              | CC              | 1946983221               |
| SNP_P4_147347_14747  | NW_004516237.1 | Scaffold878 | 14747                   | CC                              | TT              | 1946983224               |
| SNP_P4_147348_25208  | NW_004516237.1 | Scaffold878 | 25208                   | AA                              | GG              | 1946983225               |
| SNP_P4_147349_25236  | NW_004516237.1 | Scaffold878 | 25236                   | GG                              | AA              | 1946983227               |
| SNP_P4_147350_25265  | NW_004516237.1 | Scaffold878 | 25265                   | GG                              | AA              | 1946983230               |
| SNP_P4_147351_25466  | NW_004516237.1 | Scaffold878 | 25466                   | CC                              | TT              | 1946983232               |
| SNP_P4_147352_29591  | NW_004516237.1 | Scaffold878 | 29591                   | AA                              | GG              | 1946983234               |
| SNP_P4_147353_34264  | NW_004516237.1 | Scaffold878 | 34264                   | CC                              | TT              | 1946983236               |
| SNP_P4_147354_43054  | NW_004516237.1 | Scaffold878 | 43054                   | TT                              | AA              | 1946983238               |
| SNP_P4_147355_43055  | NW_004516237.1 | Scaffold878 | 43055                   | AA                              | TT              | 1946983240               |
| SNP_P4_147356_43067  | NW_004516237.1 | Scaffold878 | 43067                   | CC                              | TT              | 1946983242               |
| SNP_P4_147357_43087  | NW_004516237.1 | Scaffold878 | 43087                   | CC                              | AA              | 1946983244               |
| SNP_P4_147358_43383  | NW_004516237.1 | Scaffold878 | 43383                   | TT                              | GG              | 1946983246               |
| SNP_P4_147359_43555  | NW_004516237.1 | Scaffold878 | 43555                   | CC                              | GG              | 1946983248               |
| SNP_P4_147360_43561  | NW_004516237.1 | Scaffold878 | 43561                   | AA                              | GG              | 1946983250               |
| SNP_P4_147361_43564  | NW_004516237.1 | Scaffold878 | 43564                   | TT                              | AA              | 1946983252               |
| SNP_P4_147363_58522  | NW_004516237.1 | Scaffold878 | 58522                   | CC                              | AA              | 1946983254               |
| SNP_P4_147364_61673  | NW_004516237.1 | Scaffold878 | 61673                   | TT                              | CC              | 1946983256               |
| SNP_P4_147365_75018  | NW_004516237.1 | Scaffold878 | 75018                   | GG                              | AA              | 1946983259               |
| SNP_P4_147366_75028  | NW_004516237.1 | Scaffold878 | 75028                   | TT                              | CC              | 1946983261               |
| SNP_P4_147367_75052  | NW_004516237.1 | Scaffold878 | 75052                   | CC                              | GG              | 1946983263               |
| SNP_P4_147368_75076  | NW_004516237.1 | Scaffold878 | 75076                   | AA                              | GG              | 1946983265               |
| SNP_P4_147369_75337  | NW_004516237.1 | Scaffold878 | 75337                   | CC                              | TT              | 1946983266               |
| SNP_P4_147370_75364  | NW_004516237.1 | Scaffold878 | 75364                   | GG                              | AA              | 1946983268               |
| SNP_P4_147371_76516  | NW_004516237.1 | Scaffold878 | 76516                   | TT                              | CC              | 1946983270               |
| SNP_P4_147372_79135  | NW_004516237.1 | Scaffold878 | 79135                   | AA                              | GG              | 1946983272               |
| SNP_P4_147373_82782  | NW_004516237.1 | Scaffold878 | 82782                   | TT                              | AA              | 1946983274               |
| SNP_P4_147374_83878  | NW_004516237.1 | Scaffold878 | 83878                   | CC                              | AA              | 1946983276               |
| SNP_P4_147375_93317  | NW_004516237.1 | Scaffold878 | 93317                   | AA                              | GG              | 1946983278               |
| SNP_P4_147376_118199 | NW_004516237.1 | Scaffold878 | 118199                  | TT                              | CC              | 1946983280               |
| SNP_P4_147377_118340 | NW_004516237.1 | Scaffold878 | 118340                  | CC                              | TT              | 1946983282               |
| SNP_P4_147378_118473 | NW_004516237.1 | Scaffold878 | 118473                  | GG                              | AA              | 1946983284               |
| SNP_P4_147379_118565 | NW_004516237.1 | Scaffold878 | 118565                  | AA                              | GG              | 1946983286               |
| SNP_P4_147380_118604 | NW_004516237.1 | Scaffold878 | 118604                  | CC                              | TT              | 1946983288               |
| SNP_P4_147381_118833 | NW_004516237.1 | Scaffold878 | 118833                  | GG                              | AA              | 1946983290               |
| SNP_P4_147382_118839 | NW_004516237.1 | Scaffold878 | 118839                  | TT                              | CC              | 1946983292               |
| SNP_P4_147383_118846 | NW_004516237.1 | Scaffold878 | 118846                  | AA                              | GG              | 1946983294               |

| SNPs IDs             | Chromosome IDs | Chromosomes | Physical positions (bp) | CDC Frontier (Reference genome) | (ILWC46 & LPNB) | NCBI SNPdb Accession IDs |
|----------------------|----------------|-------------|-------------------------|---------------------------------|-----------------|--------------------------|
| SNP_P4_147384_118897 | NW_004516237.1 | Scaffold878 | 118897                  | CC                              | AA              | 1946983296               |
| SNP_P4_147385_118957 | NW_004516237.1 | Scaffold878 | 118957                  | AA                              | TT              | 1946983297               |
| SNP_P4_147386_119045 | NW_004516237.1 | Scaffold878 | 119045                  | GG                              | TT              | 1946983299               |
| SNP_P4_147387_119113 | NW_004516237.1 | Scaffold878 | 119113                  | TT                              | CC              | 1946983301               |
| SNP_P4_147388_119168 | NW_004516237.1 | Scaffold878 | 119168                  | GG                              | AA              | 1946983303               |
| SNP_P4_147389_119204 | NW_004516237.1 | Scaffold878 | 119204                  | AA                              | GG              | 1946983305               |
| SNP_P4_147390_119265 | NW_004516237.1 | Scaffold878 | 119265                  | AA                              | GG              | 1946983307               |
| SNP_P4_147391_119267 | NW_004516237.1 | Scaffold878 | 119267                  | AA                              | TT              | 1946983309               |
| SNP_P4_147392_121423 | NW_004516237.1 | Scaffold878 | 121423                  | AA                              | GG              | 1946983310               |
| SNP_P4_147393_121426 | NW_004516237.1 | Scaffold878 | 121426                  | CC                              | AA              | 1946983312               |
| SNP_P4_147394_5351   | NW_004516239.1 | Scaffold882 | 5351                    | GG                              | AA              | 1946983314               |
| SNP_P4_147395_8762   | NW_004516239.1 | Scaffold882 | 8762                    | CC                              | TT              | 1946983316               |
| SNP_P4_147396_10312  | NW_004516239.1 | Scaffold882 | 10312                   | TT                              | CC              | 1946983318               |
| SNP_P4_147397_27216  | NW_004516239.1 | Scaffold882 | 27216                   | AA                              | TT              | 1946983320               |
| SNP_P4_147398_27222  | NW_004516239.1 | Scaffold882 | 27222                   | CC                              | TT              | 1946983322               |
| SNP_P4_147399_27223  | NW_004516239.1 | Scaffold882 | 27223                   | AA                              | CC              | 1946983324               |
| SNP_P4_147400_27224  | NW_004516239.1 | Scaffold882 | 27224                   | AA                              | CC              | 1946983326               |
| SNP_P4_147401_27226  | NW_004516239.1 | Scaffold882 | 27226                   | TT                              | AA              | 1946983328               |
| SNP_P4_147402_32676  | NW_004516239.1 | Scaffold882 | 32676                   | TT                              | GG              | 1946983330               |
| SNP_P4_147404_39621  | NW_004516239.1 | Scaffold882 | 39621                   | GG                              | AA              | 1946983333               |
| SNP_P4_147405_39664  | NW_004516239.1 | Scaffold882 | 39664                   | TT                              | CC              | 1946983335               |
| SNP_P4_147406_39886  | NW_004516239.1 | Scaffold882 | 39886                   | GG                              | CC              | 1946983337               |
| SNP_P4_147407_65982  | NW_004516239.1 | Scaffold882 | 65982                   | CC                              | TT              | 1946983339               |
| SNP_P4_147408_69506  | NW_004516239.1 | Scaffold882 | 69506                   | CC                              | TT              | 1946983341               |
| SNP_P4_147409_69509  | NW_004516239.1 | Scaffold882 | 69509                   | AA                              | GG              | 1946983343               |
| SNP_P4_147410_70499  | NW_004516239.1 | Scaffold882 | 70499                   | GG                              | TT              | 1946983345               |
| SNP_P4_147411_70503  | NW_004516239.1 | Scaffold882 | 70503                   | TT                              | CC              | 1946983347               |
| SNP_P4_147412_70504  | NW_004516239.1 | Scaffold882 | 70504                   | GG                              | AA              | 1946983349               |
| SNP_P4_147414_70563  | NW_004516239.1 | Scaffold882 | 70563                   | GG                              | AA              | 1946983351               |
| SNP_P4_147415_70602  | NW_004516239.1 | Scaffold882 | 70602                   | CC                              | TT              | 1946983353               |
| SNP_P4_147416_70616  | NW_004516239.1 | Scaffold882 | 70616                   | TT                              | CC              | 1946983355               |
| SNP_P4_147417_70663  | NW_004516239.1 | Scaffold882 | 70663                   | TT                              | CC              | 1946983357               |
| SNP_P4_147418_70679  | NW_004516239.1 | Scaffold882 | 70679                   | TT                              | CC              | 1946983360               |
| SNP_P4_147419_81254  | NW_004516239.1 | Scaffold882 | 81254                   | CC                              | AA              | 1946983362               |
| SNP_P4_147420_94738  | NW_004516239.1 | Scaffold882 | 94738                   | GG                              | AA              | 1946983364               |
| SNP_P4_147421_94773  | NW_004516239.1 | Scaffold882 | 94773                   | TT                              | CC              | 1946983366               |
| SNP_P4_147423_95135  | NW_004516239.1 | Scaffold882 | 95135                   | GG                              | AA              | 1946983368               |
| SNP_P4_147425_100486 | NW_004516239.1 | Scaffold882 | 100486                  | CC                              | TT              | 1946983370               |
| SNP_P4_147426_100551 | NW_004516239.1 | Scaffold882 | 100551                  | TT                              | CC              | 1946983372               |
| SNP_P4_147427_100823 | NW_004516239.1 | Scaffold882 | 100823                  | GG                              | AA              | 1946983374               |
| SNP_P4_147428_100833 | NW_004516239.1 | Scaffold882 | 100833                  | CC                              | TT              | 1946983376               |
| SNP_P4_147429_100842 | NW_004516239.1 | Scaffold882 | 100842                  | GG                              | AA              | 1946983378               |

| SNPs IDs             | Chromosome IDs | Chromosomes | Physical positions (bp) | CDC Frontier (Reference genome) | (ILWC46 & LPNB) | NCBI SNPdb Accession IDs |
|----------------------|----------------|-------------|-------------------------|---------------------------------|-----------------|--------------------------|
| SNP_P4_147430_100873 | NW_004516239.1 | Scaffold882 | 100873                  | TT                              | CC              | 1946983380               |
| SNP_P4_147431_112256 | NW_004516239.1 | Scaffold882 | 112256                  | AA                              | TT              | 1946983382               |
| SNP_P4_147432_126732 | NW_004516239.1 | Scaffold882 | 126732                  | GG                              | AA              | 1946983384               |
| SNP_P4_147433_208312 | NW_004516239.1 | Scaffold882 | 208312                  | GG                              | TT              | 1946983386               |
| SNP_P4_147434_213836 | NW_004516239.1 | Scaffold882 | 213836                  | CC                              | GG              | 1946983388               |
| SNP_P4_147435_238102 | NW_004516239.1 | Scaffold882 | 238102                  | TT                              | GG              | 1946983390               |
| SNP_P4_147436_238939 | NW_004516239.1 | Scaffold882 | 238939                  | GG                              | AA              | 1946983392               |
| SNP_P4_147437_252348 | NW_004516239.1 | Scaffold882 | 252348                  | AA                              | TT              | 1946983394               |
| SNP_P4_147438_266509 | NW_004516239.1 | Scaffold882 | 266509                  | TT                              | CC              | 1946983396               |
| SNP_P4_147439_300136 | NW_004516239.1 | Scaffold882 | 300136                  | CC                              | TT              | 1946983398               |
| SNP_P4_147440_300172 | NW_004516239.1 | Scaffold882 | 300172                  | CC                              | GG              | 1946983400               |
| SNP_P4_147443_347183 | NW_004516239.1 | Scaffold882 | 347183                  | AA                              | CC              | 1946983402               |
| SNP_P4_147444_347196 | NW_004516239.1 | Scaffold882 | 347196                  | AA                              | GG              | 1946983404               |
| SNP_P4_147445_347238 | NW_004516239.1 | Scaffold882 | 347238                  | GG                              | CC              | 1946983406               |
| SNP_P4_147446_347249 | NW_004516239.1 | Scaffold882 | 347249                  | TT                              | GG              | 1946983408               |
| SNP_P4_147447_347273 | NW_004516239.1 | Scaffold882 | 347273                  | AA                              | GG              | 1946983410               |
| SNP_P4_147448_347290 | NW_004516239.1 | Scaffold882 | 347290                  | AA                              | TT              | 1946983413               |
| SNP_P4_147449_347537 | NW_004516239.1 | Scaffold882 | 347537                  | CC                              | TT              | 1946983415               |
| SNP_P4_147450_347595 | NW_004516239.1 | Scaffold882 | 347595                  | CC                              | TT              | 1946983417               |
| SNP_P4_147451_348849 | NW_004516239.1 | Scaffold882 | 348849                  | CC                              | TT              | 1946983419               |
| SNP_P4_147452_348855 | NW_004516239.1 | Scaffold882 | 348855                  | CC                              | TT              | 1946983421               |
| SNP_P4_147453_348865 | NW_004516239.1 | Scaffold882 | 348865                  | CC                              | TT              | 1946983423               |
| SNP_P4_147454_348868 | NW_004516239.1 | Scaffold882 | 348868                  | CC                              | TT              | 1946983425               |
| SNP_P4_147455_349085 | NW_004516239.1 | Scaffold882 | 349085                  | AA                              | GG              | 1946983427               |
| SNP_P4_147456_349149 | NW_004516239.1 | Scaffold882 | 349149                  | CC                              | TT              | 1946983429               |
| SNP_P4_147457_349193 | NW_004516239.1 | Scaffold882 | 349193                  | AA                              | GG              | 1946983431               |
| SNP_P4_147458_349194 | NW_004516239.1 | Scaffold882 | 349194                  | TT                              | GG              | 1946983433               |
| SNP_P4_147459_349223 | NW_004516239.1 | Scaffold882 | 349223                  | TT                              | AA              | 1946983435               |
| SNP_P4_147460_379515 | NW_004516239.1 | Scaffold882 | 379515                  | AA                              | GG              | 1946983437               |
| SNP_P4_147461_389550 | NW_004516239.1 | Scaffold882 | 389550                  | CC                              | GG              | 1946983439               |
| SNP_P4_147462_389552 | NW_004516239.1 | Scaffold882 | 389552                  | AA                              | GG              | 1946983441               |
| SNP_P4_147463_389553 | NW_004516239.1 | Scaffold882 | 389553                  | TT                              | CC              | 1946983443               |
| SNP_P4_147464_389571 | NW_004516239.1 | Scaffold882 | 389571                  | GG                              | CC              | 1946983445               |
| SNP_P4_147465_389804 | NW_004516239.1 | Scaffold882 | 389804                  | GG                              | AA              | 1946983447               |
| SNP_P4_147466_389846 | NW_004516239.1 | Scaffold882 | 389846                  | TT                              | CC              | 1946983449               |
| SNP_P4_147467_389849 | NW_004516239.1 | Scaffold882 | 389849                  | AA                              | GG              | 1946983450               |
| SNP_P4_147468_389852 | NW_004516239.1 | Scaffold882 | 389852                  | GG                              | AA              | 1946983452               |
| SNP_P4_147469_389855 | NW_004516239.1 | Scaffold882 | 389855                  | GG                              | AA              | 1946983454               |
| SNP_P4_147470_389861 | NW_004516239.1 | Scaffold882 | 389861                  | GG                              | AA              | 1946983456               |
| SNP_P4_147471_389943 | NW_004516239.1 | Scaffold882 | 389943                  | AA                              | GG              | 1946983458               |
| SNP_P4_147472_390028 | NW_004516239.1 | Scaffold882 | 390028                  | TT                              | CC              | 1946983460               |
| SNP_P4_147473_390033 | NW_004516239.1 | Scaffold882 | 390033                  | AA                              | GG              | 1946983462               |

| SNPs IDs             | Chromosome IDs | Chromosomes | Physical positions (bp) | CDC Frontier (Reference genome) | (ILWC46 & LPNB) | NCBI SNPdb Accession IDs |
|----------------------|----------------|-------------|-------------------------|---------------------------------|-----------------|--------------------------|
| SNP_P4_147474_401046 | NW_004516239.1 | Scaffold882 | 401046                  | TT                              | CC              | 1946983464               |
| SNP_P4_147475_407529 | NW_004516239.1 | Scaffold882 | 407529                  | AA                              | GG              | 1946983466               |
| SNP_P4_147476_426790 | NW_004516239.1 | Scaffold882 | 426790                  | GG                              | AA              | 1946983468               |
| SNP_P4_147477_427232 | NW_004516239.1 | Scaffold882 | 427232                  | GG                              | AA              | 1946983470               |
| SNP_P4_147478_428115 | NW_004516239.1 | Scaffold882 | 428115                  | CC                              | TT              | 1946983472               |
| SNP_P4_147479_428151 | NW_004516239.1 | Scaffold882 | 428151                  | CC                              | TT              | 1946983474               |
| SNP_P4_147480_428187 | NW_004516239.1 | Scaffold882 | 428187                  | TT                              | CC              | 1946983475               |
| SNP_P4_147481_428861 | NW_004516239.1 | Scaffold882 | 428861                  | AA                              | GG              | 1946983477               |
| SNP_P4_147482_429160 | NW_004516239.1 | Scaffold882 | 429160                  | TT                              | CC              | 1946983479               |
| SNP_P4_147483_429605 | NW_004516239.1 | Scaffold882 | 429605                  | CC                              | GG              | 1946983481               |
| SNP_P4_147484_429815 | NW_004516239.1 | Scaffold882 | 429815                  | GG                              | AA              | 1946983483               |
| SNP_P4_147485_430625 | NW_004516239.1 | Scaffold882 | 430625                  | GG                              | CC              | 1946983485               |
| SNP_P4_147486_431694 | NW_004516239.1 | Scaffold882 | 431694                  | CC                              | GG              | 1946983486               |
| SNP_P4_147487_431971 | NW_004516239.1 | Scaffold882 | 431971                  | GG                              | TT              | 1946983488               |
| SNP_P4_147488_432226 | NW_004516239.1 | Scaffold882 | 432226                  | TT                              | GG              | 1946983490               |
| SNP_P4_147489_432229 | NW_004516239.1 | Scaffold882 | 432229                  | GG                              | TT              | 1946983492               |
| SNP_P4_147490_432576 | NW_004516239.1 | Scaffold882 | 432576                  | GG                              | AA              | 1946983494               |
| SNP_P4_147492_434547 | NW_004516239.1 | Scaffold882 | 434547                  | TT                              | GG              | 1946983496               |
| SNP_P4_147493_436494 | NW_004516239.1 | Scaffold882 | 436494                  | GG                              | CC              | 1946983498               |
| SNP_P4_147494_436497 | NW_004516239.1 | Scaffold882 | 436497                  | AA                              | GG              | 1946983500               |
| SNP_P4_147495_437604 | NW_004516239.1 | Scaffold882 | 437604                  | CC                              | TT              | 1946983502               |
| SNP_P4_147496_438431 | NW_004516239.1 | Scaffold882 | 438431                  | CC                              | TT              | 1946983504               |
| SNP_P4_147497_438519 | NW_004516239.1 | Scaffold882 | 438519                  | GG                              | AA              | 1946983506               |
| SNP_P4_147498_438647 | NW_004516239.1 | Scaffold882 | 438647                  | TT                              | CC              | 1946983508               |
| SNP_P4_147500_439019 | NW_004516239.1 | Scaffold882 | 439019                  | AA                              | GG              | 1946983510               |
| SNP_P4_147502_447929 | NW_004516239.1 | Scaffold882 | 447929                  | GG                              | TT              | 1946983512               |
| SNP_P4_147503_448002 | NW_004516239.1 | Scaffold882 | 448002                  | CC                              | TT              | 1946983514               |
| SNP_P4_147504_448086 | NW_004516239.1 | Scaffold882 | 448086                  | AA                              | GG              | 1946983516               |
| SNP_P4_147505_448165 | NW_004516239.1 | Scaffold882 | 448165                  | AA                              | GG              | 1946983519               |
| SNP_P4_147506_448346 | NW_004516239.1 | Scaffold882 | 448346                  | GG                              | TT              | 1946983521               |
| SNP_P4_147507_476570 | NW_004516239.1 | Scaffold882 | 476570                  | AA                              | GG              | 1946983522               |
| SNP_P4_147508_476822 | NW_004516239.1 | Scaffold882 | 476822                  | CC                              | AA              | 1946983524               |
| SNP_P4_147509_476884 | NW_004516239.1 | Scaffold882 | 476884                  | CC                              | AA              | 1946983526               |
| SNP_P4_147510_477107 | NW_004516239.1 | Scaffold882 | 477107                  | GG                              | AA              | 1946983528               |
| SNP_P4_147512_513700 | NW_004516239.1 | Scaffold882 | 513700                  | GG                              | AA              | 1946983530               |
| SNP_P4_147513_517442 | NW_004516239.1 | Scaffold882 | 517442                  | AA                              | CC              | 1946983532               |
| SNP_P4_147514_517749 | NW_004516239.1 | Scaffold882 | 517749                  | TT                              | GG              | 1946983534               |
| SNP_P4_147515_523007 | NW_004516239.1 | Scaffold882 | 523007                  | CC                              | TT              | 1946983536               |
| SNP_P4_147516_523371 | NW_004516239.1 | Scaffold882 | 523371                  | AA                              | GG              | 1946983539               |
| SNP_P4_147517_523449 | NW_004516239.1 | Scaffold882 | 523449                  | TT                              | CC              | 1946983540               |
| SNP_P4_147518_523478 | NW_004516239.1 | Scaffold882 | 523478                  | AA                              | GG              | 1946983542               |
| SNP_P4_147519_523493 | NW_004516239.1 | Scaffold882 | 523493                  | AA                              | GG              | 1946983544               |

| SNPs IDs             | Chromosome IDs | Chromosomes | Physical positions (bp) | CDC Frontier (Reference genome) | (ILWC46 & LPNB) | NCBI SNPdb Accession IDs |
|----------------------|----------------|-------------|-------------------------|---------------------------------|-----------------|--------------------------|
| SNP_P4_147520_526291 | NW_004516239.1 | Scaffold882 | 526291                  | CC                              | TT              | 1946983547               |
| SNP_P4_147521_563626 | NW_004516239.1 | Scaffold882 | 563626                  | GG                              | AA              | 1946983549               |
| SNP_P4_147522_563885 | NW_004516239.1 | Scaffold882 | 563885                  | CC                              | AA              | 1946983551               |
| SNP_P4_147523_567597 | NW_004516239.1 | Scaffold882 | 567597                  | GG                              | AA              | 1946983553               |
| SNP_P4_147524_583825 | NW_004516239.1 | Scaffold882 | 583825                  | AA                              | CC              | 1946983555               |
| SNP_P4_147525_583841 | NW_004516239.1 | Scaffold882 | 583841                  | TT                              | GG              | 1946983557               |
| SNP_P4_147526_584120 | NW_004516239.1 | Scaffold882 | 584120                  | CC                              | AA              | 1946983559               |
| SNP_P4_147527_584235 | NW_004516239.1 | Scaffold882 | 584235                  | TT                              | CC              | 1946983561               |
| SNP_P4_147528_592734 | NW_004516239.1 | Scaffold882 | 592734                  | TT                              | CC              | 1946983563               |
| SNP_P4_147529_607325 | NW_004516239.1 | Scaffold882 | 607325                  | AA                              | GG              | 1946983565               |
| SNP_P4_147530_607345 | NW_004516239.1 | Scaffold882 | 607345                  | TT                              | CC              | 1946983567               |
| SNP_P4_147531_607467 | NW_004516239.1 | Scaffold882 | 607467                  | AA                              | GG              | 1946983569               |
| SNP_P4_147532_607494 | NW_004516239.1 | Scaffold882 | 607494                  | CC                              | TT              | 1946983571               |
| SNP_P4_147533_607506 | NW_004516239.1 | Scaffold882 | 607506                  | TT                              | CC              | 1946983573               |
| SNP_P4_147534_607533 | NW_004516239.1 | Scaffold882 | 607533                  | AA                              | GG              | 1946983575               |
| SNP_P4_147535_607562 | NW_004516239.1 | Scaffold882 | 607562                  | TT                              | CC              | 1946983577               |
| SNP_P4_147536_607571 | NW_004516239.1 | Scaffold882 | 607571                  | GG                              | TT              | 1946983579               |
| SNP_P4_147537_607740 | NW_004516239.1 | Scaffold882 | 607740                  | TT                              | CC              | 1946983580               |
| SNP_P4_147538_607762 | NW_004516239.1 | Scaffold882 | 607762                  | TT                              | GG              | 1946983582               |
| SNP_P4_147539_607783 | NW_004516239.1 | Scaffold882 | 607783                  | TT                              | CC              | 1946983585               |
| SNP_P4_147540_607789 | NW_004516239.1 | Scaffold882 | 607789                  | AA                              | GG              | 1946983587               |
| SNP_P4_147541_607888 | NW_004516239.1 | Scaffold882 | 607888                  | TT                              | GG              | 1946983589               |
| SNP_P4_147542_615958 | NW_004516239.1 | Scaffold882 | 615958                  | GG                              | AA              | 1946983591               |
| SNP_P4_147543_615959 | NW_004516239.1 | Scaffold882 | 615959                  | TT                              | AA              | 1946983593               |
| SNP_P4_147544_621477 | NW_004516239.1 | Scaffold882 | 621477                  | CC                              | AA              | 1946983595               |
| SNP_P4_147545_621486 | NW_004516239.1 | Scaffold882 | 621486                  | AA                              | CC              | 1946983597               |
| SNP_P4_147546_621493 | NW_004516239.1 | Scaffold882 | 621493                  | AA                              | CC              | 1946983599               |
| SNP_P4_147547_621720 | NW_004516239.1 | Scaffold882 | 621720                  | TT                              | GG              | 1946983601               |
| SNP_P4_147548_621751 | NW_004516239.1 | Scaffold882 | 621751                  | CC                              | TT              | 1946983604               |
| SNP_P4_147550_26289  | NW_004516241.1 | Scaffold884 | 26289                   | TT                              | CC              | 1946983606               |
| SNP_P4_147551_35975  | NW_004516241.1 | Scaffold884 | 35975                   | CC                              | TT              | 1946983608               |
| SNP_P4_147552_52525  | NW_004516241.1 | Scaffold884 | 52525                   | TT                              | GG              | 1946983610               |
| SNP_P4_147553_77776  | NW_004516241.1 | Scaffold884 | 77776                   | AA                              | TT              | 1946983612               |
| SNP_P4_147554_82938  | NW_004516241.1 | Scaffold884 | 82938                   | CC                              | TT              | 1946983614               |
| SNP_P4_147555_97094  | NW_004516241.1 | Scaffold884 | 97094                   | AA                              | GG              | 1946983616               |
| SNP_P4_147556_97239  | NW_004516241.1 | Scaffold884 | 97239                   | GG                              | AA              | 1946983618               |
| SNP_P4_147557_107919 | NW_004516241.1 | Scaffold884 | 107919                  | CC                              | TT              | 1946983620               |
| SNP_P4_147558_120034 | NW_004516241.1 | Scaffold884 | 120034                  | CC                              | AA              | 1946983622               |
| SNP_P4_147559_120051 | NW_004516241.1 | Scaffold884 | 120051                  | GG                              | AA              | 1946983625               |
| SNP_P4_147561_135309 | NW_004516241.1 | Scaffold884 | 135309                  | AA                              | CC              | 1946983627               |
| SNP_P4_147562_135329 | NW_004516241.1 | Scaffold884 | 135329                  | GG                              | AA              | 1946983629               |
| SNP_P4_147563_135344 | NW_004516241.1 | Scaffold884 | 135344                  | GG                              | AA              | 1946983631               |

| SNPs IDs             | Chromosome IDs | Chromosomes | Physical positions (bp) | CDC Frontier (Reference genome) | (ILWC46 & LPNB) | NCBI SNPdb Accession IDs |
|----------------------|----------------|-------------|-------------------------|---------------------------------|-----------------|--------------------------|
| SNP_P4_147564_135527 | NW_004516241.1 | Scaffold884 | 135527                  | GG                              | TT              | 1946983633               |
| SNP_P4_147565_135688 | NW_004516241.1 | Scaffold884 | 135688                  | AA                              | GG              | 1946983636               |
| SNP_P4_147566_135693 | NW_004516241.1 | Scaffold884 | 135693                  | TT                              | CC              | 1946983638               |
| SNP_P4_147567_135694 | NW_004516241.1 | Scaffold884 | 135694                  | AA                              | GG              | 1946983640               |
| SNP_P4_147568_135732 | NW_004516241.1 | Scaffold884 | 135732                  | GG                              | AA              | 1946983642               |
| SNP_P4_147569_135883 | NW_004516241.1 | Scaffold884 | 135883                  | AA                              | GG              | 1946983645               |
| SNP_P4_147570_157815 | NW_004516241.1 | Scaffold884 | 157815                  | AA                              | CC              | 1946983647               |
| SNP_P4_147571_52602  | NW_004516242.1 | Scaffold886 | 52602                   | CC                              | TT              | 1946983649               |
| SNP_P4_147573_57418  | NW_004516242.1 | Scaffold886 | 57418                   | AA                              | GG              | 1946983651               |
| SNP_P4_147574_101903 | NW_004516242.1 | Scaffold886 | 101903                  | AA                              | CC              | 1946983653               |
| SNP_P4_147575_101907 | NW_004516242.1 | Scaffold886 | 101907                  | GG                              | TT              | 1946983655               |
| SNP_P4_147577_103252 | NW_004516242.1 | Scaffold886 | 103252                  | TT                              | AA              | 1946983657               |
| SNP_P4_147578_104926 | NW_004516242.1 | Scaffold886 | 104926                  | AA                              | GG              | 1946983659               |
| SNP_P4_147580_140687 | NW_004516242.1 | Scaffold886 | 140687                  | GG                              | AA              | 1946983661               |
| SNP_P4_147581_151209 | NW_004516242.1 | Scaffold886 | 151209                  | GG                              | AA              | 1946983663               |
| SNP_P4_147583_151317 | NW_004516242.1 | Scaffold886 | 151317                  | TT                              | GG              | 1946983665               |
| SNP_P4_147584_151384 | NW_004516242.1 | Scaffold886 | 151384                  | TT                              | CC              | 1946983667               |
| SNP_P4_147585_151410 | NW_004516242.1 | Scaffold886 | 151410                  | CC                              | AA              | 1946983669               |
| SNP_P4_147586_151416 | NW_004516242.1 | Scaffold886 | 151416                  | GG                              | AA              | 1946983671               |
| SNP_P4_147588_151479 | NW_004516242.1 | Scaffold886 | 151479                  | TT                              | GG              | 1946983673               |
| SNP_P4_147590_151520 | NW_004516242.1 | Scaffold886 | 151520                  | AA                              | GG              | 1946983675               |
| SNP_P4_147591_151532 | NW_004516242.1 | Scaffold886 | 151532                  | CC                              | TT              | 1946983677               |
| SNP_P4_147592_151618 | NW_004516242.1 | Scaffold886 | 151618                  | GG                              | TT              | 1946983679               |
| SNP_P4_147593_153201 | NW_004516242.1 | Scaffold886 | 153201                  | GG                              | AA              | 1946983681               |
| SNP_P4_147594_153205 | NW_004516242.1 | Scaffold886 | 153205                  | CC                              | TT              | 1946983683               |
| SNP_P4_147595_153252 | NW_004516242.1 | Scaffold886 | 153252                  | AA                              | GG              | 1946983685               |
| SNP_P4_147596_153262 | NW_004516242.1 | Scaffold886 | 153262                  | GG                              | AA              | 1946983687               |
| SNP_P4_147597_153279 | NW_004516242.1 | Scaffold886 | 153279                  | CC                              | GG              | 1946983689               |
| SNP_P4_147598_153575 | NW_004516242.1 | Scaffold886 | 153575                  | TT                              | CC              | 1946983691               |
| SNP_P4_147599_153591 | NW_004516242.1 | Scaffold886 | 153591                  | TT                              | CC              | 1946983693               |
| SNP_P4_147600_153616 | NW_004516242.1 | Scaffold886 | 153616                  | CC                              | AA              | 1946983695               |
| SNP_P4_147601_154414 | NW_004516242.1 | Scaffold886 | 154414                  | CC                              | TT              | 1946983697               |
| SNP_P4_147602_154569 | NW_004516242.1 | Scaffold886 | 154569                  | TT                              | GG              | 1946983699               |
| SNP_P4_147603_154725 | NW_004516242.1 | Scaffold886 | 154725                  | CC                              | AA              | 1946983701               |
| SNP_P4_147604_154752 | NW_004516242.1 | Scaffold886 | 154752                  | CC                              | TT              | 1946983703               |
| SNP_P4_147605_154789 | NW_004516242.1 | Scaffold886 | 154789                  | AA                              | TT              | 1946983705               |
| SNP_P4_147606_154793 | NW_004516242.1 | Scaffold886 | 154793                  | CC                              | AA              | 1946983707               |
| SNP_P4_147607_154829 | NW_004516242.1 | Scaffold886 | 154829                  | GG                              | TT              | 1946983709               |
| SNP_P4_147608_154841 | NW_004516242.1 | Scaffold886 | 154841                  | GG                              | TT              | 1946983711               |
| SNP_P4_147609_154900 | NW_004516242.1 | Scaffold886 | 154900                  | TT                              | GG              | 1946983713               |
| SNP_P4_147610_154915 | NW_004516242.1 | Scaffold886 | 154915                  | GG                              | TT              | 1946983715               |
| SNP_P4_147611_160683 | NW_004516242.1 | Scaffold886 | 160683                  | TT                              | AA              | 1946983717               |

| SNPs IDs             | Chromosome IDs | Chromosomes   | Physical positions (bp) | CDC Frontier (Reference genome) | (ILWC46 & LPNB) | NCBI SNPdb Accession IDs |
|----------------------|----------------|---------------|-------------------------|---------------------------------|-----------------|--------------------------|
| SNP_P4_147612_160775 | NW_004516242.1 | Scaffold886   | 160775                  | AA                              | GG              | 1946983719               |
| SNP_P4_147613_160988 | NW_004516242.1 | Scaffold886   | 160988                  | TT                              | GG              | 1946983721               |
| SNP_P4_147614_160999 | NW_004516242.1 | Scaffold886   | 160999                  | CC                              | TT              | 1946983723               |
| SNP_P4_147615_161010 | NW_004516242.1 | Scaffold886   | 161010                  | TT                              | GG              | 1946983725               |
| SNP_P4_147616_161031 | NW_004516242.1 | Scaffold886   | 161031                  | CC                              | GG              | 1946983727               |
| SNP_P4_147617_161210 | NW_004516242.1 | Scaffold886   | 161210                  | GG                              | AA              | 1946983729               |
| SNP_P4_147618_161401 | NW_004516242.1 | Scaffold886   | 161401                  | TT                              | CC              | 1946983731               |
| SNP_P4_147619_164430 | NW_004516242.1 | Scaffold886   | 164430                  | AA                              | CC              | 1946983733               |
| SNP_P4_147620_164450 | NW_004516242.1 | Scaffold886   | 164450                  | CC                              | GG              | 1946983736               |
| SNP_P4_147621_164480 | NW_004516242.1 | Scaffold886   | 164480                  | TT                              | CC              | 1946983738               |
| SNP_P4_147622_164494 | NW_004516242.1 | Scaffold886   | 164494                  | GG                              | AA              | 1946983740               |
| SNP_P4_147623_164706 | NW_004516242.1 | Scaffold886   | 164706                  | TT                              | CC              | 1946983742               |
| SNP_P4_147624_164708 | NW_004516242.1 | Scaffold886   | 164708                  | CC                              | TT              | 1946983744               |
| SNP_P4_147625_164923 | NW_004516242.1 | Scaffold886   | 164923                  | TT                              | CC              | 1946983746               |
| SNP_P4_147626_165030 | NW_004516242.1 | Scaffold886   | 165030                  | GG                              | AA              | 1946983748               |
| SNP_P4_147627_165092 | NW_004516242.1 | Scaffold886   | 165092                  | TT                              | CC              | 1946983750               |
| SNP_P4_147628_165113 | NW_004516242.1 | Scaffold886   | 165113                  | AA                              | GG              | 1946983752               |
| SNP_P4_147629_165126 | NW_004516242.1 | Scaffold886   | 165126                  | AA                              | CC              | 1946983754               |
| SNP_P4_147630_171192 | NW_004516242.1 | Scaffold886   | 171192                  | TT                              | AA              | 1946983756               |
| SNP_P4_147631_171209 | NW_004516242.1 | Scaffold886   | 171209                  | GG                              | AA              | 1946983758               |
| SNP_P4_147632_171232 | NW_004516242.1 | Scaffold886   | 171232                  | TT                              | GG              | 1946983760               |
| SNP_P4_147633_172416 | NW_004516242.1 | Scaffold886   | 172416                  | AA                              | GG              | 1946983762               |
| SNP_P4_147634_172420 | NW_004516242.1 | Scaffold886   | 172420                  | TT                              | AA              | 1946983764               |
| SNP_P4_147635_172524 | NW_004516242.1 | Scaffold886   | 172524                  | CC                              | AA              | 1946983766               |
| SNP_P4_147636_172532 | NW_004516242.1 | Scaffold886   | 172532                  | GG                              | AA              | 1946983768               |
| SNP_P4_147638_172688 | NW_004516242.1 | Scaffold886   | 172688                  | AA                              | TT              | 1946983771               |
| SNP_P4_147639_172906 | NW_004516242.1 | Scaffold886   | 172906                  | AA                              | GG              | 1946983773               |
| SNP_P4_147640_172919 | NW_004516242.1 | Scaffold886   | 172919                  | TT                              | CC              | 1946983775               |
| SNP_P4_147641_69821  | NW_004516243.1 | Scaffold887_1 | 69821                   | AA                              | CC              | 1946983777               |
| SNP_P4_147642_69848  | NW_004516243.1 | Scaffold887_1 | 69848                   | AA                              | CC              | 1946983779               |
| SNP_P4_147643_69884  | NW_004516243.1 | Scaffold887_1 | 69884                   | GG                              | TT              | 1946983781               |
| SNP_P4_147644_69890  | NW_004516243.1 | Scaffold887_1 | 69890                   | AA                              | GG              | 1946983783               |
| SNP_P4_147645_69906  | NW_004516243.1 | Scaffold887_1 | 69906                   | AA                              | GG              | 1946983785               |
| SNP_P4_147646_69916  | NW_004516243.1 | Scaffold887_1 | 69916                   | TT                              | CC              | 1946983787               |
| SNP_P4_147647_69923  | NW_004516243.1 | Scaffold887_1 | 69923                   | TT                              | CC              | 1946983789               |
| SNP_P4_147648_69924  | NW_004516243.1 | Scaffold887_1 | 69924                   | CC                              | TT              | 1946983791               |
| SNP_P4_147649_69944  | NW_004516243.1 | Scaffold887_1 | 69944                   | TT                              | CC              | 1946983793               |
| SNP_P4_147650_70025  | NW_004516243.1 | Scaffold887_1 | 70025                   | AA                              | CC              | 1946983795               |
| SNP_P4_147651_70030  | NW_004516243.1 | Scaffold887_1 | 70030                   | AA                              | GG              | 1946983797               |
| SNP_P4_147652_70033  | NW_004516243.1 | Scaffold887_1 | 70033                   | AA                              | GG              | 1946983799               |
| SNP_P4_147653_70077  | NW_004516243.1 | Scaffold887_1 | 70077                   | AA                              | CC              | 1946983801               |
| SNP_P4_147654_70102  | NW_004516243.1 | Scaffold887_1 | 70102                   | AA                              | GG              | 1946983803               |

| SNPs IDs             | Chromosome IDs | Chromosomes   | Physical positions (bp) | CDC Frontier (Reference genome) | (ILWC46 & LPNB) | NCBI SNPdb Accession IDs |
|----------------------|----------------|---------------|-------------------------|---------------------------------|-----------------|--------------------------|
| SNP_P4_147655_70108  | NW_004516243.1 | Scaffold887_1 | 70108                   | AA                              | GG              | 1946983805               |
| SNP_P4_147656_70138  | NW_004516243.1 | Scaffold887_1 | 70138                   | TT                              | AA              | 1946983808               |
| SNP_P4_147657_70161  | NW_004516243.1 | Scaffold887_1 | 70161                   | GG                              | AA              | 1946983810               |
| SNP_P4_147658_70164  | NW_004516243.1 | Scaffold887_1 | 70164                   | AA                              | CC              | 1946983812               |
| SNP_P4_147659_70184  | NW_004516243.1 | Scaffold887_1 | 70184                   | AA                              | CC              | 1946983814               |
| SNP_P4_147660_70214  | NW_004516243.1 | Scaffold887_1 | 70214                   | AA                              | GG              | 1946983816               |
| SNP_P4_147661_70238  | NW_004516243.1 | Scaffold887_1 | 70238                   | TT                              | CC              | 1946983818               |
| SNP_P4_147662_70246  | NW_004516243.1 | Scaffold887_1 | 70246                   | GG                              | AA              | 1946983820               |
| SNP_P4_147663_70263  | NW_004516243.1 | Scaffold887_1 | 70263                   | AA                              | CC              | 1946983822               |
| SNP_P4_147664_70279  | NW_004516243.1 | Scaffold887_1 | 70279                   | AA                              | GG              | 1946983824               |
| SNP_P4_147665_70311  | NW_004516243.1 | Scaffold887_1 | 70311                   | AA                              | GG              | 1946983825               |
| SNP_P4_147666_70314  | NW_004516243.1 | Scaffold887_1 | 70314                   | TT                              | GG              | 1946983827               |
| SNP_P4_147667_73081  | NW_004516243.1 | Scaffold887_1 | 73081                   | AA                              | GG              | 1946983829               |
| SNP_P4_147669_131608 | NW_004516243.1 | Scaffold887_1 | 131608                  | TT                              | CC              | 1946983831               |
| SNP_P4_147670_131611 | NW_004516243.1 | Scaffold887_1 | 131611                  | TT                              | CC              | 1946983833               |
| SNP_P4_147671_159041 | NW_004516243.1 | Scaffold887_1 | 159041                  | GG                              | AA              | 1946983835               |
| SNP_P4_147673_196850 | NW_004516243.1 | Scaffold887_1 | 196850                  | GG                              | AA              | 1946983837               |
| SNP_P4_147674_200800 | NW_004516243.1 | Scaffold887_1 | 200800                  | AA                              | GG              | 1946983839               |
| SNP_P4_147675_200911 | NW_004516243.1 | Scaffold887_1 | 200911                  | TT                              | GG              | 1946983841               |
| SNP_P4_147676_200956 | NW_004516243.1 | Scaffold887_1 | 200956                  | CC                              | GG              | 1946983843               |
| SNP_P4_147677_200985 | NW_004516243.1 | Scaffold887_1 | 200985                  | AA                              | CC              | 1946983844               |
| SNP_P4_147678_200994 | NW_004516243.1 | Scaffold887_1 | 200994                  | CC                              | TT              | 1946983846               |
| SNP_P4_147679_201178 | NW_004516243.1 | Scaffold887_1 | 201178                  | AA                              | GG              | 1946983848               |
| SNP_P4_147680_201187 | NW_004516243.1 | Scaffold887_1 | 201187                  | TT                              | CC              | 1946983850               |
| SNP_P4_147682_208265 | NW_004516243.1 | Scaffold887_1 | 208265                  | CC                              | TT              | 1946983852               |
| SNP_P4_147683_208299 | NW_004516243.1 | Scaffold887_1 | 208299                  | AA                              | GG              | 1946983854               |
| SNP_P4_147684_208551 | NW_004516243.1 | Scaffold887_1 | 208551                  | TT                              | CC              | 1946983856               |
| SNP_P4_147685_208572 | NW_004516243.1 | Scaffold887_1 | 208572                  | GG                              | AA              | 1946983858               |
| SNP_P4_147686_234624 | NW_004516243.1 | Scaffold887_1 | 234624                  | CC                              | AA              | 1946983860               |
| SNP_P4_147687_239326 | NW_004516243.1 | Scaffold887_1 | 239326                  | AA                              | TT              | 1946983861               |
| SNP_P4_147689_243979 | NW_004516243.1 | Scaffold887_1 | 243979                  | GG                              | AA              | 1946983862               |
| SNP_P4_147690_244399 | NW_004516243.1 | Scaffold887_1 | 244399                  | AA                              | GG              | 1946983863               |
| SNP_P4_147691_245962 | NW_004516243.1 | Scaffold887_1 | 245962                  | TT                              | CC              | 1946983864               |
| SNP_P4_147692_246167 | NW_004516243.1 | Scaffold887_1 | 246167                  | CC                              | TT              | 1946983865               |
| SNP_P4_147693_246176 | NW_004516243.1 | Scaffold887_1 | 246176                  | GG                              | AA              | 1946983867               |
| SNP_P4_147694_246200 | NW_004516243.1 | Scaffold887_1 | 246200                  | AA                              | GG              | 1946983869               |
| SNP_P4_147695_246214 | NW_004516243.1 | Scaffold887_1 | 246214                  | TT                              | CC              | 1946983871               |
| SNP_P4_147696_246232 | NW_004516243.1 | Scaffold887_1 | 246232                  | GG                              | AA              | 1946983873               |
| SNP_P4_147697_247358 | NW_004516243.1 | Scaffold887_1 | 247358                  | AA                              | GG              | 1946983875               |
| SNP_P4_147698_247388 | NW_004516243.1 | Scaffold887_1 | 247388                  | TT                              | AA              | 1946983877               |
| SNP_P4_147699_247390 | NW_004516243.1 | Scaffold887_1 | 247390                  | GG                              | CC              | 1946983879               |
| SNP_P4_147700_247395 | NW_004516243.1 | Scaffold887_1 | 247395                  | AA                              | CC              | 1946983881               |



| SNPs IDs             | Chromosome IDs | Chromosomes   | Physical positions (bp) | CDC Frontier (Reference genome) | (ILWC46 & LPNB) | NCBI SNPdb Accession IDs |
|----------------------|----------------|---------------|-------------------------|---------------------------------|-----------------|--------------------------|
| SNP_P4_147701_247400 | NW_004516243.1 | Scaffold887_1 | 247400                  | CC                              | TT              | 1946983883               |
| SNP_P4_147702_247407 | NW_004516243.1 | Scaffold887_1 | 247407                  | CC                              | TT              | 1946983885               |
| SNP_P4_147703_250615 | NW_004516243.1 | Scaffold887_1 | 250615                  | GG                              | AA              | 1946983887               |
| SNP_P4_147704_250623 | NW_004516243.1 | Scaffold887_1 | 250623                  | TT                              | CC              | 1946983889               |
| SNP_P4_147705_253469 | NW_004516243.1 | Scaffold887_1 | 253469                  | AA                              | GG              | 1946983891               |
| SNP_P4_147706_258472 | NW_004516243.1 | Scaffold887_1 | 258472                  | CC                              | TT              | 1946983893               |
| SNP_P4_147707_258541 | NW_004516243.1 | Scaffold887_1 | 258541                  | GG                              | CC              | 1946983895               |
| SNP_P4_147708_258546 | NW_004516243.1 | Scaffold887_1 | 258546                  | CC                              | AA              | 1946983897               |
| SNP_P4_147709_258571 | NW_004516243.1 | Scaffold887_1 | 258571                  | TT                              | CC              | 1946983899               |
| SNP_P4_147710_258891 | NW_004516243.1 | Scaffold887_1 | 258891                  | CC                              | TT              | 1946983902               |
| SNP_P4_147711_95     | NW_004516244.1 | Scaffold889   | 95                      | TT                              | GG              | 1946983904               |
| SNP_P4_147712_65     | NW_004516245.1 | Scaffold890   | 65                      | AA                              | GG              | 1946983906               |
| SNP_P4_147713_266    | NW_004516245.1 | Scaffold890   | 266                     | GG                              | CC              | 1946983908               |
| SNP_P4_147714_308    | NW_004516245.1 | Scaffold890   | 308                     | GG                              | AA              | 1946983910               |
| SNP_P4_147716_414    | NW_004516245.1 | Scaffold890   | 414                     | CC                              | TT              | 1946983912               |
| SNP_P4_147717_415    | NW_004516245.1 | Scaffold890   | 415                     | AA                              | GG              | 1946983914               |
| SNP_P4_147718_430    | NW_004516245.1 | Scaffold890   | 430                     | AA                              | TT              | 1946983916               |
| SNP_P4_147719_470    | NW_004516245.1 | Scaffold890   | 470                     | GG                              | AA              | 1946983918               |
| SNP_P4_147720_482    | NW_004516245.1 | Scaffold890   | 482                     | AA                              | GG              | 1946983920               |
| SNP_P4_147721_538    | NW_004516245.1 | Scaffold890   | 538                     | AA                              | TT              | 1946983922               |
| SNP_P4_147722_546    | NW_004516245.1 | Scaffold890   | 546                     | TT                              | AA              | 1946983924               |
| SNP_P4_147723_653    | NW_004516245.1 | Scaffold890   | 653                     | AA                              | CC              | 1946983926               |
| SNP_P4_147724_705    | NW_004516245.1 | Scaffold890   | 705                     | AA                              | GG              | 1946983928               |
| SNP_P4_147725_826    | NW_004516245.1 | Scaffold890   | 826                     | AA                              | TT              | 1946983930               |
| SNP_P4_147726_872    | NW_004516245.1 | Scaffold890   | 872                     | GG                              | AA              | 1946983932               |
| SNP_P4_147727_1008   | NW_004516245.1 | Scaffold890   | 1008                    | TT                              | CC              | 1946983934               |
| SNP_P4_147728_1031   | NW_004516245.1 | Scaffold890   | 1031                    | AA                              | GG              | 1946983936               |
| SNP_P4_147729_1083   | NW_004516245.1 | Scaffold890   | 1083                    | CC                              | AA              | 1946983938               |
| SNP_P4_147730_1452   | NW_004516245.1 | Scaffold890   | 1452                    | CC                              | TT              | 1946983940               |
| SNP_P4_147732_5788   | NW_004516247.1 | Scaffold892   | 5788                    | AA                              | TT              | 1946983942               |
| SNP_P4_147733_5818   | NW_004516247.1 | Scaffold892   | 5818                    | GG                              | TT              | 1946983944               |
| SNP_P4_147734_6008   | NW_004516247.1 | Scaffold892   | 6008                    | CC                              | TT              | 1946983946               |
| SNP_P4_147735_6325   | NW_004516247.1 | Scaffold892   | 6325                    | AA                              | TT              | 1946983949               |
| SNP_P4_147736_6439   | NW_004516247.1 | Scaffold892   | 6439                    | GG                              | AA              | 1946983951               |
| SNP_P4_147737_6559   | NW_004516247.1 | Scaffold892   | 6559                    | AA                              | GG              | 1946983953               |
| SNP_P4_147738_24741  | NW_004516247.1 | Scaffold892   | 24741                   | GG                              | CC              | 1946983955               |
| SNP_P4_147739_24826  | NW_004516247.1 | Scaffold892   | 24826                   | AA                              | GG              | 1946983957               |
| SNP_P4_147740_24827  | NW_004516247.1 | Scaffold892   | 24827                   | CC                              | AA              | 1946983959               |
| SNP_P4_147741_24888  | NW_004516247.1 | Scaffold892   | 24888                   | AA                              | GG              | 1946983961               |
| SNP_P4_147742_24948  | NW_004516247.1 | Scaffold892   | 24948                   | GG                              | AA              | 1946983964               |
| SNP_P4_147743_24982  | NW_004516247.1 | Scaffold892   | 24982                   | CC                              | TT              | 1946983966               |
| SNP_P4_147744_24986  | NW_004516247.1 | Scaffold892   | 24986                   | GG                              | AA              | 1946983968               |

| SNPs IDs            | Chromosome IDs | Chromosomes | Physical positions (bp) | CDC Frontier (Reference genome) | (ILWC46 & LPNB) | NCBI SNPdb Accession IDs |
|---------------------|----------------|-------------|-------------------------|---------------------------------|-----------------|--------------------------|
| SNP_P4_147745_24988 | NW_004516247.1 | Scaffold892 | 24988                   | TT                              | AA              | 1946983970               |
| SNP_P4_147746_24991 | NW_004516247.1 | Scaffold892 | 24991                   | TT                              | AA              | 1946983972               |
| SNP_P4_147747_25182 | NW_004516247.1 | Scaffold892 | 25182                   | TT                              | AA              | 1946983974               |
| SNP_P4_147748_25207 | NW_004516247.1 | Scaffold892 | 25207                   | GG                              | AA              | 1946983976               |
| SNP_P4_147749_25209 | NW_004516247.1 | Scaffold892 | 25209                   | TT                              | CC              | 1946983978               |
| SNP_P4_147750_25260 | NW_004516247.1 | Scaffold892 | 25260                   | TT                              | GG              | 1946983980               |
| SNP_P4_147751_25272 | NW_004516247.1 | Scaffold892 | 25272                   | AA                              | GG              | 1946983982               |
| SNP_P4_147752_25325 | NW_004516247.1 | Scaffold892 | 25325                   | TT                              | CC              | 1946983984               |
| SNP_P4_147754_26350 | NW_004516247.1 | Scaffold892 | 26350                   | TT                              | CC              | 1946983986               |
| SNP_P4_147755_26357 | NW_004516247.1 | Scaffold892 | 26357                   | GG                              | CC              | 1946983988               |
| SNP_P4_147756_26483 | NW_004516247.1 | Scaffold892 | 26483                   | AA                              | TT              | 1946983990               |
| SNP_P4_147757_26493 | NW_004516247.1 | Scaffold892 | 26493                   | AA                              | CC              | 1946983992               |
| SNP_P4_147758_26500 | NW_004516247.1 | Scaffold892 | 26500                   | TT                              | AA              | 1946983994               |
| SNP_P4_147760_26640 | NW_004516247.1 | Scaffold892 | 26640                   | CC                              | TT              | 1946983996               |
| SNP_P4_147761_26678 | NW_004516247.1 | Scaffold892 | 26678                   | GG                              | TT              | 1946983998               |
| SNP_P4_147762_26679 | NW_004516247.1 | Scaffold892 | 26679                   | AA                              | TT              | 1946983999               |
| SNP_P4_147764_26725 | NW_004516247.1 | Scaffold892 | 26725                   | CC                              | AA              | 1946984001               |
| SNP_P4_147765_26800 | NW_004516247.1 | Scaffold892 | 26800                   | TT                              | AA              | 1946984003               |
| SNP_P4_147766_26856 | NW_004516247.1 | Scaffold892 | 26856                   | TT                              | GG              | 1946984005               |
| SNP_P4_147767_26871 | NW_004516247.1 | Scaffold892 | 26871                   | TT                              | CC              | 1946984007               |
| SNP_P4_147768_26890 | NW_004516247.1 | Scaffold892 | 26890                   | CC                              | TT              | 1946984009               |
| SNP_P4_147769_26904 | NW_004516247.1 | Scaffold892 | 26904                   | TT                              | CC              | 1946984011               |
| SNP_P4_147770_26964 | NW_004516247.1 | Scaffold892 | 26964                   | CC                              | GG              | 1946984013               |
| SNP_P4_147771_27181 | NW_004516247.1 | Scaffold892 | 27181                   | TT                              | GG              | 1946984015               |
| SNP_P4_147772_27270 | NW_004516247.1 | Scaffold892 | 27270                   | TT                              | CC              | 1946984017               |
| SNP_P4_147773_27315 | NW_004516247.1 | Scaffold892 | 27315                   | TT                              | GG              | 1946984019               |
| SNP_P4_147774_27376 | NW_004516247.1 | Scaffold892 | 27376                   | CC                              | TT              | 1946984021               |
| SNP_P4_147775_27389 | NW_004516247.1 | Scaffold892 | 27389                   | TT                              | AA              | 1946984023               |
| SNP_P4_147776_27431 | NW_004516247.1 | Scaffold892 | 27431                   | AA                              | CC              | 1946984025               |
| SNP_P4_147777_27491 | NW_004516247.1 | Scaffold892 | 27491                   | CC                              | GG              | 1946984027               |
| SNP_P4_147778_27603 | NW_004516247.1 | Scaffold892 | 27603                   | AA                              | TT              | 1946984029               |
| SNP_P4_147779_27605 | NW_004516247.1 | Scaffold892 | 27605                   | CC                              | TT              | 1946984031               |
| SNP_P4_147780_27680 | NW_004516247.1 | Scaffold892 | 27680                   | AA                              | GG              | 1946984033               |
| SNP_P4_147781_27719 | NW_004516247.1 | Scaffold892 | 27719                   | AA                              | TT              | 1946984035               |
| SNP_P4_147782_28128 | NW_004516247.1 | Scaffold892 | 28128                   | GG                              | TT              | 1946984038               |
| SNP_P4_147783_28212 | NW_004516247.1 | Scaffold892 | 28212                   | TT                              | AA              | 1946984040               |
| SNP_P4_147784_28262 | NW_004516247.1 | Scaffold892 | 28262                   | TT                              | CC              | 1946984042               |
| SNP_P4_147785_28419 | NW_004516247.1 | Scaffold892 | 28419                   | TT                              | CC              | 1946984044               |
| SNP_P4_147787_28569 | NW_004516247.1 | Scaffold892 | 28569                   | AA                              | CC              | 1946984046               |
| SNP_P4_147788_29190 | NW_004516247.1 | Scaffold892 | 29190                   | GG                              | TT              | 1946984048               |
| SNP_P4_147789_29316 | NW_004516247.1 | Scaffold892 | 29316                   | GG                              | TT              | 1946984050               |
| SNP_P4_147790_29588 | NW_004516247.1 | Scaffold892 | 29588                   | CC                              | TT              | 1946984052               |

| SNPs IDs            | Chromosome IDs | Chromosomes | Physical positions (bp) | CDC Frontier (Reference genome) | (ILWC46 & LPNB) | NCBI SNPdb Accession IDs |
|---------------------|----------------|-------------|-------------------------|---------------------------------|-----------------|--------------------------|
| SNP_P4_147791_29661 | NW_004516247.1 | Scaffold892 | 29661                   | CC                              | AA              | 1946984054               |
| SNP_P4_147793_29952 | NW_004516247.1 | Scaffold892 | 29952                   | GG                              | AA              | 1946984056               |
| SNP_P4_147794_30011 | NW_004516247.1 | Scaffold892 | 30011                   | GG                              | TT              | 1946984058               |
| SNP_P4_147795_30054 | NW_004516247.1 | Scaffold892 | 30054                   | GG                              | TT              | 1946984059               |
| SNP_P4_147796_30254 | NW_004516247.1 | Scaffold892 | 30254                   | TT                              | AA              | 1946984061               |
| SNP_P4_147797_30275 | NW_004516247.1 | Scaffold892 | 30275                   | AA                              | TT              | 1946984063               |
| SNP_P4_147798_30278 | NW_004516247.1 | Scaffold892 | 30278                   | AA                              | TT              | 1946984065               |
| SNP_P4_147799_30331 | NW_004516247.1 | Scaffold892 | 30331                   | TT                              | CC              | 1946984066               |
| SNP_P4_147800_30377 | NW_004516247.1 | Scaffold892 | 30377                   | AA                              | GG              | 1946984067               |
| SNP_P4_147801_30793 | NW_004516247.1 | Scaffold892 | 30793                   | CC                              | GG              | 1946984069               |
| SNP_P4_147802_32627 | NW_004516247.1 | Scaffold892 | 32627                   | CC                              | AA              | 1946984071               |
| SNP_P4_147803_32663 | NW_004516247.1 | Scaffold892 | 32663                   | TT                              | AA              | 1946984073               |
| SNP_P4_147804_32700 | NW_004516247.1 | Scaffold892 | 32700                   | GG                              | AA              | 1946984074               |
| SNP_P4_147805_32752 | NW_004516247.1 | Scaffold892 | 32752                   | TT                              | GG              | 1946984076               |
| SNP_P4_147806_32804 | NW_004516247.1 | Scaffold892 | 32804                   | TT                              | GG              | 1946984078               |
| SNP_P4_147807_32884 | NW_004516247.1 | Scaffold892 | 32884                   | TT                              | AA              | 1946984080               |
| SNP_P4_147808_32939 | NW_004516247.1 | Scaffold892 | 32939                   | TT                              | CC              | 1946984082               |
| SNP_P4_147809_32969 | NW_004516247.1 | Scaffold892 | 32969                   | TT                              | GG              | 1946984084               |
| SNP_P4_147810_32976 | NW_004516247.1 | Scaffold892 | 32976                   | GG                              | AA              | 1946984086               |
| SNP_P4_147811_32982 | NW_004516247.1 | Scaffold892 | 32982                   | AA                              | TT              | 1946984087               |
| SNP_P4_147812_33008 | NW_004516247.1 | Scaffold892 | 33008                   | CC                              | TT              | 1946984089               |
| SNP_P4_147813_33015 | NW_004516247.1 | Scaffold892 | 33015                   | TT                              | CC              | 1946984091               |
| SNP_P4_147814_33068 | NW_004516247.1 | Scaffold892 | 33068                   | GG                              | CC              | 1946984093               |
| SNP_P4_147815_33137 | NW_004516247.1 | Scaffold892 | 33137                   | TT                              | GG              | 1946984095               |
| SNP_P4_147816_33159 | NW_004516247.1 | Scaffold892 | 33159                   | TT                              | AA              | 1946984097               |
| SNP_P4_147817_33161 | NW_004516247.1 | Scaffold892 | 33161                   | TT                              | GG              | 1946984099               |
| SNP_P4_147818_33178 | NW_004516247.1 | Scaffold892 | 33178                   | TT                              | CC              | 1946984101               |
| SNP_P4_147819_33192 | NW_004516247.1 | Scaffold892 | 33192                   | AA                              | GG              | 1946984103               |
| SNP_P4_147820_33216 | NW_004516247.1 | Scaffold892 | 33216                   | GG                              | AA              | 1946984105               |
| SNP_P4_147821_33217 | NW_004516247.1 | Scaffold892 | 33217                   | GG                              | TT              | 1946984107               |
| SNP_P4_147822_33242 | NW_004516247.1 | Scaffold892 | 33242                   | CC                              | AA              | 1946984109               |
| SNP_P4_147823_33261 | NW_004516247.1 | Scaffold892 | 33261                   | TT                              | CC              | 1946984111               |
| SNP_P4_147824_33295 | NW_004516247.1 | Scaffold892 | 33295                   | GG                              | AA              | 1946984113               |
| SNP_P4_147825_33310 | NW_004516247.1 | Scaffold892 | 33310                   | TT                              | CC              | 1946984116               |
| SNP_P4_147826_33377 | NW_004516247.1 | Scaffold892 | 33377                   | CC                              | AA              | 1946984117               |
| SNP_P4_147827_33391 | NW_004516247.1 | Scaffold892 | 33391                   | TT                              | AA              | 1946984119               |
| SNP_P4_147828_33397 | NW_004516247.1 | Scaffold892 | 33397                   | AA                              | CC              | 1946984121               |
| SNP_P4_147829_33539 | NW_004516247.1 | Scaffold892 | 33539                   | TT                              | CC              | 1946984123               |
| SNP_P4_147832_33888 | NW_004516247.1 | Scaffold892 | 33888                   | CC                              | TT              | 1946984126               |
| SNP_P4_147833_34187 | NW_004516247.1 | Scaffold892 | 34187                   | GG                              | TT              | 1946984128               |
| SNP_P4_147834_34244 | NW_004516247.1 | Scaffold892 | 34244                   | AA                              | TT              | 1946984130               |
| SNP_P4_147835_34329 | NW_004516247.1 | Scaffold892 | 34329                   | TT                              | CC              | 1946984131               |

| SNPs IDs            | Chromosome IDs | Chromosomes | Physical positions (bp) | CDC Frontier (Reference genome) | (ILWC46 & LPNB) | NCBI SNPdb Accession IDs |
|---------------------|----------------|-------------|-------------------------|---------------------------------|-----------------|--------------------------|
| SNP_P4_147836_34334 | NW_004516247.1 | Scaffold892 | 34334                   | AA                              | CC              | 1946984133               |
| SNP_P4_147837_34412 | NW_004516247.1 | Scaffold892 | 34412                   | GG                              | AA              | 1946984136               |
| SNP_P4_147839_34480 | NW_004516247.1 | Scaffold892 | 34480                   | AA                              | TT              | 1946984138               |
| SNP_P4_147840_34508 | NW_004516247.1 | Scaffold892 | 34508                   | CC                              | GG              | 1946984140               |
| SNP_P4_147841_34570 | NW_004516247.1 | Scaffold892 | 34570                   | TT                              | CC              | 1946984141               |
| SNP_P4_147842_34581 | NW_004516247.1 | Scaffold892 | 34581                   | AA                              | GG              | 1946984143               |
| SNP_P4_147843_34588 | NW_004516247.1 | Scaffold892 | 34588                   | GG                              | CC              | 1946984146               |
| SNP_P4_147844_34615 | NW_004516247.1 | Scaffold892 | 34615                   | AA                              | GG              | 1946984148               |
| SNP_P4_147845_34630 | NW_004516247.1 | Scaffold892 | 34630                   | TT                              | AA              | 1946984150               |
| SNP_P4_147846_34931 | NW_004516247.1 | Scaffold892 | 34931                   | TT                              | AA              | 1946984152               |
| SNP_P4_147847_34932 | NW_004516247.1 | Scaffold892 | 34932                   | AA                              | GG              | 1946984154               |
| SNP_P4_147848_34972 | NW_004516247.1 | Scaffold892 | 34972                   | TT                              | AA              | 1946984156               |
| SNP_P4_147849_35109 | NW_004516247.1 | Scaffold892 | 35109                   | AA                              | CC              | 1946984158               |
| SNP_P4_147850_36620 | NW_004516247.1 | Scaffold892 | 36620                   | AA                              | GG              | 1946984160               |
| SNP_P4_147851_36674 | NW_004516247.1 | Scaffold892 | 36674                   | GG                              | TT              | 1946984162               |
| SNP_P4_147852_36697 | NW_004516247.1 | Scaffold892 | 36697                   | GG                              | TT              | 1946984164               |
| SNP_P4_147853_36799 | NW_004516247.1 | Scaffold892 | 36799                   | CC                              | TT              | 1946984166               |
| SNP_P4_147854_37080 | NW_004516247.1 | Scaffold892 | 37080                   | CC                              | GG              | 1946984168               |
| SNP_P4_147855_37265 | NW_004516247.1 | Scaffold892 | 37265                   | GG                              | AA              | 1946984170               |
| SNP_P4_147856_37433 | NW_004516247.1 | Scaffold892 | 37433                   | TT                              | GG              | 1946984172               |
| SNP_P4_147857_37707 | NW_004516247.1 | Scaffold892 | 37707                   | GG                              | AA              | 1946984174               |
| SNP_P4_147858_37746 | NW_004516247.1 | Scaffold892 | 37746                   | CC                              | TT              | 1946984177               |
| SNP_P4_147859_38045 | NW_004516247.1 | Scaffold892 | 38045                   | GG                              | TT              | 1946984178               |
| SNP_P4_147860_38060 | NW_004516247.1 | Scaffold892 | 38060                   | TT                              | AA              | 1946984180               |
| SNP_P4_147861_38103 | NW_004516247.1 | Scaffold892 | 38103                   | GG                              | AA              | 1946984183               |
| SNP_P4_147862_38110 | NW_004516247.1 | Scaffold892 | 38110                   | CC                              | TT              | 1946984185               |
| SNP_P4_147864_38496 | NW_004516247.1 | Scaffold892 | 38496                   | CC                              | TT              | 1946984187               |
| SNP_P4_147865_38793 | NW_004516247.1 | Scaffold892 | 38793                   | TT                              | CC              | 1946984189               |
| SNP_P4_147866_38942 | NW_004516247.1 | Scaffold892 | 38942                   | TT                              | GG              | 1946984191               |
| SNP_P4_147867_38943 | NW_004516247.1 | Scaffold892 | 38943                   | AA                              | GG              | 1946984193               |
| SNP_P4_147868_40471 | NW_004516247.1 | Scaffold892 | 40471                   | TT                              | CC              | 1946984195               |
| SNP_P4_147869_40713 | NW_004516247.1 | Scaffold892 | 40713                   | TT                              | AA              | 1946984197               |
| SNP_P4_147870_40766 | NW_004516247.1 | Scaffold892 | 40766                   | AA                              | CC              | 1946984199               |
| SNP_P4_147871_41750 | NW_004516247.1 | Scaffold892 | 41750                   | AA                              | GG              | 1946984201               |
| SNP_P4_147872_42176 | NW_004516247.1 | Scaffold892 | 42176                   | AA                              | GG              | 1946984203               |
| SNP_P4_147875_44009 | NW_004516247.1 | Scaffold892 | 44009                   | TT                              | CC              | 1946984205               |
| SNP_P4_147876_44197 | NW_004516247.1 | Scaffold892 | 44197                   | AA                              | TT              | 1946984207               |
| SNP_P4_147878_44478 | NW_004516247.1 | Scaffold892 | 44478                   | AA                              | GG              | 1946984209               |
| SNP_P4_147879_46101 | NW_004516247.1 | Scaffold892 | 46101                   | CC                              | AA              | 1946984211               |
| SNP_P4_147880_46301 | NW_004516247.1 | Scaffold892 | 46301                   | TT                              | GG              | 1946984213               |
| SNP_P4_147881_46668 | NW_004516247.1 | Scaffold892 | 46668                   | TT                              | CC              | 1946984215               |
| SNP_P4_147882_49887 | NW_004516247.1 | Scaffold892 | 49887                   | CC                              | TT              | 1946984216               |

| SNPs IDs            | Chromosome IDs | Chromosomes | Physical positions (bp) | CDC Frontier (Reference genome) | (ILWC46 & LPNB) | NCBI SNPdb Accession IDs |
|---------------------|----------------|-------------|-------------------------|---------------------------------|-----------------|--------------------------|
| SNP_P4_147883_52175 | NW_004516247.1 | Scaffold892 | 52175                   | TT                              | GG              | 1946984218               |
| SNP_P4_147884_52469 | NW_004516247.1 | Scaffold892 | 52469                   | TT                              | GG              | 1946984220               |
| SNP_P4_147885_54803 | NW_004516247.1 | Scaffold892 | 54803                   | TT                              | CC              | 1946984222               |
| SNP_P4_147886_54945 | NW_004516247.1 | Scaffold892 | 54945                   | CC                              | GG              | 1946984224               |
| SNP_P4_147887_58110 | NW_004516247.1 | Scaffold892 | 58110                   | TT                              | CC              | 1946984226               |
| SNP_P4_147888_59657 | NW_004516247.1 | Scaffold892 | 59657                   | CC                              | TT              | 1946984228               |
| SNP_P4_147889_60387 | NW_004516247.1 | Scaffold892 | 60387                   | GG                              | AA              | 1946984230               |
| SNP_P4_147891_60741 | NW_004516247.1 | Scaffold892 | 60741                   | AA                              | GG              | 1946984232               |
| SNP_P4_147892_60784 | NW_004516247.1 | Scaffold892 | 60784                   | AA                              | GG              | 1946984234               |
| SNP_P4_147894_1353  | NW_004516248.1 | Scaffold893 | 1353                    | GG                              | AA              | 1946984236               |
| SNP_P4_147895_1552  | NW_004516248.1 | Scaffold893 | 1552                    | CC                              | TT              | 1946984238               |
| SNP_P4_147896_1794  | NW_004516248.1 | Scaffold893 | 1794                    | GG                              | AA              | 1946984240               |
| SNP_P4_147897_1849  | NW_004516248.1 | Scaffold893 | 1849                    | AA                              | TT              | 1946984242               |
| SNP_P4_147898_1862  | NW_004516248.1 | Scaffold893 | 1862                    | TT                              | CC              | 1946984244               |
| SNP_P4_147899_1872  | NW_004516248.1 | Scaffold893 | 1872                    | TT                              | AA              | 1946984245               |
| SNP_P4_147900_1884  | NW_004516248.1 | Scaffold893 | 1884                    | GG                              | AA              | 1946984247               |
| SNP_P4_147902_2081  | NW_004516248.1 | Scaffold893 | 2081                    | TT                              | CC              | 1946984249               |
| SNP_P4_147903_2136  | NW_004516248.1 | Scaffold893 | 2136                    | CC                              | TT              | 1946984251               |
| SNP_P4_147904_2220  | NW_004516248.1 | Scaffold893 | 2220                    | AA                              | GG              | 1946984253               |
| SNP_P4_147905_2222  | NW_004516248.1 | Scaffold893 | 2222                    | GG                              | AA              | 1946984255               |
| SNP_P4_147906_2328  | NW_004516248.1 | Scaffold893 | 2328                    | AA                              | GG              | 1946984256               |
| SNP_P4_147907_2349  | NW_004516248.1 | Scaffold893 | 2349                    | CC                              | TT              | 1946984258               |
| SNP_P4_147908_2361  | NW_004516248.1 | Scaffold893 | 2361                    | GG                              | TT              | 1946984260               |
| SNP_P4_147909_2367  | NW_004516248.1 | Scaffold893 | 2367                    | AA                              | CC              | 1946984262               |
| SNP_P4_147910_2377  | NW_004516248.1 | Scaffold893 | 2377                    | TT                              | CC              | 1946984264               |
| SNP_P4_147911_2380  | NW_004516248.1 | Scaffold893 | 2380                    | CC                              | TT              | 1946984266               |
| SNP_P4_147912_2397  | NW_004516248.1 | Scaffold893 | 2397                    | AA                              | GG              | 1946984268               |
| SNP_P4_147913_2422  | NW_004516248.1 | Scaffold893 | 2422                    | TT                              | AA              | 1946984270               |
| SNP_P4_147914_2426  | NW_004516248.1 | Scaffold893 | 2426                    | AA                              | GG              | 1946984272               |
| SNP_P4_147915_2427  | NW_004516248.1 | Scaffold893 | 2427                    | TT                              | CC              | 1946984274               |
| SNP_P4_147916_2434  | NW_004516248.1 | Scaffold893 | 2434                    | TT                              | CC              | 1946984276               |
| SNP_P4_147917_2459  | NW_004516248.1 | Scaffold893 | 2459                    | TT                              | CC              | 1946984278               |
| SNP_P4_147918_2473  | NW_004516248.1 | Scaffold893 | 2473                    | AA                              | GG              | 1946984280               |
| SNP_P4_147920_10861 | NW_004516248.1 | Scaffold893 | 10861                   | AA                              | GG              | 1946984281               |
| SNP_P4_147922_11169 | NW_004516248.1 | Scaffold893 | 11169                   | TT                              | GG              | 1946984283               |
| SNP_P4_147923_11368 | NW_004516248.1 | Scaffold893 | 11368                   | TT                              | CC              | 1946984285               |
| SNP_P4_147924_11378 | NW_004516248.1 | Scaffold893 | 11378                   | TT                              | CC              | 1946984287               |
| SNP_P4_147925_13970 | NW_004516248.1 | Scaffold893 | 13970                   | TT                              | CC              | 1946984289               |
| SNP_P4_147926_21118 | NW_004516248.1 | Scaffold893 | 21118                   | AA                              | GG              | 1946984291               |
| SNP_P4_147927_21131 | NW_004516248.1 | Scaffold893 | 21131                   | GG                              | AA              | 1946984293               |
| SNP_P4_147928_21427 | NW_004516248.1 | Scaffold893 | 21427                   | CC                              | GG              | 1946984295               |
| SNP_P4_147929_21443 | NW_004516248.1 | Scaffold893 | 21443                   | TT                              | CC              | 1946984297               |

| SNPs IDs             | Chromosome IDs | Chromosomes | Physical positions (bp) | CDC Frontier (Reference genome) | (ILWC46 & LPNB) | NCBI SNPdb Accession IDs |
|----------------------|----------------|-------------|-------------------------|---------------------------------|-----------------|--------------------------|
| SNP_P4_147930_21474  | NW_004516248.1 | Scaffold893 | 21474                   | AA                              | TT              | 1946984299               |
| SNP_P4_147931_21545  | NW_004516248.1 | Scaffold893 | 21545                   | GG                              | AA              | 1946984301               |
| SNP_P4_147932_28561  | NW_004516250.1 | Scaffold895 | 28561                   | TT                              | CC              | 1946984303               |
| SNP_P4_147937_105571 | NW_004516250.1 | Scaffold895 | 105571                  | CC                              | AA              | 1946984305               |
| SNP_P4_147938_105707 | NW_004516250.1 | Scaffold895 | 105707                  | TT                              | CC              | 1946984307               |
| SNP_P4_147939_105763 | NW_004516250.1 | Scaffold895 | 105763                  | AA                              | TT              | 1946984309               |
| SNP_P4_147940_107670 | NW_004516250.1 | Scaffold895 | 107670                  | GG                              | TT              | 1946984311               |
| SNP_P4_147941_119170 | NW_004516250.1 | Scaffold895 | 119170                  | CC                              | TT              | 1946984313               |
| SNP_P4_147942_127149 | NW_004516250.1 | Scaffold895 | 127149                  | CC                              | TT              | 1946984315               |
| SNP_P4_147944_144557 | NW_004516250.1 | Scaffold895 | 144557                  | GG                              | AA              | 1946984317               |
| SNP_P4_147945_160456 | NW_004516250.1 | Scaffold895 | 160456                  | GG                              | CC              | 1946984318               |
| SNP_P4_147946_170728 | NW_004516250.1 | Scaffold895 | 170728                  | TT                              | CC              | 1946984320               |
| SNP_P4_147948_14454  | NW_004516251.1 | Scaffold896 | 14454                   | AA                              | CC              | 1946984322               |
| SNP_P4_147949_14484  | NW_004516251.1 | Scaffold896 | 14484                   | CC                              | TT              | 1946984324               |
| SNP_P4_147950_14512  | NW_004516251.1 | Scaffold896 | 14512                   | AA                              | GG              | 1946984326               |
| SNP_P4_147951_14514  | NW_004516251.1 | Scaffold896 | 14514                   | TT                              | AA              | 1946984328               |
| SNP_P4_147952_14535  | NW_004516251.1 | Scaffold896 | 14535                   | TT                              | CC              | 1946984330               |
| SNP_P4_147953_14541  | NW_004516251.1 | Scaffold896 | 14541                   | AA                              | GG              | 1946984332               |
| SNP_P4_147954_14622  | NW_004516251.1 | Scaffold896 | 14622                   | TT                              | CC              | 1946984334               |
| SNP_P4_147955_14625  | NW_004516251.1 | Scaffold896 | 14625                   | TT                              | CC              | 1946984336               |
| SNP_P4_147956_14631  | NW_004516251.1 | Scaffold896 | 14631                   | TT                              | AA              | 1946984338               |
| SNP_P4_147958_14722  | NW_004516251.1 | Scaffold896 | 14722                   | TT                              | CC              | 1946984340               |
| SNP_P4_147959_14763  | NW_004516251.1 | Scaffold896 | 14763                   | GG                              | AA              | 1946984342               |
| SNP_P4_147960_14800  | NW_004516251.1 | Scaffold896 | 14800                   | CC                              | TT              | 1946984344               |
| SNP_P4_147961_14807  | NW_004516251.1 | Scaffold896 | 14807                   | TT                              | CC              | 1946984346               |
| SNP_P4_147962_14817  | NW_004516251.1 | Scaffold896 | 14817                   | CC                              | GG              | 1946984348               |
| SNP_P4_147963_14900  | NW_004516251.1 | Scaffold896 | 14900                   | AA                              | GG              | 1946984350               |
| SNP_P4_147964_15546  | NW_004516251.1 | Scaffold896 | 15546                   | GG                              | AA              | 1946984352               |
| SNP_P4_147965_15584  | NW_004516251.1 | Scaffold896 | 15584                   | GG                              | AA              | 1946984354               |
| SNP_P4_147966_15604  | NW_004516251.1 | Scaffold896 | 15604                   | TT                              | CC              | 1946984356               |
| SNP_P4_147967_15614  | NW_004516251.1 | Scaffold896 | 15614                   | TT                              | CC              | 1946984358               |
| SNP_P4_147968_15682  | NW_004516251.1 | Scaffold896 | 15682                   | TT                              | GG              | 1946984360               |
| SNP_P4_147969_15694  | NW_004516251.1 | Scaffold896 | 15694                   | TT                              | CC              | 1946984362               |
| SNP_P4_147970_15709  | NW_004516251.1 | Scaffold896 | 15709                   | AA                              | GG              | 1946984364               |
| SNP_P4_147972_22584  | NW_004516251.1 | Scaffold896 | 22584                   | GG                              | TT              | 1946984366               |
| SNP_P4_147973_22628  | NW_004516251.1 | Scaffold896 | 22628                   | AA                              | TT              | 1946984368               |
| SNP_P4_147974_22663  | NW_004516251.1 | Scaffold896 | 22663                   | GG                              | AA              | 1946984370               |
| SNP_P4_147975_35460  | NW_004516251.1 | Scaffold896 | 35460                   | TT                              | AA              | 1946984372               |
| SNP_P4_147976_37933  | NW_004516251.1 | Scaffold896 | 37933                   | TT                              | AA              | 1946984374               |
| SNP_P4_147977_37941  | NW_004516251.1 | Scaffold896 | 37941                   | CC                              | TT              | 1946984377               |
| SNP_P4_147978_42665  | NW_004516251.1 | Scaffold896 | 42665                   | TT                              | GG              | 1946984378               |
| SNP_P4_147979_45830  | NW_004516251.1 | Scaffold896 | 45830                   | AA                              | GG              | 1946984380               |

| SNPs IDs            | Chromosome IDs | Chromosomes | Physical positions (bp) | CDC Frontier (Reference genome) | (ILWC46 & LPNB) | NCBI SNPdb Accession IDs |
|---------------------|----------------|-------------|-------------------------|---------------------------------|-----------------|--------------------------|
| SNP_P4_147980_45831 | NW_004516251.1 | Scaffold896 | 45831                   | AA                              | GG              | 1946984382               |
| SNP_P4_147982_57359 | NW_004516251.1 | Scaffold896 | 57359                   | TT                              | CC              | 1946984384               |
| SNP_P4_147983_57360 | NW_004516251.1 | Scaffold896 | 57360                   | AA                              | CC              | 1946984386               |
| SNP_P4_147984_57362 | NW_004516251.1 | Scaffold896 | 57362                   | AA                              | TT              | 1946984388               |
| SNP_P4_147985_57367 | NW_004516251.1 | Scaffold896 | 57367                   | GG                              | AA              | 1946984390               |
| SNP_P4_147986_57376 | NW_004516251.1 | Scaffold896 | 57376                   | TT                              | AA              | 1946984392               |
| SNP_P4_147988_75718 | NW_004516251.1 | Scaffold896 | 75718                   | AA                              | GG              | 1946984394               |
| SNP_P4_147989_75941 | NW_004516251.1 | Scaffold896 | 75941                   | GG                              | TT              | 1946984396               |
| SNP_P4_147990_75954 | NW_004516251.1 | Scaffold896 | 75954                   | AA                              | CC              | 1946984398               |
| SNP_P4_147991_75976 | NW_004516251.1 | Scaffold896 | 75976                   | TT                              | CC              | 1946984400               |
| SNP_P4_147992_8254  | NW_004516253.1 | Scaffold898 | 8254                    | TT                              | GG              | 1946984402               |
| SNP_P4_147993_8269  | NW_004516253.1 | Scaffold898 | 8269                    | AA                              | TT              | 1946984404               |
| SNP_P4_147994_8283  | NW_004516253.1 | Scaffold898 | 8283                    | TT                              | GG              | 1946984406               |
| SNP_P4_147995_8579  | NW_004516253.1 | Scaffold898 | 8579                    | TT                              | AA              | 1946984408               |
| SNP_P4_147996_9017  | NW_004516253.1 | Scaffold898 | 9017                    | CC                              | GG              | 1946984410               |
| SNP_P4_147997_11944 | NW_004516253.1 | Scaffold898 | 11944                   | TT                              | CC              | 1946984412               |
| SNP_P4_147998_25961 | NW_004516253.1 | Scaffold898 | 25961                   | AA                              | GG              | 1946984414               |
| SNP_P4_147999_25987 | NW_004516253.1 | Scaffold898 | 25987                   | GG                              | AA              | 1946984416               |
| SNP_P4_148001_13463 | NW_004516255.1 | Scaffold900 | 13463                   | AA                              | GG              | 1946984418               |
| SNP_P4_148002_13499 | NW_004516255.1 | Scaffold900 | 13499                   | TT                              | AA              | 1946984420               |
| SNP_P4_148003_13795 | NW_004516255.1 | Scaffold900 | 13795                   | GG                              | AA              | 1946984422               |
| SNP_P4_148004_13812 | NW_004516255.1 | Scaffold900 | 13812                   | AA                              | CC              | 1946984424               |
| SNP_P4_148005_13828 | NW_004516255.1 | Scaffold900 | 13828                   | GG                              | CC              | 1946984426               |
| SNP_P4_148006_13870 | NW_004516255.1 | Scaffold900 | 13870                   | GG                              | AA              | 1946984428               |
| SNP_P4_148007_13896 | NW_004516255.1 | Scaffold900 | 13896                   | AA                              | GG              | 1946984430               |
| SNP_P4_148008_13927 | NW_004516255.1 | Scaffold900 | 13927                   | AA                              | GG              | 1946984433               |
| SNP_P4_148009_14803 | NW_004516255.1 | Scaffold900 | 14803                   | AA                              | GG              | 1946984435               |
| SNP_P4_148010_15031 | NW_004516255.1 | Scaffold900 | 15031                   | GG                              | CC              | 1946984437               |
| SNP_P4_148011_15063 | NW_004516255.1 | Scaffold900 | 15063                   | TT                              | AA              | 1946984439               |
| SNP_P4_148012_15111 | NW_004516255.1 | Scaffold900 | 15111                   | GG                              | TT              | 1946984441               |
| SNP_P4_148013_15277 | NW_004516255.1 | Scaffold900 | 15277                   | AA                              | GG              | 1946984443               |
| SNP_P4_148014_29309 | NW_004516255.1 | Scaffold900 | 29309                   | AA                              | CC              | 1946984446               |
| SNP_P4_148015_29343 | NW_004516255.1 | Scaffold900 | 29343                   | TT                              | AA              | 1946984448               |
| SNP_P4_148016_29357 | NW_004516255.1 | Scaffold900 | 29357                   | TT                              | CC              | 1946984450               |
| SNP_P4_148017_29429 | NW_004516255.1 | Scaffold900 | 29429                   | AA                              | GG              | 1946984452               |
| SNP_P4_148018_29465 | NW_004516255.1 | Scaffold900 | 29465                   | TT                              | AA              | 1946984454               |
| SNP_P4_148019_29495 | NW_004516255.1 | Scaffold900 | 29495                   | GG                              | AA              | 1946984456               |
| SNP_P4_148020_29518 | NW_004516255.1 | Scaffold900 | 29518                   | CC                              | TT              | 1946984458               |
| SNP_P4_148021_29543 | NW_004516255.1 | Scaffold900 | 29543                   | TT                              | AA              | 1946984460               |
| SNP_P4_148022_29633 | NW_004516255.1 | Scaffold900 | 29633                   | GG                              | TT              | 1946984462               |
| SNP_P4_148023_29648 | NW_004516255.1 | Scaffold900 | 29648                   | CC                              | TT              | 1946984464               |
| SNP_P4_148024_29667 | NW_004516255.1 | Scaffold900 | 29667                   | TT                              | CC              | 1946984466               |

| SNPs IDs            | Chromosome IDs | Chromosomes | Physical positions (bp) | CDC Frontier (Reference genome) | (ILWC46 & LPNB) | NCBI SNPdb Accession IDs |
|---------------------|----------------|-------------|-------------------------|---------------------------------|-----------------|--------------------------|
| SNP_P4_148025_36680 | NW_004516255.1 | Scaffold900 | 36680                   | AA                              | TT              | 1946984468               |
| SNP_P4_148026_36681 | NW_004516255.1 | Scaffold900 | 36681                   | CC                              | TT              | 1946984470               |
| SNP_P4_148027_36981 | NW_004516255.1 | Scaffold900 | 36981                   | TT                              | AA              | 1946984472               |
| SNP_P4_148028_39140 | NW_004516255.1 | Scaffold900 | 39140                   | TT                              | CC              | 1946984474               |
| SNP_P4_148029_40330 | NW_004516255.1 | Scaffold900 | 40330                   | TT                              | AA              | 1946984476               |
| SNP_P4_148030_41421 | NW_004516255.1 | Scaffold900 | 41421                   | TT                              | CC              | 1946984478               |
| SNP_P4_148031_41442 | NW_004516255.1 | Scaffold900 | 41442                   | CC                              | TT              | 1946984480               |
| SNP_P4_148032_41496 | NW_004516255.1 | Scaffold900 | 41496                   | AA                              | CC              | 1946984482               |
| SNP_P4_148033_41666 | NW_004516255.1 | Scaffold900 | 41666                   | GG                              | CC              | 1946984484               |
| SNP_P4_148034_41714 | NW_004516255.1 | Scaffold900 | 41714                   | GG                              | CC              | 1946984486               |
| SNP_P4_148035_41768 | NW_004516255.1 | Scaffold900 | 41768                   | TT                              | AA              | 1946984488               |
| SNP_P4_148036_41789 | NW_004516255.1 | Scaffold900 | 41789                   | TT                              | CC              | 1946984490               |
| SNP_P4_148037_41821 | NW_004516255.1 | Scaffold900 | 41821                   | TT                              | GG              | 1946984492               |
| SNP_P4_148038_41894 | NW_004516255.1 | Scaffold900 | 41894                   | CC                              | TT              | 1946984494               |
| SNP_P4_148039_41911 | NW_004516255.1 | Scaffold900 | 41911                   | GG                              | AA              | 1946984496               |
| SNP_P4_148040_42000 | NW_004516255.1 | Scaffold900 | 42000                   | AA                              | GG              | 1946984498               |
| SNP_P4_148041_42089 | NW_004516255.1 | Scaffold900 | 42089                   | CC                              | TT              | 1946984500               |
| SNP_P4_148042_42130 | NW_004516255.1 | Scaffold900 | 42130                   | GG                              | CC              | 1946984502               |
| SNP_P4_148043_42138 | NW_004516255.1 | Scaffold900 | 42138                   | AA                              | GG              | 1946984504               |
| SNP_P4_148044_42183 | NW_004516255.1 | Scaffold900 | 42183                   | TT                              | CC              | 1946984506               |
| SNP_P4_148045_42285 | NW_004516255.1 | Scaffold900 | 42285                   | TT                              | AA              | 1946984508               |
| SNP_P4_148046_42349 | NW_004516255.1 | Scaffold900 | 42349                   | TT                              | AA              | 1946984510               |
| SNP_P4_148047_42419 | NW_004516255.1 | Scaffold900 | 42419                   | GG                              | TT              | 1946984512               |
| SNP_P4_148048_42432 | NW_004516255.1 | Scaffold900 | 42432                   | AA                              | TT              | 1946984514               |
| SNP_P4_148049_42536 | NW_004516255.1 | Scaffold900 | 42536                   | AA                              | GG              | 1946984516               |
| SNP_P4_148050_42537 | NW_004516255.1 | Scaffold900 | 42537                   | GG                              | TT              | 1946984518               |
| SNP_P4_148051_42732 | NW_004516255.1 | Scaffold900 | 42732                   | CC                              | TT              | 1946984520               |
| SNP_P4_148052_42734 | NW_004516255.1 | Scaffold900 | 42734                   | GG                              | TT              | 1946984522               |
| SNP_P4_148053_42754 | NW_004516255.1 | Scaffold900 | 42754                   | TT                              | CC              | 1946984525               |
| SNP_P4_148054_42786 | NW_004516255.1 | Scaffold900 | 42786                   | CC                              | GG              | 1946984527               |
| SNP_P4_148055_42824 | NW_004516255.1 | Scaffold900 | 42824                   | TT                              | AA              | 1946984529               |
| SNP_P4_148056_42901 | NW_004516255.1 | Scaffold900 | 42901                   | TT                              | AA              | 1946984531               |
| SNP_P4_148057_42986 | NW_004516255.1 | Scaffold900 | 42986                   | GG                              | AA              | 1946984533               |
| SNP_P4_148058_42989 | NW_004516255.1 | Scaffold900 | 42989                   | GG                              | CC              | 1946984535               |
| SNP_P4_148059_43042 | NW_004516255.1 | Scaffold900 | 43042                   | GG                              | AA              | 1946984537               |
| SNP_P4_148060_43359 | NW_004516255.1 | Scaffold900 | 43359                   | GG                              | CC              | 1946984539               |
| SNP_P4_148061_45450 | NW_004516255.1 | Scaffold900 | 45450                   | GG                              | AA              | 1946984541               |
| SNP_P4_148062_45462 | NW_004516255.1 | Scaffold900 | 45462                   | TT                              | AA              | 1946984544               |
| SNP_P4_148063_45463 | NW_004516255.1 | Scaffold900 | 45463                   | GG                              | AA              | 1946984546               |
| SNP_P4_148064_45533 | NW_004516255.1 | Scaffold900 | 45533                   | TT                              | GG              | 1946984548               |
| SNP_P4_148065_45575 | NW_004516255.1 | Scaffold900 | 45575                   | AA                              | TT              | 1946984550               |
| SNP_P4_148066_46450 | NW_004516255.1 | Scaffold900 | 46450                   | CC                              | AA              | 1946984552               |



| SNPs IDs            | Chromosome IDs | Chromosomes | Physical positions (bp) | CDC Frontier (Reference genome) | (ILWC46 & LPNB) | NCBI SNPdb Accession IDs |
|---------------------|----------------|-------------|-------------------------|---------------------------------|-----------------|--------------------------|
| SNP_P4_148067_46457 | NW_004516255.1 | Scaffold900 | 46457                   | TT                              | CC              | 1946984554               |
| SNP_P4_148068_46810 | NW_004516255.1 | Scaffold900 | 46810                   | TT                              | CC              | 1946984556               |
| SNP_P4_148069_46918 | NW_004516255.1 | Scaffold900 | 46918                   | GG                              | TT              | 1946984558               |
| SNP_P4_148070_46975 | NW_004516255.1 | Scaffold900 | 46975                   | GG                              | AA              | 1946984560               |
| SNP_P4_148071_46987 | NW_004516255.1 | Scaffold900 | 46987                   | CC                              | TT              | 1946984562               |
| SNP_P4_148072_46989 | NW_004516255.1 | Scaffold900 | 46989                   | CC                              | TT              | 1946984564               |
| SNP_P4_148073_47015 | NW_004516255.1 | Scaffold900 | 47015                   | CC                              | TT              | 1946984566               |
| SNP_P4_148074_47052 | NW_004516255.1 | Scaffold900 | 47052                   | GG                              | AA              | 1946984568               |
| SNP_P4_148075_47149 | NW_004516255.1 | Scaffold900 | 47149                   | TT                              | CC              | 1946984570               |
| SNP_P4_148076_47193 | NW_004516255.1 | Scaffold900 | 47193                   | CC                              | GG              | 1946984572               |
| SNP_P4_148077_47222 | NW_004516255.1 | Scaffold900 | 47222                   | AA                              | TT              | 1946984574               |
| SNP_P4_148078_47232 | NW_004516255.1 | Scaffold900 | 47232                   | AA                              | GG              | 1946984576               |
| SNP_P4_148079_47407 | NW_004516255.1 | Scaffold900 | 47407                   | GG                              | AA              | 1946984578               |
| SNP_P4_148080_47413 | NW_004516255.1 | Scaffold900 | 47413                   | AA                              | CC              | 1946984580               |
| SNP_P4_148081_47415 | NW_004516255.1 | Scaffold900 | 47415                   | CC                              | AA              | 1946984582               |
| SNP_P4_148082_47428 | NW_004516255.1 | Scaffold900 | 47428                   | CC                              | TT              | 1946984584               |
| SNP_P4_148083_47430 | NW_004516255.1 | Scaffold900 | 47430                   | AA                              | TT              | 1946984586               |
| SNP_P4_148084_47441 | NW_004516255.1 | Scaffold900 | 47441                   | AA                              | CC              | 1946984588               |
| SNP_P4_148085_47513 | NW_004516255.1 | Scaffold900 | 47513                   | GG                              | AA              | 1946984590               |
| SNP_P4_148086_47623 | NW_004516255.1 | Scaffold900 | 47623                   | GG                              | TT              | 1946984592               |
| SNP_P4_148087_47672 | NW_004516255.1 | Scaffold900 | 47672                   | AA                              | CC              | 1946984594               |
| SNP_P4_148088_47769 | NW_004516255.1 | Scaffold900 | 47769                   | GG                              | TT              | 1946984597               |
| SNP_P4_148089_47889 | NW_004516255.1 | Scaffold900 | 47889                   | TT                              | CC              | 1946984599               |
| SNP_P4_148090_50907 | NW_004516255.1 | Scaffold900 | 50907                   | TT                              | AA              | 1946984601               |
| SNP_P4_148091_50942 | NW_004516255.1 | Scaffold900 | 50942                   | CC                              | TT              | 1946984603               |
| SNP_P4_148092_51302 | NW_004516255.1 | Scaffold900 | 51302                   | AA                              | TT              | 1946984605               |
| SNP_P4_148093_51320 | NW_004516255.1 | Scaffold900 | 51320                   | CC                              | TT              | 1946984607               |
| SNP_P4_148094_51375 | NW_004516255.1 | Scaffold900 | 51375                   | TT                              | CC              | 1946984609               |
| SNP_P4_148095_51732 | NW_004516255.1 | Scaffold900 | 51732                   | AA                              | TT              | 1946984611               |
| SNP_P4_148096_51733 | NW_004516255.1 | Scaffold900 | 51733                   | TT                              | AA              | 1946984613               |
| SNP_P4_148097_51737 | NW_004516255.1 | Scaffold900 | 51737                   | CC                              | AA              | 1946984615               |
| SNP_P4_148098_13270 | NW_004516256.1 | Scaffold901 | 13270                   | AA                              | GG              | 1946984617               |
| SNP_P4_148099_17313 | NW_004516256.1 | Scaffold901 | 17313                   | TT                              | GG              | 1946984619               |
| SNP_P4_148100_17717 | NW_004516256.1 | Scaffold901 | 17717                   | GG                              | TT              | 1946984621               |
| SNP_P4_148101_19857 | NW_004516256.1 | Scaffold901 | 19857                   | CC                              | TT              | 1946984623               |
| SNP_P4_148102_20250 | NW_004516256.1 | Scaffold901 | 20250                   | GG                              | CC              | 1946984625               |
| SNP_P4_148103_20278 | NW_004516256.1 | Scaffold901 | 20278                   | AA                              | GG              | 1946984627               |
| SNP_P4_148104_23759 | NW_004516256.1 | Scaffold901 | 23759                   | CC                              | AA              | 1946984629               |
| SNP_P4_148105_23765 | NW_004516256.1 | Scaffold901 | 23765                   | AA                              | GG              | 1946984631               |
| SNP_P4_148106_23772 | NW_004516256.1 | Scaffold901 | 23772                   | AA                              | GG              | 1946984633               |
| SNP_P4_148107_23799 | NW_004516256.1 | Scaffold901 | 23799                   | TT                              | AA              | 1946984635               |
| SNP_P4_148108_23822 | NW_004516256.1 | Scaffold901 | 23822                   | AA                              | GG              | 1946984637               |

| SNPs IDs             | Chromosome IDs | Chromosomes | Physical positions (bp) | CDC Frontier (Reference genome) | (ILWC46 & LPNB) | NCBI SNPdb Accession IDs |
|----------------------|----------------|-------------|-------------------------|---------------------------------|-----------------|--------------------------|
| SNP_P4_148109_23845  | NW_004516256.1 | Scaffold901 | 23845                   | TT                              | AA              | 1946984638               |
| SNP_P4_148111_23882  | NW_004516256.1 | Scaffold901 | 23882                   | AA                              | GG              | 1946984640               |
| SNP_P4_148112_23901  | NW_004516256.1 | Scaffold901 | 23901                   | AA                              | GG              | 1946984642               |
| SNP_P4_148113_23912  | NW_004516256.1 | Scaffold901 | 23912                   | TT                              | AA              | 1946984644               |
| SNP_P4_148114_46297  | NW_004516256.1 | Scaffold901 | 46297                   | GG                              | AA              | 1946984646               |
| SNP_P4_148115_46302  | NW_004516256.1 | Scaffold901 | 46302                   | TT                              | CC              | 1946984648               |
| SNP_P4_148116_46303  | NW_004516256.1 | Scaffold901 | 46303                   | TT                              | CC              | 1946984650               |
| SNP_P4_148117_46312  | NW_004516256.1 | Scaffold901 | 46312                   | TT                              | AA              | 1946984652               |
| SNP_P4_148118_69555  | NW_004516256.1 | Scaffold901 | 69555                   | GG                              | TT              | 1946984654               |
| SNP_P4_148119_69559  | NW_004516256.1 | Scaffold901 | 69559                   | AA                              | GG              | 1946984656               |
| SNP_P4_148120_69585  | NW_004516256.1 | Scaffold901 | 69585                   | TT                              | CC              | 1946984658               |
| SNP_P4_148121_94374  | NW_004516256.1 | Scaffold901 | 94374                   | TT                              | AA              | 1946984660               |
| SNP_P4_148122_133005 | NW_004516256.1 | Scaffold901 | 133005                  | TT                              | CC              | 1946984661               |
| SNP_P4_148123_136782 | NW_004516256.1 | Scaffold901 | 136782                  | GG                              | AA              | 1946984663               |
| SNP_P4_148125_143018 | NW_004516256.1 | Scaffold901 | 143018                  | AA                              | CC              | 1946984665               |
| SNP_P4_148126_143021 | NW_004516256.1 | Scaffold901 | 143021                  | CC                              | TT              | 1946984667               |
| SNP_P4_148127_143065 | NW_004516256.1 | Scaffold901 | 143065                  | AA                              | TT              | 1946984669               |
| SNP_P4_148128_143131 | NW_004516256.1 | Scaffold901 | 143131                  | AA                              | GG              | 1946984671               |
| SNP_P4_148129_143163 | NW_004516256.1 | Scaffold901 | 143163                  | GG                              | TT              | 1946984673               |
| SNP_P4_148130_143164 | NW_004516256.1 | Scaffold901 | 143164                  | AA                              | GG              | 1946984675               |
| SNP_P4_148131_155718 | NW_004516256.1 | Scaffold901 | 155718                  | AA                              | GG              | 1946984676               |
| SNP_P4_148132_155789 | NW_004516256.1 | Scaffold901 | 155789                  | CC                              | AA              | 1946984678               |
| SNP_P4_148133_156199 | NW_004516256.1 | Scaffold901 | 156199                  | CC                              | TT              | 1946984680               |
| SNP_P4_148134_180721 | NW_004516256.1 | Scaffold901 | 180721                  | TT                              | CC              | 1946984682               |
| SNP_P4_148135_180758 | NW_004516256.1 | Scaffold901 | 180758                  | CC                              | TT              | 1946984685               |
| SNP_P4_148136_181131 | NW_004516256.1 | Scaffold901 | 181131                  | AA                              | CC              | 1946984687               |
| SNP_P4_148137_181134 | NW_004516256.1 | Scaffold901 | 181134                  | AA                              | GG              | 1946984689               |
| SNP_P4_148138_181137 | NW_004516256.1 | Scaffold901 | 181137                  | AA                              | GG              | 1946984691               |
| SNP_P4_148139_181175 | NW_004516256.1 | Scaffold901 | 181175                  | CC                              | TT              | 1946984693               |
| SNP_P4_148140_181189 | NW_004516256.1 | Scaffold901 | 181189                  | TT                              | CC              | 1946984695               |
| SNP_P4_148141_208428 | NW_004516256.1 | Scaffold901 | 208428                  | AA                              | CC              | 1946984697               |
| SNP_P4_148142_221916 | NW_004516256.1 | Scaffold901 | 221916                  | AA                              | CC              | 1946984699               |
| SNP_P4_148143_221951 | NW_004516256.1 | Scaffold901 | 221951                  | GG                              | AA              | 1946984701               |
| SNP_P4_148144_222304 | NW_004516256.1 | Scaffold901 | 222304                  | AA                              | GG              | 1946984703               |
| SNP_P4_148145_229453 | NW_004516256.1 | Scaffold901 | 229453                  | CC                              | TT              | 1946984705               |
| SNP_P4_148146_229670 | NW_004516256.1 | Scaffold901 | 229670                  | GG                              | AA              | 1946984707               |
| SNP_P4_148147_233257 | NW_004516256.1 | Scaffold901 | 233257                  | AA                              | GG              | 1946984709               |
| SNP_P4_148148_233267 | NW_004516256.1 | Scaffold901 | 233267                  | GG                              | AA              | 1946984711               |
| SNP_P4_148149_233287 | NW_004516256.1 | Scaffold901 | 233287                  | AA                              | GG              | 1946984713               |
| SNP_P4_148150_233293 | NW_004516256.1 | Scaffold901 | 233293                  | TT                              | CC              | 1946984715               |
| SNP_P4_148151_233559 | NW_004516256.1 | Scaffold901 | 233559                  | TT                              | AA              | 1946984717               |
| SNP_P4_148152_233560 | NW_004516256.1 | Scaffold901 | 233560                  | GG                              | TT              | 1946984719               |

| SNPs IDs             | Chromosome IDs | Chromosomes | Physical positions (bp) | CDC Frontier (Reference genome) | (ILWC46 & LPNB) | NCBI SNPdb Accession IDs |
|----------------------|----------------|-------------|-------------------------|---------------------------------|-----------------|--------------------------|
| SNP_P4_148153_236041 | NW_004516256.1 | Scaffold901 | 236041                  | GG                              | AA              | 1946984721               |
| SNP_P4_148154_239432 | NW_004516256.1 | Scaffold901 | 239432                  | TT                              | CC              | 1946984723               |
| SNP_P4_148155_246340 | NW_004516256.1 | Scaffold901 | 246340                  | AA                              | GG              | 1946984725               |
| SNP_P4_148156_325    | NW_004516258.1 | Scaffold904 | 325                     | CC                              | TT              | 1946984728               |
| SNP_P4_148157_9876   | NW_004516258.1 | Scaffold904 | 9876                    | TT                              | GG              | 1946984730               |
| SNP_P4_148158_11632  | NW_004516258.1 | Scaffold904 | 11632                   | CC                              | TT              | 1946984732               |
| SNP_P4_148159_11648  | NW_004516258.1 | Scaffold904 | 11648                   | TT                              | GG              | 1946984734               |
| SNP_P4_148160_11679  | NW_004516258.1 | Scaffold904 | 11679                   | CC                              | AA              | 1946984736               |
| SNP_P4_148161_11685  | NW_004516258.1 | Scaffold904 | 11685                   | TT                              | AA              | 1946984738               |
| SNP_P4_148162_12721  | NW_004516258.1 | Scaffold904 | 12721                   | AA                              | GG              | 1946984739               |
| SNP_P4_148163_12724  | NW_004516258.1 | Scaffold904 | 12724                   | TT                              | AA              | 1946984741               |
| SNP_P4_148164_14506  | NW_004516258.1 | Scaffold904 | 14506                   | AA                              | TT              | 1946984743               |
| SNP_P4_148165_14539  | NW_004516258.1 | Scaffold904 | 14539                   | AA                              | GG              | 1946984745               |
| SNP_P4_148166_14558  | NW_004516258.1 | Scaffold904 | 14558                   | CC                              | TT              | 1946984747               |
| SNP_P4_148167_14560  | NW_004516258.1 | Scaffold904 | 14560                   | AA                              | TT              | 1946984749               |
| SNP_P4_148168_14893  | NW_004516258.1 | Scaffold904 | 14893                   | CC                              | TT              | 1946984752               |
| SNP_P4_148169_16301  | NW_004516258.1 | Scaffold904 | 16301                   | AA                              | TT              | 1946984754               |
| SNP_P4_148170_16521  | NW_004516258.1 | Scaffold904 | 16521                   | CC                              | GG              | 1946984756               |
| SNP_P4_148171_16592  | NW_004516258.1 | Scaffold904 | 16592                   | CC                              | TT              | 1946984758               |
| SNP_P4_148172_16716  | NW_004516258.1 | Scaffold904 | 16716                   | TT                              | CC              | 1946984760               |
| SNP_P4_148173_16760  | NW_004516258.1 | Scaffold904 | 16760                   | TT                              | CC              | 1946984762               |
| SNP_P4_148174_16761  | NW_004516258.1 | Scaffold904 | 16761                   | AA                              | CC              | 1946984765               |
| SNP_P4_148175_20216  | NW_004516258.1 | Scaffold904 | 20216                   | AA                              | GG              | 1946984767               |
| SNP_P4_148176_20230  | NW_004516258.1 | Scaffold904 | 20230                   | AA                              | GG              | 1946984769               |
| SNP_P4_148177_20303  | NW_004516258.1 | Scaffold904 | 20303                   | TT                              | AA              | 1946984771               |
| SNP_P4_148178_20351  | NW_004516258.1 | Scaffold904 | 20351                   | TT                              | AA              | 1946984773               |
| SNP_P4_148179_41     | NW_004516260.1 | Scaffold907 | 41                      | AA                              | GG              | 1946984776               |
| SNP_P4_148180_67     | NW_004516260.1 | Scaffold907 | 67                      | AA                              | TT              | 1946984778               |
| SNP_P4_148181_698    | NW_004516260.1 | Scaffold907 | 698                     | AA                              | TT              | 1946984780               |
| SNP_P4_148183_10106  | NW_004516261.1 | Scaffold908 | 10106                   | TT                              | GG              | 1946984782               |
| SNP_P4_148184_10135  | NW_004516261.1 | Scaffold908 | 10135                   | AA                              | GG              | 1946984784               |
| SNP_P4_148185_11057  | NW_004516261.1 | Scaffold908 | 11057                   | TT                              | AA              | 1946984786               |
| SNP_P4_148186_11112  | NW_004516261.1 | Scaffold908 | 11112                   | AA                              | GG              | 1946984788               |
| SNP_P4_148187_11136  | NW_004516261.1 | Scaffold908 | 11136                   | CC                              | TT              | 1946984790               |
| SNP_P4_148188_11153  | NW_004516261.1 | Scaffold908 | 11153                   | CC                              | TT              | 1946984792               |
| SNP_P4_148189_11155  | NW_004516261.1 | Scaffold908 | 11155                   | CC                              | GG              | 1946984794               |
| SNP_P4_148190_11338  | NW_004516261.1 | Scaffold908 | 11338                   | TT                              | CC              | 1946984796               |
| SNP_P4_148191_11341  | NW_004516261.1 | Scaffold908 | 11341                   | CC                              | TT              | 1946984798               |
| SNP_P4_148192_11358  | NW_004516261.1 | Scaffold908 | 11358                   | TT                              | CC              | 1946984800               |
| SNP_P4_148193_11373  | NW_004516261.1 | Scaffold908 | 11373                   | CC                              | AA              | 1946984802               |
| SNP_P4_148194_11419  | NW_004516261.1 | Scaffold908 | 11419                   | CC                              | TT              | 1946984805               |
| SNP_P4_148195_11439  | NW_004516261.1 | Scaffold908 | 11439                   | CC                              | TT              | 1946984807               |

| SNPs IDs            | Chromosome IDs | Chromosomes | Physical positions (bp) | CDC Frontier (Reference genome) | (ILWC46 & LPNB) | NCBI SNPdb Accession IDs |
|---------------------|----------------|-------------|-------------------------|---------------------------------|-----------------|--------------------------|
| SNP_P4_148196_18137 | NW_004516261.1 | Scaffold908 | 18137                   | TT                              | CC              | 1946984809               |
| SNP_P4_148197_18181 | NW_004516261.1 | Scaffold908 | 18181                   | TT                              | AA              | 1946984811               |
| SNP_P4_148198_18227 | NW_004516261.1 | Scaffold908 | 18227                   | GG                              | AA              | 1946984813               |
| SNP_P4_148199_18233 | NW_004516261.1 | Scaffold908 | 18233                   | TT                              | AA              | 1946984815               |
| SNP_P4_148200_18235 | NW_004516261.1 | Scaffold908 | 18235                   | GG                              | AA              | 1946984817               |
| SNP_P4_148201_18253 | NW_004516261.1 | Scaffold908 | 18253                   | GG                              | AA              | 1946984819               |
| SNP_P4_148202_18256 | NW_004516261.1 | Scaffold908 | 18256                   | TT                              | AA              | 1946984821               |
| SNP_P4_148203_18282 | NW_004516261.1 | Scaffold908 | 18282                   | AA                              | TT              | 1946984823               |
| SNP_P4_148204_18643 | NW_004516261.1 | Scaffold908 | 18643                   | GG                              | CC              | 1946984825               |
| SNP_P4_148205_18766 | NW_004516261.1 | Scaffold908 | 18766                   | AA                              | GG              | 1946984827               |
| SNP_P4_148206_18803 | NW_004516261.1 | Scaffold908 | 18803                   | TT                              | GG              | 1946984829               |
| SNP_P4_148207_21851 | NW_004516261.1 | Scaffold908 | 21851                   | TT                              | AA              | 1946984831               |
| SNP_P4_148208_31232 | NW_004516261.1 | Scaffold908 | 31232                   | AA                              | GG              | 1946984833               |
| SNP_P4_148209_31267 | NW_004516261.1 | Scaffold908 | 31267                   | CC                              | TT              | 1946984835               |
| SNP_P4_148210_31388 | NW_004516261.1 | Scaffold908 | 31388                   | CC                              | TT              | 1946984837               |
| SNP_P4_148211_31403 | NW_004516261.1 | Scaffold908 | 31403                   | GG                              | TT              | 1946984839               |
| SNP_P4_148212_31638 | NW_004516261.1 | Scaffold908 | 31638                   | GG                              | TT              | 1946984841               |
| SNP_P4_148213_31663 | NW_004516261.1 | Scaffold908 | 31663                   | TT                              | GG              | 1946984843               |
| SNP_P4_148214_37001 | NW_004516261.1 | Scaffold908 | 37001                   | TT                              | CC              | 1946984846               |
| SNP_P4_148215_37053 | NW_004516261.1 | Scaffold908 | 37053                   | AA                              | GG              | 1946984848               |
| SNP_P4_148216_37279 | NW_004516261.1 | Scaffold908 | 37279                   | TT                              | AA              | 1946984850               |
| SNP_P4_148217_38348 | NW_004516261.1 | Scaffold908 | 38348                   | AA                              | GG              | 1946984852               |
| SNP_P4_148218_41004 | NW_004516261.1 | Scaffold908 | 41004                   | TT                              | AA              | 1946984854               |
| SNP_P4_148219_41207 | NW_004516261.1 | Scaffold908 | 41207                   | TT                              | CC              | 1946984856               |
| SNP_P4_148220_491   | NW_004516262.1 | Scaffold909 | 491                     | CC                              | TT              | 1946984858               |
| SNP_P4_148221_589   | NW_004516262.1 | Scaffold909 | 589                     | CC                              | AA              | 1946984860               |
| SNP_P4_148222_1711  | NW_004516262.1 | Scaffold909 | 1711                    | CC                              | TT              | 1946984862               |
| SNP_P4_148223_1729  | NW_004516262.1 | Scaffold909 | 1729                    | GG                              | AA              | 1946984864               |
| SNP_P4_148224_2097  | NW_004516262.1 | Scaffold909 | 2097                    | AA                              | CC              | 1946984866               |
| SNP_P4_148225_2287  | NW_004516262.1 | Scaffold909 | 2287                    | GG                              | AA              | 1946984868               |
| SNP_P4_148226_2288  | NW_004516262.1 | Scaffold909 | 2288                    | AA                              | CC              | 1946984870               |
| SNP_P4_148227_2324  | NW_004516262.1 | Scaffold909 | 2324                    | CC                              | TT              | 1946984872               |
| SNP_P4_148228_3824  | NW_004516262.1 | Scaffold909 | 3824                    | AA                              | TT              | 1946984874               |
| SNP_P4_148229_3889  | NW_004516262.1 | Scaffold909 | 3889                    | CC                              | AA              | 1946984876               |
| SNP_P4_148230_3978  | NW_004516262.1 | Scaffold909 | 3978                    | CC                              | TT              | 1946984878               |
| SNP_P4_148231_4092  | NW_004516262.1 | Scaffold909 | 4092                    | GG                              | AA              | 1946984880               |
| SNP_P4_148232_4148  | NW_004516262.1 | Scaffold909 | 4148                    | CC                              | TT              | 1946984882               |
| SNP_P4_148233_4540  | NW_004516262.1 | Scaffold909 | 4540                    | TT                              | GG              | 1946984884               |
| SNP_P4_148234_5135  | NW_004516262.1 | Scaffold909 | 5135                    | TT                              | AA              | 1946984886               |
| SNP_P4_148235_5199  | NW_004516262.1 | Scaffold909 | 5199                    | AA                              | GG              | 1946984888               |
| SNP_P4_148236_5269  | NW_004516262.1 | Scaffold909 | 5269                    | CC                              | TT              | 1946984890               |
| SNP_P4_148237_5287  | NW_004516262.1 | Scaffold909 | 5287                    | GG                              | AA              | 1946984892               |

| SNPs IDs           | Chromosome IDs | Chromosomes | Physical positions (bp) | CDC Frontier (Reference genome) | (ILWC46 & LPNB) | NCBI SNPdb Accession IDs |
|--------------------|----------------|-------------|-------------------------|---------------------------------|-----------------|--------------------------|
| SNP_P4_148238_5503 | NW_004516262.1 | Scaffold909 | 5503                    | TT                              | CC              | 1946984894               |
| SNP_P4_148239_5541 | NW_004516262.1 | Scaffold909 | 5541                    | TT                              | AA              | 1946984896               |
| SNP_P4_148240_5542 | NW_004516262.1 | Scaffold909 | 5542                    | GG                              | AA              | 1946984898               |
| SNP_P4_148241_5649 | NW_004516262.1 | Scaffold909 | 5649                    | CC                              | TT              | 1946984901               |
| SNP_P4_148242_5735 | NW_004516262.1 | Scaffold909 | 5735                    | TT                              | GG              | 1946984903               |
| SNP_P4_148243_5801 | NW_004516262.1 | Scaffold909 | 5801                    | GG                              | CC              | 1946984905               |
| SNP_P4_148244_5816 | NW_004516262.1 | Scaffold909 | 5816                    | CC                              | TT              | 1946984907               |
| SNP_P4_148245_5847 | NW_004516262.1 | Scaffold909 | 5847                    | GG                              | AA              | 1946984908               |
| SNP_P4_148246_5848 | NW_004516262.1 | Scaffold909 | 5848                    | AA                              | CC              | 1946984909               |
| SNP_P4_148247_6162 | NW_004516262.1 | Scaffold909 | 6162                    | TT                              | CC              | 1946984911               |
| SNP_P4_148248_6188 | NW_004516262.1 | Scaffold909 | 6188                    | TT                              | AA              | 1946984913               |
| SNP_P4_148249_6294 | NW_004516262.1 | Scaffold909 | 6294                    | CC                              | TT              | 1946984915               |
| SNP_P4_148250_6397 | NW_004516262.1 | Scaffold909 | 6397                    | TT                              | CC              | 1946984918               |
| SNP_P4_148251_6652 | NW_004516262.1 | Scaffold909 | 6652                    | AA                              | TT              | 1946984920               |
| SNP_P4_148253_6855 | NW_004516262.1 | Scaffold909 | 6855                    | CC                              | TT              | 1946984922               |
| SNP_P4_148254_6901 | NW_004516262.1 | Scaffold909 | 6901                    | AA                              | GG              | 1946984924               |
| SNP_P4_148255_6925 | NW_004516262.1 | Scaffold909 | 6925                    | TT                              | CC              | 1946984926               |
| SNP_P4_148256_6986 | NW_004516262.1 | Scaffold909 | 6986                    | AA                              | GG              | 1946984928               |
| SNP_P4_148257_6999 | NW_004516262.1 | Scaffold909 | 6999                    | AA                              | CC              | 1946984930               |
| SNP_P4_148258_7129 | NW_004516262.1 | Scaffold909 | 7129                    | AA                              | GG              | 1946984932               |
| SNP_P4_148259_7489 | NW_004516262.1 | Scaffold909 | 7489                    | TT                              | CC              | 1946984934               |
| SNP_P4_148260_7804 | NW_004516262.1 | Scaffold909 | 7804                    | GG                              | TT              | 1946984936               |
| SNP_P4_148261_7813 | NW_004516262.1 | Scaffold909 | 7813                    | AA                              | GG              | 1946984938               |
| SNP_P4_148262_7847 | NW_004516262.1 | Scaffold909 | 7847                    | TT                              | GG              | 1946984940               |
| SNP_P4_148263_8105 | NW_004516262.1 | Scaffold909 | 8105                    | AA                              | GG              | 1946984942               |
| SNP_P4_148264_8135 | NW_004516262.1 | Scaffold909 | 8135                    | TT                              | CC              | 1946984945               |
| SNP_P4_148265_8162 | NW_004516262.1 | Scaffold909 | 8162                    | AA                              | TT              | 1946984947               |
| SNP_P4_148266_8185 | NW_004516262.1 | Scaffold909 | 8185                    | GG                              | TT              | 1946984949               |
| SNP_P4_148267_8187 | NW_004516262.1 | Scaffold909 | 8187                    | CC                              | TT              | 1946984951               |
| SNP_P4_148268_8213 | NW_004516262.1 | Scaffold909 | 8213                    | TT                              | GG              | 1946984952               |
| SNP_P4_148269_8229 | NW_004516262.1 | Scaffold909 | 8229                    | AA                              | GG              | 1946984954               |
| SNP_P4_148270_8302 | NW_004516262.1 | Scaffold909 | 8302                    | AA                              | GG              | 1946984956               |
| SNP_P4_148271_8304 | NW_004516262.1 | Scaffold909 | 8304                    | GG                              | AA              | 1946984958               |
| SNP_P4_148272_8354 | NW_004516262.1 | Scaffold909 | 8354                    | AA                              | CC              | 1946984960               |
| SNP_P4_148273_8358 | NW_004516262.1 | Scaffold909 | 8358                    | AA                              | GG              | 1946984962               |
| SNP_P4_148274_8607 | NW_004516262.1 | Scaffold909 | 8607                    | TT                              | GG              | 1946984964               |
| SNP_P4_148275_8612 | NW_004516262.1 | Scaffold909 | 8612                    | CC                              | AA              | 1946984966               |
| SNP_P4_148276_8621 | NW_004516262.1 | Scaffold909 | 8621                    | GG                              | AA              | 1946984968               |
| SNP_P4_148277_8643 | NW_004516262.1 | Scaffold909 | 8643                    | AA                              | GG              | 1946984971               |
| SNP_P4_148278_8676 | NW_004516262.1 | Scaffold909 | 8676                    | AA                              | GG              | 1946984973               |
| SNP_P4_148279_8685 | NW_004516262.1 | Scaffold909 | 8685                    | GG                              | AA              | 1946984975               |
| SNP_P4_148280_8711 | NW_004516262.1 | Scaffold909 | 8711                    | AA                              | TT              | 1946984977               |

| SNPs IDs            | Chromosome IDs | Chromosomes | Physical positions (bp) | CDC Frontier (Reference genome) | (ILWC46 & LPNB) | NCBI SNPdb Accession IDs |
|---------------------|----------------|-------------|-------------------------|---------------------------------|-----------------|--------------------------|
| SNP_P4_148281_8715  | NW_004516262.1 | Scaffold909 | 8715                    | AA                              | GG              | 1946984979               |
| SNP_P4_148282_8723  | NW_004516262.1 | Scaffold909 | 8723                    | TT                              | GG              | 1946984982               |
| SNP_P4_148283_8726  | NW_004516262.1 | Scaffold909 | 8726                    | AA                              | GG              | 1946984984               |
| SNP_P4_148284_8743  | NW_004516262.1 | Scaffold909 | 8743                    | AA                              | GG              | 1946984986               |
| SNP_P4_148285_10162 | NW_004516262.1 | Scaffold909 | 10162                   | GG                              | TT              | 1946984988               |
| SNP_P4_148286_10256 | NW_004516262.1 | Scaffold909 | 10256                   | CC                              | TT              | 1946984990               |
| SNP_P4_148287_10306 | NW_004516262.1 | Scaffold909 | 10306                   | CC                              | TT              | 1946984992               |
| SNP_P4_148288_10307 | NW_004516262.1 | Scaffold909 | 10307                   | AA                              | GG              | 1946984994               |
| SNP_P4_148289_10384 | NW_004516262.1 | Scaffold909 | 10384                   | GG                              | AA              | 1946984996               |
| SNP_P4_148290_10508 | NW_004516262.1 | Scaffold909 | 10508                   | TT                              | CC              | 1946984998               |
| SNP_P4_148291_10510 | NW_004516262.1 | Scaffold909 | 10510                   | CC                              | GG              | 1946985000               |
| SNP_P4_148292_10559 | NW_004516262.1 | Scaffold909 | 10559                   | AA                              | TT              | 1946985002               |
| SNP_P4_148293_10722 | NW_004516262.1 | Scaffold909 | 10722                   | GG                              | AA              | 1946985004               |
| SNP_P4_148294_10771 | NW_004516262.1 | Scaffold909 | 10771                   | TT                              | CC              | 1946985006               |
| SNP_P4_148295_10951 | NW_004516262.1 | Scaffold909 | 10951                   | CC                              | TT              | 1946985008               |
| SNP_P4_148296_11793 | NW_004516262.1 | Scaffold909 | 11793                   | GG                              | AA              | 1946985010               |
| SNP_P4_148297_17079 | NW_004516262.1 | Scaffold909 | 17079                   | TT                              | CC              | 1946985012               |
| SNP_P4_148298_17088 | NW_004516262.1 | Scaffold909 | 17088                   | AA                              | CC              | 1946985014               |
| SNP_P4_148299_17425 | NW_004516262.1 | Scaffold909 | 17425                   | GG                              | AA              | 1946985016               |
| SNP_P4_148300_17474 | NW_004516262.1 | Scaffold909 | 17474                   | AA                              | TT              | 1946985017               |
| SNP_P4_148301_17831 | NW_004516262.1 | Scaffold909 | 17831                   | TT                              | GG              | 1946985019               |
| SNP_P4_148302_18028 | NW_004516262.1 | Scaffold909 | 18028                   | CC                              | TT              | 1946985021               |
| SNP_P4_148303_18181 | NW_004516262.1 | Scaffold909 | 18181                   | AA                              | CC              | 1946985023               |
| SNP_P4_148304_18281 | NW_004516262.1 | Scaffold909 | 18281                   | AA                              | GG              | 1946985025               |
| SNP_P4_148305_18294 | NW_004516262.1 | Scaffold909 | 18294                   | GG                              | AA              | 1946985027               |
| SNP_P4_148306_18365 | NW_004516262.1 | Scaffold909 | 18365                   | CC                              | GG              | 1946985029               |
| SNP_P4_148307_18453 | NW_004516262.1 | Scaffold909 | 18453                   | TT                              | CC              | 1946985031               |
| SNP_P4_148308_18541 | NW_004516262.1 | Scaffold909 | 18541                   | TT                              | GG              | 1946985033               |
| SNP_P4_148310_21682 | NW_004516262.1 | Scaffold909 | 21682                   | AA                              | GG              | 1946985035               |
| SNP_P4_148311_21718 | NW_004516262.1 | Scaffold909 | 21718                   | TT                              | CC              | 1946985037               |
| SNP_P4_148312_21779 | NW_004516262.1 | Scaffold909 | 21779                   | GG                              | AA              | 1946985038               |
| SNP_P4_148313_21787 | NW_004516262.1 | Scaffold909 | 21787                   | GG                              | AA              | 1946985040               |
| SNP_P4_148314_22110 | NW_004516262.1 | Scaffold909 | 22110                   | AA                              | GG              | 1946985042               |
| SNP_P4_148315_22481 | NW_004516262.1 | Scaffold909 | 22481                   | AA                              | TT              | 1946985044               |
| SNP_P4_148316_22566 | NW_004516262.1 | Scaffold909 | 22566                   | TT                              | CC              | 1946985046               |
| SNP_P4_148317_22772 | NW_004516262.1 | Scaffold909 | 22772                   | AA                              | GG              | 1946985048               |
| SNP_P4_148318_23494 | NW_004516262.1 | Scaffold909 | 23494                   | GG                              | TT              | 1946985050               |
| SNP_P4_148319_23924 | NW_004516262.1 | Scaffold909 | 23924                   | AA                              | GG              | 1946985052               |
| SNP_P4_148320_24797 | NW_004516262.1 | Scaffold909 | 24797                   | GG                              | AA              | 1946985054               |
| SNP_P4_148321_25077 | NW_004516262.1 | Scaffold909 | 25077                   | GG                              | CC              | 1946985056               |
| SNP_P4_148322_26124 | NW_004516262.1 | Scaffold909 | 26124                   | AA                              | GG              | 1946985058               |
| SNP_P4_148323_26216 | NW_004516262.1 | Scaffold909 | 26216                   | AA                              | GG              | 1946985060               |

| SNPs IDs            | Chromosome IDs | Chromosomes | Physical positions (bp) | CDC Frontier (Reference genome) | (ILWC46 & LPNB) | NCBI SNPdb Accession IDs |
|---------------------|----------------|-------------|-------------------------|---------------------------------|-----------------|--------------------------|
| SNP_P4_148324_26331 | NW_004516262.1 | Scaffold909 | 26331                   | GG                              | AA              | 1946985062               |
| SNP_P4_148325_26541 | NW_004516262.1 | Scaffold909 | 26541                   | TT                              | CC              | 1946985064               |
| SNP_P4_148326_26782 | NW_004516262.1 | Scaffold909 | 26782                   | TT                              | CC              | 1946985066               |
| SNP_P4_148327_26838 | NW_004516262.1 | Scaffold909 | 26838                   | GG                              | TT              | 1946985069               |
| SNP_P4_148328_26997 | NW_004516262.1 | Scaffold909 | 26997                   | GG                              | AA              | 1946985071               |
| SNP_P4_148329_27056 | NW_004516262.1 | Scaffold909 | 27056                   | CC                              | GG              | 1946985073               |
| SNP_P4_148330_27059 | NW_004516262.1 | Scaffold909 | 27059                   | GG                              | TT              | 1946985075               |
| SNP_P4_148331_27095 | NW_004516262.1 | Scaffold909 | 27095                   | TT                              | CC              | 1946985077               |
| SNP_P4_148332_27202 | NW_004516262.1 | Scaffold909 | 27202                   | GG                              | AA              | 1946985079               |
| SNP_P4_148333_27214 | NW_004516262.1 | Scaffold909 | 27214                   | AA                              | GG              | 1946985081               |
| SNP_P4_148334_27216 | NW_004516262.1 | Scaffold909 | 27216                   | TT                              | CC              | 1946985083               |
| SNP_P4_148335_27243 | NW_004516262.1 | Scaffold909 | 27243                   | AA                              | CC              | 1946985085               |
| SNP_P4_148336_27269 | NW_004516262.1 | Scaffold909 | 27269                   | CC                              | TT              | 1946985087               |
| SNP_P4_148337_27397 | NW_004516262.1 | Scaffold909 | 27397                   | AA                              | GG              | 1946985089               |
| SNP_P4_148338_27586 | NW_004516262.1 | Scaffold909 | 27586                   | CC                              | TT              | 1946985091               |
| SNP_P4_148339_28105 | NW_004516262.1 | Scaffold909 | 28105                   | TT                              | AA              | 1946985093               |
| SNP_P4_148340_29260 | NW_004516262.1 | Scaffold909 | 29260                   | GG                              | AA              | 1946985095               |
| SNP_P4_148341_29428 | NW_004516262.1 | Scaffold909 | 29428                   | AA                              | GG              | 1946985097               |
| SNP_P4_148342_32868 | NW_004516262.1 | Scaffold909 | 32868                   | CC                              | AA              | 1946985099               |
| SNP_P4_148343_33050 | NW_004516262.1 | Scaffold909 | 33050                   | AA                              | CC              | 1946985101               |
| SNP_P4_148344_33589 | NW_004516262.1 | Scaffold909 | 33589                   | CC                              | TT              | 1946985103               |
| SNP_P4_148345_35491 | NW_004516262.1 | Scaffold909 | 35491                   | GG                              | AA              | 1946985105               |
| SNP_P4_148346_35609 | NW_004516262.1 | Scaffold909 | 35609                   | TT                              | AA              | 1946985107               |
| SNP_P4_148347_35611 | NW_004516262.1 | Scaffold909 | 35611                   | TT                              | GG              | 1946985109               |
| SNP_P4_148348_35638 | NW_004516262.1 | Scaffold909 | 35638                   | TT                              | GG              | 1946985111               |
| SNP_P4_148349_35684 | NW_004516262.1 | Scaffold909 | 35684                   | GG                              | AA              | 1946985113               |
| SNP_P4_148350_35811 | NW_004516262.1 | Scaffold909 | 35811                   | CC                              | AA              | 1946985115               |
| SNP_P4_148351_35861 | NW_004516262.1 | Scaffold909 | 35861                   | GG                              | AA              | 1946985117               |
| SNP_P4_148352_35933 | NW_004516262.1 | Scaffold909 | 35933                   | GG                              | AA              | 1946985119               |
| SNP_P4_148353_35942 | NW_004516262.1 | Scaffold909 | 35942                   | AA                              | GG              | 1946985121               |
| SNP_P4_148354_35975 | NW_004516262.1 | Scaffold909 | 35975                   | TT                              | CC              | 1946985123               |
| SNP_P4_148355_35982 | NW_004516262.1 | Scaffold909 | 35982                   | TT                              | CC              | 1946985125               |
| SNP_P4_148356_35990 | NW_004516262.1 | Scaffold909 | 35990                   | CC                              | TT              | 1946985127               |
| SNP_P4_148357_36043 | NW_004516262.1 | Scaffold909 | 36043                   | AA                              | TT              | 1946985129               |
| SNP_P4_148358_37048 | NW_004516262.1 | Scaffold909 | 37048                   | CC                              | TT              | 1946985130               |
| SNP_P4_148359_37050 | NW_004516262.1 | Scaffold909 | 37050                   | AA                              | GG              | 1946985132               |
| SNP_P4_148360_44341 | NW_004516262.1 | Scaffold909 | 44341                   | GG                              | AA              | 1946985134               |
| SNP_P4_148361_44360 | NW_004516262.1 | Scaffold909 | 44360                   | CC                              | TT              | 1946985136               |
| SNP_P4_148362_44383 | NW_004516262.1 | Scaffold909 | 44383                   | TT                              | CC              | 1946985138               |
| SNP_P4_148363_44388 | NW_004516262.1 | Scaffold909 | 44388                   | AA                              | GG              | 1946985140               |
| SNP_P4_148364_53770 | NW_004516262.1 | Scaffold909 | 53770                   | GG                              | AA              | 1946985141               |
| SNP_P4_148365_53886 | NW_004516262.1 | Scaffold909 | 53886                   | CC                              | TT              | 1946985143               |

| SNPs IDs             | Chromosome IDs | Chromosomes | Physical positions (bp) | CDC Frontier (Reference genome) | (ILWC46 & LPNB) | NCBI SNPdb Accession IDs |
|----------------------|----------------|-------------|-------------------------|---------------------------------|-----------------|--------------------------|
| SNP_P4_148366_53928  | NW_004516262.1 | Scaffold909 | 53928                   | GG                              | AA              | 1946985145               |
| SNP_P4_148367_54000  | NW_004516262.1 | Scaffold909 | 54000                   | TT                              | CC              | 1946985147               |
| SNP_P4_148368_54146  | NW_004516262.1 | Scaffold909 | 54146                   | CC                              | TT              | 1946985149               |
| SNP_P4_148369_54224  | NW_004516262.1 | Scaffold909 | 54224                   | CC                              | TT              | 1946985151               |
| SNP_P4_148370_54501  | NW_004516262.1 | Scaffold909 | 54501                   | TT                              | CC              | 1946985153               |
| SNP_P4_148371_54593  | NW_004516262.1 | Scaffold909 | 54593                   | CC                              | TT              | 1946985155               |
| SNP_P4_148372_54596  | NW_004516262.1 | Scaffold909 | 54596                   | TT                              | CC              | 1946985156               |
| SNP_P4_148373_3938   | NW_004516263.1 | Scaffold910 | 3938                    | TT                              | CC              | 1946985158               |
| SNP_P4_148374_4399   | NW_004516263.1 | Scaffold910 | 4399                    | GG                              | AA              | 1946985160               |
| SNP_P4_148375_8557   | NW_004516263.1 | Scaffold910 | 8557                    | CC                              | TT              | 1946985162               |
| SNP_P4_148376_8620   | NW_004516263.1 | Scaffold910 | 8620                    | AA                              | GG              | 1946985164               |
| SNP_P4_148377_11262  | NW_004516263.1 | Scaffold910 | 11262                   | GG                              | AA              | 1946985166               |
| SNP_P4_148378_9008   | NW_004516264.1 | Scaffold913 | 9008                    | CC                              | TT              | 1946985168               |
| SNP_P4_148379_9014   | NW_004516264.1 | Scaffold913 | 9014                    | GG                              | AA              | 1946985170               |
| SNP_P4_148381_15525  | NW_004516264.1 | Scaffold913 | 15525                   | CC                              | AA              | 1946985172               |
| SNP_P4_148382_40442  | NW_004516264.1 | Scaffold913 | 40442                   | TT                              | GG              | 1946985174               |
| SNP_P4_148383_40444  | NW_004516264.1 | Scaffold913 | 40444                   | TT                              | GG              | 1946985176               |
| SNP_P4_148384_62173  | NW_004516264.1 | Scaffold913 | 62173                   | TT                              | AA              | 1946985178               |
| SNP_P4_148385_76998  | NW_004516264.1 | Scaffold913 | 76998                   | GG                              | TT              | 1946985180               |
| SNP_P4_148386_82812  | NW_004516264.1 | Scaffold913 | 82812                   | AA                              | GG              | 1946985182               |
| SNP_P4_148387_82830  | NW_004516264.1 | Scaffold913 | 82830                   | AA                              | CC              | 1946985184               |
| SNP_P4_148388_83159  | NW_004516264.1 | Scaffold913 | 83159                   | AA                              | TT              | 1946985186               |
| SNP_P4_148389_104773 | NW_004516264.1 | Scaffold913 | 104773                  | CC                              | TT              | 1946985188               |
| SNP_P4_148390_113365 | NW_004516264.1 | Scaffold913 | 113365                  | TT                              | GG              | 1946985190               |
| SNP_P4_148391_119681 | NW_004516264.1 | Scaffold913 | 119681                  | GG                              | AA              | 1946985192               |
| SNP_P4_148392_120274 | NW_004516264.1 | Scaffold913 | 120274                  | GG                              | AA              | 1946985194               |
| SNP_P4_148394_124958 | NW_004516264.1 | Scaffold913 | 124958                  | CC                              | TT              | 1946985196               |
| SNP_P4_148395_125038 | NW_004516264.1 | Scaffold913 | 125038                  | GG                              | AA              | 1946985198               |
| SNP_P4_148396_139074 | NW_004516264.1 | Scaffold913 | 139074                  | TT                              | GG              | 1946985200               |
| SNP_P4_148397_139166 | NW_004516264.1 | Scaffold913 | 139166                  | AA                              | GG              | 1946985202               |
| SNP_P4_148398_139215 | NW_004516264.1 | Scaffold913 | 139215                  | TT                              | CC              | 1946985204               |
| SNP_P4_148399_139559 | NW_004516264.1 | Scaffold913 | 139559                  | CC                              | TT              | 1946985206               |
| SNP_P4_148400_139831 | NW_004516264.1 | Scaffold913 | 139831                  | CC                              | TT              | 1946985208               |
| SNP_P4_148401_139860 | NW_004516264.1 | Scaffold913 | 139860                  | AA                              | GG              | 1946985210               |
| SNP_P4_148402_140587 | NW_004516264.1 | Scaffold913 | 140587                  | TT                              | CC              | 1946985213               |
| SNP_P4_148403_140658 | NW_004516264.1 | Scaffold913 | 140658                  | GG                              | AA              | 1946985214               |
| SNP_P4_148405_140861 | NW_004516264.1 | Scaffold913 | 140861                  | AA                              | GG              | 1946985215               |
| SNP_P4_148406_140862 | NW_004516264.1 | Scaffold913 | 140862                  | TT                              | GG              | 1946985216               |
| SNP_P4_148407_140863 | NW_004516264.1 | Scaffold913 | 140863                  | GG                              | AA              | 1946985218               |
| SNP_P4_148408_140893 | NW_004516264.1 | Scaffold913 | 140893                  | TT                              | CC              | 1946985220               |
| SNP_P4_148409_140908 | NW_004516264.1 | Scaffold913 | 140908                  | GG                              | AA              | 1946985222               |
| SNP_P4_148410_140909 | NW_004516264.1 | Scaffold913 | 140909                  | CC                              | TT              | 1946985224               |



| SNPs IDs             | Chromosome IDs | Chromosomes | Physical positions (bp) | CDC Frontier (Reference genome) | (ILWC46 & LPNB) | NCBI SNPdb Accession IDs |
|----------------------|----------------|-------------|-------------------------|---------------------------------|-----------------|--------------------------|
| SNP_P4_148411_140925 | NW_004516264.1 | Scaffold913 | 140925                  | GG                              | AA              | 1946985226               |
| SNP_P4_148412_140931 | NW_004516264.1 | Scaffold913 | 140931                  | GG                              | AA              | 1946985228               |
| SNP_P4_148413_140989 | NW_004516264.1 | Scaffold913 | 140989                  | AA                              | GG              | 1946985230               |
| SNP_P4_148414_141018 | NW_004516264.1 | Scaffold913 | 141018                  | GG                              | AA              | 1946985233               |
| SNP_P4_148415_141045 | NW_004516264.1 | Scaffold913 | 141045                  | AA                              | TT              | 1946985235               |
| SNP_P4_148416_141049 | NW_004516264.1 | Scaffold913 | 141049                  | AA                              | TT              | 1946985237               |
| SNP_P4_148417_141055 | NW_004516264.1 | Scaffold913 | 141055                  | AA                              | TT              | 1946985239               |
| SNP_P4_148418_141101 | NW_004516264.1 | Scaffold913 | 141101                  | AA                              | GG              | 1946985242               |
| SNP_P4_148419_141103 | NW_004516264.1 | Scaffold913 | 141103                  | CC                              | TT              | 1946985244               |
| SNP_P4_148420_141134 | NW_004516264.1 | Scaffold913 | 141134                  | TT                              | AA              | 1946985246               |
| SNP_P4_148421_141145 | NW_004516264.1 | Scaffold913 | 141145                  | GG                              | AA              | 1946985248               |
| SNP_P4_148422_141147 | NW_004516264.1 | Scaffold913 | 141147                  | TT                              | AA              | 1946985250               |
| SNP_P4_148423_141154 | NW_004516264.1 | Scaffold913 | 141154                  | GG                              | AA              | 1946985252               |
| SNP_P4_148424_141171 | NW_004516264.1 | Scaffold913 | 141171                  | AA                              | GG              | 1946985254               |
| SNP_P4_148425_141263 | NW_004516264.1 | Scaffold913 | 141263                  | CC                              | GG              | 1946985256               |
| SNP_P4_148426_141271 | NW_004516264.1 | Scaffold913 | 141271                  | AA                              | GG              | 1946985258               |
| SNP_P4_148427_141457 | NW_004516264.1 | Scaffold913 | 141457                  | CC                              | TT              | 1946985261               |
| SNP_P4_148428_143824 | NW_004516264.1 | Scaffold913 | 143824                  | AA                              | GG              | 1946985263               |
| SNP_P4_148429_143829 | NW_004516264.1 | Scaffold913 | 143829                  | TT                              | GG              | 1946985265               |
| SNP_P4_148430_145607 | NW_004516264.1 | Scaffold913 | 145607                  | GG                              | AA              | 1946985267               |
| SNP_P4_148432_220023 | NW_004516264.1 | Scaffold913 | 220023                  | AA                              | GG              | 1946985269               |
| SNP_P4_148433_221954 | NW_004516264.1 | Scaffold913 | 221954                  | TT                              | CC              | 1946985272               |
| SNP_P4_148434_230400 | NW_004516264.1 | Scaffold913 | 230400                  | AA                              | CC              | 1946985274               |
| SNP_P4_148435_230404 | NW_004516264.1 | Scaffold913 | 230404                  | TT                              | CC              | 1946985276               |
| SNP_P4_148436_230783 | NW_004516264.1 | Scaffold913 | 230783                  | TT                              | AA              | 1946985278               |
| SNP_P4_148437_230784 | NW_004516264.1 | Scaffold913 | 230784                  | TT                              | AA              | 1946985280               |
| SNP_P4_148438_230860 | NW_004516264.1 | Scaffold913 | 230860                  | CC                              | AA              | 1946985282               |
| SNP_P4_148439_231121 | NW_004516264.1 | Scaffold913 | 231121                  | TT                              | CC              | 1946985284               |
| SNP_P4_148440_251456 | NW_004516264.1 | Scaffold913 | 251456                  | GG                              | CC              | 1946985286               |
| SNP_P4_148443_251775 | NW_004516264.1 | Scaffold913 | 251775                  | GG                              | AA              | 1946985288               |
| SNP_P4_148444_251781 | NW_004516264.1 | Scaffold913 | 251781                  | AA                              | GG              | 1946985291               |
| SNP_P4_148445_251868 | NW_004516264.1 | Scaffold913 | 251868                  | CC                              | TT              | 1946985293               |
| SNP_P4_148446_251874 | NW_004516264.1 | Scaffold913 | 251874                  | AA                              | TT              | 1946985295               |
| SNP_P4_148448_252036 | NW_004516264.1 | Scaffold913 | 252036                  | AA                              | GG              | 1946985297               |
| SNP_P4_148451_269226 | NW_004516264.1 | Scaffold913 | 269226                  | GG                              | AA              | 1946985299               |
| SNP_P4_148452_275766 | NW_004516264.1 | Scaffold913 | 275766                  | TT                              | CC              | 1946985301               |
| SNP_P4_148453_275788 | NW_004516264.1 | Scaffold913 | 275788                  | CC                              | TT              | 1946985303               |
| SNP_P4_148454_276074 | NW_004516264.1 | Scaffold913 | 276074                  | AA                              | GG              | 1946985305               |
| SNP_P4_148455_276095 | NW_004516264.1 | Scaffold913 | 276095                  | AA                              | CC              | 1946985307               |
| SNP_P4_148456_276128 | NW_004516264.1 | Scaffold913 | 276128                  | AA                              | GG              | 1946985309               |
| SNP_P4_148458_283248 | NW_004516264.1 | Scaffold913 | 283248                  | AA                              | TT              | 1946985311               |
| SNP_P4_148459_283469 | NW_004516264.1 | Scaffold913 | 283469                  | AA                              | GG              | 1946985313               |

| SNPs IDs             | Chromosome IDs | Chromosomes | Physical positions (bp) | CDC Frontier (Reference genome) | (ILWC46 & LPNB) | NCBI SNPdb Accession IDs |
|----------------------|----------------|-------------|-------------------------|---------------------------------|-----------------|--------------------------|
| SNP_P4_148460_304682 | NW_004516264.1 | Scaffold913 | 304682                  | AA                              | CC              | 1946985315               |
| SNP_P4_148461_304686 | NW_004516264.1 | Scaffold913 | 304686                  | TT                              | GG              | 1946985317               |
| SNP_P4_148462_304700 | NW_004516264.1 | Scaffold913 | 304700                  | TT                              | CC              | 1946985319               |
| SNP_P4_148463_304706 | NW_004516264.1 | Scaffold913 | 304706                  | TT                              | CC              | 1946985321               |
| SNP_P4_148464_304823 | NW_004516264.1 | Scaffold913 | 304823                  | GG                              | AA              | 1946985323               |
| SNP_P4_148465_306028 | NW_004516264.1 | Scaffold913 | 306028                  | CC                              | TT              | 1946985325               |
| SNP_P4_148466_306344 | NW_004516264.1 | Scaffold913 | 306344                  | TT                              | CC              | 1946985327               |
| SNP_P4_148467_306357 | NW_004516264.1 | Scaffold913 | 306357                  | TT                              | CC              | 1946985329               |
| SNP_P4_148468_306360 | NW_004516264.1 | Scaffold913 | 306360                  | GG                              | AA              | 1946985331               |
| SNP_P4_148469_306372 | NW_004516264.1 | Scaffold913 | 306372                  | TT                              | GG              | 1946985333               |
| SNP_P4_148470_306407 | NW_004516264.1 | Scaffold913 | 306407                  | TT                              | CC              | 1946985335               |
| SNP_P4_148471_310132 | NW_004516264.1 | Scaffold913 | 310132                  | TT                              | CC              | 1946985337               |
| SNP_P4_148472_310138 | NW_004516264.1 | Scaffold913 | 310138                  | CC                              | GG              | 1946985340               |
| SNP_P4_148473_310149 | NW_004516264.1 | Scaffold913 | 310149                  | AA                              | CC              | 1946985342               |
| SNP_P4_148474_310156 | NW_004516264.1 | Scaffold913 | 310156                  | GG                              | AA              | 1946985344               |
| SNP_P4_148475_318878 | NW_004516264.1 | Scaffold913 | 318878                  | CC                              | AA              | 1946985346               |
| SNP_P4_148476_319207 | NW_004516264.1 | Scaffold913 | 319207                  | CC                              | TT              | 1946985348               |
| SNP_P4_148477_323145 | NW_004516264.1 | Scaffold913 | 323145                  | CC                              | TT              | 1946985350               |
| SNP_P4_148478_324552 | NW_004516264.1 | Scaffold913 | 324552                  | TT                              | GG              | 1946985353               |
| SNP_P4_148479_328720 | NW_004516264.1 | Scaffold913 | 328720                  | AA                              | TT              | 1946985355               |
| SNP_P4_148480_352222 | NW_004516264.1 | Scaffold913 | 352222                  | AA                              | CC              | 1946985357               |
| SNP_P4_148481_372679 | NW_004516264.1 | Scaffold913 | 372679                  | AA                              | TT              | 1946985359               |
| SNP_P4_148483_396654 | NW_004516264.1 | Scaffold913 | 396654                  | AA                              | GG              | 1946985361               |
| SNP_P4_148485_4873   | NW_004516265.1 | Scaffold914 | 4873                    | TT                              | GG              | 1946985363               |
| SNP_P4_148486_4947   | NW_004516265.1 | Scaffold914 | 4947                    | TT                              | CC              | 1946985365               |
| SNP_P4_148487_6179   | NW_004516265.1 | Scaffold914 | 6179                    | TT                              | CC              | 1946985367               |
| SNP_P4_148488_6210   | NW_004516265.1 | Scaffold914 | 6210                    | TT                              | CC              | 1946985369               |
| SNP_P4_148489_8530   | NW_004516265.1 | Scaffold914 | 8530                    | CC                              | TT              | 1946985371               |
| SNP_P4_148490_17569  | NW_004516265.1 | Scaffold914 | 17569                   | AA                              | GG              | 1946985373               |
| SNP_P4_148491_20664  | NW_004516265.1 | Scaffold914 | 20664                   | TT                              | AA              | 1946985375               |
| SNP_P4_148492_20668  | NW_004516265.1 | Scaffold914 | 20668                   | GG                              | CC              | 1946985377               |
| SNP_P4_148493_20673  | NW_004516265.1 | Scaffold914 | 20673                   | CC                              | TT              | 1946985379               |
| SNP_P4_148494_20680  | NW_004516265.1 | Scaffold914 | 20680                   | AA                              | GG              | 1946985381               |
| SNP_P4_148495_20717  | NW_004516265.1 | Scaffold914 | 20717                   | AA                              | TT              | 1946985383               |
| SNP_P4_148496_20738  | NW_004516265.1 | Scaffold914 | 20738                   | AA                              | GG              | 1946985385               |
| SNP_P4_148497_20909  | NW_004516265.1 | Scaffold914 | 20909                   | TT                              | CC              | 1946985387               |
| SNP_P4_148498_22407  | NW_004516265.1 | Scaffold914 | 22407                   | TT                              | CC              | 1946985389               |
| SNP_P4_148499_26777  | NW_004516265.1 | Scaffold914 | 26777                   | GG                              | TT              | 1946985391               |
| SNP_P4_148500_31748  | NW_004516265.1 | Scaffold914 | 31748                   | AA                              | GG              | 1946985393               |
| SNP_P4_148501_31754  | NW_004516265.1 | Scaffold914 | 31754                   | GG                              | AA              | 1946985395               |
| SNP_P4_148502_31763  | NW_004516265.1 | Scaffold914 | 31763                   | AA                              | CC              | 1946985397               |
| SNP_P4_148503_31814  | NW_004516265.1 | Scaffold914 | 31814                   | GG                              | AA              | 1946985399               |

| SNPs IDs             | Chromosome IDs | Chromosomes | Physical positions (bp) | CDC Frontier (Reference genome) | (ILWC46 & LPNB) | NCBI SNPdb Accession IDs |
|----------------------|----------------|-------------|-------------------------|---------------------------------|-----------------|--------------------------|
| SNP_P4_148504_32049  | NW_004516265.1 | Scaffold914 | 32049                   | CC                              | GG              | 1946985401               |
| SNP_P4_148505_32509  | NW_004516265.1 | Scaffold914 | 32509                   | CC                              | AA              | 1946985402               |
| SNP_P4_148506_32720  | NW_004516265.1 | Scaffold914 | 32720                   | AA                              | GG              | 1946985405               |
| SNP_P4_148507_41454  | NW_004516265.1 | Scaffold914 | 41454                   | AA                              | GG              | 1946985407               |
| SNP_P4_148508_41459  | NW_004516265.1 | Scaffold914 | 41459                   | TT                              | CC              | 1946985409               |
| SNP_P4_148509_41766  | NW_004516265.1 | Scaffold914 | 41766                   | CC                              | TT              | 1946985411               |
| SNP_P4_148510_41854  | NW_004516265.1 | Scaffold914 | 41854                   | CC                              | TT              | 1946985413               |
| SNP_P4_148511_43051  | NW_004516265.1 | Scaffold914 | 43051                   | TT                              | AA              | 1946985415               |
| SNP_P4_148512_103814 | NW_004516265.1 | Scaffold914 | 103814                  | TT                              | GG              | 1946985417               |
| SNP_P4_148514_131516 | NW_004516265.1 | Scaffold914 | 131516                  | AA                              | GG              | 1946985419               |
| SNP_P4_148515_131547 | NW_004516265.1 | Scaffold914 | 131547                  | AA                              | GG              | 1946985421               |
| SNP_P4_148516_131589 | NW_004516265.1 | Scaffold914 | 131589                  | GG                              | CC              | 1946985423               |
| SNP_P4_148517_137728 | NW_004516265.1 | Scaffold914 | 137728                  | GG                              | AA              | 1946985425               |
| SNP_P4_148518_139033 | NW_004516265.1 | Scaffold914 | 139033                  | TT                              | CC              | 1946985427               |
| SNP_P4_148519_142141 | NW_004516265.1 | Scaffold914 | 142141                  | TT                              | CC              | 1946985429               |
| SNP_P4_148520_152064 | NW_004516265.1 | Scaffold914 | 152064                  | CC                              | TT              | 1946985431               |
| SNP_P4_148521_158958 | NW_004516265.1 | Scaffold914 | 158958                  | AA                              | TT              | 1946985433               |
| SNP_P4_148522_180    | NW_004516266.1 | Scaffold916 | 180                     | GG                              | AA              | 1946985435               |
| SNP_P4_148524_425    | NW_004516266.1 | Scaffold916 | 425                     | TT                              | CC              | 1946985437               |
| SNP_P4_148525_594    | NW_004516266.1 | Scaffold916 | 594                     | GG                              | AA              | 1946985439               |
| SNP_P4_148526_708    | NW_004516266.1 | Scaffold916 | 708                     | TT                              | CC              | 1946985441               |
| SNP_P4_148527_2178   | NW_004516266.1 | Scaffold916 | 2178                    | AA                              | GG              | 1946985443               |
| SNP_P4_148528_3203   | NW_004516266.1 | Scaffold916 | 3203                    | GG                              | TT              | 1946985445               |
| SNP_P4_148532_3962   | NW_004516266.1 | Scaffold916 | 3962                    | GG                              | AA              | 1946985447               |
| SNP_P4_148533_4026   | NW_004516266.1 | Scaffold916 | 4026                    | CC                              | GG              | 1946985449               |
| SNP_P4_148534_4188   | NW_004516266.1 | Scaffold916 | 4188                    | CC                              | TT              | 1946985451               |
| SNP_P4_148535_4225   | NW_004516266.1 | Scaffold916 | 4225                    | GG                              | AA              | 1946985453               |
| SNP_P4_148536_4266   | NW_004516266.1 | Scaffold916 | 4266                    | AA                              | GG              | 1946985455               |
| SNP_P4_148538_4440   | NW_004516266.1 | Scaffold916 | 4440                    | GG                              | TT              | 1946985457               |
| SNP_P4_148539_4503   | NW_004516266.1 | Scaffold916 | 4503                    | TT                              | AA              | 1946985459               |
| SNP_P4_148540_4582   | NW_004516266.1 | Scaffold916 | 4582                    | TT                              | CC              | 1946985461               |
| SNP_P4_148541_4671   | NW_004516266.1 | Scaffold916 | 4671                    | CC                              | TT              | 1946985463               |
| SNP_P4_148542_4710   | NW_004516266.1 | Scaffold916 | 4710                    | TT                              | GG              | 1946985466               |
| SNP_P4_148543_4719   | NW_004516266.1 | Scaffold916 | 4719                    | GG                              | AA              | 1946985468               |
| SNP_P4_148546_4908   | NW_004516266.1 | Scaffold916 | 4908                    | GG                              | AA              | 1946985470               |
| SNP_P4_148547_4935   | NW_004516266.1 | Scaffold916 | 4935                    | AA                              | GG              | 1946985472               |
| SNP_P4_148548_5095   | NW_004516266.1 | Scaffold916 | 5095                    | CC                              | TT              | 1946985473               |
| SNP_P4_148549_5162   | NW_004516266.1 | Scaffold916 | 5162                    | GG                              | CC              | 1946985476               |
| SNP_P4_148550_5286   | NW_004516266.1 | Scaffold916 | 5286                    | TT                              | GG              | 1946985478               |
| SNP_P4_148552_5353   | NW_004516266.1 | Scaffold916 | 5353                    | CC                              | TT              | 1946985480               |
| SNP_P4_148553_5387   | NW_004516266.1 | Scaffold916 | 5387                    | AA                              | GG              | 1946985482               |
| SNP_P4_148554_7654   | NW_004516266.1 | Scaffold916 | 7654                    | CC                              | AA              | 1946985484               |

| SNPs IDs           | Chromosome IDs | Chromosomes | Physical positions (bp) | CDC Frontier (Reference genome) | (ILWC46 & LPNB) | NCBI SNPdb Accession IDs |
|--------------------|----------------|-------------|-------------------------|---------------------------------|-----------------|--------------------------|
| SNP_P4_148555_7675 | NW_004516266.1 | Scaffold916 | 7675                    | TT                              | CC              | 1946985486               |
| SNP_P4_148556_7680 | NW_004516266.1 | Scaffold916 | 7680                    | AA                              | TT              | 1946985488               |
| SNP_P4_148557_7744 | NW_004516266.1 | Scaffold916 | 7744                    | TT                              | AA              | 1946985490               |
| SNP_P4_148559_7834 | NW_004516266.1 | Scaffold916 | 7834                    | AA                              | GG              | 1946985492               |
| SNP_P4_148561_7938 | NW_004516266.1 | Scaffold916 | 7938                    | AA                              | GG              | 1946985494               |
| SNP_P4_148562_8073 | NW_004516266.1 | Scaffold916 | 8073                    | CC                              | AA              | 1946985496               |
| SNP_P4_148563_8105 | NW_004516266.1 | Scaffold916 | 8105                    | CC                              | TT              | 1946985498               |
| SNP_P4_148564_8176 | NW_004516266.1 | Scaffold916 | 8176                    | CC                              | TT              | 1946985500               |
| SNP_P4_148567_8323 | NW_004516266.1 | Scaffold916 | 8323                    | GG                              | AA              | 1946985502               |
| SNP_P4_148568_8349 | NW_004516266.1 | Scaffold916 | 8349                    | GG                              | AA              | 1946985504               |
| SNP_P4_148569_8568 | NW_004516266.1 | Scaffold916 | 8568                    | TT                              | CC              | 1946985506               |
| SNP_P4_148570_8570 | NW_004516266.1 | Scaffold916 | 8570                    | GG                              | AA              | 1946985508               |
| SNP_P4_148571_8580 | NW_004516266.1 | Scaffold916 | 8580                    | TT                              | AA              | 1946985511               |
| SNP_P4_148572_8583 | NW_004516266.1 | Scaffold916 | 8583                    | TT                              | CC              | 1946985513               |
| SNP_P4_148573_8605 | NW_004516266.1 | Scaffold916 | 8605                    | TT                              | AA              | 1946985515               |
| SNP_P4_148574_8608 | NW_004516266.1 | Scaffold916 | 8608                    | TT                              | AA              | 1946985517               |
| SNP_P4_148575_8684 | NW_004516266.1 | Scaffold916 | 8684                    | CC                              | TT              | 1946985520               |
| SNP_P4_148576_8713 | NW_004516266.1 | Scaffold916 | 8713                    | TT                              | CC              | 1946985522               |
| SNP_P4_148577_8725 | NW_004516266.1 | Scaffold916 | 8725                    | AA                              | TT              | 1946985524               |
| SNP_P4_148578_8738 | NW_004516266.1 | Scaffold916 | 8738                    | TT                              | AA              | 1946985526               |
| SNP_P4_148579_8745 | NW_004516266.1 | Scaffold916 | 8745                    | TT                              | CC              | 1946985529               |
| SNP_P4_148580_8746 | NW_004516266.1 | Scaffold916 | 8746                    | TT                              | AA              | 1946985531               |
| SNP_P4_148581_8747 | NW_004516266.1 | Scaffold916 | 8747                    | AA                              | TT              | 1946985533               |
| SNP_P4_148582_8752 | NW_004516266.1 | Scaffold916 | 8752                    | TT                              | AA              | 1946985535               |
| SNP_P4_148583_8753 | NW_004516266.1 | Scaffold916 | 8753                    | TT                              | AA              | 1946985537               |
| SNP_P4_148584_8800 | NW_004516266.1 | Scaffold916 | 8800                    | CC                              | AA              | 1946985539               |
| SNP_P4_148585_8802 | NW_004516266.1 | Scaffold916 | 8802                    | CC                              | TT              | 1946985541               |
| SNP_P4_148586_8806 | NW_004516266.1 | Scaffold916 | 8806                    | GG                              | AA              | 1946985543               |
| SNP_P4_148587_8819 | NW_004516266.1 | Scaffold916 | 8819                    | CC                              | GG              | 1946985545               |
| SNP_P4_148588_8820 | NW_004516266.1 | Scaffold916 | 8820                    | AA                              | GG              | 1946985547               |
| SNP_P4_148589_8827 | NW_004516266.1 | Scaffold916 | 8827                    | GG                              | AA              | 1946985550               |
| SNP_P4_148590_8833 | NW_004516266.1 | Scaffold916 | 8833                    | GG                              | TT              | 1946985552               |
| SNP_P4_148591_8919 | NW_004516266.1 | Scaffold916 | 8919                    | CC                              | TT              | 1946985554               |
| SNP_P4_148592_8977 | NW_004516266.1 | Scaffold916 | 8977                    | CC                              | AA              | 1946985556               |
| SNP_P4_148593_8979 | NW_004516266.1 | Scaffold916 | 8979                    | AA                              | CC              | 1946985558               |
| SNP_P4_148594_8982 | NW_004516266.1 | Scaffold916 | 8982                    | AA                              | TT              | 1946985561               |
| SNP_P4_148595_9100 | NW_004516266.1 | Scaffold916 | 9100                    | GG                              | CC              | 1946985563               |
| SNP_P4_148597_9298 | NW_004516266.1 | Scaffold916 | 9298                    | CC                              | AA              | 1946985565               |
| SNP_P4_148598_9433 | NW_004516266.1 | Scaffold916 | 9433                    | CC                              | TT              | 1946985567               |
| SNP_P4_148599_9470 | NW_004516266.1 | Scaffold916 | 9470                    | TT                              | CC              | 1946985569               |
| SNP_P4_148601_9538 | NW_004516266.1 | Scaffold916 | 9538                    | AA                              | CC              | 1946985571               |
| SNP_P4_148602_9554 | NW_004516266.1 | Scaffold916 | 9554                    | TT                              | CC              | 1946985573               |

| SNPs IDs             | Chromosome IDs | Chromosomes | Physical positions (bp) | CDC Frontier (Reference genome) | (ILWC46 & LPNB) | NCBI SNPdb Accession IDs |
|----------------------|----------------|-------------|-------------------------|---------------------------------|-----------------|--------------------------|
| SNP_P4_148603_9593   | NW_004516266.1 | Scaffold916 | 9593                    | AA                              | GG              | 1946985575               |
| SNP_P4_148604_9621   | NW_004516266.1 | Scaffold916 | 9621                    | AA                              | GG              | 1946985577               |
| SNP_P4_148605_9638   | NW_004516266.1 | Scaffold916 | 9638                    | TT                              | CC              | 1946985579               |
| SNP_P4_148606_9700   | NW_004516266.1 | Scaffold916 | 9700                    | CC                              | TT              | 1946985581               |
| SNP_P4_148607_9708   | NW_004516266.1 | Scaffold916 | 9708                    | AA                              | GG              | 1946985583               |
| SNP_P4_148608_9760   | NW_004516266.1 | Scaffold916 | 9760                    | GG                              | AA              | 1946985585               |
| SNP_P4_148609_9806   | NW_004516266.1 | Scaffold916 | 9806                    | AA                              | GG              | 1946985587               |
| SNP_P4_148610_9862   | NW_004516266.1 | Scaffold916 | 9862                    | TT                              | CC              | 1946985589               |
| SNP_P4_148611_9881   | NW_004516266.1 | Scaffold916 | 9881                    | TT                              | CC              | 1946985591               |
| SNP_P4_148612_9882   | NW_004516266.1 | Scaffold916 | 9882                    | TT                              | CC              | 1946985593               |
| SNP_P4_148614_10038  | NW_004516266.1 | Scaffold916 | 10038                   | TT                              | AA              | 1946985595               |
| SNP_P4_148615_10049  | NW_004516266.1 | Scaffold916 | 10049                   | CC                              | TT              | 1946985597               |
| SNP_P4_148616_18593  | NW_004516266.1 | Scaffold916 | 18593                   | TT                              | CC              | 1946985599               |
| SNP_P4_148617_18676  | NW_004516266.1 | Scaffold916 | 18676                   | AA                              | CC              | 1946985601               |
| SNP_P4_148618_19085  | NW_004516266.1 | Scaffold916 | 19085                   | TT                              | AA              | 1946985603               |
| SNP_P4_148619_21502  | NW_004516266.1 | Scaffold916 | 21502                   | GG                              | TT              | 1946985605               |
| SNP_P4_148620_31658  | NW_004516266.1 | Scaffold916 | 31658                   | TT                              | CC              | 1946985607               |
| SNP_P4_148621_90797  | NW_004516266.1 | Scaffold916 | 90797                   | AA                              | GG              | 1946985609               |
| SNP_P4_148622_99625  | NW_004516266.1 | Scaffold916 | 99625                   | TT                              | CC              | 1946985611               |
| SNP_P4_148623_99628  | NW_004516266.1 | Scaffold916 | 99628                   | CC                              | TT              | 1946985613               |
| SNP_P4_148624_99965  | NW_004516266.1 | Scaffold916 | 99965                   | CC                              | GG              | 1946985615               |
| SNP_P4_148625_99980  | NW_004516266.1 | Scaffold916 | 99980                   | GG                              | AA              | 1946985617               |
| SNP_P4_148626_99981  | NW_004516266.1 | Scaffold916 | 99981                   | GG                              | AA              | 1946985619               |
| SNP_P4_148627_100790 | NW_004516266.1 | Scaffold916 | 100790                  | GG                              | TT              | 1946985621               |
| SNP_P4_148628_101412 | NW_004516266.1 | Scaffold916 | 101412                  | TT                              | AA              | 1946985623               |
| SNP_P4_148629_101419 | NW_004516266.1 | Scaffold916 | 101419                  | TT                              | CC              | 1946985625               |
| SNP_P4_148630_101459 | NW_004516266.1 | Scaffold916 | 101459                  | TT                              | AA              | 1946985627               |
| SNP_P4_148631_104496 | NW_004516266.1 | Scaffold916 | 104496                  | TT                              | AA              | 1946985629               |
| SNP_P4_148632_105293 | NW_004516266.1 | Scaffold916 | 105293                  | TT                              | CC              | 1946985631               |
| SNP_P4_148633_108146 | NW_004516266.1 | Scaffold916 | 108146                  | GG                              | AA              | 1946985633               |
| SNP_P4_148634_108155 | NW_004516266.1 | Scaffold916 | 108155                  | GG                              | AA              | 1946985635               |
| SNP_P4_148635_108169 | NW_004516266.1 | Scaffold916 | 108169                  | CC                              | AA              | 1946985638               |
| SNP_P4_148637_111188 | NW_004516266.1 | Scaffold916 | 111188                  | TT                              | AA              | 1946985640               |
| SNP_P4_148638_114856 | NW_004516266.1 | Scaffold916 | 114856                  | TT                              | CC              | 1946985642               |
| SNP_P4_148639_115128 | NW_004516266.1 | Scaffold916 | 115128                  | GG                              | CC              | 1946985644               |
| SNP_P4_148640_117863 | NW_004516266.1 | Scaffold916 | 117863                  | CC                              | AA              | 1946985646               |
| SNP_P4_148641_117954 | NW_004516266.1 | Scaffold916 | 117954                  | TT                              | AA              | 1946985648               |
| SNP_P4_148642_118125 | NW_004516266.1 | Scaffold916 | 118125                  | TT                              | GG              | 1946985650               |
| SNP_P4_148643_118326 | NW_004516266.1 | Scaffold916 | 118326                  | CC                              | TT              | 1946985651               |
| SNP_P4_148644_118342 | NW_004516266.1 | Scaffold916 | 118342                  | TT                              | GG              | 1946985653               |
| SNP_P4_148645_126610 | NW_004516266.1 | Scaffold916 | 126610                  | TT                              | CC              | 1946985655               |
| SNP_P4_148646_126630 | NW_004516266.1 | Scaffold916 | 126630                  | AA                              | TT              | 1946985657               |

| SNPs IDs             | Chromosome IDs | Chromosomes | Physical positions (bp) | CDC Frontier (Reference genome) | (ILWC46 & LPNB) | NCBI SNPdb Accession IDs |
|----------------------|----------------|-------------|-------------------------|---------------------------------|-----------------|--------------------------|
| SNP_P4_148647_134584 | NW_004516266.1 | Scaffold916 | 134584                  | CC                              | AA              | 1946985659               |
| SNP_P4_148649_134956 | NW_004516266.1 | Scaffold916 | 134956                  | TT                              | CC              | 1946985662               |
| SNP_P4_148650_166341 | NW_004516266.1 | Scaffold916 | 166341                  | CC                              | TT              | 1946985664               |
| SNP_P4_148651_166342 | NW_004516266.1 | Scaffold916 | 166342                  | TT                              | CC              | 1946985665               |
| SNP_P4_148652_166353 | NW_004516266.1 | Scaffold916 | 166353                  | CC                              | TT              | 1946985667               |
| SNP_P4_148653_166399 | NW_004516266.1 | Scaffold916 | 166399                  | TT                              | GG              | 1946985669               |
| SNP_P4_148654_166416 | NW_004516266.1 | Scaffold916 | 166416                  | GG                              | AA              | 1946985672               |
| SNP_P4_148655_170303 | NW_004516266.1 | Scaffold916 | 170303                  | GG                              | AA              | 1946985674               |
| SNP_P4_148656_170609 | NW_004516266.1 | Scaffold916 | 170609                  | CC                              | TT              | 1946985676               |
| SNP_P4_148657_177485 | NW_004516266.1 | Scaffold916 | 177485                  | AA                              | GG              | 1946985678               |
| SNP_P4_148658_177802 | NW_004516266.1 | Scaffold916 | 177802                  | TT                              | CC              | 1946985680               |
| SNP_P4_148659_178103 | NW_004516266.1 | Scaffold916 | 178103                  | AA                              | GG              | 1946985682               |
| SNP_P4_148660_178106 | NW_004516266.1 | Scaffold916 | 178106                  | TT                              | AA              | 1946985684               |
| SNP_P4_148661_178107 | NW_004516266.1 | Scaffold916 | 178107                  | TT                              | AA              | 1946985686               |
| SNP_P4_148662_180943 | NW_004516266.1 | Scaffold916 | 180943                  | AA                              | GG              | 1946985688               |
| SNP_P4_148663_186982 | NW_004516266.1 | Scaffold916 | 186982                  | CC                              | TT              | 1946985690               |
| SNP_P4_148664_187928 | NW_004516266.1 | Scaffold916 | 187928                  | AA                              | TT              | 1946985692               |
| SNP_P4_148665_192252 | NW_004516266.1 | Scaffold916 | 192252                  | GG                              | AA              | 1946985694               |
| SNP_P4_148666_202298 | NW_004516266.1 | Scaffold916 | 202298                  | TT                              | GG              | 1946985696               |
| SNP_P4_148667_202305 | NW_004516266.1 | Scaffold916 | 202305                  | GG                              | CC              | 1946985698               |
| SNP_P4_148668_215366 | NW_004516266.1 | Scaffold916 | 215366                  | TT                              | CC              | 1946985700               |
| SNP_P4_148669_247661 | NW_004516266.1 | Scaffold916 | 247661                  | GG                              | AA              | 1946985702               |
| SNP_P4_148671_256398 | NW_004516266.1 | Scaffold916 | 256398                  | TT                              | GG              | 1946985704               |
| SNP_P4_148672_281527 | NW_004516266.1 | Scaffold916 | 281527                  | AA                              | TT              | 1946985706               |
| SNP_P4_148673_282441 | NW_004516266.1 | Scaffold916 | 282441                  | TT                              | CC              | 1946985708               |
| SNP_P4_148674_282444 | NW_004516266.1 | Scaffold916 | 282444                  | AA                              | CC              | 1946985710               |
| SNP_P4_148675_284079 | NW_004516266.1 | Scaffold916 | 284079                  | CC                              | AA              | 1946985711               |
| SNP_P4_148676_324224 | NW_004516266.1 | Scaffold916 | 324224                  | CC                              | AA              | 1946985713               |
| SNP_P4_148677_328929 | NW_004516266.1 | Scaffold916 | 328929                  | AA                              | CC              | 1946985715               |
| SNP_P4_148678_335665 | NW_004516266.1 | Scaffold916 | 335665                  | GG                              | CC              | 1946985717               |
| SNP_P4_148679_342740 | NW_004516266.1 | Scaffold916 | 342740                  | AA                              | CC              | 1946985719               |
| SNP_P4_148680_362345 | NW_004516266.1 | Scaffold916 | 362345                  | CC                              | TT              | 1946985721               |
| SNP_P4_148682_376947 | NW_004516266.1 | Scaffold916 | 376947                  | TT                              | GG              | 1946985723               |
| SNP_P4_148685_499242 | NW_004516266.1 | Scaffold916 | 499242                  | TT                              | AA              | 1946985725               |
| SNP_P4_148687_499514 | NW_004516266.1 | Scaffold916 | 499514                  | GG                              | CC              | 1946985727               |
| SNP_P4_148688_556037 | NW_004516266.1 | Scaffold916 | 556037                  | TT                              | AA              | 1946985729               |
| SNP_P4_148689_556051 | NW_004516266.1 | Scaffold916 | 556051                  | TT                              | GG              | 1946985731               |
| SNP_P4_148690_563710 | NW_004516266.1 | Scaffold916 | 563710                  | GG                              | AA              | 1946985733               |
| SNP_P4_148691_567500 | NW_004516266.1 | Scaffold916 | 567500                  | GG                              | AA              | 1946985735               |
| SNP_P4_148692_5240   | NW_004516268.1 | Scaffold918 | 5240                    | TT                              | AA              | 1946985736               |
| SNP_P4_148693_13914  | NW_004516268.1 | Scaffold918 | 13914                   | TT                              | CC              | 1946985738               |
| SNP_P4_148694_13926  | NW_004516268.1 | Scaffold918 | 13926                   | TT                              | AA              | 1946985740               |

| SNPs IDs            | Chromosome IDs | Chromosomes | Physical positions (bp) | CDC Frontier (Reference genome) | (ILWC46 & LPNB) | NCBI SNPdb Accession IDs |
|---------------------|----------------|-------------|-------------------------|---------------------------------|-----------------|--------------------------|
| SNP_P4_148695_13947 | NW_004516268.1 | Scaffold918 | 13947                   | GG                              | AA              | 1946985742               |
| SNP_P4_148696_20715 | NW_004516268.1 | Scaffold918 | 20715                   | CC                              | TT              | 1946985744               |
| SNP_P4_148697_34767 | NW_004516268.1 | Scaffold918 | 34767                   | GG                              | AA              | 1946985746               |
| SNP_P4_148699_49319 | NW_004516268.1 | Scaffold918 | 49319                   | AA                              | CC              | 1946985748               |
| SNP_P4_148700_12935 | NW_004516269.1 | Scaffold919 | 12935                   | TT                              | CC              | 1946985750               |
| SNP_P4_148701_12976 | NW_004516269.1 | Scaffold919 | 12976                   | TT                              | AA              | 1946985752               |
| SNP_P4_148702_12982 | NW_004516269.1 | Scaffold919 | 12982                   | AA                              | GG              | 1946985754               |
| SNP_P4_148703_12996 | NW_004516269.1 | Scaffold919 | 12996                   | AA                              | GG              | 1946985756               |
| SNP_P4_148704_13003 | NW_004516269.1 | Scaffold919 | 13003                   | AA                              | GG              | 1946985758               |
| SNP_P4_148705_13008 | NW_004516269.1 | Scaffold919 | 13008                   | AA                              | GG              | 1946985760               |
| SNP_P4_148706_13220 | NW_004516269.1 | Scaffold919 | 13220                   | GG                              | TT              | 1946985762               |
| SNP_P4_148707_13221 | NW_004516269.1 | Scaffold919 | 13221                   | TT                              | CC              | 1946985764               |
| SNP_P4_148708_13254 | NW_004516269.1 | Scaffold919 | 13254                   | AA                              | GG              | 1946985766               |
| SNP_P4_148709_13272 | NW_004516269.1 | Scaffold919 | 13272                   | GG                              | AA              | 1946985768               |
| SNP_P4_148710_13365 | NW_004516269.1 | Scaffold919 | 13365                   | GG                              | AA              | 1946985770               |
| SNP_P4_148711_13410 | NW_004516269.1 | Scaffold919 | 13410                   | TT                              | CC              | 1946985772               |
| SNP_P4_148712_13416 | NW_004516269.1 | Scaffold919 | 13416                   | AA                              | TT              | 1946985774               |
| SNP_P4_148713_13437 | NW_004516269.1 | Scaffold919 | 13437                   | GG                              | AA              | 1946985776               |
| SNP_P4_148714_13441 | NW_004516269.1 | Scaffold919 | 13441                   | AA                              | GG              | 1946985778               |
| SNP_P4_148715_13496 | NW_004516269.1 | Scaffold919 | 13496                   | GG                              | CC              | 1946985780               |
| SNP_P4_148716_13886 | NW_004516269.1 | Scaffold919 | 13886                   | TT                              | CC              | 1946985782               |
| SNP_P4_148717_13889 | NW_004516269.1 | Scaffold919 | 13889                   | GG                              | AA              | 1946985784               |
| SNP_P4_148718_14694 | NW_004516269.1 | Scaffold919 | 14694                   | CC                              | AA              | 1946985786               |
| SNP_P4_148719_24151 | NW_004516269.1 | Scaffold919 | 24151                   | GG                              | TT              | 1946985788               |
| SNP_P4_148720_24194 | NW_004516269.1 | Scaffold919 | 24194                   | GG                              | AA              | 1946985789               |
| SNP_P4_148721_54776 | NW_004516269.1 | Scaffold919 | 54776                   | GG                              | TT              | 1946985791               |
| SNP_P4_148722_54781 | NW_004516269.1 | Scaffold919 | 54781                   | AA                              | TT              | 1946985793               |
| SNP_P4_148723_54790 | NW_004516269.1 | Scaffold919 | 54790                   | CC                              | AA              | 1946985796               |
| SNP_P4_148724_55383 | NW_004516269.1 | Scaffold919 | 55383                   | TT                              | CC              | 1946985798               |
| SNP_P4_148725_70368 | NW_004516269.1 | Scaffold919 | 70368                   | CC                              | TT              | 1946985800               |
| SNP_P4_148727_73642 | NW_004516269.1 | Scaffold919 | 73642                   | TT                              | CC              | 1946985802               |
| SNP_P4_148728_73713 | NW_004516269.1 | Scaffold919 | 73713                   | CC                              | AA              | 1946985804               |
| SNP_P4_148730_73753 | NW_004516269.1 | Scaffold919 | 73753                   | CC                              | TT              | 1946985806               |
| SNP_P4_148732_85033 | NW_004516269.1 | Scaffold919 | 85033                   | AA                              | GG              | 1946985808               |
| SNP_P4_148733_85126 | NW_004516269.1 | Scaffold919 | 85126                   | TT                              | CC              | 1946985811               |
| SNP_P4_148734_85131 | NW_004516269.1 | Scaffold919 | 85131                   | CC                              | TT              | 1946985813               |
| SNP_P4_148735_85144 | NW_004516269.1 | Scaffold919 | 85144                   | GG                              | AA              | 1946985815               |
| SNP_P4_148736_85150 | NW_004516269.1 | Scaffold919 | 85150                   | GG                              | AA              | 1946985817               |
| SNP_P4_148737_94032 | NW_004516269.1 | Scaffold919 | 94032                   | CC                              | GG              | 1946985819               |
| SNP_P4_148738_94141 | NW_004516269.1 | Scaffold919 | 94141                   | AA                              | TT              | 1946985821               |
| SNP_P4_148739_94142 | NW_004516269.1 | Scaffold919 | 94142                   | TT                              | GG              | 1946985823               |
| SNP_P4_148740_94425 | NW_004516269.1 | Scaffold919 | 94425                   | AA                              | GG              | 1946985825               |

| SNPs IDs             | Chromosome IDs | Chromosomes | Physical positions (bp) | CDC Frontier (Reference genome) | (ILWC46 & LPNB) | NCBI SNPdb Accession IDs |
|----------------------|----------------|-------------|-------------------------|---------------------------------|-----------------|--------------------------|
| SNP_P4_148741_94442  | NW_004516269.1 | Scaffold919 | 94442                   | TT                              | CC              | 1946985826               |
| SNP_P4_148742_94453  | NW_004516269.1 | Scaffold919 | 94453                   | GG                              | AA              | 1946985828               |
| SNP_P4_148743_97994  | NW_004516269.1 | Scaffold919 | 97994                   | GG                              | TT              | 1946985830               |
| SNP_P4_148744_98001  | NW_004516269.1 | Scaffold919 | 98001                   | TT                              | AA              | 1946985832               |
| SNP_P4_148745_113731 | NW_004516269.1 | Scaffold919 | 113731                  | GG                              | AA              | 1946985834               |
| SNP_P4_148746_113935 | NW_004516269.1 | Scaffold919 | 113935                  | AA                              | GG              | 1946985836               |
| SNP_P4_148747_113946 | NW_004516269.1 | Scaffold919 | 113946                  | CC                              | GG              | 1946985838               |
| SNP_P4_148748_114007 | NW_004516269.1 | Scaffold919 | 114007                  | AA                              | GG              | 1946985840               |
| SNP_P4_148749_114021 | NW_004516269.1 | Scaffold919 | 114021                  | TT                              | CC              | 1946985842               |
| SNP_P4_148750_114410 | NW_004516269.1 | Scaffold919 | 114410                  | AA                              | GG              | 1946985844               |
| SNP_P4_148751_114684 | NW_004516269.1 | Scaffold919 | 114684                  | GG                              | AA              | 1946985846               |
| SNP_P4_148752_114967 | NW_004516269.1 | Scaffold919 | 114967                  | AA                              | GG              | 1946985848               |
| SNP_P4_148753_115023 | NW_004516269.1 | Scaffold919 | 115023                  | GG                              | AA              | 1946985850               |
| SNP_P4_148754_115057 | NW_004516269.1 | Scaffold919 | 115057                  | CC                              | TT              | 1946985852               |
| SNP_P4_148755_115127 | NW_004516269.1 | Scaffold919 | 115127                  | TT                              | CC              | 1946985854               |
| SNP_P4_148756_115139 | NW_004516269.1 | Scaffold919 | 115139                  | TT                              | GG              | 1946985856               |
| SNP_P4_148757_115152 | NW_004516269.1 | Scaffold919 | 115152                  | AA                              | GG              | 1946985858               |
| SNP_P4_148758_115180 | NW_004516269.1 | Scaffold919 | 115180                  | GG                              | TT              | 1946985860               |
| SNP_P4_148759_115343 | NW_004516269.1 | Scaffold919 | 115343                  | AA                              | GG              | 1946985862               |
| SNP_P4_148760_116221 | NW_004516269.1 | Scaffold919 | 116221                  | TT                              | CC              | 1946985864               |
| SNP_P4_148761_116261 | NW_004516269.1 | Scaffold919 | 116261                  | TT                              | CC              | 1946985866               |
| SNP_P4_148762_116323 | NW_004516269.1 | Scaffold919 | 116323                  | CC                              | TT              | 1946985868               |
| SNP_P4_148763_116537 | NW_004516269.1 | Scaffold919 | 116537                  | CC                              | GG              | 1946985870               |
| SNP_P4_148764_116588 | NW_004516269.1 | Scaffold919 | 116588                  | TT                              | CC              | 1946985871               |
| SNP_P4_148765_116590 | NW_004516269.1 | Scaffold919 | 116590                  | CC                              | TT              | 1946985873               |
| SNP_P4_148766_116592 | NW_004516269.1 | Scaffold919 | 116592                  | AA                              | GG              | 1946985875               |
| SNP_P4_148767_122026 | NW_004516269.1 | Scaffold919 | 122026                  | GG                              | AA              | 1946985877               |
| SNP_P4_148768_137923 | NW_004516269.1 | Scaffold919 | 137923                  | TT                              | CC              | 1946985879               |
| SNP_P4_148769_137960 | NW_004516269.1 | Scaffold919 | 137960                  | CC                              | AA              | 1946985881               |
| SNP_P4_148770_149363 | NW_004516269.1 | Scaffold919 | 149363                  | CC                              | TT              | 1946985883               |
| SNP_P4_148771_151618 | NW_004516269.1 | Scaffold919 | 151618                  | TT                              | CC              | 1946985885               |
| SNP_P4_148772_151642 | NW_004516269.1 | Scaffold919 | 151642                  | AA                              | GG              | 1946985887               |
| SNP_P4_148773_172698 | NW_004516269.1 | Scaffold919 | 172698                  | TT                              | CC              | 1946985889               |
| SNP_P4_148774_172701 | NW_004516269.1 | Scaffold919 | 172701                  | TT                              | CC              | 1946985891               |
| SNP_P4_148775_172718 | NW_004516269.1 | Scaffold919 | 172718                  | TT                              | CC              | 1946985893               |
| SNP_P4_148776_180797 | NW_004516269.1 | Scaffold919 | 180797                  | CC                              | TT              | 1946985895               |
| SNP_P4_148777_180822 | NW_004516269.1 | Scaffold919 | 180822                  | AA                              | GG              | 1946985897               |
| SNP_P4_148778_180823 | NW_004516269.1 | Scaffold919 | 180823                  | CC                              | TT              | 1946985899               |
| SNP_P4_148779_180834 | NW_004516269.1 | Scaffold919 | 180834                  | TT                              | CC              | 1946985900               |
| SNP_P4_148780_183363 | NW_004516269.1 | Scaffold919 | 183363                  | GG                              | AA              | 1946985902               |
| SNP_P4_148781_183421 | NW_004516269.1 | Scaffold919 | 183421                  | TT                              | CC              | 1946985904               |
| SNP_P4_148783_183458 | NW_004516269.1 | Scaffold919 | 183458                  | AA                              | CC              | 1946985906               |



| SNPs IDs             | Chromosome IDs | Chromosomes | Physical positions (bp) | CDC Frontier (Reference genome) | (ILWC46 & LPNB) | NCBI SNPdb Accession IDs |
|----------------------|----------------|-------------|-------------------------|---------------------------------|-----------------|--------------------------|
| SNP_P4_148784_183495 | NW_004516269.1 | Scaffold919 | 183495                  | CC                              | TT              | 1946985909               |
| SNP_P4_148785_183509 | NW_004516269.1 | Scaffold919 | 183509                  | TT                              | CC              | 1946985911               |
| SNP_P4_148786_183514 | NW_004516269.1 | Scaffold919 | 183514                  | AA                              | GG              | 1946985913               |
| SNP_P4_148787_183543 | NW_004516269.1 | Scaffold919 | 183543                  | GG                              | AA              | 1946985915               |
| SNP_P4_148788_183549 | NW_004516269.1 | Scaffold919 | 183549                  | CC                              | TT              | 1946985917               |
| SNP_P4_148789_183566 | NW_004516269.1 | Scaffold919 | 183566                  | TT                              | AA              | 1946985918               |
| SNP_P4_148790_183606 | NW_004516269.1 | Scaffold919 | 183606                  | AA                              | GG              | 1946985920               |
| SNP_P4_148791_183750 | NW_004516269.1 | Scaffold919 | 183750                  | AA                              | CC              | 1946985922               |
| SNP_P4_148792_183812 | NW_004516269.1 | Scaffold919 | 183812                  | CC                              | AA              | 1946985924               |
| SNP_P4_148793_183814 | NW_004516269.1 | Scaffold919 | 183814                  | CC                              | TT              | 1946985927               |
| SNP_P4_148794_186117 | NW_004516269.1 | Scaffold919 | 186117                  | GG                              | AA              | 1946985928               |
| SNP_P4_148795_186123 | NW_004516269.1 | Scaffold919 | 186123                  | GG                              | AA              | 1946985930               |
| SNP_P4_148796_186195 | NW_004516269.1 | Scaffold919 | 186195                  | TT                              | CC              | 1946985932               |
| SNP_P4_148797_186231 | NW_004516269.1 | Scaffold919 | 186231                  | GG                              | AA              | 1946985934               |
| SNP_P4_148798_186237 | NW_004516269.1 | Scaffold919 | 186237                  | GG                              | AA              | 1946985936               |
| SNP_P4_148799_186250 | NW_004516269.1 | Scaffold919 | 186250                  | CC                              | TT              | 1946985938               |
| SNP_P4_148800_186288 | NW_004516269.1 | Scaffold919 | 186288                  | TT                              | AA              | 1946985940               |
| SNP_P4_148801_186321 | NW_004516269.1 | Scaffold919 | 186321                  | TT                              | AA              | 1946985942               |
| SNP_P4_148802_186532 | NW_004516269.1 | Scaffold919 | 186532                  | TT                              | CC              | 1946985944               |
| SNP_P4_148803_186535 | NW_004516269.1 | Scaffold919 | 186535                  | GG                              | AA              | 1946985946               |
| SNP_P4_148804_186547 | NW_004516269.1 | Scaffold919 | 186547                  | TT                              | GG              | 1946985947               |
| SNP_P4_148805_186554 | NW_004516269.1 | Scaffold919 | 186554                  | GG                              | AA              | 1946985949               |
| SNP_P4_148806_186562 | NW_004516269.1 | Scaffold919 | 186562                  | AA                              | GG              | 1946985951               |
| SNP_P4_148807_186571 | NW_004516269.1 | Scaffold919 | 186571                  | CC                              | TT              | 1946985953               |
| SNP_P4_148808_186586 | NW_004516269.1 | Scaffold919 | 186586                  | TT                              | AA              | 1946985955               |
| SNP_P4_148809_186594 | NW_004516269.1 | Scaffold919 | 186594                  | GG                              | AA              | 1946985957               |
| SNP_P4_148810_186608 | NW_004516269.1 | Scaffold919 | 186608                  | CC                              | AA              | 1946985960               |
| SNP_P4_148811_186610 | NW_004516269.1 | Scaffold919 | 186610                  | TT                              | CC              | 1946985961               |
| SNP_P4_148812_186668 | NW_004516269.1 | Scaffold919 | 186668                  | AA                              | GG              | 1946985963               |
| SNP_P4_148813_186671 | NW_004516269.1 | Scaffold919 | 186671                  | TT                              | CC              | 1946985965               |
| SNP_P4_148814_187093 | NW_004516269.1 | Scaffold919 | 187093                  | TT                              | CC              | 1946985967               |
| SNP_P4_148815_187170 | NW_004516269.1 | Scaffold919 | 187170                  | CC                              | TT              | 1946985969               |
| SNP_P4_148816_187203 | NW_004516269.1 | Scaffold919 | 187203                  | TT                              | CC              | 1946985971               |
| SNP_P4_148817_188597 | NW_004516269.1 | Scaffold919 | 188597                  | GG                              | AA              | 1946985973               |
| SNP_P4_148818_188768 | NW_004516269.1 | Scaffold919 | 188768                  | TT                              | AA              | 1946985975               |
| SNP_P4_148819_188772 | NW_004516269.1 | Scaffold919 | 188772                  | GG                              | AA              | 1946985977               |
| SNP_P4_148820_188999 | NW_004516269.1 | Scaffold919 | 188999                  | CC                              | GG              | 1946985979               |
| SNP_P4_148821_189097 | NW_004516269.1 | Scaffold919 | 189097                  | AA                              | TT              | 1946985981               |
| SNP_P4_148822_189573 | NW_004516269.1 | Scaffold919 | 189573                  | CC                              | TT              | 1946985983               |
| SNP_P4_148823_190123 | NW_004516269.1 | Scaffold919 | 190123                  | CC                              | GG              | 1946985985               |
| SNP_P4_148824_190192 | NW_004516269.1 | Scaffold919 | 190192                  | TT                              | CC              | 1946985987               |
| SNP_P4_148825_190204 | NW_004516269.1 | Scaffold919 | 190204                  | AA                              | GG              | 1946985989               |

| SNPs IDs             | Chromosome IDs | Chromosomes | Physical positions (bp) | CDC Frontier (Reference genome) | (ILWC46 & LPNB) | NCBI SNPdb Accession IDs |
|----------------------|----------------|-------------|-------------------------|---------------------------------|-----------------|--------------------------|
| SNP_P4_148826_190259 | NW_004516269.1 | Scaffold919 | 190259                  | AA                              | GG              | 1946985991               |
| SNP_P4_148827_190318 | NW_004516269.1 | Scaffold919 | 190318                  | CC                              | GG              | 1946985993               |
| SNP_P4_148829_190407 | NW_004516269.1 | Scaffold919 | 190407                  | CC                              | TT              | 1946985996               |
| SNP_P4_148830_190429 | NW_004516269.1 | Scaffold919 | 190429                  | AA                              | CC              | 1946985998               |
| SNP_P4_148831_190621 | NW_004516269.1 | Scaffold919 | 190621                  | AA                              | TT              | 1946986000               |
| SNP_P4_148832_194034 | NW_004516269.1 | Scaffold919 | 194034                  | CC                              | TT              | 1946986001               |
| SNP_P4_148833_194117 | NW_004516269.1 | Scaffold919 | 194117                  | TT                              | AA              | 1946986003               |
| SNP_P4_148834_194180 | NW_004516269.1 | Scaffold919 | 194180                  | TT                              | AA              | 1946986005               |
| SNP_P4_148835_194181 | NW_004516269.1 | Scaffold919 | 194181                  | CC                              | TT              | 1946986006               |
| SNP_P4_148836_194706 | NW_004516269.1 | Scaffold919 | 194706                  | CC                              | TT              | 1946986008               |
| SNP_P4_148837_194808 | NW_004516269.1 | Scaffold919 | 194808                  | AA                              | TT              | 1946986010               |
| SNP_P4_148838_240131 | NW_004516269.1 | Scaffold919 | 240131                  | AA                              | GG              | 1946986013               |
| SNP_P4_148839_301572 | NW_004516269.1 | Scaffold919 | 301572                  | GG                              | AA              | 1946986015               |
| SNP_P4_148840_301622 | NW_004516269.1 | Scaffold919 | 301622                  | TT                              | AA              | 1946986017               |
| SNP_P4_148841_301702 | NW_004516269.1 | Scaffold919 | 301702                  | CC                              | GG              | 1946986019               |
| SNP_P4_148842_301768 | NW_004516269.1 | Scaffold919 | 301768                  | AA                              | TT              | 1946986021               |
| SNP_P4_148843_301804 | NW_004516269.1 | Scaffold919 | 301804                  | CC                              | AA              | 1946986023               |
| SNP_P4_148845_301855 | NW_004516269.1 | Scaffold919 | 301855                  | TT                              | CC              | 1946986025               |
| SNP_P4_148846_301865 | NW_004516269.1 | Scaffold919 | 301865                  | GG                              | TT              | 1946986027               |
| SNP_P4_148847_301921 | NW_004516269.1 | Scaffold919 | 301921                  | CC                              | TT              | 1946986029               |
| SNP_P4_148848_301928 | NW_004516269.1 | Scaffold919 | 301928                  | GG                              | AA              | 1946986030               |
| SNP_P4_148849_301945 | NW_004516269.1 | Scaffold919 | 301945                  | CC                              | TT              | 1946986032               |
| SNP_P4_148850_303591 | NW_004516269.1 | Scaffold919 | 303591                  | TT                              | CC              | 1946986034               |
| SNP_P4_148851_303644 | NW_004516269.1 | Scaffold919 | 303644                  | GG                              | AA              | 1946986036               |
| SNP_P4_148852_303677 | NW_004516269.1 | Scaffold919 | 303677                  | GG                              | AA              | 1946986038               |
| SNP_P4_148853_303844 | NW_004516269.1 | Scaffold919 | 303844                  | TT                              | CC              | 1946986040               |
| SNP_P4_148854_303953 | NW_004516269.1 | Scaffold919 | 303953                  | CC                              | TT              | 1946986042               |
| SNP_P4_148855_304180 | NW_004516269.1 | Scaffold919 | 304180                  | CC                              | AA              | 1946986044               |
| SNP_P4_148856_304339 | NW_004516269.1 | Scaffold919 | 304339                  | AA                              | GG              | 1946986046               |
| SNP_P4_148858_443988 | NW_004516269.1 | Scaffold919 | 443988                  | TT                              | AA              | 1946986048               |
| SNP_P4_148859_444498 | NW_004516269.1 | Scaffold919 | 444498                  | GG                              | AA              | 1946986050               |
| SNP_P4_148860_448220 | NW_004516269.1 | Scaffold919 | 448220                  | CC                              | TT              | 1946986052               |
| SNP_P4_148861_460953 | NW_004516269.1 | Scaffold919 | 460953                  | GG                              | AA              | 1946986054               |
| SNP_P4_148862_465571 | NW_004516269.1 | Scaffold919 | 465571                  | CC                              | AA              | 1946986056               |
| SNP_P4_148863_504440 | NW_004516269.1 | Scaffold919 | 504440                  | TT                              | CC              | 1946986058               |
| SNP_P4_148864_505016 | NW_004516269.1 | Scaffold919 | 505016                  | CC                              | TT              | 1946986060               |
| SNP_P4_148865_505422 | NW_004516269.1 | Scaffold919 | 505422                  | TT                              | CC              | 1946986062               |
| SNP_P4_148866_516129 | NW_004516269.1 | Scaffold919 | 516129                  | GG                              | AA              | 1946986064               |
| SNP_P4_148868_562074 | NW_004516269.1 | Scaffold919 | 562074                  | TT                              | CC              | 1946986066               |
| SNP_P4_148869_572830 | NW_004516269.1 | Scaffold919 | 572830                  | GG                              | AA              | 1946986068               |
| SNP_P4_148870_573071 | NW_004516269.1 | Scaffold919 | 573071                  | GG                              | AA              | 1946986070               |
| SNP_P4_148871_573108 | NW_004516269.1 | Scaffold919 | 573108                  | AA                              | TT              | 1946986072               |

| SNPs IDs             | Chromosome IDs | Chromosomes | Physical positions (bp) | CDC Frontier (Reference genome) | (ILWC46 & LPNB) | NCBI SNPdb Accession IDs |
|----------------------|----------------|-------------|-------------------------|---------------------------------|-----------------|--------------------------|
| SNP_P4_148872_573118 | NW_004516269.1 | Scaffold919 | 573118                  | TT                              | CC              | 1946986074               |
| SNP_P4_148873_573122 | NW_004516269.1 | Scaffold919 | 573122                  | GG                              | TT              | 1946986076               |
| SNP_P4_148874_573127 | NW_004516269.1 | Scaffold919 | 573127                  | AA                              | TT              | 1946986078               |
| SNP_P4_148875_573160 | NW_004516269.1 | Scaffold919 | 573160                  | AA                              | TT              | 1946986080               |
| SNP_P4_148876_573177 | NW_004516269.1 | Scaffold919 | 573177                  | TT                              | CC              | 1946986082               |
| SNP_P4_148877_573183 | NW_004516269.1 | Scaffold919 | 573183                  | AA                              | GG              | 1946986084               |
| SNP_P4_148878_573199 | NW_004516269.1 | Scaffold919 | 573199                  | TT                              | CC              | 1946986086               |
| SNP_P4_148880_589657 | NW_004516269.1 | Scaffold919 | 589657                  | TT                              | AA              | 1946986088               |
| SNP_P4_148881_589907 | NW_004516269.1 | Scaffold919 | 589907                  | TT                              | AA              | 1946986090               |
| SNP_P4_148882_603330 | NW_004516269.1 | Scaffold919 | 603330                  | TT                              | CC              | 1946986092               |
| SNP_P4_148883_615578 | NW_004516269.1 | Scaffold919 | 615578                  | GG                              | AA              | 1946986094               |
| SNP_P4_148884_627181 | NW_004516269.1 | Scaffold919 | 627181                  | AA                              | GG              | 1946986096               |
| SNP_P4_148885_627246 | NW_004516269.1 | Scaffold919 | 627246                  | CC                              | AA              | 1946986098               |
| SNP_P4_148886_628091 | NW_004516269.1 | Scaffold919 | 628091                  | TT                              | CC              | 1946986100               |
| SNP_P4_148887_628123 | NW_004516269.1 | Scaffold919 | 628123                  | TT                              | CC              | 1946986102               |
| SNP_P4_148888_644203 | NW_004516269.1 | Scaffold919 | 644203                  | TT                              | CC              | 1946986104               |
| SNP_P4_148889_646069 | NW_004516269.1 | Scaffold919 | 646069                  | GG                              | AA              | 1946986106               |
| SNP_P4_148890_662939 | NW_004516269.1 | Scaffold919 | 662939                  | TT                              | CC              | 1946986108               |
| SNP_P4_148891_673182 | NW_004516269.1 | Scaffold919 | 673182                  | AA                              | GG              | 1946986110               |
| SNP_P4_148892_673199 | NW_004516269.1 | Scaffold919 | 673199                  | AA                              | CC              | 1946986112               |
| SNP_P4_148893_673244 | NW_004516269.1 | Scaffold919 | 673244                  | TT                              | CC              | 1946986114               |
| SNP_P4_148894_673308 | NW_004516269.1 | Scaffold919 | 673308                  | AA                              | GG              | 1946986115               |
| SNP_P4_148895_686065 | NW_004516269.1 | Scaffold919 | 686065                  | TT                              | CC              | 1946986117               |
| SNP_P4_148896_686110 | NW_004516269.1 | Scaffold919 | 686110                  | CC                              | AA              | 1946986119               |
| SNP_P4_148897_704453 | NW_004516269.1 | Scaffold919 | 704453                  | AA                              | GG              | 1946986122               |
| SNP_P4_148898_704795 | NW_004516269.1 | Scaffold919 | 704795                  | GG                              | CC              | 1946986124               |
| SNP_P4_148899_704807 | NW_004516269.1 | Scaffold919 | 704807                  | TT                              | AA              | 1946986126               |
| SNP_P4_148900_711864 | NW_004516269.1 | Scaffold919 | 711864                  | TT                              | AA              | 1946986128               |
| SNP_P4_148901_711872 | NW_004516269.1 | Scaffold919 | 711872                  | GG                              | AA              | 1946986130               |
| SNP_P4_148902_718829 | NW_004516269.1 | Scaffold919 | 718829                  | AA                              | GG              | 1946986132               |
| SNP_P4_148904_724326 | NW_004516269.1 | Scaffold919 | 724326                  | AA                              | GG              | 1946986134               |
| SNP_P4_148905_724407 | NW_004516269.1 | Scaffold919 | 724407                  | CC                              | TT              | 1946986137               |
| SNP_P4_148906_724414 | NW_004516269.1 | Scaffold919 | 724414                  | CC                              | TT              | 1946986139               |
| SNP_P4_148907_724477 | NW_004516269.1 | Scaffold919 | 724477                  | CC                              | TT              | 1946986141               |
| SNP_P4_148908_724501 | NW_004516269.1 | Scaffold919 | 724501                  | CC                              | TT              | 1946986143               |
| SNP_P4_148909_724681 | NW_004516269.1 | Scaffold919 | 724681                  | TT                              | CC              | 1946986145               |
| SNP_P4_148910_2943   | NW_004516271.1 | Scaffold922 | 2943                    | AA                              | GG              | 1946986148               |
| SNP_P4_148911_13475  | NW_004516271.1 | Scaffold922 | 13475                   | AA                              | TT              | 1946986149               |
| SNP_P4_148912_13477  | NW_004516271.1 | Scaffold922 | 13477                   | AA                              | GG              | 1946986151               |
| SNP_P4_148913_13523  | NW_004516271.1 | Scaffold922 | 13523                   | AA                              | GG              | 1946986154               |
| SNP_P4_148914_13535  | NW_004516271.1 | Scaffold922 | 13535                   | TT                              | GG              | 1946986156               |
| SNP_P4_148915_13687  | NW_004516271.1 | Scaffold922 | 13687                   | AA                              | GG              | 1946986157               |

| SNPs IDs             | Chromosome IDs | Chromosomes | Physical positions (bp) | CDC Frontier (Reference genome) | (ILWC46 & LPNB) | NCBI SNPdb Accession IDs |
|----------------------|----------------|-------------|-------------------------|---------------------------------|-----------------|--------------------------|
| SNP_P4_148916_13715  | NW_004516271.1 | Scaffold922 | 13715                   | GG                              | AA              | 1946986159               |
| SNP_P4_148917_13734  | NW_004516271.1 | Scaffold922 | 13734                   | AA                              | GG              | 1946986161               |
| SNP_P4_148918_13864  | NW_004516271.1 | Scaffold922 | 13864                   | AA                              | TT              | 1946986164               |
| SNP_P4_148919_21451  | NW_004516271.1 | Scaffold922 | 21451                   | AA                              | GG              | 1946986166               |
| SNP_P4_148920_21483  | NW_004516271.1 | Scaffold922 | 21483                   | AA                              | GG              | 1946986168               |
| SNP_P4_148922_21761  | NW_004516271.1 | Scaffold922 | 21761                   | CC                              | AA              | 1946986170               |
| SNP_P4_148923_21765  | NW_004516271.1 | Scaffold922 | 21765                   | TT                              | CC              | 1946986172               |
| SNP_P4_148924_21771  | NW_004516271.1 | Scaffold922 | 21771                   | TT                              | CC              | 1946986174               |
| SNP_P4_148925_40527  | NW_004516271.1 | Scaffold922 | 40527                   | AA                              | TT              | 1946986176               |
| SNP_P4_148926_40549  | NW_004516271.1 | Scaffold922 | 40549                   | AA                              | GG              | 1946986178               |
| SNP_P4_148927_40629  | NW_004516271.1 | Scaffold922 | 40629                   | AA                              | CC              | 1946986180               |
| SNP_P4_148928_40861  | NW_004516271.1 | Scaffold922 | 40861                   | TT                              | CC              | 1946986182               |
| SNP_P4_148929_40871  | NW_004516271.1 | Scaffold922 | 40871                   | GG                              | TT              | 1946986184               |
| SNP_P4_148930_40920  | NW_004516271.1 | Scaffold922 | 40920                   | AA                              | GG              | 1946986186               |
| SNP_P4_148931_40932  | NW_004516271.1 | Scaffold922 | 40932                   | TT                              | CC              | 1946986188               |
| SNP_P4_148932_40991  | NW_004516271.1 | Scaffold922 | 40991                   | GG                              | AA              | 1946986190               |
| SNP_P4_148933_41033  | NW_004516271.1 | Scaffold922 | 41033                   | AA                              | GG              | 1946986192               |
| SNP_P4_148934_41035  | NW_004516271.1 | Scaffold922 | 41035                   | TT                              | CC              | 1946986194               |
| SNP_P4_148935_41060  | NW_004516271.1 | Scaffold922 | 41060                   | GG                              | AA              | 1946986196               |
| SNP_P4_148936_47935  | NW_004516271.1 | Scaffold922 | 47935                   | GG                              | AA              | 1946986198               |
| SNP_P4_148937_60529  | NW_004516271.1 | Scaffold922 | 60529                   | GG                              | AA              | 1946986200               |
| SNP_P4_148938_78352  | NW_004516271.1 | Scaffold922 | 78352                   | TT                              | CC              | 1946986202               |
| SNP_P4_148939_134593 | NW_004516271.1 | Scaffold922 | 134593                  | CC                              | TT              | 1946986204               |
| SNP_P4_148940_135890 | NW_004516271.1 | Scaffold922 | 135890                  | GG                              | AA              | 1946986206               |
| SNP_P4_148941_135958 | NW_004516271.1 | Scaffold922 | 135958                  | CC                              | TT              | 1946986208               |
| SNP_P4_148942_147533 | NW_004516271.1 | Scaffold922 | 147533                  | GG                              | AA              | 1946986210               |
| SNP_P4_148944_41778  | NW_004516272.1 | Scaffold924 | 41778                   | CC                              | TT              | 1946986212               |
| SNP_P4_148945_56773  | NW_004516272.1 | Scaffold924 | 56773                   | AA                              | GG              | 1946986214               |
| SNP_P4_148946_56780  | NW_004516272.1 | Scaffold924 | 56780                   | CC                              | AA              | 1946986216               |
| SNP_P4_148947_56803  | NW_004516272.1 | Scaffold924 | 56803                   | AA                              | CC              | 1946986218               |
| SNP_P4_148948_59788  | NW_004516272.1 | Scaffold924 | 59788                   | CC                              | TT              | 1946986220               |
| SNP_P4_148949_67002  | NW_004516272.1 | Scaffold924 | 67002                   | GG                              | TT              | 1946986222               |
| SNP_P4_148950_67647  | NW_004516272.1 | Scaffold924 | 67647                   | GG                              | TT              | 1946986224               |
| SNP_P4_148951_78907  | NW_004516272.1 | Scaffold924 | 78907                   | TT                              | GG              | 1946986226               |
| SNP_P4_148952_78915  | NW_004516272.1 | Scaffold924 | 78915                   | GG                              | TT              | 1946986228               |
| SNP_P4_148953_78921  | NW_004516272.1 | Scaffold924 | 78921                   | GG                              | CC              | 1946986230               |
| SNP_P4_148954_78927  | NW_004516272.1 | Scaffold924 | 78927                   | TT                              | GG              | 1946986232               |
| SNP_P4_148955_80496  | NW_004516272.1 | Scaffold924 | 80496                   | GG                              | AA              | 1946986234               |
| SNP_P4_148956_80505  | NW_004516272.1 | Scaffold924 | 80505                   | TT                              | GG              | 1946986236               |
| SNP_P4_148957_96693  | NW_004516272.1 | Scaffold924 | 96693                   | AA                              | GG              | 1946986238               |
| SNP_P4_148958_97009  | NW_004516272.1 | Scaffold924 | 97009                   | AA                              | TT              | 1946986240               |
| SNP_P4_148959_97051  | NW_004516272.1 | Scaffold924 | 97051                   | AA                              | GG              | 1946986242               |

| SNPs IDs             | Chromosome IDs | Chromosomes | Physical positions (bp) | CDC Frontier (Reference genome) | (ILWC46 & LPNB) | NCBI SNPdb Accession IDs |
|----------------------|----------------|-------------|-------------------------|---------------------------------|-----------------|--------------------------|
| SNP_P4_148960_114735 | NW_004516272.1 | Scaffold924 | 114735                  | AA                              | CC              | 1946986244               |
| SNP_P4_148961_115128 | NW_004516272.1 | Scaffold924 | 115128                  | GG                              | TT              | 1946986246               |
| SNP_P4_148962_115173 | NW_004516272.1 | Scaffold924 | 115173                  | AA                              | TT              | 1946986248               |
| SNP_P4_148963_115240 | NW_004516272.1 | Scaffold924 | 115240                  | AA                              | TT              | 1946986250               |
| SNP_P4_148964_115243 | NW_004516272.1 | Scaffold924 | 115243                  | TT                              | CC              | 1946986252               |
| SNP_P4_148965_120480 | NW_004516272.1 | Scaffold924 | 120480                  | AA                              | TT              | 1946986254               |
| SNP_P4_148966_120563 | NW_004516272.1 | Scaffold924 | 120563                  | GG                              | CC              | 1946986256               |
| SNP_P4_148967_120596 | NW_004516272.1 | Scaffold924 | 120596                  | AA                              | GG              | 1946986258               |
| SNP_P4_148968_122063 | NW_004516272.1 | Scaffold924 | 122063                  | CC                              | TT              | 1946986260               |
| SNP_P4_148969_122104 | NW_004516272.1 | Scaffold924 | 122104                  | CC                              | AA              | 1946986262               |
| SNP_P4_148970_122477 | NW_004516272.1 | Scaffold924 | 122477                  | AA                              | GG              | 1946986264               |
| SNP_P4_148971_122674 | NW_004516272.1 | Scaffold924 | 122674                  | GG                              | AA              | 1946986266               |
| SNP_P4_148972_141015 | NW_004516272.1 | Scaffold924 | 141015                  | AA                              | GG              | 1946986268               |
| SNP_P4_148973_151237 | NW_004516272.1 | Scaffold924 | 151237                  | TT                              | CC              | 1946986270               |
| SNP_P4_148975_173220 | NW_004516272.1 | Scaffold924 | 173220                  | AA                              | GG              | 1946986272               |
| SNP_P4_148977_196648 | NW_004516272.1 | Scaffold924 | 196648                  | TT                              | CC              | 1946986274               |
| SNP_P4_148979_219045 | NW_004516272.1 | Scaffold924 | 219045                  | AA                              | CC              | 1946986276               |
| SNP_P4_148980_219503 | NW_004516272.1 | Scaffold924 | 219503                  | TT                              | CC              | 1946986278               |
| SNP_P4_148981_219621 | NW_004516272.1 | Scaffold924 | 219621                  | AA                              | CC              | 1946986280               |
| SNP_P4_148982_219624 | NW_004516272.1 | Scaffold924 | 219624                  | TT                              | AA              | 1946986282               |
| SNP_P4_148983_219874 | NW_004516272.1 | Scaffold924 | 219874                  | CC                              | TT              | 1946986284               |
| SNP_P4_148985_224535 | NW_004516272.1 | Scaffold924 | 224535                  | AA                              | CC              | 1946986286               |
| SNP_P4_148986_224549 | NW_004516272.1 | Scaffold924 | 224549                  | CC                              | AA              | 1946986288               |
| SNP_P4_148987_224913 | NW_004516272.1 | Scaffold924 | 224913                  | AA                              | CC              | 1946986290               |
| SNP_P4_148989_265605 | NW_004516272.1 | Scaffold924 | 265605                  | AA                              | GG              | 1946986292               |
| SNP_P4_148990_265681 | NW_004516272.1 | Scaffold924 | 265681                  | GG                              | TT              | 1946986294               |
| SNP_P4_148991_265931 | NW_004516272.1 | Scaffold924 | 265931                  | AA                              | GG              | 1946986296               |
| SNP_P4_148992_265985 | NW_004516272.1 | Scaffold924 | 265985                  | TT                              | CC              | 1946986298               |
| SNP_P4_148993_266026 | NW_004516272.1 | Scaffold924 | 266026                  | CC                              | TT              | 1946986300               |
| SNP_P4_148994_266035 | NW_004516272.1 | Scaffold924 | 266035                  | TT                              | AA              | 1946986302               |
| SNP_P4_148995_266047 | NW_004516272.1 | Scaffold924 | 266047                  | CC                              | TT              | 1946986304               |
| SNP_P4_148996_266066 | NW_004516272.1 | Scaffold924 | 266066                  | GG                              | AA              | 1946986306               |
| SNP_P4_148997_266075 | NW_004516272.1 | Scaffold924 | 266075                  | TT                              | CC              | 1946986309               |
| SNP_P4_148998_266089 | NW_004516272.1 | Scaffold924 | 266089                  | GG                              | TT              | 1946986311               |
| SNP_P4_148999_266104 | NW_004516272.1 | Scaffold924 | 266104                  | TT                              | CC              | 1946986313               |
| SNP_P4_149000_266122 | NW_004516272.1 | Scaffold924 | 266122                  | CC                              | TT              | 1946986315               |
| SNP_P4_149001_266210 | NW_004516272.1 | Scaffold924 | 266210                  | CC                              | TT              | 1946986317               |
| SNP_P4_149002_8524   | NW_004516273.1 | Scaffold927 | 8524                    | TT                              | CC              | 1946986319               |
| SNP_P4_149003_266    | NW_004516274.1 | Scaffold929 | 266                     | GG                              | TT              | 1946986321               |
| SNP_P4_149004_286    | NW_004516274.1 | Scaffold929 | 286                     | GG                              | TT              | 1946986324               |
| SNP_P4_149005_389    | NW_004516274.1 | Scaffold929 | 389                     | AA                              | GG              | 1946986326               |
| SNP_P4_149006_683    | NW_004516274.1 | Scaffold929 | 683                     | AA                              | GG              | 1946986328               |

| SNPs IDs            | Chromosome IDs | Chromosomes | Physical positions (bp) | CDC Frontier (Reference genome) | (ILWC46 & LPNB) | NCBI SNPdb Accession IDs |
|---------------------|----------------|-------------|-------------------------|---------------------------------|-----------------|--------------------------|
| SNP_P4_149007_787   | NW_004516274.1 | Scaffold929 | 787                     | AA                              | GG              | 1946986330               |
| SNP_P4_149008_833   | NW_004516274.1 | Scaffold929 | 833                     | CC                              | TT              | 1946986333               |
| SNP_P4_149009_8257  | NW_004516274.1 | Scaffold929 | 8257                    | TT                              | AA              | 1946986335               |
| SNP_P4_149010_8258  | NW_004516274.1 | Scaffold929 | 8258                    | AA                              | TT              | 1946986337               |
| SNP_P4_149011_8284  | NW_004516274.1 | Scaffold929 | 8284                    | TT                              | CC              | 1946986339               |
| SNP_P4_149012_9776  | NW_004516274.1 | Scaffold929 | 9776                    | CC                              | TT              | 1946986342               |
| SNP_P4_149013_9899  | NW_004516274.1 | Scaffold929 | 9899                    | AA                              | GG              | 1946986344               |
| SNP_P4_149014_9945  | NW_004516274.1 | Scaffold929 | 9945                    | AA                              | GG              | 1946986346               |
| SNP_P4_149015_9976  | NW_004516274.1 | Scaffold929 | 9976                    | CC                              | AA              | 1946986348               |
| SNP_P4_149016_10050 | NW_004516274.1 | Scaffold929 | 10050                   | TT                              | CC              | 1946986350               |
| SNP_P4_149017_10220 | NW_004516274.1 | Scaffold929 | 10220                   | CC                              | TT              | 1946986353               |
| SNP_P4_149018_10228 | NW_004516274.1 | Scaffold929 | 10228                   | AA                              | GG              | 1946986355               |
| SNP_P4_149019_10260 | NW_004516274.1 | Scaffold929 | 10260                   | TT                              | AA              | 1946986358               |
| SNP_P4_149020_10535 | NW_004516274.1 | Scaffold929 | 10535                   | CC                              | TT              | 1946986360               |
| SNP_P4_149022_10795 | NW_004516274.1 | Scaffold929 | 10795                   | AA                              | GG              | 1946986362               |
| SNP_P4_149023_10832 | NW_004516274.1 | Scaffold929 | 10832                   | AA                              | TT              | 1946986364               |
| SNP_P4_149024_10833 | NW_004516274.1 | Scaffold929 | 10833                   | AA                              | CC              | 1946986366               |
| SNP_P4_149025_10868 | NW_004516274.1 | Scaffold929 | 10868                   | TT                              | CC              | 1946986368               |
| SNP_P4_149026_10920 | NW_004516274.1 | Scaffold929 | 10920                   | CC                              | GG              | 1946986370               |
| SNP_P4_149027_10924 | NW_004516274.1 | Scaffold929 | 10924                   | TT                              | AA              | 1946986372               |
| SNP_P4_149028_10970 | NW_004516274.1 | Scaffold929 | 10970                   | AA                              | GG              | 1946986374               |
| SNP_P4_149029_10999 | NW_004516274.1 | Scaffold929 | 10999                   | TT                              | CC              | 1946986377               |
| SNP_P4_149030_11205 | NW_004516274.1 | Scaffold929 | 11205                   | AA                              | GG              | 1946986378               |
| SNP_P4_149031_11235 | NW_004516274.1 | Scaffold929 | 11235                   | AA                              | GG              | 1946986380               |
| SNP_P4_149032_11243 | NW_004516274.1 | Scaffold929 | 11243                   | AA                              | GG              | 1946986382               |
| SNP_P4_149033_11244 | NW_004516274.1 | Scaffold929 | 11244                   | CC                              | AA              | 1946986384               |
| SNP_P4_149034_11276 | NW_004516274.1 | Scaffold929 | 11276                   | AA                              | GG              | 1946986386               |
| SNP_P4_149035_11304 | NW_004516274.1 | Scaffold929 | 11304                   | TT                              | CC              | 1946986388               |
| SNP_P4_149036_13969 | NW_004516274.1 | Scaffold929 | 13969                   | GG                              | AA              | 1946986390               |
| SNP_P4_149037_15225 | NW_004516274.1 | Scaffold929 | 15225                   | AA                              | GG              | 1946986392               |
| SNP_P4_149038_15399 | NW_004516274.1 | Scaffold929 | 15399                   | TT                              | CC              | 1946986394               |
| SNP_P4_149039_15676 | NW_004516274.1 | Scaffold929 | 15676                   | TT                              | CC              | 1946986396               |
| SNP_P4_149040_15688 | NW_004516274.1 | Scaffold929 | 15688                   | AA                              | CC              | 1946986398               |
| SNP_P4_149041_15921 | NW_004516274.1 | Scaffold929 | 15921                   | GG                              | CC              | 1946986400               |
| SNP_P4_149042_16263 | NW_004516274.1 | Scaffold929 | 16263                   | AA                              | TT              | 1946986402               |
| SNP_P4_149044_16283 | NW_004516274.1 | Scaffold929 | 16283                   | CC                              | TT              | 1946986404               |
| SNP_P4_149045_16593 | NW_004516274.1 | Scaffold929 | 16593                   | CC                              | TT              | 1946986406               |
| SNP_P4_149046_16670 | NW_004516274.1 | Scaffold929 | 16670                   | CC                              | AA              | 1946986408               |
| SNP_P4_149047_16869 | NW_004516274.1 | Scaffold929 | 16869                   | TT                              | GG              | 1946986411               |
| SNP_P4_149048_17057 | NW_004516274.1 | Scaffold929 | 17057                   | GG                              | TT              | 1946986413               |
| SNP_P4_149049_17297 | NW_004516274.1 | Scaffold929 | 17297                   | CC                              | TT              | 1946986415               |
| SNP_P4_149050_17349 | NW_004516274.1 | Scaffold929 | 17349                   | GG                              | AA              | 1946986417               |

| SNPs IDs             | Chromosome IDs | Chromosomes | Physical positions (bp) | CDC Frontier (Reference genome) | (ILWC46 & LPNB) | NCBI SNPdb Accession IDs |
|----------------------|----------------|-------------|-------------------------|---------------------------------|-----------------|--------------------------|
| SNP_P4_149051_17364  | NW_004516274.1 | Scaffold929 | 17364                   | GG                              | TT              | 1946986419               |
| SNP_P4_149052_17377  | NW_004516274.1 | Scaffold929 | 17377                   | AA                              | GG              | 1946986421               |
| SNP_P4_149053_17395  | NW_004516274.1 | Scaffold929 | 17395                   | CC                              | AA              | 1946986423               |
| SNP_P4_149054_17429  | NW_004516274.1 | Scaffold929 | 17429                   | CC                              | TT              | 1946986425               |
| SNP_P4_149055_17446  | NW_004516274.1 | Scaffold929 | 17446                   | CC                              | TT              | 1946986427               |
| SNP_P4_149056_17471  | NW_004516274.1 | Scaffold929 | 17471                   | AA                              | CC              | 1946986430               |
| SNP_P4_149057_18036  | NW_004516274.1 | Scaffold929 | 18036                   | AA                              | GG              | 1946986432               |
| SNP_P4_149058_18127  | NW_004516274.1 | Scaffold929 | 18127                   | TT                              | CC              | 1946986434               |
| SNP_P4_149059_18139  | NW_004516274.1 | Scaffold929 | 18139                   | GG                              | AA              | 1946986436               |
| SNP_P4_149060_18143  | NW_004516274.1 | Scaffold929 | 18143                   | AA                              | CC              | 1946986438               |
| SNP_P4_149062_65176  | NW_004516276.1 | Scaffold931 | 65176                   | AA                              | TT              | 1946986440               |
| SNP_P4_149063_65348  | NW_004516276.1 | Scaffold931 | 65348                   | TT                              | CC              | 1946986442               |
| SNP_P4_149065_81380  | NW_004516276.1 | Scaffold931 | 81380                   | TT                              | GG              | 1946986444               |
| SNP_P4_149066_81799  | NW_004516276.1 | Scaffold931 | 81799                   | AA                              | GG              | 1946986446               |
| SNP_P4_149068_88292  | NW_004516276.1 | Scaffold931 | 88292                   | AA                              | TT              | 1946986447               |
| SNP_P4_149069_97142  | NW_004516276.1 | Scaffold931 | 97142                   | GG                              | CC              | 1946986450               |
| SNP_P4_149072_102792 | NW_004516276.1 | Scaffold931 | 102792                  | AA                              | GG              | 1946986452               |
| SNP_P4_149073_102796 | NW_004516276.1 | Scaffold931 | 102796                  | CC                              | TT              | 1946986454               |
| SNP_P4_149074_102838 | NW_004516276.1 | Scaffold931 | 102838                  | TT                              | AA              | 1946986456               |
| SNP_P4_149075_102979 | NW_004516276.1 | Scaffold931 | 102979                  | AA                              | GG              | 1946986458               |
| SNP_P4_149076_103010 | NW_004516276.1 | Scaffold931 | 103010                  | TT                              | AA              | 1946986460               |
| SNP_P4_149077_103058 | NW_004516276.1 | Scaffold931 | 103058                  | TT                              | GG              | 1946986462               |
| SNP_P4_149078_103064 | NW_004516276.1 | Scaffold931 | 103064                  | AA                              | GG              | 1946986465               |
| SNP_P4_149079_103075 | NW_004516276.1 | Scaffold931 | 103075                  | AA                              | GG              | 1946986467               |
| SNP_P4_149080_103103 | NW_004516276.1 | Scaffold931 | 103103                  | TT                              | GG              | 1946986469               |
| SNP_P4_149081_103203 | NW_004516276.1 | Scaffold931 | 103203                  | AA                              | CC              | 1946986471               |
| SNP_P4_149082_103422 | NW_004516276.1 | Scaffold931 | 103422                  | GG                              | AA              | 1946986473               |
| SNP_P4_149083_103436 | NW_004516276.1 | Scaffold931 | 103436                  | GG                              | AA              | 1946986475               |
| SNP_P4_149084_103658 | NW_004516276.1 | Scaffold931 | 103658                  | GG                              | CC              | 1946986477               |
| SNP_P4_149085_108919 | NW_004516276.1 | Scaffold931 | 108919                  | GG                              | CC              | 1946986479               |
| SNP_P4_149086_108983 | NW_004516276.1 | Scaffold931 | 108983                  | AA                              | TT              | 1946986481               |
| SNP_P4_149087_109016 | NW_004516276.1 | Scaffold931 | 109016                  | CC                              | GG              | 1946986483               |
| SNP_P4_149088_109027 | NW_004516276.1 | Scaffold931 | 109027                  | AA                              | GG              | 1946986486               |
| SNP_P4_149089_112142 | NW_004516276.1 | Scaffold931 | 112142                  | GG                              | AA              | 1946986488               |
| SNP_P4_149090_112143 | NW_004516276.1 | Scaffold931 | 112143                  | CC                              | TT              | 1946986490               |
| SNP_P4_149091_112203 | NW_004516276.1 | Scaffold931 | 112203                  | AA                              | GG              | 1946986492               |
| SNP_P4_149092_112204 | NW_004516276.1 | Scaffold931 | 112204                  | TT                              | CC              | 1946986494               |
| SNP_P4_149093_112226 | NW_004516276.1 | Scaffold931 | 112226                  | AA                              | CC              | 1946986495               |
| SNP_P4_149094_112291 | NW_004516276.1 | Scaffold931 | 112291                  | TT                              | AA              | 1946986497               |
| SNP_P4_149095_112293 | NW_004516276.1 | Scaffold931 | 112293                  | GG                              | AA              | 1946986499               |
| SNP_P4_149096_112322 | NW_004516276.1 | Scaffold931 | 112322                  | TT                              | CC              | 1946986501               |
| SNP_P4_149097_112328 | NW_004516276.1 | Scaffold931 | 112328                  | TT                              | CC              | 1946986503               |

| SNPs IDs             | Chromosome IDs | Chromosomes | Physical positions (bp) | CDC Frontier (Reference genome) | (ILWC46 & LPNB) | NCBI SNPdb Accession IDs |
|----------------------|----------------|-------------|-------------------------|---------------------------------|-----------------|--------------------------|
| SNP_P4_149098_112368 | NW_004516276.1 | Scaffold931 | 112368                  | CC                              | TT              | 1946986506               |
| SNP_P4_149099_112372 | NW_004516276.1 | Scaffold931 | 112372                  | AA                              | CC              | 1946986508               |
| SNP_P4_149100_112419 | NW_004516276.1 | Scaffold931 | 112419                  | GG                              | AA              | 1946986510               |
| SNP_P4_149101_112535 | NW_004516276.1 | Scaffold931 | 112535                  | CC                              | AA              | 1946986512               |
| SNP_P4_149102_112548 | NW_004516276.1 | Scaffold931 | 112548                  | GG                              | TT              | 1946986514               |
| SNP_P4_149103_112569 | NW_004516276.1 | Scaffold931 | 112569                  | AA                              | CC              | 1946986516               |
| SNP_P4_149104_112603 | NW_004516276.1 | Scaffold931 | 112603                  | AA                              | TT              | 1946986518               |
| SNP_P4_149105_112772 | NW_004516276.1 | Scaffold931 | 112772                  | TT                              | AA              | 1946986521               |
| SNP_P4_149106_112805 | NW_004516276.1 | Scaffold931 | 112805                  | CC                              | TT              | 1946986523               |
| SNP_P4_149107_112835 | NW_004516276.1 | Scaffold931 | 112835                  | TT                              | CC              | 1946986524               |
| SNP_P4_149108_112882 | NW_004516276.1 | Scaffold931 | 112882                  | CC                              | AA              | 1946986526               |
| SNP_P4_149109_112899 | NW_004516276.1 | Scaffold931 | 112899                  | GG                              | AA              | 1946986528               |
| SNP_P4_149110_113968 | NW_004516276.1 | Scaffold931 | 113968                  | GG                              | CC              | 1946986530               |
| SNP_P4_149111_114126 | NW_004516276.1 | Scaffold931 | 114126                  | CC                              | GG              | 1946986532               |
| SNP_P4_149112_114139 | NW_004516276.1 | Scaffold931 | 114139                  | TT                              | CC              | 1946986534               |
| SNP_P4_149113_114143 | NW_004516276.1 | Scaffold931 | 114143                  | TT                              | GG              | 1946986536               |
| SNP_P4_149114_114146 | NW_004516276.1 | Scaffold931 | 114146                  | TT                              | CC              | 1946986538               |
| SNP_P4_149115_114199 | NW_004516276.1 | Scaffold931 | 114199                  | TT                              | GG              | 1946986540               |
| SNP_P4_149116_114411 | NW_004516276.1 | Scaffold931 | 114411                  | AA                              | TT              | 1946986542               |
| SNP_P4_149117_114448 | NW_004516276.1 | Scaffold931 | 114448                  | TT                              | CC              | 1946986543               |
| SNP_P4_149118_115528 | NW_004516276.1 | Scaffold931 | 115528                  | TT                              | GG              | 1946986545               |
| SNP_P4_149119_115621 | NW_004516276.1 | Scaffold931 | 115621                  | GG                              | TT              | 1946986547               |
| SNP_P4_149120_115808 | NW_004516276.1 | Scaffold931 | 115808                  | CC                              | TT              | 1946986549               |
| SNP_P4_149121_115831 | NW_004516276.1 | Scaffold931 | 115831                  | CC                              | TT              | 1946986552               |
| SNP_P4_149122_115848 | NW_004516276.1 | Scaffold931 | 115848                  | GG                              | TT              | 1946986554               |
| SNP_P4_149123_115866 | NW_004516276.1 | Scaffold931 | 115866                  | AA                              | GG              | 1946986556               |
| SNP_P4_149124_115872 | NW_004516276.1 | Scaffold931 | 115872                  | GG                              | AA              | 1946986558               |
| SNP_P4_149125_115983 | NW_004516276.1 | Scaffold931 | 115983                  | TT                              | CC              | 1946986560               |
| SNP_P4_149126_116063 | NW_004516276.1 | Scaffold931 | 116063                  | AA                              | GG              | 1946986562               |
| SNP_P4_149127_116107 | NW_004516276.1 | Scaffold931 | 116107                  | GG                              | AA              | 1946986564               |
| SNP_P4_149128_116160 | NW_004516276.1 | Scaffold931 | 116160                  | TT                              | GG              | 1946986566               |
| SNP_P4_149129_116277 | NW_004516276.1 | Scaffold931 | 116277                  | GG                              | AA              | 1946986568               |
| SNP_P4_149131_116394 | NW_004516276.1 | Scaffold931 | 116394                  | CC                              | TT              | 1946986570               |
| SNP_P4_149133_116449 | NW_004516276.1 | Scaffold931 | 116449                  | CC                              | GG              | 1946986572               |
| SNP_P4_149135_117051 | NW_004516276.1 | Scaffold931 | 117051                  | AA                              | CC              | 1946986574               |
| SNP_P4_149137_117138 | NW_004516276.1 | Scaffold931 | 117138                  | CC                              | GG              | 1946986576               |
| SNP_P4_149138_117143 | NW_004516276.1 | Scaffold931 | 117143                  | GG                              | AA              | 1946986578               |
| SNP_P4_149139_117181 | NW_004516276.1 | Scaffold931 | 117181                  | TT                              | CC              | 1946986580               |
| SNP_P4_149140_117293 | NW_004516276.1 | Scaffold931 | 117293                  | AA                              | GG              | 1946986582               |
| SNP_P4_149141_117304 | NW_004516276.1 | Scaffold931 | 117304                  | TT                              | GG              | 1946986584               |
| SNP_P4_149142_117429 | NW_004516276.1 | Scaffold931 | 117429                  | CC                              | GG              | 1946986587               |
| SNP_P4_149143_117441 | NW_004516276.1 | Scaffold931 | 117441                  | GG                              | AA              | 1946986589               |



| SNPs IDs             | Chromosome IDs | Chromosomes | Physical positions (bp) | CDC Frontier (Reference genome) | (ILWC46 & LPNB) | NCBI SNPdb Accession IDs |
|----------------------|----------------|-------------|-------------------------|---------------------------------|-----------------|--------------------------|
| SNP_P4_149144_117442 | NW_004516276.1 | Scaffold931 | 117442                  | TT                              | CC              | 1946986591               |
| SNP_P4_149145_117450 | NW_004516276.1 | Scaffold931 | 117450                  | AA                              | TT              | 1946986593               |
| SNP_P4_149146_117484 | NW_004516276.1 | Scaffold931 | 117484                  | GG                              | AA              | 1946986595               |
| SNP_P4_149147_117502 | NW_004516276.1 | Scaffold931 | 117502                  | CC                              | TT              | 1946986597               |
| SNP_P4_149148_117510 | NW_004516276.1 | Scaffold931 | 117510                  | TT                              | AA              | 1946986600               |
| SNP_P4_149149_117547 | NW_004516276.1 | Scaffold931 | 117547                  | CC                              | AA              | 1946986602               |
| SNP_P4_149150_117553 | NW_004516276.1 | Scaffold931 | 117553                  | GG                              | TT              | 1946986604               |
| SNP_P4_149151_117712 | NW_004516276.1 | Scaffold931 | 117712                  | GG                              | AA              | 1946986606               |
| SNP_P4_149152_117726 | NW_004516276.1 | Scaffold931 | 117726                  | GG                              | CC              | 1946986608               |
| SNP_P4_149153_117730 | NW_004516276.1 | Scaffold931 | 117730                  | GG                              | CC              | 1946986611               |
| SNP_P4_149154_117736 | NW_004516276.1 | Scaffold931 | 117736                  | AA                              | CC              | 1946986613               |
| SNP_P4_149155_117771 | NW_004516276.1 | Scaffold931 | 117771                  | GG                              | AA              | 1946986615               |
| SNP_P4_149156_117776 | NW_004516276.1 | Scaffold931 | 117776                  | AA                              | GG              | 1946986617               |
| SNP_P4_149157_117841 | NW_004516276.1 | Scaffold931 | 117841                  | AA                              | GG              | 1946986620               |
| SNP_P4_149159_118324 | NW_004516276.1 | Scaffold931 | 118324                  | GG                              | CC              | 1946986621               |
| SNP_P4_149160_118368 | NW_004516276.1 | Scaffold931 | 118368                  | CC                              | AA              | 1946986624               |
| SNP_P4_149161_118459 | NW_004516276.1 | Scaffold931 | 118459                  | CC                              | TT              | 1946986626               |
| SNP_P4_149162_118600 | NW_004516276.1 | Scaffold931 | 118600                  | GG                              | AA              | 1946986628               |
| SNP_P4_149163_118641 | NW_004516276.1 | Scaffold931 | 118641                  | GG                              | TT              | 1946986629               |
| SNP_P4_149164_118945 | NW_004516276.1 | Scaffold931 | 118945                  | CC                              | AA              | 1946986630               |
| SNP_P4_149165_118952 | NW_004516276.1 | Scaffold931 | 118952                  | CC                              | GG              | 1946986631               |
| SNP_P4_149166_118978 | NW_004516276.1 | Scaffold931 | 118978                  | AA                              | GG              | 1946986632               |
| SNP_P4_149167_118997 | NW_004516276.1 | Scaffold931 | 118997                  | CC                              | TT              | 1946986634               |
| SNP_P4_149168_119035 | NW_004516276.1 | Scaffold931 | 119035                  | AA                              | GG              | 1946986636               |
| SNP_P4_149169_125029 | NW_004516276.1 | Scaffold931 | 125029                  | CC                              | TT              | 1946986638               |
| SNP_P4_149170_125061 | NW_004516276.1 | Scaffold931 | 125061                  | TT                              | CC              | 1946986640               |
| SNP_P4_149171_125129 | NW_004516276.1 | Scaffold931 | 125129                  | CC                              | TT              | 1946986642               |
| SNP_P4_149172_125227 | NW_004516276.1 | Scaffold931 | 125227                  | TT                              | AA              | 1946986644               |
| SNP_P4_149173_125352 | NW_004516276.1 | Scaffold931 | 125352                  | AA                              | GG              | 1946986646               |
| SNP_P4_149174_125391 | NW_004516276.1 | Scaffold931 | 125391                  | TT                              | AA              | 1946986648               |
| SNP_P4_149175_125415 | NW_004516276.1 | Scaffold931 | 125415                  | GG                              | AA              | 1946986650               |
| SNP_P4_149176_125416 | NW_004516276.1 | Scaffold931 | 125416                  | TT                              | CC              | 1946986652               |
| SNP_P4_149177_125429 | NW_004516276.1 | Scaffold931 | 125429                  | CC                              | AA              | 1946986654               |
| SNP_P4_149178_125464 | NW_004516276.1 | Scaffold931 | 125464                  | AA                              | GG              | 1946986656               |
| SNP_P4_149179_125477 | NW_004516276.1 | Scaffold931 | 125477                  | AA                              | GG              | 1946986658               |
| SNP_P4_149180_125519 | NW_004516276.1 | Scaffold931 | 125519                  | GG                              | TT              | 1946986661               |
| SNP_P4_149181_125539 | NW_004516276.1 | Scaffold931 | 125539                  | GG                              | AA              | 1946986663               |
| SNP_P4_149182_125609 | NW_004516276.1 | Scaffold931 | 125609                  | GG                              | AA              | 1946986665               |
| SNP_P4_149184_125660 | NW_004516276.1 | Scaffold931 | 125660                  | AA                              | GG              | 1946986667               |
| SNP_P4_149185_125665 | NW_004516276.1 | Scaffold931 | 125665                  | GG                              | AA              | 1946986669               |
| SNP_P4_149186_125877 | NW_004516276.1 | Scaffold931 | 125877                  | AA                              | GG              | 1946986671               |
| SNP_P4_149187_144819 | NW_004516276.1 | Scaffold931 | 144819                  | AA                              | GG              | 1946986673               |

| SNPs IDs             | Chromosome IDs | Chromosomes | Physical positions (bp) | CDC Frontier (Reference genome) | (ILWC46 & LPNB) | NCBI SNPdb Accession IDs |
|----------------------|----------------|-------------|-------------------------|---------------------------------|-----------------|--------------------------|
| SNP_P4_149188_144835 | NW_004516276.1 | Scaffold931 | 144835                  | GG                              | AA              | 1946986675               |
| SNP_P4_149189_150262 | NW_004516276.1 | Scaffold931 | 150262                  | CC                              | TT              | 1946986677               |
| SNP_P4_149190_150992 | NW_004516276.1 | Scaffold931 | 150992                  | TT                              | CC              | 1946986679               |
| SNP_P4_149191_150996 | NW_004516276.1 | Scaffold931 | 150996                  | TT                              | CC              | 1946986681               |
| SNP_P4_149192_151972 | NW_004516276.1 | Scaffold931 | 151972                  | AA                              | TT              | 1946986683               |
| SNP_P4_149193_152258 | NW_004516276.1 | Scaffold931 | 152258                  | CC                              | TT              | 1946986685               |
| SNP_P4_149194_152264 | NW_004516276.1 | Scaffold931 | 152264                  | CC                              | TT              | 1946986687               |
| SNP_P4_149195_152284 | NW_004516276.1 | Scaffold931 | 152284                  | TT                              | GG              | 1946986689               |
| SNP_P4_149196_152307 | NW_004516276.1 | Scaffold931 | 152307                  | AA                              | GG              | 1946986691               |
| SNP_P4_149197_152664 | NW_004516276.1 | Scaffold931 | 152664                  | GG                              | AA              | 1946986693               |
| SNP_P4_149198_152694 | NW_004516276.1 | Scaffold931 | 152694                  | CC                              | TT              | 1946986695               |
| SNP_P4_149199_152845 | NW_004516276.1 | Scaffold931 | 152845                  | TT                              | CC              | 1946986697               |
| SNP_P4_149200_152864 | NW_004516276.1 | Scaffold931 | 152864                  | AA                              | TT              | 1946986699               |
| SNP_P4_149201_152871 | NW_004516276.1 | Scaffold931 | 152871                  | CC                              | TT              | 1946986701               |
| SNP_P4_149202_152991 | NW_004516276.1 | Scaffold931 | 152991                  | AA                              | GG              | 1946986703               |
| SNP_P4_149203_152998 | NW_004516276.1 | Scaffold931 | 152998                  | AA                              | GG              | 1946986705               |
| SNP_P4_149204_153003 | NW_004516276.1 | Scaffold931 | 153003                  | GG                              | TT              | 1946986707               |
| SNP_P4_149205_153114 | NW_004516276.1 | Scaffold931 | 153114                  | TT                              | AA              | 1946986708               |
| SNP_P4_149206_154301 | NW_004516276.1 | Scaffold931 | 154301                  | GG                              | TT              | 1946986710               |
| SNP_P4_149207_154416 | NW_004516276.1 | Scaffold931 | 154416                  | TT                              | CC              | 1946986712               |
| SNP_P4_149208_154435 | NW_004516276.1 | Scaffold931 | 154435                  | CC                              | TT              | 1946986714               |
| SNP_P4_149209_154714 | NW_004516276.1 | Scaffold931 | 154714                  | CC                              | TT              | 1946986716               |
| SNP_P4_149210_154752 | NW_004516276.1 | Scaffold931 | 154752                  | GG                              | AA              | 1946986718               |
| SNP_P4_149212_156152 | NW_004516276.1 | Scaffold931 | 156152                  | GG                              | TT              | 1946986720               |
| SNP_P4_149213_156171 | NW_004516276.1 | Scaffold931 | 156171                  | AA                              | CC              | 1946986722               |
| SNP_P4_149214_156201 | NW_004516276.1 | Scaffold931 | 156201                  | GG                              | TT              | 1946986724               |
| SNP_P4_149215_156227 | NW_004516276.1 | Scaffold931 | 156227                  | TT                              | AA              | 1946986726               |
| SNP_P4_149216_156255 | NW_004516276.1 | Scaffold931 | 156255                  | TT                              | AA              | 1946986728               |
| SNP_P4_149217_156449 | NW_004516276.1 | Scaffold931 | 156449                  | TT                              | CC              | 1946986730               |
| SNP_P4_149218_156453 | NW_004516276.1 | Scaffold931 | 156453                  | AA                              | CC              | 1946986732               |
| SNP_P4_149219_156486 | NW_004516276.1 | Scaffold931 | 156486                  | AA                              | GG              | 1946986734               |
| SNP_P4_149220_165975 | NW_004516276.1 | Scaffold931 | 165975                  | AA                              | TT              | 1946986736               |
| SNP_P4_149221_165979 | NW_004516276.1 | Scaffold931 | 165979                  | TT                              | CC              | 1946986738               |
| SNP_P4_149222_165985 | NW_004516276.1 | Scaffold931 | 165985                  | AA                              | GG              | 1946986740               |
| SNP_P4_149223_166283 | NW_004516276.1 | Scaffold931 | 166283                  | AA                              | CC              | 1946986742               |
| SNP_P4_149224_166341 | NW_004516276.1 | Scaffold931 | 166341                  | CC                              | TT              | 1946986744               |
| SNP_P4_149225_166832 | NW_004516276.1 | Scaffold931 | 166832                  | AA                              | TT              | 1946986746               |
| SNP_P4_149226_167037 | NW_004516276.1 | Scaffold931 | 167037                  | GG                              | TT              | 1946986748               |
| SNP_P4_149227_167075 | NW_004516276.1 | Scaffold931 | 167075                  | CC                              | AA              | 1946986750               |
| SNP_P4_149228_167214 | NW_004516276.1 | Scaffold931 | 167214                  | TT                              | AA              | 1946986752               |
| SNP_P4_149229_167277 | NW_004516276.1 | Scaffold931 | 167277                  | AA                              | GG              | 1946986754               |
| SNP_P4_149230_167347 | NW_004516276.1 | Scaffold931 | 167347                  | GG                              | AA              | 1946986756               |

| SNPs IDs             | Chromosome IDs | Chromosomes | Physical positions (bp) | CDC Frontier (Reference genome) | (ILWC46 & LPNB) | NCBI SNPdb Accession IDs |
|----------------------|----------------|-------------|-------------------------|---------------------------------|-----------------|--------------------------|
| SNP_P4_149231_167377 | NW_004516276.1 | Scaffold931 | 167377                  | CC                              | GG              | 1946986758               |
| SNP_P4_149232_178432 | NW_004516276.1 | Scaffold931 | 178432                  | AA                              | GG              | 1946986760               |
| SNP_P4_149233_179733 | NW_004516276.1 | Scaffold931 | 179733                  | AA                              | TT              | 1946986763               |
| SNP_P4_149234_179978 | NW_004516276.1 | Scaffold931 | 179978                  | CC                              | TT              | 1946986765               |
| SNP_P4_149235_180018 | NW_004516276.1 | Scaffold931 | 180018                  | TT                              | CC              | 1946986767               |
| SNP_P4_149236_180088 | NW_004516276.1 | Scaffold931 | 180088                  | AA                              | CC              | 1946986769               |
| SNP_P4_149237_180220 | NW_004516276.1 | Scaffold931 | 180220                  | AA                              | GG              | 1946986771               |
| SNP_P4_149238_180221 | NW_004516276.1 | Scaffold931 | 180221                  | GG                              | AA              | 1946986773               |
| SNP_P4_149241_180614 | NW_004516276.1 | Scaffold931 | 180614                  | AA                              | GG              | 1946986776               |
| SNP_P4_149242_180647 | NW_004516276.1 | Scaffold931 | 180647                  | CC                              | AA              | 1946986778               |
| SNP_P4_149243_180668 | NW_004516276.1 | Scaffold931 | 180668                  | TT                              | GG              | 1946986780               |
| SNP_P4_149244_180707 | NW_004516276.1 | Scaffold931 | 180707                  | AA                              | GG              | 1946986782               |
| SNP_P4_149245_180735 | NW_004516276.1 | Scaffold931 | 180735                  | AA                              | CC              | 1946986784               |
| SNP_P4_149246_180741 | NW_004516276.1 | Scaffold931 | 180741                  | CC                              | AA              | 1946986787               |
| SNP_P4_149247_180851 | NW_004516276.1 | Scaffold931 | 180851                  | TT                              | AA              | 1946986789               |
| SNP_P4_149248_181059 | NW_004516276.1 | Scaffold931 | 181059                  | TT                              | AA              | 1946986791               |
| SNP_P4_149249_181067 | NW_004516276.1 | Scaffold931 | 181067                  | CC                              | TT              | 1946986793               |
| SNP_P4_149250_181118 | NW_004516276.1 | Scaffold931 | 181118                  | TT                              | AA              | 1946986795               |
| SNP_P4_149251_181236 | NW_004516276.1 | Scaffold931 | 181236                  | TT                              | AA              | 1946986797               |
| SNP_P4_149253_181336 | NW_004516276.1 | Scaffold931 | 181336                  | CC                              | TT              | 1946986799               |
| SNP_P4_149254_181469 | NW_004516276.1 | Scaffold931 | 181469                  | TT                              | GG              | 1946986801               |
| SNP_P4_149255_181510 | NW_004516276.1 | Scaffold931 | 181510                  | TT                              | AA              | 1946986804               |
| SNP_P4_149256_181633 | NW_004516276.1 | Scaffold931 | 181633                  | GG                              | AA              | 1946986806               |
| SNP_P4_149257_181846 | NW_004516276.1 | Scaffold931 | 181846                  | TT                              | GG              | 1946986808               |
| SNP_P4_149258_182021 | NW_004516276.1 | Scaffold931 | 182021                  | AA                              | TT              | 1946986810               |
| SNP_P4_149259_190242 | NW_004516276.1 | Scaffold931 | 190242                  | AA                              | GG              | 1946986812               |
| SNP_P4_149260_190674 | NW_004516276.1 | Scaffold931 | 190674                  | GG                              | AA              | 1946986814               |
| SNP_P4_149261_190679 | NW_004516276.1 | Scaffold931 | 190679                  | CC                              | TT              | 1946986816               |
| SNP_P4_149262_190681 | NW_004516276.1 | Scaffold931 | 190681                  | CC                              | AA              | 1946986818               |
| SNP_P4_149263_190693 | NW_004516276.1 | Scaffold931 | 190693                  | GG                              | AA              | 1946986819               |
| SNP_P4_149264_190764 | NW_004516276.1 | Scaffold931 | 190764                  | TT                              | AA              | 1946986821               |
| SNP_P4_149265_190803 | NW_004516276.1 | Scaffold931 | 190803                  | GG                              | AA              | 1946986823               |
| SNP_P4_149266_197196 | NW_004516276.1 | Scaffold931 | 197196                  | TT                              | CC              | 1946986825               |
| SNP_P4_149267_197223 | NW_004516276.1 | Scaffold931 | 197223                  | CC                              | GG              | 1946986827               |
| SNP_P4_149268_202349 | NW_004516276.1 | Scaffold931 | 202349                  | AA                              | GG              | 1946986829               |
| SNP_P4_149269_207529 | NW_004516276.1 | Scaffold931 | 207529                  | GG                              | TT              | 1946986831               |
| SNP_P4_149270_209240 | NW_004516276.1 | Scaffold931 | 209240                  | TT                              | CC              | 1946986833               |
| SNP_P4_149271_209592 | NW_004516276.1 | Scaffold931 | 209592                  | TT                              | CC              | 1946986835               |
| SNP_P4_149272_240682 | NW_004516276.1 | Scaffold931 | 240682                  | TT                              | CC              | 1946986837               |
| SNP_P4_149273_240756 | NW_004516276.1 | Scaffold931 | 240756                  | TT                              | AA              | 1946986839               |
| SNP_P4_149274_242499 | NW_004516276.1 | Scaffold931 | 242499                  | TT                              | AA              | 1946986841               |
| SNP_P4_149276_247590 | NW_004516276.1 | Scaffold931 | 247590                  | TT                              | CC              | 1946986843               |

| SNPs IDs             | Chromosome IDs | Chromosomes | Physical positions (bp) | CDC Frontier (Reference genome) | (ILWC46 & LPNB) | NCBI SNPdb Accession IDs |
|----------------------|----------------|-------------|-------------------------|---------------------------------|-----------------|--------------------------|
| SNP_P4_149277_249182 | NW_004516276.1 | Scaffold931 | 249182                  | AA                              | CC              | 1946986845               |
| SNP_P4_149278_249533 | NW_004516276.1 | Scaffold931 | 249533                  | GG                              | TT              | 1946986847               |
| SNP_P4_149279_249706 | NW_004516276.1 | Scaffold931 | 249706                  | TT                              | GG              | 1946986849               |
| SNP_P4_149280_249823 | NW_004516276.1 | Scaffold931 | 249823                  | GG                              | AA              | 1946986851               |
| SNP_P4_149281_250067 | NW_004516276.1 | Scaffold931 | 250067                  | TT                              | AA              | 1946986853               |
| SNP_P4_149282_250395 | NW_004516276.1 | Scaffold931 | 250395                  | GG                              | CC              | 1946986855               |
| SNP_P4_149283_250561 | NW_004516276.1 | Scaffold931 | 250561                  | GG                              | AA              | 1946986857               |
| SNP_P4_149284_251641 | NW_004516276.1 | Scaffold931 | 251641                  | TT                              | CC              | 1946986859               |
| SNP_P4_149285_251646 | NW_004516276.1 | Scaffold931 | 251646                  | CC                              | TT              | 1946986861               |
| SNP_P4_149286_1784   | NW_004516277.1 | Scaffold933 | 1784                    | CC                              | TT              | 1946986863               |
| SNP_P4_149287_1936   | NW_004516277.1 | Scaffold933 | 1936                    | TT                              | CC              | 1946986865               |
| SNP_P4_149288_2531   | NW_004516277.1 | Scaffold933 | 2531                    | TT                              | CC              | 1946986867               |
| SNP_P4_149291_3865   | NW_004516277.1 | Scaffold933 | 3865                    | TT                              | AA              | 1946986869               |
| SNP_P4_149292_3918   | NW_004516277.1 | Scaffold933 | 3918                    | AA                              | GG              | 1946986871               |
| SNP_P4_149293_3944   | NW_004516277.1 | Scaffold933 | 3944                    | GG                              | AA              | 1946986873               |
| SNP_P4_149296_4600   | NW_004516277.1 | Scaffold933 | 4600                    | TT                              | GG              | 1946986875               |
| SNP_P4_149297_4617   | NW_004516277.1 | Scaffold933 | 4617                    | TT                              | CC              | 1946986877               |
| SNP_P4_149298_4794   | NW_004516277.1 | Scaffold933 | 4794                    | GG                              | AA              | 1946986879               |
| SNP_P4_149299_4924   | NW_004516277.1 | Scaffold933 | 4924                    | AA                              | TT              | 1946986881               |
| SNP_P4_149300_5016   | NW_004516277.1 | Scaffold933 | 5016                    | GG                              | AA              | 1946986884               |
| SNP_P4_149301_5836   | NW_004516277.1 | Scaffold933 | 5836                    | CC                              | AA              | 1946986886               |
| SNP_P4_149303_1117   | NW_004516278.1 | Scaffold934 | 1117                    | GG                              | AA              | 1946986888               |
| SNP_P4_149304_1366   | NW_004516278.1 | Scaffold934 | 1366                    | GG                              | TT              | 1946986890               |
| SNP_P4_149305_1456   | NW_004516278.1 | Scaffold934 | 1456                    | TT                              | GG              | 1946986893               |
| SNP_P4_149306_2182   | NW_004516278.1 | Scaffold934 | 2182                    | CC                              | TT              | 1946986895               |
| SNP_P4_149307_3331   | NW_004516278.1 | Scaffold934 | 3331                    | GG                              | AA              | 1946986897               |
| SNP_P4_149308_3575   | NW_004516278.1 | Scaffold934 | 3575                    | TT                              | CC              | 1946986899               |
| SNP_P4_149309_3652   | NW_004516278.1 | Scaffold934 | 3652                    | AA                              | TT              | 1946986901               |
| SNP_P4_149310_25605  | NW_004516279.1 | Scaffold937 | 25605                   | GG                              | TT              | 1946986903               |
| SNP_P4_149311_53421  | NW_004516279.1 | Scaffold937 | 53421                   | AA                              | GG              | 1946986905               |
| SNP_P4_149312_58436  | NW_004516279.1 | Scaffold937 | 58436                   | CC                              | TT              | 1946986908               |
| SNP_P4_149313_68401  | NW_004516279.1 | Scaffold937 | 68401                   | CC                              | TT              | 1946986910               |
| SNP_P4_149314_79161  | NW_004516279.1 | Scaffold937 | 79161                   | CC                              | AA              | 1946986912               |
| SNP_P4_149315_81235  | NW_004516279.1 | Scaffold937 | 81235                   | AA                              | GG              | 1946986914               |
| SNP_P4_149317_142711 | NW_004516279.1 | Scaffold937 | 142711                  | GG                              | TT              | 1946986917               |
| SNP_P4_149318_165361 | NW_004516279.1 | Scaffold937 | 165361                  | TT                              | GG              | 1946986919               |
| SNP_P4_149319_165371 | NW_004516279.1 | Scaffold937 | 165371                  | TT                              | CC              | 1946986921               |
| SNP_P4_149320_165414 | NW_004516279.1 | Scaffold937 | 165414                  | AA                              | GG              | 1946986923               |
| SNP_P4_149321_166010 | NW_004516279.1 | Scaffold937 | 166010                  | GG                              | AA              | 1946986926               |
| SNP_P4_149322_166022 | NW_004516279.1 | Scaffold937 | 166022                  | AA                              | GG              | 1946986928               |
| SNP_P4_149323_166036 | NW_004516279.1 | Scaffold937 | 166036                  | AA                              | TT              | 1946986930               |
| SNP_P4_149324_166181 | NW_004516279.1 | Scaffold937 | 166181                  | AA                              | GG              | 1946986932               |

| SNPs IDs             | Chromosome IDs | Chromosomes | Physical positions (bp) | CDC Frontier (Reference genome) | (ILWC46 & LPNB) | NCBI SNPdb Accession IDs |
|----------------------|----------------|-------------|-------------------------|---------------------------------|-----------------|--------------------------|
| SNP_P4_149326_189368 | NW_004516279.1 | Scaffold937 | 189368                  | AA                              | TT              | 1946986934               |
| SNP_P4_149328_207041 | NW_004516279.1 | Scaffold937 | 207041                  | TT                              | CC              | 1946986937               |
| SNP_P4_149329_207042 | NW_004516279.1 | Scaffold937 | 207042                  | TT                              | CC              | 1946986939               |
| SNP_P4_149330_207142 | NW_004516279.1 | Scaffold937 | 207142                  | AA                              | GG              | 1946986941               |
| SNP_P4_149331_207201 | NW_004516279.1 | Scaffold937 | 207201                  | GG                              | AA              | 1946986943               |
| SNP_P4_149332_207207 | NW_004516279.1 | Scaffold937 | 207207                  | CC                              | TT              | 1946986945               |
| SNP_P4_149333_207249 | NW_004516279.1 | Scaffold937 | 207249                  | GG                              | AA              | 1946986948               |
| SNP_P4_149334_207264 | NW_004516279.1 | Scaffold937 | 207264                  | AA                              | CC              | 1946986951               |
| SNP_P4_149335_207280 | NW_004516279.1 | Scaffold937 | 207280                  | CC                              | TT              | 1946986953               |
| SNP_P4_149336_207307 | NW_004516279.1 | Scaffold937 | 207307                  | CC                              | TT              | 1946986955               |
| SNP_P4_149337_207497 | NW_004516279.1 | Scaffold937 | 207497                  | GG                              | AA              | 1946986957               |
| SNP_P4_149338_207507 | NW_004516279.1 | Scaffold937 | 207507                  | CC                              | TT              | 1946986959               |
| SNP_P4_149339_207563 | NW_004516279.1 | Scaffold937 | 207563                  | CC                              | GG              | 1946986962               |
| SNP_P4_149340_207817 | NW_004516279.1 | Scaffold937 | 207817                  | AA                              | CC              | 1946986964               |
| SNP_P4_149341_207819 | NW_004516279.1 | Scaffold937 | 207819                  | CC                              | TT              | 1946986967               |
| SNP_P4_149342_432    | NW_004516281.1 | Scaffold939 | 432                     | CC                              | TT              | 1946986969               |
| SNP_P4_149343_458    | NW_004516281.1 | Scaffold939 | 458                     | CC                              | TT              | 1946986971               |
| SNP_P4_149344_607    | NW_004516281.1 | Scaffold939 | 607                     | GG                              | TT              | 1946986973               |
| SNP_P4_149345_655    | NW_004516281.1 | Scaffold939 | 655                     | GG                              | AA              | 1946986974               |
| SNP_P4_149346_677    | NW_004516281.1 | Scaffold939 | 677                     | CC                              | TT              | 1946986976               |
| SNP_P4_149347_699    | NW_004516281.1 | Scaffold939 | 699                     | GG                              | TT              | 1946986979               |
| SNP_P4_149348_710    | NW_004516281.1 | Scaffold939 | 710                     | GG                              | TT              | 1946986981               |
| SNP_P4_149349_934    | NW_004516281.1 | Scaffold939 | 934                     | TT                              | GG              | 1946986983               |
| SNP_P4_149350_978    | NW_004516281.1 | Scaffold939 | 978                     | CC                              | TT              | 1946986984               |
| SNP_P4_149353_1233   | NW_004516281.1 | Scaffold939 | 1233                    | AA                              | TT              | 1946986986               |
| SNP_P4_149354_1290   | NW_004516281.1 | Scaffold939 | 1290                    | CC                              | TT              | 1946986988               |
| SNP_P4_149355_1306   | NW_004516281.1 | Scaffold939 | 1306                    | AA                              | GG              | 1946986990               |
| SNP_P4_149356_1313   | NW_004516281.1 | Scaffold939 | 1313                    | CC                              | TT              | 1946986992               |
| SNP_P4_149357_24665  | NW_004516283.1 | Scaffold943 | 24665                   | TT                              | CC              | 1946986994               |
| SNP_P4_149358_35523  | NW_004516283.1 | Scaffold943 | 35523                   | GG                              | TT              | 1946986996               |
| SNP_P4_149359_36658  | NW_004516283.1 | Scaffold943 | 36658                   | CC                              | TT              | 1946986998               |
| SNP_P4_149361_42834  | NW_004516283.1 | Scaffold943 | 42834                   | AA                              | TT              | 1946987000               |
| SNP_P4_149362_42873  | NW_004516283.1 | Scaffold943 | 42873                   | GG                              | AA              | 1946987002               |
| SNP_P4_149363_42904  | NW_004516283.1 | Scaffold943 | 42904                   | CC                              | AA              | 1946987004               |
| SNP_P4_149364_42915  | NW_004516283.1 | Scaffold943 | 42915                   | AA                              | TT              | 1946987006               |
| SNP_P4_149366_42920  | NW_004516283.1 | Scaffold943 | 42920                   | CC                              | AA              | 1946987008               |
| SNP_P4_149367_42930  | NW_004516283.1 | Scaffold943 | 42930                   | AA                              | TT              | 1946987009               |
| SNP_P4_149368_42938  | NW_004516283.1 | Scaffold943 | 42938                   | TT                              | AA              | 1946987010               |
| SNP_P4_149369_43774  | NW_004516283.1 | Scaffold943 | 43774                   | GG                              | AA              | 1946987011               |
| SNP_P4_149370_45185  | NW_004516283.1 | Scaffold943 | 45185                   | CC                              | AA              | 1946987012               |
| SNP_P4_149372_119005 | NW_004516283.1 | Scaffold943 | 119005                  | AA                              | TT              | 1946987013               |
| SNP_P4_149373_119011 | NW_004516283.1 | Scaffold943 | 119011                  | AA                              | GG              | 1946987014               |

| SNPs IDs             | Chromosome IDs | Chromosomes | Physical positions (bp) | CDC Frontier (Reference genome) | (ILWC46 & LPNB) | NCBI SNPdb Accession IDs |
|----------------------|----------------|-------------|-------------------------|---------------------------------|-----------------|--------------------------|
| SNP_P4_149374_119341 | NW_004516283.1 | Scaffold943 | 119341                  | CC                              | GG              | 1946987015               |
| SNP_P4_149375_119594 | NW_004516283.1 | Scaffold943 | 119594                  | CC                              | GG              | 1946987017               |
| SNP_P4_149376_119624 | NW_004516283.1 | Scaffold943 | 119624                  | AA                              | GG              | 1946987019               |
| SNP_P4_149377_119783 | NW_004516283.1 | Scaffold943 | 119783                  | CC                              | TT              | 1946987021               |
| SNP_P4_149378_119789 | NW_004516283.1 | Scaffold943 | 119789                  | AA                              | GG              | 1946987023               |
| SNP_P4_149379_119843 | NW_004516283.1 | Scaffold943 | 119843                  | TT                              | AA              | 1946987025               |
| SNP_P4_149380_125451 | NW_004516283.1 | Scaffold943 | 125451                  | GG                              | AA              | 1946987027               |
| SNP_P4_149382_143728 | NW_004516283.1 | Scaffold943 | 143728                  | CC                              | TT              | 1946987029               |
| SNP_P4_149383_144375 | NW_004516283.1 | Scaffold943 | 144375                  | AA                              | GG              | 1946987031               |
| SNP_P4_149384_145154 | NW_004516283.1 | Scaffold943 | 145154                  | CC                              | AA              | 1946987033               |
| SNP_P4_149385_162797 | NW_004516283.1 | Scaffold943 | 162797                  | TT                              | CC              | 1946987035               |
| SNP_P4_149386_162835 | NW_004516283.1 | Scaffold943 | 162835                  | TT                              | CC              | 1946987037               |
| SNP_P4_149387_162857 | NW_004516283.1 | Scaffold943 | 162857                  | AA                              | TT              | 1946987039               |
| SNP_P4_149388_162861 | NW_004516283.1 | Scaffold943 | 162861                  | AA                              | GG              | 1946987041               |
| SNP_P4_149389_163031 | NW_004516283.1 | Scaffold943 | 163031                  | CC                              | AA              | 1946987043               |
| SNP_P4_149391_163472 | NW_004516283.1 | Scaffold943 | 163472                  | TT                              | CC              | 1946987045               |
| SNP_P4_149392_163473 | NW_004516283.1 | Scaffold943 | 163473                  | TT                              | AA              | 1946987047               |
| SNP_P4_149393_166210 | NW_004516283.1 | Scaffold943 | 166210                  | TT                              | CC              | 1946987049               |
| SNP_P4_149394_166263 | NW_004516283.1 | Scaffold943 | 166263                  | AA                              | GG              | 1946987051               |
| SNP_P4_149395_166301 | NW_004516283.1 | Scaffold943 | 166301                  | CC                              | TT              | 1946987053               |
| SNP_P4_149397_219002 | NW_004516283.1 | Scaffold943 | 219002                  | CC                              | TT              | 1946987055               |
| SNP_P4_149398_219026 | NW_004516283.1 | Scaffold943 | 219026                  | AA                              | GG              | 1946987057               |
| SNP_P4_149399_219038 | NW_004516283.1 | Scaffold943 | 219038                  | CC                              | TT              | 1946987061               |
| SNP_P4_149400_237426 | NW_004516283.1 | Scaffold943 | 237426                  | GG                              | AA              | 1946987063               |
| SNP_P4_149401_242214 | NW_004516283.1 | Scaffold943 | 242214                  | CC                              | TT              | 1946987065               |
| SNP_P4_149402_242462 | NW_004516283.1 | Scaffold943 | 242462                  | AA                              | GG              | 1946987067               |
| SNP_P4_149403_255362 | NW_004516283.1 | Scaffold943 | 255362                  | GG                              | TT              | 1946987069               |
| SNP_P4_149404_256287 | NW_004516283.1 | Scaffold943 | 256287                  | GG                              | AA              | 1946987071               |
| SNP_P4_149405_264121 | NW_004516283.1 | Scaffold943 | 264121                  | GG                              | AA              | 1946987073               |
| SNP_P4_149406_266673 | NW_004516283.1 | Scaffold943 | 266673                  | GG                              | TT              | 1946987075               |
| SNP_P4_149407_266964 | NW_004516283.1 | Scaffold943 | 266964                  | TT                              | CC              | 1946987078               |
| SNP_P4_149409_267676 | NW_004516283.1 | Scaffold943 | 267676                  | TT                              | CC              | 1946987080               |
| SNP_P4_149410_267728 | NW_004516283.1 | Scaffold943 | 267728                  | GG                              | CC              | 1946987082               |
| SNP_P4_149411_118    | NW_004516284.1 | Scaffold944 | 118                     | AA                              | GG              | 1946987084               |
| SNP_P4_149412_226    | NW_004516284.1 | Scaffold944 | 226                     | GG                              | AA              | 1946987086               |
| SNP_P4_149413_296    | NW_004516284.1 | Scaffold944 | 296                     | GG                              | AA              | 1946987088               |
| SNP_P4_149414_521    | NW_004516284.1 | Scaffold944 | 521                     | GG                              | AA              | 1946987089               |
| SNP_P4_149415_528    | NW_004516284.1 | Scaffold944 | 528                     | TT                              | CC              | 1946987091               |
| SNP_P4_149416_610    | NW_004516284.1 | Scaffold944 | 610                     | AA                              | GG              | 1946987093               |
| SNP_P4_149418_703    | NW_004516284.1 | Scaffold944 | 703                     | CC                              | AA              | 1946987095               |
| SNP_P4_149419_752    | NW_004516284.1 | Scaffold944 | 752                     | CC                              | GG              | 1946987098               |
| SNP_P4_149420_803    | NW_004516284.1 | Scaffold944 | 803                     | GG                              | AA              | 1946987100               |

| SNPs IDs           | Chromosome IDs | Chromosomes | Physical positions (bp) | CDC Frontier (Reference genome) | (ILWC46 & LPNB) | NCBI SNPdb Accession IDs |
|--------------------|----------------|-------------|-------------------------|---------------------------------|-----------------|--------------------------|
| SNP_P4_149421_879  | NW_004516284.1 | Scaffold944 | 879                     | GG                              | TT              | 1946987102               |
| SNP_P4_149422_1405 | NW_004516284.1 | Scaffold944 | 1405                    | CC                              | TT              | 1946987104               |
| SNP_P4_149423_1724 | NW_004516284.1 | Scaffold944 | 1724                    | TT                              | CC              | 1946987106               |
| SNP_P4_149424_1725 | NW_004516284.1 | Scaffold944 | 1725                    | GG                              | TT              | 1946987108               |
| SNP_P4_149425_1733 | NW_004516284.1 | Scaffold944 | 1733                    | AA                              | GG              | 1946987110               |
| SNP_P4_149426_1849 | NW_004516284.1 | Scaffold944 | 1849                    | AA                              | GG              | 1946987112               |
| SNP_P4_149427_2104 | NW_004516284.1 | Scaffold944 | 2104                    | CC                              | GG              | 1946987114               |
| SNP_P4_149428_2352 | NW_004516284.1 | Scaffold944 | 2352                    | TT                              | AA              | 1946987116               |
| SNP_P4_149430_2442 | NW_004516284.1 | Scaffold944 | 2442                    | AA                              | GG              | 1946987118               |
| SNP_P4_149432_2587 | NW_004516284.1 | Scaffold944 | 2587                    | CC                              | TT              | 1946987121               |
| SNP_P4_149433_2732 | NW_004516284.1 | Scaffold944 | 2732                    | AA                              | TT              | 1946987123               |
| SNP_P4_149434_2803 | NW_004516284.1 | Scaffold944 | 2803                    | TT                              | CC              | 1946987125               |
| SNP_P4_149435_2868 | NW_004516284.1 | Scaffold944 | 2868                    | GG                              | CC              | 1946987127               |
| SNP_P4_149438_3330 | NW_004516284.1 | Scaffold944 | 3330                    | GG                              | AA              | 1946987129               |
| SNP_P4_149440_3358 | NW_004516284.1 | Scaffold944 | 3358                    | TT                              | CC              | 1946987131               |
| SNP_P4_149441_3461 | NW_004516284.1 | Scaffold944 | 3461                    | CC                              | GG              | 1946987133               |
| SNP_P4_149442_3636 | NW_004516284.1 | Scaffold944 | 3636                    | GG                              | AA              | 1946987135               |
| SNP_P4_149443_3656 | NW_004516284.1 | Scaffold944 | 3656                    | AA                              | GG              | 1946987137               |
| SNP_P4_149444_2328 | NW_004516285.1 | Scaffold945 | 2328                    | GG                              | AA              | 1946987139               |
| SNP_P4_149445_2539 | NW_004516285.1 | Scaffold945 | 2539                    | AA                              | GG              | 1946987141               |
| SNP_P4_149446_2549 | NW_004516285.1 | Scaffold945 | 2549                    | CC                              | TT              | 1946987143               |
| SNP_P4_149447_2556 | NW_004516285.1 | Scaffold945 | 2556                    | CC                              | AA              | 1946987146               |
| SNP_P4_149448_64   | NW_004516287.1 | Scaffold948 | 64                      | CC                              | TT              | 1946987148               |
| SNP_P4_149449_80   | NW_004516287.1 | Scaffold948 | 80                      | CC                              | AA              | 1946987150               |
| SNP_P4_149450_94   | NW_004516287.1 | Scaffold948 | 94                      | AA                              | GG              | 1946987152               |
| SNP_P4_149451_120  | NW_004516287.1 | Scaffold948 | 120                     | AA                              | GG              | 1946987154               |
| SNP_P4_149452_182  | NW_004516287.1 | Scaffold948 | 182                     | AA                              | CC              | 1946987156               |
| SNP_P4_149453_295  | NW_004516287.1 | Scaffold948 | 295                     | AA                              | CC              | 1946987158               |
| SNP_P4_149454_329  | NW_004516287.1 | Scaffold948 | 329                     | CC                              | TT              | 1946987160               |
| SNP_P4_149455_429  | NW_004516287.1 | Scaffold948 | 429                     | CC                              | AA              | 1946987162               |
| SNP_P4_149456_504  | NW_004516287.1 | Scaffold948 | 504                     | GG                              | AA              | 1946987164               |
| SNP_P4_149457_506  | NW_004516287.1 | Scaffold948 | 506                     | CC                              | AA              | 1946987166               |
| SNP_P4_149458_533  | NW_004516287.1 | Scaffold948 | 533                     | TT                              | CC              | 1946987168               |
| SNP_P4_149459_576  | NW_004516287.1 | Scaffold948 | 576                     | CC                              | AA              | 1946987170               |
| SNP_P4_149460_593  | NW_004516287.1 | Scaffold948 | 593                     | CC                              | AA              | 1946987172               |
| SNP_P4_149461_748  | NW_004516287.1 | Scaffold948 | 748                     | TT                              | CC              | 1946987173               |
| SNP_P4_149462_750  | NW_004516287.1 | Scaffold948 | 750                     | GG                              | CC              | 1946987175               |
| SNP_P4_149463_757  | NW_004516287.1 | Scaffold948 | 757                     | CC                              | TT              | 1946987177               |
| SNP_P4_149464_763  | NW_004516287.1 | Scaffold948 | 763                     | AA                              | TT              | 1946987179               |
| SNP_P4_149465_809  | NW_004516287.1 | Scaffold948 | 809                     | GG                              | AA              | 1946987181               |
| SNP_P4_149466_892  | NW_004516287.1 | Scaffold948 | 892                     | CC                              | AA              | 1946987183               |
| SNP_P4_149467_988  | NW_004516287.1 | Scaffold948 | 988                     | GG                              | TT              | 1946987185               |

| SNPs IDs             | Chromosome IDs | Chromosomes | Physical positions (bp) | CDC Frontier (Reference genome) | (ILWC46 & LPNB) | NCBI SNPdb Accession IDs |
|----------------------|----------------|-------------|-------------------------|---------------------------------|-----------------|--------------------------|
| SNP_P4_149468_1183   | NW_004516287.1 | Scaffold948 | 1183                    | GG                              | CC              | 1946987187               |
| SNP_P4_149469_1239   | NW_004516287.1 | Scaffold948 | 1239                    | TT                              | AA              | 1946987189               |
| SNP_P4_149470_1473   | NW_004516287.1 | Scaffold948 | 1473                    | GG                              | AA              | 1946987191               |
| SNP_P4_149471_1493   | NW_004516287.1 | Scaffold948 | 1493                    | GG                              | AA              | 1946987192               |
| SNP_P4_149472_1652   | NW_004516287.1 | Scaffold948 | 1652                    | CC                              | GG              | 1946987194               |
| SNP_P4_149473_1772   | NW_004516287.1 | Scaffold948 | 1772                    | CC                              | AA              | 1946987196               |
| SNP_P4_149474_1786   | NW_004516287.1 | Scaffold948 | 1786                    | AA                              | GG              | 1946987198               |
| SNP_P4_149475_1821   | NW_004516287.1 | Scaffold948 | 1821                    | TT                              | GG              | 1946987200               |
| SNP_P4_149476_24470  | NW_004516287.1 | Scaffold948 | 24470                   | AA                              | GG              | 1946987202               |
| SNP_P4_149477_24479  | NW_004516287.1 | Scaffold948 | 24479                   | CC                              | TT              | 1946987204               |
| SNP_P4_149478_24861  | NW_004516287.1 | Scaffold948 | 24861                   | AA                              | GG              | 1946987206               |
| SNP_P4_149479_30602  | NW_004516287.1 | Scaffold948 | 30602                   | GG                              | AA              | 1946987208               |
| SNP_P4_149480_30684  | NW_004516287.1 | Scaffold948 | 30684                   | GG                              | AA              | 1946987210               |
| SNP_P4_149481_36354  | NW_004516287.1 | Scaffold948 | 36354                   | CC                              | TT              | 1946987212               |
| SNP_P4_149482_52358  | NW_004516287.1 | Scaffold948 | 52358                   | AA                              | GG              | 1946987214               |
| SNP_P4_149483_52474  | NW_004516287.1 | Scaffold948 | 52474                   | TT                              | CC              | 1946987216               |
| SNP_P4_149484_52520  | NW_004516287.1 | Scaffold948 | 52520                   | GG                              | AA              | 1946987218               |
| SNP_P4_149485_52522  | NW_004516287.1 | Scaffold948 | 52522                   | GG                              | AA              | 1946987220               |
| SNP_P4_149486_52531  | NW_004516287.1 | Scaffold948 | 52531                   | TT                              | AA              | 1946987222               |
| SNP_P4_149487_52599  | NW_004516287.1 | Scaffold948 | 52599                   | AA                              | GG              | 1946987225               |
| SNP_P4_149488_52759  | NW_004516287.1 | Scaffold948 | 52759                   | TT                              | CC              | 1946987227               |
| SNP_P4_149489_52981  | NW_004516287.1 | Scaffold948 | 52981                   | GG                              | AA              | 1946987229               |
| SNP_P4_149490_67115  | NW_004516287.1 | Scaffold948 | 67115                   | GG                              | AA              | 1946987231               |
| SNP_P4_149491_108637 | NW_004516287.1 | Scaffold948 | 108637                  | AA                              | CC              | 1946987233               |
| SNP_P4_149494_131449 | NW_004516287.1 | Scaffold948 | 131449                  | TT                              | AA              | 1946987235               |
| SNP_P4_149495_138452 | NW_004516287.1 | Scaffold948 | 138452                  | GG                              | AA              | 1946987237               |
| SNP_P4_149496_144190 | NW_004516287.1 | Scaffold948 | 144190                  | CC                              | TT              | 1946987239               |
| SNP_P4_149497_148163 | NW_004516287.1 | Scaffold948 | 148163                  | CC                              | TT              | 1946987241               |
| SNP_P4_149498_148334 | NW_004516287.1 | Scaffold948 | 148334                  | CC                              | TT              | 1946987243               |
| SNP_P4_149499_148351 | NW_004516287.1 | Scaffold948 | 148351                  | CC                              | TT              | 1946987246               |
| SNP_P4_149500_148364 | NW_004516287.1 | Scaffold948 | 148364                  | CC                              | TT              | 1946987248               |
| SNP_P4_149501_148368 | NW_004516287.1 | Scaffold948 | 148368                  | AA                              | GG              | 1946987250               |
| SNP_P4_149502_148398 | NW_004516287.1 | Scaffold948 | 148398                  | GG                              | AA              | 1946987251               |
| SNP_P4_149503_148435 | NW_004516287.1 | Scaffold948 | 148435                  | GG                              | CC              | 1946987252               |
| SNP_P4_149504_149214 | NW_004516287.1 | Scaffold948 | 149214                  | GG                              | AA              | 1946987253               |
| SNP_P4_149505_157851 | NW_004516287.1 | Scaffold948 | 157851                  | AA                              | TT              | 1946987254               |
| SNP_P4_149508_180079 | NW_004516287.1 | Scaffold948 | 180079                  | CC                              | TT              | 1946987256               |
| SNP_P4_149509_180093 | NW_004516287.1 | Scaffold948 | 180093                  | CC                              | GG              | 1946987259               |
| SNP_P4_149510_180113 | NW_004516287.1 | Scaffold948 | 180113                  | TT                              | GG              | 1946987261               |
| SNP_P4_149511_180482 | NW_004516287.1 | Scaffold948 | 180482                  | TT                              | CC              | 1946987263               |
| SNP_P4_149512_186815 | NW_004516287.1 | Scaffold948 | 186815                  | TT                              | CC              | 1946987265               |
| SNP_P4_149513_189423 | NW_004516287.1 | Scaffold948 | 189423                  | TT                              | CC              | 1946987267               |



| SNPs IDs             | Chromosome IDs | Chromosomes | Physical positions (bp) | CDC Frontier (Reference genome) | (ILWC46 & LPNB) | NCBI SNPdb Accession IDs |
|----------------------|----------------|-------------|-------------------------|---------------------------------|-----------------|--------------------------|
| SNP_P4_149514_189424 | NW_004516287.1 | Scaffold948 | 189424                  | GG                              | AA              | 1946987269               |
| SNP_P4_149515_189455 | NW_004516287.1 | Scaffold948 | 189455                  | AA                              | GG              | 1946987271               |
| SNP_P4_149516_189459 | NW_004516287.1 | Scaffold948 | 189459                  | TT                              | GG              | 1946987273               |
| SNP_P4_149517_3625   | NW_004516288.1 | Scaffold949 | 3625                    | GG                              | AA              | 1946987275               |
| SNP_P4_149519_3850   | NW_004516288.1 | Scaffold949 | 3850                    | TT                              | CC              | 1946987277               |
| SNP_P4_149520_3934   | NW_004516288.1 | Scaffold949 | 3934                    | CC                              | TT              | 1946987279               |
| SNP_P4_149521_3950   | NW_004516288.1 | Scaffold949 | 3950                    | AA                              | TT              | 1946987281               |
| SNP_P4_149522_3983   | NW_004516288.1 | Scaffold949 | 3983                    | AA                              | TT              | 1946987283               |
| SNP_P4_149523_4041   | NW_004516288.1 | Scaffold949 | 4041                    | CC                              | TT              | 1946987285               |
| SNP_P4_149524_4043   | NW_004516288.1 | Scaffold949 | 4043                    | AA                              | GG              | 1946987287               |
| SNP_P4_149525_4098   | NW_004516288.1 | Scaffold949 | 4098                    | CC                              | TT              | 1946987289               |
| SNP_P4_149526_11929  | NW_004516288.1 | Scaffold949 | 11929                   | TT                              | AA              | 1946987291               |
| SNP_P4_149527_12271  | NW_004516288.1 | Scaffold949 | 12271                   | GG                              | AA              | 1946987293               |
| SNP_P4_149528_12284  | NW_004516288.1 | Scaffold949 | 12284                   | GG                              | AA              | 1946987295               |
| SNP_P4_149529_12285  | NW_004516288.1 | Scaffold949 | 12285                   | GG                              | AA              | 1946987297               |
| SNP_P4_149530_12299  | NW_004516288.1 | Scaffold949 | 12299                   | GG                              | AA              | 1946987299               |
| SNP_P4_149531_12304  | NW_004516288.1 | Scaffold949 | 12304                   | AA                              | GG              | 1946987301               |
| SNP_P4_149532_12321  | NW_004516288.1 | Scaffold949 | 12321                   | CC                              | GG              | 1946987303               |
| SNP_P4_149533_12344  | NW_004516288.1 | Scaffold949 | 12344                   | GG                              | CC              | 1946987305               |
| SNP_P4_149536_21249  | NW_004516288.1 | Scaffold949 | 21249                   | AA                              | GG              | 1946987307               |
| SNP_P4_149537_21252  | NW_004516288.1 | Scaffold949 | 21252                   | TT                              | GG              | 1946987309               |
| SNP_P4_149538_21253  | NW_004516288.1 | Scaffold949 | 21253                   | CC                              | TT              | 1946987311               |
| SNP_P4_149539_21254  | NW_004516288.1 | Scaffold949 | 21254                   | AA                              | CC              | 1946987313               |
| SNP_P4_149540_21270  | NW_004516288.1 | Scaffold949 | 21270                   | GG                              | TT              | 1946987315               |
| SNP_P4_149541_21272  | NW_004516288.1 | Scaffold949 | 21272                   | AA                              | CC              | 1946987317               |
| SNP_P4_149542_21274  | NW_004516288.1 | Scaffold949 | 21274                   | AA                              | GG              | 1946987319               |
| SNP_P4_149543_21278  | NW_004516288.1 | Scaffold949 | 21278                   | AA                              | TT              | 1946987321               |
| SNP_P4_149544_26228  | NW_004516288.1 | Scaffold949 | 26228                   | GG                              | AA              | 1946987322               |
| SNP_P4_149545_26293  | NW_004516288.1 | Scaffold949 | 26293                   | CC                              | TT              | 1946987324               |
| SNP_P4_149546_26295  | NW_004516288.1 | Scaffold949 | 26295                   | CC                              | TT              | 1946987326               |
| SNP_P4_149547_26299  | NW_004516288.1 | Scaffold949 | 26299                   | CC                              | TT              | 1946987328               |
| SNP_P4_149548_26403  | NW_004516288.1 | Scaffold949 | 26403                   | TT                              | CC              | 1946987330               |
| SNP_P4_149549_26457  | NW_004516288.1 | Scaffold949 | 26457                   | GG                              | TT              | 1946987332               |
| SNP_P4_149550_26479  | NW_004516288.1 | Scaffold949 | 26479                   | AA                              | CC              | 1946987334               |
| SNP_P4_149551_26485  | NW_004516288.1 | Scaffold949 | 26485                   | TT                              | CC              | 1946987336               |
| SNP_P4_149552_26495  | NW_004516288.1 | Scaffold949 | 26495                   | CC                              | AA              | 1946987338               |
| SNP_P4_149553_26501  | NW_004516288.1 | Scaffold949 | 26501                   | GG                              | CC              | 1946987340               |
| SNP_P4_149554_26528  | NW_004516288.1 | Scaffold949 | 26528                   | TT                              | AA              | 1946987342               |
| SNP_P4_149555_26529  | NW_004516288.1 | Scaffold949 | 26529                   | GG                              | TT              | 1946987344               |
| SNP_P4_149557_26696  | NW_004516288.1 | Scaffold949 | 26696                   | GG                              | CC              | 1946987346               |
| SNP_P4_149558_26718  | NW_004516288.1 | Scaffold949 | 26718                   | CC                              | GG              | 1946987348               |
| SNP_P4_149559_26728  | NW_004516288.1 | Scaffold949 | 26728                   | GG                              | AA              | 1946987350               |

| SNPs IDs             | Chromosome IDs | Chromosomes | Physical positions (bp) | CDC Frontier (Reference genome) | (ILWC46 & LPNB) | NCBI SNPdb Accession IDs |
|----------------------|----------------|-------------|-------------------------|---------------------------------|-----------------|--------------------------|
| SNP_P4_149560_26904  | NW_004516288.1 | Scaffold949 | 26904                   | AA                              | CC              | 1946987353               |
| SNP_P4_149561_29436  | NW_004516288.1 | Scaffold949 | 29436                   | AA                              | TT              | 1946987355               |
| SNP_P4_149562_29458  | NW_004516288.1 | Scaffold949 | 29458                   | AA                              | GG              | 1946987357               |
| SNP_P4_149563_29495  | NW_004516288.1 | Scaffold949 | 29495                   | CC                              | TT              | 1946987359               |
| SNP_P4_149564_33456  | NW_004516288.1 | Scaffold949 | 33456                   | TT                              | CC              | 1946987361               |
| SNP_P4_149565_33500  | NW_004516288.1 | Scaffold949 | 33500                   | AA                              | GG              | 1946987363               |
| SNP_P4_149566_33522  | NW_004516288.1 | Scaffold949 | 33522                   | GG                              | AA              | 1946987365               |
| SNP_P4_149567_56440  | NW_004516288.1 | Scaffold949 | 56440                   | AA                              | TT              | 1946987367               |
| SNP_P4_149568_56456  | NW_004516288.1 | Scaffold949 | 56456                   | TT                              | AA              | 1946987369               |
| SNP_P4_149569_56462  | NW_004516288.1 | Scaffold949 | 56462                   | TT                              | AA              | 1946987371               |
| SNP_P4_149570_70023  | NW_004516288.1 | Scaffold949 | 70023                   | CC                              | TT              | 1946987374               |
| SNP_P4_149571_72153  | NW_004516288.1 | Scaffold949 | 72153                   | AA                              | CC              | 1946987376               |
| SNP_P4_149572_77620  | NW_004516288.1 | Scaffold949 | 77620                   | GG                              | CC              | 1946987378               |
| SNP_P4_149573_87070  | NW_004516288.1 | Scaffold949 | 87070                   | AA                              | CC              | 1946987380               |
| SNP_P4_149574_87080  | NW_004516288.1 | Scaffold949 | 87080                   | CC                              | TT              | 1946987382               |
| SNP_P4_149575_87163  | NW_004516288.1 | Scaffold949 | 87163                   | AA                              | CC              | 1946987384               |
| SNP_P4_149576_88059  | NW_004516288.1 | Scaffold949 | 88059                   | TT                              | CC              | 1946987386               |
| SNP_P4_149577_88339  | NW_004516288.1 | Scaffold949 | 88339                   | TT                              | GG              | 1946987388               |
| SNP_P4_149578_88374  | NW_004516288.1 | Scaffold949 | 88374                   | GG                              | TT              | 1946987391               |
| SNP_P4_149579_88394  | NW_004516288.1 | Scaffold949 | 88394                   | GG                              | AA              | 1946987394               |
| SNP_P4_149580_96094  | NW_004516288.1 | Scaffold949 | 96094                   | TT                              | GG              | 1946987396               |
| SNP_P4_149581_96331  | NW_004516288.1 | Scaffold949 | 96331                   | GG                              | CC              | 1946987398               |
| SNP_P4_149582_101914 | NW_004516288.1 | Scaffold949 | 101914                  | CC                              | GG              | 1946987400               |
| SNP_P4_149583_102108 | NW_004516288.1 | Scaffold949 | 102108                  | TT                              | CC              | 1946987402               |
| SNP_P4_149584_102116 | NW_004516288.1 | Scaffold949 | 102116                  | TT                              | GG              | 1946987405               |
| SNP_P4_149585_102126 | NW_004516288.1 | Scaffold949 | 102126                  | GG                              | TT              | 1946987407               |
| SNP_P4_149586_102127 | NW_004516288.1 | Scaffold949 | 102127                  | TT                              | CC              | 1946987409               |
| SNP_P4_149587_102148 | NW_004516288.1 | Scaffold949 | 102148                  | CC                              | TT              | 1946987411               |
| SNP_P4_149588_102185 | NW_004516288.1 | Scaffold949 | 102185                  | AA                              | TT              | 1946987414               |
| SNP_P4_149589_102195 | NW_004516288.1 | Scaffold949 | 102195                  | AA                              | GG              | 1946987416               |
| SNP_P4_149590_103608 | NW_004516288.1 | Scaffold949 | 103608                  | TT                              | AA              | 1946987418               |
| SNP_P4_149591_103646 | NW_004516288.1 | Scaffold949 | 103646                  | AA                              | TT              | 1946987420               |
| SNP_P4_149592_103659 | NW_004516288.1 | Scaffold949 | 103659                  | CC                              | GG              | 1946987422               |
| SNP_P4_149593_103829 | NW_004516288.1 | Scaffold949 | 103829                  | CC                              | AA              | 1946987424               |
| SNP_P4_149594_103830 | NW_004516288.1 | Scaffold949 | 103830                  | CC                              | TT              | 1946987426               |
| SNP_P4_149595_103851 | NW_004516288.1 | Scaffold949 | 103851                  | CC                              | AA              | 1946987428               |
| SNP_P4_149596_103875 | NW_004516288.1 | Scaffold949 | 103875                  | TT                              | GG              | 1946987430               |
| SNP_P4_149597_103977 | NW_004516288.1 | Scaffold949 | 103977                  | TT                              | AA              | 1946987432               |
| SNP_P4_149598_104095 | NW_004516288.1 | Scaffold949 | 104095                  | CC                              | TT              | 1946987434               |
| SNP_P4_149599_104196 | NW_004516288.1 | Scaffold949 | 104196                  | GG                              | TT              | 1946987436               |
| SNP_P4_149600_104362 | NW_004516288.1 | Scaffold949 | 104362                  | TT                              | AA              | 1946987438               |
| SNP_P4_149601_104479 | NW_004516288.1 | Scaffold949 | 104479                  | CC                              | GG              | 1946987440               |

| SNPs IDs             | Chromosome IDs | Chromosomes | Physical positions (bp) | CDC Frontier (Reference genome) | (ILWC46 & LPNB) | NCBI SNPdb Accession IDs |
|----------------------|----------------|-------------|-------------------------|---------------------------------|-----------------|--------------------------|
| SNP_P4_149602_104484 | NW_004516288.1 | Scaffold949 | 104484                  | GG                              | AA              | 1946987442               |
| SNP_P4_149603_104491 | NW_004516288.1 | Scaffold949 | 104491                  | TT                              | CC              | 1946987444               |
| SNP_P4_149604_104519 | NW_004516288.1 | Scaffold949 | 104519                  | GG                              | AA              | 1946987446               |
| SNP_P4_149605_104526 | NW_004516288.1 | Scaffold949 | 104526                  | CC                              | GG              | 1946987448               |
| SNP_P4_149606_105373 | NW_004516288.1 | Scaffold949 | 105373                  | AA                              | TT              | 1946987450               |
| SNP_P4_149607_105411 | NW_004516288.1 | Scaffold949 | 105411                  | AA                              | CC              | 1946987452               |
| SNP_P4_149608_105415 | NW_004516288.1 | Scaffold949 | 105415                  | TT                              | AA              | 1946987454               |
| SNP_P4_149609_105449 | NW_004516288.1 | Scaffold949 | 105449                  | CC                              | TT              | 1946987456               |
| SNP_P4_149610_105514 | NW_004516288.1 | Scaffold949 | 105514                  | GG                              | TT              | 1946987458               |
| SNP_P4_149611_105878 | NW_004516288.1 | Scaffold949 | 105878                  | CC                              | TT              | 1946987460               |
| SNP_P4_149612_105959 | NW_004516288.1 | Scaffold949 | 105959                  | AA                              | GG              | 1946987462               |
| SNP_P4_149613_111912 | NW_004516288.1 | Scaffold949 | 111912                  | CC                              | AA              | 1946987464               |
| SNP_P4_149614_112368 | NW_004516288.1 | Scaffold949 | 112368                  | TT                              | AA              | 1946987466               |
| SNP_P4_149615_112720 | NW_004516288.1 | Scaffold949 | 112720                  | AA                              | GG              | 1946987468               |
| SNP_P4_149616_114098 | NW_004516288.1 | Scaffold949 | 114098                  | AA                              | GG              | 1946987470               |
| SNP_P4_149617_114157 | NW_004516288.1 | Scaffold949 | 114157                  | TT                              | GG              | 1946987472               |
| SNP_P4_149618_114486 | NW_004516288.1 | Scaffold949 | 114486                  | TT                              | AA              | 1946987474               |
| SNP_P4_149619_128498 | NW_004516288.1 | Scaffold949 | 128498                  | AA                              | CC              | 1946987476               |
| SNP_P4_149620_142499 | NW_004516288.1 | Scaffold949 | 142499                  | AA                              | CC              | 1946987478               |
| SNP_P4_149621_142535 | NW_004516288.1 | Scaffold949 | 142535                  | GG                              | AA              | 1946987480               |
| SNP_P4_149622_142546 | NW_004516288.1 | Scaffold949 | 142546                  | GG                              | AA              | 1946987482               |
| SNP_P4_149623_142559 | NW_004516288.1 | Scaffold949 | 142559                  | CC                              | TT              | 1946987484               |
| SNP_P4_149624_142562 | NW_004516288.1 | Scaffold949 | 142562                  | CC                              | TT              | 1946987486               |
| SNP_P4_149625_142581 | NW_004516288.1 | Scaffold949 | 142581                  | AA                              | TT              | 1946987488               |
| SNP_P4_149626_142616 | NW_004516288.1 | Scaffold949 | 142616                  | TT                              | CC              | 1946987490               |
| SNP_P4_149627_635    | NW_004516289.1 | Scaffold950 | 635                     | GG                              | AA              | 1946987492               |
| SNP_P4_149628_727    | NW_004516289.1 | Scaffold950 | 727                     | TT                              | AA              | 1946987494               |
| SNP_P4_149629_868    | NW_004516289.1 | Scaffold950 | 868                     | TT                              | GG              | 1946987496               |
| SNP_P4_149630_1335   | NW_004516289.1 | Scaffold950 | 1335                    | AA                              | TT              | 1946987498               |
| SNP_P4_149631_1394   | NW_004516289.1 | Scaffold950 | 1394                    | TT                              | GG              | 1946987500               |
| SNP_P4_149632_1517   | NW_004516289.1 | Scaffold950 | 1517                    | CC                              | GG              | 1946987502               |
| SNP_P4_149633_1545   | NW_004516289.1 | Scaffold950 | 1545                    | AA                              | GG              | 1946987505               |
| SNP_P4_149634_1546   | NW_004516289.1 | Scaffold950 | 1546                    | GG                              | TT              | 1946987507               |
| SNP_P4_149635_1713   | NW_004516289.1 | Scaffold950 | 1713                    | GG                              | CC              | 1946987509               |
| SNP_P4_149636_1733   | NW_004516289.1 | Scaffold950 | 1733                    | CC                              | GG              | 1946987511               |
| SNP_P4_149637_1735   | NW_004516289.1 | Scaffold950 | 1735                    | AA                              | TT              | 1946987513               |
| SNP_P4_149638_1779   | NW_004516289.1 | Scaffold950 | 1779                    | AA                              | TT              | 1946987515               |
| SNP_P4_149639_1845   | NW_004516289.1 | Scaffold950 | 1845                    | AA                              | GG              | 1946987517               |
| SNP_P4_149640_1923   | NW_004516289.1 | Scaffold950 | 1923                    | AA                              | GG              | 1946987519               |
| SNP_P4_149641_2093   | NW_004516289.1 | Scaffold950 | 2093                    | GG                              | AA              | 1946987521               |
| SNP_P4_149642_2154   | NW_004516289.1 | Scaffold950 | 2154                    | CC                              | GG              | 1946987524               |
| SNP_P4_149643_2203   | NW_004516289.1 | Scaffold950 | 2203                    | CC                              | GG              | 1946987526               |

| SNPs IDs            | Chromosome IDs | Chromosomes | Physical positions (bp) | CDC Frontier (Reference genome) | (ILWC46 & LPNB) | NCBI SNPdb Accession IDs |
|---------------------|----------------|-------------|-------------------------|---------------------------------|-----------------|--------------------------|
| SNP_P4_149644_2234  | NW_004516289.1 | Scaffold950 | 2234                    | GG                              | AA              | 1946987528               |
| SNP_P4_149645_2252  | NW_004516289.1 | Scaffold950 | 2252                    | AA                              | TT              | 1946987530               |
| SNP_P4_149646_2323  | NW_004516289.1 | Scaffold950 | 2323                    | AA                              | GG              | 1946987532               |
| SNP_P4_149647_2335  | NW_004516289.1 | Scaffold950 | 2335                    | AA                              | GG              | 1946987534               |
| SNP_P4_149648_2355  | NW_004516289.1 | Scaffold950 | 2355                    | AA                              | CC              | 1946987537               |
| SNP_P4_149649_2373  | NW_004516289.1 | Scaffold950 | 2373                    | AA                              | GG              | 1946987539               |
| SNP_P4_149650_2411  | NW_004516289.1 | Scaffold950 | 2411                    | TT                              | CC              | 1946987541               |
| SNP_P4_149651_2476  | NW_004516289.1 | Scaffold950 | 2476                    | CC                              | TT              | 1946987543               |
| SNP_P4_149652_2478  | NW_004516289.1 | Scaffold950 | 2478                    | CC                              | AA              | 1946987545               |
| SNP_P4_149653_2500  | NW_004516289.1 | Scaffold950 | 2500                    | AA                              | GG              | 1946987548               |
| SNP_P4_149654_2829  | NW_004516289.1 | Scaffold950 | 2829                    | AA                              | GG              | 1946987550               |
| SNP_P4_149655_3540  | NW_004516289.1 | Scaffold950 | 3540                    | GG                              | AA              | 1946987552               |
| SNP_P4_149656_3569  | NW_004516289.1 | Scaffold950 | 3569                    | AA                              | GG              | 1946987554               |
| SNP_P4_149657_3626  | NW_004516289.1 | Scaffold950 | 3626                    | CC                              | TT              | 1946987557               |
| SNP_P4_149658_3632  | NW_004516289.1 | Scaffold950 | 3632                    | TT                              | GG              | 1946987559               |
| SNP_P4_149659_3699  | NW_004516289.1 | Scaffold950 | 3699                    | GG                              | TT              | 1946987561               |
| SNP_P4_149661_3798  | NW_004516289.1 | Scaffold950 | 3798                    | AA                              | GG              | 1946987563               |
| SNP_P4_149662_3929  | NW_004516289.1 | Scaffold950 | 3929                    | AA                              | CC              | 1946987565               |
| SNP_P4_149663_4008  | NW_004516289.1 | Scaffold950 | 4008                    | TT                              | CC              | 1946987567               |
| SNP_P4_149664_4221  | NW_004516289.1 | Scaffold950 | 4221                    | GG                              | AA              | 1946987569               |
| SNP_P4_149665_6230  | NW_004516289.1 | Scaffold950 | 6230                    | CC                              | GG              | 1946987571               |
| SNP_P4_149666_6618  | NW_004516289.1 | Scaffold950 | 6618                    | AA                              | GG              | 1946987573               |
| SNP_P4_149667_6807  | NW_004516289.1 | Scaffold950 | 6807                    | AA                              | GG              | 1946987575               |
| SNP_P4_149668_17799 | NW_004516289.1 | Scaffold950 | 17799                   | GG                              | TT              | 1946987577               |
| SNP_P4_149669_17904 | NW_004516289.1 | Scaffold950 | 17904                   | GG                              | AA              | 1946987579               |
| SNP_P4_149670_17959 | NW_004516289.1 | Scaffold950 | 17959                   | GG                              | CC              | 1946987581               |
| SNP_P4_149671_17977 | NW_004516289.1 | Scaffold950 | 17977                   | TT                              | CC              | 1946987583               |
| SNP_P4_149672_18126 | NW_004516289.1 | Scaffold950 | 18126                   | CC                              | TT              | 1946987585               |
| SNP_P4_149673_29328 | NW_004516289.1 | Scaffold950 | 29328                   | AA                              | CC              | 1946987587               |
| SNP_P4_149674_32114 | NW_004516289.1 | Scaffold950 | 32114                   | CC                              | TT              | 1946987589               |
| SNP_P4_149675_32117 | NW_004516289.1 | Scaffold950 | 32117                   | TT                              | AA              | 1946987591               |
| SNP_P4_149676_32125 | NW_004516289.1 | Scaffold950 | 32125                   | AA                              | GG              | 1946987593               |
| SNP_P4_149677_34656 | NW_004516289.1 | Scaffold950 | 34656                   | CC                              | TT              | 1946987595               |
| SNP_P4_149678_36981 | NW_004516289.1 | Scaffold950 | 36981                   | GG                              | AA              | 1946987597               |
| SNP_P4_149679_45499 | NW_004516289.1 | Scaffold950 | 45499                   | TT                              | AA              | 1946987599               |
| SNP_P4_149680_45518 | NW_004516289.1 | Scaffold950 | 45518                   | TT                              | GG              | 1946987601               |
| SNP_P4_149681_45565 | NW_004516289.1 | Scaffold950 | 45565                   | CC                              | TT              | 1946987603               |
| SNP_P4_149682_18844 | NW_004516290.1 | Scaffold951 | 18844                   | AA                              | CC              | 1946987605               |
| SNP_P4_149683_19254 | NW_004516290.1 | Scaffold951 | 19254                   | GG                              | TT              | 1946987607               |
| SNP_P4_149684_19999 | NW_004516290.1 | Scaffold951 | 19999                   | CC                              | GG              | 1946987609               |
| SNP_P4_149685_26146 | NW_004516290.1 | Scaffold951 | 26146                   | TT                              | AA              | 1946987611               |
| SNP_P4_149686_26362 | NW_004516290.1 | Scaffold951 | 26362                   | TT                              | CC              | 1946987614               |

| SNPs IDs            | Chromosome IDs | Chromosomes | Physical positions (bp) | CDC Frontier (Reference genome) | (ILWC46 & LPNB) | NCBI SNPdb Accession IDs |
|---------------------|----------------|-------------|-------------------------|---------------------------------|-----------------|--------------------------|
| SNP_P4_149687_18262 | NW_004516291.1 | Scaffold952 | 18262                   | CC                              | TT              | 1946987616               |
| SNP_P4_149688_18494 | NW_004516291.1 | Scaffold952 | 18494                   | CC                              | AA              | 1946987618               |
| SNP_P4_149689_18505 | NW_004516291.1 | Scaffold952 | 18505                   | GG                              | AA              | 1946987620               |
| SNP_P4_149690_18617 | NW_004516291.1 | Scaffold952 | 18617                   | GG                              | CC              | 1946987622               |
| SNP_P4_149691_18671 | NW_004516291.1 | Scaffold952 | 18671                   | CC                              | TT              | 1946987624               |
| SNP_P4_149692_18722 | NW_004516291.1 | Scaffold952 | 18722                   | TT                              | CC              | 1946987626               |
| SNP_P4_149693_18792 | NW_004516291.1 | Scaffold952 | 18792                   | TT                              | CC              | 1946987628               |
| SNP_P4_149694_18839 | NW_004516291.1 | Scaffold952 | 18839                   | CC                              | TT              | 1946987630               |
| SNP_P4_149695_18840 | NW_004516291.1 | Scaffold952 | 18840                   | TT                              | AA              | 1946987632               |
| SNP_P4_149696_18899 | NW_004516291.1 | Scaffold952 | 18899                   | AA                              | TT              | 1946987634               |
| SNP_P4_149697_19068 | NW_004516291.1 | Scaffold952 | 19068                   | CC                              | TT              | 1946987636               |
| SNP_P4_149698_19398 | NW_004516291.1 | Scaffold952 | 19398                   | CC                              | TT              | 1946987638               |
| SNP_P4_149699_20338 | NW_004516291.1 | Scaffold952 | 20338                   | GG                              | TT              | 1946987640               |
| SNP_P4_149700_27120 | NW_004516291.1 | Scaffold952 | 27120                   | TT                              | CC              | 1946987642               |
| SNP_P4_149701_27842 | NW_004516291.1 | Scaffold952 | 27842                   | CC                              | TT              | 1946987644               |
| SNP_P4_149702_27843 | NW_004516291.1 | Scaffold952 | 27843                   | AA                              | TT              | 1946987646               |
| SNP_P4_149703_27888 | NW_004516291.1 | Scaffold952 | 27888                   | AA                              | CC              | 1946987648               |
| SNP_P4_149704_27889 | NW_004516291.1 | Scaffold952 | 27889                   | CC                              | AA              | 1946987650               |
| SNP_P4_149705_27890 | NW_004516291.1 | Scaffold952 | 27890                   | AA                              | GG              | 1946987652               |
| SNP_P4_149706_27891 | NW_004516291.1 | Scaffold952 | 27891                   | CC                              | TT              | 1946987654               |
| SNP_P4_149707_27908 | NW_004516291.1 | Scaffold952 | 27908                   | CC                              | TT              | 1946987656               |
| SNP_P4_149708_27915 | NW_004516291.1 | Scaffold952 | 27915                   | AA                              | GG              | 1946987658               |
| SNP_P4_149709_27925 | NW_004516291.1 | Scaffold952 | 27925                   | GG                              | TT              | 1946987660               |
| SNP_P4_149710_27926 | NW_004516291.1 | Scaffold952 | 27926                   | TT                              | CC              | 1946987662               |
| SNP_P4_149711_27939 | NW_004516291.1 | Scaffold952 | 27939                   | CC                              | TT              | 1946987664               |
| SNP_P4_149712_41822 | NW_004516291.1 | Scaffold952 | 41822                   | GG                              | AA              | 1946987666               |
| SNP_P4_149713_42691 | NW_004516291.1 | Scaffold952 | 42691                   | GG                              | AA              | 1946987668               |
| SNP_P4_149714_581   | NW_004516292.1 | Scaffold953 | 581                     | TT                              | CC              | 1946987670               |
| SNP_P4_149715_609   | NW_004516292.1 | Scaffold953 | 609                     | TT                              | CC              | 1946987672               |
| SNP_P4_149716_633   | NW_004516292.1 | Scaffold953 | 633                     | AA                              | CC              | 1946987674               |
| SNP_P4_149717_987   | NW_004516292.1 | Scaffold953 | 987                     | TT                              | AA              | 1946987676               |
| SNP_P4_149718_3965  | NW_004516292.1 | Scaffold953 | 3965                    | AA                              | GG              | 1946987678               |
| SNP_P4_149719_6830  | NW_004516292.1 | Scaffold953 | 6830                    | GG                              | TT              | 1946987680               |
| SNP_P4_149720_7364  | NW_004516292.1 | Scaffold953 | 7364                    | GG                              | CC              | 1946987682               |
| SNP_P4_149722_7574  | NW_004516292.1 | Scaffold953 | 7574                    | CC                              | TT              | 1946987684               |
| SNP_P4_149723_7721  | NW_004516292.1 | Scaffold953 | 7721                    | CC                              | TT              | 1946987686               |
| SNP_P4_149724_11896 | NW_004516292.1 | Scaffold953 | 11896                   | GG                              | AA              | 1946987688               |
| SNP_P4_149725_11976 | NW_004516292.1 | Scaffold953 | 11976                   | TT                              | AA              | 1946987690               |
| SNP_P4_149726_13615 | NW_004516292.1 | Scaffold953 | 13615                   | GG                              | CC              | 1946987692               |
| SNP_P4_149727_14485 | NW_004516292.1 | Scaffold953 | 14485                   | CC                              | TT              | 1946987695               |
| SNP_P4_149728_15868 | NW_004516292.1 | Scaffold953 | 15868                   | GG                              | AA              | 1946987697               |
| SNP_P4_149729_17445 | NW_004516292.1 | Scaffold953 | 17445                   | TT                              | AA              | 1946987699               |

| SNPs IDs            | Chromosome IDs | Chromosomes | Physical positions (bp) | CDC Frontier (Reference genome) | (ILWC46 & LPNB) | NCBI SNPdb Accession IDs |
|---------------------|----------------|-------------|-------------------------|---------------------------------|-----------------|--------------------------|
| SNP_P4_149730_17480 | NW_004516292.1 | Scaffold953 | 17480                   | GG                              | TT              | 1946987701               |
| SNP_P4_149731_17889 | NW_004516292.1 | Scaffold953 | 17889                   | GG                              | AA              | 1946987703               |
| SNP_P4_149732_19412 | NW_004516292.1 | Scaffold953 | 19412                   | CC                              | GG              | 1946987705               |
| SNP_P4_149733_23253 | NW_004516292.1 | Scaffold953 | 23253                   | GG                              | AA              | 1946987707               |
| SNP_P4_149734_25068 | NW_004516292.1 | Scaffold953 | 25068                   | AA                              | GG              | 1946987709               |
| SNP_P4_149736_25204 | NW_004516292.1 | Scaffold953 | 25204                   | TT                              | CC              | 1946987711               |
| SNP_P4_149737_25277 | NW_004516292.1 | Scaffold953 | 25277                   | TT                              | CC              | 1946987713               |
| SNP_P4_149738_25285 | NW_004516292.1 | Scaffold953 | 25285                   | GG                              | CC              | 1946987715               |
| SNP_P4_149739_25340 | NW_004516292.1 | Scaffold953 | 25340                   | CC                              | TT              | 1946987717               |
| SNP_P4_149740_27826 | NW_004516292.1 | Scaffold953 | 27826                   | TT                              | AA              | 1946987719               |
| SNP_P4_149741_29821 | NW_004516292.1 | Scaffold953 | 29821                   | TT                              | CC              | 1946987721               |
| SNP_P4_149742_29838 | NW_004516292.1 | Scaffold953 | 29838                   | TT                              | GG              | 1946987723               |
| SNP_P4_149743_29867 | NW_004516292.1 | Scaffold953 | 29867                   | GG                              | AA              | 1946987725               |
| SNP_P4_149744_29917 | NW_004516292.1 | Scaffold953 | 29917                   | TT                              | GG              | 1946987727               |
| SNP_P4_149745_29934 | NW_004516292.1 | Scaffold953 | 29934                   | TT                              | CC              | 1946987729               |
| SNP_P4_149746_30104 | NW_004516292.1 | Scaffold953 | 30104                   | TT                              | GG              | 1946987731               |
| SNP_P4_149747_30116 | NW_004516292.1 | Scaffold953 | 30116                   | TT                              | GG              | 1946987733               |
| SNP_P4_149748_30125 | NW_004516292.1 | Scaffold953 | 30125                   | AA                              | GG              | 1946987736               |
| SNP_P4_149749_30154 | NW_004516292.1 | Scaffold953 | 30154                   | CC                              | TT              | 1946987738               |
| SNP_P4_149750_30156 | NW_004516292.1 | Scaffold953 | 30156                   | AA                              | GG              | 1946987740               |
| SNP_P4_149751_30168 | NW_004516292.1 | Scaffold953 | 30168                   | AA                              | GG              | 1946987742               |
| SNP_P4_149752_30180 | NW_004516292.1 | Scaffold953 | 30180                   | AA                              | GG              | 1946987744               |
| SNP_P4_149753_30217 | NW_004516292.1 | Scaffold953 | 30217                   | AA                              | TT              | 1946987746               |
| SNP_P4_149754_30218 | NW_004516292.1 | Scaffold953 | 30218                   | AA                              | GG              | 1946987748               |
| SNP_P4_149755_30223 | NW_004516292.1 | Scaffold953 | 30223                   | TT                              | CC              | 1946987750               |
| SNP_P4_149756_32187 | NW_004516292.1 | Scaffold953 | 32187                   | TT                              | CC              | 1946987752               |
| SNP_P4_149757_33219 | NW_004516292.1 | Scaffold953 | 33219                   | CC                              | GG              | 1946987754               |
| SNP_P4_149758_34026 | NW_004516292.1 | Scaffold953 | 34026                   | TT                              | AA              | 1946987756               |
| SNP_P4_149759_36248 | NW_004516292.1 | Scaffold953 | 36248                   | TT                              | CC              | 1946987758               |
| SNP_P4_149761_42226 | NW_004516292.1 | Scaffold953 | 42226                   | GG                              | TT              | 1946987760               |
| SNP_P4_149763_44634 | NW_004516292.1 | Scaffold953 | 44634                   | TT                              | CC              | 1946987762               |
| SNP_P4_149765_46207 | NW_004516292.1 | Scaffold953 | 46207                   | TT                              | CC              | 1946987764               |
| SNP_P4_149766_46342 | NW_004516292.1 | Scaffold953 | 46342                   | AA                              | GG              | 1946987766               |
| SNP_P4_149767_46723 | NW_004516292.1 | Scaffold953 | 46723                   | CC                              | TT              | 1946987768               |
| SNP_P4_149768_49556 | NW_004516292.1 | Scaffold953 | 49556                   | GG                              | AA              | 1946987770               |
| SNP_P4_149769_51046 | NW_004516292.1 | Scaffold953 | 51046                   | CC                              | TT              | 1946987772               |
| SNP_P4_149770_51586 | NW_004516292.1 | Scaffold953 | 51586                   | GG                              | AA              | 1946987774               |
| SNP_P4_149772_52513 | NW_004516292.1 | Scaffold953 | 52513                   | AA                              | GG              | 1946987776               |
| SNP_P4_149773_53167 | NW_004516292.1 | Scaffold953 | 53167                   | CC                              | TT              | 1946987778               |
| SNP_P4_149774_53530 | NW_004516292.1 | Scaffold953 | 53530                   | TT                              | CC              | 1946987780               |
| SNP_P4_149775_60639 | NW_004516292.1 | Scaffold953 | 60639                   | GG                              | TT              | 1946987782               |
| SNP_P4_149776_62895 | NW_004516292.1 | Scaffold953 | 62895                   | CC                              | TT              | 1946987784               |

| SNPs IDs             | Chromosome IDs | Chromosomes | Physical positions (bp) | CDC Frontier (Reference genome) | (ILWC46 & LPNB) | NCBI SNPdb Accession IDs |
|----------------------|----------------|-------------|-------------------------|---------------------------------|-----------------|--------------------------|
| SNP_P4_149778_64241  | NW_004516292.1 | Scaffold953 | 64241                   | GG                              | TT              | 1946987786               |
| SNP_P4_149780_74607  | NW_004516292.1 | Scaffold953 | 74607                   | TT                              | GG              | 1946987788               |
| SNP_P4_149783_81357  | NW_004516292.1 | Scaffold953 | 81357                   | AA                              | GG              | 1946987791               |
| SNP_P4_149784_81485  | NW_004516292.1 | Scaffold953 | 81485                   | AA                              | GG              | 1946987793               |
| SNP_P4_149787_86599  | NW_004516292.1 | Scaffold953 | 86599                   | TT                              | CC              | 1946987795               |
| SNP_P4_149788_86890  | NW_004516292.1 | Scaffold953 | 86890                   | GG                              | TT              | 1946987797               |
| SNP_P4_149789_89809  | NW_004516292.1 | Scaffold953 | 89809                   | GG                              | AA              | 1946987799               |
| SNP_P4_149790_89810  | NW_004516292.1 | Scaffold953 | 89810                   | TT                              | CC              | 1946987801               |
| SNP_P4_149791_93044  | NW_004516292.1 | Scaffold953 | 93044                   | GG                              | AA              | 1946987803               |
| SNP_P4_149792_96989  | NW_004516292.1 | Scaffold953 | 96989                   | CC                              | AA              | 1946987805               |
| SNP_P4_149793_97070  | NW_004516292.1 | Scaffold953 | 97070                   | AA                              | GG              | 1946987807               |
| SNP_P4_149794_97659  | NW_004516292.1 | Scaffold953 | 97659                   | TT                              | CC              | 1946987809               |
| SNP_P4_149795_97795  | NW_004516292.1 | Scaffold953 | 97795                   | TT                              | CC              | 1946987811               |
| SNP_P4_149796_97889  | NW_004516292.1 | Scaffold953 | 97889                   | CC                              | TT              | 1946987813               |
| SNP_P4_149797_105512 | NW_004516292.1 | Scaffold953 | 105512                  | CC                              | GG              | 1946987815               |
| SNP_P4_149798_106046 | NW_004516292.1 | Scaffold953 | 106046                  | TT                              | GG              | 1946987817               |
| SNP_P4_149799_106058 | NW_004516292.1 | Scaffold953 | 106058                  | CC                              | TT              | 1946987819               |
| SNP_P4_149800_106079 | NW_004516292.1 | Scaffold953 | 106079                  | GG                              | AA              | 1946987821               |
| SNP_P4_149801_109303 | NW_004516292.1 | Scaffold953 | 109303                  | AA                              | GG              | 1946987823               |
| SNP_P4_149802_109553 | NW_004516292.1 | Scaffold953 | 109553                  | TT                              | GG              | 1946987825               |
| SNP_P4_149803_111190 | NW_004516292.1 | Scaffold953 | 111190                  | AA                              | GG              | 1946987827               |
| SNP_P4_149804_111461 | NW_004516292.1 | Scaffold953 | 111461                  | GG                              | CC              | 1946987829               |
| SNP_P4_149805_111468 | NW_004516292.1 | Scaffold953 | 111468                  | AA                              | GG              | 1946987831               |
| SNP_P4_149806_111582 | NW_004516292.1 | Scaffold953 | 111582                  | AA                              | GG              | 1946987833               |
| SNP_P4_149807_113116 | NW_004516292.1 | Scaffold953 | 113116                  | TT                              | CC              | 1946987835               |
| SNP_P4_149810_119197 | NW_004516292.1 | Scaffold953 | 119197                  | AA                              | GG              | 1946987837               |
| SNP_P4_149811_123601 | NW_004516292.1 | Scaffold953 | 123601                  | GG                              | AA              | 1946987839               |
| SNP_P4_149812_123724 | NW_004516292.1 | Scaffold953 | 123724                  | GG                              | AA              | 1946987841               |
| SNP_P4_149814_124582 | NW_004516292.1 | Scaffold953 | 124582                  | GG                              | TT              | 1946987843               |
| SNP_P4_149815_124587 | NW_004516292.1 | Scaffold953 | 124587                  | CC                              | TT              | 1946987845               |
| SNP_P4_149816_127123 | NW_004516292.1 | Scaffold953 | 127123                  | CC                              | TT              | 1946987847               |
| SNP_P4_149817_128381 | NW_004516292.1 | Scaffold953 | 128381                  | GG                              | CC              | 1946987849               |
| SNP_P4_149818_134599 | NW_004516292.1 | Scaffold953 | 134599                  | TT                              | CC              | 1946987852               |
| SNP_P4_149819_134601 | NW_004516292.1 | Scaffold953 | 134601                  | GG                              | AA              | 1946987854               |
| SNP_P4_149820_134701 | NW_004516292.1 | Scaffold953 | 134701                  | GG                              | AA              | 1946987856               |
| SNP_P4_149821_136554 | NW_004516292.1 | Scaffold953 | 136554                  | AA                              | TT              | 1946987858               |
| SNP_P4_149822_141114 | NW_004516292.1 | Scaffold953 | 141114                  | GG                              | AA              | 1946987860               |
| SNP_P4_149823_141144 | NW_004516292.1 | Scaffold953 | 141144                  | GG                              | AA              | 1946987862               |
| SNP_P4_149824_141613 | NW_004516292.1 | Scaffold953 | 141613                  | CC                              | TT              | 1946987864               |
| SNP_P4_149827_141999 | NW_004516292.1 | Scaffold953 | 141999                  | TT                              | GG              | 1946987866               |
| SNP_P4_149828_147309 | NW_004516292.1 | Scaffold953 | 147309                  | AA                              | GG              | 1946987868               |
| SNP_P4_149829_153187 | NW_004516292.1 | Scaffold953 | 153187                  | AA                              | GG              | 1946987870               |

| SNPs IDs             | Chromosome IDs | Chromosomes | Physical positions (bp) | CDC Frontier (Reference genome) | (ILWC46 & LPNB) | NCBI SNPdb Accession IDs |
|----------------------|----------------|-------------|-------------------------|---------------------------------|-----------------|--------------------------|
| SNP_P4_149830_153600 | NW_004516292.1 | Scaffold953 | 153600                  | TT                              | AA              | 1946987872               |
| SNP_P4_149831_153618 | NW_004516292.1 | Scaffold953 | 153618                  | GG                              | AA              | 1946987874               |
| SNP_P4_149832_154243 | NW_004516292.1 | Scaffold953 | 154243                  | CC                              | TT              | 1946987876               |
| SNP_P4_149833_154776 | NW_004516292.1 | Scaffold953 | 154776                  | TT                              | CC              | 1946987878               |
| SNP_P4_149834_158248 | NW_004516292.1 | Scaffold953 | 158248                  | TT                              | AA              | 1946987880               |
| SNP_P4_149835_158617 | NW_004516292.1 | Scaffold953 | 158617                  | CC                              | GG              | 1946987882               |
| SNP_P4_149836_165072 | NW_004516292.1 | Scaffold953 | 165072                  | CC                              | TT              | 1946987884               |
| SNP_P4_149837_165349 | NW_004516292.1 | Scaffold953 | 165349                  | AA                              | GG              | 1946987886               |
| SNP_P4_149838_570    | NW_004516293.1 | Scaffold954 | 570                     | AA                              | CC              | 1946987888               |
| SNP_P4_149839_640    | NW_004516293.1 | Scaffold954 | 640                     | TT                              | CC              | 1946987890               |
| SNP_P4_149841_3370   | NW_004516293.1 | Scaffold954 | 3370                    | CC                              | AA              | 1946987892               |
| SNP_P4_149842_3392   | NW_004516293.1 | Scaffold954 | 3392                    | TT                              | AA              | 1946987894               |
| SNP_P4_149843_3399   | NW_004516293.1 | Scaffold954 | 3399                    | GG                              | TT              | 1946987896               |
| SNP_P4_149844_3792   | NW_004516293.1 | Scaffold954 | 3792                    | GG                              | CC              | 1946987898               |
| SNP_P4_149845_3793   | NW_004516293.1 | Scaffold954 | 3793                    | CC                              | AA              | 1946987900               |
| SNP_P4_149846_3873   | NW_004516293.1 | Scaffold954 | 3873                    | TT                              | CC              | 1946987902               |
| SNP_P4_149847_3898   | NW_004516293.1 | Scaffold954 | 3898                    | TT                              | CC              | 1946987904               |
| SNP_P4_149848_4288   | NW_004516293.1 | Scaffold954 | 4288                    | GG                              | AA              | 1946987906               |
| SNP_P4_149849_4301   | NW_004516293.1 | Scaffold954 | 4301                    | AA                              | TT              | 1946987908               |
| SNP_P4_149850_19890  | NW_004516293.1 | Scaffold954 | 19890                   | TT                              | AA              | 1946987910               |
| SNP_P4_149851_19959  | NW_004516293.1 | Scaffold954 | 19959                   | GG                              | TT              | 1946987912               |
| SNP_P4_149852_19977  | NW_004516293.1 | Scaffold954 | 19977                   | AA                              | CC              | 1946987914               |
| SNP_P4_149853_22489  | NW_004516293.1 | Scaffold954 | 22489                   | GG                              | AA              | 1946987916               |
| SNP_P4_149854_22763  | NW_004516293.1 | Scaffold954 | 22763                   | AA                              | TT              | 1946987918               |
| SNP_P4_149855_24232  | NW_004516293.1 | Scaffold954 | 24232                   | GG                              | AA              | 1946987920               |
| SNP_P4_149857_26929  | NW_004516293.1 | Scaffold954 | 26929                   | TT                              | GG              | 1946987922               |
| SNP_P4_149858_26959  | NW_004516293.1 | Scaffold954 | 26959                   | AA                              | CC              | 1946987924               |
| SNP_P4_149859_27855  | NW_004516293.1 | Scaffold954 | 27855                   | GG                              | CC              | 1946987926               |
| SNP_P4_149860_28421  | NW_004516293.1 | Scaffold954 | 28421                   | GG                              | AA              | 1946987928               |
| SNP_P4_149861_28429  | NW_004516293.1 | Scaffold954 | 28429                   | AA                              | TT              | 1946987930               |
| SNP_P4_149862_28476  | NW_004516293.1 | Scaffold954 | 28476                   | TT                              | CC              | 1946987932               |
| SNP_P4_149863_28487  | NW_004516293.1 | Scaffold954 | 28487                   | AA                              | TT              | 1946987934               |
| SNP_P4_149864_28496  | NW_004516293.1 | Scaffold954 | 28496                   | GG                              | AA              | 1946987936               |
| SNP_P4_149865_28520  | NW_004516293.1 | Scaffold954 | 28520                   | TT                              | GG              | 1946987938               |
| SNP_P4_149866_28533  | NW_004516293.1 | Scaffold954 | 28533                   | CC                              | TT              | 1946987940               |
| SNP_P4_149867_28626  | NW_004516293.1 | Scaffold954 | 28626                   | AA                              | TT              | 1946987942               |
| SNP_P4_149868_28673  | NW_004516293.1 | Scaffold954 | 28673                   | TT                              | CC              | 1946987945               |
| SNP_P4_149869_28689  | NW_004516293.1 | Scaffold954 | 28689                   | GG                              | AA              | 1946987947               |
| SNP_P4_149870_28871  | NW_004516293.1 | Scaffold954 | 28871                   | AA                              | GG              | 1946987949               |
| SNP_P4_149871_28916  | NW_004516293.1 | Scaffold954 | 28916                   | TT                              | CC              | 1946987951               |
| SNP_P4_149872_28947  | NW_004516293.1 | Scaffold954 | 28947                   | TT                              | CC              | 1946987953               |
| SNP_P4_149873_29314  | NW_004516293.1 | Scaffold954 | 29314                   | CC                              | TT              | 1946987955               |



| SNPs IDs            | Chromosome IDs | Chromosomes | Physical positions (bp) | CDC Frontier (Reference genome) | (ILWC46 & LPNB) | NCBI SNPdb Accession IDs |
|---------------------|----------------|-------------|-------------------------|---------------------------------|-----------------|--------------------------|
| SNP_P4_149874_29431 | NW_004516293.1 | Scaffold954 | 29431                   | GG                              | AA              | 1946987957               |
| SNP_P4_149875_30305 | NW_004516293.1 | Scaffold954 | 30305                   | TT                              | CC              | 1946987959               |
| SNP_P4_149876_30340 | NW_004516293.1 | Scaffold954 | 30340                   | CC                              | AA              | 1946987962               |
| SNP_P4_149877_30413 | NW_004516293.1 | Scaffold954 | 30413                   | TT                              | CC              | 1946987964               |
| SNP_P4_149878_30439 | NW_004516293.1 | Scaffold954 | 30439                   | AA                              | GG              | 1946987966               |
| SNP_P4_149879_36027 | NW_004516293.1 | Scaffold954 | 36027                   | AA                              | GG              | 1946987968               |
| SNP_P4_149880_36116 | NW_004516293.1 | Scaffold954 | 36116                   | AA                              | TT              | 1946987970               |
| SNP_P4_149881_36284 | NW_004516293.1 | Scaffold954 | 36284                   | AA                              | GG              | 1946987972               |
| SNP_P4_149882_36590 | NW_004516293.1 | Scaffold954 | 36590                   | GG                              | TT              | 1946987974               |
| SNP_P4_149883_36659 | NW_004516293.1 | Scaffold954 | 36659                   | CC                              | TT              | 1946987977               |
| SNP_P4_149884_37887 | NW_004516293.1 | Scaffold954 | 37887                   | AA                              | GG              | 1946987979               |
| SNP_P4_149885_38028 | NW_004516293.1 | Scaffold954 | 38028                   | AA                              | TT              | 1946987981               |
| SNP_P4_149886_38740 | NW_004516293.1 | Scaffold954 | 38740                   | AA                              | TT              | 1946987983               |
| SNP_P4_149887_39041 | NW_004516293.1 | Scaffold954 | 39041                   | TT                              | AA              | 1946987986               |
| SNP_P4_149888_39042 | NW_004516293.1 | Scaffold954 | 39042                   | CC                              | TT              | 1946987988               |
| SNP_P4_149890_39195 | NW_004516293.1 | Scaffold954 | 39195                   | TT                              | GG              | 1946987990               |
| SNP_P4_149891_39207 | NW_004516293.1 | Scaffold954 | 39207                   | GG                              | AA              | 1946987992               |
| SNP_P4_149892_39232 | NW_004516293.1 | Scaffold954 | 39232                   | TT                              | AA              | 1946987994               |
| SNP_P4_149893_39233 | NW_004516293.1 | Scaffold954 | 39233                   | AA                              | CC              | 1946987996               |
| SNP_P4_149894_39234 | NW_004516293.1 | Scaffold954 | 39234                   | GG                              | AA              | 1946987999               |
| SNP_P4_149895_39279 | NW_004516293.1 | Scaffold954 | 39279                   | TT                              | GG              | 1946988000               |
| SNP_P4_149896_39292 | NW_004516293.1 | Scaffold954 | 39292                   | TT                              | AA              | 1946988001               |
| SNP_P4_149897_39293 | NW_004516293.1 | Scaffold954 | 39293                   | GG                              | CC              | 1946988002               |
| SNP_P4_149898_39361 | NW_004516293.1 | Scaffold954 | 39361                   | CC                              | GG              | 1946988004               |
| SNP_P4_149899_39443 | NW_004516293.1 | Scaffold954 | 39443                   | AA                              | GG              | 1946988006               |
| SNP_P4_149900_39602 | NW_004516293.1 | Scaffold954 | 39602                   | AA                              | GG              | 1946988008               |
| SNP_P4_149901_39606 | NW_004516293.1 | Scaffold954 | 39606                   | GG                              | AA              | 1946988010               |
| SNP_P4_149902_40540 | NW_004516293.1 | Scaffold954 | 40540                   | CC                              | AA              | 1946988013               |
| SNP_P4_149903_41381 | NW_004516293.1 | Scaffold954 | 41381                   | CC                              | TT              | 1946988015               |
| SNP_P4_149904_41471 | NW_004516293.1 | Scaffold954 | 41471                   | TT                              | AA              | 1946988017               |
| SNP_P4_149905_42291 | NW_004516293.1 | Scaffold954 | 42291                   | TT                              | CC              | 1946988019               |
| SNP_P4_149906_45189 | NW_004516293.1 | Scaffold954 | 45189                   | TT                              | CC              | 1946988021               |
| SNP_P4_149907_45372 | NW_004516293.1 | Scaffold954 | 45372                   | AA                              | GG              | 1946988023               |
| SNP_P4_149908_45739 | NW_004516293.1 | Scaffold954 | 45739                   | TT                              | GG              | 1946988025               |
| SNP_P4_149909_415   | NW_004516295.1 | Scaffold956 | 415                     | GG                              | TT              | 1946988027               |
| SNP_P4_149910_577   | NW_004516295.1 | Scaffold956 | 577                     | AA                              | GG              | 1946988029               |
| SNP_P4_149911_667   | NW_004516295.1 | Scaffold956 | 667                     | GG                              | AA              | 1946988031               |
| SNP_P4_149912_822   | NW_004516295.1 | Scaffold956 | 822                     | CC                              | TT              | 1946988033               |
| SNP_P4_149913_2568  | NW_004516295.1 | Scaffold956 | 2568                    | GG                              | AA              | 1946988035               |
| SNP_P4_149914_2893  | NW_004516295.1 | Scaffold956 | 2893                    | GG                              | TT              | 1946988037               |
| SNP_P4_149915_2898  | NW_004516295.1 | Scaffold956 | 2898                    | TT                              | CC              | 1946988039               |
| SNP_P4_149916_3479  | NW_004516295.1 | Scaffold956 | 3479                    | TT                              | CC              | 1946988041               |

| SNPs IDs            | Chromosome IDs | Chromosomes | Physical positions (bp) | CDC Frontier (Reference genome) | (ILWC46 & LPNB) | NCBI SNPdb Accession IDs |
|---------------------|----------------|-------------|-------------------------|---------------------------------|-----------------|--------------------------|
| SNP_P4_149917_3519  | NW_004516295.1 | Scaffold956 | 3519                    | AA                              | GG              | 1946988044               |
| SNP_P4_149918_4278  | NW_004516295.1 | Scaffold956 | 4278                    | CC                              | TT              | 1946988046               |
| SNP_P4_149919_4483  | NW_004516295.1 | Scaffold956 | 4483                    | TT                              | GG              | 1946988048               |
| SNP_P4_149920_4503  | NW_004516295.1 | Scaffold956 | 4503                    | GG                              | CC              | 1946988050               |
| SNP_P4_149921_4561  | NW_004516295.1 | Scaffold956 | 4561                    | CC                              | TT              | 1946988052               |
| SNP_P4_149922_4652  | NW_004516295.1 | Scaffold956 | 4652                    | TT                              | AA              | 1946988054               |
| SNP_P4_149923_5883  | NW_004516295.1 | Scaffold956 | 5883                    | AA                              | TT              | 1946988056               |
| SNP_P4_149924_5966  | NW_004516295.1 | Scaffold956 | 5966                    | TT                              | AA              | 1946988058               |
| SNP_P4_149926_6020  | NW_004516295.1 | Scaffold956 | 6020                    | CC                              | TT              | 1946988060               |
| SNP_P4_149927_6027  | NW_004516295.1 | Scaffold956 | 6027                    | GG                              | CC              | 1946988062               |
| SNP_P4_149928_6276  | NW_004516295.1 | Scaffold956 | 6276                    | TT                              | CC              | 1946988064               |
| SNP_P4_149929_6314  | NW_004516295.1 | Scaffold956 | 6314                    | TT                              | AA              | 1946988066               |
| SNP_P4_149930_6330  | NW_004516295.1 | Scaffold956 | 6330                    | AA                              | CC              | 1946988068               |
| SNP_P4_149931_7384  | NW_004516295.1 | Scaffold956 | 7384                    | AA                              | CC              | 1946988070               |
| SNP_P4_149932_9746  | NW_004516295.1 | Scaffold956 | 9746                    | TT                              | CC              | 1946988072               |
| SNP_P4_149933_9762  | NW_004516295.1 | Scaffold956 | 9762                    | AA                              | GG              | 1946988074               |
| SNP_P4_149934_9830  | NW_004516295.1 | Scaffold956 | 9830                    | AA                              | GG              | 1946988076               |
| SNP_P4_149935_9835  | NW_004516295.1 | Scaffold956 | 9835                    | CC                              | GG              | 1946988078               |
| SNP_P4_149936_11969 | NW_004516295.1 | Scaffold956 | 11969                   | CC                              | TT              | 1946988080               |
| SNP_P4_149937_12008 | NW_004516295.1 | Scaffold956 | 12008                   | CC                              | TT              | 1946988082               |
| SNP_P4_149938_12344 | NW_004516295.1 | Scaffold956 | 12344                   | CC                              | GG              | 1946988084               |
| SNP_P4_149939_12462 | NW_004516295.1 | Scaffold956 | 12462                   | AA                              | GG              | 1946988086               |
| SNP_P4_149940_12465 | NW_004516295.1 | Scaffold956 | 12465                   | TT                              | GG              | 1946988088               |
| SNP_P4_149941_12590 | NW_004516295.1 | Scaffold956 | 12590                   | CC                              | TT              | 1946988090               |
| SNP_P4_149942_12600 | NW_004516295.1 | Scaffold956 | 12600                   | AA                              | CC              | 1946988092               |
| SNP_P4_149943_12601 | NW_004516295.1 | Scaffold956 | 12601                   | TT                              | CC              | 1946988094               |
| SNP_P4_149944_12611 | NW_004516295.1 | Scaffold956 | 12611                   | AA                              | CC              | 1946988096               |
| SNP_P4_149945_12617 | NW_004516295.1 | Scaffold956 | 12617                   | CC                              | TT              | 1946988098               |
| SNP_P4_149946_14078 | NW_004516295.1 | Scaffold956 | 14078                   | GG                              | AA              | 1946988100               |
| SNP_P4_149947_14123 | NW_004516295.1 | Scaffold956 | 14123                   | AA                              | TT              | 1946988102               |
| SNP_P4_149948_14157 | NW_004516295.1 | Scaffold956 | 14157                   | TT                              | AA              | 1946988104               |
| SNP_P4_149949_14374 | NW_004516295.1 | Scaffold956 | 14374                   | AA                              | TT              | 1946988107               |
| SNP_P4_149950_14391 | NW_004516295.1 | Scaffold956 | 14391                   | GG                              | AA              | 1946988109               |
| SNP_P4_149951_18321 | NW_004516295.1 | Scaffold956 | 18321                   | AA                              | GG              | 1946988111               |
| SNP_P4_149952_18438 | NW_004516295.1 | Scaffold956 | 18438                   | CC                              | GG              | 1946988113               |
| SNP_P4_149953_18446 | NW_004516295.1 | Scaffold956 | 18446                   | TT                              | CC              | 1946988115               |
| SNP_P4_149954_18648 | NW_004516295.1 | Scaffold956 | 18648                   | GG                              | CC              | 1946988117               |
| SNP_P4_149955_18730 | NW_004516295.1 | Scaffold956 | 18730                   | TT                              | CC              | 1946988119               |
| SNP_P4_149956_18841 | NW_004516295.1 | Scaffold956 | 18841                   | GG                              | TT              | 1946988121               |
| SNP_P4_149957_19023 | NW_004516295.1 | Scaffold956 | 19023                   | CC                              | TT              | 1946988123               |
| SNP_P4_149958_19089 | NW_004516295.1 | Scaffold956 | 19089                   | AA                              | GG              | 1946988125               |
| SNP_P4_149959_19091 | NW_004516295.1 | Scaffold956 | 19091                   | AA                              | CC              | 1946988127               |

| SNPs IDs            | Chromosome IDs | Chromosomes | Physical positions (bp) | CDC Frontier (Reference genome) | (ILWC46 & LPNB) | NCBI SNPdb Accession IDs |
|---------------------|----------------|-------------|-------------------------|---------------------------------|-----------------|--------------------------|
| SNP_P4_149960_19287 | NW_004516295.1 | Scaffold956 | 19287                   | CC                              | AA              | 1946988129               |
| SNP_P4_149961_19324 | NW_004516295.1 | Scaffold956 | 19324                   | CC                              | TT              | 1946988132               |
| SNP_P4_149964_3450  | NW_004516297.1 | Scaffold958 | 3450                    | GG                              | CC              | 1946988134               |
| SNP_P4_149965_3544  | NW_004516297.1 | Scaffold958 | 3544                    | AA                              | GG              | 1946988136               |
| SNP_P4_149967_3723  | NW_004516297.1 | Scaffold958 | 3723                    | GG                              | CC              | 1946988138               |
| SNP_P4_149968_4249  | NW_004516297.1 | Scaffold958 | 4249                    | CC                              | TT              | 1946988140               |
| SNP_P4_149969_12623 | NW_004516297.1 | Scaffold958 | 12623                   | AA                              | TT              | 1946988143               |
| SNP_P4_149970_3963  | NW_004516298.1 | Scaffold959 | 3963                    | CC                              | AA              | 1946988145               |
| SNP_P4_149971_7934  | NW_004516298.1 | Scaffold959 | 7934                    | CC                              | TT              | 1946988147               |
| SNP_P4_149972_7948  | NW_004516298.1 | Scaffold959 | 7948                    | AA                              | CC              | 1946988149               |
| SNP_P4_149973_8040  | NW_004516298.1 | Scaffold959 | 8040                    | TT                              | CC              | 1946988151               |
| SNP_P4_149974_8089  | NW_004516298.1 | Scaffold959 | 8089                    | TT                              | AA              | 1946988153               |
| SNP_P4_149975_8136  | NW_004516298.1 | Scaffold959 | 8136                    | AA                              | GG              | 1946988155               |
| SNP_P4_149976_10538 | NW_004516298.1 | Scaffold959 | 10538                   | AA                              | GG              | 1946988157               |
| SNP_P4_149977_10552 | NW_004516298.1 | Scaffold959 | 10552                   | CC                              | AA              | 1946988159               |
| SNP_P4_149978_10568 | NW_004516298.1 | Scaffold959 | 10568                   | TT                              | CC              | 1946988161               |
| SNP_P4_149979_10571 | NW_004516298.1 | Scaffold959 | 10571                   | AA                              | GG              | 1946988163               |
| SNP_P4_149980_10580 | NW_004516298.1 | Scaffold959 | 10580                   | GG                              | AA              | 1946988165               |
| SNP_P4_149981_10613 | NW_004516298.1 | Scaffold959 | 10613                   | CC                              | TT              | 1946988168               |
| SNP_P4_149982_10644 | NW_004516298.1 | Scaffold959 | 10644                   | CC                              | TT              | 1946988170               |
| SNP_P4_149983_10664 | NW_004516298.1 | Scaffold959 | 10664                   | AA                              | CC              | 1946988172               |
| SNP_P4_149985_20448 | NW_004516298.1 | Scaffold959 | 20448                   | GG                              | AA              | 1946988174               |
| SNP_P4_149986_20802 | NW_004516298.1 | Scaffold959 | 20802                   | TT                              | AA              | 1946988176               |
| SNP_P4_149987_20836 | NW_004516298.1 | Scaffold959 | 20836                   | AA                              | CC              | 1946988178               |
| SNP_P4_149988_20882 | NW_004516298.1 | Scaffold959 | 20882                   | TT                              | GG              | 1946988180               |
| SNP_P4_149989_21182 | NW_004516298.1 | Scaffold959 | 21182                   | AA                              | CC              | 1946988182               |
| SNP_P4_149990_21285 | NW_004516298.1 | Scaffold959 | 21285                   | CC                              | AA              | 1946988184               |
| SNP_P4_149991_22090 | NW_004516298.1 | Scaffold959 | 22090                   | GG                              | AA              | 1946988186               |
| SNP_P4_149992_22091 | NW_004516298.1 | Scaffold959 | 22091                   | AA                              | GG              | 1946988188               |
| SNP_P4_149993_22108 | NW_004516298.1 | Scaffold959 | 22108                   | TT                              | CC              | 1946988190               |
| SNP_P4_149994_22110 | NW_004516298.1 | Scaffold959 | 22110                   | GG                              | AA              | 1946988192               |
| SNP_P4_149995_47608 | NW_004516298.1 | Scaffold959 | 47608                   | CC                              | TT              | 1946988194               |
| SNP_P4_149996_53797 | NW_004516298.1 | Scaffold959 | 53797                   | AA                              | GG              | 1946988196               |
| SNP_P4_149997_57214 | NW_004516298.1 | Scaffold959 | 57214                   | CC                              | TT              | 1946988198               |
| SNP_P4_149998_57572 | NW_004516298.1 | Scaffold959 | 57572                   | AA                              | TT              | 1946988200               |
| SNP_P4_149999_57710 | NW_004516298.1 | Scaffold959 | 57710                   | TT                              | GG              | 1946988202               |
| SNP_P4_150001_57788 | NW_004516298.1 | Scaffold959 | 57788                   | TT                              | AA              | 1946988204               |
| SNP_P4_150002_57810 | NW_004516298.1 | Scaffold959 | 57810                   | GG                              | TT              | 1946988206               |
| SNP_P4_150003_57813 | NW_004516298.1 | Scaffold959 | 57813                   | GG                              | AA              | 1946988208               |
| SNP_P4_150004_57903 | NW_004516298.1 | Scaffold959 | 57903                   | AA                              | GG              | 1946988210               |
| SNP_P4_150005_57928 | NW_004516298.1 | Scaffold959 | 57928                   | AA                              | GG              | 1946988212               |
| SNP_P4_150006_58306 | NW_004516298.1 | Scaffold959 | 58306                   | AA                              | TT              | 1946988214               |

| SNPs IDs             | Chromosome IDs | Chromosomes | Physical positions (bp) | CDC Frontier (Reference genome) | (ILWC46 & LPNB) | NCBI SNPdb Accession IDs |
|----------------------|----------------|-------------|-------------------------|---------------------------------|-----------------|--------------------------|
| SNP_P4_150007_4486   | NW_004516299.1 | Scaffold960 | 4486                    | TT                              | CC              | 1946988216               |
| SNP_P4_150008_4547   | NW_004516299.1 | Scaffold960 | 4547                    | AA                              | TT              | 1946988218               |
| SNP_P4_150009_15471  | NW_004516299.1 | Scaffold960 | 15471                   | TT                              | CC              | 1946988220               |
| SNP_P4_150010_15476  | NW_004516299.1 | Scaffold960 | 15476                   | CC                              | GG              | 1946988222               |
| SNP_P4_150011_15577  | NW_004516299.1 | Scaffold960 | 15577                   | CC                              | TT              | 1946988224               |
| SNP_P4_150012_15578  | NW_004516299.1 | Scaffold960 | 15578                   | GG                              | AA              | 1946988226               |
| SNP_P4_150013_15579  | NW_004516299.1 | Scaffold960 | 15579                   | CC                              | TT              | 1946988228               |
| SNP_P4_150014_15891  | NW_004516299.1 | Scaffold960 | 15891                   | AA                              | GG              | 1946988230               |
| SNP_P4_150015_20309  | NW_004516299.1 | Scaffold960 | 20309                   | AA                              | CC              | 1946988232               |
| SNP_P4_150016_20621  | NW_004516299.1 | Scaffold960 | 20621                   | CC                              | TT              | 1946988234               |
| SNP_P4_150017_20802  | NW_004516299.1 | Scaffold960 | 20802                   | TT                              | CC              | 1946988236               |
| SNP_P4_150018_31087  | NW_004516299.1 | Scaffold960 | 31087                   | AA                              | TT              | 1946988238               |
| SNP_P4_150019_68109  | NW_004516299.1 | Scaffold960 | 68109                   | CC                              | TT              | 1946988240               |
| SNP_P4_150020_68135  | NW_004516299.1 | Scaffold960 | 68135                   | TT                              | GG              | 1946988242               |
| SNP_P4_150021_68298  | NW_004516299.1 | Scaffold960 | 68298                   | GG                              | CC              | 1946988244               |
| SNP_P4_150022_68318  | NW_004516299.1 | Scaffold960 | 68318                   | AA                              | GG              | 1946988246               |
| SNP_P4_150023_68344  | NW_004516299.1 | Scaffold960 | 68344                   | AA                              | GG              | 1946988248               |
| SNP_P4_150024_68383  | NW_004516299.1 | Scaffold960 | 68383                   | AA                              | GG              | 1946988249               |
| SNP_P4_150025_104242 | NW_004516299.1 | Scaffold960 | 104242                  | TT                              | GG              | 1946988250               |
| SNP_P4_150026_107833 | NW_004516299.1 | Scaffold960 | 107833                  | CC                              | TT              | 1946988251               |
| SNP_P4_150027_126413 | NW_004516299.1 | Scaffold960 | 126413                  | AA                              | GG              | 1946988252               |
| SNP_P4_150028_126416 | NW_004516299.1 | Scaffold960 | 126416                  | GG                              | AA              | 1946988253               |
| SNP_P4_150029_126438 | NW_004516299.1 | Scaffold960 | 126438                  | CC                              | TT              | 1946988255               |
| SNP_P4_150030_126524 | NW_004516299.1 | Scaffold960 | 126524                  | AA                              | TT              | 1946988257               |
| SNP_P4_150031_138957 | NW_004516299.1 | Scaffold960 | 138957                  | CC                              | TT              | 1946988259               |
| SNP_P4_150032_139132 | NW_004516299.1 | Scaffold960 | 139132                  | CC                              | TT              | 1946988261               |
| SNP_P4_150033_139143 | NW_004516299.1 | Scaffold960 | 139143                  | AA                              | GG              | 1946988263               |
| SNP_P4_150034_139147 | NW_004516299.1 | Scaffold960 | 139147                  | TT                              | GG              | 1946988265               |
| SNP_P4_150035_139208 | NW_004516299.1 | Scaffold960 | 139208                  | TT                              | AA              | 1946988267               |
| SNP_P4_150036_141533 | NW_004516299.1 | Scaffold960 | 141533                  | CC                              | TT              | 1946988269               |
| SNP_P4_150037_159074 | NW_004516299.1 | Scaffold960 | 159074                  | TT                              | CC              | 1946988271               |
| SNP_P4_150038_162259 | NW_004516299.1 | Scaffold960 | 162259                  | AA                              | GG              | 1946988273               |
| SNP_P4_150039_162272 | NW_004516299.1 | Scaffold960 | 162272                  | TT                              | GG              | 1946988275               |
| SNP_P4_150040_162278 | NW_004516299.1 | Scaffold960 | 162278                  | GG                              | AA              | 1946988277               |
| SNP_P4_150041_162285 | NW_004516299.1 | Scaffold960 | 162285                  | TT                              | CC              | 1946988279               |
| SNP_P4_150042_162292 | NW_004516299.1 | Scaffold960 | 162292                  | TT                              | AA              | 1946988281               |
| SNP_P4_150043_162310 | NW_004516299.1 | Scaffold960 | 162310                  | CC                              | AA              | 1946988283               |
| SNP_P4_150044_162321 | NW_004516299.1 | Scaffold960 | 162321                  | TT                              | CC              | 1946988285               |
| SNP_P4_150045_163192 | NW_004516299.1 | Scaffold960 | 163192                  | TT                              | CC              | 1946988288               |
| SNP_P4_150046_163198 | NW_004516299.1 | Scaffold960 | 163198                  | AA                              | TT              | 1946988290               |
| SNP_P4_150047_163199 | NW_004516299.1 | Scaffold960 | 163199                  | TT                              | CC              | 1946988292               |
| SNP_P4_150048_163252 | NW_004516299.1 | Scaffold960 | 163252                  | TT                              | GG              | 1946988294               |

| SNPs IDs             | Chromosome IDs | Chromosomes | Physical positions (bp) | CDC Frontier (Reference genome) | (ILWC46 & LPNB) | NCBI SNPdb Accession IDs |
|----------------------|----------------|-------------|-------------------------|---------------------------------|-----------------|--------------------------|
| SNP_P4_150049_3810   | NW_004516300.1 | Scaffold962 | 3810                    | CC                              | TT              | 1946988296               |
| SNP_P4_150050_3812   | NW_004516300.1 | Scaffold962 | 3812                    | GG                              | TT              | 1946988299               |
| SNP_P4_150051_6510   | NW_004516300.1 | Scaffold962 | 6510                    | TT                              | GG              | 1946988301               |
| SNP_P4_150052_6539   | NW_004516300.1 | Scaffold962 | 6539                    | GG                              | AA              | 1946988303               |
| SNP_P4_150053_6556   | NW_004516300.1 | Scaffold962 | 6556                    | TT                              | GG              | 1946988305               |
| SNP_P4_150054_6683   | NW_004516300.1 | Scaffold962 | 6683                    | TT                              | GG              | 1946988307               |
| SNP_P4_150055_10596  | NW_004516300.1 | Scaffold962 | 10596                   | AA                              | TT              | 1946988310               |
| SNP_P4_150056_10965  | NW_004516300.1 | Scaffold962 | 10965                   | TT                              | CC              | 1946988312               |
| SNP_P4_150057_10995  | NW_004516300.1 | Scaffold962 | 10995                   | CC                              | AA              | 1946988315               |
| SNP_P4_150058_13429  | NW_004516300.1 | Scaffold962 | 13429                   | TT                              | CC              | 1946988317               |
| SNP_P4_150059_13469  | NW_004516300.1 | Scaffold962 | 13469                   | CC                              | AA              | 1946988319               |
| SNP_P4_150060_16623  | NW_004516300.1 | Scaffold962 | 16623                   | GG                              | AA              | 1946988321               |
| SNP_P4_150061_16954  | NW_004516300.1 | Scaffold962 | 16954                   | TT                              | CC              | 1946988323               |
| SNP_P4_150063_52571  | NW_004516300.1 | Scaffold962 | 52571                   | GG                              | AA              | 1946988325               |
| SNP_P4_150064_52578  | NW_004516300.1 | Scaffold962 | 52578                   | AA                              | TT              | 1946988327               |
| SNP_P4_150065_78346  | NW_004516300.1 | Scaffold962 | 78346                   | TT                              | AA              | 1946988329               |
| SNP_P4_150066_78348  | NW_004516300.1 | Scaffold962 | 78348                   | TT                              | AA              | 1946988331               |
| SNP_P4_150067_79735  | NW_004516300.1 | Scaffold962 | 79735                   | CC                              | TT              | 1946988334               |
| SNP_P4_150068_89029  | NW_004516300.1 | Scaffold962 | 89029                   | TT                              | AA              | 1946988336               |
| SNP_P4_150069_89037  | NW_004516300.1 | Scaffold962 | 89037                   | AA                              | GG              | 1946988338               |
| SNP_P4_150070_89060  | NW_004516300.1 | Scaffold962 | 89060                   | TT                              | AA              | 1946988340               |
| SNP_P4_150071_101811 | NW_004516300.1 | Scaffold962 | 101811                  | CC                              | GG              | 1946988342               |
| SNP_P4_150072_110498 | NW_004516300.1 | Scaffold962 | 110498                  | GG                              | AA              | 1946988344               |
| SNP_P4_150073_112100 | NW_004516300.1 | Scaffold962 | 112100                  | AA                              | CC              | 1946988347               |
| SNP_P4_150074_124273 | NW_004516300.1 | Scaffold962 | 124273                  | TT                              | CC              | 1946988349               |
| SNP_P4_150075_124628 | NW_004516300.1 | Scaffold962 | 124628                  | TT                              | AA              | 1946988351               |
| SNP_P4_150076_125605 | NW_004516300.1 | Scaffold962 | 125605                  | TT                              | GG              | 1946988353               |
| SNP_P4_150077_125629 | NW_004516300.1 | Scaffold962 | 125629                  | TT                              | AA              | 1946988355               |
| SNP_P4_150078_149242 | NW_004516300.1 | Scaffold962 | 149242                  | AA                              | GG              | 1946988357               |
| SNP_P4_150079_149257 | NW_004516300.1 | Scaffold962 | 149257                  | TT                              | CC              | 1946988359               |
| SNP_P4_150080_152427 | NW_004516300.1 | Scaffold962 | 152427                  | GG                              | TT              | 1946988362               |
| SNP_P4_150081_152434 | NW_004516300.1 | Scaffold962 | 152434                  | TT                              | GG              | 1946988364               |
| SNP_P4_150082_152437 | NW_004516300.1 | Scaffold962 | 152437                  | TT                              | AA              | 1946988366               |
| SNP_P4_150083_152461 | NW_004516300.1 | Scaffold962 | 152461                  | AA                              | GG              | 1946988368               |
| SNP_P4_150084_152467 | NW_004516300.1 | Scaffold962 | 152467                  | CC                              | TT              | 1946988371               |
| SNP_P4_150085_157020 | NW_004516300.1 | Scaffold962 | 157020                  | TT                              | AA              | 1946988373               |
| SNP_P4_150086_157354 | NW_004516300.1 | Scaffold962 | 157354                  | CC                              | AA              | 1946988375               |
| SNP_P4_150087_160775 | NW_004516300.1 | Scaffold962 | 160775                  | GG                              | TT              | 1946988377               |
| SNP_P4_150088_161004 | NW_004516300.1 | Scaffold962 | 161004                  | TT                              | CC              | 1946988379               |
| SNP_P4_150089_161065 | NW_004516300.1 | Scaffold962 | 161065                  | AA                              | TT              | 1946988381               |
| SNP_P4_150090_163567 | NW_004516300.1 | Scaffold962 | 163567                  | AA                              | GG              | 1946988383               |
| SNP_P4_150091_163918 | NW_004516300.1 | Scaffold962 | 163918                  | TT                              | CC              | 1946988385               |

| SNPs IDs             | Chromosome IDs | Chromosomes | Physical positions (bp) | CDC Frontier (Reference genome) | (ILWC46 & LPNB) | NCBI SNPdb Accession IDs |
|----------------------|----------------|-------------|-------------------------|---------------------------------|-----------------|--------------------------|
| SNP_P4_150092_163935 | NW_004516300.1 | Scaffold962 | 163935                  | TT                              | AA              | 1946988387               |
| SNP_P4_150093_163953 | NW_004516300.1 | Scaffold962 | 163953                  | AA                              | TT              | 1946988389               |
| SNP_P4_150094_164204 | NW_004516300.1 | Scaffold962 | 164204                  | TT                              | GG              | 1946988391               |
| SNP_P4_150095_164532 | NW_004516300.1 | Scaffold962 | 164532                  | GG                              | AA              | 1946988393               |
| SNP_P4_150097_195805 | NW_004516300.1 | Scaffold962 | 195805                  | TT                              | CC              | 1946988395               |
| SNP_P4_150099_225347 | NW_004516300.1 | Scaffold962 | 225347                  | TT                              | CC              | 1946988398               |
| SNP_P4_150101_231850 | NW_004516300.1 | Scaffold962 | 231850                  | CC                              | TT              | 1946988400               |
| SNP_P4_150102_134    | NW_004516301.1 | Scaffold963 | 134                     | AA                              | CC              | 1946988402               |
| SNP_P4_150103_463    | NW_004516301.1 | Scaffold963 | 463                     | GG                              | CC              | 1946988404               |
| SNP_P4_150104_487    | NW_004516301.1 | Scaffold963 | 487                     | TT                              | CC              | 1946988406               |
| SNP_P4_150105_3741   | NW_004516301.1 | Scaffold963 | 3741                    | TT                              | GG              | 1946988408               |
| SNP_P4_150106_3878   | NW_004516301.1 | Scaffold963 | 3878                    | GG                              | AA              | 1946988411               |
| SNP_P4_150107_4183   | NW_004516301.1 | Scaffold963 | 4183                    | GG                              | AA              | 1946988413               |
| SNP_P4_150108_4185   | NW_004516301.1 | Scaffold963 | 4185                    | GG                              | TT              | 1946988415               |
| SNP_P4_150109_4299   | NW_004516301.1 | Scaffold963 | 4299                    | GG                              | AA              | 1946988417               |
| SNP_P4_150110_4320   | NW_004516301.1 | Scaffold963 | 4320                    | CC                              | AA              | 1946988419               |
| SNP_P4_150111_4449   | NW_004516301.1 | Scaffold963 | 4449                    | CC                              | TT              | 1946988421               |
| SNP_P4_150112_5273   | NW_004516301.1 | Scaffold963 | 5273                    | AA                              | CC              | 1946988423               |
| SNP_P4_150113_5278   | NW_004516301.1 | Scaffold963 | 5278                    | AA                              | CC              | 1946988425               |
| SNP_P4_150115_5290   | NW_004516301.1 | Scaffold963 | 5290                    | AA                              | CC              | 1946988427               |
| SNP_P4_150116_5313   | NW_004516301.1 | Scaffold963 | 5313                    | AA                              | GG              | 1946988430               |
| SNP_P4_150117_5324   | NW_004516301.1 | Scaffold963 | 5324                    | AA                              | TT              | 1946988432               |
| SNP_P4_150118_5337   | NW_004516301.1 | Scaffold963 | 5337                    | TT                              | CC              | 1946988434               |
| SNP_P4_150119_5344   | NW_004516301.1 | Scaffold963 | 5344                    | TT                              | CC              | 1946988436               |
| SNP_P4_150120_5350   | NW_004516301.1 | Scaffold963 | 5350                    | AA                              | GG              | 1946988438               |
| SNP_P4_150121_5389   | NW_004516301.1 | Scaffold963 | 5389                    | AA                              | GG              | 1946988440               |
| SNP_P4_150122_5401   | NW_004516301.1 | Scaffold963 | 5401                    | GG                              | CC              | 1946988442               |
| SNP_P4_150123_5414   | NW_004516301.1 | Scaffold963 | 5414                    | AA                              | GG              | 1946988444               |
| SNP_P4_150124_5444   | NW_004516301.1 | Scaffold963 | 5444                    | TT                              | GG              | 1946988446               |
| SNP_P4_150125_5446   | NW_004516301.1 | Scaffold963 | 5446                    | TT                              | AA              | 1946988448               |
| SNP_P4_150126_5475   | NW_004516301.1 | Scaffold963 | 5475                    | AA                              | GG              | 1946988450               |
| SNP_P4_150127_5478   | NW_004516301.1 | Scaffold963 | 5478                    | AA                              | GG              | 1946988452               |
| SNP_P4_150128_5836   | NW_004516301.1 | Scaffold963 | 5836                    | TT                              | CC              | 1946988455               |
| SNP_P4_150129_5904   | NW_004516301.1 | Scaffold963 | 5904                    | AA                              | CC              | 1946988457               |
| SNP_P4_150130_5958   | NW_004516301.1 | Scaffold963 | 5958                    | GG                              | AA              | 1946988459               |
| SNP_P4_150131_5997   | NW_004516301.1 | Scaffold963 | 5997                    | CC                              | TT              | 1946988461               |
| SNP_P4_150132_6084   | NW_004516301.1 | Scaffold963 | 6084                    | TT                              | CC              | 1946988463               |
| SNP_P4_150134_6130   | NW_004516301.1 | Scaffold963 | 6130                    | GG                              | AA              | 1946988465               |
| SNP_P4_150135_6282   | NW_004516301.1 | Scaffold963 | 6282                    | AA                              | TT              | 1946988467               |
| SNP_P4_150136_6294   | NW_004516301.1 | Scaffold963 | 6294                    | TT                              | CC              | 1946988469               |
| SNP_P4_150137_6320   | NW_004516301.1 | Scaffold963 | 6320                    | AA                              | GG              | 1946988471               |
| SNP_P4_150138_6364   | NW_004516301.1 | Scaffold963 | 6364                    | GG                              | AA              | 1946988473               |

| SNPs IDs             | Chromosome IDs | Chromosomes | Physical positions (bp) | CDC Frontier (Reference genome) | (ILWC46 & LPNB) | NCBI SNPdb Accession IDs |
|----------------------|----------------|-------------|-------------------------|---------------------------------|-----------------|--------------------------|
| SNP_P4_150139_6374   | NW_004516301.1 | Scaffold963 | 6374                    | AA                              | GG              | 1946988475               |
| SNP_P4_150140_6458   | NW_004516301.1 | Scaffold963 | 6458                    | CC                              | TT              | 1946988477               |
| SNP_P4_150141_6496   | NW_004516301.1 | Scaffold963 | 6496                    | GG                              | CC              | 1946988479               |
| SNP_P4_150142_6561   | NW_004516301.1 | Scaffold963 | 6561                    | TT                              | AA              | 1946988481               |
| SNP_P4_150143_6745   | NW_004516301.1 | Scaffold963 | 6745                    | AA                              | GG              | 1946988483               |
| SNP_P4_150144_6785   | NW_004516301.1 | Scaffold963 | 6785                    | TT                              | CC              | 1946988485               |
| SNP_P4_150145_6794   | NW_004516301.1 | Scaffold963 | 6794                    | AA                              | TT              | 1946988487               |
| SNP_P4_150146_7043   | NW_004516301.1 | Scaffold963 | 7043                    | TT                              | CC              | 1946988489               |
| SNP_P4_150147_7216   | NW_004516301.1 | Scaffold963 | 7216                    | AA                              | GG              | 1946988491               |
| SNP_P4_150148_7265   | NW_004516301.1 | Scaffold963 | 7265                    | TT                              | CC              | 1946988493               |
| SNP_P4_150149_7334   | NW_004516301.1 | Scaffold963 | 7334                    | GG                              | AA              | 1946988495               |
| SNP_P4_150150_10704  | NW_004516301.1 | Scaffold963 | 10704                   | TT                              | CC              | 1946988497               |
| SNP_P4_150151_17126  | NW_004516301.1 | Scaffold963 | 17126                   | GG                              | TT              | 1946988499               |
| SNP_P4_150152_17266  | NW_004516301.1 | Scaffold963 | 17266                   | GG                              | TT              | 1946988501               |
| SNP_P4_150153_17292  | NW_004516301.1 | Scaffold963 | 17292                   | AA                              | TT              | 1946988503               |
| SNP_P4_150155_41705  | NW_004516301.1 | Scaffold963 | 41705                   | GG                              | TT              | 1946988505               |
| SNP_P4_150156_51518  | NW_004516301.1 | Scaffold963 | 51518                   | TT                              | GG              | 1946988507               |
| SNP_P4_150157_61914  | NW_004516301.1 | Scaffold963 | 61914                   | TT                              | AA              | 1946988509               |
| SNP_P4_150158_62268  | NW_004516301.1 | Scaffold963 | 62268                   | AA                              | TT              | 1946988511               |
| SNP_P4_150159_62381  | NW_004516301.1 | Scaffold963 | 62381                   | GG                              | AA              | 1946988513               |
| SNP_P4_150160_87301  | NW_004516301.1 | Scaffold963 | 87301                   | GG                              | TT              | 1946988515               |
| SNP_P4_150161_89620  | NW_004516301.1 | Scaffold963 | 89620                   | TT                              | GG              | 1946988517               |
| SNP_P4_150162_89645  | NW_004516301.1 | Scaffold963 | 89645                   | CC                              | GG              | 1946988519               |
| SNP_P4_150163_89755  | NW_004516301.1 | Scaffold963 | 89755                   | TT                              | CC              | 1946988521               |
| SNP_P4_150164_89760  | NW_004516301.1 | Scaffold963 | 89760                   | AA                              | CC              | 1946988523               |
| SNP_P4_150165_89928  | NW_004516301.1 | Scaffold963 | 89928                   | AA                              | GG              | 1946988525               |
| SNP_P4_150166_90012  | NW_004516301.1 | Scaffold963 | 90012                   | TT                              | CC              | 1946988527               |
| SNP_P4_150167_92106  | NW_004516301.1 | Scaffold963 | 92106                   | TT                              | CC              | 1946988529               |
| SNP_P4_150168_92348  | NW_004516301.1 | Scaffold963 | 92348                   | TT                              | CC              | 1946988531               |
| SNP_P4_150169_92441  | NW_004516301.1 | Scaffold963 | 92441                   | AA                              | CC              | 1946988533               |
| SNP_P4_150170_93435  | NW_004516301.1 | Scaffold963 | 93435                   | AA                              | TT              | 1946988535               |
| SNP_P4_150171_93618  | NW_004516301.1 | Scaffold963 | 93618                   | TT                              | CC              | 1946988536               |
| SNP_P4_150172_93619  | NW_004516301.1 | Scaffold963 | 93619                   | AA                              | GG              | 1946988538               |
| SNP_P4_150174_93716  | NW_004516301.1 | Scaffold963 | 93716                   | TT                              | CC              | 1946988540               |
| SNP_P4_150175_93728  | NW_004516301.1 | Scaffold963 | 93728                   | TT                              | GG              | 1946988542               |
| SNP_P4_150176_93730  | NW_004516301.1 | Scaffold963 | 93730                   | CC                              | AA              | 1946988544               |
| SNP_P4_150177_93744  | NW_004516301.1 | Scaffold963 | 93744                   | GG                              | AA              | 1946988546               |
| SNP_P4_150178_93749  | NW_004516301.1 | Scaffold963 | 93749                   | GG                              | AA              | 1946988548               |
| SNP_P4_150179_99546  | NW_004516301.1 | Scaffold963 | 99546                   | GG                              | AA              | 1946988551               |
| SNP_P4_150181_101624 | NW_004516301.1 | Scaffold963 | 101624                  | GG                              | AA              | 1946988553               |
| SNP_P4_150182_101656 | NW_004516301.1 | Scaffold963 | 101656                  | TT                              | GG              | 1946988555               |
| SNP_P4_150183_104074 | NW_004516301.1 | Scaffold963 | 104074                  | CC                              | TT              | 1946988557               |

| SNPs IDs            | Chromosome IDs | Chromosomes | Physical positions (bp) | CDC Frontier (Reference genome) | (ILWC46 & LPNB) | NCBI SNPdb Accession IDs |
|---------------------|----------------|-------------|-------------------------|---------------------------------|-----------------|--------------------------|
| SNP_P4_150184_515   | NW_004516302.1 | Scaffold964 | 515                     | GG                              | TT              | 1946988559               |
| SNP_P4_150185_636   | NW_004516302.1 | Scaffold964 | 636                     | GG                              | AA              | 1946988561               |
| SNP_P4_150186_680   | NW_004516302.1 | Scaffold964 | 680                     | AA                              | TT              | 1946988563               |
| SNP_P4_150187_891   | NW_004516302.1 | Scaffold964 | 891                     | CC                              | TT              | 1946988565               |
| SNP_P4_150188_2351  | NW_004516302.1 | Scaffold964 | 2351                    | AA                              | GG              | 1946988567               |
| SNP_P4_150189_2646  | NW_004516302.1 | Scaffold964 | 2646                    | AA                              | GG              | 1946988569               |
| SNP_P4_150190_6784  | NW_004516302.1 | Scaffold964 | 6784                    | AA                              | CC              | 1946988571               |
| SNP_P4_150191_6984  | NW_004516302.1 | Scaffold964 | 6984                    | AA                              | GG              | 1946988573               |
| SNP_P4_150192_7084  | NW_004516302.1 | Scaffold964 | 7084                    | TT                              | GG              | 1946988576               |
| SNP_P4_150193_7087  | NW_004516302.1 | Scaffold964 | 7087                    | AA                              | TT              | 1946988578               |
| SNP_P4_150194_7090  | NW_004516302.1 | Scaffold964 | 7090                    | TT                              | AA              | 1946988580               |
| SNP_P4_150195_8643  | NW_004516302.1 | Scaffold964 | 8643                    | TT                              | CC              | 1946988582               |
| SNP_P4_150196_8844  | NW_004516302.1 | Scaffold964 | 8844                    | TT                              | GG              | 1946988584               |
| SNP_P4_150197_9547  | NW_004516302.1 | Scaffold964 | 9547                    | AA                              | GG              | 1946988586               |
| SNP_P4_150198_9568  | NW_004516302.1 | Scaffold964 | 9568                    | CC                              | GG              | 1946988588               |
| SNP_P4_150199_10101 | NW_004516302.1 | Scaffold964 | 10101                   | CC                              | TT              | 1946988590               |
| SNP_P4_150200_10613 | NW_004516302.1 | Scaffold964 | 10613                   | GG                              | TT              | 1946988592               |
| SNP_P4_150201_10695 | NW_004516302.1 | Scaffold964 | 10695                   | AA                              | GG              | 1946988594               |
| SNP_P4_150202_10993 | NW_004516302.1 | Scaffold964 | 10993                   | GG                              | AA              | 1946988596               |
| SNP_P4_150203_11017 | NW_004516302.1 | Scaffold964 | 11017                   | AA                              | CC              | 1946988598               |
| SNP_P4_150204_11379 | NW_004516302.1 | Scaffold964 | 11379                   | AA                              | CC              | 1946988600               |
| SNP_P4_150205_11411 | NW_004516302.1 | Scaffold964 | 11411                   | GG                              | AA              | 1946988602               |
| SNP_P4_150206_12586 | NW_004516302.1 | Scaffold964 | 12586                   | TT                              | AA              | 1946988604               |
| SNP_P4_150207_12615 | NW_004516302.1 | Scaffold964 | 12615                   | CC                              | AA              | 1946988606               |
| SNP_P4_150208_12810 | NW_004516302.1 | Scaffold964 | 12810                   | TT                              | CC              | 1946988608               |
| SNP_P4_150209_12862 | NW_004516302.1 | Scaffold964 | 12862                   | CC                              | TT              | 1946988610               |
| SNP_P4_150210_12900 | NW_004516302.1 | Scaffold964 | 12900                   | CC                              | TT              | 1946988612               |
| SNP_P4_150211_12953 | NW_004516302.1 | Scaffold964 | 12953                   | GG                              | TT              | 1946988614               |
| SNP_P4_150212_13573 | NW_004516302.1 | Scaffold964 | 13573                   | AA                              | CC              | 1946988616               |
| SNP_P4_150213_13605 | NW_004516302.1 | Scaffold964 | 13605                   | AA                              | GG              | 1946988618               |
| SNP_P4_150214_13638 | NW_004516302.1 | Scaffold964 | 13638                   | TT                              | AA              | 1946988620               |
| SNP_P4_150215_18131 | NW_004516302.1 | Scaffold964 | 18131                   | AA                              | TT              | 1946988622               |
| SNP_P4_150216_18136 | NW_004516302.1 | Scaffold964 | 18136                   | AA                              | CC              | 1946988624               |
| SNP_P4_150217_18142 | NW_004516302.1 | Scaffold964 | 18142                   | AA                              | GG              | 1946988626               |
| SNP_P4_150218_18161 | NW_004516302.1 | Scaffold964 | 18161                   | AA                              | GG              | 1946988628               |
| SNP_P4_150219_19810 | NW_004516302.1 | Scaffold964 | 19810                   | AA                              | GG              | 1946988630               |
| SNP_P4_150220_32109 | NW_004516302.1 | Scaffold964 | 32109                   | GG                              | TT              | 1946988632               |
| SNP_P4_150221_32122 | NW_004516302.1 | Scaffold964 | 32122                   | AA                              | CC              | 1946988634               |
| SNP_P4_150222_45675 | NW_004516302.1 | Scaffold964 | 45675                   | TT                              | AA              | 1946988637               |
| SNP_P4_150223_45808 | NW_004516302.1 | Scaffold964 | 45808                   | CC                              | AA              | 1946988639               |
| SNP_P4_150224_45869 | NW_004516302.1 | Scaffold964 | 45869                   | CC                              | TT              | 1946988641               |
| SNP_P4_150225_47714 | NW_004516302.1 | Scaffold964 | 47714                   | AA                              | CC              | 1946988643               |



| SNPs IDs            | Chromosome IDs | Chromosomes | Physical positions (bp) | CDC Frontier (Reference genome) | (ILWC46 & LPNB) | NCBI SNPdb Accession IDs |
|---------------------|----------------|-------------|-------------------------|---------------------------------|-----------------|--------------------------|
| SNP_P4_150226_51704 | NW_004516302.1 | Scaffold964 | 51704                   | TT                              | CC              | 1946988645               |
| SNP_P4_150227_58079 | NW_004516302.1 | Scaffold964 | 58079                   | CC                              | TT              | 1946988647               |
| SNP_P4_150228_62690 | NW_004516302.1 | Scaffold964 | 62690                   | CC                              | GG              | 1946988649               |
| SNP_P4_150229_62698 | NW_004516302.1 | Scaffold964 | 62698                   | GG                              | TT              | 1946988652               |
| SNP_P4_150230_62787 | NW_004516302.1 | Scaffold964 | 62787                   | AA                              | CC              | 1946988654               |
| SNP_P4_150231_63111 | NW_004516302.1 | Scaffold964 | 63111                   | AA                              | GG              | 1946988656               |
| SNP_P4_150232_67132 | NW_004516302.1 | Scaffold964 | 67132                   | TT                              | AA              | 1946988658               |
| SNP_P4_150233_72241 | NW_004516302.1 | Scaffold964 | 72241                   | CC                              | TT              | 1946988660               |
| SNP_P4_150236_80889 | NW_004516302.1 | Scaffold964 | 80889                   | TT                              | AA              | 1946988662               |
| SNP_P4_150237_84913 | NW_004516302.1 | Scaffold964 | 84913                   | TT                              | CC              | 1946988664               |
| SNP_P4_150238_3761  | NW_004516303.1 | Scaffold965 | 3761                    | TT                              | GG              | 1946988666               |
| SNP_P4_150239_2664  | NW_004516304.1 | Scaffold967 | 2664                    | CC                              | AA              | 1946988668               |
| SNP_P4_150240_5182  | NW_004516304.1 | Scaffold967 | 5182                    | CC                              | GG              | 1946988670               |
| SNP_P4_150241_5199  | NW_004516304.1 | Scaffold967 | 5199                    | TT                              | AA              | 1946988672               |
| SNP_P4_150242_583   | NW_004516305.1 | Scaffold968 | 583                     | GG                              | AA              | 1946988674               |
| SNP_P4_150243_7195  | NW_004516305.1 | Scaffold968 | 7195                    | AA                              | GG              | 1946988676               |
| SNP_P4_150244_979   | NW_004516306.1 | Scaffold969 | 979                     | AA                              | TT              | 1946988678               |
| SNP_P4_150245_1177  | NW_004516306.1 | Scaffold969 | 1177                    | AA                              | TT              | 1946988680               |
| SNP_P4_150246_1366  | NW_004516306.1 | Scaffold969 | 1366                    | CC                              | AA              | 1946988682               |
| SNP_P4_150247_1375  | NW_004516306.1 | Scaffold969 | 1375                    | GG                              | AA              | 1946988684               |
| SNP_P4_150248_1519  | NW_004516306.1 | Scaffold969 | 1519                    | AA                              | GG              | 1946988686               |
| SNP_P4_150249_281   | NW_004516307.1 | Scaffold971 | 281                     | CC                              | TT              | 1946988688               |
| SNP_P4_150250_342   | NW_004516307.1 | Scaffold971 | 342                     | CC                              | TT              | 1946988691               |
| SNP_P4_150251_527   | NW_004516307.1 | Scaffold971 | 527                     | TT                              | AA              | 1946988693               |
| SNP_P4_150252_553   | NW_004516307.1 | Scaffold971 | 553                     | TT                              | AA              | 1946988695               |
| SNP_P4_150253_573   | NW_004516307.1 | Scaffold971 | 573                     | GG                              | AA              | 1946988697               |
| SNP_P4_150254_1124  | NW_004516307.1 | Scaffold971 | 1124                    | TT                              | CC              | 1946988699               |
| SNP_P4_150255_3501  | NW_004516307.1 | Scaffold971 | 3501                    | GG                              | AA              | 1946988701               |
| SNP_P4_150256_3513  | NW_004516307.1 | Scaffold971 | 3513                    | GG                              | AA              | 1946988703               |
| SNP_P4_150257_3517  | NW_004516307.1 | Scaffold971 | 3517                    | TT                              | AA              | 1946988705               |
| SNP_P4_150258_3528  | NW_004516307.1 | Scaffold971 | 3528                    | TT                              | AA              | 1946988707               |
| SNP_P4_150259_3539  | NW_004516307.1 | Scaffold971 | 3539                    | AA                              | TT              | 1946988709               |
| SNP_P4_150260_3634  | NW_004516307.1 | Scaffold971 | 3634                    | CC                              | AA              | 1946988711               |
| SNP_P4_150261_3700  | NW_004516307.1 | Scaffold971 | 3700                    | AA                              | CC              | 1946988713               |
| SNP_P4_150262_3991  | NW_004516307.1 | Scaffold971 | 3991                    | GG                              | AA              | 1946988715               |
| SNP_P4_150263_4019  | NW_004516307.1 | Scaffold971 | 4019                    | AA                              | GG              | 1946988717               |
| SNP_P4_150264_4331  | NW_004516307.1 | Scaffold971 | 4331                    | AA                              | GG              | 1946988719               |
| SNP_P4_150265_5177  | NW_004516307.1 | Scaffold971 | 5177                    | GG                              | AA              | 1946988721               |
| SNP_P4_150266_5420  | NW_004516307.1 | Scaffold971 | 5420                    | AA                              | GG              | 1946988723               |
| SNP_P4_150267_7881  | NW_004516307.1 | Scaffold971 | 7881                    | CC                              | TT              | 1946988725               |
| SNP_P4_150268_11343 | NW_004516307.1 | Scaffold971 | 11343                   | CC                              | AA              | 1946988727               |
| SNP_P4_150269_11404 | NW_004516307.1 | Scaffold971 | 11404                   | CC                              | TT              | 1946988729               |

| SNPs IDs            | Chromosome IDs | Chromosomes | Physical positions (bp) | CDC Frontier (Reference genome) | (ILWC46 & LPNB) | NCBI SNPdb Accession IDs |
|---------------------|----------------|-------------|-------------------------|---------------------------------|-----------------|--------------------------|
| SNP_P4_150270_12587 | NW_004516307.1 | Scaffold971 | 12587                   | CC                              | AA              | 1946988731               |
| SNP_P4_150271_13443 | NW_004516307.1 | Scaffold971 | 13443                   | AA                              | TT              | 1946988734               |
| SNP_P4_150272_13460 | NW_004516307.1 | Scaffold971 | 13460                   | CC                              | GG              | 1946988736               |
| SNP_P4_150273_13900 | NW_004516307.1 | Scaffold971 | 13900                   | CC                              | AA              | 1946988738               |
| SNP_P4_150274_13945 | NW_004516307.1 | Scaffold971 | 13945                   | AA                              | TT              | 1946988740               |
| SNP_P4_150275_14796 | NW_004516307.1 | Scaffold971 | 14796                   | GG                              | TT              | 1946988742               |
| SNP_P4_150276_7258  | NW_004516308.1 | Scaffold972 | 7258                    | GG                              | AA              | 1946988745               |
| SNP_P4_150277_12487 | NW_004516308.1 | Scaffold972 | 12487                   | GG                              | TT              | 1946988747               |
| SNP_P4_150278_12532 | NW_004516308.1 | Scaffold972 | 12532                   | AA                              | GG              | 1946988749               |
| SNP_P4_150279_12878 | NW_004516308.1 | Scaffold972 | 12878                   | AA                              | GG              | 1946988751               |
| SNP_P4_150280_12939 | NW_004516308.1 | Scaffold972 | 12939                   | AA                              | CC              | 1946988753               |
| SNP_P4_150282_18976 | NW_004516308.1 | Scaffold972 | 18976                   | AA                              | GG              | 1946988755               |
| SNP_P4_150283_492   | NW_004516309.1 | Scaffold973 | 492                     | AA                              | TT              | 1946988757               |
| SNP_P4_150284_1218  | NW_004516309.1 | Scaffold973 | 1218                    | GG                              | AA              | 1946988759               |
| SNP_P4_150285_3367  | NW_004516309.1 | Scaffold973 | 3367                    | AA                              | GG              | 1946988761               |
| SNP_P4_150286_3408  | NW_004516309.1 | Scaffold973 | 3408                    | TT                              | AA              | 1946988763               |
| SNP_P4_150287_3608  | NW_004516309.1 | Scaffold973 | 3608                    | AA                              | GG              | 1946988765               |
| SNP_P4_150288_3696  | NW_004516309.1 | Scaffold973 | 3696                    | GG                              | AA              | 1946988768               |
| SNP_P4_150289_3894  | NW_004516309.1 | Scaffold973 | 3894                    | TT                              | GG              | 1946988770               |
| SNP_P4_150290_4448  | NW_004516309.1 | Scaffold973 | 4448                    | TT                              | CC              | 1946988772               |
| SNP_P4_150291_12184 | NW_004516309.1 | Scaffold973 | 12184                   | TT                              | AA              | 1946988774               |
| SNP_P4_150292_17315 | NW_004516309.1 | Scaffold973 | 17315                   | CC                              | TT              | 1946988776               |
| SNP_P4_150293_23985 | NW_004516309.1 | Scaffold973 | 23985                   | GG                              | AA              | 1946988778               |
| SNP_P4_150294_2466  | NW_004516310.1 | Scaffold974 | 2466                    | CC                              | TT              | 1946988780               |
| SNP_P4_150295_2858  | NW_004516310.1 | Scaffold974 | 2858                    | GG                              | TT              | 1946988782               |
| SNP_P4_150296_2877  | NW_004516310.1 | Scaffold974 | 2877                    | TT                              | CC              | 1946988784               |
| SNP_P4_150297_2953  | NW_004516310.1 | Scaffold974 | 2953                    | GG                              | TT              | 1946988786               |
| SNP_P4_150298_2962  | NW_004516310.1 | Scaffold974 | 2962                    | AA                              | GG              | 1946988788               |
| SNP_P4_150299_3169  | NW_004516310.1 | Scaffold974 | 3169                    | AA                              | CC              | 1946988790               |
| SNP_P4_150300_3463  | NW_004516310.1 | Scaffold974 | 3463                    | GG                              | TT              | 1946988792               |
| SNP_P4_150301_3470  | NW_004516310.1 | Scaffold974 | 3470                    | GG                              | CC              | 1946988794               |
| SNP_P4_150302_3491  | NW_004516310.1 | Scaffold974 | 3491                    | CC                              | TT              | 1946988796               |
| SNP_P4_150303_3687  | NW_004516310.1 | Scaffold974 | 3687                    | CC                              | AA              | 1946988798               |
| SNP_P4_150304_3843  | NW_004516310.1 | Scaffold974 | 3843                    | TT                              | AA              | 1946988800               |
| SNP_P4_150305_3844  | NW_004516310.1 | Scaffold974 | 3844                    | GG                              | TT              | 1946988802               |
| SNP_P4_150307_5279  | NW_004516310.1 | Scaffold974 | 5279                    | TT                              | CC              | 1946988804               |
| SNP_P4_150308_6035  | NW_004516310.1 | Scaffold974 | 6035                    | CC                              | TT              | 1946988806               |
| SNP_P4_150309_11432 | NW_004516310.1 | Scaffold974 | 11432                   | TT                              | GG              | 1946988808               |
| SNP_P4_150310_13096 | NW_004516310.1 | Scaffold974 | 13096                   | TT                              | CC              | 1946988810               |
| SNP_P4_150311_19633 | NW_004516310.1 | Scaffold974 | 19633                   | CC                              | TT              | 1946988812               |
| SNP_P4_150312_19656 | NW_004516310.1 | Scaffold974 | 19656                   | AA                              | GG              | 1946988814               |
| SNP_P4_150313_19663 | NW_004516310.1 | Scaffold974 | 19663                   | AA                              | GG              | 1946988816               |

| SNPs IDs            | Chromosome IDs | Chromosomes | Physical positions (bp) | CDC Frontier (Reference genome) | (ILWC46 & LPNB) | NCBI SNPdb Accession IDs |
|---------------------|----------------|-------------|-------------------------|---------------------------------|-----------------|--------------------------|
| SNP_P4_150314_25843 | NW_004516310.1 | Scaffold974 | 25843                   | AA                              | CC              | 1946988818               |
| SNP_P4_150315_30319 | NW_004516310.1 | Scaffold974 | 30319                   | AA                              | GG              | 1946988820               |
| SNP_P4_150316_30330 | NW_004516310.1 | Scaffold974 | 30330                   | GG                              | AA              | 1946988822               |
| SNP_P4_150317_31542 | NW_004516310.1 | Scaffold974 | 31542                   | AA                              | TT              | 1946988824               |
| SNP_P4_150318_33867 | NW_004516310.1 | Scaffold974 | 33867                   | CC                              | TT              | 1946988826               |
| SNP_P4_150319_33870 | NW_004516310.1 | Scaffold974 | 33870                   | AA                              | TT              | 1946988827               |
| SNP_P4_150320_33900 | NW_004516310.1 | Scaffold974 | 33900                   | AA                              | GG              | 1946988829               |
| SNP_P4_150321_33924 | NW_004516310.1 | Scaffold974 | 33924                   | GG                              | TT              | 1946988831               |
| SNP_P4_150322_33932 | NW_004516310.1 | Scaffold974 | 33932                   | TT                              | CC              | 1946988833               |
| SNP_P4_150323_34240 | NW_004516310.1 | Scaffold974 | 34240                   | AA                              | GG              | 1946988835               |
| SNP_P4_150324_34259 | NW_004516310.1 | Scaffold974 | 34259                   | GG                              | AA              | 1946988837               |
| SNP_P4_150325_34280 | NW_004516310.1 | Scaffold974 | 34280                   | TT                              | CC              | 1946988839               |
| SNP_P4_150326_36399 | NW_004516310.1 | Scaffold974 | 36399                   | GG                              | AA              | 1946988841               |
| SNP_P4_150327_394   | NW_004516311.1 | Scaffold977 | 394                     | CC                              | AA              | 1946988843               |
| SNP_P4_150328_471   | NW_004516311.1 | Scaffold977 | 471                     | AA                              | GG              | 1946988845               |
| SNP_P4_150329_480   | NW_004516311.1 | Scaffold977 | 480                     | GG                              | AA              | 1946988847               |
| SNP_P4_150330_602   | NW_004516311.1 | Scaffold977 | 602                     | GG                              | AA              | 1946988849               |
| SNP_P4_150331_3799  | NW_004516311.1 | Scaffold977 | 3799                    | CC                              | AA              | 1946988851               |
| SNP_P4_150332_4607  | NW_004516311.1 | Scaffold977 | 4607                    | CC                              | TT              | 1946988853               |
| SNP_P4_150333_4769  | NW_004516311.1 | Scaffold977 | 4769                    | TT                              | GG              | 1946988855               |
| SNP_P4_150334_4840  | NW_004516311.1 | Scaffold977 | 4840                    | CC                              | GG              | 1946988857               |
| SNP_P4_150335_4994  | NW_004516311.1 | Scaffold977 | 4994                    | TT                              | CC              | 1946988859               |
| SNP_P4_150336_5019  | NW_004516311.1 | Scaffold977 | 5019                    | GG                              | TT              | 1946988861               |
| SNP_P4_150337_5078  | NW_004516311.1 | Scaffold977 | 5078                    | AA                              | CC              | 1946988862               |
| SNP_P4_150338_5081  | NW_004516311.1 | Scaffold977 | 5081                    | TT                              | CC              | 1946988864               |
| SNP_P4_150339_5231  | NW_004516311.1 | Scaffold977 | 5231                    | TT                              | AA              | 1946988866               |
| SNP_P4_150340_6192  | NW_004516311.1 | Scaffold977 | 6192                    | TT                              | CC              | 1946988868               |
| SNP_P4_150341_6201  | NW_004516311.1 | Scaffold977 | 6201                    | GG                              | AA              | 1946988870               |
| SNP_P4_150342_6210  | NW_004516311.1 | Scaffold977 | 6210                    | GG                              | TT              | 1946988872               |
| SNP_P4_150343_6230  | NW_004516311.1 | Scaffold977 | 6230                    | AA                              | CC              | 1946988874               |
| SNP_P4_150344_6247  | NW_004516311.1 | Scaffold977 | 6247                    | CC                              | GG              | 1946988876               |
| SNP_P4_150345_6255  | NW_004516311.1 | Scaffold977 | 6255                    | TT                              | AA              | 1946988878               |
| SNP_P4_150346_6287  | NW_004516311.1 | Scaffold977 | 6287                    | CC                              | GG              | 1946988880               |
| SNP_P4_150347_6319  | NW_004516311.1 | Scaffold977 | 6319                    | TT                              | AA              | 1946988882               |
| SNP_P4_150348_6534  | NW_004516311.1 | Scaffold977 | 6534                    | CC                              | TT              | 1946988884               |
| SNP_P4_150349_6569  | NW_004516311.1 | Scaffold977 | 6569                    | CC                              | TT              | 1946988886               |
| SNP_P4_150350_6666  | NW_004516311.1 | Scaffold977 | 6666                    | TT                              | AA              | 1946988888               |
| SNP_P4_150351_6773  | NW_004516311.1 | Scaffold977 | 6773                    | CC                              | AA              | 1946988890               |
| SNP_P4_150352_6787  | NW_004516311.1 | Scaffold977 | 6787                    | TT                              | GG              | 1946988892               |
| SNP_P4_150353_6835  | NW_004516311.1 | Scaffold977 | 6835                    | AA                              | GG              | 1946988894               |
| SNP_P4_150354_6849  | NW_004516311.1 | Scaffold977 | 6849                    | TT                              | AA              | 1946988896               |
| SNP_P4_150356_1915  | NW_004516313.1 | Scaffold981 | 1915                    | CC                              | TT              | 1946988898               |

| SNPs IDs            | Chromosome IDs | Chromosomes | Physical positions (bp) | CDC Frontier (Reference genome) | (ILWC46 & LPNB) | NCBI SNPdb Accession IDs |
|---------------------|----------------|-------------|-------------------------|---------------------------------|-----------------|--------------------------|
| SNP_P4_150357_2126  | NW_004516313.1 | Scaffold981 | 2126                    | TT                              | CC              | 1946988900               |
| SNP_P4_150358_2141  | NW_004516313.1 | Scaffold981 | 2141                    | AA                              | GG              | 1946988902               |
| SNP_P4_150359_2144  | NW_004516313.1 | Scaffold981 | 2144                    | CC                              | TT              | 1946988904               |
| SNP_P4_150360_2243  | NW_004516313.1 | Scaffold981 | 2243                    | TT                              | CC              | 1946988906               |
| SNP_P4_150361_5955  | NW_004516313.1 | Scaffold981 | 5955                    | TT                              | CC              | 1946988908               |
| SNP_P4_150362_6355  | NW_004516313.1 | Scaffold981 | 6355                    | CC                              | AA              | 1946988910               |
| SNP_P4_150363_6377  | NW_004516313.1 | Scaffold981 | 6377                    | AA                              | GG              | 1946988912               |
| SNP_P4_150364_6459  | NW_004516313.1 | Scaffold981 | 6459                    | AA                              | CC              | 1946988914               |
| SNP_P4_150365_6557  | NW_004516313.1 | Scaffold981 | 6557                    | TT                              | CC              | 1946988916               |
| SNP_P4_150367_9244  | NW_004516313.1 | Scaffold981 | 9244                    | GG                              | AA              | 1946988918               |
| SNP_P4_150368_9252  | NW_004516313.1 | Scaffold981 | 9252                    | TT                              | CC              | 1946988920               |
| SNP_P4_150370_10135 | NW_004516313.1 | Scaffold981 | 10135                   | AA                              | GG              | 1946988922               |
| SNP_P4_150371_10352 | NW_004516313.1 | Scaffold981 | 10352                   | GG                              | CC              | 1946988924               |
| SNP_P4_150372_10555 | NW_004516313.1 | Scaffold981 | 10555                   | CC                              | GG              | 1946988927               |
| SNP_P4_150373_10903 | NW_004516313.1 | Scaffold981 | 10903                   | CC                              | TT              | 1946988929               |
| SNP_P4_150375_11060 | NW_004516313.1 | Scaffold981 | 11060                   | CC                              | AA              | 1946988931               |
| SNP_P4_150376_11074 | NW_004516313.1 | Scaffold981 | 11074                   | TT                              | CC              | 1946988933               |
| SNP_P4_150377_11087 | NW_004516313.1 | Scaffold981 | 11087                   | TT                              | CC              | 1946988935               |
| SNP_P4_150378_11098 | NW_004516313.1 | Scaffold981 | 11098                   | GG                              | AA              | 1946988937               |
| SNP_P4_150379_11963 | NW_004516313.1 | Scaffold981 | 11963                   | CC                              | TT              | 1946988939               |
| SNP_P4_150380_14778 | NW_004516313.1 | Scaffold981 | 14778                   | GG                              | AA              | 1946988941               |
| SNP_P4_150381_16363 | NW_004516313.1 | Scaffold981 | 16363                   | GG                              | AA              | 1946988943               |
| SNP_P4_150382_18681 | NW_004516313.1 | Scaffold981 | 18681                   | TT                              | CC              | 1946988945               |
| SNP_P4_150383_39566 | NW_004516313.1 | Scaffold981 | 39566                   | TT                              | CC              | 1946988947               |
| SNP_P4_150384_39700 | NW_004516313.1 | Scaffold981 | 39700                   | GG                              | AA              | 1946988949               |
| SNP_P4_150385_39758 | NW_004516313.1 | Scaffold981 | 39758                   | AA                              | GG              | 1946988951               |
| SNP_P4_150386_39759 | NW_004516313.1 | Scaffold981 | 39759                   | GG                              | AA              | 1946988953               |
| SNP_P4_150387_39764 | NW_004516313.1 | Scaffold981 | 39764                   | CC                              | AA              | 1946988955               |
| SNP_P4_150388_39766 | NW_004516313.1 | Scaffold981 | 39766                   | AA                              | GG              | 1946988957               |
| SNP_P4_150389_43253 | NW_004516313.1 | Scaffold981 | 43253                   | GG                              | CC              | 1946988959               |
| SNP_P4_150390_43324 | NW_004516313.1 | Scaffold981 | 43324                   | AA                              | CC              | 1946988961               |
| SNP_P4_150391_44322 | NW_004516313.1 | Scaffold981 | 44322                   | CC                              | TT              | 1946988963               |
| SNP_P4_150392_44457 | NW_004516313.1 | Scaffold981 | 44457                   | AA                              | CC              | 1946988965               |
| SNP_P4_150393_48794 | NW_004516313.1 | Scaffold981 | 48794                   | TT                              | AA              | 1946988967               |
| SNP_P4_150394_49494 | NW_004516313.1 | Scaffold981 | 49494                   | GG                              | CC              | 1946988969               |
| SNP_P4_150395_49714 | NW_004516313.1 | Scaffold981 | 49714                   | TT                              | CC              | 1946988971               |
| SNP_P4_150396_49726 | NW_004516313.1 | Scaffold981 | 49726                   | TT                              | AA              | 1946988973               |
| SNP_P4_150397_49735 | NW_004516313.1 | Scaffold981 | 49735                   | CC                              | GG              | 1946988975               |
| SNP_P4_150398_49740 | NW_004516313.1 | Scaffold981 | 49740                   | CC                              | TT              | 1946988977               |
| SNP_P4_150399_49777 | NW_004516313.1 | Scaffold981 | 49777                   | TT                              | CC              | 1946988979               |
| SNP_P4_150400_49824 | NW_004516313.1 | Scaffold981 | 49824                   | CC                              | AA              | 1946988981               |
| SNP_P4_150401_49926 | NW_004516313.1 | Scaffold981 | 49926                   | TT                              | AA              | 1946988983               |

| SNPs IDs            | Chromosome IDs | Chromosomes | Physical positions (bp) | CDC Frontier (Reference genome) | (ILWC46 & LPNB) | NCBI SNPdb Accession IDs |
|---------------------|----------------|-------------|-------------------------|---------------------------------|-----------------|--------------------------|
| SNP_P4_150402_49988 | NW_004516313.1 | Scaffold981 | 49988                   | CC                              | TT              | 1946988985               |
| SNP_P4_150403_50025 | NW_004516313.1 | Scaffold981 | 50025                   | TT                              | AA              | 1946988987               |
| SNP_P4_150404_50071 | NW_004516313.1 | Scaffold981 | 50071                   | CC                              | TT              | 1946988989               |
| SNP_P4_150405_50689 | NW_004516313.1 | Scaffold981 | 50689                   | AA                              | CC              | 1946988991               |
| SNP_P4_150406_52891 | NW_004516313.1 | Scaffold981 | 52891                   | CC                              | TT              | 1946988993               |
| SNP_P4_150407_53948 | NW_004516313.1 | Scaffold981 | 53948                   | GG                              | TT              | 1946988995               |
| SNP_P4_150408_54063 | NW_004516313.1 | Scaffold981 | 54063                   | CC                              | TT              | 1946988997               |
| SNP_P4_150409_70088 | NW_004516313.1 | Scaffold981 | 70088                   | GG                              | AA              | 1946988999               |
| SNP_P4_150410_70643 | NW_004516313.1 | Scaffold981 | 70643                   | CC                              | AA              | 1946989001               |
| SNP_P4_150411_73561 | NW_004516313.1 | Scaffold981 | 73561                   | CC                              | AA              | 1946989003               |
| SNP_P4_150412_73576 | NW_004516313.1 | Scaffold981 | 73576                   | TT                              | AA              | 1946989005               |
| SNP_P4_150413_73582 | NW_004516313.1 | Scaffold981 | 73582                   | CC                              | GG              | 1946989007               |
| SNP_P4_150414_77545 | NW_004516313.1 | Scaffold981 | 77545                   | CC                              | TT              | 1946989009               |
| SNP_P4_150415_77799 | NW_004516313.1 | Scaffold981 | 77799                   | CC                              | AA              | 1946989011               |
| SNP_P4_150416_77802 | NW_004516313.1 | Scaffold981 | 77802                   | CC                              | TT              | 1946989013               |
| SNP_P4_150417_77805 | NW_004516313.1 | Scaffold981 | 77805                   | TT                              | GG              | 1946989015               |
| SNP_P4_150418_77808 | NW_004516313.1 | Scaffold981 | 77808                   | CC                              | AA              | 1946989017               |
| SNP_P4_150419_77882 | NW_004516313.1 | Scaffold981 | 77882                   | TT                              | CC              | 1946989019               |
| SNP_P4_150420_77890 | NW_004516313.1 | Scaffold981 | 77890                   | GG                              | AA              | 1946989021               |
| SNP_P4_150421_77911 | NW_004516313.1 | Scaffold981 | 77911                   | GG                              | AA              | 1946989023               |
| SNP_P4_150422_78041 | NW_004516313.1 | Scaffold981 | 78041                   | AA                              | CC              | 1946989025               |
| SNP_P4_150423_78049 | NW_004516313.1 | Scaffold981 | 78049                   | AA                              | GG              | 1946989027               |
| SNP_P4_150424_78396 | NW_004516313.1 | Scaffold981 | 78396                   | TT                              | CC              | 1946989029               |
| SNP_P4_150425_78580 | NW_004516313.1 | Scaffold981 | 78580                   | AA                              | GG              | 1946989031               |
| SNP_P4_150426_78615 | NW_004516313.1 | Scaffold981 | 78615                   | AA                              | GG              | 1946989033               |
| SNP_P4_150427_78704 | NW_004516313.1 | Scaffold981 | 78704                   | TT                              | CC              | 1946989035               |
| SNP_P4_150428_79028 | NW_004516313.1 | Scaffold981 | 79028                   | AA                              | GG              | 1946989037               |
| SNP_P4_150429_79088 | NW_004516313.1 | Scaffold981 | 79088                   | CC                              | GG              | 1946989039               |
| SNP_P4_150430_79320 | NW_004516313.1 | Scaffold981 | 79320                   | AA                              | GG              | 1946989041               |
| SNP_P4_150431_79335 | NW_004516313.1 | Scaffold981 | 79335                   | CC                              | TT              | 1946989043               |
| SNP_P4_150432_79359 | NW_004516313.1 | Scaffold981 | 79359                   | AA                              | GG              | 1946989045               |
| SNP_P4_150433_79361 | NW_004516313.1 | Scaffold981 | 79361                   | AA                              | GG              | 1946989047               |
| SNP_P4_150434_83927 | NW_004516313.1 | Scaffold981 | 83927                   | TT                              | CC              | 1946989049               |
| SNP_P4_150435_84237 | NW_004516313.1 | Scaffold981 | 84237                   | TT                              | AA              | 1946989051               |
| SNP_P4_150436_84238 | NW_004516313.1 | Scaffold981 | 84238                   | AA                              | TT              | 1946989053               |
| SNP_P4_150437_84265 | NW_004516313.1 | Scaffold981 | 84265                   | AA                              | GG              | 1946989055               |
| SNP_P4_150438_84314 | NW_004516313.1 | Scaffold981 | 84314                   | AA                              | CC              | 1946989057               |
| SNP_P4_150440_84544 | NW_004516313.1 | Scaffold981 | 84544                   | CC                              | TT              | 1946989059               |
| SNP_P4_150441_496   | NW_004516314.1 | Scaffold982 | 496                     | CC                              | GG              | 1946989061               |
| SNP_P4_150445_1212  | NW_004516314.1 | Scaffold982 | 1212                    | AA                              | GG              | 1946989063               |
| SNP_P4_150446_1250  | NW_004516314.1 | Scaffold982 | 1250                    | CC                              | AA              | 1946989065               |
| SNP_P4_150449_1854  | NW_004516314.1 | Scaffold982 | 1854                    | AA                              | TT              | 1946989067               |

| SNPs IDs             | Chromosome IDs | Chromosomes | Physical positions (bp) | CDC Frontier (Reference genome) | (ILWC46 & LPNB) | NCBI SNPdb Accession IDs |
|----------------------|----------------|-------------|-------------------------|---------------------------------|-----------------|--------------------------|
| SNP_P4_150450_2456   | NW_004516314.1 | Scaffold982 | 2456                    | GG                              | TT              | 1946989069               |
| SNP_P4_150451_2819   | NW_004516314.1 | Scaffold982 | 2819                    | TT                              | AA              | 1946989071               |
| SNP_P4_150452_3235   | NW_004516314.1 | Scaffold982 | 3235                    | TT                              | AA              | 1946989073               |
| SNP_P4_150453_5464   | NW_004516314.1 | Scaffold982 | 5464                    | TT                              | AA              | 1946989075               |
| SNP_P4_150454_5533   | NW_004516314.1 | Scaffold982 | 5533                    | TT                              | CC              | 1946989077               |
| SNP_P4_150456_6010   | NW_004516314.1 | Scaffold982 | 6010                    | GG                              | TT              | 1946989079               |
| SNP_P4_150457_6976   | NW_004516314.1 | Scaffold982 | 6976                    | TT                              | AA              | 1946989081               |
| SNP_P4_150458_7001   | NW_004516314.1 | Scaffold982 | 7001                    | GG                              | AA              | 1946989083               |
| SNP_P4_150459_7346   | NW_004516314.1 | Scaffold982 | 7346                    | AA                              | TT              | 1946989085               |
| SNP_P4_150460_13785  | NW_004516314.1 | Scaffold982 | 13785                   | GG                              | AA              | 1946989087               |
| SNP_P4_150461_14243  | NW_004516314.1 | Scaffold982 | 14243                   | GG                              | CC              | 1946989089               |
| SNP_P4_150462_14553  | NW_004516314.1 | Scaffold982 | 14553                   | GG                              | CC              | 1946989091               |
| SNP_P4_150463_14774  | NW_004516314.1 | Scaffold982 | 14774                   | GG                              | TT              | 1946989093               |
| SNP_P4_150464_14789  | NW_004516314.1 | Scaffold982 | 14789                   | GG                              | AA              | 1946989095               |
| SNP_P4_150465_14806  | NW_004516314.1 | Scaffold982 | 14806                   | TT                              | AA              | 1946989097               |
| SNP_P4_150466_14809  | NW_004516314.1 | Scaffold982 | 14809                   | CC                              | AA              | 1946989099               |
| SNP_P4_150468_15039  | NW_004516314.1 | Scaffold982 | 15039                   | AA                              | GG              | 1946989101               |
| SNP_P4_150469_15057  | NW_004516314.1 | Scaffold982 | 15057                   | GG                              | AA              | 1946989103               |
| SNP_P4_150471_15693  | NW_004516314.1 | Scaffold982 | 15693                   | TT                              | GG              | 1946989105               |
| SNP_P4_150472_9875   | NW_004516315.1 | Scaffold983 | 9875                    | GG                              | AA              | 1946989107               |
| SNP_P4_150473_14324  | NW_004516315.1 | Scaffold983 | 14324                   | AA                              | GG              | 1946989109               |
| SNP_P4_150474_22548  | NW_004516315.1 | Scaffold983 | 22548                   | TT                              | CC              | 1946989111               |
| SNP_P4_150475_24835  | NW_004516315.1 | Scaffold983 | 24835                   | AA                              | GG              | 1946989113               |
| SNP_P4_150476_30190  | NW_004516315.1 | Scaffold983 | 30190                   | TT                              | CC              | 1946989115               |
| SNP_P4_150477_33233  | NW_004516315.1 | Scaffold983 | 33233                   | AA                              | GG              | 1946989117               |
| SNP_P4_150478_33259  | NW_004516315.1 | Scaffold983 | 33259                   | AA                              | GG              | 1946989119               |
| SNP_P4_150481_33288  | NW_004516315.1 | Scaffold983 | 33288                   | AA                              | TT              | 1946989121               |
| SNP_P4_150482_33319  | NW_004516315.1 | Scaffold983 | 33319                   | TT                              | CC              | 1946989123               |
| SNP_P4_150483_33338  | NW_004516315.1 | Scaffold983 | 33338                   | CC                              | TT              | 1946989125               |
| SNP_P4_150484_33343  | NW_004516315.1 | Scaffold983 | 33343                   | TT                              | GG              | 1946989127               |
| SNP_P4_150485_60154  | NW_004516315.1 | Scaffold983 | 60154                   | AA                              | TT              | 1946989129               |
| SNP_P4_150486_66567  | NW_004516315.1 | Scaffold983 | 66567                   | AA                              | GG              | 1946989131               |
| SNP_P4_150487_76816  | NW_004516315.1 | Scaffold983 | 76816                   | TT                              | CC              | 1946989133               |
| SNP_P4_150488_88005  | NW_004516315.1 | Scaffold983 | 88005                   | TT                              | AA              | 1946989135               |
| SNP_P4_150489_88021  | NW_004516315.1 | Scaffold983 | 88021                   | AA                              | GG              | 1946989137               |
| SNP_P4_150490_88174  | NW_004516315.1 | Scaffold983 | 88174                   | GG                              | CC              | 1946989139               |
| SNP_P4_150492_88254  | NW_004516315.1 | Scaffold983 | 88254                   | TT                              | CC              | 1946989141               |
| SNP_P4_150493_88296  | NW_004516315.1 | Scaffold983 | 88296                   | CC                              | TT              | 1946989143               |
| SNP_P4_150494_88343  | NW_004516315.1 | Scaffold983 | 88343                   | CC                              | TT              | 1946989145               |
| SNP_P4_150495_88349  | NW_004516315.1 | Scaffold983 | 88349                   | GG                              | AA              | 1946989147               |
| SNP_P4_150497_88683  | NW_004516315.1 | Scaffold983 | 88683                   | TT                              | AA              | 1946989149               |
| SNP_P4_150498_113999 | NW_004516315.1 | Scaffold983 | 113999                  | CC                              | AA              | 1946989151               |

| SNPs IDs             | Chromosome IDs | Chromosomes | Physical positions (bp) | CDC Frontier (Reference genome) | (ILWC46 & LPNB) | NCBI SNPdb Accession IDs |
|----------------------|----------------|-------------|-------------------------|---------------------------------|-----------------|--------------------------|
| SNP_P4_150499_114002 | NW_004516315.1 | Scaffold983 | 114002                  | AA                              | GG              | 1946989153               |
| SNP_P4_150500_128346 | NW_004516315.1 | Scaffold983 | 128346                  | TT                              | AA              | 1946989155               |
| SNP_P4_150502_128776 | NW_004516315.1 | Scaffold983 | 128776                  | GG                              | TT              | 1946989157               |
| SNP_P4_150503_129231 | NW_004516315.1 | Scaffold983 | 129231                  | AA                              | GG              | 1946989159               |
| SNP_P4_150504_129477 | NW_004516315.1 | Scaffold983 | 129477                  | GG                              | TT              | 1946989161               |
| SNP_P4_150505_129500 | NW_004516315.1 | Scaffold983 | 129500                  | TT                              | AA              | 1946989163               |
| SNP_P4_150506_129501 | NW_004516315.1 | Scaffold983 | 129501                  | CC                              | AA              | 1946989165               |
| SNP_P4_150507_129519 | NW_004516315.1 | Scaffold983 | 129519                  | GG                              | TT              | 1946989167               |
| SNP_P4_150508_141413 | NW_004516315.1 | Scaffold983 | 141413                  | TT                              | GG              | 1946989170               |
| SNP_P4_150509_141568 | NW_004516315.1 | Scaffold983 | 141568                  | CC                              | TT              | 1946989172               |
| SNP_P4_150511_141855 | NW_004516315.1 | Scaffold983 | 141855                  | TT                              | AA              | 1946989174               |
| SNP_P4_150513_169346 | NW_004516315.1 | Scaffold983 | 169346                  | TT                              | CC              | 1946989176               |
| SNP_P4_150514_169466 | NW_004516315.1 | Scaffold983 | 169466                  | GG                              | AA              | 1946989178               |
| SNP_P4_150515_169580 | NW_004516315.1 | Scaffold983 | 169580                  | CC                              | GG              | 1946989180               |
| SNP_P4_150516_169588 | NW_004516315.1 | Scaffold983 | 169588                  | TT                              | AA              | 1946989182               |
| SNP_P4_150517_169601 | NW_004516315.1 | Scaffold983 | 169601                  | AA                              | CC              | 1946989184               |
| SNP_P4_150518_169618 | NW_004516315.1 | Scaffold983 | 169618                  | CC                              | TT              | 1946989186               |
| SNP_P4_150519_169794 | NW_004516315.1 | Scaffold983 | 169794                  | TT                              | AA              | 1946989188               |
| SNP_P4_150520_169797 | NW_004516315.1 | Scaffold983 | 169797                  | GG                              | AA              | 1946989190               |
| SNP_P4_150521_174279 | NW_004516315.1 | Scaffold983 | 174279                  | AA                              | GG              | 1946989192               |
| SNP_P4_150522_174293 | NW_004516315.1 | Scaffold983 | 174293                  | GG                              | AA              | 1946989194               |
| SNP_P4_150523_174388 | NW_004516315.1 | Scaffold983 | 174388                  | CC                              | TT              | 1946989196               |
| SNP_P4_150524_174407 | NW_004516315.1 | Scaffold983 | 174407                  | TT                              | CC              | 1946989198               |
| SNP_P4_150525_174421 | NW_004516315.1 | Scaffold983 | 174421                  | TT                              | CC              | 1946989200               |
| SNP_P4_150526_174459 | NW_004516315.1 | Scaffold983 | 174459                  | AA                              | CC              | 1946989202               |
| SNP_P4_150527_174520 | NW_004516315.1 | Scaffold983 | 174520                  | AA                              | GG              | 1946989203               |
| SNP_P4_150528_174522 | NW_004516315.1 | Scaffold983 | 174522                  | CC                              | AA              | 1946989204               |
| SNP_P4_150529_174632 | NW_004516315.1 | Scaffold983 | 174632                  | AA                              | TT              | 1946989205               |
| SNP_P4_150531_174679 | NW_004516315.1 | Scaffold983 | 174679                  | GG                              | AA              | 1946989206               |
| SNP_P4_150532_175295 | NW_004516315.1 | Scaffold983 | 175295                  | GG                              | AA              | 1946989207               |
| SNP_P4_150533_219082 | NW_004516315.1 | Scaffold983 | 219082                  | AA                              | CC              | 1946989208               |
| SNP_P4_150534_234235 | NW_004516315.1 | Scaffold983 | 234235                  | CC                              | GG              | 1946989210               |
| SNP_P4_150535_250179 | NW_004516315.1 | Scaffold983 | 250179                  | AA                              | CC              | 1946989212               |
| SNP_P4_150536_254722 | NW_004516315.1 | Scaffold983 | 254722                  | AA                              | GG              | 1946989214               |
| SNP_P4_150537_254924 | NW_004516315.1 | Scaffold983 | 254924                  | CC                              | TT              | 1946989216               |
| SNP_P4_150538_255047 | NW_004516315.1 | Scaffold983 | 255047                  | AA                              | GG              | 1946989218               |
| SNP_P4_150539_255170 | NW_004516315.1 | Scaffold983 | 255170                  | AA                              | GG              | 1946989221               |
| SNP_P4_150541_255185 | NW_004516315.1 | Scaffold983 | 255185                  | CC                              | TT              | 1946989223               |
| SNP_P4_150542_276000 | NW_004516315.1 | Scaffold983 | 276000                  | TT                              | CC              | 1946989225               |
| SNP_P4_150544_278467 | NW_004516315.1 | Scaffold983 | 278467                  | TT                              | CC              | 1946989227               |
| SNP_P4_150545_287357 | NW_004516315.1 | Scaffold983 | 287357                  | GG                              | TT              | 1946989229               |
| SNP_P4_150546_287403 | NW_004516315.1 | Scaffold983 | 287403                  | TT                              | AA              | 1946989231               |

| SNPs IDs             | Chromosome IDs | Chromosomes | Physical positions (bp) | CDC Frontier (Reference genome) | (ILWC46 & LPNB) | NCBI SNPdb Accession IDs |
|----------------------|----------------|-------------|-------------------------|---------------------------------|-----------------|--------------------------|
| SNP_P4_150547_287422 | NW_004516315.1 | Scaffold983 | 287422                  | AA                              | GG              | 1946989233               |
| SNP_P4_150548_287428 | NW_004516315.1 | Scaffold983 | 287428                  | AA                              | GG              | 1946989235               |
| SNP_P4_150549_287470 | NW_004516315.1 | Scaffold983 | 287470                  | CC                              | AA              | 1946989237               |
| SNP_P4_150552_287716 | NW_004516315.1 | Scaffold983 | 287716                  | AA                              | CC              | 1946989239               |
| SNP_P4_150553_287745 | NW_004516315.1 | Scaffold983 | 287745                  | TT                              | GG              | 1946989241               |
| SNP_P4_150554_287755 | NW_004516315.1 | Scaffold983 | 287755                  | GG                              | TT              | 1946989243               |
| SNP_P4_150555_287771 | NW_004516315.1 | Scaffold983 | 287771                  | TT                              | CC              | 1946989245               |
| SNP_P4_150556_287783 | NW_004516315.1 | Scaffold983 | 287783                  | TT                              | CC              | 1946989247               |
| SNP_P4_150557_287785 | NW_004516315.1 | Scaffold983 | 287785                  | TT                              | CC              | 1946989249               |
| SNP_P4_150558_287866 | NW_004516315.1 | Scaffold983 | 287866                  | AA                              | GG              | 1946989251               |
| SNP_P4_150559_287891 | NW_004516315.1 | Scaffold983 | 287891                  | AA                              | GG              | 1946989253               |
| SNP_P4_150560_287965 | NW_004516315.1 | Scaffold983 | 287965                  | AA                              | TT              | 1946989255               |
| SNP_P4_150561_287997 | NW_004516315.1 | Scaffold983 | 287997                  | AA                              | TT              | 1946989257               |
| SNP_P4_150562_288036 | NW_004516315.1 | Scaffold983 | 288036                  | AA                              | CC              | 1946989259               |
| SNP_P4_150563_288163 | NW_004516315.1 | Scaffold983 | 288163                  | CC                              | TT              | 1946989261               |
| SNP_P4_150564_290282 | NW_004516315.1 | Scaffold983 | 290282                  | AA                              | TT              | 1946989263               |
| SNP_P4_150565_290293 | NW_004516315.1 | Scaffold983 | 290293                  | GG                              | AA              | 1946989266               |
| SNP_P4_150566_293022 | NW_004516315.1 | Scaffold983 | 293022                  | GG                              | AA              | 1946989268               |
| SNP_P4_150567_293372 | NW_004516315.1 | Scaffold983 | 293372                  | CC                              | TT              | 1946989270               |
| SNP_P4_150568_309280 | NW_004516315.1 | Scaffold983 | 309280                  | TT                              | CC              | 1946989272               |
| SNP_P4_150569_309283 | NW_004516315.1 | Scaffold983 | 309283                  | TT                              | CC              | 1946989274               |
| SNP_P4_150570_361896 | NW_004516315.1 | Scaffold983 | 361896                  | GG                              | AA              | 1946989276               |
| SNP_P4_150572_1314   | NW_004516316.1 | Scaffold984 | 1314                    | AA                              | GG              | 1946989278               |
| SNP_P4_150573_1375   | NW_004516316.1 | Scaffold984 | 1375                    | TT                              | CC              | 1946989280               |
| SNP_P4_150574_1382   | NW_004516316.1 | Scaffold984 | 1382                    | TT                              | AA              | 1946989282               |
| SNP_P4_150575_1435   | NW_004516316.1 | Scaffold984 | 1435                    | AA                              | CC              | 1946989284               |
| SNP_P4_150576_1455   | NW_004516316.1 | Scaffold984 | 1455                    | GG                              | TT              | 1946989287               |
| SNP_P4_150577_2545   | NW_004516316.1 | Scaffold984 | 2545                    | TT                              | AA              | 1946989289               |
| SNP_P4_150578_2666   | NW_004516316.1 | Scaffold984 | 2666                    | TT                              | CC              | 1946989291               |
| SNP_P4_150579_4024   | NW_004516316.1 | Scaffold984 | 4024                    | CC                              | GG              | 1946989293               |
| SNP_P4_150581_13599  | NW_004516316.1 | Scaffold984 | 13599                   | TT                              | AA              | 1946989295               |
| SNP_P4_150582_13700  | NW_004516316.1 | Scaffold984 | 13700                   | CC                              | AA              | 1946989297               |
| SNP_P4_150583_33502  | NW_004516316.1 | Scaffold984 | 33502                   | TT                              | CC              | 1946989299               |
| SNP_P4_150584_33504  | NW_004516316.1 | Scaffold984 | 33504                   | GG                              | TT              | 1946989301               |
| SNP_P4_150585_33626  | NW_004516316.1 | Scaffold984 | 33626                   | GG                              | TT              | 1946989303               |
| SNP_P4_150586_33665  | NW_004516316.1 | Scaffold984 | 33665                   | TT                              | CC              | 1946989305               |
| SNP_P4_150587_36131  | NW_004516316.1 | Scaffold984 | 36131                   | GG                              | AA              | 1946989307               |
| SNP_P4_150588_36181  | NW_004516316.1 | Scaffold984 | 36181                   | AA                              | CC              | 1946989309               |
| SNP_P4_150589_36187  | NW_004516316.1 | Scaffold984 | 36187                   | GG                              | AA              | 1946989311               |
| SNP_P4_150591_36424  | NW_004516316.1 | Scaffold984 | 36424                   | AA                              | TT              | 1946989313               |
| SNP_P4_150592_36663  | NW_004516316.1 | Scaffold984 | 36663                   | CC                              | TT              | 1946989315               |
| SNP_P4_150593_36692  | NW_004516316.1 | Scaffold984 | 36692                   | AA                              | GG              | 1946989317               |



| SNPs IDs             | Chromosome IDs | Chromosomes | Physical positions (bp) | CDC Frontier (Reference genome) | (ILWC46 & LPNB) | NCBI SNPdb Accession IDs |
|----------------------|----------------|-------------|-------------------------|---------------------------------|-----------------|--------------------------|
| SNP_P4_150594_36759  | NW_004516316.1 | Scaffold984 | 36759                   | AA                              | TT              | 1946989319               |
| SNP_P4_150595_36760  | NW_004516316.1 | Scaffold984 | 36760                   | TT                              | GG              | 1946989321               |
| SNP_P4_150596_36763  | NW_004516316.1 | Scaffold984 | 36763                   | GG                              | TT              | 1946989323               |
| SNP_P4_150597_40065  | NW_004516316.1 | Scaffold984 | 40065                   | AA                              | CC              | 1946989325               |
| SNP_P4_150598_55126  | NW_004516316.1 | Scaffold984 | 55126                   | TT                              | AA              | 1946989327               |
| SNP_P4_150599_55140  | NW_004516316.1 | Scaffold984 | 55140                   | TT                              | AA              | 1946989329               |
| SNP_P4_150600_55153  | NW_004516316.1 | Scaffold984 | 55153                   | CC                              | GG              | 1946989331               |
| SNP_P4_150601_60298  | NW_004516316.1 | Scaffold984 | 60298                   | TT                              | CC              | 1946989333               |
| SNP_P4_150602_64122  | NW_004516316.1 | Scaffold984 | 64122                   | AA                              | TT              | 1946989335               |
| SNP_P4_150603_66719  | NW_004516316.1 | Scaffold984 | 66719                   | TT                              | GG              | 1946989337               |
| SNP_P4_150604_66933  | NW_004516316.1 | Scaffold984 | 66933                   | CC                              | TT              | 1946989339               |
| SNP_P4_150605_67112  | NW_004516316.1 | Scaffold984 | 67112                   | AA                              | CC              | 1946989341               |
| SNP_P4_150606_67345  | NW_004516316.1 | Scaffold984 | 67345                   | AA                              | CC              | 1946989343               |
| SNP_P4_150607_73241  | NW_004516316.1 | Scaffold984 | 73241                   | TT                              | GG              | 1946989345               |
| SNP_P4_150608_76826  | NW_004516316.1 | Scaffold984 | 76826                   | GG                              | TT              | 1946989347               |
| SNP_P4_150609_77778  | NW_004516316.1 | Scaffold984 | 77778                   | TT                              | AA              | 1946989349               |
| SNP_P4_150610_78016  | NW_004516316.1 | Scaffold984 | 78016                   | GG                              | TT              | 1946989351               |
| SNP_P4_150611_78163  | NW_004516316.1 | Scaffold984 | 78163                   | AA                              | TT              | 1946989353               |
| SNP_P4_150612_78164  | NW_004516316.1 | Scaffold984 | 78164                   | TT                              | GG              | 1946989355               |
| SNP_P4_150613_78174  | NW_004516316.1 | Scaffold984 | 78174                   | CC                              | AA              | 1946989357               |
| SNP_P4_150614_78179  | NW_004516316.1 | Scaffold984 | 78179                   | TT                              | CC              | 1946989359               |
| SNP_P4_150615_78200  | NW_004516316.1 | Scaffold984 | 78200                   | AA                              | TT              | 1946989361               |
| SNP_P4_150616_78261  | NW_004516316.1 | Scaffold984 | 78261                   | CC                              | AA              | 1946989363               |
| SNP_P4_150617_78272  | NW_004516316.1 | Scaffold984 | 78272                   | AA                              | GG              | 1946989365               |
| SNP_P4_150618_78309  | NW_004516316.1 | Scaffold984 | 78309                   | AA                              | GG              | 1946989367               |
| SNP_P4_150619_81209  | NW_004516316.1 | Scaffold984 | 81209                   | AA                              | GG              | 1946989369               |
| SNP_P4_150620_91902  | NW_004516316.1 | Scaffold984 | 91902                   | TT                              | CC              | 1946989371               |
| SNP_P4_150621_92176  | NW_004516316.1 | Scaffold984 | 92176                   | TT                              | CC              | 1946989373               |
| SNP_P4_150622_92257  | NW_004516316.1 | Scaffold984 | 92257                   | AA                              | TT              | 1946989375               |
| SNP_P4_150623_94147  | NW_004516316.1 | Scaffold984 | 94147                   | AA                              | CC              | 1946989377               |
| SNP_P4_150624_94183  | NW_004516316.1 | Scaffold984 | 94183                   | GG                              | CC              | 1946989379               |
| SNP_P4_150625_94216  | NW_004516316.1 | Scaffold984 | 94216                   | GG                              | AA              | 1946989381               |
| SNP_P4_150626_94354  | NW_004516316.1 | Scaffold984 | 94354                   | AA                              | CC              | 1946989383               |
| SNP_P4_150627_109359 | NW_004516316.1 | Scaffold984 | 109359                  | GG                              | AA              | 1946989385               |
| SNP_P4_150628_119093 | NW_004516316.1 | Scaffold984 | 119093                  | TT                              | CC              | 1946989387               |
| SNP_P4_150629_119106 | NW_004516316.1 | Scaffold984 | 119106                  | AA                              | TT              | 1946989389               |
| SNP_P4_150630_128354 | NW_004516316.1 | Scaffold984 | 128354                  | TT                              | GG              | 1946989390               |
| SNP_P4_150631_128365 | NW_004516316.1 | Scaffold984 | 128365                  | TT                              | AA              | 1946989392               |
| SNP_P4_150632_128370 | NW_004516316.1 | Scaffold984 | 128370                  | TT                              | GG              | 1946989394               |
| SNP_P4_150633_129952 | NW_004516316.1 | Scaffold984 | 129952                  | CC                              | AA              | 1946989396               |
| SNP_P4_150634_130637 | NW_004516316.1 | Scaffold984 | 130637                  | GG                              | AA              | 1946989398               |
| SNP_P4_150635_130886 | NW_004516316.1 | Scaffold984 | 130886                  | AA                              | TT              | 1946989400               |

| SNPs IDs             | Chromosome IDs | Chromosomes | Physical positions (bp) | CDC Frontier (Reference genome) | (ILWC46 & LPNB) | NCBI SNPdb Accession IDs |
|----------------------|----------------|-------------|-------------------------|---------------------------------|-----------------|--------------------------|
| SNP_P4_150636_132634 | NW_004516316.1 | Scaffold984 | 132634                  | TT                              | CC              | 1946989402               |
| SNP_P4_150637_132637 | NW_004516316.1 | Scaffold984 | 132637                  | AA                              | GG              | 1946989404               |
| SNP_P4_150638_132677 | NW_004516316.1 | Scaffold984 | 132677                  | CC                              | GG              | 1946989406               |
| SNP_P4_150639_132679 | NW_004516316.1 | Scaffold984 | 132679                  | TT                              | GG              | 1946989408               |
| SNP_P4_150640_132680 | NW_004516316.1 | Scaffold984 | 132680                  | GG                              | TT              | 1946989410               |
| SNP_P4_150641_132685 | NW_004516316.1 | Scaffold984 | 132685                  | TT                              | AA              | 1946989412               |
| SNP_P4_150642_136987 | NW_004516316.1 | Scaffold984 | 136987                  | TT                              | CC              | 1946989415               |
| SNP_P4_150644_146010 | NW_004516316.1 | Scaffold984 | 146010                  | AA                              | GG              | 1946989417               |
| SNP_P4_150645_146017 | NW_004516316.1 | Scaffold984 | 146017                  | CC                              | TT              | 1946989420               |
| SNP_P4_150646_146029 | NW_004516316.1 | Scaffold984 | 146029                  | TT                              | CC              | 1946989422               |
| SNP_P4_150647_146030 | NW_004516316.1 | Scaffold984 | 146030                  | CC                              | TT              | 1946989425               |
| SNP_P4_150648_149799 | NW_004516316.1 | Scaffold984 | 149799                  | TT                              | CC              | 1946989427               |
| SNP_P4_150649_157208 | NW_004516316.1 | Scaffold984 | 157208                  | TT                              | CC              | 1946989429               |
| SNP_P4_150650_161437 | NW_004516316.1 | Scaffold984 | 161437                  | GG                              | CC              | 1946989431               |
| SNP_P4_150651_163034 | NW_004516316.1 | Scaffold984 | 163034                  | TT                              | CC              | 1946989433               |
| SNP_P4_150653_3131   | NW_004516317.1 | Scaffold986 | 3131                    | TT                              | AA              | 1946989435               |
| SNP_P4_150655_16851  | NW_004516317.1 | Scaffold986 | 16851                   | TT                              | AA              | 1946989437               |
| SNP_P4_150656_16875  | NW_004516317.1 | Scaffold986 | 16875                   | CC                              | TT              | 1946989439               |
| SNP_P4_150657_16878  | NW_004516317.1 | Scaffold986 | 16878                   | GG                              | AA              | 1946989441               |
| SNP_P4_150658_16899  | NW_004516317.1 | Scaffold986 | 16899                   | AA                              | GG              | 1946989443               |
| SNP_P4_150659_16910  | NW_004516317.1 | Scaffold986 | 16910                   | GG                              | AA              | 1946989445               |
| SNP_P4_150660_16932  | NW_004516317.1 | Scaffold986 | 16932                   | GG                              | AA              | 1946989447               |
| SNP_P4_150661_16942  | NW_004516317.1 | Scaffold986 | 16942                   | GG                              | CC              | 1946989449               |
| SNP_P4_150662_16955  | NW_004516317.1 | Scaffold986 | 16955                   | TT                              | AA              | 1946989451               |
| SNP_P4_150663_16959  | NW_004516317.1 | Scaffold986 | 16959                   | TT                              | CC              | 1946989453               |
| SNP_P4_150664_16979  | NW_004516317.1 | Scaffold986 | 16979                   | TT                              | CC              | 1946989455               |
| SNP_P4_150665_16984  | NW_004516317.1 | Scaffold986 | 16984                   | CC                              | AA              | 1946989457               |
| SNP_P4_150666_17016  | NW_004516317.1 | Scaffold986 | 17016                   | TT                              | CC              | 1946989459               |
| SNP_P4_150667_17033  | NW_004516317.1 | Scaffold986 | 17033                   | CC                              | TT              | 1946989461               |
| SNP_P4_150668_17068  | NW_004516317.1 | Scaffold986 | 17068                   | GG                              | AA              | 1946989463               |
| SNP_P4_150669_17069  | NW_004516317.1 | Scaffold986 | 17069                   | AA                              | GG              | 1946989465               |
| SNP_P4_150670_17147  | NW_004516317.1 | Scaffold986 | 17147                   | TT                              | CC              | 1946989467               |
| SNP_P4_150671_17148  | NW_004516317.1 | Scaffold986 | 17148                   | GG                              | AA              | 1946989469               |
| SNP_P4_150672_17204  | NW_004516317.1 | Scaffold986 | 17204                   | AA                              | CC              | 1946989471               |
| SNP_P4_150673_18350  | NW_004516317.1 | Scaffold986 | 18350                   | AA                              | TT              | 1946989473               |
| SNP_P4_150674_21484  | NW_004516317.1 | Scaffold986 | 21484                   | CC                              | TT              | 1946989475               |
| SNP_P4_150675_21485  | NW_004516317.1 | Scaffold986 | 21485                   | AA                              | GG              | 1946989477               |
| SNP_P4_150676_22061  | NW_004516317.1 | Scaffold986 | 22061                   | TT                              | AA              | 1946989480               |
| SNP_P4_150677_23199  | NW_004516317.1 | Scaffold986 | 23199                   | AA                              | TT              | 1946989481               |
| SNP_P4_150678_23616  | NW_004516317.1 | Scaffold986 | 23616                   | TT                              | AA              | 1946989482               |
| SNP_P4_150679_23650  | NW_004516317.1 | Scaffold986 | 23650                   | TT                              | GG              | 1946989483               |
| SNP_P4_150680_23662  | NW_004516317.1 | Scaffold986 | 23662                   | CC                              | AA              | 1946989484               |

| SNPs IDs            | Chromosome IDs | Chromosomes | Physical positions (bp) | CDC Frontier (Reference genome) | (ILWC46 & LPNB) | NCBI SNPdb Accession IDs |
|---------------------|----------------|-------------|-------------------------|---------------------------------|-----------------|--------------------------|
| SNP_P4_150681_23670 | NW_004516317.1 | Scaffold986 | 23670                   | GG                              | AA              | 1946989485               |
| SNP_P4_150682_23698 | NW_004516317.1 | Scaffold986 | 23698                   | AA                              | GG              | 1946989486               |
| SNP_P4_150683_23759 | NW_004516317.1 | Scaffold986 | 23759                   | TT                              | CC              | 1946989487               |
| SNP_P4_150684_24070 | NW_004516317.1 | Scaffold986 | 24070                   | TT                              | CC              | 1946989489               |
| SNP_P4_150686_35056 | NW_004516317.1 | Scaffold986 | 35056                   | CC                              | GG              | 1946989491               |
| SNP_P4_150687_36442 | NW_004516317.1 | Scaffold986 | 36442                   | GG                              | AA              | 1946989493               |
| SNP_P4_150688_38117 | NW_004516317.1 | Scaffold986 | 38117                   | CC                              | GG              | 1946989495               |
| SNP_P4_150689_39146 | NW_004516317.1 | Scaffold986 | 39146                   | TT                              | CC              | 1946989497               |
| SNP_P4_150690_39427 | NW_004516317.1 | Scaffold986 | 39427                   | AA                              | GG              | 1946989499               |
| SNP_P4_150691_39725 | NW_004516317.1 | Scaffold986 | 39725                   | TT                              | GG              | 1946989501               |
| SNP_P4_150692_39811 | NW_004516317.1 | Scaffold986 | 39811                   | TT                              | AA              | 1946989503               |
| SNP_P4_150693_79    | NW_004516318.1 | Scaffold991 | 79                      | TT                              | CC              | 1946989505               |
| SNP_P4_150694_89    | NW_004516318.1 | Scaffold991 | 89                      | TT                              | GG              | 1946989507               |
| SNP_P4_150695_126   | NW_004516318.1 | Scaffold991 | 126                     | TT                              | CC              | 1946989509               |
| SNP_P4_150696_152   | NW_004516318.1 | Scaffold991 | 152                     | CC                              | TT              | 1946989511               |
| SNP_P4_150697_181   | NW_004516318.1 | Scaffold991 | 181                     | TT                              | GG              | 1946989513               |
| SNP_P4_150698_12284 | NW_004516318.1 | Scaffold991 | 12284                   | TT                              | GG              | 1946989515               |
| SNP_P4_150699_13755 | NW_004516318.1 | Scaffold991 | 13755                   | CC                              | TT              | 1946989517               |
| SNP_P4_150700_13776 | NW_004516318.1 | Scaffold991 | 13776                   | TT                              | GG              | 1946989519               |
| SNP_P4_150701_13787 | NW_004516318.1 | Scaffold991 | 13787                   | AA                              | TT              | 1946989521               |
| SNP_P4_150702_13840 | NW_004516318.1 | Scaffold991 | 13840                   | GG                              | TT              | 1946989524               |
| SNP_P4_150703_885   | NW_004516319.1 | Scaffold992 | 885                     | AA                              | GG              | 1946989526               |
| SNP_P4_150704_8066  | NW_004516319.1 | Scaffold992 | 8066                    | CC                              | TT              | 1946989528               |
| SNP_P4_150706_8073  | NW_004516319.1 | Scaffold992 | 8073                    | AA                              | TT              | 1946989530               |
| SNP_P4_150707_8096  | NW_004516319.1 | Scaffold992 | 8096                    | GG                              | TT              | 1946989532               |
| SNP_P4_150708_8129  | NW_004516319.1 | Scaffold992 | 8129                    | AA                              | TT              | 1946989534               |
| SNP_P4_150709_27581 | NW_004516319.1 | Scaffold992 | 27581                   | GG                              | AA              | 1946989536               |
| SNP_P4_150710_27591 | NW_004516319.1 | Scaffold992 | 27591                   | AA                              | GG              | 1946989538               |
| SNP_P4_150711_28205 | NW_004516319.1 | Scaffold992 | 28205                   | AA                              | CC              | 1946989540               |
| SNP_P4_150712_32767 | NW_004516319.1 | Scaffold992 | 32767                   | CC                              | TT              | 1946989542               |
| SNP_P4_150713_32808 | NW_004516319.1 | Scaffold992 | 32808                   | AA                              | GG              | 1946989544               |
| SNP_P4_150714_33062 | NW_004516319.1 | Scaffold992 | 33062                   | AA                              | GG              | 1946989546               |
| SNP_P4_150715_33099 | NW_004516319.1 | Scaffold992 | 33099                   | TT                              | CC              | 1946989548               |
| SNP_P4_150716_33126 | NW_004516319.1 | Scaffold992 | 33126                   | TT                              | CC              | 1946989550               |
| SNP_P4_150717_33132 | NW_004516319.1 | Scaffold992 | 33132                   | GG                              | AA              | 1946989552               |
| SNP_P4_150718_33147 | NW_004516319.1 | Scaffold992 | 33147                   | AA                              | GG              | 1946989554               |
| SNP_P4_150720_36760 | NW_004516319.1 | Scaffold992 | 36760                   | GG                              | TT              | 1946989556               |
| SNP_P4_150721_36970 | NW_004516319.1 | Scaffold992 | 36970                   | CC                              | TT              | 1946989558               |
| SNP_P4_150722_37007 | NW_004516319.1 | Scaffold992 | 37007                   | TT                              | CC              | 1946989560               |
| SNP_P4_150723_37561 | NW_004516319.1 | Scaffold992 | 37561                   | GG                              | TT              | 1946989562               |
| SNP_P4_150724_37591 | NW_004516319.1 | Scaffold992 | 37591                   | AA                              | TT              | 1946989564               |
| SNP_P4_150725_37592 | NW_004516319.1 | Scaffold992 | 37592                   | CC                              | AA              | 1946989566               |

| SNPs IDs            | Chromosome IDs | Chromosomes | Physical positions (bp) | CDC Frontier (Reference genome) | (ILWC46 & LPNB) | NCBI SNPdb Accession IDs |
|---------------------|----------------|-------------|-------------------------|---------------------------------|-----------------|--------------------------|
| SNP_P4_150727_37851 | NW_004516319.1 | Scaffold992 | 37851                   | CC                              | TT              | 1946989568               |
| SNP_P4_150730_38111 | NW_004516319.1 | Scaffold992 | 38111                   | CC                              | TT              | 1946989570               |
| SNP_P4_150731_38177 | NW_004516319.1 | Scaffold992 | 38177                   | CC                              | AA              | 1946989572               |
| SNP_P4_150732_40028 | NW_004516319.1 | Scaffold992 | 40028                   | AA                              | GG              | 1946989574               |
| SNP_P4_150733_40045 | NW_004516319.1 | Scaffold992 | 40045                   | CC                              | TT              | 1946989576               |
| SNP_P4_150734_40052 | NW_004516319.1 | Scaffold992 | 40052                   | GG                              | AA              | 1946989578               |
| SNP_P4_150736_40220 | NW_004516319.1 | Scaffold992 | 40220                   | TT                              | AA              | 1946989580               |
| SNP_P4_150737_40243 | NW_004516319.1 | Scaffold992 | 40243                   | AA                              | CC              | 1946989582               |
| SNP_P4_150738_40259 | NW_004516319.1 | Scaffold992 | 40259                   | CC                              | TT              | 1946989584               |
| SNP_P4_150739_40336 | NW_004516319.1 | Scaffold992 | 40336                   | CC                              | GG              | 1946989586               |
| SNP_P4_150740_40379 | NW_004516319.1 | Scaffold992 | 40379                   | AA                              | GG              | 1946989588               |
| SNP_P4_150741_40387 | NW_004516319.1 | Scaffold992 | 40387                   | AA                              | CC              | 1946989590               |
| SNP_P4_150742_40401 | NW_004516319.1 | Scaffold992 | 40401                   | AA                              | TT              | 1946989591               |
| SNP_P4_150743_40411 | NW_004516319.1 | Scaffold992 | 40411                   | TT                              | GG              | 1946989593               |
| SNP_P4_150744_40434 | NW_004516319.1 | Scaffold992 | 40434                   | GG                              | CC              | 1946989595               |
| SNP_P4_150745_40468 | NW_004516319.1 | Scaffold992 | 40468                   | GG                              | TT              | 1946989597               |
| SNP_P4_150747_40536 | NW_004516319.1 | Scaffold992 | 40536                   | AA                              | GG              | 1946989599               |
| SNP_P4_150748_40566 | NW_004516319.1 | Scaffold992 | 40566                   | CC                              | GG              | 1946989601               |
| SNP_P4_150749_40617 | NW_004516319.1 | Scaffold992 | 40617                   | AA                              | GG              | 1946989603               |
| SNP_P4_150750_41392 | NW_004516319.1 | Scaffold992 | 41392                   | CC                              | TT              | 1946989605               |
| SNP_P4_150751_41411 | NW_004516319.1 | Scaffold992 | 41411                   | GG                              | AA              | 1946989607               |
| SNP_P4_150752_41456 | NW_004516319.1 | Scaffold992 | 41456                   | TT                              | AA              | 1946989609               |
| SNP_P4_150753_41474 | NW_004516319.1 | Scaffold992 | 41474                   | AA                              | GG              | 1946989611               |
| SNP_P4_150754_41745 | NW_004516319.1 | Scaffold992 | 41745                   | GG                              | AA              | 1946989613               |
| SNP_P4_150755_41746 | NW_004516319.1 | Scaffold992 | 41746                   | GG                              | TT              | 1946989615               |
| SNP_P4_150756_41909 | NW_004516319.1 | Scaffold992 | 41909                   | GG                              | AA              | 1946989617               |
| SNP_P4_150758_42140 | NW_004516319.1 | Scaffold992 | 42140                   | CC                              | TT              | 1946989619               |
| SNP_P4_150759_42167 | NW_004516319.1 | Scaffold992 | 42167                   | GG                              | AA              | 1946989621               |
| SNP_P4_150760_42199 | NW_004516319.1 | Scaffold992 | 42199                   | TT                              | GG              | 1946989623               |
| SNP_P4_150763_42349 | NW_004516319.1 | Scaffold992 | 42349                   | CC                              | TT              | 1946989625               |
| SNP_P4_150764_42353 | NW_004516319.1 | Scaffold992 | 42353                   | CC                              | AA              | 1946989627               |
| SNP_P4_150765_42379 | NW_004516319.1 | Scaffold992 | 42379                   | CC                              | AA              | 1946989629               |
| SNP_P4_150766_42398 | NW_004516319.1 | Scaffold992 | 42398                   | TT                              | AA              | 1946989631               |
| SNP_P4_150767_42406 | NW_004516319.1 | Scaffold992 | 42406                   | TT                              | CC              | 1946989633               |
| SNP_P4_150768_42505 | NW_004516319.1 | Scaffold992 | 42505                   | GG                              | AA              | 1946989635               |
| SNP_P4_150769_42543 | NW_004516319.1 | Scaffold992 | 42543                   | AA                              | TT              | 1946989637               |
| SNP_P4_150770_42549 | NW_004516319.1 | Scaffold992 | 42549                   | TT                              | GG              | 1946989639               |
| SNP_P4_150771_42551 | NW_004516319.1 | Scaffold992 | 42551                   | TT                              | GG              | 1946989641               |
| SNP_P4_150772_42666 | NW_004516319.1 | Scaffold992 | 42666                   | CC                              | TT              | 1946989643               |
| SNP_P4_150773_43973 | NW_004516319.1 | Scaffold992 | 43973                   | GG                              | AA              | 1946989645               |
| SNP_P4_150774_44659 | NW_004516319.1 | Scaffold992 | 44659                   | TT                              | AA              | 1946989647               |
| SNP_P4_150775_44699 | NW_004516319.1 | Scaffold992 | 44699                   | AA                              | GG              | 1946989649               |

| SNPs IDs             | Chromosome IDs | Chromosomes | Physical positions (bp) | CDC Frontier (Reference genome) | (ILWC46 & LPNB) | NCBI SNPdb Accession IDs |
|----------------------|----------------|-------------|-------------------------|---------------------------------|-----------------|--------------------------|
| SNP_P4_150776_44951  | NW_004516319.1 | Scaffold992 | 44951                   | CC                              | TT              | 1946989651               |
| SNP_P4_150777_47955  | NW_004516319.1 | Scaffold992 | 47955                   | TT                              | CC              | 1946989653               |
| SNP_P4_150778_48050  | NW_004516319.1 | Scaffold992 | 48050                   | AA                              | CC              | 1946989655               |
| SNP_P4_150779_48052  | NW_004516319.1 | Scaffold992 | 48052                   | AA                              | TT              | 1946989657               |
| SNP_P4_150780_48055  | NW_004516319.1 | Scaffold992 | 48055                   | AA                              | GG              | 1946989659               |
| SNP_P4_150781_48057  | NW_004516319.1 | Scaffold992 | 48057                   | AA                              | TT              | 1946989661               |
| SNP_P4_150782_48486  | NW_004516319.1 | Scaffold992 | 48486                   | CC                              | TT              | 1946989663               |
| SNP_P4_150783_48531  | NW_004516319.1 | Scaffold992 | 48531                   | GG                              | AA              | 1946989665               |
| SNP_P4_150784_49018  | NW_004516319.1 | Scaffold992 | 49018                   | GG                              | AA              | 1946989667               |
| SNP_P4_150785_49467  | NW_004516319.1 | Scaffold992 | 49467                   | AA                              | CC              | 1946989669               |
| SNP_P4_150786_49520  | NW_004516319.1 | Scaffold992 | 49520                   | CC                              | AA              | 1946989671               |
| SNP_P4_150787_49525  | NW_004516319.1 | Scaffold992 | 49525                   | TT                              | CC              | 1946989673               |
| SNP_P4_150788_49601  | NW_004516319.1 | Scaffold992 | 49601                   | GG                              | TT              | 1946989677               |
| SNP_P4_150789_1254   | NW_004516320.1 | Scaffold993 | 1254                    | AA                              | GG              | 1946989682               |
| SNP_P4_150790_1305   | NW_004516320.1 | Scaffold993 | 1305                    | AA                              | CC              | 1946989684               |
| SNP_P4_150792_1567   | NW_004516320.1 | Scaffold993 | 1567                    | AA                              | CC              | 1946989687               |
| SNP_P4_150793_16096  | NW_004516321.1 | Scaffold996 | 16096                   | GG                              | AA              | 1946989689               |
| SNP_P4_150794_27194  | NW_004516321.1 | Scaffold996 | 27194                   | AA                              | GG              | 1946989691               |
| SNP_P4_150795_49503  | NW_004516321.1 | Scaffold996 | 49503                   | GG                              | AA              | 1946989693               |
| SNP_P4_150796_49518  | NW_004516321.1 | Scaffold996 | 49518                   | TT                              | CC              | 1946989695               |
| SNP_P4_150797_49936  | NW_004516321.1 | Scaffold996 | 49936                   | TT                              | GG              | 1946989697               |
| SNP_P4_150798_87346  | NW_004516321.1 | Scaffold996 | 87346                   | AA                              | GG              | 1946989699               |
| SNP_P4_150799_87354  | NW_004516321.1 | Scaffold996 | 87354                   | TT                              | CC              | 1946989701               |
| SNP_P4_150800_87415  | NW_004516321.1 | Scaffold996 | 87415                   | AA                              | CC              | 1946989703               |
| SNP_P4_150801_87622  | NW_004516321.1 | Scaffold996 | 87622                   | AA                              | CC              | 1946989705               |
| SNP_P4_150802_87701  | NW_004516321.1 | Scaffold996 | 87701                   | AA                              | GG              | 1946989707               |
| SNP_P4_150803_87890  | NW_004516321.1 | Scaffold996 | 87890                   | AA                              | CC              | 1946989709               |
| SNP_P4_150804_88425  | NW_004516321.1 | Scaffold996 | 88425                   | CC                              | GG              | 1946989711               |
| SNP_P4_150805_88738  | NW_004516321.1 | Scaffold996 | 88738                   | AA                              | TT              | 1946989712               |
| SNP_P4_150806_89170  | NW_004516321.1 | Scaffold996 | 89170                   | AA                              | GG              | 1946989714               |
| SNP_P4_150807_89585  | NW_004516321.1 | Scaffold996 | 89585                   | CC                              | TT              | 1946989716               |
| SNP_P4_150808_89672  | NW_004516321.1 | Scaffold996 | 89672                   | GG                              | AA              | 1946989718               |
| SNP_P4_150809_113935 | NW_004516321.1 | Scaffold996 | 113935                  | GG                              | AA              | 1946989720               |
| SNP_P4_150810_115763 | NW_004516321.1 | Scaffold996 | 115763                  | GG                              | AA              | 1946989722               |
| SNP_P4_150811_117710 | NW_004516321.1 | Scaffold996 | 117710                  | AA                              | GG              | 1946989724               |
| SNP_P4_150812_122225 | NW_004516321.1 | Scaffold996 | 122225                  | CC                              | TT              | 1946989726               |
| SNP_P4_150813_131092 | NW_004516321.1 | Scaffold996 | 131092                  | CC                              | AA              | 1946989728               |
| SNP_P4_150814_134309 | NW_004516321.1 | Scaffold996 | 134309                  | CC                              | TT              | 1946989730               |
| SNP_P4_150815_134394 | NW_004516321.1 | Scaffold996 | 134394                  | TT                              | CC              | 1946989732               |
| SNP_P4_150817_142973 | NW_004516321.1 | Scaffold996 | 142973                  | GG                              | CC              | 1946989734               |
| SNP_P4_150818_145501 | NW_004516321.1 | Scaffold996 | 145501                  | AA                              | GG              | 1946989736               |
| SNP_P4_150819_158668 | NW_004516321.1 | Scaffold996 | 158668                  | CC                              | TT              | 1946989738               |

| SNPs IDs             | Chromosome IDs | Chromosomes | Physical positions (bp) | CDC Frontier (Reference genome) | (ILWC46 & LPNB) | NCBI SNPdb Accession IDs |
|----------------------|----------------|-------------|-------------------------|---------------------------------|-----------------|--------------------------|
| SNP_P4_150820_180233 | NW_004516321.1 | Scaffold996 | 180233                  | CC                              | AA              | 1946989740               |
| SNP_P4_150821_180263 | NW_004516321.1 | Scaffold996 | 180263                  | CC                              | AA              | 1946989742               |
| SNP_P4_150822_180333 | NW_004516321.1 | Scaffold996 | 180333                  | TT                              | CC              | 1946989744               |
| SNP_P4_150823_180351 | NW_004516321.1 | Scaffold996 | 180351                  | GG                              | TT              | 1946989746               |
| SNP_P4_150824_180539 | NW_004516321.1 | Scaffold996 | 180539                  | GG                              | AA              | 1946989748               |
| SNP_P4_150825_192770 | NW_004516321.1 | Scaffold996 | 192770                  | GG                              | TT              | 1946989750               |
| SNP_P4_150826_192778 | NW_004516321.1 | Scaffold996 | 192778                  | TT                              | AA              | 1946989752               |
| SNP_P4_150827_192779 | NW_004516321.1 | Scaffold996 | 192779                  | CC                              | TT              | 1946989754               |
| SNP_P4_150828_192789 | NW_004516321.1 | Scaffold996 | 192789                  | GG                              | AA              | 1946989756               |
| SNP_P4_150829_192833 | NW_004516321.1 | Scaffold996 | 192833                  | AA                              | GG              | 1946989758               |
| SNP_P4_150830_192835 | NW_004516321.1 | Scaffold996 | 192835                  | AA                              | GG              | 1946989760               |
| SNP_P4_150831_193181 | NW_004516321.1 | Scaffold996 | 193181                  | TT                              | GG              | 1946989762               |
| SNP_P4_150832_193445 | NW_004516321.1 | Scaffold996 | 193445                  | GG                              | TT              | 1946989764               |
| SNP_P4_150833_193455 | NW_004516321.1 | Scaffold996 | 193455                  | AA                              | GG              | 1946989766               |
| SNP_P4_150834_199473 | NW_004516321.1 | Scaffold996 | 199473                  | CC                              | AA              | 1946989768               |
| SNP_P4_150835_199493 | NW_004516321.1 | Scaffold996 | 199493                  | AA                              | TT              | 1946989770               |
| SNP_P4_150836_199878 | NW_004516321.1 | Scaffold996 | 199878                  | AA                              | TT              | 1946989772               |
| SNP_P4_150837_200969 | NW_004516321.1 | Scaffold996 | 200969                  | TT                              | GG              | 1946989774               |
| SNP_P4_150838_201045 | NW_004516321.1 | Scaffold996 | 201045                  | GG                              | AA              | 1946989776               |
| SNP_P4_150840_202118 | NW_004516321.1 | Scaffold996 | 202118                  | TT                              | GG              | 1946989778               |
| SNP_P4_150841_202604 | NW_004516321.1 | Scaffold996 | 202604                  | GG                              | TT              | 1946989780               |
| SNP_P4_150842_202650 | NW_004516321.1 | Scaffold996 | 202650                  | AA                              | TT              | 1946989782               |
| SNP_P4_150843_792    | NW_004516322.1 | Scaffold997 | 792                     | TT                              | AA              | 1946989784               |
| SNP_P4_150844_2907   | NW_004516322.1 | Scaffold997 | 2907                    | GG                              | TT              | 1946989786               |
| SNP_P4_150845_2979   | NW_004516322.1 | Scaffold997 | 2979                    | AA                              | GG              | 1946989788               |
| SNP_P4_150846_3015   | NW_004516322.1 | Scaffold997 | 3015                    | GG                              | AA              | 1946989790               |
| SNP_P4_150847_3018   | NW_004516322.1 | Scaffold997 | 3018                    | GG                              | AA              | 1946989793               |
| SNP_P4_150848_3025   | NW_004516322.1 | Scaffold997 | 3025                    | AA                              | GG              | 1946989795               |
| SNP_P4_150849_3030   | NW_004516322.1 | Scaffold997 | 3030                    | GG                              | AA              | 1946989797               |
| SNP_P4_150851_3110   | NW_004516322.1 | Scaffold997 | 3110                    | TT                              | CC              | 1946989800               |
| SNP_P4_150852_3137   | NW_004516322.1 | Scaffold997 | 3137                    | GG                              | TT              | 1946989802               |
| SNP_P4_150853_3145   | NW_004516322.1 | Scaffold997 | 3145                    | TT                              | CC              | 1946989804               |
| SNP_P4_150854_3212   | NW_004516322.1 | Scaffold997 | 3212                    | AA                              | GG              | 1946989806               |
| SNP_P4_150855_3259   | NW_004516322.1 | Scaffold997 | 3259                    | GG                              | AA              | 1946989808               |
| SNP_P4_150856_3266   | NW_004516322.1 | Scaffold997 | 3266                    | CC                              | AA              | 1946989810               |
| SNP_P4_150857_3405   | NW_004516322.1 | Scaffold997 | 3405                    | AA                              | GG              | 1946989812               |
| SNP_P4_150858_12125  | NW_004516322.1 | Scaffold997 | 12125                   | AA                              | GG              | 1946989814               |
| SNP_P4_150859_12161  | NW_004516322.1 | Scaffold997 | 12161                   | CC                              | AA              | 1946989816               |
| SNP_P4_150860_12185  | NW_004516322.1 | Scaffold997 | 12185                   | AA                              | TT              | 1946989818               |
| SNP_P4_150861_12208  | NW_004516322.1 | Scaffold997 | 12208                   | TT                              | AA              | 1946989820               |
| SNP_P4_150862_12212  | NW_004516322.1 | Scaffold997 | 12212                   | CC                              | AA              | 1946989822               |
| SNP_P4_150863_12239  | NW_004516322.1 | Scaffold997 | 12239                   | AA                              | GG              | 1946989824               |

| SNPs IDs             | Chromosome IDs | Chromosomes | Physical positions (bp) | CDC Frontier (Reference genome) | (ILWC46 & LPNB) | NCBI SNPdb Accession IDs |
|----------------------|----------------|-------------|-------------------------|---------------------------------|-----------------|--------------------------|
| SNP_P4_150864_12247  | NW_004516322.1 | Scaffold997 | 12247                   | CC                              | TT              | 1946989826               |
| SNP_P4_150865_12642  | NW_004516322.1 | Scaffold997 | 12642                   | AA                              | GG              | 1946989828               |
| SNP_P4_150866_12665  | NW_004516322.1 | Scaffold997 | 12665                   | AA                              | TT              | 1946989830               |
| SNP_P4_150867_12671  | NW_004516322.1 | Scaffold997 | 12671                   | TT                              | AA              | 1946989832               |
| SNP_P4_150868_12764  | NW_004516322.1 | Scaffold997 | 12764                   | GG                              | CC              | 1946989834               |
| SNP_P4_150869_13913  | NW_004516322.1 | Scaffold997 | 13913                   | AA                              | GG              | 1946989836               |
| SNP_P4_150870_19822  | NW_004516322.1 | Scaffold997 | 19822                   | AA                              | GG              | 1946989838               |
| SNP_P4_150871_1716   | NW_004516323.1 | Scaffold998 | 1716                    | TT                              | GG              | 1946989840               |
| SNP_P4_150872_1891   | NW_004516323.1 | Scaffold998 | 1891                    | TT                              | AA              | 1946989842               |
| SNP_P4_150873_3164   | NW_004516323.1 | Scaffold998 | 3164                    | AA                              | GG              | 1946989844               |
| SNP_P4_150874_3282   | NW_004516323.1 | Scaffold998 | 3282                    | CC                              | TT              | 1946989846               |
| SNP_P4_150875_23739  | NW_004516324.1 | Scaffold999 | 23739                   | CC                              | TT              | 1946989848               |
| SNP_P4_150876_36687  | NW_004516324.1 | Scaffold999 | 36687                   | AA                              | GG              | 1946989850               |
| SNP_P4_150877_37060  | NW_004516324.1 | Scaffold999 | 37060                   | GG                              | AA              | 1946989852               |
| SNP_P4_150878_38765  | NW_004516324.1 | Scaffold999 | 38765                   | GG                              | AA              | 1946989854               |
| SNP_P4_150879_67052  | NW_004516324.1 | Scaffold999 | 67052                   | GG                              | AA              | 1946989856               |
| SNP_P4_150880_67492  | NW_004516324.1 | Scaffold999 | 67492                   | AA                              | GG              | 1946989858               |
| SNP_P4_150881_69680  | NW_004516324.1 | Scaffold999 | 69680                   | GG                              | AA              | 1946989860               |
| SNP_P4_150882_69745  | NW_004516324.1 | Scaffold999 | 69745                   | TT                              | AA              | 1946989862               |
| SNP_P4_150883_69825  | NW_004516324.1 | Scaffold999 | 69825                   | TT                              | CC              | 1946989864               |
| SNP_P4_150884_69840  | NW_004516324.1 | Scaffold999 | 69840                   | AA                              | GG              | 1946989866               |
| SNP_P4_150885_69857  | NW_004516324.1 | Scaffold999 | 69857                   | TT                              | CC              | 1946989868               |
| SNP_P4_150886_69858  | NW_004516324.1 | Scaffold999 | 69858                   | TT                              | CC              | 1946989870               |
| SNP_P4_150887_69905  | NW_004516324.1 | Scaffold999 | 69905                   | GG                              | CC              | 1946989872               |
| SNP_P4_150888_69991  | NW_004516324.1 | Scaffold999 | 69991                   | TT                              | AA              | 1946989874               |
| SNP_P4_150889_69996  | NW_004516324.1 | Scaffold999 | 69996                   | GG                              | AA              | 1946989876               |
| SNP_P4_150890_70159  | NW_004516324.1 | Scaffold999 | 70159                   | GG                              | AA              | 1946989878               |
| SNP_P4_150891_70197  | NW_004516324.1 | Scaffold999 | 70197                   | TT                              | GG              | 1946989880               |
| SNP_P4_150892_74642  | NW_004516324.1 | Scaffold999 | 74642                   | AA                              | GG              | 1946989882               |
| SNP_P4_150893_74697  | NW_004516324.1 | Scaffold999 | 74697                   | AA                              | GG              | 1946989884               |
| SNP_P4_150894_74703  | NW_004516324.1 | Scaffold999 | 74703                   | TT                              | CC              | 1946989886               |
| SNP_P4_150895_74763  | NW_004516324.1 | Scaffold999 | 74763                   | AA                              | CC              | 1946989888               |
| SNP_P4_150896_74983  | NW_004516324.1 | Scaffold999 | 74983                   | AA                              | CC              | 1946989890               |
| SNP_P4_150897_77362  | NW_004516324.1 | Scaffold999 | 77362                   | TT                              | GG              | 1946989892               |
| SNP_P4_150898_77366  | NW_004516324.1 | Scaffold999 | 77366                   | CC                              | TT              | 1946989894               |
| SNP_P4_150899_82948  | NW_004516324.1 | Scaffold999 | 82948                   | AA                              | GG              | 1946989896               |
| SNP_P4_150900_82973  | NW_004516324.1 | Scaffold999 | 82973                   | TT                              | CC              | 1946989898               |
| SNP_P4_150901_89178  | NW_004516324.1 | Scaffold999 | 89178                   | CC                              | TT              | 1946989900               |
| SNP_P4_150902_89181  | NW_004516324.1 | Scaffold999 | 89181                   | TT                              | AA              | 1946989902               |
| SNP_P4_150903_92947  | NW_004516324.1 | Scaffold999 | 92947                   | AA                              | GG              | 1946989904               |
| SNP_P4_150904_115645 | NW_004516324.1 | Scaffold999 | 115645                  | CC                              | AA              | 1946989906               |
| SNP_P4_150905_115825 | NW_004516324.1 | Scaffold999 | 115825                  | GG                              | AA              | 1946989908               |

| SNPs IDs             | Chromosome IDs | Chromosomes  | Physical positions (bp) | CDC Frontier (Reference genome) | (ILWC46 & LPNB) | NCBI SNPdb Accession IDs |
|----------------------|----------------|--------------|-------------------------|---------------------------------|-----------------|--------------------------|
| SNP_P4_150906_117991 | NW_004516324.1 | Scaffold999  | 117991                  | AA                              | GG              | 1946989910               |
| SNP_P4_150907_118008 | NW_004516324.1 | Scaffold999  | 118008                  | TT                              | CC              | 1946989912               |
| SNP_P4_150908_123837 | NW_004516324.1 | Scaffold999  | 123837                  | GG                              | AA              | 1946989914               |
| SNP_P4_150909_123838 | NW_004516324.1 | Scaffold999  | 123838                  | CC                              | TT              | 1946989916               |
| SNP_P4_150911_124093 | NW_004516324.1 | Scaffold999  | 124093                  | CC                              | TT              | 1946989918               |
| SNP_P4_150912_124098 | NW_004516324.1 | Scaffold999  | 124098                  | TT                              | AA              | 1946989920               |
| SNP_P4_150913_127418 | NW_004516324.1 | Scaffold999  | 127418                  | GG                              | CC              | 1946989922               |
| SNP_P4_150914_127438 | NW_004516324.1 | Scaffold999  | 127438                  | CC                              | GG              | 1946989924               |
| SNP_P4_150915_127441 | NW_004516324.1 | Scaffold999  | 127441                  | TT                              | CC              | 1946989926               |
| SNP_P4_150916_127619 | NW_004516324.1 | Scaffold999  | 127619                  | TT                              | AA              | 1946989928               |
| SNP_P4_150917_127648 | NW_004516324.1 | Scaffold999  | 127648                  | AA                              | TT              | 1946989930               |
| SNP_P4_150918_130314 | NW_004516324.1 | Scaffold999  | 130314                  | AA                              | TT              | 1946989933               |
| SNP_P4_150919_130323 | NW_004516324.1 | Scaffold999  | 130323                  | AA                              | CC              | 1946989935               |
| SNP_P4_150920_130329 | NW_004516324.1 | Scaffold999  | 130329                  | GG                              | AA              | 1946989937               |
| SNP_P4_150922_130412 | NW_004516324.1 | Scaffold999  | 130412                  | CC                              | TT              | 1946989939               |
| SNP_P4_150923_130436 | NW_004516324.1 | Scaffold999  | 130436                  | TT                              | CC              | 1946989941               |
| SNP_P4_150924_130564 | NW_004516324.1 | Scaffold999  | 130564                  | GG                              | AA              | 1946989943               |
| SNP_P4_150925_130573 | NW_004516324.1 | Scaffold999  | 130573                  | CC                              | GG              | 1946989945               |
| SNP_P4_150926_130633 | NW_004516324.1 | Scaffold999  | 130633                  | CC                              | TT              | 1946989947               |
| SNP_P4_150927_130677 | NW_004516324.1 | Scaffold999  | 130677                  | GG                              | AA              | 1946989950               |
| SNP_P4_150928_132353 | NW_004516324.1 | Scaffold999  | 132353                  | CC                              | TT              | 1946989952               |
| SNP_P4_150929_132740 | NW_004516324.1 | Scaffold999  | 132740                  | AA                              | GG              | 1946989954               |
| SNP_P4_150931_133897 | NW_004516324.1 | Scaffold999  | 133897                  | TT                              | GG              | 1946989956               |
| SNP_P4_150932_134091 | NW_004516324.1 | Scaffold999  | 134091                  | CC                              | AA              | 1946989958               |
| SNP_P4_150933_134098 | NW_004516324.1 | Scaffold999  | 134098                  | TT                              | AA              | 1946989960               |
| SNP_P4_150934_134122 | NW_004516324.1 | Scaffold999  | 134122                  | CC                              | TT              | 1946989962               |
| SNP_P4_150935_134123 | NW_004516324.1 | Scaffold999  | 134123                  | GG                              | CC              | 1946989965               |
| SNP_P4_150936_148285 | NW_004516324.1 | Scaffold999  | 148285                  | AA                              | CC              | 1946989967               |
| SNP_P4_150937_151734 | NW_004516324.1 | Scaffold999  | 151734                  | GG                              | AA              | 1946989969               |
| SNP_P4_150938_151918 | NW_004516324.1 | Scaffold999  | 151918                  | TT                              | AA              | 1946989971               |
| SNP_P4_150939_152271 | NW_004516324.1 | Scaffold999  | 152271                  | AA                              | GG              | 1946989973               |
| SNP_P4_150940_153195 | NW_004516324.1 | Scaffold999  | 153195                  | CC                              | TT              | 1946989975               |
| SNP_P4_150941_153556 | NW_004516324.1 | Scaffold999  | 153556                  | CC                              | AA              | 1946989977               |
| SNP_P4_150942_155940 | NW_004516324.1 | Scaffold999  | 155940                  | TT                              | CC              | 1946989979               |
| SNP_P4_150943_8892   | NW_004516326.1 | Scaffold1003 | 8892                    | TT                              | AA              | 1946989981               |
| SNP_P4_150944_9372   | NW_004516326.1 | Scaffold1003 | 9372                    | TT                              | GG              | 1946989983               |
| SNP_P4_150945_9479   | NW_004516326.1 | Scaffold1003 | 9479                    | TT                              | AA              | 1946989985               |
| SNP_P4_150946_9480   | NW_004516326.1 | Scaffold1003 | 9480                    | TT                              | AA              | 1946989987               |
| SNP_P4_150947_11885  | NW_004516326.1 | Scaffold1003 | 11885                   | AA                              | GG              | 1946989989               |
| SNP_P4_150948_12442  | NW_004516326.1 | Scaffold1003 | 12442                   | CC                              | AA              | 1946989991               |
| SNP_P4_150949_12752  | NW_004516326.1 | Scaffold1003 | 12752                   | AA                              | GG              | 1946989993               |
| SNP_P4_150950_12790  | NW_004516326.1 | Scaffold1003 | 12790                   | AA                              | GG              | 1946989995               |



| SNPs IDs             | Chromosome IDs | Chromosomes  | Physical positions (bp) | CDC Frontier (Reference genome) | (ILWC46 & LPNB) | NCBI SNPdb Accession IDs |
|----------------------|----------------|--------------|-------------------------|---------------------------------|-----------------|--------------------------|
| SNP_P4_150951_12870  | NW_004516326.1 | Scaffold1003 | 12870                   | AA                              | GG              | 1946989997               |
| SNP_P4_150952_12981  | NW_004516326.1 | Scaffold1003 | 12981                   | GG                              | CC              | 1946989999               |
| SNP_P4_150953_13049  | NW_004516326.1 | Scaffold1003 | 13049                   | TT                              | CC              | 1946990001               |
| SNP_P4_150954_13196  | NW_004516326.1 | Scaffold1003 | 13196                   | AA                              | GG              | 1946990003               |
| SNP_P4_150955_13541  | NW_004516326.1 | Scaffold1003 | 13541                   | AA                              | GG              | 1946990005               |
| SNP_P4_150957_13662  | NW_004516326.1 | Scaffold1003 | 13662                   | AA                              | CC              | 1946990007               |
| SNP_P4_150958_13668  | NW_004516326.1 | Scaffold1003 | 13668                   | TT                              | AA              | 1946990009               |
| SNP_P4_150959_13689  | NW_004516326.1 | Scaffold1003 | 13689                   | TT                              | CC              | 1946990011               |
| SNP_P4_150960_13886  | NW_004516326.1 | Scaffold1003 | 13886                   | AA                              | GG              | 1946990013               |
| SNP_P4_150961_13894  | NW_004516326.1 | Scaffold1003 | 13894                   | GG                              | CC              | 1946990015               |
| SNP_P4_150962_13949  | NW_004516326.1 | Scaffold1003 | 13949                   | TT                              | GG              | 1946990017               |
| SNP_P4_150963_13966  | NW_004516326.1 | Scaffold1003 | 13966                   | AA                              | CC              | 1946990019               |
| SNP_P4_150964_14066  | NW_004516326.1 | Scaffold1003 | 14066                   | CC                              | AA              | 1946990020               |
| SNP_P4_150965_14134  | NW_004516326.1 | Scaffold1003 | 14134                   | CC                              | GG              | 1946990022               |
| SNP_P4_150966_14146  | NW_004516326.1 | Scaffold1003 | 14146                   | CC                              | AA              | 1946990024               |
| SNP_P4_150967_14559  | NW_004516326.1 | Scaffold1003 | 14559                   | CC                              | AA              | 1946990026               |
| SNP_P4_150968_15771  | NW_004516326.1 | Scaffold1003 | 15771                   | TT                              | AA              | 1946990028               |
| SNP_P4_150969_41321  | NW_004516326.1 | Scaffold1003 | 41321                   | AA                              | GG              | 1946990030               |
| SNP_P4_150972_41558  | NW_004516326.1 | Scaffold1003 | 41558                   | TT                              | CC              | 1946990032               |
| SNP_P4_150973_41614  | NW_004516326.1 | Scaffold1003 | 41614                   | GG                              | AA              | 1946990034               |
| SNP_P4_150974_41889  | NW_004516326.1 | Scaffold1003 | 41889                   | TT                              | CC              | 1946990036               |
| SNP_P4_150976_409    | NW_004516327.1 | Scaffold1004 | 409                     | CC                              | AA              | 1946990038               |
| SNP_P4_150977_40363  | NW_004516329.1 | Scaffold1006 | 40363                   | GG                              | AA              | 1946990040               |
| SNP_P4_150978_40710  | NW_004516329.1 | Scaffold1006 | 40710                   | TT                              | CC              | 1946990042               |
| SNP_P4_150979_47638  | NW_004516329.1 | Scaffold1006 | 47638                   | TT                              | CC              | 1946990044               |
| SNP_P4_150980_47687  | NW_004516329.1 | Scaffold1006 | 47687                   | TT                              | CC              | 1946990046               |
| SNP_P4_150981_47721  | NW_004516329.1 | Scaffold1006 | 47721                   | GG                              | AA              | 1946990048               |
| SNP_P4_150982_59119  | NW_004516329.1 | Scaffold1006 | 59119                   | AA                              | CC              | 1946990050               |
| SNP_P4_150983_62388  | NW_004516329.1 | Scaffold1006 | 62388                   | TT                              | AA              | 1946990052               |
| SNP_P4_150984_62436  | NW_004516329.1 | Scaffold1006 | 62436                   | AA                              | GG              | 1946990054               |
| SNP_P4_150985_65718  | NW_004516329.1 | Scaffold1006 | 65718                   | GG                              | TT              | 1946990056               |
| SNP_P4_150986_65884  | NW_004516329.1 | Scaffold1006 | 65884                   | GG                              | AA              | 1946990058               |
| SNP_P4_150987_67379  | NW_004516329.1 | Scaffold1006 | 67379                   | TT                              | AA              | 1946990060               |
| SNP_P4_150988_68011  | NW_004516329.1 | Scaffold1006 | 68011                   | AA                              | GG              | 1946990062               |
| SNP_P4_150989_68014  | NW_004516329.1 | Scaffold1006 | 68014                   | AA                              | GG              | 1946990064               |
| SNP_P4_150990_68052  | NW_004516329.1 | Scaffold1006 | 68052                   | GG                              | AA              | 1946990065               |
| SNP_P4_150991_68432  | NW_004516329.1 | Scaffold1006 | 68432                   | AA                              | GG              | 1946990067               |
| SNP_P4_150993_85458  | NW_004516329.1 | Scaffold1006 | 85458                   | CC                              | TT              | 1946990069               |
| SNP_P4_150995_109503 | NW_004516329.1 | Scaffold1006 | 109503                  | GG                              | AA              | 1946990071               |
| SNP_P4_150997_109678 | NW_004516329.1 | Scaffold1006 | 109678                  | AA                              | TT              | 1946990073               |
| SNP_P4_150998_109765 | NW_004516329.1 | Scaffold1006 | 109765                  | TT                              | CC              | 1946990075               |
| SNP_P4_150999_109793 | NW_004516329.1 | Scaffold1006 | 109793                  | CC                              | TT              | 1946990077               |

| SNPs IDs             | Chromosome IDs | Chromosomes  | Physical positions (bp) | CDC Frontier (Reference genome) | (ILWC46 & LPNB) | NCBI SNPdb Accession IDs |
|----------------------|----------------|--------------|-------------------------|---------------------------------|-----------------|--------------------------|
| SNP_P4_151000_109794 | NW_004516329.1 | Scaffold1006 | 109794                  | AA                              | TT              | 1946990079               |
| SNP_P4_151001_109836 | NW_004516329.1 | Scaffold1006 | 109836                  | GG                              | AA              | 1946990081               |
| SNP_P4_151002_109878 | NW_004516329.1 | Scaffold1006 | 109878                  | TT                              | GG              | 1946990083               |
| SNP_P4_151003_109912 | NW_004516329.1 | Scaffold1006 | 109912                  | CC                              | TT              | 1946990085               |
| SNP_P4_151004_109920 | NW_004516329.1 | Scaffold1006 | 109920                  | TT                              | CC              | 1946990087               |
| SNP_P4_151006_126249 | NW_004516329.1 | Scaffold1006 | 126249                  | TT                              | CC              | 1946990089               |
| SNP_P4_151007_126274 | NW_004516329.1 | Scaffold1006 | 126274                  | TT                              | AA              | 1946990091               |
| SNP_P4_151008_126420 | NW_004516329.1 | Scaffold1006 | 126420                  | CC                              | TT              | 1946990093               |
| SNP_P4_151009_126545 | NW_004516329.1 | Scaffold1006 | 126545                  | TT                              | CC              | 1946990095               |
| SNP_P4_151010_126547 | NW_004516329.1 | Scaffold1006 | 126547                  | GG                              | CC              | 1946990097               |
| SNP_P4_151011_126641 | NW_004516329.1 | Scaffold1006 | 126641                  | TT                              | CC              | 1946990099               |
| SNP_P4_151012_126732 | NW_004516329.1 | Scaffold1006 | 126732                  | AA                              | GG              | 1946990101               |
| SNP_P4_151013_126840 | NW_004516329.1 | Scaffold1006 | 126840                  | CC                              | TT              | 1946990103               |
| SNP_P4_151014_126916 | NW_004516329.1 | Scaffold1006 | 126916                  | AA                              | TT              | 1946990105               |
| SNP_P4_151015_127083 | NW_004516329.1 | Scaffold1006 | 127083                  | CC                              | TT              | 1946990107               |
| SNP_P4_151016_127287 | NW_004516329.1 | Scaffold1006 | 127287                  | AA                              | CC              | 1946990109               |
| SNP_P4_151017_127567 | NW_004516329.1 | Scaffold1006 | 127567                  | AA                              | GG              | 1946990111               |
| SNP_P4_151018_127569 | NW_004516329.1 | Scaffold1006 | 127569                  | AA                              | GG              | 1946990113               |
| SNP_P4_151019_127639 | NW_004516329.1 | Scaffold1006 | 127639                  | GG                              | AA              | 1946990115               |
| SNP_P4_151020_127705 | NW_004516329.1 | Scaffold1006 | 127705                  | CC                              | TT              | 1946990117               |
| SNP_P4_151021_127829 | NW_004516329.1 | Scaffold1006 | 127829                  | GG                              | TT              | 1946990119               |
| SNP_P4_151022_127846 | NW_004516329.1 | Scaffold1006 | 127846                  | AA                              | TT              | 1946990121               |
| SNP_P4_151023_127911 | NW_004516329.1 | Scaffold1006 | 127911                  | TT                              | CC              | 1946990123               |
| SNP_P4_151024_127971 | NW_004516329.1 | Scaffold1006 | 127971                  | CC                              | AA              | 1946990125               |
| SNP_P4_151025_128096 | NW_004516329.1 | Scaffold1006 | 128096                  | GG                              | TT              | 1946990127               |
| SNP_P4_151026_156134 | NW_004516329.1 | Scaffold1006 | 156134                  | CC                              | TT              | 1946990129               |
| SNP_P4_151027_159010 | NW_004516329.1 | Scaffold1006 | 159010                  | CC                              | AA              | 1946990131               |
| SNP_P4_151028_162222 | NW_004516329.1 | Scaffold1006 | 162222                  | TT                              | CC              | 1946990133               |
| SNP_P4_151029_165347 | NW_004516329.1 | Scaffold1006 | 165347                  | GG                              | TT              | 1946990135               |
| SNP_P4_151030_165451 | NW_004516329.1 | Scaffold1006 | 165451                  | CC                              | TT              | 1946990137               |
| SNP_P4_151031_165479 | NW_004516329.1 | Scaffold1006 | 165479                  | TT                              | CC              | 1946990139               |
| SNP_P4_151032_165502 | NW_004516329.1 | Scaffold1006 | 165502                  | CC                              | AA              | 1946990141               |
| SNP_P4_151033_165670 | NW_004516329.1 | Scaffold1006 | 165670                  | TT                              | CC              | 1946990143               |
| SNP_P4_151034_196838 | NW_004516329.1 | Scaffold1006 | 196838                  | AA                              | GG              | 1946990145               |
| SNP_P4_151035_196865 | NW_004516329.1 | Scaffold1006 | 196865                  | TT                              | CC              | 1946990147               |
| SNP_P4_151036_196876 | NW_004516329.1 | Scaffold1006 | 196876                  | AA                              | GG              | 1946990149               |
| SNP_P4_151037_196949 | NW_004516329.1 | Scaffold1006 | 196949                  | TT                              | GG              | 1946990151               |
| SNP_P4_151038_196950 | NW_004516329.1 | Scaffold1006 | 196950                  | AA                              | GG              | 1946990153               |
| SNP_P4_151039_196996 | NW_004516329.1 | Scaffold1006 | 196996                  | TT                              | CC              | 1946990155               |
| SNP_P4_151040_197028 | NW_004516329.1 | Scaffold1006 | 197028                  | GG                              | AA              | 1946990157               |
| SNP_P4_151041_197194 | NW_004516329.1 | Scaffold1006 | 197194                  | TT                              | CC              | 1946990159               |
| SNP_P4_151043_214085 | NW_004516329.1 | Scaffold1006 | 214085                  | AA                              | TT              | 1946990161               |

| SNPs IDs             | Chromosome IDs | Chromosomes  | Physical positions (bp) | CDC Frontier (Reference genome) | (ILWC46 & LPNB) | NCBI SNPdb Accession IDs |
|----------------------|----------------|--------------|-------------------------|---------------------------------|-----------------|--------------------------|
| SNP_P4_151044_227900 | NW_004516329.1 | Scaffold1006 | 227900                  | TT                              | CC              | 1946990163               |
| SNP_P4_151045_227932 | NW_004516329.1 | Scaffold1006 | 227932                  | GG                              | TT              | 1946990165               |
| SNP_P4_151046_255390 | NW_004516329.1 | Scaffold1006 | 255390                  | AA                              | TT              | 1946990167               |
| SNP_P4_151047_299835 | NW_004516329.1 | Scaffold1006 | 299835                  | AA                              | GG              | 1946990169               |
| SNP_P4_151048_301874 | NW_004516329.1 | Scaffold1006 | 301874                  | GG                              | AA              | 1946990171               |
| SNP_P4_151051_344871 | NW_004516329.1 | Scaffold1006 | 344871                  | CC                              | AA              | 1946990173               |
| SNP_P4_151052_348014 | NW_004516329.1 | Scaffold1006 | 348014                  | AA                              | GG              | 1946990175               |
| SNP_P4_151055_377834 | NW_004516329.1 | Scaffold1006 | 377834                  | TT                              | CC              | 1946990177               |
| SNP_P4_151056_400007 | NW_004516329.1 | Scaffold1006 | 400007                  | CC                              | AA              | 1946990179               |
| SNP_P4_151057_407756 | NW_004516329.1 | Scaffold1006 | 407756                  | GG                              | AA              | 1946990181               |
| SNP_P4_151059_453540 | NW_004516329.1 | Scaffold1006 | 453540                  | TT                              | CC              | 1946990183               |
| SNP_P4_151061_463173 | NW_004516329.1 | Scaffold1006 | 463173                  | TT                              | GG              | 1946990185               |
| SNP_P4_151062_486278 | NW_004516329.1 | Scaffold1006 | 486278                  | AA                              | TT              | 1946990188               |
| SNP_P4_151063_501163 | NW_004516329.1 | Scaffold1006 | 501163                  | TT                              | CC              | 1946990190               |
| SNP_P4_151067_526411 | NW_004516329.1 | Scaffold1006 | 526411                  | TT                              | AA              | 1946990193               |
| SNP_P4_151069_546829 | NW_004516329.1 | Scaffold1006 | 546829                  | AA                              | GG              | 1946990195               |
| SNP_P4_151071_559116 | NW_004516329.1 | Scaffold1006 | 559116                  | AA                              | GG              | 1946990197               |
| SNP_P4_151073_559210 | NW_004516329.1 | Scaffold1006 | 559210                  | CC                              | TT              | 1946990199               |
| SNP_P4_151074_559403 | NW_004516329.1 | Scaffold1006 | 559403                  | AA                              | GG              | 1946990201               |
| SNP_P4_151075_559442 | NW_004516329.1 | Scaffold1006 | 559442                  | GG                              | AA              | 1946990203               |
| SNP_P4_151076_559480 | NW_004516329.1 | Scaffold1006 | 559480                  | GG                              | TT              | 1946990205               |
| SNP_P4_151077_559550 | NW_004516329.1 | Scaffold1006 | 559550                  | TT                              | GG              | 1946990206               |
| SNP_P4_151078_567566 | NW_004516329.1 | Scaffold1006 | 567566                  | GG                              | AA              | 1946990207               |
| SNP_P4_151079_567575 | NW_004516329.1 | Scaffold1006 | 567575                  | CC                              | TT              | 1946990208               |
| SNP_P4_151080_567867 | NW_004516329.1 | Scaffold1006 | 567867                  | TT                              | CC              | 1946990209               |
| SNP_P4_151081_567906 | NW_004516329.1 | Scaffold1006 | 567906                  | AA                              | GG              | 1946990210               |
| SNP_P4_151082_567972 | NW_004516329.1 | Scaffold1006 | 567972                  | GG                              | AA              | 1946990211               |
| SNP_P4_151083_578296 | NW_004516329.1 | Scaffold1006 | 578296                  | TT                              | CC              | 1946990212               |
| SNP_P4_151084_578298 | NW_004516329.1 | Scaffold1006 | 578298                  | AA                              | TT              | 1946990214               |
| SNP_P4_151085_578299 | NW_004516329.1 | Scaffold1006 | 578299                  | TT                              | CC              | 1946990216               |
| SNP_P4_151086_578359 | NW_004516329.1 | Scaffold1006 | 578359                  | GG                              | AA              | 1946990218               |
| SNP_P4_151087_578413 | NW_004516329.1 | Scaffold1006 | 578413                  | CC                              | TT              | 1946990220               |
| SNP_P4_151088_578512 | NW_004516329.1 | Scaffold1006 | 578512                  | GG                              | CC              | 1946990222               |
| SNP_P4_151089_578565 | NW_004516329.1 | Scaffold1006 | 578565                  | CC                              | TT              | 1946990224               |
| SNP_P4_151090_578610 | NW_004516329.1 | Scaffold1006 | 578610                  | GG                              | AA              | 1946990226               |
| SNP_P4_151092_583340 | NW_004516329.1 | Scaffold1006 | 583340                  | GG                              | AA              | 1946990228               |
| SNP_P4_151094_665995 | NW_004516329.1 | Scaffold1006 | 665995                  | AA                              | GG              | 1946990230               |
| SNP_P4_151095_688329 | NW_004516329.1 | Scaffold1006 | 688329                  | CC                              | TT              | 1946990232               |
| SNP_P4_151096_12134  | NW_004516331.1 | Scaffold1008 | 12134                   | CC                              | TT              | 1946990234               |
| SNP_P4_151097_12327  | NW_004516331.1 | Scaffold1008 | 12327                   | AA                              | GG              | 1946990236               |
| SNP_P4_151098_12349  | NW_004516331.1 | Scaffold1008 | 12349                   | TT                              | CC              | 1946990238               |
| SNP_P4_151099_12385  | NW_004516331.1 | Scaffold1008 | 12385                   | CC                              | TT              | 1946990240               |

| SNPs IDs            | Chromosome IDs | Chromosomes  | Physical positions (bp) | CDC Frontier (Reference genome) | (ILWC46 & LPNB) | NCBI SNPdb Accession IDs |
|---------------------|----------------|--------------|-------------------------|---------------------------------|-----------------|--------------------------|
| SNP_P4_151100_12494 | NW_004516331.1 | Scaffold1008 | 12494                   | AA                              | CC              | 1946990242               |
| SNP_P4_151101_12584 | NW_004516331.1 | Scaffold1008 | 12584                   | TT                              | CC              | 1946990244               |
| SNP_P4_151102_12626 | NW_004516331.1 | Scaffold1008 | 12626                   | TT                              | GG              | 1946990246               |
| SNP_P4_151104_12723 | NW_004516331.1 | Scaffold1008 | 12723                   | AA                              | GG              | 1946990248               |
| SNP_P4_151105_12734 | NW_004516331.1 | Scaffold1008 | 12734                   | CC                              | AA              | 1946990250               |
| SNP_P4_151106_13314 | NW_004516331.1 | Scaffold1008 | 13314                   | GG                              | AA              | 1946990252               |
| SNP_P4_151107_13398 | NW_004516331.1 | Scaffold1008 | 13398                   | TT                              | AA              | 1946990254               |
| SNP_P4_151108_13414 | NW_004516331.1 | Scaffold1008 | 13414                   | TT                              | CC              | 1946990257               |
| SNP_P4_151109_13428 | NW_004516331.1 | Scaffold1008 | 13428                   | CC                              | AA              | 1946990259               |
| SNP_P4_151110_13433 | NW_004516331.1 | Scaffold1008 | 13433                   | TT                              | CC              | 1946990261               |
| SNP_P4_151111_14667 | NW_004516331.1 | Scaffold1008 | 14667                   | CC                              | TT              | 1946990263               |
| SNP_P4_151112_14680 | NW_004516331.1 | Scaffold1008 | 14680                   | TT                              | CC              | 1946990265               |
| SNP_P4_151113_14738 | NW_004516331.1 | Scaffold1008 | 14738                   | TT                              | CC              | 1946990267               |
| SNP_P4_151114_14816 | NW_004516331.1 | Scaffold1008 | 14816                   | AA                              | GG              | 1946990269               |
| SNP_P4_151115_19374 | NW_004516331.1 | Scaffold1008 | 19374                   | TT                              | CC              | 1946990272               |
| SNP_P4_151116_20374 | NW_004516331.1 | Scaffold1008 | 20374                   | TT                              | CC              | 1946990274               |
| SNP_P4_151117_20375 | NW_004516331.1 | Scaffold1008 | 20375                   | TT                              | GG              | 1946990276               |
| SNP_P4_151118_22997 | NW_004516331.1 | Scaffold1008 | 22997                   | AA                              | GG              | 1946990278               |
| SNP_P4_151119_23023 | NW_004516331.1 | Scaffold1008 | 23023                   | TT                              | GG              | 1946990280               |
| SNP_P4_151120_39867 | NW_004516331.1 | Scaffold1008 | 39867                   | CC                              | AA              | 1946990282               |
| SNP_P4_151121_42259 | NW_004516331.1 | Scaffold1008 | 42259                   | GG                              | AA              | 1946990284               |
| SNP_P4_151122_42260 | NW_004516331.1 | Scaffold1008 | 42260                   | CC                              | TT              | 1946990286               |
| SNP_P4_151123_42269 | NW_004516331.1 | Scaffold1008 | 42269                   | GG                              | AA              | 1946990288               |
| SNP_P4_151124_42280 | NW_004516331.1 | Scaffold1008 | 42280                   | GG                              | AA              | 1946990290               |
| SNP_P4_151125_42303 | NW_004516331.1 | Scaffold1008 | 42303                   | AA                              | CC              | 1946990293               |
| SNP_P4_151126_42331 | NW_004516331.1 | Scaffold1008 | 42331                   | TT                              | CC              | 1946990295               |
| SNP_P4_151127_42459 | NW_004516331.1 | Scaffold1008 | 42459                   | TT                              | CC              | 1946990297               |
| SNP_P4_151128_42464 | NW_004516331.1 | Scaffold1008 | 42464                   | CC                              | TT              | 1946990299               |
| SNP_P4_151129_42506 | NW_004516331.1 | Scaffold1008 | 42506                   | AA                              | CC              | 1946990301               |
| SNP_P4_151130_42531 | NW_004516331.1 | Scaffold1008 | 42531                   | AA                              | GG              | 1946990303               |
| SNP_P4_151131_42575 | NW_004516331.1 | Scaffold1008 | 42575                   | AA                              | GG              | 1946990305               |
| SNP_P4_151132_42661 | NW_004516331.1 | Scaffold1008 | 42661                   | CC                              | TT              | 1946990307               |
| SNP_P4_151133_42688 | NW_004516331.1 | Scaffold1008 | 42688                   | TT                              | CC              | 1946990309               |
| SNP_P4_151134_42691 | NW_004516331.1 | Scaffold1008 | 42691                   | TT                              | CC              | 1946990311               |
| SNP_P4_151135_42754 | NW_004516331.1 | Scaffold1008 | 42754                   | CC                              | TT              | 1946990313               |
| SNP_P4_151136_42769 | NW_004516331.1 | Scaffold1008 | 42769                   | GG                              | TT              | 1946990315               |
| SNP_P4_151137_42781 | NW_004516331.1 | Scaffold1008 | 42781                   | GG                              | AA              | 1946990317               |
| SNP_P4_151138_42913 | NW_004516331.1 | Scaffold1008 | 42913                   | AA                              | TT              | 1946990319               |
| SNP_P4_151139_49709 | NW_004516331.1 | Scaffold1008 | 49709                   | AA                              | CC              | 1946990321               |
| SNP_P4_151140_51325 | NW_004516331.1 | Scaffold1008 | 51325                   | GG                              | AA              | 1946990323               |
| SNP_P4_151141_51333 | NW_004516331.1 | Scaffold1008 | 51333                   | CC                              | TT              | 1946990325               |
| SNP_P4_151142_51338 | NW_004516331.1 | Scaffold1008 | 51338                   | AA                              | TT              | 1946990327               |

| SNPs IDs             | Chromosome IDs | Chromosomes  | Physical positions (bp) | CDC Frontier (Reference genome) | (ILWC46 & LPNB) | NCBI SNPdb Accession IDs |
|----------------------|----------------|--------------|-------------------------|---------------------------------|-----------------|--------------------------|
| SNP_P4_151143_51347  | NW_004516331.1 | Scaffold1008 | 51347                   | GG                              | AA              | 1946990329               |
| SNP_P4_151145_54397  | NW_004516331.1 | Scaffold1008 | 54397                   | GG                              | CC              | 1946990332               |
| SNP_P4_151146_54398  | NW_004516331.1 | Scaffold1008 | 54398                   | CC                              | TT              | 1946990333               |
| SNP_P4_151147_59822  | NW_004516331.1 | Scaffold1008 | 59822                   | GG                              | TT              | 1946990334               |
| SNP_P4_151148_61567  | NW_004516331.1 | Scaffold1008 | 61567                   | CC                              | TT              | 1946990335               |
| SNP_P4_151149_61681  | NW_004516331.1 | Scaffold1008 | 61681                   | CC                              | AA              | 1946990336               |
| SNP_P4_151150_61891  | NW_004516331.1 | Scaffold1008 | 61891                   | GG                              | AA              | 1946990338               |
| SNP_P4_151151_61912  | NW_004516331.1 | Scaffold1008 | 61912                   | GG                              | TT              | 1946990340               |
| SNP_P4_151152_61975  | NW_004516331.1 | Scaffold1008 | 61975                   | AA                              | TT              | 1946990342               |
| SNP_P4_151153_62025  | NW_004516331.1 | Scaffold1008 | 62025                   | TT                              | CC              | 1946990344               |
| SNP_P4_151154_62043  | NW_004516331.1 | Scaffold1008 | 62043                   | CC                              | AA              | 1946990346               |
| SNP_P4_151155_62058  | NW_004516331.1 | Scaffold1008 | 62058                   | AA                              | GG              | 1946990348               |
| SNP_P4_151156_62077  | NW_004516331.1 | Scaffold1008 | 62077                   | GG                              | AA              | 1946990350               |
| SNP_P4_151157_70146  | NW_004516331.1 | Scaffold1008 | 70146                   | CC                              | TT              | 1946990352               |
| SNP_P4_151158_80685  | NW_004516331.1 | Scaffold1008 | 80685                   | CC                              | TT              | 1946990354               |
| SNP_P4_151159_83271  | NW_004516331.1 | Scaffold1008 | 83271                   | AA                              | TT              | 1946990356               |
| SNP_P4_151160_84601  | NW_004516331.1 | Scaffold1008 | 84601                   | AA                              | GG              | 1946990358               |
| SNP_P4_151161_85780  | NW_004516331.1 | Scaffold1008 | 85780                   | CC                              | AA              | 1946990360               |
| SNP_P4_151162_85784  | NW_004516331.1 | Scaffold1008 | 85784                   | CC                              | AA              | 1946990362               |
| SNP_P4_151163_403    | NW_004516333.1 | Scaffold1010 | 403                     | AA                              | GG              | 1946990364               |
| SNP_P4_151164_827    | NW_004516333.1 | Scaffold1010 | 827                     | AA                              | TT              | 1946990366               |
| SNP_P4_151165_843    | NW_004516333.1 | Scaffold1010 | 843                     | TT                              | CC              | 1946990368               |
| SNP_P4_151166_44753  | NW_004516333.1 | Scaffold1010 | 44753                   | AA                              | GG              | 1946990370               |
| SNP_P4_151167_44803  | NW_004516333.1 | Scaffold1010 | 44803                   | AA                              | GG              | 1946990372               |
| SNP_P4_151168_44808  | NW_004516333.1 | Scaffold1010 | 44808                   | GG                              | AA              | 1946990374               |
| SNP_P4_151169_52692  | NW_004516333.1 | Scaffold1010 | 52692                   | TT                              | GG              | 1946990376               |
| SNP_P4_151170_52771  | NW_004516333.1 | Scaffold1010 | 52771                   | TT                              | AA              | 1946990378               |
| SNP_P4_151171_52779  | NW_004516333.1 | Scaffold1010 | 52779                   | GG                              | CC              | 1946990380               |
| SNP_P4_151173_53125  | NW_004516333.1 | Scaffold1010 | 53125                   | AA                              | TT              | 1946990382               |
| SNP_P4_151174_53160  | NW_004516333.1 | Scaffold1010 | 53160                   | TT                              | GG              | 1946990384               |
| SNP_P4_151175_53166  | NW_004516333.1 | Scaffold1010 | 53166                   | AA                              | GG              | 1946990386               |
| SNP_P4_151176_53187  | NW_004516333.1 | Scaffold1010 | 53187                   | GG                              | AA              | 1946990388               |
| SNP_P4_151177_82409  | NW_004516333.1 | Scaffold1010 | 82409                   | TT                              | AA              | 1946990390               |
| SNP_P4_151178_83449  | NW_004516333.1 | Scaffold1010 | 83449                   | GG                              | AA              | 1946990392               |
| SNP_P4_151179_93903  | NW_004516333.1 | Scaffold1010 | 93903                   | TT                              | CC              | 1946990394               |
| SNP_P4_151180_94219  | NW_004516333.1 | Scaffold1010 | 94219                   | TT                              | GG              | 1946990396               |
| SNP_P4_151181_111983 | NW_004516333.1 | Scaffold1010 | 111983                  | AA                              | CC              | 1946990398               |
| SNP_P4_151182_111985 | NW_004516333.1 | Scaffold1010 | 111985                  | AA                              | CC              | 1946990400               |
| SNP_P4_151183_143641 | NW_004516333.1 | Scaffold1010 | 143641                  | CC                              | TT              | 1946990402               |
| SNP_P4_151185_154769 | NW_004516333.1 | Scaffold1010 | 154769                  | GG                              | AA              | 1946990404               |
| SNP_P4_151186_154863 | NW_004516333.1 | Scaffold1010 | 154863                  | GG                              | AA              | 1946990406               |
| SNP_P4_151187_155054 | NW_004516333.1 | Scaffold1010 | 155054                  | AA                              | CC              | 1946990408               |

| SNPs IDs             | Chromosome IDs | Chromosomes  | Physical positions (bp) | CDC Frontier (Reference genome) | (ILWC46 & LPNB) | NCBI SNPdb Accession IDs |
|----------------------|----------------|--------------|-------------------------|---------------------------------|-----------------|--------------------------|
| SNP_P4_151188_155057 | NW_004516333.1 | Scaffold1010 | 155057                  | CC                              | TT              | 1946990410               |
| SNP_P4_151189_155119 | NW_004516333.1 | Scaffold1010 | 155119                  | CC                              | TT              | 1946990412               |
| SNP_P4_151190_155352 | NW_004516333.1 | Scaffold1010 | 155352                  | GG                              | AA              | 1946990414               |
| SNP_P4_151191_155393 | NW_004516333.1 | Scaffold1010 | 155393                  | GG                              | AA              | 1946990416               |
| SNP_P4_151193_155534 | NW_004516333.1 | Scaffold1010 | 155534                  | AA                              | CC              | 1946990418               |
| SNP_P4_151194_155704 | NW_004516333.1 | Scaffold1010 | 155704                  | TT                              | AA              | 1946990420               |
| SNP_P4_151195_155720 | NW_004516333.1 | Scaffold1010 | 155720                  | CC                              | TT              | 1946990422               |
| SNP_P4_151196_155799 | NW_004516333.1 | Scaffold1010 | 155799                  | CC                              | TT              | 1946990424               |
| SNP_P4_151197_158094 | NW_004516333.1 | Scaffold1010 | 158094                  | TT                              | CC              | 1946990426               |
| SNP_P4_151198_158096 | NW_004516333.1 | Scaffold1010 | 158096                  | GG                              | AA              | 1946990428               |
| SNP_P4_151199_158122 | NW_004516333.1 | Scaffold1010 | 158122                  | GG                              | CC              | 1946990429               |
| SNP_P4_151200_158198 | NW_004516333.1 | Scaffold1010 | 158198                  | AA                              | CC              | 1946990430               |
| SNP_P4_151201_160563 | NW_004516333.1 | Scaffold1010 | 160563                  | TT                              | CC              | 1946990431               |
| SNP_P4_151202_160631 | NW_004516333.1 | Scaffold1010 | 160631                  | GG                              | AA              | 1946990432               |
| SNP_P4_151203_160707 | NW_004516333.1 | Scaffold1010 | 160707                  | TT                              | GG              | 1946990434               |
| SNP_P4_151204_161192 | NW_004516333.1 | Scaffold1010 | 161192                  | AA                              | GG              | 1946990436               |
| SNP_P4_151205_161198 | NW_004516333.1 | Scaffold1010 | 161198                  | TT                              | CC              | 1946990438               |
| SNP_P4_151206_161249 | NW_004516333.1 | Scaffold1010 | 161249                  | AA                              | GG              | 1946990439               |
| SNP_P4_151208_51411  | NW_004516335.1 | Scaffold1013 | 51411                   | GG                              | AA              | 1946990441               |
| SNP_P4_151209_61008  | NW_004516335.1 | Scaffold1013 | 61008                   | AA                              | TT              | 1946990443               |
| SNP_P4_151210_86406  | NW_004516335.1 | Scaffold1013 | 86406                   | AA                              | GG              | 1946990445               |
| SNP_P4_151211_98414  | NW_004516335.1 | Scaffold1013 | 98414                   | AA                              | GG              | 1946990447               |
| SNP_P4_151212_98614  | NW_004516335.1 | Scaffold1013 | 98614                   | TT                              | GG              | 1946990449               |
| SNP_P4_151213_98616  | NW_004516335.1 | Scaffold1013 | 98616                   | AA                              | TT              | 1946990451               |
| SNP_P4_151214_365    | NW_004516337.1 | Scaffold1017 | 365                     | AA                              | TT              | 1946990453               |
| SNP_P4_151215_9466   | NW_004516337.1 | Scaffold1017 | 9466                    | TT                              | CC              | 1946990455               |
| SNP_P4_151216_10662  | NW_004516337.1 | Scaffold1017 | 10662                   | CC                              | AA              | 1946990457               |
| SNP_P4_151217_10731  | NW_004516337.1 | Scaffold1017 | 10731                   | TT                              | CC              | 1946990459               |
| SNP_P4_151218_10732  | NW_004516337.1 | Scaffold1017 | 10732                   | TT                              | AA              | 1946990461               |
| SNP_P4_151220_12790  | NW_004516337.1 | Scaffold1017 | 12790                   | GG                              | AA              | 1946990463               |
| SNP_P4_151222_12806  | NW_004516337.1 | Scaffold1017 | 12806                   | AA                              | CC              | 1946990465               |
| SNP_P4_151223_12846  | NW_004516337.1 | Scaffold1017 | 12846                   | CC                              | TT              | 1946990467               |
| SNP_P4_151224_12879  | NW_004516337.1 | Scaffold1017 | 12879                   | GG                              | CC              | 1946990469               |
| SNP_P4_151225_12916  | NW_004516337.1 | Scaffold1017 | 12916                   | GG                              | AA              | 1946990471               |
| SNP_P4_151226_12929  | NW_004516337.1 | Scaffold1017 | 12929                   | CC                              | AA              | 1946990473               |
| SNP_P4_151227_12931  | NW_004516337.1 | Scaffold1017 | 12931                   | TT                              | CC              | 1946990475               |
| SNP_P4_151228_13050  | NW_004516337.1 | Scaffold1017 | 13050                   | GG                              | CC              | 1946990477               |
| SNP_P4_151229_13051  | NW_004516337.1 | Scaffold1017 | 13051                   | CC                              | TT              | 1946990479               |
| SNP_P4_151230_13067  | NW_004516337.1 | Scaffold1017 | 13067                   | TT                              | CC              | 1946990481               |
| SNP_P4_151231_13129  | NW_004516337.1 | Scaffold1017 | 13129                   | TT                              | GG              | 1946990483               |
| SNP_P4_151232_13136  | NW_004516337.1 | Scaffold1017 | 13136                   | AA                              | TT              | 1946990485               |
| SNP_P4_151233_13143  | NW_004516337.1 | Scaffold1017 | 13143                   | CC                              | TT              | 1946990487               |

| SNPs IDs            | Chromosome IDs | Chromosomes  | Physical positions (bp) | CDC Frontier (Reference genome) | (ILWC46 & LPNB) | NCBI SNPdb Accession IDs |
|---------------------|----------------|--------------|-------------------------|---------------------------------|-----------------|--------------------------|
| SNP_P4_151234_13449 | NW_004516337.1 | Scaffold1017 | 13449                   | GG                              | AA              | 1946990489               |
| SNP_P4_151235_13532 | NW_004516337.1 | Scaffold1017 | 13532                   | AA                              | CC              | 1946990491               |
| SNP_P4_151236_13634 | NW_004516337.1 | Scaffold1017 | 13634                   | TT                              | AA              | 1946990493               |
| SNP_P4_151237_13776 | NW_004516337.1 | Scaffold1017 | 13776                   | GG                              | CC              | 1946990495               |
| SNP_P4_151238_13811 | NW_004516337.1 | Scaffold1017 | 13811                   | CC                              | TT              | 1946990497               |
| SNP_P4_151239_13831 | NW_004516337.1 | Scaffold1017 | 13831                   | GG                              | TT              | 1946990499               |
| SNP_P4_151240_13881 | NW_004516337.1 | Scaffold1017 | 13881                   | GG                              | AA              | 1946990501               |
| SNP_P4_151241_13984 | NW_004516337.1 | Scaffold1017 | 13984                   | TT                              | CC              | 1946990503               |
| SNP_P4_151242_14007 | NW_004516337.1 | Scaffold1017 | 14007                   | CC                              | TT              | 1946990505               |
| SNP_P4_151243_14067 | NW_004516337.1 | Scaffold1017 | 14067                   | CC                              | TT              | 1946990507               |
| SNP_P4_151244_14106 | NW_004516337.1 | Scaffold1017 | 14106                   | TT                              | CC              | 1946990509               |
| SNP_P4_151245_14167 | NW_004516337.1 | Scaffold1017 | 14167                   | CC                              | TT              | 1946990511               |
| SNP_P4_151246_14272 | NW_004516337.1 | Scaffold1017 | 14272                   | GG                              | AA              | 1946990513               |
| SNP_P4_151247_14304 | NW_004516337.1 | Scaffold1017 | 14304                   | TT                              | CC              | 1946990515               |
| SNP_P4_151248_19303 | NW_004516337.1 | Scaffold1017 | 19303                   | CC                              | AA              | 1946990517               |
| SNP_P4_151249_19413 | NW_004516337.1 | Scaffold1017 | 19413                   | GG                              | AA              | 1946990519               |
| SNP_P4_151250_19440 | NW_004516337.1 | Scaffold1017 | 19440                   | TT                              | CC              | 1946990521               |
| SNP_P4_151251_19464 | NW_004516337.1 | Scaffold1017 | 19464                   | GG                              | TT              | 1946990523               |
| SNP_P4_151252_19516 | NW_004516337.1 | Scaffold1017 | 19516                   | CC                              | GG              | 1946990525               |
| SNP_P4_151253_19557 | NW_004516337.1 | Scaffold1017 | 19557                   | TT                              | GG              | 1946990527               |
| SNP_P4_151254_19577 | NW_004516337.1 | Scaffold1017 | 19577                   | TT                              | GG              | 1946990530               |
| SNP_P4_151255_19621 | NW_004516337.1 | Scaffold1017 | 19621                   | TT                              | CC              | 1946990532               |
| SNP_P4_151256_19623 | NW_004516337.1 | Scaffold1017 | 19623                   | GG                              | AA              | 1946990534               |
| SNP_P4_151257_19642 | NW_004516337.1 | Scaffold1017 | 19642                   | CC                              | AA              | 1946990536               |
| SNP_P4_151258_19717 | NW_004516337.1 | Scaffold1017 | 19717                   | CC                              | AA              | 1946990538               |
| SNP_P4_151259_19925 | NW_004516337.1 | Scaffold1017 | 19925                   | AA                              | CC              | 1946990540               |
| SNP_P4_151260_20584 | NW_004516337.1 | Scaffold1017 | 20584                   | CC                              | TT              | 1946990542               |
| SNP_P4_151261_20912 | NW_004516337.1 | Scaffold1017 | 20912                   | AA                              | CC              | 1946990544               |
| SNP_P4_151262_21046 | NW_004516337.1 | Scaffold1017 | 21046                   | TT                              | CC              | 1946990546               |
| SNP_P4_151263_24658 | NW_004516337.1 | Scaffold1017 | 24658                   | GG                              | AA              | 1946990548               |
| SNP_P4_151264_26988 | NW_004516337.1 | Scaffold1017 | 26988                   | CC                              | TT              | 1946990550               |
| SNP_P4_151265_27209 | NW_004516337.1 | Scaffold1017 | 27209                   | CC                              | TT              | 1946990552               |
| SNP_P4_151266_27213 | NW_004516337.1 | Scaffold1017 | 27213                   | TT                              | CC              | 1946990554               |
| SNP_P4_151267_28022 | NW_004516337.1 | Scaffold1017 | 28022                   | GG                              | AA              | 1946990556               |
| SNP_P4_151268_29615 | NW_004516337.1 | Scaffold1017 | 29615                   | TT                              | AA              | 1946990558               |
| SNP_P4_151269_29649 | NW_004516337.1 | Scaffold1017 | 29649                   | CC                              | GG              | 1946990560               |
| SNP_P4_151270_29722 | NW_004516337.1 | Scaffold1017 | 29722                   | CC                              | TT              | 1946990562               |
| SNP_P4_151271_29731 | NW_004516337.1 | Scaffold1017 | 29731                   | GG                              | TT              | 1946990564               |
| SNP_P4_151272_29737 | NW_004516337.1 | Scaffold1017 | 29737                   | AA                              | GG              | 1946990566               |
| SNP_P4_151273_29752 | NW_004516337.1 | Scaffold1017 | 29752                   | TT                              | AA              | 1946990568               |
| SNP_P4_151274_29947 | NW_004516337.1 | Scaffold1017 | 29947                   | CC                              | AA              | 1946990570               |
| SNP_P4_151275_30015 | NW_004516337.1 | Scaffold1017 | 30015                   | AA                              | GG              | 1946990572               |

| SNPs IDs            | Chromosome IDs | Chromosomes  | Physical positions (bp) | CDC Frontier (Reference genome) | (ILWC46 & LPNB) | NCBI SNPdb Accession IDs |
|---------------------|----------------|--------------|-------------------------|---------------------------------|-----------------|--------------------------|
| SNP_P4_151276_30025 | NW_004516337.1 | Scaffold1017 | 30025                   | AA                              | CC              | 1946990574               |
| SNP_P4_151277_30094 | NW_004516337.1 | Scaffold1017 | 30094                   | AA                              | TT              | 1946990576               |
| SNP_P4_151278_30266 | NW_004516337.1 | Scaffold1017 | 30266                   | AA                              | TT              | 1946990578               |
| SNP_P4_151279_30320 | NW_004516337.1 | Scaffold1017 | 30320                   | CC                              | GG              | 1946990580               |
| SNP_P4_151280_30696 | NW_004516337.1 | Scaffold1017 | 30696                   | CC                              | TT              | 1946990582               |
| SNP_P4_151281_32183 | NW_004516337.1 | Scaffold1017 | 32183                   | GG                              | CC              | 1946990584               |
| SNP_P4_151282_32218 | NW_004516337.1 | Scaffold1017 | 32218                   | GG                              | AA              | 1946990586               |
| SNP_P4_151283_32223 | NW_004516337.1 | Scaffold1017 | 32223                   | TT                              | AA              | 1946990588               |
| SNP_P4_151284_32306 | NW_004516337.1 | Scaffold1017 | 32306                   | CC                              | TT              | 1946990590               |
| SNP_P4_151285_32432 | NW_004516337.1 | Scaffold1017 | 32432                   | CC                              | TT              | 1946990592               |
| SNP_P4_151286_32450 | NW_004516337.1 | Scaffold1017 | 32450                   | GG                              | AA              | 1946990594               |
| SNP_P4_151287_32499 | NW_004516337.1 | Scaffold1017 | 32499                   | TT                              | CC              | 1946990596               |
| SNP_P4_151288_32500 | NW_004516337.1 | Scaffold1017 | 32500                   | AA                              | GG              | 1946990598               |
| SNP_P4_151289_32501 | NW_004516337.1 | Scaffold1017 | 32501                   | AA                              | TT              | 1946990600               |
| SNP_P4_151290_32922 | NW_004516337.1 | Scaffold1017 | 32922                   | TT                              | CC              | 1946990602               |
| SNP_P4_151291_38128 | NW_004516337.1 | Scaffold1017 | 38128                   | CC                              | TT              | 1946990604               |
| SNP_P4_151292_38500 | NW_004516337.1 | Scaffold1017 | 38500                   | CC                              | GG              | 1946990606               |
| SNP_P4_151293_38536 | NW_004516337.1 | Scaffold1017 | 38536                   | AA                              | CC              | 1946990608               |
| SNP_P4_151294_38563 | NW_004516337.1 | Scaffold1017 | 38563                   | CC                              | AA              | 1946990610               |
| SNP_P4_151295_38578 | NW_004516337.1 | Scaffold1017 | 38578                   | GG                              | AA              | 1946990612               |
| SNP_P4_151296_38606 | NW_004516337.1 | Scaffold1017 | 38606                   | GG                              | AA              | 1946990614               |
| SNP_P4_151297_38728 | NW_004516337.1 | Scaffold1017 | 38728                   | AA                              | CC              | 1946990616               |
| SNP_P4_151298_38729 | NW_004516337.1 | Scaffold1017 | 38729                   | TT                              | AA              | 1946990618               |
| SNP_P4_151299_39022 | NW_004516337.1 | Scaffold1017 | 39022                   | CC                              | TT              | 1946990620               |
| SNP_P4_151300_39959 | NW_004516337.1 | Scaffold1017 | 39959                   | CC                              | AA              | 1946990622               |
| SNP_P4_151301_39993 | NW_004516337.1 | Scaffold1017 | 39993                   | GG                              | CC              | 1946990624               |
| SNP_P4_151302_40017 | NW_004516337.1 | Scaffold1017 | 40017                   | AA                              | GG              | 1946990626               |
| SNP_P4_151303_40479 | NW_004516337.1 | Scaffold1017 | 40479                   | GG                              | AA              | 1946990628               |
| SNP_P4_151304_42402 | NW_004516337.1 | Scaffold1017 | 42402                   | GG                              | AA              | 1946990630               |
| SNP_P4_151305_42450 | NW_004516337.1 | Scaffold1017 | 42450                   | AA                              | TT              | 1946990632               |
| SNP_P4_151306_42574 | NW_004516337.1 | Scaffold1017 | 42574                   | GG                              | AA              | 1946990634               |
| SNP_P4_151307_42609 | NW_004516337.1 | Scaffold1017 | 42609                   | CC                              | TT              | 1946990636               |
| SNP_P4_151308_42674 | NW_004516337.1 | Scaffold1017 | 42674                   | TT                              | AA              | 1946990638               |
| SNP_P4_151309_42727 | NW_004516337.1 | Scaffold1017 | 42727                   | GG                              | CC              | 1946990640               |
| SNP_P4_151310_42773 | NW_004516337.1 | Scaffold1017 | 42773                   | AA                              | TT              | 1946990642               |
| SNP_P4_151311_42864 | NW_004516337.1 | Scaffold1017 | 42864                   | TT                              | AA              | 1946990644               |
| SNP_P4_151312_43324 | NW_004516337.1 | Scaffold1017 | 43324                   | AA                              | TT              | 1946990646               |
| SNP_P4_151313_43331 | NW_004516337.1 | Scaffold1017 | 43331                   | AA                              | GG              | 1946990648               |
| SNP_P4_151314_43334 | NW_004516337.1 | Scaffold1017 | 43334                   | AA                              | GG              | 1946990650               |
| SNP_P4_151315_43450 | NW_004516337.1 | Scaffold1017 | 43450                   | CC                              | TT              | 1946990652               |
| SNP_P4_151316_43557 | NW_004516337.1 | Scaffold1017 | 43557                   | CC                              | GG              | 1946990654               |
| SNP_P4_151317_43728 | NW_004516337.1 | Scaffold1017 | 43728                   | AA                              | GG              | 1946990656               |



| SNPs IDs             | Chromosome IDs | Chromosomes  | Physical positions (bp) | CDC Frontier (Reference genome) | (ILWC46 & LPNB) | NCBI SNPdb Accession IDs |
|----------------------|----------------|--------------|-------------------------|---------------------------------|-----------------|--------------------------|
| SNP_P4_151318_43971  | NW_004516337.1 | Scaffold1017 | 43971                   | TT                              | AA              | 1946990658               |
| SNP_P4_151319_49976  | NW_004516337.1 | Scaffold1017 | 49976                   | AA                              | GG              | 1946990660               |
| SNP_P4_151320_49998  | NW_004516337.1 | Scaffold1017 | 49998                   | TT                              | AA              | 1946990662               |
| SNP_P4_151321_50010  | NW_004516337.1 | Scaffold1017 | 50010                   | GG                              | CC              | 1946990664               |
| SNP_P4_151322_50023  | NW_004516337.1 | Scaffold1017 | 50023                   | CC                              | TT              | 1946990666               |
| SNP_P4_151323_50032  | NW_004516337.1 | Scaffold1017 | 50032                   | CC                              | TT              | 1946990668               |
| SNP_P4_151324_50381  | NW_004516337.1 | Scaffold1017 | 50381                   | CC                              | TT              | 1946990670               |
| SNP_P4_151325_767    | NW_004516338.1 | Scaffold1020 | 767                     | AA                              | GG              | 1946990672               |
| SNP_P4_151326_1204   | NW_004516338.1 | Scaffold1020 | 1204                    | TT                              | CC              | 1946990674               |
| SNP_P4_151327_1206   | NW_004516338.1 | Scaffold1020 | 1206                    | GG                              | CC              | 1946990676               |
| SNP_P4_151328_1225   | NW_004516338.1 | Scaffold1020 | 1225                    | GG                              | CC              | 1946990678               |
| SNP_P4_151329_1351   | NW_004516338.1 | Scaffold1020 | 1351                    | GG                              | AA              | 1946990680               |
| SNP_P4_151330_1372   | NW_004516338.1 | Scaffold1020 | 1372                    | AA                              | GG              | 1946990682               |
| SNP_P4_151331_1374   | NW_004516338.1 | Scaffold1020 | 1374                    | GG                              | AA              | 1946990684               |
| SNP_P4_151332_1402   | NW_004516338.1 | Scaffold1020 | 1402                    | AA                              | GG              | 1946990686               |
| SNP_P4_151333_1572   | NW_004516338.1 | Scaffold1020 | 1572                    | AA                              | GG              | 1946990688               |
| SNP_P4_151334_1623   | NW_004516338.1 | Scaffold1020 | 1623                    | AA                              | GG              | 1946990690               |
| SNP_P4_151335_1785   | NW_004516338.1 | Scaffold1020 | 1785                    | AA                              | CC              | 1946990692               |
| SNP_P4_151336_1813   | NW_004516338.1 | Scaffold1020 | 1813                    | GG                              | AA              | 1946990694               |
| SNP_P4_151337_2566   | NW_004516338.1 | Scaffold1020 | 2566                    | GG                              | AA              | 1946990696               |
| SNP_P4_151338_21967  | NW_004516338.1 | Scaffold1020 | 21967                   | GG                              | CC              | 1946990698               |
| SNP_P4_151339_51048  | NW_004516338.1 | Scaffold1020 | 51048                   | CC                              | TT              | 1946990700               |
| SNP_P4_151340_51367  | NW_004516338.1 | Scaffold1020 | 51367                   | TT                              | CC              | 1946990702               |
| SNP_P4_151341_52745  | NW_004516338.1 | Scaffold1020 | 52745                   | TT                              | CC              | 1946990704               |
| SNP_P4_151343_72207  | NW_004516338.1 | Scaffold1020 | 72207                   | AA                              | TT              | 1946990706               |
| SNP_P4_151344_72535  | NW_004516338.1 | Scaffold1020 | 72535                   | CC                              | AA              | 1946990708               |
| SNP_P4_151345_72661  | NW_004516338.1 | Scaffold1020 | 72661                   | TT                              | CC              | 1946990710               |
| SNP_P4_151346_72738  | NW_004516338.1 | Scaffold1020 | 72738                   | CC                              | TT              | 1946990712               |
| SNP_P4_151347_72750  | NW_004516338.1 | Scaffold1020 | 72750                   | CC                              | GG              | 1946990714               |
| SNP_P4_151348_91580  | NW_004516338.1 | Scaffold1020 | 91580                   | AA                              | CC              | 1946990716               |
| SNP_P4_151349_93302  | NW_004516338.1 | Scaffold1020 | 93302                   | GG                              | AA              | 1946990718               |
| SNP_P4_151350_93693  | NW_004516338.1 | Scaffold1020 | 93693                   | AA                              | GG              | 1946990720               |
| SNP_P4_151351_93701  | NW_004516338.1 | Scaffold1020 | 93701                   | CC                              | TT              | 1946990722               |
| SNP_P4_151352_93713  | NW_004516338.1 | Scaffold1020 | 93713                   | AA                              | GG              | 1946990724               |
| SNP_P4_151353_93743  | NW_004516338.1 | Scaffold1020 | 93743                   | GG                              | AA              | 1946990726               |
| SNP_P4_151354_123859 | NW_004516338.1 | Scaffold1020 | 123859                  | TT                              | CC              | 1946990728               |
| SNP_P4_151355_124667 | NW_004516338.1 | Scaffold1020 | 124667                  | AA                              | TT              | 1946990730               |
| SNP_P4_151356_125524 | NW_004516338.1 | Scaffold1020 | 125524                  | AA                              | GG              | 1946990732               |
| SNP_P4_151357_125525 | NW_004516338.1 | Scaffold1020 | 125525                  | GG                              | AA              | 1946990734               |
| SNP_P4_151358_125600 | NW_004516338.1 | Scaffold1020 | 125600                  | TT                              | CC              | 1946990736               |
| SNP_P4_151359_127807 | NW_004516338.1 | Scaffold1020 | 127807                  | TT                              | CC              | 1946990738               |
| SNP_P4_151360_127815 | NW_004516338.1 | Scaffold1020 | 127815                  | TT                              | CC              | 1946990740               |

| SNPs IDs             | Chromosome IDs | Chromosomes  | Physical positions (bp) | CDC Frontier (Reference genome) | (ILWC46 & LPNB) | NCBI SNPdb Accession IDs |
|----------------------|----------------|--------------|-------------------------|---------------------------------|-----------------|--------------------------|
| SNP_P4_151361_127824 | NW_004516338.1 | Scaffold1020 | 127824                  | AA                              | CC              | 1946990742               |
| SNP_P4_151362_127825 | NW_004516338.1 | Scaffold1020 | 127825                  | TT                              | CC              | 1946990744               |
| SNP_P4_151363_127843 | NW_004516338.1 | Scaffold1020 | 127843                  | TT                              | CC              | 1946990746               |
| SNP_P4_151364_127855 | NW_004516338.1 | Scaffold1020 | 127855                  | CC                              | TT              | 1946990749               |
| SNP_P4_151365_127864 | NW_004516338.1 | Scaffold1020 | 127864                  | GG                              | AA              | 1946990751               |
| SNP_P4_151366_127877 | NW_004516338.1 | Scaffold1020 | 127877                  | CC                              | TT              | 1946990753               |
| SNP_P4_151367_127879 | NW_004516338.1 | Scaffold1020 | 127879                  | TT                              | AA              | 1946990755               |
| SNP_P4_151368_158475 | NW_004516338.1 | Scaffold1020 | 158475                  | CC                              | AA              | 1946990757               |
| SNP_P4_151369_158518 | NW_004516338.1 | Scaffold1020 | 158518                  | GG                              | AA              | 1946990759               |
| SNP_P4_151370_158524 | NW_004516338.1 | Scaffold1020 | 158524                  | AA                              | GG              | 1946990761               |
| SNP_P4_151371_158590 | NW_004516338.1 | Scaffold1020 | 158590                  | TT                              | CC              | 1946990763               |
| SNP_P4_151372_177066 | NW_004516338.1 | Scaffold1020 | 177066                  | AA                              | TT              | 1946990765               |
| SNP_P4_151373_177073 | NW_004516338.1 | Scaffold1020 | 177073                  | CC                              | GG              | 1946990767               |
| SNP_P4_151374_177080 | NW_004516338.1 | Scaffold1020 | 177080                  | GG                              | CC              | 1946990769               |
| SNP_P4_151375_177098 | NW_004516338.1 | Scaffold1020 | 177098                  | CC                              | AA              | 1946990771               |
| SNP_P4_151376_177202 | NW_004516338.1 | Scaffold1020 | 177202                  | GG                              | TT              | 1946990773               |
| SNP_P4_151377_177536 | NW_004516338.1 | Scaffold1020 | 177536                  | TT                              | CC              | 1946990775               |
| SNP_P4_151378_177553 | NW_004516338.1 | Scaffold1020 | 177553                  | AA                              | GG              | 1946990777               |
| SNP_P4_151379_183084 | NW_004516338.1 | Scaffold1020 | 183084                  | TT                              | CC              | 1946990779               |
| SNP_P4_151380_185334 | NW_004516338.1 | Scaffold1020 | 185334                  | CC                              | TT              | 1946990781               |
| SNP_P4_151381_197123 | NW_004516338.1 | Scaffold1020 | 197123                  | AA                              | GG              | 1946990784               |
| SNP_P4_151382_197149 | NW_004516338.1 | Scaffold1020 | 197149                  | GG                              | AA              | 1946990786               |
| SNP_P4_151383_197155 | NW_004516338.1 | Scaffold1020 | 197155                  | GG                              | AA              | 1946990788               |
| SNP_P4_151384_197166 | NW_004516338.1 | Scaffold1020 | 197166                  | GG                              | AA              | 1946990790               |
| SNP_P4_151386_197404 | NW_004516338.1 | Scaffold1020 | 197404                  | TT                              | CC              | 1946990792               |
| SNP_P4_151387_197463 | NW_004516338.1 | Scaffold1020 | 197463                  | GG                              | AA              | 1946990794               |
| SNP_P4_151388_197550 | NW_004516338.1 | Scaffold1020 | 197550                  | AA                              | TT              | 1946990796               |
| SNP_P4_151390_229381 | NW_004516338.1 | Scaffold1020 | 229381                  | TT                              | GG              | 1946990798               |
| SNP_P4_151391_246888 | NW_004516338.1 | Scaffold1020 | 246888                  | GG                              | AA              | 1946990800               |
| SNP_P4_151392_246890 | NW_004516338.1 | Scaffold1020 | 246890                  | CC                              | TT              | 1946990802               |
| SNP_P4_151393_264844 | NW_004516338.1 | Scaffold1020 | 264844                  | GG                              | CC              | 1946990804               |
| SNP_P4_151394_273034 | NW_004516338.1 | Scaffold1020 | 273034                  | TT                              | AA              | 1946990806               |
| SNP_P4_151395_273065 | NW_004516338.1 | Scaffold1020 | 273065                  | TT                              | AA              | 1946990808               |
| SNP_P4_151396_273066 | NW_004516338.1 | Scaffold1020 | 273066                  | GG                              | TT              | 1946990810               |
| SNP_P4_151397_273102 | NW_004516338.1 | Scaffold1020 | 273102                  | CC                              | GG              | 1946990812               |
| SNP_P4_151398_273114 | NW_004516338.1 | Scaffold1020 | 273114                  | TT                              | CC              | 1946990814               |
| SNP_P4_151399_275372 | NW_004516338.1 | Scaffold1020 | 275372                  | CC                              | TT              | 1946990816               |
| SNP_P4_151400_281016 | NW_004516338.1 | Scaffold1020 | 281016                  | CC                              | TT              | 1946990819               |
| SNP_P4_151401_325970 | NW_004516338.1 | Scaffold1020 | 325970                  | TT                              | GG              | 1946990821               |
| SNP_P4_151402_325976 | NW_004516338.1 | Scaffold1020 | 325976                  | CC                              | TT              | 1946990823               |
| SNP_P4_151403_326053 | NW_004516338.1 | Scaffold1020 | 326053                  | TT                              | GG              | 1946990825               |
| SNP_P4_151404_326224 | NW_004516338.1 | Scaffold1020 | 326224                  | AA                              | GG              | 1946990827               |

| SNPs IDs             | Chromosome IDs | Chromosomes  | Physical positions (bp) | CDC Frontier (Reference genome) | (ILWC46 & LPNB) | NCBI SNPdb Accession IDs |
|----------------------|----------------|--------------|-------------------------|---------------------------------|-----------------|--------------------------|
| SNP_P4_151405_337777 | NW_004516338.1 | Scaffold1020 | 337777                  | CC                              | TT              | 1946990829               |
| SNP_P4_151406_1949   | NW_004516340.1 | Scaffold1023 | 1949                    | AA                              | GG              | 1946990831               |
| SNP_P4_151407_19750  | NW_004516343.1 | Scaffold1027 | 19750                   | AA                              | GG              | 1946990833               |
| SNP_P4_151408_21279  | NW_004516343.1 | Scaffold1027 | 21279                   | AA                              | GG              | 1946990835               |
| SNP_P4_151409_22485  | NW_004516343.1 | Scaffold1027 | 22485                   | TT                              | CC              | 1946990837               |
| SNP_P4_151410_35961  | NW_004516343.1 | Scaffold1027 | 35961                   | TT                              | CC              | 1946990839               |
| SNP_P4_151411_38521  | NW_004516343.1 | Scaffold1027 | 38521                   | TT                              | CC              | 1946990841               |
| SNP_P4_151412_38535  | NW_004516343.1 | Scaffold1027 | 38535                   | GG                              | AA              | 1946990843               |
| SNP_P4_151413_46492  | NW_004516343.1 | Scaffold1027 | 46492                   | CC                              | TT              | 1946990845               |
| SNP_P4_151414_64608  | NW_004516343.1 | Scaffold1027 | 64608                   | TT                              | GG              | 1946990847               |
| SNP_P4_151415_77876  | NW_004516343.1 | Scaffold1027 | 77876                   | TT                              | CC              | 1946990849               |
| SNP_P4_151416_77887  | NW_004516343.1 | Scaffold1027 | 77887                   | CC                              | TT              | 1946990851               |
| SNP_P4_151417_77928  | NW_004516343.1 | Scaffold1027 | 77928                   | TT                              | CC              | 1946990853               |
| SNP_P4_151418_77974  | NW_004516343.1 | Scaffold1027 | 77974                   | TT                              | GG              | 1946990855               |
| SNP_P4_151419_78000  | NW_004516343.1 | Scaffold1027 | 78000                   | TT                              | AA              | 1946990857               |
| SNP_P4_151420_82675  | NW_004516343.1 | Scaffold1027 | 82675                   | CC                              | AA              | 1946990859               |
| SNP_P4_151421_99230  | NW_004516343.1 | Scaffold1027 | 99230                   | GG                              | AA              | 1946990861               |
| SNP_P4_151422_107858 | NW_004516343.1 | Scaffold1027 | 107858                  | CC                              | TT              | 1946990863               |
| SNP_P4_151423_109143 | NW_004516343.1 | Scaffold1027 | 109143                  | AA                              | CC              | 1946990865               |
| SNP_P4_151424_109895 | NW_004516343.1 | Scaffold1027 | 109895                  | AA                              | GG              | 1946990868               |
| SNP_P4_151425_109935 | NW_004516343.1 | Scaffold1027 | 109935                  | AA                              | TT              | 1946990870               |
| SNP_P4_151426_138879 | NW_004516343.1 | Scaffold1027 | 138879                  | CC                              | TT              | 1946990872               |
| SNP_P4_151427_142854 | NW_004516343.1 | Scaffold1027 | 142854                  | CC                              | AA              | 1946990874               |
| SNP_P4_151428_143361 | NW_004516343.1 | Scaffold1027 | 143361                  | TT                              | AA              | 1946990876               |
| SNP_P4_151429_143674 | NW_004516343.1 | Scaffold1027 | 143674                  | GG                              | AA              | 1946990878               |
| SNP_P4_151430_143687 | NW_004516343.1 | Scaffold1027 | 143687                  | AA                              | GG              | 1946990880               |
| SNP_P4_151431_146014 | NW_004516343.1 | Scaffold1027 | 146014                  | AA                              | GG              | 1946990882               |
| SNP_P4_151432_146151 | NW_004516343.1 | Scaffold1027 | 146151                  | GG                              | TT              | 1946990884               |
| SNP_P4_151433_148413 | NW_004516343.1 | Scaffold1027 | 148413                  | CC                              | TT              | 1946990886               |
| SNP_P4_151434_148470 | NW_004516343.1 | Scaffold1027 | 148470                  | GG                              | AA              | 1946990888               |
| SNP_P4_151435_148527 | NW_004516343.1 | Scaffold1027 | 148527                  | CC                              | TT              | 1946990890               |
| SNP_P4_151436_148551 | NW_004516343.1 | Scaffold1027 | 148551                  | GG                              | AA              | 1946990892               |
| SNP_P4_151437_148557 | NW_004516343.1 | Scaffold1027 | 148557                  | AA                              | GG              | 1946990893               |
| SNP_P4_151438_148590 | NW_004516343.1 | Scaffold1027 | 148590                  | CC                              | TT              | 1946990894               |
| SNP_P4_151439_148700 | NW_004516343.1 | Scaffold1027 | 148700                  | TT                              | CC              | 1946990895               |
| SNP_P4_151441_148744 | NW_004516343.1 | Scaffold1027 | 148744                  | AA                              | GG              | 1946990896               |
| SNP_P4_151442_148781 | NW_004516343.1 | Scaffold1027 | 148781                  | GG                              | AA              | 1946990898               |
| SNP_P4_151443_148787 | NW_004516343.1 | Scaffold1027 | 148787                  | TT                              | CC              | 1946990900               |
| SNP_P4_151444_148790 | NW_004516343.1 | Scaffold1027 | 148790                  | TT                              | CC              | 1946990902               |
| SNP_P4_151445_148791 | NW_004516343.1 | Scaffold1027 | 148791                  | AA                              | CC              | 1946990904               |
| SNP_P4_151446_148793 | NW_004516343.1 | Scaffold1027 | 148793                  | AA                              | GG              | 1946990906               |
| SNP_P4_151447_148823 | NW_004516343.1 | Scaffold1027 | 148823                  | AA                              | TT              | 1946990908               |

| SNPs IDs             | Chromosome IDs | Chromosomes  | Physical positions (bp) | CDC Frontier (Reference genome) | (ILWC46 & LPNB) | NCBI SNPdb Accession IDs |
|----------------------|----------------|--------------|-------------------------|---------------------------------|-----------------|--------------------------|
| SNP_P4_151448_148824 | NW_004516343.1 | Scaffold1027 | 148824                  | AA                              | GG              | 1946990910               |
| SNP_P4_151449_148829 | NW_004516343.1 | Scaffold1027 | 148829                  | AA                              | GG              | 1946990912               |
| SNP_P4_151450_148853 | NW_004516343.1 | Scaffold1027 | 148853                  | TT                              | CC              | 1946990914               |
| SNP_P4_151451_148889 | NW_004516343.1 | Scaffold1027 | 148889                  | GG                              | AA              | 1946990916               |
| SNP_P4_151452_148934 | NW_004516343.1 | Scaffold1027 | 148934                  | AA                              | GG              | 1946990918               |
| SNP_P4_151454_148958 | NW_004516343.1 | Scaffold1027 | 148958                  | AA                              | GG              | 1946990920               |
| SNP_P4_151455_148988 | NW_004516343.1 | Scaffold1027 | 148988                  | TT                              | CC              | 1946990922               |
| SNP_P4_151456_149006 | NW_004516343.1 | Scaffold1027 | 149006                  | GG                              | AA              | 1946990924               |
| SNP_P4_151457_149021 | NW_004516343.1 | Scaffold1027 | 149021                  | CC                              | TT              | 1946990926               |
| SNP_P4_151458_149045 | NW_004516343.1 | Scaffold1027 | 149045                  | TT                              | CC              | 1946990928               |
| SNP_P4_151459_149054 | NW_004516343.1 | Scaffold1027 | 149054                  | TT                              | CC              | 1946990930               |
| SNP_P4_151460_150118 | NW_004516343.1 | Scaffold1027 | 150118                  | AA                              | GG              | 1946990932               |
| SNP_P4_151461_150121 | NW_004516343.1 | Scaffold1027 | 150121                  | TT                              | GG              | 1946990934               |
| SNP_P4_151462_150175 | NW_004516343.1 | Scaffold1027 | 150175                  | CC                              | TT              | 1946990936               |
| SNP_P4_151464_160592 | NW_004516343.1 | Scaffold1027 | 160592                  | AA                              | CC              | 1946990938               |
| SNP_P4_151465_175489 | NW_004516343.1 | Scaffold1027 | 175489                  | TT                              | CC              | 1946990940               |
| SNP_P4_151466_190902 | NW_004516343.1 | Scaffold1027 | 190902                  | CC                              | GG              | 1946990942               |
| SNP_P4_151467_191355 | NW_004516343.1 | Scaffold1027 | 191355                  | AA                              | GG              | 1946990944               |
| SNP_P4_151468_191395 | NW_004516343.1 | Scaffold1027 | 191395                  | AA                              | GG              | 1946990946               |
| SNP_P4_151469_193017 | NW_004516343.1 | Scaffold1027 | 193017                  | AA                              | TT              | 1946990948               |
| SNP_P4_151470_193035 | NW_004516343.1 | Scaffold1027 | 193035                  | CC                              | TT              | 1946990950               |
| SNP_P4_151471_193049 | NW_004516343.1 | Scaffold1027 | 193049                  | CC                              | TT              | 1946990952               |
| SNP_P4_151472_193259 | NW_004516343.1 | Scaffold1027 | 193259                  | CC                              | AA              | 1946990954               |
| SNP_P4_151474_203838 | NW_004516343.1 | Scaffold1027 | 203838                  | GG                              | CC              | 1946990956               |
| SNP_P4_151475_203982 | NW_004516343.1 | Scaffold1027 | 203982                  | CC                              | TT              | 1946990958               |
| SNP_P4_151476_204003 | NW_004516343.1 | Scaffold1027 | 204003                  | CC                              | TT              | 1946990960               |
| SNP_P4_151477_204254 | NW_004516343.1 | Scaffold1027 | 204254                  | CC                              | AA              | 1946990962               |
| SNP_P4_151478_204275 | NW_004516343.1 | Scaffold1027 | 204275                  | CC                              | TT              | 1946990964               |
| SNP_P4_151479_204284 | NW_004516343.1 | Scaffold1027 | 204284                  | CC                              | TT              | 1946990966               |
| SNP_P4_151480_204321 | NW_004516343.1 | Scaffold1027 | 204321                  | AA                              | GG              | 1946990968               |
| SNP_P4_151481_204356 | NW_004516343.1 | Scaffold1027 | 204356                  | AA                              | TT              | 1946990970               |
| SNP_P4_151482_204362 | NW_004516343.1 | Scaffold1027 | 204362                  | TT                              | AA              | 1946990972               |
| SNP_P4_151483_204396 | NW_004516343.1 | Scaffold1027 | 204396                  | TT                              | CC              | 1946990974               |
| SNP_P4_151484_204406 | NW_004516343.1 | Scaffold1027 | 204406                  | CC                              | AA              | 1946990976               |
| SNP_P4_151485_204418 | NW_004516343.1 | Scaffold1027 | 204418                  | AA                              | CC              | 1946990977               |
| SNP_P4_151486_204464 | NW_004516343.1 | Scaffold1027 | 204464                  | AA                              | GG              | 1946990979               |
| SNP_P4_151487_211159 | NW_004516343.1 | Scaffold1027 | 211159                  | CC                              | TT              | 1946990981               |
| SNP_P4_151488_212761 | NW_004516343.1 | Scaffold1027 | 212761                  | TT                              | CC              | 1946990983               |
| SNP_P4_151489_219582 | NW_004516343.1 | Scaffold1027 | 219582                  | GG                              | AA              | 1946990985               |
| SNP_P4_151490_219629 | NW_004516343.1 | Scaffold1027 | 219629                  | GG                              | TT              | 1946990987               |
| SNP_P4_151491_228953 | NW_004516343.1 | Scaffold1027 | 228953                  | AA                              | GG              | 1946990989               |
| SNP_P4_151493_245455 | NW_004516343.1 | Scaffold1027 | 245455                  | TT                              | AA              | 1946990991               |

| SNPs IDs             | Chromosome IDs | Chromosomes  | Physical positions (bp) | CDC Frontier (Reference genome) | (ILWC46 & LPNB) | NCBI SNPdb Accession IDs |
|----------------------|----------------|--------------|-------------------------|---------------------------------|-----------------|--------------------------|
| SNP_P4_151495_261228 | NW_004516343.1 | Scaffold1027 | 261228                  | GG                              | TT              | 1946990993               |
| SNP_P4_151496_261229 | NW_004516343.1 | Scaffold1027 | 261229                  | GG                              | TT              | 1946990995               |
| SNP_P4_151497_276498 | NW_004516343.1 | Scaffold1027 | 276498                  | AA                              | GG              | 1946990997               |
| SNP_P4_151498_276744 | NW_004516343.1 | Scaffold1027 | 276744                  | AA                              | GG              | 1946990999               |
| SNP_P4_151499_113    | NW_004516344.1 | Scaffold1029 | 113                     | GG                              | AA              | 1946991001               |
| SNP_P4_151501_182    | NW_004516344.1 | Scaffold1029 | 182                     | AA                              | GG              | 1946991003               |
| SNP_P4_151502_184    | NW_004516344.1 | Scaffold1029 | 184                     | TT                              | GG              | 1946991006               |
| SNP_P4_151503_196    | NW_004516344.1 | Scaffold1029 | 196                     | TT                              | CC              | 1946991008               |
| SNP_P4_151504_7280   | NW_004516344.1 | Scaffold1029 | 7280                    | CC                              | TT              | 1946991010               |
| SNP_P4_151505_7617   | NW_004516344.1 | Scaffold1029 | 7617                    | GG                              | TT              | 1946991012               |
| SNP_P4_151506_7634   | NW_004516344.1 | Scaffold1029 | 7634                    | TT                              | CC              | 1946991014               |
| SNP_P4_151507_7647   | NW_004516344.1 | Scaffold1029 | 7647                    | TT                              | AA              | 1946991017               |
| SNP_P4_151508_7648   | NW_004516344.1 | Scaffold1029 | 7648                    | TT                              | GG              | 1946991019               |
| SNP_P4_151509_8051   | NW_004516344.1 | Scaffold1029 | 8051                    | CC                              | AA              | 1946991022               |
| SNP_P4_151510_8053   | NW_004516344.1 | Scaffold1029 | 8053                    | AA                              | TT              | 1946991024               |
| SNP_P4_151511_8336   | NW_004516344.1 | Scaffold1029 | 8336                    | TT                              | AA              | 1946991026               |
| SNP_P4_151512_8356   | NW_004516344.1 | Scaffold1029 | 8356                    | TT                              | AA              | 1946991028               |
| SNP_P4_151513_8387   | NW_004516344.1 | Scaffold1029 | 8387                    | TT                              | CC              | 1946991030               |
| SNP_P4_151514_12336  | NW_004516344.1 | Scaffold1029 | 12336                   | GG                              | AA              | 1946991032               |
| SNP_P4_151515_15071  | NW_004516344.1 | Scaffold1029 | 15071                   | CC                              | GG              | 1946991034               |
| SNP_P4_151516_26847  | NW_004516344.1 | Scaffold1029 | 26847                   | TT                              | CC              | 1946991036               |
| SNP_P4_151517_26853  | NW_004516344.1 | Scaffold1029 | 26853                   | CC                              | TT              | 1946991038               |
| SNP_P4_151518_26887  | NW_004516344.1 | Scaffold1029 | 26887                   | CC                              | TT              | 1946991040               |
| SNP_P4_151519_26890  | NW_004516344.1 | Scaffold1029 | 26890                   | AA                              | GG              | 1946991042               |
| SNP_P4_151520_26909  | NW_004516344.1 | Scaffold1029 | 26909                   | CC                              | TT              | 1946991044               |
| SNP_P4_151521_41756  | NW_004516344.1 | Scaffold1029 | 41756                   | AA                              | GG              | 1946991046               |
| SNP_P4_151522_56618  | NW_004516344.1 | Scaffold1029 | 56618                   | GG                              | CC              | 1946991048               |
| SNP_P4_151523_66642  | NW_004516344.1 | Scaffold1029 | 66642                   | GG                              | TT              | 1946991050               |
| SNP_P4_151524_67736  | NW_004516344.1 | Scaffold1029 | 67736                   | GG                              | TT              | 1946991052               |
| SNP_P4_151525_67745  | NW_004516344.1 | Scaffold1029 | 67745                   | GG                              | CC              | 1946991054               |
| SNP_P4_151526_67787  | NW_004516344.1 | Scaffold1029 | 67787                   | AA                              | GG              | 1946991056               |
| SNP_P4_151527_67795  | NW_004516344.1 | Scaffold1029 | 67795                   | CC                              | TT              | 1946991058               |
| SNP_P4_151528_78181  | NW_004516344.1 | Scaffold1029 | 78181                   | AA                              | GG              | 1946991060               |
| SNP_P4_151529_89692  | NW_004516344.1 | Scaffold1029 | 89692                   | CC                              | TT              | 1946991062               |
| SNP_P4_151530_89701  | NW_004516344.1 | Scaffold1029 | 89701                   | GG                              | AA              | 1946991064               |
| SNP_P4_151531_97073  | NW_004516344.1 | Scaffold1029 | 97073                   | GG                              | AA              | 1946991067               |
| SNP_P4_151532_97112  | NW_004516344.1 | Scaffold1029 | 97112                   | GG                              | AA              | 1946991069               |
| SNP_P4_151533_97113  | NW_004516344.1 | Scaffold1029 | 97113                   | GG                              | TT              | 1946991071               |
| SNP_P4_151534_110264 | NW_004516344.1 | Scaffold1029 | 110264                  | TT                              | CC              | 1946991073               |
| SNP_P4_151535_110433 | NW_004516344.1 | Scaffold1029 | 110433                  | AA                              | GG              | 1946991075               |
| SNP_P4_151536_110493 | NW_004516344.1 | Scaffold1029 | 110493                  | AA                              | TT              | 1946991077               |
| SNP_P4_151537_110499 | NW_004516344.1 | Scaffold1029 | 110499                  | TT                              | CC              | 1946991079               |

| SNPs IDs             | Chromosome IDs | Chromosomes  | Physical positions (bp) | CDC Frontier (Reference genome) | (ILWC46 & LPNB) | NCBI SNPdb Accession IDs |
|----------------------|----------------|--------------|-------------------------|---------------------------------|-----------------|--------------------------|
| SNP_P4_151538_110631 | NW_004516344.1 | Scaffold1029 | 110631                  | CC                              | TT              | 1946991081               |
| SNP_P4_151539_110685 | NW_004516344.1 | Scaffold1029 | 110685                  | TT                              | CC              | 1946991083               |
| SNP_P4_151540_110686 | NW_004516344.1 | Scaffold1029 | 110686                  | CC                              | TT              | 1946991085               |
| SNP_P4_151541_110688 | NW_004516344.1 | Scaffold1029 | 110688                  | GG                              | AA              | 1946991087               |
| SNP_P4_151542_110707 | NW_004516344.1 | Scaffold1029 | 110707                  | AA                              | GG              | 1946991089               |
| SNP_P4_151543_110720 | NW_004516344.1 | Scaffold1029 | 110720                  | GG                              | CC              | 1946991091               |
| SNP_P4_151544_110768 | NW_004516344.1 | Scaffold1029 | 110768                  | TT                              | CC              | 1946991093               |
| SNP_P4_151545_110805 | NW_004516344.1 | Scaffold1029 | 110805                  | GG                              | TT              | 1946991095               |
| SNP_P4_151546_110827 | NW_004516344.1 | Scaffold1029 | 110827                  | TT                              | CC              | 1946991097               |
| SNP_P4_151547_110841 | NW_004516344.1 | Scaffold1029 | 110841                  | CC                              | TT              | 1946991099               |
| SNP_P4_151548_114258 | NW_004516344.1 | Scaffold1029 | 114258                  | GG                              | TT              | 1946991101               |
| SNP_P4_151549_114323 | NW_004516344.1 | Scaffold1029 | 114323                  | TT                              | CC              | 1946991103               |
| SNP_P4_151550_114365 | NW_004516344.1 | Scaffold1029 | 114365                  | CC                              | AA              | 1946991105               |
| SNP_P4_151552_149633 | NW_004516344.1 | Scaffold1029 | 149633                  | CC                              | TT              | 1946991107               |
| SNP_P4_151553_149860 | NW_004516344.1 | Scaffold1029 | 149860                  | CC                              | TT              | 1946991109               |
| SNP_P4_151554_150156 | NW_004516344.1 | Scaffold1029 | 150156                  | AA                              | GG              | 1946991111               |
| SNP_P4_151555_150162 | NW_004516344.1 | Scaffold1029 | 150162                  | AA                              | GG              | 1946991113               |
| SNP_P4_151556_180    | NW_004516345.1 | Scaffold1032 | 180                     | GG                              | AA              | 1946991115               |
| SNP_P4_151557_2317   | NW_004516345.1 | Scaffold1032 | 2317                    | TT                              | CC              | 1946991117               |
| SNP_P4_151558_22585  | NW_004516345.1 | Scaffold1032 | 22585                   | CC                              | AA              | 1946991119               |
| SNP_P4_151559_22669  | NW_004516345.1 | Scaffold1032 | 22669                   | GG                              | AA              | 1946991121               |
| SNP_P4_151560_22889  | NW_004516345.1 | Scaffold1032 | 22889                   | AA                              | CC              | 1946991123               |
| SNP_P4_151561_23182  | NW_004516345.1 | Scaffold1032 | 23182                   | TT                              | GG              | 1946991125               |
| SNP_P4_151562_24836  | NW_004516345.1 | Scaffold1032 | 24836                   | TT                              | AA              | 1946991127               |
| SNP_P4_151563_24838  | NW_004516345.1 | Scaffold1032 | 24838                   | GG                              | AA              | 1946991129               |
| SNP_P4_151564_24841  | NW_004516345.1 | Scaffold1032 | 24841                   | AA                              | CC              | 1946991131               |
| SNP_P4_151565_25355  | NW_004516345.1 | Scaffold1032 | 25355                   | TT                              | AA              | 1946991133               |
| SNP_P4_151566_25356  | NW_004516345.1 | Scaffold1032 | 25356                   | TT                              | CC              | 1946991135               |
| SNP_P4_151567_1175   | NW_004516347.1 | Scaffold1034 | 1175                    | CC                              | GG              | 1946991137               |
| SNP_P4_151568_1208   | NW_004516347.1 | Scaffold1034 | 1208                    | CC                              | AA              | 1946991139               |
| SNP_P4_151569_1209   | NW_004516347.1 | Scaffold1034 | 1209                    | AA                              | TT              | 1946991141               |
| SNP_P4_151570_1243   | NW_004516347.1 | Scaffold1034 | 1243                    | TT                              | CC              | 1946991143               |
| SNP_P4_151571_1266   | NW_004516347.1 | Scaffold1034 | 1266                    | GG                              | AA              | 1946991145               |
| SNP_P4_151572_1298   | NW_004516347.1 | Scaffold1034 | 1298                    | GG                              | CC              | 1946991147               |
| SNP_P4_151573_1580   | NW_004516347.1 | Scaffold1034 | 1580                    | GG                              | AA              | 1946991149               |
| SNP_P4_151574_7088   | NW_004516347.1 | Scaffold1034 | 7088                    | GG                              | CC              | 1946991151               |
| SNP_P4_151575_8941   | NW_004516347.1 | Scaffold1034 | 8941                    | CC                              | TT              | 1946991153               |
| SNP_P4_151576_9111   | NW_004516347.1 | Scaffold1034 | 9111                    | CC                              | AA              | 1946991155               |
| SNP_P4_151577_9192   | NW_004516347.1 | Scaffold1034 | 9192                    | GG                              | AA              | 1946991157               |
| SNP_P4_151578_9204   | NW_004516347.1 | Scaffold1034 | 9204                    | GG                              | AA              | 1946991159               |
| SNP_P4_151579_9276   | NW_004516347.1 | Scaffold1034 | 9276                    | TT                              | GG              | 1946991161               |
| SNP_P4_151580_9291   | NW_004516347.1 | Scaffold1034 | 9291                    | CC                              | TT              | 1946991163               |

| SNPs IDs            | Chromosome IDs | Chromosomes  | Physical positions (bp) | CDC Frontier (Reference genome) | (ILWC46 & LPNB) | NCBI SNPdb Accession IDs |
|---------------------|----------------|--------------|-------------------------|---------------------------------|-----------------|--------------------------|
| SNP_P4_151581_9657  | NW_004516347.1 | Scaffold1034 | 9657                    | AA                              | GG              | 1946991165               |
| SNP_P4_151582_10068 | NW_004516347.1 | Scaffold1034 | 10068                   | AA                              | GG              | 1946991167               |
| SNP_P4_151583_10383 | NW_004516347.1 | Scaffold1034 | 10383                   | AA                              | GG              | 1946991169               |
| SNP_P4_151584_13347 | NW_004516347.1 | Scaffold1034 | 13347                   | CC                              | AA              | 1946991171               |
| SNP_P4_151585_13977 | NW_004516347.1 | Scaffold1034 | 13977                   | CC                              | TT              | 1946991173               |
| SNP_P4_151586_28381 | NW_004516347.1 | Scaffold1034 | 28381                   | CC                              | TT              | 1946991175               |
| SNP_P4_151587_28469 | NW_004516347.1 | Scaffold1034 | 28469                   | CC                              | TT              | 1946991176               |
| SNP_P4_151588_29606 | NW_004516347.1 | Scaffold1034 | 29606                   | AA                              | CC              | 1946991178               |
| SNP_P4_151589_36311 | NW_004516347.1 | Scaffold1034 | 36311                   | TT                              | CC              | 1946991180               |
| SNP_P4_151590_39469 | NW_004516347.1 | Scaffold1034 | 39469                   | TT                              | AA              | 1946991182               |
| SNP_P4_151591_39496 | NW_004516347.1 | Scaffold1034 | 39496                   | AA                              | GG              | 1946991184               |
| SNP_P4_151592_39497 | NW_004516347.1 | Scaffold1034 | 39497                   | CC                              | AA              | 1946991186               |
| SNP_P4_151593_39914 | NW_004516347.1 | Scaffold1034 | 39914                   | AA                              | GG              | 1946991188               |
| SNP_P4_151594_40447 | NW_004516347.1 | Scaffold1034 | 40447                   | TT                              | CC              | 1946991190               |
| SNP_P4_151595_40717 | NW_004516347.1 | Scaffold1034 | 40717                   | AA                              | GG              | 1946991192               |
| SNP_P4_151596_42442 | NW_004516347.1 | Scaffold1034 | 42442                   | GG                              | AA              | 1946991194               |
| SNP_P4_151597_42826 | NW_004516347.1 | Scaffold1034 | 42826                   | AA                              | TT              | 1946991195               |
| SNP_P4_151598_45152 | NW_004516347.1 | Scaffold1034 | 45152                   | TT                              | AA              | 1946991197               |
| SNP_P4_151599_45639 | NW_004516347.1 | Scaffold1034 | 45639                   | GG                              | AA              | 1946991199               |
| SNP_P4_151600_46156 | NW_004516347.1 | Scaffold1034 | 46156                   | AA                              | TT              | 1946991201               |
| SNP_P4_151601_46385 | NW_004516347.1 | Scaffold1034 | 46385                   | TT                              | GG              | 1946991203               |
| SNP_P4_151602_46722 | NW_004516347.1 | Scaffold1034 | 46722                   | TT                              | CC              | 1946991205               |
| SNP_P4_151603_46758 | NW_004516347.1 | Scaffold1034 | 46758                   | GG                              | TT              | 1946991207               |
| SNP_P4_151604_50558 | NW_004516347.1 | Scaffold1034 | 50558                   | AA                              | GG              | 1946991209               |
| SNP_P4_151605_51367 | NW_004516347.1 | Scaffold1034 | 51367                   | TT                              | CC              | 1946991211               |
| SNP_P4_151606_60710 | NW_004516347.1 | Scaffold1034 | 60710                   | AA                              | GG              | 1946991213               |
| SNP_P4_151607_60732 | NW_004516347.1 | Scaffold1034 | 60732                   | AA                              | CC              | 1946991215               |
| SNP_P4_151608_60742 | NW_004516347.1 | Scaffold1034 | 60742                   | TT                              | CC              | 1946991217               |
| SNP_P4_151609_60757 | NW_004516347.1 | Scaffold1034 | 60757                   | TT                              | CC              | 1946991219               |
| SNP_P4_151610_66813 | NW_004516347.1 | Scaffold1034 | 66813                   | TT                              | CC              | 1946991221               |
| SNP_P4_151611_74029 | NW_004516347.1 | Scaffold1034 | 74029                   | TT                              | GG              | 1946991223               |
| SNP_P4_151612_76770 | NW_004516347.1 | Scaffold1034 | 76770                   | TT                              | AA              | 1946991225               |
| SNP_P4_151614_504   | NW_004516348.1 | Scaffold1035 | 504                     | CC                              | TT              | 1946991227               |
| SNP_P4_151615_517   | NW_004516348.1 | Scaffold1035 | 517                     | AA                              | TT              | 1946991229               |
| SNP_P4_151616_821   | NW_004516348.1 | Scaffold1035 | 821                     | CC                              | TT              | 1946991231               |
| SNP_P4_151617_947   | NW_004516348.1 | Scaffold1035 | 947                     | TT                              | GG              | 1946991233               |
| SNP_P4_151618_1158  | NW_004516348.1 | Scaffold1035 | 1158                    | GG                              | AA              | 1946991235               |
| SNP_P4_151619_1337  | NW_004516348.1 | Scaffold1035 | 1337                    | TT                              | CC              | 1946991237               |
| SNP_P4_151620_1441  | NW_004516348.1 | Scaffold1035 | 1441                    | GG                              | CC              | 1946991239               |
| SNP_P4_151621_1586  | NW_004516348.1 | Scaffold1035 | 1586                    | GG                              | CC              | 1946991241               |
| SNP_P4_151623_1846  | NW_004516348.1 | Scaffold1035 | 1846                    | TT                              | GG              | 1946991243               |
| SNP_P4_151624_1628  | NW_004516349.1 | Scaffold1036 | 1628                    | AA                              | TT              | 1946991245               |

| SNPs IDs            | Chromosome IDs | Chromosomes  | Physical positions (bp) | CDC Frontier (Reference genome) | (ILWC46 & LPNB) | NCBI SNPdb Accession IDs |
|---------------------|----------------|--------------|-------------------------|---------------------------------|-----------------|--------------------------|
| SNP_P4_151625_6461  | NW_004516349.1 | Scaffold1036 | 6461                    | TT                              | GG              | 1946991247               |
| SNP_P4_151626_10361 | NW_004516349.1 | Scaffold1036 | 10361                   | GG                              | CC              | 1946991249               |
| SNP_P4_151627_24040 | NW_004516349.1 | Scaffold1036 | 24040                   | GG                              | CC              | 1946991251               |
| SNP_P4_151628_37452 | NW_004516349.1 | Scaffold1036 | 37452                   | AA                              | TT              | 1946991253               |
| SNP_P4_151629_43779 | NW_004516349.1 | Scaffold1036 | 43779                   | AA                              | CC              | 1946991255               |
| SNP_P4_151630_45874 | NW_004516349.1 | Scaffold1036 | 45874                   | CC                              | AA              | 1946991257               |
| SNP_P4_151631_45926 | NW_004516349.1 | Scaffold1036 | 45926                   | GG                              | AA              | 1946991259               |
| SNP_P4_151632_45939 | NW_004516349.1 | Scaffold1036 | 45939                   | GG                              | CC              | 1946991261               |
| SNP_P4_151633_45942 | NW_004516349.1 | Scaffold1036 | 45942                   | AA                              | TT              | 1946991263               |
| SNP_P4_151634_46111 | NW_004516349.1 | Scaffold1036 | 46111                   | AA                              | GG              | 1946991265               |
| SNP_P4_151635_46114 | NW_004516349.1 | Scaffold1036 | 46114                   | TT                              | CC              | 1946991267               |
| SNP_P4_151636_46160 | NW_004516349.1 | Scaffold1036 | 46160                   | GG                              | TT              | 1946991269               |
| SNP_P4_151637_46206 | NW_004516349.1 | Scaffold1036 | 46206                   | CC                              | TT              | 1946991271               |
| SNP_P4_151638_46238 | NW_004516349.1 | Scaffold1036 | 46238                   | AA                              | GG              | 1946991273               |
| SNP_P4_151639_46329 | NW_004516349.1 | Scaffold1036 | 46329                   | TT                              | GG              | 1946991275               |
| SNP_P4_151640_60401 | NW_004516349.1 | Scaffold1036 | 60401                   | GG                              | TT              | 1946991277               |
| SNP_P4_151641_60433 | NW_004516349.1 | Scaffold1036 | 60433                   | CC                              | TT              | 1946991279               |
| SNP_P4_151642_60434 | NW_004516349.1 | Scaffold1036 | 60434                   | TT                              | AA              | 1946991281               |
| SNP_P4_151643_60446 | NW_004516349.1 | Scaffold1036 | 60446                   | TT                              | GG              | 1946991283               |
| SNP_P4_151644_60496 | NW_004516349.1 | Scaffold1036 | 60496                   | TT                              | AA              | 1946991285               |
| SNP_P4_151645_60515 | NW_004516349.1 | Scaffold1036 | 60515                   | AA                              | TT              | 1946991287               |
| SNP_P4_151646_60574 | NW_004516349.1 | Scaffold1036 | 60574                   | TT                              | AA              | 1946991289               |
| SNP_P4_151647_65767 | NW_004516349.1 | Scaffold1036 | 65767                   | GG                              | AA              | 1946991291               |
| SNP_P4_151648_74748 | NW_004516349.1 | Scaffold1036 | 74748                   | TT                              | CC              | 1946991293               |
| SNP_P4_151650_75472 | NW_004516349.1 | Scaffold1036 | 75472                   | CC                              | TT              | 1946991295               |
| SNP_P4_151652_77493 | NW_004516349.1 | Scaffold1036 | 77493                   | AA                              | GG              | 1946991297               |
| SNP_P4_151653_77547 | NW_004516349.1 | Scaffold1036 | 77547                   | CC                              | TT              | 1946991299               |
| SNP_P4_151654_77595 | NW_004516349.1 | Scaffold1036 | 77595                   | TT                              | AA              | 1946991301               |
| SNP_P4_151655_78000 | NW_004516349.1 | Scaffold1036 | 78000                   | CC                              | AA              | 1946991303               |
| SNP_P4_151656_78148 | NW_004516349.1 | Scaffold1036 | 78148                   | AA                              | GG              | 1946991305               |
| SNP_P4_151657_78637 | NW_004516349.1 | Scaffold1036 | 78637                   | GG                              | AA              | 1946991307               |
| SNP_P4_151658_85156 | NW_004516349.1 | Scaffold1036 | 85156                   | AA                              | TT              | 1946991309               |
| SNP_P4_151659_86778 | NW_004516349.1 | Scaffold1036 | 86778                   | AA                              | CC              | 1946991311               |
| SNP_P4_151660_87052 | NW_004516349.1 | Scaffold1036 | 87052                   | TT                              | AA              | 1946991313               |
| SNP_P4_151661_87056 | NW_004516349.1 | Scaffold1036 | 87056                   | TT                              | GG              | 1946991315               |
| SNP_P4_151662_93798 | NW_004516349.1 | Scaffold1036 | 93798                   | GG                              | CC              | 1946991317               |
| SNP_P4_151663_93800 | NW_004516349.1 | Scaffold1036 | 93800                   | TT                              | AA              | 1946991319               |
| SNP_P4_151664_93818 | NW_004516349.1 | Scaffold1036 | 93818                   | AA                              | CC              | 1946991321               |
| SNP_P4_151665_93821 | NW_004516349.1 | Scaffold1036 | 93821                   | CC                              | AA              | 1946991323               |
| SNP_P4_151666_93823 | NW_004516349.1 | Scaffold1036 | 93823                   | TT                              | GG              | 1946991325               |
| SNP_P4_151667_94272 | NW_004516349.1 | Scaffold1036 | 94272                   | AA                              | GG              | 1946991327               |
| SNP_P4_151668_94283 | NW_004516349.1 | Scaffold1036 | 94283                   | TT                              | CC              | 1946991329               |



| SNPs IDs             | Chromosome IDs | Chromosomes  | Physical positions (bp) | CDC Frontier (Reference genome) | (ILWC46 & LPNB) | NCBI SNPdb Accession IDs |
|----------------------|----------------|--------------|-------------------------|---------------------------------|-----------------|--------------------------|
| SNP_P4_151669_94291  | NW_004516349.1 | Scaffold1036 | 94291                   | AA                              | CC              | 1946991331               |
| SNP_P4_151670_98507  | NW_004516349.1 | Scaffold1036 | 98507                   | CC                              | TT              | 1946991335               |
| SNP_P4_151671_98519  | NW_004516349.1 | Scaffold1036 | 98519                   | GG                              | AA              | 1946991337               |
| SNP_P4_151673_99789  | NW_004516349.1 | Scaffold1036 | 99789                   | TT                              | AA              | 1946991339               |
| SNP_P4_151674_99825  | NW_004516349.1 | Scaffold1036 | 99825                   | AA                              | GG              | 1946991341               |
| SNP_P4_151675_100170 | NW_004516349.1 | Scaffold1036 | 100170                  | AA                              | CC              | 1946991343               |
| SNP_P4_151676_100223 | NW_004516349.1 | Scaffold1036 | 100223                  | TT                              | AA              | 1946991345               |
| SNP_P4_151677_102220 | NW_004516349.1 | Scaffold1036 | 102220                  | AA                              | GG              | 1946991347               |
| SNP_P4_151678_102283 | NW_004516349.1 | Scaffold1036 | 102283                  | GG                              | AA              | 1946991349               |
| SNP_P4_151679_102373 | NW_004516349.1 | Scaffold1036 | 102373                  | AA                              | TT              | 1946991351               |
| SNP_P4_151680_102512 | NW_004516349.1 | Scaffold1036 | 102512                  | GG                              | TT              | 1946991353               |
| SNP_P4_151681_102522 | NW_004516349.1 | Scaffold1036 | 102522                  | AA                              | GG              | 1946991355               |
| SNP_P4_151682_102585 | NW_004516349.1 | Scaffold1036 | 102585                  | AA                              | CC              | 1946991357               |
| SNP_P4_151683_102609 | NW_004516349.1 | Scaffold1036 | 102609                  | TT                              | AA              | 1946991359               |
| SNP_P4_151684_102620 | NW_004516349.1 | Scaffold1036 | 102620                  | GG                              | TT              | 1946991361               |
| SNP_P4_151685_102636 | NW_004516349.1 | Scaffold1036 | 102636                  | AA                              | GG              | 1946991363               |
| SNP_P4_151686_102639 | NW_004516349.1 | Scaffold1036 | 102639                  | TT                              | CC              | 1946991365               |
| SNP_P4_151687_102655 | NW_004516349.1 | Scaffold1036 | 102655                  | GG                              | AA              | 1946991367               |
| SNP_P4_151688_102671 | NW_004516349.1 | Scaffold1036 | 102671                  | CC                              | TT              | 1946991369               |
| SNP_P4_151689_102956 | NW_004516349.1 | Scaffold1036 | 102956                  | TT                              | GG              | 1946991371               |
| SNP_P4_151690_102961 | NW_004516349.1 | Scaffold1036 | 102961                  | AA                              | GG              | 1946991373               |
| SNP_P4_151691_102969 | NW_004516349.1 | Scaffold1036 | 102969                  | TT                              | CC              | 1946991375               |
| SNP_P4_151692_103012 | NW_004516349.1 | Scaffold1036 | 103012                  | GG                              | TT              | 1946991377               |
| SNP_P4_151693_103024 | NW_004516349.1 | Scaffold1036 | 103024                  | TT                              | GG              | 1946991379               |
| SNP_P4_151694_103080 | NW_004516349.1 | Scaffold1036 | 103080                  | TT                              | CC              | 1946991381               |
| SNP_P4_151695_103132 | NW_004516349.1 | Scaffold1036 | 103132                  | CC                              | TT              | 1946991383               |
| SNP_P4_151696_103139 | NW_004516349.1 | Scaffold1036 | 103139                  | GG                              | TT              | 1946991385               |
| SNP_P4_151697_103167 | NW_004516349.1 | Scaffold1036 | 103167                  | AA                              | GG              | 1946991387               |
| SNP_P4_151698_103192 | NW_004516349.1 | Scaffold1036 | 103192                  | TT                              | CC              | 1946991389               |
| SNP_P4_151699_103201 | NW_004516349.1 | Scaffold1036 | 103201                  | AA                              | GG              | 1946991391               |
| SNP_P4_151700_115004 | NW_004516349.1 | Scaffold1036 | 115004                  | AA                              | GG              | 1946991393               |
| SNP_P4_151701_127023 | NW_004516349.1 | Scaffold1036 | 127023                  | GG                              | CC              | 1946991395               |
| SNP_P4_151702_127060 | NW_004516349.1 | Scaffold1036 | 127060                  | TT                              | CC              | 1946991397               |
| SNP_P4_151703_130811 | NW_004516349.1 | Scaffold1036 | 130811                  | AA                              | TT              | 1946991399               |
| SNP_P4_151704_130826 | NW_004516349.1 | Scaffold1036 | 130826                  | TT                              | CC              | 1946991401               |
| SNP_P4_151705_130827 | NW_004516349.1 | Scaffold1036 | 130827                  | TT                              | GG              | 1946991403               |
| SNP_P4_151706_130831 | NW_004516349.1 | Scaffold1036 | 130831                  | CC                              | AA              | 1946991405               |
| SNP_P4_151707_130850 | NW_004516349.1 | Scaffold1036 | 130850                  | CC                              | GG              | 1946991407               |
| SNP_P4_151708_140362 | NW_004516349.1 | Scaffold1036 | 140362                  | GG                              | CC              | 1946991409               |
| SNP_P4_151709_143991 | NW_004516349.1 | Scaffold1036 | 143991                  | TT                              | AA              | 1946991411               |
| SNP_P4_151710_144112 | NW_004516349.1 | Scaffold1036 | 144112                  | GG                              | AA              | 1946991413               |
| SNP_P4_151711_144307 | NW_004516349.1 | Scaffold1036 | 144307                  | GG                              | CC              | 1946991415               |

| SNPs IDs             | Chromosome IDs | Chromosomes  | Physical positions (bp) | CDC Frontier (Reference genome) | (ILWC46 & LPNB) | NCBI SNPdb Accession IDs |
|----------------------|----------------|--------------|-------------------------|---------------------------------|-----------------|--------------------------|
| SNP_P4_151712_157238 | NW_004516349.1 | Scaffold1036 | 157238                  | GG                              | AA              | 1946991417               |
| SNP_P4_151713_166305 | NW_004516349.1 | Scaffold1036 | 166305                  | GG                              | AA              | 1946991419               |
| SNP_P4_151714_169539 | NW_004516349.1 | Scaffold1036 | 169539                  | CC                              | AA              | 1946991421               |
| SNP_P4_151715_169653 | NW_004516349.1 | Scaffold1036 | 169653                  | TT                              | AA              | 1946991423               |
| SNP_P4_151716_171531 | NW_004516349.1 | Scaffold1036 | 171531                  | TT                              | AA              | 1946991425               |
| SNP_P4_151717_173771 | NW_004516349.1 | Scaffold1036 | 173771                  | AA                              | GG              | 1946991427               |
| SNP_P4_151718_177390 | NW_004516349.1 | Scaffold1036 | 177390                  | TT                              | AA              | 1946991429               |
| SNP_P4_151719_188198 | NW_004516349.1 | Scaffold1036 | 188198                  | AA                              | GG              | 1946991431               |
| SNP_P4_151720_194687 | NW_004516349.1 | Scaffold1036 | 194687                  | AA                              | GG              | 1946991433               |
| SNP_P4_151722_196841 | NW_004516349.1 | Scaffold1036 | 196841                  | GG                              | AA              | 1946991435               |
| SNP_P4_151724_203988 | NW_004516349.1 | Scaffold1036 | 203988                  | GG                              | TT              | 1946991437               |
| SNP_P4_151726_204756 | NW_004516349.1 | Scaffold1036 | 204756                  | GG                              | AA              | 1946991439               |
| SNP_P4_151727_204795 | NW_004516349.1 | Scaffold1036 | 204795                  | CC                              | TT              | 1946991441               |
| SNP_P4_151728_204938 | NW_004516349.1 | Scaffold1036 | 204938                  | AA                              | GG              | 1946991443               |
| SNP_P4_151729_204973 | NW_004516349.1 | Scaffold1036 | 204973                  | AA                              | TT              | 1946991445               |
| SNP_P4_151730_204984 | NW_004516349.1 | Scaffold1036 | 204984                  | AA                              | TT              | 1946991447               |
| SNP_P4_151732_205070 | NW_004516349.1 | Scaffold1036 | 205070                  | CC                              | TT              | 1946991449               |
| SNP_P4_151733_205080 | NW_004516349.1 | Scaffold1036 | 205080                  | TT                              | CC              | 1946991451               |
| SNP_P4_151734_205087 | NW_004516349.1 | Scaffold1036 | 205087                  | CC                              | AA              | 1946991453               |
| SNP_P4_151735_205967 | NW_004516349.1 | Scaffold1036 | 205967                  | GG                              | CC              | 1946991455               |
| SNP_P4_151736_207651 | NW_004516349.1 | Scaffold1036 | 207651                  | CC                              | TT              | 1946991457               |
| SNP_P4_151737_213060 | NW_004516349.1 | Scaffold1036 | 213060                  | AA                              | GG              | 1946991459               |
| SNP_P4_151738_213089 | NW_004516349.1 | Scaffold1036 | 213089                  | AA                              | GG              | 1946991461               |
| SNP_P4_151739_213102 | NW_004516349.1 | Scaffold1036 | 213102                  | TT                              | AA              | 1946991462               |
| SNP_P4_151740_214737 | NW_004516349.1 | Scaffold1036 | 214737                  | TT                              | CC              | 1946991464               |
| SNP_P4_151741_223832 | NW_004516349.1 | Scaffold1036 | 223832                  | CC                              | AA              | 1946991466               |
| SNP_P4_151742_224263 | NW_004516349.1 | Scaffold1036 | 224263                  | TT                              | AA              | 1946991468               |
| SNP_P4_151743_224391 | NW_004516349.1 | Scaffold1036 | 224391                  | TT                              | GG              | 1946991470               |
| SNP_P4_151744_224420 | NW_004516349.1 | Scaffold1036 | 224420                  | TT                              | CC              | 1946991472               |
| SNP_P4_151745_224421 | NW_004516349.1 | Scaffold1036 | 224421                  | CC                              | AA              | 1946991474               |
| SNP_P4_151746_224432 | NW_004516349.1 | Scaffold1036 | 224432                  | AA                              | CC              | 1946991476               |
| SNP_P4_151747_224441 | NW_004516349.1 | Scaffold1036 | 224441                  | AA                              | CC              | 1946991477               |
| SNP_P4_151748_224443 | NW_004516349.1 | Scaffold1036 | 224443                  | GG                              | AA              | 1946991479               |
| SNP_P4_151749_224727 | NW_004516349.1 | Scaffold1036 | 224727                  | CC                              | GG              | 1946991481               |
| SNP_P4_151750_224809 | NW_004516349.1 | Scaffold1036 | 224809                  | TT                              | AA              | 1946991483               |
| SNP_P4_151751_225057 | NW_004516349.1 | Scaffold1036 | 225057                  | CC                              | GG              | 1946991485               |
| SNP_P4_151752_225109 | NW_004516349.1 | Scaffold1036 | 225109                  | CC                              | GG              | 1946991487               |
| SNP_P4_151753_225278 | NW_004516349.1 | Scaffold1036 | 225278                  | TT                              | CC              | 1946991489               |
| SNP_P4_151754_225292 | NW_004516349.1 | Scaffold1036 | 225292                  | GG                              | TT              | 1946991491               |
| SNP_P4_151755_225368 | NW_004516349.1 | Scaffold1036 | 225368                  | AA                              | CC              | 1946991493               |
| SNP_P4_151756_225602 | NW_004516349.1 | Scaffold1036 | 225602                  | AA                              | GG              | 1946991495               |
| SNP_P4_151757_225621 | NW_004516349.1 | Scaffold1036 | 225621                  | TT                              | CC              | 1946991497               |

| SNPs IDs             | Chromosome IDs | Chromosomes  | Physical positions (bp) | CDC Frontier (Reference genome) | (ILWC46 & LPNB) | NCBI SNPdb Accession IDs |
|----------------------|----------------|--------------|-------------------------|---------------------------------|-----------------|--------------------------|
| SNP_P4_151759_233260 | NW_004516349.1 | Scaffold1036 | 233260                  | CC                              | AA              | 1946991499               |
| SNP_P4_151760_233272 | NW_004516349.1 | Scaffold1036 | 233272                  | TT                              | AA              | 1946991501               |
| SNP_P4_151761_233405 | NW_004516349.1 | Scaffold1036 | 233405                  | TT                              | GG              | 1946991503               |
| SNP_P4_151762_236063 | NW_004516349.1 | Scaffold1036 | 236063                  | AA                              | TT              | 1946991505               |
| SNP_P4_151763_236147 | NW_004516349.1 | Scaffold1036 | 236147                  | CC                              | GG              | 1946991507               |
| SNP_P4_151764_236437 | NW_004516349.1 | Scaffold1036 | 236437                  | TT                              | GG              | 1946991509               |
| SNP_P4_151766_236469 | NW_004516349.1 | Scaffold1036 | 236469                  | CC                              | GG              | 1946991511               |
| SNP_P4_151767_236479 | NW_004516349.1 | Scaffold1036 | 236479                  | TT                              | AA              | 1946991513               |
| SNP_P4_151768_236592 | NW_004516349.1 | Scaffold1036 | 236592                  | TT                              | CC              | 1946991515               |
| SNP_P4_151769_236989 | NW_004516349.1 | Scaffold1036 | 236989                  | AA                              | CC              | 1946991517               |
| SNP_P4_151770_236992 | NW_004516349.1 | Scaffold1036 | 236992                  | CC                              | TT              | 1946991519               |
| SNP_P4_151771_236993 | NW_004516349.1 | Scaffold1036 | 236993                  | GG                              | CC              | 1946991521               |
| SNP_P4_151773_120    | NW_004516350.1 | Scaffold1038 | 120                     | AA                              | GG              | 1946991523               |
| SNP_P4_151774_273    | NW_004516350.1 | Scaffold1038 | 273                     | TT                              | GG              | 1946991525               |
| SNP_P4_151775_345    | NW_004516350.1 | Scaffold1038 | 345                     | TT                              | CC              | 1946991527               |
| SNP_P4_151776_387    | NW_004516350.1 | Scaffold1038 | 387                     | AA                              | CC              | 1946991529               |
| SNP_P4_151777_389    | NW_004516350.1 | Scaffold1038 | 389                     | CC                              | TT              | 1946991531               |
| SNP_P4_151778_554    | NW_004516350.1 | Scaffold1038 | 554                     | AA                              | GG              | 1946991533               |
| SNP_P4_151779_589    | NW_004516350.1 | Scaffold1038 | 589                     | TT                              | AA              | 1946991535               |
| SNP_P4_151780_650    | NW_004516350.1 | Scaffold1038 | 650                     | AA                              | TT              | 1946991537               |
| SNP_P4_151782_726    | NW_004516350.1 | Scaffold1038 | 726                     | GG                              | TT              | 1946991539               |
| SNP_P4_151783_1591   | NW_004516350.1 | Scaffold1038 | 1591                    | TT                              | AA              | 1946991541               |
| SNP_P4_151784_1593   | NW_004516350.1 | Scaffold1038 | 1593                    | GG                              | AA              | 1946991543               |
| SNP_P4_151785_1634   | NW_004516350.1 | Scaffold1038 | 1634                    | GG                              | TT              | 1946991545               |
| SNP_P4_151786_1664   | NW_004516350.1 | Scaffold1038 | 1664                    | TT                              | GG              | 1946991547               |
| SNP_P4_151787_1683   | NW_004516350.1 | Scaffold1038 | 1683                    | TT                              | CC              | 1946991549               |
| SNP_P4_151788_1699   | NW_004516350.1 | Scaffold1038 | 1699                    | CC                              | TT              | 1946991551               |
| SNP_P4_151789_2227   | NW_004516350.1 | Scaffold1038 | 2227                    | AA                              | TT              | 1946991553               |
| SNP_P4_151790_2268   | NW_004516350.1 | Scaffold1038 | 2268                    | TT                              | GG              | 1946991555               |
| SNP_P4_151791_2348   | NW_004516350.1 | Scaffold1038 | 2348                    | TT                              | AA              | 1946991557               |
| SNP_P4_151792_2444   | NW_004516350.1 | Scaffold1038 | 2444                    | AA                              | CC              | 1946991559               |
| SNP_P4_151793_2445   | NW_004516350.1 | Scaffold1038 | 2445                    | TT                              | GG              | 1946991561               |
| SNP_P4_151795_2566   | NW_004516350.1 | Scaffold1038 | 2566                    | CC                              | TT              | 1946991563               |
| SNP_P4_151796_2741   | NW_004516350.1 | Scaffold1038 | 2741                    | CC                              | TT              | 1946991565               |
| SNP_P4_151797_2772   | NW_004516350.1 | Scaffold1038 | 2772                    | GG                              | AA              | 1946991567               |
| SNP_P4_151798_2239   | NW_004516351.1 | Scaffold1039 | 2239                    | TT                              | CC              | 1946991569               |
| SNP_P4_151799_2631   | NW_004516351.1 | Scaffold1039 | 2631                    | TT                              | GG              | 1946991571               |
| SNP_P4_151800_2997   | NW_004516351.1 | Scaffold1039 | 2997                    | AA                              | GG              | 1946991573               |
| SNP_P4_151801_3282   | NW_004516351.1 | Scaffold1039 | 3282                    | GG                              | AA              | 1946991575               |
| SNP_P4_151802_3413   | NW_004516351.1 | Scaffold1039 | 3413                    | AA                              | GG              | 1946991577               |
| SNP_P4_151803_3509   | NW_004516351.1 | Scaffold1039 | 3509                    | AA                              | CC              | 1946991579               |
| SNP_P4_151804_3649   | NW_004516351.1 | Scaffold1039 | 3649                    | TT                              | AA              | 1946991581               |

| SNPs IDs            | Chromosome IDs | Chromosomes  | Physical positions (bp) | CDC Frontier (Reference genome) | (ILWC46 & LPNB) | NCBI SNPdb Accession IDs |
|---------------------|----------------|--------------|-------------------------|---------------------------------|-----------------|--------------------------|
| SNP_P4_151805_3804  | NW_004516351.1 | Scaffold1039 | 3804                    | CC                              | TT              | 1946991583               |
| SNP_P4_151806_3939  | NW_004516351.1 | Scaffold1039 | 3939                    | AA                              | GG              | 1946991585               |
| SNP_P4_151807_4084  | NW_004516351.1 | Scaffold1039 | 4084                    | AA                              | GG              | 1946991587               |
| SNP_P4_151808_4245  | NW_004516351.1 | Scaffold1039 | 4245                    | TT                              | GG              | 1946991589               |
| SNP_P4_151809_4257  | NW_004516351.1 | Scaffold1039 | 4257                    | TT                              | CC              | 1946991591               |
| SNP_P4_151810_4293  | NW_004516351.1 | Scaffold1039 | 4293                    | AA                              | TT              | 1946991593               |
| SNP_P4_151811_4336  | NW_004516351.1 | Scaffold1039 | 4336                    | TT                              | CC              | 1946991595               |
| SNP_P4_151812_4339  | NW_004516351.1 | Scaffold1039 | 4339                    | AA                              | TT              | 1946991597               |
| SNP_P4_151813_4374  | NW_004516351.1 | Scaffold1039 | 4374                    | CC                              | TT              | 1946991599               |
| SNP_P4_151815_4498  | NW_004516351.1 | Scaffold1039 | 4498                    | AA                              | GG              | 1946991601               |
| SNP_P4_151816_10133 | NW_004516351.1 | Scaffold1039 | 10133                   | GG                              | AA              | 1946991603               |
| SNP_P4_151817_10391 | NW_004516351.1 | Scaffold1039 | 10391                   | TT                              | CC              | 1946991605               |
| SNP_P4_151818_10428 | NW_004516351.1 | Scaffold1039 | 10428                   | AA                              | GG              | 1946991607               |
| SNP_P4_151819_10447 | NW_004516351.1 | Scaffold1039 | 10447                   | GG                              | AA              | 1946991609               |
| SNP_P4_151820_12619 | NW_004516351.1 | Scaffold1039 | 12619                   | AA                              | GG              | 1946991611               |
| SNP_P4_151821_12751 | NW_004516351.1 | Scaffold1039 | 12751                   | GG                              | AA              | 1946991613               |
| SNP_P4_151822_12795 | NW_004516351.1 | Scaffold1039 | 12795                   | CC                              | AA              | 1946991615               |
| SNP_P4_151823_13102 | NW_004516351.1 | Scaffold1039 | 13102                   | CC                              | AA              | 1946991617               |
| SNP_P4_151824_32243 | NW_004516351.1 | Scaffold1039 | 32243                   | GG                              | AA              | 1946991619               |
| SNP_P4_151825_32298 | NW_004516351.1 | Scaffold1039 | 32298                   | AA                              | CC              | 1946991621               |
| SNP_P4_151826_32307 | NW_004516351.1 | Scaffold1039 | 32307                   | CC                              | AA              | 1946991623               |
| SNP_P4_151827_32318 | NW_004516351.1 | Scaffold1039 | 32318                   | TT                              | AA              | 1946991625               |
| SNP_P4_151828_32327 | NW_004516351.1 | Scaffold1039 | 32327                   | AA                              | CC              | 1946991627               |
| SNP_P4_151830_32408 | NW_004516351.1 | Scaffold1039 | 32408                   | TT                              | CC              | 1946991629               |
| SNP_P4_151831_32627 | NW_004516351.1 | Scaffold1039 | 32627                   | TT                              | AA              | 1946991631               |
| SNP_P4_151833_40022 | NW_004516351.1 | Scaffold1039 | 40022                   | AA                              | GG              | 1946991633               |
| SNP_P4_151834_40051 | NW_004516351.1 | Scaffold1039 | 40051                   | AA                              | GG              | 1946991635               |
| SNP_P4_151835_40062 | NW_004516351.1 | Scaffold1039 | 40062                   | TT                              | CC              | 1946991637               |
| SNP_P4_151836_40096 | NW_004516351.1 | Scaffold1039 | 40096                   | TT                              | CC              | 1946991639               |
| SNP_P4_151837_40132 | NW_004516351.1 | Scaffold1039 | 40132                   | CC                              | TT              | 1946991641               |
| SNP_P4_151838_40163 | NW_004516351.1 | Scaffold1039 | 40163                   | AA                              | GG              | 1946991643               |
| SNP_P4_151839_40165 | NW_004516351.1 | Scaffold1039 | 40165                   | TT                              | CC              | 1946991645               |
| SNP_P4_151840_40177 | NW_004516351.1 | Scaffold1039 | 40177                   | TT                              | CC              | 1946991647               |
| SNP_P4_151841_40208 | NW_004516351.1 | Scaffold1039 | 40208                   | AA                              | GG              | 1946991649               |
| SNP_P4_151842_40249 | NW_004516351.1 | Scaffold1039 | 40249                   | AA                              | GG              | 1946991651               |
| SNP_P4_151843_40297 | NW_004516351.1 | Scaffold1039 | 40297                   | GG                              | AA              | 1946991653               |
| SNP_P4_151844_40309 | NW_004516351.1 | Scaffold1039 | 40309                   | AA                              | GG              | 1946991655               |
| SNP_P4_151845_40365 | NW_004516351.1 | Scaffold1039 | 40365                   | AA                              | GG              | 1946991657               |
| SNP_P4_151846_40373 | NW_004516351.1 | Scaffold1039 | 40373                   | CC                              | TT              | 1946991659               |
| SNP_P4_151847_40425 | NW_004516351.1 | Scaffold1039 | 40425                   | AA                              | GG              | 1946991661               |
| SNP_P4_151848_40497 | NW_004516351.1 | Scaffold1039 | 40497                   | GG                              | AA              | 1946991663               |
| SNP_P4_151849_40539 | NW_004516351.1 | Scaffold1039 | 40539                   | CC                              | TT              | 1946991665               |

| SNPs IDs            | Chromosome IDs | Chromosomes  | Physical positions (bp) | CDC Frontier (Reference genome) | (ILWC46 & LPNB) | NCBI SNPdb Accession IDs |
|---------------------|----------------|--------------|-------------------------|---------------------------------|-----------------|--------------------------|
| SNP_P4_151850_40542 | NW_004516351.1 | Scaffold1039 | 40542                   | GG                              | AA              | 1946991667               |
| SNP_P4_151851_40554 | NW_004516351.1 | Scaffold1039 | 40554                   | TT                              | CC              | 1946991669               |
| SNP_P4_151852_40569 | NW_004516351.1 | Scaffold1039 | 40569                   | GG                              | AA              | 1946991671               |
| SNP_P4_151853_40574 | NW_004516351.1 | Scaffold1039 | 40574                   | GG                              | AA              | 1946991673               |
| SNP_P4_151854_40602 | NW_004516351.1 | Scaffold1039 | 40602                   | GG                              | AA              | 1946991675               |
| SNP_P4_151855_40812 | NW_004516351.1 | Scaffold1039 | 40812                   | TT                              | AA              | 1946991677               |
| SNP_P4_151856_40920 | NW_004516351.1 | Scaffold1039 | 40920                   | AA                              | GG              | 1946991679               |
| SNP_P4_151857_41007 | NW_004516351.1 | Scaffold1039 | 41007                   | AA                              | GG              | 1946991680               |
| SNP_P4_151858_41049 | NW_004516351.1 | Scaffold1039 | 41049                   | TT                              | CC              | 1946991681               |
| SNP_P4_151859_41085 | NW_004516351.1 | Scaffold1039 | 41085                   | GG                              | AA              | 1946991682               |
| SNP_P4_151860_41124 | NW_004516351.1 | Scaffold1039 | 41124                   | CC                              | AA              | 1946991683               |
| SNP_P4_151861_41167 | NW_004516351.1 | Scaffold1039 | 41167                   | GG                              | AA              | 1946991685               |
| SNP_P4_151862_41260 | NW_004516351.1 | Scaffold1039 | 41260                   | TT                              | CC              | 1946991687               |
| SNP_P4_151863_41262 | NW_004516351.1 | Scaffold1039 | 41262                   | TT                              | CC              | 1946991689               |
| SNP_P4_151864_41275 | NW_004516351.1 | Scaffold1039 | 41275                   | TT                              | CC              | 1946991691               |
| SNP_P4_151865_41299 | NW_004516351.1 | Scaffold1039 | 41299                   | AA                              | GG              | 1946991693               |
| SNP_P4_151866_41302 | NW_004516351.1 | Scaffold1039 | 41302                   | GG                              | AA              | 1946991695               |
| SNP_P4_151867_41312 | NW_004516351.1 | Scaffold1039 | 41312                   | TT                              | CC              | 1946991697               |
| SNP_P4_151868_41317 | NW_004516351.1 | Scaffold1039 | 41317                   | AA                              | GG              | 1946991699               |
| SNP_P4_151869_41332 | NW_004516351.1 | Scaffold1039 | 41332                   | TT                              | CC              | 1946991701               |
| SNP_P4_151870_41362 | NW_004516351.1 | Scaffold1039 | 41362                   | AA                              | GG              | 1946991703               |
| SNP_P4_151871_41392 | NW_004516351.1 | Scaffold1039 | 41392                   | AA                              | GG              | 1946991705               |
| SNP_P4_151872_41395 | NW_004516351.1 | Scaffold1039 | 41395                   | AA                              | GG              | 1946991707               |
| SNP_P4_151873_41396 | NW_004516351.1 | Scaffold1039 | 41396                   | GG                              | AA              | 1946991709               |
| SNP_P4_151874_42146 | NW_004516351.1 | Scaffold1039 | 42146                   | TT                              | CC              | 1946991711               |
| SNP_P4_151875_42147 | NW_004516351.1 | Scaffold1039 | 42147                   | AA                              | GG              | 1946991713               |
| SNP_P4_151876_42502 | NW_004516351.1 | Scaffold1039 | 42502                   | CC                              | TT              | 1946991715               |
| SNP_P4_151877_43699 | NW_004516351.1 | Scaffold1039 | 43699                   | GG                              | AA              | 1946991717               |
| SNP_P4_151878_43704 | NW_004516351.1 | Scaffold1039 | 43704                   | AA                              | TT              | 1946991719               |
| SNP_P4_151879_43900 | NW_004516351.1 | Scaffold1039 | 43900                   | CC                              | TT              | 1946991721               |
| SNP_P4_151880_44736 | NW_004516351.1 | Scaffold1039 | 44736                   | TT                              | CC              | 1946991723               |
| SNP_P4_151881_44824 | NW_004516351.1 | Scaffold1039 | 44824                   | CC                              | TT              | 1946991725               |
| SNP_P4_151882_44916 | NW_004516351.1 | Scaffold1039 | 44916                   | AA                              | TT              | 1946991727               |
| SNP_P4_151883_44950 | NW_004516351.1 | Scaffold1039 | 44950                   | TT                              | CC              | 1946991729               |
| SNP_P4_151884_45027 | NW_004516351.1 | Scaffold1039 | 45027                   | GG                              | AA              | 1946991731               |
| SNP_P4_151885_45254 | NW_004516351.1 | Scaffold1039 | 45254                   | AA                              | GG              | 1946991733               |
| SNP_P4_151886_45256 | NW_004516351.1 | Scaffold1039 | 45256                   | TT                              | GG              | 1946991735               |
| SNP_P4_151887_45260 | NW_004516351.1 | Scaffold1039 | 45260                   | AA                              | TT              | 1946991737               |
| SNP_P4_151888_45344 | NW_004516351.1 | Scaffold1039 | 45344                   | TT                              | AA              | 1946991739               |
| SNP_P4_151889_45357 | NW_004516351.1 | Scaffold1039 | 45357                   | CC                              | TT              | 1946991741               |
| SNP_P4_151890_45501 | NW_004516351.1 | Scaffold1039 | 45501                   | AA                              | GG              | 1946991743               |
| SNP_P4_151891_45545 | NW_004516351.1 | Scaffold1039 | 45545                   | CC                              | TT              | 1946991745               |

| SNPs IDs            | Chromosome IDs | Chromosomes  | Physical positions (bp) | CDC Frontier (Reference genome) | (ILWC46 & LPNB) | NCBI SNPdb Accession IDs |
|---------------------|----------------|--------------|-------------------------|---------------------------------|-----------------|--------------------------|
| SNP_P4_151892_45966 | NW_004516351.1 | Scaffold1039 | 45966                   | TT                              | GG              | 1946991747               |
| SNP_P4_151893_46003 | NW_004516351.1 | Scaffold1039 | 46003                   | AA                              | TT              | 1946991749               |
| SNP_P4_151894_46028 | NW_004516351.1 | Scaffold1039 | 46028                   | TT                              | CC              | 1946991751               |
| SNP_P4_151895_46104 | NW_004516351.1 | Scaffold1039 | 46104                   | GG                              | AA              | 1946991753               |
| SNP_P4_151896_46147 | NW_004516351.1 | Scaffold1039 | 46147                   | AA                              | TT              | 1946991755               |
| SNP_P4_151897_46149 | NW_004516351.1 | Scaffold1039 | 46149                   | AA                              | TT              | 1946991757               |
| SNP_P4_151898_46239 | NW_004516351.1 | Scaffold1039 | 46239                   | CC                              | GG              | 1946991759               |
| SNP_P4_151899_46301 | NW_004516351.1 | Scaffold1039 | 46301                   | TT                              | AA              | 1946991761               |
| SNP_P4_151900_46306 | NW_004516351.1 | Scaffold1039 | 46306                   | AA                              | TT              | 1946991763               |
| SNP_P4_151901_46648 | NW_004516351.1 | Scaffold1039 | 46648                   | AA                              | GG              | 1946991765               |
| SNP_P4_151902_46819 | NW_004516351.1 | Scaffold1039 | 46819                   | CC                              | TT              | 1946991767               |
| SNP_P4_151903_46827 | NW_004516351.1 | Scaffold1039 | 46827                   | CC                              | AA              | 1946991769               |
| SNP_P4_151904_46866 | NW_004516351.1 | Scaffold1039 | 46866                   | TT                              | CC              | 1946991771               |
| SNP_P4_151905_47488 | NW_004516351.1 | Scaffold1039 | 47488                   | TT                              | CC              | 1946991773               |
| SNP_P4_151906_47606 | NW_004516351.1 | Scaffold1039 | 47606                   | GG                              | TT              | 1946991775               |
| SNP_P4_151907_47715 | NW_004516351.1 | Scaffold1039 | 47715                   | GG                              | AA              | 1946991777               |
| SNP_P4_151908_47724 | NW_004516351.1 | Scaffold1039 | 47724                   | AA                              | GG              | 1946991779               |
| SNP_P4_151909_47762 | NW_004516351.1 | Scaffold1039 | 47762                   | GG                              | AA              | 1946991781               |
| SNP_P4_151910_47824 | NW_004516351.1 | Scaffold1039 | 47824                   | CC                              | TT              | 1946991783               |
| SNP_P4_151911_47860 | NW_004516351.1 | Scaffold1039 | 47860                   | CC                              | TT              | 1946991785               |
| SNP_P4_151912_47947 | NW_004516351.1 | Scaffold1039 | 47947                   | AA                              | GG              | 1946991787               |
| SNP_P4_151913_47973 | NW_004516351.1 | Scaffold1039 | 47973                   | GG                              | AA              | 1946991789               |
| SNP_P4_151914_48009 | NW_004516351.1 | Scaffold1039 | 48009                   | GG                              | TT              | 1946991791               |
| SNP_P4_151915_48030 | NW_004516351.1 | Scaffold1039 | 48030                   | CC                              | TT              | 1946991793               |
| SNP_P4_151916_48036 | NW_004516351.1 | Scaffold1039 | 48036                   | CC                              | TT              | 1946991795               |
| SNP_P4_151917_48039 | NW_004516351.1 | Scaffold1039 | 48039                   | TT                              | CC              | 1946991797               |
| SNP_P4_151918_48046 | NW_004516351.1 | Scaffold1039 | 48046                   | CC                              | TT              | 1946991799               |
| SNP_P4_151919_48056 | NW_004516351.1 | Scaffold1039 | 48056                   | GG                              | TT              | 1946991801               |
| SNP_P4_151920_48057 | NW_004516351.1 | Scaffold1039 | 48057                   | AA                              | GG              | 1946991803               |
| SNP_P4_151921_48073 | NW_004516351.1 | Scaffold1039 | 48073                   | GG                              | AA              | 1946991805               |
| SNP_P4_151922_48075 | NW_004516351.1 | Scaffold1039 | 48075                   | GG                              | TT              | 1946991807               |
| SNP_P4_151923_48081 | NW_004516351.1 | Scaffold1039 | 48081                   | TT                              | GG              | 1946991809               |
| SNP_P4_151924_48114 | NW_004516351.1 | Scaffold1039 | 48114                   | TT                              | GG              | 1946991811               |
| SNP_P4_151925_48153 | NW_004516351.1 | Scaffold1039 | 48153                   | GG                              | AA              | 1946991813               |
| SNP_P4_151926_48159 | NW_004516351.1 | Scaffold1039 | 48159                   | CC                              | AA              | 1946991815               |
| SNP_P4_151927_48206 | NW_004516351.1 | Scaffold1039 | 48206                   | TT                              | AA              | 1946991817               |
| SNP_P4_151928_48222 | NW_004516351.1 | Scaffold1039 | 48222                   | GG                              | AA              | 1946991819               |
| SNP_P4_151929_48355 | NW_004516351.1 | Scaffold1039 | 48355                   | TT                              | CC              | 1946991821               |
| SNP_P4_151930_48382 | NW_004516351.1 | Scaffold1039 | 48382                   | AA                              | CC              | 1946991823               |
| SNP_P4_151931_48507 | NW_004516351.1 | Scaffold1039 | 48507                   | AA                              | TT              | 1946991825               |
| SNP_P4_151932_48579 | NW_004516351.1 | Scaffold1039 | 48579                   | CC                              | AA              | 1946991827               |
| SNP_P4_151934_48935 | NW_004516351.1 | Scaffold1039 | 48935                   | CC                              | TT              | 1946991829               |

| SNPs IDs            | Chromosome IDs | Chromosomes  | Physical positions (bp) | CDC Frontier (Reference genome) | (ILWC46 & LPNB) | NCBI SNPdb Accession IDs |
|---------------------|----------------|--------------|-------------------------|---------------------------------|-----------------|--------------------------|
| SNP_P4_151935_48985 | NW_004516351.1 | Scaffold1039 | 48985                   | AA                              | GG              | 1946991831               |
| SNP_P4_151936_48993 | NW_004516351.1 | Scaffold1039 | 48993                   | TT                              | GG              | 1946991833               |
| SNP_P4_151937_49034 | NW_004516351.1 | Scaffold1039 | 49034                   | TT                              | CC              | 1946991835               |
| SNP_P4_151938_49109 | NW_004516351.1 | Scaffold1039 | 49109                   | TT                              | AA              | 1946991837               |
| SNP_P4_151939_49165 | NW_004516351.1 | Scaffold1039 | 49165                   | AA                              | TT              | 1946991839               |
| SNP_P4_151940_49177 | NW_004516351.1 | Scaffold1039 | 49177                   | AA                              | CC              | 1946991841               |
| SNP_P4_151941_49220 | NW_004516351.1 | Scaffold1039 | 49220                   | GG                              | TT              | 1946991843               |
| SNP_P4_151942_49407 | NW_004516351.1 | Scaffold1039 | 49407                   | AA                              | GG              | 1946991845               |
| SNP_P4_151943_49416 | NW_004516351.1 | Scaffold1039 | 49416                   | TT                              | CC              | 1946991847               |
| SNP_P4_151944_49724 | NW_004516351.1 | Scaffold1039 | 49724                   | TT                              | CC              | 1946991849               |
| SNP_P4_151945_49736 | NW_004516351.1 | Scaffold1039 | 49736                   | CC                              | GG              | 1946991851               |
| SNP_P4_151946_49807 | NW_004516351.1 | Scaffold1039 | 49807                   | AA                              | CC              | 1946991853               |
| SNP_P4_151947_50769 | NW_004516351.1 | Scaffold1039 | 50769                   | AA                              | GG              | 1946991855               |
| SNP_P4_151948_50827 | NW_004516351.1 | Scaffold1039 | 50827                   | CC                              | TT              | 1946991857               |
| SNP_P4_151949_51001 | NW_004516351.1 | Scaffold1039 | 51001                   | TT                              | CC              | 1946991859               |
| SNP_P4_151950_51033 | NW_004516351.1 | Scaffold1039 | 51033                   | CC                              | TT              | 1946991860               |
| SNP_P4_151951_51076 | NW_004516351.1 | Scaffold1039 | 51076                   | TT                              | CC              | 1946991861               |
| SNP_P4_151952_51091 | NW_004516351.1 | Scaffold1039 | 51091                   | TT                              | GG              | 1946991862               |
| SNP_P4_151953_51161 | NW_004516351.1 | Scaffold1039 | 51161                   | TT                              | AA              | 1946991863               |
| SNP_P4_151954_51248 | NW_004516351.1 | Scaffold1039 | 51248                   | TT                              | CC              | 1946991864               |
| SNP_P4_151955_51264 | NW_004516351.1 | Scaffold1039 | 51264                   | CC                              | TT              | 1946991865               |
| SNP_P4_151956_51304 | NW_004516351.1 | Scaffold1039 | 51304                   | GG                              | AA              | 1946991867               |
| SNP_P4_151957_51321 | NW_004516351.1 | Scaffold1039 | 51321                   | GG                              | TT              | 1946991869               |
| SNP_P4_151958_51346 | NW_004516351.1 | Scaffold1039 | 51346                   | TT                              | AA              | 1946991871               |
| SNP_P4_151959_51389 | NW_004516351.1 | Scaffold1039 | 51389                   | TT                              | GG              | 1946991873               |
| SNP_P4_151960_53951 | NW_004516351.1 | Scaffold1039 | 53951                   | AA                              | GG              | 1946991875               |
| SNP_P4_151961_54156 | NW_004516351.1 | Scaffold1039 | 54156                   | AA                              | GG              | 1946991877               |
| SNP_P4_151962_54354 | NW_004516351.1 | Scaffold1039 | 54354                   | GG                              | AA              | 1946991879               |
| SNP_P4_151963_54380 | NW_004516351.1 | Scaffold1039 | 54380                   | AA                              | GG              | 1946991881               |
| SNP_P4_151964_54395 | NW_004516351.1 | Scaffold1039 | 54395                   | AA                              | GG              | 1946991883               |
| SNP_P4_151965_54401 | NW_004516351.1 | Scaffold1039 | 54401                   | TT                              | CC              | 1946991884               |
| SNP_P4_151966_54516 | NW_004516351.1 | Scaffold1039 | 54516                   | AA                              | GG              | 1946991885               |
| SNP_P4_151967_54539 | NW_004516351.1 | Scaffold1039 | 54539                   | GG                              | AA              | 1946991886               |
| SNP_P4_151968_54630 | NW_004516351.1 | Scaffold1039 | 54630                   | GG                              | TT              | 1946991887               |
| SNP_P4_151969_54637 | NW_004516351.1 | Scaffold1039 | 54637                   | AA                              | GG              | 1946991889               |
| SNP_P4_151970_54714 | NW_004516351.1 | Scaffold1039 | 54714                   | GG                              | AA              | 1946991891               |
| SNP_P4_151971_54887 | NW_004516351.1 | Scaffold1039 | 54887                   | TT                              | CC              | 1946991893               |
| SNP_P4_151972_54953 | NW_004516351.1 | Scaffold1039 | 54953                   | TT                              | GG              | 1946991895               |
| SNP_P4_151973_55005 | NW_004516351.1 | Scaffold1039 | 55005                   | CC                              | GG              | 1946991897               |
| SNP_P4_151974_55270 | NW_004516351.1 | Scaffold1039 | 55270                   | TT                              | CC              | 1946991899               |
| SNP_P4_151975_55314 | NW_004516351.1 | Scaffold1039 | 55314                   | TT                              | GG              | 1946991901               |
| SNP_P4_151976_55334 | NW_004516351.1 | Scaffold1039 | 55334                   | TT                              | CC              | 1946991903               |

| SNPs IDs            | Chromosome IDs | Chromosomes  | Physical positions (bp) | CDC Frontier (Reference genome) | (ILWC46 & LPNB) | NCBI SNPdb Accession IDs |
|---------------------|----------------|--------------|-------------------------|---------------------------------|-----------------|--------------------------|
| SNP_P4_151977_57368 | NW_004516351.1 | Scaffold1039 | 57368                   | AA                              | TT              | 1946991905               |
| SNP_P4_151978_57592 | NW_004516351.1 | Scaffold1039 | 57592                   | GG                              | AA              | 1946991907               |
| SNP_P4_151979_57596 | NW_004516351.1 | Scaffold1039 | 57596                   | GG                              | AA              | 1946991909               |
| SNP_P4_151980_57602 | NW_004516351.1 | Scaffold1039 | 57602                   | AA                              | GG              | 1946991911               |
| SNP_P4_151981_57621 | NW_004516351.1 | Scaffold1039 | 57621                   | TT                              | CC              | 1946991913               |
| SNP_P4_151982_57638 | NW_004516351.1 | Scaffold1039 | 57638                   | GG                              | TT              | 1946991915               |
| SNP_P4_151983_57642 | NW_004516351.1 | Scaffold1039 | 57642                   | CC                              | GG              | 1946991917               |
| SNP_P4_151984_57646 | NW_004516351.1 | Scaffold1039 | 57646                   | AA                              | GG              | 1946991919               |
| SNP_P4_151985_57691 | NW_004516351.1 | Scaffold1039 | 57691                   | TT                              | CC              | 1946991921               |
| SNP_P4_151986_57723 | NW_004516351.1 | Scaffold1039 | 57723                   | GG                              | AA              | 1946991923               |
| SNP_P4_151987_57725 | NW_004516351.1 | Scaffold1039 | 57725                   | TT                              | CC              | 1946991925               |
| SNP_P4_151988_57741 | NW_004516351.1 | Scaffold1039 | 57741                   | CC                              | TT              | 1946991927               |
| SNP_P4_151989_57762 | NW_004516351.1 | Scaffold1039 | 57762                   | AA                              | TT              | 1946991929               |
| SNP_P4_151990_57763 | NW_004516351.1 | Scaffold1039 | 57763                   | AA                              | GG              | 1946991931               |
| SNP_P4_151991_57772 | NW_004516351.1 | Scaffold1039 | 57772                   | TT                              | CC              | 1946991933               |
| SNP_P4_151992_57822 | NW_004516351.1 | Scaffold1039 | 57822                   | TT                              | AA              | 1946991935               |
| SNP_P4_151993_57840 | NW_004516351.1 | Scaffold1039 | 57840                   | GG                              | CC              | 1946991937               |
| SNP_P4_151994_57841 | NW_004516351.1 | Scaffold1039 | 57841                   | TT                              | CC              | 1946991939               |
| SNP_P4_151995_57964 | NW_004516351.1 | Scaffold1039 | 57964                   | AA                              | GG              | 1946991941               |
| SNP_P4_151996_58132 | NW_004516351.1 | Scaffold1039 | 58132                   | TT                              | CC              | 1946991943               |
| SNP_P4_151997_58146 | NW_004516351.1 | Scaffold1039 | 58146                   | CC                              | AA              | 1946991945               |
| SNP_P4_151998_58160 | NW_004516351.1 | Scaffold1039 | 58160                   | GG                              | AA              | 1946991947               |
| SNP_P4_151999_58165 | NW_004516351.1 | Scaffold1039 | 58165                   | GG                              | AA              | 1946991949               |
| SNP_P4_152000_58177 | NW_004516351.1 | Scaffold1039 | 58177                   | AA                              | TT              | 1946991951               |
| SNP_P4_152001_58178 | NW_004516351.1 | Scaffold1039 | 58178                   | TT                              | AA              | 1946991953               |
| SNP_P4_152002_58462 | NW_004516351.1 | Scaffold1039 | 58462                   | TT                              | CC              | 1946991955               |
| SNP_P4_152003_58467 | NW_004516351.1 | Scaffold1039 | 58467                   | TT                              | CC              | 1946991957               |
| SNP_P4_152004_58676 | NW_004516351.1 | Scaffold1039 | 58676                   | GG                              | TT              | 1946991959               |
| SNP_P4_152005_58685 | NW_004516351.1 | Scaffold1039 | 58685                   | GG                              | AA              | 1946991960               |
| SNP_P4_152006_58798 | NW_004516351.1 | Scaffold1039 | 58798                   | TT                              | AA              | 1946991962               |
| SNP_P4_152007_58825 | NW_004516351.1 | Scaffold1039 | 58825                   | CC                              | AA              | 1946991964               |
| SNP_P4_152008_58837 | NW_004516351.1 | Scaffold1039 | 58837                   | TT                              | CC              | 1946991966               |
| SNP_P4_152009_58855 | NW_004516351.1 | Scaffold1039 | 58855                   | GG                              | AA              | 1946991968               |
| SNP_P4_152010_58859 | NW_004516351.1 | Scaffold1039 | 58859                   | TT                              | AA              | 1946991970               |
| SNP_P4_152011_58861 | NW_004516351.1 | Scaffold1039 | 58861                   | AA                              | GG              | 1946991972               |
| SNP_P4_152012_58938 | NW_004516351.1 | Scaffold1039 | 58938                   | AA                              | GG              | 1946991974               |
| SNP_P4_152013_58959 | NW_004516351.1 | Scaffold1039 | 58959                   | CC                              | AA              | 1946991976               |
| SNP_P4_152014_58967 | NW_004516351.1 | Scaffold1039 | 58967                   | AA                              | GG              | 1946991978               |
| SNP_P4_152015_58977 | NW_004516351.1 | Scaffold1039 | 58977                   | CC                              | TT              | 1946991980               |
| SNP_P4_152016_58990 | NW_004516351.1 | Scaffold1039 | 58990                   | TT                              | CC              | 1946991981               |
| SNP_P4_152017_58995 | NW_004516351.1 | Scaffold1039 | 58995                   | GG                              | AA              | 1946991983               |
| SNP_P4_152018_59031 | NW_004516351.1 | Scaffold1039 | 59031                   | GG                              | TT              | 1946991985               |



| SNPs IDs            | Chromosome IDs | Chromosomes  | Physical positions (bp) | CDC Frontier (Reference genome) | (ILWC46 & LPNB) | NCBI SNPdb Accession IDs |
|---------------------|----------------|--------------|-------------------------|---------------------------------|-----------------|--------------------------|
| SNP_P4_152019_59040 | NW_004516351.1 | Scaffold1039 | 59040                   | AA                              | TT              | 1946991987               |
| SNP_P4_152020_59146 | NW_004516351.1 | Scaffold1039 | 59146                   | TT                              | CC              | 1946991989               |
| SNP_P4_152021_59161 | NW_004516351.1 | Scaffold1039 | 59161                   | AA                              | TT              | 1946991991               |
| SNP_P4_152022_59216 | NW_004516351.1 | Scaffold1039 | 59216                   | AA                              | CC              | 1946991993               |
| SNP_P4_152023_59241 | NW_004516351.1 | Scaffold1039 | 59241                   | GG                              | AA              | 1946991995               |
| SNP_P4_152025_59436 | NW_004516351.1 | Scaffold1039 | 59436                   | GG                              | AA              | 1946991997               |
| SNP_P4_152026_59534 | NW_004516351.1 | Scaffold1039 | 59534                   | GG                              | AA              | 1946991999               |
| SNP_P4_152027_59554 | NW_004516351.1 | Scaffold1039 | 59554                   | GG                              | CC              | 1946992001               |
| SNP_P4_152028_59565 | NW_004516351.1 | Scaffold1039 | 59565                   | TT                              | AA              | 1946992003               |
| SNP_P4_152029_59907 | NW_004516351.1 | Scaffold1039 | 59907                   | GG                              | AA              | 1946992005               |
| SNP_P4_152030_63473 | NW_004516351.1 | Scaffold1039 | 63473                   | AA                              | TT              | 1946992007               |
| SNP_P4_152031_63537 | NW_004516351.1 | Scaffold1039 | 63537                   | AA                              | CC              | 1946992009               |
| SNP_P4_152032_63541 | NW_004516351.1 | Scaffold1039 | 63541                   | GG                              | CC              | 1946992011               |
| SNP_P4_152033_63550 | NW_004516351.1 | Scaffold1039 | 63550                   | GG                              | AA              | 1946992013               |
| SNP_P4_152034_63552 | NW_004516351.1 | Scaffold1039 | 63552                   | TT                              | CC              | 1946992015               |
| SNP_P4_152035_63608 | NW_004516351.1 | Scaffold1039 | 63608                   | CC                              | TT              | 1946992017               |
| SNP_P4_152036_63690 | NW_004516351.1 | Scaffold1039 | 63690                   | AA                              | GG              | 1946992018               |
| SNP_P4_152037_63697 | NW_004516351.1 | Scaffold1039 | 63697                   | AA                              | TT              | 1946992020               |
| SNP_P4_152038_63724 | NW_004516351.1 | Scaffold1039 | 63724                   | AA                              | TT              | 1946992022               |
| SNP_P4_152039_63905 | NW_004516351.1 | Scaffold1039 | 63905                   | TT                              | CC              | 1946992024               |
| SNP_P4_152040_63966 | NW_004516351.1 | Scaffold1039 | 63966                   | AA                              | GG              | 1946992026               |
| SNP_P4_152041_4535  | NW_004516352.1 | Scaffold1041 | 4535                    | CC                              | GG              | 1946992028               |
| SNP_P4_152042_14608 | NW_004516352.1 | Scaffold1041 | 14608                   | AA                              | GG              | 1946992030               |
| SNP_P4_152044_14612 | NW_004516353.1 | Scaffold1043 | 14612                   | TT                              | CC              | 1946992032               |
| SNP_P4_152045_14640 | NW_004516353.1 | Scaffold1043 | 14640                   | AA                              | GG              | 1946992034               |
| SNP_P4_152046_14655 | NW_004516353.1 | Scaffold1043 | 14655                   | AA                              | GG              | 1946992036               |
| SNP_P4_152047_14665 | NW_004516353.1 | Scaffold1043 | 14665                   | TT                              | GG              | 1946992038               |
| SNP_P4_152048_14734 | NW_004516353.1 | Scaffold1043 | 14734                   | TT                              | GG              | 1946992040               |
| SNP_P4_152049_14846 | NW_004516353.1 | Scaffold1043 | 14846                   | TT                              | CC              | 1946992042               |
| SNP_P4_152050_14866 | NW_004516353.1 | Scaffold1043 | 14866                   | AA                              | CC              | 1946992043               |
| SNP_P4_152051_15082 | NW_004516353.1 | Scaffold1043 | 15082                   | AA                              | GG              | 1946992045               |
| SNP_P4_152052_15102 | NW_004516353.1 | Scaffold1043 | 15102                   | AA                              | GG              | 1946992047               |
| SNP_P4_152053_15116 | NW_004516353.1 | Scaffold1043 | 15116                   | TT                              | CC              | 1946992049               |
| SNP_P4_152054_25869 | NW_004516353.1 | Scaffold1043 | 25869                   | AA                              | GG              | 1946992052               |
| SNP_P4_152055_32627 | NW_004516353.1 | Scaffold1043 | 32627                   | TT                              | AA              | 1946992054               |
| SNP_P4_152056_32629 | NW_004516353.1 | Scaffold1043 | 32629                   | AA                              | CC              | 1946992056               |
| SNP_P4_152057_32913 | NW_004516353.1 | Scaffold1043 | 32913                   | AA                              | TT              | 1946992058               |
| SNP_P4_152058_32939 | NW_004516353.1 | Scaffold1043 | 32939                   | AA                              | CC              | 1946992060               |
| SNP_P4_152059_32961 | NW_004516353.1 | Scaffold1043 | 32961                   | CC                              | AA              | 1946992062               |
| SNP_P4_152060_32971 | NW_004516353.1 | Scaffold1043 | 32971                   | CC                              | AA              | 1946992064               |
| SNP_P4_152061_32990 | NW_004516353.1 | Scaffold1043 | 32990                   | CC                              | TT              | 1946992066               |
| SNP_P4_152062_33002 | NW_004516353.1 | Scaffold1043 | 33002                   | GG                              | AA              | 1946992068               |

| SNPs IDs            | Chromosome IDs | Chromosomes  | Physical positions (bp) | CDC Frontier (Reference genome) | (ILWC46 & LPNB) | NCBI SNPdb Accession IDs |
|---------------------|----------------|--------------|-------------------------|---------------------------------|-----------------|--------------------------|
| SNP_P4_152063_33016 | NW_004516353.1 | Scaffold1043 | 33016                   | CC                              | TT              | 1946992070               |
| SNP_P4_152064_33028 | NW_004516353.1 | Scaffold1043 | 33028                   | TT                              | AA              | 1946992072               |
| SNP_P4_152065_33043 | NW_004516353.1 | Scaffold1043 | 33043                   | AA                              | GG              | 1946992074               |
| SNP_P4_152066_33047 | NW_004516353.1 | Scaffold1043 | 33047                   | GG                              | TT              | 1946992076               |
| SNP_P4_152067_33052 | NW_004516353.1 | Scaffold1043 | 33052                   | GG                              | AA              | 1946992078               |
| SNP_P4_152068_39377 | NW_004516353.1 | Scaffold1043 | 39377                   | GG                              | AA              | 1946992080               |
| SNP_P4_152069_39528 | NW_004516353.1 | Scaffold1043 | 39528                   | CC                              | TT              | 1946992082               |
| SNP_P4_152070_39981 | NW_004516353.1 | Scaffold1043 | 39981                   | TT                              | CC              | 1946992084               |
| SNP_P4_152071_40005 | NW_004516353.1 | Scaffold1043 | 40005                   | AA                              | GG              | 1946992086               |
| SNP_P4_152072_40474 | NW_004516353.1 | Scaffold1043 | 40474                   | GG                              | AA              | 1946992088               |
| SNP_P4_152073_41111 | NW_004516353.1 | Scaffold1043 | 41111                   | CC                              | TT              | 1946992090               |
| SNP_P4_152074_47328 | NW_004516353.1 | Scaffold1043 | 47328                   | CC                              | TT              | 1946992092               |
| SNP_P4_152075_47329 | NW_004516353.1 | Scaffold1043 | 47329                   | AA                              | GG              | 1946992094               |
| SNP_P4_152076_55560 | NW_004516353.1 | Scaffold1043 | 55560                   | TT                              | CC              | 1946992096               |
| SNP_P4_152077_55614 | NW_004516353.1 | Scaffold1043 | 55614                   | CC                              | TT              | 1946992098               |
| SNP_P4_152078_63085 | NW_004516353.1 | Scaffold1043 | 63085                   | TT                              | CC              | 1946992100               |
| SNP_P4_152079_63303 | NW_004516353.1 | Scaffold1043 | 63303                   | CC                              | TT              | 1946992102               |
| SNP_P4_152080_64867 | NW_004516353.1 | Scaffold1043 | 64867                   | TT                              | AA              | 1946992104               |
| SNP_P4_152081_72293 | NW_004516353.1 | Scaffold1043 | 72293                   | TT                              | CC              | 1946992106               |
| SNP_P4_152082_72543 | NW_004516353.1 | Scaffold1043 | 72543                   | GG                              | TT              | 1946992108               |
| SNP_P4_152083_72596 | NW_004516353.1 | Scaffold1043 | 72596                   | TT                              | GG              | 1946992110               |
| SNP_P4_152084_72597 | NW_004516353.1 | Scaffold1043 | 72597                   | AA                              | GG              | 1946992112               |
| SNP_P4_152085_72598 | NW_004516353.1 | Scaffold1043 | 72598                   | TT                              | GG              | 1946992114               |
| SNP_P4_152086_72615 | NW_004516353.1 | Scaffold1043 | 72615                   | AA                              | GG              | 1946992116               |
| SNP_P4_152087_89443 | NW_004516353.1 | Scaffold1043 | 89443                   | TT                              | AA              | 1946992118               |
| SNP_P4_152088_89469 | NW_004516353.1 | Scaffold1043 | 89469                   | CC                              | TT              | 1946992120               |
| SNP_P4_152089_89480 | NW_004516353.1 | Scaffold1043 | 89480                   | GG                              | AA              | 1946992122               |
| SNP_P4_152090_89597 | NW_004516353.1 | Scaffold1043 | 89597                   | CC                              | TT              | 1946992124               |
| SNP_P4_152091_89797 | NW_004516353.1 | Scaffold1043 | 89797                   | TT                              | CC              | 1946992126               |
| SNP_P4_152092_89901 | NW_004516353.1 | Scaffold1043 | 89901                   | TT                              | CC              | 1946992128               |
| SNP_P4_152093_89904 | NW_004516353.1 | Scaffold1043 | 89904                   | CC                              | TT              | 1946992130               |
| SNP_P4_152094_89976 | NW_004516353.1 | Scaffold1043 | 89976                   | AA                              | CC              | 1946992132               |
| SNP_P4_152095_696   | NW_004516354.1 | Scaffold1044 | 696                     | AA                              | TT              | 1946992134               |
| SNP_P4_152096_977   | NW_004516354.1 | Scaffold1044 | 977                     | TT                              | GG              | 1946992136               |
| SNP_P4_152097_1025  | NW_004516354.1 | Scaffold1044 | 1025                    | AA                              | GG              | 1946992138               |
| SNP_P4_152098_1052  | NW_004516354.1 | Scaffold1044 | 1052                    | CC                              | TT              | 1946992140               |
| SNP_P4_152099_1084  | NW_004516354.1 | Scaffold1044 | 1084                    | TT                              | CC              | 1946992142               |
| SNP_P4_152100_4786  | NW_004516354.1 | Scaffold1044 | 4786                    | CC                              | TT              | 1946992144               |
| SNP_P4_152101_4818  | NW_004516354.1 | Scaffold1044 | 4818                    | CC                              | AA              | 1946992146               |
| SNP_P4_152102_4852  | NW_004516354.1 | Scaffold1044 | 4852                    | CC                              | AA              | 1946992148               |
| SNP_P4_152103_16080 | NW_004516354.1 | Scaffold1044 | 16080                   | CC                              | GG              | 1946992150               |
| SNP_P4_152104_16874 | NW_004516354.1 | Scaffold1044 | 16874                   | TT                              | CC              | 1946992152               |

| SNPs IDs            | Chromosome IDs | Chromosomes  | Physical positions (bp) | CDC Frontier (Reference genome) | (ILWC46 & LPNB) | NCBI SNPdb Accession IDs |
|---------------------|----------------|--------------|-------------------------|---------------------------------|-----------------|--------------------------|
| SNP_P4_152105_17222 | NW_004516354.1 | Scaffold1044 | 17222                   | AA                              | CC              | 1946992154               |
| SNP_P4_152106_17271 | NW_004516354.1 | Scaffold1044 | 17271                   | CC                              | GG              | 1946992156               |
| SNP_P4_152107_21618 | NW_004516354.1 | Scaffold1044 | 21618                   | CC                              | GG              | 1946992158               |
| SNP_P4_152108_23552 | NW_004516354.1 | Scaffold1044 | 23552                   | GG                              | AA              | 1946992160               |
| SNP_P4_152109_23636 | NW_004516354.1 | Scaffold1044 | 23636                   | AA                              | TT              | 1946992162               |
| SNP_P4_152110_23828 | NW_004516354.1 | Scaffold1044 | 23828                   | CC                              | GG              | 1946992164               |
| SNP_P4_152111_24456 | NW_004516354.1 | Scaffold1044 | 24456                   | GG                              | AA              | 1946992166               |
| SNP_P4_152112_27233 | NW_004516354.1 | Scaffold1044 | 27233                   | CC                              | GG              | 1946992168               |
| SNP_P4_152113_32048 | NW_004516354.1 | Scaffold1044 | 32048                   | CC                              | TT              | 1946992170               |
| SNP_P4_152114_32536 | NW_004516354.1 | Scaffold1044 | 32536                   | CC                              | TT              | 1946992172               |
| SNP_P4_152115_34464 | NW_004516354.1 | Scaffold1044 | 34464                   | TT                              | AA              | 1946992174               |
| SNP_P4_152116_10770 | NW_004516355.1 | Scaffold1045 | 10770                   | CC                              | GG              | 1946992176               |
| SNP_P4_152117_12242 | NW_004516355.1 | Scaffold1045 | 12242                   | AA                              | CC              | 1946992178               |
| SNP_P4_152118_33424 | NW_004516355.1 | Scaffold1045 | 33424                   | TT                              | GG              | 1946992180               |
| SNP_P4_152119_35680 | NW_004516355.1 | Scaffold1045 | 35680                   | AA                              | GG              | 1946992182               |
| SNP_P4_152121_35754 | NW_004516355.1 | Scaffold1045 | 35754                   | TT                              | CC              | 1946992184               |
| SNP_P4_152122_35784 | NW_004516355.1 | Scaffold1045 | 35784                   | AA                              | GG              | 1946992186               |
| SNP_P4_152123_36101 | NW_004516355.1 | Scaffold1045 | 36101                   | TT                              | CC              | 1946992188               |
| SNP_P4_152124_36149 | NW_004516355.1 | Scaffold1045 | 36149                   | TT                              | CC              | 1946992190               |
| SNP_P4_152125_36160 | NW_004516355.1 | Scaffold1045 | 36160                   | GG                              | CC              | 1946992192               |
| SNP_P4_152126_36183 | NW_004516355.1 | Scaffold1045 | 36183                   | AA                              | GG              | 1946992194               |
| SNP_P4_152127_36191 | NW_004516355.1 | Scaffold1045 | 36191                   | AA                              | TT              | 1946992196               |
| SNP_P4_152128_36211 | NW_004516355.1 | Scaffold1045 | 36211                   | AA                              | GG              | 1946992198               |
| SNP_P4_152129_561   | NW_004516356.1 | Scaffold1046 | 561                     | AA                              | GG              | 1946992200               |
| SNP_P4_152130_1886  | NW_004516356.1 | Scaffold1046 | 1886                    | TT                              | AA              | 1946992202               |
| SNP_P4_152131_4047  | NW_004516356.1 | Scaffold1046 | 4047                    | AA                              | GG              | 1946992204               |
| SNP_P4_152132_4909  | NW_004516356.1 | Scaffold1046 | 4909                    | TT                              | GG              | 1946992206               |
| SNP_P4_152133_4936  | NW_004516356.1 | Scaffold1046 | 4936                    | GG                              | AA              | 1946992208               |
| SNP_P4_152135_5213  | NW_004516356.1 | Scaffold1046 | 5213                    | TT                              | AA              | 1946992210               |
| SNP_P4_152136_5259  | NW_004516356.1 | Scaffold1046 | 5259                    | GG                              | AA              | 1946992212               |
| SNP_P4_152137_5295  | NW_004516356.1 | Scaffold1046 | 5295                    | GG                              | AA              | 1946992214               |
| SNP_P4_152138_6453  | NW_004516356.1 | Scaffold1046 | 6453                    | CC                              | AA              | 1946992216               |
| SNP_P4_152139_7586  | NW_004516356.1 | Scaffold1046 | 7586                    | CC                              | AA              | 1946992218               |
| SNP_P4_152140_7605  | NW_004516356.1 | Scaffold1046 | 7605                    | GG                              | TT              | 1946992220               |
| SNP_P4_152141_7620  | NW_004516356.1 | Scaffold1046 | 7620                    | AA                              | TT              | 1946992222               |
| SNP_P4_152142_8016  | NW_004516356.1 | Scaffold1046 | 8016                    | GG                              | AA              | 1946992224               |
| SNP_P4_152143_8074  | NW_004516356.1 | Scaffold1046 | 8074                    | AA                              | TT              | 1946992226               |
| SNP_P4_152144_8753  | NW_004516356.1 | Scaffold1046 | 8753                    | GG                              | CC              | 1946992228               |
| SNP_P4_152145_8898  | NW_004516356.1 | Scaffold1046 | 8898                    | GG                              | AA              | 1946992230               |
| SNP_P4_152146_8949  | NW_004516356.1 | Scaffold1046 | 8949                    | CC                              | TT              | 1946992232               |
| SNP_P4_152147_9036  | NW_004516356.1 | Scaffold1046 | 9036                    | TT                              | GG              | 1946992234               |
| SNP_P4_152148_9044  | NW_004516356.1 | Scaffold1046 | 9044                    | TT                              | GG              | 1946992236               |

| SNPs IDs            | Chromosome IDs | Chromosomes  | Physical positions (bp) | CDC Frontier (Reference genome) | (ILWC46 & LPNB) | NCBI SNPdb Accession IDs |
|---------------------|----------------|--------------|-------------------------|---------------------------------|-----------------|--------------------------|
| SNP_P4_152149_9148  | NW_004516356.1 | Scaffold1046 | 9148                    | GG                              | AA              | 1946992238               |
| SNP_P4_152150_9180  | NW_004516356.1 | Scaffold1046 | 9180                    | GG                              | AA              | 1946992241               |
| SNP_P4_152151_9195  | NW_004516356.1 | Scaffold1046 | 9195                    | CC                              | AA              | 1946992243               |
| SNP_P4_152152_9232  | NW_004516356.1 | Scaffold1046 | 9232                    | GG                              | TT              | 1946992245               |
| SNP_P4_152153_9236  | NW_004516356.1 | Scaffold1046 | 9236                    | CC                              | AA              | 1946992247               |
| SNP_P4_152154_9338  | NW_004516356.1 | Scaffold1046 | 9338                    | AA                              | TT              | 1946992249               |
| SNP_P4_152155_9847  | NW_004516356.1 | Scaffold1046 | 9847                    | TT                              | CC              | 1946992251               |
| SNP_P4_152156_9962  | NW_004516356.1 | Scaffold1046 | 9962                    | AA                              | CC              | 1946992252               |
| SNP_P4_152157_10166 | NW_004516356.1 | Scaffold1046 | 10166                   | TT                              | CC              | 1946992254               |
| SNP_P4_152158_10169 | NW_004516356.1 | Scaffold1046 | 10169                   | AA                              | CC              | 1946992256               |
| SNP_P4_152159_10189 | NW_004516356.1 | Scaffold1046 | 10189                   | CC                              | TT              | 1946992258               |
| SNP_P4_152160_10190 | NW_004516356.1 | Scaffold1046 | 10190                   | TT                              | AA              | 1946992260               |
| SNP_P4_152161_10326 | NW_004516356.1 | Scaffold1046 | 10326                   | AA                              | GG              | 1946992262               |
| SNP_P4_152163_10557 | NW_004516356.1 | Scaffold1046 | 10557                   | GG                              | CC              | 1946992264               |
| SNP_P4_152164_10558 | NW_004516356.1 | Scaffold1046 | 10558                   | AA                              | GG              | 1946992266               |
| SNP_P4_152165_10566 | NW_004516356.1 | Scaffold1046 | 10566                   | AA                              | CC              | 1946992268               |
| SNP_P4_152166_10623 | NW_004516356.1 | Scaffold1046 | 10623                   | TT                              | GG              | 1946992270               |
| SNP_P4_152167_10751 | NW_004516356.1 | Scaffold1046 | 10751                   | GG                              | AA              | 1946992272               |
| SNP_P4_152168_10790 | NW_004516356.1 | Scaffold1046 | 10790                   | GG                              | AA              | 1946992274               |
| SNP_P4_152169_10930 | NW_004516356.1 | Scaffold1046 | 10930                   | GG                              | TT              | 1946992276               |
| SNP_P4_152170_10931 | NW_004516356.1 | Scaffold1046 | 10931                   | GG                              | AA              | 1946992278               |
| SNP_P4_152171_10955 | NW_004516356.1 | Scaffold1046 | 10955                   | GG                              | CC              | 1946992280               |
| SNP_P4_152172_10980 | NW_004516356.1 | Scaffold1046 | 10980                   | CC                              | TT              | 1946992282               |
| SNP_P4_152173_10987 | NW_004516356.1 | Scaffold1046 | 10987                   | TT                              | AA              | 1946992284               |
| SNP_P4_152174_11024 | NW_004516356.1 | Scaffold1046 | 11024                   | CC                              | TT              | 1946992286               |
| SNP_P4_152175_11040 | NW_004516356.1 | Scaffold1046 | 11040                   | AA                              | TT              | 1946992288               |
| SNP_P4_152176_11048 | NW_004516356.1 | Scaffold1046 | 11048                   | GG                              | CC              | 1946992290               |
| SNP_P4_152177_11220 | NW_004516356.1 | Scaffold1046 | 11220                   | AA                              | TT              | 1946992292               |
| SNP_P4_152178_11419 | NW_004516356.1 | Scaffold1046 | 11419                   | TT                              | GG              | 1946992294               |
| SNP_P4_152179_11443 | NW_004516356.1 | Scaffold1046 | 11443                   | GG                              | AA              | 1946992296               |
| SNP_P4_152180_11496 | NW_004516356.1 | Scaffold1046 | 11496                   | GG                              | TT              | 1946992298               |
| SNP_P4_152181_11526 | NW_004516356.1 | Scaffold1046 | 11526                   | TT                              | AA              | 1946992300               |
| SNP_P4_152182_11553 | NW_004516356.1 | Scaffold1046 | 11553                   | TT                              | AA              | 1946992302               |
| SNP_P4_152183_11734 | NW_004516356.1 | Scaffold1046 | 11734                   | AA                              | TT              | 1946992304               |
| SNP_P4_152184_11737 | NW_004516356.1 | Scaffold1046 | 11737                   | GG                              | CC              | 1946992306               |
| SNP_P4_152185_11809 | NW_004516356.1 | Scaffold1046 | 11809                   | AA                              | CC              | 1946992308               |
| SNP_P4_152186_11827 | NW_004516356.1 | Scaffold1046 | 11827                   | AA                              | CC              | 1946992310               |
| SNP_P4_152187_11844 | NW_004516356.1 | Scaffold1046 | 11844                   | AA                              | GG              | 1946992312               |
| SNP_P4_152188_11895 | NW_004516356.1 | Scaffold1046 | 11895                   | AA                              | CC              | 1946992314               |
| SNP_P4_152189_11919 | NW_004516356.1 | Scaffold1046 | 11919                   | GG                              | AA              | 1946992315               |
| SNP_P4_152190_11956 | NW_004516356.1 | Scaffold1046 | 11956                   | AA                              | CC              | 1946992317               |
| SNP_P4_152191_12032 | NW_004516356.1 | Scaffold1046 | 12032                   | CC                              | TT              | 1946992319               |

| SNPs IDs            | Chromosome IDs | Chromosomes  | Physical positions (bp) | CDC Frontier (Reference genome) | (ILWC46 & LPNB) | NCBI SNPdb Accession IDs |
|---------------------|----------------|--------------|-------------------------|---------------------------------|-----------------|--------------------------|
| SNP_P4_152192_12063 | NW_004516356.1 | Scaffold1046 | 12063                   | AA                              | CC              | 1946992321               |
| SNP_P4_152193_12093 | NW_004516356.1 | Scaffold1046 | 12093                   | CC                              | GG              | 1946992323               |
| SNP_P4_152194_12132 | NW_004516356.1 | Scaffold1046 | 12132                   | CC                              | GG              | 1946992325               |
| SNP_P4_152195_12203 | NW_004516356.1 | Scaffold1046 | 12203                   | GG                              | TT              | 1946992327               |
| SNP_P4_152196_12272 | NW_004516356.1 | Scaffold1046 | 12272                   | CC                              | TT              | 1946992329               |
| SNP_P4_152197_12302 | NW_004516356.1 | Scaffold1046 | 12302                   | CC                              | GG              | 1946992331               |
| SNP_P4_152198_12413 | NW_004516356.1 | Scaffold1046 | 12413                   | CC                              | AA              | 1946992333               |
| SNP_P4_152199_12456 | NW_004516356.1 | Scaffold1046 | 12456                   | AA                              | TT              | 1946992335               |
| SNP_P4_152200_12468 | NW_004516356.1 | Scaffold1046 | 12468                   | GG                              | AA              | 1946992337               |
| SNP_P4_152201_12778 | NW_004516356.1 | Scaffold1046 | 12778                   | TT                              | AA              | 1946992339               |
| SNP_P4_152202_12892 | NW_004516356.1 | Scaffold1046 | 12892                   | TT                              | GG              | 1946992341               |
| SNP_P4_152203_13002 | NW_004516356.1 | Scaffold1046 | 13002                   | TT                              | GG              | 1946992343               |
| SNP_P4_152204_13095 | NW_004516356.1 | Scaffold1046 | 13095                   | TT                              | CC              | 1946992345               |
| SNP_P4_152205_13098 | NW_004516356.1 | Scaffold1046 | 13098                   | AA                              | GG              | 1946992347               |
| SNP_P4_152206_14562 | NW_004516356.1 | Scaffold1046 | 14562                   | TT                              | AA              | 1946992349               |
| SNP_P4_152207_14565 | NW_004516356.1 | Scaffold1046 | 14565                   | CC                              | GG              | 1946992351               |
| SNP_P4_152208_14621 | NW_004516356.1 | Scaffold1046 | 14621                   | GG                              | TT              | 1946992353               |
| SNP_P4_152210_15251 | NW_004516356.1 | Scaffold1046 | 15251                   | AA                              | GG              | 1946992355               |
| SNP_P4_152211_15419 | NW_004516356.1 | Scaffold1046 | 15419                   | CC                              | GG              | 1946992357               |
| SNP_P4_152212_15433 | NW_004516356.1 | Scaffold1046 | 15433                   | CC                              | AA              | 1946992359               |
| SNP_P4_152213_15592 | NW_004516356.1 | Scaffold1046 | 15592                   | GG                              | TT              | 1946992361               |
| SNP_P4_152214_15637 | NW_004516356.1 | Scaffold1046 | 15637                   | TT                              | AA              | 1946992363               |
| SNP_P4_152215_15717 | NW_004516356.1 | Scaffold1046 | 15717                   | TT                              | AA              | 1946992365               |
| SNP_P4_152216_15871 | NW_004516356.1 | Scaffold1046 | 15871                   | TT                              | CC              | 1946992367               |
| SNP_P4_152217_15886 | NW_004516356.1 | Scaffold1046 | 15886                   | TT                              | CC              | 1946992369               |
| SNP_P4_152218_16373 | NW_004516356.1 | Scaffold1046 | 16373                   | CC                              | TT              | 1946992371               |
| SNP_P4_152219_16392 | NW_004516356.1 | Scaffold1046 | 16392                   | CC                              | GG              | 1946992373               |
| SNP_P4_152220_17065 | NW_004516356.1 | Scaffold1046 | 17065                   | TT                              | CC              | 1946992375               |
| SNP_P4_152221_17354 | NW_004516356.1 | Scaffold1046 | 17354                   | AA                              | TT              | 1946992377               |
| SNP_P4_152222_17474 | NW_004516356.1 | Scaffold1046 | 17474                   | GG                              | TT              | 1946992379               |
| SNP_P4_152223_17527 | NW_004516356.1 | Scaffold1046 | 17527                   | AA                              | CC              | 1946992381               |
| SNP_P4_152225_18073 | NW_004516356.1 | Scaffold1046 | 18073                   | GG                              | TT              | 1946992383               |
| SNP_P4_152226_18194 | NW_004516356.1 | Scaffold1046 | 18194                   | TT                              | AA              | 1946992385               |
| SNP_P4_152227_18235 | NW_004516356.1 | Scaffold1046 | 18235                   | AA                              | CC              | 1946992387               |
| SNP_P4_152228_19017 | NW_004516356.1 | Scaffold1046 | 19017                   | CC                              | GG              | 1946992389               |
| SNP_P4_152229_19446 | NW_004516356.1 | Scaffold1046 | 19446                   | TT                              | CC              | 1946992391               |
| SNP_P4_152230_19448 | NW_004516356.1 | Scaffold1046 | 19448                   | GG                              | AA              | 1946992393               |
| SNP_P4_152231_19685 | NW_004516356.1 | Scaffold1046 | 19685                   | AA                              | GG              | 1946992395               |
| SNP_P4_152232_19737 | NW_004516356.1 | Scaffold1046 | 19737                   | AA                              | GG              | 1946992397               |
| SNP_P4_152233_20185 | NW_004516356.1 | Scaffold1046 | 20185                   | GG                              | AA              | 1946992399               |
| SNP_P4_152235_20545 | NW_004516356.1 | Scaffold1046 | 20545                   | CC                              | AA              | 1946992400               |
| SNP_P4_152236_20593 | NW_004516356.1 | Scaffold1046 | 20593                   | AA                              | TT              | 1946992402               |

| SNPs IDs             | Chromosome IDs | Chromosomes  | Physical positions (bp) | CDC Frontier (Reference genome) | (ILWC46 & LPNB) | NCBI SNPdb Accession IDs |
|----------------------|----------------|--------------|-------------------------|---------------------------------|-----------------|--------------------------|
| SNP_P4_152237_20687  | NW_004516356.1 | Scaffold1046 | 20687                   | GG                              | TT              | 1946992404               |
| SNP_P4_152239_21357  | NW_004516356.1 | Scaffold1046 | 21357                   | AA                              | GG              | 1946992406               |
| SNP_P4_152240_22137  | NW_004516356.1 | Scaffold1046 | 22137                   | TT                              | AA              | 1946992408               |
| SNP_P4_152241_22190  | NW_004516356.1 | Scaffold1046 | 22190                   | AA                              | GG              | 1946992410               |
| SNP_P4_152242_22666  | NW_004516356.1 | Scaffold1046 | 22666                   | TT                              | CC              | 1946992412               |
| SNP_P4_152243_22694  | NW_004516356.1 | Scaffold1046 | 22694                   | GG                              | AA              | 1946992414               |
| SNP_P4_152244_22701  | NW_004516356.1 | Scaffold1046 | 22701                   | CC                              | TT              | 1946992416               |
| SNP_P4_152245_22718  | NW_004516356.1 | Scaffold1046 | 22718                   | AA                              | CC              | 1946992418               |
| SNP_P4_152246_22725  | NW_004516356.1 | Scaffold1046 | 22725                   | TT                              | GG              | 1946992420               |
| SNP_P4_152247_25822  | NW_004516356.1 | Scaffold1046 | 25822                   | CC                              | GG              | 1946992422               |
| SNP_P4_152248_28242  | NW_004516356.1 | Scaffold1046 | 28242                   | TT                              | CC              | 1946992424               |
| SNP_P4_152249_28243  | NW_004516356.1 | Scaffold1046 | 28243                   | CC                              | TT              | 1946992426               |
| SNP_P4_152250_30325  | NW_004516356.1 | Scaffold1046 | 30325                   | TT                              | AA              | 1946992428               |
| SNP_P4_152251_31495  | NW_004516356.1 | Scaffold1046 | 31495                   | AA                              | GG              | 1946992430               |
| SNP_P4_152253_31927  | NW_004516356.1 | Scaffold1046 | 31927                   | AA                              | GG              | 1946992432               |
| SNP_P4_152254_32340  | NW_004516356.1 | Scaffold1046 | 32340                   | AA                              | TT              | 1946992434               |
| SNP_P4_152255_32929  | NW_004516356.1 | Scaffold1046 | 32929                   | TT                              | CC              | 1946992436               |
| SNP_P4_152256_32955  | NW_004516356.1 | Scaffold1046 | 32955                   | AA                              | TT              | 1946992438               |
| SNP_P4_152257_33029  | NW_004516356.1 | Scaffold1046 | 33029                   | CC                              | TT              | 1946992440               |
| SNP_P4_152258_14713  | NW_004516357.1 | Scaffold1047 | 14713                   | TT                              | CC              | 1946992442               |
| SNP_P4_152259_16785  | NW_004516357.1 | Scaffold1047 | 16785                   | TT                              | CC              | 1946992444               |
| SNP_P4_152260_16884  | NW_004516357.1 | Scaffold1047 | 16884                   | GG                              | AA              | 1946992446               |
| SNP_P4_152261_17449  | NW_004516357.1 | Scaffold1047 | 17449                   | TT                              | CC              | 1946992448               |
| SNP_P4_152262_24092  | NW_004516357.1 | Scaffold1047 | 24092                   | CC                              | AA              | 1946992450               |
| SNP_P4_152263_24505  | NW_004516357.1 | Scaffold1047 | 24505                   | AA                              | TT              | 1946992452               |
| SNP_P4_152264_24660  | NW_004516357.1 | Scaffold1047 | 24660                   | AA                              | GG              | 1946992454               |
| SNP_P4_152265_24805  | NW_004516357.1 | Scaffold1047 | 24805                   | GG                              | TT              | 1946992456               |
| SNP_P4_152266_34925  | NW_004516357.1 | Scaffold1047 | 34925                   | CC                              | TT              | 1946992458               |
| SNP_P4_152267_34947  | NW_004516357.1 | Scaffold1047 | 34947                   | GG                              | TT              | 1946992460               |
| SNP_P4_152268_35197  | NW_004516357.1 | Scaffold1047 | 35197                   | CC                              | TT              | 1946992462               |
| SNP_P4_152269_35441  | NW_004516357.1 | Scaffold1047 | 35441                   | TT                              | AA              | 1946992464               |
| SNP_P4_152270_35505  | NW_004516357.1 | Scaffold1047 | 35505                   | GG                              | AA              | 1946992466               |
| SNP_P4_152271_41376  | NW_004516357.1 | Scaffold1047 | 41376                   | CC                              | TT              | 1946992468               |
| SNP_P4_152272_41388  | NW_004516357.1 | Scaffold1047 | 41388                   | TT                              | CC              | 1946992470               |
| SNP_P4_152274_44091  | NW_004516357.1 | Scaffold1047 | 44091                   | GG                              | AA              | 1946992472               |
| SNP_P4_152275_52983  | NW_004516357.1 | Scaffold1047 | 52983                   | AA                              | GG              | 1946992474               |
| SNP_P4_152277_62375  | NW_004516357.1 | Scaffold1047 | 62375                   | AA                              | TT              | 1946992476               |
| SNP_P4_152278_63131  | NW_004516357.1 | Scaffold1047 | 63131                   | CC                              | TT              | 1946992478               |
| SNP_P4_152279_63165  | NW_004516357.1 | Scaffold1047 | 63165                   | GG                              | TT              | 1946992480               |
| SNP_P4_152281_91350  | NW_004516357.1 | Scaffold1047 | 91350                   | GG                              | CC              | 1946992482               |
| SNP_P4_152284_163766 | NW_004516357.1 | Scaffold1047 | 163766                  | CC                              | TT              | 1946992484               |
| SNP_P4_152287_175424 | NW_004516357.1 | Scaffold1047 | 175424                  | AA                              | GG              | 1946992486               |

| SNPs IDs             | Chromosome IDs | Chromosomes  | Physical positions (bp) | CDC Frontier (Reference genome) | (ILWC46 & LPNB) | NCBI SNPdb Accession IDs |
|----------------------|----------------|--------------|-------------------------|---------------------------------|-----------------|--------------------------|
| SNP_P4_152288_199044 | NW_004516357.1 | Scaffold1047 | 199044                  | GG                              | AA              | 1946992488               |
| SNP_P4_152290_211775 | NW_004516357.1 | Scaffold1047 | 211775                  | TT                              | CC              | 1946992490               |
| SNP_P4_152292_218086 | NW_004516357.1 | Scaffold1047 | 218086                  | AA                              | GG              | 1946992492               |
| SNP_P4_152293_230317 | NW_004516357.1 | Scaffold1047 | 230317                  | AA                              | GG              | 1946992494               |
| SNP_P4_152294_242535 | NW_004516357.1 | Scaffold1047 | 242535                  | TT                              | GG              | 1946992496               |
| SNP_P4_152295_242536 | NW_004516357.1 | Scaffold1047 | 242536                  | TT                              | CC              | 1946992498               |
| SNP_P4_152296_248395 | NW_004516357.1 | Scaffold1047 | 248395                  | TT                              | CC              | 1946992500               |
| SNP_P4_152297_265553 | NW_004516357.1 | Scaffold1047 | 265553                  | GG                              | AA              | 1946992502               |
| SNP_P4_152298_278063 | NW_004516357.1 | Scaffold1047 | 278063                  | GG                              | AA              | 1946992504               |
| SNP_P4_152300_280916 | NW_004516357.1 | Scaffold1047 | 280916                  | AA                              | GG              | 1946992506               |
| SNP_P4_152301_280979 | NW_004516357.1 | Scaffold1047 | 280979                  | TT                              | CC              | 1946992508               |
| SNP_P4_152302_281047 | NW_004516357.1 | Scaffold1047 | 281047                  | CC                              | GG              | 1946992510               |
| SNP_P4_152303_281108 | NW_004516357.1 | Scaffold1047 | 281108                  | GG                              | TT              | 1946992512               |
| SNP_P4_152304_285749 | NW_004516357.1 | Scaffold1047 | 285749                  | TT                              | GG              | 1946992514               |
| SNP_P4_152306_303113 | NW_004516357.1 | Scaffold1047 | 303113                  | AA                              | TT              | 1946992516               |
| SNP_P4_152309_324624 | NW_004516357.1 | Scaffold1047 | 324624                  | GG                              | AA              | 1946992518               |
| SNP_P4_152310_325119 | NW_004516357.1 | Scaffold1047 | 325119                  | AA                              | GG              | 1946992519               |
| SNP_P4_152312_383449 | NW_004516357.1 | Scaffold1047 | 383449                  | AA                              | TT              | 1946992521               |
| SNP_P4_152313_385571 | NW_004516357.1 | Scaffold1047 | 385571                  | TT                              | CC              | 1946992523               |
| SNP_P4_152314_385785 | NW_004516357.1 | Scaffold1047 | 385785                  | GG                              | AA              | 1946992525               |
| SNP_P4_152315_385837 | NW_004516357.1 | Scaffold1047 | 385837                  | TT                              | GG              | 1946992527               |
| SNP_P4_152316_386927 | NW_004516357.1 | Scaffold1047 | 386927                  | CC                              | TT              | 1946992529               |
| SNP_P4_152317_387335 | NW_004516357.1 | Scaffold1047 | 387335                  | GG                              | AA              | 1946992531               |
| SNP_P4_152319_419821 | NW_004516357.1 | Scaffold1047 | 419821                  | GG                              | TT              | 1946992533               |
| SNP_P4_152320_419898 | NW_004516357.1 | Scaffold1047 | 419898                  | GG                              | AA              | 1946992535               |
| SNP_P4_152321_419919 | NW_004516357.1 | Scaffold1047 | 419919                  | GG                              | AA              | 1946992538               |
| SNP_P4_152322_422267 | NW_004516357.1 | Scaffold1047 | 422267                  | AA                              | TT              | 1946992539               |
| SNP_P4_152323_441637 | NW_004516357.1 | Scaffold1047 | 441637                  | TT                              | CC              | 1946992540               |
| SNP_P4_152326_483637 | NW_004516357.1 | Scaffold1047 | 483637                  | GG                              | AA              | 1946992541               |
| SNP_P4_152327_496331 | NW_004516357.1 | Scaffold1047 | 496331                  | TT                              | CC              | 1946992542               |
| SNP_P4_152328_496332 | NW_004516357.1 | Scaffold1047 | 496332                  | GG                              | AA              | 1946992543               |
| SNP_P4_152329_496368 | NW_004516357.1 | Scaffold1047 | 496368                  | TT                              | CC              | 1946992544               |
| SNP_P4_152330_496616 | NW_004516357.1 | Scaffold1047 | 496616                  | AA                              | TT              | 1946992545               |
| SNP_P4_152331_496659 | NW_004516357.1 | Scaffold1047 | 496659                  | AA                              | TT              | 1946992547               |
| SNP_P4_152332_496704 | NW_004516357.1 | Scaffold1047 | 496704                  | AA                              | TT              | 1946992549               |
| SNP_P4_152333_496719 | NW_004516357.1 | Scaffold1047 | 496719                  | TT                              | GG              | 1946992551               |
| SNP_P4_152334_503170 | NW_004516357.1 | Scaffold1047 | 503170                  | AA                              | GG              | 1946992553               |
| SNP_P4_152335_509269 | NW_004516357.1 | Scaffold1047 | 509269                  | CC                              | TT              | 1946992555               |
| SNP_P4_152338_147    | NW_004516358.1 | Scaffold1048 | 147                     | AA                              | GG              | 1946992557               |
| SNP_P4_152339_200    | NW_004516358.1 | Scaffold1048 | 200                     | CC                              | GG              | 1946992559               |
| SNP_P4_152340_751    | NW_004516358.1 | Scaffold1048 | 751                     | CC                              | TT              | 1946992561               |
| SNP_P4_152341_14811  | NW_004516359.1 | Scaffold1049 | 14811                   | TT                              | GG              | 1946992563               |

| SNPs IDs             | Chromosome IDs | Chromosomes  | Physical positions (bp) | CDC Frontier (Reference genome) | (ILWC46 & LPNB) | NCBI SNPdb Accession IDs |
|----------------------|----------------|--------------|-------------------------|---------------------------------|-----------------|--------------------------|
| SNP_P4_152342_22949  | NW_004516359.1 | Scaffold1049 | 22949                   | TT                              | AA              | 1946992565               |
| SNP_P4_152343_24250  | NW_004516359.1 | Scaffold1049 | 24250                   | TT                              | GG              | 1946992567               |
| SNP_P4_152344_24273  | NW_004516359.1 | Scaffold1049 | 24273                   | TT                              | CC              | 1946992569               |
| SNP_P4_152345_24503  | NW_004516359.1 | Scaffold1049 | 24503                   | CC                              | TT              | 1946992571               |
| SNP_P4_152346_25731  | NW_004516359.1 | Scaffold1049 | 25731                   | GG                              | AA              | 1946992573               |
| SNP_P4_152347_32856  | NW_004516359.1 | Scaffold1049 | 32856                   | AA                              | CC              | 1946992575               |
| SNP_P4_152349_44946  | NW_004516359.1 | Scaffold1049 | 44946                   | GG                              | AA              | 1946992577               |
| SNP_P4_152350_44970  | NW_004516359.1 | Scaffold1049 | 44970                   | TT                              | CC              | 1946992579               |
| SNP_P4_152351_72948  | NW_004516359.1 | Scaffold1049 | 72948                   | AA                              | GG              | 1946992581               |
| SNP_P4_152352_72984  | NW_004516359.1 | Scaffold1049 | 72984                   | AA                              | GG              | 1946992583               |
| SNP_P4_152353_72986  | NW_004516359.1 | Scaffold1049 | 72986                   | GG                              | AA              | 1946992585               |
| SNP_P4_152354_73015  | NW_004516359.1 | Scaffold1049 | 73015                   | CC                              | TT              | 1946992587               |
| SNP_P4_152355_73065  | NW_004516359.1 | Scaffold1049 | 73065                   | CC                              | TT              | 1946992589               |
| SNP_P4_152356_74752  | NW_004516359.1 | Scaffold1049 | 74752                   | AA                              | GG              | 1946992591               |
| SNP_P4_152357_74930  | NW_004516359.1 | Scaffold1049 | 74930                   | AA                              | GG              | 1946992593               |
| SNP_P4_152358_75000  | NW_004516359.1 | Scaffold1049 | 75000                   | TT                              | AA              | 1946992595               |
| SNP_P4_152360_75240  | NW_004516359.1 | Scaffold1049 | 75240                   | TT                              | GG              | 1946992597               |
| SNP_P4_152361_99703  | NW_004516359.1 | Scaffold1049 | 99703                   | TT                              | GG              | 1946992599               |
| SNP_P4_152362_99936  | NW_004516359.1 | Scaffold1049 | 99936                   | TT                              | AA              | 1946992601               |
| SNP_P4_152363_110915 | NW_004516359.1 | Scaffold1049 | 110915                  | GG                              | TT              | 1946992603               |
| SNP_P4_152364_110943 | NW_004516359.1 | Scaffold1049 | 110943                  | TT                              | CC              | 1946992605               |
| SNP_P4_152365_110979 | NW_004516359.1 | Scaffold1049 | 110979                  | AA                              | CC              | 1946992607               |
| SNP_P4_152366_111221 | NW_004516359.1 | Scaffold1049 | 111221                  | GG                              | AA              | 1946992609               |
| SNP_P4_152367_111247 | NW_004516359.1 | Scaffold1049 | 111247                  | AA                              | GG              | 1946992611               |
| SNP_P4_152368_111298 | NW_004516359.1 | Scaffold1049 | 111298                  | GG                              | AA              | 1946992613               |
| SNP_P4_152371_127969 | NW_004516359.1 | Scaffold1049 | 127969                  | TT                              | GG              | 1946992615               |
| SNP_P4_152372_127987 | NW_004516359.1 | Scaffold1049 | 127987                  | AA                              | GG              | 1946992617               |
| SNP_P4_152373_127988 | NW_004516359.1 | Scaffold1049 | 127988                  | CC                              | GG              | 1946992619               |
| SNP_P4_152374_128098 | NW_004516359.1 | Scaffold1049 | 128098                  | AA                              | GG              | 1946992621               |
| SNP_P4_152375_128253 | NW_004516359.1 | Scaffold1049 | 128253                  | TT                              | CC              | 1946992623               |
| SNP_P4_152376_128270 | NW_004516359.1 | Scaffold1049 | 128270                  | AA                              | GG              | 1946992625               |
| SNP_P4_152377_128298 | NW_004516359.1 | Scaffold1049 | 128298                  | GG                              | CC              | 1946992627               |
| SNP_P4_152378_128442 | NW_004516359.1 | Scaffold1049 | 128442                  | GG                              | AA              | 1946992629               |
| SNP_P4_152379_128463 | NW_004516359.1 | Scaffold1049 | 128463                  | AA                              | CC              | 1946992631               |
| SNP_P4_152380_128466 | NW_004516359.1 | Scaffold1049 | 128466                  | TT                              | CC              | 1946992633               |
| SNP_P4_152381_128475 | NW_004516359.1 | Scaffold1049 | 128475                  | GG                              | AA              | 1946992635               |
| SNP_P4_152382_128580 | NW_004516359.1 | Scaffold1049 | 128580                  | AA                              | GG              | 1946992637               |
| SNP_P4_152383_128587 | NW_004516359.1 | Scaffold1049 | 128587                  | CC                              | TT              | 1946992639               |
| SNP_P4_152384_185136 | NW_004516359.1 | Scaffold1049 | 185136                  | GG                              | AA              | 1946992641               |
| SNP_P4_152385_193914 | NW_004516359.1 | Scaffold1049 | 193914                  | GG                              | AA              | 1946992643               |
| SNP_P4_152386_195303 | NW_004516359.1 | Scaffold1049 | 195303                  | GG                              | TT              | 1946992645               |
| SNP_P4_152387_276213 | NW_004516359.1 | Scaffold1049 | 276213                  | TT                              | AA              | 1946992647               |



| SNPs IDs             | Chromosome IDs | Chromosomes  | Physical positions (bp) | CDC Frontier (Reference genome) | (ILWC46 & LPNB) | NCBI SNPdb Accession IDs |
|----------------------|----------------|--------------|-------------------------|---------------------------------|-----------------|--------------------------|
| SNP_P4_152388_276216 | NW_004516359.1 | Scaffold1049 | 276216                  | AA                              | CC              | 1946992649               |
| SNP_P4_152389_276642 | NW_004516359.1 | Scaffold1049 | 276642                  | AA                              | CC              | 1946992651               |
| SNP_P4_152390_277183 | NW_004516359.1 | Scaffold1049 | 277183                  | TT                              | CC              | 1946992653               |
| SNP_P4_152391_277334 | NW_004516359.1 | Scaffold1049 | 277334                  | TT                              | CC              | 1946992655               |
| SNP_P4_152392_292860 | NW_004516359.1 | Scaffold1049 | 292860                  | TT                              | AA              | 1946992657               |
| SNP_P4_152393_293701 | NW_004516359.1 | Scaffold1049 | 293701                  | TT                              | AA              | 1946992659               |
| SNP_P4_152396_1195   | NW_004516360.1 | Scaffold1050 | 1195                    | TT                              | CC              | 1946992661               |
| SNP_P4_152397_1603   | NW_004516360.1 | Scaffold1050 | 1603                    | AA                              | CC              | 1946992663               |
| SNP_P4_152398_1938   | NW_004516360.1 | Scaffold1050 | 1938                    | GG                              | AA              | 1946992665               |
| SNP_P4_152399_5328   | NW_004516360.1 | Scaffold1050 | 5328                    | GG                              | AA              | 1946992667               |
| SNP_P4_152400_8296   | NW_004516360.1 | Scaffold1050 | 8296                    | TT                              | CC              | 1946992669               |
| SNP_P4_152401_13200  | NW_004516360.1 | Scaffold1050 | 13200                   | CC                              | TT              | 1946992671               |
| SNP_P4_152402_13211  | NW_004516360.1 | Scaffold1050 | 13211                   | AA                              | GG              | 1946992673               |
| SNP_P4_152403_13226  | NW_004516360.1 | Scaffold1050 | 13226                   | CC                              | TT              | 1946992675               |
| SNP_P4_152404_13286  | NW_004516360.1 | Scaffold1050 | 13286                   | GG                              | AA              | 1946992677               |
| SNP_P4_152405_13296  | NW_004516360.1 | Scaffold1050 | 13296                   | CC                              | TT              | 1946992679               |
| SNP_P4_152406_13574  | NW_004516360.1 | Scaffold1050 | 13574                   | TT                              | AA              | 1946992681               |
| SNP_P4_152408_39009  | NW_004516360.1 | Scaffold1050 | 39009                   | AA                              | GG              | 1946992683               |
| SNP_P4_152410_39184  | NW_004516360.1 | Scaffold1050 | 39184                   | GG                              | AA              | 1946992685               |
| SNP_P4_152412_39441  | NW_004516360.1 | Scaffold1050 | 39441                   | GG                              | TT              | 1946992687               |
| SNP_P4_152413_69133  | NW_004516360.1 | Scaffold1050 | 69133                   | AA                              | GG              | 1946992689               |
| SNP_P4_152414_95302  | NW_004516360.1 | Scaffold1050 | 95302                   | AA                              | GG              | 1946992691               |
| SNP_P4_152415_95374  | NW_004516360.1 | Scaffold1050 | 95374                   | CC                              | GG              | 1946992693               |
| SNP_P4_152416_95676  | NW_004516360.1 | Scaffold1050 | 95676                   | CC                              | TT              | 1946992695               |
| SNP_P4_152417_95694  | NW_004516360.1 | Scaffold1050 | 95694                   | GG                              | AA              | 1946992697               |
| SNP_P4_152418_95709  | NW_004516360.1 | Scaffold1050 | 95709                   | AA                              | GG              | 1946992699               |
| SNP_P4_152419_95723  | NW_004516360.1 | Scaffold1050 | 95723                   | AA                              | TT              | 1946992701               |
| SNP_P4_152420_97682  | NW_004516360.1 | Scaffold1050 | 97682                   | TT                              | GG              | 1946992703               |
| SNP_P4_152421_97690  | NW_004516360.1 | Scaffold1050 | 97690                   | AA                              | CC              | 1946992705               |
| SNP_P4_152422_97694  | NW_004516360.1 | Scaffold1050 | 97694                   | CC                              | TT              | 1946992707               |
| SNP_P4_152423_98708  | NW_004516360.1 | Scaffold1050 | 98708                   | AA                              | TT              | 1946992709               |
| SNP_P4_152425_149185 | NW_004516360.1 | Scaffold1050 | 149185                  | TT                              | AA              | 1946992711               |
| SNP_P4_152426_149186 | NW_004516360.1 | Scaffold1050 | 149186                  | AA                              | CC              | 1946992713               |
| SNP_P4_152428_178658 | NW_004516360.1 | Scaffold1050 | 178658                  | TT                              | CC              | 1946992715               |
| SNP_P4_152429_178701 | NW_004516360.1 | Scaffold1050 | 178701                  | AA                              | TT              | 1946992717               |
| SNP_P4_152430_178854 | NW_004516360.1 | Scaffold1050 | 178854                  | GG                              | TT              | 1946992719               |
| SNP_P4_152431_178861 | NW_004516360.1 | Scaffold1050 | 178861                  | AA                              | GG              | 1946992721               |
| SNP_P4_152432_178909 | NW_004516360.1 | Scaffold1050 | 178909                  | GG                              | AA              | 1946992723               |
| SNP_P4_152433_185056 | NW_004516360.1 | Scaffold1050 | 185056                  | AA                              | CC              | 1946992725               |
| SNP_P4_152434_185084 | NW_004516360.1 | Scaffold1050 | 185084                  | TT                              | CC              | 1946992727               |
| SNP_P4_152435_244218 | NW_004516360.1 | Scaffold1050 | 244218                  | CC                              | TT              | 1946992729               |
| SNP_P4_152436_244513 | NW_004516360.1 | Scaffold1050 | 244513                  | TT                              | CC              | 1946992731               |

| SNPs IDs             | Chromosome IDs | Chromosomes  | Physical positions (bp) | CDC Frontier (Reference genome) | (ILWC46 & LPNB) | NCBI SNPdb Accession IDs |
|----------------------|----------------|--------------|-------------------------|---------------------------------|-----------------|--------------------------|
| SNP_P4_152437_249906 | NW_004516360.1 | Scaffold1050 | 249906                  | TT                              | GG              | 1946992733               |
| SNP_P4_152438_249923 | NW_004516360.1 | Scaffold1050 | 249923                  | TT                              | CC              | 1946992735               |
| SNP_P4_152439_2146   | NW_004516361.1 | Scaffold1051 | 2146                    | AA                              | TT              | 1946992737               |
| SNP_P4_152440_2220   | NW_004516361.1 | Scaffold1051 | 2220                    | TT                              | GG              | 1946992739               |
| SNP_P4_152441_6066   | NW_004516361.1 | Scaffold1051 | 6066                    | TT                              | CC              | 1946992741               |
| SNP_P4_152442_12076  | NW_004516361.1 | Scaffold1051 | 12076                   | GG                              | AA              | 1946992743               |
| SNP_P4_152443_12331  | NW_004516361.1 | Scaffold1051 | 12331                   | AA                              | CC              | 1946992745               |
| SNP_P4_152444_12333  | NW_004516361.1 | Scaffold1051 | 12333                   | GG                              | TT              | 1946992747               |
| SNP_P4_152445_12361  | NW_004516361.1 | Scaffold1051 | 12361                   | TT                              | CC              | 1946992749               |
| SNP_P4_152446_13591  | NW_004516361.1 | Scaffold1051 | 13591                   | AA                              | TT              | 1946992751               |
| SNP_P4_152447_13632  | NW_004516361.1 | Scaffold1051 | 13632                   | GG                              | CC              | 1946992753               |
| SNP_P4_152448_13712  | NW_004516361.1 | Scaffold1051 | 13712                   | TT                              | CC              | 1946992755               |
| SNP_P4_152449_13726  | NW_004516361.1 | Scaffold1051 | 13726                   | AA                              | GG              | 1946992757               |
| SNP_P4_152450_13800  | NW_004516361.1 | Scaffold1051 | 13800                   | GG                              | TT              | 1946992759               |
| SNP_P4_152451_13803  | NW_004516361.1 | Scaffold1051 | 13803                   | AA                              | GG              | 1946992761               |
| SNP_P4_152452_13827  | NW_004516361.1 | Scaffold1051 | 13827                   | CC                              | TT              | 1946992762               |
| SNP_P4_152453_13833  | NW_004516361.1 | Scaffold1051 | 13833                   | TT                              | AA              | 1946992764               |
| SNP_P4_152454_13872  | NW_004516361.1 | Scaffold1051 | 13872                   | TT                              | CC              | 1946992766               |
| SNP_P4_152455_13878  | NW_004516361.1 | Scaffold1051 | 13878                   | TT                              | CC              | 1946992768               |
| SNP_P4_152456_14002  | NW_004516361.1 | Scaffold1051 | 14002                   | CC                              | TT              | 1946992770               |
| SNP_P4_152457_14011  | NW_004516361.1 | Scaffold1051 | 14011                   | GG                              | AA              | 1946992772               |
| SNP_P4_152458_14051  | NW_004516361.1 | Scaffold1051 | 14051                   | GG                              | TT              | 1946992774               |
| SNP_P4_152459_14082  | NW_004516361.1 | Scaffold1051 | 14082                   | CC                              | AA              | 1946992776               |
| SNP_P4_152460_14117  | NW_004516361.1 | Scaffold1051 | 14117                   | GG                              | AA              | 1946992778               |
| SNP_P4_152461_14268  | NW_004516361.1 | Scaffold1051 | 14268                   | TT                              | CC              | 1946992780               |
| SNP_P4_152463_24586  | NW_004516361.1 | Scaffold1051 | 24586                   | TT                              | CC              | 1946992782               |
| SNP_P4_152464_24598  | NW_004516361.1 | Scaffold1051 | 24598                   | AA                              | GG              | 1946992784               |
| SNP_P4_152465_24609  | NW_004516361.1 | Scaffold1051 | 24609                   | CC                              | AA              | 1946992786               |
| SNP_P4_152466_24673  | NW_004516361.1 | Scaffold1051 | 24673                   | AA                              | CC              | 1946992788               |
| SNP_P4_152467_25610  | NW_004516361.1 | Scaffold1051 | 25610                   | CC                              | TT              | 1946992790               |
| SNP_P4_152468_30559  | NW_004516361.1 | Scaffold1051 | 30559                   | AA                              | GG              | 1946992792               |
| SNP_P4_152469_30560  | NW_004516361.1 | Scaffold1051 | 30560                   | AA                              | GG              | 1946992794               |
| SNP_P4_152470_49998  | NW_004516361.1 | Scaffold1051 | 49998                   | TT                              | CC              | 1946992796               |
| SNP_P4_152471_51633  | NW_004516361.1 | Scaffold1051 | 51633                   | AA                              | GG              | 1946992798               |
| SNP_P4_152472_51640  | NW_004516361.1 | Scaffold1051 | 51640                   | TT                              | CC              | 1946992800               |
| SNP_P4_152473_51645  | NW_004516361.1 | Scaffold1051 | 51645                   | TT                              | AA              | 1946992802               |
| SNP_P4_152474_73789  | NW_004516361.1 | Scaffold1051 | 73789                   | TT                              | GG              | 1946992804               |
| SNP_P4_152475_75024  | NW_004516361.1 | Scaffold1051 | 75024                   | TT                              | CC              | 1946992806               |
| SNP_P4_152476_6777   | NW_004516362.1 | Scaffold1052 | 6777                    | CC                              | AA              | 1946992808               |
| SNP_P4_152477_7831   | NW_004516362.1 | Scaffold1052 | 7831                    | AA                              | GG              | 1946992810               |
| SNP_P4_152478_7835   | NW_004516362.1 | Scaffold1052 | 7835                    | TT                              | CC              | 1946992812               |
| SNP_P4_152479_10419  | NW_004516362.1 | Scaffold1052 | 10419                   | GG                              | AA              | 1946992814               |

| SNPs IDs             | Chromosome IDs | Chromosomes  | Physical positions (bp) | CDC Frontier (Reference genome) | (ILWC46 & LPNB) | NCBI SNPdb Accession IDs |
|----------------------|----------------|--------------|-------------------------|---------------------------------|-----------------|--------------------------|
| SNP_P4_152480_10432  | NW_004516362.1 | Scaffold1052 | 10432                   | CC                              | TT              | 1946992816               |
| SNP_P4_152482_11661  | NW_004516362.1 | Scaffold1052 | 11661                   | CC                              | GG              | 1946992818               |
| SNP_P4_152483_16058  | NW_004516362.1 | Scaffold1052 | 16058                   | GG                              | TT              | 1946992820               |
| SNP_P4_152484_16417  | NW_004516362.1 | Scaffold1052 | 16417                   | TT                              | AA              | 1946992822               |
| SNP_P4_152486_16519  | NW_004516362.1 | Scaffold1052 | 16519                   | AA                              | GG              | 1946992824               |
| SNP_P4_152487_16532  | NW_004516362.1 | Scaffold1052 | 16532                   | AA                              | GG              | 1946992826               |
| SNP_P4_152488_16590  | NW_004516362.1 | Scaffold1052 | 16590                   | TT                              | CC              | 1946992828               |
| SNP_P4_152489_17296  | NW_004516362.1 | Scaffold1052 | 17296                   | TT                              | CC              | 1946992830               |
| SNP_P4_152490_17556  | NW_004516362.1 | Scaffold1052 | 17556                   | AA                              | TT              | 1946992832               |
| SNP_P4_152491_17679  | NW_004516362.1 | Scaffold1052 | 17679                   | AA                              | CC              | 1946992834               |
| SNP_P4_152492_41455  | NW_004516362.1 | Scaffold1052 | 41455                   | TT                              | CC              | 1946992836               |
| SNP_P4_152493_50408  | NW_004516362.1 | Scaffold1052 | 50408                   | AA                              | GG              | 1946992838               |
| SNP_P4_152494_50716  | NW_004516362.1 | Scaffold1052 | 50716                   | AA                              | GG              | 1946992840               |
| SNP_P4_152495_55022  | NW_004516362.1 | Scaffold1052 | 55022                   | GG                              | CC              | 1946992842               |
| SNP_P4_152496_55460  | NW_004516362.1 | Scaffold1052 | 55460                   | TT                              | CC              | 1946992844               |
| SNP_P4_152497_55473  | NW_004516362.1 | Scaffold1052 | 55473                   | AA                              | GG              | 1946992847               |
| SNP_P4_152498_55474  | NW_004516362.1 | Scaffold1052 | 55474                   | AA                              | GG              | 1946992849               |
| SNP_P4_152499_57349  | NW_004516362.1 | Scaffold1052 | 57349                   | TT                              | CC              | 1946992851               |
| SNP_P4_152500_57355  | NW_004516362.1 | Scaffold1052 | 57355                   | TT                              | CC              | 1946992853               |
| SNP_P4_152501_57412  | NW_004516362.1 | Scaffold1052 | 57412                   | GG                              | AA              | 1946992855               |
| SNP_P4_152502_57460  | NW_004516362.1 | Scaffold1052 | 57460                   | GG                              | AA              | 1946992857               |
| SNP_P4_152503_57760  | NW_004516362.1 | Scaffold1052 | 57760                   | GG                              | AA              | 1946992859               |
| SNP_P4_152504_58872  | NW_004516362.1 | Scaffold1052 | 58872                   | GG                              | AA              | 1946992861               |
| SNP_P4_152505_76492  | NW_004516362.1 | Scaffold1052 | 76492                   | GG                              | AA              | 1946992864               |
| SNP_P4_152506_76499  | NW_004516362.1 | Scaffold1052 | 76499                   | AA                              | GG              | 1946992866               |
| SNP_P4_152507_76506  | NW_004516362.1 | Scaffold1052 | 76506                   | AA                              | CC              | 1946992868               |
| SNP_P4_152508_76539  | NW_004516362.1 | Scaffold1052 | 76539                   | TT                              | AA              | 1946992870               |
| SNP_P4_152509_76558  | NW_004516362.1 | Scaffold1052 | 76558                   | AA                              | CC              | 1946992872               |
| SNP_P4_152510_77643  | NW_004516362.1 | Scaffold1052 | 77643                   | GG                              | AA              | 1946992874               |
| SNP_P4_152511_77677  | NW_004516362.1 | Scaffold1052 | 77677                   | TT                              | AA              | 1946992876               |
| SNP_P4_152512_89002  | NW_004516362.1 | Scaffold1052 | 89002                   | GG                              | TT              | 1946992878               |
| SNP_P4_152513_91863  | NW_004516362.1 | Scaffold1052 | 91863                   | TT                              | GG              | 1946992880               |
| SNP_P4_152514_91879  | NW_004516362.1 | Scaffold1052 | 91879                   | CC                              | TT              | 1946992882               |
| SNP_P4_152515_91892  | NW_004516362.1 | Scaffold1052 | 91892                   | TT                              | CC              | 1946992884               |
| SNP_P4_152516_100158 | NW_004516362.1 | Scaffold1052 | 100158                  | CC                              | AA              | 1946992886               |
| SNP_P4_152517_100474 | NW_004516362.1 | Scaffold1052 | 100474                  | CC                              | AA              | 1946992888               |
| SNP_P4_152518_103357 | NW_004516362.1 | Scaffold1052 | 103357                  | TT                              | GG              | 1946992890               |
| SNP_P4_152519_103691 | NW_004516362.1 | Scaffold1052 | 103691                  | AA                              | GG              | 1946992892               |
| SNP_P4_152520_103709 | NW_004516362.1 | Scaffold1052 | 103709                  | AA                              | GG              | 1946992894               |
| SNP_P4_152522_113030 | NW_004516362.1 | Scaffold1052 | 113030                  | TT                              | CC              | 1946992896               |
| SNP_P4_152523_134260 | NW_004516362.1 | Scaffold1052 | 134260                  | AA                              | TT              | 1946992898               |
| SNP_P4_152524_134276 | NW_004516362.1 | Scaffold1052 | 134276                  | TT                              | GG              | 1946992900               |

| SNPs IDs             | Chromosome IDs | Chromosomes  | Physical positions (bp) | CDC Frontier (Reference genome) | (ILWC46 & LPNB) | NCBI SNPdb Accession IDs |
|----------------------|----------------|--------------|-------------------------|---------------------------------|-----------------|--------------------------|
| SNP_P4_152525_134279 | NW_004516362.1 | Scaffold1052 | 134279                  | GG                              | AA              | 1946992902               |
| SNP_P4_152526_134284 | NW_004516362.1 | Scaffold1052 | 134284                  | AA                              | GG              | 1946992904               |
| SNP_P4_152527_134457 | NW_004516362.1 | Scaffold1052 | 134457                  | TT                              | AA              | 1946992906               |
| SNP_P4_152528_134536 | NW_004516362.1 | Scaffold1052 | 134536                  | GG                              | CC              | 1946992908               |
| SNP_P4_152529_135006 | NW_004516362.1 | Scaffold1052 | 135006                  | AA                              | TT              | 1946992910               |
| SNP_P4_152530_140139 | NW_004516362.1 | Scaffold1052 | 140139                  | TT                              | AA              | 1946992912               |
| SNP_P4_152531_140171 | NW_004516362.1 | Scaffold1052 | 140171                  | TT                              | CC              | 1946992914               |
| SNP_P4_152532_155970 | NW_004516362.1 | Scaffold1052 | 155970                  | AA                              | GG              | 1946992916               |
| SNP_P4_152533_156505 | NW_004516362.1 | Scaffold1052 | 156505                  | CC                              | TT              | 1946992918               |
| SNP_P4_152534_166649 | NW_004516362.1 | Scaffold1052 | 166649                  | GG                              | AA              | 1946992920               |
| SNP_P4_152535_171167 | NW_004516362.1 | Scaffold1052 | 171167                  | CC                              | AA              | 1946992922               |
| SNP_P4_152536_171169 | NW_004516362.1 | Scaffold1052 | 171169                  | AA                              | GG              | 1946992924               |
| SNP_P4_152537_171247 | NW_004516362.1 | Scaffold1052 | 171247                  | AA                              | GG              | 1946992926               |
| SNP_P4_152538_171525 | NW_004516362.1 | Scaffold1052 | 171525                  | GG                              | AA              | 1946992928               |
| SNP_P4_152539_171592 | NW_004516362.1 | Scaffold1052 | 171592                  | GG                              | AA              | 1946992930               |
| SNP_P4_152540_171611 | NW_004516362.1 | Scaffold1052 | 171611                  | AA                              | TT              | 1946992932               |
| SNP_P4_152541_175919 | NW_004516362.1 | Scaffold1052 | 175919                  | GG                              | CC              | 1946992934               |
| SNP_P4_152542_175968 | NW_004516362.1 | Scaffold1052 | 175968                  | AA                              | GG              | 1946992936               |
| SNP_P4_152543_175976 | NW_004516362.1 | Scaffold1052 | 175976                  | GG                              | AA              | 1946992938               |
| SNP_P4_152544_180776 | NW_004516362.1 | Scaffold1052 | 180776                  | CC                              | TT              | 1946992940               |
| SNP_P4_152545_183724 | NW_004516362.1 | Scaffold1052 | 183724                  | TT                              | CC              | 1946992942               |
| SNP_P4_152546_183736 | NW_004516362.1 | Scaffold1052 | 183736                  | GG                              | TT              | 1946992944               |
| SNP_P4_152547_183743 | NW_004516362.1 | Scaffold1052 | 183743                  | TT                              | CC              | 1946992946               |
| SNP_P4_152548_186589 | NW_004516362.1 | Scaffold1052 | 186589                  | TT                              | AA              | 1946992948               |
| SNP_P4_152549_186605 | NW_004516362.1 | Scaffold1052 | 186605                  | AA                              | TT              | 1946992950               |
| SNP_P4_152550_186690 | NW_004516362.1 | Scaffold1052 | 186690                  | GG                              | TT              | 1946992952               |
| SNP_P4_152551_186961 | NW_004516362.1 | Scaffold1052 | 186961                  | TT                              | CC              | 1946992954               |
| SNP_P4_152552_186974 | NW_004516362.1 | Scaffold1052 | 186974                  | GG                              | AA              | 1946992956               |
| SNP_P4_152553_195379 | NW_004516362.1 | Scaffold1052 | 195379                  | TT                              | GG              | 1946992958               |
| SNP_P4_152554_215753 | NW_004516362.1 | Scaffold1052 | 215753                  | CC                              | GG              | 1946992960               |
| SNP_P4_152556_216136 | NW_004516362.1 | Scaffold1052 | 216136                  | CC                              | TT              | 1946992962               |
| SNP_P4_152558_226392 | NW_004516362.1 | Scaffold1052 | 226392                  | TT                              | CC              | 1946992964               |
| SNP_P4_152559_226753 | NW_004516362.1 | Scaffold1052 | 226753                  | TT                              | CC              | 1946992966               |
| SNP_P4_152560_233182 | NW_004516362.1 | Scaffold1052 | 233182                  | CC                              | TT              | 1946992968               |
| SNP_P4_152561_233245 | NW_004516362.1 | Scaffold1052 | 233245                  | CC                              | TT              | 1946992970               |
| SNP_P4_152563_233482 | NW_004516362.1 | Scaffold1052 | 233482                  | AA                              | GG              | 1946992972               |
| SNP_P4_152564_233513 | NW_004516362.1 | Scaffold1052 | 233513                  | CC                              | TT              | 1946992974               |
| SNP_P4_152565_244396 | NW_004516362.1 | Scaffold1052 | 244396                  | AA                              | GG              | 1946992976               |
| SNP_P4_152566_252116 | NW_004516362.1 | Scaffold1052 | 252116                  | AA                              | GG              | 1946992978               |
| SNP_P4_152567_252443 | NW_004516362.1 | Scaffold1052 | 252443                  | TT                              | AA              | 1946992980               |
| SNP_P4_152568_252570 | NW_004516362.1 | Scaffold1052 | 252570                  | GG                              | AA              | 1946992982               |
| SNP_P4_152570_260148 | NW_004516362.1 | Scaffold1052 | 260148                  | CC                              | TT              | 1946992984               |

| SNPs IDs             | Chromosome IDs | Chromosomes  | Physical positions (bp) | CDC Frontier (Reference genome) | (ILWC46 & LPNB) | NCBI SNPdb Accession IDs |
|----------------------|----------------|--------------|-------------------------|---------------------------------|-----------------|--------------------------|
| SNP_P4_152572_278328 | NW_004516362.1 | Scaffold1052 | 278328                  | AA                              | GG              | 1946992986               |
| SNP_P4_152573_278526 | NW_004516362.1 | Scaffold1052 | 278526                  | TT                              | CC              | 1946992988               |
| SNP_P4_152574_278604 | NW_004516362.1 | Scaffold1052 | 278604                  | TT                              | GG              | 1946992990               |
| SNP_P4_152575_278766 | NW_004516362.1 | Scaffold1052 | 278766                  | TT                              | AA              | 1946992992               |
| SNP_P4_152576_281965 | NW_004516362.1 | Scaffold1052 | 281965                  | AA                              | TT              | 1946992994               |
| SNP_P4_152577_282008 | NW_004516362.1 | Scaffold1052 | 282008                  | CC                              | TT              | 1946992996               |
| SNP_P4_152578_282873 | NW_004516362.1 | Scaffold1052 | 282873                  | GG                              | AA              | 1946992998               |
| SNP_P4_152579_295373 | NW_004516362.1 | Scaffold1052 | 295373                  | CC                              | TT              | 1946993001               |
| SNP_P4_152580_295377 | NW_004516362.1 | Scaffold1052 | 295377                  | TT                              | AA              | 1946993003               |
| SNP_P4_152581_295740 | NW_004516362.1 | Scaffold1052 | 295740                  | AA                              | GG              | 1946993005               |
| SNP_P4_152582_303246 | NW_004516362.1 | Scaffold1052 | 303246                  | AA                              | GG              | 1946993007               |
| SNP_P4_152583_303274 | NW_004516362.1 | Scaffold1052 | 303274                  | CC                              | TT              | 1946993009               |
| SNP_P4_152584_303304 | NW_004516362.1 | Scaffold1052 | 303304                  | TT                              | CC              | 1946993011               |
| SNP_P4_152586_303348 | NW_004516362.1 | Scaffold1052 | 303348                  | GG                              | TT              | 1946993013               |
| SNP_P4_152587_303457 | NW_004516362.1 | Scaffold1052 | 303457                  | CC                              | TT              | 1946993015               |
| SNP_P4_152588_305183 | NW_004516362.1 | Scaffold1052 | 305183                  | TT                              | CC              | 1946993017               |
| SNP_P4_152589_305208 | NW_004516362.1 | Scaffold1052 | 305208                  | TT                              | CC              | 1946993019               |
| SNP_P4_152590_305283 | NW_004516362.1 | Scaffold1052 | 305283                  | GG                              | AA              | 1946993021               |
| SNP_P4_152592_322769 | NW_004516362.1 | Scaffold1052 | 322769                  | GG                              | AA              | 1946993023               |
| SNP_P4_152593_326842 | NW_004516362.1 | Scaffold1052 | 326842                  | GG                              | TT              | 1946993025               |
| SNP_P4_152595_339698 | NW_004516362.1 | Scaffold1052 | 339698                  | TT                              | CC              | 1946993027               |
| SNP_P4_152596_339704 | NW_004516362.1 | Scaffold1052 | 339704                  | AA                              | GG              | 1946993030               |
| SNP_P4_152597_339766 | NW_004516362.1 | Scaffold1052 | 339766                  | CC                              | AA              | 1946993032               |
| SNP_P4_152598_339779 | NW_004516362.1 | Scaffold1052 | 339779                  | AA                              | TT              | 1946993034               |
| SNP_P4_152599_113    | NW_004516364.1 | Scaffold1055 | 113                     | AA                              | GG              | 1946993036               |
| SNP_P4_152600_524    | NW_004516364.1 | Scaffold1055 | 524                     | AA                              | GG              | 1946993038               |
| SNP_P4_152601_13448  | NW_004516364.1 | Scaffold1055 | 13448                   | TT                              | CC              | 1946993040               |
| SNP_P4_152602_16209  | NW_004516364.1 | Scaffold1055 | 16209                   | GG                              | AA              | 1946993042               |
| SNP_P4_152604_17448  | NW_004516364.1 | Scaffold1055 | 17448                   | TT                              | GG              | 1946993044               |
| SNP_P4_152605_24453  | NW_004516364.1 | Scaffold1055 | 24453                   | CC                              | TT              | 1946993046               |
| SNP_P4_152606_28131  | NW_004516364.1 | Scaffold1055 | 28131                   | TT                              | CC              | 1946993048               |
| SNP_P4_152608_50387  | NW_004516364.1 | Scaffold1055 | 50387                   | TT                              | GG              | 1946993050               |
| SNP_P4_152609_50412  | NW_004516364.1 | Scaffold1055 | 50412                   | TT                              | AA              | 1946993052               |
| SNP_P4_152610_50880  | NW_004516364.1 | Scaffold1055 | 50880                   | TT                              | GG              | 1946993054               |
| SNP_P4_152611_56120  | NW_004516364.1 | Scaffold1055 | 56120                   | AA                              | GG              | 1946993056               |
| SNP_P4_152613_56414  | NW_004516364.1 | Scaffold1055 | 56414                   | TT                              | CC              | 1946993058               |
| SNP_P4_152614_56418  | NW_004516364.1 | Scaffold1055 | 56418                   | CC                              | GG              | 1946993060               |
| SNP_P4_152615_56600  | NW_004516364.1 | Scaffold1055 | 56600                   | GG                              | TT              | 1946993062               |
| SNP_P4_152616_62281  | NW_004516364.1 | Scaffold1055 | 62281                   | GG                              | AA              | 1946993064               |
| SNP_P4_152617_62642  | NW_004516364.1 | Scaffold1055 | 62642                   | GG                              | AA              | 1946993066               |
| SNP_P4_152618_62643  | NW_004516364.1 | Scaffold1055 | 62643                   | AA                              | GG              | 1946993068               |
| SNP_P4_152619_62654  | NW_004516364.1 | Scaffold1055 | 62654                   | TT                              | CC              | 1946993070               |

| SNPs IDs             | Chromosome IDs | Chromosomes  | Physical positions (bp) | CDC Frontier (Reference genome) | (ILWC46 & LPNB) | NCBI SNPdb Accession IDs |
|----------------------|----------------|--------------|-------------------------|---------------------------------|-----------------|--------------------------|
| SNP_P4_152620_88791  | NW_004516364.1 | Scaffold1055 | 88791                   | AA                              | GG              | 1946993072               |
| SNP_P4_152621_107339 | NW_004516364.1 | Scaffold1055 | 107339                  | CC                              | TT              | 1946993074               |
| SNP_P4_152622_115757 | NW_004516364.1 | Scaffold1055 | 115757                  | TT                              | AA              | 1946993076               |
| SNP_P4_152623_115762 | NW_004516364.1 | Scaffold1055 | 115762                  | TT                              | CC              | 1946993078               |
| SNP_P4_152624_122906 | NW_004516364.1 | Scaffold1055 | 122906                  | GG                              | CC              | 1946993080               |
| SNP_P4_152625_122911 | NW_004516364.1 | Scaffold1055 | 122911                  | TT                              | AA              | 1946993082               |
| SNP_P4_152626_122970 | NW_004516364.1 | Scaffold1055 | 122970                  | GG                              | TT              | 1946993084               |
| SNP_P4_152627_129231 | NW_004516364.1 | Scaffold1055 | 129231                  | CC                              | TT              | 1946993086               |
| SNP_P4_152628_129237 | NW_004516364.1 | Scaffold1055 | 129237                  | TT                              | AA              | 1946993088               |
| SNP_P4_152629_132118 | NW_004516364.1 | Scaffold1055 | 132118                  | TT                              | CC              | 1946993090               |
| SNP_P4_152630_137852 | NW_004516364.1 | Scaffold1055 | 137852                  | AA                              | GG              | 1946993092               |
| SNP_P4_152631_142224 | NW_004516364.1 | Scaffold1055 | 142224                  | GG                              | AA              | 1946993094               |
| SNP_P4_152632_142252 | NW_004516364.1 | Scaffold1055 | 142252                  | CC                              | TT              | 1946993096               |
| SNP_P4_152633_142473 | NW_004516364.1 | Scaffold1055 | 142473                  | TT                              | CC              | 1946993098               |
| SNP_P4_152634_142661 | NW_004516364.1 | Scaffold1055 | 142661                  | AA                              | GG              | 1946993100               |
| SNP_P4_152635_142714 | NW_004516364.1 | Scaffold1055 | 142714                  | GG                              | TT              | 1946993102               |
| SNP_P4_152636_142837 | NW_004516364.1 | Scaffold1055 | 142837                  | GG                              | AA              | 1946993104               |
| SNP_P4_152637_142841 | NW_004516364.1 | Scaffold1055 | 142841                  | CC                              | GG              | 1946993106               |
| SNP_P4_152638_146720 | NW_004516364.1 | Scaffold1055 | 146720                  | GG                              | AA              | 1946993108               |
| SNP_P4_152639_148229 | NW_004516364.1 | Scaffold1055 | 148229                  | TT                              | AA              | 1946993110               |
| SNP_P4_152640_149138 | NW_004516364.1 | Scaffold1055 | 149138                  | TT                              | AA              | 1946993112               |
| SNP_P4_152642_172000 | NW_004516364.1 | Scaffold1055 | 172000                  | AA                              | GG              | 1946993114               |
| SNP_P4_152643_172033 | NW_004516364.1 | Scaffold1055 | 172033                  | GG                              | AA              | 1946993116               |
| SNP_P4_152644_172049 | NW_004516364.1 | Scaffold1055 | 172049                  | TT                              | CC              | 1946993118               |
| SNP_P4_152645_172064 | NW_004516364.1 | Scaffold1055 | 172064                  | AA                              | TT              | 1946993120               |
| SNP_P4_152646_172207 | NW_004516364.1 | Scaffold1055 | 172207                  | TT                              | CC              | 1946993122               |
| SNP_P4_152647_172375 | NW_004516364.1 | Scaffold1055 | 172375                  | AA                              | TT              | 1946993124               |
| SNP_P4_152648_172522 | NW_004516364.1 | Scaffold1055 | 172522                  | CC                              | TT              | 1946993126               |
| SNP_P4_152649_172527 | NW_004516364.1 | Scaffold1055 | 172527                  | TT                              | AA              | 1946993128               |
| SNP_P4_152650_172552 | NW_004516364.1 | Scaffold1055 | 172552                  | CC                              | AA              | 1946993130               |
| SNP_P4_152651_172584 | NW_004516364.1 | Scaffold1055 | 172584                  | AA                              | GG              | 1946993132               |
| SNP_P4_152652_178744 | NW_004516364.1 | Scaffold1055 | 178744                  | TT                              | AA              | 1946993134               |
| SNP_P4_152654_195573 | NW_004516364.1 | Scaffold1055 | 195573                  | TT                              | GG              | 1946993136               |
| SNP_P4_152655_197566 | NW_004516364.1 | Scaffold1055 | 197566                  | CC                              | TT              | 1946993138               |
| SNP_P4_152656_198082 | NW_004516364.1 | Scaffold1055 | 198082                  | CC                              | TT              | 1946993140               |
| SNP_P4_152657_198090 | NW_004516364.1 | Scaffold1055 | 198090                  | CC                              | TT              | 1946993142               |
| SNP_P4_152658_198101 | NW_004516364.1 | Scaffold1055 | 198101                  | CC                              | AA              | 1946993144               |
| SNP_P4_152659_198115 | NW_004516364.1 | Scaffold1055 | 198115                  | TT                              | GG              | 1946993146               |
| SNP_P4_152660_198120 | NW_004516364.1 | Scaffold1055 | 198120                  | GG                              | AA              | 1946993148               |
| SNP_P4_152661_198284 | NW_004516364.1 | Scaffold1055 | 198284                  | CC                              | TT              | 1946993150               |
| SNP_P4_152662_198301 | NW_004516364.1 | Scaffold1055 | 198301                  | GG                              | TT              | 1946993152               |
| SNP_P4_152663_198309 | NW_004516364.1 | Scaffold1055 | 198309                  | TT                              | CC              | 1946993154               |

| SNPs IDs             | Chromosome IDs | Chromosomes  | Physical positions (bp) | CDC Frontier (Reference genome) | (ILWC46 & LPNB) | NCBI SNPdb Accession IDs |
|----------------------|----------------|--------------|-------------------------|---------------------------------|-----------------|--------------------------|
| SNP_P4_152664_198325 | NW_004516364.1 | Scaffold1055 | 198325                  | CC                              | TT              | 1946993156               |
| SNP_P4_152665_198340 | NW_004516364.1 | Scaffold1055 | 198340                  | TT                              | AA              | 1946993158               |
| SNP_P4_152666_198384 | NW_004516364.1 | Scaffold1055 | 198384                  | CC                              | AA              | 1946993160               |
| SNP_P4_152667_198386 | NW_004516364.1 | Scaffold1055 | 198386                  | GG                              | AA              | 1946993162               |
| SNP_P4_152668_198407 | NW_004516364.1 | Scaffold1055 | 198407                  | TT                              | AA              | 1946993164               |
| SNP_P4_152669_198413 | NW_004516364.1 | Scaffold1055 | 198413                  | CC                              | TT              | 1946993166               |
| SNP_P4_152670_198416 | NW_004516364.1 | Scaffold1055 | 198416                  | GG                              | AA              | 1946993168               |
| SNP_P4_152671_198429 | NW_004516364.1 | Scaffold1055 | 198429                  | CC                              | TT              | 1946993170               |
| SNP_P4_152672_201198 | NW_004516364.1 | Scaffold1055 | 201198                  | TT                              | CC              | 1946993172               |
| SNP_P4_152673_201257 | NW_004516364.1 | Scaffold1055 | 201257                  | AA                              | TT              | 1946993174               |
| SNP_P4_152674_202843 | NW_004516364.1 | Scaffold1055 | 202843                  | GG                              | CC              | 1946993176               |
| SNP_P4_152676_205825 | NW_004516364.1 | Scaffold1055 | 205825                  | CC                              | TT              | 1946993178               |
| SNP_P4_152677_205971 | NW_004516364.1 | Scaffold1055 | 205971                  | TT                              | AA              | 1946993180               |
| SNP_P4_152678_213514 | NW_004516364.1 | Scaffold1055 | 213514                  | AA                              | TT              | 1946993182               |
| SNP_P4_152679_214073 | NW_004516364.1 | Scaffold1055 | 214073                  | AA                              | CC              | 1946993185               |
| SNP_P4_152680_217647 | NW_004516364.1 | Scaffold1055 | 217647                  | TT                              | CC              | 1946993187               |
| SNP_P4_152681_218051 | NW_004516364.1 | Scaffold1055 | 218051                  | TT                              | CC              | 1946993189               |
| SNP_P4_152682_218072 | NW_004516364.1 | Scaffold1055 | 218072                  | GG                              | AA              | 1946993191               |
| SNP_P4_152683_218165 | NW_004516364.1 | Scaffold1055 | 218165                  | AA                              | GG              | 1946993193               |
| SNP_P4_152684_218173 | NW_004516364.1 | Scaffold1055 | 218173                  | TT                              | CC              | 1946993195               |
| SNP_P4_152685_218223 | NW_004516364.1 | Scaffold1055 | 218223                  | CC                              | TT              | 1946993197               |
| SNP_P4_152686_218241 | NW_004516364.1 | Scaffold1055 | 218241                  | AA                              | CC              | 1946993199               |
| SNP_P4_152687_218891 | NW_004516364.1 | Scaffold1055 | 218891                  | TT                              | CC              | 1946993201               |
| SNP_P4_152688_231211 | NW_004516364.1 | Scaffold1055 | 231211                  | TT                              | CC              | 1946993203               |
| SNP_P4_152689_239621 | NW_004516364.1 | Scaffold1055 | 239621                  | TT                              | CC              | 1946993205               |
| SNP_P4_152690_239628 | NW_004516364.1 | Scaffold1055 | 239628                  | CC                              | AA              | 1946993207               |
| SNP_P4_152691_239690 | NW_004516364.1 | Scaffold1055 | 239690                  | TT                              | GG              | 1946993209               |
| SNP_P4_152692_239779 | NW_004516364.1 | Scaffold1055 | 239779                  | TT                              | CC              | 1946993211               |
| SNP_P4_152693_247738 | NW_004516364.1 | Scaffold1055 | 247738                  | AA                              | GG              | 1946993213               |
| SNP_P4_152694_247741 | NW_004516364.1 | Scaffold1055 | 247741                  | AA                              | GG              | 1946993215               |
| SNP_P4_152695_251462 | NW_004516364.1 | Scaffold1055 | 251462                  | GG                              | CC              | 1946993217               |
| SNP_P4_152696_251834 | NW_004516364.1 | Scaffold1055 | 251834                  | AA                              | GG              | 1946993219               |
| SNP_P4_152697_279010 | NW_004516364.1 | Scaffold1055 | 279010                  | CC                              | TT              | 1946993222               |
| SNP_P4_152698_280231 | NW_004516364.1 | Scaffold1055 | 280231                  | TT                              | AA              | 1946993224               |
| SNP_P4_152699_284001 | NW_004516364.1 | Scaffold1055 | 284001                  | GG                              | CC              | 1946993226               |
| SNP_P4_152700_288124 | NW_004516364.1 | Scaffold1055 | 288124                  | TT                              | CC              | 1946993228               |
| SNP_P4_152701_304134 | NW_004516364.1 | Scaffold1055 | 304134                  | TT                              | CC              | 1946993230               |
| SNP_P4_152702_318027 | NW_004516364.1 | Scaffold1055 | 318027                  | AA                              | GG              | 1946993232               |
| SNP_P4_152703_318075 | NW_004516364.1 | Scaffold1055 | 318075                  | GG                              | AA              | 1946993234               |
| SNP_P4_152704_318220 | NW_004516364.1 | Scaffold1055 | 318220                  | GG                              | TT              | 1946993236               |
| SNP_P4_152705_318328 | NW_004516364.1 | Scaffold1055 | 318328                  | AA                              | CC              | 1946993238               |
| SNP_P4_152706_318393 | NW_004516364.1 | Scaffold1055 | 318393                  | TT                              | AA              | 1946993240               |

| SNPs IDs             | Chromosome IDs | Chromosomes  | Physical positions (bp) | CDC Frontier (Reference genome) | (ILWC46 & LPNB) | NCBI SNPdb Accession IDs |
|----------------------|----------------|--------------|-------------------------|---------------------------------|-----------------|--------------------------|
| SNP_P4_152707_318433 | NW_004516364.1 | Scaffold1055 | 318433                  | AA                              | GG              | 1946993242               |
| SNP_P4_152708_318503 | NW_004516364.1 | Scaffold1055 | 318503                  | TT                              | CC              | 1946993244               |
| SNP_P4_152709_318573 | NW_004516364.1 | Scaffold1055 | 318573                  | CC                              | TT              | 1946993247               |
| SNP_P4_152710_324585 | NW_004516364.1 | Scaffold1055 | 324585                  | GG                              | AA              | 1946993249               |
| SNP_P4_152711_324999 | NW_004516364.1 | Scaffold1055 | 324999                  | GG                              | AA              | 1946993251               |
| SNP_P4_152712_326472 | NW_004516364.1 | Scaffold1055 | 326472                  | CC                              | AA              | 1946993253               |
| SNP_P4_152713_326483 | NW_004516364.1 | Scaffold1055 | 326483                  | AA                              | GG              | 1946993255               |
| SNP_P4_152714_326512 | NW_004516364.1 | Scaffold1055 | 326512                  | AA                              | GG              | 1946993257               |
| SNP_P4_152715_335468 | NW_004516364.1 | Scaffold1055 | 335468                  | CC                              | TT              | 1946993259               |
| SNP_P4_152716_339166 | NW_004516364.1 | Scaffold1055 | 339166                  | GG                              | AA              | 1946993261               |
| SNP_P4_152717_339184 | NW_004516364.1 | Scaffold1055 | 339184                  | AA                              | GG              | 1946993263               |
| SNP_P4_152718_339203 | NW_004516364.1 | Scaffold1055 | 339203                  | AA                              | CC              | 1946993265               |
| SNP_P4_152719_339245 | NW_004516364.1 | Scaffold1055 | 339245                  | CC                              | GG              | 1946993267               |
| SNP_P4_152720_339267 | NW_004516364.1 | Scaffold1055 | 339267                  | CC                              | TT              | 1946993269               |
| SNP_P4_152722_339340 | NW_004516364.1 | Scaffold1055 | 339340                  | TT                              | AA              | 1946993271               |
| SNP_P4_152723_339412 | NW_004516364.1 | Scaffold1055 | 339412                  | TT                              | AA              | 1946993273               |
| SNP_P4_152724_339510 | NW_004516364.1 | Scaffold1055 | 339510                  | TT                              | GG              | 1946993275               |
| SNP_P4_152725_339562 | NW_004516364.1 | Scaffold1055 | 339562                  | GG                              | AA              | 1946993277               |
| SNP_P4_152726_339576 | NW_004516364.1 | Scaffold1055 | 339576                  | CC                              | TT              | 1946993279               |
| SNP_P4_152727_339577 | NW_004516364.1 | Scaffold1055 | 339577                  | GG                              | AA              | 1946993281               |
| SNP_P4_152728_339590 | NW_004516364.1 | Scaffold1055 | 339590                  | CC                              | TT              | 1946993283               |
| SNP_P4_152729_339619 | NW_004516364.1 | Scaffold1055 | 339619                  | GG                              | AA              | 1946993285               |
| SNP_P4_152730_339624 | NW_004516364.1 | Scaffold1055 | 339624                  | AA                              | GG              | 1946993287               |
| SNP_P4_152731_339717 | NW_004516364.1 | Scaffold1055 | 339717                  | TT                              | AA              | 1946993289               |
| SNP_P4_152732_339744 | NW_004516364.1 | Scaffold1055 | 339744                  | CC                              | TT              | 1946993291               |
| SNP_P4_152733_339752 | NW_004516364.1 | Scaffold1055 | 339752                  | CC                              | TT              | 1946993294               |
| SNP_P4_152734_339776 | NW_004516364.1 | Scaffold1055 | 339776                  | AA                              | GG              | 1946993296               |
| SNP_P4_152735_339786 | NW_004516364.1 | Scaffold1055 | 339786                  | GG                              | AA              | 1946993298               |
| SNP_P4_152736_339812 | NW_004516364.1 | Scaffold1055 | 339812                  | AA                              | GG              | 1946993300               |
| SNP_P4_152737_339831 | NW_004516364.1 | Scaffold1055 | 339831                  | TT                              | AA              | 1946993302               |
| SNP_P4_152738_339851 | NW_004516364.1 | Scaffold1055 | 339851                  | AA                              | GG              | 1946993304               |
| SNP_P4_152739_339872 | NW_004516364.1 | Scaffold1055 | 339872                  | GG                              | AA              | 1946993306               |
| SNP_P4_152740_339932 | NW_004516364.1 | Scaffold1055 | 339932                  | AA                              | TT              | 1946993308               |
| SNP_P4_152741_339945 | NW_004516364.1 | Scaffold1055 | 339945                  | CC                              | AA              | 1946993310               |
| SNP_P4_152742_339981 | NW_004516364.1 | Scaffold1055 | 339981                  | CC                              | AA              | 1946993312               |
| SNP_P4_152743_340005 | NW_004516364.1 | Scaffold1055 | 340005                  | TT                              | GG              | 1946993314               |
| SNP_P4_152745_340108 | NW_004516364.1 | Scaffold1055 | 340108                  | TT                              | AA              | 1946993316               |
| SNP_P4_152746_340136 | NW_004516364.1 | Scaffold1055 | 340136                  | AA                              | GG              | 1946993318               |
| SNP_P4_152747_340138 | NW_004516364.1 | Scaffold1055 | 340138                  | CC                              | TT              | 1946993320               |
| SNP_P4_152748_340172 | NW_004516364.1 | Scaffold1055 | 340172                  | CC                              | TT              | 1946993322               |
| SNP_P4_152749_340328 | NW_004516364.1 | Scaffold1055 | 340328                  | GG                              | AA              | 1946993325               |
| SNP_P4_152750_340329 | NW_004516364.1 | Scaffold1055 | 340329                  | AA                              | TT              | 1946993327               |



| SNPs IDs             | Chromosome IDs | Chromosomes  | Physical positions (bp) | CDC Frontier (Reference genome) | (ILWC46 & LPNB) | NCBI SNPdb Accession IDs |
|----------------------|----------------|--------------|-------------------------|---------------------------------|-----------------|--------------------------|
| SNP_P4_152752_340355 | NW_004516364.1 | Scaffold1055 | 340355                  | AA                              | CC              | 1946993329               |
| SNP_P4_152753_340393 | NW_004516364.1 | Scaffold1055 | 340393                  | CC                              | TT              | 1946993331               |
| SNP_P4_152754_340397 | NW_004516364.1 | Scaffold1055 | 340397                  | AA                              | GG              | 1946993333               |
| SNP_P4_152756_340545 | NW_004516364.1 | Scaffold1055 | 340545                  | TT                              | CC              | 1946993335               |
| SNP_P4_152757_340581 | NW_004516364.1 | Scaffold1055 | 340581                  | TT                              | CC              | 1946993337               |
| SNP_P4_152758_340602 | NW_004516364.1 | Scaffold1055 | 340602                  | TT                              | CC              | 1946993339               |
| SNP_P4_152760_340743 | NW_004516364.1 | Scaffold1055 | 340743                  | TT                              | AA              | 1946993341               |
| SNP_P4_152761_340774 | NW_004516364.1 | Scaffold1055 | 340774                  | TT                              | GG              | 1946993343               |
| SNP_P4_152762_340786 | NW_004516364.1 | Scaffold1055 | 340786                  | AA                              | GG              | 1946993345               |
| SNP_P4_152763_340824 | NW_004516364.1 | Scaffold1055 | 340824                  | TT                              | CC              | 1946993347               |
| SNP_P4_152764_340841 | NW_004516364.1 | Scaffold1055 | 340841                  | TT                              | CC              | 1946993349               |
| SNP_P4_152765_340847 | NW_004516364.1 | Scaffold1055 | 340847                  | CC                              | TT              | 1946993351               |
| SNP_P4_152766_341143 | NW_004516364.1 | Scaffold1055 | 341143                  | AA                              | GG              | 1946993353               |
| SNP_P4_152767_341159 | NW_004516364.1 | Scaffold1055 | 341159                  | CC                              | TT              | 1946993355               |
| SNP_P4_152768_341181 | NW_004516364.1 | Scaffold1055 | 341181                  | GG                              | AA              | 1946993357               |
| SNP_P4_152769_341198 | NW_004516364.1 | Scaffold1055 | 341198                  | TT                              | CC              | 1946993359               |
| SNP_P4_152770_341207 | NW_004516364.1 | Scaffold1055 | 341207                  | GG                              | TT              | 1946993361               |
| SNP_P4_152771_341251 | NW_004516364.1 | Scaffold1055 | 341251                  | AA                              | GG              | 1946993363               |
| SNP_P4_152772_341288 | NW_004516364.1 | Scaffold1055 | 341288                  | TT                              | CC              | 1946993365               |
| SNP_P4_152773_341298 | NW_004516364.1 | Scaffold1055 | 341298                  | TT                              | AA              | 1946993367               |
| SNP_P4_152774_341323 | NW_004516364.1 | Scaffold1055 | 341323                  | GG                              | AA              | 1946993370               |
| SNP_P4_152775_342879 | NW_004516364.1 | Scaffold1055 | 342879                  | TT                              | CC              | 1946993372               |
| SNP_P4_152776_343685 | NW_004516364.1 | Scaffold1055 | 343685                  | GG                              | AA              | 1946993374               |
| SNP_P4_152777_15371  | NW_004516365.1 | Scaffold1056 | 15371                   | TT                              | AA              | 1946993376               |
| SNP_P4_152778_23308  | NW_004516365.1 | Scaffold1056 | 23308                   | AA                              | CC              | 1946993378               |
| SNP_P4_152779_26801  | NW_004516365.1 | Scaffold1056 | 26801                   | AA                              | GG              | 1946993380               |
| SNP_P4_152780_26860  | NW_004516365.1 | Scaffold1056 | 26860                   | TT                              | GG              | 1946993382               |
| SNP_P4_152781_26901  | NW_004516365.1 | Scaffold1056 | 26901                   | TT                              | CC              | 1946993384               |
| SNP_P4_152782_26905  | NW_004516365.1 | Scaffold1056 | 26905                   | TT                              | CC              | 1946993386               |
| SNP_P4_152783_27244  | NW_004516365.1 | Scaffold1056 | 27244                   | GG                              | AA              | 1946993388               |
| SNP_P4_152784_32180  | NW_004516365.1 | Scaffold1056 | 32180                   | TT                              | CC              | 1946993390               |
| SNP_P4_152785_68926  | NW_004516365.1 | Scaffold1056 | 68926                   | AA                              | TT              | 1946993392               |
| SNP_P4_152786_68936  | NW_004516365.1 | Scaffold1056 | 68936                   | CC                              | TT              | 1946993394               |
| SNP_P4_152787_68960  | NW_004516365.1 | Scaffold1056 | 68960                   | AA                              | CC              | 1946993396               |
| SNP_P4_152788_68977  | NW_004516365.1 | Scaffold1056 | 68977                   | TT                              | GG              | 1946993398               |
| SNP_P4_152790_127889 | NW_004516365.1 | Scaffold1056 | 127889                  | GG                              | AA              | 1946993400               |
| SNP_P4_152791_128944 | NW_004516365.1 | Scaffold1056 | 128944                  | TT                              | AA              | 1946993402               |
| SNP_P4_152796_1263   | NW_004516368.1 | Scaffold1059 | 1263                    | AA                              | GG              | 1946993404               |
| SNP_P4_152797_1327   | NW_004516368.1 | Scaffold1059 | 1327                    | GG                              | CC              | 1946993406               |
| SNP_P4_152798_1709   | NW_004516368.1 | Scaffold1059 | 1709                    | CC                              | TT              | 1946993408               |
| SNP_P4_152799_1993   | NW_004516368.1 | Scaffold1059 | 1993                    | TT                              | GG              | 1946993410               |
| SNP_P4_152800_2041   | NW_004516368.1 | Scaffold1059 | 2041                    | TT                              | AA              | 1946993412               |

| SNPs IDs             | Chromosome IDs | Chromosomes  | Physical positions (bp) | CDC Frontier (Reference genome) | (ILWC46 & LPNB) | NCBI SNPdb Accession IDs |
|----------------------|----------------|--------------|-------------------------|---------------------------------|-----------------|--------------------------|
| SNP_P4_152801_365    | NW_004516369.1 | Scaffold1060 | 365                     | GG                              | AA              | 1946993414               |
| SNP_P4_152802_511    | NW_004516369.1 | Scaffold1060 | 511                     | CC                              | TT              | 1946993416               |
| SNP_P4_152803_567    | NW_004516369.1 | Scaffold1060 | 567                     | AA                              | GG              | 1946993418               |
| SNP_P4_152804_632    | NW_004516369.1 | Scaffold1060 | 632                     | TT                              | CC              | 1946993420               |
| SNP_P4_152805_724    | NW_004516369.1 | Scaffold1060 | 724                     | TT                              | CC              | 1946993422               |
| SNP_P4_152806_725    | NW_004516369.1 | Scaffold1060 | 725                     | CC                              | TT              | 1946993424               |
| SNP_P4_152807_731    | NW_004516369.1 | Scaffold1060 | 731                     | TT                              | CC              | 1946993426               |
| SNP_P4_152808_732    | NW_004516369.1 | Scaffold1060 | 732                     | CC                              | TT              | 1946993428               |
| SNP_P4_152809_809    | NW_004516369.1 | Scaffold1060 | 809                     | TT                              | AA              | 1946993430               |
| SNP_P4_152810_810    | NW_004516369.1 | Scaffold1060 | 810                     | CC                              | AA              | 1946993432               |
| SNP_P4_152811_856    | NW_004516369.1 | Scaffold1060 | 856                     | AA                              | GG              | 1946993434               |
| SNP_P4_152812_6569   | NW_004516369.1 | Scaffold1060 | 6569                    | TT                              | GG              | 1946993436               |
| SNP_P4_152813_31182  | NW_004516369.1 | Scaffold1060 | 31182                   | GG                              | AA              | 1946993438               |
| SNP_P4_152814_31202  | NW_004516369.1 | Scaffold1060 | 31202                   | GG                              | AA              | 1946993440               |
| SNP_P4_152815_33274  | NW_004516369.1 | Scaffold1060 | 33274                   | GG                              | AA              | 1946993442               |
| SNP_P4_152816_33333  | NW_004516369.1 | Scaffold1060 | 33333                   | GG                              | AA              | 1946993444               |
| SNP_P4_152817_33763  | NW_004516369.1 | Scaffold1060 | 33763                   | AA                              | GG              | 1946993446               |
| SNP_P4_152818_96252  | NW_004516369.1 | Scaffold1060 | 96252                   | CC                              | TT              | 1946993448               |
| SNP_P4_152819_166669 | NW_004516369.1 | Scaffold1060 | 166669                  | GG                              | AA              | 1946993450               |
| SNP_P4_152820_170053 | NW_004516369.1 | Scaffold1060 | 170053                  | GG                              | AA              | 1946993452               |
| SNP_P4_152821_170054 | NW_004516369.1 | Scaffold1060 | 170054                  | TT                              | CC              | 1946993454               |
| SNP_P4_152822_170224 | NW_004516369.1 | Scaffold1060 | 170224                  | GG                              | TT              | 1946993456               |
| SNP_P4_152823_170228 | NW_004516369.1 | Scaffold1060 | 170228                  | TT                              | GG              | 1946993458               |
| SNP_P4_152824_170252 | NW_004516369.1 | Scaffold1060 | 170252                  | CC                              | AA              | 1946993460               |
| SNP_P4_152825_170273 | NW_004516369.1 | Scaffold1060 | 170273                  | GG                              | AA              | 1946993462               |
| SNP_P4_152826_170344 | NW_004516369.1 | Scaffold1060 | 170344                  | AA                              | GG              | 1946993464               |
| SNP_P4_152827_170347 | NW_004516369.1 | Scaffold1060 | 170347                  | TT                              | CC              | 1946993466               |
| SNP_P4_152828_170378 | NW_004516369.1 | Scaffold1060 | 170378                  | TT                              | AA              | 1946993468               |
| SNP_P4_152829_170398 | NW_004516369.1 | Scaffold1060 | 170398                  | CC                              | TT              | 1946993470               |
| SNP_P4_152830_170469 | NW_004516369.1 | Scaffold1060 | 170469                  | AA                              | GG              | 1946993472               |
| SNP_P4_152831_170480 | NW_004516369.1 | Scaffold1060 | 170480                  | AA                              | GG              | 1946993474               |
| SNP_P4_152832_170533 | NW_004516369.1 | Scaffold1060 | 170533                  | AA                              | CC              | 1946993477               |
| SNP_P4_152833_183379 | NW_004516369.1 | Scaffold1060 | 183379                  | GG                              | AA              | 1946993479               |
| SNP_P4_152834_280980 | NW_004516369.1 | Scaffold1060 | 280980                  | AA                              | GG              | 1946993481               |
| SNP_P4_152835_292303 | NW_004516369.1 | Scaffold1060 | 292303                  | GG                              | AA              | 1946993483               |
| SNP_P4_152836_292656 | NW_004516369.1 | Scaffold1060 | 292656                  | CC                              | TT              | 1946993485               |
| SNP_P4_152837_302260 | NW_004516369.1 | Scaffold1060 | 302260                  | TT                              | CC              | 1946993487               |
| SNP_P4_152838_303519 | NW_004516369.1 | Scaffold1060 | 303519                  | TT                              | CC              | 1946993489               |
| SNP_P4_152839_303542 | NW_004516369.1 | Scaffold1060 | 303542                  | TT                              | CC              | 1946993492               |
| SNP_P4_152841_346747 | NW_004516369.1 | Scaffold1060 | 346747                  | AA                              | GG              | 1946993494               |
| SNP_P4_152842_346751 | NW_004516369.1 | Scaffold1060 | 346751                  | GG                              | CC              | 1946993496               |
| SNP_P4_152843_369677 | NW_004516369.1 | Scaffold1060 | 369677                  | GG                              | AA              | 1946993498               |

| SNPs IDs             | Chromosome IDs | Chromosomes  | Physical positions (bp) | CDC Frontier (Reference genome) | (ILWC46 & LPNB) | NCBI SNPdb Accession IDs |
|----------------------|----------------|--------------|-------------------------|---------------------------------|-----------------|--------------------------|
| SNP_P4_152844_378946 | NW_004516369.1 | Scaffold1060 | 378946                  | CC                              | TT              | 1946993500               |
| SNP_P4_152845_399596 | NW_004516369.1 | Scaffold1060 | 399596                  | AA                              | GG              | 1946993502               |
| SNP_P4_152846_406528 | NW_004516369.1 | Scaffold1060 | 406528                  | TT                              | AA              | 1946993505               |
| SNP_P4_152847_453547 | NW_004516369.1 | Scaffold1060 | 453547                  | TT                              | GG              | 1946993507               |
| SNP_P4_152849_483027 | NW_004516369.1 | Scaffold1060 | 483027                  | GG                              | AA              | 1946993509               |
| SNP_P4_152850_1421   | NW_004516370.1 | Scaffold1061 | 1421                    | GG                              | AA              | 1946993511               |
| SNP_P4_152851_1909   | NW_004516370.1 | Scaffold1061 | 1909                    | TT                              | CC              | 1946993513               |
| SNP_P4_152852_2014   | NW_004516370.1 | Scaffold1061 | 2014                    | CC                              | GG              | 1946993515               |
| SNP_P4_152853_2069   | NW_004516370.1 | Scaffold1061 | 2069                    | GG                              | AA              | 1946993517               |
| SNP_P4_152854_2144   | NW_004516370.1 | Scaffold1061 | 2144                    | GG                              | AA              | 1946993519               |
| SNP_P4_152855_2355   | NW_004516370.1 | Scaffold1061 | 2355                    | AA                              | GG              | 1946993521               |
| SNP_P4_152856_2410   | NW_004516370.1 | Scaffold1061 | 2410                    | GG                              | AA              | 1946993523               |
| SNP_P4_152857_2428   | NW_004516370.1 | Scaffold1061 | 2428                    | AA                              | TT              | 1946993525               |
| SNP_P4_152858_2429   | NW_004516370.1 | Scaffold1061 | 2429                    | TT                              | CC              | 1946993527               |
| SNP_P4_152859_4421   | NW_004516370.1 | Scaffold1061 | 4421                    | CC                              | AA              | 1946993529               |
| SNP_P4_152860_6949   | NW_004516370.1 | Scaffold1061 | 6949                    | CC                              | TT              | 1946993531               |
| SNP_P4_152861_7256   | NW_004516370.1 | Scaffold1061 | 7256                    | TT                              | CC              | 1946993533               |
| SNP_P4_152862_7568   | NW_004516370.1 | Scaffold1061 | 7568                    | AA                              | GG              | 1946993535               |
| SNP_P4_152863_7588   | NW_004516370.1 | Scaffold1061 | 7588                    | CC                              | TT              | 1946993537               |
| SNP_P4_152864_7591   | NW_004516370.1 | Scaffold1061 | 7591                    | CC                              | AA              | 1946993539               |
| SNP_P4_152865_7605   | NW_004516370.1 | Scaffold1061 | 7605                    | CC                              | GG              | 1946993541               |
| SNP_P4_152866_9573   | NW_004516370.1 | Scaffold1061 | 9573                    | GG                              | AA              | 1946993543               |
| SNP_P4_152867_9644   | NW_004516370.1 | Scaffold1061 | 9644                    | TT                              | GG              | 1946993545               |
| SNP_P4_152868_11488  | NW_004516370.1 | Scaffold1061 | 11488                   | AA                              | TT              | 1946993547               |
| SNP_P4_152869_11509  | NW_004516370.1 | Scaffold1061 | 11509                   | AA                              | GG              | 1946993549               |
| SNP_P4_152870_11525  | NW_004516370.1 | Scaffold1061 | 11525                   | AA                              | GG              | 1946993551               |
| SNP_P4_152871_11530  | NW_004516370.1 | Scaffold1061 | 11530                   | TT                              | CC              | 1946993553               |
| SNP_P4_152872_11550  | NW_004516370.1 | Scaffold1061 | 11550                   | GG                              | CC              | 1946993555               |
| SNP_P4_152873_11681  | NW_004516370.1 | Scaffold1061 | 11681                   | AA                              | GG              | 1946993557               |
| SNP_P4_152874_11686  | NW_004516370.1 | Scaffold1061 | 11686                   | CC                              | TT              | 1946993559               |
| SNP_P4_152875_20892  | NW_004516370.1 | Scaffold1061 | 20892                   | GG                              | AA              | 1946993561               |
| SNP_P4_152876_20910  | NW_004516370.1 | Scaffold1061 | 20910                   | TT                              | CC              | 1946993563               |
| SNP_P4_152877_20931  | NW_004516370.1 | Scaffold1061 | 20931                   | GG                              | AA              | 1946993565               |
| SNP_P4_152879_21108  | NW_004516370.1 | Scaffold1061 | 21108                   | GG                              | TT              | 1946993567               |
| SNP_P4_152880_21640  | NW_004516370.1 | Scaffold1061 | 21640                   | CC                              | AA              | 1946993569               |
| SNP_P4_152881_27636  | NW_004516370.1 | Scaffold1061 | 27636                   | CC                              | TT              | 1946993571               |
| SNP_P4_152883_28578  | NW_004516370.1 | Scaffold1061 | 28578                   | AA                              | GG              | 1946993573               |
| SNP_P4_152884_28605  | NW_004516370.1 | Scaffold1061 | 28605                   | GG                              | AA              | 1946993575               |
| SNP_P4_152885_28606  | NW_004516370.1 | Scaffold1061 | 28606                   | TT                              | AA              | 1946993577               |
| SNP_P4_152886_28624  | NW_004516370.1 | Scaffold1061 | 28624                   | TT                              | CC              | 1946993579               |
| SNP_P4_152887_28631  | NW_004516370.1 | Scaffold1061 | 28631                   | CC                              | AA              | 1946993581               |
| SNP_P4_152888_28678  | NW_004516370.1 | Scaffold1061 | 28678                   | AA                              | GG              | 1946993583               |

| SNPs IDs            | Chromosome IDs | Chromosomes  | Physical positions (bp) | CDC Frontier (Reference genome) | (ILWC46 & LPNB) | NCBI SNPdb Accession IDs |
|---------------------|----------------|--------------|-------------------------|---------------------------------|-----------------|--------------------------|
| SNP_P4_152889_28750 | NW_004516370.1 | Scaffold1061 | 28750                   | CC                              | TT              | 1946993585               |
| SNP_P4_152891_31628 | NW_004516370.1 | Scaffold1061 | 31628                   | GG                              | AA              | 1946993587               |
| SNP_P4_152892_31633 | NW_004516370.1 | Scaffold1061 | 31633                   | TT                              | CC              | 1946993589               |
| SNP_P4_152893_31722 | NW_004516370.1 | Scaffold1061 | 31722                   | TT                              | CC              | 1946993591               |
| SNP_P4_152894_31732 | NW_004516370.1 | Scaffold1061 | 31732                   | CC                              | GG              | 1946993593               |
| SNP_P4_152895_31888 | NW_004516370.1 | Scaffold1061 | 31888                   | TT                              | GG              | 1946993595               |
| SNP_P4_152896_31900 | NW_004516370.1 | Scaffold1061 | 31900                   | GG                              | TT              | 1946993597               |
| SNP_P4_152897_31954 | NW_004516370.1 | Scaffold1061 | 31954                   | AA                              | CC              | 1946993599               |
| SNP_P4_152898_31959 | NW_004516370.1 | Scaffold1061 | 31959                   | GG                              | CC              | 1946993601               |
| SNP_P4_152899_31969 | NW_004516370.1 | Scaffold1061 | 31969                   | AA                              | TT              | 1946993603               |
| SNP_P4_152900_32089 | NW_004516370.1 | Scaffold1061 | 32089                   | GG                              | TT              | 1946993605               |
| SNP_P4_152901_32128 | NW_004516370.1 | Scaffold1061 | 32128                   | TT                              | CC              | 1946993607               |
| SNP_P4_152902_32234 | NW_004516370.1 | Scaffold1061 | 32234                   | TT                              | GG              | 1946993609               |
| SNP_P4_152903_32858 | NW_004516370.1 | Scaffold1061 | 32858                   | AA                              | GG              | 1946993611               |
| SNP_P4_152905_32907 | NW_004516370.1 | Scaffold1061 | 32907                   | GG                              | TT              | 1946993613               |
| SNP_P4_152906_32935 | NW_004516370.1 | Scaffold1061 | 32935                   | TT                              | CC              | 1946993615               |
| SNP_P4_152907_32941 | NW_004516370.1 | Scaffold1061 | 32941                   | AA                              | GG              | 1946993617               |
| SNP_P4_152908_32972 | NW_004516370.1 | Scaffold1061 | 32972                   | TT                              | CC              | 1946993619               |
| SNP_P4_152909_32975 | NW_004516370.1 | Scaffold1061 | 32975                   | TT                              | AA              | 1946993621               |
| SNP_P4_152911_33022 | NW_004516370.1 | Scaffold1061 | 33022                   | TT                              | CC              | 1946993623               |
| SNP_P4_152912_33049 | NW_004516370.1 | Scaffold1061 | 33049                   | GG                              | CC              | 1946993625               |
| SNP_P4_152913_33192 | NW_004516370.1 | Scaffold1061 | 33192                   | AA                              | GG              | 1946993627               |
| SNP_P4_152914_33278 | NW_004516370.1 | Scaffold1061 | 33278                   | TT                              | CC              | 1946993629               |
| SNP_P4_152915_33347 | NW_004516370.1 | Scaffold1061 | 33347                   | AA                              | TT              | 1946993631               |
| SNP_P4_152916_33379 | NW_004516370.1 | Scaffold1061 | 33379                   | AA                              | GG              | 1946993632               |
| SNP_P4_152917_33489 | NW_004516370.1 | Scaffold1061 | 33489                   | GG                              | AA              | 1946993634               |
| SNP_P4_152918_36106 | NW_004516370.1 | Scaffold1061 | 36106                   | AA                              | TT              | 1946993636               |
| SNP_P4_152919_36198 | NW_004516370.1 | Scaffold1061 | 36198                   | CC                              | TT              | 1946993638               |
| SNP_P4_152920_36231 | NW_004516370.1 | Scaffold1061 | 36231                   | TT                              | AA              | 1946993640               |
| SNP_P4_152921_36289 | NW_004516370.1 | Scaffold1061 | 36289                   | TT                              | AA              | 1946993642               |
| SNP_P4_152922_36337 | NW_004516370.1 | Scaffold1061 | 36337                   | GG                              | AA              | 1946993644               |
| SNP_P4_152923_36477 | NW_004516370.1 | Scaffold1061 | 36477                   | TT                              | CC              | 1946993646               |
| SNP_P4_152924_36568 | NW_004516370.1 | Scaffold1061 | 36568                   | CC                              | AA              | 1946993648               |
| SNP_P4_152925_37970 | NW_004516370.1 | Scaffold1061 | 37970                   | GG                              | AA              | 1946993650               |
| SNP_P4_152926_38271 | NW_004516370.1 | Scaffold1061 | 38271                   | AA                              | GG              | 1946993652               |
| SNP_P4_152927_38392 | NW_004516370.1 | Scaffold1061 | 38392                   | CC                              | AA              | 1946993654               |
| SNP_P4_152928_38408 | NW_004516370.1 | Scaffold1061 | 38408                   | GG                              | CC              | 1946993656               |
| SNP_P4_152929_39600 | NW_004516370.1 | Scaffold1061 | 39600                   | TT                              | CC              | 1946993658               |
| SNP_P4_152930_39834 | NW_004516370.1 | Scaffold1061 | 39834                   | TT                              | CC              | 1946993660               |
| SNP_P4_152931_39884 | NW_004516370.1 | Scaffold1061 | 39884                   | AA                              | GG              | 1946993662               |
| SNP_P4_152932_39947 | NW_004516370.1 | Scaffold1061 | 39947                   | GG                              | TT              | 1946993664               |
| SNP_P4_152933_41200 | NW_004516370.1 | Scaffold1061 | 41200                   | AA                              | CC              | 1946993666               |

| SNPs IDs            | Chromosome IDs | Chromosomes  | Physical positions (bp) | CDC Frontier (Reference genome) | (ILWC46 & LPNB) | NCBI SNPdb Accession IDs |
|---------------------|----------------|--------------|-------------------------|---------------------------------|-----------------|--------------------------|
| SNP_P4_152934_42364 | NW_004516370.1 | Scaffold1061 | 42364                   | TT                              | CC              | 1946993668               |
| SNP_P4_152935_42650 | NW_004516370.1 | Scaffold1061 | 42650                   | CC                              | GG              | 1946993670               |
| SNP_P4_152936_45902 | NW_004516370.1 | Scaffold1061 | 45902                   | CC                              | TT              | 1946993672               |
| SNP_P4_152937_46224 | NW_004516370.1 | Scaffold1061 | 46224                   | AA                              | GG              | 1946993674               |
| SNP_P4_152938_46439 | NW_004516370.1 | Scaffold1061 | 46439                   | GG                              | TT              | 1946993676               |
| SNP_P4_152939_49441 | NW_004516370.1 | Scaffold1061 | 49441                   | AA                              | GG              | 1946993678               |
| SNP_P4_152940_49599 | NW_004516370.1 | Scaffold1061 | 49599                   | CC                              | AA              | 1946993680               |
| SNP_P4_152941_49638 | NW_004516370.1 | Scaffold1061 | 49638                   | AA                              | GG              | 1946993682               |
| SNP_P4_152942_49665 | NW_004516370.1 | Scaffold1061 | 49665                   | GG                              | TT              | 1946993684               |
| SNP_P4_152943_49674 | NW_004516370.1 | Scaffold1061 | 49674                   | AA                              | TT              | 1946993686               |
| SNP_P4_152944_49683 | NW_004516370.1 | Scaffold1061 | 49683                   | AA                              | TT              | 1946993688               |
| SNP_P4_152946_49942 | NW_004516370.1 | Scaffold1061 | 49942                   | GG                              | AA              | 1946993690               |
| SNP_P4_152947_50968 | NW_004516370.1 | Scaffold1061 | 50968                   | CC                              | AA              | 1946993692               |
| SNP_P4_152948_51190 | NW_004516370.1 | Scaffold1061 | 51190                   | AA                              | GG              | 1946993694               |
| SNP_P4_152949_51273 | NW_004516370.1 | Scaffold1061 | 51273                   | CC                              | TT              | 1946993696               |
| SNP_P4_152950_51378 | NW_004516370.1 | Scaffold1061 | 51378                   | TT                              | GG              | 1946993698               |
| SNP_P4_152951_51466 | NW_004516370.1 | Scaffold1061 | 51466                   | AA                              | TT              | 1946993700               |
| SNP_P4_152952_51479 | NW_004516370.1 | Scaffold1061 | 51479                   | CC                              | TT              | 1946993702               |
| SNP_P4_152953_51565 | NW_004516370.1 | Scaffold1061 | 51565                   | GG                              | AA              | 1946993704               |
| SNP_P4_152954_51746 | NW_004516370.1 | Scaffold1061 | 51746                   | TT                              | CC              | 1946993706               |
| SNP_P4_152955_52381 | NW_004516370.1 | Scaffold1061 | 52381                   | GG                              | AA              | 1946993708               |
| SNP_P4_152956_52384 | NW_004516370.1 | Scaffold1061 | 52384                   | GG                              | CC              | 1946993710               |
| SNP_P4_152957_52411 | NW_004516370.1 | Scaffold1061 | 52411                   | AA                              | CC              | 1946993712               |
| SNP_P4_152959_60803 | NW_004516370.1 | Scaffold1061 | 60803                   | AA                              | CC              | 1946993714               |
| SNP_P4_152960_60854 | NW_004516370.1 | Scaffold1061 | 60854                   | AA                              | GG              | 1946993716               |
| SNP_P4_152961_61110 | NW_004516370.1 | Scaffold1061 | 61110                   | CC                              | TT              | 1946993718               |
| SNP_P4_152962_61463 | NW_004516370.1 | Scaffold1061 | 61463                   | AA                              | TT              | 1946993720               |
| SNP_P4_152963_62047 | NW_004516370.1 | Scaffold1061 | 62047                   | CC                              | GG              | 1946993722               |
| SNP_P4_152964_62138 | NW_004516370.1 | Scaffold1061 | 62138                   | TT                              | AA              | 1946993724               |
| SNP_P4_152965_62168 | NW_004516370.1 | Scaffold1061 | 62168                   | AA                              | GG              | 1946993726               |
| SNP_P4_152966_62199 | NW_004516370.1 | Scaffold1061 | 62199                   | GG                              | AA              | 1946993728               |
| SNP_P4_152967_62212 | NW_004516370.1 | Scaffold1061 | 62212                   | GG                              | TT              | 1946993730               |
| SNP_P4_152968_62213 | NW_004516370.1 | Scaffold1061 | 62213                   | CC                              | TT              | 1946993735               |
| SNP_P4_152969_62377 | NW_004516370.1 | Scaffold1061 | 62377                   | TT                              | CC              | 1946993737               |
| SNP_P4_152970_62733 | NW_004516370.1 | Scaffold1061 | 62733                   | GG                              | AA              | 1946993739               |
| SNP_P4_152971_63358 | NW_004516370.1 | Scaffold1061 | 63358                   | AA                              | GG              | 1946993741               |
| SNP_P4_152972_64079 | NW_004516370.1 | Scaffold1061 | 64079                   | GG                              | CC              | 1946993743               |
| SNP_P4_152973_64115 | NW_004516370.1 | Scaffold1061 | 64115                   | GG                              | AA              | 1946993745               |
| SNP_P4_152974_64145 | NW_004516370.1 | Scaffold1061 | 64145                   | AA                              | TT              | 1946993747               |
| SNP_P4_152975_64149 | NW_004516370.1 | Scaffold1061 | 64149                   | TT                              | CC              | 1946993749               |
| SNP_P4_152976_64423 | NW_004516370.1 | Scaffold1061 | 64423                   | GG                              | AA              | 1946993751               |
| SNP_P4_152977_64499 | NW_004516370.1 | Scaffold1061 | 64499                   | TT                              | CC              | 1946993753               |

| SNPs IDs            | Chromosome IDs | Chromosomes  | Physical positions (bp) | CDC Frontier (Reference genome) | (ILWC46 & LPNB) | NCBI SNPdb Accession IDs |
|---------------------|----------------|--------------|-------------------------|---------------------------------|-----------------|--------------------------|
| SNP_P4_152978_64802 | NW_004516370.1 | Scaffold1061 | 64802                   | TT                              | GG              | 1946993755               |
| SNP_P4_152979_64860 | NW_004516370.1 | Scaffold1061 | 64860                   | TT                              | AA              | 1946993757               |
| SNP_P4_152980_64869 | NW_004516370.1 | Scaffold1061 | 64869                   | AA                              | CC              | 1946993759               |
| SNP_P4_152981_64913 | NW_004516370.1 | Scaffold1061 | 64913                   | AA                              | GG              | 1946993761               |
| SNP_P4_152982_65006 | NW_004516370.1 | Scaffold1061 | 65006                   | TT                              | GG              | 1946993763               |
| SNP_P4_152983_65025 | NW_004516370.1 | Scaffold1061 | 65025                   | TT                              | GG              | 1946993765               |
| SNP_P4_152984_65072 | NW_004516370.1 | Scaffold1061 | 65072                   | CC                              | TT              | 1946993767               |
| SNP_P4_152985_65178 | NW_004516370.1 | Scaffold1061 | 65178                   | TT                              | CC              | 1946993769               |
| SNP_P4_152986_67146 | NW_004516370.1 | Scaffold1061 | 67146                   | GG                              | AA              | 1946993771               |
| SNP_P4_152987_67173 | NW_004516370.1 | Scaffold1061 | 67173                   | AA                              | TT              | 1946993773               |
| SNP_P4_152988_67176 | NW_004516370.1 | Scaffold1061 | 67176                   | CC                              | AA              | 1946993775               |
| SNP_P4_152989_67527 | NW_004516370.1 | Scaffold1061 | 67527                   | CC                              | TT              | 1946993777               |
| SNP_P4_152990_67710 | NW_004516370.1 | Scaffold1061 | 67710                   | TT                              | CC              | 1946993779               |
| SNP_P4_152991_70031 | NW_004516370.1 | Scaffold1061 | 70031                   | AA                              | CC              | 1946993781               |
| SNP_P4_152992_70621 | NW_004516370.1 | Scaffold1061 | 70621                   | AA                              | CC              | 1946993783               |
| SNP_P4_152993_70666 | NW_004516370.1 | Scaffold1061 | 70666                   | CC                              | GG              | 1946993785               |
| SNP_P4_152994_70793 | NW_004516370.1 | Scaffold1061 | 70793                   | GG                              | AA              | 1946993787               |
| SNP_P4_152995_70842 | NW_004516370.1 | Scaffold1061 | 70842                   | TT                              | GG              | 1946993789               |
| SNP_P4_152996_70872 | NW_004516370.1 | Scaffold1061 | 70872                   | AA                              | GG              | 1946993791               |
| SNP_P4_152997_70902 | NW_004516370.1 | Scaffold1061 | 70902                   | AA                              | CC              | 1946993793               |
| SNP_P4_152998_70922 | NW_004516370.1 | Scaffold1061 | 70922                   | GG                              | TT              | 1946993795               |
| SNP_P4_152999_70928 | NW_004516370.1 | Scaffold1061 | 70928                   | AA                              | CC              | 1946993797               |
| SNP_P4_153000_70961 | NW_004516370.1 | Scaffold1061 | 70961                   | AA                              | TT              | 1946993799               |
| SNP_P4_153001_71016 | NW_004516370.1 | Scaffold1061 | 71016                   | CC                              | TT              | 1946993801               |
| SNP_P4_153002_71029 | NW_004516370.1 | Scaffold1061 | 71029                   | AA                              | CC              | 1946993803               |
| SNP_P4_153003_71206 | NW_004516370.1 | Scaffold1061 | 71206                   | AA                              | GG              | 1946993805               |
| SNP_P4_153004_71265 | NW_004516370.1 | Scaffold1061 | 71265                   | TT                              | AA              | 1946993807               |
| SNP_P4_153005_71303 | NW_004516370.1 | Scaffold1061 | 71303                   | GG                              | AA              | 1946993809               |
| SNP_P4_153006_71335 | NW_004516370.1 | Scaffold1061 | 71335                   | AA                              | CC              | 1946993812               |
| SNP_P4_153007_71463 | NW_004516370.1 | Scaffold1061 | 71463                   | CC                              | GG              | 1946993814               |
| SNP_P4_153008_71464 | NW_004516370.1 | Scaffold1061 | 71464                   | AA                              | GG              | 1946993816               |
| SNP_P4_153009_71487 | NW_004516370.1 | Scaffold1061 | 71487                   | TT                              | AA              | 1946993818               |
| SNP_P4_153010_71497 | NW_004516370.1 | Scaffold1061 | 71497                   | AA                              | TT              | 1946993820               |
| SNP_P4_153011_71507 | NW_004516370.1 | Scaffold1061 | 71507                   | GG                              | AA              | 1946993822               |
| SNP_P4_153012_71526 | NW_004516370.1 | Scaffold1061 | 71526                   | AA                              | TT              | 1946993824               |
| SNP_P4_153013_71527 | NW_004516370.1 | Scaffold1061 | 71527                   | AA                              | TT              | 1946993826               |
| SNP_P4_153014_71530 | NW_004516370.1 | Scaffold1061 | 71530                   | GG                              | AA              | 1946993828               |
| SNP_P4_153015_71532 | NW_004516370.1 | Scaffold1061 | 71532                   | GG                              | CC              | 1946993830               |
| SNP_P4_153016_71533 | NW_004516370.1 | Scaffold1061 | 71533                   | GG                              | AA              | 1946993832               |
| SNP_P4_153017_71536 | NW_004516370.1 | Scaffold1061 | 71536                   | CC                              | TT              | 1946993834               |
| SNP_P4_153018_71626 | NW_004516370.1 | Scaffold1061 | 71626                   | CC                              | GG              | 1946993836               |
| SNP_P4_153019_71627 | NW_004516370.1 | Scaffold1061 | 71627                   | AA                              | GG              | 1946993838               |

| SNPs IDs            | Chromosome IDs | Chromosomes  | Physical positions (bp) | CDC Frontier (Reference genome) | (ILWC46 & LPNB) | NCBI SNPdb Accession IDs |
|---------------------|----------------|--------------|-------------------------|---------------------------------|-----------------|--------------------------|
| SNP_P4_153020_71650 | NW_004516370.1 | Scaffold1061 | 71650                   | TT                              | AA              | 1946993840               |
| SNP_P4_153021_71660 | NW_004516370.1 | Scaffold1061 | 71660                   | AA                              | TT              | 1946993842               |
| SNP_P4_153022_71670 | NW_004516370.1 | Scaffold1061 | 71670                   | GG                              | AA              | 1946993845               |
| SNP_P4_153023_71719 | NW_004516370.1 | Scaffold1061 | 71719                   | GG                              | CC              | 1946993847               |
| SNP_P4_153024_71721 | NW_004516370.1 | Scaffold1061 | 71721                   | GG                              | TT              | 1946993849               |
| SNP_P4_153025_71932 | NW_004516370.1 | Scaffold1061 | 71932                   | TT                              | AA              | 1946993851               |
| SNP_P4_153026_72036 | NW_004516370.1 | Scaffold1061 | 72036                   | TT                              | CC              | 1946993853               |
| SNP_P4_153027_72056 | NW_004516370.1 | Scaffold1061 | 72056                   | GG                              | AA              | 1946993855               |
| SNP_P4_153028_72139 | NW_004516370.1 | Scaffold1061 | 72139                   | CC                              | AA              | 1946993858               |
| SNP_P4_153029_72150 | NW_004516370.1 | Scaffold1061 | 72150                   | CC                              | TT              | 1946993860               |
| SNP_P4_153030_72166 | NW_004516370.1 | Scaffold1061 | 72166                   | TT                              | GG              | 1946993862               |
| SNP_P4_153031_72167 | NW_004516370.1 | Scaffold1061 | 72167                   | GG                              | AA              | 1946993864               |
| SNP_P4_153032_72171 | NW_004516370.1 | Scaffold1061 | 72171                   | TT                              | AA              | 1946993866               |
| SNP_P4_153033_72224 | NW_004516370.1 | Scaffold1061 | 72224                   | AA                              | CC              | 1946993868               |
| SNP_P4_153034_72273 | NW_004516370.1 | Scaffold1061 | 72273                   | AA                              | GG              | 1946993870               |
| SNP_P4_153035_72599 | NW_004516370.1 | Scaffold1061 | 72599                   | AA                              | GG              | 1946993873               |
| SNP_P4_153036_72604 | NW_004516370.1 | Scaffold1061 | 72604                   | CC                              | TT              | 1946993876               |
| SNP_P4_153037_72670 | NW_004516370.1 | Scaffold1061 | 72670                   | GG                              | CC              | 1946993878               |
| SNP_P4_153038_72700 | NW_004516370.1 | Scaffold1061 | 72700                   | CC                              | GG              | 1946993880               |
| SNP_P4_153039_72979 | NW_004516370.1 | Scaffold1061 | 72979                   | AA                              | GG              | 1946993883               |
| SNP_P4_153040_73086 | NW_004516370.1 | Scaffold1061 | 73086                   | TT                              | CC              | 1946993885               |
| SNP_P4_153041_73197 | NW_004516370.1 | Scaffold1061 | 73197                   | AA                              | GG              | 1946993887               |
| SNP_P4_153042_73500 | NW_004516370.1 | Scaffold1061 | 73500                   | AA                              | TT              | 1946993889               |
| SNP_P4_153043_74407 | NW_004516370.1 | Scaffold1061 | 74407                   | CC                              | AA              | 1946993891               |
| SNP_P4_153044_74410 | NW_004516370.1 | Scaffold1061 | 74410                   | TT                              | CC              | 1946993893               |
| SNP_P4_153045_74444 | NW_004516370.1 | Scaffold1061 | 74444                   | AA                              | TT              | 1946993895               |
| SNP_P4_153046_74565 | NW_004516370.1 | Scaffold1061 | 74565                   | GG                              | CC              | 1946993897               |
| SNP_P4_153047_74578 | NW_004516370.1 | Scaffold1061 | 74578                   | AA                              | CC              | 1946993899               |
| SNP_P4_153048_74668 | NW_004516370.1 | Scaffold1061 | 74668                   | TT                              | GG              | 1946993901               |
| SNP_P4_153049_74676 | NW_004516370.1 | Scaffold1061 | 74676                   | TT                              | CC              | 1946993902               |
| SNP_P4_153050_74687 | NW_004516370.1 | Scaffold1061 | 74687                   | GG                              | AA              | 1946993903               |
| SNP_P4_153051_74725 | NW_004516370.1 | Scaffold1061 | 74725                   | CC                              | TT              | 1946993904               |
| SNP_P4_153052_74801 | NW_004516370.1 | Scaffold1061 | 74801                   | GG                              | AA              | 1946993905               |
| SNP_P4_153053_74802 | NW_004516370.1 | Scaffold1061 | 74802                   | GG                              | AA              | 1946993906               |
| SNP_P4_153054_74816 | NW_004516370.1 | Scaffold1061 | 74816                   | TT                              | CC              | 1946993908               |
| SNP_P4_153055_74825 | NW_004516370.1 | Scaffold1061 | 74825                   | CC                              | GG              | 1946993910               |
| SNP_P4_153056_74847 | NW_004516370.1 | Scaffold1061 | 74847                   | TT                              | AA              | 1946993912               |
| SNP_P4_153057_74850 | NW_004516370.1 | Scaffold1061 | 74850                   | AA                              | TT              | 1946993914               |
| SNP_P4_153058_74871 | NW_004516370.1 | Scaffold1061 | 74871                   | AA                              | GG              | 1946993916               |
| SNP_P4_153059_74933 | NW_004516370.1 | Scaffold1061 | 74933                   | TT                              | CC              | 1946993918               |
| SNP_P4_153060_74946 | NW_004516370.1 | Scaffold1061 | 74946                   | TT                              | AA              | 1946993920               |
| SNP_P4_153061_74966 | NW_004516370.1 | Scaffold1061 | 74966                   | AA                              | TT              | 1946993922               |

| SNPs IDs            | Chromosome IDs | Chromosomes  | Physical positions (bp) | CDC Frontier (Reference genome) | (ILWC46 & LPNB) | NCBI SNPdb Accession IDs |
|---------------------|----------------|--------------|-------------------------|---------------------------------|-----------------|--------------------------|
| SNP_P4_153062_75000 | NW_004516370.1 | Scaffold1061 | 75000                   | TT                              | GG              | 1946993924               |
| SNP_P4_153063_75026 | NW_004516370.1 | Scaffold1061 | 75026                   | GG                              | AA              | 1946993926               |
| SNP_P4_153064_75037 | NW_004516370.1 | Scaffold1061 | 75037                   | CC                              | TT              | 1946993928               |
| SNP_P4_153065_75051 | NW_004516370.1 | Scaffold1061 | 75051                   | TT                              | CC              | 1946993930               |
| SNP_P4_153066_75055 | NW_004516370.1 | Scaffold1061 | 75055                   | CC                              | AA              | 1946993932               |
| SNP_P4_153067_75093 | NW_004516370.1 | Scaffold1061 | 75093                   | CC                              | AA              | 1946993934               |
| SNP_P4_153068_75168 | NW_004516370.1 | Scaffold1061 | 75168                   | CC                              | TT              | 1946993936               |
| SNP_P4_153069_75172 | NW_004516370.1 | Scaffold1061 | 75172                   | TT                              | CC              | 1946993938               |
| SNP_P4_153070_75202 | NW_004516370.1 | Scaffold1061 | 75202                   | AA                              | GG              | 1946993940               |
| SNP_P4_153071_75274 | NW_004516370.1 | Scaffold1061 | 75274                   | TT                              | AA              | 1946993942               |
| SNP_P4_153072_75361 | NW_004516370.1 | Scaffold1061 | 75361                   | AA                              | TT              | 1946993944               |
| SNP_P4_153073_75404 | NW_004516370.1 | Scaffold1061 | 75404                   | TT                              | CC              | 1946993946               |
| SNP_P4_153074_75438 | NW_004516370.1 | Scaffold1061 | 75438                   | TT                              | GG              | 1946993948               |
| SNP_P4_153075_75478 | NW_004516370.1 | Scaffold1061 | 75478                   | CC                              | AA              | 1946993950               |
| SNP_P4_153076_75562 | NW_004516370.1 | Scaffold1061 | 75562                   | CC                              | TT              | 1946993952               |
| SNP_P4_153077_75566 | NW_004516370.1 | Scaffold1061 | 75566                   | AA                              | GG              | 1946993954               |
| SNP_P4_153079_77003 | NW_004516370.1 | Scaffold1061 | 77003                   | TT                              | CC              | 1946993956               |
| SNP_P4_153080_77066 | NW_004516370.1 | Scaffold1061 | 77066                   | AA                              | CC              | 1946993958               |
| SNP_P4_153081_77108 | NW_004516370.1 | Scaffold1061 | 77108                   | AA                              | CC              | 1946993960               |
| SNP_P4_153082_77177 | NW_004516370.1 | Scaffold1061 | 77177                   | CC                              | GG              | 1946993962               |
| SNP_P4_153083_77208 | NW_004516370.1 | Scaffold1061 | 77208                   | CC                              | AA              | 1946993964               |
| SNP_P4_153084_77248 | NW_004516370.1 | Scaffold1061 | 77248                   | AA                              | CC              | 1946993966               |
| SNP_P4_153085_77711 | NW_004516370.1 | Scaffold1061 | 77711                   | TT                              | GG              | 1946993968               |
| SNP_P4_153086_77762 | NW_004516370.1 | Scaffold1061 | 77762                   | TT                              | AA              | 1946993970               |
| SNP_P4_153088_78125 | NW_004516370.1 | Scaffold1061 | 78125                   | CC                              | AA              | 1946993972               |
| SNP_P4_153089_78168 | NW_004516370.1 | Scaffold1061 | 78168                   | CC                              | TT              | 1946993974               |
| SNP_P4_153090_78197 | NW_004516370.1 | Scaffold1061 | 78197                   | GG                              | AA              | 1946993976               |
| SNP_P4_153091_78219 | NW_004516370.1 | Scaffold1061 | 78219                   | AA                              | CC              | 1946993978               |
| SNP_P4_153092_78241 | NW_004516370.1 | Scaffold1061 | 78241                   | GG                              | TT              | 1946993980               |
| SNP_P4_153093_78410 | NW_004516370.1 | Scaffold1061 | 78410                   | TT                              | CC              | 1946993982               |
| SNP_P4_153094_78450 | NW_004516370.1 | Scaffold1061 | 78450                   | CC                              | TT              | 1946993984               |
| SNP_P4_153095_6146  | NW_004516372.1 | Scaffold1065 | 6146                    | AA                              | GG              | 1946993986               |
| SNP_P4_153096_6148  | NW_004516372.1 | Scaffold1065 | 6148                    | TT                              | AA              | 1946993988               |
| SNP_P4_153097_6225  | NW_004516372.1 | Scaffold1065 | 6225                    | TT                              | CC              | 1946993990               |
| SNP_P4_153098_6470  | NW_004516372.1 | Scaffold1065 | 6470                    | AA                              | GG              | 1946993992               |
| SNP_P4_153099_6475  | NW_004516372.1 | Scaffold1065 | 6475                    | TT                              | AA              | 1946993994               |
| SNP_P4_153101_6840  | NW_004516372.1 | Scaffold1065 | 6840                    | GG                              | TT              | 1946993996               |
| SNP_P4_153102_6850  | NW_004516372.1 | Scaffold1065 | 6850                    | CC                              | TT              | 1946993998               |
| SNP_P4_153103_14241 | NW_004516372.1 | Scaffold1065 | 14241                   | AA                              | GG              | 1946994000               |
| SNP_P4_153104_14248 | NW_004516372.1 | Scaffold1065 | 14248                   | AA                              | CC              | 1946994002               |
| SNP_P4_153105_23552 | NW_004516372.1 | Scaffold1065 | 23552                   | GG                              | TT              | 1946994004               |
| SNP_P4_153106_31204 | NW_004516372.1 | Scaffold1065 | 31204                   | CC                              | TT              | 1946994006               |



| SNPs IDs             | Chromosome IDs | Chromosomes  | Physical positions (bp) | CDC Frontier (Reference genome) | (ILWC46 & LPNB) | NCBI SNPdb Accession IDs |
|----------------------|----------------|--------------|-------------------------|---------------------------------|-----------------|--------------------------|
| SNP_P4_153107_31303  | NW_004516372.1 | Scaffold1065 | 31303                   | TT                              | AA              | 1946994008               |
| SNP_P4_153108_32368  | NW_004516372.1 | Scaffold1065 | 32368                   | GG                              | AA              | 1946994010               |
| SNP_P4_153109_42673  | NW_004516372.1 | Scaffold1065 | 42673                   | GG                              | TT              | 1946994012               |
| SNP_P4_153110_69833  | NW_004516372.1 | Scaffold1065 | 69833                   | GG                              | AA              | 1946994014               |
| SNP_P4_153111_72006  | NW_004516372.1 | Scaffold1065 | 72006                   | AA                              | GG              | 1946994016               |
| SNP_P4_153112_75315  | NW_004516372.1 | Scaffold1065 | 75315                   | CC                              | TT              | 1946994018               |
| SNP_P4_153114_165252 | NW_004516372.1 | Scaffold1065 | 165252                  | CC                              | AA              | 1946994020               |
| SNP_P4_153115_165487 | NW_004516372.1 | Scaffold1065 | 165487                  | TT                              | CC              | 1946994022               |
| SNP_P4_153116_165503 | NW_004516372.1 | Scaffold1065 | 165503                  | TT                              | GG              | 1946994024               |
| SNP_P4_153117_166482 | NW_004516372.1 | Scaffold1065 | 166482                  | AA                              | CC              | 1946994026               |
| SNP_P4_153118_176972 | NW_004516372.1 | Scaffold1065 | 176972                  | GG                              | AA              | 1946994028               |
| SNP_P4_153120_696    | NW_004516373.1 | Scaffold1066 | 696                     | TT                              | GG              | 1946994030               |
| SNP_P4_153121_1097   | NW_004516373.1 | Scaffold1066 | 1097                    | AA                              | GG              | 1946994032               |
| SNP_P4_153122_927    | NW_004516374.1 | Scaffold1067 | 927                     | TT                              | CC              | 1946994034               |
| SNP_P4_153123_1097   | NW_004516374.1 | Scaffold1067 | 1097                    | CC                              | TT              | 1946994036               |
| SNP_P4_153125_1180   | NW_004516374.1 | Scaffold1067 | 1180                    | CC                              | AA              | 1946994038               |
| SNP_P4_153126_1409   | NW_004516374.1 | Scaffold1067 | 1409                    | AA                              | GG              | 1946994040               |
| SNP_P4_153127_1506   | NW_004516374.1 | Scaffold1067 | 1506                    | CC                              | AA              | 1946994042               |
| SNP_P4_153128_1640   | NW_004516374.1 | Scaffold1067 | 1640                    | GG                              | CC              | 1946994044               |
| SNP_P4_153129_1731   | NW_004516374.1 | Scaffold1067 | 1731                    | CC                              | TT              | 1946994046               |
| SNP_P4_153130_1748   | NW_004516374.1 | Scaffold1067 | 1748                    | GG                              | AA              | 1946994048               |
| SNP_P4_153131_1785   | NW_004516374.1 | Scaffold1067 | 1785                    | CC                              | TT              | 1946994050               |
| SNP_P4_153132_1963   | NW_004516374.1 | Scaffold1067 | 1963                    | TT                              | AA              | 1946994052               |
| SNP_P4_153133_2149   | NW_004516374.1 | Scaffold1067 | 2149                    | GG                              | AA              | 1946994054               |
| SNP_P4_153134_2397   | NW_004516374.1 | Scaffold1067 | 2397                    | AA                              | GG              | 1946994056               |
| SNP_P4_153135_2427   | NW_004516374.1 | Scaffold1067 | 2427                    | CC                              | TT              | 1946994058               |
| SNP_P4_153136_2502   | NW_004516374.1 | Scaffold1067 | 2502                    | TT                              | CC              | 1946994060               |
| SNP_P4_153137_18762  | NW_004516374.1 | Scaffold1067 | 18762                   | AA                              | CC              | 1946994062               |
| SNP_P4_153138_18782  | NW_004516374.1 | Scaffold1067 | 18782                   | GG                              | AA              | 1946994064               |
| SNP_P4_153139_18803  | NW_004516374.1 | Scaffold1067 | 18803                   | TT                              | CC              | 1946994066               |
| SNP_P4_153140_19061  | NW_004516374.1 | Scaffold1067 | 19061                   | TT                              | CC              | 1946994068               |
| SNP_P4_153141_19099  | NW_004516374.1 | Scaffold1067 | 19099                   | TT                              | CC              | 1946994070               |
| SNP_P4_153142_19110  | NW_004516374.1 | Scaffold1067 | 19110                   | CC                              | TT              | 1946994073               |
| SNP_P4_153143_19120  | NW_004516374.1 | Scaffold1067 | 19120                   | AA                              | TT              | 1946994075               |
| SNP_P4_153144_19127  | NW_004516374.1 | Scaffold1067 | 19127                   | GG                              | AA              | 1946994077               |
| SNP_P4_153145_20666  | NW_004516374.1 | Scaffold1067 | 20666                   | CC                              | TT              | 1946994079               |
| SNP_P4_153146_20684  | NW_004516374.1 | Scaffold1067 | 20684                   | TT                              | CC              | 1946994081               |
| SNP_P4_153147_36594  | NW_004516374.1 | Scaffold1067 | 36594                   | GG                              | AA              | 1946994083               |
| SNP_P4_153149_76360  | NW_004516374.1 | Scaffold1067 | 76360                   | TT                              | CC              | 1946994085               |
| SNP_P4_153150_101063 | NW_004516374.1 | Scaffold1067 | 101063                  | CC                              | GG              | 1946994087               |
| SNP_P4_153152_120137 | NW_004516374.1 | Scaffold1067 | 120137                  | CC                              | GG              | 1946994089               |
| SNP_P4_153153_151371 | NW_004516374.1 | Scaffold1067 | 151371                  | AA                              | GG              | 1946994091               |

| SNPs IDs             | Chromosome IDs | Chromosomes  | Physical positions (bp) | CDC Frontier (Reference genome) | (ILWC46 & LPNB) | NCBI SNPdb Accession IDs |
|----------------------|----------------|--------------|-------------------------|---------------------------------|-----------------|--------------------------|
| SNP_P4_153154_155204 | NW_004516374.1 | Scaffold1067 | 155204                  | GG                              | CC              | 1946994093               |
| SNP_P4_153155_155326 | NW_004516374.1 | Scaffold1067 | 155326                  | GG                              | CC              | 1946994095               |
| SNP_P4_153156_189003 | NW_004516374.1 | Scaffold1067 | 189003                  | TT                              | CC              | 1946994097               |
| SNP_P4_153157_189058 | NW_004516374.1 | Scaffold1067 | 189058                  | AA                              | TT              | 1946994099               |
| SNP_P4_153158_189105 | NW_004516374.1 | Scaffold1067 | 189105                  | CC                              | AA              | 1946994101               |
| SNP_P4_153159_190197 | NW_004516374.1 | Scaffold1067 | 190197                  | GG                              | TT              | 1946994103               |
| SNP_P4_153160_190205 | NW_004516374.1 | Scaffold1067 | 190205                  | TT                              | GG              | 1946994105               |
| SNP_P4_153161_190230 | NW_004516374.1 | Scaffold1067 | 190230                  | AA                              | GG              | 1946994107               |
| SNP_P4_153162_190253 | NW_004516374.1 | Scaffold1067 | 190253                  | TT                              | CC              | 1946994109               |
| SNP_P4_153163_191324 | NW_004516374.1 | Scaffold1067 | 191324                  | GG                              | AA              | 1946994111               |
| SNP_P4_153164_191331 | NW_004516374.1 | Scaffold1067 | 191331                  | AA                              | CC              | 1946994113               |
| SNP_P4_153165_191334 | NW_004516374.1 | Scaffold1067 | 191334                  | AA                              | GG              | 1946994115               |
| SNP_P4_153166_191349 | NW_004516374.1 | Scaffold1067 | 191349                  | TT                              | CC              | 1946994117               |
| SNP_P4_153168_195980 | NW_004516374.1 | Scaffold1067 | 195980                  | AA                              | TT              | 1946994119               |
| SNP_P4_153169_195996 | NW_004516374.1 | Scaffold1067 | 195996                  | GG                              | TT              | 1946994121               |
| SNP_P4_153170_196147 | NW_004516374.1 | Scaffold1067 | 196147                  | AA                              | GG              | 1946994123               |
| SNP_P4_153171_197674 | NW_004516374.1 | Scaffold1067 | 197674                  | GG                              | AA              | 1946994124               |
| SNP_P4_153172_203031 | NW_004516374.1 | Scaffold1067 | 203031                  | GG                              | CC              | 1946994125               |
| SNP_P4_153173_203038 | NW_004516374.1 | Scaffold1067 | 203038                  | GG                              | TT              | 1946994126               |
| SNP_P4_153174_203042 | NW_004516374.1 | Scaffold1067 | 203042                  | CC                              | TT              | 1946994127               |
| SNP_P4_153176_203049 | NW_004516374.1 | Scaffold1067 | 203049                  | AA                              | GG              | 1946994129               |
| SNP_P4_153177_203064 | NW_004516374.1 | Scaffold1067 | 203064                  | AA                              | TT              | 1946994131               |
| SNP_P4_153179_203221 | NW_004516374.1 | Scaffold1067 | 203221                  | CC                              | TT              | 1946994133               |
| SNP_P4_153180_213820 | NW_004516374.1 | Scaffold1067 | 213820                  | TT                              | CC              | 1946994135               |
| SNP_P4_153182_213903 | NW_004516374.1 | Scaffold1067 | 213903                  | AA                              | GG              | 1946994137               |
| SNP_P4_153183_214070 | NW_004516374.1 | Scaffold1067 | 214070                  | TT                              | CC              | 1946994139               |
| SNP_P4_153184_214071 | NW_004516374.1 | Scaffold1067 | 214071                  | AA                              | GG              | 1946994141               |
| SNP_P4_153185_214104 | NW_004516374.1 | Scaffold1067 | 214104                  | TT                              | GG              | 1946994143               |
| SNP_P4_153186_214142 | NW_004516374.1 | Scaffold1067 | 214142                  | TT                              | GG              | 1946994145               |
| SNP_P4_153187_214158 | NW_004516374.1 | Scaffold1067 | 214158                  | GG                              | AA              | 1946994147               |
| SNP_P4_153188_214197 | NW_004516374.1 | Scaffold1067 | 214197                  | TT                              | CC              | 1946994149               |
| SNP_P4_153189_214243 | NW_004516374.1 | Scaffold1067 | 214243                  | TT                              | CC              | 1946994151               |
| SNP_P4_153190_214283 | NW_004516374.1 | Scaffold1067 | 214283                  | TT                              | AA              | 1946994153               |
| SNP_P4_153191_214286 | NW_004516374.1 | Scaffold1067 | 214286                  | AA                              | GG              | 1946994155               |
| SNP_P4_153192_214306 | NW_004516374.1 | Scaffold1067 | 214306                  | TT                              | GG              | 1946994157               |
| SNP_P4_153193_214314 | NW_004516374.1 | Scaffold1067 | 214314                  | TT                              | GG              | 1946994159               |
| SNP_P4_153194_214354 | NW_004516374.1 | Scaffold1067 | 214354                  | TT                              | GG              | 1946994161               |
| SNP_P4_153195_214383 | NW_004516374.1 | Scaffold1067 | 214383                  | CC                              | GG              | 1946994163               |
| SNP_P4_153196_214475 | NW_004516374.1 | Scaffold1067 | 214475                  | CC                              | AA              | 1946994165               |
| SNP_P4_153198_214708 | NW_004516374.1 | Scaffold1067 | 214708                  | AA                              | GG              | 1946994167               |
| SNP_P4_153199_214724 | NW_004516374.1 | Scaffold1067 | 214724                  | TT                              | CC              | 1946994169               |
| SNP_P4_153201_221057 | NW_004516374.1 | Scaffold1067 | 221057                  | AA                              | GG              | 1946994171               |

| SNPs IDs             | Chromosome IDs | Chromosomes  | Physical positions (bp) | CDC Frontier (Reference genome) | (ILWC46 & LPNB) | NCBI SNPdb Accession IDs |
|----------------------|----------------|--------------|-------------------------|---------------------------------|-----------------|--------------------------|
| SNP_P4_153202_222204 | NW_004516374.1 | Scaffold1067 | 222204                  | TT                              | CC              | 1946994173               |
| SNP_P4_153203_222214 | NW_004516374.1 | Scaffold1067 | 222214                  | AA                              | GG              | 1946994175               |
| SNP_P4_153204_222226 | NW_004516374.1 | Scaffold1067 | 222226                  | TT                              | CC              | 1946994177               |
| SNP_P4_153205_222290 | NW_004516374.1 | Scaffold1067 | 222290                  | AA                              | TT              | 1946994179               |
| SNP_P4_153206_222391 | NW_004516374.1 | Scaffold1067 | 222391                  | TT                              | GG              | 1946994181               |
| SNP_P4_153207_222395 | NW_004516374.1 | Scaffold1067 | 222395                  | TT                              | GG              | 1946994183               |
| SNP_P4_153208_222396 | NW_004516374.1 | Scaffold1067 | 222396                  | TT                              | CC              | 1946994185               |
| SNP_P4_153209_222399 | NW_004516374.1 | Scaffold1067 | 222399                  | TT                              | CC              | 1946994187               |
| SNP_P4_153210_222402 | NW_004516374.1 | Scaffold1067 | 222402                  | AA                              | GG              | 1946994189               |
| SNP_P4_153212_222506 | NW_004516374.1 | Scaffold1067 | 222506                  | TT                              | GG              | 1946994191               |
| SNP_P4_153213_222568 | NW_004516374.1 | Scaffold1067 | 222568                  | TT                              | GG              | 1946994193               |
| SNP_P4_153214_222574 | NW_004516374.1 | Scaffold1067 | 222574                  | TT                              | CC              | 1946994195               |
| SNP_P4_153215_222584 | NW_004516374.1 | Scaffold1067 | 222584                  | TT                              | CC              | 1946994197               |
| SNP_P4_153216_222626 | NW_004516374.1 | Scaffold1067 | 222626                  | TT                              | CC              | 1946994199               |
| SNP_P4_153217_222628 | NW_004516374.1 | Scaffold1067 | 222628                  | TT                              | GG              | 1946994201               |
| SNP_P4_153218_222685 | NW_004516374.1 | Scaffold1067 | 222685                  | AA                              | GG              | 1946994203               |
| SNP_P4_153219_222695 | NW_004516374.1 | Scaffold1067 | 222695                  | TT                              | GG              | 1946994205               |
| SNP_P4_153220_222696 | NW_004516374.1 | Scaffold1067 | 222696                  | TT                              | CC              | 1946994207               |
| SNP_P4_153221_222698 | NW_004516374.1 | Scaffold1067 | 222698                  | GG                              | AA              | 1946994209               |
| SNP_P4_153222_222741 | NW_004516374.1 | Scaffold1067 | 222741                  | TT                              | CC              | 1946994211               |
| SNP_P4_153223_222763 | NW_004516374.1 | Scaffold1067 | 222763                  | AA                              | GG              | 1946994213               |
| SNP_P4_153224_222791 | NW_004516374.1 | Scaffold1067 | 222791                  | AA                              | GG              | 1946994215               |
| SNP_P4_153225_222822 | NW_004516374.1 | Scaffold1067 | 222822                  | GG                              | TT              | 1946994217               |
| SNP_P4_153226_222855 | NW_004516374.1 | Scaffold1067 | 222855                  | AA                              | GG              | 1946994219               |
| SNP_P4_153227_227594 | NW_004516374.1 | Scaffold1067 | 227594                  | AA                              | TT              | 1946994221               |
| SNP_P4_153229_229499 | NW_004516374.1 | Scaffold1067 | 229499                  | GG                              | TT              | 1946994223               |
| SNP_P4_153230_230130 | NW_004516374.1 | Scaffold1067 | 230130                  | AA                              | GG              | 1946994225               |
| SNP_P4_153231_233430 | NW_004516374.1 | Scaffold1067 | 233430                  | CC                              | TT              | 1946994227               |
| SNP_P4_153232_234905 | NW_004516374.1 | Scaffold1067 | 234905                  | AA                              | GG              | 1946994229               |
| SNP_P4_153233_234920 | NW_004516374.1 | Scaffold1067 | 234920                  | AA                              | CC              | 1946994232               |
| SNP_P4_153234_235036 | NW_004516374.1 | Scaffold1067 | 235036                  | GG                              | CC              | 1946994233               |
| SNP_P4_153235_235054 | NW_004516374.1 | Scaffold1067 | 235054                  | CC                              | TT              | 1946994235               |
| SNP_P4_153236_235055 | NW_004516374.1 | Scaffold1067 | 235055                  | CC                              | TT              | 1946994237               |
| SNP_P4_153237_235059 | NW_004516374.1 | Scaffold1067 | 235059                  | AA                              | TT              | 1946994239               |
| SNP_P4_153238_235117 | NW_004516374.1 | Scaffold1067 | 235117                  | TT                              | GG              | 1946994241               |
| SNP_P4_153239_235124 | NW_004516374.1 | Scaffold1067 | 235124                  | TT                              | GG              | 1946994243               |
| SNP_P4_153240_235130 | NW_004516374.1 | Scaffold1067 | 235130                  | GG                              | AA              | 1946994245               |
| SNP_P4_153241_235166 | NW_004516374.1 | Scaffold1067 | 235166                  | TT                              | CC              | 1946994247               |
| SNP_P4_153242_235171 | NW_004516374.1 | Scaffold1067 | 235171                  | TT                              | CC              | 1946994249               |
| SNP_P4_153243_235173 | NW_004516374.1 | Scaffold1067 | 235173                  | TT                              | CC              | 1946994251               |
| SNP_P4_153244_235179 | NW_004516374.1 | Scaffold1067 | 235179                  | CC                              | AA              | 1946994253               |
| SNP_P4_153245_235247 | NW_004516374.1 | Scaffold1067 | 235247                  | CC                              | AA              | 1946994254               |

| SNPs IDs             | Chromosome IDs | Chromosomes  | Physical positions (bp) | CDC Frontier (Reference genome) | (ILWC46 & LPNB) | NCBI SNPdb Accession IDs |
|----------------------|----------------|--------------|-------------------------|---------------------------------|-----------------|--------------------------|
| SNP_P4_153246_235248 | NW_004516374.1 | Scaffold1067 | 235248                  | TT                              | CC              | 1946994255               |
| SNP_P4_153247_235264 | NW_004516374.1 | Scaffold1067 | 235264                  | AA                              | CC              | 1946994257               |
| SNP_P4_153248_235291 | NW_004516374.1 | Scaffold1067 | 235291                  | TT                              | AA              | 1946994259               |
| SNP_P4_153249_235310 | NW_004516374.1 | Scaffold1067 | 235310                  | AA                              | GG              | 1946994261               |
| SNP_P4_153250_235319 | NW_004516374.1 | Scaffold1067 | 235319                  | GG                              | AA              | 1946994263               |
| SNP_P4_153251_235365 | NW_004516374.1 | Scaffold1067 | 235365                  | TT                              | CC              | 1946994265               |
| SNP_P4_153252_235372 | NW_004516374.1 | Scaffold1067 | 235372                  | AA                              | GG              | 1946994267               |
| SNP_P4_153253_235459 | NW_004516374.1 | Scaffold1067 | 235459                  | AA                              | GG              | 1946994269               |
| SNP_P4_153254_235463 | NW_004516374.1 | Scaffold1067 | 235463                  | TT                              | GG              | 1946994271               |
| SNP_P4_153255_235467 | NW_004516374.1 | Scaffold1067 | 235467                  | TT                              | CC              | 1946994273               |
| SNP_P4_153256_235487 | NW_004516374.1 | Scaffold1067 | 235487                  | AA                              | GG              | 1946994275               |
| SNP_P4_153257_235496 | NW_004516374.1 | Scaffold1067 | 235496                  | AA                              | GG              | 1946994277               |
| SNP_P4_153258_235501 | NW_004516374.1 | Scaffold1067 | 235501                  | TT                              | CC              | 1946994279               |
| SNP_P4_153259_235554 | NW_004516374.1 | Scaffold1067 | 235554                  | TT                              | AA              | 1946994281               |
| SNP_P4_153260_235570 | NW_004516374.1 | Scaffold1067 | 235570                  | AA                              | GG              | 1946994283               |
| SNP_P4_153261_235595 | NW_004516374.1 | Scaffold1067 | 235595                  | TT                              | CC              | 1946994285               |
| SNP_P4_153262_235616 | NW_004516374.1 | Scaffold1067 | 235616                  | TT                              | CC              | 1946994287               |
| SNP_P4_153263_235664 | NW_004516374.1 | Scaffold1067 | 235664                  | TT                              | CC              | 1946994289               |
| SNP_P4_153264_235668 | NW_004516374.1 | Scaffold1067 | 235668                  | GG                              | CC              | 1946994291               |
| SNP_P4_153265_235681 | NW_004516374.1 | Scaffold1067 | 235681                  | TT                              | CC              | 1946994293               |
| SNP_P4_153266_235702 | NW_004516374.1 | Scaffold1067 | 235702                  | TT                              | CC              | 1946994295               |
| SNP_P4_153267_235728 | NW_004516374.1 | Scaffold1067 | 235728                  | AA                              | GG              | 1946994297               |
| SNP_P4_153268_235748 | NW_004516374.1 | Scaffold1067 | 235748                  | CC                              | GG              | 1946994299               |
| SNP_P4_153269_235771 | NW_004516374.1 | Scaffold1067 | 235771                  | AA                              | CC              | 1946994301               |
| SNP_P4_153270_235818 | NW_004516374.1 | Scaffold1067 | 235818                  | AA                              | TT              | 1946994303               |
| SNP_P4_153271_235830 | NW_004516374.1 | Scaffold1067 | 235830                  | TT                              | CC              | 1946994305               |
| SNP_P4_153272_235832 | NW_004516374.1 | Scaffold1067 | 235832                  | TT                              | CC              | 1946994307               |
| SNP_P4_153273_235852 | NW_004516374.1 | Scaffold1067 | 235852                  | GG                              | CC              | 1946994309               |
| SNP_P4_153274_235861 | NW_004516374.1 | Scaffold1067 | 235861                  | TT                              | AA              | 1946994311               |
| SNP_P4_153275_235882 | NW_004516374.1 | Scaffold1067 | 235882                  | AA                              | CC              | 1946994313               |
| SNP_P4_153276_235907 | NW_004516374.1 | Scaffold1067 | 235907                  | TT                              | CC              | 1946994315               |
| SNP_P4_153277_235918 | NW_004516374.1 | Scaffold1067 | 235918                  | TT                              | CC              | 1946994316               |
| SNP_P4_153278_235953 | NW_004516374.1 | Scaffold1067 | 235953                  | TT                              | CC              | 1946994317               |
| SNP_P4_153279_235954 | NW_004516374.1 | Scaffold1067 | 235954                  | TT                              | GG              | 1946994318               |
| SNP_P4_153280_235982 | NW_004516374.1 | Scaffold1067 | 235982                  | TT                              | CC              | 1946994320               |
| SNP_P4_153281_235991 | NW_004516374.1 | Scaffold1067 | 235991                  | AA                              | GG              | 1946994322               |
| SNP_P4_153282_236026 | NW_004516374.1 | Scaffold1067 | 236026                  | TT                              | AA              | 1946994324               |
| SNP_P4_153283_236035 | NW_004516374.1 | Scaffold1067 | 236035                  | TT                              | GG              | 1946994326               |
| SNP_P4_153284_236058 | NW_004516374.1 | Scaffold1067 | 236058                  | AA                              | GG              | 1946994328               |
| SNP_P4_153285_236079 | NW_004516374.1 | Scaffold1067 | 236079                  | AA                              | GG              | 1946994330               |
| SNP_P4_153286_236134 | NW_004516374.1 | Scaffold1067 | 236134                  | TT                              | CC              | 1946994332               |
| SNP_P4_153287_236137 | NW_004516374.1 | Scaffold1067 | 236137                  | TT                              | CC              | 1946994334               |

| SNPs IDs             | Chromosome IDs | Chromosomes  | Physical positions (bp) | CDC Frontier (Reference genome) | (ILWC46 & LPNB) | NCBI SNPdb Accession IDs |
|----------------------|----------------|--------------|-------------------------|---------------------------------|-----------------|--------------------------|
| SNP_P4_153288_236198 | NW_004516374.1 | Scaffold1067 | 236198                  | AA                              | GG              | 1946994336               |
| SNP_P4_153289_236209 | NW_004516374.1 | Scaffold1067 | 236209                  | TT                              | CC              | 1946994338               |
| SNP_P4_153290_236270 | NW_004516374.1 | Scaffold1067 | 236270                  | TT                              | CC              | 1946994340               |
| SNP_P4_153291_236320 | NW_004516374.1 | Scaffold1067 | 236320                  | AA                              | GG              | 1946994342               |
| SNP_P4_153292_236326 | NW_004516374.1 | Scaffold1067 | 236326                  | TT                              | GG              | 1946994344               |
| SNP_P4_153293_236416 | NW_004516374.1 | Scaffold1067 | 236416                  | TT                              | GG              | 1946994345               |
| SNP_P4_153294_236419 | NW_004516374.1 | Scaffold1067 | 236419                  | AA                              | GG              | 1946994347               |
| SNP_P4_153295_236482 | NW_004516374.1 | Scaffold1067 | 236482                  | TT                              | GG              | 1946994349               |
| SNP_P4_153296_236503 | NW_004516374.1 | Scaffold1067 | 236503                  | AA                              | CC              | 1946994351               |
| SNP_P4_153297_236550 | NW_004516374.1 | Scaffold1067 | 236550                  | AA                              | CC              | 1946994353               |
| SNP_P4_153298_236574 | NW_004516374.1 | Scaffold1067 | 236574                  | AA                              | GG              | 1946994354               |
| SNP_P4_153299_236576 | NW_004516374.1 | Scaffold1067 | 236576                  | AA                              | GG              | 1946994356               |
| SNP_P4_153300_236584 | NW_004516374.1 | Scaffold1067 | 236584                  | AA                              | GG              | 1946994358               |
| SNP_P4_153301_236585 | NW_004516374.1 | Scaffold1067 | 236585                  | TT                              | CC              | 1946994360               |
| SNP_P4_153302_236597 | NW_004516374.1 | Scaffold1067 | 236597                  | CC                              | AA              | 1946994362               |
| SNP_P4_153303_236612 | NW_004516374.1 | Scaffold1067 | 236612                  | AA                              | GG              | 1946994364               |
| SNP_P4_153304_236650 | NW_004516374.1 | Scaffold1067 | 236650                  | AA                              | GG              | 1946994366               |
| SNP_P4_153305_236657 | NW_004516374.1 | Scaffold1067 | 236657                  | TT                              | CC              | 1946994368               |
| SNP_P4_153306_236675 | NW_004516374.1 | Scaffold1067 | 236675                  | TT                              | GG              | 1946994370               |
| SNP_P4_153307_236690 | NW_004516374.1 | Scaffold1067 | 236690                  | TT                              | GG              | 1946994372               |
| SNP_P4_153308_236691 | NW_004516374.1 | Scaffold1067 | 236691                  | AA                              | GG              | 1946994374               |
| SNP_P4_153309_236713 | NW_004516374.1 | Scaffold1067 | 236713                  | CC                              | TT              | 1946994376               |
| SNP_P4_153310_236715 | NW_004516374.1 | Scaffold1067 | 236715                  | TT                              | CC              | 1946994378               |
| SNP_P4_153311_236727 | NW_004516374.1 | Scaffold1067 | 236727                  | AA                              | CC              | 1946994380               |
| SNP_P4_153312_236801 | NW_004516374.1 | Scaffold1067 | 236801                  | AA                              | GG              | 1946994382               |
| SNP_P4_153313_236804 | NW_004516374.1 | Scaffold1067 | 236804                  | AA                              | GG              | 1946994384               |
| SNP_P4_153314_236814 | NW_004516374.1 | Scaffold1067 | 236814                  | GG                              | AA              | 1946994386               |
| SNP_P4_153315_236834 | NW_004516374.1 | Scaffold1067 | 236834                  | AA                              | CC              | 1946994387               |
| SNP_P4_153316_236871 | NW_004516374.1 | Scaffold1067 | 236871                  | TT                              | CC              | 1946994389               |
| SNP_P4_153317_236903 | NW_004516374.1 | Scaffold1067 | 236903                  | TT                              | CC              | 1946994391               |
| SNP_P4_153318_236951 | NW_004516374.1 | Scaffold1067 | 236951                  | CC                              | GG              | 1946994393               |
| SNP_P4_153319_236952 | NW_004516374.1 | Scaffold1067 | 236952                  | AA                              | TT              | 1946994395               |
| SNP_P4_153320_236989 | NW_004516374.1 | Scaffold1067 | 236989                  | CC                              | TT              | 1946994397               |
| SNP_P4_153321_236992 | NW_004516374.1 | Scaffold1067 | 236992                  | AA                              | GG              | 1946994400               |
| SNP_P4_153322_237022 | NW_004516374.1 | Scaffold1067 | 237022                  | TT                              | CC              | 1946994402               |
| SNP_P4_153323_237055 | NW_004516374.1 | Scaffold1067 | 237055                  | GG                              | TT              | 1946994404               |
| SNP_P4_153324_237071 | NW_004516374.1 | Scaffold1067 | 237071                  | AA                              | GG              | 1946994406               |
| SNP_P4_153325_237106 | NW_004516374.1 | Scaffold1067 | 237106                  | TT                              | AA              | 1946994408               |
| SNP_P4_153326_237109 | NW_004516374.1 | Scaffold1067 | 237109                  | AA                              | CC              | 1946994409               |
| SNP_P4_153327_237127 | NW_004516374.1 | Scaffold1067 | 237127                  | AA                              | GG              | 1946994410               |
| SNP_P4_153328_237152 | NW_004516374.1 | Scaffold1067 | 237152                  | TT                              | AA              | 1946994411               |
| SNP_P4_153329_237154 | NW_004516374.1 | Scaffold1067 | 237154                  | AA                              | GG              | 1946994413               |

| SNPs IDs             | Chromosome IDs | Chromosomes  | Physical positions (bp) | CDC Frontier (Reference genome) | (ILWC46 & LPNB) | NCBI SNPdb Accession IDs |
|----------------------|----------------|--------------|-------------------------|---------------------------------|-----------------|--------------------------|
| SNP_P4_153330_237188 | NW_004516374.1 | Scaffold1067 | 237188                  | TT                              | CC              | 1946994415               |
| SNP_P4_153331_237240 | NW_004516374.1 | Scaffold1067 | 237240                  | TT                              | CC              | 1946994417               |
| SNP_P4_153332_237269 | NW_004516374.1 | Scaffold1067 | 237269                  | AA                              | CC              | 1946994419               |
| SNP_P4_153333_237306 | NW_004516374.1 | Scaffold1067 | 237306                  | AA                              | CC              | 1946994421               |
| SNP_P4_153334_237311 | NW_004516374.1 | Scaffold1067 | 237311                  | GG                              | AA              | 1946994423               |
| SNP_P4_153335_237325 | NW_004516374.1 | Scaffold1067 | 237325                  | TT                              | CC              | 1946994425               |
| SNP_P4_153336_237334 | NW_004516374.1 | Scaffold1067 | 237334                  | AA                              | GG              | 1946994427               |
| SNP_P4_153337_237339 | NW_004516374.1 | Scaffold1067 | 237339                  | TT                              | CC              | 1946994429               |
| SNP_P4_153338_237340 | NW_004516374.1 | Scaffold1067 | 237340                  | TT                              | AA              | 1946994431               |
| SNP_P4_153339_237395 | NW_004516374.1 | Scaffold1067 | 237395                  | GG                              | AA              | 1946994433               |
| SNP_P4_153340_237506 | NW_004516374.1 | Scaffold1067 | 237506                  | AA                              | GG              | 1946994435               |
| SNP_P4_153341_237509 | NW_004516374.1 | Scaffold1067 | 237509                  | AA                              | CC              | 1946994437               |
| SNP_P4_153342_237510 | NW_004516374.1 | Scaffold1067 | 237510                  | TT                              | CC              | 1946994439               |
| SNP_P4_153343_237518 | NW_004516374.1 | Scaffold1067 | 237518                  | AA                              | GG              | 1946994441               |
| SNP_P4_153344_237528 | NW_004516374.1 | Scaffold1067 | 237528                  | TT                              | AA              | 1946994442               |
| SNP_P4_153345_237536 | NW_004516374.1 | Scaffold1067 | 237536                  | TT                              | CC              | 1946994443               |
| SNP_P4_153346_237537 | NW_004516374.1 | Scaffold1067 | 237537                  | CC                              | TT              | 1946994445               |
| SNP_P4_153347_237569 | NW_004516374.1 | Scaffold1067 | 237569                  | AA                              | GG              | 1946994447               |
| SNP_P4_153348_237597 | NW_004516374.1 | Scaffold1067 | 237597                  | AA                              | CC              | 1946994449               |
| SNP_P4_153349_237637 | NW_004516374.1 | Scaffold1067 | 237637                  | TT                              | CC              | 1946994451               |
| SNP_P4_153350_237645 | NW_004516374.1 | Scaffold1067 | 237645                  | TT                              | AA              | 1946994453               |
| SNP_P4_153351_237655 | NW_004516374.1 | Scaffold1067 | 237655                  | TT                              | CC              | 1946994455               |
| SNP_P4_153352_237669 | NW_004516374.1 | Scaffold1067 | 237669                  | TT                              | GG              | 1946994457               |
| SNP_P4_153353_237701 | NW_004516374.1 | Scaffold1067 | 237701                  | GG                              | TT              | 1946994459               |
| SNP_P4_153354_237769 | NW_004516374.1 | Scaffold1067 | 237769                  | AA                              | GG              | 1946994461               |
| SNP_P4_153355_237789 | NW_004516374.1 | Scaffold1067 | 237789                  | AA                              | GG              | 1946994463               |
| SNP_P4_153356_237793 | NW_004516374.1 | Scaffold1067 | 237793                  | AA                              | GG              | 1946994465               |
| SNP_P4_153357_237871 | NW_004516374.1 | Scaffold1067 | 237871                  | TT                              | CC              | 1946994467               |
| SNP_P4_153358_237893 | NW_004516374.1 | Scaffold1067 | 237893                  | AA                              | TT              | 1946994469               |
| SNP_P4_153359_237948 | NW_004516374.1 | Scaffold1067 | 237948                  | AA                              | GG              | 1946994471               |
| SNP_P4_153360_238009 | NW_004516374.1 | Scaffold1067 | 238009                  | TT                              | GG              | 1946994473               |
| SNP_P4_153361_238078 | NW_004516374.1 | Scaffold1067 | 238078                  | TT                              | GG              | 1946994475               |
| SNP_P4_153362_238087 | NW_004516374.1 | Scaffold1067 | 238087                  | CC                              | AA              | 1946994477               |
| SNP_P4_153363_238139 | NW_004516374.1 | Scaffold1067 | 238139                  | TT                              | CC              | 1946994479               |
| SNP_P4_153364_238163 | NW_004516374.1 | Scaffold1067 | 238163                  | CC                              | AA              | 1946994481               |
| SNP_P4_153365_238208 | NW_004516374.1 | Scaffold1067 | 238208                  | TT                              | AA              | 1946994483               |
| SNP_P4_153366_238222 | NW_004516374.1 | Scaffold1067 | 238222                  | CC                              | GG              | 1946994485               |
| SNP_P4_153367_238238 | NW_004516374.1 | Scaffold1067 | 238238                  | AA                              | CC              | 1946994487               |
| SNP_P4_153368_238263 | NW_004516374.1 | Scaffold1067 | 238263                  | AA                              | CC              | 1946994489               |
| SNP_P4_153369_238282 | NW_004516374.1 | Scaffold1067 | 238282                  | AA                              | GG              | 1946994490               |
| SNP_P4_153370_238324 | NW_004516374.1 | Scaffold1067 | 238324                  | TT                              | CC              | 1946994491               |
| SNP_P4_153371_238331 | NW_004516374.1 | Scaffold1067 | 238331                  | AA                              | GG              | 1946994492               |

| SNPs IDs             | Chromosome IDs | Chromosomes  | Physical positions (bp) | CDC Frontier (Reference genome) | (ILWC46 & LPNB) | NCBI SNPdb Accession IDs |
|----------------------|----------------|--------------|-------------------------|---------------------------------|-----------------|--------------------------|
| SNP_P4_153372_238411 | NW_004516374.1 | Scaffold1067 | 238411                  | TT                              | GG              | 1946994493               |
| SNP_P4_153373_238429 | NW_004516374.1 | Scaffold1067 | 238429                  | TT                              | GG              | 1946994494               |
| SNP_P4_153374_238442 | NW_004516374.1 | Scaffold1067 | 238442                  | TT                              | CC              | 1946994496               |
| SNP_P4_153375_238473 | NW_004516374.1 | Scaffold1067 | 238473                  | CC                              | GG              | 1946994498               |
| SNP_P4_153376_238546 | NW_004516374.1 | Scaffold1067 | 238546                  | GG                              | AA              | 1946994500               |
| SNP_P4_153377_238547 | NW_004516374.1 | Scaffold1067 | 238547                  | TT                              | CC              | 1946994502               |
| SNP_P4_153378_238576 | NW_004516374.1 | Scaffold1067 | 238576                  | AA                              | GG              | 1946994504               |
| SNP_P4_153380_238614 | NW_004516374.1 | Scaffold1067 | 238614                  | AA                              | CC              | 1946994506               |
| SNP_P4_153382_238944 | NW_004516374.1 | Scaffold1067 | 238944                  | AA                              | CC              | 1946994508               |
| SNP_P4_153383_238965 | NW_004516374.1 | Scaffold1067 | 238965                  | CC                              | AA              | 1946994510               |
| SNP_P4_153384_239002 | NW_004516374.1 | Scaffold1067 | 239002                  | CC                              | AA              | 1946994512               |
| SNP_P4_153385_239043 | NW_004516374.1 | Scaffold1067 | 239043                  | TT                              | CC              | 1946994514               |
| SNP_P4_153386_239045 | NW_004516374.1 | Scaffold1067 | 239045                  | AA                              | GG              | 1946994516               |
| SNP_P4_153387_239047 | NW_004516374.1 | Scaffold1067 | 239047                  | CC                              | GG              | 1946994518               |
| SNP_P4_153388_239064 | NW_004516374.1 | Scaffold1067 | 239064                  | TT                              | CC              | 1946994520               |
| SNP_P4_153389_239100 | NW_004516374.1 | Scaffold1067 | 239100                  | TT                              | CC              | 1946994522               |
| SNP_P4_153390_239150 | NW_004516374.1 | Scaffold1067 | 239150                  | AA                              | CC              | 1946994524               |
| SNP_P4_153391_239157 | NW_004516374.1 | Scaffold1067 | 239157                  | CC                              | AA              | 1946994526               |
| SNP_P4_153392_239234 | NW_004516374.1 | Scaffold1067 | 239234                  | AA                              | CC              | 1946994528               |
| SNP_P4_153393_239253 | NW_004516374.1 | Scaffold1067 | 239253                  | TT                              | CC              | 1946994530               |
| SNP_P4_153394_239302 | NW_004516374.1 | Scaffold1067 | 239302                  | TT                              | CC              | 1946994532               |
| SNP_P4_153395_239304 | NW_004516374.1 | Scaffold1067 | 239304                  | TT                              | CC              | 1946994534               |
| SNP_P4_153396_239339 | NW_004516374.1 | Scaffold1067 | 239339                  | TT                              | CC              | 1946994536               |
| SNP_P4_153397_239395 | NW_004516374.1 | Scaffold1067 | 239395                  | TT                              | GG              | 1946994538               |
| SNP_P4_153398_239396 | NW_004516374.1 | Scaffold1067 | 239396                  | AA                              | GG              | 1946994540               |
| SNP_P4_153399_239434 | NW_004516374.1 | Scaffold1067 | 239434                  | GG                              | CC              | 1946994542               |
| SNP_P4_153400_239450 | NW_004516374.1 | Scaffold1067 | 239450                  | AA                              | GG              | 1946994544               |
| SNP_P4_153401_239492 | NW_004516374.1 | Scaffold1067 | 239492                  | AA                              | CC              | 1946994546               |
| SNP_P4_153402_239493 | NW_004516374.1 | Scaffold1067 | 239493                  | AA                              | CC              | 1946994548               |
| SNP_P4_153403_239552 | NW_004516374.1 | Scaffold1067 | 239552                  | TT                              | GG              | 1946994550               |
| SNP_P4_153404_239553 | NW_004516374.1 | Scaffold1067 | 239553                  | TT                              | CC              | 1946994552               |
| SNP_P4_153405_239595 | NW_004516374.1 | Scaffold1067 | 239595                  | TT                              | AA              | 1946994554               |
| SNP_P4_153406_239647 | NW_004516374.1 | Scaffold1067 | 239647                  | TT                              | GG              | 1946994556               |
| SNP_P4_153407_239688 | NW_004516374.1 | Scaffold1067 | 239688                  | TT                              | CC              | 1946994558               |
| SNP_P4_153408_239706 | NW_004516374.1 | Scaffold1067 | 239706                  | AA                              | GG              | 1946994560               |
| SNP_P4_153409_239742 | NW_004516374.1 | Scaffold1067 | 239742                  | AA                              | GG              | 1946994562               |
| SNP_P4_153410_239844 | NW_004516374.1 | Scaffold1067 | 239844                  | TT                              | CC              | 1946994564               |
| SNP_P4_153411_239845 | NW_004516374.1 | Scaffold1067 | 239845                  | TT                              | CC              | 1946994566               |
| SNP_P4_153412_239852 | NW_004516374.1 | Scaffold1067 | 239852                  | AA                              | CC              | 1946994568               |
| SNP_P4_153413_239857 | NW_004516374.1 | Scaffold1067 | 239857                  | AA                              | CC              | 1946994570               |
| SNP_P4_153414_239884 | NW_004516374.1 | Scaffold1067 | 239884                  | GG                              | CC              | 1946994572               |
| SNP_P4_153415_239891 | NW_004516374.1 | Scaffold1067 | 239891                  | TT                              | GG              | 1946994574               |

| SNPs IDs             | Chromosome IDs | Chromosomes  | Physical positions (bp) | CDC Frontier (Reference genome) | (ILWC46 & LPNB) | NCBI SNPdb Accession IDs |
|----------------------|----------------|--------------|-------------------------|---------------------------------|-----------------|--------------------------|
| SNP_P4_153416_239895 | NW_004516374.1 | Scaffold1067 | 239895                  | AA                              | GG              | 1946994576               |
| SNP_P4_153417_239952 | NW_004516374.1 | Scaffold1067 | 239952                  | AA                              | CC              | 1946994578               |
| SNP_P4_153418_240002 | NW_004516374.1 | Scaffold1067 | 240002                  | CC                              | TT              | 1946994580               |
| SNP_P4_153419_240035 | NW_004516374.1 | Scaffold1067 | 240035                  | TT                              | GG              | 1946994583               |
| SNP_P4_153420_240039 | NW_004516374.1 | Scaffold1067 | 240039                  | GG                              | TT              | 1946994585               |
| SNP_P4_153421_240049 | NW_004516374.1 | Scaffold1067 | 240049                  | TT                              | GG              | 1946994587               |
| SNP_P4_153422_240054 | NW_004516374.1 | Scaffold1067 | 240054                  | TT                              | GG              | 1946994589               |
| SNP_P4_153423_240062 | NW_004516374.1 | Scaffold1067 | 240062                  | TT                              | CC              | 1946994591               |
| SNP_P4_153424_240087 | NW_004516374.1 | Scaffold1067 | 240087                  | TT                              | CC              | 1946994593               |
| SNP_P4_153425_240106 | NW_004516374.1 | Scaffold1067 | 240106                  | AA                              | GG              | 1946994595               |
| SNP_P4_153426_240122 | NW_004516374.1 | Scaffold1067 | 240122                  | AA                              | GG              | 1946994597               |
| SNP_P4_153427_240144 | NW_004516374.1 | Scaffold1067 | 240144                  | TT                              | GG              | 1946994599               |
| SNP_P4_153428_240145 | NW_004516374.1 | Scaffold1067 | 240145                  | TT                              | CC              | 1946994601               |
| SNP_P4_153429_240150 | NW_004516374.1 | Scaffold1067 | 240150                  | TT                              | CC              | 1946994603               |
| SNP_P4_153430_240249 | NW_004516374.1 | Scaffold1067 | 240249                  | TT                              | CC              | 1946994605               |
| SNP_P4_153431_240262 | NW_004516374.1 | Scaffold1067 | 240262                  | AA                              | TT              | 1946994607               |
| SNP_P4_153432_240320 | NW_004516374.1 | Scaffold1067 | 240320                  | AA                              | GG              | 1946994609               |
| SNP_P4_153433_240329 | NW_004516374.1 | Scaffold1067 | 240329                  | AA                              | GG              | 1946994611               |
| SNP_P4_153434_240347 | NW_004516374.1 | Scaffold1067 | 240347                  | TT                              | CC              | 1946994613               |
| SNP_P4_153435_240368 | NW_004516374.1 | Scaffold1067 | 240368                  | TT                              | GG              | 1946994615               |
| SNP_P4_153436_240401 | NW_004516374.1 | Scaffold1067 | 240401                  | TT                              | GG              | 1946994617               |
| SNP_P4_153437_240412 | NW_004516374.1 | Scaffold1067 | 240412                  | AA                              | GG              | 1946994619               |
| SNP_P4_153438_240468 | NW_004516374.1 | Scaffold1067 | 240468                  | AA                              | GG              | 1946994621               |
| SNP_P4_153439_240483 | NW_004516374.1 | Scaffold1067 | 240483                  | AA                              | GG              | 1946994623               |
| SNP_P4_153440_240513 | NW_004516374.1 | Scaffold1067 | 240513                  | AA                              | GG              | 1946994625               |
| SNP_P4_153441_240521 | NW_004516374.1 | Scaffold1067 | 240521                  | TT                              | CC              | 1946994627               |
| SNP_P4_153442_240527 | NW_004516374.1 | Scaffold1067 | 240527                  | TT                              | CC              | 1946994629               |
| SNP_P4_153443_240539 | NW_004516374.1 | Scaffold1067 | 240539                  | TT                              | CC              | 1946994631               |
| SNP_P4_153444_240575 | NW_004516374.1 | Scaffold1067 | 240575                  | GG                              | TT              | 1946994633               |
| SNP_P4_153445_240588 | NW_004516374.1 | Scaffold1067 | 240588                  | TT                              | GG              | 1946994635               |
| SNP_P4_153446_240607 | NW_004516374.1 | Scaffold1067 | 240607                  | TT                              | GG              | 1946994637               |
| SNP_P4_153447_240640 | NW_004516374.1 | Scaffold1067 | 240640                  | AA                              | GG              | 1946994639               |
| SNP_P4_153448_240647 | NW_004516374.1 | Scaffold1067 | 240647                  | GG                              | AA              | 1946994641               |
| SNP_P4_153449_240658 | NW_004516374.1 | Scaffold1067 | 240658                  | GG                              | CC              | 1946994643               |
| SNP_P4_153450_240688 | NW_004516374.1 | Scaffold1067 | 240688                  | TT                              | CC              | 1946994645               |
| SNP_P4_153451_240704 | NW_004516374.1 | Scaffold1067 | 240704                  | AA                              | GG              | 1946994647               |
| SNP_P4_153452_240718 | NW_004516374.1 | Scaffold1067 | 240718                  | TT                              | CC              | 1946994649               |
| SNP_P4_153453_240749 | NW_004516374.1 | Scaffold1067 | 240749                  | TT                              | AA              | 1946994651               |
| SNP_P4_153454_240779 | NW_004516374.1 | Scaffold1067 | 240779                  | TT                              | CC              | 1946994653               |
| SNP_P4_153455_240790 | NW_004516374.1 | Scaffold1067 | 240790                  | TT                              | CC              | 1946994655               |
| SNP_P4_153456_240856 | NW_004516374.1 | Scaffold1067 | 240856                  | GG                              | CC              | 1946994657               |
| SNP_P4_153457_240862 | NW_004516374.1 | Scaffold1067 | 240862                  | CC                              | AA              | 1946994659               |



| SNPs IDs             | Chromosome IDs | Chromosomes  | Physical positions (bp) | CDC Frontier (Reference genome) | (ILWC46 & LPNB) | NCBI SNPdb Accession IDs |
|----------------------|----------------|--------------|-------------------------|---------------------------------|-----------------|--------------------------|
| SNP_P4_153458_240869 | NW_004516374.1 | Scaffold1067 | 240869                  | TT                              | CC              | 1946994661               |
| SNP_P4_153459_240876 | NW_004516374.1 | Scaffold1067 | 240876                  | TT                              | CC              | 1946994663               |
| SNP_P4_153460_240879 | NW_004516374.1 | Scaffold1067 | 240879                  | TT                              | CC              | 1946994665               |
| SNP_P4_153461_240923 | NW_004516374.1 | Scaffold1067 | 240923                  | AA                              | GG              | 1946994667               |
| SNP_P4_153462_240938 | NW_004516374.1 | Scaffold1067 | 240938                  | AA                              | GG              | 1946994669               |
| SNP_P4_153463_240951 | NW_004516374.1 | Scaffold1067 | 240951                  | AA                              | GG              | 1946994671               |
| SNP_P4_153464_241018 | NW_004516374.1 | Scaffold1067 | 241018                  | TT                              | CC              | 1946994673               |
| SNP_P4_153465_241026 | NW_004516374.1 | Scaffold1067 | 241026                  | TT                              | AA              | 1946994675               |
| SNP_P4_153466_241046 | NW_004516374.1 | Scaffold1067 | 241046                  | TT                              | GG              | 1946994677               |
| SNP_P4_153467_241069 | NW_004516374.1 | Scaffold1067 | 241069                  | AA                              | GG              | 1946994679               |
| SNP_P4_153468_241106 | NW_004516374.1 | Scaffold1067 | 241106                  | TT                              | CC              | 1946994681               |
| SNP_P4_153469_241112 | NW_004516374.1 | Scaffold1067 | 241112                  | AA                              | GG              | 1946994683               |
| SNP_P4_153470_241132 | NW_004516374.1 | Scaffold1067 | 241132                  | TT                              | CC              | 1946994685               |
| SNP_P4_153471_241162 | NW_004516374.1 | Scaffold1067 | 241162                  | TT                              | GG              | 1946994687               |
| SNP_P4_153472_241166 | NW_004516374.1 | Scaffold1067 | 241166                  | CC                              | GG              | 1946994689               |
| SNP_P4_153473_241170 | NW_004516374.1 | Scaffold1067 | 241170                  | TT                              | CC              | 1946994691               |
| SNP_P4_153474_241442 | NW_004516374.1 | Scaffold1067 | 241442                  | GG                              | AA              | 1946994693               |
| SNP_P4_153475_241469 | NW_004516374.1 | Scaffold1067 | 241469                  | CC                              | GG              | 1946994695               |
| SNP_P4_153476_241522 | NW_004516374.1 | Scaffold1067 | 241522                  | AA                              | TT              | 1946994697               |
| SNP_P4_153477_241537 | NW_004516374.1 | Scaffold1067 | 241537                  | GG                              | AA              | 1946994699               |
| SNP_P4_153478_241539 | NW_004516374.1 | Scaffold1067 | 241539                  | TT                              | GG              | 1946994701               |
| SNP_P4_153479_241556 | NW_004516374.1 | Scaffold1067 | 241556                  | AA                              | GG              | 1946994703               |
| SNP_P4_153480_241789 | NW_004516374.1 | Scaffold1067 | 241789                  | GG                              | TT              | 1946994705               |
| SNP_P4_153481_242762 | NW_004516374.1 | Scaffold1067 | 242762                  | AA                              | CC              | 1946994707               |
| SNP_P4_153482_242798 | NW_004516374.1 | Scaffold1067 | 242798                  | TT                              | GG              | 1946994709               |
| SNP_P4_153483_242876 | NW_004516374.1 | Scaffold1067 | 242876                  | TT                              | CC              | 1946994711               |
| SNP_P4_153484_242926 | NW_004516374.1 | Scaffold1067 | 242926                  | AA                              | GG              | 1946994713               |
| SNP_P4_153486_242983 | NW_004516374.1 | Scaffold1067 | 242983                  | AA                              | GG              | 1946994715               |
| SNP_P4_153487_243023 | NW_004516374.1 | Scaffold1067 | 243023                  | TT                              | CC              | 1946994717               |
| SNP_P4_153488_243091 | NW_004516374.1 | Scaffold1067 | 243091                  | AA                              | GG              | 1946994719               |
| SNP_P4_153489_243104 | NW_004516374.1 | Scaffold1067 | 243104                  | TT                              | GG              | 1946994721               |
| SNP_P4_153490_243160 | NW_004516374.1 | Scaffold1067 | 243160                  | TT                              | GG              | 1946994723               |
| SNP_P4_153491_243176 | NW_004516374.1 | Scaffold1067 | 243176                  | TT                              | GG              | 1946994725               |
| SNP_P4_153492_243228 | NW_004516374.1 | Scaffold1067 | 243228                  | AA                              | GG              | 1946994727               |
| SNP_P4_153494_243306 | NW_004516374.1 | Scaffold1067 | 243306                  | AA                              | CC              | 1946994729               |
| SNP_P4_153495_243315 | NW_004516374.1 | Scaffold1067 | 243315                  | AA                              | GG              | 1946994731               |
| SNP_P4_153497_243352 | NW_004516374.1 | Scaffold1067 | 243352                  | TT                              | GG              | 1946994733               |
| SNP_P4_153498_243363 | NW_004516374.1 | Scaffold1067 | 243363                  | TT                              | GG              | 1946994735               |
| SNP_P4_153499_243452 | NW_004516374.1 | Scaffold1067 | 243452                  | AA                              | GG              | 1946994737               |
| SNP_P4_153500_243464 | NW_004516374.1 | Scaffold1067 | 243464                  | AA                              | GG              | 1946994739               |
| SNP_P4_153501_243494 | NW_004516374.1 | Scaffold1067 | 243494                  | TT                              | CC              | 1946994741               |
| SNP_P4_153503_243574 | NW_004516374.1 | Scaffold1067 | 243574                  | AA                              | CC              | 1946994743               |

| SNPs IDs             | Chromosome IDs | Chromosomes  | Physical positions (bp) | CDC Frontier (Reference genome) | (ILWC46 & LPNB) | NCBI SNPdb Accession IDs |
|----------------------|----------------|--------------|-------------------------|---------------------------------|-----------------|--------------------------|
| SNP_P4_153504_243598 | NW_004516374.1 | Scaffold1067 | 243598                  | TT                              | CC              | 1946994745               |
| SNP_P4_153505_243659 | NW_004516374.1 | Scaffold1067 | 243659                  | TT                              | CC              | 1946994747               |
| SNP_P4_153506_243718 | NW_004516374.1 | Scaffold1067 | 243718                  | TT                              | CC              | 1946994749               |
| SNP_P4_153507_243768 | NW_004516374.1 | Scaffold1067 | 243768                  | TT                              | GG              | 1946994751               |
| SNP_P4_153508_243790 | NW_004516374.1 | Scaffold1067 | 243790                  | AA                              | GG              | 1946994753               |
| SNP_P4_153510_243821 | NW_004516374.1 | Scaffold1067 | 243821                  | AA                              | GG              | 1946994755               |
| SNP_P4_153511_243866 | NW_004516374.1 | Scaffold1067 | 243866                  | TT                              | GG              | 1946994757               |
| SNP_P4_153512_244015 | NW_004516374.1 | Scaffold1067 | 244015                  | AA                              | GG              | 1946994759               |
| SNP_P4_153514_244037 | NW_004516374.1 | Scaffold1067 | 244037                  | TT                              | GG              | 1946994761               |
| SNP_P4_153515_244043 | NW_004516374.1 | Scaffold1067 | 244043                  | AA                              | CC              | 1946994763               |
| SNP_P4_153516_249054 | NW_004516374.1 | Scaffold1067 | 249054                  | TT                              | CC              | 1946994765               |
| SNP_P4_153517_249081 | NW_004516374.1 | Scaffold1067 | 249081                  | TT                              | AA              | 1946994767               |
| SNP_P4_153518_249109 | NW_004516374.1 | Scaffold1067 | 249109                  | GG                              | AA              | 1946994770               |
| SNP_P4_153519_249114 | NW_004516374.1 | Scaffold1067 | 249114                  | AA                              | GG              | 1946994772               |
| SNP_P4_153520_249239 | NW_004516374.1 | Scaffold1067 | 249239                  | TT                              | CC              | 1946994774               |
| SNP_P4_153521_249277 | NW_004516374.1 | Scaffold1067 | 249277                  | TT                              | CC              | 1946994776               |
| SNP_P4_153522_249301 | NW_004516374.1 | Scaffold1067 | 249301                  | AA                              | GG              | 1946994778               |
| SNP_P4_153524_249478 | NW_004516374.1 | Scaffold1067 | 249478                  | AA                              | GG              | 1946994780               |
| SNP_P4_153525_249483 | NW_004516374.1 | Scaffold1067 | 249483                  | AA                              | GG              | 1946994782               |
| SNP_P4_153526_249572 | NW_004516374.1 | Scaffold1067 | 249572                  | TT                              | CC              | 1946994784               |
| SNP_P4_153527_249600 | NW_004516374.1 | Scaffold1067 | 249600                  | GG                              | CC              | 1946994786               |
| SNP_P4_153528_249631 | NW_004516374.1 | Scaffold1067 | 249631                  | AA                              | CC              | 1946994788               |
| SNP_P4_153529_249633 | NW_004516374.1 | Scaffold1067 | 249633                  | TT                              | CC              | 1946994790               |
| SNP_P4_153530_249664 | NW_004516374.1 | Scaffold1067 | 249664                  | AA                              | GG              | 1946994792               |
| SNP_P4_153531_249671 | NW_004516374.1 | Scaffold1067 | 249671                  | CC                              | AA              | 1946994794               |
| SNP_P4_153532_249695 | NW_004516374.1 | Scaffold1067 | 249695                  | AA                              | GG              | 1946994796               |
| SNP_P4_153533_260520 | NW_004516374.1 | Scaffold1067 | 260520                  | GG                              | AA              | 1946994798               |
| SNP_P4_153534_260612 | NW_004516374.1 | Scaffold1067 | 260612                  | AA                              | GG              | 1946994800               |
| SNP_P4_153535_261005 | NW_004516374.1 | Scaffold1067 | 261005                  | TT                              | CC              | 1946994802               |
| SNP_P4_153536_263134 | NW_004516374.1 | Scaffold1067 | 263134                  | AA                              | TT              | 1946994804               |
| SNP_P4_153537_263142 | NW_004516374.1 | Scaffold1067 | 263142                  | TT                              | CC              | 1946994806               |
| SNP_P4_153538_263143 | NW_004516374.1 | Scaffold1067 | 263143                  | AA                              | GG              | 1946994808               |
| SNP_P4_153539_263248 | NW_004516374.1 | Scaffold1067 | 263248                  | TT                              | CC              | 1946994810               |
| SNP_P4_153540_263253 | NW_004516374.1 | Scaffold1067 | 263253                  | GG                              | CC              | 1946994812               |
| SNP_P4_153541_263271 | NW_004516374.1 | Scaffold1067 | 263271                  | AA                              | GG              | 1946994814               |
| SNP_P4_153542_263281 | NW_004516374.1 | Scaffold1067 | 263281                  | AA                              | CC              | 1946994816               |
| SNP_P4_153543_263290 | NW_004516374.1 | Scaffold1067 | 263290                  | AA                              | CC              | 1946994818               |
| SNP_P4_153544_263310 | NW_004516374.1 | Scaffold1067 | 263310                  | TT                              | CC              | 1946994820               |
| SNP_P4_153545_263314 | NW_004516374.1 | Scaffold1067 | 263314                  | TT                              | CC              | 1946994822               |
| SNP_P4_153546_263319 | NW_004516374.1 | Scaffold1067 | 263319                  | AA                              | GG              | 1946994824               |
| SNP_P4_153547_263497 | NW_004516374.1 | Scaffold1067 | 263497                  | AA                              | GG              | 1946994826               |
| SNP_P4_153549_263591 | NW_004516374.1 | Scaffold1067 | 263591                  | AA                              | GG              | 1946994828               |

| SNPs IDs             | Chromosome IDs | Chromosomes  | Physical positions (bp) | CDC Frontier (Reference genome) | (ILWC46 & LPNB) | NCBI SNPdb Accession IDs |
|----------------------|----------------|--------------|-------------------------|---------------------------------|-----------------|--------------------------|
| SNP_P4_153550_263645 | NW_004516374.1 | Scaffold1067 | 263645                  | TT                              | AA              | 1946994830               |
| SNP_P4_153551_263664 | NW_004516374.1 | Scaffold1067 | 263664                  | AA                              | GG              | 1946994832               |
| SNP_P4_153552_263675 | NW_004516374.1 | Scaffold1067 | 263675                  | AA                              | GG              | 1946994834               |
| SNP_P4_153553_263692 | NW_004516374.1 | Scaffold1067 | 263692                  | CC                              | TT              | 1946994836               |
| SNP_P4_153554_263696 | NW_004516374.1 | Scaffold1067 | 263696                  | TT                              | CC              | 1946994838               |
| SNP_P4_153555_263815 | NW_004516374.1 | Scaffold1067 | 263815                  | AA                              | CC              | 1946994840               |
| SNP_P4_153556_263823 | NW_004516374.1 | Scaffold1067 | 263823                  | AA                              | GG              | 1946994842               |
| SNP_P4_153557_263827 | NW_004516374.1 | Scaffold1067 | 263827                  | TT                              | GG              | 1946994844               |
| SNP_P4_153558_263841 | NW_004516374.1 | Scaffold1067 | 263841                  | AA                              | TT              | 1946994846               |
| SNP_P4_153559_263891 | NW_004516374.1 | Scaffold1067 | 263891                  | AA                              | GG              | 1946994848               |
| SNP_P4_153560_263899 | NW_004516374.1 | Scaffold1067 | 263899                  | GG                              | AA              | 1946994850               |
| SNP_P4_153561_263935 | NW_004516374.1 | Scaffold1067 | 263935                  | TT                              | CC              | 1946994852               |
| SNP_P4_153562_264033 | NW_004516374.1 | Scaffold1067 | 264033                  | TT                              | CC              | 1946994854               |
| SNP_P4_153563_264060 | NW_004516374.1 | Scaffold1067 | 264060                  | AA                              | GG              | 1946994856               |
| SNP_P4_153564_264072 | NW_004516374.1 | Scaffold1067 | 264072                  | GG                              | AA              | 1946994858               |
| SNP_P4_153565_264702 | NW_004516374.1 | Scaffold1067 | 264702                  | TT                              | CC              | 1946994860               |
| SNP_P4_153566_264743 | NW_004516374.1 | Scaffold1067 | 264743                  | CC                              | AA              | 1946994862               |
| SNP_P4_153567_264748 | NW_004516374.1 | Scaffold1067 | 264748                  | TT                              | CC              | 1946994864               |
| SNP_P4_153568_264776 | NW_004516374.1 | Scaffold1067 | 264776                  | TT                              | CC              | 1946994866               |
| SNP_P4_153569_265093 | NW_004516374.1 | Scaffold1067 | 265093                  | TT                              | AA              | 1946994868               |
| SNP_P4_153570_265633 | NW_004516374.1 | Scaffold1067 | 265633                  | TT                              | CC              | 1946994870               |
| SNP_P4_153571_265634 | NW_004516374.1 | Scaffold1067 | 265634                  | AA                              | TT              | 1946994872               |
| SNP_P4_153572_265647 | NW_004516374.1 | Scaffold1067 | 265647                  | TT                              | GG              | 1946994874               |
| SNP_P4_153573_265654 | NW_004516374.1 | Scaffold1067 | 265654                  | TT                              | AA              | 1946994876               |
| SNP_P4_153574_265676 | NW_004516374.1 | Scaffold1067 | 265676                  | TT                              | CC              | 1946994878               |
| SNP_P4_153575_265700 | NW_004516374.1 | Scaffold1067 | 265700                  | TT                              | AA              | 1946994880               |
| SNP_P4_153576_265702 | NW_004516374.1 | Scaffold1067 | 265702                  | AA                              | GG              | 1946994882               |
| SNP_P4_153577_265724 | NW_004516374.1 | Scaffold1067 | 265724                  | AA                              | CC              | 1946994884               |
| SNP_P4_153578_265730 | NW_004516374.1 | Scaffold1067 | 265730                  | TT                              | CC              | 1946994886               |
| SNP_P4_153579_265732 | NW_004516374.1 | Scaffold1067 | 265732                  | AA                              | GG              | 1946994888               |
| SNP_P4_153580_265761 | NW_004516374.1 | Scaffold1067 | 265761                  | TT                              | CC              | 1946994890               |
| SNP_P4_153581_265779 | NW_004516374.1 | Scaffold1067 | 265779                  | CC                              | GG              | 1946994892               |
| SNP_P4_153582_266037 | NW_004516374.1 | Scaffold1067 | 266037                  | AA                              | GG              | 1946994894               |
| SNP_P4_153584_266096 | NW_004516374.1 | Scaffold1067 | 266096                  | AA                              | GG              | 1946994896               |
| SNP_P4_153585_269603 | NW_004516374.1 | Scaffold1067 | 269603                  | TT                              | CC              | 1946994898               |
| SNP_P4_153586_269626 | NW_004516374.1 | Scaffold1067 | 269626                  | TT                              | GG              | 1946994900               |
| SNP_P4_153587_1913   | NW_004516376.1 | Scaffold1071 | 1913                    | GG                              | AA              | 1946994902               |
| SNP_P4_153588_13178  | NW_004516377.1 | Scaffold1072 | 13178                   | AA                              | CC              | 1946994904               |
| SNP_P4_153589_20642  | NW_004516379.1 | Scaffold1074 | 20642                   | AA                              | CC              | 1946994906               |
| SNP_P4_153590_20657  | NW_004516379.1 | Scaffold1074 | 20657                   | CC                              | GG              | 1946994908               |
| SNP_P4_153591_20670  | NW_004516379.1 | Scaffold1074 | 20670                   | AA                              | CC              | 1946994910               |
| SNP_P4_153592_20696  | NW_004516379.1 | Scaffold1074 | 20696                   | TT                              | CC              | 1946994912               |

| SNPs IDs            | Chromosome IDs | Chromosomes  | Physical positions (bp) | CDC Frontier (Reference genome) | (ILWC46 & LPNB) | NCBI SNPdb Accession IDs |
|---------------------|----------------|--------------|-------------------------|---------------------------------|-----------------|--------------------------|
| SNP_P4_153593_20701 | NW_004516379.1 | Scaffold1074 | 20701                   | AA                              | TT              | 1946994914               |
| SNP_P4_153594_20706 | NW_004516379.1 | Scaffold1074 | 20706                   | CC                              | TT              | 1946994916               |
| SNP_P4_153595_423   | NW_004516380.1 | Scaffold1076 | 423                     | CC                              | AA              | 1946994918               |
| SNP_P4_153596_442   | NW_004516380.1 | Scaffold1076 | 442                     | GG                              | CC              | 1946994920               |
| SNP_P4_153597_503   | NW_004516380.1 | Scaffold1076 | 503                     | TT                              | AA              | 1946994922               |
| SNP_P4_153598_7191  | NW_004516380.1 | Scaffold1076 | 7191                    | GG                              | AA              | 1946994924               |
| SNP_P4_153599_7196  | NW_004516380.1 | Scaffold1076 | 7196                    | GG                              | AA              | 1946994926               |
| SNP_P4_153600_7202  | NW_004516380.1 | Scaffold1076 | 7202                    | TT                              | AA              | 1946994928               |
| SNP_P4_153601_7309  | NW_004516380.1 | Scaffold1076 | 7309                    | TT                              | GG              | 1946994930               |
| SNP_P4_153602_7653  | NW_004516380.1 | Scaffold1076 | 7653                    | GG                              | CC              | 1946994932               |
| SNP_P4_153603_8050  | NW_004516380.1 | Scaffold1076 | 8050                    | GG                              | AA              | 1946994934               |
| SNP_P4_153604_8081  | NW_004516380.1 | Scaffold1076 | 8081                    | TT                              | AA              | 1946994936               |
| SNP_P4_153605_10753 | NW_004516380.1 | Scaffold1076 | 10753                   | AA                              | GG              | 1946994938               |
| SNP_P4_153606_10953 | NW_004516380.1 | Scaffold1076 | 10953                   | CC                              | GG              | 1946994940               |
| SNP_P4_153607_11054 | NW_004516380.1 | Scaffold1076 | 11054                   | GG                              | AA              | 1946994942               |
| SNP_P4_153608_11074 | NW_004516380.1 | Scaffold1076 | 11074                   | GG                              | TT              | 1946994944               |
| SNP_P4_153609_11122 | NW_004516380.1 | Scaffold1076 | 11122                   | AA                              | CC              | 1946994946               |
| SNP_P4_153610_23771 | NW_004516380.1 | Scaffold1076 | 23771                   | TT                              | GG              | 1946994948               |
| SNP_P4_153611_24015 | NW_004516380.1 | Scaffold1076 | 24015                   | AA                              | CC              | 1946994950               |
| SNP_P4_153612_33224 | NW_004516380.1 | Scaffold1076 | 33224                   | TT                              | GG              | 1946994952               |
| SNP_P4_153613_33654 | NW_004516380.1 | Scaffold1076 | 33654                   | AA                              | GG              | 1946994954               |
| SNP_P4_153614_2518  | NW_004516382.1 | Scaffold1080 | 2518                    | AA                              | GG              | 1946994956               |
| SNP_P4_153615_5323  | NW_004516382.1 | Scaffold1080 | 5323                    | TT                              | GG              | 1946994958               |
| SNP_P4_153616_5346  | NW_004516382.1 | Scaffold1080 | 5346                    | GG                              | TT              | 1946994960               |
| SNP_P4_153617_8140  | NW_004516382.1 | Scaffold1080 | 8140                    | TT                              | AA              | 1946994962               |
| SNP_P4_153618_15616 | NW_004516382.1 | Scaffold1080 | 15616                   | GG                              | TT              | 1946994964               |
| SNP_P4_153619_15627 | NW_004516382.1 | Scaffold1080 | 15627                   | GG                              | TT              | 1946994965               |
| SNP_P4_153620_15656 | NW_004516382.1 | Scaffold1080 | 15656                   | AA                              | GG              | 1946994967               |
| SNP_P4_153621_15674 | NW_004516382.1 | Scaffold1080 | 15674                   | AA                              | GG              | 1946994969               |
| SNP_P4_153622_26909 | NW_004516382.1 | Scaffold1080 | 26909                   | AA                              | GG              | 1946994971               |
| SNP_P4_153623_32551 | NW_004516382.1 | Scaffold1080 | 32551                   | GG                              | AA              | 1946994973               |
| SNP_P4_153624_32818 | NW_004516382.1 | Scaffold1080 | 32818                   | CC                              | TT              | 1946994975               |
| SNP_P4_153625_32839 | NW_004516382.1 | Scaffold1080 | 32839                   | AA                              | GG              | 1946994977               |
| SNP_P4_153626_32871 | NW_004516382.1 | Scaffold1080 | 32871                   | AA                              | CC              | 1946994979               |
| SNP_P4_153627_29053 | NW_004516383.1 | Scaffold1081 | 29053                   | AA                              | GG              | 1946994981               |
| SNP_P4_153628_38519 | NW_004516383.1 | Scaffold1081 | 38519                   | AA                              | CC              | 1946994983               |
| SNP_P4_153629_38520 | NW_004516383.1 | Scaffold1081 | 38520                   | TT                              | AA              | 1946994985               |
| SNP_P4_153631_46980 | NW_004516383.1 | Scaffold1081 | 46980                   | TT                              | CC              | 1946994987               |
| SNP_P4_153632_50366 | NW_004516383.1 | Scaffold1081 | 50366                   | TT                              | GG              | 1946994989               |
| SNP_P4_153633_61495 | NW_004516383.1 | Scaffold1081 | 61495                   | TT                              | AA              | 1946994991               |
| SNP_P4_153634_83082 | NW_004516383.1 | Scaffold1081 | 83082                   | CC                              | TT              | 1946994993               |
| SNP_P4_153635_83153 | NW_004516383.1 | Scaffold1081 | 83153                   | CC                              | TT              | 1946994995               |

| SNPs IDs             | Chromosome IDs | Chromosomes  | Physical positions (bp) | CDC Frontier (Reference genome) | (ILWC46 & LPNB) | NCBI SNPdb Accession IDs |
|----------------------|----------------|--------------|-------------------------|---------------------------------|-----------------|--------------------------|
| SNP_P4_153636_86134  | NW_004516383.1 | Scaffold1081 | 86134                   | AA                              | GG              | 1946994997               |
| SNP_P4_153637_86148  | NW_004516383.1 | Scaffold1081 | 86148                   | AA                              | GG              | 1946994999               |
| SNP_P4_153639_86179  | NW_004516383.1 | Scaffold1081 | 86179                   | CC                              | TT              | 1946995001               |
| SNP_P4_153640_86218  | NW_004516383.1 | Scaffold1081 | 86218                   | TT                              | GG              | 1946995003               |
| SNP_P4_153643_87615  | NW_004516383.1 | Scaffold1081 | 87615                   | TT                              | GG              | 1946995005               |
| SNP_P4_153645_89778  | NW_004516383.1 | Scaffold1081 | 89778                   | GG                              | TT              | 1946995007               |
| SNP_P4_153646_93459  | NW_004516383.1 | Scaffold1081 | 93459                   | CC                              | GG              | 1946995009               |
| SNP_P4_153647_109390 | NW_004516383.1 | Scaffold1081 | 109390                  | AA                              | GG              | 1946995011               |
| SNP_P4_153648_109397 | NW_004516383.1 | Scaffold1081 | 109397                  | AA                              | GG              | 1946995013               |
| SNP_P4_153649_116974 | NW_004516383.1 | Scaffold1081 | 116974                  | TT                              | GG              | 1946995015               |
| SNP_P4_153651_707    | NW_004516384.1 | Scaffold1082 | 707                     | AA                              | TT              | 1946995017               |
| SNP_P4_153652_832    | NW_004516384.1 | Scaffold1082 | 832                     | CC                              | TT              | 1946995019               |
| SNP_P4_153653_859    | NW_004516384.1 | Scaffold1082 | 859                     | TT                              | CC              | 1946995021               |
| SNP_P4_153654_19777  | NW_004516384.1 | Scaffold1082 | 19777                   | TT                              | CC              | 1946995023               |
| SNP_P4_153655_19794  | NW_004516384.1 | Scaffold1082 | 19794                   | AA                              | TT              | 1946995024               |
| SNP_P4_153657_20012  | NW_004516384.1 | Scaffold1082 | 20012                   | CC                              | AA              | 1946995026               |
| SNP_P4_153658_20062  | NW_004516384.1 | Scaffold1082 | 20062                   | TT                              | GG              | 1946995028               |
| SNP_P4_153661_21096  | NW_004516384.1 | Scaffold1082 | 21096                   | CC                              | GG              | 1946995030               |
| SNP_P4_153662_21238  | NW_004516384.1 | Scaffold1082 | 21238                   | CC                              | AA              | 1946995032               |
| SNP_P4_153663_21342  | NW_004516384.1 | Scaffold1082 | 21342                   | AA                              | TT              | 1946995034               |
| SNP_P4_153664_21350  | NW_004516384.1 | Scaffold1082 | 21350                   | TT                              | CC              | 1946995036               |
| SNP_P4_153665_21354  | NW_004516384.1 | Scaffold1082 | 21354                   | TT                              | AA              | 1946995038               |
| SNP_P4_153666_21356  | NW_004516384.1 | Scaffold1082 | 21356                   | AA                              | TT              | 1946995040               |
| SNP_P4_153667_21392  | NW_004516384.1 | Scaffold1082 | 21392                   | TT                              | AA              | 1946995042               |
| SNP_P4_153668_23011  | NW_004516384.1 | Scaffold1082 | 23011                   | TT                              | AA              | 1946995044               |
| SNP_P4_153669_24505  | NW_004516384.1 | Scaffold1082 | 24505                   | TT                              | CC              | 1946995047               |
| SNP_P4_153670_26922  | NW_004516384.1 | Scaffold1082 | 26922                   | AA                              | GG              | 1946995049               |
| SNP_P4_153671_26957  | NW_004516384.1 | Scaffold1082 | 26957                   | TT                              | GG              | 1946995051               |
| SNP_P4_153672_27036  | NW_004516384.1 | Scaffold1082 | 27036                   | TT                              | CC              | 1946995053               |
| SNP_P4_153673_27256  | NW_004516384.1 | Scaffold1082 | 27256                   | TT                              | GG              | 1946995055               |
| SNP_P4_153674_27307  | NW_004516384.1 | Scaffold1082 | 27307                   | TT                              | AA              | 1946995057               |
| SNP_P4_153675_27410  | NW_004516384.1 | Scaffold1082 | 27410                   | GG                              | AA              | 1946995059               |
| SNP_P4_153676_27442  | NW_004516384.1 | Scaffold1082 | 27442                   | GG                              | AA              | 1946995061               |
| SNP_P4_153677_27458  | NW_004516384.1 | Scaffold1082 | 27458                   | CC                              | GG              | 1946995063               |
| SNP_P4_153678_27597  | NW_004516384.1 | Scaffold1082 | 27597                   | TT                              | AA              | 1946995065               |
| SNP_P4_153679_27630  | NW_004516384.1 | Scaffold1082 | 27630                   | CC                              | TT              | 1946995066               |
| SNP_P4_153680_27659  | NW_004516384.1 | Scaffold1082 | 27659                   | AA                              | TT              | 1946995067               |
| SNP_P4_153681_31857  | NW_004516384.1 | Scaffold1082 | 31857                   | GG                              | AA              | 1946995068               |
| SNP_P4_153682_31864  | NW_004516384.1 | Scaffold1082 | 31864                   | TT                              | AA              | 1946995070               |
| SNP_P4_153683_31928  | NW_004516384.1 | Scaffold1082 | 31928                   | GG                              | CC              | 1946995072               |
| SNP_P4_153684_31933  | NW_004516384.1 | Scaffold1082 | 31933                   | TT                              | CC              | 1946995074               |
| SNP_P4_153685_32162  | NW_004516384.1 | Scaffold1082 | 32162                   | GG                              | AA              | 1946995076               |

| SNPs IDs             | Chromosome IDs | Chromosomes  | Physical positions (bp) | CDC Frontier (Reference genome) | (ILWC46 & LPNB) | NCBI SNPdb Accession IDs |
|----------------------|----------------|--------------|-------------------------|---------------------------------|-----------------|--------------------------|
| SNP_P4_153686_32166  | NW_004516384.1 | Scaffold1082 | 32166                   | TT                              | AA              | 1946995078               |
| SNP_P4_153687_32193  | NW_004516384.1 | Scaffold1082 | 32193                   | CC                              | AA              | 1946995080               |
| SNP_P4_153688_32966  | NW_004516384.1 | Scaffold1082 | 32966                   | AA                              | CC              | 1946995082               |
| SNP_P4_153689_2831   | NW_004516385.1 | Scaffold1083 | 2831                    | CC                              | AA              | 1946995084               |
| SNP_P4_153690_10937  | NW_004516385.1 | Scaffold1083 | 10937                   | CC                              | GG              | 1946995086               |
| SNP_P4_153691_10951  | NW_004516385.1 | Scaffold1083 | 10951                   | GG                              | AA              | 1946995088               |
| SNP_P4_153692_10986  | NW_004516385.1 | Scaffold1083 | 10986                   | AA                              | GG              | 1946995090               |
| SNP_P4_153693_16493  | NW_004516385.1 | Scaffold1083 | 16493                   | GG                              | CC              | 1946995092               |
| SNP_P4_153694_27304  | NW_004516385.1 | Scaffold1083 | 27304                   | TT                              | GG              | 1946995093               |
| SNP_P4_153695_27349  | NW_004516385.1 | Scaffold1083 | 27349                   | CC                              | TT              | 1946995095               |
| SNP_P4_153696_27363  | NW_004516385.1 | Scaffold1083 | 27363                   | AA                              | GG              | 1946995097               |
| SNP_P4_153697_27386  | NW_004516385.1 | Scaffold1083 | 27386                   | TT                              | CC              | 1946995099               |
| SNP_P4_153698_27390  | NW_004516385.1 | Scaffold1083 | 27390                   | TT                              | CC              | 1946995101               |
| SNP_P4_153699_27434  | NW_004516385.1 | Scaffold1083 | 27434                   | CC                              | TT              | 1946995103               |
| SNP_P4_153700_27474  | NW_004516385.1 | Scaffold1083 | 27474                   | TT                              | GG              | 1946995105               |
| SNP_P4_153701_27516  | NW_004516385.1 | Scaffold1083 | 27516                   | AA                              | GG              | 1946995107               |
| SNP_P4_153702_27522  | NW_004516385.1 | Scaffold1083 | 27522                   | AA                              | GG              | 1946995109               |
| SNP_P4_153703_43365  | NW_004516385.1 | Scaffold1083 | 43365                   | AA                              | GG              | 1946995111               |
| SNP_P4_153706_59315  | NW_004516385.1 | Scaffold1083 | 59315                   | AA                              | CC              | 1946995113               |
| SNP_P4_153707_59337  | NW_004516385.1 | Scaffold1083 | 59337                   | CC                              | TT              | 1946995115               |
| SNP_P4_153708_59338  | NW_004516385.1 | Scaffold1083 | 59338                   | AA                              | CC              | 1946995117               |
| SNP_P4_153709_67845  | NW_004516385.1 | Scaffold1083 | 67845                   | GG                              | TT              | 1946995119               |
| SNP_P4_153711_86555  | NW_004516385.1 | Scaffold1083 | 86555                   | GG                              | AA              | 1946995121               |
| SNP_P4_153712_92707  | NW_004516385.1 | Scaffold1083 | 92707                   | GG                              | AA              | 1946995123               |
| SNP_P4_153713_92715  | NW_004516385.1 | Scaffold1083 | 92715                   | TT                              | AA              | 1946995125               |
| SNP_P4_153714_92719  | NW_004516385.1 | Scaffold1083 | 92719                   | CC                              | AA              | 1946995127               |
| SNP_P4_153715_97158  | NW_004516385.1 | Scaffold1083 | 97158                   | AA                              | GG              | 1946995129               |
| SNP_P4_153716_97334  | NW_004516385.1 | Scaffold1083 | 97334                   | GG                              | CC              | 1946995131               |
| SNP_P4_153717_97496  | NW_004516385.1 | Scaffold1083 | 97496                   | AA                              | GG              | 1946995133               |
| SNP_P4_153718_97547  | NW_004516385.1 | Scaffold1083 | 97547                   | CC                              | TT              | 1946995135               |
| SNP_P4_153719_97964  | NW_004516385.1 | Scaffold1083 | 97964                   | AA                              | GG              | 1946995137               |
| SNP_P4_153720_118643 | NW_004516385.1 | Scaffold1083 | 118643                  | CC                              | AA              | 1946995139               |
| SNP_P4_153721_118648 | NW_004516385.1 | Scaffold1083 | 118648                  | CC                              | TT              | 1946995141               |
| SNP_P4_153722_118664 | NW_004516385.1 | Scaffold1083 | 118664                  | TT                              | CC              | 1946995143               |
| SNP_P4_153723_118668 | NW_004516385.1 | Scaffold1083 | 118668                  | GG                              | CC              | 1946995145               |
| SNP_P4_153724_118673 | NW_004516385.1 | Scaffold1083 | 118673                  | AA                              | CC              | 1946995147               |
| SNP_P4_153725_119803 | NW_004516385.1 | Scaffold1083 | 119803                  | AA                              | GG              | 1946995149               |
| SNP_P4_153726_119807 | NW_004516385.1 | Scaffold1083 | 119807                  | GG                              | AA              | 1946995151               |
| SNP_P4_153727_119816 | NW_004516385.1 | Scaffold1083 | 119816                  | AA                              | GG              | 1946995153               |
| SNP_P4_153728_119874 | NW_004516385.1 | Scaffold1083 | 119874                  | AA                              | GG              | 1946995155               |
| SNP_P4_153729_119889 | NW_004516385.1 | Scaffold1083 | 119889                  | CC                              | GG              | 1946995157               |
| SNP_P4_153730_120083 | NW_004516385.1 | Scaffold1083 | 120083                  | GG                              | CC              | 1946995159               |

| SNPs IDs             | Chromosome IDs | Chromosomes  | Physical positions (bp) | CDC Frontier (Reference genome) | (ILWC46 & LPNB) | NCBI SNPdb Accession IDs |
|----------------------|----------------|--------------|-------------------------|---------------------------------|-----------------|--------------------------|
| SNP_P4_153731_120086 | NW_004516385.1 | Scaffold1083 | 120086                  | GG                              | TT              | 1946995161               |
| SNP_P4_153732_120093 | NW_004516385.1 | Scaffold1083 | 120093                  | TT                              | CC              | 1946995163               |
| SNP_P4_153733_120129 | NW_004516385.1 | Scaffold1083 | 120129                  | GG                              | AA              | 1946995165               |
| SNP_P4_153735_122113 | NW_004516385.1 | Scaffold1083 | 122113                  | AA                              | GG              | 1946995167               |
| SNP_P4_153736_122137 | NW_004516385.1 | Scaffold1083 | 122137                  | TT                              | CC              | 1946995169               |
| SNP_P4_153737_122240 | NW_004516385.1 | Scaffold1083 | 122240                  | CC                              | TT              | 1946995171               |
| SNP_P4_153738_122279 | NW_004516385.1 | Scaffold1083 | 122279                  | GG                              | CC              | 1946995173               |
| SNP_P4_153739_122294 | NW_004516385.1 | Scaffold1083 | 122294                  | GG                              | AA              | 1946995174               |
| SNP_P4_153740_122309 | NW_004516385.1 | Scaffold1083 | 122309                  | AA                              | TT              | 1946995176               |
| SNP_P4_153741_122362 | NW_004516385.1 | Scaffold1083 | 122362                  | GG                              | AA              | 1946995178               |
| SNP_P4_153742_122365 | NW_004516385.1 | Scaffold1083 | 122365                  | AA                              | GG              | 1946995180               |
| SNP_P4_153743_125793 | NW_004516385.1 | Scaffold1083 | 125793                  | GG                              | AA              | 1946995182               |
| SNP_P4_153744_128234 | NW_004516385.1 | Scaffold1083 | 128234                  | GG                              | CC              | 1946995184               |
| SNP_P4_153745_128566 | NW_004516385.1 | Scaffold1083 | 128566                  | GG                              | AA              | 1946995186               |
| SNP_P4_153746_128916 | NW_004516385.1 | Scaffold1083 | 128916                  | GG                              | AA              | 1946995188               |
| SNP_P4_153747_132024 | NW_004516385.1 | Scaffold1083 | 132024                  | TT                              | AA              | 1946995189               |
| SNP_P4_153748_132242 | NW_004516385.1 | Scaffold1083 | 132242                  | CC                              | AA              | 1946995191               |
| SNP_P4_153749_132244 | NW_004516385.1 | Scaffold1083 | 132244                  | AA                              | CC              | 1946995193               |
| SNP_P4_153750_132268 | NW_004516385.1 | Scaffold1083 | 132268                  | TT                              | AA              | 1946995195               |
| SNP_P4_153751_132504 | NW_004516385.1 | Scaffold1083 | 132504                  | GG                              | TT              | 1946995197               |
| SNP_P4_153752_132657 | NW_004516385.1 | Scaffold1083 | 132657                  | AA                              | TT              | 1946995199               |
| SNP_P4_153753_132668 | NW_004516385.1 | Scaffold1083 | 132668                  | TT                              | CC              | 1946995201               |
| SNP_P4_153754_132669 | NW_004516385.1 | Scaffold1083 | 132669                  | AA                              | TT              | 1946995203               |
| SNP_P4_153755_132685 | NW_004516385.1 | Scaffold1083 | 132685                  | TT                              | AA              | 1946995204               |
| SNP_P4_153756_132781 | NW_004516385.1 | Scaffold1083 | 132781                  | TT                              | AA              | 1946995206               |
| SNP_P4_153757_132944 | NW_004516385.1 | Scaffold1083 | 132944                  | TT                              | AA              | 1946995208               |
| SNP_P4_153758_133385 | NW_004516385.1 | Scaffold1083 | 133385                  | GG                              | AA              | 1946995210               |
| SNP_P4_153759_133678 | NW_004516385.1 | Scaffold1083 | 133678                  | TT                              | CC              | 1946995212               |
| SNP_P4_153760_133754 | NW_004516385.1 | Scaffold1083 | 133754                  | AA                              | CC              | 1946995214               |
| SNP_P4_153761_5796   | NW_004516386.1 | Scaffold1084 | 5796                    | TT                              | AA              | 1946995216               |
| SNP_P4_153762_5810   | NW_004516386.1 | Scaffold1084 | 5810                    | TT                              | GG              | 1946995218               |
| SNP_P4_153763_1114   | NW_004516387.1 | Scaffold1085 | 1114                    | TT                              | AA              | 1946995219               |
| SNP_P4_153764_1161   | NW_004516387.1 | Scaffold1085 | 1161                    | AA                              | CC              | 1946995221               |
| SNP_P4_153765_1162   | NW_004516387.1 | Scaffold1085 | 1162                    | TT                              | CC              | 1946995223               |
| SNP_P4_153766_7681   | NW_004516387.1 | Scaffold1085 | 7681                    | TT                              | CC              | 1946995225               |
| SNP_P4_153767_8018   | NW_004516387.1 | Scaffold1085 | 8018                    | TT                              | GG              | 1946995227               |
| SNP_P4_153768_7095   | NW_004516389.1 | Scaffold1087 | 7095                    | CC                              | TT              | 1946995229               |
| SNP_P4_153769_12262  | NW_004516389.1 | Scaffold1087 | 12262                   | TT                              | GG              | 1946995231               |
| SNP_P4_153770_12271  | NW_004516389.1 | Scaffold1087 | 12271                   | CC                              | TT              | 1946995233               |
| SNP_P4_153771_12318  | NW_004516389.1 | Scaffold1087 | 12318                   | TT                              | CC              | 1946995235               |
| SNP_P4_153772_12360  | NW_004516389.1 | Scaffold1087 | 12360                   | AA                              | GG              | 1946995237               |
| SNP_P4_153773_12386  | NW_004516389.1 | Scaffold1087 | 12386                   | TT                              | GG              | 1946995239               |

| SNPs IDs            | Chromosome IDs | Chromosomes  | Physical positions (bp) | CDC Frontier (Reference genome) | (ILWC46 & LPNB) | NCBI SNPdb Accession IDs |
|---------------------|----------------|--------------|-------------------------|---------------------------------|-----------------|--------------------------|
| SNP_P4_153774_12420 | NW_004516389.1 | Scaffold1087 | 12420                   | GG                              | AA              | 1946995241               |
| SNP_P4_153775_12421 | NW_004516389.1 | Scaffold1087 | 12421                   | CC                              | TT              | 1946995243               |
| SNP_P4_153776_12451 | NW_004516389.1 | Scaffold1087 | 12451                   | CC                              | TT              | 1946995245               |
| SNP_P4_153777_12483 | NW_004516389.1 | Scaffold1087 | 12483                   | CC                              | AA              | 1946995247               |
| SNP_P4_153778_12498 | NW_004516389.1 | Scaffold1087 | 12498                   | CC                              | TT              | 1946995249               |
| SNP_P4_153779_12525 | NW_004516389.1 | Scaffold1087 | 12525                   | CC                              | TT              | 1946995251               |
| SNP_P4_153781_12704 | NW_004516389.1 | Scaffold1087 | 12704                   | TT                              | CC              | 1946995253               |
| SNP_P4_153782_12707 | NW_004516389.1 | Scaffold1087 | 12707                   | GG                              | AA              | 1946995255               |
| SNP_P4_153783_12708 | NW_004516389.1 | Scaffold1087 | 12708                   | CC                              | GG              | 1946995257               |
| SNP_P4_153784_12870 | NW_004516389.1 | Scaffold1087 | 12870                   | TT                              | CC              | 1946995259               |
| SNP_P4_153785_12874 | NW_004516389.1 | Scaffold1087 | 12874                   | GG                              | AA              | 1946995261               |
| SNP_P4_153786_12946 | NW_004516389.1 | Scaffold1087 | 12946                   | AA                              | TT              | 1946995263               |
| SNP_P4_153787_13031 | NW_004516389.1 | Scaffold1087 | 13031                   | AA                              | GG              | 1946995265               |
| SNP_P4_153788_13146 | NW_004516389.1 | Scaffold1087 | 13146                   | TT                              | CC              | 1946995267               |
| SNP_P4_153789_13172 | NW_004516389.1 | Scaffold1087 | 13172                   | CC                              | TT              | 1946995269               |
| SNP_P4_153790_13246 | NW_004516389.1 | Scaffold1087 | 13246                   | AA                              | GG              | 1946995271               |
| SNP_P4_153791_13276 | NW_004516389.1 | Scaffold1087 | 13276                   | GG                              | AA              | 1946995272               |
| SNP_P4_153792_13306 | NW_004516389.1 | Scaffold1087 | 13306                   | TT                              | CC              | 1946995274               |
| SNP_P4_153793_13321 | NW_004516389.1 | Scaffold1087 | 13321                   | AA                              | TT              | 1946995276               |
| SNP_P4_153794_13368 | NW_004516389.1 | Scaffold1087 | 13368                   | TT                              | CC              | 1946995278               |
| SNP_P4_153795_13386 | NW_004516389.1 | Scaffold1087 | 13386                   | TT                              | AA              | 1946995280               |
| SNP_P4_153796_13402 | NW_004516389.1 | Scaffold1087 | 13402                   | AA                              | GG              | 1946995282               |
| SNP_P4_153797_13456 | NW_004516389.1 | Scaffold1087 | 13456                   | AA                              | TT              | 1946995284               |
| SNP_P4_153798_13461 | NW_004516389.1 | Scaffold1087 | 13461                   | GG                              | AA              | 1946995286               |
| SNP_P4_153800_13585 | NW_004516389.1 | Scaffold1087 | 13585                   | TT                              | AA              | 1946995288               |
| SNP_P4_153801_13646 | NW_004516389.1 | Scaffold1087 | 13646                   | AA                              | GG              | 1946995290               |
| SNP_P4_153802_13662 | NW_004516389.1 | Scaffold1087 | 13662                   | AA                              | GG              | 1946995292               |
| SNP_P4_153803_13747 | NW_004516389.1 | Scaffold1087 | 13747                   | CC                              | AA              | 1946995294               |
| SNP_P4_153804_13807 | NW_004516389.1 | Scaffold1087 | 13807                   | AA                              | GG              | 1946995296               |
| SNP_P4_153805_13867 | NW_004516389.1 | Scaffold1087 | 13867                   | TT                              | CC              | 1946995298               |
| SNP_P4_153806_13868 | NW_004516389.1 | Scaffold1087 | 13868                   | GG                              | AA              | 1946995300               |
| SNP_P4_153807_13931 | NW_004516389.1 | Scaffold1087 | 13931                   | AA                              | CC              | 1946995302               |
| SNP_P4_153808_14073 | NW_004516389.1 | Scaffold1087 | 14073                   | GG                              | AA              | 1946995304               |
| SNP_P4_153809_14082 | NW_004516389.1 | Scaffold1087 | 14082                   | AA                              | GG              | 1946995306               |
| SNP_P4_153810_14086 | NW_004516389.1 | Scaffold1087 | 14086                   | AA                              | TT              | 1946995309               |
| SNP_P4_153811_14291 | NW_004516389.1 | Scaffold1087 | 14291                   | AA                              | TT              | 1946995311               |
| SNP_P4_153812_14373 | NW_004516389.1 | Scaffold1087 | 14373                   | GG                              | AA              | 1946995313               |
| SNP_P4_153814_14411 | NW_004516389.1 | Scaffold1087 | 14411                   | TT                              | CC              | 1946995315               |
| SNP_P4_153815_14523 | NW_004516389.1 | Scaffold1087 | 14523                   | GG                              | TT              | 1946995317               |
| SNP_P4_153816_14567 | NW_004516389.1 | Scaffold1087 | 14567                   | GG                              | AA              | 1946995319               |
| SNP_P4_153817_14747 | NW_004516389.1 | Scaffold1087 | 14747                   | AA                              | TT              | 1946995321               |
| SNP_P4_153818_14793 | NW_004516389.1 | Scaffold1087 | 14793                   | CC                              | AA              | 1946995323               |



| SNPs IDs             | Chromosome IDs | Chromosomes  | Physical positions (bp) | CDC Frontier (Reference genome) | (ILWC46 & LPNB) | NCBI SNPdb Accession IDs |
|----------------------|----------------|--------------|-------------------------|---------------------------------|-----------------|--------------------------|
| SNP_P4_153819_14796  | NW_004516389.1 | Scaffold1087 | 14796                   | CC                              | TT              | 1946995325               |
| SNP_P4_153820_14814  | NW_004516389.1 | Scaffold1087 | 14814                   | TT                              | CC              | 1946995327               |
| SNP_P4_153822_15169  | NW_004516389.1 | Scaffold1087 | 15169                   | AA                              | TT              | 1946995329               |
| SNP_P4_153823_15753  | NW_004516389.1 | Scaffold1087 | 15753                   | TT                              | CC              | 1946995331               |
| SNP_P4_153824_15766  | NW_004516389.1 | Scaffold1087 | 15766                   | AA                              | GG              | 1946995333               |
| SNP_P4_153825_16489  | NW_004516389.1 | Scaffold1087 | 16489                   | AA                              | GG              | 1946995336               |
| SNP_P4_153826_21096  | NW_004516389.1 | Scaffold1087 | 21096                   | GG                              | AA              | 1946995338               |
| SNP_P4_153827_22796  | NW_004516389.1 | Scaffold1087 | 22796                   | AA                              | GG              | 1946995340               |
| SNP_P4_153828_22797  | NW_004516389.1 | Scaffold1087 | 22797                   | AA                              | GG              | 1946995342               |
| SNP_P4_153829_22851  | NW_004516389.1 | Scaffold1087 | 22851                   | AA                              | GG              | 1946995344               |
| SNP_P4_153830_22889  | NW_004516389.1 | Scaffold1087 | 22889                   | TT                              | CC              | 1946995346               |
| SNP_P4_153831_22935  | NW_004516389.1 | Scaffold1087 | 22935                   | TT                              | CC              | 1946995348               |
| SNP_P4_153832_22938  | NW_004516389.1 | Scaffold1087 | 22938                   | TT                              | AA              | 1946995350               |
| SNP_P4_153833_22976  | NW_004516389.1 | Scaffold1087 | 22976                   | CC                              | TT              | 1946995352               |
| SNP_P4_153834_23005  | NW_004516389.1 | Scaffold1087 | 23005                   | CC                              | TT              | 1946995354               |
| SNP_P4_153836_23095  | NW_004516389.1 | Scaffold1087 | 23095                   | TT                              | AA              | 1946995356               |
| SNP_P4_153837_23096  | NW_004516389.1 | Scaffold1087 | 23096                   | AA                              | TT              | 1946995358               |
| SNP_P4_153839_23242  | NW_004516389.1 | Scaffold1087 | 23242                   | CC                              | TT              | 1946995360               |
| SNP_P4_153840_23258  | NW_004516389.1 | Scaffold1087 | 23258                   | TT                              | CC              | 1946995362               |
| SNP_P4_153841_23320  | NW_004516389.1 | Scaffold1087 | 23320                   | TT                              | CC              | 1946995364               |
| SNP_P4_153842_23335  | NW_004516389.1 | Scaffold1087 | 23335                   | AA                              | GG              | 1946995366               |
| SNP_P4_153843_23412  | NW_004516389.1 | Scaffold1087 | 23412                   | GG                              | TT              | 1946995368               |
| SNP_P4_153844_23620  | NW_004516389.1 | Scaffold1087 | 23620                   | TT                              | AA              | 1946995370               |
| SNP_P4_153845_27855  | NW_004516389.1 | Scaffold1087 | 27855                   | AA                              | CC              | 1946995372               |
| SNP_P4_153846_28124  | NW_004516389.1 | Scaffold1087 | 28124                   | CC                              | TT              | 1946995374               |
| SNP_P4_153847_28239  | NW_004516389.1 | Scaffold1087 | 28239                   | GG                              | AA              | 1946995376               |
| SNP_P4_153848_28246  | NW_004516389.1 | Scaffold1087 | 28246                   | AA                              | GG              | 1946995378               |
| SNP_P4_153849_28489  | NW_004516389.1 | Scaffold1087 | 28489                   | CC                              | AA              | 1946995380               |
| SNP_P4_153850_28514  | NW_004516389.1 | Scaffold1087 | 28514                   | TT                              | CC              | 1946995382               |
| SNP_P4_153851_28521  | NW_004516389.1 | Scaffold1087 | 28521                   | TT                              | CC              | 1946995384               |
| SNP_P4_153852_40041  | NW_004516389.1 | Scaffold1087 | 40041                   | AA                              | GG              | 1946995386               |
| SNP_P4_153853_40888  | NW_004516389.1 | Scaffold1087 | 40888                   | CC                              | TT              | 1946995388               |
| SNP_P4_153854_3244   | NW_004516390.1 | Scaffold1089 | 3244                    | GG                              | AA              | 1946995390               |
| SNP_P4_153855_12517  | NW_004516390.1 | Scaffold1089 | 12517                   | CC                              | TT              | 1946995392               |
| SNP_P4_153858_77208  | NW_004516390.1 | Scaffold1089 | 77208                   | GG                              | AA              | 1946995394               |
| SNP_P4_153859_114121 | NW_004516390.1 | Scaffold1089 | 114121                  | CC                              | AA              | 1946995396               |
| SNP_P4_153860_114129 | NW_004516390.1 | Scaffold1089 | 114129                  | AA                              | GG              | 1946995398               |
| SNP_P4_153861_151744 | NW_004516390.1 | Scaffold1089 | 151744                  | AA                              | TT              | 1946995400               |
| SNP_P4_153862_189468 | NW_004516390.1 | Scaffold1089 | 189468                  | AA                              | GG              | 1946995401               |
| SNP_P4_153863_189931 | NW_004516390.1 | Scaffold1089 | 189931                  | AA                              | GG              | 1946995402               |
| SNP_P4_153864_201261 | NW_004516390.1 | Scaffold1089 | 201261                  | CC                              | AA              | 1946995403               |
| SNP_P4_153865_215054 | NW_004516390.1 | Scaffold1089 | 215054                  | CC                              | TT              | 1946995404               |

| SNPs IDs             | Chromosome IDs | Chromosomes  | Physical positions (bp) | CDC Frontier (Reference genome) | (ILWC46 & LPNB) | NCBI SNPdb Accession IDs |
|----------------------|----------------|--------------|-------------------------|---------------------------------|-----------------|--------------------------|
| SNP_P4_153866_226996 | NW_004516390.1 | Scaffold1089 | 226996                  | AA                              | GG              | 1946995405               |
| SNP_P4_153867_233644 | NW_004516390.1 | Scaffold1089 | 233644                  | GG                              | TT              | 1946995407               |
| SNP_P4_153869_243627 | NW_004516390.1 | Scaffold1089 | 243627                  | AA                              | GG              | 1946995409               |
| SNP_P4_153870_243760 | NW_004516390.1 | Scaffold1089 | 243760                  | CC                              | TT              | 1946995411               |
| SNP_P4_153871_243907 | NW_004516390.1 | Scaffold1089 | 243907                  | CC                              | TT              | 1946995413               |
| SNP_P4_153872_259108 | NW_004516390.1 | Scaffold1089 | 259108                  | CC                              | TT              | 1946995415               |
| SNP_P4_153873_259131 | NW_004516390.1 | Scaffold1089 | 259131                  | AA                              | GG              | 1946995417               |
| SNP_P4_153874_259348 | NW_004516390.1 | Scaffold1089 | 259348                  | TT                              | AA              | 1946995419               |
| SNP_P4_153875_259569 | NW_004516390.1 | Scaffold1089 | 259569                  | AA                              | GG              | 1946995421               |
| SNP_P4_153876_259828 | NW_004516390.1 | Scaffold1089 | 259828                  | AA                              | GG              | 1946995423               |
| SNP_P4_153877_267493 | NW_004516390.1 | Scaffold1089 | 267493                  | TT                              | AA              | 1946995425               |
| SNP_P4_153878_1454   | NW_004516391.1 | Scaffold1090 | 1454                    | CC                              | TT              | 1946995427               |
| SNP_P4_153879_2594   | NW_004516393.1 | Scaffold1092 | 2594                    | CC                              | GG              | 1946995429               |
| SNP_P4_153880_2633   | NW_004516393.1 | Scaffold1092 | 2633                    | CC                              | AA              | 1946995431               |
| SNP_P4_153881_2893   | NW_004516393.1 | Scaffold1092 | 2893                    | CC                              | AA              | 1946995433               |
| SNP_P4_153882_2928   | NW_004516393.1 | Scaffold1092 | 2928                    | TT                              | GG              | 1946995435               |
| SNP_P4_153883_2934   | NW_004516393.1 | Scaffold1092 | 2934                    | TT                              | AA              | 1946995437               |
| SNP_P4_153884_2936   | NW_004516393.1 | Scaffold1092 | 2936                    | AA                              | TT              | 1946995439               |
| SNP_P4_153885_3288   | NW_004516393.1 | Scaffold1092 | 3288                    | TT                              | GG              | 1946995441               |
| SNP_P4_153886_3323   | NW_004516393.1 | Scaffold1092 | 3323                    | CC                              | TT              | 1946995443               |
| SNP_P4_153887_3349   | NW_004516393.1 | Scaffold1092 | 3349                    | GG                              | AA              | 1946995445               |
| SNP_P4_153888_5967   | NW_004516393.1 | Scaffold1092 | 5967                    | CC                              | AA              | 1946995447               |
| SNP_P4_153889_5991   | NW_004516393.1 | Scaffold1092 | 5991                    | AA                              | GG              | 1946995449               |
| SNP_P4_153890_6038   | NW_004516393.1 | Scaffold1092 | 6038                    | AA                              | GG              | 1946995451               |
| SNP_P4_153891_6060   | NW_004516393.1 | Scaffold1092 | 6060                    | GG                              | TT              | 1946995453               |
| SNP_P4_153892_6286   | NW_004516393.1 | Scaffold1092 | 6286                    | AA                              | TT              | 1946995455               |
| SNP_P4_153893_9582   | NW_004516393.1 | Scaffold1092 | 9582                    | AA                              | GG              | 1946995457               |
| SNP_P4_153894_10465  | NW_004516393.1 | Scaffold1092 | 10465                   | GG                              | AA              | 1946995459               |
| SNP_P4_153895_10764  | NW_004516393.1 | Scaffold1092 | 10764                   | CC                              | TT              | 1946995461               |
| SNP_P4_153896_11183  | NW_004516393.1 | Scaffold1092 | 11183                   | CC                              | GG              | 1946995463               |
| SNP_P4_153897_11202  | NW_004516393.1 | Scaffold1092 | 11202                   | AA                              | CC              | 1946995465               |
| SNP_P4_153898_11267  | NW_004516393.1 | Scaffold1092 | 11267                   | AA                              | GG              | 1946995467               |
| SNP_P4_153899_12836  | NW_004516393.1 | Scaffold1092 | 12836                   | CC                              | GG              | 1946995469               |
| SNP_P4_153900_13428  | NW_004516393.1 | Scaffold1092 | 13428                   | AA                              | TT              | 1946995471               |
| SNP_P4_153903_13605  | NW_004516393.1 | Scaffold1092 | 13605                   | AA                              | TT              | 1946995473               |
| SNP_P4_153904_13797  | NW_004516393.1 | Scaffold1092 | 13797                   | CC                              | TT              | 1946995475               |
| SNP_P4_153905_17629  | NW_004516393.1 | Scaffold1092 | 17629                   | AA                              | TT              | 1946995477               |
| SNP_P4_153906_17788  | NW_004516393.1 | Scaffold1092 | 17788                   | CC                              | TT              | 1946995479               |
| SNP_P4_153907_17905  | NW_004516393.1 | Scaffold1092 | 17905                   | AA                              | CC              | 1946995481               |
| SNP_P4_153908_17909  | NW_004516393.1 | Scaffold1092 | 17909                   | CC                              | AA              | 1946995483               |
| SNP_P4_153909_17926  | NW_004516393.1 | Scaffold1092 | 17926                   | GG                              | AA              | 1946995485               |
| SNP_P4_153910_17984  | NW_004516393.1 | Scaffold1092 | 17984                   | TT                              | CC              | 1946995487               |

| SNPs IDs            | Chromosome IDs | Chromosomes  | Physical positions (bp) | CDC Frontier (Reference genome) | (ILWC46 & LPNB) | NCBI SNPdb Accession IDs |
|---------------------|----------------|--------------|-------------------------|---------------------------------|-----------------|--------------------------|
| SNP_P4_153912_18184 | NW_004516393.1 | Scaffold1092 | 18184                   | GG                              | TT              | 1946995489               |
| SNP_P4_153913_18262 | NW_004516393.1 | Scaffold1092 | 18262                   | AA                              | TT              | 1946995491               |
| SNP_P4_153914_18277 | NW_004516393.1 | Scaffold1092 | 18277                   | GG                              | TT              | 1946995493               |
| SNP_P4_153915_18428 | NW_004516393.1 | Scaffold1092 | 18428                   | TT                              | CC              | 1946995495               |
| SNP_P4_153916_18691 | NW_004516393.1 | Scaffold1092 | 18691                   | CC                              | TT              | 1946995497               |
| SNP_P4_153917_18946 | NW_004516393.1 | Scaffold1092 | 18946                   | AA                              | GG              | 1946995499               |
| SNP_P4_153918_19137 | NW_004516393.1 | Scaffold1092 | 19137                   | CC                              | TT              | 1946995501               |
| SNP_P4_153919_19303 | NW_004516393.1 | Scaffold1092 | 19303                   | CC                              | AA              | 1946995503               |
| SNP_P4_153920_19307 | NW_004516393.1 | Scaffold1092 | 19307                   | CC                              | AA              | 1946995505               |
| SNP_P4_153921_19339 | NW_004516393.1 | Scaffold1092 | 19339                   | AA                              | TT              | 1946995507               |
| SNP_P4_153922_19432 | NW_004516393.1 | Scaffold1092 | 19432                   | TT                              | CC              | 1946995509               |
| SNP_P4_153923_19440 | NW_004516393.1 | Scaffold1092 | 19440                   | AA                              | TT              | 1946995511               |
| SNP_P4_153924_19467 | NW_004516393.1 | Scaffold1092 | 19467                   | GG                              | TT              | 1946995513               |
| SNP_P4_153925_19513 | NW_004516393.1 | Scaffold1092 | 19513                   | TT                              | CC              | 1946995515               |
| SNP_P4_153926_22407 | NW_004516393.1 | Scaffold1092 | 22407                   | AA                              | TT              | 1946995517               |
| SNP_P4_153927_22470 | NW_004516393.1 | Scaffold1092 | 22470                   | CC                              | GG              | 1946995519               |
| SNP_P4_153928_29403 | NW_004516393.1 | Scaffold1092 | 29403                   | GG                              | TT              | 1946995521               |
| SNP_P4_153929_29628 | NW_004516393.1 | Scaffold1092 | 29628                   | GG                              | CC              | 1946995523               |
| SNP_P4_153930_33613 | NW_004516393.1 | Scaffold1092 | 33613                   | GG                              | CC              | 1946995525               |
| SNP_P4_153933_33906 | NW_004516393.1 | Scaffold1092 | 33906                   | GG                              | AA              | 1946995527               |
| SNP_P4_153934_33930 | NW_004516393.1 | Scaffold1092 | 33930                   | TT                              | CC              | 1946995529               |
| SNP_P4_153935_38007 | NW_004516393.1 | Scaffold1092 | 38007                   | AA                              | CC              | 1946995531               |
| SNP_P4_153936_44204 | NW_004516393.1 | Scaffold1092 | 44204                   | TT                              | GG              | 1946995533               |
| SNP_P4_153937_45963 | NW_004516393.1 | Scaffold1092 | 45963                   | CC                              | TT              | 1946995535               |
| SNP_P4_153938_46961 | NW_004516393.1 | Scaffold1092 | 46961                   | AA                              | GG              | 1946995537               |
| SNP_P4_153939_47075 | NW_004516393.1 | Scaffold1092 | 47075                   | TT                              | CC              | 1946995539               |
| SNP_P4_153940_57118 | NW_004516393.1 | Scaffold1092 | 57118                   | GG                              | TT              | 1946995541               |
| SNP_P4_153941_57130 | NW_004516393.1 | Scaffold1092 | 57130                   | TT                              | AA              | 1946995543               |
| SNP_P4_153942_57447 | NW_004516393.1 | Scaffold1092 | 57447                   | GG                              | CC              | 1946995545               |
| SNP_P4_153943_57488 | NW_004516393.1 | Scaffold1092 | 57488                   | GG                              | TT              | 1946995547               |
| SNP_P4_153944_57514 | NW_004516393.1 | Scaffold1092 | 57514                   | CC                              | TT              | 1946995549               |
| SNP_P4_153945_57702 | NW_004516393.1 | Scaffold1092 | 57702                   | AA                              | GG              | 1946995551               |
| SNP_P4_153946_58398 | NW_004516393.1 | Scaffold1092 | 58398                   | AA                              | TT              | 1946995553               |
| SNP_P4_153947_58631 | NW_004516393.1 | Scaffold1092 | 58631                   | AA                              | CC              | 1946995555               |
| SNP_P4_153948_60966 | NW_004516393.1 | Scaffold1092 | 60966                   | TT                              | GG              | 1946995557               |
| SNP_P4_153949_63385 | NW_004516393.1 | Scaffold1092 | 63385                   | CC                              | TT              | 1946995559               |
| SNP_P4_153950_64390 | NW_004516393.1 | Scaffold1092 | 64390                   | AA                              | GG              | 1946995561               |
| SNP_P4_153951_64470 | NW_004516393.1 | Scaffold1092 | 64470                   | CC                              | AA              | 1946995563               |
| SNP_P4_153952_64521 | NW_004516393.1 | Scaffold1092 | 64521                   | GG                              | TT              | 1946995565               |
| SNP_P4_153953_64746 | NW_004516393.1 | Scaffold1092 | 64746                   | AA                              | TT              | 1946995567               |
| SNP_P4_153955_65434 | NW_004516393.1 | Scaffold1092 | 65434                   | TT                              | AA              | 1946995569               |
| SNP_P4_153956_65502 | NW_004516393.1 | Scaffold1092 | 65502                   | CC                              | GG              | 1946995571               |

| SNPs IDs             | Chromosome IDs | Chromosomes  | Physical positions (bp) | CDC Frontier (Reference genome) | (ILWC46 & LPNB) | NCBI SNPdb Accession IDs |
|----------------------|----------------|--------------|-------------------------|---------------------------------|-----------------|--------------------------|
| SNP_P4_153957_66299  | NW_004516393.1 | Scaffold1092 | 66299                   | CC                              | GG              | 1946995573               |
| SNP_P4_153958_67688  | NW_004516393.1 | Scaffold1092 | 67688                   | TT                              | CC              | 1946995575               |
| SNP_P4_153959_67690  | NW_004516393.1 | Scaffold1092 | 67690                   | GG                              | AA              | 1946995577               |
| SNP_P4_153960_68309  | NW_004516393.1 | Scaffold1092 | 68309                   | GG                              | AA              | 1946995579               |
| SNP_P4_153961_72334  | NW_004516393.1 | Scaffold1092 | 72334                   | AA                              | GG              | 1946995581               |
| SNP_P4_153962_72981  | NW_004516393.1 | Scaffold1092 | 72981                   | AA                              | GG              | 1946995583               |
| SNP_P4_153963_73869  | NW_004516393.1 | Scaffold1092 | 73869                   | TT                              | GG              | 1946995585               |
| SNP_P4_153964_75400  | NW_004516393.1 | Scaffold1092 | 75400                   | TT                              | AA              | 1946995587               |
| SNP_P4_153965_75532  | NW_004516393.1 | Scaffold1092 | 75532                   | TT                              | AA              | 1946995589               |
| SNP_P4_153966_75920  | NW_004516393.1 | Scaffold1092 | 75920                   | TT                              | CC              | 1946995591               |
| SNP_P4_153967_75961  | NW_004516393.1 | Scaffold1092 | 75961                   | AA                              | GG              | 1946995593               |
| SNP_P4_153968_77647  | NW_004516393.1 | Scaffold1092 | 77647                   | GG                              | TT              | 1946995595               |
| SNP_P4_153970_82408  | NW_004516393.1 | Scaffold1092 | 82408                   | CC                              | AA              | 1946995597               |
| SNP_P4_153971_82680  | NW_004516393.1 | Scaffold1092 | 82680                   | TT                              | CC              | 1946995599               |
| SNP_P4_153972_82800  | NW_004516393.1 | Scaffold1092 | 82800                   | TT                              | AA              | 1946995601               |
| SNP_P4_153973_82903  | NW_004516393.1 | Scaffold1092 | 82903                   | GG                              | CC              | 1946995603               |
| SNP_P4_153975_85396  | NW_004516393.1 | Scaffold1092 | 85396                   | TT                              | AA              | 1946995605               |
| SNP_P4_153976_85461  | NW_004516393.1 | Scaffold1092 | 85461                   | TT                              | GG              | 1946995607               |
| SNP_P4_153977_86804  | NW_004516393.1 | Scaffold1092 | 86804                   | GG                              | TT              | 1946995609               |
| SNP_P4_153978_87027  | NW_004516393.1 | Scaffold1092 | 87027                   | TT                              | GG              | 1946995611               |
| SNP_P4_153979_87835  | NW_004516393.1 | Scaffold1092 | 87835                   | TT                              | GG              | 1946995613               |
| SNP_P4_153980_91118  | NW_004516393.1 | Scaffold1092 | 91118                   | TT                              | GG              | 1946995615               |
| SNP_P4_153981_91616  | NW_004516393.1 | Scaffold1092 | 91616                   | TT                              | AA              | 1946995617               |
| SNP_P4_153982_92142  | NW_004516393.1 | Scaffold1092 | 92142                   | CC                              | AA              | 1946995619               |
| SNP_P4_153983_92145  | NW_004516393.1 | Scaffold1092 | 92145                   | GG                              | TT              | 1946995621               |
| SNP_P4_153984_92184  | NW_004516393.1 | Scaffold1092 | 92184                   | GG                              | TT              | 1946995623               |
| SNP_P4_153985_92186  | NW_004516393.1 | Scaffold1092 | 92186                   | CC                              | TT              | 1946995625               |
| SNP_P4_153986_92381  | NW_004516393.1 | Scaffold1092 | 92381                   | CC                              | TT              | 1946995627               |
| SNP_P4_153987_94523  | NW_004516393.1 | Scaffold1092 | 94523                   | AA                              | TT              | 1946995629               |
| SNP_P4_153988_94740  | NW_004516393.1 | Scaffold1092 | 94740                   | AA                              | CC              | 1946995631               |
| SNP_P4_153989_94742  | NW_004516393.1 | Scaffold1092 | 94742                   | TT                              | AA              | 1946995633               |
| SNP_P4_153991_94859  | NW_004516393.1 | Scaffold1092 | 94859                   | TT                              | GG              | 1946995635               |
| SNP_P4_153992_95098  | NW_004516393.1 | Scaffold1092 | 95098                   | TT                              | CC              | 1946995637               |
| SNP_P4_153993_95420  | NW_004516393.1 | Scaffold1092 | 95420                   | AA                              | TT              | 1946995639               |
| SNP_P4_153994_101926 | NW_004516393.1 | Scaffold1092 | 101926                  | CC                              | TT              | 1946995641               |
| SNP_P4_153995_101994 | NW_004516393.1 | Scaffold1092 | 101994                  | GG                              | AA              | 1946995643               |
| SNP_P4_153996_102071 | NW_004516393.1 | Scaffold1092 | 102071                  | TT                              | GG              | 1946995645               |
| SNP_P4_153997_102106 | NW_004516393.1 | Scaffold1092 | 102106                  | TT                              | AA              | 1946995647               |
| SNP_P4_153998_102133 | NW_004516393.1 | Scaffold1092 | 102133                  | CC                              | GG              | 1946995649               |
| SNP_P4_153999_103452 | NW_004516393.1 | Scaffold1092 | 103452                  | GG                              | CC              | 1946995651               |
| SNP_P4_154000_103453 | NW_004516393.1 | Scaffold1092 | 103453                  | TT                              | AA              | 1946995653               |
| SNP_P4_154001_103662 | NW_004516393.1 | Scaffold1092 | 103662                  | CC                              | GG              | 1946995655               |

| SNPs IDs             | Chromosome IDs | Chromosomes  | Physical positions (bp) | CDC Frontier (Reference genome) | (ILWC46 & LPNB) | NCBI SNPdb Accession IDs |
|----------------------|----------------|--------------|-------------------------|---------------------------------|-----------------|--------------------------|
| SNP_P4_154002_103728 | NW_004516393.1 | Scaffold1092 | 103728                  | AA                              | TT              | 1946995657               |
| SNP_P4_154003_105067 | NW_004516393.1 | Scaffold1092 | 105067                  | GG                              | AA              | 1946995659               |
| SNP_P4_154004_105183 | NW_004516393.1 | Scaffold1092 | 105183                  | CC                              | TT              | 1946995661               |
| SNP_P4_154005_105209 | NW_004516393.1 | Scaffold1092 | 105209                  | CC                              | GG              | 1946995663               |
| SNP_P4_154006_105210 | NW_004516393.1 | Scaffold1092 | 105210                  | GG                              | AA              | 1946995665               |
| SNP_P4_154007_105241 | NW_004516393.1 | Scaffold1092 | 105241                  | GG                              | AA              | 1946995667               |
| SNP_P4_154008_105395 | NW_004516393.1 | Scaffold1092 | 105395                  | AA                              | GG              | 1946995669               |
| SNP_P4_154009_105600 | NW_004516393.1 | Scaffold1092 | 105600                  | GG                              | TT              | 1946995671               |
| SNP_P4_154010_105661 | NW_004516393.1 | Scaffold1092 | 105661                  | TT                              | CC              | 1946995673               |
| SNP_P4_154011_110345 | NW_004516393.1 | Scaffold1092 | 110345                  | CC                              | TT              | 1946995675               |
| SNP_P4_154012_110607 | NW_004516393.1 | Scaffold1092 | 110607                  | GG                              | AA              | 1946995677               |
| SNP_P4_154013_110737 | NW_004516393.1 | Scaffold1092 | 110737                  | GG                              | TT              | 1946995679               |
| SNP_P4_154014_110939 | NW_004516393.1 | Scaffold1092 | 110939                  | CC                              | AA              | 1946995681               |
| SNP_P4_154015_110952 | NW_004516393.1 | Scaffold1092 | 110952                  | GG                              | CC              | 1946995683               |
| SNP_P4_154016_111696 | NW_004516393.1 | Scaffold1092 | 111696                  | TT                              | CC              | 1946995685               |
| SNP_P4_154017_112051 | NW_004516393.1 | Scaffold1092 | 112051                  | AA                              | CC              | 1946995687               |
| SNP_P4_154018_112103 | NW_004516393.1 | Scaffold1092 | 112103                  | AA                              | TT              | 1946995689               |
| SNP_P4_154019_112211 | NW_004516393.1 | Scaffold1092 | 112211                  | CC                              | TT              | 1946995691               |
| SNP_P4_154020_112222 | NW_004516393.1 | Scaffold1092 | 112222                  | CC                              | GG              | 1946995693               |
| SNP_P4_154021_112236 | NW_004516393.1 | Scaffold1092 | 112236                  | AA                              | GG              | 1946995695               |
| SNP_P4_154022_114050 | NW_004516393.1 | Scaffold1092 | 114050                  | CC                              | AA              | 1946995697               |
| SNP_P4_154023_114174 | NW_004516393.1 | Scaffold1092 | 114174                  | TT                              | AA              | 1946995699               |
| SNP_P4_154024_114182 | NW_004516393.1 | Scaffold1092 | 114182                  | GG                              | CC              | 1946995701               |
| SNP_P4_154025_114349 | NW_004516393.1 | Scaffold1092 | 114349                  | CC                              | AA              | 1946995703               |
| SNP_P4_154026_114479 | NW_004516393.1 | Scaffold1092 | 114479                  | AA                              | GG              | 1946995705               |
| SNP_P4_154027_114560 | NW_004516393.1 | Scaffold1092 | 114560                  | TT                              | AA              | 1946995707               |
| SNP_P4_154028_114582 | NW_004516393.1 | Scaffold1092 | 114582                  | TT                              | CC              | 1946995709               |
| SNP_P4_154029_114652 | NW_004516393.1 | Scaffold1092 | 114652                  | GG                              | CC              | 1946995711               |
| SNP_P4_154030_115099 | NW_004516393.1 | Scaffold1092 | 115099                  | AA                              | TT              | 1946995713               |
| SNP_P4_154031_115129 | NW_004516393.1 | Scaffold1092 | 115129                  | TT                              | CC              | 1946995715               |
| SNP_P4_154032_115144 | NW_004516393.1 | Scaffold1092 | 115144                  | GG                              | CC              | 1946995717               |
| SNP_P4_154033_115197 | NW_004516393.1 | Scaffold1092 | 115197                  | TT                              | GG              | 1946995719               |
| SNP_P4_154034_115457 | NW_004516393.1 | Scaffold1092 | 115457                  | AA                              | GG              | 1946995721               |
| SNP_P4_154035_116693 | NW_004516393.1 | Scaffold1092 | 116693                  | GG                              | AA              | 1946995723               |
| SNP_P4_154036_116740 | NW_004516393.1 | Scaffold1092 | 116740                  | AA                              | TT              | 1946995725               |
| SNP_P4_154037_116777 | NW_004516393.1 | Scaffold1092 | 116777                  | TT                              | CC              | 1946995727               |
| SNP_P4_154038_116820 | NW_004516393.1 | Scaffold1092 | 116820                  | TT                              | AA              | 1946995729               |
| SNP_P4_154039_116829 | NW_004516393.1 | Scaffold1092 | 116829                  | TT                              | GG              | 1946995731               |
| SNP_P4_154040_116851 | NW_004516393.1 | Scaffold1092 | 116851                  | TT                              | AA              | 1946995733               |
| SNP_P4_154041_116879 | NW_004516393.1 | Scaffold1092 | 116879                  | AA                              | TT              | 1946995735               |
| SNP_P4_154042_116900 | NW_004516393.1 | Scaffold1092 | 116900                  | TT                              | GG              | 1946995737               |
| SNP_P4_154043_116995 | NW_004516393.1 | Scaffold1092 | 116995                  | AA                              | GG              | 1946995739               |

| SNPs IDs             | Chromosome IDs | Chromosomes  | Physical positions (bp) | CDC Frontier (Reference genome) | (ILWC46 & LPNB) | NCBI SNPdb Accession IDs |
|----------------------|----------------|--------------|-------------------------|---------------------------------|-----------------|--------------------------|
| SNP_P4_154044_117145 | NW_004516393.1 | Scaffold1092 | 117145                  | AA                              | TT              | 1946995741               |
| SNP_P4_154046_117391 | NW_004516393.1 | Scaffold1092 | 117391                  | AA                              | TT              | 1946995743               |
| SNP_P4_154047_117398 | NW_004516393.1 | Scaffold1092 | 117398                  | AA                              | GG              | 1946995745               |
| SNP_P4_154048_117408 | NW_004516393.1 | Scaffold1092 | 117408                  | TT                              | AA              | 1946995747               |
| SNP_P4_154049_117437 | NW_004516393.1 | Scaffold1092 | 117437                  | TT                              | GG              | 1946995749               |
| SNP_P4_154050_117439 | NW_004516393.1 | Scaffold1092 | 117439                  | CC                              | TT              | 1946995751               |
| SNP_P4_154051_117452 | NW_004516393.1 | Scaffold1092 | 117452                  | TT                              | CC              | 1946995753               |
| SNP_P4_154052_117589 | NW_004516393.1 | Scaffold1092 | 117589                  | TT                              | AA              | 1946995755               |
| SNP_P4_154053_117793 | NW_004516393.1 | Scaffold1092 | 117793                  | TT                              | GG              | 1946995757               |
| SNP_P4_154054_117841 | NW_004516393.1 | Scaffold1092 | 117841                  | GG                              | AA              | 1946995759               |
| SNP_P4_154055_117986 | NW_004516393.1 | Scaffold1092 | 117986                  | TT                              | CC              | 1946995761               |
| SNP_P4_154056_118244 | NW_004516393.1 | Scaffold1092 | 118244                  | TT                              | CC              | 1946995763               |
| SNP_P4_154057_118908 | NW_004516393.1 | Scaffold1092 | 118908                  | GG                              | TT              | 1946995765               |
| SNP_P4_154058_119122 | NW_004516393.1 | Scaffold1092 | 119122                  | GG                              | AA              | 1946995767               |
| SNP_P4_154059_119137 | NW_004516393.1 | Scaffold1092 | 119137                  | AA                              | TT              | 1946995770               |
| SNP_P4_154060_119148 | NW_004516393.1 | Scaffold1092 | 119148                  | TT                              | AA              | 1946995772               |
| SNP_P4_154061_119240 | NW_004516393.1 | Scaffold1092 | 119240                  | AA                              | CC              | 1946995774               |
| SNP_P4_154062_119243 | NW_004516393.1 | Scaffold1092 | 119243                  | TT                              | AA              | 1946995776               |
| SNP_P4_154063_119450 | NW_004516393.1 | Scaffold1092 | 119450                  | TT                              | AA              | 1946995778               |
| SNP_P4_154064_119505 | NW_004516393.1 | Scaffold1092 | 119505                  | GG                              | AA              | 1946995780               |
| SNP_P4_154065_119541 | NW_004516393.1 | Scaffold1092 | 119541                  | CC                              | TT              | 1946995782               |
| SNP_P4_154066_119552 | NW_004516393.1 | Scaffold1092 | 119552                  | GG                              | CC              | 1946995783               |
| SNP_P4_154067_121098 | NW_004516393.1 | Scaffold1092 | 121098                  | AA                              | TT              | 1946995785               |
| SNP_P4_154069_121581 | NW_004516393.1 | Scaffold1092 | 121581                  | TT                              | CC              | 1946995787               |
| SNP_P4_154070_122096 | NW_004516393.1 | Scaffold1092 | 122096                  | TT                              | AA              | 1946995789               |
| SNP_P4_154071_122112 | NW_004516393.1 | Scaffold1092 | 122112                  | TT                              | AA              | 1946995791               |
| SNP_P4_154072_122191 | NW_004516393.1 | Scaffold1092 | 122191                  | AA                              | TT              | 1946995793               |
| SNP_P4_154074_122298 | NW_004516393.1 | Scaffold1092 | 122298                  | TT                              | GG              | 1946995795               |
| SNP_P4_154075_122361 | NW_004516393.1 | Scaffold1092 | 122361                  | GG                              | TT              | 1946995797               |
| SNP_P4_154076_122415 | NW_004516393.1 | Scaffold1092 | 122415                  | CC                              | GG              | 1946995799               |
| SNP_P4_154077_122423 | NW_004516393.1 | Scaffold1092 | 122423                  | TT                              | CC              | 1946995801               |
| SNP_P4_154078_122474 | NW_004516393.1 | Scaffold1092 | 122474                  | CC                              | AA              | 1946995803               |
| SNP_P4_154079_122726 | NW_004516393.1 | Scaffold1092 | 122726                  | AA                              | GG              | 1946995805               |
| SNP_P4_154080_122781 | NW_004516393.1 | Scaffold1092 | 122781                  | TT                              | GG              | 1946995807               |
| SNP_P4_154081_125742 | NW_004516393.1 | Scaffold1092 | 125742                  | AA                              | TT              | 1946995809               |
| SNP_P4_154082_127843 | NW_004516393.1 | Scaffold1092 | 127843                  | GG                              | TT              | 1946995811               |
| SNP_P4_154083_128080 | NW_004516393.1 | Scaffold1092 | 128080                  | TT                              | CC              | 1946995813               |
| SNP_P4_154084_130425 | NW_004516393.1 | Scaffold1092 | 130425                  | AA                              | GG              | 1946995815               |
| SNP_P4_154085_138199 | NW_004516393.1 | Scaffold1092 | 138199                  | AA                              | GG              | 1946995816               |
| SNP_P4_154086_138709 | NW_004516393.1 | Scaffold1092 | 138709                  | GG                              | CC              | 1946995818               |
| SNP_P4_154087_139135 | NW_004516393.1 | Scaffold1092 | 139135                  | GG                              | AA              | 1946995820               |
| SNP_P4_154088_139166 | NW_004516393.1 | Scaffold1092 | 139166                  | TT                              | AA              | 1946995822               |

| SNPs IDs             | Chromosome IDs | Chromosomes  | Physical positions (bp) | CDC Frontier (Reference genome) | (ILWC46 & LPNB) | NCBI SNPdb Accession IDs |
|----------------------|----------------|--------------|-------------------------|---------------------------------|-----------------|--------------------------|
| SNP_P4_154090_139264 | NW_004516393.1 | Scaffold1092 | 139264                  | CC                              | TT              | 1946995824               |
| SNP_P4_154091_139302 | NW_004516393.1 | Scaffold1092 | 139302                  | GG                              | AA              | 1946995826               |
| SNP_P4_154092_139339 | NW_004516393.1 | Scaffold1092 | 139339                  | CC                              | TT              | 1946995828               |
| SNP_P4_154093_139376 | NW_004516393.1 | Scaffold1092 | 139376                  | CC                              | GG              | 1946995830               |
| SNP_P4_154094_139431 | NW_004516393.1 | Scaffold1092 | 139431                  | AA                              | GG              | 1946995832               |
| SNP_P4_154095_139478 | NW_004516393.1 | Scaffold1092 | 139478                  | TT                              | CC              | 1946995834               |
| SNP_P4_154096_139481 | NW_004516393.1 | Scaffold1092 | 139481                  | GG                              | AA              | 1946995836               |
| SNP_P4_154097_139571 | NW_004516393.1 | Scaffold1092 | 139571                  | TT                              | GG              | 1946995838               |
| SNP_P4_154098_139654 | NW_004516393.1 | Scaffold1092 | 139654                  | AA                              | GG              | 1946995839               |
| SNP_P4_154099_139682 | NW_004516393.1 | Scaffold1092 | 139682                  | GG                              | AA              | 1946995841               |
| SNP_P4_154100_139743 | NW_004516393.1 | Scaffold1092 | 139743                  | TT                              | CC              | 1946995843               |
| SNP_P4_154101_139748 | NW_004516393.1 | Scaffold1092 | 139748                  | AA                              | GG              | 1946995845               |
| SNP_P4_154102_139781 | NW_004516393.1 | Scaffold1092 | 139781                  | GG                              | AA              | 1946995847               |
| SNP_P4_154103_139869 | NW_004516393.1 | Scaffold1092 | 139869                  | AA                              | CC              | 1946995849               |
| SNP_P4_154104_139870 | NW_004516393.1 | Scaffold1092 | 139870                  | TT                              | GG              | 1946995851               |
| SNP_P4_154105_140420 | NW_004516393.1 | Scaffold1092 | 140420                  | AA                              | GG              | 1946995853               |
| SNP_P4_154106_141168 | NW_004516393.1 | Scaffold1092 | 141168                  | AA                              | CC              | 1946995855               |
| SNP_P4_154107_141332 | NW_004516393.1 | Scaffold1092 | 141332                  | AA                              | TT              | 1946995857               |
| SNP_P4_154108_141405 | NW_004516393.1 | Scaffold1092 | 141405                  | GG                              | AA              | 1946995859               |
| SNP_P4_154109_141674 | NW_004516393.1 | Scaffold1092 | 141674                  | AA                              | TT              | 1946995861               |
| SNP_P4_154110_141849 | NW_004516393.1 | Scaffold1092 | 141849                  | GG                              | AA              | 1946995863               |
| SNP_P4_154111_142155 | NW_004516393.1 | Scaffold1092 | 142155                  | GG                              | TT              | 1946995865               |
| SNP_P4_154112_142418 | NW_004516393.1 | Scaffold1092 | 142418                  | AA                              | GG              | 1946995867               |
| SNP_P4_154113_142465 | NW_004516393.1 | Scaffold1092 | 142465                  | TT                              | CC              | 1946995869               |
| SNP_P4_154114_142620 | NW_004516393.1 | Scaffold1092 | 142620                  | CC                              | TT              | 1946995871               |
| SNP_P4_154115_142710 | NW_004516393.1 | Scaffold1092 | 142710                  | TT                              | CC              | 1946995873               |
| SNP_P4_154116_142757 | NW_004516393.1 | Scaffold1092 | 142757                  | CC                              | TT              | 1946995875               |
| SNP_P4_154117_142772 | NW_004516393.1 | Scaffold1092 | 142772                  | GG                              | CC              | 1946995877               |
| SNP_P4_154118_143221 | NW_004516393.1 | Scaffold1092 | 143221                  | GG                              | AA              | 1946995879               |
| SNP_P4_154119_144387 | NW_004516393.1 | Scaffold1092 | 144387                  | GG                              | TT              | 1946995882               |
| SNP_P4_154120_145373 | NW_004516393.1 | Scaffold1092 | 145373                  | GG                              | AA              | 1946995884               |
| SNP_P4_154121_145550 | NW_004516393.1 | Scaffold1092 | 145550                  | CC                              | GG              | 1946995886               |
| SNP_P4_154122_146083 | NW_004516393.1 | Scaffold1092 | 146083                  | CC                              | TT              | 1946995888               |
| SNP_P4_154123_146132 | NW_004516393.1 | Scaffold1092 | 146132                  | AA                              | GG              | 1946995890               |
| SNP_P4_154124_146395 | NW_004516393.1 | Scaffold1092 | 146395                  | TT                              | CC              | 1946995892               |
| SNP_P4_154125_146429 | NW_004516393.1 | Scaffold1092 | 146429                  | AA                              | GG              | 1946995894               |
| SNP_P4_154126_146546 | NW_004516393.1 | Scaffold1092 | 146546                  | CC                              | GG              | 1946995896               |
| SNP_P4_154127_146717 | NW_004516393.1 | Scaffold1092 | 146717                  | CC                              | TT              | 1946995898               |
| SNP_P4_154129_146836 | NW_004516393.1 | Scaffold1092 | 146836                  | CC                              | TT              | 1946995900               |
| SNP_P4_154130_146877 | NW_004516393.1 | Scaffold1092 | 146877                  | CC                              | GG              | 1946995902               |
| SNP_P4_154131_147132 | NW_004516393.1 | Scaffold1092 | 147132                  | TT                              | AA              | 1946995904               |
| SNP_P4_154132_147193 | NW_004516393.1 | Scaffold1092 | 147193                  | AA                              | TT              | 1946995906               |

| SNPs IDs             | Chromosome IDs | Chromosomes  | Physical positions (bp) | CDC Frontier (Reference genome) | (ILWC46 & LPNB) | NCBI SNPdb Accession IDs |
|----------------------|----------------|--------------|-------------------------|---------------------------------|-----------------|--------------------------|
| SNP_P4_154133_147552 | NW_004516393.1 | Scaffold1092 | 147552                  | GG                              | TT              | 1946995908               |
| SNP_P4_154134_147947 | NW_004516393.1 | Scaffold1092 | 147947                  | AA                              | TT              | 1946995910               |
| SNP_P4_154135_147968 | NW_004516393.1 | Scaffold1092 | 147968                  | CC                              | GG              | 1946995912               |
| SNP_P4_154136_148278 | NW_004516393.1 | Scaffold1092 | 148278                  | GG                              | CC              | 1946995914               |
| SNP_P4_154137_150679 | NW_004516393.1 | Scaffold1092 | 150679                  | TT                              | AA              | 1946995916               |
| SNP_P4_154138_150815 | NW_004516393.1 | Scaffold1092 | 150815                  | GG                              | AA              | 1946995918               |
| SNP_P4_154139_152490 | NW_004516393.1 | Scaffold1092 | 152490                  | AA                              | TT              | 1946995920               |
| SNP_P4_154140_152515 | NW_004516393.1 | Scaffold1092 | 152515                  | CC                              | AA              | 1946995922               |
| SNP_P4_154141_152603 | NW_004516393.1 | Scaffold1092 | 152603                  | TT                              | CC              | 1946995924               |
| SNP_P4_154142_152660 | NW_004516393.1 | Scaffold1092 | 152660                  | CC                              | TT              | 1946995926               |
| SNP_P4_154143_152766 | NW_004516393.1 | Scaffold1092 | 152766                  | TT                              | AA              | 1946995928               |
| SNP_P4_154144_152938 | NW_004516393.1 | Scaffold1092 | 152938                  | TT                              | AA              | 1946995930               |
| SNP_P4_154145_155531 | NW_004516393.1 | Scaffold1092 | 155531                  | AA                              | TT              | 1946995932               |
| SNP_P4_154146_156899 | NW_004516393.1 | Scaffold1092 | 156899                  | TT                              | CC              | 1946995935               |
| SNP_P4_154147_156929 | NW_004516393.1 | Scaffold1092 | 156929                  | AA                              | CC              | 1946995937               |
| SNP_P4_154148_157580 | NW_004516393.1 | Scaffold1092 | 157580                  | TT                              | GG              | 1946995939               |
| SNP_P4_154149_2880   | NW_004516394.1 | Scaffold1095 | 2880                    | TT                              | GG              | 1946995941               |
| SNP_P4_154150_2920   | NW_004516394.1 | Scaffold1095 | 2920                    | CC                              | AA              | 1946995943               |
| SNP_P4_154151_5751   | NW_004516394.1 | Scaffold1095 | 5751                    | TT                              | AA              | 1946995945               |
| SNP_P4_154152_6020   | NW_004516394.1 | Scaffold1095 | 6020                    | CC                              | TT              | 1946995947               |
| SNP_P4_154153_20318  | NW_004516394.1 | Scaffold1095 | 20318                   | AA                              | GG              | 1946995949               |
| SNP_P4_154154_26005  | NW_004516394.1 | Scaffold1095 | 26005                   | CC                              | TT              | 1946995951               |
| SNP_P4_154155_26103  | NW_004516394.1 | Scaffold1095 | 26103                   | TT                              | CC              | 1946995953               |
| SNP_P4_154156_26335  | NW_004516394.1 | Scaffold1095 | 26335                   | TT                              | AA              | 1946995955               |
| SNP_P4_154157_26610  | NW_004516394.1 | Scaffold1095 | 26610                   | AA                              | GG              | 1946995957               |
| SNP_P4_154158_38876  | NW_004516394.1 | Scaffold1095 | 38876                   | TT                              | AA              | 1946995959               |
| SNP_P4_154160_1741   | NW_004516396.1 | Scaffold1101 | 1741                    | AA                              | TT              | 1946995961               |
| SNP_P4_154161_3375   | NW_004516396.1 | Scaffold1101 | 3375                    | TT                              | CC              | 1946995963               |
| SNP_P4_154163_3956   | NW_004516396.1 | Scaffold1101 | 3956                    | CC                              | GG              | 1946995966               |
| SNP_P4_154164_3967   | NW_004516396.1 | Scaffold1101 | 3967                    | CC                              | GG              | 1946995968               |
| SNP_P4_154165_4661   | NW_004516396.1 | Scaffold1101 | 4661                    | GG                              | AA              | 1946995970               |
| SNP_P4_154166_5808   | NW_004516397.1 | Scaffold1102 | 5808                    | TT                              | CC              | 1946995972               |
| SNP_P4_154167_5955   | NW_004516397.1 | Scaffold1102 | 5955                    | GG                              | TT              | 1946995974               |
| SNP_P4_154168_11031  | NW_004516397.1 | Scaffold1102 | 11031                   | TT                              | CC              | 1946995976               |
| SNP_P4_154169_11312  | NW_004516397.1 | Scaffold1102 | 11312                   | AA                              | CC              | 1946995978               |
| SNP_P4_154170_1710   | NW_004516398.1 | Scaffold1103 | 1710                    | GG                              | AA              | 1946995980               |
| SNP_P4_154171_1869   | NW_004516398.1 | Scaffold1103 | 1869                    | AA                              | GG              | 1946995982               |
| SNP_P4_154172_3082   | NW_004516398.1 | Scaffold1103 | 3082                    | CC                              | AA              | 1946995984               |
| SNP_P4_154173_3095   | NW_004516398.1 | Scaffold1103 | 3095                    | GG                              | AA              | 1946995986               |
| SNP_P4_154174_8921   | NW_004516398.1 | Scaffold1103 | 8921                    | TT                              | GG              | 1946995988               |
| SNP_P4_154175_25202  | NW_004516398.1 | Scaffold1103 | 25202                   | CC                              | AA              | 1946995990               |
| SNP_P4_154178_13365  | NW_004516401.1 | Scaffold1107 | 13365                   | TT                              | CC              | 1946995992               |



| SNPs IDs             | Chromosome IDs | Chromosomes  | Physical positions (bp) | CDC Frontier (Reference genome) | (ILWC46 & LPNB) | NCBI SNPdb Accession IDs |
|----------------------|----------------|--------------|-------------------------|---------------------------------|-----------------|--------------------------|
| SNP_P4_154179_32706  | NW_004516401.1 | Scaffold1107 | 32706                   | CC                              | TT              | 1946995994               |
| SNP_P4_154180_36157  | NW_004516401.1 | Scaffold1107 | 36157                   | GG                              | CC              | 1946995996               |
| SNP_P4_154181_54123  | NW_004516401.1 | Scaffold1107 | 54123                   | TT                              | CC              | 1946995998               |
| SNP_P4_154182_58346  | NW_004516401.1 | Scaffold1107 | 58346                   | AA                              | GG              | 1946996000               |
| SNP_P4_154183_58350  | NW_004516401.1 | Scaffold1107 | 58350                   | AA                              | GG              | 1946996002               |
| SNP_P4_154184_58352  | NW_004516401.1 | Scaffold1107 | 58352                   | GG                              | AA              | 1946996004               |
| SNP_P4_154185_58362  | NW_004516401.1 | Scaffold1107 | 58362                   | AA                              | GG              | 1946996006               |
| SNP_P4_154186_58382  | NW_004516401.1 | Scaffold1107 | 58382                   | TT                              | GG              | 1946996008               |
| SNP_P4_154187_71291  | NW_004516401.1 | Scaffold1107 | 71291                   | CC                              | TT              | 1946996010               |
| SNP_P4_154188_73854  | NW_004516401.1 | Scaffold1107 | 73854                   | CC                              | TT              | 1946996012               |
| SNP_P4_154189_74054  | NW_004516401.1 | Scaffold1107 | 74054                   | TT                              | AA              | 1946996014               |
| SNP_P4_154190_74108  | NW_004516401.1 | Scaffold1107 | 74108                   | TT                              | GG              | 1946996016               |
| SNP_P4_154191_74862  | NW_004516401.1 | Scaffold1107 | 74862                   | CC                              | TT              | 1946996018               |
| SNP_P4_154192_74885  | NW_004516401.1 | Scaffold1107 | 74885                   | TT                              | CC              | 1946996020               |
| SNP_P4_154193_74960  | NW_004516401.1 | Scaffold1107 | 74960                   | AA                              | TT              | 1946996022               |
| SNP_P4_154194_75883  | NW_004516401.1 | Scaffold1107 | 75883                   | AA                              | GG              | 1946996024               |
| SNP_P4_154195_75920  | NW_004516401.1 | Scaffold1107 | 75920                   | CC                              | TT              | 1946996026               |
| SNP_P4_154196_75931  | NW_004516401.1 | Scaffold1107 | 75931                   | GG                              | AA              | 1946996028               |
| SNP_P4_154197_86264  | NW_004516401.1 | Scaffold1107 | 86264                   | TT                              | CC              | 1946996030               |
| SNP_P4_154198_87015  | NW_004516401.1 | Scaffold1107 | 87015                   | GG                              | TT              | 1946996032               |
| SNP_P4_154199_93946  | NW_004516401.1 | Scaffold1107 | 93946                   | GG                              | TT              | 1946996034               |
| SNP_P4_154200_94046  | NW_004516401.1 | Scaffold1107 | 94046                   | GG                              | TT              | 1946996036               |
| SNP_P4_154201_94067  | NW_004516401.1 | Scaffold1107 | 94067                   | CC                              | AA              | 1946996038               |
| SNP_P4_154202_94153  | NW_004516401.1 | Scaffold1107 | 94153                   | CC                              | AA              | 1946996040               |
| SNP_P4_154203_94160  | NW_004516401.1 | Scaffold1107 | 94160                   | GG                              | TT              | 1946996042               |
| SNP_P4_154204_94203  | NW_004516401.1 | Scaffold1107 | 94203                   | CC                              | AA              | 1946996044               |
| SNP_P4_154205_94205  | NW_004516401.1 | Scaffold1107 | 94205                   | AA                              | GG              | 1946996046               |
| SNP_P4_154206_94216  | NW_004516401.1 | Scaffold1107 | 94216                   | AA                              | CC              | 1946996048               |
| SNP_P4_154207_94241  | NW_004516401.1 | Scaffold1107 | 94241                   | AA                              | TT              | 1946996050               |
| SNP_P4_154208_94258  | NW_004516401.1 | Scaffold1107 | 94258                   | GG                              | CC              | 1946996052               |
| SNP_P4_154209_100305 | NW_004516401.1 | Scaffold1107 | 100305                  | AA                              | TT              | 1946996054               |
| SNP_P4_154210_100643 | NW_004516401.1 | Scaffold1107 | 100643                  | CC                              | TT              | 1946996056               |
| SNP_P4_154211_843    | NW_004516402.1 | Scaffold1108 | 843                     | GG                              | TT              | 1946996058               |
| SNP_P4_154212_988    | NW_004516402.1 | Scaffold1108 | 988                     | TT                              | GG              | 1946996060               |
| SNP_P4_154213_2940   | NW_004516402.1 | Scaffold1108 | 2940                    | TT                              | CC              | 1946996062               |
| SNP_P4_154214_10180  | NW_004516403.1 | Scaffold1109 | 10180                   | TT                              | AA              | 1946996064               |
| SNP_P4_154215_12335  | NW_004516403.1 | Scaffold1109 | 12335                   | AA                              | CC              | 1946996066               |
| SNP_P4_154216_12666  | NW_004516403.1 | Scaffold1109 | 12666                   | AA                              | TT              | 1946996068               |
| SNP_P4_154217_12699  | NW_004516403.1 | Scaffold1109 | 12699                   | AA                              | TT              | 1946996070               |
| SNP_P4_154218_12702  | NW_004516403.1 | Scaffold1109 | 12702                   | AA                              | TT              | 1946996072               |
| SNP_P4_154219_12710  | NW_004516403.1 | Scaffold1109 | 12710                   | CC                              | AA              | 1946996074               |
| SNP_P4_154220_12765  | NW_004516403.1 | Scaffold1109 | 12765                   | GG                              | AA              | 1946996076               |

| SNPs IDs            | Chromosome IDs | Chromosomes  | Physical positions (bp) | CDC Frontier (Reference genome) | (ILWC46 & LPNB) | NCBI SNPdb Accession IDs |
|---------------------|----------------|--------------|-------------------------|---------------------------------|-----------------|--------------------------|
| SNP_P4_154221_13196 | NW_004516403.1 | Scaffold1109 | 13196                   | AA                              | TT              | 1946996078               |
| SNP_P4_154222_13470 | NW_004516403.1 | Scaffold1109 | 13470                   | AA                              | GG              | 1946996080               |
| SNP_P4_154223_13479 | NW_004516403.1 | Scaffold1109 | 13479                   | CC                              | TT              | 1946996082               |
| SNP_P4_154224_13493 | NW_004516403.1 | Scaffold1109 | 13493                   | CC                              | AA              | 1946996084               |
| SNP_P4_154225_13494 | NW_004516403.1 | Scaffold1109 | 13494                   | GG                              | AA              | 1946996086               |
| SNP_P4_154226_13545 | NW_004516403.1 | Scaffold1109 | 13545                   | CC                              | GG              | 1946996088               |
| SNP_P4_154227_13549 | NW_004516403.1 | Scaffold1109 | 13549                   | AA                              | GG              | 1946996090               |
| SNP_P4_154228_13552 | NW_004516403.1 | Scaffold1109 | 13552                   | CC                              | TT              | 1946996092               |
| SNP_P4_154229_13573 | NW_004516403.1 | Scaffold1109 | 13573                   | AA                              | GG              | 1946996094               |
| SNP_P4_154230_13584 | NW_004516403.1 | Scaffold1109 | 13584                   | TT                              | GG              | 1946996096               |
| SNP_P4_154231_13593 | NW_004516403.1 | Scaffold1109 | 13593                   | AA                              | GG              | 1946996098               |
| SNP_P4_154232_13615 | NW_004516403.1 | Scaffold1109 | 13615                   | TT                              | AA              | 1946996100               |
| SNP_P4_154233_13627 | NW_004516403.1 | Scaffold1109 | 13627                   | AA                              | CC              | 1946996102               |
| SNP_P4_154234_13635 | NW_004516403.1 | Scaffold1109 | 13635                   | CC                              | AA              | 1946996104               |
| SNP_P4_154235_13658 | NW_004516403.1 | Scaffold1109 | 13658                   | TT                              | CC              | 1946996106               |
| SNP_P4_154236_13692 | NW_004516403.1 | Scaffold1109 | 13692                   | TT                              | CC              | 1946996108               |
| SNP_P4_154237_13714 | NW_004516403.1 | Scaffold1109 | 13714                   | AA                              | TT              | 1946996110               |
| SNP_P4_154238_13733 | NW_004516403.1 | Scaffold1109 | 13733                   | AA                              | GG              | 1946996112               |
| SNP_P4_154239_13812 | NW_004516403.1 | Scaffold1109 | 13812                   | TT                              | GG              | 1946996114               |
| SNP_P4_154240_13819 | NW_004516403.1 | Scaffold1109 | 13819                   | TT                              | GG              | 1946996116               |
| SNP_P4_154241_13916 | NW_004516403.1 | Scaffold1109 | 13916                   | TT                              | GG              | 1946996118               |
| SNP_P4_154245_24096 | NW_004516403.1 | Scaffold1109 | 24096                   | AA                              | TT              | 1946996120               |
| SNP_P4_154246_24154 | NW_004516403.1 | Scaffold1109 | 24154                   | AA                              | GG              | 1946996122               |
| SNP_P4_154247_24200 | NW_004516403.1 | Scaffold1109 | 24200                   | CC                              | AA              | 1946996124               |
| SNP_P4_154248_24210 | NW_004516403.1 | Scaffold1109 | 24210                   | CC                              | GG              | 1946996126               |
| SNP_P4_154249_24481 | NW_004516403.1 | Scaffold1109 | 24481                   | CC                              | TT              | 1946996128               |
| SNP_P4_154250_26345 | NW_004516403.1 | Scaffold1109 | 26345                   | TT                              | GG              | 1946996130               |
| SNP_P4_154251_26703 | NW_004516403.1 | Scaffold1109 | 26703                   | GG                              | AA              | 1946996132               |
| SNP_P4_154252_26713 | NW_004516403.1 | Scaffold1109 | 26713                   | TT                              | AA              | 1946996134               |
| SNP_P4_154253_43827 | NW_004516403.1 | Scaffold1109 | 43827                   | TT                              | AA              | 1946996136               |
| SNP_P4_154255_65469 | NW_004516403.1 | Scaffold1109 | 65469                   | TT                              | CC              | 1946996138               |
| SNP_P4_154256_84886 | NW_004516403.1 | Scaffold1109 | 84886                   | TT                              | CC              | 1946996140               |
| SNP_P4_154257_87861 | NW_004516403.1 | Scaffold1109 | 87861                   | AA                              | GG              | 1946996142               |
| SNP_P4_154258_97209 | NW_004516403.1 | Scaffold1109 | 97209                   | TT                              | GG              | 1946996144               |
| SNP_P4_154259_97631 | NW_004516403.1 | Scaffold1109 | 97631                   | AA                              | TT              | 1946996146               |
| SNP_P4_154260_97696 | NW_004516403.1 | Scaffold1109 | 97696                   | TT                              | GG              | 1946996148               |
| SNP_P4_154261_97800 | NW_004516403.1 | Scaffold1109 | 97800                   | AA                              | CC              | 1946996150               |
| SNP_P4_154262_97810 | NW_004516403.1 | Scaffold1109 | 97810                   | AA                              | GG              | 1946996152               |
| SNP_P4_154264_97946 | NW_004516403.1 | Scaffold1109 | 97946                   | AA                              | TT              | 1946996154               |
| SNP_P4_154265_98234 | NW_004516403.1 | Scaffold1109 | 98234                   | TT                              | GG              | 1946996156               |
| SNP_P4_154266_98246 | NW_004516403.1 | Scaffold1109 | 98246                   | GG                              | AA              | 1946996158               |
| SNP_P4_154267_98349 | NW_004516403.1 | Scaffold1109 | 98349                   | GG                              | AA              | 1946996160               |

| SNPs IDs             | Chromosome IDs | Chromosomes  | Physical positions (bp) | CDC Frontier (Reference genome) | (ILWC46 & LPNB) | NCBI SNPdb Accession IDs |
|----------------------|----------------|--------------|-------------------------|---------------------------------|-----------------|--------------------------|
| SNP_P4_154268_101500 | NW_004516403.1 | Scaffold1109 | 101500                  | CC                              | GG              | 1946996162               |
| SNP_P4_154269_124832 | NW_004516403.1 | Scaffold1109 | 124832                  | GG                              | AA              | 1946996164               |
| SNP_P4_154270_124837 | NW_004516403.1 | Scaffold1109 | 124837                  | GG                              | AA              | 1946996166               |
| SNP_P4_154271_124846 | NW_004516403.1 | Scaffold1109 | 124846                  | GG                              | TT              | 1946996168               |
| SNP_P4_154272_124847 | NW_004516403.1 | Scaffold1109 | 124847                  | CC                              | TT              | 1946996170               |
| SNP_P4_154273_124879 | NW_004516403.1 | Scaffold1109 | 124879                  | CC                              | TT              | 1946996172               |
| SNP_P4_154274_125496 | NW_004516403.1 | Scaffold1109 | 125496                  | AA                              | TT              | 1946996174               |
| SNP_P4_154276_150104 | NW_004516403.1 | Scaffold1109 | 150104                  | TT                              | CC              | 1946996176               |
| SNP_P4_154277_150117 | NW_004516403.1 | Scaffold1109 | 150117                  | GG                              | TT              | 1946996178               |
| SNP_P4_154278_150138 | NW_004516403.1 | Scaffold1109 | 150138                  | AA                              | TT              | 1946996180               |
| SNP_P4_154279_150145 | NW_004516403.1 | Scaffold1109 | 150145                  | GG                              | TT              | 1946996182               |
| SNP_P4_154280_153037 | NW_004516403.1 | Scaffold1109 | 153037                  | TT                              | GG              | 1946996184               |
| SNP_P4_154281_153080 | NW_004516403.1 | Scaffold1109 | 153080                  | TT                              | GG              | 1946996186               |
| SNP_P4_154282_153485 | NW_004516403.1 | Scaffold1109 | 153485                  | TT                              | GG              | 1946996188               |
| SNP_P4_154283_153511 | NW_004516403.1 | Scaffold1109 | 153511                  | TT                              | GG              | 1946996191               |
| SNP_P4_154284_4446   | NW_004516405.1 | Scaffold1111 | 4446                    | GG                              | AA              | 1946996193               |
| SNP_P4_154285_4845   | NW_004516405.1 | Scaffold1111 | 4845                    | TT                              | CC              | 1946996195               |
| SNP_P4_154286_4901   | NW_004516405.1 | Scaffold1111 | 4901                    | AA                              | GG              | 1946996197               |
| SNP_P4_154287_4988   | NW_004516405.1 | Scaffold1111 | 4988                    | GG                              | CC              | 1946996199               |
| SNP_P4_154288_11273  | NW_004516405.1 | Scaffold1111 | 11273                   | GG                              | AA              | 1946996201               |
| SNP_P4_154289_19314  | NW_004516405.1 | Scaffold1111 | 19314                   | AA                              | CC              | 1946996203               |
| SNP_P4_154290_19317  | NW_004516405.1 | Scaffold1111 | 19317                   | CC                              | TT              | 1946996205               |
| SNP_P4_154291_22129  | NW_004516405.1 | Scaffold1111 | 22129                   | TT                              | GG              | 1946996207               |
| SNP_P4_154292_26710  | NW_004516405.1 | Scaffold1111 | 26710                   | AA                              | GG              | 1946996209               |
| SNP_P4_154293_27869  | NW_004516405.1 | Scaffold1111 | 27869                   | GG                              | CC              | 1946996211               |
| SNP_P4_154294_27941  | NW_004516405.1 | Scaffold1111 | 27941                   | GG                              | TT              | 1946996213               |
| SNP_P4_154295_27970  | NW_004516405.1 | Scaffold1111 | 27970                   | GG                              | AA              | 1946996215               |
| SNP_P4_154296_28155  | NW_004516405.1 | Scaffold1111 | 28155                   | TT                              | CC              | 1946996217               |
| SNP_P4_154297_1184   | NW_004516406.1 | Scaffold1113 | 1184                    | TT                              | CC              | 1946996219               |
| SNP_P4_154298_1205   | NW_004516406.1 | Scaffold1113 | 1205                    | AA                              | GG              | 1946996221               |
| SNP_P4_154299_1211   | NW_004516406.1 | Scaffold1113 | 1211                    | AA                              | GG              | 1946996223               |
| SNP_P4_154300_6073   | NW_004516406.1 | Scaffold1113 | 6073                    | CC                              | AA              | 1946996225               |
| SNP_P4_154301_11429  | NW_004516406.1 | Scaffold1113 | 11429                   | AA                              | TT              | 1946996227               |
| SNP_P4_154302_11712  | NW_004516406.1 | Scaffold1113 | 11712                   | CC                              | TT              | 1946996229               |
| SNP_P4_154303_11714  | NW_004516406.1 | Scaffold1113 | 11714                   | AA                              | CC              | 1946996231               |
| SNP_P4_154304_11796  | NW_004516406.1 | Scaffold1113 | 11796                   | AA                              | CC              | 1946996233               |
| SNP_P4_154305_36922  | NW_004516406.1 | Scaffold1113 | 36922                   | AA                              | GG              | 1946996235               |
| SNP_P4_154306_5841   | NW_004516407.1 | Scaffold1114 | 5841                    | TT                              | CC              | 1946996237               |
| SNP_P4_154307_54642  | NW_004516407.1 | Scaffold1114 | 54642                   | TT                              | AA              | 1946996239               |
| SNP_P4_154308_54643  | NW_004516407.1 | Scaffold1114 | 54643                   | TT                              | AA              | 1946996241               |
| SNP_P4_154310_62862  | NW_004516407.1 | Scaffold1114 | 62862                   | TT                              | CC              | 1946996243               |
| SNP_P4_154311_72037  | NW_004516407.1 | Scaffold1114 | 72037                   | TT                              | GG              | 1946996245               |

| SNPs IDs             | Chromosome IDs | Chromosomes  | Physical positions (bp) | CDC Frontier (Reference genome) | (ILWC46 & LPNB) | NCBI SNPdb Accession IDs |
|----------------------|----------------|--------------|-------------------------|---------------------------------|-----------------|--------------------------|
| SNP_P4_154312_72089  | NW_004516407.1 | Scaffold1114 | 72089                   | CC                              | AA              | 1946996247               |
| SNP_P4_154313_72336  | NW_004516407.1 | Scaffold1114 | 72336                   | AA                              | GG              | 1946996249               |
| SNP_P4_154314_72827  | NW_004516407.1 | Scaffold1114 | 72827                   | AA                              | CC              | 1946996251               |
| SNP_P4_154315_72840  | NW_004516407.1 | Scaffold1114 | 72840                   | TT                              | CC              | 1946996253               |
| SNP_P4_154316_83619  | NW_004516407.1 | Scaffold1114 | 83619                   | TT                              | CC              | 1946996255               |
| SNP_P4_154317_555    | NW_004516408.1 | Scaffold1115 | 555                     | TT                              | GG              | 1946996257               |
| SNP_P4_154318_682    | NW_004516408.1 | Scaffold1115 | 682                     | AA                              | TT              | 1946996259               |
| SNP_P4_154319_814    | NW_004516408.1 | Scaffold1115 | 814                     | GG                              | AA              | 1946996261               |
| SNP_P4_154320_1043   | NW_004516408.1 | Scaffold1115 | 1043                    | AA                              | TT              | 1946996263               |
| SNP_P4_154321_1693   | NW_004516408.1 | Scaffold1115 | 1693                    | GG                              | TT              | 1946996265               |
| SNP_P4_154322_3463   | NW_004516408.1 | Scaffold1115 | 3463                    | AA                              | CC              | 1946996267               |
| SNP_P4_154323_11658  | NW_004516408.1 | Scaffold1115 | 11658                   | CC                              | TT              | 1946996269               |
| SNP_P4_154324_39262  | NW_004516408.1 | Scaffold1115 | 39262                   | CC                              | TT              | 1946996271               |
| SNP_P4_154325_39275  | NW_004516408.1 | Scaffold1115 | 39275                   | CC                              | TT              | 1946996273               |
| SNP_P4_154326_39276  | NW_004516408.1 | Scaffold1115 | 39276                   | CC                              | TT              | 1946996275               |
| SNP_P4_154327_39331  | NW_004516408.1 | Scaffold1115 | 39331                   | TT                              | GG              | 1946996277               |
| SNP_P4_154328_39332  | NW_004516408.1 | Scaffold1115 | 39332                   | GG                              | CC              | 1946996279               |
| SNP_P4_154330_54079  | NW_004516408.1 | Scaffold1115 | 54079                   | CC                              | AA              | 1946996281               |
| SNP_P4_154331_54109  | NW_004516408.1 | Scaffold1115 | 54109                   | CC                              | AA              | 1946996283               |
| SNP_P4_154332_90164  | NW_004516408.1 | Scaffold1115 | 90164                   | TT                              | GG              | 1946996285               |
| SNP_P4_154333_103352 | NW_004516408.1 | Scaffold1115 | 103352                  | TT                              | CC              | 1946996287               |
| SNP_P4_154334_108812 | NW_004516408.1 | Scaffold1115 | 108812                  | CC                              | TT              | 1946996289               |
| SNP_P4_154335_126631 | NW_004516408.1 | Scaffold1115 | 126631                  | CC                              | TT              | 1946996291               |
| SNP_P4_154336_153052 | NW_004516408.1 | Scaffold1115 | 153052                  | CC                              | TT              | 1946996293               |
| SNP_P4_154337_153054 | NW_004516408.1 | Scaffold1115 | 153054                  | CC                              | TT              | 1946996295               |
| SNP_P4_154338_164594 | NW_004516408.1 | Scaffold1115 | 164594                  | CC                              | TT              | 1946996297               |
| SNP_P4_154339_2814   | NW_004516409.1 | Scaffold1116 | 2814                    | TT                              | CC              | 1946996299               |
| SNP_P4_154340_2820   | NW_004516409.1 | Scaffold1116 | 2820                    | TT                              | CC              | 1946996301               |
| SNP_P4_154341_2860   | NW_004516409.1 | Scaffold1116 | 2860                    | TT                              | CC              | 1946996303               |
| SNP_P4_154343_2901   | NW_004516409.1 | Scaffold1116 | 2901                    | CC                              | TT              | 1946996305               |
| SNP_P4_154344_6171   | NW_004516409.1 | Scaffold1116 | 6171                    | CC                              | TT              | 1946996307               |
| SNP_P4_154345_8467   | NW_004516409.1 | Scaffold1116 | 8467                    | TT                              | AA              | 1946996309               |
| SNP_P4_154346_16329  | NW_004516409.1 | Scaffold1116 | 16329                   | CC                              | TT              | 1946996311               |
| SNP_P4_154347_16351  | NW_004516409.1 | Scaffold1116 | 16351                   | AA                              | GG              | 1946996313               |
| SNP_P4_154348_16356  | NW_004516409.1 | Scaffold1116 | 16356                   | TT                              | AA              | 1946996315               |
| SNP_P4_154349_16678  | NW_004516409.1 | Scaffold1116 | 16678                   | CC                              | TT              | 1946996317               |
| SNP_P4_154350_16687  | NW_004516409.1 | Scaffold1116 | 16687                   | AA                              | TT              | 1946996319               |
| SNP_P4_154351_16759  | NW_004516409.1 | Scaffold1116 | 16759                   | GG                              | AA              | 1946996321               |
| SNP_P4_154353_19321  | NW_004516409.1 | Scaffold1116 | 19321                   | CC                              | TT              | 1946996323               |
| SNP_P4_154354_19350  | NW_004516409.1 | Scaffold1116 | 19350                   | CC                              | TT              | 1946996325               |
| SNP_P4_154355_24153  | NW_004516409.1 | Scaffold1116 | 24153                   | GG                              | AA              | 1946996327               |
| SNP_P4_154356_25273  | NW_004516409.1 | Scaffold1116 | 25273                   | GG                              | AA              | 1946996329               |

| SNPs IDs            | Chromosome IDs | Chromosomes  | Physical positions (bp) | CDC Frontier (Reference genome) | (ILWC46 & LPNB) | NCBI SNPdb Accession IDs |
|---------------------|----------------|--------------|-------------------------|---------------------------------|-----------------|--------------------------|
| SNP_P4_154357_25299 | NW_004516409.1 | Scaffold1116 | 25299                   | GG                              | AA              | 1946996331               |
| SNP_P4_154358_25645 | NW_004516409.1 | Scaffold1116 | 25645                   | CC                              | TT              | 1946996333               |
| SNP_P4_154359_25709 | NW_004516409.1 | Scaffold1116 | 25709                   | CC                              | AA              | 1946996335               |
| SNP_P4_154360_25737 | NW_004516409.1 | Scaffold1116 | 25737                   | TT                              | CC              | 1946996337               |
| SNP_P4_154361_25755 | NW_004516409.1 | Scaffold1116 | 25755                   | TT                              | CC              | 1946996339               |
| SNP_P4_154362_25757 | NW_004516409.1 | Scaffold1116 | 25757                   | AA                              | GG              | 1946996341               |
| SNP_P4_154363_25773 | NW_004516409.1 | Scaffold1116 | 25773                   | GG                              | AA              | 1946996343               |
| SNP_P4_154364_25847 | NW_004516409.1 | Scaffold1116 | 25847                   | AA                              | GG              | 1946996345               |
| SNP_P4_154365_28849 | NW_004516409.1 | Scaffold1116 | 28849                   | CC                              | TT              | 1946996347               |
| SNP_P4_154366_28852 | NW_004516409.1 | Scaffold1116 | 28852                   | GG                              | AA              | 1946996349               |
| SNP_P4_154367_28956 | NW_004516409.1 | Scaffold1116 | 28956                   | AA                              | GG              | 1946996351               |
| SNP_P4_154368_28972 | NW_004516409.1 | Scaffold1116 | 28972                   | GG                              | TT              | 1946996353               |
| SNP_P4_154369_28973 | NW_004516409.1 | Scaffold1116 | 28973                   | AA                              | CC              | 1946996355               |
| SNP_P4_154370_29197 | NW_004516409.1 | Scaffold1116 | 29197                   | CC                              | TT              | 1946996357               |
| SNP_P4_154371_29216 | NW_004516409.1 | Scaffold1116 | 29216                   | CC                              | TT              | 1946996359               |
| SNP_P4_154372_29278 | NW_004516409.1 | Scaffold1116 | 29278                   | CC                              | TT              | 1946996361               |
| SNP_P4_154373_29349 | NW_004516409.1 | Scaffold1116 | 29349                   | CC                              | GG              | 1946996363               |
| SNP_P4_154374_29405 | NW_004516409.1 | Scaffold1116 | 29405                   | CC                              | TT              | 1946996365               |
| SNP_P4_154375_29512 | NW_004516409.1 | Scaffold1116 | 29512                   | TT                              | AA              | 1946996367               |
| SNP_P4_154376_29538 | NW_004516409.1 | Scaffold1116 | 29538                   | CC                              | TT              | 1946996369               |
| SNP_P4_154377_31161 | NW_004516409.1 | Scaffold1116 | 31161                   | TT                              | GG              | 1946996371               |
| SNP_P4_154378_31433 | NW_004516409.1 | Scaffold1116 | 31433                   | TT                              | CC              | 1946996373               |
| SNP_P4_154379_31434 | NW_004516409.1 | Scaffold1116 | 31434                   | GG                              | CC              | 1946996375               |
| SNP_P4_154380_31530 | NW_004516409.1 | Scaffold1116 | 31530                   | GG                              | AA              | 1946996377               |
| SNP_P4_154381_32461 | NW_004516409.1 | Scaffold1116 | 32461                   | TT                              | AA              | 1946996379               |
| SNP_P4_154382_33671 | NW_004516409.1 | Scaffold1116 | 33671                   | GG                              | TT              | 1946996381               |
| SNP_P4_154383_38105 | NW_004516409.1 | Scaffold1116 | 38105                   | GG                              | AA              | 1946996383               |
| SNP_P4_154384_38170 | NW_004516409.1 | Scaffold1116 | 38170                   | GG                              | AA              | 1946996386               |
| SNP_P4_154385_38175 | NW_004516409.1 | Scaffold1116 | 38175                   | TT                              | CC              | 1946996388               |
| SNP_P4_154386_38440 | NW_004516409.1 | Scaffold1116 | 38440                   | AA                              | GG              | 1946996390               |
| SNP_P4_154387_38470 | NW_004516409.1 | Scaffold1116 | 38470                   | AA                              | GG              | 1946996392               |
| SNP_P4_154389_44965 | NW_004516409.1 | Scaffold1116 | 44965                   | GG                              | AA              | 1946996394               |
| SNP_P4_154390_49416 | NW_004516409.1 | Scaffold1116 | 49416                   | AA                              | TT              | 1946996396               |
| SNP_P4_154391_49422 | NW_004516409.1 | Scaffold1116 | 49422                   | AA                              | GG              | 1946996398               |
| SNP_P4_154392_60362 | NW_004516409.1 | Scaffold1116 | 60362                   | GG                              | TT              | 1946996400               |
| SNP_P4_154393_70524 | NW_004516409.1 | Scaffold1116 | 70524                   | AA                              | GG              | 1946996402               |
| SNP_P4_154394_70670 | NW_004516409.1 | Scaffold1116 | 70670                   | CC                              | TT              | 1946996404               |
| SNP_P4_154395_70754 | NW_004516409.1 | Scaffold1116 | 70754                   | CC                              | TT              | 1946996406               |
| SNP_P4_154396_70760 | NW_004516409.1 | Scaffold1116 | 70760                   | CC                              | TT              | 1946996408               |
| SNP_P4_154398_70823 | NW_004516409.1 | Scaffold1116 | 70823                   | AA                              | GG              | 1946996410               |
| SNP_P4_154399_70842 | NW_004516409.1 | Scaffold1116 | 70842                   | AA                              | TT              | 1946996412               |
| SNP_P4_154400_70845 | NW_004516409.1 | Scaffold1116 | 70845                   | TT                              | CC              | 1946996414               |

| SNPs IDs             | Chromosome IDs | Chromosomes  | Physical positions (bp) | CDC Frontier (Reference genome) | (ILWC46 & LPNB) | NCBI SNPdb Accession IDs |
|----------------------|----------------|--------------|-------------------------|---------------------------------|-----------------|--------------------------|
| SNP_P4_154401_71018  | NW_004516409.1 | Scaffold1116 | 71018                   | TT                              | CC              | 1946996416               |
| SNP_P4_154402_73693  | NW_004516409.1 | Scaffold1116 | 73693                   | CC                              | GG              | 1946996418               |
| SNP_P4_154403_73705  | NW_004516409.1 | Scaffold1116 | 73705                   | GG                              | AA              | 1946996420               |
| SNP_P4_154404_73752  | NW_004516409.1 | Scaffold1116 | 73752                   | CC                              | TT              | 1946996422               |
| SNP_P4_154405_73774  | NW_004516409.1 | Scaffold1116 | 73774                   | TT                              | GG              | 1946996424               |
| SNP_P4_154406_75014  | NW_004516409.1 | Scaffold1116 | 75014                   | TT                              | CC              | 1946996426               |
| SNP_P4_154407_78051  | NW_004516409.1 | Scaffold1116 | 78051                   | GG                              | TT              | 1946996428               |
| SNP_P4_154408_78295  | NW_004516409.1 | Scaffold1116 | 78295                   | TT                              | GG              | 1946996430               |
| SNP_P4_154409_78303  | NW_004516409.1 | Scaffold1116 | 78303                   | TT                              | GG              | 1946996432               |
| SNP_P4_154410_78428  | NW_004516409.1 | Scaffold1116 | 78428                   | CC                              | TT              | 1946996434               |
| SNP_P4_154411_92314  | NW_004516409.1 | Scaffold1116 | 92314                   | GG                              | AA              | 1946996436               |
| SNP_P4_154412_93339  | NW_004516409.1 | Scaffold1116 | 93339                   | TT                              | GG              | 1946996438               |
| SNP_P4_154413_94511  | NW_004516409.1 | Scaffold1116 | 94511                   | AA                              | CC              | 1946996440               |
| SNP_P4_154414_94657  | NW_004516409.1 | Scaffold1116 | 94657                   | CC                              | GG              | 1946996442               |
| SNP_P4_154415_94701  | NW_004516409.1 | Scaffold1116 | 94701                   | TT                              | CC              | 1946996444               |
| SNP_P4_154416_94717  | NW_004516409.1 | Scaffold1116 | 94717                   | AA                              | GG              | 1946996446               |
| SNP_P4_154417_94730  | NW_004516409.1 | Scaffold1116 | 94730                   | TT                              | GG              | 1946996448               |
| SNP_P4_154418_94816  | NW_004516409.1 | Scaffold1116 | 94816                   | AA                              | CC              | 1946996450               |
| SNP_P4_154419_94820  | NW_004516409.1 | Scaffold1116 | 94820                   | GG                              | AA              | 1946996452               |
| SNP_P4_154420_94838  | NW_004516409.1 | Scaffold1116 | 94838                   | GG                              | TT              | 1946996454               |
| SNP_P4_154422_95008  | NW_004516409.1 | Scaffold1116 | 95008                   | CC                              | TT              | 1946996456               |
| SNP_P4_154423_97818  | NW_004516409.1 | Scaffold1116 | 97818                   | AA                              | GG              | 1946996458               |
| SNP_P4_154424_113852 | NW_004516409.1 | Scaffold1116 | 113852                  | GG                              | AA              | 1946996460               |
| SNP_P4_154425_116664 | NW_004516409.1 | Scaffold1116 | 116664                  | AA                              | CC              | 1946996462               |
| SNP_P4_154426_117085 | NW_004516409.1 | Scaffold1116 | 117085                  | CC                              | AA              | 1946996464               |
| SNP_P4_154427_118050 | NW_004516409.1 | Scaffold1116 | 118050                  | CC                              | TT              | 1946996466               |
| SNP_P4_154429_118307 | NW_004516409.1 | Scaffold1116 | 118307                  | GG                              | CC              | 1946996468               |
| SNP_P4_154430_118320 | NW_004516409.1 | Scaffold1116 | 118320                  | TT                              | CC              | 1946996470               |
| SNP_P4_154431_119318 | NW_004516409.1 | Scaffold1116 | 119318                  | TT                              | CC              | 1946996472               |
| SNP_P4_154432_119319 | NW_004516409.1 | Scaffold1116 | 119319                  | TT                              | GG              | 1946996474               |
| SNP_P4_154433_122507 | NW_004516409.1 | Scaffold1116 | 122507                  | CC                              | AA              | 1946996476               |
| SNP_P4_154434_122510 | NW_004516409.1 | Scaffold1116 | 122510                  | CC                              | AA              | 1946996478               |
| SNP_P4_154435_122560 | NW_004516409.1 | Scaffold1116 | 122560                  | AA                              | GG              | 1946996480               |
| SNP_P4_154436_122687 | NW_004516409.1 | Scaffold1116 | 122687                  | AA                              | CC              | 1946996482               |
| SNP_P4_154437_122772 | NW_004516409.1 | Scaffold1116 | 122772                  | GG                              | AA              | 1946996484               |
| SNP_P4_154438_122865 | NW_004516409.1 | Scaffold1116 | 122865                  | TT                              | CC              | 1946996486               |
| SNP_P4_154439_122874 | NW_004516409.1 | Scaffold1116 | 122874                  | AA                              | CC              | 1946996488               |
| SNP_P4_154440_122884 | NW_004516409.1 | Scaffold1116 | 122884                  | AA                              | GG              | 1946996490               |
| SNP_P4_154441_131440 | NW_004516409.1 | Scaffold1116 | 131440                  | GG                              | AA              | 1946996492               |
| SNP_P4_154442_132682 | NW_004516409.1 | Scaffold1116 | 132682                  | CC                              | TT              | 1946996494               |
| SNP_P4_154443_133784 | NW_004516409.1 | Scaffold1116 | 133784                  | GG                              | AA              | 1946996496               |
| SNP_P4_154444_136041 | NW_004516409.1 | Scaffold1116 | 136041                  | TT                              | CC              | 1946996498               |

| SNPs IDs             | Chromosome IDs | Chromosomes  | Physical positions (bp) | CDC Frontier (Reference genome) | (ILWC46 & LPNB) | NCBI SNPdb Accession IDs |
|----------------------|----------------|--------------|-------------------------|---------------------------------|-----------------|--------------------------|
| SNP_P4_154445_136059 | NW_004516409.1 | Scaffold1116 | 136059                  | TT                              | AA              | 1946996500               |
| SNP_P4_154446_141403 | NW_004516409.1 | Scaffold1116 | 141403                  | TT                              | CC              | 1946996502               |
| SNP_P4_154447_141412 | NW_004516409.1 | Scaffold1116 | 141412                  | CC                              | TT              | 1946996504               |
| SNP_P4_154448_141685 | NW_004516409.1 | Scaffold1116 | 141685                  | TT                              | AA              | 1946996506               |
| SNP_P4_154449_141723 | NW_004516409.1 | Scaffold1116 | 141723                  | AA                              | GG              | 1946996508               |
| SNP_P4_154450_141955 | NW_004516409.1 | Scaffold1116 | 141955                  | TT                              | GG              | 1946996511               |
| SNP_P4_154451_144987 | NW_004516409.1 | Scaffold1116 | 144987                  | GG                              | AA              | 1946996513               |
| SNP_P4_154452_1685   | NW_004516410.1 | Scaffold1118 | 1685                    | AA                              | GG              | 1946996515               |
| SNP_P4_154453_1969   | NW_004516410.1 | Scaffold1118 | 1969                    | GG                              | AA              | 1946996517               |
| SNP_P4_154454_7245   | NW_004516410.1 | Scaffold1118 | 7245                    | GG                              | AA              | 1946996519               |
| SNP_P4_154455_9174   | NW_004516410.1 | Scaffold1118 | 9174                    | TT                              | AA              | 1946996521               |
| SNP_P4_154456_9185   | NW_004516410.1 | Scaffold1118 | 9185                    | AA                              | GG              | 1946996523               |
| SNP_P4_154457_9214   | NW_004516410.1 | Scaffold1118 | 9214                    | CC                              | AA              | 1946996525               |
| SNP_P4_154458_9429   | NW_004516410.1 | Scaffold1118 | 9429                    | CC                              | GG              | 1946996527               |
| SNP_P4_154459_9556   | NW_004516410.1 | Scaffold1118 | 9556                    | CC                              | TT              | 1946996529               |
| SNP_P4_154460_9585   | NW_004516410.1 | Scaffold1118 | 9585                    | TT                              | CC              | 1946996531               |
| SNP_P4_154461_9745   | NW_004516410.1 | Scaffold1118 | 9745                    | AA                              | CC              | 1946996533               |
| SNP_P4_154462_9852   | NW_004516410.1 | Scaffold1118 | 9852                    | CC                              | GG              | 1946996535               |
| SNP_P4_154463_19003  | NW_004516410.1 | Scaffold1118 | 19003                   | TT                              | CC              | 1946996537               |
| SNP_P4_154464_19020  | NW_004516410.1 | Scaffold1118 | 19020                   | CC                              | TT              | 1946996539               |
| SNP_P4_154465_20552  | NW_004516410.1 | Scaffold1118 | 20552                   | GG                              | AA              | 1946996541               |
| SNP_P4_154466_20588  | NW_004516410.1 | Scaffold1118 | 20588                   | CC                              | TT              | 1946996543               |
| SNP_P4_154467_20608  | NW_004516410.1 | Scaffold1118 | 20608                   | TT                              | CC              | 1946996545               |
| SNP_P4_154468_23892  | NW_004516410.1 | Scaffold1118 | 23892                   | TT                              | GG              | 1946996547               |
| SNP_P4_154469_25881  | NW_004516410.1 | Scaffold1118 | 25881                   | TT                              | CC              | 1946996549               |
| SNP_P4_154470_26048  | NW_004516410.1 | Scaffold1118 | 26048                   | AA                              | GG              | 1946996551               |
| SNP_P4_154471_26062  | NW_004516410.1 | Scaffold1118 | 26062                   | GG                              | TT              | 1946996553               |
| SNP_P4_154472_26095  | NW_004516410.1 | Scaffold1118 | 26095                   | GG                              | CC              | 1946996555               |
| SNP_P4_154473_26185  | NW_004516410.1 | Scaffold1118 | 26185                   | AA                              | GG              | 1946996557               |
| SNP_P4_154474_26209  | NW_004516410.1 | Scaffold1118 | 26209                   | TT                              | CC              | 1946996559               |
| SNP_P4_154475_26230  | NW_004516410.1 | Scaffold1118 | 26230                   | TT                              | AA              | 1946996561               |
| SNP_P4_154476_26232  | NW_004516410.1 | Scaffold1118 | 26232                   | AA                              | GG              | 1946996563               |
| SNP_P4_154477_26239  | NW_004516410.1 | Scaffold1118 | 26239                   | GG                              | AA              | 1946996565               |
| SNP_P4_154478_26244  | NW_004516410.1 | Scaffold1118 | 26244                   | AA                              | GG              | 1946996567               |
| SNP_P4_154479_26378  | NW_004516410.1 | Scaffold1118 | 26378                   | AA                              | GG              | 1946996569               |
| SNP_P4_154480_26383  | NW_004516410.1 | Scaffold1118 | 26383                   | GG                              | AA              | 1946996571               |
| SNP_P4_154481_26534  | NW_004516410.1 | Scaffold1118 | 26534                   | AA                              | TT              | 1946996573               |
| SNP_P4_154482_26645  | NW_004516410.1 | Scaffold1118 | 26645                   | AA                              | TT              | 1946996575               |
| SNP_P4_154484_29964  | NW_004516410.1 | Scaffold1118 | 29964                   | AA                              | CC              | 1946996577               |
| SNP_P4_154485_30426  | NW_004516410.1 | Scaffold1118 | 30426                   | AA                              | GG              | 1946996579               |
| SNP_P4_154486_30586  | NW_004516410.1 | Scaffold1118 | 30586                   | GG                              | AA              | 1946996581               |
| SNP_P4_154487_30588  | NW_004516410.1 | Scaffold1118 | 30588                   | TT                              | CC              | 1946996583               |

| SNPs IDs            | Chromosome IDs | Chromosomes  | Physical positions (bp) | CDC Frontier (Reference genome) | (ILWC46 & LPNB) | NCBI SNPdb Accession IDs |
|---------------------|----------------|--------------|-------------------------|---------------------------------|-----------------|--------------------------|
| SNP_P4_154488_32320 | NW_004516410.1 | Scaffold1118 | 32320                   | AA                              | GG              | 1946996585               |
| SNP_P4_154489_32461 | NW_004516410.1 | Scaffold1118 | 32461                   | TT                              | CC              | 1946996587               |
| SNP_P4_154490_32507 | NW_004516410.1 | Scaffold1118 | 32507                   | TT                              | CC              | 1946996589               |
| SNP_P4_154491_32635 | NW_004516410.1 | Scaffold1118 | 32635                   | GG                              | CC              | 1946996591               |
| SNP_P4_154492_33094 | NW_004516410.1 | Scaffold1118 | 33094                   | GG                              | TT              | 1946996593               |
| SNP_P4_154493_34350 | NW_004516410.1 | Scaffold1118 | 34350                   | GG                              | TT              | 1946996595               |
| SNP_P4_154494_34573 | NW_004516410.1 | Scaffold1118 | 34573                   | AA                              | CC              | 1946996597               |
| SNP_P4_154496_5253  | NW_004516411.1 | Scaffold1120 | 5253                    | TT                              | GG              | 1946996599               |
| SNP_P4_154497_5255  | NW_004516411.1 | Scaffold1120 | 5255                    | GG                              | AA              | 1946996601               |
| SNP_P4_154498_7468  | NW_004516411.1 | Scaffold1120 | 7468                    | GG                              | AA              | 1946996603               |
| SNP_P4_154499_7488  | NW_004516411.1 | Scaffold1120 | 7488                    | AA                              | TT              | 1946996605               |
| SNP_P4_154500_7510  | NW_004516411.1 | Scaffold1120 | 7510                    | AA                              | TT              | 1946996607               |
| SNP_P4_154501_7565  | NW_004516411.1 | Scaffold1120 | 7565                    | AA                              | CC              | 1946996609               |
| SNP_P4_154502_7594  | NW_004516411.1 | Scaffold1120 | 7594                    | CC                              | TT              | 1946996611               |
| SNP_P4_154503_7726  | NW_004516411.1 | Scaffold1120 | 7726                    | AA                              | GG              | 1946996613               |
| SNP_P4_154504_7868  | NW_004516411.1 | Scaffold1120 | 7868                    | AA                              | GG              | 1946996615               |
| SNP_P4_154505_8007  | NW_004516411.1 | Scaffold1120 | 8007                    | AA                              | TT              | 1946996617               |
| SNP_P4_154506_8015  | NW_004516411.1 | Scaffold1120 | 8015                    | AA                              | GG              | 1946996619               |
| SNP_P4_154507_11049 | NW_004516411.1 | Scaffold1120 | 11049                   | AA                              | GG              | 1946996621               |
| SNP_P4_154508_11088 | NW_004516411.1 | Scaffold1120 | 11088                   | GG                              | AA              | 1946996623               |
| SNP_P4_154509_11098 | NW_004516411.1 | Scaffold1120 | 11098                   | TT                              | CC              | 1946996625               |
| SNP_P4_154510_11133 | NW_004516411.1 | Scaffold1120 | 11133                   | CC                              | TT              | 1946996627               |
| SNP_P4_154512_11153 | NW_004516411.1 | Scaffold1120 | 11153                   | TT                              | GG              | 1946996629               |
| SNP_P4_154513_11179 | NW_004516411.1 | Scaffold1120 | 11179                   | TT                              | CC              | 1946996631               |
| SNP_P4_154514_11189 | NW_004516411.1 | Scaffold1120 | 11189                   | CC                              | AA              | 1946996633               |
| SNP_P4_154515_11408 | NW_004516411.1 | Scaffold1120 | 11408                   | GG                              | AA              | 1946996635               |
| SNP_P4_154516_11839 | NW_004516411.1 | Scaffold1120 | 11839                   | AA                              | TT              | 1946996637               |
| SNP_P4_154517_13816 | NW_004516411.1 | Scaffold1120 | 13816                   | TT                              | AA              | 1946996639               |
| SNP_P4_154518_18355 | NW_004516411.1 | Scaffold1120 | 18355                   | AA                              | GG              | 1946996641               |
| SNP_P4_154519_18368 | NW_004516411.1 | Scaffold1120 | 18368                   | GG                              | AA              | 1946996643               |
| SNP_P4_154520_18380 | NW_004516411.1 | Scaffold1120 | 18380                   | CC                              | GG              | 1946996645               |
| SNP_P4_154521_24816 | NW_004516411.1 | Scaffold1120 | 24816                   | CC                              | AA              | 1946996646               |
| SNP_P4_154522_26554 | NW_004516411.1 | Scaffold1120 | 26554                   | CC                              | TT              | 1946996648               |
| SNP_P4_154523_39638 | NW_004516411.1 | Scaffold1120 | 39638                   | GG                              | AA              | 1946996650               |
| SNP_P4_154525_46884 | NW_004516411.1 | Scaffold1120 | 46884                   | CC                              | TT              | 1946996652               |
| SNP_P4_154526_52724 | NW_004516411.1 | Scaffold1120 | 52724                   | AA                              | TT              | 1946996654               |
| SNP_P4_154527_53022 | NW_004516411.1 | Scaffold1120 | 53022                   | CC                              | GG              | 1946996656               |
| SNP_P4_154528_53261 | NW_004516411.1 | Scaffold1120 | 53261                   | AA                              | GG              | 1946996658               |
| SNP_P4_154529_53482 | NW_004516411.1 | Scaffold1120 | 53482                   | TT                              | GG              | 1946996660               |
| SNP_P4_154530_58357 | NW_004516411.1 | Scaffold1120 | 58357                   | TT                              | GG              | 1946996662               |
| SNP_P4_154531_58358 | NW_004516411.1 | Scaffold1120 | 58358                   | GG                              | AA              | 1946996664               |
| SNP_P4_154532_58362 | NW_004516411.1 | Scaffold1120 | 58362                   | AA                              | TT              | 1946996666               |



| SNPs IDs             | Chromosome IDs | Chromosomes  | Physical positions (bp) | CDC Frontier (Reference genome) | (ILWC46 & LPNB) | NCBI SNPdb Accession IDs |
|----------------------|----------------|--------------|-------------------------|---------------------------------|-----------------|--------------------------|
| SNP_P4_154533_875    | NW_004516412.1 | Scaffold1123 | 875                     | TT                              | CC              | 1946996668               |
| SNP_P4_154534_940    | NW_004516414.1 | Scaffold1126 | 940                     | AA                              | TT              | 1946996669               |
| SNP_P4_154535_948    | NW_004516414.1 | Scaffold1126 | 948                     | AA                              | TT              | 1946996671               |
| SNP_P4_154536_3923   | NW_004516414.1 | Scaffold1126 | 3923                    | TT                              | CC              | 1946996673               |
| SNP_P4_154537_4197   | NW_004516414.1 | Scaffold1126 | 4197                    | TT                              | CC              | 1946996675               |
| SNP_P4_154538_4277   | NW_004516414.1 | Scaffold1126 | 4277                    | TT                              | AA              | 1946996677               |
| SNP_P4_154539_4882   | NW_004516414.1 | Scaffold1126 | 4882                    | TT                              | AA              | 1946996679               |
| SNP_P4_154540_5094   | NW_004516414.1 | Scaffold1126 | 5094                    | CC                              | TT              | 1946996681               |
| SNP_P4_154541_5101   | NW_004516414.1 | Scaffold1126 | 5101                    | AA                              | CC              | 1946996683               |
| SNP_P4_154542_5112   | NW_004516414.1 | Scaffold1126 | 5112                    | GG                              | AA              | 1946996684               |
| SNP_P4_154543_5113   | NW_004516414.1 | Scaffold1126 | 5113                    | AA                              | GG              | 1946996686               |
| SNP_P4_154544_5302   | NW_004516414.1 | Scaffold1126 | 5302                    | AA                              | GG              | 1946996688               |
| SNP_P4_154545_5389   | NW_004516414.1 | Scaffold1126 | 5389                    | CC                              | AA              | 1946996690               |
| SNP_P4_154546_5418   | NW_004516414.1 | Scaffold1126 | 5418                    | CC                              | GG              | 1946996692               |
| SNP_P4_154547_5519   | NW_004516414.1 | Scaffold1126 | 5519                    | CC                              | AA              | 1946996694               |
| SNP_P4_154548_9903   | NW_004516414.1 | Scaffold1126 | 9903                    | TT                              | GG              | 1946996696               |
| SNP_P4_154549_10125  | NW_004516414.1 | Scaffold1126 | 10125                   | AA                              | GG              | 1946996698               |
| SNP_P4_154550_10808  | NW_004516414.1 | Scaffold1126 | 10808                   | GG                              | CC              | 1946996700               |
| SNP_P4_154551_10821  | NW_004516414.1 | Scaffold1126 | 10821                   | CC                              | AA              | 1946996702               |
| SNP_P4_154552_66     | NW_004516415.1 | Scaffold1127 | 66                      | GG                              | CC              | 1946996703               |
| SNP_P4_154553_111    | NW_004516415.1 | Scaffold1127 | 111                     | AA                              | GG              | 1946996705               |
| SNP_P4_154555_8771   | NW_004516416.1 | Scaffold1128 | 8771                    | CC                              | TT              | 1946996707               |
| SNP_P4_154556_16934  | NW_004516416.1 | Scaffold1128 | 16934                   | TT                              | AA              | 1946996709               |
| SNP_P4_154557_21151  | NW_004516416.1 | Scaffold1128 | 21151                   | AA                              | GG              | 1946996711               |
| SNP_P4_154558_21167  | NW_004516416.1 | Scaffold1128 | 21167                   | GG                              | AA              | 1946996713               |
| SNP_P4_154559_25385  | NW_004516416.1 | Scaffold1128 | 25385                   | CC                              | TT              | 1946996715               |
| SNP_P4_154560_27823  | NW_004516416.1 | Scaffold1128 | 27823                   | AA                              | TT              | 1946996717               |
| SNP_P4_154561_27854  | NW_004516416.1 | Scaffold1128 | 27854                   | AA                              | CC              | 1946996719               |
| SNP_P4_154562_27901  | NW_004516416.1 | Scaffold1128 | 27901                   | AA                              | TT              | 1946996721               |
| SNP_P4_154563_27902  | NW_004516416.1 | Scaffold1128 | 27902                   | TT                              | CC              | 1946996723               |
| SNP_P4_154564_28155  | NW_004516416.1 | Scaffold1128 | 28155                   | TT                              | AA              | 1946996725               |
| SNP_P4_154565_37025  | NW_004516416.1 | Scaffold1128 | 37025                   | TT                              | CC              | 1946996727               |
| SNP_P4_154567_51061  | NW_004516416.1 | Scaffold1128 | 51061                   | AA                              | GG              | 1946996729               |
| SNP_P4_154568_55804  | NW_004516416.1 | Scaffold1128 | 55804                   | TT                              | CC              | 1946996731               |
| SNP_P4_154569_58067  | NW_004516416.1 | Scaffold1128 | 58067                   | GG                              | AA              | 1946996733               |
| SNP_P4_154570_70453  | NW_004516416.1 | Scaffold1128 | 70453                   | GG                              | AA              | 1946996735               |
| SNP_P4_154571_74382  | NW_004516416.1 | Scaffold1128 | 74382                   | AA                              | CC              | 1946996737               |
| SNP_P4_154572_75564  | NW_004516416.1 | Scaffold1128 | 75564                   | CC                              | TT              | 1946996739               |
| SNP_P4_154573_82187  | NW_004516416.1 | Scaffold1128 | 82187                   | CC                              | TT              | 1946996741               |
| SNP_P4_154574_96030  | NW_004516416.1 | Scaffold1128 | 96030                   | AA                              | GG              | 1946996743               |
| SNP_P4_154575_97081  | NW_004516416.1 | Scaffold1128 | 97081                   | CC                              | TT              | 1946996745               |
| SNP_P4_154576_100043 | NW_004516416.1 | Scaffold1128 | 100043                  | TT                              | CC              | 1946996747               |

| SNPs IDs             | Chromosome IDs | Chromosomes  | Physical positions (bp) | CDC Frontier (Reference genome) | (ILWC46 & LPNB) | NCBI SNPdb Accession IDs |
|----------------------|----------------|--------------|-------------------------|---------------------------------|-----------------|--------------------------|
| SNP_P4_154578_114362 | NW_004516416.1 | Scaffold1128 | 114362                  | CC                              | GG              | 1946996749               |
| SNP_P4_154579_115162 | NW_004516416.1 | Scaffold1128 | 115162                  | CC                              | TT              | 1946996751               |
| SNP_P4_154580_123449 | NW_004516416.1 | Scaffold1128 | 123449                  | TT                              | CC              | 1946996753               |
| SNP_P4_154581_126037 | NW_004516416.1 | Scaffold1128 | 126037                  | CC                              | TT              | 1946996755               |
| SNP_P4_154582_146108 | NW_004516416.1 | Scaffold1128 | 146108                  | CC                              | TT              | 1946996757               |
| SNP_P4_154583_146154 | NW_004516416.1 | Scaffold1128 | 146154                  | TT                              | GG              | 1946996759               |
| SNP_P4_154584_146382 | NW_004516416.1 | Scaffold1128 | 146382                  | TT                              | CC              | 1946996761               |
| SNP_P4_154585_146385 | NW_004516416.1 | Scaffold1128 | 146385                  | GG                              | TT              | 1946996763               |
| SNP_P4_154586_146451 | NW_004516416.1 | Scaffold1128 | 146451                  | TT                              | CC              | 1946996765               |
| SNP_P4_154587_146453 | NW_004516416.1 | Scaffold1128 | 146453                  | TT                              | GG              | 1946996767               |
| SNP_P4_154588_146457 | NW_004516416.1 | Scaffold1128 | 146457                  | AA                              | GG              | 1946996769               |
| SNP_P4_154589_148704 | NW_004516416.1 | Scaffold1128 | 148704                  | GG                              | TT              | 1946996771               |
| SNP_P4_154590_152285 | NW_004516416.1 | Scaffold1128 | 152285                  | CC                              | GG              | 1946996773               |
| SNP_P4_154591_156592 | NW_004516416.1 | Scaffold1128 | 156592                  | GG                              | TT              | 1946996775               |
| SNP_P4_154592_159308 | NW_004516416.1 | Scaffold1128 | 159308                  | CC                              | GG              | 1946996777               |
| SNP_P4_154594_163878 | NW_004516416.1 | Scaffold1128 | 163878                  | TT                              | CC              | 1946996779               |
| SNP_P4_154595_178856 | NW_004516416.1 | Scaffold1128 | 178856                  | TT                              | GG              | 1946996781               |
| SNP_P4_154597_190655 | NW_004516416.1 | Scaffold1128 | 190655                  | GG                              | TT              | 1946996783               |
| SNP_P4_154598_229865 | NW_004516416.1 | Scaffold1128 | 229865                  | CC                              | TT              | 1946996785               |
| SNP_P4_154599_230263 | NW_004516416.1 | Scaffold1128 | 230263                  | GG                              | AA              | 1946996787               |
| SNP_P4_154600_230277 | NW_004516416.1 | Scaffold1128 | 230277                  | GG                              | TT              | 1946996789               |
| SNP_P4_154602_248972 | NW_004516416.1 | Scaffold1128 | 248972                  | GG                              | TT              | 1946996791               |
| SNP_P4_154603_248976 | NW_004516416.1 | Scaffold1128 | 248976                  | AA                              | GG              | 1946996793               |
| SNP_P4_154605_253247 | NW_004516416.1 | Scaffold1128 | 253247                  | CC                              | TT              | 1946996795               |
| SNP_P4_154606_254254 | NW_004516416.1 | Scaffold1128 | 254254                  | CC                              | TT              | 1946996797               |
| SNP_P4_154608_269534 | NW_004516416.1 | Scaffold1128 | 269534                  | CC                              | GG              | 1946996799               |
| SNP_P4_154609_275004 | NW_004516416.1 | Scaffold1128 | 275004                  | GG                              | AA              | 1946996801               |
| SNP_P4_154610_275052 | NW_004516416.1 | Scaffold1128 | 275052                  | CC                              | GG              | 1946996803               |
| SNP_P4_154611_275083 | NW_004516416.1 | Scaffold1128 | 275083                  | TT                              | CC              | 1946996805               |
| SNP_P4_154612_275214 | NW_004516416.1 | Scaffold1128 | 275214                  | TT                              | AA              | 1946996807               |
| SNP_P4_154613_278893 | NW_004516416.1 | Scaffold1128 | 278893                  | AA                              | GG              | 1946996809               |
| SNP_P4_154614_303866 | NW_004516416.1 | Scaffold1128 | 303866                  | AA                              | GG              | 1946996811               |
| SNP_P4_154616_317963 | NW_004516416.1 | Scaffold1128 | 317963                  | TT                              | GG              | 1946996813               |
| SNP_P4_154617_322953 | NW_004516416.1 | Scaffold1128 | 322953                  | TT                              | AA              | 1946996815               |
| SNP_P4_154618_335378 | NW_004516416.1 | Scaffold1128 | 335378                  | CC                              | GG              | 1946996817               |
| SNP_P4_154619_336755 | NW_004516416.1 | Scaffold1128 | 336755                  | AA                              | GG              | 1946996819               |
| SNP_P4_154620_347430 | NW_004516416.1 | Scaffold1128 | 347430                  | GG                              | AA              | 1946996821               |
| SNP_P4_154621_347486 | NW_004516416.1 | Scaffold1128 | 347486                  | TT                              | CC              | 1946996823               |
| SNP_P4_154622_347507 | NW_004516416.1 | Scaffold1128 | 347507                  | GG                              | AA              | 1946996825               |
| SNP_P4_154623_350112 | NW_004516416.1 | Scaffold1128 | 350112                  | GG                              | TT              | 1946996827               |
| SNP_P4_154624_350488 | NW_004516416.1 | Scaffold1128 | 350488                  | CC                              | TT              | 1946996829               |
| SNP_P4_154625_350652 | NW_004516416.1 | Scaffold1128 | 350652                  | TT                              | CC              | 1946996831               |

| SNPs IDs             | Chromosome IDs | Chromosomes  | Physical positions (bp) | CDC Frontier (Reference genome) | (ILWC46 & LPNB) | NCBI SNPdb Accession IDs |
|----------------------|----------------|--------------|-------------------------|---------------------------------|-----------------|--------------------------|
| SNP_P4_154626_351081 | NW_004516416.1 | Scaffold1128 | 351081                  | TT                              | GG              | 1946996833               |
| SNP_P4_154627_352913 | NW_004516416.1 | Scaffold1128 | 352913                  | GG                              | TT              | 1946996835               |
| SNP_P4_154628_354492 | NW_004516416.1 | Scaffold1128 | 354492                  | GG                              | AA              | 1946996837               |
| SNP_P4_154629_362225 | NW_004516416.1 | Scaffold1128 | 362225                  | TT                              | GG              | 1946996839               |
| SNP_P4_154630_364946 | NW_004516416.1 | Scaffold1128 | 364946                  | AA                              | GG              | 1946996841               |
| SNP_P4_154631_365234 | NW_004516416.1 | Scaffold1128 | 365234                  | GG                              | TT              | 1946996843               |
| SNP_P4_154632_381065 | NW_004516416.1 | Scaffold1128 | 381065                  | AA                              | TT              | 1946996845               |
| SNP_P4_154633_389772 | NW_004516416.1 | Scaffold1128 | 389772                  | TT                              | AA              | 1946996847               |
| SNP_P4_154634_395188 | NW_004516416.1 | Scaffold1128 | 395188                  | CC                              | TT              | 1946996849               |
| SNP_P4_154635_403546 | NW_004516416.1 | Scaffold1128 | 403546                  | CC                              | TT              | 1946996851               |
| SNP_P4_154636_403547 | NW_004516416.1 | Scaffold1128 | 403547                  | AA                              | GG              | 1946996853               |
| SNP_P4_154637_406041 | NW_004516416.1 | Scaffold1128 | 406041                  | CC                              | AA              | 1946996855               |
| SNP_P4_154638_407685 | NW_004516416.1 | Scaffold1128 | 407685                  | AA                              | GG              | 1946996857               |
| SNP_P4_154639_413453 | NW_004516416.1 | Scaffold1128 | 413453                  | TT                              | CC              | 1946996859               |
| SNP_P4_154640_413457 | NW_004516416.1 | Scaffold1128 | 413457                  | GG                              | AA              | 1946996861               |
| SNP_P4_154641_413483 | NW_004516416.1 | Scaffold1128 | 413483                  | AA                              | GG              | 1946996863               |
| SNP_P4_154642_413484 | NW_004516416.1 | Scaffold1128 | 413484                  | AA                              | TT              | 1946996865               |
| SNP_P4_154643_413490 | NW_004516416.1 | Scaffold1128 | 413490                  | AA                              | TT              | 1946996867               |
| SNP_P4_154644_413645 | NW_004516416.1 | Scaffold1128 | 413645                  | GG                              | TT              | 1946996869               |
| SNP_P4_154645_413762 | NW_004516416.1 | Scaffold1128 | 413762                  | TT                              | GG              | 1946996871               |
| SNP_P4_154646_413775 | NW_004516416.1 | Scaffold1128 | 413775                  | AA                              | GG              | 1946996873               |
| SNP_P4_154647_413782 | NW_004516416.1 | Scaffold1128 | 413782                  | TT                              | CC              | 1946996875               |
| SNP_P4_154649_423991 | NW_004516416.1 | Scaffold1128 | 423991                  | TT                              | CC              | 1946996877               |
| SNP_P4_154650_425233 | NW_004516416.1 | Scaffold1128 | 425233                  | CC                              | TT              | 1946996879               |
| SNP_P4_154651_432880 | NW_004516416.1 | Scaffold1128 | 432880                  | TT                              | CC              | 1946996881               |
| SNP_P4_154652_441112 | NW_004516416.1 | Scaffold1128 | 441112                  | TT                              | CC              | 1946996883               |
| SNP_P4_154654_464661 | NW_004516416.1 | Scaffold1128 | 464661                  | AA                              | GG              | 1946996885               |
| SNP_P4_154655_479704 | NW_004516416.1 | Scaffold1128 | 479704                  | GG                              | AA              | 1946996887               |
| SNP_P4_154656_485484 | NW_004516416.1 | Scaffold1128 | 485484                  | GG                              | AA              | 1946996889               |
| SNP_P4_154657_485840 | NW_004516416.1 | Scaffold1128 | 485840                  | TT                              | AA              | 1946996891               |
| SNP_P4_154658_492031 | NW_004516416.1 | Scaffold1128 | 492031                  | GG                              | AA              | 1946996893               |
| SNP_P4_154659_492291 | NW_004516416.1 | Scaffold1128 | 492291                  | GG                              | AA              | 1946996895               |
| SNP_P4_154660_492308 | NW_004516416.1 | Scaffold1128 | 492308                  | GG                              | AA              | 1946996897               |
| SNP_P4_154661_492346 | NW_004516416.1 | Scaffold1128 | 492346                  | CC                              | GG              | 1946996899               |
| SNP_P4_154662_492647 | NW_004516416.1 | Scaffold1128 | 492647                  | CC                              | GG              | 1946996901               |
| SNP_P4_154663_492699 | NW_004516416.1 | Scaffold1128 | 492699                  | TT                              | GG              | 1946996903               |
| SNP_P4_154664_492725 | NW_004516416.1 | Scaffold1128 | 492725                  | AA                              | GG              | 1946996905               |
| SNP_P4_154665_496297 | NW_004516416.1 | Scaffold1128 | 496297                  | TT                              | GG              | 1946996907               |
| SNP_P4_154666_496323 | NW_004516416.1 | Scaffold1128 | 496323                  | AA                              | GG              | 1946996909               |
| SNP_P4_154667_496364 | NW_004516416.1 | Scaffold1128 | 496364                  | TT                              | CC              | 1946996911               |
| SNP_P4_154668_508606 | NW_004516416.1 | Scaffold1128 | 508606                  | CC                              | AA              | 1946996913               |
| SNP_P4_154669_3767   | NW_004516418.1 | Scaffold1131 | 3767                    | AA                              | CC              | 1946996915               |

| SNPs IDs            | Chromosome IDs | Chromosomes  | Physical positions (bp) | CDC Frontier (Reference genome) | (ILWC46 & LPNB) | NCBI SNPdb Accession IDs |
|---------------------|----------------|--------------|-------------------------|---------------------------------|-----------------|--------------------------|
| SNP_P4_154670_11509 | NW_004516418.1 | Scaffold1131 | 11509                   | TT                              | CC              | 1946996917               |
| SNP_P4_154672_17278 | NW_004516418.1 | Scaffold1131 | 17278                   | TT                              | CC              | 1946996919               |
| SNP_P4_154673_17582 | NW_004516418.1 | Scaffold1131 | 17582                   | AA                              | TT              | 1946996921               |
| SNP_P4_154674_17768 | NW_004516418.1 | Scaffold1131 | 17768                   | GG                              | AA              | 1946996923               |
| SNP_P4_154675_29661 | NW_004516418.1 | Scaffold1131 | 29661                   | CC                              | AA              | 1946996925               |
| SNP_P4_154676_29755 | NW_004516418.1 | Scaffold1131 | 29755                   | CC                              | TT              | 1946996927               |
| SNP_P4_154677_29814 | NW_004516418.1 | Scaffold1131 | 29814                   | TT                              | CC              | 1946996929               |
| SNP_P4_154678_29848 | NW_004516418.1 | Scaffold1131 | 29848                   | TT                              | CC              | 1946996931               |
| SNP_P4_154680_30070 | NW_004516418.1 | Scaffold1131 | 30070                   | AA                              | TT              | 1946996933               |
| SNP_P4_154681_30110 | NW_004516418.1 | Scaffold1131 | 30110                   | CC                              | AA              | 1946996935               |
| SNP_P4_154682_30117 | NW_004516418.1 | Scaffold1131 | 30117                   | CC                              | TT              | 1946996937               |
| SNP_P4_154683_30136 | NW_004516418.1 | Scaffold1131 | 30136                   | CC                              | GG              | 1946996939               |
| SNP_P4_154684_30145 | NW_004516418.1 | Scaffold1131 | 30145                   | GG                              | AA              | 1946996941               |
| SNP_P4_154685_30154 | NW_004516418.1 | Scaffold1131 | 30154                   | AA                              | GG              | 1946996943               |
| SNP_P4_154686_30175 | NW_004516418.1 | Scaffold1131 | 30175                   | AA                              | GG              | 1946996945               |
| SNP_P4_154687_30179 | NW_004516418.1 | Scaffold1131 | 30179                   | AA                              | GG              | 1946996947               |
| SNP_P4_154688_30244 | NW_004516418.1 | Scaffold1131 | 30244                   | CC                              | GG              | 1946996949               |
| SNP_P4_154689_30294 | NW_004516418.1 | Scaffold1131 | 30294                   | AA                              | CC              | 1946996951               |
| SNP_P4_154690_34828 | NW_004516418.1 | Scaffold1131 | 34828                   | GG                              | AA              | 1946996953               |
| SNP_P4_154691_39163 | NW_004516418.1 | Scaffold1131 | 39163                   | CC                              | TT              | 1946996955               |
| SNP_P4_154692_39349 | NW_004516418.1 | Scaffold1131 | 39349                   | CC                              | TT              | 1946996957               |
| SNP_P4_154693_39370 | NW_004516418.1 | Scaffold1131 | 39370                   | AA                              | GG              | 1946996959               |
| SNP_P4_154694_39462 | NW_004516418.1 | Scaffold1131 | 39462                   | CC                              | TT              | 1946996961               |
| SNP_P4_154696_39583 | NW_004516418.1 | Scaffold1131 | 39583                   | TT                              | CC              | 1946996963               |
| SNP_P4_154697_39587 | NW_004516418.1 | Scaffold1131 | 39587                   | CC                              | GG              | 1946996965               |
| SNP_P4_154699_40200 | NW_004516418.1 | Scaffold1131 | 40200                   | CC                              | TT              | 1946996967               |
| SNP_P4_154700_40242 | NW_004516418.1 | Scaffold1131 | 40242                   | GG                              | AA              | 1946996969               |
| SNP_P4_154701_40251 | NW_004516418.1 | Scaffold1131 | 40251                   | GG                              | AA              | 1946996971               |
| SNP_P4_154702_40502 | NW_004516418.1 | Scaffold1131 | 40502                   | TT                              | AA              | 1946996973               |
| SNP_P4_154703_40504 | NW_004516418.1 | Scaffold1131 | 40504                   | AA                              | CC              | 1946996975               |
| SNP_P4_154704_40554 | NW_004516418.1 | Scaffold1131 | 40554                   | GG                              | AA              | 1946996977               |
| SNP_P4_154705_40561 | NW_004516418.1 | Scaffold1131 | 40561                   | CC                              | TT              | 1946996979               |
| SNP_P4_154706_56462 | NW_004516418.1 | Scaffold1131 | 56462                   | GG                              | AA              | 1946996981               |
| SNP_P4_154707_56548 | NW_004516418.1 | Scaffold1131 | 56548                   | AA                              | TT              | 1946996983               |
| SNP_P4_154708_56938 | NW_004516418.1 | Scaffold1131 | 56938                   | CC                              | TT              | 1946996985               |
| SNP_P4_154709_58531 | NW_004516418.1 | Scaffold1131 | 58531                   | AA                              | GG              | 1946996987               |
| SNP_P4_154710_81684 | NW_004516418.1 | Scaffold1131 | 81684                   | AA                              | GG              | 1946996989               |
| SNP_P4_154711_81759 | NW_004516418.1 | Scaffold1131 | 81759                   | GG                              | AA              | 1946996991               |
| SNP_P4_154712_81840 | NW_004516418.1 | Scaffold1131 | 81840                   | AA                              | GG              | 1946996992               |
| SNP_P4_154713_81870 | NW_004516418.1 | Scaffold1131 | 81870                   | CC                              | AA              | 1946996993               |
| SNP_P4_154714_81914 | NW_004516418.1 | Scaffold1131 | 81914                   | CC                              | AA              | 1946996994               |
| SNP_P4_154715_82004 | NW_004516418.1 | Scaffold1131 | 82004                   | TT                              | GG              | 1946996996               |

| SNPs IDs             | Chromosome IDs | Chromosomes  | Physical positions (bp) | CDC Frontier (Reference genome) | (ILWC46 & LPNB) | NCBI SNPdb Accession IDs |
|----------------------|----------------|--------------|-------------------------|---------------------------------|-----------------|--------------------------|
| SNP_P4_154716_82067  | NW_004516418.1 | Scaffold1131 | 82067                   | CC                              | AA              | 1946996998               |
| SNP_P4_154717_101547 | NW_004516418.1 | Scaffold1131 | 101547                  | TT                              | CC              | 1946997000               |
| SNP_P4_154718_101574 | NW_004516418.1 | Scaffold1131 | 101574                  | AA                              | GG              | 1946997002               |
| SNP_P4_154719_101587 | NW_004516418.1 | Scaffold1131 | 101587                  | AA                              | GG              | 1946997004               |
| SNP_P4_154720_111150 | NW_004516418.1 | Scaffold1131 | 111150                  | CC                              | AA              | 1946997006               |
| SNP_P4_154721_112887 | NW_004516418.1 | Scaffold1131 | 112887                  | GG                              | AA              | 1946997008               |
| SNP_P4_154722_118011 | NW_004516418.1 | Scaffold1131 | 118011                  | AA                              | CC              | 1946997010               |
| SNP_P4_154723_118032 | NW_004516418.1 | Scaffold1131 | 118032                  | AA                              | GG              | 1946997012               |
| SNP_P4_154724_118038 | NW_004516418.1 | Scaffold1131 | 118038                  | TT                              | CC              | 1946997014               |
| SNP_P4_154725_118041 | NW_004516418.1 | Scaffold1131 | 118041                  | TT                              | CC              | 1946997016               |
| SNP_P4_154727_131239 | NW_004516418.1 | Scaffold1131 | 131239                  | CC                              | GG              | 1946997018               |
| SNP_P4_154728_144206 | NW_004516418.1 | Scaffold1131 | 144206                  | GG                              | TT              | 1946997020               |
| SNP_P4_154730_789    | NW_004516419.1 | Scaffold1132 | 789                     | GG                              | AA              | 1946997022               |
| SNP_P4_154731_49438  | NW_004516419.1 | Scaffold1132 | 49438                   | AA                              | GG              | 1946997024               |
| SNP_P4_154732_49485  | NW_004516419.1 | Scaffold1132 | 49485                   | TT                              | CC              | 1946997026               |
| SNP_P4_154733_49522  | NW_004516419.1 | Scaffold1132 | 49522                   | AA                              | GG              | 1946997028               |
| SNP_P4_154734_51509  | NW_004516419.1 | Scaffold1132 | 51509                   | TT                              | GG              | 1946997030               |
| SNP_P4_154735_51510  | NW_004516419.1 | Scaffold1132 | 51510                   | GG                              | CC              | 1946997032               |
| SNP_P4_154736_51515  | NW_004516419.1 | Scaffold1132 | 51515                   | GG                              | AA              | 1946997034               |
| SNP_P4_154737_1632   | NW_004516420.1 | Scaffold1133 | 1632                    | CC                              | GG              | 1946997036               |
| SNP_P4_154738_1666   | NW_004516420.1 | Scaffold1133 | 1666                    | TT                              | CC              | 1946997038               |
| SNP_P4_154739_18462  | NW_004516420.1 | Scaffold1133 | 18462                   | TT                              | CC              | 1946997041               |
| SNP_P4_154740_18516  | NW_004516420.1 | Scaffold1133 | 18516                   | CC                              | GG              | 1946997043               |
| SNP_P4_154741_18551  | NW_004516420.1 | Scaffold1133 | 18551                   | TT                              | CC              | 1946997045               |
| SNP_P4_154742_18758  | NW_004516420.1 | Scaffold1133 | 18758                   | CC                              | TT              | 1946997047               |
| SNP_P4_154743_18845  | NW_004516420.1 | Scaffold1133 | 18845                   | CC                              | TT              | 1946997049               |
| SNP_P4_154744_18860  | NW_004516420.1 | Scaffold1133 | 18860                   | GG                              | TT              | 1946997051               |
| SNP_P4_154745_18897  | NW_004516420.1 | Scaffold1133 | 18897                   | TT                              | GG              | 1946997053               |
| SNP_P4_154746_18904  | NW_004516420.1 | Scaffold1133 | 18904                   | GG                              | AA              | 1946997055               |
| SNP_P4_154747_19126  | NW_004516420.1 | Scaffold1133 | 19126                   | CC                              | AA              | 1946997057               |
| SNP_P4_154748_30091  | NW_004516420.1 | Scaffold1133 | 30091                   | GG                              | AA              | 1946997059               |
| SNP_P4_154749_31830  | NW_004516420.1 | Scaffold1133 | 31830                   | TT                              | AA              | 1946997061               |
| SNP_P4_154750_42067  | NW_004516420.1 | Scaffold1133 | 42067                   | CC                              | AA              | 1946997063               |
| SNP_P4_154751_46801  | NW_004516420.1 | Scaffold1133 | 46801                   | CC                              | GG              | 1946997065               |
| SNP_P4_154752_53101  | NW_004516420.1 | Scaffold1133 | 53101                   | CC                              | TT              | 1946997067               |
| SNP_P4_154753_53122  | NW_004516420.1 | Scaffold1133 | 53122                   | CC                              | TT              | 1946997069               |
| SNP_P4_154754_53131  | NW_004516420.1 | Scaffold1133 | 53131                   | AA                              | GG              | 1946997071               |
| SNP_P4_154755_53145  | NW_004516420.1 | Scaffold1133 | 53145                   | GG                              | TT              | 1946997073               |
| SNP_P4_154756_53426  | NW_004516420.1 | Scaffold1133 | 53426                   | CC                              | AA              | 1946997075               |
| SNP_P4_154757_53434  | NW_004516420.1 | Scaffold1133 | 53434                   | CC                              | TT              | 1946997077               |
| SNP_P4_154758_53482  | NW_004516420.1 | Scaffold1133 | 53482                   | CC                              | TT              | 1946997079               |
| SNP_P4_154759_53483  | NW_004516420.1 | Scaffold1133 | 53483                   | TT                              | CC              | 1946997081               |

| SNPs IDs            | Chromosome IDs | Chromosomes  | Physical positions (bp) | CDC Frontier (Reference genome) | (ILWC46 & LPNB) | NCBI SNPdb Accession IDs |
|---------------------|----------------|--------------|-------------------------|---------------------------------|-----------------|--------------------------|
| SNP_P4_154760_53507 | NW_004516420.1 | Scaffold1133 | 53507                   | TT                              | CC              | 1946997083               |
| SNP_P4_154761_53873 | NW_004516420.1 | Scaffold1133 | 53873                   | CC                              | TT              | 1946997085               |
| SNP_P4_154762_54368 | NW_004516420.1 | Scaffold1133 | 54368                   | TT                              | CC              | 1946997087               |
| SNP_P4_154763_57019 | NW_004516420.1 | Scaffold1133 | 57019                   | TT                              | CC              | 1946997089               |
| SNP_P4_154764_57345 | NW_004516420.1 | Scaffold1133 | 57345                   | TT                              | GG              | 1946997091               |
| SNP_P4_154765_58031 | NW_004516420.1 | Scaffold1133 | 58031                   | CC                              | TT              | 1946997093               |
| SNP_P4_154766_59804 | NW_004516420.1 | Scaffold1133 | 59804                   | CC                              | GG              | 1946997095               |
| SNP_P4_154767_349   | NW_004516421.1 | Scaffold1134 | 349                     | CC                              | GG              | 1946997097               |
| SNP_P4_154768_435   | NW_004516421.1 | Scaffold1134 | 435                     | CC                              | TT              | 1946997099               |
| SNP_P4_154769_7412  | NW_004516421.1 | Scaffold1134 | 7412                    | AA                              | TT              | 1946997100               |
| SNP_P4_154771_7598  | NW_004516421.1 | Scaffold1134 | 7598                    | AA                              | CC              | 1946997102               |
| SNP_P4_154772_13404 | NW_004516421.1 | Scaffold1134 | 13404                   | CC                              | TT              | 1946997104               |
| SNP_P4_154776_938   | NW_004516422.1 | Scaffold1135 | 938                     | GG                              | AA              | 1946997106               |
| SNP_P4_154777_1781  | NW_004516422.1 | Scaffold1135 | 1781                    | TT                              | CC              | 1946997108               |
| SNP_P4_154778_9107  | NW_004516422.1 | Scaffold1135 | 9107                    | CC                              | TT              | 1946997110               |
| SNP_P4_154779_9211  | NW_004516422.1 | Scaffold1135 | 9211                    | AA                              | GG              | 1946997112               |
| SNP_P4_154781_9990  | NW_004516422.1 | Scaffold1135 | 9990                    | GG                              | AA              | 1946997114               |
| SNP_P4_154782_10345 | NW_004516422.1 | Scaffold1135 | 10345                   | GG                              | AA              | 1946997116               |
| SNP_P4_154783_10597 | NW_004516422.1 | Scaffold1135 | 10597                   | GG                              | AA              | 1946997118               |
| SNP_P4_154784_10601 | NW_004516422.1 | Scaffold1135 | 10601                   | TT                              | CC              | 1946997120               |
| SNP_P4_154785_10955 | NW_004516422.1 | Scaffold1135 | 10955                   | GG                              | AA              | 1946997122               |
| SNP_P4_154786_11584 | NW_004516422.1 | Scaffold1135 | 11584                   | TT                              | CC              | 1946997124               |
| SNP_P4_154787_11589 | NW_004516422.1 | Scaffold1135 | 11589                   | GG                              | TT              | 1946997126               |
| SNP_P4_154788_12417 | NW_004516422.1 | Scaffold1135 | 12417                   | GG                              | AA              | 1946997128               |
| SNP_P4_154789_12437 | NW_004516422.1 | Scaffold1135 | 12437                   | AA                              | GG              | 1946997130               |
| SNP_P4_154790_13105 | NW_004516422.1 | Scaffold1135 | 13105                   | CC                              | GG              | 1946997132               |
| SNP_P4_154791_13153 | NW_004516422.1 | Scaffold1135 | 13153                   | CC                              | TT              | 1946997134               |
| SNP_P4_154792_13367 | NW_004516422.1 | Scaffold1135 | 13367                   | CC                              | TT              | 1946997136               |
| SNP_P4_154793_13911 | NW_004516422.1 | Scaffold1135 | 13911                   | GG                              | AA              | 1946997138               |
| SNP_P4_154795_14186 | NW_004516422.1 | Scaffold1135 | 14186                   | GG                              | AA              | 1946997140               |
| SNP_P4_154796_14650 | NW_004516422.1 | Scaffold1135 | 14650                   | GG                              | AA              | 1946997142               |
| SNP_P4_154797_14696 | NW_004516422.1 | Scaffold1135 | 14696                   | TT                              | CC              | 1946997144               |
| SNP_P4_154798_15078 | NW_004516422.1 | Scaffold1135 | 15078                   | CC                              | TT              | 1946997146               |
| SNP_P4_154799_15802 | NW_004516422.1 | Scaffold1135 | 15802                   | AA                              | CC              | 1946997148               |
| SNP_P4_154800_15914 | NW_004516422.1 | Scaffold1135 | 15914                   | AA                              | GG              | 1946997150               |
| SNP_P4_154801_16844 | NW_004516422.1 | Scaffold1135 | 16844                   | TT                              | AA              | 1946997152               |
| SNP_P4_154802_17124 | NW_004516422.1 | Scaffold1135 | 17124                   | GG                              | AA              | 1946997154               |
| SNP_P4_154803_17580 | NW_004516422.1 | Scaffold1135 | 17580                   | TT                              | CC              | 1946997156               |
| SNP_P4_154804_18052 | NW_004516422.1 | Scaffold1135 | 18052                   | CC                              | TT              | 1946997158               |
| SNP_P4_154805_18276 | NW_004516422.1 | Scaffold1135 | 18276                   | TT                              | AA              | 1946997160               |
| SNP_P4_154806_18277 | NW_004516422.1 | Scaffold1135 | 18277                   | TT                              | CC              | 1946997162               |
| SNP_P4_154807_18278 | NW_004516422.1 | Scaffold1135 | 18278                   | AA                              | TT              | 1946997164               |

| SNPs IDs            | Chromosome IDs | Chromosomes  | Physical positions (bp) | CDC Frontier (Reference genome) | (ILWC46 & LPNB) | NCBI SNPdb Accession IDs |
|---------------------|----------------|--------------|-------------------------|---------------------------------|-----------------|--------------------------|
| SNP_P4_154808_32391 | NW_004516422.1 | Scaffold1135 | 32391                   | TT                              | GG              | 1946997166               |
| SNP_P4_154809_32437 | NW_004516422.1 | Scaffold1135 | 32437                   | CC                              | TT              | 1946997168               |
| SNP_P4_154810_32585 | NW_004516422.1 | Scaffold1135 | 32585                   | AA                              | GG              | 1946997170               |
| SNP_P4_154811_32596 | NW_004516422.1 | Scaffold1135 | 32596                   | TT                              | AA              | 1946997172               |
| SNP_P4_154813_60832 | NW_004516422.1 | Scaffold1135 | 60832                   | GG                              | TT              | 1946997174               |
| SNP_P4_154814_60849 | NW_004516422.1 | Scaffold1135 | 60849                   | TT                              | CC              | 1946997176               |
| SNP_P4_154815_60890 | NW_004516422.1 | Scaffold1135 | 60890                   | GG                              | AA              | 1946997178               |
| SNP_P4_154816_60896 | NW_004516422.1 | Scaffold1135 | 60896                   | CC                              | TT              | 1946997180               |
| SNP_P4_154817_60950 | NW_004516422.1 | Scaffold1135 | 60950                   | TT                              | GG              | 1946997182               |
| SNP_P4_154818_60968 | NW_004516422.1 | Scaffold1135 | 60968                   | TT                              | AA              | 1946997184               |
| SNP_P4_154819_61262 | NW_004516422.1 | Scaffold1135 | 61262                   | AA                              | TT              | 1946997186               |
| SNP_P4_154820_61263 | NW_004516422.1 | Scaffold1135 | 61263                   | AA                              | GG              | 1946997188               |
| SNP_P4_154821_61274 | NW_004516422.1 | Scaffold1135 | 61274                   | TT                              | CC              | 1946997190               |
| SNP_P4_154824_68793 | NW_004516422.1 | Scaffold1135 | 68793                   | CC                              | TT              | 1946997192               |
| SNP_P4_154826_71395 | NW_004516422.1 | Scaffold1135 | 71395                   | GG                              | CC              | 1946997194               |
| SNP_P4_154827_71396 | NW_004516422.1 | Scaffold1135 | 71396                   | TT                              | CC              | 1946997196               |
| SNP_P4_154828_71572 | NW_004516422.1 | Scaffold1135 | 71572                   | GG                              | AA              | 1946997198               |
| SNP_P4_154829_71593 | NW_004516422.1 | Scaffold1135 | 71593                   | AA                              | CC              | 1946997200               |
| SNP_P4_154830_71878 | NW_004516422.1 | Scaffold1135 | 71878                   | TT                              | GG              | 1946997202               |
| SNP_P4_154831_71892 | NW_004516422.1 | Scaffold1135 | 71892                   | GG                              | TT              | 1946997204               |
| SNP_P4_154832_71899 | NW_004516422.1 | Scaffold1135 | 71899                   | GG                              | TT              | 1946997206               |
| SNP_P4_154834_72311 | NW_004516422.1 | Scaffold1135 | 72311                   | CC                              | TT              | 1946997208               |
| SNP_P4_154835_73439 | NW_004516422.1 | Scaffold1135 | 73439                   | CC                              | AA              | 1946997210               |
| SNP_P4_154836_74533 | NW_004516422.1 | Scaffold1135 | 74533                   | AA                              | TT              | 1946997212               |
| SNP_P4_154837_74802 | NW_004516422.1 | Scaffold1135 | 74802                   | AA                              | GG              | 1946997214               |
| SNP_P4_154838_74950 | NW_004516422.1 | Scaffold1135 | 74950                   | TT                              | CC              | 1946997216               |
| SNP_P4_154840_75010 | NW_004516422.1 | Scaffold1135 | 75010                   | TT                              | CC              | 1946997218               |
| SNP_P4_154841_75011 | NW_004516422.1 | Scaffold1135 | 75011                   | AA                              | TT              | 1946997220               |
| SNP_P4_154842_75514 | NW_004516422.1 | Scaffold1135 | 75514                   | CC                              | AA              | 1946997222               |
| SNP_P4_154844_806   | NW_004516425.1 | Scaffold1139 | 806                     | AA                              | CC              | 1946997224               |
| SNP_P4_154845_817   | NW_004516425.1 | Scaffold1139 | 817                     | TT                              | CC              | 1946997226               |
| SNP_P4_154846_842   | NW_004516425.1 | Scaffold1139 | 842                     | AA                              | GG              | 1946997228               |
| SNP_P4_154847_874   | NW_004516425.1 | Scaffold1139 | 874                     | GG                              | TT              | 1946997230               |
| SNP_P4_154848_886   | NW_004516425.1 | Scaffold1139 | 886                     | TT                              | CC              | 1946997232               |
| SNP_P4_154849_939   | NW_004516425.1 | Scaffold1139 | 939                     | GG                              | AA              | 1946997234               |
| SNP_P4_154850_1116  | NW_004516425.1 | Scaffold1139 | 1116                    | TT                              | CC              | 1946997236               |
| SNP_P4_154851_1117  | NW_004516425.1 | Scaffold1139 | 1117                    | CC                              | AA              | 1946997238               |
| SNP_P4_154852_1234  | NW_004516425.1 | Scaffold1139 | 1234                    | CC                              | AA              | 1946997240               |
| SNP_P4_154853_1235  | NW_004516425.1 | Scaffold1139 | 1235                    | AA                              | GG              | 1946997242               |
| SNP_P4_154854_1253  | NW_004516425.1 | Scaffold1139 | 1253                    | AA                              | GG              | 1946997244               |
| SNP_P4_154856_1359  | NW_004516425.1 | Scaffold1139 | 1359                    | CC                              | AA              | 1946997246               |
| SNP_P4_154858_1409  | NW_004516425.1 | Scaffold1139 | 1409                    | TT                              | AA              | 1946997248               |

| SNPs IDs            | Chromosome IDs | Chromosomes  | Physical positions (bp) | CDC Frontier (Reference genome) | (ILWC46 & LPNB) | NCBI SNPdb Accession IDs |
|---------------------|----------------|--------------|-------------------------|---------------------------------|-----------------|--------------------------|
| SNP_P4_154859_1420  | NW_004516425.1 | Scaffold1139 | 1420                    | AA                              | GG              | 1946997250               |
| SNP_P4_154861_1701  | NW_004516425.1 | Scaffold1139 | 1701                    | TT                              | AA              | 1946997252               |
| SNP_P4_154862_1764  | NW_004516425.1 | Scaffold1139 | 1764                    | AA                              | GG              | 1946997254               |
| SNP_P4_154863_1813  | NW_004516425.1 | Scaffold1139 | 1813                    | GG                              | CC              | 1946997256               |
| SNP_P4_154864_1828  | NW_004516425.1 | Scaffold1139 | 1828                    | CC                              | TT              | 1946997258               |
| SNP_P4_154865_1845  | NW_004516425.1 | Scaffold1139 | 1845                    | TT                              | GG              | 1946997260               |
| SNP_P4_154866_1884  | NW_004516425.1 | Scaffold1139 | 1884                    | GG                              | CC              | 1946997262               |
| SNP_P4_154867_1892  | NW_004516425.1 | Scaffold1139 | 1892                    | TT                              | CC              | 1946997264               |
| SNP_P4_154868_1926  | NW_004516425.1 | Scaffold1139 | 1926                    | CC                              | TT              | 1946997266               |
| SNP_P4_154869_1970  | NW_004516425.1 | Scaffold1139 | 1970                    | AA                              | GG              | 1946997268               |
| SNP_P4_154870_1990  | NW_004516425.1 | Scaffold1139 | 1990                    | CC                              | TT              | 1946997270               |
| SNP_P4_154871_2019  | NW_004516425.1 | Scaffold1139 | 2019                    | TT                              | CC              | 1946997272               |
| SNP_P4_154873_6102  | NW_004516427.1 | Scaffold1142 | 6102                    | GG                              | AA              | 1946997274               |
| SNP_P4_154874_9660  | NW_004516427.1 | Scaffold1142 | 9660                    | AA                              | GG              | 1946997276               |
| SNP_P4_154875_18484 | NW_004516427.1 | Scaffold1142 | 18484                   | TT                              | AA              | 1946997278               |
| SNP_P4_154876_18857 | NW_004516427.1 | Scaffold1142 | 18857                   | GG                              | AA              | 1946997280               |
| SNP_P4_154877_18878 | NW_004516427.1 | Scaffold1142 | 18878                   | TT                              | CC              | 1946997282               |
| SNP_P4_154878_48250 | NW_004516427.1 | Scaffold1142 | 48250                   | TT                              | CC              | 1946997284               |
| SNP_P4_154879_2152  | NW_004516429.1 | Scaffold1145 | 2152                    | TT                              | CC              | 1946997286               |
| SNP_P4_154880_2232  | NW_004516429.1 | Scaffold1145 | 2232                    | AA                              | GG              | 1946997288               |
| SNP_P4_154882_2368  | NW_004516429.1 | Scaffold1145 | 2368                    | TT                              | CC              | 1946997290               |
| SNP_P4_154883_2422  | NW_004516429.1 | Scaffold1145 | 2422                    | TT                              | GG              | 1946997292               |
| SNP_P4_154884_2514  | NW_004516429.1 | Scaffold1145 | 2514                    | CC                              | TT              | 1946997294               |
| SNP_P4_154885_2535  | NW_004516429.1 | Scaffold1145 | 2535                    | TT                              | CC              | 1946997296               |
| SNP_P4_154887_2680  | NW_004516429.1 | Scaffold1145 | 2680                    | TT                              | CC              | 1946997298               |
| SNP_P4_154888_2709  | NW_004516429.1 | Scaffold1145 | 2709                    | TT                              | CC              | 1946997300               |
| SNP_P4_154889_2719  | NW_004516429.1 | Scaffold1145 | 2719                    | AA                              | GG              | 1946997302               |
| SNP_P4_154890_3304  | NW_004516429.1 | Scaffold1145 | 3304                    | GG                              | TT              | 1946997304               |
| SNP_P4_154891_3670  | NW_004516429.1 | Scaffold1145 | 3670                    | CC                              | AA              | 1946997306               |
| SNP_P4_154892_3720  | NW_004516429.1 | Scaffold1145 | 3720                    | TT                              | CC              | 1946997308               |
| SNP_P4_154895_4073  | NW_004516429.1 | Scaffold1145 | 4073                    | TT                              | CC              | 1946997310               |
| SNP_P4_154896_4286  | NW_004516429.1 | Scaffold1145 | 4286                    | TT                              | GG              | 1946997311               |
| SNP_P4_154897_4320  | NW_004516429.1 | Scaffold1145 | 4320                    | GG                              | CC              | 1946997313               |
| SNP_P4_154898_6855  | NW_004516429.1 | Scaffold1145 | 6855                    | CC                              | TT              | 1946997315               |
| SNP_P4_154899_7444  | NW_004516429.1 | Scaffold1145 | 7444                    | TT                              | CC              | 1946997317               |
| SNP_P4_154900_7446  | NW_004516429.1 | Scaffold1145 | 7446                    | TT                              | GG              | 1946997319               |
| SNP_P4_154901_13924 | NW_004516429.1 | Scaffold1145 | 13924                   | CC                              | TT              | 1946997321               |
| SNP_P4_154902_14008 | NW_004516429.1 | Scaffold1145 | 14008                   | GG                              | CC              | 1946997322               |
| SNP_P4_154903_15698 | NW_004516429.1 | Scaffold1145 | 15698                   | AA                              | GG              | 1946997324               |
| SNP_P4_154904_15711 | NW_004516429.1 | Scaffold1145 | 15711                   | CC                              | TT              | 1946997326               |
| SNP_P4_154905_15712 | NW_004516429.1 | Scaffold1145 | 15712                   | AA                              | TT              | 1946997328               |
| SNP_P4_154907_16045 | NW_004516429.1 | Scaffold1145 | 16045                   | CC                              | GG              | 1946997330               |



| SNPs IDs             | Chromosome IDs | Chromosomes  | Physical positions (bp) | CDC Frontier (Reference genome) | (ILWC46 & LPNB) | NCBI SNPdb Accession IDs |
|----------------------|----------------|--------------|-------------------------|---------------------------------|-----------------|--------------------------|
| SNP_P4_154908_16115  | NW_004516429.1 | Scaffold1145 | 16115                   | AA                              | TT              | 1946997332               |
| SNP_P4_154909_16240  | NW_004516429.1 | Scaffold1145 | 16240                   | AA                              | TT              | 1946997334               |
| SNP_P4_154910_16252  | NW_004516429.1 | Scaffold1145 | 16252                   | TT                              | CC              | 1946997336               |
| SNP_P4_154912_16290  | NW_004516429.1 | Scaffold1145 | 16290                   | TT                              | AA              | 1946997338               |
| SNP_P4_154913_16393  | NW_004516429.1 | Scaffold1145 | 16393                   | AA                              | TT              | 1946997340               |
| SNP_P4_154914_16413  | NW_004516429.1 | Scaffold1145 | 16413                   | AA                              | TT              | 1946997342               |
| SNP_P4_154915_16510  | NW_004516429.1 | Scaffold1145 | 16510                   | CC                              | TT              | 1946997344               |
| SNP_P4_154916_16523  | NW_004516429.1 | Scaffold1145 | 16523                   | CC                              | TT              | 1946997346               |
| SNP_P4_154917_16534  | NW_004516429.1 | Scaffold1145 | 16534                   | AA                              | CC              | 1946997348               |
| SNP_P4_154918_16573  | NW_004516429.1 | Scaffold1145 | 16573                   | CC                              | TT              | 1946997350               |
| SNP_P4_154919_16576  | NW_004516429.1 | Scaffold1145 | 16576                   | CC                              | TT              | 1946997352               |
| SNP_P4_154920_16597  | NW_004516429.1 | Scaffold1145 | 16597                   | AA                              | GG              | 1946997354               |
| SNP_P4_154922_16799  | NW_004516429.1 | Scaffold1145 | 16799                   | GG                              | TT              | 1946997356               |
| SNP_P4_154923_16806  | NW_004516429.1 | Scaffold1145 | 16806                   | GG                              | AA              | 1946997358               |
| SNP_P4_154924_17143  | NW_004516429.1 | Scaffold1145 | 17143                   | AA                              | GG              | 1946997359               |
| SNP_P4_154925_26375  | NW_004516429.1 | Scaffold1145 | 26375                   | GG                              | AA              | 1946997361               |
| SNP_P4_154926_26522  | NW_004516429.1 | Scaffold1145 | 26522                   | CC                              | TT              | 1946997363               |
| SNP_P4_154927_26849  | NW_004516429.1 | Scaffold1145 | 26849                   | AA                              | GG              | 1946997365               |
| SNP_P4_154929_26911  | NW_004516429.1 | Scaffold1145 | 26911                   | AA                              | GG              | 1946997367               |
| SNP_P4_154930_31589  | NW_004516429.1 | Scaffold1145 | 31589                   | TT                              | AA              | 1946997369               |
| SNP_P4_154931_31620  | NW_004516429.1 | Scaffold1145 | 31620                   | AA                              | CC              | 1946997371               |
| SNP_P4_154932_39729  | NW_004516429.1 | Scaffold1145 | 39729                   | GG                              | AA              | 1946997373               |
| SNP_P4_154933_60274  | NW_004516429.1 | Scaffold1145 | 60274                   | AA                              | TT              | 1946997375               |
| SNP_P4_154934_81439  | NW_004516429.1 | Scaffold1145 | 81439                   | TT                              | CC              | 1946997377               |
| SNP_P4_154935_81655  | NW_004516429.1 | Scaffold1145 | 81655                   | CC                              | TT              | 1946997379               |
| SNP_P4_154936_81805  | NW_004516429.1 | Scaffold1145 | 81805                   | AA                              | GG              | 1946997381               |
| SNP_P4_154937_90660  | NW_004516429.1 | Scaffold1145 | 90660                   | TT                              | CC              | 1946997383               |
| SNP_P4_154938_100412 | NW_004516429.1 | Scaffold1145 | 100412                  | AA                              | CC              | 1946997385               |
| SNP_P4_154939_100414 | NW_004516429.1 | Scaffold1145 | 100414                  | GG                              | AA              | 1946997387               |
| SNP_P4_154940_100492 | NW_004516429.1 | Scaffold1145 | 100492                  | AA                              | GG              | 1946997389               |
| SNP_P4_154941_100493 | NW_004516429.1 | Scaffold1145 | 100493                  | AA                              | CC              | 1946997391               |
| SNP_P4_154942_100522 | NW_004516429.1 | Scaffold1145 | 100522                  | GG                              | AA              | 1946997393               |
| SNP_P4_154943_100544 | NW_004516429.1 | Scaffold1145 | 100544                  | AA                              | CC              | 1946997395               |
| SNP_P4_154944_8431   | NW_004516430.1 | Scaffold1147 | 8431                    | TT                              | AA              | 1946997396               |
| SNP_P4_154945_28118  | NW_004516430.1 | Scaffold1147 | 28118                   | AA                              | GG              | 1946997398               |
| SNP_P4_154946_34001  | NW_004516430.1 | Scaffold1147 | 34001                   | GG                              | CC              | 1946997400               |
| SNP_P4_154947_34099  | NW_004516430.1 | Scaffold1147 | 34099                   | TT                              | AA              | 1946997402               |
| SNP_P4_154948_1153   | NW_004516431.1 | Scaffold1148 | 1153                    | CC                              | AA              | 1946997404               |
| SNP_P4_154949_496    | NW_004516433.1 | Scaffold1150 | 496                     | TT                              | CC              | 1946997406               |
| SNP_P4_154950_516    | NW_004516433.1 | Scaffold1150 | 516                     | GG                              | CC              | 1946997408               |
| SNP_P4_154951_796    | NW_004516433.1 | Scaffold1150 | 796                     | CC                              | TT              | 1946997410               |
| SNP_P4_154952_849    | NW_004516433.1 | Scaffold1150 | 849                     | CC                              | AA              | 1946997412               |

| SNPs IDs             | Chromosome IDs | Chromosomes  | Physical positions (bp) | CDC Frontier (Reference genome) | (ILWC46 & LPNB) | NCBI SNPdb Accession IDs |
|----------------------|----------------|--------------|-------------------------|---------------------------------|-----------------|--------------------------|
| SNP_P4_154953_911    | NW_004516433.1 | Scaffold1150 | 911                     | CC                              | AA              | 1946997414               |
| SNP_P4_154954_1039   | NW_004516433.1 | Scaffold1150 | 1039                    | TT                              | GG              | 1946997416               |
| SNP_P4_154955_1169   | NW_004516433.1 | Scaffold1150 | 1169                    | AA                              | CC              | 1946997418               |
| SNP_P4_154956_1195   | NW_004516433.1 | Scaffold1150 | 1195                    | AA                              | GG              | 1946997420               |
| SNP_P4_154957_1236   | NW_004516433.1 | Scaffold1150 | 1236                    | TT                              | CC              | 1946997422               |
| SNP_P4_154958_18772  | NW_004516434.1 | Scaffold1151 | 18772                   | TT                              | AA              | 1946997424               |
| SNP_P4_154960_18896  | NW_004516434.1 | Scaffold1151 | 18896                   | GG                              | CC              | 1946997426               |
| SNP_P4_154961_19827  | NW_004516434.1 | Scaffold1151 | 19827                   | AA                              | TT              | 1946997428               |
| SNP_P4_154962_19855  | NW_004516434.1 | Scaffold1151 | 19855                   | CC                              | TT              | 1946997430               |
| SNP_P4_154963_20255  | NW_004516434.1 | Scaffold1151 | 20255                   | TT                              | CC              | 1946997432               |
| SNP_P4_154964_20269  | NW_004516434.1 | Scaffold1151 | 20269                   | TT                              | GG              | 1946997434               |
| SNP_P4_154965_20307  | NW_004516434.1 | Scaffold1151 | 20307                   | TT                              | GG              | 1946997436               |
| SNP_P4_154966_20360  | NW_004516434.1 | Scaffold1151 | 20360                   | CC                              | AA              | 1946997438               |
| SNP_P4_154967_27784  | NW_004516434.1 | Scaffold1151 | 27784                   | TT                              | AA              | 1946997440               |
| SNP_P4_154968_29091  | NW_004516434.1 | Scaffold1151 | 29091                   | TT                              | CC              | 1946997442               |
| SNP_P4_154969_29561  | NW_004516434.1 | Scaffold1151 | 29561                   | GG                              | CC              | 1946997444               |
| SNP_P4_154970_59756  | NW_004516434.1 | Scaffold1151 | 59756                   | AA                              | GG              | 1946997446               |
| SNP_P4_154971_59786  | NW_004516434.1 | Scaffold1151 | 59786                   | GG                              | AA              | 1946997448               |
| SNP_P4_154972_119328 | NW_004516434.1 | Scaffold1151 | 119328                  | AA                              | GG              | 1946997450               |
| SNP_P4_154973_119357 | NW_004516434.1 | Scaffold1151 | 119357                  | CC                              | TT              | 1946997452               |
| SNP_P4_154974_119412 | NW_004516434.1 | Scaffold1151 | 119412                  | TT                              | CC              | 1946997454               |
| SNP_P4_154975_119653 | NW_004516434.1 | Scaffold1151 | 119653                  | CC                              | TT              | 1946997456               |
| SNP_P4_154976_119710 | NW_004516434.1 | Scaffold1151 | 119710                  | TT                              | CC              | 1946997458               |
| SNP_P4_154977_119758 | NW_004516434.1 | Scaffold1151 | 119758                  | AA                              | TT              | 1946997460               |
| SNP_P4_154978_152336 | NW_004516434.1 | Scaffold1151 | 152336                  | AA                              | GG              | 1946997462               |
| SNP_P4_154979_161631 | NW_004516434.1 | Scaffold1151 | 161631                  | CC                              | TT              | 1946997464               |
| SNP_P4_154980_175548 | NW_004516434.1 | Scaffold1151 | 175548                  | GG                              | AA              | 1946997466               |
| SNP_P4_154981_175577 | NW_004516434.1 | Scaffold1151 | 175577                  | GG                              | TT              | 1946997468               |
| SNP_P4_154983_225617 | NW_004516434.1 | Scaffold1151 | 225617                  | AA                              | GG              | 1946997470               |
| SNP_P4_154984_240411 | NW_004516434.1 | Scaffold1151 | 240411                  | TT                              | CC              | 1946997472               |
| SNP_P4_154985_279729 | NW_004516434.1 | Scaffold1151 | 279729                  | AA                              | CC              | 1946997474               |
| SNP_P4_154986_279737 | NW_004516434.1 | Scaffold1151 | 279737                  | GG                              | TT              | 1946997476               |
| SNP_P4_154987_279759 | NW_004516434.1 | Scaffold1151 | 279759                  | AA                              | GG              | 1946997478               |
| SNP_P4_154988_279777 | NW_004516434.1 | Scaffold1151 | 279777                  | AA                              | CC              | 1946997480               |
| SNP_P4_154989_279783 | NW_004516434.1 | Scaffold1151 | 279783                  | CC                              | GG              | 1946997482               |
| SNP_P4_154990_279866 | NW_004516434.1 | Scaffold1151 | 279866                  | CC                              | AA              | 1946997484               |
| SNP_P4_154991_279877 | NW_004516434.1 | Scaffold1151 | 279877                  | AA                              | GG              | 1946997486               |
| SNP_P4_154992_279888 | NW_004516434.1 | Scaffold1151 | 279888                  | GG                              | AA              | 1946997488               |
| SNP_P4_154993_279896 | NW_004516434.1 | Scaffold1151 | 279896                  | AA                              | TT              | 1946997490               |
| SNP_P4_154994_279904 | NW_004516434.1 | Scaffold1151 | 279904                  | AA                              | GG              | 1946997492               |
| SNP_P4_154995_279919 | NW_004516434.1 | Scaffold1151 | 279919                  | CC                              | TT              | 1946997494               |
| SNP_P4_154996_279931 | NW_004516434.1 | Scaffold1151 | 279931                  | AA                              | CC              | 1946997496               |

| SNPs IDs             | Chromosome IDs | Chromosomes  | Physical positions (bp) | CDC Frontier (Reference genome) | (ILWC46 & LPNB) | NCBI SNPdb Accession IDs |
|----------------------|----------------|--------------|-------------------------|---------------------------------|-----------------|--------------------------|
| SNP_P4_154997_279948 | NW_004516434.1 | Scaffold1151 | 279948                  | TT                              | CC              | 1946997498               |
| SNP_P4_154998_280116 | NW_004516434.1 | Scaffold1151 | 280116                  | AA                              | GG              | 1946997500               |
| SNP_P4_154999_280162 | NW_004516434.1 | Scaffold1151 | 280162                  | GG                              | AA              | 1946997502               |
| SNP_P4_155000_280163 | NW_004516434.1 | Scaffold1151 | 280163                  | GG                              | AA              | 1946997504               |
| SNP_P4_155001_280239 | NW_004516434.1 | Scaffold1151 | 280239                  | TT                              | CC              | 1946997506               |
| SNP_P4_155002_280335 | NW_004516434.1 | Scaffold1151 | 280335                  | TT                              | GG              | 1946997508               |
| SNP_P4_155003_280370 | NW_004516434.1 | Scaffold1151 | 280370                  | GG                              | CC              | 1946997510               |
| SNP_P4_155004_281008 | NW_004516434.1 | Scaffold1151 | 281008                  | AA                              | GG              | 1946997512               |
| SNP_P4_155005_281023 | NW_004516434.1 | Scaffold1151 | 281023                  | AA                              | TT              | 1946997514               |
| SNP_P4_155006_281043 | NW_004516434.1 | Scaffold1151 | 281043                  | CC                              | AA              | 1946997516               |
| SNP_P4_155007_281054 | NW_004516434.1 | Scaffold1151 | 281054                  | TT                              | CC              | 1946997518               |
| SNP_P4_155008_281259 | NW_004516434.1 | Scaffold1151 | 281259                  | TT                              | CC              | 1946997520               |
| SNP_P4_155011_9866   | NW_004516435.1 | Scaffold1152 | 9866                    | TT                              | GG              | 1946997522               |
| SNP_P4_155012_13318  | NW_004516435.1 | Scaffold1152 | 13318                   | TT                              | CC              | 1946997524               |
| SNP_P4_155013_13628  | NW_004516435.1 | Scaffold1152 | 13628                   | GG                              | TT              | 1946997526               |
| SNP_P4_155014_14181  | NW_004516435.1 | Scaffold1152 | 14181                   | AA                              | GG              | 1946997528               |
| SNP_P4_155015_32629  | NW_004516435.1 | Scaffold1152 | 32629                   | AA                              | GG              | 1946997530               |
| SNP_P4_155016_32653  | NW_004516435.1 | Scaffold1152 | 32653                   | CC                              | TT              | 1946997532               |
| SNP_P4_155017_32654  | NW_004516435.1 | Scaffold1152 | 32654                   | AA                              | TT              | 1946997534               |
| SNP_P4_155018_32779  | NW_004516435.1 | Scaffold1152 | 32779                   | TT                              | CC              | 1946997536               |
| SNP_P4_155019_32798  | NW_004516435.1 | Scaffold1152 | 32798                   | GG                              | AA              | 1946997538               |
| SNP_P4_155020_32814  | NW_004516435.1 | Scaffold1152 | 32814                   | AA                              | TT              | 1946997540               |
| SNP_P4_155021_32835  | NW_004516435.1 | Scaffold1152 | 32835                   | AA                              | CC              | 1946997542               |
| SNP_P4_155022_33129  | NW_004516435.1 | Scaffold1152 | 33129                   | AA                              | GG              | 1946997544               |
| SNP_P4_155023_33171  | NW_004516435.1 | Scaffold1152 | 33171                   | TT                              | CC              | 1946997546               |
| SNP_P4_155024_33172  | NW_004516435.1 | Scaffold1152 | 33172                   | GG                              | AA              | 1946997548               |
| SNP_P4_155025_33173  | NW_004516435.1 | Scaffold1152 | 33173                   | TT                              | CC              | 1946997550               |
| SNP_P4_155026_36519  | NW_004516435.1 | Scaffold1152 | 36519                   | AA                              | GG              | 1946997552               |
| SNP_P4_155027_45946  | NW_004516435.1 | Scaffold1152 | 45946                   | TT                              | GG              | 1946997554               |
| SNP_P4_155028_46314  | NW_004516435.1 | Scaffold1152 | 46314                   | GG                              | CC              | 1946997556               |
| SNP_P4_155029_70651  | NW_004516435.1 | Scaffold1152 | 70651                   | TT                              | AA              | 1946997558               |
| SNP_P4_155030_77695  | NW_004516435.1 | Scaffold1152 | 77695                   | TT                              | CC              | 1946997560               |
| SNP_P4_155032_77946  | NW_004516435.1 | Scaffold1152 | 77946                   | CC                              | TT              | 1946997562               |
| SNP_P4_155033_78565  | NW_004516435.1 | Scaffold1152 | 78565                   | GG                              | AA              | 1946997564               |
| SNP_P4_155034_78824  | NW_004516435.1 | Scaffold1152 | 78824                   | TT                              | CC              | 1946997566               |
| SNP_P4_155035_92851  | NW_004516435.1 | Scaffold1152 | 92851                   | AA                              | TT              | 1946997568               |
| SNP_P4_155036_92886  | NW_004516435.1 | Scaffold1152 | 92886                   | AA                              | CC              | 1946997570               |
| SNP_P4_155037_92897  | NW_004516435.1 | Scaffold1152 | 92897                   | TT                              | GG              | 1946997572               |
| SNP_P4_155038_92947  | NW_004516435.1 | Scaffold1152 | 92947                   | AA                              | CC              | 1946997574               |
| SNP_P4_155039_93352  | NW_004516435.1 | Scaffold1152 | 93352                   | GG                              | AA              | 1946997576               |
| SNP_P4_155040_93366  | NW_004516435.1 | Scaffold1152 | 93366                   | GG                              | AA              | 1946997578               |
| SNP_P4_155041_93371  | NW_004516435.1 | Scaffold1152 | 93371                   | TT                              | CC              | 1946997580               |

| SNPs IDs             | Chromosome IDs | Chromosomes  | Physical positions (bp) | CDC Frontier (Reference genome) | (ILWC46 & LPNB) | NCBI SNPdb Accession IDs |
|----------------------|----------------|--------------|-------------------------|---------------------------------|-----------------|--------------------------|
| SNP_P4_155042_115150 | NW_004516435.1 | Scaffold1152 | 115150                  | AA                              | GG              | 1946997582               |
| SNP_P4_155043_115173 | NW_004516435.1 | Scaffold1152 | 115173                  | TT                              | GG              | 1946997584               |
| SNP_P4_155044_115183 | NW_004516435.1 | Scaffold1152 | 115183                  | AA                              | TT              | 1946997586               |
| SNP_P4_155045_115229 | NW_004516435.1 | Scaffold1152 | 115229                  | TT                              | AA              | 1946997588               |
| SNP_P4_155046_115432 | NW_004516435.1 | Scaffold1152 | 115432                  | GG                              | AA              | 1946997590               |
| SNP_P4_155047_115440 | NW_004516435.1 | Scaffold1152 | 115440                  | GG                              | CC              | 1946997592               |
| SNP_P4_155048_115510 | NW_004516435.1 | Scaffold1152 | 115510                  | GG                              | AA              | 1946997594               |
| SNP_P4_155049_115521 | NW_004516435.1 | Scaffold1152 | 115521                  | AA                              | GG              | 1946997596               |
| SNP_P4_155051_119150 | NW_004516435.1 | Scaffold1152 | 119150                  | AA                              | CC              | 1946997598               |
| SNP_P4_155052_121100 | NW_004516435.1 | Scaffold1152 | 121100                  | CC                              | GG              | 1946997600               |
| SNP_P4_155053_134970 | NW_004516435.1 | Scaffold1152 | 134970                  | CC                              | TT              | 1946997602               |
| SNP_P4_155054_145822 | NW_004516435.1 | Scaffold1152 | 145822                  | CC                              | AA              | 1946997604               |
| SNP_P4_155055_20140  | NW_004516436.1 | Scaffold1153 | 20140                   | CC                              | AA              | 1946997606               |
| SNP_P4_155057_26825  | NW_004516436.1 | Scaffold1153 | 26825                   | TT                              | CC              | 1946997608               |
| SNP_P4_155058_26826  | NW_004516436.1 | Scaffold1153 | 26826                   | TT                              | CC              | 1946997610               |
| SNP_P4_155059_42188  | NW_004516436.1 | Scaffold1153 | 42188                   | GG                              | AA              | 1946997612               |
| SNP_P4_155060_42194  | NW_004516436.1 | Scaffold1153 | 42194                   | TT                              | AA              | 1946997614               |
| SNP_P4_155061_42198  | NW_004516436.1 | Scaffold1153 | 42198                   | TT                              | CC              | 1946997616               |
| SNP_P4_155062_42215  | NW_004516436.1 | Scaffold1153 | 42215                   | CC                              | GG              | 1946997618               |
| SNP_P4_155063_42217  | NW_004516436.1 | Scaffold1153 | 42217                   | TT                              | GG              | 1946997620               |
| SNP_P4_155065_46191  | NW_004516436.1 | Scaffold1153 | 46191                   | TT                              | AA              | 1946997622               |
| SNP_P4_155066_108713 | NW_004516436.1 | Scaffold1153 | 108713                  | AA                              | GG              | 1946997624               |
| SNP_P4_155067_108840 | NW_004516436.1 | Scaffold1153 | 108840                  | AA                              | GG              | 1946997626               |
| SNP_P4_155068_108853 | NW_004516436.1 | Scaffold1153 | 108853                  | CC                              | TT              | 1946997628               |
| SNP_P4_155069_118121 | NW_004516436.1 | Scaffold1153 | 118121                  | GG                              | TT              | 1946997630               |
| SNP_P4_155070_118426 | NW_004516436.1 | Scaffold1153 | 118426                  | AA                              | GG              | 1946997632               |
| SNP_P4_155071_128498 | NW_004516436.1 | Scaffold1153 | 128498                  | TT                              | AA              | 1946997634               |
| SNP_P4_155072_64     | NW_004516439.1 | Scaffold1156 | 64                      | CC                              | AA              | 1946997636               |
| SNP_P4_155073_95     | NW_004516439.1 | Scaffold1156 | 95                      | GG                              | AA              | 1946997638               |
| SNP_P4_155074_186    | NW_004516439.1 | Scaffold1156 | 186                     | TT                              | GG              | 1946997640               |
| SNP_P4_155075_413    | NW_004516439.1 | Scaffold1156 | 413                     | TT                              | AA              | 1946997642               |
| SNP_P4_155076_507    | NW_004516439.1 | Scaffold1156 | 507                     | TT                              | CC              | 1946997644               |
| SNP_P4_155077_628    | NW_004516439.1 | Scaffold1156 | 628                     | TT                              | CC              | 1946997646               |
| SNP_P4_155078_650    | NW_004516439.1 | Scaffold1156 | 650                     | CC                              | AA              | 1946997648               |
| SNP_P4_155079_1061   | NW_004516439.1 | Scaffold1156 | 1061                    | GG                              | CC              | 1946997650               |
| SNP_P4_155080_1649   | NW_004516439.1 | Scaffold1156 | 1649                    | AA                              | GG              | 1946997652               |
| SNP_P4_155081_2679   | NW_004516439.1 | Scaffold1156 | 2679                    | AA                              | CC              | 1946997654               |
| SNP_P4_155082_2901   | NW_004516439.1 | Scaffold1156 | 2901                    | AA                              | CC              | 1946997656               |
| SNP_P4_155083_2960   | NW_004516439.1 | Scaffold1156 | 2960                    | GG                              | CC              | 1946997658               |
| SNP_P4_155084_3022   | NW_004516439.1 | Scaffold1156 | 3022                    | GG                              | TT              | 1946997660               |
| SNP_P4_155085_3023   | NW_004516439.1 | Scaffold1156 | 3023                    | TT                              | AA              | 1946997662               |
| SNP_P4_155086_3051   | NW_004516439.1 | Scaffold1156 | 3051                    | AA                              | GG              | 1946997664               |

| SNPs IDs            | Chromosome IDs | Chromosomes  | Physical positions (bp) | CDC Frontier (Reference genome) | (ILWC46 & LPNB) | NCBI SNPdb Accession IDs |
|---------------------|----------------|--------------|-------------------------|---------------------------------|-----------------|--------------------------|
| SNP_P4_155087_3064  | NW_004516439.1 | Scaffold1156 | 3064                    | TT                              | CC              | 1946997666               |
| SNP_P4_155088_3250  | NW_004516439.1 | Scaffold1156 | 3250                    | TT                              | AA              | 1946997668               |
| SNP_P4_155089_3291  | NW_004516439.1 | Scaffold1156 | 3291                    | CC                              | TT              | 1946997670               |
| SNP_P4_155090_3353  | NW_004516439.1 | Scaffold1156 | 3353                    | CC                              | TT              | 1946997672               |
| SNP_P4_155091_3354  | NW_004516439.1 | Scaffold1156 | 3354                    | TT                              | CC              | 1946997674               |
| SNP_P4_155092_3365  | NW_004516439.1 | Scaffold1156 | 3365                    | AA                              | TT              | 1946997676               |
| SNP_P4_155094_120   | NW_004516441.1 | Scaffold1158 | 120                     | CC                              | TT              | 1946997678               |
| SNP_P4_155095_186   | NW_004516441.1 | Scaffold1158 | 186                     | TT                              | GG              | 1946997680               |
| SNP_P4_155096_199   | NW_004516441.1 | Scaffold1158 | 199                     | CC                              | TT              | 1946997682               |
| SNP_P4_155097_231   | NW_004516441.1 | Scaffold1158 | 231                     | TT                              | CC              | 1946997684               |
| SNP_P4_155098_253   | NW_004516441.1 | Scaffold1158 | 253                     | TT                              | AA              | 1946997686               |
| SNP_P4_155099_273   | NW_004516441.1 | Scaffold1158 | 273                     | AA                              | CC              | 1946997688               |
| SNP_P4_155100_289   | NW_004516441.1 | Scaffold1158 | 289                     | AA                              | CC              | 1946997690               |
| SNP_P4_155101_291   | NW_004516441.1 | Scaffold1158 | 291                     | GG                              | TT              | 1946997692               |
| SNP_P4_155102_347   | NW_004516441.1 | Scaffold1158 | 347                     | GG                              | AA              | 1946997694               |
| SNP_P4_155103_446   | NW_004516441.1 | Scaffold1158 | 446                     | GG                              | AA              | 1946997696               |
| SNP_P4_155104_5250  | NW_004516441.1 | Scaffold1158 | 5250                    | CC                              | TT              | 1946997698               |
| SNP_P4_155105_5274  | NW_004516441.1 | Scaffold1158 | 5274                    | CC                              | TT              | 1946997700               |
| SNP_P4_155107_27488 | NW_004516442.1 | Scaffold1159 | 27488                   | AA                              | CC              | 1946997702               |
| SNP_P4_155109_2631  | NW_004516443.1 | Scaffold1161 | 2631                    | GG                              | TT              | 1946997704               |
| SNP_P4_155110_9389  | NW_004516443.1 | Scaffold1161 | 9389                    | AA                              | GG              | 1946997706               |
| SNP_P4_155111_11758 | NW_004516443.1 | Scaffold1161 | 11758                   | TT                              | AA              | 1946997708               |
| SNP_P4_155112_12326 | NW_004516443.1 | Scaffold1161 | 12326                   | AA                              | GG              | 1946997710               |
| SNP_P4_155113_12343 | NW_004516443.1 | Scaffold1161 | 12343                   | TT                              | CC              | 1946997712               |
| SNP_P4_155114_12398 | NW_004516443.1 | Scaffold1161 | 12398                   | TT                              | AA              | 1946997714               |
| SNP_P4_155115_12435 | NW_004516443.1 | Scaffold1161 | 12435                   | AA                              | GG              | 1946997716               |
| SNP_P4_155116_12471 | NW_004516443.1 | Scaffold1161 | 12471                   | TT                              | AA              | 1946997718               |
| SNP_P4_155117_12491 | NW_004516443.1 | Scaffold1161 | 12491                   | GG                              | AA              | 1946997720               |
| SNP_P4_155118_12557 | NW_004516443.1 | Scaffold1161 | 12557                   | AA                              | TT              | 1946997722               |
| SNP_P4_155119_12561 | NW_004516443.1 | Scaffold1161 | 12561                   | GG                              | TT              | 1946997724               |
| SNP_P4_155120_12573 | NW_004516443.1 | Scaffold1161 | 12573                   | AA                              | TT              | 1946997726               |
| SNP_P4_155121_12604 | NW_004516443.1 | Scaffold1161 | 12604                   | GG                              | TT              | 1946997729               |
| SNP_P4_155122_12735 | NW_004516443.1 | Scaffold1161 | 12735                   | TT                              | AA              | 1946997731               |
| SNP_P4_155123_12737 | NW_004516443.1 | Scaffold1161 | 12737                   | CC                              | GG              | 1946997733               |
| SNP_P4_155126_12901 | NW_004516443.1 | Scaffold1161 | 12901                   | AA                              | TT              | 1946997735               |
| SNP_P4_155127_12914 | NW_004516443.1 | Scaffold1161 | 12914                   | TT                              | CC              | 1946997737               |
| SNP_P4_155128_12937 | NW_004516443.1 | Scaffold1161 | 12937                   | CC                              | TT              | 1946997739               |
| SNP_P4_155129_12960 | NW_004516443.1 | Scaffold1161 | 12960                   | AA                              | GG              | 1946997741               |
| SNP_P4_155130_13014 | NW_004516443.1 | Scaffold1161 | 13014                   | CC                              | AA              | 1946997743               |
| SNP_P4_155131_13016 | NW_004516443.1 | Scaffold1161 | 13016                   | TT                              | AA              | 1946997745               |
| SNP_P4_155132_980   | NW_004516446.1 | Scaffold1165 | 980                     | TT                              | GG              | 1946997748               |
| SNP_P4_155133_2231  | NW_004516447.1 | Scaffold1166 | 2231                    | CC                              | TT              | 1946997750               |

| SNPs IDs            | Chromosome IDs | Chromosomes  | Physical positions (bp) | CDC Frontier (Reference genome) | (ILWC46 & LPNB) | NCBI SNPdb Accession IDs |
|---------------------|----------------|--------------|-------------------------|---------------------------------|-----------------|--------------------------|
| SNP_P4_155134_18254 | NW_004516447.1 | Scaffold1166 | 18254                   | CC                              | AA              | 1946997752               |
| SNP_P4_155135_36232 | NW_004516447.1 | Scaffold1166 | 36232                   | AA                              | TT              | 1946997754               |
| SNP_P4_155136_36235 | NW_004516447.1 | Scaffold1166 | 36235                   | TT                              | CC              | 1946997756               |
| SNP_P4_155137_36244 | NW_004516447.1 | Scaffold1166 | 36244                   | TT                              | CC              | 1946997758               |
| SNP_P4_155138_47658 | NW_004516447.1 | Scaffold1166 | 47658                   | AA                              | GG              | 1946997760               |
| SNP_P4_155139_47823 | NW_004516447.1 | Scaffold1166 | 47823                   | AA                              | GG              | 1946997762               |
| SNP_P4_155141_47924 | NW_004516447.1 | Scaffold1166 | 47924                   | CC                              | TT              | 1946997764               |
| SNP_P4_155142_47932 | NW_004516447.1 | Scaffold1166 | 47932                   | AA                              | GG              | 1946997766               |
| SNP_P4_155143_48085 | NW_004516447.1 | Scaffold1166 | 48085                   | CC                              | AA              | 1946997768               |
| SNP_P4_155144_48116 | NW_004516447.1 | Scaffold1166 | 48116                   | AA                              | TT              | 1946997770               |
| SNP_P4_155145_48138 | NW_004516447.1 | Scaffold1166 | 48138                   | GG                              | AA              | 1946997772               |
| SNP_P4_155146_48153 | NW_004516447.1 | Scaffold1166 | 48153                   | GG                              | AA              | 1946997774               |
| SNP_P4_155147_48184 | NW_004516447.1 | Scaffold1166 | 48184                   | TT                              | CC              | 1946997776               |
| SNP_P4_155148_48187 | NW_004516447.1 | Scaffold1166 | 48187                   | TT                              | AA              | 1946997778               |
| SNP_P4_155149_899   | NW_004516450.1 | Scaffold1172 | 899                     | AA                              | TT              | 1946997780               |
| SNP_P4_155150_1064  | NW_004516450.1 | Scaffold1172 | 1064                    | GG                              | AA              | 1946997782               |
| SNP_P4_155151_1241  | NW_004516450.1 | Scaffold1172 | 1241                    | TT                              | AA              | 1946997784               |
| SNP_P4_155152_11951 | NW_004516451.1 | Scaffold1173 | 11951                   | CC                              | TT              | 1946997786               |
| SNP_P4_155153_107   | NW_004516452.1 | Scaffold1174 | 107                     | GG                              | AA              | 1946997788               |
| SNP_P4_155154_108   | NW_004516452.1 | Scaffold1174 | 108                     | AA                              | TT              | 1946997790               |
| SNP_P4_155155_274   | NW_004516452.1 | Scaffold1174 | 274                     | CC                              | GG              | 1946997792               |
| SNP_P4_155156_323   | NW_004516452.1 | Scaffold1174 | 323                     | CC                              | AA              | 1946997794               |
| SNP_P4_155157_433   | NW_004516452.1 | Scaffold1174 | 433                     | TT                              | GG              | 1946997796               |
| SNP_P4_155158_741   | NW_004516452.1 | Scaffold1174 | 741                     | TT                              | GG              | 1946997798               |
| SNP_P4_155159_809   | NW_004516452.1 | Scaffold1174 | 809                     | TT                              | AA              | 1946997800               |
| SNP_P4_155160_1134  | NW_004516452.1 | Scaffold1174 | 1134                    | GG                              | CC              | 1946997802               |
| SNP_P4_155161_1399  | NW_004516452.1 | Scaffold1174 | 1399                    | TT                              | AA              | 1946997804               |
| SNP_P4_155162_1445  | NW_004516452.1 | Scaffold1174 | 1445                    | CC                              | TT              | 1946997806               |
| SNP_P4_155163_1605  | NW_004516452.1 | Scaffold1174 | 1605                    | CC                              | TT              | 1946997808               |
| SNP_P4_155164_1706  | NW_004516452.1 | Scaffold1174 | 1706                    | CC                              | AA              | 1946997810               |
| SNP_P4_155165_1808  | NW_004516452.1 | Scaffold1174 | 1808                    | AA                              | TT              | 1946997812               |
| SNP_P4_155166_15270 | NW_004516452.1 | Scaffold1174 | 15270                   | GG                              | TT              | 1946997814               |
| SNP_P4_155167_15297 | NW_004516452.1 | Scaffold1174 | 15297                   | AA                              | GG              | 1946997816               |
| SNP_P4_155168_15307 | NW_004516452.1 | Scaffold1174 | 15307                   | GG                              | TT              | 1946997818               |
| SNP_P4_155169_15381 | NW_004516452.1 | Scaffold1174 | 15381                   | GG                              | AA              | 1946997820               |
| SNP_P4_155170_15535 | NW_004516452.1 | Scaffold1174 | 15535                   | TT                              | CC              | 1946997822               |
| SNP_P4_155171_15569 | NW_004516452.1 | Scaffold1174 | 15569                   | TT                              | AA              | 1946997824               |
| SNP_P4_155172_15943 | NW_004516452.1 | Scaffold1174 | 15943                   | AA                              | CC              | 1946997826               |
| SNP_P4_155173_15944 | NW_004516452.1 | Scaffold1174 | 15944                   | AA                              | CC              | 1946997828               |
| SNP_P4_155174_21198 | NW_004516452.1 | Scaffold1174 | 21198                   | TT                              | CC              | 1946997830               |
| SNP_P4_155175_22913 | NW_004516452.1 | Scaffold1174 | 22913                   | GG                              | AA              | 1946997832               |
| SNP_P4_155176_23064 | NW_004516452.1 | Scaffold1174 | 23064                   | AA                              | GG              | 1946997834               |

| SNPs IDs             | Chromosome IDs | Chromosomes    | Physical positions (bp) | CDC Frontier (Reference genome) | (ILWC46 & LPNB) | NCBI SNPdb Accession IDs |
|----------------------|----------------|----------------|-------------------------|---------------------------------|-----------------|--------------------------|
| SNP_P4_155178_25186  | NW_004516452.1 | Scaffold1174   | 25186                   | TT                              | AA              | 1946997836               |
| SNP_P4_155179_493    | NW_004516453.1 | Scaffold1175   | 493                     | AA                              | GG              | 1946997838               |
| SNP_P4_155180_714    | NW_004516453.1 | Scaffold1175   | 714                     | AA                              | GG              | 1946997840               |
| SNP_P4_155181_721    | NW_004516453.1 | Scaffold1175   | 721                     | AA                              | GG              | 1946997842               |
| SNP_P4_155182_802    | NW_004516453.1 | Scaffold1175   | 802                     | TT                              | CC              | 1946997844               |
| SNP_P4_155183_867    | NW_004516453.1 | Scaffold1175   | 867                     | TT                              | CC              | 1946997846               |
| SNP_P4_155184_3465   | NW_004516453.1 | Scaffold1175   | 3465                    | CC                              | GG              | 1946997848               |
| SNP_P4_155185_3530   | NW_004516453.1 | Scaffold1175   | 3530                    | AA                              | TT              | 1946997850               |
| SNP_P4_155186_3532   | NW_004516453.1 | Scaffold1175   | 3532                    | CC                              | TT              | 1946997852               |
| SNP_P4_155187_3558   | NW_004516453.1 | Scaffold1175   | 3558                    | CC                              | TT              | 1946997854               |
| SNP_P4_155188_8375   | NW_004516453.1 | Scaffold1175   | 8375                    | TT                              | AA              | 1946997856               |
| SNP_P4_155189_30992  | NW_004516454.1 | Scaffold1176_2 | 30992                   | TT                              | AA              | 1946997858               |
| SNP_P4_155190_33161  | NW_004516454.1 | Scaffold1176_2 | 33161                   | GG                              | CC              | 1946997860               |
| SNP_P4_155191_37110  | NW_004516454.1 | Scaffold1176_2 | 37110                   | TT                              | GG              | 1946997862               |
| SNP_P4_155192_37121  | NW_004516454.1 | Scaffold1176_2 | 37121                   | TT                              | CC              | 1946997864               |
| SNP_P4_155193_57713  | NW_004516454.1 | Scaffold1176_2 | 57713                   | AA                              | GG              | 1946997866               |
| SNP_P4_155194_58173  | NW_004516454.1 | Scaffold1176_2 | 58173                   | AA                              | TT              | 1946997868               |
| SNP_P4_155195_58190  | NW_004516454.1 | Scaffold1176_2 | 58190                   | CC                              | TT              | 1946997870               |
| SNP_P4_155196_58219  | NW_004516454.1 | Scaffold1176_2 | 58219                   | CC                              | TT              | 1946997872               |
| SNP_P4_155197_58302  | NW_004516454.1 | Scaffold1176_2 | 58302                   | CC                              | TT              | 1946997874               |
| SNP_P4_155198_102497 | NW_004516454.1 | Scaffold1176_2 | 102497                  | AA                              | TT              | 1946997876               |
| SNP_P4_155199_102498 | NW_004516454.1 | Scaffold1176_2 | 102498                  | AA                              | TT              | 1946997878               |
| SNP_P4_155200_102499 | NW_004516454.1 | Scaffold1176_2 | 102499                  | AA                              | TT              | 1946997880               |
| SNP_P4_155201_128790 | NW_004516454.1 | Scaffold1176_2 | 128790                  | AA                              | CC              | 1946997882               |
| SNP_P4_155202_128793 | NW_004516454.1 | Scaffold1176_2 | 128793                  | TT                              | GG              | 1946997884               |
| SNP_P4_155203_158306 | NW_004516454.1 | Scaffold1176_2 | 158306                  | GG                              | TT              | 1946997886               |
| SNP_P4_155204_185893 | NW_004516454.1 | Scaffold1176_2 | 185893                  | AA                              | CC              | 1946997888               |
| SNP_P4_155205_185899 | NW_004516454.1 | Scaffold1176_2 | 185899                  | CC                              | TT              | 1946997890               |
| SNP_P4_155206_185903 | NW_004516454.1 | Scaffold1176_2 | 185903                  | TT                              | AA              | 1946997892               |
| SNP_P4_155209_196313 | NW_004516454.1 | Scaffold1176_2 | 196313                  | AA                              | CC              | 1946997894               |
| SNP_P4_155210_196314 | NW_004516454.1 | Scaffold1176_2 | 196314                  | AA                              | GG              | 1946997896               |
| SNP_P4_155211_196334 | NW_004516454.1 | Scaffold1176_2 | 196334                  | CC                              | AA              | 1946997898               |
| SNP_P4_155212_196383 | NW_004516454.1 | Scaffold1176_2 | 196383                  | AA                              | GG              | 1946997900               |
| SNP_P4_155213_196468 | NW_004516454.1 | Scaffold1176_2 | 196468                  | GG                              | AA              | 1946997903               |
| SNP_P4_155214_196506 | NW_004516454.1 | Scaffold1176_2 | 196506                  | CC                              | AA              | 1946997905               |
| SNP_P4_155215_196623 | NW_004516454.1 | Scaffold1176_2 | 196623                  | TT                              | CC              | 1946997907               |
| SNP_P4_155216_196655 | NW_004516454.1 | Scaffold1176_2 | 196655                  | TT                              | CC              | 1946997909               |
| SNP_P4_155217_196708 | NW_004516454.1 | Scaffold1176_2 | 196708                  | TT                              | AA              | 1946997911               |
| SNP_P4_155218_227395 | NW_004516454.1 | Scaffold1176_2 | 227395                  | AA                              | TT              | 1946997913               |
| SNP_P4_155219_237547 | NW_004516454.1 | Scaffold1176_2 | 237547                  | GG                              | AA              | 1946997915               |
| SNP_P4_155220_237769 | NW_004516454.1 | Scaffold1176_2 | 237769                  | CC                              | TT              | 1946997917               |
| SNP_P4_155221_237770 | NW_004516454.1 | Scaffold1176_2 | 237770                  | GG                              | TT              | 1946997919               |

| SNPs IDs             | Chromosome IDs | Chromosomes    | Physical positions (bp) | CDC Frontier (Reference genome) | (ILWC46 & LPNB) | NCBI SNPdb Accession IDs |
|----------------------|----------------|----------------|-------------------------|---------------------------------|-----------------|--------------------------|
| SNP_P4_155222_237788 | NW_004516454.1 | Scaffold1176_2 | 237788                  | TT                              | GG              | 1946997921               |
| SNP_P4_155223_237818 | NW_004516454.1 | Scaffold1176_2 | 237818                  | AA                              | GG              | 1946997923               |
| SNP_P4_155224_238246 | NW_004516454.1 | Scaffold1176_2 | 238246                  | GG                              | AA              | 1946997925               |
| SNP_P4_155225_238257 | NW_004516454.1 | Scaffold1176_2 | 238257                  | AA                              | GG              | 1946997927               |
| SNP_P4_155226_238266 | NW_004516454.1 | Scaffold1176_2 | 238266                  | TT                              | CC              | 1946997929               |
| SNP_P4_155227_238268 | NW_004516454.1 | Scaffold1176_2 | 238268                  | CC                              | TT              | 1946997931               |
| SNP_P4_155228_238525 | NW_004516454.1 | Scaffold1176_2 | 238525                  | GG                              | AA              | 1946997933               |
| SNP_P4_155230_238592 | NW_004516454.1 | Scaffold1176_2 | 238592                  | GG                              | CC              | 1946997935               |
| SNP_P4_155231_238889 | NW_004516454.1 | Scaffold1176_2 | 238889                  | CC                              | GG              | 1946997937               |
| SNP_P4_155232_238926 | NW_004516454.1 | Scaffold1176_2 | 238926                  | CC                              | TT              | 1946997939               |
| SNP_P4_155233_250522 | NW_004516454.1 | Scaffold1176_2 | 250522                  | AA                              | GG              | 1946997941               |
| SNP_P4_155234_259871 | NW_004516454.1 | Scaffold1176_2 | 259871                  | AA                              | GG              | 1946997943               |
| SNP_P4_155235_271480 | NW_004516454.1 | Scaffold1176_2 | 271480                  | CC                              | TT              | 1946997945               |
| SNP_P4_155236_271505 | NW_004516454.1 | Scaffold1176_2 | 271505                  | AA                              | GG              | 1946997947               |
| SNP_P4_155237_274488 | NW_004516454.1 | Scaffold1176_2 | 274488                  | TT                              | AA              | 1946997949               |
| SNP_P4_155238_286710 | NW_004516454.1 | Scaffold1176_2 | 286710                  | AA                              | CC              | 1946997951               |
| SNP_P4_155239_290779 | NW_004516454.1 | Scaffold1176_2 | 290779                  | TT                              | GG              | 1946997953               |
| SNP_P4_155240_290780 | NW_004516454.1 | Scaffold1176_2 | 290780                  | AA                              | TT              | 1946997955               |
| SNP_P4_155241_304697 | NW_004516454.1 | Scaffold1176_2 | 304697                  | CC                              | AA              | 1946997957               |
| SNP_P4_155242_320294 | NW_004516454.1 | Scaffold1176_2 | 320294                  | AA                              | GG              | 1946997959               |
| SNP_P4_155243_347462 | NW_004516454.1 | Scaffold1176_2 | 347462                  | TT                              | CC              | 1946997961               |
| SNP_P4_155244_347903 | NW_004516454.1 | Scaffold1176_2 | 347903                  | TT                              | CC              | 1946997963               |
| SNP_P4_155245_347908 | NW_004516454.1 | Scaffold1176_2 | 347908                  | CC                              | TT              | 1946997965               |
| SNP_P4_155246_363293 | NW_004516454.1 | Scaffold1176_2 | 363293                  | CC                              | GG              | 1946997967               |
| SNP_P4_155247_363302 | NW_004516454.1 | Scaffold1176_2 | 363302                  | TT                              | AA              | 1946997969               |
| SNP_P4_155248_363723 | NW_004516454.1 | Scaffold1176_2 | 363723                  | AA                              | GG              | 1946997971               |
| SNP_P4_155249_719    | NW_004516455.1 | Scaffold1177   | 719                     | AA                              | GG              | 1946997973               |
| SNP_P4_155251_1935   | NW_004516456.1 | Scaffold1178   | 1935                    | TT                              | CC              | 1946997975               |
| SNP_P4_155252_1946   | NW_004516456.1 | Scaffold1178   | 1946                    | CC                              | TT              | 1946997977               |
| SNP_P4_155253_2249   | NW_004516456.1 | Scaffold1178   | 2249                    | CC                              | TT              | 1946997979               |
| SNP_P4_155254_2301   | NW_004516456.1 | Scaffold1178   | 2301                    | AA                              | GG              | 1946997981               |
| SNP_P4_155255_2851   | NW_004516456.1 | Scaffold1178   | 2851                    | CC                              | GG              | 1946997983               |
| SNP_P4_155256_6725   | NW_004516456.1 | Scaffold1178   | 6725                    | TT                              | AA              | 1946997985               |
| SNP_P4_155257_6765   | NW_004516456.1 | Scaffold1178   | 6765                    | AA                              | GG              | 1946997987               |
| SNP_P4_155258_1445   | NW_004516457.1 | Scaffold1179   | 1445                    | TT                              | CC              | 1946997989               |
| SNP_P4_155259_1470   | NW_004516457.1 | Scaffold1179   | 1470                    | TT                              | CC              | 1946997991               |
| SNP_P4_155260_1695   | NW_004516457.1 | Scaffold1179   | 1695                    | TT                              | CC              | 1946997993               |
| SNP_P4_155262_226    | NW_004516458.1 | Scaffold1180   | 226                     | TT                              | AA              | 1946997995               |
| SNP_P4_155263_266    | NW_004516458.1 | Scaffold1180   | 266                     | TT                              | CC              | 1946997997               |
| SNP_P4_155264_320    | NW_004516458.1 | Scaffold1180   | 320                     | GG                              | AA              | 1946997999               |
| SNP_P4_155265_439    | NW_004516458.1 | Scaffold1180   | 439                     | GG                              | AA              | 1946998001               |
| SNP_P4_155266_773    | NW_004516458.1 | Scaffold1180   | 773                     | GG                              | TT              | 1946998003               |



| SNPs IDs           | Chromosome IDs | Chromosomes  | Physical positions (bp) | CDC Frontier (Reference genome) | (ILWC46 & LPNB) | NCBI SNPdb Accession IDs |
|--------------------|----------------|--------------|-------------------------|---------------------------------|-----------------|--------------------------|
| SNP_P4_155267_2507 | NW_004516458.1 | Scaffold1180 | 2507                    | CC                              | TT              | 1946998005               |
| SNP_P4_155268_2525 | NW_004516458.1 | Scaffold1180 | 2525                    | AA                              | CC              | 1946998007               |
| SNP_P4_155269_2577 | NW_004516458.1 | Scaffold1180 | 2577                    | GG                              | AA              | 1946998009               |
| SNP_P4_155271_2632 | NW_004516458.1 | Scaffold1180 | 2632                    | CC                              | TT              | 1946998011               |
| SNP_P4_155272_2647 | NW_004516458.1 | Scaffold1180 | 2647                    | CC                              | TT              | 1946998013               |
| SNP_P4_155273_2673 | NW_004516458.1 | Scaffold1180 | 2673                    | TT                              | CC              | 1946998015               |
| SNP_P4_155274_2744 | NW_004516458.1 | Scaffold1180 | 2744                    | AA                              | GG              | 1946998017               |
| SNP_P4_155275_2749 | NW_004516458.1 | Scaffold1180 | 2749                    | CC                              | GG              | 1946998019               |
| SNP_P4_155276_2775 | NW_004516458.1 | Scaffold1180 | 2775                    | GG                              | CC              | 1946998021               |
| SNP_P4_155277_2786 | NW_004516458.1 | Scaffold1180 | 2786                    | GG                              | AA              | 1946998023               |
| SNP_P4_155278_2787 | NW_004516458.1 | Scaffold1180 | 2787                    | GG                              | CC              | 1946998025               |
| SNP_P4_155279_2833 | NW_004516458.1 | Scaffold1180 | 2833                    | CC                              | GG              | 1946998027               |
| SNP_P4_155280_2855 | NW_004516458.1 | Scaffold1180 | 2855                    | CC                              | AA              | 1946998030               |
| SNP_P4_155281_2856 | NW_004516458.1 | Scaffold1180 | 2856                    | GG                              | AA              | 1946998032               |
| SNP_P4_155283_2927 | NW_004516458.1 | Scaffold1180 | 2927                    | CC                              | AA              | 1946998034               |
| SNP_P4_155284_2954 | NW_004516458.1 | Scaffold1180 | 2954                    | TT                              | GG              | 1946998036               |
| SNP_P4_155285_2959 | NW_004516458.1 | Scaffold1180 | 2959                    | CC                              | TT              | 1946998038               |
| SNP_P4_155286_2964 | NW_004516458.1 | Scaffold1180 | 2964                    | AA                              | GG              | 1946998040               |
| SNP_P4_155287_2968 | NW_004516458.1 | Scaffold1180 | 2968                    | CC                              | AA              | 1946998042               |
| SNP_P4_155288_3087 | NW_004516458.1 | Scaffold1180 | 3087                    | GG                              | AA              | 1946998044               |
| SNP_P4_155289_3124 | NW_004516458.1 | Scaffold1180 | 3124                    | TT                              | CC              | 1946998046               |
| SNP_P4_155290_3132 | NW_004516458.1 | Scaffold1180 | 3132                    | CC                              | TT              | 1946998048               |
| SNP_P4_155291_3184 | NW_004516458.1 | Scaffold1180 | 3184                    | AA                              | CC              | 1946998050               |
| SNP_P4_155292_3216 | NW_004516458.1 | Scaffold1180 | 3216                    | CC                              | TT              | 1946998052               |
| SNP_P4_155293_3237 | NW_004516458.1 | Scaffold1180 | 3237                    | GG                              | TT              | 1946998054               |
| SNP_P4_155294_3240 | NW_004516458.1 | Scaffold1180 | 3240                    | GG                              | TT              | 1946998056               |
| SNP_P4_155295_3253 | NW_004516458.1 | Scaffold1180 | 3253                    | CC                              | TT              | 1946998058               |
| SNP_P4_155297_3293 | NW_004516458.1 | Scaffold1180 | 3293                    | AA                              | GG              | 1946998060               |
| SNP_P4_155298_3311 | NW_004516458.1 | Scaffold1180 | 3311                    | CC                              | TT              | 1946998062               |
| SNP_P4_155299_3329 | NW_004516458.1 | Scaffold1180 | 3329                    | TT                              | CC              | 1946998064               |
| SNP_P4_155300_3357 | NW_004516458.1 | Scaffold1180 | 3357                    | CC                              | TT              | 1946998066               |
| SNP_P4_155301_3395 | NW_004516458.1 | Scaffold1180 | 3395                    | AA                              | GG              | 1946998068               |
| SNP_P4_155302_3400 | NW_004516458.1 | Scaffold1180 | 3400                    | CC                              | GG              | 1946998070               |
| SNP_P4_155303_3435 | NW_004516458.1 | Scaffold1180 | 3435                    | GG                              | TT              | 1946998072               |
| SNP_P4_155304_3440 | NW_004516458.1 | Scaffold1180 | 3440                    | CC                              | TT              | 1946998074               |
| SNP_P4_155305_3465 | NW_004516458.1 | Scaffold1180 | 3465                    | GG                              | AA              | 1946998076               |
| SNP_P4_155306_3472 | NW_004516458.1 | Scaffold1180 | 3472                    | GG                              | TT              | 1946998078               |
| SNP_P4_155307_3478 | NW_004516458.1 | Scaffold1180 | 3478                    | CC                              | TT              | 1946998080               |
| SNP_P4_155308_3509 | NW_004516458.1 | Scaffold1180 | 3509                    | GG                              | AA              | 1946998082               |
| SNP_P4_155309_3512 | NW_004516458.1 | Scaffold1180 | 3512                    | CC                              | TT              | 1946998084               |
| SNP_P4_155310_3576 | NW_004516458.1 | Scaffold1180 | 3576                    | AA                              | GG              | 1946998086               |
| SNP_P4_155311_3580 | NW_004516458.1 | Scaffold1180 | 3580                    | CC                              | TT              | 1946998088               |

| SNPs IDs            | Chromosome IDs | Chromosomes  | Physical positions (bp) | CDC Frontier (Reference genome) | (ILWC46 & LPNB) | NCBI SNPdb Accession IDs |
|---------------------|----------------|--------------|-------------------------|---------------------------------|-----------------|--------------------------|
| SNP_P4_155312_3665  | NW_004516458.1 | Scaffold1180 | 3665                    | TT                              | CC              | 1946998090               |
| SNP_P4_155314_3756  | NW_004516458.1 | Scaffold1180 | 3756                    | AA                              | TT              | 1946998092               |
| SNP_P4_155315_3820  | NW_004516458.1 | Scaffold1180 | 3820                    | TT                              | CC              | 1946998094               |
| SNP_P4_155316_3845  | NW_004516458.1 | Scaffold1180 | 3845                    | TT                              | CC              | 1946998096               |
| SNP_P4_155317_3873  | NW_004516458.1 | Scaffold1180 | 3873                    | AA                              | GG              | 1946998098               |
| SNP_P4_155318_3981  | NW_004516458.1 | Scaffold1180 | 3981                    | CC                              | TT              | 1946998100               |
| SNP_P4_155319_4192  | NW_004516458.1 | Scaffold1180 | 4192                    | CC                              | TT              | 1946998102               |
| SNP_P4_155320_4195  | NW_004516458.1 | Scaffold1180 | 4195                    | AA                              | CC              | 1946998104               |
| SNP_P4_155321_4204  | NW_004516458.1 | Scaffold1180 | 4204                    | CC                              | TT              | 1946998106               |
| SNP_P4_155322_4214  | NW_004516458.1 | Scaffold1180 | 4214                    | GG                              | AA              | 1946998108               |
| SNP_P4_155323_4223  | NW_004516458.1 | Scaffold1180 | 4223                    | CC                              | TT              | 1946998110               |
| SNP_P4_155324_4246  | NW_004516458.1 | Scaffold1180 | 4246                    | CC                              | TT              | 1946998112               |
| SNP_P4_155325_11371 | NW_004516458.1 | Scaffold1180 | 11371                   | TT                              | CC              | 1946998114               |
| SNP_P4_155326_11433 | NW_004516458.1 | Scaffold1180 | 11433                   | GG                              | AA              | 1946998116               |
| SNP_P4_155327_11635 | NW_004516458.1 | Scaffold1180 | 11635                   | AA                              | GG              | 1946998118               |
| SNP_P4_155328_11641 | NW_004516458.1 | Scaffold1180 | 11641                   | TT                              | GG              | 1946998120               |
| SNP_P4_155329_11689 | NW_004516458.1 | Scaffold1180 | 11689                   | AA                              | GG              | 1946998122               |
| SNP_P4_155330_11693 | NW_004516458.1 | Scaffold1180 | 11693                   | AA                              | TT              | 1946998124               |
| SNP_P4_155331_13225 | NW_004516458.1 | Scaffold1180 | 13225                   | AA                              | GG              | 1946998126               |
| SNP_P4_155333_36716 | NW_004516458.1 | Scaffold1180 | 36716                   | TT                              | CC              | 1946998128               |
| SNP_P4_155336_59729 | NW_004516458.1 | Scaffold1180 | 59729                   | CC                              | AA              | 1946998130               |
| SNP_P4_155337_59731 | NW_004516458.1 | Scaffold1180 | 59731                   | AA                              | GG              | 1946998132               |
| SNP_P4_155338_59740 | NW_004516458.1 | Scaffold1180 | 59740                   | GG                              | AA              | 1946998134               |
| SNP_P4_155340_60478 | NW_004516458.1 | Scaffold1180 | 60478                   | AA                              | CC              | 1946998136               |
| SNP_P4_155341_71327 | NW_004516458.1 | Scaffold1180 | 71327                   | TT                              | CC              | 1946998138               |
| SNP_P4_155342_71361 | NW_004516458.1 | Scaffold1180 | 71361                   | AA                              | GG              | 1946998140               |
| SNP_P4_155343_72696 | NW_004516458.1 | Scaffold1180 | 72696                   | TT                              | CC              | 1946998142               |
| SNP_P4_155344_72703 | NW_004516458.1 | Scaffold1180 | 72703                   | TT                              | AA              | 1946998144               |
| SNP_P4_155345_80602 | NW_004516458.1 | Scaffold1180 | 80602                   | TT                              | CC              | 1946998146               |
| SNP_P4_155346_81261 | NW_004516458.1 | Scaffold1180 | 81261                   | TT                              | AA              | 1946998148               |
| SNP_P4_155347_81274 | NW_004516458.1 | Scaffold1180 | 81274                   | TT                              | CC              | 1946998150               |
| SNP_P4_155348_81275 | NW_004516458.1 | Scaffold1180 | 81275                   | GG                              | TT              | 1946998152               |
| SNP_P4_155349_81346 | NW_004516458.1 | Scaffold1180 | 81346                   | CC                              | TT              | 1946998154               |
| SNP_P4_155350_81496 | NW_004516458.1 | Scaffold1180 | 81496                   | GG                              | AA              | 1946998156               |
| SNP_P4_155351_81614 | NW_004516458.1 | Scaffold1180 | 81614                   | TT                              | CC              | 1946998158               |
| SNP_P4_155352_85097 | NW_004516458.1 | Scaffold1180 | 85097                   | AA                              | GG              | 1946998160               |
| SNP_P4_155353_90503 | NW_004516458.1 | Scaffold1180 | 90503                   | AA                              | CC              | 1946998162               |
| SNP_P4_155354_90872 | NW_004516458.1 | Scaffold1180 | 90872                   | TT                              | CC              | 1946998164               |
| SNP_P4_155355_90927 | NW_004516458.1 | Scaffold1180 | 90927                   | GG                              | AA              | 1946998166               |
| SNP_P4_155356_92052 | NW_004516458.1 | Scaffold1180 | 92052                   | AA                              | GG              | 1946998168               |
| SNP_P4_155357_92053 | NW_004516458.1 | Scaffold1180 | 92053                   | TT                              | CC              | 1946998170               |
| SNP_P4_155358_92457 | NW_004516458.1 | Scaffold1180 | 92457                   | TT                              | CC              | 1946998172               |

| SNPs IDs             | Chromosome IDs | Chromosomes  | Physical positions (bp) | CDC Frontier (Reference genome) | (ILWC46 & LPNB) | NCBI SNPdb Accession IDs |
|----------------------|----------------|--------------|-------------------------|---------------------------------|-----------------|--------------------------|
| SNP_P4_155359_93096  | NW_004516458.1 | Scaffold1180 | 93096                   | GG                              | CC              | 1946998174               |
| SNP_P4_155360_93114  | NW_004516458.1 | Scaffold1180 | 93114                   | TT                              | CC              | 1946998176               |
| SNP_P4_155361_93135  | NW_004516458.1 | Scaffold1180 | 93135                   | AA                              | GG              | 1946998178               |
| SNP_P4_155362_93144  | NW_004516458.1 | Scaffold1180 | 93144                   | AA                              | GG              | 1946998180               |
| SNP_P4_155363_93171  | NW_004516458.1 | Scaffold1180 | 93171                   | CC                              | TT              | 1946998182               |
| SNP_P4_155364_93173  | NW_004516458.1 | Scaffold1180 | 93173                   | GG                              | AA              | 1946998184               |
| SNP_P4_155365_93180  | NW_004516458.1 | Scaffold1180 | 93180                   | AA                              | CC              | 1946998186               |
| SNP_P4_155366_93182  | NW_004516458.1 | Scaffold1180 | 93182                   | AA                              | CC              | 1946998188               |
| SNP_P4_155367_93222  | NW_004516458.1 | Scaffold1180 | 93222                   | AA                              | GG              | 1946998190               |
| SNP_P4_155368_93276  | NW_004516458.1 | Scaffold1180 | 93276                   | AA                              | GG              | 1946998192               |
| SNP_P4_155369_93279  | NW_004516458.1 | Scaffold1180 | 93279                   | GG                              | AA              | 1946998194               |
| SNP_P4_155370_93280  | NW_004516458.1 | Scaffold1180 | 93280                   | AA                              | GG              | 1946998196               |
| SNP_P4_155371_93281  | NW_004516458.1 | Scaffold1180 | 93281                   | CC                              | TT              | 1946998198               |
| SNP_P4_155372_93300  | NW_004516458.1 | Scaffold1180 | 93300                   | CC                              | TT              | 1946998200               |
| SNP_P4_155373_93309  | NW_004516458.1 | Scaffold1180 | 93309                   | GG                              | AA              | 1946998202               |
| SNP_P4_155374_93313  | NW_004516458.1 | Scaffold1180 | 93313                   | TT                              | CC              | 1946998204               |
| SNP_P4_155375_96605  | NW_004516458.1 | Scaffold1180 | 96605                   | TT                              | CC              | 1946998206               |
| SNP_P4_155376_110084 | NW_004516458.1 | Scaffold1180 | 110084                  | AA                              | TT              | 1946998208               |
| SNP_P4_155377_121933 | NW_004516458.1 | Scaffold1180 | 121933                  | GG                              | AA              | 1946998210               |
| SNP_P4_155378_121937 | NW_004516458.1 | Scaffold1180 | 121937                  | GG                              | TT              | 1946998212               |
| SNP_P4_155379_133804 | NW_004516458.1 | Scaffold1180 | 133804                  | TT                              | GG              | 1946998214               |
| SNP_P4_155380_134330 | NW_004516458.1 | Scaffold1180 | 134330                  | TT                              | CC              | 1946998216               |
| SNP_P4_155381_134530 | NW_004516458.1 | Scaffold1180 | 134530                  | CC                              | TT              | 1946998218               |
| SNP_P4_155382_134543 | NW_004516458.1 | Scaffold1180 | 134543                  | TT                              | CC              | 1946998220               |
| SNP_P4_155383_134695 | NW_004516458.1 | Scaffold1180 | 134695                  | GG                              | TT              | 1946998222               |
| SNP_P4_155384_134696 | NW_004516458.1 | Scaffold1180 | 134696                  | GG                              | CC              | 1946998224               |
| SNP_P4_155385_134711 | NW_004516458.1 | Scaffold1180 | 134711                  | GG                              | AA              | 1946998225               |
| SNP_P4_155386_134734 | NW_004516458.1 | Scaffold1180 | 134734                  | GG                              | CC              | 1946998226               |
| SNP_P4_155387_134791 | NW_004516458.1 | Scaffold1180 | 134791                  | AA                              | GG              | 1946998227               |
| SNP_P4_155388_134930 | NW_004516458.1 | Scaffold1180 | 134930                  | CC                              | AA              | 1946998228               |
| SNP_P4_155389_135135 | NW_004516458.1 | Scaffold1180 | 135135                  | AA                              | GG              | 1946998229               |
| SNP_P4_155391_135743 | NW_004516458.1 | Scaffold1180 | 135743                  | GG                              | CC              | 1946998230               |
| SNP_P4_155392_136044 | NW_004516458.1 | Scaffold1180 | 136044                  | CC                              | AA              | 1946998231               |
| SNP_P4_155393_136048 | NW_004516458.1 | Scaffold1180 | 136048                  | AA                              | GG              | 1946998232               |
| SNP_P4_155394_136068 | NW_004516458.1 | Scaffold1180 | 136068                  | AA                              | GG              | 1946998233               |
| SNP_P4_155395_136090 | NW_004516458.1 | Scaffold1180 | 136090                  | TT                              | CC              | 1946998234               |
| SNP_P4_155396_138082 | NW_004516458.1 | Scaffold1180 | 138082                  | GG                              | AA              | 1946998235               |
| SNP_P4_155397_148457 | NW_004516458.1 | Scaffold1180 | 148457                  | CC                              | TT              | 1946998236               |
| SNP_P4_155398_149244 | NW_004516458.1 | Scaffold1180 | 149244                  | TT                              | CC              | 1946998237               |
| SNP_P4_155399_156405 | NW_004516458.1 | Scaffold1180 | 156405                  | CC                              | GG              | 1946998238               |
| SNP_P4_155400_157624 | NW_004516458.1 | Scaffold1180 | 157624                  | GG                              | CC              | 1946998239               |
| SNP_P4_155402_157717 | NW_004516458.1 | Scaffold1180 | 157717                  | CC                              | TT              | 1946998240               |

| SNPs IDs             | Chromosome IDs | Chromosomes  | Physical positions (bp) | CDC Frontier (Reference genome) | (ILWC46 & LPNB) | NCBI SNPdb Accession IDs |
|----------------------|----------------|--------------|-------------------------|---------------------------------|-----------------|--------------------------|
| SNP_P4_155403_157867 | NW_004516458.1 | Scaffold1180 | 157867                  | GG                              | AA              | 1946998241               |
| SNP_P4_155404_157882 | NW_004516458.1 | Scaffold1180 | 157882                  | CC                              | TT              | 1946998242               |
| SNP_P4_155405_158042 | NW_004516458.1 | Scaffold1180 | 158042                  | AA                              | TT              | 1946998243               |
| SNP_P4_155406_160463 | NW_004516458.1 | Scaffold1180 | 160463                  | CC                              | TT              | 1946998244               |
| SNP_P4_155407_161106 | NW_004516458.1 | Scaffold1180 | 161106                  | CC                              | TT              | 1946998245               |
| SNP_P4_155408_163196 | NW_004516458.1 | Scaffold1180 | 163196                  | CC                              | TT              | 1946998246               |
| SNP_P4_155409_168317 | NW_004516458.1 | Scaffold1180 | 168317                  | CC                              | TT              | 1946998247               |
| SNP_P4_155410_168318 | NW_004516458.1 | Scaffold1180 | 168318                  | CC                              | TT              | 1946998248               |
| SNP_P4_155411_168346 | NW_004516458.1 | Scaffold1180 | 168346                  | TT                              | AA              | 1946998249               |
| SNP_P4_155412_170839 | NW_004516458.1 | Scaffold1180 | 170839                  | TT                              | AA              | 1946998250               |
| SNP_P4_155413_190298 | NW_004516458.1 | Scaffold1180 | 190298                  | AA                              | TT              | 1946998251               |
| SNP_P4_155414_194401 | NW_004516458.1 | Scaffold1180 | 194401                  | GG                              | AA              | 1946998252               |
| SNP_P4_155415_194764 | NW_004516458.1 | Scaffold1180 | 194764                  | CC                              | AA              | 1946998253               |
| SNP_P4_155416_194978 | NW_004516458.1 | Scaffold1180 | 194978                  | TT                              | CC              | 1946998254               |
| SNP_P4_155417_194981 | NW_004516458.1 | Scaffold1180 | 194981                  | TT                              | GG              | 1946998255               |
| SNP_P4_155418_195014 | NW_004516458.1 | Scaffold1180 | 195014                  | GG                              | AA              | 1946998256               |
| SNP_P4_155419_195021 | NW_004516458.1 | Scaffold1180 | 195021                  | AA                              | TT              | 1946998257               |
| SNP_P4_155420_195206 | NW_004516458.1 | Scaffold1180 | 195206                  | CC                              | TT              | 1946998258               |
| SNP_P4_155422_207113 | NW_004516458.1 | Scaffold1180 | 207113                  | CC                              | AA              | 1946998259               |
| SNP_P4_155423_207624 | NW_004516458.1 | Scaffold1180 | 207624                  | GG                              | AA              | 1946998260               |
| SNP_P4_155424_208395 | NW_004516458.1 | Scaffold1180 | 208395                  | GG                              | AA              | 1946998261               |
| SNP_P4_155426_208673 | NW_004516458.1 | Scaffold1180 | 208673                  | TT                              | CC              | 1946998262               |
| SNP_P4_155427_208784 | NW_004516458.1 | Scaffold1180 | 208784                  | GG                              | AA              | 1946998263               |
| SNP_P4_155428_209484 | NW_004516458.1 | Scaffold1180 | 209484                  | AA                              | GG              | 1946998264               |
| SNP_P4_155429_209496 | NW_004516458.1 | Scaffold1180 | 209496                  | TT                              | CC              | 1946998265               |
| SNP_P4_155430_209645 | NW_004516458.1 | Scaffold1180 | 209645                  | TT                              | CC              | 1946998266               |
| SNP_P4_155431_209690 | NW_004516458.1 | Scaffold1180 | 209690                  | AA                              | GG              | 1946998267               |
| SNP_P4_155432_209867 | NW_004516458.1 | Scaffold1180 | 209867                  | CC                              | TT              | 1946998268               |
| SNP_P4_155433_209943 | NW_004516458.1 | Scaffold1180 | 209943                  | GG                              | TT              | 1946998269               |
| SNP_P4_155434_210794 | NW_004516458.1 | Scaffold1180 | 210794                  | GG                              | TT              | 1946998270               |
| SNP_P4_155435_210828 | NW_004516458.1 | Scaffold1180 | 210828                  | AA                              | TT              | 1946998271               |
| SNP_P4_155436_210906 | NW_004516458.1 | Scaffold1180 | 210906                  | CC                              | GG              | 1946998272               |
| SNP_P4_155437_210987 | NW_004516458.1 | Scaffold1180 | 210987                  | CC                              | TT              | 1946998273               |
| SNP_P4_155438_211369 | NW_004516458.1 | Scaffold1180 | 211369                  | AA                              | GG              | 1946998274               |
| SNP_P4_155439_211370 | NW_004516458.1 | Scaffold1180 | 211370                  | TT                              | GG              | 1946998275               |
| SNP_P4_155440_211381 | NW_004516458.1 | Scaffold1180 | 211381                  | AA                              | GG              | 1946998276               |
| SNP_P4_155441_211397 | NW_004516458.1 | Scaffold1180 | 211397                  | AA                              | CC              | 1946998277               |
| SNP_P4_155442_211426 | NW_004516458.1 | Scaffold1180 | 211426                  | CC                              | GG              | 1946998278               |
| SNP_P4_155443_212307 | NW_004516458.1 | Scaffold1180 | 212307                  | AA                              | GG              | 1946998279               |
| SNP_P4_155444_212316 | NW_004516458.1 | Scaffold1180 | 212316                  | TT                              | AA              | 1946998280               |
| SNP_P4_155445_212352 | NW_004516458.1 | Scaffold1180 | 212352                  | TT                              | CC              | 1946998281               |
| SNP_P4_155446_212514 | NW_004516458.1 | Scaffold1180 | 212514                  | GG                              | AA              | 1946998282               |

| SNPs IDs             | Chromosome IDs | Chromosomes  | Physical positions (bp) | CDC Frontier (Reference genome) | (ILWC46 & LPNB) | NCBI SNPdb Accession IDs |
|----------------------|----------------|--------------|-------------------------|---------------------------------|-----------------|--------------------------|
| SNP_P4_155447_212703 | NW_004516458.1 | Scaffold1180 | 212703                  | TT                              | GG              | 1946998283               |
| SNP_P4_155448_213911 | NW_004516458.1 | Scaffold1180 | 213911                  | TT                              | CC              | 1946998284               |
| SNP_P4_155449_213925 | NW_004516458.1 | Scaffold1180 | 213925                  | TT                              | CC              | 1946998285               |
| SNP_P4_155450_215388 | NW_004516458.1 | Scaffold1180 | 215388                  | AA                              | CC              | 1946998286               |
| SNP_P4_155453_215754 | NW_004516458.1 | Scaffold1180 | 215754                  | GG                              | AA              | 1946998287               |
| SNP_P4_155454_216211 | NW_004516458.1 | Scaffold1180 | 216211                  | GG                              | AA              | 1946998288               |
| SNP_P4_155455_217872 | NW_004516458.1 | Scaffold1180 | 217872                  | GG                              | CC              | 1946998289               |
| SNP_P4_155456_218496 | NW_004516458.1 | Scaffold1180 | 218496                  | GG                              | AA              | 1946998290               |
| SNP_P4_155457_218585 | NW_004516458.1 | Scaffold1180 | 218585                  | TT                              | CC              | 1946998291               |
| SNP_P4_155458_218733 | NW_004516458.1 | Scaffold1180 | 218733                  | GG                              | AA              | 1946998292               |
| SNP_P4_155459_218745 | NW_004516458.1 | Scaffold1180 | 218745                  | CC                              | TT              | 1946998293               |
| SNP_P4_155460_218887 | NW_004516458.1 | Scaffold1180 | 218887                  | GG                              | CC              | 1946998294               |
| SNP_P4_155461_218892 | NW_004516458.1 | Scaffold1180 | 218892                  | CC                              | TT              | 1946998295               |
| SNP_P4_155462_219037 | NW_004516458.1 | Scaffold1180 | 219037                  | AA                              | CC              | 1946998296               |
| SNP_P4_155463_219039 | NW_004516458.1 | Scaffold1180 | 219039                  | GG                              | TT              | 1946998297               |
| SNP_P4_155464_219136 | NW_004516458.1 | Scaffold1180 | 219136                  | GG                              | TT              | 1946998299               |
| SNP_P4_155465_219154 | NW_004516458.1 | Scaffold1180 | 219154                  | GG                              | AA              | 1946998301               |
| SNP_P4_155466_219188 | NW_004516458.1 | Scaffold1180 | 219188                  | GG                              | AA              | 1946998303               |
| SNP_P4_155467_219189 | NW_004516458.1 | Scaffold1180 | 219189                  | TT                              | GG              | 1946998305               |
| SNP_P4_155468_225229 | NW_004516458.1 | Scaffold1180 | 225229                  | AA                              | GG              | 1946998307               |
| SNP_P4_155469_225474 | NW_004516458.1 | Scaffold1180 | 225474                  | CC                              | GG              | 1946998309               |
| SNP_P4_155472_227295 | NW_004516458.1 | Scaffold1180 | 227295                  | AA                              | TT              | 1946998310               |
| SNP_P4_155473_227312 | NW_004516458.1 | Scaffold1180 | 227312                  | TT                              | AA              | 1946998312               |
| SNP_P4_155474_227811 | NW_004516458.1 | Scaffold1180 | 227811                  | TT                              | GG              | 1946998314               |
| SNP_P4_155476_228110 | NW_004516458.1 | Scaffold1180 | 228110                  | GG                              | CC              | 1946998316               |
| SNP_P4_155477_228205 | NW_004516458.1 | Scaffold1180 | 228205                  | GG                              | TT              | 1946998318               |
| SNP_P4_155478_228238 | NW_004516458.1 | Scaffold1180 | 228238                  | TT                              | CC              | 1946998320               |
| SNP_P4_155479_228336 | NW_004516458.1 | Scaffold1180 | 228336                  | AA                              | GG              | 1946998322               |
| SNP_P4_155480_234775 | NW_004516458.1 | Scaffold1180 | 234775                  | TT                              | CC              | 1946998324               |
| SNP_P4_155481_236351 | NW_004516458.1 | Scaffold1180 | 236351                  | AA                              | GG              | 1946998326               |
| SNP_P4_155482_236799 | NW_004516458.1 | Scaffold1180 | 236799                  | TT                              | AA              | 1946998328               |
| SNP_P4_155483_240910 | NW_004516458.1 | Scaffold1180 | 240910                  | AA                              | GG              | 1946998329               |
| SNP_P4_155484_240923 | NW_004516458.1 | Scaffold1180 | 240923                  | AA                              | GG              | 1946998331               |
| SNP_P4_155485_241210 | NW_004516458.1 | Scaffold1180 | 241210                  | AA                              | GG              | 1946998333               |
| SNP_P4_155486_241239 | NW_004516458.1 | Scaffold1180 | 241239                  | TT                              | AA              | 1946998335               |
| SNP_P4_155487_241276 | NW_004516458.1 | Scaffold1180 | 241276                  | CC                              | GG              | 1946998337               |
| SNP_P4_155488_241313 | NW_004516458.1 | Scaffold1180 | 241313                  | AA                              | GG              | 1946998339               |
| SNP_P4_155489_241445 | NW_004516458.1 | Scaffold1180 | 241445                  | AA                              | GG              | 1946998341               |
| SNP_P4_155490_243358 | NW_004516458.1 | Scaffold1180 | 243358                  | GG                              | AA              | 1946998343               |
| SNP_P4_155491_243367 | NW_004516458.1 | Scaffold1180 | 243367                  | GG                              | TT              | 1946998345               |
| SNP_P4_155492_244943 | NW_004516458.1 | Scaffold1180 | 244943                  | AA                              | GG              | 1946998347               |
| SNP_P4_155493_247530 | NW_004516458.1 | Scaffold1180 | 247530                  | CC                              | TT              | 1946998349               |

| SNPs IDs             | Chromosome IDs | Chromosomes  | Physical positions (bp) | CDC Frontier (Reference genome) | (ILWC46 & LPNB) | NCBI SNPdb Accession IDs |
|----------------------|----------------|--------------|-------------------------|---------------------------------|-----------------|--------------------------|
| SNP_P4_155494_252058 | NW_004516458.1 | Scaffold1180 | 252058                  | AA                              | CC              | 1946998351               |
| SNP_P4_155495_252372 | NW_004516458.1 | Scaffold1180 | 252372                  | AA                              | GG              | 1946998353               |
| SNP_P4_155496_255662 | NW_004516458.1 | Scaffold1180 | 255662                  | TT                              | CC              | 1946998355               |
| SNP_P4_155497_255713 | NW_004516458.1 | Scaffold1180 | 255713                  | AA                              | GG              | 1946998357               |
| SNP_P4_155498_255724 | NW_004516458.1 | Scaffold1180 | 255724                  | CC                              | GG              | 1946998359               |
| SNP_P4_155499_255738 | NW_004516458.1 | Scaffold1180 | 255738                  | AA                              | CC              | 1946998361               |
| SNP_P4_155500_255801 | NW_004516458.1 | Scaffold1180 | 255801                  | AA                              | TT              | 1946998363               |
| SNP_P4_155501_256024 | NW_004516458.1 | Scaffold1180 | 256024                  | AA                              | GG              | 1946998365               |
| SNP_P4_155502_258522 | NW_004516458.1 | Scaffold1180 | 258522                  | CC                              | TT              | 1946998367               |
| SNP_P4_155503_258830 | NW_004516458.1 | Scaffold1180 | 258830                  | AA                              | GG              | 1946998369               |
| SNP_P4_155504_83     | NW_004516459.1 | Scaffold1181 | 83                      | TT                              | CC              | 1946998371               |
| SNP_P4_155505_475    | NW_004516459.1 | Scaffold1181 | 475                     | AA                              | CC              | 1946998373               |
| SNP_P4_155506_1547   | NW_004516459.1 | Scaffold1181 | 1547                    | AA                              | TT              | 1946998375               |
| SNP_P4_155507_1559   | NW_004516459.1 | Scaffold1181 | 1559                    | CC                              | GG              | 1946998377               |
| SNP_P4_155508_1574   | NW_004516459.1 | Scaffold1181 | 1574                    | AA                              | TT              | 1946998379               |
| SNP_P4_155509_1585   | NW_004516459.1 | Scaffold1181 | 1585                    | TT                              | AA              | 1946998381               |
| SNP_P4_155510_1665   | NW_004516459.1 | Scaffold1181 | 1665                    | TT                              | AA              | 1946998383               |
| SNP_P4_155511_1940   | NW_004516459.1 | Scaffold1181 | 1940                    | GG                              | CC              | 1946998385               |
| SNP_P4_155512_5391   | NW_004516459.1 | Scaffold1181 | 5391                    | AA                              | TT              | 1946998386               |
| SNP_P4_155513_5445   | NW_004516459.1 | Scaffold1181 | 5445                    | CC                              | AA              | 1946998388               |
| SNP_P4_155514_5731   | NW_004516459.1 | Scaffold1181 | 5731                    | AA                              | GG              | 1946998390               |
| SNP_P4_155515_5737   | NW_004516459.1 | Scaffold1181 | 5737                    | CC                              | AA              | 1946998392               |
| SNP_P4_155516_5874   | NW_004516459.1 | Scaffold1181 | 5874                    | CC                              | TT              | 1946998394               |
| SNP_P4_155517_5889   | NW_004516459.1 | Scaffold1181 | 5889                    | AA                              | GG              | 1946998396               |
| SNP_P4_155518_5921   | NW_004516459.1 | Scaffold1181 | 5921                    | TT                              | CC              | 1946998398               |
| SNP_P4_155520_6118   | NW_004516459.1 | Scaffold1181 | 6118                    | CC                              | AA              | 1946998400               |
| SNP_P4_155521_6141   | NW_004516459.1 | Scaffold1181 | 6141                    | TT                              | AA              | 1946998402               |
| SNP_P4_155522_6429   | NW_004516459.1 | Scaffold1181 | 6429                    | AA                              | CC              | 1946998404               |
| SNP_P4_155523_6430   | NW_004516459.1 | Scaffold1181 | 6430                    | AA                              | TT              | 1946998406               |
| SNP_P4_155524_6715   | NW_004516459.1 | Scaffold1181 | 6715                    | TT                              | AA              | 1946998407               |
| SNP_P4_155525_6775   | NW_004516459.1 | Scaffold1181 | 6775                    | AA                              | TT              | 1946998409               |
| SNP_P4_155526_6863   | NW_004516459.1 | Scaffold1181 | 6863                    | CC                              | AA              | 1946998411               |
| SNP_P4_155527_6947   | NW_004516459.1 | Scaffold1181 | 6947                    | GG                              | AA              | 1946998413               |
| SNP_P4_155528_6949   | NW_004516459.1 | Scaffold1181 | 6949                    | CC                              | AA              | 1946998415               |
| SNP_P4_155529_7064   | NW_004516459.1 | Scaffold1181 | 7064                    | GG                              | CC              | 1946998417               |
| SNP_P4_155530_7086   | NW_004516459.1 | Scaffold1181 | 7086                    | GG                              | CC              | 1946998419               |
| SNP_P4_155531_7088   | NW_004516459.1 | Scaffold1181 | 7088                    | AA                              | TT              | 1946998421               |
| SNP_P4_155532_7093   | NW_004516459.1 | Scaffold1181 | 7093                    | CC                              | AA              | 1946998423               |
| SNP_P4_155533_7184   | NW_004516459.1 | Scaffold1181 | 7184                    | AA                              | CC              | 1946998425               |
| SNP_P4_155534_7214   | NW_004516459.1 | Scaffold1181 | 7214                    | TT                              | CC              | 1946998427               |
| SNP_P4_155535_7293   | NW_004516459.1 | Scaffold1181 | 7293                    | AA                              | CC              | 1946998429               |
| SNP_P4_155536_7322   | NW_004516459.1 | Scaffold1181 | 7322                    | AA                              | GG              | 1946998431               |

| SNPs IDs            | Chromosome IDs | Chromosomes  | Physical positions (bp) | CDC Frontier (Reference genome) | (ILWC46 & LPNB) | NCBI SNPdb Accession IDs |
|---------------------|----------------|--------------|-------------------------|---------------------------------|-----------------|--------------------------|
| SNP_P4_155537_7357  | NW_004516459.1 | Scaffold1181 | 7357                    | TT                              | CC              | 1946998433               |
| SNP_P4_155538_7752  | NW_004516459.1 | Scaffold1181 | 7752                    | CC                              | TT              | 1946998435               |
| SNP_P4_155539_10628 | NW_004516459.1 | Scaffold1181 | 10628                   | AA                              | CC              | 1946998437               |
| SNP_P4_155540_10634 | NW_004516459.1 | Scaffold1181 | 10634                   | AA                              | CC              | 1946998439               |
| SNP_P4_155541_10640 | NW_004516459.1 | Scaffold1181 | 10640                   | CC                              | AA              | 1946998441               |
| SNP_P4_155542_10642 | NW_004516459.1 | Scaffold1181 | 10642                   | TT                              | CC              | 1946998443               |
| SNP_P4_155543_10647 | NW_004516459.1 | Scaffold1181 | 10647                   | AA                              | CC              | 1946998445               |
| SNP_P4_155544_10664 | NW_004516459.1 | Scaffold1181 | 10664                   | TT                              | AA              | 1946998446               |
| SNP_P4_155545_10712 | NW_004516459.1 | Scaffold1181 | 10712                   | CC                              | AA              | 1946998448               |
| SNP_P4_155546_10742 | NW_004516459.1 | Scaffold1181 | 10742                   | CC                              | TT              | 1946998450               |
| SNP_P4_155547_10906 | NW_004516459.1 | Scaffold1181 | 10906                   | CC                              | TT              | 1946998452               |
| SNP_P4_155548_10993 | NW_004516459.1 | Scaffold1181 | 10993                   | TT                              | CC              | 1946998454               |
| SNP_P4_155549_11066 | NW_004516459.1 | Scaffold1181 | 11066                   | TT                              | CC              | 1946998456               |
| SNP_P4_155550_11124 | NW_004516459.1 | Scaffold1181 | 11124                   | AA                              | CC              | 1946998458               |
| SNP_P4_155552_11252 | NW_004516459.1 | Scaffold1181 | 11252                   | CC                              | AA              | 1946998460               |
| SNP_P4_155553_11253 | NW_004516459.1 | Scaffold1181 | 11253                   | CC                              | TT              | 1946998462               |
| SNP_P4_155554_11257 | NW_004516459.1 | Scaffold1181 | 11257                   | AA                              | TT              | 1946998464               |
| SNP_P4_155555_11264 | NW_004516459.1 | Scaffold1181 | 11264                   | AA                              | TT              | 1946998466               |
| SNP_P4_155556_11271 | NW_004516459.1 | Scaffold1181 | 11271                   | AA                              | TT              | 1946998468               |
| SNP_P4_155557_11273 | NW_004516459.1 | Scaffold1181 | 11273                   | AA                              | CC              | 1946998470               |
| SNP_P4_155558_11278 | NW_004516459.1 | Scaffold1181 | 11278                   | AA                              | TT              | 1946998471               |
| SNP_P4_155559_11285 | NW_004516459.1 | Scaffold1181 | 11285                   | AA                              | TT              | 1946998473               |
| SNP_P4_155560_11300 | NW_004516459.1 | Scaffold1181 | 11300                   | TT                              | CC              | 1946998475               |
| SNP_P4_155561_11499 | NW_004516459.1 | Scaffold1181 | 11499                   | AA                              | GG              | 1946998477               |
| SNP_P4_155562_11534 | NW_004516459.1 | Scaffold1181 | 11534                   | AA                              | GG              | 1946998479               |
| SNP_P4_155563_11546 | NW_004516459.1 | Scaffold1181 | 11546                   | GG                              | CC              | 1946998481               |
| SNP_P4_155564_11549 | NW_004516459.1 | Scaffold1181 | 11549                   | GG                              | CC              | 1946998483               |
| SNP_P4_155566_181   | NW_004516461.1 | Scaffold1183 | 181                     | TT                              | CC              | 1946998484               |
| SNP_P4_155567_361   | NW_004516461.1 | Scaffold1183 | 361                     | CC                              | GG              | 1946998486               |
| SNP_P4_155568_1965  | NW_004516461.1 | Scaffold1183 | 1965                    | CC                              | AA              | 1946998488               |
| SNP_P4_155569_2590  | NW_004516461.1 | Scaffold1183 | 2590                    | AA                              | CC              | 1946998490               |
| SNP_P4_155570_24880 | NW_004516461.1 | Scaffold1183 | 24880                   | GG                              | AA              | 1946998492               |
| SNP_P4_155571_29415 | NW_004516461.1 | Scaffold1183 | 29415                   | TT                              | CC              | 1946998494               |
| SNP_P4_155572_29482 | NW_004516461.1 | Scaffold1183 | 29482                   | AA                              | GG              | 1946998496               |
| SNP_P4_155573_29844 | NW_004516461.1 | Scaffold1183 | 29844                   | AA                              | GG              | 1946998498               |
| SNP_P4_155574_31009 | NW_004516461.1 | Scaffold1183 | 31009                   | CC                              | AA              | 1946998500               |
| SNP_P4_155575_42747 | NW_004516461.1 | Scaffold1183 | 42747                   | GG                              | AA              | 1946998502               |
| SNP_P4_155576_42759 | NW_004516461.1 | Scaffold1183 | 42759                   | TT                              | CC              | 1946998503               |
| SNP_P4_155577_45217 | NW_004516461.1 | Scaffold1183 | 45217                   | TT                              | GG              | 1946998505               |
| SNP_P4_155578_45627 | NW_004516461.1 | Scaffold1183 | 45627                   | AA                              | CC              | 1946998507               |
| SNP_P4_155579_45647 | NW_004516461.1 | Scaffold1183 | 45647                   | GG                              | AA              | 1946998509               |
| SNP_P4_155580_45667 | NW_004516461.1 | Scaffold1183 | 45667                   | GG                              | AA              | 1946998511               |

| SNPs IDs             | Chromosome IDs | Chromosomes  | Physical positions (bp) | CDC Frontier (Reference genome) | (ILWC46 & LPNB) | NCBI SNPdb Accession IDs |
|----------------------|----------------|--------------|-------------------------|---------------------------------|-----------------|--------------------------|
| SNP_P4_155581_45668  | NW_004516461.1 | Scaffold1183 | 45668                   | TT                              | CC              | 1946998513               |
| SNP_P4_155582_60455  | NW_004516461.1 | Scaffold1183 | 60455                   | AA                              | GG              | 1946998515               |
| SNP_P4_155583_60478  | NW_004516461.1 | Scaffold1183 | 60478                   | AA                              | GG              | 1946998517               |
| SNP_P4_155584_60653  | NW_004516461.1 | Scaffold1183 | 60653                   | CC                              | TT              | 1946998519               |
| SNP_P4_155585_60953  | NW_004516461.1 | Scaffold1183 | 60953                   | AA                              | GG              | 1946998521               |
| SNP_P4_155587_75739  | NW_004516461.1 | Scaffold1183 | 75739                   | CC                              | GG              | 1946998523               |
| SNP_P4_155588_75951  | NW_004516461.1 | Scaffold1183 | 75951                   | GG                              | TT              | 1946998525               |
| SNP_P4_155589_76003  | NW_004516461.1 | Scaffold1183 | 76003                   | AA                              | TT              | 1946998527               |
| SNP_P4_155590_76058  | NW_004516461.1 | Scaffold1183 | 76058                   | CC                              | TT              | 1946998529               |
| SNP_P4_155591_76061  | NW_004516461.1 | Scaffold1183 | 76061                   | TT                              | AA              | 1946998531               |
| SNP_P4_155592_76114  | NW_004516461.1 | Scaffold1183 | 76114                   | TT                              | CC              | 1946998533               |
| SNP_P4_155594_96949  | NW_004516461.1 | Scaffold1183 | 96949                   | GG                              | CC              | 1946998535               |
| SNP_P4_155595_107680 | NW_004516461.1 | Scaffold1183 | 107680                  | CC                              | TT              | 1946998536               |
| SNP_P4_155597_115008 | NW_004516461.1 | Scaffold1183 | 115008                  | TT                              | AA              | 1946998538               |
| SNP_P4_155598_129097 | NW_004516461.1 | Scaffold1183 | 129097                  | AA                              | CC              | 1946998540               |
| SNP_P4_155599_130848 | NW_004516461.1 | Scaffold1183 | 130848                  | CC                              | AA              | 1946998542               |
| SNP_P4_155600_131079 | NW_004516461.1 | Scaffold1183 | 131079                  | AA                              | GG              | 1946998544               |
| SNP_P4_155602_135574 | NW_004516461.1 | Scaffold1183 | 135574                  | AA                              | GG              | 1946998546               |
| SNP_P4_155604_147567 | NW_004516461.1 | Scaffold1183 | 147567                  | TT                              | CC              | 1946998548               |
| SNP_P4_155605_147623 | NW_004516461.1 | Scaffold1183 | 147623                  | AA                              | CC              | 1946998550               |
| SNP_P4_155606_147627 | NW_004516461.1 | Scaffold1183 | 147627                  | CC                              | AA              | 1946998552               |
| SNP_P4_155607_147669 | NW_004516461.1 | Scaffold1183 | 147669                  | AA                              | GG              | 1946998554               |
| SNP_P4_155608_147728 | NW_004516461.1 | Scaffold1183 | 147728                  | TT                              | CC              | 1946998556               |
| SNP_P4_155609_147831 | NW_004516461.1 | Scaffold1183 | 147831                  | CC                              | GG              | 1946998558               |
| SNP_P4_155611_148831 | NW_004516461.1 | Scaffold1183 | 148831                  | CC                              | GG              | 1946998560               |
| SNP_P4_155612_148919 | NW_004516461.1 | Scaffold1183 | 148919                  | AA                              | GG              | 1946998562               |
| SNP_P4_155613_149438 | NW_004516461.1 | Scaffold1183 | 149438                  | GG                              | AA              | 1946998564               |
| SNP_P4_155614_151649 | NW_004516461.1 | Scaffold1183 | 151649                  | AA                              | GG              | 1946998566               |
| SNP_P4_155615_151846 | NW_004516461.1 | Scaffold1183 | 151846                  | AA                              | TT              | 1946998568               |
| SNP_P4_155617_201933 | NW_004516461.1 | Scaffold1183 | 201933                  | TT                              | CC              | 1946998570               |
| SNP_P4_155618_210612 | NW_004516461.1 | Scaffold1183 | 210612                  | CC                              | TT              | 1946998572               |
| SNP_P4_155619_232085 | NW_004516461.1 | Scaffold1183 | 232085                  | CC                              | TT              | 1946998574               |
| SNP_P4_155620_232092 | NW_004516461.1 | Scaffold1183 | 232092                  | TT                              | CC              | 1946998576               |
| SNP_P4_155621_234544 | NW_004516461.1 | Scaffold1183 | 234544                  | CC                              | TT              | 1946998578               |
| SNP_P4_155622_2437   | NW_004516462.1 | Scaffold1185 | 2437                    | TT                              | CC              | 1946998580               |
| SNP_P4_155623_2946   | NW_004516462.1 | Scaffold1185 | 2946                    | CC                              | AA              | 1946998582               |
| SNP_P4_155624_3529   | NW_004516462.1 | Scaffold1185 | 3529                    | TT                              | GG              | 1946998583               |
| SNP_P4_155625_3698   | NW_004516462.1 | Scaffold1185 | 3698                    | CC                              | TT              | 1946998585               |
| SNP_P4_155626_3811   | NW_004516462.1 | Scaffold1185 | 3811                    | AA                              | TT              | 1946998587               |
| SNP_P4_155627_3828   | NW_004516462.1 | Scaffold1185 | 3828                    | TT                              | AA              | 1946998589               |
| SNP_P4_155628_4030   | NW_004516462.1 | Scaffold1185 | 4030                    | GG                              | AA              | 1946998591               |
| SNP_P4_155629_4308   | NW_004516462.1 | Scaffold1185 | 4308                    | TT                              | AA              | 1946998593               |



| SNPs IDs            | Chromosome IDs | Chromosomes  | Physical positions (bp) | CDC Frontier (Reference genome) | (ILWC46 & LPNB) | NCBI SNPdb Accession IDs |
|---------------------|----------------|--------------|-------------------------|---------------------------------|-----------------|--------------------------|
| SNP_P4_155630_4628  | NW_004516462.1 | Scaffold1185 | 4628                    | AA                              | GG              | 1946998595               |
| SNP_P4_155631_5496  | NW_004516462.1 | Scaffold1185 | 5496                    | GG                              | AA              | 1946998597               |
| SNP_P4_155632_5580  | NW_004516462.1 | Scaffold1185 | 5580                    | TT                              | CC              | 1946998599               |
| SNP_P4_155633_6187  | NW_004516462.1 | Scaffold1185 | 6187                    | GG                              | TT              | 1946998601               |
| SNP_P4_155635_6648  | NW_004516462.1 | Scaffold1185 | 6648                    | AA                              | GG              | 1946998603               |
| SNP_P4_155636_6650  | NW_004516462.1 | Scaffold1185 | 6650                    | AA                              | TT              | 1946998605               |
| SNP_P4_155637_7745  | NW_004516462.1 | Scaffold1185 | 7745                    | TT                              | CC              | 1946998607               |
| SNP_P4_155638_9100  | NW_004516462.1 | Scaffold1185 | 9100                    | GG                              | AA              | 1946998608               |
| SNP_P4_155639_9129  | NW_004516462.1 | Scaffold1185 | 9129                    | AA                              | GG              | 1946998610               |
| SNP_P4_155640_9192  | NW_004516462.1 | Scaffold1185 | 9192                    | GG                              | AA              | 1946998612               |
| SNP_P4_155641_10573 | NW_004516462.1 | Scaffold1185 | 10573                   | CC                              | TT              | 1946998614               |
| SNP_P4_155642_10859 | NW_004516462.1 | Scaffold1185 | 10859                   | GG                              | AA              | 1946998616               |
| SNP_P4_155643_10951 | NW_004516462.1 | Scaffold1185 | 10951                   | GG                              | TT              | 1946998618               |
| SNP_P4_155644_12319 | NW_004516462.1 | Scaffold1185 | 12319                   | TT                              | AA              | 1946998620               |
| SNP_P4_155645_12650 | NW_004516462.1 | Scaffold1185 | 12650                   | CC                              | AA              | 1946998622               |
| SNP_P4_155646_12911 | NW_004516462.1 | Scaffold1185 | 12911                   | GG                              | AA              | 1946998624               |
| SNP_P4_155647_13994 | NW_004516462.1 | Scaffold1185 | 13994                   | GG                              | TT              | 1946998626               |
| SNP_P4_155648_14106 | NW_004516462.1 | Scaffold1185 | 14106                   | AA                              | GG              | 1946998628               |
| SNP_P4_155649_14127 | NW_004516462.1 | Scaffold1185 | 14127                   | GG                              | AA              | 1946998629               |
| SNP_P4_155650_14153 | NW_004516462.1 | Scaffold1185 | 14153                   | TT                              | CC              | 1946998631               |
| SNP_P4_155651_14447 | NW_004516462.1 | Scaffold1185 | 14447                   | GG                              | TT              | 1946998633               |
| SNP_P4_155652_15776 | NW_004516462.1 | Scaffold1185 | 15776                   | CC                              | TT              | 1946998635               |
| SNP_P4_155653_19972 | NW_004516462.1 | Scaffold1185 | 19972                   | CC                              | TT              | 1946998637               |
| SNP_P4_155654_19984 | NW_004516462.1 | Scaffold1185 | 19984                   | GG                              | CC              | 1946998639               |
| SNP_P4_155655_20271 | NW_004516462.1 | Scaffold1185 | 20271                   | AA                              | CC              | 1946998641               |
| SNP_P4_155656_20443 | NW_004516462.1 | Scaffold1185 | 20443                   | GG                              | AA              | 1946998643               |
| SNP_P4_155657_21339 | NW_004516462.1 | Scaffold1185 | 21339                   | CC                              | TT              | 1946998645               |
| SNP_P4_155658_21525 | NW_004516462.1 | Scaffold1185 | 21525                   | CC                              | TT              | 1946998647               |
| SNP_P4_155659_21798 | NW_004516462.1 | Scaffold1185 | 21798                   | TT                              | AA              | 1946998649               |
| SNP_P4_155660_22115 | NW_004516462.1 | Scaffold1185 | 22115                   | CC                              | AA              | 1946998651               |
| SNP_P4_155661_22154 | NW_004516462.1 | Scaffold1185 | 22154                   | AA                              | GG              | 1946998653               |
| SNP_P4_155662_22287 | NW_004516462.1 | Scaffold1185 | 22287                   | TT                              | AA              | 1946998655               |
| SNP_P4_155663_22295 | NW_004516462.1 | Scaffold1185 | 22295                   | AA                              | CC              | 1946998657               |
| SNP_P4_155664_24596 | NW_004516462.1 | Scaffold1185 | 24596                   | AA                              | CC              | 1946998659               |
| SNP_P4_155665_25006 | NW_004516462.1 | Scaffold1185 | 25006                   | CC                              | AA              | 1946998661               |
| SNP_P4_155666_25273 | NW_004516462.1 | Scaffold1185 | 25273                   | AA                              | GG              | 1946998663               |
| SNP_P4_155667_25776 | NW_004516462.1 | Scaffold1185 | 25776                   | GG                              | AA              | 1946998665               |
| SNP_P4_155668_26098 | NW_004516462.1 | Scaffold1185 | 26098                   | TT                              | CC              | 1946998666               |
| SNP_P4_155669_26140 | NW_004516462.1 | Scaffold1185 | 26140                   | CC                              | TT              | 1946998668               |
| SNP_P4_155670_26283 | NW_004516462.1 | Scaffold1185 | 26283                   | GG                              | AA              | 1946998670               |
| SNP_P4_155671_26456 | NW_004516462.1 | Scaffold1185 | 26456                   | CC                              | AA              | 1946998672               |
| SNP_P4_155672_27488 | NW_004516462.1 | Scaffold1185 | 27488                   | AA                              | GG              | 1946998674               |

| SNPs IDs             | Chromosome IDs | Chromosomes  | Physical positions (bp) | CDC Frontier (Reference genome) | (ILWC46 & LPNB) | NCBI SNPdb Accession IDs |
|----------------------|----------------|--------------|-------------------------|---------------------------------|-----------------|--------------------------|
| SNP_P4_155673_27526  | NW_004516462.1 | Scaffold1185 | 27526                   | TT                              | CC              | 1946998676               |
| SNP_P4_155674_27891  | NW_004516462.1 | Scaffold1185 | 27891                   | GG                              | AA              | 1946998678               |
| SNP_P4_155675_28071  | NW_004516462.1 | Scaffold1185 | 28071                   | TT                              | AA              | 1946998680               |
| SNP_P4_155676_29835  | NW_004516462.1 | Scaffold1185 | 29835                   | GG                              | AA              | 1946998682               |
| SNP_P4_155677_30154  | NW_004516462.1 | Scaffold1185 | 30154                   | GG                              | CC              | 1946998684               |
| SNP_P4_155678_30199  | NW_004516462.1 | Scaffold1185 | 30199                   | CC                              | TT              | 1946998686               |
| SNP_P4_155679_30502  | NW_004516462.1 | Scaffold1185 | 30502                   | GG                              | AA              | 1946998688               |
| SNP_P4_155680_30507  | NW_004516462.1 | Scaffold1185 | 30507                   | GG                              | TT              | 1946998690               |
| SNP_P4_155681_30539  | NW_004516462.1 | Scaffold1185 | 30539                   | CC                              | TT              | 1946998692               |
| SNP_P4_155682_30983  | NW_004516462.1 | Scaffold1185 | 30983                   | GG                              | AA              | 1946998693               |
| SNP_P4_155683_38662  | NW_004516462.1 | Scaffold1185 | 38662                   | TT                              | CC              | 1946998695               |
| SNP_P4_155684_38749  | NW_004516462.1 | Scaffold1185 | 38749                   | TT                              | AA              | 1946998697               |
| SNP_P4_155686_39169  | NW_004516462.1 | Scaffold1185 | 39169                   | AA                              | GG              | 1946998699               |
| SNP_P4_155687_46909  | NW_004516462.1 | Scaffold1185 | 46909                   | AA                              | GG              | 1946998701               |
| SNP_P4_155689_67222  | NW_004516462.1 | Scaffold1185 | 67222                   | AA                              | TT              | 1946998703               |
| SNP_P4_155690_67255  | NW_004516462.1 | Scaffold1185 | 67255                   | CC                              | TT              | 1946998705               |
| SNP_P4_155693_67645  | NW_004516462.1 | Scaffold1185 | 67645                   | AA                              | CC              | 1946998707               |
| SNP_P4_155694_67697  | NW_004516462.1 | Scaffold1185 | 67697                   | TT                              | CC              | 1946998709               |
| SNP_P4_155696_92640  | NW_004516462.1 | Scaffold1185 | 92640                   | TT                              | CC              | 1946998711               |
| SNP_P4_155697_92656  | NW_004516462.1 | Scaffold1185 | 92656                   | AA                              | TT              | 1946998713               |
| SNP_P4_155698_92667  | NW_004516462.1 | Scaffold1185 | 92667                   | GG                              | CC              | 1946998715               |
| SNP_P4_155699_92671  | NW_004516462.1 | Scaffold1185 | 92671                   | GG                              | CC              | 1946998717               |
| SNP_P4_155700_93537  | NW_004516462.1 | Scaffold1185 | 93537                   | GG                              | AA              | 1946998719               |
| SNP_P4_155701_93561  | NW_004516462.1 | Scaffold1185 | 93561                   | AA                              | GG              | 1946998721               |
| SNP_P4_155702_93617  | NW_004516462.1 | Scaffold1185 | 93617                   | AA                              | GG              | 1946998723               |
| SNP_P4_155703_93642  | NW_004516462.1 | Scaffold1185 | 93642                   | AA                              | TT              | 1946998725               |
| SNP_P4_155704_93810  | NW_004516462.1 | Scaffold1185 | 93810                   | AA                              | GG              | 1946998727               |
| SNP_P4_155705_93820  | NW_004516462.1 | Scaffold1185 | 93820                   | AA                              | GG              | 1946998729               |
| SNP_P4_155706_93935  | NW_004516462.1 | Scaffold1185 | 93935                   | AA                              | GG              | 1946998731               |
| SNP_P4_155707_108003 | NW_004516462.1 | Scaffold1185 | 108003                  | AA                              | TT              | 1946998733               |
| SNP_P4_155708_110960 | NW_004516462.1 | Scaffold1185 | 110960                  | CC                              | TT              | 1946998735               |
| SNP_P4_155709_115425 | NW_004516462.1 | Scaffold1185 | 115425                  | TT                              | CC              | 1946998737               |
| SNP_P4_155710_115429 | NW_004516462.1 | Scaffold1185 | 115429                  | AA                              | CC              | 1946998739               |
| SNP_P4_155711_115432 | NW_004516462.1 | Scaffold1185 | 115432                  | CC                              | AA              | 1946998741               |
| SNP_P4_155712_115468 | NW_004516462.1 | Scaffold1185 | 115468                  | CC                              | GG              | 1946998743               |
| SNP_P4_155713_115480 | NW_004516462.1 | Scaffold1185 | 115480                  | CC                              | GG              | 1946998745               |
| SNP_P4_155714_115691 | NW_004516462.1 | Scaffold1185 | 115691                  | TT                              | GG              | 1946998747               |
| SNP_P4_155715_115715 | NW_004516462.1 | Scaffold1185 | 115715                  | GG                              | AA              | 1946998749               |
| SNP_P4_155716_115720 | NW_004516462.1 | Scaffold1185 | 115720                  | TT                              | CC              | 1946998751               |
| SNP_P4_155718_134345 | NW_004516462.1 | Scaffold1185 | 134345                  | TT                              | CC              | 1946998753               |
| SNP_P4_155719_414    | NW_004516465.1 | Scaffold1191 | 414                     | AA                              | GG              | 1946998755               |
| SNP_P4_155720_517    | NW_004516465.1 | Scaffold1191 | 517                     | CC                              | AA              | 1946998757               |

| SNPs IDs             | Chromosome IDs | Chromosomes  | Physical positions (bp) | CDC Frontier (Reference genome) | (ILWC46 & LPNB) | NCBI SNPdb Accession IDs |
|----------------------|----------------|--------------|-------------------------|---------------------------------|-----------------|--------------------------|
| SNP_P4_155721_588    | NW_004516465.1 | Scaffold1191 | 588                     | TT                              | GG              | 1946998759               |
| SNP_P4_155722_824    | NW_004516465.1 | Scaffold1191 | 824                     | TT                              | CC              | 1946998761               |
| SNP_P4_155723_188    | NW_004516466.1 | Scaffold1192 | 188                     | AA                              | GG              | 1946998763               |
| SNP_P4_155724_366    | NW_004516466.1 | Scaffold1192 | 366                     | GG                              | CC              | 1946998765               |
| SNP_P4_155726_400    | NW_004516466.1 | Scaffold1192 | 400                     | TT                              | AA              | 1946998767               |
| SNP_P4_155727_470    | NW_004516466.1 | Scaffold1192 | 470                     | GG                              | CC              | 1946998769               |
| SNP_P4_155728_479    | NW_004516466.1 | Scaffold1192 | 479                     | GG                              | AA              | 1946998771               |
| SNP_P4_155729_491    | NW_004516466.1 | Scaffold1192 | 491                     | CC                              | TT              | 1946998773               |
| SNP_P4_155730_517    | NW_004516466.1 | Scaffold1192 | 517                     | CC                              | AA              | 1946998775               |
| SNP_P4_155731_549    | NW_004516466.1 | Scaffold1192 | 549                     | GG                              | TT              | 1946998776               |
| SNP_P4_155732_630    | NW_004516466.1 | Scaffold1192 | 630                     | TT                              | GG              | 1946998778               |
| SNP_P4_155733_643    | NW_004516466.1 | Scaffold1192 | 643                     | TT                              | AA              | 1946998780               |
| SNP_P4_155734_650    | NW_004516466.1 | Scaffold1192 | 650                     | GG                              | AA              | 1946998782               |
| SNP_P4_155735_660    | NW_004516466.1 | Scaffold1192 | 660                     | AA                              | GG              | 1946998784               |
| SNP_P4_155737_7549   | NW_004516467.1 | Scaffold1193 | 7549                    | GG                              | TT              | 1946998786               |
| SNP_P4_155738_7605   | NW_004516467.1 | Scaffold1193 | 7605                    | TT                              | CC              | 1946998788               |
| SNP_P4_155739_8123   | NW_004516467.1 | Scaffold1193 | 8123                    | CC                              | TT              | 1946998790               |
| SNP_P4_155740_8970   | NW_004516467.1 | Scaffold1193 | 8970                    | CC                              | AA              | 1946998792               |
| SNP_P4_155741_9032   | NW_004516467.1 | Scaffold1193 | 9032                    | CC                              | TT              | 1946998794               |
| SNP_P4_155742_9039   | NW_004516467.1 | Scaffold1193 | 9039                    | CC                              | TT              | 1946998796               |
| SNP_P4_155744_9068   | NW_004516467.1 | Scaffold1193 | 9068                    | AA                              | TT              | 1946998798               |
| SNP_P4_155745_10096  | NW_004516467.1 | Scaffold1193 | 10096                   | AA                              | GG              | 1946998800               |
| SNP_P4_155747_60320  | NW_004516467.1 | Scaffold1193 | 60320                   | GG                              | AA              | 1946998802               |
| SNP_P4_155748_62892  | NW_004516467.1 | Scaffold1193 | 62892                   | CC                              | TT              | 1946998804               |
| SNP_P4_155749_62927  | NW_004516467.1 | Scaffold1193 | 62927                   | TT                              | CC              | 1946998806               |
| SNP_P4_155750_62963  | NW_004516467.1 | Scaffold1193 | 62963                   | GG                              | TT              | 1946998808               |
| SNP_P4_155751_62991  | NW_004516467.1 | Scaffold1193 | 62991                   | AA                              | GG              | 1946998810               |
| SNP_P4_155752_63068  | NW_004516467.1 | Scaffold1193 | 63068                   | TT                              | CC              | 1946998812               |
| SNP_P4_155753_63101  | NW_004516467.1 | Scaffold1193 | 63101                   | AA                              | TT              | 1946998814               |
| SNP_P4_155754_63210  | NW_004516467.1 | Scaffold1193 | 63210                   | TT                              | GG              | 1946998816               |
| SNP_P4_155755_63213  | NW_004516467.1 | Scaffold1193 | 63213                   | TT                              | CC              | 1946998818               |
| SNP_P4_155756_63255  | NW_004516467.1 | Scaffold1193 | 63255                   | TT                              | CC              | 1946998820               |
| SNP_P4_155758_70498  | NW_004516467.1 | Scaffold1193 | 70498                   | CC                              | TT              | 1946998822               |
| SNP_P4_155759_75618  | NW_004516467.1 | Scaffold1193 | 75618                   | AA                              | GG              | 1946998824               |
| SNP_P4_155760_75630  | NW_004516467.1 | Scaffold1193 | 75630                   | CC                              | TT              | 1946998826               |
| SNP_P4_155761_98220  | NW_004516467.1 | Scaffold1193 | 98220                   | AA                              | GG              | 1946998828               |
| SNP_P4_155762_137529 | NW_004516467.1 | Scaffold1193 | 137529                  | AA                              | CC              | 1946998830               |
| SNP_P4_155764_158363 | NW_004516467.1 | Scaffold1193 | 158363                  | TT                              | GG              | 1946998832               |
| SNP_P4_155765_166702 | NW_004516467.1 | Scaffold1193 | 166702                  | GG                              | CC              | 1946998834               |
| SNP_P4_155766_192381 | NW_004516467.1 | Scaffold1193 | 192381                  | AA                              | GG              | 1946998836               |
| SNP_P4_155767_192614 | NW_004516467.1 | Scaffold1193 | 192614                  | GG                              | AA              | 1946998838               |
| SNP_P4_155768_194055 | NW_004516467.1 | Scaffold1193 | 194055                  | AA                              | GG              | 1946998840               |

| SNPs IDs             | Chromosome IDs | Chromosomes  | Physical positions (bp) | CDC Frontier (Reference genome) | (ILWC46 & LPNB) | NCBI SNPdb Accession IDs |
|----------------------|----------------|--------------|-------------------------|---------------------------------|-----------------|--------------------------|
| SNP_P4_155769_194058 | NW_004516467.1 | Scaffold1193 | 194058                  | AA                              | TT              | 1946998842               |
| SNP_P4_155770_194079 | NW_004516467.1 | Scaffold1193 | 194079                  | CC                              | AA              | 1946998844               |
| SNP_P4_155771_194400 | NW_004516467.1 | Scaffold1193 | 194400                  | TT                              | GG              | 1946998846               |
| SNP_P4_155772_222158 | NW_004516467.1 | Scaffold1193 | 222158                  | AA                              | GG              | 1946998848               |
| SNP_P4_155773_222453 | NW_004516467.1 | Scaffold1193 | 222453                  | AA                              | GG              | 1946998850               |
| SNP_P4_155774_222582 | NW_004516467.1 | Scaffold1193 | 222582                  | TT                              | AA              | 1946998852               |
| SNP_P4_155775_222619 | NW_004516467.1 | Scaffold1193 | 222619                  | GG                              | TT              | 1946998854               |
| SNP_P4_155776_222626 | NW_004516467.1 | Scaffold1193 | 222626                  | TT                              | AA              | 1946998856               |
| SNP_P4_155777_226065 | NW_004516467.1 | Scaffold1193 | 226065                  | GG                              | AA              | 1946998858               |
| SNP_P4_155778_227269 | NW_004516467.1 | Scaffold1193 | 227269                  | TT                              | CC              | 1946998860               |
| SNP_P4_155780_241650 | NW_004516467.1 | Scaffold1193 | 241650                  | GG                              | AA              | 1946998862               |
| SNP_P4_155781_241720 | NW_004516467.1 | Scaffold1193 | 241720                  | TT                              | CC              | 1946998864               |
| SNP_P4_155782_241763 | NW_004516467.1 | Scaffold1193 | 241763                  | TT                              | CC              | 1946998866               |
| SNP_P4_155783_241772 | NW_004516467.1 | Scaffold1193 | 241772                  | TT                              | CC              | 1946998868               |
| SNP_P4_155784_241933 | NW_004516467.1 | Scaffold1193 | 241933                  | CC                              | TT              | 1946998870               |
| SNP_P4_155785_241942 | NW_004516467.1 | Scaffold1193 | 241942                  | CC                              | TT              | 1946998872               |
| SNP_P4_155786_241969 | NW_004516467.1 | Scaffold1193 | 241969                  | AA                              | GG              | 1946998874               |
| SNP_P4_155787_241988 | NW_004516467.1 | Scaffold1193 | 241988                  | GG                              | TT              | 1946998876               |
| SNP_P4_155788_242036 | NW_004516467.1 | Scaffold1193 | 242036                  | AA                              | GG              | 1946998878               |
| SNP_P4_155789_242043 | NW_004516467.1 | Scaffold1193 | 242043                  | AA                              | GG              | 1946998880               |
| SNP_P4_155790_242055 | NW_004516467.1 | Scaffold1193 | 242055                  | AA                              | GG              | 1946998882               |
| SNP_P4_155791_242059 | NW_004516467.1 | Scaffold1193 | 242059                  | TT                              | CC              | 1946998884               |
| SNP_P4_155792_248235 | NW_004516467.1 | Scaffold1193 | 248235                  | TT                              | GG              | 1946998886               |
| SNP_P4_155793_250384 | NW_004516467.1 | Scaffold1193 | 250384                  | AA                              | GG              | 1946998888               |
| SNP_P4_155794_250698 | NW_004516467.1 | Scaffold1193 | 250698                  | AA                              | GG              | 1946998890               |
| SNP_P4_155795_257885 | NW_004516467.1 | Scaffold1193 | 257885                  | TT                              | CC              | 1946998891               |
| SNP_P4_155796_257886 | NW_004516467.1 | Scaffold1193 | 257886                  | GG                              | AA              | 1946998893               |
| SNP_P4_155797_257891 | NW_004516467.1 | Scaffold1193 | 257891                  | TT                              | CC              | 1946998895               |
| SNP_P4_155798_257892 | NW_004516467.1 | Scaffold1193 | 257892                  | CC                              | TT              | 1946998897               |
| SNP_P4_155799_258201 | NW_004516467.1 | Scaffold1193 | 258201                  | GG                              | AA              | 1946998899               |
| SNP_P4_155800_258240 | NW_004516467.1 | Scaffold1193 | 258240                  | CC                              | TT              | 1946998901               |
| SNP_P4_155801_271783 | NW_004516467.1 | Scaffold1193 | 271783                  | GG                              | TT              | 1946998903               |
| SNP_P4_155802_272715 | NW_004516467.1 | Scaffold1193 | 272715                  | AA                              | GG              | 1946998905               |
| SNP_P4_155803_272732 | NW_004516467.1 | Scaffold1193 | 272732                  | TT                              | CC              | 1946998907               |
| SNP_P4_155804_272831 | NW_004516467.1 | Scaffold1193 | 272831                  | CC                              | TT              | 1946998909               |
| SNP_P4_155805_272837 | NW_004516467.1 | Scaffold1193 | 272837                  | CC                              | GG              | 1946998911               |
| SNP_P4_155806_272843 | NW_004516467.1 | Scaffold1193 | 272843                  | CC                              | TT              | 1946998913               |
| SNP_P4_155807_272852 | NW_004516467.1 | Scaffold1193 | 272852                  | GG                              | AA              | 1946998915               |
| SNP_P4_155808_272858 | NW_004516467.1 | Scaffold1193 | 272858                  | TT                              | CC              | 1946998917               |
| SNP_P4_155809_272900 | NW_004516467.1 | Scaffold1193 | 272900                  | CC                              | TT              | 1946998919               |
| SNP_P4_155810_272906 | NW_004516467.1 | Scaffold1193 | 272906                  | GG                              | AA              | 1946998921               |
| SNP_P4_155811_275557 | NW_004516467.1 | Scaffold1193 | 275557                  | GG                              | CC              | 1946998923               |

| SNPs IDs             | Chromosome IDs | Chromosomes  | Physical positions (bp) | CDC Frontier (Reference genome) | (ILWC46 & LPNB) | NCBI SNPdb Accession IDs |
|----------------------|----------------|--------------|-------------------------|---------------------------------|-----------------|--------------------------|
| SNP_P4_155812_395    | NW_004516469.1 | Scaffold1195 | 395                     | GG                              | AA              | 1946998925               |
| SNP_P4_155813_404    | NW_004516469.1 | Scaffold1195 | 404                     | AA                              | GG              | 1946998927               |
| SNP_P4_155814_438    | NW_004516469.1 | Scaffold1195 | 438                     | CC                              | TT              | 1946998929               |
| SNP_P4_155815_456    | NW_004516469.1 | Scaffold1195 | 456                     | AA                              | GG              | 1946998931               |
| SNP_P4_155817_33484  | NW_004516469.1 | Scaffold1195 | 33484                   | CC                              | TT              | 1946998933               |
| SNP_P4_155818_33506  | NW_004516469.1 | Scaffold1195 | 33506                   | AA                              | GG              | 1946998935               |
| SNP_P4_155819_34974  | NW_004516469.1 | Scaffold1195 | 34974                   | AA                              | CC              | 1946998938               |
| SNP_P4_155820_35025  | NW_004516469.1 | Scaffold1195 | 35025                   | AA                              | GG              | 1946998940               |
| SNP_P4_155821_35082  | NW_004516469.1 | Scaffold1195 | 35082                   | CC                              | TT              | 1946998942               |
| SNP_P4_155822_35084  | NW_004516469.1 | Scaffold1195 | 35084                   | TT                              | CC              | 1946998944               |
| SNP_P4_155823_35129  | NW_004516469.1 | Scaffold1195 | 35129                   | AA                              | CC              | 1946998946               |
| SNP_P4_155824_35142  | NW_004516469.1 | Scaffold1195 | 35142                   | TT                              | CC              | 1946998948               |
| SNP_P4_155825_35180  | NW_004516469.1 | Scaffold1195 | 35180                   | AA                              | GG              | 1946998950               |
| SNP_P4_155826_35227  | NW_004516469.1 | Scaffold1195 | 35227                   | AA                              | GG              | 1946998952               |
| SNP_P4_155827_35494  | NW_004516469.1 | Scaffold1195 | 35494                   | GG                              | AA              | 1946998954               |
| SNP_P4_155828_35495  | NW_004516469.1 | Scaffold1195 | 35495                   | TT                              | CC              | 1946998956               |
| SNP_P4_155830_40151  | NW_004516469.1 | Scaffold1195 | 40151                   | GG                              | AA              | 1946998958               |
| SNP_P4_155831_53303  | NW_004516469.1 | Scaffold1195 | 53303                   | GG                              | AA              | 1946998960               |
| SNP_P4_155833_64007  | NW_004516469.1 | Scaffold1195 | 64007                   | AA                              | GG              | 1946998962               |
| SNP_P4_155834_64064  | NW_004516469.1 | Scaffold1195 | 64064                   | AA                              | GG              | 1946998964               |
| SNP_P4_155835_64514  | NW_004516469.1 | Scaffold1195 | 64514                   | TT                              | CC              | 1946998966               |
| SNP_P4_155836_64536  | NW_004516469.1 | Scaffold1195 | 64536                   | CC                              | TT              | 1946998968               |
| SNP_P4_155837_68735  | NW_004516469.1 | Scaffold1195 | 68735                   | GG                              | AA              | 1946998970               |
| SNP_P4_155838_86121  | NW_004516469.1 | Scaffold1195 | 86121                   | AA                              | GG              | 1946998972               |
| SNP_P4_155839_91431  | NW_004516469.1 | Scaffold1195 | 91431                   | AA                              | GG              | 1946998974               |
| SNP_P4_155840_91461  | NW_004516469.1 | Scaffold1195 | 91461                   | GG                              | AA              | 1946998976               |
| SNP_P4_155841_91472  | NW_004516469.1 | Scaffold1195 | 91472                   | CC                              | TT              | 1946998978               |
| SNP_P4_155842_91498  | NW_004516469.1 | Scaffold1195 | 91498                   | AA                              | TT              | 1946998980               |
| SNP_P4_155843_111926 | NW_004516469.1 | Scaffold1195 | 111926                  | TT                              | CC              | 1946998982               |
| SNP_P4_155844_111932 | NW_004516469.1 | Scaffold1195 | 111932                  | AA                              | TT              | 1946998984               |
| SNP_P4_155845_2583   | NW_004516470.1 | Scaffold1196 | 2583                    | AA                              | TT              | 1946998986               |
| SNP_P4_155846_3307   | NW_004516470.1 | Scaffold1196 | 3307                    | CC                              | TT              | 1946998988               |
| SNP_P4_155847_17265  | NW_004516470.1 | Scaffold1196 | 17265                   | AA                              | TT              | 1946998990               |
| SNP_P4_155848_19684  | NW_004516470.1 | Scaffold1196 | 19684                   | CC                              | AA              | 1946998992               |
| SNP_P4_155849_20074  | NW_004516470.1 | Scaffold1196 | 20074                   | CC                              | TT              | 1946998995               |
| SNP_P4_155851_33026  | NW_004516470.1 | Scaffold1196 | 33026                   | GG                              | AA              | 1946998997               |
| SNP_P4_155852_37129  | NW_004516470.1 | Scaffold1196 | 37129                   | TT                              | CC              | 1946998999               |
| SNP_P4_155853_37137  | NW_004516470.1 | Scaffold1196 | 37137                   | AA                              | CC              | 1946999001               |
| SNP_P4_155854_37189  | NW_004516470.1 | Scaffold1196 | 37189                   | TT                              | CC              | 1946999003               |
| SNP_P4_155855_37590  | NW_004516470.1 | Scaffold1196 | 37590                   | TT                              | CC              | 1946999005               |
| SNP_P4_155856_38665  | NW_004516470.1 | Scaffold1196 | 38665                   | CC                              | TT              | 1946999007               |
| SNP_P4_155857_38669  | NW_004516470.1 | Scaffold1196 | 38669                   | CC                              | AA              | 1946999009               |

| SNPs IDs             | Chromosome IDs | Chromosomes  | Physical positions (bp) | CDC Frontier (Reference genome) | (ILWC46 & LPNB) | NCBI SNPdb Accession IDs |
|----------------------|----------------|--------------|-------------------------|---------------------------------|-----------------|--------------------------|
| SNP_P4_155858_38688  | NW_004516470.1 | Scaffold1196 | 38688                   | AA                              | TT              | 1946999011               |
| SNP_P4_155859_39812  | NW_004516470.1 | Scaffold1196 | 39812                   | AA                              | GG              | 1946999013               |
| SNP_P4_155860_40034  | NW_004516470.1 | Scaffold1196 | 40034                   | GG                              | TT              | 1946999015               |
| SNP_P4_155861_57278  | NW_004516470.1 | Scaffold1196 | 57278                   | CC                              | AA              | 1946999017               |
| SNP_P4_155862_58790  | NW_004516470.1 | Scaffold1196 | 58790                   | TT                              | GG              | 1946999019               |
| SNP_P4_155863_69977  | NW_004516470.1 | Scaffold1196 | 69977                   | AA                              | GG              | 1946999021               |
| SNP_P4_155865_70878  | NW_004516470.1 | Scaffold1196 | 70878                   | TT                              | CC              | 1946999023               |
| SNP_P4_155866_70919  | NW_004516470.1 | Scaffold1196 | 70919                   | TT                              | CC              | 1946999025               |
| SNP_P4_155867_78148  | NW_004516470.1 | Scaffold1196 | 78148                   | GG                              | TT              | 1946999027               |
| SNP_P4_155868_78506  | NW_004516470.1 | Scaffold1196 | 78506                   | AA                              | TT              | 1946999029               |
| SNP_P4_155869_78659  | NW_004516470.1 | Scaffold1196 | 78659                   | AA                              | GG              | 1946999031               |
| SNP_P4_155870_78811  | NW_004516470.1 | Scaffold1196 | 78811                   | GG                              | TT              | 1946999033               |
| SNP_P4_155871_103843 | NW_004516470.1 | Scaffold1196 | 103843                  | TT                              | AA              | 1946999035               |
| SNP_P4_155872_103860 | NW_004516470.1 | Scaffold1196 | 103860                  | CC                              | AA              | 1946999037               |
| SNP_P4_155874_106246 | NW_004516470.1 | Scaffold1196 | 106246                  | AA                              | GG              | 1946999039               |
| SNP_P4_155875_106805 | NW_004516470.1 | Scaffold1196 | 106805                  | TT                              | GG              | 1946999041               |
| SNP_P4_155876_110975 | NW_004516470.1 | Scaffold1196 | 110975                  | CC                              | GG              | 1946999043               |
| SNP_P4_155877_111033 | NW_004516470.1 | Scaffold1196 | 111033                  | GG                              | TT              | 1946999045               |
| SNP_P4_155878_111597 | NW_004516470.1 | Scaffold1196 | 111597                  | AA                              | TT              | 1946999047               |
| SNP_P4_155882_118320 | NW_004516470.1 | Scaffold1196 | 118320                  | GG                              | AA              | 1946999049               |
| SNP_P4_155883_119694 | NW_004516470.1 | Scaffold1196 | 119694                  | AA                              | GG              | 1946999051               |
| SNP_P4_155884_119714 | NW_004516470.1 | Scaffold1196 | 119714                  | AA                              | GG              | 1946999053               |
| SNP_P4_155885_119731 | NW_004516470.1 | Scaffold1196 | 119731                  | AA                              | GG              | 1946999055               |
| SNP_P4_155886_120004 | NW_004516470.1 | Scaffold1196 | 120004                  | AA                              | GG              | 1946999057               |
| SNP_P4_155887_120036 | NW_004516470.1 | Scaffold1196 | 120036                  | AA                              | GG              | 1946999059               |
| SNP_P4_155888_120769 | NW_004516470.1 | Scaffold1196 | 120769                  | GG                              | AA              | 1946999061               |
| SNP_P4_155889_125863 | NW_004516470.1 | Scaffold1196 | 125863                  | GG                              | AA              | 1946999063               |
| SNP_P4_155890_125866 | NW_004516470.1 | Scaffold1196 | 125866                  | CC                              | TT              | 1946999065               |
| SNP_P4_155891_126513 | NW_004516470.1 | Scaffold1196 | 126513                  | AA                              | GG              | 1946999067               |
| SNP_P4_155893_134694 | NW_004516470.1 | Scaffold1196 | 134694                  | AA                              | TT              | 1946999069               |
| SNP_P4_155894_144459 | NW_004516470.1 | Scaffold1196 | 144459                  | TT                              | AA              | 1946999071               |
| SNP_P4_155895_144738 | NW_004516470.1 | Scaffold1196 | 144738                  | CC                              | TT              | 1946999073               |
| SNP_P4_155896_144755 | NW_004516470.1 | Scaffold1196 | 144755                  | TT                              | AA              | 1946999075               |
| SNP_P4_155897_147246 | NW_004516470.1 | Scaffold1196 | 147246                  | CC                              | TT              | 1946999077               |
| SNP_P4_155898_158190 | NW_004516470.1 | Scaffold1196 | 158190                  | TT                              | AA              | 1946999079               |
| SNP_P4_155899_165515 | NW_004516470.1 | Scaffold1196 | 165515                  | GG                              | TT              | 1946999081               |
| SNP_P4_155901_172038 | NW_004516470.1 | Scaffold1196 | 172038                  | CC                              | AA              | 1946999083               |
| SNP_P4_155902_173002 | NW_004516470.1 | Scaffold1196 | 173002                  | TT                              | CC              | 1946999085               |
| SNP_P4_155903_180809 | NW_004516470.1 | Scaffold1196 | 180809                  | AA                              | GG              | 1946999087               |
| SNP_P4_155904_183621 | NW_004516470.1 | Scaffold1196 | 183621                  | AA                              | GG              | 1946999089               |
| SNP_P4_155905_183687 | NW_004516470.1 | Scaffold1196 | 183687                  | AA                              | GG              | 1946999091               |
| SNP_P4_155906_184212 | NW_004516470.1 | Scaffold1196 | 184212                  | AA                              | TT              | 1946999093               |

| SNPs IDs             | Chromosome IDs | Chromosomes  | Physical positions (bp) | CDC Frontier (Reference genome) | (ILWC46 & LPNB) | NCBI SNPdb Accession IDs |
|----------------------|----------------|--------------|-------------------------|---------------------------------|-----------------|--------------------------|
| SNP_P4_155907_192878 | NW_004516470.1 | Scaffold1196 | 192878                  | TT                              | CC              | 1946999095               |
| SNP_P4_155908_193226 | NW_004516470.1 | Scaffold1196 | 193226                  | TT                              | CC              | 1946999097               |
| SNP_P4_155909_193304 | NW_004516470.1 | Scaffold1196 | 193304                  | AA                              | GG              | 1946999099               |
| SNP_P4_155910_194712 | NW_004516470.1 | Scaffold1196 | 194712                  | CC                              | TT              | 1946999101               |
| SNP_P4_155911_205914 | NW_004516470.1 | Scaffold1196 | 205914                  | CC                              | AA              | 1946999103               |
| SNP_P4_155912_205962 | NW_004516470.1 | Scaffold1196 | 205962                  | CC                              | AA              | 1946999105               |
| SNP_P4_155913_206115 | NW_004516470.1 | Scaffold1196 | 206115                  | TT                              | AA              | 1946999107               |
| SNP_P4_155914_206224 | NW_004516470.1 | Scaffold1196 | 206224                  | AA                              | GG              | 1946999109               |
| SNP_P4_155916_206789 | NW_004516470.1 | Scaffold1196 | 206789                  | GG                              | TT              | 1946999111               |
| SNP_P4_155917_207287 | NW_004516470.1 | Scaffold1196 | 207287                  | AA                              | GG              | 1946999113               |
| SNP_P4_155918_207588 | NW_004516470.1 | Scaffold1196 | 207588                  | TT                              | AA              | 1946999115               |
| SNP_P4_155919_957    | NW_004516471.1 | Scaffold1197 | 957                     | GG                              | AA              | 1946999117               |
| SNP_P4_155920_974    | NW_004516471.1 | Scaffold1197 | 974                     | TT                              | GG              | 1946999119               |
| SNP_P4_155921_1249   | NW_004516471.1 | Scaffold1197 | 1249                    | CC                              | TT              | 1946999121               |
| SNP_P4_155922_1396   | NW_004516471.1 | Scaffold1197 | 1396                    | AA                              | TT              | 1946999123               |
| SNP_P4_155923_4896   | NW_004516471.1 | Scaffold1197 | 4896                    | GG                              | AA              | 1946999125               |
| SNP_P4_155924_4911   | NW_004516471.1 | Scaffold1197 | 4911                    | AA                              | CC              | 1946999127               |
| SNP_P4_155925_4963   | NW_004516471.1 | Scaffold1197 | 4963                    | CC                              | AA              | 1946999129               |
| SNP_P4_155926_4984   | NW_004516471.1 | Scaffold1197 | 4984                    | CC                              | TT              | 1946999131               |
| SNP_P4_155927_5059   | NW_004516471.1 | Scaffold1197 | 5059                    | TT                              | CC              | 1946999133               |
| SNP_P4_155929_5190   | NW_004516471.1 | Scaffold1197 | 5190                    | TT                              | CC              | 1946999135               |
| SNP_P4_155930_5244   | NW_004516471.1 | Scaffold1197 | 5244                    | AA                              | CC              | 1946999137               |
| SNP_P4_155931_5271   | NW_004516471.1 | Scaffold1197 | 5271                    | TT                              | AA              | 1946999139               |
| SNP_P4_155932_5272   | NW_004516471.1 | Scaffold1197 | 5272                    | CC                              | AA              | 1946999141               |
| SNP_P4_155933_5326   | NW_004516471.1 | Scaffold1197 | 5326                    | GG                              | AA              | 1946999143               |
| SNP_P4_155934_5332   | NW_004516471.1 | Scaffold1197 | 5332                    | AA                              | GG              | 1946999145               |
| SNP_P4_155935_5352   | NW_004516471.1 | Scaffold1197 | 5352                    | AA                              | GG              | 1946999147               |
| SNP_P4_155936_5407   | NW_004516471.1 | Scaffold1197 | 5407                    | AA                              | GG              | 1946999149               |
| SNP_P4_155937_5411   | NW_004516471.1 | Scaffold1197 | 5411                    | GG                              | AA              | 1946999151               |
| SNP_P4_155938_5508   | NW_004516471.1 | Scaffold1197 | 5508                    | GG                              | AA              | 1946999153               |
| SNP_P4_155939_5595   | NW_004516471.1 | Scaffold1197 | 5595                    | GG                              | AA              | 1946999155               |
| SNP_P4_155940_5615   | NW_004516471.1 | Scaffold1197 | 5615                    | AA                              | GG              | 1946999157               |
| SNP_P4_155941_5655   | NW_004516471.1 | Scaffold1197 | 5655                    | GG                              | TT              | 1946999159               |
| SNP_P4_155942_5681   | NW_004516471.1 | Scaffold1197 | 5681                    | TT                              | GG              | 1946999161               |
| SNP_P4_155943_5744   | NW_004516471.1 | Scaffold1197 | 5744                    | AA                              | TT              | 1946999163               |
| SNP_P4_155944_5879   | NW_004516471.1 | Scaffold1197 | 5879                    | TT                              | AA              | 1946999165               |
| SNP_P4_155945_5880   | NW_004516471.1 | Scaffold1197 | 5880                    | GG                              | TT              | 1946999167               |
| SNP_P4_155946_5894   | NW_004516471.1 | Scaffold1197 | 5894                    | CC                              | AA              | 1946999169               |
| SNP_P4_155947_6106   | NW_004516471.1 | Scaffold1197 | 6106                    | TT                              | CC              | 1946999171               |
| SNP_P4_155948_6111   | NW_004516471.1 | Scaffold1197 | 6111                    | AA                              | GG              | 1946999173               |
| SNP_P4_155949_6124   | NW_004516471.1 | Scaffold1197 | 6124                    | GG                              | TT              | 1946999175               |
| SNP_P4_155950_6140   | NW_004516471.1 | Scaffold1197 | 6140                    | TT                              | CC              | 1946999177               |

| SNPs IDs             | Chromosome IDs | Chromosomes  | Physical positions (bp) | CDC Frontier (Reference genome) | (ILWC46 & LPNB) | NCBI SNPdb Accession IDs |
|----------------------|----------------|--------------|-------------------------|---------------------------------|-----------------|--------------------------|
| SNP_P4_155951_6232   | NW_004516471.1 | Scaffold1197 | 6232                    | CC                              | TT              | 1946999179               |
| SNP_P4_155952_6243   | NW_004516471.1 | Scaffold1197 | 6243                    | TT                              | CC              | 1946999181               |
| SNP_P4_155953_9975   | NW_004516471.1 | Scaffold1197 | 9975                    | TT                              | CC              | 1946999183               |
| SNP_P4_155955_10299  | NW_004516471.1 | Scaffold1197 | 10299                   | GG                              | AA              | 1946999185               |
| SNP_P4_155956_23138  | NW_004516471.1 | Scaffold1197 | 23138                   | TT                              | AA              | 1946999187               |
| SNP_P4_155957_23146  | NW_004516471.1 | Scaffold1197 | 23146                   | TT                              | GG              | 1946999189               |
| SNP_P4_155958_23242  | NW_004516471.1 | Scaffold1197 | 23242                   | TT                              | AA              | 1946999191               |
| SNP_P4_155959_25833  | NW_004516471.1 | Scaffold1197 | 25833                   | TT                              | CC              | 1946999193               |
| SNP_P4_155960_25835  | NW_004516471.1 | Scaffold1197 | 25835                   | TT                              | AA              | 1946999195               |
| SNP_P4_155961_26193  | NW_004516471.1 | Scaffold1197 | 26193                   | CC                              | TT              | 1946999197               |
| SNP_P4_155963_28092  | NW_004516471.1 | Scaffold1197 | 28092                   | AA                              | GG              | 1946999199               |
| SNP_P4_155964_28111  | NW_004516471.1 | Scaffold1197 | 28111                   | GG                              | AA              | 1946999201               |
| SNP_P4_155965_38654  | NW_004516471.1 | Scaffold1197 | 38654                   | TT                              | CC              | 1946999203               |
| SNP_P4_155966_41973  | NW_004516471.1 | Scaffold1197 | 41973                   | TT                              | GG              | 1946999205               |
| SNP_P4_155967_44357  | NW_004516471.1 | Scaffold1197 | 44357                   | AA                              | CC              | 1946999207               |
| SNP_P4_155968_44618  | NW_004516471.1 | Scaffold1197 | 44618                   | GG                              | AA              | 1946999209               |
| SNP_P4_155969_48285  | NW_004516471.1 | Scaffold1197 | 48285                   | AA                              | GG              | 1946999211               |
| SNP_P4_155970_58181  | NW_004516471.1 | Scaffold1197 | 58181                   | AA                              | TT              | 1946999213               |
| SNP_P4_155971_58202  | NW_004516471.1 | Scaffold1197 | 58202                   | GG                              | AA              | 1946999215               |
| SNP_P4_155973_58296  | NW_004516471.1 | Scaffold1197 | 58296                   | GG                              | AA              | 1946999217               |
| SNP_P4_155974_58374  | NW_004516471.1 | Scaffold1197 | 58374                   | TT                              | CC              | 1946999219               |
| SNP_P4_155975_58522  | NW_004516471.1 | Scaffold1197 | 58522                   | CC                              | TT              | 1946999221               |
| SNP_P4_155976_58544  | NW_004516471.1 | Scaffold1197 | 58544                   | AA                              | TT              | 1946999223               |
| SNP_P4_155977_58555  | NW_004516471.1 | Scaffold1197 | 58555                   | CC                              | TT              | 1946999225               |
| SNP_P4_155978_58587  | NW_004516471.1 | Scaffold1197 | 58587                   | TT                              | AA              | 1946999227               |
| SNP_P4_155979_58612  | NW_004516471.1 | Scaffold1197 | 58612                   | GG                              | AA              | 1946999229               |
| SNP_P4_155980_58615  | NW_004516471.1 | Scaffold1197 | 58615                   | TT                              | GG              | 1946999231               |
| SNP_P4_155981_58619  | NW_004516471.1 | Scaffold1197 | 58619                   | GG                              | AA              | 1946999233               |
| SNP_P4_155982_58641  | NW_004516471.1 | Scaffold1197 | 58641                   | CC                              | AA              | 1946999235               |
| SNP_P4_155983_72858  | NW_004516471.1 | Scaffold1197 | 72858                   | CC                              | AA              | 1946999237               |
| SNP_P4_155985_82922  | NW_004516471.1 | Scaffold1197 | 82922                   | GG                              | TT              | 1946999239               |
| SNP_P4_155986_86741  | NW_004516471.1 | Scaffold1197 | 86741                   | TT                              | CC              | 1946999241               |
| SNP_P4_155987_86742  | NW_004516471.1 | Scaffold1197 | 86742                   | CC                              | TT              | 1946999243               |
| SNP_P4_155988_87157  | NW_004516471.1 | Scaffold1197 | 87157                   | TT                              | CC              | 1946999245               |
| SNP_P4_155989_87414  | NW_004516471.1 | Scaffold1197 | 87414                   | TT                              | CC              | 1946999247               |
| SNP_P4_155990_87425  | NW_004516471.1 | Scaffold1197 | 87425                   | TT                              | AA              | 1946999249               |
| SNP_P4_155991_104110 | NW_004516471.1 | Scaffold1197 | 104110                  | CC                              | AA              | 1946999251               |
| SNP_P4_155993_136559 | NW_004516471.1 | Scaffold1197 | 136559                  | GG                              | AA              | 1946999253               |
| SNP_P4_155994_142099 | NW_004516471.1 | Scaffold1197 | 142099                  | TT                              | CC              | 1946999255               |
| SNP_P4_155995_142109 | NW_004516471.1 | Scaffold1197 | 142109                  | TT                              | AA              | 1946999257               |
| SNP_P4_155996_142163 | NW_004516471.1 | Scaffold1197 | 142163                  | CC                              | TT              | 1946999259               |
| SNP_P4_155997_142168 | NW_004516471.1 | Scaffold1197 | 142168                  | GG                              | CC              | 1946999261               |



| SNPs IDs             | Chromosome IDs | Chromosomes  | Physical positions (bp) | CDC Frontier (Reference genome) | (ILWC46 & LPNB) | NCBI SNPdb Accession IDs |
|----------------------|----------------|--------------|-------------------------|---------------------------------|-----------------|--------------------------|
| SNP_P4_155998_142169 | NW_004516471.1 | Scaffold1197 | 142169                  | TT                              | CC              | 1946999263               |
| SNP_P4_155999_142202 | NW_004516471.1 | Scaffold1197 | 142202                  | CC                              | AA              | 1946999265               |
| SNP_P4_156000_142218 | NW_004516471.1 | Scaffold1197 | 142218                  | TT                              | AA              | 1946999267               |
| SNP_P4_156001_142412 | NW_004516471.1 | Scaffold1197 | 142412                  | GG                              | CC              | 1946999269               |
| SNP_P4_156002_142420 | NW_004516471.1 | Scaffold1197 | 142420                  | GG                              | TT              | 1946999271               |
| SNP_P4_156004_142464 | NW_004516471.1 | Scaffold1197 | 142464                  | AA                              | GG              | 1946999273               |
| SNP_P4_156005_146253 | NW_004516471.1 | Scaffold1197 | 146253                  | GG                              | AA              | 1946999275               |
| SNP_P4_156006_146262 | NW_004516471.1 | Scaffold1197 | 146262                  | GG                              | TT              | 1946999277               |
| SNP_P4_156007_146440 | NW_004516471.1 | Scaffold1197 | 146440                  | CC                              | AA              | 1946999279               |
| SNP_P4_156008_146577 | NW_004516471.1 | Scaffold1197 | 146577                  | TT                              | AA              | 1946999281               |
| SNP_P4_156009_146801 | NW_004516471.1 | Scaffold1197 | 146801                  | TT                              | AA              | 1946999283               |
| SNP_P4_156010_151652 | NW_004516471.1 | Scaffold1197 | 151652                  | GG                              | AA              | 1946999285               |
| SNP_P4_156011_156030 | NW_004516471.1 | Scaffold1197 | 156030                  | GG                              | CC              | 1946999287               |
| SNP_P4_156013_173109 | NW_004516471.1 | Scaffold1197 | 173109                  | GG                              | AA              | 1946999289               |
| SNP_P4_156014_173153 | NW_004516471.1 | Scaffold1197 | 173153                  | AA                              | TT              | 1946999291               |
| SNP_P4_156015_173164 | NW_004516471.1 | Scaffold1197 | 173164                  | AA                              | CC              | 1946999293               |
| SNP_P4_156017_186224 | NW_004516471.1 | Scaffold1197 | 186224                  | TT                              | CC              | 1946999295               |
| SNP_P4_156018_186736 | NW_004516471.1 | Scaffold1197 | 186736                  | TT                              | CC              | 1946999297               |
| SNP_P4_156020_191663 | NW_004516471.1 | Scaffold1197 | 191663                  | AA                              | GG              | 1946999299               |
| SNP_P4_156021_209377 | NW_004516471.1 | Scaffold1197 | 209377                  | GG                              | TT              | 1946999301               |
| SNP_P4_156022_227362 | NW_004516471.1 | Scaffold1197 | 227362                  | AA                              | GG              | 1946999303               |
| SNP_P4_156023_231226 | NW_004516471.1 | Scaffold1197 | 231226                  | TT                              | CC              | 1946999305               |
| SNP_P4_156024_231245 | NW_004516471.1 | Scaffold1197 | 231245                  | GG                              | CC              | 1946999307               |
| SNP_P4_156025_231267 | NW_004516471.1 | Scaffold1197 | 231267                  | AA                              | GG              | 1946999309               |
| SNP_P4_156026_231511 | NW_004516471.1 | Scaffold1197 | 231511                  | TT                              | GG              | 1946999311               |
| SNP_P4_156027_231576 | NW_004516471.1 | Scaffold1197 | 231576                  | GG                              | AA              | 1946999313               |
| SNP_P4_156028_231787 | NW_004516471.1 | Scaffold1197 | 231787                  | CC                              | TT              | 1946999315               |
| SNP_P4_156029_237229 | NW_004516471.1 | Scaffold1197 | 237229                  | GG                              | AA              | 1946999317               |
| SNP_P4_156030_237241 | NW_004516471.1 | Scaffold1197 | 237241                  | GG                              | TT              | 1946999319               |
| SNP_P4_156033_248318 | NW_004516471.1 | Scaffold1197 | 248318                  | CC                              | AA              | 1946999321               |
| SNP_P4_156034_248598 | NW_004516471.1 | Scaffold1197 | 248598                  | TT                              | CC              | 1946999323               |
| SNP_P4_156035_253313 | NW_004516471.1 | Scaffold1197 | 253313                  | TT                              | GG              | 1946999325               |
| SNP_P4_156036_253339 | NW_004516471.1 | Scaffold1197 | 253339                  | AA                              | GG              | 1946999327               |
| SNP_P4_156037_268200 | NW_004516471.1 | Scaffold1197 | 268200                  | TT                              | AA              | 1946999329               |
| SNP_P4_156038_268520 | NW_004516471.1 | Scaffold1197 | 268520                  | AA                              | GG              | 1946999331               |
| SNP_P4_156039_268632 | NW_004516471.1 | Scaffold1197 | 268632                  | AA                              | CC              | 1946999333               |
| SNP_P4_156040_269576 | NW_004516471.1 | Scaffold1197 | 269576                  | AA                              | GG              | 1946999335               |
| SNP_P4_156041_269580 | NW_004516471.1 | Scaffold1197 | 269580                  | AA                              | GG              | 1946999337               |
| SNP_P4_156042_359641 | NW_004516471.1 | Scaffold1197 | 359641                  | AA                              | TT              | 1946999339               |
| SNP_P4_156043_369634 | NW_004516471.1 | Scaffold1197 | 369634                  | TT                              | GG              | 1946999341               |
| SNP_P4_156044_370015 | NW_004516471.1 | Scaffold1197 | 370015                  | GG                              | AA              | 1946999343               |
| SNP_P4_156045_380421 | NW_004516471.1 | Scaffold1197 | 380421                  | TT                              | GG              | 1946999345               |

| SNPs IDs             | Chromosome IDs | Chromosomes  | Physical positions (bp) | CDC Frontier (Reference genome) | (ILWC46 & LPNB) | NCBI SNPdb Accession IDs |
|----------------------|----------------|--------------|-------------------------|---------------------------------|-----------------|--------------------------|
| SNP_P4_156046_380569 | NW_004516471.1 | Scaffold1197 | 380569                  | AA                              | TT              | 1946999347               |
| SNP_P4_156047_380611 | NW_004516471.1 | Scaffold1197 | 380611                  | GG                              | CC              | 1946999349               |
| SNP_P4_156048_380661 | NW_004516471.1 | Scaffold1197 | 380661                  | CC                              | TT              | 1946999351               |
| SNP_P4_156049_380663 | NW_004516471.1 | Scaffold1197 | 380663                  | GG                              | AA              | 1946999353               |
| SNP_P4_156050_380701 | NW_004516471.1 | Scaffold1197 | 380701                  | CC                              | TT              | 1946999355               |
| SNP_P4_156051_380702 | NW_004516471.1 | Scaffold1197 | 380702                  | CC                              | TT              | 1946999357               |
| SNP_P4_156052_384910 | NW_004516471.1 | Scaffold1197 | 384910                  | CC                              | TT              | 1946999359               |
| SNP_P4_156053_385027 | NW_004516471.1 | Scaffold1197 | 385027                  | TT                              | CC              | 1946999361               |
| SNP_P4_156054_405878 | NW_004516471.1 | Scaffold1197 | 405878                  | GG                              | AA              | 1946999363               |
| SNP_P4_156055_427710 | NW_004516471.1 | Scaffold1197 | 427710                  | CC                              | AA              | 1946999365               |
| SNP_P4_156056_432950 | NW_004516471.1 | Scaffold1197 | 432950                  | TT                              | AA              | 1946999367               |
| SNP_P4_156057_433819 | NW_004516471.1 | Scaffold1197 | 433819                  | AA                              | CC              | 1946999369               |
| SNP_P4_156058_439519 | NW_004516471.1 | Scaffold1197 | 439519                  | GG                              | AA              | 1946999371               |
| SNP_P4_156059_447776 | NW_004516471.1 | Scaffold1197 | 447776                  | GG                              | TT              | 1946999373               |
| SNP_P4_156060_447812 | NW_004516471.1 | Scaffold1197 | 447812                  | TT                              | CC              | 1946999375               |
| SNP_P4_156061_447833 | NW_004516471.1 | Scaffold1197 | 447833                  | TT                              | CC              | 1946999377               |
| SNP_P4_156062_447863 | NW_004516471.1 | Scaffold1197 | 447863                  | AA                              | GG              | 1946999379               |
| SNP_P4_156063_447900 | NW_004516471.1 | Scaffold1197 | 447900                  | AA                              | CC              | 1946999381               |
| SNP_P4_156064_447909 | NW_004516471.1 | Scaffold1197 | 447909                  | GG                              | CC              | 1946999383               |
| SNP_P4_156065_447940 | NW_004516471.1 | Scaffold1197 | 447940                  | GG                              | TT              | 1946999385               |
| SNP_P4_156066_447991 | NW_004516471.1 | Scaffold1197 | 447991                  | AA                              | GG              | 1946999387               |
| SNP_P4_156068_488017 | NW_004516471.1 | Scaffold1197 | 488017                  | AA                              | GG              | 1946999389               |
| SNP_P4_156069_489650 | NW_004516471.1 | Scaffold1197 | 489650                  | GG                              | AA              | 1946999391               |
| SNP_P4_156070_492556 | NW_004516471.1 | Scaffold1197 | 492556                  | CC                              | GG              | 1946999393               |
| SNP_P4_156071_510635 | NW_004516471.1 | Scaffold1197 | 510635                  | TT                              | CC              | 1946999395               |
| SNP_P4_156072_510655 | NW_004516471.1 | Scaffold1197 | 510655                  | GG                              | AA              | 1946999397               |
| SNP_P4_156073_510674 | NW_004516471.1 | Scaffold1197 | 510674                  | TT                              | CC              | 1946999399               |
| SNP_P4_156074_510709 | NW_004516471.1 | Scaffold1197 | 510709                  | CC                              | TT              | 1946999401               |
| SNP_P4_156075_510760 | NW_004516471.1 | Scaffold1197 | 510760                  | TT                              | CC              | 1946999403               |
| SNP_P4_156076_510797 | NW_004516471.1 | Scaffold1197 | 510797                  | AA                              | GG              | 1946999405               |
| SNP_P4_156077_510827 | NW_004516471.1 | Scaffold1197 | 510827                  | TT                              | CC              | 1946999407               |
| SNP_P4_156078_511060 | NW_004516471.1 | Scaffold1197 | 511060                  | AA                              | TT              | 1946999409               |
| SNP_P4_156079_511145 | NW_004516471.1 | Scaffold1197 | 511145                  | TT                              | AA              | 1946999411               |
| SNP_P4_156080_511169 | NW_004516471.1 | Scaffold1197 | 511169                  | GG                              | AA              | 1946999413               |
| SNP_P4_156081_511189 | NW_004516471.1 | Scaffold1197 | 511189                  | GG                              | TT              | 1946999415               |
| SNP_P4_156082_511190 | NW_004516471.1 | Scaffold1197 | 511190                  | AA                              | GG              | 1946999417               |
| SNP_P4_156083_511227 | NW_004516471.1 | Scaffold1197 | 511227                  | CC                              | GG              | 1946999419               |
| SNP_P4_156084_511235 | NW_004516471.1 | Scaffold1197 | 511235                  | TT                              | GG              | 1946999421               |
| SNP_P4_156085_520563 | NW_004516471.1 | Scaffold1197 | 520563                  | CC                              | TT              | 1946999423               |
| SNP_P4_156086_520622 | NW_004516471.1 | Scaffold1197 | 520622                  | GG                              | TT              | 1946999425               |
| SNP_P4_156087_540953 | NW_004516471.1 | Scaffold1197 | 540953                  | AA                              | TT              | 1946999427               |
| SNP_P4_156089_541188 | NW_004516471.1 | Scaffold1197 | 541188                  | CC                              | TT              | 1946999429               |

| SNPs IDs             | Chromosome IDs | Chromosomes  | Physical positions (bp) | CDC Frontier (Reference genome) | (ILWC46 & LPNB) | NCBI SNPdb Accession IDs |
|----------------------|----------------|--------------|-------------------------|---------------------------------|-----------------|--------------------------|
| SNP_P4_156090_550231 | NW_004516471.1 | Scaffold1197 | 550231                  | TT                              | AA              | 1946999431               |
| SNP_P4_156091_550239 | NW_004516471.1 | Scaffold1197 | 550239                  | TT                              | GG              | 1946999433               |
| SNP_P4_156093_530    | NW_004516472.1 | Scaffold1198 | 530                     | TT                              | CC              | 1946999435               |
| SNP_P4_156094_590    | NW_004516472.1 | Scaffold1198 | 590                     | AA                              | CC              | 1946999437               |
| SNP_P4_156095_616    | NW_004516472.1 | Scaffold1198 | 616                     | CC                              | AA              | 1946999439               |
| SNP_P4_156096_772    | NW_004516472.1 | Scaffold1198 | 772                     | CC                              | TT              | 1946999441               |
| SNP_P4_156097_6440   | NW_004516473.1 | Scaffold1202 | 6440                    | TT                              | GG              | 1946999443               |
| SNP_P4_156099_22843  | NW_004516473.1 | Scaffold1202 | 22843                   | TT                              | CC              | 1946999445               |
| SNP_P4_156101_29172  | NW_004516473.1 | Scaffold1202 | 29172                   | TT                              | CC              | 1946999447               |
| SNP_P4_156105_107962 | NW_004516473.1 | Scaffold1202 | 107962                  | GG                              | AA              | 1946999449               |
| SNP_P4_156106_169132 | NW_004516473.1 | Scaffold1202 | 169132                  | TT                              | CC              | 1946999451               |
| SNP_P4_156107_176908 | NW_004516473.1 | Scaffold1202 | 176908                  | AA                              | TT              | 1946999453               |
| SNP_P4_156108_177003 | NW_004516473.1 | Scaffold1202 | 177003                  | CC                              | TT              | 1946999455               |
| SNP_P4_156109_177004 | NW_004516473.1 | Scaffold1202 | 177004                  | CC                              | GG              | 1946999457               |
| SNP_P4_156110_177022 | NW_004516473.1 | Scaffold1202 | 177022                  | CC                              | GG              | 1946999459               |
| SNP_P4_156111_177025 | NW_004516473.1 | Scaffold1202 | 177025                  | TT                              | CC              | 1946999461               |
| SNP_P4_156112_177033 | NW_004516473.1 | Scaffold1202 | 177033                  | TT                              | CC              | 1946999463               |
| SNP_P4_156113_177036 | NW_004516473.1 | Scaffold1202 | 177036                  | TT                              | GG              | 1946999465               |
| SNP_P4_156114_177043 | NW_004516473.1 | Scaffold1202 | 177043                  | TT                              | CC              | 1946999467               |
| SNP_P4_156116_177588 | NW_004516473.1 | Scaffold1202 | 177588                  | TT                              | CC              | 1946999469               |
| SNP_P4_156117_177601 | NW_004516473.1 | Scaffold1202 | 177601                  | AA                              | GG              | 1946999471               |
| SNP_P4_156118_177604 | NW_004516473.1 | Scaffold1202 | 177604                  | AA                              | GG              | 1946999473               |
| SNP_P4_156119_178470 | NW_004516473.1 | Scaffold1202 | 178470                  | TT                              | CC              | 1946999475               |
| SNP_P4_156120_178482 | NW_004516473.1 | Scaffold1202 | 178482                  | AA                              | GG              | 1946999477               |
| SNP_P4_156121_178507 | NW_004516473.1 | Scaffold1202 | 178507                  | TT                              | GG              | 1946999479               |
| SNP_P4_156122_178509 | NW_004516473.1 | Scaffold1202 | 178509                  | GG                              | AA              | 1946999481               |
| SNP_P4_156123_178560 | NW_004516473.1 | Scaffold1202 | 178560                  | TT                              | CC              | 1946999483               |
| SNP_P4_156124_178562 | NW_004516473.1 | Scaffold1202 | 178562                  | TT                              | GG              | 1946999485               |
| SNP_P4_156125_178616 | NW_004516473.1 | Scaffold1202 | 178616                  | AA                              | GG              | 1946999487               |
| SNP_P4_156126_178639 | NW_004516473.1 | Scaffold1202 | 178639                  | GG                              | TT              | 1946999489               |
| SNP_P4_156127_178644 | NW_004516473.1 | Scaffold1202 | 178644                  | AA                              | GG              | 1946999490               |
| SNP_P4_156128_178655 | NW_004516473.1 | Scaffold1202 | 178655                  | TT                              | CC              | 1946999492               |
| SNP_P4_156129_178715 | NW_004516473.1 | Scaffold1202 | 178715                  | TT                              | CC              | 1946999494               |
| SNP_P4_156130_178720 | NW_004516473.1 | Scaffold1202 | 178720                  | TT                              | CC              | 1946999496               |
| SNP_P4_156131_178721 | NW_004516473.1 | Scaffold1202 | 178721                  | TT                              | GG              | 1946999498               |
| SNP_P4_156132_178739 | NW_004516473.1 | Scaffold1202 | 178739                  | AA                              | CC              | 1946999500               |
| SNP_P4_156133_178774 | NW_004516473.1 | Scaffold1202 | 178774                  | TT                              | GG              | 1946999502               |
| SNP_P4_156134_178845 | NW_004516473.1 | Scaffold1202 | 178845                  | TT                              | AA              | 1946999504               |
| SNP_P4_156135_178880 | NW_004516473.1 | Scaffold1202 | 178880                  | TT                              | CC              | 1946999506               |
| SNP_P4_156136_178898 | NW_004516473.1 | Scaffold1202 | 178898                  | TT                              | CC              | 1946999508               |
| SNP_P4_156137_178917 | NW_004516473.1 | Scaffold1202 | 178917                  | AA                              | GG              | 1946999510               |
| SNP_P4_156138_178927 | NW_004516473.1 | Scaffold1202 | 178927                  | CC                              | GG              | 1946999512               |

| SNPs IDs             | Chromosome IDs | Chromosomes  | Physical positions (bp) | CDC Frontier (Reference genome) | (ILWC46 & LPNB) | NCBI SNPdb Accession IDs |
|----------------------|----------------|--------------|-------------------------|---------------------------------|-----------------|--------------------------|
| SNP_P4_156139_178992 | NW_004516473.1 | Scaffold1202 | 178992                  | CC                              | GG              | 1946999514               |
| SNP_P4_156140_178999 | NW_004516473.1 | Scaffold1202 | 178999                  | AA                              | GG              | 1946999516               |
| SNP_P4_156141_179056 | NW_004516473.1 | Scaffold1202 | 179056                  | AA                              | GG              | 1946999518               |
| SNP_P4_156142_179069 | NW_004516473.1 | Scaffold1202 | 179069                  | AA                              | GG              | 1946999520               |
| SNP_P4_156143_179089 | NW_004516473.1 | Scaffold1202 | 179089                  | TT                              | CC              | 1946999522               |
| SNP_P4_156144_179095 | NW_004516473.1 | Scaffold1202 | 179095                  | AA                              | GG              | 1946999524               |
| SNP_P4_156145_179096 | NW_004516473.1 | Scaffold1202 | 179096                  | AA                              | GG              | 1946999526               |
| SNP_P4_156146_179098 | NW_004516473.1 | Scaffold1202 | 179098                  | GG                              | TT              | 1946999528               |
| SNP_P4_156147_179127 | NW_004516473.1 | Scaffold1202 | 179127                  | AA                              | GG              | 1946999530               |
| SNP_P4_156148_179148 | NW_004516473.1 | Scaffold1202 | 179148                  | TT                              | CC              | 1946999532               |
| SNP_P4_156149_179152 | NW_004516473.1 | Scaffold1202 | 179152                  | AA                              | GG              | 1946999534               |
| SNP_P4_156150_179197 | NW_004516473.1 | Scaffold1202 | 179197                  | CC                              | GG              | 1946999536               |
| SNP_P4_156151_179220 | NW_004516473.1 | Scaffold1202 | 179220                  | TT                              | CC              | 1946999538               |
| SNP_P4_156152_179221 | NW_004516473.1 | Scaffold1202 | 179221                  | GG                              | CC              | 1946999540               |
| SNP_P4_156153_179272 | NW_004516473.1 | Scaffold1202 | 179272                  | AA                              | GG              | 1946999542               |
| SNP_P4_156154_179290 | NW_004516473.1 | Scaffold1202 | 179290                  | AA                              | GG              | 1946999544               |
| SNP_P4_156155_179334 | NW_004516473.1 | Scaffold1202 | 179334                  | GG                              | AA              | 1946999546               |
| SNP_P4_156157_179488 | NW_004516473.1 | Scaffold1202 | 179488                  | TT                              | GG              | 1946999548               |
| SNP_P4_156158_179498 | NW_004516473.1 | Scaffold1202 | 179498                  | AA                              | CC              | 1946999550               |
| SNP_P4_156159_179503 | NW_004516473.1 | Scaffold1202 | 179503                  | AA                              | GG              | 1946999552               |
| SNP_P4_156160_179517 | NW_004516473.1 | Scaffold1202 | 179517                  | AA                              | GG              | 1946999554               |
| SNP_P4_156161_179556 | NW_004516473.1 | Scaffold1202 | 179556                  | TT                              | GG              | 1946999556               |
| SNP_P4_156162_179574 | NW_004516473.1 | Scaffold1202 | 179574                  | CC                              | TT              | 1946999558               |
| SNP_P4_156164_179622 | NW_004516473.1 | Scaffold1202 | 179622                  | AA                              | GG              | 1946999560               |
| SNP_P4_156165_179657 | NW_004516473.1 | Scaffold1202 | 179657                  | AA                              | GG              | 1946999562               |
| SNP_P4_156166_179659 | NW_004516473.1 | Scaffold1202 | 179659                  | CC                              | GG              | 1946999564               |
| SNP_P4_156167_179667 | NW_004516473.1 | Scaffold1202 | 179667                  | TT                              | GG              | 1946999566               |
| SNP_P4_156168_179686 | NW_004516473.1 | Scaffold1202 | 179686                  | AA                              | GG              | 1946999568               |
| SNP_P4_156169_179724 | NW_004516473.1 | Scaffold1202 | 179724                  | TT                              | CC              | 1946999570               |
| SNP_P4_156170_179743 | NW_004516473.1 | Scaffold1202 | 179743                  | AA                              | GG              | 1946999572               |
| SNP_P4_156171_179752 | NW_004516473.1 | Scaffold1202 | 179752                  | AA                              | GG              | 1946999574               |
| SNP_P4_156172_179754 | NW_004516473.1 | Scaffold1202 | 179754                  | CC                              | GG              | 1946999576               |
| SNP_P4_156173_179781 | NW_004516473.1 | Scaffold1202 | 179781                  | AA                              | GG              | 1946999578               |
| SNP_P4_156174_179808 | NW_004516473.1 | Scaffold1202 | 179808                  | AA                              | GG              | 1946999580               |
| SNP_P4_156175_183073 | NW_004516473.1 | Scaffold1202 | 183073                  | AA                              | TT              | 1946999582               |
| SNP_P4_156176_183099 | NW_004516473.1 | Scaffold1202 | 183099                  | CC                              | AA              | 1946999584               |
| SNP_P4_156177_183219 | NW_004516473.1 | Scaffold1202 | 183219                  | GG                              | AA              | 1946999586               |
| SNP_P4_156178_183258 | NW_004516473.1 | Scaffold1202 | 183258                  | TT                              | AA              | 1946999588               |
| SNP_P4_156179_183262 | NW_004516473.1 | Scaffold1202 | 183262                  | CC                              | TT              | 1946999590               |
| SNP_P4_156180_183354 | NW_004516473.1 | Scaffold1202 | 183354                  | GG                              | AA              | 1946999592               |
| SNP_P4_156181_183360 | NW_004516473.1 | Scaffold1202 | 183360                  | TT                              | GG              | 1946999593               |
| SNP_P4_156182_183364 | NW_004516473.1 | Scaffold1202 | 183364                  | GG                              | TT              | 1946999595               |

| SNPs IDs             | Chromosome IDs | Chromosomes  | Physical positions (bp) | CDC Frontier (Reference genome) | (ILWC46 & LPNB) | NCBI SNPdb Accession IDs |
|----------------------|----------------|--------------|-------------------------|---------------------------------|-----------------|--------------------------|
| SNP_P4_156183_183367 | NW_004516473.1 | Scaffold1202 | 183367                  | AA                              | GG              | 1946999597               |
| SNP_P4_156184_183386 | NW_004516473.1 | Scaffold1202 | 183386                  | AA                              | CC              | 1946999599               |
| SNP_P4_156185_183458 | NW_004516473.1 | Scaffold1202 | 183458                  | TT                              | AA              | 1946999601               |
| SNP_P4_156187_183482 | NW_004516473.1 | Scaffold1202 | 183482                  | AA                              | GG              | 1946999603               |
| SNP_P4_156188_183631 | NW_004516473.1 | Scaffold1202 | 183631                  | TT                              | AA              | 1946999605               |
| SNP_P4_156189_183660 | NW_004516473.1 | Scaffold1202 | 183660                  | AA                              | GG              | 1946999607               |
| SNP_P4_156190_183664 | NW_004516473.1 | Scaffold1202 | 183664                  | TT                              | CC              | 1946999609               |
| SNP_P4_156191_183675 | NW_004516473.1 | Scaffold1202 | 183675                  | TT                              | CC              | 1946999611               |
| SNP_P4_156192_183751 | NW_004516473.1 | Scaffold1202 | 183751                  | AA                              | CC              | 1946999613               |
| SNP_P4_156193_183752 | NW_004516473.1 | Scaffold1202 | 183752                  | CC                              | TT              | 1946999615               |
| SNP_P4_156194_183755 | NW_004516473.1 | Scaffold1202 | 183755                  | AA                              | GG              | 1946999616               |
| SNP_P4_156195_190770 | NW_004516473.1 | Scaffold1202 | 190770                  | AA                              | CC              | 1946999617               |
| SNP_P4_156196_190791 | NW_004516473.1 | Scaffold1202 | 190791                  | AA                              | TT              | 1946999618               |
| SNP_P4_156197_190857 | NW_004516473.1 | Scaffold1202 | 190857                  | CC                              | AA              | 1946999620               |
| SNP_P4_156198_190899 | NW_004516473.1 | Scaffold1202 | 190899                  | GG                              | TT              | 1946999621               |
| SNP_P4_156199_190908 | NW_004516473.1 | Scaffold1202 | 190908                  | CC                              | AA              | 1946999622               |
| SNP_P4_156200_190913 | NW_004516473.1 | Scaffold1202 | 190913                  | AA                              | GG              | 1946999623               |
| SNP_P4_156201_190998 | NW_004516473.1 | Scaffold1202 | 190998                  | CC                              | TT              | 1946999624               |
| SNP_P4_156202_196826 | NW_004516473.1 | Scaffold1202 | 196826                  | CC                              | TT              | 1946999625               |
| SNP_P4_156203_197774 | NW_004516473.1 | Scaffold1202 | 197774                  | TT                              | CC              | 1946999626               |
| SNP_P4_156204_204206 | NW_004516473.1 | Scaffold1202 | 204206                  | GG                              | CC              | 1946999627               |
| SNP_P4_156205_211697 | NW_004516473.1 | Scaffold1202 | 211697                  | CC                              | TT              | 1946999628               |
| SNP_P4_156206_212537 | NW_004516473.1 | Scaffold1202 | 212537                  | AA                              | GG              | 1946999629               |
| SNP_P4_156207_227640 | NW_004516473.1 | Scaffold1202 | 227640                  | AA                              | GG              | 1946999630               |
| SNP_P4_156208_227644 | NW_004516473.1 | Scaffold1202 | 227644                  | AA                              | TT              | 1946999631               |
| SNP_P4_156209_227685 | NW_004516473.1 | Scaffold1202 | 227685                  | GG                              | AA              | 1946999632               |
| SNP_P4_156210_227688 | NW_004516473.1 | Scaffold1202 | 227688                  | CC                              | TT              | 1946999633               |
| SNP_P4_156211_227716 | NW_004516473.1 | Scaffold1202 | 227716                  | GG                              | TT              | 1946999634               |
| SNP_P4_156212_227809 | NW_004516473.1 | Scaffold1202 | 227809                  | AA                              | GG              | 1946999635               |
| SNP_P4_156213_227852 | NW_004516473.1 | Scaffold1202 | 227852                  | GG                              | TT              | 1946999636               |
| SNP_P4_156214_227903 | NW_004516473.1 | Scaffold1202 | 227903                  | GG                              | AA              | 1946999637               |
| SNP_P4_156215_227957 | NW_004516473.1 | Scaffold1202 | 227957                  | CC                              | AA              | 1946999638               |
| SNP_P4_156216_227971 | NW_004516473.1 | Scaffold1202 | 227971                  | AA                              | GG              | 1946999639               |
| SNP_P4_156217_228080 | NW_004516473.1 | Scaffold1202 | 228080                  | CC                              | AA              | 1946999640               |
| SNP_P4_156218_228137 | NW_004516473.1 | Scaffold1202 | 228137                  | TT                              | CC              | 1946999641               |
| SNP_P4_156219_228256 | NW_004516473.1 | Scaffold1202 | 228256                  | TT                              | CC              | 1946999642               |
| SNP_P4_156220_228289 | NW_004516473.1 | Scaffold1202 | 228289                  | GG                              | CC              | 1946999643               |
| SNP_P4_156221_228290 | NW_004516473.1 | Scaffold1202 | 228290                  | CC                              | GG              | 1946999644               |
| SNP_P4_156222_228320 | NW_004516473.1 | Scaffold1202 | 228320                  | GG                              | CC              | 1946999645               |
| SNP_P4_156223_228547 | NW_004516473.1 | Scaffold1202 | 228547                  | CC                              | AA              | 1946999646               |
| SNP_P4_156224_228654 | NW_004516473.1 | Scaffold1202 | 228654                  | CC                              | TT              | 1946999647               |
| SNP_P4_156225_231000 | NW_004516473.1 | Scaffold1202 | 231000                  | GG                              | CC              | 1946999648               |

| SNPs IDs             | Chromosome IDs | Chromosomes  | Physical positions (bp) | CDC Frontier (Reference genome) | (ILWC46 & LPNB) | NCBI SNPdb Accession IDs |
|----------------------|----------------|--------------|-------------------------|---------------------------------|-----------------|--------------------------|
| SNP_P4_156226_247497 | NW_004516473.1 | Scaffold1202 | 247497                  | CC                              | TT              | 1946999649               |
| SNP_P4_156227_251141 | NW_004516473.1 | Scaffold1202 | 251141                  | GG                              | AA              | 1946999650               |
| SNP_P4_156228_251170 | NW_004516473.1 | Scaffold1202 | 251170                  | GG                              | AA              | 1946999651               |
| SNP_P4_156230_254980 | NW_004516473.1 | Scaffold1202 | 254980                  | AA                              | CC              | 1946999652               |
| SNP_P4_156231_264884 | NW_004516473.1 | Scaffold1202 | 264884                  | CC                              | TT              | 1946999653               |
| SNP_P4_156232_276905 | NW_004516473.1 | Scaffold1202 | 276905                  | TT                              | CC              | 1946999655               |
| SNP_P4_156233_281328 | NW_004516473.1 | Scaffold1202 | 281328                  | TT                              | CC              | 1946999656               |
| SNP_P4_156234_284610 | NW_004516473.1 | Scaffold1202 | 284610                  | TT                              | GG              | 1946999658               |
| SNP_P4_156235_289014 | NW_004516473.1 | Scaffold1202 | 289014                  | GG                              | CC              | 1946999660               |
| SNP_P4_156236_289383 | NW_004516473.1 | Scaffold1202 | 289383                  | GG                              | AA              | 1946999662               |
| SNP_P4_156237_289405 | NW_004516473.1 | Scaffold1202 | 289405                  | AA                              | CC              | 1946999664               |
| SNP_P4_156238_289453 | NW_004516473.1 | Scaffold1202 | 289453                  | AA                              | GG              | 1946999666               |
| SNP_P4_156240_267    | NW_004516474.1 | Scaffold1206 | 267                     | GG                              | AA              | 1946999668               |
| SNP_P4_156241_463    | NW_004516474.1 | Scaffold1206 | 463                     | CC                              | TT              | 1946999670               |
| SNP_P4_156242_616    | NW_004516474.1 | Scaffold1206 | 616                     | GG                              | AA              | 1946999672               |
| SNP_P4_156243_653    | NW_004516474.1 | Scaffold1206 | 653                     | GG                              | CC              | 1946999674               |
| SNP_P4_156244_681    | NW_004516474.1 | Scaffold1206 | 681                     | AA                              | GG              | 1946999676               |
| SNP_P4_156245_709    | NW_004516474.1 | Scaffold1206 | 709                     | AA                              | GG              | 1946999678               |
| SNP_P4_156246_756    | NW_004516474.1 | Scaffold1206 | 756                     | GG                              | CC              | 1946999680               |
| SNP_P4_156247_768    | NW_004516475.1 | Scaffold1207 | 768                     | AA                              | GG              | 1946999682               |
| SNP_P4_156248_774    | NW_004516475.1 | Scaffold1207 | 774                     | CC                              | GG              | 1946999684               |
| SNP_P4_156249_806    | NW_004516475.1 | Scaffold1207 | 806                     | CC                              | AA              | 1946999686               |
| SNP_P4_156250_848    | NW_004516475.1 | Scaffold1207 | 848                     | TT                              | CC              | 1946999688               |
| SNP_P4_156251_1416   | NW_004516475.1 | Scaffold1207 | 1416                    | AA                              | GG              | 1946999690               |
| SNP_P4_156252_4542   | NW_004516475.1 | Scaffold1207 | 4542                    | TT                              | AA              | 1946999692               |
| SNP_P4_156254_10153  | NW_004516479.1 | Scaffold1215 | 10153                   | TT                              | AA              | 1946999694               |
| SNP_P4_156255_12541  | NW_004516479.1 | Scaffold1215 | 12541                   | AA                              | CC              | 1946999696               |
| SNP_P4_156256_12612  | NW_004516479.1 | Scaffold1215 | 12612                   | AA                              | GG              | 1946999698               |
| SNP_P4_156257_12627  | NW_004516479.1 | Scaffold1215 | 12627                   | CC                              | AA              | 1946999700               |
| SNP_P4_156259_12752  | NW_004516479.1 | Scaffold1215 | 12752                   | TT                              | CC              | 1946999702               |
| SNP_P4_156260_12824  | NW_004516479.1 | Scaffold1215 | 12824                   | TT                              | CC              | 1946999704               |
| SNP_P4_156261_12891  | NW_004516479.1 | Scaffold1215 | 12891                   | GG                              | TT              | 1946999706               |
| SNP_P4_156262_13026  | NW_004516479.1 | Scaffold1215 | 13026                   | AA                              | GG              | 1946999708               |
| SNP_P4_156263_13045  | NW_004516479.1 | Scaffold1215 | 13045                   | GG                              | AA              | 1946999710               |
| SNP_P4_156264_13100  | NW_004516479.1 | Scaffold1215 | 13100                   | TT                              | CC              | 1946999712               |
| SNP_P4_156265_13129  | NW_004516479.1 | Scaffold1215 | 13129                   | CC                              | TT              | 1946999714               |
| SNP_P4_156266_13136  | NW_004516479.1 | Scaffold1215 | 13136                   | TT                              | GG              | 1946999716               |
| SNP_P4_156267_13151  | NW_004516479.1 | Scaffold1215 | 13151                   | AA                              | GG              | 1946999718               |
| SNP_P4_156268_13249  | NW_004516479.1 | Scaffold1215 | 13249                   | GG                              | AA              | 1946999720               |
| SNP_P4_156269_13351  | NW_004516479.1 | Scaffold1215 | 13351                   | GG                              | AA              | 1946999722               |
| SNP_P4_156270_13353  | NW_004516479.1 | Scaffold1215 | 13353                   | TT                              | CC              | 1946999724               |
| SNP_P4_156271_13398  | NW_004516479.1 | Scaffold1215 | 13398                   | TT                              | CC              | 1946999726               |

| SNPs IDs            | Chromosome IDs | Chromosomes  | Physical positions (bp) | CDC Frontier (Reference genome) | (ILWC46 & LPNB) | NCBI SNPdb Accession IDs |
|---------------------|----------------|--------------|-------------------------|---------------------------------|-----------------|--------------------------|
| SNP_P4_156272_13482 | NW_004516479.1 | Scaffold1215 | 13482                   | GG                              | TT              | 1946999728               |
| SNP_P4_156273_13495 | NW_004516479.1 | Scaffold1215 | 13495                   | GG                              | TT              | 1946999730               |
| SNP_P4_156274_13539 | NW_004516479.1 | Scaffold1215 | 13539                   | AA                              | GG              | 1946999732               |
| SNP_P4_156275_13610 | NW_004516479.1 | Scaffold1215 | 13610                   | GG                              | AA              | 1946999734               |
| SNP_P4_156277_13674 | NW_004516479.1 | Scaffold1215 | 13674                   | CC                              | TT              | 1946999736               |
| SNP_P4_156278_13746 | NW_004516479.1 | Scaffold1215 | 13746                   | AA                              | TT              | 1946999738               |
| SNP_P4_156279_13794 | NW_004516479.1 | Scaffold1215 | 13794                   | TT                              | GG              | 1946999740               |
| SNP_P4_156280_13798 | NW_004516479.1 | Scaffold1215 | 13798                   | AA                              | GG              | 1946999742               |
| SNP_P4_156281_13827 | NW_004516479.1 | Scaffold1215 | 13827                   | AA                              | TT              | 1946999744               |
| SNP_P4_156282_13845 | NW_004516479.1 | Scaffold1215 | 13845                   | CC                              | AA              | 1946999746               |
| SNP_P4_156283_13850 | NW_004516479.1 | Scaffold1215 | 13850                   | GG                              | CC              | 1946999748               |
| SNP_P4_156284_14031 | NW_004516479.1 | Scaffold1215 | 14031                   | CC                              | TT              | 1946999750               |
| SNP_P4_156286_14080 | NW_004516479.1 | Scaffold1215 | 14080                   | CC                              | TT              | 1946999752               |
| SNP_P4_156287_14098 | NW_004516479.1 | Scaffold1215 | 14098                   | AA                              | GG              | 1946999754               |
| SNP_P4_156288_14160 | NW_004516479.1 | Scaffold1215 | 14160                   | TT                              | CC              | 1946999756               |
| SNP_P4_156289_14161 | NW_004516479.1 | Scaffold1215 | 14161                   | GG                              | AA              | 1946999758               |
| SNP_P4_156290_14207 | NW_004516479.1 | Scaffold1215 | 14207                   | TT                              | GG              | 1946999760               |
| SNP_P4_156291_14309 | NW_004516479.1 | Scaffold1215 | 14309                   | TT                              | CC              | 1946999762               |
| SNP_P4_156292_14340 | NW_004516479.1 | Scaffold1215 | 14340                   | TT                              | CC              | 1946999764               |
| SNP_P4_156293_14357 | NW_004516479.1 | Scaffold1215 | 14357                   | AA                              | TT              | 1946999766               |
| SNP_P4_156294_14405 | NW_004516479.1 | Scaffold1215 | 14405                   | GG                              | AA              | 1946999768               |
| SNP_P4_156295_14465 | NW_004516479.1 | Scaffold1215 | 14465                   | CC                              | AA              | 1946999770               |
| SNP_P4_156296_14563 | NW_004516479.1 | Scaffold1215 | 14563                   | AA                              | TT              | 1946999772               |
| SNP_P4_156297_14634 | NW_004516479.1 | Scaffold1215 | 14634                   | GG                              | TT              | 1946999774               |
| SNP_P4_156298_14694 | NW_004516479.1 | Scaffold1215 | 14694                   | GG                              | AA              | 1946999776               |
| SNP_P4_156299_16521 | NW_004516479.1 | Scaffold1215 | 16521                   | CC                              | TT              | 1946999778               |
| SNP_P4_156300_16922 | NW_004516479.1 | Scaffold1215 | 16922                   | CC                              | AA              | 1946999780               |
| SNP_P4_156301_16925 | NW_004516479.1 | Scaffold1215 | 16925                   | AA                              | TT              | 1946999782               |
| SNP_P4_156303_16943 | NW_004516479.1 | Scaffold1215 | 16943                   | TT                              | AA              | 1946999784               |
| SNP_P4_156304_16944 | NW_004516479.1 | Scaffold1215 | 16944                   | AA                              | TT              | 1946999786               |
| SNP_P4_156305_16948 | NW_004516479.1 | Scaffold1215 | 16948                   | GG                              | TT              | 1946999788               |
| SNP_P4_156306_17780 | NW_004516479.1 | Scaffold1215 | 17780                   | TT                              | AA              | 1946999790               |
| SNP_P4_156307_17917 | NW_004516479.1 | Scaffold1215 | 17917                   | CC                              | TT              | 1946999792               |
| SNP_P4_156308_17919 | NW_004516479.1 | Scaffold1215 | 17919                   | CC                              | TT              | 1946999794               |
| SNP_P4_156309_17928 | NW_004516479.1 | Scaffold1215 | 17928                   | TT                              | CC              | 1946999796               |
| SNP_P4_156310_17941 | NW_004516479.1 | Scaffold1215 | 17941                   | AA                              | CC              | 1946999798               |
| SNP_P4_156311_18177 | NW_004516479.1 | Scaffold1215 | 18177                   | GG                              | AA              | 1946999800               |
| SNP_P4_156312_18301 | NW_004516479.1 | Scaffold1215 | 18301                   | TT                              | AA              | 1946999802               |
| SNP_P4_156313_21193 | NW_004516479.1 | Scaffold1215 | 21193                   | GG                              | AA              | 1946999804               |
| SNP_P4_156314_26342 | NW_004516479.1 | Scaffold1215 | 26342                   | TT                              | CC              | 1946999806               |
| SNP_P4_156315_35986 | NW_004516479.1 | Scaffold1215 | 35986                   | TT                              | CC              | 1946999808               |
| SNP_P4_156316_36088 | NW_004516479.1 | Scaffold1215 | 36088                   | GG                              | AA              | 1946999810               |

| SNPs IDs            | Chromosome IDs | Chromosomes  | Physical positions (bp) | CDC Frontier (Reference genome) | (ILWC46 & LPNB) | NCBI SNPdb Accession IDs |
|---------------------|----------------|--------------|-------------------------|---------------------------------|-----------------|--------------------------|
| SNP_P4_156317_36381 | NW_004516479.1 | Scaffold1215 | 36381                   | GG                              | AA              | 1946999812               |
| SNP_P4_156318_38793 | NW_004516479.1 | Scaffold1215 | 38793                   | TT                              | CC              | 1946999814               |
| SNP_P4_156319_41363 | NW_004516479.1 | Scaffold1215 | 41363                   | AA                              | GG              | 1946999816               |
| SNP_P4_156320_41470 | NW_004516479.1 | Scaffold1215 | 41470                   | CC                              | TT              | 1946999818               |
| SNP_P4_156321_41478 | NW_004516479.1 | Scaffold1215 | 41478                   | AA                              | CC              | 1946999820               |
| SNP_P4_156322_41503 | NW_004516479.1 | Scaffold1215 | 41503                   | CC                              | TT              | 1946999822               |
| SNP_P4_156324_42150 | NW_004516479.1 | Scaffold1215 | 42150                   | GG                              | AA              | 1946999824               |
| SNP_P4_156325_42164 | NW_004516479.1 | Scaffold1215 | 42164                   | CC                              | GG              | 1946999826               |
| SNP_P4_156326_43906 | NW_004516479.1 | Scaffold1215 | 43906                   | AA                              | TT              | 1946999828               |
| SNP_P4_156327_44423 | NW_004516479.1 | Scaffold1215 | 44423                   | TT                              | CC              | 1946999830               |
| SNP_P4_156328_44447 | NW_004516479.1 | Scaffold1215 | 44447                   | AA                              | TT              | 1946999832               |
| SNP_P4_156330_45699 | NW_004516479.1 | Scaffold1215 | 45699                   | GG                              | AA              | 1946999834               |
| SNP_P4_156332_202   | NW_004516480.1 | Scaffold1216 | 202                     | AA                              | GG              | 1946999836               |
| SNP_P4_156333_245   | NW_004516480.1 | Scaffold1216 | 245                     | GG                              | AA              | 1946999838               |
| SNP_P4_156334_269   | NW_004516480.1 | Scaffold1216 | 269                     | TT                              | AA              | 1946999840               |
| SNP_P4_156335_305   | NW_004516480.1 | Scaffold1216 | 305                     | AA                              | GG              | 1946999842               |
| SNP_P4_156336_364   | NW_004516480.1 | Scaffold1216 | 364                     | GG                              | AA              | 1946999844               |
| SNP_P4_156337_404   | NW_004516480.1 | Scaffold1216 | 404                     | CC                              | TT              | 1946999846               |
| SNP_P4_156338_486   | NW_004516480.1 | Scaffold1216 | 486                     | CC                              | TT              | 1946999848               |
| SNP_P4_156339_549   | NW_004516480.1 | Scaffold1216 | 549                     | TT                              | AA              | 1946999850               |
| SNP_P4_156340_638   | NW_004516480.1 | Scaffold1216 | 638                     | CC                              | TT              | 1946999852               |
| SNP_P4_156341_3404  | NW_004516480.1 | Scaffold1216 | 3404                    | GG                              | CC              | 1946999854               |
| SNP_P4_156342_3579  | NW_004516480.1 | Scaffold1216 | 3579                    | AA                              | TT              | 1946999856               |
| SNP_P4_156343_3656  | NW_004516480.1 | Scaffold1216 | 3656                    | CC                              | TT              | 1946999858               |
| SNP_P4_156344_3890  | NW_004516480.1 | Scaffold1216 | 3890                    | AA                              | TT              | 1946999860               |
| SNP_P4_156345_3936  | NW_004516480.1 | Scaffold1216 | 3936                    | TT                              | AA              | 1946999862               |
| SNP_P4_156346_4210  | NW_004516480.1 | Scaffold1216 | 4210                    | GG                              | TT              | 1946999864               |
| SNP_P4_156347_4555  | NW_004516480.1 | Scaffold1216 | 4555                    | CC                              | TT              | 1946999866               |
| SNP_P4_156348_4609  | NW_004516480.1 | Scaffold1216 | 4609                    | AA                              | GG              | 1946999868               |
| SNP_P4_156349_4618  | NW_004516480.1 | Scaffold1216 | 4618                    | TT                              | CC              | 1946999870               |
| SNP_P4_156350_4641  | NW_004516480.1 | Scaffold1216 | 4641                    | GG                              | TT              | 1946999872               |
| SNP_P4_156351_4643  | NW_004516480.1 | Scaffold1216 | 4643                    | AA                              | TT              | 1946999874               |
| SNP_P4_156352_4832  | NW_004516480.1 | Scaffold1216 | 4832                    | TT                              | CC              | 1946999876               |
| SNP_P4_156353_4842  | NW_004516480.1 | Scaffold1216 | 4842                    | TT                              | CC              | 1946999877               |
| SNP_P4_156354_4844  | NW_004516480.1 | Scaffold1216 | 4844                    | GG                              | AA              | 1946999879               |
| SNP_P4_156355_5074  | NW_004516480.1 | Scaffold1216 | 5074                    | CC                              | TT              | 1946999881               |
| SNP_P4_156356_5118  | NW_004516480.1 | Scaffold1216 | 5118                    | AA                              | TT              | 1946999883               |
| SNP_P4_156357_5128  | NW_004516480.1 | Scaffold1216 | 5128                    | AA                              | GG              | 1946999885               |
| SNP_P4_156358_5176  | NW_004516480.1 | Scaffold1216 | 5176                    | TT                              | CC              | 1946999887               |
| SNP_P4_156359_5209  | NW_004516480.1 | Scaffold1216 | 5209                    | CC                              | TT              | 1946999889               |
| SNP_P4_156360_9938  | NW_004516480.1 | Scaffold1216 | 9938                    | AA                              | GG              | 1946999891               |
| SNP_P4_156361_9953  | NW_004516480.1 | Scaffold1216 | 9953                    | GG                              | AA              | 1946999893               |



| SNPs IDs            | Chromosome IDs | Chromosomes  | Physical positions (bp) | CDC Frontier (Reference genome) | (ILWC46 & LPNB) | NCBI SNPdb Accession IDs |
|---------------------|----------------|--------------|-------------------------|---------------------------------|-----------------|--------------------------|
| SNP_P4_156362_12754 | NW_004516480.1 | Scaffold1216 | 12754                   | GG                              | AA              | 1946999895               |
| SNP_P4_156363_12761 | NW_004516480.1 | Scaffold1216 | 12761                   | TT                              | AA              | 1946999897               |
| SNP_P4_156364_12767 | NW_004516480.1 | Scaffold1216 | 12767                   | GG                              | AA              | 1946999899               |
| SNP_P4_156365_12775 | NW_004516480.1 | Scaffold1216 | 12775                   | TT                              | CC              | 1946999901               |
| SNP_P4_156366_12890 | NW_004516480.1 | Scaffold1216 | 12890                   | AA                              | GG              | 1946999902               |
| SNP_P4_156367_13072 | NW_004516480.1 | Scaffold1216 | 13072                   | TT                              | AA              | 1946999904               |
| SNP_P4_156368_13266 | NW_004516480.1 | Scaffold1216 | 13266                   | CC                              | TT              | 1946999906               |
| SNP_P4_156369_13290 | NW_004516480.1 | Scaffold1216 | 13290                   | CC                              | TT              | 1946999908               |
| SNP_P4_156370_13308 | NW_004516480.1 | Scaffold1216 | 13308                   | TT                              | AA              | 1946999910               |
| SNP_P4_156371_13444 | NW_004516480.1 | Scaffold1216 | 13444                   | GG                              | TT              | 1946999912               |
| SNP_P4_156372_13447 | NW_004516480.1 | Scaffold1216 | 13447                   | AA                              | TT              | 1946999914               |
| SNP_P4_156373_13713 | NW_004516480.1 | Scaffold1216 | 13713                   | GG                              | AA              | 1946999916               |
| SNP_P4_156374_14115 | NW_004516480.1 | Scaffold1216 | 14115                   | AA                              | TT              | 1946999918               |
| SNP_P4_156375_14267 | NW_004516480.1 | Scaffold1216 | 14267                   | CC                              | TT              | 1946999920               |
| SNP_P4_156376_14661 | NW_004516480.1 | Scaffold1216 | 14661                   | AA                              | TT              | 1946999922               |
| SNP_P4_156377_14844 | NW_004516480.1 | Scaffold1216 | 14844                   | TT                              | GG              | 1946999924               |
| SNP_P4_156378_14871 | NW_004516480.1 | Scaffold1216 | 14871                   | AA                              | GG              | 1946999926               |
| SNP_P4_156379_14885 | NW_004516480.1 | Scaffold1216 | 14885                   | TT                              | CC              | 1946999928               |
| SNP_P4_156380_15070 | NW_004516480.1 | Scaffold1216 | 15070                   | GG                              | TT              | 1946999930               |
| SNP_P4_156381_15071 | NW_004516480.1 | Scaffold1216 | 15071                   | GG                              | AA              | 1946999932               |
| SNP_P4_156382_15075 | NW_004516480.1 | Scaffold1216 | 15075                   | TT                              | AA              | 1946999934               |
| SNP_P4_156384_15785 | NW_004516480.1 | Scaffold1216 | 15785                   | AA                              | GG              | 1946999936               |
| SNP_P4_156385_15786 | NW_004516480.1 | Scaffold1216 | 15786                   | AA                              | GG              | 1946999938               |
| SNP_P4_156386_16054 | NW_004516480.1 | Scaffold1216 | 16054                   | GG                              | CC              | 1946999940               |
| SNP_P4_156387_16109 | NW_004516480.1 | Scaffold1216 | 16109                   | GG                              | AA              | 1946999942               |
| SNP_P4_156388_16162 | NW_004516480.1 | Scaffold1216 | 16162                   | AA                              | TT              | 1946999944               |
| SNP_P4_156389_16283 | NW_004516480.1 | Scaffold1216 | 16283                   | TT                              | CC              | 1946999946               |
| SNP_P4_156390_16376 | NW_004516480.1 | Scaffold1216 | 16376                   | CC                              | AA              | 1946999948               |
| SNP_P4_156391_16418 | NW_004516480.1 | Scaffold1216 | 16418                   | GG                              | TT              | 1946999950               |
| SNP_P4_156392_16432 | NW_004516480.1 | Scaffold1216 | 16432                   | TT                              | GG              | 1946999952               |
| SNP_P4_156393_16433 | NW_004516480.1 | Scaffold1216 | 16433                   | GG                              | AA              | 1946999954               |
| SNP_P4_156394_16504 | NW_004516480.1 | Scaffold1216 | 16504                   | TT                              | CC              | 1946999956               |
| SNP_P4_156395_16552 | NW_004516480.1 | Scaffold1216 | 16552                   | GG                              | AA              | 1946999958               |
| SNP_P4_156396_16701 | NW_004516480.1 | Scaffold1216 | 16701                   | AA                              | TT              | 1946999960               |
| SNP_P4_156397_16745 | NW_004516480.1 | Scaffold1216 | 16745                   | CC                              | TT              | 1946999962               |
| SNP_P4_156398_16756 | NW_004516480.1 | Scaffold1216 | 16756                   | TT                              | AA              | 1946999964               |
| SNP_P4_156399_16814 | NW_004516480.1 | Scaffold1216 | 16814                   | CC                              | AA              | 1946999966               |
| SNP_P4_156400_16816 | NW_004516480.1 | Scaffold1216 | 16816                   | GG                              | CC              | 1946999968               |
| SNP_P4_156401_16878 | NW_004516480.1 | Scaffold1216 | 16878                   | TT                              | AA              | 1946999970               |
| SNP_P4_156402_16918 | NW_004516480.1 | Scaffold1216 | 16918                   | AA                              | GG              | 1946999972               |
| SNP_P4_156403_16944 | NW_004516480.1 | Scaffold1216 | 16944                   | AA                              | GG              | 1946999974               |
| SNP_P4_156404_16955 | NW_004516480.1 | Scaffold1216 | 16955                   | CC                              | TT              | 1946999976               |

| SNPs IDs            | Chromosome IDs | Chromosomes  | Physical positions (bp) | CDC Frontier (Reference genome) | (ILWC46 & LPNB) | NCBI SNPdb Accession IDs |
|---------------------|----------------|--------------|-------------------------|---------------------------------|-----------------|--------------------------|
| SNP_P4_156405_17014 | NW_004516480.1 | Scaffold1216 | 17014                   | TT                              | CC              | 1946999978               |
| SNP_P4_156406_17025 | NW_004516480.1 | Scaffold1216 | 17025                   | GG                              | CC              | 1946999980               |
| SNP_P4_156407_17064 | NW_004516480.1 | Scaffold1216 | 17064                   | TT                              | CC              | 1946999982               |
| SNP_P4_156408_17105 | NW_004516480.1 | Scaffold1216 | 17105                   | TT                              | AA              | 1946999984               |
| SNP_P4_156409_17113 | NW_004516480.1 | Scaffold1216 | 17113                   | AA                              | GG              | 1946999986               |
| SNP_P4_156410_17114 | NW_004516480.1 | Scaffold1216 | 17114                   | CC                              | GG              | 1946999988               |
| SNP_P4_156411_17139 | NW_004516480.1 | Scaffold1216 | 17139                   | AA                              | GG              | 1946999990               |
| SNP_P4_156412_17186 | NW_004516480.1 | Scaffold1216 | 17186                   | GG                              | TT              | 1946999992               |
| SNP_P4_156413_17484 | NW_004516480.1 | Scaffold1216 | 17484                   | GG                              | AA              | 1946999994               |
| SNP_P4_156414_17552 | NW_004516480.1 | Scaffold1216 | 17552                   | TT                              | CC              | 1946999996               |
| SNP_P4_156415_17626 | NW_004516480.1 | Scaffold1216 | 17626                   | AA                              | GG              | 1946999998               |
| SNP_P4_156416_17818 | NW_004516480.1 | Scaffold1216 | 17818                   | AA                              | GG              | 1947000000               |
| SNP_P4_156417_20369 | NW_004516480.1 | Scaffold1216 | 20369                   | GG                              | AA              | 1947000002               |
| SNP_P4_156418_20501 | NW_004516480.1 | Scaffold1216 | 20501                   | CC                              | TT              | 1947000004               |
| SNP_P4_156419_20523 | NW_004516480.1 | Scaffold1216 | 20523                   | AA                              | TT              | 1947000006               |
| SNP_P4_156420_20525 | NW_004516480.1 | Scaffold1216 | 20525                   | CC                              | TT              | 1947000008               |
| SNP_P4_156421_20551 | NW_004516480.1 | Scaffold1216 | 20551                   | AA                              | GG              | 1947000010               |
| SNP_P4_156422_20581 | NW_004516480.1 | Scaffold1216 | 20581                   | TT                              | GG              | 1947000012               |
| SNP_P4_156423_20631 | NW_004516480.1 | Scaffold1216 | 20631                   | AA                              | TT              | 1947000014               |
| SNP_P4_156424_20653 | NW_004516480.1 | Scaffold1216 | 20653                   | GG                              | CC              | 1947000016               |
| SNP_P4_156425_20780 | NW_004516480.1 | Scaffold1216 | 20780                   | GG                              | CC              | 1947000018               |
| SNP_P4_156426_20791 | NW_004516480.1 | Scaffold1216 | 20791                   | AA                              | TT              | 1947000020               |
| SNP_P4_156427_20806 | NW_004516480.1 | Scaffold1216 | 20806                   | TT                              | AA              | 1947000022               |
| SNP_P4_156428_20816 | NW_004516480.1 | Scaffold1216 | 20816                   | TT                              | CC              | 1947000024               |
| SNP_P4_156429_20832 | NW_004516480.1 | Scaffold1216 | 20832                   | CC                              | GG              | 1947000026               |
| SNP_P4_156430_20988 | NW_004516480.1 | Scaffold1216 | 20988                   | AA                              | GG              | 1947000027               |
| SNP_P4_156431_21062 | NW_004516480.1 | Scaffold1216 | 21062                   | AA                              | GG              | 1947000029               |
| SNP_P4_156432_21108 | NW_004516480.1 | Scaffold1216 | 21108                   | GG                              | AA              | 1947000031               |
| SNP_P4_156433_21119 | NW_004516480.1 | Scaffold1216 | 21119                   | CC                              | TT              | 1947000033               |
| SNP_P4_156434_21138 | NW_004516480.1 | Scaffold1216 | 21138                   | TT                              | AA              | 1947000035               |
| SNP_P4_156435_21142 | NW_004516480.1 | Scaffold1216 | 21142                   | CC                              | AA              | 1947000037               |
| SNP_P4_156436_21144 | NW_004516480.1 | Scaffold1216 | 21144                   | TT                              | CC              | 1947000039               |
| SNP_P4_156437_21393 | NW_004516480.1 | Scaffold1216 | 21393                   | GG                              | CC              | 1947000041               |
| SNP_P4_156438_21404 | NW_004516480.1 | Scaffold1216 | 21404                   | CC                              | GG              | 1947000043               |
| SNP_P4_156439_21409 | NW_004516480.1 | Scaffold1216 | 21409                   | GG                              | AA              | 1947000045               |
| SNP_P4_156440_6475  | NW_004516482.1 | Scaffold1219 | 6475                    | GG                              | AA              | 1947000047               |
| SNP_P4_156441_6965  | NW_004516482.1 | Scaffold1219 | 6965                    | AA                              | TT              | 1947000049               |
| SNP_P4_156442_6985  | NW_004516482.1 | Scaffold1219 | 6985                    | TT                              | CC              | 1947000051               |
| SNP_P4_156443_6991  | NW_004516482.1 | Scaffold1219 | 6991                    | GG                              | AA              | 1947000053               |
| SNP_P4_156444_7034  | NW_004516482.1 | Scaffold1219 | 7034                    | CC                              | TT              | 1947000055               |
| SNP_P4_156445_7073  | NW_004516482.1 | Scaffold1219 | 7073                    | AA                              | TT              | 1947000057               |
| SNP_P4_156446_7087  | NW_004516482.1 | Scaffold1219 | 7087                    | TT                              | GG              | 1947000059               |

| SNPs IDs             | Chromosome IDs | Chromosomes  | Physical positions (bp) | CDC Frontier (Reference genome) | (ILWC46 & LPNB) | NCBI SNPdb Accession IDs |
|----------------------|----------------|--------------|-------------------------|---------------------------------|-----------------|--------------------------|
| SNP_P4_156447_7108   | NW_004516482.1 | Scaffold1219 | 7108                    | GG                              | AA              | 1947000061               |
| SNP_P4_156449_7214   | NW_004516482.1 | Scaffold1219 | 7214                    | TT                              | CC              | 1947000063               |
| SNP_P4_156450_7308   | NW_004516482.1 | Scaffold1219 | 7308                    | GG                              | TT              | 1947000065               |
| SNP_P4_156451_11078  | NW_004516482.1 | Scaffold1219 | 11078                   | GG                              | AA              | 1947000067               |
| SNP_P4_156452_11097  | NW_004516482.1 | Scaffold1219 | 11097                   | TT                              | CC              | 1947000069               |
| SNP_P4_156453_11137  | NW_004516482.1 | Scaffold1219 | 11137                   | TT                              | CC              | 1947000071               |
| SNP_P4_156454_11383  | NW_004516482.1 | Scaffold1219 | 11383                   | AA                              | GG              | 1947000073               |
| SNP_P4_156455_11385  | NW_004516482.1 | Scaffold1219 | 11385                   | AA                              | TT              | 1947000076               |
| SNP_P4_156456_11434  | NW_004516482.1 | Scaffold1219 | 11434                   | GG                              | AA              | 1947000078               |
| SNP_P4_156457_11445  | NW_004516482.1 | Scaffold1219 | 11445                   | TT                              | GG              | 1947000080               |
| SNP_P4_156458_11470  | NW_004516482.1 | Scaffold1219 | 11470                   | CC                              | TT              | 1947000082               |
| SNP_P4_156459_11504  | NW_004516482.1 | Scaffold1219 | 11504                   | CC                              | TT              | 1947000084               |
| SNP_P4_156460_11691  | NW_004516482.1 | Scaffold1219 | 11691                   | GG                              | AA              | 1947000086               |
| SNP_P4_156461_11751  | NW_004516482.1 | Scaffold1219 | 11751                   | TT                              | CC              | 1947000088               |
| SNP_P4_156462_13021  | NW_004516482.1 | Scaffold1219 | 13021                   | GG                              | AA              | 1947000090               |
| SNP_P4_156463_13367  | NW_004516482.1 | Scaffold1219 | 13367                   | CC                              | AA              | 1947000092               |
| SNP_P4_156464_14008  | NW_004516482.1 | Scaffold1219 | 14008                   | AA                              | TT              | 1947000094               |
| SNP_P4_156465_14923  | NW_004516482.1 | Scaffold1219 | 14923                   | CC                              | TT              | 1947000096               |
| SNP_P4_156467_16442  | NW_004516482.1 | Scaffold1219 | 16442                   | CC                              | AA              | 1947000098               |
| SNP_P4_156468_16669  | NW_004516482.1 | Scaffold1219 | 16669                   | AA                              | TT              | 1947000100               |
| SNP_P4_156469_16706  | NW_004516482.1 | Scaffold1219 | 16706                   | GG                              | TT              | 1947000102               |
| SNP_P4_156471_29147  | NW_004516482.1 | Scaffold1219 | 29147                   | CC                              | TT              | 1947000104               |
| SNP_P4_156472_29201  | NW_004516482.1 | Scaffold1219 | 29201                   | AA                              | CC              | 1947000106               |
| SNP_P4_156473_29397  | NW_004516482.1 | Scaffold1219 | 29397                   | AA                              | GG              | 1947000108               |
| SNP_P4_156474_29444  | NW_004516482.1 | Scaffold1219 | 29444                   | GG                              | TT              | 1947000110               |
| SNP_P4_156475_37915  | NW_004516482.1 | Scaffold1219 | 37915                   | CC                              | TT              | 1947000112               |
| SNP_P4_156476_39964  | NW_004516482.1 | Scaffold1219 | 39964                   | TT                              | CC              | 1947000114               |
| SNP_P4_156477_39981  | NW_004516482.1 | Scaffold1219 | 39981                   | AA                              | TT              | 1947000116               |
| SNP_P4_156480_54163  | NW_004516482.1 | Scaffold1219 | 54163                   | GG                              | CC              | 1947000118               |
| SNP_P4_156481_58190  | NW_004516482.1 | Scaffold1219 | 58190                   | CC                              | TT              | 1947000120               |
| SNP_P4_156482_71975  | NW_004516482.1 | Scaffold1219 | 71975                   | TT                              | CC              | 1947000122               |
| SNP_P4_156483_103048 | NW_004516482.1 | Scaffold1219 | 103048                  | TT                              | CC              | 1947000124               |
| SNP_P4_156484_103054 | NW_004516482.1 | Scaffold1219 | 103054                  | TT                              | GG              | 1947000126               |
| SNP_P4_156485_103068 | NW_004516482.1 | Scaffold1219 | 103068                  | TT                              | CC              | 1947000127               |
| SNP_P4_156486_117939 | NW_004516482.1 | Scaffold1219 | 117939                  | TT                              | CC              | 1947000128               |
| SNP_P4_156487_8894   | NW_004516484.1 | Scaffold1221 | 8894                    | AA                              | GG              | 1947000129               |
| SNP_P4_156488_9079   | NW_004516484.1 | Scaffold1221 | 9079                    | AA                              | GG              | 1947000130               |
| SNP_P4_156489_9088   | NW_004516484.1 | Scaffold1221 | 9088                    | GG                              | CC              | 1947000131               |
| SNP_P4_156490_9199   | NW_004516484.1 | Scaffold1221 | 9199                    | CC                              | AA              | 1947000132               |
| SNP_P4_156491_32260  | NW_004516484.1 | Scaffold1221 | 32260                   | CC                              | TT              | 1947000134               |
| SNP_P4_156492_42806  | NW_004516484.1 | Scaffold1221 | 42806                   | GG                              | CC              | 1947000136               |
| SNP_P4_156493_42866  | NW_004516484.1 | Scaffold1221 | 42866                   | GG                              | CC              | 1947000138               |

| SNPs IDs            | Chromosome IDs | Chromosomes  | Physical positions (bp) | CDC Frontier (Reference genome) | (ILWC46 & LPNB) | NCBI SNPdb Accession IDs |
|---------------------|----------------|--------------|-------------------------|---------------------------------|-----------------|--------------------------|
| SNP_P4_156494_48833 | NW_004516484.1 | Scaffold1221 | 48833                   | TT                              | CC              | 1947000140               |
| SNP_P4_156495_49140 | NW_004516484.1 | Scaffold1221 | 49140                   | TT                              | CC              | 1947000142               |
| SNP_P4_156496_49167 | NW_004516484.1 | Scaffold1221 | 49167                   | AA                              | GG              | 1947000144               |
| SNP_P4_156497_69745 | NW_004516484.1 | Scaffold1221 | 69745                   | CC                              | TT              | 1947000146               |
| SNP_P4_156498_77238 | NW_004516484.1 | Scaffold1221 | 77238                   | AA                              | GG              | 1947000148               |
| SNP_P4_156499_77306 | NW_004516484.1 | Scaffold1221 | 77306                   | CC                              | TT              | 1947000150               |
| SNP_P4_156500_13747 | NW_004516485.1 | Scaffold1222 | 13747                   | TT                              | AA              | 1947000152               |
| SNP_P4_156501_13750 | NW_004516485.1 | Scaffold1222 | 13750                   | TT                              | AA              | 1947000154               |
| SNP_P4_156502_13802 | NW_004516485.1 | Scaffold1222 | 13802                   | CC                              | TT              | 1947000156               |
| SNP_P4_156503_13831 | NW_004516485.1 | Scaffold1222 | 13831                   | AA                              | GG              | 1947000158               |
| SNP_P4_156504_13837 | NW_004516485.1 | Scaffold1222 | 13837                   | CC                              | TT              | 1947000160               |
| SNP_P4_156506_13952 | NW_004516485.1 | Scaffold1222 | 13952                   | TT                              | AA              | 1947000162               |
| SNP_P4_156507_14510 | NW_004516485.1 | Scaffold1222 | 14510                   | CC                              | GG              | 1947000164               |
| SNP_P4_156508_14520 | NW_004516485.1 | Scaffold1222 | 14520                   | AA                              | GG              | 1947000166               |
| SNP_P4_156509_14529 | NW_004516485.1 | Scaffold1222 | 14529                   | TT                              | AA              | 1947000168               |
| SNP_P4_156510_14606 | NW_004516485.1 | Scaffold1222 | 14606                   | AA                              | CC              | 1947000170               |
| SNP_P4_156511_14615 | NW_004516485.1 | Scaffold1222 | 14615                   | CC                              | AA              | 1947000172               |
| SNP_P4_156512_14713 | NW_004516485.1 | Scaffold1222 | 14713                   | AA                              | GG              | 1947000174               |
| SNP_P4_156513_14724 | NW_004516485.1 | Scaffold1222 | 14724                   | AA                              | TT              | 1947000176               |
| SNP_P4_156514_14755 | NW_004516485.1 | Scaffold1222 | 14755                   | GG                              | CC              | 1947000178               |
| SNP_P4_156515_14806 | NW_004516485.1 | Scaffold1222 | 14806                   | TT                              | AA              | 1947000180               |
| SNP_P4_156516_14826 | NW_004516485.1 | Scaffold1222 | 14826                   | CC                              | TT              | 1947000182               |
| SNP_P4_156517_14856 | NW_004516485.1 | Scaffold1222 | 14856                   | TT                              | AA              | 1947000184               |
| SNP_P4_156518_14858 | NW_004516485.1 | Scaffold1222 | 14858                   | TT                              | AA              | 1947000186               |
| SNP_P4_156519_14863 | NW_004516485.1 | Scaffold1222 | 14863                   | TT                              | GG              | 1947000188               |
| SNP_P4_156520_14895 | NW_004516485.1 | Scaffold1222 | 14895                   | CC                              | AA              | 1947000190               |
| SNP_P4_156521_14902 | NW_004516485.1 | Scaffold1222 | 14902                   | CC                              | AA              | 1947000192               |
| SNP_P4_156523_3988  | NW_004516486.1 | Scaffold1224 | 3988                    | AA                              | CC              | 1947000193               |
| SNP_P4_156524_4004  | NW_004516486.1 | Scaffold1224 | 4004                    | TT                              | AA              | 1947000195               |
| SNP_P4_156525_4016  | NW_004516486.1 | Scaffold1224 | 4016                    | TT                              | GG              | 1947000197               |
| SNP_P4_156526_4021  | NW_004516486.1 | Scaffold1224 | 4021                    | TT                              | AA              | 1947000199               |
| SNP_P4_156527_4107  | NW_004516486.1 | Scaffold1224 | 4107                    | TT                              | CC              | 1947000201               |
| SNP_P4_156528_4136  | NW_004516486.1 | Scaffold1224 | 4136                    | TT                              | CC              | 1947000203               |
| SNP_P4_156529_4138  | NW_004516486.1 | Scaffold1224 | 4138                    | GG                              | AA              | 1947000205               |
| SNP_P4_156530_4140  | NW_004516486.1 | Scaffold1224 | 4140                    | GG                              | CC              | 1947000207               |
| SNP_P4_156531_4187  | NW_004516486.1 | Scaffold1224 | 4187                    | CC                              | TT              | 1947000209               |
| SNP_P4_156532_4445  | NW_004516486.1 | Scaffold1224 | 4445                    | AA                              | GG              | 1947000211               |
| SNP_P4_156533_5066  | NW_004516486.1 | Scaffold1224 | 5066                    | TT                              | CC              | 1947000213               |
| SNP_P4_156534_5083  | NW_004516486.1 | Scaffold1224 | 5083                    | AA                              | GG              | 1947000215               |
| SNP_P4_156535_32365 | NW_004516487.1 | Scaffold1226 | 32365                   | TT                              | CC              | 1947000217               |
| SNP_P4_156536_32391 | NW_004516487.1 | Scaffold1226 | 32391                   | GG                              | AA              | 1947000219               |
| SNP_P4_156537_5098  | NW_004516489.1 | Scaffold1231 | 5098                    | AA                              | GG              | 1947000221               |

| SNPs IDs             | Chromosome IDs | Chromosomes  | Physical positions (bp) | CDC Frontier (Reference genome) | (ILWC46 & LPNB) | NCBI SNPdb Accession IDs |
|----------------------|----------------|--------------|-------------------------|---------------------------------|-----------------|--------------------------|
| SNP_P4_156538_6970   | NW_004516489.1 | Scaffold1231 | 6970                    | CC                              | TT              | 1947000223               |
| SNP_P4_156539_7023   | NW_004516489.1 | Scaffold1231 | 7023                    | TT                              | GG              | 1947000225               |
| SNP_P4_156541_7364   | NW_004516489.1 | Scaffold1231 | 7364                    | GG                              | AA              | 1947000227               |
| SNP_P4_156542_7374   | NW_004516489.1 | Scaffold1231 | 7374                    | TT                              | CC              | 1947000229               |
| SNP_P4_156543_24211  | NW_004516489.1 | Scaffold1231 | 24211                   | CC                              | AA              | 1947000231               |
| SNP_P4_156544_25734  | NW_004516489.1 | Scaffold1231 | 25734                   | CC                              | TT              | 1947000233               |
| SNP_P4_156545_41538  | NW_004516489.1 | Scaffold1231 | 41538                   | TT                              | CC              | 1947000235               |
| SNP_P4_156546_41573  | NW_004516489.1 | Scaffold1231 | 41573                   | GG                              | TT              | 1947000237               |
| SNP_P4_156547_41583  | NW_004516489.1 | Scaffold1231 | 41583                   | CC                              | GG              | 1947000238               |
| SNP_P4_156548_54952  | NW_004516489.1 | Scaffold1231 | 54952                   | TT                              | CC              | 1947000240               |
| SNP_P4_156549_74732  | NW_004516489.1 | Scaffold1231 | 74732                   | AA                              | CC              | 1947000242               |
| SNP_P4_156550_74909  | NW_004516489.1 | Scaffold1231 | 74909                   | GG                              | AA              | 1947000244               |
| SNP_P4_156551_87001  | NW_004516489.1 | Scaffold1231 | 87001                   | CC                              | GG              | 1947000246               |
| SNP_P4_156552_87335  | NW_004516489.1 | Scaffold1231 | 87335                   | CC                              | TT              | 1947000248               |
| SNP_P4_156553_113338 | NW_004516489.1 | Scaffold1231 | 113338                  | GG                              | AA              | 1947000250               |
| SNP_P4_156554_118077 | NW_004516489.1 | Scaffold1231 | 118077                  | AA                              | GG              | 1947000252               |
| SNP_P4_156555_118880 | NW_004516489.1 | Scaffold1231 | 118880                  | GG                              | AA              | 1947000254               |
| SNP_P4_156556_128469 | NW_004516489.1 | Scaffold1231 | 128469                  | CC                              | TT              | 1947000256               |
| SNP_P4_156557_143103 | NW_004516489.1 | Scaffold1231 | 143103                  | CC                              | TT              | 1947000258               |
| SNP_P4_156558_143114 | NW_004516489.1 | Scaffold1231 | 143114                  | GG                              | AA              | 1947000260               |
| SNP_P4_156559_143118 | NW_004516489.1 | Scaffold1231 | 143118                  | CC                              | TT              | 1947000262               |
| SNP_P4_156560_143142 | NW_004516489.1 | Scaffold1231 | 143142                  | TT                              | CC              | 1947000264               |
| SNP_P4_156562_185086 | NW_004516489.1 | Scaffold1231 | 185086                  | AA                              | GG              | 1947000266               |
| SNP_P4_156563_185092 | NW_004516489.1 | Scaffold1231 | 185092                  | CC                              | TT              | 1947000268               |
| SNP_P4_156564_185155 | NW_004516489.1 | Scaffold1231 | 185155                  | AA                              | CC              | 1947000270               |
| SNP_P4_156565_185758 | NW_004516489.1 | Scaffold1231 | 185758                  | GG                              | AA              | 1947000272               |
| SNP_P4_156566_186606 | NW_004516489.1 | Scaffold1231 | 186606                  | GG                              | AA              | 1947000274               |
| SNP_P4_156567_186898 | NW_004516489.1 | Scaffold1231 | 186898                  | GG                              | AA              | 1947000276               |
| SNP_P4_156568_187139 | NW_004516489.1 | Scaffold1231 | 187139                  | CC                              | TT              | 1947000278               |
| SNP_P4_156569_187189 | NW_004516489.1 | Scaffold1231 | 187189                  | TT                              | CC              | 1947000280               |
| SNP_P4_156570_3158   | NW_004516491.1 | Scaffold1234 | 3158                    | GG                              | AA              | 1947000282               |
| SNP_P4_156571_469    | NW_004516492.1 | Scaffold1235 | 469                     | TT                              | AA              | 1947000284               |
| SNP_P4_156572_848    | NW_004516492.1 | Scaffold1235 | 848                     | GG                              | AA              | 1947000286               |
| SNP_P4_156573_881    | NW_004516492.1 | Scaffold1235 | 881                     | CC                              | TT              | 1947000288               |
| SNP_P4_156574_940    | NW_004516492.1 | Scaffold1235 | 940                     | GG                              | AA              | 1947000290               |
| SNP_P4_156575_1112   | NW_004516492.1 | Scaffold1235 | 1112                    | AA                              | GG              | 1947000292               |
| SNP_P4_156576_1200   | NW_004516492.1 | Scaffold1235 | 1200                    | AA                              | GG              | 1947000294               |
| SNP_P4_156577_1154   | NW_004516495.1 | Scaffold1238 | 1154                    | TT                              | GG              | 1947000296               |
| SNP_P4_156578_1640   | NW_004516495.1 | Scaffold1238 | 1640                    | AA                              | TT              | 1947000298               |
| SNP_P4_156579_1897   | NW_004516495.1 | Scaffold1238 | 1897                    | AA                              | CC              | 1947000300               |
| SNP_P4_156580_13795  | NW_004516495.1 | Scaffold1238 | 13795                   | CC                              | AA              | 1947000302               |
| SNP_P4_156581_13796  | NW_004516495.1 | Scaffold1238 | 13796                   | CC                              | AA              | 1947000304               |

| SNPs IDs             | Chromosome IDs | Chromosomes  | Physical positions (bp) | CDC Frontier (Reference genome) | (ILWC46 & LPNB) | NCBI SNPdb Accession IDs |
|----------------------|----------------|--------------|-------------------------|---------------------------------|-----------------|--------------------------|
| SNP_P4_156583_30331  | NW_004516495.1 | Scaffold1238 | 30331                   | TT                              | GG              | 1947000306               |
| SNP_P4_156584_30358  | NW_004516495.1 | Scaffold1238 | 30358                   | CC                              | TT              | 1947000308               |
| SNP_P4_156585_30362  | NW_004516495.1 | Scaffold1238 | 30362                   | CC                              | TT              | 1947000310               |
| SNP_P4_156587_30720  | NW_004516495.1 | Scaffold1238 | 30720                   | AA                              | GG              | 1947000312               |
| SNP_P4_156588_31178  | NW_004516495.1 | Scaffold1238 | 31178                   | AA                              | TT              | 1947000314               |
| SNP_P4_156590_50957  | NW_004516495.1 | Scaffold1238 | 50957                   | CC                              | TT              | 1947000316               |
| SNP_P4_156591_50970  | NW_004516495.1 | Scaffold1238 | 50970                   | CC                              | TT              | 1947000318               |
| SNP_P4_156592_50981  | NW_004516495.1 | Scaffold1238 | 50981                   | TT                              | CC              | 1947000320               |
| SNP_P4_156593_50986  | NW_004516495.1 | Scaffold1238 | 50986                   | CC                              | TT              | 1947000322               |
| SNP_P4_156594_51026  | NW_004516495.1 | Scaffold1238 | 51026                   | TT                              | CC              | 1947000324               |
| SNP_P4_156595_64911  | NW_004516495.1 | Scaffold1238 | 64911                   | TT                              | CC              | 1947000326               |
| SNP_P4_156596_65186  | NW_004516495.1 | Scaffold1238 | 65186                   | CC                              | AA              | 1947000328               |
| SNP_P4_156597_65188  | NW_004516495.1 | Scaffold1238 | 65188                   | AA                              | GG              | 1947000330               |
| SNP_P4_156598_65650  | NW_004516495.1 | Scaffold1238 | 65650                   | AA                              | GG              | 1947000332               |
| SNP_P4_156599_72064  | NW_004516495.1 | Scaffold1238 | 72064                   | GG                              | AA              | 1947000334               |
| SNP_P4_156600_101775 | NW_004516495.1 | Scaffold1238 | 101775                  | TT                              | AA              | 1947000335               |
| SNP_P4_156601_103805 | NW_004516495.1 | Scaffold1238 | 103805                  | CC                              | TT              | 1947000337               |
| SNP_P4_156602_103916 | NW_004516495.1 | Scaffold1238 | 103916                  | GG                              | AA              | 1947000339               |
| SNP_P4_156603_103927 | NW_004516495.1 | Scaffold1238 | 103927                  | CC                              | TT              | 1947000341               |
| SNP_P4_156604_103990 | NW_004516495.1 | Scaffold1238 | 103990                  | AA                              | TT              | 1947000343               |
| SNP_P4_156605_104024 | NW_004516495.1 | Scaffold1238 | 104024                  | AA                              | CC              | 1947000345               |
| SNP_P4_156606_104167 | NW_004516495.1 | Scaffold1238 | 104167                  | AA                              | GG              | 1947000347               |
| SNP_P4_156607_104205 | NW_004516495.1 | Scaffold1238 | 104205                  | TT                              | CC              | 1947000349               |
| SNP_P4_156608_104222 | NW_004516495.1 | Scaffold1238 | 104222                  | AA                              | TT              | 1947000351               |
| SNP_P4_156609_104226 | NW_004516495.1 | Scaffold1238 | 104226                  | GG                              | AA              | 1947000353               |
| SNP_P4_156610_104230 | NW_004516495.1 | Scaffold1238 | 104230                  | CC                              | TT              | 1947000354               |
| SNP_P4_156611_104364 | NW_004516495.1 | Scaffold1238 | 104364                  | TT                              | GG              | 1947000356               |
| SNP_P4_156612_104365 | NW_004516495.1 | Scaffold1238 | 104365                  | GG                              | TT              | 1947000358               |
| SNP_P4_156613_104391 | NW_004516495.1 | Scaffold1238 | 104391                  | GG                              | TT              | 1947000360               |
| SNP_P4_156614_109714 | NW_004516495.1 | Scaffold1238 | 109714                  | AA                              | TT              | 1947000362               |
| SNP_P4_156615_109844 | NW_004516495.1 | Scaffold1238 | 109844                  | AA                              | GG              | 1947000364               |
| SNP_P4_156616_109869 | NW_004516495.1 | Scaffold1238 | 109869                  | CC                              | GG              | 1947000366               |
| SNP_P4_156617_110097 | NW_004516495.1 | Scaffold1238 | 110097                  | AA                              | GG              | 1947000368               |
| SNP_P4_156618_110307 | NW_004516495.1 | Scaffold1238 | 110307                  | AA                              | GG              | 1947000370               |
| SNP_P4_156619_110331 | NW_004516495.1 | Scaffold1238 | 110331                  | AA                              | GG              | 1947000372               |
| SNP_P4_156620_110338 | NW_004516495.1 | Scaffold1238 | 110338                  | AA                              | CC              | 1947000374               |
| SNP_P4_156621_110526 | NW_004516495.1 | Scaffold1238 | 110526                  | CC                              | TT              | 1947000376               |
| SNP_P4_156623_110559 | NW_004516495.1 | Scaffold1238 | 110559                  | AA                              | CC              | 1947000378               |
| SNP_P4_156624_110560 | NW_004516495.1 | Scaffold1238 | 110560                  | TT                              | CC              | 1947000380               |
| SNP_P4_156625_110740 | NW_004516495.1 | Scaffold1238 | 110740                  | AA                              | GG              | 1947000381               |
| SNP_P4_156626_110747 | NW_004516495.1 | Scaffold1238 | 110747                  | AA                              | CC              | 1947000383               |
| SNP_P4_156627_110759 | NW_004516495.1 | Scaffold1238 | 110759                  | TT                              | GG              | 1947000385               |

| SNPs IDs             | Chromosome IDs | Chromosomes  | Physical positions (bp) | CDC Frontier (Reference genome) | (ILWC46 & LPNB) | NCBI SNPdb Accession IDs |
|----------------------|----------------|--------------|-------------------------|---------------------------------|-----------------|--------------------------|
| SNP_P4_156628_110776 | NW_004516495.1 | Scaffold1238 | 110776                  | AA                              | CC              | 1947000387               |
| SNP_P4_156629_110791 | NW_004516495.1 | Scaffold1238 | 110791                  | GG                              | AA              | 1947000389               |
| SNP_P4_156630_110830 | NW_004516495.1 | Scaffold1238 | 110830                  | AA                              | TT              | 1947000391               |
| SNP_P4_156631_110839 | NW_004516495.1 | Scaffold1238 | 110839                  | TT                              | CC              | 1947000393               |
| SNP_P4_156632_110842 | NW_004516495.1 | Scaffold1238 | 110842                  | GG                              | AA              | 1947000395               |
| SNP_P4_156633_110843 | NW_004516495.1 | Scaffold1238 | 110843                  | GG                              | AA              | 1947000397               |
| SNP_P4_156634_110918 | NW_004516495.1 | Scaffold1238 | 110918                  | AA                              | TT              | 1947000399               |
| SNP_P4_156635_130359 | NW_004516495.1 | Scaffold1238 | 130359                  | AA                              | TT              | 1947000401               |
| SNP_P4_156636_136281 | NW_004516495.1 | Scaffold1238 | 136281                  | TT                              | AA              | 1947000403               |
| SNP_P4_156637_141443 | NW_004516495.1 | Scaffold1238 | 141443                  | AA                              | GG              | 1947000405               |
| SNP_P4_156638_146657 | NW_004516495.1 | Scaffold1238 | 146657                  | GG                              | AA              | 1947000407               |
| SNP_P4_156639_146707 | NW_004516495.1 | Scaffold1238 | 146707                  | CC                              | TT              | 1947000408               |
| SNP_P4_156640_147017 | NW_004516495.1 | Scaffold1238 | 147017                  | AA                              | GG              | 1947000410               |
| SNP_P4_156641_150794 | NW_004516495.1 | Scaffold1238 | 150794                  | TT                              | CC              | 1947000412               |
| SNP_P4_156643_254    | NW_004516496.1 | Scaffold1239 | 254                     | AA                              | TT              | 1947000414               |
| SNP_P4_156644_272    | NW_004516496.1 | Scaffold1239 | 272                     | GG                              | AA              | 1947000416               |
| SNP_P4_156645_2478   | NW_004516496.1 | Scaffold1239 | 2478                    | AA                              | CC              | 1947000418               |
| SNP_P4_156646_2567   | NW_004516496.1 | Scaffold1239 | 2567                    | TT                              | AA              | 1947000420               |
| SNP_P4_156647_2634   | NW_004516496.1 | Scaffold1239 | 2634                    | TT                              | AA              | 1947000422               |
| SNP_P4_156648_3871   | NW_004516496.1 | Scaffold1239 | 3871                    | GG                              | AA              | 1947000424               |
| SNP_P4_156649_3931   | NW_004516496.1 | Scaffold1239 | 3931                    | AA                              | GG              | 1947000426               |
| SNP_P4_156650_4068   | NW_004516496.1 | Scaffold1239 | 4068                    | GG                              | AA              | 1947000428               |
| SNP_P4_156651_4076   | NW_004516496.1 | Scaffold1239 | 4076                    | TT                              | CC              | 1947000430               |
| SNP_P4_156652_4196   | NW_004516496.1 | Scaffold1239 | 4196                    | CC                              | GG              | 1947000432               |
| SNP_P4_156653_4248   | NW_004516496.1 | Scaffold1239 | 4248                    | CC                              | TT              | 1947000434               |
| SNP_P4_156655_4392   | NW_004516496.1 | Scaffold1239 | 4392                    | GG                              | AA              | 1947000436               |
| SNP_P4_156656_4520   | NW_004516496.1 | Scaffold1239 | 4520                    | GG                              | CC              | 1947000438               |
| SNP_P4_156657_4633   | NW_004516496.1 | Scaffold1239 | 4633                    | TT                              | CC              | 1947000440               |
| SNP_P4_156658_4803   | NW_004516496.1 | Scaffold1239 | 4803                    | AA                              | GG              | 1947000442               |
| SNP_P4_156659_5289   | NW_004516496.1 | Scaffold1239 | 5289                    | TT                              | AA              | 1947000444               |
| SNP_P4_156660_7024   | NW_004516497.1 | Scaffold1240 | 7024                    | CC                              | TT              | 1947000446               |
| SNP_P4_156662_62859  | NW_004516497.1 | Scaffold1240 | 62859                   | CC                              | AA              | 1947000447               |
| SNP_P4_156663_67626  | NW_004516497.1 | Scaffold1240 | 67626                   | GG                              | AA              | 1947000449               |
| SNP_P4_156664_68951  | NW_004516497.1 | Scaffold1240 | 68951                   | TT                              | AA              | 1947000451               |
| SNP_P4_156666_102732 | NW_004516497.1 | Scaffold1240 | 102732                  | TT                              | CC              | 1947000453               |
| SNP_P4_156667_105518 | NW_004516497.1 | Scaffold1240 | 105518                  | AA                              | GG              | 1947000455               |
| SNP_P4_156669_105760 | NW_004516497.1 | Scaffold1240 | 105760                  | CC                              | AA              | 1947000457               |
| SNP_P4_156670_105771 | NW_004516497.1 | Scaffold1240 | 105771                  | AA                              | GG              | 1947000459               |
| SNP_P4_156671_106016 | NW_004516497.1 | Scaffold1240 | 106016                  | CC                              | TT              | 1947000461               |
| SNP_P4_156674_133150 | NW_004516497.1 | Scaffold1240 | 133150                  | AA                              | GG              | 1947000463               |
| SNP_P4_156675_145473 | NW_004516497.1 | Scaffold1240 | 145473                  | CC                              | AA              | 1947000465               |
| SNP_P4_156676_145548 | NW_004516497.1 | Scaffold1240 | 145548                  | TT                              | CC              | 1947000467               |

| SNPs IDs             | Chromosome IDs | Chromosomes  | Physical positions (bp) | CDC Frontier (Reference genome) | (ILWC46 & LPNB) | NCBI SNPdb Accession IDs |
|----------------------|----------------|--------------|-------------------------|---------------------------------|-----------------|--------------------------|
| SNP_P4_156677_145554 | NW_004516497.1 | Scaffold1240 | 145554                  | TT                              | CC              | 1947000469               |
| SNP_P4_156678_145846 | NW_004516497.1 | Scaffold1240 | 145846                  | TT                              | AA              | 1947000471               |
| SNP_P4_156679_145850 | NW_004516497.1 | Scaffold1240 | 145850                  | CC                              | TT              | 1947000472               |
| SNP_P4_156680_145922 | NW_004516497.1 | Scaffold1240 | 145922                  | CC                              | TT              | 1947000474               |
| SNP_P4_156682_2695   | NW_004516498.1 | Scaffold1242 | 2695                    | GG                              | AA              | 1947000476               |
| SNP_P4_156683_2869   | NW_004516498.1 | Scaffold1242 | 2869                    | AA                              | TT              | 1947000478               |
| SNP_P4_156684_14600  | NW_004516498.1 | Scaffold1242 | 14600                   | CC                              | TT              | 1947000480               |
| SNP_P4_156685_14606  | NW_004516498.1 | Scaffold1242 | 14606                   | AA                              | GG              | 1947000482               |
| SNP_P4_156686_15015  | NW_004516498.1 | Scaffold1242 | 15015                   | AA                              | TT              | 1947000484               |
| SNP_P4_156687_15051  | NW_004516498.1 | Scaffold1242 | 15051                   | GG                              | CC              | 1947000486               |
| SNP_P4_156688_15251  | NW_004516498.1 | Scaffold1242 | 15251                   | AA                              | GG              | 1947000488               |
| SNP_P4_156689_17022  | NW_004516498.1 | Scaffold1242 | 17022                   | TT                              | CC              | 1947000490               |
| SNP_P4_156690_17030  | NW_004516498.1 | Scaffold1242 | 17030                   | TT                              | CC              | 1947000492               |
| SNP_P4_156691_17059  | NW_004516498.1 | Scaffold1242 | 17059                   | TT                              | CC              | 1947000494               |
| SNP_P4_156692_22590  | NW_004516498.1 | Scaffold1242 | 22590                   | CC                              | AA              | 1947000496               |
| SNP_P4_156693_24742  | NW_004516498.1 | Scaffold1242 | 24742                   | CC                              | TT              | 1947000498               |
| SNP_P4_156694_26632  | NW_004516498.1 | Scaffold1242 | 26632                   | TT                              | AA              | 1947000500               |
| SNP_P4_156695_26635  | NW_004516498.1 | Scaffold1242 | 26635                   | TT                              | GG              | 1947000502               |
| SNP_P4_156696_27488  | NW_004516498.1 | Scaffold1242 | 27488                   | TT                              | GG              | 1947000504               |
| SNP_P4_156697_27542  | NW_004516498.1 | Scaffold1242 | 27542                   | TT                              | CC              | 1947000505               |
| SNP_P4_156698_40148  | NW_004516498.1 | Scaffold1242 | 40148                   | CC                              | TT              | 1947000507               |
| SNP_P4_156699_40213  | NW_004516498.1 | Scaffold1242 | 40213                   | TT                              | CC              | 1947000509               |
| SNP_P4_156700_40393  | NW_004516498.1 | Scaffold1242 | 40393                   | AA                              | GG              | 1947000511               |
| SNP_P4_156701_40428  | NW_004516498.1 | Scaffold1242 | 40428                   | AA                              | CC              | 1947000513               |
| SNP_P4_156702_40462  | NW_004516498.1 | Scaffold1242 | 40462                   | AA                              | TT              | 1947000515               |
| SNP_P4_156703_40487  | NW_004516498.1 | Scaffold1242 | 40487                   | GG                              | TT              | 1947000517               |
| SNP_P4_156704_40509  | NW_004516498.1 | Scaffold1242 | 40509                   | CC                              | TT              | 1947000519               |
| SNP_P4_156705_47768  | NW_004516498.1 | Scaffold1242 | 47768                   | AA                              | TT              | 1947000521               |
| SNP_P4_156706_48188  | NW_004516498.1 | Scaffold1242 | 48188                   | AA                              | CC              | 1947000523               |
| SNP_P4_156707_50869  | NW_004516498.1 | Scaffold1242 | 50869                   | AA                              | GG              | 1947000524               |
| SNP_P4_156708_53727  | NW_004516498.1 | Scaffold1242 | 53727                   | TT                              | CC              | 1947000526               |
| SNP_P4_156709_53728  | NW_004516498.1 | Scaffold1242 | 53728                   | CC                              | GG              | 1947000528               |
| SNP_P4_156710_57107  | NW_004516498.1 | Scaffold1242 | 57107                   | CC                              | TT              | 1947000530               |
| SNP_P4_156711_57109  | NW_004516498.1 | Scaffold1242 | 57109                   | TT                              | GG              | 1947000532               |
| SNP_P4_156712_57110  | NW_004516498.1 | Scaffold1242 | 57110                   | AA                              | GG              | 1947000534               |
| SNP_P4_156713_62321  | NW_004516498.1 | Scaffold1242 | 62321                   | TT                              | CC              | 1947000536               |
| SNP_P4_156714_64273  | NW_004516498.1 | Scaffold1242 | 64273                   | GG                              | AA              | 1947000538               |
| SNP_P4_156715_775    | NW_004516499.1 | Scaffold1243 | 775                     | TT                              | GG              | 1947000540               |
| SNP_P4_156716_994    | NW_004516499.1 | Scaffold1243 | 994                     | GG                              | TT              | 1947000542               |
| SNP_P4_156717_1104   | NW_004516499.1 | Scaffold1243 | 1104                    | AA                              | GG              | 1947000544               |
| SNP_P4_156718_1165   | NW_004516499.1 | Scaffold1243 | 1165                    | TT                              | GG              | 1947000546               |
| SNP_P4_156719_1272   | NW_004516499.1 | Scaffold1243 | 1272                    | AA                              | TT              | 1947000548               |



| SNPs IDs           | Chromosome IDs | Chromosomes  | Physical positions (bp) | CDC Frontier (Reference genome) | (ILWC46 & LPNB) | NCBI SNPdb Accession IDs |
|--------------------|----------------|--------------|-------------------------|---------------------------------|-----------------|--------------------------|
| SNP_P4_156720_1335 | NW_004516499.1 | Scaffold1243 | 1335                    | TT                              | GG              | 1947000550               |
| SNP_P4_156721_1534 | NW_004516499.1 | Scaffold1243 | 1534                    | GG                              | AA              | 1947000552               |
| SNP_P4_156722_1612 | NW_004516499.1 | Scaffold1243 | 1612                    | AA                              | CC              | 1947000554               |
| SNP_P4_156723_1818 | NW_004516499.1 | Scaffold1243 | 1818                    | AA                              | TT              | 1947000556               |
| SNP_P4_156724_2211 | NW_004516499.1 | Scaffold1243 | 2211                    | AA                              | CC              | 1947000558               |
| SNP_P4_156725_2256 | NW_004516499.1 | Scaffold1243 | 2256                    | CC                              | GG              | 1947000560               |
| SNP_P4_156726_2018 | NW_004516500.1 | Scaffold1244 | 2018                    | TT                              | GG              | 1947000562               |
| SNP_P4_156727_2028 | NW_004516500.1 | Scaffold1244 | 2028                    | AA                              | TT              | 1947000564               |
| SNP_P4_156728_2105 | NW_004516500.1 | Scaffold1244 | 2105                    | TT                              | AA              | 1947000566               |
| SNP_P4_156729_2175 | NW_004516500.1 | Scaffold1244 | 2175                    | TT                              | AA              | 1947000568               |
| SNP_P4_156730_2183 | NW_004516500.1 | Scaffold1244 | 2183                    | AA                              | TT              | 1947000569               |
| SNP_P4_156731_2192 | NW_004516500.1 | Scaffold1244 | 2192                    | CC                              | AA              | 1947000571               |
| SNP_P4_156732_2305 | NW_004516500.1 | Scaffold1244 | 2305                    | TT                              | AA              | 1947000573               |
| SNP_P4_156733_2371 | NW_004516500.1 | Scaffold1244 | 2371                    | CC                              | AA              | 1947000575               |
| SNP_P4_156734_2634 | NW_004516500.1 | Scaffold1244 | 2634                    | TT                              | AA              | 1947000577               |
| SNP_P4_156735_2754 | NW_004516500.1 | Scaffold1244 | 2754                    | AA                              | GG              | 1947000579               |
| SNP_P4_156737_4773 | NW_004516500.1 | Scaffold1244 | 4773                    | CC                              | AA              | 1947000581               |
| SNP_P4_156738_5191 | NW_004516500.1 | Scaffold1244 | 5191                    | GG                              | TT              | 1947000583               |
| SNP_P4_156739_5198 | NW_004516500.1 | Scaffold1244 | 5198                    | CC                              | TT              | 1947000585               |
| SNP_P4_156740_5216 | NW_004516500.1 | Scaffold1244 | 5216                    | CC                              | AA              | 1947000586               |
| SNP_P4_156741_5231 | NW_004516500.1 | Scaffold1244 | 5231                    | AA                              | GG              | 1947000588               |
| SNP_P4_156742_5249 | NW_004516500.1 | Scaffold1244 | 5249                    | GG                              | TT              | 1947000590               |
| SNP_P4_156743_5274 | NW_004516500.1 | Scaffold1244 | 5274                    | AA                              | GG              | 1947000592               |
| SNP_P4_156744_5836 | NW_004516500.1 | Scaffold1244 | 5836                    | TT                              | CC              | 1947000594               |
| SNP_P4_156745_5845 | NW_004516500.1 | Scaffold1244 | 5845                    | GG                              | CC              | 1947000596               |
| SNP_P4_156746_6059 | NW_004516500.1 | Scaffold1244 | 6059                    | TT                              | GG              | 1947000598               |
| SNP_P4_156747_6065 | NW_004516500.1 | Scaffold1244 | 6065                    | AA                              | GG              | 1947000600               |
| SNP_P4_156748_7037 | NW_004516500.1 | Scaffold1244 | 7037                    | AA                              | TT              | 1947000602               |
| SNP_P4_156749_7850 | NW_004516500.1 | Scaffold1244 | 7850                    | AA                              | TT              | 1947000604               |
| SNP_P4_156750_7856 | NW_004516500.1 | Scaffold1244 | 7856                    | CC                              | TT              | 1947000606               |
| SNP_P4_156751_7859 | NW_004516500.1 | Scaffold1244 | 7859                    | CC                              | TT              | 1947000607               |
| SNP_P4_156752_7863 | NW_004516500.1 | Scaffold1244 | 7863                    | TT                              | CC              | 1947000609               |
| SNP_P4_156753_7865 | NW_004516500.1 | Scaffold1244 | 7865                    | TT                              | CC              | 1947000611               |
| SNP_P4_156755_7877 | NW_004516500.1 | Scaffold1244 | 7877                    | AA                              | GG              | 1947000613               |
| SNP_P4_156757_7914 | NW_004516500.1 | Scaffold1244 | 7914                    | TT                              | CC              | 1947000615               |
| SNP_P4_156758_7981 | NW_004516500.1 | Scaffold1244 | 7981                    | GG                              | AA              | 1947000617               |
| SNP_P4_156759_7982 | NW_004516500.1 | Scaffold1244 | 7982                    | TT                              | CC              | 1947000619               |
| SNP_P4_156760_7983 | NW_004516500.1 | Scaffold1244 | 7983                    | CC                              | TT              | 1947000621               |
| SNP_P4_156761_7984 | NW_004516500.1 | Scaffold1244 | 7984                    | CC                              | TT              | 1947000623               |
| SNP_P4_156762_7985 | NW_004516500.1 | Scaffold1244 | 7985                    | AA                              | GG              | 1947000625               |
| SNP_P4_156763_7993 | NW_004516500.1 | Scaffold1244 | 7993                    | AA                              | GG              | 1947000626               |
| SNP_P4_156764_7994 | NW_004516500.1 | Scaffold1244 | 7994                    | AA                              | GG              | 1947000628               |

| SNPs IDs            | Chromosome IDs | Chromosomes  | Physical positions (bp) | CDC Frontier (Reference genome) | (ILWC46 & LPNB) | NCBI SNPdb Accession IDs |
|---------------------|----------------|--------------|-------------------------|---------------------------------|-----------------|--------------------------|
| SNP_P4_156765_8168  | NW_004516500.1 | Scaffold1244 | 8168                    | GG                              | AA              | 1947000630               |
| SNP_P4_156766_8246  | NW_004516500.1 | Scaffold1244 | 8246                    | TT                              | CC              | 1947000632               |
| SNP_P4_156767_10111 | NW_004516500.1 | Scaffold1244 | 10111                   | GG                              | AA              | 1947000634               |
| SNP_P4_156768_11070 | NW_004516500.1 | Scaffold1244 | 11070                   | TT                              | GG              | 1947000636               |
| SNP_P4_156769_13970 | NW_004516500.1 | Scaffold1244 | 13970                   | AA                              | TT              | 1947000638               |
| SNP_P4_156770_14040 | NW_004516500.1 | Scaffold1244 | 14040                   | CC                              | TT              | 1947000640               |
| SNP_P4_156771_14079 | NW_004516500.1 | Scaffold1244 | 14079                   | TT                              | CC              | 1947000642               |
| SNP_P4_156773_17129 | NW_004516500.1 | Scaffold1244 | 17129                   | CC                              | TT              | 1947000643               |
| SNP_P4_156774_17143 | NW_004516500.1 | Scaffold1244 | 17143                   | GG                              | AA              | 1947000645               |
| SNP_P4_156775_20590 | NW_004516500.1 | Scaffold1244 | 20590                   | CC                              | AA              | 1947000647               |
| SNP_P4_156777_64    | NW_004516503.1 | Scaffold1247 | 64                      | CC                              | GG              | 1947000649               |
| SNP_P4_156778_81    | NW_004516503.1 | Scaffold1247 | 81                      | AA                              | GG              | 1947000651               |
| SNP_P4_156779_4612  | NW_004516503.1 | Scaffold1247 | 4612                    | TT                              | CC              | 1947000653               |
| SNP_P4_156780_4951  | NW_004516503.1 | Scaffold1247 | 4951                    | AA                              | GG              | 1947000655               |
| SNP_P4_156781_6320  | NW_004516503.1 | Scaffold1247 | 6320                    | CC                              | TT              | 1947000657               |
| SNP_P4_156782_6352  | NW_004516503.1 | Scaffold1247 | 6352                    | GG                              | AA              | 1947000659               |
| SNP_P4_156783_6614  | NW_004516503.1 | Scaffold1247 | 6614                    | TT                              | CC              | 1947000661               |
| SNP_P4_156784_6690  | NW_004516503.1 | Scaffold1247 | 6690                    | AA                              | GG              | 1947000663               |
| SNP_P4_156785_7202  | NW_004516503.1 | Scaffold1247 | 7202                    | TT                              | CC              | 1947000664               |
| SNP_P4_156786_7838  | NW_004516503.1 | Scaffold1247 | 7838                    | GG                              | AA              | 1947000666               |
| SNP_P4_156787_10565 | NW_004516503.1 | Scaffold1247 | 10565                   | GG                              | TT              | 1947000668               |
| SNP_P4_156788_10859 | NW_004516503.1 | Scaffold1247 | 10859                   | GG                              | AA              | 1947000670               |
| SNP_P4_156789_10880 | NW_004516503.1 | Scaffold1247 | 10880                   | CC                              | TT              | 1947000672               |
| SNP_P4_156790_13306 | NW_004516503.1 | Scaffold1247 | 13306                   | GG                              | CC              | 1947000674               |
| SNP_P4_156791_13318 | NW_004516503.1 | Scaffold1247 | 13318                   | TT                              | CC              | 1947000676               |
| SNP_P4_156792_13372 | NW_004516503.1 | Scaffold1247 | 13372                   | GG                              | AA              | 1947000678               |
| SNP_P4_156793_13560 | NW_004516503.1 | Scaffold1247 | 13560                   | CC                              | AA              | 1947000680               |
| SNP_P4_156794_13598 | NW_004516503.1 | Scaffold1247 | 13598                   | CC                              | TT              | 1947000682               |
| SNP_P4_156795_13675 | NW_004516503.1 | Scaffold1247 | 13675                   | CC                              | AA              | 1947000684               |
| SNP_P4_156796_23671 | NW_004516503.1 | Scaffold1247 | 23671                   | CC                              | TT              | 1947000686               |
| SNP_P4_156797_30633 | NW_004516503.1 | Scaffold1247 | 30633                   | AA                              | GG              | 1947000688               |
| SNP_P4_156798_30634 | NW_004516503.1 | Scaffold1247 | 30634                   | AA                              | TT              | 1947000690               |
| SNP_P4_156799_32156 | NW_004516503.1 | Scaffold1247 | 32156                   | AA                              | GG              | 1947000692               |
| SNP_P4_156800_37368 | NW_004516503.1 | Scaffold1247 | 37368                   | CC                              | TT              | 1947000694               |
| SNP_P4_156801_37608 | NW_004516503.1 | Scaffold1247 | 37608                   | TT                              | CC              | 1947000696               |
| SNP_P4_156802_38188 | NW_004516503.1 | Scaffold1247 | 38188                   | TT                              | AA              | 1947000698               |
| SNP_P4_156803_38748 | NW_004516503.1 | Scaffold1247 | 38748                   | TT                              | AA              | 1947000700               |
| SNP_P4_156804_38761 | NW_004516503.1 | Scaffold1247 | 38761                   | TT                              | AA              | 1947000702               |
| SNP_P4_156805_38764 | NW_004516503.1 | Scaffold1247 | 38764                   | AA                              | CC              | 1947000704               |
| SNP_P4_156806_498   | NW_004516504.1 | Scaffold1248 | 498                     | CC                              | AA              | 1947000706               |
| SNP_P4_156807_574   | NW_004516504.1 | Scaffold1248 | 574                     | GG                              | TT              | 1947000708               |
| SNP_P4_156808_589   | NW_004516504.1 | Scaffold1248 | 589                     | AA                              | CC              | 1947000710               |

| SNPs IDs            | Chromosome IDs | Chromosomes  | Physical positions (bp) | CDC Frontier (Reference genome) | (ILWC46 & LPNB) | NCBI SNPdb Accession IDs |
|---------------------|----------------|--------------|-------------------------|---------------------------------|-----------------|--------------------------|
| SNP_P4_156809_590   | NW_004516504.1 | Scaffold1248 | 590                     | TT                              | AA              | 1947000713               |
| SNP_P4_156810_1069  | NW_004516504.1 | Scaffold1248 | 1069                    | AA                              | TT              | 1947000715               |
| SNP_P4_156811_1099  | NW_004516504.1 | Scaffold1248 | 1099                    | GG                              | TT              | 1947000718               |
| SNP_P4_156812_686   | NW_004516505.1 | Scaffold1250 | 686                     | TT                              | GG              | 1947000720               |
| SNP_P4_156813_1234  | NW_004516506.1 | Scaffold1251 | 1234                    | CC                              | AA              | 1947000722               |
| SNP_P4_156814_15073 | NW_004516507.1 | Scaffold1252 | 15073                   | TT                              | CC              | 1947000724               |
| SNP_P4_156815_19295 | NW_004516507.1 | Scaffold1252 | 19295                   | TT                              | AA              | 1947000726               |
| SNP_P4_156816_28038 | NW_004516507.1 | Scaffold1252 | 28038                   | TT                              | CC              | 1947000728               |
| SNP_P4_156817_28150 | NW_004516507.1 | Scaffold1252 | 28150                   | CC                              | GG              | 1947000730               |
| SNP_P4_156818_28316 | NW_004516507.1 | Scaffold1252 | 28316                   | GG                              | CC              | 1947000732               |
| SNP_P4_156819_28574 | NW_004516507.1 | Scaffold1252 | 28574                   | TT                              | GG              | 1947000734               |
| SNP_P4_156820_28575 | NW_004516507.1 | Scaffold1252 | 28575                   | GG                              | TT              | 1947000736               |
| SNP_P4_156821_28936 | NW_004516507.1 | Scaffold1252 | 28936                   | AA                              | GG              | 1947000738               |
| SNP_P4_156822_43292 | NW_004516507.1 | Scaffold1252 | 43292                   | TT                              | AA              | 1947000740               |
| SNP_P4_156823_43921 | NW_004516507.1 | Scaffold1252 | 43921                   | TT                              | GG              | 1947000742               |
| SNP_P4_156824_44047 | NW_004516507.1 | Scaffold1252 | 44047                   | GG                              | TT              | 1947000744               |
| SNP_P4_156825_44095 | NW_004516507.1 | Scaffold1252 | 44095                   | AA                              | CC              | 1947000746               |
| SNP_P4_156826_44238 | NW_004516507.1 | Scaffold1252 | 44238                   | TT                              | GG              | 1947000748               |
| SNP_P4_156827_55572 | NW_004516507.1 | Scaffold1252 | 55572                   | TT                              | CC              | 1947000750               |
| SNP_P4_156828_55609 | NW_004516507.1 | Scaffold1252 | 55609                   | TT                              | CC              | 1947000752               |
| SNP_P4_156829_55922 | NW_004516507.1 | Scaffold1252 | 55922                   | AA                              | GG              | 1947000754               |
| SNP_P4_156830_56095 | NW_004516507.1 | Scaffold1252 | 56095                   | GG                              | AA              | 1947000756               |
| SNP_P4_156831_56527 | NW_004516507.1 | Scaffold1252 | 56527                   | CC                              | TT              | 1947000758               |
| SNP_P4_156832_60484 | NW_004516507.1 | Scaffold1252 | 60484                   | TT                              | CC              | 1947000760               |
| SNP_P4_156833_60627 | NW_004516507.1 | Scaffold1252 | 60627                   | GG                              | AA              | 1947000762               |
| SNP_P4_156834_60974 | NW_004516507.1 | Scaffold1252 | 60974                   | AA                              | GG              | 1947000764               |
| SNP_P4_156835_63461 | NW_004516507.1 | Scaffold1252 | 63461                   | TT                              | CC              | 1947000766               |
| SNP_P4_156836_63693 | NW_004516507.1 | Scaffold1252 | 63693                   | TT                              | CC              | 1947000768               |
| SNP_P4_156837_64021 | NW_004516507.1 | Scaffold1252 | 64021                   | GG                              | TT              | 1947000770               |
| SNP_P4_156838_65524 | NW_004516507.1 | Scaffold1252 | 65524                   | GG                              | AA              | 1947000772               |
| SNP_P4_156840_69996 | NW_004516507.1 | Scaffold1252 | 69996                   | CC                              | GG              | 1947000774               |
| SNP_P4_156841_71418 | NW_004516507.1 | Scaffold1252 | 71418                   | CC                              | TT              | 1947000776               |
| SNP_P4_156842_71426 | NW_004516507.1 | Scaffold1252 | 71426                   | GG                              | AA              | 1947000778               |
| SNP_P4_156843_71458 | NW_004516507.1 | Scaffold1252 | 71458                   | GG                              | AA              | 1947000780               |
| SNP_P4_156844_71738 | NW_004516507.1 | Scaffold1252 | 71738                   | TT                              | GG              | 1947000782               |
| SNP_P4_156845_75549 | NW_004516507.1 | Scaffold1252 | 75549                   | TT                              | CC              | 1947000784               |
| SNP_P4_156846_75592 | NW_004516507.1 | Scaffold1252 | 75592                   | GG                              | CC              | 1947000786               |
| SNP_P4_156847_76642 | NW_004516507.1 | Scaffold1252 | 76642                   | AA                              | GG              | 1947000788               |
| SNP_P4_156849_88600 | NW_004516507.1 | Scaffold1252 | 88600                   | AA                              | GG              | 1947000790               |
| SNP_P4_156851_91026 | NW_004516507.1 | Scaffold1252 | 91026                   | AA                              | TT              | 1947000792               |
| SNP_P4_156852_95675 | NW_004516507.1 | Scaffold1252 | 95675                   | AA                              | TT              | 1947000794               |
| SNP_P4_156853_97953 | NW_004516507.1 | Scaffold1252 | 97953                   | TT                              | CC              | 1947000796               |

| SNPs IDs             | Chromosome IDs | Chromosomes  | Physical positions (bp) | CDC Frontier (Reference genome) | (ILWC46 & LPNB) | NCBI SNPdb Accession IDs |
|----------------------|----------------|--------------|-------------------------|---------------------------------|-----------------|--------------------------|
| SNP_P4_156854_97967  | NW_004516507.1 | Scaffold1252 | 97967                   | CC                              | TT              | 1947000798               |
| SNP_P4_156855_97969  | NW_004516507.1 | Scaffold1252 | 97969                   | GG                              | AA              | 1947000800               |
| SNP_P4_156856_97978  | NW_004516507.1 | Scaffold1252 | 97978                   | CC                              | GG              | 1947000802               |
| SNP_P4_156857_97988  | NW_004516507.1 | Scaffold1252 | 97988                   | AA                              | GG              | 1947000804               |
| SNP_P4_156858_97990  | NW_004516507.1 | Scaffold1252 | 97990                   | AA                              | TT              | 1947000806               |
| SNP_P4_156860_98146  | NW_004516507.1 | Scaffold1252 | 98146                   | CC                              | AA              | 1947000808               |
| SNP_P4_156861_98150  | NW_004516507.1 | Scaffold1252 | 98150                   | TT                              | AA              | 1947000810               |
| SNP_P4_156862_107126 | NW_004516507.1 | Scaffold1252 | 107126                  | AA                              | GG              | 1947000812               |
| SNP_P4_156863_107794 | NW_004516507.1 | Scaffold1252 | 107794                  | TT                              | AA              | 1947000814               |
| SNP_P4_156864_109003 | NW_004516507.1 | Scaffold1252 | 109003                  | AA                              | CC              | 1947000816               |
| SNP_P4_156865_110715 | NW_004516507.1 | Scaffold1252 | 110715                  | TT                              | GG              | 1947000818               |
| SNP_P4_156866_112973 | NW_004516507.1 | Scaffold1252 | 112973                  | AA                              | GG              | 1947000820               |
| SNP_P4_156867_112988 | NW_004516507.1 | Scaffold1252 | 112988                  | AA                              | GG              | 1947000822               |
| SNP_P4_156868_114740 | NW_004516507.1 | Scaffold1252 | 114740                  | AA                              | GG              | 1947000824               |
| SNP_P4_156870_1595   | NW_004516510.1 | Scaffold1255 | 1595                    | TT                              | GG              | 1947000826               |
| SNP_P4_156871_1601   | NW_004516510.1 | Scaffold1255 | 1601                    | AA                              | GG              | 1947000828               |
| SNP_P4_156872_1648   | NW_004516510.1 | Scaffold1255 | 1648                    | CC                              | TT              | 1947000830               |
| SNP_P4_156873_1712   | NW_004516510.1 | Scaffold1255 | 1712                    | TT                              | CC              | 1947000832               |
| SNP_P4_156874_1718   | NW_004516510.1 | Scaffold1255 | 1718                    | CC                              | TT              | 1947000834               |
| SNP_P4_156875_1860   | NW_004516510.1 | Scaffold1255 | 1860                    | GG                              | AA              | 1947000836               |
| SNP_P4_156876_1923   | NW_004516510.1 | Scaffold1255 | 1923                    | TT                              | AA              | 1947000838               |
| SNP_P4_156877_1967   | NW_004516510.1 | Scaffold1255 | 1967                    | TT                              | CC              | 1947000839               |
| SNP_P4_156878_2003   | NW_004516510.1 | Scaffold1255 | 2003                    | AA                              | GG              | 1947000841               |
| SNP_P4_156879_2004   | NW_004516510.1 | Scaffold1255 | 2004                    | AA                              | GG              | 1947000843               |
| SNP_P4_156880_2025   | NW_004516510.1 | Scaffold1255 | 2025                    | AA                              | CC              | 1947000845               |
| SNP_P4_156881_2108   | NW_004516510.1 | Scaffold1255 | 2108                    | CC                              | TT              | 1947000847               |
| SNP_P4_156882_2121   | NW_004516510.1 | Scaffold1255 | 2121                    | AA                              | GG              | 1947000849               |
| SNP_P4_156883_2155   | NW_004516510.1 | Scaffold1255 | 2155                    | CC                              | GG              | 1947000851               |
| SNP_P4_156884_2241   | NW_004516510.1 | Scaffold1255 | 2241                    | AA                              | CC              | 1947000853               |
| SNP_P4_156885_2739   | NW_004516510.1 | Scaffold1255 | 2739                    | GG                              | AA              | 1947000855               |
| SNP_P4_156886_2748   | NW_004516510.1 | Scaffold1255 | 2748                    | CC                              | AA              | 1947000857               |
| SNP_P4_156887_3448   | NW_004516510.1 | Scaffold1255 | 3448                    | TT                              | AA              | 1947000859               |
| SNP_P4_156888_7986   | NW_004516510.1 | Scaffold1255 | 7986                    | CC                              | TT              | 1947000861               |
| SNP_P4_156889_8162   | NW_004516510.1 | Scaffold1255 | 8162                    | TT                              | CC              | 1947000863               |
| SNP_P4_156890_8193   | NW_004516510.1 | Scaffold1255 | 8193                    | TT                              | CC              | 1947000865               |
| SNP_P4_156891_8581   | NW_004516510.1 | Scaffold1255 | 8581                    | TT                              | CC              | 1947000867               |
| SNP_P4_156892_8701   | NW_004516510.1 | Scaffold1255 | 8701                    | TT                              | CC              | 1947000869               |
| SNP_P4_156893_14799  | NW_004516510.1 | Scaffold1255 | 14799                   | GG                              | AA              | 1947000871               |
| SNP_P4_156894_14836  | NW_004516510.1 | Scaffold1255 | 14836                   | AA                              | GG              | 1947000873               |
| SNP_P4_156895_14840  | NW_004516510.1 | Scaffold1255 | 14840                   | AA                              | GG              | 1947000875               |
| SNP_P4_156896_14968  | NW_004516510.1 | Scaffold1255 | 14968                   | CC                              | GG              | 1947000877               |
| SNP_P4_156897_14982  | NW_004516510.1 | Scaffold1255 | 14982                   | GG                              | TT              | 1947000879               |

| SNPs IDs            | Chromosome IDs | Chromosomes  | Physical positions (bp) | CDC Frontier (Reference genome) | (ILWC46 & LPNB) | NCBI SNPdb Accession IDs |
|---------------------|----------------|--------------|-------------------------|---------------------------------|-----------------|--------------------------|
| SNP_P4_156899_17375 | NW_004516510.1 | Scaffold1255 | 17375                   | TT                              | CC              | 1947000881               |
| SNP_P4_156900_17422 | NW_004516510.1 | Scaffold1255 | 17422                   | TT                              | CC              | 1947000883               |
| SNP_P4_156901_17429 | NW_004516510.1 | Scaffold1255 | 17429                   | TT                              | GG              | 1947000885               |
| SNP_P4_156902_17461 | NW_004516510.1 | Scaffold1255 | 17461                   | CC                              | TT              | 1947000887               |
| SNP_P4_156903_17537 | NW_004516510.1 | Scaffold1255 | 17537                   | AA                              | TT              | 1947000889               |
| SNP_P4_156904_17583 | NW_004516510.1 | Scaffold1255 | 17583                   | TT                              | AA              | 1947000891               |
| SNP_P4_156905_17623 | NW_004516510.1 | Scaffold1255 | 17623                   | AA                              | GG              | 1947000893               |
| SNP_P4_156906_17653 | NW_004516510.1 | Scaffold1255 | 17653                   | GG                              | AA              | 1947000895               |
| SNP_P4_156907_24436 | NW_004516510.1 | Scaffold1255 | 24436                   | GG                              | AA              | 1947000897               |
| SNP_P4_156908_24778 | NW_004516510.1 | Scaffold1255 | 24778                   | AA                              | GG              | 1947000899               |
| SNP_P4_156909_24799 | NW_004516510.1 | Scaffold1255 | 24799                   | CC                              | TT              | 1947000901               |
| SNP_P4_156910_24807 | NW_004516510.1 | Scaffold1255 | 24807                   | TT                              | CC              | 1947000903               |
| SNP_P4_156911_24814 | NW_004516510.1 | Scaffold1255 | 24814                   | GG                              | AA              | 1947000905               |
| SNP_P4_156912_477   | NW_004516511.1 | Scaffold1256 | 477                     | GG                              | TT              | 1947000907               |
| SNP_P4_156913_535   | NW_004516511.1 | Scaffold1256 | 535                     | CC                              | AA              | 1947000909               |
| SNP_P4_156915_4126  | NW_004516511.1 | Scaffold1256 | 4126                    | TT                              | CC              | 1947000911               |
| SNP_P4_156917_8291  | NW_004516511.1 | Scaffold1256 | 8291                    | CC                              | TT              | 1947000913               |
| SNP_P4_156918_13855 | NW_004516511.1 | Scaffold1256 | 13855                   | TT                              | CC              | 1947000915               |
| SNP_P4_156919_15576 | NW_004516511.1 | Scaffold1256 | 15576                   | TT                              | GG              | 1947000917               |
| SNP_P4_156920_15614 | NW_004516511.1 | Scaffold1256 | 15614                   | TT                              | AA              | 1947000919               |
| SNP_P4_156921_15649 | NW_004516511.1 | Scaffold1256 | 15649                   | GG                              | TT              | 1947000921               |
| SNP_P4_156922_15903 | NW_004516511.1 | Scaffold1256 | 15903                   | CC                              | TT              | 1947000923               |
| SNP_P4_156923_20211 | NW_004516511.1 | Scaffold1256 | 20211                   | GG                              | AA              | 1947000925               |
| SNP_P4_156924_20338 | NW_004516511.1 | Scaffold1256 | 20338                   | CC                              | TT              | 1947000927               |
| SNP_P4_156925_21064 | NW_004516511.1 | Scaffold1256 | 21064                   | GG                              | AA              | 1947000929               |
| SNP_P4_156926_22242 | NW_004516511.1 | Scaffold1256 | 22242                   | CC                              | TT              | 1947000931               |
| SNP_P4_156927_23227 | NW_004516511.1 | Scaffold1256 | 23227                   | CC                              | AA              | 1947000933               |
| SNP_P4_156928_23991 | NW_004516511.1 | Scaffold1256 | 23991                   | TT                              | CC              | 1947000935               |
| SNP_P4_156929_25081 | NW_004516511.1 | Scaffold1256 | 25081                   | CC                              | TT              | 1947000937               |
| SNP_P4_156930_25160 | NW_004516511.1 | Scaffold1256 | 25160                   | CC                              | AA              | 1947000939               |
| SNP_P4_156931_25166 | NW_004516511.1 | Scaffold1256 | 25166                   | GG                              | TT              | 1947000941               |
| SNP_P4_156932_25213 | NW_004516511.1 | Scaffold1256 | 25213                   | GG                              | AA              | 1947000943               |
| SNP_P4_156933_25214 | NW_004516511.1 | Scaffold1256 | 25214                   | CC                              | TT              | 1947000945               |
| SNP_P4_156934_25321 | NW_004516511.1 | Scaffold1256 | 25321                   | TT                              | GG              | 1947000947               |
| SNP_P4_156935_25358 | NW_004516511.1 | Scaffold1256 | 25358                   | CC                              | TT              | 1947000949               |
| SNP_P4_156936_25402 | NW_004516511.1 | Scaffold1256 | 25402                   | TT                              | CC              | 1947000951               |
| SNP_P4_156937_25422 | NW_004516511.1 | Scaffold1256 | 25422                   | AA                              | CC              | 1947000953               |
| SNP_P4_156938_25439 | NW_004516511.1 | Scaffold1256 | 25439                   | AA                              | TT              | 1947000955               |
| SNP_P4_156939_30011 | NW_004516511.1 | Scaffold1256 | 30011                   | GG                              | AA              | 1947000957               |
| SNP_P4_156940_30305 | NW_004516511.1 | Scaffold1256 | 30305                   | GG                              | AA              | 1947000959               |
| SNP_P4_156941_30312 | NW_004516511.1 | Scaffold1256 | 30312                   | GG                              | AA              | 1947000961               |
| SNP_P4_156942_31453 | NW_004516511.1 | Scaffold1256 | 31453                   | GG                              | AA              | 1947000963               |

| SNPs IDs            | Chromosome IDs | Chromosomes  | Physical positions (bp) | CDC Frontier (Reference genome) | (ILWC46 & LPNB) | NCBI SNPdb Accession IDs |
|---------------------|----------------|--------------|-------------------------|---------------------------------|-----------------|--------------------------|
| SNP_P4_156943_32295 | NW_004516511.1 | Scaffold1256 | 32295                   | TT                              | GG              | 1947000965               |
| SNP_P4_156944_32512 | NW_004516511.1 | Scaffold1256 | 32512                   | AA                              | CC              | 1947000967               |
| SNP_P4_156945_33114 | NW_004516511.1 | Scaffold1256 | 33114                   | AA                              | TT              | 1947000969               |
| SNP_P4_156946_33224 | NW_004516511.1 | Scaffold1256 | 33224                   | AA                              | GG              | 1947000971               |
| SNP_P4_156947_33436 | NW_004516511.1 | Scaffold1256 | 33436                   | TT                              | GG              | 1947000973               |
| SNP_P4_156948_38137 | NW_004516511.1 | Scaffold1256 | 38137                   | TT                              | GG              | 1947000975               |
| SNP_P4_156949_48714 | NW_004516511.1 | Scaffold1256 | 48714                   | AA                              | GG              | 1947000977               |
| SNP_P4_156950_49070 | NW_004516511.1 | Scaffold1256 | 49070                   | CC                              | TT              | 1947000979               |
| SNP_P4_156952_56197 | NW_004516511.1 | Scaffold1256 | 56197                   | CC                              | TT              | 1947000981               |
| SNP_P4_156953_60084 | NW_004516511.1 | Scaffold1256 | 60084                   | TT                              | GG              | 1947000983               |
| SNP_P4_156954_62595 | NW_004516511.1 | Scaffold1256 | 62595                   | TT                              | CC              | 1947000985               |
| SNP_P4_156955_62628 | NW_004516511.1 | Scaffold1256 | 62628                   | GG                              | AA              | 1947000987               |
| SNP_P4_156956_62633 | NW_004516511.1 | Scaffold1256 | 62633                   | CC                              | GG              | 1947000989               |
| SNP_P4_156957_62706 | NW_004516511.1 | Scaffold1256 | 62706                   | GG                              | AA              | 1947000991               |
| SNP_P4_156958_62716 | NW_004516511.1 | Scaffold1256 | 62716                   | TT                              | GG              | 1947000993               |
| SNP_P4_156959_64421 | NW_004516511.1 | Scaffold1256 | 64421                   | GG                              | AA              | 1947000995               |
| SNP_P4_156960_65877 | NW_004516511.1 | Scaffold1256 | 65877                   | AA                              | CC              | 1947000997               |
| SNP_P4_156961_66456 | NW_004516511.1 | Scaffold1256 | 66456                   | TT                              | AA              | 1947000999               |
| SNP_P4_156962_69586 | NW_004516511.1 | Scaffold1256 | 69586                   | AA                              | TT              | 1947001001               |
| SNP_P4_156963_69596 | NW_004516511.1 | Scaffold1256 | 69596                   | CC                              | GG              | 1947001002               |
| SNP_P4_156964_69635 | NW_004516511.1 | Scaffold1256 | 69635                   | TT                              | CC              | 1947001004               |
| SNP_P4_156965_76116 | NW_004516511.1 | Scaffold1256 | 76116                   | AA                              | TT              | 1947001006               |
| SNP_P4_156966_87839 | NW_004516511.1 | Scaffold1256 | 87839                   | TT                              | AA              | 1947001008               |
| SNP_P4_156967_727   | NW_004516513.1 | Scaffold1259 | 727                     | AA                              | TT              | 1947001010               |
| SNP_P4_156968_739   | NW_004516513.1 | Scaffold1259 | 739                     | CC                              | AA              | 1947001012               |
| SNP_P4_156970_23766 | NW_004516513.1 | Scaffold1259 | 23766                   | CC                              | GG              | 1947001014               |
| SNP_P4_156971_35563 | NW_004516513.1 | Scaffold1259 | 35563                   | TT                              | CC              | 1947001016               |
| SNP_P4_156972_65492 | NW_004516513.1 | Scaffold1259 | 65492                   | TT                              | CC              | 1947001018               |
| SNP_P4_156973_65976 | NW_004516513.1 | Scaffold1259 | 65976                   | TT                              | CC              | 1947001020               |
| SNP_P4_156974_65994 | NW_004516513.1 | Scaffold1259 | 65994                   | TT                              | CC              | 1947001022               |
| SNP_P4_156975_66033 | NW_004516513.1 | Scaffold1259 | 66033                   | TT                              | GG              | 1947001024               |
| SNP_P4_156976_66035 | NW_004516513.1 | Scaffold1259 | 66035                   | TT                              | AA              | 1947001026               |
| SNP_P4_156977_66396 | NW_004516513.1 | Scaffold1259 | 66396                   | AA                              | TT              | 1947001027               |
| SNP_P4_156978_66451 | NW_004516513.1 | Scaffold1259 | 66451                   | CC                              | TT              | 1947001029               |
| SNP_P4_156979_84731 | NW_004516513.1 | Scaffold1259 | 84731                   | AA                              | TT              | 1947001031               |
| SNP_P4_156980_3059  | NW_004516518.1 | Scaffold1269 | 3059                    | TT                              | AA              | 1947001033               |
| SNP_P4_156981_3303  | NW_004516518.1 | Scaffold1269 | 3303                    | AA                              | TT              | 1947001035               |
| SNP_P4_156982_4470  | NW_004516518.1 | Scaffold1269 | 4470                    | CC                              | GG              | 1947001037               |
| SNP_P4_156983_4868  | NW_004516518.1 | Scaffold1269 | 4868                    | CC                              | AA              | 1947001039               |
| SNP_P4_156984_102   | NW_004516520.1 | Scaffold1272 | 102                     | AA                              | GG              | 1947001041               |
| SNP_P4_156985_106   | NW_004516520.1 | Scaffold1272 | 106                     | TT                              | CC              | 1947001043               |
| SNP_P4_156986_131   | NW_004516520.1 | Scaffold1272 | 131                     | CC                              | TT              | 1947001045               |

| SNPs IDs            | Chromosome IDs | Chromosomes  | Physical positions (bp) | CDC Frontier (Reference genome) | (ILWC46 & LPNB) | NCBI SNPdb Accession IDs |
|---------------------|----------------|--------------|-------------------------|---------------------------------|-----------------|--------------------------|
| SNP_P4_156987_441   | NW_004516520.1 | Scaffold1272 | 441                     | TT                              | AA              | 1947001047               |
| SNP_P4_156988_3068  | NW_004516520.1 | Scaffold1272 | 3068                    | CC                              | AA              | 1947001049               |
| SNP_P4_156989_12814 | NW_004516520.1 | Scaffold1272 | 12814                   | TT                              | AA              | 1947001051               |
| SNP_P4_156990_12873 | NW_004516520.1 | Scaffold1272 | 12873                   | GG                              | TT              | 1947001053               |
| SNP_P4_156991_12885 | NW_004516520.1 | Scaffold1272 | 12885                   | GG                              | AA              | 1947001055               |
| SNP_P4_156992_12935 | NW_004516520.1 | Scaffold1272 | 12935                   | GG                              | CC              | 1947001057               |
| SNP_P4_156993_12956 | NW_004516520.1 | Scaffold1272 | 12956                   | GG                              | TT              | 1947001059               |
| SNP_P4_156994_13088 | NW_004516520.1 | Scaffold1272 | 13088                   | AA                              | GG              | 1947001061               |
| SNP_P4_156995_13157 | NW_004516520.1 | Scaffold1272 | 13157                   | TT                              | CC              | 1947001063               |
| SNP_P4_156996_13162 | NW_004516520.1 | Scaffold1272 | 13162                   | CC                              | AA              | 1947001065               |
| SNP_P4_156997_13163 | NW_004516520.1 | Scaffold1272 | 13163                   | AA                              | GG              | 1947001066               |
| SNP_P4_156998_13166 | NW_004516520.1 | Scaffold1272 | 13166                   | GG                              | AA              | 1947001068               |
| SNP_P4_156999_13212 | NW_004516520.1 | Scaffold1272 | 13212                   | CC                              | AA              | 1947001070               |
| SNP_P4_157000_19904 | NW_004516520.1 | Scaffold1272 | 19904                   | CC                              | TT              | 1947001072               |
| SNP_P4_157001_20011 | NW_004516520.1 | Scaffold1272 | 20011                   | TT                              | CC              | 1947001074               |
| SNP_P4_157003_20204 | NW_004516520.1 | Scaffold1272 | 20204                   | TT                              | CC              | 1947001076               |
| SNP_P4_157004_20360 | NW_004516520.1 | Scaffold1272 | 20360                   | AA                              | TT              | 1947001078               |
| SNP_P4_157005_21384 | NW_004516520.1 | Scaffold1272 | 21384                   | GG                              | AA              | 1947001080               |
| SNP_P4_157006_21394 | NW_004516520.1 | Scaffold1272 | 21394                   | TT                              | AA              | 1947001082               |
| SNP_P4_157007_21445 | NW_004516520.1 | Scaffold1272 | 21445                   | AA                              | TT              | 1947001084               |
| SNP_P4_157008_21569 | NW_004516520.1 | Scaffold1272 | 21569                   | AA                              | GG              | 1947001086               |
| SNP_P4_157009_21627 | NW_004516520.1 | Scaffold1272 | 21627                   | TT                              | CC              | 1947001088               |
| SNP_P4_157010_21666 | NW_004516520.1 | Scaffold1272 | 21666                   | AA                              | GG              | 1947001090               |
| SNP_P4_157011_21672 | NW_004516520.1 | Scaffold1272 | 21672                   | GG                              | CC              | 1947001092               |
| SNP_P4_157012_21715 | NW_004516520.1 | Scaffold1272 | 21715                   | GG                              | AA              | 1947001094               |
| SNP_P4_157013_21759 | NW_004516520.1 | Scaffold1272 | 21759                   | TT                              | GG              | 1947001096               |
| SNP_P4_157014_21797 | NW_004516520.1 | Scaffold1272 | 21797                   | AA                              | GG              | 1947001098               |
| SNP_P4_157015_21798 | NW_004516520.1 | Scaffold1272 | 21798                   | CC                              | GG              | 1947001100               |
| SNP_P4_157016_21840 | NW_004516520.1 | Scaffold1272 | 21840                   | AA                              | GG              | 1947001102               |
| SNP_P4_157017_48490 | NW_004516520.1 | Scaffold1272 | 48490                   | AA                              | TT              | 1947001104               |
| SNP_P4_157018_73439 | NW_004516520.1 | Scaffold1272 | 73439                   | GG                              | AA              | 1947001106               |
| SNP_P4_157019_79492 | NW_004516520.1 | Scaffold1272 | 79492                   | GG                              | AA              | 1947001108               |
| SNP_P4_157020_86112 | NW_004516520.1 | Scaffold1272 | 86112                   | TT                              | CC              | 1947001110               |
| SNP_P4_157021_87036 | NW_004516520.1 | Scaffold1272 | 87036                   | GG                              | AA              | 1947001112               |
| SNP_P4_157022_87079 | NW_004516520.1 | Scaffold1272 | 87079                   | AA                              | TT              | 1947001114               |
| SNP_P4_157023_87120 | NW_004516520.1 | Scaffold1272 | 87120                   | GG                              | AA              | 1947001117               |
| SNP_P4_157024_87145 | NW_004516520.1 | Scaffold1272 | 87145                   | TT                              | CC              | 1947001119               |
| SNP_P4_157025_87195 | NW_004516520.1 | Scaffold1272 | 87195                   | TT                              | CC              | 1947001121               |
| SNP_P4_157026_87196 | NW_004516520.1 | Scaffold1272 | 87196                   | GG                              | CC              | 1947001123               |
| SNP_P4_157027_87197 | NW_004516520.1 | Scaffold1272 | 87197                   | AA                              | GG              | 1947001125               |
| SNP_P4_157028_87240 | NW_004516520.1 | Scaffold1272 | 87240                   | AA                              | GG              | 1947001127               |
| SNP_P4_157029_87249 | NW_004516520.1 | Scaffold1272 | 87249                   | TT                              | CC              | 1947001129               |

| SNPs IDs             | Chromosome IDs | Chromosomes  | Physical positions (bp) | CDC Frontier (Reference genome) | (ILWC46 & LPNB) | NCBI SNPdb Accession IDs |
|----------------------|----------------|--------------|-------------------------|---------------------------------|-----------------|--------------------------|
| SNP_P4_157030_87286  | NW_004516520.1 | Scaffold1272 | 87286                   | AA                              | GG              | 1947001131               |
| SNP_P4_157031_87579  | NW_004516520.1 | Scaffold1272 | 87579                   | CC                              | TT              | 1947001133               |
| SNP_P4_157032_87580  | NW_004516520.1 | Scaffold1272 | 87580                   | AA                              | GG              | 1947001135               |
| SNP_P4_157033_87588  | NW_004516520.1 | Scaffold1272 | 87588                   | GG                              | AA              | 1947001138               |
| SNP_P4_157034_87589  | NW_004516520.1 | Scaffold1272 | 87589                   | TT                              | AA              | 1947001140               |
| SNP_P4_157035_105047 | NW_004516520.1 | Scaffold1272 | 105047                  | AA                              | TT              | 1947001142               |
| SNP_P4_157036_107075 | NW_004516520.1 | Scaffold1272 | 107075                  | AA                              | TT              | 1947001144               |
| SNP_P4_157037_125614 | NW_004516520.1 | Scaffold1272 | 125614                  | TT                              | GG              | 1947001146               |
| SNP_P4_157038_125655 | NW_004516520.1 | Scaffold1272 | 125655                  | CC                              | GG              | 1947001148               |
| SNP_P4_157039_130641 | NW_004516520.1 | Scaffold1272 | 130641                  | AA                              | CC              | 1947001151               |
| SNP_P4_157040_132559 | NW_004516520.1 | Scaffold1272 | 132559                  | GG                              | TT              | 1947001153               |
| SNP_P4_157041_132582 | NW_004516520.1 | Scaffold1272 | 132582                  | CC                              | TT              | 1947001155               |
| SNP_P4_157042_132624 | NW_004516520.1 | Scaffold1272 | 132624                  | CC                              | TT              | 1947001157               |
| SNP_P4_157043_132630 | NW_004516520.1 | Scaffold1272 | 132630                  | CC                              | AA              | 1947001159               |
| SNP_P4_157044_132636 | NW_004516520.1 | Scaffold1272 | 132636                  | TT                              | CC              | 1947001161               |
| SNP_P4_157045_132645 | NW_004516520.1 | Scaffold1272 | 132645                  | GG                              | AA              | 1947001163               |
| SNP_P4_157046_132652 | NW_004516520.1 | Scaffold1272 | 132652                  | TT                              | CC              | 1947001165               |
| SNP_P4_157047_132660 | NW_004516520.1 | Scaffold1272 | 132660                  | AA                              | GG              | 1947001167               |
| SNP_P4_157048_132669 | NW_004516520.1 | Scaffold1272 | 132669                  | TT                              | CC              | 1947001169               |
| SNP_P4_157049_132675 | NW_004516520.1 | Scaffold1272 | 132675                  | AA                              | GG              | 1947001171               |
| SNP_P4_157050_132678 | NW_004516520.1 | Scaffold1272 | 132678                  | AA                              | GG              | 1947001173               |
| SNP_P4_157051_132686 | NW_004516520.1 | Scaffold1272 | 132686                  | GG                              | AA              | 1947001175               |
| SNP_P4_157052_132717 | NW_004516520.1 | Scaffold1272 | 132717                  | AA                              | GG              | 1947001177               |
| SNP_P4_157053_132816 | NW_004516520.1 | Scaffold1272 | 132816                  | TT                              | CC              | 1947001179               |
| SNP_P4_157054_133117 | NW_004516520.1 | Scaffold1272 | 133117                  | AA                              | GG              | 1947001181               |
| SNP_P4_157055_133765 | NW_004516520.1 | Scaffold1272 | 133765                  | GG                              | CC              | 1947001183               |
| SNP_P4_157056_147801 | NW_004516520.1 | Scaffold1272 | 147801                  | GG                              | AA              | 1947001185               |
| SNP_P4_157057_147823 | NW_004516520.1 | Scaffold1272 | 147823                  | TT                              | CC              | 1947001187               |
| SNP_P4_157058_148152 | NW_004516520.1 | Scaffold1272 | 148152                  | CC                              | TT              | 1947001189               |
| SNP_P4_157059_148245 | NW_004516520.1 | Scaffold1272 | 148245                  | AA                              | CC              | 1947001191               |
| SNP_P4_157060_148261 | NW_004516520.1 | Scaffold1272 | 148261                  | TT                              | GG              | 1947001193               |
| SNP_P4_157061_167466 | NW_004516520.1 | Scaffold1272 | 167466                  | GG                              | AA              | 1947001195               |
| SNP_P4_157062_183810 | NW_004516520.1 | Scaffold1272 | 183810                  | TT                              | CC              | 1947001197               |
| SNP_P4_157063_190829 | NW_004516520.1 | Scaffold1272 | 190829                  | AA                              | GG              | 1947001199               |
| SNP_P4_157064_190960 | NW_004516520.1 | Scaffold1272 | 190960                  | GG                              | TT              | 1947001201               |
| SNP_P4_157065_197054 | NW_004516520.1 | Scaffold1272 | 197054                  | CC                              | TT              | 1947001203               |
| SNP_P4_157066_197151 | NW_004516520.1 | Scaffold1272 | 197151                  | TT                              | GG              | 1947001205               |
| SNP_P4_157067_197663 | NW_004516520.1 | Scaffold1272 | 197663                  | CC                              | TT              | 1947001206               |
| SNP_P4_157068_197665 | NW_004516520.1 | Scaffold1272 | 197665                  | GG                              | AA              | 1947001208               |
| SNP_P4_157069_197688 | NW_004516520.1 | Scaffold1272 | 197688                  | CC                              | AA              | 1947001210               |
| SNP_P4_157070_197693 | NW_004516520.1 | Scaffold1272 | 197693                  | CC                              | TT              | 1947001212               |
| SNP_P4_157071_231721 | NW_004516520.1 | Scaffold1272 | 231721                  | TT                              | CC              | 1947001214               |



| SNPs IDs           | Chromosome IDs | Chromosomes  | Physical positions (bp) | CDC Frontier (Reference genome) | (ILWC46 & LPNB) | NCBI SNPdb Accession IDs |
|--------------------|----------------|--------------|-------------------------|---------------------------------|-----------------|--------------------------|
| SNP_P4_157072_3305 | NW_004516522.1 | Scaffold1274 | 3305                    | TT                              | GG              | 1947001216               |
| SNP_P4_157073_3674 | NW_004516522.1 | Scaffold1274 | 3674                    | AA                              | GG              | 1947001218               |
| SNP_P4_157074_3708 | NW_004516522.1 | Scaffold1274 | 3708                    | AA                              | GG              | 1947001220               |
| SNP_P4_157075_6680 | NW_004516522.1 | Scaffold1274 | 6680                    | AA                              | TT              | 1947001222               |
| SNP_P4_157077_6991 | NW_004516522.1 | Scaffold1274 | 6991                    | CC                              | GG              | 1947001224               |
| SNP_P4_157078_7060 | NW_004516522.1 | Scaffold1274 | 7060                    | TT                              | CC              | 1947001226               |
| SNP_P4_157079_7062 | NW_004516522.1 | Scaffold1274 | 7062                    | GG                              | TT              | 1947001228               |
| SNP_P4_157080_7071 | NW_004516522.1 | Scaffold1274 | 7071                    | GG                              | AA              | 1947001230               |
| SNP_P4_157081_7075 | NW_004516522.1 | Scaffold1274 | 7075                    | AA                              | GG              | 1947001232               |
| SNP_P4_157082_7191 | NW_004516522.1 | Scaffold1274 | 7191                    | GG                              | CC              | 1947001234               |
| SNP_P4_157083_7199 | NW_004516522.1 | Scaffold1274 | 7199                    | AA                              | TT              | 1947001236               |
| SNP_P4_157084_7212 | NW_004516522.1 | Scaffold1274 | 7212                    | CC                              | AA              | 1947001238               |
| SNP_P4_157085_7230 | NW_004516522.1 | Scaffold1274 | 7230                    | CC                              | TT              | 1947001240               |
| SNP_P4_157086_3706 | NW_004516523.1 | Scaffold1275 | 3706                    | GG                              | AA              | 1947001242               |
| SNP_P4_157087_5461 | NW_004516523.1 | Scaffold1275 | 5461                    | TT                              | CC              | 1947001244               |
| SNP_P4_157088_5470 | NW_004516523.1 | Scaffold1275 | 5470                    | AA                              | GG              | 1947001246               |
| SNP_P4_157089_5547 | NW_004516523.1 | Scaffold1275 | 5547                    | GG                              | CC              | 1947001248               |
| SNP_P4_157090_5578 | NW_004516523.1 | Scaffold1275 | 5578                    | CC                              | TT              | 1947001250               |
| SNP_P4_157091_5691 | NW_004516523.1 | Scaffold1275 | 5691                    | TT                              | CC              | 1947001252               |
| SNP_P4_157092_5698 | NW_004516523.1 | Scaffold1275 | 5698                    | TT                              | CC              | 1947001254               |
| SNP_P4_157093_5791 | NW_004516523.1 | Scaffold1275 | 5791                    | AA                              | GG              | 1947001256               |
| SNP_P4_157094_5820 | NW_004516523.1 | Scaffold1275 | 5820                    | TT                              | CC              | 1947001258               |
| SNP_P4_157095_5827 | NW_004516523.1 | Scaffold1275 | 5827                    | TT                              | CC              | 1947001260               |
| SNP_P4_157096_5844 | NW_004516523.1 | Scaffold1275 | 5844                    | GG                              | AA              | 1947001262               |
| SNP_P4_157097_5860 | NW_004516523.1 | Scaffold1275 | 5860                    | CC                              | TT              | 1947001264               |
| SNP_P4_157098_5861 | NW_004516523.1 | Scaffold1275 | 5861                    | AA                              | GG              | 1947001266               |
| SNP_P4_157099_5916 | NW_004516523.1 | Scaffold1275 | 5916                    | CC                              | TT              | 1947001268               |
| SNP_P4_157100_5917 | NW_004516523.1 | Scaffold1275 | 5917                    | GG                              | AA              | 1947001270               |
| SNP_P4_157101_5933 | NW_004516523.1 | Scaffold1275 | 5933                    | TT                              | CC              | 1947001272               |
| SNP_P4_157102_5935 | NW_004516523.1 | Scaffold1275 | 5935                    | AA                              | GG              | 1947001274               |
| SNP_P4_157103_5972 | NW_004516523.1 | Scaffold1275 | 5972                    | GG                              | AA              | 1947001276               |
| SNP_P4_157104_5973 | NW_004516523.1 | Scaffold1275 | 5973                    | AA                              | GG              | 1947001278               |
| SNP_P4_157105_5997 | NW_004516523.1 | Scaffold1275 | 5997                    | GG                              | AA              | 1947001280               |
| SNP_P4_157106_6003 | NW_004516523.1 | Scaffold1275 | 6003                    | CC                              | TT              | 1947001281               |
| SNP_P4_157107_6035 | NW_004516523.1 | Scaffold1275 | 6035                    | TT                              | AA              | 1947001283               |
| SNP_P4_157108_6054 | NW_004516523.1 | Scaffold1275 | 6054                    | AA                              | GG              | 1947001285               |
| SNP_P4_157109_6055 | NW_004516523.1 | Scaffold1275 | 6055                    | AA                              | CC              | 1947001287               |
| SNP_P4_157110_6056 | NW_004516523.1 | Scaffold1275 | 6056                    | GG                              | CC              | 1947001289               |
| SNP_P4_157111_6058 | NW_004516523.1 | Scaffold1275 | 6058                    | AA                              | GG              | 1947001291               |
| SNP_P4_157112_6181 | NW_004516523.1 | Scaffold1275 | 6181                    | GG                              | AA              | 1947001293               |
| SNP_P4_157114_6212 | NW_004516523.1 | Scaffold1275 | 6212                    | TT                              | CC              | 1947001295               |
| SNP_P4_157115_6252 | NW_004516523.1 | Scaffold1275 | 6252                    | CC                              | TT              | 1947001297               |

| SNPs IDs            | Chromosome IDs | Chromosomes  | Physical positions (bp) | CDC Frontier (Reference genome) | (ILWC46 & LPNB) | NCBI SNPdb Accession IDs |
|---------------------|----------------|--------------|-------------------------|---------------------------------|-----------------|--------------------------|
| SNP_P4_157116_6255  | NW_004516523.1 | Scaffold1275 | 6255                    | TT                              | CC              | 1947001299               |
| SNP_P4_157117_6363  | NW_004516523.1 | Scaffold1275 | 6363                    | AA                              | GG              | 1947001301               |
| SNP_P4_157118_6380  | NW_004516523.1 | Scaffold1275 | 6380                    | TT                              | CC              | 1947001303               |
| SNP_P4_157119_6452  | NW_004516523.1 | Scaffold1275 | 6452                    | AA                              | TT              | 1947001305               |
| SNP_P4_157120_8574  | NW_004516523.1 | Scaffold1275 | 8574                    | AA                              | TT              | 1947001307               |
| SNP_P4_157121_8714  | NW_004516523.1 | Scaffold1275 | 8714                    | CC                              | TT              | 1947001309               |
| SNP_P4_157122_12663 | NW_004516523.1 | Scaffold1275 | 12663                   | AA                              | GG              | 1947001311               |
| SNP_P4_157123_135   | NW_004516524.1 | Scaffold1276 | 135                     | AA                              | GG              | 1947001313               |
| SNP_P4_157124_335   | NW_004516524.1 | Scaffold1276 | 335                     | CC                              | TT              | 1947001315               |
| SNP_P4_157125_615   | NW_004516524.1 | Scaffold1276 | 615                     | TT                              | AA              | 1947001316               |
| SNP_P4_157126_618   | NW_004516524.1 | Scaffold1276 | 618                     | AA                              | GG              | 1947001318               |
| SNP_P4_157127_623   | NW_004516524.1 | Scaffold1276 | 623                     | CC                              | TT              | 1947001320               |
| SNP_P4_157128_958   | NW_004516524.1 | Scaffold1276 | 958                     | AA                              | TT              | 1947001322               |
| SNP_P4_157129_1052  | NW_004516524.1 | Scaffold1276 | 1052                    | GG                              | CC              | 1947001324               |
| SNP_P4_157130_1087  | NW_004516524.1 | Scaffold1276 | 1087                    | CC                              | AA              | 1947001326               |
| SNP_P4_157131_1163  | NW_004516524.1 | Scaffold1276 | 1163                    | TT                              | CC              | 1947001328               |
| SNP_P4_157132_1178  | NW_004516524.1 | Scaffold1276 | 1178                    | CC                              | TT              | 1947001330               |
| SNP_P4_157133_1543  | NW_004516524.1 | Scaffold1276 | 1543                    | GG                              | AA              | 1947001332               |
| SNP_P4_157135_2279  | NW_004516524.1 | Scaffold1276 | 2279                    | GG                              | TT              | 1947001334               |
| SNP_P4_157136_22147 | NW_004516524.1 | Scaffold1276 | 22147                   | GG                              | TT              | 1947001336               |
| SNP_P4_157137_27636 | NW_004516524.1 | Scaffold1276 | 27636                   | GG                              | CC              | 1947001338               |
| SNP_P4_157138_29535 | NW_004516524.1 | Scaffold1276 | 29535                   | AA                              | TT              | 1947001340               |
| SNP_P4_157139_47797 | NW_004516524.1 | Scaffold1276 | 47797                   | AA                              | TT              | 1947001342               |
| SNP_P4_157140_47816 | NW_004516524.1 | Scaffold1276 | 47816                   | TT                              | GG              | 1947001343               |
| SNP_P4_157141_48246 | NW_004516524.1 | Scaffold1276 | 48246                   | CC                              | GG              | 1947001345               |
| SNP_P4_157142_48281 | NW_004516524.1 | Scaffold1276 | 48281                   | TT                              | CC              | 1947001347               |
| SNP_P4_157144_53397 | NW_004516524.1 | Scaffold1276 | 53397                   | CC                              | GG              | 1947001349               |
| SNP_P4_157145_53405 | NW_004516524.1 | Scaffold1276 | 53405                   | TT                              | GG              | 1947001351               |
| SNP_P4_157146_53436 | NW_004516524.1 | Scaffold1276 | 53436                   | TT                              | GG              | 1947001353               |
| SNP_P4_157147_53613 | NW_004516524.1 | Scaffold1276 | 53613                   | GG                              | TT              | 1947001355               |
| SNP_P4_157148_57210 | NW_004516524.1 | Scaffold1276 | 57210                   | TT                              | CC              | 1947001357               |
| SNP_P4_157149_62487 | NW_004516524.1 | Scaffold1276 | 62487                   | GG                              | AA              | 1947001358               |
| SNP_P4_157150_495   | NW_004516525.1 | Scaffold1278 | 495                     | CC                              | AA              | 1947001360               |
| SNP_P4_157151_10128 | NW_004516525.1 | Scaffold1278 | 10128                   | TT                              | CC              | 1947001362               |
| SNP_P4_157152_10163 | NW_004516525.1 | Scaffold1278 | 10163                   | CC                              | GG              | 1947001364               |
| SNP_P4_157153_10538 | NW_004516525.1 | Scaffold1278 | 10538                   | AA                              | GG              | 1947001366               |
| SNP_P4_157154_10782 | NW_004516525.1 | Scaffold1278 | 10782                   | CC                              | AA              | 1947001368               |
| SNP_P4_157155_10785 | NW_004516525.1 | Scaffold1278 | 10785                   | AA                              | GG              | 1947001370               |
| SNP_P4_157156_10794 | NW_004516525.1 | Scaffold1278 | 10794                   | AA                              | TT              | 1947001372               |
| SNP_P4_157157_10813 | NW_004516525.1 | Scaffold1278 | 10813                   | AA                              | GG              | 1947001374               |
| SNP_P4_157158_10821 | NW_004516525.1 | Scaffold1278 | 10821                   | AA                              | GG              | 1947001376               |
| SNP_P4_157159_10855 | NW_004516525.1 | Scaffold1278 | 10855                   | GG                              | AA              | 1947001378               |

| SNPs IDs            | Chromosome IDs | Chromosomes  | Physical positions (bp) | CDC Frontier (Reference genome) | (ILWC46 & LPNB) | NCBI SNPdb Accession IDs |
|---------------------|----------------|--------------|-------------------------|---------------------------------|-----------------|--------------------------|
| SNP_P4_157160_11164 | NW_004516525.1 | Scaffold1278 | 11164                   | AA                              | GG              | 1947001380               |
| SNP_P4_157161_12762 | NW_004516525.1 | Scaffold1278 | 12762                   | GG                              | AA              | 1947001381               |
| SNP_P4_157162_29765 | NW_004516525.1 | Scaffold1278 | 29765                   | AA                              | GG              | 1947001383               |
| SNP_P4_157164_34594 | NW_004516525.1 | Scaffold1278 | 34594                   | AA                              | GG              | 1947001385               |
| SNP_P4_157166_34804 | NW_004516525.1 | Scaffold1278 | 34804                   | AA                              | CC              | 1947001387               |
| SNP_P4_157167_35232 | NW_004516525.1 | Scaffold1278 | 35232                   | TT                              | CC              | 1947001389               |
| SNP_P4_157168_35412 | NW_004516525.1 | Scaffold1278 | 35412                   | TT                              | CC              | 1947001391               |
| SNP_P4_157169_35427 | NW_004516525.1 | Scaffold1278 | 35427                   | AA                              | TT              | 1947001393               |
| SNP_P4_157170_35449 | NW_004516525.1 | Scaffold1278 | 35449                   | GG                              | TT              | 1947001395               |
| SNP_P4_157171_35503 | NW_004516525.1 | Scaffold1278 | 35503                   | GG                              | CC              | 1947001397               |
| SNP_P4_157172_35856 | NW_004516525.1 | Scaffold1278 | 35856                   | TT                              | CC              | 1947001399               |
| SNP_P4_157173_35914 | NW_004516525.1 | Scaffold1278 | 35914                   | CC                              | TT              | 1947001400               |
| SNP_P4_157174_35942 | NW_004516525.1 | Scaffold1278 | 35942                   | AA                              | GG              | 1947001402               |
| SNP_P4_157176_62193 | NW_004516525.1 | Scaffold1278 | 62193                   | TT                              | CC              | 1947001404               |
| SNP_P4_157177_62213 | NW_004516525.1 | Scaffold1278 | 62213                   | GG                              | AA              | 1947001406               |
| SNP_P4_157178_62249 | NW_004516525.1 | Scaffold1278 | 62249                   | AA                              | GG              | 1947001408               |
| SNP_P4_157179_62271 | NW_004516525.1 | Scaffold1278 | 62271                   | TT                              | AA              | 1947001410               |
| SNP_P4_157180_62272 | NW_004516525.1 | Scaffold1278 | 62272                   | GG                              | AA              | 1947001412               |
| SNP_P4_157181_62273 | NW_004516525.1 | Scaffold1278 | 62273                   | GG                              | AA              | 1947001414               |
| SNP_P4_157182_62278 | NW_004516525.1 | Scaffold1278 | 62278                   | AA                              | GG              | 1947001416               |
| SNP_P4_157183_62283 | NW_004516525.1 | Scaffold1278 | 62283                   | CC                              | AA              | 1947001418               |
| SNP_P4_157184_62310 | NW_004516525.1 | Scaffold1278 | 62310                   | TT                              | CC              | 1947001420               |
| SNP_P4_157185_62326 | NW_004516525.1 | Scaffold1278 | 62326                   | GG                              | TT              | 1947001422               |
| SNP_P4_157186_62334 | NW_004516525.1 | Scaffold1278 | 62334                   | TT                              | CC              | 1947001423               |
| SNP_P4_157187_62335 | NW_004516525.1 | Scaffold1278 | 62335                   | TT                              | CC              | 1947001425               |
| SNP_P4_157188_62346 | NW_004516525.1 | Scaffold1278 | 62346                   | GG                              | AA              | 1947001427               |
| SNP_P4_157189_62369 | NW_004516525.1 | Scaffold1278 | 62369                   | CC                              | AA              | 1947001429               |
| SNP_P4_157190_62371 | NW_004516525.1 | Scaffold1278 | 62371                   | CC                              | TT              | 1947001431               |
| SNP_P4_157191_62511 | NW_004516525.1 | Scaffold1278 | 62511                   | GG                              | AA              | 1947001433               |
| SNP_P4_157192_62535 | NW_004516525.1 | Scaffold1278 | 62535                   | GG                              | AA              | 1947001435               |
| SNP_P4_157193_62552 | NW_004516525.1 | Scaffold1278 | 62552                   | GG                              | AA              | 1947001437               |
| SNP_P4_157194_62721 | NW_004516525.1 | Scaffold1278 | 62721                   | CC                              | TT              | 1947001439               |
| SNP_P4_157195_62733 | NW_004516525.1 | Scaffold1278 | 62733                   | TT                              | CC              | 1947001441               |
| SNP_P4_157196_62740 | NW_004516525.1 | Scaffold1278 | 62740                   | GG                              | AA              | 1947001443               |
| SNP_P4_157197_62749 | NW_004516525.1 | Scaffold1278 | 62749                   | TT                              | AA              | 1947001445               |
| SNP_P4_157198_62768 | NW_004516525.1 | Scaffold1278 | 62768                   | GG                              | AA              | 1947001447               |
| SNP_P4_157199_62769 | NW_004516525.1 | Scaffold1278 | 62769                   | AA                              | TT              | 1947001449               |
| SNP_P4_157200_62836 | NW_004516525.1 | Scaffold1278 | 62836                   | TT                              | CC              | 1947001451               |
| SNP_P4_157201_62857 | NW_004516525.1 | Scaffold1278 | 62857                   | GG                              | AA              | 1947001453               |
| SNP_P4_157202_62875 | NW_004516525.1 | Scaffold1278 | 62875                   | AA                              | CC              | 1947001455               |
| SNP_P4_157203_62879 | NW_004516525.1 | Scaffold1278 | 62879                   | CC                              | TT              | 1947001456               |
| SNP_P4_157204_62921 | NW_004516525.1 | Scaffold1278 | 62921                   | TT                              | GG              | 1947001458               |

| SNPs IDs            | Chromosome IDs | Chromosomes  | Physical positions (bp) | CDC Frontier (Reference genome) | (ILWC46 & LPNB) | NCBI SNPdb Accession IDs |
|---------------------|----------------|--------------|-------------------------|---------------------------------|-----------------|--------------------------|
| SNP_P4_157205_63009 | NW_004516525.1 | Scaffold1278 | 63009                   | AA                              | TT              | 1947001460               |
| SNP_P4_157207_63131 | NW_004516525.1 | Scaffold1278 | 63131                   | TT                              | CC              | 1947001462               |
| SNP_P4_157208_63132 | NW_004516525.1 | Scaffold1278 | 63132                   | GG                              | AA              | 1947001464               |
| SNP_P4_157209_63158 | NW_004516525.1 | Scaffold1278 | 63158                   | TT                              | CC              | 1947001466               |
| SNP_P4_157210_63160 | NW_004516525.1 | Scaffold1278 | 63160                   | AA                              | CC              | 1947001468               |
| SNP_P4_157211_63192 | NW_004516525.1 | Scaffold1278 | 63192                   | AA                              | GG              | 1947001470               |
| SNP_P4_157212_63215 | NW_004516525.1 | Scaffold1278 | 63215                   | GG                              | AA              | 1947001472               |
| SNP_P4_157213_63237 | NW_004516525.1 | Scaffold1278 | 63237                   | CC                              | TT              | 1947001474               |
| SNP_P4_157216_63317 | NW_004516525.1 | Scaffold1278 | 63317                   | TT                              | CC              | 1947001476               |
| SNP_P4_157217_63319 | NW_004516525.1 | Scaffold1278 | 63319                   | AA                              | GG              | 1947001478               |
| SNP_P4_157218_63354 | NW_004516525.1 | Scaffold1278 | 63354                   | AA                              | GG              | 1947001480               |
| SNP_P4_157219_63387 | NW_004516525.1 | Scaffold1278 | 63387                   | AA                              | GG              | 1947001482               |
| SNP_P4_157221_83765 | NW_004516525.1 | Scaffold1278 | 83765                   | TT                              | CC              | 1947001484               |
| SNP_P4_157222_84020 | NW_004516525.1 | Scaffold1278 | 84020                   | GG                              | AA              | 1947001486               |
| SNP_P4_157223_88725 | NW_004516525.1 | Scaffold1278 | 88725                   | GG                              | AA              | 1947001488               |
| SNP_P4_157224_95436 | NW_004516525.1 | Scaffold1278 | 95436                   | CC                              | AA              | 1947001490               |
| SNP_P4_157225_95444 | NW_004516525.1 | Scaffold1278 | 95444                   | GG                              | AA              | 1947001492               |
| SNP_P4_157226_95459 | NW_004516525.1 | Scaffold1278 | 95459                   | TT                              | CC              | 1947001494               |
| SNP_P4_157227_95500 | NW_004516525.1 | Scaffold1278 | 95500                   | AA                              | CC              | 1947001496               |
| SNP_P4_157228_95505 | NW_004516525.1 | Scaffold1278 | 95505                   | AA                              | TT              | 1947001498               |
| SNP_P4_157229_95516 | NW_004516525.1 | Scaffold1278 | 95516                   | TT                              | CC              | 1947001500               |
| SNP_P4_157230_95548 | NW_004516525.1 | Scaffold1278 | 95548                   | TT                              | GG              | 1947001502               |
| SNP_P4_157231_95825 | NW_004516525.1 | Scaffold1278 | 95825                   | CC                              | AA              | 1947001504               |
| SNP_P4_157232_95878 | NW_004516525.1 | Scaffold1278 | 95878                   | AA                              | CC              | 1947001506               |
| SNP_P4_157233_95990 | NW_004516525.1 | Scaffold1278 | 95990                   | AA                              | GG              | 1947001508               |
| SNP_P4_157234_96018 | NW_004516525.1 | Scaffold1278 | 96018                   | AA                              | GG              | 1947001510               |
| SNP_P4_157235_99984 | NW_004516525.1 | Scaffold1278 | 99984                   | AA                              | GG              | 1947001512               |
| SNP_P4_157236_473   | NW_004516526.1 | Scaffold1279 | 473                     | CC                              | TT              | 1947001514               |
| SNP_P4_157237_478   | NW_004516526.1 | Scaffold1279 | 478                     | TT                              | CC              | 1947001516               |
| SNP_P4_157238_542   | NW_004516526.1 | Scaffold1279 | 542                     | TT                              | GG              | 1947001518               |
| SNP_P4_157239_597   | NW_004516526.1 | Scaffold1279 | 597                     | TT                              | CC              | 1947001520               |
| SNP_P4_157241_1539  | NW_004516527.1 | Scaffold1281 | 1539                    | TT                              | AA              | 1947001522               |
| SNP_P4_157242_1886  | NW_004516527.1 | Scaffold1281 | 1886                    | TT                              | GG              | 1947001524               |
| SNP_P4_157243_15378 | NW_004516527.1 | Scaffold1281 | 15378                   | AA                              | CC              | 1947001526               |
| SNP_P4_157244_16305 | NW_004516527.1 | Scaffold1281 | 16305                   | TT                              | CC              | 1947001528               |
| SNP_P4_157245_46576 | NW_004516527.1 | Scaffold1281 | 46576                   | CC                              | AA              | 1947001530               |
| SNP_P4_157246_46768 | NW_004516527.1 | Scaffold1281 | 46768                   | AA                              | GG              | 1947001532               |
| SNP_P4_157247_46810 | NW_004516527.1 | Scaffold1281 | 46810                   | GG                              | AA              | 1947001534               |
| SNP_P4_157248_47382 | NW_004516527.1 | Scaffold1281 | 47382                   | TT                              | CC              | 1947001536               |
| SNP_P4_157249_47457 | NW_004516527.1 | Scaffold1281 | 47457                   | CC                              | GG              | 1947001538               |
| SNP_P4_157250_48284 | NW_004516527.1 | Scaffold1281 | 48284                   | GG                              | AA              | 1947001540               |
| SNP_P4_157251_48404 | NW_004516527.1 | Scaffold1281 | 48404                   | AA                              | TT              | 1947001542               |

| SNPs IDs             | Chromosome IDs | Chromosomes  | Physical positions (bp) | CDC Frontier (Reference genome) | (ILWC46 & LPNB) | NCBI SNPdb Accession IDs |
|----------------------|----------------|--------------|-------------------------|---------------------------------|-----------------|--------------------------|
| SNP_P4_157252_50796  | NW_004516527.1 | Scaffold1281 | 50796                   | CC                              | GG              | 1947001544               |
| SNP_P4_157253_51547  | NW_004516527.1 | Scaffold1281 | 51547                   | GG                              | AA              | 1947001546               |
| SNP_P4_157254_51752  | NW_004516527.1 | Scaffold1281 | 51752                   | AA                              | GG              | 1947001548               |
| SNP_P4_157255_51809  | NW_004516527.1 | Scaffold1281 | 51809                   | CC                              | TT              | 1947001550               |
| SNP_P4_157256_51921  | NW_004516527.1 | Scaffold1281 | 51921                   | TT                              | AA              | 1947001552               |
| SNP_P4_157257_52043  | NW_004516527.1 | Scaffold1281 | 52043                   | CC                              | AA              | 1947001554               |
| SNP_P4_157258_57470  | NW_004516527.1 | Scaffold1281 | 57470                   | AA                              | GG              | 1947001556               |
| SNP_P4_157259_63347  | NW_004516527.1 | Scaffold1281 | 63347                   | CC                              | TT              | 1947001558               |
| SNP_P4_157260_72851  | NW_004516527.1 | Scaffold1281 | 72851                   | TT                              | CC              | 1947001560               |
| SNP_P4_157261_75370  | NW_004516527.1 | Scaffold1281 | 75370                   | CC                              | TT              | 1947001562               |
| SNP_P4_157262_75374  | NW_004516527.1 | Scaffold1281 | 75374                   | AA                              | TT              | 1947001564               |
| SNP_P4_157263_75641  | NW_004516527.1 | Scaffold1281 | 75641                   | CC                              | TT              | 1947001566               |
| SNP_P4_157264_84721  | NW_004516527.1 | Scaffold1281 | 84721                   | TT                              | GG              | 1947001568               |
| SNP_P4_157265_84725  | NW_004516527.1 | Scaffold1281 | 84725                   | AA                              | GG              | 1947001570               |
| SNP_P4_157266_111724 | NW_004516527.1 | Scaffold1281 | 111724                  | AA                              | GG              | 1947001572               |
| SNP_P4_157267_118045 | NW_004516527.1 | Scaffold1281 | 118045                  | AA                              | TT              | 1947001574               |
| SNP_P4_157268_118046 | NW_004516527.1 | Scaffold1281 | 118046                  | AA                              | TT              | 1947001576               |
| SNP_P4_157269_118047 | NW_004516527.1 | Scaffold1281 | 118047                  | TT                              | AA              | 1947001578               |
| SNP_P4_157270_118053 | NW_004516527.1 | Scaffold1281 | 118053                  | GG                              | AA              | 1947001580               |
| SNP_P4_157271_138951 | NW_004516527.1 | Scaffold1281 | 138951                  | TT                              | CC              | 1947001582               |
| SNP_P4_157272_160415 | NW_004516527.1 | Scaffold1281 | 160415                  | AA                              | GG              | 1947001584               |
| SNP_P4_157274_166134 | NW_004516527.1 | Scaffold1281 | 166134                  | AA                              | GG              | 1947001586               |
| SNP_P4_157277_283131 | NW_004516527.1 | Scaffold1281 | 283131                  | AA                              | GG              | 1947001588               |
| SNP_P4_157278_296635 | NW_004516527.1 | Scaffold1281 | 296635                  | AA                              | CC              | 1947001590               |
| SNP_P4_157279_297003 | NW_004516527.1 | Scaffold1281 | 297003                  | GG                              | AA              | 1947001592               |
| SNP_P4_157280_297006 | NW_004516527.1 | Scaffold1281 | 297006                  | CC                              | TT              | 1947001594               |
| SNP_P4_157281_308631 | NW_004516527.1 | Scaffold1281 | 308631                  | GG                              | AA              | 1947001596               |
| SNP_P4_157285_376175 | NW_004516527.1 | Scaffold1281 | 376175                  | CC                              | GG              | 1947001598               |
| SNP_P4_157286_376316 | NW_004516527.1 | Scaffold1281 | 376316                  | GG                              | AA              | 1947001600               |
| SNP_P4_157288_376414 | NW_004516527.1 | Scaffold1281 | 376414                  | CC                              | TT              | 1947001602               |
| SNP_P4_157289_376489 | NW_004516527.1 | Scaffold1281 | 376489                  | AA                              | CC              | 1947001604               |
| SNP_P4_157290_376537 | NW_004516527.1 | Scaffold1281 | 376537                  | GG                              | TT              | 1947001606               |
| SNP_P4_157291_405059 | NW_004516527.1 | Scaffold1281 | 405059                  | GG                              | AA              | 1947001608               |
| SNP_P4_157293_414752 | NW_004516527.1 | Scaffold1281 | 414752                  | TT                              | GG              | 1947001610               |
| SNP_P4_157294_435240 | NW_004516527.1 | Scaffold1281 | 435240                  | GG                              | AA              | 1947001612               |
| SNP_P4_157297_467352 | NW_004516527.1 | Scaffold1281 | 467352                  | GG                              | AA              | 1947001613               |
| SNP_P4_157298_467387 | NW_004516527.1 | Scaffold1281 | 467387                  | AA                              | GG              | 1947001615               |
| SNP_P4_157299_469010 | NW_004516527.1 | Scaffold1281 | 469010                  | CC                              | TT              | 1947001617               |
| SNP_P4_157301_470972 | NW_004516527.1 | Scaffold1281 | 470972                  | AA                              | TT              | 1947001619               |
| SNP_P4_157302_471201 | NW_004516527.1 | Scaffold1281 | 471201                  | CC                              | TT              | 1947001621               |
| SNP_P4_157303_471371 | NW_004516527.1 | Scaffold1281 | 471371                  | CC                              | TT              | 1947001623               |
| SNP_P4_157304_471404 | NW_004516527.1 | Scaffold1281 | 471404                  | GG                              | AA              | 1947001625               |

| SNPs IDs             | Chromosome IDs | Chromosomes  | Physical positions (bp) | CDC Frontier (Reference genome) | (ILWC46 & LPNB) | NCBI SNPdb Accession IDs |
|----------------------|----------------|--------------|-------------------------|---------------------------------|-----------------|--------------------------|
| SNP_P4_157305_471422 | NW_004516527.1 | Scaffold1281 | 471422                  | AA                              | TT              | 1947001627               |
| SNP_P4_157306_471476 | NW_004516527.1 | Scaffold1281 | 471476                  | CC                              | AA              | 1947001629               |
| SNP_P4_157307_471502 | NW_004516527.1 | Scaffold1281 | 471502                  | TT                              | CC              | 1947001631               |
| SNP_P4_157308_471580 | NW_004516527.1 | Scaffold1281 | 471580                  | TT                              | GG              | 1947001632               |
| SNP_P4_157310_471940 | NW_004516527.1 | Scaffold1281 | 471940                  | AA                              | GG              | 1947001634               |
| SNP_P4_157311_472102 | NW_004516527.1 | Scaffold1281 | 472102                  | TT                              | CC              | 1947001636               |
| SNP_P4_157314_475676 | NW_004516527.1 | Scaffold1281 | 475676                  | GG                              | AA              | 1947001638               |
| SNP_P4_157315_475918 | NW_004516527.1 | Scaffold1281 | 475918                  | AA                              | GG              | 1947001640               |
| SNP_P4_157316_492031 | NW_004516527.1 | Scaffold1281 | 492031                  | AA                              | GG              | 1947001642               |
| SNP_P4_157317_492039 | NW_004516527.1 | Scaffold1281 | 492039                  | AA                              | TT              | 1947001644               |
| SNP_P4_157318_492041 | NW_004516527.1 | Scaffold1281 | 492041                  | GG                              | TT              | 1947001646               |
| SNP_P4_157319_492128 | NW_004516527.1 | Scaffold1281 | 492128                  | AA                              | GG              | 1947001648               |
| SNP_P4_157320_492145 | NW_004516527.1 | Scaffold1281 | 492145                  | CC                              | GG              | 1947001650               |
| SNP_P4_157323_492357 | NW_004516527.1 | Scaffold1281 | 492357                  | CC                              | AA              | 1947001652               |
| SNP_P4_157324_492365 | NW_004516527.1 | Scaffold1281 | 492365                  | TT                              | CC              | 1947001654               |
| SNP_P4_157325_492369 | NW_004516527.1 | Scaffold1281 | 492369                  | CC                              | AA              | 1947001655               |
| SNP_P4_157326_492375 | NW_004516527.1 | Scaffold1281 | 492375                  | CC                              | AA              | 1947001657               |
| SNP_P4_157327_492386 | NW_004516527.1 | Scaffold1281 | 492386                  | CC                              | GG              | 1947001659               |
| SNP_P4_157328_492389 | NW_004516527.1 | Scaffold1281 | 492389                  | TT                              | CC              | 1947001661               |
| SNP_P4_157329_492402 | NW_004516527.1 | Scaffold1281 | 492402                  | CC                              | GG              | 1947001663               |
| SNP_P4_157330_492455 | NW_004516527.1 | Scaffold1281 | 492455                  | AA                              | GG              | 1947001665               |
| SNP_P4_157331_503796 | NW_004516527.1 | Scaffold1281 | 503796                  | AA                              | CC              | 1947001667               |
| SNP_P4_157332_503809 | NW_004516527.1 | Scaffold1281 | 503809                  | GG                              | TT              | 1947001669               |
| SNP_P4_157333_503894 | NW_004516527.1 | Scaffold1281 | 503894                  | TT                              | CC              | 1947001671               |
| SNP_P4_157334_503919 | NW_004516527.1 | Scaffold1281 | 503919                  | TT                              | CC              | 1947001673               |
| SNP_P4_157335_503957 | NW_004516527.1 | Scaffold1281 | 503957                  | TT                              | GG              | 1947001675               |
| SNP_P4_157336_504024 | NW_004516527.1 | Scaffold1281 | 504024                  | TT                              | GG              | 1947001676               |
| SNP_P4_157337_504098 | NW_004516527.1 | Scaffold1281 | 504098                  | GG                              | TT              | 1947001678               |
| SNP_P4_157338_504107 | NW_004516527.1 | Scaffold1281 | 504107                  | TT                              | CC              | 1947001680               |
| SNP_P4_157339_504115 | NW_004516527.1 | Scaffold1281 | 504115                  | TT                              | CC              | 1947001682               |
| SNP_P4_157340_504134 | NW_004516527.1 | Scaffold1281 | 504134                  | GG                              | TT              | 1947001684               |
| SNP_P4_157341_504138 | NW_004516527.1 | Scaffold1281 | 504138                  | CC                              | TT              | 1947001686               |
| SNP_P4_157342_504281 | NW_004516527.1 | Scaffold1281 | 504281                  | AA                              | CC              | 1947001688               |
| SNP_P4_157343_504551 | NW_004516527.1 | Scaffold1281 | 504551                  | GG                              | AA              | 1947001690               |
| SNP_P4_157344_516222 | NW_004516527.1 | Scaffold1281 | 516222                  | GG                              | AA              | 1947001692               |
| SNP_P4_157345_518041 | NW_004516527.1 | Scaffold1281 | 518041                  | CC                              | TT              | 1947001694               |
| SNP_P4_157346_518052 | NW_004516527.1 | Scaffold1281 | 518052                  | GG                              | AA              | 1947001696               |
| SNP_P4_157347_4166   | NW_004516528.1 | Scaffold1283 | 4166                    | CC                              | AA              | 1947001698               |
| SNP_P4_157348_4385   | NW_004516528.1 | Scaffold1283 | 4385                    | AA                              | GG              | 1947001700               |
| SNP_P4_157349_4887   | NW_004516528.1 | Scaffold1283 | 4887                    | CC                              | TT              | 1947001702               |
| SNP_P4_157350_13480  | NW_004516528.1 | Scaffold1283 | 13480                   | TT                              | GG              | 1947001704               |
| SNP_P4_157351_13497  | NW_004516528.1 | Scaffold1283 | 13497                   | TT                              | CC              | 1947001706               |

| SNPs IDs            | Chromosome IDs | Chromosomes  | Physical positions (bp) | CDC Frontier (Reference genome) | (ILWC46 & LPNB) | NCBI SNPdb Accession IDs |
|---------------------|----------------|--------------|-------------------------|---------------------------------|-----------------|--------------------------|
| SNP_P4_157352_13834 | NW_004516528.1 | Scaffold1283 | 13834                   | AA                              | TT              | 1947001708               |
| SNP_P4_157353_13835 | NW_004516528.1 | Scaffold1283 | 13835                   | TT                              | CC              | 1947001710               |
| SNP_P4_157354_13841 | NW_004516528.1 | Scaffold1283 | 13841                   | TT                              | GG              | 1947001712               |
| SNP_P4_157355_47105 | NW_004516528.1 | Scaffold1283 | 47105                   | GG                              | TT              | 1947001714               |
| SNP_P4_157356_47107 | NW_004516528.1 | Scaffold1283 | 47107                   | TT                              | CC              | 1947001716               |
| SNP_P4_157357_53805 | NW_004516528.1 | Scaffold1283 | 53805                   | TT                              | AA              | 1947001718               |
| SNP_P4_157358_53816 | NW_004516528.1 | Scaffold1283 | 53816                   | TT                              | AA              | 1947001720               |
| SNP_P4_157359_54000 | NW_004516528.1 | Scaffold1283 | 54000                   | CC                              | GG              | 1947001722               |
| SNP_P4_157360_54191 | NW_004516528.1 | Scaffold1283 | 54191                   | GG                              | TT              | 1947001724               |
| SNP_P4_157361_54204 | NW_004516528.1 | Scaffold1283 | 54204                   | AA                              | GG              | 1947001727               |
| SNP_P4_157362_54217 | NW_004516528.1 | Scaffold1283 | 54217                   | CC                              | TT              | 1947001729               |
| SNP_P4_157363_54224 | NW_004516528.1 | Scaffold1283 | 54224                   | AA                              | TT              | 1947001731               |
| SNP_P4_157364_54237 | NW_004516528.1 | Scaffold1283 | 54237                   | GG                              | TT              | 1947001733               |
| SNP_P4_157365_586   | NW_004516529.1 | Scaffold1285 | 586                     | AA                              | GG              | 1947001735               |
| SNP_P4_157366_39362 | NW_004516529.1 | Scaffold1285 | 39362                   | TT                              | GG              | 1947001736               |
| SNP_P4_157367_39708 | NW_004516529.1 | Scaffold1285 | 39708                   | TT                              | CC              | 1947001738               |
| SNP_P4_157368_65271 | NW_004516529.1 | Scaffold1285 | 65271                   | AA                              | GG              | 1947001740               |
| SNP_P4_157369_65273 | NW_004516529.1 | Scaffold1285 | 65273                   | TT                              | CC              | 1947001742               |
| SNP_P4_157370_65327 | NW_004516529.1 | Scaffold1285 | 65327                   | TT                              | CC              | 1947001744               |
| SNP_P4_157371_65694 | NW_004516529.1 | Scaffold1285 | 65694                   | GG                              | AA              | 1947001746               |
| SNP_P4_157372_67137 | NW_004516529.1 | Scaffold1285 | 67137                   | AA                              | GG              | 1947001748               |
| SNP_P4_157373_67139 | NW_004516529.1 | Scaffold1285 | 67139                   | TT                              | AA              | 1947001750               |
| SNP_P4_157374_67146 | NW_004516529.1 | Scaffold1285 | 67146                   | CC                              | AA              | 1947001752               |
| SNP_P4_157375_67274 | NW_004516529.1 | Scaffold1285 | 67274                   | TT                              | CC              | 1947001754               |
| SNP_P4_157376_67281 | NW_004516529.1 | Scaffold1285 | 67281                   | AA                              | GG              | 1947001757               |
| SNP_P4_157377_67301 | NW_004516529.1 | Scaffold1285 | 67301                   | AA                              | GG              | 1947001759               |
| SNP_P4_157378_67418 | NW_004516529.1 | Scaffold1285 | 67418                   | TT                              | GG              | 1947001761               |
| SNP_P4_157379_67454 | NW_004516529.1 | Scaffold1285 | 67454                   | TT                              | GG              | 1947001763               |
| SNP_P4_157380_67467 | NW_004516529.1 | Scaffold1285 | 67467                   | AA                              | TT              | 1947001765               |
| SNP_P4_157381_67548 | NW_004516529.1 | Scaffold1285 | 67548                   | TT                              | AA              | 1947001767               |
| SNP_P4_157382_67556 | NW_004516529.1 | Scaffold1285 | 67556                   | AA                              | GG              | 1947001769               |
| SNP_P4_157383_67598 | NW_004516529.1 | Scaffold1285 | 67598                   | GG                              | AA              | 1947001771               |
| SNP_P4_157384_67602 | NW_004516529.1 | Scaffold1285 | 67602                   | AA                              | CC              | 1947001773               |
| SNP_P4_157385_67603 | NW_004516529.1 | Scaffold1285 | 67603                   | TT                              | CC              | 1947001775               |
| SNP_P4_157386_67618 | NW_004516529.1 | Scaffold1285 | 67618                   | AA                              | CC              | 1947001777               |
| SNP_P4_157387_67695 | NW_004516529.1 | Scaffold1285 | 67695                   | TT                              | CC              | 1947001779               |
| SNP_P4_157388_68126 | NW_004516529.1 | Scaffold1285 | 68126                   | GG                              | TT              | 1947001781               |
| SNP_P4_157389_73203 | NW_004516529.1 | Scaffold1285 | 73203                   | GG                              | CC              | 1947001783               |
| SNP_P4_157390_73206 | NW_004516529.1 | Scaffold1285 | 73206                   | CC                              | TT              | 1947001786               |
| SNP_P4_157391_96358 | NW_004516529.1 | Scaffold1285 | 96358                   | TT                              | CC              | 1947001788               |
| SNP_P4_157392_99026 | NW_004516529.1 | Scaffold1285 | 99026                   | AA                              | GG              | 1947001790               |
| SNP_P4_157393_99127 | NW_004516529.1 | Scaffold1285 | 99127                   | AA                              | GG              | 1947001792               |

| SNPs IDs             | Chromosome IDs | Chromosomes  | Physical positions (bp) | CDC Frontier (Reference genome) | (ILWC46 & LPNB) | NCBI SNPdb Accession IDs |
|----------------------|----------------|--------------|-------------------------|---------------------------------|-----------------|--------------------------|
| SNP_P4_157394_99128  | NW_004516529.1 | Scaffold1285 | 99128                   | AA                              | GG              | 1947001794               |
| SNP_P4_157395_149125 | NW_004516529.1 | Scaffold1285 | 149125                  | GG                              | AA              | 1947001796               |
| SNP_P4_157396_154780 | NW_004516529.1 | Scaffold1285 | 154780                  | TT                              | AA              | 1947001798               |
| SNP_P4_157397_155993 | NW_004516529.1 | Scaffold1285 | 155993                  | GG                              | AA              | 1947001800               |
| SNP_P4_157398_160414 | NW_004516529.1 | Scaffold1285 | 160414                  | GG                              | TT              | 1947001802               |
| SNP_P4_157399_170876 | NW_004516529.1 | Scaffold1285 | 170876                  | AA                              | GG              | 1947001804               |
| SNP_P4_157400_182564 | NW_004516529.1 | Scaffold1285 | 182564                  | AA                              | GG              | 1947001806               |
| SNP_P4_157401_194137 | NW_004516529.1 | Scaffold1285 | 194137                  | TT                              | AA              | 1947001808               |
| SNP_P4_157402_199145 | NW_004516529.1 | Scaffold1285 | 199145                  | AA                              | GG              | 1947001810               |
| SNP_P4_157403_199152 | NW_004516529.1 | Scaffold1285 | 199152                  | CC                              | TT              | 1947001812               |
| SNP_P4_157404_199169 | NW_004516529.1 | Scaffold1285 | 199169                  | AA                              | GG              | 1947001814               |
| SNP_P4_157405_199383 | NW_004516529.1 | Scaffold1285 | 199383                  | CC                              | GG              | 1947001816               |
| SNP_P4_157406_199434 | NW_004516529.1 | Scaffold1285 | 199434                  | CC                              | GG              | 1947001818               |
| SNP_P4_157407_202253 | NW_004516529.1 | Scaffold1285 | 202253                  | TT                              | GG              | 1947001821               |
| SNP_P4_157408_202290 | NW_004516529.1 | Scaffold1285 | 202290                  | GG                              | AA              | 1947001823               |
| SNP_P4_157409_202703 | NW_004516529.1 | Scaffold1285 | 202703                  | CC                              | TT              | 1947001825               |
| SNP_P4_157410_202717 | NW_004516529.1 | Scaffold1285 | 202717                  | CC                              | AA              | 1947001827               |
| SNP_P4_157411_203998 | NW_004516529.1 | Scaffold1285 | 203998                  | TT                              | GG              | 1947001829               |
| SNP_P4_157412_204225 | NW_004516529.1 | Scaffold1285 | 204225                  | AA                              | GG              | 1947001831               |
| SNP_P4_157413_204289 | NW_004516529.1 | Scaffold1285 | 204289                  | AA                              | TT              | 1947001833               |
| SNP_P4_157414_204474 | NW_004516529.1 | Scaffold1285 | 204474                  | TT                              | CC              | 1947001835               |
| SNP_P4_157415_204605 | NW_004516529.1 | Scaffold1285 | 204605                  | CC                              | TT              | 1947001837               |
| SNP_P4_157416_210969 | NW_004516529.1 | Scaffold1285 | 210969                  | AA                              | CC              | 1947001839               |
| SNP_P4_157417_210981 | NW_004516529.1 | Scaffold1285 | 210981                  | AA                              | TT              | 1947001841               |
| SNP_P4_157418_210992 | NW_004516529.1 | Scaffold1285 | 210992                  | CC                              | TT              | 1947001843               |
| SNP_P4_157419_210995 | NW_004516529.1 | Scaffold1285 | 210995                  | TT                              | CC              | 1947001845               |
| SNP_P4_157420_211052 | NW_004516529.1 | Scaffold1285 | 211052                  | TT                              | GG              | 1947001847               |
| SNP_P4_157421_211059 | NW_004516529.1 | Scaffold1285 | 211059                  | TT                              | CC              | 1947001849               |
| SNP_P4_157422_211065 | NW_004516529.1 | Scaffold1285 | 211065                  | CC                              | AA              | 1947001851               |
| SNP_P4_157423_211390 | NW_004516529.1 | Scaffold1285 | 211390                  | GG                              | TT              | 1947001853               |
| SNP_P4_157424_235117 | NW_004516529.1 | Scaffold1285 | 235117                  | GG                              | AA              | 1947001855               |
| SNP_P4_157425_239631 | NW_004516529.1 | Scaffold1285 | 239631                  | AA                              | GG              | 1947001857               |
| SNP_P4_157426_239666 | NW_004516529.1 | Scaffold1285 | 239666                  | AA                              | CC              | 1947001859               |
| SNP_P4_157427_239869 | NW_004516529.1 | Scaffold1285 | 239869                  | AA                              | CC              | 1947001861               |
| SNP_P4_157428_239884 | NW_004516529.1 | Scaffold1285 | 239884                  | AA                              | GG              | 1947001863               |
| SNP_P4_157429_240298 | NW_004516529.1 | Scaffold1285 | 240298                  | CC                              | TT              | 1947001865               |
| SNP_P4_157430_251436 | NW_004516529.1 | Scaffold1285 | 251436                  | TT                              | GG              | 1947001867               |
| SNP_P4_157431_252943 | NW_004516529.1 | Scaffold1285 | 252943                  | AA                              | GG              | 1947001869               |
| SNP_P4_157432_252979 | NW_004516529.1 | Scaffold1285 | 252979                  | TT                              | CC              | 1947001871               |
| SNP_P4_157433_278303 | NW_004516529.1 | Scaffold1285 | 278303                  | CC                              | TT              | 1947001873               |
| SNP_P4_157434_278487 | NW_004516529.1 | Scaffold1285 | 278487                  | AA                              | GG              | 1947001875               |
| SNP_P4_157435_278501 | NW_004516529.1 | Scaffold1285 | 278501                  | TT                              | GG              | 1947001877               |



| SNPs IDs             | Chromosome IDs | Chromosomes  | Physical positions (bp) | CDC Frontier (Reference genome) | (ILWC46 & LPNB) | NCBI SNPdb Accession IDs |
|----------------------|----------------|--------------|-------------------------|---------------------------------|-----------------|--------------------------|
| SNP_P4_157436_278506 | NW_004516529.1 | Scaffold1285 | 278506                  | CC                              | TT              | 1947001879               |
| SNP_P4_157437_278535 | NW_004516529.1 | Scaffold1285 | 278535                  | TT                              | AA              | 1947001881               |
| SNP_P4_157438_278887 | NW_004516529.1 | Scaffold1285 | 278887                  | GG                              | TT              | 1947001883               |
| SNP_P4_157439_279049 | NW_004516529.1 | Scaffold1285 | 279049                  | CC                              | TT              | 1947001885               |
| SNP_P4_157440_279057 | NW_004516529.1 | Scaffold1285 | 279057                  | CC                              | AA              | 1947001887               |
| SNP_P4_157441_279058 | NW_004516529.1 | Scaffold1285 | 279058                  | AA                              | GG              | 1947001889               |
| SNP_P4_157442_326318 | NW_004516529.1 | Scaffold1285 | 326318                  | AA                              | GG              | 1947001891               |
| SNP_P4_157443_326725 | NW_004516529.1 | Scaffold1285 | 326725                  | GG                              | AA              | 1947001893               |
| SNP_P4_157444_327283 | NW_004516529.1 | Scaffold1285 | 327283                  | GG                              | AA              | 1947001895               |
| SNP_P4_157445_330938 | NW_004516529.1 | Scaffold1285 | 330938                  | AA                              | CC              | 1947001897               |
| SNP_P4_157446_331711 | NW_004516529.1 | Scaffold1285 | 331711                  | TT                              | CC              | 1947001899               |
| SNP_P4_157447_331811 | NW_004516529.1 | Scaffold1285 | 331811                  | AA                              | GG              | 1947001901               |
| SNP_P4_157448_332169 | NW_004516529.1 | Scaffold1285 | 332169                  | TT                              | CC              | 1947001903               |
| SNP_P4_157449_1038   | NW_004516530.1 | Scaffold1286 | 1038                    | AA                              | CC              | 1947001905               |
| SNP_P4_157450_2249   | NW_004516530.1 | Scaffold1286 | 2249                    | TT                              | CC              | 1947001907               |
| SNP_P4_157451_2309   | NW_004516530.1 | Scaffold1286 | 2309                    | TT                              | AA              | 1947001909               |
| SNP_P4_157452_2482   | NW_004516530.1 | Scaffold1286 | 2482                    | GG                              | TT              | 1947001911               |
| SNP_P4_157453_2486   | NW_004516530.1 | Scaffold1286 | 2486                    | CC                              | TT              | 1947001913               |
| SNP_P4_157454_2491   | NW_004516530.1 | Scaffold1286 | 2491                    | CC                              | TT              | 1947001915               |
| SNP_P4_157455_8646   | NW_004516530.1 | Scaffold1286 | 8646                    | CC                              | AA              | 1947001917               |
| SNP_P4_157456_8712   | NW_004516530.1 | Scaffold1286 | 8712                    | TT                              | GG              | 1947001919               |
| SNP_P4_157457_11130  | NW_004516530.1 | Scaffold1286 | 11130                   | TT                              | AA              | 1947001921               |
| SNP_P4_157458_15380  | NW_004516530.1 | Scaffold1286 | 15380                   | CC                              | GG              | 1947001923               |
| SNP_P4_157459_15388  | NW_004516530.1 | Scaffold1286 | 15388                   | TT                              | AA              | 1947001925               |
| SNP_P4_157460_15429  | NW_004516530.1 | Scaffold1286 | 15429                   | GG                              | TT              | 1947001927               |
| SNP_P4_157461_15455  | NW_004516530.1 | Scaffold1286 | 15455                   | GG                              | CC              | 1947001929               |
| SNP_P4_157462_15547  | NW_004516530.1 | Scaffold1286 | 15547                   | CC                              | TT              | 1947001931               |
| SNP_P4_157463_15559  | NW_004516530.1 | Scaffold1286 | 15559                   | CC                              | GG              | 1947001933               |
| SNP_P4_157464_15626  | NW_004516530.1 | Scaffold1286 | 15626                   | CC                              | GG              | 1947001935               |
| SNP_P4_157465_15664  | NW_004516530.1 | Scaffold1286 | 15664                   | AA                              | TT              | 1947001937               |
| SNP_P4_157466_15689  | NW_004516530.1 | Scaffold1286 | 15689                   | AA                              | CC              | 1947001939               |
| SNP_P4_157467_15741  | NW_004516530.1 | Scaffold1286 | 15741                   | AA                              | CC              | 1947001941               |
| SNP_P4_157468_15843  | NW_004516530.1 | Scaffold1286 | 15843                   | TT                              | CC              | 1947001943               |
| SNP_P4_157469_15901  | NW_004516530.1 | Scaffold1286 | 15901                   | TT                              | AA              | 1947001945               |
| SNP_P4_157470_16194  | NW_004516530.1 | Scaffold1286 | 16194                   | TT                              | GG              | 1947001947               |
| SNP_P4_157471_16472  | NW_004516530.1 | Scaffold1286 | 16472                   | GG                              | AA              | 1947001949               |
| SNP_P4_157472_686    | NW_004516532.1 | Scaffold1290 | 686                     | AA                              | TT              | 1947001951               |
| SNP_P4_157473_64     | NW_004516533.1 | Scaffold1291 | 64                      | AA                              | GG              | 1947001953               |
| SNP_P4_157474_65     | NW_004516533.1 | Scaffold1291 | 65                      | AA                              | GG              | 1947001955               |
| SNP_P4_157476_4633   | NW_004516534.1 | Scaffold1292 | 4633                    | TT                              | AA              | 1947001957               |
| SNP_P4_157477_5454   | NW_004516534.1 | Scaffold1292 | 5454                    | TT                              | AA              | 1947001959               |
| SNP_P4_157478_5475   | NW_004516534.1 | Scaffold1292 | 5475                    | CC                              | GG              | 1947001961               |

| SNPs IDs            | Chromosome IDs | Chromosomes  | Physical positions (bp) | CDC Frontier (Reference genome) | (ILWC46 & LPNB) | NCBI SNPdb Accession IDs |
|---------------------|----------------|--------------|-------------------------|---------------------------------|-----------------|--------------------------|
| SNP_P4_157479_7562  | NW_004516534.1 | Scaffold1292 | 7562                    | GG                              | AA              | 1947001963               |
| SNP_P4_157481_8032  | NW_004516534.1 | Scaffold1292 | 8032                    | TT                              | CC              | 1947001965               |
| SNP_P4_157482_8136  | NW_004516534.1 | Scaffold1292 | 8136                    | AA                              | GG              | 1947001967               |
| SNP_P4_157483_8147  | NW_004516534.1 | Scaffold1292 | 8147                    | TT                              | AA              | 1947001969               |
| SNP_P4_157484_8181  | NW_004516534.1 | Scaffold1292 | 8181                    | TT                              | AA              | 1947001971               |
| SNP_P4_157485_8196  | NW_004516534.1 | Scaffold1292 | 8196                    | CC                              | AA              | 1947001973               |
| SNP_P4_157486_8200  | NW_004516534.1 | Scaffold1292 | 8200                    | GG                              | TT              | 1947001975               |
| SNP_P4_157487_8221  | NW_004516534.1 | Scaffold1292 | 8221                    | TT                              | CC              | 1947001977               |
| SNP_P4_157488_8270  | NW_004516534.1 | Scaffold1292 | 8270                    | TT                              | GG              | 1947001979               |
| SNP_P4_157490_4524  | NW_004516535.1 | Scaffold1293 | 4524                    | AA                              | GG              | 1947001981               |
| SNP_P4_157491_4786  | NW_004516535.1 | Scaffold1293 | 4786                    | GG                              | TT              | 1947001983               |
| SNP_P4_157492_4802  | NW_004516535.1 | Scaffold1293 | 4802                    | CC                              | TT              | 1947001985               |
| SNP_P4_157493_4809  | NW_004516535.1 | Scaffold1293 | 4809                    | CC                              | GG              | 1947001987               |
| SNP_P4_157494_4848  | NW_004516535.1 | Scaffold1293 | 4848                    | TT                              | GG              | 1947001989               |
| SNP_P4_157495_31604 | NW_004516535.1 | Scaffold1293 | 31604                   | GG                              | AA              | 1947001991               |
| SNP_P4_157496_31666 | NW_004516535.1 | Scaffold1293 | 31666                   | AA                              | CC              | 1947001993               |
| SNP_P4_157497_31675 | NW_004516535.1 | Scaffold1293 | 31675                   | AA                              | TT              | 1947001995               |
| SNP_P4_157498_31689 | NW_004516535.1 | Scaffold1293 | 31689                   | CC                              | TT              | 1947001997               |
| SNP_P4_157499_31733 | NW_004516535.1 | Scaffold1293 | 31733                   | AA                              | TT              | 1947001999               |
| SNP_P4_157500_32031 | NW_004516535.1 | Scaffold1293 | 32031                   | CC                              | TT              | 1947002001               |
| SNP_P4_157501_37431 | NW_004516535.1 | Scaffold1293 | 37431                   | GG                              | TT              | 1947002003               |
| SNP_P4_157502_44413 | NW_004516535.1 | Scaffold1293 | 44413                   | AA                              | GG              | 1947002005               |
| SNP_P4_157503_44426 | NW_004516535.1 | Scaffold1293 | 44426                   | TT                              | CC              | 1947002007               |
| SNP_P4_157504_44441 | NW_004516535.1 | Scaffold1293 | 44441                   | TT                              | GG              | 1947002009               |
| SNP_P4_157505_44790 | NW_004516535.1 | Scaffold1293 | 44790                   | AA                              | GG              | 1947002011               |
| SNP_P4_157506_44863 | NW_004516535.1 | Scaffold1293 | 44863                   | AA                              | GG              | 1947002013               |
| SNP_P4_157507_44867 | NW_004516535.1 | Scaffold1293 | 44867                   | CC                              | GG              | 1947002015               |
| SNP_P4_157508_44897 | NW_004516535.1 | Scaffold1293 | 44897                   | GG                              | AA              | 1947002017               |
| SNP_P4_157509_67174 | NW_004516535.1 | Scaffold1293 | 67174                   | CC                              | TT              | 1947002019               |
| SNP_P4_157510_67196 | NW_004516535.1 | Scaffold1293 | 67196                   | CC                              | TT              | 1947002021               |
| SNP_P4_157511_67558 | NW_004516535.1 | Scaffold1293 | 67558                   | TT                              | AA              | 1947002023               |
| SNP_P4_157513_68226 | NW_004516535.1 | Scaffold1293 | 68226                   | GG                              | TT              | 1947002025               |
| SNP_P4_157514_68243 | NW_004516535.1 | Scaffold1293 | 68243                   | CC                              | TT              | 1947002027               |
| SNP_P4_157515_68507 | NW_004516535.1 | Scaffold1293 | 68507                   | AA                              | GG              | 1947002029               |
| SNP_P4_157516_68556 | NW_004516535.1 | Scaffold1293 | 68556                   | AA                              | GG              | 1947002031               |
| SNP_P4_157517_68784 | NW_004516535.1 | Scaffold1293 | 68784                   | CC                              | GG              | 1947002033               |
| SNP_P4_157518_71065 | NW_004516535.1 | Scaffold1293 | 71065                   | TT                              | CC              | 1947002035               |
| SNP_P4_157519_71920 | NW_004516535.1 | Scaffold1293 | 71920                   | AA                              | TT              | 1947002037               |
| SNP_P4_157520_72373 | NW_004516535.1 | Scaffold1293 | 72373                   | CC                              | AA              | 1947002039               |
| SNP_P4_157521_72394 | NW_004516535.1 | Scaffold1293 | 72394                   | GG                              | AA              | 1947002041               |
| SNP_P4_157522_78795 | NW_004516535.1 | Scaffold1293 | 78795                   | AA                              | CC              | 1947002042               |
| SNP_P4_157523_79139 | NW_004516535.1 | Scaffold1293 | 79139                   | AA                              | TT              | 1947002044               |

| SNPs IDs            | Chromosome IDs | Chromosomes  | Physical positions (bp) | CDC Frontier (Reference genome) | (ILWC46 & LPNB) | NCBI SNPdb Accession IDs |
|---------------------|----------------|--------------|-------------------------|---------------------------------|-----------------|--------------------------|
| SNP_P4_157524_79161 | NW_004516535.1 | Scaffold1293 | 79161                   | CC                              | GG              | 1947002046               |
| SNP_P4_157525_79234 | NW_004516535.1 | Scaffold1293 | 79234                   | GG                              | CC              | 1947002048               |
| SNP_P4_157526_79330 | NW_004516535.1 | Scaffold1293 | 79330                   | TT                              | AA              | 1947002050               |
| SNP_P4_157527_87835 | NW_004516535.1 | Scaffold1293 | 87835                   | AA                              | TT              | 1947002052               |
| SNP_P4_157528_88022 | NW_004516535.1 | Scaffold1293 | 88022                   | TT                              | AA              | 1947002054               |
| SNP_P4_157529_88227 | NW_004516535.1 | Scaffold1293 | 88227                   | TT                              | CC              | 1947002056               |
| SNP_P4_157530_88500 | NW_004516535.1 | Scaffold1293 | 88500                   | GG                              | CC              | 1947002058               |
| SNP_P4_157531_88516 | NW_004516535.1 | Scaffold1293 | 88516                   | AA                              | CC              | 1947002060               |
| SNP_P4_157532_88715 | NW_004516535.1 | Scaffold1293 | 88715                   | GG                              | AA              | 1947002061               |
| SNP_P4_157533_91334 | NW_004516535.1 | Scaffold1293 | 91334                   | GG                              | TT              | 1947002063               |
| SNP_P4_157534_91584 | NW_004516535.1 | Scaffold1293 | 91584                   | CC                              | GG              | 1947002065               |
| SNP_P4_157535_91918 | NW_004516535.1 | Scaffold1293 | 91918                   | AA                              | TT              | 1947002067               |
| SNP_P4_157536_92476 | NW_004516535.1 | Scaffold1293 | 92476                   | GG                              | AA              | 1947002069               |
| SNP_P4_157537_1196  | NW_004516536.1 | Scaffold1294 | 1196                    | TT                              | CC              | 1947002071               |
| SNP_P4_157538_4847  | NW_004516536.1 | Scaffold1294 | 4847                    | GG                              | CC              | 1947002073               |
| SNP_P4_157539_4969  | NW_004516536.1 | Scaffold1294 | 4969                    | AA                              | CC              | 1947002075               |
| SNP_P4_157540_16436 | NW_004516536.1 | Scaffold1294 | 16436                   | TT                              | GG              | 1947002077               |
| SNP_P4_157541_16760 | NW_004516536.1 | Scaffold1294 | 16760                   | TT                              | CC              | 1947002079               |
| SNP_P4_157542_16851 | NW_004516536.1 | Scaffold1294 | 16851                   | GG                              | TT              | 1947002081               |
| SNP_P4_157543_20741 | NW_004516536.1 | Scaffold1294 | 20741                   | AA                              | GG              | 1947002083               |
| SNP_P4_157544_26580 | NW_004516536.1 | Scaffold1294 | 26580                   | AA                              | GG              | 1947002084               |
| SNP_P4_157545_26581 | NW_004516536.1 | Scaffold1294 | 26581                   | TT                              | AA              | 1947002086               |
| SNP_P4_157546_26589 | NW_004516536.1 | Scaffold1294 | 26589                   | AA                              | GG              | 1947002088               |
| SNP_P4_157547_26623 | NW_004516536.1 | Scaffold1294 | 26623                   | GG                              | CC              | 1947002090               |
| SNP_P4_157548_26808 | NW_004516536.1 | Scaffold1294 | 26808                   | GG                              | CC              | 1947002092               |
| SNP_P4_157549_26848 | NW_004516536.1 | Scaffold1294 | 26848                   | TT                              | GG              | 1947002094               |
| SNP_P4_157550_26867 | NW_004516536.1 | Scaffold1294 | 26867                   | CC                              | TT              | 1947002096               |
| SNP_P4_157551_27183 | NW_004516536.1 | Scaffold1294 | 27183                   | TT                              | AA              | 1947002098               |
| SNP_P4_157552_28723 | NW_004516536.1 | Scaffold1294 | 28723                   | TT                              | AA              | 1947002100               |
| SNP_P4_157553_28735 | NW_004516536.1 | Scaffold1294 | 28735                   | GG                              | CC              | 1947002102               |
| SNP_P4_157554_29230 | NW_004516536.1 | Scaffold1294 | 29230                   | TT                              | AA              | 1947002104               |
| SNP_P4_157555_29238 | NW_004516536.1 | Scaffold1294 | 29238                   | GG                              | AA              | 1947002106               |
| SNP_P4_157556_29457 | NW_004516536.1 | Scaffold1294 | 29457                   | CC                              | TT              | 1947002108               |
| SNP_P4_157557_29472 | NW_004516536.1 | Scaffold1294 | 29472                   | GG                              | AA              | 1947002110               |
| SNP_P4_157558_29494 | NW_004516536.1 | Scaffold1294 | 29494                   | TT                              | GG              | 1947002112               |
| SNP_P4_157559_29511 | NW_004516536.1 | Scaffold1294 | 29511                   | TT                              | CC              | 1947002114               |
| SNP_P4_157560_29513 | NW_004516536.1 | Scaffold1294 | 29513                   | TT                              | AA              | 1947002117               |
| SNP_P4_157561_29749 | NW_004516536.1 | Scaffold1294 | 29749                   | CC                              | GG              | 1947002119               |
| SNP_P4_157562_29815 | NW_004516536.1 | Scaffold1294 | 29815                   | GG                              | TT              | 1947002121               |
| SNP_P4_157563_29843 | NW_004516536.1 | Scaffold1294 | 29843                   | GG                              | AA              | 1947002123               |
| SNP_P4_157564_30021 | NW_004516536.1 | Scaffold1294 | 30021                   | AA                              | TT              | 1947002125               |
| SNP_P4_157565_30087 | NW_004516536.1 | Scaffold1294 | 30087                   | AA                              | TT              | 1947002127               |

| SNPs IDs             | Chromosome IDs | Chromosomes    | Physical positions (bp) | CDC Frontier (Reference genome) | (ILWC46 & LPNB) | NCBI SNPdb Accession IDs |
|----------------------|----------------|----------------|-------------------------|---------------------------------|-----------------|--------------------------|
| SNP_P4_157566_32774  | NW_004516536.1 | Scaffold1294   | 32774                   | TT                              | CC              | 1947002129               |
| SNP_P4_157567_34328  | NW_004516536.1 | Scaffold1294   | 34328                   | GG                              | CC              | 1947002132               |
| SNP_P4_157568_34350  | NW_004516536.1 | Scaffold1294   | 34350                   | AA                              | TT              | 1947002134               |
| SNP_P4_157569_34458  | NW_004516536.1 | Scaffold1294   | 34458                   | TT                              | CC              | 1947002136               |
| SNP_P4_157570_35058  | NW_004516536.1 | Scaffold1294   | 35058                   | CC                              | TT              | 1947002138               |
| SNP_P4_157571_35084  | NW_004516536.1 | Scaffold1294   | 35084                   | TT                              | GG              | 1947002140               |
| SNP_P4_157572_35109  | NW_004516536.1 | Scaffold1294   | 35109                   | AA                              | TT              | 1947002142               |
| SNP_P4_157573_35142  | NW_004516536.1 | Scaffold1294   | 35142                   | AA                              | GG              | 1947002144               |
| SNP_P4_157575_59274  | NW_004516538.1 | Scaffold1301_1 | 59274                   | AA                              | GG              | 1947002146               |
| SNP_P4_157576_75392  | NW_004516538.1 | Scaffold1301_1 | 75392                   | CC                              | TT              | 1947002148               |
| SNP_P4_157578_95233  | NW_004516538.1 | Scaffold1301_1 | 95233                   | CC                              | TT              | 1947002149               |
| SNP_P4_157579_101028 | NW_004516538.1 | Scaffold1301_1 | 101028                  | CC                              | AA              | 1947002151               |
| SNP_P4_157580_168707 | NW_004516538.1 | Scaffold1301_1 | 168707                  | AA                              | GG              | 1947002153               |
| SNP_P4_157581_168711 | NW_004516538.1 | Scaffold1301_1 | 168711                  | AA                              | GG              | 1947002155               |
| SNP_P4_157584_260528 | NW_004516538.1 | Scaffold1301_1 | 260528                  | GG                              | AA              | 1947002157               |
| SNP_P4_157585_286850 | NW_004516538.1 | Scaffold1301_1 | 286850                  | AA                              | GG              | 1947002159               |
| SNP_P4_157586_290781 | NW_004516538.1 | Scaffold1301_1 | 290781                  | GG                              | AA              | 1947002161               |
| SNP_P4_157587_290783 | NW_004516538.1 | Scaffold1301_1 | 290783                  | GG                              | AA              | 1947002163               |
| SNP_P4_157588_298989 | NW_004516538.1 | Scaffold1301_1 | 298989                  | GG                              | AA              | 1947002165               |
| SNP_P4_157589_298993 | NW_004516538.1 | Scaffold1301_1 | 298993                  | CC                              | TT              | 1947002167               |
| SNP_P4_157590_299006 | NW_004516538.1 | Scaffold1301_1 | 299006                  | GG                              | AA              | 1947002169               |
| SNP_P4_157591_299022 | NW_004516538.1 | Scaffold1301_1 | 299022                  | CC                              | TT              | 1947002171               |
| SNP_P4_157592_299198 | NW_004516538.1 | Scaffold1301_1 | 299198                  | CC                              | AA              | 1947002173               |
| SNP_P4_157593_299271 | NW_004516538.1 | Scaffold1301_1 | 299271                  | TT                              | CC              | 1947002175               |
| SNP_P4_157594_299311 | NW_004516538.1 | Scaffold1301_1 | 299311                  | GG                              | AA              | 1947002176               |
| SNP_P4_157595_299336 | NW_004516538.1 | Scaffold1301_1 | 299336                  | TT                              | AA              | 1947002178               |
| SNP_P4_157596_299359 | NW_004516538.1 | Scaffold1301_1 | 299359                  | AA                              | GG              | 1947002180               |
| SNP_P4_157597_299371 | NW_004516538.1 | Scaffold1301_1 | 299371                  | TT                              | CC              | 1947002182               |
| SNP_P4_157598_299390 | NW_004516538.1 | Scaffold1301_1 | 299390                  | GG                              | AA              | 1947002184               |
| SNP_P4_157599_299540 | NW_004516538.1 | Scaffold1301_1 | 299540                  | GG                              | AA              | 1947002186               |
| SNP_P4_157600_299561 | NW_004516538.1 | Scaffold1301_1 | 299561                  | TT                              | CC              | 1947002188               |
| SNP_P4_157601_299572 | NW_004516538.1 | Scaffold1301_1 | 299572                  | AA                              | GG              | 1947002190               |
| SNP_P4_157602_303057 | NW_004516538.1 | Scaffold1301_1 | 303057                  | CC                              | TT              | 1947002192               |
| SNP_P4_157604_307079 | NW_004516538.1 | Scaffold1301_1 | 307079                  | AA                              | TT              | 1947002193               |
| SNP_P4_157605_1920   | NW_004516539.1 | Scaffold1302   | 1920                    | TT                              | GG              | 1947002195               |
| SNP_P4_157606_2188   | NW_004516539.1 | Scaffold1302   | 2188                    | GG                              | TT              | 1947002197               |
| SNP_P4_157607_2216   | NW_004516539.1 | Scaffold1302   | 2216                    | AA                              | GG              | 1947002199               |
| SNP_P4_157608_2228   | NW_004516539.1 | Scaffold1302   | 2228                    | AA                              | GG              | 1947002201               |
| SNP_P4_157609_220    | NW_004516540.1 | Scaffold1303   | 220                     | GG                              | TT              | 1947002203               |
| SNP_P4_157610_5937   | NW_004516540.1 | Scaffold1303   | 5937                    | CC                              | TT              | 1947002205               |
| SNP_P4_157611_277    | NW_004516541.1 | Scaffold1304   | 277                     | TT                              | AA              | 1947002207               |
| SNP_P4_157612_296    | NW_004516541.1 | Scaffold1304   | 296                     | GG                              | AA              | 1947002208               |

| SNPs IDs            | Chromosome IDs | Chromosomes  | Physical positions (bp) | CDC Frontier (Reference genome) | (ILWC46 & LPNB) | NCBI SNPdb Accession IDs |
|---------------------|----------------|--------------|-------------------------|---------------------------------|-----------------|--------------------------|
| SNP_P4_157613_360   | NW_004516541.1 | Scaffold1304 | 360                     | AA                              | CC              | 1947002210               |
| SNP_P4_157614_5443  | NW_004516543.1 | Scaffold1307 | 5443                    | AA                              | GG              | 1947002212               |
| SNP_P4_157615_5444  | NW_004516543.1 | Scaffold1307 | 5444                    | TT                              | AA              | 1947002214               |
| SNP_P4_157616_5791  | NW_004516543.1 | Scaffold1307 | 5791                    | AA                              | GG              | 1947002216               |
| SNP_P4_157618_10141 | NW_004516543.1 | Scaffold1307 | 10141                   | TT                              | AA              | 1947002218               |
| SNP_P4_157619_10142 | NW_004516543.1 | Scaffold1307 | 10142                   | AA                              | TT              | 1947002220               |
| SNP_P4_157620_10561 | NW_004516543.1 | Scaffold1307 | 10561                   | AA                              | TT              | 1947002222               |
| SNP_P4_157621_14762 | NW_004516543.1 | Scaffold1307 | 14762                   | GG                              | AA              | 1947002224               |
| SNP_P4_157622_17328 | NW_004516543.1 | Scaffold1307 | 17328                   | TT                              | AA              | 1947002225               |
| SNP_P4_157623_17478 | NW_004516543.1 | Scaffold1307 | 17478                   | AA                              | CC              | 1947002227               |
| SNP_P4_157624_17483 | NW_004516543.1 | Scaffold1307 | 17483                   | GG                              | AA              | 1947002229               |
| SNP_P4_157625_17492 | NW_004516543.1 | Scaffold1307 | 17492                   | GG                              | AA              | 1947002231               |
| SNP_P4_157626_17519 | NW_004516543.1 | Scaffold1307 | 17519                   | CC                              | AA              | 1947002233               |
| SNP_P4_157627_20487 | NW_004516543.1 | Scaffold1307 | 20487                   | TT                              | CC              | 1947002235               |
| SNP_P4_157628_21268 | NW_004516543.1 | Scaffold1307 | 21268                   | CC                              | AA              | 1947002237               |
| SNP_P4_157629_21903 | NW_004516543.1 | Scaffold1307 | 21903                   | AA                              | GG              | 1947002239               |
| SNP_P4_157630_24365 | NW_004516543.1 | Scaffold1307 | 24365                   | TT                              | AA              | 1947002241               |
| SNP_P4_157631_24430 | NW_004516543.1 | Scaffold1307 | 24430                   | AA                              | CC              | 1947002243               |
| SNP_P4_157632_34882 | NW_004516543.1 | Scaffold1307 | 34882                   | GG                              | CC              | 1947002245               |
| SNP_P4_157633_34885 | NW_004516543.1 | Scaffold1307 | 34885                   | AA                              | TT              | 1947002247               |
| SNP_P4_157634_34887 | NW_004516543.1 | Scaffold1307 | 34887                   | TT                              | CC              | 1947002249               |
| SNP_P4_157635_34892 | NW_004516543.1 | Scaffold1307 | 34892                   | GG                              | CC              | 1947002251               |
| SNP_P4_157636_34893 | NW_004516543.1 | Scaffold1307 | 34893                   | AA                              | TT              | 1947002253               |
| SNP_P4_157637_34895 | NW_004516543.1 | Scaffold1307 | 34895                   | AA                              | TT              | 1947002255               |
| SNP_P4_157638_36674 | NW_004516543.1 | Scaffold1307 | 36674                   | GG                              | AA              | 1947002257               |
| SNP_P4_157639_42504 | NW_004516543.1 | Scaffold1307 | 42504                   | GG                              | CC              | 1947002259               |
| SNP_P4_157640_3398  | NW_004516544.1 | Scaffold1308 | 3398                    | AA                              | TT              | 1947002261               |
| SNP_P4_157641_5924  | NW_004516544.1 | Scaffold1308 | 5924                    | TT                              | CC              | 1947002263               |
| SNP_P4_157642_6265  | NW_004516544.1 | Scaffold1308 | 6265                    | CC                              | TT              | 1947002265               |
| SNP_P4_157643_8949  | NW_004516544.1 | Scaffold1308 | 8949                    | CC                              | TT              | 1947002267               |
| SNP_P4_157644_8950  | NW_004516544.1 | Scaffold1308 | 8950                    | AA                              | TT              | 1947002269               |
| SNP_P4_157645_8973  | NW_004516544.1 | Scaffold1308 | 8973                    | TT                              | CC              | 1947002271               |
| SNP_P4_157646_9033  | NW_004516544.1 | Scaffold1308 | 9033                    | TT                              | AA              | 1947002273               |
| SNP_P4_157647_9357  | NW_004516544.1 | Scaffold1308 | 9357                    | GG                              | AA              | 1947002275               |
| SNP_P4_157648_9667  | NW_004516544.1 | Scaffold1308 | 9667                    | TT                              | CC              | 1947002277               |
| SNP_P4_157649_9767  | NW_004516544.1 | Scaffold1308 | 9767                    | AA                              | CC              | 1947002279               |
| SNP_P4_157650_12655 | NW_004516544.1 | Scaffold1308 | 12655                   | GG                              | TT              | 1947002281               |
| SNP_P4_157651_12666 | NW_004516544.1 | Scaffold1308 | 12666                   | AA                              | TT              | 1947002283               |
| SNP_P4_157652_12669 | NW_004516544.1 | Scaffold1308 | 12669                   | CC                              | AA              | 1947002285               |
| SNP_P4_157653_12671 | NW_004516544.1 | Scaffold1308 | 12671                   | GG                              | AA              | 1947002287               |
| SNP_P4_157654_14675 | NW_004516544.1 | Scaffold1308 | 14675                   | TT                              | CC              | 1947002289               |
| SNP_P4_157655_14796 | NW_004516544.1 | Scaffold1308 | 14796                   | AA                              | CC              | 1947002291               |

| SNPs IDs            | Chromosome IDs | Chromosomes  | Physical positions (bp) | CDC Frontier (Reference genome) | (ILWC46 & LPNB) | NCBI SNPdb Accession IDs |
|---------------------|----------------|--------------|-------------------------|---------------------------------|-----------------|--------------------------|
| SNP_P4_157657_21694 | NW_004516544.1 | Scaffold1308 | 21694                   | CC                              | TT              | 1947002293               |
| SNP_P4_157658_22171 | NW_004516544.1 | Scaffold1308 | 22171                   | AA                              | GG              | 1947002295               |
| SNP_P4_157659_24186 | NW_004516544.1 | Scaffold1308 | 24186                   | TT                              | CC              | 1947002297               |
| SNP_P4_157660_24216 | NW_004516544.1 | Scaffold1308 | 24216                   | TT                              | CC              | 1947002299               |
| SNP_P4_157661_24539 | NW_004516544.1 | Scaffold1308 | 24539                   | TT                              | AA              | 1947002301               |
| SNP_P4_157662_24555 | NW_004516544.1 | Scaffold1308 | 24555                   | CC                              | AA              | 1947002303               |
| SNP_P4_157663_24559 | NW_004516544.1 | Scaffold1308 | 24559                   | GG                              | TT              | 1947002305               |
| SNP_P4_157664_24592 | NW_004516544.1 | Scaffold1308 | 24592                   | CC                              | TT              | 1947002307               |
| SNP_P4_157665_24622 | NW_004516544.1 | Scaffold1308 | 24622                   | AA                              | TT              | 1947002309               |
| SNP_P4_157666_35268 | NW_004516544.1 | Scaffold1308 | 35268                   | AA                              | GG              | 1947002311               |
| SNP_P4_157667_35419 | NW_004516544.1 | Scaffold1308 | 35419                   | CC                              | TT              | 1947002313               |
| SNP_P4_157668_38163 | NW_004516544.1 | Scaffold1308 | 38163                   | TT                              | CC              | 1947002315               |
| SNP_P4_157669_38172 | NW_004516544.1 | Scaffold1308 | 38172                   | TT                              | CC              | 1947002317               |
| SNP_P4_157670_39977 | NW_004516544.1 | Scaffold1308 | 39977                   | TT                              | CC              | 1947002319               |
| SNP_P4_157671_42160 | NW_004516544.1 | Scaffold1308 | 42160                   | AA                              | GG              | 1947002321               |
| SNP_P4_157672_43282 | NW_004516544.1 | Scaffold1308 | 43282                   | GG                              | CC              | 1947002323               |
| SNP_P4_157673_43931 | NW_004516544.1 | Scaffold1308 | 43931                   | AA                              | GG              | 1947002325               |
| SNP_P4_157674_43936 | NW_004516544.1 | Scaffold1308 | 43936                   | TT                              | GG              | 1947002327               |
| SNP_P4_157675_45077 | NW_004516544.1 | Scaffold1308 | 45077                   | TT                              | CC              | 1947002329               |
| SNP_P4_157676_50944 | NW_004516544.1 | Scaffold1308 | 50944                   | AA                              | GG              | 1947002331               |
| SNP_P4_157677_51056 | NW_004516544.1 | Scaffold1308 | 51056                   | CC                              | TT              | 1947002333               |
| SNP_P4_157678_51450 | NW_004516544.1 | Scaffold1308 | 51450                   | CC                              | TT              | 1947002335               |
| SNP_P4_157679_55963 | NW_004516544.1 | Scaffold1308 | 55963                   | TT                              | GG              | 1947002337               |
| SNP_P4_157680_55966 | NW_004516544.1 | Scaffold1308 | 55966                   | CC                              | TT              | 1947002339               |
| SNP_P4_157681_55968 | NW_004516544.1 | Scaffold1308 | 55968                   | GG                              | AA              | 1947002341               |
| SNP_P4_157682_55977 | NW_004516544.1 | Scaffold1308 | 55977                   | CC                              | AA              | 1947002343               |
| SNP_P4_157683_55980 | NW_004516544.1 | Scaffold1308 | 55980                   | GG                              | AA              | 1947002345               |
| SNP_P4_157684_55984 | NW_004516544.1 | Scaffold1308 | 55984                   | GG                              | CC              | 1947002347               |
| SNP_P4_157685_55989 | NW_004516544.1 | Scaffold1308 | 55989                   | AA                              | GG              | 1947002349               |
| SNP_P4_157686_56463 | NW_004516544.1 | Scaffold1308 | 56463                   | GG                              | AA              | 1947002351               |
| SNP_P4_157687_56906 | NW_004516544.1 | Scaffold1308 | 56906                   | AA                              | TT              | 1947002353               |
| SNP_P4_157688_56908 | NW_004516544.1 | Scaffold1308 | 56908                   | CC                              | TT              | 1947002355               |
| SNP_P4_157689_56909 | NW_004516544.1 | Scaffold1308 | 56909                   | CC                              | TT              | 1947002357               |
| SNP_P4_157690_56911 | NW_004516544.1 | Scaffold1308 | 56911                   | TT                              | AA              | 1947002359               |
| SNP_P4_157691_56914 | NW_004516544.1 | Scaffold1308 | 56914                   | AA                              | TT              | 1947002361               |
| SNP_P4_157693_57630 | NW_004516544.1 | Scaffold1308 | 57630                   | TT                              | CC              | 1947002363               |
| SNP_P4_157694_57679 | NW_004516544.1 | Scaffold1308 | 57679                   | GG                              | AA              | 1947002365               |
| SNP_P4_157695_57899 | NW_004516544.1 | Scaffold1308 | 57899                   | TT                              | AA              | 1947002367               |
| SNP_P4_157696_59184 | NW_004516544.1 | Scaffold1308 | 59184                   | GG                              | AA              | 1947002369               |
| SNP_P4_157697_59323 | NW_004516544.1 | Scaffold1308 | 59323                   | GG                              | TT              | 1947002371               |
| SNP_P4_157698_60165 | NW_004516544.1 | Scaffold1308 | 60165                   | CC                              | GG              | 1947002373               |
| SNP_P4_157699_60183 | NW_004516544.1 | Scaffold1308 | 60183                   | CC                              | TT              | 1947002375               |

| SNPs IDs            | Chromosome IDs | Chromosomes  | Physical positions (bp) | CDC Frontier (Reference genome) | (ILWC46 & LPNB) | NCBI SNPdb Accession IDs |
|---------------------|----------------|--------------|-------------------------|---------------------------------|-----------------|--------------------------|
| SNP_P4_157700_60188 | NW_004516544.1 | Scaffold1308 | 60188                   | GG                              | AA              | 1947002377               |
| SNP_P4_157701_60190 | NW_004516544.1 | Scaffold1308 | 60190                   | TT                              | GG              | 1947002379               |
| SNP_P4_157702_60195 | NW_004516544.1 | Scaffold1308 | 60195                   | TT                              | CC              | 1947002381               |
| SNP_P4_157703_60203 | NW_004516544.1 | Scaffold1308 | 60203                   | AA                              | GG              | 1947002383               |
| SNP_P4_157704_60305 | NW_004516544.1 | Scaffold1308 | 60305                   | CC                              | GG              | 1947002385               |
| SNP_P4_157705_62554 | NW_004516544.1 | Scaffold1308 | 62554                   | CC                              | GG              | 1947002387               |
| SNP_P4_157706_65714 | NW_004516544.1 | Scaffold1308 | 65714                   | AA                              | GG              | 1947002389               |
| SNP_P4_157707_65759 | NW_004516544.1 | Scaffold1308 | 65759                   | AA                              | GG              | 1947002391               |
| SNP_P4_157708_65820 | NW_004516544.1 | Scaffold1308 | 65820                   | CC                              | AA              | 1947002393               |
| SNP_P4_157709_65848 | NW_004516544.1 | Scaffold1308 | 65848                   | CC                              | TT              | 1947002395               |
| SNP_P4_157710_65850 | NW_004516544.1 | Scaffold1308 | 65850                   | AA                              | GG              | 1947002397               |
| SNP_P4_157711_66578 | NW_004516544.1 | Scaffold1308 | 66578                   | CC                              | GG              | 1947002399               |
| SNP_P4_157712_66741 | NW_004516544.1 | Scaffold1308 | 66741                   | CC                              | TT              | 1947002401               |
| SNP_P4_157713_66761 | NW_004516544.1 | Scaffold1308 | 66761                   | CC                              | TT              | 1947002403               |
| SNP_P4_157714_66872 | NW_004516544.1 | Scaffold1308 | 66872                   | AA                              | GG              | 1947002405               |
| SNP_P4_157715_78385 | NW_004516544.1 | Scaffold1308 | 78385                   | GG                              | CC              | 1947002407               |
| SNP_P4_157716_78528 | NW_004516544.1 | Scaffold1308 | 78528                   | CC                              | GG              | 1947002409               |
| SNP_P4_157717_79034 | NW_004516544.1 | Scaffold1308 | 79034                   | GG                              | TT              | 1947002411               |
| SNP_P4_157719_87209 | NW_004516544.1 | Scaffold1308 | 87209                   | TT                              | CC              | 1947002413               |
| SNP_P4_157720_87242 | NW_004516544.1 | Scaffold1308 | 87242                   | GG                              | AA              | 1947002415               |
| SNP_P4_157721_87248 | NW_004516544.1 | Scaffold1308 | 87248                   | GG                              | AA              | 1947002417               |
| SNP_P4_157722_87513 | NW_004516544.1 | Scaffold1308 | 87513                   | TT                              | GG              | 1947002419               |
| SNP_P4_157723_87521 | NW_004516544.1 | Scaffold1308 | 87521                   | TT                              | GG              | 1947002421               |
| SNP_P4_157724_87527 | NW_004516544.1 | Scaffold1308 | 87527                   | AA                              | GG              | 1947002423               |
| SNP_P4_157725_87539 | NW_004516544.1 | Scaffold1308 | 87539                   | AA                              | CC              | 1947002425               |
| SNP_P4_157726_87599 | NW_004516544.1 | Scaffold1308 | 87599                   | AA                              | GG              | 1947002427               |
| SNP_P4_157727_87649 | NW_004516544.1 | Scaffold1308 | 87649                   | CC                              | GG              | 1947002429               |
| SNP_P4_157728_87763 | NW_004516544.1 | Scaffold1308 | 87763                   | TT                              | CC              | 1947002431               |
| SNP_P4_157729_87795 | NW_004516544.1 | Scaffold1308 | 87795                   | AA                              | CC              | 1947002433               |
| SNP_P4_157730_87806 | NW_004516544.1 | Scaffold1308 | 87806                   | AA                              | CC              | 1947002435               |
| SNP_P4_157731_88541 | NW_004516544.1 | Scaffold1308 | 88541                   | TT                              | CC              | 1947002436               |
| SNP_P4_157732_89232 | NW_004516544.1 | Scaffold1308 | 89232                   | TT                              | CC              | 1947002438               |
| SNP_P4_157733_89234 | NW_004516544.1 | Scaffold1308 | 89234                   | TT                              | AA              | 1947002440               |
| SNP_P4_157734_89396 | NW_004516544.1 | Scaffold1308 | 89396                   | GG                              | TT              | 1947002442               |
| SNP_P4_157735_89400 | NW_004516544.1 | Scaffold1308 | 89400                   | CC                              | TT              | 1947002444               |
| SNP_P4_157736_91257 | NW_004516544.1 | Scaffold1308 | 91257                   | GG                              | CC              | 1947002446               |
| SNP_P4_157737_91699 | NW_004516544.1 | Scaffold1308 | 91699                   | CC                              | TT              | 1947002448               |
| SNP_P4_157738_94596 | NW_004516544.1 | Scaffold1308 | 94596                   | TT                              | GG              | 1947002450               |
| SNP_P4_157739_94807 | NW_004516544.1 | Scaffold1308 | 94807                   | GG                              | CC              | 1947002452               |
| SNP_P4_157740_95314 | NW_004516544.1 | Scaffold1308 | 95314                   | TT                              | GG              | 1947002454               |
| SNP_P4_157741_95864 | NW_004516544.1 | Scaffold1308 | 95864                   | GG                              | TT              | 1947002456               |
| SNP_P4_157742_97151 | NW_004516544.1 | Scaffold1308 | 97151                   | TT                              | CC              | 1947002458               |

| SNPs IDs            | Chromosome IDs | Chromosomes  | Physical positions (bp) | CDC Frontier (Reference genome) | (ILWC46 & LPNB) | NCBI SNPdb Accession IDs |
|---------------------|----------------|--------------|-------------------------|---------------------------------|-----------------|--------------------------|
| SNP_P4_157743_97510 | NW_004516544.1 | Scaffold1308 | 97510                   | AA                              | GG              | 1947002460               |
| SNP_P4_157744_97675 | NW_004516544.1 | Scaffold1308 | 97675                   | TT                              | AA              | 1947002462               |
| SNP_P4_157745_97856 | NW_004516544.1 | Scaffold1308 | 97856                   | GG                              | CC              | 1947002464               |
| SNP_P4_157746_97897 | NW_004516544.1 | Scaffold1308 | 97897                   | TT                              | GG              | 1947002466               |
| SNP_P4_157747_97952 | NW_004516544.1 | Scaffold1308 | 97952                   | CC                              | GG              | 1947002468               |
| SNP_P4_157748_98002 | NW_004516544.1 | Scaffold1308 | 98002                   | CC                              | GG              | 1947002470               |
| SNP_P4_157749_98007 | NW_004516544.1 | Scaffold1308 | 98007                   | TT                              | AA              | 1947002472               |
| SNP_P4_157751_98104 | NW_004516544.1 | Scaffold1308 | 98104                   | CC                              | TT              | 1947002474               |
| SNP_P4_157753_98113 | NW_004516544.1 | Scaffold1308 | 98113                   | CC                              | AA              | 1947002476               |
| SNP_P4_157754_98194 | NW_004516544.1 | Scaffold1308 | 98194                   | AA                              | CC              | 1947002478               |
| SNP_P4_157755_98870 | NW_004516544.1 | Scaffold1308 | 98870                   | TT                              | CC              | 1947002480               |
| SNP_P4_157756_26542 | NW_004516545.1 | Scaffold1309 | 26542                   | CC                              | TT              | 1947002482               |
| SNP_P4_157757_26766 | NW_004516545.1 | Scaffold1309 | 26766                   | CC                              | AA              | 1947002484               |
| SNP_P4_157759_30164 | NW_004516545.1 | Scaffold1309 | 30164                   | CC                              | AA              | 1947002486               |
| SNP_P4_157760_36102 | NW_004516545.1 | Scaffold1309 | 36102                   | AA                              | CC              | 1947002488               |
| SNP_P4_157762_36114 | NW_004516545.1 | Scaffold1309 | 36114                   | TT                              | CC              | 1947002490               |
| SNP_P4_157764_36274 | NW_004516545.1 | Scaffold1309 | 36274                   | TT                              | AA              | 1947002492               |
| SNP_P4_157765_36298 | NW_004516545.1 | Scaffold1309 | 36298                   | AA                              | GG              | 1947002494               |
| SNP_P4_157766_36339 | NW_004516545.1 | Scaffold1309 | 36339                   | AA                              | TT              | 1947002496               |
| SNP_P4_157767_36409 | NW_004516545.1 | Scaffold1309 | 36409                   | TT                              | CC              | 1947002498               |
| SNP_P4_157768_39392 | NW_004516545.1 | Scaffold1309 | 39392                   | CC                              | AA              | 1947002500               |
| SNP_P4_157769_39692 | NW_004516545.1 | Scaffold1309 | 39692                   | TT                              | GG              | 1947002502               |
| SNP_P4_157770_39801 | NW_004516545.1 | Scaffold1309 | 39801                   | TT                              | CC              | 1947002504               |
| SNP_P4_157771_40127 | NW_004516545.1 | Scaffold1309 | 40127                   | AA                              | CC              | 1947002506               |
| SNP_P4_157772_40146 | NW_004516545.1 | Scaffold1309 | 40146                   | TT                              | CC              | 1947002508               |
| SNP_P4_157773_41563 | NW_004516545.1 | Scaffold1309 | 41563                   | TT                              | GG              | 1947002510               |
| SNP_P4_157774_41860 | NW_004516545.1 | Scaffold1309 | 41860                   | AA                              | CC              | 1947002512               |
| SNP_P4_157775_46951 | NW_004516545.1 | Scaffold1309 | 46951                   | GG                              | AA              | 1947002514               |
| SNP_P4_157776_47787 | NW_004516545.1 | Scaffold1309 | 47787                   | CC                              | TT              | 1947002516               |
| SNP_P4_157777_48630 | NW_004516545.1 | Scaffold1309 | 48630                   | CC                              | AA              | 1947002518               |
| SNP_P4_157778_48917 | NW_004516545.1 | Scaffold1309 | 48917                   | CC                              | TT              | 1947002520               |
| SNP_P4_157779_49425 | NW_004516545.1 | Scaffold1309 | 49425                   | TT                              | CC              | 1947002522               |
| SNP_P4_157780_49518 | NW_004516545.1 | Scaffold1309 | 49518                   | GG                              | TT              | 1947002524               |
| SNP_P4_157781_49857 | NW_004516545.1 | Scaffold1309 | 49857                   | CC                              | AA              | 1947002526               |
| SNP_P4_157783_50017 | NW_004516545.1 | Scaffold1309 | 50017                   | TT                              | GG              | 1947002528               |
| SNP_P4_157784_50019 | NW_004516545.1 | Scaffold1309 | 50019                   | AA                              | GG              | 1947002530               |
| SNP_P4_157785_50267 | NW_004516545.1 | Scaffold1309 | 50267                   | TT                              | GG              | 1947002532               |
| SNP_P4_157787_50888 | NW_004516545.1 | Scaffold1309 | 50888                   | GG                              | TT              | 1947002534               |
| SNP_P4_157788_51035 | NW_004516545.1 | Scaffold1309 | 51035                   | CC                              | TT              | 1947002536               |
| SNP_P4_157789_51177 | NW_004516545.1 | Scaffold1309 | 51177                   | GG                              | AA              | 1947002538               |
| SNP_P4_157790_51254 | NW_004516545.1 | Scaffold1309 | 51254                   | AA                              | CC              | 1947002540               |
| SNP_P4_157791_55977 | NW_004516545.1 | Scaffold1309 | 55977                   | GG                              | AA              | 1947002542               |



| SNPs IDs            | Chromosome IDs | Chromosomes  | Physical positions (bp) | CDC Frontier (Reference genome) | (ILWC46 & LPNB) | NCBI SNPdb Accession IDs |
|---------------------|----------------|--------------|-------------------------|---------------------------------|-----------------|--------------------------|
| SNP_P4_157792_57100 | NW_004516545.1 | Scaffold1309 | 57100                   | GG                              | AA              | 1947002544               |
| SNP_P4_157793_57143 | NW_004516545.1 | Scaffold1309 | 57143                   | GG                              | TT              | 1947002546               |
| SNP_P4_157794_57218 | NW_004516545.1 | Scaffold1309 | 57218                   | CC                              | GG              | 1947002548               |
| SNP_P4_157795_57455 | NW_004516545.1 | Scaffold1309 | 57455                   | GG                              | AA              | 1947002550               |
| SNP_P4_157796_57592 | NW_004516545.1 | Scaffold1309 | 57592                   | GG                              | TT              | 1947002552               |
| SNP_P4_157797_58063 | NW_004516545.1 | Scaffold1309 | 58063                   | CC                              | TT              | 1947002554               |
| SNP_P4_157800_77499 | NW_004516545.1 | Scaffold1309 | 77499                   | TT                              | CC              | 1947002556               |
| SNP_P4_157801_84481 | NW_004516545.1 | Scaffold1309 | 84481                   | TT                              | GG              | 1947002558               |
| SNP_P4_157802_84482 | NW_004516545.1 | Scaffold1309 | 84482                   | TT                              | CC              | 1947002560               |
| SNP_P4_157803_88860 | NW_004516545.1 | Scaffold1309 | 88860                   | TT                              | AA              | 1947002562               |
| SNP_P4_157804_89142 | NW_004516545.1 | Scaffold1309 | 89142                   | TT                              | CC              | 1947002564               |
| SNP_P4_157805_89154 | NW_004516545.1 | Scaffold1309 | 89154                   | AA                              | GG              | 1947002566               |
| SNP_P4_157806_89427 | NW_004516545.1 | Scaffold1309 | 89427                   | CC                              | AA              | 1947002568               |
| SNP_P4_157807_89536 | NW_004516545.1 | Scaffold1309 | 89536                   | TT                              | AA              | 1947002570               |
| SNP_P4_157808_89808 | NW_004516545.1 | Scaffold1309 | 89808                   | AA                              | GG              | 1947002572               |
| SNP_P4_157809_90176 | NW_004516545.1 | Scaffold1309 | 90176                   | TT                              | CC              | 1947002577               |
| SNP_P4_157810_90254 | NW_004516545.1 | Scaffold1309 | 90254                   | GG                              | AA              | 1947002579               |
| SNP_P4_157811_90637 | NW_004516545.1 | Scaffold1309 | 90637                   | GG                              | TT              | 1947002581               |
| SNP_P4_157812_3703  | NW_004516547.1 | Scaffold1312 | 3703                    | TT                              | AA              | 1947002583               |
| SNP_P4_157813_3709  | NW_004516547.1 | Scaffold1312 | 3709                    | AA                              | TT              | 1947002585               |
| SNP_P4_157814_52707 | NW_004516547.1 | Scaffold1312 | 52707                   | TT                              | GG              | 1947002587               |
| SNP_P4_157815_57806 | NW_004516547.1 | Scaffold1312 | 57806                   | TT                              | CC              | 1947002589               |
| SNP_P4_157817_58766 | NW_004516547.1 | Scaffold1312 | 58766                   | TT                              | AA              | 1947002591               |
| SNP_P4_157819_59447 | NW_004516547.1 | Scaffold1312 | 59447                   | GG                              | TT              | 1947002593               |
| SNP_P4_157820_64919 | NW_004516547.1 | Scaffold1312 | 64919                   | TT                              | GG              | 1947002595               |
| SNP_P4_157821_65136 | NW_004516547.1 | Scaffold1312 | 65136                   | GG                              | AA              | 1947002597               |
| SNP_P4_157822_65421 | NW_004516547.1 | Scaffold1312 | 65421                   | TT                              | CC              | 1947002599               |
| SNP_P4_157823_65599 | NW_004516547.1 | Scaffold1312 | 65599                   | TT                              | CC              | 1947002601               |
| SNP_P4_157824_65658 | NW_004516547.1 | Scaffold1312 | 65658                   | TT                              | CC              | 1947002603               |
| SNP_P4_157826_66031 | NW_004516547.1 | Scaffold1312 | 66031                   | CC                              | TT              | 1947002605               |
| SNP_P4_157827_66606 | NW_004516547.1 | Scaffold1312 | 66606                   | AA                              | GG              | 1947002607               |
| SNP_P4_157828_67119 | NW_004516547.1 | Scaffold1312 | 67119                   | AA                              | CC              | 1947002609               |
| SNP_P4_157829_68527 | NW_004516547.1 | Scaffold1312 | 68527                   | GG                              | AA              | 1947002610               |
| SNP_P4_157830_69466 | NW_004516547.1 | Scaffold1312 | 69466                   | GG                              | CC              | 1947002611               |
| SNP_P4_157831_69596 | NW_004516547.1 | Scaffold1312 | 69596                   | GG                              | TT              | 1947002612               |
| SNP_P4_157834_72077 | NW_004516547.1 | Scaffold1312 | 72077                   | CC                              | TT              | 1947002613               |
| SNP_P4_157835_72289 | NW_004516547.1 | Scaffold1312 | 72289                   | AA                              | GG              | 1947002614               |
| SNP_P4_157836_72293 | NW_004516547.1 | Scaffold1312 | 72293                   | CC                              | GG              | 1947002615               |
| SNP_P4_157837_73314 | NW_004516547.1 | Scaffold1312 | 73314                   | TT                              | AA              | 1947002616               |
| SNP_P4_157838_73979 | NW_004516547.1 | Scaffold1312 | 73979                   | AA                              | CC              | 1947002617               |
| SNP_P4_157839_74961 | NW_004516547.1 | Scaffold1312 | 74961                   | GG                              | AA              | 1947002618               |
| SNP_P4_157840_75105 | NW_004516547.1 | Scaffold1312 | 75105                   | AA                              | GG              | 1947002619               |

| SNPs IDs            | Chromosome IDs | Chromosomes  | Physical positions (bp) | CDC Frontier (Reference genome) | (ILWC46 & LPNB) | NCBI SNPdb Accession IDs |
|---------------------|----------------|--------------|-------------------------|---------------------------------|-----------------|--------------------------|
| SNP_P4_157841_75340 | NW_004516547.1 | Scaffold1312 | 75340                   | GG                              | AA              | 1947002620               |
| SNP_P4_157842_75346 | NW_004516547.1 | Scaffold1312 | 75346                   | AA                              | GG              | 1947002621               |
| SNP_P4_157843_75462 | NW_004516547.1 | Scaffold1312 | 75462                   | GG                              | TT              | 1947002622               |
| SNP_P4_157844_75568 | NW_004516547.1 | Scaffold1312 | 75568                   | CC                              | TT              | 1947002623               |
| SNP_P4_157845_75581 | NW_004516547.1 | Scaffold1312 | 75581                   | AA                              | TT              | 1947002624               |
| SNP_P4_157846_76168 | NW_004516547.1 | Scaffold1312 | 76168                   | AA                              | GG              | 1947002625               |
| SNP_P4_157847_76652 | NW_004516547.1 | Scaffold1312 | 76652                   | CC                              | TT              | 1947002626               |
| SNP_P4_157848_77681 | NW_004516547.1 | Scaffold1312 | 77681                   | TT                              | AA              | 1947002627               |
| SNP_P4_157849_78435 | NW_004516547.1 | Scaffold1312 | 78435                   | GG                              | AA              | 1947002628               |
| SNP_P4_157850_78520 | NW_004516547.1 | Scaffold1312 | 78520                   | TT                              | AA              | 1947002629               |
| SNP_P4_157851_78625 | NW_004516547.1 | Scaffold1312 | 78625                   | AA                              | TT              | 1947002630               |
| SNP_P4_157852_78629 | NW_004516547.1 | Scaffold1312 | 78629                   | AA                              | GG              | 1947002631               |
| SNP_P4_157854_78775 | NW_004516547.1 | Scaffold1312 | 78775                   | GG                              | AA              | 1947002632               |
| SNP_P4_157858_78980 | NW_004516547.1 | Scaffold1312 | 78980                   | TT                              | CC              | 1947002633               |
| SNP_P4_157859_78991 | NW_004516547.1 | Scaffold1312 | 78991                   | AA                              | GG              | 1947002634               |
| SNP_P4_157860_79107 | NW_004516547.1 | Scaffold1312 | 79107                   | GG                              | AA              | 1947002635               |
| SNP_P4_157861_79124 | NW_004516547.1 | Scaffold1312 | 79124                   | TT                              | CC              | 1947002636               |
| SNP_P4_157862_79155 | NW_004516547.1 | Scaffold1312 | 79155                   | CC                              | TT              | 1947002637               |
| SNP_P4_157863_79226 | NW_004516547.1 | Scaffold1312 | 79226                   | AA                              | TT              | 1947002638               |
| SNP_P4_157864_79260 | NW_004516547.1 | Scaffold1312 | 79260                   | TT                              | CC              | 1947002639               |
| SNP_P4_157865_79280 | NW_004516547.1 | Scaffold1312 | 79280                   | GG                              | TT              | 1947002640               |
| SNP_P4_157866_79666 | NW_004516547.1 | Scaffold1312 | 79666                   | GG                              | AA              | 1947002641               |
| SNP_P4_157867_79682 | NW_004516547.1 | Scaffold1312 | 79682                   | GG                              | AA              | 1947002642               |
| SNP_P4_157868_79698 | NW_004516547.1 | Scaffold1312 | 79698                   | CC                              | AA              | 1947002643               |
| SNP_P4_157869_79733 | NW_004516547.1 | Scaffold1312 | 79733                   | CC                              | AA              | 1947002644               |
| SNP_P4_157870_79764 | NW_004516547.1 | Scaffold1312 | 79764                   | CC                              | TT              | 1947002645               |
| SNP_P4_157871_79824 | NW_004516547.1 | Scaffold1312 | 79824                   | AA                              | GG              | 1947002646               |
| SNP_P4_157872_79842 | NW_004516547.1 | Scaffold1312 | 79842                   | GG                              | AA              | 1947002647               |
| SNP_P4_157873_79901 | NW_004516547.1 | Scaffold1312 | 79901                   | CC                              | TT              | 1947002648               |
| SNP_P4_157874_79959 | NW_004516547.1 | Scaffold1312 | 79959                   | TT                              | CC              | 1947002649               |
| SNP_P4_157875_80007 | NW_004516547.1 | Scaffold1312 | 80007                   | CC                              | TT              | 1947002650               |
| SNP_P4_157876_80061 | NW_004516547.1 | Scaffold1312 | 80061                   | TT                              | GG              | 1947002651               |
| SNP_P4_157877_80079 | NW_004516547.1 | Scaffold1312 | 80079                   | TT                              | AA              | 1947002652               |
| SNP_P4_157878_80259 | NW_004516547.1 | Scaffold1312 | 80259                   | CC                              | AA              | 1947002653               |
| SNP_P4_157879_80287 | NW_004516547.1 | Scaffold1312 | 80287                   | AA                              | CC              | 1947002654               |
| SNP_P4_157880_80350 | NW_004516547.1 | Scaffold1312 | 80350                   | CC                              | TT              | 1947002655               |
| SNP_P4_157881_80372 | NW_004516547.1 | Scaffold1312 | 80372                   | GG                              | AA              | 1947002656               |
| SNP_P4_157882_80394 | NW_004516547.1 | Scaffold1312 | 80394                   | GG                              | AA              | 1947002657               |
| SNP_P4_157883_80499 | NW_004516547.1 | Scaffold1312 | 80499                   | AA                              | TT              | 1947002658               |
| SNP_P4_157885_80593 | NW_004516547.1 | Scaffold1312 | 80593                   | GG                              | AA              | 1947002659               |
| SNP_P4_157886_80716 | NW_004516547.1 | Scaffold1312 | 80716                   | AA                              | GG              | 1947002660               |
| SNP_P4_157887_80833 | NW_004516547.1 | Scaffold1312 | 80833                   | GG                              | AA              | 1947002661               |

| SNPs IDs            | Chromosome IDs | Chromosomes  | Physical positions (bp) | CDC Frontier (Reference genome) | (ILWC46 & LPNB) | NCBI SNPdb Accession IDs |
|---------------------|----------------|--------------|-------------------------|---------------------------------|-----------------|--------------------------|
| SNP_P4_157888_80955 | NW_004516547.1 | Scaffold1312 | 80955                   | TT                              | CC              | 1947002662               |
| SNP_P4_157889_81003 | NW_004516547.1 | Scaffold1312 | 81003                   | CC                              | TT              | 1947002663               |
| SNP_P4_157890_81067 | NW_004516547.1 | Scaffold1312 | 81067                   | AA                              | CC              | 1947002664               |
| SNP_P4_157891_81081 | NW_004516547.1 | Scaffold1312 | 81081                   | TT                              | CC              | 1947002665               |
| SNP_P4_157892_81389 | NW_004516547.1 | Scaffold1312 | 81389                   | TT                              | GG              | 1947002666               |
| SNP_P4_157893_81450 | NW_004516547.1 | Scaffold1312 | 81450                   | AA                              | GG              | 1947002667               |
| SNP_P4_157894_81454 | NW_004516547.1 | Scaffold1312 | 81454                   | CC                              | TT              | 1947002668               |
| SNP_P4_157895_81469 | NW_004516547.1 | Scaffold1312 | 81469                   | TT                              | AA              | 1947002669               |
| SNP_P4_157896_81590 | NW_004516547.1 | Scaffold1312 | 81590                   | TT                              | CC              | 1947002670               |
| SNP_P4_157897_81727 | NW_004516547.1 | Scaffold1312 | 81727                   | AA                              | GG              | 1947002671               |
| SNP_P4_157898_81751 | NW_004516547.1 | Scaffold1312 | 81751                   | TT                              | CC              | 1947002672               |
| SNP_P4_157899_81898 | NW_004516547.1 | Scaffold1312 | 81898                   | AA                              | GG              | 1947002673               |
| SNP_P4_157900_82002 | NW_004516547.1 | Scaffold1312 | 82002                   | GG                              | AA              | 1947002674               |
| SNP_P4_157901_82003 | NW_004516547.1 | Scaffold1312 | 82003                   | AA                              | GG              | 1947002675               |
| SNP_P4_157902_82188 | NW_004516547.1 | Scaffold1312 | 82188                   | GG                              | AA              | 1947002676               |
| SNP_P4_157903_82276 | NW_004516547.1 | Scaffold1312 | 82276                   | TT                              | CC              | 1947002677               |
| SNP_P4_157904_82277 | NW_004516547.1 | Scaffold1312 | 82277                   | GG                              | AA              | 1947002678               |
| SNP_P4_157905_82296 | NW_004516547.1 | Scaffold1312 | 82296                   | CC                              | TT              | 1947002679               |
| SNP_P4_157906_82323 | NW_004516547.1 | Scaffold1312 | 82323                   | CC                              | TT              | 1947002680               |
| SNP_P4_157907_82356 | NW_004516547.1 | Scaffold1312 | 82356                   | TT                              | CC              | 1947002681               |
| SNP_P4_157908_82369 | NW_004516547.1 | Scaffold1312 | 82369                   | GG                              | AA              | 1947002682               |
| SNP_P4_157909_82416 | NW_004516547.1 | Scaffold1312 | 82416                   | TT                              | AA              | 1947002683               |
| SNP_P4_157910_82524 | NW_004516547.1 | Scaffold1312 | 82524                   | AA                              | GG              | 1947002684               |
| SNP_P4_157911_82525 | NW_004516547.1 | Scaffold1312 | 82525                   | AA                              | CC              | 1947002685               |
| SNP_P4_157912_82588 | NW_004516547.1 | Scaffold1312 | 82588                   | CC                              | GG              | 1947002686               |
| SNP_P4_157913_82616 | NW_004516547.1 | Scaffold1312 | 82616                   | TT                              | CC              | 1947002687               |
| SNP_P4_157914_82627 | NW_004516547.1 | Scaffold1312 | 82627                   | CC                              | TT              | 1947002688               |
| SNP_P4_157915_82637 | NW_004516547.1 | Scaffold1312 | 82637                   | AA                              | TT              | 1947002689               |
| SNP_P4_157916_82769 | NW_004516547.1 | Scaffold1312 | 82769                   | AA                              | TT              | 1947002690               |
| SNP_P4_157917_82845 | NW_004516547.1 | Scaffold1312 | 82845                   | GG                              | AA              | 1947002691               |
| SNP_P4_157918_82959 | NW_004516547.1 | Scaffold1312 | 82959                   | CC                              | AA              | 1947002692               |
| SNP_P4_157919_83001 | NW_004516547.1 | Scaffold1312 | 83001                   | AA                              | GG              | 1947002693               |
| SNP_P4_157920_83177 | NW_004516547.1 | Scaffold1312 | 83177                   | GG                              | AA              | 1947002694               |
| SNP_P4_157922_83302 | NW_004516547.1 | Scaffold1312 | 83302                   | TT                              | CC              | 1947002695               |
| SNP_P4_157923_83429 | NW_004516547.1 | Scaffold1312 | 83429                   | CC                              | GG              | 1947002696               |
| SNP_P4_157924_83443 | NW_004516547.1 | Scaffold1312 | 83443                   | CC                              | TT              | 1947002697               |
| SNP_P4_157925_83462 | NW_004516547.1 | Scaffold1312 | 83462                   | TT                              | CC              | 1947002698               |
| SNP_P4_157926_83497 | NW_004516547.1 | Scaffold1312 | 83497                   | GG                              | AA              | 1947002699               |
| SNP_P4_157927_83625 | NW_004516547.1 | Scaffold1312 | 83625                   | TT                              | CC              | 1947002700               |
| SNP_P4_157928_83633 | NW_004516547.1 | Scaffold1312 | 83633                   | CC                              | AA              | 1947002701               |
| SNP_P4_157929_83804 | NW_004516547.1 | Scaffold1312 | 83804                   | TT                              | AA              | 1947002702               |
| SNP_P4_157930_86106 | NW_004516547.1 | Scaffold1312 | 86106                   | AA                              | GG              | 1947002703               |

| SNPs IDs            | Chromosome IDs | Chromosomes  | Physical positions (bp) | CDC Frontier (Reference genome) | (ILWC46 & LPNB) | NCBI SNPdb Accession IDs |
|---------------------|----------------|--------------|-------------------------|---------------------------------|-----------------|--------------------------|
| SNP_P4_157931_86209 | NW_004516547.1 | Scaffold1312 | 86209                   | TT                              | CC              | 1947002704               |
| SNP_P4_157932_86278 | NW_004516547.1 | Scaffold1312 | 86278                   | GG                              | AA              | 1947002705               |
| SNP_P4_157933_86353 | NW_004516547.1 | Scaffold1312 | 86353                   | AA                              | TT              | 1947002706               |
| SNP_P4_157934_86383 | NW_004516547.1 | Scaffold1312 | 86383                   | GG                              | AA              | 1947002707               |
| SNP_P4_157935_86432 | NW_004516547.1 | Scaffold1312 | 86432                   | AA                              | GG              | 1947002708               |
| SNP_P4_157936_86525 | NW_004516547.1 | Scaffold1312 | 86525                   | AA                              | GG              | 1947002709               |
| SNP_P4_157937_86738 | NW_004516547.1 | Scaffold1312 | 86738                   | AA                              | TT              | 1947002710               |
| SNP_P4_157938_86772 | NW_004516547.1 | Scaffold1312 | 86772                   | GG                              | CC              | 1947002711               |
| SNP_P4_157939_86834 | NW_004516547.1 | Scaffold1312 | 86834                   | CC                              | TT              | 1947002712               |
| SNP_P4_157940_86843 | NW_004516547.1 | Scaffold1312 | 86843                   | GG                              | AA              | 1947002713               |
| SNP_P4_157941_86974 | NW_004516547.1 | Scaffold1312 | 86974                   | GG                              | TT              | 1947002714               |
| SNP_P4_157942_87071 | NW_004516547.1 | Scaffold1312 | 87071                   | TT                              | GG              | 1947002715               |
| SNP_P4_157943_87148 | NW_004516547.1 | Scaffold1312 | 87148                   | GG                              | TT              | 1947002716               |
| SNP_P4_157944_87208 | NW_004516547.1 | Scaffold1312 | 87208                   | AA                              | CC              | 1947002717               |
| SNP_P4_157945_87216 | NW_004516547.1 | Scaffold1312 | 87216                   | TT                              | CC              | 1947002718               |
| SNP_P4_157946_87401 | NW_004516547.1 | Scaffold1312 | 87401                   | TT                              | AA              | 1947002720               |
| SNP_P4_157947_87420 | NW_004516547.1 | Scaffold1312 | 87420                   | TT                              | CC              | 1947002722               |
| SNP_P4_157948_87451 | NW_004516547.1 | Scaffold1312 | 87451                   | AA                              | GG              | 1947002724               |
| SNP_P4_157949_87477 | NW_004516547.1 | Scaffold1312 | 87477                   | CC                              | TT              | 1947002726               |
| SNP_P4_157950_87550 | NW_004516547.1 | Scaffold1312 | 87550                   | TT                              | AA              | 1947002728               |
| SNP_P4_157951_87645 | NW_004516547.1 | Scaffold1312 | 87645                   | GG                              | AA              | 1947002730               |
| SNP_P4_157952_87750 | NW_004516547.1 | Scaffold1312 | 87750                   | AA                              | GG              | 1947002732               |
| SNP_P4_157953_87752 | NW_004516547.1 | Scaffold1312 | 87752                   | GG                              | CC              | 1947002734               |
| SNP_P4_157954_87807 | NW_004516547.1 | Scaffold1312 | 87807                   | AA                              | GG              | 1947002736               |
| SNP_P4_157955_87815 | NW_004516547.1 | Scaffold1312 | 87815                   | GG                              | AA              | 1947002738               |
| SNP_P4_157956_87845 | NW_004516547.1 | Scaffold1312 | 87845                   | GG                              | TT              | 1947002740               |
| SNP_P4_157957_87909 | NW_004516547.1 | Scaffold1312 | 87909                   | TT                              | CC              | 1947002742               |
| SNP_P4_157958_87935 | NW_004516547.1 | Scaffold1312 | 87935                   | CC                              | TT              | 1947002744               |
| SNP_P4_157959_87945 | NW_004516547.1 | Scaffold1312 | 87945                   | TT                              | CC              | 1947002746               |
| SNP_P4_157960_87953 | NW_004516547.1 | Scaffold1312 | 87953                   | CC                              | AA              | 1947002748               |
| SNP_P4_157961_88539 | NW_004516547.1 | Scaffold1312 | 88539                   | GG                              | AA              | 1947002750               |
| SNP_P4_157962_88551 | NW_004516547.1 | Scaffold1312 | 88551                   | TT                              | AA              | 1947002752               |
| SNP_P4_157963_88605 | NW_004516547.1 | Scaffold1312 | 88605                   | GG                              | AA              | 1947002754               |
| SNP_P4_157964_88613 | NW_004516547.1 | Scaffold1312 | 88613                   | AA                              | CC              | 1947002756               |
| SNP_P4_157965_88763 | NW_004516547.1 | Scaffold1312 | 88763                   | CC                              | TT              | 1947002758               |
| SNP_P4_157966_88778 | NW_004516547.1 | Scaffold1312 | 88778                   | GG                              | TT              | 1947002760               |
| SNP_P4_157967_88809 | NW_004516547.1 | Scaffold1312 | 88809                   | GG                              | TT              | 1947002762               |
| SNP_P4_157968_88931 | NW_004516547.1 | Scaffold1312 | 88931                   | TT                              | AA              | 1947002765               |
| SNP_P4_157969_88944 | NW_004516547.1 | Scaffold1312 | 88944                   | CC                              | TT              | 1947002767               |
| SNP_P4_157970_89201 | NW_004516547.1 | Scaffold1312 | 89201                   | AA                              | CC              | 1947002769               |
| SNP_P4_157971_89251 | NW_004516547.1 | Scaffold1312 | 89251                   | AA                              | TT              | 1947002771               |
| SNP_P4_157972_89333 | NW_004516547.1 | Scaffold1312 | 89333                   | AA                              | GG              | 1947002773               |

| SNPs IDs             | Chromosome IDs | Chromosomes  | Physical positions (bp) | CDC Frontier (Reference genome) | (ILWC46 & LPNB) | NCBI SNPdb Accession IDs |
|----------------------|----------------|--------------|-------------------------|---------------------------------|-----------------|--------------------------|
| SNP_P4_157974_89728  | NW_004516547.1 | Scaffold1312 | 89728                   | GG                              | TT              | 1947002775               |
| SNP_P4_157976_94521  | NW_004516547.1 | Scaffold1312 | 94521                   | CC                              | AA              | 1947002777               |
| SNP_P4_157977_95635  | NW_004516547.1 | Scaffold1312 | 95635                   | TT                              | CC              | 1947002779               |
| SNP_P4_157978_95678  | NW_004516547.1 | Scaffold1312 | 95678                   | CC                              | TT              | 1947002781               |
| SNP_P4_157979_95688  | NW_004516547.1 | Scaffold1312 | 95688                   | GG                              | AA              | 1947002783               |
| SNP_P4_157980_95843  | NW_004516547.1 | Scaffold1312 | 95843                   | CC                              | TT              | 1947002785               |
| SNP_P4_157981_95881  | NW_004516547.1 | Scaffold1312 | 95881                   | GG                              | TT              | 1947002787               |
| SNP_P4_157982_95909  | NW_004516547.1 | Scaffold1312 | 95909                   | GG                              | TT              | 1947002789               |
| SNP_P4_157983_95989  | NW_004516547.1 | Scaffold1312 | 95989                   | AA                              | GG              | 1947002791               |
| SNP_P4_157984_96428  | NW_004516547.1 | Scaffold1312 | 96428                   | GG                              | CC              | 1947002793               |
| SNP_P4_157985_96434  | NW_004516547.1 | Scaffold1312 | 96434                   | GG                              | TT              | 1947002795               |
| SNP_P4_157986_96804  | NW_004516547.1 | Scaffold1312 | 96804                   | TT                              | AA              | 1947002797               |
| SNP_P4_157987_96849  | NW_004516547.1 | Scaffold1312 | 96849                   | GG                              | AA              | 1947002799               |
| SNP_P4_157988_1341   | NW_004516548.1 | Scaffold1313 | 1341                    | TT                              | CC              | 1947002801               |
| SNP_P4_157989_1344   | NW_004516548.1 | Scaffold1313 | 1344                    | AA                              | GG              | 1947002803               |
| SNP_P4_157990_1382   | NW_004516548.1 | Scaffold1313 | 1382                    | AA                              | GG              | 1947002805               |
| SNP_P4_157993_43706  | NW_004516548.1 | Scaffold1313 | 43706                   | AA                              | GG              | 1947002807               |
| SNP_P4_157994_43795  | NW_004516548.1 | Scaffold1313 | 43795                   | CC                              | TT              | 1947002809               |
| SNP_P4_157996_47165  | NW_004516548.1 | Scaffold1313 | 47165                   | TT                              | CC              | 1947002811               |
| SNP_P4_157997_47466  | NW_004516548.1 | Scaffold1313 | 47466                   | TT                              | AA              | 1947002813               |
| SNP_P4_157998_54179  | NW_004516548.1 | Scaffold1313 | 54179                   | CC                              | TT              | 1947002815               |
| SNP_P4_157999_71897  | NW_004516548.1 | Scaffold1313 | 71897                   | CC                              | TT              | 1947002817               |
| SNP_P4_158000_71899  | NW_004516548.1 | Scaffold1313 | 71899                   | CC                              | TT              | 1947002819               |
| SNP_P4_158001_71907  | NW_004516548.1 | Scaffold1313 | 71907                   | GG                              | AA              | 1947002821               |
| SNP_P4_158002_72178  | NW_004516548.1 | Scaffold1313 | 72178                   | GG                              | AA              | 1947002823               |
| SNP_P4_158003_72200  | NW_004516548.1 | Scaffold1313 | 72200                   | TT                              | AA              | 1947002825               |
| SNP_P4_158004_72232  | NW_004516548.1 | Scaffold1313 | 72232                   | AA                              | GG              | 1947002827               |
| SNP_P4_158005_102495 | NW_004516548.1 | Scaffold1313 | 102495                  | TT                              | AA              | 1947002829               |
| SNP_P4_158006_102685 | NW_004516548.1 | Scaffold1313 | 102685                  | AA                              | GG              | 1947002831               |
| SNP_P4_158008_103240 | NW_004516548.1 | Scaffold1313 | 103240                  | TT                              | CC              | 1947002833               |
| SNP_P4_158009_103447 | NW_004516548.1 | Scaffold1313 | 103447                  | CC                              | AA              | 1947002835               |
| SNP_P4_158010_103457 | NW_004516548.1 | Scaffold1313 | 103457                  | CC                              | TT              | 1947002837               |
| SNP_P4_158011_103720 | NW_004516548.1 | Scaffold1313 | 103720                  | AA                              | GG              | 1947002839               |
| SNP_P4_158012_103785 | NW_004516548.1 | Scaffold1313 | 103785                  | CC                              | TT              | 1947002841               |
| SNP_P4_158013_103877 | NW_004516548.1 | Scaffold1313 | 103877                  | GG                              | AA              | 1947002843               |
| SNP_P4_158014_108279 | NW_004516548.1 | Scaffold1313 | 108279                  | AA                              | GG              | 1947002845               |
| SNP_P4_158015_108309 | NW_004516548.1 | Scaffold1313 | 108309                  | AA                              | GG              | 1947002847               |
| SNP_P4_158016_110130 | NW_004516548.1 | Scaffold1313 | 110130                  | AA                              | TT              | 1947002849               |
| SNP_P4_158017_117786 | NW_004516548.1 | Scaffold1313 | 117786                  | CC                              | GG              | 1947002851               |
| SNP_P4_158018_117787 | NW_004516548.1 | Scaffold1313 | 117787                  | CC                              | AA              | 1947002852               |
| SNP_P4_158019_117798 | NW_004516548.1 | Scaffold1313 | 117798                  | AA                              | GG              | 1947002854               |
| SNP_P4_158020_117824 | NW_004516548.1 | Scaffold1313 | 117824                  | AA                              | GG              | 1947002856               |

| SNPs IDs             | Chromosome IDs | Chromosomes  | Physical positions (bp) | CDC Frontier (Reference genome) | (ILWC46 & LPNB) | NCBI SNPdb Accession IDs |
|----------------------|----------------|--------------|-------------------------|---------------------------------|-----------------|--------------------------|
| SNP_P4_158021_117825 | NW_004516548.1 | Scaffold1313 | 117825                  | AA                              | GG              | 1947002858               |
| SNP_P4_158022_117826 | NW_004516548.1 | Scaffold1313 | 117826                  | TT                              | CC              | 1947002860               |
| SNP_P4_158023_117860 | NW_004516548.1 | Scaffold1313 | 117860                  | CC                              | TT              | 1947002862               |
| SNP_P4_158024_117870 | NW_004516548.1 | Scaffold1313 | 117870                  | AA                              | GG              | 1947002864               |
| SNP_P4_158025_117881 | NW_004516548.1 | Scaffold1313 | 117881                  | CC                              | TT              | 1947002866               |
| SNP_P4_158026_117884 | NW_004516548.1 | Scaffold1313 | 117884                  | AA                              | GG              | 1947002868               |
| SNP_P4_158027_117900 | NW_004516548.1 | Scaffold1313 | 117900                  | TT                              | AA              | 1947002870               |
| SNP_P4_158028_117934 | NW_004516548.1 | Scaffold1313 | 117934                  | TT                              | CC              | 1947002872               |
| SNP_P4_158029_117941 | NW_004516548.1 | Scaffold1313 | 117941                  | AA                              | GG              | 1947002874               |
| SNP_P4_158030_117968 | NW_004516548.1 | Scaffold1313 | 117968                  | CC                              | TT              | 1947002876               |
| SNP_P4_158031_117977 | NW_004516548.1 | Scaffold1313 | 117977                  | CC                              | AA              | 1947002878               |
| SNP_P4_158032_120777 | NW_004516548.1 | Scaffold1313 | 120777                  | CC                              | AA              | 1947002880               |
| SNP_P4_158033_123889 | NW_004516548.1 | Scaffold1313 | 123889                  | AA                              | GG              | 1947002881               |
| SNP_P4_158034_131857 | NW_004516548.1 | Scaffold1313 | 131857                  | GG                              | AA              | 1947002883               |
| SNP_P4_158035_132461 | NW_004516548.1 | Scaffold1313 | 132461                  | TT                              | AA              | 1947002885               |
| SNP_P4_158036_132791 | NW_004516548.1 | Scaffold1313 | 132791                  | TT                              | CC              | 1947002887               |
| SNP_P4_158037_132870 | NW_004516548.1 | Scaffold1313 | 132870                  | AA                              | TT              | 1947002889               |
| SNP_P4_158038_132874 | NW_004516548.1 | Scaffold1313 | 132874                  | TT                              | CC              | 1947002891               |
| SNP_P4_158039_133023 | NW_004516548.1 | Scaffold1313 | 133023                  | TT                              | CC              | 1947002893               |
| SNP_P4_158041_133556 | NW_004516548.1 | Scaffold1313 | 133556                  | TT                              | CC              | 1947002895               |
| SNP_P4_158042_133561 | NW_004516548.1 | Scaffold1313 | 133561                  | GG                              | CC              | 1947002897               |
| SNP_P4_158043_133562 | NW_004516548.1 | Scaffold1313 | 133562                  | AA                              | CC              | 1947002899               |
| SNP_P4_158044_133599 | NW_004516548.1 | Scaffold1313 | 133599                  | AA                              | TT              | 1947002901               |
| SNP_P4_158045_133746 | NW_004516548.1 | Scaffold1313 | 133746                  | TT                              | CC              | 1947002903               |
| SNP_P4_158047_133935 | NW_004516548.1 | Scaffold1313 | 133935                  | TT                              | CC              | 1947002905               |
| SNP_P4_158048_138256 | NW_004516548.1 | Scaffold1313 | 138256                  | CC                              | TT              | 1947002907               |
| SNP_P4_158049_143923 | NW_004516548.1 | Scaffold1313 | 143923                  | AA                              | TT              | 1947002909               |
| SNP_P4_158051_158913 | NW_004516548.1 | Scaffold1313 | 158913                  | GG                              | TT              | 1947002911               |
| SNP_P4_158052_158923 | NW_004516548.1 | Scaffold1313 | 158923                  | GG                              | AA              | 1947002912               |
| SNP_P4_158053_158967 | NW_004516548.1 | Scaffold1313 | 158967                  | AA                              | TT              | 1947002914               |
| SNP_P4_158055_165273 | NW_004516548.1 | Scaffold1313 | 165273                  | TT                              | CC              | 1947002916               |
| SNP_P4_158056_165289 | NW_004516548.1 | Scaffold1313 | 165289                  | TT                              | CC              | 1947002918               |
| SNP_P4_158057_167246 | NW_004516548.1 | Scaffold1313 | 167246                  | TT                              | GG              | 1947002920               |
| SNP_P4_158058_168031 | NW_004516548.1 | Scaffold1313 | 168031                  | TT                              | CC              | 1947002922               |
| SNP_P4_158059_168044 | NW_004516548.1 | Scaffold1313 | 168044                  | TT                              | GG              | 1947002924               |
| SNP_P4_158060_168844 | NW_004516548.1 | Scaffold1313 | 168844                  | AA                              | CC              | 1947002926               |
| SNP_P4_158061_168899 | NW_004516548.1 | Scaffold1313 | 168899                  | AA                              | CC              | 1947002928               |
| SNP_P4_158062_168928 | NW_004516548.1 | Scaffold1313 | 168928                  | AA                              | CC              | 1947002930               |
| SNP_P4_158063_197934 | NW_004516548.1 | Scaffold1313 | 197934                  | TT                              | CC              | 1947002932               |
| SNP_P4_158064_203224 | NW_004516548.1 | Scaffold1313 | 203224                  | CC                              | AA              | 1947002934               |
| SNP_P4_158065_204250 | NW_004516548.1 | Scaffold1313 | 204250                  | TT                              | CC              | 1947002936               |
| SNP_P4_158067_206082 | NW_004516548.1 | Scaffold1313 | 206082                  | GG                              | CC              | 1947002938               |

| SNPs IDs             | Chromosome IDs | Chromosomes  | Physical positions (bp) | CDC Frontier (Reference genome) | (ILWC46 & LPNB) | NCBI SNPdb Accession IDs |
|----------------------|----------------|--------------|-------------------------|---------------------------------|-----------------|--------------------------|
| SNP_P4_158068_214375 | NW_004516548.1 | Scaffold1313 | 214375                  | TT                              | CC              | 1947002940               |
| SNP_P4_158069_214396 | NW_004516548.1 | Scaffold1313 | 214396                  | GG                              | AA              | 1947002942               |
| SNP_P4_158070_214416 | NW_004516548.1 | Scaffold1313 | 214416                  | AA                              | TT              | 1947002944               |
| SNP_P4_158071_216483 | NW_004516548.1 | Scaffold1313 | 216483                  | AA                              | GG              | 1947002946               |
| SNP_P4_158072_216950 | NW_004516548.1 | Scaffold1313 | 216950                  | GG                              | AA              | 1947002947               |
| SNP_P4_158073_216965 | NW_004516548.1 | Scaffold1313 | 216965                  | TT                              | GG              | 1947002949               |
| SNP_P4_158074_229501 | NW_004516548.1 | Scaffold1313 | 229501                  | TT                              | AA              | 1947002951               |
| SNP_P4_158075_229523 | NW_004516548.1 | Scaffold1313 | 229523                  | GG                              | TT              | 1947002953               |
| SNP_P4_158076_229526 | NW_004516548.1 | Scaffold1313 | 229526                  | GG                              | AA              | 1947002955               |
| SNP_P4_158077_346    | NW_004516549.1 | Scaffold1314 | 346                     | CC                              | GG              | 1947002957               |
| SNP_P4_158078_371    | NW_004516549.1 | Scaffold1314 | 371                     | GG                              | AA              | 1947002959               |
| SNP_P4_158079_372    | NW_004516549.1 | Scaffold1314 | 372                     | AA                              | TT              | 1947002961               |
| SNP_P4_158080_524    | NW_004516549.1 | Scaffold1314 | 524                     | TT                              | GG              | 1947002963               |
| SNP_P4_158082_618    | NW_004516549.1 | Scaffold1314 | 618                     | TT                              | CC              | 1947002965               |
| SNP_P4_158083_757    | NW_004516549.1 | Scaffold1314 | 757                     | GG                              | TT              | 1947002967               |
| SNP_P4_158084_859    | NW_004516549.1 | Scaffold1314 | 859                     | AA                              | TT              | 1947002969               |
| SNP_P4_158085_12984  | NW_004516550.1 | Scaffold1315 | 12984                   | CC                              | AA              | 1947002971               |
| SNP_P4_158086_14487  | NW_004516550.1 | Scaffold1315 | 14487                   | AA                              | GG              | 1947002973               |
| SNP_P4_158087_14544  | NW_004516550.1 | Scaffold1315 | 14544                   | GG                              | AA              | 1947002975               |
| SNP_P4_158088_14779  | NW_004516550.1 | Scaffold1315 | 14779                   | GG                              | AA              | 1947002977               |
| SNP_P4_158089_14820  | NW_004516550.1 | Scaffold1315 | 14820                   | CC                              | TT              | 1947002979               |
| SNP_P4_158090_14827  | NW_004516550.1 | Scaffold1315 | 14827                   | TT                              | GG              | 1947002981               |
| SNP_P4_158091_15062  | NW_004516550.1 | Scaffold1315 | 15062                   | CC                              | AA              | 1947002983               |
| SNP_P4_158092_15069  | NW_004516550.1 | Scaffold1315 | 15069                   | CC                              | TT              | 1947002985               |
| SNP_P4_158093_15100  | NW_004516550.1 | Scaffold1315 | 15100                   | CC                              | TT              | 1947002987               |
| SNP_P4_158094_15106  | NW_004516550.1 | Scaffold1315 | 15106                   | TT                              | CC              | 1947002989               |
| SNP_P4_158095_15111  | NW_004516550.1 | Scaffold1315 | 15111                   | AA                              | CC              | 1947002991               |
| SNP_P4_158096_15389  | NW_004516550.1 | Scaffold1315 | 15389                   | TT                              | CC              | 1947002993               |
| SNP_P4_158098_37528  | NW_004516550.1 | Scaffold1315 | 37528                   | AA                              | GG              | 1947002995               |
| SNP_P4_158099_37534  | NW_004516550.1 | Scaffold1315 | 37534                   | CC                              | AA              | 1947002997               |
| SNP_P4_158100_37536  | NW_004516550.1 | Scaffold1315 | 37536                   | AA                              | GG              | 1947002999               |
| SNP_P4_158101_37551  | NW_004516550.1 | Scaffold1315 | 37551                   | CC                              | TT              | 1947003001               |
| SNP_P4_158102_37558  | NW_004516550.1 | Scaffold1315 | 37558                   | GG                              | AA              | 1947003003               |
| SNP_P4_158103_37589  | NW_004516550.1 | Scaffold1315 | 37589                   | AA                              | TT              | 1947003005               |
| SNP_P4_158104_37593  | NW_004516550.1 | Scaffold1315 | 37593                   | TT                              | CC              | 1947003007               |
| SNP_P4_158105_37628  | NW_004516550.1 | Scaffold1315 | 37628                   | GG                              | AA              | 1947003008               |
| SNP_P4_158106_37630  | NW_004516550.1 | Scaffold1315 | 37630                   | CC                              | AA              | 1947003010               |
| SNP_P4_158107_37646  | NW_004516550.1 | Scaffold1315 | 37646                   | CC                              | TT              | 1947003012               |
| SNP_P4_158108_37817  | NW_004516550.1 | Scaffold1315 | 37817                   | AA                              | GG              | 1947003014               |
| SNP_P4_158109_37818  | NW_004516550.1 | Scaffold1315 | 37818                   | AA                              | GG              | 1947003016               |
| SNP_P4_158110_37856  | NW_004516550.1 | Scaffold1315 | 37856                   | GG                              | TT              | 1947003018               |
| SNP_P4_158111_37892  | NW_004516550.1 | Scaffold1315 | 37892                   | AA                              | GG              | 1947003020               |

| SNPs IDs             | Chromosome IDs | Chromosomes  | Physical positions (bp) | CDC Frontier (Reference genome) | (ILWC46 & LPNB) | NCBI SNPdb Accession IDs |
|----------------------|----------------|--------------|-------------------------|---------------------------------|-----------------|--------------------------|
| SNP_P4_158112_63738  | NW_004516550.1 | Scaffold1315 | 63738                   | TT                              | CC              | 1947003022               |
| SNP_P4_158113_63767  | NW_004516550.1 | Scaffold1315 | 63767                   | AA                              | TT              | 1947003024               |
| SNP_P4_158114_64121  | NW_004516550.1 | Scaffold1315 | 64121                   | CC                              | TT              | 1947003026               |
| SNP_P4_158115_64194  | NW_004516550.1 | Scaffold1315 | 64194                   | GG                              | AA              | 1947003028               |
| SNP_P4_158116_64227  | NW_004516550.1 | Scaffold1315 | 64227                   | GG                              | AA              | 1947003030               |
| SNP_P4_158117_64535  | NW_004516550.1 | Scaffold1315 | 64535                   | AA                              | GG              | 1947003032               |
| SNP_P4_158118_64623  | NW_004516550.1 | Scaffold1315 | 64623                   | TT                              | CC              | 1947003034               |
| SNP_P4_158119_65878  | NW_004516550.1 | Scaffold1315 | 65878                   | TT                              | GG              | 1947003036               |
| SNP_P4_158120_69135  | NW_004516550.1 | Scaffold1315 | 69135                   | AA                              | GG              | 1947003038               |
| SNP_P4_158121_76322  | NW_004516550.1 | Scaffold1315 | 76322                   | TT                              | CC              | 1947003040               |
| SNP_P4_158122_88545  | NW_004516550.1 | Scaffold1315 | 88545                   | GG                              | AA              | 1947003042               |
| SNP_P4_158123_88550  | NW_004516550.1 | Scaffold1315 | 88550                   | GG                              | TT              | 1947003044               |
| SNP_P4_158124_100921 | NW_004516550.1 | Scaffold1315 | 100921                  | GG                              | TT              | 1947003046               |
| SNP_P4_158125_107968 | NW_004516550.1 | Scaffold1315 | 107968                  | TT                              | GG              | 1947003048               |
| SNP_P4_158126_108277 | NW_004516550.1 | Scaffold1315 | 108277                  | TT                              | CC              | 1947003050               |
| SNP_P4_158127_108346 | NW_004516550.1 | Scaffold1315 | 108346                  | AA                              | CC              | 1947003052               |
| SNP_P4_158128_109036 | NW_004516550.1 | Scaffold1315 | 109036                  | TT                              | CC              | 1947003054               |
| SNP_P4_158130_114802 | NW_004516550.1 | Scaffold1315 | 114802                  | TT                              | GG              | 1947003055               |
| SNP_P4_158131_114813 | NW_004516550.1 | Scaffold1315 | 114813                  | TT                              | CC              | 1947003057               |
| SNP_P4_158132_115048 | NW_004516550.1 | Scaffold1315 | 115048                  | CC                              | TT              | 1947003059               |
| SNP_P4_158133_115057 | NW_004516550.1 | Scaffold1315 | 115057                  | TT                              | CC              | 1947003061               |
| SNP_P4_158134_115206 | NW_004516550.1 | Scaffold1315 | 115206                  | TT                              | AA              | 1947003063               |
| SNP_P4_158135_115235 | NW_004516550.1 | Scaffold1315 | 115235                  | TT                              | GG              | 1947003065               |
| SNP_P4_158136_115284 | NW_004516550.1 | Scaffold1315 | 115284                  | CC                              | TT              | 1947003067               |
| SNP_P4_158137_115305 | NW_004516550.1 | Scaffold1315 | 115305                  | AA                              | TT              | 1947003069               |
| SNP_P4_158138_120490 | NW_004516550.1 | Scaffold1315 | 120490                  | GG                              | AA              | 1947003071               |
| SNP_P4_158139_120838 | NW_004516550.1 | Scaffold1315 | 120838                  | TT                              | CC              | 1947003073               |
| SNP_P4_158140_120993 | NW_004516550.1 | Scaffold1315 | 120993                  | CC                              | TT              | 1947003075               |
| SNP_P4_158141_125228 | NW_004516550.1 | Scaffold1315 | 125228                  | AA                              | GG              | 1947003077               |
| SNP_P4_158142_125243 | NW_004516550.1 | Scaffold1315 | 125243                  | TT                              | CC              | 1947003079               |
| SNP_P4_158143_127678 | NW_004516550.1 | Scaffold1315 | 127678                  | TT                              | GG              | 1947003081               |
| SNP_P4_158144_150598 | NW_004516550.1 | Scaffold1315 | 150598                  | TT                              | GG              | 1947003083               |
| SNP_P4_158145_151243 | NW_004516550.1 | Scaffold1315 | 151243                  | TT                              | GG              | 1947003084               |
| SNP_P4_158146_151271 | NW_004516550.1 | Scaffold1315 | 151271                  | CC                              | GG              | 1947003086               |
| SNP_P4_158147_151455 | NW_004516550.1 | Scaffold1315 | 151455                  | TT                              | AA              | 1947003088               |
| SNP_P4_158148_151516 | NW_004516550.1 | Scaffold1315 | 151516                  | TT                              | CC              | 1947003090               |
| SNP_P4_158149_151531 | NW_004516550.1 | Scaffold1315 | 151531                  | AA                              | TT              | 1947003092               |
| SNP_P4_158151_151634 | NW_004516550.1 | Scaffold1315 | 151634                  | GG                              | AA              | 1947003095               |
| SNP_P4_158152_160078 | NW_004516550.1 | Scaffold1315 | 160078                  | TT                              | CC              | 1947003097               |
| SNP_P4_158153_160415 | NW_004516550.1 | Scaffold1315 | 160415                  | CC                              | GG              | 1947003099               |
| SNP_P4_158154_163466 | NW_004516550.1 | Scaffold1315 | 163466                  | GG                              | AA              | 1947003101               |
| SNP_P4_158155_163574 | NW_004516550.1 | Scaffold1315 | 163574                  | GG                              | TT              | 1947003103               |



| SNPs IDs             | Chromosome IDs | Chromosomes  | Physical positions (bp) | CDC Frontier (Reference genome) | (ILWC46 & LPNB) | NCBI SNPdb Accession IDs |
|----------------------|----------------|--------------|-------------------------|---------------------------------|-----------------|--------------------------|
| SNP_P4_158156_163601 | NW_004516550.1 | Scaffold1315 | 163601                  | CC                              | TT              | 1947003105               |
| SNP_P4_158157_163630 | NW_004516550.1 | Scaffold1315 | 163630                  | TT                              | CC              | 1947003107               |
| SNP_P4_158158_163659 | NW_004516550.1 | Scaffold1315 | 163659                  | GG                              | AA              | 1947003109               |
| SNP_P4_158159_169092 | NW_004516550.1 | Scaffold1315 | 169092                  | GG                              | AA              | 1947003111               |
| SNP_P4_158160_169130 | NW_004516550.1 | Scaffold1315 | 169130                  | AA                              | GG              | 1947003112               |
| SNP_P4_158161_169140 | NW_004516550.1 | Scaffold1315 | 169140                  | AA                              | CC              | 1947003114               |
| SNP_P4_158162_169144 | NW_004516550.1 | Scaffold1315 | 169144                  | AA                              | TT              | 1947003116               |
| SNP_P4_158163_169467 | NW_004516550.1 | Scaffold1315 | 169467                  | CC                              | AA              | 1947003118               |
| SNP_P4_158164_169468 | NW_004516550.1 | Scaffold1315 | 169468                  | AA                              | TT              | 1947003120               |
| SNP_P4_158165_178579 | NW_004516550.1 | Scaffold1315 | 178579                  | CC                              | AA              | 1947003122               |
| SNP_P4_158166_178761 | NW_004516550.1 | Scaffold1315 | 178761                  | CC                              | AA              | 1947003124               |
| SNP_P4_158167_178779 | NW_004516550.1 | Scaffold1315 | 178779                  | CC                              | TT              | 1947003126               |
| SNP_P4_158168_181360 | NW_004516550.1 | Scaffold1315 | 181360                  | CC                              | TT              | 1947003128               |
| SNP_P4_158169_181811 | NW_004516550.1 | Scaffold1315 | 181811                  | TT                              | AA              | 1947003130               |
| SNP_P4_158171_3852   | NW_004516551.1 | Scaffold1316 | 3852                    | TT                              | CC              | 1947003132               |
| SNP_P4_158173_8009   | NW_004516551.1 | Scaffold1316 | 8009                    | CC                              | TT              | 1947003134               |
| SNP_P4_158174_8402   | NW_004516551.1 | Scaffold1316 | 8402                    | AA                              | TT              | 1947003136               |
| SNP_P4_158175_8446   | NW_004516551.1 | Scaffold1316 | 8446                    | TT                              | CC              | 1947003138               |
| SNP_P4_158176_8448   | NW_004516551.1 | Scaffold1316 | 8448                    | GG                              | TT              | 1947003140               |
| SNP_P4_158177_8457   | NW_004516551.1 | Scaffold1316 | 8457                    | AA                              | TT              | 1947003142               |
| SNP_P4_158178_8464   | NW_004516551.1 | Scaffold1316 | 8464                    | GG                              | TT              | 1947003145               |
| SNP_P4_158179_8475   | NW_004516551.1 | Scaffold1316 | 8475                    | TT                              | GG              | 1947003147               |
| SNP_P4_158180_8666   | NW_004516551.1 | Scaffold1316 | 8666                    | GG                              | AA              | 1947003149               |
| SNP_P4_158181_8676   | NW_004516551.1 | Scaffold1316 | 8676                    | GG                              | AA              | 1947003151               |
| SNP_P4_158182_8686   | NW_004516551.1 | Scaffold1316 | 8686                    | TT                              | CC              | 1947003153               |
| SNP_P4_158183_8972   | NW_004516551.1 | Scaffold1316 | 8972                    | CC                              | TT              | 1947003155               |
| SNP_P4_158184_9806   | NW_004516551.1 | Scaffold1316 | 9806                    | GG                              | AA              | 1947003157               |
| SNP_P4_158185_9928   | NW_004516551.1 | Scaffold1316 | 9928                    | AA                              | GG              | 1947003159               |
| SNP_P4_158186_9992   | NW_004516551.1 | Scaffold1316 | 9992                    | TT                              | CC              | 1947003161               |
| SNP_P4_158187_9995   | NW_004516551.1 | Scaffold1316 | 9995                    | AA                              | GG              | 1947003163               |
| SNP_P4_158188_10268  | NW_004516551.1 | Scaffold1316 | 10268                   | AA                              | TT              | 1947003165               |
| SNP_P4_158189_10484  | NW_004516551.1 | Scaffold1316 | 10484                   | GG                              | AA              | 1947003167               |
| SNP_P4_158190_11969  | NW_004516551.1 | Scaffold1316 | 11969                   | CC                              | GG              | 1947003169               |
| SNP_P4_158191_12837  | NW_004516551.1 | Scaffold1316 | 12837                   | CC                              | GG              | 1947003170               |
| SNP_P4_158192_12999  | NW_004516551.1 | Scaffold1316 | 12999                   | AA                              | CC              | 1947003172               |
| SNP_P4_158194_13614  | NW_004516551.1 | Scaffold1316 | 13614                   | AA                              | GG              | 1947003174               |
| SNP_P4_158195_13626  | NW_004516551.1 | Scaffold1316 | 13626                   | GG                              | AA              | 1947003176               |
| SNP_P4_158198_4405   | NW_004516552.1 | Scaffold1317 | 4405                    | GG                              | CC              | 1947003178               |
| SNP_P4_158201_6456   | NW_004516552.1 | Scaffold1317 | 6456                    | TT                              | CC              | 1947003180               |
| SNP_P4_158202_6970   | NW_004516552.1 | Scaffold1317 | 6970                    | CC                              | GG              | 1947003182               |
| SNP_P4_158203_8203   | NW_004516552.1 | Scaffold1317 | 8203                    | AA                              | CC              | 1947003184               |
| SNP_P4_158204_8207   | NW_004516552.1 | Scaffold1317 | 8207                    | TT                              | GG              | 1947003186               |

| SNPs IDs            | Chromosome IDs | Chromosomes  | Physical positions (bp) | CDC Frontier (Reference genome) | (ILWC46 & LPNB) | NCBI SNPdb Accession IDs |
|---------------------|----------------|--------------|-------------------------|---------------------------------|-----------------|--------------------------|
| SNP_P4_158205_8330  | NW_004516552.1 | Scaffold1317 | 8330                    | CC                              | AA              | 1947003188               |
| SNP_P4_158206_9220  | NW_004516552.1 | Scaffold1317 | 9220                    | CC                              | TT              | 1947003190               |
| SNP_P4_158207_13120 | NW_004516552.1 | Scaffold1317 | 13120                   | TT                              | CC              | 1947003192               |
| SNP_P4_158208_15694 | NW_004516552.1 | Scaffold1317 | 15694                   | TT                              | CC              | 1947003194               |
| SNP_P4_158209_16237 | NW_004516552.1 | Scaffold1317 | 16237                   | GG                              | TT              | 1947003196               |
| SNP_P4_158210_19446 | NW_004516552.1 | Scaffold1317 | 19446                   | CC                              | TT              | 1947003198               |
| SNP_P4_158211_20404 | NW_004516552.1 | Scaffold1317 | 20404                   | AA                              | GG              | 1947003200               |
| SNP_P4_158213_22203 | NW_004516552.1 | Scaffold1317 | 22203                   | GG                              | TT              | 1947003201               |
| SNP_P4_158214_22254 | NW_004516552.1 | Scaffold1317 | 22254                   | GG                              | AA              | 1947003202               |
| SNP_P4_158215_22268 | NW_004516552.1 | Scaffold1317 | 22268                   | AA                              | GG              | 1947003203               |
| SNP_P4_158217_32427 | NW_004516552.1 | Scaffold1317 | 32427                   | GG                              | AA              | 1947003204               |
| SNP_P4_158218_32449 | NW_004516552.1 | Scaffold1317 | 32449                   | CC                              | TT              | 1947003206               |
| SNP_P4_158219_39619 | NW_004516552.1 | Scaffold1317 | 39619                   | CC                              | TT              | 1947003208               |
| SNP_P4_158221_42917 | NW_004516552.1 | Scaffold1317 | 42917                   | GG                              | TT              | 1947003210               |
| SNP_P4_158222_43436 | NW_004516552.1 | Scaffold1317 | 43436                   | TT                              | AA              | 1947003212               |
| SNP_P4_158223_44305 | NW_004516552.1 | Scaffold1317 | 44305                   | TT                              | GG              | 1947003214               |
| SNP_P4_158224_44373 | NW_004516552.1 | Scaffold1317 | 44373                   | AA                              | GG              | 1947003216               |
| SNP_P4_158225_44390 | NW_004516552.1 | Scaffold1317 | 44390                   | GG                              | TT              | 1947003218               |
| SNP_P4_158226_44523 | NW_004516552.1 | Scaffold1317 | 44523                   | CC                              | TT              | 1947003220               |
| SNP_P4_158227_44527 | NW_004516552.1 | Scaffold1317 | 44527                   | GG                              | AA              | 1947003222               |
| SNP_P4_158228_44746 | NW_004516552.1 | Scaffold1317 | 44746                   | AA                              | TT              | 1947003224               |
| SNP_P4_158229_44748 | NW_004516552.1 | Scaffold1317 | 44748                   | AA                              | GG              | 1947003226               |
| SNP_P4_158230_44787 | NW_004516552.1 | Scaffold1317 | 44787                   | AA                              | GG              | 1947003228               |
| SNP_P4_158231_44802 | NW_004516552.1 | Scaffold1317 | 44802                   | AA                              | GG              | 1947003230               |
| SNP_P4_158232_44832 | NW_004516552.1 | Scaffold1317 | 44832                   | TT                              | GG              | 1947003232               |
| SNP_P4_158233_44880 | NW_004516552.1 | Scaffold1317 | 44880                   | CC                              | AA              | 1947003234               |
| SNP_P4_158235_44950 | NW_004516552.1 | Scaffold1317 | 44950                   | AA                              | GG              | 1947003236               |
| SNP_P4_158236_44951 | NW_004516552.1 | Scaffold1317 | 44951                   | AA                              | GG              | 1947003238               |
| SNP_P4_158237_44952 | NW_004516552.1 | Scaffold1317 | 44952                   | CC                              | AA              | 1947003240               |
| SNP_P4_158238_44983 | NW_004516552.1 | Scaffold1317 | 44983                   | GG                              | AA              | 1947003242               |
| SNP_P4_158239_44985 | NW_004516552.1 | Scaffold1317 | 44985                   | CC                              | TT              | 1947003244               |
| SNP_P4_158240_45012 | NW_004516552.1 | Scaffold1317 | 45012                   | CC                              | TT              | 1947003246               |
| SNP_P4_158241_45067 | NW_004516552.1 | Scaffold1317 | 45067                   | GG                              | CC              | 1947003248               |
| SNP_P4_158242_45142 | NW_004516552.1 | Scaffold1317 | 45142                   | GG                              | AA              | 1947003250               |
| SNP_P4_158244_45170 | NW_004516552.1 | Scaffold1317 | 45170                   | AA                              | GG              | 1947003252               |
| SNP_P4_158245_45223 | NW_004516552.1 | Scaffold1317 | 45223                   | AA                              | GG              | 1947003254               |
| SNP_P4_158246_45227 | NW_004516552.1 | Scaffold1317 | 45227                   | CC                              | TT              | 1947003255               |
| SNP_P4_158247_45245 | NW_004516552.1 | Scaffold1317 | 45245                   | GG                              | TT              | 1947003257               |
| SNP_P4_158248_45261 | NW_004516552.1 | Scaffold1317 | 45261                   | GG                              | CC              | 1947003259               |
| SNP_P4_158249_45266 | NW_004516552.1 | Scaffold1317 | 45266                   | GG                              | AA              | 1947003261               |
| SNP_P4_158250_45283 | NW_004516552.1 | Scaffold1317 | 45283                   | AA                              | CC              | 1947003263               |
| SNP_P4_158251_45304 | NW_004516552.1 | Scaffold1317 | 45304                   | AA                              | GG              | 1947003265               |

| SNPs IDs            | Chromosome IDs | Chromosomes  | Physical positions (bp) | CDC Frontier (Reference genome) | (ILWC46 & LPNB) | NCBI SNPdb Accession IDs |
|---------------------|----------------|--------------|-------------------------|---------------------------------|-----------------|--------------------------|
| SNP_P4_158252_45416 | NW_004516552.1 | Scaffold1317 | 45416                   | AA                              | GG              | 1947003267               |
| SNP_P4_158253_45457 | NW_004516552.1 | Scaffold1317 | 45457                   | TT                              | CC              | 1947003269               |
| SNP_P4_158254_45528 | NW_004516552.1 | Scaffold1317 | 45528                   | AA                              | GG              | 1947003271               |
| SNP_P4_158255_45561 | NW_004516552.1 | Scaffold1317 | 45561                   | CC                              | TT              | 1947003273               |
| SNP_P4_158256_45852 | NW_004516552.1 | Scaffold1317 | 45852                   | CC                              | AA              | 1947003275               |
| SNP_P4_158257_46041 | NW_004516552.1 | Scaffold1317 | 46041                   | TT                              | GG              | 1947003277               |
| SNP_P4_158258_46237 | NW_004516552.1 | Scaffold1317 | 46237                   | CC                              | TT              | 1947003279               |
| SNP_P4_158261_46417 | NW_004516552.1 | Scaffold1317 | 46417                   | TT                              | GG              | 1947003281               |
| SNP_P4_158262_46455 | NW_004516552.1 | Scaffold1317 | 46455                   | CC                              | TT              | 1947003283               |
| SNP_P4_158263_46483 | NW_004516552.1 | Scaffold1317 | 46483                   | AA                              | CC              | 1947003285               |
| SNP_P4_158264_46489 | NW_004516552.1 | Scaffold1317 | 46489                   | GG                              | AA              | 1947003287               |
| SNP_P4_158265_46550 | NW_004516552.1 | Scaffold1317 | 46550                   | GG                              | TT              | 1947003289               |
| SNP_P4_158266_46551 | NW_004516552.1 | Scaffold1317 | 46551                   | AA                              | GG              | 1947003291               |
| SNP_P4_158267_46553 | NW_004516552.1 | Scaffold1317 | 46553                   | TT                              | AA              | 1947003293               |
| SNP_P4_158268_46567 | NW_004516552.1 | Scaffold1317 | 46567                   | GG                              | AA              | 1947003295               |
| SNP_P4_158270_46621 | NW_004516552.1 | Scaffold1317 | 46621                   | TT                              | AA              | 1947003297               |
| SNP_P4_158271_46711 | NW_004516552.1 | Scaffold1317 | 46711                   | AA                              | GG              | 1947003299               |
| SNP_P4_158272_48481 | NW_004516552.1 | Scaffold1317 | 48481                   | AA                              | TT              | 1947003301               |
| SNP_P4_158273_49604 | NW_004516552.1 | Scaffold1317 | 49604                   | CC                              | GG              | 1947003303               |
| SNP_P4_158274_56182 | NW_004516552.1 | Scaffold1317 | 56182                   | CC                              | TT              | 1947003305               |
| SNP_P4_158275_56291 | NW_004516552.1 | Scaffold1317 | 56291                   | AA                              | GG              | 1947003307               |
| SNP_P4_158276_56600 | NW_004516552.1 | Scaffold1317 | 56600                   | TT                              | CC              | 1947003309               |
| SNP_P4_158277_56662 | NW_004516552.1 | Scaffold1317 | 56662                   | TT                              | CC              | 1947003311               |
| SNP_P4_158278_57604 | NW_004516552.1 | Scaffold1317 | 57604                   | GG                              | AA              | 1947003313               |
| SNP_P4_158279_59382 | NW_004516552.1 | Scaffold1317 | 59382                   | TT                              | CC              | 1947003315               |
| SNP_P4_158280_59708 | NW_004516552.1 | Scaffold1317 | 59708                   | AA                              | GG              | 1947003317               |
| SNP_P4_158281_59830 | NW_004516552.1 | Scaffold1317 | 59830                   | TT                              | GG              | 1947003319               |
| SNP_P4_158283_59899 | NW_004516552.1 | Scaffold1317 | 59899                   | AA                              | GG              | 1947003321               |
| SNP_P4_158284_59928 | NW_004516552.1 | Scaffold1317 | 59928                   | TT                              | CC              | 1947003323               |
| SNP_P4_158285_62055 | NW_004516552.1 | Scaffold1317 | 62055                   | TT                              | GG              | 1947003325               |
| SNP_P4_158287_62829 | NW_004516552.1 | Scaffold1317 | 62829                   | AA                              | TT              | 1947003327               |
| SNP_P4_158288_62935 | NW_004516552.1 | Scaffold1317 | 62935                   | GG                              | AA              | 1947003329               |
| SNP_P4_158290_63218 | NW_004516552.1 | Scaffold1317 | 63218                   | CC                              | AA              | 1947003331               |
| SNP_P4_158291_63232 | NW_004516552.1 | Scaffold1317 | 63232                   | TT                              | CC              | 1947003333               |
| SNP_P4_158292_63268 | NW_004516552.1 | Scaffold1317 | 63268                   | GG                              | AA              | 1947003335               |
| SNP_P4_158293_63269 | NW_004516552.1 | Scaffold1317 | 63269                   | TT                              | CC              | 1947003337               |
| SNP_P4_158294_63277 | NW_004516552.1 | Scaffold1317 | 63277                   | TT                              | CC              | 1947003339               |
| SNP_P4_158295_63283 | NW_004516552.1 | Scaffold1317 | 63283                   | GG                              | AA              | 1947003341               |
| SNP_P4_158296_63289 | NW_004516552.1 | Scaffold1317 | 63289                   | AA                              | GG              | 1947003343               |
| SNP_P4_158297_63290 | NW_004516552.1 | Scaffold1317 | 63290                   | CC                              | TT              | 1947003345               |
| SNP_P4_158298_63297 | NW_004516552.1 | Scaffold1317 | 63297                   | AA                              | CC              | 1947003347               |
| SNP_P4_158299_63316 | NW_004516552.1 | Scaffold1317 | 63316                   | CC                              | GG              | 1947003349               |

| SNPs IDs            | Chromosome IDs | Chromosomes  | Physical positions (bp) | CDC Frontier (Reference genome) | (ILWC46 & LPNB) | NCBI SNPdb Accession IDs |
|---------------------|----------------|--------------|-------------------------|---------------------------------|-----------------|--------------------------|
| SNP_P4_158300_63335 | NW_004516552.1 | Scaffold1317 | 63335                   | TT                              | CC              | 1947003351               |
| SNP_P4_158301_63369 | NW_004516552.1 | Scaffold1317 | 63369                   | TT                              | CC              | 1947003353               |
| SNP_P4_158302_63406 | NW_004516552.1 | Scaffold1317 | 63406                   | CC                              | TT              | 1947003355               |
| SNP_P4_158303_63420 | NW_004516552.1 | Scaffold1317 | 63420                   | CC                              | GG              | 1947003357               |
| SNP_P4_158304_63454 | NW_004516552.1 | Scaffold1317 | 63454                   | GG                              | CC              | 1947003359               |
| SNP_P4_158305_63508 | NW_004516552.1 | Scaffold1317 | 63508                   | CC                              | TT              | 1947003361               |
| SNP_P4_158306_63509 | NW_004516552.1 | Scaffold1317 | 63509                   | CC                              | TT              | 1947003363               |
| SNP_P4_158307_63590 | NW_004516552.1 | Scaffold1317 | 63590                   | CC                              | TT              | 1947003365               |
| SNP_P4_158308_63593 | NW_004516552.1 | Scaffold1317 | 63593                   | CC                              | TT              | 1947003367               |
| SNP_P4_158309_63595 | NW_004516552.1 | Scaffold1317 | 63595                   | CC                              | TT              | 1947003369               |
| SNP_P4_158310_63603 | NW_004516552.1 | Scaffold1317 | 63603                   | GG                              | AA              | 1947003371               |
| SNP_P4_158311_63658 | NW_004516552.1 | Scaffold1317 | 63658                   | TT                              | AA              | 1947003373               |
| SNP_P4_158312_63720 | NW_004516552.1 | Scaffold1317 | 63720                   | TT                              | CC              | 1947003375               |
| SNP_P4_158313_63814 | NW_004516552.1 | Scaffold1317 | 63814                   | AA                              | CC              | 1947003377               |
| SNP_P4_158314_63826 | NW_004516552.1 | Scaffold1317 | 63826                   | AA                              | GG              | 1947003379               |
| SNP_P4_158315_63844 | NW_004516552.1 | Scaffold1317 | 63844                   | GG                              | AA              | 1947003381               |
| SNP_P4_158316_63901 | NW_004516552.1 | Scaffold1317 | 63901                   | TT                              | CC              | 1947003383               |
| SNP_P4_158317_63932 | NW_004516552.1 | Scaffold1317 | 63932                   | AA                              | GG              | 1947003385               |
| SNP_P4_158318_63942 | NW_004516552.1 | Scaffold1317 | 63942                   | GG                              | AA              | 1947003387               |
| SNP_P4_158319_64742 | NW_004516552.1 | Scaffold1317 | 64742                   | TT                              | GG              | 1947003389               |
| SNP_P4_158320_65029 | NW_004516552.1 | Scaffold1317 | 65029                   | AA                              | TT              | 1947003391               |
| SNP_P4_158321_66074 | NW_004516552.1 | Scaffold1317 | 66074                   | CC                              | AA              | 1947003393               |
| SNP_P4_158322_66085 | NW_004516552.1 | Scaffold1317 | 66085                   | TT                              | CC              | 1947003395               |
| SNP_P4_158323_66092 | NW_004516552.1 | Scaffold1317 | 66092                   | GG                              | TT              | 1947003396               |
| SNP_P4_158324_66093 | NW_004516552.1 | Scaffold1317 | 66093                   | AA                              | GG              | 1947003397               |
| SNP_P4_158325_66599 | NW_004516552.1 | Scaffold1317 | 66599                   | AA                              | GG              | 1947003398               |
| SNP_P4_158326_66704 | NW_004516552.1 | Scaffold1317 | 66704                   | CC                              | AA              | 1947003399               |
| SNP_P4_158327_66713 | NW_004516552.1 | Scaffold1317 | 66713                   | GG                              | AA              | 1947003401               |
| SNP_P4_158328_68065 | NW_004516552.1 | Scaffold1317 | 68065                   | CC                              | TT              | 1947003403               |
| SNP_P4_158330_68438 | NW_004516552.1 | Scaffold1317 | 68438                   | TT                              | AA              | 1947003405               |
| SNP_P4_158331_69278 | NW_004516552.1 | Scaffold1317 | 69278                   | AA                              | GG              | 1947003407               |
| SNP_P4_158332_69475 | NW_004516552.1 | Scaffold1317 | 69475                   | CC                              | TT              | 1947003409               |
| SNP_P4_158333_69491 | NW_004516552.1 | Scaffold1317 | 69491                   | GG                              | AA              | 1947003411               |
| SNP_P4_158334_69631 | NW_004516552.1 | Scaffold1317 | 69631                   | AA                              | CC              | 1947003413               |
| SNP_P4_158335_72720 | NW_004516552.1 | Scaffold1317 | 72720                   | GG                              | AA              | 1947003415               |
| SNP_P4_158336_73091 | NW_004516552.1 | Scaffold1317 | 73091                   | GG                              | AA              | 1947003417               |
| SNP_P4_158337_73292 | NW_004516552.1 | Scaffold1317 | 73292                   | CC                              | TT              | 1947003419               |
| SNP_P4_158338_73352 | NW_004516552.1 | Scaffold1317 | 73352                   | GG                              | AA              | 1947003421               |
| SNP_P4_158339_73370 | NW_004516552.1 | Scaffold1317 | 73370                   | GG                              | TT              | 1947003423               |
| SNP_P4_158340_73378 | NW_004516552.1 | Scaffold1317 | 73378                   | CC                              | GG              | 1947003425               |
| SNP_P4_158341_73698 | NW_004516552.1 | Scaffold1317 | 73698                   | GG                              | AA              | 1947003427               |
| SNP_P4_158343_9544  | NW_004516553.1 | Scaffold1319 | 9544                    | TT                              | CC              | 1947003429               |

| SNPs IDs            | Chromosome IDs | Chromosomes  | Physical positions (bp) | CDC Frontier (Reference genome) | (ILWC46 & LPNB) | NCBI SNPdb Accession IDs |
|---------------------|----------------|--------------|-------------------------|---------------------------------|-----------------|--------------------------|
| SNP_P4_158344_19639 | NW_004516553.1 | Scaffold1319 | 19639                   | TT                              | AA              | 1947003431               |
| SNP_P4_158345_19647 | NW_004516553.1 | Scaffold1319 | 19647                   | TT                              | AA              | 1947003433               |
| SNP_P4_158346_19648 | NW_004516553.1 | Scaffold1319 | 19648                   | CC                              | AA              | 1947003435               |
| SNP_P4_158347_19693 | NW_004516553.1 | Scaffold1319 | 19693                   | GG                              | TT              | 1947003437               |
| SNP_P4_158348_19834 | NW_004516553.1 | Scaffold1319 | 19834                   | CC                              | GG              | 1947003439               |
| SNP_P4_158349_20000 | NW_004516553.1 | Scaffold1319 | 20000                   | GG                              | AA              | 1947003441               |
| SNP_P4_158350_20345 | NW_004516553.1 | Scaffold1319 | 20345                   | AA                              | GG              | 1947003443               |
| SNP_P4_158351_20349 | NW_004516553.1 | Scaffold1319 | 20349                   | GG                              | AA              | 1947003445               |
| SNP_P4_158352_20421 | NW_004516553.1 | Scaffold1319 | 20421                   | AA                              | CC              | 1947003447               |
| SNP_P4_158353_129   | NW_004516554.1 | Scaffold1320 | 129                     | TT                              | CC              | 1947003449               |
| SNP_P4_158354_343   | NW_004516554.1 | Scaffold1320 | 343                     | AA                              | CC              | 1947003451               |
| SNP_P4_158355_454   | NW_004516554.1 | Scaffold1320 | 454                     | TT                              | GG              | 1947003453               |
| SNP_P4_158356_574   | NW_004516554.1 | Scaffold1320 | 574                     | CC                              | TT              | 1947003455               |
| SNP_P4_158357_660   | NW_004516554.1 | Scaffold1320 | 660                     | AA                              | CC              | 1947003457               |
| SNP_P4_158358_675   | NW_004516554.1 | Scaffold1320 | 675                     | GG                              | AA              | 1947003459               |
| SNP_P4_158359_698   | NW_004516554.1 | Scaffold1320 | 698                     | GG                              | CC              | 1947003461               |
| SNP_P4_158360_1029  | NW_004516554.1 | Scaffold1320 | 1029                    | AA                              | TT              | 1947003463               |
| SNP_P4_158361_1040  | NW_004516554.1 | Scaffold1320 | 1040                    | CC                              | TT              | 1947003465               |
| SNP_P4_158362_1407  | NW_004516554.1 | Scaffold1320 | 1407                    | GG                              | CC              | 1947003467               |
| SNP_P4_158363_2692  | NW_004516554.1 | Scaffold1320 | 2692                    | CC                              | AA              | 1947003469               |
| SNP_P4_158364_3293  | NW_004516554.1 | Scaffold1320 | 3293                    | AA                              | CC              | 1947003471               |
| SNP_P4_158365_3294  | NW_004516554.1 | Scaffold1320 | 3294                    | TT                              | CC              | 1947003473               |
| SNP_P4_158366_10818 | NW_004516554.1 | Scaffold1320 | 10818                   | AA                              | CC              | 1947003475               |
| SNP_P4_158367_10819 | NW_004516554.1 | Scaffold1320 | 10819                   | AA                              | CC              | 1947003477               |
| SNP_P4_158368_10832 | NW_004516554.1 | Scaffold1320 | 10832                   | TT                              | CC              | 1947003479               |
| SNP_P4_158369_17259 | NW_004516554.1 | Scaffold1320 | 17259                   | GG                              | AA              | 1947003481               |
| SNP_P4_158370_26845 | NW_004516554.1 | Scaffold1320 | 26845                   | AA                              | GG              | 1947003483               |
| SNP_P4_158371_8807  | NW_004516556.1 | Scaffold1322 | 8807                    | TT                              | AA              | 1947003485               |
| SNP_P4_158372_9113  | NW_004516556.1 | Scaffold1322 | 9113                    | AA                              | CC              | 1947003487               |
| SNP_P4_158373_9116  | NW_004516556.1 | Scaffold1322 | 9116                    | GG                              | AA              | 1947003489               |
| SNP_P4_158374_9201  | NW_004516556.1 | Scaffold1322 | 9201                    | GG                              | TT              | 1947003491               |
| SNP_P4_158375_9608  | NW_004516556.1 | Scaffold1322 | 9608                    | TT                              | GG              | 1947003493               |
| SNP_P4_158376_9711  | NW_004516556.1 | Scaffold1322 | 9711                    | TT                              | CC              | 1947003495               |
| SNP_P4_158378_9804  | NW_004516556.1 | Scaffold1322 | 9804                    | TT                              | GG              | 1947003497               |
| SNP_P4_158379_9820  | NW_004516556.1 | Scaffold1322 | 9820                    | TT                              | AA              | 1947003499               |
| SNP_P4_158380_9873  | NW_004516556.1 | Scaffold1322 | 9873                    | TT                              | AA              | 1947003501               |
| SNP_P4_158381_9875  | NW_004516556.1 | Scaffold1322 | 9875                    | CC                              | TT              | 1947003503               |
| SNP_P4_158382_9936  | NW_004516556.1 | Scaffold1322 | 9936                    | TT                              | AA              | 1947003505               |
| SNP_P4_158383_9990  | NW_004516556.1 | Scaffold1322 | 9990                    | TT                              | AA              | 1947003507               |
| SNP_P4_158384_4585  | NW_004516557.1 | Scaffold1323 | 4585                    | GG                              | TT              | 1947003509               |
| SNP_P4_158385_4610  | NW_004516557.1 | Scaffold1323 | 4610                    | GG                              | TT              | 1947003511               |
| SNP_P4_158386_5969  | NW_004516557.1 | Scaffold1323 | 5969                    | CC                              | AA              | 1947003513               |

| SNPs IDs            | Chromosome IDs | Chromosomes  | Physical positions (bp) | CDC Frontier (Reference genome) | (ILWC46 & LPNB) | NCBI SNPdb Accession IDs |
|---------------------|----------------|--------------|-------------------------|---------------------------------|-----------------|--------------------------|
| SNP_P4_158387_6001  | NW_004516557.1 | Scaffold1323 | 6001                    | AA                              | CC              | 1947003515               |
| SNP_P4_158388_6002  | NW_004516557.1 | Scaffold1323 | 6002                    | TT                              | AA              | 1947003517               |
| SNP_P4_158389_6007  | NW_004516557.1 | Scaffold1323 | 6007                    | CC                              | TT              | 1947003519               |
| SNP_P4_158390_6052  | NW_004516557.1 | Scaffold1323 | 6052                    | AA                              | TT              | 1947003521               |
| SNP_P4_158391_6055  | NW_004516557.1 | Scaffold1323 | 6055                    | AA                              | GG              | 1947003523               |
| SNP_P4_158392_6194  | NW_004516557.1 | Scaffold1323 | 6194                    | GG                              | TT              | 1947003525               |
| SNP_P4_158393_6195  | NW_004516557.1 | Scaffold1323 | 6195                    | GG                              | AA              | 1947003527               |
| SNP_P4_158394_6231  | NW_004516557.1 | Scaffold1323 | 6231                    | CC                              | TT              | 1947003529               |
| SNP_P4_158395_6558  | NW_004516557.1 | Scaffold1323 | 6558                    | AA                              | GG              | 1947003531               |
| SNP_P4_158396_6588  | NW_004516557.1 | Scaffold1323 | 6588                    | CC                              | GG              | 1947003533               |
| SNP_P4_158398_14841 | NW_004516557.1 | Scaffold1323 | 14841                   | AA                              | CC              | 1947003535               |
| SNP_P4_158399_7370  | NW_004516558.1 | Scaffold1324 | 7370                    | CC                              | TT              | 1947003536               |
| SNP_P4_158400_7623  | NW_004516558.1 | Scaffold1324 | 7623                    | AA                              | CC              | 1947003538               |
| SNP_P4_158401_7890  | NW_004516558.1 | Scaffold1324 | 7890                    | CC                              | TT              | 1947003540               |
| SNP_P4_158403_7982  | NW_004516558.1 | Scaffold1324 | 7982                    | GG                              | AA              | 1947003542               |
| SNP_P4_158404_7995  | NW_004516558.1 | Scaffold1324 | 7995                    | CC                              | AA              | 1947003544               |
| SNP_P4_158405_8021  | NW_004516558.1 | Scaffold1324 | 8021                    | TT                              | CC              | 1947003546               |
| SNP_P4_158406_8043  | NW_004516558.1 | Scaffold1324 | 8043                    | TT                              | AA              | 1947003548               |
| SNP_P4_158407_8044  | NW_004516558.1 | Scaffold1324 | 8044                    | AA                              | GG              | 1947003550               |
| SNP_P4_158408_8053  | NW_004516558.1 | Scaffold1324 | 8053                    | CC                              | TT              | 1947003552               |
| SNP_P4_158409_8085  | NW_004516558.1 | Scaffold1324 | 8085                    | AA                              | CC              | 1947003554               |
| SNP_P4_158410_8088  | NW_004516558.1 | Scaffold1324 | 8088                    | GG                              | TT              | 1947003556               |
| SNP_P4_158411_8097  | NW_004516558.1 | Scaffold1324 | 8097                    | TT                              | AA              | 1947003557               |
| SNP_P4_158412_8112  | NW_004516558.1 | Scaffold1324 | 8112                    | CC                              | TT              | 1947003559               |
| SNP_P4_158413_8141  | NW_004516558.1 | Scaffold1324 | 8141                    | CC                              | TT              | 1947003561               |
| SNP_P4_158414_8147  | NW_004516558.1 | Scaffold1324 | 8147                    | CC                              | TT              | 1947003563               |
| SNP_P4_158415_8163  | NW_004516558.1 | Scaffold1324 | 8163                    | TT                              | CC              | 1947003565               |
| SNP_P4_158416_8178  | NW_004516558.1 | Scaffold1324 | 8178                    | GG                              | TT              | 1947003567               |
| SNP_P4_158417_8192  | NW_004516558.1 | Scaffold1324 | 8192                    | AA                              | TT              | 1947003569               |
| SNP_P4_158418_8195  | NW_004516558.1 | Scaffold1324 | 8195                    | AA                              | TT              | 1947003571               |
| SNP_P4_158419_8221  | NW_004516558.1 | Scaffold1324 | 8221                    | CC                              | TT              | 1947003573               |
| SNP_P4_158420_8231  | NW_004516558.1 | Scaffold1324 | 8231                    | CC                              | AA              | 1947003575               |
| SNP_P4_158421_8232  | NW_004516558.1 | Scaffold1324 | 8232                    | GG                              | AA              | 1947003577               |
| SNP_P4_158422_8259  | NW_004516558.1 | Scaffold1324 | 8259                    | AA                              | GG              | 1947003579               |
| SNP_P4_158423_8266  | NW_004516558.1 | Scaffold1324 | 8266                    | GG                              | AA              | 1947003581               |
| SNP_P4_158424_8284  | NW_004516558.1 | Scaffold1324 | 8284                    | AA                              | CC              | 1947003583               |
| SNP_P4_158425_8315  | NW_004516558.1 | Scaffold1324 | 8315                    | TT                              | CC              | 1947003585               |
| SNP_P4_158426_8399  | NW_004516558.1 | Scaffold1324 | 8399                    | GG                              | AA              | 1947003587               |
| SNP_P4_158427_8405  | NW_004516558.1 | Scaffold1324 | 8405                    | TT                              | AA              | 1947003589               |
| SNP_P4_158428_8415  | NW_004516558.1 | Scaffold1324 | 8415                    | TT                              | GG              | 1947003591               |
| SNP_P4_158429_8417  | NW_004516558.1 | Scaffold1324 | 8417                    | TT                              | CC              | 1947003592               |
| SNP_P4_158430_8445  | NW_004516558.1 | Scaffold1324 | 8445                    | TT                              | AA              | 1947003594               |

| SNPs IDs             | Chromosome IDs | Chromosomes  | Physical positions (bp) | CDC Frontier (Reference genome) | (ILWC46 & LPNB) | NCBI SNPdb Accession IDs |
|----------------------|----------------|--------------|-------------------------|---------------------------------|-----------------|--------------------------|
| SNP_P4_158432_8527   | NW_004516558.1 | Scaffold1324 | 8527                    | CC                              | TT              | 1947003596               |
| SNP_P4_158433_8613   | NW_004516558.1 | Scaffold1324 | 8613                    | GG                              | CC              | 1947003598               |
| SNP_P4_158435_49572  | NW_004516558.1 | Scaffold1324 | 49572                   | GG                              | AA              | 1947003600               |
| SNP_P4_158436_49635  | NW_004516558.1 | Scaffold1324 | 49635                   | AA                              | TT              | 1947003602               |
| SNP_P4_158438_49941  | NW_004516558.1 | Scaffold1324 | 49941                   | AA                              | TT              | 1947003604               |
| SNP_P4_158439_53422  | NW_004516558.1 | Scaffold1324 | 53422                   | AA                              | TT              | 1947003606               |
| SNP_P4_158440_55885  | NW_004516558.1 | Scaffold1324 | 55885                   | CC                              | TT              | 1947003608               |
| SNP_P4_158441_61731  | NW_004516558.1 | Scaffold1324 | 61731                   | TT                              | CC              | 1947003610               |
| SNP_P4_158442_71718  | NW_004516558.1 | Scaffold1324 | 71718                   | GG                              | AA              | 1947003612               |
| SNP_P4_158444_109214 | NW_004516558.1 | Scaffold1324 | 109214                  | GG                              | TT              | 1947003614               |
| SNP_P4_158445_110340 | NW_004516558.1 | Scaffold1324 | 110340                  | AA                              | GG              | 1947003615               |
| SNP_P4_158446_110369 | NW_004516558.1 | Scaffold1324 | 110369                  | TT                              | CC              | 1947003617               |
| SNP_P4_158447_110426 | NW_004516558.1 | Scaffold1324 | 110426                  | AA                              | GG              | 1947003619               |
| SNP_P4_158449_110502 | NW_004516558.1 | Scaffold1324 | 110502                  | AA                              | TT              | 1947003621               |
| SNP_P4_158450_110722 | NW_004516558.1 | Scaffold1324 | 110722                  | AA                              | CC              | 1947003623               |
| SNP_P4_158451_110759 | NW_004516558.1 | Scaffold1324 | 110759                  | TT                              | AA              | 1947003625               |
| SNP_P4_158452_110804 | NW_004516558.1 | Scaffold1324 | 110804                  | CC                              | TT              | 1947003627               |
| SNP_P4_158453_110808 | NW_004516558.1 | Scaffold1324 | 110808                  | AA                              | GG              | 1947003629               |
| SNP_P4_158454_110832 | NW_004516558.1 | Scaffold1324 | 110832                  | GG                              | AA              | 1947003631               |
| SNP_P4_158455_113370 | NW_004516558.1 | Scaffold1324 | 113370                  | AA                              | CC              | 1947003633               |
| SNP_P4_158456_116751 | NW_004516558.1 | Scaffold1324 | 116751                  | CC                              | TT              | 1947003635               |
| SNP_P4_158457_118831 | NW_004516558.1 | Scaffold1324 | 118831                  | AA                              | CC              | 1947003637               |
| SNP_P4_158458_118959 | NW_004516558.1 | Scaffold1324 | 118959                  | TT                              | GG              | 1947003639               |
| SNP_P4_158459_118992 | NW_004516558.1 | Scaffold1324 | 118992                  | AA                              | GG              | 1947003640               |
| SNP_P4_158460_119035 | NW_004516558.1 | Scaffold1324 | 119035                  | CC                              | TT              | 1947003642               |
| SNP_P4_158461_119047 | NW_004516558.1 | Scaffold1324 | 119047                  | GG                              | AA              | 1947003644               |
| SNP_P4_158462_163765 | NW_004516558.1 | Scaffold1324 | 163765                  | CC                              | TT              | 1947003646               |
| SNP_P4_158463_171122 | NW_004516558.1 | Scaffold1324 | 171122                  | CC                              | AA              | 1947003648               |
| SNP_P4_158464_190170 | NW_004516558.1 | Scaffold1324 | 190170                  | GG                              | AA              | 1947003650               |
| SNP_P4_158465_190171 | NW_004516558.1 | Scaffold1324 | 190171                  | CC                              | GG              | 1947003652               |
| SNP_P4_158466_190199 | NW_004516558.1 | Scaffold1324 | 190199                  | TT                              | GG              | 1947003655               |
| SNP_P4_158467_190515 | NW_004516558.1 | Scaffold1324 | 190515                  | GG                              | AA              | 1947003657               |
| SNP_P4_158468_190522 | NW_004516558.1 | Scaffold1324 | 190522                  | AA                              | GG              | 1947003659               |
| SNP_P4_158469_190590 | NW_004516558.1 | Scaffold1324 | 190590                  | AA                              | CC              | 1947003661               |
| SNP_P4_158470_193088 | NW_004516558.1 | Scaffold1324 | 193088                  | AA                              | GG              | 1947003663               |
| SNP_P4_158471_219371 | NW_004516558.1 | Scaffold1324 | 219371                  | CC                              | AA              | 1947003665               |
| SNP_P4_158472_219384 | NW_004516558.1 | Scaffold1324 | 219384                  | CC                              | TT              | 1947003667               |
| SNP_P4_158473_219401 | NW_004516558.1 | Scaffold1324 | 219401                  | AA                              | GG              | 1947003668               |
| SNP_P4_158474_219569 | NW_004516558.1 | Scaffold1324 | 219569                  | TT                              | AA              | 1947003670               |
| SNP_P4_158475_219706 | NW_004516558.1 | Scaffold1324 | 219706                  | GG                              | TT              | 1947003672               |
| SNP_P4_158476_219881 | NW_004516558.1 | Scaffold1324 | 219881                  | AA                              | GG              | 1947003674               |
| SNP_P4_158477_219913 | NW_004516558.1 | Scaffold1324 | 219913                  | AA                              | CC              | 1947003677               |

| SNPs IDs             | Chromosome IDs | Chromosomes  | Physical positions (bp) | CDC Frontier (Reference genome) | (ILWC46 & LPNB) | NCBI SNPdb Accession IDs |
|----------------------|----------------|--------------|-------------------------|---------------------------------|-----------------|--------------------------|
| SNP_P4_158478_219934 | NW_004516558.1 | Scaffold1324 | 219934                  | CC                              | AA              | 1947003679               |
| SNP_P4_158479_219958 | NW_004516558.1 | Scaffold1324 | 219958                  | GG                              | AA              | 1947003681               |
| SNP_P4_158480_219962 | NW_004516558.1 | Scaffold1324 | 219962                  | TT                              | AA              | 1947003683               |
| SNP_P4_158481_225149 | NW_004516558.1 | Scaffold1324 | 225149                  | CC                              | TT              | 1947003685               |
| SNP_P4_158482_225724 | NW_004516558.1 | Scaffold1324 | 225724                  | TT                              | AA              | 1947003687               |
| SNP_P4_158483_225726 | NW_004516558.1 | Scaffold1324 | 225726                  | GG                              | TT              | 1947003689               |
| SNP_P4_158484_225761 | NW_004516558.1 | Scaffold1324 | 225761                  | CC                              | TT              | 1947003691               |
| SNP_P4_158485_225774 | NW_004516558.1 | Scaffold1324 | 225774                  | TT                              | CC              | 1947003693               |
| SNP_P4_158486_225896 | NW_004516558.1 | Scaffold1324 | 225896                  | GG                              | AA              | 1947003695               |
| SNP_P4_158487_226001 | NW_004516558.1 | Scaffold1324 | 226001                  | TT                              | GG              | 1947003697               |
| SNP_P4_158488_226076 | NW_004516558.1 | Scaffold1324 | 226076                  | CC                              | TT              | 1947003699               |
| SNP_P4_158489_226086 | NW_004516558.1 | Scaffold1324 | 226086                  | AA                              | TT              | 1947003701               |
| SNP_P4_158490_226172 | NW_004516558.1 | Scaffold1324 | 226172                  | TT                              | GG              | 1947003703               |
| SNP_P4_158491_226185 | NW_004516558.1 | Scaffold1324 | 226185                  | TT                              | CC              | 1947003705               |
| SNP_P4_158492_226286 | NW_004516558.1 | Scaffold1324 | 226286                  | AA                              | TT              | 1947003707               |
| SNP_P4_158493_226409 | NW_004516558.1 | Scaffold1324 | 226409                  | AA                              | CC              | 1947003709               |
| SNP_P4_158494_226444 | NW_004516558.1 | Scaffold1324 | 226444                  | GG                              | AA              | 1947003711               |
| SNP_P4_158495_226660 | NW_004516558.1 | Scaffold1324 | 226660                  | CC                              | AA              | 1947003713               |
| SNP_P4_158496_226975 | NW_004516558.1 | Scaffold1324 | 226975                  | AA                              | GG              | 1947003715               |
| SNP_P4_158497_226980 | NW_004516558.1 | Scaffold1324 | 226980                  | AA                              | GG              | 1947003717               |
| SNP_P4_158498_227036 | NW_004516558.1 | Scaffold1324 | 227036                  | GG                              | AA              | 1947003719               |
| SNP_P4_158499_227049 | NW_004516558.1 | Scaffold1324 | 227049                  | TT                              | CC              | 1947003721               |
| SNP_P4_158500_227067 | NW_004516558.1 | Scaffold1324 | 227067                  | GG                              | AA              | 1947003723               |
| SNP_P4_158501_227312 | NW_004516558.1 | Scaffold1324 | 227312                  | AA                              | GG              | 1947003725               |
| SNP_P4_158503_227409 | NW_004516558.1 | Scaffold1324 | 227409                  | TT                              | GG              | 1947003727               |
| SNP_P4_158504_227425 | NW_004516558.1 | Scaffold1324 | 227425                  | AA                              | CC              | 1947003729               |
| SNP_P4_158505_227535 | NW_004516558.1 | Scaffold1324 | 227535                  | TT                              | AA              | 1947003731               |
| SNP_P4_158506_227536 | NW_004516558.1 | Scaffold1324 | 227536                  | GG                              | TT              | 1947003733               |
| SNP_P4_158507_227664 | NW_004516558.1 | Scaffold1324 | 227664                  | GG                              | AA              | 1947003735               |
| SNP_P4_158508_227843 | NW_004516558.1 | Scaffold1324 | 227843                  | TT                              | CC              | 1947003737               |
| SNP_P4_158509_227893 | NW_004516558.1 | Scaffold1324 | 227893                  | CC                              | TT              | 1947003739               |
| SNP_P4_158510_227964 | NW_004516558.1 | Scaffold1324 | 227964                  | GG                              | AA              | 1947003741               |
| SNP_P4_158511_227978 | NW_004516558.1 | Scaffold1324 | 227978                  | TT                              | AA              | 1947003743               |
| SNP_P4_158512_228159 | NW_004516558.1 | Scaffold1324 | 228159                  | AA                              | CC              | 1947003745               |
| SNP_P4_158513_228328 | NW_004516558.1 | Scaffold1324 | 228328                  | TT                              | GG              | 1947003747               |
| SNP_P4_158514_228459 | NW_004516558.1 | Scaffold1324 | 228459                  | AA                              | TT              | 1947003749               |
| SNP_P4_158515_228536 | NW_004516558.1 | Scaffold1324 | 228536                  | CC                              | AA              | 1947003750               |
| SNP_P4_158516_228548 | NW_004516558.1 | Scaffold1324 | 228548                  | AA                              | TT              | 1947003752               |
| SNP_P4_158517_228679 | NW_004516558.1 | Scaffold1324 | 228679                  | AA                              | GG              | 1947003754               |
| SNP_P4_158518_228793 | NW_004516558.1 | Scaffold1324 | 228793                  | GG                              | AA              | 1947003756               |
| SNP_P4_158519_228868 | NW_004516558.1 | Scaffold1324 | 228868                  | AA                              | GG              | 1947003758               |
| SNP_P4_158520_232002 | NW_004516558.1 | Scaffold1324 | 232002                  | CC                              | TT              | 1947003760               |



| SNPs IDs             | Chromosome IDs | Chromosomes  | Physical positions (bp) | CDC Frontier (Reference genome) | (ILWC46 & LPNB) | NCBI SNPdb Accession IDs |
|----------------------|----------------|--------------|-------------------------|---------------------------------|-----------------|--------------------------|
| SNP_P4_158521_232027 | NW_004516558.1 | Scaffold1324 | 232027                  | AA                              | CC              | 1947003762               |
| SNP_P4_158522_234679 | NW_004516558.1 | Scaffold1324 | 234679                  | GG                              | AA              | 1947003765               |
| SNP_P4_158523_234693 | NW_004516558.1 | Scaffold1324 | 234693                  | GG                              | AA              | 1947003767               |
| SNP_P4_158524_234716 | NW_004516558.1 | Scaffold1324 | 234716                  | TT                              | AA              | 1947003769               |
| SNP_P4_158525_234817 | NW_004516558.1 | Scaffold1324 | 234817                  | CC                              | TT              | 1947003771               |
| SNP_P4_158526_234825 | NW_004516558.1 | Scaffold1324 | 234825                  | AA                              | GG              | 1947003773               |
| SNP_P4_158527_235040 | NW_004516558.1 | Scaffold1324 | 235040                  | TT                              | CC              | 1947003775               |
| SNP_P4_158529_235263 | NW_004516558.1 | Scaffold1324 | 235263                  | CC                              | TT              | 1947003777               |
| SNP_P4_158530_235264 | NW_004516558.1 | Scaffold1324 | 235264                  | AA                              | TT              | 1947003779               |
| SNP_P4_158531_235302 | NW_004516558.1 | Scaffold1324 | 235302                  | CC                              | TT              | 1947003781               |
| SNP_P4_158532_235374 | NW_004516558.1 | Scaffold1324 | 235374                  | TT                              | AA              | 1947003783               |
| SNP_P4_158533_235454 | NW_004516558.1 | Scaffold1324 | 235454                  | TT                              | GG              | 1947003785               |
| SNP_P4_158534_235619 | NW_004516558.1 | Scaffold1324 | 235619                  | AA                              | GG              | 1947003787               |
| SNP_P4_158535_235741 | NW_004516558.1 | Scaffold1324 | 235741                  | TT                              | CC              | 1947003789               |
| SNP_P4_158536_235778 | NW_004516558.1 | Scaffold1324 | 235778                  | CC                              | TT              | 1947003791               |
| SNP_P4_158537_236004 | NW_004516558.1 | Scaffold1324 | 236004                  | GG                              | AA              | 1947003793               |
| SNP_P4_158538_236020 | NW_004516558.1 | Scaffold1324 | 236020                  | AA                              | GG              | 1947003795               |
| SNP_P4_158539_236072 | NW_004516558.1 | Scaffold1324 | 236072                  | AA                              | CC              | 1947003797               |
| SNP_P4_158540_236153 | NW_004516558.1 | Scaffold1324 | 236153                  | AA                              | CC              | 1947003799               |
| SNP_P4_158541_236212 | NW_004516558.1 | Scaffold1324 | 236212                  | GG                              | AA              | 1947003801               |
| SNP_P4_158542_236250 | NW_004516558.1 | Scaffold1324 | 236250                  | AA                              | GG              | 1947003803               |
| SNP_P4_158543_236261 | NW_004516558.1 | Scaffold1324 | 236261                  | GG                              | AA              | 1947003805               |
| SNP_P4_158544_236280 | NW_004516558.1 | Scaffold1324 | 236280                  | TT                              | GG              | 1947003807               |
| SNP_P4_158545_236414 | NW_004516558.1 | Scaffold1324 | 236414                  | GG                              | AA              | 1947003809               |
| SNP_P4_158546_236473 | NW_004516558.1 | Scaffold1324 | 236473                  | GG                              | AA              | 1947003811               |
| SNP_P4_158547_236495 | NW_004516558.1 | Scaffold1324 | 236495                  | AA                              | CC              | 1947003813               |
| SNP_P4_158548_236516 | NW_004516558.1 | Scaffold1324 | 236516                  | CC                              | TT              | 1947003815               |
| SNP_P4_158549_236540 | NW_004516558.1 | Scaffold1324 | 236540                  | AA                              | GG              | 1947003817               |
| SNP_P4_158551_236759 | NW_004516558.1 | Scaffold1324 | 236759                  | AA                              | GG              | 1947003819               |
| SNP_P4_158552_236853 | NW_004516558.1 | Scaffold1324 | 236853                  | GG                              | CC              | 1947003821               |
| SNP_P4_158553_236916 | NW_004516558.1 | Scaffold1324 | 236916                  | TT                              | CC              | 1947003823               |
| SNP_P4_158554_237069 | NW_004516558.1 | Scaffold1324 | 237069                  | AA                              | CC              | 1947003825               |
| SNP_P4_158555_237071 | NW_004516558.1 | Scaffold1324 | 237071                  | CC                              | TT              | 1947003827               |
| SNP_P4_158556_237097 | NW_004516558.1 | Scaffold1324 | 237097                  | AA                              | GG              | 1947003829               |
| SNP_P4_158557_237098 | NW_004516558.1 | Scaffold1324 | 237098                  | TT                              | CC              | 1947003831               |
| SNP_P4_158558_237112 | NW_004516558.1 | Scaffold1324 | 237112                  | TT                              | CC              | 1947003833               |
| SNP_P4_158559_237114 | NW_004516558.1 | Scaffold1324 | 237114                  | GG                              | TT              | 1947003835               |
| SNP_P4_158560_237189 | NW_004516558.1 | Scaffold1324 | 237189                  | GG                              | AA              | 1947003837               |
| SNP_P4_158561_237202 | NW_004516558.1 | Scaffold1324 | 237202                  | GG                              | AA              | 1947003839               |
| SNP_P4_158562_237300 | NW_004516558.1 | Scaffold1324 | 237300                  | AA                              | GG              | 1947003841               |
| SNP_P4_158563_237379 | NW_004516558.1 | Scaffold1324 | 237379                  | TT                              | CC              | 1947003843               |
| SNP_P4_158564_237502 | NW_004516558.1 | Scaffold1324 | 237502                  | CC                              | TT              | 1947003845               |

| SNPs IDs             | Chromosome IDs | Chromosomes  | Physical positions (bp) | CDC Frontier (Reference genome) | (ILWC46 & LPNB) | NCBI SNPdb Accession IDs |
|----------------------|----------------|--------------|-------------------------|---------------------------------|-----------------|--------------------------|
| SNP_P4_158565_237522 | NW_004516558.1 | Scaffold1324 | 237522                  | GG                              | CC              | 1947003847               |
| SNP_P4_158566_237539 | NW_004516558.1 | Scaffold1324 | 237539                  | TT                              | CC              | 1947003849               |
| SNP_P4_158567_237904 | NW_004516558.1 | Scaffold1324 | 237904                  | AA                              | GG              | 1947003851               |
| SNP_P4_158568_237932 | NW_004516558.1 | Scaffold1324 | 237932                  | CC                              | TT              | 1947003853               |
| SNP_P4_158569_237935 | NW_004516558.1 | Scaffold1324 | 237935                  | TT                              | CC              | 1947003855               |
| SNP_P4_158570_238070 | NW_004516558.1 | Scaffold1324 | 238070                  | CC                              | TT              | 1947003857               |
| SNP_P4_158573_238507 | NW_004516558.1 | Scaffold1324 | 238507                  | TT                              | CC              | 1947003859               |
| SNP_P4_158574_238532 | NW_004516558.1 | Scaffold1324 | 238532                  | AA                              | GG              | 1947003861               |
| SNP_P4_158575_238745 | NW_004516558.1 | Scaffold1324 | 238745                  | CC                              | TT              | 1947003863               |
| SNP_P4_158576_238805 | NW_004516558.1 | Scaffold1324 | 238805                  | CC                              | TT              | 1947003865               |
| SNP_P4_158577_238872 | NW_004516558.1 | Scaffold1324 | 238872                  | GG                              | CC              | 1947003867               |
| SNP_P4_158578_238936 | NW_004516558.1 | Scaffold1324 | 238936                  | AA                              | GG              | 1947003869               |
| SNP_P4_158579_238966 | NW_004516558.1 | Scaffold1324 | 238966                  | TT                              | CC              | 1947003871               |
| SNP_P4_158580_238992 | NW_004516558.1 | Scaffold1324 | 238992                  | TT                              | CC              | 1947003873               |
| SNP_P4_158581_239125 | NW_004516558.1 | Scaffold1324 | 239125                  | GG                              | AA              | 1947003875               |
| SNP_P4_158582_239133 | NW_004516558.1 | Scaffold1324 | 239133                  | TT                              | CC              | 1947003877               |
| SNP_P4_158583_239134 | NW_004516558.1 | Scaffold1324 | 239134                  | GG                              | AA              | 1947003879               |
| SNP_P4_158584_239184 | NW_004516558.1 | Scaffold1324 | 239184                  | GG                              | AA              | 1947003881               |
| SNP_P4_158585_239336 | NW_004516558.1 | Scaffold1324 | 239336                  | GG                              | TT              | 1947003883               |
| SNP_P4_158586_239604 | NW_004516558.1 | Scaffold1324 | 239604                  | AA                              | GG              | 1947003885               |
| SNP_P4_158587_239790 | NW_004516558.1 | Scaffold1324 | 239790                  | GG                              | AA              | 1947003887               |
| SNP_P4_158588_239791 | NW_004516558.1 | Scaffold1324 | 239791                  | TT                              | CC              | 1947003889               |
| SNP_P4_158589_240447 | NW_004516558.1 | Scaffold1324 | 240447                  | GG                              | AA              | 1947003891               |
| SNP_P4_158590_240455 | NW_004516558.1 | Scaffold1324 | 240455                  | TT                              | CC              | 1947003893               |
| SNP_P4_158591_240508 | NW_004516558.1 | Scaffold1324 | 240508                  | AA                              | GG              | 1947003895               |
| SNP_P4_158592_240530 | NW_004516558.1 | Scaffold1324 | 240530                  | CC                              | TT              | 1947003897               |
| SNP_P4_158593_240569 | NW_004516558.1 | Scaffold1324 | 240569                  | TT                              | CC              | 1947003899               |
| SNP_P4_158594_240723 | NW_004516558.1 | Scaffold1324 | 240723                  | CC                              | AA              | 1947003901               |
| SNP_P4_158595_240761 | NW_004516558.1 | Scaffold1324 | 240761                  | TT                              | CC              | 1947003903               |
| SNP_P4_158596_240773 | NW_004516558.1 | Scaffold1324 | 240773                  | TT                              | AA              | 1947003904               |
| SNP_P4_158597_241003 | NW_004516558.1 | Scaffold1324 | 241003                  | TT                              | CC              | 1947003906               |
| SNP_P4_158598_241021 | NW_004516558.1 | Scaffold1324 | 241021                  | AA                              | GG              | 1947003908               |
| SNP_P4_158599_241041 | NW_004516558.1 | Scaffold1324 | 241041                  | TT                              | CC              | 1947003910               |
| SNP_P4_158600_241203 | NW_004516558.1 | Scaffold1324 | 241203                  | TT                              | CC              | 1947003912               |
| SNP_P4_158601_241206 | NW_004516558.1 | Scaffold1324 | 241206                  | TT                              | GG              | 1947003914               |
| SNP_P4_158602_241251 | NW_004516558.1 | Scaffold1324 | 241251                  | GG                              | TT              | 1947003916               |
| SNP_P4_158603_241328 | NW_004516558.1 | Scaffold1324 | 241328                  | TT                              | CC              | 1947003918               |
| SNP_P4_158604_241353 | NW_004516558.1 | Scaffold1324 | 241353                  | AA                              | TT              | 1947003920               |
| SNP_P4_158605_241523 | NW_004516558.1 | Scaffold1324 | 241523                  | TT                              | CC              | 1947003922               |
| SNP_P4_158606_241558 | NW_004516558.1 | Scaffold1324 | 241558                  | CC                              | TT              | 1947003924               |
| SNP_P4_158607_241569 | NW_004516558.1 | Scaffold1324 | 241569                  | TT                              | CC              | 1947003926               |
| SNP_P4_158608_241582 | NW_004516558.1 | Scaffold1324 | 241582                  | GG                              | AA              | 1947003927               |

| SNPs IDs             | Chromosome IDs | Chromosomes  | Physical positions (bp) | CDC Frontier (Reference genome) | (ILWC46 & LPNB) | NCBI SNPdb Accession IDs |
|----------------------|----------------|--------------|-------------------------|---------------------------------|-----------------|--------------------------|
| SNP_P4_158609_241729 | NW_004516558.1 | Scaffold1324 | 241729                  | CC                              | TT              | 1947003929               |
| SNP_P4_158610_241809 | NW_004516558.1 | Scaffold1324 | 241809                  | AA                              | CC              | 1947003931               |
| SNP_P4_158611_241819 | NW_004516558.1 | Scaffold1324 | 241819                  | TT                              | GG              | 1947003933               |
| SNP_P4_158612_241847 | NW_004516558.1 | Scaffold1324 | 241847                  | CC                              | TT              | 1947003935               |
| SNP_P4_158613_241850 | NW_004516558.1 | Scaffold1324 | 241850                  | TT                              | CC              | 1947003937               |
| SNP_P4_158614_241884 | NW_004516558.1 | Scaffold1324 | 241884                  | GG                              | CC              | 1947003939               |
| SNP_P4_158616_245660 | NW_004516558.1 | Scaffold1324 | 245660                  | AA                              | GG              | 1947003941               |
| SNP_P4_158617_245669 | NW_004516558.1 | Scaffold1324 | 245669                  | GG                              | AA              | 1947003943               |
| SNP_P4_158618_247901 | NW_004516558.1 | Scaffold1324 | 247901                  | CC                              | TT              | 1947003945               |
| SNP_P4_158619_248095 | NW_004516558.1 | Scaffold1324 | 248095                  | TT                              | AA              | 1947003946               |
| SNP_P4_158620_248344 | NW_004516558.1 | Scaffold1324 | 248344                  | CC                              | TT              | 1947003948               |
| SNP_P4_158622_252751 | NW_004516558.1 | Scaffold1324 | 252751                  | CC                              | TT              | 1947003950               |
| SNP_P4_158623_252775 | NW_004516558.1 | Scaffold1324 | 252775                  | AA                              | GG              | 1947003952               |
| SNP_P4_158625_252843 | NW_004516558.1 | Scaffold1324 | 252843                  | AA                              | CC              | 1947003954               |
| SNP_P4_158626_253082 | NW_004516558.1 | Scaffold1324 | 253082                  | TT                              | CC              | 1947003956               |
| SNP_P4_158627_253362 | NW_004516558.1 | Scaffold1324 | 253362                  | TT                              | GG              | 1947003958               |
| SNP_P4_158628_253375 | NW_004516558.1 | Scaffold1324 | 253375                  | CC                              | TT              | 1947003960               |
| SNP_P4_158629_253379 | NW_004516558.1 | Scaffold1324 | 253379                  | GG                              | TT              | 1947003962               |
| SNP_P4_158630_253520 | NW_004516558.1 | Scaffold1324 | 253520                  | CC                              | AA              | 1947003963               |
| SNP_P4_158631_253608 | NW_004516558.1 | Scaffold1324 | 253608                  | AA                              | GG              | 1947003965               |
| SNP_P4_158632_253611 | NW_004516558.1 | Scaffold1324 | 253611                  | CC                              | AA              | 1947003967               |
| SNP_P4_158634_253796 | NW_004516558.1 | Scaffold1324 | 253796                  | AA                              | TT              | 1947003969               |
| SNP_P4_158635_253985 | NW_004516558.1 | Scaffold1324 | 253985                  | TT                              | GG              | 1947003971               |
| SNP_P4_158636_254034 | NW_004516558.1 | Scaffold1324 | 254034                  | TT                              | CC              | 1947003973               |
| SNP_P4_158637_254050 | NW_004516558.1 | Scaffold1324 | 254050                  | CC                              | AA              | 1947003975               |
| SNP_P4_158638_254052 | NW_004516558.1 | Scaffold1324 | 254052                  | AA                              | TT              | 1947003977               |
| SNP_P4_158639_254078 | NW_004516558.1 | Scaffold1324 | 254078                  | AA                              | TT              | 1947003979               |
| SNP_P4_158640_254079 | NW_004516558.1 | Scaffold1324 | 254079                  | CC                              | TT              | 1947003981               |
| SNP_P4_158641_254248 | NW_004516558.1 | Scaffold1324 | 254248                  | GG                              | AA              | 1947003982               |
| SNP_P4_158642_254261 | NW_004516558.1 | Scaffold1324 | 254261                  | CC                              | TT              | 1947003984               |
| SNP_P4_158643_254945 | NW_004516558.1 | Scaffold1324 | 254945                  | AA                              | GG              | 1947003986               |
| SNP_P4_158644_255028 | NW_004516558.1 | Scaffold1324 | 255028                  | CC                              | AA              | 1947003988               |
| SNP_P4_158645_255090 | NW_004516558.1 | Scaffold1324 | 255090                  | AA                              | TT              | 1947003990               |
| SNP_P4_158646_255279 | NW_004516558.1 | Scaffold1324 | 255279                  | GG                              | TT              | 1947003992               |
| SNP_P4_158647_255579 | NW_004516558.1 | Scaffold1324 | 255579                  | GG                              | AA              | 1947003994               |
| SNP_P4_158648_255580 | NW_004516558.1 | Scaffold1324 | 255580                  | GG                              | TT              | 1947003995               |
| SNP_P4_158649_255591 | NW_004516558.1 | Scaffold1324 | 255591                  | CC                              | GG              | 1947003997               |
| SNP_P4_158650_255595 | NW_004516558.1 | Scaffold1324 | 255595                  | AA                              | TT              | 1947003999               |
| SNP_P4_158652_255687 | NW_004516558.1 | Scaffold1324 | 255687                  | AA                              | GG              | 1947004001               |
| SNP_P4_158653_255734 | NW_004516558.1 | Scaffold1324 | 255734                  | AA                              | GG              | 1947004003               |
| SNP_P4_158654_255774 | NW_004516558.1 | Scaffold1324 | 255774                  | CC                              | TT              | 1947004005               |
| SNP_P4_158655_255787 | NW_004516558.1 | Scaffold1324 | 255787                  | GG                              | TT              | 1947004007               |

| SNPs IDs             | Chromosome IDs | Chromosomes  | Physical positions (bp) | CDC Frontier (Reference genome) | (ILWC46 & LPNB) | NCBI SNPdb Accession IDs |
|----------------------|----------------|--------------|-------------------------|---------------------------------|-----------------|--------------------------|
| SNP_P4_158657_255878 | NW_004516558.1 | Scaffold1324 | 255878                  | GG                              | TT              | 1947004009               |
| SNP_P4_158659_256014 | NW_004516558.1 | Scaffold1324 | 256014                  | AA                              | GG              | 1947004011               |
| SNP_P4_158660_256050 | NW_004516558.1 | Scaffold1324 | 256050                  | TT                              | CC              | 1947004013               |
| SNP_P4_158661_256109 | NW_004516558.1 | Scaffold1324 | 256109                  | TT                              | CC              | 1947004015               |
| SNP_P4_158662_256117 | NW_004516558.1 | Scaffold1324 | 256117                  | TT                              | CC              | 1947004017               |
| SNP_P4_158663_256158 | NW_004516558.1 | Scaffold1324 | 256158                  | AA                              | GG              | 1947004019               |
| SNP_P4_158664_256209 | NW_004516558.1 | Scaffold1324 | 256209                  | GG                              | CC              | 1947004021               |
| SNP_P4_158665_256211 | NW_004516558.1 | Scaffold1324 | 256211                  | AA                              | TT              | 1947004023               |
| SNP_P4_158666_256277 | NW_004516558.1 | Scaffold1324 | 256277                  | TT                              | GG              | 1947004024               |
| SNP_P4_158668_256352 | NW_004516558.1 | Scaffold1324 | 256352                  | AA                              | GG              | 1947004026               |
| SNP_P4_158669_256403 | NW_004516558.1 | Scaffold1324 | 256403                  | AA                              | TT              | 1947004028               |
| SNP_P4_158670_256425 | NW_004516558.1 | Scaffold1324 | 256425                  | GG                              | AA              | 1947004030               |
| SNP_P4_158671_256503 | NW_004516558.1 | Scaffold1324 | 256503                  | AA                              | GG              | 1947004032               |
| SNP_P4_158672_256610 | NW_004516558.1 | Scaffold1324 | 256610                  | TT                              | CC              | 1947004034               |
| SNP_P4_158673_262791 | NW_004516558.1 | Scaffold1324 | 262791                  | AA                              | TT              | 1947004036               |
| SNP_P4_158674_265912 | NW_004516558.1 | Scaffold1324 | 265912                  | TT                              | CC              | 1947004038               |
| SNP_P4_158675_266088 | NW_004516558.1 | Scaffold1324 | 266088                  | CC                              | TT              | 1947004040               |
| SNP_P4_158677_266150 | NW_004516558.1 | Scaffold1324 | 266150                  | AA                              | CC              | 1947004042               |
| SNP_P4_158678_266152 | NW_004516558.1 | Scaffold1324 | 266152                  | CC                              | TT              | 1947004044               |
| SNP_P4_158679_266169 | NW_004516558.1 | Scaffold1324 | 266169                  | AA                              | GG              | 1947004046               |
| SNP_P4_158680_266309 | NW_004516558.1 | Scaffold1324 | 266309                  | TT                              | AA              | 1947004048               |
| SNP_P4_158681_266386 | NW_004516558.1 | Scaffold1324 | 266386                  | GG                              | TT              | 1947004050               |
| SNP_P4_158682_266658 | NW_004516558.1 | Scaffold1324 | 266658                  | CC                              | TT              | 1947004052               |
| SNP_P4_158684_266786 | NW_004516558.1 | Scaffold1324 | 266786                  | TT                              | CC              | 1947004054               |
| SNP_P4_158685_266787 | NW_004516558.1 | Scaffold1324 | 266787                  | GG                              | AA              | 1947004056               |
| SNP_P4_158687_266850 | NW_004516558.1 | Scaffold1324 | 266850                  | TT                              | GG              | 1947004058               |
| SNP_P4_158688_266875 | NW_004516558.1 | Scaffold1324 | 266875                  | AA                              | GG              | 1947004060               |
| SNP_P4_158689_266930 | NW_004516558.1 | Scaffold1324 | 266930                  | TT                              | CC              | 1947004062               |
| SNP_P4_158690_267002 | NW_004516558.1 | Scaffold1324 | 267002                  | GG                              | CC              | 1947004064               |
| SNP_P4_158691_267023 | NW_004516558.1 | Scaffold1324 | 267023                  | CC                              | TT              | 1947004065               |
| SNP_P4_158692_267072 | NW_004516558.1 | Scaffold1324 | 267072                  | TT                              | CC              | 1947004066               |
| SNP_P4_158693_267182 | NW_004516558.1 | Scaffold1324 | 267182                  | AA                              | TT              | 1947004067               |
| SNP_P4_158694_267692 | NW_004516558.1 | Scaffold1324 | 267692                  | AA                              | CC              | 1947004068               |
| SNP_P4_158695_267695 | NW_004516558.1 | Scaffold1324 | 267695                  | TT                              | CC              | 1947004070               |
| SNP_P4_158696_267799 | NW_004516558.1 | Scaffold1324 | 267799                  | AA                              | GG              | 1947004072               |
| SNP_P4_158697_267814 | NW_004516558.1 | Scaffold1324 | 267814                  | AA                              | GG              | 1947004074               |
| SNP_P4_158698_267864 | NW_004516558.1 | Scaffold1324 | 267864                  | TT                              | CC              | 1947004076               |
| SNP_P4_158699_267874 | NW_004516558.1 | Scaffold1324 | 267874                  | GG                              | AA              | 1947004078               |
| SNP_P4_158700_267967 | NW_004516558.1 | Scaffold1324 | 267967                  | GG                              | AA              | 1947004080               |
| SNP_P4_158702_268245 | NW_004516558.1 | Scaffold1324 | 268245                  | TT                              | AA              | 1947004082               |
| SNP_P4_158703_268324 | NW_004516558.1 | Scaffold1324 | 268324                  | GG                              | TT              | 1947004084               |
| SNP_P4_158705_268674 | NW_004516558.1 | Scaffold1324 | 268674                  | CC                              | TT              | 1947004086               |

| SNPs IDs             | Chromosome IDs | Chromosomes  | Physical positions (bp) | CDC Frontier (Reference genome) | (ILWC46 & LPNB) | NCBI SNPdb Accession IDs |
|----------------------|----------------|--------------|-------------------------|---------------------------------|-----------------|--------------------------|
| SNP_P4_158706_268786 | NW_004516558.1 | Scaffold1324 | 268786                  | GG                              | AA              | 1947004088               |
| SNP_P4_158707_268868 | NW_004516558.1 | Scaffold1324 | 268868                  | AA                              | GG              | 1947004090               |
| SNP_P4_158708_268904 | NW_004516558.1 | Scaffold1324 | 268904                  | TT                              | CC              | 1947004092               |
| SNP_P4_158709_268926 | NW_004516558.1 | Scaffold1324 | 268926                  | TT                              | CC              | 1947004094               |
| SNP_P4_158710_268984 | NW_004516558.1 | Scaffold1324 | 268984                  | GG                              | TT              | 1947004096               |
| SNP_P4_158711_269083 | NW_004516558.1 | Scaffold1324 | 269083                  | AA                              | GG              | 1947004098               |
| SNP_P4_158712_269150 | NW_004516558.1 | Scaffold1324 | 269150                  | CC                              | TT              | 1947004100               |
| SNP_P4_158713_269325 | NW_004516558.1 | Scaffold1324 | 269325                  | GG                              | AA              | 1947004102               |
| SNP_P4_158714_269469 | NW_004516558.1 | Scaffold1324 | 269469                  | CC                              | GG              | 1947004104               |
| SNP_P4_158715_269999 | NW_004516558.1 | Scaffold1324 | 269999                  | CC                              | TT              | 1947004106               |
| SNP_P4_158716_270055 | NW_004516558.1 | Scaffold1324 | 270055                  | TT                              | AA              | 1947004108               |
| SNP_P4_158717_270059 | NW_004516558.1 | Scaffold1324 | 270059                  | TT                              | GG              | 1947004110               |
| SNP_P4_158718_270140 | NW_004516558.1 | Scaffold1324 | 270140                  | CC                              | GG              | 1947004112               |
| SNP_P4_158719_270172 | NW_004516558.1 | Scaffold1324 | 270172                  | AA                              | GG              | 1947004114               |
| SNP_P4_158720_270197 | NW_004516558.1 | Scaffold1324 | 270197                  | AA                              | TT              | 1947004116               |
| SNP_P4_158721_270316 | NW_004516558.1 | Scaffold1324 | 270316                  | GG                              | AA              | 1947004118               |
| SNP_P4_158722_270334 | NW_004516558.1 | Scaffold1324 | 270334                  | CC                              | TT              | 1947004119               |
| SNP_P4_158723_270393 | NW_004516558.1 | Scaffold1324 | 270393                  | GG                              | AA              | 1947004120               |
| SNP_P4_158724_270398 | NW_004516558.1 | Scaffold1324 | 270398                  | CC                              | AA              | 1947004121               |
| SNP_P4_158725_270429 | NW_004516558.1 | Scaffold1324 | 270429                  | CC                              | TT              | 1947004122               |
| SNP_P4_158726_270448 | NW_004516558.1 | Scaffold1324 | 270448                  | TT                              | GG              | 1947004123               |
| SNP_P4_158727_270488 | NW_004516558.1 | Scaffold1324 | 270488                  | TT                              | CC              | 1947004124               |
| SNP_P4_158728_270560 | NW_004516558.1 | Scaffold1324 | 270560                  | TT                              | AA              | 1947004125               |
| SNP_P4_158729_270565 | NW_004516558.1 | Scaffold1324 | 270565                  | AA                              | GG              | 1947004126               |
| SNP_P4_158730_270627 | NW_004516558.1 | Scaffold1324 | 270627                  | CC                              | TT              | 1947004127               |
| SNP_P4_158731_270657 | NW_004516558.1 | Scaffold1324 | 270657                  | TT                              | CC              | 1947004128               |
| SNP_P4_158732_270664 | NW_004516558.1 | Scaffold1324 | 270664                  | GG                              | AA              | 1947004129               |
| SNP_P4_158733_270771 | NW_004516558.1 | Scaffold1324 | 270771                  | TT                              | AA              | 1947004130               |
| SNP_P4_158734_270772 | NW_004516558.1 | Scaffold1324 | 270772                  | GG                              | CC              | 1947004131               |
| SNP_P4_158735_270778 | NW_004516558.1 | Scaffold1324 | 270778                  | TT                              | CC              | 1947004132               |
| SNP_P4_158737_270896 | NW_004516558.1 | Scaffold1324 | 270896                  | TT                              | CC              | 1947004133               |
| SNP_P4_158738_271002 | NW_004516558.1 | Scaffold1324 | 271002                  | CC                              | TT              | 1947004134               |
| SNP_P4_158739_271004 | NW_004516558.1 | Scaffold1324 | 271004                  | TT                              | CC              | 1947004135               |
| SNP_P4_158740_271281 | NW_004516558.1 | Scaffold1324 | 271281                  | AA                              | GG              | 1947004136               |
| SNP_P4_158741_271299 | NW_004516558.1 | Scaffold1324 | 271299                  | TT                              | GG              | 1947004137               |
| SNP_P4_158742_271448 | NW_004516558.1 | Scaffold1324 | 271448                  | AA                              | TT              | 1947004138               |
| SNP_P4_158743_271450 | NW_004516558.1 | Scaffold1324 | 271450                  | CC                              | TT              | 1947004139               |
| SNP_P4_158744_271496 | NW_004516558.1 | Scaffold1324 | 271496                  | CC                              | GG              | 1947004140               |
| SNP_P4_158745_271521 | NW_004516558.1 | Scaffold1324 | 271521                  | GG                              | TT              | 1947004141               |
| SNP_P4_158746_271584 | NW_004516558.1 | Scaffold1324 | 271584                  | AA                              | GG              | 1947004142               |
| SNP_P4_158747_271730 | NW_004516558.1 | Scaffold1324 | 271730                  | TT                              | CC              | 1947004144               |
| SNP_P4_158748_271787 | NW_004516558.1 | Scaffold1324 | 271787                  | GG                              | AA              | 1947004146               |

| SNPs IDs             | Chromosome IDs | Chromosomes  | Physical positions (bp) | CDC Frontier (Reference genome) | (ILWC46 & LPNB) | NCBI SNPdb Accession IDs |
|----------------------|----------------|--------------|-------------------------|---------------------------------|-----------------|--------------------------|
| SNP_P4_158749_271820 | NW_004516558.1 | Scaffold1324 | 271820                  | CC                              | TT              | 1947004147               |
| SNP_P4_158752_272168 | NW_004516558.1 | Scaffold1324 | 272168                  | CC                              | TT              | 1947004149               |
| SNP_P4_158754_272246 | NW_004516558.1 | Scaffold1324 | 272246                  | GG                              | AA              | 1947004151               |
| SNP_P4_158755_272252 | NW_004516558.1 | Scaffold1324 | 272252                  | TT                              | CC              | 1947004153               |
| SNP_P4_158756_272292 | NW_004516558.1 | Scaffold1324 | 272292                  | TT                              | CC              | 1947004155               |
| SNP_P4_158757_272326 | NW_004516558.1 | Scaffold1324 | 272326                  | AA                              | CC              | 1947004157               |
| SNP_P4_158758_272332 | NW_004516558.1 | Scaffold1324 | 272332                  | TT                              | CC              | 1947004159               |
| SNP_P4_158759_272392 | NW_004516558.1 | Scaffold1324 | 272392                  | CC                              | TT              | 1947004161               |
| SNP_P4_158760_272447 | NW_004516558.1 | Scaffold1324 | 272447                  | CC                              | AA              | 1947004163               |
| SNP_P4_158761_272463 | NW_004516558.1 | Scaffold1324 | 272463                  | GG                              | AA              | 1947004165               |
| SNP_P4_158763_272669 | NW_004516558.1 | Scaffold1324 | 272669                  | AA                              | TT              | 1947004167               |
| SNP_P4_158764_272856 | NW_004516558.1 | Scaffold1324 | 272856                  | TT                              | CC              | 1947004168               |
| SNP_P4_158765_272878 | NW_004516558.1 | Scaffold1324 | 272878                  | AA                              | CC              | 1947004170               |
| SNP_P4_158766_272879 | NW_004516558.1 | Scaffold1324 | 272879                  | AA                              | CC              | 1947004172               |
| SNP_P4_158767_272943 | NW_004516558.1 | Scaffold1324 | 272943                  | CC                              | TT              | 1947004174               |
| SNP_P4_158768_272988 | NW_004516558.1 | Scaffold1324 | 272988                  | GG                              | AA              | 1947004176               |
| SNP_P4_158769_272993 | NW_004516558.1 | Scaffold1324 | 272993                  | CC                              | AA              | 1947004178               |
| SNP_P4_158770_273017 | NW_004516558.1 | Scaffold1324 | 273017                  | CC                              | AA              | 1947004180               |
| SNP_P4_158771_273045 | NW_004516558.1 | Scaffold1324 | 273045                  | AA                              | CC              | 1947004182               |
| SNP_P4_158772_273567 | NW_004516558.1 | Scaffold1324 | 273567                  | AA                              | GG              | 1947004184               |
| SNP_P4_158773_273584 | NW_004516558.1 | Scaffold1324 | 273584                  | AA                              | TT              | 1947004186               |
| SNP_P4_158774_273586 | NW_004516558.1 | Scaffold1324 | 273586                  | AA                              | TT              | 1947004188               |
| SNP_P4_158775_273600 | NW_004516558.1 | Scaffold1324 | 273600                  | AA                              | CC              | 1947004190               |
| SNP_P4_158776_273608 | NW_004516558.1 | Scaffold1324 | 273608                  | AA                              | GG              | 1947004192               |
| SNP_P4_158777_273650 | NW_004516558.1 | Scaffold1324 | 273650                  | GG                              | CC              | 1947004194               |
| SNP_P4_158778_273763 | NW_004516558.1 | Scaffold1324 | 273763                  | CC                              | TT              | 1947004196               |
| SNP_P4_158779_273790 | NW_004516558.1 | Scaffold1324 | 273790                  | CC                              | TT              | 1947004198               |
| SNP_P4_158780_273841 | NW_004516558.1 | Scaffold1324 | 273841                  | GG                              | AA              | 1947004199               |
| SNP_P4_158781_273865 | NW_004516558.1 | Scaffold1324 | 273865                  | AA                              | CC              | 1947004201               |
| SNP_P4_158782_273897 | NW_004516558.1 | Scaffold1324 | 273897                  | GG                              | CC              | 1947004203               |
| SNP_P4_158783_273903 | NW_004516558.1 | Scaffold1324 | 273903                  | TT                              | CC              | 1947004205               |
| SNP_P4_158784_273911 | NW_004516558.1 | Scaffold1324 | 273911                  | AA                              | GG              | 1947004207               |
| SNP_P4_158785_273946 | NW_004516558.1 | Scaffold1324 | 273946                  | CC                              | GG              | 1947004209               |
| SNP_P4_158786_273967 | NW_004516558.1 | Scaffold1324 | 273967                  | CC                              | AA              | 1947004211               |
| SNP_P4_158787_273970 | NW_004516558.1 | Scaffold1324 | 273970                  | GG                              | AA              | 1947004213               |
| SNP_P4_158788_273991 | NW_004516558.1 | Scaffold1324 | 273991                  | AA                              | GG              | 1947004215               |
| SNP_P4_158789_274718 | NW_004516558.1 | Scaffold1324 | 274718                  | CC                              | TT              | 1947004217               |
| SNP_P4_158790_274757 | NW_004516558.1 | Scaffold1324 | 274757                  | GG                              | AA              | 1947004219               |
| SNP_P4_158791_275824 | NW_004516558.1 | Scaffold1324 | 275824                  | GG                              | TT              | 1947004220               |
| SNP_P4_158792_278413 | NW_004516558.1 | Scaffold1324 | 278413                  | TT                              | CC              | 1947004222               |
| SNP_P4_158793_278417 | NW_004516558.1 | Scaffold1324 | 278417                  | TT                              | GG              | 1947004224               |
| SNP_P4_158794_279326 | NW_004516558.1 | Scaffold1324 | 279326                  | CC                              | TT              | 1947004226               |

| SNPs IDs             | Chromosome IDs | Chromosomes  | Physical positions (bp) | CDC Frontier (Reference genome) | (ILWC46 & LPNB) | NCBI SNPdb Accession IDs |
|----------------------|----------------|--------------|-------------------------|---------------------------------|-----------------|--------------------------|
| SNP_P4_158796_279367 | NW_004516558.1 | Scaffold1324 | 279367                  | TT                              | GG              | 1947004228               |
| SNP_P4_158797_321517 | NW_004516558.1 | Scaffold1324 | 321517                  | GG                              | AA              | 1947004230               |
| SNP_P4_158798_321882 | NW_004516558.1 | Scaffold1324 | 321882                  | CC                              | GG              | 1947004232               |
| SNP_P4_158799_343744 | NW_004516558.1 | Scaffold1324 | 343744                  | AA                              | TT              | 1947004234               |
| SNP_P4_158800_362478 | NW_004516558.1 | Scaffold1324 | 362478                  | AA                              | GG              | 1947004236               |
| SNP_P4_158801_362615 | NW_004516558.1 | Scaffold1324 | 362615                  | CC                              | AA              | 1947004238               |
| SNP_P4_158802_362744 | NW_004516558.1 | Scaffold1324 | 362744                  | CC                              | GG              | 1947004240               |
| SNP_P4_158803_362862 | NW_004516558.1 | Scaffold1324 | 362862                  | AA                              | GG              | 1947004242               |
| SNP_P4_158804_362889 | NW_004516558.1 | Scaffold1324 | 362889                  | GG                              | CC              | 1947004244               |
| SNP_P4_158805_362890 | NW_004516558.1 | Scaffold1324 | 362890                  | GG                              | TT              | 1947004246               |
| SNP_P4_158806_362912 | NW_004516558.1 | Scaffold1324 | 362912                  | CC                              | GG              | 1947004248               |
| SNP_P4_158807_362925 | NW_004516558.1 | Scaffold1324 | 362925                  | AA                              | GG              | 1947004250               |
| SNP_P4_158808_362961 | NW_004516558.1 | Scaffold1324 | 362961                  | TT                              | CC              | 1947004251               |
| SNP_P4_158809_362967 | NW_004516558.1 | Scaffold1324 | 362967                  | GG                              | AA              | 1947004253               |
| SNP_P4_158810_401165 | NW_004516558.1 | Scaffold1324 | 401165                  | GG                              | AA              | 1947004255               |
| SNP_P4_158812_476471 | NW_004516558.1 | Scaffold1324 | 476471                  | AA                              | GG              | 1947004257               |
| SNP_P4_158813_476476 | NW_004516558.1 | Scaffold1324 | 476476                  | AA                              | GG              | 1947004259               |
| SNP_P4_158814_476735 | NW_004516558.1 | Scaffold1324 | 476735                  | AA                              | GG              | 1947004261               |
| SNP_P4_158815_476777 | NW_004516558.1 | Scaffold1324 | 476777                  | AA                              | TT              | 1947004263               |
| SNP_P4_158816_477097 | NW_004516558.1 | Scaffold1324 | 477097                  | TT                              | GG              | 1947004265               |
| SNP_P4_158817_485832 | NW_004516558.1 | Scaffold1324 | 485832                  | CC                              | GG              | 1947004267               |
| SNP_P4_158818_495758 | NW_004516558.1 | Scaffold1324 | 495758                  | GG                              | AA              | 1947004269               |
| SNP_P4_158819_505106 | NW_004516558.1 | Scaffold1324 | 505106                  | CC                              | AA              | 1947004271               |
| SNP_P4_158820_506539 | NW_004516558.1 | Scaffold1324 | 506539                  | AA                              | GG              | 1947004273               |
| SNP_P4_158821_514259 | NW_004516558.1 | Scaffold1324 | 514259                  | TT                              | CC              | 1947004275               |
| SNP_P4_158822_514268 | NW_004516558.1 | Scaffold1324 | 514268                  | GG                              | AA              | 1947004277               |
| SNP_P4_158823_514269 | NW_004516558.1 | Scaffold1324 | 514269                  | AA                              | GG              | 1947004279               |
| SNP_P4_158824_514344 | NW_004516558.1 | Scaffold1324 | 514344                  | TT                              | CC              | 1947004281               |
| SNP_P4_158825_514709 | NW_004516558.1 | Scaffold1324 | 514709                  | TT                              | GG              | 1947004283               |
| SNP_P4_158827_519598 | NW_004516558.1 | Scaffold1324 | 519598                  | AA                              | TT              | 1947004285               |
| SNP_P4_158829_524722 | NW_004516558.1 | Scaffold1324 | 524722                  | TT                              | AA              | 1947004287               |
| SNP_P4_158830_538945 | NW_004516558.1 | Scaffold1324 | 538945                  | TT                              | CC              | 1947004289               |
| SNP_P4_158831_538958 | NW_004516558.1 | Scaffold1324 | 538958                  | CC                              | AA              | 1947004291               |
| SNP_P4_158832_539215 | NW_004516558.1 | Scaffold1324 | 539215                  | CC                              | TT              | 1947004293               |
| SNP_P4_158833_543545 | NW_004516558.1 | Scaffold1324 | 543545                  | GG                              | AA              | 1947004295               |
| SNP_P4_158834_571453 | NW_004516558.1 | Scaffold1324 | 571453                  | AA                              | CC              | 1947004297               |
| SNP_P4_158835_576946 | NW_004516558.1 | Scaffold1324 | 576946                  | TT                              | GG              | 1947004299               |
| SNP_P4_158837_630409 | NW_004516558.1 | Scaffold1324 | 630409                  | AA                              | GG              | 1947004301               |
| SNP_P4_158838_630416 | NW_004516558.1 | Scaffold1324 | 630416                  | AA                              | GG              | 1947004303               |
| SNP_P4_158839_630435 | NW_004516558.1 | Scaffold1324 | 630435                  | TT                              | GG              | 1947004305               |
| SNP_P4_158840_630494 | NW_004516558.1 | Scaffold1324 | 630494                  | AA                              | GG              | 1947004307               |
| SNP_P4_158841_632978 | NW_004516558.1 | Scaffold1324 | 632978                  | TT                              | CC              | 1947004309               |

| SNPs IDs             | Chromosome IDs | Chromosomes  | Physical positions (bp) | CDC Frontier (Reference genome) | (ILWC46 & LPNB) | NCBI SNPdb Accession IDs |
|----------------------|----------------|--------------|-------------------------|---------------------------------|-----------------|--------------------------|
| SNP_P4_158842_633204 | NW_004516558.1 | Scaffold1324 | 633204                  | CC                              | AA              | 1947004311               |
| SNP_P4_158843_633286 | NW_004516558.1 | Scaffold1324 | 633286                  | GG                              | CC              | 1947004313               |
| SNP_P4_158844_642296 | NW_004516558.1 | Scaffold1324 | 642296                  | CC                              | GG              | 1947004315               |
| SNP_P4_158845_642345 | NW_004516558.1 | Scaffold1324 | 642345                  | CC                              | TT              | 1947004317               |
| SNP_P4_158847_642644 | NW_004516558.1 | Scaffold1324 | 642644                  | AA                              | GG              | 1947004319               |
| SNP_P4_158848_642696 | NW_004516558.1 | Scaffold1324 | 642696                  | GG                              | TT              | 1947004321               |
| SNP_P4_158850_642755 | NW_004516558.1 | Scaffold1324 | 642755                  | AA                              | GG              | 1947004323               |
| SNP_P4_158851_642827 | NW_004516558.1 | Scaffold1324 | 642827                  | TT                              | CC              | 1947004325               |
| SNP_P4_158854_699298 | NW_004516558.1 | Scaffold1324 | 699298                  | CC                              | TT              | 1947004327               |
| SNP_P4_158856_726650 | NW_004516558.1 | Scaffold1324 | 726650                  | CC                              | TT              | 1947004329               |
| SNP_P4_158858_1554   | NW_004516560.1 | Scaffold1327 | 1554                    | GG                              | TT              | 1947004331               |
| SNP_P4_158859_1964   | NW_004516560.1 | Scaffold1327 | 1964                    | TT                              | AA              | 1947004333               |
| SNP_P4_158860_25333  | NW_004516560.1 | Scaffold1327 | 25333                   | GG                              | CC              | 1947004335               |
| SNP_P4_158861_31256  | NW_004516560.1 | Scaffold1327 | 31256                   | AA                              | CC              | 1947004337               |
| SNP_P4_158862_32232  | NW_004516560.1 | Scaffold1327 | 32232                   | GG                              | AA              | 1947004339               |
| SNP_P4_158863_32324  | NW_004516560.1 | Scaffold1327 | 32324                   | GG                              | AA              | 1947004341               |
| SNP_P4_158864_32862  | NW_004516560.1 | Scaffold1327 | 32862                   | TT                              | CC              | 1947004343               |
| SNP_P4_158865_33415  | NW_004516560.1 | Scaffold1327 | 33415                   | CC                              | AA              | 1947004345               |
| SNP_P4_158866_33422  | NW_004516560.1 | Scaffold1327 | 33422                   | GG                              | TT              | 1947004347               |
| SNP_P4_158867_33438  | NW_004516560.1 | Scaffold1327 | 33438                   | TT                              | CC              | 1947004350               |
| SNP_P4_158868_33443  | NW_004516560.1 | Scaffold1327 | 33443                   | CC                              | AA              | 1947004352               |
| SNP_P4_158869_33455  | NW_004516560.1 | Scaffold1327 | 33455                   | TT                              | CC              | 1947004354               |
| SNP_P4_158870_33560  | NW_004516560.1 | Scaffold1327 | 33560                   | GG                              | TT              | 1947004356               |
| SNP_P4_158871_39870  | NW_004516560.1 | Scaffold1327 | 39870                   | TT                              | CC              | 1947004358               |
| SNP_P4_158872_39905  | NW_004516560.1 | Scaffold1327 | 39905                   | GG                              | AA              | 1947004360               |
| SNP_P4_158873_40100  | NW_004516560.1 | Scaffold1327 | 40100                   | TT                              | GG              | 1947004362               |
| SNP_P4_158874_40130  | NW_004516560.1 | Scaffold1327 | 40130                   | TT                              | GG              | 1947004364               |
| SNP_P4_158875_40141  | NW_004516560.1 | Scaffold1327 | 40141                   | CC                              | TT              | 1947004366               |
| SNP_P4_158876_43222  | NW_004516560.1 | Scaffold1327 | 43222                   | AA                              | CC              | 1947004368               |
| SNP_P4_158877_43275  | NW_004516560.1 | Scaffold1327 | 43275                   | TT                              | CC              | 1947004370               |
| SNP_P4_158878_50241  | NW_004516560.1 | Scaffold1327 | 50241                   | TT                              | CC              | 1947004372               |
| SNP_P4_158879_51093  | NW_004516560.1 | Scaffold1327 | 51093                   | GG                              | AA              | 1947004374               |
| SNP_P4_158880_54149  | NW_004516560.1 | Scaffold1327 | 54149                   | AA                              | GG              | 1947004376               |
| SNP_P4_158881_54201  | NW_004516560.1 | Scaffold1327 | 54201                   | CC                              | TT              | 1947004378               |
| SNP_P4_158882_54279  | NW_004516560.1 | Scaffold1327 | 54279                   | AA                              | CC              | 1947004380               |
| SNP_P4_158883_54431  | NW_004516560.1 | Scaffold1327 | 54431                   | CC                              | GG              | 1947004382               |
| SNP_P4_158884_54438  | NW_004516560.1 | Scaffold1327 | 54438                   | GG                              | TT              | 1947004384               |
| SNP_P4_158885_54538  | NW_004516560.1 | Scaffold1327 | 54538                   | AA                              | GG              | 1947004386               |
| SNP_P4_158886_59457  | NW_004516560.1 | Scaffold1327 | 59457                   | AA                              | CC              | 1947004388               |
| SNP_P4_158887_74148  | NW_004516560.1 | Scaffold1327 | 74148                   | AA                              | TT              | 1947004390               |
| SNP_P4_158889_75532  | NW_004516560.1 | Scaffold1327 | 75532                   | GG                              | TT              | 1947004392               |
| SNP_P4_158890_85648  | NW_004516560.1 | Scaffold1327 | 85648                   | TT                              | CC              | 1947004394               |



| SNPs IDs             | Chromosome IDs | Chromosomes  | Physical positions (bp) | CDC Frontier (Reference genome) | (ILWC46 & LPNB) | NCBI SNPdb Accession IDs |
|----------------------|----------------|--------------|-------------------------|---------------------------------|-----------------|--------------------------|
| SNP_P4_158891_92314  | NW_004516560.1 | Scaffold1327 | 92314                   | TT                              | AA              | 1947004396               |
| SNP_P4_158892_92345  | NW_004516560.1 | Scaffold1327 | 92345                   | TT                              | CC              | 1947004398               |
| SNP_P4_158893_92446  | NW_004516560.1 | Scaffold1327 | 92446                   | AA                              | CC              | 1947004400               |
| SNP_P4_158894_92490  | NW_004516560.1 | Scaffold1327 | 92490                   | GG                              | CC              | 1947004402               |
| SNP_P4_158895_92498  | NW_004516560.1 | Scaffold1327 | 92498                   | AA                              | TT              | 1947004404               |
| SNP_P4_158896_92584  | NW_004516560.1 | Scaffold1327 | 92584                   | TT                              | CC              | 1947004406               |
| SNP_P4_158897_94000  | NW_004516560.1 | Scaffold1327 | 94000                   | CC                              | GG              | 1947004408               |
| SNP_P4_158898_95033  | NW_004516560.1 | Scaffold1327 | 95033                   | GG                              | AA              | 1947004410               |
| SNP_P4_158899_95744  | NW_004516560.1 | Scaffold1327 | 95744                   | TT                              | CC              | 1947004412               |
| SNP_P4_158900_95836  | NW_004516560.1 | Scaffold1327 | 95836                   | AA                              | GG              | 1947004414               |
| SNP_P4_158901_106610 | NW_004516560.1 | Scaffold1327 | 106610                  | AA                              | GG              | 1947004416               |
| SNP_P4_158902_107759 | NW_004516560.1 | Scaffold1327 | 107759                  | AA                              | GG              | 1947004418               |
| SNP_P4_158903_107835 | NW_004516560.1 | Scaffold1327 | 107835                  | GG                              | CC              | 1947004420               |
| SNP_P4_158904_114508 | NW_004516560.1 | Scaffold1327 | 114508                  | GG                              | TT              | 1947004422               |
| SNP_P4_158905_114518 | NW_004516560.1 | Scaffold1327 | 114518                  | AA                              | CC              | 1947004424               |
| SNP_P4_158906_114521 | NW_004516560.1 | Scaffold1327 | 114521                  | AA                              | CC              | 1947004427               |
| SNP_P4_158907_114524 | NW_004516560.1 | Scaffold1327 | 114524                  | GG                              | TT              | 1947004429               |
| SNP_P4_158908_114525 | NW_004516560.1 | Scaffold1327 | 114525                  | GG                              | AA              | 1947004431               |
| SNP_P4_158909_114532 | NW_004516560.1 | Scaffold1327 | 114532                  | GG                              | AA              | 1947004433               |
| SNP_P4_158910_114553 | NW_004516560.1 | Scaffold1327 | 114553                  | TT                              | CC              | 1947004435               |
| SNP_P4_158911_114569 | NW_004516560.1 | Scaffold1327 | 114569                  | GG                              | AA              | 1947004437               |
| SNP_P4_158912_114587 | NW_004516560.1 | Scaffold1327 | 114587                  | GG                              | AA              | 1947004439               |
| SNP_P4_158913_114652 | NW_004516560.1 | Scaffold1327 | 114652                  | AA                              | GG              | 1947004441               |
| SNP_P4_158914_114738 | NW_004516560.1 | Scaffold1327 | 114738                  | CC                              | TT              | 1947004443               |
| SNP_P4_158915_114794 | NW_004516560.1 | Scaffold1327 | 114794                  | GG                              | AA              | 1947004445               |
| SNP_P4_158916_114804 | NW_004516560.1 | Scaffold1327 | 114804                  | TT                              | CC              | 1947004447               |
| SNP_P4_158917_114834 | NW_004516560.1 | Scaffold1327 | 114834                  | TT                              | CC              | 1947004449               |
| SNP_P4_158918_114863 | NW_004516560.1 | Scaffold1327 | 114863                  | TT                              | CC              | 1947004451               |
| SNP_P4_158919_118802 | NW_004516560.1 | Scaffold1327 | 118802                  | GG                              | TT              | 1947004453               |
| SNP_P4_158920_120201 | NW_004516560.1 | Scaffold1327 | 120201                  | GG                              | AA              | 1947004455               |
| SNP_P4_158921_122913 | NW_004516560.1 | Scaffold1327 | 122913                  | GG                              | CC              | 1947004457               |
| SNP_P4_158922_123115 | NW_004516560.1 | Scaffold1327 | 123115                  | AA                              | TT              | 1947004459               |
| SNP_P4_158923_123159 | NW_004516560.1 | Scaffold1327 | 123159                  | AA                              | TT              | 1947004461               |
| SNP_P4_158924_11458  | NW_004516561.1 | Scaffold1328 | 11458                   | CC                              | AA              | 1947004463               |
| SNP_P4_158925_11761  | NW_004516561.1 | Scaffold1328 | 11761                   | CC                              | TT              | 1947004466               |
| SNP_P4_158927_20270  | NW_004516561.1 | Scaffold1328 | 20270                   | AA                              | GG              | 1947004468               |
| SNP_P4_158928_26375  | NW_004516561.1 | Scaffold1328 | 26375                   | AA                              | TT              | 1947004470               |
| SNP_P4_158929_26716  | NW_004516561.1 | Scaffold1328 | 26716                   | GG                              | AA              | 1947004472               |
| SNP_P4_158930_26726  | NW_004516561.1 | Scaffold1328 | 26726                   | CC                              | AA              | 1947004474               |
| SNP_P4_158931_31842  | NW_004516561.1 | Scaffold1328 | 31842                   | GG                              | AA              | 1947004476               |
| SNP_P4_158932_32077  | NW_004516561.1 | Scaffold1328 | 32077                   | GG                              | AA              | 1947004478               |
| SNP_P4_158933_32939  | NW_004516561.1 | Scaffold1328 | 32939                   | AA                              | GG              | 1947004480               |

| SNPs IDs            | Chromosome IDs | Chromosomes  | Physical positions (bp) | CDC Frontier (Reference genome) | (ILWC46 & LPNB) | NCBI SNPdb Accession IDs |
|---------------------|----------------|--------------|-------------------------|---------------------------------|-----------------|--------------------------|
| SNP_P4_158934_35381 | NW_004516561.1 | Scaffold1328 | 35381                   | AA                              | GG              | 1947004482               |
| SNP_P4_158935_38871 | NW_004516561.1 | Scaffold1328 | 38871                   | TT                              | CC              | 1947004484               |
| SNP_P4_158936_41159 | NW_004516561.1 | Scaffold1328 | 41159                   | AA                              | GG              | 1947004486               |
| SNP_P4_158937_41164 | NW_004516561.1 | Scaffold1328 | 41164                   | AA                              | GG              | 1947004488               |
| SNP_P4_158938_53405 | NW_004516561.1 | Scaffold1328 | 53405                   | AA                              | TT              | 1947004490               |
| SNP_P4_158939_53444 | NW_004516561.1 | Scaffold1328 | 53444                   | TT                              | AA              | 1947004492               |
| SNP_P4_158940_54139 | NW_004516561.1 | Scaffold1328 | 54139                   | GG                              | TT              | 1947004494               |
| SNP_P4_158941_54183 | NW_004516561.1 | Scaffold1328 | 54183                   | GG                              | TT              | 1947004496               |
| SNP_P4_158942_54622 | NW_004516561.1 | Scaffold1328 | 54622                   | AA                              | GG              | 1947004498               |
| SNP_P4_158944_56521 | NW_004516561.1 | Scaffold1328 | 56521                   | TT                              | AA              | 1947004500               |
| SNP_P4_158945_59578 | NW_004516561.1 | Scaffold1328 | 59578                   | TT                              | CC              | 1947004502               |
| SNP_P4_158946_62402 | NW_004516561.1 | Scaffold1328 | 62402                   | TT                              | CC              | 1947004504               |
| SNP_P4_158947_63265 | NW_004516561.1 | Scaffold1328 | 63265                   | AA                              | GG              | 1947004506               |
| SNP_P4_158948_63337 | NW_004516561.1 | Scaffold1328 | 63337                   | AA                              | GG              | 1947004508               |
| SNP_P4_158949_63440 | NW_004516561.1 | Scaffold1328 | 63440                   | TT                              | CC              | 1947004510               |
| SNP_P4_158950_63543 | NW_004516561.1 | Scaffold1328 | 63543                   | TT                              | CC              | 1947004512               |
| SNP_P4_158951_63606 | NW_004516561.1 | Scaffold1328 | 63606                   | CC                              | AA              | 1947004514               |
| SNP_P4_158952_63648 | NW_004516561.1 | Scaffold1328 | 63648                   | CC                              | GG              | 1947004516               |
| SNP_P4_158953_63679 | NW_004516561.1 | Scaffold1328 | 63679                   | AA                              | CC              | 1947004518               |
| SNP_P4_158954_63699 | NW_004516561.1 | Scaffold1328 | 63699                   | AA                              | CC              | 1947004520               |
| SNP_P4_158955_63700 | NW_004516561.1 | Scaffold1328 | 63700                   | TT                              | CC              | 1947004522               |
| SNP_P4_158956_63857 | NW_004516561.1 | Scaffold1328 | 63857                   | AA                              | GG              | 1947004524               |
| SNP_P4_158957_64265 | NW_004516561.1 | Scaffold1328 | 64265                   | GG                              | AA              | 1947004526               |
| SNP_P4_158958_70772 | NW_004516561.1 | Scaffold1328 | 70772                   | CC                              | TT              | 1947004528               |
| SNP_P4_158959_71535 | NW_004516561.1 | Scaffold1328 | 71535                   | AA                              | GG              | 1947004530               |
| SNP_P4_158960_71571 | NW_004516561.1 | Scaffold1328 | 71571                   | CC                              | TT              | 1947004532               |
| SNP_P4_158961_71735 | NW_004516561.1 | Scaffold1328 | 71735                   | TT                              | AA              | 1947004534               |
| SNP_P4_158963_72565 | NW_004516561.1 | Scaffold1328 | 72565                   | AA                              | GG              | 1947004536               |
| SNP_P4_158964_72573 | NW_004516561.1 | Scaffold1328 | 72573                   | GG                              | TT              | 1947004538               |
| SNP_P4_158965_72592 | NW_004516561.1 | Scaffold1328 | 72592                   | TT                              | CC              | 1947004540               |
| SNP_P4_158966_72594 | NW_004516561.1 | Scaffold1328 | 72594                   | TT                              | GG              | 1947004542               |
| SNP_P4_158967_75444 | NW_004516561.1 | Scaffold1328 | 75444                   | GG                              | CC              | 1947004544               |
| SNP_P4_158968_76344 | NW_004516561.1 | Scaffold1328 | 76344                   | GG                              | TT              | 1947004546               |
| SNP_P4_158969_76982 | NW_004516561.1 | Scaffold1328 | 76982                   | AA                              | GG              | 1947004548               |
| SNP_P4_158970_77129 | NW_004516561.1 | Scaffold1328 | 77129                   | GG                              | TT              | 1947004550               |
| SNP_P4_158972_77323 | NW_004516561.1 | Scaffold1328 | 77323                   | GG                              | TT              | 1947004552               |
| SNP_P4_158973_79806 | NW_004516561.1 | Scaffold1328 | 79806                   | GG                              | AA              | 1947004554               |
| SNP_P4_158974_79807 | NW_004516561.1 | Scaffold1328 | 79807                   | AA                              | TT              | 1947004556               |
| SNP_P4_158975_351   | NW_004516562.1 | Scaffold1329 | 351                     | GG                              | TT              | 1947004558               |
| SNP_P4_158976_1692  | NW_004516562.1 | Scaffold1329 | 1692                    | AA                              | GG              | 1947004560               |
| SNP_P4_158977_15870 | NW_004516562.1 | Scaffold1329 | 15870                   | CC                              | AA              | 1947004562               |
| SNP_P4_158978_16258 | NW_004516562.1 | Scaffold1329 | 16258                   | TT                              | CC              | 1947004564               |

| SNPs IDs            | Chromosome IDs | Chromosomes  | Physical positions (bp) | CDC Frontier (Reference genome) | (ILWC46 & LPNB) | NCBI SNPdb Accession IDs |
|---------------------|----------------|--------------|-------------------------|---------------------------------|-----------------|--------------------------|
| SNP_P4_158979_16281 | NW_004516562.1 | Scaffold1329 | 16281                   | AA                              | GG              | 1947004566               |
| SNP_P4_158980_16842 | NW_004516562.1 | Scaffold1329 | 16842                   | TT                              | CC              | 1947004568               |
| SNP_P4_158981_16850 | NW_004516562.1 | Scaffold1329 | 16850                   | GG                              | AA              | 1947004570               |
| SNP_P4_158982_19642 | NW_004516562.1 | Scaffold1329 | 19642                   | CC                              | AA              | 1947004572               |
| SNP_P4_158983_32978 | NW_004516562.1 | Scaffold1329 | 32978                   | CC                              | TT              | 1947004574               |
| SNP_P4_158984_36240 | NW_004516562.1 | Scaffold1329 | 36240                   | GG                              | AA              | 1947004576               |
| SNP_P4_158985_1185  | NW_004516563.1 | Scaffold1330 | 1185                    | AA                              | TT              | 1947004578               |
| SNP_P4_158986_1251  | NW_004516563.1 | Scaffold1330 | 1251                    | TT                              | AA              | 1947004580               |
| SNP_P4_158987_16141 | NW_004516563.1 | Scaffold1330 | 16141                   | AA                              | CC              | 1947004582               |
| SNP_P4_158988_16406 | NW_004516563.1 | Scaffold1330 | 16406                   | AA                              | TT              | 1947004584               |
| SNP_P4_158989_16530 | NW_004516563.1 | Scaffold1330 | 16530                   | GG                              | AA              | 1947004587               |
| SNP_P4_158990_21062 | NW_004516563.1 | Scaffold1330 | 21062                   | TT                              | CC              | 1947004589               |
| SNP_P4_158991_21092 | NW_004516563.1 | Scaffold1330 | 21092                   | CC                              | TT              | 1947004591               |
| SNP_P4_158992_40847 | NW_004516563.1 | Scaffold1330 | 40847                   | AA                              | GG              | 1947004593               |
| SNP_P4_158993_40848 | NW_004516563.1 | Scaffold1330 | 40848                   | TT                              | AA              | 1947004595               |
| SNP_P4_158994_458   | NW_004516564.1 | Scaffold1331 | 458                     | CC                              | TT              | 1947004596               |
| SNP_P4_158995_629   | NW_004516564.1 | Scaffold1331 | 629                     | CC                              | TT              | 1947004598               |
| SNP_P4_158996_632   | NW_004516564.1 | Scaffold1331 | 632                     | AA                              | GG              | 1947004600               |
| SNP_P4_158997_636   | NW_004516564.1 | Scaffold1331 | 636                     | TT                              | GG              | 1947004602               |
| SNP_P4_158998_23505 | NW_004516564.1 | Scaffold1331 | 23505                   | CC                              | AA              | 1947004604               |
| SNP_P4_158999_23510 | NW_004516564.1 | Scaffold1331 | 23510                   | AA                              | CC              | 1947004606               |
| SNP_P4_159000_23588 | NW_004516564.1 | Scaffold1331 | 23588                   | AA                              | TT              | 1947004608               |
| SNP_P4_159001_23810 | NW_004516564.1 | Scaffold1331 | 23810                   | GG                              | AA              | 1947004610               |
| SNP_P4_159002_23813 | NW_004516564.1 | Scaffold1331 | 23813                   | TT                              | CC              | 1947004612               |
| SNP_P4_159003_23855 | NW_004516564.1 | Scaffold1331 | 23855                   | CC                              | TT              | 1947004614               |
| SNP_P4_159004_23869 | NW_004516564.1 | Scaffold1331 | 23869                   | GG                              | AA              | 1947004616               |
| SNP_P4_159005_23870 | NW_004516564.1 | Scaffold1331 | 23870                   | TT                              | CC              | 1947004618               |
| SNP_P4_159007_24511 | NW_004516564.1 | Scaffold1331 | 24511                   | AA                              | TT              | 1947004620               |
| SNP_P4_159009_32675 | NW_004516564.1 | Scaffold1331 | 32675                   | TT                              | CC              | 1947004622               |
| SNP_P4_159010_33625 | NW_004516564.1 | Scaffold1331 | 33625                   | TT                              | CC              | 1947004624               |
| SNP_P4_159011_33926 | NW_004516564.1 | Scaffold1331 | 33926                   | TT                              | AA              | 1947004626               |
| SNP_P4_159012_38314 | NW_004516564.1 | Scaffold1331 | 38314                   | TT                              | AA              | 1947004628               |
| SNP_P4_159013_39406 | NW_004516564.1 | Scaffold1331 | 39406                   | AA                              | TT              | 1947004630               |
| SNP_P4_159015_41279 | NW_004516564.1 | Scaffold1331 | 41279                   | AA                              | CC              | 1947004632               |
| SNP_P4_159016_41460 | NW_004516564.1 | Scaffold1331 | 41460                   | CC                              | AA              | 1947004634               |
| SNP_P4_159017_41462 | NW_004516564.1 | Scaffold1331 | 41462                   | AA                              | CC              | 1947004636               |
| SNP_P4_159018_41482 | NW_004516564.1 | Scaffold1331 | 41482                   | CC                              | AA              | 1947004638               |
| SNP_P4_159019_50287 | NW_004516564.1 | Scaffold1331 | 50287                   | GG                              | AA              | 1947004640               |
| SNP_P4_159020_50313 | NW_004516564.1 | Scaffold1331 | 50313                   | CC                              | TT              | 1947004642               |
| SNP_P4_159021_50358 | NW_004516564.1 | Scaffold1331 | 50358                   | CC                              | TT              | 1947004644               |
| SNP_P4_159022_50359 | NW_004516564.1 | Scaffold1331 | 50359                   | GG                              | TT              | 1947004646               |
| SNP_P4_159023_50373 | NW_004516564.1 | Scaffold1331 | 50373                   | CC                              | TT              | 1947004648               |

| SNPs IDs            | Chromosome IDs | Chromosomes  | Physical positions (bp) | CDC Frontier (Reference genome) | (ILWC46 & LPNB) | NCBI SNPdb Accession IDs |
|---------------------|----------------|--------------|-------------------------|---------------------------------|-----------------|--------------------------|
| SNP_P4_159025_50668 | NW_004516564.1 | Scaffold1331 | 50668                   | AA                              | GG              | 1947004650               |
| SNP_P4_159026_50721 | NW_004516564.1 | Scaffold1331 | 50721                   | TT                              | AA              | 1947004652               |
| SNP_P4_159029_51802 | NW_004516564.1 | Scaffold1331 | 51802                   | TT                              | CC              | 1947004654               |
| SNP_P4_159030_53217 | NW_004516564.1 | Scaffold1331 | 53217                   | AA                              | TT              | 1947004656               |
| SNP_P4_159031_53218 | NW_004516564.1 | Scaffold1331 | 53218                   | AA                              | TT              | 1947004658               |
| SNP_P4_159033_56053 | NW_004516564.1 | Scaffold1331 | 56053                   | GG                              | AA              | 1947004660               |
| SNP_P4_159034_57039 | NW_004516564.1 | Scaffold1331 | 57039                   | AA                              | CC              | 1947004662               |
| SNP_P4_159035_57637 | NW_004516564.1 | Scaffold1331 | 57637                   | TT                              | AA              | 1947004664               |
| SNP_P4_159036_59183 | NW_004516564.1 | Scaffold1331 | 59183                   | GG                              | AA              | 1947004666               |
| SNP_P4_159037_59398 | NW_004516564.1 | Scaffold1331 | 59398                   | GG                              | AA              | 1947004668               |
| SNP_P4_159038_59430 | NW_004516564.1 | Scaffold1331 | 59430                   | CC                              | TT              | 1947004670               |
| SNP_P4_159039_59431 | NW_004516564.1 | Scaffold1331 | 59431                   | CC                              | TT              | 1947004672               |
| SNP_P4_159040_59448 | NW_004516564.1 | Scaffold1331 | 59448                   | GG                              | TT              | 1947004674               |
| SNP_P4_159041_59454 | NW_004516564.1 | Scaffold1331 | 59454                   | CC                              | TT              | 1947004676               |
| SNP_P4_159042_59455 | NW_004516564.1 | Scaffold1331 | 59455                   | AA                              | GG              | 1947004678               |
| SNP_P4_159043_59716 | NW_004516564.1 | Scaffold1331 | 59716                   | CC                              | TT              | 1947004680               |
| SNP_P4_159044_61674 | NW_004516564.1 | Scaffold1331 | 61674                   | CC                              | GG              | 1947004682               |
| SNP_P4_159045_62316 | NW_004516564.1 | Scaffold1331 | 62316                   | TT                              | CC              | 1947004684               |
| SNP_P4_159046_62626 | NW_004516564.1 | Scaffold1331 | 62626                   | GG                              | AA              | 1947004686               |
| SNP_P4_159047_63228 | NW_004516564.1 | Scaffold1331 | 63228                   | AA                              | TT              | 1947004688               |
| SNP_P4_159049_64693 | NW_004516564.1 | Scaffold1331 | 64693                   | TT                              | CC              | 1947004690               |
| SNP_P4_159050_64817 | NW_004516564.1 | Scaffold1331 | 64817                   | AA                              | GG              | 1947004692               |
| SNP_P4_159051_75330 | NW_004516564.1 | Scaffold1331 | 75330                   | TT                              | AA              | 1947004694               |
| SNP_P4_159052_75654 | NW_004516564.1 | Scaffold1331 | 75654                   | AA                              | TT              | 1947004696               |
| SNP_P4_159054_82730 | NW_004516564.1 | Scaffold1331 | 82730                   | AA                              | TT              | 1947004698               |
| SNP_P4_159055_84087 | NW_004516564.1 | Scaffold1331 | 84087                   | GG                              | CC              | 1947004700               |
| SNP_P4_159056_85137 | NW_004516564.1 | Scaffold1331 | 85137                   | CC                              | TT              | 1947004702               |
| SNP_P4_159057_86188 | NW_004516564.1 | Scaffold1331 | 86188                   | GG                              | AA              | 1947004704               |
| SNP_P4_159058_86786 | NW_004516564.1 | Scaffold1331 | 86786                   | CC                              | TT              | 1947004706               |
| SNP_P4_159059_245   | NW_004516565.1 | Scaffold1332 | 245                     | AA                              | GG              | 1947004708               |
| SNP_P4_159060_248   | NW_004516565.1 | Scaffold1332 | 248                     | TT                              | CC              | 1947004710               |
| SNP_P4_159061_254   | NW_004516565.1 | Scaffold1332 | 254                     | TT                              | CC              | 1947004712               |
| SNP_P4_159062_270   | NW_004516565.1 | Scaffold1332 | 270                     | AA                              | TT              | 1947004714               |
| SNP_P4_159064_386   | NW_004516565.1 | Scaffold1332 | 386                     | AA                              | GG              | 1947004716               |
| SNP_P4_159065_402   | NW_004516565.1 | Scaffold1332 | 402                     | CC                              | TT              | 1947004718               |
| SNP_P4_159066_423   | NW_004516565.1 | Scaffold1332 | 423                     | CC                              | TT              | 1947004720               |
| SNP_P4_159068_536   | NW_004516565.1 | Scaffold1332 | 536                     | GG                              | TT              | 1947004722               |
| SNP_P4_159069_590   | NW_004516565.1 | Scaffold1332 | 590                     | CC                              | TT              | 1947004724               |
| SNP_P4_159070_610   | NW_004516565.1 | Scaffold1332 | 610                     | GG                              | AA              | 1947004726               |
| SNP_P4_159071_613   | NW_004516565.1 | Scaffold1332 | 613                     | TT                              | CC              | 1947004728               |
| SNP_P4_159072_642   | NW_004516565.1 | Scaffold1332 | 642                     | TT                              | AA              | 1947004730               |
| SNP_P4_159073_648   | NW_004516565.1 | Scaffold1332 | 648                     | GG                              | AA              | 1947004732               |

| SNPs IDs           | Chromosome IDs | Chromosomes  | Physical positions (bp) | CDC Frontier (Reference genome) | (ILWC46 & LPNB) | NCBI SNPdb Accession IDs |
|--------------------|----------------|--------------|-------------------------|---------------------------------|-----------------|--------------------------|
| SNP_P4_159074_673  | NW_004516565.1 | Scaffold1332 | 673                     | GG                              | TT              | 1947004734               |
| SNP_P4_159077_4554 | NW_004516565.1 | Scaffold1332 | 4554                    | TT                              | GG              | 1947004736               |
| SNP_P4_159078_4555 | NW_004516565.1 | Scaffold1332 | 4555                    | AA                              | CC              | 1947004738               |
| SNP_P4_159079_4894 | NW_004516565.1 | Scaffold1332 | 4894                    | GG                              | CC              | 1947004740               |
| SNP_P4_159080_5571 | NW_004516565.1 | Scaffold1332 | 5571                    | TT                              | AA              | 1947004742               |
| SNP_P4_159081_5596 | NW_004516565.1 | Scaffold1332 | 5596                    | CC                              | TT              | 1947004743               |
| SNP_P4_159082_5661 | NW_004516565.1 | Scaffold1332 | 5661                    | GG                              | TT              | 1947004745               |
| SNP_P4_159083_5665 | NW_004516565.1 | Scaffold1332 | 5665                    | GG                              | TT              | 1947004747               |
| SNP_P4_159084_5926 | NW_004516565.1 | Scaffold1332 | 5926                    | TT                              | AA              | 1947004749               |
| SNP_P4_159085_5952 | NW_004516565.1 | Scaffold1332 | 5952                    | CC                              | TT              | 1947004751               |
| SNP_P4_159086_6009 | NW_004516565.1 | Scaffold1332 | 6009                    | CC                              | AA              | 1947004753               |
| SNP_P4_159087_6029 | NW_004516565.1 | Scaffold1332 | 6029                    | GG                              | AA              | 1947004755               |
| SNP_P4_159088_6058 | NW_004516565.1 | Scaffold1332 | 6058                    | GG                              | TT              | 1947004757               |
| SNP_P4_159089_6072 | NW_004516565.1 | Scaffold1332 | 6072                    | CC                              | AA              | 1947004759               |
| SNP_P4_159090_6244 | NW_004516565.1 | Scaffold1332 | 6244                    | AA                              | GG              | 1947004761               |
| SNP_P4_159091_6251 | NW_004516565.1 | Scaffold1332 | 6251                    | AA                              | TT              | 1947004763               |
| SNP_P4_159092_6390 | NW_004516565.1 | Scaffold1332 | 6390                    | TT                              | CC              | 1947004766               |
| SNP_P4_159093_7224 | NW_004516565.1 | Scaffold1332 | 7224                    | CC                              | TT              | 1947004768               |
| SNP_P4_159094_7282 | NW_004516565.1 | Scaffold1332 | 7282                    | CC                              | AA              | 1947004770               |
| SNP_P4_159095_7325 | NW_004516565.1 | Scaffold1332 | 7325                    | CC                              | AA              | 1947004771               |
| SNP_P4_159096_7771 | NW_004516565.1 | Scaffold1332 | 7771                    | CC                              | TT              | 1947004773               |
| SNP_P4_159097_7940 | NW_004516565.1 | Scaffold1332 | 7940                    | AA                              | GG              | 1947004775               |
| SNP_P4_159098_8008 | NW_004516565.1 | Scaffold1332 | 8008                    | AA                              | TT              | 1947004777               |
| SNP_P4_159099_8282 | NW_004516565.1 | Scaffold1332 | 8282                    | TT                              | CC              | 1947004779               |
| SNP_P4_159100_8403 | NW_004516565.1 | Scaffold1332 | 8403                    | CC                              | TT              | 1947004781               |
| SNP_P4_159101_8423 | NW_004516565.1 | Scaffold1332 | 8423                    | CC                              | AA              | 1947004783               |
| SNP_P4_159102_8453 | NW_004516565.1 | Scaffold1332 | 8453                    | AA                              | TT              | 1947004785               |
| SNP_P4_159103_8454 | NW_004516565.1 | Scaffold1332 | 8454                    | AA                              | TT              | 1947004787               |
| SNP_P4_159105_8501 | NW_004516565.1 | Scaffold1332 | 8501                    | CC                              | AA              | 1947004789               |
| SNP_P4_159106_8681 | NW_004516565.1 | Scaffold1332 | 8681                    | AA                              | GG              | 1947004791               |
| SNP_P4_159107_8769 | NW_004516565.1 | Scaffold1332 | 8769                    | TT                              | CC              | 1947004793               |
| SNP_P4_159108_8818 | NW_004516565.1 | Scaffold1332 | 8818                    | AA                              | TT              | 1947004795               |
| SNP_P4_159109_8844 | NW_004516565.1 | Scaffold1332 | 8844                    | AA                              | GG              | 1947004797               |
| SNP_P4_159110_8883 | NW_004516565.1 | Scaffold1332 | 8883                    | TT                              | CC              | 1947004799               |
| SNP_P4_159111_8899 | NW_004516565.1 | Scaffold1332 | 8899                    | GG                              | AA              | 1947004801               |
| SNP_P4_159112_9066 | NW_004516565.1 | Scaffold1332 | 9066                    | CC                              | TT              | 1947004803               |
| SNP_P4_159113_9091 | NW_004516565.1 | Scaffold1332 | 9091                    | CC                              | GG              | 1947004805               |
| SNP_P4_159114_9110 | NW_004516565.1 | Scaffold1332 | 9110                    | CC                              | TT              | 1947004807               |
| SNP_P4_159115_9190 | NW_004516565.1 | Scaffold1332 | 9190                    | GG                              | TT              | 1947004809               |
| SNP_P4_159116_9355 | NW_004516565.1 | Scaffold1332 | 9355                    | TT                              | GG              | 1947004811               |
| SNP_P4_159117_9384 | NW_004516565.1 | Scaffold1332 | 9384                    | GG                              | TT              | 1947004813               |
| SNP_P4_159118_9416 | NW_004516565.1 | Scaffold1332 | 9416                    | GG                              | TT              | 1947004814               |

| SNPs IDs            | Chromosome IDs | Chromosomes  | Physical positions (bp) | CDC Frontier (Reference genome) | (ILWC46 & LPNB) | NCBI SNPdb Accession IDs |
|---------------------|----------------|--------------|-------------------------|---------------------------------|-----------------|--------------------------|
| SNP_P4_159119_9516  | NW_004516565.1 | Scaffold1332 | 9516                    | TT                              | CC              | 1947004816               |
| SNP_P4_159120_9624  | NW_004516565.1 | Scaffold1332 | 9624                    | TT                              | AA              | 1947004818               |
| SNP_P4_159121_9651  | NW_004516565.1 | Scaffold1332 | 9651                    | GG                              | AA              | 1947004820               |
| SNP_P4_159122_9684  | NW_004516565.1 | Scaffold1332 | 9684                    | GG                              | CC              | 1947004822               |
| SNP_P4_159123_9953  | NW_004516565.1 | Scaffold1332 | 9953                    | AA                              | GG              | 1947004824               |
| SNP_P4_159124_10138 | NW_004516565.1 | Scaffold1332 | 10138                   | AA                              | GG              | 1947004826               |
| SNP_P4_159125_11000 | NW_004516565.1 | Scaffold1332 | 11000                   | GG                              | AA              | 1947004828               |
| SNP_P4_159126_11035 | NW_004516565.1 | Scaffold1332 | 11035                   | TT                              | GG              | 1947004830               |
| SNP_P4_159127_11260 | NW_004516565.1 | Scaffold1332 | 11260                   | GG                              | TT              | 1947004832               |
| SNP_P4_159128_11285 | NW_004516565.1 | Scaffold1332 | 11285                   | GG                              | CC              | 1947004834               |
| SNP_P4_159129_11597 | NW_004516565.1 | Scaffold1332 | 11597                   | CC                              | AA              | 1947004836               |
| SNP_P4_159130_22259 | NW_004516566.1 | Scaffold1335 | 22259                   | TT                              | AA              | 1947004838               |
| SNP_P4_159131_22267 | NW_004516566.1 | Scaffold1335 | 22267                   | AA                              | GG              | 1947004840               |
| SNP_P4_159132_22268 | NW_004516566.1 | Scaffold1335 | 22268                   | AA                              | TT              | 1947004842               |
| SNP_P4_159133_22271 | NW_004516566.1 | Scaffold1335 | 22271                   | TT                              | CC              | 1947004844               |
| SNP_P4_159134_22279 | NW_004516566.1 | Scaffold1335 | 22279                   | TT                              | CC              | 1947004846               |
| SNP_P4_159135_22731 | NW_004516566.1 | Scaffold1335 | 22731                   | AA                              | GG              | 1947004848               |
| SNP_P4_159136_22745 | NW_004516566.1 | Scaffold1335 | 22745                   | TT                              | CC              | 1947004849               |
| SNP_P4_159137_22746 | NW_004516566.1 | Scaffold1335 | 22746                   | TT                              | AA              | 1947004851               |
| SNP_P4_159138_22754 | NW_004516566.1 | Scaffold1335 | 22754                   | AA                              | GG              | 1947004853               |
| SNP_P4_159139_22791 | NW_004516566.1 | Scaffold1335 | 22791                   | TT                              | GG              | 1947004855               |
| SNP_P4_159140_27304 | NW_004516566.1 | Scaffold1335 | 27304                   | AA                              | GG              | 1947004857               |
| SNP_P4_159141_27337 | NW_004516566.1 | Scaffold1335 | 27337                   | AA                              | GG              | 1947004859               |
| SNP_P4_159142_27367 | NW_004516566.1 | Scaffold1335 | 27367                   | AA                              | GG              | 1947004861               |
| SNP_P4_159143_32032 | NW_004516566.1 | Scaffold1335 | 32032                   | CC                              | GG              | 1947004863               |
| SNP_P4_159144_32387 | NW_004516566.1 | Scaffold1335 | 32387                   | AA                              | GG              | 1947004865               |
| SNP_P4_159145_32432 | NW_004516566.1 | Scaffold1335 | 32432                   | GG                              | AA              | 1947004866               |
| SNP_P4_159146_33328 | NW_004516566.1 | Scaffold1335 | 33328                   | TT                              | AA              | 1947004868               |
| SNP_P4_159147_33352 | NW_004516566.1 | Scaffold1335 | 33352                   | TT                              | GG              | 1947004870               |
| SNP_P4_159148_33382 | NW_004516566.1 | Scaffold1335 | 33382                   | AA                              | GG              | 1947004872               |
| SNP_P4_159149_33392 | NW_004516566.1 | Scaffold1335 | 33392                   | GG                              | AA              | 1947004874               |
| SNP_P4_159150_33409 | NW_004516566.1 | Scaffold1335 | 33409                   | TT                              | AA              | 1947004876               |
| SNP_P4_159151_33420 | NW_004516566.1 | Scaffold1335 | 33420                   | TT                              | AA              | 1947004878               |
| SNP_P4_159152_33452 | NW_004516566.1 | Scaffold1335 | 33452                   | AA                              | GG              | 1947004880               |
| SNP_P4_159153_33630 | NW_004516566.1 | Scaffold1335 | 33630                   | GG                              | AA              | 1947004882               |
| SNP_P4_159154_33682 | NW_004516566.1 | Scaffold1335 | 33682                   | TT                              | AA              | 1947004884               |
| SNP_P4_159155_33716 | NW_004516566.1 | Scaffold1335 | 33716                   | GG                              | AA              | 1947004886               |
| SNP_P4_159156_33727 | NW_004516566.1 | Scaffold1335 | 33727                   | GG                              | TT              | 1947004888               |
| SNP_P4_159157_33732 | NW_004516566.1 | Scaffold1335 | 33732                   | AA                              | GG              | 1947004890               |
| SNP_P4_159158_33733 | NW_004516566.1 | Scaffold1335 | 33733                   | GG                              | AA              | 1947004892               |
| SNP_P4_159159_33792 | NW_004516566.1 | Scaffold1335 | 33792                   | AA                              | TT              | 1947004894               |
| SNP_P4_159160_33801 | NW_004516566.1 | Scaffold1335 | 33801                   | GG                              | CC              | 1947004896               |

| SNPs IDs            | Chromosome IDs | Chromosomes  | Physical positions (bp) | CDC Frontier (Reference genome) | (ILWC46 & LPNB) | NCBI SNPdb Accession IDs |
|---------------------|----------------|--------------|-------------------------|---------------------------------|-----------------|--------------------------|
| SNP_P4_159161_33857 | NW_004516566.1 | Scaffold1335 | 33857                   | AA                              | GG              | 1947004898               |
| SNP_P4_159162_33860 | NW_004516566.1 | Scaffold1335 | 33860                   | GG                              | AA              | 1947004899               |
| SNP_P4_159163_45023 | NW_004516566.1 | Scaffold1335 | 45023                   | GG                              | CC              | 1947004901               |
| SNP_P4_159164_45125 | NW_004516566.1 | Scaffold1335 | 45125                   | AA                              | CC              | 1947004903               |
| SNP_P4_159166_45410 | NW_004516566.1 | Scaffold1335 | 45410                   | AA                              | TT              | 1947004905               |
| SNP_P4_159167_45452 | NW_004516566.1 | Scaffold1335 | 45452                   | AA                              | GG              | 1947004907               |
| SNP_P4_159168_45473 | NW_004516566.1 | Scaffold1335 | 45473                   | AA                              | GG              | 1947004909               |
| SNP_P4_159169_45482 | NW_004516566.1 | Scaffold1335 | 45482                   | TT                              | CC              | 1947004911               |
| SNP_P4_159170_45494 | NW_004516566.1 | Scaffold1335 | 45494                   | CC                              | TT              | 1947004913               |
| SNP_P4_159171_45502 | NW_004516566.1 | Scaffold1335 | 45502                   | AA                              | GG              | 1947004915               |
| SNP_P4_159172_45527 | NW_004516566.1 | Scaffold1335 | 45527                   | TT                              | CC              | 1947004917               |
| SNP_P4_159173_45667 | NW_004516566.1 | Scaffold1335 | 45667                   | GG                              | AA              | 1947004919               |
| SNP_P4_159174_45691 | NW_004516566.1 | Scaffold1335 | 45691                   | TT                              | CC              | 1947004921               |
| SNP_P4_159175_45791 | NW_004516566.1 | Scaffold1335 | 45791                   | CC                              | TT              | 1947004923               |
| SNP_P4_159176_45793 | NW_004516566.1 | Scaffold1335 | 45793                   | GG                              | CC              | 1947004925               |
| SNP_P4_159177_45803 | NW_004516566.1 | Scaffold1335 | 45803                   | TT                              | AA              | 1947004927               |
| SNP_P4_159178_45806 | NW_004516566.1 | Scaffold1335 | 45806                   | TT                              | AA              | 1947004929               |
| SNP_P4_159179_45840 | NW_004516566.1 | Scaffold1335 | 45840                   | TT                              | CC              | 1947004931               |
| SNP_P4_159180_45863 | NW_004516566.1 | Scaffold1335 | 45863                   | GG                              | AA              | 1947004933               |
| SNP_P4_159181_45924 | NW_004516566.1 | Scaffold1335 | 45924                   | GG                              | AA              | 1947004935               |
| SNP_P4_159182_45933 | NW_004516566.1 | Scaffold1335 | 45933                   | TT                              | GG              | 1947004937               |
| SNP_P4_159183_45941 | NW_004516566.1 | Scaffold1335 | 45941                   | GG                              | AA              | 1947004939               |
| SNP_P4_159185_46050 | NW_004516566.1 | Scaffold1335 | 46050                   | CC                              | TT              | 1947004941               |
| SNP_P4_159186_46073 | NW_004516566.1 | Scaffold1335 | 46073                   | TT                              | AA              | 1947004943               |
| SNP_P4_159187_46127 | NW_004516566.1 | Scaffold1335 | 46127                   | GG                              | AA              | 1947004945               |
| SNP_P4_159188_46255 | NW_004516566.1 | Scaffold1335 | 46255                   | GG                              | AA              | 1947004947               |
| SNP_P4_159190_46291 | NW_004516566.1 | Scaffold1335 | 46291                   | GG                              | AA              | 1947004949               |
| SNP_P4_159191_46361 | NW_004516566.1 | Scaffold1335 | 46361                   | GG                              | TT              | 1947004951               |
| SNP_P4_159192_46375 | NW_004516566.1 | Scaffold1335 | 46375                   | CC                              | TT              | 1947004952               |
| SNP_P4_159193_46433 | NW_004516566.1 | Scaffold1335 | 46433                   | TT                              | CC              | 1947004954               |
| SNP_P4_159194_46439 | NW_004516566.1 | Scaffold1335 | 46439                   | GG                              | TT              | 1947004956               |
| SNP_P4_159195_46471 | NW_004516566.1 | Scaffold1335 | 46471                   | TT                              | CC              | 1947004958               |
| SNP_P4_159196_2847  | NW_004516567.1 | Scaffold1337 | 2847                    | GG                              | AA              | 1947004960               |
| SNP_P4_159198_40986 | NW_004516567.1 | Scaffold1337 | 40986                   | GG                              | AA              | 1947004962               |
| SNP_P4_159199_41478 | NW_004516567.1 | Scaffold1337 | 41478                   | TT                              | GG              | 1947004964               |
| SNP_P4_159200_41495 | NW_004516567.1 | Scaffold1337 | 41495                   | CC                              | TT              | 1947004966               |
| SNP_P4_159201_43016 | NW_004516567.1 | Scaffold1337 | 43016                   | TT                              | CC              | 1947004968               |
| SNP_P4_159202_43081 | NW_004516567.1 | Scaffold1337 | 43081                   | CC                              | AA              | 1947004970               |
| SNP_P4_159203_45518 | NW_004516567.1 | Scaffold1337 | 45518                   | AA                              | GG              | 1947004972               |
| SNP_P4_159205_69487 | NW_004516567.1 | Scaffold1337 | 69487                   | AA                              | CC              | 1947004974               |
| SNP_P4_159206_1266  | NW_004516569.1 | Scaffold1339 | 1266                    | TT                              | AA              | 1947004976               |
| SNP_P4_159207_1296  | NW_004516569.1 | Scaffold1339 | 1296                    | TT                              | GG              | 1947004978               |

| SNPs IDs             | Chromosome IDs | Chromosomes    | Physical positions (bp) | CDC Frontier (Reference genome) | (ILWC46 & LPNB) | NCBI SNPdb Accession IDs |
|----------------------|----------------|----------------|-------------------------|---------------------------------|-----------------|--------------------------|
| SNP_P4_159208_1301   | NW_004516569.1 | Scaffold1339   | 1301                    | GG                              | CC              | 1947004980               |
| SNP_P4_159209_1555   | NW_004516569.1 | Scaffold1339   | 1555                    | AA                              | CC              | 1947004982               |
| SNP_P4_159210_1689   | NW_004516569.1 | Scaffold1339   | 1689                    | TT                              | CC              | 1947004983               |
| SNP_P4_159211_1882   | NW_004516569.1 | Scaffold1339   | 1882                    | CC                              | GG              | 1947004985               |
| SNP_P4_159212_1883   | NW_004516569.1 | Scaffold1339   | 1883                    | TT                              | GG              | 1947004987               |
| SNP_P4_159214_269    | NW_004516570.1 | Scaffold1342   | 269                     | GG                              | AA              | 1947004989               |
| SNP_P4_159215_315    | NW_004516570.1 | Scaffold1342   | 315                     | CC                              | TT              | 1947004991               |
| SNP_P4_159216_2996   | NW_004516571.1 | Scaffold1343   | 2996                    | CC                              | TT              | 1947004993               |
| SNP_P4_159217_4666   | NW_004516571.1 | Scaffold1343   | 4666                    | CC                              | TT              | 1947004995               |
| SNP_P4_159218_5490   | NW_004516571.1 | Scaffold1343   | 5490                    | GG                              | AA              | 1947004997               |
| SNP_P4_159219_5539   | NW_004516571.1 | Scaffold1343   | 5539                    | GG                              | CC              | 1947004998               |
| SNP_P4_159220_5560   | NW_004516571.1 | Scaffold1343   | 5560                    | GG                              | AA              | 1947005000               |
| SNP_P4_159221_5673   | NW_004516571.1 | Scaffold1343   | 5673                    | GG                              | AA              | 1947005002               |
| SNP_P4_159222_5796   | NW_004516571.1 | Scaffold1343   | 5796                    | CC                              | TT              | 1947005004               |
| SNP_P4_159223_473    | NW_004516572.1 | Scaffold1344   | 473                     | CC                              | GG              | 1947005006               |
| SNP_P4_159224_483    | NW_004516572.1 | Scaffold1344   | 483                     | CC                              | TT              | 1947005008               |
| SNP_P4_159225_2075   | NW_004516572.1 | Scaffold1344   | 2075                    | GG                              | CC              | 1947005010               |
| SNP_P4_159226_2575   | NW_004516572.1 | Scaffold1344   | 2575                    | TT                              | CC              | 1947005012               |
| SNP_P4_159227_11963  | NW_004516572.1 | Scaffold1344   | 11963                   | GG                              | AA              | 1947005014               |
| SNP_P4_159228_11982  | NW_004516572.1 | Scaffold1344   | 11982                   | GG                              | AA              | 1947005016               |
| SNP_P4_159229_14219  | NW_004516572.1 | Scaffold1344   | 14219                   | TT                              | CC              | 1947005018               |
| SNP_P4_159230_14605  | NW_004516572.1 | Scaffold1344   | 14605                   | TT                              | AA              | 1947005020               |
| SNP_P4_159231_20708  | NW_004516572.1 | Scaffold1344   | 20708                   | GG                              | AA              | 1947005022               |
| SNP_P4_159232_21040  | NW_004516572.1 | Scaffold1344   | 21040                   | AA                              | GG              | 1947005024               |
| SNP_P4_159233_21110  | NW_004516572.1 | Scaffold1344   | 21110                   | CC                              | TT              | 1947005026               |
| SNP_P4_159234_22170  | NW_004516572.1 | Scaffold1344   | 22170                   | TT                              | CC              | 1947005028               |
| SNP_P4_159235_3269   | NW_004516574.1 | Scaffold1348_1 | 3269                    | AA                              | GG              | 1947005030               |
| SNP_P4_159236_15326  | NW_004516574.1 | Scaffold1348_1 | 15326                   | CC                              | TT              | 1947005032               |
| SNP_P4_159237_22206  | NW_004516574.1 | Scaffold1348_1 | 22206                   | TT                              | AA              | 1947005034               |
| SNP_P4_159238_23268  | NW_004516574.1 | Scaffold1348_1 | 23268                   | CC                              | TT              | 1947005036               |
| SNP_P4_159240_35494  | NW_004516574.1 | Scaffold1348_1 | 35494                   | CC                              | TT              | 1947005038               |
| SNP_P4_159241_57067  | NW_004516574.1 | Scaffold1348_1 | 57067                   | AA                              | TT              | 1947005040               |
| SNP_P4_159243_78363  | NW_004516574.1 | Scaffold1348_1 | 78363                   | CC                              | TT              | 1947005042               |
| SNP_P4_159244_96711  | NW_004516574.1 | Scaffold1348_1 | 96711                   | CC                              | GG              | 1947005043               |
| SNP_P4_159246_107326 | NW_004516574.1 | Scaffold1348_1 | 107326                  | GG                              | CC              | 1947005045               |
| SNP_P4_159247_113340 | NW_004516574.1 | Scaffold1348_1 | 113340                  | GG                              | CC              | 1947005047               |
| SNP_P4_159248_129870 | NW_004516574.1 | Scaffold1348_1 | 129870                  | GG                              | AA              | 1947005049               |
| SNP_P4_159250_152776 | NW_004516574.1 | Scaffold1348_1 | 152776                  | TT                              | AA              | 1947005051               |
| SNP_P4_159251_157443 | NW_004516574.1 | Scaffold1348_1 | 157443                  | TT                              | AA              | 1947005053               |
| SNP_P4_159252_171740 | NW_004516574.1 | Scaffold1348_1 | 171740                  | AA                              | GG              | 1947005055               |
| SNP_P4_159253_171791 | NW_004516574.1 | Scaffold1348_1 | 171791                  | AA                              | GG              | 1947005057               |
| SNP_P4_159254_171810 | NW_004516574.1 | Scaffold1348_1 | 171810                  | GG                              | AA              | 1947005058               |



| SNPs IDs             | Chromosome IDs | Chromosomes    | Physical positions (bp) | CDC Frontier (Reference genome) | (ILWC46 & LPNB) | NCBI SNPdb Accession IDs |
|----------------------|----------------|----------------|-------------------------|---------------------------------|-----------------|--------------------------|
| SNP_P4_159255_171861 | NW_004516574.1 | Scaffold1348_1 | 171861                  | CC                              | TT              | 1947005060               |
| SNP_P4_159256_171900 | NW_004516574.1 | Scaffold1348_1 | 171900                  | GG                              | AA              | 1947005062               |
| SNP_P4_159257_171942 | NW_004516574.1 | Scaffold1348_1 | 171942                  | AA                              | GG              | 1947005064               |
| SNP_P4_159258_172092 | NW_004516574.1 | Scaffold1348_1 | 172092                  | TT                              | CC              | 1947005066               |
| SNP_P4_159259_172094 | NW_004516574.1 | Scaffold1348_1 | 172094                  | TT                              | CC              | 1947005068               |
| SNP_P4_159260_172097 | NW_004516574.1 | Scaffold1348_1 | 172097                  | AA                              | TT              | 1947005070               |
| SNP_P4_159261_172098 | NW_004516574.1 | Scaffold1348_1 | 172098                  | AA                              | TT              | 1947005072               |
| SNP_P4_159262_172099 | NW_004516574.1 | Scaffold1348_1 | 172099                  | TT                              | AA              | 1947005074               |
| SNP_P4_159263_172126 | NW_004516574.1 | Scaffold1348_1 | 172126                  | AA                              | GG              | 1947005075               |
| SNP_P4_159264_172151 | NW_004516574.1 | Scaffold1348_1 | 172151                  | TT                              | AA              | 1947005077               |
| SNP_P4_159265_172191 | NW_004516574.1 | Scaffold1348_1 | 172191                  | TT                              | CC              | 1947005079               |
| SNP_P4_159266_172249 | NW_004516574.1 | Scaffold1348_1 | 172249                  | CC                              | AA              | 1947005081               |
| SNP_P4_159267_172265 | NW_004516574.1 | Scaffold1348_1 | 172265                  | TT                              | GG              | 1947005083               |
| SNP_P4_159268_172274 | NW_004516574.1 | Scaffold1348_1 | 172274                  | CC                              | TT              | 1947005085               |
| SNP_P4_159269_172476 | NW_004516574.1 | Scaffold1348_1 | 172476                  | CC                              | TT              | 1947005087               |
| SNP_P4_159270_172527 | NW_004516574.1 | Scaffold1348_1 | 172527                  | GG                              | AA              | 1947005089               |
| SNP_P4_159271_189296 | NW_004516574.1 | Scaffold1348_1 | 189296                  | GG                              | AA              | 1947005091               |
| SNP_P4_159272_190473 | NW_004516574.1 | Scaffold1348_1 | 190473                  | AA                              | GG              | 1947005093               |
| SNP_P4_159273_194511 | NW_004516574.1 | Scaffold1348_1 | 194511                  | TT                              | AA              | 1947005095               |
| SNP_P4_159274_194535 | NW_004516574.1 | Scaffold1348_1 | 194535                  | CC                              | TT              | 1947005096               |
| SNP_P4_159275_194559 | NW_004516574.1 | Scaffold1348_1 | 194559                  | TT                              | GG              | 1947005098               |
| SNP_P4_159276_194635 | NW_004516574.1 | Scaffold1348_1 | 194635                  | CC                              | AA              | 1947005100               |
| SNP_P4_159277_194639 | NW_004516574.1 | Scaffold1348_1 | 194639                  | CC                              | GG              | 1947005102               |
| SNP_P4_159278_194658 | NW_004516574.1 | Scaffold1348_1 | 194658                  | GG                              | AA              | 1947005104               |
| SNP_P4_159279_195121 | NW_004516574.1 | Scaffold1348_1 | 195121                  | TT                              | CC              | 1947005106               |
| SNP_P4_159280_195131 | NW_004516574.1 | Scaffold1348_1 | 195131                  | GG                              | TT              | 1947005108               |
| SNP_P4_159281_195141 | NW_004516574.1 | Scaffold1348_1 | 195141                  | GG                              | AA              | 1947005110               |
| SNP_P4_159283_222606 | NW_004516574.1 | Scaffold1348_1 | 222606                  | TT                              | CC              | 1947005112               |
| SNP_P4_159286_231771 | NW_004516574.1 | Scaffold1348_1 | 231771                  | TT                              | CC              | 1947005114               |
| SNP_P4_159288_236746 | NW_004516574.1 | Scaffold1348_1 | 236746                  | GG                              | AA              | 1947005116               |
| SNP_P4_159289_236760 | NW_004516574.1 | Scaffold1348_1 | 236760                  | CC                              | AA              | 1947005118               |
| SNP_P4_159290_250135 | NW_004516574.1 | Scaffold1348_1 | 250135                  | TT                              | CC              | 1947005120               |
| SNP_P4_159291_308881 | NW_004516574.1 | Scaffold1348_1 | 308881                  | TT                              | GG              | 1947005122               |
| SNP_P4_159293_315787 | NW_004516574.1 | Scaffold1348_1 | 315787                  | GG                              | CC              | 1947005124               |
| SNP_P4_159294_317278 | NW_004516574.1 | Scaffold1348_1 | 317278                  | CC                              | TT              | 1947005126               |
| SNP_P4_159295_364817 | NW_004516574.1 | Scaffold1348_1 | 364817                  | CC                              | AA              | 1947005128               |
| SNP_P4_159296_383819 | NW_004516574.1 | Scaffold1348_1 | 383819                  | GG                              | AA              | 1947005130               |
| SNP_P4_159297_383843 | NW_004516574.1 | Scaffold1348_1 | 383843                  | CC                              | TT              | 1947005132               |
| SNP_P4_159299_383872 | NW_004516574.1 | Scaffold1348_1 | 383872                  | AA                              | GG              | 1947005134               |
| SNP_P4_159300_384833 | NW_004516574.1 | Scaffold1348_1 | 384833                  | GG                              | TT              | 1947005136               |
| SNP_P4_159301_386323 | NW_004516574.1 | Scaffold1348_1 | 386323                  | TT                              | GG              | 1947005138               |
| SNP_P4_159302_386478 | NW_004516574.1 | Scaffold1348_1 | 386478                  | AA                              | GG              | 1947005140               |

| SNPs IDs             | Chromosome IDs | Chromosomes    | Physical positions (bp) | CDC Frontier (Reference genome) | (ILWC46 & LPNB) | NCBI SNPdb Accession IDs |
|----------------------|----------------|----------------|-------------------------|---------------------------------|-----------------|--------------------------|
| SNP_P4_159303_386577 | NW_004516574.1 | Scaffold1348_1 | 386577                  | AA                              | CC              | 1947005142               |
| SNP_P4_159304_386615 | NW_004516574.1 | Scaffold1348_1 | 386615                  | AA                              | GG              | 1947005144               |
| SNP_P4_159305_386616 | NW_004516574.1 | Scaffold1348_1 | 386616                  | TT                              | GG              | 1947005146               |
| SNP_P4_159306_397029 | NW_004516574.1 | Scaffold1348_1 | 397029                  | TT                              | CC              | 1947005148               |
| SNP_P4_159307_406872 | NW_004516574.1 | Scaffold1348_1 | 406872                  | AA                              | TT              | 1947005150               |
| SNP_P4_159308_415495 | NW_004516574.1 | Scaffold1348_1 | 415495                  | AA                              | CC              | 1947005152               |
| SNP_P4_159310_417935 | NW_004516574.1 | Scaffold1348_1 | 417935                  | AA                              | GG              | 1947005154               |
| SNP_P4_159311_420265 | NW_004516574.1 | Scaffold1348_1 | 420265                  | AA                              | CC              | 1947005156               |
| SNP_P4_159313_435422 | NW_004516574.1 | Scaffold1348_1 | 435422                  | GG                              | AA              | 1947005158               |
| SNP_P4_159314_446232 | NW_004516574.1 | Scaffold1348_1 | 446232                  | AA                              | CC              | 1947005160               |
| SNP_P4_159315_454765 | NW_004516574.1 | Scaffold1348_1 | 454765                  | AA                              | TT              | 1947005162               |
| SNP_P4_159317_502425 | NW_004516574.1 | Scaffold1348_1 | 502425                  | TT                              | CC              | 1947005164               |
| SNP_P4_159318_502469 | NW_004516574.1 | Scaffold1348_1 | 502469                  | TT                              | AA              | 1947005166               |
| SNP_P4_159319_502470 | NW_004516574.1 | Scaffold1348_1 | 502470                  | CC                              | TT              | 1947005168               |
| SNP_P4_159321_514959 | NW_004516574.1 | Scaffold1348_1 | 514959                  | AA                              | CC              | 1947005170               |
| SNP_P4_159322_519400 | NW_004516574.1 | Scaffold1348_1 | 519400                  | CC                              | TT              | 1947005172               |
| SNP_P4_159323_521825 | NW_004516574.1 | Scaffold1348_1 | 521825                  | CC                              | TT              | 1947005174               |
| SNP_P4_159325_533376 | NW_004516574.1 | Scaffold1348_1 | 533376                  | AA                              | TT              | 1947005176               |
| SNP_P4_159326_533377 | NW_004516574.1 | Scaffold1348_1 | 533377                  | AA                              | TT              | 1947005178               |
| SNP_P4_159327_565597 | NW_004516574.1 | Scaffold1348_1 | 565597                  | CC                              | TT              | 1947005180               |
| SNP_P4_159328_571861 | NW_004516574.1 | Scaffold1348_1 | 571861                  | GG                              | AA              | 1947005182               |
| SNP_P4_159330_580127 | NW_004516574.1 | Scaffold1348_1 | 580127                  | CC                              | TT              | 1947005184               |
| SNP_P4_159331_580416 | NW_004516574.1 | Scaffold1348_1 | 580416                  | TT                              | AA              | 1947005186               |
| SNP_P4_159332_633298 | NW_004516574.1 | Scaffold1348_1 | 633298                  | GG                              | TT              | 1947005188               |
| SNP_P4_159334_634699 | NW_004516574.1 | Scaffold1348_1 | 634699                  | GG                              | AA              | 1947005190               |
| SNP_P4_159335_634940 | NW_004516574.1 | Scaffold1348_1 | 634940                  | CC                              | TT              | 1947005192               |
| SNP_P4_159336_642773 | NW_004516574.1 | Scaffold1348_1 | 642773                  | AA                              | CC              | 1947005194               |
| SNP_P4_159337_649286 | NW_004516574.1 | Scaffold1348_1 | 649286                  | AA                              | TT              | 1947005196               |
| SNP_P4_159340_698071 | NW_004516574.1 | Scaffold1348_1 | 698071                  | GG                              | AA              | 1947005198               |
| SNP_P4_159341_699499 | NW_004516574.1 | Scaffold1348_1 | 699499                  | GG                              | CC              | 1947005200               |
| SNP_P4_159344_712663 | NW_004516574.1 | Scaffold1348_1 | 712663                  | TT                              | CC              | 1947005202               |
| SNP_P4_159346_741980 | NW_004516574.1 | Scaffold1348_1 | 741980                  | AA                              | GG              | 1947005204               |
| SNP_P4_159347_752681 | NW_004516574.1 | Scaffold1348_1 | 752681                  | CC                              | TT              | 1947005205               |
| SNP_P4_159348_761161 | NW_004516574.1 | Scaffold1348_1 | 761161                  | GG                              | CC              | 1947005207               |
| SNP_P4_159350_786179 | NW_004516574.1 | Scaffold1348_1 | 786179                  | AA                              | GG              | 1947005209               |
| SNP_P4_159351_789112 | NW_004516574.1 | Scaffold1348_1 | 789112                  | TT                              | CC              | 1947005211               |
| SNP_P4_159352_791527 | NW_004516574.1 | Scaffold1348_1 | 791527                  | AA                              | GG              | 1947005213               |
| SNP_P4_159353_821282 | NW_004516574.1 | Scaffold1348_1 | 821282                  | TT                              | CC              | 1947005215               |
| SNP_P4_159355_832032 | NW_004516574.1 | Scaffold1348_1 | 832032                  | TT                              | CC              | 1947005217               |
| SNP_P4_159356_850790 | NW_004516574.1 | Scaffold1348_1 | 850790                  | AA                              | TT              | 1947005219               |
| SNP_P4_159357_858978 | NW_004516574.1 | Scaffold1348_1 | 858978                  | CC                              | TT              | 1947005221               |
| SNP_P4_159358_883373 | NW_004516574.1 | Scaffold1348_1 | 883373                  | AA                              | GG              | 1947005223               |

| SNPs IDs              | Chromosome IDs | Chromosomes    | Physical positions (bp) | CDC Frontier (Reference genome) | (ILWC46 & LPNB) | NCBI SNPdb Accession IDs |
|-----------------------|----------------|----------------|-------------------------|---------------------------------|-----------------|--------------------------|
| SNP_P4_159359_883375  | NW_004516574.1 | Scaffold1348_1 | 883375                  | TT                              | GG              | 1947005225               |
| SNP_P4_159360_883388  | NW_004516574.1 | Scaffold1348_1 | 883388                  | AA                              | TT              | 1947005227               |
| SNP_P4_159361_887781  | NW_004516574.1 | Scaffold1348_1 | 887781                  | CC                              | TT              | 1947005229               |
| SNP_P4_159362_888024  | NW_004516574.1 | Scaffold1348_1 | 888024                  | TT                              | CC              | 1947005231               |
| SNP_P4_159363_888083  | NW_004516574.1 | Scaffold1348_1 | 888083                  | CC                              | TT              | 1947005233               |
| SNP_P4_159365_888264  | NW_004516574.1 | Scaffold1348_1 | 888264                  | CC                              | TT              | 1947005235               |
| SNP_P4_159367_894333  | NW_004516574.1 | Scaffold1348_1 | 894333                  | GG                              | AA              | 1947005237               |
| SNP_P4_159368_894345  | NW_004516574.1 | Scaffold1348_1 | 894345                  | CC                              | TT              | 1947005239               |
| SNP_P4_159369_894367  | NW_004516574.1 | Scaffold1348_1 | 894367                  | GG                              | AA              | 1947005241               |
| SNP_P4_159370_894369  | NW_004516574.1 | Scaffold1348_1 | 894369                  | TT                              | CC              | 1947005243               |
| SNP_P4_159371_894377  | NW_004516574.1 | Scaffold1348_1 | 894377                  | AA                              | GG              | 1947005245               |
| SNP_P4_159372_894383  | NW_004516574.1 | Scaffold1348_1 | 894383                  | TT                              | GG              | 1947005247               |
| SNP_P4_159373_894417  | NW_004516574.1 | Scaffold1348_1 | 894417                  | CC                              | TT              | 1947005249               |
| SNP_P4_159374_894419  | NW_004516574.1 | Scaffold1348_1 | 894419                  | AA                              | GG              | 1947005251               |
| SNP_P4_159375_894574  | NW_004516574.1 | Scaffold1348_1 | 894574                  | TT                              | CC              | 1947005253               |
| SNP_P4_159376_894933  | NW_004516574.1 | Scaffold1348_1 | 894933                  | CC                              | TT              | 1947005255               |
| SNP_P4_159377_895154  | NW_004516574.1 | Scaffold1348_1 | 895154                  | GG                              | AA              | 1947005257               |
| SNP_P4_159378_899307  | NW_004516574.1 | Scaffold1348_1 | 899307                  | AA                              | GG              | 1947005259               |
| SNP_P4_159379_900659  | NW_004516574.1 | Scaffold1348_1 | 900659                  | GG                              | TT              | 1947005260               |
| SNP_P4_159381_926446  | NW_004516574.1 | Scaffold1348_1 | 926446                  | TT                              | GG              | 1947005262               |
| SNP_P4_159382_940675  | NW_004516574.1 | Scaffold1348_1 | 940675                  | CC                              | TT              | 1947005264               |
| SNP_P4_159383_948169  | NW_004516574.1 | Scaffold1348_1 | 948169                  | GG                              | AA              | 1947005266               |
| SNP_P4_159384_956240  | NW_004516574.1 | Scaffold1348_1 | 956240                  | AA                              | TT              | 1947005268               |
| SNP_P4_159385_986383  | NW_004516574.1 | Scaffold1348_1 | 986383                  | GG                              | AA              | 1947005270               |
| SNP_P4_159387_992314  | NW_004516574.1 | Scaffold1348_1 | 992314                  | AA                              | GG              | 1947005272               |
| SNP_P4_159388_1027238 | NW_004516574.1 | Scaffold1348_1 | 1027238                 | CC                              | TT              | 1947005274               |
| SNP_P4_159389_1028579 | NW_004516574.1 | Scaffold1348_1 | 1028579                 | CC                              | AA              | 1947005276               |
| SNP_P4_159390_1028601 | NW_004516574.1 | Scaffold1348_1 | 1028601                 | AA                              | CC              | 1947005278               |
| SNP_P4_159391_1028673 | NW_004516574.1 | Scaffold1348_1 | 1028673                 | AA                              | GG              | 1947005280               |
| SNP_P4_159392_1029409 | NW_004516574.1 | Scaffold1348_1 | 1029409                 | GG                              | AA              | 1947005282               |
| SNP_P4_159394_1043029 | NW_004516574.1 | Scaffold1348_1 | 1043029                 | TT                              | CC              | 1947005284               |
| SNP_P4_159395_1070841 | NW_004516574.1 | Scaffold1348_1 | 1070841                 | AA                              | TT              | 1947005286               |
| SNP_P4_159396_1076776 | NW_004516574.1 | Scaffold1348_1 | 1076776                 | GG                              | TT              | 1947005288               |
| SNP_P4_159397_1124824 | NW_004516574.1 | Scaffold1348_1 | 1124824                 | TT                              | AA              | 1947005290               |
| SNP_P4_159398_1133662 | NW_004516574.1 | Scaffold1348_1 | 1133662                 | TT                              | GG              | 1947005292               |
| SNP_P4_159399_1133664 | NW_004516574.1 | Scaffold1348_1 | 1133664                 | AA                              | CC              | 1947005294               |
| SNP_P4_159400_1138055 | NW_004516574.1 | Scaffold1348_1 | 1138055                 | AA                              | TT              | 1947005296               |
| SNP_P4_159401_1138066 | NW_004516574.1 | Scaffold1348_1 | 1138066                 | AA                              | GG              | 1947005298               |
| SNP_P4_159402_1138072 | NW_004516574.1 | Scaffold1348_1 | 1138072                 | TT                              | AA              | 1947005299               |
| SNP_P4_159403_1138097 | NW_004516574.1 | Scaffold1348_1 | 1138097                 | TT                              | AA              | 1947005301               |
| SNP_P4_159404_1138119 | NW_004516574.1 | Scaffold1348_1 | 1138119                 | CC                              | GG              | 1947005303               |
| SNP_P4_159405_1138165 | NW_004516574.1 | Scaffold1348_1 | 1138165                 | TT                              | AA              | 1947005305               |

| SNPs IDs              | Chromosome IDs | Chromosomes    | Physical positions (bp) | CDC Frontier (Reference genome) | (ILWC46 & LPNB) | NCBI SNPdb Accession IDs |
|-----------------------|----------------|----------------|-------------------------|---------------------------------|-----------------|--------------------------|
| SNP_P4_159406_1138212 | NW_004516574.1 | Scaffold1348_1 | 1138212                 | AA                              | GG              | 1947005307               |
| SNP_P4_159408_1138327 | NW_004516574.1 | Scaffold1348_1 | 1138327                 | TT                              | CC              | 1947005309               |
| SNP_P4_159409_1138346 | NW_004516574.1 | Scaffold1348_1 | 1138346                 | GG                              | TT              | 1947005311               |
| SNP_P4_159410_1138402 | NW_004516574.1 | Scaffold1348_1 | 1138402                 | AA                              | GG              | 1947005313               |
| SNP_P4_159411_1138410 | NW_004516574.1 | Scaffold1348_1 | 1138410                 | AA                              | CC              | 1947005315               |
| SNP_P4_159412_1138431 | NW_004516574.1 | Scaffold1348_1 | 1138431                 | AA                              | GG              | 1947005317               |
| SNP_P4_159413_1138440 | NW_004516574.1 | Scaffold1348_1 | 1138440                 | CC                              | GG              | 1947005319               |
| SNP_P4_159414_1138462 | NW_004516574.1 | Scaffold1348_1 | 1138462                 | AA                              | TT              | 1947005321               |
| SNP_P4_159416_1138503 | NW_004516574.1 | Scaffold1348_1 | 1138503                 | TT                              | GG              | 1947005323               |
| SNP_P4_159418_1138556 | NW_004516574.1 | Scaffold1348_1 | 1138556                 | CC                              | GG              | 1947005325               |
| SNP_P4_159419_1138587 | NW_004516574.1 | Scaffold1348_1 | 1138587                 | TT                              | CC              | 1947005327               |
| SNP_P4_159420_1138589 | NW_004516574.1 | Scaffold1348_1 | 1138589                 | AA                              | TT              | 1947005329               |
| SNP_P4_159421_1138595 | NW_004516574.1 | Scaffold1348_1 | 1138595                 | AA                              | CC              | 1947005331               |
| SNP_P4_159422_1138618 | NW_004516574.1 | Scaffold1348_1 | 1138618                 | CC                              | TT              | 1947005333               |
| SNP_P4_159423_1138634 | NW_004516574.1 | Scaffold1348_1 | 1138634                 | AA                              | TT              | 1947005335               |
| SNP_P4_159424_1138663 | NW_004516574.1 | Scaffold1348_1 | 1138663                 | GG                              | TT              | 1947005337               |
| SNP_P4_159425_1138678 | NW_004516574.1 | Scaffold1348_1 | 1138678                 | AA                              | TT              | 1947005339               |
| SNP_P4_159426_1138694 | NW_004516574.1 | Scaffold1348_1 | 1138694                 | TT                              | CC              | 1947005341               |
| SNP_P4_159427_1138696 | NW_004516574.1 | Scaffold1348_1 | 1138696                 | TT                              | CC              | 1947005343               |
| SNP_P4_159428_1138707 | NW_004516574.1 | Scaffold1348_1 | 1138707                 | AA                              | GG              | 1947005345               |
| SNP_P4_159429_1138716 | NW_004516574.1 | Scaffold1348_1 | 1138716                 | AA                              | TT              | 1947005347               |
| SNP_P4_159430_1138722 | NW_004516574.1 | Scaffold1348_1 | 1138722                 | AA                              | GG              | 1947005349               |
| SNP_P4_159431_1138725 | NW_004516574.1 | Scaffold1348_1 | 1138725                 | CC                              | AA              | 1947005351               |
| SNP_P4_159432_1138753 | NW_004516574.1 | Scaffold1348_1 | 1138753                 | TT                              | CC              | 1947005353               |
| SNP_P4_159433_1138772 | NW_004516574.1 | Scaffold1348_1 | 1138772                 | CC                              | AA              | 1947005355               |
| SNP_P4_159434_1138778 | NW_004516574.1 | Scaffold1348_1 | 1138778                 | GG                              | AA              | 1947005357               |
| SNP_P4_159435_1138782 | NW_004516574.1 | Scaffold1348_1 | 1138782                 | TT                              | CC              | 1947005359               |
| SNP_P4_159436_1138790 | NW_004516574.1 | Scaffold1348_1 | 1138790                 | CC                              | TT              | 1947005361               |
| SNP_P4_159437_1138794 | NW_004516574.1 | Scaffold1348_1 | 1138794                 | TT                              | AA              | 1947005363               |
| SNP_P4_159438_1138836 | NW_004516574.1 | Scaffold1348_1 | 1138836                 | GG                              | AA              | 1947005365               |
| SNP_P4_159439_1138841 | NW_004516574.1 | Scaffold1348_1 | 1138841                 | TT                              | CC              | 1947005367               |
| SNP_P4_159440_1138873 | NW_004516574.1 | Scaffold1348_1 | 1138873                 | TT                              | CC              | 1947005369               |
| SNP_P4_159441_1139335 | NW_004516574.1 | Scaffold1348_1 | 1139335                 | TT                              | CC              | 1947005371               |
| SNP_P4_159442_1139400 | NW_004516574.1 | Scaffold1348_1 | 1139400                 | AA                              | CC              | 1947005373               |
| SNP_P4_159443_1139403 | NW_004516574.1 | Scaffold1348_1 | 1139403                 | CC                              | TT              | 1947005375               |
| SNP_P4_159444_1139418 | NW_004516574.1 | Scaffold1348_1 | 1139418                 | AA                              | TT              | 1947005377               |
| SNP_P4_159445_1139478 | NW_004516574.1 | Scaffold1348_1 | 1139478                 | AA                              | CC              | 1947005378               |
| SNP_P4_159446_1139697 | NW_004516574.1 | Scaffold1348_1 | 1139697                 | GG                              | TT              | 1947005379               |
| SNP_P4_159447_1139769 | NW_004516574.1 | Scaffold1348_1 | 1139769                 | GG                              | TT              | 1947005380               |
| SNP_P4_159448_1139780 | NW_004516574.1 | Scaffold1348_1 | 1139780                 | AA                              | GG              | 1947005381               |
| SNP_P4_159450_1156312 | NW_004516574.1 | Scaffold1348_1 | 1156312                 | TT                              | GG              | 1947005382               |
| SNP_P4_159451_1163116 | NW_004516574.1 | Scaffold1348_1 | 1163116                 | TT                              | AA              | 1947005383               |

| SNPs IDs              | Chromosome IDs | Chromosomes    | Physical positions (bp) | CDC Frontier (Reference genome) | (ILWC46 & LPNB) | NCBI SNPdb Accession IDs |
|-----------------------|----------------|----------------|-------------------------|---------------------------------|-----------------|--------------------------|
| SNP_P4_159452_1167890 | NW_004516574.1 | Scaffold1348_1 | 1167890                 | AA                              | GG              | 1947005384               |
| SNP_P4_159453_1178573 | NW_004516574.1 | Scaffold1348_1 | 1178573                 | AA                              | TT              | 1947005385               |
| SNP_P4_159455_1205542 | NW_004516574.1 | Scaffold1348_1 | 1205542                 | TT                              | GG              | 1947005386               |
| SNP_P4_159456_1209532 | NW_004516574.1 | Scaffold1348_1 | 1209532                 | CC                              | TT              | 1947005387               |
| SNP_P4_159457_1217065 | NW_004516574.1 | Scaffold1348_1 | 1217065                 | TT                              | CC              | 1947005388               |
| SNP_P4_159458_1217094 | NW_004516574.1 | Scaffold1348_1 | 1217094                 | CC                              | TT              | 1947005389               |
| SNP_P4_159460_1231346 | NW_004516574.1 | Scaffold1348_1 | 1231346                 | CC                              | TT              | 1947005390               |
| SNP_P4_159461_1250144 | NW_004516574.1 | Scaffold1348_1 | 1250144                 | TT                              | AA              | 1947005391               |
| SNP_P4_159463_1257236 | NW_004516574.1 | Scaffold1348_1 | 1257236                 | AA                              | GG              | 1947005392               |
| SNP_P4_159464_1258146 | NW_004516574.1 | Scaffold1348_1 | 1258146                 | AA                              | GG              | 1947005393               |
| SNP_P4_159465_1262851 | NW_004516574.1 | Scaffold1348_1 | 1262851                 | TT                              | AA              | 1947005394               |
| SNP_P4_159468_1315066 | NW_004516574.1 | Scaffold1348_1 | 1315066                 | CC                              | AA              | 1947005395               |
| SNP_P4_159469_1323076 | NW_004516574.1 | Scaffold1348_1 | 1323076                 | AA                              | TT              | 1947005396               |
| SNP_P4_159470_1323087 | NW_004516574.1 | Scaffold1348_1 | 1323087                 | AA                              | GG              | 1947005397               |
| SNP_P4_159471_1323182 | NW_004516574.1 | Scaffold1348_1 | 1323182                 | TT                              | CC              | 1947005398               |
| SNP_P4_159472_1323248 | NW_004516574.1 | Scaffold1348_1 | 1323248                 | AA                              | GG              | 1947005399               |
| SNP_P4_159473_1361279 | NW_004516574.1 | Scaffold1348_1 | 1361279                 | GG                              | AA              | 1947005400               |
| SNP_P4_159475_1375679 | NW_004516574.1 | Scaffold1348_1 | 1375679                 | GG                              | AA              | 1947005401               |
| SNP_P4_159477_1392879 | NW_004516574.1 | Scaffold1348_1 | 1392879                 | TT                              | CC              | 1947005402               |
| SNP_P4_159478_1398411 | NW_004516574.1 | Scaffold1348_1 | 1398411                 | GG                              | AA              | 1947005403               |
| SNP_P4_159480_1408512 | NW_004516574.1 | Scaffold1348_1 | 1408512                 | AA                              | CC              | 1947005404               |
| SNP_P4_159481_1408548 | NW_004516574.1 | Scaffold1348_1 | 1408548                 | CC                              | AA              | 1947005405               |
| SNP_P4_159482_1408565 | NW_004516574.1 | Scaffold1348_1 | 1408565                 | CC                              | TT              | 1947005406               |
| SNP_P4_159483_1408784 | NW_004516574.1 | Scaffold1348_1 | 1408784                 | CC                              | TT              | 1947005407               |
| SNP_P4_159484_1408832 | NW_004516574.1 | Scaffold1348_1 | 1408832                 | CC                              | TT              | 1947005408               |
| SNP_P4_159485_1410187 | NW_004516574.1 | Scaffold1348_1 | 1410187                 | TT                              | CC              | 1947005409               |
| SNP_P4_159486_1410194 | NW_004516574.1 | Scaffold1348_1 | 1410194                 | AA                              | GG              | 1947005410               |
| SNP_P4_159487_1410481 | NW_004516574.1 | Scaffold1348_1 | 1410481                 | TT                              | GG              | 1947005411               |
| SNP_P4_159488_1410522 | NW_004516574.1 | Scaffold1348_1 | 1410522                 | AA                              | GG              | 1947005412               |
| SNP_P4_159489_1410556 | NW_004516574.1 | Scaffold1348_1 | 1410556                 | TT                              | CC              | 1947005413               |
| SNP_P4_159490_370     | NW_004516576.1 | Scaffold1351   | 370                     | TT                              | GG              | 1947005414               |
| SNP_P4_159491_20933   | NW_004516576.1 | Scaffold1351   | 20933                   | TT                              | CC              | 1947005415               |
| SNP_P4_159492_20950   | NW_004516576.1 | Scaffold1351   | 20950                   | AA                              | CC              | 1947005416               |
| SNP_P4_159493_20962   | NW_004516576.1 | Scaffold1351   | 20962                   | GG                              | AA              | 1947005417               |
| SNP_P4_159494_20964   | NW_004516576.1 | Scaffold1351   | 20964                   | AA                              | CC              | 1947005418               |
| SNP_P4_159495_21755   | NW_004516576.1 | Scaffold1351   | 21755                   | TT                              | AA              | 1947005419               |
| SNP_P4_159496_21764   | NW_004516576.1 | Scaffold1351   | 21764                   | TT                              | CC              | 1947005420               |
| SNP_P4_159497_22449   | NW_004516576.1 | Scaffold1351   | 22449                   | AA                              | CC              | 1947005421               |
| SNP_P4_159498_45779   | NW_004516576.1 | Scaffold1351   | 45779                   | TT                              | CC              | 1947005422               |
| SNP_P4_159499_54747   | NW_004516576.1 | Scaffold1351   | 54747                   | AA                              | GG              | 1947005423               |
| SNP_P4_159500_61922   | NW_004516576.1 | Scaffold1351   | 61922                   | CC                              | GG              | 1947005424               |
| SNP_P4_159501_62507   | NW_004516576.1 | Scaffold1351   | 62507                   | CC                              | AA              | 1947005425               |

| SNPs IDs             | Chromosome IDs | Chromosomes  | Physical positions (bp) | CDC Frontier (Reference genome) | (ILWC46 & LPNB) | NCBI SNPdb Accession IDs |
|----------------------|----------------|--------------|-------------------------|---------------------------------|-----------------|--------------------------|
| SNP_P4_159502_62536  | NW_004516576.1 | Scaffold1351 | 62536                   | CC                              | TT              | 1947005426               |
| SNP_P4_159503_62544  | NW_004516576.1 | Scaffold1351 | 62544                   | CC                              | TT              | 1947005427               |
| SNP_P4_159504_62548  | NW_004516576.1 | Scaffold1351 | 62548                   | CC                              | AA              | 1947005429               |
| SNP_P4_159505_62568  | NW_004516576.1 | Scaffold1351 | 62568                   | GG                              | AA              | 1947005431               |
| SNP_P4_159506_62577  | NW_004516576.1 | Scaffold1351 | 62577                   | CC                              | GG              | 1947005433               |
| SNP_P4_159507_62597  | NW_004516576.1 | Scaffold1351 | 62597                   | GG                              | AA              | 1947005435               |
| SNP_P4_159508_62760  | NW_004516576.1 | Scaffold1351 | 62760                   | TT                              | AA              | 1947005437               |
| SNP_P4_159509_66694  | NW_004516576.1 | Scaffold1351 | 66694                   | TT                              | CC              | 1947005439               |
| SNP_P4_159510_66708  | NW_004516576.1 | Scaffold1351 | 66708                   | CC                              | TT              | 1947005441               |
| SNP_P4_159511_66712  | NW_004516576.1 | Scaffold1351 | 66712                   | TT                              | AA              | 1947005443               |
| SNP_P4_159512_67037  | NW_004516576.1 | Scaffold1351 | 67037                   | GG                              | AA              | 1947005445               |
| SNP_P4_159513_67052  | NW_004516576.1 | Scaffold1351 | 67052                   | GG                              | AA              | 1947005447               |
| SNP_P4_159514_67094  | NW_004516576.1 | Scaffold1351 | 67094                   | TT                              | CC              | 1947005449               |
| SNP_P4_159516_97121  | NW_004516576.1 | Scaffold1351 | 97121                   | GG                              | CC              | 1947005451               |
| SNP_P4_159518_109859 | NW_004516576.1 | Scaffold1351 | 109859                  | AA                              | CC              | 1947005453               |
| SNP_P4_159519_109864 | NW_004516576.1 | Scaffold1351 | 109864                  | AA                              | GG              | 1947005455               |
| SNP_P4_159521_156104 | NW_004516576.1 | Scaffold1351 | 156104                  | CC                              | AA              | 1947005457               |
| SNP_P4_159522_163210 | NW_004516576.1 | Scaffold1351 | 163210                  | AA                              | GG              | 1947005459               |
| SNP_P4_159523_170841 | NW_004516576.1 | Scaffold1351 | 170841                  | GG                              | AA              | 1947005461               |
| SNP_P4_159524_170862 | NW_004516576.1 | Scaffold1351 | 170862                  | CC                              | TT              | 1947005463               |
| SNP_P4_159525_171120 | NW_004516576.1 | Scaffold1351 | 171120                  | AA                              | GG              | 1947005465               |
| SNP_P4_159526_174307 | NW_004516576.1 | Scaffold1351 | 174307                  | CC                              | TT              | 1947005467               |
| SNP_P4_159527_174316 | NW_004516576.1 | Scaffold1351 | 174316                  | AA                              | TT              | 1947005469               |
| SNP_P4_159528_174329 | NW_004516576.1 | Scaffold1351 | 174329                  | CC                              | TT              | 1947005472               |
| SNP_P4_159529_174380 | NW_004516576.1 | Scaffold1351 | 174380                  | AA                              | GG              | 1947005474               |
| SNP_P4_159530_174739 | NW_004516576.1 | Scaffold1351 | 174739                  | TT                              | AA              | 1947005476               |
| SNP_P4_159531_177061 | NW_004516576.1 | Scaffold1351 | 177061                  | GG                              | TT              | 1947005478               |
| SNP_P4_159532_177068 | NW_004516576.1 | Scaffold1351 | 177068                  | GG                              | AA              | 1947005480               |
| SNP_P4_159533_177148 | NW_004516576.1 | Scaffold1351 | 177148                  | CC                              | TT              | 1947005482               |
| SNP_P4_159534_194779 | NW_004516576.1 | Scaffold1351 | 194779                  | GG                              | TT              | 1947005484               |
| SNP_P4_159535_196023 | NW_004516576.1 | Scaffold1351 | 196023                  | TT                              | AA              | 1947005486               |
| SNP_P4_159536_198685 | NW_004516576.1 | Scaffold1351 | 198685                  | GG                              | AA              | 1947005488               |
| SNP_P4_159537_198952 | NW_004516576.1 | Scaffold1351 | 198952                  | CC                              | TT              | 1947005490               |
| SNP_P4_159538_198998 | NW_004516576.1 | Scaffold1351 | 198998                  | CC                              | TT              | 1947005492               |
| SNP_P4_159540_211385 | NW_004516576.1 | Scaffold1351 | 211385                  | AA                              | TT              | 1947005494               |
| SNP_P4_159541_217634 | NW_004516576.1 | Scaffold1351 | 217634                  | TT                              | AA              | 1947005496               |
| SNP_P4_159542_218061 | NW_004516576.1 | Scaffold1351 | 218061                  | TT                              | CC              | 1947005498               |
| SNP_P4_159543_224364 | NW_004516576.1 | Scaffold1351 | 224364                  | GG                              | TT              | 1947005500               |
| SNP_P4_159544_254323 | NW_004516576.1 | Scaffold1351 | 254323                  | GG                              | AA              | 1947005502               |
| SNP_P4_159545_257201 | NW_004516576.1 | Scaffold1351 | 257201                  | GG                              | AA              | 1947005504               |
| SNP_P4_159546_269205 | NW_004516576.1 | Scaffold1351 | 269205                  | TT                              | AA              | 1947005506               |
| SNP_P4_159547_274685 | NW_004516576.1 | Scaffold1351 | 274685                  | CC                              | TT              | 1947005508               |

| SNPs IDs             | Chromosome IDs | Chromosomes  | Physical positions (bp) | CDC Frontier (Reference genome) | (ILWC46 & LPNB) | NCBI SNPdb Accession IDs |
|----------------------|----------------|--------------|-------------------------|---------------------------------|-----------------|--------------------------|
| SNP_P4_159548_274726 | NW_004516576.1 | Scaffold1351 | 274726                  | GG                              | AA              | 1947005510               |
| SNP_P4_159549_274812 | NW_004516576.1 | Scaffold1351 | 274812                  | CC                              | TT              | 1947005512               |
| SNP_P4_159550_274912 | NW_004516576.1 | Scaffold1351 | 274912                  | AA                              | CC              | 1947005514               |
| SNP_P4_159551_279624 | NW_004516576.1 | Scaffold1351 | 279624                  | TT                              | CC              | 1947005516               |
| SNP_P4_159552_279649 | NW_004516576.1 | Scaffold1351 | 279649                  | TT                              | AA              | 1947005518               |
| SNP_P4_159553_284498 | NW_004516576.1 | Scaffold1351 | 284498                  | TT                              | AA              | 1947005521               |
| SNP_P4_159554_286240 | NW_004516576.1 | Scaffold1351 | 286240                  | AA                              | GG              | 1947005523               |
| SNP_P4_159555_295969 | NW_004516576.1 | Scaffold1351 | 295969                  | CC                              | TT              | 1947005525               |
| SNP_P4_159556_296582 | NW_004516576.1 | Scaffold1351 | 296582                  | TT                              | CC              | 1947005527               |
| SNP_P4_159557_302704 | NW_004516576.1 | Scaffold1351 | 302704                  | CC                              | TT              | 1947005529               |
| SNP_P4_159558_302713 | NW_004516576.1 | Scaffold1351 | 302713                  | AA                              | GG              | 1947005531               |
| SNP_P4_159559_309474 | NW_004516576.1 | Scaffold1351 | 309474                  | AA                              | CC              | 1947005533               |
| SNP_P4_159560_318002 | NW_004516576.1 | Scaffold1351 | 318002                  | CC                              | AA              | 1947005535               |
| SNP_P4_159561_327137 | NW_004516576.1 | Scaffold1351 | 327137                  | GG                              | AA              | 1947005537               |
| SNP_P4_159562_329596 | NW_004516576.1 | Scaffold1351 | 329596                  | AA                              | GG              | 1947005539               |
| SNP_P4_159563_331248 | NW_004516576.1 | Scaffold1351 | 331248                  | CC                              | AA              | 1947005541               |
| SNP_P4_159564_332801 | NW_004516576.1 | Scaffold1351 | 332801                  | AA                              | GG              | 1947005542               |
| SNP_P4_159565_338966 | NW_004516576.1 | Scaffold1351 | 338966                  | TT                              | AA              | 1947005543               |
| SNP_P4_159566_340991 | NW_004516576.1 | Scaffold1351 | 340991                  | AA                              | GG              | 1947005544               |
| SNP_P4_159567_341028 | NW_004516576.1 | Scaffold1351 | 341028                  | AA                              | GG              | 1947005545               |
| SNP_P4_159568_342056 | NW_004516576.1 | Scaffold1351 | 342056                  | AA                              | GG              | 1947005546               |
| SNP_P4_159569_342783 | NW_004516576.1 | Scaffold1351 | 342783                  | GG                              | TT              | 1947005547               |
| SNP_P4_159570_342787 | NW_004516576.1 | Scaffold1351 | 342787                  | AA                              | GG              | 1947005548               |
| SNP_P4_159571_342835 | NW_004516576.1 | Scaffold1351 | 342835                  | TT                              | CC              | 1947005549               |
| SNP_P4_159572_342856 | NW_004516576.1 | Scaffold1351 | 342856                  | CC                              | TT              | 1947005550               |
| SNP_P4_159573_352025 | NW_004516576.1 | Scaffold1351 | 352025                  | AA                              | GG              | 1947005551               |
| SNP_P4_159574_365869 | NW_004516576.1 | Scaffold1351 | 365869                  | GG                              | TT              | 1947005552               |
| SNP_P4_159575_365890 | NW_004516576.1 | Scaffold1351 | 365890                  | AA                              | GG              | 1947005553               |
| SNP_P4_159576_366068 | NW_004516576.1 | Scaffold1351 | 366068                  | GG                              | TT              | 1947005554               |
| SNP_P4_159577_366092 | NW_004516576.1 | Scaffold1351 | 366092                  | CC                              | TT              | 1947005555               |
| SNP_P4_159578_366108 | NW_004516576.1 | Scaffold1351 | 366108                  | AA                              | GG              | 1947005556               |
| SNP_P4_159579_366201 | NW_004516576.1 | Scaffold1351 | 366201                  | TT                              | AA              | 1947005557               |
| SNP_P4_159580_366273 | NW_004516576.1 | Scaffold1351 | 366273                  | TT                              | GG              | 1947005558               |
| SNP_P4_159581_2273   | NW_004516579.1 | Scaffold1354 | 2273                    | AA                              | GG              | 1947005559               |
| SNP_P4_159582_5734   | NW_004516579.1 | Scaffold1354 | 5734                    | TT                              | AA              | 1947005560               |
| SNP_P4_159583_6832   | NW_004516579.1 | Scaffold1354 | 6832                    | TT                              | CC              | 1947005561               |
| SNP_P4_159584_405    | NW_004516582.1 | Scaffold1358 | 405                     | AA                              | TT              | 1947005562               |
| SNP_P4_159585_476    | NW_004516582.1 | Scaffold1358 | 476                     | CC                              | TT              | 1947005563               |
| SNP_P4_159587_522    | NW_004516582.1 | Scaffold1358 | 522                     | TT                              | CC              | 1947005564               |
| SNP_P4_159588_532    | NW_004516582.1 | Scaffold1358 | 532                     | AA                              | TT              | 1947005565               |
| SNP_P4_159589_578    | NW_004516582.1 | Scaffold1358 | 578                     | AA                              | GG              | 1947005566               |
| SNP_P4_159590_705    | NW_004516582.1 | Scaffold1358 | 705                     | CC                              | AA              | 1947005568               |

| SNPs IDs            | Chromosome IDs | Chromosomes  | Physical positions (bp) | CDC Frontier (Reference genome) | (ILWC46 & LPNB) | NCBI SNPdb Accession IDs |
|---------------------|----------------|--------------|-------------------------|---------------------------------|-----------------|--------------------------|
| SNP_P4_159591_732   | NW_004516582.1 | Scaffold1358 | 732                     | AA                              | CC              | 1947005570               |
| SNP_P4_159592_752   | NW_004516582.1 | Scaffold1358 | 752                     | GG                              | AA              | 1947005572               |
| SNP_P4_159594_871   | NW_004516582.1 | Scaffold1358 | 871                     | TT                              | CC              | 1947005574               |
| SNP_P4_159595_919   | NW_004516582.1 | Scaffold1358 | 919                     | CC                              | AA              | 1947005576               |
| SNP_P4_159596_995   | NW_004516582.1 | Scaffold1358 | 995                     | AA                              | CC              | 1947005578               |
| SNP_P4_159597_1002  | NW_004516582.1 | Scaffold1358 | 1002                    | AA                              | TT              | 1947005580               |
| SNP_P4_159598_1229  | NW_004516582.1 | Scaffold1358 | 1229                    | AA                              | CC              | 1947005582               |
| SNP_P4_159599_4601  | NW_004516582.1 | Scaffold1358 | 4601                    | TT                              | GG              | 1947005584               |
| SNP_P4_159600_9797  | NW_004516582.1 | Scaffold1358 | 9797                    | TT                              | AA              | 1947005586               |
| SNP_P4_159601_9806  | NW_004516582.1 | Scaffold1358 | 9806                    | CC                              | AA              | 1947005588               |
| SNP_P4_159602_10073 | NW_004516582.1 | Scaffold1358 | 10073                   | GG                              | AA              | 1947005590               |
| SNP_P4_159603_10138 | NW_004516582.1 | Scaffold1358 | 10138                   | CC                              | AA              | 1947005592               |
| SNP_P4_159604_10227 | NW_004516582.1 | Scaffold1358 | 10227                   | AA                              | CC              | 1947005594               |
| SNP_P4_159605_10289 | NW_004516582.1 | Scaffold1358 | 10289                   | AA                              | TT              | 1947005596               |
| SNP_P4_159606_10450 | NW_004516582.1 | Scaffold1358 | 10450                   | TT                              | AA              | 1947005598               |
| SNP_P4_159607_10451 | NW_004516582.1 | Scaffold1358 | 10451                   | AA                              | TT              | 1947005600               |
| SNP_P4_159608_10614 | NW_004516582.1 | Scaffold1358 | 10614                   | TT                              | AA              | 1947005602               |
| SNP_P4_159609_10697 | NW_004516582.1 | Scaffold1358 | 10697                   | GG                              | AA              | 1947005604               |
| SNP_P4_159610_10858 | NW_004516582.1 | Scaffold1358 | 10858                   | AA                              | GG              | 1947005606               |
| SNP_P4_159611_11044 | NW_004516582.1 | Scaffold1358 | 11044                   | AA                              | CC              | 1947005608               |
| SNP_P4_159612_11757 | NW_004516582.1 | Scaffold1358 | 11757                   | AA                              | GG              | 1947005610               |
| SNP_P4_159613_11825 | NW_004516582.1 | Scaffold1358 | 11825                   | AA                              | GG              | 1947005612               |
| SNP_P4_159614_11896 | NW_004516582.1 | Scaffold1358 | 11896                   | AA                              | TT              | 1947005614               |
| SNP_P4_159615_11941 | NW_004516582.1 | Scaffold1358 | 11941                   | CC                              | TT              | 1947005616               |
| SNP_P4_159616_12062 | NW_004516582.1 | Scaffold1358 | 12062                   | CC                              | GG              | 1947005618               |
| SNP_P4_159617_12075 | NW_004516582.1 | Scaffold1358 | 12075                   | AA                              | GG              | 1947005620               |
| SNP_P4_159618_12088 | NW_004516582.1 | Scaffold1358 | 12088                   | CC                              | GG              | 1947005622               |
| SNP_P4_159619_12110 | NW_004516582.1 | Scaffold1358 | 12110                   | AA                              | CC              | 1947005624               |
| SNP_P4_159620_12128 | NW_004516582.1 | Scaffold1358 | 12128                   | AA                              | GG              | 1947005626               |
| SNP_P4_159621_12154 | NW_004516582.1 | Scaffold1358 | 12154                   | TT                              | AA              | 1947005628               |
| SNP_P4_159622_12155 | NW_004516582.1 | Scaffold1358 | 12155                   | AA                              | TT              | 1947005630               |
| SNP_P4_159623_12192 | NW_004516582.1 | Scaffold1358 | 12192                   | AA                              | CC              | 1947005632               |
| SNP_P4_159624_12197 | NW_004516582.1 | Scaffold1358 | 12197                   | TT                              | GG              | 1947005634               |
| SNP_P4_159625_3859  | NW_004516583.1 | Scaffold1359 | 3859                    | TT                              | CC              | 1947005636               |
| SNP_P4_159626_19218 | NW_004516583.1 | Scaffold1359 | 19218                   | AA                              | TT              | 1947005638               |
| SNP_P4_159627_42651 | NW_004516583.1 | Scaffold1359 | 42651                   | TT                              | CC              | 1947005640               |
| SNP_P4_159628_53279 | NW_004516583.1 | Scaffold1359 | 53279                   | GG                              | TT              | 1947005642               |
| SNP_P4_159629_56876 | NW_004516583.1 | Scaffold1359 | 56876                   | TT                              | CC              | 1947005644               |
| SNP_P4_159630_56883 | NW_004516583.1 | Scaffold1359 | 56883                   | AA                              | CC              | 1947005646               |
| SNP_P4_159631_56886 | NW_004516583.1 | Scaffold1359 | 56886                   | GG                              | TT              | 1947005648               |
| SNP_P4_159632_58538 | NW_004516583.1 | Scaffold1359 | 58538                   | GG                              | AA              | 1947005650               |
| SNP_P4_159633_58595 | NW_004516583.1 | Scaffold1359 | 58595                   | AA                              | GG              | 1947005652               |



| SNPs IDs             | Chromosome IDs | Chromosomes  | Physical positions (bp) | CDC Frontier (Reference genome) | (ILWC46 & LPNB) | NCBI SNPdb Accession IDs |
|----------------------|----------------|--------------|-------------------------|---------------------------------|-----------------|--------------------------|
| SNP_P4_159634_58609  | NW_004516583.1 | Scaffold1359 | 58609                   | CC                              | TT              | 1947005654               |
| SNP_P4_159635_58613  | NW_004516583.1 | Scaffold1359 | 58613                   | AA                              | GG              | 1947005656               |
| SNP_P4_159636_58834  | NW_004516583.1 | Scaffold1359 | 58834                   | TT                              | GG              | 1947005658               |
| SNP_P4_159638_74383  | NW_004516583.1 | Scaffold1359 | 74383                   | TT                              | AA              | 1947005660               |
| SNP_P4_159640_74688  | NW_004516583.1 | Scaffold1359 | 74688                   | AA                              | TT              | 1947005662               |
| SNP_P4_159641_97101  | NW_004516583.1 | Scaffold1359 | 97101                   | TT                              | CC              | 1947005664               |
| SNP_P4_159642_98497  | NW_004516583.1 | Scaffold1359 | 98497                   | TT                              | CC              | 1947005666               |
| SNP_P4_159643_98505  | NW_004516583.1 | Scaffold1359 | 98505                   | AA                              | GG              | 1947005668               |
| SNP_P4_159644_99511  | NW_004516583.1 | Scaffold1359 | 99511                   | TT                              | GG              | 1947005670               |
| SNP_P4_159645_99531  | NW_004516583.1 | Scaffold1359 | 99531                   | GG                              | TT              | 1947005672               |
| SNP_P4_159646_99544  | NW_004516583.1 | Scaffold1359 | 99544                   | TT                              | CC              | 1947005674               |
| SNP_P4_159647_101918 | NW_004516583.1 | Scaffold1359 | 101918                  | AA                              | GG              | 1947005676               |
| SNP_P4_159648_115102 | NW_004516583.1 | Scaffold1359 | 115102                  | GG                              | TT              | 1947005678               |
| SNP_P4_159649_651    | NW_004516584.1 | Scaffold1360 | 651                     | AA                              | TT              | 1947005680               |
| SNP_P4_159652_6900   | NW_004516584.1 | Scaffold1360 | 6900                    | GG                              | AA              | 1947005682               |
| SNP_P4_159653_14198  | NW_004516584.1 | Scaffold1360 | 14198                   | GG                              | TT              | 1947005684               |
| SNP_P4_159654_14354  | NW_004516584.1 | Scaffold1360 | 14354                   | AA                              | GG              | 1947005686               |
| SNP_P4_159655_14459  | NW_004516584.1 | Scaffold1360 | 14459                   | AA                              | TT              | 1947005688               |
| SNP_P4_159656_14896  | NW_004516584.1 | Scaffold1360 | 14896                   | AA                              | TT              | 1947005690               |
| SNP_P4_159657_14930  | NW_004516584.1 | Scaffold1360 | 14930                   | AA                              | GG              | 1947005692               |
| SNP_P4_159658_14978  | NW_004516584.1 | Scaffold1360 | 14978                   | AA                              | GG              | 1947005694               |
| SNP_P4_159659_15129  | NW_004516584.1 | Scaffold1360 | 15129                   | GG                              | TT              | 1947005696               |
| SNP_P4_159660_15133  | NW_004516584.1 | Scaffold1360 | 15133                   | GG                              | AA              | 1947005698               |
| SNP_P4_159661_15156  | NW_004516584.1 | Scaffold1360 | 15156                   | GG                              | AA              | 1947005700               |
| SNP_P4_159662_15188  | NW_004516584.1 | Scaffold1360 | 15188                   | AA                              | CC              | 1947005702               |
| SNP_P4_159663_16801  | NW_004516584.1 | Scaffold1360 | 16801                   | TT                              | CC              | 1947005704               |
| SNP_P4_159664_16813  | NW_004516584.1 | Scaffold1360 | 16813                   | TT                              | AA              | 1947005706               |
| SNP_P4_159665_16814  | NW_004516584.1 | Scaffold1360 | 16814                   | TT                              | AA              | 1947005708               |
| SNP_P4_159666_17301  | NW_004516584.1 | Scaffold1360 | 17301                   | GG                              | AA              | 1947005710               |
| SNP_P4_159667_17318  | NW_004516584.1 | Scaffold1360 | 17318                   | AA                              | CC              | 1947005712               |
| SNP_P4_159668_17417  | NW_004516584.1 | Scaffold1360 | 17417                   | TT                              | GG              | 1947005714               |
| SNP_P4_159669_17450  | NW_004516584.1 | Scaffold1360 | 17450                   | GG                              | AA              | 1947005716               |
| SNP_P4_159670_9817   | NW_004516585.1 | Scaffold1361 | 9817                    | TT                              | GG              | 1947005718               |
| SNP_P4_159671_10284  | NW_004516585.1 | Scaffold1361 | 10284                   | GG                              | AA              | 1947005720               |
| SNP_P4_159672_31198  | NW_004516587.1 | Scaffold1364 | 31198                   | GG                              | CC              | 1947005722               |
| SNP_P4_159673_56996  | NW_004516587.1 | Scaffold1364 | 56996                   | TT                              | AA              | 1947005724               |
| SNP_P4_159674_76674  | NW_004516587.1 | Scaffold1364 | 76674                   | CC                              | GG              | 1947005726               |
| SNP_P4_159675_76885  | NW_004516587.1 | Scaffold1364 | 76885                   | TT                              | AA              | 1947005728               |
| SNP_P4_159676_110649 | NW_004516587.1 | Scaffold1364 | 110649                  | TT                              | CC              | 1947005730               |
| SNP_P4_159677_110650 | NW_004516587.1 | Scaffold1364 | 110650                  | GG                              | TT              | 1947005732               |
| SNP_P4_159678_110670 | NW_004516587.1 | Scaffold1364 | 110670                  | TT                              | CC              | 1947005734               |
| SNP_P4_159679_110691 | NW_004516587.1 | Scaffold1364 | 110691                  | CC                              | TT              | 1947005736               |

| SNPs IDs             | Chromosome IDs | Chromosomes  | Physical positions (bp) | CDC Frontier (Reference genome) | (ILWC46 & LPNB) | NCBI SNPdb Accession IDs |
|----------------------|----------------|--------------|-------------------------|---------------------------------|-----------------|--------------------------|
| SNP_P4_159680_110722 | NW_004516587.1 | Scaffold1364 | 110722                  | GG                              | AA              | 1947005738               |
| SNP_P4_159681_111448 | NW_004516587.1 | Scaffold1364 | 111448                  | AA                              | TT              | 1947005740               |
| SNP_P4_159682_113972 | NW_004516587.1 | Scaffold1364 | 113972                  | CC                              | TT              | 1947005742               |
| SNP_P4_159683_114925 | NW_004516587.1 | Scaffold1364 | 114925                  | GG                              | AA              | 1947005744               |
| SNP_P4_159684_126014 | NW_004516587.1 | Scaffold1364 | 126014                  | GG                              | AA              | 1947005746               |
| SNP_P4_159685_132255 | NW_004516587.1 | Scaffold1364 | 132255                  | TT                              | AA              | 1947005748               |
| SNP_P4_159686_132267 | NW_004516587.1 | Scaffold1364 | 132267                  | AA                              | GG              | 1947005750               |
| SNP_P4_159687_139622 | NW_004516587.1 | Scaffold1364 | 139622                  | AA                              | GG              | 1947005752               |
| SNP_P4_159688_148069 | NW_004516587.1 | Scaffold1364 | 148069                  | AA                              | TT              | 1947005754               |
| SNP_P4_159689_148087 | NW_004516587.1 | Scaffold1364 | 148087                  | CC                              | AA              | 1947005756               |
| SNP_P4_159690_148114 | NW_004516587.1 | Scaffold1364 | 148114                  | AA                              | TT              | 1947005758               |
| SNP_P4_159691_154430 | NW_004516587.1 | Scaffold1364 | 154430                  | AA                              | GG              | 1947005760               |
| SNP_P4_159692_522    | NW_004516588.1 | Scaffold1365 | 522                     | GG                              | AA              | 1947005762               |
| SNP_P4_159693_545    | NW_004516588.1 | Scaffold1365 | 545                     | AA                              | GG              | 1947005763               |
| SNP_P4_159694_604    | NW_004516588.1 | Scaffold1365 | 604                     | AA                              | TT              | 1947005764               |
| SNP_P4_159695_4799   | NW_004516588.1 | Scaffold1365 | 4799                    | GG                              | AA              | 1947005765               |
| SNP_P4_159697_7112   | NW_004516588.1 | Scaffold1365 | 7112                    | TT                              | AA              | 1947005766               |
| SNP_P4_159698_7307   | NW_004516588.1 | Scaffold1365 | 7307                    | AA                              | TT              | 1947005768               |
| SNP_P4_159699_7404   | NW_004516588.1 | Scaffold1365 | 7404                    | GG                              | AA              | 1947005770               |
| SNP_P4_159700_7426   | NW_004516588.1 | Scaffold1365 | 7426                    | TT                              | GG              | 1947005772               |
| SNP_P4_159701_7459   | NW_004516588.1 | Scaffold1365 | 7459                    | CC                              | TT              | 1947005774               |
| SNP_P4_159702_7472   | NW_004516588.1 | Scaffold1365 | 7472                    | AA                              | TT              | 1947005776               |
| SNP_P4_159703_7662   | NW_004516588.1 | Scaffold1365 | 7662                    | GG                              | AA              | 1947005778               |
| SNP_P4_159704_7682   | NW_004516588.1 | Scaffold1365 | 7682                    | AA                              | TT              | 1947005780               |
| SNP_P4_159705_7744   | NW_004516588.1 | Scaffold1365 | 7744                    | AA                              | TT              | 1947005782               |
| SNP_P4_159706_7768   | NW_004516588.1 | Scaffold1365 | 7768                    | CC                              | TT              | 1947005784               |
| SNP_P4_159707_7774   | NW_004516588.1 | Scaffold1365 | 7774                    | GG                              | CC              | 1947005786               |
| SNP_P4_159708_8118   | NW_004516588.1 | Scaffold1365 | 8118                    | TT                              | AA              | 1947005788               |
| SNP_P4_159709_8130   | NW_004516588.1 | Scaffold1365 | 8130                    | TT                              | CC              | 1947005790               |
| SNP_P4_159710_8200   | NW_004516588.1 | Scaffold1365 | 8200                    | TT                              | AA              | 1947005792               |
| SNP_P4_159711_8212   | NW_004516588.1 | Scaffold1365 | 8212                    | AA                              | GG              | 1947005794               |
| SNP_P4_159712_8227   | NW_004516588.1 | Scaffold1365 | 8227                    | TT                              | AA              | 1947005796               |
| SNP_P4_159713_8255   | NW_004516588.1 | Scaffold1365 | 8255                    | TT                              | CC              | 1947005798               |
| SNP_P4_159714_8260   | NW_004516588.1 | Scaffold1365 | 8260                    | TT                              | CC              | 1947005800               |
| SNP_P4_159715_8277   | NW_004516588.1 | Scaffold1365 | 8277                    | GG                              | AA              | 1947005802               |
| SNP_P4_159716_8354   | NW_004516588.1 | Scaffold1365 | 8354                    | CC                              | TT              | 1947005804               |
| SNP_P4_159717_8423   | NW_004516588.1 | Scaffold1365 | 8423                    | TT                              | AA              | 1947005806               |
| SNP_P4_159718_8468   | NW_004516588.1 | Scaffold1365 | 8468                    | CC                              | GG              | 1947005808               |
| SNP_P4_159719_8525   | NW_004516588.1 | Scaffold1365 | 8525                    | CC                              | TT              | 1947005810               |
| SNP_P4_159720_8563   | NW_004516588.1 | Scaffold1365 | 8563                    | GG                              | CC              | 1947005812               |
| SNP_P4_159721_8658   | NW_004516588.1 | Scaffold1365 | 8658                    | TT                              | AA              | 1947005814               |
| SNP_P4_159722_8723   | NW_004516588.1 | Scaffold1365 | 8723                    | TT                              | GG              | 1947005816               |

| SNPs IDs             | Chromosome IDs | Chromosomes  | Physical positions (bp) | CDC Frontier (Reference genome) | (ILWC46 & LPNB) | NCBI SNPdb Accession IDs |
|----------------------|----------------|--------------|-------------------------|---------------------------------|-----------------|--------------------------|
| SNP_P4_159723_8871   | NW_004516588.1 | Scaffold1365 | 8871                    | AA                              | GG              | 1947005818               |
| SNP_P4_159724_19348  | NW_004516588.1 | Scaffold1365 | 19348                   | GG                              | AA              | 1947005820               |
| SNP_P4_159725_19355  | NW_004516588.1 | Scaffold1365 | 19355                   | AA                              | GG              | 1947005822               |
| SNP_P4_159726_19356  | NW_004516588.1 | Scaffold1365 | 19356                   | GG                              | CC              | 1947005824               |
| SNP_P4_159727_19358  | NW_004516588.1 | Scaffold1365 | 19358                   | AA                              | TT              | 1947005826               |
| SNP_P4_159728_19367  | NW_004516588.1 | Scaffold1365 | 19367                   | AA                              | GG              | 1947005828               |
| SNP_P4_159729_19374  | NW_004516588.1 | Scaffold1365 | 19374                   | GG                              | AA              | 1947005830               |
| SNP_P4_159733_74762  | NW_004516588.1 | Scaffold1365 | 74762                   | AA                              | GG              | 1947005832               |
| SNP_P4_159734_74877  | NW_004516588.1 | Scaffold1365 | 74877                   | GG                              | TT              | 1947005834               |
| SNP_P4_159735_84659  | NW_004516588.1 | Scaffold1365 | 84659                   | TT                              | AA              | 1947005836               |
| SNP_P4_159736_86598  | NW_004516588.1 | Scaffold1365 | 86598                   | TT                              | AA              | 1947005838               |
| SNP_P4_159737_86831  | NW_004516588.1 | Scaffold1365 | 86831                   | CC                              | AA              | 1947005840               |
| SNP_P4_159738_86862  | NW_004516588.1 | Scaffold1365 | 86862                   | TT                              | CC              | 1947005842               |
| SNP_P4_159739_86973  | NW_004516588.1 | Scaffold1365 | 86973                   | AA                              | GG              | 1947005844               |
| SNP_P4_159740_87050  | NW_004516588.1 | Scaffold1365 | 87050                   | CC                              | GG              | 1947005846               |
| SNP_P4_159741_87151  | NW_004516588.1 | Scaffold1365 | 87151                   | CC                              | TT              | 1947005848               |
| SNP_P4_159742_87171  | NW_004516588.1 | Scaffold1365 | 87171                   | GG                              | AA              | 1947005850               |
| SNP_P4_159743_89127  | NW_004516588.1 | Scaffold1365 | 89127                   | GG                              | AA              | 1947005852               |
| SNP_P4_159744_95245  | NW_004516588.1 | Scaffold1365 | 95245                   | GG                              | TT              | 1947005854               |
| SNP_P4_159745_95261  | NW_004516588.1 | Scaffold1365 | 95261                   | AA                              | GG              | 1947005856               |
| SNP_P4_159746_95501  | NW_004516588.1 | Scaffold1365 | 95501                   | CC                              | GG              | 1947005858               |
| SNP_P4_159747_96159  | NW_004516588.1 | Scaffold1365 | 96159                   | GG                              | TT              | 1947005860               |
| SNP_P4_159748_96525  | NW_004516588.1 | Scaffold1365 | 96525                   | CC                              | AA              | 1947005862               |
| SNP_P4_159749_96527  | NW_004516588.1 | Scaffold1365 | 96527                   | TT                              | CC              | 1947005864               |
| SNP_P4_159750_96631  | NW_004516588.1 | Scaffold1365 | 96631                   | AA                              | TT              | 1947005866               |
| SNP_P4_159751_96864  | NW_004516588.1 | Scaffold1365 | 96864                   | GG                              | AA              | 1947005868               |
| SNP_P4_159752_97347  | NW_004516588.1 | Scaffold1365 | 97347                   | CC                              | TT              | 1947005870               |
| SNP_P4_159753_97469  | NW_004516588.1 | Scaffold1365 | 97469                   | TT                              | CC              | 1947005872               |
| SNP_P4_159754_98724  | NW_004516588.1 | Scaffold1365 | 98724                   | TT                              | CC              | 1947005874               |
| SNP_P4_159755_98787  | NW_004516588.1 | Scaffold1365 | 98787                   | GG                              | CC              | 1947005876               |
| SNP_P4_159756_98885  | NW_004516588.1 | Scaffold1365 | 98885                   | CC                              | AA              | 1947005878               |
| SNP_P4_159757_98901  | NW_004516588.1 | Scaffold1365 | 98901                   | TT                              | GG              | 1947005880               |
| SNP_P4_159758_99083  | NW_004516588.1 | Scaffold1365 | 99083                   | AA                              | TT              | 1947005882               |
| SNP_P4_159759_99146  | NW_004516588.1 | Scaffold1365 | 99146                   | AA                              | GG              | 1947005884               |
| SNP_P4_159760_99150  | NW_004516588.1 | Scaffold1365 | 99150                   | GG                              | TT              | 1947005886               |
| SNP_P4_159761_99268  | NW_004516588.1 | Scaffold1365 | 99268                   | CC                              | TT              | 1947005888               |
| SNP_P4_159762_99351  | NW_004516588.1 | Scaffold1365 | 99351                   | CC                              | AA              | 1947005890               |
| SNP_P4_159763_99834  | NW_004516588.1 | Scaffold1365 | 99834                   | GG                              | TT              | 1947005892               |
| SNP_P4_159764_99872  | NW_004516588.1 | Scaffold1365 | 99872                   | TT                              | GG              | 1947005894               |
| SNP_P4_159765_100398 | NW_004516588.1 | Scaffold1365 | 100398                  | GG                              | AA              | 1947005896               |
| SNP_P4_159766_102505 | NW_004516588.1 | Scaffold1365 | 102505                  | AA                              | GG              | 1947005898               |
| SNP_P4_159767_102523 | NW_004516588.1 | Scaffold1365 | 102523                  | GG                              | TT              | 1947005900               |

| SNPs IDs             | Chromosome IDs | Chromosomes  | Physical positions (bp) | CDC Frontier (Reference genome) | (ILWC46 & LPNB) | NCBI SNPdb Accession IDs |
|----------------------|----------------|--------------|-------------------------|---------------------------------|-----------------|--------------------------|
| SNP_P4_159768_102621 | NW_004516588.1 | Scaffold1365 | 102621                  | AA                              | GG              | 1947005902               |
| SNP_P4_159769_104475 | NW_004516588.1 | Scaffold1365 | 104475                  | AA                              | TT              | 1947005904               |
| SNP_P4_159770_104476 | NW_004516588.1 | Scaffold1365 | 104476                  | TT                              | CC              | 1947005906               |
| SNP_P4_159771_558    | NW_004516589.1 | Scaffold1366 | 558                     | GG                              | CC              | 1947005908               |
| SNP_P4_159772_561    | NW_004516589.1 | Scaffold1366 | 561                     | GG                              | AA              | 1947005910               |
| SNP_P4_159773_689    | NW_004516589.1 | Scaffold1366 | 689                     | AA                              | TT              | 1947005912               |
| SNP_P4_159774_13423  | NW_004516590.1 | Scaffold1367 | 13423                   | TT                              | CC              | 1947005914               |
| SNP_P4_159776_13445  | NW_004516590.1 | Scaffold1367 | 13445                   | CC                              | TT              | 1947005916               |
| SNP_P4_159777_13672  | NW_004516590.1 | Scaffold1367 | 13672                   | CC                              | TT              | 1947005918               |
| SNP_P4_159778_22363  | NW_004516590.1 | Scaffold1367 | 22363                   | TT                              | GG              | 1947005920               |
| SNP_P4_159779_22418  | NW_004516590.1 | Scaffold1367 | 22418                   | AA                              | TT              | 1947005922               |
| SNP_P4_159780_29606  | NW_004516590.1 | Scaffold1367 | 29606                   | TT                              | GG              | 1947005924               |
| SNP_P4_159781_31184  | NW_004516590.1 | Scaffold1367 | 31184                   | CC                              | TT              | 1947005926               |
| SNP_P4_159782_3748   | NW_004516592.1 | Scaffold1369 | 3748                    | CC                              | GG              | 1947005928               |
| SNP_P4_159783_3749   | NW_004516592.1 | Scaffold1369 | 3749                    | AA                              | TT              | 1947005930               |
| SNP_P4_159784_5116   | NW_004516592.1 | Scaffold1369 | 5116                    | CC                              | AA              | 1947005932               |
| SNP_P4_159785_5212   | NW_004516592.1 | Scaffold1369 | 5212                    | AA                              | GG              | 1947005934               |
| SNP_P4_159786_5227   | NW_004516592.1 | Scaffold1369 | 5227                    | AA                              | TT              | 1947005936               |
| SNP_P4_159787_5229   | NW_004516592.1 | Scaffold1369 | 5229                    | AA                              | GG              | 1947005938               |
| SNP_P4_159788_5240   | NW_004516592.1 | Scaffold1369 | 5240                    | AA                              | GG              | 1947005940               |
| SNP_P4_159789_5253   | NW_004516592.1 | Scaffold1369 | 5253                    | AA                              | GG              | 1947005942               |
| SNP_P4_159790_16122  | NW_004516592.1 | Scaffold1369 | 16122                   | CC                              | TT              | 1947005944               |
| SNP_P4_159792_65831  | NW_004516592.1 | Scaffold1369 | 65831                   | TT                              | AA              | 1947005946               |
| SNP_P4_159793_66170  | NW_004516592.1 | Scaffold1369 | 66170                   | CC                              | TT              | 1947005948               |
| SNP_P4_159794_66172  | NW_004516592.1 | Scaffold1369 | 66172                   | AA                              | GG              | 1947005950               |
| SNP_P4_159795_68091  | NW_004516592.1 | Scaffold1369 | 68091                   | AA                              | CC              | 1947005952               |
| SNP_P4_159796_68092  | NW_004516592.1 | Scaffold1369 | 68092                   | GG                              | AA              | 1947005954               |
| SNP_P4_159797_76646  | NW_004516592.1 | Scaffold1369 | 76646                   | TT                              | AA              | 1947005956               |
| SNP_P4_159798_76676  | NW_004516592.1 | Scaffold1369 | 76676                   | TT                              | CC              | 1947005958               |
| SNP_P4_159799_76677  | NW_004516592.1 | Scaffold1369 | 76677                   | CC                              | TT              | 1947005960               |
| SNP_P4_159800_76679  | NW_004516592.1 | Scaffold1369 | 76679                   | AA                              | GG              | 1947005962               |
| SNP_P4_159801_76700  | NW_004516592.1 | Scaffold1369 | 76700                   | TT                              | CC              | 1947005964               |
| SNP_P4_159802_76702  | NW_004516592.1 | Scaffold1369 | 76702                   | TT                              | CC              | 1947005966               |
| SNP_P4_159803_76723  | NW_004516592.1 | Scaffold1369 | 76723                   | CC                              | AA              | 1947005968               |
| SNP_P4_159804_76742  | NW_004516592.1 | Scaffold1369 | 76742                   | AA                              | GG              | 1947005970               |
| SNP_P4_159805_77014  | NW_004516592.1 | Scaffold1369 | 77014                   | AA                              | GG              | 1947005972               |
| SNP_P4_159806_77107  | NW_004516592.1 | Scaffold1369 | 77107                   | AA                              | GG              | 1947005974               |
| SNP_P4_159807_77113  | NW_004516592.1 | Scaffold1369 | 77113                   | TT                              | GG              | 1947005976               |
| SNP_P4_159808_77140  | NW_004516592.1 | Scaffold1369 | 77140                   | AA                              | GG              | 1947005978               |
| SNP_P4_159809_77199  | NW_004516592.1 | Scaffold1369 | 77199                   | GG                              | TT              | 1947005980               |
| SNP_P4_159811_81027  | NW_004516592.1 | Scaffold1369 | 81027                   | AA                              | GG              | 1947005982               |
| SNP_P4_159813_196602 | NW_004516592.1 | Scaffold1369 | 196602                  | GG                              | AA              | 1947005984               |

| SNPs IDs             | Chromosome IDs | Chromosomes  | Physical positions (bp) | CDC Frontier (Reference genome) | (ILWC46 & LPNB) | NCBI SNPdb Accession IDs |
|----------------------|----------------|--------------|-------------------------|---------------------------------|-----------------|--------------------------|
| SNP_P4_159814_196910 | NW_004516592.1 | Scaffold1369 | 196910                  | GG                              | AA              | 1947005986               |
| SNP_P4_159815_196937 | NW_004516592.1 | Scaffold1369 | 196937                  | CC                              | TT              | 1947005988               |
| SNP_P4_159816_197264 | NW_004516592.1 | Scaffold1369 | 197264                  | GG                              | AA              | 1947005990               |
| SNP_P4_159818_211148 | NW_004516592.1 | Scaffold1369 | 211148                  | TT                              | AA              | 1947005992               |
| SNP_P4_159819_215564 | NW_004516592.1 | Scaffold1369 | 215564                  | TT                              | GG              | 1947005994               |
| SNP_P4_159820_215611 | NW_004516592.1 | Scaffold1369 | 215611                  | TT                              | GG              | 1947005996               |
| SNP_P4_159821_215635 | NW_004516592.1 | Scaffold1369 | 215635                  | GG                              | TT              | 1947005998               |
| SNP_P4_159822_215636 | NW_004516592.1 | Scaffold1369 | 215636                  | AA                              | GG              | 1947006000               |
| SNP_P4_159823_216004 | NW_004516592.1 | Scaffold1369 | 216004                  | CC                              | AA              | 1947006002               |
| SNP_P4_159824_216026 | NW_004516592.1 | Scaffold1369 | 216026                  | TT                              | GG              | 1947006004               |
| SNP_P4_159825_550    | NW_004516593.1 | Scaffold1370 | 550                     | AA                              | CC              | 1947006006               |
| SNP_P4_159826_597    | NW_004516593.1 | Scaffold1370 | 597                     | AA                              | GG              | 1947006008               |
| SNP_P4_159827_22792  | NW_004516593.1 | Scaffold1370 | 22792                   | AA                              | GG              | 1947006010               |
| SNP_P4_159828_22821  | NW_004516593.1 | Scaffold1370 | 22821                   | AA                              | GG              | 1947006012               |
| SNP_P4_159829_22845  | NW_004516593.1 | Scaffold1370 | 22845                   | TT                              | AA              | 1947006014               |
| SNP_P4_159830_22846  | NW_004516593.1 | Scaffold1370 | 22846                   | GG                              | AA              | 1947006016               |
| SNP_P4_159831_22870  | NW_004516593.1 | Scaffold1370 | 22870                   | AA                              | GG              | 1947006018               |
| SNP_P4_159832_23170  | NW_004516593.1 | Scaffold1370 | 23170                   | CC                              | TT              | 1947006020               |
| SNP_P4_159833_23171  | NW_004516593.1 | Scaffold1370 | 23171                   | AA                              | GG              | 1947006022               |
| SNP_P4_159834_23188  | NW_004516593.1 | Scaffold1370 | 23188                   | TT                              | CC              | 1947006024               |
| SNP_P4_159835_23196  | NW_004516593.1 | Scaffold1370 | 23196                   | AA                              | GG              | 1947006026               |
| SNP_P4_159836_27588  | NW_004516593.1 | Scaffold1370 | 27588                   | GG                              | AA              | 1947006028               |
| SNP_P4_159837_27669  | NW_004516593.1 | Scaffold1370 | 27669                   | AA                              | GG              | 1947006030               |
| SNP_P4_159838_27753  | NW_004516593.1 | Scaffold1370 | 27753                   | AA                              | GG              | 1947006032               |
| SNP_P4_159839_27854  | NW_004516593.1 | Scaffold1370 | 27854                   | AA                              | GG              | 1947006034               |
| SNP_P4_159840_27871  | NW_004516593.1 | Scaffold1370 | 27871                   | TT                              | CC              | 1947006036               |
| SNP_P4_159841_27890  | NW_004516593.1 | Scaffold1370 | 27890                   | TT                              | GG              | 1947006038               |
| SNP_P4_159842_27894  | NW_004516593.1 | Scaffold1370 | 27894                   | AA                              | GG              | 1947006040               |
| SNP_P4_159843_27901  | NW_004516593.1 | Scaffold1370 | 27901                   | AA                              | GG              | 1947006042               |
| SNP_P4_159844_27931  | NW_004516593.1 | Scaffold1370 | 27931                   | AA                              | GG              | 1947006044               |
| SNP_P4_159845_27935  | NW_004516593.1 | Scaffold1370 | 27935                   | GG                              | TT              | 1947006046               |
| SNP_P4_159846_27936  | NW_004516593.1 | Scaffold1370 | 27936                   | CC                              | TT              | 1947006048               |
| SNP_P4_159847_27946  | NW_004516593.1 | Scaffold1370 | 27946                   | AA                              | GG              | 1947006050               |
| SNP_P4_159848_27961  | NW_004516593.1 | Scaffold1370 | 27961                   | CC                              | TT              | 1947006052               |
| SNP_P4_159849_27997  | NW_004516593.1 | Scaffold1370 | 27997                   | GG                              | AA              | 1947006054               |
| SNP_P4_159850_28004  | NW_004516593.1 | Scaffold1370 | 28004                   | CC                              | TT              | 1947006056               |
| SNP_P4_159851_28040  | NW_004516593.1 | Scaffold1370 | 28040                   | TT                              | CC              | 1947006058               |
| SNP_P4_159852_31044  | NW_004516593.1 | Scaffold1370 | 31044                   | AA                              | CC              | 1947006060               |
| SNP_P4_159853_51391  | NW_004516593.1 | Scaffold1370 | 51391                   | TT                              | CC              | 1947006062               |
| SNP_P4_159854_84000  | NW_004516593.1 | Scaffold1370 | 84000                   | CC                              | TT              | 1947006064               |
| SNP_P4_159855_84057  | NW_004516593.1 | Scaffold1370 | 84057                   | AA                              | CC              | 1947006066               |
| SNP_P4_159856_85926  | NW_004516593.1 | Scaffold1370 | 85926                   | TT                              | GG              | 1947006068               |

| SNPs IDs             | Chromosome IDs | Chromosomes  | Physical positions (bp) | CDC Frontier (Reference genome) | (ILWC46 & LPNB) | NCBI SNPdb Accession IDs |
|----------------------|----------------|--------------|-------------------------|---------------------------------|-----------------|--------------------------|
| SNP_P4_159857_86070  | NW_004516593.1 | Scaffold1370 | 86070                   | AA                              | CC              | 1947006070               |
| SNP_P4_159858_86264  | NW_004516593.1 | Scaffold1370 | 86264                   | AA                              | GG              | 1947006072               |
| SNP_P4_159860_86394  | NW_004516593.1 | Scaffold1370 | 86394                   | CC                              | GG              | 1947006074               |
| SNP_P4_159861_86437  | NW_004516593.1 | Scaffold1370 | 86437                   | GG                              | AA              | 1947006076               |
| SNP_P4_159862_20233  | NW_004516594.1 | Scaffold1371 | 20233                   | CC                              | TT              | 1947006078               |
| SNP_P4_159863_20287  | NW_004516594.1 | Scaffold1371 | 20287                   | TT                              | AA              | 1947006080               |
| SNP_P4_159864_26768  | NW_004516594.1 | Scaffold1371 | 26768                   | AA                              | CC              | 1947006082               |
| SNP_P4_159865_26786  | NW_004516594.1 | Scaffold1371 | 26786                   | AA                              | CC              | 1947006084               |
| SNP_P4_159866_27162  | NW_004516594.1 | Scaffold1371 | 27162                   | AA                              | GG              | 1947006086               |
| SNP_P4_159867_27238  | NW_004516594.1 | Scaffold1371 | 27238                   | GG                              | TT              | 1947006088               |
| SNP_P4_159868_27294  | NW_004516594.1 | Scaffold1371 | 27294                   | AA                              | TT              | 1947006090               |
| SNP_P4_159869_27363  | NW_004516594.1 | Scaffold1371 | 27363                   | GG                              | AA              | 1947006092               |
| SNP_P4_159870_27418  | NW_004516594.1 | Scaffold1371 | 27418                   | AA                              | GG              | 1947006094               |
| SNP_P4_159871_27423  | NW_004516594.1 | Scaffold1371 | 27423                   | CC                              | TT              | 1947006096               |
| SNP_P4_159872_27526  | NW_004516594.1 | Scaffold1371 | 27526                   | TT                              | CC              | 1947006098               |
| SNP_P4_159873_27548  | NW_004516594.1 | Scaffold1371 | 27548                   | GG                              | AA              | 1947006100               |
| SNP_P4_159874_27612  | NW_004516594.1 | Scaffold1371 | 27612                   | AA                              | TT              | 1947006102               |
| SNP_P4_159875_27667  | NW_004516594.1 | Scaffold1371 | 27667                   | TT                              | CC              | 1947006104               |
| SNP_P4_159876_42230  | NW_004516594.1 | Scaffold1371 | 42230                   | GG                              | CC              | 1947006106               |
| SNP_P4_159877_44796  | NW_004516594.1 | Scaffold1371 | 44796                   | AA                              | GG              | 1947006108               |
| SNP_P4_159878_45395  | NW_004516594.1 | Scaffold1371 | 45395                   | TT                              | CC              | 1947006110               |
| SNP_P4_159879_45441  | NW_004516594.1 | Scaffold1371 | 45441                   | AA                              | GG              | 1947006112               |
| SNP_P4_159880_45570  | NW_004516594.1 | Scaffold1371 | 45570                   | AA                              | TT              | 1947006114               |
| SNP_P4_159881_45592  | NW_004516594.1 | Scaffold1371 | 45592                   | CC                              | AA              | 1947006116               |
| SNP_P4_159882_64929  | NW_004516594.1 | Scaffold1371 | 64929                   | TT                              | CC              | 1947006118               |
| SNP_P4_159883_65095  | NW_004516594.1 | Scaffold1371 | 65095                   | AA                              | GG              | 1947006120               |
| SNP_P4_159884_65139  | NW_004516594.1 | Scaffold1371 | 65139                   | AA                              | TT              | 1947006122               |
| SNP_P4_159885_65152  | NW_004516594.1 | Scaffold1371 | 65152                   | AA                              | GG              | 1947006124               |
| SNP_P4_159886_65181  | NW_004516594.1 | Scaffold1371 | 65181                   | TT                              | CC              | 1947006126               |
| SNP_P4_159887_65187  | NW_004516594.1 | Scaffold1371 | 65187                   | TT                              | CC              | 1947006128               |
| SNP_P4_159888_65212  | NW_004516594.1 | Scaffold1371 | 65212                   | AA                              | GG              | 1947006130               |
| SNP_P4_159889_65257  | NW_004516594.1 | Scaffold1371 | 65257                   | AA                              | GG              | 1947006132               |
| SNP_P4_159890_65307  | NW_004516594.1 | Scaffold1371 | 65307                   | TT                              | CC              | 1947006134               |
| SNP_P4_159891_66609  | NW_004516594.1 | Scaffold1371 | 66609                   | AA                              | GG              | 1947006136               |
| SNP_P4_159892_66770  | NW_004516594.1 | Scaffold1371 | 66770                   | AA                              | GG              | 1947006138               |
| SNP_P4_159893_66817  | NW_004516594.1 | Scaffold1371 | 66817                   | AA                              | GG              | 1947006140               |
| SNP_P4_159894_69749  | NW_004516594.1 | Scaffold1371 | 69749                   | CC                              | AA              | 1947006142               |
| SNP_P4_159895_101128 | NW_004516594.1 | Scaffold1371 | 101128                  | TT                              | CC              | 1947006144               |
| SNP_P4_159896_103854 | NW_004516594.1 | Scaffold1371 | 103854                  | GG                              | AA              | 1947006146               |
| SNP_P4_159897_734    | NW_004516595.1 | Scaffold1372 | 734                     | AA                              | TT              | 1947006149               |
| SNP_P4_159898_4930   | NW_004516595.1 | Scaffold1372 | 4930                    | GG                              | AA              | 1947006151               |
| SNP_P4_159899_4695   | NW_004516596.1 | Scaffold1373 | 4695                    | GG                              | TT              | 1947006153               |

| SNPs IDs            | Chromosome IDs | Chromosomes  | Physical positions (bp) | CDC Frontier (Reference genome) | (ILWC46 & LPNB) | NCBI SNPdb Accession IDs |
|---------------------|----------------|--------------|-------------------------|---------------------------------|-----------------|--------------------------|
| SNP_P4_159900_4778  | NW_004516596.1 | Scaffold1373 | 4778                    | GG                              | TT              | 1947006155               |
| SNP_P4_159901_989   | NW_004516597.1 | Scaffold1376 | 989                     | AA                              | GG              | 1947006157               |
| SNP_P4_159902_1516  | NW_004516597.1 | Scaffold1376 | 1516                    | TT                              | CC              | 1947006159               |
| SNP_P4_159903_17033 | NW_004516597.1 | Scaffold1376 | 17033                   | AA                              | TT              | 1947006161               |
| SNP_P4_159904_21805 | NW_004516597.1 | Scaffold1376 | 21805                   | CC                              | TT              | 1947006163               |
| SNP_P4_159905_21807 | NW_004516597.1 | Scaffold1376 | 21807                   | TT                              | GG              | 1947006165               |
| SNP_P4_159906_21815 | NW_004516597.1 | Scaffold1376 | 21815                   | AA                              | GG              | 1947006167               |
| SNP_P4_159907_21816 | NW_004516597.1 | Scaffold1376 | 21816                   | AA                              | CC              | 1947006169               |
| SNP_P4_159908_21839 | NW_004516597.1 | Scaffold1376 | 21839                   | AA                              | GG              | 1947006171               |
| SNP_P4_159909_21854 | NW_004516597.1 | Scaffold1376 | 21854                   | GG                              | AA              | 1947006173               |
| SNP_P4_159910_21859 | NW_004516597.1 | Scaffold1376 | 21859                   | TT                              | CC              | 1947006175               |
| SNP_P4_159911_21877 | NW_004516597.1 | Scaffold1376 | 21877                   | TT                              | CC              | 1947006177               |
| SNP_P4_159912_21943 | NW_004516597.1 | Scaffold1376 | 21943                   | TT                              | CC              | 1947006179               |
| SNP_P4_159913_22052 | NW_004516597.1 | Scaffold1376 | 22052                   | TT                              | GG              | 1947006181               |
| SNP_P4_159914_22060 | NW_004516597.1 | Scaffold1376 | 22060                   | TT                              | GG              | 1947006183               |
| SNP_P4_159915_22066 | NW_004516597.1 | Scaffold1376 | 22066                   | CC                              | TT              | 1947006185               |
| SNP_P4_159916_22076 | NW_004516597.1 | Scaffold1376 | 22076                   | TT                              | GG              | 1947006187               |
| SNP_P4_159917_22232 | NW_004516597.1 | Scaffold1376 | 22232                   | GG                              | AA              | 1947006189               |
| SNP_P4_159918_22235 | NW_004516597.1 | Scaffold1376 | 22235                   | AA                              | GG              | 1947006191               |
| SNP_P4_159919_22250 | NW_004516597.1 | Scaffold1376 | 22250                   | AA                              | GG              | 1947006193               |
| SNP_P4_159920_22262 | NW_004516597.1 | Scaffold1376 | 22262                   | TT                              | CC              | 1947006195               |
| SNP_P4_159921_22268 | NW_004516597.1 | Scaffold1376 | 22268                   | GG                              | AA              | 1947006197               |
| SNP_P4_159922_22269 | NW_004516597.1 | Scaffold1376 | 22269                   | TT                              | AA              | 1947006199               |
| SNP_P4_159923_22273 | NW_004516597.1 | Scaffold1376 | 22273                   | AA                              | GG              | 1947006201               |
| SNP_P4_159924_22392 | NW_004516597.1 | Scaffold1376 | 22392                   | TT                              | GG              | 1947006203               |
| SNP_P4_159925_22420 | NW_004516597.1 | Scaffold1376 | 22420                   | TT                              | AA              | 1947006205               |
| SNP_P4_159926_22901 | NW_004516597.1 | Scaffold1376 | 22901                   | CC                              | TT              | 1947006207               |
| SNP_P4_159927_54150 | NW_004516597.1 | Scaffold1376 | 54150                   | CC                              | AA              | 1947006209               |
| SNP_P4_159928_54155 | NW_004516597.1 | Scaffold1376 | 54155                   | GG                              | TT              | 1947006211               |
| SNP_P4_159929_54222 | NW_004516597.1 | Scaffold1376 | 54222                   | AA                              | GG              | 1947006213               |
| SNP_P4_159930_54252 | NW_004516597.1 | Scaffold1376 | 54252                   | TT                              | CC              | 1947006216               |
| SNP_P4_159931_57796 | NW_004516597.1 | Scaffold1376 | 57796                   | TT                              | CC              | 1947006218               |
| SNP_P4_159932_57803 | NW_004516597.1 | Scaffold1376 | 57803                   | TT                              | CC              | 1947006220               |
| SNP_P4_159933_57806 | NW_004516597.1 | Scaffold1376 | 57806                   | GG                              | AA              | 1947006222               |
| SNP_P4_159934_57809 | NW_004516597.1 | Scaffold1376 | 57809                   | AA                              | CC              | 1947006224               |
| SNP_P4_159935_57819 | NW_004516597.1 | Scaffold1376 | 57819                   | AA                              | GG              | 1947006226               |
| SNP_P4_159936_57835 | NW_004516597.1 | Scaffold1376 | 57835                   | AA                              | GG              | 1947006228               |
| SNP_P4_159937_57839 | NW_004516597.1 | Scaffold1376 | 57839                   | AA                              | GG              | 1947006230               |
| SNP_P4_159938_57845 | NW_004516597.1 | Scaffold1376 | 57845                   | TT                              | AA              | 1947006232               |
| SNP_P4_159939_57853 | NW_004516597.1 | Scaffold1376 | 57853                   | AA                              | GG              | 1947006234               |
| SNP_P4_159940_57870 | NW_004516597.1 | Scaffold1376 | 57870                   | TT                              | CC              | 1947006236               |
| SNP_P4_159941_57872 | NW_004516597.1 | Scaffold1376 | 57872                   | GG                              | AA              | 1947006238               |

| SNPs IDs            | Chromosome IDs | Chromosomes  | Physical positions (bp) | CDC Frontier (Reference genome) | (ILWC46 & LPNB) | NCBI SNPdb Accession IDs |
|---------------------|----------------|--------------|-------------------------|---------------------------------|-----------------|--------------------------|
| SNP_P4_159942_57884 | NW_004516597.1 | Scaffold1376 | 57884                   | TT                              | GG              | 1947006240               |
| SNP_P4_159943_57889 | NW_004516597.1 | Scaffold1376 | 57889                   | CC                              | AA              | 1947006242               |
| SNP_P4_159944_57905 | NW_004516597.1 | Scaffold1376 | 57905                   | TT                              | CC              | 1947006244               |
| SNP_P4_159945_57929 | NW_004516597.1 | Scaffold1376 | 57929                   | CC                              | TT              | 1947006246               |
| SNP_P4_159946_57971 | NW_004516597.1 | Scaffold1376 | 57971                   | TT                              | CC              | 1947006248               |
| SNP_P4_159947_57996 | NW_004516597.1 | Scaffold1376 | 57996                   | CC                              | TT              | 1947006250               |
| SNP_P4_159948_58004 | NW_004516597.1 | Scaffold1376 | 58004                   | CC                              | TT              | 1947006252               |
| SNP_P4_159949_58009 | NW_004516597.1 | Scaffold1376 | 58009                   | GG                              | AA              | 1947006254               |
| SNP_P4_159950_58034 | NW_004516597.1 | Scaffold1376 | 58034                   | AA                              | GG              | 1947006256               |
| SNP_P4_159951_58161 | NW_004516597.1 | Scaffold1376 | 58161                   | GG                              | AA              | 1947006258               |
| SNP_P4_159952_58266 | NW_004516597.1 | Scaffold1376 | 58266                   | TT                              | AA              | 1947006260               |
| SNP_P4_159953_58371 | NW_004516597.1 | Scaffold1376 | 58371                   | CC                              | AA              | 1947006262               |
| SNP_P4_159954_58383 | NW_004516597.1 | Scaffold1376 | 58383                   | AA                              | GG              | 1947006264               |
| SNP_P4_159955_58403 | NW_004516597.1 | Scaffold1376 | 58403                   | TT                              | CC              | 1947006266               |
| SNP_P4_159956_66175 | NW_004516597.1 | Scaffold1376 | 66175                   | CC                              | TT              | 1947006268               |
| SNP_P4_159957_66227 | NW_004516597.1 | Scaffold1376 | 66227                   | AA                              | GG              | 1947006269               |
| SNP_P4_159958_66273 | NW_004516597.1 | Scaffold1376 | 66273                   | GG                              | AA              | 1947006271               |
| SNP_P4_159959_66274 | NW_004516597.1 | Scaffold1376 | 66274                   | AA                              | GG              | 1947006273               |
| SNP_P4_159960_66466 | NW_004516597.1 | Scaffold1376 | 66466                   | CC                              | TT              | 1947006275               |
| SNP_P4_159961_66493 | NW_004516597.1 | Scaffold1376 | 66493                   | AA                              | GG              | 1947006277               |
| SNP_P4_159962_66655 | NW_004516597.1 | Scaffold1376 | 66655                   | TT                              | CC              | 1947006279               |
| SNP_P4_159963_68993 | NW_004516597.1 | Scaffold1376 | 68993                   | GG                              | AA              | 1947006281               |
| SNP_P4_159964_69130 | NW_004516597.1 | Scaffold1376 | 69130                   | CC                              | AA              | 1947006283               |
| SNP_P4_159965_69397 | NW_004516597.1 | Scaffold1376 | 69397                   | CC                              | TT              | 1947006285               |
| SNP_P4_159966_69398 | NW_004516597.1 | Scaffold1376 | 69398                   | GG                              | AA              | 1947006287               |
| SNP_P4_159967_69537 | NW_004516597.1 | Scaffold1376 | 69537                   | CC                              | TT              | 1947006289               |
| SNP_P4_159969_69624 | NW_004516597.1 | Scaffold1376 | 69624                   | GG                              | AA              | 1947006291               |
| SNP_P4_159970_69648 | NW_004516597.1 | Scaffold1376 | 69648                   | CC                              | AA              | 1947006293               |
| SNP_P4_159971_1726  | NW_004516600.1 | Scaffold1380 | 1726                    | AA                              | GG              | 1947006295               |
| SNP_P4_159972_1828  | NW_004516600.1 | Scaffold1380 | 1828                    | GG                              | CC              | 1947006297               |
| SNP_P4_159973_1847  | NW_004516600.1 | Scaffold1380 | 1847                    | GG                              | CC              | 1947006299               |
| SNP_P4_159974_1863  | NW_004516600.1 | Scaffold1380 | 1863                    | GG                              | AA              | 1947006301               |
| SNP_P4_159975_4689  | NW_004516600.1 | Scaffold1380 | 4689                    | AA                              | CC              | 1947006303               |
| SNP_P4_159976_4690  | NW_004516600.1 | Scaffold1380 | 4690                    | TT                              | AA              | 1947006305               |
| SNP_P4_159977_4708  | NW_004516600.1 | Scaffold1380 | 4708                    | TT                              | AA              | 1947006307               |
| SNP_P4_159978_4770  | NW_004516600.1 | Scaffold1380 | 4770                    | GG                              | AA              | 1947006309               |
| SNP_P4_159979_5103  | NW_004516600.1 | Scaffold1380 | 5103                    | GG                              | AA              | 1947006311               |
| SNP_P4_159980_5116  | NW_004516600.1 | Scaffold1380 | 5116                    | GG                              | TT              | 1947006313               |
| SNP_P4_159981_5355  | NW_004516600.1 | Scaffold1380 | 5355                    | AA                              | CC              | 1947006315               |
| SNP_P4_159983_6440  | NW_004516600.1 | Scaffold1380 | 6440                    | AA                              | CC              | 1947006317               |
| SNP_P4_159984_6505  | NW_004516600.1 | Scaffold1380 | 6505                    | TT                              | CC              | 1947006319               |
| SNP_P4_159985_7134  | NW_004516600.1 | Scaffold1380 | 7134                    | AA                              | TT              | 1947006321               |



| SNPs IDs             | Chromosome IDs | Chromosomes  | Physical positions (bp) | CDC Frontier (Reference genome) | (ILWC46 & LPNB) | NCBI SNPdb Accession IDs |
|----------------------|----------------|--------------|-------------------------|---------------------------------|-----------------|--------------------------|
| SNP_P4_159986_7938   | NW_004516600.1 | Scaffold1380 | 7938                    | GG                              | AA              | 1947006323               |
| SNP_P4_159987_7973   | NW_004516600.1 | Scaffold1380 | 7973                    | AA                              | TT              | 1947006325               |
| SNP_P4_159988_7977   | NW_004516600.1 | Scaffold1380 | 7977                    | AA                              | GG              | 1947006327               |
| SNP_P4_159989_8337   | NW_004516600.1 | Scaffold1380 | 8337                    | AA                              | GG              | 1947006329               |
| SNP_P4_159990_8355   | NW_004516600.1 | Scaffold1380 | 8355                    | GG                              | AA              | 1947006331               |
| SNP_P4_159991_8999   | NW_004516600.1 | Scaffold1380 | 8999                    | CC                              | AA              | 1947006333               |
| SNP_P4_159992_9096   | NW_004516600.1 | Scaffold1380 | 9096                    | CC                              | TT              | 1947006335               |
| SNP_P4_159993_10287  | NW_004516600.1 | Scaffold1380 | 10287                   | AA                              | GG              | 1947006337               |
| SNP_P4_159994_10723  | NW_004516600.1 | Scaffold1380 | 10723                   | GG                              | AA              | 1947006339               |
| SNP_P4_159995_10759  | NW_004516600.1 | Scaffold1380 | 10759                   | TT                              | GG              | 1947006341               |
| SNP_P4_159996_10868  | NW_004516600.1 | Scaffold1380 | 10868                   | AA                              | GG              | 1947006343               |
| SNP_P4_159997_11105  | NW_004516600.1 | Scaffold1380 | 11105                   | CC                              | AA              | 1947006345               |
| SNP_P4_159998_12202  | NW_004516600.1 | Scaffold1380 | 12202                   | CC                              | TT              | 1947006347               |
| SNP_P4_159999_2650   | NW_004516601.1 | Scaffold1382 | 2650                    | CC                              | TT              | 1947006349               |
| SNP_P4_160000_4494   | NW_004516601.1 | Scaffold1382 | 4494                    | GG                              | AA              | 1947006351               |
| SNP_P4_160001_4622   | NW_004516601.1 | Scaffold1382 | 4622                    | GG                              | AA              | 1947006353               |
| SNP_P4_160002_10246  | NW_004516601.1 | Scaffold1382 | 10246                   | GG                              | AA              | 1947006355               |
| SNP_P4_160004_84507  | NW_004516601.1 | Scaffold1382 | 84507                   | GG                              | AA              | 1947006357               |
| SNP_P4_160005_94012  | NW_004516601.1 | Scaffold1382 | 94012                   | CC                              | AA              | 1947006359               |
| SNP_P4_160006_111392 | NW_004516601.1 | Scaffold1382 | 111392                  | TT                              | GG              | 1947006361               |
| SNP_P4_160007_123351 | NW_004516601.1 | Scaffold1382 | 123351                  | TT                              | CC              | 1947006363               |
| SNP_P4_160008_123394 | NW_004516601.1 | Scaffold1382 | 123394                  | TT                              | CC              | 1947006365               |
| SNP_P4_160009_123424 | NW_004516601.1 | Scaffold1382 | 123424                  | TT                              | CC              | 1947006367               |
| SNP_P4_160010_123760 | NW_004516601.1 | Scaffold1382 | 123760                  | AA                              | TT              | 1947006370               |
| SNP_P4_160011_123820 | NW_004516601.1 | Scaffold1382 | 123820                  | AA                              | TT              | 1947006372               |
| SNP_P4_160012_127745 | NW_004516601.1 | Scaffold1382 | 127745                  | GG                              | TT              | 1947006374               |
| SNP_P4_160013_150598 | NW_004516601.1 | Scaffold1382 | 150598                  | TT                              | GG              | 1947006376               |
| SNP_P4_160014_206011 | NW_004516601.1 | Scaffold1382 | 206011                  | AA                              | CC              | 1947006378               |
| SNP_P4_160015_206040 | NW_004516601.1 | Scaffold1382 | 206040                  | TT                              | CC              | 1947006380               |
| SNP_P4_160016_206085 | NW_004516601.1 | Scaffold1382 | 206085                  | TT                              | CC              | 1947006382               |
| SNP_P4_160017_206294 | NW_004516601.1 | Scaffold1382 | 206294                  | GG                              | TT              | 1947006384               |
| SNP_P4_160018_211940 | NW_004516601.1 | Scaffold1382 | 211940                  | CC                              | AA              | 1947006386               |
| SNP_P4_160019_223197 | NW_004516601.1 | Scaffold1382 | 223197                  | TT                              | AA              | 1947006388               |
| SNP_P4_160020_225345 | NW_004516601.1 | Scaffold1382 | 225345                  | TT                              | GG              | 1947006390               |
| SNP_P4_160021_225591 | NW_004516601.1 | Scaffold1382 | 225591                  | AA                              | GG              | 1947006392               |
| SNP_P4_160023_225629 | NW_004516601.1 | Scaffold1382 | 225629                  | AA                              | TT              | 1947006393               |
| SNP_P4_160024_225633 | NW_004516601.1 | Scaffold1382 | 225633                  | AA                              | GG              | 1947006395               |
| SNP_P4_160025_225691 | NW_004516601.1 | Scaffold1382 | 225691                  | TT                              | AA              | 1947006397               |
| SNP_P4_160026_225783 | NW_004516601.1 | Scaffold1382 | 225783                  | GG                              | AA              | 1947006399               |
| SNP_P4_160027_225799 | NW_004516601.1 | Scaffold1382 | 225799                  | TT                              | CC              | 1947006401               |
| SNP_P4_160028_225886 | NW_004516601.1 | Scaffold1382 | 225886                  | AA                              | GG              | 1947006403               |
| SNP_P4_160029_225949 | NW_004516601.1 | Scaffold1382 | 225949                  | GG                              | TT              | 1947006405               |

| SNPs IDs             | Chromosome IDs | Chromosomes  | Physical positions (bp) | CDC Frontier (Reference genome) | (ILWC46 & LPNB) | NCBI SNPdb Accession IDs |
|----------------------|----------------|--------------|-------------------------|---------------------------------|-----------------|--------------------------|
| SNP_P4_160030_225960 | NW_004516601.1 | Scaffold1382 | 225960                  | CC                              | GG              | 1947006407               |
| SNP_P4_160031_225971 | NW_004516601.1 | Scaffold1382 | 225971                  | CC                              | AA              | 1947006409               |
| SNP_P4_160032_226075 | NW_004516601.1 | Scaffold1382 | 226075                  | AA                              | GG              | 1947006411               |
| SNP_P4_160033_226079 | NW_004516601.1 | Scaffold1382 | 226079                  | GG                              | TT              | 1947006413               |
| SNP_P4_160034_226081 | NW_004516601.1 | Scaffold1382 | 226081                  | AA                              | TT              | 1947006415               |
| SNP_P4_160036_234083 | NW_004516601.1 | Scaffold1382 | 234083                  | TT                              | AA              | 1947006417               |
| SNP_P4_160037_234090 | NW_004516601.1 | Scaffold1382 | 234090                  | CC                              | TT              | 1947006419               |
| SNP_P4_160038_234107 | NW_004516601.1 | Scaffold1382 | 234107                  | TT                              | AA              | 1947006421               |
| SNP_P4_160039_234112 | NW_004516601.1 | Scaffold1382 | 234112                  | TT                              | GG              | 1947006423               |
| SNP_P4_160040_234117 | NW_004516601.1 | Scaffold1382 | 234117                  | CC                              | TT              | 1947006425               |
| SNP_P4_160041_234151 | NW_004516601.1 | Scaffold1382 | 234151                  | TT                              | CC              | 1947006427               |
| SNP_P4_160042_234157 | NW_004516601.1 | Scaffold1382 | 234157                  | TT                              | AA              | 1947006429               |
| SNP_P4_160043_234168 | NW_004516601.1 | Scaffold1382 | 234168                  | CC                              | TT              | 1947006431               |
| SNP_P4_160044_234176 | NW_004516601.1 | Scaffold1382 | 234176                  | AA                              | GG              | 1947006433               |
| SNP_P4_160045_241220 | NW_004516601.1 | Scaffold1382 | 241220                  | AA                              | TT              | 1947006435               |
| SNP_P4_160046_260118 | NW_004516601.1 | Scaffold1382 | 260118                  | CC                              | TT              | 1947006437               |
| SNP_P4_160047_260127 | NW_004516601.1 | Scaffold1382 | 260127                  | CC                              | AA              | 1947006439               |
| SNP_P4_160049_275793 | NW_004516601.1 | Scaffold1382 | 275793                  | CC                              | TT              | 1947006441               |
| SNP_P4_160050_281777 | NW_004516601.1 | Scaffold1382 | 281777                  | TT                              | CC              | 1947006443               |
| SNP_P4_160051_281778 | NW_004516601.1 | Scaffold1382 | 281778                  | TT                              | CC              | 1947006445               |
| SNP_P4_160052_281791 | NW_004516601.1 | Scaffold1382 | 281791                  | TT                              | CC              | 1947006447               |
| SNP_P4_160053_281829 | NW_004516601.1 | Scaffold1382 | 281829                  | TT                              | CC              | 1947006449               |
| SNP_P4_160054_281851 | NW_004516601.1 | Scaffold1382 | 281851                  | CC                              | TT              | 1947006451               |
| SNP_P4_160055_281869 | NW_004516601.1 | Scaffold1382 | 281869                  | AA                              | CC              | 1947006453               |
| SNP_P4_160056_281913 | NW_004516601.1 | Scaffold1382 | 281913                  | CC                              | GG              | 1947006455               |
| SNP_P4_160057_282090 | NW_004516601.1 | Scaffold1382 | 282090                  | TT                              | CC              | 1947006457               |
| SNP_P4_160058_282164 | NW_004516601.1 | Scaffold1382 | 282164                  | CC                              | TT              | 1947006459               |
| SNP_P4_160059_283466 | NW_004516601.1 | Scaffold1382 | 283466                  | AA                              | TT              | 1947006461               |
| SNP_P4_160060_284940 | NW_004516601.1 | Scaffold1382 | 284940                  | GG                              | CC              | 1947006463               |
| SNP_P4_160061_290346 | NW_004516601.1 | Scaffold1382 | 290346                  | CC                              | AA              | 1947006465               |
| SNP_P4_160062_290365 | NW_004516601.1 | Scaffold1382 | 290365                  | CC                              | GG              | 1947006467               |
| SNP_P4_160063_290367 | NW_004516601.1 | Scaffold1382 | 290367                  | CC                              | TT              | 1947006469               |
| SNP_P4_160064_290368 | NW_004516601.1 | Scaffold1382 | 290368                  | CC                              | GG              | 1947006471               |
| SNP_P4_160065_291789 | NW_004516601.1 | Scaffold1382 | 291789                  | AA                              | TT              | 1947006473               |
| SNP_P4_160066_292007 | NW_004516601.1 | Scaffold1382 | 292007                  | CC                              | TT              | 1947006475               |
| SNP_P4_160067_292107 | NW_004516601.1 | Scaffold1382 | 292107                  | AA                              | CC              | 1947006477               |
| SNP_P4_160068_292264 | NW_004516601.1 | Scaffold1382 | 292264                  | TT                              | CC              | 1947006479               |
| SNP_P4_160069_292601 | NW_004516601.1 | Scaffold1382 | 292601                  | TT                              | AA              | 1947006481               |
| SNP_P4_160070_292654 | NW_004516601.1 | Scaffold1382 | 292654                  | CC                              | AA              | 1947006483               |
| SNP_P4_160071_292711 | NW_004516601.1 | Scaffold1382 | 292711                  | GG                              | AA              | 1947006485               |
| SNP_P4_160072_292945 | NW_004516601.1 | Scaffold1382 | 292945                  | CC                              | TT              | 1947006487               |
| SNP_P4_160073_293589 | NW_004516601.1 | Scaffold1382 | 293589                  | AA                              | CC              | 1947006489               |

| SNPs IDs             | Chromosome IDs | Chromosomes  | Physical positions (bp) | CDC Frontier (Reference genome) | (ILWC46 & LPNB) | NCBI SNPdb Accession IDs |
|----------------------|----------------|--------------|-------------------------|---------------------------------|-----------------|--------------------------|
| SNP_P4_160074_293591 | NW_004516601.1 | Scaffold1382 | 293591                  | CC                              | GG              | 1947006491               |
| SNP_P4_160075_293592 | NW_004516601.1 | Scaffold1382 | 293592                  | CC                              | AA              | 1947006493               |
| SNP_P4_160076_293801 | NW_004516601.1 | Scaffold1382 | 293801                  | GG                              | AA              | 1947006495               |
| SNP_P4_160077_293945 | NW_004516601.1 | Scaffold1382 | 293945                  | TT                              | AA              | 1947006497               |
| SNP_P4_160078_293960 | NW_004516601.1 | Scaffold1382 | 293960                  | TT                              | AA              | 1947006499               |
| SNP_P4_160079_294103 | NW_004516601.1 | Scaffold1382 | 294103                  | CC                              | TT              | 1947006501               |
| SNP_P4_160080_294110 | NW_004516601.1 | Scaffold1382 | 294110                  | CC                              | AA              | 1947006503               |
| SNP_P4_160081_294170 | NW_004516601.1 | Scaffold1382 | 294170                  | CC                              | TT              | 1947006505               |
| SNP_P4_160082_294189 | NW_004516601.1 | Scaffold1382 | 294189                  | TT                              | AA              | 1947006507               |
| SNP_P4_160083_294228 | NW_004516601.1 | Scaffold1382 | 294228                  | AA                              | GG              | 1947006509               |
| SNP_P4_160084_294309 | NW_004516601.1 | Scaffold1382 | 294309                  | GG                              | TT              | 1947006511               |
| SNP_P4_160086_295102 | NW_004516601.1 | Scaffold1382 | 295102                  | CC                              | GG              | 1947006513               |
| SNP_P4_160087_295256 | NW_004516601.1 | Scaffold1382 | 295256                  | TT                              | AA              | 1947006515               |
| SNP_P4_160088_295348 | NW_004516601.1 | Scaffold1382 | 295348                  | AA                              | CC              | 1947006517               |
| SNP_P4_160089_295406 | NW_004516601.1 | Scaffold1382 | 295406                  | CC                              | GG              | 1947006519               |
| SNP_P4_160090_295415 | NW_004516601.1 | Scaffold1382 | 295415                  | CC                              | GG              | 1947006521               |
| SNP_P4_160091_295424 | NW_004516601.1 | Scaffold1382 | 295424                  | GG                              | AA              | 1947006523               |
| SNP_P4_160092_295455 | NW_004516601.1 | Scaffold1382 | 295455                  | GG                              | TT              | 1947006525               |
| SNP_P4_160093_295504 | NW_004516601.1 | Scaffold1382 | 295504                  | GG                              | CC              | 1947006527               |
| SNP_P4_160094_295505 | NW_004516601.1 | Scaffold1382 | 295505                  | AA                              | GG              | 1947006529               |
| SNP_P4_160095_295610 | NW_004516601.1 | Scaffold1382 | 295610                  | GG                              | TT              | 1947006531               |
| SNP_P4_160096_295693 | NW_004516601.1 | Scaffold1382 | 295693                  | AA                              | GG              | 1947006533               |
| SNP_P4_160097_295725 | NW_004516601.1 | Scaffold1382 | 295725                  | GG                              | AA              | 1947006535               |
| SNP_P4_160098_295849 | NW_004516601.1 | Scaffold1382 | 295849                  | TT                              | CC              | 1947006537               |
| SNP_P4_160100_295885 | NW_004516601.1 | Scaffold1382 | 295885                  | GG                              | TT              | 1947006539               |
| SNP_P4_160101_295887 | NW_004516601.1 | Scaffold1382 | 295887                  | CC                              | GG              | 1947006541               |
| SNP_P4_160102_295961 | NW_004516601.1 | Scaffold1382 | 295961                  | AA                              | TT              | 1947006543               |
| SNP_P4_160104_296028 | NW_004516601.1 | Scaffold1382 | 296028                  | GG                              | TT              | 1947006545               |
| SNP_P4_160105_296036 | NW_004516601.1 | Scaffold1382 | 296036                  | TT                              | CC              | 1947006547               |
| SNP_P4_160106_296042 | NW_004516601.1 | Scaffold1382 | 296042                  | GG                              | TT              | 1947006549               |
| SNP_P4_160107_296043 | NW_004516601.1 | Scaffold1382 | 296043                  | AA                              | GG              | 1947006551               |
| SNP_P4_160108_296044 | NW_004516601.1 | Scaffold1382 | 296044                  | TT                              | CC              | 1947006553               |
| SNP_P4_160109_296079 | NW_004516601.1 | Scaffold1382 | 296079                  | AA                              | TT              | 1947006555               |
| SNP_P4_160110_296156 | NW_004516601.1 | Scaffold1382 | 296156                  | CC                              | TT              | 1947006557               |
| SNP_P4_160111_296177 | NW_004516601.1 | Scaffold1382 | 296177                  | AA                              | TT              | 1947006559               |
| SNP_P4_160112_296252 | NW_004516601.1 | Scaffold1382 | 296252                  | AA                              | TT              | 1947006561               |
| SNP_P4_160113_296357 | NW_004516601.1 | Scaffold1382 | 296357                  | AA                              | TT              | 1947006563               |
| SNP_P4_160114_296377 | NW_004516601.1 | Scaffold1382 | 296377                  | CC                              | GG              | 1947006565               |
| SNP_P4_160115_296436 | NW_004516601.1 | Scaffold1382 | 296436                  | CC                              | TT              | 1947006567               |
| SNP_P4_160116_296439 | NW_004516601.1 | Scaffold1382 | 296439                  | CC                              | GG              | 1947006569               |
| SNP_P4_160117_296496 | NW_004516601.1 | Scaffold1382 | 296496                  | TT                              | CC              | 1947006571               |
| SNP_P4_160118_296497 | NW_004516601.1 | Scaffold1382 | 296497                  | GG                              | TT              | 1947006573               |

| SNPs IDs             | Chromosome IDs | Chromosomes  | Physical positions (bp) | CDC Frontier (Reference genome) | (ILWC46 & LPNB) | NCBI SNPdb Accession IDs |
|----------------------|----------------|--------------|-------------------------|---------------------------------|-----------------|--------------------------|
| SNP_P4_160119_296503 | NW_004516601.1 | Scaffold1382 | 296503                  | GG                              | AA              | 1947006575               |
| SNP_P4_160120_296544 | NW_004516601.1 | Scaffold1382 | 296544                  | TT                              | CC              | 1947006577               |
| SNP_P4_160121_296583 | NW_004516601.1 | Scaffold1382 | 296583                  | TT                              | CC              | 1947006579               |
| SNP_P4_160122_296722 | NW_004516601.1 | Scaffold1382 | 296722                  | CC                              | GG              | 1947006581               |
| SNP_P4_160123_296728 | NW_004516601.1 | Scaffold1382 | 296728                  | TT                              | AA              | 1947006583               |
| SNP_P4_160124_296735 | NW_004516601.1 | Scaffold1382 | 296735                  | TT                              | CC              | 1947006585               |
| SNP_P4_160125_296763 | NW_004516601.1 | Scaffold1382 | 296763                  | AA                              | GG              | 1947006587               |
| SNP_P4_160126_296850 | NW_004516601.1 | Scaffold1382 | 296850                  | CC                              | GG              | 1947006589               |
| SNP_P4_160127_296858 | NW_004516601.1 | Scaffold1382 | 296858                  | AA                              | GG              | 1947006591               |
| SNP_P4_160128_296900 | NW_004516601.1 | Scaffold1382 | 296900                  | TT                              | CC              | 1947006593               |
| SNP_P4_160129_296902 | NW_004516601.1 | Scaffold1382 | 296902                  | TT                              | AA              | 1947006595               |
| SNP_P4_160130_297139 | NW_004516601.1 | Scaffold1382 | 297139                  | CC                              | GG              | 1947006597               |
| SNP_P4_160131_300493 | NW_004516601.1 | Scaffold1382 | 300493                  | TT                              | CC              | 1947006599               |
| SNP_P4_160133_305440 | NW_004516601.1 | Scaffold1382 | 305440                  | TT                              | GG              | 1947006601               |
| SNP_P4_160134_305650 | NW_004516601.1 | Scaffold1382 | 305650                  | TT                              | CC              | 1947006603               |
| SNP_P4_160135_317110 | NW_004516601.1 | Scaffold1382 | 317110                  | AA                              | CC              | 1947006605               |
| SNP_P4_160136_317135 | NW_004516601.1 | Scaffold1382 | 317135                  | TT                              | AA              | 1947006607               |
| SNP_P4_160137_317267 | NW_004516601.1 | Scaffold1382 | 317267                  | GG                              | AA              | 1947006609               |
| SNP_P4_160138_317291 | NW_004516601.1 | Scaffold1382 | 317291                  | GG                              | AA              | 1947006611               |
| SNP_P4_160139_317598 | NW_004516601.1 | Scaffold1382 | 317598                  | TT                              | CC              | 1947006613               |
| SNP_P4_160140_317602 | NW_004516601.1 | Scaffold1382 | 317602                  | TT                              | GG              | 1947006615               |
| SNP_P4_160141_332505 | NW_004516601.1 | Scaffold1382 | 332505                  | TT                              | AA              | 1947006617               |
| SNP_P4_160142_333117 | NW_004516601.1 | Scaffold1382 | 333117                  | CC                              | AA              | 1947006619               |
| SNP_P4_160143_339016 | NW_004516601.1 | Scaffold1382 | 339016                  | TT                              | CC              | 1947006621               |
| SNP_P4_160144_339063 | NW_004516601.1 | Scaffold1382 | 339063                  | TT                              | AA              | 1947006623               |
| SNP_P4_160145_339369 | NW_004516601.1 | Scaffold1382 | 339369                  | TT                              | GG              | 1947006625               |
| SNP_P4_160146_339472 | NW_004516601.1 | Scaffold1382 | 339472                  | AA                              | CC              | 1947006627               |
| SNP_P4_160147_351204 | NW_004516601.1 | Scaffold1382 | 351204                  | TT                              | GG              | 1947006629               |
| SNP_P4_160148_354520 | NW_004516601.1 | Scaffold1382 | 354520                  | TT                              | AA              | 1947006631               |
| SNP_P4_160149_370226 | NW_004516601.1 | Scaffold1382 | 370226                  | CC                              | AA              | 1947006633               |
| SNP_P4_160150_371661 | NW_004516601.1 | Scaffold1382 | 371661                  | GG                              | TT              | 1947006635               |
| SNP_P4_160151_373990 | NW_004516601.1 | Scaffold1382 | 373990                  | GG                              | TT              | 1947006637               |
| SNP_P4_160152_375254 | NW_004516601.1 | Scaffold1382 | 375254                  | AA                              | CC              | 1947006639               |
| SNP_P4_160153_375335 | NW_004516601.1 | Scaffold1382 | 375335                  | GG                              | AA              | 1947006641               |
| SNP_P4_160154_377612 | NW_004516601.1 | Scaffold1382 | 377612                  | AA                              | GG              | 1947006644               |
| SNP_P4_160155_396011 | NW_004516601.1 | Scaffold1382 | 396011                  | AA                              | GG              | 1947006646               |
| SNP_P4_160156_397082 | NW_004516601.1 | Scaffold1382 | 397082                  | CC                              | AA              | 1947006648               |
| SNP_P4_160157_397357 | NW_004516601.1 | Scaffold1382 | 397357                  | AA                              | GG              | 1947006650               |
| SNP_P4_160158_397376 | NW_004516601.1 | Scaffold1382 | 397376                  | TT                              | AA              | 1947006652               |
| SNP_P4_160159_397390 | NW_004516601.1 | Scaffold1382 | 397390                  | TT                              | CC              | 1947006654               |
| SNP_P4_160160_397395 | NW_004516601.1 | Scaffold1382 | 397395                  | TT                              | GG              | 1947006656               |
| SNP_P4_160161_397407 | NW_004516601.1 | Scaffold1382 | 397407                  | GG                              | AA              | 1947006658               |

| SNPs IDs             | Chromosome IDs | Chromosomes  | Physical positions (bp) | CDC Frontier (Reference genome) | (ILWC46 & LPNB) | NCBI SNPdb Accession IDs |
|----------------------|----------------|--------------|-------------------------|---------------------------------|-----------------|--------------------------|
| SNP_P4_160162_397478 | NW_004516601.1 | Scaffold1382 | 397478                  | AA                              | CC              | 1947006660               |
| SNP_P4_160163_397479 | NW_004516601.1 | Scaffold1382 | 397479                  | TT                              | CC              | 1947006662               |
| SNP_P4_160164_414207 | NW_004516601.1 | Scaffold1382 | 414207                  | AA                              | GG              | 1947006664               |
| SNP_P4_160165_414485 | NW_004516601.1 | Scaffold1382 | 414485                  | AA                              | GG              | 1947006666               |
| SNP_P4_160166_414604 | NW_004516601.1 | Scaffold1382 | 414604                  | TT                              | CC              | 1947006668               |
| SNP_P4_160167_414617 | NW_004516601.1 | Scaffold1382 | 414617                  | CC                              | TT              | 1947006670               |
| SNP_P4_160168_417499 | NW_004516601.1 | Scaffold1382 | 417499                  | TT                              | AA              | 1947006672               |
| SNP_P4_160169_417684 | NW_004516601.1 | Scaffold1382 | 417684                  | AA                              | CC              | 1947006673               |
| SNP_P4_160170_424348 | NW_004516601.1 | Scaffold1382 | 424348                  | AA                              | GG              | 1947006675               |
| SNP_P4_160171_424477 | NW_004516601.1 | Scaffold1382 | 424477                  | AA                              | GG              | 1947006677               |
| SNP_P4_160172_430721 | NW_004516601.1 | Scaffold1382 | 430721                  | CC                              | AA              | 1947006679               |
| SNP_P4_160173_433287 | NW_004516601.1 | Scaffold1382 | 433287                  | TT                              | AA              | 1947006681               |
| SNP_P4_160174_433833 | NW_004516601.1 | Scaffold1382 | 433833                  | AA                              | TT              | 1947006683               |
| SNP_P4_160175_436939 | NW_004516601.1 | Scaffold1382 | 436939                  | CC                              | TT              | 1947006686               |
| SNP_P4_160176_442221 | NW_004516601.1 | Scaffold1382 | 442221                  | AA                              | GG              | 1947006688               |
| SNP_P4_160177_442407 | NW_004516601.1 | Scaffold1382 | 442407                  | AA                              | GG              | 1947006690               |
| SNP_P4_160178_442423 | NW_004516601.1 | Scaffold1382 | 442423                  | CC                              | AA              | 1947006692               |
| SNP_P4_160179_442436 | NW_004516601.1 | Scaffold1382 | 442436                  | CC                              | TT              | 1947006694               |
| SNP_P4_160180_449027 | NW_004516601.1 | Scaffold1382 | 449027                  | AA                              | GG              | 1947006696               |
| SNP_P4_160181_449069 | NW_004516601.1 | Scaffold1382 | 449069                  | CC                              | TT              | 1947006698               |
| SNP_P4_160182_449413 | NW_004516601.1 | Scaffold1382 | 449413                  | TT                              | AA              | 1947006700               |
| SNP_P4_160183_449426 | NW_004516601.1 | Scaffold1382 | 449426                  | AA                              | TT              | 1947006702               |
| SNP_P4_160184_450595 | NW_004516601.1 | Scaffold1382 | 450595                  | GG                              | CC              | 1947006704               |
| SNP_P4_160185_456460 | NW_004516601.1 | Scaffold1382 | 456460                  | AA                              | TT              | 1947006706               |
| SNP_P4_160186_457020 | NW_004516601.1 | Scaffold1382 | 457020                  | TT                              | CC              | 1947006708               |
| SNP_P4_160187_471720 | NW_004516601.1 | Scaffold1382 | 471720                  | TT                              | AA              | 1947006710               |
| SNP_P4_160190_479167 | NW_004516601.1 | Scaffold1382 | 479167                  | TT                              | AA              | 1947006712               |
| SNP_P4_160191_479171 | NW_004516601.1 | Scaffold1382 | 479171                  | CC                              | AA              | 1947006714               |
| SNP_P4_160192_526227 | NW_004516601.1 | Scaffold1382 | 526227                  | GG                              | TT              | 1947006716               |
| SNP_P4_160193_526517 | NW_004516601.1 | Scaffold1382 | 526517                  | CC                              | TT              | 1947006718               |
| SNP_P4_160194_526519 | NW_004516601.1 | Scaffold1382 | 526519                  | CC                              | TT              | 1947006720               |
| SNP_P4_160195_526539 | NW_004516601.1 | Scaffold1382 | 526539                  | CC                              | TT              | 1947006722               |
| SNP_P4_160196_526553 | NW_004516601.1 | Scaffold1382 | 526553                  | TT                              | GG              | 1947006724               |
| SNP_P4_160197_526577 | NW_004516601.1 | Scaffold1382 | 526577                  | CC                              | GG              | 1947006726               |
| SNP_P4_160198_526610 | NW_004516601.1 | Scaffold1382 | 526610                  | GG                              | TT              | 1947006728               |
| SNP_P4_160199_526614 | NW_004516601.1 | Scaffold1382 | 526614                  | TT                              | GG              | 1947006730               |
| SNP_P4_160200_526616 | NW_004516601.1 | Scaffold1382 | 526616                  | AA                              | TT              | 1947006732               |
| SNP_P4_160201_526617 | NW_004516601.1 | Scaffold1382 | 526617                  | TT                              | CC              | 1947006734               |
| SNP_P4_160202_526702 | NW_004516601.1 | Scaffold1382 | 526702                  | CC                              | TT              | 1947006736               |
| SNP_P4_160203_526716 | NW_004516601.1 | Scaffold1382 | 526716                  | TT                              | AA              | 1947006738               |
| SNP_P4_160204_526726 | NW_004516601.1 | Scaffold1382 | 526726                  | CC                              | AA              | 1947006740               |
| SNP_P4_160205_526772 | NW_004516601.1 | Scaffold1382 | 526772                  | CC                              | TT              | 1947006742               |

| SNPs IDs             | Chromosome IDs | Chromosomes  | Physical positions (bp) | CDC Frontier (Reference genome) | (ILWC46 & LPNB) | NCBI SNPdb Accession IDs |
|----------------------|----------------|--------------|-------------------------|---------------------------------|-----------------|--------------------------|
| SNP_P4_160206_527005 | NW_004516601.1 | Scaffold1382 | 527005                  | CC                              | TT              | 1947006744               |
| SNP_P4_160207_535522 | NW_004516601.1 | Scaffold1382 | 535522                  | CC                              | AA              | 1947006746               |
| SNP_P4_160208_535543 | NW_004516601.1 | Scaffold1382 | 535543                  | AA                              | TT              | 1947006748               |
| SNP_P4_160209_535681 | NW_004516601.1 | Scaffold1382 | 535681                  | AA                              | TT              | 1947006750               |
| SNP_P4_160210_536398 | NW_004516601.1 | Scaffold1382 | 536398                  | TT                              | CC              | 1947006751               |
| SNP_P4_160211_536517 | NW_004516601.1 | Scaffold1382 | 536517                  | AA                              | GG              | 1947006753               |
| SNP_P4_160212_536525 | NW_004516601.1 | Scaffold1382 | 536525                  | GG                              | TT              | 1947006755               |
| SNP_P4_160213_536528 | NW_004516601.1 | Scaffold1382 | 536528                  | AA                              | GG              | 1947006757               |
| SNP_P4_160214_536531 | NW_004516601.1 | Scaffold1382 | 536531                  | AA                              | CC              | 1947006759               |
| SNP_P4_160215_536640 | NW_004516601.1 | Scaffold1382 | 536640                  | CC                              | TT              | 1947006761               |
| SNP_P4_160216_536701 | NW_004516601.1 | Scaffold1382 | 536701                  | CC                              | AA              | 1947006763               |
| SNP_P4_160217_536742 | NW_004516601.1 | Scaffold1382 | 536742                  | AA                              | TT              | 1947006765               |
| SNP_P4_160218_536761 | NW_004516601.1 | Scaffold1382 | 536761                  | TT                              | GG              | 1947006767               |
| SNP_P4_160219_536769 | NW_004516601.1 | Scaffold1382 | 536769                  | GG                              | CC              | 1947006769               |
| SNP_P4_160220_536839 | NW_004516601.1 | Scaffold1382 | 536839                  | AA                              | GG              | 1947006771               |
| SNP_P4_160221_536952 | NW_004516601.1 | Scaffold1382 | 536952                  | CC                              | GG              | 1947006773               |
| SNP_P4_160222_536961 | NW_004516601.1 | Scaffold1382 | 536961                  | TT                              | GG              | 1947006775               |
| SNP_P4_160223_537025 | NW_004516601.1 | Scaffold1382 | 537025                  | CC                              | AA              | 1947006777               |
| SNP_P4_160224_537062 | NW_004516601.1 | Scaffold1382 | 537062                  | TT                              | GG              | 1947006779               |
| SNP_P4_160225_538776 | NW_004516601.1 | Scaffold1382 | 538776                  | CC                              | TT              | 1947006781               |
| SNP_P4_160226_539156 | NW_004516601.1 | Scaffold1382 | 539156                  | CC                              | TT              | 1947006783               |
| SNP_P4_160227_539174 | NW_004516601.1 | Scaffold1382 | 539174                  | AA                              | GG              | 1947006784               |
| SNP_P4_160228_546029 | NW_004516601.1 | Scaffold1382 | 546029                  | GG                              | CC              | 1947006786               |
| SNP_P4_160229_546046 | NW_004516601.1 | Scaffold1382 | 546046                  | CC                              | TT              | 1947006788               |
| SNP_P4_160230_546047 | NW_004516601.1 | Scaffold1382 | 546047                  | AA                              | TT              | 1947006790               |
| SNP_P4_160231_550331 | NW_004516601.1 | Scaffold1382 | 550331                  | GG                              | CC              | 1947006792               |
| SNP_P4_160233_4394   | NW_004516603.1 | Scaffold1386 | 4394                    | CC                              | TT              | 1947006794               |
| SNP_P4_160234_4432   | NW_004516603.1 | Scaffold1386 | 4432                    | AA                              | CC              | 1947006796               |
| SNP_P4_160235_7440   | NW_004516603.1 | Scaffold1386 | 7440                    | CC                              | TT              | 1947006798               |
| SNP_P4_160236_7500   | NW_004516603.1 | Scaffold1386 | 7500                    | CC                              | AA              | 1947006800               |
| SNP_P4_160237_7822   | NW_004516603.1 | Scaffold1386 | 7822                    | AA                              | TT              | 1947006802               |
| SNP_P4_160238_7829   | NW_004516603.1 | Scaffold1386 | 7829                    | TT                              | AA              | 1947006804               |
| SNP_P4_160239_10876  | NW_004516603.1 | Scaffold1386 | 10876                   | TT                              | AA              | 1947006806               |
| SNP_P4_160240_13392  | NW_004516603.1 | Scaffold1386 | 13392                   | AA                              | GG              | 1947006808               |
| SNP_P4_160241_13516  | NW_004516603.1 | Scaffold1386 | 13516                   | GG                              | TT              | 1947006810               |
| SNP_P4_160242_13590  | NW_004516603.1 | Scaffold1386 | 13590                   | GG                              | AA              | 1947006812               |
| SNP_P4_160243_13604  | NW_004516603.1 | Scaffold1386 | 13604                   | CC                              | TT              | 1947006814               |
| SNP_P4_160245_13659  | NW_004516603.1 | Scaffold1386 | 13659                   | TT                              | CC              | 1947006816               |
| SNP_P4_160246_13671  | NW_004516603.1 | Scaffold1386 | 13671                   | GG                              | AA              | 1947006818               |
| SNP_P4_160247_13699  | NW_004516603.1 | Scaffold1386 | 13699                   | GG                              | AA              | 1947006820               |
| SNP_P4_160248_13707  | NW_004516603.1 | Scaffold1386 | 13707                   | AA                              | TT              | 1947006822               |
| SNP_P4_160249_13710  | NW_004516603.1 | Scaffold1386 | 13710                   | TT                              | AA              | 1947006824               |

| SNPs IDs            | Chromosome IDs | Chromosomes  | Physical positions (bp) | CDC Frontier (Reference genome) | (ILWC46 & LPNB) | NCBI SNPdb Accession IDs |
|---------------------|----------------|--------------|-------------------------|---------------------------------|-----------------|--------------------------|
| SNP_P4_160250_13862 | NW_004516603.1 | Scaffold1386 | 13862                   | GG                              | AA              | 1947006826               |
| SNP_P4_160251_13895 | NW_004516603.1 | Scaffold1386 | 13895                   | AA                              | GG              | 1947006828               |
| SNP_P4_160252_13907 | NW_004516603.1 | Scaffold1386 | 13907                   | AA                              | GG              | 1947006830               |
| SNP_P4_160253_14824 | NW_004516603.1 | Scaffold1386 | 14824                   | TT                              | CC              | 1947006832               |
| SNP_P4_160254_14843 | NW_004516603.1 | Scaffold1386 | 14843                   | CC                              | TT              | 1947006834               |
| SNP_P4_160256_22236 | NW_004516603.1 | Scaffold1386 | 22236                   | AA                              | GG              | 1947006836               |
| SNP_P4_160257_38507 | NW_004516603.1 | Scaffold1386 | 38507                   | AA                              | GG              | 1947006838               |
| SNP_P4_160258_38825 | NW_004516603.1 | Scaffold1386 | 38825                   | AA                              | GG              | 1947006840               |
| SNP_P4_160259_38827 | NW_004516603.1 | Scaffold1386 | 38827                   | TT                              | AA              | 1947006842               |
| SNP_P4_160260_38861 | NW_004516603.1 | Scaffold1386 | 38861                   | AA                              | TT              | 1947006844               |
| SNP_P4_160261_38862 | NW_004516603.1 | Scaffold1386 | 38862                   | GG                              | TT              | 1947006846               |
| SNP_P4_160262_51987 | NW_004516603.1 | Scaffold1386 | 51987                   | GG                              | TT              | 1947006848               |
| SNP_P4_160263_88920 | NW_004516603.1 | Scaffold1386 | 88920                   | TT                              | CC              | 1947006850               |
| SNP_P4_160264_88946 | NW_004516603.1 | Scaffold1386 | 88946                   | TT                              | CC              | 1947006852               |
| SNP_P4_160265_2633  | NW_004516606.1 | Scaffold1390 | 2633                    | AA                              | GG              | 1947006854               |
| SNP_P4_160266_8562  | NW_004516606.1 | Scaffold1390 | 8562                    | CC                              | TT              | 1947006856               |
| SNP_P4_160267_8573  | NW_004516606.1 | Scaffold1390 | 8573                    | TT                              | CC              | 1947006858               |
| SNP_P4_160268_10301 | NW_004516606.1 | Scaffold1390 | 10301                   | GG                              | AA              | 1947006860               |
| SNP_P4_160269_29161 | NW_004516606.1 | Scaffold1390 | 29161                   | CC                              | AA              | 1947006862               |
| SNP_P4_160270_29170 | NW_004516606.1 | Scaffold1390 | 29170                   | AA                              | TT              | 1947006864               |
| SNP_P4_160271_29180 | NW_004516606.1 | Scaffold1390 | 29180                   | CC                              | TT              | 1947006866               |
| SNP_P4_160272_29181 | NW_004516606.1 | Scaffold1390 | 29181                   | CC                              | AA              | 1947006868               |
| SNP_P4_160273_29183 | NW_004516606.1 | Scaffold1390 | 29183                   | TT                              | AA              | 1947006870               |
| SNP_P4_160274_29185 | NW_004516606.1 | Scaffold1390 | 29185                   | AA                              | GG              | 1947006872               |
| SNP_P4_160275_29187 | NW_004516606.1 | Scaffold1390 | 29187                   | TT                              | GG              | 1947006874               |
| SNP_P4_160276_30811 | NW_004516606.1 | Scaffold1390 | 30811                   | AA                              | TT              | 1947006876               |
| SNP_P4_160277_30813 | NW_004516606.1 | Scaffold1390 | 30813                   | TT                              | CC              | 1947006878               |
| SNP_P4_160279_38493 | NW_004516606.1 | Scaffold1390 | 38493                   | AA                              | GG              | 1947006880               |
| SNP_P4_160280_38495 | NW_004516606.1 | Scaffold1390 | 38495                   | GG                              | TT              | 1947006882               |
| SNP_P4_160281_45417 | NW_004516606.1 | Scaffold1390 | 45417                   | CC                              | GG              | 1947006884               |
| SNP_P4_160282_55736 | NW_004516606.1 | Scaffold1390 | 55736                   | GG                              | CC              | 1947006886               |
| SNP_P4_160283_55753 | NW_004516606.1 | Scaffold1390 | 55753                   | CC                              | GG              | 1947006888               |
| SNP_P4_160284_58667 | NW_004516606.1 | Scaffold1390 | 58667                   | AA                              | TT              | 1947006890               |
| SNP_P4_160285_58723 | NW_004516606.1 | Scaffold1390 | 58723                   | CC                              | TT              | 1947006892               |
| SNP_P4_160286_85848 | NW_004516606.1 | Scaffold1390 | 85848                   | AA                              | TT              | 1947006894               |
| SNP_P4_160287_85851 | NW_004516606.1 | Scaffold1390 | 85851                   | GG                              | AA              | 1947006895               |
| SNP_P4_160288_85852 | NW_004516606.1 | Scaffold1390 | 85852                   | GG                              | AA              | 1947006897               |
| SNP_P4_160289_86338 | NW_004516606.1 | Scaffold1390 | 86338                   | TT                              | AA              | 1947006899               |
| SNP_P4_160290_86342 | NW_004516606.1 | Scaffold1390 | 86342                   | AA                              | TT              | 1947006901               |
| SNP_P4_160291_86358 | NW_004516606.1 | Scaffold1390 | 86358                   | CC                              | GG              | 1947006903               |
| SNP_P4_160292_86362 | NW_004516606.1 | Scaffold1390 | 86362                   | TT                              | CC              | 1947006905               |
| SNP_P4_160293_93374 | NW_004516606.1 | Scaffold1390 | 93374                   | TT                              | CC              | 1947006907               |

| SNPs IDs             | Chromosome IDs | Chromosomes  | Physical positions (bp) | CDC Frontier (Reference genome) | (ILWC46 & LPNB) | NCBI SNPdb Accession IDs |
|----------------------|----------------|--------------|-------------------------|---------------------------------|-----------------|--------------------------|
| SNP_P4_160294_104408 | NW_004516606.1 | Scaffold1390 | 104408                  | CC                              | TT              | 1947006909               |
| SNP_P4_160295_107256 | NW_004516606.1 | Scaffold1390 | 107256                  | AA                              | GG              | 1947006911               |
| SNP_P4_160296_108645 | NW_004516606.1 | Scaffold1390 | 108645                  | CC                              | TT              | 1947006913               |
| SNP_P4_160298_2670   | NW_004516609.1 | Scaffold1394 | 2670                    | TT                              | AA              | 1947006915               |
| SNP_P4_160299_3051   | NW_004516609.1 | Scaffold1394 | 3051                    | GG                              | CC              | 1947006917               |
| SNP_P4_160300_3242   | NW_004516609.1 | Scaffold1394 | 3242                    | TT                              | CC              | 1947006919               |
| SNP_P4_160301_5242   | NW_004516609.1 | Scaffold1394 | 5242                    | TT                              | CC              | 1947006921               |
| SNP_P4_160302_5475   | NW_004516609.1 | Scaffold1394 | 5475                    | AA                              | GG              | 1947006923               |
| SNP_P4_160303_5499   | NW_004516609.1 | Scaffold1394 | 5499                    | TT                              | CC              | 1947006925               |
| SNP_P4_160304_5504   | NW_004516609.1 | Scaffold1394 | 5504                    | AA                              | CC              | 1947006927               |
| SNP_P4_160305_5519   | NW_004516609.1 | Scaffold1394 | 5519                    | TT                              | CC              | 1947006929               |
| SNP_P4_160306_5542   | NW_004516609.1 | Scaffold1394 | 5542                    | AA                              | GG              | 1947006931               |
| SNP_P4_160307_7879   | NW_004516609.1 | Scaffold1394 | 7879                    | AA                              | CC              | 1947006933               |
| SNP_P4_160308_7890   | NW_004516609.1 | Scaffold1394 | 7890                    | CC                              | TT              | 1947006935               |
| SNP_P4_160309_8371   | NW_004516609.1 | Scaffold1394 | 8371                    | TT                              | AA              | 1947006937               |
| SNP_P4_160310_12007  | NW_004516609.1 | Scaffold1394 | 12007                   | TT                              | CC              | 1947006939               |
| SNP_P4_160311_12130  | NW_004516609.1 | Scaffold1394 | 12130                   | CC                              | TT              | 1947006941               |
| SNP_P4_160312_12219  | NW_004516609.1 | Scaffold1394 | 12219                   | GG                              | AA              | 1947006943               |
| SNP_P4_160313_12223  | NW_004516609.1 | Scaffold1394 | 12223                   | CC                              | AA              | 1947006945               |
| SNP_P4_160314_12374  | NW_004516609.1 | Scaffold1394 | 12374                   | AA                              | GG              | 1947006946               |
| SNP_P4_160315_12415  | NW_004516609.1 | Scaffold1394 | 12415                   | AA                              | TT              | 1947006948               |
| SNP_P4_160316_12440  | NW_004516609.1 | Scaffold1394 | 12440                   | TT                              | CC              | 1947006950               |
| SNP_P4_160317_12497  | NW_004516609.1 | Scaffold1394 | 12497                   | GG                              | TT              | 1947006952               |
| SNP_P4_160318_12510  | NW_004516609.1 | Scaffold1394 | 12510                   | GG                              | AA              | 1947006954               |
| SNP_P4_160319_12578  | NW_004516609.1 | Scaffold1394 | 12578                   | TT                              | CC              | 1947006956               |
| SNP_P4_160320_17868  | NW_004516609.1 | Scaffold1394 | 17868                   | GG                              | AA              | 1947006958               |
| SNP_P4_160321_22473  | NW_004516609.1 | Scaffold1394 | 22473                   | CC                              | TT              | 1947006960               |
| SNP_P4_160322_25567  | NW_004516609.1 | Scaffold1394 | 25567                   | GG                              | AA              | 1947006962               |
| SNP_P4_160323_25622  | NW_004516609.1 | Scaffold1394 | 25622                   | AA                              | GG              | 1947006964               |
| SNP_P4_160324_25989  | NW_004516609.1 | Scaffold1394 | 25989                   | TT                              | CC              | 1947006966               |
| SNP_P4_160325_29065  | NW_004516609.1 | Scaffold1394 | 29065                   | TT                              | AA              | 1947006968               |
| SNP_P4_160326_30679  | NW_004516609.1 | Scaffold1394 | 30679                   | AA                              | GG              | 1947006970               |
| SNP_P4_160327_30682  | NW_004516609.1 | Scaffold1394 | 30682                   | AA                              | GG              | 1947006972               |
| SNP_P4_160328_30686  | NW_004516609.1 | Scaffold1394 | 30686                   | TT                              | AA              | 1947006974               |
| SNP_P4_160329_31851  | NW_004516609.1 | Scaffold1394 | 31851                   | TT                              | CC              | 1947006976               |
| SNP_P4_160330_1489   | NW_004516612.1 | Scaffold1399 | 1489                    | AA                              | CC              | 1947006978               |
| SNP_P4_160331_1504   | NW_004516612.1 | Scaffold1399 | 1504                    | CC                              | TT              | 1947006980               |
| SNP_P4_160332_2055   | NW_004516612.1 | Scaffold1399 | 2055                    | TT                              | AA              | 1947006982               |
| SNP_P4_160333_2081   | NW_004516612.1 | Scaffold1399 | 2081                    | TT                              | CC              | 1947006984               |
| SNP_P4_160334_5853   | NW_004516612.1 | Scaffold1399 | 5853                    | GG                              | CC              | 1947006986               |
| SNP_P4_160335_5877   | NW_004516612.1 | Scaffold1399 | 5877                    | TT                              | GG              | 1947006988               |
| SNP_P4_160336_5979   | NW_004516612.1 | Scaffold1399 | 5979                    | CC                              | TT              | 1947006990               |



| SNPs IDs            | Chromosome IDs | Chromosomes  | Physical positions (bp) | CDC Frontier (Reference genome) | (ILWC46 & LPNB) | NCBI SNPdb Accession IDs |
|---------------------|----------------|--------------|-------------------------|---------------------------------|-----------------|--------------------------|
| SNP_P4_160337_6020  | NW_004516612.1 | Scaffold1399 | 6020                    | AA                              | TT              | 1947006992               |
| SNP_P4_160338_18964 | NW_004516612.1 | Scaffold1399 | 18964                   | AA                              | GG              | 1947006994               |
| SNP_P4_160339_19032 | NW_004516612.1 | Scaffold1399 | 19032                   | CC                              | TT              | 1947006996               |
| SNP_P4_160340_19331 | NW_004516612.1 | Scaffold1399 | 19331                   | TT                              | AA              | 1947006998               |
| SNP_P4_160341_19377 | NW_004516612.1 | Scaffold1399 | 19377                   | CC                              | AA              | 1947007000               |
| SNP_P4_160342_154   | NW_004516613.1 | Scaffold1400 | 154                     | TT                              | GG              | 1947007002               |
| SNP_P4_160343_2557  | NW_004516614.1 | Scaffold1401 | 2557                    | TT                              | CC              | 1947007004               |
| SNP_P4_160344_2674  | NW_004516614.1 | Scaffold1401 | 2674                    | TT                              | GG              | 1947007006               |
| SNP_P4_160345_2698  | NW_004516614.1 | Scaffold1401 | 2698                    | TT                              | AA              | 1947007008               |
| SNP_P4_160346_2835  | NW_004516614.1 | Scaffold1401 | 2835                    | AA                              | TT              | 1947007010               |
| SNP_P4_160347_2901  | NW_004516614.1 | Scaffold1401 | 2901                    | GG                              | CC              | 1947007012               |
| SNP_P4_160348_2904  | NW_004516614.1 | Scaffold1401 | 2904                    | TT                              | AA              | 1947007014               |
| SNP_P4_160349_2992  | NW_004516614.1 | Scaffold1401 | 2992                    | CC                              | TT              | 1947007016               |
| SNP_P4_160350_3005  | NW_004516614.1 | Scaffold1401 | 3005                    | GG                              | AA              | 1947007018               |
| SNP_P4_160351_19860 | NW_004516614.1 | Scaffold1401 | 19860                   | GG                              | AA              | 1947007019               |
| SNP_P4_160352_25557 | NW_004516614.1 | Scaffold1401 | 25557                   | AA                              | GG              | 1947007021               |
| SNP_P4_160353_25673 | NW_004516614.1 | Scaffold1401 | 25673                   | TT                              | CC              | 1947007023               |
| SNP_P4_160354_25858 | NW_004516614.1 | Scaffold1401 | 25858                   | AA                              | TT              | 1947007025               |
| SNP_P4_160355_25924 | NW_004516614.1 | Scaffold1401 | 25924                   | TT                              | CC              | 1947007027               |
| SNP_P4_160356_36806 | NW_004516614.1 | Scaffold1401 | 36806                   | AA                              | CC              | 1947007029               |
| SNP_P4_160357_39144 | NW_004516614.1 | Scaffold1401 | 39144                   | TT                              | AA              | 1947007031               |
| SNP_P4_160358_53888 | NW_004516614.1 | Scaffold1401 | 53888                   | CC                              | TT              | 1947007033               |
| SNP_P4_160359_53895 | NW_004516614.1 | Scaffold1401 | 53895                   | AA                              | GG              | 1947007035               |
| SNP_P4_160360_63125 | NW_004516614.1 | Scaffold1401 | 63125                   | GG                              | TT              | 1947007037               |
| SNP_P4_160361_67483 | NW_004516614.1 | Scaffold1401 | 67483                   | CC                              | GG              | 1947007039               |
| SNP_P4_160362_67713 | NW_004516614.1 | Scaffold1401 | 67713                   | TT                              | CC              | 1947007041               |
| SNP_P4_160363_69857 | NW_004516614.1 | Scaffold1401 | 69857                   | CC                              | TT              | 1947007043               |
| SNP_P4_160364_70792 | NW_004516614.1 | Scaffold1401 | 70792                   | GG                              | TT              | 1947007045               |
| SNP_P4_160365_70853 | NW_004516614.1 | Scaffold1401 | 70853                   | TT                              | CC              | 1947007047               |
| SNP_P4_160366_70952 | NW_004516614.1 | Scaffold1401 | 70952                   | TT                              | CC              | 1947007049               |
| SNP_P4_160367_71066 | NW_004516614.1 | Scaffold1401 | 71066                   | TT                              | CC              | 1947007051               |
| SNP_P4_160368_71108 | NW_004516614.1 | Scaffold1401 | 71108                   | TT                              | GG              | 1947007053               |
| SNP_P4_160369_71193 | NW_004516614.1 | Scaffold1401 | 71193                   | TT                              | CC              | 1947007055               |
| SNP_P4_160370_71374 | NW_004516614.1 | Scaffold1401 | 71374                   | AA                              | GG              | 1947007057               |
| SNP_P4_160371_71485 | NW_004516614.1 | Scaffold1401 | 71485                   | CC                              | TT              | 1947007059               |
| SNP_P4_160372_71613 | NW_004516614.1 | Scaffold1401 | 71613                   | AA                              | GG              | 1947007061               |
| SNP_P4_160373_87793 | NW_004516614.1 | Scaffold1401 | 87793                   | GG                              | CC              | 1947007063               |
| SNP_P4_160375_840   | NW_004516615.1 | Scaffold1403 | 840                     | GG                              | TT              | 1947007065               |
| SNP_P4_160376_862   | NW_004516615.1 | Scaffold1403 | 862                     | CC                              | TT              | 1947007067               |
| SNP_P4_160377_889   | NW_004516615.1 | Scaffold1403 | 889                     | TT                              | AA              | 1947007068               |
| SNP_P4_160378_961   | NW_004516615.1 | Scaffold1403 | 961                     | AA                              | GG              | 1947007070               |
| SNP_P4_160380_2965  | NW_004516617.1 | Scaffold1405 | 2965                    | CC                              | AA              | 1947007072               |

| SNPs IDs            | Chromosome IDs | Chromosomes  | Physical positions (bp) | CDC Frontier (Reference genome) | (ILWC46 & LPNB) | NCBI SNPdb Accession IDs |
|---------------------|----------------|--------------|-------------------------|---------------------------------|-----------------|--------------------------|
| SNP_P4_160381_49    | NW_004516619.1 | Scaffold1408 | 49                      | CC                              | TT              | 1947007074               |
| SNP_P4_160382_624   | NW_004516619.1 | Scaffold1408 | 624                     | AA                              | GG              | 1947007076               |
| SNP_P4_160383_2211  | NW_004516619.1 | Scaffold1408 | 2211                    | TT                              | CC              | 1947007078               |
| SNP_P4_160384_2415  | NW_004516619.1 | Scaffold1408 | 2415                    | TT                              | GG              | 1947007080               |
| SNP_P4_160385_2699  | NW_004516619.1 | Scaffold1408 | 2699                    | AA                              | GG              | 1947007082               |
| SNP_P4_160386_2874  | NW_004516619.1 | Scaffold1408 | 2874                    | GG                              | TT              | 1947007084               |
| SNP_P4_160387_2975  | NW_004516619.1 | Scaffold1408 | 2975                    | AA                              | GG              | 1947007086               |
| SNP_P4_160388_4424  | NW_004516619.1 | Scaffold1408 | 4424                    | GG                              | TT              | 1947007088               |
| SNP_P4_160389_4692  | NW_004516619.1 | Scaffold1408 | 4692                    | GG                              | TT              | 1947007090               |
| SNP_P4_160390_4933  | NW_004516619.1 | Scaffold1408 | 4933                    | AA                              | GG              | 1947007092               |
| SNP_P4_160391_5273  | NW_004516619.1 | Scaffold1408 | 5273                    | AA                              | GG              | 1947007094               |
| SNP_P4_160392_5330  | NW_004516619.1 | Scaffold1408 | 5330                    | AA                              | TT              | 1947007096               |
| SNP_P4_160393_5412  | NW_004516619.1 | Scaffold1408 | 5412                    | GG                              | AA              | 1947007098               |
| SNP_P4_160394_5505  | NW_004516619.1 | Scaffold1408 | 5505                    | TT                              | CC              | 1947007100               |
| SNP_P4_160395_5949  | NW_004516619.1 | Scaffold1408 | 5949                    | GG                              | TT              | 1947007102               |
| SNP_P4_160397_6239  | NW_004516619.1 | Scaffold1408 | 6239                    | GG                              | TT              | 1947007104               |
| SNP_P4_160398_6548  | NW_004516619.1 | Scaffold1408 | 6548                    | GG                              | TT              | 1947007106               |
| SNP_P4_160399_6549  | NW_004516619.1 | Scaffold1408 | 6549                    | TT                              | GG              | 1947007108               |
| SNP_P4_160400_6562  | NW_004516619.1 | Scaffold1408 | 6562                    | GG                              | TT              | 1947007110               |
| SNP_P4_160401_6591  | NW_004516619.1 | Scaffold1408 | 6591                    | GG                              | AA              | 1947007112               |
| SNP_P4_160402_6643  | NW_004516619.1 | Scaffold1408 | 6643                    | AA                              | CC              | 1947007114               |
| SNP_P4_160403_6686  | NW_004516619.1 | Scaffold1408 | 6686                    | CC                              | GG              | 1947007116               |
| SNP_P4_160404_6705  | NW_004516619.1 | Scaffold1408 | 6705                    | CC                              | AA              | 1947007118               |
| SNP_P4_160405_6781  | NW_004516619.1 | Scaffold1408 | 6781                    | AA                              | GG              | 1947007120               |
| SNP_P4_160406_6991  | NW_004516619.1 | Scaffold1408 | 6991                    | TT                              | AA              | 1947007122               |
| SNP_P4_160407_7213  | NW_004516619.1 | Scaffold1408 | 7213                    | GG                              | TT              | 1947007124               |
| SNP_P4_160408_7665  | NW_004516619.1 | Scaffold1408 | 7665                    | AA                              | GG              | 1947007126               |
| SNP_P4_160409_7670  | NW_004516619.1 | Scaffold1408 | 7670                    | AA                              | TT              | 1947007128               |
| SNP_P4_160410_7671  | NW_004516619.1 | Scaffold1408 | 7671                    | TT                              | GG              | 1947007130               |
| SNP_P4_160412_7919  | NW_004516619.1 | Scaffold1408 | 7919                    | TT                              | AA              | 1947007132               |
| SNP_P4_160413_9407  | NW_004516619.1 | Scaffold1408 | 9407                    | AA                              | CC              | 1947007134               |
| SNP_P4_160414_9833  | NW_004516619.1 | Scaffold1408 | 9833                    | GG                              | CC              | 1947007136               |
| SNP_P4_160415_10022 | NW_004516619.1 | Scaffold1408 | 10022                   | AA                              | TT              | 1947007138               |
| SNP_P4_160416_10031 | NW_004516619.1 | Scaffold1408 | 10031                   | GG                              | CC              | 1947007140               |
| SNP_P4_160417_10044 | NW_004516619.1 | Scaffold1408 | 10044                   | TT                              | CC              | 1947007142               |
| SNP_P4_160418_10131 | NW_004516619.1 | Scaffold1408 | 10131                   | AA                              | GG              | 1947007144               |
| SNP_P4_160419_10449 | NW_004516619.1 | Scaffold1408 | 10449                   | TT                              | AA              | 1947007146               |
| SNP_P4_160420_10610 | NW_004516619.1 | Scaffold1408 | 10610                   | GG                              | AA              | 1947007148               |
| SNP_P4_160421_10668 | NW_004516619.1 | Scaffold1408 | 10668                   | TT                              | GG              | 1947007150               |
| SNP_P4_160422_10795 | NW_004516619.1 | Scaffold1408 | 10795                   | TT                              | CC              | 1947007151               |
| SNP_P4_160423_10937 | NW_004516619.1 | Scaffold1408 | 10937                   | GG                              | TT              | 1947007152               |
| SNP_P4_160424_11010 | NW_004516619.1 | Scaffold1408 | 11010                   | AA                              | TT              | 1947007153               |

| SNPs IDs            | Chromosome IDs | Chromosomes  | Physical positions (bp) | CDC Frontier (Reference genome) | (ILWC46 & LPNB) | NCBI SNPdb Accession IDs |
|---------------------|----------------|--------------|-------------------------|---------------------------------|-----------------|--------------------------|
| SNP_P4_160426_11041 | NW_004516619.1 | Scaffold1408 | 11041                   | TT                              | GG              | 1947007154               |
| SNP_P4_160427_11318 | NW_004516619.1 | Scaffold1408 | 11318                   | CC                              | TT              | 1947007155               |
| SNP_P4_160428_11804 | NW_004516619.1 | Scaffold1408 | 11804                   | CC                              | AA              | 1947007156               |
| SNP_P4_160430_11847 | NW_004516619.1 | Scaffold1408 | 11847                   | AA                              | TT              | 1947007157               |
| SNP_P4_160431_11852 | NW_004516619.1 | Scaffold1408 | 11852                   | AA                              | GG              | 1947007159               |
| SNP_P4_160432_12084 | NW_004516619.1 | Scaffold1408 | 12084                   | CC                              | TT              | 1947007161               |
| SNP_P4_160433_12140 | NW_004516619.1 | Scaffold1408 | 12140                   | CC                              | GG              | 1947007163               |
| SNP_P4_160434_12174 | NW_004516619.1 | Scaffold1408 | 12174                   | AA                              | TT              | 1947007165               |
| SNP_P4_160435_12407 | NW_004516619.1 | Scaffold1408 | 12407                   | AA                              | GG              | 1947007167               |
| SNP_P4_160436_14281 | NW_004516619.1 | Scaffold1408 | 14281                   | GG                              | TT              | 1947007169               |
| SNP_P4_160437_16311 | NW_004516619.1 | Scaffold1408 | 16311                   | TT                              | CC              | 1947007171               |
| SNP_P4_160439_16486 | NW_004516619.1 | Scaffold1408 | 16486                   | AA                              | GG              | 1947007173               |
| SNP_P4_160440_16513 | NW_004516619.1 | Scaffold1408 | 16513                   | CC                              | TT              | 1947007175               |
| SNP_P4_160441_16766 | NW_004516619.1 | Scaffold1408 | 16766                   | AA                              | GG              | 1947007177               |
| SNP_P4_160442_16945 | NW_004516619.1 | Scaffold1408 | 16945                   | TT                              | GG              | 1947007179               |
| SNP_P4_160443_18760 | NW_004516619.1 | Scaffold1408 | 18760                   | TT                              | AA              | 1947007181               |
| SNP_P4_160444_18836 | NW_004516619.1 | Scaffold1408 | 18836                   | TT                              | AA              | 1947007183               |
| SNP_P4_160445_19963 | NW_004516619.1 | Scaffold1408 | 19963                   | AA                              | CC              | 1947007185               |
| SNP_P4_160446_20316 | NW_004516619.1 | Scaffold1408 | 20316                   | CC                              | AA              | 1947007187               |
| SNP_P4_160447_20385 | NW_004516619.1 | Scaffold1408 | 20385                   | AA                              | TT              | 1947007189               |
| SNP_P4_160448_20442 | NW_004516619.1 | Scaffold1408 | 20442                   | TT                              | AA              | 1947007191               |
| SNP_P4_160449_20458 | NW_004516619.1 | Scaffold1408 | 20458                   | TT                              | GG              | 1947007193               |
| SNP_P4_160451_20829 | NW_004516619.1 | Scaffold1408 | 20829                   | CC                              | TT              | 1947007194               |
| SNP_P4_160452_23668 | NW_004516619.1 | Scaffold1408 | 23668                   | GG                              | AA              | 1947007196               |
| SNP_P4_160453_23814 | NW_004516619.1 | Scaffold1408 | 23814                   | GG                              | AA              | 1947007198               |
| SNP_P4_160454_23819 | NW_004516619.1 | Scaffold1408 | 23819                   | CC                              | TT              | 1947007200               |
| SNP_P4_160455_23822 | NW_004516619.1 | Scaffold1408 | 23822                   | TT                              | CC              | 1947007202               |
| SNP_P4_160456_23848 | NW_004516619.1 | Scaffold1408 | 23848                   | TT                              | AA              | 1947007204               |
| SNP_P4_160457_23870 | NW_004516619.1 | Scaffold1408 | 23870                   | GG                              | TT              | 1947007206               |
| SNP_P4_160458_23930 | NW_004516619.1 | Scaffold1408 | 23930                   | GG                              | TT              | 1947007208               |
| SNP_P4_160459_23947 | NW_004516619.1 | Scaffold1408 | 23947                   | AA                              | GG              | 1947007210               |
| SNP_P4_160460_23986 | NW_004516619.1 | Scaffold1408 | 23986                   | GG                              | TT              | 1947007212               |
| SNP_P4_160461_24607 | NW_004516619.1 | Scaffold1408 | 24607                   | CC                              | TT              | 1947007213               |
| SNP_P4_160462_24672 | NW_004516619.1 | Scaffold1408 | 24672                   | GG                              | AA              | 1947007215               |
| SNP_P4_160464_25071 | NW_004516619.1 | Scaffold1408 | 25071                   | GG                              | TT              | 1947007217               |
| SNP_P4_160465_25112 | NW_004516619.1 | Scaffold1408 | 25112                   | AA                              | GG              | 1947007219               |
| SNP_P4_160466_25228 | NW_004516619.1 | Scaffold1408 | 25228                   | CC                              | GG              | 1947007221               |
| SNP_P4_160467_25233 | NW_004516619.1 | Scaffold1408 | 25233                   | AA                              | CC              | 1947007223               |
| SNP_P4_160468_25904 | NW_004516619.1 | Scaffold1408 | 25904                   | TT                              | CC              | 1947007225               |
| SNP_P4_160469_25912 | NW_004516619.1 | Scaffold1408 | 25912                   | AA                              | TT              | 1947007227               |
| SNP_P4_160470_25962 | NW_004516619.1 | Scaffold1408 | 25962                   | CC                              | TT              | 1947007229               |
| SNP_P4_160472_26180 | NW_004516619.1 | Scaffold1408 | 26180                   | TT                              | GG              | 1947007231               |

| SNPs IDs            | Chromosome IDs | Chromosomes  | Physical positions (bp) | CDC Frontier (Reference genome) | (ILWC46 & LPNB) | NCBI SNPdb Accession IDs |
|---------------------|----------------|--------------|-------------------------|---------------------------------|-----------------|--------------------------|
| SNP_P4_160473_26188 | NW_004516619.1 | Scaffold1408 | 26188                   | CC                              | TT              | 1947007233               |
| SNP_P4_160474_26220 | NW_004516619.1 | Scaffold1408 | 26220                   | CC                              | TT              | 1947007235               |
| SNP_P4_160475_26296 | NW_004516619.1 | Scaffold1408 | 26296                   | TT                              | CC              | 1947007236               |
| SNP_P4_160476_26338 | NW_004516619.1 | Scaffold1408 | 26338                   | CC                              | GG              | 1947007238               |
| SNP_P4_160477_26395 | NW_004516619.1 | Scaffold1408 | 26395                   | TT                              | AA              | 1947007240               |
| SNP_P4_160478_26413 | NW_004516619.1 | Scaffold1408 | 26413                   | AA                              | TT              | 1947007242               |
| SNP_P4_160479_26414 | NW_004516619.1 | Scaffold1408 | 26414                   | TT                              | AA              | 1947007244               |
| SNP_P4_160480_26485 | NW_004516619.1 | Scaffold1408 | 26485                   | AA                              | TT              | 1947007246               |
| SNP_P4_160481_26567 | NW_004516619.1 | Scaffold1408 | 26567                   | TT                              | GG              | 1947007248               |
| SNP_P4_160482_26571 | NW_004516619.1 | Scaffold1408 | 26571                   | TT                              | AA              | 1947007250               |
| SNP_P4_160483_26598 | NW_004516619.1 | Scaffold1408 | 26598                   | CC                              | AA              | 1947007252               |
| SNP_P4_160484_26602 | NW_004516619.1 | Scaffold1408 | 26602                   | GG                              | CC              | 1947007254               |
| SNP_P4_160485_26651 | NW_004516619.1 | Scaffold1408 | 26651                   | TT                              | AA              | 1947007256               |
| SNP_P4_160486_26688 | NW_004516619.1 | Scaffold1408 | 26688                   | GG                              | TT              | 1947007258               |
| SNP_P4_160487_26751 | NW_004516619.1 | Scaffold1408 | 26751                   | AA                              | CC              | 1947007260               |
| SNP_P4_160488_26756 | NW_004516619.1 | Scaffold1408 | 26756                   | CC                              | TT              | 1947007262               |
| SNP_P4_160489_26762 | NW_004516619.1 | Scaffold1408 | 26762                   | CC                              | TT              | 1947007264               |
| SNP_P4_160490_26768 | NW_004516619.1 | Scaffold1408 | 26768                   | GG                              | TT              | 1947007266               |
| SNP_P4_160491_26991 | NW_004516619.1 | Scaffold1408 | 26991                   | TT                              | AA              | 1947007268               |
| SNP_P4_160492_27035 | NW_004516619.1 | Scaffold1408 | 27035                   | GG                              | AA              | 1947007270               |
| SNP_P4_160493_27153 | NW_004516619.1 | Scaffold1408 | 27153                   | TT                              | GG              | 1947007272               |
| SNP_P4_160494_27277 | NW_004516619.1 | Scaffold1408 | 27277                   | CC                              | TT              | 1947007274               |
| SNP_P4_160495_27372 | NW_004516619.1 | Scaffold1408 | 27372                   | AA                              | TT              | 1947007277               |
| SNP_P4_160496_27399 | NW_004516619.1 | Scaffold1408 | 27399                   | CC                              | AA              | 1947007279               |
| SNP_P4_160497_27479 | NW_004516619.1 | Scaffold1408 | 27479                   | GG                              | TT              | 1947007281               |
| SNP_P4_160498_27995 | NW_004516619.1 | Scaffold1408 | 27995                   | AA                              | TT              | 1947007283               |
| SNP_P4_160499_28025 | NW_004516619.1 | Scaffold1408 | 28025                   | TT                              | CC              | 1947007285               |
| SNP_P4_160500_28029 | NW_004516619.1 | Scaffold1408 | 28029                   | CC                              | TT              | 1947007287               |
| SNP_P4_160501_28129 | NW_004516619.1 | Scaffold1408 | 28129                   | TT                              | AA              | 1947007289               |
| SNP_P4_160502_28182 | NW_004516619.1 | Scaffold1408 | 28182                   | TT                              | GG              | 1947007291               |
| SNP_P4_160503_28329 | NW_004516619.1 | Scaffold1408 | 28329                   | GG                              | CC              | 1947007293               |
| SNP_P4_160504_29283 | NW_004516619.1 | Scaffold1408 | 29283                   | AA                              | TT              | 1947007295               |
| SNP_P4_160505_29302 | NW_004516619.1 | Scaffold1408 | 29302                   | TT                              | GG              | 1947007297               |
| SNP_P4_160506_29303 | NW_004516619.1 | Scaffold1408 | 29303                   | AA                              | TT              | 1947007299               |
| SNP_P4_160507_29328 | NW_004516619.1 | Scaffold1408 | 29328                   | CC                              | TT              | 1947007301               |
| SNP_P4_160508_29389 | NW_004516619.1 | Scaffold1408 | 29389                   | AA                              | GG              | 1947007303               |
| SNP_P4_160509_29441 | NW_004516619.1 | Scaffold1408 | 29441                   | AA                              | GG              | 1947007305               |
| SNP_P4_160511_29619 | NW_004516619.1 | Scaffold1408 | 29619                   | TT                              | CC              | 1947007307               |
| SNP_P4_160512_29621 | NW_004516619.1 | Scaffold1408 | 29621                   | GG                              | AA              | 1947007309               |
| SNP_P4_160514_34804 | NW_004516619.1 | Scaffold1408 | 34804                   | AA                              | GG              | 1947007311               |
| SNP_P4_160515_34962 | NW_004516619.1 | Scaffold1408 | 34962                   | TT                              | CC              | 1947007313               |
| SNP_P4_160516_34963 | NW_004516619.1 | Scaffold1408 | 34963                   | GG                              | AA              | 1947007315               |

| SNPs IDs            | Chromosome IDs | Chromosomes  | Physical positions (bp) | CDC Frontier (Reference genome) | (ILWC46 & LPNB) | NCBI SNPdb Accession IDs |
|---------------------|----------------|--------------|-------------------------|---------------------------------|-----------------|--------------------------|
| SNP_P4_160517_34994 | NW_004516619.1 | Scaffold1408 | 34994                   | TT                              | CC              | 1947007317               |
| SNP_P4_160518_35005 | NW_004516619.1 | Scaffold1408 | 35005                   | AA                              | CC              | 1947007319               |
| SNP_P4_160519_35028 | NW_004516619.1 | Scaffold1408 | 35028                   | CC                              | TT              | 1947007321               |
| SNP_P4_160520_36923 | NW_004516619.1 | Scaffold1408 | 36923                   | CC                              | GG              | 1947007323               |
| SNP_P4_160521_37063 | NW_004516619.1 | Scaffold1408 | 37063                   | GG                              | AA              | 1947007325               |
| SNP_P4_160522_37111 | NW_004516619.1 | Scaffold1408 | 37111                   | AA                              | GG              | 1947007327               |
| SNP_P4_160523_37147 | NW_004516619.1 | Scaffold1408 | 37147                   | TT                              | AA              | 1947007329               |
| SNP_P4_160524_37165 | NW_004516619.1 | Scaffold1408 | 37165                   | AA                              | CC              | 1947007331               |
| SNP_P4_160525_37207 | NW_004516619.1 | Scaffold1408 | 37207                   | GG                              | TT              | 1947007333               |
| SNP_P4_160526_37216 | NW_004516619.1 | Scaffold1408 | 37216                   | CC                              | TT              | 1947007335               |
| SNP_P4_160527_37235 | NW_004516619.1 | Scaffold1408 | 37235                   | GG                              | AA              | 1947007337               |
| SNP_P4_160528_37248 | NW_004516619.1 | Scaffold1408 | 37248                   | AA                              | TT              | 1947007339               |
| SNP_P4_160529_37249 | NW_004516619.1 | Scaffold1408 | 37249                   | GG                              | AA              | 1947007341               |
| SNP_P4_160530_37265 | NW_004516619.1 | Scaffold1408 | 37265                   | GG                              | CC              | 1947007343               |
| SNP_P4_160531_37299 | NW_004516619.1 | Scaffold1408 | 37299                   | GG                              | AA              | 1947007345               |
| SNP_P4_160532_37326 | NW_004516619.1 | Scaffold1408 | 37326                   | TT                              | CC              | 1947007347               |
| SNP_P4_160533_37327 | NW_004516619.1 | Scaffold1408 | 37327                   | CC                              | GG              | 1947007349               |
| SNP_P4_160534_37329 | NW_004516619.1 | Scaffold1408 | 37329                   | AA                              | TT              | 1947007351               |
| SNP_P4_160535_39530 | NW_004516619.1 | Scaffold1408 | 39530                   | TT                              | GG              | 1947007353               |
| SNP_P4_160536_39610 | NW_004516619.1 | Scaffold1408 | 39610                   | GG                              | TT              | 1947007355               |
| SNP_P4_160537_53106 | NW_004516619.1 | Scaffold1408 | 53106                   | TT                              | AA              | 1947007357               |
| SNP_P4_160538_53145 | NW_004516619.1 | Scaffold1408 | 53145                   | GG                              | AA              | 1947007359               |
| SNP_P4_160539_53150 | NW_004516619.1 | Scaffold1408 | 53150                   | TT                              | CC              | 1947007361               |
| SNP_P4_160540_53252 | NW_004516619.1 | Scaffold1408 | 53252                   | AA                              | CC              | 1947007363               |
| SNP_P4_160541_53269 | NW_004516619.1 | Scaffold1408 | 53269                   | GG                              | TT              | 1947007365               |
| SNP_P4_160542_53298 | NW_004516619.1 | Scaffold1408 | 53298                   | CC                              | TT              | 1947007367               |
| SNP_P4_160543_53317 | NW_004516619.1 | Scaffold1408 | 53317                   | AA                              | TT              | 1947007369               |
| SNP_P4_160544_53510 | NW_004516619.1 | Scaffold1408 | 53510                   | AA                              | TT              | 1947007371               |
| SNP_P4_160546_54070 | NW_004516619.1 | Scaffold1408 | 54070                   | AA                              | TT              | 1947007373               |
| SNP_P4_160547_54611 | NW_004516619.1 | Scaffold1408 | 54611                   | AA                              | CC              | 1947007375               |
| SNP_P4_160548_54797 | NW_004516619.1 | Scaffold1408 | 54797                   | AA                              | GG              | 1947007377               |
| SNP_P4_160549_54907 | NW_004516619.1 | Scaffold1408 | 54907                   | AA                              | GG              | 1947007379               |
| SNP_P4_160550_54927 | NW_004516619.1 | Scaffold1408 | 54927                   | GG                              | TT              | 1947007381               |
| SNP_P4_160551_55167 | NW_004516619.1 | Scaffold1408 | 55167                   | AA                              | TT              | 1947007383               |
| SNP_P4_160552_55219 | NW_004516619.1 | Scaffold1408 | 55219                   | CC                              | TT              | 1947007385               |
| SNP_P4_160553_56198 | NW_004516619.1 | Scaffold1408 | 56198                   | TT                              | CC              | 1947007387               |
| SNP_P4_160554_62197 | NW_004516619.1 | Scaffold1408 | 62197                   | TT                              | CC              | 1947007389               |
| SNP_P4_160555_62285 | NW_004516619.1 | Scaffold1408 | 62285                   | AA                              | TT              | 1947007391               |
| SNP_P4_160556_62860 | NW_004516619.1 | Scaffold1408 | 62860                   | TT                              | CC              | 1947007393               |
| SNP_P4_160557_62987 | NW_004516619.1 | Scaffold1408 | 62987                   | GG                              | AA              | 1947007395               |
| SNP_P4_160558_63231 | NW_004516619.1 | Scaffold1408 | 63231                   | AA                              | GG              | 1947007397               |
| SNP_P4_160559_63277 | NW_004516619.1 | Scaffold1408 | 63277                   | TT                              | AA              | 1947007400               |

| SNPs IDs            | Chromosome IDs | Chromosomes  | Physical positions (bp) | CDC Frontier (Reference genome) | (ILWC46 & LPNB) | NCBI SNPdb Accession IDs |
|---------------------|----------------|--------------|-------------------------|---------------------------------|-----------------|--------------------------|
| SNP_P4_160560_66463 | NW_004516619.1 | Scaffold1408 | 66463                   | AA                              | TT              | 1947007402               |
| SNP_P4_160561_66530 | NW_004516619.1 | Scaffold1408 | 66530                   | TT                              | GG              | 1947007404               |
| SNP_P4_160562_66596 | NW_004516619.1 | Scaffold1408 | 66596                   | TT                              | CC              | 1947007406               |
| SNP_P4_160563_66725 | NW_004516619.1 | Scaffold1408 | 66725                   | TT                              | AA              | 1947007408               |
| SNP_P4_160564_66763 | NW_004516619.1 | Scaffold1408 | 66763                   | AA                              | TT              | 1947007410               |
| SNP_P4_160565_66992 | NW_004516619.1 | Scaffold1408 | 66992                   | GG                              | AA              | 1947007412               |
| SNP_P4_160566_67068 | NW_004516619.1 | Scaffold1408 | 67068                   | AA                              | TT              | 1947007413               |
| SNP_P4_160567_68187 | NW_004516619.1 | Scaffold1408 | 68187                   | TT                              | CC              | 1947007415               |
| SNP_P4_160568_68250 | NW_004516619.1 | Scaffold1408 | 68250                   | CC                              | GG              | 1947007417               |
| SNP_P4_160569_68267 | NW_004516619.1 | Scaffold1408 | 68267                   | TT                              | AA              | 1947007419               |
| SNP_P4_160570_68306 | NW_004516619.1 | Scaffold1408 | 68306                   | TT                              | GG              | 1947007421               |
| SNP_P4_160571_68335 | NW_004516619.1 | Scaffold1408 | 68335                   | AA                              | GG              | 1947007423               |
| SNP_P4_160572_68490 | NW_004516619.1 | Scaffold1408 | 68490                   | AA                              | GG              | 1947007425               |
| SNP_P4_160573_68508 | NW_004516619.1 | Scaffold1408 | 68508                   | CC                              | TT              | 1947007427               |
| SNP_P4_160574_69184 | NW_004516619.1 | Scaffold1408 | 69184                   | AA                              | GG              | 1947007429               |
| SNP_P4_160575_69220 | NW_004516619.1 | Scaffold1408 | 69220                   | TT                              | GG              | 1947007431               |
| SNP_P4_160576_69225 | NW_004516619.1 | Scaffold1408 | 69225                   | GG                              | CC              | 1947007433               |
| SNP_P4_160577_69266 | NW_004516619.1 | Scaffold1408 | 69266                   | AA                              | TT              | 1947007435               |
| SNP_P4_160578_69541 | NW_004516619.1 | Scaffold1408 | 69541                   | TT                              | AA              | 1947007437               |
| SNP_P4_160579_69652 | NW_004516619.1 | Scaffold1408 | 69652                   | CC                              | TT              | 1947007439               |
| SNP_P4_160580_69770 | NW_004516619.1 | Scaffold1408 | 69770                   | GG                              | TT              | 1947007441               |
| SNP_P4_160581_69942 | NW_004516619.1 | Scaffold1408 | 69942                   | GG                              | AA              | 1947007443               |
| SNP_P4_160582_70022 | NW_004516619.1 | Scaffold1408 | 70022                   | TT                              | AA              | 1947007445               |
| SNP_P4_160583_70248 | NW_004516619.1 | Scaffold1408 | 70248                   | TT                              | CC              | 1947007447               |
| SNP_P4_160584_70487 | NW_004516619.1 | Scaffold1408 | 70487                   | TT                              | AA              | 1947007449               |
| SNP_P4_160585_70638 | NW_004516619.1 | Scaffold1408 | 70638                   | CC                              | GG              | 1947007451               |
| SNP_P4_160586_70655 | NW_004516619.1 | Scaffold1408 | 70655                   | TT                              | AA              | 1947007453               |
| SNP_P4_160587_70873 | NW_004516619.1 | Scaffold1408 | 70873                   | GG                              | TT              | 1947007455               |
| SNP_P4_160588_70901 | NW_004516619.1 | Scaffold1408 | 70901                   | CC                              | AA              | 1947007457               |
| SNP_P4_160590_71000 | NW_004516619.1 | Scaffold1408 | 71000                   | GG                              | CC              | 1947007459               |
| SNP_P4_160591_71985 | NW_004516619.1 | Scaffold1408 | 71985                   | GG                              | AA              | 1947007461               |
| SNP_P4_160592_72045 | NW_004516619.1 | Scaffold1408 | 72045                   | GG                              | TT              | 1947007463               |
| SNP_P4_160593_72071 | NW_004516619.1 | Scaffold1408 | 72071                   | GG                              | TT              | 1947007465               |
| SNP_P4_160594_72171 | NW_004516619.1 | Scaffold1408 | 72171                   | TT                              | GG              | 1947007467               |
| SNP_P4_160595_72312 | NW_004516619.1 | Scaffold1408 | 72312                   | TT                              | CC              | 1947007469               |
| SNP_P4_160596_72362 | NW_004516619.1 | Scaffold1408 | 72362                   | AA                              | TT              | 1947007471               |
| SNP_P4_160597_72491 | NW_004516619.1 | Scaffold1408 | 72491                   | CC                              | GG              | 1947007473               |
| SNP_P4_160598_72654 | NW_004516619.1 | Scaffold1408 | 72654                   | TT                              | AA              | 1947007475               |
| SNP_P4_160599_72660 | NW_004516619.1 | Scaffold1408 | 72660                   | GG                              | TT              | 1947007477               |
| SNP_P4_160600_72915 | NW_004516619.1 | Scaffold1408 | 72915                   | GG                              | AA              | 1947007479               |
| SNP_P4_160601_73240 | NW_004516619.1 | Scaffold1408 | 73240                   | AA                              | TT              | 1947007481               |
| SNP_P4_160602_74896 | NW_004516619.1 | Scaffold1408 | 74896                   | GG                              | AA              | 1947007483               |

| SNPs IDs            | Chromosome IDs | Chromosomes  | Physical positions (bp) | CDC Frontier (Reference genome) | (ILWC46 & LPNB) | NCBI SNPdb Accession IDs |
|---------------------|----------------|--------------|-------------------------|---------------------------------|-----------------|--------------------------|
| SNP_P4_160603_76364 | NW_004516619.1 | Scaffold1408 | 76364                   | CC                              | TT              | 1947007485               |
| SNP_P4_160604_77010 | NW_004516619.1 | Scaffold1408 | 77010                   | AA                              | CC              | 1947007487               |
| SNP_P4_160605_77840 | NW_004516619.1 | Scaffold1408 | 77840                   | GG                              | AA              | 1947007489               |
| SNP_P4_160606_77899 | NW_004516619.1 | Scaffold1408 | 77899                   | TT                              | CC              | 1947007491               |
| SNP_P4_160607_77935 | NW_004516619.1 | Scaffold1408 | 77935                   | GG                              | CC              | 1947007493               |
| SNP_P4_160608_78006 | NW_004516619.1 | Scaffold1408 | 78006                   | TT                              | CC              | 1947007494               |
| SNP_P4_160609_78012 | NW_004516619.1 | Scaffold1408 | 78012                   | TT                              | CC              | 1947007496               |
| SNP_P4_160610_78161 | NW_004516619.1 | Scaffold1408 | 78161                   | CC                              | AA              | 1947007498               |
| SNP_P4_160611_78269 | NW_004516619.1 | Scaffold1408 | 78269                   | GG                              | CC              | 1947007500               |
| SNP_P4_160612_80470 | NW_004516619.1 | Scaffold1408 | 80470                   | AA                              | TT              | 1947007502               |
| SNP_P4_160613_80707 | NW_004516619.1 | Scaffold1408 | 80707                   | GG                              | AA              | 1947007504               |
| SNP_P4_160614_80772 | NW_004516619.1 | Scaffold1408 | 80772                   | CC                              | GG              | 1947007506               |
| SNP_P4_160615_80847 | NW_004516619.1 | Scaffold1408 | 80847                   | GG                              | AA              | 1947007508               |
| SNP_P4_160616_80854 | NW_004516619.1 | Scaffold1408 | 80854                   | TT                              | GG              | 1947007510               |
| SNP_P4_160617_81211 | NW_004516619.1 | Scaffold1408 | 81211                   | GG                              | TT              | 1947007512               |
| SNP_P4_160618_81246 | NW_004516619.1 | Scaffold1408 | 81246                   | GG                              | AA              | 1947007514               |
| SNP_P4_160619_81378 | NW_004516619.1 | Scaffold1408 | 81378                   | TT                              | CC              | 1947007516               |
| SNP_P4_160620_81702 | NW_004516619.1 | Scaffold1408 | 81702                   | TT                              | AA              | 1947007518               |
| SNP_P4_160621_81789 | NW_004516619.1 | Scaffold1408 | 81789                   | TT                              | CC              | 1947007519               |
| SNP_P4_160622_81819 | NW_004516619.1 | Scaffold1408 | 81819                   | CC                              | TT              | 1947007521               |
| SNP_P4_160623_82135 | NW_004516619.1 | Scaffold1408 | 82135                   | TT                              | AA              | 1947007523               |
| SNP_P4_160624_82136 | NW_004516619.1 | Scaffold1408 | 82136                   | CC                              | TT              | 1947007525               |
| SNP_P4_160625_82714 | NW_004516619.1 | Scaffold1408 | 82714                   | GG                              | CC              | 1947007527               |
| SNP_P4_160626_82828 | NW_004516619.1 | Scaffold1408 | 82828                   | GG                              | AA              | 1947007529               |
| SNP_P4_160627_82922 | NW_004516619.1 | Scaffold1408 | 82922                   | AA                              | TT              | 1947007531               |
| SNP_P4_160628_82974 | NW_004516619.1 | Scaffold1408 | 82974                   | CC                              | GG              | 1947007533               |
| SNP_P4_160629_83047 | NW_004516619.1 | Scaffold1408 | 83047                   | GG                              | TT              | 1947007535               |
| SNP_P4_160630_83104 | NW_004516619.1 | Scaffold1408 | 83104                   | TT                              | AA              | 1947007537               |
| SNP_P4_160631_83108 | NW_004516619.1 | Scaffold1408 | 83108                   | TT                              | CC              | 1947007539               |
| SNP_P4_160632_83784 | NW_004516619.1 | Scaffold1408 | 83784                   | GG                              | TT              | 1947007541               |
| SNP_P4_160633_84068 | NW_004516619.1 | Scaffold1408 | 84068                   | TT                              | GG              | 1947007542               |
| SNP_P4_160634_84900 | NW_004516619.1 | Scaffold1408 | 84900                   | TT                              | CC              | 1947007544               |
| SNP_P4_160635_84941 | NW_004516619.1 | Scaffold1408 | 84941                   | CC                              | TT              | 1947007546               |
| SNP_P4_160636_85104 | NW_004516619.1 | Scaffold1408 | 85104                   | TT                              | GG              | 1947007548               |
| SNP_P4_160637_85133 | NW_004516619.1 | Scaffold1408 | 85133                   | TT                              | GG              | 1947007550               |
| SNP_P4_160638_85633 | NW_004516619.1 | Scaffold1408 | 85633                   | AA                              | GG              | 1947007552               |
| SNP_P4_160639_85892 | NW_004516619.1 | Scaffold1408 | 85892                   | GG                              | TT              | 1947007554               |
| SNP_P4_160640_85906 | NW_004516619.1 | Scaffold1408 | 85906                   | AA                              | TT              | 1947007556               |
| SNP_P4_160641_85912 | NW_004516619.1 | Scaffold1408 | 85912                   | TT                              | CC              | 1947007558               |
| SNP_P4_160642_85918 | NW_004516619.1 | Scaffold1408 | 85918                   | GG                              | TT              | 1947007560               |
| SNP_P4_160643_86024 | NW_004516619.1 | Scaffold1408 | 86024                   | TT                              | AA              | 1947007562               |
| SNP_P4_160644_86031 | NW_004516619.1 | Scaffold1408 | 86031                   | TT                              | CC              | 1947007564               |

| SNPs IDs             | Chromosome IDs | Chromosomes  | Physical positions (bp) | CDC Frontier (Reference genome) | (ILWC46 & LPNB) | NCBI SNPdb Accession IDs |
|----------------------|----------------|--------------|-------------------------|---------------------------------|-----------------|--------------------------|
| SNP_P4_160645_86421  | NW_004516619.1 | Scaffold1408 | 86421                   | GG                              | AA              | 1947007566               |
| SNP_P4_160646_86640  | NW_004516619.1 | Scaffold1408 | 86640                   | AA                              | TT              | 1947007567               |
| SNP_P4_160647_87027  | NW_004516619.1 | Scaffold1408 | 87027                   | TT                              | GG              | 1947007569               |
| SNP_P4_160648_89984  | NW_004516619.1 | Scaffold1408 | 89984                   | GG                              | CC              | 1947007571               |
| SNP_P4_160649_91030  | NW_004516619.1 | Scaffold1408 | 91030                   | GG                              | AA              | 1947007573               |
| SNP_P4_160650_91438  | NW_004516619.1 | Scaffold1408 | 91438                   | GG                              | AA              | 1947007575               |
| SNP_P4_160651_91451  | NW_004516619.1 | Scaffold1408 | 91451                   | AA                              | TT              | 1947007577               |
| SNP_P4_160652_91499  | NW_004516619.1 | Scaffold1408 | 91499                   | GG                              | AA              | 1947007579               |
| SNP_P4_160653_91552  | NW_004516619.1 | Scaffold1408 | 91552                   | AA                              | GG              | 1947007581               |
| SNP_P4_160654_91908  | NW_004516619.1 | Scaffold1408 | 91908                   | GG                              | TT              | 1947007583               |
| SNP_P4_160655_91980  | NW_004516619.1 | Scaffold1408 | 91980                   | AA                              | TT              | 1947007585               |
| SNP_P4_160656_92145  | NW_004516619.1 | Scaffold1408 | 92145                   | CC                              | TT              | 1947007587               |
| SNP_P4_160657_92249  | NW_004516619.1 | Scaffold1408 | 92249                   | AA                              | TT              | 1947007589               |
| SNP_P4_160659_92365  | NW_004516619.1 | Scaffold1408 | 92365                   | TT                              | CC              | 1947007591               |
| SNP_P4_160660_92391  | NW_004516619.1 | Scaffold1408 | 92391                   | GG                              | TT              | 1947007593               |
| SNP_P4_160661_92446  | NW_004516619.1 | Scaffold1408 | 92446                   | GG                              | AA              | 1947007594               |
| SNP_P4_160662_92451  | NW_004516619.1 | Scaffold1408 | 92451                   | CC                              | GG              | 1947007596               |
| SNP_P4_160663_92545  | NW_004516619.1 | Scaffold1408 | 92545                   | AA                              | TT              | 1947007598               |
| SNP_P4_160664_92582  | NW_004516619.1 | Scaffold1408 | 92582                   | CC                              | TT              | 1947007600               |
| SNP_P4_160665_92592  | NW_004516619.1 | Scaffold1408 | 92592                   | TT                              | GG              | 1947007602               |
| SNP_P4_160666_92620  | NW_004516619.1 | Scaffold1408 | 92620                   | TT                              | GG              | 1947007604               |
| SNP_P4_160667_92667  | NW_004516619.1 | Scaffold1408 | 92667                   | GG                              | AA              | 1947007606               |
| SNP_P4_160668_92870  | NW_004516619.1 | Scaffold1408 | 92870                   | TT                              | GG              | 1947007608               |
| SNP_P4_160669_92918  | NW_004516619.1 | Scaffold1408 | 92918                   | AA                              | TT              | 1947007610               |
| SNP_P4_160671_96558  | NW_004516619.1 | Scaffold1408 | 96558                   | TT                              | AA              | 1947007612               |
| SNP_P4_160672_97771  | NW_004516619.1 | Scaffold1408 | 97771                   | TT                              | AA              | 1947007614               |
| SNP_P4_160673_101647 | NW_004516619.1 | Scaffold1408 | 101647                  | GG                              | CC              | 1947007616               |
| SNP_P4_160674_101665 | NW_004516619.1 | Scaffold1408 | 101665                  | TT                              | AA              | 1947007618               |
| SNP_P4_160675_101721 | NW_004516619.1 | Scaffold1408 | 101721                  | GG                              | AA              | 1947007620               |
| SNP_P4_160676_101869 | NW_004516619.1 | Scaffold1408 | 101869                  | AA                              | CC              | 1947007622               |
| SNP_P4_160677_101954 | NW_004516619.1 | Scaffold1408 | 101954                  | TT                              | AA              | 1947007624               |
| SNP_P4_160678_103198 | NW_004516619.1 | Scaffold1408 | 103198                  | CC                              | AA              | 1947007626               |
| SNP_P4_160679_103316 | NW_004516619.1 | Scaffold1408 | 103316                  | AA                              | CC              | 1947007628               |
| SNP_P4_160680_103646 | NW_004516619.1 | Scaffold1408 | 103646                  | TT                              | CC              | 1947007630               |
| SNP_P4_160681_103695 | NW_004516619.1 | Scaffold1408 | 103695                  | TT                              | CC              | 1947007632               |
| SNP_P4_160683_103971 | NW_004516619.1 | Scaffold1408 | 103971                  | GG                              | TT              | 1947007634               |
| SNP_P4_160684_104452 | NW_004516619.1 | Scaffold1408 | 104452                  | AA                              | GG              | 1947007636               |
| SNP_P4_160685_104815 | NW_004516619.1 | Scaffold1408 | 104815                  | AA                              | GG              | 1947007639               |
| SNP_P4_160686_105145 | NW_004516619.1 | Scaffold1408 | 105145                  | AA                              | GG              | 1947007641               |
| SNP_P4_160687_105324 | NW_004516619.1 | Scaffold1408 | 105324                  | GG                              | AA              | 1947007643               |
| SNP_P4_160688_105439 | NW_004516619.1 | Scaffold1408 | 105439                  | CC                              | TT              | 1947007645               |
| SNP_P4_160689_105712 | NW_004516619.1 | Scaffold1408 | 105712                  | GG                              | TT              | 1947007647               |



| SNPs IDs             | Chromosome IDs | Chromosomes  | Physical positions (bp) | CDC Frontier (Reference genome) | (ILWC46 & LPNB) | NCBI SNPdb Accession IDs |
|----------------------|----------------|--------------|-------------------------|---------------------------------|-----------------|--------------------------|
| SNP_P4_160690_105716 | NW_004516619.1 | Scaffold1408 | 105716                  | AA                              | CC              | 1947007649               |
| SNP_P4_160691_108089 | NW_004516619.1 | Scaffold1408 | 108089                  | AA                              | TT              | 1947007651               |
| SNP_P4_160692_108639 | NW_004516619.1 | Scaffold1408 | 108639                  | GG                              | TT              | 1947007654               |
| SNP_P4_160693_108640 | NW_004516619.1 | Scaffold1408 | 108640                  | TT                              | GG              | 1947007656               |
| SNP_P4_160694_108733 | NW_004516619.1 | Scaffold1408 | 108733                  | GG                              | AA              | 1947007658               |
| SNP_P4_160695_5728   | NW_004516620.1 | Scaffold1409 | 5728                    | CC                              | TT              | 1947007660               |
| SNP_P4_160696_6850   | NW_004516620.1 | Scaffold1409 | 6850                    | AA                              | GG              | 1947007662               |
| SNP_P4_160697_6895   | NW_004516620.1 | Scaffold1409 | 6895                    | AA                              | TT              | 1947007664               |
| SNP_P4_160698_6921   | NW_004516620.1 | Scaffold1409 | 6921                    | TT                              | CC              | 1947007666               |
| SNP_P4_160699_6922   | NW_004516620.1 | Scaffold1409 | 6922                    | AA                              | GG              | 1947007668               |
| SNP_P4_160700_6928   | NW_004516620.1 | Scaffold1409 | 6928                    | GG                              | TT              | 1947007670               |
| SNP_P4_160701_7345   | NW_004516620.1 | Scaffold1409 | 7345                    | AA                              | GG              | 1947007672               |
| SNP_P4_160702_7412   | NW_004516620.1 | Scaffold1409 | 7412                    | GG                              | AA              | 1947007674               |
| SNP_P4_160703_8589   | NW_004516620.1 | Scaffold1409 | 8589                    | TT                              | CC              | 1947007676               |
| SNP_P4_160704_8884   | NW_004516620.1 | Scaffold1409 | 8884                    | TT                              | CC              | 1947007678               |
| SNP_P4_160705_8919   | NW_004516620.1 | Scaffold1409 | 8919                    | AA                              | GG              | 1947007680               |
| SNP_P4_160706_8931   | NW_004516620.1 | Scaffold1409 | 8931                    | AA                              | CC              | 1947007682               |
| SNP_P4_160707_8950   | NW_004516620.1 | Scaffold1409 | 8950                    | AA                              | GG              | 1947007685               |
| SNP_P4_160708_8982   | NW_004516620.1 | Scaffold1409 | 8982                    | TT                              | CC              | 1947007687               |
| SNP_P4_160709_8996   | NW_004516620.1 | Scaffold1409 | 8996                    | CC                              | TT              | 1947007689               |
| SNP_P4_160710_9044   | NW_004516620.1 | Scaffold1409 | 9044                    | CC                              | TT              | 1947007691               |
| SNP_P4_160712_9152   | NW_004516620.1 | Scaffold1409 | 9152                    | CC                              | TT              | 1947007693               |
| SNP_P4_160713_9213   | NW_004516620.1 | Scaffold1409 | 9213                    | CC                              | TT              | 1947007695               |
| SNP_P4_160715_9257   | NW_004516620.1 | Scaffold1409 | 9257                    | TT                              | AA              | 1947007697               |
| SNP_P4_160716_9336   | NW_004516620.1 | Scaffold1409 | 9336                    | TT                              | AA              | 1947007699               |
| SNP_P4_160717_9452   | NW_004516620.1 | Scaffold1409 | 9452                    | CC                              | TT              | 1947007701               |
| SNP_P4_160718_9510   | NW_004516620.1 | Scaffold1409 | 9510                    | TT                              | CC              | 1947007703               |
| SNP_P4_160719_9568   | NW_004516620.1 | Scaffold1409 | 9568                    | CC                              | TT              | 1947007705               |
| SNP_P4_160720_9591   | NW_004516620.1 | Scaffold1409 | 9591                    | AA                              | TT              | 1947007707               |
| SNP_P4_160721_9643   | NW_004516620.1 | Scaffold1409 | 9643                    | GG                              | AA              | 1947007709               |
| SNP_P4_160722_9910   | NW_004516620.1 | Scaffold1409 | 9910                    | AA                              | CC              | 1947007711               |
| SNP_P4_160723_9978   | NW_004516620.1 | Scaffold1409 | 9978                    | TT                              | CC              | 1947007713               |
| SNP_P4_160724_9982   | NW_004516620.1 | Scaffold1409 | 9982                    | TT                              | CC              | 1947007715               |
| SNP_P4_160725_10031  | NW_004516620.1 | Scaffold1409 | 10031                   | CC                              | TT              | 1947007717               |
| SNP_P4_160726_10078  | NW_004516620.1 | Scaffold1409 | 10078                   | TT                              | AA              | 1947007719               |
| SNP_P4_160727_10158  | NW_004516620.1 | Scaffold1409 | 10158                   | TT                              | GG              | 1947007721               |
| SNP_P4_160728_10237  | NW_004516620.1 | Scaffold1409 | 10237                   | AA                              | GG              | 1947007723               |
| SNP_P4_160729_11827  | NW_004516620.1 | Scaffold1409 | 11827                   | CC                              | TT              | 1947007725               |
| SNP_P4_160731_12375  | NW_004516620.1 | Scaffold1409 | 12375                   | AA                              | CC              | 1947007727               |
| SNP_P4_160732_12482  | NW_004516620.1 | Scaffold1409 | 12482                   | TT                              | CC              | 1947007729               |
| SNP_P4_160733_12518  | NW_004516620.1 | Scaffold1409 | 12518                   | GG                              | AA              | 1947007731               |
| SNP_P4_160734_12552  | NW_004516620.1 | Scaffold1409 | 12552                   | AA                              | GG              | 1947007733               |

| SNPs IDs             | Chromosome IDs | Chromosomes  | Physical positions (bp) | CDC Frontier (Reference genome) | (ILWC46 & LPNB) | NCBI SNPdb Accession IDs |
|----------------------|----------------|--------------|-------------------------|---------------------------------|-----------------|--------------------------|
| SNP_P4_160735_12687  | NW_004516620.1 | Scaffold1409 | 12687                   | CC                              | AA              | 1947007735               |
| SNP_P4_160736_12691  | NW_004516620.1 | Scaffold1409 | 12691                   | AA                              | TT              | 1947007737               |
| SNP_P4_160737_12740  | NW_004516620.1 | Scaffold1409 | 12740                   | GG                              | CC              | 1947007739               |
| SNP_P4_160738_12744  | NW_004516620.1 | Scaffold1409 | 12744                   | CC                              | GG              | 1947007741               |
| SNP_P4_160739_14734  | NW_004516620.1 | Scaffold1409 | 14734                   | GG                              | CC              | 1947007743               |
| SNP_P4_160740_15048  | NW_004516620.1 | Scaffold1409 | 15048                   | CC                              | TT              | 1947007745               |
| SNP_P4_160741_18226  | NW_004516622.1 | Scaffold1411 | 18226                   | TT                              | CC              | 1947007747               |
| SNP_P4_160742_35590  | NW_004516622.1 | Scaffold1411 | 35590                   | GG                              | CC              | 1947007749               |
| SNP_P4_160743_35683  | NW_004516622.1 | Scaffold1411 | 35683                   | AA                              | GG              | 1947007751               |
| SNP_P4_160744_36051  | NW_004516622.1 | Scaffold1411 | 36051                   | TT                              | CC              | 1947007753               |
| SNP_P4_160745_37261  | NW_004516622.1 | Scaffold1411 | 37261                   | GG                              | CC              | 1947007755               |
| SNP_P4_160746_37279  | NW_004516622.1 | Scaffold1411 | 37279                   | GG                              | CC              | 1947007757               |
| SNP_P4_160747_37280  | NW_004516622.1 | Scaffold1411 | 37280                   | TT                              | CC              | 1947007759               |
| SNP_P4_160748_39207  | NW_004516622.1 | Scaffold1411 | 39207                   | TT                              | CC              | 1947007762               |
| SNP_P4_160749_72817  | NW_004516622.1 | Scaffold1411 | 72817                   | GG                              | AA              | 1947007764               |
| SNP_P4_160750_76856  | NW_004516622.1 | Scaffold1411 | 76856                   | TT                              | AA              | 1947007766               |
| SNP_P4_160751_83365  | NW_004516622.1 | Scaffold1411 | 83365                   | TT                              | GG              | 1947007768               |
| SNP_P4_160752_87332  | NW_004516622.1 | Scaffold1411 | 87332                   | CC                              | GG              | 1947007769               |
| SNP_P4_160753_100167 | NW_004516622.1 | Scaffold1411 | 100167                  | GG                              | AA              | 1947007771               |
| SNP_P4_160754_107660 | NW_004516622.1 | Scaffold1411 | 107660                  | TT                              | CC              | 1947007773               |
| SNP_P4_160755_114654 | NW_004516622.1 | Scaffold1411 | 114654                  | CC                              | TT              | 1947007775               |
| SNP_P4_160756_123956 | NW_004516622.1 | Scaffold1411 | 123956                  | GG                              | AA              | 1947007777               |
| SNP_P4_160757_124946 | NW_004516622.1 | Scaffold1411 | 124946                  | CC                              | GG              | 1947007779               |
| SNP_P4_160758_125347 | NW_004516622.1 | Scaffold1411 | 125347                  | GG                              | TT              | 1947007781               |
| SNP_P4_160759_135337 | NW_004516622.1 | Scaffold1411 | 135337                  | CC                              | AA              | 1947007783               |
| SNP_P4_160760_136913 | NW_004516622.1 | Scaffold1411 | 136913                  | AA                              | CC              | 1947007785               |
| SNP_P4_160761_139327 | NW_004516622.1 | Scaffold1411 | 139327                  | CC                              | TT              | 1947007787               |
| SNP_P4_160762_304    | NW_004516623.1 | Scaffold1412 | 304                     | GG                              | AA              | 1947007789               |
| SNP_P4_160764_3352   | NW_004516623.1 | Scaffold1412 | 3352                    | AA                              | GG              | 1947007791               |
| SNP_P4_160765_3356   | NW_004516623.1 | Scaffold1412 | 3356                    | AA                              | GG              | 1947007793               |
| SNP_P4_160766_3409   | NW_004516623.1 | Scaffold1412 | 3409                    | GG                              | TT              | 1947007795               |
| SNP_P4_160767_3426   | NW_004516623.1 | Scaffold1412 | 3426                    | TT                              | GG              | 1947007797               |
| SNP_P4_160768_3448   | NW_004516623.1 | Scaffold1412 | 3448                    | TT                              | CC              | 1947007799               |
| SNP_P4_160769_3469   | NW_004516623.1 | Scaffold1412 | 3469                    | GG                              | AA              | 1947007801               |
| SNP_P4_160770_3482   | NW_004516623.1 | Scaffold1412 | 3482                    | GG                              | AA              | 1947007803               |
| SNP_P4_160771_3515   | NW_004516623.1 | Scaffold1412 | 3515                    | AA                              | GG              | 1947007805               |
| SNP_P4_160772_3529   | NW_004516623.1 | Scaffold1412 | 3529                    | AA                              | GG              | 1947007807               |
| SNP_P4_160773_3543   | NW_004516623.1 | Scaffold1412 | 3543                    | TT                              | AA              | 1947007809               |
| SNP_P4_160774_3669   | NW_004516623.1 | Scaffold1412 | 3669                    | CC                              | TT              | 1947007812               |
| SNP_P4_160775_3698   | NW_004516623.1 | Scaffold1412 | 3698                    | TT                              | CC              | 1947007814               |
| SNP_P4_160776_3714   | NW_004516623.1 | Scaffold1412 | 3714                    | CC                              | TT              | 1947007816               |
| SNP_P4_160777_3734   | NW_004516623.1 | Scaffold1412 | 3734                    | TT                              | CC              | 1947007818               |

| SNPs IDs            | Chromosome IDs | Chromosomes  | Physical positions (bp) | CDC Frontier (Reference genome) | (ILWC46 & LPNB) | NCBI SNPdb Accession IDs |
|---------------------|----------------|--------------|-------------------------|---------------------------------|-----------------|--------------------------|
| SNP_P4_160778_3748  | NW_004516623.1 | Scaffold1412 | 3748                    | TT                              | GG              | 1947007820               |
| SNP_P4_160779_3786  | NW_004516623.1 | Scaffold1412 | 3786                    | TT                              | GG              | 1947007822               |
| SNP_P4_160780_3804  | NW_004516623.1 | Scaffold1412 | 3804                    | GG                              | AA              | 1947007824               |
| SNP_P4_160781_3836  | NW_004516623.1 | Scaffold1412 | 3836                    | TT                              | CC              | 1947007826               |
| SNP_P4_160782_3853  | NW_004516623.1 | Scaffold1412 | 3853                    | AA                              | GG              | 1947007828               |
| SNP_P4_160783_17458 | NW_004516623.1 | Scaffold1412 | 17458                   | TT                              | AA              | 1947007830               |
| SNP_P4_160784_17595 | NW_004516623.1 | Scaffold1412 | 17595                   | CC                              | TT              | 1947007832               |
| SNP_P4_160785_18209 | NW_004516623.1 | Scaffold1412 | 18209                   | GG                              | TT              | 1947007834               |
| SNP_P4_160786_1325  | NW_004516624.1 | Scaffold1413 | 1325                    | TT                              | CC              | 1947007836               |
| SNP_P4_160787_1789  | NW_004516625.1 | Scaffold1414 | 1789                    | GG                              | TT              | 1947007838               |
| SNP_P4_160788_2034  | NW_004516625.1 | Scaffold1414 | 2034                    | TT                              | AA              | 1947007840               |
| SNP_P4_160789_2038  | NW_004516625.1 | Scaffold1414 | 2038                    | TT                              | GG              | 1947007842               |
| SNP_P4_160790_2051  | NW_004516625.1 | Scaffold1414 | 2051                    | AA                              | GG              | 1947007844               |
| SNP_P4_160791_2127  | NW_004516625.1 | Scaffold1414 | 2127                    | GG                              | AA              | 1947007846               |
| SNP_P4_160792_2293  | NW_004516625.1 | Scaffold1414 | 2293                    | CC                              | TT              | 1947007848               |
| SNP_P4_160793_2437  | NW_004516625.1 | Scaffold1414 | 2437                    | AA                              | TT              | 1947007850               |
| SNP_P4_160794_2521  | NW_004516625.1 | Scaffold1414 | 2521                    | AA                              | TT              | 1947007852               |
| SNP_P4_160796_8410  | NW_004516625.1 | Scaffold1414 | 8410                    | TT                              | CC              | 1947007854               |
| SNP_P4_160797_20959 | NW_004516625.1 | Scaffold1414 | 20959                   | GG                              | CC              | 1947007856               |
| SNP_P4_160798_28607 | NW_004516625.1 | Scaffold1414 | 28607                   | AA                              | CC              | 1947007858               |
| SNP_P4_160799_29817 | NW_004516625.1 | Scaffold1414 | 29817                   | TT                              | CC              | 1947007860               |
| SNP_P4_160800_32255 | NW_004516625.1 | Scaffold1414 | 32255                   | TT                              | CC              | 1947007862               |
| SNP_P4_160801_32360 | NW_004516625.1 | Scaffold1414 | 32360                   | CC                              | TT              | 1947007864               |
| SNP_P4_160802_32423 | NW_004516625.1 | Scaffold1414 | 32423                   | TT                              | CC              | 1947007866               |
| SNP_P4_160803_32747 | NW_004516625.1 | Scaffold1414 | 32747                   | AA                              | GG              | 1947007868               |
| SNP_P4_160804_33901 | NW_004516625.1 | Scaffold1414 | 33901                   | AA                              | TT              | 1947007870               |
| SNP_P4_160805_33903 | NW_004516625.1 | Scaffold1414 | 33903                   | GG                              | TT              | 1947007872               |
| SNP_P4_160806_35999 | NW_004516625.1 | Scaffold1414 | 35999                   | TT                              | GG              | 1947007874               |
| SNP_P4_160807_36281 | NW_004516625.1 | Scaffold1414 | 36281                   | GG                              | TT              | 1947007876               |
| SNP_P4_160808_36485 | NW_004516625.1 | Scaffold1414 | 36485                   | CC                              | AA              | 1947007878               |
| SNP_P4_160809_36517 | NW_004516625.1 | Scaffold1414 | 36517                   | AA                              | GG              | 1947007880               |
| SNP_P4_160810_37984 | NW_004516625.1 | Scaffold1414 | 37984                   | AA                              | GG              | 1947007882               |
| SNP_P4_160812_48864 | NW_004516625.1 | Scaffold1414 | 48864                   | TT                              | CC              | 1947007884               |
| SNP_P4_160813_48895 | NW_004516625.1 | Scaffold1414 | 48895                   | GG                              | AA              | 1947007886               |
| SNP_P4_160814_55133 | NW_004516625.1 | Scaffold1414 | 55133                   | CC                              | GG              | 1947007888               |
| SNP_P4_160815_55291 | NW_004516625.1 | Scaffold1414 | 55291                   | CC                              | AA              | 1947007890               |
| SNP_P4_160816_56195 | NW_004516625.1 | Scaffold1414 | 56195                   | TT                              | AA              | 1947007892               |
| SNP_P4_160817_59516 | NW_004516625.1 | Scaffold1414 | 59516                   | AA                              | GG              | 1947007894               |
| SNP_P4_160818_59565 | NW_004516625.1 | Scaffold1414 | 59565                   | TT                              | CC              | 1947007896               |
| SNP_P4_160819_59759 | NW_004516625.1 | Scaffold1414 | 59759                   | GG                              | AA              | 1947007898               |
| SNP_P4_160820_59813 | NW_004516625.1 | Scaffold1414 | 59813                   | CC                              | TT              | 1947007900               |
| SNP_P4_160821_67066 | NW_004516625.1 | Scaffold1414 | 67066                   | CC                              | GG              | 1947007902               |

| SNPs IDs             | Chromosome IDs | Chromosomes  | Physical positions (bp) | CDC Frontier (Reference genome) | (ILWC46 & LPNB) | NCBI SNPdb Accession IDs |
|----------------------|----------------|--------------|-------------------------|---------------------------------|-----------------|--------------------------|
| SNP_P4_160822_67074  | NW_004516625.1 | Scaffold1414 | 67074                   | AA                              | TT              | 1947007904               |
| SNP_P4_160823_67081  | NW_004516625.1 | Scaffold1414 | 67081                   | GG                              | AA              | 1947007906               |
| SNP_P4_160824_71247  | NW_004516625.1 | Scaffold1414 | 71247                   | TT                              | CC              | 1947007908               |
| SNP_P4_160825_71248  | NW_004516625.1 | Scaffold1414 | 71248                   | CC                              | TT              | 1947007909               |
| SNP_P4_160826_71249  | NW_004516625.1 | Scaffold1414 | 71249                   | TT                              | GG              | 1947007910               |
| SNP_P4_160827_71368  | NW_004516625.1 | Scaffold1414 | 71368                   | GG                              | TT              | 1947007911               |
| SNP_P4_160828_71382  | NW_004516625.1 | Scaffold1414 | 71382                   | TT                              | CC              | 1947007912               |
| SNP_P4_160829_71413  | NW_004516625.1 | Scaffold1414 | 71413                   | AA                              | GG              | 1947007913               |
| SNP_P4_160830_71425  | NW_004516625.1 | Scaffold1414 | 71425                   | AA                              | CC              | 1947007914               |
| SNP_P4_160831_71445  | NW_004516625.1 | Scaffold1414 | 71445                   | AA                              | GG              | 1947007916               |
| SNP_P4_160832_71495  | NW_004516625.1 | Scaffold1414 | 71495                   | AA                              | GG              | 1947007918               |
| SNP_P4_160833_72532  | NW_004516625.1 | Scaffold1414 | 72532                   | TT                              | CC              | 1947007920               |
| SNP_P4_160834_77321  | NW_004516625.1 | Scaffold1414 | 77321                   | TT                              | GG              | 1947007922               |
| SNP_P4_160835_78771  | NW_004516625.1 | Scaffold1414 | 78771                   | GG                              | AA              | 1947007924               |
| SNP_P4_160836_88758  | NW_004516625.1 | Scaffold1414 | 88758                   | AA                              | GG              | 1947007926               |
| SNP_P4_160837_121006 | NW_004516625.1 | Scaffold1414 | 121006                  | TT                              | CC              | 1947007928               |
| SNP_P4_160838_121010 | NW_004516625.1 | Scaffold1414 | 121010                  | CC                              | TT              | 1947007930               |
| SNP_P4_160839_121026 | NW_004516625.1 | Scaffold1414 | 121026                  | TT                              | CC              | 1947007932               |
| SNP_P4_160840_124664 | NW_004516625.1 | Scaffold1414 | 124664                  | TT                              | CC              | 1947007934               |
| SNP_P4_160841_124829 | NW_004516625.1 | Scaffold1414 | 124829                  | CC                              | TT              | 1947007936               |
| SNP_P4_160842_124832 | NW_004516625.1 | Scaffold1414 | 124832                  | AA                              | TT              | 1947007938               |
| SNP_P4_160843_124841 | NW_004516625.1 | Scaffold1414 | 124841                  | CC                              | TT              | 1947007940               |
| SNP_P4_160844_124951 | NW_004516625.1 | Scaffold1414 | 124951                  | CC                              | TT              | 1947007942               |
| SNP_P4_160845_124963 | NW_004516625.1 | Scaffold1414 | 124963                  | GG                              | AA              | 1947007944               |
| SNP_P4_160846_124986 | NW_004516625.1 | Scaffold1414 | 124986                  | AA                              | CC              | 1947007946               |
| SNP_P4_160847_125022 | NW_004516625.1 | Scaffold1414 | 125022                  | AA                              | TT              | 1947007948               |
| SNP_P4_160848_125045 | NW_004516625.1 | Scaffold1414 | 125045                  | AA                              | GG              | 1947007950               |
| SNP_P4_160849_125064 | NW_004516625.1 | Scaffold1414 | 125064                  | GG                              | AA              | 1947007952               |
| SNP_P4_160850_125123 | NW_004516625.1 | Scaffold1414 | 125123                  | AA                              | CC              | 1947007954               |
| SNP_P4_160851_125124 | NW_004516625.1 | Scaffold1414 | 125124                  | TT                              | CC              | 1947007956               |
| SNP_P4_160852_125131 | NW_004516625.1 | Scaffold1414 | 125131                  | AA                              | GG              | 1947007958               |
| SNP_P4_160853_125165 | NW_004516625.1 | Scaffold1414 | 125165                  | CC                              | GG              | 1947007960               |
| SNP_P4_160854_125174 | NW_004516625.1 | Scaffold1414 | 125174                  | GG                              | AA              | 1947007962               |
| SNP_P4_160855_125192 | NW_004516625.1 | Scaffold1414 | 125192                  | GG                              | CC              | 1947007964               |
| SNP_P4_160856_125196 | NW_004516625.1 | Scaffold1414 | 125196                  | AA                              | CC              | 1947007966               |
| SNP_P4_160857_125250 | NW_004516625.1 | Scaffold1414 | 125250                  | CC                              | AA              | 1947007968               |
| SNP_P4_160858_125522 | NW_004516625.1 | Scaffold1414 | 125522                  | AA                              | GG              | 1947007970               |
| SNP_P4_160859_125690 | NW_004516625.1 | Scaffold1414 | 125690                  | CC                              | TT              | 1947007972               |
| SNP_P4_160860_139602 | NW_004516625.1 | Scaffold1414 | 139602                  | TT                              | CC              | 1947007974               |
| SNP_P4_160861_140010 | NW_004516625.1 | Scaffold1414 | 140010                  | AA                              | GG              | 1947007976               |
| SNP_P4_160862_140086 | NW_004516625.1 | Scaffold1414 | 140086                  | AA                              | GG              | 1947007978               |
| SNP_P4_160863_140138 | NW_004516625.1 | Scaffold1414 | 140138                  | AA                              | GG              | 1947007980               |

| SNPs IDs             | Chromosome IDs | Chromosomes  | Physical positions (bp) | CDC Frontier (Reference genome) | (ILWC46 & LPNB) | NCBI SNPdb Accession IDs |
|----------------------|----------------|--------------|-------------------------|---------------------------------|-----------------|--------------------------|
| SNP_P4_160864_140197 | NW_004516625.1 | Scaffold1414 | 140197                  | AA                              | GG              | 1947007982               |
| SNP_P4_160865_140199 | NW_004516625.1 | Scaffold1414 | 140199                  | AA                              | GG              | 1947007984               |
| SNP_P4_160866_140202 | NW_004516625.1 | Scaffold1414 | 140202                  | AA                              | CC              | 1947007986               |
| SNP_P4_160867_145128 | NW_004516625.1 | Scaffold1414 | 145128                  | TT                              | CC              | 1947007988               |
| SNP_P4_160868_145168 | NW_004516625.1 | Scaffold1414 | 145168                  | TT                              | CC              | 1947007990               |
| SNP_P4_160869_145180 | NW_004516625.1 | Scaffold1414 | 145180                  | GG                              | TT              | 1947007992               |
| SNP_P4_160870_145184 | NW_004516625.1 | Scaffold1414 | 145184                  | TT                              | CC              | 1947007994               |
| SNP_P4_160871_145188 | NW_004516625.1 | Scaffold1414 | 145188                  | AA                              | TT              | 1947007996               |
| SNP_P4_160872_145194 | NW_004516625.1 | Scaffold1414 | 145194                  | TT                              | GG              | 1947007998               |
| SNP_P4_160873_145241 | NW_004516625.1 | Scaffold1414 | 145241                  | GG                              | AA              | 1947008000               |
| SNP_P4_160874_145242 | NW_004516625.1 | Scaffold1414 | 145242                  | CC                              | AA              | 1947008002               |
| SNP_P4_160875_145246 | NW_004516625.1 | Scaffold1414 | 145246                  | AA                              | TT              | 1947008004               |
| SNP_P4_160876_145550 | NW_004516625.1 | Scaffold1414 | 145550                  | AA                              | CC              | 1947008006               |
| SNP_P4_160877_145584 | NW_004516625.1 | Scaffold1414 | 145584                  | GG                              | AA              | 1947008008               |
| SNP_P4_160878_145601 | NW_004516625.1 | Scaffold1414 | 145601                  | GG                              | AA              | 1947008010               |
| SNP_P4_160879_145631 | NW_004516625.1 | Scaffold1414 | 145631                  | CC                              | GG              | 1947008012               |
| SNP_P4_160880_145666 | NW_004516625.1 | Scaffold1414 | 145666                  | AA                              | CC              | 1947008014               |
| SNP_P4_160881_146704 | NW_004516625.1 | Scaffold1414 | 146704                  | GG                              | AA              | 1947008016               |
| SNP_P4_160882_147059 | NW_004516625.1 | Scaffold1414 | 147059                  | GG                              | AA              | 1947008017               |
| SNP_P4_160883_148516 | NW_004516625.1 | Scaffold1414 | 148516                  | TT                              | CC              | 1947008019               |
| SNP_P4_160884_149520 | NW_004516625.1 | Scaffold1414 | 149520                  | CC                              | GG              | 1947008021               |
| SNP_P4_160885_151029 | NW_004516625.1 | Scaffold1414 | 151029                  | TT                              | CC              | 1947008023               |
| SNP_P4_160886_151052 | NW_004516625.1 | Scaffold1414 | 151052                  | AA                              | GG              | 1947008025               |
| SNP_P4_160887_151412 | NW_004516625.1 | Scaffold1414 | 151412                  | AA                              | GG              | 1947008027               |
| SNP_P4_160888_151418 | NW_004516625.1 | Scaffold1414 | 151418                  | AA                              | GG              | 1947008029               |
| SNP_P4_160889_161963 | NW_004516625.1 | Scaffold1414 | 161963                  | GG                              | AA              | 1947008031               |
| SNP_P4_160890_171046 | NW_004516625.1 | Scaffold1414 | 171046                  | TT                              | CC              | 1947008033               |
| SNP_P4_160891_171050 | NW_004516625.1 | Scaffold1414 | 171050                  | TT                              | CC              | 1947008035               |
| SNP_P4_160892_172700 | NW_004516625.1 | Scaffold1414 | 172700                  | TT                              | CC              | 1947008037               |
| SNP_P4_160893_186362 | NW_004516625.1 | Scaffold1414 | 186362                  | AA                              | GG              | 1947008039               |
| SNP_P4_160894_190257 | NW_004516625.1 | Scaffold1414 | 190257                  | CC                              | AA              | 1947008041               |
| SNP_P4_160895_190283 | NW_004516625.1 | Scaffold1414 | 190283                  | AA                              | CC              | 1947008043               |
| SNP_P4_160896_190286 | NW_004516625.1 | Scaffold1414 | 190286                  | TT                              | GG              | 1947008045               |
| SNP_P4_160897_190327 | NW_004516625.1 | Scaffold1414 | 190327                  | TT                              | CC              | 1947008047               |
| SNP_P4_160898_190353 | NW_004516625.1 | Scaffold1414 | 190353                  | AA                              | GG              | 1947008049               |
| SNP_P4_160899_190363 | NW_004516625.1 | Scaffold1414 | 190363                  | AA                              | TT              | 1947008051               |
| SNP_P4_160900_190375 | NW_004516625.1 | Scaffold1414 | 190375                  | TT                              | CC              | 1947008053               |
| SNP_P4_160901_190394 | NW_004516625.1 | Scaffold1414 | 190394                  | GG                              | AA              | 1947008055               |
| SNP_P4_160902_190433 | NW_004516625.1 | Scaffold1414 | 190433                  | AA                              | GG              | 1947008057               |
| SNP_P4_160903_190449 | NW_004516625.1 | Scaffold1414 | 190449                  | CC                              | TT              | 1947008059               |
| SNP_P4_160904_190469 | NW_004516625.1 | Scaffold1414 | 190469                  | AA                              | TT              | 1947008061               |
| SNP_P4_160906_190638 | NW_004516625.1 | Scaffold1414 | 190638                  | TT                              | CC              | 1947008063               |

| SNPs IDs             | Chromosome IDs | Chromosomes  | Physical positions (bp) | CDC Frontier (Reference genome) | (ILWC46 & LPNB) | NCBI SNPdb Accession IDs |
|----------------------|----------------|--------------|-------------------------|---------------------------------|-----------------|--------------------------|
| SNP_P4_160907_190644 | NW_004516625.1 | Scaffold1414 | 190644                  | GG                              | AA              | 1947008065               |
| SNP_P4_160908_190698 | NW_004516625.1 | Scaffold1414 | 190698                  | TT                              | GG              | 1947008067               |
| SNP_P4_160909_190794 | NW_004516625.1 | Scaffold1414 | 190794                  | GG                              | TT              | 1947008069               |
| SNP_P4_160910_195589 | NW_004516625.1 | Scaffold1414 | 195589                  | AA                              | CC              | 1947008071               |
| SNP_P4_160911_196913 | NW_004516625.1 | Scaffold1414 | 196913                  | GG                              | AA              | 1947008073               |
| SNP_P4_160912_209401 | NW_004516625.1 | Scaffold1414 | 209401                  | TT                              | AA              | 1947008075               |
| SNP_P4_160913_227252 | NW_004516625.1 | Scaffold1414 | 227252                  | AA                              | CC              | 1947008077               |
| SNP_P4_160914_227263 | NW_004516625.1 | Scaffold1414 | 227263                  | TT                              | GG              | 1947008079               |
| SNP_P4_160915_240925 | NW_004516625.1 | Scaffold1414 | 240925                  | AA                              | CC              | 1947008081               |
| SNP_P4_160916_241015 | NW_004516625.1 | Scaffold1414 | 241015                  | GG                              | AA              | 1947008083               |
| SNP_P4_160917_241108 | NW_004516625.1 | Scaffold1414 | 241108                  | CC                              | AA              | 1947008086               |
| SNP_P4_160918_241209 | NW_004516625.1 | Scaffold1414 | 241209                  | TT                              | CC              | 1947008088               |
| SNP_P4_160919_241248 | NW_004516625.1 | Scaffold1414 | 241248                  | AA                              | CC              | 1947008090               |
| SNP_P4_160920_241304 | NW_004516625.1 | Scaffold1414 | 241304                  | AA                              | GG              | 1947008092               |
| SNP_P4_160921_241315 | NW_004516625.1 | Scaffold1414 | 241315                  | AA                              | TT              | 1947008094               |
| SNP_P4_160922_245774 | NW_004516625.1 | Scaffold1414 | 245774                  | TT                              | AA              | 1947008096               |
| SNP_P4_160923_245775 | NW_004516625.1 | Scaffold1414 | 245775                  | AA                              | CC              | 1947008098               |
| SNP_P4_160924_245776 | NW_004516625.1 | Scaffold1414 | 245776                  | TT                              | CC              | 1947008100               |
| SNP_P4_160925_245996 | NW_004516625.1 | Scaffold1414 | 245996                  | TT                              | CC              | 1947008101               |
| SNP_P4_160926_246004 | NW_004516625.1 | Scaffold1414 | 246004                  | CC                              | TT              | 1947008103               |
| SNP_P4_160927_246034 | NW_004516625.1 | Scaffold1414 | 246034                  | GG                              | AA              | 1947008105               |
| SNP_P4_160928_246066 | NW_004516625.1 | Scaffold1414 | 246066                  | GG                              | AA              | 1947008107               |
| SNP_P4_160929_246099 | NW_004516625.1 | Scaffold1414 | 246099                  | GG                              | CC              | 1947008109               |
| SNP_P4_160930_246134 | NW_004516625.1 | Scaffold1414 | 246134                  | CC                              | GG              | 1947008111               |
| SNP_P4_160931_246148 | NW_004516625.1 | Scaffold1414 | 246148                  | CC                              | AA              | 1947008113               |
| SNP_P4_160932_246149 | NW_004516625.1 | Scaffold1414 | 246149                  | TT                              | CC              | 1947008115               |
| SNP_P4_160933_247366 | NW_004516625.1 | Scaffold1414 | 247366                  | AA                              | TT              | 1947008117               |
| SNP_P4_160934_8747   | NW_004516627.1 | Scaffold1417 | 8747                    | TT                              | CC              | 1947008119               |
| SNP_P4_160935_8778   | NW_004516627.1 | Scaffold1417 | 8778                    | TT                              | GG              | 1947008121               |
| SNP_P4_160936_8795   | NW_004516627.1 | Scaffold1417 | 8795                    | TT                              | CC              | 1947008123               |
| SNP_P4_160937_9099   | NW_004516627.1 | Scaffold1417 | 9099                    | GG                              | AA              | 1947008125               |
| SNP_P4_160938_9262   | NW_004516627.1 | Scaffold1417 | 9262                    | AA                              | CC              | 1947008127               |
| SNP_P4_160939_9282   | NW_004516627.1 | Scaffold1417 | 9282                    | CC                              | AA              | 1947008129               |
| SNP_P4_160940_9283   | NW_004516627.1 | Scaffold1417 | 9283                    | TT                              | GG              | 1947008131               |
| SNP_P4_160941_9309   | NW_004516627.1 | Scaffold1417 | 9309                    | AA                              | GG              | 1947008133               |
| SNP_P4_160942_10030  | NW_004516627.1 | Scaffold1417 | 10030                   | CC                              | AA              | 1947008135               |
| SNP_P4_160944_41572  | NW_004516627.1 | Scaffold1417 | 41572                   | CC                              | TT              | 1947008137               |
| SNP_P4_160945_41575  | NW_004516627.1 | Scaffold1417 | 41575                   | CC                              | AA              | 1947008139               |
| SNP_P4_160946_41579  | NW_004516627.1 | Scaffold1417 | 41579                   | CC                              | TT              | 1947008141               |
| SNP_P4_160947_41818  | NW_004516627.1 | Scaffold1417 | 41818                   | TT                              | GG              | 1947008143               |
| SNP_P4_160948_41839  | NW_004516627.1 | Scaffold1417 | 41839                   | GG                              | AA              | 1947008145               |
| SNP_P4_160949_41856  | NW_004516627.1 | Scaffold1417 | 41856                   | GG                              | CC              | 1947008147               |

| SNPs IDs             | Chromosome IDs | Chromosomes  | Physical positions (bp) | CDC Frontier (Reference genome) | (ILWC46 & LPNB) | NCBI SNPdb Accession IDs |
|----------------------|----------------|--------------|-------------------------|---------------------------------|-----------------|--------------------------|
| SNP_P4_160950_46825  | NW_004516627.1 | Scaffold1417 | 46825                   | AA                              | GG              | 1947008149               |
| SNP_P4_160951_46884  | NW_004516627.1 | Scaffold1417 | 46884                   | CC                              | AA              | 1947008151               |
| SNP_P4_160952_46905  | NW_004516627.1 | Scaffold1417 | 46905                   | CC                              | GG              | 1947008153               |
| SNP_P4_160953_47226  | NW_004516627.1 | Scaffold1417 | 47226                   | CC                              | TT              | 1947008155               |
| SNP_P4_160954_58658  | NW_004516627.1 | Scaffold1417 | 58658                   | GG                              | AA              | 1947008157               |
| SNP_P4_160955_58661  | NW_004516627.1 | Scaffold1417 | 58661                   | TT                              | AA              | 1947008159               |
| SNP_P4_160956_58674  | NW_004516627.1 | Scaffold1417 | 58674                   | AA                              | TT              | 1947008161               |
| SNP_P4_160957_58684  | NW_004516627.1 | Scaffold1417 | 58684                   | TT                              | CC              | 1947008162               |
| SNP_P4_160958_87661  | NW_004516627.1 | Scaffold1417 | 87661                   | GG                              | AA              | 1947008163               |
| SNP_P4_160959_95863  | NW_004516627.1 | Scaffold1417 | 95863                   | TT                              | CC              | 1947008164               |
| SNP_P4_160960_95864  | NW_004516627.1 | Scaffold1417 | 95864                   | GG                              | AA              | 1947008165               |
| SNP_P4_160962_122738 | NW_004516627.1 | Scaffold1417 | 122738                  | GG                              | TT              | 1947008166               |
| SNP_P4_160963_123643 | NW_004516627.1 | Scaffold1417 | 123643                  | TT                              | GG              | 1947008167               |
| SNP_P4_160964_123713 | NW_004516627.1 | Scaffold1417 | 123713                  | CC                              | TT              | 1947008168               |
| SNP_P4_160966_123834 | NW_004516627.1 | Scaffold1417 | 123834                  | GG                              | CC              | 1947008169               |
| SNP_P4_160967_123859 | NW_004516627.1 | Scaffold1417 | 123859                  | TT                              | CC              | 1947008170               |
| SNP_P4_160968_123927 | NW_004516627.1 | Scaffold1417 | 123927                  | GG                              | AA              | 1947008171               |
| SNP_P4_160969_123950 | NW_004516627.1 | Scaffold1417 | 123950                  | TT                              | AA              | 1947008172               |
| SNP_P4_160970_124259 | NW_004516627.1 | Scaffold1417 | 124259                  | GG                              | AA              | 1947008173               |
| SNP_P4_160971_126742 | NW_004516627.1 | Scaffold1417 | 126742                  | TT                              | GG              | 1947008174               |
| SNP_P4_160972_127924 | NW_004516627.1 | Scaffold1417 | 127924                  | AA                              | GG              | 1947008175               |
| SNP_P4_160973_127927 | NW_004516627.1 | Scaffold1417 | 127927                  | AA                              | GG              | 1947008176               |
| SNP_P4_160974_127951 | NW_004516627.1 | Scaffold1417 | 127951                  | TT                              | GG              | 1947008177               |
| SNP_P4_160975_127983 | NW_004516627.1 | Scaffold1417 | 127983                  | GG                              | AA              | 1947008178               |
| SNP_P4_160976_127986 | NW_004516627.1 | Scaffold1417 | 127986                  | AA                              | GG              | 1947008179               |
| SNP_P4_160977_131815 | NW_004516627.1 | Scaffold1417 | 131815                  | AA                              | GG              | 1947008180               |
| SNP_P4_160978_151201 | NW_004516627.1 | Scaffold1417 | 151201                  | CC                              | TT              | 1947008181               |
| SNP_P4_160979_151209 | NW_004516627.1 | Scaffold1417 | 151209                  | AA                              | GG              | 1947008182               |
| SNP_P4_160980_151734 | NW_004516627.1 | Scaffold1417 | 151734                  | AA                              | TT              | 1947008183               |
| SNP_P4_160981_151812 | NW_004516627.1 | Scaffold1417 | 151812                  | AA                              | CC              | 1947008184               |
| SNP_P4_160982_184458 | NW_004516627.1 | Scaffold1417 | 184458                  | TT                              | CC              | 1947008185               |
| SNP_P4_160983_189626 | NW_004516627.1 | Scaffold1417 | 189626                  | GG                              | AA              | 1947008186               |
| SNP_P4_160984_220618 | NW_004516627.1 | Scaffold1417 | 220618                  | GG                              | TT              | 1947008187               |
| SNP_P4_160985_234532 | NW_004516627.1 | Scaffold1417 | 234532                  | AA                              | CC              | 1947008188               |
| SNP_P4_160986_234654 | NW_004516627.1 | Scaffold1417 | 234654                  | CC                              | GG              | 1947008189               |
| SNP_P4_160988_249671 | NW_004516627.1 | Scaffold1417 | 249671                  | AA                              | GG              | 1947008190               |
| SNP_P4_160989_257838 | NW_004516627.1 | Scaffold1417 | 257838                  | CC                              | TT              | 1947008191               |
| SNP_P4_160990_260139 | NW_004516627.1 | Scaffold1417 | 260139                  | AA                              | TT              | 1947008192               |
| SNP_P4_160991_260171 | NW_004516627.1 | Scaffold1417 | 260171                  | AA                              | GG              | 1947008193               |
| SNP_P4_160992_260257 | NW_004516627.1 | Scaffold1417 | 260257                  | GG                              | TT              | 1947008194               |
| SNP_P4_160993_260275 | NW_004516627.1 | Scaffold1417 | 260275                  | CC                              | TT              | 1947008195               |
| SNP_P4_160994_260347 | NW_004516627.1 | Scaffold1417 | 260347                  | GG                              | AA              | 1947008196               |

| SNPs IDs             | Chromosome IDs | Chromosomes  | Physical positions (bp) | CDC Frontier (Reference genome) | (ILWC46 & LPNB) | NCBI SNPdb Accession IDs |
|----------------------|----------------|--------------|-------------------------|---------------------------------|-----------------|--------------------------|
| SNP_P4_160995_260412 | NW_004516627.1 | Scaffold1417 | 260412                  | TT                              | CC              | 1947008197               |
| SNP_P4_160996_267559 | NW_004516627.1 | Scaffold1417 | 267559                  | CC                              | TT              | 1947008198               |
| SNP_P4_160997_282942 | NW_004516627.1 | Scaffold1417 | 282942                  | AA                              | TT              | 1947008199               |
| SNP_P4_160998_282955 | NW_004516627.1 | Scaffold1417 | 282955                  | GG                              | AA              | 1947008200               |
| SNP_P4_160999_351798 | NW_004516627.1 | Scaffold1417 | 351798                  | CC                              | TT              | 1947008202               |
| SNP_P4_161000_351984 | NW_004516627.1 | Scaffold1417 | 351984                  | TT                              | CC              | 1947008204               |
| SNP_P4_161001_352091 | NW_004516627.1 | Scaffold1417 | 352091                  | AA                              | GG              | 1947008206               |
| SNP_P4_161002_352155 | NW_004516627.1 | Scaffold1417 | 352155                  | TT                              | AA              | 1947008208               |
| SNP_P4_161003_352211 | NW_004516627.1 | Scaffold1417 | 352211                  | CC                              | TT              | 1947008210               |
| SNP_P4_161004_352223 | NW_004516627.1 | Scaffold1417 | 352223                  | TT                              | CC              | 1947008212               |
| SNP_P4_161005_352302 | NW_004516627.1 | Scaffold1417 | 352302                  | AA                              | GG              | 1947008214               |
| SNP_P4_161006_352311 | NW_004516627.1 | Scaffold1417 | 352311                  | GG                              | TT              | 1947008216               |
| SNP_P4_161007_352320 | NW_004516627.1 | Scaffold1417 | 352320                  | TT                              | GG              | 1947008218               |
| SNP_P4_161008_352344 | NW_004516627.1 | Scaffold1417 | 352344                  | GG                              | AA              | 1947008220               |
| SNP_P4_161009_4092   | NW_004516628.1 | Scaffold1418 | 4092                    | GG                              | TT              | 1947008222               |
| SNP_P4_161010_5071   | NW_004516628.1 | Scaffold1418 | 5071                    | AA                              | TT              | 1947008224               |
| SNP_P4_161012_8780   | NW_004516628.1 | Scaffold1418 | 8780                    | TT                              | CC              | 1947008226               |
| SNP_P4_161013_9705   | NW_004516628.1 | Scaffold1418 | 9705                    | TT                              | GG              | 1947008228               |
| SNP_P4_161014_12836  | NW_004516628.1 | Scaffold1418 | 12836                   | CC                              | TT              | 1947008230               |
| SNP_P4_161015_14333  | NW_004516628.1 | Scaffold1418 | 14333                   | AA                              | GG              | 1947008232               |
| SNP_P4_161018_16368  | NW_004516628.1 | Scaffold1418 | 16368                   | CC                              | TT              | 1947008234               |
| SNP_P4_161019_17363  | NW_004516628.1 | Scaffold1418 | 17363                   | TT                              | CC              | 1947008236               |
| SNP_P4_161020_17777  | NW_004516628.1 | Scaffold1418 | 17777                   | CC                              | TT              | 1947008238               |
| SNP_P4_161024_18338  | NW_004516628.1 | Scaffold1418 | 18338                   | TT                              | CC              | 1947008240               |
| SNP_P4_161025_18480  | NW_004516628.1 | Scaffold1418 | 18480                   | CC                              | TT              | 1947008242               |
| SNP_P4_161026_18543  | NW_004516628.1 | Scaffold1418 | 18543                   | AA                              | GG              | 1947008244               |
| SNP_P4_161027_18812  | NW_004516628.1 | Scaffold1418 | 18812                   | CC                              | AA              | 1947008246               |
| SNP_P4_161028_18868  | NW_004516628.1 | Scaffold1418 | 18868                   | CC                              | TT              | 1947008248               |
| SNP_P4_161031_32025  | NW_004516628.1 | Scaffold1418 | 32025                   | AA                              | TT              | 1947008250               |
| SNP_P4_161032_32984  | NW_004516628.1 | Scaffold1418 | 32984                   | GG                              | AA              | 1947008252               |
| SNP_P4_161033_33084  | NW_004516628.1 | Scaffold1418 | 33084                   | AA                              | TT              | 1947008254               |
| SNP_P4_161036_38722  | NW_004516628.1 | Scaffold1418 | 38722                   | CC                              | TT              | 1947008256               |
| SNP_P4_161039_49139  | NW_004516628.1 | Scaffold1418 | 49139                   | CC                              | TT              | 1947008258               |
| SNP_P4_161040_58791  | NW_004516628.1 | Scaffold1418 | 58791                   | AA                              | CC              | 1947008260               |
| SNP_P4_161041_58802  | NW_004516628.1 | Scaffold1418 | 58802                   | CC                              | TT              | 1947008262               |
| SNP_P4_161042_59196  | NW_004516628.1 | Scaffold1418 | 59196                   | TT                              | AA              | 1947008264               |
| SNP_P4_161043_91671  | NW_004516628.1 | Scaffold1418 | 91671                   | CC                              | TT              | 1947008266               |
| SNP_P4_161044_115445 | NW_004516628.1 | Scaffold1418 | 115445                  | CC                              | TT              | 1947008268               |
| SNP_P4_161046_123    | NW_004516629.1 | Scaffold1419 | 123                     | TT                              | AA              | 1947008270               |
| SNP_P4_161047_381    | NW_004516629.1 | Scaffold1419 | 381                     | GG                              | AA              | 1947008272               |
| SNP_P4_161048_545    | NW_004516629.1 | Scaffold1419 | 545                     | CC                              | AA              | 1947008274               |
| SNP_P4_161049_737    | NW_004516629.1 | Scaffold1419 | 737                     | TT                              | GG              | 1947008276               |



| SNPs IDs            | Chromosome IDs | Chromosomes  | Physical positions (bp) | CDC Frontier (Reference genome) | (ILWC46 & LPNB) | NCBI SNPdb Accession IDs |
|---------------------|----------------|--------------|-------------------------|---------------------------------|-----------------|--------------------------|
| SNP_P4_161050_1989  | NW_004516629.1 | Scaffold1419 | 1989                    | CC                              | TT              | 1947008278               |
| SNP_P4_161051_3309  | NW_004516629.1 | Scaffold1419 | 3309                    | AA                              | TT              | 1947008280               |
| SNP_P4_161052_10167 | NW_004516629.1 | Scaffold1419 | 10167                   | CC                              | AA              | 1947008282               |
| SNP_P4_161053_10358 | NW_004516629.1 | Scaffold1419 | 10358                   | TT                              | AA              | 1947008284               |
| SNP_P4_161054_10422 | NW_004516629.1 | Scaffold1419 | 10422                   | GG                              | CC              | 1947008286               |
| SNP_P4_161055_10553 | NW_004516629.1 | Scaffold1419 | 10553                   | GG                              | CC              | 1947008288               |
| SNP_P4_161056_10564 | NW_004516629.1 | Scaffold1419 | 10564                   | GG                              | AA              | 1947008290               |
| SNP_P4_161057_10567 | NW_004516629.1 | Scaffold1419 | 10567                   | TT                              | CC              | 1947008292               |
| SNP_P4_161059_10762 | NW_004516629.1 | Scaffold1419 | 10762                   | GG                              | AA              | 1947008294               |
| SNP_P4_161060_10791 | NW_004516629.1 | Scaffold1419 | 10791                   | GG                              | AA              | 1947008296               |
| SNP_P4_161061_10796 | NW_004516629.1 | Scaffold1419 | 10796                   | CC                              | TT              | 1947008298               |
| SNP_P4_161062_10797 | NW_004516629.1 | Scaffold1419 | 10797                   | CC                              | AA              | 1947008300               |
| SNP_P4_161064_17691 | NW_004516629.1 | Scaffold1419 | 17691                   | GG                              | TT              | 1947008302               |
| SNP_P4_161065_19473 | NW_004516629.1 | Scaffold1419 | 19473                   | CC                              | TT              | 1947008304               |
| SNP_P4_161066_19512 | NW_004516629.1 | Scaffold1419 | 19512                   | TT                              | GG              | 1947008306               |
| SNP_P4_161067_19521 | NW_004516629.1 | Scaffold1419 | 19521                   | TT                              | GG              | 1947008308               |
| SNP_P4_161068_19767 | NW_004516629.1 | Scaffold1419 | 19767                   | TT                              | CC              | 1947008310               |
| SNP_P4_161069_20019 | NW_004516629.1 | Scaffold1419 | 20019                   | CC                              | TT              | 1947008312               |
| SNP_P4_161070_20140 | NW_004516629.1 | Scaffold1419 | 20140                   | AA                              | CC              | 1947008314               |
| SNP_P4_161073_21620 | NW_004516629.1 | Scaffold1419 | 21620                   | TT                              | CC              | 1947008316               |
| SNP_P4_161074_21645 | NW_004516629.1 | Scaffold1419 | 21645                   | TT                              | AA              | 1947008318               |
| SNP_P4_161075_21646 | NW_004516629.1 | Scaffold1419 | 21646                   | CC                              | AA              | 1947008320               |
| SNP_P4_161076_21651 | NW_004516629.1 | Scaffold1419 | 21651                   | AA                              | TT              | 1947008322               |
| SNP_P4_161077_21664 | NW_004516629.1 | Scaffold1419 | 21664                   | TT                              | AA              | 1947008324               |
| SNP_P4_161078_21682 | NW_004516629.1 | Scaffold1419 | 21682                   | AA                              | GG              | 1947008326               |
| SNP_P4_161079_21748 | NW_004516629.1 | Scaffold1419 | 21748                   | GG                              | AA              | 1947008328               |
| SNP_P4_161080_21758 | NW_004516629.1 | Scaffold1419 | 21758                   | AA                              | TT              | 1947008330               |
| SNP_P4_161081_21779 | NW_004516629.1 | Scaffold1419 | 21779                   | GG                              | AA              | 1947008332               |
| SNP_P4_161083_22058 | NW_004516629.1 | Scaffold1419 | 22058                   | CC                              | TT              | 1947008334               |
| SNP_P4_161084_22070 | NW_004516629.1 | Scaffold1419 | 22070                   | AA                              | TT              | 1947008336               |
| SNP_P4_161085_22122 | NW_004516629.1 | Scaffold1419 | 22122                   | AA                              | TT              | 1947008338               |
| SNP_P4_161086_22323 | NW_004516629.1 | Scaffold1419 | 22323                   | AA                              | GG              | 1947008340               |
| SNP_P4_161087_22395 | NW_004516629.1 | Scaffold1419 | 22395                   | GG                              | TT              | 1947008342               |
| SNP_P4_161088_22457 | NW_004516629.1 | Scaffold1419 | 22457                   | GG                              | CC              | 1947008344               |
| SNP_P4_161089_22472 | NW_004516629.1 | Scaffold1419 | 22472                   | GG                              | AA              | 1947008346               |
| SNP_P4_161090_22697 | NW_004516629.1 | Scaffold1419 | 22697                   | TT                              | CC              | 1947008348               |
| SNP_P4_161091_22732 | NW_004516629.1 | Scaffold1419 | 22732                   | GG                              | TT              | 1947008350               |
| SNP_P4_161092_22927 | NW_004516629.1 | Scaffold1419 | 22927                   | GG                              | AA              | 1947008352               |
| SNP_P4_161093_25444 | NW_004516629.1 | Scaffold1419 | 25444                   | TT                              | CC              | 1947008354               |
| SNP_P4_161094_25919 | NW_004516629.1 | Scaffold1419 | 25919                   | GG                              | TT              | 1947008356               |
| SNP_P4_161095_26316 | NW_004516629.1 | Scaffold1419 | 26316                   | CC                              | TT              | 1947008358               |
| SNP_P4_161096_26324 | NW_004516629.1 | Scaffold1419 | 26324                   | TT                              | CC              | 1947008360               |

| SNPs IDs            | Chromosome IDs | Chromosomes  | Physical positions (bp) | CDC Frontier (Reference genome) | (ILWC46 & LPNB) | NCBI SNPdb Accession IDs |
|---------------------|----------------|--------------|-------------------------|---------------------------------|-----------------|--------------------------|
| SNP_P4_161097_26580 | NW_004516629.1 | Scaffold1419 | 26580                   | GG                              | AA              | 1947008362               |
| SNP_P4_161098_26632 | NW_004516629.1 | Scaffold1419 | 26632                   | TT                              | GG              | 1947008364               |
| SNP_P4_161099_26736 | NW_004516629.1 | Scaffold1419 | 26736                   | CC                              | TT              | 1947008366               |
| SNP_P4_161100_26753 | NW_004516629.1 | Scaffold1419 | 26753                   | TT                              | AA              | 1947008368               |
| SNP_P4_161101_26756 | NW_004516629.1 | Scaffold1419 | 26756                   | TT                              | CC              | 1947008370               |
| SNP_P4_161102_26783 | NW_004516629.1 | Scaffold1419 | 26783                   | GG                              | AA              | 1947008372               |
| SNP_P4_161103_26847 | NW_004516629.1 | Scaffold1419 | 26847                   | CC                              | TT              | 1947008374               |
| SNP_P4_161104_26879 | NW_004516629.1 | Scaffold1419 | 26879                   | TT                              | CC              | 1947008376               |
| SNP_P4_161105_26895 | NW_004516629.1 | Scaffold1419 | 26895                   | AA                              | CC              | 1947008378               |
| SNP_P4_161106_26897 | NW_004516629.1 | Scaffold1419 | 26897                   | AA                              | GG              | 1947008380               |
| SNP_P4_161107_26965 | NW_004516629.1 | Scaffold1419 | 26965                   | GG                              | AA              | 1947008382               |
| SNP_P4_161108_27067 | NW_004516629.1 | Scaffold1419 | 27067                   | TT                              | CC              | 1947008384               |
| SNP_P4_161109_27160 | NW_004516629.1 | Scaffold1419 | 27160                   | CC                              | TT              | 1947008386               |
| SNP_P4_161110_30410 | NW_004516629.1 | Scaffold1419 | 30410                   | TT                              | AA              | 1947008388               |
| SNP_P4_161111_30675 | NW_004516629.1 | Scaffold1419 | 30675                   | AA                              | GG              | 1947008390               |
| SNP_P4_161113_30887 | NW_004516629.1 | Scaffold1419 | 30887                   | CC                              | TT              | 1947008392               |
| SNP_P4_161114_30889 | NW_004516629.1 | Scaffold1419 | 30889                   | TT                              | GG              | 1947008394               |
| SNP_P4_161115_45414 | NW_004516629.1 | Scaffold1419 | 45414                   | TT                              | GG              | 1947008396               |
| SNP_P4_161116_45417 | NW_004516629.1 | Scaffold1419 | 45417                   | CC                              | TT              | 1947008398               |
| SNP_P4_161117_48533 | NW_004516629.1 | Scaffold1419 | 48533                   | TT                              | CC              | 1947008400               |
| SNP_P4_161118_51069 | NW_004516629.1 | Scaffold1419 | 51069                   | CC                              | TT              | 1947008402               |
| SNP_P4_161119_54197 | NW_004516629.1 | Scaffold1419 | 54197                   | TT                              | CC              | 1947008404               |
| SNP_P4_161120_54412 | NW_004516629.1 | Scaffold1419 | 54412                   | CC                              | TT              | 1947008406               |
| SNP_P4_161121_57438 | NW_004516629.1 | Scaffold1419 | 57438                   | AA                              | GG              | 1947008409               |
| SNP_P4_161122_57444 | NW_004516629.1 | Scaffold1419 | 57444                   | AA                              | GG              | 1947008411               |
| SNP_P4_161123_57469 | NW_004516629.1 | Scaffold1419 | 57469                   | GG                              | TT              | 1947008413               |
| SNP_P4_161124_57483 | NW_004516629.1 | Scaffold1419 | 57483                   | AA                              | GG              | 1947008415               |
| SNP_P4_161125_57499 | NW_004516629.1 | Scaffold1419 | 57499                   | TT                              | CC              | 1947008417               |
| SNP_P4_161126_57574 | NW_004516629.1 | Scaffold1419 | 57574                   | AA                              | GG              | 1947008419               |
| SNP_P4_161127_57593 | NW_004516629.1 | Scaffold1419 | 57593                   | TT                              | GG              | 1947008421               |
| SNP_P4_161128_57601 | NW_004516629.1 | Scaffold1419 | 57601                   | TT                              | GG              | 1947008423               |
| SNP_P4_161129_64490 | NW_004516629.1 | Scaffold1419 | 64490                   | TT                              | CC              | 1947008425               |
| SNP_P4_161130_64541 | NW_004516629.1 | Scaffold1419 | 64541                   | AA                              | CC              | 1947008427               |
| SNP_P4_161131_1750  | NW_004516630.1 | Scaffold1420 | 1750                    | AA                              | CC              | 1947008429               |
| SNP_P4_161132_1753  | NW_004516630.1 | Scaffold1420 | 1753                    | AA                              | CC              | 1947008431               |
| SNP_P4_161133_1782  | NW_004516630.1 | Scaffold1420 | 1782                    | CC                              | TT              | 1947008434               |
| SNP_P4_161134_1817  | NW_004516630.1 | Scaffold1420 | 1817                    | TT                              | CC              | 1947008436               |
| SNP_P4_161135_1835  | NW_004516630.1 | Scaffold1420 | 1835                    | TT                              | CC              | 1947008438               |
| SNP_P4_161136_1867  | NW_004516630.1 | Scaffold1420 | 1867                    | AA                              | CC              | 1947008440               |
| SNP_P4_161137_1881  | NW_004516630.1 | Scaffold1420 | 1881                    | CC                              | AA              | 1947008442               |
| SNP_P4_161138_1924  | NW_004516630.1 | Scaffold1420 | 1924                    | CC                              | GG              | 1947008444               |
| SNP_P4_161139_1928  | NW_004516630.1 | Scaffold1420 | 1928                    | TT                              | AA              | 1947008446               |

| SNPs IDs            | Chromosome IDs | Chromosomes  | Physical positions (bp) | CDC Frontier (Reference genome) | (ILWC46 & LPNB) | NCBI SNPdb Accession IDs |
|---------------------|----------------|--------------|-------------------------|---------------------------------|-----------------|--------------------------|
| SNP_P4_161140_2022  | NW_004516630.1 | Scaffold1420 | 2022                    | AA                              | GG              | 1947008448               |
| SNP_P4_161141_2092  | NW_004516630.1 | Scaffold1420 | 2092                    | AA                              | GG              | 1947008450               |
| SNP_P4_161142_2105  | NW_004516630.1 | Scaffold1420 | 2105                    | TT                              | CC              | 1947008452               |
| SNP_P4_161143_2195  | NW_004516630.1 | Scaffold1420 | 2195                    | AA                              | GG              | 1947008454               |
| SNP_P4_161144_2229  | NW_004516630.1 | Scaffold1420 | 2229                    | TT                              | GG              | 1947008456               |
| SNP_P4_161145_4848  | NW_004516630.1 | Scaffold1420 | 4848                    | CC                              | TT              | 1947008458               |
| SNP_P4_161146_4855  | NW_004516630.1 | Scaffold1420 | 4855                    | TT                              | CC              | 1947008460               |
| SNP_P4_161147_4930  | NW_004516630.1 | Scaffold1420 | 4930                    | TT                              | CC              | 1947008462               |
| SNP_P4_161148_5146  | NW_004516630.1 | Scaffold1420 | 5146                    | AA                              | TT              | 1947008463               |
| SNP_P4_161150_5355  | NW_004516630.1 | Scaffold1420 | 5355                    | CC                              | AA              | 1947008465               |
| SNP_P4_161151_5381  | NW_004516630.1 | Scaffold1420 | 5381                    | AA                              | GG              | 1947008467               |
| SNP_P4_161152_5384  | NW_004516630.1 | Scaffold1420 | 5384                    | CC                              | AA              | 1947008469               |
| SNP_P4_161153_5408  | NW_004516630.1 | Scaffold1420 | 5408                    | CC                              | TT              | 1947008471               |
| SNP_P4_161154_5409  | NW_004516630.1 | Scaffold1420 | 5409                    | AA                              | CC              | 1947008473               |
| SNP_P4_161155_9347  | NW_004516630.1 | Scaffold1420 | 9347                    | GG                              | AA              | 1947008475               |
| SNP_P4_161156_9446  | NW_004516630.1 | Scaffold1420 | 9446                    | TT                              | GG              | 1947008477               |
| SNP_P4_161157_11591 | NW_004516630.1 | Scaffold1420 | 11591                   | GG                              | AA              | 1947008480               |
| SNP_P4_161158_11592 | NW_004516630.1 | Scaffold1420 | 11592                   | AA                              | CC              | 1947008482               |
| SNP_P4_161159_12154 | NW_004516630.1 | Scaffold1420 | 12154                   | AA                              | CC              | 1947008484               |
| SNP_P4_161160_12173 | NW_004516630.1 | Scaffold1420 | 12173                   | GG                              | TT              | 1947008485               |
| SNP_P4_161161_15131 | NW_004516630.1 | Scaffold1420 | 15131                   | CC                              | TT              | 1947008487               |
| SNP_P4_161162_15166 | NW_004516630.1 | Scaffold1420 | 15166                   | TT                              | AA              | 1947008489               |
| SNP_P4_161163_15167 | NW_004516630.1 | Scaffold1420 | 15167                   | TT                              | CC              | 1947008491               |
| SNP_P4_161164_15259 | NW_004516630.1 | Scaffold1420 | 15259                   | AA                              | CC              | 1947008493               |
| SNP_P4_161165_20879 | NW_004516630.1 | Scaffold1420 | 20879                   | AA                              | GG              | 1947008495               |
| SNP_P4_161166_20890 | NW_004516630.1 | Scaffold1420 | 20890                   | CC                              | AA              | 1947008497               |
| SNP_P4_161167_21199 | NW_004516630.1 | Scaffold1420 | 21199                   | CC                              | GG              | 1947008499               |
| SNP_P4_161168_21259 | NW_004516630.1 | Scaffold1420 | 21259                   | GG                              | TT              | 1947008501               |
| SNP_P4_161169_21397 | NW_004516630.1 | Scaffold1420 | 21397                   | AA                              | CC              | 1947008503               |
| SNP_P4_161170_21449 | NW_004516630.1 | Scaffold1420 | 21449                   | CC                              | TT              | 1947008505               |
| SNP_P4_161171_21459 | NW_004516630.1 | Scaffold1420 | 21459                   | AA                              | GG              | 1947008507               |
| SNP_P4_161172_21462 | NW_004516630.1 | Scaffold1420 | 21462                   | AA                              | GG              | 1947008509               |
| SNP_P4_161173_1951  | NW_004516631.1 | Scaffold1422 | 1951                    | GG                              | AA              | 1947008511               |
| SNP_P4_161174_2234  | NW_004516631.1 | Scaffold1422 | 2234                    | GG                              | TT              | 1947008514               |
| SNP_P4_161175_7212  | NW_004516631.1 | Scaffold1422 | 7212                    | AA                              | CC              | 1947008516               |
| SNP_P4_161176_64    | NW_004516633.1 | Scaffold1424 | 64                      | CC                              | GG              | 1947008518               |
| SNP_P4_161177_91    | NW_004516633.1 | Scaffold1424 | 91                      | AA                              | TT              | 1947008520               |
| SNP_P4_161178_106   | NW_004516633.1 | Scaffold1424 | 106                     | GG                              | TT              | 1947008522               |
| SNP_P4_161179_532   | NW_004516633.1 | Scaffold1424 | 532                     | TT                              | GG              | 1947008524               |
| SNP_P4_161180_3283  | NW_004516633.1 | Scaffold1424 | 3283                    | TT                              | AA              | 1947008526               |
| SNP_P4_161182_24227 | NW_004516633.1 | Scaffold1424 | 24227                   | AA                              | CC              | 1947008528               |
| SNP_P4_161183_43748 | NW_004516633.1 | Scaffold1424 | 43748                   | AA                              | GG              | 1947008530               |

| SNPs IDs            | Chromosome IDs | Chromosomes  | Physical positions (bp) | CDC Frontier (Reference genome) | (ILWC46 & LPNB) | NCBI SNPdb Accession IDs |
|---------------------|----------------|--------------|-------------------------|---------------------------------|-----------------|--------------------------|
| SNP_P4_161184_43778 | NW_004516633.1 | Scaffold1424 | 43778                   | TT                              | AA              | 1947008532               |
| SNP_P4_161185_43780 | NW_004516633.1 | Scaffold1424 | 43780                   | CC                              | TT              | 1947008534               |
| SNP_P4_161186_43807 | NW_004516633.1 | Scaffold1424 | 43807                   | TT                              | CC              | 1947008536               |
| SNP_P4_161187_43828 | NW_004516633.1 | Scaffold1424 | 43828                   | TT                              | AA              | 1947008538               |
| SNP_P4_161188_43842 | NW_004516633.1 | Scaffold1424 | 43842                   | TT                              | CC              | 1947008540               |
| SNP_P4_161189_43858 | NW_004516633.1 | Scaffold1424 | 43858                   | AA                              | GG              | 1947008543               |
| SNP_P4_161190_43881 | NW_004516633.1 | Scaffold1424 | 43881                   | CC                              | GG              | 1947008545               |
| SNP_P4_161191_43913 | NW_004516633.1 | Scaffold1424 | 43913                   | GG                              | CC              | 1947008547               |
| SNP_P4_161192_43941 | NW_004516633.1 | Scaffold1424 | 43941                   | TT                              | AA              | 1947008549               |
| SNP_P4_161193_44027 | NW_004516633.1 | Scaffold1424 | 44027                   | GG                              | CC              | 1947008551               |
| SNP_P4_161194_44093 | NW_004516633.1 | Scaffold1424 | 44093                   | GG                              | TT              | 1947008553               |
| SNP_P4_161195_44104 | NW_004516633.1 | Scaffold1424 | 44104                   | CC                              | AA              | 1947008555               |
| SNP_P4_161196_44143 | NW_004516633.1 | Scaffold1424 | 44143                   | GG                              | CC              | 1947008557               |
| SNP_P4_161197_44144 | NW_004516633.1 | Scaffold1424 | 44144                   | GG                              | AA              | 1947008559               |
| SNP_P4_161198_44149 | NW_004516633.1 | Scaffold1424 | 44149                   | AA                              | TT              | 1947008561               |
| SNP_P4_161199_44169 | NW_004516633.1 | Scaffold1424 | 44169                   | GG                              | TT              | 1947008563               |
| SNP_P4_161200_44177 | NW_004516633.1 | Scaffold1424 | 44177                   | TT                              | CC              | 1947008565               |
| SNP_P4_161201_44184 | NW_004516633.1 | Scaffold1424 | 44184                   | AA                              | CC              | 1947008567               |
| SNP_P4_161202_44196 | NW_004516633.1 | Scaffold1424 | 44196                   | TT                              | GG              | 1947008569               |
| SNP_P4_161203_48247 | NW_004516633.1 | Scaffold1424 | 48247                   | CC                              | AA              | 1947008571               |
| SNP_P4_161204_48252 | NW_004516633.1 | Scaffold1424 | 48252                   | GG                              | AA              | 1947008573               |
| SNP_P4_161205_48274 | NW_004516633.1 | Scaffold1424 | 48274                   | GG                              | TT              | 1947008575               |
| SNP_P4_161206_48278 | NW_004516633.1 | Scaffold1424 | 48278                   | TT                              | AA              | 1947008577               |
| SNP_P4_161207_48400 | NW_004516633.1 | Scaffold1424 | 48400                   | AA                              | CC              | 1947008579               |
| SNP_P4_161208_48407 | NW_004516633.1 | Scaffold1424 | 48407                   | AA                              | GG              | 1947008580               |
| SNP_P4_161209_48468 | NW_004516633.1 | Scaffold1424 | 48468                   | GG                              | AA              | 1947008581               |
| SNP_P4_161210_48493 | NW_004516633.1 | Scaffold1424 | 48493                   | GG                              | TT              | 1947008582               |
| SNP_P4_161211_48511 | NW_004516633.1 | Scaffold1424 | 48511                   | AA                              | GG              | 1947008583               |
| SNP_P4_161212_48711 | NW_004516633.1 | Scaffold1424 | 48711                   | TT                              | GG              | 1947008585               |
| SNP_P4_161213_48741 | NW_004516633.1 | Scaffold1424 | 48741                   | GG                              | AA              | 1947008587               |
| SNP_P4_161214_48772 | NW_004516633.1 | Scaffold1424 | 48772                   | TT                              | CC              | 1947008589               |
| SNP_P4_161215_48777 | NW_004516633.1 | Scaffold1424 | 48777                   | GG                              | AA              | 1947008591               |
| SNP_P4_161216_3757  | NW_004516634.1 | Scaffold1425 | 3757                    | CC                              | AA              | 1947008593               |
| SNP_P4_161217_4162  | NW_004516634.1 | Scaffold1425 | 4162                    | TT                              | GG              | 1947008595               |
| SNP_P4_161218_4176  | NW_004516634.1 | Scaffold1425 | 4176                    | TT                              | CC              | 1947008597               |
| SNP_P4_161219_4180  | NW_004516634.1 | Scaffold1425 | 4180                    | TT                              | AA              | 1947008599               |
| SNP_P4_161220_4216  | NW_004516634.1 | Scaffold1425 | 4216                    | GG                              | CC              | 1947008601               |
| SNP_P4_161221_4237  | NW_004516634.1 | Scaffold1425 | 4237                    | TT                              | CC              | 1947008603               |
| SNP_P4_161222_4447  | NW_004516634.1 | Scaffold1425 | 4447                    | TT                              | CC              | 1947008605               |
| SNP_P4_161223_4525  | NW_004516634.1 | Scaffold1425 | 4525                    | GG                              | AA              | 1947008607               |
| SNP_P4_161224_4776  | NW_004516634.1 | Scaffold1425 | 4776                    | AA                              | CC              | 1947008609               |
| SNP_P4_161225_4804  | NW_004516634.1 | Scaffold1425 | 4804                    | AA                              | GG              | 1947008611               |

| SNPs IDs            | Chromosome IDs | Chromosomes  | Physical positions (bp) | CDC Frontier (Reference genome) | (ILWC46 & LPNB) | NCBI SNPdb Accession IDs |
|---------------------|----------------|--------------|-------------------------|---------------------------------|-----------------|--------------------------|
| SNP_P4_161226_4814  | NW_004516634.1 | Scaffold1425 | 4814                    | TT                              | GG              | 1947008613               |
| SNP_P4_161227_4852  | NW_004516634.1 | Scaffold1425 | 4852                    | TT                              | AA              | 1947008615               |
| SNP_P4_161228_4853  | NW_004516634.1 | Scaffold1425 | 4853                    | AA                              | CC              | 1947008617               |
| SNP_P4_161229_4874  | NW_004516634.1 | Scaffold1425 | 4874                    | AA                              | TT              | 1947008619               |
| SNP_P4_161230_4889  | NW_004516634.1 | Scaffold1425 | 4889                    | GG                              | AA              | 1947008620               |
| SNP_P4_161232_5570  | NW_004516635.1 | Scaffold1426 | 5570                    | AA                              | GG              | 1947008622               |
| SNP_P4_161233_5631  | NW_004516635.1 | Scaffold1426 | 5631                    | TT                              | AA              | 1947008624               |
| SNP_P4_161234_5786  | NW_004516635.1 | Scaffold1426 | 5786                    | CC                              | TT              | 1947008626               |
| SNP_P4_161236_5971  | NW_004516635.1 | Scaffold1426 | 5971                    | TT                              | GG              | 1947008628               |
| SNP_P4_161237_6191  | NW_004516635.1 | Scaffold1426 | 6191                    | TT                              | GG              | 1947008630               |
| SNP_P4_161238_6209  | NW_004516635.1 | Scaffold1426 | 6209                    | TT                              | CC              | 1947008632               |
| SNP_P4_161239_6220  | NW_004516635.1 | Scaffold1426 | 6220                    | AA                              | GG              | 1947008634               |
| SNP_P4_161240_6332  | NW_004516635.1 | Scaffold1426 | 6332                    | AA                              | TT              | 1947008636               |
| SNP_P4_161242_6855  | NW_004516635.1 | Scaffold1426 | 6855                    | CC                              | TT              | 1947008638               |
| SNP_P4_161243_7007  | NW_004516635.1 | Scaffold1426 | 7007                    | CC                              | AA              | 1947008639               |
| SNP_P4_161244_7023  | NW_004516635.1 | Scaffold1426 | 7023                    | TT                              | CC              | 1947008641               |
| SNP_P4_161245_7044  | NW_004516635.1 | Scaffold1426 | 7044                    | AA                              | GG              | 1947008643               |
| SNP_P4_161246_7073  | NW_004516635.1 | Scaffold1426 | 7073                    | AA                              | TT              | 1947008645               |
| SNP_P4_161248_7241  | NW_004516635.1 | Scaffold1426 | 7241                    | AA                              | GG              | 1947008647               |
| SNP_P4_161249_7380  | NW_004516635.1 | Scaffold1426 | 7380                    | TT                              | CC              | 1947008649               |
| SNP_P4_161250_7412  | NW_004516635.1 | Scaffold1426 | 7412                    | CC                              | GG              | 1947008651               |
| SNP_P4_161251_7529  | NW_004516635.1 | Scaffold1426 | 7529                    | CC                              | TT              | 1947008653               |
| SNP_P4_161252_11275 | NW_004516635.1 | Scaffold1426 | 11275                   | TT                              | CC              | 1947008655               |
| SNP_P4_161253_11640 | NW_004516635.1 | Scaffold1426 | 11640                   | AA                              | TT              | 1947008657               |
| SNP_P4_161254_738   | NW_004516636.1 | Scaffold1429 | 738                     | AA                              | TT              | 1947008659               |
| SNP_P4_161255_820   | NW_004516636.1 | Scaffold1429 | 820                     | AA                              | GG              | 1947008661               |
| SNP_P4_161256_858   | NW_004516636.1 | Scaffold1429 | 858                     | TT                              | GG              | 1947008663               |
| SNP_P4_161257_862   | NW_004516636.1 | Scaffold1429 | 862                     | CC                              | GG              | 1947008665               |
| SNP_P4_161258_1234  | NW_004516637.1 | Scaffold1430 | 1234                    | CC                              | GG              | 1947008667               |
| SNP_P4_161260_2296  | NW_004516637.1 | Scaffold1430 | 2296                    | GG                              | CC              | 1947008668               |
| SNP_P4_161261_4491  | NW_004516637.1 | Scaffold1430 | 4491                    | GG                              | AA              | 1947008670               |
| SNP_P4_161262_4830  | NW_004516637.1 | Scaffold1430 | 4830                    | GG                              | AA              | 1947008672               |
| SNP_P4_161263_4841  | NW_004516637.1 | Scaffold1430 | 4841                    | TT                              | AA              | 1947008674               |
| SNP_P4_161264_4846  | NW_004516637.1 | Scaffold1430 | 4846                    | GG                              | AA              | 1947008676               |
| SNP_P4_161266_8456  | NW_004516637.1 | Scaffold1430 | 8456                    | AA                              | TT              | 1947008678               |
| SNP_P4_161267_8509  | NW_004516637.1 | Scaffold1430 | 8509                    | CC                              | TT              | 1947008680               |
| SNP_P4_161269_8754  | NW_004516637.1 | Scaffold1430 | 8754                    | GG                              | AA              | 1947008682               |
| SNP_P4_161270_8813  | NW_004516637.1 | Scaffold1430 | 8813                    | GG                              | TT              | 1947008684               |
| SNP_P4_161271_8817  | NW_004516637.1 | Scaffold1430 | 8817                    | GG                              | TT              | 1947008686               |
| SNP_P4_161273_4310  | NW_004516638.1 | Scaffold1432 | 4310                    | TT                              | AA              | 1947008688               |
| SNP_P4_161274_7934  | NW_004516638.1 | Scaffold1432 | 7934                    | CC                              | TT              | 1947008690               |
| SNP_P4_161275_8233  | NW_004516638.1 | Scaffold1432 | 8233                    | GG                              | TT              | 1947008692               |

| SNPs IDs            | Chromosome IDs | Chromosomes  | Physical positions (bp) | CDC Frontier (Reference genome) | (ILWC46 & LPNB) | NCBI SNPdb Accession IDs |
|---------------------|----------------|--------------|-------------------------|---------------------------------|-----------------|--------------------------|
| SNP_P4_161276_14893 | NW_004516638.1 | Scaffold1432 | 14893                   | TT                              | CC              | 1947008694               |
| SNP_P4_161277_34628 | NW_004516638.1 | Scaffold1432 | 34628                   | CC                              | TT              | 1947008696               |
| SNP_P4_161278_38624 | NW_004516638.1 | Scaffold1432 | 38624                   | TT                              | CC              | 1947008698               |
| SNP_P4_161279_51246 | NW_004516638.1 | Scaffold1432 | 51246                   | AA                              | GG              | 1947008700               |
| SNP_P4_161280_75775 | NW_004516638.1 | Scaffold1432 | 75775                   | AA                              | GG              | 1947008702               |
| SNP_P4_161281_79988 | NW_004516638.1 | Scaffold1432 | 79988                   | TT                              | CC              | 1947008704               |
| SNP_P4_161282_80033 | NW_004516638.1 | Scaffold1432 | 80033                   | TT                              | CC              | 1947008706               |
| SNP_P4_161283_80113 | NW_004516638.1 | Scaffold1432 | 80113                   | CC                              | AA              | 1947008708               |
| SNP_P4_161284_80134 | NW_004516638.1 | Scaffold1432 | 80134                   | TT                              | CC              | 1947008710               |
| SNP_P4_161285_80235 | NW_004516638.1 | Scaffold1432 | 80235                   | TT                              | AA              | 1947008712               |
| SNP_P4_161286_80283 | NW_004516638.1 | Scaffold1432 | 80283                   | TT                              | AA              | 1947008714               |
| SNP_P4_161287_80327 | NW_004516638.1 | Scaffold1432 | 80327                   | CC                              | TT              | 1947008716               |
| SNP_P4_161288_80344 | NW_004516638.1 | Scaffold1432 | 80344                   | GG                              | AA              | 1947008717               |
| SNP_P4_161289_80402 | NW_004516638.1 | Scaffold1432 | 80402                   | CC                              | AA              | 1947008719               |
| SNP_P4_161292_80595 | NW_004516638.1 | Scaffold1432 | 80595                   | AA                              | CC              | 1947008721               |
| SNP_P4_161293_80627 | NW_004516638.1 | Scaffold1432 | 80627                   | AA                              | GG              | 1947008723               |
| SNP_P4_161294_80688 | NW_004516638.1 | Scaffold1432 | 80688                   | TT                              | AA              | 1947008725               |
| SNP_P4_161295_80792 | NW_004516638.1 | Scaffold1432 | 80792                   | CC                              | GG              | 1947008727               |
| SNP_P4_161296_64    | NW_004516639.1 | Scaffold1433 | 64                      | CC                              | AA              | 1947008729               |
| SNP_P4_161297_449   | NW_004516639.1 | Scaffold1433 | 449                     | AA                              | CC              | 1947008731               |
| SNP_P4_161298_479   | NW_004516639.1 | Scaffold1433 | 479                     | CC                              | TT              | 1947008733               |
| SNP_P4_161299_4936  | NW_004516639.1 | Scaffold1433 | 4936                    | AA                              | GG              | 1947008735               |
| SNP_P4_161300_4943  | NW_004516639.1 | Scaffold1433 | 4943                    | TT                              | GG              | 1947008737               |
| SNP_P4_161301_6365  | NW_004516639.1 | Scaffold1433 | 6365                    | AA                              | TT              | 1947008739               |
| SNP_P4_161302_8286  | NW_004516639.1 | Scaffold1433 | 8286                    | AA                              | GG              | 1947008741               |
| SNP_P4_161303_8312  | NW_004516639.1 | Scaffold1433 | 8312                    | TT                              | GG              | 1947008743               |
| SNP_P4_161304_8331  | NW_004516639.1 | Scaffold1433 | 8331                    | AA                              | TT              | 1947008745               |
| SNP_P4_161305_8358  | NW_004516639.1 | Scaffold1433 | 8358                    | AA                              | GG              | 1947008747               |
| SNP_P4_161306_8547  | NW_004516639.1 | Scaffold1433 | 8547                    | GG                              | AA              | 1947008749               |
| SNP_P4_161307_8606  | NW_004516639.1 | Scaffold1433 | 8606                    | GG                              | AA              | 1947008751               |
| SNP_P4_161308_8617  | NW_004516639.1 | Scaffold1433 | 8617                    | TT                              | CC              | 1947008753               |
| SNP_P4_161309_8663  | NW_004516639.1 | Scaffold1433 | 8663                    | TT                              | CC              | 1947008755               |
| SNP_P4_161310_8757  | NW_004516639.1 | Scaffold1433 | 8757                    | AA                              | GG              | 1947008757               |
| SNP_P4_161311_9052  | NW_004516639.1 | Scaffold1433 | 9052                    | CC                              | AA              | 1947008759               |
| SNP_P4_161312_9094  | NW_004516639.1 | Scaffold1433 | 9094                    | AA                              | CC              | 1947008761               |
| SNP_P4_161313_9327  | NW_004516639.1 | Scaffold1433 | 9327                    | AA                              | GG              | 1947008763               |
| SNP_P4_161314_9416  | NW_004516639.1 | Scaffold1433 | 9416                    | CC                              | AA              | 1947008765               |
| SNP_P4_161315_10398 | NW_004516639.1 | Scaffold1433 | 10398                   | TT                              | AA              | 1947008767               |
| SNP_P4_161316_10414 | NW_004516639.1 | Scaffold1433 | 10414                   | TT                              | CC              | 1947008769               |
| SNP_P4_161317_10597 | NW_004516639.1 | Scaffold1433 | 10597                   | CC                              | TT              | 1947008771               |
| SNP_P4_161318_10777 | NW_004516639.1 | Scaffold1433 | 10777                   | GG                              | TT              | 1947008773               |
| SNP_P4_161319_14943 | NW_004516639.1 | Scaffold1433 | 14943                   | CC                              | AA              | 1947008775               |

| SNPs IDs            | Chromosome IDs | Chromosomes  | Physical positions (bp) | CDC Frontier (Reference genome) | (ILWC46 & LPNB) | NCBI SNPdb Accession IDs |
|---------------------|----------------|--------------|-------------------------|---------------------------------|-----------------|--------------------------|
| SNP_P4_161320_15512 | NW_004516639.1 | Scaffold1433 | 15512                   | TT                              | GG              | 1947008776               |
| SNP_P4_161321_15716 | NW_004516639.1 | Scaffold1433 | 15716                   | GG                              | AA              | 1947008778               |
| SNP_P4_161322_15737 | NW_004516639.1 | Scaffold1433 | 15737                   | GG                              | AA              | 1947008780               |
| SNP_P4_161323_15750 | NW_004516639.1 | Scaffold1433 | 15750                   | AA                              | GG              | 1947008782               |
| SNP_P4_161324_15787 | NW_004516639.1 | Scaffold1433 | 15787                   | CC                              | AA              | 1947008785               |
| SNP_P4_161325_15798 | NW_004516639.1 | Scaffold1433 | 15798                   | GG                              | AA              | 1947008786               |
| SNP_P4_161326_15861 | NW_004516639.1 | Scaffold1433 | 15861                   | CC                              | AA              | 1947008788               |
| SNP_P4_161327_15865 | NW_004516639.1 | Scaffold1433 | 15865                   | GG                              | TT              | 1947008790               |
| SNP_P4_161328_17153 | NW_004516639.1 | Scaffold1433 | 17153                   | AA                              | GG              | 1947008792               |
| SNP_P4_161329_18517 | NW_004516639.1 | Scaffold1433 | 18517                   | GG                              | AA              | 1947008795               |
| SNP_P4_161330_18568 | NW_004516639.1 | Scaffold1433 | 18568                   | GG                              | AA              | 1947008797               |
| SNP_P4_161331_18733 | NW_004516639.1 | Scaffold1433 | 18733                   | AA                              | GG              | 1947008798               |
| SNP_P4_161332_18927 | NW_004516639.1 | Scaffold1433 | 18927                   | AA                              | CC              | 1947008799               |
| SNP_P4_161333_18945 | NW_004516639.1 | Scaffold1433 | 18945                   | TT                              | CC              | 1947008800               |
| SNP_P4_161334_19088 | NW_004516639.1 | Scaffold1433 | 19088                   | TT                              | GG              | 1947008801               |
| SNP_P4_161335_19090 | NW_004516639.1 | Scaffold1433 | 19090                   | TT                              | CC              | 1947008802               |
| SNP_P4_161336_19365 | NW_004516639.1 | Scaffold1433 | 19365                   | AA                              | CC              | 1947008803               |
| SNP_P4_161337_19554 | NW_004516639.1 | Scaffold1433 | 19554                   | CC                              | TT              | 1947008804               |
| SNP_P4_161338_20798 | NW_004516639.1 | Scaffold1433 | 20798                   | AA                              | CC              | 1947008805               |
| SNP_P4_161339_21054 | NW_004516639.1 | Scaffold1433 | 21054                   | GG                              | TT              | 1947008806               |
| SNP_P4_161340_21076 | NW_004516639.1 | Scaffold1433 | 21076                   | AA                              | GG              | 1947008807               |
| SNP_P4_161341_21080 | NW_004516639.1 | Scaffold1433 | 21080                   | GG                              | AA              | 1947008808               |
| SNP_P4_161342_21121 | NW_004516639.1 | Scaffold1433 | 21121                   | AA                              | CC              | 1947008809               |
| SNP_P4_161344_21161 | NW_004516639.1 | Scaffold1433 | 21161                   | CC                              | TT              | 1947008810               |
| SNP_P4_161346_21298 | NW_004516639.1 | Scaffold1433 | 21298                   | GG                              | AA              | 1947008811               |
| SNP_P4_161347_21401 | NW_004516639.1 | Scaffold1433 | 21401                   | TT                              | CC              | 1947008812               |
| SNP_P4_161348_21435 | NW_004516639.1 | Scaffold1433 | 21435                   | TT                              | AA              | 1947008813               |
| SNP_P4_161349_21534 | NW_004516639.1 | Scaffold1433 | 21534                   | TT                              | GG              | 1947008814               |
| SNP_P4_161350_21627 | NW_004516639.1 | Scaffold1433 | 21627                   | TT                              | GG              | 1947008815               |
| SNP_P4_161351_21662 | NW_004516639.1 | Scaffold1433 | 21662                   | AA                              | TT              | 1947008816               |
| SNP_P4_161352_21696 | NW_004516639.1 | Scaffold1433 | 21696                   | GG                              | AA              | 1947008817               |
| SNP_P4_161353_21735 | NW_004516639.1 | Scaffold1433 | 21735                   | TT                              | GG              | 1947008818               |
| SNP_P4_161355_21803 | NW_004516639.1 | Scaffold1433 | 21803                   | GG                              | TT              | 1947008819               |
| SNP_P4_161356_21828 | NW_004516639.1 | Scaffold1433 | 21828                   | GG                              | AA              | 1947008820               |
| SNP_P4_161357_21886 | NW_004516639.1 | Scaffold1433 | 21886                   | CC                              | TT              | 1947008821               |
| SNP_P4_161359_22036 | NW_004516639.1 | Scaffold1433 | 22036                   | CC                              | GG              | 1947008822               |
| SNP_P4_161360_22054 | NW_004516639.1 | Scaffold1433 | 22054                   | CC                              | AA              | 1947008823               |
| SNP_P4_161361_22055 | NW_004516639.1 | Scaffold1433 | 22055                   | TT                              | CC              | 1947008824               |
| SNP_P4_161362_22157 | NW_004516639.1 | Scaffold1433 | 22157                   | CC                              | AA              | 1947008825               |
| SNP_P4_161363_22163 | NW_004516639.1 | Scaffold1433 | 22163                   | CC                              | AA              | 1947008826               |
| SNP_P4_161364_22184 | NW_004516639.1 | Scaffold1433 | 22184                   | AA                              | CC              | 1947008828               |
| SNP_P4_161365_22214 | NW_004516639.1 | Scaffold1433 | 22214                   | TT                              | CC              | 1947008830               |

| SNPs IDs            | Chromosome IDs | Chromosomes  | Physical positions (bp) | CDC Frontier (Reference genome) | (ILWC46 & LPNB) | NCBI SNPdb Accession IDs |
|---------------------|----------------|--------------|-------------------------|---------------------------------|-----------------|--------------------------|
| SNP_P4_161366_22223 | NW_004516639.1 | Scaffold1433 | 22223                   | CC                              | AA              | 1947008832               |
| SNP_P4_161367_22239 | NW_004516639.1 | Scaffold1433 | 22239                   | GG                              | AA              | 1947008834               |
| SNP_P4_161368_22328 | NW_004516639.1 | Scaffold1433 | 22328                   | TT                              | GG              | 1947008836               |
| SNP_P4_161369_22331 | NW_004516639.1 | Scaffold1433 | 22331                   | GG                              | TT              | 1947008838               |
| SNP_P4_161370_22393 | NW_004516639.1 | Scaffold1433 | 22393                   | GG                              | CC              | 1947008840               |
| SNP_P4_161371_22413 | NW_004516639.1 | Scaffold1433 | 22413                   | TT                              | GG              | 1947008842               |
| SNP_P4_161372_22457 | NW_004516639.1 | Scaffold1433 | 22457                   | AA                              | GG              | 1947008844               |
| SNP_P4_161373_22489 | NW_004516639.1 | Scaffold1433 | 22489                   | CC                              | TT              | 1947008846               |
| SNP_P4_161374_22493 | NW_004516639.1 | Scaffold1433 | 22493                   | CC                              | TT              | 1947008848               |
| SNP_P4_161375_22527 | NW_004516639.1 | Scaffold1433 | 22527                   | CC                              | TT              | 1947008850               |
| SNP_P4_161376_22543 | NW_004516639.1 | Scaffold1433 | 22543                   | AA                              | TT              | 1947008852               |
| SNP_P4_161377_22584 | NW_004516639.1 | Scaffold1433 | 22584                   | TT                              | AA              | 1947008854               |
| SNP_P4_161378_22669 | NW_004516639.1 | Scaffold1433 | 22669                   | TT                              | CC              | 1947008856               |
| SNP_P4_161379_22692 | NW_004516639.1 | Scaffold1433 | 22692                   | AA                              | GG              | 1947008858               |
| SNP_P4_161380_22818 | NW_004516639.1 | Scaffold1433 | 22818                   | CC                              | AA              | 1947008860               |
| SNP_P4_161381_22870 | NW_004516639.1 | Scaffold1433 | 22870                   | TT                              | GG              | 1947008862               |
| SNP_P4_161382_22935 | NW_004516639.1 | Scaffold1433 | 22935                   | CC                              | AA              | 1947008864               |
| SNP_P4_161383_22967 | NW_004516639.1 | Scaffold1433 | 22967                   | GG                              | CC              | 1947008866               |
| SNP_P4_161384_23040 | NW_004516639.1 | Scaffold1433 | 23040                   | AA                              | TT              | 1947008868               |
| SNP_P4_161385_24689 | NW_004516639.1 | Scaffold1433 | 24689                   | CC                              | TT              | 1947008870               |
| SNP_P4_161386_24698 | NW_004516639.1 | Scaffold1433 | 24698                   | CC                              | TT              | 1947008872               |
| SNP_P4_161387_24700 | NW_004516639.1 | Scaffold1433 | 24700                   | AA                              | TT              | 1947008874               |
| SNP_P4_161388_24737 | NW_004516639.1 | Scaffold1433 | 24737                   | AA                              | GG              | 1947008875               |
| SNP_P4_161389_24979 | NW_004516639.1 | Scaffold1433 | 24979                   | AA                              | GG              | 1947008877               |
| SNP_P4_161390_25009 | NW_004516639.1 | Scaffold1433 | 25009                   | GG                              | AA              | 1947008879               |
| SNP_P4_161391_25051 | NW_004516639.1 | Scaffold1433 | 25051                   | AA                              | GG              | 1947008881               |
| SNP_P4_161392_25104 | NW_004516639.1 | Scaffold1433 | 25104                   | TT                              | CC              | 1947008883               |
| SNP_P4_161393_25106 | NW_004516639.1 | Scaffold1433 | 25106                   | GG                              | TT              | 1947008885               |
| SNP_P4_161394_25552 | NW_004516639.1 | Scaffold1433 | 25552                   | CC                              | GG              | 1947008887               |
| SNP_P4_161395_25594 | NW_004516639.1 | Scaffold1433 | 25594                   | TT                              | CC              | 1947008889               |
| SNP_P4_161396_25630 | NW_004516639.1 | Scaffold1433 | 25630                   | TT                              | CC              | 1947008891               |
| SNP_P4_161397_25655 | NW_004516639.1 | Scaffold1433 | 25655                   | GG                              | AA              | 1947008893               |
| SNP_P4_161398_25834 | NW_004516639.1 | Scaffold1433 | 25834                   | AA                              | TT              | 1947008895               |
| SNP_P4_161399_25835 | NW_004516639.1 | Scaffold1433 | 25835                   | CC                              | TT              | 1947008897               |
| SNP_P4_161400_25889 | NW_004516639.1 | Scaffold1433 | 25889                   | GG                              | CC              | 1947008899               |
| SNP_P4_161401_25902 | NW_004516639.1 | Scaffold1433 | 25902                   | GG                              | AA              | 1947008901               |
| SNP_P4_161402_30564 | NW_004516639.1 | Scaffold1433 | 30564                   | CC                              | GG              | 1947008903               |
| SNP_P4_161403_32045 | NW_004516639.1 | Scaffold1433 | 32045                   | AA                              | CC              | 1947008905               |
| SNP_P4_161404_33296 | NW_004516639.1 | Scaffold1433 | 33296                   | TT                              | CC              | 1947008907               |
| SNP_P4_161405_33555 | NW_004516639.1 | Scaffold1433 | 33555                   | AA                              | TT              | 1947008909               |
| SNP_P4_161406_33556 | NW_004516639.1 | Scaffold1433 | 33556                   | GG                              | AA              | 1947008911               |
| SNP_P4_161409_33992 | NW_004516639.1 | Scaffold1433 | 33992                   | AA                              | TT              | 1947008913               |



| SNPs IDs             | Chromosome IDs | Chromosomes  | Physical positions (bp) | CDC Frontier (Reference genome) | (ILWC46 & LPNB) | NCBI SNPdb Accession IDs |
|----------------------|----------------|--------------|-------------------------|---------------------------------|-----------------|--------------------------|
| SNP_P4_161410_38887  | NW_004516639.1 | Scaffold1433 | 38887                   | TT                              | CC              | 1947008915               |
| SNP_P4_161411_1305   | NW_004516640.1 | Scaffold1436 | 1305                    | GG                              | AA              | 1947008917               |
| SNP_P4_161412_1593   | NW_004516640.1 | Scaffold1436 | 1593                    | GG                              | AA              | 1947008919               |
| SNP_P4_161413_55     | NW_004516641.1 | Scaffold1437 | 55                      | GG                              | AA              | 1947008921               |
| SNP_P4_161414_64     | NW_004516641.1 | Scaffold1437 | 64                      | CC                              | TT              | 1947008923               |
| SNP_P4_161415_85     | NW_004516641.1 | Scaffold1437 | 85                      | AA                              | GG              | 1947008925               |
| SNP_P4_161416_98     | NW_004516641.1 | Scaffold1437 | 98                      | TT                              | CC              | 1947008927               |
| SNP_P4_161417_375    | NW_004516641.1 | Scaffold1437 | 375                     | TT                              | CC              | 1947008929               |
| SNP_P4_161418_11651  | NW_004516641.1 | Scaffold1437 | 11651                   | CC                              | GG              | 1947008931               |
| SNP_P4_161419_11735  | NW_004516641.1 | Scaffold1437 | 11735                   | GG                              | TT              | 1947008933               |
| SNP_P4_161420_11773  | NW_004516641.1 | Scaffold1437 | 11773                   | GG                              | AA              | 1947008935               |
| SNP_P4_161421_12378  | NW_004516641.1 | Scaffold1437 | 12378                   | CC                              | GG              | 1947008937               |
| SNP_P4_161422_6372   | NW_004516642.1 | Scaffold1439 | 6372                    | GG                              | AA              | 1947008939               |
| SNP_P4_161423_33459  | NW_004516642.1 | Scaffold1439 | 33459                   | CC                              | TT              | 1947008941               |
| SNP_P4_161424_54963  | NW_004516642.1 | Scaffold1439 | 54963                   | AA                              | TT              | 1947008943               |
| SNP_P4_161425_57926  | NW_004516642.1 | Scaffold1439 | 57926                   | TT                              | CC              | 1947008945               |
| SNP_P4_161426_95978  | NW_004516642.1 | Scaffold1439 | 95978                   | CC                              | TT              | 1947008948               |
| SNP_P4_161427_122316 | NW_004516642.1 | Scaffold1439 | 122316                  | TT                              | CC              | 1947008950               |
| SNP_P4_161428_122364 | NW_004516642.1 | Scaffold1439 | 122364                  | TT                              | CC              | 1947008952               |
| SNP_P4_161430_199541 | NW_004516642.1 | Scaffold1439 | 199541                  | TT                              | AA              | 1947008954               |
| SNP_P4_161431_199598 | NW_004516642.1 | Scaffold1439 | 199598                  | GG                              | TT              | 1947008956               |
| SNP_P4_161432_199599 | NW_004516642.1 | Scaffold1439 | 199599                  | CC                              | GG              | 1947008958               |
| SNP_P4_161433_206183 | NW_004516642.1 | Scaffold1439 | 206183                  | TT                              | AA              | 1947008960               |
| SNP_P4_161434_206203 | NW_004516642.1 | Scaffold1439 | 206203                  | GG                              | AA              | 1947008962               |
| SNP_P4_161435_206204 | NW_004516642.1 | Scaffold1439 | 206204                  | TT                              | CC              | 1947008964               |
| SNP_P4_161436_209568 | NW_004516642.1 | Scaffold1439 | 209568                  | AA                              | GG              | 1947008966               |
| SNP_P4_161437_209580 | NW_004516642.1 | Scaffold1439 | 209580                  | AA                              | GG              | 1947008968               |
| SNP_P4_161438_209634 | NW_004516642.1 | Scaffold1439 | 209634                  | AA                              | GG              | 1947008970               |
| SNP_P4_161439_222751 | NW_004516642.1 | Scaffold1439 | 222751                  | AA                              | GG              | 1947008972               |
| SNP_P4_161440_224739 | NW_004516642.1 | Scaffold1439 | 224739                  | CC                              | AA              | 1947008974               |
| SNP_P4_161441_224750 | NW_004516642.1 | Scaffold1439 | 224750                  | GG                              | AA              | 1947008976               |
| SNP_P4_161442_248568 | NW_004516642.1 | Scaffold1439 | 248568                  | GG                              | TT              | 1947008978               |
| SNP_P4_161443_248624 | NW_004516642.1 | Scaffold1439 | 248624                  | AA                              | GG              | 1947008980               |
| SNP_P4_161444_248700 | NW_004516642.1 | Scaffold1439 | 248700                  | TT                              | CC              | 1947008982               |
| SNP_P4_161445_249340 | NW_004516642.1 | Scaffold1439 | 249340                  | AA                              | CC              | 1947008984               |
| SNP_P4_161446_272774 | NW_004516642.1 | Scaffold1439 | 272774                  | GG                              | AA              | 1947008987               |
| SNP_P4_161447_274440 | NW_004516642.1 | Scaffold1439 | 274440                  | CC                              | TT              | 1947008989               |
| SNP_P4_161448_281509 | NW_004516642.1 | Scaffold1439 | 281509                  | TT                              | GG              | 1947008991               |
| SNP_P4_161449_281511 | NW_004516642.1 | Scaffold1439 | 281511                  | CC                              | TT              | 1947008993               |
| SNP_P4_161451_284017 | NW_004516642.1 | Scaffold1439 | 284017                  | GG                              | AA              | 1947008995               |
| SNP_P4_161452_286418 | NW_004516642.1 | Scaffold1439 | 286418                  | CC                              | AA              | 1947008997               |
| SNP_P4_161453_1262   | NW_004516643.1 | Scaffold1440 | 1262                    | AA                              | GG              | 1947008999               |

| SNPs IDs            | Chromosome IDs | Chromosomes  | Physical positions (bp) | CDC Frontier (Reference genome) | (ILWC46 & LPNB) | NCBI SNPdb Accession IDs |
|---------------------|----------------|--------------|-------------------------|---------------------------------|-----------------|--------------------------|
| SNP_P4_161454_2645  | NW_004516643.1 | Scaffold1440 | 2645                    | CC                              | AA              | 1947009001               |
| SNP_P4_161455_2728  | NW_004516643.1 | Scaffold1440 | 2728                    | GG                              | TT              | 1947009003               |
| SNP_P4_161456_2729  | NW_004516643.1 | Scaffold1440 | 2729                    | AA                              | GG              | 1947009005               |
| SNP_P4_161457_2730  | NW_004516643.1 | Scaffold1440 | 2730                    | TT                              | AA              | 1947009007               |
| SNP_P4_161458_2782  | NW_004516643.1 | Scaffold1440 | 2782                    | CC                              | TT              | 1947009009               |
| SNP_P4_161459_2790  | NW_004516643.1 | Scaffold1440 | 2790                    | TT                              | CC              | 1947009011               |
| SNP_P4_161460_2843  | NW_004516643.1 | Scaffold1440 | 2843                    | GG                              | TT              | 1947009013               |
| SNP_P4_161461_2861  | NW_004516643.1 | Scaffold1440 | 2861                    | CC                              | TT              | 1947009015               |
| SNP_P4_161462_2871  | NW_004516643.1 | Scaffold1440 | 2871                    | CC                              | GG              | 1947009017               |
| SNP_P4_161463_3029  | NW_004516643.1 | Scaffold1440 | 3029                    | AA                              | GG              | 1947009019               |
| SNP_P4_161464_3088  | NW_004516643.1 | Scaffold1440 | 3088                    | TT                              | CC              | 1947009021               |
| SNP_P4_161465_3091  | NW_004516643.1 | Scaffold1440 | 3091                    | AA                              | TT              | 1947009023               |
| SNP_P4_161466_3099  | NW_004516643.1 | Scaffold1440 | 3099                    | TT                              | GG              | 1947009025               |
| SNP_P4_161467_3121  | NW_004516643.1 | Scaffold1440 | 3121                    | TT                              | CC              | 1947009027               |
| SNP_P4_161468_3155  | NW_004516643.1 | Scaffold1440 | 3155                    | AA                              | GG              | 1947009029               |
| SNP_P4_161469_3197  | NW_004516643.1 | Scaffold1440 | 3197                    | AA                              | CC              | 1947009031               |
| SNP_P4_161470_49062 | NW_004516643.1 | Scaffold1440 | 49062                   | GG                              | AA              | 1947009033               |
| SNP_P4_161471_49207 | NW_004516643.1 | Scaffold1440 | 49207                   | CC                              | TT              | 1947009035               |
| SNP_P4_161472_49577 | NW_004516643.1 | Scaffold1440 | 49577                   | GG                              | CC              | 1947009037               |
| SNP_P4_161473_49624 | NW_004516643.1 | Scaffold1440 | 49624                   | CC                              | TT              | 1947009039               |
| SNP_P4_161474_51698 | NW_004516643.1 | Scaffold1440 | 51698                   | TT                              | AA              | 1947009041               |
| SNP_P4_161476_1291  | NW_004516646.1 | Scaffold1445 | 1291                    | AA                              | TT              | 1947009043               |
| SNP_P4_161477_1407  | NW_004516646.1 | Scaffold1445 | 1407                    | TT                              | AA              | 1947009045               |
| SNP_P4_161478_1498  | NW_004516646.1 | Scaffold1445 | 1498                    | GG                              | AA              | 1947009047               |
| SNP_P4_161479_4312  | NW_004516646.1 | Scaffold1445 | 4312                    | CC                              | TT              | 1947009049               |
| SNP_P4_161480_4353  | NW_004516646.1 | Scaffold1445 | 4353                    | TT                              | CC              | 1947009051               |
| SNP_P4_161481_11301 | NW_004516647.1 | Scaffold1446 | 11301                   | GG                              | AA              | 1947009053               |
| SNP_P4_161482_12127 | NW_004516647.1 | Scaffold1446 | 12127                   | CC                              | TT              | 1947009055               |
| SNP_P4_161483_20572 | NW_004516647.1 | Scaffold1446 | 20572                   | CC                              | TT              | 1947009057               |
| SNP_P4_161484_20581 | NW_004516647.1 | Scaffold1446 | 20581                   | TT                              | AA              | 1947009059               |
| SNP_P4_161486_22081 | NW_004516647.1 | Scaffold1446 | 22081                   | CC                              | GG              | 1947009061               |
| SNP_P4_161487_22932 | NW_004516647.1 | Scaffold1446 | 22932                   | TT                              | CC              | 1947009063               |
| SNP_P4_161488_5879  | NW_004516648.1 | Scaffold1447 | 5879                    | CC                              | TT              | 1947009065               |
| SNP_P4_161489_11576 | NW_004516648.1 | Scaffold1447 | 11576                   | GG                              | CC              | 1947009067               |
| SNP_P4_161490_17747 | NW_004516648.1 | Scaffold1447 | 17747                   | GG                              | AA              | 1947009069               |
| SNP_P4_161491_17816 | NW_004516648.1 | Scaffold1447 | 17816                   | GG                              | TT              | 1947009071               |
| SNP_P4_161492_20033 | NW_004516648.1 | Scaffold1447 | 20033                   | CC                              | TT              | 1947009073               |
| SNP_P4_161493_20053 | NW_004516648.1 | Scaffold1447 | 20053                   | AA                              | GG              | 1947009075               |
| SNP_P4_161494_20108 | NW_004516648.1 | Scaffold1447 | 20108                   | TT                              | CC              | 1947009077               |
| SNP_P4_161495_20163 | NW_004516648.1 | Scaffold1447 | 20163                   | TT                              | GG              | 1947009079               |
| SNP_P4_161496_20164 | NW_004516648.1 | Scaffold1447 | 20164                   | TT                              | AA              | 1947009081               |
| SNP_P4_161497_20215 | NW_004516648.1 | Scaffold1447 | 20215                   | GG                              | AA              | 1947009083               |

| SNPs IDs            | Chromosome IDs | Chromosomes  | Physical positions (bp) | CDC Frontier (Reference genome) | (ILWC46 & LPNB) | NCBI SNPdb Accession IDs |
|---------------------|----------------|--------------|-------------------------|---------------------------------|-----------------|--------------------------|
| SNP_P4_161498_20225 | NW_004516648.1 | Scaffold1447 | 20225                   | GG                              | AA              | 1947009085               |
| SNP_P4_161500_20366 | NW_004516648.1 | Scaffold1447 | 20366                   | TT                              | CC              | 1947009087               |
| SNP_P4_161501_20381 | NW_004516648.1 | Scaffold1447 | 20381                   | AA                              | TT              | 1947009089               |
| SNP_P4_161503_20390 | NW_004516648.1 | Scaffold1447 | 20390                   | CC                              | TT              | 1947009091               |
| SNP_P4_161504_20418 | NW_004516648.1 | Scaffold1447 | 20418                   | AA                              | GG              | 1947009093               |
| SNP_P4_161505_20423 | NW_004516648.1 | Scaffold1447 | 20423                   | CC                              | TT              | 1947009095               |
| SNP_P4_161506_20438 | NW_004516648.1 | Scaffold1447 | 20438                   | TT                              | CC              | 1947009097               |
| SNP_P4_161507_20439 | NW_004516648.1 | Scaffold1447 | 20439                   | CC                              | TT              | 1947009099               |
| SNP_P4_161508_20450 | NW_004516648.1 | Scaffold1447 | 20450                   | GG                              | TT              | 1947009101               |
| SNP_P4_161509_21271 | NW_004516648.1 | Scaffold1447 | 21271                   | TT                              | CC              | 1947009103               |
| SNP_P4_161510_21579 | NW_004516648.1 | Scaffold1447 | 21579                   | TT                              | CC              | 1947009105               |
| SNP_P4_161511_21600 | NW_004516648.1 | Scaffold1447 | 21600                   | AA                              | GG              | 1947009107               |
| SNP_P4_161512_21615 | NW_004516648.1 | Scaffold1447 | 21615                   | GG                              | TT              | 1947009109               |
| SNP_P4_161513_21660 | NW_004516648.1 | Scaffold1447 | 21660                   | TT                              | AA              | 1947009111               |
| SNP_P4_161514_21675 | NW_004516648.1 | Scaffold1447 | 21675                   | TT                              | GG              | 1947009113               |
| SNP_P4_161515_21684 | NW_004516648.1 | Scaffold1447 | 21684                   | TT                              | CC              | 1947009114               |
| SNP_P4_161517_22830 | NW_004516648.1 | Scaffold1447 | 22830                   | TT                              | CC              | 1947009116               |
| SNP_P4_161518_23239 | NW_004516648.1 | Scaffold1447 | 23239                   | AA                              | TT              | 1947009118               |
| SNP_P4_161519_24328 | NW_004516648.1 | Scaffold1447 | 24328                   | TT                              | GG              | 1947009120               |
| SNP_P4_161520_24370 | NW_004516648.1 | Scaffold1447 | 24370                   | CC                              | TT              | 1947009122               |
| SNP_P4_161521_24371 | NW_004516648.1 | Scaffold1447 | 24371                   | AA                              | GG              | 1947009124               |
| SNP_P4_161522_24600 | NW_004516648.1 | Scaffold1447 | 24600                   | TT                              | AA              | 1947009126               |
| SNP_P4_161523_24635 | NW_004516648.1 | Scaffold1447 | 24635                   | TT                              | CC              | 1947009128               |
| SNP_P4_161524_24663 | NW_004516648.1 | Scaffold1447 | 24663                   | AA                              | CC              | 1947009131               |
| SNP_P4_161525_24672 | NW_004516648.1 | Scaffold1447 | 24672                   | TT                              | CC              | 1947009133               |
| SNP_P4_161526_24684 | NW_004516648.1 | Scaffold1447 | 24684                   | GG                              | AA              | 1947009135               |
| SNP_P4_161527_24746 | NW_004516648.1 | Scaffold1447 | 24746                   | TT                              | CC              | 1947009137               |
| SNP_P4_161528_24780 | NW_004516648.1 | Scaffold1447 | 24780                   | GG                              | AA              | 1947009139               |
| SNP_P4_161529_25667 | NW_004516648.1 | Scaffold1447 | 25667                   | AA                              | CC              | 1947009141               |
| SNP_P4_161530_25703 | NW_004516648.1 | Scaffold1447 | 25703                   | AA                              | CC              | 1947009143               |
| SNP_P4_161531_26052 | NW_004516648.1 | Scaffold1447 | 26052                   | GG                              | AA              | 1947009145               |
| SNP_P4_161532_26280 | NW_004516648.1 | Scaffold1447 | 26280                   | AA                              | TT              | 1947009147               |
| SNP_P4_161533_26295 | NW_004516648.1 | Scaffold1447 | 26295                   | GG                              | AA              | 1947009149               |
| SNP_P4_161534_26336 | NW_004516648.1 | Scaffold1447 | 26336                   | CC                              | TT              | 1947009151               |
| SNP_P4_161535_26338 | NW_004516648.1 | Scaffold1447 | 26338                   | CC                              | TT              | 1947009153               |
| SNP_P4_161536_26340 | NW_004516648.1 | Scaffold1447 | 26340                   | AA                              | GG              | 1947009155               |
| SNP_P4_161537_30861 | NW_004516648.1 | Scaffold1447 | 30861                   | GG                              | CC              | 1947009157               |
| SNP_P4_161538_30872 | NW_004516648.1 | Scaffold1447 | 30872                   | TT                              | AA              | 1947009159               |
| SNP_P4_161539_30879 | NW_004516648.1 | Scaffold1447 | 30879                   | CC                              | TT              | 1947009161               |
| SNP_P4_161540_30964 | NW_004516648.1 | Scaffold1447 | 30964                   | CC                              | TT              | 1947009163               |
| SNP_P4_161541_31057 | NW_004516648.1 | Scaffold1447 | 31057                   | CC                              | GG              | 1947009165               |
| SNP_P4_161542_31107 | NW_004516648.1 | Scaffold1447 | 31107                   | GG                              | AA              | 1947009167               |

| SNPs IDs             | Chromosome IDs | Chromosomes  | Physical positions (bp) | CDC Frontier (Reference genome) | (ILWC46 & LPNB) | NCBI SNPdb Accession IDs |
|----------------------|----------------|--------------|-------------------------|---------------------------------|-----------------|--------------------------|
| SNP_P4_161543_31244  | NW_004516648.1 | Scaffold1447 | 31244                   | TT                              | CC              | 1947009169               |
| SNP_P4_161544_33824  | NW_004516648.1 | Scaffold1447 | 33824                   | AA                              | CC              | 1947009171               |
| SNP_P4_161545_43349  | NW_004516648.1 | Scaffold1447 | 43349                   | CC                              | TT              | 1947009173               |
| SNP_P4_161546_861    | NW_004516649.1 | Scaffold1448 | 861                     | GG                              | AA              | 1947009175               |
| SNP_P4_161547_5509   | NW_004516649.1 | Scaffold1448 | 5509                    | GG                              | CC              | 1947009177               |
| SNP_P4_161548_6364   | NW_004516649.1 | Scaffold1448 | 6364                    | GG                              | AA              | 1947009179               |
| SNP_P4_161549_7253   | NW_004516649.1 | Scaffold1448 | 7253                    | CC                              | AA              | 1947009180               |
| SNP_P4_161552_12043  | NW_004516649.1 | Scaffold1448 | 12043                   | TT                              | GG              | 1947009183               |
| SNP_P4_161553_16861  | NW_004516649.1 | Scaffold1448 | 16861                   | TT                              | CC              | 1947009185               |
| SNP_P4_161554_20698  | NW_004516649.1 | Scaffold1448 | 20698                   | CC                              | AA              | 1947009187               |
| SNP_P4_161555_20706  | NW_004516649.1 | Scaffold1448 | 20706                   | AA                              | GG              | 1947009189               |
| SNP_P4_161556_20749  | NW_004516649.1 | Scaffold1448 | 20749                   | TT                              | CC              | 1947009191               |
| SNP_P4_161557_20751  | NW_004516649.1 | Scaffold1448 | 20751                   | TT                              | GG              | 1947009193               |
| SNP_P4_161558_20990  | NW_004516649.1 | Scaffold1448 | 20990                   | AA                              | GG              | 1947009195               |
| SNP_P4_161559_21025  | NW_004516649.1 | Scaffold1448 | 21025                   | AA                              | CC              | 1947009197               |
| SNP_P4_161560_21034  | NW_004516649.1 | Scaffold1448 | 21034                   | GG                              | TT              | 1947009199               |
| SNP_P4_161561_21039  | NW_004516649.1 | Scaffold1448 | 21039                   | AA                              | GG              | 1947009201               |
| SNP_P4_161562_21095  | NW_004516649.1 | Scaffold1448 | 21095                   | CC                              | AA              | 1947009203               |
| SNP_P4_161563_21098  | NW_004516649.1 | Scaffold1448 | 21098                   | TT                              | CC              | 1947009205               |
| SNP_P4_161564_21444  | NW_004516649.1 | Scaffold1448 | 21444                   | GG                              | AA              | 1947009207               |
| SNP_P4_161565_29564  | NW_004516649.1 | Scaffold1448 | 29564                   | GG                              | CC              | 1947009209               |
| SNP_P4_161567_34553  | NW_004516649.1 | Scaffold1448 | 34553                   | GG                              | TT              | 1947009211               |
| SNP_P4_161569_37707  | NW_004516649.1 | Scaffold1448 | 37707                   | TT                              | CC              | 1947009213               |
| SNP_P4_161571_39731  | NW_004516649.1 | Scaffold1448 | 39731                   | CC                              | TT              | 1947009215               |
| SNP_P4_161572_40358  | NW_004516649.1 | Scaffold1448 | 40358                   | TT                              | CC              | 1947009217               |
| SNP_P4_161573_40798  | NW_004516649.1 | Scaffold1448 | 40798                   | CC                              | AA              | 1947009219               |
| SNP_P4_161574_42593  | NW_004516649.1 | Scaffold1448 | 42593                   | AA                              | TT              | 1947009221               |
| SNP_P4_161576_77231  | NW_004516649.1 | Scaffold1448 | 77231                   | AA                              | TT              | 1947009223               |
| SNP_P4_161577_77734  | NW_004516649.1 | Scaffold1448 | 77734                   | AA                              | GG              | 1947009225               |
| SNP_P4_161578_78836  | NW_004516649.1 | Scaffold1448 | 78836                   | AA                              | GG              | 1947009227               |
| SNP_P4_161579_79659  | NW_004516649.1 | Scaffold1448 | 79659                   | TT                              | CC              | 1947009230               |
| SNP_P4_161580_79663  | NW_004516649.1 | Scaffold1448 | 79663                   | CC                              | AA              | 1947009232               |
| SNP_P4_161581_80510  | NW_004516649.1 | Scaffold1448 | 80510                   | AA                              | GG              | 1947009234               |
| SNP_P4_161582_81739  | NW_004516649.1 | Scaffold1448 | 81739                   | TT                              | CC              | 1947009236               |
| SNP_P4_161583_88362  | NW_004516649.1 | Scaffold1448 | 88362                   | GG                              | CC              | 1947009238               |
| SNP_P4_161584_90092  | NW_004516649.1 | Scaffold1448 | 90092                   | GG                              | CC              | 1947009240               |
| SNP_P4_161585_90100  | NW_004516649.1 | Scaffold1448 | 90100                   | AA                              | GG              | 1947009242               |
| SNP_P4_161586_90420  | NW_004516649.1 | Scaffold1448 | 90420                   | GG                              | AA              | 1947009244               |
| SNP_P4_161587_98811  | NW_004516649.1 | Scaffold1448 | 98811                   | CC                              | GG              | 1947009246               |
| SNP_P4_161588_99081  | NW_004516649.1 | Scaffold1448 | 99081                   | GG                              | AA              | 1947009248               |
| SNP_P4_161591_100766 | NW_004516649.1 | Scaffold1448 | 100766                  | AA                              | GG              | 1947009250               |
| SNP_P4_161592_101606 | NW_004516649.1 | Scaffold1448 | 101606                  | AA                              | TT              | 1947009252               |

| SNPs IDs             | Chromosome IDs | Chromosomes  | Physical positions (bp) | CDC Frontier (Reference genome) | (ILWC46 & LPNB) | NCBI SNPdb Accession IDs |
|----------------------|----------------|--------------|-------------------------|---------------------------------|-----------------|--------------------------|
| SNP_P4_161593_109285 | NW_004516649.1 | Scaffold1448 | 109285                  | GG                              | AA              | 1947009254               |
| SNP_P4_161594_113511 | NW_004516649.1 | Scaffold1448 | 113511                  | AA                              | GG              | 1947009256               |
| SNP_P4_161595_116749 | NW_004516649.1 | Scaffold1448 | 116749                  | TT                              | CC              | 1947009258               |
| SNP_P4_161596_118021 | NW_004516649.1 | Scaffold1448 | 118021                  | GG                              | AA              | 1947009260               |
| SNP_P4_161597_118343 | NW_004516649.1 | Scaffold1448 | 118343                  | AA                              | GG              | 1947009262               |
| SNP_P4_161598_132646 | NW_004516649.1 | Scaffold1448 | 132646                  | AA                              | CC              | 1947009264               |
| SNP_P4_161599_132992 | NW_004516649.1 | Scaffold1448 | 132992                  | AA                              | CC              | 1947009266               |
| SNP_P4_161602_141192 | NW_004516649.1 | Scaffold1448 | 141192                  | GG                              | AA              | 1947009268               |
| SNP_P4_161603_144037 | NW_004516649.1 | Scaffold1448 | 144037                  | TT                              | CC              | 1947009270               |
| SNP_P4_161604_144038 | NW_004516649.1 | Scaffold1448 | 144038                  | CC                              | TT              | 1947009272               |
| SNP_P4_161606_2815   | NW_004516650.1 | Scaffold1449 | 2815                    | TT                              | CC              | 1947009274               |
| SNP_P4_161607_3136   | NW_004516650.1 | Scaffold1449 | 3136                    | CC                              | TT              | 1947009276               |
| SNP_P4_161608_3377   | NW_004516650.1 | Scaffold1449 | 3377                    | CC                              | AA              | 1947009278               |
| SNP_P4_161609_3494   | NW_004516650.1 | Scaffold1449 | 3494                    | AA                              | GG              | 1947009280               |
| SNP_P4_161610_3530   | NW_004516650.1 | Scaffold1449 | 3530                    | TT                              | CC              | 1947009282               |
| SNP_P4_161611_3537   | NW_004516650.1 | Scaffold1449 | 3537                    | CC                              | GG              | 1947009284               |
| SNP_P4_161613_6567   | NW_004516650.1 | Scaffold1449 | 6567                    | TT                              | GG              | 1947009286               |
| SNP_P4_161614_6752   | NW_004516650.1 | Scaffold1449 | 6752                    | TT                              | CC              | 1947009288               |
| SNP_P4_161615_6765   | NW_004516650.1 | Scaffold1449 | 6765                    | CC                              | GG              | 1947009290               |
| SNP_P4_161616_6844   | NW_004516650.1 | Scaffold1449 | 6844                    | AA                              | GG              | 1947009292               |
| SNP_P4_161617_6921   | NW_004516650.1 | Scaffold1449 | 6921                    | TT                              | AA              | 1947009294               |
| SNP_P4_161618_7149   | NW_004516650.1 | Scaffold1449 | 7149                    | AA                              | GG              | 1947009296               |
| SNP_P4_161619_7581   | NW_004516650.1 | Scaffold1449 | 7581                    | AA                              | CC              | 1947009298               |
| SNP_P4_161620_7638   | NW_004516650.1 | Scaffold1449 | 7638                    | GG                              | AA              | 1947009300               |
| SNP_P4_161621_7668   | NW_004516650.1 | Scaffold1449 | 7668                    | GG                              | TT              | 1947009302               |
| SNP_P4_161622_11307  | NW_004516650.1 | Scaffold1449 | 11307                   | TT                              | CC              | 1947009304               |
| SNP_P4_161623_19493  | NW_004516650.1 | Scaffold1449 | 19493                   | TT                              | CC              | 1947009306               |
| SNP_P4_161624_19528  | NW_004516650.1 | Scaffold1449 | 19528                   | GG                              | TT              | 1947009308               |
| SNP_P4_161625_19597  | NW_004516650.1 | Scaffold1449 | 19597                   | AA                              | GG              | 1947009310               |
| SNP_P4_161626_28302  | NW_004516650.1 | Scaffold1449 | 28302                   | GG                              | AA              | 1947009312               |
| SNP_P4_161627_45667  | NW_004516650.1 | Scaffold1449 | 45667                   | AA                              | GG              | 1947009315               |
| SNP_P4_161628_45670  | NW_004516650.1 | Scaffold1449 | 45670                   | TT                              | AA              | 1947009317               |
| SNP_P4_161629_45707  | NW_004516650.1 | Scaffold1449 | 45707                   | AA                              | GG              | 1947009319               |
| SNP_P4_161630_45757  | NW_004516650.1 | Scaffold1449 | 45757                   | TT                              | CC              | 1947009321               |
| SNP_P4_161631_45985  | NW_004516650.1 | Scaffold1449 | 45985                   | GG                              | TT              | 1947009323               |
| SNP_P4_161632_46082  | NW_004516650.1 | Scaffold1449 | 46082                   | CC                              | AA              | 1947009326               |
| SNP_P4_161633_46110  | NW_004516650.1 | Scaffold1449 | 46110                   | AA                              | GG              | 1947009328               |
| SNP_P4_161634_47982  | NW_004516650.1 | Scaffold1449 | 47982                   | TT                              | CC              | 1947009330               |
| SNP_P4_161635_54650  | NW_004516650.1 | Scaffold1449 | 54650                   | GG                              | CC              | 1947009332               |
| SNP_P4_161636_55045  | NW_004516650.1 | Scaffold1449 | 55045                   | GG                              | TT              | 1947009334               |
| SNP_P4_161637_59017  | NW_004516650.1 | Scaffold1449 | 59017                   | CC                              | TT              | 1947009336               |
| SNP_P4_161639_17224  | NW_004516651.1 | Scaffold1450 | 17224                   | GG                              | AA              | 1947009338               |

| SNPs IDs            | Chromosome IDs | Chromosomes  | Physical positions (bp) | CDC Frontier (Reference genome) | (ILWC46 & LPNB) | NCBI SNPdb Accession IDs |
|---------------------|----------------|--------------|-------------------------|---------------------------------|-----------------|--------------------------|
| SNP_P4_161640_54169 | NW_004516651.1 | Scaffold1450 | 54169                   | CC                              | AA              | 1947009340               |
| SNP_P4_161641_62698 | NW_004516651.1 | Scaffold1450 | 62698                   | GG                              | AA              | 1947009342               |
| SNP_P4_161642_69211 | NW_004516651.1 | Scaffold1450 | 69211                   | TT                              | CC              | 1947009344               |
| SNP_P4_161643_71846 | NW_004516651.1 | Scaffold1450 | 71846                   | AA                              | GG              | 1947009346               |
| SNP_P4_161644_71870 | NW_004516651.1 | Scaffold1450 | 71870                   | GG                              | AA              | 1947009348               |
| SNP_P4_161645_880   | NW_004516653.1 | Scaffold1452 | 880                     | AA                              | TT              | 1947009350               |
| SNP_P4_161648_4016  | NW_004516653.1 | Scaffold1452 | 4016                    | GG                              | TT              | 1947009352               |
| SNP_P4_161649_4080  | NW_004516653.1 | Scaffold1452 | 4080                    | AA                              | GG              | 1947009354               |
| SNP_P4_161650_4088  | NW_004516653.1 | Scaffold1452 | 4088                    | CC                              | TT              | 1947009356               |
| SNP_P4_161651_4090  | NW_004516653.1 | Scaffold1452 | 4090                    | AA                              | TT              | 1947009358               |
| SNP_P4_161652_4107  | NW_004516653.1 | Scaffold1452 | 4107                    | TT                              | CC              | 1947009360               |
| SNP_P4_161653_4123  | NW_004516653.1 | Scaffold1452 | 4123                    | GG                              | AA              | 1947009362               |
| SNP_P4_161654_6389  | NW_004516653.1 | Scaffold1452 | 6389                    | GG                              | AA              | 1947009364               |
| SNP_P4_161655_8057  | NW_004516653.1 | Scaffold1452 | 8057                    | GG                              | AA              | 1947009366               |
| SNP_P4_161656_8359  | NW_004516653.1 | Scaffold1452 | 8359                    | GG                              | CC              | 1947009368               |
| SNP_P4_161657_29667 | NW_004516653.1 | Scaffold1452 | 29667                   | TT                              | CC              | 1947009370               |
| SNP_P4_161659_29820 | NW_004516653.1 | Scaffold1452 | 29820                   | TT                              | AA              | 1947009372               |
| SNP_P4_161660_29854 | NW_004516653.1 | Scaffold1452 | 29854                   | TT                              | AA              | 1947009374               |
| SNP_P4_161661_29871 | NW_004516653.1 | Scaffold1452 | 29871                   | AA                              | TT              | 1947009376               |
| SNP_P4_161662_30013 | NW_004516653.1 | Scaffold1452 | 30013                   | CC                              | AA              | 1947009378               |
| SNP_P4_161663_30110 | NW_004516653.1 | Scaffold1452 | 30110                   | TT                              | AA              | 1947009380               |
| SNP_P4_161664_30167 | NW_004516653.1 | Scaffold1452 | 30167                   | TT                              | AA              | 1947009382               |
| SNP_P4_161665_30196 | NW_004516653.1 | Scaffold1452 | 30196                   | AA                              | CC              | 1947009384               |
| SNP_P4_161666_30205 | NW_004516653.1 | Scaffold1452 | 30205                   | CC                              | TT              | 1947009386               |
| SNP_P4_161668_30221 | NW_004516653.1 | Scaffold1452 | 30221                   | CC                              | AA              | 1947009388               |
| SNP_P4_161669_30289 | NW_004516653.1 | Scaffold1452 | 30289                   | GG                              | TT              | 1947009390               |
| SNP_P4_161670_30293 | NW_004516653.1 | Scaffold1452 | 30293                   | GG                              | TT              | 1947009392               |
| SNP_P4_161671_30349 | NW_004516653.1 | Scaffold1452 | 30349                   | CC                              | GG              | 1947009394               |
| SNP_P4_161672_30386 | NW_004516653.1 | Scaffold1452 | 30386                   | TT                              | GG              | 1947009396               |
| SNP_P4_161673_30390 | NW_004516653.1 | Scaffold1452 | 30390                   | AA                              | TT              | 1947009398               |
| SNP_P4_161674_30414 | NW_004516653.1 | Scaffold1452 | 30414                   | CC                              | AA              | 1947009400               |
| SNP_P4_161675_30422 | NW_004516653.1 | Scaffold1452 | 30422                   | TT                              | GG              | 1947009402               |
| SNP_P4_161676_30453 | NW_004516653.1 | Scaffold1452 | 30453                   | TT                              | CC              | 1947009404               |
| SNP_P4_161677_30457 | NW_004516653.1 | Scaffold1452 | 30457                   | GG                              | TT              | 1947009406               |
| SNP_P4_161678_30481 | NW_004516653.1 | Scaffold1452 | 30481                   | GG                              | AA              | 1947009408               |
| SNP_P4_161679_30487 | NW_004516653.1 | Scaffold1452 | 30487                   | GG                              | TT              | 1947009410               |
| SNP_P4_161680_30490 | NW_004516653.1 | Scaffold1452 | 30490                   | AA                              | CC              | 1947009412               |
| SNP_P4_161682_414   | NW_004516654.1 | Scaffold1453 | 414                     | GG                              | CC              | 1947009414               |
| SNP_P4_161683_519   | NW_004516654.1 | Scaffold1453 | 519                     | AA                              | GG              | 1947009416               |
| SNP_P4_161684_574   | NW_004516654.1 | Scaffold1453 | 574                     | AA                              | GG              | 1947009418               |
| SNP_P4_161685_592   | NW_004516654.1 | Scaffold1453 | 592                     | TT                              | CC              | 1947009420               |
| SNP_P4_161686_608   | NW_004516654.1 | Scaffold1453 | 608                     | TT                              | CC              | 1947009422               |

| SNPs IDs             | Chromosome IDs | Chromosomes  | Physical positions (bp) | CDC Frontier (Reference genome) | (ILWC46 & LPNB) | NCBI SNPdb Accession IDs |
|----------------------|----------------|--------------|-------------------------|---------------------------------|-----------------|--------------------------|
| SNP_P4_161687_10573  | NW_004516654.1 | Scaffold1453 | 10573                   | AA                              | GG              | 1947009424               |
| SNP_P4_161688_10786  | NW_004516654.1 | Scaffold1453 | 10786                   | CC                              | TT              | 1947009426               |
| SNP_P4_161689_12857  | NW_004516654.1 | Scaffold1453 | 12857                   | CC                              | TT              | 1947009428               |
| SNP_P4_161690_17616  | NW_004516654.1 | Scaffold1453 | 17616                   | CC                              | AA              | 1947009431               |
| SNP_P4_161691_25676  | NW_004516654.1 | Scaffold1453 | 25676                   | GG                              | TT              | 1947009433               |
| SNP_P4_161692_25823  | NW_004516654.1 | Scaffold1453 | 25823                   | TT                              | AA              | 1947009435               |
| SNP_P4_161693_34796  | NW_004516654.1 | Scaffold1453 | 34796                   | GG                              | AA              | 1947009437               |
| SNP_P4_161694_34879  | NW_004516654.1 | Scaffold1453 | 34879                   | CC                              | AA              | 1947009439               |
| SNP_P4_161695_35383  | NW_004516654.1 | Scaffold1453 | 35383                   | CC                              | TT              | 1947009441               |
| SNP_P4_161696_42065  | NW_004516654.1 | Scaffold1453 | 42065                   | CC                              | TT              | 1947009443               |
| SNP_P4_161697_42284  | NW_004516654.1 | Scaffold1453 | 42284                   | AA                              | CC              | 1947009445               |
| SNP_P4_161698_51908  | NW_004516654.1 | Scaffold1453 | 51908                   | CC                              | GG              | 1947009447               |
| SNP_P4_161699_82294  | NW_004516654.1 | Scaffold1453 | 82294                   | GG                              | CC              | 1947009449               |
| SNP_P4_161700_87684  | NW_004516654.1 | Scaffold1453 | 87684                   | TT                              | GG              | 1947009451               |
| SNP_P4_161701_99040  | NW_004516654.1 | Scaffold1453 | 99040                   | CC                              | TT              | 1947009453               |
| SNP_P4_161702_99041  | NW_004516654.1 | Scaffold1453 | 99041                   | CC                              | AA              | 1947009455               |
| SNP_P4_161703_108314 | NW_004516654.1 | Scaffold1453 | 108314                  | AA                              | GG              | 1947009457               |
| SNP_P4_161704_108325 | NW_004516654.1 | Scaffold1453 | 108325                  | TT                              | GG              | 1947009459               |
| SNP_P4_161705_108361 | NW_004516654.1 | Scaffold1453 | 108361                  | AA                              | CC              | 1947009461               |
| SNP_P4_161706_108396 | NW_004516654.1 | Scaffold1453 | 108396                  | AA                              | TT              | 1947009463               |
| SNP_P4_161707_108413 | NW_004516654.1 | Scaffold1453 | 108413                  | GG                              | TT              | 1947009465               |
| SNP_P4_161708_108586 | NW_004516654.1 | Scaffold1453 | 108586                  | TT                              | AA              | 1947009467               |
| SNP_P4_161709_108684 | NW_004516654.1 | Scaffold1453 | 108684                  | CC                              | TT              | 1947009469               |
| SNP_P4_161710_108727 | NW_004516654.1 | Scaffold1453 | 108727                  | CC                              | GG              | 1947009471               |
| SNP_P4_161711_108784 | NW_004516654.1 | Scaffold1453 | 108784                  | CC                              | TT              | 1947009474               |
| SNP_P4_161712_108788 | NW_004516654.1 | Scaffold1453 | 108788                  | AA                              | GG              | 1947009476               |
| SNP_P4_161713_108807 | NW_004516654.1 | Scaffold1453 | 108807                  | CC                              | GG              | 1947009478               |
| SNP_P4_161714_108834 | NW_004516654.1 | Scaffold1453 | 108834                  | AA                              | GG              | 1947009480               |
| SNP_P4_161715_108865 | NW_004516654.1 | Scaffold1453 | 108865                  | AA                              | GG              | 1947009482               |
| SNP_P4_161716_108904 | NW_004516654.1 | Scaffold1453 | 108904                  | AA                              | GG              | 1947009484               |
| SNP_P4_161717_108926 | NW_004516654.1 | Scaffold1453 | 108926                  | CC                              | TT              | 1947009486               |
| SNP_P4_161718_109079 | NW_004516654.1 | Scaffold1453 | 109079                  | CC                              | TT              | 1947009488               |
| SNP_P4_161719_109085 | NW_004516654.1 | Scaffold1453 | 109085                  | TT                              | AA              | 1947009490               |
| SNP_P4_161720_109106 | NW_004516654.1 | Scaffold1453 | 109106                  | TT                              | CC              | 1947009492               |
| SNP_P4_161721_109134 | NW_004516654.1 | Scaffold1453 | 109134                  | GG                              | TT              | 1947009494               |
| SNP_P4_161722_109135 | NW_004516654.1 | Scaffold1453 | 109135                  | GG                              | CC              | 1947009496               |
| SNP_P4_161723_109144 | NW_004516654.1 | Scaffold1453 | 109144                  | CC                              | TT              | 1947009498               |
| SNP_P4_161724_109214 | NW_004516654.1 | Scaffold1453 | 109214                  | CC                              | GG              | 1947009500               |
| SNP_P4_161725_109222 | NW_004516654.1 | Scaffold1453 | 109222                  | TT                              | CC              | 1947009502               |
| SNP_P4_161726_109297 | NW_004516654.1 | Scaffold1453 | 109297                  | CC                              | AA              | 1947009504               |
| SNP_P4_161727_109307 | NW_004516654.1 | Scaffold1453 | 109307                  | AA                              | CC              | 1947009506               |
| SNP_P4_161728_109465 | NW_004516654.1 | Scaffold1453 | 109465                  | TT                              | CC              | 1947009509               |

| SNPs IDs             | Chromosome IDs | Chromosomes  | Physical positions (bp) | CDC Frontier (Reference genome) | (ILWC46 & LPNB) | NCBI SNPdb Accession IDs |
|----------------------|----------------|--------------|-------------------------|---------------------------------|-----------------|--------------------------|
| SNP_P4_161729_109496 | NW_004516654.1 | Scaffold1453 | 109496                  | AA                              | CC              | 1947009511               |
| SNP_P4_161730_109786 | NW_004516654.1 | Scaffold1453 | 109786                  | TT                              | CC              | 1947009513               |
| SNP_P4_161731_111111 | NW_004516654.1 | Scaffold1453 | 111111                  | GG                              | AA              | 1947009515               |
| SNP_P4_161732_6026   | NW_004516655.1 | Scaffold1455 | 6026                    | GG                              | AA              | 1947009517               |
| SNP_P4_161733_6128   | NW_004516655.1 | Scaffold1455 | 6128                    | GG                              | CC              | 1947009519               |
| SNP_P4_161734_6597   | NW_004516655.1 | Scaffold1455 | 6597                    | CC                              | AA              | 1947009521               |
| SNP_P4_161735_6891   | NW_004516655.1 | Scaffold1455 | 6891                    | GG                              | AA              | 1947009523               |
| SNP_P4_161736_7075   | NW_004516655.1 | Scaffold1455 | 7075                    | AA                              | GG              | 1947009525               |
| SNP_P4_161737_7116   | NW_004516655.1 | Scaffold1455 | 7116                    | TT                              | AA              | 1947009527               |
| SNP_P4_161738_7134   | NW_004516655.1 | Scaffold1455 | 7134                    | AA                              | CC              | 1947009529               |
| SNP_P4_161739_10942  | NW_004516655.1 | Scaffold1455 | 10942                   | GG                              | TT              | 1947009531               |
| SNP_P4_161740_11106  | NW_004516655.1 | Scaffold1455 | 11106                   | AA                              | GG              | 1947009533               |
| SNP_P4_161741_11129  | NW_004516655.1 | Scaffold1455 | 11129                   | TT                              | CC              | 1947009535               |
| SNP_P4_161742_11295  | NW_004516655.1 | Scaffold1455 | 11295                   | GG                              | AA              | 1947009537               |
| SNP_P4_161743_11414  | NW_004516655.1 | Scaffold1455 | 11414                   | GG                              | AA              | 1947009539               |
| SNP_P4_161744_11734  | NW_004516655.1 | Scaffold1455 | 11734                   | CC                              | TT              | 1947009541               |
| SNP_P4_161745_11790  | NW_004516655.1 | Scaffold1455 | 11790                   | CC                              | TT              | 1947009543               |
| SNP_P4_161746_12175  | NW_004516655.1 | Scaffold1455 | 12175                   | GG                              | AA              | 1947009545               |
| SNP_P4_161747_12403  | NW_004516655.1 | Scaffold1455 | 12403                   | AA                              | GG              | 1947009547               |
| SNP_P4_161748_12411  | NW_004516655.1 | Scaffold1455 | 12411                   | TT                              | AA              | 1947009549               |
| SNP_P4_161749_12495  | NW_004516655.1 | Scaffold1455 | 12495                   | AA                              | CC              | 1947009551               |
| SNP_P4_161751_12612  | NW_004516655.1 | Scaffold1455 | 12612                   | CC                              | TT              | 1947009553               |
| SNP_P4_161752_12662  | NW_004516655.1 | Scaffold1455 | 12662                   | TT                              | GG              | 1947009555               |
| SNP_P4_161753_12813  | NW_004516655.1 | Scaffold1455 | 12813                   | GG                              | AA              | 1947009557               |
| SNP_P4_161754_12908  | NW_004516655.1 | Scaffold1455 | 12908                   | AA                              | CC              | 1947009559               |
| SNP_P4_161756_13238  | NW_004516655.1 | Scaffold1455 | 13238                   | CC                              | TT              | 1947009561               |
| SNP_P4_161757_13724  | NW_004516655.1 | Scaffold1455 | 13724                   | TT                              | CC              | 1947009563               |
| SNP_P4_161758_13813  | NW_004516655.1 | Scaffold1455 | 13813                   | CC                              | GG              | 1947009565               |
| SNP_P4_161759_14612  | NW_004516655.1 | Scaffold1455 | 14612                   | GG                              | AA              | 1947009567               |
| SNP_P4_161760_14629  | NW_004516655.1 | Scaffold1455 | 14629                   | GG                              | AA              | 1947009569               |
| SNP_P4_161761_16202  | NW_004516655.1 | Scaffold1455 | 16202                   | GG                              | AA              | 1947009571               |
| SNP_P4_161762_16236  | NW_004516655.1 | Scaffold1455 | 16236                   | GG                              | TT              | 1947009573               |
| SNP_P4_161763_16248  | NW_004516655.1 | Scaffold1455 | 16248                   | GG                              | AA              | 1947009575               |
| SNP_P4_161764_16577  | NW_004516655.1 | Scaffold1455 | 16577                   | TT                              | CC              | 1947009577               |
| SNP_P4_161765_18070  | NW_004516655.1 | Scaffold1455 | 18070                   | CC                              | TT              | 1947009579               |
| SNP_P4_161766_18241  | NW_004516655.1 | Scaffold1455 | 18241                   | TT                              | CC              | 1947009581               |
| SNP_P4_161767_18253  | NW_004516655.1 | Scaffold1455 | 18253                   | TT                              | AA              | 1947009583               |
| SNP_P4_161768_18320  | NW_004516655.1 | Scaffold1455 | 18320                   | TT                              | CC              | 1947009585               |
| SNP_P4_161769_18365  | NW_004516655.1 | Scaffold1455 | 18365                   | CC                              | TT              | 1947009587               |
| SNP_P4_161770_18406  | NW_004516655.1 | Scaffold1455 | 18406                   | CC                              | AA              | 1947009589               |
| SNP_P4_161771_18500  | NW_004516655.1 | Scaffold1455 | 18500                   | AA                              | GG              | 1947009591               |
| SNP_P4_161772_18515  | NW_004516655.1 | Scaffold1455 | 18515                   | TT                              | AA              | 1947009593               |



| SNPs IDs            | Chromosome IDs | Chromosomes  | Physical positions (bp) | CDC Frontier (Reference genome) | (ILWC46 & LPNB) | NCBI SNPdb Accession IDs |
|---------------------|----------------|--------------|-------------------------|---------------------------------|-----------------|--------------------------|
| SNP_P4_161773_18637 | NW_004516655.1 | Scaffold1455 | 18637                   | AA                              | GG              | 1947009595               |
| SNP_P4_161774_18655 | NW_004516655.1 | Scaffold1455 | 18655                   | GG                              | AA              | 1947009597               |
| SNP_P4_161775_18920 | NW_004516655.1 | Scaffold1455 | 18920                   | TT                              | CC              | 1947009599               |
| SNP_P4_161776_19070 | NW_004516655.1 | Scaffold1455 | 19070                   | GG                              | AA              | 1947009601               |
| SNP_P4_161778_21099 | NW_004516655.1 | Scaffold1455 | 21099                   | CC                              | TT              | 1947009603               |
| SNP_P4_161779_21455 | NW_004516655.1 | Scaffold1455 | 21455                   | TT                              | GG              | 1947009605               |
| SNP_P4_161780_21495 | NW_004516655.1 | Scaffold1455 | 21495                   | CC                              | TT              | 1947009607               |
| SNP_P4_161781_21595 | NW_004516655.1 | Scaffold1455 | 21595                   | CC                              | GG              | 1947009609               |
| SNP_P4_161782_21604 | NW_004516655.1 | Scaffold1455 | 21604                   | CC                              | AA              | 1947009611               |
| SNP_P4_161783_21607 | NW_004516655.1 | Scaffold1455 | 21607                   | AA                              | GG              | 1947009613               |
| SNP_P4_161784_21828 | NW_004516655.1 | Scaffold1455 | 21828                   | AA                              | GG              | 1947009615               |
| SNP_P4_161785_41904 | NW_004516655.1 | Scaffold1455 | 41904                   | CC                              | AA              | 1947009617               |
| SNP_P4_161786_42388 | NW_004516655.1 | Scaffold1455 | 42388                   | TT                              | GG              | 1947009619               |
| SNP_P4_161787_1074  | NW_004516656.1 | Scaffold1456 | 1074                    | TT                              | GG              | 1947009621               |
| SNP_P4_161788_1312  | NW_004516656.1 | Scaffold1456 | 1312                    | TT                              | CC              | 1947009623               |
| SNP_P4_161789_19649 | NW_004516657.1 | Scaffold1457 | 19649                   | GG                              | AA              | 1947009625               |
| SNP_P4_161790_19893 | NW_004516657.1 | Scaffold1457 | 19893                   | TT                              | CC              | 1947009627               |
| SNP_P4_161791_19944 | NW_004516657.1 | Scaffold1457 | 19944                   | AA                              | TT              | 1947009629               |
| SNP_P4_161793_25613 | NW_004516657.1 | Scaffold1457 | 25613                   | AA                              | GG              | 1947009631               |
| SNP_P4_161794_25671 | NW_004516657.1 | Scaffold1457 | 25671                   | GG                              | CC              | 1947009633               |
| SNP_P4_161795_25711 | NW_004516657.1 | Scaffold1457 | 25711                   | GG                              | AA              | 1947009635               |
| SNP_P4_161796_25840 | NW_004516657.1 | Scaffold1457 | 25840                   | CC                              | AA              | 1947009637               |
| SNP_P4_161797_25874 | NW_004516657.1 | Scaffold1457 | 25874                   | AA                              | TT              | 1947009640               |
| SNP_P4_161798_34301 | NW_004516657.1 | Scaffold1457 | 34301                   | TT                              | CC              | 1947009642               |
| SNP_P4_161799_50553 | NW_004516657.1 | Scaffold1457 | 50553                   | AA                              | CC              | 1947009644               |
| SNP_P4_161800_51412 | NW_004516657.1 | Scaffold1457 | 51412                   | GG                              | TT              | 1947009646               |
| SNP_P4_161801_51415 | NW_004516657.1 | Scaffold1457 | 51415                   | AA                              | GG              | 1947009648               |
| SNP_P4_161802_51423 | NW_004516657.1 | Scaffold1457 | 51423                   | AA                              | GG              | 1947009650               |
| SNP_P4_161803_66498 | NW_004516657.1 | Scaffold1457 | 66498                   | AA                              | GG              | 1947009652               |
| SNP_P4_161804_66501 | NW_004516657.1 | Scaffold1457 | 66501                   | AA                              | GG              | 1947009654               |
| SNP_P4_161805_66559 | NW_004516657.1 | Scaffold1457 | 66559                   | CC                              | TT              | 1947009657               |
| SNP_P4_161806_68576 | NW_004516657.1 | Scaffold1457 | 68576                   | AA                              | CC              | 1947009659               |
| SNP_P4_161807_68626 | NW_004516657.1 | Scaffold1457 | 68626                   | AA                              | GG              | 1947009661               |
| SNP_P4_161808_68638 | NW_004516657.1 | Scaffold1457 | 68638                   | TT                              | AA              | 1947009663               |
| SNP_P4_161809_68669 | NW_004516657.1 | Scaffold1457 | 68669                   | AA                              | GG              | 1947009665               |
| SNP_P4_161810_935   | NW_004516659.1 | Scaffold1459 | 935                     | TT                              | CC              | 1947009667               |
| SNP_P4_161811_1158  | NW_004516659.1 | Scaffold1459 | 1158                    | GG                              | TT              | 1947009669               |
| SNP_P4_161812_4696  | NW_004516659.1 | Scaffold1459 | 4696                    | TT                              | CC              | 1947009671               |
| SNP_P4_161813_5511  | NW_004516659.1 | Scaffold1459 | 5511                    | GG                              | AA              | 1947009673               |
| SNP_P4_161814_6197  | NW_004516659.1 | Scaffold1459 | 6197                    | TT                              | CC              | 1947009675               |
| SNP_P4_161815_6202  | NW_004516659.1 | Scaffold1459 | 6202                    | CC                              | TT              | 1947009677               |
| SNP_P4_161816_7224  | NW_004516659.1 | Scaffold1459 | 7224                    | CC                              | TT              | 1947009679               |

| SNPs IDs            | Chromosome IDs | Chromosomes  | Physical positions (bp) | CDC Frontier (Reference genome) | (ILWC46 & LPNB) | NCBI SNPdb Accession IDs |
|---------------------|----------------|--------------|-------------------------|---------------------------------|-----------------|--------------------------|
| SNP_P4_161817_933   | NW_004516661.1 | Scaffold1461 | 933                     | TT                              | AA              | 1947009681               |
| SNP_P4_161818_941   | NW_004516661.1 | Scaffold1461 | 941                     | AA                              | GG              | 1947009683               |
| SNP_P4_161819_7629  | NW_004516661.1 | Scaffold1461 | 7629                    | AA                              | GG              | 1947009685               |
| SNP_P4_161820_12290 | NW_004516661.1 | Scaffold1461 | 12290                   | GG                              | TT              | 1947009687               |
| SNP_P4_161821_12292 | NW_004516661.1 | Scaffold1461 | 12292                   | CC                              | AA              | 1947009689               |
| SNP_P4_161822_12330 | NW_004516661.1 | Scaffold1461 | 12330                   | TT                              | GG              | 1947009691               |
| SNP_P4_161823_12342 | NW_004516661.1 | Scaffold1461 | 12342                   | GG                              | TT              | 1947009693               |
| SNP_P4_161824_12390 | NW_004516661.1 | Scaffold1461 | 12390                   | GG                              | CC              | 1947009695               |
| SNP_P4_161825_12567 | NW_004516661.1 | Scaffold1461 | 12567                   | CC                              | TT              | 1947009697               |
| SNP_P4_161826_12905 | NW_004516661.1 | Scaffold1461 | 12905                   | GG                              | AA              | 1947009699               |
| SNP_P4_161827_13019 | NW_004516661.1 | Scaffold1461 | 13019                   | GG                              | AA              | 1947009701               |
| SNP_P4_161829_12085 | NW_004516662.1 | Scaffold1462 | 12085                   | CC                              | TT              | 1947009703               |
| SNP_P4_161830_12719 | NW_004516662.1 | Scaffold1462 | 12719                   | CC                              | TT              | 1947009705               |
| SNP_P4_161831_12891 | NW_004516662.1 | Scaffold1462 | 12891                   | CC                              | TT              | 1947009707               |
| SNP_P4_161832_12893 | NW_004516662.1 | Scaffold1462 | 12893                   | AA                              | TT              | 1947009709               |
| SNP_P4_161833_14748 | NW_004516662.1 | Scaffold1462 | 14748                   | AA                              | GG              | 1947009711               |
| SNP_P4_161834_14749 | NW_004516662.1 | Scaffold1462 | 14749                   | TT                              | CC              | 1947009713               |
| SNP_P4_161835_14944 | NW_004516662.1 | Scaffold1462 | 14944                   | GG                              | AA              | 1947009715               |
| SNP_P4_161836_15068 | NW_004516662.1 | Scaffold1462 | 15068                   | GG                              | TT              | 1947009717               |
| SNP_P4_161837_15228 | NW_004516662.1 | Scaffold1462 | 15228                   | GG                              | AA              | 1947009719               |
| SNP_P4_161838_12717 | NW_004516663.1 | Scaffold1464 | 12717                   | GG                              | AA              | 1947009721               |
| SNP_P4_161839_12753 | NW_004516663.1 | Scaffold1464 | 12753                   | CC                              | TT              | 1947009723               |
| SNP_P4_161840_13064 | NW_004516663.1 | Scaffold1464 | 13064                   | TT                              | CC              | 1947009725               |
| SNP_P4_161841_13079 | NW_004516663.1 | Scaffold1464 | 13079                   | CC                              | TT              | 1947009727               |
| SNP_P4_161842_14984 | NW_004516663.1 | Scaffold1464 | 14984                   | CC                              | TT              | 1947009729               |
| SNP_P4_161843_15004 | NW_004516663.1 | Scaffold1464 | 15004                   | CC                              | AA              | 1947009731               |
| SNP_P4_161844_15032 | NW_004516663.1 | Scaffold1464 | 15032                   | GG                              | AA              | 1947009733               |
| SNP_P4_161845_15118 | NW_004516663.1 | Scaffold1464 | 15118                   | GG                              | TT              | 1947009735               |
| SNP_P4_161846_28029 | NW_004516663.1 | Scaffold1464 | 28029                   | AA                              | GG              | 1947009737               |
| SNP_P4_161847_40391 | NW_004516663.1 | Scaffold1464 | 40391                   | CC                              | AA              | 1947009739               |
| SNP_P4_161848_41851 | NW_004516663.1 | Scaffold1464 | 41851                   | AA                              | GG              | 1947009741               |
| SNP_P4_161849_41861 | NW_004516663.1 | Scaffold1464 | 41861                   | TT                              | AA              | 1947009743               |
| SNP_P4_161850_56861 | NW_004516663.1 | Scaffold1464 | 56861                   | GG                              | AA              | 1947009745               |
| SNP_P4_161851_69835 | NW_004516663.1 | Scaffold1464 | 69835                   | GG                              | AA              | 1947009747               |
| SNP_P4_161852_69873 | NW_004516663.1 | Scaffold1464 | 69873                   | AA                              | CC              | 1947009749               |
| SNP_P4_161853_69894 | NW_004516663.1 | Scaffold1464 | 69894                   | CC                              | GG              | 1947009751               |
| SNP_P4_161854_70111 | NW_004516663.1 | Scaffold1464 | 70111                   | TT                              | CC              | 1947009753               |
| SNP_P4_161855_70236 | NW_004516663.1 | Scaffold1464 | 70236                   | CC                              | TT              | 1947009755               |
| SNP_P4_161856_70240 | NW_004516663.1 | Scaffold1464 | 70240                   | TT                              | AA              | 1947009757               |
| SNP_P4_161858_79188 | NW_004516663.1 | Scaffold1464 | 79188                   | TT                              | GG              | 1947009759               |
| SNP_P4_161859_79212 | NW_004516663.1 | Scaffold1464 | 79212                   | TT                              | CC              | 1947009761               |
| SNP_P4_161860_86362 | NW_004516663.1 | Scaffold1464 | 86362                   | AA                              | GG              | 1947009763               |

| SNPs IDs             | Chromosome IDs | Chromosomes  | Physical positions (bp) | CDC Frontier (Reference genome) | (ILWC46 & LPNB) | NCBI SNPdb Accession IDs |
|----------------------|----------------|--------------|-------------------------|---------------------------------|-----------------|--------------------------|
| SNP_P4_161861_89961  | NW_004516663.1 | Scaffold1464 | 89961                   | TT                              | CC              | 1947009765               |
| SNP_P4_161862_90005  | NW_004516663.1 | Scaffold1464 | 90005                   | AA                              | GG              | 1947009767               |
| SNP_P4_161863_90017  | NW_004516663.1 | Scaffold1464 | 90017                   | GG                              | AA              | 1947009769               |
| SNP_P4_161864_90136  | NW_004516663.1 | Scaffold1464 | 90136                   | CC                              | TT              | 1947009771               |
| SNP_P4_161865_90140  | NW_004516663.1 | Scaffold1464 | 90140                   | GG                              | TT              | 1947009773               |
| SNP_P4_161866_90147  | NW_004516663.1 | Scaffold1464 | 90147                   | TT                              | CC              | 1947009775               |
| SNP_P4_161867_90410  | NW_004516663.1 | Scaffold1464 | 90410                   | AA                              | GG              | 1947009777               |
| SNP_P4_161868_2107   | NW_004516664.1 | Scaffold1465 | 2107                    | TT                              | CC              | 1947009779               |
| SNP_P4_161870_5121   | NW_004516664.1 | Scaffold1465 | 5121                    | GG                              | TT              | 1947009781               |
| SNP_P4_161871_5141   | NW_004516664.1 | Scaffold1465 | 5141                    | TT                              | CC              | 1947009783               |
| SNP_P4_161872_5732   | NW_004516664.1 | Scaffold1465 | 5732                    | AA                              | GG              | 1947009785               |
| SNP_P4_161874_8491   | NW_004516664.1 | Scaffold1465 | 8491                    | TT                              | CC              | 1947009787               |
| SNP_P4_161875_8492   | NW_004516664.1 | Scaffold1465 | 8492                    | TT                              | GG              | 1947009789               |
| SNP_P4_161876_8658   | NW_004516664.1 | Scaffold1465 | 8658                    | CC                              | GG              | 1947009791               |
| SNP_P4_161877_8916   | NW_004516664.1 | Scaffold1465 | 8916                    | CC                              | TT              | 1947009793               |
| SNP_P4_161878_9066   | NW_004516664.1 | Scaffold1465 | 9066                    | TT                              | GG              | 1947009795               |
| SNP_P4_161879_12118  | NW_004516664.1 | Scaffold1465 | 12118                   | GG                              | TT              | 1947009797               |
| SNP_P4_161880_12140  | NW_004516664.1 | Scaffold1465 | 12140                   | AA                              | TT              | 1947009799               |
| SNP_P4_161881_12212  | NW_004516664.1 | Scaffold1465 | 12212                   | AA                              | CC              | 1947009801               |
| SNP_P4_161882_12558  | NW_004516664.1 | Scaffold1465 | 12558                   | TT                              | AA              | 1947009803               |
| SNP_P4_161883_12622  | NW_004516664.1 | Scaffold1465 | 12622                   | CC                              | TT              | 1947009805               |
| SNP_P4_161884_12668  | NW_004516664.1 | Scaffold1465 | 12668                   | GG                              | AA              | 1947009807               |
| SNP_P4_161885_13370  | NW_004516664.1 | Scaffold1465 | 13370                   | AA                              | CC              | 1947009809               |
| SNP_P4_161887_22467  | NW_004516664.1 | Scaffold1465 | 22467                   | TT                              | GG              | 1947009811               |
| SNP_P4_161889_22550  | NW_004516664.1 | Scaffold1465 | 22550                   | CC                              | TT              | 1947009814               |
| SNP_P4_161890_22720  | NW_004516664.1 | Scaffold1465 | 22720                   | CC                              | GG              | 1947009816               |
| SNP_P4_161891_22780  | NW_004516664.1 | Scaffold1465 | 22780                   | AA                              | CC              | 1947009818               |
| SNP_P4_161892_22814  | NW_004516664.1 | Scaffold1465 | 22814                   | AA                              | GG              | 1947009820               |
| SNP_P4_161895_68023  | NW_004516665.1 | Scaffold1466 | 68023                   | TT                              | CC              | 1947009822               |
| SNP_P4_161896_68024  | NW_004516665.1 | Scaffold1466 | 68024                   | CC                              | TT              | 1947009824               |
| SNP_P4_161898_73597  | NW_004516665.1 | Scaffold1466 | 73597                   | CC                              | GG              | 1947009826               |
| SNP_P4_161899_86018  | NW_004516665.1 | Scaffold1466 | 86018                   | CC                              | TT              | 1947009828               |
| SNP_P4_161900_124214 | NW_004516665.1 | Scaffold1466 | 124214                  | CC                              | TT              | 1947009830               |
| SNP_P4_161901_144437 | NW_004516665.1 | Scaffold1466 | 144437                  | AA                              | GG              | 1947009832               |
| SNP_P4_161902_144829 | NW_004516665.1 | Scaffold1466 | 144829                  | CC                              | TT              | 1947009834               |
| SNP_P4_161903_148512 | NW_004516665.1 | Scaffold1466 | 148512                  | GG                              | AA              | 1947009836               |
| SNP_P4_161904_154268 | NW_004516665.1 | Scaffold1466 | 154268                  | CC                              | TT              | 1947009838               |
| SNP_P4_161905_169018 | NW_004516665.1 | Scaffold1466 | 169018                  | TT                              | GG              | 1947009840               |
| SNP_P4_161906_173946 | NW_004516665.1 | Scaffold1466 | 173946                  | TT                              | CC              | 1947009842               |
| SNP_P4_161907_179799 | NW_004516665.1 | Scaffold1466 | 179799                  | CC                              | TT              | 1947009844               |
| SNP_P4_161908_181151 | NW_004516665.1 | Scaffold1466 | 181151                  | AA                              | CC              | 1947009846               |
| SNP_P4_161909_222556 | NW_004516665.1 | Scaffold1466 | 222556                  | TT                              | GG              | 1947009848               |

| SNPs IDs             | Chromosome IDs | Chromosomes  | Physical positions (bp) | CDC Frontier (Reference genome) | (ILWC46 & LPNB) | NCBI SNPdb Accession IDs |
|----------------------|----------------|--------------|-------------------------|---------------------------------|-----------------|--------------------------|
| SNP_P4_161910_239648 | NW_004516665.1 | Scaffold1466 | 239648                  | TT                              | AA              | 1947009850               |
| SNP_P4_161911_241253 | NW_004516665.1 | Scaffold1466 | 241253                  | TT                              | CC              | 1947009852               |
| SNP_P4_161912_241255 | NW_004516665.1 | Scaffold1466 | 241255                  | TT                              | CC              | 1947009854               |
| SNP_P4_161913_241446 | NW_004516665.1 | Scaffold1466 | 241446                  | TT                              | CC              | 1947009856               |
| SNP_P4_161914_241640 | NW_004516665.1 | Scaffold1466 | 241640                  | TT                              | AA              | 1947009858               |
| SNP_P4_161915_241656 | NW_004516665.1 | Scaffold1466 | 241656                  | CC                              | TT              | 1947009860               |
| SNP_P4_161916_241686 | NW_004516665.1 | Scaffold1466 | 241686                  | GG                              | AA              | 1947009862               |
| SNP_P4_161917_241692 | NW_004516665.1 | Scaffold1466 | 241692                  | CC                              | TT              | 1947009864               |
| SNP_P4_161918_252749 | NW_004516665.1 | Scaffold1466 | 252749                  | CC                              | TT              | 1947009866               |
| SNP_P4_161919_265290 | NW_004516665.1 | Scaffold1466 | 265290                  | CC                              | TT              | 1947009868               |
| SNP_P4_161920_281192 | NW_004516665.1 | Scaffold1466 | 281192                  | AA                              | CC              | 1947009870               |
| SNP_P4_161921_282943 | NW_004516665.1 | Scaffold1466 | 282943                  | TT                              | CC              | 1947009872               |
| SNP_P4_161922_284134 | NW_004516665.1 | Scaffold1466 | 284134                  | GG                              | AA              | 1947009874               |
| SNP_P4_161923_284508 | NW_004516665.1 | Scaffold1466 | 284508                  | TT                              | CC              | 1947009876               |
| SNP_P4_161924_284541 | NW_004516665.1 | Scaffold1466 | 284541                  | AA                              | CC              | 1947009878               |
| SNP_P4_161925_300352 | NW_004516665.1 | Scaffold1466 | 300352                  | TT                              | GG              | 1947009880               |
| SNP_P4_161926_311598 | NW_004516665.1 | Scaffold1466 | 311598                  | AA                              | GG              | 1947009882               |
| SNP_P4_161927_311987 | NW_004516665.1 | Scaffold1466 | 311987                  | AA                              | GG              | 1947009884               |
| SNP_P4_161928_312005 | NW_004516665.1 | Scaffold1466 | 312005                  | AA                              | GG              | 1947009886               |
| SNP_P4_161929_314063 | NW_004516665.1 | Scaffold1466 | 314063                  | TT                              | CC              | 1947009888               |
| SNP_P4_161930_314397 | NW_004516665.1 | Scaffold1466 | 314397                  | AA                              | CC              | 1947009890               |
| SNP_P4_161931_314415 | NW_004516665.1 | Scaffold1466 | 314415                  | TT                              | CC              | 1947009892               |
| SNP_P4_161932_323421 | NW_004516665.1 | Scaffold1466 | 323421                  | TT                              | GG              | 1947009894               |
| SNP_P4_161933_328634 | NW_004516665.1 | Scaffold1466 | 328634                  | AA                              | GG              | 1947009896               |
| SNP_P4_161935_358416 | NW_004516665.1 | Scaffold1466 | 358416                  | TT                              | CC              | 1947009898               |
| SNP_P4_161936_358484 | NW_004516665.1 | Scaffold1466 | 358484                  | AA                              | GG              | 1947009900               |
| SNP_P4_161939_22476  | NW_004516666.1 | Scaffold1467 | 22476                   | TT                              | CC              | 1947009902               |
| SNP_P4_161940_22480  | NW_004516666.1 | Scaffold1467 | 22480                   | TT                              | GG              | 1947009904               |
| SNP_P4_161941_22481  | NW_004516666.1 | Scaffold1467 | 22481                   | GG                              | TT              | 1947009906               |
| SNP_P4_161942_26504  | NW_004516666.1 | Scaffold1467 | 26504                   | AA                              | GG              | 1947009908               |
| SNP_P4_161943_46940  | NW_004516666.1 | Scaffold1467 | 46940                   | GG                              | AA              | 1947009910               |
| SNP_P4_161944_71815  | NW_004516666.1 | Scaffold1467 | 71815                   | GG                              | TT              | 1947009912               |
| SNP_P4_161945_71824  | NW_004516666.1 | Scaffold1467 | 71824                   | GG                              | AA              | 1947009914               |
| SNP_P4_161946_71856  | NW_004516666.1 | Scaffold1467 | 71856                   | GG                              | CC              | 1947009915               |
| SNP_P4_161947_71873  | NW_004516666.1 | Scaffold1467 | 71873                   | CC                              | TT              | 1947009917               |
| SNP_P4_161948_71875  | NW_004516666.1 | Scaffold1467 | 71875                   | AA                              | CC              | 1947009919               |
| SNP_P4_161949_91880  | NW_004516666.1 | Scaffold1467 | 91880                   | CC                              | TT              | 1947009921               |
| SNP_P4_161950_92039  | NW_004516666.1 | Scaffold1467 | 92039                   | GG                              | AA              | 1947009923               |
| SNP_P4_161951_92040  | NW_004516666.1 | Scaffold1467 | 92040                   | TT                              | CC              | 1947009925               |
| SNP_P4_161952_92224  | NW_004516666.1 | Scaffold1467 | 92224                   | GG                              | AA              | 1947009927               |
| SNP_P4_161953_92227  | NW_004516666.1 | Scaffold1467 | 92227                   | GG                              | CC              | 1947009929               |
| SNP_P4_161954_92228  | NW_004516666.1 | Scaffold1467 | 92228                   | CC                              | AA              | 1947009931               |

| SNPs IDs             | Chromosome IDs | Chromosomes  | Physical positions (bp) | CDC Frontier (Reference genome) | (ILWC46 & LPNB) | NCBI SNPdb Accession IDs |
|----------------------|----------------|--------------|-------------------------|---------------------------------|-----------------|--------------------------|
| SNP_P4_161956_92258  | NW_004516666.1 | Scaffold1467 | 92258                   | AA                              | GG              | 1947009933               |
| SNP_P4_161958_141691 | NW_004516666.1 | Scaffold1467 | 141691                  | GG                              | TT              | 1947009935               |
| SNP_P4_161959_141742 | NW_004516666.1 | Scaffold1467 | 141742                  | TT                              | CC              | 1947009937               |
| SNP_P4_161960_143339 | NW_004516666.1 | Scaffold1467 | 143339                  | TT                              | CC              | 1947009939               |
| SNP_P4_161961_143350 | NW_004516666.1 | Scaffold1467 | 143350                  | AA                              | GG              | 1947009940               |
| SNP_P4_161962_177189 | NW_004516666.1 | Scaffold1467 | 177189                  | AA                              | CC              | 1947009942               |
| SNP_P4_161963_202478 | NW_004516666.1 | Scaffold1467 | 202478                  | CC                              | TT              | 1947009944               |
| SNP_P4_161964_202563 | NW_004516666.1 | Scaffold1467 | 202563                  | GG                              | AA              | 1947009946               |
| SNP_P4_161965_202584 | NW_004516666.1 | Scaffold1467 | 202584                  | CC                              | TT              | 1947009948               |
| SNP_P4_161966_206277 | NW_004516666.1 | Scaffold1467 | 206277                  | AA                              | GG              | 1947009950               |
| SNP_P4_161967_206307 | NW_004516666.1 | Scaffold1467 | 206307                  | GG                              | AA              | 1947009952               |
| SNP_P4_161968_3306   | NW_004516667.1 | Scaffold1468 | 3306                    | TT                              | GG              | 1947009954               |
| SNP_P4_161969_3549   | NW_004516667.1 | Scaffold1468 | 3549                    | GG                              | AA              | 1947009956               |
| SNP_P4_161970_3550   | NW_004516667.1 | Scaffold1468 | 3550                    | TT                              | AA              | 1947009958               |
| SNP_P4_161971_3734   | NW_004516667.1 | Scaffold1468 | 3734                    | GG                              | CC              | 1947009960               |
| SNP_P4_161972_4037   | NW_004516667.1 | Scaffold1468 | 4037                    | GG                              | TT              | 1947009962               |
| SNP_P4_161973_11404  | NW_004516667.1 | Scaffold1468 | 11404                   | CC                              | TT              | 1947009964               |
| SNP_P4_161974_11753  | NW_004516667.1 | Scaffold1468 | 11753                   | AA                              | GG              | 1947009966               |
| SNP_P4_161975_858    | NW_004516669.1 | Scaffold1472 | 858                     | CC                              | TT              | 1947009968               |
| SNP_P4_161976_873    | NW_004516669.1 | Scaffold1472 | 873                     | TT                              | AA              | 1947009970               |
| SNP_P4_161977_875    | NW_004516669.1 | Scaffold1472 | 875                     | GG                              | TT              | 1947009972               |
| SNP_P4_161978_2253   | NW_004516669.1 | Scaffold1472 | 2253                    | TT                              | CC              | 1947009974               |
| SNP_P4_161979_2063   | NW_004516670.1 | Scaffold1473 | 2063                    | AA                              | GG              | 1947009976               |
| SNP_P4_161980_2230   | NW_004516670.1 | Scaffold1473 | 2230                    | CC                              | TT              | 1947009978               |
| SNP_P4_161981_2347   | NW_004516670.1 | Scaffold1473 | 2347                    | TT                              | GG              | 1947009980               |
| SNP_P4_161982_2590   | NW_004516670.1 | Scaffold1473 | 2590                    | TT                              | AA              | 1947009982               |
| SNP_P4_161983_2737   | NW_004516670.1 | Scaffold1473 | 2737                    | AA                              | GG              | 1947009984               |
| SNP_P4_161984_2924   | NW_004516670.1 | Scaffold1473 | 2924                    | AA                              | GG              | 1947009986               |
| SNP_P4_161985_3047   | NW_004516670.1 | Scaffold1473 | 3047                    | TT                              | CC              | 1947009988               |
| SNP_P4_161986_3060   | NW_004516670.1 | Scaffold1473 | 3060                    | GG                              | AA              | 1947009990               |
| SNP_P4_161987_3404   | NW_004516670.1 | Scaffold1473 | 3404                    | TT                              | CC              | 1947009992               |
| SNP_P4_161988_4549   | NW_004516670.1 | Scaffold1473 | 4549                    | GG                              | TT              | 1947009994               |
| SNP_P4_161989_42360  | NW_004516671.1 | Scaffold1475 | 42360                   | CC                              | GG              | 1947009996               |
| SNP_P4_161990_42497  | NW_004516671.1 | Scaffold1475 | 42497                   | TT                              | CC              | 1947009998               |
| SNP_P4_161991_42498  | NW_004516671.1 | Scaffold1475 | 42498                   | CC                              | AA              | 1947010000               |
| SNP_P4_161992_42531  | NW_004516671.1 | Scaffold1475 | 42531                   | CC                              | AA              | 1947010002               |
| SNP_P4_161993_42534  | NW_004516671.1 | Scaffold1475 | 42534                   | CC                              | AA              | 1947010004               |
| SNP_P4_161994_56245  | NW_004516671.1 | Scaffold1475 | 56245                   | AA                              | TT              | 1947010006               |
| SNP_P4_161995_56280  | NW_004516671.1 | Scaffold1475 | 56280                   | CC                              | TT              | 1947010008               |
| SNP_P4_161996_57593  | NW_004516671.1 | Scaffold1475 | 57593                   | TT                              | GG              | 1947010010               |
| SNP_P4_161997_69193  | NW_004516671.1 | Scaffold1475 | 69193                   | GG                              | AA              | 1947010012               |
| SNP_P4_161998_69204  | NW_004516671.1 | Scaffold1475 | 69204                   | AA                              | GG              | 1947010014               |

| SNPs IDs            | Chromosome IDs | Chromosomes  | Physical positions (bp) | CDC Frontier (Reference genome) | (ILWC46 & LPNB) | NCBI SNPdb Accession IDs |
|---------------------|----------------|--------------|-------------------------|---------------------------------|-----------------|--------------------------|
| SNP_P4_161999_69407 | NW_004516671.1 | Scaffold1475 | 69407                   | CC                              | TT              | 1947010016               |
| SNP_P4_162000_73572 | NW_004516671.1 | Scaffold1475 | 73572                   | GG                              | TT              | 1947010018               |
| SNP_P4_162001_73582 | NW_004516671.1 | Scaffold1475 | 73582                   | TT                              | AA              | 1947010020               |
| SNP_P4_162002_73698 | NW_004516671.1 | Scaffold1475 | 73698                   | GG                              | AA              | 1947010022               |
| SNP_P4_162003_81549 | NW_004516671.1 | Scaffold1475 | 81549                   | TT                              | GG              | 1947010024               |
| SNP_P4_162005_99238 | NW_004516671.1 | Scaffold1475 | 99238                   | AA                              | GG              | 1947010026               |
| SNP_P4_162006_99255 | NW_004516671.1 | Scaffold1475 | 99255                   | AA                              | CC              | 1947010028               |
| SNP_P4_162007_99314 | NW_004516671.1 | Scaffold1475 | 99314                   | AA                              | CC              | 1947010030               |
| SNP_P4_162009_99336 | NW_004516671.1 | Scaffold1475 | 99336                   | TT                              | GG              | 1947010032               |
| SNP_P4_162010_99342 | NW_004516671.1 | Scaffold1475 | 99342                   | TT                              | CC              | 1947010034               |
| SNP_P4_162011_99366 | NW_004516671.1 | Scaffold1475 | 99366                   | AA                              | GG              | 1947010036               |
| SNP_P4_162012_99384 | NW_004516671.1 | Scaffold1475 | 99384                   | CC                              | TT              | 1947010038               |
| SNP_P4_162013_99630 | NW_004516671.1 | Scaffold1475 | 99630                   | AA                              | GG              | 1947010040               |
| SNP_P4_162014_99632 | NW_004516671.1 | Scaffold1475 | 99632                   | TT                              | CC              | 1947010042               |
| SNP_P4_162015_99780 | NW_004516671.1 | Scaffold1475 | 99780                   | CC                              | GG              | 1947010044               |
| SNP_P4_162016_99788 | NW_004516671.1 | Scaffold1475 | 99788                   | CC                              | AA              | 1947010046               |
| SNP_P4_162017_99809 | NW_004516671.1 | Scaffold1475 | 99809                   | AA                              | GG              | 1947010048               |
| SNP_P4_162018_99810 | NW_004516671.1 | Scaffold1475 | 99810                   | GG                              | AA              | 1947010050               |
| SNP_P4_162019_99825 | NW_004516671.1 | Scaffold1475 | 99825                   | TT                              | CC              | 1947010052               |
| SNP_P4_162020_99841 | NW_004516671.1 | Scaffold1475 | 99841                   | TT                              | CC              | 1947010054               |
| SNP_P4_162022_848   | NW_004516673.1 | Scaffold1477 | 848                     | TT                              | CC              | 1947010056               |
| SNP_P4_162023_899   | NW_004516673.1 | Scaffold1477 | 899                     | TT                              | CC              | 1947010058               |
| SNP_P4_162024_831   | NW_004516674.1 | Scaffold1478 | 831                     | TT                              | CC              | 1947010060               |
| SNP_P4_162025_6734  | NW_004516674.1 | Scaffold1478 | 6734                    | TT                              | AA              | 1947010062               |
| SNP_P4_162026_8983  | NW_004516674.1 | Scaffold1478 | 8983                    | TT                              | GG              | 1947010064               |
| SNP_P4_162027_9033  | NW_004516674.1 | Scaffold1478 | 9033                    | TT                              | CC              | 1947010066               |
| SNP_P4_162028_9182  | NW_004516674.1 | Scaffold1478 | 9182                    | TT                              | CC              | 1947010068               |
| SNP_P4_162029_9187  | NW_004516674.1 | Scaffold1478 | 9187                    | TT                              | CC              | 1947010070               |
| SNP_P4_162030_9302  | NW_004516674.1 | Scaffold1478 | 9302                    | AA                              | GG              | 1947010072               |
| SNP_P4_162031_11224 | NW_004516674.1 | Scaffold1478 | 11224                   | TT                              | GG              | 1947010075               |
| SNP_P4_162032_21378 | NW_004516674.1 | Scaffold1478 | 21378                   | AA                              | TT              | 1947010077               |
| SNP_P4_162033_23623 | NW_004516674.1 | Scaffold1478 | 23623                   | AA                              | GG              | 1947010079               |
| SNP_P4_162034_26248 | NW_004516674.1 | Scaffold1478 | 26248                   | TT                              | CC              | 1947010081               |
| SNP_P4_162035_30176 | NW_004516674.1 | Scaffold1478 | 30176                   | GG                              | AA              | 1947010083               |
| SNP_P4_162036_30178 | NW_004516674.1 | Scaffold1478 | 30178                   | CC                              | AA              | 1947010085               |
| SNP_P4_162037_30220 | NW_004516674.1 | Scaffold1478 | 30220                   | TT                              | CC              | 1947010087               |
| SNP_P4_162038_30510 | NW_004516674.1 | Scaffold1478 | 30510                   | CC                              | TT              | 1947010089               |
| SNP_P4_162039_38673 | NW_004516674.1 | Scaffold1478 | 38673                   | TT                              | GG              | 1947010091               |
| SNP_P4_162040_38691 | NW_004516674.1 | Scaffold1478 | 38691                   | AA                              | GG              | 1947010093               |
| SNP_P4_162041_43036 | NW_004516674.1 | Scaffold1478 | 43036                   | TT                              | GG              | 1947010095               |
| SNP_P4_162042_45183 | NW_004516674.1 | Scaffold1478 | 45183                   | TT                              | CC              | 1947010097               |
| SNP_P4_162043_58780 | NW_004516674.1 | Scaffold1478 | 58780                   | CC                              | TT              | 1947010099               |

| SNPs IDs            | Chromosome IDs | Chromosomes  | Physical positions (bp) | CDC Frontier (Reference genome) | (ILWC46 & LPNB) | NCBI SNPdb Accession IDs |
|---------------------|----------------|--------------|-------------------------|---------------------------------|-----------------|--------------------------|
| SNP_P4_162044_64265 | NW_004516674.1 | Scaffold1478 | 64265                   | AA                              | CC              | 1947010101               |
| SNP_P4_162045_71515 | NW_004516674.1 | Scaffold1478 | 71515                   | TT                              | CC              | 1947010103               |
| SNP_P4_162046_71711 | NW_004516674.1 | Scaffold1478 | 71711                   | AA                              | TT              | 1947010105               |
| SNP_P4_162047_73500 | NW_004516674.1 | Scaffold1478 | 73500                   | CC                              | AA              | 1947010107               |
| SNP_P4_162048_73537 | NW_004516674.1 | Scaffold1478 | 73537                   | TT                              | AA              | 1947010109               |
| SNP_P4_162049_73539 | NW_004516674.1 | Scaffold1478 | 73539                   | AA                              | CC              | 1947010111               |
| SNP_P4_162050_73581 | NW_004516674.1 | Scaffold1478 | 73581                   | GG                              | AA              | 1947010113               |
| SNP_P4_162051_73605 | NW_004516674.1 | Scaffold1478 | 73605                   | GG                              | AA              | 1947010115               |
| SNP_P4_162052_73627 | NW_004516674.1 | Scaffold1478 | 73627                   | CC                              | AA              | 1947010117               |
| SNP_P4_162053_73629 | NW_004516674.1 | Scaffold1478 | 73629                   | TT                              | CC              | 1947010119               |
| SNP_P4_162054_73635 | NW_004516674.1 | Scaffold1478 | 73635                   | CC                              | TT              | 1947010121               |
| SNP_P4_162055_77349 | NW_004516674.1 | Scaffold1478 | 77349                   | AA                              | CC              | 1947010123               |
| SNP_P4_162056_88063 | NW_004516674.1 | Scaffold1478 | 88063                   | TT                              | CC              | 1947010125               |
| SNP_P4_162057_88071 | NW_004516674.1 | Scaffold1478 | 88071                   | CC                              | AA              | 1947010127               |
| SNP_P4_162058_88413 | NW_004516674.1 | Scaffold1478 | 88413                   | TT                              | CC              | 1947010129               |
| SNP_P4_162059_90772 | NW_004516674.1 | Scaffold1478 | 90772                   | CC                              | TT              | 1947010131               |
| SNP_P4_162060_92172 | NW_004516674.1 | Scaffold1478 | 92172                   | AA                              | GG              | 1947010133               |
| SNP_P4_162061_92265 | NW_004516674.1 | Scaffold1478 | 92265                   | TT                              | CC              | 1947010135               |
| SNP_P4_162062_5716  | NW_004516678.1 | Scaffold1483 | 5716                    | AA                              | GG              | 1947010137               |
| SNP_P4_162063_5748  | NW_004516678.1 | Scaffold1483 | 5748                    | TT                              | CC              | 1947010139               |
| SNP_P4_162064_5811  | NW_004516678.1 | Scaffold1483 | 5811                    | AA                              | CC              | 1947010141               |
| SNP_P4_162065_5984  | NW_004516678.1 | Scaffold1483 | 5984                    | GG                              | AA              | 1947010143               |
| SNP_P4_162066_6000  | NW_004516678.1 | Scaffold1483 | 6000                    | CC                              | TT              | 1947010145               |
| SNP_P4_162067_6016  | NW_004516678.1 | Scaffold1483 | 6016                    | GG                              | TT              | 1947010147               |
| SNP_P4_162068_6017  | NW_004516678.1 | Scaffold1483 | 6017                    | GG                              | AA              | 1947010149               |
| SNP_P4_162069_6030  | NW_004516678.1 | Scaffold1483 | 6030                    | CC                              | TT              | 1947010151               |
| SNP_P4_162070_6309  | NW_004516678.1 | Scaffold1483 | 6309                    | GG                              | CC              | 1947010153               |
| SNP_P4_162071_6377  | NW_004516678.1 | Scaffold1483 | 6377                    | AA                              | GG              | 1947010155               |
| SNP_P4_162072_6399  | NW_004516678.1 | Scaffold1483 | 6399                    | GG                              | CC              | 1947010157               |
| SNP_P4_162073_6411  | NW_004516678.1 | Scaffold1483 | 6411                    | CC                              | AA              | 1947010159               |
| SNP_P4_162075_6533  | NW_004516678.1 | Scaffold1483 | 6533                    | CC                              | TT              | 1947010161               |
| SNP_P4_162076_6536  | NW_004516678.1 | Scaffold1483 | 6536                    | GG                              | AA              | 1947010163               |
| SNP_P4_162077_6564  | NW_004516678.1 | Scaffold1483 | 6564                    | GG                              | CC              | 1947010165               |
| SNP_P4_162078_6606  | NW_004516678.1 | Scaffold1483 | 6606                    | GG                              | AA              | 1947010167               |
| SNP_P4_162079_6618  | NW_004516678.1 | Scaffold1483 | 6618                    | TT                              | GG              | 1947010169               |
| SNP_P4_162080_6665  | NW_004516678.1 | Scaffold1483 | 6665                    | AA                              | CC              | 1947010171               |
| SNP_P4_162081_6713  | NW_004516678.1 | Scaffold1483 | 6713                    | CC                              | TT              | 1947010173               |
| SNP_P4_162082_6764  | NW_004516678.1 | Scaffold1483 | 6764                    | TT                              | CC              | 1947010175               |
| SNP_P4_162083_6772  | NW_004516678.1 | Scaffold1483 | 6772                    | CC                              | TT              | 1947010177               |
| SNP_P4_162084_6809  | NW_004516678.1 | Scaffold1483 | 6809                    | TT                              | CC              | 1947010179               |
| SNP_P4_162085_6814  | NW_004516678.1 | Scaffold1483 | 6814                    | TT                              | CC              | 1947010181               |
| SNP_P4_162086_6817  | NW_004516678.1 | Scaffold1483 | 6817                    | AA                              | TT              | 1947010183               |

| SNPs IDs            | Chromosome IDs | Chromosomes  | Physical positions (bp) | CDC Frontier (Reference genome) | (ILWC46 & LPNB) | NCBI SNPdb Accession IDs |
|---------------------|----------------|--------------|-------------------------|---------------------------------|-----------------|--------------------------|
| SNP_P4_162088_6891  | NW_004516678.1 | Scaffold1483 | 6891                    | TT                              | GG              | 1947010185               |
| SNP_P4_162089_6901  | NW_004516678.1 | Scaffold1483 | 6901                    | AA                              | GG              | 1947010187               |
| SNP_P4_162090_6917  | NW_004516678.1 | Scaffold1483 | 6917                    | AA                              | CC              | 1947010189               |
| SNP_P4_162091_6930  | NW_004516678.1 | Scaffold1483 | 6930                    | GG                              | CC              | 1947010191               |
| SNP_P4_162092_7082  | NW_004516678.1 | Scaffold1483 | 7082                    | GG                              | CC              | 1947010193               |
| SNP_P4_162093_18100 | NW_004516678.1 | Scaffold1483 | 18100                   | GG                              | AA              | 1947010195               |
| SNP_P4_162094_18896 | NW_004516678.1 | Scaffold1483 | 18896                   | AA                              | TT              | 1947010197               |
| SNP_P4_162095_24578 | NW_004516678.1 | Scaffold1483 | 24578                   | AA                              | GG              | 1947010200               |
| SNP_P4_162096_28011 | NW_004516678.1 | Scaffold1483 | 28011                   | CC                              | TT              | 1947010202               |
| SNP_P4_162097_31558 | NW_004516678.1 | Scaffold1483 | 31558                   | AA                              | TT              | 1947010204               |
| SNP_P4_162099_34496 | NW_004516678.1 | Scaffold1483 | 34496                   | TT                              | CC              | 1947010206               |
| SNP_P4_162100_50606 | NW_004516678.1 | Scaffold1483 | 50606                   | TT                              | CC              | 1947010208               |
| SNP_P4_162101_50653 | NW_004516678.1 | Scaffold1483 | 50653                   | AA                              | CC              | 1947010210               |
| SNP_P4_162102_54769 | NW_004516678.1 | Scaffold1483 | 54769                   | TT                              | CC              | 1947010212               |
| SNP_P4_162103_54800 | NW_004516678.1 | Scaffold1483 | 54800                   | AA                              | TT              | 1947010214               |
| SNP_P4_162104_54848 | NW_004516678.1 | Scaffold1483 | 54848                   | CC                              | TT              | 1947010216               |
| SNP_P4_162106_55108 | NW_004516678.1 | Scaffold1483 | 55108                   | AA                              | GG              | 1947010218               |
| SNP_P4_162107_55114 | NW_004516678.1 | Scaffold1483 | 55114                   | GG                              | TT              | 1947010220               |
| SNP_P4_162108_55117 | NW_004516678.1 | Scaffold1483 | 55117                   | TT                              | GG              | 1947010222               |
| SNP_P4_162109_55122 | NW_004516678.1 | Scaffold1483 | 55122                   | TT                              | CC              | 1947010224               |
| SNP_P4_162110_55403 | NW_004516678.1 | Scaffold1483 | 55403                   | CC                              | TT              | 1947010226               |
| SNP_P4_162111_55520 | NW_004516678.1 | Scaffold1483 | 55520                   | GG                              | AA              | 1947010228               |
| SNP_P4_162113_56575 | NW_004516678.1 | Scaffold1483 | 56575                   | AA                              | GG              | 1947010230               |
| SNP_P4_162114_56609 | NW_004516678.1 | Scaffold1483 | 56609                   | CC                              | AA              | 1947010232               |
| SNP_P4_162115_56849 | NW_004516678.1 | Scaffold1483 | 56849                   | GG                              | AA              | 1947010234               |
| SNP_P4_162116_56860 | NW_004516678.1 | Scaffold1483 | 56860                   | AA                              | CC              | 1947010236               |
| SNP_P4_162117_56900 | NW_004516678.1 | Scaffold1483 | 56900                   | GG                              | AA              | 1947010238               |
| SNP_P4_162118_56901 | NW_004516678.1 | Scaffold1483 | 56901                   | GG                              | AA              | 1947010240               |
| SNP_P4_162119_57081 | NW_004516678.1 | Scaffold1483 | 57081                   | AA                              | CC              | 1947010242               |
| SNP_P4_162120_57271 | NW_004516678.1 | Scaffold1483 | 57271                   | GG                              | AA              | 1947010244               |
| SNP_P4_162121_57313 | NW_004516678.1 | Scaffold1483 | 57313                   | GG                              | CC              | 1947010246               |
| SNP_P4_162122_69213 | NW_004516678.1 | Scaffold1483 | 69213                   | AA                              | GG              | 1947010248               |
| SNP_P4_162123_69313 | NW_004516678.1 | Scaffold1483 | 69313                   | TT                              | AA              | 1947010250               |
| SNP_P4_162124_69768 | NW_004516678.1 | Scaffold1483 | 69768                   | AA                              | CC              | 1947010252               |
| SNP_P4_162125_69873 | NW_004516678.1 | Scaffold1483 | 69873                   | GG                              | CC              | 1947010254               |
| SNP_P4_162126_69969 | NW_004516678.1 | Scaffold1483 | 69969                   | GG                              | AA              | 1947010256               |
| SNP_P4_162127_70085 | NW_004516678.1 | Scaffold1483 | 70085                   | AA                              | CC              | 1947010258               |
| SNP_P4_162128_70092 | NW_004516678.1 | Scaffold1483 | 70092                   | CC                              | TT              | 1947010260               |
| SNP_P4_162129_70115 | NW_004516678.1 | Scaffold1483 | 70115                   | CC                              | AA              | 1947010262               |
| SNP_P4_162130_70136 | NW_004516678.1 | Scaffold1483 | 70136                   | CC                              | GG              | 1947010264               |
| SNP_P4_162131_70138 | NW_004516678.1 | Scaffold1483 | 70138                   | AA                              | GG              | 1947010266               |
| SNP_P4_162132_70142 | NW_004516678.1 | Scaffold1483 | 70142                   | AA                              | TT              | 1947010268               |



| SNPs IDs            | Chromosome IDs | Chromosomes  | Physical positions (bp) | CDC Frontier (Reference genome) | (ILWC46 & LPNB) | NCBI SNPdb Accession IDs |
|---------------------|----------------|--------------|-------------------------|---------------------------------|-----------------|--------------------------|
| SNP_P4_162133_70146 | NW_004516678.1 | Scaffold1483 | 70146                   | GG                              | AA              | 1947010270               |
| SNP_P4_162134_70159 | NW_004516678.1 | Scaffold1483 | 70159                   | AA                              | GG              | 1947010272               |
| SNP_P4_162135_70162 | NW_004516678.1 | Scaffold1483 | 70162                   | TT                              | GG              | 1947010274               |
| SNP_P4_162136_70168 | NW_004516678.1 | Scaffold1483 | 70168                   | AA                              | GG              | 1947010276               |
| SNP_P4_162137_70221 | NW_004516678.1 | Scaffold1483 | 70221                   | GG                              | AA              | 1947010278               |
| SNP_P4_162138_72960 | NW_004516678.1 | Scaffold1483 | 72960                   | TT                              | GG              | 1947010280               |
| SNP_P4_162140_240   | NW_004516680.1 | Scaffold1486 | 240                     | TT                              | AA              | 1947010282               |
| SNP_P4_162141_474   | NW_004516680.1 | Scaffold1486 | 474                     | TT                              | AA              | 1947010284               |
| SNP_P4_162142_2876  | NW_004516680.1 | Scaffold1486 | 2876                    | TT                              | GG              | 1947010286               |
| SNP_P4_162143_64    | NW_004516681.1 | Scaffold1488 | 64                      | GG                              | CC              | 1947010288               |
| SNP_P4_162144_85    | NW_004516681.1 | Scaffold1488 | 85                      | AA                              | CC              | 1947010290               |
| SNP_P4_162145_89    | NW_004516681.1 | Scaffold1488 | 89                      | GG                              | AA              | 1947010292               |
| SNP_P4_162146_325   | NW_004516681.1 | Scaffold1488 | 325                     | GG                              | TT              | 1947010294               |
| SNP_P4_162147_341   | NW_004516681.1 | Scaffold1488 | 341                     | AA                              | CC              | 1947010296               |
| SNP_P4_162148_512   | NW_004516681.1 | Scaffold1488 | 512                     | AA                              | TT              | 1947010298               |
| SNP_P4_162150_9051  | NW_004516681.1 | Scaffold1488 | 9051                    | AA                              | CC              | 1947010300               |
| SNP_P4_162151_9527  | NW_004516681.1 | Scaffold1488 | 9527                    | TT                              | CC              | 1947010302               |
| SNP_P4_162152_650   | NW_004516683.1 | Scaffold1490 | 650                     | GG                              | CC              | 1947010304               |
| SNP_P4_162153_668   | NW_004516683.1 | Scaffold1490 | 668                     | GG                              | CC              | 1947010306               |
| SNP_P4_162154_687   | NW_004516683.1 | Scaffold1490 | 687                     | TT                              | AA              | 1947010308               |
| SNP_P4_162155_702   | NW_004516683.1 | Scaffold1490 | 702                     | CC                              | AA              | 1947010310               |
| SNP_P4_162156_730   | NW_004516683.1 | Scaffold1490 | 730                     | CC                              | TT              | 1947010312               |
| SNP_P4_162157_766   | NW_004516683.1 | Scaffold1490 | 766                     | GG                              | TT              | 1947010314               |
| SNP_P4_162158_938   | NW_004516683.1 | Scaffold1490 | 938                     | CC                              | AA              | 1947010316               |
| SNP_P4_162159_968   | NW_004516683.1 | Scaffold1490 | 968                     | GG                              | AA              | 1947010318               |
| SNP_P4_162160_973   | NW_004516683.1 | Scaffold1490 | 973                     | CC                              | AA              | 1947010320               |
| SNP_P4_162161_974   | NW_004516683.1 | Scaffold1490 | 974                     | GG                              | AA              | 1947010322               |
| SNP_P4_162162_1009  | NW_004516683.1 | Scaffold1490 | 1009                    | GG                              | AA              | 1947010324               |
| SNP_P4_162163_1048  | NW_004516683.1 | Scaffold1490 | 1048                    | TT                              | CC              | 1947010326               |
| SNP_P4_162164_1141  | NW_004516683.1 | Scaffold1490 | 1141                    | AA                              | CC              | 1947010328               |
| SNP_P4_162165_1151  | NW_004516683.1 | Scaffold1490 | 1151                    | AA                              | GG              | 1947010330               |
| SNP_P4_162166_1158  | NW_004516683.1 | Scaffold1490 | 1158                    | GG                              | AA              | 1947010332               |
| SNP_P4_162167_1229  | NW_004516683.1 | Scaffold1490 | 1229                    | GG                              | CC              | 1947010334               |
| SNP_P4_162169_1296  | NW_004516683.1 | Scaffold1490 | 1296                    | TT                              | CC              | 1947010336               |
| SNP_P4_162170_1431  | NW_004516683.1 | Scaffold1490 | 1431                    | AA                              | TT              | 1947010338               |
| SNP_P4_162171_1450  | NW_004516683.1 | Scaffold1490 | 1450                    | AA                              | GG              | 1947010340               |
| SNP_P4_162172_1461  | NW_004516683.1 | Scaffold1490 | 1461                    | GG                              | AA              | 1947010342               |
| SNP_P4_162173_2442  | NW_004516683.1 | Scaffold1490 | 2442                    | AA                              | GG              | 1947010344               |
| SNP_P4_162174_12112 | NW_004516683.1 | Scaffold1490 | 12112                   | GG                              | AA              | 1947010346               |
| SNP_P4_162175_12154 | NW_004516683.1 | Scaffold1490 | 12154                   | AA                              | TT              | 1947010348               |
| SNP_P4_162176_12176 | NW_004516683.1 | Scaffold1490 | 12176                   | TT                              | GG              | 1947010350               |
| SNP_P4_162177_12177 | NW_004516683.1 | Scaffold1490 | 12177                   | TT                              | AA              | 1947010352               |

| SNPs IDs            | Chromosome IDs | Chromosomes  | Physical positions (bp) | CDC Frontier (Reference genome) | (ILWC46 & LPNB) | NCBI SNPdb Accession IDs |
|---------------------|----------------|--------------|-------------------------|---------------------------------|-----------------|--------------------------|
| SNP_P4_162178_12188 | NW_004516683.1 | Scaffold1490 | 12188                   | AA                              | CC              | 1947010354               |
| SNP_P4_162179_12196 | NW_004516683.1 | Scaffold1490 | 12196                   | GG                              | TT              | 1947010356               |
| SNP_P4_162180_12198 | NW_004516683.1 | Scaffold1490 | 12198                   | AA                              | CC              | 1947010358               |
| SNP_P4_162181_14254 | NW_004516683.1 | Scaffold1490 | 14254                   | AA                              | GG              | 1947010360               |
| SNP_P4_162182_14257 | NW_004516683.1 | Scaffold1490 | 14257                   | AA                              | CC              | 1947010362               |
| SNP_P4_162183_14266 | NW_004516683.1 | Scaffold1490 | 14266                   | GG                              | AA              | 1947010364               |
| SNP_P4_162184_14288 | NW_004516683.1 | Scaffold1490 | 14288                   | AA                              | CC              | 1947010366               |
| SNP_P4_162185_14297 | NW_004516683.1 | Scaffold1490 | 14297                   | AA                              | GG              | 1947010368               |
| SNP_P4_162186_14310 | NW_004516683.1 | Scaffold1490 | 14310                   | TT                              | AA              | 1947010369               |
| SNP_P4_162187_16398 | NW_004516683.1 | Scaffold1490 | 16398                   | AA                              | CC              | 1947010371               |
| SNP_P4_162188_62551 | NW_004516683.1 | Scaffold1490 | 62551                   | GG                              | TT              | 1947010373               |
| SNP_P4_162189_62600 | NW_004516683.1 | Scaffold1490 | 62600                   | AA                              | GG              | 1947010375               |
| SNP_P4_162190_62605 | NW_004516683.1 | Scaffold1490 | 62605                   | AA                              | GG              | 1947010377               |
| SNP_P4_162191_73031 | NW_004516683.1 | Scaffold1490 | 73031                   | TT                              | AA              | 1947010379               |
| SNP_P4_162192_73729 | NW_004516683.1 | Scaffold1490 | 73729                   | TT                              | CC              | 1947010381               |
| SNP_P4_162193_73801 | NW_004516683.1 | Scaffold1490 | 73801                   | TT                              | CC              | 1947010383               |
| SNP_P4_162194_73956 | NW_004516683.1 | Scaffold1490 | 73956                   | AA                              | GG              | 1947010385               |
| SNP_P4_162195_73971 | NW_004516683.1 | Scaffold1490 | 73971                   | GG                              | AA              | 1947010387               |
| SNP_P4_162196_74046 | NW_004516683.1 | Scaffold1490 | 74046                   | TT                              | GG              | 1947010389               |
| SNP_P4_162197_74168 | NW_004516683.1 | Scaffold1490 | 74168                   | AA                              | GG              | 1947010391               |
| SNP_P4_162198_74169 | NW_004516683.1 | Scaffold1490 | 74169                   | AA                              | CC              | 1947010393               |
| SNP_P4_162199_74241 | NW_004516683.1 | Scaffold1490 | 74241                   | AA                              | GG              | 1947010395               |
| SNP_P4_162201_74264 | NW_004516683.1 | Scaffold1490 | 74264                   | GG                              | AA              | 1947010397               |
| SNP_P4_162202_74276 | NW_004516683.1 | Scaffold1490 | 74276                   | GG                              | AA              | 1947010399               |
| SNP_P4_162203_74282 | NW_004516683.1 | Scaffold1490 | 74282                   | AA                              | GG              | 1947010401               |
| SNP_P4_162204_74312 | NW_004516683.1 | Scaffold1490 | 74312                   | TT                              | AA              | 1947010403               |
| SNP_P4_162205_74318 | NW_004516683.1 | Scaffold1490 | 74318                   | TT                              | CC              | 1947010405               |
| SNP_P4_162206_74360 | NW_004516683.1 | Scaffold1490 | 74360                   | TT                              | CC              | 1947010407               |
| SNP_P4_162207_74649 | NW_004516683.1 | Scaffold1490 | 74649                   | AA                              | GG              | 1947010409               |
| SNP_P4_162208_78030 | NW_004516683.1 | Scaffold1490 | 78030                   | TT                              | AA              | 1947010411               |
| SNP_P4_162209_78035 | NW_004516683.1 | Scaffold1490 | 78035                   | TT                              | CC              | 1947010413               |
| SNP_P4_162210_78057 | NW_004516683.1 | Scaffold1490 | 78057                   | GG                              | AA              | 1947010415               |
| SNP_P4_162211_78070 | NW_004516683.1 | Scaffold1490 | 78070                   | TT                              | GG              | 1947010417               |
| SNP_P4_162212_78347 | NW_004516683.1 | Scaffold1490 | 78347                   | GG                              | AA              | 1947010419               |
| SNP_P4_162213_88533 | NW_004516683.1 | Scaffold1490 | 88533                   | TT                              | AA              | 1947010421               |
| SNP_P4_162214_88547 | NW_004516683.1 | Scaffold1490 | 88547                   | AA                              | TT              | 1947010423               |
| SNP_P4_162215_88550 | NW_004516683.1 | Scaffold1490 | 88550                   | TT                              | GG              | 1947010425               |
| SNP_P4_162216_88551 | NW_004516683.1 | Scaffold1490 | 88551                   | GG                              | TT              | 1947010427               |
| SNP_P4_162217_88553 | NW_004516683.1 | Scaffold1490 | 88553                   | AA                              | CC              | 1947010429               |
| SNP_P4_162218_88577 | NW_004516683.1 | Scaffold1490 | 88577                   | GG                              | TT              | 1947010431               |
| SNP_P4_162219_625   | NW_004516684.1 | Scaffold1491 | 625                     | GG                              | CC              | 1947010433               |
| SNP_P4_162220_653   | NW_004516684.1 | Scaffold1491 | 653                     | CC                              | GG              | 1947010435               |

| SNPs IDs            | Chromosome IDs | Chromosomes  | Physical positions (bp) | CDC Frontier (Reference genome) | (ILWC46 & LPNB) | NCBI SNPdb Accession IDs |
|---------------------|----------------|--------------|-------------------------|---------------------------------|-----------------|--------------------------|
| SNP_P4_162221_671   | NW_004516684.1 | Scaffold1491 | 671                     | GG                              | TT              | 1947010437               |
| SNP_P4_162222_687   | NW_004516684.1 | Scaffold1491 | 687                     | GG                              | AA              | 1947010439               |
| SNP_P4_162223_688   | NW_004516684.1 | Scaffold1491 | 688                     | CC                              | GG              | 1947010441               |
| SNP_P4_162224_684   | NW_004516685.1 | Scaffold1492 | 684                     | AA                              | TT              | 1947010443               |
| SNP_P4_162225_1027  | NW_004516685.1 | Scaffold1492 | 1027                    | TT                              | CC              | 1947010445               |
| SNP_P4_162226_1059  | NW_004516685.1 | Scaffold1492 | 1059                    | GG                              | AA              | 1947010447               |
| SNP_P4_162227_2064  | NW_004516686.1 | Scaffold1493 | 2064                    | AA                              | TT              | 1947010449               |
| SNP_P4_162228_2174  | NW_004516686.1 | Scaffold1493 | 2174                    | GG                              | AA              | 1947010451               |
| SNP_P4_162229_2217  | NW_004516686.1 | Scaffold1493 | 2217                    | CC                              | TT              | 1947010453               |
| SNP_P4_162230_2349  | NW_004516686.1 | Scaffold1493 | 2349                    | GG                              | AA              | 1947010455               |
| SNP_P4_162231_2355  | NW_004516686.1 | Scaffold1493 | 2355                    | AA                              | GG              | 1947010457               |
| SNP_P4_162232_2827  | NW_004516686.1 | Scaffold1493 | 2827                    | GG                              | CC              | 1947010459               |
| SNP_P4_162233_2843  | NW_004516686.1 | Scaffold1493 | 2843                    | AA                              | GG              | 1947010461               |
| SNP_P4_162234_3073  | NW_004516686.1 | Scaffold1493 | 3073                    | CC                              | AA              | 1947010463               |
| SNP_P4_162235_3363  | NW_004516686.1 | Scaffold1493 | 3363                    | AA                              | GG              | 1947010465               |
| SNP_P4_162236_3434  | NW_004516686.1 | Scaffold1493 | 3434                    | AA                              | GG              | 1947010467               |
| SNP_P4_162237_3508  | NW_004516686.1 | Scaffold1493 | 3508                    | TT                              | CC              | 1947010469               |
| SNP_P4_162238_3609  | NW_004516686.1 | Scaffold1493 | 3609                    | TT                              | AA              | 1947010471               |
| SNP_P4_162239_12493 | NW_004516686.1 | Scaffold1493 | 12493                   | AA                              | GG              | 1947010473               |
| SNP_P4_162240_12695 | NW_004516686.1 | Scaffold1493 | 12695                   | TT                              | CC              | 1947010475               |
| SNP_P4_162241_12722 | NW_004516686.1 | Scaffold1493 | 12722                   | TT                              | AA              | 1947010477               |
| SNP_P4_162242_12785 | NW_004516686.1 | Scaffold1493 | 12785                   | TT                              | CC              | 1947010479               |
| SNP_P4_162243_12793 | NW_004516686.1 | Scaffold1493 | 12793                   | AA                              | GG              | 1947010480               |
| SNP_P4_162244_12802 | NW_004516686.1 | Scaffold1493 | 12802                   | GG                              | CC              | 1947010482               |
| SNP_P4_162245_12823 | NW_004516686.1 | Scaffold1493 | 12823                   | AA                              | GG              | 1947010484               |
| SNP_P4_162246_12827 | NW_004516686.1 | Scaffold1493 | 12827                   | CC                              | TT              | 1947010486               |
| SNP_P4_162247_34739 | NW_004516686.1 | Scaffold1493 | 34739                   | GG                              | AA              | 1947010488               |
| SNP_P4_162248_34874 | NW_004516686.1 | Scaffold1493 | 34874                   | CC                              | TT              | 1947010490               |
| SNP_P4_162249_34897 | NW_004516686.1 | Scaffold1493 | 34897                   | AA                              | GG              | 1947010492               |
| SNP_P4_162250_34907 | NW_004516686.1 | Scaffold1493 | 34907                   | GG                              | AA              | 1947010494               |
| SNP_P4_162251_34913 | NW_004516686.1 | Scaffold1493 | 34913                   | TT                              | CC              | 1947010496               |
| SNP_P4_162253_35017 | NW_004516686.1 | Scaffold1493 | 35017                   | TT                              | CC              | 1947010498               |
| SNP_P4_162254_35092 | NW_004516686.1 | Scaffold1493 | 35092                   | TT                              | CC              | 1947010500               |
| SNP_P4_162255_38511 | NW_004516686.1 | Scaffold1493 | 38511                   | CC                              | GG              | 1947010501               |
| SNP_P4_162256_56103 | NW_004516686.1 | Scaffold1493 | 56103                   | TT                              | AA              | 1947010503               |
| SNP_P4_162257_56108 | NW_004516686.1 | Scaffold1493 | 56108                   | AA                              | GG              | 1947010505               |
| SNP_P4_162258_56118 | NW_004516686.1 | Scaffold1493 | 56118                   | AA                              | GG              | 1947010507               |
| SNP_P4_162259_56149 | NW_004516686.1 | Scaffold1493 | 56149                   | AA                              | GG              | 1947010509               |
| SNP_P4_162260_56157 | NW_004516686.1 | Scaffold1493 | 56157                   | TT                              | CC              | 1947010511               |
| SNP_P4_162261_56162 | NW_004516686.1 | Scaffold1493 | 56162                   | TT                              | CC              | 1947010513               |
| SNP_P4_162262_56172 | NW_004516686.1 | Scaffold1493 | 56172                   | GG                              | TT              | 1947010515               |
| SNP_P4_162263_56181 | NW_004516686.1 | Scaffold1493 | 56181                   | GG                              | AA              | 1947010517               |

| SNPs IDs            | Chromosome IDs | Chromosomes  | Physical positions (bp) | CDC Frontier (Reference genome) | (ILWC46 & LPNB) | NCBI SNPdb Accession IDs |
|---------------------|----------------|--------------|-------------------------|---------------------------------|-----------------|--------------------------|
| SNP_P4_162264_56419 | NW_004516686.1 | Scaffold1493 | 56419                   | TT                              | CC              | 1947010519               |
| SNP_P4_162265_56420 | NW_004516686.1 | Scaffold1493 | 56420                   | GG                              | AA              | 1947010521               |
| SNP_P4_162266_56466 | NW_004516686.1 | Scaffold1493 | 56466                   | CC                              | TT              | 1947010523               |
| SNP_P4_162267_64522 | NW_004516686.1 | Scaffold1493 | 64522                   | CC                              | TT              | 1947010525               |
| SNP_P4_162268_65144 | NW_004516686.1 | Scaffold1493 | 65144                   | GG                              | AA              | 1947010527               |
| SNP_P4_162269_65211 | NW_004516686.1 | Scaffold1493 | 65211                   | AA                              | GG              | 1947010529               |
| SNP_P4_162271_65521 | NW_004516686.1 | Scaffold1493 | 65521                   | CC                              | AA              | 1947010531               |
| SNP_P4_162272_65594 | NW_004516686.1 | Scaffold1493 | 65594                   | TT                              | CC              | 1947010533               |
| SNP_P4_162273_65676 | NW_004516686.1 | Scaffold1493 | 65676                   | TT                              | AA              | 1947010535               |
| SNP_P4_162274_65697 | NW_004516686.1 | Scaffold1493 | 65697                   | CC                              | TT              | 1947010537               |
| SNP_P4_162275_65699 | NW_004516686.1 | Scaffold1493 | 65699                   | AA                              | CC              | 1947010539               |
| SNP_P4_162276_65719 | NW_004516686.1 | Scaffold1493 | 65719                   | AA                              | GG              | 1947010541               |
| SNP_P4_162277_65786 | NW_004516686.1 | Scaffold1493 | 65786                   | CC                              | TT              | 1947010543               |
| SNP_P4_162278_65917 | NW_004516686.1 | Scaffold1493 | 65917                   | TT                              | CC              | 1947010545               |
| SNP_P4_162279_66126 | NW_004516686.1 | Scaffold1493 | 66126                   | TT                              | CC              | 1947010547               |
| SNP_P4_162280_66157 | NW_004516686.1 | Scaffold1493 | 66157                   | CC                              | GG              | 1947010549               |
| SNP_P4_162281_67212 | NW_004516686.1 | Scaffold1493 | 67212                   | AA                              | GG              | 1947010551               |
| SNP_P4_162282_67213 | NW_004516686.1 | Scaffold1493 | 67213                   | GG                              | AA              | 1947010553               |
| SNP_P4_162285_85017 | NW_004516686.1 | Scaffold1493 | 85017                   | TT                              | CC              | 1947010555               |
| SNP_P4_162286_85049 | NW_004516686.1 | Scaffold1493 | 85049                   | TT                              | CC              | 1947010556               |
| SNP_P4_162287_85114 | NW_004516686.1 | Scaffold1493 | 85114                   | GG                              | AA              | 1947010558               |
| SNP_P4_162288_85126 | NW_004516686.1 | Scaffold1493 | 85126                   | TT                              | CC              | 1947010560               |
| SNP_P4_162289_85145 | NW_004516686.1 | Scaffold1493 | 85145                   | AA                              | GG              | 1947010562               |
| SNP_P4_162290_85210 | NW_004516686.1 | Scaffold1493 | 85210                   | TT                              | GG              | 1947010564               |
| SNP_P4_162291_85373 | NW_004516686.1 | Scaffold1493 | 85373                   | TT                              | CC              | 1947010566               |
| SNP_P4_162292_85401 | NW_004516686.1 | Scaffold1493 | 85401                   | GG                              | AA              | 1947010568               |
| SNP_P4_162293_85428 | NW_004516686.1 | Scaffold1493 | 85428                   | CC                              | TT              | 1947010570               |
| SNP_P4_162294_85431 | NW_004516686.1 | Scaffold1493 | 85431                   | GG                              | AA              | 1947010571               |
| SNP_P4_162295_85451 | NW_004516686.1 | Scaffold1493 | 85451                   | CC                              | TT              | 1947010573               |
| SNP_P4_162296_89579 | NW_004516686.1 | Scaffold1493 | 89579                   | AA                              | CC              | 1947010575               |
| SNP_P4_162297_89830 | NW_004516686.1 | Scaffold1493 | 89830                   | TT                              | CC              | 1947010577               |
| SNP_P4_162298_89893 | NW_004516686.1 | Scaffold1493 | 89893                   | TT                              | CC              | 1947010579               |
| SNP_P4_162299_6446  | NW_004516689.1 | Scaffold1496 | 6446                    | GG                              | TT              | 1947010581               |
| SNP_P4_162300_6447  | NW_004516689.1 | Scaffold1496 | 6447                    | TT                              | GG              | 1947010583               |
| SNP_P4_162301_21393 | NW_004516689.1 | Scaffold1496 | 21393                   | AA                              | GG              | 1947010585               |
| SNP_P4_162302_21432 | NW_004516689.1 | Scaffold1496 | 21432                   | TT                              | AA              | 1947010587               |
| SNP_P4_162303_21476 | NW_004516689.1 | Scaffold1496 | 21476                   | TT                              | AA              | 1947010589               |
| SNP_P4_162304_21482 | NW_004516689.1 | Scaffold1496 | 21482                   | TT                              | GG              | 1947010591               |
| SNP_P4_162305_21507 | NW_004516689.1 | Scaffold1496 | 21507                   | TT                              | CC              | 1947010593               |
| SNP_P4_162306_23365 | NW_004516689.1 | Scaffold1496 | 23365                   | CC                              | TT              | 1947010595               |
| SNP_P4_162307_29234 | NW_004516689.1 | Scaffold1496 | 29234                   | AA                              | GG              | 1947010597               |
| SNP_P4_162308_29295 | NW_004516689.1 | Scaffold1496 | 29295                   | TT                              | CC              | 1947010599               |

| SNPs IDs             | Chromosome IDs | Chromosomes  | Physical positions (bp) | CDC Frontier (Reference genome) | (ILWC46 & LPNB) | NCBI SNPdb Accession IDs |
|----------------------|----------------|--------------|-------------------------|---------------------------------|-----------------|--------------------------|
| SNP_P4_162309_53996  | NW_004516689.1 | Scaffold1496 | 53996                   | GG                              | CC              | 1947010601               |
| SNP_P4_162310_68759  | NW_004516689.1 | Scaffold1496 | 68759                   | GG                              | AA              | 1947010603               |
| SNP_P4_162311_68812  | NW_004516689.1 | Scaffold1496 | 68812                   | GG                              | AA              | 1947010604               |
| SNP_P4_162312_68829  | NW_004516689.1 | Scaffold1496 | 68829                   | AA                              | GG              | 1947010606               |
| SNP_P4_162313_81345  | NW_004516689.1 | Scaffold1496 | 81345                   | CC                              | TT              | 1947010608               |
| SNP_P4_162314_81357  | NW_004516689.1 | Scaffold1496 | 81357                   | TT                              | GG              | 1947010610               |
| SNP_P4_162315_82575  | NW_004516689.1 | Scaffold1496 | 82575                   | TT                              | AA              | 1947010612               |
| SNP_P4_162316_82577  | NW_004516689.1 | Scaffold1496 | 82577                   | CC                              | AA              | 1947010614               |
| SNP_P4_162317_87393  | NW_004516689.1 | Scaffold1496 | 87393                   | AA                              | TT              | 1947010616               |
| SNP_P4_162318_107451 | NW_004516689.1 | Scaffold1496 | 107451                  | AA                              | GG              | 1947010618               |
| SNP_P4_162319_121099 | NW_004516689.1 | Scaffold1496 | 121099                  | TT                              | CC              | 1947010620               |
| SNP_P4_162320_123085 | NW_004516689.1 | Scaffold1496 | 123085                  | AA                              | CC              | 1947010622               |
| SNP_P4_162321_123117 | NW_004516689.1 | Scaffold1496 | 123117                  | CC                              | TT              | 1947010624               |
| SNP_P4_162322_123122 | NW_004516689.1 | Scaffold1496 | 123122                  | GG                              | AA              | 1947010625               |
| SNP_P4_162323_123309 | NW_004516689.1 | Scaffold1496 | 123309                  | CC                              | TT              | 1947010627               |
| SNP_P4_162324_123396 | NW_004516689.1 | Scaffold1496 | 123396                  | CC                              | TT              | 1947010629               |
| SNP_P4_162326_123446 | NW_004516689.1 | Scaffold1496 | 123446                  | AA                              | GG              | 1947010631               |
| SNP_P4_162328_137617 | NW_004516689.1 | Scaffold1496 | 137617                  | TT                              | CC              | 1947010633               |
| SNP_P4_162329_139074 | NW_004516689.1 | Scaffold1496 | 139074                  | CC                              | TT              | 1947010635               |
| SNP_P4_162330_139202 | NW_004516689.1 | Scaffold1496 | 139202                  | TT                              | CC              | 1947010637               |
| SNP_P4_162331_147530 | NW_004516689.1 | Scaffold1496 | 147530                  | GG                              | AA              | 1947010639               |
| SNP_P4_162332_147592 | NW_004516689.1 | Scaffold1496 | 147592                  | TT                              | CC              | 1947010641               |
| SNP_P4_162334_178058 | NW_004516689.1 | Scaffold1496 | 178058                  | GG                              | TT              | 1947010643               |
| SNP_P4_162336_189300 | NW_004516689.1 | Scaffold1496 | 189300                  | TT                              | CC              | 1947010645               |
| SNP_P4_162337_194932 | NW_004516689.1 | Scaffold1496 | 194932                  | AA                              | GG              | 1947010647               |
| SNP_P4_162338_202769 | NW_004516689.1 | Scaffold1496 | 202769                  | AA                              | GG              | 1947010649               |
| SNP_P4_162339_202782 | NW_004516689.1 | Scaffold1496 | 202782                  | CC                              | AA              | 1947010651               |
| SNP_P4_162340_205718 | NW_004516689.1 | Scaffold1496 | 205718                  | CC                              | TT              | 1947010653               |
| SNP_P4_162341_206445 | NW_004516689.1 | Scaffold1496 | 206445                  | GG                              | AA              | 1947010655               |
| SNP_P4_162342_206453 | NW_004516689.1 | Scaffold1496 | 206453                  | AA                              | GG              | 1947010657               |
| SNP_P4_162343_206456 | NW_004516689.1 | Scaffold1496 | 206456                  | TT                              | CC              | 1947010659               |
| SNP_P4_162344_206831 | NW_004516689.1 | Scaffold1496 | 206831                  | GG                              | TT              | 1947010661               |
| SNP_P4_162345_210010 | NW_004516689.1 | Scaffold1496 | 210010                  | AA                              | TT              | 1947010663               |
| SNP_P4_162346_213400 | NW_004516689.1 | Scaffold1496 | 213400                  | CC                              | AA              | 1947010665               |
| SNP_P4_162347_215617 | NW_004516689.1 | Scaffold1496 | 215617                  | GG                              | AA              | 1947010667               |
| SNP_P4_162348_229659 | NW_004516689.1 | Scaffold1496 | 229659                  | CC                              | AA              | 1947010669               |
| SNP_P4_162349_229661 | NW_004516689.1 | Scaffold1496 | 229661                  | AA                              | GG              | 1947010671               |
| SNP_P4_162350_231886 | NW_004516689.1 | Scaffold1496 | 231886                  | CC                              | AA              | 1947010672               |
| SNP_P4_162354_237716 | NW_004516689.1 | Scaffold1496 | 237716                  | GG                              | AA              | 1947010673               |
| SNP_P4_162355_238797 | NW_004516689.1 | Scaffold1496 | 238797                  | CC                              | TT              | 1947010674               |
| SNP_P4_162356_238913 | NW_004516689.1 | Scaffold1496 | 238913                  | CC                              | TT              | 1947010675               |
| SNP_P4_162357_246576 | NW_004516689.1 | Scaffold1496 | 246576                  | GG                              | AA              | 1947010676               |

| SNPs IDs             | Chromosome IDs | Chromosomes  | Physical positions (bp) | CDC Frontier (Reference genome) | (ILWC46 & LPNB) | NCBI SNPdb Accession IDs |
|----------------------|----------------|--------------|-------------------------|---------------------------------|-----------------|--------------------------|
| SNP_P4_162358_246898 | NW_004516689.1 | Scaffold1496 | 246898                  | CC                              | AA              | 1947010677               |
| SNP_P4_162359_247630 | NW_004516689.1 | Scaffold1496 | 247630                  | GG                              | AA              | 1947010678               |
| SNP_P4_162360_251082 | NW_004516689.1 | Scaffold1496 | 251082                  | TT                              | CC              | 1947010679               |
| SNP_P4_162361_252720 | NW_004516689.1 | Scaffold1496 | 252720                  | CC                              | AA              | 1947010680               |
| SNP_P4_162362_269540 | NW_004516689.1 | Scaffold1496 | 269540                  | CC                              | GG              | 1947010681               |
| SNP_P4_162363_269957 | NW_004516689.1 | Scaffold1496 | 269957                  | GG                              | AA              | 1947010682               |
| SNP_P4_162364_275732 | NW_004516689.1 | Scaffold1496 | 275732                  | TT                              | CC              | 1947010683               |
| SNP_P4_162365_278252 | NW_004516689.1 | Scaffold1496 | 278252                  | TT                              | CC              | 1947010684               |
| SNP_P4_162366_280558 | NW_004516689.1 | Scaffold1496 | 280558                  | CC                              | TT              | 1947010685               |
| SNP_P4_162367_285645 | NW_004516689.1 | Scaffold1496 | 285645                  | GG                              | AA              | 1947010686               |
| SNP_P4_162368_286202 | NW_004516689.1 | Scaffold1496 | 286202                  | GG                              | AA              | 1947010687               |
| SNP_P4_162369_287858 | NW_004516689.1 | Scaffold1496 | 287858                  | GG                              | AA              | 1947010688               |
| SNP_P4_162370_288407 | NW_004516689.1 | Scaffold1496 | 288407                  | CC                              | TT              | 1947010689               |
| SNP_P4_162371_290711 | NW_004516689.1 | Scaffold1496 | 290711                  | TT                              | AA              | 1947010690               |
| SNP_P4_162372_292029 | NW_004516689.1 | Scaffold1496 | 292029                  | TT                              | AA              | 1947010691               |
| SNP_P4_162373_295690 | NW_004516689.1 | Scaffold1496 | 295690                  | TT                              | CC              | 1947010693               |
| SNP_P4_162374_295699 | NW_004516689.1 | Scaffold1496 | 295699                  | TT                              | CC              | 1947010694               |
| SNP_P4_162375_295721 | NW_004516689.1 | Scaffold1496 | 295721                  | CC                              | TT              | 1947010696               |
| SNP_P4_162376_295732 | NW_004516689.1 | Scaffold1496 | 295732                  | CC                              | TT              | 1947010698               |
| SNP_P4_162377_295734 | NW_004516689.1 | Scaffold1496 | 295734                  | AA                              | GG              | 1947010700               |
| SNP_P4_162378_295740 | NW_004516689.1 | Scaffold1496 | 295740                  | AA                              | TT              | 1947010702               |
| SNP_P4_162379_295923 | NW_004516689.1 | Scaffold1496 | 295923                  | TT                              | CC              | 1947010704               |
| SNP_P4_162380_295934 | NW_004516689.1 | Scaffold1496 | 295934                  | TT                              | CC              | 1947010705               |
| SNP_P4_162381_295936 | NW_004516689.1 | Scaffold1496 | 295936                  | GG                              | AA              | 1947010707               |
| SNP_P4_162382_295942 | NW_004516689.1 | Scaffold1496 | 295942                  | TT                              | AA              | 1947010709               |
| SNP_P4_162383_301288 | NW_004516689.1 | Scaffold1496 | 301288                  | CC                              | AA              | 1947010711               |
| SNP_P4_162384_305593 | NW_004516689.1 | Scaffold1496 | 305593                  | AA                              | TT              | 1947010713               |
| SNP_P4_162385_306831 | NW_004516689.1 | Scaffold1496 | 306831                  | GG                              | AA              | 1947010715               |
| SNP_P4_162386_1834   | NW_004516690.1 | Scaffold1497 | 1834                    | CC                              | TT              | 1947010717               |
| SNP_P4_162387_2325   | NW_004516690.1 | Scaffold1497 | 2325                    | AA                              | TT              | 1947010719               |
| SNP_P4_162388_3538   | NW_004516690.1 | Scaffold1497 | 3538                    | TT                              | CC              | 1947010721               |
| SNP_P4_162389_4072   | NW_004516690.1 | Scaffold1497 | 4072                    | AA                              | TT              | 1947010723               |
| SNP_P4_162390_4127   | NW_004516690.1 | Scaffold1497 | 4127                    | CC                              | TT              | 1947010724               |
| SNP_P4_162391_4152   | NW_004516690.1 | Scaffold1497 | 4152                    | AA                              | TT              | 1947010726               |
| SNP_P4_162392_4231   | NW_004516690.1 | Scaffold1497 | 4231                    | TT                              | CC              | 1947010728               |
| SNP_P4_162393_4247   | NW_004516690.1 | Scaffold1497 | 4247                    | TT                              | AA              | 1947010730               |
| SNP_P4_162394_4425   | NW_004516690.1 | Scaffold1497 | 4425                    | AA                              | TT              | 1947010732               |
| SNP_P4_162395_4534   | NW_004516690.1 | Scaffold1497 | 4534                    | CC                              | TT              | 1947010734               |
| SNP_P4_162396_406    | NW_004516691.1 | Scaffold1498 | 406                     | CC                              | TT              | 1947010736               |
| SNP_P4_162397_416    | NW_004516691.1 | Scaffold1498 | 416                     | CC                              | TT              | 1947010738               |
| SNP_P4_162398_2082   | NW_004516691.1 | Scaffold1498 | 2082                    | CC                              | TT              | 1947010740               |
| SNP_P4_162399_2316   | NW_004516691.1 | Scaffold1498 | 2316                    | GG                              | AA              | 1947010742               |

| SNPs IDs            | Chromosome IDs | Chromosomes  | Physical positions (bp) | CDC Frontier (Reference genome) | (ILWC46 & LPNB) | NCBI SNPdb Accession IDs |
|---------------------|----------------|--------------|-------------------------|---------------------------------|-----------------|--------------------------|
| SNP_P4_162400_2541  | NW_004516691.1 | Scaffold1498 | 2541                    | TT                              | CC              | 1947010744               |
| SNP_P4_162401_2557  | NW_004516691.1 | Scaffold1498 | 2557                    | AA                              | CC              | 1947010746               |
| SNP_P4_162402_2581  | NW_004516691.1 | Scaffold1498 | 2581                    | GG                              | AA              | 1947010748               |
| SNP_P4_162403_440   | NW_004516692.1 | Scaffold1499 | 440                     | TT                              | CC              | 1947010750               |
| SNP_P4_162404_546   | NW_004516692.1 | Scaffold1499 | 546                     | TT                              | CC              | 1947010752               |
| SNP_P4_162405_592   | NW_004516692.1 | Scaffold1499 | 592                     | CC                              | AA              | 1947010754               |
| SNP_P4_162407_998   | NW_004516692.1 | Scaffold1499 | 998                     | TT                              | AA              | 1947010756               |
| SNP_P4_162408_1244  | NW_004516692.1 | Scaffold1499 | 1244                    | TT                              | CC              | 1947010758               |
| SNP_P4_162409_3596  | NW_004516692.1 | Scaffold1499 | 3596                    | CC                              | AA              | 1947010760               |
| SNP_P4_162410_3711  | NW_004516692.1 | Scaffold1499 | 3711                    | GG                              | AA              | 1947010762               |
| SNP_P4_162412_4070  | NW_004516692.1 | Scaffold1499 | 4070                    | GG                              | AA              | 1947010764               |
| SNP_P4_162413_4445  | NW_004516692.1 | Scaffold1499 | 4445                    | AA                              | TT              | 1947010766               |
| SNP_P4_162414_4488  | NW_004516692.1 | Scaffold1499 | 4488                    | AA                              | GG              | 1947010768               |
| SNP_P4_162415_7148  | NW_004516692.1 | Scaffold1499 | 7148                    | GG                              | TT              | 1947010770               |
| SNP_P4_162417_11544 | NW_004516692.1 | Scaffold1499 | 11544                   | CC                              | TT              | 1947010771               |
| SNP_P4_162418_11573 | NW_004516692.1 | Scaffold1499 | 11573                   | GG                              | AA              | 1947010773               |
| SNP_P4_162419_11639 | NW_004516692.1 | Scaffold1499 | 11639                   | TT                              | CC              | 1947010775               |
| SNP_P4_162420_11641 | NW_004516692.1 | Scaffold1499 | 11641                   | TT                              | AA              | 1947010777               |
| SNP_P4_162421_11647 | NW_004516692.1 | Scaffold1499 | 11647                   | TT                              | CC              | 1947010779               |
| SNP_P4_162422_11668 | NW_004516692.1 | Scaffold1499 | 11668                   | GG                              | AA              | 1947010781               |
| SNP_P4_162423_11852 | NW_004516692.1 | Scaffold1499 | 11852                   | GG                              | AA              | 1947010783               |
| SNP_P4_162424_12032 | NW_004516692.1 | Scaffold1499 | 12032                   | GG                              | AA              | 1947010785               |
| SNP_P4_162425_12147 | NW_004516692.1 | Scaffold1499 | 12147                   | GG                              | TT              | 1947010787               |
| SNP_P4_162426_12172 | NW_004516692.1 | Scaffold1499 | 12172                   | CC                              | TT              | 1947010789               |
| SNP_P4_162427_12388 | NW_004516692.1 | Scaffold1499 | 12388                   | CC                              | TT              | 1947010791               |
| SNP_P4_162428_12504 | NW_004516692.1 | Scaffold1499 | 12504                   | CC                              | AA              | 1947010792               |
| SNP_P4_162429_12519 | NW_004516692.1 | Scaffold1499 | 12519                   | GG                              | AA              | 1947010794               |
| SNP_P4_162430_12520 | NW_004516692.1 | Scaffold1499 | 12520                   | CC                              | GG              | 1947010796               |
| SNP_P4_162431_12642 | NW_004516692.1 | Scaffold1499 | 12642                   | TT                              | CC              | 1947010798               |
| SNP_P4_162432_12656 | NW_004516692.1 | Scaffold1499 | 12656                   | CC                              | AA              | 1947010800               |
| SNP_P4_162434_12781 | NW_004516692.1 | Scaffold1499 | 12781                   | CC                              | TT              | 1947010802               |
| SNP_P4_162436_19438 | NW_004516692.1 | Scaffold1499 | 19438                   | TT                              | GG              | 1947010804               |
| SNP_P4_162437_19501 | NW_004516692.1 | Scaffold1499 | 19501                   | TT                              | CC              | 1947010806               |
| SNP_P4_162438_20504 | NW_004516692.1 | Scaffold1499 | 20504                   | CC                              | AA              | 1947010808               |
| SNP_P4_162439_20547 | NW_004516692.1 | Scaffold1499 | 20547                   | GG                              | TT              | 1947010810               |
| SNP_P4_162441_25081 | NW_004516692.1 | Scaffold1499 | 25081                   | CC                              | TT              | 1947010812               |
| SNP_P4_162442_28172 | NW_004516692.1 | Scaffold1499 | 28172                   | TT                              | GG              | 1947010814               |
| SNP_P4_162443_29708 | NW_004516692.1 | Scaffold1499 | 29708                   | TT                              | AA              | 1947010816               |
| SNP_P4_162445_29718 | NW_004516692.1 | Scaffold1499 | 29718                   | CC                              | TT              | 1947010818               |
| SNP_P4_162446_29940 | NW_004516692.1 | Scaffold1499 | 29940                   | GG                              | AA              | 1947010820               |
| SNP_P4_162447_29992 | NW_004516692.1 | Scaffold1499 | 29992                   | GG                              | AA              | 1947010822               |
| SNP_P4_162448_34115 | NW_004516692.1 | Scaffold1499 | 34115                   | GG                              | AA              | 1947010824               |

| SNPs IDs            | Chromosome IDs | Chromosomes  | Physical positions (bp) | CDC Frontier (Reference genome) | (ILWC46 & LPNB) | NCBI SNPdb Accession IDs |
|---------------------|----------------|--------------|-------------------------|---------------------------------|-----------------|--------------------------|
| SNP_P4_162449_34245 | NW_004516692.1 | Scaffold1499 | 34245                   | CC                              | AA              | 1947010826               |
| SNP_P4_162450_34256 | NW_004516692.1 | Scaffold1499 | 34256                   | AA                              | GG              | 1947010828               |
| SNP_P4_162451_34326 | NW_004516692.1 | Scaffold1499 | 34326                   | AA                              | CC              | 1947010829               |
| SNP_P4_162452_34350 | NW_004516692.1 | Scaffold1499 | 34350                   | AA                              | TT              | 1947010831               |
| SNP_P4_162453_34357 | NW_004516692.1 | Scaffold1499 | 34357                   | GG                              | TT              | 1947010833               |
| SNP_P4_162454_34419 | NW_004516692.1 | Scaffold1499 | 34419                   | GG                              | AA              | 1947010835               |
| SNP_P4_162455_34433 | NW_004516692.1 | Scaffold1499 | 34433                   | TT                              | AA              | 1947010837               |
| SNP_P4_162456_34447 | NW_004516692.1 | Scaffold1499 | 34447                   | AA                              | GG              | 1947010839               |
| SNP_P4_162457_34486 | NW_004516692.1 | Scaffold1499 | 34486                   | GG                              | TT              | 1947010841               |
| SNP_P4_162458_34492 | NW_004516692.1 | Scaffold1499 | 34492                   | CC                              | TT              | 1947010843               |
| SNP_P4_162459_34568 | NW_004516692.1 | Scaffold1499 | 34568                   | AA                              | TT              | 1947010845               |
| SNP_P4_162460_34629 | NW_004516692.1 | Scaffold1499 | 34629                   | GG                              | CC              | 1947010847               |
| SNP_P4_162461_34648 | NW_004516692.1 | Scaffold1499 | 34648                   | CC                              | AA              | 1947010849               |
| SNP_P4_162462_34664 | NW_004516692.1 | Scaffold1499 | 34664                   | TT                              | GG              | 1947010851               |
| SNP_P4_162463_34682 | NW_004516692.1 | Scaffold1499 | 34682                   | CC                              | AA              | 1947010853               |
| SNP_P4_162464_34819 | NW_004516692.1 | Scaffold1499 | 34819                   | AA                              | CC              | 1947010855               |
| SNP_P4_162465_40095 | NW_004516692.1 | Scaffold1499 | 40095                   | AA                              | TT              | 1947010857               |
| SNP_P4_162466_40154 | NW_004516692.1 | Scaffold1499 | 40154                   | CC                              | TT              | 1947010859               |
| SNP_P4_162468_40356 | NW_004516692.1 | Scaffold1499 | 40356                   | CC                              | AA              | 1947010861               |
| SNP_P4_162469_40365 | NW_004516692.1 | Scaffold1499 | 40365                   | CC                              | GG              | 1947010866               |
| SNP_P4_162470_40373 | NW_004516692.1 | Scaffold1499 | 40373                   | CC                              | TT              | 1947010868               |
| SNP_P4_162471_40426 | NW_004516692.1 | Scaffold1499 | 40426                   | CC                              | TT              | 1947010870               |
| SNP_P4_162473_41673 | NW_004516692.1 | Scaffold1499 | 41673                   | GG                              | AA              | 1947010872               |
| SNP_P4_162474_41760 | NW_004516692.1 | Scaffold1499 | 41760                   | TT                              | CC              | 1947010874               |
| SNP_P4_162475_45905 | NW_004516692.1 | Scaffold1499 | 45905                   | AA                              | TT              | 1947010876               |
| SNP_P4_162476_45906 | NW_004516692.1 | Scaffold1499 | 45906                   | AA                              | GG              | 1947010878               |
| SNP_P4_162477_46071 | NW_004516692.1 | Scaffold1499 | 46071                   | AA                              | GG              | 1947010880               |
| SNP_P4_162478_46207 | NW_004516692.1 | Scaffold1499 | 46207                   | TT                              | GG              | 1947010882               |
| SNP_P4_162479_46233 | NW_004516692.1 | Scaffold1499 | 46233                   | GG                              | AA              | 1947010884               |
| SNP_P4_162480_46241 | NW_004516692.1 | Scaffold1499 | 46241                   | CC                              | AA              | 1947010886               |
| SNP_P4_162481_46315 | NW_004516692.1 | Scaffold1499 | 46315                   | GG                              | TT              | 1947010888               |
| SNP_P4_162482_46320 | NW_004516692.1 | Scaffold1499 | 46320                   | AA                              | CC              | 1947010890               |
| SNP_P4_162483_46514 | NW_004516692.1 | Scaffold1499 | 46514                   | AA                              | CC              | 1947010892               |
| SNP_P4_162484_46603 | NW_004516692.1 | Scaffold1499 | 46603                   | AA                              | GG              | 1947010894               |
| SNP_P4_162486_48715 | NW_004516692.1 | Scaffold1499 | 48715                   | GG                              | TT              | 1947010896               |
| SNP_P4_162487_53866 | NW_004516692.1 | Scaffold1499 | 53866                   | CC                              | TT              | 1947010898               |
| SNP_P4_162488_54367 | NW_004516692.1 | Scaffold1499 | 54367                   | AA                              | CC              | 1947010900               |
| SNP_P4_162489_54382 | NW_004516692.1 | Scaffold1499 | 54382                   | AA                              | TT              | 1947010902               |
| SNP_P4_162490_54392 | NW_004516692.1 | Scaffold1499 | 54392                   | CC                              | TT              | 1947010904               |
| SNP_P4_162491_56354 | NW_004516692.1 | Scaffold1499 | 56354                   | AA                              | CC              | 1947010906               |
| SNP_P4_162492_56817 | NW_004516692.1 | Scaffold1499 | 56817                   | CC                              | TT              | 1947010908               |
| SNP_P4_162493_58419 | NW_004516692.1 | Scaffold1499 | 58419                   | GG                              | AA              | 1947010910               |



| SNPs IDs             | Chromosome IDs | Chromosomes  | Physical positions (bp) | CDC Frontier (Reference genome) | (ILWC46 & LPNB) | NCBI SNPdb Accession IDs |
|----------------------|----------------|--------------|-------------------------|---------------------------------|-----------------|--------------------------|
| SNP_P4_162494_59318  | NW_004516692.1 | Scaffold1499 | 59318                   | TT                              | CC              | 1947010912               |
| SNP_P4_162495_59324  | NW_004516692.1 | Scaffold1499 | 59324                   | AA                              | GG              | 1947010914               |
| SNP_P4_162496_59374  | NW_004516692.1 | Scaffold1499 | 59374                   | CC                              | TT              | 1947010916               |
| SNP_P4_162497_60854  | NW_004516692.1 | Scaffold1499 | 60854                   | GG                              | AA              | 1947010918               |
| SNP_P4_162501_65027  | NW_004516692.1 | Scaffold1499 | 65027                   | GG                              | AA              | 1947010920               |
| SNP_P4_162503_71114  | NW_004516692.1 | Scaffold1499 | 71114                   | GG                              | AA              | 1947010922               |
| SNP_P4_162504_84505  | NW_004516692.1 | Scaffold1499 | 84505                   | AA                              | GG              | 1947010924               |
| SNP_P4_162506_93242  | NW_004516692.1 | Scaffold1499 | 93242                   | CC                              | TT              | 1947010926               |
| SNP_P4_162507_93529  | NW_004516692.1 | Scaffold1499 | 93529                   | CC                              | TT              | 1947010928               |
| SNP_P4_162508_106151 | NW_004516692.1 | Scaffold1499 | 106151                  | TT                              | GG              | 1947010930               |
| SNP_P4_162511_112881 | NW_004516692.1 | Scaffold1499 | 112881                  | CC                              | TT              | 1947010932               |
| SNP_P4_162512_115435 | NW_004516692.1 | Scaffold1499 | 115435                  | TT                              | CC              | 1947010934               |
| SNP_P4_162513_116532 | NW_004516692.1 | Scaffold1499 | 116532                  | TT                              | CC              | 1947010936               |
| SNP_P4_162514_121469 | NW_004516692.1 | Scaffold1499 | 121469                  | AA                              | GG              | 1947010938               |
| SNP_P4_162515_124413 | NW_004516692.1 | Scaffold1499 | 124413                  | AA                              | GG              | 1947010940               |
| SNP_P4_162517_130430 | NW_004516692.1 | Scaffold1499 | 130430                  | CC                              | AA              | 1947010942               |
| SNP_P4_162518_139155 | NW_004516692.1 | Scaffold1499 | 139155                  | TT                              | CC              | 1947010944               |
| SNP_P4_162519_139261 | NW_004516692.1 | Scaffold1499 | 139261                  | GG                              | AA              | 1947010946               |
| SNP_P4_162521_145243 | NW_004516692.1 | Scaffold1499 | 145243                  | AA                              | GG              | 1947010948               |
| SNP_P4_162522_145940 | NW_004516692.1 | Scaffold1499 | 145940                  | GG                              | TT              | 1947010951               |
| SNP_P4_162523_152250 | NW_004516692.1 | Scaffold1499 | 152250                  | TT                              | CC              | 1947010953               |
| SNP_P4_162524_158093 | NW_004516692.1 | Scaffold1499 | 158093                  | GG                              | AA              | 1947010955               |
| SNP_P4_162525_214    | NW_004516693.1 | Scaffold1502 | 214                     | TT                              | CC              | 1947010957               |
| SNP_P4_162526_727    | NW_004516693.1 | Scaffold1502 | 727                     | GG                              | AA              | 1947010959               |
| SNP_P4_162528_1180   | NW_004516693.1 | Scaffold1502 | 1180                    | CC                              | GG              | 1947010961               |
| SNP_P4_162529_1193   | NW_004516693.1 | Scaffold1502 | 1193                    | GG                              | TT              | 1947010963               |
| SNP_P4_162530_1339   | NW_004516693.1 | Scaffold1502 | 1339                    | CC                              | TT              | 1947010965               |
| SNP_P4_162531_1411   | NW_004516693.1 | Scaffold1502 | 1411                    | CC                              | TT              | 1947010967               |
| SNP_P4_162532_1432   | NW_004516693.1 | Scaffold1502 | 1432                    | CC                              | AA              | 1947010969               |
| SNP_P4_162534_10191  | NW_004516694.1 | Scaffold1504 | 10191                   | AA                              | GG              | 1947010971               |
| SNP_P4_162535_10345  | NW_004516694.1 | Scaffold1504 | 10345                   | TT                              | GG              | 1947010973               |
| SNP_P4_162536_10413  | NW_004516694.1 | Scaffold1504 | 10413                   | TT                              | CC              | 1947010976               |
| SNP_P4_162537_114272 | NW_004516694.1 | Scaffold1504 | 114272                  | CC                              | TT              | 1947010978               |
| SNP_P4_162538_114308 | NW_004516694.1 | Scaffold1504 | 114308                  | CC                              | TT              | 1947010980               |
| SNP_P4_162539_117313 | NW_004516694.1 | Scaffold1504 | 117313                  | AA                              | GG              | 1947010982               |
| SNP_P4_162540_135066 | NW_004516694.1 | Scaffold1504 | 135066                  | AA                              | TT              | 1947010984               |
| SNP_P4_162541_140928 | NW_004516694.1 | Scaffold1504 | 140928                  | CC                              | GG              | 1947010986               |
| SNP_P4_162542_141069 | NW_004516694.1 | Scaffold1504 | 141069                  | AA                              | GG              | 1947010988               |
| SNP_P4_162543_141586 | NW_004516694.1 | Scaffold1504 | 141586                  | AA                              | GG              | 1947010990               |
| SNP_P4_162544_161224 | NW_004516694.1 | Scaffold1504 | 161224                  | AA                              | GG              | 1947010992               |
| SNP_P4_162545_161263 | NW_004516694.1 | Scaffold1504 | 161263                  | AA                              | TT              | 1947010994               |
| SNP_P4_162546_161347 | NW_004516694.1 | Scaffold1504 | 161347                  | AA                              | GG              | 1947010996               |

| SNPs IDs             | Chromosome IDs | Chromosomes  | Physical positions (bp) | CDC Frontier (Reference genome) | (ILWC46 & LPNB) | NCBI SNPdb Accession IDs |
|----------------------|----------------|--------------|-------------------------|---------------------------------|-----------------|--------------------------|
| SNP_P4_162547_161399 | NW_004516694.1 | Scaffold1504 | 161399                  | AA                              | TT              | 1947010998               |
| SNP_P4_162549_161685 | NW_004516694.1 | Scaffold1504 | 161685                  | TT                              | AA              | 1947011000               |
| SNP_P4_162550_173983 | NW_004516694.1 | Scaffold1504 | 173983                  | AA                              | GG              | 1947011002               |
| SNP_P4_162551_174106 | NW_004516694.1 | Scaffold1504 | 174106                  | GG                              | AA              | 1947011004               |
| SNP_P4_162552_174467 | NW_004516694.1 | Scaffold1504 | 174467                  | AA                              | GG              | 1947011006               |
| SNP_P4_162553_174493 | NW_004516694.1 | Scaffold1504 | 174493                  | GG                              | TT              | 1947011008               |
| SNP_P4_162554_174519 | NW_004516694.1 | Scaffold1504 | 174519                  | AA                              | GG              | 1947011010               |
| SNP_P4_162555_177293 | NW_004516694.1 | Scaffold1504 | 177293                  | GG                              | AA              | 1947011012               |
| SNP_P4_162556_182222 | NW_004516694.1 | Scaffold1504 | 182222                  | AA                              | GG              | 1947011013               |
| SNP_P4_162557_182247 | NW_004516694.1 | Scaffold1504 | 182247                  | GG                              | AA              | 1947011015               |
| SNP_P4_162558_182267 | NW_004516694.1 | Scaffold1504 | 182267                  | AA                              | CC              | 1947011017               |
| SNP_P4_162559_182283 | NW_004516694.1 | Scaffold1504 | 182283                  | CC                              | TT              | 1947011019               |
| SNP_P4_162560_182375 | NW_004516694.1 | Scaffold1504 | 182375                  | CC                              | AA              | 1947011021               |
| SNP_P4_162561_182420 | NW_004516694.1 | Scaffold1504 | 182420                  | CC                              | GG              | 1947011023               |
| SNP_P4_162562_182567 | NW_004516694.1 | Scaffold1504 | 182567                  | AA                              | GG              | 1947011025               |
| SNP_P4_162563_182672 | NW_004516694.1 | Scaffold1504 | 182672                  | TT                              | AA              | 1947011027               |
| SNP_P4_162564_182685 | NW_004516694.1 | Scaffold1504 | 182685                  | AA                              | TT              | 1947011029               |
| SNP_P4_162565_182754 | NW_004516694.1 | Scaffold1504 | 182754                  | TT                              | AA              | 1947011032               |
| SNP_P4_162566_183604 | NW_004516694.1 | Scaffold1504 | 183604                  | TT                              | CC              | 1947011034               |
| SNP_P4_162567_183607 | NW_004516694.1 | Scaffold1504 | 183607                  | TT                              | CC              | 1947011036               |
| SNP_P4_162568_194930 | NW_004516694.1 | Scaffold1504 | 194930                  | GG                              | AA              | 1947011038               |
| SNP_P4_162569_194941 | NW_004516694.1 | Scaffold1504 | 194941                  | AA                              | GG              | 1947011040               |
| SNP_P4_162570_194993 | NW_004516694.1 | Scaffold1504 | 194993                  | AA                              | GG              | 1947011042               |
| SNP_P4_162571_195005 | NW_004516694.1 | Scaffold1504 | 195005                  | TT                              | CC              | 1947011044               |
| SNP_P4_162572_195014 | NW_004516694.1 | Scaffold1504 | 195014                  | AA                              | GG              | 1947011045               |
| SNP_P4_162573_195029 | NW_004516694.1 | Scaffold1504 | 195029                  | CC                              | TT              | 1947011047               |
| SNP_P4_162574_195044 | NW_004516694.1 | Scaffold1504 | 195044                  | AA                              | GG              | 1947011049               |
| SNP_P4_162575_195313 | NW_004516694.1 | Scaffold1504 | 195313                  | TT                              | GG              | 1947011051               |
| SNP_P4_162576_195375 | NW_004516694.1 | Scaffold1504 | 195375                  | CC                              | TT              | 1947011053               |
| SNP_P4_162577_198188 | NW_004516694.1 | Scaffold1504 | 198188                  | TT                              | AA              | 1947011055               |
| SNP_P4_162578_198199 | NW_004516694.1 | Scaffold1504 | 198199                  | GG                              | AA              | 1947011057               |
| SNP_P4_162579_198207 | NW_004516694.1 | Scaffold1504 | 198207                  | GG                              | AA              | 1947011059               |
| SNP_P4_162580_204759 | NW_004516694.1 | Scaffold1504 | 204759                  | AA                              | GG              | 1947011061               |
| SNP_P4_162582_239015 | NW_004516694.1 | Scaffold1504 | 239015                  | GG                              | AA              | 1947011063               |
| SNP_P4_162583_239018 | NW_004516694.1 | Scaffold1504 | 239018                  | GG                              | AA              | 1947011065               |
| SNP_P4_162584_239021 | NW_004516694.1 | Scaffold1504 | 239021                  | GG                              | AA              | 1947011067               |
| SNP_P4_162585_239024 | NW_004516694.1 | Scaffold1504 | 239024                  | GG                              | AA              | 1947011069               |
| SNP_P4_162586_239030 | NW_004516694.1 | Scaffold1504 | 239030                  | GG                              | AA              | 1947011071               |
| SNP_P4_162587_239033 | NW_004516694.1 | Scaffold1504 | 239033                  | GG                              | AA              | 1947011073               |
| SNP_P4_162588_240740 | NW_004516694.1 | Scaffold1504 | 240740                  | TT                              | GG              | 1947011075               |
| SNP_P4_162589_240757 | NW_004516694.1 | Scaffold1504 | 240757                  | GG                              | AA              | 1947011077               |
| SNP_P4_162590_240775 | NW_004516694.1 | Scaffold1504 | 240775                  | TT                              | GG              | 1947011079               |

| SNPs IDs             | Chromosome IDs | Chromosomes  | Physical positions (bp) | CDC Frontier (Reference genome) | (ILWC46 & LPNB) | NCBI SNPdb Accession IDs |
|----------------------|----------------|--------------|-------------------------|---------------------------------|-----------------|--------------------------|
| SNP_P4_162591_240781 | NW_004516694.1 | Scaffold1504 | 240781                  | AA                              | GG              | 1947011081               |
| SNP_P4_162592_240789 | NW_004516694.1 | Scaffold1504 | 240789                  | TT                              | CC              | 1947011083               |
| SNP_P4_162593_240793 | NW_004516694.1 | Scaffold1504 | 240793                  | CC                              | TT              | 1947011085               |
| SNP_P4_162594_241130 | NW_004516694.1 | Scaffold1504 | 241130                  | TT                              | GG              | 1947011087               |
| SNP_P4_162595_242855 | NW_004516694.1 | Scaffold1504 | 242855                  | GG                              | CC              | 1947011089               |
| SNP_P4_162596_242878 | NW_004516694.1 | Scaffold1504 | 242878                  | AA                              | GG              | 1947011091               |
| SNP_P4_162597_242890 | NW_004516694.1 | Scaffold1504 | 242890                  | AA                              | GG              | 1947011093               |
| SNP_P4_162598_242893 | NW_004516694.1 | Scaffold1504 | 242893                  | GG                              | AA              | 1947011095               |
| SNP_P4_162599_242922 | NW_004516694.1 | Scaffold1504 | 242922                  | GG                              | CC              | 1947011097               |
| SNP_P4_162600_242944 | NW_004516694.1 | Scaffold1504 | 242944                  | TT                              | CC              | 1947011099               |
| SNP_P4_162601_242980 | NW_004516694.1 | Scaffold1504 | 242980                  | CC                              | TT              | 1947011101               |
| SNP_P4_162602_242993 | NW_004516694.1 | Scaffold1504 | 242993                  | CC                              | AA              | 1947011103               |
| SNP_P4_162603_243871 | NW_004516694.1 | Scaffold1504 | 243871                  | TT                              | CC              | 1947011105               |
| SNP_P4_162604_272582 | NW_004516694.1 | Scaffold1504 | 272582                  | TT                              | CC              | 1947011107               |
| SNP_P4_162605_286614 | NW_004516694.1 | Scaffold1504 | 286614                  | AA                              | GG              | 1947011109               |
| SNP_P4_162607_318576 | NW_004516694.1 | Scaffold1504 | 318576                  | CC                              | AA              | 1947011111               |
| SNP_P4_162608_318595 | NW_004516694.1 | Scaffold1504 | 318595                  | TT                              | CC              | 1947011113               |
| SNP_P4_162609_318645 | NW_004516694.1 | Scaffold1504 | 318645                  | TT                              | CC              | 1947011115               |
| SNP_P4_162610_318844 | NW_004516694.1 | Scaffold1504 | 318844                  | TT                              | AA              | 1947011117               |
| SNP_P4_162611_318875 | NW_004516694.1 | Scaffold1504 | 318875                  | AA                              | GG              | 1947011119               |
| SNP_P4_162612_326379 | NW_004516694.1 | Scaffold1504 | 326379                  | TT                              | GG              | 1947011121               |
| SNP_P4_162613_328714 | NW_004516694.1 | Scaffold1504 | 328714                  | GG                              | AA              | 1947011123               |
| SNP_P4_162614_328717 | NW_004516694.1 | Scaffold1504 | 328717                  | GG                              | AA              | 1947011125               |
| SNP_P4_162615_342876 | NW_004516694.1 | Scaffold1504 | 342876                  | CC                              | GG              | 1947011127               |
| SNP_P4_162616_347124 | NW_004516694.1 | Scaffold1504 | 347124                  | CC                              | TT              | 1947011129               |
| SNP_P4_162617_389009 | NW_004516694.1 | Scaffold1504 | 389009                  | CC                              | TT              | 1947011131               |
| SNP_P4_162619_396057 | NW_004516694.1 | Scaffold1504 | 396057                  | TT                              | CC              | 1947011133               |
| SNP_P4_162620_398289 | NW_004516694.1 | Scaffold1504 | 398289                  | GG                              | TT              | 1947011135               |
| SNP_P4_162621_398300 | NW_004516694.1 | Scaffold1504 | 398300                  | AA                              | GG              | 1947011137               |
| SNP_P4_162622_398340 | NW_004516694.1 | Scaffold1504 | 398340                  | AA                              | GG              | 1947011139               |
| SNP_P4_162623_398347 | NW_004516694.1 | Scaffold1504 | 398347                  | TT                              | CC              | 1947011141               |
| SNP_P4_162624_398802 | NW_004516694.1 | Scaffold1504 | 398802                  | AA                              | GG              | 1947011143               |
| SNP_P4_162625_15192  | NW_004516695.1 | Scaffold1505 | 15192                   | CC                              | TT              | 1947011145               |
| SNP_P4_162626_14013  | NW_004516696.1 | Scaffold1506 | 14013                   | AA                              | TT              | 1947011147               |
| SNP_P4_162627_14021  | NW_004516696.1 | Scaffold1506 | 14021                   | TT                              | CC              | 1947011149               |
| SNP_P4_162628_14041  | NW_004516696.1 | Scaffold1506 | 14041                   | TT                              | AA              | 1947011151               |
| SNP_P4_162629_14237  | NW_004516696.1 | Scaffold1506 | 14237                   | AA                              | GG              | 1947011153               |
| SNP_P4_162630_14254  | NW_004516696.1 | Scaffold1506 | 14254                   | TT                              | AA              | 1947011155               |
| SNP_P4_162631_14330  | NW_004516696.1 | Scaffold1506 | 14330                   | AA                              | TT              | 1947011157               |
| SNP_P4_162632_14407  | NW_004516696.1 | Scaffold1506 | 14407                   | CC                              | TT              | 1947011159               |
| SNP_P4_162633_14418  | NW_004516696.1 | Scaffold1506 | 14418                   | TT                              | CC              | 1947011161               |
| SNP_P4_162634_15768  | NW_004516696.1 | Scaffold1506 | 15768                   | TT                              | CC              | 1947011163               |

| SNPs IDs             | Chromosome IDs | Chromosomes  | Physical positions (bp) | CDC Frontier (Reference genome) | (ILWC46 & LPNB) | NCBI SNPdb Accession IDs |
|----------------------|----------------|--------------|-------------------------|---------------------------------|-----------------|--------------------------|
| SNP_P4_162635_39417  | NW_004516696.1 | Scaffold1506 | 39417                   | CC                              | TT              | 1947011165               |
| SNP_P4_162636_59354  | NW_004516696.1 | Scaffold1506 | 59354                   | GG                              | AA              | 1947011167               |
| SNP_P4_162637_103299 | NW_004516696.1 | Scaffold1506 | 103299                  | AA                              | GG              | 1947011169               |
| SNP_P4_162638_103725 | NW_004516696.1 | Scaffold1506 | 103725                  | AA                              | CC              | 1947011171               |
| SNP_P4_162639_103726 | NW_004516696.1 | Scaffold1506 | 103726                  | TT                              | AA              | 1947011173               |
| SNP_P4_162640_103730 | NW_004516696.1 | Scaffold1506 | 103730                  | AA                              | CC              | 1947011175               |
| SNP_P4_162641_103742 | NW_004516696.1 | Scaffold1506 | 103742                  | TT                              | CC              | 1947011177               |
| SNP_P4_162643_169    | NW_004516697.1 | Scaffold1507 | 169                     | CC                              | GG              | 1947011179               |
| SNP_P4_162644_233    | NW_004516697.1 | Scaffold1507 | 233                     | GG                              | CC              | 1947011181               |
| SNP_P4_162645_30417  | NW_004516697.1 | Scaffold1507 | 30417                   | AA                              | TT              | 1947011183               |
| SNP_P4_162646_30559  | NW_004516697.1 | Scaffold1507 | 30559                   | TT                              | GG              | 1947011185               |
| SNP_P4_162647_6184   | NW_004516698.1 | Scaffold1508 | 6184                    | CC                              | GG              | 1947011187               |
| SNP_P4_162648_6194   | NW_004516698.1 | Scaffold1508 | 6194                    | AA                              | GG              | 1947011189               |
| SNP_P4_162649_17316  | NW_004516698.1 | Scaffold1508 | 17316                   | TT                              | CC              | 1947011191               |
| SNP_P4_162650_30295  | NW_004516698.1 | Scaffold1508 | 30295                   | GG                              | CC              | 1947011193               |
| SNP_P4_162651_47199  | NW_004516698.1 | Scaffold1508 | 47199                   | AA                              | CC              | 1947011195               |
| SNP_P4_162652_55431  | NW_004516698.1 | Scaffold1508 | 55431                   | TT                              | CC              | 1947011197               |
| SNP_P4_162653_59480  | NW_004516698.1 | Scaffold1508 | 59480                   | GG                              | AA              | 1947011199               |
| SNP_P4_162654_60310  | NW_004516698.1 | Scaffold1508 | 60310                   | AA                              | GG              | 1947011201               |
| SNP_P4_162655_79733  | NW_004516698.1 | Scaffold1508 | 79733                   | AA                              | GG              | 1947011202               |
| SNP_P4_162656_84264  | NW_004516698.1 | Scaffold1508 | 84264                   | TT                              | GG              | 1947011204               |
| SNP_P4_162657_84495  | NW_004516698.1 | Scaffold1508 | 84495                   | AA                              | TT              | 1947011206               |
| SNP_P4_162658_115931 | NW_004516698.1 | Scaffold1508 | 115931                  | GG                              | AA              | 1947011208               |
| SNP_P4_162659_760    | NW_004516700.1 | Scaffold1511 | 760                     | AA                              | GG              | 1947011210               |
| SNP_P4_162660_1277   | NW_004516700.1 | Scaffold1511 | 1277                    | CC                              | TT              | 1947011212               |
| SNP_P4_162661_1436   | NW_004516700.1 | Scaffold1511 | 1436                    | AA                              | GG              | 1947011214               |
| SNP_P4_162662_2660   | NW_004516700.1 | Scaffold1511 | 2660                    | AA                              | TT              | 1947011216               |
| SNP_P4_162663_4893   | NW_004516700.1 | Scaffold1511 | 4893                    | CC                              | TT              | 1947011218               |
| SNP_P4_162664_11943  | NW_004516700.1 | Scaffold1511 | 11943                   | AA                              | TT              | 1947011220               |
| SNP_P4_162665_14814  | NW_004516700.1 | Scaffold1511 | 14814                   | GG                              | AA              | 1947011222               |
| SNP_P4_162666_14851  | NW_004516700.1 | Scaffold1511 | 14851                   | TT                              | AA              | 1947011224               |
| SNP_P4_162667_14880  | NW_004516700.1 | Scaffold1511 | 14880                   | CC                              | TT              | 1947011226               |
| SNP_P4_162668_19442  | NW_004516700.1 | Scaffold1511 | 19442                   | CC                              | TT              | 1947011228               |
| SNP_P4_162669_24718  | NW_004516700.1 | Scaffold1511 | 24718                   | CC                              | TT              | 1947011230               |
| SNP_P4_162670_25076  | NW_004516700.1 | Scaffold1511 | 25076                   | AA                              | GG              | 1947011232               |
| SNP_P4_162672_27234  | NW_004516700.1 | Scaffold1511 | 27234                   | TT                              | GG              | 1947011234               |
| SNP_P4_162673_30730  | NW_004516700.1 | Scaffold1511 | 30730                   | TT                              | AA              | 1947011236               |
| SNP_P4_162674_30917  | NW_004516700.1 | Scaffold1511 | 30917                   | AA                              | GG              | 1947011238               |
| SNP_P4_162675_32626  | NW_004516700.1 | Scaffold1511 | 32626                   | TT                              | GG              | 1947011240               |
| SNP_P4_162676_34272  | NW_004516700.1 | Scaffold1511 | 34272                   | TT                              | GG              | 1947011242               |
| SNP_P4_162677_34289  | NW_004516700.1 | Scaffold1511 | 34289                   | CC                              | GG              | 1947011244               |
| SNP_P4_162678_34434  | NW_004516700.1 | Scaffold1511 | 34434                   | AA                              | GG              | 1947011246               |

| SNPs IDs            | Chromosome IDs | Chromosomes  | Physical positions (bp) | CDC Frontier (Reference genome) | (ILWC46 & LPNB) | NCBI SNPdb Accession IDs |
|---------------------|----------------|--------------|-------------------------|---------------------------------|-----------------|--------------------------|
| SNP_P4_162679_38091 | NW_004516700.1 | Scaffold1511 | 38091                   | GG                              | AA              | 1947011248               |
| SNP_P4_162680_38724 | NW_004516700.1 | Scaffold1511 | 38724                   | TT                              | CC              | 1947011250               |
| SNP_P4_162681_38772 | NW_004516700.1 | Scaffold1511 | 38772                   | GG                              | AA              | 1947011252               |
| SNP_P4_162682_39855 | NW_004516700.1 | Scaffold1511 | 39855                   | AA                              | GG              | 1947011254               |
| SNP_P4_162683_41106 | NW_004516700.1 | Scaffold1511 | 41106                   | AA                              | GG              | 1947011256               |
| SNP_P4_162684_42121 | NW_004516700.1 | Scaffold1511 | 42121                   | AA                              | GG              | 1947011257               |
| SNP_P4_162685_44432 | NW_004516700.1 | Scaffold1511 | 44432                   | GG                              | AA              | 1947011258               |
| SNP_P4_162686_47667 | NW_004516700.1 | Scaffold1511 | 47667                   | CC                              | TT              | 1947011259               |
| SNP_P4_162687_47768 | NW_004516700.1 | Scaffold1511 | 47768                   | GG                              | AA              | 1947011260               |
| SNP_P4_162688_47846 | NW_004516700.1 | Scaffold1511 | 47846                   | AA                              | CC              | 1947011261               |
| SNP_P4_162689_47932 | NW_004516700.1 | Scaffold1511 | 47932                   | CC                              | GG              | 1947011263               |
| SNP_P4_162690_47942 | NW_004516700.1 | Scaffold1511 | 47942                   | TT                              | GG              | 1947011265               |
| SNP_P4_162691_52133 | NW_004516700.1 | Scaffold1511 | 52133                   | TT                              | AA              | 1947011267               |
| SNP_P4_162692_52201 | NW_004516700.1 | Scaffold1511 | 52201                   | TT                              | CC              | 1947011269               |
| SNP_P4_162693_58411 | NW_004516700.1 | Scaffold1511 | 58411                   | AA                              | CC              | 1947011271               |
| SNP_P4_162694_59122 | NW_004516700.1 | Scaffold1511 | 59122                   | AA                              | GG              | 1947011273               |
| SNP_P4_162697_65556 | NW_004516700.1 | Scaffold1511 | 65556                   | TT                              | CC              | 1947011275               |
| SNP_P4_162699_75255 | NW_004516700.1 | Scaffold1511 | 75255                   | GG                              | CC              | 1947011277               |
| SNP_P4_162701_80673 | NW_004516700.1 | Scaffold1511 | 80673                   | TT                              | GG              | 1947011279               |
| SNP_P4_162702_81331 | NW_004516700.1 | Scaffold1511 | 81331                   | GG                              | AA              | 1947011281               |
| SNP_P4_162703_81412 | NW_004516700.1 | Scaffold1511 | 81412                   | TT                              | CC              | 1947011283               |
| SNP_P4_162704_81620 | NW_004516700.1 | Scaffold1511 | 81620                   | TT                              | AA              | 1947011285               |
| SNP_P4_162705_82377 | NW_004516700.1 | Scaffold1511 | 82377                   | CC                              | TT              | 1947011287               |
| SNP_P4_162706_82734 | NW_004516700.1 | Scaffold1511 | 82734                   | TT                              | CC              | 1947011289               |
| SNP_P4_162707_82742 | NW_004516700.1 | Scaffold1511 | 82742                   | TT                              | CC              | 1947011291               |
| SNP_P4_162708_82803 | NW_004516700.1 | Scaffold1511 | 82803                   | AA                              | CC              | 1947011293               |
| SNP_P4_162709_82851 | NW_004516700.1 | Scaffold1511 | 82851                   | AA                              | TT              | 1947011295               |
| SNP_P4_162710_82936 | NW_004516700.1 | Scaffold1511 | 82936                   | GG                              | AA              | 1947011297               |
| SNP_P4_162711_83141 | NW_004516700.1 | Scaffold1511 | 83141                   | AA                              | GG              | 1947011299               |
| SNP_P4_162712_83615 | NW_004516700.1 | Scaffold1511 | 83615                   | TT                              | AA              | 1947011301               |
| SNP_P4_162713_85907 | NW_004516700.1 | Scaffold1511 | 85907                   | AA                              | GG              | 1947011303               |
| SNP_P4_162715_86417 | NW_004516700.1 | Scaffold1511 | 86417                   | AA                              | CC              | 1947011305               |
| SNP_P4_162716_88325 | NW_004516700.1 | Scaffold1511 | 88325                   | CC                              | TT              | 1947011307               |
| SNP_P4_162717_88355 | NW_004516700.1 | Scaffold1511 | 88355                   | GG                              | AA              | 1947011308               |
| SNP_P4_162718_88373 | NW_004516700.1 | Scaffold1511 | 88373                   | TT                              | CC              | 1947011310               |
| SNP_P4_162719_90802 | NW_004516700.1 | Scaffold1511 | 90802                   | TT                              | CC              | 1947011312               |
| SNP_P4_162720_91104 | NW_004516700.1 | Scaffold1511 | 91104                   | AA                              | CC              | 1947011314               |
| SNP_P4_162721_91132 | NW_004516700.1 | Scaffold1511 | 91132                   | CC                              | TT              | 1947011316               |
| SNP_P4_162722_91235 | NW_004516700.1 | Scaffold1511 | 91235                   | AA                              | CC              | 1947011318               |
| SNP_P4_162724_94565 | NW_004516700.1 | Scaffold1511 | 94565                   | TT                              | GG              | 1947011320               |
| SNP_P4_162725_94655 | NW_004516700.1 | Scaffold1511 | 94655                   | GG                              | TT              | 1947011322               |
| SNP_P4_162726_95425 | NW_004516700.1 | Scaffold1511 | 95425                   | GG                              | TT              | 1947011324               |

| SNPs IDs             | Chromosome IDs | Chromosomes  | Physical positions (bp) | CDC Frontier (Reference genome) | (ILWC46 & LPNB) | NCBI SNPdb Accession IDs |
|----------------------|----------------|--------------|-------------------------|---------------------------------|-----------------|--------------------------|
| SNP_P4_162727_96085  | NW_004516700.1 | Scaffold1511 | 96085                   | TT                              | AA              | 1947011326               |
| SNP_P4_162728_96098  | NW_004516700.1 | Scaffold1511 | 96098                   | CC                              | TT              | 1947011328               |
| SNP_P4_162729_98053  | NW_004516700.1 | Scaffold1511 | 98053                   | AA                              | GG              | 1947011330               |
| SNP_P4_162730_99709  | NW_004516700.1 | Scaffold1511 | 99709                   | GG                              | AA              | 1947011332               |
| SNP_P4_162731_101137 | NW_004516700.1 | Scaffold1511 | 101137                  | AA                              | GG              | 1947011334               |
| SNP_P4_162732_102480 | NW_004516700.1 | Scaffold1511 | 102480                  | AA                              | GG              | 1947011336               |
| SNP_P4_162733_102908 | NW_004516700.1 | Scaffold1511 | 102908                  | TT                              | CC              | 1947011338               |
| SNP_P4_162734_103541 | NW_004516700.1 | Scaffold1511 | 103541                  | GG                              | AA              | 1947011340               |
| SNP_P4_162735_104734 | NW_004516700.1 | Scaffold1511 | 104734                  | TT                              | AA              | 1947011342               |
| SNP_P4_162736_104742 | NW_004516700.1 | Scaffold1511 | 104742                  | CC                              | TT              | 1947011344               |
| SNP_P4_162737_105848 | NW_004516700.1 | Scaffold1511 | 105848                  | GG                              | CC              | 1947011346               |
| SNP_P4_162738_107259 | NW_004516700.1 | Scaffold1511 | 107259                  | CC                              | TT              | 1947011348               |
| SNP_P4_162740_110258 | NW_004516700.1 | Scaffold1511 | 110258                  | TT                              | AA              | 1947011350               |
| SNP_P4_162741_111753 | NW_004516700.1 | Scaffold1511 | 111753                  | AA                              | GG              | 1947011352               |
| SNP_P4_162742_111767 | NW_004516700.1 | Scaffold1511 | 111767                  | AA                              | CC              | 1947011354               |
| SNP_P4_162743_111806 | NW_004516700.1 | Scaffold1511 | 111806                  | TT                              | CC              | 1947011356               |
| SNP_P4_162744_111846 | NW_004516700.1 | Scaffold1511 | 111846                  | TT                              | CC              | 1947011358               |
| SNP_P4_162745_114850 | NW_004516700.1 | Scaffold1511 | 114850                  | GG                              | AA              | 1947011360               |
| SNP_P4_162746_116040 | NW_004516700.1 | Scaffold1511 | 116040                  | TT                              | GG              | 1947011362               |
| SNP_P4_162747_116381 | NW_004516700.1 | Scaffold1511 | 116381                  | TT                              | GG              | 1947011364               |
| SNP_P4_162749_117847 | NW_004516700.1 | Scaffold1511 | 117847                  | TT                              | GG              | 1947011366               |
| SNP_P4_162750_122120 | NW_004516700.1 | Scaffold1511 | 122120                  | TT                              | CC              | 1947011368               |
| SNP_P4_162751_122175 | NW_004516700.1 | Scaffold1511 | 122175                  | TT                              | CC              | 1947011370               |
| SNP_P4_162752_122359 | NW_004516700.1 | Scaffold1511 | 122359                  | TT                              | GG              | 1947011372               |
| SNP_P4_162753_122363 | NW_004516700.1 | Scaffold1511 | 122363                  | AA                              | TT              | 1947011374               |
| SNP_P4_162754_122392 | NW_004516700.1 | Scaffold1511 | 122392                  | AA                              | GG              | 1947011376               |
| SNP_P4_162755_122575 | NW_004516700.1 | Scaffold1511 | 122575                  | TT                              | CC              | 1947011378               |
| SNP_P4_162756_122703 | NW_004516700.1 | Scaffold1511 | 122703                  | AA                              | GG              | 1947011380               |
| SNP_P4_162757_122843 | NW_004516700.1 | Scaffold1511 | 122843                  | CC                              | TT              | 1947011382               |
| SNP_P4_162758_124385 | NW_004516700.1 | Scaffold1511 | 124385                  | GG                              | TT              | 1947011385               |
| SNP_P4_162759_125246 | NW_004516700.1 | Scaffold1511 | 125246                  | GG                              | TT              | 1947011388               |
| SNP_P4_162760_125254 | NW_004516700.1 | Scaffold1511 | 125254                  | TT                              | AA              | 1947011390               |
| SNP_P4_162761_125574 | NW_004516700.1 | Scaffold1511 | 125574                  | GG                              | AA              | 1947011392               |
| SNP_P4_162763_129068 | NW_004516700.1 | Scaffold1511 | 129068                  | GG                              | AA              | 1947011394               |
| SNP_P4_162764_130282 | NW_004516700.1 | Scaffold1511 | 130282                  | AA                              | TT              | 1947011396               |
| SNP_P4_162765_133165 | NW_004516700.1 | Scaffold1511 | 133165                  | AA                              | GG              | 1947011398               |
| SNP_P4_162766_135099 | NW_004516700.1 | Scaffold1511 | 135099                  | CC                              | TT              | 1947011400               |
| SNP_P4_162767_135326 | NW_004516700.1 | Scaffold1511 | 135326                  | CC                              | TT              | 1947011402               |
| SNP_P4_162768_135873 | NW_004516700.1 | Scaffold1511 | 135873                  | CC                              | TT              | 1947011405               |
| SNP_P4_162769_136394 | NW_004516700.1 | Scaffold1511 | 136394                  | TT                              | CC              | 1947011407               |
| SNP_P4_162770_137060 | NW_004516700.1 | Scaffold1511 | 137060                  | CC                              | TT              | 1947011409               |
| SNP_P4_162771_137231 | NW_004516700.1 | Scaffold1511 | 137231                  | AA                              | CC              | 1947011411               |

| SNPs IDs             | Chromosome IDs | Chromosomes  | Physical positions (bp) | CDC Frontier (Reference genome) | (ILWC46 & LPNB) | NCBI SNPdb Accession IDs |
|----------------------|----------------|--------------|-------------------------|---------------------------------|-----------------|--------------------------|
| SNP_P4_162772_142886 | NW_004516700.1 | Scaffold1511 | 142886                  | GG                              | AA              | 1947011414               |
| SNP_P4_162774_146114 | NW_004516700.1 | Scaffold1511 | 146114                  | CC                              | TT              | 1947011416               |
| SNP_P4_162776_152522 | NW_004516700.1 | Scaffold1511 | 152522                  | GG                              | AA              | 1947011418               |
| SNP_P4_162777_152611 | NW_004516700.1 | Scaffold1511 | 152611                  | AA                              | GG              | 1947011420               |
| SNP_P4_162778_152614 | NW_004516700.1 | Scaffold1511 | 152614                  | AA                              | TT              | 1947011422               |
| SNP_P4_162779_153172 | NW_004516700.1 | Scaffold1511 | 153172                  | GG                              | AA              | 1947011424               |
| SNP_P4_162780_154498 | NW_004516700.1 | Scaffold1511 | 154498                  | GG                              | AA              | 1947011426               |
| SNP_P4_162781_154867 | NW_004516700.1 | Scaffold1511 | 154867                  | AA                              | GG              | 1947011428               |
| SNP_P4_162782_155545 | NW_004516700.1 | Scaffold1511 | 155545                  | TT                              | CC              | 1947011430               |
| SNP_P4_162783_155547 | NW_004516700.1 | Scaffold1511 | 155547                  | AA                              | CC              | 1947011433               |
| SNP_P4_162784_157473 | NW_004516700.1 | Scaffold1511 | 157473                  | CC                              | AA              | 1947011435               |
| SNP_P4_162785_163341 | NW_004516700.1 | Scaffold1511 | 163341                  | CC                              | GG              | 1947011437               |
| SNP_P4_162787_164202 | NW_004516700.1 | Scaffold1511 | 164202                  | AA                              | GG              | 1947011439               |
| SNP_P4_162788_164221 | NW_004516700.1 | Scaffold1511 | 164221                  | AA                              | TT              | 1947011441               |
| SNP_P4_162789_164638 | NW_004516700.1 | Scaffold1511 | 164638                  | GG                              | TT              | 1947011443               |
| SNP_P4_162790_164795 | NW_004516700.1 | Scaffold1511 | 164795                  | AA                              | CC              | 1947011445               |
| SNP_P4_162791_165142 | NW_004516700.1 | Scaffold1511 | 165142                  | AA                              | GG              | 1947011447               |
| SNP_P4_162792_167119 | NW_004516700.1 | Scaffold1511 | 167119                  | GG                              | CC              | 1947011449               |
| SNP_P4_162794_167925 | NW_004516700.1 | Scaffold1511 | 167925                  | AA                              | GG              | 1947011451               |
| SNP_P4_162796_170080 | NW_004516700.1 | Scaffold1511 | 170080                  | TT                              | CC              | 1947011453               |
| SNP_P4_162797_170276 | NW_004516700.1 | Scaffold1511 | 170276                  | AA                              | GG              | 1947011455               |
| SNP_P4_162798_173462 | NW_004516700.1 | Scaffold1511 | 173462                  | CC                              | TT              | 1947011457               |
| SNP_P4_162799_173774 | NW_004516700.1 | Scaffold1511 | 173774                  | CC                              | TT              | 1947011459               |
| SNP_P4_162801_174277 | NW_004516700.1 | Scaffold1511 | 174277                  | GG                              | AA              | 1947011461               |
| SNP_P4_162802_174414 | NW_004516700.1 | Scaffold1511 | 174414                  | AA                              | GG              | 1947011464               |
| SNP_P4_162803_174417 | NW_004516700.1 | Scaffold1511 | 174417                  | GG                              | CC              | 1947011466               |
| SNP_P4_162804_174581 | NW_004516700.1 | Scaffold1511 | 174581                  | TT                              | CC              | 1947011468               |
| SNP_P4_162805_174631 | NW_004516700.1 | Scaffold1511 | 174631                  | AA                              | GG              | 1947011470               |
| SNP_P4_162806_174643 | NW_004516700.1 | Scaffold1511 | 174643                  | CC                              | GG              | 1947011472               |
| SNP_P4_162807_174676 | NW_004516700.1 | Scaffold1511 | 174676                  | GG                              | TT              | 1947011474               |
| SNP_P4_162808_174693 | NW_004516700.1 | Scaffold1511 | 174693                  | TT                              | CC              | 1947011476               |
| SNP_P4_162809_174811 | NW_004516700.1 | Scaffold1511 | 174811                  | TT                              | CC              | 1947011478               |
| SNP_P4_162810_175182 | NW_004516700.1 | Scaffold1511 | 175182                  | CC                              | TT              | 1947011480               |
| SNP_P4_162811_175197 | NW_004516700.1 | Scaffold1511 | 175197                  | GG                              | AA              | 1947011482               |
| SNP_P4_162812_176590 | NW_004516700.1 | Scaffold1511 | 176590                  | GG                              | TT              | 1947011484               |
| SNP_P4_162813_176606 | NW_004516700.1 | Scaffold1511 | 176606                  | CC                              | TT              | 1947011486               |
| SNP_P4_162814_176630 | NW_004516700.1 | Scaffold1511 | 176630                  | GG                              | AA              | 1947011488               |
| SNP_P4_162815_177175 | NW_004516700.1 | Scaffold1511 | 177175                  | TT                              | CC              | 1947011490               |
| SNP_P4_162817_179285 | NW_004516700.1 | Scaffold1511 | 179285                  | AA                              | TT              | 1947011492               |
| SNP_P4_162819_180354 | NW_004516700.1 | Scaffold1511 | 180354                  | AA                              | CC              | 1947011494               |
| SNP_P4_162820_181038 | NW_004516700.1 | Scaffold1511 | 181038                  | AA                              | GG              | 1947011496               |
| SNP_P4_162821_181755 | NW_004516700.1 | Scaffold1511 | 181755                  | GG                              | AA              | 1947011498               |

| SNPs IDs             | Chromosome IDs | Chromosomes  | Physical positions (bp) | CDC Frontier (Reference genome) | (ILWC46 & LPNB) | NCBI SNPdb Accession IDs |
|----------------------|----------------|--------------|-------------------------|---------------------------------|-----------------|--------------------------|
| SNP_P4_162822_181822 | NW_004516700.1 | Scaffold1511 | 181822                  | GG                              | AA              | 1947011500               |
| SNP_P4_162823_182018 | NW_004516700.1 | Scaffold1511 | 182018                  | AA                              | TT              | 1947011502               |
| SNP_P4_162824_182870 | NW_004516700.1 | Scaffold1511 | 182870                  | CC                              | AA              | 1947011504               |
| SNP_P4_162825_183361 | NW_004516700.1 | Scaffold1511 | 183361                  | AA                              | TT              | 1947011506               |
| SNP_P4_162826_183406 | NW_004516700.1 | Scaffold1511 | 183406                  | TT                              | GG              | 1947011508               |
| SNP_P4_162827_187622 | NW_004516700.1 | Scaffold1511 | 187622                  | TT                              | GG              | 1947011510               |
| SNP_P4_162828_188123 | NW_004516700.1 | Scaffold1511 | 188123                  | CC                              | TT              | 1947011512               |
| SNP_P4_162829_188124 | NW_004516700.1 | Scaffold1511 | 188124                  | TT                              | CC              | 1947011514               |
| SNP_P4_162830_188129 | NW_004516700.1 | Scaffold1511 | 188129                  | TT                              | AA              | 1947011516               |
| SNP_P4_162831_190982 | NW_004516700.1 | Scaffold1511 | 190982                  | GG                              | AA              | 1947011518               |
| SNP_P4_162833_191339 | NW_004516700.1 | Scaffold1511 | 191339                  | TT                              | CC              | 1947011520               |
| SNP_P4_162835_8544   | NW_004516701.1 | Scaffold1512 | 8544                    | CC                              | AA              | 1947011522               |
| SNP_P4_162836_9174   | NW_004516701.1 | Scaffold1512 | 9174                    | AA                              | GG              | 1947011524               |
| SNP_P4_162837_1112   | NW_004516704.1 | Scaffold1515 | 1112                    | TT                              | CC              | 1947011526               |
| SNP_P4_162838_8893   | NW_004516704.1 | Scaffold1515 | 8893                    | AA                              | GG              | 1947011528               |
| SNP_P4_162839_9056   | NW_004516704.1 | Scaffold1515 | 9056                    | TT                              | CC              | 1947011530               |
| SNP_P4_162840_9115   | NW_004516704.1 | Scaffold1515 | 9115                    | TT                              | CC              | 1947011532               |
| SNP_P4_162841_9254   | NW_004516704.1 | Scaffold1515 | 9254                    | TT                              | AA              | 1947011534               |
| SNP_P4_162842_9263   | NW_004516704.1 | Scaffold1515 | 9263                    | TT                              | AA              | 1947011536               |
| SNP_P4_162843_9358   | NW_004516704.1 | Scaffold1515 | 9358                    | GG                              | AA              | 1947011538               |
| SNP_P4_162844_9385   | NW_004516704.1 | Scaffold1515 | 9385                    | AA                              | CC              | 1947011540               |
| SNP_P4_162845_9387   | NW_004516704.1 | Scaffold1515 | 9387                    | GG                              | TT              | 1947011542               |
| SNP_P4_162846_9455   | NW_004516704.1 | Scaffold1515 | 9455                    | AA                              | CC              | 1947011545               |
| SNP_P4_162847_9503   | NW_004516704.1 | Scaffold1515 | 9503                    | AA                              | TT              | 1947011547               |
| SNP_P4_162848_9548   | NW_004516704.1 | Scaffold1515 | 9548                    | TT                              | CC              | 1947011549               |
| SNP_P4_162849_9675   | NW_004516704.1 | Scaffold1515 | 9675                    | AA                              | TT              | 1947011551               |
| SNP_P4_162850_9791   | NW_004516704.1 | Scaffold1515 | 9791                    | CC                              | TT              | 1947011553               |
| SNP_P4_162851_9885   | NW_004516704.1 | Scaffold1515 | 9885                    | AA                              | GG              | 1947011555               |
| SNP_P4_162852_9909   | NW_004516704.1 | Scaffold1515 | 9909                    | AA                              | GG              | 1947011557               |
| SNP_P4_162853_10026  | NW_004516704.1 | Scaffold1515 | 10026                   | TT                              | CC              | 1947011559               |
| SNP_P4_162854_10090  | NW_004516704.1 | Scaffold1515 | 10090                   | CC                              | TT              | 1947011562               |
| SNP_P4_162855_10329  | NW_004516704.1 | Scaffold1515 | 10329                   | TT                              | CC              | 1947011564               |
| SNP_P4_162856_10394  | NW_004516704.1 | Scaffold1515 | 10394                   | TT                              | CC              | 1947011566               |
| SNP_P4_162857_10400  | NW_004516704.1 | Scaffold1515 | 10400                   | CC                              | AA              | 1947011568               |
| SNP_P4_162858_10471  | NW_004516704.1 | Scaffold1515 | 10471                   | TT                              | AA              | 1947011570               |
| SNP_P4_162859_15072  | NW_004516704.1 | Scaffold1515 | 15072                   | TT                              | AA              | 1947011572               |
| SNP_P4_162860_15278  | NW_004516704.1 | Scaffold1515 | 15278                   | CC                              | AA              | 1947011574               |
| SNP_P4_162861_15280  | NW_004516704.1 | Scaffold1515 | 15280                   | GG                              | AA              | 1947011576               |
| SNP_P4_162862_15383  | NW_004516704.1 | Scaffold1515 | 15383                   | CC                              | TT              | 1947011578               |
| SNP_P4_162863_15413  | NW_004516704.1 | Scaffold1515 | 15413                   | CC                              | TT              | 1947011580               |
| SNP_P4_162864_15424  | NW_004516704.1 | Scaffold1515 | 15424                   | TT                              | CC              | 1947011582               |
| SNP_P4_162865_15460  | NW_004516704.1 | Scaffold1515 | 15460                   | CC                              | GG              | 1947011584               |



| SNPs IDs            | Chromosome IDs | Chromosomes  | Physical positions (bp) | CDC Frontier (Reference genome) | (ILWC46 & LPNB) | NCBI SNPdb Accession IDs |
|---------------------|----------------|--------------|-------------------------|---------------------------------|-----------------|--------------------------|
| SNP_P4_162866_15506 | NW_004516704.1 | Scaffold1515 | 15506                   | TT                              | AA              | 1947011586               |
| SNP_P4_162868_15699 | NW_004516704.1 | Scaffold1515 | 15699                   | AA                              | CC              | 1947011588               |
| SNP_P4_162869_15775 | NW_004516704.1 | Scaffold1515 | 15775                   | TT                              | CC              | 1947011590               |
| SNP_P4_162870_17493 | NW_004516704.1 | Scaffold1515 | 17493                   | TT                              | CC              | 1947011592               |
| SNP_P4_162871_17517 | NW_004516704.1 | Scaffold1515 | 17517                   | TT                              | CC              | 1947011594               |
| SNP_P4_162872_17765 | NW_004516704.1 | Scaffold1515 | 17765                   | GG                              | AA              | 1947011596               |
| SNP_P4_162873_17835 | NW_004516704.1 | Scaffold1515 | 17835                   | GG                              | AA              | 1947011598               |
| SNP_P4_162874_18024 | NW_004516704.1 | Scaffold1515 | 18024                   | GG                              | AA              | 1947011600               |
| SNP_P4_162875_18052 | NW_004516704.1 | Scaffold1515 | 18052                   | TT                              | CC              | 1947011602               |
| SNP_P4_162876_18201 | NW_004516704.1 | Scaffold1515 | 18201                   | CC                              | TT              | 1947011604               |
| SNP_P4_162878_30530 | NW_004516704.1 | Scaffold1515 | 30530                   | TT                              | CC              | 1947011606               |
| SNP_P4_162879_33646 | NW_004516704.1 | Scaffold1515 | 33646                   | GG                              | AA              | 1947011608               |
| SNP_P4_162880_531   | NW_004516705.1 | Scaffold1516 | 531                     | GG                              | TT              | 1947011610               |
| SNP_P4_162881_554   | NW_004516705.1 | Scaffold1516 | 554                     | TT                              | GG              | 1947011612               |
| SNP_P4_162882_574   | NW_004516705.1 | Scaffold1516 | 574                     | GG                              | CC              | 1947011614               |
| SNP_P4_162883_825   | NW_004516705.1 | Scaffold1516 | 825                     | GG                              | TT              | 1947011616               |
| SNP_P4_162884_2725  | NW_004516705.1 | Scaffold1516 | 2725                    | GG                              | TT              | 1947011618               |
| SNP_P4_162885_2978  | NW_004516705.1 | Scaffold1516 | 2978                    | AA                              | TT              | 1947011620               |
| SNP_P4_162886_3038  | NW_004516705.1 | Scaffold1516 | 3038                    | GG                              | TT              | 1947011622               |
| SNP_P4_162887_3058  | NW_004516705.1 | Scaffold1516 | 3058                    | AA                              | CC              | 1947011624               |
| SNP_P4_162888_3059  | NW_004516705.1 | Scaffold1516 | 3059                    | TT                              | AA              | 1947011626               |
| SNP_P4_162889_3084  | NW_004516705.1 | Scaffold1516 | 3084                    | GG                              | AA              | 1947011628               |
| SNP_P4_162890_3085  | NW_004516705.1 | Scaffold1516 | 3085                    | GG                              | AA              | 1947011630               |
| SNP_P4_162892_3469  | NW_004516705.1 | Scaffold1516 | 3469                    | TT                              | CC              | 1947011632               |
| SNP_P4_162893_3522  | NW_004516705.1 | Scaffold1516 | 3522                    | TT                              | GG              | 1947011634               |
| SNP_P4_162894_8044  | NW_004516705.1 | Scaffold1516 | 8044                    | CC                              | TT              | 1947011635               |
| SNP_P4_162895_8143  | NW_004516705.1 | Scaffold1516 | 8143                    | TT                              | CC              | 1947011637               |
| SNP_P4_162896_8320  | NW_004516705.1 | Scaffold1516 | 8320                    | AA                              | CC              | 1947011639               |
| SNP_P4_162897_8430  | NW_004516705.1 | Scaffold1516 | 8430                    | GG                              | AA              | 1947011641               |
| SNP_P4_162898_8441  | NW_004516705.1 | Scaffold1516 | 8441                    | CC                              | GG              | 1947011643               |
| SNP_P4_162899_8649  | NW_004516705.1 | Scaffold1516 | 8649                    | TT                              | AA              | 1947011645               |
| SNP_P4_162900_9061  | NW_004516705.1 | Scaffold1516 | 9061                    | CC                              | AA              | 1947011647               |
| SNP_P4_162901_9101  | NW_004516705.1 | Scaffold1516 | 9101                    | TT                              | CC              | 1947011649               |
| SNP_P4_162902_9111  | NW_004516705.1 | Scaffold1516 | 9111                    | TT                              | CC              | 1947011651               |
| SNP_P4_162903_3303  | NW_004516706.1 | Scaffold1519 | 3303                    | TT                              | GG              | 1947011653               |
| SNP_P4_162904_3888  | NW_004516706.1 | Scaffold1519 | 3888                    | GG                              | TT              | 1947011655               |
| SNP_P4_162905_4109  | NW_004516706.1 | Scaffold1519 | 4109                    | CC                              | AA              | 1947011657               |
| SNP_P4_162906_4144  | NW_004516706.1 | Scaffold1519 | 4144                    | AA                              | GG              | 1947011659               |
| SNP_P4_162907_4145  | NW_004516706.1 | Scaffold1519 | 4145                    | TT                              | GG              | 1947011661               |
| SNP_P4_162908_16951 | NW_004516706.1 | Scaffold1519 | 16951                   | TT                              | CC              | 1947011663               |
| SNP_P4_162909_16993 | NW_004516706.1 | Scaffold1519 | 16993                   | TT                              | CC              | 1947011665               |
| SNP_P4_162910_425   | NW_004516708.1 | Scaffold1521 | 425                     | TT                              | GG              | 1947011667               |

| SNPs IDs            | Chromosome IDs | Chromosomes  | Physical positions (bp) | CDC Frontier (Reference genome) | (ILWC46 & LPNB) | NCBI SNPdb Accession IDs |
|---------------------|----------------|--------------|-------------------------|---------------------------------|-----------------|--------------------------|
| SNP_P4_162911_559   | NW_004516708.1 | Scaffold1521 | 559                     | GG                              | AA              | 1947011669               |
| SNP_P4_162912_593   | NW_004516708.1 | Scaffold1521 | 593                     | AA                              | GG              | 1947011671               |
| SNP_P4_162913_599   | NW_004516708.1 | Scaffold1521 | 599                     | AA                              | GG              | 1947011673               |
| SNP_P4_162914_632   | NW_004516708.1 | Scaffold1521 | 632                     | AA                              | CC              | 1947011675               |
| SNP_P4_162915_657   | NW_004516708.1 | Scaffold1521 | 657                     | AA                              | TT              | 1947011677               |
| SNP_P4_162916_705   | NW_004516708.1 | Scaffold1521 | 705                     | CC                              | TT              | 1947011679               |
| SNP_P4_162917_725   | NW_004516708.1 | Scaffold1521 | 725                     | CC                              | TT              | 1947011681               |
| SNP_P4_162918_992   | NW_004516708.1 | Scaffold1521 | 992                     | TT                              | GG              | 1947011683               |
| SNP_P4_162919_1036  | NW_004516708.1 | Scaffold1521 | 1036                    | TT                              | GG              | 1947011685               |
| SNP_P4_162920_5730  | NW_004516708.1 | Scaffold1521 | 5730                    | AA                              | TT              | 1947011687               |
| SNP_P4_162921_5903  | NW_004516708.1 | Scaffold1521 | 5903                    | AA                              | TT              | 1947011689               |
| SNP_P4_162922_5913  | NW_004516708.1 | Scaffold1521 | 5913                    | CC                              | TT              | 1947011691               |
| SNP_P4_162923_6874  | NW_004516708.1 | Scaffold1521 | 6874                    | CC                              | AA              | 1947011693               |
| SNP_P4_162924_7001  | NW_004516708.1 | Scaffold1521 | 7001                    | TT                              | AA              | 1947011695               |
| SNP_P4_162925_7659  | NW_004516708.1 | Scaffold1521 | 7659                    | TT                              | GG              | 1947011697               |
| SNP_P4_162926_8212  | NW_004516708.1 | Scaffold1521 | 8212                    | TT                              | CC              | 1947011699               |
| SNP_P4_162927_8220  | NW_004516708.1 | Scaffold1521 | 8220                    | AA                              | CC              | 1947011701               |
| SNP_P4_162928_8339  | NW_004516708.1 | Scaffold1521 | 8339                    | AA                              | CC              | 1947011703               |
| SNP_P4_162929_8365  | NW_004516708.1 | Scaffold1521 | 8365                    | AA                              | TT              | 1947011705               |
| SNP_P4_162930_8370  | NW_004516708.1 | Scaffold1521 | 8370                    | AA                              | TT              | 1947011707               |
| SNP_P4_162931_8377  | NW_004516708.1 | Scaffold1521 | 8377                    | AA                              | TT              | 1947011709               |
| SNP_P4_162932_8383  | NW_004516708.1 | Scaffold1521 | 8383                    | TT                              | GG              | 1947011711               |
| SNP_P4_162933_8620  | NW_004516708.1 | Scaffold1521 | 8620                    | AA                              | GG              | 1947011713               |
| SNP_P4_162934_8643  | NW_004516708.1 | Scaffold1521 | 8643                    | TT                              | CC              | 1947011715               |
| SNP_P4_162935_10337 | NW_004516708.1 | Scaffold1521 | 10337                   | TT                              | CC              | 1947011717               |
| SNP_P4_162936_10345 | NW_004516708.1 | Scaffold1521 | 10345                   | TT                              | AA              | 1947011719               |
| SNP_P4_162937_10356 | NW_004516708.1 | Scaffold1521 | 10356                   | TT                              | AA              | 1947011721               |
| SNP_P4_162938_10386 | NW_004516708.1 | Scaffold1521 | 10386                   | GG                              | AA              | 1947011723               |
| SNP_P4_162939_10400 | NW_004516708.1 | Scaffold1521 | 10400                   | CC                              | TT              | 1947011725               |
| SNP_P4_162940_10585 | NW_004516708.1 | Scaffold1521 | 10585                   | GG                              | TT              | 1947011727               |
| SNP_P4_162941_10747 | NW_004516708.1 | Scaffold1521 | 10747                   | GG                              | TT              | 1947011729               |
| SNP_P4_162942_10757 | NW_004516708.1 | Scaffold1521 | 10757                   | TT                              | CC              | 1947011731               |
| SNP_P4_162944_11999 | NW_004516708.1 | Scaffold1521 | 11999                   | CC                              | TT              | 1947011733               |
| SNP_P4_162945_13482 | NW_004516708.1 | Scaffold1521 | 13482                   | GG                              | AA              | 1947011735               |
| SNP_P4_162948_15273 | NW_004516708.1 | Scaffold1521 | 15273                   | TT                              | CC              | 1947011737               |
| SNP_P4_162949_15300 | NW_004516708.1 | Scaffold1521 | 15300                   | TT                              | AA              | 1947011739               |
| SNP_P4_162950_15309 | NW_004516708.1 | Scaffold1521 | 15309                   | TT                              | GG              | 1947011741               |
| SNP_P4_162951_15346 | NW_004516708.1 | Scaffold1521 | 15346                   | TT                              | AA              | 1947011743               |
| SNP_P4_162952_15440 | NW_004516708.1 | Scaffold1521 | 15440                   | AA                              | TT              | 1947011744               |
| SNP_P4_162953_15463 | NW_004516708.1 | Scaffold1521 | 15463                   | AA                              | TT              | 1947011746               |
| SNP_P4_162954_15470 | NW_004516708.1 | Scaffold1521 | 15470                   | AA                              | CC              | 1947011748               |
| SNP_P4_162955_15481 | NW_004516708.1 | Scaffold1521 | 15481                   | TT                              | AA              | 1947011750               |

| SNPs IDs            | Chromosome IDs | Chromosomes  | Physical positions (bp) | CDC Frontier (Reference genome) | (ILWC46 & LPNB) | NCBI SNPdb Accession IDs |
|---------------------|----------------|--------------|-------------------------|---------------------------------|-----------------|--------------------------|
| SNP_P4_162956_15531 | NW_004516708.1 | Scaffold1521 | 15531                   | CC                              | AA              | 1947011752               |
| SNP_P4_162957_15560 | NW_004516708.1 | Scaffold1521 | 15560                   | TT                              | CC              | 1947011754               |
| SNP_P4_162958_15575 | NW_004516708.1 | Scaffold1521 | 15575                   | TT                              | CC              | 1947011756               |
| SNP_P4_162960_15755 | NW_004516708.1 | Scaffold1521 | 15755                   | TT                              | CC              | 1947011758               |
| SNP_P4_162962_15947 | NW_004516708.1 | Scaffold1521 | 15947                   | TT                              | AA              | 1947011760               |
| SNP_P4_162963_17931 | NW_004516708.1 | Scaffold1521 | 17931                   | GG                              | TT              | 1947011762               |
| SNP_P4_162964_17941 | NW_004516708.1 | Scaffold1521 | 17941                   | TT                              | CC              | 1947011764               |
| SNP_P4_162966_18009 | NW_004516708.1 | Scaffold1521 | 18009                   | TT                              | AA              | 1947011765               |
| SNP_P4_162967_18012 | NW_004516708.1 | Scaffold1521 | 18012                   | AA                              | GG              | 1947011767               |
| SNP_P4_162968_19345 | NW_004516708.1 | Scaffold1521 | 19345                   | GG                              | CC              | 1947011769               |
| SNP_P4_162969_19363 | NW_004516708.1 | Scaffold1521 | 19363                   | CC                              | TT              | 1947011771               |
| SNP_P4_162970_19398 | NW_004516708.1 | Scaffold1521 | 19398                   | TT                              | GG              | 1947011773               |
| SNP_P4_162972_19506 | NW_004516708.1 | Scaffold1521 | 19506                   | GG                              | AA              | 1947011775               |
| SNP_P4_162973_19525 | NW_004516708.1 | Scaffold1521 | 19525                   | AA                              | GG              | 1947011777               |
| SNP_P4_162974_19605 | NW_004516708.1 | Scaffold1521 | 19605                   | CC                              | AA              | 1947011779               |
| SNP_P4_162975_19653 | NW_004516708.1 | Scaffold1521 | 19653                   | CC                              | AA              | 1947011780               |
| SNP_P4_162976_19670 | NW_004516708.1 | Scaffold1521 | 19670                   | TT                              | AA              | 1947011782               |
| SNP_P4_162977_19764 | NW_004516708.1 | Scaffold1521 | 19764                   | CC                              | TT              | 1947011784               |
| SNP_P4_162978_19910 | NW_004516708.1 | Scaffold1521 | 19910                   | GG                              | AA              | 1947011786               |
| SNP_P4_162980_20082 | NW_004516708.1 | Scaffold1521 | 20082                   | CC                              | TT              | 1947011788               |
| SNP_P4_162981_20335 | NW_004516708.1 | Scaffold1521 | 20335                   | GG                              | CC              | 1947011790               |
| SNP_P4_162983_21505 | NW_004516708.1 | Scaffold1521 | 21505                   | CC                              | TT              | 1947011792               |
| SNP_P4_162984_21510 | NW_004516708.1 | Scaffold1521 | 21510                   | CC                              | TT              | 1947011794               |
| SNP_P4_162985_21578 | NW_004516708.1 | Scaffold1521 | 21578                   | TT                              | AA              | 1947011796               |
| SNP_P4_162986_21606 | NW_004516708.1 | Scaffold1521 | 21606                   | AA                              | GG              | 1947011798               |
| SNP_P4_162987_21689 | NW_004516708.1 | Scaffold1521 | 21689                   | AA                              | TT              | 1947011800               |
| SNP_P4_162988_21693 | NW_004516708.1 | Scaffold1521 | 21693                   | TT                              | AA              | 1947011802               |
| SNP_P4_162989_23331 | NW_004516708.1 | Scaffold1521 | 23331                   | CC                              | TT              | 1947011804               |
| SNP_P4_162990_23355 | NW_004516708.1 | Scaffold1521 | 23355                   | AA                              | TT              | 1947011806               |
| SNP_P4_162991_23391 | NW_004516708.1 | Scaffold1521 | 23391                   | CC                              | TT              | 1947011808               |
| SNP_P4_162992_23422 | NW_004516708.1 | Scaffold1521 | 23422                   | GG                              | TT              | 1947011810               |
| SNP_P4_162993_23817 | NW_004516708.1 | Scaffold1521 | 23817                   | TT                              | GG              | 1947011812               |
| SNP_P4_162994_23834 | NW_004516708.1 | Scaffold1521 | 23834                   | AA                              | GG              | 1947011814               |
| SNP_P4_162995_25362 | NW_004516708.1 | Scaffold1521 | 25362                   | TT                              | AA              | 1947011816               |
| SNP_P4_162996_25845 | NW_004516708.1 | Scaffold1521 | 25845                   | CC                              | TT              | 1947011818               |
| SNP_P4_162997_25915 | NW_004516708.1 | Scaffold1521 | 25915                   | AA                              | GG              | 1947011820               |
| SNP_P4_162998_26566 | NW_004516708.1 | Scaffold1521 | 26566                   | AA                              | GG              | 1947011822               |
| SNP_P4_162999_26705 | NW_004516708.1 | Scaffold1521 | 26705                   | CC                              | TT              | 1947011824               |
| SNP_P4_163000_26848 | NW_004516708.1 | Scaffold1521 | 26848                   | TT                              | AA              | 1947011826               |
| SNP_P4_163001_26925 | NW_004516708.1 | Scaffold1521 | 26925                   | GG                              | TT              | 1947011828               |
| SNP_P4_163003_27261 | NW_004516708.1 | Scaffold1521 | 27261                   | TT                              | CC              | 1947011830               |
| SNP_P4_163004_27262 | NW_004516708.1 | Scaffold1521 | 27262                   | TT                              | AA              | 1947011832               |

| SNPs IDs            | Chromosome IDs | Chromosomes  | Physical positions (bp) | CDC Frontier (Reference genome) | (ILWC46 & LPNB) | NCBI SNPdb Accession IDs |
|---------------------|----------------|--------------|-------------------------|---------------------------------|-----------------|--------------------------|
| SNP_P4_163005_1299  | NW_004516709.1 | Scaffold1523 | 1299                    | TT                              | AA              | 1947011834               |
| SNP_P4_163006_1594  | NW_004516709.1 | Scaffold1523 | 1594                    | AA                              | TT              | 1947011836               |
| SNP_P4_163008_4752  | NW_004516709.1 | Scaffold1523 | 4752                    | GG                              | AA              | 1947011838               |
| SNP_P4_163009_5067  | NW_004516709.1 | Scaffold1523 | 5067                    | GG                              | TT              | 1947011840               |
| SNP_P4_163010_9777  | NW_004516709.1 | Scaffold1523 | 9777                    | GG                              | TT              | 1947011842               |
| SNP_P4_163011_9867  | NW_004516709.1 | Scaffold1523 | 9867                    | GG                              | CC              | 1947011844               |
| SNP_P4_163012_9965  | NW_004516714.1 | Scaffold1530 | 9965                    | CC                              | TT              | 1947011846               |
| SNP_P4_163013_9989  | NW_004516714.1 | Scaffold1530 | 9989                    | TT                              | CC              | 1947011848               |
| SNP_P4_163015_10096 | NW_004516714.1 | Scaffold1530 | 10096                   | CC                              | TT              | 1947011850               |
| SNP_P4_163016_10165 | NW_004516714.1 | Scaffold1530 | 10165                   | TT                              | AA              | 1947011852               |
| SNP_P4_163017_10194 | NW_004516714.1 | Scaffold1530 | 10194                   | TT                              | CC              | 1947011854               |
| SNP_P4_163018_10225 | NW_004516714.1 | Scaffold1530 | 10225                   | CC                              | TT              | 1947011856               |
| SNP_P4_163019_10299 | NW_004516714.1 | Scaffold1530 | 10299                   | GG                              | AA              | 1947011858               |
| SNP_P4_163020_10309 | NW_004516714.1 | Scaffold1530 | 10309                   | CC                              | TT              | 1947011860               |
| SNP_P4_163021_10320 | NW_004516714.1 | Scaffold1530 | 10320                   | GG                              | AA              | 1947011862               |
| SNP_P4_163022_10432 | NW_004516714.1 | Scaffold1530 | 10432                   | TT                              | CC              | 1947011864               |
| SNP_P4_163023_10462 | NW_004516714.1 | Scaffold1530 | 10462                   | TT                              | CC              | 1947011866               |
| SNP_P4_163024_10507 | NW_004516714.1 | Scaffold1530 | 10507                   | TT                              | AA              | 1947011868               |
| SNP_P4_163025_13129 | NW_004516714.1 | Scaffold1530 | 13129                   | GG                              | AA              | 1947011870               |
| SNP_P4_163026_13194 | NW_004516714.1 | Scaffold1530 | 13194                   | TT                              | CC              | 1947011872               |
| SNP_P4_163027_13385 | NW_004516714.1 | Scaffold1530 | 13385                   | AA                              | TT              | 1947011874               |
| SNP_P4_163028_13386 | NW_004516714.1 | Scaffold1530 | 13386                   | GG                              | AA              | 1947011876               |
| SNP_P4_163029_13402 | NW_004516714.1 | Scaffold1530 | 13402                   | GG                              | AA              | 1947011878               |
| SNP_P4_163030_13457 | NW_004516714.1 | Scaffold1530 | 13457                   | GG                              | TT              | 1947011880               |
| SNP_P4_163031_13460 | NW_004516714.1 | Scaffold1530 | 13460                   | TT                              | CC              | 1947011882               |
| SNP_P4_163032_13465 | NW_004516714.1 | Scaffold1530 | 13465                   | CC                              | AA              | 1947011884               |
| SNP_P4_163033_13510 | NW_004516714.1 | Scaffold1530 | 13510                   | TT                              | CC              | 1947011886               |
| SNP_P4_163034_13548 | NW_004516714.1 | Scaffold1530 | 13548                   | GG                              | AA              | 1947011888               |
| SNP_P4_163035_13602 | NW_004516714.1 | Scaffold1530 | 13602                   | CC                              | TT              | 1947011890               |
| SNP_P4_163036_13609 | NW_004516714.1 | Scaffold1530 | 13609                   | TT                              | AA              | 1947011892               |
| SNP_P4_163037_13628 | NW_004516714.1 | Scaffold1530 | 13628                   | TT                              | CC              | 1947011894               |
| SNP_P4_163038_13752 | NW_004516714.1 | Scaffold1530 | 13752                   | TT                              | CC              | 1947011896               |
| SNP_P4_163039_13811 | NW_004516714.1 | Scaffold1530 | 13811                   | GG                              | CC              | 1947011898               |
| SNP_P4_163040_13983 | NW_004516714.1 | Scaffold1530 | 13983                   | GG                              | AA              | 1947011900               |
| SNP_P4_163041_14010 | NW_004516714.1 | Scaffold1530 | 14010                   | TT                              | GG              | 1947011902               |
| SNP_P4_163042_14127 | NW_004516714.1 | Scaffold1530 | 14127                   | AA                              | TT              | 1947011904               |
| SNP_P4_163044_14488 | NW_004516714.1 | Scaffold1530 | 14488                   | GG                              | TT              | 1947011906               |
| SNP_P4_163045_14527 | NW_004516714.1 | Scaffold1530 | 14527                   | AA                              | GG              | 1947011908               |
| SNP_P4_163046_14633 | NW_004516714.1 | Scaffold1530 | 14633                   | CC                              | AA              | 1947011910               |
| SNP_P4_163047_14647 | NW_004516714.1 | Scaffold1530 | 14647                   | TT                              | CC              | 1947011912               |
| SNP_P4_163048_14720 | NW_004516714.1 | Scaffold1530 | 14720                   | TT                              | GG              | 1947011914               |
| SNP_P4_163049_14755 | NW_004516714.1 | Scaffold1530 | 14755                   | TT                              | CC              | 1947011916               |

| SNPs IDs            | Chromosome IDs | Chromosomes  | Physical positions (bp) | CDC Frontier (Reference genome) | (ILWC46 & LPNB) | NCBI SNPdb Accession IDs |
|---------------------|----------------|--------------|-------------------------|---------------------------------|-----------------|--------------------------|
| SNP_P4_163050_14924 | NW_004516714.1 | Scaffold1530 | 14924                   | AA                              | GG              | 1947011918               |
| SNP_P4_163051_14976 | NW_004516714.1 | Scaffold1530 | 14976                   | AA                              | CC              | 1947011920               |
| SNP_P4_163052_15043 | NW_004516714.1 | Scaffold1530 | 15043                   | TT                              | AA              | 1947011923               |
| SNP_P4_163053_15046 | NW_004516714.1 | Scaffold1530 | 15046                   | GG                              | AA              | 1947011925               |
| SNP_P4_163054_15082 | NW_004516714.1 | Scaffold1530 | 15082                   | TT                              | GG              | 1947011927               |
| SNP_P4_163055_15089 | NW_004516714.1 | Scaffold1530 | 15089                   | CC                              | TT              | 1947011929               |
| SNP_P4_163056_15295 | NW_004516714.1 | Scaffold1530 | 15295                   | AA                              | CC              | 1947011931               |
| SNP_P4_163057_15846 | NW_004516714.1 | Scaffold1530 | 15846                   | AA                              | GG              | 1947011933               |
| SNP_P4_163059_16172 | NW_004516714.1 | Scaffold1530 | 16172                   | GG                              | AA              | 1947011935               |
| SNP_P4_163060_16175 | NW_004516714.1 | Scaffold1530 | 16175                   | AA                              | TT              | 1947011937               |
| SNP_P4_163061_16440 | NW_004516714.1 | Scaffold1530 | 16440                   | GG                              | AA              | 1947011939               |
| SNP_P4_163062_16460 | NW_004516714.1 | Scaffold1530 | 16460                   | CC                              | TT              | 1947011941               |
| SNP_P4_163063_16525 | NW_004516714.1 | Scaffold1530 | 16525                   | GG                              | AA              | 1947011944               |
| SNP_P4_163064_16658 | NW_004516714.1 | Scaffold1530 | 16658                   | GG                              | CC              | 1947011946               |
| SNP_P4_163066_16998 | NW_004516714.1 | Scaffold1530 | 16998                   | CC                              | TT              | 1947011948               |
| SNP_P4_163067_17184 | NW_004516714.1 | Scaffold1530 | 17184                   | AA                              | GG              | 1947011950               |
| SNP_P4_163068_17357 | NW_004516714.1 | Scaffold1530 | 17357                   | AA                              | TT              | 1947011952               |
| SNP_P4_163069_17359 | NW_004516714.1 | Scaffold1530 | 17359                   | TT                              | AA              | 1947011954               |
| SNP_P4_163070_17477 | NW_004516714.1 | Scaffold1530 | 17477                   | GG                              | AA              | 1947011957               |
| SNP_P4_163071_17510 | NW_004516714.1 | Scaffold1530 | 17510                   | CC                              | AA              | 1947011959               |
| SNP_P4_163072_17710 | NW_004516714.1 | Scaffold1530 | 17710                   | TT                              | GG              | 1947011961               |
| SNP_P4_163073_17769 | NW_004516714.1 | Scaffold1530 | 17769                   | GG                              | CC              | 1947011963               |
| SNP_P4_163074_17792 | NW_004516714.1 | Scaffold1530 | 17792                   | GG                              | TT              | 1947011965               |
| SNP_P4_163075_17814 | NW_004516714.1 | Scaffold1530 | 17814                   | GG                              | TT              | 1947011967               |
| SNP_P4_163077_17883 | NW_004516714.1 | Scaffold1530 | 17883                   | CC                              | TT              | 1947011969               |
| SNP_P4_163078_17889 | NW_004516714.1 | Scaffold1530 | 17889                   | GG                              | TT              | 1947011971               |
| SNP_P4_163079_17919 | NW_004516714.1 | Scaffold1530 | 17919                   | TT                              | AA              | 1947011973               |
| SNP_P4_163080_18077 | NW_004516714.1 | Scaffold1530 | 18077                   | GG                              | AA              | 1947011975               |
| SNP_P4_163081_18091 | NW_004516714.1 | Scaffold1530 | 18091                   | GG                              | TT              | 1947011977               |
| SNP_P4_163082_18671 | NW_004516714.1 | Scaffold1530 | 18671                   | CC                              | GG              | 1947011979               |
| SNP_P4_163084_18838 | NW_004516714.1 | Scaffold1530 | 18838                   | GG                              | AA              | 1947011981               |
| SNP_P4_163085_18839 | NW_004516714.1 | Scaffold1530 | 18839                   | AA                              | GG              | 1947011983               |
| SNP_P4_163086_18918 | NW_004516714.1 | Scaffold1530 | 18918                   | CC                              | AA              | 1947011985               |
| SNP_P4_163087_18929 | NW_004516714.1 | Scaffold1530 | 18929                   | GG                              | TT              | 1947011987               |
| SNP_P4_163088_18932 | NW_004516714.1 | Scaffold1530 | 18932                   | AA                              | GG              | 1947011989               |
| SNP_P4_163089_19158 | NW_004516714.1 | Scaffold1530 | 19158                   | GG                              | TT              | 1947011991               |
| SNP_P4_163090_19165 | NW_004516714.1 | Scaffold1530 | 19165                   | GG                              | AA              | 1947011993               |
| SNP_P4_163091_19186 | NW_004516714.1 | Scaffold1530 | 19186                   | AA                              | TT              | 1947011995               |
| SNP_P4_163092_19420 | NW_004516714.1 | Scaffold1530 | 19420                   | AA                              | TT              | 1947011997               |
| SNP_P4_163093_19443 | NW_004516714.1 | Scaffold1530 | 19443                   | CC                              | GG              | 1947011999               |
| SNP_P4_163095_19742 | NW_004516714.1 | Scaffold1530 | 19742                   | CC                              | TT              | 1947012001               |
| SNP_P4_163097_19957 | NW_004516714.1 | Scaffold1530 | 19957                   | TT                              | CC              | 1947012003               |

| SNPs IDs            | Chromosome IDs | Chromosomes  | Physical positions (bp) | CDC Frontier (Reference genome) | (ILWC46 & LPNB) | NCBI SNPdb Accession IDs |
|---------------------|----------------|--------------|-------------------------|---------------------------------|-----------------|--------------------------|
| SNP_P4_163098_19958 | NW_004516714.1 | Scaffold1530 | 19958                   | GG                              | AA              | 1947012005               |
| SNP_P4_163099_20007 | NW_004516714.1 | Scaffold1530 | 20007                   | CC                              | GG              | 1947012007               |
| SNP_P4_163102_20457 | NW_004516714.1 | Scaffold1530 | 20457                   | CC                              | TT              | 1947012009               |
| SNP_P4_163103_20653 | NW_004516714.1 | Scaffold1530 | 20653                   | AA                              | GG              | 1947012011               |
| SNP_P4_163104_20759 | NW_004516714.1 | Scaffold1530 | 20759                   | GG                              | CC              | 1947012013               |
| SNP_P4_163106_20799 | NW_004516714.1 | Scaffold1530 | 20799                   | TT                              | AA              | 1947012015               |
| SNP_P4_163107_20817 | NW_004516714.1 | Scaffold1530 | 20817                   | TT                              | CC              | 1947012017               |
| SNP_P4_163108_20825 | NW_004516714.1 | Scaffold1530 | 20825                   | GG                              | AA              | 1947012019               |
| SNP_P4_163109_20830 | NW_004516714.1 | Scaffold1530 | 20830                   | AA                              | GG              | 1947012021               |
| SNP_P4_163110_21032 | NW_004516714.1 | Scaffold1530 | 21032                   | AA                              | TT              | 1947012023               |
| SNP_P4_163112_21189 | NW_004516714.1 | Scaffold1530 | 21189                   | AA                              | GG              | 1947012025               |
| SNP_P4_163113_21234 | NW_004516714.1 | Scaffold1530 | 21234                   | CC                              | TT              | 1947012027               |
| SNP_P4_163114_21256 | NW_004516714.1 | Scaffold1530 | 21256                   | GG                              | AA              | 1947012029               |
| SNP_P4_163115_21327 | NW_004516714.1 | Scaffold1530 | 21327                   | GG                              | AA              | 1947012031               |
| SNP_P4_163116_21344 | NW_004516714.1 | Scaffold1530 | 21344                   | AA                              | GG              | 1947012033               |
| SNP_P4_163117_21399 | NW_004516714.1 | Scaffold1530 | 21399                   | GG                              | AA              | 1947012035               |
| SNP_P4_163118_21410 | NW_004516714.1 | Scaffold1530 | 21410                   | AA                              | GG              | 1947012036               |
| SNP_P4_163119_21416 | NW_004516714.1 | Scaffold1530 | 21416                   | AA                              | CC              | 1947012038               |
| SNP_P4_163120_21420 | NW_004516714.1 | Scaffold1530 | 21420                   | CC                              | AA              | 1947012040               |
| SNP_P4_163121_21430 | NW_004516714.1 | Scaffold1530 | 21430                   | AA                              | CC              | 1947012042               |
| SNP_P4_163122_21451 | NW_004516714.1 | Scaffold1530 | 21451                   | GG                              | AA              | 1947012044               |
| SNP_P4_163123_21510 | NW_004516714.1 | Scaffold1530 | 21510                   | TT                              | CC              | 1947012046               |
| SNP_P4_163124_21520 | NW_004516714.1 | Scaffold1530 | 21520                   | AA                              | GG              | 1947012048               |
| SNP_P4_163125_21577 | NW_004516714.1 | Scaffold1530 | 21577                   | GG                              | TT              | 1947012050               |
| SNP_P4_163126_21582 | NW_004516714.1 | Scaffold1530 | 21582                   | CC                              | TT              | 1947012052               |
| SNP_P4_163127_21821 | NW_004516714.1 | Scaffold1530 | 21821                   | TT                              | CC              | 1947012054               |
| SNP_P4_163128_21852 | NW_004516714.1 | Scaffold1530 | 21852                   | GG                              | AA              | 1947012056               |
| SNP_P4_163129_21976 | NW_004516714.1 | Scaffold1530 | 21976                   | GG                              | AA              | 1947012058               |
| SNP_P4_163130_22141 | NW_004516714.1 | Scaffold1530 | 22141                   | AA                              | GG              | 1947012060               |
| SNP_P4_163131_22158 | NW_004516714.1 | Scaffold1530 | 22158                   | GG                              | TT              | 1947012062               |
| SNP_P4_163132_22214 | NW_004516714.1 | Scaffold1530 | 22214                   | GG                              | TT              | 1947012064               |
| SNP_P4_163133_22280 | NW_004516714.1 | Scaffold1530 | 22280                   | TT                              | CC              | 1947012066               |
| SNP_P4_163134_22298 | NW_004516714.1 | Scaffold1530 | 22298                   | CC                              | TT              | 1947012068               |
| SNP_P4_163135_22300 | NW_004516714.1 | Scaffold1530 | 22300                   | CC                              | TT              | 1947012070               |
| SNP_P4_163136_22322 | NW_004516714.1 | Scaffold1530 | 22322                   | TT                              | CC              | 1947012072               |
| SNP_P4_163137_22403 | NW_004516714.1 | Scaffold1530 | 22403                   | AA                              | GG              | 1947012074               |
| SNP_P4_163138_22465 | NW_004516714.1 | Scaffold1530 | 22465                   | GG                              | AA              | 1947012076               |
| SNP_P4_163139_22491 | NW_004516714.1 | Scaffold1530 | 22491                   | AA                              | GG              | 1947012078               |
| SNP_P4_163140_22520 | NW_004516714.1 | Scaffold1530 | 22520                   | GG                              | CC              | 1947012080               |
| SNP_P4_163141_22563 | NW_004516714.1 | Scaffold1530 | 22563                   | CC                              | TT              | 1947012082               |
| SNP_P4_163142_22595 | NW_004516714.1 | Scaffold1530 | 22595                   | AA                              | GG              | 1947012084               |
| SNP_P4_163143_23014 | NW_004516714.1 | Scaffold1530 | 23014                   | AA                              | GG              | 1947012086               |

| SNPs IDs            | Chromosome IDs | Chromosomes  | Physical positions (bp) | CDC Frontier (Reference genome) | (ILWC46 & LPNB) | NCBI SNPdb Accession IDs |
|---------------------|----------------|--------------|-------------------------|---------------------------------|-----------------|--------------------------|
| SNP_P4_163144_23037 | NW_004516714.1 | Scaffold1530 | 23037                   | CC                              | AA              | 1947012088               |
| SNP_P4_163147_23369 | NW_004516714.1 | Scaffold1530 | 23369                   | TT                              | AA              | 1947012090               |
| SNP_P4_163148_23524 | NW_004516714.1 | Scaffold1530 | 23524                   | GG                              | CC              | 1947012092               |
| SNP_P4_163149_23534 | NW_004516714.1 | Scaffold1530 | 23534                   | CC                              | AA              | 1947012094               |
| SNP_P4_163150_23612 | NW_004516714.1 | Scaffold1530 | 23612                   | AA                              | TT              | 1947012096               |
| SNP_P4_163151_23711 | NW_004516714.1 | Scaffold1530 | 23711                   | AA                              | GG              | 1947012099               |
| SNP_P4_163152_23793 | NW_004516714.1 | Scaffold1530 | 23793                   | TT                              | CC              | 1947012101               |
| SNP_P4_163154_23866 | NW_004516714.1 | Scaffold1530 | 23866                   | TT                              | AA              | 1947012103               |
| SNP_P4_163155_23895 | NW_004516714.1 | Scaffold1530 | 23895                   | CC                              | TT              | 1947012105               |
| SNP_P4_163156_23906 | NW_004516714.1 | Scaffold1530 | 23906                   | AA                              | CC              | 1947012107               |
| SNP_P4_163157_23918 | NW_004516714.1 | Scaffold1530 | 23918                   | CC                              | AA              | 1947012109               |
| SNP_P4_163158_24066 | NW_004516714.1 | Scaffold1530 | 24066                   | TT                              | CC              | 1947012111               |
| SNP_P4_163159_24232 | NW_004516714.1 | Scaffold1530 | 24232                   | CC                              | AA              | 1947012113               |
| SNP_P4_163160_24256 | NW_004516714.1 | Scaffold1530 | 24256                   | TT                              | GG              | 1947012115               |
| SNP_P4_163161_24313 | NW_004516714.1 | Scaffold1530 | 24313                   | CC                              | GG              | 1947012117               |
| SNP_P4_163162_24427 | NW_004516714.1 | Scaffold1530 | 24427                   | TT                              | CC              | 1947012119               |
| SNP_P4_163164_24460 | NW_004516714.1 | Scaffold1530 | 24460                   | GG                              | AA              | 1947012121               |
| SNP_P4_163165_24470 | NW_004516714.1 | Scaffold1530 | 24470                   | CC                              | TT              | 1947012123               |
| SNP_P4_163166_24528 | NW_004516714.1 | Scaffold1530 | 24528                   | AA                              | GG              | 1947012125               |
| SNP_P4_163167_24604 | NW_004516714.1 | Scaffold1530 | 24604                   | AA                              | GG              | 1947012127               |
| SNP_P4_163168_24621 | NW_004516714.1 | Scaffold1530 | 24621                   | AA                              | GG              | 1947012129               |
| SNP_P4_163169_24638 | NW_004516714.1 | Scaffold1530 | 24638                   | TT                              | CC              | 1947012131               |
| SNP_P4_163170_24686 | NW_004516714.1 | Scaffold1530 | 24686                   | AA                              | GG              | 1947012133               |
| SNP_P4_163172_24718 | NW_004516714.1 | Scaffold1530 | 24718                   | AA                              | TT              | 1947012135               |
| SNP_P4_163173_24741 | NW_004516714.1 | Scaffold1530 | 24741                   | TT                              | AA              | 1947012137               |
| SNP_P4_163174_24781 | NW_004516714.1 | Scaffold1530 | 24781                   | CC                              | TT              | 1947012139               |
| SNP_P4_163175_25059 | NW_004516714.1 | Scaffold1530 | 25059                   | TT                              | CC              | 1947012141               |
| SNP_P4_163176_25074 | NW_004516714.1 | Scaffold1530 | 25074                   | GG                              | AA              | 1947012143               |
| SNP_P4_163177_25097 | NW_004516714.1 | Scaffold1530 | 25097                   | CC                              | AA              | 1947012145               |
| SNP_P4_163178_25098 | NW_004516714.1 | Scaffold1530 | 25098                   | GG                              | AA              | 1947012147               |
| SNP_P4_163179_25101 | NW_004516714.1 | Scaffold1530 | 25101                   | TT                              | GG              | 1947012149               |
| SNP_P4_163180_25111 | NW_004516714.1 | Scaffold1530 | 25111                   | GG                              | CC              | 1947012151               |
| SNP_P4_163181_25143 | NW_004516714.1 | Scaffold1530 | 25143                   | CC                              | TT              | 1947012153               |
| SNP_P4_163182_25144 | NW_004516714.1 | Scaffold1530 | 25144                   | TT                              | CC              | 1947012155               |
| SNP_P4_163183_25160 | NW_004516714.1 | Scaffold1530 | 25160                   | TT                              | CC              | 1947012157               |
| SNP_P4_163184_25223 | NW_004516714.1 | Scaffold1530 | 25223                   | TT                              | AA              | 1947012159               |
| SNP_P4_163185_25224 | NW_004516714.1 | Scaffold1530 | 25224                   | TT                              | AA              | 1947012161               |
| SNP_P4_163186_25399 | NW_004516714.1 | Scaffold1530 | 25399                   | TT                              | CC              | 1947012164               |
| SNP_P4_163187_25441 | NW_004516714.1 | Scaffold1530 | 25441                   | TT                              | AA              | 1947012166               |
| SNP_P4_163189_25535 | NW_004516714.1 | Scaffold1530 | 25535                   | GG                              | TT              | 1947012168               |
| SNP_P4_163190_25629 | NW_004516714.1 | Scaffold1530 | 25629                   | CC                              | GG              | 1947012170               |
| SNP_P4_163191_25706 | NW_004516714.1 | Scaffold1530 | 25706                   | CC                              | GG              | 1947012172               |

| SNPs IDs            | Chromosome IDs | Chromosomes  | Physical positions (bp) | CDC Frontier (Reference genome) | (ILWC46 & LPNB) | NCBI SNPdb Accession IDs |
|---------------------|----------------|--------------|-------------------------|---------------------------------|-----------------|--------------------------|
| SNP_P4_163192_25823 | NW_004516714.1 | Scaffold1530 | 25823                   | GG                              | AA              | 1947012174               |
| SNP_P4_163194_25908 | NW_004516714.1 | Scaffold1530 | 25908                   | AA                              | GG              | 1947012176               |
| SNP_P4_163195_25987 | NW_004516714.1 | Scaffold1530 | 25987                   | AA                              | GG              | 1947012178               |
| SNP_P4_163196_26013 | NW_004516714.1 | Scaffold1530 | 26013                   | TT                              | CC              | 1947012180               |
| SNP_P4_163197_26023 | NW_004516714.1 | Scaffold1530 | 26023                   | CC                              | TT              | 1947012182               |
| SNP_P4_163198_26147 | NW_004516714.1 | Scaffold1530 | 26147                   | GG                              | TT              | 1947012184               |
| SNP_P4_163199_26244 | NW_004516714.1 | Scaffold1530 | 26244                   | AA                              | TT              | 1947012186               |
| SNP_P4_163200_26262 | NW_004516714.1 | Scaffold1530 | 26262                   | AA                              | TT              | 1947012189               |
| SNP_P4_163201_26270 | NW_004516714.1 | Scaffold1530 | 26270                   | GG                              | AA              | 1947012191               |
| SNP_P4_163202_26363 | NW_004516714.1 | Scaffold1530 | 26363                   | CC                              | TT              | 1947012193               |
| SNP_P4_163204_26417 | NW_004516714.1 | Scaffold1530 | 26417                   | CC                              | AA              | 1947012195               |
| SNP_P4_163205_26432 | NW_004516714.1 | Scaffold1530 | 26432                   | TT                              | AA              | 1947012197               |
| SNP_P4_163206_26462 | NW_004516714.1 | Scaffold1530 | 26462                   | TT                              | CC              | 1947012199               |
| SNP_P4_163207_26542 | NW_004516714.1 | Scaffold1530 | 26542                   | TT                              | AA              | 1947012201               |
| SNP_P4_163208_26557 | NW_004516714.1 | Scaffold1530 | 26557                   | AA                              | GG              | 1947012203               |
| SNP_P4_163209_26603 | NW_004516714.1 | Scaffold1530 | 26603                   | AA                              | TT              | 1947012205               |
| SNP_P4_163211_26782 | NW_004516714.1 | Scaffold1530 | 26782                   | AA                              | GG              | 1947012207               |
| SNP_P4_163213_27016 | NW_004516714.1 | Scaffold1530 | 27016                   | AA                              | GG              | 1947012209               |
| SNP_P4_163214_27025 | NW_004516714.1 | Scaffold1530 | 27025                   | TT                              | CC              | 1947012211               |
| SNP_P4_163215_27031 | NW_004516714.1 | Scaffold1530 | 27031                   | GG                              | AA              | 1947012213               |
| SNP_P4_163217_27115 | NW_004516714.1 | Scaffold1530 | 27115                   | TT                              | CC              | 1947012215               |
| SNP_P4_163220_27386 | NW_004516714.1 | Scaffold1530 | 27386                   | GG                              | AA              | 1947012217               |
| SNP_P4_163221_27476 | NW_004516714.1 | Scaffold1530 | 27476                   | TT                              | AA              | 1947012219               |
| SNP_P4_163222_27480 | NW_004516714.1 | Scaffold1530 | 27480                   | AA                              | TT              | 1947012221               |
| SNP_P4_163223_27582 | NW_004516714.1 | Scaffold1530 | 27582                   | AA                              | GG              | 1947012223               |
| SNP_P4_163224_27592 | NW_004516714.1 | Scaffold1530 | 27592                   | AA                              | GG              | 1947012225               |
| SNP_P4_163225_27737 | NW_004516714.1 | Scaffold1530 | 27737                   | TT                              | CC              | 1947012227               |
| SNP_P4_163227_27835 | NW_004516714.1 | Scaffold1530 | 27835                   | AA                              | GG              | 1947012229               |
| SNP_P4_163228_27873 | NW_004516714.1 | Scaffold1530 | 27873                   | GG                              | TT              | 1947012231               |
| SNP_P4_163229_27909 | NW_004516714.1 | Scaffold1530 | 27909                   | AA                              | TT              | 1947012233               |
| SNP_P4_163232_28052 | NW_004516714.1 | Scaffold1530 | 28052                   | GG                              | AA              | 1947012235               |
| SNP_P4_163233_28165 | NW_004516714.1 | Scaffold1530 | 28165                   | GG                              | AA              | 1947012237               |
| SNP_P4_163234_28179 | NW_004516714.1 | Scaffold1530 | 28179                   | AA                              | TT              | 1947012239               |
| SNP_P4_163235_28254 | NW_004516714.1 | Scaffold1530 | 28254                   | GG                              | AA              | 1947012241               |
| SNP_P4_163236_28275 | NW_004516714.1 | Scaffold1530 | 28275                   | TT                              | CC              | 1947012244               |
| SNP_P4_163237_28342 | NW_004516714.1 | Scaffold1530 | 28342                   | AA                              | GG              | 1947012246               |
| SNP_P4_163239_28454 | NW_004516714.1 | Scaffold1530 | 28454                   | AA                              | TT              | 1947012248               |
| SNP_P4_163240_28599 | NW_004516714.1 | Scaffold1530 | 28599                   | CC                              | AA              | 1947012250               |
| SNP_P4_163241_28621 | NW_004516714.1 | Scaffold1530 | 28621                   | GG                              | AA              | 1947012252               |
| SNP_P4_163242_28626 | NW_004516714.1 | Scaffold1530 | 28626                   | CC                              | TT              | 1947012254               |
| SNP_P4_163243_28635 | NW_004516714.1 | Scaffold1530 | 28635                   | CC                              | GG              | 1947012256               |
| SNP_P4_163244_28652 | NW_004516714.1 | Scaffold1530 | 28652                   | TT                              | GG              | 1947012258               |



| SNPs IDs            | Chromosome IDs | Chromosomes  | Physical positions (bp) | CDC Frontier (Reference genome) | (ILWC46 & LPNB) | NCBI SNPdb Accession IDs |
|---------------------|----------------|--------------|-------------------------|---------------------------------|-----------------|--------------------------|
| SNP_P4_163245_28671 | NW_004516714.1 | Scaffold1530 | 28671                   | CC                              | TT              | 1947012260               |
| SNP_P4_163246_28710 | NW_004516714.1 | Scaffold1530 | 28710                   | TT                              | CC              | 1947012262               |
| SNP_P4_163247_477   | NW_004516715.1 | Scaffold1531 | 477                     | CC                              | AA              | 1947012264               |
| SNP_P4_163248_517   | NW_004516715.1 | Scaffold1531 | 517                     | CC                              | TT              | 1947012266               |
| SNP_P4_163249_656   | NW_004516715.1 | Scaffold1531 | 656                     | CC                              | TT              | 1947012268               |
| SNP_P4_163250_695   | NW_004516715.1 | Scaffold1531 | 695                     | AA                              | GG              | 1947012270               |
| SNP_P4_163251_702   | NW_004516715.1 | Scaffold1531 | 702                     | TT                              | AA              | 1947012272               |
| SNP_P4_163252_3739  | NW_004516715.1 | Scaffold1531 | 3739                    | TT                              | AA              | 1947012274               |
| SNP_P4_163253_3785  | NW_004516715.1 | Scaffold1531 | 3785                    | GG                              | AA              | 1947012276               |
| SNP_P4_163254_3898  | NW_004516715.1 | Scaffold1531 | 3898                    | CC                              | TT              | 1947012278               |
| SNP_P4_163255_3984  | NW_004516715.1 | Scaffold1531 | 3984                    | CC                              | GG              | 1947012280               |
| SNP_P4_163256_4236  | NW_004516715.1 | Scaffold1531 | 4236                    | GG                              | TT              | 1947012282               |
| SNP_P4_163257_4358  | NW_004516715.1 | Scaffold1531 | 4358                    | AA                              | GG              | 1947012284               |
| SNP_P4_163258_10046 | NW_004516715.1 | Scaffold1531 | 10046                   | AA                              | TT              | 1947012286               |
| SNP_P4_163259_12861 | NW_004516715.1 | Scaffold1531 | 12861                   | TT                              | AA              | 1947012288               |
| SNP_P4_163260_12862 | NW_004516715.1 | Scaffold1531 | 12862                   | CC                              | TT              | 1947012290               |
| SNP_P4_163261_19825 | NW_004516715.1 | Scaffold1531 | 19825                   | AA                              | GG              | 1947012292               |
| SNP_P4_163262_20987 | NW_004516715.1 | Scaffold1531 | 20987                   | AA                              | CC              | 1947012294               |
| SNP_P4_163263_21054 | NW_004516715.1 | Scaffold1531 | 21054                   | AA                              | CC              | 1947012296               |
| SNP_P4_163264_21258 | NW_004516715.1 | Scaffold1531 | 21258                   | TT                              | CC              | 1947012298               |
| SNP_P4_163265_21706 | NW_004516715.1 | Scaffold1531 | 21706                   | GG                              | CC              | 1947012300               |
| SNP_P4_163266_21795 | NW_004516715.1 | Scaffold1531 | 21795                   | AA                              | TT              | 1947012302               |
| SNP_P4_163267_21993 | NW_004516715.1 | Scaffold1531 | 21993                   | AA                              | CC              | 1947012304               |
| SNP_P4_163268_22282 | NW_004516715.1 | Scaffold1531 | 22282                   | CC                              | TT              | 1947012306               |
| SNP_P4_163269_22349 | NW_004516715.1 | Scaffold1531 | 22349                   | CC                              | TT              | 1947012308               |
| SNP_P4_163270_22637 | NW_004516715.1 | Scaffold1531 | 22637                   | AA                              | GG              | 1947012310               |
| SNP_P4_163271_22684 | NW_004516715.1 | Scaffold1531 | 22684                   | GG                              | AA              | 1947012312               |
| SNP_P4_163273_23946 | NW_004516715.1 | Scaffold1531 | 23946                   | CC                              | TT              | 1947012314               |
| SNP_P4_163274_23950 | NW_004516715.1 | Scaffold1531 | 23950                   | AA                              | CC              | 1947012316               |
| SNP_P4_163275_23951 | NW_004516715.1 | Scaffold1531 | 23951                   | TT                              | CC              | 1947012318               |
| SNP_P4_163276_24116 | NW_004516715.1 | Scaffold1531 | 24116                   | CC                              | TT              | 1947012321               |
| SNP_P4_163277_24218 | NW_004516715.1 | Scaffold1531 | 24218                   | AA                              | CC              | 1947012323               |
| SNP_P4_163278_24251 | NW_004516715.1 | Scaffold1531 | 24251                   | AA                              | GG              | 1947012325               |
| SNP_P4_163279_24281 | NW_004516715.1 | Scaffold1531 | 24281                   | AA                              | GG              | 1947012327               |
| SNP_P4_163280_24320 | NW_004516715.1 | Scaffold1531 | 24320                   | TT                              | GG              | 1947012329               |
| SNP_P4_163281_24341 | NW_004516715.1 | Scaffold1531 | 24341                   | TT                              | CC              | 1947012331               |
| SNP_P4_163282_24349 | NW_004516715.1 | Scaffold1531 | 24349                   | AA                              | TT              | 1947012333               |
| SNP_P4_163283_24363 | NW_004516715.1 | Scaffold1531 | 24363                   | GG                              | TT              | 1947012335               |
| SNP_P4_163284_24370 | NW_004516715.1 | Scaffold1531 | 24370                   | CC                              | TT              | 1947012337               |
| SNP_P4_163285_24525 | NW_004516715.1 | Scaffold1531 | 24525                   | GG                              | CC              | 1947012339               |
| SNP_P4_163286_24529 | NW_004516715.1 | Scaffold1531 | 24529                   | CC                              | TT              | 1947012341               |
| SNP_P4_163287_24546 | NW_004516715.1 | Scaffold1531 | 24546                   | CC                              | AA              | 1947012343               |

| SNPs IDs            | Chromosome IDs | Chromosomes  | Physical positions (bp) | CDC Frontier (Reference genome) | (ILWC46 & LPNB) | NCBI SNPdb Accession IDs |
|---------------------|----------------|--------------|-------------------------|---------------------------------|-----------------|--------------------------|
| SNP_P4_163288_24547 | NW_004516715.1 | Scaffold1531 | 24547                   | AA                              | GG              | 1947012345               |
| SNP_P4_163289_24858 | NW_004516715.1 | Scaffold1531 | 24858                   | CC                              | AA              | 1947012347               |
| SNP_P4_163290_24868 | NW_004516715.1 | Scaffold1531 | 24868                   | AA                              | CC              | 1947012349               |
| SNP_P4_163291_24875 | NW_004516715.1 | Scaffold1531 | 24875                   | GG                              | TT              | 1947012351               |
| SNP_P4_163293_24941 | NW_004516715.1 | Scaffold1531 | 24941                   | GG                              | AA              | 1947012353               |
| SNP_P4_163295_25698 | NW_004516715.1 | Scaffold1531 | 25698                   | TT                              | AA              | 1947012355               |
| SNP_P4_163296_25925 | NW_004516715.1 | Scaffold1531 | 25925                   | AA                              | GG              | 1947012357               |
| SNP_P4_163297_25931 | NW_004516715.1 | Scaffold1531 | 25931                   | TT                              | CC              | 1947012359               |
| SNP_P4_163298_25945 | NW_004516715.1 | Scaffold1531 | 25945                   | CC                              | GG              | 1947012361               |
| SNP_P4_163299_26082 | NW_004516715.1 | Scaffold1531 | 26082                   | CC                              | TT              | 1947012363               |
| SNP_P4_163300_26084 | NW_004516715.1 | Scaffold1531 | 26084                   | TT                              | AA              | 1947012365               |
| SNP_P4_163301_26160 | NW_004516715.1 | Scaffold1531 | 26160                   | GG                              | AA              | 1947012367               |
| SNP_P4_163302_26382 | NW_004516715.1 | Scaffold1531 | 26382                   | GG                              | AA              | 1947012369               |
| SNP_P4_163303_26402 | NW_004516715.1 | Scaffold1531 | 26402                   | TT                              | CC              | 1947012371               |
| SNP_P4_163304_26550 | NW_004516715.1 | Scaffold1531 | 26550                   | CC                              | AA              | 1947012373               |
| SNP_P4_163306_27820 | NW_004516715.1 | Scaffold1531 | 27820                   | AA                              | GG              | 1947012375               |
| SNP_P4_163307_27856 | NW_004516715.1 | Scaffold1531 | 27856                   | TT                              | GG              | 1947012377               |
| SNP_P4_163308_27881 | NW_004516715.1 | Scaffold1531 | 27881                   | AA                              | GG              | 1947012379               |
| SNP_P4_163309_27884 | NW_004516715.1 | Scaffold1531 | 27884                   | AA                              | TT              | 1947012381               |
| SNP_P4_163310_27941 | NW_004516715.1 | Scaffold1531 | 27941                   | TT                              | CC              | 1947012383               |
| SNP_P4_163311_27959 | NW_004516715.1 | Scaffold1531 | 27959                   | CC                              | GG              | 1947012385               |
| SNP_P4_163312_28001 | NW_004516715.1 | Scaffold1531 | 28001                   | TT                              | AA              | 1947012387               |
| SNP_P4_163313_28008 | NW_004516715.1 | Scaffold1531 | 28008                   | GG                              | AA              | 1947012389               |
| SNP_P4_163314_28034 | NW_004516715.1 | Scaffold1531 | 28034                   | TT                              | CC              | 1947012391               |
| SNP_P4_163315_28138 | NW_004516715.1 | Scaffold1531 | 28138                   | TT                              | AA              | 1947012393               |
| SNP_P4_163316_28145 | NW_004516715.1 | Scaffold1531 | 28145                   | GG                              | AA              | 1947012395               |
| SNP_P4_163317_28175 | NW_004516715.1 | Scaffold1531 | 28175                   | TT                              | GG              | 1947012397               |
| SNP_P4_163318_28187 | NW_004516715.1 | Scaffold1531 | 28187                   | CC                              | AA              | 1947012399               |
| SNP_P4_163319_28345 | NW_004516715.1 | Scaffold1531 | 28345                   | AA                              | GG              | 1947012401               |
| SNP_P4_163320_28346 | NW_004516715.1 | Scaffold1531 | 28346                   | GG                              | AA              | 1947012403               |
| SNP_P4_163321_28363 | NW_004516715.1 | Scaffold1531 | 28363                   | TT                              | GG              | 1947012405               |
| SNP_P4_163322_28435 | NW_004516715.1 | Scaffold1531 | 28435                   | CC                              | AA              | 1947012407               |
| SNP_P4_163323_28443 | NW_004516715.1 | Scaffold1531 | 28443                   | CC                              | AA              | 1947012409               |
| SNP_P4_163324_28489 | NW_004516715.1 | Scaffold1531 | 28489                   | GG                              | TT              | 1947012411               |
| SNP_P4_163325_28494 | NW_004516715.1 | Scaffold1531 | 28494                   | AA                              | GG              | 1947012413               |
| SNP_P4_163326_28528 | NW_004516715.1 | Scaffold1531 | 28528                   | TT                              | CC              | 1947012415               |
| SNP_P4_163327_28531 | NW_004516715.1 | Scaffold1531 | 28531                   | GG                              | AA              | 1947012417               |
| SNP_P4_163328_28564 | NW_004516715.1 | Scaffold1531 | 28564                   | TT                              | AA              | 1947012418               |
| SNP_P4_163329_28579 | NW_004516715.1 | Scaffold1531 | 28579                   | AA                              | CC              | 1947012420               |
| SNP_P4_163330_28644 | NW_004516715.1 | Scaffold1531 | 28644                   | TT                              | GG              | 1947012422               |
| SNP_P4_163332_28795 | NW_004516715.1 | Scaffold1531 | 28795                   | TT                              | CC              | 1947012424               |
| SNP_P4_163333_28908 | NW_004516715.1 | Scaffold1531 | 28908                   | AA                              | GG              | 1947012426               |

| SNPs IDs            | Chromosome IDs | Chromosomes  | Physical positions (bp) | CDC Frontier (Reference genome) | (ILWC46 & LPNB) | NCBI SNPdb Accession IDs |
|---------------------|----------------|--------------|-------------------------|---------------------------------|-----------------|--------------------------|
| SNP_P4_163334_28925 | NW_004516715.1 | Scaffold1531 | 28925                   | GG                              | CC              | 1947012428               |
| SNP_P4_163335_28972 | NW_004516715.1 | Scaffold1531 | 28972                   | GG                              | AA              | 1947012430               |
| SNP_P4_163336_29010 | NW_004516715.1 | Scaffold1531 | 29010                   | CC                              | TT              | 1947012432               |
| SNP_P4_163337_29011 | NW_004516715.1 | Scaffold1531 | 29011                   | GG                              | AA              | 1947012434               |
| SNP_P4_163338_29064 | NW_004516715.1 | Scaffold1531 | 29064                   | TT                              | CC              | 1947012436               |
| SNP_P4_163339_29106 | NW_004516715.1 | Scaffold1531 | 29106                   | GG                              | AA              | 1947012438               |
| SNP_P4_163340_29133 | NW_004516715.1 | Scaffold1531 | 29133                   | CC                              | TT              | 1947012440               |
| SNP_P4_163341_29158 | NW_004516715.1 | Scaffold1531 | 29158                   | TT                              | AA              | 1947012442               |
| SNP_P4_163342_29214 | NW_004516715.1 | Scaffold1531 | 29214                   | GG                              | TT              | 1947012444               |
| SNP_P4_163343_29221 | NW_004516715.1 | Scaffold1531 | 29221                   | TT                              | AA              | 1947012446               |
| SNP_P4_163344_29265 | NW_004516715.1 | Scaffold1531 | 29265                   | TT                              | AA              | 1947012448               |
| SNP_P4_163345_29276 | NW_004516715.1 | Scaffold1531 | 29276                   | GG                              | AA              | 1947012450               |
| SNP_P4_163346_29327 | NW_004516715.1 | Scaffold1531 | 29327                   | TT                              | GG              | 1947012452               |
| SNP_P4_163347_29344 | NW_004516715.1 | Scaffold1531 | 29344                   | GG                              | CC              | 1947012454               |
| SNP_P4_163348_29360 | NW_004516715.1 | Scaffold1531 | 29360                   | TT                              | AA              | 1947012456               |
| SNP_P4_163349_29362 | NW_004516715.1 | Scaffold1531 | 29362                   | CC                              | GG              | 1947012458               |
| SNP_P4_163350_29403 | NW_004516715.1 | Scaffold1531 | 29403                   | GG                              | CC              | 1947012460               |
| SNP_P4_163351_29421 | NW_004516715.1 | Scaffold1531 | 29421                   | GG                              | CC              | 1947012462               |
| SNP_P4_163353_29460 | NW_004516715.1 | Scaffold1531 | 29460                   | GG                              | TT              | 1947012464               |
| SNP_P4_163354_29509 | NW_004516715.1 | Scaffold1531 | 29509                   | AA                              | TT              | 1947012466               |
| SNP_P4_163355_29575 | NW_004516715.1 | Scaffold1531 | 29575                   | TT                              | AA              | 1947012468               |
| SNP_P4_163356_29605 | NW_004516715.1 | Scaffold1531 | 29605                   | CC                              | TT              | 1947012469               |
| SNP_P4_163357_29606 | NW_004516715.1 | Scaffold1531 | 29606                   | AA                              | GG              | 1947012471               |
| SNP_P4_163358_29634 | NW_004516715.1 | Scaffold1531 | 29634                   | CC                              | TT              | 1947012473               |
| SNP_P4_163359_30003 | NW_004516715.1 | Scaffold1531 | 30003                   | TT                              | AA              | 1947012475               |
| SNP_P4_163360_30733 | NW_004516715.1 | Scaffold1531 | 30733                   | AA                              | CC              | 1947012477               |
| SNP_P4_163361_30761 | NW_004516715.1 | Scaffold1531 | 30761                   | CC                              | TT              | 1947012479               |
| SNP_P4_163362_34615 | NW_004516715.1 | Scaffold1531 | 34615                   | AA                              | TT              | 1947012481               |
| SNP_P4_163363_34674 | NW_004516715.1 | Scaffold1531 | 34674                   | CC                              | AA              | 1947012483               |
| SNP_P4_163364_34849 | NW_004516715.1 | Scaffold1531 | 34849                   | TT                              | AA              | 1947012485               |
| SNP_P4_163365_35117 | NW_004516715.1 | Scaffold1531 | 35117                   | TT                              | CC              | 1947012487               |
| SNP_P4_163366_35143 | NW_004516715.1 | Scaffold1531 | 35143                   | TT                              | GG              | 1947012489               |
| SNP_P4_163367_35192 | NW_004516715.1 | Scaffold1531 | 35192                   | CC                              | TT              | 1947012490               |
| SNP_P4_163368_35602 | NW_004516715.1 | Scaffold1531 | 35602                   | AA                              | CC              | 1947012492               |
| SNP_P4_163369_35650 | NW_004516715.1 | Scaffold1531 | 35650                   | GG                              | TT              | 1947012494               |
| SNP_P4_163370_35654 | NW_004516715.1 | Scaffold1531 | 35654                   | CC                              | TT              | 1947012496               |
| SNP_P4_163371_35684 | NW_004516715.1 | Scaffold1531 | 35684                   | GG                              | AA              | 1947012498               |
| SNP_P4_163372_35704 | NW_004516715.1 | Scaffold1531 | 35704                   | GG                              | AA              | 1947012500               |
| SNP_P4_163373_35733 | NW_004516715.1 | Scaffold1531 | 35733                   | AA                              | GG              | 1947012502               |
| SNP_P4_163374_35766 | NW_004516715.1 | Scaffold1531 | 35766                   | TT                              | CC              | 1947012504               |
| SNP_P4_163375_35773 | NW_004516715.1 | Scaffold1531 | 35773                   | CC                              | TT              | 1947012506               |
| SNP_P4_163376_35817 | NW_004516715.1 | Scaffold1531 | 35817                   | TT                              | CC              | 1947012508               |

| SNPs IDs            | Chromosome IDs | Chromosomes  | Physical positions (bp) | CDC Frontier (Reference genome) | (ILWC46 & LPNB) | NCBI SNPdb Accession IDs |
|---------------------|----------------|--------------|-------------------------|---------------------------------|-----------------|--------------------------|
| SNP_P4_163377_35831 | NW_004516715.1 | Scaffold1531 | 35831                   | TT                              | AA              | 1947012510               |
| SNP_P4_163378_35838 | NW_004516715.1 | Scaffold1531 | 35838                   | CC                              | GG              | 1947012511               |
| SNP_P4_163379_35879 | NW_004516715.1 | Scaffold1531 | 35879                   | TT                              | CC              | 1947012513               |
| SNP_P4_163380_36028 | NW_004516715.1 | Scaffold1531 | 36028                   | CC                              | GG              | 1947012515               |
| SNP_P4_163381_36119 | NW_004516715.1 | Scaffold1531 | 36119                   | CC                              | GG              | 1947012517               |
| SNP_P4_163382_36129 | NW_004516715.1 | Scaffold1531 | 36129                   | CC                              | AA              | 1947012519               |
| SNP_P4_163383_36269 | NW_004516715.1 | Scaffold1531 | 36269                   | AA                              | TT              | 1947012521               |
| SNP_P4_163384_36289 | NW_004516715.1 | Scaffold1531 | 36289                   | GG                              | TT              | 1947012523               |
| SNP_P4_163385_36292 | NW_004516715.1 | Scaffold1531 | 36292                   | TT                              | AA              | 1947012525               |
| SNP_P4_163386_36318 | NW_004516715.1 | Scaffold1531 | 36318                   | TT                              | AA              | 1947012527               |
| SNP_P4_163387_36502 | NW_004516715.1 | Scaffold1531 | 36502                   | AA                              | GG              | 1947012529               |
| SNP_P4_163388_36531 | NW_004516715.1 | Scaffold1531 | 36531                   | CC                              | AA              | 1947012531               |
| SNP_P4_163389_36572 | NW_004516715.1 | Scaffold1531 | 36572                   | TT                              | CC              | 1947012533               |
| SNP_P4_163390_36590 | NW_004516715.1 | Scaffold1531 | 36590                   | AA                              | GG              | 1947012535               |
| SNP_P4_163391_36591 | NW_004516715.1 | Scaffold1531 | 36591                   | GG                              | TT              | 1947012537               |
| SNP_P4_163392_36738 | NW_004516715.1 | Scaffold1531 | 36738                   | CC                              | GG              | 1947012539               |
| SNP_P4_163393_36824 | NW_004516715.1 | Scaffold1531 | 36824                   | GG                              | TT              | 1947012541               |
| SNP_P4_163394_36873 | NW_004516715.1 | Scaffold1531 | 36873                   | AA                              | TT              | 1947012542               |
| SNP_P4_163395_36897 | NW_004516715.1 | Scaffold1531 | 36897                   | CC                              | AA              | 1947012544               |
| SNP_P4_163396_37166 | NW_004516715.1 | Scaffold1531 | 37166                   | CC                              | TT              | 1947012546               |
| SNP_P4_163397_37778 | NW_004516715.1 | Scaffold1531 | 37778                   | CC                              | TT              | 1947012548               |
| SNP_P4_163398_37814 | NW_004516715.1 | Scaffold1531 | 37814                   | TT                              | CC              | 1947012550               |
| SNP_P4_163399_37909 | NW_004516715.1 | Scaffold1531 | 37909                   | TT                              | GG              | 1947012552               |
| SNP_P4_163400_37964 | NW_004516715.1 | Scaffold1531 | 37964                   | CC                              | TT              | 1947012554               |
| SNP_P4_163401_37978 | NW_004516715.1 | Scaffold1531 | 37978                   | CC                              | TT              | 1947012556               |
| SNP_P4_163402_38017 | NW_004516715.1 | Scaffold1531 | 38017                   | TT                              | CC              | 1947012558               |
| SNP_P4_163403_38044 | NW_004516715.1 | Scaffold1531 | 38044                   | TT                              | CC              | 1947012560               |
| SNP_P4_163404_38156 | NW_004516715.1 | Scaffold1531 | 38156                   | AA                              | TT              | 1947012562               |
| SNP_P4_163405_38212 | NW_004516715.1 | Scaffold1531 | 38212                   | GG                              | AA              | 1947012564               |
| SNP_P4_163406_38239 | NW_004516715.1 | Scaffold1531 | 38239                   | TT                              | CC              | 1947012566               |
| SNP_P4_163407_38253 | NW_004516715.1 | Scaffold1531 | 38253                   | CC                              | TT              | 1947012568               |
| SNP_P4_163408_38258 | NW_004516715.1 | Scaffold1531 | 38258                   | AA                              | TT              | 1947012570               |
| SNP_P4_163409_38413 | NW_004516715.1 | Scaffold1531 | 38413                   | GG                              | AA              | 1947012572               |
| SNP_P4_163410_39043 | NW_004516715.1 | Scaffold1531 | 39043                   | TT                              | CC              | 1947012574               |
| SNP_P4_163411_39377 | NW_004516715.1 | Scaffold1531 | 39377                   | CC                              | AA              | 1947012576               |
| SNP_P4_163412_39616 | NW_004516715.1 | Scaffold1531 | 39616                   | AA                              | TT              | 1947012578               |
| SNP_P4_163413_39665 | NW_004516715.1 | Scaffold1531 | 39665                   | TT                              | AA              | 1947012580               |
| SNP_P4_163414_40573 | NW_004516715.1 | Scaffold1531 | 40573                   | AA                              | GG              | 1947012582               |
| SNP_P4_163415_40587 | NW_004516715.1 | Scaffold1531 | 40587                   | TT                              | CC              | 1947012584               |
| SNP_P4_163416_6435  | NW_004516716.1 | Scaffold1532 | 6435                    | CC                              | TT              | 1947012586               |
| SNP_P4_163417_7992  | NW_004516716.1 | Scaffold1532 | 7992                    | TT                              | AA              | 1947012588               |
| SNP_P4_163418_8308  | NW_004516716.1 | Scaffold1532 | 8308                    | AA                              | GG              | 1947012590               |

| SNPs IDs            | Chromosome IDs | Chromosomes  | Physical positions (bp) | CDC Frontier (Reference genome) | (ILWC46 & LPNB) | NCBI SNPdb Accession IDs |
|---------------------|----------------|--------------|-------------------------|---------------------------------|-----------------|--------------------------|
| SNP_P4_163419_10243 | NW_004516716.1 | Scaffold1532 | 10243                   | AA                              | GG              | 1947012592               |
| SNP_P4_163420_10280 | NW_004516716.1 | Scaffold1532 | 10280                   | CC                              | TT              | 1947012593               |
| SNP_P4_163421_10288 | NW_004516716.1 | Scaffold1532 | 10288                   | GG                              | AA              | 1947012595               |
| SNP_P4_163422_10348 | NW_004516716.1 | Scaffold1532 | 10348                   | AA                              | GG              | 1947012597               |
| SNP_P4_163424_10646 | NW_004516716.1 | Scaffold1532 | 10646                   | AA                              | TT              | 1947012599               |
| SNP_P4_163425_10684 | NW_004516716.1 | Scaffold1532 | 10684                   | CC                              | TT              | 1947012601               |
| SNP_P4_163426_10685 | NW_004516716.1 | Scaffold1532 | 10685                   | GG                              | CC              | 1947012603               |
| SNP_P4_163427_10689 | NW_004516716.1 | Scaffold1532 | 10689                   | CC                              | TT              | 1947012605               |
| SNP_P4_163428_10703 | NW_004516716.1 | Scaffold1532 | 10703                   | TT                              | AA              | 1947012607               |
| SNP_P4_163429_10823 | NW_004516716.1 | Scaffold1532 | 10823                   | AA                              | GG              | 1947012609               |
| SNP_P4_163430_10849 | NW_004516716.1 | Scaffold1532 | 10849                   | CC                              | TT              | 1947012611               |
| SNP_P4_163431_15772 | NW_004516716.1 | Scaffold1532 | 15772                   | AA                              | GG              | 1947012613               |
| SNP_P4_163432_17484 | NW_004516716.1 | Scaffold1532 | 17484                   | CC                              | TT              | 1947012615               |
| SNP_P4_163433_18526 | NW_004516716.1 | Scaffold1532 | 18526                   | GG                              | AA              | 1947012617               |
| SNP_P4_163434_22090 | NW_004516716.1 | Scaffold1532 | 22090                   | AA                              | GG              | 1947012618               |
| SNP_P4_163435_22113 | NW_004516716.1 | Scaffold1532 | 22113                   | GG                              | AA              | 1947012620               |
| SNP_P4_163436_22154 | NW_004516716.1 | Scaffold1532 | 22154                   | AA                              | GG              | 1947012622               |
| SNP_P4_163437_22161 | NW_004516716.1 | Scaffold1532 | 22161                   | TT                              | CC              | 1947012624               |
| SNP_P4_163438_22176 | NW_004516716.1 | Scaffold1532 | 22176                   | TT                              | CC              | 1947012626               |
| SNP_P4_163439_22182 | NW_004516716.1 | Scaffold1532 | 22182                   | GG                              | AA              | 1947012628               |
| SNP_P4_163440_22188 | NW_004516716.1 | Scaffold1532 | 22188                   | AA                              | GG              | 1947012630               |
| SNP_P4_163441_22190 | NW_004516716.1 | Scaffold1532 | 22190                   | TT                              | CC              | 1947012632               |
| SNP_P4_163442_22197 | NW_004516716.1 | Scaffold1532 | 22197                   | AA                              | GG              | 1947012634               |
| SNP_P4_163443_22209 | NW_004516716.1 | Scaffold1532 | 22209                   | TT                              | CC              | 1947012636               |
| SNP_P4_163444_22606 | NW_004516716.1 | Scaffold1532 | 22606                   | AA                              | GG              | 1947012638               |
| SNP_P4_163445_24826 | NW_004516716.1 | Scaffold1532 | 24826                   | AA                              | CC              | 1947012640               |
| SNP_P4_163446_25104 | NW_004516716.1 | Scaffold1532 | 25104                   | GG                              | CC              | 1947012642               |
| SNP_P4_163447_25123 | NW_004516716.1 | Scaffold1532 | 25123                   | TT                              | CC              | 1947012644               |
| SNP_P4_163448_25161 | NW_004516716.1 | Scaffold1532 | 25161                   | CC                              | TT              | 1947012646               |
| SNP_P4_163449_25182 | NW_004516716.1 | Scaffold1532 | 25182                   | GG                              | TT              | 1947012648               |
| SNP_P4_163450_25236 | NW_004516716.1 | Scaffold1532 | 25236                   | TT                              | CC              | 1947012650               |
| SNP_P4_163451_25248 | NW_004516716.1 | Scaffold1532 | 25248                   | GG                              | TT              | 1947012651               |
| SNP_P4_163452_25270 | NW_004516716.1 | Scaffold1532 | 25270                   | GG                              | AA              | 1947012653               |
| SNP_P4_163453_25298 | NW_004516716.1 | Scaffold1532 | 25298                   | TT                              | CC              | 1947012655               |
| SNP_P4_163454_25299 | NW_004516716.1 | Scaffold1532 | 25299                   | TT                              | CC              | 1947012657               |
| SNP_P4_163455_25348 | NW_004516716.1 | Scaffold1532 | 25348                   | TT                              | AA              | 1947012659               |
| SNP_P4_163456_25466 | NW_004516716.1 | Scaffold1532 | 25466                   | CC                              | TT              | 1947012661               |
| SNP_P4_163457_26069 | NW_004516716.1 | Scaffold1532 | 26069                   | AA                              | GG              | 1947012663               |
| SNP_P4_163458_26119 | NW_004516716.1 | Scaffold1532 | 26119                   | AA                              | TT              | 1947012665               |
| SNP_P4_163459_26127 | NW_004516716.1 | Scaffold1532 | 26127                   | TT                              | AA              | 1947012667               |
| SNP_P4_163460_26208 | NW_004516716.1 | Scaffold1532 | 26208                   | CC                              | GG              | 1947012669               |
| SNP_P4_163461_29046 | NW_004516716.1 | Scaffold1532 | 29046                   | GG                              | CC              | 1947012670               |

| SNPs IDs            | Chromosome IDs | Chromosomes  | Physical positions (bp) | CDC Frontier (Reference genome) | (ILWC46 & LPNB) | NCBI SNPdb Accession IDs |
|---------------------|----------------|--------------|-------------------------|---------------------------------|-----------------|--------------------------|
| SNP_P4_163462_29066 | NW_004516716.1 | Scaffold1532 | 29066                   | GG                              | TT              | 1947012672               |
| SNP_P4_163463_29532 | NW_004516716.1 | Scaffold1532 | 29532                   | TT                              | CC              | 1947012674               |
| SNP_P4_163464_35304 | NW_004516716.1 | Scaffold1532 | 35304                   | CC                              | TT              | 1947012676               |
| SNP_P4_163465_44869 | NW_004516716.1 | Scaffold1532 | 44869                   | TT                              | CC              | 1947012678               |
| SNP_P4_163466_45468 | NW_004516716.1 | Scaffold1532 | 45468                   | CC                              | GG              | 1947012680               |
| SNP_P4_163467_57881 | NW_004516716.1 | Scaffold1532 | 57881                   | GG                              | TT              | 1947012682               |
| SNP_P4_163468_60967 | NW_004516716.1 | Scaffold1532 | 60967                   | CC                              | TT              | 1947012684               |
| SNP_P4_163470_82048 | NW_004516716.1 | Scaffold1532 | 82048                   | CC                              | TT              | 1947012686               |
| SNP_P4_163471_82069 | NW_004516716.1 | Scaffold1532 | 82069                   | AA                              | CC              | 1947012688               |
| SNP_P4_163472_82073 | NW_004516716.1 | Scaffold1532 | 82073                   | TT                              | GG              | 1947012690               |
| SNP_P4_163473_82079 | NW_004516716.1 | Scaffold1532 | 82079                   | TT                              | GG              | 1947012692               |
| SNP_P4_163474_82080 | NW_004516716.1 | Scaffold1532 | 82080                   | TT                              | GG              | 1947012694               |
| SNP_P4_163475_82083 | NW_004516716.1 | Scaffold1532 | 82083                   | GG                              | AA              | 1947012696               |
| SNP_P4_163476_82104 | NW_004516716.1 | Scaffold1532 | 82104                   | GG                              | AA              | 1947012698               |
| SNP_P4_163477_82108 | NW_004516716.1 | Scaffold1532 | 82108                   | TT                              | GG              | 1947012700               |
| SNP_P4_163478_6734  | NW_004516717.1 | Scaffold1533 | 6734                    | AA                              | GG              | 1947012702               |
| SNP_P4_163479_7079  | NW_004516717.1 | Scaffold1533 | 7079                    | CC                              | TT              | 1947012704               |
| SNP_P4_163480_7096  | NW_004516717.1 | Scaffold1533 | 7096                    | TT                              | CC              | 1947012706               |
| SNP_P4_163481_7302  | NW_004516717.1 | Scaffold1533 | 7302                    | CC                              | TT              | 1947012708               |
| SNP_P4_163482_10866 | NW_004516717.1 | Scaffold1533 | 10866                   | AA                              | GG              | 1947012710               |
| SNP_P4_163483_10882 | NW_004516717.1 | Scaffold1533 | 10882                   | GG                              | AA              | 1947012712               |
| SNP_P4_163484_11123 | NW_004516717.1 | Scaffold1533 | 11123                   | TT                              | CC              | 1947012714               |
| SNP_P4_163485_11378 | NW_004516717.1 | Scaffold1533 | 11378                   | CC                              | TT              | 1947012716               |
| SNP_P4_163486_11385 | NW_004516717.1 | Scaffold1533 | 11385                   | AA                              | CC              | 1947012718               |
| SNP_P4_163487_11507 | NW_004516717.1 | Scaffold1533 | 11507                   | CC                              | TT              | 1947012720               |
| SNP_P4_163488_11508 | NW_004516717.1 | Scaffold1533 | 11508                   | AA                              | GG              | 1947012722               |
| SNP_P4_163489_11571 | NW_004516717.1 | Scaffold1533 | 11571                   | AA                              | GG              | 1947012724               |
| SNP_P4_163490_14311 | NW_004516717.1 | Scaffold1533 | 14311                   | GG                              | CC              | 1947012726               |
| SNP_P4_163491_14324 | NW_004516717.1 | Scaffold1533 | 14324                   | AA                              | GG              | 1947012728               |
| SNP_P4_163492_14369 | NW_004516717.1 | Scaffold1533 | 14369                   | TT                              | GG              | 1947012730               |
| SNP_P4_163493_14392 | NW_004516717.1 | Scaffold1533 | 14392                   | TT                              | GG              | 1947012732               |
| SNP_P4_163494_14401 | NW_004516717.1 | Scaffold1533 | 14401                   | CC                              | TT              | 1947012733               |
| SNP_P4_163495_14406 | NW_004516717.1 | Scaffold1533 | 14406                   | AA                              | GG              | 1947012734               |
| SNP_P4_163496_14484 | NW_004516717.1 | Scaffold1533 | 14484                   | CC                              | TT              | 1947012735               |
| SNP_P4_163497_27189 | NW_004516717.1 | Scaffold1533 | 27189                   | TT                              | CC              | 1947012736               |
| SNP_P4_163498_27208 | NW_004516717.1 | Scaffold1533 | 27208                   | CC                              | TT              | 1947012737               |
| SNP_P4_163499_28248 | NW_004516717.1 | Scaffold1533 | 28248                   | CC                              | TT              | 1947012738               |
| SNP_P4_163500_28250 | NW_004516717.1 | Scaffold1533 | 28250                   | GG                              | AA              | 1947012739               |
| SNP_P4_163501_28269 | NW_004516717.1 | Scaffold1533 | 28269                   | AA                              | TT              | 1947012740               |
| SNP_P4_163502_36771 | NW_004516717.1 | Scaffold1533 | 36771                   | AA                              | CC              | 1947012741               |
| SNP_P4_163503_36791 | NW_004516717.1 | Scaffold1533 | 36791                   | CC                              | AA              | 1947012742               |
| SNP_P4_163505_39665 | NW_004516717.1 | Scaffold1533 | 39665                   | CC                              | TT              | 1947012743               |

| SNPs IDs             | Chromosome IDs | Chromosomes  | Physical positions (bp) | CDC Frontier (Reference genome) | (ILWC46 & LPNB) | NCBI SNPdb Accession IDs |
|----------------------|----------------|--------------|-------------------------|---------------------------------|-----------------|--------------------------|
| SNP_P4_163506_39666  | NW_004516717.1 | Scaffold1533 | 39666                   | AA                              | GG              | 1947012744               |
| SNP_P4_163507_63783  | NW_004516717.1 | Scaffold1533 | 63783                   | AA                              | GG              | 1947012745               |
| SNP_P4_163508_63818  | NW_004516717.1 | Scaffold1533 | 63818                   | GG                              | AA              | 1947012746               |
| SNP_P4_163509_64132  | NW_004516717.1 | Scaffold1533 | 64132                   | GG                              | AA              | 1947012747               |
| SNP_P4_163510_65263  | NW_004516717.1 | Scaffold1533 | 65263                   | GG                              | TT              | 1947012748               |
| SNP_P4_163511_65430  | NW_004516717.1 | Scaffold1533 | 65430                   | AA                              | GG              | 1947012749               |
| SNP_P4_163512_73950  | NW_004516717.1 | Scaffold1533 | 73950                   | TT                              | CC              | 1947012750               |
| SNP_P4_163513_74029  | NW_004516717.1 | Scaffold1533 | 74029                   | TT                              | CC              | 1947012751               |
| SNP_P4_163514_84594  | NW_004516717.1 | Scaffold1533 | 84594                   | GG                              | AA              | 1947012752               |
| SNP_P4_163515_89040  | NW_004516717.1 | Scaffold1533 | 89040                   | AA                              | TT              | 1947012753               |
| SNP_P4_163516_89041  | NW_004516717.1 | Scaffold1533 | 89041                   | AA                              | GG              | 1947012754               |
| SNP_P4_163517_89084  | NW_004516717.1 | Scaffold1533 | 89084                   | CC                              | AA              | 1947012755               |
| SNP_P4_163518_89089  | NW_004516717.1 | Scaffold1533 | 89089                   | TT                              | GG              | 1947012756               |
| SNP_P4_163519_89317  | NW_004516717.1 | Scaffold1533 | 89317                   | AA                              | GG              | 1947012757               |
| SNP_P4_163520_89329  | NW_004516717.1 | Scaffold1533 | 89329                   | GG                              | AA              | 1947012758               |
| SNP_P4_163521_89332  | NW_004516717.1 | Scaffold1533 | 89332                   | CC                              | TT              | 1947012759               |
| SNP_P4_163522_89343  | NW_004516717.1 | Scaffold1533 | 89343                   | CC                              | AA              | 1947012760               |
| SNP_P4_163523_104706 | NW_004516717.1 | Scaffold1533 | 104706                  | CC                              | TT              | 1947012761               |
| SNP_P4_163524_104713 | NW_004516717.1 | Scaffold1533 | 104713                  | TT                              | CC              | 1947012763               |
| SNP_P4_163525_104717 | NW_004516717.1 | Scaffold1533 | 104717                  | TT                              | CC              | 1947012765               |
| SNP_P4_163526_104718 | NW_004516717.1 | Scaffold1533 | 104718                  | TT                              | GG              | 1947012766               |
| SNP_P4_163527_104719 | NW_004516717.1 | Scaffold1533 | 104719                  | CC                              | TT              | 1947012768               |
| SNP_P4_163528_104737 | NW_004516717.1 | Scaffold1533 | 104737                  | AA                              | CC              | 1947012770               |
| SNP_P4_163529_105973 | NW_004516717.1 | Scaffold1533 | 105973                  | TT                              | CC              | 1947012772               |
| SNP_P4_163530_105978 | NW_004516717.1 | Scaffold1533 | 105978                  | GG                              | AA              | 1947012774               |
| SNP_P4_163531_118598 | NW_004516717.1 | Scaffold1533 | 118598                  | CC                              | AA              | 1947012776               |
| SNP_P4_163532_119833 | NW_004516717.1 | Scaffold1533 | 119833                  | TT                              | AA              | 1947012778               |
| SNP_P4_163533_132845 | NW_004516717.1 | Scaffold1533 | 132845                  | GG                              | AA              | 1947012780               |
| SNP_P4_163534_135092 | NW_004516717.1 | Scaffold1533 | 135092                  | AA                              | GG              | 1947012782               |
| SNP_P4_163535_135112 | NW_004516717.1 | Scaffold1533 | 135112                  | TT                              | CC              | 1947012784               |
| SNP_P4_163536_135449 | NW_004516717.1 | Scaffold1533 | 135449                  | GG                              | CC              | 1947012786               |
| SNP_P4_163537_891    | NW_004516718.1 | Scaffold1535 | 891                     | GG                              | AA              | 1947012788               |
| SNP_P4_163538_2578   | NW_004516718.1 | Scaffold1535 | 2578                    | TT                              | AA              | 1947012790               |
| SNP_P4_163539_2937   | NW_004516718.1 | Scaffold1535 | 2937                    | AA                              | TT              | 1947012792               |
| SNP_P4_163540_2992   | NW_004516718.1 | Scaffold1535 | 2992                    | AA                              | GG              | 1947012794               |
| SNP_P4_163541_3111   | NW_004516718.1 | Scaffold1535 | 3111                    | AA                              | TT              | 1947012796               |
| SNP_P4_163542_3129   | NW_004516718.1 | Scaffold1535 | 3129                    | CC                              | TT              | 1947012798               |
| SNP_P4_163543_3160   | NW_004516718.1 | Scaffold1535 | 3160                    | CC                              | AA              | 1947012800               |
| SNP_P4_163544_442    | NW_004516720.1 | Scaffold1542 | 442                     | AA                              | GG              | 1947012802               |
| SNP_P4_163545_602    | NW_004516720.1 | Scaffold1542 | 602                     | AA                              | TT              | 1947012804               |
| SNP_P4_163546_4875   | NW_004516720.1 | Scaffold1542 | 4875                    | GG                              | AA              | 1947012806               |
| SNP_P4_163547_7035   | NW_004516720.1 | Scaffold1542 | 7035                    | TT                              | AA              | 1947012808               |

| SNPs IDs            | Chromosome IDs | Chromosomes  | Physical positions (bp) | CDC Frontier (Reference genome) | (ILWC46 & LPNB) | NCBI SNPdb Accession IDs |
|---------------------|----------------|--------------|-------------------------|---------------------------------|-----------------|--------------------------|
| SNP_P4_163548_7130  | NW_004516720.1 | Scaffold1542 | 7130                    | TT                              | CC              | 1947012810               |
| SNP_P4_163549_7416  | NW_004516720.1 | Scaffold1542 | 7416                    | AA                              | CC              | 1947012812               |
| SNP_P4_163550_39361 | NW_004516720.1 | Scaffold1542 | 39361                   | AA                              | TT              | 1947012814               |
| SNP_P4_163551_39366 | NW_004516720.1 | Scaffold1542 | 39366                   | AA                              | CC              | 1947012816               |
| SNP_P4_163552_42855 | NW_004516720.1 | Scaffold1542 | 42855                   | GG                              | CC              | 1947012818               |
| SNP_P4_163553_64    | NW_004516721.1 | Scaffold1543 | 64                      | GG                              | CC              | 1947012820               |
| SNP_P4_163554_309   | NW_004516721.1 | Scaffold1543 | 309                     | TT                              | GG              | 1947012822               |
| SNP_P4_163555_328   | NW_004516721.1 | Scaffold1543 | 328                     | GG                              | TT              | 1947012824               |
| SNP_P4_163556_605   | NW_004516722.1 | Scaffold1544 | 605                     | CC                              | AA              | 1947012826               |
| SNP_P4_163557_644   | NW_004516722.1 | Scaffold1544 | 644                     | TT                              | AA              | 1947012828               |
| SNP_P4_163558_782   | NW_004516722.1 | Scaffold1544 | 782                     | TT                              | GG              | 1947012830               |
| SNP_P4_163559_830   | NW_004516722.1 | Scaffold1544 | 830                     | CC                              | AA              | 1947012832               |
| SNP_P4_163560_1190  | NW_004516722.1 | Scaffold1544 | 1190                    | TT                              | AA              | 1947012834               |
| SNP_P4_163561_1191  | NW_004516722.1 | Scaffold1544 | 1191                    | GG                              | TT              | 1947012836               |
| SNP_P4_163562_1589  | NW_004516722.1 | Scaffold1544 | 1589                    | AA                              | GG              | 1947012838               |
| SNP_P4_163563_1656  | NW_004516722.1 | Scaffold1544 | 1656                    | AA                              | TT              | 1947012840               |
| SNP_P4_163564_1679  | NW_004516722.1 | Scaffold1544 | 1679                    | CC                              | TT              | 1947012842               |
| SNP_P4_163565_1705  | NW_004516722.1 | Scaffold1544 | 1705                    | TT                              | CC              | 1947012844               |
| SNP_P4_163566_1767  | NW_004516722.1 | Scaffold1544 | 1767                    | AA                              | CC              | 1947012846               |
| SNP_P4_163567_2411  | NW_004516722.1 | Scaffold1544 | 2411                    | GG                              | AA              | 1947012848               |
| SNP_P4_163568_2527  | NW_004516722.1 | Scaffold1544 | 2527                    | TT                              | CC              | 1947012850               |
| SNP_P4_163569_2804  | NW_004516722.1 | Scaffold1544 | 2804                    | AA                              | GG              | 1947012852               |
| SNP_P4_163570_2874  | NW_004516722.1 | Scaffold1544 | 2874                    | GG                              | AA              | 1947012854               |
| SNP_P4_163571_3283  | NW_004516722.1 | Scaffold1544 | 3283                    | GG                              | AA              | 1947012856               |
| SNP_P4_163572_8679  | NW_004516722.1 | Scaffold1544 | 8679                    | TT                              | CC              | 1947012858               |
| SNP_P4_163573_8915  | NW_004516722.1 | Scaffold1544 | 8915                    | GG                              | CC              | 1947012860               |
| SNP_P4_163574_9076  | NW_004516722.1 | Scaffold1544 | 9076                    | TT                              | GG              | 1947012863               |
| SNP_P4_163575_9127  | NW_004516722.1 | Scaffold1544 | 9127                    | CC                              | GG              | 1947012865               |
| SNP_P4_163576_9308  | NW_004516722.1 | Scaffold1544 | 9308                    | AA                              | TT              | 1947012867               |
| SNP_P4_163577_9549  | NW_004516722.1 | Scaffold1544 | 9549                    | TT                              | AA              | 1947012869               |
| SNP_P4_163578_9698  | NW_004516722.1 | Scaffold1544 | 9698                    | CC                              | TT              | 1947012871               |
| SNP_P4_163579_14141 | NW_004516722.1 | Scaffold1544 | 14141                   | GG                              | CC              | 1947012873               |
| SNP_P4_163580_14552 | NW_004516722.1 | Scaffold1544 | 14552                   | AA                              | TT              | 1947012875               |
| SNP_P4_163582_14944 | NW_004516722.1 | Scaffold1544 | 14944                   | TT                              | CC              | 1947012877               |
| SNP_P4_163584_29477 | NW_004516723.1 | Scaffold1545 | 29477                   | CC                              | TT              | 1947012879               |
| SNP_P4_163585_36896 | NW_004516723.1 | Scaffold1545 | 36896                   | AA                              | GG              | 1947012881               |
| SNP_P4_163586_39676 | NW_004516723.1 | Scaffold1545 | 39676                   | TT                              | GG              | 1947012883               |
| SNP_P4_163587_39685 | NW_004516723.1 | Scaffold1545 | 39685                   | AA                              | GG              | 1947012885               |
| SNP_P4_163588_39745 | NW_004516723.1 | Scaffold1545 | 39745                   | CC                              | TT              | 1947012887               |
| SNP_P4_163589_40016 | NW_004516723.1 | Scaffold1545 | 40016                   | CC                              | TT              | 1947012889               |
| SNP_P4_163590_40093 | NW_004516723.1 | Scaffold1545 | 40093                   | CC                              | TT              | 1947012891               |
| SNP_P4_163591_42745 | NW_004516723.1 | Scaffold1545 | 42745                   | TT                              | GG              | 1947012893               |



| SNPs IDs             | Chromosome IDs | Chromosomes  | Physical positions (bp) | CDC Frontier (Reference genome) | (ILWC46 & LPNB) | NCBI SNPdb Accession IDs |
|----------------------|----------------|--------------|-------------------------|---------------------------------|-----------------|--------------------------|
| SNP_P4_163592_60316  | NW_004516723.1 | Scaffold1545 | 60316                   | AA                              | GG              | 1947012895               |
| SNP_P4_163593_60355  | NW_004516723.1 | Scaffold1545 | 60355                   | TT                              | CC              | 1947012897               |
| SNP_P4_163594_60521  | NW_004516723.1 | Scaffold1545 | 60521                   | AA                              | GG              | 1947012899               |
| SNP_P4_163595_60755  | NW_004516723.1 | Scaffold1545 | 60755                   | TT                              | CC              | 1947012901               |
| SNP_P4_163596_74399  | NW_004516723.1 | Scaffold1545 | 74399                   | TT                              | AA              | 1947012903               |
| SNP_P4_163597_74637  | NW_004516723.1 | Scaffold1545 | 74637                   | GG                              | AA              | 1947012905               |
| SNP_P4_163598_81342  | NW_004516723.1 | Scaffold1545 | 81342                   | AA                              | TT              | 1947012907               |
| SNP_P4_163599_81343  | NW_004516723.1 | Scaffold1545 | 81343                   | GG                              | AA              | 1947012909               |
| SNP_P4_163600_81400  | NW_004516723.1 | Scaffold1545 | 81400                   | GG                              | CC              | 1947012911               |
| SNP_P4_163601_81406  | NW_004516723.1 | Scaffold1545 | 81406                   | TT                              | CC              | 1947012913               |
| SNP_P4_163603_81521  | NW_004516723.1 | Scaffold1545 | 81521                   | AA                              | GG              | 1947012915               |
| SNP_P4_163604_81569  | NW_004516723.1 | Scaffold1545 | 81569                   | AA                              | GG              | 1947012917               |
| SNP_P4_163605_81616  | NW_004516723.1 | Scaffold1545 | 81616                   | TT                              | AA              | 1947012919               |
| SNP_P4_163606_81627  | NW_004516723.1 | Scaffold1545 | 81627                   | GG                              | AA              | 1947012921               |
| SNP_P4_163607_81633  | NW_004516723.1 | Scaffold1545 | 81633                   | CC                              | AA              | 1947012923               |
| SNP_P4_163608_81648  | NW_004516723.1 | Scaffold1545 | 81648                   | AA                              | GG              | 1947012925               |
| SNP_P4_163609_81661  | NW_004516723.1 | Scaffold1545 | 81661                   | CC                              | GG              | 1947012927               |
| SNP_P4_163610_81665  | NW_004516723.1 | Scaffold1545 | 81665                   | TT                              | GG              | 1947012929               |
| SNP_P4_163611_81699  | NW_004516723.1 | Scaffold1545 | 81699                   | AA                              | GG              | 1947012931               |
| SNP_P4_163612_81763  | NW_004516723.1 | Scaffold1545 | 81763                   | TT                              | GG              | 1947012933               |
| SNP_P4_163613_81779  | NW_004516723.1 | Scaffold1545 | 81779                   | TT                              | CC              | 1947012935               |
| SNP_P4_163614_81786  | NW_004516723.1 | Scaffold1545 | 81786                   | TT                              | CC              | 1947012937               |
| SNP_P4_163615_81787  | NW_004516723.1 | Scaffold1545 | 81787                   | TT                              | GG              | 1947012939               |
| SNP_P4_163616_81790  | NW_004516723.1 | Scaffold1545 | 81790                   | GG                              | AA              | 1947012941               |
| SNP_P4_163617_81791  | NW_004516723.1 | Scaffold1545 | 81791                   | AA                              | GG              | 1947012943               |
| SNP_P4_163618_81797  | NW_004516723.1 | Scaffold1545 | 81797                   | TT                              | AA              | 1947012945               |
| SNP_P4_163619_81813  | NW_004516723.1 | Scaffold1545 | 81813                   | AA                              | TT              | 1947012947               |
| SNP_P4_163620_81973  | NW_004516723.1 | Scaffold1545 | 81973                   | AA                              | GG              | 1947012949               |
| SNP_P4_163621_82018  | NW_004516723.1 | Scaffold1545 | 82018                   | TT                              | AA              | 1947012951               |
| SNP_P4_163622_84899  | NW_004516723.1 | Scaffold1545 | 84899                   | GG                              | AA              | 1947012953               |
| SNP_P4_163623_84906  | NW_004516723.1 | Scaffold1545 | 84906                   | TT                              | CC              | 1947012955               |
| SNP_P4_163625_143980 | NW_004516723.1 | Scaffold1545 | 143980                  | GG                              | AA              | 1947012957               |
| SNP_P4_163626_152435 | NW_004516723.1 | Scaffold1545 | 152435                  | TT                              | CC              | 1947012959               |
| SNP_P4_163628_177536 | NW_004516723.1 | Scaffold1545 | 177536                  | AA                              | GG              | 1947012961               |
| SNP_P4_163629_177542 | NW_004516723.1 | Scaffold1545 | 177542                  | GG                              | AA              | 1947012963               |
| SNP_P4_163630_177622 | NW_004516723.1 | Scaffold1545 | 177622                  | CC                              | TT              | 1947012965               |
| SNP_P4_163632_192180 | NW_004516723.1 | Scaffold1545 | 192180                  | GG                              | AA              | 1947012967               |
| SNP_P4_163633_194883 | NW_004516723.1 | Scaffold1545 | 194883                  | GG                              | CC              | 1947012969               |
| SNP_P4_163634_237472 | NW_004516723.1 | Scaffold1545 | 237472                  | CC                              | AA              | 1947012971               |
| SNP_P4_163635_237498 | NW_004516723.1 | Scaffold1545 | 237498                  | TT                              | CC              | 1947012973               |
| SNP_P4_163636_237523 | NW_004516723.1 | Scaffold1545 | 237523                  | AA                              | CC              | 1947012975               |
| SNP_P4_163637_268707 | NW_004516723.1 | Scaffold1545 | 268707                  | GG                              | TT              | 1947012977               |

| SNPs IDs             | Chromosome IDs | Chromosomes  | Physical positions (bp) | CDC Frontier (Reference genome) | (ILWC46 & LPNB) | NCBI SNPdb Accession IDs |
|----------------------|----------------|--------------|-------------------------|---------------------------------|-----------------|--------------------------|
| SNP_P4_163638_269034 | NW_004516723.1 | Scaffold1545 | 269034                  | CC                              | TT              | 1947012979               |
| SNP_P4_163639_269092 | NW_004516723.1 | Scaffold1545 | 269092                  | GG                              | AA              | 1947012981               |
| SNP_P4_163640_274853 | NW_004516723.1 | Scaffold1545 | 274853                  | AA                              | GG              | 1947012983               |
| SNP_P4_163641_279946 | NW_004516723.1 | Scaffold1545 | 279946                  | TT                              | GG              | 1947012985               |
| SNP_P4_163642_287021 | NW_004516723.1 | Scaffold1545 | 287021                  | GG                              | AA              | 1947012987               |
| SNP_P4_163643_288461 | NW_004516723.1 | Scaffold1545 | 288461                  | GG                              | CC              | 1947012989               |
| SNP_P4_163644_288902 | NW_004516723.1 | Scaffold1545 | 288902                  | CC                              | TT              | 1947012991               |
| SNP_P4_163645_288903 | NW_004516723.1 | Scaffold1545 | 288903                  | AA                              | GG              | 1947012993               |
| SNP_P4_163646_288910 | NW_004516723.1 | Scaffold1545 | 288910                  | TT                              | CC              | 1947012995               |
| SNP_P4_163647_290175 | NW_004516723.1 | Scaffold1545 | 290175                  | TT                              | CC              | 1947012997               |
| SNP_P4_163648_305043 | NW_004516723.1 | Scaffold1545 | 305043                  | GG                              | AA              | 1947012999               |
| SNP_P4_163650_39273  | NW_004516724.1 | Scaffold1546 | 39273                   | CC                              | TT              | 1947013001               |
| SNP_P4_163651_70043  | NW_004516724.1 | Scaffold1546 | 70043                   | GG                              | AA              | 1947013003               |
| SNP_P4_163652_76669  | NW_004516724.1 | Scaffold1546 | 76669                   | GG                              | AA              | 1947013005               |
| SNP_P4_163653_76904  | NW_004516724.1 | Scaffold1546 | 76904                   | GG                              | AA              | 1947013007               |
| SNP_P4_163654_81290  | NW_004516724.1 | Scaffold1546 | 81290                   | GG                              | AA              | 1947013009               |
| SNP_P4_163655_81309  | NW_004516724.1 | Scaffold1546 | 81309                   | GG                              | AA              | 1947013011               |
| SNP_P4_163656_81334  | NW_004516724.1 | Scaffold1546 | 81334                   | TT                              | GG              | 1947013013               |
| SNP_P4_163657_81687  | NW_004516724.1 | Scaffold1546 | 81687                   | TT                              | CC              | 1947013015               |
| SNP_P4_163658_84878  | NW_004516724.1 | Scaffold1546 | 84878                   | CC                              | AA              | 1947013017               |
| SNP_P4_163659_99232  | NW_004516724.1 | Scaffold1546 | 99232                   | CC                              | TT              | 1947013019               |
| SNP_P4_163660_99276  | NW_004516724.1 | Scaffold1546 | 99276                   | AA                              | GG              | 1947013021               |
| SNP_P4_163661_99686  | NW_004516724.1 | Scaffold1546 | 99686                   | TT                              | CC              | 1947013023               |
| SNP_P4_163663_125114 | NW_004516724.1 | Scaffold1546 | 125114                  | TT                              | AA              | 1947013025               |
| SNP_P4_163664_127817 | NW_004516724.1 | Scaffold1546 | 127817                  | GG                              | TT              | 1947013027               |
| SNP_P4_163665_128063 | NW_004516724.1 | Scaffold1546 | 128063                  | GG                              | TT              | 1947013029               |
| SNP_P4_163666_140926 | NW_004516724.1 | Scaffold1546 | 140926                  | AA                              | TT              | 1947013031               |
| SNP_P4_163667_141005 | NW_004516724.1 | Scaffold1546 | 141005                  | TT                              | CC              | 1947013033               |
| SNP_P4_163668_141049 | NW_004516724.1 | Scaffold1546 | 141049                  | TT                              | GG              | 1947013035               |
| SNP_P4_163669_141056 | NW_004516724.1 | Scaffold1546 | 141056                  | GG                              | CC              | 1947013037               |
| SNP_P4_163670_141062 | NW_004516724.1 | Scaffold1546 | 141062                  | GG                              | AA              | 1947013039               |
| SNP_P4_163671_141064 | NW_004516724.1 | Scaffold1546 | 141064                  | AA                              | TT              | 1947013041               |
| SNP_P4_163672_141072 | NW_004516724.1 | Scaffold1546 | 141072                  | GG                              | AA              | 1947013043               |
| SNP_P4_163673_141086 | NW_004516724.1 | Scaffold1546 | 141086                  | CC                              | AA              | 1947013045               |
| SNP_P4_163674_141381 | NW_004516724.1 | Scaffold1546 | 141381                  | TT                              | GG              | 1947013047               |
| SNP_P4_163675_141430 | NW_004516724.1 | Scaffold1546 | 141430                  | CC                              | TT              | 1947013049               |
| SNP_P4_163676_141503 | NW_004516724.1 | Scaffold1546 | 141503                  | AA                              | GG              | 1947013051               |
| SNP_P4_163677_141728 | NW_004516724.1 | Scaffold1546 | 141728                  | TT                              | CC              | 1947013053               |
| SNP_P4_163678_141772 | NW_004516724.1 | Scaffold1546 | 141772                  | GG                              | AA              | 1947013055               |
| SNP_P4_163679_141776 | NW_004516724.1 | Scaffold1546 | 141776                  | AA                              | TT              | 1947013057               |
| SNP_P4_163680_141851 | NW_004516724.1 | Scaffold1546 | 141851                  | AA                              | GG              | 1947013059               |
| SNP_P4_163681_855    | NW_004516726.1 | Scaffold1548 | 855                     | TT                              | GG              | 1947013061               |

| SNPs IDs            | Chromosome IDs | Chromosomes  | Physical positions (bp) | CDC Frontier (Reference genome) | (ILWC46 & LPNB) | NCBI SNPdb Accession IDs |
|---------------------|----------------|--------------|-------------------------|---------------------------------|-----------------|--------------------------|
| SNP_P4_163682_863   | NW_004516726.1 | Scaffold1548 | 863                     | TT                              | GG              | 1947013063               |
| SNP_P4_163683_872   | NW_004516726.1 | Scaffold1548 | 872                     | AA                              | GG              | 1947013065               |
| SNP_P4_163685_1173  | NW_004516726.1 | Scaffold1548 | 1173                    | AA                              | GG              | 1947013067               |
| SNP_P4_163686_1469  | NW_004516726.1 | Scaffold1548 | 1469                    | GG                              | TT              | 1947013069               |
| SNP_P4_163687_1557  | NW_004516726.1 | Scaffold1548 | 1557                    | AA                              | TT              | 1947013071               |
| SNP_P4_163688_1732  | NW_004516726.1 | Scaffold1548 | 1732                    | TT                              | CC              | 1947013073               |
| SNP_P4_163689_10135 | NW_004516726.1 | Scaffold1548 | 10135                   | TT                              | AA              | 1947013075               |
| SNP_P4_163690_10409 | NW_004516726.1 | Scaffold1548 | 10409                   | TT                              | CC              | 1947013077               |
| SNP_P4_163691_11023 | NW_004516726.1 | Scaffold1548 | 11023                   | AA                              | TT              | 1947013079               |
| SNP_P4_163693_11187 | NW_004516726.1 | Scaffold1548 | 11187                   | CC                              | TT              | 1947013081               |
| SNP_P4_163694_11283 | NW_004516726.1 | Scaffold1548 | 11283                   | CC                              | TT              | 1947013083               |
| SNP_P4_163695_11314 | NW_004516726.1 | Scaffold1548 | 11314                   | AA                              | GG              | 1947013085               |
| SNP_P4_163696_12321 | NW_004516726.1 | Scaffold1548 | 12321                   | GG                              | TT              | 1947013087               |
| SNP_P4_163697_15003 | NW_004516726.1 | Scaffold1548 | 15003                   | CC                              | TT              | 1947013089               |
| SNP_P4_163698_15317 | NW_004516726.1 | Scaffold1548 | 15317                   | CC                              | TT              | 1947013091               |
| SNP_P4_163699_15490 | NW_004516726.1 | Scaffold1548 | 15490                   | AA                              | TT              | 1947013093               |
| SNP_P4_163700_16152 | NW_004516726.1 | Scaffold1548 | 16152                   | GG                              | AA              | 1947013095               |
| SNP_P4_163701_18691 | NW_004516726.1 | Scaffold1548 | 18691                   | AA                              | TT              | 1947013097               |
| SNP_P4_163702_18719 | NW_004516726.1 | Scaffold1548 | 18719                   | AA                              | GG              | 1947013099               |
| SNP_P4_163703_20048 | NW_004516726.1 | Scaffold1548 | 20048                   | CC                              | TT              | 1947013101               |
| SNP_P4_163704_20264 | NW_004516726.1 | Scaffold1548 | 20264                   | TT                              | CC              | 1947013103               |
| SNP_P4_163705_20320 | NW_004516726.1 | Scaffold1548 | 20320                   | CC                              | AA              | 1947013105               |
| SNP_P4_163706_20478 | NW_004516726.1 | Scaffold1548 | 20478                   | CC                              | TT              | 1947013107               |
| SNP_P4_163707_20692 | NW_004516726.1 | Scaffold1548 | 20692                   | AA                              | GG              | 1947013109               |
| SNP_P4_163708_20719 | NW_004516726.1 | Scaffold1548 | 20719                   | TT                              | CC              | 1947013111               |
| SNP_P4_163709_24779 | NW_004516726.1 | Scaffold1548 | 24779                   | AA                              | GG              | 1947013113               |
| SNP_P4_163711_25024 | NW_004516726.1 | Scaffold1548 | 25024                   | GG                              | TT              | 1947013115               |
| SNP_P4_163712_25138 | NW_004516726.1 | Scaffold1548 | 25138                   | TT                              | CC              | 1947013117               |
| SNP_P4_163713_27497 | NW_004516726.1 | Scaffold1548 | 27497                   | GG                              | AA              | 1947013120               |
| SNP_P4_163714_27544 | NW_004516726.1 | Scaffold1548 | 27544                   | GG                              | AA              | 1947013122               |
| SNP_P4_163715_27669 | NW_004516726.1 | Scaffold1548 | 27669                   | GG                              | AA              | 1947013124               |
| SNP_P4_163716_27731 | NW_004516726.1 | Scaffold1548 | 27731                   | GG                              | AA              | 1947013126               |
| SNP_P4_163717_27879 | NW_004516726.1 | Scaffold1548 | 27879                   | GG                              | TT              | 1947013128               |
| SNP_P4_163718_5550  | NW_004516728.1 | Scaffold1550 | 5550                    | CC                              | AA              | 1947013130               |
| SNP_P4_163719_5552  | NW_004516728.1 | Scaffold1550 | 5552                    | AA                              | GG              | 1947013132               |
| SNP_P4_163720_5840  | NW_004516728.1 | Scaffold1550 | 5840                    | AA                              | TT              | 1947013134               |
| SNP_P4_163721_5854  | NW_004516728.1 | Scaffold1550 | 5854                    | GG                              | AA              | 1947013136               |
| SNP_P4_163722_5878  | NW_004516728.1 | Scaffold1550 | 5878                    | AA                              | CC              | 1947013137               |
| SNP_P4_163723_6606  | NW_004516728.1 | Scaffold1550 | 6606                    | CC                              | TT              | 1947013139               |
| SNP_P4_163724_6781  | NW_004516728.1 | Scaffold1550 | 6781                    | AA                              | CC              | 1947013141               |
| SNP_P4_163725_16296 | NW_004516728.1 | Scaffold1550 | 16296                   | CC                              | TT              | 1947013143               |
| SNP_P4_163726_16444 | NW_004516728.1 | Scaffold1550 | 16444                   | TT                              | CC              | 1947013145               |

| SNPs IDs            | Chromosome IDs | Chromosomes  | Physical positions (bp) | CDC Frontier (Reference genome) | (ILWC46 & LPNB) | NCBI SNPdb Accession IDs |
|---------------------|----------------|--------------|-------------------------|---------------------------------|-----------------|--------------------------|
| SNP_P4_163727_16677 | NW_004516728.1 | Scaffold1550 | 16677                   | TT                              | CC              | 1947013147               |
| SNP_P4_163728_16891 | NW_004516728.1 | Scaffold1550 | 16891                   | AA                              | GG              | 1947013149               |
| SNP_P4_163730_33264 | NW_004516728.1 | Scaffold1550 | 33264                   | AA                              | GG              | 1947013151               |
| SNP_P4_163732_33635 | NW_004516728.1 | Scaffold1550 | 33635                   | TT                              | GG              | 1947013153               |
| SNP_P4_163733_33760 | NW_004516728.1 | Scaffold1550 | 33760                   | CC                              | AA              | 1947013155               |
| SNP_P4_163734_33766 | NW_004516728.1 | Scaffold1550 | 33766                   | TT                              | CC              | 1947013157               |
| SNP_P4_163735_40467 | NW_004516728.1 | Scaffold1550 | 40467                   | TT                              | CC              | 1947013159               |
| SNP_P4_163736_40470 | NW_004516728.1 | Scaffold1550 | 40470                   | TT                              | CC              | 1947013161               |
| SNP_P4_163737_40546 | NW_004516728.1 | Scaffold1550 | 40546                   | AA                              | TT              | 1947013163               |
| SNP_P4_163738_40821 | NW_004516728.1 | Scaffold1550 | 40821                   | TT                              | CC              | 1947013165               |
| SNP_P4_163739_40829 | NW_004516728.1 | Scaffold1550 | 40829                   | AA                              | CC              | 1947013167               |
| SNP_P4_163740_40840 | NW_004516728.1 | Scaffold1550 | 40840                   | CC                              | TT              | 1947013169               |
| SNP_P4_163741_40990 | NW_004516728.1 | Scaffold1550 | 40990                   | AA                              | GG              | 1947013171               |
| SNP_P4_163742_41102 | NW_004516728.1 | Scaffold1550 | 41102                   | CC                              | GG              | 1947013173               |
| SNP_P4_163743_41138 | NW_004516728.1 | Scaffold1550 | 41138                   | TT                              | AA              | 1947013175               |
| SNP_P4_163744_43768 | NW_004516728.1 | Scaffold1550 | 43768                   | AA                              | GG              | 1947013177               |
| SNP_P4_163745_43804 | NW_004516728.1 | Scaffold1550 | 43804                   | AA                              | GG              | 1947013179               |
| SNP_P4_163746_43889 | NW_004516728.1 | Scaffold1550 | 43889                   | CC                              | AA              | 1947013181               |
| SNP_P4_163747_43907 | NW_004516728.1 | Scaffold1550 | 43907                   | AA                              | GG              | 1947013183               |
| SNP_P4_163748_44240 | NW_004516728.1 | Scaffold1550 | 44240                   | AA                              | GG              | 1947013185               |
| SNP_P4_163749_44277 | NW_004516728.1 | Scaffold1550 | 44277                   | TT                              | AA              | 1947013187               |
| SNP_P4_163751_49087 | NW_004516728.1 | Scaffold1550 | 49087                   | GG                              | AA              | 1947013189               |
| SNP_P4_163752_49398 | NW_004516728.1 | Scaffold1550 | 49398                   | CC                              | TT              | 1947013192               |
| SNP_P4_163753_49655 | NW_004516728.1 | Scaffold1550 | 49655                   | CC                              | GG              | 1947013194               |
| SNP_P4_163754_49733 | NW_004516728.1 | Scaffold1550 | 49733                   | GG                              | TT              | 1947013196               |
| SNP_P4_163755_53461 | NW_004516728.1 | Scaffold1550 | 53461                   | TT                              | GG              | 1947013198               |
| SNP_P4_163756_53515 | NW_004516728.1 | Scaffold1550 | 53515                   | AA                              | CC              | 1947013200               |
| SNP_P4_163757_53527 | NW_004516728.1 | Scaffold1550 | 53527                   | AA                              | GG              | 1947013202               |
| SNP_P4_163760_61356 | NW_004516728.1 | Scaffold1550 | 61356                   | GG                              | AA              | 1947013204               |
| SNP_P4_163761_61359 | NW_004516728.1 | Scaffold1550 | 61359                   | CC                              | TT              | 1947013206               |
| SNP_P4_163762_63832 | NW_004516728.1 | Scaffold1550 | 63832                   | AA                              | GG              | 1947013208               |
| SNP_P4_163763_65794 | NW_004516728.1 | Scaffold1550 | 65794                   | CC                              | AA              | 1947013210               |
| SNP_P4_163764_77690 | NW_004516728.1 | Scaffold1550 | 77690                   | AA                              | TT              | 1947013212               |
| SNP_P4_163765_95447 | NW_004516728.1 | Scaffold1550 | 95447                   | CC                              | TT              | 1947013214               |
| SNP_P4_163766_95654 | NW_004516728.1 | Scaffold1550 | 95654                   | AA                              | TT              | 1947013216               |
| SNP_P4_163767_95657 | NW_004516728.1 | Scaffold1550 | 95657                   | AA                              | GG              | 1947013219               |
| SNP_P4_163768_95661 | NW_004516728.1 | Scaffold1550 | 95661                   | TT                              | CC              | 1947013221               |
| SNP_P4_163769_95693 | NW_004516728.1 | Scaffold1550 | 95693                   | AA                              | TT              | 1947013223               |
| SNP_P4_163770_99250 | NW_004516728.1 | Scaffold1550 | 99250                   | TT                              | CC              | 1947013225               |
| SNP_P4_163771_99275 | NW_004516728.1 | Scaffold1550 | 99275                   | CC                              | GG              | 1947013227               |
| SNP_P4_163772_99328 | NW_004516728.1 | Scaffold1550 | 99328                   | AA                              | TT              | 1947013229               |
| SNP_P4_163773_99346 | NW_004516728.1 | Scaffold1550 | 99346                   | CC                              | TT              | 1947013231               |

| SNPs IDs             | Chromosome IDs | Chromosomes  | Physical positions (bp) | CDC Frontier (Reference genome) | (ILWC46 & LPNB) | NCBI SNPdb Accession IDs |
|----------------------|----------------|--------------|-------------------------|---------------------------------|-----------------|--------------------------|
| SNP_P4_163774_100250 | NW_004516728.1 | Scaffold1550 | 100250                  | AA                              | GG              | 1947013232               |
| SNP_P4_163775_100264 | NW_004516728.1 | Scaffold1550 | 100264                  | TT                              | AA              | 1947013235               |
| SNP_P4_163776_100921 | NW_004516728.1 | Scaffold1550 | 100921                  | GG                              | AA              | 1947013237               |
| SNP_P4_163777_100982 | NW_004516728.1 | Scaffold1550 | 100982                  | AA                              | TT              | 1947013239               |
| SNP_P4_163778_104745 | NW_004516728.1 | Scaffold1550 | 104745                  | AA                              | CC              | 1947013241               |
| SNP_P4_163779_104773 | NW_004516728.1 | Scaffold1550 | 104773                  | TT                              | AA              | 1947013243               |
| SNP_P4_163780_104815 | NW_004516728.1 | Scaffold1550 | 104815                  | TT                              | AA              | 1947013245               |
| SNP_P4_163782_1903   | NW_004516730.1 | Scaffold1552 | 1903                    | CC                              | GG              | 1947013247               |
| SNP_P4_163783_1928   | NW_004516730.1 | Scaffold1552 | 1928                    | TT                              | AA              | 1947013249               |
| SNP_P4_163784_1954   | NW_004516730.1 | Scaffold1552 | 1954                    | CC                              | TT              | 1947013251               |
| SNP_P4_163785_2004   | NW_004516730.1 | Scaffold1552 | 2004                    | CC                              | TT              | 1947013253               |
| SNP_P4_163786_2125   | NW_004516730.1 | Scaffold1552 | 2125                    | GG                              | AA              | 1947013255               |
| SNP_P4_163788_2534   | NW_004516730.1 | Scaffold1552 | 2534                    | TT                              | AA              | 1947013257               |
| SNP_P4_163789_2538   | NW_004516730.1 | Scaffold1552 | 2538                    | CC                              | TT              | 1947013259               |
| SNP_P4_163790_2540   | NW_004516730.1 | Scaffold1552 | 2540                    | GG                              | AA              | 1947013261               |
| SNP_P4_163791_4664   | NW_004516730.1 | Scaffold1552 | 4664                    | TT                              | CC              | 1947013263               |
| SNP_P4_163792_4792   | NW_004516730.1 | Scaffold1552 | 4792                    | CC                              | TT              | 1947013265               |
| SNP_P4_163793_4837   | NW_004516730.1 | Scaffold1552 | 4837                    | AA                              | GG              | 1947013267               |
| SNP_P4_163794_4872   | NW_004516730.1 | Scaffold1552 | 4872                    | TT                              | CC              | 1947013269               |
| SNP_P4_163795_4911   | NW_004516730.1 | Scaffold1552 | 4911                    | CC                              | AA              | 1947013271               |
| SNP_P4_163796_5040   | NW_004516730.1 | Scaffold1552 | 5040                    | AA                              | GG              | 1947013273               |
| SNP_P4_163797_5093   | NW_004516730.1 | Scaffold1552 | 5093                    | AA                              | GG              | 1947013275               |
| SNP_P4_163798_5403   | NW_004516730.1 | Scaffold1552 | 5403                    | CC                              | TT              | 1947013277               |
| SNP_P4_163799_5410   | NW_004516730.1 | Scaffold1552 | 5410                    | GG                              | AA              | 1947013279               |
| SNP_P4_163800_6212   | NW_004516730.1 | Scaffold1552 | 6212                    | CC                              | TT              | 1947013281               |
| SNP_P4_163801_6321   | NW_004516730.1 | Scaffold1552 | 6321                    | CC                              | GG              | 1947013283               |
| SNP_P4_163802_6484   | NW_004516730.1 | Scaffold1552 | 6484                    | TT                              | GG              | 1947013285               |
| SNP_P4_163803_6541   | NW_004516730.1 | Scaffold1552 | 6541                    | TT                              | AA              | 1947013287               |
| SNP_P4_163804_6585   | NW_004516730.1 | Scaffold1552 | 6585                    | GG                              | AA              | 1947013289               |
| SNP_P4_163805_6591   | NW_004516730.1 | Scaffold1552 | 6591                    | CC                              | AA              | 1947013291               |
| SNP_P4_163806_6596   | NW_004516730.1 | Scaffold1552 | 6596                    | GG                              | TT              | 1947013293               |
| SNP_P4_163807_6598   | NW_004516730.1 | Scaffold1552 | 6598                    | CC                              | TT              | 1947013295               |
| SNP_P4_163808_7414   | NW_004516730.1 | Scaffold1552 | 7414                    | AA                              | GG              | 1947013297               |
| SNP_P4_163809_7987   | NW_004516730.1 | Scaffold1552 | 7987                    | TT                              | CC              | 1947013299               |
| SNP_P4_163810_7998   | NW_004516730.1 | Scaffold1552 | 7998                    | CC                              | TT              | 1947013301               |
| SNP_P4_163811_8031   | NW_004516730.1 | Scaffold1552 | 8031                    | GG                              | AA              | 1947013303               |
| SNP_P4_163812_8070   | NW_004516730.1 | Scaffold1552 | 8070                    | CC                              | TT              | 1947013305               |
| SNP_P4_163813_8125   | NW_004516730.1 | Scaffold1552 | 8125                    | CC                              | TT              | 1947013307               |
| SNP_P4_163814_8275   | NW_004516730.1 | Scaffold1552 | 8275                    | CC                              | TT              | 1947013309               |
| SNP_P4_163815_10587  | NW_004516730.1 | Scaffold1552 | 10587                   | AA                              | GG              | 1947013310               |
| SNP_P4_163816_10780  | NW_004516730.1 | Scaffold1552 | 10780                   | TT                              | AA              | 1947013312               |
| SNP_P4_163817_10856  | NW_004516730.1 | Scaffold1552 | 10856                   | AA                              | CC              | 1947013314               |

| SNPs IDs            | Chromosome IDs | Chromosomes  | Physical positions (bp) | CDC Frontier (Reference genome) | (ILWC46 & LPNB) | NCBI SNPdb Accession IDs |
|---------------------|----------------|--------------|-------------------------|---------------------------------|-----------------|--------------------------|
| SNP_P4_163818_10910 | NW_004516730.1 | Scaffold1552 | 10910                   | GG                              | AA              | 1947013316               |
| SNP_P4_163819_11332 | NW_004516730.1 | Scaffold1552 | 11332                   | AA                              | TT              | 1947013318               |
| SNP_P4_163820_11370 | NW_004516730.1 | Scaffold1552 | 11370                   | CC                              | GG              | 1947013320               |
| SNP_P4_163821_11478 | NW_004516730.1 | Scaffold1552 | 11478                   | GG                              | AA              | 1947013321               |
| SNP_P4_163822_11548 | NW_004516730.1 | Scaffold1552 | 11548                   | AA                              | TT              | 1947013323               |
| SNP_P4_163823_13272 | NW_004516730.1 | Scaffold1552 | 13272                   | AA                              | GG              | 1947013325               |
| SNP_P4_163824_13296 | NW_004516730.1 | Scaffold1552 | 13296                   | CC                              | AA              | 1947013327               |
| SNP_P4_163825_13304 | NW_004516730.1 | Scaffold1552 | 13304                   | AA                              | TT              | 1947013329               |
| SNP_P4_163826_13312 | NW_004516730.1 | Scaffold1552 | 13312                   | AA                              | TT              | 1947013331               |
| SNP_P4_163827_13321 | NW_004516730.1 | Scaffold1552 | 13321                   | AA                              | TT              | 1947013333               |
| SNP_P4_163828_13359 | NW_004516730.1 | Scaffold1552 | 13359                   | AA                              | GG              | 1947013335               |
| SNP_P4_163829_17302 | NW_004516730.1 | Scaffold1552 | 17302                   | GG                              | AA              | 1947013337               |
| SNP_P4_163830_17321 | NW_004516730.1 | Scaffold1552 | 17321                   | AA                              | CC              | 1947013339               |
| SNP_P4_163831_19741 | NW_004516730.1 | Scaffold1552 | 19741                   | GG                              | TT              | 1947013341               |
| SNP_P4_163832_19836 | NW_004516730.1 | Scaffold1552 | 19836                   | CC                              | GG              | 1947013343               |
| SNP_P4_163833_19890 | NW_004516730.1 | Scaffold1552 | 19890                   | TT                              | CC              | 1947013345               |
| SNP_P4_163834_19992 | NW_004516730.1 | Scaffold1552 | 19992                   | GG                              | AA              | 1947013347               |
| SNP_P4_163835_20170 | NW_004516730.1 | Scaffold1552 | 20170                   | CC                              | TT              | 1947013349               |
| SNP_P4_163836_20290 | NW_004516730.1 | Scaffold1552 | 20290                   | TT                              | CC              | 1947013351               |
| SNP_P4_163837_20295 | NW_004516730.1 | Scaffold1552 | 20295                   | GG                              | AA              | 1947013353               |
| SNP_P4_163838_20558 | NW_004516730.1 | Scaffold1552 | 20558                   | TT                              | AA              | 1947013355               |
| SNP_P4_163839_20573 | NW_004516730.1 | Scaffold1552 | 20573                   | CC                              | TT              | 1947013357               |
| SNP_P4_163840_4168  | NW_004516731.1 | Scaffold1553 | 4168                    | CC                              | TT              | 1947013359               |
| SNP_P4_163841_4317  | NW_004516731.1 | Scaffold1553 | 4317                    | TT                              | CC              | 1947013361               |
| SNP_P4_163842_4569  | NW_004516731.1 | Scaffold1553 | 4569                    | CC                              | TT              | 1947013363               |
| SNP_P4_163843_4576  | NW_004516731.1 | Scaffold1553 | 4576                    | CC                              | AA              | 1947013365               |
| SNP_P4_163845_4887  | NW_004516731.1 | Scaffold1553 | 4887                    | TT                              | CC              | 1947013367               |
| SNP_P4_163846_1182  | NW_004516734.1 | Scaffold1557 | 1182                    | CC                              | TT              | 1947013369               |
| SNP_P4_163847_1477  | NW_004516734.1 | Scaffold1557 | 1477                    | AA                              | GG              | 1947013371               |
| SNP_P4_163848_1540  | NW_004516734.1 | Scaffold1557 | 1540                    | TT                              | GG              | 1947013373               |
| SNP_P4_163849_5800  | NW_004516734.1 | Scaffold1557 | 5800                    | GG                              | AA              | 1947013375               |
| SNP_P4_163850_64    | NW_004516736.1 | Scaffold1559 | 64                      | AA                              | GG              | 1947013377               |
| SNP_P4_163851_426   | NW_004516736.1 | Scaffold1559 | 426                     | GG                              | CC              | 1947013379               |
| SNP_P4_163852_438   | NW_004516736.1 | Scaffold1559 | 438                     | AA                              | TT              | 1947013381               |
| SNP_P4_163853_460   | NW_004516736.1 | Scaffold1559 | 460                     | AA                              | TT              | 1947013383               |
| SNP_P4_163854_758   | NW_004516736.1 | Scaffold1559 | 758                     | CC                              | TT              | 1947013385               |
| SNP_P4_163855_820   | NW_004516736.1 | Scaffold1559 | 820                     | AA                              | TT              | 1947013387               |
| SNP_P4_163856_955   | NW_004516736.1 | Scaffold1559 | 955                     | AA                              | GG              | 1947013389               |
| SNP_P4_163857_1082  | NW_004516736.1 | Scaffold1559 | 1082                    | AA                              | TT              | 1947013391               |
| SNP_P4_163858_1087  | NW_004516736.1 | Scaffold1559 | 1087                    | TT                              | AA              | 1947013393               |
| SNP_P4_163859_1089  | NW_004516736.1 | Scaffold1559 | 1089                    | TT                              | AA              | 1947013395               |
| SNP_P4_163860_984   | NW_004516738.1 | Scaffold1561 | 984                     | AA                              | TT              | 1947013397               |

| SNPs IDs            | Chromosome IDs | Chromosomes  | Physical positions (bp) | CDC Frontier (Reference genome) | (ILWC46 & LPNB) | NCBI SNPdb Accession IDs |
|---------------------|----------------|--------------|-------------------------|---------------------------------|-----------------|--------------------------|
| SNP_P4_163861_1731  | NW_004516738.1 | Scaffold1561 | 1731                    | TT                              | AA              | 1947013399               |
| SNP_P4_163862_1874  | NW_004516738.1 | Scaffold1561 | 1874                    | CC                              | AA              | 1947013401               |
| SNP_P4_163863_7396  | NW_004516738.1 | Scaffold1561 | 7396                    | TT                              | CC              | 1947013403               |
| SNP_P4_163864_7415  | NW_004516738.1 | Scaffold1561 | 7415                    | CC                              | AA              | 1947013405               |
| SNP_P4_163865_7440  | NW_004516738.1 | Scaffold1561 | 7440                    | TT                              | GG              | 1947013407               |
| SNP_P4_163866_7664  | NW_004516738.1 | Scaffold1561 | 7664                    | CC                              | GG              | 1947013409               |
| SNP_P4_163867_7666  | NW_004516738.1 | Scaffold1561 | 7666                    | TT                              | CC              | 1947013411               |
| SNP_P4_163868_7731  | NW_004516738.1 | Scaffold1561 | 7731                    | GG                              | TT              | 1947013413               |
| SNP_P4_163869_7743  | NW_004516738.1 | Scaffold1561 | 7743                    | TT                              | CC              | 1947013415               |
| SNP_P4_163870_7772  | NW_004516738.1 | Scaffold1561 | 7772                    | GG                              | TT              | 1947013417               |
| SNP_P4_163871_7893  | NW_004516738.1 | Scaffold1561 | 7893                    | TT                              | GG              | 1947013419               |
| SNP_P4_163872_15598 | NW_004516738.1 | Scaffold1561 | 15598                   | CC                              | AA              | 1947013421               |
| SNP_P4_163874_17538 | NW_004516738.1 | Scaffold1561 | 17538                   | AA                              | TT              | 1947013424               |
| SNP_P4_163875_17612 | NW_004516738.1 | Scaffold1561 | 17612                   | GG                              | TT              | 1947013426               |
| SNP_P4_163876_17639 | NW_004516738.1 | Scaffold1561 | 17639                   | CC                              | TT              | 1947013428               |
| SNP_P4_163877_25802 | NW_004516738.1 | Scaffold1561 | 25802                   | GG                              | AA              | 1947013430               |
| SNP_P4_163879_32241 | NW_004516738.1 | Scaffold1561 | 32241                   | CC                              | TT              | 1947013432               |
| SNP_P4_163880_33607 | NW_004516738.1 | Scaffold1561 | 33607                   | GG                              | AA              | 1947013434               |
| SNP_P4_163882_34471 | NW_004516738.1 | Scaffold1561 | 34471                   | AA                              | CC              | 1947013436               |
| SNP_P4_163883_34474 | NW_004516738.1 | Scaffold1561 | 34474                   | AA                              | CC              | 1947013439               |
| SNP_P4_163884_37149 | NW_004516738.1 | Scaffold1561 | 37149                   | GG                              | AA              | 1947013441               |
| SNP_P4_163885_44889 | NW_004516738.1 | Scaffold1561 | 44889                   | GG                              | AA              | 1947013443               |
| SNP_P4_163886_48594 | NW_004516738.1 | Scaffold1561 | 48594                   | AA                              | GG              | 1947013445               |
| SNP_P4_163887_49502 | NW_004516738.1 | Scaffold1561 | 49502                   | AA                              | CC              | 1947013447               |
| SNP_P4_163888_52370 | NW_004516738.1 | Scaffold1561 | 52370                   | GG                              | AA              | 1947013449               |
| SNP_P4_163889_52664 | NW_004516738.1 | Scaffold1561 | 52664                   | TT                              | CC              | 1947013451               |
| SNP_P4_163890_52694 | NW_004516738.1 | Scaffold1561 | 52694                   | AA                              | GG              | 1947013453               |
| SNP_P4_163891_52704 | NW_004516738.1 | Scaffold1561 | 52704                   | TT                              | AA              | 1947013455               |
| SNP_P4_163892_52735 | NW_004516738.1 | Scaffold1561 | 52735                   | TT                              | CC              | 1947013457               |
| SNP_P4_163893_54774 | NW_004516738.1 | Scaffold1561 | 54774                   | AA                              | GG              | 1947013459               |
| SNP_P4_163894_55106 | NW_004516738.1 | Scaffold1561 | 55106                   | AA                              | TT              | 1947013461               |
| SNP_P4_163895_55110 | NW_004516738.1 | Scaffold1561 | 55110                   | AA                              | GG              | 1947013464               |
| SNP_P4_163896_55146 | NW_004516738.1 | Scaffold1561 | 55146                   | AA                              | GG              | 1947013466               |
| SNP_P4_163897_55159 | NW_004516738.1 | Scaffold1561 | 55159                   | CC                              | TT              | 1947013468               |
| SNP_P4_163898_55164 | NW_004516738.1 | Scaffold1561 | 55164                   | TT                              | CC              | 1947013470               |
| SNP_P4_163899_55182 | NW_004516738.1 | Scaffold1561 | 55182                   | TT                              | AA              | 1947013472               |
| SNP_P4_163900_55184 | NW_004516738.1 | Scaffold1561 | 55184                   | CC                              | AA              | 1947013474               |
| SNP_P4_163901_55229 | NW_004516738.1 | Scaffold1561 | 55229                   | CC                              | AA              | 1947013476               |
| SNP_P4_163902_55271 | NW_004516738.1 | Scaffold1561 | 55271                   | CC                              | TT              | 1947013479               |
| SNP_P4_163903_55285 | NW_004516738.1 | Scaffold1561 | 55285                   | AA                              | TT              | 1947013481               |
| SNP_P4_163904_55298 | NW_004516738.1 | Scaffold1561 | 55298                   | GG                              | AA              | 1947013483               |
| SNP_P4_163905_55330 | NW_004516738.1 | Scaffold1561 | 55330                   | AA                              | TT              | 1947013485               |

| SNPs IDs            | Chromosome IDs | Chromosomes  | Physical positions (bp) | CDC Frontier (Reference genome) | (ILWC46 & LPNB) | NCBI SNPdb Accession IDs |
|---------------------|----------------|--------------|-------------------------|---------------------------------|-----------------|--------------------------|
| SNP_P4_163906_55334 | NW_004516738.1 | Scaffold1561 | 55334                   | AA                              | CC              | 1947013487               |
| SNP_P4_163907_55356 | NW_004516738.1 | Scaffold1561 | 55356                   | CC                              | TT              | 1947013489               |
| SNP_P4_163908_55547 | NW_004516738.1 | Scaffold1561 | 55547                   | GG                              | AA              | 1947013491               |
| SNP_P4_163909_55594 | NW_004516738.1 | Scaffold1561 | 55594                   | AA                              | GG              | 1947013493               |
| SNP_P4_163910_55610 | NW_004516738.1 | Scaffold1561 | 55610                   | AA                              | GG              | 1947013495               |
| SNP_P4_163911_55642 | NW_004516738.1 | Scaffold1561 | 55642                   | AA                              | GG              | 1947013497               |
| SNP_P4_163912_55701 | NW_004516738.1 | Scaffold1561 | 55701                   | TT                              | CC              | 1947013499               |
| SNP_P4_163913_57692 | NW_004516738.1 | Scaffold1561 | 57692                   | AA                              | CC              | 1947013502               |
| SNP_P4_163914_57693 | NW_004516738.1 | Scaffold1561 | 57693                   | TT                              | AA              | 1947013504               |
| SNP_P4_163915_69864 | NW_004516738.1 | Scaffold1561 | 69864                   | GG                              | TT              | 1947013506               |
| SNP_P4_163916_69882 | NW_004516738.1 | Scaffold1561 | 69882                   | GG                              | TT              | 1947013508               |
| SNP_P4_163917_69885 | NW_004516738.1 | Scaffold1561 | 69885                   | GG                              | TT              | 1947013510               |
| SNP_P4_163918_69921 | NW_004516738.1 | Scaffold1561 | 69921                   | CC                              | AA              | 1947013512               |
| SNP_P4_163919_70296 | NW_004516738.1 | Scaffold1561 | 70296                   | GG                              | AA              | 1947013514               |
| SNP_P4_163920_70451 | NW_004516738.1 | Scaffold1561 | 70451                   | TT                              | GG              | 1947013516               |
| SNP_P4_163921_70458 | NW_004516738.1 | Scaffold1561 | 70458                   | CC                              | AA              | 1947013518               |
| SNP_P4_163922_70497 | NW_004516738.1 | Scaffold1561 | 70497                   | AA                              | GG              | 1947013520               |
| SNP_P4_163923_70521 | NW_004516738.1 | Scaffold1561 | 70521                   | TT                              | CC              | 1947013522               |
| SNP_P4_163924_70536 | NW_004516738.1 | Scaffold1561 | 70536                   | AA                              | TT              | 1947013524               |
| SNP_P4_163925_70544 | NW_004516738.1 | Scaffold1561 | 70544                   | AA                              | CC              | 1947013526               |
| SNP_P4_163926_70585 | NW_004516738.1 | Scaffold1561 | 70585                   | CC                              | TT              | 1947013528               |
| SNP_P4_163927_70662 | NW_004516738.1 | Scaffold1561 | 70662                   | GG                              | AA              | 1947013530               |
| SNP_P4_163928_70667 | NW_004516738.1 | Scaffold1561 | 70667                   | TT                              | CC              | 1947013532               |
| SNP_P4_163929_70786 | NW_004516738.1 | Scaffold1561 | 70786                   | GG                              | TT              | 1947013534               |
| SNP_P4_163930_70812 | NW_004516738.1 | Scaffold1561 | 70812                   | CC                              | TT              | 1947013536               |
| SNP_P4_163931_70829 | NW_004516738.1 | Scaffold1561 | 70829                   | GG                              | TT              | 1947013538               |
| SNP_P4_163933_80132 | NW_004516738.1 | Scaffold1561 | 80132                   | AA                              | GG              | 1947013540               |
| SNP_P4_163934_80157 | NW_004516738.1 | Scaffold1561 | 80157                   | TT                              | GG              | 1947013542               |
| SNP_P4_163935_80394 | NW_004516738.1 | Scaffold1561 | 80394                   | AA                              | CC              | 1947013544               |
| SNP_P4_163936_80419 | NW_004516738.1 | Scaffold1561 | 80419                   | AA                              | GG              | 1947013546               |
| SNP_P4_163938_81977 | NW_004516738.1 | Scaffold1561 | 81977                   | TT                              | CC              | 1947013548               |
| SNP_P4_163939_1069  | NW_004516739.1 | Scaffold1562 | 1069                    | CC                              | AA              | 1947013550               |
| SNP_P4_163940_1080  | NW_004516739.1 | Scaffold1562 | 1080                    | AA                              | CC              | 1947013552               |
| SNP_P4_163941_1082  | NW_004516739.1 | Scaffold1562 | 1082                    | GG                              | AA              | 1947013554               |
| SNP_P4_163942_1127  | NW_004516739.1 | Scaffold1562 | 1127                    | CC                              | AA              | 1947013556               |
| SNP_P4_163943_1139  | NW_004516739.1 | Scaffold1562 | 1139                    | TT                              | CC              | 1947013559               |
| SNP_P4_163944_1155  | NW_004516739.1 | Scaffold1562 | 1155                    | CC                              | TT              | 1947013561               |
| SNP_P4_163945_4343  | NW_004516739.1 | Scaffold1562 | 4343                    | CC                              | TT              | 1947013563               |
| SNP_P4_163946_4415  | NW_004516739.1 | Scaffold1562 | 4415                    | AA                              | TT              | 1947013565               |
| SNP_P4_163947_4726  | NW_004516739.1 | Scaffold1562 | 4726                    | AA                              | GG              | 1947013567               |
| SNP_P4_163948_4731  | NW_004516739.1 | Scaffold1562 | 4731                    | AA                              | CC              | 1947013569               |
| SNP_P4_163949_4758  | NW_004516739.1 | Scaffold1562 | 4758                    | TT                              | GG              | 1947013571               |



| SNPs IDs             | Chromosome IDs | Chromosomes  | Physical positions (bp) | CDC Frontier (Reference genome) | (ILWC46 & LPNB) | NCBI SNPdb Accession IDs |
|----------------------|----------------|--------------|-------------------------|---------------------------------|-----------------|--------------------------|
| SNP_P4_163951_25275  | NW_004516739.1 | Scaffold1562 | 25275                   | GG                              | AA              | 1947013573               |
| SNP_P4_163954_62113  | NW_004516739.1 | Scaffold1562 | 62113                   | TT                              | AA              | 1947013575               |
| SNP_P4_163955_62157  | NW_004516739.1 | Scaffold1562 | 62157                   | AA                              | CC              | 1947013577               |
| SNP_P4_163957_63043  | NW_004516739.1 | Scaffold1562 | 63043                   | TT                              | CC              | 1947013579               |
| SNP_P4_163958_64108  | NW_004516739.1 | Scaffold1562 | 64108                   | AA                              | CC              | 1947013581               |
| SNP_P4_163959_64144  | NW_004516739.1 | Scaffold1562 | 64144                   | GG                              | AA              | 1947013583               |
| SNP_P4_163960_64173  | NW_004516739.1 | Scaffold1562 | 64173                   | TT                              | AA              | 1947013585               |
| SNP_P4_163961_64207  | NW_004516739.1 | Scaffold1562 | 64207                   | GG                              | TT              | 1947013587               |
| SNP_P4_163962_64421  | NW_004516739.1 | Scaffold1562 | 64421                   | CC                              | TT              | 1947013590               |
| SNP_P4_163963_64444  | NW_004516739.1 | Scaffold1562 | 64444                   | GG                              | AA              | 1947013592               |
| SNP_P4_163964_77222  | NW_004516739.1 | Scaffold1562 | 77222                   | AA                              | GG              | 1947013594               |
| SNP_P4_163965_82072  | NW_004516739.1 | Scaffold1562 | 82072                   | GG                              | AA              | 1947013596               |
| SNP_P4_163966_96965  | NW_004516739.1 | Scaffold1562 | 96965                   | AA                              | GG              | 1947013598               |
| SNP_P4_163967_96986  | NW_004516739.1 | Scaffold1562 | 96986                   | GG                              | AA              | 1947013600               |
| SNP_P4_163968_96997  | NW_004516739.1 | Scaffold1562 | 96997                   | TT                              | CC              | 1947013602               |
| SNP_P4_163969_101812 | NW_004516739.1 | Scaffold1562 | 101812                  | AA                              | GG              | 1947013604               |
| SNP_P4_163970_101818 | NW_004516739.1 | Scaffold1562 | 101818                  | AA                              | GG              | 1947013606               |
| SNP_P4_163971_102210 | NW_004516739.1 | Scaffold1562 | 102210                  | TT                              | CC              | 1947013608               |
| SNP_P4_163972_102212 | NW_004516739.1 | Scaffold1562 | 102212                  | GG                              | AA              | 1947013610               |
| SNP_P4_163973_102213 | NW_004516739.1 | Scaffold1562 | 102213                  | TT                              | GG              | 1947013612               |
| SNP_P4_163974_102224 | NW_004516739.1 | Scaffold1562 | 102224                  | CC                              | GG              | 1947013614               |
| SNP_P4_163975_102232 | NW_004516739.1 | Scaffold1562 | 102232                  | TT                              | AA              | 1947013616               |
| SNP_P4_163976_102254 | NW_004516739.1 | Scaffold1562 | 102254                  | TT                              | GG              | 1947013618               |
| SNP_P4_163977_102314 | NW_004516739.1 | Scaffold1562 | 102314                  | TT                              | AA              | 1947013620               |
| SNP_P4_163978_103703 | NW_004516739.1 | Scaffold1562 | 103703                  | AA                              | GG              | 1947013622               |
| SNP_P4_163979_103809 | NW_004516739.1 | Scaffold1562 | 103809                  | AA                              | TT              | 1947013624               |
| SNP_P4_163980_103818 | NW_004516739.1 | Scaffold1562 | 103818                  | AA                              | CC              | 1947013626               |
| SNP_P4_163981_103869 | NW_004516739.1 | Scaffold1562 | 103869                  | AA                              | CC              | 1947013628               |
| SNP_P4_163982_104130 | NW_004516739.1 | Scaffold1562 | 104130                  | TT                              | CC              | 1947013630               |
| SNP_P4_163983_104208 | NW_004516739.1 | Scaffold1562 | 104208                  | AA                              | GG              | 1947013632               |
| SNP_P4_163984_104216 | NW_004516739.1 | Scaffold1562 | 104216                  | GG                              | AA              | 1947013634               |
| SNP_P4_163985_104224 | NW_004516739.1 | Scaffold1562 | 104224                  | GG                              | AA              | 1947013636               |
| SNP_P4_163986_140636 | NW_004516739.1 | Scaffold1562 | 140636                  | TT                              | CC              | 1947013638               |
| SNP_P4_163988_1563   | NW_004516742.1 | Scaffold1568 | 1563                    | CC                              | AA              | 1947013640               |
| SNP_P4_163989_1691   | NW_004516742.1 | Scaffold1568 | 1691                    | AA                              | CC              | 1947013642               |
| SNP_P4_163990_1861   | NW_004516742.1 | Scaffold1568 | 1861                    | TT                              | GG              | 1947013644               |
| SNP_P4_163991_1903   | NW_004516742.1 | Scaffold1568 | 1903                    | TT                              | AA              | 1947013646               |
| SNP_P4_163992_1946   | NW_004516742.1 | Scaffold1568 | 1946                    | CC                              | TT              | 1947013648               |
| SNP_P4_163993_1981   | NW_004516742.1 | Scaffold1568 | 1981                    | GG                              | CC              | 1947013650               |
| SNP_P4_163994_2042   | NW_004516742.1 | Scaffold1568 | 2042                    | GG                              | TT              | 1947013652               |
| SNP_P4_163995_9656   | NW_004516742.1 | Scaffold1568 | 9656                    | GG                              | AA              | 1947013654               |
| SNP_P4_163996_9993   | NW_004516742.1 | Scaffold1568 | 9993                    | TT                              | CC              | 1947013656               |

| SNPs IDs            | Chromosome IDs | Chromosomes  | Physical positions (bp) | CDC Frontier (Reference genome) | (ILWC46 & LPNB) | NCBI SNPdb Accession IDs |
|---------------------|----------------|--------------|-------------------------|---------------------------------|-----------------|--------------------------|
| SNP_P4_163997_11649 | NW_004516742.1 | Scaffold1568 | 11649                   | TT                              | CC              | 1947013658               |
| SNP_P4_163998_11652 | NW_004516742.1 | Scaffold1568 | 11652                   | GG                              | TT              | 1947013660               |
| SNP_P4_163999_11933 | NW_004516742.1 | Scaffold1568 | 11933                   | TT                              | CC              | 1947013662               |
| SNP_P4_164000_12683 | NW_004516742.1 | Scaffold1568 | 12683                   | AA                              | GG              | 1947013664               |
| SNP_P4_164001_13473 | NW_004516742.1 | Scaffold1568 | 13473                   | GG                              | AA              | 1947013666               |
| SNP_P4_164002_14044 | NW_004516742.1 | Scaffold1568 | 14044                   | TT                              | AA              | 1947013668               |
| SNP_P4_164003_15212 | NW_004516742.1 | Scaffold1568 | 15212                   | TT                              | CC              | 1947013670               |
| SNP_P4_164004_17241 | NW_004516742.1 | Scaffold1568 | 17241                   | GG                              | TT              | 1947013672               |
| SNP_P4_164005_17265 | NW_004516742.1 | Scaffold1568 | 17265                   | AA                              | GG              | 1947013674               |
| SNP_P4_164006_17267 | NW_004516742.1 | Scaffold1568 | 17267                   | GG                              | AA              | 1947013676               |
| SNP_P4_164007_17271 | NW_004516742.1 | Scaffold1568 | 17271                   | AA                              | TT              | 1947013678               |
| SNP_P4_164008_17905 | NW_004516742.1 | Scaffold1568 | 17905                   | CC                              | GG              | 1947013680               |
| SNP_P4_164009_17988 | NW_004516742.1 | Scaffold1568 | 17988                   | TT                              | GG              | 1947013682               |
| SNP_P4_164010_18012 | NW_004516742.1 | Scaffold1568 | 18012                   | AA                              | TT              | 1947013684               |
| SNP_P4_164011_18208 | NW_004516742.1 | Scaffold1568 | 18208                   | TT                              | GG              | 1947013686               |
| SNP_P4_164012_21888 | NW_004516742.1 | Scaffold1568 | 21888                   | TT                              | AA              | 1947013688               |
| SNP_P4_164013_22086 | NW_004516742.1 | Scaffold1568 | 22086                   | CC                              | AA              | 1947013690               |
| SNP_P4_164014_22311 | NW_004516742.1 | Scaffold1568 | 22311                   | AA                              | GG              | 1947013692               |
| SNP_P4_164015_22332 | NW_004516742.1 | Scaffold1568 | 22332                   | CC                              | TT              | 1947013694               |
| SNP_P4_164016_22463 | NW_004516742.1 | Scaffold1568 | 22463                   | CC                              | AA              | 1947013696               |
| SNP_P4_164017_22487 | NW_004516742.1 | Scaffold1568 | 22487                   | TT                              | AA              | 1947013698               |
| SNP_P4_164018_22832 | NW_004516742.1 | Scaffold1568 | 22832                   | GG                              | AA              | 1947013700               |
| SNP_P4_164019_23008 | NW_004516742.1 | Scaffold1568 | 23008                   | TT                              | AA              | 1947013703               |
| SNP_P4_164020_23429 | NW_004516742.1 | Scaffold1568 | 23429                   | TT                              | AA              | 1947013705               |
| SNP_P4_164021_23489 | NW_004516742.1 | Scaffold1568 | 23489                   | CC                              | AA              | 1947013707               |
| SNP_P4_164022_23585 | NW_004516742.1 | Scaffold1568 | 23585                   | TT                              | CC              | 1947013709               |
| SNP_P4_164023_23596 | NW_004516742.1 | Scaffold1568 | 23596                   | CC                              | GG              | 1947013711               |
| SNP_P4_164024_23610 | NW_004516742.1 | Scaffold1568 | 23610                   | AA                              | GG              | 1947013713               |
| SNP_P4_164025_23659 | NW_004516742.1 | Scaffold1568 | 23659                   | GG                              | CC              | 1947013715               |
| SNP_P4_164026_23667 | NW_004516742.1 | Scaffold1568 | 23667                   | AA                              | TT              | 1947013717               |
| SNP_P4_164027_24472 | NW_004516742.1 | Scaffold1568 | 24472                   | GG                              | AA              | 1947013719               |
| SNP_P4_164028_24754 | NW_004516742.1 | Scaffold1568 | 24754                   | TT                              | CC              | 1947013720               |
| SNP_P4_164029_24953 | NW_004516742.1 | Scaffold1568 | 24953                   | TT                              | GG              | 1947013722               |
| SNP_P4_164030_24962 | NW_004516742.1 | Scaffold1568 | 24962                   | TT                              | CC              | 1947013724               |
| SNP_P4_164031_25009 | NW_004516742.1 | Scaffold1568 | 25009                   | CC                              | TT              | 1947013726               |
| SNP_P4_164032_25017 | NW_004516742.1 | Scaffold1568 | 25017                   | GG                              | TT              | 1947013728               |
| SNP_P4_164033_25085 | NW_004516742.1 | Scaffold1568 | 25085                   | CC                              | GG              | 1947013730               |
| SNP_P4_164034_25098 | NW_004516742.1 | Scaffold1568 | 25098                   | TT                              | GG              | 1947013732               |
| SNP_P4_164035_27234 | NW_004516742.1 | Scaffold1568 | 27234                   | TT                              | AA              | 1947013734               |
| SNP_P4_164036_27649 | NW_004516742.1 | Scaffold1568 | 27649                   | AA                              | TT              | 1947013736               |
| SNP_P4_164037_29438 | NW_004516742.1 | Scaffold1568 | 29438                   | GG                              | AA              | 1947013738               |
| SNP_P4_164038_29455 | NW_004516742.1 | Scaffold1568 | 29455                   | CC                              | GG              | 1947013740               |

| SNPs IDs            | Chromosome IDs | Chromosomes  | Physical positions (bp) | CDC Frontier (Reference genome) | (ILWC46 & LPNB) | NCBI SNPdb Accession IDs |
|---------------------|----------------|--------------|-------------------------|---------------------------------|-----------------|--------------------------|
| SNP_P4_164039_30131 | NW_004516742.1 | Scaffold1568 | 30131                   | GG                              | CC              | 1947013742               |
| SNP_P4_164040_33292 | NW_004516742.1 | Scaffold1568 | 33292                   | TT                              | CC              | 1947013744               |
| SNP_P4_164042_33313 | NW_004516742.1 | Scaffold1568 | 33313                   | AA                              | TT              | 1947013746               |
| SNP_P4_164045_33374 | NW_004516742.1 | Scaffold1568 | 33374                   | TT                              | GG              | 1947013748               |
| SNP_P4_164046_33390 | NW_004516742.1 | Scaffold1568 | 33390                   | CC                              | TT              | 1947013750               |
| SNP_P4_164047_33621 | NW_004516742.1 | Scaffold1568 | 33621                   | TT                              | CC              | 1947013752               |
| SNP_P4_164048_33648 | NW_004516742.1 | Scaffold1568 | 33648                   | AA                              | CC              | 1947013754               |
| SNP_P4_164049_34378 | NW_004516742.1 | Scaffold1568 | 34378                   | TT                              | CC              | 1947013756               |
| SNP_P4_164050_34390 | NW_004516742.1 | Scaffold1568 | 34390                   | TT                              | GG              | 1947013758               |
| SNP_P4_164051_44282 | NW_004516742.1 | Scaffold1568 | 44282                   | TT                              | GG              | 1947013760               |
| SNP_P4_164052_44391 | NW_004516742.1 | Scaffold1568 | 44391                   | AA                              | TT              | 1947013762               |
| SNP_P4_164053_44419 | NW_004516742.1 | Scaffold1568 | 44419                   | TT                              | CC              | 1947013764               |
| SNP_P4_164054_44423 | NW_004516742.1 | Scaffold1568 | 44423                   | GG                              | CC              | 1947013766               |
| SNP_P4_164056_44462 | NW_004516742.1 | Scaffold1568 | 44462                   | AA                              | CC              | 1947013768               |
| SNP_P4_164057_44478 | NW_004516742.1 | Scaffold1568 | 44478                   | AA                              | GG              | 1947013770               |
| SNP_P4_164058_44487 | NW_004516742.1 | Scaffold1568 | 44487                   | TT                              | AA              | 1947013772               |
| SNP_P4_164059_44506 | NW_004516742.1 | Scaffold1568 | 44506                   | AA                              | TT              | 1947013774               |
| SNP_P4_164061_44530 | NW_004516742.1 | Scaffold1568 | 44530                   | TT                              | AA              | 1947013776               |
| SNP_P4_164062_44559 | NW_004516742.1 | Scaffold1568 | 44559                   | TT                              | GG              | 1947013778               |
| SNP_P4_164064_45165 | NW_004516742.1 | Scaffold1568 | 45165                   | TT                              | CC              | 1947013780               |
| SNP_P4_164065_45176 | NW_004516742.1 | Scaffold1568 | 45176                   | CC                              | TT              | 1947013782               |
| SNP_P4_164066_46136 | NW_004516742.1 | Scaffold1568 | 46136                   | TT                              | AA              | 1947013784               |
| SNP_P4_164067_46477 | NW_004516742.1 | Scaffold1568 | 46477                   | TT                              | GG              | 1947013786               |
| SNP_P4_164068_46483 | NW_004516742.1 | Scaffold1568 | 46483                   | GG                              | TT              | 1947013788               |
| SNP_P4_164069_46493 | NW_004516742.1 | Scaffold1568 | 46493                   | TT                              | CC              | 1947013790               |
| SNP_P4_164070_46720 | NW_004516742.1 | Scaffold1568 | 46720                   | GG                              | AA              | 1947013792               |
| SNP_P4_164071_48878 | NW_004516742.1 | Scaffold1568 | 48878                   | TT                              | GG              | 1947013794               |
| SNP_P4_164072_49466 | NW_004516742.1 | Scaffold1568 | 49466                   | AA                              | TT              | 1947013796               |
| SNP_P4_164073_49500 | NW_004516742.1 | Scaffold1568 | 49500                   | TT                              | CC              | 1947013798               |
| SNP_P4_164074_49719 | NW_004516742.1 | Scaffold1568 | 49719                   | TT                              | CC              | 1947013800               |
| SNP_P4_164075_52323 | NW_004516742.1 | Scaffold1568 | 52323                   | GG                              | AA              | 1947013802               |
| SNP_P4_164076_54350 | NW_004516742.1 | Scaffold1568 | 54350                   | TT                              | AA              | 1947013803               |
| SNP_P4_164077_54887 | NW_004516742.1 | Scaffold1568 | 54887                   | GG                              | AA              | 1947013805               |
| SNP_P4_164078_55282 | NW_004516742.1 | Scaffold1568 | 55282                   | GG                              | CC              | 1947013807               |
| SNP_P4_164079_66587 | NW_004516742.1 | Scaffold1568 | 66587                   | TT                              | AA              | 1947013809               |
| SNP_P4_164080_66600 | NW_004516742.1 | Scaffold1568 | 66600                   | TT                              | AA              | 1947013811               |
| SNP_P4_164081_66716 | NW_004516742.1 | Scaffold1568 | 66716                   | TT                              | AA              | 1947013813               |
| SNP_P4_164082_66728 | NW_004516742.1 | Scaffold1568 | 66728                   | TT                              | AA              | 1947013815               |
| SNP_P4_164083_70173 | NW_004516742.1 | Scaffold1568 | 70173                   | AA                              | TT              | 1947013817               |
| SNP_P4_164084_70175 | NW_004516742.1 | Scaffold1568 | 70175                   | GG                              | AA              | 1947013819               |
| SNP_P4_164085_70768 | NW_004516742.1 | Scaffold1568 | 70768                   | AA                              | TT              | 1947013821               |
| SNP_P4_164086_70939 | NW_004516742.1 | Scaffold1568 | 70939                   | AA                              | GG              | 1947013823               |

| SNPs IDs            | Chromosome IDs | Chromosomes  | Physical positions (bp) | CDC Frontier (Reference genome) | (ILWC46 & LPNB) | NCBI SNPdb Accession IDs |
|---------------------|----------------|--------------|-------------------------|---------------------------------|-----------------|--------------------------|
| SNP_P4_164087_72894 | NW_004516742.1 | Scaffold1568 | 72894                   | CC                              | TT              | 1947013825               |
| SNP_P4_164088_73494 | NW_004516742.1 | Scaffold1568 | 73494                   | GG                              | TT              | 1947013827               |
| SNP_P4_164089_74481 | NW_004516742.1 | Scaffold1568 | 74481                   | TT                              | CC              | 1947013829               |
| SNP_P4_164090_77684 | NW_004516742.1 | Scaffold1568 | 77684                   | TT                              | GG              | 1947013831               |
| SNP_P4_164091_79343 | NW_004516742.1 | Scaffold1568 | 79343                   | GG                              | CC              | 1947013833               |
| SNP_P4_164092_80053 | NW_004516742.1 | Scaffold1568 | 80053                   | GG                              | CC              | 1947013835               |
| SNP_P4_164093_80149 | NW_004516742.1 | Scaffold1568 | 80149                   | TT                              | CC              | 1947013837               |
| SNP_P4_164094_80257 | NW_004516742.1 | Scaffold1568 | 80257                   | CC                              | GG              | 1947013839               |
| SNP_P4_164095_80595 | NW_004516742.1 | Scaffold1568 | 80595                   | GG                              | CC              | 1947013841               |
| SNP_P4_164096_81378 | NW_004516742.1 | Scaffold1568 | 81378                   | GG                              | TT              | 1947013843               |
| SNP_P4_164097_81392 | NW_004516742.1 | Scaffold1568 | 81392                   | CC                              | TT              | 1947013845               |
| SNP_P4_164098_81815 | NW_004516742.1 | Scaffold1568 | 81815                   | GG                              | AA              | 1947013847               |
| SNP_P4_164099_82223 | NW_004516742.1 | Scaffold1568 | 82223                   | TT                              | GG              | 1947013849               |
| SNP_P4_164100_82246 | NW_004516742.1 | Scaffold1568 | 82246                   | AA                              | TT              | 1947013851               |
| SNP_P4_164101_82550 | NW_004516742.1 | Scaffold1568 | 82550                   | AA                              | TT              | 1947013853               |
| SNP_P4_164104_82833 | NW_004516742.1 | Scaffold1568 | 82833                   | AA                              | GG              | 1947013855               |
| SNP_P4_164105_83153 | NW_004516742.1 | Scaffold1568 | 83153                   | TT                              | GG              | 1947013857               |
| SNP_P4_164106_83190 | NW_004516742.1 | Scaffold1568 | 83190                   | AA                              | GG              | 1947013859               |
| SNP_P4_164107_83218 | NW_004516742.1 | Scaffold1568 | 83218                   | CC                              | TT              | 1947013861               |
| SNP_P4_164108_83232 | NW_004516742.1 | Scaffold1568 | 83232                   | CC                              | GG              | 1947013863               |
| SNP_P4_164109_83266 | NW_004516742.1 | Scaffold1568 | 83266                   | GG                              | TT              | 1947013865               |
| SNP_P4_164110_83281 | NW_004516742.1 | Scaffold1568 | 83281                   | GG                              | TT              | 1947013867               |
| SNP_P4_164111_83523 | NW_004516742.1 | Scaffold1568 | 83523                   | TT                              | GG              | 1947013869               |
| SNP_P4_164112_9538  | NW_004516743.1 | Scaffold1569 | 9538                    | TT                              | AA              | 1947013871               |
| SNP_P4_164113_9699  | NW_004516743.1 | Scaffold1569 | 9699                    | CC                              | AA              | 1947013873               |
| SNP_P4_164114_19584 | NW_004516743.1 | Scaffold1569 | 19584                   | AA                              | GG              | 1947013877               |
| SNP_P4_164115_19611 | NW_004516743.1 | Scaffold1569 | 19611                   | AA                              | GG              | 1947013879               |
| SNP_P4_164116_19620 | NW_004516743.1 | Scaffold1569 | 19620                   | CC                              | GG              | 1947013881               |
| SNP_P4_164117_19628 | NW_004516743.1 | Scaffold1569 | 19628                   | CC                              | TT              | 1947013883               |
| SNP_P4_164118_19634 | NW_004516743.1 | Scaffold1569 | 19634                   | CC                              | AA              | 1947013885               |
| SNP_P4_164119_21630 | NW_004516743.1 | Scaffold1569 | 21630                   | TT                              | CC              | 1947013887               |
| SNP_P4_164120_25539 | NW_004516743.1 | Scaffold1569 | 25539                   | CC                              | AA              | 1947013889               |
| SNP_P4_164121_25545 | NW_004516743.1 | Scaffold1569 | 25545                   | GG                              | AA              | 1947013891               |
| SNP_P4_164122_25655 | NW_004516743.1 | Scaffold1569 | 25655                   | TT                              | AA              | 1947013893               |
| SNP_P4_164123_25866 | NW_004516743.1 | Scaffold1569 | 25866                   | CC                              | TT              | 1947013895               |
| SNP_P4_164124_25899 | NW_004516743.1 | Scaffold1569 | 25899                   | AA                              | CC              | 1947013897               |
| SNP_P4_164125_32401 | NW_004516743.1 | Scaffold1569 | 32401                   | AA                              | CC              | 1947013899               |
| SNP_P4_164126_32457 | NW_004516743.1 | Scaffold1569 | 32457                   | CC                              | GG              | 1947013901               |
| SNP_P4_164129_32774 | NW_004516743.1 | Scaffold1569 | 32774                   | AA                              | CC              | 1947013903               |
| SNP_P4_164130_32866 | NW_004516743.1 | Scaffold1569 | 32866                   | AA                              | CC              | 1947013905               |
| SNP_P4_164131_32885 | NW_004516743.1 | Scaffold1569 | 32885                   | AA                              | TT              | 1947013907               |
| SNP_P4_164132_32929 | NW_004516743.1 | Scaffold1569 | 32929                   | AA                              | TT              | 1947013909               |

| SNPs IDs             | Chromosome IDs | Chromosomes  | Physical positions (bp) | CDC Frontier (Reference genome) | (ILWC46 & LPNB) | NCBI SNPdb Accession IDs |
|----------------------|----------------|--------------|-------------------------|---------------------------------|-----------------|--------------------------|
| SNP_P4_164133_32956  | NW_004516743.1 | Scaffold1569 | 32956                   | AA                              | CC              | 1947013911               |
| SNP_P4_164135_33009  | NW_004516743.1 | Scaffold1569 | 33009                   | CC                              | TT              | 1947013913               |
| SNP_P4_164136_33019  | NW_004516743.1 | Scaffold1569 | 33019                   | TT                              | CC              | 1947013915               |
| SNP_P4_164137_33042  | NW_004516743.1 | Scaffold1569 | 33042                   | GG                              | TT              | 1947013917               |
| SNP_P4_164138_33047  | NW_004516743.1 | Scaffold1569 | 33047                   | TT                              | CC              | 1947013919               |
| SNP_P4_164140_4445   | NW_004516745.1 | Scaffold1572 | 4445                    | TT                              | CC              | 1947013921               |
| SNP_P4_164141_4447   | NW_004516745.1 | Scaffold1572 | 4447                    | GG                              | AA              | 1947013923               |
| SNP_P4_164142_6129   | NW_004516745.1 | Scaffold1572 | 6129                    | CC                              | GG              | 1947013925               |
| SNP_P4_164143_6285   | NW_004516745.1 | Scaffold1572 | 6285                    | AA                              | CC              | 1947013926               |
| SNP_P4_164144_6289   | NW_004516745.1 | Scaffold1572 | 6289                    | GG                              | AA              | 1947013928               |
| SNP_P4_164145_6388   | NW_004516745.1 | Scaffold1572 | 6388                    | GG                              | AA              | 1947013930               |
| SNP_P4_164146_6564   | NW_004516745.1 | Scaffold1572 | 6564                    | CC                              | AA              | 1947013932               |
| SNP_P4_164147_6579   | NW_004516745.1 | Scaffold1572 | 6579                    | AA                              | GG              | 1947013934               |
| SNP_P4_164148_6586   | NW_004516745.1 | Scaffold1572 | 6586                    | AA                              | CC              | 1947013936               |
| SNP_P4_164149_6588   | NW_004516745.1 | Scaffold1572 | 6588                    | GG                              | AA              | 1947013938               |
| SNP_P4_164150_6622   | NW_004516745.1 | Scaffold1572 | 6622                    | CC                              | GG              | 1947013940               |
| SNP_P4_164151_151    | NW_004516746.1 | Scaffold1573 | 151                     | TT                              | CC              | 1947013942               |
| SNP_P4_164152_1851   | NW_004516746.1 | Scaffold1573 | 1851                    | TT                              | CC              | 1947013944               |
| SNP_P4_164153_2043   | NW_004516746.1 | Scaffold1573 | 2043                    | AA                              | GG              | 1947013946               |
| SNP_P4_164154_2578   | NW_004516746.1 | Scaffold1573 | 2578                    | AA                              | TT              | 1947013948               |
| SNP_P4_164155_2617   | NW_004516746.1 | Scaffold1573 | 2617                    | AA                              | TT              | 1947013950               |
| SNP_P4_164156_7073   | NW_004516747.1 | Scaffold1574 | 7073                    | TT                              | CC              | 1947013952               |
| SNP_P4_164157_20807  | NW_004516747.1 | Scaffold1574 | 20807                   | TT                              | CC              | 1947013954               |
| SNP_P4_164158_20808  | NW_004516747.1 | Scaffold1574 | 20808                   | GG                              | AA              | 1947013956               |
| SNP_P4_164159_20809  | NW_004516747.1 | Scaffold1574 | 20809                   | GG                              | AA              | 1947013958               |
| SNP_P4_164160_20833  | NW_004516747.1 | Scaffold1574 | 20833                   | TT                              | CC              | 1947013960               |
| SNP_P4_164161_68795  | NW_004516747.1 | Scaffold1574 | 68795                   | CC                              | TT              | 1947013962               |
| SNP_P4_164162_68815  | NW_004516747.1 | Scaffold1574 | 68815                   | GG                              | AA              | 1947013964               |
| SNP_P4_164163_75559  | NW_004516747.1 | Scaffold1574 | 75559                   | AA                              | GG              | 1947013966               |
| SNP_P4_164164_88832  | NW_004516747.1 | Scaffold1574 | 88832                   | TT                              | CC              | 1947013968               |
| SNP_P4_164165_98891  | NW_004516747.1 | Scaffold1574 | 98891                   | TT                              | CC              | 1947013970               |
| SNP_P4_164166_109537 | NW_004516747.1 | Scaffold1574 | 109537                  | GG                              | TT              | 1947013972               |
| SNP_P4_164167_109540 | NW_004516747.1 | Scaffold1574 | 109540                  | TT                              | GG              | 1947013975               |
| SNP_P4_164168_109679 | NW_004516747.1 | Scaffold1574 | 109679                  | CC                              | TT              | 1947013977               |
| SNP_P4_164169_110172 | NW_004516747.1 | Scaffold1574 | 110172                  | TT                              | CC              | 1947013979               |
| SNP_P4_164170_110180 | NW_004516747.1 | Scaffold1574 | 110180                  | AA                              | GG              | 1947013981               |
| SNP_P4_164171_110827 | NW_004516747.1 | Scaffold1574 | 110827                  | AA                              | TT              | 1947013983               |
| SNP_P4_164172_51219  | NW_004516748.1 | Scaffold1575 | 51219                   | CC                              | AA              | 1947013985               |
| SNP_P4_164173_51224  | NW_004516748.1 | Scaffold1575 | 51224                   | GG                              | AA              | 1947013987               |
| SNP_P4_164174_51228  | NW_004516748.1 | Scaffold1575 | 51228                   | CC                              | TT              | 1947013989               |
| SNP_P4_164175_51239  | NW_004516748.1 | Scaffold1575 | 51239                   | CC                              | AA              | 1947013991               |
| SNP_P4_164176_53241  | NW_004516748.1 | Scaffold1575 | 53241                   | TT                              | GG              | 1947013994               |

| SNPs IDs             | Chromosome IDs | Chromosomes  | Physical positions (bp) | CDC Frontier (Reference genome) | (ILWC46 & LPNB) | NCBI SNPdb Accession IDs |
|----------------------|----------------|--------------|-------------------------|---------------------------------|-----------------|--------------------------|
| SNP_P4_164177_83692  | NW_004516748.1 | Scaffold1575 | 83692                   | AA                              | GG              | 1947013996               |
| SNP_P4_164178_83700  | NW_004516748.1 | Scaffold1575 | 83700                   | AA                              | TT              | 1947013998               |
| SNP_P4_164179_90041  | NW_004516748.1 | Scaffold1575 | 90041                   | AA                              | CC              | 1947014000               |
| SNP_P4_164180_90081  | NW_004516748.1 | Scaffold1575 | 90081                   | CC                              | TT              | 1947014002               |
| SNP_P4_164181_90091  | NW_004516748.1 | Scaffold1575 | 90091                   | CC                              | TT              | 1947014004               |
| SNP_P4_164182_123942 | NW_004516748.1 | Scaffold1575 | 123942                  | TT                              | CC              | 1947014006               |
| SNP_P4_164183_142815 | NW_004516748.1 | Scaffold1575 | 142815                  | AA                              | GG              | 1947014008               |
| SNP_P4_164184_189278 | NW_004516748.1 | Scaffold1575 | 189278                  | GG                              | AA              | 1947014011               |
| SNP_P4_164186_3050   | NW_004516751.1 | Scaffold1578 | 3050                    | CC                              | TT              | 1947014013               |
| SNP_P4_164187_4217   | NW_004516751.1 | Scaffold1578 | 4217                    | AA                              | GG              | 1947014015               |
| SNP_P4_164188_17010  | NW_004516751.1 | Scaffold1578 | 17010                   | AA                              | GG              | 1947014017               |
| SNP_P4_164189_17190  | NW_004516751.1 | Scaffold1578 | 17190                   | CC                              | TT              | 1947014019               |
| SNP_P4_164190_18220  | NW_004516751.1 | Scaffold1578 | 18220                   | AA                              | TT              | 1947014021               |
| SNP_P4_164191_33798  | NW_004516751.1 | Scaffold1578 | 33798                   | TT                              | CC              | 1947014023               |
| SNP_P4_164192_33873  | NW_004516751.1 | Scaffold1578 | 33873                   | AA                              | GG              | 1947014025               |
| SNP_P4_164193_41723  | NW_004516751.1 | Scaffold1578 | 41723                   | GG                              | TT              | 1947014027               |
| SNP_P4_164194_41958  | NW_004516751.1 | Scaffold1578 | 41958                   | TT                              | GG              | 1947014029               |
| SNP_P4_164196_46541  | NW_004516751.1 | Scaffold1578 | 46541                   | TT                              | GG              | 1947014031               |
| SNP_P4_164197_46562  | NW_004516751.1 | Scaffold1578 | 46562                   | CC                              | AA              | 1947014033               |
| SNP_P4_164198_59797  | NW_004516751.1 | Scaffold1578 | 59797                   | TT                              | CC              | 1947014036               |
| SNP_P4_164199_61142  | NW_004516751.1 | Scaffold1578 | 61142                   | GG                              | AA              | 1947014038               |
| SNP_P4_164200_63339  | NW_004516751.1 | Scaffold1578 | 63339                   | TT                              | AA              | 1947014040               |
| SNP_P4_164201_71482  | NW_004516751.1 | Scaffold1578 | 71482                   | CC                              | TT              | 1947014042               |
| SNP_P4_164202_73547  | NW_004516751.1 | Scaffold1578 | 73547                   | AA                              | TT              | 1947014044               |
| SNP_P4_164203_73552  | NW_004516751.1 | Scaffold1578 | 73552                   | GG                              | CC              | 1947014046               |
| SNP_P4_164205_76725  | NW_004516751.1 | Scaffold1578 | 76725                   | GG                              | AA              | 1947014048               |
| SNP_P4_164207_77067  | NW_004516751.1 | Scaffold1578 | 77067                   | AA                              | GG              | 1947014050               |
| SNP_P4_164208_77122  | NW_004516751.1 | Scaffold1578 | 77122                   | TT                              | AA              | 1947014052               |
| SNP_P4_164209_77150  | NW_004516751.1 | Scaffold1578 | 77150                   | GG                              | TT              | 1947014054               |
| SNP_P4_164210_77234  | NW_004516751.1 | Scaffold1578 | 77234                   | TT                              | AA              | 1947014056               |
| SNP_P4_164212_77876  | NW_004516751.1 | Scaffold1578 | 77876                   | AA                              | GG              | 1947014058               |
| SNP_P4_164213_78027  | NW_004516751.1 | Scaffold1578 | 78027                   | AA                              | GG              | 1947014060               |
| SNP_P4_164214_78463  | NW_004516751.1 | Scaffold1578 | 78463                   | CC                              | TT              | 1947014062               |
| SNP_P4_164215_78478  | NW_004516751.1 | Scaffold1578 | 78478                   | TT                              | CC              | 1947014064               |
| SNP_P4_164216_78496  | NW_004516751.1 | Scaffold1578 | 78496                   | TT                              | AA              | 1947014066               |
| SNP_P4_164217_79007  | NW_004516751.1 | Scaffold1578 | 79007                   | GG                              | TT              | 1947014068               |
| SNP_P4_164219_80909  | NW_004516751.1 | Scaffold1578 | 80909                   | TT                              | CC              | 1947014070               |
| SNP_P4_164220_85569  | NW_004516751.1 | Scaffold1578 | 85569                   | TT                              | CC              | 1947014072               |
| SNP_P4_164221_85582  | NW_004516751.1 | Scaffold1578 | 85582                   | CC                              | TT              | 1947014074               |
| SNP_P4_164222_85623  | NW_004516751.1 | Scaffold1578 | 85623                   | CC                              | AA              | 1947014076               |
| SNP_P4_164223_86637  | NW_004516751.1 | Scaffold1578 | 86637                   | AA                              | GG              | 1947014079               |
| SNP_P4_164224_86859  | NW_004516751.1 | Scaffold1578 | 86859                   | AA                              | GG              | 1947014081               |

| SNPs IDs            | Chromosome IDs | Chromosomes  | Physical positions (bp) | CDC Frontier (Reference genome) | (ILWC46 & LPNB) | NCBI SNPdb Accession IDs |
|---------------------|----------------|--------------|-------------------------|---------------------------------|-----------------|--------------------------|
| SNP_P4_164225_86864 | NW_004516751.1 | Scaffold1578 | 86864                   | TT                              | GG              | 1947014083               |
| SNP_P4_164226_86906 | NW_004516751.1 | Scaffold1578 | 86906                   | CC                              | TT              | 1947014085               |
| SNP_P4_164227_86920 | NW_004516751.1 | Scaffold1578 | 86920                   | AA                              | GG              | 1947014087               |
| SNP_P4_164228_86938 | NW_004516751.1 | Scaffold1578 | 86938                   | AA                              | GG              | 1947014089               |
| SNP_P4_164229_705   | NW_004516752.1 | Scaffold1579 | 705                     | AA                              | TT              | 1947014091               |
| SNP_P4_164231_9028  | NW_004516752.1 | Scaffold1579 | 9028                    | TT                              | CC              | 1947014093               |
| SNP_P4_164232_9179  | NW_004516752.1 | Scaffold1579 | 9179                    | TT                              | CC              | 1947014095               |
| SNP_P4_164233_9191  | NW_004516752.1 | Scaffold1579 | 9191                    | TT                              | CC              | 1947014097               |
| SNP_P4_164234_9297  | NW_004516752.1 | Scaffold1579 | 9297                    | TT                              | AA              | 1947014099               |
| SNP_P4_164235_9299  | NW_004516752.1 | Scaffold1579 | 9299                    | CC                              | AA              | 1947014101               |
| SNP_P4_164236_9339  | NW_004516752.1 | Scaffold1579 | 9339                    | TT                              | CC              | 1947014103               |
| SNP_P4_164237_9343  | NW_004516752.1 | Scaffold1579 | 9343                    | AA                              | GG              | 1947014105               |
| SNP_P4_164238_9348  | NW_004516752.1 | Scaffold1579 | 9348                    | TT                              | GG              | 1947014107               |
| SNP_P4_164239_9442  | NW_004516752.1 | Scaffold1579 | 9442                    | CC                              | TT              | 1947014109               |
| SNP_P4_164240_9508  | NW_004516752.1 | Scaffold1579 | 9508                    | CC                              | TT              | 1947014111               |
| SNP_P4_164241_9521  | NW_004516752.1 | Scaffold1579 | 9521                    | CC                              | GG              | 1947014113               |
| SNP_P4_164242_9572  | NW_004516752.1 | Scaffold1579 | 9572                    | AA                              | CC              | 1947014115               |
| SNP_P4_164243_9692  | NW_004516752.1 | Scaffold1579 | 9692                    | GG                              | AA              | 1947014117               |
| SNP_P4_164244_9703  | NW_004516752.1 | Scaffold1579 | 9703                    | GG                              | TT              | 1947014119               |
| SNP_P4_164245_9726  | NW_004516752.1 | Scaffold1579 | 9726                    | AA                              | GG              | 1947014121               |
| SNP_P4_164246_9727  | NW_004516752.1 | Scaffold1579 | 9727                    | AA                              | CC              | 1947014123               |
| SNP_P4_164247_9764  | NW_004516752.1 | Scaffold1579 | 9764                    | AA                              | TT              | 1947014125               |
| SNP_P4_164248_9793  | NW_004516752.1 | Scaffold1579 | 9793                    | TT                              | CC              | 1947014127               |
| SNP_P4_164249_9894  | NW_004516752.1 | Scaffold1579 | 9894                    | AA                              | GG              | 1947014129               |
| SNP_P4_164250_10372 | NW_004516752.1 | Scaffold1579 | 10372                   | TT                              | CC              | 1947014131               |
| SNP_P4_164251_17623 | NW_004516752.1 | Scaffold1579 | 17623                   | AA                              | GG              | 1947014133               |
| SNP_P4_164252_17625 | NW_004516752.1 | Scaffold1579 | 17625                   | AA                              | TT              | 1947014135               |
| SNP_P4_164253_17879 | NW_004516752.1 | Scaffold1579 | 17879                   | TT                              | CC              | 1947014137               |
| SNP_P4_164254_18105 | NW_004516752.1 | Scaffold1579 | 18105                   | CC                              | TT              | 1947014139               |
| SNP_P4_164256_19148 | NW_004516752.1 | Scaffold1579 | 19148                   | TT                              | AA              | 1947014141               |
| SNP_P4_164257_35111 | NW_004516752.1 | Scaffold1579 | 35111                   | AA                              | TT              | 1947014143               |
| SNP_P4_164259_35254 | NW_004516752.1 | Scaffold1579 | 35254                   | AA                              | GG              | 1947014145               |
| SNP_P4_164260_35295 | NW_004516752.1 | Scaffold1579 | 35295                   | CC                              | TT              | 1947014147               |
| SNP_P4_164261_35487 | NW_004516752.1 | Scaffold1579 | 35487                   | TT                              | AA              | 1947014149               |
| SNP_P4_164262_35524 | NW_004516752.1 | Scaffold1579 | 35524                   | AA                              | TT              | 1947014151               |
| SNP_P4_164263_35592 | NW_004516752.1 | Scaffold1579 | 35592                   | TT                              | CC              | 1947014153               |
| SNP_P4_164264_52788 | NW_004516752.1 | Scaffold1579 | 52788                   | AA                              | GG              | 1947014155               |
| SNP_P4_164265_52789 | NW_004516752.1 | Scaffold1579 | 52789                   | TT                              | GG              | 1947014157               |
| SNP_P4_164266_56905 | NW_004516752.1 | Scaffold1579 | 56905                   | CC                              | TT              | 1947014159               |
| SNP_P4_164267_57419 | NW_004516752.1 | Scaffold1579 | 57419                   | GG                              | AA              | 1947014161               |
| SNP_P4_164268_57797 | NW_004516752.1 | Scaffold1579 | 57797                   | AA                              | GG              | 1947014163               |
| SNP_P4_164270_63925 | NW_004516752.1 | Scaffold1579 | 63925                   | GG                              | TT              | 1947014165               |

| SNPs IDs             | Chromosome IDs | Chromosomes  | Physical positions (bp) | CDC Frontier (Reference genome) | (ILWC46 & LPNB) | NCBI SNPdb Accession IDs |
|----------------------|----------------|--------------|-------------------------|---------------------------------|-----------------|--------------------------|
| SNP_P4_164271_63928  | NW_004516752.1 | Scaffold1579 | 63928                   | TT                              | AA              | 1947014167               |
| SNP_P4_164273_65117  | NW_004516752.1 | Scaffold1579 | 65117                   | TT                              | CC              | 1947014169               |
| SNP_P4_164274_65172  | NW_004516752.1 | Scaffold1579 | 65172                   | TT                              | AA              | 1947014171               |
| SNP_P4_164275_65187  | NW_004516752.1 | Scaffold1579 | 65187                   | CC                              | TT              | 1947014173               |
| SNP_P4_164276_65194  | NW_004516752.1 | Scaffold1579 | 65194                   | CC                              | TT              | 1947014175               |
| SNP_P4_164277_65196  | NW_004516752.1 | Scaffold1579 | 65196                   | GG                              | AA              | 1947014177               |
| SNP_P4_164278_65343  | NW_004516752.1 | Scaffold1579 | 65343                   | TT                              | AA              | 1947014179               |
| SNP_P4_164279_65395  | NW_004516752.1 | Scaffold1579 | 65395                   | CC                              | TT              | 1947014181               |
| SNP_P4_164280_65477  | NW_004516752.1 | Scaffold1579 | 65477                   | TT                              | AA              | 1947014183               |
| SNP_P4_164281_69353  | NW_004516752.1 | Scaffold1579 | 69353                   | GG                              | AA              | 1947014185               |
| SNP_P4_164282_74446  | NW_004516752.1 | Scaffold1579 | 74446                   | AA                              | CC              | 1947014187               |
| SNP_P4_164283_74466  | NW_004516752.1 | Scaffold1579 | 74466                   | AA                              | TT              | 1947014189               |
| SNP_P4_164284_82828  | NW_004516752.1 | Scaffold1579 | 82828                   | CC                              | TT              | 1947014191               |
| SNP_P4_164285_82872  | NW_004516752.1 | Scaffold1579 | 82872                   | GG                              | AA              | 1947014193               |
| SNP_P4_164286_83106  | NW_004516752.1 | Scaffold1579 | 83106                   | AA                              | TT              | 1947014195               |
| SNP_P4_164287_101664 | NW_004516752.1 | Scaffold1579 | 101664                  | CC                              | TT              | 1947014197               |
| SNP_P4_164288_111344 | NW_004516752.1 | Scaffold1579 | 111344                  | AA                              | TT              | 1947014199               |
| SNP_P4_164289_118205 | NW_004516752.1 | Scaffold1579 | 118205                  | AA                              | GG              | 1947014201               |
| SNP_P4_164290_126723 | NW_004516752.1 | Scaffold1579 | 126723                  | TT                              | CC              | 1947014203               |
| SNP_P4_164291_145222 | NW_004516752.1 | Scaffold1579 | 145222                  | TT                              | CC              | 1947014205               |
| SNP_P4_164292_146277 | NW_004516752.1 | Scaffold1579 | 146277                  | CC                              | TT              | 1947014207               |
| SNP_P4_164293_150696 | NW_004516752.1 | Scaffold1579 | 150696                  | CC                              | TT              | 1947014209               |
| SNP_P4_164294_150871 | NW_004516752.1 | Scaffold1579 | 150871                  | TT                              | AA              | 1947014211               |
| SNP_P4_164295_150881 | NW_004516752.1 | Scaffold1579 | 150881                  | TT                              | CC              | 1947014214               |
| SNP_P4_164296_163962 | NW_004516752.1 | Scaffold1579 | 163962                  | TT                              | CC              | 1947014216               |
| SNP_P4_164297_164808 | NW_004516752.1 | Scaffold1579 | 164808                  | CC                              | GG              | 1947014218               |
| SNP_P4_164298_172962 | NW_004516752.1 | Scaffold1579 | 172962                  | AA                              | GG              | 1947014220               |
| SNP_P4_164299_186951 | NW_004516752.1 | Scaffold1579 | 186951                  | TT                              | CC              | 1947014222               |
| SNP_P4_164300_187208 | NW_004516752.1 | Scaffold1579 | 187208                  | TT                              | CC              | 1947014223               |
| SNP_P4_164301_187217 | NW_004516752.1 | Scaffold1579 | 187217                  | TT                              | GG              | 1947014225               |
| SNP_P4_164302_187245 | NW_004516752.1 | Scaffold1579 | 187245                  | TT                              | GG              | 1947014227               |
| SNP_P4_164303_192018 | NW_004516752.1 | Scaffold1579 | 192018                  | CC                              | TT              | 1947014229               |
| SNP_P4_164304_194129 | NW_004516752.1 | Scaffold1579 | 194129                  | TT                              | CC              | 1947014231               |
| SNP_P4_164305_194242 | NW_004516752.1 | Scaffold1579 | 194242                  | AA                              | CC              | 1947014233               |
| SNP_P4_164306_194455 | NW_004516752.1 | Scaffold1579 | 194455                  | CC                              | TT              | 1947014235               |
| SNP_P4_164307_194457 | NW_004516752.1 | Scaffold1579 | 194457                  | AA                              | CC              | 1947014237               |
| SNP_P4_164308_194537 | NW_004516752.1 | Scaffold1579 | 194537                  | CC                              | GG              | 1947014239               |
| SNP_P4_164309_198561 | NW_004516752.1 | Scaffold1579 | 198561                  | GG                              | AA              | 1947014241               |
| SNP_P4_164310_202987 | NW_004516752.1 | Scaffold1579 | 202987                  | GG                              | CC              | 1947014243               |
| SNP_P4_164311_203001 | NW_004516752.1 | Scaffold1579 | 203001                  | AA                              | TT              | 1947014245               |
| SNP_P4_164312_203342 | NW_004516752.1 | Scaffold1579 | 203342                  | TT                              | CC              | 1947014247               |
| SNP_P4_164313_203345 | NW_004516752.1 | Scaffold1579 | 203345                  | AA                              | CC              | 1947014249               |



| SNPs IDs             | Chromosome IDs | Chromosomes  | Physical positions (bp) | CDC Frontier (Reference genome) | (ILWC46 & LPNB) | NCBI SNPdb Accession IDs |
|----------------------|----------------|--------------|-------------------------|---------------------------------|-----------------|--------------------------|
| SNP_P4_164314_203490 | NW_004516752.1 | Scaffold1579 | 203490                  | AA                              | TT              | 1947014251               |
| SNP_P4_164315_204020 | NW_004516752.1 | Scaffold1579 | 204020                  | CC                              | TT              | 1947014253               |
| SNP_P4_164316_204117 | NW_004516752.1 | Scaffold1579 | 204117                  | AA                              | TT              | 1947014255               |
| SNP_P4_164317_204509 | NW_004516752.1 | Scaffold1579 | 204509                  | GG                              | AA              | 1947014257               |
| SNP_P4_164318_226214 | NW_004516752.1 | Scaffold1579 | 226214                  | TT                              | CC              | 1947014259               |
| SNP_P4_164319_226259 | NW_004516752.1 | Scaffold1579 | 226259                  | TT                              | CC              | 1947014261               |
| SNP_P4_164320_226512 | NW_004516752.1 | Scaffold1579 | 226512                  | TT                              | AA              | 1947014263               |
| SNP_P4_164321_228342 | NW_004516752.1 | Scaffold1579 | 228342                  | GG                              | AA              | 1947014265               |
| SNP_P4_164322_232589 | NW_004516752.1 | Scaffold1579 | 232589                  | CC                              | GG              | 1947014267               |
| SNP_P4_164323_232671 | NW_004516752.1 | Scaffold1579 | 232671                  | TT                              | CC              | 1947014269               |
| SNP_P4_164324_232808 | NW_004516752.1 | Scaffold1579 | 232808                  | AA                              | GG              | 1947014271               |
| SNP_P4_164325_232819 | NW_004516752.1 | Scaffold1579 | 232819                  | AA                              | CC              | 1947014273               |
| SNP_P4_164326_232820 | NW_004516752.1 | Scaffold1579 | 232820                  | AA                              | TT              | 1947014275               |
| SNP_P4_164327_233206 | NW_004516752.1 | Scaffold1579 | 233206                  | AA                              | GG              | 1947014277               |
| SNP_P4_164328_233211 | NW_004516752.1 | Scaffold1579 | 233211                  | AA                              | CC              | 1947014279               |
| SNP_P4_164329_233287 | NW_004516752.1 | Scaffold1579 | 233287                  | TT                              | CC              | 1947014281               |
| SNP_P4_164330_233946 | NW_004516752.1 | Scaffold1579 | 233946                  | TT                              | CC              | 1947014283               |
| SNP_P4_164331_233960 | NW_004516752.1 | Scaffold1579 | 233960                  | TT                              | AA              | 1947014285               |
| SNP_P4_164332_234063 | NW_004516752.1 | Scaffold1579 | 234063                  | TT                              | GG              | 1947014287               |
| SNP_P4_164333_234077 | NW_004516752.1 | Scaffold1579 | 234077                  | AA                              | GG              | 1947014289               |
| SNP_P4_164334_238109 | NW_004516752.1 | Scaffold1579 | 238109                  | CC                              | AA              | 1947014291               |
| SNP_P4_164335_240849 | NW_004516752.1 | Scaffold1579 | 240849                  | TT                              | CC              | 1947014293               |
| SNP_P4_164336_240973 | NW_004516752.1 | Scaffold1579 | 240973                  | AA                              | GG              | 1947014295               |
| SNP_P4_164337_241246 | NW_004516752.1 | Scaffold1579 | 241246                  | AA                              | CC              | 1947014297               |
| SNP_P4_164338_241346 | NW_004516752.1 | Scaffold1579 | 241346                  | TT                              | CC              | 1947014299               |
| SNP_P4_164339_243275 | NW_004516752.1 | Scaffold1579 | 243275                  | AA                              | GG              | 1947014301               |
| SNP_P4_164340_243292 | NW_004516752.1 | Scaffold1579 | 243292                  | AA                              | CC              | 1947014303               |
| SNP_P4_164341_243297 | NW_004516752.1 | Scaffold1579 | 243297                  | CC                              | TT              | 1947014305               |
| SNP_P4_164342_243299 | NW_004516752.1 | Scaffold1579 | 243299                  | AA                              | GG              | 1947014307               |
| SNP_P4_164343_243396 | NW_004516752.1 | Scaffold1579 | 243396                  | TT                              | GG              | 1947014309               |
| SNP_P4_164344_243602 | NW_004516752.1 | Scaffold1579 | 243602                  | AA                              | GG              | 1947014311               |
| SNP_P4_164345_243710 | NW_004516752.1 | Scaffold1579 | 243710                  | TT                              | CC              | 1947014313               |
| SNP_P4_164346_243800 | NW_004516752.1 | Scaffold1579 | 243800                  | AA                              | GG              | 1947014315               |
| SNP_P4_164347_243804 | NW_004516752.1 | Scaffold1579 | 243804                  | TT                              | CC              | 1947014317               |
| SNP_P4_164348_244431 | NW_004516752.1 | Scaffold1579 | 244431                  | AA                              | GG              | 1947014319               |
| SNP_P4_164349_244445 | NW_004516752.1 | Scaffold1579 | 244445                  | TT                              | CC              | 1947014321               |
| SNP_P4_164350_244620 | NW_004516752.1 | Scaffold1579 | 244620                  | AA                              | TT              | 1947014323               |
| SNP_P4_164351_244790 | NW_004516752.1 | Scaffold1579 | 244790                  | TT                              | AA              | 1947014325               |
| SNP_P4_164352_7207   | NW_004516753.1 | Scaffold1580 | 7207                    | AA                              | CC              | 1947014327               |
| SNP_P4_164353_7217   | NW_004516753.1 | Scaffold1580 | 7217                    | TT                              | GG              | 1947014329               |
| SNP_P4_164354_7241   | NW_004516753.1 | Scaffold1580 | 7241                    | AA                              | CC              | 1947014331               |
| SNP_P4_164355_7294   | NW_004516753.1 | Scaffold1580 | 7294                    | TT                              | AA              | 1947014333               |

| SNPs IDs             | Chromosome IDs | Chromosomes  | Physical positions (bp) | CDC Frontier (Reference genome) | (ILWC46 & LPNB) | NCBI SNPdb Accession IDs |
|----------------------|----------------|--------------|-------------------------|---------------------------------|-----------------|--------------------------|
| SNP_P4_164356_7298   | NW_004516753.1 | Scaffold1580 | 7298                    | AA                              | TT              | 1947014335               |
| SNP_P4_164357_7541   | NW_004516753.1 | Scaffold1580 | 7541                    | TT                              | AA              | 1947014337               |
| SNP_P4_164358_7714   | NW_004516753.1 | Scaffold1580 | 7714                    | AA                              | TT              | 1947014339               |
| SNP_P4_164359_63963  | NW_004516753.1 | Scaffold1580 | 63963                   | CC                              | TT              | 1947014341               |
| SNP_P4_164360_69840  | NW_004516753.1 | Scaffold1580 | 69840                   | AA                              | TT              | 1947014343               |
| SNP_P4_164361_69874  | NW_004516753.1 | Scaffold1580 | 69874                   | TT                              | CC              | 1947014345               |
| SNP_P4_164363_70138  | NW_004516753.1 | Scaffold1580 | 70138                   | GG                              | AA              | 1947014347               |
| SNP_P4_164364_70481  | NW_004516753.1 | Scaffold1580 | 70481                   | TT                              | CC              | 1947014349               |
| SNP_P4_164365_70497  | NW_004516753.1 | Scaffold1580 | 70497                   | AA                              | CC              | 1947014351               |
| SNP_P4_164366_70511  | NW_004516753.1 | Scaffold1580 | 70511                   | GG                              | AA              | 1947014353               |
| SNP_P4_164367_155580 | NW_004516753.1 | Scaffold1580 | 155580                  | TT                              | CC              | 1947014355               |
| SNP_P4_164368_168772 | NW_004516753.1 | Scaffold1580 | 168772                  | GG                              | AA              | 1947014357               |
| SNP_P4_164369_169206 | NW_004516753.1 | Scaffold1580 | 169206                  | TT                              | GG              | 1947014359               |
| SNP_P4_164370_169207 | NW_004516753.1 | Scaffold1580 | 169207                  | TT                              | CC              | 1947014361               |
| SNP_P4_164371_174729 | NW_004516753.1 | Scaffold1580 | 174729                  | CC                              | TT              | 1947014363               |
| SNP_P4_164372_183977 | NW_004516753.1 | Scaffold1580 | 183977                  | GG                              | AA              | 1947014365               |
| SNP_P4_164373_184211 | NW_004516753.1 | Scaffold1580 | 184211                  | CC                              | TT              | 1947014367               |
| SNP_P4_164374_184236 | NW_004516753.1 | Scaffold1580 | 184236                  | CC                              | TT              | 1947014369               |
| SNP_P4_164375_184262 | NW_004516753.1 | Scaffold1580 | 184262                  | GG                              | AA              | 1947014371               |
| SNP_P4_164376_184304 | NW_004516753.1 | Scaffold1580 | 184304                  | TT                              | AA              | 1947014373               |
| SNP_P4_164377_184575 | NW_004516753.1 | Scaffold1580 | 184575                  | CC                              | TT              | 1947014375               |
| SNP_P4_164378_185221 | NW_004516753.1 | Scaffold1580 | 185221                  | AA                              | GG              | 1947014377               |
| SNP_P4_164379_185231 | NW_004516753.1 | Scaffold1580 | 185231                  | CC                              | TT              | 1947014378               |
| SNP_P4_164380_185383 | NW_004516753.1 | Scaffold1580 | 185383                  | AA                              | TT              | 1947014380               |
| SNP_P4_164381_196144 | NW_004516753.1 | Scaffold1580 | 196144                  | AA                              | TT              | 1947014382               |
| SNP_P4_164382_196147 | NW_004516753.1 | Scaffold1580 | 196147                  | TT                              | GG              | 1947014384               |
| SNP_P4_164383_196163 | NW_004516753.1 | Scaffold1580 | 196163                  | TT                              | GG              | 1947014386               |
| SNP_P4_164384_220299 | NW_004516753.1 | Scaffold1580 | 220299                  | AA                              | GG              | 1947014388               |
| SNP_P4_164385_232585 | NW_004516753.1 | Scaffold1580 | 232585                  | GG                              | AA              | 1947014390               |
| SNP_P4_164389_289415 | NW_004516753.1 | Scaffold1580 | 289415                  | AA                              | GG              | 1947014392               |
| SNP_P4_164390_314115 | NW_004516753.1 | Scaffold1580 | 314115                  | GG                              | AA              | 1947014394               |
| SNP_P4_164391_361067 | NW_004516753.1 | Scaffold1580 | 361067                  | TT                              | CC              | 1947014396               |
| SNP_P4_164392_361083 | NW_004516753.1 | Scaffold1580 | 361083                  | TT                              | CC              | 1947014398               |
| SNP_P4_164393_361103 | NW_004516753.1 | Scaffold1580 | 361103                  | AA                              | TT              | 1947014400               |
| SNP_P4_164394_361104 | NW_004516753.1 | Scaffold1580 | 361104                  | TT                              | CC              | 1947014402               |
| SNP_P4_164395_395591 | NW_004516753.1 | Scaffold1580 | 395591                  | GG                              | TT              | 1947014404               |
| SNP_P4_164396_397471 | NW_004516753.1 | Scaffold1580 | 397471                  | TT                              | GG              | 1947014406               |
| SNP_P4_164397_397537 | NW_004516753.1 | Scaffold1580 | 397537                  | GG                              | TT              | 1947014408               |
| SNP_P4_164398_412511 | NW_004516753.1 | Scaffold1580 | 412511                  | CC                              | TT              | 1947014410               |
| SNP_P4_164399_447377 | NW_004516753.1 | Scaffold1580 | 447377                  | AA                              | CC              | 1947014412               |
| SNP_P4_164400_472094 | NW_004516753.1 | Scaffold1580 | 472094                  | GG                              | AA              | 1947014413               |
| SNP_P4_164405_472834 | NW_004516753.1 | Scaffold1580 | 472834                  | AA                              | TT              | 1947014415               |

| SNPs IDs             | Chromosome IDs | Chromosomes  | Physical positions (bp) | CDC Frontier (Reference genome) | (ILWC46 & LPNB) | NCBI SNPdb Accession IDs |
|----------------------|----------------|--------------|-------------------------|---------------------------------|-----------------|--------------------------|
| SNP_P4_164406_472915 | NW_004516753.1 | Scaffold1580 | 472915                  | CC                              | AA              | 1947014417               |
| SNP_P4_164407_472917 | NW_004516753.1 | Scaffold1580 | 472917                  | AA                              | GG              | 1947014419               |
| SNP_P4_164408_473072 | NW_004516753.1 | Scaffold1580 | 473072                  | TT                              | CC              | 1947014421               |
| SNP_P4_164409_473112 | NW_004516753.1 | Scaffold1580 | 473112                  | AA                              | GG              | 1947014423               |
| SNP_P4_164410_473120 | NW_004516753.1 | Scaffold1580 | 473120                  | GG                              | AA              | 1947014425               |
| SNP_P4_164411_473123 | NW_004516753.1 | Scaffold1580 | 473123                  | AA                              | TT              | 1947014427               |
| SNP_P4_164412_473150 | NW_004516753.1 | Scaffold1580 | 473150                  | TT                              | GG              | 1947014429               |
| SNP_P4_164413_473221 | NW_004516753.1 | Scaffold1580 | 473221                  | CC                              | TT              | 1947014431               |
| SNP_P4_164414_473223 | NW_004516753.1 | Scaffold1580 | 473223                  | CC                              | TT              | 1947014433               |
| SNP_P4_164415_473331 | NW_004516753.1 | Scaffold1580 | 473331                  | CC                              | AA              | 1947014435               |
| SNP_P4_164416_473356 | NW_004516753.1 | Scaffold1580 | 473356                  | CC                              | AA              | 1947014437               |
| SNP_P4_164417_473412 | NW_004516753.1 | Scaffold1580 | 473412                  | AA                              | GG              | 1947014439               |
| SNP_P4_164418_477635 | NW_004516753.1 | Scaffold1580 | 477635                  | CC                              | AA              | 1947014441               |
| SNP_P4_164419_504806 | NW_004516753.1 | Scaffold1580 | 504806                  | AA                              | TT              | 1947014443               |
| SNP_P4_164420_504891 | NW_004516753.1 | Scaffold1580 | 504891                  | CC                              | AA              | 1947014445               |
| SNP_P4_164421_504949 | NW_004516753.1 | Scaffold1580 | 504949                  | CC                              | TT              | 1947014446               |
| SNP_P4_164422_504952 | NW_004516753.1 | Scaffold1580 | 504952                  | AA                              | CC              | 1947014448               |
| SNP_P4_164423_505307 | NW_004516753.1 | Scaffold1580 | 505307                  | AA                              | CC              | 1947014450               |
| SNP_P4_164424_505320 | NW_004516753.1 | Scaffold1580 | 505320                  | AA                              | TT              | 1947014452               |
| SNP_P4_164425_505400 | NW_004516753.1 | Scaffold1580 | 505400                  | CC                              | TT              | 1947014454               |
| SNP_P4_164426_505416 | NW_004516753.1 | Scaffold1580 | 505416                  | AA                              | GG              | 1947014456               |
| SNP_P4_164427_505578 | NW_004516753.1 | Scaffold1580 | 505578                  | AA                              | TT              | 1947014458               |
| SNP_P4_164428_7731   | NW_004516754.1 | Scaffold1581 | 7731                    | GG                              | CC              | 1947014460               |
| SNP_P4_164429_156    | NW_004516755.1 | Scaffold1585 | 156                     | GG                              | TT              | 1947014462               |
| SNP_P4_164430_174    | NW_004516755.1 | Scaffold1585 | 174                     | CC                              | TT              | 1947014464               |
| SNP_P4_164431_9790   | NW_004516755.1 | Scaffold1585 | 9790                    | TT                              | CC              | 1947014465               |
| SNP_P4_164432_48417  | NW_004516755.1 | Scaffold1585 | 48417                   | AA                              | TT              | 1947014467               |
| SNP_P4_164433_48421  | NW_004516755.1 | Scaffold1585 | 48421                   | CC                              | TT              | 1947014469               |
| SNP_P4_164434_58019  | NW_004516755.1 | Scaffold1585 | 58019                   | AA                              | GG              | 1947014471               |
| SNP_P4_164435_58020  | NW_004516755.1 | Scaffold1585 | 58020                   | TT                              | CC              | 1947014473               |
| SNP_P4_164436_58032  | NW_004516755.1 | Scaffold1585 | 58032                   | CC                              | GG              | 1947014475               |
| SNP_P4_164437_58035  | NW_004516755.1 | Scaffold1585 | 58035                   | TT                              | GG              | 1947014477               |
| SNP_P4_164438_58074  | NW_004516755.1 | Scaffold1585 | 58074                   | AA                              | GG              | 1947014479               |
| SNP_P4_164439_58139  | NW_004516755.1 | Scaffold1585 | 58139                   | TT                              | CC              | 1947014481               |
| SNP_P4_164440_58342  | NW_004516755.1 | Scaffold1585 | 58342                   | CC                              | TT              | 1947014483               |
| SNP_P4_164441_58357  | NW_004516755.1 | Scaffold1585 | 58357                   | TT                              | GG              | 1947014485               |
| SNP_P4_164442_58362  | NW_004516755.1 | Scaffold1585 | 58362                   | GG                              | AA              | 1947014487               |
| SNP_P4_164443_58466  | NW_004516755.1 | Scaffold1585 | 58466                   | GG                              | TT              | 1947014489               |
| SNP_P4_164444_58562  | NW_004516755.1 | Scaffold1585 | 58562                   | GG                              | AA              | 1947014491               |
| SNP_P4_164445_58577  | NW_004516755.1 | Scaffold1585 | 58577                   | TT                              | CC              | 1947014493               |
| SNP_P4_164446_58774  | NW_004516755.1 | Scaffold1585 | 58774                   | AA                              | GG              | 1947014495               |
| SNP_P4_164447_58785  | NW_004516755.1 | Scaffold1585 | 58785                   | AA                              | CC              | 1947014497               |

| SNPs IDs             | Chromosome IDs | Chromosomes  | Physical positions (bp) | CDC Frontier (Reference genome) | (ILWC46 & LPNB) | NCBI SNPdb Accession IDs |
|----------------------|----------------|--------------|-------------------------|---------------------------------|-----------------|--------------------------|
| SNP_P4_164448_58801  | NW_004516755.1 | Scaffold1585 | 58801                   | AA                              | GG              | 1947014499               |
| SNP_P4_164449_58805  | NW_004516755.1 | Scaffold1585 | 58805                   | TT                              | CC              | 1947014501               |
| SNP_P4_164450_58822  | NW_004516755.1 | Scaffold1585 | 58822                   | TT                              | GG              | 1947014503               |
| SNP_P4_164451_59001  | NW_004516755.1 | Scaffold1585 | 59001                   | CC                              | TT              | 1947014505               |
| SNP_P4_164452_61903  | NW_004516755.1 | Scaffold1585 | 61903                   | CC                              | TT              | 1947014507               |
| SNP_P4_164453_62120  | NW_004516755.1 | Scaffold1585 | 62120                   | CC                              | AA              | 1947014509               |
| SNP_P4_164454_62170  | NW_004516755.1 | Scaffold1585 | 62170                   | TT                              | CC              | 1947014511               |
| SNP_P4_164455_62176  | NW_004516755.1 | Scaffold1585 | 62176                   | TT                              | CC              | 1947014513               |
| SNP_P4_164456_62370  | NW_004516755.1 | Scaffold1585 | 62370                   | CC                              | AA              | 1947014515               |
| SNP_P4_164457_62433  | NW_004516755.1 | Scaffold1585 | 62433                   | TT                              | CC              | 1947014517               |
| SNP_P4_164459_147789 | NW_004516755.1 | Scaffold1585 | 147789                  | GG                              | AA              | 1947014519               |
| SNP_P4_164460_147791 | NW_004516755.1 | Scaffold1585 | 147791                  | AA                              | GG              | 1947014521               |
| SNP_P4_164461_148205 | NW_004516755.1 | Scaffold1585 | 148205                  | TT                              | CC              | 1947014523               |
| SNP_P4_164462_152342 | NW_004516755.1 | Scaffold1585 | 152342                  | CC                              | AA              | 1947014525               |
| SNP_P4_164463_152364 | NW_004516755.1 | Scaffold1585 | 152364                  | CC                              | AA              | 1947014527               |
| SNP_P4_164464_152589 | NW_004516755.1 | Scaffold1585 | 152589                  | GG                              | AA              | 1947014529               |
| SNP_P4_164465_152804 | NW_004516755.1 | Scaffold1585 | 152804                  | AA                              | GG              | 1947014531               |
| SNP_P4_164466_152824 | NW_004516755.1 | Scaffold1585 | 152824                  | GG                              | AA              | 1947014534               |
| SNP_P4_164467_154285 | NW_004516755.1 | Scaffold1585 | 154285                  | GG                              | AA              | 1947014536               |
| SNP_P4_164468_179349 | NW_004516755.1 | Scaffold1585 | 179349                  | GG                              | CC              | 1947014538               |
| SNP_P4_164469_179353 | NW_004516755.1 | Scaffold1585 | 179353                  | TT                              | CC              | 1947014540               |
| SNP_P4_164470_179357 | NW_004516755.1 | Scaffold1585 | 179357                  | AA                              | TT              | 1947014542               |
| SNP_P4_164472_179450 | NW_004516755.1 | Scaffold1585 | 179450                  | TT                              | CC              | 1947014544               |
| SNP_P4_164473_179463 | NW_004516755.1 | Scaffold1585 | 179463                  | GG                              | AA              | 1947014546               |
| SNP_P4_164474_179466 | NW_004516755.1 | Scaffold1585 | 179466                  | CC                              | AA              | 1947014549               |
| SNP_P4_164475_180239 | NW_004516755.1 | Scaffold1585 | 180239                  | AA                              | TT              | 1947014551               |
| SNP_P4_164476_180270 | NW_004516755.1 | Scaffold1585 | 180270                  | TT                              | AA              | 1947014553               |
| SNP_P4_164477_183197 | NW_004516755.1 | Scaffold1585 | 183197                  | GG                              | TT              | 1947014555               |
| SNP_P4_164478_183200 | NW_004516755.1 | Scaffold1585 | 183200                  | TT                              | CC              | 1947014557               |
| SNP_P4_164479_183206 | NW_004516755.1 | Scaffold1585 | 183206                  | CC                              | AA              | 1947014559               |
| SNP_P4_164480_1821   | NW_004516756.1 | Scaffold1586 | 1821                    | AA                              | TT              | 1947014561               |
| SNP_P4_164482_2154   | NW_004516756.1 | Scaffold1586 | 2154                    | GG                              | AA              | 1947014563               |
| SNP_P4_164483_2199   | NW_004516756.1 | Scaffold1586 | 2199                    | CC                              | GG              | 1947014565               |
| SNP_P4_164484_2205   | NW_004516756.1 | Scaffold1586 | 2205                    | CC                              | GG              | 1947014567               |
| SNP_P4_164485_4011   | NW_004516756.1 | Scaffold1586 | 4011                    | AA                              | CC              | 1947014569               |
| SNP_P4_164486_7392   | NW_004516756.1 | Scaffold1586 | 7392                    | TT                              | CC              | 1947014571               |
| SNP_P4_164487_11439  | NW_004516756.1 | Scaffold1586 | 11439                   | TT                              | AA              | 1947014574               |
| SNP_P4_164488_13151  | NW_004516756.1 | Scaffold1586 | 13151                   | GG                              | AA              | 1947014576               |
| SNP_P4_164489_21137  | NW_004516756.1 | Scaffold1586 | 21137                   | AA                              | GG              | 1947014578               |
| SNP_P4_164490_4792   | NW_004516758.1 | Scaffold1588 | 4792                    | AA                              | GG              | 1947014580               |
| SNP_P4_164491_6075   | NW_004516758.1 | Scaffold1588 | 6075                    | GG                              | TT              | 1947014582               |
| SNP_P4_164492_6560   | NW_004516758.1 | Scaffold1588 | 6560                    | AA                              | GG              | 1947014583               |

| SNPs IDs            | Chromosome IDs | Chromosomes  | Physical positions (bp) | CDC Frontier (Reference genome) | (ILWC46 & LPNB) | NCBI SNPdb Accession IDs |
|---------------------|----------------|--------------|-------------------------|---------------------------------|-----------------|--------------------------|
| SNP_P4_164493_6569  | NW_004516758.1 | Scaffold1588 | 6569                    | AA                              | GG              | 1947014585               |
| SNP_P4_164494_8364  | NW_004516759.1 | Scaffold1590 | 8364                    | CC                              | TT              | 1947014587               |
| SNP_P4_164495_8373  | NW_004516759.1 | Scaffold1590 | 8373                    | AA                              | CC              | 1947014589               |
| SNP_P4_164496_8470  | NW_004516759.1 | Scaffold1590 | 8470                    | CC                              | TT              | 1947014591               |
| SNP_P4_164497_8487  | NW_004516759.1 | Scaffold1590 | 8487                    | CC                              | TT              | 1947014593               |
| SNP_P4_164498_8517  | NW_004516759.1 | Scaffold1590 | 8517                    | CC                              | AA              | 1947014595               |
| SNP_P4_164499_8633  | NW_004516759.1 | Scaffold1590 | 8633                    | CC                              | AA              | 1947014597               |
| SNP_P4_164500_8726  | NW_004516759.1 | Scaffold1590 | 8726                    | TT                              | CC              | 1947014599               |
| SNP_P4_164501_8835  | NW_004516759.1 | Scaffold1590 | 8835                    | TT                              | CC              | 1947014601               |
| SNP_P4_164502_12414 | NW_004516759.1 | Scaffold1590 | 12414                   | TT                              | CC              | 1947014603               |
| SNP_P4_164503_12434 | NW_004516759.1 | Scaffold1590 | 12434                   | CC                              | TT              | 1947014605               |
| SNP_P4_164504_12622 | NW_004516759.1 | Scaffold1590 | 12622                   | AA                              | GG              | 1947014607               |
| SNP_P4_164505_12886 | NW_004516759.1 | Scaffold1590 | 12886                   | TT                              | GG              | 1947014609               |
| SNP_P4_164506_3857  | NW_004516762.1 | Scaffold1599 | 3857                    | TT                              | GG              | 1947014611               |
| SNP_P4_164507_4146  | NW_004516762.1 | Scaffold1599 | 4146                    | AA                              | GG              | 1947014613               |
| SNP_P4_164508_721   | NW_004516763.1 | Scaffold1600 | 721                     | GG                              | TT              | 1947014615               |
| SNP_P4_164509_722   | NW_004516763.1 | Scaffold1600 | 722                     | TT                              | GG              | 1947014617               |
| SNP_P4_164510_1210  | NW_004516763.1 | Scaffold1600 | 1210                    | CC                              | GG              | 1947014619               |
| SNP_P4_164511_7651  | NW_004516764.1 | Scaffold1603 | 7651                    | AA                              | GG              | 1947014621               |
| SNP_P4_164512_7686  | NW_004516764.1 | Scaffold1603 | 7686                    | AA                              | GG              | 1947014623               |
| SNP_P4_164513_7726  | NW_004516764.1 | Scaffold1603 | 7726                    | TT                              | CC              | 1947014625               |
| SNP_P4_164514_7729  | NW_004516764.1 | Scaffold1603 | 7729                    | TT                              | GG              | 1947014627               |
| SNP_P4_164515_7744  | NW_004516764.1 | Scaffold1603 | 7744                    | TT                              | CC              | 1947014629               |
| SNP_P4_164516_18529 | NW_004516764.1 | Scaffold1603 | 18529                   | TT                              | CC              | 1947014631               |
| SNP_P4_164517_18535 | NW_004516764.1 | Scaffold1603 | 18535                   | GG                              | TT              | 1947014633               |
| SNP_P4_164518_22698 | NW_004516764.1 | Scaffold1603 | 22698                   | AA                              | GG              | 1947014635               |
| SNP_P4_164519_44153 | NW_004516764.1 | Scaffold1603 | 44153                   | AA                              | GG              | 1947014637               |
| SNP_P4_164520_44188 | NW_004516764.1 | Scaffold1603 | 44188                   | AA                              | GG              | 1947014639               |
| SNP_P4_164521_46646 | NW_004516764.1 | Scaffold1603 | 46646                   | TT                              | CC              | 1947014641               |
| SNP_P4_164522_46703 | NW_004516764.1 | Scaffold1603 | 46703                   | TT                              | CC              | 1947014644               |
| SNP_P4_164523_46849 | NW_004516764.1 | Scaffold1603 | 46849                   | AA                              | CC              | 1947014646               |
| SNP_P4_164524_46864 | NW_004516764.1 | Scaffold1603 | 46864                   | TT                              | AA              | 1947014648               |
| SNP_P4_164525_1505  | NW_004516765.1 | Scaffold1606 | 1505                    | TT                              | AA              | 1947014650               |
| SNP_P4_164526_1691  | NW_004516765.1 | Scaffold1606 | 1691                    | AA                              | TT              | 1947014652               |
| SNP_P4_164527_315   | NW_004516766.1 | Scaffold1607 | 315                     | GG                              | AA              | 1947014654               |
| SNP_P4_164528_391   | NW_004516766.1 | Scaffold1607 | 391                     | TT                              | CC              | 1947014656               |
| SNP_P4_164529_3504  | NW_004516766.1 | Scaffold1607 | 3504                    | TT                              | CC              | 1947014658               |
| SNP_P4_164530_5311  | NW_004516766.1 | Scaffold1607 | 5311                    | CC                              | AA              | 1947014660               |
| SNP_P4_164531_14084 | NW_004516766.1 | Scaffold1607 | 14084                   | AA                              | GG              | 1947014662               |
| SNP_P4_164532_14171 | NW_004516766.1 | Scaffold1607 | 14171                   | AA                              | TT              | 1947014664               |
| SNP_P4_164533_14323 | NW_004516766.1 | Scaffold1607 | 14323                   | GG                              | TT              | 1947014665               |
| SNP_P4_164534_14540 | NW_004516766.1 | Scaffold1607 | 14540                   | GG                              | AA              | 1947014667               |

| SNPs IDs             | Chromosome IDs | Chromosomes  | Physical positions (bp) | CDC Frontier (Reference genome) | (ILWC46 & LPNB) | NCBI SNPdb Accession IDs |
|----------------------|----------------|--------------|-------------------------|---------------------------------|-----------------|--------------------------|
| SNP_P4_164536_41332  | NW_004516766.1 | Scaffold1607 | 41332                   | CC                              | AA              | 1947014669               |
| SNP_P4_164537_41644  | NW_004516766.1 | Scaffold1607 | 41644                   | TT                              | CC              | 1947014671               |
| SNP_P4_164538_41665  | NW_004516766.1 | Scaffold1607 | 41665                   | TT                              | CC              | 1947014673               |
| SNP_P4_164539_41680  | NW_004516766.1 | Scaffold1607 | 41680                   | TT                              | CC              | 1947014675               |
| SNP_P4_164540_42086  | NW_004516766.1 | Scaffold1607 | 42086                   | CC                              | TT              | 1947014677               |
| SNP_P4_164541_47212  | NW_004516766.1 | Scaffold1607 | 47212                   | TT                              | GG              | 1947014679               |
| SNP_P4_164542_47267  | NW_004516766.1 | Scaffold1607 | 47267                   | AA                              | CC              | 1947014681               |
| SNP_P4_164543_47430  | NW_004516766.1 | Scaffold1607 | 47430                   | TT                              | AA              | 1947014683               |
| SNP_P4_164544_60100  | NW_004516766.1 | Scaffold1607 | 60100                   | TT                              | GG              | 1947014685               |
| SNP_P4_164545_69369  | NW_004516766.1 | Scaffold1607 | 69369                   | AA                              | GG              | 1947014687               |
| SNP_P4_164546_73695  | NW_004516766.1 | Scaffold1607 | 73695                   | GG                              | AA              | 1947014689               |
| SNP_P4_164547_83438  | NW_004516766.1 | Scaffold1607 | 83438                   | TT                              | CC              | 1947014691               |
| SNP_P4_164548_91483  | NW_004516766.1 | Scaffold1607 | 91483                   | CC                              | TT              | 1947014693               |
| SNP_P4_164549_99010  | NW_004516766.1 | Scaffold1607 | 99010                   | GG                              | AA              | 1947014695               |
| SNP_P4_164550_99041  | NW_004516766.1 | Scaffold1607 | 99041                   | CC                              | TT              | 1947014697               |
| SNP_P4_164551_99188  | NW_004516766.1 | Scaffold1607 | 99188                   | TT                              | CC              | 1947014699               |
| SNP_P4_164552_99407  | NW_004516766.1 | Scaffold1607 | 99407                   | TT                              | CC              | 1947014701               |
| SNP_P4_164553_99760  | NW_004516766.1 | Scaffold1607 | 99760                   | AA                              | GG              | 1947014703               |
| SNP_P4_164554_116790 | NW_004516766.1 | Scaffold1607 | 116790                  | TT                              | CC              | 1947014705               |
| SNP_P4_164555_116848 | NW_004516766.1 | Scaffold1607 | 116848                  | TT                              | AA              | 1947014707               |
| SNP_P4_164557_117126 | NW_004516766.1 | Scaffold1607 | 117126                  | GG                              | CC              | 1947014709               |
| SNP_P4_164558_117128 | NW_004516766.1 | Scaffold1607 | 117128                  | GG                              | TT              | 1947014711               |
| SNP_P4_164559_117170 | NW_004516766.1 | Scaffold1607 | 117170                  | TT                              | AA              | 1947014713               |
| SNP_P4_164560_119464 | NW_004516766.1 | Scaffold1607 | 119464                  | GG                              | AA              | 1947014715               |
| SNP_P4_164561_119480 | NW_004516766.1 | Scaffold1607 | 119480                  | GG                              | AA              | 1947014717               |
| SNP_P4_164562_119539 | NW_004516766.1 | Scaffold1607 | 119539                  | TT                              | AA              | 1947014719               |
| SNP_P4_164563_119639 | NW_004516766.1 | Scaffold1607 | 119639                  | AA                              | GG              | 1947014721               |
| SNP_P4_164564_119717 | NW_004516766.1 | Scaffold1607 | 119717                  | AA                              | TT              | 1947014723               |
| SNP_P4_164565_119813 | NW_004516766.1 | Scaffold1607 | 119813                  | TT                              | AA              | 1947014725               |
| SNP_P4_164566_119882 | NW_004516766.1 | Scaffold1607 | 119882                  | TT                              | GG              | 1947014727               |
| SNP_P4_164567_119888 | NW_004516766.1 | Scaffold1607 | 119888                  | CC                              | TT              | 1947014729               |
| SNP_P4_164568_119895 | NW_004516766.1 | Scaffold1607 | 119895                  | GG                              | AA              | 1947014731               |
| SNP_P4_164569_119896 | NW_004516766.1 | Scaffold1607 | 119896                  | CC                              | AA              | 1947014733               |
| SNP_P4_164570_119928 | NW_004516766.1 | Scaffold1607 | 119928                  | TT                              | CC              | 1947014736               |
| SNP_P4_164571_119938 | NW_004516766.1 | Scaffold1607 | 119938                  | AA                              | CC              | 1947014738               |
| SNP_P4_164573_131361 | NW_004516766.1 | Scaffold1607 | 131361                  | TT                              | CC              | 1947014740               |
| SNP_P4_164574_136057 | NW_004516766.1 | Scaffold1607 | 136057                  | GG                              | AA              | 1947014742               |
| SNP_P4_164575_136065 | NW_004516766.1 | Scaffold1607 | 136065                  | CC                              | TT              | 1947014744               |
| SNP_P4_164576_136074 | NW_004516766.1 | Scaffold1607 | 136074                  | AA                              | CC              | 1947014746               |
| SNP_P4_164578_657    | NW_004516769.1 | Scaffold1611 | 657                     | GG                              | AA              | 1947014748               |
| SNP_P4_164579_2839   | NW_004516770.1 | Scaffold1612 | 2839                    | AA                              | GG              | 1947014750               |
| SNP_P4_164580_1398   | NW_004516771.1 | Scaffold1613 | 1398                    | TT                              | AA              | 1947014752               |

| SNPs IDs             | Chromosome IDs | Chromosomes  | Physical positions (bp) | CDC Frontier (Reference genome) | (ILWC46 & LPNB) | NCBI SNPdb Accession IDs |
|----------------------|----------------|--------------|-------------------------|---------------------------------|-----------------|--------------------------|
| SNP_P4_164581_2390   | NW_004516771.1 | Scaffold1613 | 2390                    | CC                              | AA              | 1947014754               |
| SNP_P4_164582_10570  | NW_004516771.1 | Scaffold1613 | 10570                   | CC                              | TT              | 1947014756               |
| SNP_P4_164583_10630  | NW_004516771.1 | Scaffold1613 | 10630                   | GG                              | AA              | 1947014758               |
| SNP_P4_164584_10633  | NW_004516771.1 | Scaffold1613 | 10633                   | AA                              | TT              | 1947014760               |
| SNP_P4_164585_10726  | NW_004516771.1 | Scaffold1613 | 10726                   | TT                              | CC              | 1947014762               |
| SNP_P4_164587_54699  | NW_004516771.1 | Scaffold1613 | 54699                   | AA                              | CC              | 1947014764               |
| SNP_P4_164588_65293  | NW_004516771.1 | Scaffold1613 | 65293                   | AA                              | CC              | 1947014767               |
| SNP_P4_164589_65426  | NW_004516771.1 | Scaffold1613 | 65426                   | AA                              | GG              | 1947014769               |
| SNP_P4_164590_65455  | NW_004516771.1 | Scaffold1613 | 65455                   | TT                              | CC              | 1947014771               |
| SNP_P4_164591_65476  | NW_004516771.1 | Scaffold1613 | 65476                   | AA                              | GG              | 1947014773               |
| SNP_P4_164592_88689  | NW_004516771.1 | Scaffold1613 | 88689                   | TT                              | AA              | 1947014775               |
| SNP_P4_164593_98123  | NW_004516771.1 | Scaffold1613 | 98123                   | CC                              | TT              | 1947014777               |
| SNP_P4_164594_98142  | NW_004516771.1 | Scaffold1613 | 98142                   | CC                              | AA              | 1947014779               |
| SNP_P4_164595_98146  | NW_004516771.1 | Scaffold1613 | 98146                   | AA                              | CC              | 1947014781               |
| SNP_P4_164596_98293  | NW_004516771.1 | Scaffold1613 | 98293                   | TT                              | GG              | 1947014783               |
| SNP_P4_164597_98421  | NW_004516771.1 | Scaffold1613 | 98421                   | AA                              | TT              | 1947014785               |
| SNP_P4_164599_98448  | NW_004516771.1 | Scaffold1613 | 98448                   | TT                              | CC              | 1947014787               |
| SNP_P4_164600_98456  | NW_004516771.1 | Scaffold1613 | 98456                   | TT                              | CC              | 1947014789               |
| SNP_P4_164601_98474  | NW_004516771.1 | Scaffold1613 | 98474                   | GG                              | AA              | 1947014791               |
| SNP_P4_164603_107869 | NW_004516771.1 | Scaffold1613 | 107869                  | AA                              | GG              | 1947014793               |
| SNP_P4_164604_113276 | NW_004516771.1 | Scaffold1613 | 113276                  | CC                              | TT              | 1947014795               |
| SNP_P4_164605_113636 | NW_004516771.1 | Scaffold1613 | 113636                  | TT                              | CC              | 1947014797               |
| SNP_P4_164606_115948 | NW_004516771.1 | Scaffold1613 | 115948                  | TT                              | AA              | 1947014799               |
| SNP_P4_164607_116032 | NW_004516771.1 | Scaffold1613 | 116032                  | CC                              | TT              | 1947014801               |
| SNP_P4_164608_116913 | NW_004516771.1 | Scaffold1613 | 116913                  | AA                              | GG              | 1947014803               |
| SNP_P4_164609_117037 | NW_004516771.1 | Scaffold1613 | 117037                  | GG                              | TT              | 1947014805               |
| SNP_P4_164610_117299 | NW_004516771.1 | Scaffold1613 | 117299                  | CC                              | TT              | 1947014807               |
| SNP_P4_164611_117313 | NW_004516771.1 | Scaffold1613 | 117313                  | AA                              | GG              | 1947014809               |
| SNP_P4_164612_117373 | NW_004516771.1 | Scaffold1613 | 117373                  | AA                              | GG              | 1947014811               |
| SNP_P4_164613_117436 | NW_004516771.1 | Scaffold1613 | 117436                  | CC                              | AA              | 1947014813               |
| SNP_P4_164614_5153   | NW_004516772.1 | Scaffold1614 | 5153                    | CC                              | GG              | 1947014815               |
| SNP_P4_164615_5295   | NW_004516772.1 | Scaffold1614 | 5295                    | AA                              | TT              | 1947014817               |
| SNP_P4_164616_5436   | NW_004516772.1 | Scaffold1614 | 5436                    | AA                              | GG              | 1947014819               |
| SNP_P4_164617_6566   | NW_004516772.1 | Scaffold1614 | 6566                    | TT                              | GG              | 1947014821               |
| SNP_P4_164618_6807   | NW_004516772.1 | Scaffold1614 | 6807                    | TT                              | GG              | 1947014823               |
| SNP_P4_164619_7613   | NW_004516772.1 | Scaffold1614 | 7613                    | TT                              | AA              | 1947014825               |
| SNP_P4_164620_7663   | NW_004516772.1 | Scaffold1614 | 7663                    | CC                              | AA              | 1947014827               |
| SNP_P4_164621_7714   | NW_004516772.1 | Scaffold1614 | 7714                    | TT                              | AA              | 1947014829               |
| SNP_P4_164622_8043   | NW_004516772.1 | Scaffold1614 | 8043                    | GG                              | AA              | 1947014831               |
| SNP_P4_164623_8066   | NW_004516772.1 | Scaffold1614 | 8066                    | AA                              | CC              | 1947014833               |
| SNP_P4_164624_8113   | NW_004516772.1 | Scaffold1614 | 8113                    | AA                              | CC              | 1947014835               |
| SNP_P4_164626_8344   | NW_004516772.1 | Scaffold1614 | 8344                    | GG                              | TT              | 1947014837               |

| SNPs IDs             | Chromosome IDs | Chromosomes  | Physical positions (bp) | CDC Frontier (Reference genome) | (ILWC46 & LPNB) | NCBI SNPdb Accession IDs |
|----------------------|----------------|--------------|-------------------------|---------------------------------|-----------------|--------------------------|
| SNP_P4_164627_8697   | NW_004516772.1 | Scaffold1614 | 8697                    | TT                              | CC              | 1947014839               |
| SNP_P4_164628_9462   | NW_004516772.1 | Scaffold1614 | 9462                    | AA                              | CC              | 1947014841               |
| SNP_P4_164629_9888   | NW_004516772.1 | Scaffold1614 | 9888                    | AA                              | GG              | 1947014843               |
| SNP_P4_164630_13490  | NW_004516772.1 | Scaffold1614 | 13490                   | TT                              | AA              | 1947014845               |
| SNP_P4_164631_13669  | NW_004516772.1 | Scaffold1614 | 13669                   | CC                              | TT              | 1947014847               |
| SNP_P4_164632_13695  | NW_004516772.1 | Scaffold1614 | 13695                   | AA                              | TT              | 1947014849               |
| SNP_P4_164633_13706  | NW_004516772.1 | Scaffold1614 | 13706                   | TT                              | GG              | 1947014851               |
| SNP_P4_164634_13724  | NW_004516772.1 | Scaffold1614 | 13724                   | TT                              | GG              | 1947014853               |
| SNP_P4_164635_13732  | NW_004516772.1 | Scaffold1614 | 13732                   | CC                              | TT              | 1947014855               |
| SNP_P4_164636_13878  | NW_004516772.1 | Scaffold1614 | 13878                   | GG                              | CC              | 1947014857               |
| SNP_P4_164637_13916  | NW_004516772.1 | Scaffold1614 | 13916                   | AA                              | GG              | 1947014859               |
| SNP_P4_164638_13933  | NW_004516772.1 | Scaffold1614 | 13933                   | CC                              | TT              | 1947014861               |
| SNP_P4_164639_14056  | NW_004516772.1 | Scaffold1614 | 14056                   | GG                              | CC              | 1947014863               |
| SNP_P4_164641_14103  | NW_004516772.1 | Scaffold1614 | 14103                   | TT                              | AA              | 1947014865               |
| SNP_P4_164642_14189  | NW_004516772.1 | Scaffold1614 | 14189                   | AA                              | CC              | 1947014867               |
| SNP_P4_164643_14195  | NW_004516772.1 | Scaffold1614 | 14195                   | GG                              | CC              | 1947014869               |
| SNP_P4_164644_14198  | NW_004516772.1 | Scaffold1614 | 14198                   | TT                              | CC              | 1947014871               |
| SNP_P4_164645_14253  | NW_004516772.1 | Scaffold1614 | 14253                   | CC                              | GG              | 1947014873               |
| SNP_P4_164646_14410  | NW_004516772.1 | Scaffold1614 | 14410                   | AA                              | TT              | 1947014875               |
| SNP_P4_164647_45771  | NW_004516772.1 | Scaffold1614 | 45771                   | CC                              | AA              | 1947014877               |
| SNP_P4_164648_45794  | NW_004516772.1 | Scaffold1614 | 45794                   | CC                              | TT              | 1947014879               |
| SNP_P4_164649_49089  | NW_004516772.1 | Scaffold1614 | 49089                   | CC                              | AA              | 1947014881               |
| SNP_P4_164650_58251  | NW_004516772.1 | Scaffold1614 | 58251                   | TT                              | GG              | 1947014883               |
| SNP_P4_164651_58253  | NW_004516772.1 | Scaffold1614 | 58253                   | GG                              | TT              | 1947014885               |
| SNP_P4_164652_62087  | NW_004516772.1 | Scaffold1614 | 62087                   | TT                              | CC              | 1947014887               |
| SNP_P4_164653_66054  | NW_004516772.1 | Scaffold1614 | 66054                   | TT                              | CC              | 1947014889               |
| SNP_P4_164654_66132  | NW_004516772.1 | Scaffold1614 | 66132                   | TT                              | CC              | 1947014891               |
| SNP_P4_164655_66393  | NW_004516772.1 | Scaffold1614 | 66393                   | GG                              | CC              | 1947014893               |
| SNP_P4_164656_66416  | NW_004516772.1 | Scaffold1614 | 66416                   | TT                              | CC              | 1947014895               |
| SNP_P4_164657_66535  | NW_004516772.1 | Scaffold1614 | 66535                   | AA                              | TT              | 1947014897               |
| SNP_P4_164658_70093  | NW_004516772.1 | Scaffold1614 | 70093                   | AA                              | GG              | 1947014899               |
| SNP_P4_164659_73933  | NW_004516772.1 | Scaffold1614 | 73933                   | TT                              | CC              | 1947014901               |
| SNP_P4_164660_90291  | NW_004516772.1 | Scaffold1614 | 90291                   | AA                              | GG              | 1947014903               |
| SNP_P4_164661_90324  | NW_004516772.1 | Scaffold1614 | 90324                   | TT                              | AA              | 1947014905               |
| SNP_P4_164662_95586  | NW_004516772.1 | Scaffold1614 | 95586                   | TT                              | CC              | 1947014907               |
| SNP_P4_164663_95855  | NW_004516772.1 | Scaffold1614 | 95855                   | CC                              | TT              | 1947014909               |
| SNP_P4_164664_96569  | NW_004516772.1 | Scaffold1614 | 96569                   | CC                              | TT              | 1947014911               |
| SNP_P4_164665_99702  | NW_004516772.1 | Scaffold1614 | 99702                   | CC                              | TT              | 1947014913               |
| SNP_P4_164666_100165 | NW_004516772.1 | Scaffold1614 | 100165                  | AA                              | GG              | 1947014915               |
| SNP_P4_164667_100446 | NW_004516772.1 | Scaffold1614 | 100446                  | CC                              | AA              | 1947014917               |
| SNP_P4_164668_102574 | NW_004516772.1 | Scaffold1614 | 102574                  | GG                              | AA              | 1947014919               |
| SNP_P4_164669_102663 | NW_004516772.1 | Scaffold1614 | 102663                  | TT                              | GG              | 1947014920               |



| SNPs IDs             | Chromosome IDs | Chromosomes  | Physical positions (bp) | CDC Frontier (Reference genome) | (ILWC46 & LPNB) | NCBI SNPdb Accession IDs |
|----------------------|----------------|--------------|-------------------------|---------------------------------|-----------------|--------------------------|
| SNP_P4_164670_103646 | NW_004516772.1 | Scaffold1614 | 103646                  | GG                              | TT              | 1947014921               |
| SNP_P4_164671_104578 | NW_004516772.1 | Scaffold1614 | 104578                  | CC                              | TT              | 1947014922               |
| SNP_P4_164672_104583 | NW_004516772.1 | Scaffold1614 | 104583                  | CC                              | TT              | 1947014923               |
| SNP_P4_164673_104589 | NW_004516772.1 | Scaffold1614 | 104589                  | GG                              | CC              | 1947014924               |
| SNP_P4_164674_104596 | NW_004516772.1 | Scaffold1614 | 104596                  | CC                              | TT              | 1947014926               |
| SNP_P4_164675_104600 | NW_004516772.1 | Scaffold1614 | 104600                  | CC                              | TT              | 1947014928               |
| SNP_P4_164676_111066 | NW_004516772.1 | Scaffold1614 | 111066                  | TT                              | CC              | 1947014930               |
| SNP_P4_164677_111164 | NW_004516772.1 | Scaffold1614 | 111164                  | GG                              | AA              | 1947014932               |
| SNP_P4_164678_112105 | NW_004516772.1 | Scaffold1614 | 112105                  | GG                              | AA              | 1947014934               |
| SNP_P4_164679_112879 | NW_004516772.1 | Scaffold1614 | 112879                  | TT                              | AA              | 1947014936               |
| SNP_P4_164680_113023 | NW_004516772.1 | Scaffold1614 | 113023                  | AA                              | TT              | 1947014938               |
| SNP_P4_164681_113229 | NW_004516772.1 | Scaffold1614 | 113229                  | TT                              | CC              | 1947014940               |
| SNP_P4_164682_113859 | NW_004516772.1 | Scaffold1614 | 113859                  | TT                              | CC              | 1947014942               |
| SNP_P4_164683_113930 | NW_004516772.1 | Scaffold1614 | 113930                  | AA                              | TT              | 1947014944               |
| SNP_P4_164684_113936 | NW_004516772.1 | Scaffold1614 | 113936                  | AA                              | TT              | 1947014946               |
| SNP_P4_164685_113937 | NW_004516772.1 | Scaffold1614 | 113937                  | TT                              | CC              | 1947014948               |
| SNP_P4_164686_114003 | NW_004516772.1 | Scaffold1614 | 114003                  | TT                              | CC              | 1947014950               |
| SNP_P4_164687_114019 | NW_004516772.1 | Scaffold1614 | 114019                  | CC                              | TT              | 1947014952               |
| SNP_P4_164688_114044 | NW_004516772.1 | Scaffold1614 | 114044                  | TT                              | CC              | 1947014954               |
| SNP_P4_164689_114287 | NW_004516772.1 | Scaffold1614 | 114287                  | GG                              | AA              | 1947014956               |
| SNP_P4_164690_114288 | NW_004516772.1 | Scaffold1614 | 114288                  | AA                              | CC              | 1947014958               |
| SNP_P4_164691_114756 | NW_004516772.1 | Scaffold1614 | 114756                  | AA                              | TT              | 1947014960               |
| SNP_P4_164692_114805 | NW_004516772.1 | Scaffold1614 | 114805                  | GG                              | AA              | 1947014962               |
| SNP_P4_164693_114810 | NW_004516772.1 | Scaffold1614 | 114810                  | GG                              | AA              | 1947014964               |
| SNP_P4_164694_114818 | NW_004516772.1 | Scaffold1614 | 114818                  | AA                              | TT              | 1947014966               |
| SNP_P4_164695_114883 | NW_004516772.1 | Scaffold1614 | 114883                  | TT                              | CC              | 1947014968               |
| SNP_P4_164696_114900 | NW_004516772.1 | Scaffold1614 | 114900                  | TT                              | CC              | 1947014970               |
| SNP_P4_164697_114913 | NW_004516772.1 | Scaffold1614 | 114913                  | GG                              | AA              | 1947014972               |
| SNP_P4_164698_114920 | NW_004516772.1 | Scaffold1614 | 114920                  | TT                              | AA              | 1947014974               |
| SNP_P4_164699_114921 | NW_004516772.1 | Scaffold1614 | 114921                  | AA                              | TT              | 1947014976               |
| SNP_P4_164700_114926 | NW_004516772.1 | Scaffold1614 | 114926                  | TT                              | GG              | 1947014978               |
| SNP_P4_164701_114977 | NW_004516772.1 | Scaffold1614 | 114977                  | AA                              | CC              | 1947014980               |
| SNP_P4_164702_115028 | NW_004516772.1 | Scaffold1614 | 115028                  | CC                              | TT              | 1947014982               |
| SNP_P4_164703_115120 | NW_004516772.1 | Scaffold1614 | 115120                  | CC                              | GG              | 1947014984               |
| SNP_P4_164704_115131 | NW_004516772.1 | Scaffold1614 | 115131                  | CC                              | TT              | 1947014986               |
| SNP_P4_164705_115283 | NW_004516772.1 | Scaffold1614 | 115283                  | GG                              | AA              | 1947014988               |
| SNP_P4_164706_115627 | NW_004516772.1 | Scaffold1614 | 115627                  | GG                              | AA              | 1947014990               |
| SNP_P4_164707_115749 | NW_004516772.1 | Scaffold1614 | 115749                  | TT                              | CC              | 1947014992               |
| SNP_P4_164708_115750 | NW_004516772.1 | Scaffold1614 | 115750                  | GG                              | AA              | 1947014994               |
| SNP_P4_164709_115760 | NW_004516772.1 | Scaffold1614 | 115760                  | GG                              | AA              | 1947014996               |
| SNP_P4_164710_115773 | NW_004516772.1 | Scaffold1614 | 115773                  | GG                              | CC              | 1947014998               |
| SNP_P4_164711_115791 | NW_004516772.1 | Scaffold1614 | 115791                  | CC                              | TT              | 1947015000               |

| SNPs IDs             | Chromosome IDs | Chromosomes  | Physical positions (bp) | CDC Frontier (Reference genome) | (ILWC46 & LPNB) | NCBI SNPdb Accession IDs |
|----------------------|----------------|--------------|-------------------------|---------------------------------|-----------------|--------------------------|
| SNP_P4_164712_115857 | NW_004516772.1 | Scaffold1614 | 115857                  | CC                              | TT              | 1947015002               |
| SNP_P4_164713_116111 | NW_004516772.1 | Scaffold1614 | 116111                  | TT                              | CC              | 1947015004               |
| SNP_P4_164714_116264 | NW_004516772.1 | Scaffold1614 | 116264                  | TT                              | AA              | 1947015006               |
| SNP_P4_164715_116740 | NW_004516772.1 | Scaffold1614 | 116740                  | AA                              | TT              | 1947015008               |
| SNP_P4_164716_116898 | NW_004516772.1 | Scaffold1614 | 116898                  | TT                              | AA              | 1947015010               |
| SNP_P4_164717_116917 | NW_004516772.1 | Scaffold1614 | 116917                  | CC                              | GG              | 1947015012               |
| SNP_P4_164718_117002 | NW_004516772.1 | Scaffold1614 | 117002                  | GG                              | AA              | 1947015014               |
| SNP_P4_164719_119989 | NW_004516772.1 | Scaffold1614 | 119989                  | TT                              | GG              | 1947015016               |
| SNP_P4_164720_120875 | NW_004516772.1 | Scaffold1614 | 120875                  | GG                              | CC              | 1947015018               |
| SNP_P4_164721_120964 | NW_004516772.1 | Scaffold1614 | 120964                  | TT                              | AA              | 1947015020               |
| SNP_P4_164722_121033 | NW_004516772.1 | Scaffold1614 | 121033                  | CC                              | GG              | 1947015022               |
| SNP_P4_164723_121043 | NW_004516772.1 | Scaffold1614 | 121043                  | CC                              | TT              | 1947015024               |
| SNP_P4_164724_124167 | NW_004516772.1 | Scaffold1614 | 124167                  | AA                              | CC              | 1947015026               |
| SNP_P4_164725_124660 | NW_004516772.1 | Scaffold1614 | 124660                  | GG                              | TT              | 1947015028               |
| SNP_P4_164727_132680 | NW_004516772.1 | Scaffold1614 | 132680                  | AA                              | GG              | 1947015030               |
| SNP_P4_164728_132916 | NW_004516772.1 | Scaffold1614 | 132916                  | CC                              | AA              | 1947015032               |
| SNP_P4_164729_133098 | NW_004516772.1 | Scaffold1614 | 133098                  | TT                              | AA              | 1947015034               |
| SNP_P4_164730_133121 | NW_004516772.1 | Scaffold1614 | 133121                  | AA                              | GG              | 1947015036               |
| SNP_P4_164731_133251 | NW_004516772.1 | Scaffold1614 | 133251                  | TT                              | GG              | 1947015038               |
| SNP_P4_164732_134404 | NW_004516772.1 | Scaffold1614 | 134404                  | AA                              | TT              | 1947015040               |
| SNP_P4_164733_135517 | NW_004516772.1 | Scaffold1614 | 135517                  | GG                              | AA              | 1947015042               |
| SNP_P4_164734_135560 | NW_004516772.1 | Scaffold1614 | 135560                  | CC                              | TT              | 1947015044               |
| SNP_P4_164735_137114 | NW_004516772.1 | Scaffold1614 | 137114                  | CC                              | GG              | 1947015046               |
| SNP_P4_164736_138848 | NW_004516772.1 | Scaffold1614 | 138848                  | GG                              | TT              | 1947015048               |
| SNP_P4_164737_140546 | NW_004516772.1 | Scaffold1614 | 140546                  | GG                              | TT              | 1947015050               |
| SNP_P4_164738_140867 | NW_004516772.1 | Scaffold1614 | 140867                  | CC                              | TT              | 1947015052               |
| SNP_P4_164739_141715 | NW_004516772.1 | Scaffold1614 | 141715                  | GG                              | AA              | 1947015054               |
| SNP_P4_164740_142008 | NW_004516772.1 | Scaffold1614 | 142008                  | TT                              | GG              | 1947015056               |
| SNP_P4_164741_145930 | NW_004516772.1 | Scaffold1614 | 145930                  | AA                              | TT              | 1947015058               |
| SNP_P4_164742_146533 | NW_004516772.1 | Scaffold1614 | 146533                  | CC                              | TT              | 1947015060               |
| SNP_P4_164743_148170 | NW_004516772.1 | Scaffold1614 | 148170                  | AA                              | TT              | 1947015062               |
| SNP_P4_164744_148233 | NW_004516772.1 | Scaffold1614 | 148233                  | AA                              | GG              | 1947015064               |
| SNP_P4_164745_148237 | NW_004516772.1 | Scaffold1614 | 148237                  | AA                              | GG              | 1947015066               |
| SNP_P4_164746_148238 | NW_004516772.1 | Scaffold1614 | 148238                  | CC                              | GG              | 1947015068               |
| SNP_P4_164747_151826 | NW_004516772.1 | Scaffold1614 | 151826                  | GG                              | AA              | 1947015070               |
| SNP_P4_164748_151892 | NW_004516772.1 | Scaffold1614 | 151892                  | AA                              | TT              | 1947015072               |
| SNP_P4_164749_152159 | NW_004516772.1 | Scaffold1614 | 152159                  | AA                              | TT              | 1947015074               |
| SNP_P4_164750_152936 | NW_004516772.1 | Scaffold1614 | 152936                  | CC                              | TT              | 1947015076               |
| SNP_P4_164751_153481 | NW_004516772.1 | Scaffold1614 | 153481                  | CC                              | TT              | 1947015078               |
| SNP_P4_164752_154090 | NW_004516772.1 | Scaffold1614 | 154090                  | TT                              | CC              | 1947015080               |
| SNP_P4_164753_154092 | NW_004516772.1 | Scaffold1614 | 154092                  | AA                              | CC              | 1947015082               |
| SNP_P4_164754_154173 | NW_004516772.1 | Scaffold1614 | 154173                  | GG                              | CC              | 1947015084               |

| SNPs IDs             | Chromosome IDs | Chromosomes  | Physical positions (bp) | CDC Frontier (Reference genome) | (ILWC46 & LPNB) | NCBI SNPdb Accession IDs |
|----------------------|----------------|--------------|-------------------------|---------------------------------|-----------------|--------------------------|
| SNP_P4_164755_154349 | NW_004516772.1 | Scaffold1614 | 154349                  | CC                              | AA              | 1947015086               |
| SNP_P4_164756_154402 | NW_004516772.1 | Scaffold1614 | 154402                  | CC                              | TT              | 1947015088               |
| SNP_P4_164757_155028 | NW_004516772.1 | Scaffold1614 | 155028                  | GG                              | TT              | 1947015090               |
| SNP_P4_164758_155686 | NW_004516772.1 | Scaffold1614 | 155686                  | TT                              | CC              | 1947015092               |
| SNP_P4_164759_157135 | NW_004516772.1 | Scaffold1614 | 157135                  | GG                              | CC              | 1947015094               |
| SNP_P4_164760_158187 | NW_004516772.1 | Scaffold1614 | 158187                  | CC                              | GG              | 1947015096               |
| SNP_P4_164761_158255 | NW_004516772.1 | Scaffold1614 | 158255                  | AA                              | GG              | 1947015098               |
| SNP_P4_164762_159655 | NW_004516772.1 | Scaffold1614 | 159655                  | AA                              | CC              | 1947015100               |
| SNP_P4_164763_160277 | NW_004516772.1 | Scaffold1614 | 160277                  | TT                              | CC              | 1947015102               |
| SNP_P4_164764_161453 | NW_004516772.1 | Scaffold1614 | 161453                  | AA                              | GG              | 1947015104               |
| SNP_P4_164765_161706 | NW_004516772.1 | Scaffold1614 | 161706                  | AA                              | CC              | 1947015106               |
| SNP_P4_164766_162051 | NW_004516772.1 | Scaffold1614 | 162051                  | CC                              | GG              | 1947015108               |
| SNP_P4_164767_162298 | NW_004516772.1 | Scaffold1614 | 162298                  | CC                              | GG              | 1947015110               |
| SNP_P4_164768_162315 | NW_004516772.1 | Scaffold1614 | 162315                  | AA                              | CC              | 1947015112               |
| SNP_P4_164769_163795 | NW_004516772.1 | Scaffold1614 | 163795                  | GG                              | TT              | 1947015114               |
| SNP_P4_164770_163848 | NW_004516772.1 | Scaffold1614 | 163848                  | AA                              | GG              | 1947015116               |
| SNP_P4_164771_163859 | NW_004516772.1 | Scaffold1614 | 163859                  | GG                              | AA              | 1947015118               |
| SNP_P4_164772_163872 | NW_004516772.1 | Scaffold1614 | 163872                  | GG                              | AA              | 1947015120               |
| SNP_P4_164773_163894 | NW_004516772.1 | Scaffold1614 | 163894                  | GG                              | AA              | 1947015122               |
| SNP_P4_164774_163924 | NW_004516772.1 | Scaffold1614 | 163924                  | TT                              | CC              | 1947015124               |
| SNP_P4_164775_163926 | NW_004516772.1 | Scaffold1614 | 163926                  | GG                              | AA              | 1947015127               |
| SNP_P4_164776_164141 | NW_004516772.1 | Scaffold1614 | 164141                  | CC                              | TT              | 1947015129               |
| SNP_P4_164777_164145 | NW_004516772.1 | Scaffold1614 | 164145                  | AA                              | GG              | 1947015131               |
| SNP_P4_164778_164153 | NW_004516772.1 | Scaffold1614 | 164153                  | CC                              | GG              | 1947015133               |
| SNP_P4_164779_164156 | NW_004516772.1 | Scaffold1614 | 164156                  | AA                              | TT              | 1947015135               |
| SNP_P4_164780_164157 | NW_004516772.1 | Scaffold1614 | 164157                  | CC                              | AA              | 1947015137               |
| SNP_P4_164781_164277 | NW_004516772.1 | Scaffold1614 | 164277                  | AA                              | GG              | 1947015139               |
| SNP_P4_164782_164282 | NW_004516772.1 | Scaffold1614 | 164282                  | TT                              | GG              | 1947015141               |
| SNP_P4_164783_164427 | NW_004516772.1 | Scaffold1614 | 164427                  | TT                              | GG              | 1947015143               |
| SNP_P4_164785_164494 | NW_004516772.1 | Scaffold1614 | 164494                  | GG                              | AA              | 1947015146               |
| SNP_P4_164786_164504 | NW_004516772.1 | Scaffold1614 | 164504                  | CC                              | TT              | 1947015148               |
| SNP_P4_164787_167131 | NW_004516772.1 | Scaffold1614 | 167131                  | GG                              | CC              | 1947015150               |
| SNP_P4_164788_167342 | NW_004516772.1 | Scaffold1614 | 167342                  | GG                              | TT              | 1947015152               |
| SNP_P4_164789_168729 | NW_004516772.1 | Scaffold1614 | 168729                  | TT                              | CC              | 1947015154               |
| SNP_P4_164790_168858 | NW_004516772.1 | Scaffold1614 | 168858                  | GG                              | CC              | 1947015156               |
| SNP_P4_164791_169135 | NW_004516772.1 | Scaffold1614 | 169135                  | AA                              | CC              | 1947015158               |
| SNP_P4_164792_184308 | NW_004516772.1 | Scaffold1614 | 184308                  | AA                              | CC              | 1947015160               |
| SNP_P4_164793_184890 | NW_004516772.1 | Scaffold1614 | 184890                  | GG                              | CC              | 1947015162               |
| SNP_P4_164794_184898 | NW_004516772.1 | Scaffold1614 | 184898                  | TT                              | CC              | 1947015164               |
| SNP_P4_164795_186861 | NW_004516772.1 | Scaffold1614 | 186861                  | CC                              | AA              | 1947015166               |
| SNP_P4_164796_186870 | NW_004516772.1 | Scaffold1614 | 186870                  | CC                              | GG              | 1947015168               |
| SNP_P4_164797_187728 | NW_004516772.1 | Scaffold1614 | 187728                  | AA                              | GG              | 1947015170               |

| SNPs IDs             | Chromosome IDs | Chromosomes  | Physical positions (bp) | CDC Frontier (Reference genome) | (ILWC46 & LPNB) | NCBI SNPdb Accession IDs |
|----------------------|----------------|--------------|-------------------------|---------------------------------|-----------------|--------------------------|
| SNP_P4_164798_188421 | NW_004516772.1 | Scaffold1614 | 188421                  | AA                              | CC              | 1947015172               |
| SNP_P4_164799_190866 | NW_004516772.1 | Scaffold1614 | 190866                  | TT                              | AA              | 1947015174               |
| SNP_P4_164801_192873 | NW_004516772.1 | Scaffold1614 | 192873                  | GG                              | TT              | 1947015176               |
| SNP_P4_164802_192882 | NW_004516772.1 | Scaffold1614 | 192882                  | GG                              | AA              | 1947015178               |
| SNP_P4_164803_193028 | NW_004516772.1 | Scaffold1614 | 193028                  | CC                              | TT              | 1947015180               |
| SNP_P4_164804_193075 | NW_004516772.1 | Scaffold1614 | 193075                  | GG                              | AA              | 1947015182               |
| SNP_P4_164805_193428 | NW_004516772.1 | Scaffold1614 | 193428                  | TT                              | CC              | 1947015184               |
| SNP_P4_164806_194351 | NW_004516772.1 | Scaffold1614 | 194351                  | AA                              | TT              | 1947015186               |
| SNP_P4_164807_637    | NW_004516773.1 | Scaffold1615 | 637                     | TT                              | CC              | 1947015188               |
| SNP_P4_164808_649    | NW_004516773.1 | Scaffold1615 | 649                     | GG                              | TT              | 1947015190               |
| SNP_P4_164810_430    | NW_004516775.1 | Scaffold1620 | 430                     | TT                              | GG              | 1947015192               |
| SNP_P4_164811_516    | NW_004516775.1 | Scaffold1620 | 516                     | TT                              | CC              | 1947015194               |
| SNP_P4_164812_810    | NW_004516775.1 | Scaffold1620 | 810                     | TT                              | GG              | 1947015196               |
| SNP_P4_164813_1163   | NW_004516775.1 | Scaffold1620 | 1163                    | GG                              | AA              | 1947015198               |
| SNP_P4_164814_1228   | NW_004516775.1 | Scaffold1620 | 1228                    | GG                              | AA              | 1947015200               |
| SNP_P4_164815_1251   | NW_004516775.1 | Scaffold1620 | 1251                    | AA                              | TT              | 1947015202               |
| SNP_P4_164817_4623   | NW_004516777.1 | Scaffold1623 | 4623                    | TT                              | CC              | 1947015204               |
| SNP_P4_164818_14045  | NW_004516777.1 | Scaffold1623 | 14045                   | GG                              | TT              | 1947015206               |
| SNP_P4_164819_14088  | NW_004516777.1 | Scaffold1623 | 14088                   | AA                              | GG              | 1947015208               |
| SNP_P4_164820_14370  | NW_004516777.1 | Scaffold1623 | 14370                   | CC                              | AA              | 1947015210               |
| SNP_P4_164821_16743  | NW_004516777.1 | Scaffold1623 | 16743                   | AA                              | GG              | 1947015212               |
| SNP_P4_164822_5505   | NW_004516779.1 | Scaffold1626 | 5505                    | AA                              | GG              | 1947015214               |
| SNP_P4_164823_14738  | NW_004516779.1 | Scaffold1626 | 14738                   | TT                              | CC              | 1947015216               |
| SNP_P4_164824_14739  | NW_004516779.1 | Scaffold1626 | 14739                   | GG                              | AA              | 1947015218               |
| SNP_P4_164825_14742  | NW_004516779.1 | Scaffold1626 | 14742                   | GG                              | AA              | 1947015220               |
| SNP_P4_164826_31246  | NW_004516779.1 | Scaffold1626 | 31246                   | AA                              | GG              | 1947015222               |
| SNP_P4_164827_31465  | NW_004516779.1 | Scaffold1626 | 31465                   | GG                              | AA              | 1947015224               |
| SNP_P4_164828_31484  | NW_004516779.1 | Scaffold1626 | 31484                   | TT                              | GG              | 1947015226               |
| SNP_P4_164829_31539  | NW_004516779.1 | Scaffold1626 | 31539                   | AA                              | CC              | 1947015228               |
| SNP_P4_164830_32092  | NW_004516779.1 | Scaffold1626 | 32092                   | GG                              | AA              | 1947015230               |
| SNP_P4_164831_32207  | NW_004516779.1 | Scaffold1626 | 32207                   | AA                              | GG              | 1947015232               |
| SNP_P4_164832_32244  | NW_004516779.1 | Scaffold1626 | 32244                   | CC                              | TT              | 1947015234               |
| SNP_P4_164833_32260  | NW_004516779.1 | Scaffold1626 | 32260                   | AA                              | CC              | 1947015236               |
| SNP_P4_164834_32455  | NW_004516779.1 | Scaffold1626 | 32455                   | CC                              | TT              | 1947015238               |
| SNP_P4_164835_36329  | NW_004516779.1 | Scaffold1626 | 36329                   | GG                              | AA              | 1947015240               |
| SNP_P4_164836_37201  | NW_004516779.1 | Scaffold1626 | 37201                   | AA                              | GG              | 1947015242               |
| SNP_P4_164837_76926  | NW_004516779.1 | Scaffold1626 | 76926                   | TT                              | CC              | 1947015244               |
| SNP_P4_164838_108438 | NW_004516779.1 | Scaffold1626 | 108438                  | AA                              | CC              | 1947015246               |
| SNP_P4_164839_108691 | NW_004516779.1 | Scaffold1626 | 108691                  | TT                              | GG              | 1947015248               |
| SNP_P4_164840_124921 | NW_004516779.1 | Scaffold1626 | 124921                  | GG                              | AA              | 1947015250               |
| SNP_P4_164841_124965 | NW_004516779.1 | Scaffold1626 | 124965                  | TT                              | CC              | 1947015252               |
| SNP_P4_164842_125626 | NW_004516779.1 | Scaffold1626 | 125626                  | AA                              | CC              | 1947015254               |

| SNPs IDs             | Chromosome IDs | Chromosomes  | Physical positions (bp) | CDC Frontier (Reference genome) | (ILWC46 & LPNB) | NCBI SNPdb Accession IDs |
|----------------------|----------------|--------------|-------------------------|---------------------------------|-----------------|--------------------------|
| SNP_P4_164843_125644 | NW_004516779.1 | Scaffold1626 | 125644                  | GG                              | TT              | 1947015256               |
| SNP_P4_164844_126832 | NW_004516779.1 | Scaffold1626 | 126832                  | TT                              | CC              | 1947015258               |
| SNP_P4_164845_126855 | NW_004516779.1 | Scaffold1626 | 126855                  | AA                              | CC              | 1947015260               |
| SNP_P4_164846_127379 | NW_004516779.1 | Scaffold1626 | 127379                  | GG                              | AA              | 1947015262               |
| SNP_P4_164847_128015 | NW_004516779.1 | Scaffold1626 | 128015                  | AA                              | TT              | 1947015264               |
| SNP_P4_164851_11950  | NW_004516781.1 | Scaffold1630 | 11950                   | TT                              | CC              | 1947015266               |
| SNP_P4_164852_12314  | NW_004516781.1 | Scaffold1630 | 12314                   | CC                              | TT              | 1947015268               |
| SNP_P4_164853_13359  | NW_004516781.1 | Scaffold1630 | 13359                   | AA                              | GG              | 1947015270               |
| SNP_P4_164854_13361  | NW_004516781.1 | Scaffold1630 | 13361                   | AA                              | CC              | 1947015272               |
| SNP_P4_164855_13474  | NW_004516781.1 | Scaffold1630 | 13474                   | TT                              | AA              | 1947015274               |
| SNP_P4_164856_13548  | NW_004516781.1 | Scaffold1630 | 13548                   | AA                              | TT              | 1947015276               |
| SNP_P4_164857_13555  | NW_004516781.1 | Scaffold1630 | 13555                   | GG                              | AA              | 1947015277               |
| SNP_P4_164858_13576  | NW_004516781.1 | Scaffold1630 | 13576                   | GG                              | CC              | 1947015279               |
| SNP_P4_164859_20341  | NW_004516781.1 | Scaffold1630 | 20341                   | CC                              | AA              | 1947015281               |
| SNP_P4_164860_20399  | NW_004516781.1 | Scaffold1630 | 20399                   | GG                              | AA              | 1947015283               |
| SNP_P4_164861_26180  | NW_004516781.1 | Scaffold1630 | 26180                   | AA                              | GG              | 1947015285               |
| SNP_P4_164862_30205  | NW_004516781.1 | Scaffold1630 | 30205                   | AA                              | GG              | 1947015287               |
| SNP_P4_164863_30235  | NW_004516781.1 | Scaffold1630 | 30235                   | AA                              | CC              | 1947015289               |
| SNP_P4_164864_30252  | NW_004516781.1 | Scaffold1630 | 30252                   | AA                              | TT              | 1947015291               |
| SNP_P4_164865_30264  | NW_004516781.1 | Scaffold1630 | 30264                   | CC                              | TT              | 1947015293               |
| SNP_P4_164866_30269  | NW_004516781.1 | Scaffold1630 | 30269                   | TT                              | CC              | 1947015295               |
| SNP_P4_164867_30284  | NW_004516781.1 | Scaffold1630 | 30284                   | GG                              | CC              | 1947015297               |
| SNP_P4_164868_30352  | NW_004516781.1 | Scaffold1630 | 30352                   | AA                              | GG              | 1947015299               |
| SNP_P4_164869_30432  | NW_004516781.1 | Scaffold1630 | 30432                   | AA                              | GG              | 1947015301               |
| SNP_P4_164870_30439  | NW_004516781.1 | Scaffold1630 | 30439                   | CC                              | AA              | 1947015303               |
| SNP_P4_164871_30546  | NW_004516781.1 | Scaffold1630 | 30546                   | TT                              | CC              | 1947015305               |
| SNP_P4_164872_30550  | NW_004516781.1 | Scaffold1630 | 30550                   | AA                              | TT              | 1947015307               |
| SNP_P4_164873_35798  | NW_004516781.1 | Scaffold1630 | 35798                   | TT                              | CC              | 1947015309               |
| SNP_P4_164874_37040  | NW_004516781.1 | Scaffold1630 | 37040                   | GG                              | AA              | 1947015310               |
| SNP_P4_164875_37113  | NW_004516781.1 | Scaffold1630 | 37113                   | CC                              | TT              | 1947015312               |
| SNP_P4_164876_37343  | NW_004516781.1 | Scaffold1630 | 37343                   | GG                              | CC              | 1947015314               |
| SNP_P4_164877_37493  | NW_004516781.1 | Scaffold1630 | 37493                   | AA                              | TT              | 1947015316               |
| SNP_P4_164878_37606  | NW_004516781.1 | Scaffold1630 | 37606                   | TT                              | CC              | 1947015318               |
| SNP_P4_164879_38377  | NW_004516781.1 | Scaffold1630 | 38377                   | TT                              | AA              | 1947015320               |
| SNP_P4_164880_40245  | NW_004516781.1 | Scaffold1630 | 40245                   | AA                              | TT              | 1947015322               |
| SNP_P4_164881_44047  | NW_004516781.1 | Scaffold1630 | 44047                   | GG                              | CC              | 1947015324               |
| SNP_P4_164882_44048  | NW_004516781.1 | Scaffold1630 | 44048                   | TT                              | CC              | 1947015326               |
| SNP_P4_164883_44092  | NW_004516781.1 | Scaffold1630 | 44092                   | AA                              | TT              | 1947015328               |
| SNP_P4_164884_44317  | NW_004516781.1 | Scaffold1630 | 44317                   | CC                              | TT              | 1947015330               |
| SNP_P4_164885_45357  | NW_004516781.1 | Scaffold1630 | 45357                   | TT                              | CC              | 1947015332               |
| SNP_P4_164886_57261  | NW_004516781.1 | Scaffold1630 | 57261                   | CC                              | AA              | 1947015334               |
| SNP_P4_164887_57274  | NW_004516781.1 | Scaffold1630 | 57274                   | GG                              | TT              | 1947015336               |

| SNPs IDs             | Chromosome IDs | Chromosomes  | Physical positions (bp) | CDC Frontier (Reference genome) | (ILWC46 & LPNB) | NCBI SNPdb Accession IDs |
|----------------------|----------------|--------------|-------------------------|---------------------------------|-----------------|--------------------------|
| SNP_P4_164888_57318  | NW_004516781.1 | Scaffold1630 | 57318                   | CC                              | TT              | 1947015338               |
| SNP_P4_164889_57327  | NW_004516781.1 | Scaffold1630 | 57327                   | AA                              | GG              | 1947015340               |
| SNP_P4_164890_81274  | NW_004516781.1 | Scaffold1630 | 81274                   | TT                              | CC              | 1947015342               |
| SNP_P4_164891_91431  | NW_004516781.1 | Scaffold1630 | 91431                   | TT                              | CC              | 1947015344               |
| SNP_P4_164892_91437  | NW_004516781.1 | Scaffold1630 | 91437                   | CC                              | TT              | 1947015346               |
| SNP_P4_164893_91440  | NW_004516781.1 | Scaffold1630 | 91440                   | CC                              | TT              | 1947015348               |
| SNP_P4_164894_91443  | NW_004516781.1 | Scaffold1630 | 91443                   | GG                              | AA              | 1947015350               |
| SNP_P4_164895_91448  | NW_004516781.1 | Scaffold1630 | 91448                   | TT                              | GG              | 1947015352               |
| SNP_P4_164896_93302  | NW_004516781.1 | Scaffold1630 | 93302                   | AA                              | TT              | 1947015354               |
| SNP_P4_164897_93305  | NW_004516781.1 | Scaffold1630 | 93305                   | TT                              | CC              | 1947015356               |
| SNP_P4_164898_93311  | NW_004516781.1 | Scaffold1630 | 93311                   | AA                              | GG              | 1947015358               |
| SNP_P4_164899_93312  | NW_004516781.1 | Scaffold1630 | 93312                   | CC                              | TT              | 1947015360               |
| SNP_P4_164900_96749  | NW_004516781.1 | Scaffold1630 | 96749                   | AA                              | GG              | 1947015362               |
| SNP_P4_164901_96750  | NW_004516781.1 | Scaffold1630 | 96750                   | AA                              | CC              | 1947015364               |
| SNP_P4_164902_96760  | NW_004516781.1 | Scaffold1630 | 96760                   | CC                              | AA              | 1947015366               |
| SNP_P4_164903_104852 | NW_004516781.1 | Scaffold1630 | 104852                  | TT                              | GG              | 1947015368               |
| SNP_P4_164904_106690 | NW_004516781.1 | Scaffold1630 | 106690                  | CC                              | TT              | 1947015370               |
| SNP_P4_164905_106692 | NW_004516781.1 | Scaffold1630 | 106692                  | GG                              | AA              | 1947015372               |
| SNP_P4_164906_106701 | NW_004516781.1 | Scaffold1630 | 106701                  | AA                              | TT              | 1947015374               |
| SNP_P4_164907_106712 | NW_004516781.1 | Scaffold1630 | 106712                  | AA                              | TT              | 1947015376               |
| SNP_P4_164908_106736 | NW_004516781.1 | Scaffold1630 | 106736                  | CC                              | AA              | 1947015378               |
| SNP_P4_164909_106750 | NW_004516781.1 | Scaffold1630 | 106750                  | CC                              | AA              | 1947015380               |
| SNP_P4_164910_106811 | NW_004516781.1 | Scaffold1630 | 106811                  | GG                              | AA              | 1947015382               |
| SNP_P4_164911_106812 | NW_004516781.1 | Scaffold1630 | 106812                  | GG                              | AA              | 1947015384               |
| SNP_P4_164912_106827 | NW_004516781.1 | Scaffold1630 | 106827                  | CC                              | TT              | 1947015386               |
| SNP_P4_164913_106838 | NW_004516781.1 | Scaffold1630 | 106838                  | TT                              | GG              | 1947015388               |
| SNP_P4_164914_106906 | NW_004516781.1 | Scaffold1630 | 106906                  | AA                              | CC              | 1947015390               |
| SNP_P4_164915_107337 | NW_004516781.1 | Scaffold1630 | 107337                  | AA                              | TT              | 1947015392               |
| SNP_P4_164916_107341 | NW_004516781.1 | Scaffold1630 | 107341                  | GG                              | TT              | 1947015394               |
| SNP_P4_164917_107343 | NW_004516781.1 | Scaffold1630 | 107343                  | GG                              | CC              | 1947015396               |
| SNP_P4_164918_107351 | NW_004516781.1 | Scaffold1630 | 107351                  | TT                              | GG              | 1947015398               |
| SNP_P4_164919_107356 | NW_004516781.1 | Scaffold1630 | 107356                  | TT                              | AA              | 1947015400               |
| SNP_P4_164920_107407 | NW_004516781.1 | Scaffold1630 | 107407                  | TT                              | CC              | 1947015402               |
| SNP_P4_164921_107412 | NW_004516781.1 | Scaffold1630 | 107412                  | TT                              | AA              | 1947015404               |
| SNP_P4_164922_107414 | NW_004516781.1 | Scaffold1630 | 107414                  | AA                              | TT              | 1947015406               |
| SNP_P4_164923_107416 | NW_004516781.1 | Scaffold1630 | 107416                  | AA                              | GG              | 1947015408               |
| SNP_P4_164924_107427 | NW_004516781.1 | Scaffold1630 | 107427                  | TT                              | AA              | 1947015410               |
| SNP_P4_164925_107430 | NW_004516781.1 | Scaffold1630 | 107430                  | GG                              | CC              | 1947015412               |
| SNP_P4_164926_107815 | NW_004516781.1 | Scaffold1630 | 107815                  | AA                              | TT              | 1947015414               |
| SNP_P4_164927_109462 | NW_004516781.1 | Scaffold1630 | 109462                  | TT                              | CC              | 1947015416               |
| SNP_P4_164928_109633 | NW_004516781.1 | Scaffold1630 | 109633                  | GG                              | TT              | 1947015418               |
| SNP_P4_164929_109641 | NW_004516781.1 | Scaffold1630 | 109641                  | TT                              | AA              | 1947015420               |

| SNPs IDs             | Chromosome IDs | Chromosomes  | Physical positions (bp) | CDC Frontier (Reference genome) | (ILWC46 & LPNB) | NCBI SNPdb Accession IDs |
|----------------------|----------------|--------------|-------------------------|---------------------------------|-----------------|--------------------------|
| SNP_P4_164930_109672 | NW_004516781.1 | Scaffold1630 | 109672                  | GG                              | CC              | 1947015422               |
| SNP_P4_164931_109947 | NW_004516781.1 | Scaffold1630 | 109947                  | AA                              | GG              | 1947015424               |
| SNP_P4_164932_110346 | NW_004516781.1 | Scaffold1630 | 110346                  | TT                              | AA              | 1947015426               |
| SNP_P4_164933_113259 | NW_004516781.1 | Scaffold1630 | 113259                  | AA                              | GG              | 1947015428               |
| SNP_P4_164934_120895 | NW_004516781.1 | Scaffold1630 | 120895                  | GG                              | AA              | 1947015430               |
| SNP_P4_164935_121027 | NW_004516781.1 | Scaffold1630 | 121027                  | CC                              | GG              | 1947015432               |
| SNP_P4_164936_121099 | NW_004516781.1 | Scaffold1630 | 121099                  | TT                              | CC              | 1947015434               |
| SNP_P4_164937_125959 | NW_004516781.1 | Scaffold1630 | 125959                  | AA                              | GG              | 1947015437               |
| SNP_P4_164938_125980 | NW_004516781.1 | Scaffold1630 | 125980                  | AA                              | CC              | 1947015439               |
| SNP_P4_164939_135140 | NW_004516781.1 | Scaffold1630 | 135140                  | CC                              | TT              | 1947015441               |
| SNP_P4_164940_135187 | NW_004516781.1 | Scaffold1630 | 135187                  | TT                              | AA              | 1947015443               |
| SNP_P4_164941_136355 | NW_004516781.1 | Scaffold1630 | 136355                  | GG                              | TT              | 1947015445               |
| SNP_P4_164942_136763 | NW_004516781.1 | Scaffold1630 | 136763                  | GG                              | CC              | 1947015447               |
| SNP_P4_164943_136771 | NW_004516781.1 | Scaffold1630 | 136771                  | TT                              | CC              | 1947015449               |
| SNP_P4_164944_144455 | NW_004516781.1 | Scaffold1630 | 144455                  | CC                              | TT              | 1947015451               |
| SNP_P4_164945_144579 | NW_004516781.1 | Scaffold1630 | 144579                  | CC                              | AA              | 1947015453               |
| SNP_P4_164946_157534 | NW_004516781.1 | Scaffold1630 | 157534                  | AA                              | GG              | 1947015455               |
| SNP_P4_164947_157568 | NW_004516781.1 | Scaffold1630 | 157568                  | GG                              | TT              | 1947015457               |
| SNP_P4_164948_157904 | NW_004516781.1 | Scaffold1630 | 157904                  | AA                              | CC              | 1947015459               |
| SNP_P4_164949_157936 | NW_004516781.1 | Scaffold1630 | 157936                  | AA                              | TT              | 1947015461               |
| SNP_P4_164950_158055 | NW_004516781.1 | Scaffold1630 | 158055                  | TT                              | AA              | 1947015463               |
| SNP_P4_164951_159093 | NW_004516781.1 | Scaffold1630 | 159093                  | AA                              | GG              | 1947015465               |
| SNP_P4_164952_160115 | NW_004516781.1 | Scaffold1630 | 160115                  | TT                              | GG              | 1947015467               |
| SNP_P4_164953_177737 | NW_004516781.1 | Scaffold1630 | 177737                  | CC                              | TT              | 1947015469               |
| SNP_P4_164954_185746 | NW_004516781.1 | Scaffold1630 | 185746                  | TT                              | CC              | 1947015471               |
| SNP_P4_164955_2219   | NW_004516782.1 | Scaffold1631 | 2219                    | TT                              | AA              | 1947015473               |
| SNP_P4_164957_45334  | NW_004516782.1 | Scaffold1631 | 45334                   | TT                              | CC              | 1947015475               |
| SNP_P4_164958_70433  | NW_004516782.1 | Scaffold1631 | 70433                   | GG                              | TT              | 1947015477               |
| SNP_P4_164959_78685  | NW_004516782.1 | Scaffold1631 | 78685                   | AA                              | TT              | 1947015479               |
| SNP_P4_164960_119627 | NW_004516782.1 | Scaffold1631 | 119627                  | TT                              | GG              | 1947015481               |
| SNP_P4_164961_121146 | NW_004516782.1 | Scaffold1631 | 121146                  | GG                              | AA              | 1947015483               |
| SNP_P4_164962_121159 | NW_004516782.1 | Scaffold1631 | 121159                  | AA                              | CC              | 1947015485               |
| SNP_P4_164963_121342 | NW_004516782.1 | Scaffold1631 | 121342                  | TT                              | CC              | 1947015487               |
| SNP_P4_164964_121402 | NW_004516782.1 | Scaffold1631 | 121402                  | CC                              | TT              | 1947015489               |
| SNP_P4_164965_121469 | NW_004516782.1 | Scaffold1631 | 121469                  | GG                              | TT              | 1947015491               |
| SNP_P4_164966_145362 | NW_004516782.1 | Scaffold1631 | 145362                  | GG                              | AA              | 1947015493               |
| SNP_P4_164967_156802 | NW_004516782.1 | Scaffold1631 | 156802                  | TT                              | CC              | 1947015495               |
| SNP_P4_164968_170074 | NW_004516782.1 | Scaffold1631 | 170074                  | GG                              | AA              | 1947015497               |
| SNP_P4_164969_170292 | NW_004516782.1 | Scaffold1631 | 170292                  | TT                              | CC              | 1947015499               |
| SNP_P4_164970_175754 | NW_004516782.1 | Scaffold1631 | 175754                  | TT                              | CC              | 1947015501               |
| SNP_P4_164971_209129 | NW_004516782.1 | Scaffold1631 | 209129                  | AA                              | GG              | 1947015503               |
| SNP_P4_164972_230258 | NW_004516782.1 | Scaffold1631 | 230258                  | TT                              | CC              | 1947015505               |

| SNPs IDs             | Chromosome IDs | Chromosomes  | Physical positions (bp) | CDC Frontier (Reference genome) | (ILWC46 & LPNB) | NCBI SNPdb Accession IDs |
|----------------------|----------------|--------------|-------------------------|---------------------------------|-----------------|--------------------------|
| SNP_P4_164973_230900 | NW_004516782.1 | Scaffold1631 | 230900                  | TT                              | CC              | 1947015507               |
| SNP_P4_164974_240839 | NW_004516782.1 | Scaffold1631 | 240839                  | TT                              | AA              | 1947015509               |
| SNP_P4_164975_2049   | NW_004516783.1 | Scaffold1632 | 2049                    | TT                              | CC              | 1947015511               |
| SNP_P4_164978_19110  | NW_004516783.1 | Scaffold1632 | 19110                   | AA                              | TT              | 1947015513               |
| SNP_P4_164979_19135  | NW_004516783.1 | Scaffold1632 | 19135                   | AA                              | GG              | 1947015515               |
| SNP_P4_164981_26487  | NW_004516783.1 | Scaffold1632 | 26487                   | TT                              | CC              | 1947015517               |
| SNP_P4_164982_29630  | NW_004516783.1 | Scaffold1632 | 29630                   | AA                              | GG              | 1947015519               |
| SNP_P4_164983_50796  | NW_004516783.1 | Scaffold1632 | 50796                   | GG                              | AA              | 1947015521               |
| SNP_P4_164984_69514  | NW_004516783.1 | Scaffold1632 | 69514                   | TT                              | CC              | 1947015523               |
| SNP_P4_164985_82826  | NW_004516783.1 | Scaffold1632 | 82826                   | AA                              | GG              | 1947015525               |
| SNP_P4_164986_97736  | NW_004516783.1 | Scaffold1632 | 97736                   | TT                              | CC              | 1947015527               |
| SNP_P4_164987_8684   | NW_004516784.1 | Scaffold1633 | 8684                    | TT                              | CC              | 1947015529               |
| SNP_P4_164988_10122  | NW_004516784.1 | Scaffold1633 | 10122                   | TT                              | AA              | 1947015531               |
| SNP_P4_164990_15935  | NW_004516784.1 | Scaffold1633 | 15935                   | CC                              | GG              | 1947015533               |
| SNP_P4_164991_61351  | NW_004516784.1 | Scaffold1633 | 61351                   | CC                              | AA              | 1947015535               |
| SNP_P4_164992_61774  | NW_004516784.1 | Scaffold1633 | 61774                   | GG                              | AA              | 1947015536               |
| SNP_P4_164993_61866  | NW_004516784.1 | Scaffold1633 | 61866                   | GG                              | AA              | 1947015537               |
| SNP_P4_164994_62124  | NW_004516784.1 | Scaffold1633 | 62124                   | AA                              | GG              | 1947015538               |
| SNP_P4_164995_62187  | NW_004516784.1 | Scaffold1633 | 62187                   | TT                              | AA              | 1947015539               |
| SNP_P4_164996_62189  | NW_004516784.1 | Scaffold1633 | 62189                   | TT                              | CC              | 1947015540               |
| SNP_P4_164997_62233  | NW_004516784.1 | Scaffold1633 | 62233                   | TT                              | CC              | 1947015542               |
| SNP_P4_164998_68673  | NW_004516784.1 | Scaffold1633 | 68673                   | AA                              | GG              | 1947015544               |
| SNP_P4_164999_73192  | NW_004516784.1 | Scaffold1633 | 73192                   | GG                              | AA              | 1947015546               |
| SNP_P4_165000_75213  | NW_004516784.1 | Scaffold1633 | 75213                   | AA                              | GG              | 1947015548               |
| SNP_P4_165001_93422  | NW_004516784.1 | Scaffold1633 | 93422                   | TT                              | GG              | 1947015550               |
| SNP_P4_165002_93423  | NW_004516784.1 | Scaffold1633 | 93423                   | AA                              | CC              | 1947015552               |
| SNP_P4_165003_116288 | NW_004516784.1 | Scaffold1633 | 116288                  | CC                              | GG              | 1947015554               |
| SNP_P4_165004_121876 | NW_004516784.1 | Scaffold1633 | 121876                  | TT                              | CC              | 1947015556               |
| SNP_P4_165005_122049 | NW_004516784.1 | Scaffold1633 | 122049                  | CC                              | AA              | 1947015558               |
| SNP_P4_165006_157506 | NW_004516784.1 | Scaffold1633 | 157506                  | CC                              | TT              | 1947015560               |
| SNP_P4_165007_157579 | NW_004516784.1 | Scaffold1633 | 157579                  | AA                              | GG              | 1947015562               |
| SNP_P4_165008_172851 | NW_004516784.1 | Scaffold1633 | 172851                  | TT                              | CC              | 1947015564               |
| SNP_P4_165009_795    | NW_004516785.1 | Scaffold1634 | 795                     | AA                              | GG              | 1947015566               |
| SNP_P4_165010_1259   | NW_004516785.1 | Scaffold1634 | 1259                    | CC                              | TT              | 1947015568               |
| SNP_P4_165011_7572   | NW_004516785.1 | Scaffold1634 | 7572                    | TT                              | CC              | 1947015570               |
| SNP_P4_165012_8585   | NW_004516785.1 | Scaffold1634 | 8585                    | CC                              | AA              | 1947015572               |
| SNP_P4_165013_9495   | NW_004516785.1 | Scaffold1634 | 9495                    | AA                              | TT              | 1947015574               |
| SNP_P4_165014_10302  | NW_004516785.1 | Scaffold1634 | 10302                   | AA                              | CC              | 1947015576               |
| SNP_P4_165015_10521  | NW_004516785.1 | Scaffold1634 | 10521                   | TT                              | GG              | 1947015579               |
| SNP_P4_165016_15447  | NW_004516785.1 | Scaffold1634 | 15447                   | TT                              | CC              | 1947015581               |
| SNP_P4_165017_18780  | NW_004516785.1 | Scaffold1634 | 18780                   | TT                              | CC              | 1947015583               |
| SNP_P4_165018_18994  | NW_004516785.1 | Scaffold1634 | 18994                   | CC                              | TT              | 1947015585               |



| SNPs IDs             | Chromosome IDs | Chromosomes  | Physical positions (bp) | CDC Frontier (Reference genome) | (ILWC46 & LPNB) | NCBI SNPdb Accession IDs |
|----------------------|----------------|--------------|-------------------------|---------------------------------|-----------------|--------------------------|
| SNP_P4_165019_19020  | NW_004516785.1 | Scaffold1634 | 19020                   | CC                              | TT              | 1947015587               |
| SNP_P4_165021_20803  | NW_004516785.1 | Scaffold1634 | 20803                   | GG                              | TT              | 1947015589               |
| SNP_P4_165022_20967  | NW_004516785.1 | Scaffold1634 | 20967                   | CC                              | TT              | 1947015591               |
| SNP_P4_165023_22002  | NW_004516785.1 | Scaffold1634 | 22002                   | GG                              | CC              | 1947015593               |
| SNP_P4_165024_23557  | NW_004516785.1 | Scaffold1634 | 23557                   | CC                              | TT              | 1947015595               |
| SNP_P4_165025_34500  | NW_004516785.1 | Scaffold1634 | 34500                   | GG                              | CC              | 1947015597               |
| SNP_P4_165026_34903  | NW_004516785.1 | Scaffold1634 | 34903                   | GG                              | AA              | 1947015599               |
| SNP_P4_165027_8512   | NW_004516786.1 | Scaffold1635 | 8512                    | AA                              | CC              | 1947015601               |
| SNP_P4_165028_20312  | NW_004516786.1 | Scaffold1635 | 20312                   | TT                              | CC              | 1947015603               |
| SNP_P4_165029_47685  | NW_004516786.1 | Scaffold1635 | 47685                   | CC                              | AA              | 1947015605               |
| SNP_P4_165030_67687  | NW_004516786.1 | Scaffold1635 | 67687                   | CC                              | TT              | 1947015608               |
| SNP_P4_165031_71853  | NW_004516786.1 | Scaffold1635 | 71853                   | GG                              | TT              | 1947015610               |
| SNP_P4_165032_72076  | NW_004516786.1 | Scaffold1635 | 72076                   | AA                              | GG              | 1947015612               |
| SNP_P4_165033_72086  | NW_004516786.1 | Scaffold1635 | 72086                   | AA                              | TT              | 1947015614               |
| SNP_P4_165034_72471  | NW_004516786.1 | Scaffold1635 | 72471                   | CC                              | TT              | 1947015616               |
| SNP_P4_165035_74104  | NW_004516786.1 | Scaffold1635 | 74104                   | GG                              | AA              | 1947015618               |
| SNP_P4_165037_74294  | NW_004516786.1 | Scaffold1635 | 74294                   | AA                              | CC              | 1947015620               |
| SNP_P4_165038_74816  | NW_004516786.1 | Scaffold1635 | 74816                   | TT                              | CC              | 1947015622               |
| SNP_P4_165039_75133  | NW_004516786.1 | Scaffold1635 | 75133                   | TT                              | CC              | 1947015624               |
| SNP_P4_165040_75222  | NW_004516786.1 | Scaffold1635 | 75222                   | CC                              | TT              | 1947015626               |
| SNP_P4_165041_75548  | NW_004516786.1 | Scaffold1635 | 75548                   | CC                              | TT              | 1947015628               |
| SNP_P4_165042_75730  | NW_004516786.1 | Scaffold1635 | 75730                   | GG                              | TT              | 1947015630               |
| SNP_P4_165043_97976  | NW_004516786.1 | Scaffold1635 | 97976                   | GG                              | AA              | 1947015632               |
| SNP_P4_165044_98041  | NW_004516786.1 | Scaffold1635 | 98041                   | CC                              | TT              | 1947015634               |
| SNP_P4_165045_98042  | NW_004516786.1 | Scaffold1635 | 98042                   | AA                              | TT              | 1947015636               |
| SNP_P4_165046_98321  | NW_004516786.1 | Scaffold1635 | 98321                   | GG                              | AA              | 1947015638               |
| SNP_P4_165047_99050  | NW_004516786.1 | Scaffold1635 | 99050                   | GG                              | AA              | 1947015640               |
| SNP_P4_165048_105304 | NW_004516786.1 | Scaffold1635 | 105304                  | GG                              | AA              | 1947015643               |
| SNP_P4_165049_131096 | NW_004516786.1 | Scaffold1635 | 131096                  | AA                              | CC              | 1947015645               |
| SNP_P4_165050_131484 | NW_004516786.1 | Scaffold1635 | 131484                  | GG                              | AA              | 1947015647               |
| SNP_P4_165051_131494 | NW_004516786.1 | Scaffold1635 | 131494                  | AA                              | TT              | 1947015649               |
| SNP_P4_165052_131496 | NW_004516786.1 | Scaffold1635 | 131496                  | GG                              | CC              | 1947015651               |
| SNP_P4_165053_131503 | NW_004516786.1 | Scaffold1635 | 131503                  | TT                              | AA              | 1947015653               |
| SNP_P4_165054_131509 | NW_004516786.1 | Scaffold1635 | 131509                  | CC                              | TT              | 1947015655               |
| SNP_P4_165055_131514 | NW_004516786.1 | Scaffold1635 | 131514                  | GG                              | TT              | 1947015657               |
| SNP_P4_165056_131543 | NW_004516786.1 | Scaffold1635 | 131543                  | AA                              | TT              | 1947015659               |
| SNP_P4_165057_131560 | NW_004516786.1 | Scaffold1635 | 131560                  | CC                              | GG              | 1947015661               |
| SNP_P4_165058_131571 | NW_004516786.1 | Scaffold1635 | 131571                  | TT                              | CC              | 1947015663               |
| SNP_P4_165059_131590 | NW_004516786.1 | Scaffold1635 | 131590                  | AA                              | CC              | 1947015665               |
| SNP_P4_165060_131627 | NW_004516786.1 | Scaffold1635 | 131627                  | TT                              | CC              | 1947015667               |
| SNP_P4_165061_131629 | NW_004516786.1 | Scaffold1635 | 131629                  | GG                              | TT              | 1947015669               |
| SNP_P4_165062_131691 | NW_004516786.1 | Scaffold1635 | 131691                  | TT                              | AA              | 1947015671               |

| SNPs IDs             | Chromosome IDs | Chromosomes  | Physical positions (bp) | CDC Frontier (Reference genome) | (ILWC46 & LPNB) | NCBI SNPdb Accession IDs |
|----------------------|----------------|--------------|-------------------------|---------------------------------|-----------------|--------------------------|
| SNP_P4_165063_131703 | NW_004516786.1 | Scaffold1635 | 131703                  | TT                              | CC              | 1947015673               |
| SNP_P4_165064_131710 | NW_004516786.1 | Scaffold1635 | 131710                  | AA                              | CC              | 1947015675               |
| SNP_P4_165065_131760 | NW_004516786.1 | Scaffold1635 | 131760                  | AA                              | CC              | 1947015677               |
| SNP_P4_165066_131782 | NW_004516786.1 | Scaffold1635 | 131782                  | GG                              | CC              | 1947015679               |
| SNP_P4_165067_133236 | NW_004516786.1 | Scaffold1635 | 133236                  | TT                              | AA              | 1947015681               |
| SNP_P4_165068_133237 | NW_004516786.1 | Scaffold1635 | 133237                  | CC                              | AA              | 1947015683               |
| SNP_P4_165069_133239 | NW_004516786.1 | Scaffold1635 | 133239                  | CC                              | AA              | 1947015685               |
| SNP_P4_165070_133247 | NW_004516786.1 | Scaffold1635 | 133247                  | CC                              | TT              | 1947015687               |
| SNP_P4_165071_133264 | NW_004516786.1 | Scaffold1635 | 133264                  | GG                              | TT              | 1947015689               |
| SNP_P4_165072_134104 | NW_004516786.1 | Scaffold1635 | 134104                  | AA                              | CC              | 1947015691               |
| SNP_P4_165073_147386 | NW_004516786.1 | Scaffold1635 | 147386                  | AA                              | CC              | 1947015693               |
| SNP_P4_165074_81     | NW_004516787.1 | Scaffold1637 | 81                      | CC                              | TT              | 1947015695               |
| SNP_P4_165075_1243   | NW_004516787.1 | Scaffold1637 | 1243                    | AA                              | GG              | 1947015697               |
| SNP_P4_165076_723    | NW_004516788.1 | Scaffold1638 | 723                     | AA                              | CC              | 1947015699               |
| SNP_P4_165077_9915   | NW_004516788.1 | Scaffold1638 | 9915                    | AA                              | TT              | 1947015701               |
| SNP_P4_165078_9916   | NW_004516788.1 | Scaffold1638 | 9916                    | TT                              | AA              | 1947015704               |
| SNP_P4_165079_10235  | NW_004516788.1 | Scaffold1638 | 10235                   | AA                              | GG              | 1947015706               |
| SNP_P4_165080_12130  | NW_004516788.1 | Scaffold1638 | 12130                   | CC                              | TT              | 1947015708               |
| SNP_P4_165082_24105  | NW_004516788.1 | Scaffold1638 | 24105                   | GG                              | AA              | 1947015710               |
| SNP_P4_165083_24168  | NW_004516788.1 | Scaffold1638 | 24168                   | TT                              | CC              | 1947015712               |
| SNP_P4_165084_24210  | NW_004516788.1 | Scaffold1638 | 24210                   | GG                              | AA              | 1947015714               |
| SNP_P4_165085_32356  | NW_004516788.1 | Scaffold1638 | 32356                   | CC                              | TT              | 1947015716               |
| SNP_P4_165086_46227  | NW_004516788.1 | Scaffold1638 | 46227                   | GG                              | TT              | 1947015718               |
| SNP_P4_165087_46259  | NW_004516788.1 | Scaffold1638 | 46259                   | AA                              | GG              | 1947015720               |
| SNP_P4_165088_54437  | NW_004516788.1 | Scaffold1638 | 54437                   | GG                              | CC              | 1947015722               |
| SNP_P4_165089_54441  | NW_004516788.1 | Scaffold1638 | 54441                   | GG                              | TT              | 1947015724               |
| SNP_P4_165090_54485  | NW_004516788.1 | Scaffold1638 | 54485                   | CC                              | TT              | 1947015726               |
| SNP_P4_165091_54643  | NW_004516788.1 | Scaffold1638 | 54643                   | CC                              | TT              | 1947015728               |
| SNP_P4_165092_54648  | NW_004516788.1 | Scaffold1638 | 54648                   | AA                              | GG              | 1947015730               |
| SNP_P4_165093_54747  | NW_004516788.1 | Scaffold1638 | 54747                   | AA                              | GG              | 1947015732               |
| SNP_P4_165094_54757  | NW_004516788.1 | Scaffold1638 | 54757                   | TT                              | CC              | 1947015734               |
| SNP_P4_165095_54802  | NW_004516788.1 | Scaffold1638 | 54802                   | AA                              | GG              | 1947015736               |
| SNP_P4_165096_54852  | NW_004516788.1 | Scaffold1638 | 54852                   | TT                              | AA              | 1947015738               |
| SNP_P4_165097_54897  | NW_004516788.1 | Scaffold1638 | 54897                   | TT                              | CC              | 1947015740               |
| SNP_P4_165098_54937  | NW_004516788.1 | Scaffold1638 | 54937                   | TT                              | CC              | 1947015742               |
| SNP_P4_165099_54951  | NW_004516788.1 | Scaffold1638 | 54951                   | AA                              | TT              | 1947015744               |
| SNP_P4_165100_68653  | NW_004516788.1 | Scaffold1638 | 68653                   | CC                              | GG              | 1947015746               |
| SNP_P4_165101_72075  | NW_004516788.1 | Scaffold1638 | 72075                   | GG                              | TT              | 1947015748               |
| SNP_P4_165103_87383  | NW_004516788.1 | Scaffold1638 | 87383                   | CC                              | AA              | 1947015750               |
| SNP_P4_165104_88956  | NW_004516788.1 | Scaffold1638 | 88956                   | GG                              | TT              | 1947015752               |
| SNP_P4_165106_1483   | NW_004516792.1 | Scaffold1643 | 1483                    | TT                              | CC              | 1947015754               |
| SNP_P4_165107_1509   | NW_004516792.1 | Scaffold1643 | 1509                    | CC                              | TT              | 1947015756               |

| SNPs IDs             | Chromosome IDs | Chromosomes  | Physical positions (bp) | CDC Frontier (Reference genome) | (ILWC46 & LPNB) | NCBI SNPdb Accession IDs |
|----------------------|----------------|--------------|-------------------------|---------------------------------|-----------------|--------------------------|
| SNP_P4_165108_1606   | NW_004516792.1 | Scaffold1643 | 1606                    | GG                              | AA              | 1947015758               |
| SNP_P4_165109_4719   | NW_004516792.1 | Scaffold1643 | 4719                    | AA                              | GG              | 1947015760               |
| SNP_P4_165111_5412   | NW_004516792.1 | Scaffold1643 | 5412                    | CC                              | TT              | 1947015762               |
| SNP_P4_165112_5442   | NW_004516792.1 | Scaffold1643 | 5442                    | AA                              | GG              | 1947015765               |
| SNP_P4_165113_7499   | NW_004516792.1 | Scaffold1643 | 7499                    | TT                              | CC              | 1947015767               |
| SNP_P4_165114_8475   | NW_004516792.1 | Scaffold1643 | 8475                    | AA                              | TT              | 1947015769               |
| SNP_P4_165115_8757   | NW_004516792.1 | Scaffold1643 | 8757                    | AA                              | GG              | 1947015771               |
| SNP_P4_165116_8970   | NW_004516792.1 | Scaffold1643 | 8970                    | CC                              | TT              | 1947015773               |
| SNP_P4_165117_13124  | NW_004516792.1 | Scaffold1643 | 13124                   | AA                              | GG              | 1947015775               |
| SNP_P4_165118_15601  | NW_004516792.1 | Scaffold1643 | 15601                   | TT                              | CC              | 1947015777               |
| SNP_P4_165119_15634  | NW_004516792.1 | Scaffold1643 | 15634                   | AA                              | GG              | 1947015779               |
| SNP_P4_165120_15642  | NW_004516792.1 | Scaffold1643 | 15642                   | TT                              | AA              | 1947015781               |
| SNP_P4_165121_15648  | NW_004516792.1 | Scaffold1643 | 15648                   | AA                              | CC              | 1947015783               |
| SNP_P4_165122_15675  | NW_004516792.1 | Scaffold1643 | 15675                   | AA                              | TT              | 1947015785               |
| SNP_P4_165123_15680  | NW_004516792.1 | Scaffold1643 | 15680                   | GG                              | AA              | 1947015787               |
| SNP_P4_165124_15827  | NW_004516792.1 | Scaffold1643 | 15827                   | GG                              | CC              | 1947015789               |
| SNP_P4_165125_15839  | NW_004516792.1 | Scaffold1643 | 15839                   | AA                              | TT              | 1947015791               |
| SNP_P4_165126_15845  | NW_004516792.1 | Scaffold1643 | 15845                   | CC                              | TT              | 1947015793               |
| SNP_P4_165128_16479  | NW_004516792.1 | Scaffold1643 | 16479                   | AA                              | TT              | 1947015795               |
| SNP_P4_165129_16552  | NW_004516792.1 | Scaffold1643 | 16552                   | TT                              | AA              | 1947015797               |
| SNP_P4_165130_16558  | NW_004516792.1 | Scaffold1643 | 16558                   | AA                              | TT              | 1947015799               |
| SNP_P4_165131_16560  | NW_004516792.1 | Scaffold1643 | 16560                   | AA                              | TT              | 1947015801               |
| SNP_P4_165132_19793  | NW_004516792.1 | Scaffold1643 | 19793                   | GG                              | CC              | 1947015803               |
| SNP_P4_165133_19794  | NW_004516792.1 | Scaffold1643 | 19794                   | TT                              | GG              | 1947015805               |
| SNP_P4_165134_19806  | NW_004516792.1 | Scaffold1643 | 19806                   | GG                              | AA              | 1947015807               |
| SNP_P4_165135_31922  | NW_004516792.1 | Scaffold1643 | 31922                   | CC                              | GG              | 1947015809               |
| SNP_P4_165137_120761 | NW_004516792.1 | Scaffold1643 | 120761                  | CC                              | TT              | 1947015811               |
| SNP_P4_165138_128571 | NW_004516792.1 | Scaffold1643 | 128571                  | CC                              | TT              | 1947015813               |
| SNP_P4_165139_131216 | NW_004516792.1 | Scaffold1643 | 131216                  | TT                              | CC              | 1947015815               |
| SNP_P4_165140_156117 | NW_004516792.1 | Scaffold1643 | 156117                  | TT                              | CC              | 1947015817               |
| SNP_P4_165142_156426 | NW_004516792.1 | Scaffold1643 | 156426                  | CC                              | AA              | 1947015819               |
| SNP_P4_165143_156427 | NW_004516792.1 | Scaffold1643 | 156427                  | AA                              | GG              | 1947015821               |
| SNP_P4_165144_156431 | NW_004516792.1 | Scaffold1643 | 156431                  | AA                              | CC              | 1947015823               |
| SNP_P4_165145_156762 | NW_004516792.1 | Scaffold1643 | 156762                  | TT                              | CC              | 1947015825               |
| SNP_P4_165146_156799 | NW_004516792.1 | Scaffold1643 | 156799                  | GG                              | CC              | 1947015827               |
| SNP_P4_165147_159471 | NW_004516792.1 | Scaffold1643 | 159471                  | GG                              | TT              | 1947015829               |
| SNP_P4_165148_159475 | NW_004516792.1 | Scaffold1643 | 159475                  | GG                              | AA              | 1947015831               |
| SNP_P4_165149_159512 | NW_004516792.1 | Scaffold1643 | 159512                  | GG                              | AA              | 1947015833               |
| SNP_P4_165150_159531 | NW_004516792.1 | Scaffold1643 | 159531                  | CC                              | TT              | 1947015835               |
| SNP_P4_165151_159563 | NW_004516792.1 | Scaffold1643 | 159563                  | TT                              | AA              | 1947015837               |
| SNP_P4_165152_159819 | NW_004516792.1 | Scaffold1643 | 159819                  | AA                              | CC              | 1947015839               |
| SNP_P4_165153_159821 | NW_004516792.1 | Scaffold1643 | 159821                  | CC                              | TT              | 1947015841               |

| SNPs IDs             | Chromosome IDs | Chromosomes  | Physical positions (bp) | CDC Frontier (Reference genome) | (ILWC46 & LPNB) | NCBI SNPdb Accession IDs |
|----------------------|----------------|--------------|-------------------------|---------------------------------|-----------------|--------------------------|
| SNP_P4_165154_161327 | NW_004516792.1 | Scaffold1643 | 161327                  | GG                              | AA              | 1947015843               |
| SNP_P4_165156_163893 | NW_004516792.1 | Scaffold1643 | 163893                  | GG                              | AA              | 1947015845               |
| SNP_P4_165157_164110 | NW_004516792.1 | Scaffold1643 | 164110                  | AA                              | GG              | 1947015847               |
| SNP_P4_165158_164130 | NW_004516792.1 | Scaffold1643 | 164130                  | AA                              | CC              | 1947015849               |
| SNP_P4_165159_164185 | NW_004516792.1 | Scaffold1643 | 164185                  | GG                              | AA              | 1947015851               |
| SNP_P4_165160_164188 | NW_004516792.1 | Scaffold1643 | 164188                  | CC                              | TT              | 1947015853               |
| SNP_P4_165161_164566 | NW_004516792.1 | Scaffold1643 | 164566                  | GG                              | AA              | 1947015855               |
| SNP_P4_165162_164736 | NW_004516792.1 | Scaffold1643 | 164736                  | TT                              | CC              | 1947015857               |
| SNP_P4_165163_164812 | NW_004516792.1 | Scaffold1643 | 164812                  | CC                              | TT              | 1947015859               |
| SNP_P4_165164_165289 | NW_004516792.1 | Scaffold1643 | 165289                  | CC                              | TT              | 1947015861               |
| SNP_P4_165165_165308 | NW_004516792.1 | Scaffold1643 | 165308                  | CC                              | TT              | 1947015863               |
| SNP_P4_165166_165562 | NW_004516792.1 | Scaffold1643 | 165562                  | GG                              | AA              | 1947015865               |
| SNP_P4_165167_166370 | NW_004516792.1 | Scaffold1643 | 166370                  | GG                              | AA              | 1947015867               |
| SNP_P4_165168_166480 | NW_004516792.1 | Scaffold1643 | 166480                  | CC                              | GG              | 1947015869               |
| SNP_P4_165169_166536 | NW_004516792.1 | Scaffold1643 | 166536                  | AA                              | CC              | 1947015871               |
| SNP_P4_165170_166695 | NW_004516792.1 | Scaffold1643 | 166695                  | AA                              | CC              | 1947015873               |
| SNP_P4_165173_166961 | NW_004516792.1 | Scaffold1643 | 166961                  | TT                              | AA              | 1947015875               |
| SNP_P4_165174_166984 | NW_004516792.1 | Scaffold1643 | 166984                  | AA                              | TT              | 1947015877               |
| SNP_P4_165175_167002 | NW_004516792.1 | Scaffold1643 | 167002                  | AA                              | CC              | 1947015879               |
| SNP_P4_165176_167116 | NW_004516792.1 | Scaffold1643 | 167116                  | GG                              | AA              | 1947015881               |
| SNP_P4_165177_167336 | NW_004516792.1 | Scaffold1643 | 167336                  | TT                              | CC              | 1947015883               |
| SNP_P4_165178_167347 | NW_004516792.1 | Scaffold1643 | 167347                  | GG                              | AA              | 1947015885               |
| SNP_P4_165179_167375 | NW_004516792.1 | Scaffold1643 | 167375                  | AA                              | GG              | 1947015887               |
| SNP_P4_165180_167395 | NW_004516792.1 | Scaffold1643 | 167395                  | AA                              | GG              | 1947015889               |
| SNP_P4_165181_167419 | NW_004516792.1 | Scaffold1643 | 167419                  | TT                              | CC              | 1947015891               |
| SNP_P4_165183_167454 | NW_004516792.1 | Scaffold1643 | 167454                  | CC                              | AA              | 1947015893               |
| SNP_P4_165184_167478 | NW_004516792.1 | Scaffold1643 | 167478                  | GG                              | AA              | 1947015895               |
| SNP_P4_165185_167511 | NW_004516792.1 | Scaffold1643 | 167511                  | CC                              | TT              | 1947015897               |
| SNP_P4_165186_167548 | NW_004516792.1 | Scaffold1643 | 167548                  | AA                              | GG              | 1947015899               |
| SNP_P4_165187_167549 | NW_004516792.1 | Scaffold1643 | 167549                  | CC                              | TT              | 1947015901               |
| SNP_P4_165188_167550 | NW_004516792.1 | Scaffold1643 | 167550                  | GG                              | AA              | 1947015903               |
| SNP_P4_165189_167584 | NW_004516792.1 | Scaffold1643 | 167584                  | CC                              | AA              | 1947015905               |
| SNP_P4_165190_167638 | NW_004516792.1 | Scaffold1643 | 167638                  | TT                              | AA              | 1947015907               |
| SNP_P4_165191_167656 | NW_004516792.1 | Scaffold1643 | 167656                  | GG                              | AA              | 1947015909               |
| SNP_P4_165192_167659 | NW_004516792.1 | Scaffold1643 | 167659                  | GG                              | AA              | 1947015911               |
| SNP_P4_165193_167766 | NW_004516792.1 | Scaffold1643 | 167766                  | TT                              | AA              | 1947015912               |
| SNP_P4_165195_169482 | NW_004516792.1 | Scaffold1643 | 169482                  | GG                              | AA              | 1947015913               |
| SNP_P4_165196_169501 | NW_004516792.1 | Scaffold1643 | 169501                  | GG                              | TT              | 1947015914               |
| SNP_P4_165197_169558 | NW_004516792.1 | Scaffold1643 | 169558                  | CC                              | TT              | 1947015915               |
| SNP_P4_165198_170473 | NW_004516792.1 | Scaffold1643 | 170473                  | TT                              | AA              | 1947015916               |
| SNP_P4_165199_170474 | NW_004516792.1 | Scaffold1643 | 170474                  | TT                              | AA              | 1947015917               |
| SNP_P4_165200_170986 | NW_004516792.1 | Scaffold1643 | 170986                  | CC                              | TT              | 1947015918               |

| SNPs IDs             | Chromosome IDs | Chromosomes  | Physical positions (bp) | CDC Frontier (Reference genome) | (ILWC46 & LPNB) | NCBI SNPdb Accession IDs |
|----------------------|----------------|--------------|-------------------------|---------------------------------|-----------------|--------------------------|
| SNP_P4_165202_171449 | NW_004516792.1 | Scaffold1643 | 171449                  | AA                              | CC              | 1947015919               |
| SNP_P4_165203_171461 | NW_004516792.1 | Scaffold1643 | 171461                  | AA                              | GG              | 1947015920               |
| SNP_P4_165205_171701 | NW_004516792.1 | Scaffold1643 | 171701                  | TT                              | CC              | 1947015921               |
| SNP_P4_165206_171703 | NW_004516792.1 | Scaffold1643 | 171703                  | CC                              | TT              | 1947015922               |
| SNP_P4_165208_171864 | NW_004516792.1 | Scaffold1643 | 171864                  | CC                              | TT              | 1947015923               |
| SNP_P4_165209_171915 | NW_004516792.1 | Scaffold1643 | 171915                  | CC                              | TT              | 1947015924               |
| SNP_P4_165210_172001 | NW_004516792.1 | Scaffold1643 | 172001                  | TT                              | AA              | 1947015926               |
| SNP_P4_165211_172037 | NW_004516792.1 | Scaffold1643 | 172037                  | CC                              | TT              | 1947015928               |
| SNP_P4_165212_172294 | NW_004516792.1 | Scaffold1643 | 172294                  | CC                              | AA              | 1947015930               |
| SNP_P4_165213_180898 | NW_004516792.1 | Scaffold1643 | 180898                  | CC                              | TT              | 1947015932               |
| SNP_P4_165214_180916 | NW_004516792.1 | Scaffold1643 | 180916                  | TT                              | CC              | 1947015934               |
| SNP_P4_165215_180924 | NW_004516792.1 | Scaffold1643 | 180924                  | TT                              | CC              | 1947015936               |
| SNP_P4_165217_181071 | NW_004516792.1 | Scaffold1643 | 181071                  | GG                              | CC              | 1947015938               |
| SNP_P4_165218_181130 | NW_004516792.1 | Scaffold1643 | 181130                  | TT                              | GG              | 1947015940               |
| SNP_P4_165219_181151 | NW_004516792.1 | Scaffold1643 | 181151                  | AA                              | CC              | 1947015942               |
| SNP_P4_165220_181164 | NW_004516792.1 | Scaffold1643 | 181164                  | GG                              | AA              | 1947015944               |
| SNP_P4_165221_181333 | NW_004516792.1 | Scaffold1643 | 181333                  | TT                              | GG              | 1947015946               |
| SNP_P4_165222_181385 | NW_004516792.1 | Scaffold1643 | 181385                  | GG                              | AA              | 1947015948               |
| SNP_P4_165223_181447 | NW_004516792.1 | Scaffold1643 | 181447                  | CC                              | TT              | 1947015950               |
| SNP_P4_165224_181492 | NW_004516792.1 | Scaffold1643 | 181492                  | GG                              | TT              | 1947015952               |
| SNP_P4_165225_183152 | NW_004516792.1 | Scaffold1643 | 183152                  | TT                              | CC              | 1947015954               |
| SNP_P4_165226_183220 | NW_004516792.1 | Scaffold1643 | 183220                  | AA                              | CC              | 1947015956               |
| SNP_P4_165227_183228 | NW_004516792.1 | Scaffold1643 | 183228                  | AA                              | GG              | 1947015958               |
| SNP_P4_165228_183302 | NW_004516792.1 | Scaffold1643 | 183302                  | GG                              | AA              | 1947015960               |
| SNP_P4_165229_183362 | NW_004516792.1 | Scaffold1643 | 183362                  | TT                              | CC              | 1947015962               |
| SNP_P4_165230_183382 | NW_004516792.1 | Scaffold1643 | 183382                  | TT                              | CC              | 1947015964               |
| SNP_P4_165231_184186 | NW_004516792.1 | Scaffold1643 | 184186                  | TT                              | AA              | 1947015966               |
| SNP_P4_165232_187243 | NW_004516792.1 | Scaffold1643 | 187243                  | GG                              | CC              | 1947015968               |
| SNP_P4_165233_187280 | NW_004516792.1 | Scaffold1643 | 187280                  | TT                              | CC              | 1947015970               |
| SNP_P4_165234_187337 | NW_004516792.1 | Scaffold1643 | 187337                  | AA                              | TT              | 1947015972               |
| SNP_P4_165235_187405 | NW_004516792.1 | Scaffold1643 | 187405                  | CC                              | TT              | 1947015974               |
| SNP_P4_165236_187437 | NW_004516792.1 | Scaffold1643 | 187437                  | CC                              | TT              | 1947015976               |
| SNP_P4_165237_187499 | NW_004516792.1 | Scaffold1643 | 187499                  | AA                              | TT              | 1947015978               |
| SNP_P4_165238_187500 | NW_004516792.1 | Scaffold1643 | 187500                  | AA                              | GG              | 1947015980               |
| SNP_P4_165239_187786 | NW_004516792.1 | Scaffold1643 | 187786                  | AA                              | CC              | 1947015982               |
| SNP_P4_165240_189083 | NW_004516792.1 | Scaffold1643 | 189083                  | GG                              | AA              | 1947015984               |
| SNP_P4_165241_189207 | NW_004516792.1 | Scaffold1643 | 189207                  | CC                              | GG              | 1947015986               |
| SNP_P4_165242_189310 | NW_004516792.1 | Scaffold1643 | 189310                  | GG                              | TT              | 1947015988               |
| SNP_P4_165243_189320 | NW_004516792.1 | Scaffold1643 | 189320                  | GG                              | CC              | 1947015990               |
| SNP_P4_165244_189698 | NW_004516792.1 | Scaffold1643 | 189698                  | TT                              | AA              | 1947015992               |
| SNP_P4_165245_189978 | NW_004516792.1 | Scaffold1643 | 189978                  | CC                              | AA              | 1947015994               |
| SNP_P4_165246_190007 | NW_004516792.1 | Scaffold1643 | 190007                  | AA                              | GG              | 1947015996               |

| SNPs IDs             | Chromosome IDs | Chromosomes  | Physical positions (bp) | CDC Frontier (Reference genome) | (ILWC46 & LPNB) | NCBI SNPdb Accession IDs |
|----------------------|----------------|--------------|-------------------------|---------------------------------|-----------------|--------------------------|
| SNP_P4_165247_190030 | NW_004516792.1 | Scaffold1643 | 190030                  | CC                              | GG              | 1947015998               |
| SNP_P4_165248_190075 | NW_004516792.1 | Scaffold1643 | 190075                  | GG                              | AA              | 1947016000               |
| SNP_P4_165249_190330 | NW_004516792.1 | Scaffold1643 | 190330                  | GG                              | AA              | 1947016002               |
| SNP_P4_165250_190413 | NW_004516792.1 | Scaffold1643 | 190413                  | AA                              | CC              | 1947016004               |
| SNP_P4_165251_190520 | NW_004516792.1 | Scaffold1643 | 190520                  | AA                              | TT              | 1947016006               |
| SNP_P4_165252_190537 | NW_004516792.1 | Scaffold1643 | 190537                  | AA                              | CC              | 1947016008               |
| SNP_P4_165253_190539 | NW_004516792.1 | Scaffold1643 | 190539                  | GG                              | AA              | 1947016010               |
| SNP_P4_165254_190596 | NW_004516792.1 | Scaffold1643 | 190596                  | AA                              | CC              | 1947016012               |
| SNP_P4_165255_190655 | NW_004516792.1 | Scaffold1643 | 190655                  | AA                              | GG              | 1947016014               |
| SNP_P4_165256_190743 | NW_004516792.1 | Scaffold1643 | 190743                  | TT                              | AA              | 1947016016               |
| SNP_P4_165258_192934 | NW_004516792.1 | Scaffold1643 | 192934                  | GG                              | AA              | 1947016018               |
| SNP_P4_165259_192935 | NW_004516792.1 | Scaffold1643 | 192935                  | TT                              | CC              | 1947016020               |
| SNP_P4_165260_192975 | NW_004516792.1 | Scaffold1643 | 192975                  | CC                              | TT              | 1947016022               |
| SNP_P4_165261_192978 | NW_004516792.1 | Scaffold1643 | 192978                  | TT                              | CC              | 1947016024               |
| SNP_P4_165263_193108 | NW_004516792.1 | Scaffold1643 | 193108                  | GG                              | AA              | 1947016026               |
| SNP_P4_165264_193186 | NW_004516792.1 | Scaffold1643 | 193186                  | AA                              | TT              | 1947016028               |
| SNP_P4_165265_193189 | NW_004516792.1 | Scaffold1643 | 193189                  | CC                              | AA              | 1947016030               |
| SNP_P4_165266_193193 | NW_004516792.1 | Scaffold1643 | 193193                  | CC                              | AA              | 1947016032               |
| SNP_P4_165267_193211 | NW_004516792.1 | Scaffold1643 | 193211                  | CC                              | TT              | 1947016034               |
| SNP_P4_165268_193219 | NW_004516792.1 | Scaffold1643 | 193219                  | GG                              | CC              | 1947016036               |
| SNP_P4_165269_193220 | NW_004516792.1 | Scaffold1643 | 193220                  | AA                              | CC              | 1947016038               |
| SNP_P4_165270_193256 | NW_004516792.1 | Scaffold1643 | 193256                  | AA                              | GG              | 1947016040               |
| SNP_P4_165271_193308 | NW_004516792.1 | Scaffold1643 | 193308                  | CC                              | TT              | 1947016042               |
| SNP_P4_165272_193619 | NW_004516792.1 | Scaffold1643 | 193619                  | AA                              | TT              | 1947016044               |
| SNP_P4_165273_201063 | NW_004516792.1 | Scaffold1643 | 201063                  | GG                              | AA              | 1947016046               |
| SNP_P4_165274_201132 | NW_004516792.1 | Scaffold1643 | 201132                  | TT                              | AA              | 1947016048               |
| SNP_P4_165275_201177 | NW_004516792.1 | Scaffold1643 | 201177                  | AA                              | GG              | 1947016050               |
| SNP_P4_165276_201237 | NW_004516792.1 | Scaffold1643 | 201237                  | GG                              | AA              | 1947016052               |
| SNP_P4_165277_201238 | NW_004516792.1 | Scaffold1643 | 201238                  | CC                              | TT              | 1947016054               |
| SNP_P4_165278_201254 | NW_004516792.1 | Scaffold1643 | 201254                  | GG                              | AA              | 1947016056               |
| SNP_P4_165279_201264 | NW_004516792.1 | Scaffold1643 | 201264                  | GG                              | AA              | 1947016058               |
| SNP_P4_165280_201267 | NW_004516792.1 | Scaffold1643 | 201267                  | TT                              | CC              | 1947016060               |
| SNP_P4_165281_201277 | NW_004516792.1 | Scaffold1643 | 201277                  | TT                              | CC              | 1947016062               |
| SNP_P4_165282_201308 | NW_004516792.1 | Scaffold1643 | 201308                  | AA                              | GG              | 1947016064               |
| SNP_P4_165283_201337 | NW_004516792.1 | Scaffold1643 | 201337                  | CC                              | GG              | 1947016066               |
| SNP_P4_165284_201340 | NW_004516792.1 | Scaffold1643 | 201340                  | CC                              | TT              | 1947016068               |
| SNP_P4_165285_201365 | NW_004516792.1 | Scaffold1643 | 201365                  | CC                              | TT              | 1947016071               |
| SNP_P4_165286_201373 | NW_004516792.1 | Scaffold1643 | 201373                  | TT                              | CC              | 1947016073               |
| SNP_P4_165287_201378 | NW_004516792.1 | Scaffold1643 | 201378                  | TT                              | CC              | 1947016075               |
| SNP_P4_165288_201387 | NW_004516792.1 | Scaffold1643 | 201387                  | CC                              | TT              | 1947016077               |
| SNP_P4_165289_201412 | NW_004516792.1 | Scaffold1643 | 201412                  | CC                              | GG              | 1947016079               |
| SNP_P4_165290_201467 | NW_004516792.1 | Scaffold1643 | 201467                  | AA                              | GG              | 1947016081               |

| SNPs IDs             | Chromosome IDs | Chromosomes  | Physical positions (bp) | CDC Frontier (Reference genome) | (ILWC46 & LPNB) | NCBI SNPdb Accession IDs |
|----------------------|----------------|--------------|-------------------------|---------------------------------|-----------------|--------------------------|
| SNP_P4_165291_201474 | NW_004516792.1 | Scaffold1643 | 201474                  | CC                              | TT              | 1947016083               |
| SNP_P4_165292_201482 | NW_004516792.1 | Scaffold1643 | 201482                  | GG                              | CC              | 1947016085               |
| SNP_P4_165293_201662 | NW_004516792.1 | Scaffold1643 | 201662                  | CC                              | AA              | 1947016087               |
| SNP_P4_165294_203695 | NW_004516792.1 | Scaffold1643 | 203695                  | AA                              | CC              | 1947016089               |
| SNP_P4_165295_203731 | NW_004516792.1 | Scaffold1643 | 203731                  | AA                              | TT              | 1947016091               |
| SNP_P4_165296_206761 | NW_004516792.1 | Scaffold1643 | 206761                  | AA                              | CC              | 1947016093               |
| SNP_P4_165297_206777 | NW_004516792.1 | Scaffold1643 | 206777                  | GG                              | AA              | 1947016095               |
| SNP_P4_165298_206791 | NW_004516792.1 | Scaffold1643 | 206791                  | TT                              | CC              | 1947016097               |
| SNP_P4_165299_206814 | NW_004516792.1 | Scaffold1643 | 206814                  | CC                              | AA              | 1947016099               |
| SNP_P4_165300_206836 | NW_004516792.1 | Scaffold1643 | 206836                  | AA                              | TT              | 1947016101               |
| SNP_P4_165301_206938 | NW_004516792.1 | Scaffold1643 | 206938                  | AA                              | GG              | 1947016103               |
| SNP_P4_165302_206954 | NW_004516792.1 | Scaffold1643 | 206954                  | CC                              | TT              | 1947016105               |
| SNP_P4_165303_206996 | NW_004516792.1 | Scaffold1643 | 206996                  | CC                              | TT              | 1947016107               |
| SNP_P4_165304_207127 | NW_004516792.1 | Scaffold1643 | 207127                  | TT                              | CC              | 1947016109               |
| SNP_P4_165305_207305 | NW_004516792.1 | Scaffold1643 | 207305                  | TT                              | CC              | 1947016110               |
| SNP_P4_165306_207333 | NW_004516792.1 | Scaffold1643 | 207333                  | AA                              | GG              | 1947016112               |
| SNP_P4_165307_207812 | NW_004516792.1 | Scaffold1643 | 207812                  | CC                              | AA              | 1947016114               |
| SNP_P4_165308_207828 | NW_004516792.1 | Scaffold1643 | 207828                  | GG                              | AA              | 1947016116               |
| SNP_P4_165309_207859 | NW_004516792.1 | Scaffold1643 | 207859                  | GG                              | AA              | 1947016118               |
| SNP_P4_165310_208010 | NW_004516792.1 | Scaffold1643 | 208010                  | GG                              | AA              | 1947016120               |
| SNP_P4_165311_208403 | NW_004516792.1 | Scaffold1643 | 208403                  | AA                              | TT              | 1947016122               |
| SNP_P4_165312_208431 | NW_004516792.1 | Scaffold1643 | 208431                  | CC                              | AA              | 1947016124               |
| SNP_P4_165313_208435 | NW_004516792.1 | Scaffold1643 | 208435                  | AA                              | CC              | 1947016126               |
| SNP_P4_165314_208436 | NW_004516792.1 | Scaffold1643 | 208436                  | AA                              | TT              | 1947016128               |
| SNP_P4_165315_208457 | NW_004516792.1 | Scaffold1643 | 208457                  | AA                              | GG              | 1947016130               |
| SNP_P4_165316_208470 | NW_004516792.1 | Scaffold1643 | 208470                  | AA                              | TT              | 1947016132               |
| SNP_P4_165317_209385 | NW_004516792.1 | Scaffold1643 | 209385                  | CC                              | GG              | 1947016134               |
| SNP_P4_165318_209452 | NW_004516792.1 | Scaffold1643 | 209452                  | TT                              | AA              | 1947016136               |
| SNP_P4_165319_209878 | NW_004516792.1 | Scaffold1643 | 209878                  | CC                              | TT              | 1947016138               |
| SNP_P4_165320_210161 | NW_004516792.1 | Scaffold1643 | 210161                  | TT                              | AA              | 1947016140               |
| SNP_P4_165321_210213 | NW_004516792.1 | Scaffold1643 | 210213                  | AA                              | GG              | 1947016142               |
| SNP_P4_165322_210234 | NW_004516792.1 | Scaffold1643 | 210234                  | TT                              | CC              | 1947016144               |
| SNP_P4_165323_210242 | NW_004516792.1 | Scaffold1643 | 210242                  | TT                              | AA              | 1947016146               |
| SNP_P4_165324_210260 | NW_004516792.1 | Scaffold1643 | 210260                  | AA                              | TT              | 1947016147               |
| SNP_P4_165325_210279 | NW_004516792.1 | Scaffold1643 | 210279                  | GG                              | AA              | 1947016149               |
| SNP_P4_165326_210301 | NW_004516792.1 | Scaffold1643 | 210301                  | TT                              | AA              | 1947016151               |
| SNP_P4_165327_210309 | NW_004516792.1 | Scaffold1643 | 210309                  | TT                              | AA              | 1947016153               |
| SNP_P4_165329_210515 | NW_004516792.1 | Scaffold1643 | 210515                  | TT                              | CC              | 1947016155               |
| SNP_P4_165330_210516 | NW_004516792.1 | Scaffold1643 | 210516                  | GG                              | TT              | 1947016157               |
| SNP_P4_165332_210595 | NW_004516792.1 | Scaffold1643 | 210595                  | AA                              | CC              | 1947016159               |
| SNP_P4_165333_210727 | NW_004516792.1 | Scaffold1643 | 210727                  | GG                              | AA              | 1947016161               |
| SNP_P4_165334_210784 | NW_004516792.1 | Scaffold1643 | 210784                  | TT                              | CC              | 1947016163               |

| SNPs IDs             | Chromosome IDs | Chromosomes  | Physical positions (bp) | CDC Frontier (Reference genome) | (ILWC46 & LPNB) | NCBI SNPdb Accession IDs |
|----------------------|----------------|--------------|-------------------------|---------------------------------|-----------------|--------------------------|
| SNP_P4_165335_210872 | NW_004516792.1 | Scaffold1643 | 210872                  | TT                              | CC              | 1947016165               |
| SNP_P4_165336_210914 | NW_004516792.1 | Scaffold1643 | 210914                  | TT                              | AA              | 1947016166               |
| SNP_P4_165337_210932 | NW_004516792.1 | Scaffold1643 | 210932                  | AA                              | CC              | 1947016168               |
| SNP_P4_165338_210976 | NW_004516792.1 | Scaffold1643 | 210976                  | TT                              | AA              | 1947016170               |
| SNP_P4_165340_211057 | NW_004516792.1 | Scaffold1643 | 211057                  | TT                              | AA              | 1947016172               |
| SNP_P4_165342_211113 | NW_004516792.1 | Scaffold1643 | 211113                  | CC                              | AA              | 1947016174               |
| SNP_P4_165343_211176 | NW_004516792.1 | Scaffold1643 | 211176                  | TT                              | CC              | 1947016176               |
| SNP_P4_165344_211191 | NW_004516792.1 | Scaffold1643 | 211191                  | GG                              | AA              | 1947016178               |
| SNP_P4_165346_211346 | NW_004516792.1 | Scaffold1643 | 211346                  | TT                              | AA              | 1947016180               |
| SNP_P4_165347_211354 | NW_004516792.1 | Scaffold1643 | 211354                  | CC                              | AA              | 1947016182               |
| SNP_P4_165348_212477 | NW_004516792.1 | Scaffold1643 | 212477                  | TT                              | CC              | 1947016184               |
| SNP_P4_165349_212497 | NW_004516792.1 | Scaffold1643 | 212497                  | CC                              | TT              | 1947016186               |
| SNP_P4_165350_212638 | NW_004516792.1 | Scaffold1643 | 212638                  | GG                              | AA              | 1947016187               |
| SNP_P4_165351_213211 | NW_004516792.1 | Scaffold1643 | 213211                  | CC                              | TT              | 1947016189               |
| SNP_P4_165352_213227 | NW_004516792.1 | Scaffold1643 | 213227                  | AA                              | TT              | 1947016191               |
| SNP_P4_165353_213915 | NW_004516792.1 | Scaffold1643 | 213915                  | GG                              | CC              | 1947016193               |
| SNP_P4_165355_213942 | NW_004516792.1 | Scaffold1643 | 213942                  | GG                              | AA              | 1947016195               |
| SNP_P4_165356_214715 | NW_004516792.1 | Scaffold1643 | 214715                  | TT                              | CC              | 1947016197               |
| SNP_P4_165357_215033 | NW_004516792.1 | Scaffold1643 | 215033                  | GG                              | AA              | 1947016199               |
| SNP_P4_165358_215158 | NW_004516792.1 | Scaffold1643 | 215158                  | GG                              | AA              | 1947016201               |
| SNP_P4_165359_215240 | NW_004516792.1 | Scaffold1643 | 215240                  | CC                              | TT              | 1947016203               |
| SNP_P4_165360_1330   | NW_004516793.1 | Scaffold1644 | 1330                    | CC                              | GG              | 1947016205               |
| SNP_P4_165361_1335   | NW_004516793.1 | Scaffold1644 | 1335                    | AA                              | CC              | 1947016207               |
| SNP_P4_165362_4323   | NW_004516793.1 | Scaffold1644 | 4323                    | TT                              | GG              | 1947016208               |
| SNP_P4_165363_4331   | NW_004516793.1 | Scaffold1644 | 4331                    | TT                              | GG              | 1947016210               |
| SNP_P4_165364_4466   | NW_004516793.1 | Scaffold1644 | 4466                    | TT                              | CC              | 1947016212               |
| SNP_P4_165365_4726   | NW_004516793.1 | Scaffold1644 | 4726                    | GG                              | TT              | 1947016214               |
| SNP_P4_165366_4732   | NW_004516793.1 | Scaffold1644 | 4732                    | CC                              | TT              | 1947016216               |
| SNP_P4_165367_10075  | NW_004516793.1 | Scaffold1644 | 10075                   | GG                              | AA              | 1947016218               |
| SNP_P4_165368_10079  | NW_004516793.1 | Scaffold1644 | 10079                   | GG                              | AA              | 1947016220               |
| SNP_P4_165369_10082  | NW_004516793.1 | Scaffold1644 | 10082                   | TT                              | CC              | 1947016222               |
| SNP_P4_165370_10092  | NW_004516793.1 | Scaffold1644 | 10092                   | TT                              | CC              | 1947016224               |
| SNP_P4_165371_10147  | NW_004516793.1 | Scaffold1644 | 10147                   | AA                              | GG              | 1947016226               |
| SNP_P4_165372_10498  | NW_004516793.1 | Scaffold1644 | 10498                   | AA                              | GG              | 1947016228               |
| SNP_P4_165373_10551  | NW_004516793.1 | Scaffold1644 | 10551                   | AA                              | TT              | 1947016230               |
| SNP_P4_165374_10554  | NW_004516793.1 | Scaffold1644 | 10554                   | CC                              | TT              | 1947016232               |
| SNP_P4_165375_3146   | NW_004516795.1 | Scaffold1649 | 3146                    | CC                              | GG              | 1947016234               |
| SNP_P4_165376_17672  | NW_004516795.1 | Scaffold1649 | 17672                   | TT                              | AA              | 1947016236               |
| SNP_P4_165377_17726  | NW_004516795.1 | Scaffold1649 | 17726                   | CC                              | TT              | 1947016238               |
| SNP_P4_165378_182    | NW_004516797.1 | Scaffold1651 | 182                     | AA                              | CC              | 1947016240               |
| SNP_P4_165379_4184   | NW_004516797.1 | Scaffold1651 | 4184                    | AA                              | GG              | 1947016242               |
| SNP_P4_165380_4289   | NW_004516797.1 | Scaffold1651 | 4289                    | GG                              | AA              | 1947016244               |



| SNPs IDs            | Chromosome IDs | Chromosomes  | Physical positions (bp) | CDC Frontier (Reference genome) | (ILWC46 & LPNB) | NCBI SNPdb Accession IDs |
|---------------------|----------------|--------------|-------------------------|---------------------------------|-----------------|--------------------------|
| SNP_P4_165381_4485  | NW_004516797.1 | Scaffold1651 | 4485                    | TT                              | CC              | 1947016246               |
| SNP_P4_165382_4525  | NW_004516797.1 | Scaffold1651 | 4525                    | AA                              | TT              | 1947016248               |
| SNP_P4_165383_4665  | NW_004516797.1 | Scaffold1651 | 4665                    | TT                              | CC              | 1947016250               |
| SNP_P4_165384_4675  | NW_004516797.1 | Scaffold1651 | 4675                    | GG                              | AA              | 1947016252               |
| SNP_P4_165385_4809  | NW_004516797.1 | Scaffold1651 | 4809                    | TT                              | CC              | 1947016254               |
| SNP_P4_165387_5085  | NW_004516797.1 | Scaffold1651 | 5085                    | TT                              | GG              | 1947016256               |
| SNP_P4_165389_5171  | NW_004516797.1 | Scaffold1651 | 5171                    | CC                              | TT              | 1947016258               |
| SNP_P4_165390_5265  | NW_004516797.1 | Scaffold1651 | 5265                    | GG                              | AA              | 1947016260               |
| SNP_P4_165391_5441  | NW_004516797.1 | Scaffold1651 | 5441                    | TT                              | CC              | 1947016262               |
| SNP_P4_165392_5980  | NW_004516797.1 | Scaffold1651 | 5980                    | GG                              | AA              | 1947016264               |
| SNP_P4_165393_6076  | NW_004516797.1 | Scaffold1651 | 6076                    | CC                              | TT              | 1947016266               |
| SNP_P4_165394_6108  | NW_004516797.1 | Scaffold1651 | 6108                    | TT                              | CC              | 1947016268               |
| SNP_P4_165395_6149  | NW_004516797.1 | Scaffold1651 | 6149                    | GG                              | AA              | 1947016270               |
| SNP_P4_165396_6152  | NW_004516797.1 | Scaffold1651 | 6152                    | TT                              | CC              | 1947016272               |
| SNP_P4_165397_6197  | NW_004516797.1 | Scaffold1651 | 6197                    | GG                              | AA              | 1947016274               |
| SNP_P4_165398_6223  | NW_004516797.1 | Scaffold1651 | 6223                    | TT                              | CC              | 1947016276               |
| SNP_P4_165399_6549  | NW_004516797.1 | Scaffold1651 | 6549                    | GG                              | AA              | 1947016278               |
| SNP_P4_165400_6685  | NW_004516797.1 | Scaffold1651 | 6685                    | TT                              | GG              | 1947016280               |
| SNP_P4_165401_6852  | NW_004516797.1 | Scaffold1651 | 6852                    | GG                              | AA              | 1947016282               |
| SNP_P4_165402_6999  | NW_004516797.1 | Scaffold1651 | 6999                    | TT                              | GG              | 1947016284               |
| SNP_P4_165403_7087  | NW_004516797.1 | Scaffold1651 | 7087                    | AA                              | TT              | 1947016286               |
| SNP_P4_165404_7151  | NW_004516797.1 | Scaffold1651 | 7151                    | CC                              | AA              | 1947016288               |
| SNP_P4_165405_7212  | NW_004516797.1 | Scaffold1651 | 7212                    | AA                              | GG              | 1947016290               |
| SNP_P4_165406_7376  | NW_004516797.1 | Scaffold1651 | 7376                    | TT                              | CC              | 1947016292               |
| SNP_P4_165407_7440  | NW_004516797.1 | Scaffold1651 | 7440                    | GG                              | TT              | 1947016294               |
| SNP_P4_165408_7558  | NW_004516797.1 | Scaffold1651 | 7558                    | AA                              | GG              | 1947016296               |
| SNP_P4_165409_7638  | NW_004516797.1 | Scaffold1651 | 7638                    | GG                              | AA              | 1947016298               |
| SNP_P4_165410_7707  | NW_004516797.1 | Scaffold1651 | 7707                    | AA                              | CC              | 1947016300               |
| SNP_P4_165412_9081  | NW_004516797.1 | Scaffold1651 | 9081                    | GG                              | AA              | 1947016302               |
| SNP_P4_165413_9085  | NW_004516797.1 | Scaffold1651 | 9085                    | GG                              | TT              | 1947016304               |
| SNP_P4_165414_9305  | NW_004516797.1 | Scaffold1651 | 9305                    | TT                              | CC              | 1947016306               |
| SNP_P4_165415_9323  | NW_004516797.1 | Scaffold1651 | 9323                    | TT                              | GG              | 1947016308               |
| SNP_P4_165416_9331  | NW_004516797.1 | Scaffold1651 | 9331                    | GG                              | TT              | 1947016310               |
| SNP_P4_165417_9343  | NW_004516797.1 | Scaffold1651 | 9343                    | AA                              | CC              | 1947016312               |
| SNP_P4_165418_9353  | NW_004516797.1 | Scaffold1651 | 9353                    | TT                              | GG              | 1947016314               |
| SNP_P4_165419_9452  | NW_004516797.1 | Scaffold1651 | 9452                    | GG                              | TT              | 1947016316               |
| SNP_P4_165420_9771  | NW_004516797.1 | Scaffold1651 | 9771                    | GG                              | AA              | 1947016318               |
| SNP_P4_165421_9813  | NW_004516797.1 | Scaffold1651 | 9813                    | GG                              | AA              | 1947016320               |
| SNP_P4_165422_9986  | NW_004516797.1 | Scaffold1651 | 9986                    | CC                              | TT              | 1947016322               |
| SNP_P4_165423_10057 | NW_004516797.1 | Scaffold1651 | 10057                   | GG                              | AA              | 1947016324               |
| SNP_P4_165424_10086 | NW_004516797.1 | Scaffold1651 | 10086                   | CC                              | AA              | 1947016326               |
| SNP_P4_165425_10258 | NW_004516797.1 | Scaffold1651 | 10258                   | TT                              | CC              | 1947016328               |

| SNPs IDs            | Chromosome IDs | Chromosomes  | Physical positions (bp) | CDC Frontier (Reference genome) | (ILWC46 & LPNB) | NCBI SNPdb Accession IDs |
|---------------------|----------------|--------------|-------------------------|---------------------------------|-----------------|--------------------------|
| SNP_P4_165426_10314 | NW_004516797.1 | Scaffold1651 | 10314                   | AA                              | GG              | 1947016331               |
| SNP_P4_165427_10362 | NW_004516797.1 | Scaffold1651 | 10362                   | GG                              | AA              | 1947016333               |
| SNP_P4_165428_10400 | NW_004516797.1 | Scaffold1651 | 10400                   | AA                              | GG              | 1947016335               |
| SNP_P4_165429_10429 | NW_004516797.1 | Scaffold1651 | 10429                   | CC                              | TT              | 1947016337               |
| SNP_P4_165430_10503 | NW_004516797.1 | Scaffold1651 | 10503                   | GG                              | AA              | 1947016339               |
| SNP_P4_165431_10603 | NW_004516797.1 | Scaffold1651 | 10603                   | GG                              | TT              | 1947016341               |
| SNP_P4_165432_10836 | NW_004516797.1 | Scaffold1651 | 10836                   | GG                              | AA              | 1947016343               |
| SNP_P4_165433_10841 | NW_004516797.1 | Scaffold1651 | 10841                   | CC                              | TT              | 1947016345               |
| SNP_P4_165434_10882 | NW_004516797.1 | Scaffold1651 | 10882                   | CC                              | TT              | 1947016347               |
| SNP_P4_165435_11014 | NW_004516797.1 | Scaffold1651 | 11014                   | AA                              | TT              | 1947016349               |
| SNP_P4_165436_11033 | NW_004516797.1 | Scaffold1651 | 11033                   | AA                              | GG              | 1947016351               |
| SNP_P4_165437_11042 | NW_004516797.1 | Scaffold1651 | 11042                   | GG                              | AA              | 1947016353               |
| SNP_P4_165438_11047 | NW_004516797.1 | Scaffold1651 | 11047                   | GG                              | AA              | 1947016355               |
| SNP_P4_165439_11081 | NW_004516797.1 | Scaffold1651 | 11081                   | TT                              | GG              | 1947016357               |
| SNP_P4_165440_11082 | NW_004516797.1 | Scaffold1651 | 11082                   | CC                              | TT              | 1947016359               |
| SNP_P4_165442_11155 | NW_004516797.1 | Scaffold1651 | 11155                   | CC                              | TT              | 1947016361               |
| SNP_P4_165443_11219 | NW_004516797.1 | Scaffold1651 | 11219                   | CC                              | TT              | 1947016363               |
| SNP_P4_165444_11242 | NW_004516797.1 | Scaffold1651 | 11242                   | TT                              | CC              | 1947016365               |
| SNP_P4_165445_11463 | NW_004516797.1 | Scaffold1651 | 11463                   | GG                              | AA              | 1947016367               |
| SNP_P4_165446_11486 | NW_004516797.1 | Scaffold1651 | 11486                   | TT                              | CC              | 1947016369               |
| SNP_P4_165447_11490 | NW_004516797.1 | Scaffold1651 | 11490                   | GG                              | TT              | 1947016371               |
| SNP_P4_165449_11572 | NW_004516797.1 | Scaffold1651 | 11572                   | AA                              | GG              | 1947016373               |
| SNP_P4_165450_11638 | NW_004516797.1 | Scaffold1651 | 11638                   | AA                              | GG              | 1947016375               |
| SNP_P4_165451_11648 | NW_004516797.1 | Scaffold1651 | 11648                   | GG                              | TT              | 1947016377               |
| SNP_P4_165452_11829 | NW_004516797.1 | Scaffold1651 | 11829                   | AA                              | GG              | 1947016379               |
| SNP_P4_165454_12084 | NW_004516797.1 | Scaffold1651 | 12084                   | CC                              | TT              | 1947016381               |
| SNP_P4_165455_12256 | NW_004516797.1 | Scaffold1651 | 12256                   | CC                              | TT              | 1947016383               |
| SNP_P4_165456_12261 | NW_004516797.1 | Scaffold1651 | 12261                   | TT                              | CC              | 1947016385               |
| SNP_P4_165457_12323 | NW_004516797.1 | Scaffold1651 | 12323                   | CC                              | TT              | 1947016387               |
| SNP_P4_165458_12330 | NW_004516797.1 | Scaffold1651 | 12330                   | CC                              | TT              | 1947016389               |
| SNP_P4_165459_12337 | NW_004516797.1 | Scaffold1651 | 12337                   | AA                              | GG              | 1947016391               |
| SNP_P4_165461_13043 | NW_004516797.1 | Scaffold1651 | 13043                   | TT                              | CC              | 1947016393               |
| SNP_P4_165462_13097 | NW_004516797.1 | Scaffold1651 | 13097                   | AA                              | TT              | 1947016395               |
| SNP_P4_165463_13161 | NW_004516797.1 | Scaffold1651 | 13161                   | CC                              | TT              | 1947016397               |
| SNP_P4_165464_13209 | NW_004516797.1 | Scaffold1651 | 13209                   | GG                              | AA              | 1947016399               |
| SNP_P4_165466_13454 | NW_004516797.1 | Scaffold1651 | 13454                   | AA                              | CC              | 1947016401               |
| SNP_P4_165467_13462 | NW_004516797.1 | Scaffold1651 | 13462                   | CC                              | TT              | 1947016403               |
| SNP_P4_165469_13627 | NW_004516797.1 | Scaffold1651 | 13627                   | AA                              | GG              | 1947016406               |
| SNP_P4_165470_13644 | NW_004516797.1 | Scaffold1651 | 13644                   | CC                              | AA              | 1947016408               |
| SNP_P4_165471_13668 | NW_004516797.1 | Scaffold1651 | 13668                   | AA                              | TT              | 1947016410               |
| SNP_P4_165472_13679 | NW_004516797.1 | Scaffold1651 | 13679                   | GG                              | AA              | 1947016412               |
| SNP_P4_165473_13694 | NW_004516797.1 | Scaffold1651 | 13694                   | AA                              | GG              | 1947016414               |

| SNPs IDs            | Chromosome IDs | Chromosomes  | Physical positions (bp) | CDC Frontier (Reference genome) | (ILWC46 & LPNB) | NCBI SNPdb Accession IDs |
|---------------------|----------------|--------------|-------------------------|---------------------------------|-----------------|--------------------------|
| SNP_P4_165474_13843 | NW_004516797.1 | Scaffold1651 | 13843                   | GG                              | CC              | 1947016415               |
| SNP_P4_165475_13891 | NW_004516797.1 | Scaffold1651 | 13891                   | TT                              | AA              | 1947016417               |
| SNP_P4_165476_14049 | NW_004516797.1 | Scaffold1651 | 14049                   | AA                              | CC              | 1947016419               |
| SNP_P4_165477_14177 | NW_004516797.1 | Scaffold1651 | 14177                   | GG                              | TT              | 1947016421               |
| SNP_P4_165479_14358 | NW_004516797.1 | Scaffold1651 | 14358                   | GG                              | AA              | 1947016423               |
| SNP_P4_165480_14585 | NW_004516797.1 | Scaffold1651 | 14585                   | AA                              | CC              | 1947016425               |
| SNP_P4_165481_14639 | NW_004516797.1 | Scaffold1651 | 14639                   | CC                              | AA              | 1947016427               |
| SNP_P4_165482_14813 | NW_004516797.1 | Scaffold1651 | 14813                   | AA                              | CC              | 1947016429               |
| SNP_P4_165483_14919 | NW_004516797.1 | Scaffold1651 | 14919                   | GG                              | AA              | 1947016431               |
| SNP_P4_165484_14967 | NW_004516797.1 | Scaffold1651 | 14967                   | TT                              | CC              | 1947016433               |
| SNP_P4_165486_15053 | NW_004516797.1 | Scaffold1651 | 15053                   | CC                              | TT              | 1947016435               |
| SNP_P4_165487_16101 | NW_004516797.1 | Scaffold1651 | 16101                   | CC                              | TT              | 1947016437               |
| SNP_P4_165488_16191 | NW_004516797.1 | Scaffold1651 | 16191                   | AA                              | GG              | 1947016439               |
| SNP_P4_165491_16690 | NW_004516797.1 | Scaffold1651 | 16690                   | TT                              | GG              | 1947016441               |
| SNP_P4_165492_16784 | NW_004516797.1 | Scaffold1651 | 16784                   | AA                              | GG              | 1947016443               |
| SNP_P4_165494_16872 | NW_004516797.1 | Scaffold1651 | 16872                   | GG                              | AA              | 1947016445               |
| SNP_P4_165496_17291 | NW_004516797.1 | Scaffold1651 | 17291                   | GG                              | AA              | 1947016447               |
| SNP_P4_165497_17314 | NW_004516797.1 | Scaffold1651 | 17314                   | CC                              | GG              | 1947016449               |
| SNP_P4_165498_17352 | NW_004516797.1 | Scaffold1651 | 17352                   | CC                              | TT              | 1947016451               |
| SNP_P4_165499_17497 | NW_004516797.1 | Scaffold1651 | 17497                   | CC                              | TT              | 1947016453               |
| SNP_P4_165501_17739 | NW_004516797.1 | Scaffold1651 | 17739                   | GG                              | AA              | 1947016455               |
| SNP_P4_165503_18310 | NW_004516797.1 | Scaffold1651 | 18310                   | GG                              | AA              | 1947016457               |
| SNP_P4_165504_18415 | NW_004516797.1 | Scaffold1651 | 18415                   | TT                              | CC              | 1947016459               |
| SNP_P4_165505_18477 | NW_004516797.1 | Scaffold1651 | 18477                   | CC                              | TT              | 1947016461               |
| SNP_P4_165507_18579 | NW_004516797.1 | Scaffold1651 | 18579                   | GG                              | CC              | 1947016463               |
| SNP_P4_165508_18614 | NW_004516797.1 | Scaffold1651 | 18614                   | GG                              | AA              | 1947016465               |
| SNP_P4_165509_18754 | NW_004516797.1 | Scaffold1651 | 18754                   | TT                              | CC              | 1947016467               |
| SNP_P4_165510_18759 | NW_004516797.1 | Scaffold1651 | 18759                   | GG                              | AA              | 1947016469               |
| SNP_P4_165511_18795 | NW_004516797.1 | Scaffold1651 | 18795                   | TT                              | AA              | 1947016471               |
| SNP_P4_165512_18813 | NW_004516797.1 | Scaffold1651 | 18813                   | GG                              | TT              | 1947016473               |
| SNP_P4_165514_19021 | NW_004516797.1 | Scaffold1651 | 19021                   | TT                              | CC              | 1947016475               |
| SNP_P4_165515_19817 | NW_004516797.1 | Scaffold1651 | 19817                   | AA                              | TT              | 1947016477               |
| SNP_P4_165516_19854 | NW_004516797.1 | Scaffold1651 | 19854                   | AA                              | GG              | 1947016479               |
| SNP_P4_165517_20099 | NW_004516797.1 | Scaffold1651 | 20099                   | CC                              | TT              | 1947016481               |
| SNP_P4_165518_20104 | NW_004516797.1 | Scaffold1651 | 20104                   | AA                              | TT              | 1947016483               |
| SNP_P4_165519_20253 | NW_004516797.1 | Scaffold1651 | 20253                   | GG                              | TT              | 1947016485               |
| SNP_P4_165520_20382 | NW_004516797.1 | Scaffold1651 | 20382                   | CC                              | TT              | 1947016487               |
| SNP_P4_165521_20709 | NW_004516797.1 | Scaffold1651 | 20709                   | AA                              | GG              | 1947016489               |
| SNP_P4_165522_22607 | NW_004516797.1 | Scaffold1651 | 22607                   | TT                              | CC              | 1947016491               |
| SNP_P4_165523_22608 | NW_004516797.1 | Scaffold1651 | 22608                   | TT                              | CC              | 1947016493               |
| SNP_P4_165524_22724 | NW_004516797.1 | Scaffold1651 | 22724                   | CC                              | AA              | 1947016495               |
| SNP_P4_165525_23019 | NW_004516797.1 | Scaffold1651 | 23019                   | TT                              | CC              | 1947016497               |

| SNPs IDs            | Chromosome IDs | Chromosomes  | Physical positions (bp) | CDC Frontier (Reference genome) | (ILWC46 & LPNB) | NCBI SNPdb Accession IDs |
|---------------------|----------------|--------------|-------------------------|---------------------------------|-----------------|--------------------------|
| SNP_P4_165526_23064 | NW_004516797.1 | Scaffold1651 | 23064                   | GG                              | AA              | 1947016499               |
| SNP_P4_165527_23141 | NW_004516797.1 | Scaffold1651 | 23141                   | GG                              | AA              | 1947016500               |
| SNP_P4_165528_26872 | NW_004516797.1 | Scaffold1651 | 26872                   | CC                              | TT              | 1947016502               |
| SNP_P4_165529_26874 | NW_004516797.1 | Scaffold1651 | 26874                   | TT                              | GG              | 1947016504               |
| SNP_P4_165530_30471 | NW_004516797.1 | Scaffold1651 | 30471                   | GG                              | AA              | 1947016506               |
| SNP_P4_165531_30556 | NW_004516797.1 | Scaffold1651 | 30556                   | AA                              | TT              | 1947016508               |
| SNP_P4_165532_30934 | NW_004516797.1 | Scaffold1651 | 30934                   | CC                              | TT              | 1947016510               |
| SNP_P4_165533_31077 | NW_004516797.1 | Scaffold1651 | 31077                   | GG                              | AA              | 1947016512               |
| SNP_P4_165534_31081 | NW_004516797.1 | Scaffold1651 | 31081                   | TT                              | CC              | 1947016514               |
| SNP_P4_165535_31123 | NW_004516797.1 | Scaffold1651 | 31123                   | CC                              | TT              | 1947016516               |
| SNP_P4_165536_31137 | NW_004516797.1 | Scaffold1651 | 31137                   | AA                              | GG              | 1947016518               |
| SNP_P4_165537_31271 | NW_004516797.1 | Scaffold1651 | 31271                   | GG                              | CC              | 1947016520               |
| SNP_P4_165538_31348 | NW_004516797.1 | Scaffold1651 | 31348                   | CC                              | TT              | 1947016522               |
| SNP_P4_165539_31440 | NW_004516797.1 | Scaffold1651 | 31440                   | TT                              | GG              | 1947016524               |
| SNP_P4_165540_31441 | NW_004516797.1 | Scaffold1651 | 31441                   | CC                              | TT              | 1947016526               |
| SNP_P4_165541_31470 | NW_004516797.1 | Scaffold1651 | 31470                   | AA                              | GG              | 1947016528               |
| SNP_P4_165542_31530 | NW_004516797.1 | Scaffold1651 | 31530                   | CC                              | TT              | 1947016530               |
| SNP_P4_165543_31546 | NW_004516797.1 | Scaffold1651 | 31546                   | GG                              | AA              | 1947016532               |
| SNP_P4_165544_2444  | NW_004516798.1 | Scaffold1652 | 2444                    | CC                              | TT              | 1947016534               |
| SNP_P4_165545_44323 | NW_004516799.1 | Scaffold1654 | 44323                   | TT                              | AA              | 1947016536               |
| SNP_P4_165546_44332 | NW_004516799.1 | Scaffold1654 | 44332                   | GG                              | AA              | 1947016538               |
| SNP_P4_165547_44436 | NW_004516799.1 | Scaffold1654 | 44436                   | AA                              | TT              | 1947016540               |
| SNP_P4_165548_44673 | NW_004516799.1 | Scaffold1654 | 44673                   | GG                              | AA              | 1947016542               |
| SNP_P4_165549_44723 | NW_004516799.1 | Scaffold1654 | 44723                   | TT                              | CC              | 1947016544               |
| SNP_P4_165550_44873 | NW_004516799.1 | Scaffold1654 | 44873                   | GG                              | AA              | 1947016546               |
| SNP_P4_165551_53110 | NW_004516799.1 | Scaffold1654 | 53110                   | CC                              | TT              | 1947016548               |
| SNP_P4_165552_53123 | NW_004516799.1 | Scaffold1654 | 53123                   | GG                              | AA              | 1947016550               |
| SNP_P4_165553_74254 | NW_004516799.1 | Scaffold1654 | 74254                   | GG                              | TT              | 1947016552               |
| SNP_P4_165554_154   | NW_004516801.1 | Scaffold1657 | 154                     | CC                              | TT              | 1947016554               |
| SNP_P4_165555_169   | NW_004516801.1 | Scaffold1657 | 169                     | CC                              | TT              | 1947016556               |
| SNP_P4_165556_205   | NW_004516801.1 | Scaffold1657 | 205                     | TT                              | CC              | 1947016558               |
| SNP_P4_165557_279   | NW_004516801.1 | Scaffold1657 | 279                     | TT                              | CC              | 1947016560               |
| SNP_P4_165558_320   | NW_004516801.1 | Scaffold1657 | 320                     | AA                              | GG              | 1947016562               |
| SNP_P4_165559_324   | NW_004516801.1 | Scaffold1657 | 324                     | GG                              | AA              | 1947016564               |
| SNP_P4_165560_337   | NW_004516801.1 | Scaffold1657 | 337                     | TT                              | AA              | 1947016566               |
| SNP_P4_165561_411   | NW_004516801.1 | Scaffold1657 | 411                     | GG                              | CC              | 1947016568               |
| SNP_P4_165562_460   | NW_004516801.1 | Scaffold1657 | 460                     | CC                              | AA              | 1947016570               |
| SNP_P4_165563_568   | NW_004516801.1 | Scaffold1657 | 568                     | AA                              | GG              | 1947016573               |
| SNP_P4_165564_660   | NW_004516801.1 | Scaffold1657 | 660                     | TT                              | AA              | 1947016575               |
| SNP_P4_165565_661   | NW_004516801.1 | Scaffold1657 | 661                     | GG                              | TT              | 1947016577               |
| SNP_P4_165566_913   | NW_004516801.1 | Scaffold1657 | 913                     | TT                              | CC              | 1947016579               |
| SNP_P4_165567_1030  | NW_004516801.1 | Scaffold1657 | 1030                    | AA                              | GG              | 1947016581               |

| SNPs IDs            | Chromosome IDs | Chromosomes  | Physical positions (bp) | CDC Frontier (Reference genome) | (ILWC46 & LPNB) | NCBI SNPdb Accession IDs |
|---------------------|----------------|--------------|-------------------------|---------------------------------|-----------------|--------------------------|
| SNP_P4_165568_133   | NW_004516802.1 | Scaffold1658 | 133                     | AA                              | GG              | 1947016583               |
| SNP_P4_165569_64    | NW_004516803.1 | Scaffold1659 | 64                      | AA                              | TT              | 1947016585               |
| SNP_P4_165570_99    | NW_004516803.1 | Scaffold1659 | 99                      | GG                              | TT              | 1947016587               |
| SNP_P4_165572_157   | NW_004516803.1 | Scaffold1659 | 157                     | GG                              | AA              | 1947016589               |
| SNP_P4_165573_453   | NW_004516803.1 | Scaffold1659 | 453                     | TT                              | AA              | 1947016591               |
| SNP_P4_165574_565   | NW_004516803.1 | Scaffold1659 | 565                     | TT                              | AA              | 1947016593               |
| SNP_P4_165575_702   | NW_004516803.1 | Scaffold1659 | 702                     | TT                              | CC              | 1947016595               |
| SNP_P4_165576_1583  | NW_004516803.1 | Scaffold1659 | 1583                    | TT                              | AA              | 1947016597               |
| SNP_P4_165577_2088  | NW_004516803.1 | Scaffold1659 | 2088                    | GG                              | AA              | 1947016599               |
| SNP_P4_165578_2162  | NW_004516803.1 | Scaffold1659 | 2162                    | TT                              | CC              | 1947016601               |
| SNP_P4_165579_2216  | NW_004516803.1 | Scaffold1659 | 2216                    | GG                              | AA              | 1947016602               |
| SNP_P4_165580_2279  | NW_004516803.1 | Scaffold1659 | 2279                    | CC                              | TT              | 1947016604               |
| SNP_P4_165581_2869  | NW_004516803.1 | Scaffold1659 | 2869                    | GG                              | AA              | 1947016606               |
| SNP_P4_165582_2925  | NW_004516803.1 | Scaffold1659 | 2925                    | GG                              | AA              | 1947016608               |
| SNP_P4_165583_3019  | NW_004516803.1 | Scaffold1659 | 3019                    | AA                              | TT              | 1947016610               |
| SNP_P4_165584_3212  | NW_004516803.1 | Scaffold1659 | 3212                    | GG                              | AA              | 1947016612               |
| SNP_P4_165585_3371  | NW_004516803.1 | Scaffold1659 | 3371                    | CC                              | GG              | 1947016614               |
| SNP_P4_165586_3978  | NW_004516803.1 | Scaffold1659 | 3978                    | CC                              | TT              | 1947016616               |
| SNP_P4_165587_4832  | NW_004516803.1 | Scaffold1659 | 4832                    | GG                              | AA              | 1947016618               |
| SNP_P4_165588_4902  | NW_004516803.1 | Scaffold1659 | 4902                    | TT                              | CC              | 1947016620               |
| SNP_P4_165589_4918  | NW_004516803.1 | Scaffold1659 | 4918                    | GG                              | TT              | 1947016622               |
| SNP_P4_165590_19768 | NW_004516803.1 | Scaffold1659 | 19768                   | TT                              | CC              | 1947016624               |
| SNP_P4_165591_19786 | NW_004516803.1 | Scaffold1659 | 19786                   | TT                              | CC              | 1947016626               |
| SNP_P4_165592_19830 | NW_004516803.1 | Scaffold1659 | 19830                   | GG                              | AA              | 1947016628               |
| SNP_P4_165593_19874 | NW_004516803.1 | Scaffold1659 | 19874                   | TT                              | AA              | 1947016630               |
| SNP_P4_165594_19940 | NW_004516803.1 | Scaffold1659 | 19940                   | AA                              | GG              | 1947016632               |
| SNP_P4_165596_20029 | NW_004516803.1 | Scaffold1659 | 20029                   | TT                              | GG              | 1947016634               |
| SNP_P4_165597_20075 | NW_004516803.1 | Scaffold1659 | 20075                   | CC                              | TT              | 1947016636               |
| SNP_P4_165598_20186 | NW_004516803.1 | Scaffold1659 | 20186                   | TT                              | CC              | 1947016638               |
| SNP_P4_165599_20229 | NW_004516803.1 | Scaffold1659 | 20229                   | AA                              | GG              | 1947016639               |
| SNP_P4_165600_20349 | NW_004516803.1 | Scaffold1659 | 20349                   | GG                              | AA              | 1947016641               |
| SNP_P4_165601_20366 | NW_004516803.1 | Scaffold1659 | 20366                   | AA                              | TT              | 1947016643               |
| SNP_P4_165602_20499 | NW_004516803.1 | Scaffold1659 | 20499                   | TT                              | AA              | 1947016645               |
| SNP_P4_165603_21061 | NW_004516803.1 | Scaffold1659 | 21061                   | AA                              | GG              | 1947016647               |
| SNP_P4_165604_21117 | NW_004516803.1 | Scaffold1659 | 21117                   | GG                              | AA              | 1947016649               |
| SNP_P4_165605_21629 | NW_004516803.1 | Scaffold1659 | 21629                   | CC                              | TT              | 1947016651               |
| SNP_P4_165606_21977 | NW_004516803.1 | Scaffold1659 | 21977                   | GG                              | AA              | 1947016653               |
| SNP_P4_165607_31022 | NW_004516803.1 | Scaffold1659 | 31022                   | AA                              | CC              | 1947016655               |
| SNP_P4_165610_59718 | NW_004516803.1 | Scaffold1659 | 59718                   | AA                              | CC              | 1947016657               |
| SNP_P4_165611_60033 | NW_004516803.1 | Scaffold1659 | 60033                   | TT                              | GG              | 1947016659               |
| SNP_P4_165612_63100 | NW_004516803.1 | Scaffold1659 | 63100                   | AA                              | GG              | 1947016661               |
| SNP_P4_165613_81320 | NW_004516803.1 | Scaffold1659 | 81320                   | TT                              | CC              | 1947016663               |

| SNPs IDs             | Chromosome IDs | Chromosomes  | Physical positions (bp) | CDC Frontier (Reference genome) | (ILWC46 & LPNB) | NCBI SNPdb Accession IDs |
|----------------------|----------------|--------------|-------------------------|---------------------------------|-----------------|--------------------------|
| SNP_P4_165614_81322  | NW_004516803.1 | Scaffold1659 | 81322                   | CC                              | TT              | 1947016665               |
| SNP_P4_165615_81409  | NW_004516803.1 | Scaffold1659 | 81409                   | GG                              | AA              | 1947016667               |
| SNP_P4_165616_82177  | NW_004516803.1 | Scaffold1659 | 82177                   | AA                              | CC              | 1947016669               |
| SNP_P4_165617_96017  | NW_004516803.1 | Scaffold1659 | 96017                   | AA                              | GG              | 1947016671               |
| SNP_P4_165618_96235  | NW_004516803.1 | Scaffold1659 | 96235                   | TT                              | CC              | 1947016673               |
| SNP_P4_165620_105882 | NW_004516803.1 | Scaffold1659 | 105882                  | AA                              | GG              | 1947016675               |
| SNP_P4_165621_123282 | NW_004516803.1 | Scaffold1659 | 123282                  | CC                              | AA              | 1947016677               |
| SNP_P4_165622_123381 | NW_004516803.1 | Scaffold1659 | 123381                  | CC                              | TT              | 1947016679               |
| SNP_P4_165624_130241 | NW_004516803.1 | Scaffold1659 | 130241                  | AA                              | CC              | 1947016681               |
| SNP_P4_165625_135779 | NW_004516803.1 | Scaffold1659 | 135779                  | CC                              | TT              | 1947016683               |
| SNP_P4_165627_167215 | NW_004516803.1 | Scaffold1659 | 167215                  | TT                              | CC              | 1947016685               |
| SNP_P4_165628_167312 | NW_004516803.1 | Scaffold1659 | 167312                  | CC                              | TT              | 1947016687               |
| SNP_P4_165629_171716 | NW_004516803.1 | Scaffold1659 | 171716                  | TT                              | CC              | 1947016689               |
| SNP_P4_165630_171872 | NW_004516803.1 | Scaffold1659 | 171872                  | TT                              | AA              | 1947016691               |
| SNP_P4_165631_172348 | NW_004516803.1 | Scaffold1659 | 172348                  | AA                              | GG              | 1947016693               |
| SNP_P4_165632_172355 | NW_004516803.1 | Scaffold1659 | 172355                  | GG                              | AA              | 1947016695               |
| SNP_P4_165633_195474 | NW_004516803.1 | Scaffold1659 | 195474                  | AA                              | GG              | 1947016697               |
| SNP_P4_165634_217066 | NW_004516803.1 | Scaffold1659 | 217066                  | TT                              | AA              | 1947016699               |
| SNP_P4_165635_217096 | NW_004516803.1 | Scaffold1659 | 217096                  | AA                              | GG              | 1947016700               |
| SNP_P4_165636_217144 | NW_004516803.1 | Scaffold1659 | 217144                  | AA                              | CC              | 1947016702               |
| SNP_P4_165637_217206 | NW_004516803.1 | Scaffold1659 | 217206                  | AA                              | GG              | 1947016704               |
| SNP_P4_165638_217299 | NW_004516803.1 | Scaffold1659 | 217299                  | AA                              | GG              | 1947016706               |
| SNP_P4_165639_217311 | NW_004516803.1 | Scaffold1659 | 217311                  | GG                              | TT              | 1947016708               |
| SNP_P4_165640_217323 | NW_004516803.1 | Scaffold1659 | 217323                  | AA                              | GG              | 1947016710               |
| SNP_P4_165641_219742 | NW_004516803.1 | Scaffold1659 | 219742                  | GG                              | AA              | 1947016712               |
| SNP_P4_165642_242929 | NW_004516803.1 | Scaffold1659 | 242929                  | TT                              | AA              | 1947016714               |
| SNP_P4_165643_242937 | NW_004516803.1 | Scaffold1659 | 242937                  | CC                              | TT              | 1947016716               |
| SNP_P4_165644_244052 | NW_004516803.1 | Scaffold1659 | 244052                  | TT                              | GG              | 1947016718               |
| SNP_P4_165645_244057 | NW_004516803.1 | Scaffold1659 | 244057                  | CC                              | AA              | 1947016720               |
| SNP_P4_165646_244086 | NW_004516803.1 | Scaffold1659 | 244086                  | TT                              | AA              | 1947016722               |
| SNP_P4_165647_244091 | NW_004516803.1 | Scaffold1659 | 244091                  | CC                              | AA              | 1947016724               |
| SNP_P4_165648_244115 | NW_004516803.1 | Scaffold1659 | 244115                  | CC                              | TT              | 1947016726               |
| SNP_P4_165649_244151 | NW_004516803.1 | Scaffold1659 | 244151                  | AA                              | GG              | 1947016728               |
| SNP_P4_165650_264565 | NW_004516803.1 | Scaffold1659 | 264565                  | AA                              | GG              | 1947016729               |
| SNP_P4_165651_264570 | NW_004516803.1 | Scaffold1659 | 264570                  | TT                              | GG              | 1947016731               |
| SNP_P4_165652_264583 | NW_004516803.1 | Scaffold1659 | 264583                  | AA                              | GG              | 1947016733               |
| SNP_P4_165653_264601 | NW_004516803.1 | Scaffold1659 | 264601                  | TT                              | CC              | 1947016735               |
| SNP_P4_165654_264946 | NW_004516803.1 | Scaffold1659 | 264946                  | TT                              | CC              | 1947016737               |
| SNP_P4_165655_268691 | NW_004516803.1 | Scaffold1659 | 268691                  | AA                              | GG              | 1947016739               |
| SNP_P4_165657_283386 | NW_004516803.1 | Scaffold1659 | 283386                  | TT                              | AA              | 1947016741               |
| SNP_P4_165658_283791 | NW_004516803.1 | Scaffold1659 | 283791                  | AA                              | CC              | 1947016743               |
| SNP_P4_165659_287448 | NW_004516803.1 | Scaffold1659 | 287448                  | GG                              | TT              | 1947016745               |

| SNPs IDs             | Chromosome IDs | Chromosomes  | Physical positions (bp) | CDC Frontier (Reference genome) | (ILWC46 & LPNB) | NCBI SNPdb Accession IDs |
|----------------------|----------------|--------------|-------------------------|---------------------------------|-----------------|--------------------------|
| SNP_P4_165660_287457 | NW_004516803.1 | Scaffold1659 | 287457                  | AA                              | CC              | 1947016747               |
| SNP_P4_165661_287460 | NW_004516803.1 | Scaffold1659 | 287460                  | CC                              | TT              | 1947016749               |
| SNP_P4_165662_287461 | NW_004516803.1 | Scaffold1659 | 287461                  | AA                              | CC              | 1947016751               |
| SNP_P4_165663_287463 | NW_004516803.1 | Scaffold1659 | 287463                  | GG                              | AA              | 1947016753               |
| SNP_P4_165664_287466 | NW_004516803.1 | Scaffold1659 | 287466                  | CC                              | TT              | 1947016755               |
| SNP_P4_165665_287467 | NW_004516803.1 | Scaffold1659 | 287467                  | AA                              | GG              | 1947016757               |
| SNP_P4_165666_287480 | NW_004516803.1 | Scaffold1659 | 287480                  | TT                              | CC              | 1947016759               |
| SNP_P4_165667_287486 | NW_004516803.1 | Scaffold1659 | 287486                  | GG                              | TT              | 1947016761               |
| SNP_P4_165668_287501 | NW_004516803.1 | Scaffold1659 | 287501                  | GG                              | AA              | 1947016763               |
| SNP_P4_165669_287503 | NW_004516803.1 | Scaffold1659 | 287503                  | AA                              | GG              | 1947016765               |
| SNP_P4_165670_287505 | NW_004516803.1 | Scaffold1659 | 287505                  | AA                              | GG              | 1947016767               |
| SNP_P4_165671_294652 | NW_004516803.1 | Scaffold1659 | 294652                  | TT                              | GG              | 1947016769               |
| SNP_P4_165672_294678 | NW_004516803.1 | Scaffold1659 | 294678                  | TT                              | CC              | 1947016771               |
| SNP_P4_165673_294721 | NW_004516803.1 | Scaffold1659 | 294721                  | CC                              | GG              | 1947016773               |
| SNP_P4_165674_294748 | NW_004516803.1 | Scaffold1659 | 294748                  | TT                              | CC              | 1947016776               |
| SNP_P4_165675_294749 | NW_004516803.1 | Scaffold1659 | 294749                  | CC                              | TT              | 1947016778               |
| SNP_P4_165676_294758 | NW_004516803.1 | Scaffold1659 | 294758                  | AA                              | TT              | 1947016780               |
| SNP_P4_165677_294760 | NW_004516803.1 | Scaffold1659 | 294760                  | AA                              | GG              | 1947016782               |
| SNP_P4_165678_308543 | NW_004516803.1 | Scaffold1659 | 308543                  | GG                              | CC              | 1947016784               |
| SNP_P4_165679_331062 | NW_004516803.1 | Scaffold1659 | 331062                  | CC                              | AA              | 1947016786               |
| SNP_P4_165680_346212 | NW_004516803.1 | Scaffold1659 | 346212                  | CC                              | TT              | 1947016788               |
| SNP_P4_165681_355392 | NW_004516803.1 | Scaffold1659 | 355392                  | TT                              | CC              | 1947016790               |
| SNP_P4_165682_355955 | NW_004516803.1 | Scaffold1659 | 355955                  | GG                              | AA              | 1947016792               |
| SNP_P4_165683_355956 | NW_004516803.1 | Scaffold1659 | 355956                  | AA                              | GG              | 1947016794               |
| SNP_P4_165684_355975 | NW_004516803.1 | Scaffold1659 | 355975                  | AA                              | TT              | 1947016796               |
| SNP_P4_165685_356296 | NW_004516803.1 | Scaffold1659 | 356296                  | CC                              | TT              | 1947016798               |
| SNP_P4_165686_356324 | NW_004516803.1 | Scaffold1659 | 356324                  | TT                              | AA              | 1947016800               |
| SNP_P4_165687_359178 | NW_004516803.1 | Scaffold1659 | 359178                  | AA                              | GG              | 1947016802               |
| SNP_P4_165688_359276 | NW_004516803.1 | Scaffold1659 | 359276                  | GG                              | AA              | 1947016804               |
| SNP_P4_165689_364314 | NW_004516803.1 | Scaffold1659 | 364314                  | CC                              | TT              | 1947016806               |
| SNP_P4_165690_364329 | NW_004516803.1 | Scaffold1659 | 364329                  | TT                              | CC              | 1947016807               |
| SNP_P4_165691_374086 | NW_004516803.1 | Scaffold1659 | 374086                  | TT                              | AA              | 1947016809               |
| SNP_P4_165692_374098 | NW_004516803.1 | Scaffold1659 | 374098                  | TT                              | AA              | 1947016811               |
| SNP_P4_165693_385381 | NW_004516803.1 | Scaffold1659 | 385381                  | AA                              | GG              | 1947016813               |
| SNP_P4_165695_416178 | NW_004516803.1 | Scaffold1659 | 416178                  | TT                              | CC              | 1947016815               |
| SNP_P4_165696_436224 | NW_004516803.1 | Scaffold1659 | 436224                  | GG                              | TT              | 1947016817               |
| SNP_P4_165698_437405 | NW_004516803.1 | Scaffold1659 | 437405                  | GG                              | CC              | 1947016819               |
| SNP_P4_165700_466968 | NW_004516803.1 | Scaffold1659 | 466968                  | CC                              | AA              | 1947016821               |
| SNP_P4_165701_467897 | NW_004516803.1 | Scaffold1659 | 467897                  | AA                              | TT              | 1947016823               |
| SNP_P4_165702_468098 | NW_004516803.1 | Scaffold1659 | 468098                  | TT                              | GG              | 1947016825               |
| SNP_P4_165703_468122 | NW_004516803.1 | Scaffold1659 | 468122                  | CC                              | AA              | 1947016827               |
| SNP_P4_165704_468162 | NW_004516803.1 | Scaffold1659 | 468162                  | AA                              | GG              | 1947016829               |

| SNPs IDs             | Chromosome IDs | Chromosomes  | Physical positions (bp) | CDC Frontier (Reference genome) | (ILWC46 & LPNB) | NCBI SNPdb Accession IDs |
|----------------------|----------------|--------------|-------------------------|---------------------------------|-----------------|--------------------------|
| SNP_P4_165705_468541 | NW_004516803.1 | Scaffold1659 | 468541                  | CC                              | TT              | 1947016831               |
| SNP_P4_165706_468543 | NW_004516803.1 | Scaffold1659 | 468543                  | TT                              | CC              | 1947016833               |
| SNP_P4_165707_468562 | NW_004516803.1 | Scaffold1659 | 468562                  | TT                              | CC              | 1947016835               |
| SNP_P4_165708_468601 | NW_004516803.1 | Scaffold1659 | 468601                  | CC                              | TT              | 1947016837               |
| SNP_P4_165709_468608 | NW_004516803.1 | Scaffold1659 | 468608                  | TT                              | GG              | 1947016839               |
| SNP_P4_165710_12242  | NW_004516805.1 | Scaffold1661 | 12242                   | CC                              | AA              | 1947016841               |
| SNP_P4_165711_20783  | NW_004516805.1 | Scaffold1661 | 20783                   | TT                              | AA              | 1947016843               |
| SNP_P4_165712_21348  | NW_004516805.1 | Scaffold1661 | 21348                   | AA                              | CC              | 1947016845               |
| SNP_P4_165713_21355  | NW_004516805.1 | Scaffold1661 | 21355                   | TT                              | AA              | 1947016848               |
| SNP_P4_165714_23513  | NW_004516805.1 | Scaffold1661 | 23513                   | GG                              | AA              | 1947016850               |
| SNP_P4_165715_23514  | NW_004516805.1 | Scaffold1661 | 23514                   | AA                              | TT              | 1947016852               |
| SNP_P4_165716_23561  | NW_004516805.1 | Scaffold1661 | 23561                   | CC                              | AA              | 1947016854               |
| SNP_P4_165717_23562  | NW_004516805.1 | Scaffold1661 | 23562                   | GG                              | AA              | 1947016856               |
| SNP_P4_165718_23578  | NW_004516805.1 | Scaffold1661 | 23578                   | GG                              | AA              | 1947016858               |
| SNP_P4_165719_30243  | NW_004516805.1 | Scaffold1661 | 30243                   | AA                              | CC              | 1947016860               |
| SNP_P4_165720_36838  | NW_004516805.1 | Scaffold1661 | 36838                   | CC                              | AA              | 1947016862               |
| SNP_P4_165721_36840  | NW_004516805.1 | Scaffold1661 | 36840                   | AA                              | CC              | 1947016864               |
| SNP_P4_165723_38474  | NW_004516805.1 | Scaffold1661 | 38474                   | TT                              | AA              | 1947016866               |
| SNP_P4_165724_38678  | NW_004516805.1 | Scaffold1661 | 38678                   | CC                              | TT              | 1947016868               |
| SNP_P4_165726_65819  | NW_004516805.1 | Scaffold1661 | 65819                   | TT                              | CC              | 1947016870               |
| SNP_P4_165727_69767  | NW_004516805.1 | Scaffold1661 | 69767                   | CC                              | TT              | 1947016872               |
| SNP_P4_165730_106640 | NW_004516805.1 | Scaffold1661 | 106640                  | CC                              | TT              | 1947016874               |
| SNP_P4_165731_108925 | NW_004516805.1 | Scaffold1661 | 108925                  | GG                              | TT              | 1947016876               |
| SNP_P4_165732_109778 | NW_004516805.1 | Scaffold1661 | 109778                  | AA                              | TT              | 1947016878               |
| SNP_P4_165733_112777 | NW_004516805.1 | Scaffold1661 | 112777                  | AA                              | GG              | 1947016880               |
| SNP_P4_165734_112859 | NW_004516805.1 | Scaffold1661 | 112859                  | AA                              | CC              | 1947016882               |
| SNP_P4_165735_114454 | NW_004516805.1 | Scaffold1661 | 114454                  | GG                              | TT              | 1947016884               |
| SNP_P4_165736_114467 | NW_004516805.1 | Scaffold1661 | 114467                  | AA                              | CC              | 1947016886               |
| SNP_P4_165737_64     | NW_004516806.1 | Scaffold1663 | 64                      | AA                              | GG              | 1947016888               |
| SNP_P4_165738_112    | NW_004516806.1 | Scaffold1663 | 112                     | TT                              | GG              | 1947016890               |
| SNP_P4_165739_554    | NW_004516806.1 | Scaffold1663 | 554                     | TT                              | AA              | 1947016892               |
| SNP_P4_165740_604    | NW_004516806.1 | Scaffold1663 | 604                     | TT                              | AA              | 1947016894               |
| SNP_P4_165741_656    | NW_004516806.1 | Scaffold1663 | 656                     | AA                              | GG              | 1947016896               |
| SNP_P4_165742_676    | NW_004516806.1 | Scaffold1663 | 676                     | CC                              | GG              | 1947016898               |
| SNP_P4_165743_2638   | NW_004516807.1 | Scaffold1664 | 2638                    | CC                              | AA              | 1947016900               |
| SNP_P4_165744_2661   | NW_004516807.1 | Scaffold1664 | 2661                    | CC                              | TT              | 1947016902               |
| SNP_P4_165745_3029   | NW_004516807.1 | Scaffold1664 | 3029                    | AA                              | CC              | 1947016904               |
| SNP_P4_165747_22691  | NW_004516807.1 | Scaffold1664 | 22691                   | AA                              | GG              | 1947016906               |
| SNP_P4_165748_32674  | NW_004516807.1 | Scaffold1664 | 32674                   | TT                              | CC              | 1947016908               |
| SNP_P4_165749_37796  | NW_004516807.1 | Scaffold1664 | 37796                   | TT                              | CC              | 1947016910               |
| SNP_P4_165750_37815  | NW_004516807.1 | Scaffold1664 | 37815                   | TT                              | CC              | 1947016913               |
| SNP_P4_165751_39595  | NW_004516807.1 | Scaffold1664 | 39595                   | TT                              | CC              | 1947016915               |



| SNPs IDs            | Chromosome IDs | Chromosomes  | Physical positions (bp) | CDC Frontier (Reference genome) | (ILWC46 & LPNB) | NCBI SNPdb Accession IDs |
|---------------------|----------------|--------------|-------------------------|---------------------------------|-----------------|--------------------------|
| SNP_P4_165752_63027 | NW_004516807.1 | Scaffold1664 | 63027                   | TT                              | GG              | 1947016916               |
| SNP_P4_165753_63028 | NW_004516807.1 | Scaffold1664 | 63028                   | AA                              | CC              | 1947016919               |
| SNP_P4_165754_94797 | NW_004516807.1 | Scaffold1664 | 94797                   | AA                              | GG              | 1947016921               |
| SNP_P4_165755_94979 | NW_004516807.1 | Scaffold1664 | 94979                   | AA                              | GG              | 1947016923               |
| SNP_P4_165756_94989 | NW_004516807.1 | Scaffold1664 | 94989                   | GG                              | AA              | 1947016925               |
| SNP_P4_165757_2617  | NW_004516810.1 | Scaffold1673 | 2617                    | AA                              | GG              | 1947016927               |
| SNP_P4_165758_2737  | NW_004516810.1 | Scaffold1673 | 2737                    | AA                              | TT              | 1947016929               |
| SNP_P4_165759_9297  | NW_004516810.1 | Scaffold1673 | 9297                    | TT                              | GG              | 1947016931               |
| SNP_P4_165760_64    | NW_004516811.1 | Scaffold1674 | 64                      | TT                              | CC              | 1947016933               |
| SNP_P4_165761_65    | NW_004516811.1 | Scaffold1674 | 65                      | AA                              | GG              | 1947016935               |
| SNP_P4_165762_405   | NW_004516811.1 | Scaffold1674 | 405                     | CC                              | TT              | 1947016937               |
| SNP_P4_165763_511   | NW_004516811.1 | Scaffold1674 | 511                     | GG                              | TT              | 1947016939               |
| SNP_P4_165765_504   | NW_004516812.1 | Scaffold1675 | 504                     | AA                              | GG              | 1947016941               |
| SNP_P4_165767_895   | NW_004516812.1 | Scaffold1675 | 895                     | CC                              | GG              | 1947016943               |
| SNP_P4_165768_983   | NW_004516812.1 | Scaffold1675 | 983                     | CC                              | TT              | 1947016944               |
| SNP_P4_165769_994   | NW_004516812.1 | Scaffold1675 | 994                     | GG                              | AA              | 1947016946               |
| SNP_P4_165770_1012  | NW_004516812.1 | Scaffold1675 | 1012                    | TT                              | GG              | 1947016948               |
| SNP_P4_165771_1239  | NW_004516812.1 | Scaffold1675 | 1239                    | GG                              | AA              | 1947016950               |
| SNP_P4_165772_1309  | NW_004516812.1 | Scaffold1675 | 1309                    | TT                              | CC              | 1947016952               |
| SNP_P4_165773_2137  | NW_004516812.1 | Scaffold1675 | 2137                    | TT                              | CC              | 1947016954               |
| SNP_P4_165774_2493  | NW_004516812.1 | Scaffold1675 | 2493                    | CC                              | GG              | 1947016956               |
| SNP_P4_165776_1911  | NW_004516815.1 | Scaffold1680 | 1911                    | AA                              | TT              | 1947016958               |
| SNP_P4_165777_15886 | NW_004516815.1 | Scaffold1680 | 15886                   | AA                              | TT              | 1947016959               |
| SNP_P4_165778_15954 | NW_004516815.1 | Scaffold1680 | 15954                   | TT                              | CC              | 1947016961               |
| SNP_P4_165779_16312 | NW_004516815.1 | Scaffold1680 | 16312                   | CC                              | GG              | 1947016963               |
| SNP_P4_165780_18329 | NW_004516815.1 | Scaffold1680 | 18329                   | TT                              | CC              | 1947016965               |
| SNP_P4_165781_18354 | NW_004516815.1 | Scaffold1680 | 18354                   | GG                              | AA              | 1947016967               |
| SNP_P4_165782_20909 | NW_004516815.1 | Scaffold1680 | 20909                   | GG                              | TT              | 1947016969               |
| SNP_P4_165783_23351 | NW_004516815.1 | Scaffold1680 | 23351                   | CC                              | TT              | 1947016971               |
| SNP_P4_165784_101   | NW_004516816.1 | Scaffold1681 | 101                     | GG                              | CC              | 1947016973               |
| SNP_P4_165785_294   | NW_004516816.1 | Scaffold1681 | 294                     | TT                              | CC              | 1947016975               |
| SNP_P4_165786_321   | NW_004516816.1 | Scaffold1681 | 321                     | TT                              | AA              | 1947016977               |
| SNP_P4_165787_411   | NW_004516816.1 | Scaffold1681 | 411                     | CC                              | GG              | 1947016979               |
| SNP_P4_165788_659   | NW_004516816.1 | Scaffold1681 | 659                     | GG                              | CC              | 1947016981               |
| SNP_P4_165789_689   | NW_004516816.1 | Scaffold1681 | 689                     | AA                              | GG              | 1947016983               |
| SNP_P4_165790_731   | NW_004516816.1 | Scaffold1681 | 731                     | GG                              | TT              | 1947016985               |
| SNP_P4_165791_743   | NW_004516816.1 | Scaffold1681 | 743                     | AA                              | CC              | 1947016987               |
| SNP_P4_165792_756   | NW_004516816.1 | Scaffold1681 | 756                     | AA                              | GG              | 1947016989               |
| SNP_P4_165794_958   | NW_004516816.1 | Scaffold1681 | 958                     | CC                              | TT              | 1947016991               |
| SNP_P4_165795_959   | NW_004516816.1 | Scaffold1681 | 959                     | GG                              | AA              | 1947016993               |
| SNP_P4_165796_974   | NW_004516816.1 | Scaffold1681 | 974                     | AA                              | GG              | 1947016995               |
| SNP_P4_165797_1160  | NW_004516816.1 | Scaffold1681 | 1160                    | GG                              | TT              | 1947016997               |

| SNPs IDs            | Chromosome IDs | Chromosomes  | Physical positions (bp) | CDC Frontier (Reference genome) | (ILWC46 & LPNB) | NCBI SNPdb Accession IDs |
|---------------------|----------------|--------------|-------------------------|---------------------------------|-----------------|--------------------------|
| SNP_P4_165798_1335  | NW_004516816.1 | Scaffold1681 | 1335                    | AA                              | GG              | 1947016999               |
| SNP_P4_165799_1364  | NW_004516816.1 | Scaffold1681 | 1364                    | TT                              | AA              | 1947017001               |
| SNP_P4_165800_1421  | NW_004516816.1 | Scaffold1681 | 1421                    | AA                              | CC              | 1947017003               |
| SNP_P4_165801_1749  | NW_004516816.1 | Scaffold1681 | 1749                    | CC                              | TT              | 1947017005               |
| SNP_P4_165802_1754  | NW_004516816.1 | Scaffold1681 | 1754                    | TT                              | AA              | 1947017007               |
| SNP_P4_165803_1823  | NW_004516816.1 | Scaffold1681 | 1823                    | AA                              | TT              | 1947017009               |
| SNP_P4_165804_1935  | NW_004516816.1 | Scaffold1681 | 1935                    | GG                              | TT              | 1947017011               |
| SNP_P4_165805_2151  | NW_004516816.1 | Scaffold1681 | 2151                    | GG                              | AA              | 1947017013               |
| SNP_P4_165806_2152  | NW_004516816.1 | Scaffold1681 | 2152                    | CC                              | TT              | 1947017015               |
| SNP_P4_165807_2513  | NW_004516816.1 | Scaffold1681 | 2513                    | GG                              | AA              | 1947017017               |
| SNP_P4_165808_2801  | NW_004516816.1 | Scaffold1681 | 2801                    | AA                              | TT              | 1947017019               |
| SNP_P4_165809_3861  | NW_004516816.1 | Scaffold1681 | 3861                    | GG                              | AA              | 1947017021               |
| SNP_P4_165810_4884  | NW_004516816.1 | Scaffold1681 | 4884                    | CC                              | AA              | 1947017023               |
| SNP_P4_165811_4897  | NW_004516816.1 | Scaffold1681 | 4897                    | CC                              | AA              | 1947017025               |
| SNP_P4_165812_5308  | NW_004516816.1 | Scaffold1681 | 5308                    | GG                              | CC              | 1947017027               |
| SNP_P4_165813_5949  | NW_004516816.1 | Scaffold1681 | 5949                    | TT                              | CC              | 1947017029               |
| SNP_P4_165814_6044  | NW_004516816.1 | Scaffold1681 | 6044                    | AA                              | GG              | 1947017031               |
| SNP_P4_165815_6544  | NW_004516816.1 | Scaffold1681 | 6544                    | CC                              | TT              | 1947017033               |
| SNP_P4_165816_6614  | NW_004516816.1 | Scaffold1681 | 6614                    | TT                              | GG              | 1947017035               |
| SNP_P4_165817_6634  | NW_004516816.1 | Scaffold1681 | 6634                    | AA                              | TT              | 1947017037               |
| SNP_P4_165818_6714  | NW_004516816.1 | Scaffold1681 | 6714                    | AA                              | GG              | 1947017039               |
| SNP_P4_165819_6722  | NW_004516816.1 | Scaffold1681 | 6722                    | AA                              | GG              | 1947017041               |
| SNP_P4_165820_6838  | NW_004516816.1 | Scaffold1681 | 6838                    | GG                              | AA              | 1947017043               |
| SNP_P4_165821_6864  | NW_004516816.1 | Scaffold1681 | 6864                    | CC                              | GG              | 1947017045               |
| SNP_P4_165822_6904  | NW_004516816.1 | Scaffold1681 | 6904                    | CC                              | AA              | 1947017047               |
| SNP_P4_165823_6913  | NW_004516816.1 | Scaffold1681 | 6913                    | CC                              | AA              | 1947017049               |
| SNP_P4_165824_7082  | NW_004516816.1 | Scaffold1681 | 7082                    | AA                              | TT              | 1947017051               |
| SNP_P4_165825_7147  | NW_004516816.1 | Scaffold1681 | 7147                    | AA                              | GG              | 1947017053               |
| SNP_P4_165826_7246  | NW_004516816.1 | Scaffold1681 | 7246                    | GG                              | AA              | 1947017055               |
| SNP_P4_165827_7258  | NW_004516816.1 | Scaffold1681 | 7258                    | TT                              | CC              | 1947017057               |
| SNP_P4_165828_7289  | NW_004516816.1 | Scaffold1681 | 7289                    | TT                              | CC              | 1947017059               |
| SNP_P4_165830_8677  | NW_004516817.1 | Scaffold1682 | 8677                    | CC                              | TT              | 1947017061               |
| SNP_P4_165831_11689 | NW_004516817.1 | Scaffold1682 | 11689                   | GG                              | TT              | 1947017063               |
| SNP_P4_165832_14501 | NW_004516817.1 | Scaffold1682 | 14501                   | CC                              | TT              | 1947017065               |
| SNP_P4_165833_16120 | NW_004516817.1 | Scaffold1682 | 16120                   | AA                              | TT              | 1947017067               |
| SNP_P4_165834_1416  | NW_004516818.1 | Scaffold1683 | 1416                    | AA                              | CC              | 1947017069               |
| SNP_P4_165836_1612  | NW_004516819.1 | Scaffold1684 | 1612                    | AA                              | GG              | 1947017071               |
| SNP_P4_165837_6099  | NW_004516819.1 | Scaffold1684 | 6099                    | CC                              | AA              | 1947017073               |
| SNP_P4_165838_6135  | NW_004516819.1 | Scaffold1684 | 6135                    | AA                              | GG              | 1947017075               |
| SNP_P4_165839_6376  | NW_004516819.1 | Scaffold1684 | 6376                    | GG                              | AA              | 1947017077               |
| SNP_P4_165840_6391  | NW_004516819.1 | Scaffold1684 | 6391                    | GG                              | AA              | 1947017079               |
| SNP_P4_165842_6518  | NW_004516819.1 | Scaffold1684 | 6518                    | TT                              | CC              | 1947017081               |

| SNPs IDs            | Chromosome IDs | Chromosomes  | Physical positions (bp) | CDC Frontier (Reference genome) | (ILWC46 & LPNB) | NCBI SNPdb Accession IDs |
|---------------------|----------------|--------------|-------------------------|---------------------------------|-----------------|--------------------------|
| SNP_P4_165843_6556  | NW_004516819.1 | Scaffold1684 | 6556                    | TT                              | AA              | 1947017083               |
| SNP_P4_165844_21037 | NW_004516819.1 | Scaffold1684 | 21037                   | AA                              | GG              | 1947017085               |
| SNP_P4_165845_22957 | NW_004516819.1 | Scaffold1684 | 22957                   | TT                              | GG              | 1947017087               |
| SNP_P4_165846_23002 | NW_004516819.1 | Scaffold1684 | 23002                   | TT                              | GG              | 1947017089               |
| SNP_P4_165847_23578 | NW_004516819.1 | Scaffold1684 | 23578                   | GG                              | CC              | 1947017091               |
| SNP_P4_165848_24226 | NW_004516819.1 | Scaffold1684 | 24226                   | CC                              | GG              | 1947017093               |
| SNP_P4_165849_24535 | NW_004516819.1 | Scaffold1684 | 24535                   | TT                              | AA              | 1947017095               |
| SNP_P4_165850_24770 | NW_004516819.1 | Scaffold1684 | 24770                   | CC                              | TT              | 1947017097               |
| SNP_P4_165851_28199 | NW_004516819.1 | Scaffold1684 | 28199                   | CC                              | GG              | 1947017099               |
| SNP_P4_165852_28223 | NW_004516819.1 | Scaffold1684 | 28223                   | AA                              | GG              | 1947017101               |
| SNP_P4_165853_28224 | NW_004516819.1 | Scaffold1684 | 28224                   | CC                              | TT              | 1947017103               |
| SNP_P4_165854_28378 | NW_004516819.1 | Scaffold1684 | 28378                   | AA                              | CC              | 1947017105               |
| SNP_P4_165855_28407 | NW_004516819.1 | Scaffold1684 | 28407                   | CC                              | TT              | 1947017107               |
| SNP_P4_165856_28577 | NW_004516819.1 | Scaffold1684 | 28577                   | GG                              | AA              | 1947017109               |
| SNP_P4_165857_28632 | NW_004516819.1 | Scaffold1684 | 28632                   | TT                              | CC              | 1947017111               |
| SNP_P4_165858_28808 | NW_004516819.1 | Scaffold1684 | 28808                   | TT                              | CC              | 1947017113               |
| SNP_P4_165859_28975 | NW_004516819.1 | Scaffold1684 | 28975                   | TT                              | CC              | 1947017115               |
| SNP_P4_165860_28989 | NW_004516819.1 | Scaffold1684 | 28989                   | CC                              | TT              | 1947017117               |
| SNP_P4_165861_29014 | NW_004516819.1 | Scaffold1684 | 29014                   | CC                              | TT              | 1947017119               |
| SNP_P4_165862_29037 | NW_004516819.1 | Scaffold1684 | 29037                   | AA                              | TT              | 1947017121               |
| SNP_P4_165863_29071 | NW_004516819.1 | Scaffold1684 | 29071                   | AA                              | TT              | 1947017123               |
| SNP_P4_165864_29089 | NW_004516819.1 | Scaffold1684 | 29089                   | GG                              | CC              | 1947017125               |
| SNP_P4_165865_29091 | NW_004516819.1 | Scaffold1684 | 29091                   | GG                              | TT              | 1947017127               |
| SNP_P4_165866_29122 | NW_004516819.1 | Scaffold1684 | 29122                   | CC                              | TT              | 1947017129               |
| SNP_P4_165867_29200 | NW_004516819.1 | Scaffold1684 | 29200                   | TT                              | AA              | 1947017131               |
| SNP_P4_165868_29228 | NW_004516819.1 | Scaffold1684 | 29228                   | GG                              | AA              | 1947017133               |
| SNP_P4_165869_29244 | NW_004516819.1 | Scaffold1684 | 29244                   | GG                              | AA              | 1947017135               |
| SNP_P4_165870_29390 | NW_004516819.1 | Scaffold1684 | 29390                   | GG                              | AA              | 1947017137               |
| SNP_P4_165871_29392 | NW_004516819.1 | Scaffold1684 | 29392                   | TT                              | AA              | 1947017139               |
| SNP_P4_165872_29440 | NW_004516819.1 | Scaffold1684 | 29440                   | AA                              | TT              | 1947017141               |
| SNP_P4_165873_29480 | NW_004516819.1 | Scaffold1684 | 29480                   | TT                              | CC              | 1947017143               |
| SNP_P4_165874_29494 | NW_004516819.1 | Scaffold1684 | 29494                   | AA                              | TT              | 1947017145               |
| SNP_P4_165875_29533 | NW_004516819.1 | Scaffold1684 | 29533                   | TT                              | CC              | 1947017147               |
| SNP_P4_165876_29552 | NW_004516819.1 | Scaffold1684 | 29552                   | AA                              | TT              | 1947017149               |
| SNP_P4_165877_29563 | NW_004516819.1 | Scaffold1684 | 29563                   | GG                              | CC              | 1947017151               |
| SNP_P4_165878_29637 | NW_004516819.1 | Scaffold1684 | 29637                   | AA                              | CC              | 1947017153               |
| SNP_P4_165879_29673 | NW_004516819.1 | Scaffold1684 | 29673                   | GG                              | AA              | 1947017155               |
| SNP_P4_165880_29692 | NW_004516819.1 | Scaffold1684 | 29692                   | TT                              | AA              | 1947017157               |
| SNP_P4_165881_29726 | NW_004516819.1 | Scaffold1684 | 29726                   | CC                              | TT              | 1947017159               |
| SNP_P4_165882_29742 | NW_004516819.1 | Scaffold1684 | 29742                   | CC                              | TT              | 1947017161               |
| SNP_P4_165883_29778 | NW_004516819.1 | Scaffold1684 | 29778                   | TT                              | CC              | 1947017163               |
| SNP_P4_165884_29994 | NW_004516819.1 | Scaffold1684 | 29994                   | CC                              | TT              | 1947017165               |

| SNPs IDs            | Chromosome IDs | Chromosomes  | Physical positions (bp) | CDC Frontier (Reference genome) | (ILWC46 & LPNB) | NCBI SNPdb Accession IDs |
|---------------------|----------------|--------------|-------------------------|---------------------------------|-----------------|--------------------------|
| SNP_P4_165885_32361 | NW_004516819.1 | Scaffold1684 | 32361                   | AA                              | TT              | 1947017167               |
| SNP_P4_165886_32414 | NW_004516819.1 | Scaffold1684 | 32414                   | AA                              | GG              | 1947017169               |
| SNP_P4_165887_32427 | NW_004516819.1 | Scaffold1684 | 32427                   | TT                              | CC              | 1947017171               |
| SNP_P4_165888_33542 | NW_004516819.1 | Scaffold1684 | 33542                   | CC                              | TT              | 1947017173               |
| SNP_P4_165889_40359 | NW_004516819.1 | Scaffold1684 | 40359                   | AA                              | TT              | 1947017175               |
| SNP_P4_165890_40559 | NW_004516819.1 | Scaffold1684 | 40559                   | TT                              | GG              | 1947017177               |
| SNP_P4_165891_40602 | NW_004516819.1 | Scaffold1684 | 40602                   | CC                              | TT              | 1947017179               |
| SNP_P4_165892_40652 | NW_004516819.1 | Scaffold1684 | 40652                   | GG                              | AA              | 1947017181               |
| SNP_P4_165893_40667 | NW_004516819.1 | Scaffold1684 | 40667                   | GG                              | CC              | 1947017183               |
| SNP_P4_165894_40850 | NW_004516819.1 | Scaffold1684 | 40850                   | GG                              | TT              | 1947017185               |
| SNP_P4_165895_44572 | NW_004516819.1 | Scaffold1684 | 44572                   | CC                              | TT              | 1947017187               |
| SNP_P4_165896_44758 | NW_004516819.1 | Scaffold1684 | 44758                   | AA                              | GG              | 1947017189               |
| SNP_P4_165897_60347 | NW_004516819.1 | Scaffold1684 | 60347                   | AA                              | CC              | 1947017191               |
| SNP_P4_165898_62694 | NW_004516819.1 | Scaffold1684 | 62694                   | CC                              | TT              | 1947017193               |
| SNP_P4_165900_62991 | NW_004516819.1 | Scaffold1684 | 62991                   | AA                              | GG              | 1947017195               |
| SNP_P4_165901_63231 | NW_004516819.1 | Scaffold1684 | 63231                   | TT                              | AA              | 1947017197               |
| SNP_P4_165902_63484 | NW_004516819.1 | Scaffold1684 | 63484                   | AA                              | GG              | 1947017199               |
| SNP_P4_165903_63568 | NW_004516819.1 | Scaffold1684 | 63568                   | AA                              | CC              | 1947017201               |
| SNP_P4_165905_69406 | NW_004516819.1 | Scaffold1684 | 69406                   | CC                              | GG              | 1947017203               |
| SNP_P4_165906_70897 | NW_004516819.1 | Scaffold1684 | 70897                   | GG                              | AA              | 1947017205               |
| SNP_P4_165907_71205 | NW_004516819.1 | Scaffold1684 | 71205                   | AA                              | TT              | 1947017207               |
| SNP_P4_165908_71276 | NW_004516819.1 | Scaffold1684 | 71276                   | AA                              | GG              | 1947017209               |
| SNP_P4_165909_71306 | NW_004516819.1 | Scaffold1684 | 71306                   | CC                              | TT              | 1947017211               |
| SNP_P4_165910_71329 | NW_004516819.1 | Scaffold1684 | 71329                   | GG                              | AA              | 1947017213               |
| SNP_P4_165911_71460 | NW_004516819.1 | Scaffold1684 | 71460                   | AA                              | TT              | 1947017215               |
| SNP_P4_165912_71612 | NW_004516819.1 | Scaffold1684 | 71612                   | TT                              | CC              | 1947017217               |
| SNP_P4_165913_71756 | NW_004516819.1 | Scaffold1684 | 71756                   | TT                              | GG              | 1947017219               |
| SNP_P4_165915_3663  | NW_004516820.1 | Scaffold1685 | 3663                    | CC                              | TT              | 1947017221               |
| SNP_P4_165916_15469 | NW_004516820.1 | Scaffold1685 | 15469                   | TT                              | GG              | 1947017223               |
| SNP_P4_165917_15476 | NW_004516820.1 | Scaffold1685 | 15476                   | TT                              | CC              | 1947017226               |
| SNP_P4_165918_15554 | NW_004516820.1 | Scaffold1685 | 15554                   | TT                              | AA              | 1947017228               |
| SNP_P4_165919_15717 | NW_004516820.1 | Scaffold1685 | 15717                   | TT                              | AA              | 1947017230               |
| SNP_P4_165920_33002 | NW_004516820.1 | Scaffold1685 | 33002                   | CC                              | TT              | 1947017232               |
| SNP_P4_165921_33007 | NW_004516820.1 | Scaffold1685 | 33007                   | CC                              | TT              | 1947017234               |
| SNP_P4_165922_33394 | NW_004516820.1 | Scaffold1685 | 33394                   | TT                              | CC              | 1947017236               |
| SNP_P4_165923_53481 | NW_004516820.1 | Scaffold1685 | 53481                   | CC                              | TT              | 1947017238               |
| SNP_P4_165924_53511 | NW_004516820.1 | Scaffold1685 | 53511                   | TT                              | GG              | 1947017240               |
| SNP_P4_165925_53519 | NW_004516820.1 | Scaffold1685 | 53519                   | GG                              | AA              | 1947017242               |
| SNP_P4_165926_53520 | NW_004516820.1 | Scaffold1685 | 53520                   | AA                              | GG              | 1947017243               |
| SNP_P4_165927_64700 | NW_004516820.1 | Scaffold1685 | 64700                   | AA                              | TT              | 1947017244               |
| SNP_P4_165928_64716 | NW_004516820.1 | Scaffold1685 | 64716                   | AA                              | CC              | 1947017245               |
| SNP_P4_165929_64750 | NW_004516820.1 | Scaffold1685 | 64750                   | CC                              | TT              | 1947017246               |

| SNPs IDs             | Chromosome IDs | Chromosomes  | Physical positions (bp) | CDC Frontier (Reference genome) | (ILWC46 & LPNB) | NCBI SNPdb Accession IDs |
|----------------------|----------------|--------------|-------------------------|---------------------------------|-----------------|--------------------------|
| SNP_P4_165930_64797  | NW_004516820.1 | Scaffold1685 | 64797                   | GG                              | CC              | 1947017247               |
| SNP_P4_165931_77045  | NW_004516820.1 | Scaffold1685 | 77045                   | GG                              | CC              | 1947017249               |
| SNP_P4_165932_77056  | NW_004516820.1 | Scaffold1685 | 77056                   | AA                              | GG              | 1947017251               |
| SNP_P4_165933_77067  | NW_004516820.1 | Scaffold1685 | 77067                   | CC                              | TT              | 1947017253               |
| SNP_P4_165934_77372  | NW_004516820.1 | Scaffold1685 | 77372                   | TT                              | AA              | 1947017255               |
| SNP_P4_165935_83235  | NW_004516820.1 | Scaffold1685 | 83235                   | AA                              | CC              | 1947017256               |
| SNP_P4_165936_83301  | NW_004516820.1 | Scaffold1685 | 83301                   | CC                              | TT              | 1947017257               |
| SNP_P4_165937_86036  | NW_004516820.1 | Scaffold1685 | 86036                   | GG                              | AA              | 1947017259               |
| SNP_P4_165938_88372  | NW_004516820.1 | Scaffold1685 | 88372                   | CC                              | GG              | 1947017261               |
| SNP_P4_165939_88573  | NW_004516820.1 | Scaffold1685 | 88573                   | TT                              | CC              | 1947017262               |
| SNP_P4_165940_88825  | NW_004516820.1 | Scaffold1685 | 88825                   | AA                              | TT              | 1947017264               |
| SNP_P4_165941_88828  | NW_004516820.1 | Scaffold1685 | 88828                   | TT                              | CC              | 1947017266               |
| SNP_P4_165942_88885  | NW_004516820.1 | Scaffold1685 | 88885                   | AA                              | CC              | 1947017268               |
| SNP_P4_165943_89145  | NW_004516820.1 | Scaffold1685 | 89145                   | CC                              | TT              | 1947017270               |
| SNP_P4_165944_89167  | NW_004516820.1 | Scaffold1685 | 89167                   | CC                              | GG              | 1947017272               |
| SNP_P4_165945_89209  | NW_004516820.1 | Scaffold1685 | 89209                   | TT                              | CC              | 1947017274               |
| SNP_P4_165947_116808 | NW_004516820.1 | Scaffold1685 | 116808                  | AA                              | CC              | 1947017276               |
| SNP_P4_165948_125183 | NW_004516820.1 | Scaffold1685 | 125183                  | AA                              | TT              | 1947017278               |
| SNP_P4_165949_125184 | NW_004516820.1 | Scaffold1685 | 125184                  | TT                              | AA              | 1947017280               |
| SNP_P4_165950_127668 | NW_004516820.1 | Scaffold1685 | 127668                  | GG                              | CC              | 1947017282               |
| SNP_P4_165951_128118 | NW_004516820.1 | Scaffold1685 | 128118                  | AA                              | GG              | 1947017284               |
| SNP_P4_165952_129113 | NW_004516820.1 | Scaffold1685 | 129113                  | CC                              | AA              | 1947017286               |
| SNP_P4_165953_130826 | NW_004516820.1 | Scaffold1685 | 130826                  | GG                              | AA              | 1947017288               |
| SNP_P4_165954_131144 | NW_004516820.1 | Scaffold1685 | 131144                  | CC                              | TT              | 1947017290               |
| SNP_P4_165955_131148 | NW_004516820.1 | Scaffold1685 | 131148                  | CC                              | TT              | 1947017292               |
| SNP_P4_165956_131151 | NW_004516820.1 | Scaffold1685 | 131151                  | CC                              | TT              | 1947017294               |
| SNP_P4_165957_154    | NW_004516821.1 | Scaffold1686 | 154                     | GG                              | TT              | 1947017296               |
| SNP_P4_165958_155    | NW_004516821.1 | Scaffold1686 | 155                     | TT                              | GG              | 1947017298               |
| SNP_P4_165959_54361  | NW_004516822.1 | Scaffold1687 | 54361                   | TT                              | CC              | 1947017300               |
| SNP_P4_165961_80637  | NW_004516822.1 | Scaffold1687 | 80637                   | TT                              | AA              | 1947017302               |
| SNP_P4_165962_85085  | NW_004516822.1 | Scaffold1687 | 85085                   | AA                              | GG              | 1947017304               |
| SNP_P4_165963_85088  | NW_004516822.1 | Scaffold1687 | 85088                   | AA                              | GG              | 1947017306               |
| SNP_P4_165964_97267  | NW_004516822.1 | Scaffold1687 | 97267                   | AA                              | GG              | 1947017308               |
| SNP_P4_165966_103007 | NW_004516822.1 | Scaffold1687 | 103007                  | AA                              | GG              | 1947017310               |
| SNP_P4_165967_103257 | NW_004516822.1 | Scaffold1687 | 103257                  | AA                              | CC              | 1947017312               |
| SNP_P4_165968_103334 | NW_004516822.1 | Scaffold1687 | 103334                  | TT                              | GG              | 1947017314               |
| SNP_P4_165969_103339 | NW_004516822.1 | Scaffold1687 | 103339                  | AA                              | GG              | 1947017316               |
| SNP_P4_165970_144609 | NW_004516822.1 | Scaffold1687 | 144609                  | GG                              | AA              | 1947017318               |
| SNP_P4_165971_144623 | NW_004516822.1 | Scaffold1687 | 144623                  | TT                              | GG              | 1947017319               |
| SNP_P4_165972_144636 | NW_004516822.1 | Scaffold1687 | 144636                  | AA                              | GG              | 1947017321               |
| SNP_P4_165973_144637 | NW_004516822.1 | Scaffold1687 | 144637                  | GG                              | AA              | 1947017323               |
| SNP_P4_165974_144662 | NW_004516822.1 | Scaffold1687 | 144662                  | CC                              | AA              | 1947017325               |

| SNPs IDs             | Chromosome IDs | Chromosomes  | Physical positions (bp) | CDC Frontier (Reference genome) | (ILWC46 & LPNB) | NCBI SNPdb Accession IDs |
|----------------------|----------------|--------------|-------------------------|---------------------------------|-----------------|--------------------------|
| SNP_P4_165975_144667 | NW_004516822.1 | Scaffold1687 | 144667                  | CC                              | GG              | 1947017327               |
| SNP_P4_165976_144671 | NW_004516822.1 | Scaffold1687 | 144671                  | GG                              | AA              | 1947017329               |
| SNP_P4_165977_144859 | NW_004516822.1 | Scaffold1687 | 144859                  | TT                              | CC              | 1947017331               |
| SNP_P4_165978_144911 | NW_004516822.1 | Scaffold1687 | 144911                  | TT                              | AA              | 1947017333               |
| SNP_P4_165979_145322 | NW_004516822.1 | Scaffold1687 | 145322                  | CC                              | TT              | 1947017335               |
| SNP_P4_165980_150652 | NW_004516822.1 | Scaffold1687 | 150652                  | GG                              | AA              | 1947017337               |
| SNP_P4_165981_153085 | NW_004516822.1 | Scaffold1687 | 153085                  | TT                              | CC              | 1947017339               |
| SNP_P4_165983_169442 | NW_004516822.1 | Scaffold1687 | 169442                  | AA                              | GG              | 1947017341               |
| SNP_P4_165984_177663 | NW_004516822.1 | Scaffold1687 | 177663                  | TT                              | CC              | 1947017343               |
| SNP_P4_165985_180732 | NW_004516822.1 | Scaffold1687 | 180732                  | TT                              | CC              | 1947017345               |
| SNP_P4_165986_192103 | NW_004516822.1 | Scaffold1687 | 192103                  | GG                              | AA              | 1947017347               |
| SNP_P4_165987_196662 | NW_004516822.1 | Scaffold1687 | 196662                  | TT                              | CC              | 1947017349               |
| SNP_P4_165988_196971 | NW_004516822.1 | Scaffold1687 | 196971                  | AA                              | CC              | 1947017351               |
| SNP_P4_165989_209547 | NW_004516822.1 | Scaffold1687 | 209547                  | GG                              | AA              | 1947017353               |
| SNP_P4_165990_210303 | NW_004516822.1 | Scaffold1687 | 210303                  | CC                              | TT              | 1947017355               |
| SNP_P4_165991_223399 | NW_004516822.1 | Scaffold1687 | 223399                  | CC                              | TT              | 1947017357               |
| SNP_P4_165992_224096 | NW_004516822.1 | Scaffold1687 | 224096                  | GG                              | AA              | 1947017359               |
| SNP_P4_165993_224163 | NW_004516822.1 | Scaffold1687 | 224163                  | TT                              | CC              | 1947017361               |
| SNP_P4_165995_1985   | NW_004516823.1 | Scaffold1688 | 1985                    | GG                              | TT              | 1947017363               |
| SNP_P4_165996_2221   | NW_004516823.1 | Scaffold1688 | 2221                    | GG                              | AA              | 1947017365               |
| SNP_P4_165997_2342   | NW_004516823.1 | Scaffold1688 | 2342                    | AA                              | TT              | 1947017367               |
| SNP_P4_165998_2365   | NW_004516823.1 | Scaffold1688 | 2365                    | TT                              | CC              | 1947017369               |
| SNP_P4_165999_2378   | NW_004516823.1 | Scaffold1688 | 2378                    | TT                              | CC              | 1947017371               |
| SNP_P4_166000_2423   | NW_004516823.1 | Scaffold1688 | 2423                    | AA                              | GG              | 1947017373               |
| SNP_P4_166001_2431   | NW_004516823.1 | Scaffold1688 | 2431                    | TT                              | CC              | 1947017375               |
| SNP_P4_166002_2432   | NW_004516823.1 | Scaffold1688 | 2432                    | CC                              | GG              | 1947017377               |
| SNP_P4_166003_1821   | NW_004516824.1 | Scaffold1689 | 1821                    | AA                              | CC              | 1947017379               |
| SNP_P4_166004_5728   | NW_004516825.1 | Scaffold1690 | 5728                    | TT                              | GG              | 1947017381               |
| SNP_P4_166005_2363   | NW_004516829.1 | Scaffold1695 | 2363                    | TT                              | CC              | 1947017383               |
| SNP_P4_166006_2414   | NW_004516829.1 | Scaffold1695 | 2414                    | GG                              | AA              | 1947017385               |
| SNP_P4_166007_2684   | NW_004516829.1 | Scaffold1695 | 2684                    | TT                              | CC              | 1947017387               |
| SNP_P4_166008_2727   | NW_004516829.1 | Scaffold1695 | 2727                    | GG                              | TT              | 1947017389               |
| SNP_P4_166009_2744   | NW_004516829.1 | Scaffold1695 | 2744                    | CC                              | TT              | 1947017391               |
| SNP_P4_166010_4467   | NW_004516829.1 | Scaffold1695 | 4467                    | GG                              | AA              | 1947017393               |
| SNP_P4_166011_6193   | NW_004516829.1 | Scaffold1695 | 6193                    | GG                              | AA              | 1947017395               |
| SNP_P4_166012_6218   | NW_004516829.1 | Scaffold1695 | 6218                    | CC                              | TT              | 1947017397               |
| SNP_P4_166013_716    | NW_004516830.1 | Scaffold1696 | 716                     | GG                              | AA              | 1947017399               |
| SNP_P4_166014_3949   | NW_004516830.1 | Scaffold1696 | 3949                    | AA                              | TT              | 1947017401               |
| SNP_P4_166015_3982   | NW_004516830.1 | Scaffold1696 | 3982                    | AA                              | TT              | 1947017403               |
| SNP_P4_166016_4076   | NW_004516830.1 | Scaffold1696 | 4076                    | AA                              | GG              | 1947017405               |
| SNP_P4_166017_4137   | NW_004516830.1 | Scaffold1696 | 4137                    | CC                              | TT              | 1947017407               |
| SNP_P4_166019_4571   | NW_004516830.1 | Scaffold1696 | 4571                    | TT                              | CC              | 1947017409               |

| SNPs IDs            | Chromosome IDs | Chromosomes  | Physical positions (bp) | CDC Frontier (Reference genome) | (ILWC46 & LPNB) | NCBI SNPdb Accession IDs |
|---------------------|----------------|--------------|-------------------------|---------------------------------|-----------------|--------------------------|
| SNP_P4_166020_4637  | NW_004516830.1 | Scaffold1696 | 4637                    | AA                              | GG              | 1947017411               |
| SNP_P4_166021_4739  | NW_004516830.1 | Scaffold1696 | 4739                    | TT                              | AA              | 1947017413               |
| SNP_P4_166022_4762  | NW_004516830.1 | Scaffold1696 | 4762                    | TT                              | CC              | 1947017415               |
| SNP_P4_166023_4771  | NW_004516830.1 | Scaffold1696 | 4771                    | AA                              | TT              | 1947017417               |
| SNP_P4_166024_4875  | NW_004516830.1 | Scaffold1696 | 4875                    | TT                              | CC              | 1947017419               |
| SNP_P4_166025_4930  | NW_004516830.1 | Scaffold1696 | 4930                    | CC                              | GG              | 1947017421               |
| SNP_P4_166026_4948  | NW_004516830.1 | Scaffold1696 | 4948                    | CC                              | TT              | 1947017423               |
| SNP_P4_166027_5007  | NW_004516830.1 | Scaffold1696 | 5007                    | CC                              | TT              | 1947017425               |
| SNP_P4_166028_5008  | NW_004516830.1 | Scaffold1696 | 5008                    | GG                              | CC              | 1947017427               |
| SNP_P4_166029_5088  | NW_004516830.1 | Scaffold1696 | 5088                    | CC                              | TT              | 1947017429               |
| SNP_P4_166030_5104  | NW_004516830.1 | Scaffold1696 | 5104                    | GG                              | AA              | 1947017431               |
| SNP_P4_166031_5134  | NW_004516830.1 | Scaffold1696 | 5134                    | TT                              | AA              | 1947017433               |
| SNP_P4_166032_5198  | NW_004516830.1 | Scaffold1696 | 5198                    | GG                              | AA              | 1947017435               |
| SNP_P4_166033_5308  | NW_004516830.1 | Scaffold1696 | 5308                    | TT                              | GG              | 1947017437               |
| SNP_P4_166034_5348  | NW_004516830.1 | Scaffold1696 | 5348                    | CC                              | AA              | 1947017439               |
| SNP_P4_166036_5448  | NW_004516830.1 | Scaffold1696 | 5448                    | AA                              | GG              | 1947017441               |
| SNP_P4_166037_5532  | NW_004516830.1 | Scaffold1696 | 5532                    | CC                              | AA              | 1947017443               |
| SNP_P4_166038_5631  | NW_004516830.1 | Scaffold1696 | 5631                    | TT                              | AA              | 1947017445               |
| SNP_P4_166039_5703  | NW_004516830.1 | Scaffold1696 | 5703                    | AA                              | TT              | 1947017447               |
| SNP_P4_166040_5719  | NW_004516830.1 | Scaffold1696 | 5719                    | CC                              | AA              | 1947017449               |
| SNP_P4_166041_6717  | NW_004516830.1 | Scaffold1696 | 6717                    | AA                              | GG              | 1947017451               |
| SNP_P4_166042_6775  | NW_004516830.1 | Scaffold1696 | 6775                    | GG                              | CC              | 1947017453               |
| SNP_P4_166043_6786  | NW_004516830.1 | Scaffold1696 | 6786                    | GG                              | AA              | 1947017455               |
| SNP_P4_166045_7117  | NW_004516830.1 | Scaffold1696 | 7117                    | GG                              | TT              | 1947017457               |
| SNP_P4_166046_7997  | NW_004516830.1 | Scaffold1696 | 7997                    | CC                              | TT              | 1947017459               |
| SNP_P4_166047_8230  | NW_004516830.1 | Scaffold1696 | 8230                    | AA                              | CC              | 1947017461               |
| SNP_P4_166048_8249  | NW_004516830.1 | Scaffold1696 | 8249                    | GG                              | AA              | 1947017463               |
| SNP_P4_166049_8369  | NW_004516830.1 | Scaffold1696 | 8369                    | CC                              | AA              | 1947017465               |
| SNP_P4_166050_8383  | NW_004516830.1 | Scaffold1696 | 8383                    | CC                              | TT              | 1947017466               |
| SNP_P4_166051_10603 | NW_004516830.1 | Scaffold1696 | 10603                   | AA                              | CC              | 1947017468               |
| SNP_P4_166052_10695 | NW_004516830.1 | Scaffold1696 | 10695                   | TT                              | AA              | 1947017470               |
| SNP_P4_166053_12369 | NW_004516830.1 | Scaffold1696 | 12369                   | TT                              | CC              | 1947017472               |
| SNP_P4_166054_12372 | NW_004516830.1 | Scaffold1696 | 12372                   | GG                              | AA              | 1947017474               |
| SNP_P4_166055_12396 | NW_004516830.1 | Scaffold1696 | 12396                   | CC                              | TT              | 1947017476               |
| SNP_P4_166056_12510 | NW_004516830.1 | Scaffold1696 | 12510                   | TT                              | CC              | 1947017478               |
| SNP_P4_166057_12572 | NW_004516830.1 | Scaffold1696 | 12572                   | CC                              | TT              | 1947017480               |
| SNP_P4_166058_12584 | NW_004516830.1 | Scaffold1696 | 12584                   | CC                              | TT              | 1947017482               |
| SNP_P4_166059_12704 | NW_004516830.1 | Scaffold1696 | 12704                   | AA                              | GG              | 1947017484               |
| SNP_P4_166060_12711 | NW_004516830.1 | Scaffold1696 | 12711                   | GG                              | AA              | 1947017486               |
| SNP_P4_166061_12754 | NW_004516830.1 | Scaffold1696 | 12754                   | TT                              | CC              | 1947017488               |
| SNP_P4_166062_12853 | NW_004516830.1 | Scaffold1696 | 12853                   | AA                              | GG              | 1947017490               |
| SNP_P4_166063_12901 | NW_004516830.1 | Scaffold1696 | 12901                   | CC                              | AA              | 1947017492               |

| SNPs IDs            | Chromosome IDs | Chromosomes  | Physical positions (bp) | CDC Frontier (Reference genome) | (ILWC46 & LPNB) | NCBI SNPdb Accession IDs |
|---------------------|----------------|--------------|-------------------------|---------------------------------|-----------------|--------------------------|
| SNP_P4_166064_12946 | NW_004516830.1 | Scaffold1696 | 12946                   | GG                              | TT              | 1947017494               |
| SNP_P4_166065_12951 | NW_004516830.1 | Scaffold1696 | 12951                   | CC                              | AA              | 1947017496               |
| SNP_P4_166066_12956 | NW_004516830.1 | Scaffold1696 | 12956                   | TT                              | CC              | 1947017498               |
| SNP_P4_166067_12957 | NW_004516830.1 | Scaffold1696 | 12957                   | GG                              | AA              | 1947017500               |
| SNP_P4_166068_13432 | NW_004516830.1 | Scaffold1696 | 13432                   | TT                              | CC              | 1947017502               |
| SNP_P4_166069_14513 | NW_004516830.1 | Scaffold1696 | 14513                   | TT                              | CC              | 1947017504               |
| SNP_P4_166070_15919 | NW_004516830.1 | Scaffold1696 | 15919                   | AA                              | TT              | 1947017506               |
| SNP_P4_166071_15923 | NW_004516830.1 | Scaffold1696 | 15923                   | CC                              | AA              | 1947017508               |
| SNP_P4_166072_15979 | NW_004516830.1 | Scaffold1696 | 15979                   | TT                              | CC              | 1947017510               |
| SNP_P4_166073_16022 | NW_004516830.1 | Scaffold1696 | 16022                   | TT                              | GG              | 1947017511               |
| SNP_P4_166074_16104 | NW_004516830.1 | Scaffold1696 | 16104                   | AA                              | CC              | 1947017513               |
| SNP_P4_166075_16268 | NW_004516830.1 | Scaffold1696 | 16268                   | GG                              | CC              | 1947017515               |
| SNP_P4_166076_16362 | NW_004516830.1 | Scaffold1696 | 16362                   | CC                              | AA              | 1947017517               |
| SNP_P4_166077_16431 | NW_004516830.1 | Scaffold1696 | 16431                   | GG                              | AA              | 1947017519               |
| SNP_P4_166078_16516 | NW_004516830.1 | Scaffold1696 | 16516                   | AA                              | TT              | 1947017521               |
| SNP_P4_166079_20096 | NW_004516830.1 | Scaffold1696 | 20096                   | AA                              | CC              | 1947017523               |
| SNP_P4_166080_20172 | NW_004516830.1 | Scaffold1696 | 20172                   | CC                              | TT              | 1947017525               |
| SNP_P4_166081_20255 | NW_004516830.1 | Scaffold1696 | 20255                   | TT                              | CC              | 1947017527               |
| SNP_P4_166082_20355 | NW_004516830.1 | Scaffold1696 | 20355                   | TT                              | CC              | 1947017528               |
| SNP_P4_166083_20420 | NW_004516830.1 | Scaffold1696 | 20420                   | AA                              | TT              | 1947017530               |
| SNP_P4_166084_20465 | NW_004516830.1 | Scaffold1696 | 20465                   | CC                              | TT              | 1947017532               |
| SNP_P4_166085_20483 | NW_004516830.1 | Scaffold1696 | 20483                   | AA                              | GG              | 1947017534               |
| SNP_P4_166086_20494 | NW_004516830.1 | Scaffold1696 | 20494                   | CC                              | AA              | 1947017536               |
| SNP_P4_166087_20499 | NW_004516830.1 | Scaffold1696 | 20499                   | AA                              | CC              | 1947017538               |
| SNP_P4_166088_20758 | NW_004516830.1 | Scaffold1696 | 20758                   | CC                              | AA              | 1947017540               |
| SNP_P4_166089_20899 | NW_004516830.1 | Scaffold1696 | 20899                   | CC                              | TT              | 1947017542               |
| SNP_P4_166090_21130 | NW_004516830.1 | Scaffold1696 | 21130                   | CC                              | AA              | 1947017544               |
| SNP_P4_166091_21252 | NW_004516830.1 | Scaffold1696 | 21252                   | GG                              | TT              | 1947017546               |
| SNP_P4_166092_21270 | NW_004516830.1 | Scaffold1696 | 21270                   | AA                              | GG              | 1947017548               |
| SNP_P4_166093_21318 | NW_004516830.1 | Scaffold1696 | 21318                   | TT                              | CC              | 1947017549               |
| SNP_P4_166094_21357 | NW_004516830.1 | Scaffold1696 | 21357                   | AA                              | TT              | 1947017551               |
| SNP_P4_166095_21449 | NW_004516830.1 | Scaffold1696 | 21449                   | TT                              | AA              | 1947017553               |
| SNP_P4_166096_21459 | NW_004516830.1 | Scaffold1696 | 21459                   | GG                              | CC              | 1947017555               |
| SNP_P4_166097_21486 | NW_004516830.1 | Scaffold1696 | 21486                   | GG                              | AA              | 1947017557               |
| SNP_P4_166098_21527 | NW_004516830.1 | Scaffold1696 | 21527                   | CC                              | TT              | 1947017559               |
| SNP_P4_166099_21534 | NW_004516830.1 | Scaffold1696 | 21534                   | AA                              | GG              | 1947017561               |
| SNP_P4_166100_21582 | NW_004516830.1 | Scaffold1696 | 21582                   | GG                              | AA              | 1947017563               |
| SNP_P4_166101_21614 | NW_004516830.1 | Scaffold1696 | 21614                   | TT                              | CC              | 1947017565               |
| SNP_P4_166102_21648 | NW_004516830.1 | Scaffold1696 | 21648                   | AA                              | TT              | 1947017567               |
| SNP_P4_166103_21665 | NW_004516830.1 | Scaffold1696 | 21665                   | AA                              | CC              | 1947017569               |
| SNP_P4_166104_21677 | NW_004516830.1 | Scaffold1696 | 21677                   | CC                              | TT              | 1947017570               |
| SNP_P4_166105_22924 | NW_004516830.1 | Scaffold1696 | 22924                   | AA                              | GG              | 1947017572               |



| SNPs IDs            | Chromosome IDs | Chromosomes  | Physical positions (bp) | CDC Frontier (Reference genome) | (ILWC46 & LPNB) | NCBI SNPdb Accession IDs |
|---------------------|----------------|--------------|-------------------------|---------------------------------|-----------------|--------------------------|
| SNP_P4_166106_23124 | NW_004516830.1 | Scaffold1696 | 23124                   | GG                              | TT              | 1947017574               |
| SNP_P4_166107_23140 | NW_004516830.1 | Scaffold1696 | 23140                   | CC                              | GG              | 1947017576               |
| SNP_P4_166108_23179 | NW_004516830.1 | Scaffold1696 | 23179                   | CC                              | TT              | 1947017578               |
| SNP_P4_166109_376   | NW_004516832.1 | Scaffold1699 | 376                     | AA                              | GG              | 1947017580               |
| SNP_P4_166110_409   | NW_004516832.1 | Scaffold1699 | 409                     | GG                              | CC              | 1947017582               |
| SNP_P4_166111_450   | NW_004516832.1 | Scaffold1699 | 450                     | AA                              | TT              | 1947017584               |
| SNP_P4_166112_456   | NW_004516832.1 | Scaffold1699 | 456                     | GG                              | AA              | 1947017586               |
| SNP_P4_166113_540   | NW_004516832.1 | Scaffold1699 | 540                     | CC                              | GG              | 1947017588               |
| SNP_P4_166114_811   | NW_004516832.1 | Scaffold1699 | 811                     | AA                              | TT              | 1947017590               |
| SNP_P4_166115_846   | NW_004516832.1 | Scaffold1699 | 846                     | AA                              | CC              | 1947017592               |
| SNP_P4_166116_859   | NW_004516832.1 | Scaffold1699 | 859                     | GG                              | AA              | 1947017594               |
| SNP_P4_166117_927   | NW_004516832.1 | Scaffold1699 | 927                     | TT                              | GG              | 1947017595               |
| SNP_P4_166118_1439  | NW_004516832.1 | Scaffold1699 | 1439                    | CC                              | TT              | 1947017597               |
| SNP_P4_166119_1504  | NW_004516832.1 | Scaffold1699 | 1504                    | AA                              | GG              | 1947017599               |
| SNP_P4_166120_1670  | NW_004516832.1 | Scaffold1699 | 1670                    | AA                              | GG              | 1947017601               |
| SNP_P4_166121_1686  | NW_004516832.1 | Scaffold1699 | 1686                    | AA                              | CC              | 1947017603               |
| SNP_P4_166122_1814  | NW_004516832.1 | Scaffold1699 | 1814                    | CC                              | TT              | 1947017605               |
| SNP_P4_166123_2129  | NW_004516832.1 | Scaffold1699 | 2129                    | GG                              | TT              | 1947017607               |
| SNP_P4_166124_16039 | NW_004516832.1 | Scaffold1699 | 16039                   | TT                              | CC              | 1947017609               |
| SNP_P4_166125_17230 | NW_004516832.1 | Scaffold1699 | 17230                   | GG                              | AA              | 1947017611               |
| SNP_P4_166126_20010 | NW_004516832.1 | Scaffold1699 | 20010                   | AA                              | CC              | 1947017613               |
| SNP_P4_166127_7001  | NW_004516833.1 | Scaffold1701 | 7001                    | GG                              | CC              | 1947017615               |
| SNP_P4_166128_21467 | NW_004516833.1 | Scaffold1701 | 21467                   | TT                              | GG              | 1947017617               |
| SNP_P4_166129_25921 | NW_004516833.1 | Scaffold1701 | 25921                   | TT                              | CC              | 1947017619               |
| SNP_P4_166130_26252 | NW_004516833.1 | Scaffold1701 | 26252                   | TT                              | GG              | 1947017620               |
| SNP_P4_166131_26256 | NW_004516833.1 | Scaffold1701 | 26256                   | AA                              | TT              | 1947017622               |
| SNP_P4_166132_26261 | NW_004516833.1 | Scaffold1701 | 26261                   | TT                              | AA              | 1947017624               |
| SNP_P4_166133_26720 | NW_004516833.1 | Scaffold1701 | 26720                   | AA                              | GG              | 1947017626               |
| SNP_P4_166134_26924 | NW_004516833.1 | Scaffold1701 | 26924                   | CC                              | TT              | 1947017628               |
| SNP_P4_166135_26942 | NW_004516833.1 | Scaffold1701 | 26942                   | AA                              | GG              | 1947017630               |
| SNP_P4_166136_26947 | NW_004516833.1 | Scaffold1701 | 26947                   | TT                              | GG              | 1947017632               |
| SNP_P4_166137_26960 | NW_004516833.1 | Scaffold1701 | 26960                   | CC                              | AA              | 1947017634               |
| SNP_P4_166138_26984 | NW_004516833.1 | Scaffold1701 | 26984                   | AA                              | GG              | 1947017636               |
| SNP_P4_166139_27023 | NW_004516833.1 | Scaffold1701 | 27023                   | CC                              | AA              | 1947017638               |
| SNP_P4_166140_27027 | NW_004516833.1 | Scaffold1701 | 27027                   | CC                              | GG              | 1947017640               |
| SNP_P4_166141_27053 | NW_004516833.1 | Scaffold1701 | 27053                   | TT                              | CC              | 1947017642               |
| SNP_P4_166142_27064 | NW_004516833.1 | Scaffold1701 | 27064                   | TT                              | GG              | 1947017644               |
| SNP_P4_166143_28337 | NW_004516833.1 | Scaffold1701 | 28337                   | TT                              | GG              | 1947017645               |
| SNP_P4_166144_37626 | NW_004516833.1 | Scaffold1701 | 37626                   | AA                              | GG              | 1947017647               |
| SNP_P4_166145_37779 | NW_004516833.1 | Scaffold1701 | 37779                   | GG                              | TT              | 1947017649               |
| SNP_P4_166146_37936 | NW_004516833.1 | Scaffold1701 | 37936                   | AA                              | CC              | 1947017651               |
| SNP_P4_166147_37946 | NW_004516833.1 | Scaffold1701 | 37946                   | CC                              | TT              | 1947017653               |

| SNPs IDs             | Chromosome IDs | Chromosomes  | Physical positions (bp) | CDC Frontier (Reference genome) | (ILWC46 & LPNB) | NCBI SNPdb Accession IDs |
|----------------------|----------------|--------------|-------------------------|---------------------------------|-----------------|--------------------------|
| SNP_P4_166148_40247  | NW_004516833.1 | Scaffold1701 | 40247                   | CC                              | TT              | 1947017655               |
| SNP_P4_166149_40324  | NW_004516833.1 | Scaffold1701 | 40324                   | CC                              | AA              | 1947017657               |
| SNP_P4_166150_40331  | NW_004516833.1 | Scaffold1701 | 40331                   | AA                              | GG              | 1947017659               |
| SNP_P4_166151_54170  | NW_004516833.1 | Scaffold1701 | 54170                   | AA                              | GG              | 1947017661               |
| SNP_P4_166152_54179  | NW_004516833.1 | Scaffold1701 | 54179                   | TT                              | GG              | 1947017663               |
| SNP_P4_166153_54190  | NW_004516833.1 | Scaffold1701 | 54190                   | GG                              | CC              | 1947017665               |
| SNP_P4_166154_54202  | NW_004516833.1 | Scaffold1701 | 54202                   | AA                              | TT              | 1947017667               |
| SNP_P4_166155_54358  | NW_004516833.1 | Scaffold1701 | 54358                   | CC                              | AA              | 1947017669               |
| SNP_P4_166156_54410  | NW_004516833.1 | Scaffold1701 | 54410                   | TT                              | CC              | 1947017670               |
| SNP_P4_166157_55951  | NW_004516833.1 | Scaffold1701 | 55951                   | GG                              | TT              | 1947017672               |
| SNP_P4_166158_56972  | NW_004516833.1 | Scaffold1701 | 56972                   | GG                              | TT              | 1947017674               |
| SNP_P4_166159_57677  | NW_004516833.1 | Scaffold1701 | 57677                   | AA                              | CC              | 1947017676               |
| SNP_P4_166160_57734  | NW_004516833.1 | Scaffold1701 | 57734                   | TT                              | CC              | 1947017678               |
| SNP_P4_166161_57739  | NW_004516833.1 | Scaffold1701 | 57739                   | AA                              | GG              | 1947017680               |
| SNP_P4_166162_57760  | NW_004516833.1 | Scaffold1701 | 57760                   | GG                              | AA              | 1947017682               |
| SNP_P4_166163_57902  | NW_004516833.1 | Scaffold1701 | 57902                   | TT                              | CC              | 1947017684               |
| SNP_P4_166164_57906  | NW_004516833.1 | Scaffold1701 | 57906                   | TT                              | AA              | 1947017686               |
| SNP_P4_166165_57912  | NW_004516833.1 | Scaffold1701 | 57912                   | TT                              | AA              | 1947017687               |
| SNP_P4_166166_57945  | NW_004516833.1 | Scaffold1701 | 57945                   | TT                              | CC              | 1947017689               |
| SNP_P4_166167_68115  | NW_004516833.1 | Scaffold1701 | 68115                   | AA                              | GG              | 1947017691               |
| SNP_P4_166168_76961  | NW_004516833.1 | Scaffold1701 | 76961                   | GG                              | CC              | 1947017693               |
| SNP_P4_166169_86540  | NW_004516833.1 | Scaffold1701 | 86540                   | GG                              | CC              | 1947017695               |
| SNP_P4_166170_86557  | NW_004516833.1 | Scaffold1701 | 86557                   | TT                              | AA              | 1947017697               |
| SNP_P4_166171_86567  | NW_004516833.1 | Scaffold1701 | 86567                   | GG                              | AA              | 1947017699               |
| SNP_P4_166172_86607  | NW_004516833.1 | Scaffold1701 | 86607                   | CC                              | TT              | 1947017701               |
| SNP_P4_166173_86612  | NW_004516833.1 | Scaffold1701 | 86612                   | GG                              | AA              | 1947017703               |
| SNP_P4_166174_86613  | NW_004516833.1 | Scaffold1701 | 86613                   | GG                              | TT              | 1947017705               |
| SNP_P4_166175_86623  | NW_004516833.1 | Scaffold1701 | 86623                   | CC                              | AA              | 1947017706               |
| SNP_P4_166176_86656  | NW_004516833.1 | Scaffold1701 | 86656                   | CC                              | TT              | 1947017708               |
| SNP_P4_166177_86770  | NW_004516833.1 | Scaffold1701 | 86770                   | AA                              | GG              | 1947017710               |
| SNP_P4_166178_86771  | NW_004516833.1 | Scaffold1701 | 86771                   | AA                              | CC              | 1947017712               |
| SNP_P4_166179_95564  | NW_004516833.1 | Scaffold1701 | 95564                   | GG                              | CC              | 1947017714               |
| SNP_P4_166180_95571  | NW_004516833.1 | Scaffold1701 | 95571                   | AA                              | TT              | 1947017716               |
| SNP_P4_166181_97131  | NW_004516833.1 | Scaffold1701 | 97131                   | GG                              | AA              | 1947017718               |
| SNP_P4_166183_101192 | NW_004516833.1 | Scaffold1701 | 101192                  | TT                              | CC              | 1947017720               |
| SNP_P4_166184_101230 | NW_004516833.1 | Scaffold1701 | 101230                  | TT                              | CC              | 1947017722               |
| SNP_P4_166185_101256 | NW_004516833.1 | Scaffold1701 | 101256                  | GG                              | AA              | 1947017724               |
| SNP_P4_166186_106163 | NW_004516833.1 | Scaffold1701 | 106163                  | TT                              | CC              | 1947017725               |
| SNP_P4_166187_106728 | NW_004516833.1 | Scaffold1701 | 106728                  | TT                              | GG              | 1947017727               |
| SNP_P4_166188_111656 | NW_004516833.1 | Scaffold1701 | 111656                  | TT                              | CC              | 1947017729               |
| SNP_P4_166190_126250 | NW_004516833.1 | Scaffold1701 | 126250                  | TT                              | GG              | 1947017731               |
| SNP_P4_166192_126569 | NW_004516833.1 | Scaffold1701 | 126569                  | AA                              | GG              | 1947017733               |

| SNPs IDs             | Chromosome IDs | Chromosomes  | Physical positions (bp) | CDC Frontier (Reference genome) | (ILWC46 & LPNB) | NCBI SNPdb Accession IDs |
|----------------------|----------------|--------------|-------------------------|---------------------------------|-----------------|--------------------------|
| SNP_P4_166193_126571 | NW_004516833.1 | Scaffold1701 | 126571                  | AA                              | CC              | 1947017735               |
| SNP_P4_166194_126581 | NW_004516833.1 | Scaffold1701 | 126581                  | AA                              | CC              | 1947017737               |
| SNP_P4_166195_141538 | NW_004516833.1 | Scaffold1701 | 141538                  | GG                              | AA              | 1947017739               |
| SNP_P4_166196_142670 | NW_004516833.1 | Scaffold1701 | 142670                  | AA                              | GG              | 1947017741               |
| SNP_P4_166197_142751 | NW_004516833.1 | Scaffold1701 | 142751                  | CC                              | TT              | 1947017743               |
| SNP_P4_166198_144785 | NW_004516833.1 | Scaffold1701 | 144785                  | AA                              | CC              | 1947017745               |
| SNP_P4_166199_145146 | NW_004516833.1 | Scaffold1701 | 145146                  | TT                              | GG              | 1947017747               |
| SNP_P4_166200_150762 | NW_004516833.1 | Scaffold1701 | 150762                  | GG                              | AA              | 1947017749               |
| SNP_P4_166201_151013 | NW_004516833.1 | Scaffold1701 | 151013                  | TT                              | GG              | 1947017751               |
| SNP_P4_166202_151014 | NW_004516833.1 | Scaffold1701 | 151014                  | CC                              | TT              | 1947017753               |
| SNP_P4_166203_151979 | NW_004516833.1 | Scaffold1701 | 151979                  | CC                              | TT              | 1947017755               |
| SNP_P4_166204_23790  | NW_004516835.1 | Scaffold1703 | 23790                   | TT                              | CC              | 1947017757               |
| SNP_P4_166205_37702  | NW_004516835.1 | Scaffold1703 | 37702                   | CC                              | TT              | 1947017759               |
| SNP_P4_166206_48256  | NW_004516835.1 | Scaffold1703 | 48256                   | TT                              | CC              | 1947017761               |
| SNP_P4_166207_86499  | NW_004516835.1 | Scaffold1703 | 86499                   | CC                              | AA              | 1947017763               |
| SNP_P4_166208_112847 | NW_004516835.1 | Scaffold1703 | 112847                  | CC                              | GG              | 1947017765               |
| SNP_P4_166209_112849 | NW_004516835.1 | Scaffold1703 | 112849                  | TT                              | CC              | 1947017767               |
| SNP_P4_166210_130609 | NW_004516835.1 | Scaffold1703 | 130609                  | TT                              | CC              | 1947017769               |
| SNP_P4_166211_130642 | NW_004516835.1 | Scaffold1703 | 130642                  | GG                              | AA              | 1947017771               |
| SNP_P4_166212_130670 | NW_004516835.1 | Scaffold1703 | 130670                  | TT                              | CC              | 1947017773               |
| SNP_P4_166213_130696 | NW_004516835.1 | Scaffold1703 | 130696                  | CC                              | TT              | 1947017775               |
| SNP_P4_166214_130722 | NW_004516835.1 | Scaffold1703 | 130722                  | TT                              | CC              | 1947017777               |
| SNP_P4_166215_130744 | NW_004516835.1 | Scaffold1703 | 130744                  | CC                              | TT              | 1947017779               |
| SNP_P4_166216_130759 | NW_004516835.1 | Scaffold1703 | 130759                  | TT                              | CC              | 1947017781               |
| SNP_P4_166217_130911 | NW_004516835.1 | Scaffold1703 | 130911                  | AA                              | GG              | 1947017783               |
| SNP_P4_166218_130923 | NW_004516835.1 | Scaffold1703 | 130923                  | AA                              | GG              | 1947017785               |
| SNP_P4_166219_130935 | NW_004516835.1 | Scaffold1703 | 130935                  | CC                              | AA              | 1947017787               |
| SNP_P4_166220_130943 | NW_004516835.1 | Scaffold1703 | 130943                  | GG                              | AA              | 1947017789               |
| SNP_P4_166221_131007 | NW_004516835.1 | Scaffold1703 | 131007                  | AA                              | GG              | 1947017791               |
| SNP_P4_166223_137618 | NW_004516835.1 | Scaffold1703 | 137618                  | GG                              | AA              | 1947017793               |
| SNP_P4_166224_165049 | NW_004516835.1 | Scaffold1703 | 165049                  | GG                              | AA              | 1947017795               |
| SNP_P4_166225_165274 | NW_004516835.1 | Scaffold1703 | 165274                  | TT                              | GG              | 1947017797               |
| SNP_P4_166226_165319 | NW_004516835.1 | Scaffold1703 | 165319                  | TT                              | GG              | 1947017799               |
| SNP_P4_166227_165327 | NW_004516835.1 | Scaffold1703 | 165327                  | TT                              | GG              | 1947017801               |
| SNP_P4_166228_171135 | NW_004516835.1 | Scaffold1703 | 171135                  | AA                              | GG              | 1947017803               |
| SNP_P4_166229_178085 | NW_004516835.1 | Scaffold1703 | 178085                  | AA                              | CC              | 1947017805               |
| SNP_P4_166230_200062 | NW_004516835.1 | Scaffold1703 | 200062                  | CC                              | TT              | 1947017807               |
| SNP_P4_166231_200147 | NW_004516835.1 | Scaffold1703 | 200147                  | TT                              | AA              | 1947017809               |
| SNP_P4_166232_200679 | NW_004516835.1 | Scaffold1703 | 200679                  | TT                              | CC              | 1947017811               |
| SNP_P4_166233_220939 | NW_004516835.1 | Scaffold1703 | 220939                  | TT                              | GG              | 1947017813               |
| SNP_P4_166234_220951 | NW_004516835.1 | Scaffold1703 | 220951                  | AA                              | CC              | 1947017815               |
| SNP_P4_166235_220990 | NW_004516835.1 | Scaffold1703 | 220990                  | TT                              | GG              | 1947017816               |

| SNPs IDs             | Chromosome IDs | Chromosomes  | Physical positions (bp) | CDC Frontier (Reference genome) | (ILWC46 & LPNB) | NCBI SNPdb Accession IDs |
|----------------------|----------------|--------------|-------------------------|---------------------------------|-----------------|--------------------------|
| SNP_P4_166236_223074 | NW_004516835.1 | Scaffold1703 | 223074                  | GG                              | AA              | 1947017818               |
| SNP_P4_166237_223111 | NW_004516835.1 | Scaffold1703 | 223111                  | TT                              | CC              | 1947017820               |
| SNP_P4_166238_223126 | NW_004516835.1 | Scaffold1703 | 223126                  | GG                              | AA              | 1947017822               |
| SNP_P4_166239_232358 | NW_004516835.1 | Scaffold1703 | 232358                  | CC                              | TT              | 1947017824               |
| SNP_P4_166240_232590 | NW_004516835.1 | Scaffold1703 | 232590                  | AA                              | GG              | 1947017826               |
| SNP_P4_166241_242726 | NW_004516835.1 | Scaffold1703 | 242726                  | GG                              | AA              | 1947017828               |
| SNP_P4_166242_251983 | NW_004516835.1 | Scaffold1703 | 251983                  | CC                              | TT              | 1947017830               |
| SNP_P4_166243_262400 | NW_004516835.1 | Scaffold1703 | 262400                  | AA                              | TT              | 1947017832               |
| SNP_P4_166244_277824 | NW_004516835.1 | Scaffold1703 | 277824                  | CC                              | TT              | 1947017834               |
| SNP_P4_166246_299980 | NW_004516835.1 | Scaffold1703 | 299980                  | AA                              | CC              | 1947017836               |
| SNP_P4_166247_8790   | NW_004516836.1 | Scaffold1704 | 8790                    | AA                              | GG              | 1947017838               |
| SNP_P4_166248_8834   | NW_004516836.1 | Scaffold1704 | 8834                    | TT                              | CC              | 1947017840               |
| SNP_P4_166249_9137   | NW_004516836.1 | Scaffold1704 | 9137                    | AA                              | GG              | 1947017842               |
| SNP_P4_166250_9271   | NW_004516836.1 | Scaffold1704 | 9271                    | AA                              | GG              | 1947017844               |
| SNP_P4_166251_9301   | NW_004516836.1 | Scaffold1704 | 9301                    | AA                              | CC              | 1947017846               |
| SNP_P4_166253_9676   | NW_004516836.1 | Scaffold1704 | 9676                    | AA                              | CC              | 1947017848               |
| SNP_P4_166254_9784   | NW_004516836.1 | Scaffold1704 | 9784                    | GG                              | AA              | 1947017850               |
| SNP_P4_166255_10823  | NW_004516836.1 | Scaffold1704 | 10823                   | CC                              | TT              | 1947017852               |
| SNP_P4_166256_11047  | NW_004516836.1 | Scaffold1704 | 11047                   | AA                              | CC              | 1947017854               |
| SNP_P4_166257_11073  | NW_004516836.1 | Scaffold1704 | 11073                   | CC                              | GG              | 1947017856               |
| SNP_P4_166259_11854  | NW_004516836.1 | Scaffold1704 | 11854                   | TT                              | CC              | 1947017857               |
| SNP_P4_166260_11857  | NW_004516836.1 | Scaffold1704 | 11857                   | CC                              | TT              | 1947017859               |
| SNP_P4_166261_11895  | NW_004516836.1 | Scaffold1704 | 11895                   | GG                              | AA              | 1947017861               |
| SNP_P4_166262_11982  | NW_004516836.1 | Scaffold1704 | 11982                   | TT                              | AA              | 1947017863               |
| SNP_P4_166263_32873  | NW_004516836.1 | Scaffold1704 | 32873                   | TT                              | CC              | 1947017865               |
| SNP_P4_166264_32901  | NW_004516836.1 | Scaffold1704 | 32901                   | TT                              | AA              | 1947017867               |
| SNP_P4_166265_32938  | NW_004516836.1 | Scaffold1704 | 32938                   | AA                              | GG              | 1947017869               |
| SNP_P4_166267_39280  | NW_004516836.1 | Scaffold1704 | 39280                   | AA                              | GG              | 1947017871               |
| SNP_P4_166268_39297  | NW_004516836.1 | Scaffold1704 | 39297                   | GG                              | TT              | 1947017873               |
| SNP_P4_166269_39653  | NW_004516836.1 | Scaffold1704 | 39653                   | AA                              | CC              | 1947017875               |
| SNP_P4_166270_61672  | NW_004516836.1 | Scaffold1704 | 61672                   | TT                              | AA              | 1947017877               |
| SNP_P4_166271_61895  | NW_004516836.1 | Scaffold1704 | 61895                   | TT                              | CC              | 1947017879               |
| SNP_P4_166272_61964  | NW_004516836.1 | Scaffold1704 | 61964                   | AA                              | TT              | 1947017881               |
| SNP_P4_166273_61977  | NW_004516836.1 | Scaffold1704 | 61977                   | GG                              | AA              | 1947017883               |
| SNP_P4_166274_92482  | NW_004516836.1 | Scaffold1704 | 92482                   | GG                              | AA              | 1947017885               |
| SNP_P4_166275_476    | NW_004516837.1 | Scaffold1706 | 476                     | GG                              | AA              | 1947017887               |
| SNP_P4_166276_482    | NW_004516837.1 | Scaffold1706 | 482                     | CC                              | TT              | 1947017889               |
| SNP_P4_166277_540    | NW_004516837.1 | Scaffold1706 | 540                     | CC                              | TT              | 1947017891               |
| SNP_P4_166278_1061   | NW_004516837.1 | Scaffold1706 | 1061                    | CC                              | TT              | 1947017893               |
| SNP_P4_166279_1098   | NW_004516837.1 | Scaffold1706 | 1098                    | TT                              | AA              | 1947017895               |
| SNP_P4_166280_1128   | NW_004516837.1 | Scaffold1706 | 1128                    | CC                              | TT              | 1947017897               |
| SNP_P4_166281_1237   | NW_004516837.1 | Scaffold1706 | 1237                    | AA                              | GG              | 1947017899               |

| SNPs IDs             | Chromosome IDs | Chromosomes  | Physical positions (bp) | CDC Frontier (Reference genome) | (ILWC46 & LPNB) | NCBI SNPdb Accession IDs |
|----------------------|----------------|--------------|-------------------------|---------------------------------|-----------------|--------------------------|
| SNP_P4_166282_4643   | NW_004516837.1 | Scaffold1706 | 4643                    | GG                              | AA              | 1947017901               |
| SNP_P4_166283_22951  | NW_004516837.1 | Scaffold1706 | 22951                   | AA                              | GG              | 1947017903               |
| SNP_P4_166284_24535  | NW_004516837.1 | Scaffold1706 | 24535                   | TT                              | AA              | 1947017905               |
| SNP_P4_166285_29490  | NW_004516837.1 | Scaffold1706 | 29490                   | AA                              | GG              | 1947017907               |
| SNP_P4_166286_61837  | NW_004516837.1 | Scaffold1706 | 61837                   | CC                              | AA              | 1947017909               |
| SNP_P4_166287_64370  | NW_004516837.1 | Scaffold1706 | 64370                   | AA                              | GG              | 1947017911               |
| SNP_P4_166288_64400  | NW_004516837.1 | Scaffold1706 | 64400                   | CC                              | TT              | 1947017913               |
| SNP_P4_166289_76349  | NW_004516837.1 | Scaffold1706 | 76349                   | TT                              | AA              | 1947017915               |
| SNP_P4_166290_76421  | NW_004516837.1 | Scaffold1706 | 76421                   | TT                              | CC              | 1947017917               |
| SNP_P4_166291_76703  | NW_004516837.1 | Scaffold1706 | 76703                   | GG                              | AA              | 1947017919               |
| SNP_P4_166292_76868  | NW_004516837.1 | Scaffold1706 | 76868                   | AA                              | CC              | 1947017921               |
| SNP_P4_166293_76903  | NW_004516837.1 | Scaffold1706 | 76903                   | TT                              | CC              | 1947017923               |
| SNP_P4_166294_76926  | NW_004516837.1 | Scaffold1706 | 76926                   | TT                              | CC              | 1947017925               |
| SNP_P4_166295_76929  | NW_004516837.1 | Scaffold1706 | 76929                   | GG                              | AA              | 1947017927               |
| SNP_P4_166296_76959  | NW_004516837.1 | Scaffold1706 | 76959                   | TT                              | CC              | 1947017929               |
| SNP_P4_166297_76985  | NW_004516837.1 | Scaffold1706 | 76985                   | CC                              | TT              | 1947017931               |
| SNP_P4_166298_76987  | NW_004516837.1 | Scaffold1706 | 76987                   | AA                              | GG              | 1947017933               |
| SNP_P4_166299_77072  | NW_004516837.1 | Scaffold1706 | 77072                   | CC                              | GG              | 1947017935               |
| SNP_P4_166300_77551  | NW_004516837.1 | Scaffold1706 | 77551                   | AA                              | GG              | 1947017937               |
| SNP_P4_166301_77609  | NW_004516837.1 | Scaffold1706 | 77609                   | GG                              | TT              | 1947017939               |
| SNP_P4_166302_79654  | NW_004516837.1 | Scaffold1706 | 79654                   | AA                              | GG              | 1947017941               |
| SNP_P4_166303_79670  | NW_004516837.1 | Scaffold1706 | 79670                   | AA                              | TT              | 1947017943               |
| SNP_P4_166304_79680  | NW_004516837.1 | Scaffold1706 | 79680                   | AA                              | CC              | 1947017945               |
| SNP_P4_166305_83591  | NW_004516837.1 | Scaffold1706 | 83591                   | TT                              | AA              | 1947017947               |
| SNP_P4_166306_83651  | NW_004516837.1 | Scaffold1706 | 83651                   | AA                              | GG              | 1947017949               |
| SNP_P4_166307_83652  | NW_004516837.1 | Scaffold1706 | 83652                   | GG                              | AA              | 1947017951               |
| SNP_P4_166308_83659  | NW_004516837.1 | Scaffold1706 | 83659                   | AA                              | GG              | 1947017953               |
| SNP_P4_166309_83829  | NW_004516837.1 | Scaffold1706 | 83829                   | TT                              | CC              | 1947017955               |
| SNP_P4_166310_84222  | NW_004516837.1 | Scaffold1706 | 84222                   | GG                              | CC              | 1947017957               |
| SNP_P4_166311_85330  | NW_004516837.1 | Scaffold1706 | 85330                   | TT                              | AA              | 1947017959               |
| SNP_P4_166312_85334  | NW_004516837.1 | Scaffold1706 | 85334                   | TT                              | GG              | 1947017961               |
| SNP_P4_166313_91142  | NW_004516837.1 | Scaffold1706 | 91142                   | AA                              | TT              | 1947017963               |
| SNP_P4_166314_96350  | NW_004516837.1 | Scaffold1706 | 96350                   | AA                              | GG              | 1947017965               |
| SNP_P4_166315_99093  | NW_004516837.1 | Scaffold1706 | 99093                   | AA                              | GG              | 1947017967               |
| SNP_P4_166316_100260 | NW_004516837.1 | Scaffold1706 | 100260                  | AA                              | GG              | 1947017969               |
| SNP_P4_166317_101573 | NW_004516837.1 | Scaffold1706 | 101573                  | AA                              | GG              | 1947017970               |
| SNP_P4_166320_533    | NW_004516839.1 | Scaffold1708 | 533                     | AA                              | GG              | 1947017972               |
| SNP_P4_166321_906    | NW_004516839.1 | Scaffold1708 | 906                     | GG                              | AA              | 1947017974               |
| SNP_P4_166322_946    | NW_004516839.1 | Scaffold1708 | 946                     | TT                              | CC              | 1947017976               |
| SNP_P4_166323_3179   | NW_004516839.1 | Scaffold1708 | 3179                    | AA                              | GG              | 1947017978               |
| SNP_P4_166324_3794   | NW_004516839.1 | Scaffold1708 | 3794                    | AA                              | TT              | 1947017979               |
| SNP_P4_166325_4900   | NW_004516839.1 | Scaffold1708 | 4900                    | TT                              | CC              | 1947017980               |

| SNPs IDs            | Chromosome IDs | Chromosomes  | Physical positions (bp) | CDC Frontier (Reference genome) | (ILWC46 & LPNB) | NCBI SNPdb Accession IDs |
|---------------------|----------------|--------------|-------------------------|---------------------------------|-----------------|--------------------------|
| SNP_P4_166326_5782  | NW_004516839.1 | Scaffold1708 | 5782                    | AA                              | TT              | 1947017981               |
| SNP_P4_166327_6319  | NW_004516839.1 | Scaffold1708 | 6319                    | GG                              | AA              | 1947017982               |
| SNP_P4_166328_7717  | NW_004516839.1 | Scaffold1708 | 7717                    | GG                              | AA              | 1947017983               |
| SNP_P4_166329_7720  | NW_004516839.1 | Scaffold1708 | 7720                    | CC                              | TT              | 1947017984               |
| SNP_P4_166330_7722  | NW_004516839.1 | Scaffold1708 | 7722                    | TT                              | CC              | 1947017985               |
| SNP_P4_166331_7769  | NW_004516839.1 | Scaffold1708 | 7769                    | TT                              | AA              | 1947017986               |
| SNP_P4_166333_7852  | NW_004516839.1 | Scaffold1708 | 7852                    | TT                              | AA              | 1947017987               |
| SNP_P4_166334_8044  | NW_004516839.1 | Scaffold1708 | 8044                    | AA                              | TT              | 1947017988               |
| SNP_P4_166335_8093  | NW_004516839.1 | Scaffold1708 | 8093                    | TT                              | AA              | 1947017989               |
| SNP_P4_166336_8101  | NW_004516839.1 | Scaffold1708 | 8101                    | AA                              | TT              | 1947017990               |
| SNP_P4_166337_8143  | NW_004516839.1 | Scaffold1708 | 8143                    | GG                              | CC              | 1947017991               |
| SNP_P4_166338_10112 | NW_004516839.1 | Scaffold1708 | 10112                   | CC                              | TT              | 1947017992               |
| SNP_P4_166340_12949 | NW_004516839.1 | Scaffold1708 | 12949                   | TT                              | GG              | 1947017993               |
| SNP_P4_166341_13056 | NW_004516839.1 | Scaffold1708 | 13056                   | AA                              | TT              | 1947017994               |
| SNP_P4_166344_15541 | NW_004516839.1 | Scaffold1708 | 15541                   | TT                              | AA              | 1947017996               |
| SNP_P4_166345_15625 | NW_004516839.1 | Scaffold1708 | 15625                   | GG                              | AA              | 1947017998               |
| SNP_P4_166346_21167 | NW_004516839.1 | Scaffold1708 | 21167                   | TT                              | CC              | 1947018000               |
| SNP_P4_166347_21617 | NW_004516839.1 | Scaffold1708 | 21617                   | AA                              | TT              | 1947018002               |
| SNP_P4_166348_21623 | NW_004516839.1 | Scaffold1708 | 21623                   | AA                              | CC              | 1947018004               |
| SNP_P4_166349_21886 | NW_004516839.1 | Scaffold1708 | 21886                   | CC                              | AA              | 1947018006               |
| SNP_P4_166350_22024 | NW_004516839.1 | Scaffold1708 | 22024                   | CC                              | AA              | 1947018008               |
| SNP_P4_166351_22050 | NW_004516839.1 | Scaffold1708 | 22050                   | CC                              | AA              | 1947018010               |
| SNP_P4_166352_24239 | NW_004516839.1 | Scaffold1708 | 24239                   | AA                              | TT              | 1947018011               |
| SNP_P4_166353_25883 | NW_004516839.1 | Scaffold1708 | 25883                   | CC                              | GG              | 1947018013               |
| SNP_P4_166354_26592 | NW_004516839.1 | Scaffold1708 | 26592                   | AA                              | GG              | 1947018015               |
| SNP_P4_166355_26636 | NW_004516839.1 | Scaffold1708 | 26636                   | TT                              | CC              | 1947018017               |
| SNP_P4_166356_29042 | NW_004516839.1 | Scaffold1708 | 29042                   | GG                              | AA              | 1947018019               |
| SNP_P4_166358_29646 | NW_004516839.1 | Scaffold1708 | 29646                   | GG                              | TT              | 1947018021               |
| SNP_P4_166359_29825 | NW_004516839.1 | Scaffold1708 | 29825                   | AA                              | TT              | 1947018023               |
| SNP_P4_166360_29880 | NW_004516839.1 | Scaffold1708 | 29880                   | GG                              | CC              | 1947018024               |
| SNP_P4_166361_29914 | NW_004516839.1 | Scaffold1708 | 29914                   | CC                              | TT              | 1947018026               |
| SNP_P4_166362_29961 | NW_004516839.1 | Scaffold1708 | 29961                   | CC                              | TT              | 1947018028               |
| SNP_P4_166363_31379 | NW_004516839.1 | Scaffold1708 | 31379                   | TT                              | CC              | 1947018030               |
| SNP_P4_166364_31707 | NW_004516839.1 | Scaffold1708 | 31707                   | AA                              | TT              | 1947018032               |
| SNP_P4_166365_34497 | NW_004516839.1 | Scaffold1708 | 34497                   | GG                              | TT              | 1947018034               |
| SNP_P4_166367_34746 | NW_004516839.1 | Scaffold1708 | 34746                   | GG                              | AA              | 1947018036               |
| SNP_P4_166368_35029 | NW_004516839.1 | Scaffold1708 | 35029                   | GG                              | AA              | 1947018038               |
| SNP_P4_166369_35210 | NW_004516839.1 | Scaffold1708 | 35210                   | CC                              | TT              | 1947018040               |
| SNP_P4_166370_40137 | NW_004516839.1 | Scaffold1708 | 40137                   | GG                              | TT              | 1947018042               |
| SNP_P4_166371_40740 | NW_004516839.1 | Scaffold1708 | 40740                   | TT                              | GG              | 1947018044               |
| SNP_P4_166373_42915 | NW_004516839.1 | Scaffold1708 | 42915                   | AA                              | TT              | 1947018046               |
| SNP_P4_166374_43932 | NW_004516839.1 | Scaffold1708 | 43932                   | AA                              | TT              | 1947018048               |

| SNPs IDs            | Chromosome IDs | Chromosomes  | Physical positions (bp) | CDC Frontier (Reference genome) | (ILWC46 & LPNB) | NCBI SNPdb Accession IDs |
|---------------------|----------------|--------------|-------------------------|---------------------------------|-----------------|--------------------------|
| SNP_P4_166375_46683 | NW_004516839.1 | Scaffold1708 | 46683                   | CC                              | AA              | 1947018049               |
| SNP_P4_166376_47748 | NW_004516839.1 | Scaffold1708 | 47748                   | GG                              | TT              | 1947018051               |
| SNP_P4_166377_49156 | NW_004516839.1 | Scaffold1708 | 49156                   | CC                              | TT              | 1947018053               |
| SNP_P4_166378_59949 | NW_004516839.1 | Scaffold1708 | 59949                   | CC                              | TT              | 1947018055               |
| SNP_P4_166379_59966 | NW_004516839.1 | Scaffold1708 | 59966                   | GG                              | AA              | 1947018057               |
| SNP_P4_166380_60022 | NW_004516839.1 | Scaffold1708 | 60022                   | CC                              | TT              | 1947018059               |
| SNP_P4_166381_60834 | NW_004516839.1 | Scaffold1708 | 60834                   | GG                              | TT              | 1947018061               |
| SNP_P4_166382_61039 | NW_004516839.1 | Scaffold1708 | 61039                   | GG                              | AA              | 1947018063               |
| SNP_P4_166384_64732 | NW_004516839.1 | Scaffold1708 | 64732                   | AA                              | GG              | 1947018065               |
| SNP_P4_166385_67154 | NW_004516839.1 | Scaffold1708 | 67154                   | TT                              | CC              | 1947018067               |
| SNP_P4_166386_67165 | NW_004516839.1 | Scaffold1708 | 67165                   | CC                              | AA              | 1947018069               |
| SNP_P4_166387_67291 | NW_004516839.1 | Scaffold1708 | 67291                   | GG                              | CC              | 1947018071               |
| SNP_P4_166388_67545 | NW_004516839.1 | Scaffold1708 | 67545                   | AA                              | GG              | 1947018073               |
| SNP_P4_166389_67560 | NW_004516839.1 | Scaffold1708 | 67560                   | AA                              | GG              | 1947018075               |
| SNP_P4_166392_85283 | NW_004516839.1 | Scaffold1708 | 85283                   | AA                              | GG              | 1947018077               |
| SNP_P4_166393_85349 | NW_004516839.1 | Scaffold1708 | 85349                   | AA                              | CC              | 1947018079               |
| SNP_P4_166394_87218 | NW_004516839.1 | Scaffold1708 | 87218                   | AA                              | GG              | 1947018081               |
| SNP_P4_166396_64    | NW_004516840.1 | Scaffold1709 | 64                      | CC                              | AA              | 1947018083               |
| SNP_P4_166397_65    | NW_004516840.1 | Scaffold1709 | 65                      | AA                              | TT              | 1947018085               |
| SNP_P4_166398_81    | NW_004516840.1 | Scaffold1709 | 81                      | TT                              | CC              | 1947018086               |
| SNP_P4_166399_196   | NW_004516840.1 | Scaffold1709 | 196                     | GG                              | AA              | 1947018088               |
| SNP_P4_166400_197   | NW_004516840.1 | Scaffold1709 | 197                     | CC                              | GG              | 1947018090               |
| SNP_P4_166401_202   | NW_004516840.1 | Scaffold1709 | 202                     | GG                              | AA              | 1947018092               |
| SNP_P4_166402_203   | NW_004516840.1 | Scaffold1709 | 203                     | GG                              | TT              | 1947018094               |
| SNP_P4_166403_403   | NW_004516840.1 | Scaffold1709 | 403                     | AA                              | GG              | 1947018096               |
| SNP_P4_166404_422   | NW_004516840.1 | Scaffold1709 | 422                     | CC                              | AA              | 1947018098               |
| SNP_P4_166405_468   | NW_004516840.1 | Scaffold1709 | 468                     | TT                              | GG              | 1947018100               |
| SNP_P4_166406_3810  | NW_004516840.1 | Scaffold1709 | 3810                    | TT                              | CC              | 1947018102               |
| SNP_P4_166407_3839  | NW_004516840.1 | Scaffold1709 | 3839                    | TT                              | GG              | 1947018104               |
| SNP_P4_166408_3843  | NW_004516840.1 | Scaffold1709 | 3843                    | CC                              | TT              | 1947018105               |
| SNP_P4_166409_3857  | NW_004516840.1 | Scaffold1709 | 3857                    | GG                              | CC              | 1947018107               |
| SNP_P4_166410_3889  | NW_004516840.1 | Scaffold1709 | 3889                    | CC                              | TT              | 1947018109               |
| SNP_P4_166411_3895  | NW_004516840.1 | Scaffold1709 | 3895                    | CC                              | AA              | 1947018111               |
| SNP_P4_166412_225   | NW_004516841.1 | Scaffold1710 | 225                     | AA                              | TT              | 1947018113               |
| SNP_P4_166413_416   | NW_004516841.1 | Scaffold1710 | 416                     | AA                              | TT              | 1947018115               |
| SNP_P4_166414_5539  | NW_004516841.1 | Scaffold1710 | 5539                    | TT                              | CC              | 1947018117               |
| SNP_P4_166416_8585  | NW_004516841.1 | Scaffold1710 | 8585                    | AA                              | CC              | 1947018119               |
| SNP_P4_166417_8589  | NW_004516841.1 | Scaffold1710 | 8589                    | TT                              | AA              | 1947018121               |
| SNP_P4_166418_10154 | NW_004516841.1 | Scaffold1710 | 10154                   | AA                              | GG              | 1947018123               |
| SNP_P4_166420_13202 | NW_004516841.1 | Scaffold1710 | 13202                   | TT                              | AA              | 1947018125               |
| SNP_P4_166421_23981 | NW_004516841.1 | Scaffold1710 | 23981                   | CC                              | TT              | 1947018127               |
| SNP_P4_166422_35836 | NW_004516841.1 | Scaffold1710 | 35836                   | CC                              | TT              | 1947018128               |

| SNPs IDs             | Chromosome IDs | Chromosomes  | Physical positions (bp) | CDC Frontier (Reference genome) | (ILWC46 & LPNB) | NCBI SNPdb Accession IDs |
|----------------------|----------------|--------------|-------------------------|---------------------------------|-----------------|--------------------------|
| SNP_P4_166423_40943  | NW_004516841.1 | Scaffold1710 | 40943                   | CC                              | TT              | 1947018130               |
| SNP_P4_166425_51163  | NW_004516841.1 | Scaffold1710 | 51163                   | AA                              | TT              | 1947018132               |
| SNP_P4_166426_51167  | NW_004516841.1 | Scaffold1710 | 51167                   | AA                              | GG              | 1947018134               |
| SNP_P4_166427_82897  | NW_004516841.1 | Scaffold1710 | 82897                   | TT                              | AA              | 1947018136               |
| SNP_P4_166429_92778  | NW_004516841.1 | Scaffold1710 | 92778                   | GG                              | TT              | 1947018138               |
| SNP_P4_166431_96579  | NW_004516841.1 | Scaffold1710 | 96579                   | TT                              | CC              | 1947018140               |
| SNP_P4_166432_116039 | NW_004516841.1 | Scaffold1710 | 116039                  | CC                              | TT              | 1947018141               |
| SNP_P4_166434_132827 | NW_004516841.1 | Scaffold1710 | 132827                  | TT                              | CC              | 1947018143               |
| SNP_P4_166435_132958 | NW_004516841.1 | Scaffold1710 | 132958                  | GG                              | AA              | 1947018145               |
| SNP_P4_166436_133080 | NW_004516841.1 | Scaffold1710 | 133080                  | CC                              | TT              | 1947018147               |
| SNP_P4_166437_141981 | NW_004516841.1 | Scaffold1710 | 141981                  | GG                              | AA              | 1947018149               |
| SNP_P4_166439_160639 | NW_004516841.1 | Scaffold1710 | 160639                  | TT                              | AA              | 1947018151               |
| SNP_P4_166440_166812 | NW_004516841.1 | Scaffold1710 | 166812                  | TT                              | AA              | 1947018153               |
| SNP_P4_166441_2775   | NW_004516843.1 | Scaffold1715 | 2775                    | TT                              | GG              | 1947018155               |
| SNP_P4_166442_3058   | NW_004516843.1 | Scaffold1715 | 3058                    | GG                              | AA              | 1947018157               |
| SNP_P4_166443_1034   | NW_004516845.1 | Scaffold1717 | 1034                    | CC                              | TT              | 1947018159               |
| SNP_P4_166444_1188   | NW_004516845.1 | Scaffold1717 | 1188                    | GG                              | CC              | 1947018160               |
| SNP_P4_166445_14235  | NW_004516846.1 | Scaffold1718 | 14235                   | AA                              | GG              | 1947018162               |
| SNP_P4_166446_16523  | NW_004516846.1 | Scaffold1718 | 16523                   | TT                              | AA              | 1947018164               |
| SNP_P4_166448_60473  | NW_004516846.1 | Scaffold1718 | 60473                   | TT                              | CC              | 1947018166               |
| SNP_P4_166449_71692  | NW_004516846.1 | Scaffold1718 | 71692                   | AA                              | CC              | 1947018168               |
| SNP_P4_166450_71930  | NW_004516846.1 | Scaffold1718 | 71930                   | CC                              | TT              | 1947018170               |
| SNP_P4_166451_10759  | NW_004516849.1 | Scaffold1722 | 10759                   | CC                              | GG              | 1947018172               |
| SNP_P4_166452_31751  | NW_004516849.1 | Scaffold1722 | 31751                   | TT                              | CC              | 1947018174               |
| SNP_P4_166453_38153  | NW_004516849.1 | Scaffold1722 | 38153                   | AA                              | GG              | 1947018176               |
| SNP_P4_166454_42629  | NW_004516849.1 | Scaffold1722 | 42629                   | AA                              | GG              | 1947018178               |
| SNP_P4_166455_42687  | NW_004516849.1 | Scaffold1722 | 42687                   | CC                              | AA              | 1947018180               |
| SNP_P4_166459_135557 | NW_004516849.1 | Scaffold1722 | 135557                  | GG                              | AA              | 1947018182               |
| SNP_P4_166460_135590 | NW_004516849.1 | Scaffold1722 | 135590                  | GG                              | AA              | 1947018184               |
| SNP_P4_166461_135675 | NW_004516849.1 | Scaffold1722 | 135675                  | GG                              | AA              | 1947018186               |
| SNP_P4_166462_135682 | NW_004516849.1 | Scaffold1722 | 135682                  | TT                              | CC              | 1947018188               |
| SNP_P4_166463_135971 | NW_004516849.1 | Scaffold1722 | 135971                  | TT                              | GG              | 1947018190               |
| SNP_P4_166464_148308 | NW_004516849.1 | Scaffold1722 | 148308                  | AA                              | TT              | 1947018192               |
| SNP_P4_166465_176623 | NW_004516849.1 | Scaffold1722 | 176623                  | CC                              | TT              | 1947018194               |
| SNP_P4_166466_182316 | NW_004516849.1 | Scaffold1722 | 182316                  | AA                              | TT              | 1947018196               |
| SNP_P4_166467_184376 | NW_004516849.1 | Scaffold1722 | 184376                  | AA                              | TT              | 1947018198               |
| SNP_P4_166468_184553 | NW_004516849.1 | Scaffold1722 | 184553                  | AA                              | GG              | 1947018200               |
| SNP_P4_166469_184587 | NW_004516849.1 | Scaffold1722 | 184587                  | AA                              | GG              | 1947018202               |
| SNP_P4_166470_184654 | NW_004516849.1 | Scaffold1722 | 184654                  | AA                              | GG              | 1947018204               |
| SNP_P4_166471_184665 | NW_004516849.1 | Scaffold1722 | 184665                  | GG                              | AA              | 1947018206               |
| SNP_P4_166472_187229 | NW_004516849.1 | Scaffold1722 | 187229                  | AA                              | GG              | 1947018208               |
| SNP_P4_166473_187272 | NW_004516849.1 | Scaffold1722 | 187272                  | CC                              | TT              | 1947018210               |



| SNPs IDs             | Chromosome IDs | Chromosomes  | Physical positions (bp) | CDC Frontier (Reference genome) | (ILWC46 & LPNB) | NCBI SNPdb Accession IDs |
|----------------------|----------------|--------------|-------------------------|---------------------------------|-----------------|--------------------------|
| SNP_P4_166474_195400 | NW_004516849.1 | Scaffold1722 | 195400                  | AA                              | GG              | 1947018212               |
| SNP_P4_166475_275    | NW_004516850.1 | Scaffold1723 | 275                     | GG                              | AA              | 1947018214               |
| SNP_P4_166476_637    | NW_004516850.1 | Scaffold1723 | 637                     | CC                              | TT              | 1947018216               |
| SNP_P4_166477_657    | NW_004516850.1 | Scaffold1723 | 657                     | CC                              | TT              | 1947018218               |
| SNP_P4_166478_796    | NW_004516850.1 | Scaffold1723 | 796                     | GG                              | CC              | 1947018220               |
| SNP_P4_166479_801    | NW_004516850.1 | Scaffold1723 | 801                     | CC                              | TT              | 1947018222               |
| SNP_P4_166480_802    | NW_004516850.1 | Scaffold1723 | 802                     | TT                              | GG              | 1947018224               |
| SNP_P4_166481_817    | NW_004516850.1 | Scaffold1723 | 817                     | TT                              | CC              | 1947018226               |
| SNP_P4_166482_852    | NW_004516850.1 | Scaffold1723 | 852                     | CC                              | TT              | 1947018228               |
| SNP_P4_166483_869    | NW_004516850.1 | Scaffold1723 | 869                     | CC                              | TT              | 1947018230               |
| SNP_P4_166484_978    | NW_004516850.1 | Scaffold1723 | 978                     | TT                              | CC              | 1947018232               |
| SNP_P4_166486_1133   | NW_004516850.1 | Scaffold1723 | 1133                    | AA                              | GG              | 1947018234               |
| SNP_P4_166487_1136   | NW_004516850.1 | Scaffold1723 | 1136                    | CC                              | AA              | 1947018236               |
| SNP_P4_166488_1176   | NW_004516850.1 | Scaffold1723 | 1176                    | TT                              | CC              | 1947018238               |
| SNP_P4_166489_1188   | NW_004516850.1 | Scaffold1723 | 1188                    | AA                              | CC              | 1947018240               |
| SNP_P4_166490_1193   | NW_004516850.1 | Scaffold1723 | 1193                    | GG                              | TT              | 1947018242               |
| SNP_P4_166491_1241   | NW_004516850.1 | Scaffold1723 | 1241                    | CC                              | TT              | 1947018244               |
| SNP_P4_166492_1271   | NW_004516850.1 | Scaffold1723 | 1271                    | GG                              | TT              | 1947018246               |
| SNP_P4_166494_1314   | NW_004516850.1 | Scaffold1723 | 1314                    | GG                              | AA              | 1947018248               |
| SNP_P4_166495_1351   | NW_004516850.1 | Scaffold1723 | 1351                    | TT                              | AA              | 1947018250               |
| SNP_P4_166496_1418   | NW_004516850.1 | Scaffold1723 | 1418                    | TT                              | CC              | 1947018252               |
| SNP_P4_166497_1424   | NW_004516850.1 | Scaffold1723 | 1424                    | CC                              | TT              | 1947018254               |
| SNP_P4_166498_1487   | NW_004516850.1 | Scaffold1723 | 1487                    | AA                              | TT              | 1947018256               |
| SNP_P4_166499_1488   | NW_004516850.1 | Scaffold1723 | 1488                    | CC                              | AA              | 1947018258               |
| SNP_P4_166500_1493   | NW_004516850.1 | Scaffold1723 | 1493                    | AA                              | CC              | 1947018260               |
| SNP_P4_166501_1510   | NW_004516850.1 | Scaffold1723 | 1510                    | AA                              | TT              | 1947018261               |
| SNP_P4_166502_1516   | NW_004516850.1 | Scaffold1723 | 1516                    | GG                              | AA              | 1947018263               |
| SNP_P4_166503_1523   | NW_004516850.1 | Scaffold1723 | 1523                    | AA                              | GG              | 1947018265               |
| SNP_P4_166504_90     | NW_004516851.1 | Scaffold1725 | 90                      | TT                              | GG              | 1947018267               |
| SNP_P4_166505_179    | NW_004516851.1 | Scaffold1725 | 179                     | CC                              | GG              | 1947018269               |
| SNP_P4_166506_22112  | NW_004516851.1 | Scaffold1725 | 22112                   | TT                              | CC              | 1947018271               |
| SNP_P4_166507_22140  | NW_004516851.1 | Scaffold1725 | 22140                   | TT                              | GG              | 1947018273               |
| SNP_P4_166508_23007  | NW_004516851.1 | Scaffold1725 | 23007                   | AA                              | TT              | 1947018275               |
| SNP_P4_166509_28621  | NW_004516851.1 | Scaffold1725 | 28621                   | TT                              | AA              | 1947018277               |
| SNP_P4_166510_28648  | NW_004516851.1 | Scaffold1725 | 28648                   | AA                              | CC              | 1947018279               |
| SNP_P4_166511_28662  | NW_004516851.1 | Scaffold1725 | 28662                   | AA                              | TT              | 1947018281               |
| SNP_P4_166513_33511  | NW_004516851.1 | Scaffold1725 | 33511                   | AA                              | GG              | 1947018283               |
| SNP_P4_166514_33547  | NW_004516851.1 | Scaffold1725 | 33547                   | TT                              | CC              | 1947018285               |
| SNP_P4_166515_33594  | NW_004516851.1 | Scaffold1725 | 33594                   | GG                              | AA              | 1947018287               |
| SNP_P4_166516_33622  | NW_004516851.1 | Scaffold1725 | 33622                   | AA                              | GG              | 1947018289               |
| SNP_P4_166517_33885  | NW_004516851.1 | Scaffold1725 | 33885                   | TT                              | GG              | 1947018291               |
| SNP_P4_166518_39984  | NW_004516851.1 | Scaffold1725 | 39984                   | AA                              | CC              | 1947018293               |

| SNPs IDs            | Chromosome IDs | Chromosomes  | Physical positions (bp) | CDC Frontier (Reference genome) | (ILWC46 & LPNB) | NCBI SNPdb Accession IDs |
|---------------------|----------------|--------------|-------------------------|---------------------------------|-----------------|--------------------------|
| SNP_P4_166519_40002 | NW_004516851.1 | Scaffold1725 | 40002                   | AA                              | GG              | 1947018295               |
| SNP_P4_166520_40012 | NW_004516851.1 | Scaffold1725 | 40012                   | TT                              | CC              | 1947018297               |
| SNP_P4_166521_40077 | NW_004516851.1 | Scaffold1725 | 40077                   | TT                              | CC              | 1947018299               |
| SNP_P4_166522_40184 | NW_004516851.1 | Scaffold1725 | 40184                   | TT                              | CC              | 1947018300               |
| SNP_P4_166523_40187 | NW_004516851.1 | Scaffold1725 | 40187                   | CC                              | TT              | 1947018302               |
| SNP_P4_166524_40326 | NW_004516851.1 | Scaffold1725 | 40326                   | TT                              | CC              | 1947018304               |
| SNP_P4_166525_40341 | NW_004516851.1 | Scaffold1725 | 40341                   | CC                              | AA              | 1947018306               |
| SNP_P4_166526_40347 | NW_004516851.1 | Scaffold1725 | 40347                   | CC                              | AA              | 1947018308               |
| SNP_P4_166527_40424 | NW_004516851.1 | Scaffold1725 | 40424                   | TT                              | CC              | 1947018310               |
| SNP_P4_166528_40432 | NW_004516851.1 | Scaffold1725 | 40432                   | AA                              | GG              | 1947018312               |
| SNP_P4_166529_40443 | NW_004516851.1 | Scaffold1725 | 40443                   | AA                              | CC              | 1947018314               |
| SNP_P4_166530_40502 | NW_004516851.1 | Scaffold1725 | 40502                   | AA                              | GG              | 1947018316               |
| SNP_P4_166531_15942 | NW_004516852.1 | Scaffold1726 | 15942                   | TT                              | GG              | 1947018318               |
| SNP_P4_166532_16229 | NW_004516852.1 | Scaffold1726 | 16229                   | GG                              | TT              | 1947018320               |
| SNP_P4_166533_18775 | NW_004516852.1 | Scaffold1726 | 18775                   | CC                              | TT              | 1947018322               |
| SNP_P4_166534_24197 | NW_004516852.1 | Scaffold1726 | 24197                   | AA                              | GG              | 1947018324               |
| SNP_P4_166535_24475 | NW_004516852.1 | Scaffold1726 | 24475                   | AA                              | GG              | 1947018326               |
| SNP_P4_166536_24529 | NW_004516852.1 | Scaffold1726 | 24529                   | TT                              | GG              | 1947018328               |
| SNP_P4_166537_30749 | NW_004516852.1 | Scaffold1726 | 30749                   | GG                              | AA              | 1947018330               |
| SNP_P4_166538_38231 | NW_004516852.1 | Scaffold1726 | 38231                   | GG                              | AA              | 1947018332               |
| SNP_P4_166539_44699 | NW_004516852.1 | Scaffold1726 | 44699                   | GG                              | AA              | 1947018334               |
| SNP_P4_166540_44734 | NW_004516852.1 | Scaffold1726 | 44734                   | TT                              | CC              | 1947018336               |
| SNP_P4_166541_44735 | NW_004516852.1 | Scaffold1726 | 44735                   | GG                              | AA              | 1947018338               |
| SNP_P4_166542_46264 | NW_004516852.1 | Scaffold1726 | 46264                   | TT                              | GG              | 1947018340               |
| SNP_P4_166543_49179 | NW_004516852.1 | Scaffold1726 | 49179                   | AA                              | TT              | 1947018342               |
| SNP_P4_166544_49200 | NW_004516852.1 | Scaffold1726 | 49200                   | AA                              | GG              | 1947018344               |
| SNP_P4_166545_470   | NW_004516855.1 | Scaffold1729 | 470                     | CC                              | GG              | 1947018346               |
| SNP_P4_166546_522   | NW_004516855.1 | Scaffold1729 | 522                     | AA                              | TT              | 1947018347               |
| SNP_P4_166547_8477  | NW_004516855.1 | Scaffold1729 | 8477                    | CC                              | TT              | 1947018349               |
| SNP_P4_166548_8518  | NW_004516855.1 | Scaffold1729 | 8518                    | CC                              | AA              | 1947018351               |
| SNP_P4_166549_8881  | NW_004516855.1 | Scaffold1729 | 8881                    | TT                              | CC              | 1947018353               |
| SNP_P4_166550_16161 | NW_004516855.1 | Scaffold1729 | 16161                   | CC                              | TT              | 1947018355               |
| SNP_P4_166551_16522 | NW_004516855.1 | Scaffold1729 | 16522                   | GG                              | CC              | 1947018357               |
| SNP_P4_166552_16555 | NW_004516855.1 | Scaffold1729 | 16555                   | TT                              | CC              | 1947018358               |
| SNP_P4_166553_16649 | NW_004516855.1 | Scaffold1729 | 16649                   | TT                              | CC              | 1947018360               |
| SNP_P4_166554_27126 | NW_004516855.1 | Scaffold1729 | 27126                   | AA                              | GG              | 1947018362               |
| SNP_P4_166555_27492 | NW_004516855.1 | Scaffold1729 | 27492                   | TT                              | CC              | 1947018364               |
| SNP_P4_166556_27503 | NW_004516855.1 | Scaffold1729 | 27503                   | TT                              | GG              | 1947018366               |
| SNP_P4_166557_27505 | NW_004516855.1 | Scaffold1729 | 27505                   | TT                              | GG              | 1947018368               |
| SNP_P4_166558_49497 | NW_004516855.1 | Scaffold1729 | 49497                   | CC                              | AA              | 1947018370               |
| SNP_P4_166559_49739 | NW_004516855.1 | Scaffold1729 | 49739                   | TT                              | CC              | 1947018372               |
| SNP_P4_166560_49762 | NW_004516855.1 | Scaffold1729 | 49762                   | GG                              | AA              | 1947018374               |

| SNPs IDs             | Chromosome IDs | Chromosomes  | Physical positions (bp) | CDC Frontier (Reference genome) | (ILWC46 & LPNB) | NCBI SNPdb Accession IDs |
|----------------------|----------------|--------------|-------------------------|---------------------------------|-----------------|--------------------------|
| SNP_P4_166561_54310  | NW_004516855.1 | Scaffold1729 | 54310                   | CC                              | TT              | 1947018376               |
| SNP_P4_166562_56175  | NW_004516855.1 | Scaffold1729 | 56175                   | GG                              | AA              | 1947018378               |
| SNP_P4_166563_56210  | NW_004516855.1 | Scaffold1729 | 56210                   | GG                              | AA              | 1947018380               |
| SNP_P4_166564_56543  | NW_004516855.1 | Scaffold1729 | 56543                   | CC                              | GG              | 1947018382               |
| SNP_P4_166565_79849  | NW_004516855.1 | Scaffold1729 | 79849                   | AA                              | GG              | 1947018384               |
| SNP_P4_166566_79972  | NW_004516855.1 | Scaffold1729 | 79972                   | AA                              | CC              | 1947018386               |
| SNP_P4_166567_80019  | NW_004516855.1 | Scaffold1729 | 80019                   | AA                              | CC              | 1947018388               |
| SNP_P4_166568_80056  | NW_004516855.1 | Scaffold1729 | 80056                   | TT                              | GG              | 1947018390               |
| SNP_P4_166569_80209  | NW_004516855.1 | Scaffold1729 | 80209                   | CC                              | TT              | 1947018392               |
| SNP_P4_166570_80252  | NW_004516855.1 | Scaffold1729 | 80252                   | CC                              | TT              | 1947018394               |
| SNP_P4_166571_80324  | NW_004516855.1 | Scaffold1729 | 80324                   | GG                              | CC              | 1947018396               |
| SNP_P4_166572_80332  | NW_004516855.1 | Scaffold1729 | 80332                   | AA                              | GG              | 1947018397               |
| SNP_P4_166573_80374  | NW_004516855.1 | Scaffold1729 | 80374                   | AA                              | GG              | 1947018399               |
| SNP_P4_166574_80390  | NW_004516855.1 | Scaffold1729 | 80390                   | TT                              | CC              | 1947018401               |
| SNP_P4_166575_86052  | NW_004516855.1 | Scaffold1729 | 86052                   | CC                              | AA              | 1947018403               |
| SNP_P4_166576_86056  | NW_004516855.1 | Scaffold1729 | 86056                   | CC                              | AA              | 1947018405               |
| SNP_P4_166577_86090  | NW_004516855.1 | Scaffold1729 | 86090                   | TT                              | CC              | 1947018407               |
| SNP_P4_166578_86481  | NW_004516855.1 | Scaffold1729 | 86481                   | AA                              | GG              | 1947018409               |
| SNP_P4_166579_98574  | NW_004516855.1 | Scaffold1729 | 98574                   | TT                              | CC              | 1947018411               |
| SNP_P4_166580_132087 | NW_004516855.1 | Scaffold1729 | 132087                  | TT                              | CC              | 1947018413               |
| SNP_P4_166581_140244 | NW_004516855.1 | Scaffold1729 | 140244                  | CC                              | GG              | 1947018415               |
| SNP_P4_166582_146903 | NW_004516855.1 | Scaffold1729 | 146903                  | TT                              | CC              | 1947018417               |
| SNP_P4_166583_11791  | NW_004516856.1 | Scaffold1730 | 11791                   | TT                              | AA              | 1947018419               |
| SNP_P4_166584_12188  | NW_004516856.1 | Scaffold1730 | 12188                   | CC                              | TT              | 1947018421               |
| SNP_P4_166585_12319  | NW_004516856.1 | Scaffold1730 | 12319                   | AA                              | TT              | 1947018423               |
| SNP_P4_166588_21268  | NW_004516856.1 | Scaffold1730 | 21268                   | TT                              | GG              | 1947018425               |
| SNP_P4_166589_23516  | NW_004516856.1 | Scaffold1730 | 23516                   | TT                              | CC              | 1947018427               |
| SNP_P4_166590_24648  | NW_004516856.1 | Scaffold1730 | 24648                   | GG                              | AA              | 1947018429               |
| SNP_P4_166592_28567  | NW_004516856.1 | Scaffold1730 | 28567                   | TT                              | CC              | 1947018431               |
| SNP_P4_166593_28590  | NW_004516856.1 | Scaffold1730 | 28590                   | AA                              | TT              | 1947018433               |
| SNP_P4_166595_28648  | NW_004516856.1 | Scaffold1730 | 28648                   | TT                              | CC              | 1947018435               |
| SNP_P4_166596_28711  | NW_004516856.1 | Scaffold1730 | 28711                   | CC                              | GG              | 1947018437               |
| SNP_P4_166597_28768  | NW_004516856.1 | Scaffold1730 | 28768                   | GG                              | AA              | 1947018439               |
| SNP_P4_166598_28806  | NW_004516856.1 | Scaffold1730 | 28806                   | TT                              | GG              | 1947018441               |
| SNP_P4_166599_28828  | NW_004516856.1 | Scaffold1730 | 28828                   | TT                              | AA              | 1947018443               |
| SNP_P4_166600_28830  | NW_004516856.1 | Scaffold1730 | 28830                   | AA                              | CC              | 1947018445               |
| SNP_P4_166601_28838  | NW_004516856.1 | Scaffold1730 | 28838                   | GG                              | AA              | 1947018447               |
| SNP_P4_166602_28842  | NW_004516856.1 | Scaffold1730 | 28842                   | GG                              | AA              | 1947018449               |
| SNP_P4_166603_28890  | NW_004516856.1 | Scaffold1730 | 28890                   | GG                              | TT              | 1947018451               |
| SNP_P4_166604_29530  | NW_004516856.1 | Scaffold1730 | 29530                   | CC                              | TT              | 1947018453               |
| SNP_P4_166605_29533  | NW_004516856.1 | Scaffold1730 | 29533                   | GG                              | AA              | 1947018455               |
| SNP_P4_166606_29537  | NW_004516856.1 | Scaffold1730 | 29537                   | TT                              | CC              | 1947018457               |

| SNPs IDs            | Chromosome IDs | Chromosomes  | Physical positions (bp) | CDC Frontier (Reference genome) | (ILWC46 & LPNB) | NCBI SNPdb Accession IDs |
|---------------------|----------------|--------------|-------------------------|---------------------------------|-----------------|--------------------------|
| SNP_P4_166607_29591 | NW_004516856.1 | Scaffold1730 | 29591                   | TT                              | CC              | 1947018459               |
| SNP_P4_166608_31650 | NW_004516856.1 | Scaffold1730 | 31650                   | AA                              | GG              | 1947018461               |
| SNP_P4_166609_32256 | NW_004516856.1 | Scaffold1730 | 32256                   | GG                              | AA              | 1947018463               |
| SNP_P4_166610_32368 | NW_004516856.1 | Scaffold1730 | 32368                   | AA                              | TT              | 1947018465               |
| SNP_P4_166611_33343 | NW_004516856.1 | Scaffold1730 | 33343                   | AA                              | TT              | 1947018467               |
| SNP_P4_166612_33367 | NW_004516856.1 | Scaffold1730 | 33367                   | AA                              | TT              | 1947018469               |
| SNP_P4_166613_33915 | NW_004516856.1 | Scaffold1730 | 33915                   | TT                              | GG              | 1947018471               |
| SNP_P4_166614_33979 | NW_004516856.1 | Scaffold1730 | 33979                   | CC                              | TT              | 1947018473               |
| SNP_P4_166615_34037 | NW_004516856.1 | Scaffold1730 | 34037                   | AA                              | GG              | 1947018475               |
| SNP_P4_166616_34148 | NW_004516856.1 | Scaffold1730 | 34148                   | GG                              | TT              | 1947018477               |
| SNP_P4_166617_43228 | NW_004516856.1 | Scaffold1730 | 43228                   | CC                              | GG              | 1947018479               |
| SNP_P4_166618_46919 | NW_004516856.1 | Scaffold1730 | 46919                   | AA                              | TT              | 1947018481               |
| SNP_P4_166619_46920 | NW_004516856.1 | Scaffold1730 | 46920                   | TT                              | CC              | 1947018483               |
| SNP_P4_166620_47030 | NW_004516856.1 | Scaffold1730 | 47030                   | TT                              | CC              | 1947018485               |
| SNP_P4_166621_47181 | NW_004516856.1 | Scaffold1730 | 47181                   | CC                              | TT              | 1947018487               |
| SNP_P4_166622_49827 | NW_004516856.1 | Scaffold1730 | 49827                   | AA                              | CC              | 1947018489               |
| SNP_P4_166623_52576 | NW_004516856.1 | Scaffold1730 | 52576                   | CC                              | TT              | 1947018491               |
| SNP_P4_166624_52667 | NW_004516856.1 | Scaffold1730 | 52667                   | TT                              | AA              | 1947018493               |
| SNP_P4_166625_52786 | NW_004516856.1 | Scaffold1730 | 52786                   | TT                              | AA              | 1947018495               |
| SNP_P4_166626_53203 | NW_004516856.1 | Scaffold1730 | 53203                   | GG                              | AA              | 1947018497               |
| SNP_P4_166627_54717 | NW_004516856.1 | Scaffold1730 | 54717                   | AA                              | GG              | 1947018499               |
| SNP_P4_166628_58896 | NW_004516856.1 | Scaffold1730 | 58896                   | GG                              | TT              | 1947018501               |
| SNP_P4_166629_58914 | NW_004516856.1 | Scaffold1730 | 58914                   | TT                              | CC              | 1947018503               |
| SNP_P4_166630_59389 | NW_004516856.1 | Scaffold1730 | 59389                   | TT                              | GG              | 1947018505               |
| SNP_P4_166631_60790 | NW_004516856.1 | Scaffold1730 | 60790                   | TT                              | CC              | 1947018507               |
| SNP_P4_166632_63988 | NW_004516856.1 | Scaffold1730 | 63988                   | CC                              | GG              | 1947018509               |
| SNP_P4_166634_64610 | NW_004516856.1 | Scaffold1730 | 64610                   | AA                              | TT              | 1947018511               |
| SNP_P4_166635_64729 | NW_004516856.1 | Scaffold1730 | 64729                   | AA                              | GG              | 1947018513               |
| SNP_P4_166636_66149 | NW_004516856.1 | Scaffold1730 | 66149                   | TT                              | CC              | 1947018515               |
| SNP_P4_166637_67044 | NW_004516856.1 | Scaffold1730 | 67044                   | CC                              | AA              | 1947018517               |
| SNP_P4_166638_67953 | NW_004516856.1 | Scaffold1730 | 67953                   | CC                              | AA              | 1947018519               |
| SNP_P4_166639_69094 | NW_004516856.1 | Scaffold1730 | 69094                   | TT                              | CC              | 1947018521               |
| SNP_P4_166640_69863 | NW_004516856.1 | Scaffold1730 | 69863                   | GG                              | AA              | 1947018523               |
| SNP_P4_166641_70080 | NW_004516856.1 | Scaffold1730 | 70080                   | CC                              | AA              | 1947018525               |
| SNP_P4_166642_70157 | NW_004516856.1 | Scaffold1730 | 70157                   | TT                              | GG              | 1947018527               |
| SNP_P4_166644_70395 | NW_004516856.1 | Scaffold1730 | 70395                   | CC                              | TT              | 1947018529               |
| SNP_P4_166645_70454 | NW_004516856.1 | Scaffold1730 | 70454                   | CC                              | AA              | 1947018531               |
| SNP_P4_166646_71250 | NW_004516856.1 | Scaffold1730 | 71250                   | TT                              | CC              | 1947018533               |
| SNP_P4_166647_72035 | NW_004516856.1 | Scaffold1730 | 72035                   | GG                              | CC              | 1947018535               |
| SNP_P4_166648_72175 | NW_004516856.1 | Scaffold1730 | 72175                   | AA                              | GG              | 1947018537               |
| SNP_P4_166649_72182 | NW_004516856.1 | Scaffold1730 | 72182                   | GG                              | CC              | 1947018539               |
| SNP_P4_166650_72236 | NW_004516856.1 | Scaffold1730 | 72236                   | GG                              | AA              | 1947018541               |

| SNPs IDs             | Chromosome IDs | Chromosomes  | Physical positions (bp) | CDC Frontier (Reference genome) | (ILWC46 & LPNB) | NCBI SNPdb Accession IDs |
|----------------------|----------------|--------------|-------------------------|---------------------------------|-----------------|--------------------------|
| SNP_P4_166651_72238  | NW_004516856.1 | Scaffold1730 | 72238                   | AA                              | GG              | 1947018543               |
| SNP_P4_166652_72242  | NW_004516856.1 | Scaffold1730 | 72242                   | TT                              | CC              | 1947018545               |
| SNP_P4_166653_72268  | NW_004516856.1 | Scaffold1730 | 72268                   | AA                              | GG              | 1947018547               |
| SNP_P4_166654_72683  | NW_004516856.1 | Scaffold1730 | 72683                   | TT                              | CC              | 1947018549               |
| SNP_P4_166655_74525  | NW_004516856.1 | Scaffold1730 | 74525                   | GG                              | TT              | 1947018551               |
| SNP_P4_166656_74564  | NW_004516856.1 | Scaffold1730 | 74564                   | GG                              | AA              | 1947018553               |
| SNP_P4_166657_74890  | NW_004516856.1 | Scaffold1730 | 74890                   | AA                              | TT              | 1947018555               |
| SNP_P4_166658_76498  | NW_004516856.1 | Scaffold1730 | 76498                   | AA                              | CC              | 1947018557               |
| SNP_P4_166659_79506  | NW_004516856.1 | Scaffold1730 | 79506                   | TT                              | CC              | 1947018559               |
| SNP_P4_166660_79680  | NW_004516856.1 | Scaffold1730 | 79680                   | CC                              | TT              | 1947018561               |
| SNP_P4_166661_83261  | NW_004516856.1 | Scaffold1730 | 83261                   | TT                              | AA              | 1947018563               |
| SNP_P4_166662_83276  | NW_004516856.1 | Scaffold1730 | 83276                   | GG                              | AA              | 1947018566               |
| SNP_P4_166663_83277  | NW_004516856.1 | Scaffold1730 | 83277                   | AA                              | GG              | 1947018568               |
| SNP_P4_166665_88241  | NW_004516856.1 | Scaffold1730 | 88241                   | AA                              | GG              | 1947018570               |
| SNP_P4_166666_89341  | NW_004516856.1 | Scaffold1730 | 89341                   | AA                              | GG              | 1947018572               |
| SNP_P4_166667_89351  | NW_004516856.1 | Scaffold1730 | 89351                   | TT                              | CC              | 1947018574               |
| SNP_P4_166668_89859  | NW_004516856.1 | Scaffold1730 | 89859                   | TT                              | CC              | 1947018576               |
| SNP_P4_166669_95545  | NW_004516856.1 | Scaffold1730 | 95545                   | TT                              | GG              | 1947018578               |
| SNP_P4_166670_96958  | NW_004516856.1 | Scaffold1730 | 96958                   | CC                              | AA              | 1947018580               |
| SNP_P4_166671_102499 | NW_004516856.1 | Scaffold1730 | 102499                  | TT                              | GG              | 1947018582               |
| SNP_P4_166672_104952 | NW_004516856.1 | Scaffold1730 | 104952                  | CC                              | TT              | 1947018584               |
| SNP_P4_166673_104983 | NW_004516856.1 | Scaffold1730 | 104983                  | TT                              | CC              | 1947018586               |
| SNP_P4_166674_105910 | NW_004516856.1 | Scaffold1730 | 105910                  | TT                              | GG              | 1947018588               |
| SNP_P4_166675_105931 | NW_004516856.1 | Scaffold1730 | 105931                  | AA                              | GG              | 1947018590               |
| SNP_P4_166676_105945 | NW_004516856.1 | Scaffold1730 | 105945                  | CC                              | AA              | 1947018592               |
| SNP_P4_166677_105950 | NW_004516856.1 | Scaffold1730 | 105950                  | GG                              | AA              | 1947018594               |
| SNP_P4_166678_106010 | NW_004516856.1 | Scaffold1730 | 106010                  | CC                              | TT              | 1947018596               |
| SNP_P4_166679_106078 | NW_004516856.1 | Scaffold1730 | 106078                  | CC                              | TT              | 1947018598               |
| SNP_P4_166680_106079 | NW_004516856.1 | Scaffold1730 | 106079                  | TT                              | CC              | 1947018600               |
| SNP_P4_166681_106083 | NW_004516856.1 | Scaffold1730 | 106083                  | GG                              | AA              | 1947018602               |
| SNP_P4_166682_109372 | NW_004516856.1 | Scaffold1730 | 109372                  | AA                              | GG              | 1947018604               |
| SNP_P4_166683_110485 | NW_004516856.1 | Scaffold1730 | 110485                  | TT                              | CC              | 1947018606               |
| SNP_P4_166684_110511 | NW_004516856.1 | Scaffold1730 | 110511                  | GG                              | AA              | 1947018608               |
| SNP_P4_166685_110744 | NW_004516856.1 | Scaffold1730 | 110744                  | CC                              | GG              | 1947018610               |
| SNP_P4_166686_110877 | NW_004516856.1 | Scaffold1730 | 110877                  | TT                              | CC              | 1947018613               |
| SNP_P4_166687_111652 | NW_004516856.1 | Scaffold1730 | 111652                  | CC                              | GG              | 1947018615               |
| SNP_P4_166688_111850 | NW_004516856.1 | Scaffold1730 | 111850                  | GG                              | TT              | 1947018617               |
| SNP_P4_166689_111859 | NW_004516856.1 | Scaffold1730 | 111859                  | TT                              | CC              | 1947018619               |
| SNP_P4_166690_111890 | NW_004516856.1 | Scaffold1730 | 111890                  | CC                              | TT              | 1947018621               |
| SNP_P4_166691_111918 | NW_004516856.1 | Scaffold1730 | 111918                  | TT                              | CC              | 1947018623               |
| SNP_P4_166692_112295 | NW_004516856.1 | Scaffold1730 | 112295                  | TT                              | AA              | 1947018625               |
| SNP_P4_166693_114397 | NW_004516856.1 | Scaffold1730 | 114397                  | TT                              | CC              | 1947018627               |

| SNPs IDs             | Chromosome IDs | Chromosomes  | Physical positions (bp) | CDC Frontier (Reference genome) | (ILWC46 & LPNB) | NCBI SNPdb Accession IDs |
|----------------------|----------------|--------------|-------------------------|---------------------------------|-----------------|--------------------------|
| SNP_P4_166694_114400 | NW_004516856.1 | Scaffold1730 | 114400                  | AA                              | GG              | 1947018629               |
| SNP_P4_166695_114434 | NW_004516856.1 | Scaffold1730 | 114434                  | AA                              | CC              | 1947018631               |
| SNP_P4_166696_114437 | NW_004516856.1 | Scaffold1730 | 114437                  | TT                              | AA              | 1947018633               |
| SNP_P4_166697_114449 | NW_004516856.1 | Scaffold1730 | 114449                  | GG                              | AA              | 1947018635               |
| SNP_P4_166698_114621 | NW_004516856.1 | Scaffold1730 | 114621                  | AA                              | GG              | 1947018637               |
| SNP_P4_166699_114723 | NW_004516856.1 | Scaffold1730 | 114723                  | CC                              | AA              | 1947018639               |
| SNP_P4_166700_114730 | NW_004516856.1 | Scaffold1730 | 114730                  | GG                              | AA              | 1947018641               |
| SNP_P4_166701_114802 | NW_004516856.1 | Scaffold1730 | 114802                  | CC                              | TT              | 1947018643               |
| SNP_P4_166702_114814 | NW_004516856.1 | Scaffold1730 | 114814                  | TT                              | CC              | 1947018645               |
| SNP_P4_166703_114821 | NW_004516856.1 | Scaffold1730 | 114821                  | GG                              | AA              | 1947018647               |
| SNP_P4_166704_115822 | NW_004516856.1 | Scaffold1730 | 115822                  | TT                              | AA              | 1947018649               |
| SNP_P4_166705_118267 | NW_004516856.1 | Scaffold1730 | 118267                  | AA                              | GG              | 1947018651               |
| SNP_P4_166706_118319 | NW_004516856.1 | Scaffold1730 | 118319                  | AA                              | CC              | 1947018653               |
| SNP_P4_166707_118815 | NW_004516856.1 | Scaffold1730 | 118815                  | TT                              | CC              | 1947018655               |
| SNP_P4_166708_121957 | NW_004516856.1 | Scaffold1730 | 121957                  | AA                              | GG              | 1947018657               |
| SNP_P4_166709_121965 | NW_004516856.1 | Scaffold1730 | 121965                  | TT                              | AA              | 1947018659               |
| SNP_P4_166710_121969 | NW_004516856.1 | Scaffold1730 | 121969                  | GG                              | CC              | 1947018661               |
| SNP_P4_166711_122205 | NW_004516856.1 | Scaffold1730 | 122205                  | AA                              | TT              | 1947018663               |
| SNP_P4_166712_122206 | NW_004516856.1 | Scaffold1730 | 122206                  | TT                              | AA              | 1947018665               |
| SNP_P4_166713_123441 | NW_004516856.1 | Scaffold1730 | 123441                  | GG                              | CC              | 1947018667               |
| SNP_P4_166714_123671 | NW_004516856.1 | Scaffold1730 | 123671                  | CC                              | GG              | 1947018669               |
| SNP_P4_166715_125214 | NW_004516856.1 | Scaffold1730 | 125214                  | AA                              | GG              | 1947018671               |
| SNP_P4_166716_125681 | NW_004516856.1 | Scaffold1730 | 125681                  | GG                              | TT              | 1947018673               |
| SNP_P4_166717_126179 | NW_004516856.1 | Scaffold1730 | 126179                  | TT                              | CC              | 1947018675               |
| SNP_P4_166718_126183 | NW_004516856.1 | Scaffold1730 | 126183                  | GG                              | AA              | 1947018677               |
| SNP_P4_166719_9523   | NW_004516857.1 | Scaffold1731 | 9523                    | AA                              | TT              | 1947018679               |
| SNP_P4_166720_9829   | NW_004516857.1 | Scaffold1731 | 9829                    | CC                              | TT              | 1947018681               |
| SNP_P4_166721_13277  | NW_004516857.1 | Scaffold1731 | 13277                   | TT                              | CC              | 1947018683               |
| SNP_P4_166722_13673  | NW_004516857.1 | Scaffold1731 | 13673                   | AA                              | GG              | 1947018685               |
| SNP_P4_166723_13685  | NW_004516857.1 | Scaffold1731 | 13685                   | TT                              | CC              | 1947018687               |
| SNP_P4_166724_16173  | NW_004516857.1 | Scaffold1731 | 16173                   | GG                              | AA              | 1947018689               |
| SNP_P4_166725_16748  | NW_004516857.1 | Scaffold1731 | 16748                   | CC                              | AA              | 1947018691               |
| SNP_P4_166726_30239  | NW_004516857.1 | Scaffold1731 | 30239                   | GG                              | AA              | 1947018693               |
| SNP_P4_166727_34580  | NW_004516857.1 | Scaffold1731 | 34580                   | GG                              | TT              | 1947018695               |
| SNP_P4_166729_38787  | NW_004516857.1 | Scaffold1731 | 38787                   | CC                              | TT              | 1947018697               |
| SNP_P4_166730_38795  | NW_004516857.1 | Scaffold1731 | 38795                   | CC                              | TT              | 1947018699               |
| SNP_P4_166731_38803  | NW_004516857.1 | Scaffold1731 | 38803                   | CC                              | TT              | 1947018701               |
| SNP_P4_166732_38811  | NW_004516857.1 | Scaffold1731 | 38811                   | CC                              | TT              | 1947018703               |
| SNP_P4_166733_38819  | NW_004516857.1 | Scaffold1731 | 38819                   | CC                              | TT              | 1947018705               |
| SNP_P4_166734_38827  | NW_004516857.1 | Scaffold1731 | 38827                   | CC                              | TT              | 1947018707               |
| SNP_P4_166735_38835  | NW_004516857.1 | Scaffold1731 | 38835                   | CC                              | TT              | 1947018709               |
| SNP_P4_166737_38910  | NW_004516857.1 | Scaffold1731 | 38910                   | AA                              | CC              | 1947018711               |

| SNPs IDs            | Chromosome IDs | Chromosomes  | Physical positions (bp) | CDC Frontier (Reference genome) | (ILWC46 & LPNB) | NCBI SNPdb Accession IDs |
|---------------------|----------------|--------------|-------------------------|---------------------------------|-----------------|--------------------------|
| SNP_P4_166738_38974 | NW_004516857.1 | Scaffold1731 | 38974                   | TT                              | AA              | 1947018713               |
| SNP_P4_166739_39797 | NW_004516857.1 | Scaffold1731 | 39797                   | GG                              | AA              | 1947018715               |
| SNP_P4_166740_39828 | NW_004516857.1 | Scaffold1731 | 39828                   | CC                              | TT              | 1947018717               |
| SNP_P4_166742_39917 | NW_004516857.1 | Scaffold1731 | 39917                   | AA                              | GG              | 1947018719               |
| SNP_P4_166743_45696 | NW_004516857.1 | Scaffold1731 | 45696                   | CC                              | TT              | 1947018721               |
| SNP_P4_166744_46936 | NW_004516857.1 | Scaffold1731 | 46936                   | CC                              | GG              | 1947018723               |
| SNP_P4_166745_47097 | NW_004516857.1 | Scaffold1731 | 47097                   | AA                              | CC              | 1947018725               |
| SNP_P4_166746_47385 | NW_004516857.1 | Scaffold1731 | 47385                   | AA                              | GG              | 1947018727               |
| SNP_P4_166747_48170 | NW_004516857.1 | Scaffold1731 | 48170                   | GG                              | TT              | 1947018729               |
| SNP_P4_166749_50013 | NW_004516857.1 | Scaffold1731 | 50013                   | CC                              | TT              | 1947018731               |
| SNP_P4_166750_51758 | NW_004516857.1 | Scaffold1731 | 51758                   | TT                              | CC              | 1947018733               |
| SNP_P4_166751_52597 | NW_004516857.1 | Scaffold1731 | 52597                   | CC                              | AA              | 1947018735               |
| SNP_P4_166753_54079 | NW_004516857.1 | Scaffold1731 | 54079                   | AA                              | GG              | 1947018737               |
| SNP_P4_166754_54357 | NW_004516857.1 | Scaffold1731 | 54357                   | AA                              | GG              | 1947018739               |
| SNP_P4_166755_54370 | NW_004516857.1 | Scaffold1731 | 54370                   | CC                              | TT              | 1947018741               |
| SNP_P4_166756_62091 | NW_004516857.1 | Scaffold1731 | 62091                   | CC                              | AA              | 1947018743               |
| SNP_P4_166757_62092 | NW_004516857.1 | Scaffold1731 | 62092                   | GG                              | CC              | 1947018745               |
| SNP_P4_166758_62720 | NW_004516857.1 | Scaffold1731 | 62720                   | AA                              | GG              | 1947018747               |
| SNP_P4_166759_62723 | NW_004516857.1 | Scaffold1731 | 62723                   | CC                              | TT              | 1947018749               |
| SNP_P4_166760_63731 | NW_004516857.1 | Scaffold1731 | 63731                   | TT                              | CC              | 1947018751               |
| SNP_P4_166761_65438 | NW_004516857.1 | Scaffold1731 | 65438                   | GG                              | TT              | 1947018753               |
| SNP_P4_166763_72207 | NW_004516857.1 | Scaffold1731 | 72207                   | GG                              | AA              | 1947018755               |
| SNP_P4_166765_85402 | NW_004516857.1 | Scaffold1731 | 85402                   | AA                              | GG              | 1947018757               |
| SNP_P4_166766_85936 | NW_004516857.1 | Scaffold1731 | 85936                   | TT                              | CC              | 1947018759               |
| SNP_P4_166768_356   | NW_004516858.1 | Scaffold1734 | 356                     | AA                              | GG              | 1947018761               |
| SNP_P4_166769_377   | NW_004516858.1 | Scaffold1734 | 377                     | GG                              | AA              | 1947018763               |
| SNP_P4_166770_415   | NW_004516858.1 | Scaffold1734 | 415                     | GG                              | AA              | 1947018765               |
| SNP_P4_166771_417   | NW_004516858.1 | Scaffold1734 | 417                     | GG                              | AA              | 1947018767               |
| SNP_P4_166772_437   | NW_004516858.1 | Scaffold1734 | 437                     | TT                              | CC              | 1947018769               |
| SNP_P4_166773_462   | NW_004516858.1 | Scaffold1734 | 462                     | AA                              | TT              | 1947018771               |
| SNP_P4_166774_464   | NW_004516858.1 | Scaffold1734 | 464                     | CC                              | TT              | 1947018773               |
| SNP_P4_166776_796   | NW_004516858.1 | Scaffold1734 | 796                     | CC                              | TT              | 1947018775               |
| SNP_P4_166777_811   | NW_004516858.1 | Scaffold1734 | 811                     | TT                              | CC              | 1947018777               |
| SNP_P4_166778_2254  | NW_004516858.1 | Scaffold1734 | 2254                    | CC                              | TT              | 1947018779               |
| SNP_P4_166779_6582  | NW_004516858.1 | Scaffold1734 | 6582                    | TT                              | CC              | 1947018781               |
| SNP_P4_166780_6599  | NW_004516858.1 | Scaffold1734 | 6599                    | TT                              | CC              | 1947018784               |
| SNP_P4_166781_7138  | NW_004516858.1 | Scaffold1734 | 7138                    | CC                              | TT              | 1947018786               |
| SNP_P4_166782_7393  | NW_004516858.1 | Scaffold1734 | 7393                    | GG                              | TT              | 1947018788               |
| SNP_P4_166783_7595  | NW_004516858.1 | Scaffold1734 | 7595                    | AA                              | GG              | 1947018790               |
| SNP_P4_166784_7596  | NW_004516858.1 | Scaffold1734 | 7596                    | TT                              | AA              | 1947018792               |
| SNP_P4_166785_7819  | NW_004516858.1 | Scaffold1734 | 7819                    | CC                              | TT              | 1947018794               |
| SNP_P4_166786_7891  | NW_004516858.1 | Scaffold1734 | 7891                    | CC                              | AA              | 1947018796               |

| SNPs IDs            | Chromosome IDs | Chromosomes  | Physical positions (bp) | CDC Frontier (Reference genome) | (ILWC46 & LPNB) | NCBI SNPdb Accession IDs |
|---------------------|----------------|--------------|-------------------------|---------------------------------|-----------------|--------------------------|
| SNP_P4_166787_8073  | NW_004516858.1 | Scaffold1734 | 8073                    | AA                              | TT              | 1947018798               |
| SNP_P4_166788_9961  | NW_004516858.1 | Scaffold1734 | 9961                    | AA                              | TT              | 1947018800               |
| SNP_P4_166789_10087 | NW_004516858.1 | Scaffold1734 | 10087                   | TT                              | CC              | 1947018802               |
| SNP_P4_166790_10323 | NW_004516858.1 | Scaffold1734 | 10323                   | GG                              | AA              | 1947018804               |
| SNP_P4_166791_10335 | NW_004516858.1 | Scaffold1734 | 10335                   | AA                              | TT              | 1947018806               |
| SNP_P4_166792_10362 | NW_004516858.1 | Scaffold1734 | 10362                   | TT                              | CC              | 1947018808               |
| SNP_P4_166793_10471 | NW_004516858.1 | Scaffold1734 | 10471                   | TT                              | CC              | 1947018810               |
| SNP_P4_166794_10583 | NW_004516858.1 | Scaffold1734 | 10583                   | GG                              | AA              | 1947018812               |
| SNP_P4_166795_3691  | NW_004516859.1 | Scaffold1736 | 3691                    | AA                              | GG              | 1947018814               |
| SNP_P4_166796_7728  | NW_004516859.1 | Scaffold1736 | 7728                    | TT                              | CC              | 1947018816               |
| SNP_P4_166797_8179  | NW_004516859.1 | Scaffold1736 | 8179                    | TT                              | CC              | 1947018818               |
| SNP_P4_166798_8236  | NW_004516859.1 | Scaffold1736 | 8236                    | GG                              | AA              | 1947018820               |
| SNP_P4_166799_8334  | NW_004516859.1 | Scaffold1736 | 8334                    | AA                              | GG              | 1947018822               |
| SNP_P4_166800_8623  | NW_004516859.1 | Scaffold1736 | 8623                    | GG                              | AA              | 1947018824               |
| SNP_P4_166801_8742  | NW_004516859.1 | Scaffold1736 | 8742                    | TT                              | CC              | 1947018826               |
| SNP_P4_166802_8789  | NW_004516859.1 | Scaffold1736 | 8789                    | CC                              | TT              | 1947018828               |
| SNP_P4_166803_8792  | NW_004516859.1 | Scaffold1736 | 8792                    | GG                              | AA              | 1947018830               |
| SNP_P4_166804_8855  | NW_004516859.1 | Scaffold1736 | 8855                    | CC                              | TT              | 1947018832               |
| SNP_P4_166805_8858  | NW_004516859.1 | Scaffold1736 | 8858                    | CC                              | TT              | 1947018834               |
| SNP_P4_166806_17304 | NW_004516859.1 | Scaffold1736 | 17304                   | TT                              | CC              | 1947018836               |
| SNP_P4_166807_17570 | NW_004516859.1 | Scaffold1736 | 17570                   | AA                              | GG              | 1947018838               |
| SNP_P4_166809_27661 | NW_004516859.1 | Scaffold1736 | 27661                   | TT                              | CC              | 1947018840               |
| SNP_P4_166810_27691 | NW_004516859.1 | Scaffold1736 | 27691                   | GG                              | TT              | 1947018842               |
| SNP_P4_166811_32471 | NW_004516859.1 | Scaffold1736 | 32471                   | TT                              | CC              | 1947018844               |
| SNP_P4_166812_32479 | NW_004516859.1 | Scaffold1736 | 32479                   | CC                              | TT              | 1947018846               |
| SNP_P4_166813_32589 | NW_004516859.1 | Scaffold1736 | 32589                   | TT                              | GG              | 1947018848               |
| SNP_P4_166814_1338  | NW_004516861.1 | Scaffold1739 | 1338                    | AA                              | GG              | 1947018850               |
| SNP_P4_166815_1688  | NW_004516861.1 | Scaffold1739 | 1688                    | TT                              | GG              | 1947018852               |
| SNP_P4_166816_431   | NW_004516862.1 | Scaffold1740 | 431                     | GG                              | AA              | 1947018854               |
| SNP_P4_166818_929   | NW_004516862.1 | Scaffold1740 | 929                     | TT                              | GG              | 1947018856               |
| SNP_P4_166819_1026  | NW_004516862.1 | Scaffold1740 | 1026                    | GG                              | AA              | 1947018858               |
| SNP_P4_166820_1055  | NW_004516862.1 | Scaffold1740 | 1055                    | TT                              | GG              | 1947018860               |
| SNP_P4_166821_1422  | NW_004516862.1 | Scaffold1740 | 1422                    | CC                              | TT              | 1947018862               |
| SNP_P4_166822_1495  | NW_004516862.1 | Scaffold1740 | 1495                    | GG                              | TT              | 1947018864               |
| SNP_P4_166823_2186  | NW_004516862.1 | Scaffold1740 | 2186                    | GG                              | TT              | 1947018866               |
| SNP_P4_166824_2422  | NW_004516862.1 | Scaffold1740 | 2422                    | GG                              | AA              | 1947018868               |
| SNP_P4_166825_2428  | NW_004516862.1 | Scaffold1740 | 2428                    | TT                              | CC              | 1947018870               |
| SNP_P4_166826_2462  | NW_004516862.1 | Scaffold1740 | 2462                    | GG                              | AA              | 1947018872               |
| SNP_P4_166828_4907  | NW_004516862.1 | Scaffold1740 | 4907                    | CC                              | AA              | 1947018874               |
| SNP_P4_166829_5017  | NW_004516862.1 | Scaffold1740 | 5017                    | GG                              | CC              | 1947018876               |
| SNP_P4_166830_5058  | NW_004516862.1 | Scaffold1740 | 5058                    | CC                              | TT              | 1947018878               |
| SNP_P4_166831_5084  | NW_004516862.1 | Scaffold1740 | 5084                    | GG                              | TT              | 1947018880               |



| SNPs IDs             | Chromosome IDs | Chromosomes  | Physical positions (bp) | CDC Frontier (Reference genome) | (ILWC46 & LPNB) | NCBI SNPdb Accession IDs |
|----------------------|----------------|--------------|-------------------------|---------------------------------|-----------------|--------------------------|
| SNP_P4_166832_5247   | NW_004516862.1 | Scaffold1740 | 5247                    | CC                              | TT              | 1947018882               |
| SNP_P4_166833_5248   | NW_004516862.1 | Scaffold1740 | 5248                    | GG                              | AA              | 1947018884               |
| SNP_P4_166834_5277   | NW_004516862.1 | Scaffold1740 | 5277                    | GG                              | AA              | 1947018886               |
| SNP_P4_166835_16506  | NW_004516862.1 | Scaffold1740 | 16506                   | TT                              | GG              | 1947018888               |
| SNP_P4_166836_16526  | NW_004516862.1 | Scaffold1740 | 16526                   | TT                              | CC              | 1947018890               |
| SNP_P4_166837_16680  | NW_004516862.1 | Scaffold1740 | 16680                   | CC                              | GG              | 1947018892               |
| SNP_P4_166838_4820   | NW_004516863.1 | Scaffold1742 | 4820                    | GG                              | AA              | 1947018894               |
| SNP_P4_166839_881    | NW_004516866.1 | Scaffold1745 | 881                     | AA                              | GG              | 1947018896               |
| SNP_P4_166840_883    | NW_004516866.1 | Scaffold1745 | 883                     | AA                              | CC              | 1947018898               |
| SNP_P4_166841_1126   | NW_004516866.1 | Scaffold1745 | 1126                    | CC                              | AA              | 1947018901               |
| SNP_P4_166842_1498   | NW_004516866.1 | Scaffold1745 | 1498                    | AA                              | GG              | 1947018903               |
| SNP_P4_166843_1501   | NW_004516866.1 | Scaffold1745 | 1501                    | GG                              | CC              | 1947018905               |
| SNP_P4_166844_2645   | NW_004516866.1 | Scaffold1745 | 2645                    | TT                              | GG              | 1947018907               |
| SNP_P4_166845_2653   | NW_004516866.1 | Scaffold1745 | 2653                    | CC                              | TT              | 1947018909               |
| SNP_P4_166846_3302   | NW_004516866.1 | Scaffold1745 | 3302                    | AA                              | TT              | 1947018911               |
| SNP_P4_166847_3469   | NW_004516866.1 | Scaffold1745 | 3469                    | GG                              | AA              | 1947018913               |
| SNP_P4_166848_3635   | NW_004516866.1 | Scaffold1745 | 3635                    | CC                              | TT              | 1947018915               |
| SNP_P4_166849_3657   | NW_004516866.1 | Scaffold1745 | 3657                    | AA                              | TT              | 1947018917               |
| SNP_P4_166850_4675   | NW_004516866.1 | Scaffold1745 | 4675                    | TT                              | GG              | 1947018919               |
| SNP_P4_166851_4794   | NW_004516866.1 | Scaffold1745 | 4794                    | CC                              | TT              | 1947018921               |
| SNP_P4_166852_4908   | NW_004516866.1 | Scaffold1745 | 4908                    | AA                              | GG              | 1947018923               |
| SNP_P4_166853_5069   | NW_004516866.1 | Scaffold1745 | 5069                    | AA                              | GG              | 1947018925               |
| SNP_P4_166854_44921  | NW_004516870.1 | Scaffold1750 | 44921                   | TT                              | CC              | 1947018927               |
| SNP_P4_166855_59718  | NW_004516870.1 | Scaffold1750 | 59718                   | GG                              | AA              | 1947018929               |
| SNP_P4_166856_112945 | NW_004516870.1 | Scaffold1750 | 112945                  | AA                              | GG              | 1947018931               |
| SNP_P4_166857_112955 | NW_004516870.1 | Scaffold1750 | 112955                  | GG                              | TT              | 1947018933               |
| SNP_P4_166858_112957 | NW_004516870.1 | Scaffold1750 | 112957                  | AA                              | CC              | 1947018935               |
| SNP_P4_166859_113141 | NW_004516870.1 | Scaffold1750 | 113141                  | CC                              | TT              | 1947018937               |
| SNP_P4_166860_113258 | NW_004516870.1 | Scaffold1750 | 113258                  | AA                              | GG              | 1947018939               |
| SNP_P4_166861_138165 | NW_004516870.1 | Scaffold1750 | 138165                  | CC                              | TT              | 1947018941               |
| SNP_P4_166862_151751 | NW_004516870.1 | Scaffold1750 | 151751                  | TT                              | CC              | 1947018943               |
| SNP_P4_166863_151810 | NW_004516870.1 | Scaffold1750 | 151810                  | AA                              | GG              | 1947018945               |
| SNP_P4_166864_152168 | NW_004516870.1 | Scaffold1750 | 152168                  | CC                              | AA              | 1947018947               |
| SNP_P4_166865_152174 | NW_004516870.1 | Scaffold1750 | 152174                  | CC                              | TT              | 1947018949               |
| SNP_P4_166866_152202 | NW_004516870.1 | Scaffold1750 | 152202                  | GG                              | TT              | 1947018951               |
| SNP_P4_166867_177578 | NW_004516870.1 | Scaffold1750 | 177578                  | TT                              | CC              | 1947018953               |
| SNP_P4_166868_227161 | NW_004516870.1 | Scaffold1750 | 227161                  | TT                              | CC              | 1947018955               |
| SNP_P4_166869_228572 | NW_004516870.1 | Scaffold1750 | 228572                  | TT                              | CC              | 1947018957               |
| SNP_P4_166871_229469 | NW_004516870.1 | Scaffold1750 | 229469                  | TT                              | CC              | 1947018959               |
| SNP_P4_166872_236063 | NW_004516870.1 | Scaffold1750 | 236063                  | AA                              | CC              | 1947018961               |
| SNP_P4_166873_236652 | NW_004516870.1 | Scaffold1750 | 236652                  | GG                              | AA              | 1947018963               |
| SNP_P4_166874_237017 | NW_004516870.1 | Scaffold1750 | 237017                  | GG                              | AA              | 1947018965               |

| SNPs IDs             | Chromosome IDs | Chromosomes  | Physical positions (bp) | CDC Frontier (Reference genome) | (ILWC46 & LPNB) | NCBI SNPdb Accession IDs |
|----------------------|----------------|--------------|-------------------------|---------------------------------|-----------------|--------------------------|
| SNP_P4_166875_242836 | NW_004516870.1 | Scaffold1750 | 242836                  | AA                              | GG              | 1947018967               |
| SNP_P4_166876_251690 | NW_004516870.1 | Scaffold1750 | 251690                  | AA                              | GG              | 1947018969               |
| SNP_P4_166877_258882 | NW_004516870.1 | Scaffold1750 | 258882                  | CC                              | TT              | 1947018971               |
| SNP_P4_166878_258884 | NW_004516870.1 | Scaffold1750 | 258884                  | TT                              | GG              | 1947018973               |
| SNP_P4_166879_826    | NW_004516871.1 | Scaffold1751 | 826                     | AA                              | GG              | 1947018975               |
| SNP_P4_166880_2900   | NW_004516871.1 | Scaffold1751 | 2900                    | TT                              | AA              | 1947018977               |
| SNP_P4_166881_6165   | NW_004516871.1 | Scaffold1751 | 6165                    | TT                              | AA              | 1947018979               |
| SNP_P4_166882_6177   | NW_004516871.1 | Scaffold1751 | 6177                    | TT                              | AA              | 1947018981               |
| SNP_P4_166883_6226   | NW_004516871.1 | Scaffold1751 | 6226                    | TT                              | AA              | 1947018983               |
| SNP_P4_166884_6239   | NW_004516871.1 | Scaffold1751 | 6239                    | AA                              | GG              | 1947018985               |
| SNP_P4_166885_8044   | NW_004516871.1 | Scaffold1751 | 8044                    | GG                              | TT              | 1947018987               |
| SNP_P4_166886_8742   | NW_004516871.1 | Scaffold1751 | 8742                    | GG                              | TT              | 1947018989               |
| SNP_P4_166887_9041   | NW_004516871.1 | Scaffold1751 | 9041                    | AA                              | GG              | 1947018991               |
| SNP_P4_166888_11670  | NW_004516871.1 | Scaffold1751 | 11670                   | AA                              | CC              | 1947018993               |
| SNP_P4_166889_14860  | NW_004516871.1 | Scaffold1751 | 14860                   | CC                              | AA              | 1947018995               |
| SNP_P4_166891_15633  | NW_004516871.1 | Scaffold1751 | 15633                   | AA                              | CC              | 1947018997               |
| SNP_P4_166892_15689  | NW_004516871.1 | Scaffold1751 | 15689                   | CC                              | AA              | 1947018999               |
| SNP_P4_166893_16041  | NW_004516871.1 | Scaffold1751 | 16041                   | AA                              | CC              | 1947019001               |
| SNP_P4_166894_16044  | NW_004516871.1 | Scaffold1751 | 16044                   | TT                              | CC              | 1947019003               |
| SNP_P4_166895_17601  | NW_004516871.1 | Scaffold1751 | 17601                   | AA                              | GG              | 1947019005               |
| SNP_P4_166896_33277  | NW_004516871.1 | Scaffold1751 | 33277                   | GG                              | TT              | 1947019007               |
| SNP_P4_166897_33308  | NW_004516871.1 | Scaffold1751 | 33308                   | CC                              | AA              | 1947019009               |
| SNP_P4_166898_38362  | NW_004516871.1 | Scaffold1751 | 38362                   | AA                              | TT              | 1947019010               |
| SNP_P4_166900_41281  | NW_004516871.1 | Scaffold1751 | 41281                   | AA                              | TT              | 1947019012               |
| SNP_P4_166901_41681  | NW_004516871.1 | Scaffold1751 | 41681                   | AA                              | TT              | 1947019014               |
| SNP_P4_166902_48079  | NW_004516871.1 | Scaffold1751 | 48079                   | CC                              | AA              | 1947019016               |
| SNP_P4_166903_54546  | NW_004516871.1 | Scaffold1751 | 54546                   | AA                              | TT              | 1947019018               |
| SNP_P4_166904_58521  | NW_004516871.1 | Scaffold1751 | 58521                   | TT                              | AA              | 1947019020               |
| SNP_P4_166905_58598  | NW_004516871.1 | Scaffold1751 | 58598                   | AA                              | GG              | 1947019022               |
| SNP_P4_166906_63272  | NW_004516871.1 | Scaffold1751 | 63272                   | TT                              | CC              | 1947019024               |
| SNP_P4_166907_63358  | NW_004516871.1 | Scaffold1751 | 63358                   | AA                              | TT              | 1947019026               |
| SNP_P4_166908_63359  | NW_004516871.1 | Scaffold1751 | 63359                   | AA                              | TT              | 1947019028               |
| SNP_P4_166909_63373  | NW_004516871.1 | Scaffold1751 | 63373                   | GG                              | AA              | 1947019029               |
| SNP_P4_166910_63376  | NW_004516871.1 | Scaffold1751 | 63376                   | TT                              | GG              | 1947019031               |
| SNP_P4_166911_63441  | NW_004516871.1 | Scaffold1751 | 63441                   | TT                              | CC              | 1947019033               |
| SNP_P4_166912_63482  | NW_004516871.1 | Scaffold1751 | 63482                   | TT                              | GG              | 1947019035               |
| SNP_P4_166913_63487  | NW_004516871.1 | Scaffold1751 | 63487                   | CC                              | TT              | 1947019037               |
| SNP_P4_166914_64788  | NW_004516871.1 | Scaffold1751 | 64788                   | CC                              | TT              | 1947019039               |
| SNP_P4_166915_64805  | NW_004516871.1 | Scaffold1751 | 64805                   | CC                              | TT              | 1947019041               |
| SNP_P4_166916_65096  | NW_004516871.1 | Scaffold1751 | 65096                   | TT                              | CC              | 1947019043               |
| SNP_P4_166917_65108  | NW_004516871.1 | Scaffold1751 | 65108                   | AA                              | GG              | 1947019044               |
| SNP_P4_166918_65138  | NW_004516871.1 | Scaffold1751 | 65138                   | GG                              | AA              | 1947019046               |

| SNPs IDs             | Chromosome IDs | Chromosomes  | Physical positions (bp) | CDC Frontier (Reference genome) | (ILWC46 & LPNB) | NCBI SNPdb Accession IDs |
|----------------------|----------------|--------------|-------------------------|---------------------------------|-----------------|--------------------------|
| SNP_P4_166919_65302  | NW_004516871.1 | Scaffold1751 | 65302                   | GG                              | AA              | 1947019048               |
| SNP_P4_166920_65314  | NW_004516871.1 | Scaffold1751 | 65314                   | AA                              | TT              | 1947019050               |
| SNP_P4_166921_65323  | NW_004516871.1 | Scaffold1751 | 65323                   | CC                              | TT              | 1947019052               |
| SNP_P4_166922_65332  | NW_004516871.1 | Scaffold1751 | 65332                   | TT                              | CC              | 1947019054               |
| SNP_P4_166923_65334  | NW_004516871.1 | Scaffold1751 | 65334                   | AA                              | GG              | 1947019056               |
| SNP_P4_166924_65338  | NW_004516871.1 | Scaffold1751 | 65338                   | TT                              | CC              | 1947019058               |
| SNP_P4_166925_65356  | NW_004516871.1 | Scaffold1751 | 65356                   | GG                              | AA              | 1947019060               |
| SNP_P4_166926_65362  | NW_004516871.1 | Scaffold1751 | 65362                   | AA                              | TT              | 1947019062               |
| SNP_P4_166927_65378  | NW_004516871.1 | Scaffold1751 | 65378                   | TT                              | GG              | 1947019064               |
| SNP_P4_166928_65467  | NW_004516871.1 | Scaffold1751 | 65467                   | TT                              | CC              | 1947019066               |
| SNP_P4_166929_68958  | NW_004516871.1 | Scaffold1751 | 68958                   | CC                              | TT              | 1947019068               |
| SNP_P4_166930_68962  | NW_004516871.1 | Scaffold1751 | 68962                   | CC                              | TT              | 1947019070               |
| SNP_P4_166931_68965  | NW_004516871.1 | Scaffold1751 | 68965                   | GG                              | TT              | 1947019072               |
| SNP_P4_166932_68966  | NW_004516871.1 | Scaffold1751 | 68966                   | AA                              | CC              | 1947019074               |
| SNP_P4_166933_68991  | NW_004516871.1 | Scaffold1751 | 68991                   | GG                              | AA              | 1947019076               |
| SNP_P4_166934_68998  | NW_004516871.1 | Scaffold1751 | 68998                   | AA                              | GG              | 1947019078               |
| SNP_P4_166935_69005  | NW_004516871.1 | Scaffold1751 | 69005                   | GG                              | TT              | 1947019080               |
| SNP_P4_166936_69036  | NW_004516871.1 | Scaffold1751 | 69036                   | AA                              | GG              | 1947019081               |
| SNP_P4_166937_69043  | NW_004516871.1 | Scaffold1751 | 69043                   | AA                              | GG              | 1947019083               |
| SNP_P4_166938_69049  | NW_004516871.1 | Scaffold1751 | 69049                   | GG                              | AA              | 1947019085               |
| SNP_P4_166939_69055  | NW_004516871.1 | Scaffold1751 | 69055                   | AA                              | GG              | 1947019087               |
| SNP_P4_166940_69103  | NW_004516871.1 | Scaffold1751 | 69103                   | AA                              | GG              | 1947019089               |
| SNP_P4_166941_69178  | NW_004516871.1 | Scaffold1751 | 69178                   | CC                              | TT              | 1947019091               |
| SNP_P4_166942_73398  | NW_004516871.1 | Scaffold1751 | 73398                   | AA                              | TT              | 1947019093               |
| SNP_P4_166943_76481  | NW_004516871.1 | Scaffold1751 | 76481                   | AA                              | TT              | 1947019095               |
| SNP_P4_166944_109091 | NW_004516871.1 | Scaffold1751 | 109091                  | AA                              | CC              | 1947019097               |
| SNP_P4_166945_114202 | NW_004516871.1 | Scaffold1751 | 114202                  | AA                              | GG              | 1947019099               |
| SNP_P4_166946_114224 | NW_004516871.1 | Scaffold1751 | 114224                  | TT                              | AA              | 1947019101               |
| SNP_P4_166947_127537 | NW_004516871.1 | Scaffold1751 | 127537                  | CC                              | AA              | 1947019103               |
| SNP_P4_166949_127615 | NW_004516871.1 | Scaffold1751 | 127615                  | AA                              | CC              | 1947019104               |
| SNP_P4_166950_128226 | NW_004516871.1 | Scaffold1751 | 128226                  | CC                              | AA              | 1947019106               |
| SNP_P4_166951_139570 | NW_004516871.1 | Scaffold1751 | 139570                  | TT                              | AA              | 1947019108               |
| SNP_P4_166952_144109 | NW_004516871.1 | Scaffold1751 | 144109                  | CC                              | GG              | 1947019110               |
| SNP_P4_166953_144337 | NW_004516871.1 | Scaffold1751 | 144337                  | CC                              | TT              | 1947019112               |
| SNP_P4_166954_145802 | NW_004516871.1 | Scaffold1751 | 145802                  | GG                              | TT              | 1947019114               |
| SNP_P4_166955_145807 | NW_004516871.1 | Scaffold1751 | 145807                  | TT                              | CC              | 1947019116               |
| SNP_P4_166956_147212 | NW_004516871.1 | Scaffold1751 | 147212                  | AA                              | CC              | 1947019117               |
| SNP_P4_166957_148761 | NW_004516871.1 | Scaffold1751 | 148761                  | CC                              | TT              | 1947019119               |
| SNP_P4_166958_148764 | NW_004516871.1 | Scaffold1751 | 148764                  | AA                              | TT              | 1947019121               |
| SNP_P4_166959_148769 | NW_004516871.1 | Scaffold1751 | 148769                  | TT                              | GG              | 1947019123               |
| SNP_P4_166960_148772 | NW_004516871.1 | Scaffold1751 | 148772                  | CC                              | TT              | 1947019125               |
| SNP_P4_166961_148775 | NW_004516871.1 | Scaffold1751 | 148775                  | CC                              | TT              | 1947019127               |

| SNPs IDs             | Chromosome IDs | Chromosomes  | Physical positions (bp) | CDC Frontier (Reference genome) | (ILWC46 & LPNB) | NCBI SNPdb Accession IDs |
|----------------------|----------------|--------------|-------------------------|---------------------------------|-----------------|--------------------------|
| SNP_P4_166962_155135 | NW_004516871.1 | Scaffold1751 | 155135                  | CC                              | TT              | 1947019128               |
| SNP_P4_166963_158857 | NW_004516871.1 | Scaffold1751 | 158857                  | AA                              | CC              | 1947019130               |
| SNP_P4_166964_159199 | NW_004516871.1 | Scaffold1751 | 159199                  | GG                              | TT              | 1947019132               |
| SNP_P4_166965_159208 | NW_004516871.1 | Scaffold1751 | 159208                  | GG                              | TT              | 1947019134               |
| SNP_P4_166966_159227 | NW_004516871.1 | Scaffold1751 | 159227                  | GG                              | AA              | 1947019136               |
| SNP_P4_166967_159617 | NW_004516871.1 | Scaffold1751 | 159617                  | CC                              | TT              | 1947019138               |
| SNP_P4_166968_164351 | NW_004516871.1 | Scaffold1751 | 164351                  | CC                              | TT              | 1947019140               |
| SNP_P4_166969_164352 | NW_004516871.1 | Scaffold1751 | 164352                  | AA                              | GG              | 1947019142               |
| SNP_P4_166970_164358 | NW_004516871.1 | Scaffold1751 | 164358                  | TT                              | GG              | 1947019144               |
| SNP_P4_166971_167201 | NW_004516871.1 | Scaffold1751 | 167201                  | AA                              | CC              | 1947019146               |
| SNP_P4_166972_167206 | NW_004516871.1 | Scaffold1751 | 167206                  | AA                              | TT              | 1947019148               |
| SNP_P4_166973_167217 | NW_004516871.1 | Scaffold1751 | 167217                  | AA                              | TT              | 1947019150               |
| SNP_P4_166974_168755 | NW_004516871.1 | Scaffold1751 | 168755                  | AA                              | TT              | 1947019151               |
| SNP_P4_166975_174390 | NW_004516871.1 | Scaffold1751 | 174390                  | TT                              | CC              | 1947019153               |
| SNP_P4_166976_178811 | NW_004516871.1 | Scaffold1751 | 178811                  | TT                              | CC              | 1947019155               |
| SNP_P4_166977_188477 | NW_004516871.1 | Scaffold1751 | 188477                  | TT                              | CC              | 1947019157               |
| SNP_P4_166978_193883 | NW_004516871.1 | Scaffold1751 | 193883                  | AA                              | CC              | 1947019159               |
| SNP_P4_166979_194210 | NW_004516871.1 | Scaffold1751 | 194210                  | AA                              | GG              | 1947019161               |
| SNP_P4_166980_194531 | NW_004516871.1 | Scaffold1751 | 194531                  | CC                              | AA              | 1947019163               |
| SNP_P4_166981_201478 | NW_004516871.1 | Scaffold1751 | 201478                  | CC                              | TT              | 1947019165               |
| SNP_P4_166982_203844 | NW_004516871.1 | Scaffold1751 | 203844                  | GG                              | AA              | 1947019167               |
| SNP_P4_166984_266355 | NW_004516871.1 | Scaffold1751 | 266355                  | AA                              | CC              | 1947019168               |
| SNP_P4_166985_267262 | NW_004516871.1 | Scaffold1751 | 267262                  | TT                              | CC              | 1947019170               |
| SNP_P4_166986_267335 | NW_004516871.1 | Scaffold1751 | 267335                  | TT                              | AA              | 1947019172               |
| SNP_P4_166988_316880 | NW_004516871.1 | Scaffold1751 | 316880                  | GG                              | AA              | 1947019174               |
| SNP_P4_166989_349443 | NW_004516871.1 | Scaffold1751 | 349443                  | GG                              | AA              | 1947019176               |
| SNP_P4_166991_362158 | NW_004516871.1 | Scaffold1751 | 362158                  | AA                              | GG              | 1947019178               |
| SNP_P4_166992_362200 | NW_004516871.1 | Scaffold1751 | 362200                  | TT                              | AA              | 1947019180               |
| SNP_P4_166993_381808 | NW_004516871.1 | Scaffold1751 | 381808                  | CC                              | GG              | 1947019182               |
| SNP_P4_166994_383987 | NW_004516871.1 | Scaffold1751 | 383987                  | CC                              | GG              | 1947019184               |
| SNP_P4_166995_390831 | NW_004516871.1 | Scaffold1751 | 390831                  | CC                              | AA              | 1947019186               |
| SNP_P4_166996_423682 | NW_004516871.1 | Scaffold1751 | 423682                  | CC                              | TT              | 1947019188               |
| SNP_P4_166997_423736 | NW_004516871.1 | Scaffold1751 | 423736                  | TT                              | CC              | 1947019190               |
| SNP_P4_166998_423767 | NW_004516871.1 | Scaffold1751 | 423767                  | AA                              | GG              | 1947019191               |
| SNP_P4_166999_423770 | NW_004516871.1 | Scaffold1751 | 423770                  | CC                              | TT              | 1947019193               |
| SNP_P4_167000_423816 | NW_004516871.1 | Scaffold1751 | 423816                  | TT                              | CC              | 1947019195               |
| SNP_P4_167001_423817 | NW_004516871.1 | Scaffold1751 | 423817                  | TT                              | AA              | 1947019197               |
| SNP_P4_167002_423818 | NW_004516871.1 | Scaffold1751 | 423818                  | AA                              | GG              | 1947019199               |
| SNP_P4_167003_425043 | NW_004516871.1 | Scaffold1751 | 425043                  | AA                              | TT              | 1947019201               |
| SNP_P4_167004_425045 | NW_004516871.1 | Scaffold1751 | 425045                  | CC                              | TT              | 1947019203               |
| SNP_P4_167005_425066 | NW_004516871.1 | Scaffold1751 | 425066                  | AA                              | GG              | 1947019205               |
| SNP_P4_167006_425085 | NW_004516871.1 | Scaffold1751 | 425085                  | AA                              | TT              | 1947019207               |

| SNPs IDs             | Chromosome IDs | Chromosomes  | Physical positions (bp) | CDC Frontier (Reference genome) | (ILWC46 & LPNB) | NCBI SNPdb Accession IDs |
|----------------------|----------------|--------------|-------------------------|---------------------------------|-----------------|--------------------------|
| SNP_P4_167007_425781 | NW_004516871.1 | Scaffold1751 | 425781                  | GG                              | AA              | 1947019208               |
| SNP_P4_167008_426264 | NW_004516871.1 | Scaffold1751 | 426264                  | AA                              | GG              | 1947019210               |
| SNP_P4_167009_426276 | NW_004516871.1 | Scaffold1751 | 426276                  | TT                              | CC              | 1947019212               |
| SNP_P4_167010_426293 | NW_004516871.1 | Scaffold1751 | 426293                  | GG                              | TT              | 1947019214               |
| SNP_P4_167011_430334 | NW_004516871.1 | Scaffold1751 | 430334                  | CC                              | TT              | 1947019216               |
| SNP_P4_167013_448976 | NW_004516871.1 | Scaffold1751 | 448976                  | AA                              | GG              | 1947019218               |
| SNP_P4_167014_448991 | NW_004516871.1 | Scaffold1751 | 448991                  | GG                              | AA              | 1947019220               |
| SNP_P4_167015_449086 | NW_004516871.1 | Scaffold1751 | 449086                  | TT                              | AA              | 1947019222               |
| SNP_P4_167016_449089 | NW_004516871.1 | Scaffold1751 | 449089                  | CC                              | TT              | 1947019224               |
| SNP_P4_167017_451182 | NW_004516871.1 | Scaffold1751 | 451182                  | TT                              | GG              | 1947019225               |
| SNP_P4_167018_451196 | NW_004516871.1 | Scaffold1751 | 451196                  | TT                              | CC              | 1947019227               |
| SNP_P4_167019_451214 | NW_004516871.1 | Scaffold1751 | 451214                  | TT                              | CC              | 1947019229               |
| SNP_P4_167020_451220 | NW_004516871.1 | Scaffold1751 | 451220                  | TT                              | CC              | 1947019231               |
| SNP_P4_167021_451248 | NW_004516871.1 | Scaffold1751 | 451248                  | TT                              | CC              | 1947019233               |
| SNP_P4_167022_455873 | NW_004516871.1 | Scaffold1751 | 455873                  | CC                              | TT              | 1947019235               |
| SNP_P4_167023_455887 | NW_004516871.1 | Scaffold1751 | 455887                  | CC                              | TT              | 1947019237               |
| SNP_P4_167024_519325 | NW_004516871.1 | Scaffold1751 | 519325                  | TT                              | CC              | 1947019239               |
| SNP_P4_167025_525768 | NW_004516871.1 | Scaffold1751 | 525768                  | CC                              | TT              | 1947019241               |
| SNP_P4_167027_547001 | NW_004516871.1 | Scaffold1751 | 547001                  | GG                              | CC              | 1947019243               |
| SNP_P4_167028_547874 | NW_004516871.1 | Scaffold1751 | 547874                  | TT                              | GG              | 1947019244               |
| SNP_P4_167029_552988 | NW_004516871.1 | Scaffold1751 | 552988                  | CC                              | TT              | 1947019246               |
| SNP_P4_167030_553008 | NW_004516871.1 | Scaffold1751 | 553008                  | TT                              | GG              | 1947019248               |
| SNP_P4_167031_556706 | NW_004516871.1 | Scaffold1751 | 556706                  | AA                              | GG              | 1947019250               |
| SNP_P4_167032_624724 | NW_004516871.1 | Scaffold1751 | 624724                  | GG                              | CC              | 1947019252               |
| SNP_P4_167033_624737 | NW_004516871.1 | Scaffold1751 | 624737                  | CC                              | GG              | 1947019254               |
| SNP_P4_167034_624820 | NW_004516871.1 | Scaffold1751 | 624820                  | TT                              | CC              | 1947019256               |
| SNP_P4_167035_631374 | NW_004516871.1 | Scaffold1751 | 631374                  | TT                              | CC              | 1947019258               |
| SNP_P4_167036_631455 | NW_004516871.1 | Scaffold1751 | 631455                  | AA                              | GG              | 1947019260               |
| SNP_P4_167037_631505 | NW_004516871.1 | Scaffold1751 | 631505                  | AA                              | GG              | 1947019262               |
| SNP_P4_167038_631894 | NW_004516871.1 | Scaffold1751 | 631894                  | TT                              | AA              | 1947019263               |
| SNP_P4_167039_631982 | NW_004516871.1 | Scaffold1751 | 631982                  | TT                              | AA              | 1947019265               |
| SNP_P4_167040_632104 | NW_004516871.1 | Scaffold1751 | 632104                  | GG                              | AA              | 1947019267               |
| SNP_P4_167041_632720 | NW_004516871.1 | Scaffold1751 | 632720                  | GG                              | AA              | 1947019269               |
| SNP_P4_167042_632894 | NW_004516871.1 | Scaffold1751 | 632894                  | TT                              | CC              | 1947019271               |
| SNP_P4_167043_396    | NW_004516872.1 | Scaffold1752 | 396                     | GG                              | CC              | 1947019273               |
| SNP_P4_167044_825    | NW_004516872.1 | Scaffold1752 | 825                     | TT                              | CC              | 1947019275               |
| SNP_P4_167045_862    | NW_004516872.1 | Scaffold1752 | 862                     | AA                              | CC              | 1947019277               |
| SNP_P4_167046_4861   | NW_004516873.1 | Scaffold1754 | 4861                    | TT                              | CC              | 1947019279               |
| SNP_P4_167047_4919   | NW_004516873.1 | Scaffold1754 | 4919                    | TT                              | GG              | 1947019281               |
| SNP_P4_167048_6166   | NW_004516873.1 | Scaffold1754 | 6166                    | TT                              | CC              | 1947019283               |
| SNP_P4_167049_6171   | NW_004516873.1 | Scaffold1754 | 6171                    | TT                              | CC              | 1947019284               |
| SNP_P4_167050_6174   | NW_004516873.1 | Scaffold1754 | 6174                    | AA                              | GG              | 1947019286               |

| SNPs IDs            | Chromosome IDs | Chromosomes  | Physical positions (bp) | CDC Frontier (Reference genome) | (ILWC46 & LPNB) | NCBI SNPdb Accession IDs |
|---------------------|----------------|--------------|-------------------------|---------------------------------|-----------------|--------------------------|
| SNP_P4_167051_6397  | NW_004516873.1 | Scaffold1754 | 6397                    | TT                              | GG              | 1947019288               |
| SNP_P4_167052_6491  | NW_004516873.1 | Scaffold1754 | 6491                    | TT                              | AA              | 1947019290               |
| SNP_P4_167053_6513  | NW_004516873.1 | Scaffold1754 | 6513                    | TT                              | CC              | 1947019292               |
| SNP_P4_167054_6638  | NW_004516873.1 | Scaffold1754 | 6638                    | GG                              | AA              | 1947019294               |
| SNP_P4_167055_6716  | NW_004516873.1 | Scaffold1754 | 6716                    | TT                              | GG              | 1947019296               |
| SNP_P4_167056_6939  | NW_004516873.1 | Scaffold1754 | 6939                    | GG                              | TT              | 1947019298               |
| SNP_P4_167057_6963  | NW_004516873.1 | Scaffold1754 | 6963                    | AA                              | CC              | 1947019299               |
| SNP_P4_167058_6972  | NW_004516873.1 | Scaffold1754 | 6972                    | GG                              | AA              | 1947019301               |
| SNP_P4_167059_7046  | NW_004516873.1 | Scaffold1754 | 7046                    | GG                              | CC              | 1947019303               |
| SNP_P4_167060_497   | NW_004516874.1 | Scaffold1755 | 497                     | AA                              | GG              | 1947019305               |
| SNP_P4_167061_808   | NW_004516874.1 | Scaffold1755 | 808                     | AA                              | TT              | 1947019307               |
| SNP_P4_167062_809   | NW_004516874.1 | Scaffold1755 | 809                     | TT                              | AA              | 1947019309               |
| SNP_P4_167063_10385 | NW_004516874.1 | Scaffold1755 | 10385                   | TT                              | AA              | 1947019311               |
| SNP_P4_167064_10388 | NW_004516874.1 | Scaffold1755 | 10388                   | TT                              | CC              | 1947019313               |
| SNP_P4_167065_10409 | NW_004516874.1 | Scaffold1755 | 10409                   | AA                              | TT              | 1947019314               |
| SNP_P4_167066_10460 | NW_004516874.1 | Scaffold1755 | 10460                   | GG                              | AA              | 1947019316               |
| SNP_P4_167067_10487 | NW_004516874.1 | Scaffold1755 | 10487                   | AA                              | TT              | 1947019318               |
| SNP_P4_167068_10806 | NW_004516874.1 | Scaffold1755 | 10806                   | TT                              | CC              | 1947019320               |
| SNP_P4_167069_10901 | NW_004516874.1 | Scaffold1755 | 10901                   | AA                              | GG              | 1947019322               |
| SNP_P4_167070_10920 | NW_004516874.1 | Scaffold1755 | 10920                   | GG                              | AA              | 1947019324               |
| SNP_P4_167071_12356 | NW_004516874.1 | Scaffold1755 | 12356                   | AA                              | GG              | 1947019326               |
| SNP_P4_167072_13493 | NW_004516874.1 | Scaffold1755 | 13493                   | TT                              | AA              | 1947019328               |
| SNP_P4_167073_13500 | NW_004516874.1 | Scaffold1755 | 13500                   | TT                              | CC              | 1947019330               |
| SNP_P4_167074_13570 | NW_004516874.1 | Scaffold1755 | 13570                   | AA                              | CC              | 1947019332               |
| SNP_P4_167075_15523 | NW_004516874.1 | Scaffold1755 | 15523                   | AA                              | GG              | 1947019334               |
| SNP_P4_167076_17971 | NW_004516874.1 | Scaffold1755 | 17971                   | GG                              | AA              | 1947019336               |
| SNP_P4_167077_23850 | NW_004516874.1 | Scaffold1755 | 23850                   | AA                              | GG              | 1947019338               |
| SNP_P4_167078_24017 | NW_004516874.1 | Scaffold1755 | 24017                   | TT                              | GG              | 1947019340               |
| SNP_P4_167079_25225 | NW_004516874.1 | Scaffold1755 | 25225                   | AA                              | TT              | 1947019342               |
| SNP_P4_167080_29419 | NW_004516874.1 | Scaffold1755 | 29419                   | CC                              | TT              | 1947019343               |
| SNP_P4_167081_32564 | NW_004516874.1 | Scaffold1755 | 32564                   | TT                              | CC              | 1947019345               |
| SNP_P4_167082_32565 | NW_004516874.1 | Scaffold1755 | 32565                   | TT                              | CC              | 1947019347               |
| SNP_P4_167083_32787 | NW_004516874.1 | Scaffold1755 | 32787                   | GG                              | AA              | 1947019349               |
| SNP_P4_167084_33107 | NW_004516874.1 | Scaffold1755 | 33107                   | GG                              | TT              | 1947019351               |
| SNP_P4_167085_33192 | NW_004516874.1 | Scaffold1755 | 33192                   | CC                              | AA              | 1947019353               |
| SNP_P4_167086_33270 | NW_004516874.1 | Scaffold1755 | 33270                   | TT                              | CC              | 1947019355               |
| SNP_P4_167087_33520 | NW_004516874.1 | Scaffold1755 | 33520                   | TT                              | CC              | 1947019357               |
| SNP_P4_167088_33554 | NW_004516874.1 | Scaffold1755 | 33554                   | TT                              | CC              | 1947019359               |
| SNP_P4_167089_33556 | NW_004516874.1 | Scaffold1755 | 33556                   | AA                              | CC              | 1947019361               |
| SNP_P4_167091_34258 | NW_004516874.1 | Scaffold1755 | 34258                   | TT                              | CC              | 1947019363               |
| SNP_P4_167092_41384 | NW_004516874.1 | Scaffold1755 | 41384                   | TT                              | GG              | 1947019365               |
| SNP_P4_167093_41385 | NW_004516874.1 | Scaffold1755 | 41385                   | AA                              | TT              | 1947019367               |

| SNPs IDs             | Chromosome IDs | Chromosomes  | Physical positions (bp) | CDC Frontier (Reference genome) | (ILWC46 & LPNB) | NCBI SNPdb Accession IDs |
|----------------------|----------------|--------------|-------------------------|---------------------------------|-----------------|--------------------------|
| SNP_P4_167094_41404  | NW_004516874.1 | Scaffold1755 | 41404                   | GG                              | AA              | 1947019369               |
| SNP_P4_167095_41408  | NW_004516874.1 | Scaffold1755 | 41408                   | AA                              | GG              | 1947019371               |
| SNP_P4_167096_41449  | NW_004516874.1 | Scaffold1755 | 41449                   | AA                              | GG              | 1947019373               |
| SNP_P4_167097_41451  | NW_004516874.1 | Scaffold1755 | 41451                   | TT                              | GG              | 1947019375               |
| SNP_P4_167099_64973  | NW_004516874.1 | Scaffold1755 | 64973                   | TT                              | CC              | 1947019377               |
| SNP_P4_167101_126132 | NW_004516874.1 | Scaffold1755 | 126132                  | CC                              | GG              | 1947019379               |
| SNP_P4_167102_126183 | NW_004516874.1 | Scaffold1755 | 126183                  | AA                              | TT              | 1947019381               |
| SNP_P4_167103_126195 | NW_004516874.1 | Scaffold1755 | 126195                  | AA                              | CC              | 1947019383               |
| SNP_P4_167104_126272 | NW_004516874.1 | Scaffold1755 | 126272                  | AA                              | GG              | 1947019385               |
| SNP_P4_167105_126273 | NW_004516874.1 | Scaffold1755 | 126273                  | AA                              | TT              | 1947019387               |
| SNP_P4_167106_126388 | NW_004516874.1 | Scaffold1755 | 126388                  | AA                              | CC              | 1947019389               |
| SNP_P4_167107_126707 | NW_004516874.1 | Scaffold1755 | 126707                  | GG                              | AA              | 1947019391               |
| SNP_P4_167108_126712 | NW_004516874.1 | Scaffold1755 | 126712                  | AA                              | TT              | 1947019393               |
| SNP_P4_167109_126750 | NW_004516874.1 | Scaffold1755 | 126750                  | TT                              | CC              | 1947019395               |
| SNP_P4_167110_126757 | NW_004516874.1 | Scaffold1755 | 126757                  | AA                              | GG              | 1947019397               |
| SNP_P4_167111_126796 | NW_004516874.1 | Scaffold1755 | 126796                  | CC                              | TT              | 1947019399               |
| SNP_P4_167112_126805 | NW_004516874.1 | Scaffold1755 | 126805                  | AA                              | CC              | 1947019401               |
| SNP_P4_167113_127152 | NW_004516874.1 | Scaffold1755 | 127152                  | GG                              | TT              | 1947019403               |
| SNP_P4_167114_127154 | NW_004516874.1 | Scaffold1755 | 127154                  | AA                              | TT              | 1947019404               |
| SNP_P4_167115_127838 | NW_004516874.1 | Scaffold1755 | 127838                  | CC                              | AA              | 1947019406               |
| SNP_P4_167116_128707 | NW_004516874.1 | Scaffold1755 | 128707                  | CC                              | TT              | 1947019408               |
| SNP_P4_167117_128710 | NW_004516874.1 | Scaffold1755 | 128710                  | TT                              | GG              | 1947019410               |
| SNP_P4_167119_128794 | NW_004516874.1 | Scaffold1755 | 128794                  | AA                              | GG              | 1947019412               |
| SNP_P4_167120_128991 | NW_004516874.1 | Scaffold1755 | 128991                  | TT                              | GG              | 1947019414               |
| SNP_P4_167121_129023 | NW_004516874.1 | Scaffold1755 | 129023                  | CC                              | TT              | 1947019416               |
| SNP_P4_167122_129030 | NW_004516874.1 | Scaffold1755 | 129030                  | AA                              | GG              | 1947019418               |
| SNP_P4_167123_129036 | NW_004516874.1 | Scaffold1755 | 129036                  | TT                              | AA              | 1947019420               |
| SNP_P4_167124_129054 | NW_004516874.1 | Scaffold1755 | 129054                  | TT                              | CC              | 1947019422               |
| SNP_P4_167125_129077 | NW_004516874.1 | Scaffold1755 | 129077                  | AA                              | CC              | 1947019424               |
| SNP_P4_167126_129084 | NW_004516874.1 | Scaffold1755 | 129084                  | TT                              | GG              | 1947019426               |
| SNP_P4_167127_129091 | NW_004516874.1 | Scaffold1755 | 129091                  | TT                              | GG              | 1947019428               |
| SNP_P4_167128_129093 | NW_004516874.1 | Scaffold1755 | 129093                  | CC                              | GG              | 1947019430               |
| SNP_P4_167129_129130 | NW_004516874.1 | Scaffold1755 | 129130                  | AA                              | GG              | 1947019432               |
| SNP_P4_167131_129151 | NW_004516874.1 | Scaffold1755 | 129151                  | TT                              | CC              | 1947019434               |
| SNP_P4_167132_165    | NW_004516875.1 | Scaffold1756 | 165                     | GG                              | AA              | 1947019436               |
| SNP_P4_167133_172    | NW_004516875.1 | Scaffold1756 | 172                     | TT                              | GG              | 1947019437               |
| SNP_P4_167134_372    | NW_004516875.1 | Scaffold1756 | 372                     | GG                              | AA              | 1947019439               |
| SNP_P4_167135_922    | NW_004516875.1 | Scaffold1756 | 922                     | TT                              | AA              | 1947019441               |
| SNP_P4_167136_937    | NW_004516875.1 | Scaffold1756 | 937                     | GG                              | TT              | 1947019443               |
| SNP_P4_167137_974    | NW_004516875.1 | Scaffold1756 | 974                     | CC                              | TT              | 1947019445               |
| SNP_P4_167138_1351   | NW_004516875.1 | Scaffold1756 | 1351                    | GG                              | AA              | 1947019447               |
| SNP_P4_167139_3215   | NW_004516875.1 | Scaffold1756 | 3215                    | GG                              | AA              | 1947019449               |

| SNPs IDs             | Chromosome IDs | Chromosomes  | Physical positions (bp) | CDC Frontier (Reference genome) | (ILWC46 & LPNB) | NCBI SNPdb Accession IDs |
|----------------------|----------------|--------------|-------------------------|---------------------------------|-----------------|--------------------------|
| SNP_P4_167141_4095   | NW_004516875.1 | Scaffold1756 | 4095                    | CC                              | GG              | 1947019451               |
| SNP_P4_167142_4677   | NW_004516875.1 | Scaffold1756 | 4677                    | GG                              | AA              | 1947019452               |
| SNP_P4_167143_4787   | NW_004516875.1 | Scaffold1756 | 4787                    | GG                              | AA              | 1947019454               |
| SNP_P4_167144_5156   | NW_004516875.1 | Scaffold1756 | 5156                    | CC                              | TT              | 1947019456               |
| SNP_P4_167146_6600   | NW_004516875.1 | Scaffold1756 | 6600                    | CC                              | TT              | 1947019458               |
| SNP_P4_167148_54817  | NW_004516875.1 | Scaffold1756 | 54817                   | GG                              | TT              | 1947019460               |
| SNP_P4_167149_54842  | NW_004516875.1 | Scaffold1756 | 54842                   | TT                              | CC              | 1947019462               |
| SNP_P4_167150_55004  | NW_004516875.1 | Scaffold1756 | 55004                   | TT                              | CC              | 1947019464               |
| SNP_P4_167151_55231  | NW_004516875.1 | Scaffold1756 | 55231                   | GG                              | AA              | 1947019466               |
| SNP_P4_167152_55295  | NW_004516875.1 | Scaffold1756 | 55295                   | TT                              | CC              | 1947019468               |
| SNP_P4_167153_56863  | NW_004516875.1 | Scaffold1756 | 56863                   | TT                              | CC              | 1947019469               |
| SNP_P4_167154_56876  | NW_004516875.1 | Scaffold1756 | 56876                   | CC                              | TT              | 1947019471               |
| SNP_P4_167155_57243  | NW_004516875.1 | Scaffold1756 | 57243                   | TT                              | CC              | 1947019473               |
| SNP_P4_167159_86108  | NW_004516875.1 | Scaffold1756 | 86108                   | CC                              | AA              | 1947019475               |
| SNP_P4_167160_86258  | NW_004516875.1 | Scaffold1756 | 86258                   | AA                              | GG              | 1947019477               |
| SNP_P4_167161_86516  | NW_004516875.1 | Scaffold1756 | 86516                   | GG                              | AA              | 1947019479               |
| SNP_P4_167162_86525  | NW_004516875.1 | Scaffold1756 | 86525                   | GG                              | CC              | 1947019481               |
| SNP_P4_167163_86544  | NW_004516875.1 | Scaffold1756 | 86544                   | AA                              | GG              | 1947019483               |
| SNP_P4_167164_86553  | NW_004516875.1 | Scaffold1756 | 86553                   | GG                              | AA              | 1947019485               |
| SNP_P4_167165_86581  | NW_004516875.1 | Scaffold1756 | 86581                   | TT                              | AA              | 1947019486               |
| SNP_P4_167166_86591  | NW_004516875.1 | Scaffold1756 | 86591                   | TT                              | AA              | 1947019488               |
| SNP_P4_167168_104201 | NW_004516875.1 | Scaffold1756 | 104201                  | AA                              | TT              | 1947019490               |
| SNP_P4_167169_130815 | NW_004516875.1 | Scaffold1756 | 130815                  | CC                              | AA              | 1947019492               |
| SNP_P4_167170_1055   | NW_004516876.1 | Scaffold1757 | 1055                    | GG                              | AA              | 1947019494               |
| SNP_P4_167172_1271   | NW_004516876.1 | Scaffold1757 | 1271                    | GG                              | AA              | 1947019496               |
| SNP_P4_167173_1272   | NW_004516876.1 | Scaffold1757 | 1272                    | CC                              | TT              | 1947019498               |
| SNP_P4_167174_1274   | NW_004516876.1 | Scaffold1757 | 1274                    | TT                              | AA              | 1947019500               |
| SNP_P4_167175_1275   | NW_004516876.1 | Scaffold1757 | 1275                    | GG                              | TT              | 1947019502               |
| SNP_P4_167176_1306   | NW_004516876.1 | Scaffold1757 | 1306                    | AA                              | TT              | 1947019504               |
| SNP_P4_167177_1307   | NW_004516876.1 | Scaffold1757 | 1307                    | TT                              | AA              | 1947019506               |
| SNP_P4_167178_1805   | NW_004516876.1 | Scaffold1757 | 1805                    | GG                              | AA              | 1947019508               |
| SNP_P4_167179_1863   | NW_004516876.1 | Scaffold1757 | 1863                    | TT                              | AA              | 1947019509               |
| SNP_P4_167180_1938   | NW_004516876.1 | Scaffold1757 | 1938                    | TT                              | GG              | 1947019511               |
| SNP_P4_167181_1946   | NW_004516876.1 | Scaffold1757 | 1946                    | CC                              | TT              | 1947019513               |
| SNP_P4_167182_2092   | NW_004516876.1 | Scaffold1757 | 2092                    | AA                              | CC              | 1947019515               |
| SNP_P4_167183_2123   | NW_004516876.1 | Scaffold1757 | 2123                    | GG                              | AA              | 1947019517               |
| SNP_P4_167184_2179   | NW_004516876.1 | Scaffold1757 | 2179                    | AA                              | TT              | 1947019519               |
| SNP_P4_167185_2372   | NW_004516876.1 | Scaffold1757 | 2372                    | AA                              | GG              | 1947019521               |
| SNP_P4_167186_2406   | NW_004516876.1 | Scaffold1757 | 2406                    | TT                              | AA              | 1947019523               |
| SNP_P4_167188_16538  | NW_004516876.1 | Scaffold1757 | 16538                   | TT                              | CC              | 1947019525               |
| SNP_P4_167189_16576  | NW_004516876.1 | Scaffold1757 | 16576                   | AA                              | GG              | 1947019527               |
| SNP_P4_167190_16840  | NW_004516876.1 | Scaffold1757 | 16840                   | TT                              | AA              | 1947019529               |



| SNPs IDs             | Chromosome IDs | Chromosomes  | Physical positions (bp) | CDC Frontier (Reference genome) | (ILWC46 & LPNB) | NCBI SNPdb Accession IDs |
|----------------------|----------------|--------------|-------------------------|---------------------------------|-----------------|--------------------------|
| SNP_P4_167191_23699  | NW_004516876.1 | Scaffold1757 | 23699                   | CC                              | TT              | 1947019531               |
| SNP_P4_167192_23700  | NW_004516876.1 | Scaffold1757 | 23700                   | AA                              | TT              | 1947019533               |
| SNP_P4_167193_25272  | NW_004516876.1 | Scaffold1757 | 25272                   | TT                              | CC              | 1947019535               |
| SNP_P4_167194_25296  | NW_004516876.1 | Scaffold1757 | 25296                   | AA                              | TT              | 1947019537               |
| SNP_P4_167195_25354  | NW_004516876.1 | Scaffold1757 | 25354                   | GG                              | AA              | 1947019538               |
| SNP_P4_167196_25364  | NW_004516876.1 | Scaffold1757 | 25364                   | CC                              | AA              | 1947019540               |
| SNP_P4_167197_25408  | NW_004516876.1 | Scaffold1757 | 25408                   | TT                              | CC              | 1947019542               |
| SNP_P4_167198_25411  | NW_004516876.1 | Scaffold1757 | 25411                   | CC                              | TT              | 1947019544               |
| SNP_P4_167199_25471  | NW_004516876.1 | Scaffold1757 | 25471                   | TT                              | GG              | 1947019546               |
| SNP_P4_167200_25565  | NW_004516876.1 | Scaffold1757 | 25565                   | AA                              | GG              | 1947019548               |
| SNP_P4_167201_25592  | NW_004516876.1 | Scaffold1757 | 25592                   | TT                              | CC              | 1947019550               |
| SNP_P4_167202_25707  | NW_004516876.1 | Scaffold1757 | 25707                   | AA                              | CC              | 1947019552               |
| SNP_P4_167203_25708  | NW_004516876.1 | Scaffold1757 | 25708                   | TT                              | CC              | 1947019554               |
| SNP_P4_167204_25709  | NW_004516876.1 | Scaffold1757 | 25709                   | GG                              | CC              | 1947019556               |
| SNP_P4_167205_25710  | NW_004516876.1 | Scaffold1757 | 25710                   | CC                              | TT              | 1947019558               |
| SNP_P4_167206_25714  | NW_004516876.1 | Scaffold1757 | 25714                   | AA                              | GG              | 1947019560               |
| SNP_P4_167207_26318  | NW_004516876.1 | Scaffold1757 | 26318                   | CC                              | AA              | 1947019562               |
| SNP_P4_167208_26831  | NW_004516876.1 | Scaffold1757 | 26831                   | AA                              | GG              | 1947019564               |
| SNP_P4_167209_27657  | NW_004516876.1 | Scaffold1757 | 27657                   | AA                              | GG              | 1947019566               |
| SNP_P4_167210_29964  | NW_004516876.1 | Scaffold1757 | 29964                   | GG                              | AA              | 1947019568               |
| SNP_P4_167211_31732  | NW_004516876.1 | Scaffold1757 | 31732                   | AA                              | CC              | 1947019570               |
| SNP_P4_167212_31742  | NW_004516876.1 | Scaffold1757 | 31742                   | TT                              | AA              | 1947019572               |
| SNP_P4_167214_62362  | NW_004516876.1 | Scaffold1757 | 62362                   | CC                              | TT              | 1947019574               |
| SNP_P4_167216_86468  | NW_004516876.1 | Scaffold1757 | 86468                   | GG                              | CC              | 1947019576               |
| SNP_P4_167218_107874 | NW_004516876.1 | Scaffold1757 | 107874                  | CC                              | TT              | 1947019578               |
| SNP_P4_167221_131745 | NW_004516876.1 | Scaffold1757 | 131745                  | GG                              | AA              | 1947019580               |
| SNP_P4_167222_151638 | NW_004516876.1 | Scaffold1757 | 151638                  | CC                              | TT              | 1947019582               |
| SNP_P4_167223_151642 | NW_004516876.1 | Scaffold1757 | 151642                  | GG                              | AA              | 1947019584               |
| SNP_P4_167224_151841 | NW_004516876.1 | Scaffold1757 | 151841                  | CC                              | AA              | 1947019586               |
| SNP_P4_167225_3775   | NW_004516877.1 | Scaffold1761 | 3775                    | AA                              | GG              | 1947019588               |
| SNP_P4_167226_3883   | NW_004516877.1 | Scaffold1761 | 3883                    | TT                              | CC              | 1947019590               |
| SNP_P4_167227_3909   | NW_004516877.1 | Scaffold1761 | 3909                    | CC                              | TT              | 1947019592               |
| SNP_P4_167228_3915   | NW_004516877.1 | Scaffold1761 | 3915                    | AA                              | CC              | 1947019594               |
| SNP_P4_167229_3923   | NW_004516877.1 | Scaffold1761 | 3923                    | GG                              | TT              | 1947019596               |
| SNP_P4_167230_4005   | NW_004516877.1 | Scaffold1761 | 4005                    | AA                              | CC              | 1947019598               |
| SNP_P4_167231_4014   | NW_004516877.1 | Scaffold1761 | 4014                    | TT                              | CC              | 1947019600               |
| SNP_P4_167232_4046   | NW_004516877.1 | Scaffold1761 | 4046                    | GG                              | AA              | 1947019602               |
| SNP_P4_167233_4051   | NW_004516877.1 | Scaffold1761 | 4051                    | AA                              | GG              | 1947019604               |
| SNP_P4_167234_4140   | NW_004516877.1 | Scaffold1761 | 4140                    | AA                              | GG              | 1947019606               |
| SNP_P4_167235_4216   | NW_004516877.1 | Scaffold1761 | 4216                    | TT                              | CC              | 1947019608               |
| SNP_P4_167236_4262   | NW_004516877.1 | Scaffold1761 | 4262                    | CC                              | AA              | 1947019610               |
| SNP_P4_167237_4266   | NW_004516877.1 | Scaffold1761 | 4266                    | AA                              | CC              | 1947019612               |

| SNPs IDs            | Chromosome IDs | Chromosomes  | Physical positions (bp) | CDC Frontier (Reference genome) | (ILWC46 & LPNB) | NCBI SNPdb Accession IDs |
|---------------------|----------------|--------------|-------------------------|---------------------------------|-----------------|--------------------------|
| SNP_P4_167238_4284  | NW_004516877.1 | Scaffold1761 | 4284                    | GG                              | TT              | 1947019614               |
| SNP_P4_167239_4294  | NW_004516877.1 | Scaffold1761 | 4294                    | TT                              | CC              | 1947019616               |
| SNP_P4_167240_4352  | NW_004516877.1 | Scaffold1761 | 4352                    | TT                              | AA              | 1947019618               |
| SNP_P4_167241_10869 | NW_004516877.1 | Scaffold1761 | 10869                   | AA                              | GG              | 1947019620               |
| SNP_P4_167242_10919 | NW_004516877.1 | Scaffold1761 | 10919                   | CC                              | TT              | 1947019622               |
| SNP_P4_167243_11320 | NW_004516877.1 | Scaffold1761 | 11320                   | TT                              | CC              | 1947019624               |
| SNP_P4_167244_11372 | NW_004516877.1 | Scaffold1761 | 11372                   | TT                              | CC              | 1947019626               |
| SNP_P4_167245_11415 | NW_004516877.1 | Scaffold1761 | 11415                   | TT                              | AA              | 1947019628               |
| SNP_P4_167247_45434 | NW_004516877.1 | Scaffold1761 | 45434                   | CC                              | TT              | 1947019630               |
| SNP_P4_167248_54513 | NW_004516877.1 | Scaffold1761 | 54513                   | CC                              | TT              | 1947019632               |
| SNP_P4_167249_88805 | NW_004516877.1 | Scaffold1761 | 88805                   | AA                              | GG              | 1947019634               |
| SNP_P4_167250_982   | NW_004516878.1 | Scaffold1762 | 982                     | TT                              | CC              | 1947019636               |
| SNP_P4_167251_2220  | NW_004516879.1 | Scaffold1763 | 2220                    | CC                              | TT              | 1947019638               |
| SNP_P4_167252_4437  | NW_004516879.1 | Scaffold1763 | 4437                    | CC                              | TT              | 1947019640               |
| SNP_P4_167253_8457  | NW_004516879.1 | Scaffold1763 | 8457                    | GG                              | AA              | 1947019642               |
| SNP_P4_167254_8481  | NW_004516879.1 | Scaffold1763 | 8481                    | TT                              | CC              | 1947019644               |
| SNP_P4_167255_10551 | NW_004516879.1 | Scaffold1763 | 10551                   | AA                              | GG              | 1947019646               |
| SNP_P4_167256_10578 | NW_004516879.1 | Scaffold1763 | 10578                   | AA                              | CC              | 1947019648               |
| SNP_P4_167257_19142 | NW_004516879.1 | Scaffold1763 | 19142                   | GG                              | AA              | 1947019650               |
| SNP_P4_167258_19167 | NW_004516879.1 | Scaffold1763 | 19167                   | AA                              | TT              | 1947019653               |
| SNP_P4_167259_19169 | NW_004516879.1 | Scaffold1763 | 19169                   | AA                              | TT              | 1947019655               |
| SNP_P4_167260_19185 | NW_004516879.1 | Scaffold1763 | 19185                   | CC                              | GG              | 1947019657               |
| SNP_P4_167261_19194 | NW_004516879.1 | Scaffold1763 | 19194                   | TT                              | CC              | 1947019659               |
| SNP_P4_167262_19261 | NW_004516879.1 | Scaffold1763 | 19261                   | AA                              | TT              | 1947019661               |
| SNP_P4_167263_19265 | NW_004516879.1 | Scaffold1763 | 19265                   | TT                              | CC              | 1947019663               |
| SNP_P4_167264_19273 | NW_004516879.1 | Scaffold1763 | 19273                   | AA                              | TT              | 1947019665               |
| SNP_P4_167265_19425 | NW_004516879.1 | Scaffold1763 | 19425                   | AA                              | CC              | 1947019667               |
| SNP_P4_167266_19459 | NW_004516879.1 | Scaffold1763 | 19459                   | TT                              | AA              | 1947019669               |
| SNP_P4_167267_19460 | NW_004516879.1 | Scaffold1763 | 19460                   | CC                              | AA              | 1947019671               |
| SNP_P4_167268_19461 | NW_004516879.1 | Scaffold1763 | 19461                   | AA                              | CC              | 1947019673               |
| SNP_P4_167269_21683 | NW_004516879.1 | Scaffold1763 | 21683                   | GG                              | TT              | 1947019675               |
| SNP_P4_167270_22475 | NW_004516879.1 | Scaffold1763 | 22475                   | CC                              | TT              | 1947019677               |
| SNP_P4_167271_690   | NW_004516880.1 | Scaffold1767 | 690                     | TT                              | CC              | 1947019679               |
| SNP_P4_167272_814   | NW_004516880.1 | Scaffold1767 | 814                     | GG                              | TT              | 1947019681               |
| SNP_P4_167273_6091  | NW_004516880.1 | Scaffold1767 | 6091                    | GG                              | AA              | 1947019683               |
| SNP_P4_167274_6361  | NW_004516880.1 | Scaffold1767 | 6361                    | AA                              | TT              | 1947019685               |
| SNP_P4_167275_6920  | NW_004516880.1 | Scaffold1767 | 6920                    | AA                              | GG              | 1947019687               |
| SNP_P4_167276_7051  | NW_004516880.1 | Scaffold1767 | 7051                    | AA                              | GG              | 1947019689               |
| SNP_P4_167277_7161  | NW_004516880.1 | Scaffold1767 | 7161                    | GG                              | AA              | 1947019691               |
| SNP_P4_167278_8910  | NW_004516880.1 | Scaffold1767 | 8910                    | TT                              | CC              | 1947019693               |
| SNP_P4_167279_8923  | NW_004516880.1 | Scaffold1767 | 8923                    | GG                              | AA              | 1947019695               |
| SNP_P4_167280_15112 | NW_004516880.1 | Scaffold1767 | 15112                   | GG                              | AA              | 1947019697               |

| SNPs IDs            | Chromosome IDs | Chromosomes  | Physical positions (bp) | CDC Frontier (Reference genome) | (ILWC46 & LPNB) | NCBI SNPdb Accession IDs |
|---------------------|----------------|--------------|-------------------------|---------------------------------|-----------------|--------------------------|
| SNP_P4_167281_16716 | NW_004516880.1 | Scaffold1767 | 16716                   | GG                              | AA              | 1947019699               |
| SNP_P4_167282_20588 | NW_004516880.1 | Scaffold1767 | 20588                   | AA                              | CC              | 1947019702               |
| SNP_P4_167283_24728 | NW_004516880.1 | Scaffold1767 | 24728                   | TT                              | AA              | 1947019705               |
| SNP_P4_167284_24793 | NW_004516880.1 | Scaffold1767 | 24793                   | TT                              | CC              | 1947019707               |
| SNP_P4_167285_25113 | NW_004516880.1 | Scaffold1767 | 25113                   | TT                              | CC              | 1947019710               |
| SNP_P4_167286_25128 | NW_004516880.1 | Scaffold1767 | 25128                   | GG                              | CC              | 1947019713               |
| SNP_P4_167287_25238 | NW_004516880.1 | Scaffold1767 | 25238                   | TT                              | GG              | 1947019715               |
| SNP_P4_167288_25375 | NW_004516880.1 | Scaffold1767 | 25375                   | GG                              | TT              | 1947019718               |
| SNP_P4_167289_27951 | NW_004516880.1 | Scaffold1767 | 27951                   | TT                              | GG              | 1947019720               |
| SNP_P4_167290_27967 | NW_004516880.1 | Scaffold1767 | 27967                   | AA                              | TT              | 1947019723               |
| SNP_P4_167291_27980 | NW_004516880.1 | Scaffold1767 | 27980                   | TT                              | GG              | 1947019725               |
| SNP_P4_167293_31461 | NW_004516880.1 | Scaffold1767 | 31461                   | AA                              | CC              | 1947019727               |
| SNP_P4_167294_31487 | NW_004516880.1 | Scaffold1767 | 31487                   | CC                              | TT              | 1947019729               |
| SNP_P4_167295_31515 | NW_004516880.1 | Scaffold1767 | 31515                   | AA                              | TT              | 1947019731               |
| SNP_P4_167296_31527 | NW_004516880.1 | Scaffold1767 | 31527                   | TT                              | AA              | 1947019733               |
| SNP_P4_167297_31542 | NW_004516880.1 | Scaffold1767 | 31542                   | AA                              | CC              | 1947019735               |
| SNP_P4_167298_31553 | NW_004516880.1 | Scaffold1767 | 31553                   | CC                              | TT              | 1947019737               |
| SNP_P4_167299_32310 | NW_004516880.1 | Scaffold1767 | 32310                   | AA                              | TT              | 1947019739               |
| SNP_P4_167300_41843 | NW_004516880.1 | Scaffold1767 | 41843                   | CC                              | TT              | 1947019742               |
| SNP_P4_167301_316   | NW_004516881.1 | Scaffold1768 | 316                     | GG                              | TT              | 1947019744               |
| SNP_P4_167302_619   | NW_004516881.1 | Scaffold1768 | 619                     | CC                              | TT              | 1947019746               |
| SNP_P4_167303_983   | NW_004516881.1 | Scaffold1768 | 983                     | AA                              | TT              | 1947019748               |
| SNP_P4_167304_998   | NW_004516881.1 | Scaffold1768 | 998                     | CC                              | TT              | 1947019750               |
| SNP_P4_167305_1393  | NW_004516881.1 | Scaffold1768 | 1393                    | GG                              | AA              | 1947019752               |
| SNP_P4_167306_1467  | NW_004516881.1 | Scaffold1768 | 1467                    | CC                              | TT              | 1947019754               |
| SNP_P4_167307_1548  | NW_004516881.1 | Scaffold1768 | 1548                    | AA                              | GG              | 1947019756               |
| SNP_P4_167308_1752  | NW_004516881.1 | Scaffold1768 | 1752                    | TT                              | CC              | 1947019758               |
| SNP_P4_167309_1873  | NW_004516881.1 | Scaffold1768 | 1873                    | GG                              | AA              | 1947019760               |
| SNP_P4_167310_1894  | NW_004516881.1 | Scaffold1768 | 1894                    | TT                              | GG              | 1947019762               |
| SNP_P4_167311_10217 | NW_004516881.1 | Scaffold1768 | 10217                   | AA                              | CC              | 1947019764               |
| SNP_P4_167312_10517 | NW_004516881.1 | Scaffold1768 | 10517                   | AA                              | TT              | 1947019766               |
| SNP_P4_167313_12690 | NW_004516881.1 | Scaffold1768 | 12690                   | AA                              | CC              | 1947019768               |
| SNP_P4_167314_13017 | NW_004516881.1 | Scaffold1768 | 13017                   | TT                              | CC              | 1947019770               |
| SNP_P4_167315_13018 | NW_004516881.1 | Scaffold1768 | 13018                   | TT                              | CC              | 1947019773               |
| SNP_P4_167316_14238 | NW_004516881.1 | Scaffold1768 | 14238                   | TT                              | AA              | 1947019775               |
| SNP_P4_167317_15493 | NW_004516881.1 | Scaffold1768 | 15493                   | AA                              | GG              | 1947019777               |
| SNP_P4_167318_23660 | NW_004516881.1 | Scaffold1768 | 23660                   | GG                              | TT              | 1947019779               |
| SNP_P4_167319_23676 | NW_004516881.1 | Scaffold1768 | 23676                   | AA                              | GG              | 1947019781               |
| SNP_P4_167320_28343 | NW_004516881.1 | Scaffold1768 | 28343                   | TT                              | AA              | 1947019783               |
| SNP_P4_167321_28384 | NW_004516881.1 | Scaffold1768 | 28384                   | TT                              | AA              | 1947019785               |
| SNP_P4_167322_29427 | NW_004516881.1 | Scaffold1768 | 29427                   | TT                              | CC              | 1947019787               |
| SNP_P4_167323_29747 | NW_004516881.1 | Scaffold1768 | 29747                   | AA                              | CC              | 1947019789               |

| SNPs IDs            | Chromosome IDs | Chromosomes  | Physical positions (bp) | CDC Frontier (Reference genome) | (ILWC46 & LPNB) | NCBI SNPdb Accession IDs |
|---------------------|----------------|--------------|-------------------------|---------------------------------|-----------------|--------------------------|
| SNP_P4_167324_29849 | NW_004516881.1 | Scaffold1768 | 29849                   | GG                              | AA              | 1947019790               |
| SNP_P4_167325_29901 | NW_004516881.1 | Scaffold1768 | 29901                   | TT                              | CC              | 1947019791               |
| SNP_P4_167326_38125 | NW_004516881.1 | Scaffold1768 | 38125                   | GG                              | AA              | 1947019792               |
| SNP_P4_167327_38165 | NW_004516881.1 | Scaffold1768 | 38165                   | TT                              | AA              | 1947019794               |
| SNP_P4_167328_3377  | NW_004516882.1 | Scaffold1769 | 3377                    | GG                              | AA              | 1947019796               |
| SNP_P4_167329_3407  | NW_004516882.1 | Scaffold1769 | 3407                    | AA                              | GG              | 1947019798               |
| SNP_P4_167330_3516  | NW_004516882.1 | Scaffold1769 | 3516                    | CC                              | TT              | 1947019800               |
| SNP_P4_167331_3548  | NW_004516882.1 | Scaffold1769 | 3548                    | TT                              | GG              | 1947019802               |
| SNP_P4_167332_3705  | NW_004516882.1 | Scaffold1769 | 3705                    | TT                              | AA              | 1947019804               |
| SNP_P4_167333_3724  | NW_004516882.1 | Scaffold1769 | 3724                    | AA                              | TT              | 1947019806               |
| SNP_P4_167334_3725  | NW_004516882.1 | Scaffold1769 | 3725                    | TT                              | GG              | 1947019808               |
| SNP_P4_167335_4198  | NW_004516882.1 | Scaffold1769 | 4198                    | CC                              | GG              | 1947019810               |
| SNP_P4_167336_4579  | NW_004516884.1 | Scaffold1771 | 4579                    | GG                              | TT              | 1947019812               |
| SNP_P4_167337_5641  | NW_004516884.1 | Scaffold1771 | 5641                    | AA                              | CC              | 1947019814               |
| SNP_P4_167338_5656  | NW_004516884.1 | Scaffold1771 | 5656                    | TT                              | CC              | 1947019816               |
| SNP_P4_167339_5669  | NW_004516884.1 | Scaffold1771 | 5669                    | TT                              | CC              | 1947019818               |
| SNP_P4_167340_5703  | NW_004516884.1 | Scaffold1771 | 5703                    | GG                              | AA              | 1947019820               |
| SNP_P4_167341_5740  | NW_004516884.1 | Scaffold1771 | 5740                    | TT                              | GG              | 1947019822               |
| SNP_P4_167342_5838  | NW_004516884.1 | Scaffold1771 | 5838                    | GG                              | TT              | 1947019824               |
| SNP_P4_167343_5878  | NW_004516884.1 | Scaffold1771 | 5878                    | GG                              | AA              | 1947019826               |
| SNP_P4_167344_5886  | NW_004516884.1 | Scaffold1771 | 5886                    | TT                              | CC              | 1947019828               |
| SNP_P4_167345_5896  | NW_004516884.1 | Scaffold1771 | 5896                    | TT                              | CC              | 1947019830               |
| SNP_P4_167346_5905  | NW_004516884.1 | Scaffold1771 | 5905                    | GG                              | AA              | 1947019832               |
| SNP_P4_167347_5914  | NW_004516884.1 | Scaffold1771 | 5914                    | GG                              | CC              | 1947019834               |
| SNP_P4_167348_5916  | NW_004516884.1 | Scaffold1771 | 5916                    | GG                              | AA              | 1947019836               |
| SNP_P4_167349_5923  | NW_004516884.1 | Scaffold1771 | 5923                    | CC                              | TT              | 1947019838               |
| SNP_P4_167350_5932  | NW_004516884.1 | Scaffold1771 | 5932                    | CC                              | TT              | 1947019840               |
| SNP_P4_167351_5941  | NW_004516884.1 | Scaffold1771 | 5941                    | TT                              | CC              | 1947019842               |
| SNP_P4_167352_5953  | NW_004516884.1 | Scaffold1771 | 5953                    | TT                              | CC              | 1947019844               |
| SNP_P4_167353_5954  | NW_004516884.1 | Scaffold1771 | 5954                    | AA                              | GG              | 1947019846               |
| SNP_P4_167354_5965  | NW_004516884.1 | Scaffold1771 | 5965                    | TT                              | CC              | 1947019848               |
| SNP_P4_167355_6860  | NW_004516884.1 | Scaffold1771 | 6860                    | AA                              | GG              | 1947019850               |
| SNP_P4_167356_6894  | NW_004516884.1 | Scaffold1771 | 6894                    | CC                              | TT              | 1947019853               |
| SNP_P4_167357_6902  | NW_004516884.1 | Scaffold1771 | 6902                    | CC                              | AA              | 1947019855               |
| SNP_P4_167358_7083  | NW_004516884.1 | Scaffold1771 | 7083                    | TT                              | CC              | 1947019857               |
| SNP_P4_167359_7084  | NW_004516884.1 | Scaffold1771 | 7084                    | AA                              | GG              | 1947019859               |
| SNP_P4_167360_7104  | NW_004516884.1 | Scaffold1771 | 7104                    | GG                              | TT              | 1947019861               |
| SNP_P4_167361_7200  | NW_004516884.1 | Scaffold1771 | 7200                    | TT                              | CC              | 1947019863               |
| SNP_P4_167362_7236  | NW_004516884.1 | Scaffold1771 | 7236                    | GG                              | AA              | 1947019865               |
| SNP_P4_167363_7244  | NW_004516884.1 | Scaffold1771 | 7244                    | CC                              | TT              | 1947019867               |
| SNP_P4_167364_7262  | NW_004516884.1 | Scaffold1771 | 7262                    | TT                              | AA              | 1947019870               |
| SNP_P4_167365_7455  | NW_004516884.1 | Scaffold1771 | 7455                    | CC                              | TT              | 1947019872               |

| SNPs IDs             | Chromosome IDs | Chromosomes  | Physical positions (bp) | CDC Frontier (Reference genome) | (ILWC46 & LPNB) | NCBI SNPdb Accession IDs |
|----------------------|----------------|--------------|-------------------------|---------------------------------|-----------------|--------------------------|
| SNP_P4_167366_10971  | NW_004516884.1 | Scaffold1771 | 10971                   | GG                              | AA              | 1947019874               |
| SNP_P4_167367_11187  | NW_004516884.1 | Scaffold1771 | 11187                   | CC                              | GG              | 1947019876               |
| SNP_P4_167368_16378  | NW_004516884.1 | Scaffold1771 | 16378                   | GG                              | AA              | 1947019878               |
| SNP_P4_167369_59075  | NW_004516884.1 | Scaffold1771 | 59075                   | CC                              | TT              | 1947019880               |
| SNP_P4_167370_73803  | NW_004516884.1 | Scaffold1771 | 73803                   | AA                              | CC              | 1947019882               |
| SNP_P4_167371_83491  | NW_004516884.1 | Scaffold1771 | 83491                   | AA                              | GG              | 1947019884               |
| SNP_P4_167372_83811  | NW_004516884.1 | Scaffold1771 | 83811                   | TT                              | CC              | 1947019886               |
| SNP_P4_167374_119287 | NW_004516884.1 | Scaffold1771 | 119287                  | AA                              | GG              | 1947019888               |
| SNP_P4_167376_119660 | NW_004516884.1 | Scaffold1771 | 119660                  | CC                              | TT              | 1947019890               |
| SNP_P4_167377_129091 | NW_004516884.1 | Scaffold1771 | 129091                  | AA                              | TT              | 1947019892               |
| SNP_P4_167378_847    | NW_004516886.1 | Scaffold1773 | 847                     | TT                              | AA              | 1947019894               |
| SNP_P4_167379_2403   | NW_004516886.1 | Scaffold1773 | 2403                    | CC                              | AA              | 1947019896               |
| SNP_P4_167380_2942   | NW_004516886.1 | Scaffold1773 | 2942                    | CC                              | TT              | 1947019898               |
| SNP_P4_167381_3311   | NW_004516886.1 | Scaffold1773 | 3311                    | TT                              | GG              | 1947019900               |
| SNP_P4_167382_4498   | NW_004516886.1 | Scaffold1773 | 4498                    | TT                              | CC              | 1947019902               |
| SNP_P4_167384_5390   | NW_004516886.1 | Scaffold1773 | 5390                    | GG                              | TT              | 1947019904               |
| SNP_P4_167385_6917   | NW_004516886.1 | Scaffold1773 | 6917                    | AA                              | GG              | 1947019906               |
| SNP_P4_167386_8102   | NW_004516886.1 | Scaffold1773 | 8102                    | AA                              | TT              | 1947019908               |
| SNP_P4_167387_8644   | NW_004516886.1 | Scaffold1773 | 8644                    | AA                              | GG              | 1947019910               |
| SNP_P4_167388_8739   | NW_004516886.1 | Scaffold1773 | 8739                    | AA                              | GG              | 1947019912               |
| SNP_P4_167389_8746   | NW_004516886.1 | Scaffold1773 | 8746                    | AA                              | TT              | 1947019914               |
| SNP_P4_167390_8762   | NW_004516886.1 | Scaffold1773 | 8762                    | AA                              | TT              | 1947019916               |
| SNP_P4_167391_8778   | NW_004516886.1 | Scaffold1773 | 8778                    | AA                              | GG              | 1947019918               |
| SNP_P4_167392_8779   | NW_004516886.1 | Scaffold1773 | 8779                    | AA                              | GG              | 1947019920               |
| SNP_P4_167393_8782   | NW_004516886.1 | Scaffold1773 | 8782                    | GG                              | AA              | 1947019922               |
| SNP_P4_167394_9108   | NW_004516886.1 | Scaffold1773 | 9108                    | AA                              | TT              | 1947019924               |
| SNP_P4_167395_9876   | NW_004516886.1 | Scaffold1773 | 9876                    | TT                              | AA              | 1947019926               |
| SNP_P4_167396_9932   | NW_004516886.1 | Scaffold1773 | 9932                    | GG                              | AA              | 1947019928               |
| SNP_P4_167397_9934   | NW_004516886.1 | Scaffold1773 | 9934                    | CC                              | AA              | 1947019930               |
| SNP_P4_167398_10257  | NW_004516886.1 | Scaffold1773 | 10257                   | AA                              | TT              | 1947019932               |
| SNP_P4_167399_10483  | NW_004516886.1 | Scaffold1773 | 10483                   | GG                              | TT              | 1947019934               |
| SNP_P4_167400_10507  | NW_004516886.1 | Scaffold1773 | 10507                   | AA                              | GG              | 1947019936               |
| SNP_P4_167401_10821  | NW_004516886.1 | Scaffold1773 | 10821                   | CC                              | TT              | 1947019938               |
| SNP_P4_167402_10831  | NW_004516886.1 | Scaffold1773 | 10831                   | CC                              | AA              | 1947019940               |
| SNP_P4_167403_11740  | NW_004516886.1 | Scaffold1773 | 11740                   | CC                              | TT              | 1947019942               |
| SNP_P4_167404_12940  | NW_004516886.1 | Scaffold1773 | 12940                   | GG                              | AA              | 1947019944               |
| SNP_P4_167405_13113  | NW_004516886.1 | Scaffold1773 | 13113                   | AA                              | GG              | 1947019947               |
| SNP_P4_167406_13315  | NW_004516886.1 | Scaffold1773 | 13315                   | GG                              | TT              | 1947019949               |
| SNP_P4_167408_14182  | NW_004516886.1 | Scaffold1773 | 14182                   | GG                              | AA              | 1947019951               |
| SNP_P4_167409_15671  | NW_004516886.1 | Scaffold1773 | 15671                   | CC                              | TT              | 1947019953               |
| SNP_P4_167410_15718  | NW_004516886.1 | Scaffold1773 | 15718                   | TT                              | AA              | 1947019955               |
| SNP_P4_167411_15880  | NW_004516886.1 | Scaffold1773 | 15880                   | GG                              | CC              | 1947019957               |

| SNPs IDs            | Chromosome IDs | Chromosomes  | Physical positions (bp) | CDC Frontier (Reference genome) | (ILWC46 & LPNB) | NCBI SNPdb Accession IDs |
|---------------------|----------------|--------------|-------------------------|---------------------------------|-----------------|--------------------------|
| SNP_P4_167412_15954 | NW_004516886.1 | Scaffold1773 | 15954                   | TT                              | CC              | 1947019959               |
| SNP_P4_167413_16001 | NW_004516886.1 | Scaffold1773 | 16001                   | AA                              | TT              | 1947019962               |
| SNP_P4_167414_16043 | NW_004516886.1 | Scaffold1773 | 16043                   | AA                              | TT              | 1947019964               |
| SNP_P4_167415_16224 | NW_004516886.1 | Scaffold1773 | 16224                   | GG                              | TT              | 1947019966               |
| SNP_P4_167416_16309 | NW_004516886.1 | Scaffold1773 | 16309                   | GG                              | AA              | 1947019968               |
| SNP_P4_167417_16316 | NW_004516886.1 | Scaffold1773 | 16316                   | AA                              | TT              | 1947019970               |
| SNP_P4_167418_16390 | NW_004516886.1 | Scaffold1773 | 16390                   | AA                              | GG              | 1947019972               |
| SNP_P4_167419_16537 | NW_004516886.1 | Scaffold1773 | 16537                   | TT                              | CC              | 1947019974               |
| SNP_P4_167420_17822 | NW_004516886.1 | Scaffold1773 | 17822                   | GG                              | AA              | 1947019976               |
| SNP_P4_167421_18124 | NW_004516886.1 | Scaffold1773 | 18124                   | AA                              | TT              | 1947019978               |
| SNP_P4_167422_19359 | NW_004516886.1 | Scaffold1773 | 19359                   | TT                              | AA              | 1947019980               |
| SNP_P4_167423_19827 | NW_004516886.1 | Scaffold1773 | 19827                   | CC                              | TT              | 1947019982               |
| SNP_P4_167424_20676 | NW_004516886.1 | Scaffold1773 | 20676                   | AA                              | TT              | 1947019984               |
| SNP_P4_167425_20684 | NW_004516886.1 | Scaffold1773 | 20684                   | GG                              | TT              | 1947019986               |
| SNP_P4_167426_21568 | NW_004516886.1 | Scaffold1773 | 21568                   | TT                              | CC              | 1947019988               |
| SNP_P4_167427_21625 | NW_004516886.1 | Scaffold1773 | 21625                   | AA                              | GG              | 1947019990               |
| SNP_P4_167428_21688 | NW_004516886.1 | Scaffold1773 | 21688                   | AA                              | GG              | 1947019992               |
| SNP_P4_167429_21689 | NW_004516886.1 | Scaffold1773 | 21689                   | GG                              | AA              | 1947019994               |
| SNP_P4_167430_25736 | NW_004516886.1 | Scaffold1773 | 25736                   | CC                              | TT              | 1947019996               |
| SNP_P4_167431_25745 | NW_004516886.1 | Scaffold1773 | 25745                   | AA                              | GG              | 1947019998               |
| SNP_P4_167432_25751 | NW_004516886.1 | Scaffold1773 | 25751                   | TT                              | CC              | 1947020000               |
| SNP_P4_167433_25753 | NW_004516886.1 | Scaffold1773 | 25753                   | GG                              | AA              | 1947020002               |
| SNP_P4_167434_26029 | NW_004516886.1 | Scaffold1773 | 26029                   | AA                              | GG              | 1947020004               |
| SNP_P4_167435_26089 | NW_004516886.1 | Scaffold1773 | 26089                   | AA                              | GG              | 1947020006               |
| SNP_P4_167436_26094 | NW_004516886.1 | Scaffold1773 | 26094                   | AA                              | GG              | 1947020008               |
| SNP_P4_167437_26107 | NW_004516886.1 | Scaffold1773 | 26107                   | CC                              | AA              | 1947020010               |
| SNP_P4_167438_28407 | NW_004516886.1 | Scaffold1773 | 28407                   | CC                              | TT              | 1947020012               |
| SNP_P4_167439_28769 | NW_004516886.1 | Scaffold1773 | 28769                   | CC                              | AA              | 1947020014               |
| SNP_P4_167440_29444 | NW_004516886.1 | Scaffold1773 | 29444                   | CC                              | AA              | 1947020016               |
| SNP_P4_167441_29455 | NW_004516886.1 | Scaffold1773 | 29455                   | AA                              | TT              | 1947020018               |
| SNP_P4_167442_29462 | NW_004516886.1 | Scaffold1773 | 29462                   | CC                              | AA              | 1947020020               |
| SNP_P4_167443_29468 | NW_004516886.1 | Scaffold1773 | 29468                   | TT                              | CC              | 1947020022               |
| SNP_P4_167444_30421 | NW_004516886.1 | Scaffold1773 | 30421                   | CC                              | TT              | 1947020024               |
| SNP_P4_167445_30734 | NW_004516886.1 | Scaffold1773 | 30734                   | TT                              | AA              | 1947020026               |
| SNP_P4_167446_30766 | NW_004516886.1 | Scaffold1773 | 30766                   | AA                              | TT              | 1947020028               |
| SNP_P4_167447_31139 | NW_004516886.1 | Scaffold1773 | 31139                   | AA                              | GG              | 1947020030               |
| SNP_P4_167448_32328 | NW_004516886.1 | Scaffold1773 | 32328                   | GG                              | AA              | 1947020032               |
| SNP_P4_167449_32977 | NW_004516886.1 | Scaffold1773 | 32977                   | CC                              | TT              | 1947020034               |
| SNP_P4_167450_33955 | NW_004516886.1 | Scaffold1773 | 33955                   | AA                              | TT              | 1947020036               |
| SNP_P4_167451_34487 | NW_004516886.1 | Scaffold1773 | 34487                   | GG                              | AA              | 1947020038               |
| SNP_P4_167452_35303 | NW_004516886.1 | Scaffold1773 | 35303                   | CC                              | TT              | 1947020040               |
| SNP_P4_167453_35543 | NW_004516886.1 | Scaffold1773 | 35543                   | GG                              | AA              | 1947020042               |

| SNPs IDs            | Chromosome IDs | Chromosomes  | Physical positions (bp) | CDC Frontier (Reference genome) | (ILWC46 & LPNB) | NCBI SNPdb Accession IDs |
|---------------------|----------------|--------------|-------------------------|---------------------------------|-----------------|--------------------------|
| SNP_P4_167454_35674 | NW_004516886.1 | Scaffold1773 | 35674                   | TT                              | CC              | 1947020044               |
| SNP_P4_167455_49140 | NW_004516886.1 | Scaffold1773 | 49140                   | CC                              | AA              | 1947020046               |
| SNP_P4_167456_6197  | NW_004516888.1 | Scaffold1776 | 6197                    | CC                              | TT              | 1947020048               |
| SNP_P4_167457_14351 | NW_004516888.1 | Scaffold1776 | 14351                   | AA                              | GG              | 1947020050               |
| SNP_P4_167458_14466 | NW_004516888.1 | Scaffold1776 | 14466                   | CC                              | TT              | 1947020052               |
| SNP_P4_167459_14474 | NW_004516888.1 | Scaffold1776 | 14474                   | AA                              | CC              | 1947020054               |
| SNP_P4_167460_14691 | NW_004516888.1 | Scaffold1776 | 14691                   | TT                              | AA              | 1947020056               |
| SNP_P4_167461_14741 | NW_004516888.1 | Scaffold1776 | 14741                   | CC                              | TT              | 1947020058               |
| SNP_P4_167462_14749 | NW_004516888.1 | Scaffold1776 | 14749                   | AA                              | GG              | 1947020060               |
| SNP_P4_167463_14827 | NW_004516888.1 | Scaffold1776 | 14827                   | TT                              | CC              | 1947020062               |
| SNP_P4_167464_16309 | NW_004516888.1 | Scaffold1776 | 16309                   | AA                              | GG              | 1947020064               |
| SNP_P4_167465_16317 | NW_004516888.1 | Scaffold1776 | 16317                   | TT                              | CC              | 1947020066               |
| SNP_P4_167466_16544 | NW_004516888.1 | Scaffold1776 | 16544                   | TT                              | CC              | 1947020068               |
| SNP_P4_167467_16553 | NW_004516888.1 | Scaffold1776 | 16553                   | TT                              | AA              | 1947020070               |
| SNP_P4_167468_23550 | NW_004516888.1 | Scaffold1776 | 23550                   | TT                              | AA              | 1947020073               |
| SNP_P4_167470_23569 | NW_004516888.1 | Scaffold1776 | 23569                   | AA                              | GG              | 1947020075               |
| SNP_P4_167471_23855 | NW_004516888.1 | Scaffold1776 | 23855                   | GG                              | CC              | 1947020077               |
| SNP_P4_167472_25004 | NW_004516888.1 | Scaffold1776 | 25004                   | AA                              | TT              | 1947020079               |
| SNP_P4_167473_25466 | NW_004516888.1 | Scaffold1776 | 25466                   | AA                              | TT              | 1947020080               |
| SNP_P4_167474_26059 | NW_004516888.1 | Scaffold1776 | 26059                   | TT                              | AA              | 1947020082               |
| SNP_P4_167475_26660 | NW_004516888.1 | Scaffold1776 | 26660                   | AA                              | TT              | 1947020084               |
| SNP_P4_167476_27495 | NW_004516888.1 | Scaffold1776 | 27495                   | TT                              | AA              | 1947020086               |
| SNP_P4_167477_27684 | NW_004516888.1 | Scaffold1776 | 27684                   | GG                              | TT              | 1947020088               |
| SNP_P4_167478_27688 | NW_004516888.1 | Scaffold1776 | 27688                   | CC                              | TT              | 1947020090               |
| SNP_P4_167479_27788 | NW_004516888.1 | Scaffold1776 | 27788                   | CC                              | TT              | 1947020092               |
| SNP_P4_167480_28293 | NW_004516888.1 | Scaffold1776 | 28293                   | AA                              | GG              | 1947020094               |
| SNP_P4_167481_29289 | NW_004516888.1 | Scaffold1776 | 29289                   | AA                              | GG              | 1947020096               |
| SNP_P4_167482_29290 | NW_004516888.1 | Scaffold1776 | 29290                   | AA                              | GG              | 1947020098               |
| SNP_P4_167483_29291 | NW_004516888.1 | Scaffold1776 | 29291                   | AA                              | GG              | 1947020100               |
| SNP_P4_167484_36226 | NW_004516888.1 | Scaffold1776 | 36226                   | TT                              | GG              | 1947020102               |
| SNP_P4_167485_37474 | NW_004516888.1 | Scaffold1776 | 37474                   | CC                              | TT              | 1947020104               |
| SNP_P4_167486_22451 | NW_004516889.1 | Scaffold1777 | 22451                   | GG                              | AA              | 1947020106               |
| SNP_P4_167487_22626 | NW_004516889.1 | Scaffold1777 | 22626                   | AA                              | GG              | 1947020109               |
| SNP_P4_167488_22691 | NW_004516889.1 | Scaffold1777 | 22691                   | AA                              | GG              | 1947020111               |
| SNP_P4_167489_22809 | NW_004516889.1 | Scaffold1777 | 22809                   | AA                              | GG              | 1947020113               |
| SNP_P4_167490_22844 | NW_004516889.1 | Scaffold1777 | 22844                   | TT                              | CC              | 1947020115               |
| SNP_P4_167491_22857 | NW_004516889.1 | Scaffold1777 | 22857                   | TT                              | CC              | 1947020117               |
| SNP_P4_167492_22873 | NW_004516889.1 | Scaffold1777 | 22873                   | GG                              | CC              | 1947020119               |
| SNP_P4_167493_28098 | NW_004516889.1 | Scaffold1777 | 28098                   | TT                              | GG              | 1947020121               |
| SNP_P4_167494_65522 | NW_004516889.1 | Scaffold1777 | 65522                   | AA                              | CC              | 1947020123               |
| SNP_P4_167495_65528 | NW_004516889.1 | Scaffold1777 | 65528                   | CC                              | AA              | 1947020125               |
| SNP_P4_167497_70396 | NW_004516889.1 | Scaffold1777 | 70396                   | CC                              | TT              | 1947020127               |

| SNPs IDs             | Chromosome IDs | Chromosomes  | Physical positions (bp) | CDC Frontier (Reference genome) | (ILWC46 & LPNB) | NCBI SNPdb Accession IDs |
|----------------------|----------------|--------------|-------------------------|---------------------------------|-----------------|--------------------------|
| SNP_P4_167498_103874 | NW_004516889.1 | Scaffold1777 | 103874                  | TT                              | CC              | 1947020129               |
| SNP_P4_167499_104197 | NW_004516889.1 | Scaffold1777 | 104197                  | GG                              | AA              | 1947020131               |
| SNP_P4_167500_104242 | NW_004516889.1 | Scaffold1777 | 104242                  | CC                              | TT              | 1947020133               |
| SNP_P4_167501_104295 | NW_004516889.1 | Scaffold1777 | 104295                  | CC                              | TT              | 1947020135               |
| SNP_P4_167502_104871 | NW_004516889.1 | Scaffold1777 | 104871                  | AA                              | CC              | 1947020137               |
| SNP_P4_167504_112362 | NW_004516889.1 | Scaffold1777 | 112362                  | GG                              | AA              | 1947020139               |
| SNP_P4_167505_113313 | NW_004516889.1 | Scaffold1777 | 113313                  | TT                              | CC              | 1947020141               |
| SNP_P4_167506_114276 | NW_004516889.1 | Scaffold1777 | 114276                  | TT                              | CC              | 1947020143               |
| SNP_P4_167507_114287 | NW_004516889.1 | Scaffold1777 | 114287                  | TT                              | CC              | 1947020145               |
| SNP_P4_167508_114314 | NW_004516889.1 | Scaffold1777 | 114314                  | CC                              | GG              | 1947020147               |
| SNP_P4_167510_162355 | NW_004516889.1 | Scaffold1777 | 162355                  | CC                              | AA              | 1947020149               |
| SNP_P4_167511_182099 | NW_004516889.1 | Scaffold1777 | 182099                  | GG                              | TT              | 1947020151               |
| SNP_P4_167512_229267 | NW_004516889.1 | Scaffold1777 | 229267                  | CC                              | GG              | 1947020153               |
| SNP_P4_167513_234012 | NW_004516889.1 | Scaffold1777 | 234012                  | AA                              | GG              | 1947020155               |
| SNP_P4_167514_247025 | NW_004516889.1 | Scaffold1777 | 247025                  | GG                              | TT              | 1947020157               |
| SNP_P4_167515_267697 | NW_004516889.1 | Scaffold1777 | 267697                  | GG                              | TT              | 1947020159               |
| SNP_P4_167516_273224 | NW_004516889.1 | Scaffold1777 | 273224                  | AA                              | GG              | 1947020161               |
| SNP_P4_167517_273621 | NW_004516889.1 | Scaffold1777 | 273621                  | GG                              | AA              | 1947020163               |
| SNP_P4_167518_273868 | NW_004516889.1 | Scaffold1777 | 273868                  | TT                              | CC              | 1947020165               |
| SNP_P4_167519_302692 | NW_004516889.1 | Scaffold1777 | 302692                  | CC                              | TT              | 1947020167               |
| SNP_P4_167520_340032 | NW_004516889.1 | Scaffold1777 | 340032                  | CC                              | TT              | 1947020169               |
| SNP_P4_167521_340038 | NW_004516889.1 | Scaffold1777 | 340038                  | CC                              | TT              | 1947020171               |
| SNP_P4_167522_340048 | NW_004516889.1 | Scaffold1777 | 340048                  | TT                              | CC              | 1947020173               |
| SNP_P4_167523_340054 | NW_004516889.1 | Scaffold1777 | 340054                  | TT                              | GG              | 1947020175               |
| SNP_P4_167524_340440 | NW_004516889.1 | Scaffold1777 | 340440                  | CC                              | AA              | 1947020177               |
| SNP_P4_167525_342440 | NW_004516889.1 | Scaffold1777 | 342440                  | GG                              | AA              | 1947020179               |
| SNP_P4_167526_343026 | NW_004516889.1 | Scaffold1777 | 343026                  | AA                              | GG              | 1947020181               |
| SNP_P4_167527_343116 | NW_004516889.1 | Scaffold1777 | 343116                  | CC                              | TT              | 1947020183               |
| SNP_P4_167528_343140 | NW_004516889.1 | Scaffold1777 | 343140                  | TT                              | CC              | 1947020185               |
| SNP_P4_167529_343164 | NW_004516889.1 | Scaffold1777 | 343164                  | CC                              | TT              | 1947020187               |
| SNP_P4_167530_343173 | NW_004516889.1 | Scaffold1777 | 343173                  | CC                              | TT              | 1947020189               |
| SNP_P4_167531_343185 | NW_004516889.1 | Scaffold1777 | 343185                  | GG                              | AA              | 1947020191               |
| SNP_P4_167532_343228 | NW_004516889.1 | Scaffold1777 | 343228                  | TT                              | CC              | 1947020193               |
| SNP_P4_167533_343253 | NW_004516889.1 | Scaffold1777 | 343253                  | AA                              | GG              | 1947020195               |
| SNP_P4_167534_343330 | NW_004516889.1 | Scaffold1777 | 343330                  | AA                              | CC              | 1947020196               |
| SNP_P4_167535_343381 | NW_004516889.1 | Scaffold1777 | 343381                  | CC                              | TT              | 1947020197               |
| SNP_P4_167536_343417 | NW_004516889.1 | Scaffold1777 | 343417                  | TT                              | CC              | 1947020198               |
| SNP_P4_167537_343462 | NW_004516889.1 | Scaffold1777 | 343462                  | AA                              | GG              | 1947020200               |
| SNP_P4_167538_343466 | NW_004516889.1 | Scaffold1777 | 343466                  | TT                              | CC              | 1947020202               |
| SNP_P4_167539_343484 | NW_004516889.1 | Scaffold1777 | 343484                  | TT                              | AA              | 1947020204               |
| SNP_P4_167540_343489 | NW_004516889.1 | Scaffold1777 | 343489                  | TT                              | CC              | 1947020206               |
| SNP_P4_167541_343513 | NW_004516889.1 | Scaffold1777 | 343513                  | GG                              | TT              | 1947020208               |



| SNPs IDs             | Chromosome IDs | Chromosomes  | Physical positions (bp) | CDC Frontier (Reference genome) | (ILWC46 & LPNB) | NCBI SNPdb Accession IDs |
|----------------------|----------------|--------------|-------------------------|---------------------------------|-----------------|--------------------------|
| SNP_P4_167542_343522 | NW_004516889.1 | Scaffold1777 | 343522                  | AA                              | GG              | 1947020210               |
| SNP_P4_167543_343525 | NW_004516889.1 | Scaffold1777 | 343525                  | TT                              | CC              | 1947020212               |
| SNP_P4_167544_343537 | NW_004516889.1 | Scaffold1777 | 343537                  | GG                              | AA              | 1947020214               |
| SNP_P4_167545_345392 | NW_004516889.1 | Scaffold1777 | 345392                  | TT                              | CC              | 1947020216               |
| SNP_P4_167546_356814 | NW_004516889.1 | Scaffold1777 | 356814                  | TT                              | CC              | 1947020218               |
| SNP_P4_167547_372085 | NW_004516889.1 | Scaffold1777 | 372085                  | CC                              | GG              | 1947020220               |
| SNP_P4_167550_447175 | NW_004516889.1 | Scaffold1777 | 447175                  | CC                              | GG              | 1947020222               |
| SNP_P4_167551_447199 | NW_004516889.1 | Scaffold1777 | 447199                  | TT                              | AA              | 1947020224               |
| SNP_P4_167552_447384 | NW_004516889.1 | Scaffold1777 | 447384                  | TT                              | CC              | 1947020226               |
| SNP_P4_167553_492134 | NW_004516889.1 | Scaffold1777 | 492134                  | TT                              | CC              | 1947020228               |
| SNP_P4_167554_492136 | NW_004516889.1 | Scaffold1777 | 492136                  | GG                              | AA              | 1947020230               |
| SNP_P4_167555_492309 | NW_004516889.1 | Scaffold1777 | 492309                  | AA                              | GG              | 1947020232               |
| SNP_P4_167556_492339 | NW_004516889.1 | Scaffold1777 | 492339                  | TT                              | CC              | 1947020234               |
| SNP_P4_167557_492382 | NW_004516889.1 | Scaffold1777 | 492382                  | GG                              | CC              | 1947020236               |
| SNP_P4_167558_518894 | NW_004516889.1 | Scaffold1777 | 518894                  | AA                              | GG              | 1947020238               |
| SNP_P4_167559_518940 | NW_004516889.1 | Scaffold1777 | 518940                  | TT                              | CC              | 1947020240               |
| SNP_P4_167560_518948 | NW_004516889.1 | Scaffold1777 | 518948                  | AA                              | GG              | 1947020242               |
| SNP_P4_167561_518955 | NW_004516889.1 | Scaffold1777 | 518955                  | TT                              | CC              | 1947020244               |
| SNP_P4_167562_518970 | NW_004516889.1 | Scaffold1777 | 518970                  | AA                              | GG              | 1947020246               |
| SNP_P4_167563_519038 | NW_004516889.1 | Scaffold1777 | 519038                  | TT                              | CC              | 1947020248               |
| SNP_P4_167564_519045 | NW_004516889.1 | Scaffold1777 | 519045                  | TT                              | CC              | 1947020250               |
| SNP_P4_167566_519476 | NW_004516889.1 | Scaffold1777 | 519476                  | TT                              | CC              | 1947020252               |
| SNP_P4_167569_539805 | NW_004516889.1 | Scaffold1777 | 539805                  | TT                              | CC              | 1947020254               |
| SNP_P4_167570_567365 | NW_004516889.1 | Scaffold1777 | 567365                  | GG                              | AA              | 1947020256               |
| SNP_P4_167571_567453 | NW_004516889.1 | Scaffold1777 | 567453                  | GG                              | TT              | 1947020258               |
| SNP_P4_167572_567465 | NW_004516889.1 | Scaffold1777 | 567465                  | CC                              | TT              | 1947020260               |
| SNP_P4_167573_567468 | NW_004516889.1 | Scaffold1777 | 567468                  | AA                              | GG              | 1947020262               |
| SNP_P4_167575_590283 | NW_004516889.1 | Scaffold1777 | 590283                  | TT                              | CC              | 1947020264               |
| SNP_P4_167576_613663 | NW_004516889.1 | Scaffold1777 | 613663                  | GG                              | AA              | 1947020266               |
| SNP_P4_167577_613665 | NW_004516889.1 | Scaffold1777 | 613665                  | AA                              | GG              | 1947020268               |
| SNP_P4_167578_613731 | NW_004516889.1 | Scaffold1777 | 613731                  | AA                              | GG              | 1947020270               |
| SNP_P4_167579_613787 | NW_004516889.1 | Scaffold1777 | 613787                  | GG                              | AA              | 1947020272               |
| SNP_P4_167580_613810 | NW_004516889.1 | Scaffold1777 | 613810                  | TT                              | CC              | 1947020274               |
| SNP_P4_167581_613859 | NW_004516889.1 | Scaffold1777 | 613859                  | CC                              | GG              | 1947020276               |
| SNP_P4_167582_613879 | NW_004516889.1 | Scaffold1777 | 613879                  | GG                              | AA              | 1947020278               |
| SNP_P4_167583_613963 | NW_004516889.1 | Scaffold1777 | 613963                  | CC                              | GG              | 1947020280               |
| SNP_P4_167584_614044 | NW_004516889.1 | Scaffold1777 | 614044                  | TT                              | CC              | 1947020282               |
| SNP_P4_167585_614064 | NW_004516889.1 | Scaffold1777 | 614064                  | AA                              | GG              | 1947020284               |
| SNP_P4_167586_614145 | NW_004516889.1 | Scaffold1777 | 614145                  | TT                              | AA              | 1947020286               |
| SNP_P4_167587_614402 | NW_004516889.1 | Scaffold1777 | 614402                  | AA                              | GG              | 1947020288               |
| SNP_P4_167588_614469 | NW_004516889.1 | Scaffold1777 | 614469                  | CC                              | AA              | 1947020290               |
| SNP_P4_167589_614511 | NW_004516889.1 | Scaffold1777 | 614511                  | GG                              | AA              | 1947020292               |

| SNPs IDs             | Chromosome IDs | Chromosomes  | Physical positions (bp) | CDC Frontier (Reference genome) | (ILWC46 & LPNB) | NCBI SNPdb Accession IDs |
|----------------------|----------------|--------------|-------------------------|---------------------------------|-----------------|--------------------------|
| SNP_P4_167590_614599 | NW_004516889.1 | Scaffold1777 | 614599                  | TT                              | GG              | 1947020294               |
| SNP_P4_167591_614649 | NW_004516889.1 | Scaffold1777 | 614649                  | CC                              | AA              | 1947020296               |
| SNP_P4_167592_614684 | NW_004516889.1 | Scaffold1777 | 614684                  | CC                              | TT              | 1947020298               |
| SNP_P4_167593_614699 | NW_004516889.1 | Scaffold1777 | 614699                  | TT                              | GG              | 1947020300               |
| SNP_P4_167594_614717 | NW_004516889.1 | Scaffold1777 | 614717                  | CC                              | TT              | 1947020302               |
| SNP_P4_167595_614788 | NW_004516889.1 | Scaffold1777 | 614788                  | AA                              | TT              | 1947020304               |
| SNP_P4_167596_617288 | NW_004516889.1 | Scaffold1777 | 617288                  | CC                              | TT              | 1947020306               |
| SNP_P4_167597_617728 | NW_004516889.1 | Scaffold1777 | 617728                  | GG                              | AA              | 1947020308               |
| SNP_P4_167598_623708 | NW_004516889.1 | Scaffold1777 | 623708                  | CC                              | AA              | 1947020310               |
| SNP_P4_167599_623744 | NW_004516889.1 | Scaffold1777 | 623744                  | CC                              | AA              | 1947020312               |
| SNP_P4_167600_623763 | NW_004516889.1 | Scaffold1777 | 623763                  | GG                              | AA              | 1947020314               |
| SNP_P4_167601_623808 | NW_004516889.1 | Scaffold1777 | 623808                  | TT                              | CC              | 1947020316               |
| SNP_P4_167602_623848 | NW_004516889.1 | Scaffold1777 | 623848                  | GG                              | AA              | 1947020318               |
| SNP_P4_167603_624028 | NW_004516889.1 | Scaffold1777 | 624028                  | GG                              | AA              | 1947020320               |
| SNP_P4_167604_624353 | NW_004516889.1 | Scaffold1777 | 624353                  | AA                              | GG              | 1947020322               |
| SNP_P4_167605_624370 | NW_004516889.1 | Scaffold1777 | 624370                  | TT                              | GG              | 1947020324               |
| SNP_P4_167606_625389 | NW_004516889.1 | Scaffold1777 | 625389                  | GG                              | CC              | 1947020326               |
| SNP_P4_167607_625409 | NW_004516889.1 | Scaffold1777 | 625409                  | AA                              | GG              | 1947020328               |
| SNP_P4_167608_625595 | NW_004516889.1 | Scaffold1777 | 625595                  | CC                              | TT              | 1947020330               |
| SNP_P4_167609_625648 | NW_004516889.1 | Scaffold1777 | 625648                  | AA                              | GG              | 1947020332               |
| SNP_P4_167610_625735 | NW_004516889.1 | Scaffold1777 | 625735                  | AA                              | GG              | 1947020334               |
| SNP_P4_167611_625749 | NW_004516889.1 | Scaffold1777 | 625749                  | GG                              | CC              | 1947020336               |
| SNP_P4_167612_625765 | NW_004516889.1 | Scaffold1777 | 625765                  | GG                              | TT              | 1947020338               |
| SNP_P4_167613_626478 | NW_004516889.1 | Scaffold1777 | 626478                  | AA                              | TT              | 1947020340               |
| SNP_P4_167614_626517 | NW_004516889.1 | Scaffold1777 | 626517                  | CC                              | AA              | 1947020342               |
| SNP_P4_167615_626782 | NW_004516889.1 | Scaffold1777 | 626782                  | TT                              | CC              | 1947020344               |
| SNP_P4_167616_626817 | NW_004516889.1 | Scaffold1777 | 626817                  | AA                              | TT              | 1947020346               |
| SNP_P4_167617_626838 | NW_004516889.1 | Scaffold1777 | 626838                  | AA                              | GG              | 1947020348               |
| SNP_P4_167618_628203 | NW_004516889.1 | Scaffold1777 | 628203                  | CC                              | TT              | 1947020350               |
| SNP_P4_167619_628264 | NW_004516889.1 | Scaffold1777 | 628264                  | TT                              | CC              | 1947020352               |
| SNP_P4_167620_628295 | NW_004516889.1 | Scaffold1777 | 628295                  | TT                              | CC              | 1947020354               |
| SNP_P4_167621_628406 | NW_004516889.1 | Scaffold1777 | 628406                  | GG                              | AA              | 1947020356               |
| SNP_P4_167622_628448 | NW_004516889.1 | Scaffold1777 | 628448                  | AA                              | GG              | 1947020358               |
| SNP_P4_167623_628509 | NW_004516889.1 | Scaffold1777 | 628509                  | AA                              | GG              | 1947020360               |
| SNP_P4_167624_628540 | NW_004516889.1 | Scaffold1777 | 628540                  | CC                              | AA              | 1947020362               |
| SNP_P4_167625_628629 | NW_004516889.1 | Scaffold1777 | 628629                  | AA                              | GG              | 1947020364               |
| SNP_P4_167626_628679 | NW_004516889.1 | Scaffold1777 | 628679                  | TT                              | CC              | 1947020366               |
| SNP_P4_167627_628701 | NW_004516889.1 | Scaffold1777 | 628701                  | AA                              | CC              | 1947020368               |
| SNP_P4_167628_629227 | NW_004516889.1 | Scaffold1777 | 629227                  | GG                              | CC              | 1947020370               |
| SNP_P4_167629_629451 | NW_004516889.1 | Scaffold1777 | 629451                  | TT                              | CC              | 1947020372               |
| SNP_P4_167630_629487 | NW_004516889.1 | Scaffold1777 | 629487                  | CC                              | TT              | 1947020374               |
| SNP_P4_167631_632271 | NW_004516889.1 | Scaffold1777 | 632271                  | GG                              | AA              | 1947020376               |

| SNPs IDs             | Chromosome IDs | Chromosomes  | Physical positions (bp) | CDC Frontier (Reference genome) | (ILWC46 & LPNB) | NCBI SNPdb Accession IDs |
|----------------------|----------------|--------------|-------------------------|---------------------------------|-----------------|--------------------------|
| SNP_P4_167632_632287 | NW_004516889.1 | Scaffold1777 | 632287                  | GG                              | TT              | 1947020378               |
| SNP_P4_167633_632529 | NW_004516889.1 | Scaffold1777 | 632529                  | TT                              | CC              | 1947020380               |
| SNP_P4_167634_632545 | NW_004516889.1 | Scaffold1777 | 632545                  | GG                              | AA              | 1947020382               |
| SNP_P4_167635_636001 | NW_004516889.1 | Scaffold1777 | 636001                  | TT                              | CC              | 1947020384               |
| SNP_P4_167636_636343 | NW_004516889.1 | Scaffold1777 | 636343                  | TT                              | AA              | 1947020386               |
| SNP_P4_167637_636598 | NW_004516889.1 | Scaffold1777 | 636598                  | TT                              | AA              | 1947020388               |
| SNP_P4_167638_205    | NW_004516890.1 | Scaffold1778 | 205                     | AA                              | CC              | 1947020390               |
| SNP_P4_167639_414    | NW_004516890.1 | Scaffold1778 | 414                     | GG                              | CC              | 1947020392               |
| SNP_P4_167640_852    | NW_004516890.1 | Scaffold1778 | 852                     | TT                              | AA              | 1947020394               |
| SNP_P4_167641_915    | NW_004516890.1 | Scaffold1778 | 915                     | AA                              | GG              | 1947020396               |
| SNP_P4_167642_925    | NW_004516890.1 | Scaffold1778 | 925                     | TT                              | CC              | 1947020398               |
| SNP_P4_167643_982    | NW_004516890.1 | Scaffold1778 | 982                     | GG                              | AA              | 1947020400               |
| SNP_P4_167644_1114   | NW_004516890.1 | Scaffold1778 | 1114                    | GG                              | TT              | 1947020402               |
| SNP_P4_167645_1214   | NW_004516890.1 | Scaffold1778 | 1214                    | CC                              | GG              | 1947020404               |
| SNP_P4_167646_1218   | NW_004516890.1 | Scaffold1778 | 1218                    | AA                              | CC              | 1947020406               |
| SNP_P4_167647_1223   | NW_004516890.1 | Scaffold1778 | 1223                    | TT                              | GG              | 1947020408               |
| SNP_P4_167649_1489   | NW_004516890.1 | Scaffold1778 | 1489                    | CC                              | TT              | 1947020410               |
| SNP_P4_167650_1527   | NW_004516890.1 | Scaffold1778 | 1527                    | AA                              | CC              | 1947020412               |
| SNP_P4_167651_1651   | NW_004516890.1 | Scaffold1778 | 1651                    | CC                              | TT              | 1947020414               |
| SNP_P4_167652_1918   | NW_004516890.1 | Scaffold1778 | 1918                    | AA                              | GG              | 1947020416               |
| SNP_P4_167653_1973   | NW_004516890.1 | Scaffold1778 | 1973                    | TT                              | GG              | 1947020418               |
| SNP_P4_167654_1980   | NW_004516890.1 | Scaffold1778 | 1980                    | CC                              | TT              | 1947020420               |
| SNP_P4_167655_2039   | NW_004516890.1 | Scaffold1778 | 2039                    | CC                              | TT              | 1947020422               |
| SNP_P4_167656_2044   | NW_004516890.1 | Scaffold1778 | 2044                    | TT                              | AA              | 1947020424               |
| SNP_P4_167657_4064   | NW_004516890.1 | Scaffold1778 | 4064                    | CC                              | TT              | 1947020426               |
| SNP_P4_167658_4067   | NW_004516890.1 | Scaffold1778 | 4067                    | GG                              | AA              | 1947020428               |
| SNP_P4_167659_4156   | NW_004516890.1 | Scaffold1778 | 4156                    | GG                              | AA              | 1947020430               |
| SNP_P4_167660_4177   | NW_004516890.1 | Scaffold1778 | 4177                    | TT                              | GG              | 1947020432               |
| SNP_P4_167661_4184   | NW_004516890.1 | Scaffold1778 | 4184                    | GG                              | AA              | 1947020434               |
| SNP_P4_167662_4197   | NW_004516890.1 | Scaffold1778 | 4197                    | CC                              | TT              | 1947020436               |
| SNP_P4_167663_4444   | NW_004516890.1 | Scaffold1778 | 4444                    | TT                              | GG              | 1947020438               |
| SNP_P4_167664_4452   | NW_004516890.1 | Scaffold1778 | 4452                    | GG                              | TT              | 1947020440               |
| SNP_P4_167665_4631   | NW_004516890.1 | Scaffold1778 | 4631                    | TT                              | AA              | 1947020442               |
| SNP_P4_167666_4960   | NW_004516890.1 | Scaffold1778 | 4960                    | GG                              | AA              | 1947020444               |
| SNP_P4_167667_4973   | NW_004516890.1 | Scaffold1778 | 4973                    | AA                              | GG              | 1947020446               |
| SNP_P4_167668_5011   | NW_004516890.1 | Scaffold1778 | 5011                    | AA                              | GG              | 1947020448               |
| SNP_P4_167669_10419  | NW_004516890.1 | Scaffold1778 | 10419                   | TT                              | AA              | 1947020451               |
| SNP_P4_167670_15221  | NW_004516890.1 | Scaffold1778 | 15221                   | GG                              | AA              | 1947020453               |
| SNP_P4_167671_15263  | NW_004516890.1 | Scaffold1778 | 15263                   | AA                              | TT              | 1947020455               |
| SNP_P4_167672_15806  | NW_004516890.1 | Scaffold1778 | 15806                   | TT                              | AA              | 1947020457               |
| SNP_P4_167673_15832  | NW_004516890.1 | Scaffold1778 | 15832                   | AA                              | GG              | 1947020459               |
| SNP_P4_167674_15882  | NW_004516890.1 | Scaffold1778 | 15882                   | AA                              | TT              | 1947020461               |

| SNPs IDs             | Chromosome IDs | Chromosomes  | Physical positions (bp) | CDC Frontier (Reference genome) | (ILWC46 & LPNB) | NCBI SNPdb Accession IDs |
|----------------------|----------------|--------------|-------------------------|---------------------------------|-----------------|--------------------------|
| SNP_P4_167675_15959  | NW_004516890.1 | Scaffold1778 | 15959                   | GG                              | AA              | 1947020463               |
| SNP_P4_167676_16103  | NW_004516890.1 | Scaffold1778 | 16103                   | CC                              | TT              | 1947020465               |
| SNP_P4_167677_16113  | NW_004516890.1 | Scaffold1778 | 16113                   | TT                              | CC              | 1947020467               |
| SNP_P4_167678_16129  | NW_004516890.1 | Scaffold1778 | 16129                   | CC                              | GG              | 1947020469               |
| SNP_P4_167679_16171  | NW_004516890.1 | Scaffold1778 | 16171                   | AA                              | GG              | 1947020471               |
| SNP_P4_167680_16240  | NW_004516890.1 | Scaffold1778 | 16240                   | TT                              | CC              | 1947020473               |
| SNP_P4_167681_16241  | NW_004516890.1 | Scaffold1778 | 16241                   | TT                              | GG              | 1947020475               |
| SNP_P4_167682_16282  | NW_004516890.1 | Scaffold1778 | 16282                   | CC                              | AA              | 1947020477               |
| SNP_P4_167683_16286  | NW_004516890.1 | Scaffold1778 | 16286                   | AA                              | GG              | 1947020479               |
| SNP_P4_167684_16312  | NW_004516890.1 | Scaffold1778 | 16312                   | TT                              | CC              | 1947020481               |
| SNP_P4_167685_16340  | NW_004516890.1 | Scaffold1778 | 16340                   | CC                              | TT              | 1947020483               |
| SNP_P4_167686_16476  | NW_004516890.1 | Scaffold1778 | 16476                   | GG                              | AA              | 1947020485               |
| SNP_P4_167687_16489  | NW_004516890.1 | Scaffold1778 | 16489                   | CC                              | TT              | 1947020487               |
| SNP_P4_167688_16601  | NW_004516890.1 | Scaffold1778 | 16601                   | AA                              | GG              | 1947020489               |
| SNP_P4_167689_16645  | NW_004516890.1 | Scaffold1778 | 16645                   | TT                              | AA              | 1947020491               |
| SNP_P4_167690_16648  | NW_004516890.1 | Scaffold1778 | 16648                   | TT                              | GG              | 1947020493               |
| SNP_P4_167691_16716  | NW_004516890.1 | Scaffold1778 | 16716                   | CC                              | TT              | 1947020495               |
| SNP_P4_167692_16776  | NW_004516890.1 | Scaffold1778 | 16776                   | TT                              | CC              | 1947020497               |
| SNP_P4_167693_16858  | NW_004516890.1 | Scaffold1778 | 16858                   | CC                              | GG              | 1947020499               |
| SNP_P4_167694_16869  | NW_004516890.1 | Scaffold1778 | 16869                   | GG                              | AA              | 1947020501               |
| SNP_P4_167695_16915  | NW_004516890.1 | Scaffold1778 | 16915                   | TT                              | CC              | 1947020503               |
| SNP_P4_167696_16931  | NW_004516890.1 | Scaffold1778 | 16931                   | AA                              | GG              | 1947020505               |
| SNP_P4_167697_16974  | NW_004516890.1 | Scaffold1778 | 16974                   | GG                              | TT              | 1947020507               |
| SNP_P4_167698_8322   | NW_004516891.1 | Scaffold1779 | 8322                    | AA                              | CC              | 1947020509               |
| SNP_P4_167699_8364   | NW_004516891.1 | Scaffold1779 | 8364                    | AA                              | CC              | 1947020511               |
| SNP_P4_167700_8743   | NW_004516891.1 | Scaffold1779 | 8743                    | AA                              | GG              | 1947020513               |
| SNP_P4_167701_9609   | NW_004516891.1 | Scaffold1779 | 9609                    | TT                              | CC              | 1947020515               |
| SNP_P4_167702_11637  | NW_004516891.1 | Scaffold1779 | 11637                   | AA                              | TT              | 1947020517               |
| SNP_P4_167703_11653  | NW_004516891.1 | Scaffold1779 | 11653                   | GG                              | AA              | 1947020519               |
| SNP_P4_167704_11659  | NW_004516891.1 | Scaffold1779 | 11659                   | TT                              | GG              | 1947020521               |
| SNP_P4_167705_11666  | NW_004516891.1 | Scaffold1779 | 11666                   | AA                              | GG              | 1947020523               |
| SNP_P4_167706_11679  | NW_004516891.1 | Scaffold1779 | 11679                   | CC                              | GG              | 1947020525               |
| SNP_P4_167707_40224  | NW_004516891.1 | Scaffold1779 | 40224                   | GG                              | AA              | 1947020527               |
| SNP_P4_167708_72985  | NW_004516891.1 | Scaffold1779 | 72985                   | AA                              | GG              | 1947020529               |
| SNP_P4_167709_118767 | NW_004516891.1 | Scaffold1779 | 118767                  | GG                              | AA              | 1947020531               |
| SNP_P4_167710_119031 | NW_004516891.1 | Scaffold1779 | 119031                  | CC                              | TT              | 1947020533               |
| SNP_P4_167711_119111 | NW_004516891.1 | Scaffold1779 | 119111                  | CC                              | TT              | 1947020535               |
| SNP_P4_167712_119160 | NW_004516891.1 | Scaffold1779 | 119160                  | CC                              | AA              | 1947020537               |
| SNP_P4_167713_119244 | NW_004516891.1 | Scaffold1779 | 119244                  | TT                              | CC              | 1947020539               |
| SNP_P4_167714_119275 | NW_004516891.1 | Scaffold1779 | 119275                  | TT                              | AA              | 1947020541               |
| SNP_P4_167715_119450 | NW_004516891.1 | Scaffold1779 | 119450                  | GG                              | TT              | 1947020543               |
| SNP_P4_167716_119565 | NW_004516891.1 | Scaffold1779 | 119565                  | CC                              | TT              | 1947020545               |

| SNPs IDs             | Chromosome IDs | Chromosomes  | Physical positions (bp) | CDC Frontier (Reference genome) | (ILWC46 & LPNB) | NCBI SNPdb Accession IDs |
|----------------------|----------------|--------------|-------------------------|---------------------------------|-----------------|--------------------------|
| SNP_P4_167717_119679 | NW_004516891.1 | Scaffold1779 | 119679                  | AA                              | TT              | 1947020547               |
| SNP_P4_167718_119694 | NW_004516891.1 | Scaffold1779 | 119694                  | AA                              | TT              | 1947020549               |
| SNP_P4_167719_119822 | NW_004516891.1 | Scaffold1779 | 119822                  | AA                              | GG              | 1947020551               |
| SNP_P4_167720_120026 | NW_004516891.1 | Scaffold1779 | 120026                  | CC                              | AA              | 1947020553               |
| SNP_P4_167721_120035 | NW_004516891.1 | Scaffold1779 | 120035                  | AA                              | CC              | 1947020555               |
| SNP_P4_167722_120129 | NW_004516891.1 | Scaffold1779 | 120129                  | CC                              | TT              | 1947020557               |
| SNP_P4_167723_120171 | NW_004516891.1 | Scaffold1779 | 120171                  | AA                              | GG              | 1947020559               |
| SNP_P4_167724_122089 | NW_004516891.1 | Scaffold1779 | 122089                  | AA                              | GG              | 1947020561               |
| SNP_P4_167725_129700 | NW_004516891.1 | Scaffold1779 | 129700                  | GG                              | AA              | 1947020563               |
| SNP_P4_167728_131559 | NW_004516891.1 | Scaffold1779 | 131559                  | TT                              | GG              | 1947020565               |
| SNP_P4_167729_131566 | NW_004516891.1 | Scaffold1779 | 131566                  | CC                              | AA              | 1947020567               |
| SNP_P4_167730_132015 | NW_004516891.1 | Scaffold1779 | 132015                  | TT                              | CC              | 1947020569               |
| SNP_P4_167732_132441 | NW_004516891.1 | Scaffold1779 | 132441                  | AA                              | GG              | 1947020571               |
| SNP_P4_167733_132965 | NW_004516891.1 | Scaffold1779 | 132965                  | GG                              | AA              | 1947020573               |
| SNP_P4_167734_132999 | NW_004516891.1 | Scaffold1779 | 132999                  | GG                              | AA              | 1947020575               |
| SNP_P4_167735_792    | NW_004516892.1 | Scaffold1780 | 792                     | AA                              | GG              | 1947020577               |
| SNP_P4_167736_5678   | NW_004516893.1 | Scaffold1782 | 5678                    | GG                              | AA              | 1947020579               |
| SNP_P4_167737_5693   | NW_004516893.1 | Scaffold1782 | 5693                    | AA                              | GG              | 1947020581               |
| SNP_P4_167738_6072   | NW_004516893.1 | Scaffold1782 | 6072                    | AA                              | TT              | 1947020583               |
| SNP_P4_167739_6121   | NW_004516893.1 | Scaffold1782 | 6121                    | GG                              | AA              | 1947020585               |
| SNP_P4_167740_6171   | NW_004516893.1 | Scaffold1782 | 6171                    | TT                              | GG              | 1947020587               |
| SNP_P4_167741_6208   | NW_004516893.1 | Scaffold1782 | 6208                    | AA                              | GG              | 1947020589               |
| SNP_P4_167742_5042   | NW_004516894.1 | Scaffold1783 | 5042                    | AA                              | GG              | 1947020591               |
| SNP_P4_167743_37671  | NW_004516894.1 | Scaffold1783 | 37671                   | GG                              | AA              | 1947020593               |
| SNP_P4_167745_39925  | NW_004516894.1 | Scaffold1783 | 39925                   | TT                              | AA              | 1947020595               |
| SNP_P4_167746_40203  | NW_004516894.1 | Scaffold1783 | 40203                   | AA                              | TT              | 1947020597               |
| SNP_P4_167747_40251  | NW_004516894.1 | Scaffold1783 | 40251                   | AA                              | CC              | 1947020600               |
| SNP_P4_167748_40269  | NW_004516894.1 | Scaffold1783 | 40269                   | TT                              | GG              | 1947020602               |
| SNP_P4_167749_40291  | NW_004516894.1 | Scaffold1783 | 40291                   | GG                              | AA              | 1947020604               |
| SNP_P4_167750_45378  | NW_004516894.1 | Scaffold1783 | 45378                   | AA                              | GG              | 1947020606               |
| SNP_P4_167751_46057  | NW_004516894.1 | Scaffold1783 | 46057                   | TT                              | CC              | 1947020608               |
| SNP_P4_167752_46060  | NW_004516894.1 | Scaffold1783 | 46060                   | AA                              | GG              | 1947020610               |
| SNP_P4_167754_46336  | NW_004516894.1 | Scaffold1783 | 46336                   | AA                              | CC              | 1947020612               |
| SNP_P4_167755_46642  | NW_004516894.1 | Scaffold1783 | 46642                   | AA                              | TT              | 1947020614               |
| SNP_P4_167756_296    | NW_004516897.1 | Scaffold1789 | 296                     | GG                              | AA              | 1947020616               |
| SNP_P4_167757_417    | NW_004516897.1 | Scaffold1789 | 417                     | AA                              | GG              | 1947020618               |
| SNP_P4_167758_551    | NW_004516897.1 | Scaffold1789 | 551                     | GG                              | AA              | 1947020620               |
| SNP_P4_167759_21088  | NW_004516897.1 | Scaffold1789 | 21088                   | TT                              | CC              | 1947020622               |
| SNP_P4_167760_21349  | NW_004516897.1 | Scaffold1789 | 21349                   | AA                              | TT              | 1947020624               |
| SNP_P4_167761_21364  | NW_004516897.1 | Scaffold1789 | 21364                   | GG                              | AA              | 1947020626               |
| SNP_P4_167762_12342  | NW_004516898.1 | Scaffold1791 | 12342                   | CC                              | GG              | 1947020628               |
| SNP_P4_167763_12351  | NW_004516898.1 | Scaffold1791 | 12351                   | GG                              | CC              | 1947020630               |

| SNPs IDs            | Chromosome IDs | Chromosomes  | Physical positions (bp) | CDC Frontier (Reference genome) | (ILWC46 & LPNB) | NCBI SNPdb Accession IDs |
|---------------------|----------------|--------------|-------------------------|---------------------------------|-----------------|--------------------------|
| SNP_P4_167764_12631 | NW_004516898.1 | Scaffold1791 | 12631                   | TT                              | GG              | 1947020632               |
| SNP_P4_167765_12640 | NW_004516898.1 | Scaffold1791 | 12640                   | TT                              | CC              | 1947020634               |
| SNP_P4_167766_12733 | NW_004516898.1 | Scaffold1791 | 12733                   | GG                              | TT              | 1947020636               |
| SNP_P4_167768_188   | NW_004516900.1 | Scaffold1793 | 188                     | TT                              | AA              | 1947020638               |
| SNP_P4_167769_408   | NW_004516900.1 | Scaffold1793 | 408                     | TT                              | AA              | 1947020640               |
| SNP_P4_167770_2130  | NW_004516901.1 | Scaffold1795 | 2130                    | CC                              | TT              | 1947020642               |
| SNP_P4_167771_2148  | NW_004516901.1 | Scaffold1795 | 2148                    | CC                              | TT              | 1947020644               |
| SNP_P4_167773_5762  | NW_004516901.1 | Scaffold1795 | 5762                    | GG                              | AA              | 1947020646               |
| SNP_P4_167774_5825  | NW_004516901.1 | Scaffold1795 | 5825                    | AA                              | GG              | 1947020648               |
| SNP_P4_167775_2610  | NW_004516903.1 | Scaffold1797 | 2610                    | AA                              | GG              | 1947020650               |
| SNP_P4_167776_16773 | NW_004516903.1 | Scaffold1797 | 16773                   | AA                              | CC              | 1947020652               |
| SNP_P4_167777_16777 | NW_004516903.1 | Scaffold1797 | 16777                   | AA                              | TT              | 1947020654               |
| SNP_P4_167778_16824 | NW_004516903.1 | Scaffold1797 | 16824                   | CC                              | AA              | 1947020656               |
| SNP_P4_167780_34099 | NW_004516903.1 | Scaffold1797 | 34099                   | GG                              | AA              | 1947020658               |
| SNP_P4_167781_37300 | NW_004516903.1 | Scaffold1797 | 37300                   | TT                              | AA              | 1947020660               |
| SNP_P4_167782_37802 | NW_004516903.1 | Scaffold1797 | 37802                   | CC                              | TT              | 1947020662               |
| SNP_P4_167783_37844 | NW_004516903.1 | Scaffold1797 | 37844                   | CC                              | AA              | 1947020664               |
| SNP_P4_167784_1533  | NW_004516904.1 | Scaffold1798 | 1533                    | AA                              | TT              | 1947020666               |
| SNP_P4_167785_1579  | NW_004516904.1 | Scaffold1798 | 1579                    | CC                              | TT              | 1947020668               |
| SNP_P4_167786_1588  | NW_004516904.1 | Scaffold1798 | 1588                    | TT                              | AA              | 1947020670               |
| SNP_P4_167788_1695  | NW_004516904.1 | Scaffold1798 | 1695                    | TT                              | CC              | 1947020672               |
| SNP_P4_167790_1785  | NW_004516904.1 | Scaffold1798 | 1785                    | TT                              | CC              | 1947020674               |
| SNP_P4_167791_8882  | NW_004516905.1 | Scaffold1799 | 8882                    | GG                              | AA              | 1947020676               |
| SNP_P4_167792_3252  | NW_004516907.1 | Scaffold1802 | 3252                    | CC                              | TT              | 1947020678               |
| SNP_P4_167793_3437  | NW_004516907.1 | Scaffold1802 | 3437                    | CC                              | AA              | 1947020680               |
| SNP_P4_167794_3722  | NW_004516907.1 | Scaffold1802 | 3722                    | GG                              | AA              | 1947020682               |
| SNP_P4_167795_3988  | NW_004516907.1 | Scaffold1802 | 3988                    | TT                              | CC              | 1947020684               |
| SNP_P4_167796_15454 | NW_004516907.1 | Scaffold1802 | 15454                   | AA                              | GG              | 1947020686               |
| SNP_P4_167797_15785 | NW_004516907.1 | Scaffold1802 | 15785                   | GG                              | AA              | 1947020688               |
| SNP_P4_167798_15880 | NW_004516907.1 | Scaffold1802 | 15880                   | AA                              | GG              | 1947020690               |
| SNP_P4_167799_15897 | NW_004516907.1 | Scaffold1802 | 15897                   | GG                              | AA              | 1947020692               |
| SNP_P4_167800_17217 | NW_004516907.1 | Scaffold1802 | 17217                   | TT                              | GG              | 1947020694               |
| SNP_P4_167801_18872 | NW_004516907.1 | Scaffold1802 | 18872                   | AA                              | CC              | 1947020696               |
| SNP_P4_167802_18877 | NW_004516907.1 | Scaffold1802 | 18877                   | CC                              | TT              | 1947020698               |
| SNP_P4_167803_18888 | NW_004516907.1 | Scaffold1802 | 18888                   | CC                              | TT              | 1947020700               |
| SNP_P4_167804_18891 | NW_004516907.1 | Scaffold1802 | 18891                   | AA                              | GG              | 1947020702               |
| SNP_P4_167805_18894 | NW_004516907.1 | Scaffold1802 | 18894                   | TT                              | CC              | 1947020704               |
| SNP_P4_167806_44542 | NW_004516909.1 | Scaffold1804 | 44542                   | AA                              | CC              | 1947020706               |
| SNP_P4_167808_82206 | NW_004516909.1 | Scaffold1804 | 82206                   | AA                              | GG              | 1947020708               |
| SNP_P4_167809_92356 | NW_004516909.1 | Scaffold1804 | 92356                   | TT                              | GG              | 1947020710               |
| SNP_P4_167810_97486 | NW_004516909.1 | Scaffold1804 | 97486                   | CC                              | GG              | 1947020712               |
| SNP_P4_167811_97841 | NW_004516909.1 | Scaffold1804 | 97841                   | TT                              | CC              | 1947020714               |

| SNPs IDs             | Chromosome IDs | Chromosomes  | Physical positions (bp) | CDC Frontier (Reference genome) | (ILWC46 & LPNB) | NCBI SNPdb Accession IDs |
|----------------------|----------------|--------------|-------------------------|---------------------------------|-----------------|--------------------------|
| SNP_P4_167812_115932 | NW_004516909.1 | Scaffold1804 | 115932                  | AA                              | CC              | 1947020716               |
| SNP_P4_167813_115939 | NW_004516909.1 | Scaffold1804 | 115939                  | AA                              | CC              | 1947020718               |
| SNP_P4_167814_116307 | NW_004516909.1 | Scaffold1804 | 116307                  | CC                              | TT              | 1947020720               |
| SNP_P4_167815_116347 | NW_004516909.1 | Scaffold1804 | 116347                  | TT                              | GG              | 1947020722               |
| SNP_P4_167816_116392 | NW_004516909.1 | Scaffold1804 | 116392                  | CC                              | TT              | 1947020724               |
| SNP_P4_167817_116409 | NW_004516909.1 | Scaffold1804 | 116409                  | GG                              | TT              | 1947020726               |
| SNP_P4_167818_116440 | NW_004516909.1 | Scaffold1804 | 116440                  | AA                              | CC              | 1947020728               |
| SNP_P4_167819_116444 | NW_004516909.1 | Scaffold1804 | 116444                  | GG                              | AA              | 1947020730               |
| SNP_P4_167820_116463 | NW_004516909.1 | Scaffold1804 | 116463                  | AA                              | TT              | 1947020732               |
| SNP_P4_167821_117236 | NW_004516909.1 | Scaffold1804 | 117236                  | TT                              | CC              | 1947020734               |
| SNP_P4_167822_117240 | NW_004516909.1 | Scaffold1804 | 117240                  | AA                              | CC              | 1947020736               |
| SNP_P4_167823_117269 | NW_004516909.1 | Scaffold1804 | 117269                  | AA                              | CC              | 1947020738               |
| SNP_P4_167824_117624 | NW_004516909.1 | Scaffold1804 | 117624                  | AA                              | GG              | 1947020740               |
| SNP_P4_167825_118885 | NW_004516909.1 | Scaffold1804 | 118885                  | GG                              | TT              | 1947020742               |
| SNP_P4_167826_118909 | NW_004516909.1 | Scaffold1804 | 118909                  | AA                              | TT              | 1947020744               |
| SNP_P4_167827_118951 | NW_004516909.1 | Scaffold1804 | 118951                  | GG                              | AA              | 1947020746               |
| SNP_P4_167828_119124 | NW_004516909.1 | Scaffold1804 | 119124                  | CC                              | TT              | 1947020748               |
| SNP_P4_167829_148809 | NW_004516909.1 | Scaffold1804 | 148809                  | TT                              | CC              | 1947020750               |
| SNP_P4_167830_148811 | NW_004516909.1 | Scaffold1804 | 148811                  | GG                              | AA              | 1947020752               |
| SNP_P4_167831_148889 | NW_004516909.1 | Scaffold1804 | 148889                  | GG                              | AA              | 1947020754               |
| SNP_P4_167832_149154 | NW_004516909.1 | Scaffold1804 | 149154                  | TT                              | CC              | 1947020756               |
| SNP_P4_167833_149172 | NW_004516909.1 | Scaffold1804 | 149172                  | CC                              | TT              | 1947020758               |
| SNP_P4_167834_149175 | NW_004516909.1 | Scaffold1804 | 149175                  | CC                              | GG              | 1947020760               |
| SNP_P4_167835_151681 | NW_004516909.1 | Scaffold1804 | 151681                  | TT                              | CC              | 1947020762               |
| SNP_P4_167836_154855 | NW_004516909.1 | Scaffold1804 | 154855                  | GG                              | AA              | 1947020764               |
| SNP_P4_167837_154876 | NW_004516909.1 | Scaffold1804 | 154876                  | CC                              | GG              | 1947020766               |
| SNP_P4_167838_154877 | NW_004516909.1 | Scaffold1804 | 154877                  | TT                              | CC              | 1947020768               |
| SNP_P4_167839_154914 | NW_004516909.1 | Scaffold1804 | 154914                  | TT                              | GG              | 1947020770               |
| SNP_P4_167840_162544 | NW_004516909.1 | Scaffold1804 | 162544                  | TT                              | CC              | 1947020772               |
| SNP_P4_167841_172533 | NW_004516909.1 | Scaffold1804 | 172533                  | CC                              | GG              | 1947020774               |
| SNP_P4_167844_179381 | NW_004516909.1 | Scaffold1804 | 179381                  | CC                              | GG              | 1947020776               |
| SNP_P4_167845_179399 | NW_004516909.1 | Scaffold1804 | 179399                  | AA                              | GG              | 1947020778               |
| SNP_P4_167846_183818 | NW_004516909.1 | Scaffold1804 | 183818                  | CC                              | TT              | 1947020780               |
| SNP_P4_167847_184121 | NW_004516909.1 | Scaffold1804 | 184121                  | CC                              | TT              | 1947020782               |
| SNP_P4_167848_184131 | NW_004516909.1 | Scaffold1804 | 184131                  | TT                              | AA              | 1947020784               |
| SNP_P4_167849_184143 | NW_004516909.1 | Scaffold1804 | 184143                  | AA                              | GG              | 1947020786               |
| SNP_P4_167850_184160 | NW_004516909.1 | Scaffold1804 | 184160                  | CC                              | TT              | 1947020788               |
| SNP_P4_167851_184229 | NW_004516909.1 | Scaffold1804 | 184229                  | GG                              | TT              | 1947020790               |
| SNP_P4_167852_184335 | NW_004516909.1 | Scaffold1804 | 184335                  | TT                              | GG              | 1947020792               |
| SNP_P4_167853_184480 | NW_004516909.1 | Scaffold1804 | 184480                  | TT                              | CC              | 1947020794               |
| SNP_P4_167854_184667 | NW_004516909.1 | Scaffold1804 | 184667                  | GG                              | AA              | 1947020796               |
| SNP_P4_167855_184706 | NW_004516909.1 | Scaffold1804 | 184706                  | AA                              | GG              | 1947020798               |

| SNPs IDs             | Chromosome IDs | Chromosomes  | Physical positions (bp) | CDC Frontier (Reference genome) | (ILWC46 & LPNB) | NCBI SNPdb Accession IDs |
|----------------------|----------------|--------------|-------------------------|---------------------------------|-----------------|--------------------------|
| SNP_P4_167856_184724 | NW_004516909.1 | Scaffold1804 | 184724                  | CC                              | TT              | 1947020800               |
| SNP_P4_167857_184725 | NW_004516909.1 | Scaffold1804 | 184725                  | CC                              | GG              | 1947020802               |
| SNP_P4_167858_184776 | NW_004516909.1 | Scaffold1804 | 184776                  | TT                              | CC              | 1947020804               |
| SNP_P4_167859_184842 | NW_004516909.1 | Scaffold1804 | 184842                  | AA                              | TT              | 1947020806               |
| SNP_P4_167860_188761 | NW_004516909.1 | Scaffold1804 | 188761                  | TT                              | AA              | 1947020808               |
| SNP_P4_167861_188854 | NW_004516909.1 | Scaffold1804 | 188854                  | TT                              | CC              | 1947020810               |
| SNP_P4_167862_190951 | NW_004516909.1 | Scaffold1804 | 190951                  | TT                              | AA              | 1947020812               |
| SNP_P4_167863_190980 | NW_004516909.1 | Scaffold1804 | 190980                  | TT                              | AA              | 1947020814               |
| SNP_P4_167865_191095 | NW_004516909.1 | Scaffold1804 | 191095                  | AA                              | GG              | 1947020816               |
| SNP_P4_167866_191259 | NW_004516909.1 | Scaffold1804 | 191259                  | GG                              | CC              | 1947020818               |
| SNP_P4_167867_191720 | NW_004516909.1 | Scaffold1804 | 191720                  | AA                              | GG              | 1947020820               |
| SNP_P4_167868_191771 | NW_004516909.1 | Scaffold1804 | 191771                  | AA                              | CC              | 1947020822               |
| SNP_P4_167869_191811 | NW_004516909.1 | Scaffold1804 | 191811                  | GG                              | AA              | 1947020824               |
| SNP_P4_167870_192140 | NW_004516909.1 | Scaffold1804 | 192140                  | TT                              | AA              | 1947020826               |
| SNP_P4_167871_192173 | NW_004516909.1 | Scaffold1804 | 192173                  | AA                              | GG              | 1947020828               |
| SNP_P4_167872_192197 | NW_004516909.1 | Scaffold1804 | 192197                  | CC                              | TT              | 1947020830               |
| SNP_P4_167873_192247 | NW_004516909.1 | Scaffold1804 | 192247                  | TT                              | AA              | 1947020832               |
| SNP_P4_167874_192248 | NW_004516909.1 | Scaffold1804 | 192248                  | AA                              | GG              | 1947020834               |
| SNP_P4_167875_192249 | NW_004516909.1 | Scaffold1804 | 192249                  | TT                              | AA              | 1947020835               |
| SNP_P4_167876_205132 | NW_004516909.1 | Scaffold1804 | 205132                  | AA                              | CC              | 1947020837               |
| SNP_P4_167877_205155 | NW_004516909.1 | Scaffold1804 | 205155                  | GG                              | TT              | 1947020839               |
| SNP_P4_167878_212960 | NW_004516909.1 | Scaffold1804 | 212960                  | AA                              | CC              | 1947020841               |
| SNP_P4_167879_214884 | NW_004516909.1 | Scaffold1804 | 214884                  | AA                              | GG              | 1947020843               |
| SNP_P4_167880_214896 | NW_004516909.1 | Scaffold1804 | 214896                  | CC                              | AA              | 1947020845               |
| SNP_P4_167881_216673 | NW_004516909.1 | Scaffold1804 | 216673                  | AA                              | GG              | 1947020847               |
| SNP_P4_167882_219874 | NW_004516909.1 | Scaffold1804 | 219874                  | AA                              | GG              | 1947020849               |
| SNP_P4_167883_223583 | NW_004516909.1 | Scaffold1804 | 223583                  | AA                              | GG              | 1947020851               |
| SNP_P4_167884_223635 | NW_004516909.1 | Scaffold1804 | 223635                  | GG                              | AA              | 1947020852               |
| SNP_P4_167885_225483 | NW_004516909.1 | Scaffold1804 | 225483                  | AA                              | GG              | 1947020854               |
| SNP_P4_167886_226601 | NW_004516909.1 | Scaffold1804 | 226601                  | TT                              | CC              | 1947020856               |
| SNP_P4_167887_226640 | NW_004516909.1 | Scaffold1804 | 226640                  | CC                              | TT              | 1947020858               |
| SNP_P4_167888_230702 | NW_004516909.1 | Scaffold1804 | 230702                  | GG                              | AA              | 1947020860               |
| SNP_P4_167889_234184 | NW_004516909.1 | Scaffold1804 | 234184                  | TT                              | CC              | 1947020862               |
| SNP_P4_167890_234328 | NW_004516909.1 | Scaffold1804 | 234328                  | TT                              | CC              | 1947020864               |
| SNP_P4_167891_234527 | NW_004516909.1 | Scaffold1804 | 234527                  | TT                              | AA              | 1947020866               |
| SNP_P4_167892_234640 | NW_004516909.1 | Scaffold1804 | 234640                  | CC                              | TT              | 1947020868               |
| SNP_P4_167893_236960 | NW_004516909.1 | Scaffold1804 | 236960                  | GG                              | AA              | 1947020869               |
| SNP_P4_167894_244532 | NW_004516909.1 | Scaffold1804 | 244532                  | AA                              | CC              | 1947020871               |
| SNP_P4_167895_244682 | NW_004516909.1 | Scaffold1804 | 244682                  | CC                              | AA              | 1947020873               |
| SNP_P4_167896_246834 | NW_004516909.1 | Scaffold1804 | 246834                  | GG                              | TT              | 1947020875               |
| SNP_P4_167897_246865 | NW_004516909.1 | Scaffold1804 | 246865                  | AA                              | GG              | 1947020877               |
| SNP_P4_167898_246901 | NW_004516909.1 | Scaffold1804 | 246901                  | GG                              | TT              | 1947020879               |



| SNPs IDs             | Chromosome IDs | Chromosomes  | Physical positions (bp) | CDC Frontier (Reference genome) | (ILWC46 & LPNB) | NCBI SNPdb Accession IDs |
|----------------------|----------------|--------------|-------------------------|---------------------------------|-----------------|--------------------------|
| SNP_P4_167899_247171 | NW_004516909.1 | Scaffold1804 | 247171                  | CC                              | GG              | 1947020881               |
| SNP_P4_167900_247307 | NW_004516909.1 | Scaffold1804 | 247307                  | AA                              | CC              | 1947020883               |
| SNP_P4_167901_253308 | NW_004516909.1 | Scaffold1804 | 253308                  | AA                              | TT              | 1947020885               |
| SNP_P4_167902_253314 | NW_004516909.1 | Scaffold1804 | 253314                  | TT                              | AA              | 1947020886               |
| SNP_P4_167903_253541 | NW_004516909.1 | Scaffold1804 | 253541                  | AA                              | TT              | 1947020888               |
| SNP_P4_167905_253574 | NW_004516909.1 | Scaffold1804 | 253574                  | TT                              | CC              | 1947020890               |
| SNP_P4_167906_253575 | NW_004516909.1 | Scaffold1804 | 253575                  | CC                              | GG              | 1947020892               |
| SNP_P4_167907_253716 | NW_004516909.1 | Scaffold1804 | 253716                  | TT                              | CC              | 1947020894               |
| SNP_P4_167908_253840 | NW_004516909.1 | Scaffold1804 | 253840                  | CC                              | TT              | 1947020896               |
| SNP_P4_167909_253897 | NW_004516909.1 | Scaffold1804 | 253897                  | CC                              | TT              | 1947020898               |
| SNP_P4_167910_257642 | NW_004516909.1 | Scaffold1804 | 257642                  | TT                              | CC              | 1947020900               |
| SNP_P4_167911_257658 | NW_004516909.1 | Scaffold1804 | 257658                  | CC                              | AA              | 1947020902               |
| SNP_P4_167912_257704 | NW_004516909.1 | Scaffold1804 | 257704                  | AA                              | GG              | 1947020904               |
| SNP_P4_167913_257727 | NW_004516909.1 | Scaffold1804 | 257727                  | GG                              | AA              | 1947020905               |
| SNP_P4_167915_257997 | NW_004516909.1 | Scaffold1804 | 257997                  | TT                              | GG              | 1947020907               |
| SNP_P4_167916_277991 | NW_004516909.1 | Scaffold1804 | 277991                  | CC                              | AA              | 1947020909               |
| SNP_P4_167917_286185 | NW_004516909.1 | Scaffold1804 | 286185                  | CC                              | AA              | 1947020911               |
| SNP_P4_167918_287017 | NW_004516909.1 | Scaffold1804 | 287017                  | CC                              | TT              | 1947020913               |
| SNP_P4_167919_287043 | NW_004516909.1 | Scaffold1804 | 287043                  | GG                              | TT              | 1947020915               |
| SNP_P4_167920_287056 | NW_004516909.1 | Scaffold1804 | 287056                  | TT                              | GG              | 1947020917               |
| SNP_P4_167921_287276 | NW_004516909.1 | Scaffold1804 | 287276                  | TT                              | AA              | 1947020919               |
| SNP_P4_167922_292972 | NW_004516909.1 | Scaffold1804 | 292972                  | GG                              | CC              | 1947020921               |
| SNP_P4_167923_298415 | NW_004516909.1 | Scaffold1804 | 298415                  | GG                              | AA              | 1947020922               |
| SNP_P4_167924_310075 | NW_004516909.1 | Scaffold1804 | 310075                  | TT                              | GG              | 1947020924               |
| SNP_P4_167925_310412 | NW_004516909.1 | Scaffold1804 | 310412                  | CC                              | TT              | 1947020926               |
| SNP_P4_167926_310431 | NW_004516909.1 | Scaffold1804 | 310431                  | AA                              | TT              | 1947020928               |
| SNP_P4_167927_317851 | NW_004516909.1 | Scaffold1804 | 317851                  | CC                              | GG              | 1947020930               |
| SNP_P4_167928_317904 | NW_004516909.1 | Scaffold1804 | 317904                  | CC                              | AA              | 1947020932               |
| SNP_P4_167929_317906 | NW_004516909.1 | Scaffold1804 | 317906                  | TT                              | AA              | 1947020934               |
| SNP_P4_167931_318835 | NW_004516909.1 | Scaffold1804 | 318835                  | CC                              | TT              | 1947020936               |
| SNP_P4_167932_318899 | NW_004516909.1 | Scaffold1804 | 318899                  | AA                              | GG              | 1947020938               |
| SNP_P4_167933_319183 | NW_004516909.1 | Scaffold1804 | 319183                  | TT                              | CC              | 1947020940               |
| SNP_P4_167934_319236 | NW_004516909.1 | Scaffold1804 | 319236                  | TT                              | CC              | 1947020942               |
| SNP_P4_167935_319597 | NW_004516909.1 | Scaffold1804 | 319597                  | GG                              | CC              | 1947020944               |
| SNP_P4_167936_64     | NW_004516910.1 | Scaffold1806 | 64                      | CC                              | AA              | 1947020945               |
| SNP_P4_167937_107    | NW_004516910.1 | Scaffold1806 | 107                     | AA                              | TT              | 1947020947               |
| SNP_P4_167939_225    | NW_004516910.1 | Scaffold1806 | 225                     | CC                              | TT              | 1947020949               |
| SNP_P4_167940_324    | NW_004516910.1 | Scaffold1806 | 324                     | GG                              | AA              | 1947020951               |
| SNP_P4_167941_347    | NW_004516910.1 | Scaffold1806 | 347                     | AA                              | CC              | 1947020953               |
| SNP_P4_167942_365    | NW_004516910.1 | Scaffold1806 | 365                     | CC                              | GG              | 1947020955               |
| SNP_P4_167943_446    | NW_004516910.1 | Scaffold1806 | 446                     | GG                              | TT              | 1947020957               |
| SNP_P4_167944_457    | NW_004516910.1 | Scaffold1806 | 457                     | TT                              | AA              | 1947020959               |

| SNPs IDs           | Chromosome IDs | Chromosomes  | Physical positions (bp) | CDC Frontier (Reference genome) | (ILWC46 & LPNB) | NCBI SNPdb Accession IDs |
|--------------------|----------------|--------------|-------------------------|---------------------------------|-----------------|--------------------------|
| SNP_P4_167945_469  | NW_004516910.1 | Scaffold1806 | 469                     | CC                              | TT              | 1947020961               |
| SNP_P4_167946_541  | NW_004516910.1 | Scaffold1806 | 541                     | AA                              | GG              | 1947020962               |
| SNP_P4_167947_555  | NW_004516910.1 | Scaffold1806 | 555                     | AA                              | GG              | 1947020964               |
| SNP_P4_167948_650  | NW_004516910.1 | Scaffold1806 | 650                     | GG                              | CC              | 1947020966               |
| SNP_P4_167949_701  | NW_004516910.1 | Scaffold1806 | 701                     | AA                              | GG              | 1947020968               |
| SNP_P4_167950_730  | NW_004516910.1 | Scaffold1806 | 730                     | AA                              | GG              | 1947020970               |
| SNP_P4_167951_2389 | NW_004516910.1 | Scaffold1806 | 2389                    | GG                              | AA              | 1947020972               |
| SNP_P4_167952_2390 | NW_004516910.1 | Scaffold1806 | 2390                    | TT                              | GG              | 1947020974               |
| SNP_P4_167953_2391 | NW_004516910.1 | Scaffold1806 | 2391                    | GG                              | TT              | 1947020976               |
| SNP_P4_167954_2407 | NW_004516910.1 | Scaffold1806 | 2407                    | GG                              | AA              | 1947020978               |
| SNP_P4_167955_2435 | NW_004516910.1 | Scaffold1806 | 2435                    | AA                              | GG              | 1947020980               |
| SNP_P4_167956_2563 | NW_004516910.1 | Scaffold1806 | 2563                    | TT                              | AA              | 1947020982               |
| SNP_P4_167957_2566 | NW_004516910.1 | Scaffold1806 | 2566                    | TT                              | CC              | 1947020984               |
| SNP_P4_167958_2754 | NW_004516910.1 | Scaffold1806 | 2754                    | CC                              | TT              | 1947020985               |
| SNP_P4_167959_2942 | NW_004516910.1 | Scaffold1806 | 2942                    | CC                              | TT              | 1947020987               |
| SNP_P4_167960_2978 | NW_004516910.1 | Scaffold1806 | 2978                    | GG                              | AA              | 1947020989               |
| SNP_P4_167962_3542 | NW_004516910.1 | Scaffold1806 | 3542                    | CC                              | AA              | 1947020991               |
| SNP_P4_167963_3584 | NW_004516910.1 | Scaffold1806 | 3584                    | GG                              | CC              | 1947020993               |
| SNP_P4_167964_3986 | NW_004516910.1 | Scaffold1806 | 3986                    | TT                              | GG              | 1947020995               |
| SNP_P4_167965_4586 | NW_004516910.1 | Scaffold1806 | 4586                    | AA                              | GG              | 1947020997               |
| SNP_P4_167966_4702 | NW_004516910.1 | Scaffold1806 | 4702                    | TT                              | CC              | 1947020999               |
| SNP_P4_167967_4919 | NW_004516910.1 | Scaffold1806 | 4919                    | AA                              | GG              | 1947021001               |
| SNP_P4_167968_4956 | NW_004516910.1 | Scaffold1806 | 4956                    | CC                              | GG              | 1947021003               |
| SNP_P4_167969_4966 | NW_004516910.1 | Scaffold1806 | 4966                    | GG                              | AA              | 1947021005               |
| SNP_P4_167970_5041 | NW_004516910.1 | Scaffold1806 | 5041                    | AA                              | TT              | 1947021006               |
| SNP_P4_167971_5279 | NW_004516910.1 | Scaffold1806 | 5279                    | GG                              | TT              | 1947021008               |
| SNP_P4_167973_7016 | NW_004516910.1 | Scaffold1806 | 7016                    | AA                              | GG              | 1947021010               |
| SNP_P4_167974_7064 | NW_004516910.1 | Scaffold1806 | 7064                    | CC                              | AA              | 1947021012               |
| SNP_P4_167975_7076 | NW_004516910.1 | Scaffold1806 | 7076                    | CC                              | GG              | 1947021014               |
| SNP_P4_167976_7435 | NW_004516910.1 | Scaffold1806 | 7435                    | AA                              | CC              | 1947021016               |
| SNP_P4_167977_7465 | NW_004516910.1 | Scaffold1806 | 7465                    | CC                              | TT              | 1947021018               |
| SNP_P4_167978_7480 | NW_004516910.1 | Scaffold1806 | 7480                    | TT                              | AA              | 1947021019               |
| SNP_P4_167979_7518 | NW_004516910.1 | Scaffold1806 | 7518                    | TT                              | AA              | 1947021021               |
| SNP_P4_167980_7535 | NW_004516910.1 | Scaffold1806 | 7535                    | AA                              | GG              | 1947021023               |
| SNP_P4_167981_7906 | NW_004516910.1 | Scaffold1806 | 7906                    | GG                              | TT              | 1947021025               |
| SNP_P4_167982_7950 | NW_004516910.1 | Scaffold1806 | 7950                    | TT                              | AA              | 1947021027               |
| SNP_P4_167983_8213 | NW_004516910.1 | Scaffold1806 | 8213                    | CC                              | AA              | 1947021029               |
| SNP_P4_167984_8478 | NW_004516910.1 | Scaffold1806 | 8478                    | AA                              | GG              | 1947021031               |
| SNP_P4_167985_8536 | NW_004516910.1 | Scaffold1806 | 8536                    | AA                              | GG              | 1947021033               |
| SNP_P4_167986_8599 | NW_004516910.1 | Scaffold1806 | 8599                    | AA                              | GG              | 1947021035               |
| SNP_P4_167987_8760 | NW_004516910.1 | Scaffold1806 | 8760                    | CC                              | GG              | 1947021037               |
| SNP_P4_167988_8776 | NW_004516910.1 | Scaffold1806 | 8776                    | AA                              | GG              | 1947021039               |

| SNPs IDs            | Chromosome IDs | Chromosomes  | Physical positions (bp) | CDC Frontier (Reference genome) | (ILWC46 & LPNB) | NCBI SNPdb Accession IDs |
|---------------------|----------------|--------------|-------------------------|---------------------------------|-----------------|--------------------------|
| SNP_P4_167989_23856 | NW_004516910.1 | Scaffold1806 | 23856                   | CC                              | TT              | 1947021041               |
| SNP_P4_167990_23943 | NW_004516910.1 | Scaffold1806 | 23943                   | TT                              | AA              | 1947021043               |
| SNP_P4_167991_24090 | NW_004516910.1 | Scaffold1806 | 24090                   | CC                              | TT              | 1947021044               |
| SNP_P4_167992_24170 | NW_004516910.1 | Scaffold1806 | 24170                   | TT                              | AA              | 1947021046               |
| SNP_P4_167993_24427 | NW_004516910.1 | Scaffold1806 | 24427                   | CC                              | AA              | 1947021048               |
| SNP_P4_167994_24656 | NW_004516910.1 | Scaffold1806 | 24656                   | CC                              | TT              | 1947021050               |
| SNP_P4_167995_24660 | NW_004516910.1 | Scaffold1806 | 24660                   | CC                              | TT              | 1947021052               |
| SNP_P4_167996_24768 | NW_004516910.1 | Scaffold1806 | 24768                   | CC                              | AA              | 1947021054               |
| SNP_P4_167997_24793 | NW_004516910.1 | Scaffold1806 | 24793                   | TT                              | AA              | 1947021056               |
| SNP_P4_167998_25347 | NW_004516910.1 | Scaffold1806 | 25347                   | AA                              | CC              | 1947021058               |
| SNP_P4_167999_25986 | NW_004516910.1 | Scaffold1806 | 25986                   | CC                              | TT              | 1947021060               |
| SNP_P4_168000_26314 | NW_004516910.1 | Scaffold1806 | 26314                   | CC                              | TT              | 1947021062               |
| SNP_P4_168001_26667 | NW_004516910.1 | Scaffold1806 | 26667                   | TT                              | AA              | 1947021064               |
| SNP_P4_168002_26757 | NW_004516910.1 | Scaffold1806 | 26757                   | GG                              | AA              | 1947021066               |
| SNP_P4_168003_26878 | NW_004516910.1 | Scaffold1806 | 26878                   | TT                              | AA              | 1947021068               |
| SNP_P4_168004_27144 | NW_004516910.1 | Scaffold1806 | 27144                   | GG                              | CC              | 1947021070               |
| SNP_P4_168005_27198 | NW_004516910.1 | Scaffold1806 | 27198                   | GG                              | AA              | 1947021072               |
| SNP_P4_168006_28204 | NW_004516910.1 | Scaffold1806 | 28204                   | TT                              | CC              | 1947021074               |
| SNP_P4_168007_28256 | NW_004516910.1 | Scaffold1806 | 28256                   | AA                              | TT              | 1947021076               |
| SNP_P4_168008_28263 | NW_004516910.1 | Scaffold1806 | 28263                   | TT                              | AA              | 1947021078               |
| SNP_P4_168009_28264 | NW_004516910.1 | Scaffold1806 | 28264                   | TT                              | CC              | 1947021080               |
| SNP_P4_168010_28481 | NW_004516910.1 | Scaffold1806 | 28481                   | GG                              | AA              | 1947021082               |
| SNP_P4_168011_28546 | NW_004516910.1 | Scaffold1806 | 28546                   | TT                              | CC              | 1947021084               |
| SNP_P4_168012_498   | NW_004516913.1 | Scaffold1810 | 498                     | GG                              | AA              | 1947021086               |
| SNP_P4_168013_519   | NW_004516913.1 | Scaffold1810 | 519                     | GG                              | AA              | 1947021087               |
| SNP_P4_168014_731   | NW_004516913.1 | Scaffold1810 | 731                     | TT                              | GG              | 1947021089               |
| SNP_P4_168015_969   | NW_004516913.1 | Scaffold1810 | 969                     | AA                              | TT              | 1947021091               |
| SNP_P4_168016_1028  | NW_004516913.1 | Scaffold1810 | 1028                    | TT                              | AA              | 1947021093               |
| SNP_P4_168017_1331  | NW_004516913.1 | Scaffold1810 | 1331                    | GG                              | AA              | 1947021095               |
| SNP_P4_168018_1431  | NW_004516913.1 | Scaffold1810 | 1431                    | GG                              | AA              | 1947021097               |
| SNP_P4_168019_1649  | NW_004516913.1 | Scaffold1810 | 1649                    | AA                              | CC              | 1947021099               |
| SNP_P4_168020_1694  | NW_004516913.1 | Scaffold1810 | 1694                    | CC                              | TT              | 1947021101               |
| SNP_P4_168021_1735  | NW_004516913.1 | Scaffold1810 | 1735                    | TT                              | AA              | 1947021103               |
| SNP_P4_168022_1946  | NW_004516913.1 | Scaffold1810 | 1946                    | TT                              | AA              | 1947021105               |
| SNP_P4_168023_2053  | NW_004516913.1 | Scaffold1810 | 2053                    | CC                              | TT              | 1947021107               |
| SNP_P4_168024_2066  | NW_004516913.1 | Scaffold1810 | 2066                    | GG                              | AA              | 1947021109               |
| SNP_P4_168025_2243  | NW_004516913.1 | Scaffold1810 | 2243                    | TT                              | CC              | 1947021110               |
| SNP_P4_168026_24349 | NW_004516913.1 | Scaffold1810 | 24349                   | TT                              | CC              | 1947021112               |
| SNP_P4_168027_24360 | NW_004516913.1 | Scaffold1810 | 24360                   | AA                              | GG              | 1947021114               |
| SNP_P4_168028_25430 | NW_004516913.1 | Scaffold1810 | 25430                   | GG                              | CC              | 1947021116               |
| SNP_P4_168029_28377 | NW_004516913.1 | Scaffold1810 | 28377                   | AA                              | GG              | 1947021118               |
| SNP_P4_168031_47612 | NW_004516913.1 | Scaffold1810 | 47612                   | TT                              | CC              | 1947021120               |

| SNPs IDs             | Chromosome IDs | Chromosomes  | Physical positions (bp) | CDC Frontier (Reference genome) | (ILWC46 & LPNB) | NCBI SNPdb Accession IDs |
|----------------------|----------------|--------------|-------------------------|---------------------------------|-----------------|--------------------------|
| SNP_P4_168032_48301  | NW_004516913.1 | Scaffold1810 | 48301                   | AA                              | GG              | 1947021122               |
| SNP_P4_168033_95353  | NW_004516913.1 | Scaffold1810 | 95353                   | TT                              | CC              | 1947021124               |
| SNP_P4_168034_98522  | NW_004516913.1 | Scaffold1810 | 98522                   | AA                              | TT              | 1947021126               |
| SNP_P4_168036_98595  | NW_004516913.1 | Scaffold1810 | 98595                   | TT                              | AA              | 1947021128               |
| SNP_P4_168037_98663  | NW_004516913.1 | Scaffold1810 | 98663                   | AA                              | GG              | 1947021129               |
| SNP_P4_168038_98676  | NW_004516913.1 | Scaffold1810 | 98676                   | CC                              | TT              | 1947021131               |
| SNP_P4_168039_98679  | NW_004516913.1 | Scaffold1810 | 98679                   | CC                              | AA              | 1947021133               |
| SNP_P4_168040_98687  | NW_004516913.1 | Scaffold1810 | 98687                   | AA                              | GG              | 1947021135               |
| SNP_P4_168041_98813  | NW_004516913.1 | Scaffold1810 | 98813                   | GG                              | AA              | 1947021137               |
| SNP_P4_168042_101967 | NW_004516913.1 | Scaffold1810 | 101967                  | AA                              | TT              | 1947021139               |
| SNP_P4_168043_103203 | NW_004516913.1 | Scaffold1810 | 103203                  | TT                              | CC              | 1947021141               |
| SNP_P4_168044_103209 | NW_004516913.1 | Scaffold1810 | 103209                  | TT                              | GG              | 1947021143               |
| SNP_P4_168046_103347 | NW_004516913.1 | Scaffold1810 | 103347                  | GG                              | AA              | 1947021145               |
| SNP_P4_168047_103363 | NW_004516913.1 | Scaffold1810 | 103363                  | TT                              | AA              | 1947021147               |
| SNP_P4_168048_103413 | NW_004516913.1 | Scaffold1810 | 103413                  | AA                              | GG              | 1947021149               |
| SNP_P4_168049_103633 | NW_004516913.1 | Scaffold1810 | 103633                  | GG                              | AA              | 1947021151               |
| SNP_P4_168050_103667 | NW_004516913.1 | Scaffold1810 | 103667                  | GG                              | TT              | 1947021153               |
| SNP_P4_168053_103934 | NW_004516913.1 | Scaffold1810 | 103934                  | TT                              | CC              | 1947021155               |
| SNP_P4_168054_105071 | NW_004516913.1 | Scaffold1810 | 105071                  | AA                              | TT              | 1947021157               |
| SNP_P4_168055_105085 | NW_004516913.1 | Scaffold1810 | 105085                  | TT                              | AA              | 1947021159               |
| SNP_P4_168056_25     | NW_004516914.1 | Scaffold1811 | 25                      | TT                              | CC              | 1947021161               |
| SNP_P4_168057_46     | NW_004516914.1 | Scaffold1811 | 46                      | CC                              | TT              | 1947021162               |
| SNP_P4_168058_1579   | NW_004516916.1 | Scaffold1813 | 1579                    | GG                              | AA              | 1947021164               |
| SNP_P4_168059_1580   | NW_004516916.1 | Scaffold1813 | 1580                    | AA                              | GG              | 1947021166               |
| SNP_P4_168060_1897   | NW_004516916.1 | Scaffold1813 | 1897                    | AA                              | TT              | 1947021168               |
| SNP_P4_168061_423    | NW_004516917.1 | Scaffold1814 | 423                     | TT                              | CC              | 1947021170               |
| SNP_P4_168062_1850   | NW_004516918.1 | Scaffold1815 | 1850                    | CC                              | GG              | 1947021172               |
| SNP_P4_168063_5477   | NW_004516918.1 | Scaffold1815 | 5477                    | CC                              | TT              | 1947021174               |
| SNP_P4_168064_5738   | NW_004516918.1 | Scaffold1815 | 5738                    | GG                              | AA              | 1947021176               |
| SNP_P4_168066_5771   | NW_004516918.1 | Scaffold1815 | 5771                    | TT                              | CC              | 1947021178               |
| SNP_P4_168067_8899   | NW_004516918.1 | Scaffold1815 | 8899                    | GG                              | TT              | 1947021179               |
| SNP_P4_168068_8930   | NW_004516918.1 | Scaffold1815 | 8930                    | TT                              | CC              | 1947021181               |
| SNP_P4_168069_8947   | NW_004516918.1 | Scaffold1815 | 8947                    | GG                              | AA              | 1947021183               |
| SNP_P4_168070_9240   | NW_004516918.1 | Scaffold1815 | 9240                    | AA                              | GG              | 1947021185               |
| SNP_P4_168071_12795  | NW_004516918.1 | Scaffold1815 | 12795                   | AA                              | GG              | 1947021187               |
| SNP_P4_168072_12827  | NW_004516918.1 | Scaffold1815 | 12827                   | AA                              | GG              | 1947021189               |
| SNP_P4_168073_13019  | NW_004516918.1 | Scaffold1815 | 13019                   | AA                              | GG              | 1947021191               |
| SNP_P4_168074_13105  | NW_004516918.1 | Scaffold1815 | 13105                   | GG                              | TT              | 1947021193               |
| SNP_P4_168076_24010  | NW_004516918.1 | Scaffold1815 | 24010                   | AA                              | TT              | 1947021195               |
| SNP_P4_168077_24135  | NW_004516918.1 | Scaffold1815 | 24135                   | TT                              | CC              | 1947021197               |
| SNP_P4_168079_24776  | NW_004516918.1 | Scaffold1815 | 24776                   | GG                              | TT              | 1947021198               |
| SNP_P4_168080_24797  | NW_004516918.1 | Scaffold1815 | 24797                   | CC                              | AA              | 1947021200               |

| SNPs IDs            | Chromosome IDs | Chromosomes  | Physical positions (bp) | CDC Frontier (Reference genome) | (ILWC46 & LPNB) | NCBI SNPdb Accession IDs |
|---------------------|----------------|--------------|-------------------------|---------------------------------|-----------------|--------------------------|
| SNP_P4_168081_31902 | NW_004516918.1 | Scaffold1815 | 31902                   | GG                              | AA              | 1947021202               |
| SNP_P4_168082_31939 | NW_004516918.1 | Scaffold1815 | 31939                   | AA                              | GG              | 1947021204               |
| SNP_P4_168083_32173 | NW_004516918.1 | Scaffold1815 | 32173                   | AA                              | GG              | 1947021206               |
| SNP_P4_168084_32732 | NW_004516918.1 | Scaffold1815 | 32732                   | TT                              | CC              | 1947021208               |
| SNP_P4_168085_34555 | NW_004516918.1 | Scaffold1815 | 34555                   | CC                              | TT              | 1947021210               |
| SNP_P4_168086_14268 | NW_004516919.1 | Scaffold1816 | 14268                   | TT                              | AA              | 1947021212               |
| SNP_P4_168087_15682 | NW_004516919.1 | Scaffold1816 | 15682                   | AA                              | GG              | 1947021214               |
| SNP_P4_168088_25829 | NW_004516919.1 | Scaffold1816 | 25829                   | TT                              | AA              | 1947021216               |
| SNP_P4_168089_25842 | NW_004516919.1 | Scaffold1816 | 25842                   | CC                              | TT              | 1947021218               |
| SNP_P4_168090_25851 | NW_004516919.1 | Scaffold1816 | 25851                   | CC                              | TT              | 1947021220               |
| SNP_P4_168091_26240 | NW_004516919.1 | Scaffold1816 | 26240                   | TT                              | CC              | 1947021222               |
| SNP_P4_168092_26494 | NW_004516919.1 | Scaffold1816 | 26494                   | CC                              | TT              | 1947021224               |
| SNP_P4_168093_26759 | NW_004516919.1 | Scaffold1816 | 26759                   | CC                              | GG              | 1947021226               |
| SNP_P4_168094_27031 | NW_004516919.1 | Scaffold1816 | 27031                   | CC                              | TT              | 1947021228               |
| SNP_P4_168095_27083 | NW_004516919.1 | Scaffold1816 | 27083                   | TT                              | CC              | 1947021230               |
| SNP_P4_168096_27117 | NW_004516919.1 | Scaffold1816 | 27117                   | GG                              | AA              | 1947021232               |
| SNP_P4_168097_27126 | NW_004516919.1 | Scaffold1816 | 27126                   | AA                              | TT              | 1947021234               |
| SNP_P4_168098_27803 | NW_004516919.1 | Scaffold1816 | 27803                   | AA                              | CC              | 1947021236               |
| SNP_P4_168099_27880 | NW_004516919.1 | Scaffold1816 | 27880                   | AA                              | TT              | 1947021238               |
| SNP_P4_168100_27897 | NW_004516919.1 | Scaffold1816 | 27897                   | CC                              | AA              | 1947021240               |
| SNP_P4_168101_27997 | NW_004516919.1 | Scaffold1816 | 27997                   | AA                              | CC              | 1947021241               |
| SNP_P4_168102_28316 | NW_004516919.1 | Scaffold1816 | 28316                   | TT                              | GG              | 1947021243               |
| SNP_P4_168103_28707 | NW_004516919.1 | Scaffold1816 | 28707                   | GG                              | AA              | 1947021245               |
| SNP_P4_168104_28719 | NW_004516919.1 | Scaffold1816 | 28719                   | GG                              | CC              | 1947021247               |
| SNP_P4_168105_29004 | NW_004516919.1 | Scaffold1816 | 29004                   | TT                              | CC              | 1947021249               |
| SNP_P4_168106_49735 | NW_004516919.1 | Scaffold1816 | 49735                   | TT                              | CC              | 1947021251               |
| SNP_P4_168107_49739 | NW_004516919.1 | Scaffold1816 | 49739                   | CC                              | TT              | 1947021253               |
| SNP_P4_168109_52676 | NW_004516919.1 | Scaffold1816 | 52676                   | TT                              | CC              | 1947021255               |
| SNP_P4_168110_52755 | NW_004516919.1 | Scaffold1816 | 52755                   | GG                              | AA              | 1947021257               |
| SNP_P4_168111_52763 | NW_004516919.1 | Scaffold1816 | 52763                   | GG                              | AA              | 1947021259               |
| SNP_P4_168112_52952 | NW_004516919.1 | Scaffold1816 | 52952                   | TT                              | CC              | 1947021261               |
| SNP_P4_168113_52975 | NW_004516919.1 | Scaffold1816 | 52975                   | GG                              | AA              | 1947021263               |
| SNP_P4_168114_52991 | NW_004516919.1 | Scaffold1816 | 52991                   | CC                              | AA              | 1947021265               |
| SNP_P4_168115_52992 | NW_004516919.1 | Scaffold1816 | 52992                   | TT                              | CC              | 1947021267               |
| SNP_P4_168116_52999 | NW_004516919.1 | Scaffold1816 | 52999                   | TT                              | CC              | 1947021269               |
| SNP_P4_168117_53009 | NW_004516919.1 | Scaffold1816 | 53009                   | TT                              | CC              | 1947021271               |
| SNP_P4_168118_53044 | NW_004516919.1 | Scaffold1816 | 53044                   | TT                              | AA              | 1947021273               |
| SNP_P4_168119_53064 | NW_004516919.1 | Scaffold1816 | 53064                   | TT                              | CC              | 1947021275               |
| SNP_P4_168120_53083 | NW_004516919.1 | Scaffold1816 | 53083                   | CC                              | GG              | 1947021277               |
| SNP_P4_168121_53110 | NW_004516919.1 | Scaffold1816 | 53110                   | AA                              | GG              | 1947021279               |
| SNP_P4_168122_53115 | NW_004516919.1 | Scaffold1816 | 53115                   | GG                              | AA              | 1947021281               |
| SNP_P4_168123_53141 | NW_004516919.1 | Scaffold1816 | 53141                   | AA                              | GG              | 1947021283               |

| SNPs IDs            | Chromosome IDs | Chromosomes  | Physical positions (bp) | CDC Frontier (Reference genome) | (ILWC46 & LPNB) | NCBI SNPdb Accession IDs |
|---------------------|----------------|--------------|-------------------------|---------------------------------|-----------------|--------------------------|
| SNP_P4_168124_53347 | NW_004516919.1 | Scaffold1816 | 53347                   | CC                              | GG              | 1947021285               |
| SNP_P4_168125_53367 | NW_004516919.1 | Scaffold1816 | 53367                   | AA                              | GG              | 1947021287               |
| SNP_P4_168126_53386 | NW_004516919.1 | Scaffold1816 | 53386                   | TT                              | AA              | 1947021289               |
| SNP_P4_168127_53448 | NW_004516919.1 | Scaffold1816 | 53448                   | AA                              | GG              | 1947021291               |
| SNP_P4_168128_53496 | NW_004516919.1 | Scaffold1816 | 53496                   | GG                              | CC              | 1947021293               |
| SNP_P4_168129_53552 | NW_004516919.1 | Scaffold1816 | 53552                   | TT                              | CC              | 1947021295               |
| SNP_P4_168130_53582 | NW_004516919.1 | Scaffold1816 | 53582                   | CC                              | TT              | 1947021297               |
| SNP_P4_168132_53686 | NW_004516919.1 | Scaffold1816 | 53686                   | TT                              | CC              | 1947021299               |
| SNP_P4_168133_2982  | NW_004516920.1 | Scaffold1817 | 2982                    | GG                              | AA              | 1947021301               |
| SNP_P4_168134_3079  | NW_004516920.1 | Scaffold1817 | 3079                    | AA                              | GG              | 1947021303               |
| SNP_P4_168135_3298  | NW_004516920.1 | Scaffold1817 | 3298                    | AA                              | GG              | 1947021305               |
| SNP_P4_168136_3336  | NW_004516920.1 | Scaffold1817 | 3336                    | TT                              | CC              | 1947021307               |
| SNP_P4_168137_3403  | NW_004516920.1 | Scaffold1817 | 3403                    | TT                              | CC              | 1947021309               |
| SNP_P4_168138_3432  | NW_004516920.1 | Scaffold1817 | 3432                    | TT                              | CC              | 1947021311               |
| SNP_P4_168139_3679  | NW_004516920.1 | Scaffold1817 | 3679                    | CC                              | GG              | 1947021313               |
| SNP_P4_168140_3748  | NW_004516920.1 | Scaffold1817 | 3748                    | AA                              | GG              | 1947021315               |
| SNP_P4_168141_18725 | NW_004516921.1 | Scaffold1818 | 18725                   | AA                              | CC              | 1947021317               |
| SNP_P4_168142_18741 | NW_004516921.1 | Scaffold1818 | 18741                   | AA                              | GG              | 1947021318               |
| SNP_P4_168143_18989 | NW_004516921.1 | Scaffold1818 | 18989                   | AA                              | CC              | 1947021320               |
| SNP_P4_168144_18995 | NW_004516921.1 | Scaffold1818 | 18995                   | GG                              | TT              | 1947021322               |
| SNP_P4_168145_19292 | NW_004516921.1 | Scaffold1818 | 19292                   | GG                              | AA              | 1947021324               |
| SNP_P4_168146_19312 | NW_004516921.1 | Scaffold1818 | 19312                   | AA                              | TT              | 1947021326               |
| SNP_P4_168147_19351 | NW_004516921.1 | Scaffold1818 | 19351                   | CC                              | AA              | 1947021328               |
| SNP_P4_168148_19509 | NW_004516921.1 | Scaffold1818 | 19509                   | TT                              | AA              | 1947021330               |
| SNP_P4_168149_19595 | NW_004516921.1 | Scaffold1818 | 19595                   | CC                              | GG              | 1947021332               |
| SNP_P4_168150_22629 | NW_004516921.1 | Scaffold1818 | 22629                   | TT                              | GG              | 1947021334               |
| SNP_P4_168151_27344 | NW_004516921.1 | Scaffold1818 | 27344                   | TT                              | GG              | 1947021336               |
| SNP_P4_168152_27352 | NW_004516921.1 | Scaffold1818 | 27352                   | TT                              | CC              | 1947021338               |
| SNP_P4_168153_28531 | NW_004516921.1 | Scaffold1818 | 28531                   | TT                              | CC              | 1947021340               |
| SNP_P4_168154_28576 | NW_004516921.1 | Scaffold1818 | 28576                   | AA                              | GG              | 1947021342               |
| SNP_P4_168155_28593 | NW_004516921.1 | Scaffold1818 | 28593                   | AA                              | GG              | 1947021344               |
| SNP_P4_168156_28603 | NW_004516921.1 | Scaffold1818 | 28603                   | AA                              | TT              | 1947021346               |
| SNP_P4_168157_28630 | NW_004516921.1 | Scaffold1818 | 28630                   | GG                              | AA              | 1947021347               |
| SNP_P4_168158_28652 | NW_004516921.1 | Scaffold1818 | 28652                   | CC                              | AA              | 1947021349               |
| SNP_P4_168159_194   | NW_004516923.1 | Scaffold1820 | 194                     | AA                              | TT              | 1947021351               |
| SNP_P4_168160_214   | NW_004516923.1 | Scaffold1820 | 214                     | TT                              | AA              | 1947021353               |
| SNP_P4_168161_8731  | NW_004516924.1 | Scaffold1822 | 8731                    | AA                              | GG              | 1947021355               |
| SNP_P4_168162_17390 | NW_004516924.1 | Scaffold1822 | 17390                   | CC                              | TT              | 1947021357               |
| SNP_P4_168164_17423 | NW_004516924.1 | Scaffold1822 | 17423                   | TT                              | AA              | 1947021359               |
| SNP_P4_168166_17507 | NW_004516924.1 | Scaffold1822 | 17507                   | TT                              | AA              | 1947021361               |
| SNP_P4_168167_17646 | NW_004516924.1 | Scaffold1822 | 17646                   | GG                              | AA              | 1947021362               |
| SNP_P4_168168_17846 | NW_004516924.1 | Scaffold1822 | 17846                   | CC                              | TT              | 1947021364               |

| SNPs IDs             | Chromosome IDs | Chromosomes  | Physical positions (bp) | CDC Frontier (Reference genome) | (ILWC46 & LPNB) | NCBI SNPdb Accession IDs |
|----------------------|----------------|--------------|-------------------------|---------------------------------|-----------------|--------------------------|
| SNP_P4_168169_18160  | NW_004516924.1 | Scaffold1822 | 18160                   | TT                              | CC              | 1947021366               |
| SNP_P4_168170_18282  | NW_004516924.1 | Scaffold1822 | 18282                   | AA                              | GG              | 1947021368               |
| SNP_P4_168171_18329  | NW_004516924.1 | Scaffold1822 | 18329                   | CC                              | AA              | 1947021370               |
| SNP_P4_168172_18332  | NW_004516924.1 | Scaffold1822 | 18332                   | GG                              | AA              | 1947021372               |
| SNP_P4_168173_18349  | NW_004516924.1 | Scaffold1822 | 18349                   | CC                              | TT              | 1947021374               |
| SNP_P4_168175_20756  | NW_004516924.1 | Scaffold1822 | 20756                   | CC                              | AA              | 1947021376               |
| SNP_P4_168176_38842  | NW_004516924.1 | Scaffold1822 | 38842                   | CC                              | GG              | 1947021378               |
| SNP_P4_168177_38962  | NW_004516924.1 | Scaffold1822 | 38962                   | TT                              | CC              | 1947021380               |
| SNP_P4_168178_44637  | NW_004516924.1 | Scaffold1822 | 44637                   | TT                              | CC              | 1947021382               |
| SNP_P4_168179_46900  | NW_004516924.1 | Scaffold1822 | 46900                   | GG                              | AA              | 1947021384               |
| SNP_P4_168180_47286  | NW_004516924.1 | Scaffold1822 | 47286                   | TT                              | CC              | 1947021386               |
| SNP_P4_168181_4947   | NW_004516926.1 | Scaffold1825 | 4947                    | GG                              | AA              | 1947021388               |
| SNP_P4_168183_26068  | NW_004516926.1 | Scaffold1825 | 26068                   | GG                              | AA              | 1947021390               |
| SNP_P4_168184_26104  | NW_004516926.1 | Scaffold1825 | 26104                   | GG                              | AA              | 1947021392               |
| SNP_P4_168185_26276  | NW_004516926.1 | Scaffold1825 | 26276                   | CC                              | TT              | 1947021394               |
| SNP_P4_168187_45909  | NW_004516926.1 | Scaffold1825 | 45909                   | GG                              | AA              | 1947021396               |
| SNP_P4_168188_48938  | NW_004516926.1 | Scaffold1825 | 48938                   | CC                              | TT              | 1947021398               |
| SNP_P4_168189_48939  | NW_004516926.1 | Scaffold1825 | 48939                   | CC                              | TT              | 1947021400               |
| SNP_P4_168190_50535  | NW_004516926.1 | Scaffold1825 | 50535                   | CC                              | AA              | 1947021402               |
| SNP_P4_168192_63766  | NW_004516926.1 | Scaffold1825 | 63766                   | TT                              | CC              | 1947021404               |
| SNP_P4_168193_63781  | NW_004516926.1 | Scaffold1825 | 63781                   | GG                              | AA              | 1947021406               |
| SNP_P4_168194_63787  | NW_004516926.1 | Scaffold1825 | 63787                   | GG                              | CC              | 1947021408               |
| SNP_P4_168195_64208  | NW_004516926.1 | Scaffold1825 | 64208                   | GG                              | AA              | 1947021410               |
| SNP_P4_168196_64269  | NW_004516926.1 | Scaffold1825 | 64269                   | GG                              | AA              | 1947021412               |
| SNP_P4_168197_64299  | NW_004516926.1 | Scaffold1825 | 64299                   | TT                              | CC              | 1947021414               |
| SNP_P4_168198_66867  | NW_004516926.1 | Scaffold1825 | 66867                   | CC                              | TT              | 1947021416               |
| SNP_P4_168199_71297  | NW_004516926.1 | Scaffold1825 | 71297                   | AA                              | CC              | 1947021417               |
| SNP_P4_168200_71341  | NW_004516926.1 | Scaffold1825 | 71341                   | CC                              | TT              | 1947021419               |
| SNP_P4_168201_71539  | NW_004516926.1 | Scaffold1825 | 71539                   | AA                              | GG              | 1947021421               |
| SNP_P4_168202_71554  | NW_004516926.1 | Scaffold1825 | 71554                   | AA                              | CC              | 1947021423               |
| SNP_P4_168203_71566  | NW_004516926.1 | Scaffold1825 | 71566                   | GG                              | AA              | 1947021425               |
| SNP_P4_168204_71567  | NW_004516926.1 | Scaffold1825 | 71567                   | AA                              | GG              | 1947021427               |
| SNP_P4_168205_71580  | NW_004516926.1 | Scaffold1825 | 71580                   | TT                              | CC              | 1947021429               |
| SNP_P4_168206_112049 | NW_004516926.1 | Scaffold1825 | 112049                  | AA                              | TT              | 1947021431               |
| SNP_P4_168207_112050 | NW_004516926.1 | Scaffold1825 | 112050                  | TT                              | AA              | 1947021433               |
| SNP_P4_168208_112124 | NW_004516926.1 | Scaffold1825 | 112124                  | TT                              | AA              | 1947021435               |
| SNP_P4_168209_118214 | NW_004516926.1 | Scaffold1825 | 118214                  | GG                              | TT              | 1947021437               |
| SNP_P4_168210_126458 | NW_004516926.1 | Scaffold1825 | 126458                  | CC                              | GG              | 1947021439               |
| SNP_P4_168211_131572 | NW_004516926.1 | Scaffold1825 | 131572                  | GG                              | AA              | 1947021440               |
| SNP_P4_168212_132222 | NW_004516926.1 | Scaffold1825 | 132222                  | CC                              | TT              | 1947021442               |
| SNP_P4_168213_133693 | NW_004516926.1 | Scaffold1825 | 133693                  | CC                              | TT              | 1947021444               |
| SNP_P4_168214_135705 | NW_004516926.1 | Scaffold1825 | 135705                  | GG                              | CC              | 1947021446               |

| SNPs IDs             | Chromosome IDs | Chromosomes  | Physical positions (bp) | CDC Frontier (Reference genome) | (ILWC46 & LPNB) | NCBI SNPdb Accession IDs |
|----------------------|----------------|--------------|-------------------------|---------------------------------|-----------------|--------------------------|
| SNP_P4_168215_144112 | NW_004516926.1 | Scaffold1825 | 144112                  | CC                              | TT              | 1947021448               |
| SNP_P4_168216_147754 | NW_004516926.1 | Scaffold1825 | 147754                  | GG                              | CC              | 1947021450               |
| SNP_P4_168217_147783 | NW_004516926.1 | Scaffold1825 | 147783                  | GG                              | CC              | 1947021452               |
| SNP_P4_168218_147835 | NW_004516926.1 | Scaffold1825 | 147835                  | TT                              | CC              | 1947021454               |
| SNP_P4_168219_147842 | NW_004516926.1 | Scaffold1825 | 147842                  | AA                              | GG              | 1947021456               |
| SNP_P4_168221_149764 | NW_004516926.1 | Scaffold1825 | 149764                  | CC                              | TT              | 1947021458               |
| SNP_P4_168222_149857 | NW_004516926.1 | Scaffold1825 | 149857                  | CC                              | TT              | 1947021460               |
| SNP_P4_168223_150217 | NW_004516926.1 | Scaffold1825 | 150217                  | CC                              | TT              | 1947021462               |
| SNP_P4_168224_153613 | NW_004516926.1 | Scaffold1825 | 153613                  | CC                              | TT              | 1947021464               |
| SNP_P4_168225_156503 | NW_004516926.1 | Scaffold1825 | 156503                  | AA                              | GG              | 1947021465               |
| SNP_P4_168226_21332  | NW_004516928.1 | Scaffold1829 | 21332                   | AA                              | TT              | 1947021467               |
| SNP_P4_168227_21518  | NW_004516928.1 | Scaffold1829 | 21518                   | TT                              | CC              | 1947021469               |
| SNP_P4_168229_29394  | NW_004516929.1 | Scaffold1830 | 29394                   | TT                              | GG              | 1947021471               |
| SNP_P4_168230_29458  | NW_004516929.1 | Scaffold1830 | 29458                   | CC                              | TT              | 1947021473               |
| SNP_P4_168231_29500  | NW_004516929.1 | Scaffold1830 | 29500                   | CC                              | GG              | 1947021475               |
| SNP_P4_168232_29802  | NW_004516929.1 | Scaffold1830 | 29802                   | AA                              | TT              | 1947021477               |
| SNP_P4_168233_30023  | NW_004516929.1 | Scaffold1830 | 30023                   | GG                              | CC              | 1947021479               |
| SNP_P4_168234_33246  | NW_004516929.1 | Scaffold1830 | 33246                   | TT                              | AA              | 1947021481               |
| SNP_P4_168235_33494  | NW_004516929.1 | Scaffold1830 | 33494                   | CC                              | AA              | 1947021483               |
| SNP_P4_168236_37397  | NW_004516929.1 | Scaffold1830 | 37397                   | AA                              | GG              | 1947021484               |
| SNP_P4_168237_37423  | NW_004516929.1 | Scaffold1830 | 37423                   | AA                              | GG              | 1947021486               |
| SNP_P4_168238_38171  | NW_004516929.1 | Scaffold1830 | 38171                   | GG                              | AA              | 1947021488               |
| SNP_P4_168239_43304  | NW_004516929.1 | Scaffold1830 | 43304                   | AA                              | CC              | 1947021490               |
| SNP_P4_168240_1506   | NW_004516930.1 | Scaffold1832 | 1506                    | CC                              | TT              | 1947021492               |
| SNP_P4_168241_64     | NW_004516931.1 | Scaffold1835 | 64                      | CC                              | GG              | 1947021494               |
| SNP_P4_168242_104    | NW_004516931.1 | Scaffold1835 | 104                     | AA                              | TT              | 1947021496               |
| SNP_P4_168243_116    | NW_004516931.1 | Scaffold1835 | 116                     | CC                              | TT              | 1947021497               |
| SNP_P4_168244_558    | NW_004516931.1 | Scaffold1835 | 558                     | GG                              | AA              | 1947021499               |
| SNP_P4_168245_666    | NW_004516931.1 | Scaffold1835 | 666                     | TT                              | GG              | 1947021501               |
| SNP_P4_168246_712    | NW_004516931.1 | Scaffold1835 | 712                     | AA                              | GG              | 1947021503               |
| SNP_P4_168247_758    | NW_004516931.1 | Scaffold1835 | 758                     | TT                              | CC              | 1947021505               |
| SNP_P4_168248_988    | NW_004516931.1 | Scaffold1835 | 988                     | CC                              | AA              | 1947021507               |
| SNP_P4_168249_1011   | NW_004516931.1 | Scaffold1835 | 1011                    | GG                              | TT              | 1947021509               |
| SNP_P4_168250_1038   | NW_004516931.1 | Scaffold1835 | 1038                    | AA                              | GG              | 1947021511               |
| SNP_P4_168251_1411   | NW_004516931.1 | Scaffold1835 | 1411                    | TT                              | GG              | 1947021513               |
| SNP_P4_168252_1448   | NW_004516931.1 | Scaffold1835 | 1448                    | TT                              | CC              | 1947021515               |
| SNP_P4_168253_1549   | NW_004516931.1 | Scaffold1835 | 1549                    | AA                              | GG              | 1947021517               |
| SNP_P4_168254_1683   | NW_004516931.1 | Scaffold1835 | 1683                    | AA                              | GG              | 1947021519               |
| SNP_P4_168255_1774   | NW_004516931.1 | Scaffold1835 | 1774                    | TT                              | CC              | 1947021521               |
| SNP_P4_168256_2038   | NW_004516931.1 | Scaffold1835 | 2038                    | AA                              | GG              | 1947021523               |
| SNP_P4_168257_2044   | NW_004516931.1 | Scaffold1835 | 2044                    | TT                              | CC              | 1947021525               |
| SNP_P4_168258_2068   | NW_004516931.1 | Scaffold1835 | 2068                    | CC                              | TT              | 1947021527               |



| SNPs IDs            | Chromosome IDs | Chromosomes  | Physical positions (bp) | CDC Frontier (Reference genome) | (ILWC46 & LPNB) | NCBI SNPdb Accession IDs |
|---------------------|----------------|--------------|-------------------------|---------------------------------|-----------------|--------------------------|
| SNP_P4_168259_2161  | NW_004516931.1 | Scaffold1835 | 2161                    | CC                              | TT              | 1947021529               |
| SNP_P4_168260_5325  | NW_004516931.1 | Scaffold1835 | 5325                    | TT                              | CC              | 1947021531               |
| SNP_P4_168261_5327  | NW_004516931.1 | Scaffold1835 | 5327                    | TT                              | CC              | 1947021533               |
| SNP_P4_168262_5344  | NW_004516931.1 | Scaffold1835 | 5344                    | GG                              | AA              | 1947021535               |
| SNP_P4_168263_5364  | NW_004516931.1 | Scaffold1835 | 5364                    | CC                              | AA              | 1947021537               |
| SNP_P4_168264_5396  | NW_004516931.1 | Scaffold1835 | 5396                    | CC                              | GG              | 1947021539               |
| SNP_P4_168265_5430  | NW_004516931.1 | Scaffold1835 | 5430                    | TT                              | CC              | 1947021541               |
| SNP_P4_168266_5463  | NW_004516931.1 | Scaffold1835 | 5463                    | CC                              | AA              | 1947021543               |
| SNP_P4_168267_5785  | NW_004516931.1 | Scaffold1835 | 5785                    | GG                              | AA              | 1947021545               |
| SNP_P4_168268_5916  | NW_004516931.1 | Scaffold1835 | 5916                    | TT                              | AA              | 1947021546               |
| SNP_P4_168269_6732  | NW_004516931.1 | Scaffold1835 | 6732                    | TT                              | GG              | 1947021548               |
| SNP_P4_168270_6736  | NW_004516931.1 | Scaffold1835 | 6736                    | GG                              | AA              | 1947021550               |
| SNP_P4_168271_6783  | NW_004516931.1 | Scaffold1835 | 6783                    | GG                              | CC              | 1947021552               |
| SNP_P4_168272_6785  | NW_004516931.1 | Scaffold1835 | 6785                    | GG                              | CC              | 1947021554               |
| SNP_P4_168273_6805  | NW_004516931.1 | Scaffold1835 | 6805                    | CC                              | GG              | 1947021556               |
| SNP_P4_168274_6812  | NW_004516931.1 | Scaffold1835 | 6812                    | TT                              | CC              | 1947021558               |
| SNP_P4_168275_6814  | NW_004516931.1 | Scaffold1835 | 6814                    | GG                              | AA              | 1947021560               |
| SNP_P4_168276_6823  | NW_004516931.1 | Scaffold1835 | 6823                    | GG                              | CC              | 1947021562               |
| SNP_P4_168278_6855  | NW_004516931.1 | Scaffold1835 | 6855                    | GG                              | TT              | 1947021564               |
| SNP_P4_168279_6859  | NW_004516931.1 | Scaffold1835 | 6859                    | GG                              | AA              | 1947021565               |
| SNP_P4_168280_6860  | NW_004516931.1 | Scaffold1835 | 6860                    | CC                              | GG              | 1947021567               |
| SNP_P4_168281_6863  | NW_004516931.1 | Scaffold1835 | 6863                    | GG                              | CC              | 1947021569               |
| SNP_P4_168282_6874  | NW_004516931.1 | Scaffold1835 | 6874                    | GG                              | AA              | 1947021571               |
| SNP_P4_168283_7365  | NW_004516931.1 | Scaffold1835 | 7365                    | GG                              | AA              | 1947021573               |
| SNP_P4_168284_7559  | NW_004516931.1 | Scaffold1835 | 7559                    | CC                              | TT              | 1947021575               |
| SNP_P4_168285_7710  | NW_004516931.1 | Scaffold1835 | 7710                    | GG                              | CC              | 1947021577               |
| SNP_P4_168286_7829  | NW_004516931.1 | Scaffold1835 | 7829                    | AA                              | GG              | 1947021579               |
| SNP_P4_168287_8026  | NW_004516931.1 | Scaffold1835 | 8026                    | AA                              | GG              | 1947021581               |
| SNP_P4_168290_8207  | NW_004516931.1 | Scaffold1835 | 8207                    | GG                              | AA              | 1947021583               |
| SNP_P4_168291_8208  | NW_004516931.1 | Scaffold1835 | 8208                    | CC                              | TT              | 1947021585               |
| SNP_P4_168292_8339  | NW_004516931.1 | Scaffold1835 | 8339                    | CC                              | GG              | 1947021587               |
| SNP_P4_168293_8341  | NW_004516931.1 | Scaffold1835 | 8341                    | GG                              | TT              | 1947021589               |
| SNP_P4_168294_8404  | NW_004516931.1 | Scaffold1835 | 8404                    | TT                              | GG              | 1947021591               |
| SNP_P4_168295_8438  | NW_004516931.1 | Scaffold1835 | 8438                    | TT                              | GG              | 1947021593               |
| SNP_P4_168296_8456  | NW_004516931.1 | Scaffold1835 | 8456                    | AA                              | GG              | 1947021594               |
| SNP_P4_168298_8515  | NW_004516931.1 | Scaffold1835 | 8515                    | GG                              | AA              | 1947021596               |
| SNP_P4_168299_8762  | NW_004516931.1 | Scaffold1835 | 8762                    | GG                              | TT              | 1947021598               |
| SNP_P4_168300_8831  | NW_004516931.1 | Scaffold1835 | 8831                    | CC                              | AA              | 1947021600               |
| SNP_P4_168301_9417  | NW_004516931.1 | Scaffold1835 | 9417                    | CC                              | AA              | 1947021602               |
| SNP_P4_168303_10541 | NW_004516931.1 | Scaffold1835 | 10541                   | CC                              | GG              | 1947021604               |
| SNP_P4_168304_10563 | NW_004516931.1 | Scaffold1835 | 10563                   | TT                              | CC              | 1947021606               |
| SNP_P4_168306_11300 | NW_004516931.1 | Scaffold1835 | 11300                   | CC                              | AA              | 1947021608               |

| SNPs IDs            | Chromosome IDs | Chromosomes  | Physical positions (bp) | CDC Frontier (Reference genome) | (ILWC46 & LPNB) | NCBI SNPdb Accession IDs |
|---------------------|----------------|--------------|-------------------------|---------------------------------|-----------------|--------------------------|
| SNP_P4_168307_11356 | NW_004516931.1 | Scaffold1835 | 11356                   | CC                              | TT              | 1947021609               |
| SNP_P4_168308_25434 | NW_004516931.1 | Scaffold1835 | 25434                   | GG                              | AA              | 1947021611               |
| SNP_P4_168309_25690 | NW_004516931.1 | Scaffold1835 | 25690                   | CC                              | TT              | 1947021613               |
| SNP_P4_168310_25790 | NW_004516931.1 | Scaffold1835 | 25790                   | GG                              | AA              | 1947021615               |
| SNP_P4_168311_25836 | NW_004516931.1 | Scaffold1835 | 25836                   | CC                              | TT              | 1947021617               |
| SNP_P4_168312_26148 | NW_004516931.1 | Scaffold1835 | 26148                   | TT                              | AA              | 1947021619               |
| SNP_P4_168313_26198 | NW_004516931.1 | Scaffold1835 | 26198                   | AA                              | GG              | 1947021621               |
| SNP_P4_168314_26248 | NW_004516931.1 | Scaffold1835 | 26248                   | CC                              | TT              | 1947021623               |
| SNP_P4_168317_2200  | NW_004516932.1 | Scaffold1838 | 2200                    | TT                              | CC              | 1947021625               |
| SNP_P4_168318_2227  | NW_004516932.1 | Scaffold1838 | 2227                    | AA                              | GG              | 1947021626               |
| SNP_P4_168319_410   | NW_004516933.1 | Scaffold1839 | 410                     | AA                              | TT              | 1947021628               |
| SNP_P4_168320_597   | NW_004516933.1 | Scaffold1839 | 597                     | AA                              | GG              | 1947021630               |
| SNP_P4_168321_668   | NW_004516933.1 | Scaffold1839 | 668                     | GG                              | TT              | 1947021632               |
| SNP_P4_168322_2157  | NW_004516933.1 | Scaffold1839 | 2157                    | TT                              | AA              | 1947021634               |
| SNP_P4_168323_7583  | NW_004516933.1 | Scaffold1839 | 7583                    | GG                              | AA              | 1947021636               |
| SNP_P4_168324_21913 | NW_004516933.1 | Scaffold1839 | 21913                   | TT                              | AA              | 1947021638               |
| SNP_P4_168325_21951 | NW_004516933.1 | Scaffold1839 | 21951                   | CC                              | TT              | 1947021640               |
| SNP_P4_168326_7199  | NW_004516934.1 | Scaffold1840 | 7199                    | CC                              | TT              | 1947021642               |
| SNP_P4_168327_7615  | NW_004516934.1 | Scaffold1840 | 7615                    | CC                              | GG              | 1947021643               |
| SNP_P4_168329_913   | NW_004516936.1 | Scaffold1843 | 913                     | CC                              | GG              | 1947021644               |
| SNP_P4_168331_615   | NW_004516937.1 | Scaffold1844 | 615                     | AA                              | TT              | 1947021645               |
| SNP_P4_168332_665   | NW_004516937.1 | Scaffold1844 | 665                     | AA                              | GG              | 1947021646               |
| SNP_P4_168333_679   | NW_004516937.1 | Scaffold1844 | 679                     | GG                              | AA              | 1947021647               |
| SNP_P4_168334_734   | NW_004516937.1 | Scaffold1844 | 734                     | AA                              | GG              | 1947021649               |
| SNP_P4_168335_837   | NW_004516937.1 | Scaffold1844 | 837                     | AA                              | GG              | 1947021651               |
| SNP_P4_168336_847   | NW_004516937.1 | Scaffold1844 | 847                     | CC                              | AA              | 1947021653               |
| SNP_P4_168337_886   | NW_004516937.1 | Scaffold1844 | 886                     | CC                              | TT              | 1947021655               |
| SNP_P4_168338_917   | NW_004516937.1 | Scaffold1844 | 917                     | CC                              | TT              | 1947021657               |
| SNP_P4_168339_957   | NW_004516937.1 | Scaffold1844 | 957                     | TT                              | CC              | 1947021659               |
| SNP_P4_168340_967   | NW_004516937.1 | Scaffold1844 | 967                     | TT                              | CC              | 1947021661               |
| SNP_P4_168341_990   | NW_004516937.1 | Scaffold1844 | 990                     | TT                              | CC              | 1947021663               |
| SNP_P4_168342_1035  | NW_004516937.1 | Scaffold1844 | 1035                    | AA                              | CC              | 1947021665               |
| SNP_P4_168343_1151  | NW_004516937.1 | Scaffold1844 | 1151                    | CC                              | TT              | 1947021667               |
| SNP_P4_168344_1686  | NW_004516937.1 | Scaffold1844 | 1686                    | GG                              | TT              | 1947021669               |
| SNP_P4_168345_1701  | NW_004516937.1 | Scaffold1844 | 1701                    | CC                              | TT              | 1947021671               |
| SNP_P4_168346_1777  | NW_004516937.1 | Scaffold1844 | 1777                    | GG                              | AA              | 1947021672               |
| SNP_P4_168347_1881  | NW_004516937.1 | Scaffold1844 | 1881                    | TT                              | CC              | 1947021674               |
| SNP_P4_168348_1892  | NW_004516937.1 | Scaffold1844 | 1892                    | AA                              | TT              | 1947021676               |
| SNP_P4_168349_1932  | NW_004516937.1 | Scaffold1844 | 1932                    | AA                              | TT              | 1947021678               |
| SNP_P4_168352_2126  | NW_004516937.1 | Scaffold1844 | 2126                    | AA                              | CC              | 1947021680               |
| SNP_P4_168353_2146  | NW_004516937.1 | Scaffold1844 | 2146                    | TT                              | AA              | 1947021682               |
| SNP_P4_168354_2154  | NW_004516937.1 | Scaffold1844 | 2154                    | TT                              | GG              | 1947021684               |

| SNPs IDs             | Chromosome IDs | Chromosomes  | Physical positions (bp) | CDC Frontier (Reference genome) | (ILWC46 & LPNB) | NCBI SNPdb Accession IDs |
|----------------------|----------------|--------------|-------------------------|---------------------------------|-----------------|--------------------------|
| SNP_P4_168356_2240   | NW_004516937.1 | Scaffold1844 | 2240                    | TT                              | AA              | 1947021686               |
| SNP_P4_168357_2309   | NW_004516937.1 | Scaffold1844 | 2309                    | CC                              | AA              | 1947021688               |
| SNP_P4_168358_2327   | NW_004516937.1 | Scaffold1844 | 2327                    | CC                              | AA              | 1947021690               |
| SNP_P4_168359_2374   | NW_004516937.1 | Scaffold1844 | 2374                    | TT                              | AA              | 1947021691               |
| SNP_P4_168360_2403   | NW_004516937.1 | Scaffold1844 | 2403                    | TT                              | GG              | 1947021693               |
| SNP_P4_168361_2464   | NW_004516937.1 | Scaffold1844 | 2464                    | GG                              | TT              | 1947021695               |
| SNP_P4_168363_2631   | NW_004516937.1 | Scaffold1844 | 2631                    | CC                              | AA              | 1947021697               |
| SNP_P4_168364_2673   | NW_004516937.1 | Scaffold1844 | 2673                    | AA                              | TT              | 1947021699               |
| SNP_P4_168365_2733   | NW_004516937.1 | Scaffold1844 | 2733                    | GG                              | CC              | 1947021701               |
| SNP_P4_168367_2766   | NW_004516937.1 | Scaffold1844 | 2766                    | CC                              | TT              | 1947021703               |
| SNP_P4_168368_2797   | NW_004516937.1 | Scaffold1844 | 2797                    | CC                              | TT              | 1947021705               |
| SNP_P4_168369_3302   | NW_004516937.1 | Scaffold1844 | 3302                    | GG                              | AA              | 1947021707               |
| SNP_P4_168370_6270   | NW_004516937.1 | Scaffold1844 | 6270                    | CC                              | TT              | 1947021709               |
| SNP_P4_168371_6271   | NW_004516937.1 | Scaffold1844 | 6271                    | AA                              | GG              | 1947021711               |
| SNP_P4_168372_9616   | NW_004516937.1 | Scaffold1844 | 9616                    | GG                              | AA              | 1947021713               |
| SNP_P4_168373_10652  | NW_004516937.1 | Scaffold1844 | 10652                   | TT                              | CC              | 1947021715               |
| SNP_P4_168374_10710  | NW_004516937.1 | Scaffold1844 | 10710                   | GG                              | CC              | 1947021716               |
| SNP_P4_168375_10977  | NW_004516937.1 | Scaffold1844 | 10977                   | AA                              | CC              | 1947021718               |
| SNP_P4_168376_12434  | NW_004516937.1 | Scaffold1844 | 12434                   | AA                              | TT              | 1947021720               |
| SNP_P4_168377_12452  | NW_004516937.1 | Scaffold1844 | 12452                   | CC                              | GG              | 1947021722               |
| SNP_P4_168378_12702  | NW_004516937.1 | Scaffold1844 | 12702                   | TT                              | CC              | 1947021724               |
| SNP_P4_168379_12717  | NW_004516937.1 | Scaffold1844 | 12717                   | TT                              | CC              | 1947021726               |
| SNP_P4_168380_12728  | NW_004516937.1 | Scaffold1844 | 12728                   | CC                              | TT              | 1947021728               |
| SNP_P4_168381_12745  | NW_004516937.1 | Scaffold1844 | 12745                   | AA                              | GG              | 1947021730               |
| SNP_P4_168382_12805  | NW_004516937.1 | Scaffold1844 | 12805                   | GG                              | AA              | 1947021732               |
| SNP_P4_168383_12816  | NW_004516937.1 | Scaffold1844 | 12816                   | AA                              | TT              | 1947021734               |
| SNP_P4_168384_12819  | NW_004516937.1 | Scaffold1844 | 12819                   | AA                              | GG              | 1947021736               |
| SNP_P4_168386_46627  | NW_004516937.1 | Scaffold1844 | 46627                   | TT                              | CC              | 1947021738               |
| SNP_P4_168387_53918  | NW_004516937.1 | Scaffold1844 | 53918                   | TT                              | CC              | 1947021740               |
| SNP_P4_168388_56158  | NW_004516937.1 | Scaffold1844 | 56158                   | GG                              | AA              | 1947021742               |
| SNP_P4_168389_89549  | NW_004516937.1 | Scaffold1844 | 89549                   | TT                              | CC              | 1947021743               |
| SNP_P4_168390_89555  | NW_004516937.1 | Scaffold1844 | 89555                   | GG                              | AA              | 1947021745               |
| SNP_P4_168391_89558  | NW_004516937.1 | Scaffold1844 | 89558                   | GG                              | AA              | 1947021747               |
| SNP_P4_168392_89559  | NW_004516937.1 | Scaffold1844 | 89559                   | CC                              | TT              | 1947021749               |
| SNP_P4_168393_89577  | NW_004516937.1 | Scaffold1844 | 89577                   | CC                              | GG              | 1947021751               |
| SNP_P4_168394_120928 | NW_004516937.1 | Scaffold1844 | 120928                  | CC                              | AA              | 1947021753               |
| SNP_P4_168396_120998 | NW_004516937.1 | Scaffold1844 | 120998                  | AA                              | GG              | 1947021755               |
| SNP_P4_168397_121126 | NW_004516937.1 | Scaffold1844 | 121126                  | GG                              | TT              | 1947021757               |
| SNP_P4_168398_121128 | NW_004516937.1 | Scaffold1844 | 121128                  | TT                              | GG              | 1947021759               |
| SNP_P4_168399_121176 | NW_004516937.1 | Scaffold1844 | 121176                  | CC                              | AA              | 1947021761               |
| SNP_P4_168400_121191 | NW_004516937.1 | Scaffold1844 | 121191                  | CC                              | GG              | 1947021763               |
| SNP_P4_168402_121470 | NW_004516937.1 | Scaffold1844 | 121470                  | TT                              | AA              | 1947021765               |

| SNPs IDs             | Chromosome IDs | Chromosomes  | Physical positions (bp) | CDC Frontier (Reference genome) | (ILWC46 & LPNB) | NCBI SNPdb Accession IDs |
|----------------------|----------------|--------------|-------------------------|---------------------------------|-----------------|--------------------------|
| SNP_P4_168403_123434 | NW_004516937.1 | Scaffold1844 | 123434                  | AA                              | TT              | 1947021767               |
| SNP_P4_168404_134053 | NW_004516937.1 | Scaffold1844 | 134053                  | GG                              | TT              | 1947021769               |
| SNP_P4_168405_134285 | NW_004516937.1 | Scaffold1844 | 134285                  | AA                              | GG              | 1947021771               |
| SNP_P4_168406_134351 | NW_004516937.1 | Scaffold1844 | 134351                  | TT                              | AA              | 1947021773               |
| SNP_P4_168407_134376 | NW_004516937.1 | Scaffold1844 | 134376                  | AA                              | TT              | 1947021775               |
| SNP_P4_168408_134726 | NW_004516937.1 | Scaffold1844 | 134726                  | AA                              | GG              | 1947021777               |
| SNP_P4_168409_137774 | NW_004516937.1 | Scaffold1844 | 137774                  | TT                              | AA              | 1947021779               |
| SNP_P4_168410_152341 | NW_004516937.1 | Scaffold1844 | 152341                  | AA                              | CC              | 1947021781               |
| SNP_P4_168411_155804 | NW_004516937.1 | Scaffold1844 | 155804                  | GG                              | AA              | 1947021783               |
| SNP_P4_168412_157438 | NW_004516937.1 | Scaffold1844 | 157438                  | TT                              | CC              | 1947021785               |
| SNP_P4_168413_157447 | NW_004516937.1 | Scaffold1844 | 157447                  | CC                              | TT              | 1947021787               |
| SNP_P4_168414_157464 | NW_004516937.1 | Scaffold1844 | 157464                  | TT                              | GG              | 1947021789               |
| SNP_P4_168415_157534 | NW_004516937.1 | Scaffold1844 | 157534                  | TT                              | CC              | 1947021791               |
| SNP_P4_168416_157540 | NW_004516937.1 | Scaffold1844 | 157540                  | CC                              | AA              | 1947021793               |
| SNP_P4_168417_157821 | NW_004516937.1 | Scaffold1844 | 157821                  | TT                              | AA              | 1947021795               |
| SNP_P4_168418_165090 | NW_004516937.1 | Scaffold1844 | 165090                  | AA                              | GG              | 1947021797               |
| SNP_P4_168419_165100 | NW_004516937.1 | Scaffold1844 | 165100                  | AA                              | TT              | 1947021799               |
| SNP_P4_168421_166906 | NW_004516937.1 | Scaffold1844 | 166906                  | TT                              | CC              | 1947021800               |
| SNP_P4_168422_167034 | NW_004516937.1 | Scaffold1844 | 167034                  | TT                              | GG              | 1947021802               |
| SNP_P4_168423_167045 | NW_004516937.1 | Scaffold1844 | 167045                  | TT                              | CC              | 1947021804               |
| SNP_P4_168424_167090 | NW_004516937.1 | Scaffold1844 | 167090                  | AA                              | GG              | 1947021806               |
| SNP_P4_168425_167103 | NW_004516937.1 | Scaffold1844 | 167103                  | AA                              | GG              | 1947021808               |
| SNP_P4_168426_167132 | NW_004516937.1 | Scaffold1844 | 167132                  | CC                              | TT              | 1947021810               |
| SNP_P4_168427_167141 | NW_004516937.1 | Scaffold1844 | 167141                  | CC                              | TT              | 1947021812               |
| SNP_P4_168428_167163 | NW_004516937.1 | Scaffold1844 | 167163                  | AA                              | TT              | 1947021814               |
| SNP_P4_168429_167164 | NW_004516937.1 | Scaffold1844 | 167164                  | AA                              | TT              | 1947021816               |
| SNP_P4_168431_167266 | NW_004516937.1 | Scaffold1844 | 167266                  | TT                              | AA              | 1947021818               |
| SNP_P4_168432_167317 | NW_004516937.1 | Scaffold1844 | 167317                  | GG                              | TT              | 1947021820               |
| SNP_P4_168433_167318 | NW_004516937.1 | Scaffold1844 | 167318                  | TT                              | GG              | 1947021822               |
| SNP_P4_168434_167549 | NW_004516937.1 | Scaffold1844 | 167549                  | GG                              | TT              | 1947021824               |
| SNP_P4_168435_167554 | NW_004516937.1 | Scaffold1844 | 167554                  | AA                              | GG              | 1947021825               |
| SNP_P4_168436_167602 | NW_004516937.1 | Scaffold1844 | 167602                  | CC                              | TT              | 1947021827               |
| SNP_P4_168437_167639 | NW_004516937.1 | Scaffold1844 | 167639                  | GG                              | TT              | 1947021829               |
| SNP_P4_168438_499    | NW_004516938.1 | Scaffold1845 | 499                     | AA                              | GG              | 1947021831               |
| SNP_P4_168439_523    | NW_004516938.1 | Scaffold1845 | 523                     | CC                              | TT              | 1947021833               |
| SNP_P4_168441_7389   | NW_004516938.1 | Scaffold1845 | 7389                    | CC                              | TT              | 1947021835               |
| SNP_P4_168444_11725  | NW_004516938.1 | Scaffold1845 | 11725                   | GG                              | TT              | 1947021837               |
| SNP_P4_168445_12746  | NW_004516938.1 | Scaffold1845 | 12746                   | AA                              | GG              | 1947021838               |
| SNP_P4_168446_15470  | NW_004516938.1 | Scaffold1845 | 15470                   | TT                              | CC              | 1947021840               |
| SNP_P4_168447_15483  | NW_004516938.1 | Scaffold1845 | 15483                   | AA                              | GG              | 1947021841               |
| SNP_P4_168448_15525  | NW_004516938.1 | Scaffold1845 | 15525                   | AA                              | CC              | 1947021842               |
| SNP_P4_168449_15584  | NW_004516938.1 | Scaffold1845 | 15584                   | TT                              | CC              | 1947021843               |

| SNPs IDs             | Chromosome IDs | Chromosomes  | Physical positions (bp) | CDC Frontier (Reference genome) | (ILWC46 & LPNB) | NCBI SNPdb Accession IDs |
|----------------------|----------------|--------------|-------------------------|---------------------------------|-----------------|--------------------------|
| SNP_P4_168450_16034  | NW_004516938.1 | Scaffold1845 | 16034                   | GG                              | AA              | 1947021844               |
| SNP_P4_168451_28473  | NW_004516938.1 | Scaffold1845 | 28473                   | GG                              | TT              | 1947021845               |
| SNP_P4_168452_28566  | NW_004516938.1 | Scaffold1845 | 28566                   | AA                              | GG              | 1947021846               |
| SNP_P4_168453_28580  | NW_004516938.1 | Scaffold1845 | 28580                   | TT                              | CC              | 1947021847               |
| SNP_P4_168454_28617  | NW_004516938.1 | Scaffold1845 | 28617                   | GG                              | AA              | 1947021848               |
| SNP_P4_168455_28787  | NW_004516938.1 | Scaffold1845 | 28787                   | CC                              | AA              | 1947021849               |
| SNP_P4_168456_28790  | NW_004516938.1 | Scaffold1845 | 28790                   | AA                              | GG              | 1947021850               |
| SNP_P4_168457_28820  | NW_004516938.1 | Scaffold1845 | 28820                   | AA                              | CC              | 1947021851               |
| SNP_P4_168458_28842  | NW_004516938.1 | Scaffold1845 | 28842                   | CC                              | GG              | 1947021852               |
| SNP_P4_168459_28850  | NW_004516938.1 | Scaffold1845 | 28850                   | TT                              | CC              | 1947021853               |
| SNP_P4_168460_28860  | NW_004516938.1 | Scaffold1845 | 28860                   | GG                              | AA              | 1947021854               |
| SNP_P4_168461_31582  | NW_004516938.1 | Scaffold1845 | 31582                   | AA                              | GG              | 1947021855               |
| SNP_P4_168462_31613  | NW_004516938.1 | Scaffold1845 | 31613                   | AA                              | TT              | 1947021856               |
| SNP_P4_168463_40182  | NW_004516938.1 | Scaffold1845 | 40182                   | GG                              | CC              | 1947021857               |
| SNP_P4_168464_40189  | NW_004516938.1 | Scaffold1845 | 40189                   | AA                              | CC              | 1947021858               |
| SNP_P4_168465_42257  | NW_004516938.1 | Scaffold1845 | 42257                   | GG                              | TT              | 1947021859               |
| SNP_P4_168466_42536  | NW_004516938.1 | Scaffold1845 | 42536                   | TT                              | CC              | 1947021860               |
| SNP_P4_168467_44439  | NW_004516938.1 | Scaffold1845 | 44439                   | GG                              | AA              | 1947021861               |
| SNP_P4_168468_45747  | NW_004516938.1 | Scaffold1845 | 45747                   | TT                              | AA              | 1947021862               |
| SNP_P4_168469_46370  | NW_004516938.1 | Scaffold1845 | 46370                   | AA                              | GG              | 1947021863               |
| SNP_P4_168470_50886  | NW_004516938.1 | Scaffold1845 | 50886                   | CC                              | TT              | 1947021864               |
| SNP_P4_168471_51235  | NW_004516938.1 | Scaffold1845 | 51235                   | AA                              | GG              | 1947021865               |
| SNP_P4_168472_57056  | NW_004516938.1 | Scaffold1845 | 57056                   | TT                              | CC              | 1947021866               |
| SNP_P4_168473_63028  | NW_004516938.1 | Scaffold1845 | 63028                   | GG                              | AA              | 1947021867               |
| SNP_P4_168474_70616  | NW_004516938.1 | Scaffold1845 | 70616                   | AA                              | GG              | 1947021868               |
| SNP_P4_168475_77074  | NW_004516938.1 | Scaffold1845 | 77074                   | AA                              | TT              | 1947021869               |
| SNP_P4_168476_78545  | NW_004516938.1 | Scaffold1845 | 78545                   | AA                              | GG              | 1947021870               |
| SNP_P4_168477_79530  | NW_004516938.1 | Scaffold1845 | 79530                   | TT                              | GG              | 1947021871               |
| SNP_P4_168478_79548  | NW_004516938.1 | Scaffold1845 | 79548                   | TT                              | CC              | 1947021872               |
| SNP_P4_168479_79557  | NW_004516938.1 | Scaffold1845 | 79557                   | CC                              | GG              | 1947021873               |
| SNP_P4_168480_79653  | NW_004516938.1 | Scaffold1845 | 79653                   | AA                              | GG              | 1947021874               |
| SNP_P4_168482_81179  | NW_004516938.1 | Scaffold1845 | 81179                   | TT                              | CC              | 1947021875               |
| SNP_P4_168483_81714  | NW_004516938.1 | Scaffold1845 | 81714                   | AA                              | CC              | 1947021876               |
| SNP_P4_168484_82226  | NW_004516938.1 | Scaffold1845 | 82226                   | AA                              | GG              | 1947021877               |
| SNP_P4_168485_83889  | NW_004516938.1 | Scaffold1845 | 83889                   | GG                              | AA              | 1947021878               |
| SNP_P4_168486_83890  | NW_004516938.1 | Scaffold1845 | 83890                   | GG                              | AA              | 1947021879               |
| SNP_P4_168488_99875  | NW_004516938.1 | Scaffold1845 | 99875                   | TT                              | CC              | 1947021880               |
| SNP_P4_168489_104927 | NW_004516938.1 | Scaffold1845 | 104927                  | GG                              | CC              | 1947021881               |
| SNP_P4_168490_105147 | NW_004516938.1 | Scaffold1845 | 105147                  | AA                              | GG              | 1947021882               |
| SNP_P4_168491_107281 | NW_004516938.1 | Scaffold1845 | 107281                  | TT                              | CC              | 1947021883               |
| SNP_P4_168492_107282 | NW_004516938.1 | Scaffold1845 | 107282                  | GG                              | AA              | 1947021884               |
| SNP_P4_168493_107344 | NW_004516938.1 | Scaffold1845 | 107344                  | AA                              | GG              | 1947021885               |

| SNPs IDs             | Chromosome IDs | Chromosomes  | Physical positions (bp) | CDC Frontier (Reference genome) | (ILWC46 & LPNB) | NCBI SNPdb Accession IDs |
|----------------------|----------------|--------------|-------------------------|---------------------------------|-----------------|--------------------------|
| SNP_P4_168494_116906 | NW_004516938.1 | Scaffold1845 | 116906                  | GG                              | AA              | 1947021886               |
| SNP_P4_168495_119791 | NW_004516938.1 | Scaffold1845 | 119791                  | AA                              | GG              | 1947021887               |
| SNP_P4_168496_126540 | NW_004516938.1 | Scaffold1845 | 126540                  | AA                              | GG              | 1947021888               |
| SNP_P4_168497_126546 | NW_004516938.1 | Scaffold1845 | 126546                  | AA                              | GG              | 1947021889               |
| SNP_P4_168498_127213 | NW_004516938.1 | Scaffold1845 | 127213                  | CC                              | GG              | 1947021890               |
| SNP_P4_168499_127476 | NW_004516938.1 | Scaffold1845 | 127476                  | TT                              | GG              | 1947021891               |
| SNP_P4_168500_127525 | NW_004516938.1 | Scaffold1845 | 127525                  | TT                              | CC              | 1947021892               |
| SNP_P4_168501_127560 | NW_004516938.1 | Scaffold1845 | 127560                  | CC                              | TT              | 1947021893               |
| SNP_P4_168502_127576 | NW_004516938.1 | Scaffold1845 | 127576                  | CC                              | TT              | 1947021894               |
| SNP_P4_168503_127584 | NW_004516938.1 | Scaffold1845 | 127584                  | AA                              | GG              | 1947021895               |
| SNP_P4_168504_132415 | NW_004516938.1 | Scaffold1845 | 132415                  | CC                              | TT              | 1947021896               |
| SNP_P4_168505_132905 | NW_004516938.1 | Scaffold1845 | 132905                  | AA                              | GG              | 1947021897               |
| SNP_P4_168506_132916 | NW_004516938.1 | Scaffold1845 | 132916                  | CC                              | TT              | 1947021898               |
| SNP_P4_168507_870    | NW_004516940.1 | Scaffold1847 | 870                     | TT                              | CC              | 1947021899               |
| SNP_P4_168508_908    | NW_004516940.1 | Scaffold1847 | 908                     | TT                              | AA              | 1947021900               |
| SNP_P4_168509_1023   | NW_004516940.1 | Scaffold1847 | 1023                    | AA                              | CC              | 1947021901               |
| SNP_P4_168510_1304   | NW_004516940.1 | Scaffold1847 | 1304                    | AA                              | CC              | 1947021902               |
| SNP_P4_168511_5231   | NW_004516940.1 | Scaffold1847 | 5231                    | AA                              | GG              | 1947021903               |
| SNP_P4_168512_5255   | NW_004516940.1 | Scaffold1847 | 5255                    | TT                              | CC              | 1947021904               |
| SNP_P4_168513_5299   | NW_004516940.1 | Scaffold1847 | 5299                    | CC                              | TT              | 1947021905               |
| SNP_P4_168514_5318   | NW_004516940.1 | Scaffold1847 | 5318                    | GG                              | AA              | 1947021906               |
| SNP_P4_168515_932    | NW_004516941.1 | Scaffold1848 | 932                     | CC                              | TT              | 1947021907               |
| SNP_P4_168516_3470   | NW_004516941.1 | Scaffold1848 | 3470                    | AA                              | TT              | 1947021908               |
| SNP_P4_168517_3503   | NW_004516941.1 | Scaffold1848 | 3503                    | CC                              | AA              | 1947021909               |
| SNP_P4_168518_3507   | NW_004516941.1 | Scaffold1848 | 3507                    | AA                              | GG              | 1947021910               |
| SNP_P4_168520_4674   | NW_004516941.1 | Scaffold1848 | 4674                    | GG                              | AA              | 1947021911               |
| SNP_P4_168521_10934  | NW_004516941.1 | Scaffold1848 | 10934                   | GG                              | CC              | 1947021912               |
| SNP_P4_168522_10951  | NW_004516941.1 | Scaffold1848 | 10951                   | GG                              | TT              | 1947021913               |
| SNP_P4_168523_11354  | NW_004516941.1 | Scaffold1848 | 11354                   | TT                              | CC              | 1947021914               |
| SNP_P4_168524_12161  | NW_004516941.1 | Scaffold1848 | 12161                   | AA                              | GG              | 1947021916               |
| SNP_P4_168525_12166  | NW_004516941.1 | Scaffold1848 | 12166                   | TT                              | CC              | 1947021918               |
| SNP_P4_168526_12207  | NW_004516941.1 | Scaffold1848 | 12207                   | AA                              | GG              | 1947021920               |
| SNP_P4_168527_12213  | NW_004516941.1 | Scaffold1848 | 12213                   | CC                              | TT              | 1947021922               |
| SNP_P4_168528_12260  | NW_004516941.1 | Scaffold1848 | 12260                   | TT                              | CC              | 1947021924               |
| SNP_P4_168529_12311  | NW_004516941.1 | Scaffold1848 | 12311                   | TT                              | AA              | 1947021926               |
| SNP_P4_168530_12434  | NW_004516941.1 | Scaffold1848 | 12434                   | GG                              | AA              | 1947021928               |
| SNP_P4_168531_12436  | NW_004516941.1 | Scaffold1848 | 12436                   | CC                              | GG              | 1947021929               |
| SNP_P4_168532_64     | NW_004516943.1 | Scaffold1851 | 64                      | AA                              | CC              | 1947021931               |
| SNP_P4_168533_121    | NW_004516943.1 | Scaffold1851 | 121                     | TT                              | AA              | 1947021933               |
| SNP_P4_168534_306    | NW_004516943.1 | Scaffold1851 | 306                     | TT                              | CC              | 1947021935               |
| SNP_P4_168535_312    | NW_004516943.1 | Scaffold1851 | 312                     | AA                              | GG              | 1947021937               |
| SNP_P4_168536_385    | NW_004516943.1 | Scaffold1851 | 385                     | TT                              | CC              | 1947021939               |

| SNPs IDs            | Chromosome IDs | Chromosomes  | Physical positions (bp) | CDC Frontier (Reference genome) | (ILWC46 & LPNB) | NCBI SNPdb Accession IDs |
|---------------------|----------------|--------------|-------------------------|---------------------------------|-----------------|--------------------------|
| SNP_P4_168537_539   | NW_004516943.1 | Scaffold1851 | 539                     | GG                              | CC              | 1947021941               |
| SNP_P4_168539_42824 | NW_004516944.1 | Scaffold1852 | 42824                   | CC                              | TT              | 1947021943               |
| SNP_P4_168540_43156 | NW_004516944.1 | Scaffold1852 | 43156                   | CC                              | TT              | 1947021945               |
| SNP_P4_168541_43157 | NW_004516944.1 | Scaffold1852 | 43157                   | GG                              | TT              | 1947021946               |
| SNP_P4_168542_43161 | NW_004516944.1 | Scaffold1852 | 43161                   | GG                              | CC              | 1947021948               |
| SNP_P4_168543_43162 | NW_004516944.1 | Scaffold1852 | 43162                   | GG                              | AA              | 1947021950               |
| SNP_P4_168544_43183 | NW_004516944.1 | Scaffold1852 | 43183                   | CC                              | TT              | 1947021952               |
| SNP_P4_168545_43192 | NW_004516944.1 | Scaffold1852 | 43192                   | TT                              | GG              | 1947021954               |
| SNP_P4_168546_43209 | NW_004516944.1 | Scaffold1852 | 43209                   | TT                              | CC              | 1947021956               |
| SNP_P4_168547_43307 | NW_004516944.1 | Scaffold1852 | 43307                   | AA                              | GG              | 1947021958               |
| SNP_P4_168548_57735 | NW_004516944.1 | Scaffold1852 | 57735                   | GG                              | AA              | 1947021960               |
| SNP_P4_168549_78542 | NW_004516944.1 | Scaffold1852 | 78542                   | AA                              | TT              | 1947021962               |
| SNP_P4_168550_87042 | NW_004516944.1 | Scaffold1852 | 87042                   | GG                              | AA              | 1947021964               |
| SNP_P4_168551_87043 | NW_004516944.1 | Scaffold1852 | 87043                   | TT                              | GG              | 1947021966               |
| SNP_P4_168552_93824 | NW_004516944.1 | Scaffold1852 | 93824                   | GG                              | TT              | 1947021968               |
| SNP_P4_168553_93832 | NW_004516944.1 | Scaffold1852 | 93832                   | AA                              | GG              | 1947021970               |
| SNP_P4_168554_93835 | NW_004516944.1 | Scaffold1852 | 93835                   | AA                              | GG              | 1947021972               |
| SNP_P4_168555_93988 | NW_004516944.1 | Scaffold1852 | 93988                   | TT                              | GG              | 1947021974               |
| SNP_P4_168556_94239 | NW_004516944.1 | Scaffold1852 | 94239                   | TT                              | CC              | 1947021975               |
| SNP_P4_168558_94271 | NW_004516944.1 | Scaffold1852 | 94271                   | AA                              | TT              | 1947021977               |
| SNP_P4_168559_94277 | NW_004516944.1 | Scaffold1852 | 94277                   | AA                              | GG              | 1947021979               |
| SNP_P4_168560_94281 | NW_004516944.1 | Scaffold1852 | 94281                   | TT                              | CC              | 1947021981               |
| SNP_P4_168561_94296 | NW_004516944.1 | Scaffold1852 | 94296                   | CC                              | TT              | 1947021983               |
| SNP_P4_168562_94298 | NW_004516944.1 | Scaffold1852 | 94298                   | GG                              | CC              | 1947021985               |
| SNP_P4_168563_94303 | NW_004516944.1 | Scaffold1852 | 94303                   | CC                              | TT              | 1947021987               |
| SNP_P4_168564_94307 | NW_004516944.1 | Scaffold1852 | 94307                   | TT                              | CC              | 1947021989               |
| SNP_P4_168565_94340 | NW_004516944.1 | Scaffold1852 | 94340                   | TT                              | CC              | 1947021991               |
| SNP_P4_168567_94420 | NW_004516944.1 | Scaffold1852 | 94420                   | CC                              | TT              | 1947021993               |
| SNP_P4_168568_94454 | NW_004516944.1 | Scaffold1852 | 94454                   | AA                              | GG              | 1947021995               |
| SNP_P4_168570_94587 | NW_004516944.1 | Scaffold1852 | 94587                   | TT                              | CC              | 1947021996               |
| SNP_P4_168571_94670 | NW_004516944.1 | Scaffold1852 | 94670                   | AA                              | GG              | 1947021998               |
| SNP_P4_168572_94685 | NW_004516944.1 | Scaffold1852 | 94685                   | AA                              | GG              | 1947022000               |
| SNP_P4_168573_94707 | NW_004516944.1 | Scaffold1852 | 94707                   | GG                              | AA              | 1947022002               |
| SNP_P4_168574_94739 | NW_004516944.1 | Scaffold1852 | 94739                   | CC                              | TT              | 1947022004               |
| SNP_P4_168576_94799 | NW_004516944.1 | Scaffold1852 | 94799                   | GG                              | AA              | 1947022006               |
| SNP_P4_168578_95104 | NW_004516944.1 | Scaffold1852 | 95104                   | AA                              | TT              | 1947022008               |
| SNP_P4_168579_95109 | NW_004516944.1 | Scaffold1852 | 95109                   | GG                              | AA              | 1947022010               |
| SNP_P4_168580_95122 | NW_004516944.1 | Scaffold1852 | 95122                   | CC                              | TT              | 1947022012               |
| SNP_P4_168581_95147 | NW_004516944.1 | Scaffold1852 | 95147                   | AA                              | TT              | 1947022014               |
| SNP_P4_168582_95167 | NW_004516944.1 | Scaffold1852 | 95167                   | TT                              | GG              | 1947022016               |
| SNP_P4_168583_95191 | NW_004516944.1 | Scaffold1852 | 95191                   | TT                              | CC              | 1947022018               |
| SNP_P4_168584_95249 | NW_004516944.1 | Scaffold1852 | 95249                   | GG                              | TT              | 1947022020               |

| SNPs IDs             | Chromosome IDs | Chromosomes  | Physical positions (bp) | CDC Frontier (Reference genome) | (ILWC46 & LPNB) | NCBI SNPdb Accession IDs |
|----------------------|----------------|--------------|-------------------------|---------------------------------|-----------------|--------------------------|
| SNP_P4_168585_95335  | NW_004516944.1 | Scaffold1852 | 95335                   | TT                              | GG              | 1947022022               |
| SNP_P4_168586_95380  | NW_004516944.1 | Scaffold1852 | 95380                   | TT                              | GG              | 1947022024               |
| SNP_P4_168589_101421 | NW_004516944.1 | Scaffold1852 | 101421                  | TT                              | CC              | 1947022025               |
| SNP_P4_168590_101508 | NW_004516944.1 | Scaffold1852 | 101508                  | AA                              | GG              | 1947022027               |
| SNP_P4_168591_101525 | NW_004516944.1 | Scaffold1852 | 101525                  | CC                              | TT              | 1947022029               |
| SNP_P4_168592_101606 | NW_004516944.1 | Scaffold1852 | 101606                  | CC                              | AA              | 1947022031               |
| SNP_P4_168593_101615 | NW_004516944.1 | Scaffold1852 | 101615                  | GG                              | AA              | 1947022033               |
| SNP_P4_168595_101782 | NW_004516944.1 | Scaffold1852 | 101782                  | AA                              | CC              | 1947022035               |
| SNP_P4_168596_101791 | NW_004516944.1 | Scaffold1852 | 101791                  | CC                              | TT              | 1947022037               |
| SNP_P4_168597_101797 | NW_004516944.1 | Scaffold1852 | 101797                  | TT                              | AA              | 1947022039               |
| SNP_P4_168598_101799 | NW_004516944.1 | Scaffold1852 | 101799                  | TT                              | GG              | 1947022041               |
| SNP_P4_168599_101850 | NW_004516944.1 | Scaffold1852 | 101850                  | AA                              | CC              | 1947022043               |
| SNP_P4_168600_101855 | NW_004516944.1 | Scaffold1852 | 101855                  | AA                              | GG              | 1947022045               |
| SNP_P4_168601_101858 | NW_004516944.1 | Scaffold1852 | 101858                  | GG                              | AA              | 1947022046               |
| SNP_P4_168602_101859 | NW_004516944.1 | Scaffold1852 | 101859                  | TT                              | CC              | 1947022048               |
| SNP_P4_168603_101955 | NW_004516944.1 | Scaffold1852 | 101955                  | TT                              | AA              | 1947022050               |
| SNP_P4_168604_101979 | NW_004516944.1 | Scaffold1852 | 101979                  | GG                              | AA              | 1947022052               |
| SNP_P4_168605_101990 | NW_004516944.1 | Scaffold1852 | 101990                  | GG                              | AA              | 1947022054               |
| SNP_P4_168606_102044 | NW_004516944.1 | Scaffold1852 | 102044                  | AA                              | GG              | 1947022056               |
| SNP_P4_168607_102048 | NW_004516944.1 | Scaffold1852 | 102048                  | AA                              | GG              | 1947022058               |
| SNP_P4_168608_102060 | NW_004516944.1 | Scaffold1852 | 102060                  | AA                              | CC              | 1947022060               |
| SNP_P4_168609_102069 | NW_004516944.1 | Scaffold1852 | 102069                  | CC                              | TT              | 1947022062               |
| SNP_P4_168610_102084 | NW_004516944.1 | Scaffold1852 | 102084                  | GG                              | AA              | 1947022064               |
| SNP_P4_168611_102087 | NW_004516944.1 | Scaffold1852 | 102087                  | AA                              | TT              | 1947022066               |
| SNP_P4_168612_102089 | NW_004516944.1 | Scaffold1852 | 102089                  | AA                              | CC              | 1947022068               |
| SNP_P4_168613_102130 | NW_004516944.1 | Scaffold1852 | 102130                  | CC                              | TT              | 1947022070               |
| SNP_P4_168614_102172 | NW_004516944.1 | Scaffold1852 | 102172                  | TT                              | CC              | 1947022072               |
| SNP_P4_168615_102199 | NW_004516944.1 | Scaffold1852 | 102199                  | GG                              | AA              | 1947022074               |
| SNP_P4_168616_102217 | NW_004516944.1 | Scaffold1852 | 102217                  | GG                              | CC              | 1947022076               |
| SNP_P4_168617_102237 | NW_004516944.1 | Scaffold1852 | 102237                  | TT                              | CC              | 1947022078               |
| SNP_P4_168618_102239 | NW_004516944.1 | Scaffold1852 | 102239                  | GG                              | AA              | 1947022080               |
| SNP_P4_168620_102907 | NW_004516944.1 | Scaffold1852 | 102907                  | TT                              | CC              | 1947022082               |
| SNP_P4_168621_102936 | NW_004516944.1 | Scaffold1852 | 102936                  | GG                              | AA              | 1947022084               |
| SNP_P4_168623_103011 | NW_004516944.1 | Scaffold1852 | 103011                  | TT                              | AA              | 1947022086               |
| SNP_P4_168624_103023 | NW_004516944.1 | Scaffold1852 | 103023                  | CC                              | TT              | 1947022088               |
| SNP_P4_168625_103101 | NW_004516944.1 | Scaffold1852 | 103101                  | CC                              | AA              | 1947022090               |
| SNP_P4_168626_103133 | NW_004516944.1 | Scaffold1852 | 103133                  | AA                              | TT              | 1947022092               |
| SNP_P4_168627_103134 | NW_004516944.1 | Scaffold1852 | 103134                  | TT                              | AA              | 1947022094               |
| SNP_P4_168628_103192 | NW_004516944.1 | Scaffold1852 | 103192                  | TT                              | AA              | 1947022096               |
| SNP_P4_168630_103483 | NW_004516944.1 | Scaffold1852 | 103483                  | AA                              | TT              | 1947022098               |
| SNP_P4_168631_103499 | NW_004516944.1 | Scaffold1852 | 103499                  | TT                              | CC              | 1947022100               |
| SNP_P4_168633_103552 | NW_004516944.1 | Scaffold1852 | 103552                  | CC                              | TT              | 1947022102               |



| SNPs IDs             | Chromosome IDs | Chromosomes  | Physical positions (bp) | CDC Frontier (Reference genome) | (ILWC46 & LPNB) | NCBI SNPdb Accession IDs |
|----------------------|----------------|--------------|-------------------------|---------------------------------|-----------------|--------------------------|
| SNP_P4_168634_103561 | NW_004516944.1 | Scaffold1852 | 103561                  | TT                              | CC              | 1947022104               |
| SNP_P4_168635_103577 | NW_004516944.1 | Scaffold1852 | 103577                  | GG                              | AA              | 1947022106               |
| SNP_P4_168636_103630 | NW_004516944.1 | Scaffold1852 | 103630                  | AA                              | GG              | 1947022108               |
| SNP_P4_168637_104203 | NW_004516944.1 | Scaffold1852 | 104203                  | GG                              | TT              | 1947022110               |
| SNP_P4_168638_104228 | NW_004516944.1 | Scaffold1852 | 104228                  | CC                              | AA              | 1947022112               |
| SNP_P4_168639_6550   | NW_004516945.1 | Scaffold1854 | 6550                    | GG                              | TT              | 1947022114               |
| SNP_P4_168640_7105   | NW_004516945.1 | Scaffold1854 | 7105                    | GG                              | TT              | 1947022116               |
| SNP_P4_168641_7125   | NW_004516945.1 | Scaffold1854 | 7125                    | TT                              | CC              | 1947022117               |
| SNP_P4_168642_7128   | NW_004516945.1 | Scaffold1854 | 7128                    | GG                              | AA              | 1947022119               |
| SNP_P4_168643_10528  | NW_004516945.1 | Scaffold1854 | 10528                   | TT                              | AA              | 1947022121               |
| SNP_P4_168644_35464  | NW_004516945.1 | Scaffold1854 | 35464                   | AA                              | GG              | 1947022123               |
| SNP_P4_168645_39330  | NW_004516945.1 | Scaffold1854 | 39330                   | GG                              | TT              | 1947022125               |
| SNP_P4_168646_39363  | NW_004516945.1 | Scaffold1854 | 39363                   | TT                              | GG              | 1947022127               |
| SNP_P4_168647_39662  | NW_004516945.1 | Scaffold1854 | 39662                   | CC                              | GG              | 1947022129               |
| SNP_P4_168648_39797  | NW_004516945.1 | Scaffold1854 | 39797                   | TT                              | CC              | 1947022131               |
| SNP_P4_168649_39813  | NW_004516945.1 | Scaffold1854 | 39813                   | AA                              | TT              | 1947022133               |
| SNP_P4_168650_49964  | NW_004516945.1 | Scaffold1854 | 49964                   | AA                              | GG              | 1947022135               |
| SNP_P4_168651_50045  | NW_004516945.1 | Scaffold1854 | 50045                   | GG                              | AA              | 1947022137               |
| SNP_P4_168652_5889   | NW_004516946.1 | Scaffold1855 | 5889                    | TT                              | CC              | 1947022139               |
| SNP_P4_168653_6543   | NW_004516947.1 | Scaffold1856 | 6543                    | CC                              | TT              | 1947022141               |
| SNP_P4_168654_6790   | NW_004516947.1 | Scaffold1856 | 6790                    | GG                              | AA              | 1947022143               |
| SNP_P4_168655_7246   | NW_004516947.1 | Scaffold1856 | 7246                    | CC                              | TT              | 1947022144               |
| SNP_P4_168656_12318  | NW_004516951.1 | Scaffold1861 | 12318                   | AA                              | CC              | 1947022146               |
| SNP_P4_168657_12407  | NW_004516951.1 | Scaffold1861 | 12407                   | CC                              | AA              | 1947022148               |
| SNP_P4_168658_12439  | NW_004516951.1 | Scaffold1861 | 12439                   | AA                              | GG              | 1947022150               |
| SNP_P4_168659_12446  | NW_004516951.1 | Scaffold1861 | 12446                   | GG                              | AA              | 1947022152               |
| SNP_P4_168660_12478  | NW_004516951.1 | Scaffold1861 | 12478                   | TT                              | CC              | 1947022154               |
| SNP_P4_168661_12688  | NW_004516951.1 | Scaffold1861 | 12688                   | TT                              | CC              | 1947022156               |
| SNP_P4_168662_12707  | NW_004516951.1 | Scaffold1861 | 12707                   | TT                              | CC              | 1947022158               |
| SNP_P4_168663_12778  | NW_004516951.1 | Scaffold1861 | 12778                   | TT                              | CC              | 1947022160               |
| SNP_P4_168664_12790  | NW_004516951.1 | Scaffold1861 | 12790                   | CC                              | AA              | 1947022162               |
| SNP_P4_168665_12793  | NW_004516951.1 | Scaffold1861 | 12793                   | AA                              | GG              | 1947022164               |
| SNP_P4_168666_12821  | NW_004516951.1 | Scaffold1861 | 12821                   | TT                              | CC              | 1947022166               |
| SNP_P4_168667_458    | NW_004516952.1 | Scaffold1862 | 458                     | AA                              | CC              | 1947022168               |
| SNP_P4_168668_956    | NW_004516952.1 | Scaffold1862 | 956                     | TT                              | GG              | 1947022170               |
| SNP_P4_168669_1011   | NW_004516952.1 | Scaffold1862 | 1011                    | TT                              | AA              | 1947022172               |
| SNP_P4_168670_1095   | NW_004516952.1 | Scaffold1862 | 1095                    | CC                              | AA              | 1947022173               |
| SNP_P4_168671_2884   | NW_004516953.1 | Scaffold1864 | 2884                    | TT                              | CC              | 1947022175               |
| SNP_P4_168673_3033   | NW_004516953.1 | Scaffold1864 | 3033                    | AA                              | GG              | 1947022177               |
| SNP_P4_168674_3585   | NW_004516953.1 | Scaffold1864 | 3585                    | GG                              | AA              | 1947022179               |
| SNP_P4_168676_3785   | NW_004516953.1 | Scaffold1864 | 3785                    | CC                              | TT              | 1947022181               |
| SNP_P4_168677_3789   | NW_004516953.1 | Scaffold1864 | 3789                    | TT                              | CC              | 1947022183               |

| SNPs IDs           | Chromosome IDs | Chromosomes  | Physical positions (bp) | CDC Frontier (Reference genome) | (ILWC46 & LPNB) | NCBI SNPdb Accession IDs |
|--------------------|----------------|--------------|-------------------------|---------------------------------|-----------------|--------------------------|
| SNP_P4_168678_3790 | NW_004516953.1 | Scaffold1864 | 3790                    | GG                              | AA              | 1947022185               |
| SNP_P4_168679_3808 | NW_004516953.1 | Scaffold1864 | 3808                    | AA                              | GG              | 1947022187               |
| SNP_P4_168680_3970 | NW_004516953.1 | Scaffold1864 | 3970                    | TT                              | CC              | 1947022189               |
| SNP_P4_168681_4138 | NW_004516953.1 | Scaffold1864 | 4138                    | GG                              | TT              | 1947022191               |
| SNP_P4_168682_4160 | NW_004516953.1 | Scaffold1864 | 4160                    | AA                              | GG              | 1947022192               |
| SNP_P4_168684_4337 | NW_004516953.1 | Scaffold1864 | 4337                    | TT                              | AA              | 1947022193               |
| SNP_P4_168685_4362 | NW_004516953.1 | Scaffold1864 | 4362                    | AA                              | GG              | 1947022194               |
| SNP_P4_168687_4619 | NW_004516953.1 | Scaffold1864 | 4619                    | CC                              | TT              | 1947022195               |
| SNP_P4_168689_4764 | NW_004516953.1 | Scaffold1864 | 4764                    | TT                              | CC              | 1947022196               |
| SNP_P4_168690_4791 | NW_004516953.1 | Scaffold1864 | 4791                    | CC                              | GG              | 1947022197               |
| SNP_P4_168691_4893 | NW_004516953.1 | Scaffold1864 | 4893                    | CC                              | TT              | 1947022198               |
| SNP_P4_168692_4901 | NW_004516953.1 | Scaffold1864 | 4901                    | CC                              | TT              | 1947022199               |
| SNP_P4_168693_4973 | NW_004516953.1 | Scaffold1864 | 4973                    | GG                              | AA              | 1947022200               |
| SNP_P4_168694_4984 | NW_004516953.1 | Scaffold1864 | 4984                    | GG                              | AA              | 1947022201               |
| SNP_P4_168695_5028 | NW_004516953.1 | Scaffold1864 | 5028                    | GG                              | TT              | 1947022202               |
| SNP_P4_168697_5292 | NW_004516953.1 | Scaffold1864 | 5292                    | GG                              | AA              | 1947022203               |
| SNP_P4_168698_5300 | NW_004516953.1 | Scaffold1864 | 5300                    | TT                              | AA              | 1947022204               |
| SNP_P4_168699_5382 | NW_004516953.1 | Scaffold1864 | 5382                    | TT                              | CC              | 1947022205               |
| SNP_P4_168700_5523 | NW_004516953.1 | Scaffold1864 | 5523                    | TT                              | AA              | 1947022206               |
| SNP_P4_168702_5603 | NW_004516953.1 | Scaffold1864 | 5603                    | CC                              | TT              | 1947022207               |
| SNP_P4_168703_5613 | NW_004516953.1 | Scaffold1864 | 5613                    | CC                              | TT              | 1947022208               |
| SNP_P4_168704_5673 | NW_004516953.1 | Scaffold1864 | 5673                    | CC                              | AA              | 1947022209               |
| SNP_P4_168705_5700 | NW_004516953.1 | Scaffold1864 | 5700                    | CC                              | TT              | 1947022210               |
| SNP_P4_168706_5715 | NW_004516953.1 | Scaffold1864 | 5715                    | TT                              | CC              | 1947022211               |
| SNP_P4_168707_5716 | NW_004516953.1 | Scaffold1864 | 5716                    | TT                              | CC              | 1947022212               |
| SNP_P4_168708_5753 | NW_004516953.1 | Scaffold1864 | 5753                    | AA                              | GG              | 1947022213               |
| SNP_P4_168709_5754 | NW_004516953.1 | Scaffold1864 | 5754                    | CC                              | TT              | 1947022214               |
| SNP_P4_168710_5758 | NW_004516953.1 | Scaffold1864 | 5758                    | TT                              | CC              | 1947022215               |
| SNP_P4_168711_5762 | NW_004516953.1 | Scaffold1864 | 5762                    | AA                              | GG              | 1947022216               |
| SNP_P4_168712_5789 | NW_004516953.1 | Scaffold1864 | 5789                    | TT                              | CC              | 1947022218               |
| SNP_P4_168713_5848 | NW_004516953.1 | Scaffold1864 | 5848                    | CC                              | TT              | 1947022219               |
| SNP_P4_168714_5875 | NW_004516953.1 | Scaffold1864 | 5875                    | TT                              | GG              | 1947022221               |
| SNP_P4_168718_6035 | NW_004516953.1 | Scaffold1864 | 6035                    | CC                              | AA              | 1947022223               |
| SNP_P4_168719_6058 | NW_004516953.1 | Scaffold1864 | 6058                    | CC                              | AA              | 1947022225               |
| SNP_P4_168720_6163 | NW_004516953.1 | Scaffold1864 | 6163                    | AA                              | GG              | 1947022227               |
| SNP_P4_168721_6194 | NW_004516953.1 | Scaffold1864 | 6194                    | AA                              | CC              | 1947022228               |
| SNP_P4_168722_6220 | NW_004516953.1 | Scaffold1864 | 6220                    | GG                              | AA              | 1947022230               |
| SNP_P4_168724_6306 | NW_004516953.1 | Scaffold1864 | 6306                    | GG                              | TT              | 1947022232               |
| SNP_P4_168725_6314 | NW_004516953.1 | Scaffold1864 | 6314                    | GG                              | AA              | 1947022234               |
| SNP_P4_168726_6401 | NW_004516953.1 | Scaffold1864 | 6401                    | TT                              | GG              | 1947022236               |
| SNP_P4_168727_6452 | NW_004516953.1 | Scaffold1864 | 6452                    | GG                              | AA              | 1947022238               |
| SNP_P4_168728_6916 | NW_004516953.1 | Scaffold1864 | 6916                    | TT                              | GG              | 1947022240               |

| SNPs IDs            | Chromosome IDs | Chromosomes  | Physical positions (bp) | CDC Frontier (Reference genome) | (ILWC46 & LPNB) | NCBI SNPdb Accession IDs |
|---------------------|----------------|--------------|-------------------------|---------------------------------|-----------------|--------------------------|
| SNP_P4_168729_10268 | NW_004516953.1 | Scaffold1864 | 10268                   | CC                              | TT              | 1947022242               |
| SNP_P4_168730_10269 | NW_004516953.1 | Scaffold1864 | 10269                   | TT                              | AA              | 1947022244               |
| SNP_P4_168731_10359 | NW_004516953.1 | Scaffold1864 | 10359                   | CC                              | TT              | 1947022245               |
| SNP_P4_168732_10477 | NW_004516953.1 | Scaffold1864 | 10477                   | CC                              | AA              | 1947022247               |
| SNP_P4_168733_10555 | NW_004516953.1 | Scaffold1864 | 10555                   | AA                              | GG              | 1947022249               |
| SNP_P4_168734_10600 | NW_004516953.1 | Scaffold1864 | 10600                   | TT                              | GG              | 1947022251               |
| SNP_P4_168735_10736 | NW_004516953.1 | Scaffold1864 | 10736                   | CC                              | TT              | 1947022253               |
| SNP_P4_168736_10746 | NW_004516953.1 | Scaffold1864 | 10746                   | CC                              | TT              | 1947022255               |
| SNP_P4_168737_10776 | NW_004516953.1 | Scaffold1864 | 10776                   | CC                              | TT              | 1947022257               |
| SNP_P4_168738_10841 | NW_004516953.1 | Scaffold1864 | 10841                   | TT                              | CC              | 1947022259               |
| SNP_P4_168739_10856 | NW_004516953.1 | Scaffold1864 | 10856                   | AA                              | TT              | 1947022260               |
| SNP_P4_168740_10858 | NW_004516953.1 | Scaffold1864 | 10858                   | TT                              | CC              | 1947022262               |
| SNP_P4_168741_11038 | NW_004516953.1 | Scaffold1864 | 11038                   | CC                              | TT              | 1947022264               |
| SNP_P4_168742_11080 | NW_004516953.1 | Scaffold1864 | 11080                   | AA                              | CC              | 1947022266               |
| SNP_P4_168743_11104 | NW_004516953.1 | Scaffold1864 | 11104                   | TT                              | AA              | 1947022268               |
| SNP_P4_168744_11176 | NW_004516953.1 | Scaffold1864 | 11176                   | TT                              | AA              | 1947022270               |
| SNP_P4_168745_11180 | NW_004516953.1 | Scaffold1864 | 11180                   | AA                              | CC              | 1947022272               |
| SNP_P4_168746_11218 | NW_004516953.1 | Scaffold1864 | 11218                   | TT                              | AA              | 1947022274               |
| SNP_P4_168747_11407 | NW_004516953.1 | Scaffold1864 | 11407                   | AA                              | GG              | 1947022276               |
| SNP_P4_168748_11473 | NW_004516953.1 | Scaffold1864 | 11473                   | CC                              | TT              | 1947022278               |
| SNP_P4_168749_11585 | NW_004516953.1 | Scaffold1864 | 11585                   | AA                              | GG              | 1947022279               |
| SNP_P4_168750_11696 | NW_004516953.1 | Scaffold1864 | 11696                   | CC                              | TT              | 1947022281               |
| SNP_P4_168751_11825 | NW_004516953.1 | Scaffold1864 | 11825                   | CC                              | TT              | 1947022283               |
| SNP_P4_168752_11904 | NW_004516953.1 | Scaffold1864 | 11904                   | AA                              | GG              | 1947022285               |
| SNP_P4_168753_12027 | NW_004516953.1 | Scaffold1864 | 12027                   | GG                              | CC              | 1947022287               |
| SNP_P4_168754_12078 | NW_004516953.1 | Scaffold1864 | 12078                   | TT                              | AA              | 1947022289               |
| SNP_P4_168755_14542 | NW_004516953.1 | Scaffold1864 | 14542                   | GG                              | AA              | 1947022291               |
| SNP_P4_168757_14875 | NW_004516953.1 | Scaffold1864 | 14875                   | AA                              | GG              | 1947022293               |
| SNP_P4_168758_14907 | NW_004516953.1 | Scaffold1864 | 14907                   | CC                              | TT              | 1947022295               |
| SNP_P4_168760_15049 | NW_004516953.1 | Scaffold1864 | 15049                   | CC                              | TT              | 1947022297               |
| SNP_P4_168761_15095 | NW_004516953.1 | Scaffold1864 | 15095                   | GG                              | TT              | 1947022299               |
| SNP_P4_168762_15100 | NW_004516953.1 | Scaffold1864 | 15100                   | TT                              | GG              | 1947022301               |
| SNP_P4_168763_15112 | NW_004516953.1 | Scaffold1864 | 15112                   | GG                              | AA              | 1947022303               |
| SNP_P4_168764_15123 | NW_004516953.1 | Scaffold1864 | 15123                   | TT                              | CC              | 1947022304               |
| SNP_P4_168765_15257 | NW_004516953.1 | Scaffold1864 | 15257                   | TT                              | GG              | 1947022306               |
| SNP_P4_168766_15564 | NW_004516953.1 | Scaffold1864 | 15564                   | CC                              | AA              | 1947022308               |
| SNP_P4_168767_17433 | NW_004516953.1 | Scaffold1864 | 17433                   | AA                              | TT              | 1947022310               |
| SNP_P4_168768_19613 | NW_004516953.1 | Scaffold1864 | 19613                   | CC                              | TT              | 1947022312               |
| SNP_P4_168769_19788 | NW_004516953.1 | Scaffold1864 | 19788                   | TT                              | AA              | 1947022314               |
| SNP_P4_168770_19823 | NW_004516953.1 | Scaffold1864 | 19823                   | GG                              | AA              | 1947022316               |
| SNP_P4_168771_19862 | NW_004516953.1 | Scaffold1864 | 19862                   | AA                              | CC              | 1947022318               |
| SNP_P4_168772_20019 | NW_004516953.1 | Scaffold1864 | 20019                   | AA                              | TT              | 1947022320               |

| SNPs IDs             | Chromosome IDs | Chromosomes  | Physical positions (bp) | CDC Frontier (Reference genome) | (ILWC46 & LPNB) | NCBI SNPdb Accession IDs |
|----------------------|----------------|--------------|-------------------------|---------------------------------|-----------------|--------------------------|
| SNP_P4_168773_20371  | NW_004516953.1 | Scaffold1864 | 20371                   | GG                              | AA              | 1947022321               |
| SNP_P4_168775_20537  | NW_004516953.1 | Scaffold1864 | 20537                   | GG                              | AA              | 1947022323               |
| SNP_P4_168776_4320   | NW_004516955.1 | Scaffold1866 | 4320                    | CC                              | TT              | 1947022325               |
| SNP_P4_168777_4335   | NW_004516955.1 | Scaffold1866 | 4335                    | TT                              | CC              | 1947022327               |
| SNP_P4_168778_4341   | NW_004516955.1 | Scaffold1866 | 4341                    | CC                              | TT              | 1947022329               |
| SNP_P4_168779_4357   | NW_004516955.1 | Scaffold1866 | 4357                    | CC                              | TT              | 1947022331               |
| SNP_P4_168780_4475   | NW_004516955.1 | Scaffold1866 | 4475                    | GG                              | AA              | 1947022333               |
| SNP_P4_168781_4480   | NW_004516955.1 | Scaffold1866 | 4480                    | AA                              | GG              | 1947022335               |
| SNP_P4_168782_4510   | NW_004516955.1 | Scaffold1866 | 4510                    | AA                              | GG              | 1947022337               |
| SNP_P4_168783_4520   | NW_004516955.1 | Scaffold1866 | 4520                    | AA                              | GG              | 1947022339               |
| SNP_P4_168784_4523   | NW_004516955.1 | Scaffold1866 | 4523                    | AA                              | GG              | 1947022341               |
| SNP_P4_168785_4592   | NW_004516955.1 | Scaffold1866 | 4592                    | CC                              | TT              | 1947022343               |
| SNP_P4_168786_4660   | NW_004516955.1 | Scaffold1866 | 4660                    | GG                              | TT              | 1947022345               |
| SNP_P4_168787_4688   | NW_004516955.1 | Scaffold1866 | 4688                    | AA                              | TT              | 1947022347               |
| SNP_P4_168788_4745   | NW_004516955.1 | Scaffold1866 | 4745                    | CC                              | TT              | 1947022349               |
| SNP_P4_168789_23105  | NW_004516955.1 | Scaffold1866 | 23105                   | GG                              | AA              | 1947022351               |
| SNP_P4_168790_25534  | NW_004516955.1 | Scaffold1866 | 25534                   | TT                              | AA              | 1947022353               |
| SNP_P4_168791_35242  | NW_004516955.1 | Scaffold1866 | 35242                   | TT                              | CC              | 1947022355               |
| SNP_P4_168793_42409  | NW_004516955.1 | Scaffold1866 | 42409                   | TT                              | CC              | 1947022357               |
| SNP_P4_168794_42432  | NW_004516955.1 | Scaffold1866 | 42432                   | GG                              | AA              | 1947022359               |
| SNP_P4_168795_42669  | NW_004516955.1 | Scaffold1866 | 42669                   | CC                              | GG              | 1947022361               |
| SNP_P4_168797_44369  | NW_004516955.1 | Scaffold1866 | 44369                   | TT                              | CC              | 1947022363               |
| SNP_P4_168798_50333  | NW_004516955.1 | Scaffold1866 | 50333                   | AA                              | GG              | 1947022365               |
| SNP_P4_168799_62679  | NW_004516955.1 | Scaffold1866 | 62679                   | TT                              | CC              | 1947022367               |
| SNP_P4_168800_62718  | NW_004516955.1 | Scaffold1866 | 62718                   | GG                              | AA              | 1947022369               |
| SNP_P4_168801_62759  | NW_004516955.1 | Scaffold1866 | 62759                   | TT                              | GG              | 1947022371               |
| SNP_P4_168803_62805  | NW_004516955.1 | Scaffold1866 | 62805                   | TT                              | CC              | 1947022373               |
| SNP_P4_168804_62850  | NW_004516955.1 | Scaffold1866 | 62850                   | TT                              | CC              | 1947022375               |
| SNP_P4_168805_62875  | NW_004516955.1 | Scaffold1866 | 62875                   | AA                              | GG              | 1947022377               |
| SNP_P4_168806_62883  | NW_004516955.1 | Scaffold1866 | 62883                   | CC                              | TT              | 1947022379               |
| SNP_P4_168807_62916  | NW_004516955.1 | Scaffold1866 | 62916                   | CC                              | AA              | 1947022381               |
| SNP_P4_168808_62938  | NW_004516955.1 | Scaffold1866 | 62938                   | AA                              | CC              | 1947022383               |
| SNP_P4_168809_62962  | NW_004516955.1 | Scaffold1866 | 62962                   | AA                              | CC              | 1947022385               |
| SNP_P4_168810_63070  | NW_004516955.1 | Scaffold1866 | 63070                   | TT                              | AA              | 1947022387               |
| SNP_P4_168811_71767  | NW_004516955.1 | Scaffold1866 | 71767                   | GG                              | AA              | 1947022389               |
| SNP_P4_168812_73755  | NW_004516955.1 | Scaffold1866 | 73755                   | GG                              | AA              | 1947022390               |
| SNP_P4_168814_100443 | NW_004516955.1 | Scaffold1866 | 100443                  | TT                              | CC              | 1947022392               |
| SNP_P4_168815_100450 | NW_004516955.1 | Scaffold1866 | 100450                  | GG                              | AA              | 1947022394               |
| SNP_P4_168816_101009 | NW_004516955.1 | Scaffold1866 | 101009                  | AA                              | GG              | 1947022396               |
| SNP_P4_168817_103235 | NW_004516955.1 | Scaffold1866 | 103235                  | CC                              | TT              | 1947022398               |
| SNP_P4_168818_103242 | NW_004516955.1 | Scaffold1866 | 103242                  | TT                              | AA              | 1947022400               |
| SNP_P4_168819_103255 | NW_004516955.1 | Scaffold1866 | 103255                  | TT                              | CC              | 1947022402               |

| SNPs IDs             | Chromosome IDs | Chromosomes  | Physical positions (bp) | CDC Frontier (Reference genome) | (ILWC46 & LPNB) | NCBI SNPdb Accession IDs |
|----------------------|----------------|--------------|-------------------------|---------------------------------|-----------------|--------------------------|
| SNP_P4_168821_114377 | NW_004516955.1 | Scaffold1866 | 114377                  | TT                              | AA              | 1947022404               |
| SNP_P4_168822_115706 | NW_004516955.1 | Scaffold1866 | 115706                  | TT                              | AA              | 1947022406               |
| SNP_P4_168824_135305 | NW_004516955.1 | Scaffold1866 | 135305                  | CC                              | TT              | 1947022408               |
| SNP_P4_168826_142034 | NW_004516955.1 | Scaffold1866 | 142034                  | GG                              | AA              | 1947022410               |
| SNP_P4_168827_142039 | NW_004516955.1 | Scaffold1866 | 142039                  | AA                              | GG              | 1947022411               |
| SNP_P4_168828_142095 | NW_004516955.1 | Scaffold1866 | 142095                  | CC                              | TT              | 1947022413               |
| SNP_P4_168829_142130 | NW_004516955.1 | Scaffold1866 | 142130                  | GG                              | AA              | 1947022415               |
| SNP_P4_168830_142143 | NW_004516955.1 | Scaffold1866 | 142143                  | GG                              | AA              | 1947022417               |
| SNP_P4_168832_12812  | NW_004516956.1 | Scaffold1867 | 12812                   | TT                              | CC              | 1947022419               |
| SNP_P4_168833_50169  | NW_004516956.1 | Scaffold1867 | 50169                   | AA                              | CC              | 1947022421               |
| SNP_P4_168834_58984  | NW_004516956.1 | Scaffold1867 | 58984                   | GG                              | TT              | 1947022423               |
| SNP_P4_168835_59637  | NW_004516956.1 | Scaffold1867 | 59637                   | CC                              | GG              | 1947022425               |
| SNP_P4_168836_66846  | NW_004516956.1 | Scaffold1867 | 66846                   | GG                              | CC              | 1947022427               |
| SNP_P4_168837_70977  | NW_004516956.1 | Scaffold1867 | 70977                   | TT                              | CC              | 1947022429               |
| SNP_P4_168838_70991  | NW_004516956.1 | Scaffold1867 | 70991                   | CC                              | TT              | 1947022431               |
| SNP_P4_168839_71006  | NW_004516956.1 | Scaffold1867 | 71006                   | GG                              | AA              | 1947022433               |
| SNP_P4_168841_71018  | NW_004516956.1 | Scaffold1867 | 71018                   | TT                              | CC              | 1947022435               |
| SNP_P4_168842_71037  | NW_004516956.1 | Scaffold1867 | 71037                   | AA                              | CC              | 1947022437               |
| SNP_P4_168843_71038  | NW_004516956.1 | Scaffold1867 | 71038                   | CC                              | AA              | 1947022439               |
| SNP_P4_168844_90129  | NW_004516956.1 | Scaffold1867 | 90129                   | AA                              | CC              | 1947022441               |
| SNP_P4_168845_90503  | NW_004516956.1 | Scaffold1867 | 90503                   | CC                              | GG              | 1947022443               |
| SNP_P4_168846_90521  | NW_004516956.1 | Scaffold1867 | 90521                   | GG                              | TT              | 1947022445               |
| SNP_P4_168848_91836  | NW_004516956.1 | Scaffold1867 | 91836                   | CC                              | AA              | 1947022447               |
| SNP_P4_168849_91841  | NW_004516956.1 | Scaffold1867 | 91841                   | TT                              | AA              | 1947022449               |
| SNP_P4_168850_95399  | NW_004516956.1 | Scaffold1867 | 95399                   | TT                              | AA              | 1947022451               |
| SNP_P4_168851_95410  | NW_004516956.1 | Scaffold1867 | 95410                   | TT                              | AA              | 1947022453               |
| SNP_P4_168852_95423  | NW_004516956.1 | Scaffold1867 | 95423                   | AA                              | TT              | 1947022455               |
| SNP_P4_168853_95428  | NW_004516956.1 | Scaffold1867 | 95428                   | TT                              | GG              | 1947022457               |
| SNP_P4_168854_95443  | NW_004516956.1 | Scaffold1867 | 95443                   | CC                              | TT              | 1947022459               |
| SNP_P4_168855_96059  | NW_004516956.1 | Scaffold1867 | 96059                   | TT                              | CC              | 1947022461               |
| SNP_P4_168856_96083  | NW_004516956.1 | Scaffold1867 | 96083                   | TT                              | AA              | 1947022463               |
| SNP_P4_168857_96230  | NW_004516956.1 | Scaffold1867 | 96230                   | TT                              | CC              | 1947022465               |
| SNP_P4_168858_96424  | NW_004516956.1 | Scaffold1867 | 96424                   | AA                              | GG              | 1947022467               |
| SNP_P4_168859_96746  | NW_004516956.1 | Scaffold1867 | 96746                   | CC                              | TT              | 1947022469               |
| SNP_P4_168860_96774  | NW_004516956.1 | Scaffold1867 | 96774                   | GG                              | AA              | 1947022470               |
| SNP_P4_168861_104938 | NW_004516956.1 | Scaffold1867 | 104938                  | TT                              | AA              | 1947022472               |
| SNP_P4_168862_104942 | NW_004516956.1 | Scaffold1867 | 104942                  | GG                              | CC              | 1947022474               |
| SNP_P4_168863_104955 | NW_004516956.1 | Scaffold1867 | 104955                  | GG                              | CC              | 1947022476               |
| SNP_P4_168864_106103 | NW_004516956.1 | Scaffold1867 | 106103                  | CC                              | AA              | 1947022478               |
| SNP_P4_168865_111323 | NW_004516956.1 | Scaffold1867 | 111323                  | GG                              | TT              | 1947022480               |
| SNP_P4_168866_133676 | NW_004516956.1 | Scaffold1867 | 133676                  | CC                              | GG              | 1947022482               |
| SNP_P4_168867_161085 | NW_004516956.1 | Scaffold1867 | 161085                  | CC                              | TT              | 1947022484               |

| SNPs IDs             | Chromosome IDs | Chromosomes  | Physical positions (bp) | CDC Frontier (Reference genome) | (ILWC46 & LPNB) | NCBI SNPdb Accession IDs |
|----------------------|----------------|--------------|-------------------------|---------------------------------|-----------------|--------------------------|
| SNP_P4_168868_161449 | NW_004516956.1 | Scaffold1867 | 161449                  | TT                              | CC              | 1947022486               |
| SNP_P4_168869_163285 | NW_004516956.1 | Scaffold1867 | 163285                  | AA                              | CC              | 1947022488               |
| SNP_P4_168870_163455 | NW_004516956.1 | Scaffold1867 | 163455                  | TT                              | CC              | 1947022490               |
| SNP_P4_168871_163467 | NW_004516956.1 | Scaffold1867 | 163467                  | AA                              | GG              | 1947022492               |
| SNP_P4_168872_164369 | NW_004516956.1 | Scaffold1867 | 164369                  | CC                              | TT              | 1947022494               |
| SNP_P4_168873_164390 | NW_004516956.1 | Scaffold1867 | 164390                  | CC                              | AA              | 1947022496               |
| SNP_P4_168874_172188 | NW_004516956.1 | Scaffold1867 | 172188                  | AA                              | TT              | 1947022498               |
| SNP_P4_168875_172519 | NW_004516956.1 | Scaffold1867 | 172519                  | AA                              | TT              | 1947022500               |
| SNP_P4_168876_172572 | NW_004516956.1 | Scaffold1867 | 172572                  | AA                              | TT              | 1947022502               |
| SNP_P4_168877_196848 | NW_004516956.1 | Scaffold1867 | 196848                  | TT                              | GG              | 1947022503               |
| SNP_P4_168879_214970 | NW_004516956.1 | Scaffold1867 | 214970                  | AA                              | CC              | 1947022505               |
| SNP_P4_168880_226666 | NW_004516956.1 | Scaffold1867 | 226666                  | AA                              | GG              | 1947022507               |
| SNP_P4_168882_229447 | NW_004516956.1 | Scaffold1867 | 229447                  | CC                              | TT              | 1947022509               |
| SNP_P4_168883_233738 | NW_004516956.1 | Scaffold1867 | 233738                  | TT                              | CC              | 1947022511               |
| SNP_P4_168884_237465 | NW_004516956.1 | Scaffold1867 | 237465                  | GG                              | AA              | 1947022513               |
| SNP_P4_168885_237494 | NW_004516956.1 | Scaffold1867 | 237494                  | CC                              | TT              | 1947022515               |
| SNP_P4_168886_237506 | NW_004516956.1 | Scaffold1867 | 237506                  | AA                              | CC              | 1947022517               |
| SNP_P4_168887_237510 | NW_004516956.1 | Scaffold1867 | 237510                  | CC                              | TT              | 1947022519               |
| SNP_P4_168888_237520 | NW_004516956.1 | Scaffold1867 | 237520                  | TT                              | CC              | 1947022521               |
| SNP_P4_168889_237539 | NW_004516956.1 | Scaffold1867 | 237539                  | TT                              | CC              | 1947022523               |
| SNP_P4_168890_237559 | NW_004516956.1 | Scaffold1867 | 237559                  | TT                              | AA              | 1947022525               |
| SNP_P4_168891_237566 | NW_004516956.1 | Scaffold1867 | 237566                  | CC                              | TT              | 1947022527               |
| SNP_P4_168892_237578 | NW_004516956.1 | Scaffold1867 | 237578                  | AA                              | CC              | 1947022529               |
| SNP_P4_168893_237592 | NW_004516956.1 | Scaffold1867 | 237592                  | TT                              | CC              | 1947022530               |
| SNP_P4_168894_237617 | NW_004516956.1 | Scaffold1867 | 237617                  | CC                              | TT              | 1947022532               |
| SNP_P4_168895_237644 | NW_004516956.1 | Scaffold1867 | 237644                  | AA                              | GG              | 1947022534               |
| SNP_P4_168896_237650 | NW_004516956.1 | Scaffold1867 | 237650                  | TT                              | CC              | 1947022536               |
| SNP_P4_168897_237661 | NW_004516956.1 | Scaffold1867 | 237661                  | AA                              | GG              | 1947022538               |
| SNP_P4_168898_237662 | NW_004516956.1 | Scaffold1867 | 237662                  | TT                              | AA              | 1947022540               |
| SNP_P4_168899_237713 | NW_004516956.1 | Scaffold1867 | 237713                  | TT                              | CC              | 1947022542               |
| SNP_P4_168900_237715 | NW_004516956.1 | Scaffold1867 | 237715                  | AA                              | CC              | 1947022544               |
| SNP_P4_168901_237881 | NW_004516956.1 | Scaffold1867 | 237881                  | TT                              | CC              | 1947022546               |
| SNP_P4_168902_238648 | NW_004516956.1 | Scaffold1867 | 238648                  | TT                              | CC              | 1947022548               |
| SNP_P4_168903_257111 | NW_004516956.1 | Scaffold1867 | 257111                  | AA                              | TT              | 1947022550               |
| SNP_P4_168904_310647 | NW_004516956.1 | Scaffold1867 | 310647                  | TT                              | CC              | 1947022552               |
| SNP_P4_168905_314157 | NW_004516956.1 | Scaffold1867 | 314157                  | TT                              | CC              | 1947022554               |
| SNP_P4_168906_314805 | NW_004516956.1 | Scaffold1867 | 314805                  | AA                              | GG              | 1947022556               |
| SNP_P4_168907_316217 | NW_004516956.1 | Scaffold1867 | 316217                  | GG                              | TT              | 1947022557               |
| SNP_P4_168908_336289 | NW_004516956.1 | Scaffold1867 | 336289                  | AA                              | GG              | 1947022559               |
| SNP_P4_168909_64     | NW_004516958.1 | Scaffold1869 | 64                      | AA                              | GG              | 1947022561               |
| SNP_P4_168910_74     | NW_004516958.1 | Scaffold1869 | 74                      | CC                              | TT              | 1947022563               |
| SNP_P4_168911_419    | NW_004516958.1 | Scaffold1869 | 419                     | TT                              | GG              | 1947022565               |

| SNPs IDs            | Chromosome IDs | Chromosomes  | Physical positions (bp) | CDC Frontier (Reference genome) | (ILWC46 & LPNB) | NCBI SNPdb Accession IDs |
|---------------------|----------------|--------------|-------------------------|---------------------------------|-----------------|--------------------------|
| SNP_P4_168912_426   | NW_004516958.1 | Scaffold1869 | 426                     | CC                              | TT              | 1947022567               |
| SNP_P4_168913_569   | NW_004516958.1 | Scaffold1869 | 569                     | TT                              | AA              | 1947022569               |
| SNP_P4_168914_625   | NW_004516958.1 | Scaffold1869 | 625                     | GG                              | CC              | 1947022571               |
| SNP_P4_168915_647   | NW_004516958.1 | Scaffold1869 | 647                     | GG                              | AA              | 1947022573               |
| SNP_P4_168916_666   | NW_004516958.1 | Scaffold1869 | 666                     | CC                              | TT              | 1947022575               |
| SNP_P4_168917_840   | NW_004516958.1 | Scaffold1869 | 840                     | AA                              | GG              | 1947022577               |
| SNP_P4_168918_1393  | NW_004516958.1 | Scaffold1869 | 1393                    | TT                              | CC              | 1947022579               |
| SNP_P4_168919_1480  | NW_004516958.1 | Scaffold1869 | 1480                    | TT                              | CC              | 1947022581               |
| SNP_P4_168920_1484  | NW_004516958.1 | Scaffold1869 | 1484                    | AA                              | TT              | 1947022583               |
| SNP_P4_168921_1497  | NW_004516958.1 | Scaffold1869 | 1497                    | TT                              | CC              | 1947022585               |
| SNP_P4_168922_1550  | NW_004516958.1 | Scaffold1869 | 1550                    | GG                              | CC              | 1947022587               |
| SNP_P4_168923_1930  | NW_004516958.1 | Scaffold1869 | 1930                    | CC                              | TT              | 1947022589               |
| SNP_P4_168924_1987  | NW_004516958.1 | Scaffold1869 | 1987                    | AA                              | CC              | 1947022590               |
| SNP_P4_168925_1994  | NW_004516958.1 | Scaffold1869 | 1994                    | CC                              | AA              | 1947022592               |
| SNP_P4_168926_1995  | NW_004516958.1 | Scaffold1869 | 1995                    | CC                              | TT              | 1947022594               |
| SNP_P4_168927_2083  | NW_004516958.1 | Scaffold1869 | 2083                    | AA                              | GG              | 1947022596               |
| SNP_P4_168928_8062  | NW_004516958.1 | Scaffold1869 | 8062                    | AA                              | TT              | 1947022598               |
| SNP_P4_168929_8107  | NW_004516958.1 | Scaffold1869 | 8107                    | GG                              | AA              | 1947022600               |
| SNP_P4_168930_8198  | NW_004516958.1 | Scaffold1869 | 8198                    | CC                              | TT              | 1947022602               |
| SNP_P4_168931_11155 | NW_004516958.1 | Scaffold1869 | 11155                   | GG                              | AA              | 1947022604               |
| SNP_P4_168932_11960 | NW_004516958.1 | Scaffold1869 | 11960                   | AA                              | TT              | 1947022606               |
| SNP_P4_168933_12600 | NW_004516958.1 | Scaffold1869 | 12600                   | GG                              | CC              | 1947022608               |
| SNP_P4_168934_12686 | NW_004516958.1 | Scaffold1869 | 12686                   | CC                              | AA              | 1947022610               |
| SNP_P4_168935_12817 | NW_004516958.1 | Scaffold1869 | 12817                   | AA                              | GG              | 1947022612               |
| SNP_P4_168936_12818 | NW_004516958.1 | Scaffold1869 | 12818                   | TT                              | AA              | 1947022614               |
| SNP_P4_168937_12867 | NW_004516958.1 | Scaffold1869 | 12867                   | CC                              | TT              | 1947022615               |
| SNP_P4_168938_13099 | NW_004516958.1 | Scaffold1869 | 13099                   | AA                              | GG              | 1947022617               |
| SNP_P4_168939_13823 | NW_004516958.1 | Scaffold1869 | 13823                   | CC                              | TT              | 1947022619               |
| SNP_P4_168940_14115 | NW_004516958.1 | Scaffold1869 | 14115                   | CC                              | TT              | 1947022621               |
| SNP_P4_168941_14200 | NW_004516958.1 | Scaffold1869 | 14200                   | GG                              | AA              | 1947022623               |
| SNP_P4_168942_14222 | NW_004516958.1 | Scaffold1869 | 14222                   | TT                              | CC              | 1947022625               |
| SNP_P4_168943_14315 | NW_004516958.1 | Scaffold1869 | 14315                   | CC                              | AA              | 1947022627               |
| SNP_P4_168944_15938 | NW_004516958.1 | Scaffold1869 | 15938                   | CC                              | GG              | 1947022629               |
| SNP_P4_168945_15953 | NW_004516958.1 | Scaffold1869 | 15953                   | TT                              | CC              | 1947022631               |
| SNP_P4_168947_16097 | NW_004516958.1 | Scaffold1869 | 16097                   | TT                              | CC              | 1947022633               |
| SNP_P4_168948_16245 | NW_004516958.1 | Scaffold1869 | 16245                   | TT                              | CC              | 1947022634               |
| SNP_P4_168949_16256 | NW_004516958.1 | Scaffold1869 | 16256                   | CC                              | GG              | 1947022636               |
| SNP_P4_168950_16263 | NW_004516958.1 | Scaffold1869 | 16263                   | CC                              | TT              | 1947022638               |
| SNP_P4_168951_16288 | NW_004516958.1 | Scaffold1869 | 16288                   | AA                              | TT              | 1947022640               |
| SNP_P4_168952_16575 | NW_004516958.1 | Scaffold1869 | 16575                   | AA                              | GG              | 1947022642               |
| SNP_P4_168953_16642 | NW_004516958.1 | Scaffold1869 | 16642                   | AA                              | GG              | 1947022644               |
| SNP_P4_168954_16659 | NW_004516958.1 | Scaffold1869 | 16659                   | AA                              | GG              | 1947022646               |

| SNPs IDs            | Chromosome IDs | Chromosomes  | Physical positions (bp) | CDC Frontier (Reference genome) | (ILWC46 & LPNB) | NCBI SNPdb Accession IDs |
|---------------------|----------------|--------------|-------------------------|---------------------------------|-----------------|--------------------------|
| SNP_P4_168955_16690 | NW_004516958.1 | Scaffold1869 | 16690                   | AA                              | GG              | 1947022648               |
| SNP_P4_168956_16702 | NW_004516958.1 | Scaffold1869 | 16702                   | AA                              | CC              | 1947022650               |
| SNP_P4_168957_16756 | NW_004516958.1 | Scaffold1869 | 16756                   | AA                              | GG              | 1947022651               |
| SNP_P4_168958_16786 | NW_004516958.1 | Scaffold1869 | 16786                   | CC                              | TT              | 1947022653               |
| SNP_P4_168959_16787 | NW_004516958.1 | Scaffold1869 | 16787                   | CC                              | GG              | 1947022655               |
| SNP_P4_168960_16798 | NW_004516958.1 | Scaffold1869 | 16798                   | AA                              | TT              | 1947022657               |
| SNP_P4_168961_16803 | NW_004516958.1 | Scaffold1869 | 16803                   | CC                              | TT              | 1947022659               |
| SNP_P4_168962_16851 | NW_004516958.1 | Scaffold1869 | 16851                   | GG                              | AA              | 1947022661               |
| SNP_P4_168963_16877 | NW_004516958.1 | Scaffold1869 | 16877                   | GG                              | TT              | 1947022663               |
| SNP_P4_168964_17012 | NW_004516958.1 | Scaffold1869 | 17012                   | CC                              | TT              | 1947022665               |
| SNP_P4_168965_18540 | NW_004516958.1 | Scaffold1869 | 18540                   | CC                              | GG              | 1947022667               |
| SNP_P4_168966_18716 | NW_004516958.1 | Scaffold1869 | 18716                   | GG                              | TT              | 1947022669               |
| SNP_P4_168967_18810 | NW_004516958.1 | Scaffold1869 | 18810                   | CC                              | GG              | 1947022670               |
| SNP_P4_168968_18846 | NW_004516958.1 | Scaffold1869 | 18846                   | CC                              | GG              | 1947022672               |
| SNP_P4_168969_18883 | NW_004516958.1 | Scaffold1869 | 18883                   | TT                              | GG              | 1947022674               |
| SNP_P4_168970_18929 | NW_004516958.1 | Scaffold1869 | 18929                   | AA                              | CC              | 1947022676               |
| SNP_P4_168971_18973 | NW_004516958.1 | Scaffold1869 | 18973                   | CC                              | TT              | 1947022678               |
| SNP_P4_168972_19057 | NW_004516958.1 | Scaffold1869 | 19057                   | CC                              | AA              | 1947022680               |
| SNP_P4_168974_19107 | NW_004516958.1 | Scaffold1869 | 19107                   | CC                              | TT              | 1947022682               |
| SNP_P4_168975_19154 | NW_004516958.1 | Scaffold1869 | 19154                   | GG                              | AA              | 1947022684               |
| SNP_P4_168976_19167 | NW_004516958.1 | Scaffold1869 | 19167                   | TT                              | CC              | 1947022686               |
| SNP_P4_168977_19278 | NW_004516958.1 | Scaffold1869 | 19278                   | GG                              | AA              | 1947022687               |
| SNP_P4_168978_19380 | NW_004516958.1 | Scaffold1869 | 19380                   | CC                              | TT              | 1947022689               |
| SNP_P4_168979_19488 | NW_004516958.1 | Scaffold1869 | 19488                   | CC                              | GG              | 1947022691               |
| SNP_P4_168980_19515 | NW_004516958.1 | Scaffold1869 | 19515                   | TT                              | GG              | 1947022693               |
| SNP_P4_168982_19603 | NW_004516958.1 | Scaffold1869 | 19603                   | CC                              | TT              | 1947022695               |
| SNP_P4_168983_19609 | NW_004516958.1 | Scaffold1869 | 19609                   | TT                              | CC              | 1947022697               |
| SNP_P4_168984_19720 | NW_004516958.1 | Scaffold1869 | 19720                   | CC                              | TT              | 1947022699               |
| SNP_P4_168985_19757 | NW_004516958.1 | Scaffold1869 | 19757                   | CC                              | AA              | 1947022701               |
| SNP_P4_168986_19847 | NW_004516958.1 | Scaffold1869 | 19847                   | CC                              | AA              | 1947022703               |
| SNP_P4_168987_19950 | NW_004516958.1 | Scaffold1869 | 19950                   | CC                              | AA              | 1947022704               |
| SNP_P4_168988_19962 | NW_004516958.1 | Scaffold1869 | 19962                   | AA                              | TT              | 1947022706               |
| SNP_P4_168990_20064 | NW_004516958.1 | Scaffold1869 | 20064                   | TT                              | GG              | 1947022708               |
| SNP_P4_168991_20108 | NW_004516958.1 | Scaffold1869 | 20108                   | TT                              | AA              | 1947022710               |
| SNP_P4_168992_20228 | NW_004516958.1 | Scaffold1869 | 20228                   | AA                              | CC              | 1947022712               |
| SNP_P4_168993_20356 | NW_004516958.1 | Scaffold1869 | 20356                   | AA                              | GG              | 1947022714               |
| SNP_P4_168994_24480 | NW_004516958.1 | Scaffold1869 | 24480                   | AA                              | GG              | 1947022716               |
| SNP_P4_168995_24516 | NW_004516958.1 | Scaffold1869 | 24516                   | GG                              | AA              | 1947022718               |
| SNP_P4_168996_24564 | NW_004516958.1 | Scaffold1869 | 24564                   | TT                              | CC              | 1947022720               |
| SNP_P4_168997_274   | NW_004516959.1 | Scaffold1870 | 274                     | TT                              | AA              | 1947022722               |
| SNP_P4_168998_319   | NW_004516959.1 | Scaffold1870 | 319                     | CC                              | GG              | 1947022724               |
| SNP_P4_168999_593   | NW_004516959.1 | Scaffold1870 | 593                     | AA                              | GG              | 1947022725               |



| SNPs IDs            | Chromosome IDs | Chromosomes  | Physical positions (bp) | CDC Frontier (Reference genome) | (ILWC46 & LPNB) | NCBI SNPdb Accession IDs |
|---------------------|----------------|--------------|-------------------------|---------------------------------|-----------------|--------------------------|
| SNP_P4_169000_634   | NW_004516959.1 | Scaffold1870 | 634                     | TT                              | AA              | 1947022727               |
| SNP_P4_169001_636   | NW_004516959.1 | Scaffold1870 | 636                     | GG                              | TT              | 1947022729               |
| SNP_P4_169002_819   | NW_004516959.1 | Scaffold1870 | 819                     | GG                              | AA              | 1947022731               |
| SNP_P4_169003_11200 | NW_004516959.1 | Scaffold1870 | 11200                   | CC                              | TT              | 1947022733               |
| SNP_P4_169004_11318 | NW_004516959.1 | Scaffold1870 | 11318                   | AA                              | CC              | 1947022735               |
| SNP_P4_169005_11326 | NW_004516959.1 | Scaffold1870 | 11326                   | AA                              | CC              | 1947022737               |
| SNP_P4_169006_11339 | NW_004516959.1 | Scaffold1870 | 11339                   | GG                              | AA              | 1947022739               |
| SNP_P4_169007_11490 | NW_004516959.1 | Scaffold1870 | 11490                   | TT                              | GG              | 1947022741               |
| SNP_P4_169008_12733 | NW_004516959.1 | Scaffold1870 | 12733                   | AA                              | CC              | 1947022743               |
| SNP_P4_169009_13715 | NW_004516959.1 | Scaffold1870 | 13715                   | TT                              | CC              | 1947022745               |
| SNP_P4_169010_13721 | NW_004516959.1 | Scaffold1870 | 13721                   | TT                              | CC              | 1947022747               |
| SNP_P4_169011_20925 | NW_004516959.1 | Scaffold1870 | 20925                   | AA                              | GG              | 1947022749               |
| SNP_P4_169012_21202 | NW_004516959.1 | Scaffold1870 | 21202                   | GG                              | TT              | 1947022751               |
| SNP_P4_169014_21240 | NW_004516959.1 | Scaffold1870 | 21240                   | AA                              | TT              | 1947022752               |
| SNP_P4_169015_21295 | NW_004516959.1 | Scaffold1870 | 21295                   | AA                              | GG              | 1947022754               |
| SNP_P4_169016_21918 | NW_004516960.1 | Scaffold1872 | 21918                   | TT                              | CC              | 1947022756               |
| SNP_P4_169017_21964 | NW_004516960.1 | Scaffold1872 | 21964                   | AA                              | GG              | 1947022758               |
| SNP_P4_169018_21966 | NW_004516960.1 | Scaffold1872 | 21966                   | GG                              | AA              | 1947022760               |
| SNP_P4_169019_21982 | NW_004516960.1 | Scaffold1872 | 21982                   | GG                              | TT              | 1947022762               |
| SNP_P4_169020_2518  | NW_004516961.1 | Scaffold1874 | 2518                    | GG                              | TT              | 1947022764               |
| SNP_P4_169021_521   | NW_004516962.1 | Scaffold1878 | 521                     | GG                              | TT              | 1947022766               |
| SNP_P4_169022_545   | NW_004516962.1 | Scaffold1878 | 545                     | CC                              | GG              | 1947022768               |
| SNP_P4_169023_4772  | NW_004516962.1 | Scaffold1878 | 4772                    | TT                              | CC              | 1947022770               |
| SNP_P4_169024_5069  | NW_004516962.1 | Scaffold1878 | 5069                    | CC                              | AA              | 1947022772               |
| SNP_P4_169025_5210  | NW_004516962.1 | Scaffold1878 | 5210                    | CC                              | TT              | 1947022774               |
| SNP_P4_169026_5886  | NW_004516962.1 | Scaffold1878 | 5886                    | TT                              | CC              | 1947022775               |
| SNP_P4_169027_6242  | NW_004516962.1 | Scaffold1878 | 6242                    | TT                              | AA              | 1947022777               |
| SNP_P4_169029_8902  | NW_004516962.1 | Scaffold1878 | 8902                    | GG                              | CC              | 1947022779               |
| SNP_P4_169030_8924  | NW_004516962.1 | Scaffold1878 | 8924                    | TT                              | CC              | 1947022781               |
| SNP_P4_169031_8994  | NW_004516962.1 | Scaffold1878 | 8994                    | TT                              | AA              | 1947022783               |
| SNP_P4_169032_10019 | NW_004516962.1 | Scaffold1878 | 10019                   | TT                              | AA              | 1947022785               |
| SNP_P4_169033_14782 | NW_004516962.1 | Scaffold1878 | 14782                   | TT                              | CC              | 1947022787               |
| SNP_P4_169034_14926 | NW_004516962.1 | Scaffold1878 | 14926                   | GG                              | TT              | 1947022789               |
| SNP_P4_169035_16587 | NW_004516962.1 | Scaffold1878 | 16587                   | CC                              | TT              | 1947022791               |
| SNP_P4_169036_17583 | NW_004516962.1 | Scaffold1878 | 17583                   | TT                              | GG              | 1947022793               |
| SNP_P4_169037_18111 | NW_004516962.1 | Scaffold1878 | 18111                   | GG                              | CC              | 1947022795               |
| SNP_P4_169038_18599 | NW_004516962.1 | Scaffold1878 | 18599                   | AA                              | GG              | 1947022796               |
| SNP_P4_169039_23087 | NW_004516962.1 | Scaffold1878 | 23087                   | GG                              | TT              | 1947022798               |
| SNP_P4_169040_23092 | NW_004516962.1 | Scaffold1878 | 23092                   | CC                              | TT              | 1947022800               |
| SNP_P4_169041_23383 | NW_004516962.1 | Scaffold1878 | 23383                   | GG                              | AA              | 1947022802               |
| SNP_P4_169042_23534 | NW_004516962.1 | Scaffold1878 | 23534                   | AA                              | GG              | 1947022804               |
| SNP_P4_169043_25774 | NW_004516962.1 | Scaffold1878 | 25774                   | AA                              | GG              | 1947022806               |

| SNPs IDs            | Chromosome IDs | Chromosomes  | Physical positions (bp) | CDC Frontier (Reference genome) | (ILWC46 & LPNB) | NCBI SNPdb Accession IDs |
|---------------------|----------------|--------------|-------------------------|---------------------------------|-----------------|--------------------------|
| SNP_P4_169045_26582 | NW_004516962.1 | Scaffold1878 | 26582                   | AA                              | GG              | 1947022808               |
| SNP_P4_169046_26758 | NW_004516962.1 | Scaffold1878 | 26758                   | GG                              | TT              | 1947022810               |
| SNP_P4_169047_27613 | NW_004516962.1 | Scaffold1878 | 27613                   | TT                              | CC              | 1947022812               |
| SNP_P4_169048_28978 | NW_004516962.1 | Scaffold1878 | 28978                   | GG                              | AA              | 1947022813               |
| SNP_P4_169049_30593 | NW_004516962.1 | Scaffold1878 | 30593                   | GG                              | AA              | 1947022815               |
| SNP_P4_169051_30821 | NW_004516962.1 | Scaffold1878 | 30821                   | CC                              | TT              | 1947022817               |
| SNP_P4_169052_32839 | NW_004516962.1 | Scaffold1878 | 32839                   | CC                              | TT              | 1947022819               |
| SNP_P4_169053_40201 | NW_004516962.1 | Scaffold1878 | 40201                   | TT                              | CC              | 1947022821               |
| SNP_P4_169054_40297 | NW_004516962.1 | Scaffold1878 | 40297                   | CC                              | TT              | 1947022823               |
| SNP_P4_169055_40520 | NW_004516962.1 | Scaffold1878 | 40520                   | TT                              | CC              | 1947022825               |
| SNP_P4_169056_40549 | NW_004516962.1 | Scaffold1878 | 40549                   | CC                              | GG              | 1947022827               |
| SNP_P4_169057_40558 | NW_004516962.1 | Scaffold1878 | 40558                   | AA                              | CC              | 1947022829               |
| SNP_P4_169058_40603 | NW_004516962.1 | Scaffold1878 | 40603                   | CC                              | TT              | 1947022831               |
| SNP_P4_169059_40607 | NW_004516962.1 | Scaffold1878 | 40607                   | GG                              | AA              | 1947022833               |
| SNP_P4_169060_40614 | NW_004516962.1 | Scaffold1878 | 40614                   | TT                              | CC              | 1947022835               |
| SNP_P4_169061_40624 | NW_004516962.1 | Scaffold1878 | 40624                   | AA                              | GG              | 1947022837               |
| SNP_P4_169062_40645 | NW_004516962.1 | Scaffold1878 | 40645                   | AA                              | GG              | 1947022839               |
| SNP_P4_169064_40677 | NW_004516962.1 | Scaffold1878 | 40677                   | GG                              | AA              | 1947022841               |
| SNP_P4_169065_40686 | NW_004516962.1 | Scaffold1878 | 40686                   | AA                              | GG              | 1947022843               |
| SNP_P4_169066_40768 | NW_004516962.1 | Scaffold1878 | 40768                   | AA                              | GG              | 1947022845               |
| SNP_P4_169068_45231 | NW_004516962.1 | Scaffold1878 | 45231                   | GG                              | AA              | 1947022847               |
| SNP_P4_169069_45380 | NW_004516962.1 | Scaffold1878 | 45380                   | AA                              | TT              | 1947022849               |
| SNP_P4_169070_51592 | NW_004516962.1 | Scaffold1878 | 51592                   | AA                              | GG              | 1947022852               |
| SNP_P4_169072_54209 | NW_004516962.1 | Scaffold1878 | 54209                   | AA                              | GG              | 1947022854               |
| SNP_P4_169073_56316 | NW_004516962.1 | Scaffold1878 | 56316                   | AA                              | TT              | 1947022857               |
| SNP_P4_169074_56617 | NW_004516962.1 | Scaffold1878 | 56617                   | GG                              | TT              | 1947022859               |
| SNP_P4_169075_56805 | NW_004516962.1 | Scaffold1878 | 56805                   | AA                              | CC              | 1947022862               |
| SNP_P4_169076_56819 | NW_004516962.1 | Scaffold1878 | 56819                   | CC                              | TT              | 1947022864               |
| SNP_P4_169077_57067 | NW_004516962.1 | Scaffold1878 | 57067                   | CC                              | GG              | 1947022867               |
| SNP_P4_169078_69347 | NW_004516962.1 | Scaffold1878 | 69347                   | GG                              | TT              | 1947022869               |
| SNP_P4_169079_70595 | NW_004516962.1 | Scaffold1878 | 70595                   | TT                              | AA              | 1947022872               |
| SNP_P4_169080_73558 | NW_004516962.1 | Scaffold1878 | 73558                   | GG                              | TT              | 1947022874               |
| SNP_P4_169081_73560 | NW_004516962.1 | Scaffold1878 | 73560                   | TT                              | CC              | 1947022877               |
| SNP_P4_169083_75389 | NW_004516962.1 | Scaffold1878 | 75389                   | AA                              | CC              | 1947022879               |
| SNP_P4_169084_75390 | NW_004516962.1 | Scaffold1878 | 75390                   | AA                              | GG              | 1947022882               |
| SNP_P4_169085_76669 | NW_004516962.1 | Scaffold1878 | 76669                   | AA                              | GG              | 1947022885               |
| SNP_P4_169086_7074  | NW_004516963.1 | Scaffold1880 | 7074                    | AA                              | CC              | 1947022887               |
| SNP_P4_169087_1398  | NW_004516965.1 | Scaffold1883 | 1398                    | AA                              | GG              | 1947022890               |
| SNP_P4_169088_19506 | NW_004516966.1 | Scaffold1884 | 19506                   | CC                              | TT              | 1947022892               |
| SNP_P4_169089_19713 | NW_004516966.1 | Scaffold1884 | 19713                   | AA                              | GG              | 1947022895               |
| SNP_P4_169090_23927 | NW_004516966.1 | Scaffold1884 | 23927                   | GG                              | AA              | 1947022897               |
| SNP_P4_169091_237   | NW_004516967.1 | Scaffold1885 | 237                     | TT                              | AA              | 1947022900               |

| SNPs IDs            | Chromosome IDs | Chromosomes  | Physical positions (bp) | CDC Frontier (Reference genome) | (ILWC46 & LPNB) | NCBI SNPdb Accession IDs |
|---------------------|----------------|--------------|-------------------------|---------------------------------|-----------------|--------------------------|
| SNP_P4_169092_430   | NW_004516967.1 | Scaffold1885 | 430                     | CC                              | TT              | 1947022902               |
| SNP_P4_169093_500   | NW_004516967.1 | Scaffold1885 | 500                     | AA                              | TT              | 1947022904               |
| SNP_P4_169094_501   | NW_004516967.1 | Scaffold1885 | 501                     | TT                              | AA              | 1947022906               |
| SNP_P4_169095_521   | NW_004516967.1 | Scaffold1885 | 521                     | TT                              | CC              | 1947022909               |
| SNP_P4_169096_538   | NW_004516967.1 | Scaffold1885 | 538                     | GG                              | TT              | 1947022911               |
| SNP_P4_169097_559   | NW_004516967.1 | Scaffold1885 | 559                     | AA                              | CC              | 1947022913               |
| SNP_P4_169098_631   | NW_004516967.1 | Scaffold1885 | 631                     | GG                              | AA              | 1947022915               |
| SNP_P4_169099_965   | NW_004516967.1 | Scaffold1885 | 965                     | TT                              | CC              | 1947022917               |
| SNP_P4_169100_1169  | NW_004516967.1 | Scaffold1885 | 1169                    | GG                              | TT              | 1947022919               |
| SNP_P4_169101_1187  | NW_004516967.1 | Scaffold1885 | 1187                    | AA                              | CC              | 1947022921               |
| SNP_P4_169102_2065  | NW_004516967.1 | Scaffold1885 | 2065                    | TT                              | AA              | 1947022923               |
| SNP_P4_169103_2067  | NW_004516967.1 | Scaffold1885 | 2067                    | GG                              | AA              | 1947022925               |
| SNP_P4_169104_2093  | NW_004516967.1 | Scaffold1885 | 2093                    | CC                              | AA              | 1947022927               |
| SNP_P4_169105_2107  | NW_004516967.1 | Scaffold1885 | 2107                    | AA                              | TT              | 1947022929               |
| SNP_P4_169106_2190  | NW_004516967.1 | Scaffold1885 | 2190                    | CC                              | AA              | 1947022931               |
| SNP_P4_169107_2267  | NW_004516967.1 | Scaffold1885 | 2267                    | CC                              | GG              | 1947022933               |
| SNP_P4_169108_2319  | NW_004516967.1 | Scaffold1885 | 2319                    | AA                              | CC              | 1947022935               |
| SNP_P4_169109_2325  | NW_004516967.1 | Scaffold1885 | 2325                    | TT                              | GG              | 1947022937               |
| SNP_P4_169110_2541  | NW_004516967.1 | Scaffold1885 | 2541                    | TT                              | CC              | 1947022939               |
| SNP_P4_169111_2555  | NW_004516967.1 | Scaffold1885 | 2555                    | AA                              | TT              | 1947022941               |
| SNP_P4_169112_2683  | NW_004516967.1 | Scaffold1885 | 2683                    | AA                              | GG              | 1947022943               |
| SNP_P4_169113_2695  | NW_004516967.1 | Scaffold1885 | 2695                    | TT                              | AA              | 1947022945               |
| SNP_P4_169114_2763  | NW_004516967.1 | Scaffold1885 | 2763                    | GG                              | TT              | 1947022947               |
| SNP_P4_169115_3086  | NW_004516967.1 | Scaffold1885 | 3086                    | CC                              | TT              | 1947022949               |
| SNP_P4_169116_5279  | NW_004516967.1 | Scaffold1885 | 5279                    | TT                              | AA              | 1947022951               |
| SNP_P4_169117_9394  | NW_004516967.1 | Scaffold1885 | 9394                    | TT                              | CC              | 1947022953               |
| SNP_P4_169118_9573  | NW_004516967.1 | Scaffold1885 | 9573                    | AA                              | GG              | 1947022955               |
| SNP_P4_169119_9981  | NW_004516967.1 | Scaffold1885 | 9981                    | AA                              | TT              | 1947022957               |
| SNP_P4_169120_10335 | NW_004516967.1 | Scaffold1885 | 10335                   | CC                              | TT              | 1947022959               |
| SNP_P4_169121_10358 | NW_004516967.1 | Scaffold1885 | 10358                   | TT                              | CC              | 1947022961               |
| SNP_P4_169122_12702 | NW_004516967.1 | Scaffold1885 | 12702                   | GG                              | AA              | 1947022963               |
| SNP_P4_169123_12764 | NW_004516967.1 | Scaffold1885 | 12764                   | TT                              | CC              | 1947022965               |
| SNP_P4_169124_13189 | NW_004516967.1 | Scaffold1885 | 13189                   | CC                              | TT              | 1947022967               |
| SNP_P4_169125_13226 | NW_004516967.1 | Scaffold1885 | 13226                   | AA                              | GG              | 1947022969               |
| SNP_P4_169126_27593 | NW_004516967.1 | Scaffold1885 | 27593                   | AA                              | GG              | 1947022971               |
| SNP_P4_169127_27643 | NW_004516967.1 | Scaffold1885 | 27643                   | GG                              | AA              | 1947022973               |
| SNP_P4_169128_27674 | NW_004516967.1 | Scaffold1885 | 27674                   | TT                              | GG              | 1947022975               |
| SNP_P4_169129_27679 | NW_004516967.1 | Scaffold1885 | 27679                   | TT                              | CC              | 1947022977               |
| SNP_P4_169130_27992 | NW_004516967.1 | Scaffold1885 | 27992                   | TT                              | GG              | 1947022979               |
| SNP_P4_169131_32351 | NW_004516967.1 | Scaffold1885 | 32351                   | GG                              | AA              | 1947022981               |
| SNP_P4_169132_39311 | NW_004516967.1 | Scaffold1885 | 39311                   | TT                              | CC              | 1947022983               |
| SNP_P4_169133_39606 | NW_004516967.1 | Scaffold1885 | 39606                   | AA                              | CC              | 1947022985               |

| SNPs IDs            | Chromosome IDs | Chromosomes  | Physical positions (bp) | CDC Frontier (Reference genome) | (ILWC46 & LPNB) | NCBI SNPdb Accession IDs |
|---------------------|----------------|--------------|-------------------------|---------------------------------|-----------------|--------------------------|
| SNP_P4_169134_39783 | NW_004516967.1 | Scaffold1885 | 39783                   | AA                              | CC              | 1947022987               |
| SNP_P4_169135_40085 | NW_004516967.1 | Scaffold1885 | 40085                   | CC                              | GG              | 1947022989               |
| SNP_P4_169136_40089 | NW_004516967.1 | Scaffold1885 | 40089                   | CC                              | TT              | 1947022991               |
| SNP_P4_169138_42432 | NW_004516967.1 | Scaffold1885 | 42432                   | AA                              | GG              | 1947022993               |
| SNP_P4_169139_42661 | NW_004516967.1 | Scaffold1885 | 42661                   | CC                              | AA              | 1947022995               |
| SNP_P4_169140_42833 | NW_004516967.1 | Scaffold1885 | 42833                   | TT                              | CC              | 1947022997               |
| SNP_P4_169141_42986 | NW_004516967.1 | Scaffold1885 | 42986                   | GG                              | AA              | 1947022999               |
| SNP_P4_169142_43818 | NW_004516967.1 | Scaffold1885 | 43818                   | AA                              | GG              | 1947023001               |
| SNP_P4_169143_43822 | NW_004516967.1 | Scaffold1885 | 43822                   | TT                              | AA              | 1947023003               |
| SNP_P4_169144_45434 | NW_004516967.1 | Scaffold1885 | 45434                   | TT                              | GG              | 1947023005               |
| SNP_P4_169145_46787 | NW_004516967.1 | Scaffold1885 | 46787                   | AA                              | TT              | 1947023007               |
| SNP_P4_169146_47090 | NW_004516967.1 | Scaffold1885 | 47090                   | TT                              | CC              | 1947023009               |
| SNP_P4_169147_47190 | NW_004516967.1 | Scaffold1885 | 47190                   | TT                              | CC              | 1947023011               |
| SNP_P4_169148_47458 | NW_004516967.1 | Scaffold1885 | 47458                   | CC                              | GG              | 1947023013               |
| SNP_P4_169151_17931 | NW_004516968.1 | Scaffold1886 | 17931                   | GG                              | AA              | 1947023015               |
| SNP_P4_169153_18289 | NW_004516968.1 | Scaffold1886 | 18289                   | CC                              | TT              | 1947023017               |
| SNP_P4_169154_19108 | NW_004516968.1 | Scaffold1886 | 19108                   | TT                              | GG              | 1947023019               |
| SNP_P4_169155_19167 | NW_004516968.1 | Scaffold1886 | 19167                   | CC                              | TT              | 1947023021               |
| SNP_P4_169158_94    | NW_004516969.1 | Scaffold1888 | 94                      | CC                              | AA              | 1947023023               |
| SNP_P4_169159_383   | NW_004516969.1 | Scaffold1888 | 383                     | TT                              | CC              | 1947023025               |
| SNP_P4_169161_533   | NW_004516969.1 | Scaffold1888 | 533                     | AA                              | CC              | 1947023027               |
| SNP_P4_169162_547   | NW_004516969.1 | Scaffold1888 | 547                     | AA                              | GG              | 1947023029               |
| SNP_P4_169163_588   | NW_004516969.1 | Scaffold1888 | 588                     | AA                              | GG              | 1947023031               |
| SNP_P4_169164_835   | NW_004516969.1 | Scaffold1888 | 835                     | AA                              | GG              | 1947023033               |
| SNP_P4_169166_101   | NW_004516972.1 | Scaffold1893 | 101                     | CC                              | TT              | 1947023035               |
| SNP_P4_169167_130   | NW_004516972.1 | Scaffold1893 | 130                     | CC                              | GG              | 1947023037               |
| SNP_P4_169168_151   | NW_004516972.1 | Scaffold1893 | 151                     | CC                              | GG              | 1947023039               |
| SNP_P4_169169_183   | NW_004516972.1 | Scaffold1893 | 183                     | CC                              | TT              | 1947023041               |
| SNP_P4_169170_506   | NW_004516972.1 | Scaffold1893 | 506                     | CC                              | TT              | 1947023043               |
| SNP_P4_169171_791   | NW_004516972.1 | Scaffold1893 | 791                     | AA                              | GG              | 1947023045               |
| SNP_P4_169172_1930  | NW_004516972.1 | Scaffold1893 | 1930                    | AA                              | GG              | 1947023047               |
| SNP_P4_169173_1976  | NW_004516972.1 | Scaffold1893 | 1976                    | CC                              | TT              | 1947023049               |
| SNP_P4_169174_2233  | NW_004516972.1 | Scaffold1893 | 2233                    | CC                              | TT              | 1947023051               |
| SNP_P4_169175_14864 | NW_004516972.1 | Scaffold1893 | 14864                   | AA                              | GG              | 1947023053               |
| SNP_P4_169176_15793 | NW_004516972.1 | Scaffold1893 | 15793                   | TT                              | GG              | 1947023055               |
| SNP_P4_169177_15796 | NW_004516972.1 | Scaffold1893 | 15796                   | TT                              | AA              | 1947023057               |
| SNP_P4_169178_15812 | NW_004516972.1 | Scaffold1893 | 15812                   | GG                              | AA              | 1947023059               |
| SNP_P4_169179_16857 | NW_004516972.1 | Scaffold1893 | 16857                   | GG                              | AA              | 1947023061               |
| SNP_P4_169180_17300 | NW_004516972.1 | Scaffold1893 | 17300                   | CC                              | TT              | 1947023063               |
| SNP_P4_169181_17354 | NW_004516972.1 | Scaffold1893 | 17354                   | AA                              | CC              | 1947023065               |
| SNP_P4_169182_17454 | NW_004516972.1 | Scaffold1893 | 17454                   | TT                              | AA              | 1947023066               |
| SNP_P4_169183_44325 | NW_004516972.1 | Scaffold1893 | 44325                   | AA                              | GG              | 1947023068               |

| SNPs IDs            | Chromosome IDs | Chromosomes  | Physical positions (bp) | CDC Frontier (Reference genome) | (ILWC46 & LPNB) | NCBI SNPdb Accession IDs |
|---------------------|----------------|--------------|-------------------------|---------------------------------|-----------------|--------------------------|
| SNP_P4_169184_55    | NW_004516973.1 | Scaffold1894 | 55                      | CC                              | GG              | 1947023070               |
| SNP_P4_169185_85    | NW_004516973.1 | Scaffold1894 | 85                      | AA                              | CC              | 1947023072               |
| SNP_P4_169186_1439  | NW_004516973.1 | Scaffold1894 | 1439                    | GG                              | CC              | 1947023074               |
| SNP_P4_169187_1530  | NW_004516973.1 | Scaffold1894 | 1530                    | AA                              | CC              | 1947023076               |
| SNP_P4_169188_1977  | NW_004516973.1 | Scaffold1894 | 1977                    | CC                              | TT              | 1947023078               |
| SNP_P4_169189_2685  | NW_004516973.1 | Scaffold1894 | 2685                    | CC                              | GG              | 1947023080               |
| SNP_P4_169190_14180 | NW_004516973.1 | Scaffold1894 | 14180                   | GG                              | AA              | 1947023082               |
| SNP_P4_169191_2242  | NW_004516974.1 | Scaffold1896 | 2242                    | AA                              | GG              | 1947023084               |
| SNP_P4_169192_6761  | NW_004516974.1 | Scaffold1896 | 6761                    | AA                              | CC              | 1947023086               |
| SNP_P4_169193_10165 | NW_004516974.1 | Scaffold1896 | 10165                   | CC                              | GG              | 1947023087               |
| SNP_P4_169194_13425 | NW_004516974.1 | Scaffold1896 | 13425                   | CC                              | AA              | 1947023089               |
| SNP_P4_169195_14281 | NW_004516974.1 | Scaffold1896 | 14281                   | AA                              | TT              | 1947023091               |
| SNP_P4_169196_14329 | NW_004516974.1 | Scaffold1896 | 14329                   | CC                              | GG              | 1947023093               |
| SNP_P4_169197_18633 | NW_004516974.1 | Scaffold1896 | 18633                   | GG                              | CC              | 1947023095               |
| SNP_P4_169198_24974 | NW_004516974.1 | Scaffold1896 | 24974                   | TT                              | AA              | 1947023097               |
| SNP_P4_169199_25018 | NW_004516974.1 | Scaffold1896 | 25018                   | GG                              | TT              | 1947023099               |
| SNP_P4_169200_2987  | NW_004516975.1 | Scaffold1897 | 2987                    | TT                              | CC              | 1947023101               |
| SNP_P4_169201_11738 | NW_004516975.1 | Scaffold1897 | 11738                   | TT                              | GG              | 1947023103               |
| SNP_P4_169202_11899 | NW_004516975.1 | Scaffold1897 | 11899                   | CC                              | TT              | 1947023104               |
| SNP_P4_169203_11915 | NW_004516975.1 | Scaffold1897 | 11915                   | CC                              | AA              | 1947023106               |
| SNP_P4_169204_11916 | NW_004516975.1 | Scaffold1897 | 11916                   | AA                              | GG              | 1947023108               |
| SNP_P4_169205_21998 | NW_004516975.1 | Scaffold1897 | 21998                   | CC                              | TT              | 1947023110               |
| SNP_P4_169206_3723  | NW_004516977.1 | Scaffold1899 | 3723                    | CC                              | TT              | 1947023112               |
| SNP_P4_169209_33568 | NW_004516977.1 | Scaffold1899 | 33568                   | AA                              | GG              | 1947023114               |
| SNP_P4_169210_33730 | NW_004516977.1 | Scaffold1899 | 33730                   | AA                              | CC              | 1947023116               |
| SNP_P4_169211_33735 | NW_004516977.1 | Scaffold1899 | 33735                   | TT                              | CC              | 1947023118               |
| SNP_P4_169212_33765 | NW_004516977.1 | Scaffold1899 | 33765                   | TT                              | GG              | 1947023120               |
| SNP_P4_169213_33816 | NW_004516977.1 | Scaffold1899 | 33816                   | TT                              | CC              | 1947023122               |
| SNP_P4_169214_34973 | NW_004516977.1 | Scaffold1899 | 34973                   | TT                              | CC              | 1947023123               |
| SNP_P4_169216_42770 | NW_004516977.1 | Scaffold1899 | 42770                   | CC                              | AA              | 1947023125               |
| SNP_P4_169217_42781 | NW_004516977.1 | Scaffold1899 | 42781                   | TT                              | CC              | 1947023127               |
| SNP_P4_169218_64    | NW_004516981.1 | Scaffold1903 | 64                      | AA                              | GG              | 1947023129               |
| SNP_P4_169219_116   | NW_004516981.1 | Scaffold1903 | 116                     | GG                              | TT              | 1947023131               |
| SNP_P4_169220_128   | NW_004516981.1 | Scaffold1903 | 128                     | GG                              | CC              | 1947023133               |
| SNP_P4_169221_1739  | NW_004516981.1 | Scaffold1903 | 1739                    | GG                              | AA              | 1947023135               |
| SNP_P4_169222_2071  | NW_004516981.1 | Scaffold1903 | 2071                    | GG                              | CC              | 1947023137               |
| SNP_P4_169223_2091  | NW_004516981.1 | Scaffold1903 | 2091                    | AA                              | GG              | 1947023139               |
| SNP_P4_169224_2188  | NW_004516981.1 | Scaffold1903 | 2188                    | AA                              | GG              | 1947023141               |
| SNP_P4_169225_2206  | NW_004516981.1 | Scaffold1903 | 2206                    | AA                              | TT              | 1947023143               |
| SNP_P4_169226_2221  | NW_004516981.1 | Scaffold1903 | 2221                    | GG                              | AA              | 1947023145               |
| SNP_P4_169227_2222  | NW_004516981.1 | Scaffold1903 | 2222                    | GG                              | AA              | 1947023147               |
| SNP_P4_169228_2252  | NW_004516981.1 | Scaffold1903 | 2252                    | TT                              | AA              | 1947023149               |

| SNPs IDs            | Chromosome IDs | Chromosomes  | Physical positions (bp) | CDC Frontier (Reference genome) | (ILWC46 & LPNB) | NCBI SNPdb Accession IDs |
|---------------------|----------------|--------------|-------------------------|---------------------------------|-----------------|--------------------------|
| SNP_P4_169229_835   | NW_004516982.1 | Scaffold1904 | 835                     | TT                              | CC              | 1947023151               |
| SNP_P4_169230_1107  | NW_004516982.1 | Scaffold1904 | 1107                    | TT                              | CC              | 1947023153               |
| SNP_P4_169231_1134  | NW_004516982.1 | Scaffold1904 | 1134                    | CC                              | TT              | 1947023155               |
| SNP_P4_169232_1149  | NW_004516982.1 | Scaffold1904 | 1149                    | AA                              | TT              | 1947023156               |
| SNP_P4_169233_1173  | NW_004516982.1 | Scaffold1904 | 1173                    | AA                              | GG              | 1947023158               |
| SNP_P4_169234_1215  | NW_004516982.1 | Scaffold1904 | 1215                    | AA                              | TT              | 1947023160               |
| SNP_P4_169235_1227  | NW_004516982.1 | Scaffold1904 | 1227                    | AA                              | TT              | 1947023162               |
| SNP_P4_169236_1273  | NW_004516982.1 | Scaffold1904 | 1273                    | TT                              | AA              | 1947023164               |
| SNP_P4_169237_1284  | NW_004516982.1 | Scaffold1904 | 1284                    | CC                              | TT              | 1947023166               |
| SNP_P4_169238_1335  | NW_004516982.1 | Scaffold1904 | 1335                    | AA                              | GG              | 1947023168               |
| SNP_P4_169239_1487  | NW_004516982.1 | Scaffold1904 | 1487                    | CC                              | GG              | 1947023170               |
| SNP_P4_169240_1527  | NW_004516982.1 | Scaffold1904 | 1527                    | GG                              | AA              | 1947023172               |
| SNP_P4_169241_1575  | NW_004516982.1 | Scaffold1904 | 1575                    | TT                              | CC              | 1947023174               |
| SNP_P4_169242_1581  | NW_004516982.1 | Scaffold1904 | 1581                    | TT                              | GG              | 1947023176               |
| SNP_P4_169243_1611  | NW_004516982.1 | Scaffold1904 | 1611                    | CC                              | GG              | 1947023177               |
| SNP_P4_169244_6627  | NW_004516982.1 | Scaffold1904 | 6627                    | CC                              | GG              | 1947023179               |
| SNP_P4_169245_338   | NW_004516983.1 | Scaffold1905 | 338                     | AA                              | GG              | 1947023181               |
| SNP_P4_169246_596   | NW_004516983.1 | Scaffold1905 | 596                     | TT                              | CC              | 1947023183               |
| SNP_P4_169247_634   | NW_004516983.1 | Scaffold1905 | 634                     | AA                              | TT              | 1947023185               |
| SNP_P4_169248_1580  | NW_004516983.1 | Scaffold1905 | 1580                    | GG                              | AA              | 1947023187               |
| SNP_P4_169249_1591  | NW_004516983.1 | Scaffold1905 | 1591                    | TT                              | GG              | 1947023189               |
| SNP_P4_169251_1731  | NW_004516983.1 | Scaffold1905 | 1731                    | GG                              | AA              | 1947023191               |
| SNP_P4_169252_1763  | NW_004516983.1 | Scaffold1905 | 1763                    | CC                              | GG              | 1947023193               |
| SNP_P4_169253_1803  | NW_004516983.1 | Scaffold1905 | 1803                    | CC                              | TT              | 1947023195               |
| SNP_P4_169254_1889  | NW_004516983.1 | Scaffold1905 | 1889                    | GG                              | AA              | 1947023197               |
| SNP_P4_169255_1988  | NW_004516983.1 | Scaffold1905 | 1988                    | TT                              | GG              | 1947023199               |
| SNP_P4_169256_2077  | NW_004516983.1 | Scaffold1905 | 2077                    | TT                              | AA              | 1947023201               |
| SNP_P4_169257_2090  | NW_004516983.1 | Scaffold1905 | 2090                    | TT                              | GG              | 1947023202               |
| SNP_P4_169258_2103  | NW_004516983.1 | Scaffold1905 | 2103                    | GG                              | AA              | 1947023204               |
| SNP_P4_169259_2125  | NW_004516983.1 | Scaffold1905 | 2125                    | AA                              | TT              | 1947023206               |
| SNP_P4_169260_2134  | NW_004516983.1 | Scaffold1905 | 2134                    | TT                              | CC              | 1947023208               |
| SNP_P4_169261_2217  | NW_004516983.1 | Scaffold1905 | 2217                    | TT                              | AA              | 1947023210               |
| SNP_P4_169262_16317 | NW_004516983.1 | Scaffold1905 | 16317                   | AA                              | CC              | 1947023212               |
| SNP_P4_169263_16504 | NW_004516983.1 | Scaffold1905 | 16504                   | TT                              | GG              | 1947023214               |
| SNP_P4_169264_16560 | NW_004516983.1 | Scaffold1905 | 16560                   | TT                              | CC              | 1947023216               |
| SNP_P4_169266_16756 | NW_004516983.1 | Scaffold1905 | 16756                   | AA                              | CC              | 1947023218               |
| SNP_P4_169267_16816 | NW_004516983.1 | Scaffold1905 | 16816                   | TT                              | AA              | 1947023220               |
| SNP_P4_169268_16880 | NW_004516983.1 | Scaffold1905 | 16880                   | AA                              | GG              | 1947023221               |
| SNP_P4_169269_16886 | NW_004516983.1 | Scaffold1905 | 16886                   | TT                              | CC              | 1947023223               |
| SNP_P4_169270_16927 | NW_004516983.1 | Scaffold1905 | 16927                   | TT                              | CC              | 1947023225               |
| SNP_P4_169271_16946 | NW_004516983.1 | Scaffold1905 | 16946                   | TT                              | CC              | 1947023227               |
| SNP_P4_169272_16966 | NW_004516983.1 | Scaffold1905 | 16966                   | CC                              | AA              | 1947023229               |

| SNPs IDs            | Chromosome IDs | Chromosomes  | Physical positions (bp) | CDC Frontier (Reference genome) | (ILWC46 & LPNB) | NCBI SNPdb Accession IDs |
|---------------------|----------------|--------------|-------------------------|---------------------------------|-----------------|--------------------------|
| SNP_P4_169273_17006 | NW_004516983.1 | Scaffold1905 | 17006                   | AA                              | CC              | 1947023231               |
| SNP_P4_169274_17011 | NW_004516983.1 | Scaffold1905 | 17011                   | GG                              | AA              | 1947023233               |
| SNP_P4_169276_31193 | NW_004516983.1 | Scaffold1905 | 31193                   | CC                              | TT              | 1947023235               |
| SNP_P4_169277_31672 | NW_004516983.1 | Scaffold1905 | 31672                   | GG                              | AA              | 1947023237               |
| SNP_P4_169278_31971 | NW_004516983.1 | Scaffold1905 | 31971                   | TT                              | GG              | 1947023239               |
| SNP_P4_169279_32057 | NW_004516983.1 | Scaffold1905 | 32057                   | CC                              | GG              | 1947023241               |
| SNP_P4_169280_32295 | NW_004516983.1 | Scaffold1905 | 32295                   | GG                              | CC              | 1947023242               |
| SNP_P4_169281_32404 | NW_004516983.1 | Scaffold1905 | 32404                   | GG                              | AA              | 1947023244               |
| SNP_P4_169282_1760  | NW_004516984.1 | Scaffold1907 | 1760                    | CC                              | TT              | 1947023246               |
| SNP_P4_169283_13439 | NW_004516984.1 | Scaffold1907 | 13439                   | TT                              | GG              | 1947023248               |
| SNP_P4_169284_18664 | NW_004516984.1 | Scaffold1907 | 18664                   | CC                              | TT              | 1947023250               |
| SNP_P4_169285_18778 | NW_004516984.1 | Scaffold1907 | 18778                   | GG                              | CC              | 1947023252               |
| SNP_P4_169286_23722 | NW_004516984.1 | Scaffold1907 | 23722                   | TT                              | GG              | 1947023254               |
| SNP_P4_169287_23733 | NW_004516984.1 | Scaffold1907 | 23733                   | TT                              | GG              | 1947023256               |
| SNP_P4_169288_24075 | NW_004516984.1 | Scaffold1907 | 24075                   | TT                              | GG              | 1947023257               |
| SNP_P4_169289_24140 | NW_004516984.1 | Scaffold1907 | 24140                   | AA                              | CC              | 1947023259               |
| SNP_P4_169290_24142 | NW_004516984.1 | Scaffold1907 | 24142                   | TT                              | AA              | 1947023261               |
| SNP_P4_169291_37524 | NW_004516984.1 | Scaffold1907 | 37524                   | AA                              | TT              | 1947023263               |
| SNP_P4_169292_61664 | NW_004516984.1 | Scaffold1907 | 61664                   | AA                              | TT              | 1947023265               |
| SNP_P4_169293_61757 | NW_004516984.1 | Scaffold1907 | 61757                   | AA                              | GG              | 1947023267               |
| SNP_P4_169294_62076 | NW_004516984.1 | Scaffold1907 | 62076                   | GG                              | AA              | 1947023269               |
| SNP_P4_169296_62877 | NW_004516984.1 | Scaffold1907 | 62877                   | AA                              | GG              | 1947023271               |
| SNP_P4_169297_62925 | NW_004516984.1 | Scaffold1907 | 62925                   | GG                              | TT              | 1947023273               |
| SNP_P4_169298_63168 | NW_004516984.1 | Scaffold1907 | 63168                   | GG                              | AA              | 1947023275               |
| SNP_P4_169299_63180 | NW_004516984.1 | Scaffold1907 | 63180                   | AA                              | GG              | 1947023277               |
| SNP_P4_169300_63214 | NW_004516984.1 | Scaffold1907 | 63214                   | CC                              | AA              | 1947023279               |
| SNP_P4_169301_64821 | NW_004516984.1 | Scaffold1907 | 64821                   | TT                              | CC              | 1947023281               |
| SNP_P4_169302_72030 | NW_004516984.1 | Scaffold1907 | 72030                   | TT                              | GG              | 1947023283               |
| SNP_P4_169303_72042 | NW_004516984.1 | Scaffold1907 | 72042                   | TT                              | CC              | 1947023285               |
| SNP_P4_169304_72043 | NW_004516984.1 | Scaffold1907 | 72043                   | AA                              | GG              | 1947023287               |
| SNP_P4_169305_264   | NW_004516987.1 | Scaffold1910 | 264                     | GG                              | AA              | 1947023289               |
| SNP_P4_169306_303   | NW_004516987.1 | Scaffold1910 | 303                     | AA                              | GG              | 1947023291               |
| SNP_P4_169307_306   | NW_004516987.1 | Scaffold1910 | 306                     | CC                              | TT              | 1947023293               |
| SNP_P4_169308_1091  | NW_004516987.1 | Scaffold1910 | 1091                    | AA                              | GG              | 1947023295               |
| SNP_P4_169309_6532  | NW_004516987.1 | Scaffold1910 | 6532                    | TT                              | GG              | 1947023296               |
| SNP_P4_169310_6552  | NW_004516987.1 | Scaffold1910 | 6552                    | AA                              | GG              | 1947023298               |
| SNP_P4_169311_6555  | NW_004516987.1 | Scaffold1910 | 6555                    | CC                              | GG              | 1947023300               |
| SNP_P4_169312_6563  | NW_004516987.1 | Scaffold1910 | 6563                    | TT                              | AA              | 1947023302               |
| SNP_P4_169313_6594  | NW_004516987.1 | Scaffold1910 | 6594                    | AA                              | TT              | 1947023304               |
| SNP_P4_169314_6604  | NW_004516987.1 | Scaffold1910 | 6604                    | GG                              | CC              | 1947023306               |
| SNP_P4_169315_6607  | NW_004516987.1 | Scaffold1910 | 6607                    | AA                              | TT              | 1947023308               |
| SNP_P4_169316_6612  | NW_004516987.1 | Scaffold1910 | 6612                    | GG                              | AA              | 1947023310               |

| SNPs IDs            | Chromosome IDs | Chromosomes  | Physical positions (bp) | CDC Frontier (Reference genome) | (ILWC46 & LPNB) | NCBI SNPdb Accession IDs |
|---------------------|----------------|--------------|-------------------------|---------------------------------|-----------------|--------------------------|
| SNP_P4_169317_6619  | NW_004516987.1 | Scaffold1910 | 6619                    | CC                              | TT              | 1947023312               |
| SNP_P4_169318_6620  | NW_004516987.1 | Scaffold1910 | 6620                    | CC                              | TT              | 1947023314               |
| SNP_P4_169319_6621  | NW_004516987.1 | Scaffold1910 | 6621                    | AA                              | TT              | 1947023316               |
| SNP_P4_169320_6622  | NW_004516987.1 | Scaffold1910 | 6622                    | TT                              | GG              | 1947023318               |
| SNP_P4_169321_6680  | NW_004516987.1 | Scaffold1910 | 6680                    | GG                              | CC              | 1947023320               |
| SNP_P4_169322_6681  | NW_004516987.1 | Scaffold1910 | 6681                    | AA                              | TT              | 1947023322               |
| SNP_P4_169323_6686  | NW_004516987.1 | Scaffold1910 | 6686                    | CC                              | TT              | 1947023324               |
| SNP_P4_169324_6688  | NW_004516987.1 | Scaffold1910 | 6688                    | TT                              | AA              | 1947023325               |
| SNP_P4_169325_6712  | NW_004516987.1 | Scaffold1910 | 6712                    | GG                              | AA              | 1947023327               |
| SNP_P4_169326_6781  | NW_004516987.1 | Scaffold1910 | 6781                    | GG                              | TT              | 1947023329               |
| SNP_P4_169327_6852  | NW_004516987.1 | Scaffold1910 | 6852                    | CC                              | TT              | 1947023331               |
| SNP_P4_169328_6935  | NW_004516987.1 | Scaffold1910 | 6935                    | GG                              | CC              | 1947023333               |
| SNP_P4_169329_6998  | NW_004516987.1 | Scaffold1910 | 6998                    | AA                              | TT              | 1947023335               |
| SNP_P4_169330_7009  | NW_004516987.1 | Scaffold1910 | 7009                    | TT                              | GG              | 1947023337               |
| SNP_P4_169331_7010  | NW_004516987.1 | Scaffold1910 | 7010                    | GG                              | CC              | 1947023339               |
| SNP_P4_169332_7050  | NW_004516987.1 | Scaffold1910 | 7050                    | CC                              | TT              | 1947023341               |
| SNP_P4_169333_7058  | NW_004516987.1 | Scaffold1910 | 7058                    | CC                              | TT              | 1947023343               |
| SNP_P4_169334_7081  | NW_004516987.1 | Scaffold1910 | 7081                    | AA                              | GG              | 1947023345               |
| SNP_P4_169335_7105  | NW_004516987.1 | Scaffold1910 | 7105                    | TT                              | CC              | 1947023347               |
| SNP_P4_169336_7142  | NW_004516987.1 | Scaffold1910 | 7142                    | CC                              | GG              | 1947023349               |
| SNP_P4_169337_7597  | NW_004516987.1 | Scaffold1910 | 7597                    | CC                              | TT              | 1947023351               |
| SNP_P4_169338_8242  | NW_004516987.1 | Scaffold1910 | 8242                    | AA                              | TT              | 1947023353               |
| SNP_P4_169339_13477 | NW_004516987.1 | Scaffold1910 | 13477                   | GG                              | AA              | 1947023355               |
| SNP_P4_169340_13528 | NW_004516987.1 | Scaffold1910 | 13528                   | TT                              | CC              | 1947023357               |
| SNP_P4_169341_13549 | NW_004516987.1 | Scaffold1910 | 13549                   | AA                              | TT              | 1947023359               |
| SNP_P4_169342_13695 | NW_004516987.1 | Scaffold1910 | 13695                   | GG                              | AA              | 1947023361               |
| SNP_P4_169343_13921 | NW_004516987.1 | Scaffold1910 | 13921                   | GG                              | AA              | 1947023363               |
| SNP_P4_169345_13957 | NW_004516987.1 | Scaffold1910 | 13957                   | AA                              | CC              | 1947023365               |
| SNP_P4_169346_17722 | NW_004516987.1 | Scaffold1910 | 17722                   | GG                              | AA              | 1947023367               |
| SNP_P4_169347_17795 | NW_004516987.1 | Scaffold1910 | 17795                   | TT                              | CC              | 1947023369               |
| SNP_P4_169348_18126 | NW_004516987.1 | Scaffold1910 | 18126                   | AA                              | GG              | 1947023371               |
| SNP_P4_169349_18151 | NW_004516987.1 | Scaffold1910 | 18151                   | GG                              | CC              | 1947023373               |
| SNP_P4_169350_18229 | NW_004516987.1 | Scaffold1910 | 18229                   | TT                              | GG              | 1947023375               |
| SNP_P4_169351_23293 | NW_004516987.1 | Scaffold1910 | 23293                   | AA                              | CC              | 1947023377               |
| SNP_P4_169352_24926 | NW_004516987.1 | Scaffold1910 | 24926                   | AA                              | TT              | 1947023379               |
| SNP_P4_169353_24945 | NW_004516987.1 | Scaffold1910 | 24945                   | GG                              | TT              | 1947023381               |
| SNP_P4_169354_26606 | NW_004516987.1 | Scaffold1910 | 26606                   | AA                              | TT              | 1947023383               |
| SNP_P4_169355_30228 | NW_004516987.1 | Scaffold1910 | 30228                   | CC                              | GG              | 1947023385               |
| SNP_P4_169356_36679 | NW_004516987.1 | Scaffold1910 | 36679                   | GG                              | TT              | 1947023387               |
| SNP_P4_169357_36680 | NW_004516987.1 | Scaffold1910 | 36680                   | TT                              | CC              | 1947023389               |
| SNP_P4_169358_36710 | NW_004516987.1 | Scaffold1910 | 36710                   | CC                              | TT              | 1947023391               |
| SNP_P4_169359_36746 | NW_004516987.1 | Scaffold1910 | 36746                   | GG                              | AA              | 1947023393               |



| SNPs IDs            | Chromosome IDs | Chromosomes  | Physical positions (bp) | CDC Frontier (Reference genome) | (ILWC46 & LPNB) | NCBI SNPdb Accession IDs |
|---------------------|----------------|--------------|-------------------------|---------------------------------|-----------------|--------------------------|
| SNP_P4_169360_36788 | NW_004516987.1 | Scaffold1910 | 36788                   | TT                              | CC              | 1947023395               |
| SNP_P4_169361_36797 | NW_004516987.1 | Scaffold1910 | 36797                   | GG                              | AA              | 1947023397               |
| SNP_P4_169362_36815 | NW_004516987.1 | Scaffold1910 | 36815                   | TT                              | CC              | 1947023399               |
| SNP_P4_169363_37038 | NW_004516987.1 | Scaffold1910 | 37038                   | GG                              | CC              | 1947023401               |
| SNP_P4_169364_37079 | NW_004516987.1 | Scaffold1910 | 37079                   | TT                              | CC              | 1947023403               |
| SNP_P4_169365_37089 | NW_004516987.1 | Scaffold1910 | 37089                   | AA                              | GG              | 1947023405               |
| SNP_P4_169366_37111 | NW_004516987.1 | Scaffold1910 | 37111                   | AA                              | CC              | 1947023407               |
| SNP_P4_169367_37137 | NW_004516987.1 | Scaffold1910 | 37137                   | TT                              | CC              | 1947023409               |
| SNP_P4_169368_37170 | NW_004516987.1 | Scaffold1910 | 37170                   | GG                              | TT              | 1947023411               |
| SNP_P4_169369_37173 | NW_004516987.1 | Scaffold1910 | 37173                   | TT                              | CC              | 1947023413               |
| SNP_P4_169370_37182 | NW_004516987.1 | Scaffold1910 | 37182                   | GG                              | AA              | 1947023415               |
| SNP_P4_169371_37185 | NW_004516987.1 | Scaffold1910 | 37185                   | GG                              | AA              | 1947023417               |
| SNP_P4_169372_38991 | NW_004516987.1 | Scaffold1910 | 38991                   | TT                              | AA              | 1947023419               |
| SNP_P4_169373_39163 | NW_004516987.1 | Scaffold1910 | 39163                   | AA                              | TT              | 1947023421               |
| SNP_P4_169374_46545 | NW_004516987.1 | Scaffold1910 | 46545                   | CC                              | TT              | 1947023423               |
| SNP_P4_169375_46547 | NW_004516987.1 | Scaffold1910 | 46547                   | CC                              | GG              | 1947023425               |
| SNP_P4_169376_46549 | NW_004516987.1 | Scaffold1910 | 46549                   | TT                              | AA              | 1947023427               |
| SNP_P4_169377_46565 | NW_004516987.1 | Scaffold1910 | 46565                   | AA                              | CC              | 1947023429               |
| SNP_P4_169378_46886 | NW_004516987.1 | Scaffold1910 | 46886                   | TT                              | AA              | 1947023431               |
| SNP_P4_169379_1976  | NW_004516988.1 | Scaffold1911 | 1976                    | TT                              | AA              | 1947023433               |
| SNP_P4_169380_1977  | NW_004516988.1 | Scaffold1911 | 1977                    | AA                              | TT              | 1947023435               |
| SNP_P4_169381_2708  | NW_004516988.1 | Scaffold1911 | 2708                    | CC                              | AA              | 1947023437               |
| SNP_P4_169382_2726  | NW_004516988.1 | Scaffold1911 | 2726                    | AA                              | TT              | 1947023439               |
| SNP_P4_169383_2743  | NW_004516988.1 | Scaffold1911 | 2743                    | AA                              | TT              | 1947023441               |
| SNP_P4_169384_2815  | NW_004516988.1 | Scaffold1911 | 2815                    | TT                              | AA              | 1947023443               |
| SNP_P4_169385_2843  | NW_004516988.1 | Scaffold1911 | 2843                    | GG                              | TT              | 1947023445               |
| SNP_P4_169386_2905  | NW_004516988.1 | Scaffold1911 | 2905                    | TT                              | GG              | 1947023447               |
| SNP_P4_169387_2943  | NW_004516988.1 | Scaffold1911 | 2943                    | CC                              | AA              | 1947023449               |
| SNP_P4_169388_3010  | NW_004516988.1 | Scaffold1911 | 3010                    | TT                              | CC              | 1947023451               |
| SNP_P4_169389_3017  | NW_004516988.1 | Scaffold1911 | 3017                    | CC                              | TT              | 1947023453               |
| SNP_P4_169390_3146  | NW_004516988.1 | Scaffold1911 | 3146                    | TT                              | CC              | 1947023455               |
| SNP_P4_169391_3210  | NW_004516988.1 | Scaffold1911 | 3210                    | GG                              | CC              | 1947023457               |
| SNP_P4_169392_3275  | NW_004516988.1 | Scaffold1911 | 3275                    | CC                              | TT              | 1947023459               |
| SNP_P4_169393_4299  | NW_004516988.1 | Scaffold1911 | 4299                    | CC                              | AA              | 1947023462               |
| SNP_P4_169394_12254 | NW_004516988.1 | Scaffold1911 | 12254                   | GG                              | AA              | 1947023464               |
| SNP_P4_169395_12266 | NW_004516988.1 | Scaffold1911 | 12266                   | CC                              | TT              | 1947023466               |
| SNP_P4_169396_12329 | NW_004516988.1 | Scaffold1911 | 12329                   | GG                              | AA              | 1947023468               |
| SNP_P4_169397_12368 | NW_004516988.1 | Scaffold1911 | 12368                   | TT                              | AA              | 1947023470               |
| SNP_P4_169398_12650 | NW_004516988.1 | Scaffold1911 | 12650                   | AA                              | TT              | 1947023472               |
| SNP_P4_169399_12755 | NW_004516988.1 | Scaffold1911 | 12755                   | TT                              | CC              | 1947023474               |
| SNP_P4_169400_13202 | NW_004516988.1 | Scaffold1911 | 13202                   | GG                              | AA              | 1947023476               |
| SNP_P4_169401_13218 | NW_004516988.1 | Scaffold1911 | 13218                   | AA                              | GG              | 1947023478               |

| SNPs IDs            | Chromosome IDs | Chromosomes  | Physical positions (bp) | CDC Frontier (Reference genome) | (ILWC46 & LPNB) | NCBI SNPdb Accession IDs |
|---------------------|----------------|--------------|-------------------------|---------------------------------|-----------------|--------------------------|
| SNP_P4_169402_13224 | NW_004516988.1 | Scaffold1911 | 13224                   | AA                              | GG              | 1947023480               |
| SNP_P4_169403_13256 | NW_004516988.1 | Scaffold1911 | 13256                   | AA                              | GG              | 1947023482               |
| SNP_P4_169404_13322 | NW_004516988.1 | Scaffold1911 | 13322                   | TT                              | CC              | 1947023484               |
| SNP_P4_169405_14634 | NW_004516988.1 | Scaffold1911 | 14634                   | TT                              | GG              | 1947023486               |
| SNP_P4_169406_14643 | NW_004516988.1 | Scaffold1911 | 14643                   | CC                              | TT              | 1947023488               |
| SNP_P4_169407_14792 | NW_004516988.1 | Scaffold1911 | 14792                   | TT                              | AA              | 1947023490               |
| SNP_P4_169408_14941 | NW_004516988.1 | Scaffold1911 | 14941                   | AA                              | CC              | 1947023492               |
| SNP_P4_169409_14995 | NW_004516988.1 | Scaffold1911 | 14995                   | AA                              | TT              | 1947023494               |
| SNP_P4_169410_15142 | NW_004516988.1 | Scaffold1911 | 15142                   | TT                              | AA              | 1947023496               |
| SNP_P4_169411_15193 | NW_004516988.1 | Scaffold1911 | 15193                   | GG                              | AA              | 1947023498               |
| SNP_P4_169412_15252 | NW_004516988.1 | Scaffold1911 | 15252                   | AA                              | GG              | 1947023500               |
| SNP_P4_169413_16689 | NW_004516988.1 | Scaffold1911 | 16689                   | TT                              | CC              | 1947023502               |
| SNP_P4_169414_16781 | NW_004516988.1 | Scaffold1911 | 16781                   | TT                              | CC              | 1947023504               |
| SNP_P4_169415_16842 | NW_004516988.1 | Scaffold1911 | 16842                   | GG                              | TT              | 1947023506               |
| SNP_P4_169416_16954 | NW_004516988.1 | Scaffold1911 | 16954                   | AA                              | TT              | 1947023508               |
| SNP_P4_169417_16955 | NW_004516988.1 | Scaffold1911 | 16955                   | GG                              | AA              | 1947023510               |
| SNP_P4_169418_16958 | NW_004516988.1 | Scaffold1911 | 16958                   | AA                              | TT              | 1947023512               |
| SNP_P4_169419_16959 | NW_004516988.1 | Scaffold1911 | 16959                   | TT                              | CC              | 1947023514               |
| SNP_P4_169420_17143 | NW_004516988.1 | Scaffold1911 | 17143                   | AA                              | CC              | 1947023516               |
| SNP_P4_169422_17218 | NW_004516988.1 | Scaffold1911 | 17218                   | AA                              | TT              | 1947023518               |
| SNP_P4_169423_17224 | NW_004516988.1 | Scaffold1911 | 17224                   | AA                              | GG              | 1947023520               |
| SNP_P4_169424_17305 | NW_004516988.1 | Scaffold1911 | 17305                   | GG                              | AA              | 1947023522               |
| SNP_P4_169425_2453  | NW_004516989.1 | Scaffold1912 | 2453                    | CC                              | TT              | 1947023525               |
| SNP_P4_169426_5702  | NW_004516989.1 | Scaffold1912 | 5702                    | CC                              | TT              | 1947023527               |
| SNP_P4_169427_5743  | NW_004516989.1 | Scaffold1912 | 5743                    | TT                              | GG              | 1947023529               |
| SNP_P4_169428_5779  | NW_004516989.1 | Scaffold1912 | 5779                    | TT                              | AA              | 1947023531               |
| SNP_P4_169429_5908  | NW_004516989.1 | Scaffold1912 | 5908                    | CC                              | GG              | 1947023533               |
| SNP_P4_169430_8024  | NW_004516989.1 | Scaffold1912 | 8024                    | AA                              | GG              | 1947023535               |
| SNP_P4_169431_8200  | NW_004516989.1 | Scaffold1912 | 8200                    | AA                              | CC              | 1947023537               |
| SNP_P4_169432_8413  | NW_004516989.1 | Scaffold1912 | 8413                    | AA                              | CC              | 1947023539               |
| SNP_P4_169433_15624 | NW_004516989.1 | Scaffold1912 | 15624                   | CC                              | AA              | 1947023541               |
| SNP_P4_169434_16228 | NW_004516989.1 | Scaffold1912 | 16228                   | TT                              | AA              | 1947023544               |
| SNP_P4_169435_16248 | NW_004516989.1 | Scaffold1912 | 16248                   | TT                              | AA              | 1947023546               |
| SNP_P4_169436_16266 | NW_004516989.1 | Scaffold1912 | 16266                   | GG                              | AA              | 1947023548               |
| SNP_P4_169437_16333 | NW_004516989.1 | Scaffold1912 | 16333                   | AA                              | GG              | 1947023550               |
| SNP_P4_169438_16482 | NW_004516989.1 | Scaffold1912 | 16482                   | TT                              | AA              | 1947023552               |
| SNP_P4_169439_4940  | NW_004516990.1 | Scaffold1913 | 4940                    | GG                              | AA              | 1947023554               |
| SNP_P4_169440_59752 | NW_004516994.1 | Scaffold1918 | 59752                   | CC                              | TT              | 1947023556               |
| SNP_P4_169441_59885 | NW_004516994.1 | Scaffold1918 | 59885                   | GG                              | AA              | 1947023558               |
| SNP_P4_169442_60735 | NW_004516994.1 | Scaffold1918 | 60735                   | GG                              | AA              | 1947023560               |
| SNP_P4_169443_93789 | NW_004516994.1 | Scaffold1918 | 93789                   | AA                              | GG              | 1947023562               |
| SNP_P4_169444_93818 | NW_004516994.1 | Scaffold1918 | 93818                   | TT                              | GG              | 1947023564               |

| SNPs IDs             | Chromosome IDs | Chromosomes  | Physical positions (bp) | CDC Frontier (Reference genome) | (ILWC46 & LPNB) | NCBI SNPdb Accession IDs |
|----------------------|----------------|--------------|-------------------------|---------------------------------|-----------------|--------------------------|
| SNP_P4_169445_94072  | NW_004516994.1 | Scaffold1918 | 94072                   | TT                              | CC              | 1947023566               |
| SNP_P4_169446_94157  | NW_004516994.1 | Scaffold1918 | 94157                   | AA                              | GG              | 1947023569               |
| SNP_P4_169447_94203  | NW_004516994.1 | Scaffold1918 | 94203                   | AA                              | GG              | 1947023571               |
| SNP_P4_169448_96755  | NW_004516994.1 | Scaffold1918 | 96755                   | TT                              | CC              | 1947023573               |
| SNP_P4_169449_102785 | NW_004516994.1 | Scaffold1918 | 102785                  | CC                              | TT              | 1947023575               |
| SNP_P4_169450_115813 | NW_004516994.1 | Scaffold1918 | 115813                  | AA                              | GG              | 1947023577               |
| SNP_P4_169451_115844 | NW_004516994.1 | Scaffold1918 | 115844                  | AA                              | GG              | 1947023579               |
| SNP_P4_169452_116102 | NW_004516994.1 | Scaffold1918 | 116102                  | AA                              | GG              | 1947023581               |
| SNP_P4_169453_123277 | NW_004516994.1 | Scaffold1918 | 123277                  | GG                              | AA              | 1947023583               |
| SNP_P4_169454_123382 | NW_004516994.1 | Scaffold1918 | 123382                  | GG                              | AA              | 1947023585               |
| SNP_P4_169455_126159 | NW_004516994.1 | Scaffold1918 | 126159                  | TT                              | CC              | 1947023587               |
| SNP_P4_169456_172302 | NW_004516994.1 | Scaffold1918 | 172302                  | CC                              | TT              | 1947023589               |
| SNP_P4_169457_172317 | NW_004516994.1 | Scaffold1918 | 172317                  | CC                              | TT              | 1947023591               |
| SNP_P4_169458_172995 | NW_004516994.1 | Scaffold1918 | 172995                  | AA                              | GG              | 1947023593               |
| SNP_P4_169459_173058 | NW_004516994.1 | Scaffold1918 | 173058                  | CC                              | GG              | 1947023595               |
| SNP_P4_169460_173293 | NW_004516994.1 | Scaffold1918 | 173293                  | TT                              | GG              | 1947023598               |
| SNP_P4_169461_176770 | NW_004516994.1 | Scaffold1918 | 176770                  | CC                              | AA              | 1947023600               |
| SNP_P4_169462_176841 | NW_004516994.1 | Scaffold1918 | 176841                  | TT                              | GG              | 1947023602               |
| SNP_P4_169463_185943 | NW_004516994.1 | Scaffold1918 | 185943                  | TT                              | AA              | 1947023604               |
| SNP_P4_169464_185947 | NW_004516994.1 | Scaffold1918 | 185947                  | TT                              | AA              | 1947023606               |
| SNP_P4_169465_205667 | NW_004516994.1 | Scaffold1918 | 205667                  | GG                              | AA              | 1947023608               |
| SNP_P4_169466_205702 | NW_004516994.1 | Scaffold1918 | 205702                  | GG                              | AA              | 1947023610               |
| SNP_P4_169467_205722 | NW_004516994.1 | Scaffold1918 | 205722                  | CC                              | TT              | 1947023612               |
| SNP_P4_169469_213693 | NW_004516994.1 | Scaffold1918 | 213693                  | TT                              | CC              | 1947023614               |
| SNP_P4_169470_213722 | NW_004516994.1 | Scaffold1918 | 213722                  | TT                              | GG              | 1947023617               |
| SNP_P4_169471_220968 | NW_004516994.1 | Scaffold1918 | 220968                  | AA                              | GG              | 1947023619               |
| SNP_P4_169472_235199 | NW_004516994.1 | Scaffold1918 | 235199                  | TT                              | GG              | 1947023621               |
| SNP_P4_169473_235556 | NW_004516994.1 | Scaffold1918 | 235556                  | GG                              | AA              | 1947023623               |
| SNP_P4_169474_235577 | NW_004516994.1 | Scaffold1918 | 235577                  | CC                              | AA              | 1947023625               |
| SNP_P4_169475_235975 | NW_004516994.1 | Scaffold1918 | 235975                  | TT                              | CC              | 1947023627               |
| SNP_P4_169476_235978 | NW_004516994.1 | Scaffold1918 | 235978                  | GG                              | AA              | 1947023629               |
| SNP_P4_169477_236028 | NW_004516994.1 | Scaffold1918 | 236028                  | TT                              | CC              | 1947023631               |
| SNP_P4_169478_236057 | NW_004516994.1 | Scaffold1918 | 236057                  | AA                              | GG              | 1947023633               |
| SNP_P4_169479_236063 | NW_004516994.1 | Scaffold1918 | 236063                  | TT                              | CC              | 1947023635               |
| SNP_P4_169480_236376 | NW_004516994.1 | Scaffold1918 | 236376                  | GG                              | AA              | 1947023637               |
| SNP_P4_169481_236429 | NW_004516994.1 | Scaffold1918 | 236429                  | GG                              | AA              | 1947023639               |
| SNP_P4_169482_236442 | NW_004516994.1 | Scaffold1918 | 236442                  | TT                              | AA              | 1947023641               |
| SNP_P4_169483_239083 | NW_004516994.1 | Scaffold1918 | 239083                  | TT                              | AA              | 1947023643               |
| SNP_P4_169484_239534 | NW_004516994.1 | Scaffold1918 | 239534                  | TT                              | CC              | 1947023645               |
| SNP_P4_169485_239537 | NW_004516994.1 | Scaffold1918 | 239537                  | TT                              | AA              | 1947023647               |
| SNP_P4_169486_255798 | NW_004516994.1 | Scaffold1918 | 255798                  | AA                              | CC              | 1947023649               |
| SNP_P4_169487_255800 | NW_004516994.1 | Scaffold1918 | 255800                  | GG                              | AA              | 1947023651               |

| SNPs IDs             | Chromosome IDs | Chromosomes  | Physical positions (bp) | CDC Frontier (Reference genome) | (ILWC46 & LPNB) | NCBI SNPdb Accession IDs |
|----------------------|----------------|--------------|-------------------------|---------------------------------|-----------------|--------------------------|
| SNP_P4_169488_261760 | NW_004516994.1 | Scaffold1918 | 261760                  | GG                              | AA              | 1947023654               |
| SNP_P4_169489_261886 | NW_004516994.1 | Scaffold1918 | 261886                  | CC                              | AA              | 1947023656               |
| SNP_P4_169490_2463   | NW_004516995.1 | Scaffold1919 | 2463                    | AA                              | CC              | 1947023658               |
| SNP_P4_169491_4470   | NW_004516995.1 | Scaffold1919 | 4470                    | CC                              | TT              | 1947023660               |
| SNP_P4_169492_4471   | NW_004516995.1 | Scaffold1919 | 4471                    | TT                              | AA              | 1947023662               |
| SNP_P4_169493_4867   | NW_004516995.1 | Scaffold1919 | 4867                    | GG                              | AA              | 1947023664               |
| SNP_P4_169494_4918   | NW_004516995.1 | Scaffold1919 | 4918                    | AA                              | GG              | 1947023666               |
| SNP_P4_169495_5042   | NW_004516995.1 | Scaffold1919 | 5042                    | CC                              | TT              | 1947023668               |
| SNP_P4_169496_5065   | NW_004516995.1 | Scaffold1919 | 5065                    | CC                              | TT              | 1947023670               |
| SNP_P4_169497_5162   | NW_004516995.1 | Scaffold1919 | 5162                    | GG                              | AA              | 1947023672               |
| SNP_P4_169498_4879   | NW_004516996.1 | Scaffold1920 | 4879                    | CC                              | GG              | 1947023674               |
| SNP_P4_169500_4933   | NW_004516996.1 | Scaffold1920 | 4933                    | GG                              | AA              | 1947023676               |
| SNP_P4_169501_4943   | NW_004516996.1 | Scaffold1920 | 4943                    | TT                              | CC              | 1947023678               |
| SNP_P4_169502_8573   | NW_004516996.1 | Scaffold1920 | 8573                    | CC                              | AA              | 1947023680               |
| SNP_P4_169503_8574   | NW_004516996.1 | Scaffold1920 | 8574                    | CC                              | AA              | 1947023682               |
| SNP_P4_169505_8751   | NW_004516996.1 | Scaffold1920 | 8751                    | AA                              | TT              | 1947023684               |
| SNP_P4_169506_8859   | NW_004516996.1 | Scaffold1920 | 8859                    | AA                              | TT              | 1947023686               |
| SNP_P4_169507_10063  | NW_004516996.1 | Scaffold1920 | 10063                   | CC                              | AA              | 1947023688               |
| SNP_P4_169508_10102  | NW_004516996.1 | Scaffold1920 | 10102                   | TT                              | CC              | 1947023690               |
| SNP_P4_169509_10232  | NW_004516996.1 | Scaffold1920 | 10232                   | TT                              | AA              | 1947023692               |
| SNP_P4_169510_10407  | NW_004516996.1 | Scaffold1920 | 10407                   | CC                              | TT              | 1947023694               |
| SNP_P4_169511_10477  | NW_004516996.1 | Scaffold1920 | 10477                   | CC                              | TT              | 1947023696               |
| SNP_P4_169512_10478  | NW_004516996.1 | Scaffold1920 | 10478                   | TT                              | CC              | 1947023698               |
| SNP_P4_169513_14638  | NW_004516996.1 | Scaffold1920 | 14638                   | GG                              | AA              | 1947023700               |
| SNP_P4_169514_14690  | NW_004516996.1 | Scaffold1920 | 14690                   | AA                              | TT              | 1947023702               |
| SNP_P4_169515_16196  | NW_004516996.1 | Scaffold1920 | 16196                   | TT                              | GG              | 1947023704               |
| SNP_P4_169516_20323  | NW_004516996.1 | Scaffold1920 | 20323                   | GG                              | AA              | 1947023706               |
| SNP_P4_169517_20641  | NW_004516996.1 | Scaffold1920 | 20641                   | GG                              | AA              | 1947023708               |
| SNP_P4_169518_20659  | NW_004516996.1 | Scaffold1920 | 20659                   | TT                              | CC              | 1947023710               |
| SNP_P4_169519_20668  | NW_004516996.1 | Scaffold1920 | 20668                   | CC                              | TT              | 1947023712               |
| SNP_P4_169520_20674  | NW_004516996.1 | Scaffold1920 | 20674                   | CC                              | AA              | 1947023714               |
| SNP_P4_169521_21284  | NW_004516996.1 | Scaffold1920 | 21284                   | GG                              | AA              | 1947023716               |
| SNP_P4_169522_21290  | NW_004516996.1 | Scaffold1920 | 21290                   | AA                              | CC              | 1947023718               |
| SNP_P4_169523_21302  | NW_004516996.1 | Scaffold1920 | 21302                   | AA                              | GG              | 1947023720               |
| SNP_P4_169524_24430  | NW_004516996.1 | Scaffold1920 | 24430                   | CC                              | AA              | 1947023722               |
| SNP_P4_169525_25458  | NW_004516996.1 | Scaffold1920 | 25458                   | CC                              | TT              | 1947023724               |
| SNP_P4_169526_1437   | NW_004516998.1 | Scaffold1923 | 1437                    | CC                              | TT              | 1947023726               |
| SNP_P4_169527_1751   | NW_004516998.1 | Scaffold1923 | 1751                    | CC                              | AA              | 1947023728               |
| SNP_P4_169528_1815   | NW_004516998.1 | Scaffold1923 | 1815                    | CC                              | TT              | 1947023730               |
| SNP_P4_169529_2334   | NW_004516998.1 | Scaffold1923 | 2334                    | GG                              | AA              | 1947023732               |
| SNP_P4_169530_3772   | NW_004516998.1 | Scaffold1923 | 3772                    | GG                              | AA              | 1947023734               |
| SNP_P4_169531_10394  | NW_004516998.1 | Scaffold1923 | 10394                   | AA                              | TT              | 1947023736               |

| SNPs IDs             | Chromosome IDs | Chromosomes  | Physical positions (bp) | CDC Frontier (Reference genome) | (ILWC46 & LPNB) | NCBI SNPdb Accession IDs |
|----------------------|----------------|--------------|-------------------------|---------------------------------|-----------------|--------------------------|
| SNP_P4_169532_10669  | NW_004516998.1 | Scaffold1923 | 10669                   | GG                              | AA              | 1947023738               |
| SNP_P4_169534_10835  | NW_004516998.1 | Scaffold1923 | 10835                   | TT                              | AA              | 1947023740               |
| SNP_P4_169535_1865   | NW_004517001.1 | Scaffold1928 | 1865                    | AA                              | CC              | 1947023742               |
| SNP_P4_169536_2421   | NW_004517001.1 | Scaffold1928 | 2421                    | GG                              | CC              | 1947023744               |
| SNP_P4_169537_3661   | NW_004517001.1 | Scaffold1928 | 3661                    | CC                              | GG              | 1947023746               |
| SNP_P4_169538_3666   | NW_004517001.1 | Scaffold1928 | 3666                    | TT                              | AA              | 1947023748               |
| SNP_P4_169540_3916   | NW_004517001.1 | Scaffold1928 | 3916                    | CC                              | TT              | 1947023750               |
| SNP_P4_169541_3932   | NW_004517001.1 | Scaffold1928 | 3932                    | CC                              | TT              | 1947023752               |
| SNP_P4_169542_3995   | NW_004517001.1 | Scaffold1928 | 3995                    | AA                              | CC              | 1947023754               |
| SNP_P4_169543_4040   | NW_004517001.1 | Scaffold1928 | 4040                    | TT                              | AA              | 1947023756               |
| SNP_P4_169544_15924  | NW_004517001.1 | Scaffold1928 | 15924                   | GG                              | TT              | 1947023758               |
| SNP_P4_169546_15975  | NW_004517001.1 | Scaffold1928 | 15975                   | AA                              | GG              | 1947023760               |
| SNP_P4_169547_16313  | NW_004517001.1 | Scaffold1928 | 16313                   | GG                              | AA              | 1947023762               |
| SNP_P4_169548_19698  | NW_004517001.1 | Scaffold1928 | 19698                   | TT                              | AA              | 1947023764               |
| SNP_P4_169549_50159  | NW_004517001.1 | Scaffold1928 | 50159                   | CC                              | TT              | 1947023766               |
| SNP_P4_169550_50514  | NW_004517001.1 | Scaffold1928 | 50514                   | AA                              | GG              | 1947023768               |
| SNP_P4_169551_67991  | NW_004517001.1 | Scaffold1928 | 67991                   | CC                              | TT              | 1947023770               |
| SNP_P4_169552_68102  | NW_004517001.1 | Scaffold1928 | 68102                   | AA                              | GG              | 1947023772               |
| SNP_P4_169553_68445  | NW_004517001.1 | Scaffold1928 | 68445                   | TT                              | CC              | 1947023774               |
| SNP_P4_169555_78187  | NW_004517001.1 | Scaffold1928 | 78187                   | CC                              | TT              | 1947023776               |
| SNP_P4_169556_78237  | NW_004517001.1 | Scaffold1928 | 78237                   | CC                              | TT              | 1947023778               |
| SNP_P4_169557_78296  | NW_004517001.1 | Scaffold1928 | 78296                   | GG                              | AA              | 1947023780               |
| SNP_P4_169558_78429  | NW_004517001.1 | Scaffold1928 | 78429                   | TT                              | AA              | 1947023782               |
| SNP_P4_169559_78673  | NW_004517001.1 | Scaffold1928 | 78673                   | TT                              | CC              | 1947023784               |
| SNP_P4_169560_80783  | NW_004517001.1 | Scaffold1928 | 80783                   | TT                              | GG              | 1947023786               |
| SNP_P4_169561_80786  | NW_004517001.1 | Scaffold1928 | 80786                   | CC                              | AA              | 1947023788               |
| SNP_P4_169564_118384 | NW_004517001.1 | Scaffold1928 | 118384                  | TT                              | CC              | 1947023790               |
| SNP_P4_169565_133811 | NW_004517001.1 | Scaffold1928 | 133811                  | GG                              | AA              | 1947023792               |
| SNP_P4_169566_133827 | NW_004517001.1 | Scaffold1928 | 133827                  | CC                              | AA              | 1947023794               |
| SNP_P4_169567_1644   | NW_004517003.1 | Scaffold1930 | 1644                    | AA                              | CC              | 1947023796               |
| SNP_P4_169568_1664   | NW_004517003.1 | Scaffold1930 | 1664                    | CC                              | GG              | 1947023798               |
| SNP_P4_169569_1693   | NW_004517003.1 | Scaffold1930 | 1693                    | CC                              | TT              | 1947023800               |
| SNP_P4_169570_1705   | NW_004517003.1 | Scaffold1930 | 1705                    | GG                              | AA              | 1947023802               |
| SNP_P4_169571_1713   | NW_004517003.1 | Scaffold1930 | 1713                    | CC                              | TT              | 1947023804               |
| SNP_P4_169572_23982  | NW_004517003.1 | Scaffold1930 | 23982                   | AA                              | GG              | 1947023806               |
| SNP_P4_169573_31695  | NW_004517003.1 | Scaffold1930 | 31695                   | AA                              | GG              | 1947023808               |
| SNP_P4_169574_31724  | NW_004517003.1 | Scaffold1930 | 31724                   | CC                              | AA              | 1947023810               |
| SNP_P4_169575_32450  | NW_004517003.1 | Scaffold1930 | 32450                   | AA                              | TT              | 1947023812               |
| SNP_P4_169576_32547  | NW_004517003.1 | Scaffold1930 | 32547                   | GG                              | CC              | 1947023814               |
| SNP_P4_169577_32696  | NW_004517003.1 | Scaffold1930 | 32696                   | GG                              | TT              | 1947023816               |
| SNP_P4_169578_32986  | NW_004517003.1 | Scaffold1930 | 32986                   | CC                              | AA              | 1947023818               |
| SNP_P4_169579_33010  | NW_004517003.1 | Scaffold1930 | 33010                   | GG                              | CC              | 1947023820               |

| SNPs IDs            | Chromosome IDs | Chromosomes  | Physical positions (bp) | CDC Frontier (Reference genome) | (ILWC46 & LPNB) | NCBI SNPdb Accession IDs |
|---------------------|----------------|--------------|-------------------------|---------------------------------|-----------------|--------------------------|
| SNP_P4_169580_33011 | NW_004517003.1 | Scaffold1930 | 33011                   | AA                              | GG              | 1947023822               |
| SNP_P4_169582_35906 | NW_004517003.1 | Scaffold1930 | 35906                   | CC                              | AA              | 1947023824               |
| SNP_P4_169583_37276 | NW_004517003.1 | Scaffold1930 | 37276                   | TT                              | CC              | 1947023826               |
| SNP_P4_169584_37319 | NW_004517003.1 | Scaffold1930 | 37319                   | CC                              | AA              | 1947023828               |
| SNP_P4_169585_37332 | NW_004517003.1 | Scaffold1930 | 37332                   | GG                              | TT              | 1947023830               |
| SNP_P4_169586_37374 | NW_004517003.1 | Scaffold1930 | 37374                   | CC                              | TT              | 1947023832               |
| SNP_P4_169587_37421 | NW_004517003.1 | Scaffold1930 | 37421                   | TT                              | CC              | 1947023834               |
| SNP_P4_169588_37508 | NW_004517003.1 | Scaffold1930 | 37508                   | TT                              | AA              | 1947023836               |
| SNP_P4_169589_37509 | NW_004517003.1 | Scaffold1930 | 37509                   | AA                              | GG              | 1947023838               |
| SNP_P4_169590_37596 | NW_004517003.1 | Scaffold1930 | 37596                   | TT                              | CC              | 1947023840               |
| SNP_P4_169591_37623 | NW_004517003.1 | Scaffold1930 | 37623                   | TT                              | AA              | 1947023842               |
| SNP_P4_169592_37738 | NW_004517003.1 | Scaffold1930 | 37738                   | AA                              | TT              | 1947023844               |
| SNP_P4_169593_37762 | NW_004517003.1 | Scaffold1930 | 37762                   | TT                              | CC              | 1947023846               |
| SNP_P4_169594_37811 | NW_004517003.1 | Scaffold1930 | 37811                   | TT                              | GG              | 1947023848               |
| SNP_P4_169595_37822 | NW_004517003.1 | Scaffold1930 | 37822                   | TT                              | CC              | 1947023850               |
| SNP_P4_169596_37824 | NW_004517003.1 | Scaffold1930 | 37824                   | AA                              | GG              | 1947023852               |
| SNP_P4_169597_37898 | NW_004517003.1 | Scaffold1930 | 37898                   | GG                              | AA              | 1947023854               |
| SNP_P4_169598_38447 | NW_004517003.1 | Scaffold1930 | 38447                   | AA                              | GG              | 1947023856               |
| SNP_P4_169599_38448 | NW_004517003.1 | Scaffold1930 | 38448                   | TT                              | AA              | 1947023858               |
| SNP_P4_169600_38450 | NW_004517003.1 | Scaffold1930 | 38450                   | CC                              | TT              | 1947023860               |
| SNP_P4_169601_38481 | NW_004517003.1 | Scaffold1930 | 38481                   | GG                              | TT              | 1947023862               |
| SNP_P4_169602_38552 | NW_004517003.1 | Scaffold1930 | 38552                   | GG                              | CC              | 1947023864               |
| SNP_P4_169603_39297 | NW_004517003.1 | Scaffold1930 | 39297                   | GG                              | AA              | 1947023866               |
| SNP_P4_169604_40169 | NW_004517003.1 | Scaffold1930 | 40169                   | CC                              | TT              | 1947023868               |
| SNP_P4_169605_40246 | NW_004517003.1 | Scaffold1930 | 40246                   | CC                              | TT              | 1947023870               |
| SNP_P4_169606_40272 | NW_004517003.1 | Scaffold1930 | 40272                   | GG                              | AA              | 1947023872               |
| SNP_P4_169608_40381 | NW_004517003.1 | Scaffold1930 | 40381                   | TT                              | GG              | 1947023874               |
| SNP_P4_169609_40407 | NW_004517003.1 | Scaffold1930 | 40407                   | GG                              | TT              | 1947023876               |
| SNP_P4_169610_40485 | NW_004517003.1 | Scaffold1930 | 40485                   | CC                              | GG              | 1947023878               |
| SNP_P4_169611_40493 | NW_004517003.1 | Scaffold1930 | 40493                   | GG                              | TT              | 1947023880               |
| SNP_P4_169612_41515 | NW_004517003.1 | Scaffold1930 | 41515                   | TT                              | AA              | 1947023882               |
| SNP_P4_169613_41531 | NW_004517003.1 | Scaffold1930 | 41531                   | TT                              | CC              | 1947023884               |
| SNP_P4_169614_41718 | NW_004517003.1 | Scaffold1930 | 41718                   | GG                              | TT              | 1947023886               |
| SNP_P4_169615_41833 | NW_004517003.1 | Scaffold1930 | 41833                   | GG                              | CC              | 1947023888               |
| SNP_P4_169616_41846 | NW_004517003.1 | Scaffold1930 | 41846                   | TT                              | CC              | 1947023890               |
| SNP_P4_169617_41998 | NW_004517003.1 | Scaffold1930 | 41998                   | GG                              | TT              | 1947023892               |
| SNP_P4_169618_42087 | NW_004517003.1 | Scaffold1930 | 42087                   | TT                              | GG              | 1947023894               |
| SNP_P4_169619_42360 | NW_004517003.1 | Scaffold1930 | 42360                   | AA                              | TT              | 1947023896               |
| SNP_P4_169620_43820 | NW_004517003.1 | Scaffold1930 | 43820                   | GG                              | CC              | 1947023898               |
| SNP_P4_169621_43842 | NW_004517003.1 | Scaffold1930 | 43842                   | CC                              | TT              | 1947023900               |
| SNP_P4_169622_43855 | NW_004517003.1 | Scaffold1930 | 43855                   | GG                              | AA              | 1947023902               |
| SNP_P4_169623_43862 | NW_004517003.1 | Scaffold1930 | 43862                   | AA                              | GG              | 1947023904               |

| SNPs IDs            | Chromosome IDs | Chromosomes  | Physical positions (bp) | CDC Frontier (Reference genome) | (ILWC46 & LPNB) | NCBI SNPdb Accession IDs |
|---------------------|----------------|--------------|-------------------------|---------------------------------|-----------------|--------------------------|
| SNP_P4_169624_43952 | NW_004517003.1 | Scaffold1930 | 43952                   | AA                              | GG              | 1947023906               |
| SNP_P4_169626_45012 | NW_004517003.1 | Scaffold1930 | 45012                   | AA                              | GG              | 1947023908               |
| SNP_P4_169627_45060 | NW_004517003.1 | Scaffold1930 | 45060                   | AA                              | TT              | 1947023910               |
| SNP_P4_169628_45365 | NW_004517003.1 | Scaffold1930 | 45365                   | AA                              | CC              | 1947023912               |
| SNP_P4_169629_45675 | NW_004517003.1 | Scaffold1930 | 45675                   | TT                              | CC              | 1947023914               |
| SNP_P4_169630_59805 | NW_004517003.1 | Scaffold1930 | 59805                   | TT                              | CC              | 1947023916               |
| SNP_P4_169631_60173 | NW_004517003.1 | Scaffold1930 | 60173                   | TT                              | GG              | 1947023918               |
| SNP_P4_169632_42972 | NW_004517005.1 | Scaffold1932 | 42972                   | CC                              | TT              | 1947023920               |
| SNP_P4_169633_42990 | NW_004517005.1 | Scaffold1932 | 42990                   | CC                              | TT              | 1947023922               |
| SNP_P4_169634_42993 | NW_004517005.1 | Scaffold1932 | 42993                   | AA                              | GG              | 1947023924               |
| SNP_P4_169635_43028 | NW_004517005.1 | Scaffold1932 | 43028                   | TT                              | CC              | 1947023926               |
| SNP_P4_169636_43059 | NW_004517005.1 | Scaffold1932 | 43059                   | CC                              | TT              | 1947023928               |
| SNP_P4_169637_59818 | NW_004517005.1 | Scaffold1932 | 59818                   | TT                              | GG              | 1947023930               |
| SNP_P4_169638_66813 | NW_004517005.1 | Scaffold1932 | 66813                   | CC                              | GG              | 1947023932               |
| SNP_P4_169639_73738 | NW_004517005.1 | Scaffold1932 | 73738                   | CC                              | TT              | 1947023934               |
| SNP_P4_169640_77587 | NW_004517005.1 | Scaffold1932 | 77587                   | TT                              | CC              | 1947023936               |
| SNP_P4_169641_77595 | NW_004517005.1 | Scaffold1932 | 77595                   | AA                              | CC              | 1947023938               |
| SNP_P4_169642_77630 | NW_004517005.1 | Scaffold1932 | 77630                   | AA                              | GG              | 1947023940               |
| SNP_P4_169643_77643 | NW_004517005.1 | Scaffold1932 | 77643                   | AA                              | CC              | 1947023942               |
| SNP_P4_169644_77656 | NW_004517005.1 | Scaffold1932 | 77656                   | TT                              | AA              | 1947023944               |
| SNP_P4_169645_77658 | NW_004517005.1 | Scaffold1932 | 77658                   | TT                              | CC              | 1947023946               |
| SNP_P4_169646_77659 | NW_004517005.1 | Scaffold1932 | 77659                   | TT                              | GG              | 1947023947               |
| SNP_P4_169647_77666 | NW_004517005.1 | Scaffold1932 | 77666                   | TT                              | GG              | 1947023949               |
| SNP_P4_169648_77711 | NW_004517005.1 | Scaffold1932 | 77711                   | GG                              | AA              | 1947023951               |
| SNP_P4_169649_82769 | NW_004517005.1 | Scaffold1932 | 82769                   | AA                              | GG              | 1947023953               |
| SNP_P4_169650_82774 | NW_004517005.1 | Scaffold1932 | 82774                   | CC                              | TT              | 1947023955               |
| SNP_P4_169651_83153 | NW_004517005.1 | Scaffold1932 | 83153                   | AA                              | GG              | 1947023957               |
| SNP_P4_169652_83183 | NW_004517005.1 | Scaffold1932 | 83183                   | AA                              | GG              | 1947023958               |
| SNP_P4_169653_83209 | NW_004517005.1 | Scaffold1932 | 83209                   | CC                              | AA              | 1947023960               |
| SNP_P4_169654_83220 | NW_004517005.1 | Scaffold1932 | 83220                   | CC                              | AA              | 1947023962               |
| SNP_P4_169655_83245 | NW_004517005.1 | Scaffold1932 | 83245                   | GG                              | AA              | 1947023964               |
| SNP_P4_169656_347   | NW_004517006.1 | Scaffold1933 | 347                     | GG                              | AA              | 1947023966               |
| SNP_P4_169657_488   | NW_004517007.1 | Scaffold1934 | 488                     | TT                              | CC              | 1947023968               |
| SNP_P4_169658_489   | NW_004517007.1 | Scaffold1934 | 489                     | TT                              | CC              | 1947023970               |
| SNP_P4_169659_7206  | NW_004517010.1 | Scaffold1937 | 7206                    | CC                              | AA              | 1947023972               |
| SNP_P4_169660_236   | NW_004517013.1 | Scaffold1940 | 236                     | GG                              | CC              | 1947023974               |
| SNP_P4_169661_546   | NW_004517013.1 | Scaffold1940 | 546                     | AA                              | GG              | 1947023976               |
| SNP_P4_169662_5320  | NW_004517015.1 | Scaffold1942 | 5320                    | GG                              | CC              | 1947023978               |
| SNP_P4_169663_5323  | NW_004517015.1 | Scaffold1942 | 5323                    | AA                              | CC              | 1947023980               |
| SNP_P4_169664_5326  | NW_004517015.1 | Scaffold1942 | 5326                    | GG                              | CC              | 1947023982               |
| SNP_P4_169665_5332  | NW_004517015.1 | Scaffold1942 | 5332                    | CC                              | TT              | 1947023984               |
| SNP_P4_169666_5334  | NW_004517015.1 | Scaffold1942 | 5334                    | GG                              | AA              | 1947023986               |

| SNPs IDs             | Chromosome IDs | Chromosomes  | Physical positions (bp) | CDC Frontier (Reference genome) | (ILWC46 & LPNB) | NCBI SNPdb Accession IDs |
|----------------------|----------------|--------------|-------------------------|---------------------------------|-----------------|--------------------------|
| SNP_P4_169667_116    | NW_004517016.1 | Scaffold1943 | 116                     | CC                              | TT              | 1947023988               |
| SNP_P4_169668_121    | NW_004517016.1 | Scaffold1943 | 121                     | CC                              | TT              | 1947023990               |
| SNP_P4_169669_218    | NW_004517016.1 | Scaffold1943 | 218                     | GG                              | CC              | 1947023992               |
| SNP_P4_169670_278    | NW_004517016.1 | Scaffold1943 | 278                     | AA                              | GG              | 1947023994               |
| SNP_P4_169671_436    | NW_004517016.1 | Scaffold1943 | 436                     | CC                              | AA              | 1947023996               |
| SNP_P4_169672_560    | NW_004517016.1 | Scaffold1943 | 560                     | TT                              | GG              | 1947023998               |
| SNP_P4_169673_2329   | NW_004517016.1 | Scaffold1943 | 2329                    | GG                              | AA              | 1947024001               |
| SNP_P4_169674_2350   | NW_004517016.1 | Scaffold1943 | 2350                    | AA                              | CC              | 1947024003               |
| SNP_P4_169675_2415   | NW_004517016.1 | Scaffold1943 | 2415                    | TT                              | CC              | 1947024005               |
| SNP_P4_169676_2417   | NW_004517016.1 | Scaffold1943 | 2417                    | TT                              | GG              | 1947024007               |
| SNP_P4_169677_2421   | NW_004517016.1 | Scaffold1943 | 2421                    | TT                              | CC              | 1947024009               |
| SNP_P4_169678_2450   | NW_004517016.1 | Scaffold1943 | 2450                    | TT                              | CC              | 1947024011               |
| SNP_P4_169679_2451   | NW_004517016.1 | Scaffold1943 | 2451                    | CC                              | TT              | 1947024013               |
| SNP_P4_169680_2457   | NW_004517016.1 | Scaffold1943 | 2457                    | TT                              | AA              | 1947024015               |
| SNP_P4_169681_2497   | NW_004517016.1 | Scaffold1943 | 2497                    | CC                              | TT              | 1947024017               |
| SNP_P4_169682_2541   | NW_004517016.1 | Scaffold1943 | 2541                    | GG                              | CC              | 1947024019               |
| SNP_P4_169683_2555   | NW_004517016.1 | Scaffold1943 | 2555                    | TT                              | GG              | 1947024021               |
| SNP_P4_169684_2556   | NW_004517016.1 | Scaffold1943 | 2556                    | TT                              | CC              | 1947024023               |
| SNP_P4_169685_2603   | NW_004517016.1 | Scaffold1943 | 2603                    | TT                              | CC              | 1947024025               |
| SNP_P4_169686_2942   | NW_004517016.1 | Scaffold1943 | 2942                    | CC                              | TT              | 1947024027               |
| SNP_P4_169688_3008   | NW_004517016.1 | Scaffold1943 | 3008                    | CC                              | AA              | 1947024029               |
| SNP_P4_169689_4932   | NW_004517016.1 | Scaffold1943 | 4932                    | GG                              | AA              | 1947024031               |
| SNP_P4_169690_12930  | NW_004517016.1 | Scaffold1943 | 12930                   | AA                              | CC              | 1947024033               |
| SNP_P4_169691_13194  | NW_004517016.1 | Scaffold1943 | 13194                   | AA                              | GG              | 1947024035               |
| SNP_P4_169692_24684  | NW_004517016.1 | Scaffold1943 | 24684                   | TT                              | CC              | 1947024038               |
| SNP_P4_169693_59073  | NW_004517016.1 | Scaffold1943 | 59073                   | AA                              | GG              | 1947024040               |
| SNP_P4_169694_59775  | NW_004517016.1 | Scaffold1943 | 59775                   | GG                              | AA              | 1947024042               |
| SNP_P4_169695_94603  | NW_004517016.1 | Scaffold1943 | 94603                   | TT                              | CC              | 1947024044               |
| SNP_P4_169696_94859  | NW_004517016.1 | Scaffold1943 | 94859                   | GG                              | AA              | 1947024046               |
| SNP_P4_169698_106055 | NW_004517016.1 | Scaffold1943 | 106055                  | GG                              | AA              | 1947024048               |
| SNP_P4_169699_110617 | NW_004517016.1 | Scaffold1943 | 110617                  | AA                              | TT              | 1947024050               |
| SNP_P4_169700_111251 | NW_004517016.1 | Scaffold1943 | 111251                  | AA                              | GG              | 1947024052               |
| SNP_P4_169701_116592 | NW_004517016.1 | Scaffold1943 | 116592                  | AA                              | CC              | 1947024054               |
| SNP_P4_169702_121178 | NW_004517016.1 | Scaffold1943 | 121178                  | GG                              | AA              | 1947024056               |
| SNP_P4_169703_121193 | NW_004517016.1 | Scaffold1943 | 121193                  | CC                              | TT              | 1947024058               |
| SNP_P4_169704_121195 | NW_004517016.1 | Scaffold1943 | 121195                  | GG                              | TT              | 1947024060               |
| SNP_P4_169705_121198 | NW_004517016.1 | Scaffold1943 | 121198                  | TT                              | GG              | 1947024062               |
| SNP_P4_169706_121228 | NW_004517016.1 | Scaffold1943 | 121228                  | CC                              | AA              | 1947024064               |
| SNP_P4_169707_121231 | NW_004517016.1 | Scaffold1943 | 121231                  | TT                              | CC              | 1947024066               |
| SNP_P4_169709_121482 | NW_004517016.1 | Scaffold1943 | 121482                  | TT                              | CC              | 1947024068               |
| SNP_P4_169710_121587 | NW_004517016.1 | Scaffold1943 | 121587                  | AA                              | GG              | 1947024070               |
| SNP_P4_169711_121633 | NW_004517016.1 | Scaffold1943 | 121633                  | TT                              | CC              | 1947024072               |



| SNPs IDs             | Chromosome IDs | Chromosomes  | Physical positions (bp) | CDC Frontier (Reference genome) | (ILWC46 & LPNB) | NCBI SNPdb Accession IDs |
|----------------------|----------------|--------------|-------------------------|---------------------------------|-----------------|--------------------------|
| SNP_P4_169712_123259 | NW_004517016.1 | Scaffold1943 | 123259                  | TT                              | GG              | 1947024074               |
| SNP_P4_169713_123277 | NW_004517016.1 | Scaffold1943 | 123277                  | TT                              | CC              | 1947024076               |
| SNP_P4_169714_123310 | NW_004517016.1 | Scaffold1943 | 123310                  | CC                              | TT              | 1947024078               |
| SNP_P4_169715_123427 | NW_004517016.1 | Scaffold1943 | 123427                  | GG                              | AA              | 1947024080               |
| SNP_P4_169716_123439 | NW_004517016.1 | Scaffold1943 | 123439                  | CC                              | TT              | 1947024082               |
| SNP_P4_169717_123469 | NW_004517016.1 | Scaffold1943 | 123469                  | CC                              | AA              | 1947024084               |
| SNP_P4_169718_123472 | NW_004517016.1 | Scaffold1943 | 123472                  | GG                              | AA              | 1947024086               |
| SNP_P4_169719_123495 | NW_004517016.1 | Scaffold1943 | 123495                  | AA                              | GG              | 1947024088               |
| SNP_P4_169720_123496 | NW_004517016.1 | Scaffold1943 | 123496                  | GG                              | AA              | 1947024091               |
| SNP_P4_169721_123524 | NW_004517016.1 | Scaffold1943 | 123524                  | TT                              | CC              | 1947024093               |
| SNP_P4_169722_123532 | NW_004517016.1 | Scaffold1943 | 123532                  | TT                              | AA              | 1947024095               |
| SNP_P4_169723_123535 | NW_004517016.1 | Scaffold1943 | 123535                  | AA                              | GG              | 1947024097               |
| SNP_P4_169724_123538 | NW_004517016.1 | Scaffold1943 | 123538                  | GG                              | AA              | 1947024099               |
| SNP_P4_169725_123778 | NW_004517016.1 | Scaffold1943 | 123778                  | CC                              | TT              | 1947024101               |
| SNP_P4_169726_127048 | NW_004517016.1 | Scaffold1943 | 127048                  | GG                              | AA              | 1947024103               |
| SNP_P4_169727_127056 | NW_004517016.1 | Scaffold1943 | 127056                  | CC                              | TT              | 1947024105               |
| SNP_P4_169728_127385 | NW_004517016.1 | Scaffold1943 | 127385                  | CC                              | TT              | 1947024107               |
| SNP_P4_169729_127475 | NW_004517016.1 | Scaffold1943 | 127475                  | CC                              | AA              | 1947024109               |
| SNP_P4_169730_127508 | NW_004517016.1 | Scaffold1943 | 127508                  | CC                              | TT              | 1947024111               |
| SNP_P4_169731_127523 | NW_004517016.1 | Scaffold1943 | 127523                  | TT                              | CC              | 1947024113               |
| SNP_P4_169732_127541 | NW_004517016.1 | Scaffold1943 | 127541                  | CC                              | AA              | 1947024115               |
| SNP_P4_169733_128136 | NW_004517016.1 | Scaffold1943 | 128136                  | TT                              | CC              | 1947024117               |
| SNP_P4_169734_132236 | NW_004517016.1 | Scaffold1943 | 132236                  | GG                              | AA              | 1947024119               |
| SNP_P4_169735_136928 | NW_004517016.1 | Scaffold1943 | 136928                  | TT                              | CC              | 1947024121               |
| SNP_P4_169736_141206 | NW_004517016.1 | Scaffold1943 | 141206                  | TT                              | CC              | 1947024123               |
| SNP_P4_169737_151027 | NW_004517016.1 | Scaffold1943 | 151027                  | AA                              | TT              | 1947024125               |
| SNP_P4_169738_159067 | NW_004517016.1 | Scaffold1943 | 159067                  | CC                              | GG              | 1947024127               |
| SNP_P4_169739_163339 | NW_004517016.1 | Scaffold1943 | 163339                  | TT                              | GG              | 1947024129               |
| SNP_P4_169740_163701 | NW_004517016.1 | Scaffold1943 | 163701                  | AA                              | GG              | 1947024131               |
| SNP_P4_169741_163876 | NW_004517016.1 | Scaffold1943 | 163876                  | TT                              | AA              | 1947024133               |
| SNP_P4_169742_171758 | NW_004517016.1 | Scaffold1943 | 171758                  | GG                              | TT              | 1947024135               |
| SNP_P4_169743_171930 | NW_004517016.1 | Scaffold1943 | 171930                  | GG                              | AA              | 1947024137               |
| SNP_P4_169744_171934 | NW_004517016.1 | Scaffold1943 | 171934                  | AA                              | GG              | 1947024139               |
| SNP_P4_169745_171946 | NW_004517016.1 | Scaffold1943 | 171946                  | AA                              | GG              | 1947024141               |
| SNP_P4_169746_177869 | NW_004517016.1 | Scaffold1943 | 177869                  | CC                              | TT              | 1947024143               |
| SNP_P4_169747_179455 | NW_004517016.1 | Scaffold1943 | 179455                  | CC                              | TT              | 1947024145               |
| SNP_P4_169748_179569 | NW_004517016.1 | Scaffold1943 | 179569                  | CC                              | AA              | 1947024147               |
| SNP_P4_169749_179580 | NW_004517016.1 | Scaffold1943 | 179580                  | CC                              | AA              | 1947024149               |
| SNP_P4_169752_193959 | NW_004517016.1 | Scaffold1943 | 193959                  | AA                              | GG              | 1947024151               |
| SNP_P4_169753_199116 | NW_004517016.1 | Scaffold1943 | 199116                  | GG                              | CC              | 1947024153               |
| SNP_P4_169754_201015 | NW_004517016.1 | Scaffold1943 | 201015                  | GG                              | AA              | 1947024155               |
| SNP_P4_169755_206824 | NW_004517016.1 | Scaffold1943 | 206824                  | TT                              | CC              | 1947024157               |

| SNPs IDs             | Chromosome IDs | Chromosomes  | Physical positions (bp) | CDC Frontier (Reference genome) | (ILWC46 & LPNB) | NCBI SNPdb Accession IDs |
|----------------------|----------------|--------------|-------------------------|---------------------------------|-----------------|--------------------------|
| SNP_P4_169756_211361 | NW_004517016.1 | Scaffold1943 | 211361                  | TT                              | CC              | 1947024159               |
| SNP_P4_169757_212422 | NW_004517016.1 | Scaffold1943 | 212422                  | TT                              | CC              | 1947024161               |
| SNP_P4_169758_218211 | NW_004517016.1 | Scaffold1943 | 218211                  | CC                              | TT              | 1947024163               |
| SNP_P4_169759_220910 | NW_004517016.1 | Scaffold1943 | 220910                  | CC                              | TT              | 1947024165               |
| SNP_P4_169760_223181 | NW_004517016.1 | Scaffold1943 | 223181                  | TT                              | AA              | 1947024167               |
| SNP_P4_169761_230201 | NW_004517016.1 | Scaffold1943 | 230201                  | TT                              | AA              | 1947024169               |
| SNP_P4_169762_230202 | NW_004517016.1 | Scaffold1943 | 230202                  | CC                              | AA              | 1947024171               |
| SNP_P4_169763_234717 | NW_004517016.1 | Scaffold1943 | 234717                  | TT                              | CC              | 1947024173               |
| SNP_P4_169764_234721 | NW_004517016.1 | Scaffold1943 | 234721                  | TT                              | CC              | 1947024175               |
| SNP_P4_169765_234895 | NW_004517016.1 | Scaffold1943 | 234895                  | GG                              | AA              | 1947024177               |
| SNP_P4_169766_237410 | NW_004517016.1 | Scaffold1943 | 237410                  | AA                              | GG              | 1947024179               |
| SNP_P4_169769_254153 | NW_004517016.1 | Scaffold1943 | 254153                  | GG                              | AA              | 1947024181               |
| SNP_P4_169770_259101 | NW_004517016.1 | Scaffold1943 | 259101                  | GG                              | AA              | 1947024183               |
| SNP_P4_169771_266263 | NW_004517016.1 | Scaffold1943 | 266263                  | GG                              | AA              | 1947024185               |
| SNP_P4_169772_281222 | NW_004517016.1 | Scaffold1943 | 281222                  | CC                              | TT              | 1947024187               |
| SNP_P4_169773_281550 | NW_004517016.1 | Scaffold1943 | 281550                  | AA                              | GG              | 1947024189               |
| SNP_P4_169775_281594 | NW_004517016.1 | Scaffold1943 | 281594                  | AA                              | GG              | 1947024191               |
| SNP_P4_169776_281599 | NW_004517016.1 | Scaffold1943 | 281599                  | AA                              | GG              | 1947024193               |
| SNP_P4_169777_281629 | NW_004517016.1 | Scaffold1943 | 281629                  | GG                              | TT              | 1947024195               |
| SNP_P4_169778_281684 | NW_004517016.1 | Scaffold1943 | 281684                  | GG                              | AA              | 1947024197               |
| SNP_P4_169779_281687 | NW_004517016.1 | Scaffold1943 | 281687                  | TT                              | GG              | 1947024199               |
| SNP_P4_169780_281925 | NW_004517016.1 | Scaffold1943 | 281925                  | GG                              | AA              | 1947024201               |
| SNP_P4_169781_281955 | NW_004517016.1 | Scaffold1943 | 281955                  | TT                              | AA              | 1947024203               |
| SNP_P4_169783_282625 | NW_004517016.1 | Scaffold1943 | 282625                  | AA                              | GG              | 1947024205               |
| SNP_P4_169784_282638 | NW_004517016.1 | Scaffold1943 | 282638                  | CC                              | TT              | 1947024208               |
| SNP_P4_169785_282676 | NW_004517016.1 | Scaffold1943 | 282676                  | AA                              | GG              | 1947024210               |
| SNP_P4_169786_294850 | NW_004517016.1 | Scaffold1943 | 294850                  | TT                              | CC              | 1947024212               |
| SNP_P4_169787_309962 | NW_004517016.1 | Scaffold1943 | 309962                  | AA                              | GG              | 1947024214               |
| SNP_P4_169788_327078 | NW_004517016.1 | Scaffold1943 | 327078                  | TT                              | AA              | 1947024216               |
| SNP_P4_169789_338056 | NW_004517016.1 | Scaffold1943 | 338056                  | TT                              | CC              | 1947024218               |
| SNP_P4_169790_338106 | NW_004517016.1 | Scaffold1943 | 338106                  | TT                              | AA              | 1947024220               |
| SNP_P4_169792_359575 | NW_004517016.1 | Scaffold1943 | 359575                  | CC                              | AA              | 1947024222               |
| SNP_P4_169793_361905 | NW_004517016.1 | Scaffold1943 | 361905                  | AA                              | GG              | 1947024224               |
| SNP_P4_169794_362551 | NW_004517016.1 | Scaffold1943 | 362551                  | CC                              | TT              | 1947024226               |
| SNP_P4_169796_368140 | NW_004517016.1 | Scaffold1943 | 368140                  | AA                              | GG              | 1947024228               |
| SNP_P4_169797_369200 | NW_004517016.1 | Scaffold1943 | 369200                  | GG                              | TT              | 1947024230               |
| SNP_P4_169798_369388 | NW_004517016.1 | Scaffold1943 | 369388                  | AA                              | TT              | 1947024232               |
| SNP_P4_169799_376590 | NW_004517016.1 | Scaffold1943 | 376590                  | AA                              | TT              | 1947024234               |
| SNP_P4_169800_377184 | NW_004517016.1 | Scaffold1943 | 377184                  | TT                              | CC              | 1947024236               |
| SNP_P4_169801_382926 | NW_004517016.1 | Scaffold1943 | 382926                  | CC                              | TT              | 1947024238               |
| SNP_P4_169802_385843 | NW_004517016.1 | Scaffold1943 | 385843                  | TT                              | CC              | 1947024240               |
| SNP_P4_169803_390429 | NW_004517016.1 | Scaffold1943 | 390429                  | TT                              | GG              | 1947024242               |

| SNPs IDs             | Chromosome IDs | Chromosomes  | Physical positions (bp) | CDC Frontier (Reference genome) | (ILWC46 & LPNB) | NCBI SNPdb Accession IDs |
|----------------------|----------------|--------------|-------------------------|---------------------------------|-----------------|--------------------------|
| SNP_P4_169804_390657 | NW_004517016.1 | Scaffold1943 | 390657                  | GG                              | AA              | 1947024244               |
| SNP_P4_169805_392407 | NW_004517016.1 | Scaffold1943 | 392407                  | GG                              | AA              | 1947024246               |
| SNP_P4_169806_392555 | NW_004517016.1 | Scaffold1943 | 392555                  | AA                              | GG              | 1947024248               |
| SNP_P4_169807_392578 | NW_004517016.1 | Scaffold1943 | 392578                  | TT                              | CC              | 1947024250               |
| SNP_P4_169808_392606 | NW_004517016.1 | Scaffold1943 | 392606                  | AA                              | GG              | 1947024252               |
| SNP_P4_169809_392609 | NW_004517016.1 | Scaffold1943 | 392609                  | TT                              | AA              | 1947024254               |
| SNP_P4_169810_393161 | NW_004517016.1 | Scaffold1943 | 393161                  | TT                              | GG              | 1947024256               |
| SNP_P4_169811_393163 | NW_004517016.1 | Scaffold1943 | 393163                  | TT                              | AA              | 1947024258               |
| SNP_P4_169812_393343 | NW_004517016.1 | Scaffold1943 | 393343                  | GG                              | AA              | 1947024260               |
| SNP_P4_169813_393359 | NW_004517016.1 | Scaffold1943 | 393359                  | CC                              | TT              | 1947024262               |
| SNP_P4_169815_394099 | NW_004517016.1 | Scaffold1943 | 394099                  | AA                              | CC              | 1947024264               |
| SNP_P4_169816_394196 | NW_004517016.1 | Scaffold1943 | 394196                  | TT                              | CC              | 1947024267               |
| SNP_P4_169817_394240 | NW_004517016.1 | Scaffold1943 | 394240                  | CC                              | TT              | 1947024269               |
| SNP_P4_169818_394299 | NW_004517016.1 | Scaffold1943 | 394299                  | CC                              | TT              | 1947024271               |
| SNP_P4_169819_394392 | NW_004517016.1 | Scaffold1943 | 394392                  | CC                              | TT              | 1947024273               |
| SNP_P4_169820_394450 | NW_004517016.1 | Scaffold1943 | 394450                  | TT                              | AA              | 1947024275               |
| SNP_P4_169821_394748 | NW_004517016.1 | Scaffold1943 | 394748                  | CC                              | AA              | 1947024277               |
| SNP_P4_169822_394887 | NW_004517016.1 | Scaffold1943 | 394887                  | AA                              | TT              | 1947024279               |
| SNP_P4_169823_395066 | NW_004517016.1 | Scaffold1943 | 395066                  | AA                              | GG              | 1947024281               |
| SNP_P4_169824_395254 | NW_004517016.1 | Scaffold1943 | 395254                  | TT                              | CC              | 1947024283               |
| SNP_P4_169825_395385 | NW_004517016.1 | Scaffold1943 | 395385                  | AA                              | TT              | 1947024285               |
| SNP_P4_169826_395401 | NW_004517016.1 | Scaffold1943 | 395401                  | AA                              | GG              | 1947024287               |
| SNP_P4_169827_395493 | NW_004517016.1 | Scaffold1943 | 395493                  | TT                              | CC              | 1947024289               |
| SNP_P4_169828_395531 | NW_004517016.1 | Scaffold1943 | 395531                  | AA                              | TT              | 1947024291               |
| SNP_P4_169829_395540 | NW_004517016.1 | Scaffold1943 | 395540                  | GG                              | AA              | 1947024293               |
| SNP_P4_169830_395627 | NW_004517016.1 | Scaffold1943 | 395627                  | GG                              | AA              | 1947024295               |
| SNP_P4_169831_395654 | NW_004517016.1 | Scaffold1943 | 395654                  | CC                              | TT              | 1947024297               |
| SNP_P4_169832_396042 | NW_004517016.1 | Scaffold1943 | 396042                  | AA                              | CC              | 1947024299               |
| SNP_P4_169833_396043 | NW_004517016.1 | Scaffold1943 | 396043                  | CC                              | AA              | 1947024301               |
| SNP_P4_169835_4881   | NW_004517017.1 | Scaffold1944 | 4881                    | TT                              | CC              | 1947024303               |
| SNP_P4_169840_11418  | NW_004517018.1 | Scaffold1945 | 11418                   | GG                              | AA              | 1947024305               |
| SNP_P4_169841_11596  | NW_004517018.1 | Scaffold1945 | 11596                   | TT                              | CC              | 1947024307               |
| SNP_P4_169842_11645  | NW_004517018.1 | Scaffold1945 | 11645                   | CC                              | TT              | 1947024309               |
| SNP_P4_169843_11719  | NW_004517018.1 | Scaffold1945 | 11719                   | CC                              | TT              | 1947024311               |
| SNP_P4_169844_11725  | NW_004517018.1 | Scaffold1945 | 11725                   | AA                              | GG              | 1947024313               |
| SNP_P4_169845_11900  | NW_004517018.1 | Scaffold1945 | 11900                   | GG                              | AA              | 1947024315               |
| SNP_P4_169846_11915  | NW_004517018.1 | Scaffold1945 | 11915                   | AA                              | GG              | 1947024317               |
| SNP_P4_169849_24578  | NW_004517018.1 | Scaffold1945 | 24578                   | AA                              | CC              | 1947024319               |
| SNP_P4_169850_31373  | NW_004517018.1 | Scaffold1945 | 31373                   | GG                              | AA              | 1947024321               |
| SNP_P4_169851_31715  | NW_004517018.1 | Scaffold1945 | 31715                   | TT                              | AA              | 1947024323               |
| SNP_P4_169853_40563  | NW_004517018.1 | Scaffold1945 | 40563                   | GG                              | TT              | 1947024325               |
| SNP_P4_169854_40928  | NW_004517018.1 | Scaffold1945 | 40928                   | AA                              | CC              | 1947024327               |

| SNPs IDs             | Chromosome IDs | Chromosomes  | Physical positions (bp) | CDC Frontier (Reference genome) | (ILWC46 & LPNB) | NCBI SNPdb Accession IDs |
|----------------------|----------------|--------------|-------------------------|---------------------------------|-----------------|--------------------------|
| SNP_P4_169855_40934  | NW_004517018.1 | Scaffold1945 | 40934                   | AA                              | TT              | 1947024329               |
| SNP_P4_169856_40943  | NW_004517018.1 | Scaffold1945 | 40943                   | AA                              | GG              | 1947024331               |
| SNP_P4_169857_97815  | NW_004517018.1 | Scaffold1945 | 97815                   | GG                              | AA              | 1947024333               |
| SNP_P4_169858_128801 | NW_004517018.1 | Scaffold1945 | 128801                  | CC                              | TT              | 1947024335               |
| SNP_P4_169859_138211 | NW_004517018.1 | Scaffold1945 | 138211                  | AA                              | TT              | 1947024337               |
| SNP_P4_169860_138213 | NW_004517018.1 | Scaffold1945 | 138213                  | GG                              | AA              | 1947024339               |
| SNP_P4_169861_159286 | NW_004517018.1 | Scaffold1945 | 159286                  | TT                              | CC              | 1947024341               |
| SNP_P4_169862_164109 | NW_004517018.1 | Scaffold1945 | 164109                  | AA                              | CC              | 1947024343               |
| SNP_P4_169863_166669 | NW_004517018.1 | Scaffold1945 | 166669                  | TT                              | GG              | 1947024345               |
| SNP_P4_169864_166917 | NW_004517018.1 | Scaffold1945 | 166917                  | AA                              | TT              | 1947024347               |
| SNP_P4_169865_173113 | NW_004517018.1 | Scaffold1945 | 173113                  | CC                              | TT              | 1947024350               |
| SNP_P4_169867_1314   | NW_004517019.1 | Scaffold1946 | 1314                    | TT                              | AA              | 1947024352               |
| SNP_P4_169868_1400   | NW_004517019.1 | Scaffold1946 | 1400                    | TT                              | CC              | 1947024354               |
| SNP_P4_169869_1649   | NW_004517019.1 | Scaffold1946 | 1649                    | TT                              | CC              | 1947024356               |
| SNP_P4_169870_1887   | NW_004517019.1 | Scaffold1946 | 1887                    | TT                              | CC              | 1947024358               |
| SNP_P4_169871_5232   | NW_004517019.1 | Scaffold1946 | 5232                    | GG                              | AA              | 1947024360               |
| SNP_P4_169872_5513   | NW_004517019.1 | Scaffold1946 | 5513                    | CC                              | TT              | 1947024362               |
| SNP_P4_169873_6511   | NW_004517019.1 | Scaffold1946 | 6511                    | AA                              | TT              | 1947024364               |
| SNP_P4_169874_6550   | NW_004517019.1 | Scaffold1946 | 6550                    | GG                              | TT              | 1947024366               |
| SNP_P4_169875_6823   | NW_004517019.1 | Scaffold1946 | 6823                    | GG                              | AA              | 1947024368               |
| SNP_P4_169876_9783   | NW_004517019.1 | Scaffold1946 | 9783                    | AA                              | TT              | 1947024370               |
| SNP_P4_169877_11583  | NW_004517019.1 | Scaffold1946 | 11583                   | CC                              | TT              | 1947024372               |
| SNP_P4_169878_12732  | NW_004517019.1 | Scaffold1946 | 12732                   | CC                              | TT              | 1947024374               |
| SNP_P4_169879_15479  | NW_004517019.1 | Scaffold1946 | 15479                   | AA                              | CC              | 1947024376               |
| SNP_P4_169880_19939  | NW_004517019.1 | Scaffold1946 | 19939                   | CC                              | TT              | 1947024378               |
| SNP_P4_169881_19948  | NW_004517019.1 | Scaffold1946 | 19948                   | TT                              | AA              | 1947024380               |
| SNP_P4_169882_20239  | NW_004517019.1 | Scaffold1946 | 20239                   | TT                              | CC              | 1947024382               |
| SNP_P4_169883_20243  | NW_004517019.1 | Scaffold1946 | 20243                   | TT                              | CC              | 1947024384               |
| SNP_P4_169884_29973  | NW_004517019.1 | Scaffold1946 | 29973                   | GG                              | TT              | 1947024386               |
| SNP_P4_169885_39895  | NW_004517019.1 | Scaffold1946 | 39895                   | AA                              | TT              | 1947024388               |
| SNP_P4_169886_39970  | NW_004517019.1 | Scaffold1946 | 39970                   | CC                              | TT              | 1947024390               |
| SNP_P4_169887_43802  | NW_004517019.1 | Scaffold1946 | 43802                   | AA                              | GG              | 1947024392               |
| SNP_P4_169888_60068  | NW_004517019.1 | Scaffold1946 | 60068                   | CC                              | TT              | 1947024394               |
| SNP_P4_169889_74833  | NW_004517019.1 | Scaffold1946 | 74833                   | AA                              | GG              | 1947024396               |
| SNP_P4_169890_75106  | NW_004517019.1 | Scaffold1946 | 75106                   | GG                              | AA              | 1947024398               |
| SNP_P4_169891_75562  | NW_004517019.1 | Scaffold1946 | 75562                   | TT                              | CC              | 1947024400               |
| SNP_P4_169892_75596  | NW_004517019.1 | Scaffold1946 | 75596                   | TT                              | CC              | 1947024402               |
| SNP_P4_169893_75804  | NW_004517019.1 | Scaffold1946 | 75804                   | TT                              | CC              | 1947024404               |
| SNP_P4_169894_1465   | NW_004517021.1 | Scaffold1949 | 1465                    | TT                              | AA              | 1947024406               |
| SNP_P4_169895_1466   | NW_004517021.1 | Scaffold1949 | 1466                    | AA                              | TT              | 1947024408               |
| SNP_P4_169896_1549   | NW_004517021.1 | Scaffold1949 | 1549                    | GG                              | CC              | 1947024410               |
| SNP_P4_169897_2027   | NW_004517021.1 | Scaffold1949 | 2027                    | TT                              | AA              | 1947024412               |

| SNPs IDs            | Chromosome IDs | Chromosomes  | Physical positions (bp) | CDC Frontier (Reference genome) | (ILWC46 & LPNB) | NCBI SNPdb Accession IDs |
|---------------------|----------------|--------------|-------------------------|---------------------------------|-----------------|--------------------------|
| SNP_P4_169898_5975  | NW_004517021.1 | Scaffold1949 | 5975                    | TT                              | GG              | 1947024414               |
| SNP_P4_169899_5999  | NW_004517021.1 | Scaffold1949 | 5999                    | TT                              | CC              | 1947024416               |
| SNP_P4_169900_6002  | NW_004517021.1 | Scaffold1949 | 6002                    | AA                              | GG              | 1947024418               |
| SNP_P4_169901_2698  | NW_004517022.1 | Scaffold1950 | 2698                    | GG                              | TT              | 1947024420               |
| SNP_P4_169902_22388 | NW_004517022.1 | Scaffold1950 | 22388                   | TT                              | AA              | 1947024422               |
| SNP_P4_169903_22393 | NW_004517022.1 | Scaffold1950 | 22393                   | AA                              | TT              | 1947024424               |
| SNP_P4_169904_22433 | NW_004517022.1 | Scaffold1950 | 22433                   | AA                              | GG              | 1947024426               |
| SNP_P4_169905_22437 | NW_004517022.1 | Scaffold1950 | 22437                   | AA                              | TT              | 1947024428               |
| SNP_P4_169906_22438 | NW_004517022.1 | Scaffold1950 | 22438                   | GG                              | AA              | 1947024430               |
| SNP_P4_169907_22454 | NW_004517022.1 | Scaffold1950 | 22454                   | TT                              | GG              | 1947024432               |
| SNP_P4_169908_443   | NW_004517023.1 | Scaffold1951 | 443                     | AA                              | TT              | 1947024434               |
| SNP_P4_169909_2142  | NW_004517023.1 | Scaffold1951 | 2142                    | TT                              | AA              | 1947024436               |
| SNP_P4_169910_14883 | NW_004517024.1 | Scaffold1952 | 14883                   | GG                              | TT              | 1947024438               |
| SNP_P4_169911_784   | NW_004517026.1 | Scaffold1954 | 784                     | CC                              | GG              | 1947024440               |
| SNP_P4_169912_799   | NW_004517026.1 | Scaffold1954 | 799                     | CC                              | TT              | 1947024442               |
| SNP_P4_169913_863   | NW_004517026.1 | Scaffold1954 | 863                     | CC                              | TT              | 1947024444               |
| SNP_P4_169914_908   | NW_004517026.1 | Scaffold1954 | 908                     | GG                              | AA              | 1947024446               |
| SNP_P4_169915_931   | NW_004517026.1 | Scaffold1954 | 931                     | AA                              | CC              | 1947024448               |
| SNP_P4_169916_941   | NW_004517026.1 | Scaffold1954 | 941                     | AA                              | GG              | 1947024450               |
| SNP_P4_169917_1054  | NW_004517026.1 | Scaffold1954 | 1054                    | TT                              | AA              | 1947024452               |
| SNP_P4_169918_1062  | NW_004517026.1 | Scaffold1954 | 1062                    | TT                              | CC              | 1947024454               |
| SNP_P4_169920_1155  | NW_004517026.1 | Scaffold1954 | 1155                    | TT                              | CC              | 1947024456               |
| SNP_P4_169921_1164  | NW_004517026.1 | Scaffold1954 | 1164                    | AA                              | TT              | 1947024458               |
| SNP_P4_169922_1189  | NW_004517026.1 | Scaffold1954 | 1189                    | GG                              | AA              | 1947024460               |
| SNP_P4_169923_1293  | NW_004517026.1 | Scaffold1954 | 1293                    | AA                              | TT              | 1947024462               |
| SNP_P4_169924_1351  | NW_004517026.1 | Scaffold1954 | 1351                    | TT                              | GG              | 1947024464               |
| SNP_P4_169925_1375  | NW_004517026.1 | Scaffold1954 | 1375                    | GG                              | AA              | 1947024466               |
| SNP_P4_169926_1442  | NW_004517026.1 | Scaffold1954 | 1442                    | TT                              | AA              | 1947024468               |
| SNP_P4_169927_1448  | NW_004517026.1 | Scaffold1954 | 1448                    | TT                              | AA              | 1947024470               |
| SNP_P4_169928_1461  | NW_004517026.1 | Scaffold1954 | 1461                    | TT                              | CC              | 1947024472               |
| SNP_P4_169929_1503  | NW_004517026.1 | Scaffold1954 | 1503                    | AA                              | TT              | 1947024474               |
| SNP_P4_169930_1524  | NW_004517026.1 | Scaffold1954 | 1524                    | AA                              | GG              | 1947024476               |
| SNP_P4_169931_1525  | NW_004517026.1 | Scaffold1954 | 1525                    | CC                              | TT              | 1947024478               |
| SNP_P4_169932_1593  | NW_004517026.1 | Scaffold1954 | 1593                    | TT                              | GG              | 1947024480               |
| SNP_P4_169934_2172  | NW_004517026.1 | Scaffold1954 | 2172                    | TT                              | AA              | 1947024482               |
| SNP_P4_169935_2307  | NW_004517026.1 | Scaffold1954 | 2307                    | AA                              | GG              | 1947024484               |
| SNP_P4_169936_2332  | NW_004517026.1 | Scaffold1954 | 2332                    | GG                              | AA              | 1947024486               |
| SNP_P4_169938_2544  | NW_004517026.1 | Scaffold1954 | 2544                    | AA                              | GG              | 1947024488               |
| SNP_P4_169939_2569  | NW_004517026.1 | Scaffold1954 | 2569                    | TT                              | AA              | 1947024490               |
| SNP_P4_169940_2581  | NW_004517026.1 | Scaffold1954 | 2581                    | AA                              | CC              | 1947024492               |
| SNP_P4_169941_4837  | NW_004517026.1 | Scaffold1954 | 4837                    | TT                              | AA              | 1947024494               |
| SNP_P4_169942_4852  | NW_004517026.1 | Scaffold1954 | 4852                    | TT                              | CC              | 1947024496               |

| SNPs IDs            | Chromosome IDs | Chromosomes  | Physical positions (bp) | CDC Frontier (Reference genome) | (ILWC46 & LPNB) | NCBI SNPdb Accession IDs |
|---------------------|----------------|--------------|-------------------------|---------------------------------|-----------------|--------------------------|
| SNP_P4_169943_4860  | NW_004517026.1 | Scaffold1954 | 4860                    | GG                              | TT              | 1947024498               |
| SNP_P4_169944_4879  | NW_004517026.1 | Scaffold1954 | 4879                    | AA                              | GG              | 1947024500               |
| SNP_P4_169945_4933  | NW_004517026.1 | Scaffold1954 | 4933                    | CC                              | TT              | 1947024502               |
| SNP_P4_169946_4949  | NW_004517026.1 | Scaffold1954 | 4949                    | TT                              | GG              | 1947024504               |
| SNP_P4_169947_5093  | NW_004517026.1 | Scaffold1954 | 5093                    | GG                              | AA              | 1947024506               |
| SNP_P4_169948_9313  | NW_004517028.1 | Scaffold1956 | 9313                    | AA                              | TT              | 1947024508               |
| SNP_P4_169949_9716  | NW_004517028.1 | Scaffold1956 | 9716                    | TT                              | CC              | 1947024510               |
| SNP_P4_169950_9794  | NW_004517028.1 | Scaffold1956 | 9794                    | TT                              | AA              | 1947024512               |
| SNP_P4_169951_9826  | NW_004517028.1 | Scaffold1956 | 9826                    | CC                              | TT              | 1947024514               |
| SNP_P4_169952_9910  | NW_004517028.1 | Scaffold1956 | 9910                    | GG                              | AA              | 1947024516               |
| SNP_P4_169953_9935  | NW_004517028.1 | Scaffold1956 | 9935                    | AA                              | GG              | 1947024518               |
| SNP_P4_169954_9976  | NW_004517028.1 | Scaffold1956 | 9976                    | TT                              | GG              | 1947024521               |
| SNP_P4_169955_10021 | NW_004517028.1 | Scaffold1956 | 10021                   | GG                              | TT              | 1947024523               |
| SNP_P4_169956_10129 | NW_004517028.1 | Scaffold1956 | 10129                   | AA                              | GG              | 1947024525               |
| SNP_P4_169957_14129 | NW_004517028.1 | Scaffold1956 | 14129                   | TT                              | GG              | 1947024527               |
| SNP_P4_169958_14186 | NW_004517028.1 | Scaffold1956 | 14186                   | TT                              | AA              | 1947024529               |
| SNP_P4_169959_14223 | NW_004517028.1 | Scaffold1956 | 14223                   | CC                              | TT              | 1947024531               |
| SNP_P4_169960_14271 | NW_004517028.1 | Scaffold1956 | 14271                   | TT                              | GG              | 1947024533               |
| SNP_P4_169961_14276 | NW_004517028.1 | Scaffold1956 | 14276                   | AA                              | GG              | 1947024535               |
| SNP_P4_169962_14296 | NW_004517028.1 | Scaffold1956 | 14296                   | GG                              | AA              | 1947024537               |
| SNP_P4_169963_15865 | NW_004517028.1 | Scaffold1956 | 15865                   | CC                              | AA              | 1947024539               |
| SNP_P4_169964_16540 | NW_004517028.1 | Scaffold1956 | 16540                   | GG                              | CC              | 1947024541               |
| SNP_P4_169965_16866 | NW_004517028.1 | Scaffold1956 | 16866                   | GG                              | CC              | 1947024543               |
| SNP_P4_169966_17018 | NW_004517028.1 | Scaffold1956 | 17018                   | TT                              | CC              | 1947024545               |
| SNP_P4_169967_17064 | NW_004517028.1 | Scaffold1956 | 17064                   | CC                              | TT              | 1947024547               |
| SNP_P4_169968_17112 | NW_004517028.1 | Scaffold1956 | 17112                   | AA                              | TT              | 1947024549               |
| SNP_P4_169969_17605 | NW_004517028.1 | Scaffold1956 | 17605                   | TT                              | GG              | 1947024551               |
| SNP_P4_169970_18425 | NW_004517028.1 | Scaffold1956 | 18425                   | CC                              | TT              | 1947024553               |
| SNP_P4_169971_22342 | NW_004517028.1 | Scaffold1956 | 22342                   | CC                              | GG              | 1947024555               |
| SNP_P4_169972_22730 | NW_004517028.1 | Scaffold1956 | 22730                   | GG                              | AA              | 1947024557               |
| SNP_P4_169973_27556 | NW_004517028.1 | Scaffold1956 | 27556                   | TT                              | GG              | 1947024559               |
| SNP_P4_169974_27557 | NW_004517028.1 | Scaffold1956 | 27557                   | GG                              | TT              | 1947024561               |
| SNP_P4_169975_27791 | NW_004517028.1 | Scaffold1956 | 27791                   | AA                              | GG              | 1947024563               |
| SNP_P4_169976_27834 | NW_004517028.1 | Scaffold1956 | 27834                   | TT                              | CC              | 1947024566               |
| SNP_P4_169977_27871 | NW_004517028.1 | Scaffold1956 | 27871                   | CC                              | AA              | 1947024568               |
| SNP_P4_169978_27887 | NW_004517028.1 | Scaffold1956 | 27887                   | TT                              | CC              | 1947024570               |
| SNP_P4_169979_27974 | NW_004517028.1 | Scaffold1956 | 27974                   | GG                              | AA              | 1947024572               |
| SNP_P4_169980_28022 | NW_004517028.1 | Scaffold1956 | 28022                   | AA                              | GG              | 1947024574               |
| SNP_P4_169981_28043 | NW_004517028.1 | Scaffold1956 | 28043                   | TT                              | GG              | 1947024576               |
| SNP_P4_169982_30833 | NW_004517028.1 | Scaffold1956 | 30833                   | AA                              | CC              | 1947024578               |
| SNP_P4_169983_30858 | NW_004517028.1 | Scaffold1956 | 30858                   | TT                              | GG              | 1947024580               |
| SNP_P4_169985_40746 | NW_004517028.1 | Scaffold1956 | 40746                   | GG                              | AA              | 1947024582               |

| SNPs IDs            | Chromosome IDs | Chromosomes  | Physical positions (bp) | CDC Frontier (Reference genome) | (ILWC46 & LPNB) | NCBI SNPdb Accession IDs |
|---------------------|----------------|--------------|-------------------------|---------------------------------|-----------------|--------------------------|
| SNP_P4_169986_40829 | NW_004517028.1 | Scaffold1956 | 40829                   | TT                              | CC              | 1947024584               |
| SNP_P4_169987_40834 | NW_004517028.1 | Scaffold1956 | 40834                   | GG                              | AA              | 1947024586               |
| SNP_P4_169988_46654 | NW_004517028.1 | Scaffold1956 | 46654                   | TT                              | CC              | 1947024588               |
| SNP_P4_169989_46820 | NW_004517028.1 | Scaffold1956 | 46820                   | GG                              | AA              | 1947024590               |
| SNP_P4_169990_46821 | NW_004517028.1 | Scaffold1956 | 46821                   | GG                              | AA              | 1947024592               |
| SNP_P4_169991_46868 | NW_004517028.1 | Scaffold1956 | 46868                   | TT                              | CC              | 1947024594               |
| SNP_P4_169992_50089 | NW_004517028.1 | Scaffold1956 | 50089                   | TT                              | CC              | 1947024596               |
| SNP_P4_169993_50481 | NW_004517028.1 | Scaffold1956 | 50481                   | TT                              | GG              | 1947024598               |
| SNP_P4_169994_50482 | NW_004517028.1 | Scaffold1956 | 50482                   | AA                              | TT              | 1947024600               |
| SNP_P4_169995_52702 | NW_004517028.1 | Scaffold1956 | 52702                   | AA                              | TT              | 1947024602               |
| SNP_P4_169996_52873 | NW_004517028.1 | Scaffold1956 | 52873                   | TT                              | CC              | 1947024604               |
| SNP_P4_169997_54171 | NW_004517028.1 | Scaffold1956 | 54171                   | AA                              | TT              | 1947024606               |
| SNP_P4_169998_63443 | NW_004517028.1 | Scaffold1956 | 63443                   | TT                              | CC              | 1947024608               |
| SNP_P4_169999_63638 | NW_004517028.1 | Scaffold1956 | 63638                   | CC                              | TT              | 1947024610               |
| SNP_P4_170001_72186 | NW_004517028.1 | Scaffold1956 | 72186                   | AA                              | TT              | 1947024612               |
| SNP_P4_170002_72526 | NW_004517028.1 | Scaffold1956 | 72526                   | GG                              | TT              | 1947024614               |
| SNP_P4_170003_72593 | NW_004517028.1 | Scaffold1956 | 72593                   | AA                              | CC              | 1947024616               |
| SNP_P4_170004_85717 | NW_004517028.1 | Scaffold1956 | 85717                   | CC                              | TT              | 1947024618               |
| SNP_P4_170005_85880 | NW_004517028.1 | Scaffold1956 | 85880                   | AA                              | TT              | 1947024620               |
| SNP_P4_170006_85954 | NW_004517028.1 | Scaffold1956 | 85954                   | GG                              | TT              | 1947024622               |
| SNP_P4_170007_85961 | NW_004517028.1 | Scaffold1956 | 85961                   | TT                              | GG              | 1947024624               |
| SNP_P4_170008_86053 | NW_004517028.1 | Scaffold1956 | 86053                   | AA                              | CC              | 1947024626               |
| SNP_P4_170009_86241 | NW_004517028.1 | Scaffold1956 | 86241                   | AA                              | GG              | 1947024628               |
| SNP_P4_170010_87785 | NW_004517028.1 | Scaffold1956 | 87785                   | TT                              | AA              | 1947024630               |
| SNP_P4_170011_87857 | NW_004517028.1 | Scaffold1956 | 87857                   | CC                              | GG              | 1947024632               |
| SNP_P4_170012_88025 | NW_004517028.1 | Scaffold1956 | 88025                   | GG                              | AA              | 1947024633               |
| SNP_P4_170013_88040 | NW_004517028.1 | Scaffold1956 | 88040                   | AA                              | CC              | 1947024634               |
| SNP_P4_170014_88263 | NW_004517028.1 | Scaffold1956 | 88263                   | GG                              | TT              | 1947024635               |
| SNP_P4_170015_88432 | NW_004517028.1 | Scaffold1956 | 88432                   | AA                              | GG              | 1947024636               |
| SNP_P4_170016_88531 | NW_004517028.1 | Scaffold1956 | 88531                   | CC                              | AA              | 1947024637               |
| SNP_P4_170017_88814 | NW_004517028.1 | Scaffold1956 | 88814                   | CC                              | TT              | 1947024638               |
| SNP_P4_170018_93193 | NW_004517028.1 | Scaffold1956 | 93193                   | AA                              | GG              | 1947024639               |
| SNP_P4_170019_93295 | NW_004517028.1 | Scaffold1956 | 93295                   | AA                              | GG              | 1947024640               |
| SNP_P4_170020_93403 | NW_004517028.1 | Scaffold1956 | 93403                   | TT                              | CC              | 1947024641               |
| SNP_P4_170021_93497 | NW_004517028.1 | Scaffold1956 | 93497                   | GG                              | AA              | 1947024642               |
| SNP_P4_170022_93498 | NW_004517028.1 | Scaffold1956 | 93498                   | GG                              | CC              | 1947024643               |
| SNP_P4_170023_93539 | NW_004517028.1 | Scaffold1956 | 93539                   | AA                              | GG              | 1947024644               |
| SNP_P4_170024_93563 | NW_004517028.1 | Scaffold1956 | 93563                   | TT                              | CC              | 1947024645               |
| SNP_P4_170025_93567 | NW_004517028.1 | Scaffold1956 | 93567                   | CC                              | AA              | 1947024646               |
| SNP_P4_170026_93581 | NW_004517028.1 | Scaffold1956 | 93581                   | TT                              | CC              | 1947024647               |
| SNP_P4_170027_93685 | NW_004517028.1 | Scaffold1956 | 93685                   | GG                              | TT              | 1947024648               |
| SNP_P4_170028_94034 | NW_004517028.1 | Scaffold1956 | 94034                   | GG                              | TT              | 1947024649               |

| SNPs IDs             | Chromosome IDs | Chromosomes  | Physical positions (bp) | CDC Frontier (Reference genome) | (ILWC46 & LPNB) | NCBI SNPdb Accession IDs |
|----------------------|----------------|--------------|-------------------------|---------------------------------|-----------------|--------------------------|
| SNP_P4_170029_94133  | NW_004517028.1 | Scaffold1956 | 94133                   | TT                              | CC              | 1947024650               |
| SNP_P4_170030_96638  | NW_004517028.1 | Scaffold1956 | 96638                   | TT                              | AA              | 1947024651               |
| SNP_P4_170031_96658  | NW_004517028.1 | Scaffold1956 | 96658                   | TT                              | CC              | 1947024652               |
| SNP_P4_170032_96732  | NW_004517028.1 | Scaffold1956 | 96732                   | GG                              | TT              | 1947024654               |
| SNP_P4_170033_96733  | NW_004517028.1 | Scaffold1956 | 96733                   | AA                              | TT              | 1947024656               |
| SNP_P4_170034_96881  | NW_004517028.1 | Scaffold1956 | 96881                   | AA                              | GG              | 1947024658               |
| SNP_P4_170035_96918  | NW_004517028.1 | Scaffold1956 | 96918                   | GG                              | AA              | 1947024660               |
| SNP_P4_170036_96963  | NW_004517028.1 | Scaffold1956 | 96963                   | TT                              | CC              | 1947024662               |
| SNP_P4_170037_96966  | NW_004517028.1 | Scaffold1956 | 96966                   | CC                              | TT              | 1947024664               |
| SNP_P4_170038_97227  | NW_004517028.1 | Scaffold1956 | 97227                   | TT                              | GG              | 1947024666               |
| SNP_P4_170039_102522 | NW_004517028.1 | Scaffold1956 | 102522                  | TT                              | AA              | 1947024669               |
| SNP_P4_170040_120035 | NW_004517028.1 | Scaffold1956 | 120035                  | CC                              | GG              | 1947024671               |
| SNP_P4_170041_120038 | NW_004517028.1 | Scaffold1956 | 120038                  | CC                              | TT              | 1947024673               |
| SNP_P4_170042_120081 | NW_004517028.1 | Scaffold1956 | 120081                  | AA                              | CC              | 1947024675               |
| SNP_P4_170043_120492 | NW_004517028.1 | Scaffold1956 | 120492                  | TT                              | CC              | 1947024677               |
| SNP_P4_170044_120493 | NW_004517028.1 | Scaffold1956 | 120493                  | GG                              | AA              | 1947024679               |
| SNP_P4_170045_120502 | NW_004517028.1 | Scaffold1956 | 120502                  | AA                              | GG              | 1947024681               |
| SNP_P4_170046_120522 | NW_004517028.1 | Scaffold1956 | 120522                  | AA                              | CC              | 1947024683               |
| SNP_P4_170047_120552 | NW_004517028.1 | Scaffold1956 | 120552                  | CC                              | TT              | 1947024685               |
| SNP_P4_170048_120560 | NW_004517028.1 | Scaffold1956 | 120560                  | TT                              | CC              | 1947024687               |
| SNP_P4_170049_133155 | NW_004517028.1 | Scaffold1956 | 133155                  | GG                              | AA              | 1947024689               |
| SNP_P4_170050_133156 | NW_004517028.1 | Scaffold1956 | 133156                  | CC                              | TT              | 1947024691               |
| SNP_P4_170051_133228 | NW_004517028.1 | Scaffold1956 | 133228                  | GG                              | AA              | 1947024693               |
| SNP_P4_170052_133485 | NW_004517028.1 | Scaffold1956 | 133485                  | AA                              | GG              | 1947024694               |
| SNP_P4_170053_135039 | NW_004517028.1 | Scaffold1956 | 135039                  | TT                              | CC              | 1947024696               |
| SNP_P4_170054_32620  | NW_004517029.1 | Scaffold1959 | 32620                   | GG                              | CC              | 1947024698               |
| SNP_P4_170055_32628  | NW_004517029.1 | Scaffold1959 | 32628                   | GG                              | TT              | 1947024700               |
| SNP_P4_170056_33094  | NW_004517029.1 | Scaffold1959 | 33094                   | AA                              | GG              | 1947024702               |
| SNP_P4_170057_33367  | NW_004517029.1 | Scaffold1959 | 33367                   | CC                              | TT              | 1947024704               |
| SNP_P4_170058_40318  | NW_004517029.1 | Scaffold1959 | 40318                   | TT                              | AA              | 1947024706               |
| SNP_P4_170059_44670  | NW_004517029.1 | Scaffold1959 | 44670                   | CC                              | GG              | 1947024708               |
| SNP_P4_170060_45265  | NW_004517029.1 | Scaffold1959 | 45265                   | AA                              | TT              | 1947024710               |
| SNP_P4_170061_45333  | NW_004517029.1 | Scaffold1959 | 45333                   | CC                              | TT              | 1947024712               |
| SNP_P4_170062_45433  | NW_004517029.1 | Scaffold1959 | 45433                   | CC                              | TT              | 1947024714               |
| SNP_P4_170063_46647  | NW_004517029.1 | Scaffold1959 | 46647                   | GG                              | TT              | 1947024716               |
| SNP_P4_170064_46691  | NW_004517029.1 | Scaffold1959 | 46691                   | AA                              | GG              | 1947024718               |
| SNP_P4_170065_46694  | NW_004517029.1 | Scaffold1959 | 46694                   | AA                              | CC              | 1947024720               |
| SNP_P4_170066_46915  | NW_004517029.1 | Scaffold1959 | 46915                   | GG                              | TT              | 1947024722               |
| SNP_P4_170067_46936  | NW_004517029.1 | Scaffold1959 | 46936                   | CC                              | AA              | 1947024724               |
| SNP_P4_170068_47215  | NW_004517029.1 | Scaffold1959 | 47215                   | TT                              | CC              | 1947024727               |
| SNP_P4_170070_47298  | NW_004517029.1 | Scaffold1959 | 47298                   | CC                              | TT              | 1947024729               |
| SNP_P4_170071_47360  | NW_004517029.1 | Scaffold1959 | 47360                   | CC                              | AA              | 1947024731               |



| SNPs IDs             | Chromosome IDs | Chromosomes  | Physical positions (bp) | CDC Frontier (Reference genome) | (ILWC46 & LPNB) | NCBI SNPdb Accession IDs |
|----------------------|----------------|--------------|-------------------------|---------------------------------|-----------------|--------------------------|
| SNP_P4_170072_47522  | NW_004517029.1 | Scaffold1959 | 47522                   | TT                              | GG              | 1947024733               |
| SNP_P4_170073_47525  | NW_004517029.1 | Scaffold1959 | 47525                   | GG                              | CC              | 1947024735               |
| SNP_P4_170074_47589  | NW_004517029.1 | Scaffold1959 | 47589                   | AA                              | GG              | 1947024737               |
| SNP_P4_170075_47640  | NW_004517029.1 | Scaffold1959 | 47640                   | CC                              | GG              | 1947024739               |
| SNP_P4_170076_47654  | NW_004517029.1 | Scaffold1959 | 47654                   | TT                              | GG              | 1947024741               |
| SNP_P4_170077_59120  | NW_004517029.1 | Scaffold1959 | 59120                   | TT                              | CC              | 1947024743               |
| SNP_P4_170078_59327  | NW_004517029.1 | Scaffold1959 | 59327                   | AA                              | TT              | 1947024745               |
| SNP_P4_170079_59376  | NW_004517029.1 | Scaffold1959 | 59376                   | AA                              | CC              | 1947024747               |
| SNP_P4_170080_59387  | NW_004517029.1 | Scaffold1959 | 59387                   | TT                              | AA              | 1947024749               |
| SNP_P4_170081_64316  | NW_004517029.1 | Scaffold1959 | 64316                   | AA                              | TT              | 1947024751               |
| SNP_P4_170082_64319  | NW_004517029.1 | Scaffold1959 | 64319                   | AA                              | GG              | 1947024753               |
| SNP_P4_170083_64335  | NW_004517029.1 | Scaffold1959 | 64335                   | AA                              | GG              | 1947024755               |
| SNP_P4_170084_64342  | NW_004517029.1 | Scaffold1959 | 64342                   | CC                              | TT              | 1947024757               |
| SNP_P4_170085_64546  | NW_004517029.1 | Scaffold1959 | 64546                   | GG                              | AA              | 1947024759               |
| SNP_P4_170086_64631  | NW_004517029.1 | Scaffold1959 | 64631                   | TT                              | CC              | 1947024761               |
| SNP_P4_170087_64672  | NW_004517029.1 | Scaffold1959 | 64672                   | GG                              | AA              | 1947024763               |
| SNP_P4_170088_67152  | NW_004517029.1 | Scaffold1959 | 67152                   | AA                              | CC              | 1947024765               |
| SNP_P4_170089_67170  | NW_004517029.1 | Scaffold1959 | 67170                   | CC                              | TT              | 1947024767               |
| SNP_P4_170090_67174  | NW_004517029.1 | Scaffold1959 | 67174                   | GG                              | TT              | 1947024769               |
| SNP_P4_170091_67286  | NW_004517029.1 | Scaffold1959 | 67286                   | GG                              | AA              | 1947024771               |
| SNP_P4_170093_67650  | NW_004517029.1 | Scaffold1959 | 67650                   | AA                              | TT              | 1947024772               |
| SNP_P4_170094_67709  | NW_004517029.1 | Scaffold1959 | 67709                   | CC                              | AA              | 1947024774               |
| SNP_P4_170095_79299  | NW_004517029.1 | Scaffold1959 | 79299                   | TT                              | CC              | 1947024776               |
| SNP_P4_170097_84364  | NW_004517029.1 | Scaffold1959 | 84364                   | TT                              | GG              | 1947024778               |
| SNP_P4_170098_84369  | NW_004517029.1 | Scaffold1959 | 84369                   | AA                              | TT              | 1947024780               |
| SNP_P4_170099_84677  | NW_004517029.1 | Scaffold1959 | 84677                   | GG                              | CC              | 1947024782               |
| SNP_P4_170100_84710  | NW_004517029.1 | Scaffold1959 | 84710                   | CC                              | TT              | 1947024784               |
| SNP_P4_170101_91903  | NW_004517029.1 | Scaffold1959 | 91903                   | TT                              | CC              | 1947024786               |
| SNP_P4_170102_91904  | NW_004517029.1 | Scaffold1959 | 91904                   | GG                              | CC              | 1947024788               |
| SNP_P4_170103_120749 | NW_004517029.1 | Scaffold1959 | 120749                  | CC                              | AA              | 1947024790               |
| SNP_P4_170105_125024 | NW_004517029.1 | Scaffold1959 | 125024                  | TT                              | GG              | 1947024792               |
| SNP_P4_170106_125033 | NW_004517029.1 | Scaffold1959 | 125033                  | TT                              | CC              | 1947024794               |
| SNP_P4_170107_125323 | NW_004517029.1 | Scaffold1959 | 125323                  | CC                              | TT              | 1947024796               |
| SNP_P4_170108_125336 | NW_004517029.1 | Scaffold1959 | 125336                  | CC                              | GG              | 1947024798               |
| SNP_P4_170109_125363 | NW_004517029.1 | Scaffold1959 | 125363                  | TT                              | CC              | 1947024800               |
| SNP_P4_170110_125374 | NW_004517029.1 | Scaffold1959 | 125374                  | TT                              | CC              | 1947024802               |
| SNP_P4_170111_125379 | NW_004517029.1 | Scaffold1959 | 125379                  | AA                              | GG              | 1947024804               |
| SNP_P4_170112_125390 | NW_004517029.1 | Scaffold1959 | 125390                  | TT                              | CC              | 1947024806               |
| SNP_P4_170113_8805   | NW_004517032.1 | Scaffold1962 | 8805                    | AA                              | CC              | 1947024808               |
| SNP_P4_170114_8858   | NW_004517032.1 | Scaffold1962 | 8858                    | TT                              | AA              | 1947024810               |
| SNP_P4_170115_19714  | NW_004517032.1 | Scaffold1962 | 19714                   | GG                              | AA              | 1947024812               |
| SNP_P4_170116_19739  | NW_004517032.1 | Scaffold1962 | 19739                   | TT                              | GG              | 1947024814               |

| SNPs IDs             | Chromosome IDs | Chromosomes  | Physical positions (bp) | CDC Frontier (Reference genome) | (ILWC46 & LPNB) | NCBI SNPdb Accession IDs |
|----------------------|----------------|--------------|-------------------------|---------------------------------|-----------------|--------------------------|
| SNP_P4_170117_44277  | NW_004517032.1 | Scaffold1962 | 44277                   | TT                              | CC              | 1947024816               |
| SNP_P4_170118_44279  | NW_004517032.1 | Scaffold1962 | 44279                   | TT                              | GG              | 1947024818               |
| SNP_P4_170119_44482  | NW_004517032.1 | Scaffold1962 | 44482                   | TT                              | GG              | 1947024820               |
| SNP_P4_170120_44490  | NW_004517032.1 | Scaffold1962 | 44490                   | GG                              | AA              | 1947024822               |
| SNP_P4_170121_70156  | NW_004517032.1 | Scaffold1962 | 70156                   | TT                              | AA              | 1947024824               |
| SNP_P4_170122_70162  | NW_004517032.1 | Scaffold1962 | 70162                   | GG                              | TT              | 1947024826               |
| SNP_P4_170123_70163  | NW_004517032.1 | Scaffold1962 | 70163                   | AA                              | TT              | 1947024828               |
| SNP_P4_170124_70169  | NW_004517032.1 | Scaffold1962 | 70169                   | GG                              | TT              | 1947024830               |
| SNP_P4_170125_72393  | NW_004517032.1 | Scaffold1962 | 72393                   | GG                              | AA              | 1947024832               |
| SNP_P4_170126_74997  | NW_004517032.1 | Scaffold1962 | 74997                   | AA                              | GG              | 1947024834               |
| SNP_P4_170128_119045 | NW_004517032.1 | Scaffold1962 | 119045                  | TT                              | CC              | 1947024836               |
| SNP_P4_170129_150836 | NW_004517032.1 | Scaffold1962 | 150836                  | CC                              | TT              | 1947024838               |
| SNP_P4_170131_170086 | NW_004517032.1 | Scaffold1962 | 170086                  | GG                              | AA              | 1947024840               |
| SNP_P4_170132_170553 | NW_004517032.1 | Scaffold1962 | 170553                  | CC                              | TT              | 1947024842               |
| SNP_P4_170133_170687 | NW_004517032.1 | Scaffold1962 | 170687                  | CC                              | TT              | 1947024844               |
| SNP_P4_170135_170743 | NW_004517032.1 | Scaffold1962 | 170743                  | TT                              | CC              | 1947024847               |
| SNP_P4_170136_170953 | NW_004517032.1 | Scaffold1962 | 170953                  | GG                              | AA              | 1947024849               |
| SNP_P4_170137_171050 | NW_004517032.1 | Scaffold1962 | 171050                  | TT                              | CC              | 1947024851               |
| SNP_P4_170138_171057 | NW_004517032.1 | Scaffold1962 | 171057                  | AA                              | TT              | 1947024853               |
| SNP_P4_170139_3106   | NW_004517033.1 | Scaffold1963 | 3106                    | AA                              | GG              | 1947024855               |
| SNP_P4_170140_3702   | NW_004517033.1 | Scaffold1963 | 3702                    | AA                              | GG              | 1947024857               |
| SNP_P4_170142_7258   | NW_004517034.1 | Scaffold1964 | 7258                    | AA                              | GG              | 1947024859               |
| SNP_P4_170143_7550   | NW_004517034.1 | Scaffold1964 | 7550                    | TT                              | CC              | 1947024861               |
| SNP_P4_170144_7736   | NW_004517034.1 | Scaffold1964 | 7736                    | CC                              | TT              | 1947024863               |
| SNP_P4_170145_7839   | NW_004517034.1 | Scaffold1964 | 7839                    | GG                              | AA              | 1947024865               |
| SNP_P4_170146_8291   | NW_004517034.1 | Scaffold1964 | 8291                    | CC                              | TT              | 1947024867               |
| SNP_P4_170147_8405   | NW_004517034.1 | Scaffold1964 | 8405                    | CC                              | TT              | 1947024869               |
| SNP_P4_170148_8463   | NW_004517034.1 | Scaffold1964 | 8463                    | GG                              | AA              | 1947024871               |
| SNP_P4_170149_8908   | NW_004517034.1 | Scaffold1964 | 8908                    | AA                              | GG              | 1947024873               |
| SNP_P4_170151_9086   | NW_004517034.1 | Scaffold1964 | 9086                    | CC                              | GG              | 1947024876               |
| SNP_P4_170152_9087   | NW_004517034.1 | Scaffold1964 | 9087                    | TT                              | GG              | 1947024878               |
| SNP_P4_170153_9088   | NW_004517034.1 | Scaffold1964 | 9088                    | CC                              | AA              | 1947024880               |
| SNP_P4_170154_9089   | NW_004517034.1 | Scaffold1964 | 9089                    | CC                              | GG              | 1947024882               |
| SNP_P4_170155_9348   | NW_004517034.1 | Scaffold1964 | 9348                    | TT                              | AA              | 1947024884               |
| SNP_P4_170156_9550   | NW_004517034.1 | Scaffold1964 | 9550                    | CC                              | GG              | 1947024886               |
| SNP_P4_170157_10009  | NW_004517034.1 | Scaffold1964 | 10009                   | GG                              | AA              | 1947024888               |
| SNP_P4_170158_10272  | NW_004517034.1 | Scaffold1964 | 10272                   | TT                              | CC              | 1947024890               |
| SNP_P4_170159_10279  | NW_004517034.1 | Scaffold1964 | 10279                   | GG                              | AA              | 1947024892               |
| SNP_P4_170160_10442  | NW_004517034.1 | Scaffold1964 | 10442                   | GG                              | AA              | 1947024894               |
| SNP_P4_170161_10529  | NW_004517034.1 | Scaffold1964 | 10529                   | AA                              | GG              | 1947024896               |
| SNP_P4_170162_10764  | NW_004517034.1 | Scaffold1964 | 10764                   | TT                              | CC              | 1947024898               |
| SNP_P4_170163_10821  | NW_004517034.1 | Scaffold1964 | 10821                   | AA                              | GG              | 1947024900               |

| SNPs IDs             | Chromosome IDs | Chromosomes  | Physical positions (bp) | CDC Frontier (Reference genome) | (ILWC46 & LPNB) | NCBI SNPdb Accession IDs |
|----------------------|----------------|--------------|-------------------------|---------------------------------|-----------------|--------------------------|
| SNP_P4_170164_10842  | NW_004517034.1 | Scaffold1964 | 10842                   | TT                              | GG              | 1947024902               |
| SNP_P4_170166_11016  | NW_004517034.1 | Scaffold1964 | 11016                   | GG                              | AA              | 1947024904               |
| SNP_P4_170168_17989  | NW_004517034.1 | Scaffold1964 | 17989                   | GG                              | AA              | 1947024906               |
| SNP_P4_170169_20103  | NW_004517034.1 | Scaffold1964 | 20103                   | AA                              | CC              | 1947024908               |
| SNP_P4_170170_20108  | NW_004517034.1 | Scaffold1964 | 20108                   | GG                              | TT              | 1947024910               |
| SNP_P4_170172_20246  | NW_004517034.1 | Scaffold1964 | 20246                   | CC                              | TT              | 1947024912               |
| SNP_P4_170173_20248  | NW_004517034.1 | Scaffold1964 | 20248                   | CC                              | TT              | 1947024914               |
| SNP_P4_170174_20257  | NW_004517034.1 | Scaffold1964 | 20257                   | CC                              | AA              | 1947024916               |
| SNP_P4_170175_20394  | NW_004517034.1 | Scaffold1964 | 20394                   | TT                              | AA              | 1947024918               |
| SNP_P4_170176_20422  | NW_004517034.1 | Scaffold1964 | 20422                   | GG                              | AA              | 1947024920               |
| SNP_P4_170177_20442  | NW_004517034.1 | Scaffold1964 | 20442                   | CC                              | TT              | 1947024922               |
| SNP_P4_170178_20601  | NW_004517034.1 | Scaffold1964 | 20601                   | AA                              | CC              | 1947024924               |
| SNP_P4_170179_20811  | NW_004517034.1 | Scaffold1964 | 20811                   | TT                              | CC              | 1947024926               |
| SNP_P4_170180_20884  | NW_004517034.1 | Scaffold1964 | 20884                   | GG                              | AA              | 1947024928               |
| SNP_P4_170181_20885  | NW_004517034.1 | Scaffold1964 | 20885                   | CC                              | TT              | 1947024930               |
| SNP_P4_170182_20940  | NW_004517034.1 | Scaffold1964 | 20940                   | CC                              | AA              | 1947024932               |
| SNP_P4_170183_21130  | NW_004517034.1 | Scaffold1964 | 21130                   | TT                              | CC              | 1947024934               |
| SNP_P4_170184_21191  | NW_004517034.1 | Scaffold1964 | 21191                   | AA                              | GG              | 1947024936               |
| SNP_P4_170186_22615  | NW_004517034.1 | Scaffold1964 | 22615                   | GG                              | CC              | 1947024938               |
| SNP_P4_170187_32359  | NW_004517034.1 | Scaffold1964 | 32359                   | CC                              | TT              | 1947024940               |
| SNP_P4_170188_35029  | NW_004517034.1 | Scaffold1964 | 35029                   | TT                              | AA              | 1947024942               |
| SNP_P4_170189_35030  | NW_004517034.1 | Scaffold1964 | 35030                   | TT                              | AA              | 1947024944               |
| SNP_P4_170190_87690  | NW_004517034.1 | Scaffold1964 | 87690                   | AA                              | GG              | 1947024946               |
| SNP_P4_170191_107508 | NW_004517034.1 | Scaffold1964 | 107508                  | CC                              | TT              | 1947024948               |
| SNP_P4_170192_107511 | NW_004517034.1 | Scaffold1964 | 107511                  | GG                              | CC              | 1947024950               |
| SNP_P4_170193_107535 | NW_004517034.1 | Scaffold1964 | 107535                  | AA                              | GG              | 1947024951               |
| SNP_P4_170194_107849 | NW_004517034.1 | Scaffold1964 | 107849                  | AA                              | GG              | 1947024952               |
| SNP_P4_170195_112857 | NW_004517034.1 | Scaffold1964 | 112857                  | AA                              | GG              | 1947024953               |
| SNP_P4_170196_113158 | NW_004517034.1 | Scaffold1964 | 113158                  | GG                              | AA              | 1947024954               |
| SNP_P4_170197_157821 | NW_004517034.1 | Scaffold1964 | 157821                  | AA                              | GG              | 1947024955               |
| SNP_P4_170198_165358 | NW_004517034.1 | Scaffold1964 | 165358                  | AA                              | GG              | 1947024956               |
| SNP_P4_170199_165530 | NW_004517034.1 | Scaffold1964 | 165530                  | AA                              | GG              | 1947024957               |
| SNP_P4_170200_171915 | NW_004517034.1 | Scaffold1964 | 171915                  | TT                              | CC              | 1947024958               |
| SNP_P4_170201_172096 | NW_004517034.1 | Scaffold1964 | 172096                  | TT                              | CC              | 1947024959               |
| SNP_P4_170204_172293 | NW_004517034.1 | Scaffold1964 | 172293                  | AA                              | GG              | 1947024960               |
| SNP_P4_170205_172461 | NW_004517034.1 | Scaffold1964 | 172461                  | GG                              | TT              | 1947024961               |
| SNP_P4_170206_172562 | NW_004517034.1 | Scaffold1964 | 172562                  | AA                              | CC              | 1947024963               |
| SNP_P4_170207_172579 | NW_004517034.1 | Scaffold1964 | 172579                  | GG                              | TT              | 1947024965               |
| SNP_P4_170208_4056   | NW_004517040.1 | Scaffold1971 | 4056                    | TT                              | CC              | 1947024967               |
| SNP_P4_170209_4247   | NW_004517040.1 | Scaffold1971 | 4247                    | TT                              | AA              | 1947024969               |
| SNP_P4_170210_4292   | NW_004517040.1 | Scaffold1971 | 4292                    | TT                              | CC              | 1947024971               |
| SNP_P4_170211_4317   | NW_004517040.1 | Scaffold1971 | 4317                    | CC                              | AA              | 1947024973               |

| SNPs IDs            | Chromosome IDs | Chromosomes  | Physical positions (bp) | CDC Frontier (Reference genome) | (ILWC46 & LPNB) | NCBI SNPdb Accession IDs |
|---------------------|----------------|--------------|-------------------------|---------------------------------|-----------------|--------------------------|
| SNP_P4_170212_4445  | NW_004517040.1 | Scaffold1971 | 4445                    | TT                              | CC              | 1947024975               |
| SNP_P4_170213_4455  | NW_004517040.1 | Scaffold1971 | 4455                    | CC                              | TT              | 1947024977               |
| SNP_P4_170214_4471  | NW_004517040.1 | Scaffold1971 | 4471                    | CC                              | TT              | 1947024979               |
| SNP_P4_170215_4487  | NW_004517040.1 | Scaffold1971 | 4487                    | TT                              | AA              | 1947024981               |
| SNP_P4_170216_4550  | NW_004517040.1 | Scaffold1971 | 4550                    | CC                              | TT              | 1947024983               |
| SNP_P4_170217_1180  | NW_004517042.1 | Scaffold1974 | 1180                    | AA                              | TT              | 1947024985               |
| SNP_P4_170218_1206  | NW_004517042.1 | Scaffold1974 | 1206                    | GG                              | AA              | 1947024987               |
| SNP_P4_170219_1228  | NW_004517042.1 | Scaffold1974 | 1228                    | AA                              | GG              | 1947024989               |
| SNP_P4_170220_1231  | NW_004517042.1 | Scaffold1974 | 1231                    | AA                              | CC              | 1947024991               |
| SNP_P4_170221_4779  | NW_004517042.1 | Scaffold1974 | 4779                    | AA                              | TT              | 1947024993               |
| SNP_P4_170222_4781  | NW_004517042.1 | Scaffold1974 | 4781                    | TT                              | CC              | 1947024995               |
| SNP_P4_170223_4818  | NW_004517042.1 | Scaffold1974 | 4818                    | GG                              | AA              | 1947024997               |
| SNP_P4_170224_13933 | NW_004517042.1 | Scaffold1974 | 13933                   | CC                              | TT              | 1947024999               |
| SNP_P4_170225_700   | NW_004517044.1 | Scaffold1976 | 700                     | GG                              | AA              | 1947025001               |
| SNP_P4_170226_5339  | NW_004517044.1 | Scaffold1976 | 5339                    | GG                              | CC              | 1947025003               |
| SNP_P4_170227_5395  | NW_004517044.1 | Scaffold1976 | 5395                    | CC                              | TT              | 1947025005               |
| SNP_P4_170228_9479  | NW_004517044.1 | Scaffold1976 | 9479                    | TT                              | CC              | 1947025007               |
| SNP_P4_170229_9511  | NW_004517044.1 | Scaffold1976 | 9511                    | AA                              | GG              | 1947025009               |
| SNP_P4_170230_9640  | NW_004517044.1 | Scaffold1976 | 9640                    | AA                              | GG              | 1947025011               |
| SNP_P4_170231_9663  | NW_004517044.1 | Scaffold1976 | 9663                    | AA                              | TT              | 1947025013               |
| SNP_P4_170232_9688  | NW_004517044.1 | Scaffold1976 | 9688                    | CC                              | AA              | 1947025015               |
| SNP_P4_170233_9709  | NW_004517044.1 | Scaffold1976 | 9709                    | CC                              | AA              | 1947025017               |
| SNP_P4_170234_10589 | NW_004517044.1 | Scaffold1976 | 10589                   | GG                              | CC              | 1947025019               |
| SNP_P4_170235_10596 | NW_004517044.1 | Scaffold1976 | 10596                   | CC                              | AA              | 1947025021               |
| SNP_P4_170236_10608 | NW_004517044.1 | Scaffold1976 | 10608                   | TT                              | AA              | 1947025023               |
| SNP_P4_170237_10738 | NW_004517044.1 | Scaffold1976 | 10738                   | CC                              | TT              | 1947025025               |
| SNP_P4_170238_10858 | NW_004517044.1 | Scaffold1976 | 10858                   | CC                              | AA              | 1947025027               |
| SNP_P4_170239_10866 | NW_004517044.1 | Scaffold1976 | 10866                   | GG                              | AA              | 1947025029               |
| SNP_P4_170240_10886 | NW_004517044.1 | Scaffold1976 | 10886                   | TT                              | CC              | 1947025031               |
| SNP_P4_170241_17096 | NW_004517044.1 | Scaffold1976 | 17096                   | GG                              | AA              | 1947025033               |
| SNP_P4_170242_17145 | NW_004517044.1 | Scaffold1976 | 17145                   | AA                              | TT              | 1947025035               |
| SNP_P4_170243_17202 | NW_004517044.1 | Scaffold1976 | 17202                   | TT                              | CC              | 1947025037               |
| SNP_P4_170244_17607 | NW_004517044.1 | Scaffold1976 | 17607                   | GG                              | AA              | 1947025039               |
| SNP_P4_170245_17636 | NW_004517044.1 | Scaffold1976 | 17636                   | TT                              | CC              | 1947025041               |
| SNP_P4_170246_26420 | NW_004517044.1 | Scaffold1976 | 26420                   | CC                              | TT              | 1947025043               |
| SNP_P4_170247_27091 | NW_004517044.1 | Scaffold1976 | 27091                   | CC                              | TT              | 1947025045               |
| SNP_P4_170248_27109 | NW_004517044.1 | Scaffold1976 | 27109                   | AA                              | GG              | 1947025047               |
| SNP_P4_170249_27139 | NW_004517044.1 | Scaffold1976 | 27139                   | GG                              | AA              | 1947025049               |
| SNP_P4_170250_27142 | NW_004517044.1 | Scaffold1976 | 27142                   | GG                              | AA              | 1947025051               |
| SNP_P4_170251_27153 | NW_004517044.1 | Scaffold1976 | 27153                   | CC                              | TT              | 1947025053               |
| SNP_P4_170252_27174 | NW_004517044.1 | Scaffold1976 | 27174                   | GG                              | TT              | 1947025055               |
| SNP_P4_170253_27175 | NW_004517044.1 | Scaffold1976 | 27175                   | TT                              | CC              | 1947025057               |

| SNPs IDs             | Chromosome IDs | Chromosomes  | Physical positions (bp) | CDC Frontier (Reference genome) | (ILWC46 & LPNB) | NCBI SNPdb Accession IDs |
|----------------------|----------------|--------------|-------------------------|---------------------------------|-----------------|--------------------------|
| SNP_P4_170254_27433  | NW_004517044.1 | Scaffold1976 | 27433                   | AA                              | TT              | 1947025059               |
| SNP_P4_170255_27451  | NW_004517044.1 | Scaffold1976 | 27451                   | AA                              | GG              | 1947025061               |
| SNP_P4_170256_27964  | NW_004517044.1 | Scaffold1976 | 27964                   | AA                              | TT              | 1947025063               |
| SNP_P4_170257_28197  | NW_004517044.1 | Scaffold1976 | 28197                   | CC                              | GG              | 1947025065               |
| SNP_P4_170258_28209  | NW_004517044.1 | Scaffold1976 | 28209                   | GG                              | AA              | 1947025067               |
| SNP_P4_170259_28247  | NW_004517044.1 | Scaffold1976 | 28247                   | CC                              | TT              | 1947025069               |
| SNP_P4_170260_28618  | NW_004517044.1 | Scaffold1976 | 28618                   | AA                              | GG              | 1947025071               |
| SNP_P4_170261_31214  | NW_004517044.1 | Scaffold1976 | 31214                   | AA                              | GG              | 1947025073               |
| SNP_P4_170262_31270  | NW_004517044.1 | Scaffold1976 | 31270                   | TT                              | GG              | 1947025075               |
| SNP_P4_170263_31612  | NW_004517044.1 | Scaffold1976 | 31612                   | GG                              | AA              | 1947025077               |
| SNP_P4_170264_500    | NW_004517046.1 | Scaffold1981 | 500                     | GG                              | AA              | 1947025079               |
| SNP_P4_170265_21535  | NW_004517046.1 | Scaffold1981 | 21535                   | CC                              | TT              | 1947025081               |
| SNP_P4_170267_30730  | NW_004517046.1 | Scaffold1981 | 30730                   | TT                              | GG              | 1947025083               |
| SNP_P4_170268_30737  | NW_004517046.1 | Scaffold1981 | 30737                   | TT                              | GG              | 1947025085               |
| SNP_P4_170269_48295  | NW_004517046.1 | Scaffold1981 | 48295                   | CC                              | TT              | 1947025087               |
| SNP_P4_170270_50577  | NW_004517046.1 | Scaffold1981 | 50577                   | GG                              | AA              | 1947025089               |
| SNP_P4_170271_50679  | NW_004517046.1 | Scaffold1981 | 50679                   | AA                              | GG              | 1947025091               |
| SNP_P4_170272_50824  | NW_004517046.1 | Scaffold1981 | 50824                   | CC                              | TT              | 1947025093               |
| SNP_P4_170273_82412  | NW_004517046.1 | Scaffold1981 | 82412                   | CC                              | GG              | 1947025095               |
| SNP_P4_170274_82428  | NW_004517046.1 | Scaffold1981 | 82428                   | CC                              | TT              | 1947025097               |
| SNP_P4_170275_82480  | NW_004517046.1 | Scaffold1981 | 82480                   | GG                              | AA              | 1947025099               |
| SNP_P4_170276_82481  | NW_004517046.1 | Scaffold1981 | 82481                   | AA                              | GG              | 1947025101               |
| SNP_P4_170277_82493  | NW_004517046.1 | Scaffold1981 | 82493                   | CC                              | AA              | 1947025103               |
| SNP_P4_170278_82519  | NW_004517046.1 | Scaffold1981 | 82519                   | GG                              | AA              | 1947025105               |
| SNP_P4_170279_82542  | NW_004517046.1 | Scaffold1981 | 82542                   | GG                              | TT              | 1947025107               |
| SNP_P4_170280_82710  | NW_004517046.1 | Scaffold1981 | 82710                   | AA                              | TT              | 1947025109               |
| SNP_P4_170281_82774  | NW_004517046.1 | Scaffold1981 | 82774                   | AA                              | TT              | 1947025111               |
| SNP_P4_170282_82825  | NW_004517046.1 | Scaffold1981 | 82825                   | TT                              | AA              | 1947025113               |
| SNP_P4_170283_82906  | NW_004517046.1 | Scaffold1981 | 82906                   | CC                              | AA              | 1947025115               |
| SNP_P4_170284_82965  | NW_004517046.1 | Scaffold1981 | 82965                   | CC                              | TT              | 1947025117               |
| SNP_P4_170285_83085  | NW_004517046.1 | Scaffold1981 | 83085                   | CC                              | TT              | 1947025119               |
| SNP_P4_170286_83147  | NW_004517046.1 | Scaffold1981 | 83147                   | GG                              | AA              | 1947025121               |
| SNP_P4_170287_83160  | NW_004517046.1 | Scaffold1981 | 83160                   | TT                              | AA              | 1947025123               |
| SNP_P4_170288_83161  | NW_004517046.1 | Scaffold1981 | 83161                   | TT                              | AA              | 1947025125               |
| SNP_P4_170289_85912  | NW_004517046.1 | Scaffold1981 | 85912                   | CC                              | TT              | 1947025127               |
| SNP_P4_170290_91284  | NW_004517046.1 | Scaffold1981 | 91284                   | AA                              | GG              | 1947025129               |
| SNP_P4_170291_99535  | NW_004517046.1 | Scaffold1981 | 99535                   | AA                              | GG              | 1947025131               |
| SNP_P4_170292_100121 | NW_004517046.1 | Scaffold1981 | 100121                  | TT                              | CC              | 1947025133               |
| SNP_P4_170293_100200 | NW_004517046.1 | Scaffold1981 | 100200                  | GG                              | AA              | 1947025135               |
| SNP_P4_170294_100560 | NW_004517046.1 | Scaffold1981 | 100560                  | CC                              | TT              | 1947025137               |
| SNP_P4_170295_100621 | NW_004517046.1 | Scaffold1981 | 100621                  | GG                              | AA              | 1947025139               |
| SNP_P4_170296_116696 | NW_004517046.1 | Scaffold1981 | 116696                  | CC                              | GG              | 1947025141               |

| SNPs IDs             | Chromosome IDs | Chromosomes  | Physical positions (bp) | CDC Frontier (Reference genome) | (ILWC46 & LPNB) | NCBI SNPdb Accession IDs |
|----------------------|----------------|--------------|-------------------------|---------------------------------|-----------------|--------------------------|
| SNP_P4_170298_117404 | NW_004517046.1 | Scaffold1981 | 117404                  | TT                              | AA              | 1947025143               |
| SNP_P4_170300_117858 | NW_004517046.1 | Scaffold1981 | 117858                  | TT                              | CC              | 1947025145               |
| SNP_P4_170303_118338 | NW_004517046.1 | Scaffold1981 | 118338                  | AA                              | GG              | 1947025147               |
| SNP_P4_170305_126422 | NW_004517046.1 | Scaffold1981 | 126422                  | AA                              | CC              | 1947025149               |
| SNP_P4_170306_131434 | NW_004517046.1 | Scaffold1981 | 131434                  | TT                              | CC              | 1947025151               |
| SNP_P4_170307_131491 | NW_004517046.1 | Scaffold1981 | 131491                  | AA                              | TT              | 1947025153               |
| SNP_P4_170308_131702 | NW_004517046.1 | Scaffold1981 | 131702                  | CC                              | TT              | 1947025155               |
| SNP_P4_170309_149229 | NW_004517046.1 | Scaffold1981 | 149229                  | GG                              | TT              | 1947025157               |
| SNP_P4_170310_149249 | NW_004517046.1 | Scaffold1981 | 149249                  | TT                              | CC              | 1947025159               |
| SNP_P4_170312_159267 | NW_004517046.1 | Scaffold1981 | 159267                  | AA                              | CC              | 1947025161               |
| SNP_P4_170314_229407 | NW_004517046.1 | Scaffold1981 | 229407                  | TT                              | CC              | 1947025163               |
| SNP_P4_170317_234032 | NW_004517046.1 | Scaffold1981 | 234032                  | GG                              | AA              | 1947025165               |
| SNP_P4_170318_234242 | NW_004517046.1 | Scaffold1981 | 234242                  | TT                              | CC              | 1947025167               |
| SNP_P4_170321_240669 | NW_004517046.1 | Scaffold1981 | 240669                  | AA                              | TT              | 1947025170               |
| SNP_P4_170322_240890 | NW_004517046.1 | Scaffold1981 | 240890                  | TT                              | AA              | 1947025172               |
| SNP_P4_170323_242067 | NW_004517046.1 | Scaffold1981 | 242067                  | TT                              | CC              | 1947025174               |
| SNP_P4_170324_243116 | NW_004517046.1 | Scaffold1981 | 243116                  | TT                              | AA              | 1947025176               |
| SNP_P4_170325_243491 | NW_004517046.1 | Scaffold1981 | 243491                  | GG                              | AA              | 1947025178               |
| SNP_P4_170326_243578 | NW_004517046.1 | Scaffold1981 | 243578                  | CC                              | TT              | 1947025180               |
| SNP_P4_170327_254425 | NW_004517046.1 | Scaffold1981 | 254425                  | GG                              | CC              | 1947025182               |
| SNP_P4_170328_254708 | NW_004517046.1 | Scaffold1981 | 254708                  | AA                              | GG              | 1947025184               |
| SNP_P4_170329_255286 | NW_004517046.1 | Scaffold1981 | 255286                  | CC                              | TT              | 1947025186               |
| SNP_P4_170330_264343 | NW_004517046.1 | Scaffold1981 | 264343                  | AA                              | GG              | 1947025188               |
| SNP_P4_170331_276788 | NW_004517046.1 | Scaffold1981 | 276788                  | AA                              | CC              | 1947025190               |
| SNP_P4_170332_277053 | NW_004517046.1 | Scaffold1981 | 277053                  | CC                              | GG              | 1947025192               |
| SNP_P4_170333_277055 | NW_004517046.1 | Scaffold1981 | 277055                  | GG                              | AA              | 1947025194               |
| SNP_P4_170334_277065 | NW_004517046.1 | Scaffold1981 | 277065                  | TT                              | CC              | 1947025196               |
| SNP_P4_170335_277095 | NW_004517046.1 | Scaffold1981 | 277095                  | TT                              | CC              | 1947025198               |
| SNP_P4_170336_277133 | NW_004517046.1 | Scaffold1981 | 277133                  | TT                              | CC              | 1947025200               |
| SNP_P4_170337_277372 | NW_004517046.1 | Scaffold1981 | 277372                  | GG                              | AA              | 1947025202               |
| SNP_P4_170338_277480 | NW_004517046.1 | Scaffold1981 | 277480                  | GG                              | AA              | 1947025204               |
| SNP_P4_170339_277982 | NW_004517046.1 | Scaffold1981 | 277982                  | TT                              | CC              | 1947025206               |
| SNP_P4_170340_278010 | NW_004517046.1 | Scaffold1981 | 278010                  | AA                              | CC              | 1947025208               |
| SNP_P4_170341_278323 | NW_004517046.1 | Scaffold1981 | 278323                  | GG                              | AA              | 1947025210               |
| SNP_P4_170342_278347 | NW_004517046.1 | Scaffold1981 | 278347                  | GG                              | AA              | 1947025212               |
| SNP_P4_170343_278361 | NW_004517046.1 | Scaffold1981 | 278361                  | AA                              | GG              | 1947025214               |
| SNP_P4_170344_299584 | NW_004517046.1 | Scaffold1981 | 299584                  | TT                              | CC              | 1947025216               |
| SNP_P4_170345_304137 | NW_004517046.1 | Scaffold1981 | 304137                  | GG                              | AA              | 1947025218               |
| SNP_P4_170346_310315 | NW_004517046.1 | Scaffold1981 | 310315                  | GG                              | AA              | 1947025220               |
| SNP_P4_170347_313094 | NW_004517046.1 | Scaffold1981 | 313094                  | CC                              | TT              | 1947025222               |
| SNP_P4_170349_320635 | NW_004517046.1 | Scaffold1981 | 320635                  | CC                              | TT              | 1947025224               |
| SNP_P4_170350_320667 | NW_004517046.1 | Scaffold1981 | 320667                  | TT                              | CC              | 1947025226               |

| SNPs IDs             | Chromosome IDs | Chromosomes  | Physical positions (bp) | CDC Frontier (Reference genome) | (ILWC46 & LPNB) | NCBI SNPdb Accession IDs |
|----------------------|----------------|--------------|-------------------------|---------------------------------|-----------------|--------------------------|
| SNP_P4_170351_320672 | NW_004517046.1 | Scaffold1981 | 320672                  | TT                              | CC              | 1947025229               |
| SNP_P4_170352_320688 | NW_004517046.1 | Scaffold1981 | 320688                  | AA                              | GG              | 1947025231               |
| SNP_P4_170353_320705 | NW_004517046.1 | Scaffold1981 | 320705                  | AA                              | GG              | 1947025233               |
| SNP_P4_170354_320734 | NW_004517046.1 | Scaffold1981 | 320734                  | TT                              | GG              | 1947025235               |
| SNP_P4_170355_320741 | NW_004517046.1 | Scaffold1981 | 320741                  | GG                              | AA              | 1947025237               |
| SNP_P4_170356_320831 | NW_004517046.1 | Scaffold1981 | 320831                  | AA                              | GG              | 1947025239               |
| SNP_P4_170357_320933 | NW_004517046.1 | Scaffold1981 | 320933                  | TT                              | CC              | 1947025241               |
| SNP_P4_170358_320942 | NW_004517046.1 | Scaffold1981 | 320942                  | AA                              | GG              | 1947025243               |
| SNP_P4_170359_320958 | NW_004517046.1 | Scaffold1981 | 320958                  | CC                              | TT              | 1947025245               |
| SNP_P4_170360_321180 | NW_004517046.1 | Scaffold1981 | 321180                  | TT                              | GG              | 1947025247               |
| SNP_P4_170362_324043 | NW_004517046.1 | Scaffold1981 | 324043                  | CC                              | TT              | 1947025249               |
| SNP_P4_170363_335575 | NW_004517046.1 | Scaffold1981 | 335575                  | GG                              | AA              | 1947025251               |
| SNP_P4_170365_335682 | NW_004517046.1 | Scaffold1981 | 335682                  | GG                              | AA              | 1947025253               |
| SNP_P4_170366_335723 | NW_004517046.1 | Scaffold1981 | 335723                  | GG                              | CC              | 1947025255               |
| SNP_P4_170368_335948 | NW_004517046.1 | Scaffold1981 | 335948                  | GG                              | AA              | 1947025257               |
| SNP_P4_170369_336033 | NW_004517046.1 | Scaffold1981 | 336033                  | AA                              | TT              | 1947025259               |
| SNP_P4_170370_336220 | NW_004517046.1 | Scaffold1981 | 336220                  | TT                              | CC              | 1947025261               |
| SNP_P4_170371_336259 | NW_004517046.1 | Scaffold1981 | 336259                  | GG                              | CC              | 1947025263               |
| SNP_P4_170372_336322 | NW_004517046.1 | Scaffold1981 | 336322                  | GG                              | AA              | 1947025265               |
| SNP_P4_170373_336490 | NW_004517046.1 | Scaffold1981 | 336490                  | AA                              | GG              | 1947025267               |
| SNP_P4_170374_336500 | NW_004517046.1 | Scaffold1981 | 336500                  | AA                              | GG              | 1947025269               |
| SNP_P4_170375_336546 | NW_004517046.1 | Scaffold1981 | 336546                  | GG                              | AA              | 1947025271               |
| SNP_P4_170376_336547 | NW_004517046.1 | Scaffold1981 | 336547                  | TT                              | CC              | 1947025273               |
| SNP_P4_170377_336565 | NW_004517046.1 | Scaffold1981 | 336565                  | TT                              | CC              | 1947025275               |
| SNP_P4_170378_336862 | NW_004517046.1 | Scaffold1981 | 336862                  | GG                              | AA              | 1947025277               |
| SNP_P4_170379_336873 | NW_004517046.1 | Scaffold1981 | 336873                  | CC                              | GG              | 1947025279               |
| SNP_P4_170380_336875 | NW_004517046.1 | Scaffold1981 | 336875                  | AA                              | GG              | 1947025281               |
| SNP_P4_170382_337701 | NW_004517046.1 | Scaffold1981 | 337701                  | AA                              | GG              | 1947025283               |
| SNP_P4_170384_341272 | NW_004517046.1 | Scaffold1981 | 341272                  | CC                              | TT              | 1947025285               |
| SNP_P4_170385_341291 | NW_004517046.1 | Scaffold1981 | 341291                  | GG                              | AA              | 1947025287               |
| SNP_P4_170386_341662 | NW_004517046.1 | Scaffold1981 | 341662                  | CC                              | GG              | 1947025289               |
| SNP_P4_170387_341678 | NW_004517046.1 | Scaffold1981 | 341678                  | GG                              | AA              | 1947025291               |
| SNP_P4_170388_341692 | NW_004517046.1 | Scaffold1981 | 341692                  | CC                              | AA              | 1947025293               |
| SNP_P4_170389_341703 | NW_004517046.1 | Scaffold1981 | 341703                  | AA                              | GG              | 1947025295               |
| SNP_P4_170390_342670 | NW_004517046.1 | Scaffold1981 | 342670                  | GG                              | AA              | 1947025297               |
| SNP_P4_170391_343597 | NW_004517046.1 | Scaffold1981 | 343597                  | TT                              | CC              | 1947025299               |
| SNP_P4_170392_343612 | NW_004517046.1 | Scaffold1981 | 343612                  | TT                              | CC              | 1947025301               |
| SNP_P4_170393_344138 | NW_004517046.1 | Scaffold1981 | 344138                  | CC                              | TT              | 1947025303               |
| SNP_P4_170394_344156 | NW_004517046.1 | Scaffold1981 | 344156                  | TT                              | CC              | 1947025305               |
| SNP_P4_170396_345022 | NW_004517046.1 | Scaffold1981 | 345022                  | AA                              | GG              | 1947025307               |
| SNP_P4_170397_347757 | NW_004517046.1 | Scaffold1981 | 347757                  | TT                              | CC              | 1947025309               |
| SNP_P4_170398_347816 | NW_004517046.1 | Scaffold1981 | 347816                  | GG                              | AA              | 1947025311               |

| SNPs IDs             | Chromosome IDs | Chromosomes  | Physical positions (bp) | CDC Frontier (Reference genome) | (ILWC46 & LPNB) | NCBI SNPdb Accession IDs |
|----------------------|----------------|--------------|-------------------------|---------------------------------|-----------------|--------------------------|
| SNP_P4_170399_347825 | NW_004517046.1 | Scaffold1981 | 347825                  | TT                              | CC              | 1947025313               |
| SNP_P4_170400_348024 | NW_004517046.1 | Scaffold1981 | 348024                  | CC                              | TT              | 1947025315               |
| SNP_P4_170401_348178 | NW_004517046.1 | Scaffold1981 | 348178                  | AA                              | TT              | 1947025317               |
| SNP_P4_170402_348203 | NW_004517046.1 | Scaffold1981 | 348203                  | AA                              | CC              | 1947025319               |
| SNP_P4_170403_348576 | NW_004517046.1 | Scaffold1981 | 348576                  | AA                              | TT              | 1947025321               |
| SNP_P4_170404_348681 | NW_004517046.1 | Scaffold1981 | 348681                  | AA                              | TT              | 1947025323               |
| SNP_P4_170405_348923 | NW_004517046.1 | Scaffold1981 | 348923                  | TT                              | CC              | 1947025325               |
| SNP_P4_170408_349213 | NW_004517046.1 | Scaffold1981 | 349213                  | TT                              | CC              | 1947025327               |
| SNP_P4_170409_349220 | NW_004517046.1 | Scaffold1981 | 349220                  | GG                              | AA              | 1947025329               |
| SNP_P4_170410_349229 | NW_004517046.1 | Scaffold1981 | 349229                  | TT                              | AA              | 1947025331               |
| SNP_P4_170411_349559 | NW_004517046.1 | Scaffold1981 | 349559                  | AA                              | GG              | 1947025333               |
| SNP_P4_170412_349595 | NW_004517046.1 | Scaffold1981 | 349595                  | AA                              | GG              | 1947025336               |
| SNP_P4_170413_349598 | NW_004517046.1 | Scaffold1981 | 349598                  | CC                              | TT              | 1947025338               |
| SNP_P4_170414_349601 | NW_004517046.1 | Scaffold1981 | 349601                  | CC                              | TT              | 1947025340               |
| SNP_P4_170415_349603 | NW_004517046.1 | Scaffold1981 | 349603                  | CC                              | TT              | 1947025342               |
| SNP_P4_170416_349626 | NW_004517046.1 | Scaffold1981 | 349626                  | GG                              | TT              | 1947025344               |
| SNP_P4_170417_351038 | NW_004517046.1 | Scaffold1981 | 351038                  | TT                              | GG              | 1947025346               |
| SNP_P4_170420_351555 | NW_004517046.1 | Scaffold1981 | 351555                  | GG                              | AA              | 1947025348               |
| SNP_P4_170421_351556 | NW_004517046.1 | Scaffold1981 | 351556                  | GG                              | TT              | 1947025350               |
| SNP_P4_170422_351716 | NW_004517046.1 | Scaffold1981 | 351716                  | AA                              | CC              | 1947025352               |
| SNP_P4_170423_351935 | NW_004517046.1 | Scaffold1981 | 351935                  | AA                              | GG              | 1947025354               |
| SNP_P4_170425_355139 | NW_004517046.1 | Scaffold1981 | 355139                  | TT                              | GG              | 1947025356               |
| SNP_P4_170426_355336 | NW_004517046.1 | Scaffold1981 | 355336                  | GG                              | AA              | 1947025358               |
| SNP_P4_170428_355612 | NW_004517046.1 | Scaffold1981 | 355612                  | GG                              | AA              | 1947025360               |
| SNP_P4_170429_355949 | NW_004517046.1 | Scaffold1981 | 355949                  | TT                              | CC              | 1947025362               |
| SNP_P4_170430_355975 | NW_004517046.1 | Scaffold1981 | 355975                  | TT                              | AA              | 1947025364               |
| SNP_P4_170431_356786 | NW_004517046.1 | Scaffold1981 | 356786                  | TT                              | CC              | 1947025366               |
| SNP_P4_170432_356787 | NW_004517046.1 | Scaffold1981 | 356787                  | GG                              | AA              | 1947025368               |
| SNP_P4_170433_356886 | NW_004517046.1 | Scaffold1981 | 356886                  | TT                              | CC              | 1947025370               |
| SNP_P4_170435_356938 | NW_004517046.1 | Scaffold1981 | 356938                  | GG                              | AA              | 1947025372               |
| SNP_P4_170436_356948 | NW_004517046.1 | Scaffold1981 | 356948                  | CC                              | AA              | 1947025374               |
| SNP_P4_170437_356949 | NW_004517046.1 | Scaffold1981 | 356949                  | CC                              | TT              | 1947025376               |
| SNP_P4_170438_356967 | NW_004517046.1 | Scaffold1981 | 356967                  | CC                              | AA              | 1947025378               |
| SNP_P4_170439_356968 | NW_004517046.1 | Scaffold1981 | 356968                  | TT                              | CC              | 1947025380               |
| SNP_P4_170440_357094 | NW_004517046.1 | Scaffold1981 | 357094                  | TT                              | CC              | 1947025382               |
| SNP_P4_170441_357095 | NW_004517046.1 | Scaffold1981 | 357095                  | CC                              | TT              | 1947025384               |
| SNP_P4_170442_357128 | NW_004517046.1 | Scaffold1981 | 357128                  | AA                              | TT              | 1947025386               |
| SNP_P4_170443_357222 | NW_004517046.1 | Scaffold1981 | 357222                  | GG                              | AA              | 1947025388               |
| SNP_P4_170444_357253 | NW_004517046.1 | Scaffold1981 | 357253                  | GG                              | TT              | 1947025390               |
| SNP_P4_170445_357349 | NW_004517046.1 | Scaffold1981 | 357349                  | TT                              | AA              | 1947025392               |
| SNP_P4_170446_357405 | NW_004517046.1 | Scaffold1981 | 357405                  | AA                              | TT              | 1947025394               |
| SNP_P4_170447_357413 | NW_004517046.1 | Scaffold1981 | 357413                  | AA                              | TT              | 1947025396               |



| SNPs IDs             | Chromosome IDs | Chromosomes  | Physical positions (bp) | CDC Frontier (Reference genome) | (ILWC46 & LPNB) | NCBI SNPdb Accession IDs |
|----------------------|----------------|--------------|-------------------------|---------------------------------|-----------------|--------------------------|
| SNP_P4_170448_357561 | NW_004517046.1 | Scaffold1981 | 357561                  | CC                              | GG              | 1947025398               |
| SNP_P4_170449_357594 | NW_004517046.1 | Scaffold1981 | 357594                  | GG                              | TT              | 1947025400               |
| SNP_P4_170450_357614 | NW_004517046.1 | Scaffold1981 | 357614                  | CC                              | TT              | 1947025402               |
| SNP_P4_170453_357739 | NW_004517046.1 | Scaffold1981 | 357739                  | AA                              | GG              | 1947025404               |
| SNP_P4_170456_360232 | NW_004517046.1 | Scaffold1981 | 360232                  | CC                              | TT              | 1947025406               |
| SNP_P4_170457_360304 | NW_004517046.1 | Scaffold1981 | 360304                  | CC                              | TT              | 1947025408               |
| SNP_P4_170458_360309 | NW_004517046.1 | Scaffold1981 | 360309                  | AA                              | GG              | 1947025410               |
| SNP_P4_170460_361452 | NW_004517046.1 | Scaffold1981 | 361452                  | TT                              | CC              | 1947025412               |
| SNP_P4_170461_361461 | NW_004517046.1 | Scaffold1981 | 361461                  | GG                              | AA              | 1947025414               |
| SNP_P4_170462_361466 | NW_004517046.1 | Scaffold1981 | 361466                  | CC                              | AA              | 1947025416               |
| SNP_P4_170463_361514 | NW_004517046.1 | Scaffold1981 | 361514                  | TT                              | AA              | 1947025418               |
| SNP_P4_170464_361531 | NW_004517046.1 | Scaffold1981 | 361531                  | GG                              | TT              | 1947025420               |
| SNP_P4_170465_361562 | NW_004517046.1 | Scaffold1981 | 361562                  | AA                              | TT              | 1947025422               |
| SNP_P4_170466_362190 | NW_004517046.1 | Scaffold1981 | 362190                  | CC                              | GG              | 1947025424               |
| SNP_P4_170467_362193 | NW_004517046.1 | Scaffold1981 | 362193                  | TT                              | AA              | 1947025426               |
| SNP_P4_170468_362212 | NW_004517046.1 | Scaffold1981 | 362212                  | TT                              | CC              | 1947025428               |
| SNP_P4_170469_362997 | NW_004517046.1 | Scaffold1981 | 362997                  | TT                              | CC              | 1947025430               |
| SNP_P4_170470_363233 | NW_004517046.1 | Scaffold1981 | 363233                  | TT                              | CC              | 1947025432               |
| SNP_P4_170471_363270 | NW_004517046.1 | Scaffold1981 | 363270                  | GG                              | TT              | 1947025434               |
| SNP_P4_170472_363272 | NW_004517046.1 | Scaffold1981 | 363272                  | AA                              | CC              | 1947025436               |
| SNP_P4_170473_363286 | NW_004517046.1 | Scaffold1981 | 363286                  | CC                              | TT              | 1947025438               |
| SNP_P4_170474_363304 | NW_004517046.1 | Scaffold1981 | 363304                  | AA                              | GG              | 1947025440               |
| SNP_P4_170475_363310 | NW_004517046.1 | Scaffold1981 | 363310                  | GG                              | AA              | 1947025442               |
| SNP_P4_170476_363311 | NW_004517046.1 | Scaffold1981 | 363311                  | GG                              | TT              | 1947025444               |
| SNP_P4_170477_363320 | NW_004517046.1 | Scaffold1981 | 363320                  | AA                              | TT              | 1947025446               |
| SNP_P4_170478_363338 | NW_004517046.1 | Scaffold1981 | 363338                  | TT                              | AA              | 1947025448               |
| SNP_P4_170479_364541 | NW_004517046.1 | Scaffold1981 | 364541                  | TT                              | CC              | 1947025450               |
| SNP_P4_170480_364542 | NW_004517046.1 | Scaffold1981 | 364542                  | TT                              | CC              | 1947025452               |
| SNP_P4_170481_364551 | NW_004517046.1 | Scaffold1981 | 364551                  | GG                              | AA              | 1947025454               |
| SNP_P4_170482_364589 | NW_004517046.1 | Scaffold1981 | 364589                  | TT                              | CC              | 1947025456               |
| SNP_P4_170483_364601 | NW_004517046.1 | Scaffold1981 | 364601                  | TT                              | AA              | 1947025459               |
| SNP_P4_170484_365281 | NW_004517046.1 | Scaffold1981 | 365281                  | TT                              | CC              | 1947025461               |
| SNP_P4_170485_365288 | NW_004517046.1 | Scaffold1981 | 365288                  | AA                              | GG              | 1947025463               |
| SNP_P4_170486_365297 | NW_004517046.1 | Scaffold1981 | 365297                  | CC                              | TT              | 1947025465               |
| SNP_P4_170487_365626 | NW_004517046.1 | Scaffold1981 | 365626                  | GG                              | AA              | 1947025467               |
| SNP_P4_170488_366173 | NW_004517046.1 | Scaffold1981 | 366173                  | TT                              | CC              | 1947025469               |
| SNP_P4_170489_366206 | NW_004517046.1 | Scaffold1981 | 366206                  | TT                              | CC              | 1947025471               |
| SNP_P4_170490_366460 | NW_004517046.1 | Scaffold1981 | 366460                  | GG                              | AA              | 1947025473               |
| SNP_P4_170491_366508 | NW_004517046.1 | Scaffold1981 | 366508                  | CC                              | GG              | 1947025475               |
| SNP_P4_170492_366526 | NW_004517046.1 | Scaffold1981 | 366526                  | AA                              | CC              | 1947025477               |
| SNP_P4_170493_366583 | NW_004517046.1 | Scaffold1981 | 366583                  | CC                              | TT              | 1947025479               |
| SNP_P4_170494_366681 | NW_004517046.1 | Scaffold1981 | 366681                  | AA                              | GG              | 1947025481               |

| SNPs IDs             | Chromosome IDs | Chromosomes  | Physical positions (bp) | CDC Frontier (Reference genome) | (ILWC46 & LPNB) | NCBI SNPdb Accession IDs |
|----------------------|----------------|--------------|-------------------------|---------------------------------|-----------------|--------------------------|
| SNP_P4_170495_366823 | NW_004517046.1 | Scaffold1981 | 366823                  | AA                              | GG              | 1947025483               |
| SNP_P4_170497_371685 | NW_004517046.1 | Scaffold1981 | 371685                  | CC                              | TT              | 1947025485               |
| SNP_P4_170498_372630 | NW_004517046.1 | Scaffold1981 | 372630                  | CC                              | AA              | 1947025487               |
| SNP_P4_170499_372688 | NW_004517046.1 | Scaffold1981 | 372688                  | CC                              | AA              | 1947025489               |
| SNP_P4_170500_372691 | NW_004517046.1 | Scaffold1981 | 372691                  | GG                              | AA              | 1947025491               |
| SNP_P4_170501_372894 | NW_004517046.1 | Scaffold1981 | 372894                  | GG                              | AA              | 1947025493               |
| SNP_P4_170502_372897 | NW_004517046.1 | Scaffold1981 | 372897                  | GG                              | AA              | 1947025495               |
| SNP_P4_170503_372900 | NW_004517046.1 | Scaffold1981 | 372900                  | TT                              | CC              | 1947025497               |
| SNP_P4_170504_372938 | NW_004517046.1 | Scaffold1981 | 372938                  | TT                              | CC              | 1947025499               |
| SNP_P4_170505_373066 | NW_004517046.1 | Scaffold1981 | 373066                  | AA                              | TT              | 1947025501               |
| SNP_P4_170506_373148 | NW_004517046.1 | Scaffold1981 | 373148                  | GG                              | TT              | 1947025503               |
| SNP_P4_170507_373292 | NW_004517046.1 | Scaffold1981 | 373292                  | GG                              | AA              | 1947025505               |
| SNP_P4_170508_373293 | NW_004517046.1 | Scaffold1981 | 373293                  | CC                              | TT              | 1947025507               |
| SNP_P4_170509_373303 | NW_004517046.1 | Scaffold1981 | 373303                  | AA                              | GG              | 1947025509               |
| SNP_P4_170510_373308 | NW_004517046.1 | Scaffold1981 | 373308                  | GG                              | AA              | 1947025511               |
| SNP_P4_170511_375404 | NW_004517046.1 | Scaffold1981 | 375404                  | AA                              | GG              | 1947025513               |
| SNP_P4_170512_375414 | NW_004517046.1 | Scaffold1981 | 375414                  | TT                              | GG              | 1947025515               |
| SNP_P4_170513_376093 | NW_004517046.1 | Scaffold1981 | 376093                  | GG                              | AA              | 1947025517               |
| SNP_P4_170514_376100 | NW_004517046.1 | Scaffold1981 | 376100                  | CC                              | AA              | 1947025519               |
| SNP_P4_170515_376348 | NW_004517046.1 | Scaffold1981 | 376348                  | TT                              | CC              | 1947025521               |
| SNP_P4_170516_377027 | NW_004517046.1 | Scaffold1981 | 377027                  | GG                              | CC              | 1947025523               |
| SNP_P4_170517_377093 | NW_004517046.1 | Scaffold1981 | 377093                  | AA                              | GG              | 1947025525               |
| SNP_P4_170518_377331 | NW_004517046.1 | Scaffold1981 | 377331                  | AA                              | GG              | 1947025527               |
| SNP_P4_170519_377346 | NW_004517046.1 | Scaffold1981 | 377346                  | GG                              | AA              | 1947025529               |
| SNP_P4_170520_378025 | NW_004517046.1 | Scaffold1981 | 378025                  | CC                              | TT              | 1947025531               |
| SNP_P4_170522_378337 | NW_004517046.1 | Scaffold1981 | 378337                  | TT                              | AA              | 1947025533               |
| SNP_P4_170524_378717 | NW_004517046.1 | Scaffold1981 | 378717                  | GG                              | CC              | 1947025535               |
| SNP_P4_170525_378884 | NW_004517046.1 | Scaffold1981 | 378884                  | CC                              | TT              | 1947025537               |
| SNP_P4_170526_379088 | NW_004517046.1 | Scaffold1981 | 379088                  | TT                              | GG              | 1947025539               |
| SNP_P4_170527_379206 | NW_004517046.1 | Scaffold1981 | 379206                  | AA                              | GG              | 1947025541               |
| SNP_P4_170529_379595 | NW_004517046.1 | Scaffold1981 | 379595                  | CC                              | GG              | 1947025543               |
| SNP_P4_170530_379622 | NW_004517046.1 | Scaffold1981 | 379622                  | TT                              | GG              | 1947025545               |
| SNP_P4_170531_379629 | NW_004517046.1 | Scaffold1981 | 379629                  | TT                              | CC              | 1947025547               |
| SNP_P4_170532_379632 | NW_004517046.1 | Scaffold1981 | 379632                  | AA                              | TT              | 1947025549               |
| SNP_P4_170533_379636 | NW_004517046.1 | Scaffold1981 | 379636                  | AA                              | CC              | 1947025551               |
| SNP_P4_170534_379646 | NW_004517046.1 | Scaffold1981 | 379646                  | AA                              | CC              | 1947025553               |
| SNP_P4_170535_381105 | NW_004517046.1 | Scaffold1981 | 381105                  | TT                              | CC              | 1947025555               |
| SNP_P4_170537_382489 | NW_004517046.1 | Scaffold1981 | 382489                  | AA                              | TT              | 1947025557               |
| SNP_P4_170538_382520 | NW_004517046.1 | Scaffold1981 | 382520                  | GG                              | AA              | 1947025559               |
| SNP_P4_170539_386671 | NW_004517046.1 | Scaffold1981 | 386671                  | TT                              | CC              | 1947025561               |
| SNP_P4_170540_387273 | NW_004517046.1 | Scaffold1981 | 387273                  | CC                              | TT              | 1947025563               |
| SNP_P4_170541_389206 | NW_004517046.1 | Scaffold1981 | 389206                  | CC                              | TT              | 1947025565               |

| SNPs IDs             | Chromosome IDs | Chromosomes  | Physical positions (bp) | CDC Frontier (Reference genome) | (ILWC46 & LPNB) | NCBI SNPdb Accession IDs |
|----------------------|----------------|--------------|-------------------------|---------------------------------|-----------------|--------------------------|
| SNP_P4_170542_390610 | NW_004517046.1 | Scaffold1981 | 390610                  | GG                              | AA              | 1947025567               |
| SNP_P4_170543_390626 | NW_004517046.1 | Scaffold1981 | 390626                  | TT                              | CC              | 1947025569               |
| SNP_P4_170544_390797 | NW_004517046.1 | Scaffold1981 | 390797                  | AA                              | CC              | 1947025571               |
| SNP_P4_170545_390807 | NW_004517046.1 | Scaffold1981 | 390807                  | CC                              | TT              | 1947025573               |
| SNP_P4_170546_391159 | NW_004517046.1 | Scaffold1981 | 391159                  | CC                              | TT              | 1947025575               |
| SNP_P4_170547_391564 | NW_004517046.1 | Scaffold1981 | 391564                  | CC                              | TT              | 1947025577               |
| SNP_P4_170548_391574 | NW_004517046.1 | Scaffold1981 | 391574                  | CC                              | GG              | 1947025579               |
| SNP_P4_170551_393675 | NW_004517046.1 | Scaffold1981 | 393675                  | CC                              | TT              | 1947025581               |
| SNP_P4_170552_393676 | NW_004517046.1 | Scaffold1981 | 393676                  | TT                              | GG              | 1947025583               |
| SNP_P4_170553_393678 | NW_004517046.1 | Scaffold1981 | 393678                  | CC                              | AA              | 1947025585               |
| SNP_P4_170554_393765 | NW_004517046.1 | Scaffold1981 | 393765                  | TT                              | GG              | 1947025587               |
| SNP_P4_170556_394800 | NW_004517046.1 | Scaffold1981 | 394800                  | TT                              | CC              | 1947025589               |
| SNP_P4_170557_395241 | NW_004517046.1 | Scaffold1981 | 395241                  | AA                              | GG              | 1947025591               |
| SNP_P4_170559_395855 | NW_004517046.1 | Scaffold1981 | 395855                  | GG                              | CC              | 1947025593               |
| SNP_P4_170560_395872 | NW_004517046.1 | Scaffold1981 | 395872                  | TT                              | CC              | 1947025595               |
| SNP_P4_170561_395969 | NW_004517046.1 | Scaffold1981 | 395969                  | AA                              | GG              | 1947025597               |
| SNP_P4_170562_398176 | NW_004517046.1 | Scaffold1981 | 398176                  | CC                              | AA              | 1947025599               |
| SNP_P4_170563_399701 | NW_004517046.1 | Scaffold1981 | 399701                  | GG                              | TT              | 1947025601               |
| SNP_P4_170564_399737 | NW_004517046.1 | Scaffold1981 | 399737                  | TT                              | AA              | 1947025603               |
| SNP_P4_170565_400762 | NW_004517046.1 | Scaffold1981 | 400762                  | AA                              | CC              | 1947025605               |
| SNP_P4_170566_405398 | NW_004517046.1 | Scaffold1981 | 405398                  | GG                              | TT              | 1947025607               |
| SNP_P4_170567_405832 | NW_004517046.1 | Scaffold1981 | 405832                  | TT                              | CC              | 1947025609               |
| SNP_P4_170571_407084 | NW_004517046.1 | Scaffold1981 | 407084                  | AA                              | TT              | 1947025611               |
| SNP_P4_170572_408456 | NW_004517046.1 | Scaffold1981 | 408456                  | AA                              | GG              | 1947025613               |
| SNP_P4_170574_408467 | NW_004517046.1 | Scaffold1981 | 408467                  | AA                              | GG              | 1947025615               |
| SNP_P4_170575_408609 | NW_004517046.1 | Scaffold1981 | 408609                  | CC                              | GG              | 1947025617               |
| SNP_P4_170576_408758 | NW_004517046.1 | Scaffold1981 | 408758                  | CC                              | TT              | 1947025619               |
| SNP_P4_170578_408965 | NW_004517046.1 | Scaffold1981 | 408965                  | AA                              | TT              | 1947025621               |
| SNP_P4_170579_411154 | NW_004517046.1 | Scaffold1981 | 411154                  | AA                              | GG              | 1947025623               |
| SNP_P4_170580_411185 | NW_004517046.1 | Scaffold1981 | 411185                  | GG                              | CC              | 1947025625               |
| SNP_P4_170581_411187 | NW_004517046.1 | Scaffold1981 | 411187                  | GG                              | CC              | 1947025627               |
| SNP_P4_170582_411492 | NW_004517046.1 | Scaffold1981 | 411492                  | CC                              | TT              | 1947025629               |
| SNP_P4_170583_411501 | NW_004517046.1 | Scaffold1981 | 411501                  | GG                              | AA              | 1947025632               |
| SNP_P4_170584_411506 | NW_004517046.1 | Scaffold1981 | 411506                  | AA                              | GG              | 1947025634               |
| SNP_P4_170585_411694 | NW_004517046.1 | Scaffold1981 | 411694                  | GG                              | AA              | 1947025636               |
| SNP_P4_170586_411712 | NW_004517046.1 | Scaffold1981 | 411712                  | TT                              | GG              | 1947025638               |
| SNP_P4_170587_411768 | NW_004517046.1 | Scaffold1981 | 411768                  | CC                              | TT              | 1947025640               |
| SNP_P4_170588_412940 | NW_004517046.1 | Scaffold1981 | 412940                  | TT                              | CC              | 1947025642               |
| SNP_P4_170589_412952 | NW_004517046.1 | Scaffold1981 | 412952                  | CC                              | TT              | 1947025644               |
| SNP_P4_170590_412964 | NW_004517046.1 | Scaffold1981 | 412964                  | GG                              | AA              | 1947025646               |
| SNP_P4_170592_413581 | NW_004517046.1 | Scaffold1981 | 413581                  | GG                              | AA              | 1947025648               |
| SNP_P4_170593_415618 | NW_004517046.1 | Scaffold1981 | 415618                  | AA                              | GG              | 1947025650               |

| SNPs IDs             | Chromosome IDs | Chromosomes  | Physical positions (bp) | CDC Frontier (Reference genome) | (ILWC46 & LPNB) | NCBI SNPdb Accession IDs |
|----------------------|----------------|--------------|-------------------------|---------------------------------|-----------------|--------------------------|
| SNP_P4_170594_415648 | NW_004517046.1 | Scaffold1981 | 415648                  | GG                              | AA              | 1947025652               |
| SNP_P4_170595_415658 | NW_004517046.1 | Scaffold1981 | 415658                  | AA                              | TT              | 1947025654               |
| SNP_P4_170596_415899 | NW_004517046.1 | Scaffold1981 | 415899                  | AA                              | TT              | 1947025656               |
| SNP_P4_170597_415902 | NW_004517046.1 | Scaffold1981 | 415902                  | AA                              | GG              | 1947025658               |
| SNP_P4_170598_415940 | NW_004517046.1 | Scaffold1981 | 415940                  | AA                              | GG              | 1947025660               |
| SNP_P4_170600_416017 | NW_004517046.1 | Scaffold1981 | 416017                  | CC                              | TT              | 1947025662               |
| SNP_P4_170601_416044 | NW_004517046.1 | Scaffold1981 | 416044                  | AA                              | GG              | 1947025664               |
| SNP_P4_170602_416088 | NW_004517046.1 | Scaffold1981 | 416088                  | TT                              | CC              | 1947025666               |
| SNP_P4_170603_416126 | NW_004517046.1 | Scaffold1981 | 416126                  | CC                              | GG              | 1947025668               |
| SNP_P4_170604_416316 | NW_004517046.1 | Scaffold1981 | 416316                  | TT                              | CC              | 1947025670               |
| SNP_P4_170605_416329 | NW_004517046.1 | Scaffold1981 | 416329                  | AA                              | TT              | 1947025672               |
| SNP_P4_170606_416333 | NW_004517046.1 | Scaffold1981 | 416333                  | AA                              | GG              | 1947025674               |
| SNP_P4_170607_416338 | NW_004517046.1 | Scaffold1981 | 416338                  | TT                              | GG              | 1947025676               |
| SNP_P4_170608_416345 | NW_004517046.1 | Scaffold1981 | 416345                  | AA                              | GG              | 1947025678               |
| SNP_P4_170609_416350 | NW_004517046.1 | Scaffold1981 | 416350                  | CC                              | AA              | 1947025680               |
| SNP_P4_170610_416372 | NW_004517046.1 | Scaffold1981 | 416372                  | GG                              | AA              | 1947025682               |
| SNP_P4_170611_416381 | NW_004517046.1 | Scaffold1981 | 416381                  | TT                              | CC              | 1947025684               |
| SNP_P4_170612_416414 | NW_004517046.1 | Scaffold1981 | 416414                  | GG                              | AA              | 1947025686               |
| SNP_P4_170614_416420 | NW_004517046.1 | Scaffold1981 | 416420                  | CC                              | TT              | 1947025688               |
| SNP_P4_170615_416454 | NW_004517046.1 | Scaffold1981 | 416454                  | AA                              | GG              | 1947025690               |
| SNP_P4_170616_416498 | NW_004517046.1 | Scaffold1981 | 416498                  | GG                              | AA              | 1947025692               |
| SNP_P4_170617_416506 | NW_004517046.1 | Scaffold1981 | 416506                  | CC                              | GG              | 1947025694               |
| SNP_P4_170618_416526 | NW_004517046.1 | Scaffold1981 | 416526                  | GG                              | AA              | 1947025696               |
| SNP_P4_170619_416530 | NW_004517046.1 | Scaffold1981 | 416530                  | TT                              | GG              | 1947025698               |
| SNP_P4_170620_416985 | NW_004517046.1 | Scaffold1981 | 416985                  | CC                              | AA              | 1947025700               |
| SNP_P4_170621_417015 | NW_004517046.1 | Scaffold1981 | 417015                  | CC                              | TT              | 1947025702               |
| SNP_P4_170622_417163 | NW_004517046.1 | Scaffold1981 | 417163                  | GG                              | TT              | 1947025704               |
| SNP_P4_170623_417175 | NW_004517046.1 | Scaffold1981 | 417175                  | GG                              | AA              | 1947025706               |
| SNP_P4_170624_417199 | NW_004517046.1 | Scaffold1981 | 417199                  | GG                              | TT              | 1947025708               |
| SNP_P4_170625_417242 | NW_004517046.1 | Scaffold1981 | 417242                  | AA                              | GG              | 1947025710               |
| SNP_P4_170626_417383 | NW_004517046.1 | Scaffold1981 | 417383                  | TT                              | GG              | 1947025712               |
| SNP_P4_170627_417442 | NW_004517046.1 | Scaffold1981 | 417442                  | AA                              | CC              | 1947025714               |
| SNP_P4_170628_417597 | NW_004517046.1 | Scaffold1981 | 417597                  | AA                              | GG              | 1947025716               |
| SNP_P4_170629_417618 | NW_004517046.1 | Scaffold1981 | 417618                  | GG                              | CC              | 1947025718               |
| SNP_P4_170630_417646 | NW_004517046.1 | Scaffold1981 | 417646                  | AA                              | TT              | 1947025720               |
| SNP_P4_170631_417675 | NW_004517046.1 | Scaffold1981 | 417675                  | CC                              | TT              | 1947025722               |
| SNP_P4_170632_417736 | NW_004517046.1 | Scaffold1981 | 417736                  | CC                              | TT              | 1947025724               |
| SNP_P4_170633_417738 | NW_004517046.1 | Scaffold1981 | 417738                  | GG                              | AA              | 1947025726               |
| SNP_P4_170634_417760 | NW_004517046.1 | Scaffold1981 | 417760                  | GG                              | AA              | 1947025728               |
| SNP_P4_170635_417761 | NW_004517046.1 | Scaffold1981 | 417761                  | CC                              | TT              | 1947025730               |
| SNP_P4_170636_417778 | NW_004517046.1 | Scaffold1981 | 417778                  | TT                              | CC              | 1947025732               |
| SNP_P4_170637_417805 | NW_004517046.1 | Scaffold1981 | 417805                  | CC                              | TT              | 1947025734               |

| SNPs IDs             | Chromosome IDs | Chromosomes  | Physical positions (bp) | CDC Frontier (Reference genome) | (ILWC46 & LPNB) | NCBI SNPdb Accession IDs |
|----------------------|----------------|--------------|-------------------------|---------------------------------|-----------------|--------------------------|
| SNP_P4_170638_417839 | NW_004517046.1 | Scaffold1981 | 417839                  | GG                              | AA              | 1947025736               |
| SNP_P4_170639_417891 | NW_004517046.1 | Scaffold1981 | 417891                  | TT                              | CC              | 1947025738               |
| SNP_P4_170640_417918 | NW_004517046.1 | Scaffold1981 | 417918                  | AA                              | GG              | 1947025739               |
| SNP_P4_170641_420003 | NW_004517046.1 | Scaffold1981 | 420003                  | TT                              | GG              | 1947025741               |
| SNP_P4_170642_420019 | NW_004517046.1 | Scaffold1981 | 420019                  | AA                              | GG              | 1947025743               |
| SNP_P4_170643_420029 | NW_004517046.1 | Scaffold1981 | 420029                  | AA                              | TT              | 1947025745               |
| SNP_P4_170644_420034 | NW_004517046.1 | Scaffold1981 | 420034                  | AA                              | TT              | 1947025747               |
| SNP_P4_170646_422602 | NW_004517046.1 | Scaffold1981 | 422602                  | TT                              | AA              | 1947025749               |
| SNP_P4_170647_422614 | NW_004517046.1 | Scaffold1981 | 422614                  | CC                              | TT              | 1947025751               |
| SNP_P4_170648_422888 | NW_004517046.1 | Scaffold1981 | 422888                  | TT                              | CC              | 1947025753               |
| SNP_P4_170649_423022 | NW_004517046.1 | Scaffold1981 | 423022                  | TT                              | CC              | 1947025755               |
| SNP_P4_170650_423031 | NW_004517046.1 | Scaffold1981 | 423031                  | CC                              | TT              | 1947025757               |
| SNP_P4_170651_423035 | NW_004517046.1 | Scaffold1981 | 423035                  | TT                              | CC              | 1947025759               |
| SNP_P4_170652_423078 | NW_004517046.1 | Scaffold1981 | 423078                  | GG                              | AA              | 1947025761               |
| SNP_P4_170653_423096 | NW_004517046.1 | Scaffold1981 | 423096                  | TT                              | CC              | 1947025763               |
| SNP_P4_170654_423103 | NW_004517046.1 | Scaffold1981 | 423103                  | AA                              | GG              | 1947025765               |
| SNP_P4_170655_423126 | NW_004517046.1 | Scaffold1981 | 423126                  | GG                              | TT              | 1947025767               |
| SNP_P4_170656_430767 | NW_004517046.1 | Scaffold1981 | 430767                  | AA                              | GG              | 1947025769               |
| SNP_P4_170657_430770 | NW_004517046.1 | Scaffold1981 | 430770                  | GG                              | TT              | 1947025771               |
| SNP_P4_170658_430775 | NW_004517046.1 | Scaffold1981 | 430775                  | AA                              | GG              | 1947025773               |
| SNP_P4_170659_430796 | NW_004517046.1 | Scaffold1981 | 430796                  | TT                              | AA              | 1947025774               |
| SNP_P4_170660_430857 | NW_004517046.1 | Scaffold1981 | 430857                  | AA                              | CC              | 1947025776               |
| SNP_P4_170661_431107 | NW_004517046.1 | Scaffold1981 | 431107                  | TT                              | CC              | 1947025778               |
| SNP_P4_170662_431258 | NW_004517046.1 | Scaffold1981 | 431258                  | TT                              | CC              | 1947025780               |
| SNP_P4_170664_431447 | NW_004517046.1 | Scaffold1981 | 431447                  | GG                              | AA              | 1947025782               |
| SNP_P4_170665_431458 | NW_004517046.1 | Scaffold1981 | 431458                  | AA                              | TT              | 1947025784               |
| SNP_P4_170666_431472 | NW_004517046.1 | Scaffold1981 | 431472                  | GG                              | AA              | 1947025786               |
| SNP_P4_170667_431527 | NW_004517046.1 | Scaffold1981 | 431527                  | GG                              | AA              | 1947025788               |
| SNP_P4_170669_30066  | NW_004517048.1 | Scaffold1983 | 30066                   | AA                              | GG              | 1947025790               |
| SNP_P4_170670_31039  | NW_004517048.1 | Scaffold1983 | 31039                   | CC                              | TT              | 1947025792               |
| SNP_P4_170671_34126  | NW_004517048.1 | Scaffold1983 | 34126                   | AA                              | GG              | 1947025794               |
| SNP_P4_170673_34337  | NW_004517048.1 | Scaffold1983 | 34337                   | AA                              | TT              | 1947025797               |
| SNP_P4_170674_34513  | NW_004517048.1 | Scaffold1983 | 34513                   | TT                              | CC              | 1947025799               |
| SNP_P4_170675_34553  | NW_004517048.1 | Scaffold1983 | 34553                   | TT                              | CC              | 1947025801               |
| SNP_P4_170676_34561  | NW_004517048.1 | Scaffold1983 | 34561                   | CC                              | AA              | 1947025803               |
| SNP_P4_170677_34623  | NW_004517048.1 | Scaffold1983 | 34623                   | AA                              | CC              | 1947025805               |
| SNP_P4_170678_34629  | NW_004517048.1 | Scaffold1983 | 34629                   | AA                              | GG              | 1947025807               |
| SNP_P4_170679_34695  | NW_004517048.1 | Scaffold1983 | 34695                   | GG                              | AA              | 1947025809               |
| SNP_P4_170680_34712  | NW_004517048.1 | Scaffold1983 | 34712                   | TT                              | CC              | 1947025811               |
| SNP_P4_170681_34737  | NW_004517048.1 | Scaffold1983 | 34737                   | AA                              | CC              | 1947025813               |
| SNP_P4_170682_34758  | NW_004517048.1 | Scaffold1983 | 34758                   | CC                              | TT              | 1947025815               |
| SNP_P4_170683_36900  | NW_004517048.1 | Scaffold1983 | 36900                   | GG                              | AA              | 1947025817               |

| SNPs IDs             | Chromosome IDs | Chromosomes  | Physical positions (bp) | CDC Frontier (Reference genome) | (ILWC46 & LPNB) | NCBI SNPdb Accession IDs |
|----------------------|----------------|--------------|-------------------------|---------------------------------|-----------------|--------------------------|
| SNP_P4_170684_37185  | NW_004517048.1 | Scaffold1983 | 37185                   | AA                              | CC              | 1947025819               |
| SNP_P4_170685_37197  | NW_004517048.1 | Scaffold1983 | 37197                   | TT                              | AA              | 1947025821               |
| SNP_P4_170686_37635  | NW_004517048.1 | Scaffold1983 | 37635                   | GG                              | AA              | 1947025823               |
| SNP_P4_170687_37637  | NW_004517048.1 | Scaffold1983 | 37637                   | TT                              | AA              | 1947025825               |
| SNP_P4_170688_37652  | NW_004517048.1 | Scaffold1983 | 37652                   | TT                              | GG              | 1947025827               |
| SNP_P4_170689_38218  | NW_004517048.1 | Scaffold1983 | 38218                   | AA                              | CC              | 1947025829               |
| SNP_P4_170690_38229  | NW_004517048.1 | Scaffold1983 | 38229                   | TT                              | GG              | 1947025831               |
| SNP_P4_170691_47980  | NW_004517048.1 | Scaffold1983 | 47980                   | AA                              | CC              | 1947025833               |
| SNP_P4_170692_47987  | NW_004517048.1 | Scaffold1983 | 47987                   | AA                              | GG              | 1947025835               |
| SNP_P4_170693_48027  | NW_004517048.1 | Scaffold1983 | 48027                   | AA                              | GG              | 1947025837               |
| SNP_P4_170694_48224  | NW_004517048.1 | Scaffold1983 | 48224                   | TT                              | CC              | 1947025839               |
| SNP_P4_170695_48276  | NW_004517048.1 | Scaffold1983 | 48276                   | CC                              | TT              | 1947025841               |
| SNP_P4_170696_48293  | NW_004517048.1 | Scaffold1983 | 48293                   | AA                              | GG              | 1947025843               |
| SNP_P4_170697_55992  | NW_004517048.1 | Scaffold1983 | 55992                   | TT                              | GG              | 1947025845               |
| SNP_P4_170698_62796  | NW_004517048.1 | Scaffold1983 | 62796                   | AA                              | CC              | 1947025847               |
| SNP_P4_170699_62806  | NW_004517048.1 | Scaffold1983 | 62806                   | AA                              | GG              | 1947025849               |
| SNP_P4_170700_62815  | NW_004517048.1 | Scaffold1983 | 62815                   | TT                              | AA              | 1947025851               |
| SNP_P4_170701_62819  | NW_004517048.1 | Scaffold1983 | 62819                   | GG                              | AA              | 1947025853               |
| SNP_P4_170703_63153  | NW_004517048.1 | Scaffold1983 | 63153                   | GG                              | TT              | 1947025855               |
| SNP_P4_170704_63409  | NW_004517048.1 | Scaffold1983 | 63409                   | TT                              | AA              | 1947025857               |
| SNP_P4_170705_31252  | NW_004517049.1 | Scaffold1984 | 31252                   | CC                              | AA              | 1947025859               |
| SNP_P4_170706_62914  | NW_004517049.1 | Scaffold1984 | 62914                   | CC                              | TT              | 1947025861               |
| SNP_P4_170707_63840  | NW_004517049.1 | Scaffold1984 | 63840                   | CC                              | TT              | 1947025863               |
| SNP_P4_170708_65883  | NW_004517049.1 | Scaffold1984 | 65883                   | GG                              | AA              | 1947025865               |
| SNP_P4_170709_79175  | NW_004517049.1 | Scaffold1984 | 79175                   | AA                              | CC              | 1947025867               |
| SNP_P4_170710_96719  | NW_004517049.1 | Scaffold1984 | 96719                   | TT                              | GG              | 1947025869               |
| SNP_P4_170711_97033  | NW_004517049.1 | Scaffold1984 | 97033                   | AA                              | CC              | 1947025871               |
| SNP_P4_170712_100821 | NW_004517049.1 | Scaffold1984 | 100821                  | CC                              | AA              | 1947025874               |
| SNP_P4_170714_133807 | NW_004517049.1 | Scaffold1984 | 133807                  | TT                              | CC              | 1947025876               |
| SNP_P4_170715_134135 | NW_004517049.1 | Scaffold1984 | 134135                  | TT                              | CC              | 1947025878               |
| SNP_P4_170716_134176 | NW_004517049.1 | Scaffold1984 | 134176                  | GG                              | AA              | 1947025880               |
| SNP_P4_170719_135980 | NW_004517049.1 | Scaffold1984 | 135980                  | TT                              | CC              | 1947025882               |
| SNP_P4_170720_136048 | NW_004517049.1 | Scaffold1984 | 136048                  | GG                              | AA              | 1947025884               |
| SNP_P4_170721_142735 | NW_004517049.1 | Scaffold1984 | 142735                  | CC                              | TT              | 1947025886               |
| SNP_P4_170722_142738 | NW_004517049.1 | Scaffold1984 | 142738                  | CC                              | TT              | 1947025888               |
| SNP_P4_170723_166174 | NW_004517049.1 | Scaffold1984 | 166174                  | GG                              | TT              | 1947025890               |
| SNP_P4_170724_166176 | NW_004517049.1 | Scaffold1984 | 166176                  | TT                              | CC              | 1947025892               |
| SNP_P4_170725_166177 | NW_004517049.1 | Scaffold1984 | 166177                  | GG                              | CC              | 1947025894               |
| SNP_P4_170726_171935 | NW_004517049.1 | Scaffold1984 | 171935                  | GG                              | AA              | 1947025896               |
| SNP_P4_170727_172426 | NW_004517049.1 | Scaffold1984 | 172426                  | GG                              | CC              | 1947025898               |
| SNP_P4_170728_172439 | NW_004517049.1 | Scaffold1984 | 172439                  | TT                              | CC              | 1947025900               |
| SNP_P4_170729_172606 | NW_004517049.1 | Scaffold1984 | 172606                  | AA                              | GG              | 1947025902               |

| SNPs IDs             | Chromosome IDs | Chromosomes  | Physical positions (bp) | CDC Frontier (Reference genome) | (ILWC46 & LPNB) | NCBI SNPdb Accession IDs |
|----------------------|----------------|--------------|-------------------------|---------------------------------|-----------------|--------------------------|
| SNP_P4_170730_244125 | NW_004517049.1 | Scaffold1984 | 244125                  | TT                              | AA              | 1947025904               |
| SNP_P4_170731_244290 | NW_004517049.1 | Scaffold1984 | 244290                  | AA                              | CC              | 1947025906               |
| SNP_P4_170732_244461 | NW_004517049.1 | Scaffold1984 | 244461                  | AA                              | GG              | 1947025908               |
| SNP_P4_170733_244511 | NW_004517049.1 | Scaffold1984 | 244511                  | AA                              | GG              | 1947025910               |
| SNP_P4_170734_244513 | NW_004517049.1 | Scaffold1984 | 244513                  | AA                              | GG              | 1947025912               |
| SNP_P4_170735_244526 | NW_004517049.1 | Scaffold1984 | 244526                  | TT                              | GG              | 1947025914               |
| SNP_P4_170736_247046 | NW_004517049.1 | Scaffold1984 | 247046                  | GG                              | AA              | 1947025916               |
| SNP_P4_170737_251467 | NW_004517049.1 | Scaffold1984 | 251467                  | CC                              | TT              | 1947025918               |
| SNP_P4_170738_251593 | NW_004517049.1 | Scaffold1984 | 251593                  | AA                              | CC              | 1947025920               |
| SNP_P4_170739_251607 | NW_004517049.1 | Scaffold1984 | 251607                  | TT                              | CC              | 1947025922               |
| SNP_P4_170740_251618 | NW_004517049.1 | Scaffold1984 | 251618                  | CC                              | GG              | 1947025924               |
| SNP_P4_170741_251622 | NW_004517049.1 | Scaffold1984 | 251622                  | TT                              | CC              | 1947025926               |
| SNP_P4_170742_251651 | NW_004517049.1 | Scaffold1984 | 251651                  | TT                              | CC              | 1947025928               |
| SNP_P4_170743_251801 | NW_004517049.1 | Scaffold1984 | 251801                  | CC                              | TT              | 1947025930               |
| SNP_P4_170744_251978 | NW_004517049.1 | Scaffold1984 | 251978                  | AA                              | CC              | 1947025932               |
| SNP_P4_170745_253206 | NW_004517049.1 | Scaffold1984 | 253206                  | TT                              | GG              | 1947025934               |
| SNP_P4_170746_253317 | NW_004517049.1 | Scaffold1984 | 253317                  | AA                              | GG              | 1947025936               |
| SNP_P4_170747_253667 | NW_004517049.1 | Scaffold1984 | 253667                  | CC                              | TT              | 1947025938               |
| SNP_P4_170748_253706 | NW_004517049.1 | Scaffold1984 | 253706                  | AA                              | GG              | 1947025940               |
| SNP_P4_170749_253748 | NW_004517049.1 | Scaffold1984 | 253748                  | TT                              | AA              | 1947025942               |
| SNP_P4_170750_255335 | NW_004517049.1 | Scaffold1984 | 255335                  | TT                              | CC              | 1947025944               |
| SNP_P4_170751_255431 | NW_004517049.1 | Scaffold1984 | 255431                  | AA                              | GG              | 1947025946               |
| SNP_P4_170752_255450 | NW_004517049.1 | Scaffold1984 | 255450                  | AA                              | GG              | 1947025948               |
| SNP_P4_170753_255453 | NW_004517049.1 | Scaffold1984 | 255453                  | AA                              | GG              | 1947025950               |
| SNP_P4_170754_255682 | NW_004517049.1 | Scaffold1984 | 255682                  | TT                              | GG              | 1947025952               |
| SNP_P4_170755_255868 | NW_004517049.1 | Scaffold1984 | 255868                  | AA                              | CC              | 1947025954               |
| SNP_P4_170757_323144 | NW_004517049.1 | Scaffold1984 | 323144                  | TT                              | AA              | 1947025956               |
| SNP_P4_170758_323400 | NW_004517049.1 | Scaffold1984 | 323400                  | AA                              | GG              | 1947025958               |
| SNP_P4_170759_323527 | NW_004517049.1 | Scaffold1984 | 323527                  | TT                              | AA              | 1947025960               |
| SNP_P4_170760_323575 | NW_004517049.1 | Scaffold1984 | 323575                  | CC                              | TT              | 1947025962               |
| SNP_P4_170761_323593 | NW_004517049.1 | Scaffold1984 | 323593                  | TT                              | CC              | 1947025964               |
| SNP_P4_170762_323674 | NW_004517049.1 | Scaffold1984 | 323674                  | GG                              | TT              | 1947025966               |
| SNP_P4_170763_323802 | NW_004517049.1 | Scaffold1984 | 323802                  | TT                              | CC              | 1947025968               |
| SNP_P4_170764_323805 | NW_004517049.1 | Scaffold1984 | 323805                  | AA                              | GG              | 1947025970               |
| SNP_P4_170765_323806 | NW_004517049.1 | Scaffold1984 | 323806                  | GG                              | AA              | 1947025973               |
| SNP_P4_170766_323847 | NW_004517049.1 | Scaffold1984 | 323847                  | AA                              | GG              | 1947025975               |
| SNP_P4_170767_325206 | NW_004517049.1 | Scaffold1984 | 325206                  | GG                              | AA              | 1947025977               |
| SNP_P4_170768_325320 | NW_004517049.1 | Scaffold1984 | 325320                  | AA                              | GG              | 1947025979               |
| SNP_P4_170769_325346 | NW_004517049.1 | Scaffold1984 | 325346                  | AA                              | GG              | 1947025981               |
| SNP_P4_170770_325392 | NW_004517049.1 | Scaffold1984 | 325392                  | TT                              | CC              | 1947025983               |
| SNP_P4_170771_325550 | NW_004517049.1 | Scaffold1984 | 325550                  | TT                              | CC              | 1947025985               |
| SNP_P4_170772_325559 | NW_004517049.1 | Scaffold1984 | 325559                  | TT                              | CC              | 1947025987               |

| SNPs IDs             | Chromosome IDs | Chromosomes  | Physical positions (bp) | CDC Frontier (Reference genome) | (ILWC46 & LPNB) | NCBI SNPdb Accession IDs |
|----------------------|----------------|--------------|-------------------------|---------------------------------|-----------------|--------------------------|
| SNP_P4_170773_325586 | NW_004517049.1 | Scaffold1984 | 325586                  | GG                              | AA              | 1947025989               |
| SNP_P4_170774_325685 | NW_004517049.1 | Scaffold1984 | 325685                  | GG                              | AA              | 1947025991               |
| SNP_P4_170775_325713 | NW_004517049.1 | Scaffold1984 | 325713                  | GG                              | AA              | 1947025993               |
| SNP_P4_170776_325744 | NW_004517049.1 | Scaffold1984 | 325744                  | TT                              | AA              | 1947025995               |
| SNP_P4_170777_325754 | NW_004517049.1 | Scaffold1984 | 325754                  | AA                              | GG              | 1947025997               |
| SNP_P4_170778_325761 | NW_004517049.1 | Scaffold1984 | 325761                  | AA                              | CC              | 1947025999               |
| SNP_P4_170779_325779 | NW_004517049.1 | Scaffold1984 | 325779                  | TT                              | CC              | 1947026001               |
| SNP_P4_170780_325784 | NW_004517049.1 | Scaffold1984 | 325784                  | GG                              | AA              | 1947026003               |
| SNP_P4_170781_325790 | NW_004517049.1 | Scaffold1984 | 325790                  | GG                              | AA              | 1947026005               |
| SNP_P4_170782_325808 | NW_004517049.1 | Scaffold1984 | 325808                  | CC                              | TT              | 1947026007               |
| SNP_P4_170783_335395 | NW_004517049.1 | Scaffold1984 | 335395                  | AA                              | TT              | 1947026010               |
| SNP_P4_170784_336575 | NW_004517049.1 | Scaffold1984 | 336575                  | TT                              | CC              | 1947026012               |
| SNP_P4_170785_339709 | NW_004517049.1 | Scaffold1984 | 339709                  | GG                              | AA              | 1947026014               |
| SNP_P4_170786_342970 | NW_004517049.1 | Scaffold1984 | 342970                  | TT                              | GG              | 1947026016               |
| SNP_P4_170787_343059 | NW_004517049.1 | Scaffold1984 | 343059                  | TT                              | CC              | 1947026018               |
| SNP_P4_170788_343354 | NW_004517049.1 | Scaffold1984 | 343354                  | TT                              | CC              | 1947026020               |
| SNP_P4_170789_343367 | NW_004517049.1 | Scaffold1984 | 343367                  | TT                              | GG              | 1947026022               |
| SNP_P4_170790_343399 | NW_004517049.1 | Scaffold1984 | 343399                  | TT                              | CC              | 1947026024               |
| SNP_P4_170791_343416 | NW_004517049.1 | Scaffold1984 | 343416                  | TT                              | CC              | 1947026026               |
| SNP_P4_170792_343449 | NW_004517049.1 | Scaffold1984 | 343449                  | AA                              | GG              | 1947026028               |
| SNP_P4_170793_343465 | NW_004517049.1 | Scaffold1984 | 343465                  | AA                              | GG              | 1947026030               |
| SNP_P4_170794_345913 | NW_004517049.1 | Scaffold1984 | 345913                  | TT                              | CC              | 1947026032               |
| SNP_P4_170795_350331 | NW_004517049.1 | Scaffold1984 | 350331                  | CC                              | AA              | 1947026034               |
| SNP_P4_170796_350342 | NW_004517049.1 | Scaffold1984 | 350342                  | AA                              | GG              | 1947026036               |
| SNP_P4_170797_351213 | NW_004517049.1 | Scaffold1984 | 351213                  | CC                              | TT              | 1947026038               |
| SNP_P4_170798_359978 | NW_004517049.1 | Scaffold1984 | 359978                  | AA                              | GG              | 1947026040               |
| SNP_P4_170799_359991 | NW_004517049.1 | Scaffold1984 | 359991                  | TT                              | CC              | 1947026042               |
| SNP_P4_170800_360007 | NW_004517049.1 | Scaffold1984 | 360007                  | AA                              | GG              | 1947026044               |
| SNP_P4_170801_360122 | NW_004517049.1 | Scaffold1984 | 360122                  | CC                              | AA              | 1947026046               |
| SNP_P4_170802_360229 | NW_004517049.1 | Scaffold1984 | 360229                  | AA                              | GG              | 1947026048               |
| SNP_P4_170803_360316 | NW_004517049.1 | Scaffold1984 | 360316                  | AA                              | GG              | 1947026050               |
| SNP_P4_170804_362646 | NW_004517049.1 | Scaffold1984 | 362646                  | AA                              | CC              | 1947026052               |
| SNP_P4_170805_363077 | NW_004517049.1 | Scaffold1984 | 363077                  | CC                              | TT              | 1947026054               |
| SNP_P4_170806_363281 | NW_004517049.1 | Scaffold1984 | 363281                  | TT                              | CC              | 1947026056               |
| SNP_P4_170807_369347 | NW_004517049.1 | Scaffold1984 | 369347                  | TT                              | CC              | 1947026058               |
| SNP_P4_170808_384349 | NW_004517049.1 | Scaffold1984 | 384349                  | TT                              | AA              | 1947026060               |
| SNP_P4_170809_384350 | NW_004517049.1 | Scaffold1984 | 384350                  | CC                              | AA              | 1947026062               |
| SNP_P4_170810_384351 | NW_004517049.1 | Scaffold1984 | 384351                  | AA                              | TT              | 1947026064               |
| SNP_P4_170811_384352 | NW_004517049.1 | Scaffold1984 | 384352                  | AA                              | TT              | 1947026066               |
| SNP_P4_170812_384353 | NW_004517049.1 | Scaffold1984 | 384353                  | AA                              | TT              | 1947026068               |
| SNP_P4_170813_384356 | NW_004517049.1 | Scaffold1984 | 384356                  | CC                              | AA              | 1947026070               |
| SNP_P4_170814_384358 | NW_004517049.1 | Scaffold1984 | 384358                  | CC                              | AA              | 1947026072               |



| SNPs IDs             | Chromosome IDs | Chromosomes  | Physical positions (bp) | CDC Frontier (Reference genome) | (ILWC46 & LPNB) | NCBI SNPdb Accession IDs |
|----------------------|----------------|--------------|-------------------------|---------------------------------|-----------------|--------------------------|
| SNP_P4_170815_384374 | NW_004517049.1 | Scaffold1984 | 384374                  | CC                              | AA              | 1947026074               |
| SNP_P4_170816_384375 | NW_004517049.1 | Scaffold1984 | 384375                  | AA                              | TT              | 1947026076               |
| SNP_P4_170817_384744 | NW_004517049.1 | Scaffold1984 | 384744                  | TT                              | GG              | 1947026078               |
| SNP_P4_170818_386457 | NW_004517049.1 | Scaffold1984 | 386457                  | CC                              | TT              | 1947026080               |
| SNP_P4_170819_386604 | NW_004517049.1 | Scaffold1984 | 386604                  | AA                              | TT              | 1947026082               |
| SNP_P4_170820_386835 | NW_004517049.1 | Scaffold1984 | 386835                  | AA                              | GG              | 1947026084               |
| SNP_P4_170821_386943 | NW_004517049.1 | Scaffold1984 | 386943                  | TT                              | CC              | 1947026086               |
| SNP_P4_170822_386963 | NW_004517049.1 | Scaffold1984 | 386963                  | CC                              | TT              | 1947026088               |
| SNP_P4_170823_387057 | NW_004517049.1 | Scaffold1984 | 387057                  | GG                              | AA              | 1947026090               |
| SNP_P4_170824_387139 | NW_004517049.1 | Scaffold1984 | 387139                  | TT                              | CC              | 1947026091               |
| SNP_P4_170825_4601   | NW_004517050.1 | Scaffold1985 | 4601                    | AA                              | GG              | 1947026092               |
| SNP_P4_170826_4917   | NW_004517050.1 | Scaffold1985 | 4917                    | TT                              | GG              | 1947026093               |
| SNP_P4_170827_4959   | NW_004517050.1 | Scaffold1985 | 4959                    | AA                              | GG              | 1947026094               |
| SNP_P4_170828_4981   | NW_004517050.1 | Scaffold1985 | 4981                    | AA                              | GG              | 1947026095               |
| SNP_P4_170829_4998   | NW_004517050.1 | Scaffold1985 | 4998                    | TT                              | CC              | 1947026096               |
| SNP_P4_170830_109196 | NW_004517050.1 | Scaffold1985 | 109196                  | CC                              | TT              | 1947026097               |
| SNP_P4_170831_109200 | NW_004517050.1 | Scaffold1985 | 109200                  | AA                              | GG              | 1947026098               |
| SNP_P4_170832_109270 | NW_004517050.1 | Scaffold1985 | 109270                  | AA                              | GG              | 1947026099               |
| SNP_P4_170833_109282 | NW_004517050.1 | Scaffold1985 | 109282                  | CC                              | AA              | 1947026100               |
| SNP_P4_170834_109411 | NW_004517050.1 | Scaffold1985 | 109411                  | AA                              | GG              | 1947026102               |
| SNP_P4_170835_109538 | NW_004517050.1 | Scaffold1985 | 109538                  | AA                              | GG              | 1947026104               |
| SNP_P4_170836_109585 | NW_004517050.1 | Scaffold1985 | 109585                  | AA                              | GG              | 1947026106               |
| SNP_P4_170837_109600 | NW_004517050.1 | Scaffold1985 | 109600                  | GG                              | AA              | 1947026108               |
| SNP_P4_170838_109614 | NW_004517050.1 | Scaffold1985 | 109614                  | TT                              | CC              | 1947026110               |
| SNP_P4_170839_109625 | NW_004517050.1 | Scaffold1985 | 109625                  | TT                              | CC              | 1947026112               |
| SNP_P4_170840_109641 | NW_004517050.1 | Scaffold1985 | 109641                  | GG                              | AA              | 1947026114               |
| SNP_P4_170841_110282 | NW_004517050.1 | Scaffold1985 | 110282                  | CC                              | TT              | 1947026116               |
| SNP_P4_170842_110299 | NW_004517050.1 | Scaffold1985 | 110299                  | TT                              | AA              | 1947026118               |
| SNP_P4_170843_110305 | NW_004517050.1 | Scaffold1985 | 110305                  | AA                              | GG              | 1947026120               |
| SNP_P4_170844_134795 | NW_004517050.1 | Scaffold1985 | 134795                  | TT                              | CC              | 1947026122               |
| SNP_P4_170845_135426 | NW_004517050.1 | Scaffold1985 | 135426                  | TT                              | CC              | 1947026124               |
| SNP_P4_170846_141811 | NW_004517050.1 | Scaffold1985 | 141811                  | TT                              | CC              | 1947026126               |
| SNP_P4_170847_141876 | NW_004517050.1 | Scaffold1985 | 141876                  | AA                              | TT              | 1947026128               |
| SNP_P4_170848_141894 | NW_004517050.1 | Scaffold1985 | 141894                  | TT                              | AA              | 1947026130               |
| SNP_P4_170849_142178 | NW_004517050.1 | Scaffold1985 | 142178                  | CC                              | TT              | 1947026132               |
| SNP_P4_170850_3744   | NW_004517052.1 | Scaffold1987 | 3744                    | TT                              | CC              | 1947026134               |
| SNP_P4_170851_3745   | NW_004517052.1 | Scaffold1987 | 3745                    | TT                              | AA              | 1947026136               |
| SNP_P4_170853_4562   | NW_004517053.1 | Scaffold1988 | 4562                    | AA                              | CC              | 1947026138               |
| SNP_P4_170854_4590   | NW_004517053.1 | Scaffold1988 | 4590                    | CC                              | TT              | 1947026140               |
| SNP_P4_170855_4737   | NW_004517053.1 | Scaffold1988 | 4737                    | TT                              | CC              | 1947026142               |
| SNP_P4_170856_4794   | NW_004517053.1 | Scaffold1988 | 4794                    | AA                              | GG              | 1947026144               |
| SNP_P4_170857_4798   | NW_004517053.1 | Scaffold1988 | 4798                    | GG                              | CC              | 1947026146               |

| SNPs IDs             | Chromosome IDs | Chromosomes  | Physical positions (bp) | CDC Frontier (Reference genome) | (ILWC46 & LPNB) | NCBI SNPdb Accession IDs |
|----------------------|----------------|--------------|-------------------------|---------------------------------|-----------------|--------------------------|
| SNP_P4_170858_4965   | NW_004517053.1 | Scaffold1988 | 4965                    | CC                              | GG              | 1947026148               |
| SNP_P4_170859_4988   | NW_004517053.1 | Scaffold1988 | 4988                    | GG                              | AA              | 1947026150               |
| SNP_P4_170860_5207   | NW_004517053.1 | Scaffold1988 | 5207                    | CC                              | TT              | 1947026152               |
| SNP_P4_170861_7447   | NW_004517053.1 | Scaffold1988 | 7447                    | GG                              | TT              | 1947026154               |
| SNP_P4_170862_7515   | NW_004517053.1 | Scaffold1988 | 7515                    | TT                              | AA              | 1947026156               |
| SNP_P4_170863_7523   | NW_004517053.1 | Scaffold1988 | 7523                    | TT                              | GG              | 1947026158               |
| SNP_P4_170864_7756   | NW_004517053.1 | Scaffold1988 | 7756                    | TT                              | GG              | 1947026160               |
| SNP_P4_170866_13907  | NW_004517053.1 | Scaffold1988 | 13907                   | TT                              | CC              | 1947026162               |
| SNP_P4_170867_14100  | NW_004517053.1 | Scaffold1988 | 14100                   | CC                              | TT              | 1947026164               |
| SNP_P4_170868_4319   | NW_004517055.1 | Scaffold1990 | 4319                    | GG                              | TT              | 1947026166               |
| SNP_P4_170869_4399   | NW_004517055.1 | Scaffold1990 | 4399                    | AA                              | GG              | 1947026168               |
| SNP_P4_170870_4400   | NW_004517055.1 | Scaffold1990 | 4400                    | AA                              | GG              | 1947026170               |
| SNP_P4_170871_4406   | NW_004517055.1 | Scaffold1990 | 4406                    | TT                              | CC              | 1947026172               |
| SNP_P4_170873_18151  | NW_004517056.1 | Scaffold1991 | 18151                   | TT                              | CC              | 1947026174               |
| SNP_P4_170874_62154  | NW_004517056.1 | Scaffold1991 | 62154                   | TT                              | GG              | 1947026176               |
| SNP_P4_170875_81835  | NW_004517056.1 | Scaffold1991 | 81835                   | AA                              | CC              | 1947026178               |
| SNP_P4_170876_93730  | NW_004517056.1 | Scaffold1991 | 93730                   | GG                              | TT              | 1947026180               |
| SNP_P4_170877_100123 | NW_004517056.1 | Scaffold1991 | 100123                  | TT                              | CC              | 1947026182               |
| SNP_P4_170879_113487 | NW_004517056.1 | Scaffold1991 | 113487                  | CC                              | AA              | 1947026184               |
| SNP_P4_170880_113518 | NW_004517056.1 | Scaffold1991 | 113518                  | AA                              | GG              | 1947026186               |
| SNP_P4_170881_113612 | NW_004517056.1 | Scaffold1991 | 113612                  | GG                              | CC              | 1947026188               |
| SNP_P4_170882_113633 | NW_004517056.1 | Scaffold1991 | 113633                  | AA                              | CC              | 1947026190               |
| SNP_P4_170883_113915 | NW_004517056.1 | Scaffold1991 | 113915                  | TT                              | CC              | 1947026192               |
| SNP_P4_170884_113975 | NW_004517056.1 | Scaffold1991 | 113975                  | GG                              | AA              | 1947026194               |
| SNP_P4_170885_113988 | NW_004517056.1 | Scaffold1991 | 113988                  | AA                              | GG              | 1947026196               |
| SNP_P4_170886_113998 | NW_004517056.1 | Scaffold1991 | 113998                  | GG                              | AA              | 1947026198               |
| SNP_P4_170887_114003 | NW_004517056.1 | Scaffold1991 | 114003                  | CC                              | TT              | 1947026200               |
| SNP_P4_170888_114007 | NW_004517056.1 | Scaffold1991 | 114007                  | TT                              | CC              | 1947026202               |
| SNP_P4_170889_114008 | NW_004517056.1 | Scaffold1991 | 114008                  | CC                              | TT              | 1947026204               |
| SNP_P4_170890_116610 | NW_004517056.1 | Scaffold1991 | 116610                  | CC                              | TT              | 1947026206               |
| SNP_P4_170892_632    | NW_004517061.1 | Scaffold1996 | 632                     | GG                              | AA              | 1947026208               |
| SNP_P4_170893_744    | NW_004517061.1 | Scaffold1996 | 744                     | GG                              | AA              | 1947026210               |
| SNP_P4_170894_1036   | NW_004517061.1 | Scaffold1996 | 1036                    | CC                              | TT              | 1947026212               |
| SNP_P4_170895_1039   | NW_004517061.1 | Scaffold1996 | 1039                    | CC                              | TT              | 1947026214               |
| SNP_P4_170896_1041   | NW_004517061.1 | Scaffold1996 | 1041                    | GG                              | AA              | 1947026216               |
| SNP_P4_170897_1057   | NW_004517061.1 | Scaffold1996 | 1057                    | GG                              | AA              | 1947026218               |
| SNP_P4_170898_1084   | NW_004517061.1 | Scaffold1996 | 1084                    | CC                              | TT              | 1947026220               |
| SNP_P4_170899_1099   | NW_004517061.1 | Scaffold1996 | 1099                    | CC                              | AA              | 1947026222               |
| SNP_P4_170901_1696   | NW_004517061.1 | Scaffold1996 | 1696                    | CC                              | TT              | 1947026224               |
| SNP_P4_170902_5502   | NW_004517061.1 | Scaffold1996 | 5502                    | GG                              | AA              | 1947026226               |
| SNP_P4_170903_5518   | NW_004517061.1 | Scaffold1996 | 5518                    | GG                              | TT              | 1947026228               |
| SNP_P4_170904_5563   | NW_004517061.1 | Scaffold1996 | 5563                    | AA                              | GG              | 1947026230               |

| SNPs IDs            | Chromosome IDs | Chromosomes  | Physical positions (bp) | CDC Frontier (Reference genome) | (ILWC46 & LPNB) | NCBI SNPdb Accession IDs |
|---------------------|----------------|--------------|-------------------------|---------------------------------|-----------------|--------------------------|
| SNP_P4_170905_5631  | NW_004517061.1 | Scaffold1996 | 5631                    | CC                              | TT              | 1947026232               |
| SNP_P4_170907_5745  | NW_004517061.1 | Scaffold1996 | 5745                    | CC                              | AA              | 1947026234               |
| SNP_P4_170908_5863  | NW_004517061.1 | Scaffold1996 | 5863                    | GG                              | AA              | 1947026236               |
| SNP_P4_170909_5866  | NW_004517061.1 | Scaffold1996 | 5866                    | TT                              | CC              | 1947026238               |
| SNP_P4_170910_5902  | NW_004517061.1 | Scaffold1996 | 5902                    | TT                              | AA              | 1947026240               |
| SNP_P4_170911_5947  | NW_004517061.1 | Scaffold1996 | 5947                    | CC                              | TT              | 1947026241               |
| SNP_P4_170913_6048  | NW_004517061.1 | Scaffold1996 | 6048                    | GG                              | AA              | 1947026243               |
| SNP_P4_170914_6059  | NW_004517061.1 | Scaffold1996 | 6059                    | CC                              | TT              | 1947026245               |
| SNP_P4_170915_6074  | NW_004517061.1 | Scaffold1996 | 6074                    | AA                              | GG              | 1947026247               |
| SNP_P4_170916_6160  | NW_004517061.1 | Scaffold1996 | 6160                    | AA                              | GG              | 1947026249               |
| SNP_P4_170917_6221  | NW_004517061.1 | Scaffold1996 | 6221                    | TT                              | CC              | 1947026251               |
| SNP_P4_170918_420   | NW_004517062.1 | Scaffold1997 | 420                     | AA                              | CC              | 1947026253               |
| SNP_P4_170919_541   | NW_004517062.1 | Scaffold1997 | 541                     | AA                              | TT              | 1947026255               |
| SNP_P4_170920_542   | NW_004517062.1 | Scaffold1997 | 542                     | TT                              | CC              | 1947026257               |
| SNP_P4_170921_584   | NW_004517062.1 | Scaffold1997 | 584                     | AA                              | GG              | 1947026259               |
| SNP_P4_170922_15435 | NW_004517062.1 | Scaffold1997 | 15435                   | TT                              | AA              | 1947026261               |
| SNP_P4_170924_2952  | NW_004517063.1 | Scaffold1999 | 2952                    | CC                              | AA              | 1947026263               |
| SNP_P4_170925_2958  | NW_004517063.1 | Scaffold1999 | 2958                    | AA                              | GG              | 1947026265               |
| SNP_P4_170926_3035  | NW_004517063.1 | Scaffold1999 | 3035                    | GG                              | AA              | 1947026267               |
| SNP_P4_170927_3092  | NW_004517063.1 | Scaffold1999 | 3092                    | TT                              | CC              | 1947026269               |
| SNP_P4_170928_4026  | NW_004517063.1 | Scaffold1999 | 4026                    | TT                              | CC              | 1947026270               |
| SNP_P4_170929_4458  | NW_004517063.1 | Scaffold1999 | 4458                    | GG                              | AA              | 1947026272               |
| SNP_P4_170930_4462  | NW_004517063.1 | Scaffold1999 | 4462                    | GG                              | AA              | 1947026274               |
| SNP_P4_170931_7576  | NW_004517063.1 | Scaffold1999 | 7576                    | TT                              | GG              | 1947026276               |
| SNP_P4_170932_7581  | NW_004517063.1 | Scaffold1999 | 7581                    | GG                              | AA              | 1947026278               |
| SNP_P4_170933_7627  | NW_004517063.1 | Scaffold1999 | 7627                    | AA                              | TT              | 1947026280               |
| SNP_P4_170934_7697  | NW_004517063.1 | Scaffold1999 | 7697                    | GG                              | AA              | 1947026282               |
| SNP_P4_170935_7913  | NW_004517063.1 | Scaffold1999 | 7913                    | AA                              | TT              | 1947026284               |
| SNP_P4_170936_9986  | NW_004517063.1 | Scaffold1999 | 9986                    | CC                              | TT              | 1947026286               |
| SNP_P4_170937_10962 | NW_004517063.1 | Scaffold1999 | 10962                   | AA                              | CC              | 1947026288               |
| SNP_P4_170938_22804 | NW_004517063.1 | Scaffold1999 | 22804                   | AA                              | GG              | 1947026290               |
| SNP_P4_170939_24873 | NW_004517063.1 | Scaffold1999 | 24873                   | CC                              | AA              | 1947026292               |
| SNP_P4_170940_25728 | NW_004517063.1 | Scaffold1999 | 25728                   | AA                              | TT              | 1947026294               |
| SNP_P4_170941_25857 | NW_004517063.1 | Scaffold1999 | 25857                   | CC                              | TT              | 1947026296               |
| SNP_P4_170942_25931 | NW_004517063.1 | Scaffold1999 | 25931                   | GG                              | TT              | 1947026298               |
| SNP_P4_170943_26052 | NW_004517063.1 | Scaffold1999 | 26052                   | TT                              | AA              | 1947026300               |
| SNP_P4_170945_28005 | NW_004517063.1 | Scaffold1999 | 28005                   | TT                              | CC              | 1947026302               |
| SNP_P4_170946_28230 | NW_004517063.1 | Scaffold1999 | 28230                   | GG                              | AA              | 1947026303               |
| SNP_P4_170947_28859 | NW_004517063.1 | Scaffold1999 | 28859                   | CC                              | GG              | 1947026305               |
| SNP_P4_170948_29510 | NW_004517063.1 | Scaffold1999 | 29510                   | AA                              | TT              | 1947026307               |
| SNP_P4_170949_29540 | NW_004517063.1 | Scaffold1999 | 29540                   | AA                              | GG              | 1947026309               |
| SNP_P4_170951_29821 | NW_004517063.1 | Scaffold1999 | 29821                   | GG                              | AA              | 1947026311               |

| SNPs IDs            | Chromosome IDs | Chromosomes  | Physical positions (bp) | CDC Frontier (Reference genome) | (ILWC46 & LPNB) | NCBI SNPdb Accession IDs |
|---------------------|----------------|--------------|-------------------------|---------------------------------|-----------------|--------------------------|
| SNP_P4_170953_29969 | NW_004517063.1 | Scaffold1999 | 29969                   | AA                              | GG              | 1947026313               |
| SNP_P4_170954_30014 | NW_004517063.1 | Scaffold1999 | 30014                   | GG                              | CC              | 1947026316               |
| SNP_P4_170955_30130 | NW_004517063.1 | Scaffold1999 | 30130                   | CC                              | GG              | 1947026318               |
| SNP_P4_170956_30133 | NW_004517063.1 | Scaffold1999 | 30133                   | CC                              | TT              | 1947026320               |
| SNP_P4_170957_30248 | NW_004517063.1 | Scaffold1999 | 30248                   | GG                              | CC              | 1947026322               |
| SNP_P4_170958_30249 | NW_004517063.1 | Scaffold1999 | 30249                   | GG                              | AA              | 1947026324               |
| SNP_P4_170959_30319 | NW_004517063.1 | Scaffold1999 | 30319                   | TT                              | AA              | 1947026326               |
| SNP_P4_170960_30490 | NW_004517063.1 | Scaffold1999 | 30490                   | CC                              | TT              | 1947026328               |
| SNP_P4_170961_30604 | NW_004517063.1 | Scaffold1999 | 30604                   | AA                              | GG              | 1947026330               |
| SNP_P4_170962_30698 | NW_004517063.1 | Scaffold1999 | 30698                   | TT                              | AA              | 1947026332               |
| SNP_P4_170963_30719 | NW_004517063.1 | Scaffold1999 | 30719                   | AA                              | GG              | 1947026334               |
| SNP_P4_170964_30741 | NW_004517063.1 | Scaffold1999 | 30741                   | CC                              | TT              | 1947026336               |
| SNP_P4_170965_30774 | NW_004517063.1 | Scaffold1999 | 30774                   | GG                              | AA              | 1947026338               |
| SNP_P4_170966_30799 | NW_004517063.1 | Scaffold1999 | 30799                   | CC                              | TT              | 1947026340               |
| SNP_P4_170967_31134 | NW_004517063.1 | Scaffold1999 | 31134                   | AA                              | TT              | 1947026342               |
| SNP_P4_170968_31258 | NW_004517063.1 | Scaffold1999 | 31258                   | GG                              | AA              | 1947026344               |
| SNP_P4_170969_31902 | NW_004517063.1 | Scaffold1999 | 31902                   | CC                              | GG              | 1947026346               |
| SNP_P4_170970_31963 | NW_004517063.1 | Scaffold1999 | 31963                   | CC                              | TT              | 1947026348               |
| SNP_P4_170971_31975 | NW_004517063.1 | Scaffold1999 | 31975                   | CC                              | AA              | 1947026350               |
| SNP_P4_170972_32111 | NW_004517063.1 | Scaffold1999 | 32111                   | TT                              | AA              | 1947026353               |
| SNP_P4_170973_32192 | NW_004517063.1 | Scaffold1999 | 32192                   | TT                              | CC              | 1947026355               |
| SNP_P4_170974_32312 | NW_004517063.1 | Scaffold1999 | 32312                   | TT                              | CC              | 1947026357               |
| SNP_P4_170975_32326 | NW_004517063.1 | Scaffold1999 | 32326                   | CC                              | GG              | 1947026359               |
| SNP_P4_170976_32374 | NW_004517063.1 | Scaffold1999 | 32374                   | GG                              | AA              | 1947026361               |
| SNP_P4_170977_32503 | NW_004517063.1 | Scaffold1999 | 32503                   | TT                              | GG              | 1947026363               |
| SNP_P4_170978_32524 | NW_004517063.1 | Scaffold1999 | 32524                   | TT                              | AA              | 1947026365               |
| SNP_P4_170979_32602 | NW_004517063.1 | Scaffold1999 | 32602                   | GG                              | TT              | 1947026367               |
| SNP_P4_170980_113   | NW_004517064.1 | Scaffold2000 | 113                     | GG                              | CC              | 1947026369               |
| SNP_P4_170981_1088  | NW_004517064.1 | Scaffold2000 | 1088                    | TT                              | AA              | 1947026371               |
| SNP_P4_170982_1100  | NW_004517064.1 | Scaffold2000 | 1100                    | AA                              | CC              | 1947026373               |
| SNP_P4_170983_1115  | NW_004517064.1 | Scaffold2000 | 1115                    | AA                              | TT              | 1947026375               |
| SNP_P4_170984_1127  | NW_004517064.1 | Scaffold2000 | 1127                    | CC                              | TT              | 1947026377               |
| SNP_P4_170985_1140  | NW_004517064.1 | Scaffold2000 | 1140                    | TT                              | CC              | 1947026379               |
| SNP_P4_170986_1164  | NW_004517064.1 | Scaffold2000 | 1164                    | GG                              | AA              | 1947026381               |
| SNP_P4_170987_1245  | NW_004517064.1 | Scaffold2000 | 1245                    | AA                              | GG              | 1947026383               |
| SNP_P4_170988_1258  | NW_004517064.1 | Scaffold2000 | 1258                    | AA                              | CC              | 1947026385               |
| SNP_P4_170989_1376  | NW_004517064.1 | Scaffold2000 | 1376                    | CC                              | TT              | 1947026387               |
| SNP_P4_170990_1444  | NW_004517064.1 | Scaffold2000 | 1444                    | GG                              | AA              | 1947026389               |
| SNP_P4_170991_1523  | NW_004517064.1 | Scaffold2000 | 1523                    | CC                              | GG              | 1947026392               |
| SNP_P4_170993_1565  | NW_004517064.1 | Scaffold2000 | 1565                    | AA                              | GG              | 1947026394               |
| SNP_P4_170994_1606  | NW_004517064.1 | Scaffold2000 | 1606                    | AA                              | CC              | 1947026396               |
| SNP_P4_170995_1613  | NW_004517064.1 | Scaffold2000 | 1613                    | TT                              | GG              | 1947026398               |

| SNPs IDs           | Chromosome IDs | Chromosomes  | Physical positions (bp) | CDC Frontier (Reference genome) | (ILWC46 & LPNB) | NCBI SNPdb Accession IDs |
|--------------------|----------------|--------------|-------------------------|---------------------------------|-----------------|--------------------------|
| SNP_P4_170996_1625 | NW_004517064.1 | Scaffold2000 | 1625                    | CC                              | AA              | 1947026400               |
| SNP_P4_170997_1627 | NW_004517064.1 | Scaffold2000 | 1627                    | AA                              | TT              | 1947026402               |
| SNP_P4_170998_1671 | NW_004517064.1 | Scaffold2000 | 1671                    | TT                              | GG              | 1947026404               |
| SNP_P4_170999_1686 | NW_004517064.1 | Scaffold2000 | 1686                    | GG                              | CC              | 1947026406               |
| SNP_P4_171000_1709 | NW_004517064.1 | Scaffold2000 | 1709                    | GG                              | AA              | 1947026408               |
| SNP_P4_171001_1746 | NW_004517064.1 | Scaffold2000 | 1746                    | TT                              | CC              | 1947026410               |
| SNP_P4_171002_1750 | NW_004517064.1 | Scaffold2000 | 1750                    | TT                              | AA              | 1947026412               |
| SNP_P4_171003_1754 | NW_004517064.1 | Scaffold2000 | 1754                    | TT                              | AA              | 1947026414               |
| SNP_P4_171004_1765 | NW_004517064.1 | Scaffold2000 | 1765                    | TT                              | CC              | 1947026416               |
| SNP_P4_171005_2029 | NW_004517064.1 | Scaffold2000 | 2029                    | CC                              | AA              | 1947026418               |
| SNP_P4_171006_2158 | NW_004517064.1 | Scaffold2000 | 2158                    | GG                              | TT              | 1947026420               |
| SNP_P4_171007_2163 | NW_004517064.1 | Scaffold2000 | 2163                    | CC                              | AA              | 1947026422               |
| SNP_P4_171008_2251 | NW_004517064.1 | Scaffold2000 | 2251                    | TT                              | AA              | 1947026424               |
| SNP_P4_171009_2351 | NW_004517064.1 | Scaffold2000 | 2351                    | TT                              | AA              | 1947026426               |
| SNP_P4_171010_2382 | NW_004517064.1 | Scaffold2000 | 2382                    | CC                              | AA              | 1947026428               |
| SNP_P4_171011_2396 | NW_004517064.1 | Scaffold2000 | 2396                    | AA                              | GG              | 1947026430               |
| SNP_P4_171012_2418 | NW_004517064.1 | Scaffold2000 | 2418                    | GG                              | TT              | 1947026432               |
| SNP_P4_171013_2530 | NW_004517064.1 | Scaffold2000 | 2530                    | AA                              | CC              | 1947026434               |
| SNP_P4_171014_2557 | NW_004517064.1 | Scaffold2000 | 2557                    | AA                              | GG              | 1947026436               |
| SNP_P4_171015_2560 | NW_004517064.1 | Scaffold2000 | 2560                    | CC                              | AA              | 1947026438               |
| SNP_P4_171016_2577 | NW_004517064.1 | Scaffold2000 | 2577                    | GG                              | TT              | 1947026440               |
| SNP_P4_171017_2580 | NW_004517064.1 | Scaffold2000 | 2580                    | AA                              | TT              | 1947026442               |
| SNP_P4_171018_2641 | NW_004517064.1 | Scaffold2000 | 2641                    | GG                              | CC              | 1947026444               |
| SNP_P4_171019_2678 | NW_004517064.1 | Scaffold2000 | 2678                    | CC                              | AA              | 1947026446               |
| SNP_P4_171020_2705 | NW_004517064.1 | Scaffold2000 | 2705                    | GG                              | CC              | 1947026448               |
| SNP_P4_171021_2730 | NW_004517064.1 | Scaffold2000 | 2730                    | AA                              | TT              | 1947026450               |
| SNP_P4_171022_2811 | NW_004517064.1 | Scaffold2000 | 2811                    | AA                              | CC              | 1947026452               |
| SNP_P4_171023_2818 | NW_004517064.1 | Scaffold2000 | 2818                    | GG                              | TT              | 1947026454               |
| SNP_P4_171024_2852 | NW_004517064.1 | Scaffold2000 | 2852                    | GG                              | AA              | 1947026456               |
| SNP_P4_171025_2895 | NW_004517064.1 | Scaffold2000 | 2895                    | TT                              | CC              | 1947026458               |
| SNP_P4_171026_2917 | NW_004517064.1 | Scaffold2000 | 2917                    | AA                              | GG              | 1947026460               |
| SNP_P4_171027_2922 | NW_004517064.1 | Scaffold2000 | 2922                    | TT                              | AA              | 1947026462               |
| SNP_P4_171028_2937 | NW_004517064.1 | Scaffold2000 | 2937                    | CC                              | TT              | 1947026464               |
| SNP_P4_171029_2944 | NW_004517064.1 | Scaffold2000 | 2944                    | TT                              | AA              | 1947026466               |
| SNP_P4_171030_2965 | NW_004517064.1 | Scaffold2000 | 2965                    | CC                              | AA              | 1947026468               |
| SNP_P4_171031_2971 | NW_004517064.1 | Scaffold2000 | 2971                    | CC                              | AA              | 1947026470               |
| SNP_P4_171032_3005 | NW_004517064.1 | Scaffold2000 | 3005                    | TT                              | CC              | 1947026472               |
| SNP_P4_171033_3026 | NW_004517064.1 | Scaffold2000 | 3026                    | CC                              | GG              | 1947026474               |
| SNP_P4_171034_3027 | NW_004517064.1 | Scaffold2000 | 3027                    | GG                              | CC              | 1947026476               |
| SNP_P4_171035_3039 | NW_004517064.1 | Scaffold2000 | 3039                    | AA                              | GG              | 1947026478               |
| SNP_P4_171036_9452 | NW_004517064.1 | Scaffold2000 | 9452                    | CC                              | TT              | 1947026480               |
| SNP_P4_171037_9832 | NW_004517064.1 | Scaffold2000 | 9832                    | AA                              | GG              | 1947026482               |

| SNPs IDs            | Chromosome IDs | Chromosomes  | Physical positions (bp) | CDC Frontier (Reference genome) | (ILWC46 & LPNB) | NCBI SNPdb Accession IDs |
|---------------------|----------------|--------------|-------------------------|---------------------------------|-----------------|--------------------------|
| SNP_P4_171038_9844  | NW_004517064.1 | Scaffold2000 | 9844                    | CC                              | TT              | 1947026485               |
| SNP_P4_171039_10379 | NW_004517064.1 | Scaffold2000 | 10379                   | GG                              | CC              | 1947026487               |
| SNP_P4_171040_10741 | NW_004517064.1 | Scaffold2000 | 10741                   | AA                              | GG              | 1947026489               |
| SNP_P4_171041_10795 | NW_004517064.1 | Scaffold2000 | 10795                   | CC                              | TT              | 1947026491               |
| SNP_P4_171042_10811 | NW_004517064.1 | Scaffold2000 | 10811                   | GG                              | AA              | 1947026493               |
| SNP_P4_171044_10890 | NW_004517064.1 | Scaffold2000 | 10890                   | TT                              | CC              | 1947026495               |
| SNP_P4_171046_10942 | NW_004517064.1 | Scaffold2000 | 10942                   | TT                              | GG              | 1947026497               |
| SNP_P4_171047_10945 | NW_004517064.1 | Scaffold2000 | 10945                   | GG                              | AA              | 1947026499               |
| SNP_P4_171048_10962 | NW_004517064.1 | Scaffold2000 | 10962                   | AA                              | CC              | 1947026502               |
| SNP_P4_171049_11238 | NW_004517064.1 | Scaffold2000 | 11238                   | GG                              | CC              | 1947026504               |
| SNP_P4_171050_11259 | NW_004517064.1 | Scaffold2000 | 11259                   | CC                              | GG              | 1947026506               |
| SNP_P4_171051_11275 | NW_004517064.1 | Scaffold2000 | 11275                   | GG                              | TT              | 1947026508               |
| SNP_P4_171052_11276 | NW_004517064.1 | Scaffold2000 | 11276                   | GG                              | AA              | 1947026510               |
| SNP_P4_171053_11302 | NW_004517064.1 | Scaffold2000 | 11302                   | CC                              | TT              | 1947026512               |
| SNP_P4_171054_11341 | NW_004517064.1 | Scaffold2000 | 11341                   | AA                              | GG              | 1947026514               |
| SNP_P4_171055_11365 | NW_004517064.1 | Scaffold2000 | 11365                   | CC                              | TT              | 1947026516               |
| SNP_P4_171056_11411 | NW_004517064.1 | Scaffold2000 | 11411                   | CC                              | GG              | 1947026518               |
| SNP_P4_171057_11420 | NW_004517064.1 | Scaffold2000 | 11420                   | GG                              | TT              | 1947026520               |
| SNP_P4_171058_11425 | NW_004517064.1 | Scaffold2000 | 11425                   | TT                              | GG              | 1947026522               |
| SNP_P4_171059_11544 | NW_004517064.1 | Scaffold2000 | 11544                   | AA                              | GG              | 1947026524               |
| SNP_P4_171060_11569 | NW_004517064.1 | Scaffold2000 | 11569                   | CC                              | GG              | 1947026526               |
| SNP_P4_171061_11603 | NW_004517064.1 | Scaffold2000 | 11603                   | GG                              | AA              | 1947026528               |
| SNP_P4_171062_11735 | NW_004517064.1 | Scaffold2000 | 11735                   | CC                              | GG              | 1947026530               |
| SNP_P4_171063_13844 | NW_004517064.1 | Scaffold2000 | 13844                   | CC                              | GG              | 1947026532               |
| SNP_P4_171064_13866 | NW_004517064.1 | Scaffold2000 | 13866                   | AA                              | GG              | 1947026534               |
| SNP_P4_171065_13887 | NW_004517064.1 | Scaffold2000 | 13887                   | TT                              | AA              | 1947026536               |
| SNP_P4_171066_13894 | NW_004517064.1 | Scaffold2000 | 13894                   | TT                              | GG              | 1947026538               |
| SNP_P4_171067_14156 | NW_004517064.1 | Scaffold2000 | 14156                   | AA                              | CC              | 1947026540               |
| SNP_P4_171068_14241 | NW_004517064.1 | Scaffold2000 | 14241                   | CC                              | TT              | 1947026542               |
| SNP_P4_171069_18454 | NW_004517064.1 | Scaffold2000 | 18454                   | AA                              | CC              | 1947026544               |
| SNP_P4_171070_18477 | NW_004517064.1 | Scaffold2000 | 18477                   | TT                              | AA              | 1947026546               |
| SNP_P4_171071_18504 | NW_004517064.1 | Scaffold2000 | 18504                   | TT                              | CC              | 1947026548               |
| SNP_P4_171072_18818 | NW_004517064.1 | Scaffold2000 | 18818                   | TT                              | GG              | 1947026550               |
| SNP_P4_171073_18859 | NW_004517064.1 | Scaffold2000 | 18859                   | AA                              | GG              | 1947026552               |
| SNP_P4_171074_18886 | NW_004517064.1 | Scaffold2000 | 18886                   | TT                              | CC              | 1947026554               |
| SNP_P4_171075_20109 | NW_004517064.1 | Scaffold2000 | 20109                   | GG                              | AA              | 1947026556               |
| SNP_P4_171076_20118 | NW_004517064.1 | Scaffold2000 | 20118                   | TT                              | AA              | 1947026558               |
| SNP_P4_171077_20173 | NW_004517064.1 | Scaffold2000 | 20173                   | GG                              | TT              | 1947026560               |
| SNP_P4_171078_20285 | NW_004517064.1 | Scaffold2000 | 20285                   | CC                              | AA              | 1947026562               |
| SNP_P4_171079_20415 | NW_004517064.1 | Scaffold2000 | 20415                   | CC                              | TT              | 1947026564               |
| SNP_P4_171080_20419 | NW_004517064.1 | Scaffold2000 | 20419                   | GG                              | TT              | 1947026566               |
| SNP_P4_171081_20469 | NW_004517064.1 | Scaffold2000 | 20469                   | TT                              | AA              | 1947026568               |

| SNPs IDs            | Chromosome IDs | Chromosomes  | Physical positions (bp) | CDC Frontier (Reference genome) | (ILWC46 & LPNB) | NCBI SNPdb Accession IDs |
|---------------------|----------------|--------------|-------------------------|---------------------------------|-----------------|--------------------------|
| SNP_P4_171082_20635 | NW_004517064.1 | Scaffold2000 | 20635                   | AA                              | GG              | 1947026571               |
| SNP_P4_171083_20663 | NW_004517064.1 | Scaffold2000 | 20663                   | TT                              | GG              | 1947026573               |
| SNP_P4_171084_21435 | NW_004517064.1 | Scaffold2000 | 21435                   | GG                              | AA              | 1947026575               |
| SNP_P4_171085_21443 | NW_004517064.1 | Scaffold2000 | 21443                   | CC                              | TT              | 1947026577               |
| SNP_P4_171086_21493 | NW_004517064.1 | Scaffold2000 | 21493                   | GG                              | AA              | 1947026579               |
| SNP_P4_171087_21555 | NW_004517064.1 | Scaffold2000 | 21555                   | AA                              | TT              | 1947026581               |
| SNP_P4_171088_21557 | NW_004517064.1 | Scaffold2000 | 21557                   | CC                              | AA              | 1947026583               |
| SNP_P4_171089_21623 | NW_004517064.1 | Scaffold2000 | 21623                   | AA                              | GG              | 1947026585               |
| SNP_P4_171090_21624 | NW_004517064.1 | Scaffold2000 | 21624                   | CC                              | AA              | 1947026587               |
| SNP_P4_171091_22159 | NW_004517064.1 | Scaffold2000 | 22159                   | TT                              | CC              | 1947026589               |
| SNP_P4_171092_22442 | NW_004517064.1 | Scaffold2000 | 22442                   | AA                              | TT              | 1947026591               |
| SNP_P4_171093_22446 | NW_004517064.1 | Scaffold2000 | 22446                   | GG                              | AA              | 1947026593               |
| SNP_P4_171094_22479 | NW_004517064.1 | Scaffold2000 | 22479                   | CC                              | AA              | 1947026595               |
| SNP_P4_171095_22495 | NW_004517064.1 | Scaffold2000 | 22495                   | GG                              | CC              | 1947026597               |
| SNP_P4_171096_22504 | NW_004517064.1 | Scaffold2000 | 22504                   | CC                              | AA              | 1947026599               |
| SNP_P4_171097_22517 | NW_004517064.1 | Scaffold2000 | 22517                   | AA                              | GG              | 1947026601               |
| SNP_P4_171098_26646 | NW_004517064.1 | Scaffold2000 | 26646                   | TT                              | AA              | 1947026603               |
| SNP_P4_171099_3592  | NW_004517066.1 | Scaffold2003 | 3592                    | AA                              | GG              | 1947026605               |
| SNP_P4_171100_3606  | NW_004517066.1 | Scaffold2003 | 3606                    | AA                              | TT              | 1947026608               |
| SNP_P4_171101_3643  | NW_004517066.1 | Scaffold2003 | 3643                    | TT                              | GG              | 1947026610               |
| SNP_P4_171102_3651  | NW_004517066.1 | Scaffold2003 | 3651                    | TT                              | CC              | 1947026612               |
| SNP_P4_171103_3719  | NW_004517066.1 | Scaffold2003 | 3719                    | GG                              | TT              | 1947026614               |
| SNP_P4_171104_3727  | NW_004517066.1 | Scaffold2003 | 3727                    | CC                              | TT              | 1947026616               |
| SNP_P4_171105_3740  | NW_004517066.1 | Scaffold2003 | 3740                    | CC                              | AA              | 1947026618               |
| SNP_P4_171106_3771  | NW_004517066.1 | Scaffold2003 | 3771                    | GG                              | AA              | 1947026620               |
| SNP_P4_171107_3774  | NW_004517066.1 | Scaffold2003 | 3774                    | GG                              | TT              | 1947026622               |
| SNP_P4_171108_3775  | NW_004517066.1 | Scaffold2003 | 3775                    | TT                              | CC              | 1947026624               |
| SNP_P4_171109_3776  | NW_004517066.1 | Scaffold2003 | 3776                    | GG                              | AA              | 1947026626               |
| SNP_P4_171110_3778  | NW_004517066.1 | Scaffold2003 | 3778                    | CC                              | TT              | 1947026628               |
| SNP_P4_171111_3789  | NW_004517066.1 | Scaffold2003 | 3789                    | AA                              | GG              | 1947026630               |
| SNP_P4_171112_5262  | NW_004517066.1 | Scaffold2003 | 5262                    | TT                              | AA              | 1947026632               |
| SNP_P4_171113_5293  | NW_004517066.1 | Scaffold2003 | 5293                    | TT                              | CC              | 1947026634               |
| SNP_P4_171114_7505  | NW_004517066.1 | Scaffold2003 | 7505                    | GG                              | TT              | 1947026636               |
| SNP_P4_171115_7903  | NW_004517066.1 | Scaffold2003 | 7903                    | TT                              | CC              | 1947026638               |
| SNP_P4_171116_7962  | NW_004517066.1 | Scaffold2003 | 7962                    | AA                              | TT              | 1947026640               |
| SNP_P4_171117_8219  | NW_004517066.1 | Scaffold2003 | 8219                    | AA                              | GG              | 1947026642               |
| SNP_P4_171118_11119 | NW_004517066.1 | Scaffold2003 | 11119                   | TT                              | CC              | 1947026644               |
| SNP_P4_171119_12480 | NW_004517066.1 | Scaffold2003 | 12480                   | AA                              | GG              | 1947026646               |
| SNP_P4_171120_12500 | NW_004517066.1 | Scaffold2003 | 12500                   | AA                              | TT              | 1947026648               |
| SNP_P4_171121_12521 | NW_004517066.1 | Scaffold2003 | 12521                   | GG                              | AA              | 1947026650               |
| SNP_P4_171122_12525 | NW_004517066.1 | Scaffold2003 | 12525                   | TT                              | AA              | 1947026652               |
| SNP_P4_171123_14296 | NW_004517066.1 | Scaffold2003 | 14296                   | CC                              | TT              | 1947026654               |

| SNPs IDs            | Chromosome IDs | Chromosomes  | Physical positions (bp) | CDC Frontier (Reference genome) | (ILWC46 & LPNB) | NCBI SNPdb Accession IDs |
|---------------------|----------------|--------------|-------------------------|---------------------------------|-----------------|--------------------------|
| SNP_P4_171124_14644 | NW_004517066.1 | Scaffold2003 | 14644                   | AA                              | TT              | 1947026656               |
| SNP_P4_171125_15412 | NW_004517066.1 | Scaffold2003 | 15412                   | AA                              | TT              | 1947026658               |
| SNP_P4_171126_15521 | NW_004517066.1 | Scaffold2003 | 15521                   | GG                              | AA              | 1947026660               |
| SNP_P4_171127_15548 | NW_004517066.1 | Scaffold2003 | 15548                   | TT                              | AA              | 1947026662               |
| SNP_P4_171128_15550 | NW_004517066.1 | Scaffold2003 | 15550                   | AA                              | CC              | 1947026664               |
| SNP_P4_171129_15739 | NW_004517066.1 | Scaffold2003 | 15739                   | AA                              | TT              | 1947026666               |
| SNP_P4_171130_15776 | NW_004517066.1 | Scaffold2003 | 15776                   | TT                              | AA              | 1947026668               |
| SNP_P4_171131_16032 | NW_004517066.1 | Scaffold2003 | 16032                   | AA                              | TT              | 1947026670               |
| SNP_P4_171132_16042 | NW_004517066.1 | Scaffold2003 | 16042                   | TT                              | AA              | 1947026672               |
| SNP_P4_171133_17096 | NW_004517066.1 | Scaffold2003 | 17096                   | GG                              | TT              | 1947026674               |
| SNP_P4_171134_18212 | NW_004517066.1 | Scaffold2003 | 18212                   | CC                              | TT              | 1947026676               |
| SNP_P4_171135_19133 | NW_004517066.1 | Scaffold2003 | 19133                   | AA                              | GG              | 1947026678               |
| SNP_P4_171136_19795 | NW_004517066.1 | Scaffold2003 | 19795                   | AA                              | GG              | 1947026680               |
| SNP_P4_171137_19894 | NW_004517066.1 | Scaffold2003 | 19894                   | TT                              | CC              | 1947026682               |
| SNP_P4_171138_19909 | NW_004517066.1 | Scaffold2003 | 19909                   | CC                              | AA              | 1947026684               |
| SNP_P4_171140_21532 | NW_004517066.1 | Scaffold2003 | 21532                   | CC                              | AA              | 1947026686               |
| SNP_P4_171141_21576 | NW_004517066.1 | Scaffold2003 | 21576                   | AA                              | GG              | 1947026688               |
| SNP_P4_171142_22628 | NW_004517066.1 | Scaffold2003 | 22628                   | AA                              | GG              | 1947026690               |
| SNP_P4_171143_22637 | NW_004517066.1 | Scaffold2003 | 22637                   | CC                              | AA              | 1947026692               |
| SNP_P4_171144_23179 | NW_004517066.1 | Scaffold2003 | 23179                   | TT                              | CC              | 1947026694               |
| SNP_P4_171145_23205 | NW_004517066.1 | Scaffold2003 | 23205                   | CC                              | AA              | 1947026696               |
| SNP_P4_171146_23263 | NW_004517066.1 | Scaffold2003 | 23263                   | CC                              | TT              | 1947026698               |
| SNP_P4_171147_23376 | NW_004517066.1 | Scaffold2003 | 23376                   | AA                              | TT              | 1947026700               |
| SNP_P4_171148_23414 | NW_004517066.1 | Scaffold2003 | 23414                   | TT                              | CC              | 1947026702               |
| SNP_P4_171149_23462 | NW_004517066.1 | Scaffold2003 | 23462                   | TT                              | CC              | 1947026704               |
| SNP_P4_171150_23473 | NW_004517066.1 | Scaffold2003 | 23473                   | GG                              | CC              | 1947026706               |
| SNP_P4_171151_23554 | NW_004517066.1 | Scaffold2003 | 23554                   | CC                              | AA              | 1947026708               |
| SNP_P4_171152_23555 | NW_004517066.1 | Scaffold2003 | 23555                   | CC                              | TT              | 1947026710               |
| SNP_P4_171153_23621 | NW_004517066.1 | Scaffold2003 | 23621                   | CC                              | TT              | 1947026712               |
| SNP_P4_171154_32748 | NW_004517066.1 | Scaffold2003 | 32748                   | CC                              | GG              | 1947026714               |
| SNP_P4_171155_32868 | NW_004517066.1 | Scaffold2003 | 32868                   | AA                              | TT              | 1947026717               |
| SNP_P4_171156_34168 | NW_004517066.1 | Scaffold2003 | 34168                   | CC                              | TT              | 1947026719               |
| SNP_P4_171157_10866 | NW_004517067.1 | Scaffold2004 | 10866                   | CC                              | TT              | 1947026721               |
| SNP_P4_171158_2025  | NW_004517068.1 | Scaffold2005 | 2025                    | TT                              | GG              | 1947026723               |
| SNP_P4_171160_3150  | NW_004517068.1 | Scaffold2005 | 3150                    | AA                              | GG              | 1947026725               |
| SNP_P4_171161_3282  | NW_004517068.1 | Scaffold2005 | 3282                    | TT                              | CC              | 1947026727               |
| SNP_P4_171162_4950  | NW_004517068.1 | Scaffold2005 | 4950                    | TT                              | CC              | 1947026729               |
| SNP_P4_171163_6636  | NW_004517068.1 | Scaffold2005 | 6636                    | AA                              | GG              | 1947026731               |
| SNP_P4_171164_8826  | NW_004517068.1 | Scaffold2005 | 8826                    | TT                              | CC              | 1947026733               |
| SNP_P4_171165_8855  | NW_004517068.1 | Scaffold2005 | 8855                    | TT                              | GG              | 1947026735               |
| SNP_P4_171166_9010  | NW_004517068.1 | Scaffold2005 | 9010                    | AA                              | TT              | 1947026737               |
| SNP_P4_171167_9013  | NW_004517068.1 | Scaffold2005 | 9013                    | CC                              | TT              | 1947026739               |



| SNPs IDs            | Chromosome IDs | Chromosomes  | Physical positions (bp) | CDC Frontier (Reference genome) | (ILWC46 & LPNB) | NCBI SNPdb Accession IDs |
|---------------------|----------------|--------------|-------------------------|---------------------------------|-----------------|--------------------------|
| SNP_P4_171168_9146  | NW_004517068.1 | Scaffold2005 | 9146                    | CC                              | TT              | 1947026741               |
| SNP_P4_171169_9185  | NW_004517068.1 | Scaffold2005 | 9185                    | TT                              | CC              | 1947026743               |
| SNP_P4_171170_9228  | NW_004517068.1 | Scaffold2005 | 9228                    | GG                              | AA              | 1947026745               |
| SNP_P4_171171_9576  | NW_004517068.1 | Scaffold2005 | 9576                    | AA                              | CC              | 1947026747               |
| SNP_P4_171172_11096 | NW_004517068.1 | Scaffold2005 | 11096                   | GG                              | AA              | 1947026749               |
| SNP_P4_171173_11613 | NW_004517068.1 | Scaffold2005 | 11613                   | CC                              | TT              | 1947026751               |
| SNP_P4_171174_11821 | NW_004517068.1 | Scaffold2005 | 11821                   | TT                              | CC              | 1947026753               |
| SNP_P4_171175_11968 | NW_004517068.1 | Scaffold2005 | 11968                   | CC                              | GG              | 1947026755               |
| SNP_P4_171176_12707 | NW_004517068.1 | Scaffold2005 | 12707                   | TT                              | AA              | 1947026757               |
| SNP_P4_171177_12947 | NW_004517068.1 | Scaffold2005 | 12947                   | TT                              | CC              | 1947026759               |
| SNP_P4_171178_13036 | NW_004517068.1 | Scaffold2005 | 13036                   | TT                              | CC              | 1947026761               |
| SNP_P4_171180_21693 | NW_004517068.1 | Scaffold2005 | 21693                   | TT                              | CC              | 1947026763               |
| SNP_P4_171181_21955 | NW_004517068.1 | Scaffold2005 | 21955                   | TT                              | CC              | 1947026765               |
| SNP_P4_171182_22141 | NW_004517068.1 | Scaffold2005 | 22141                   | TT                              | AA              | 1947026767               |
| SNP_P4_171183_24923 | NW_004517068.1 | Scaffold2005 | 24923                   | GG                              | AA              | 1947026769               |
| SNP_P4_171184_25260 | NW_004517068.1 | Scaffold2005 | 25260                   | TT                              | GG              | 1947026772               |
| SNP_P4_171185_25600 | NW_004517068.1 | Scaffold2005 | 25600                   | AA                              | GG              | 1947026774               |
| SNP_P4_171186_31399 | NW_004517068.1 | Scaffold2005 | 31399                   | AA                              | GG              | 1947026776               |
| SNP_P4_171187_31501 | NW_004517068.1 | Scaffold2005 | 31501                   | TT                              | CC              | 1947026778               |
| SNP_P4_171189_32384 | NW_004517068.1 | Scaffold2005 | 32384                   | TT                              | CC              | 1947026780               |
| SNP_P4_171191_32421 | NW_004517068.1 | Scaffold2005 | 32421                   | AA                              | GG              | 1947026783               |
| SNP_P4_171192_32669 | NW_004517068.1 | Scaffold2005 | 32669                   | GG                              | AA              | 1947026785               |
| SNP_P4_171193_33662 | NW_004517068.1 | Scaffold2005 | 33662                   | AA                              | TT              | 1947026787               |
| SNP_P4_171194_33713 | NW_004517068.1 | Scaffold2005 | 33713                   | CC                              | TT              | 1947026789               |
| SNP_P4_171195_33718 | NW_004517068.1 | Scaffold2005 | 33718                   | TT                              | GG              | 1947026791               |
| SNP_P4_171196_34053 | NW_004517068.1 | Scaffold2005 | 34053                   | AA                              | GG              | 1947026793               |
| SNP_P4_171197_1158  | NW_004517069.1 | Scaffold2006 | 1158                    | CC                              | TT              | 1947026795               |
| SNP_P4_171198_1194  | NW_004517069.1 | Scaffold2006 | 1194                    | AA                              | TT              | 1947026797               |
| SNP_P4_171199_1201  | NW_004517069.1 | Scaffold2006 | 1201                    | CC                              | TT              | 1947026799               |
| SNP_P4_171200_1219  | NW_004517069.1 | Scaffold2006 | 1219                    | TT                              | CC              | 1947026801               |
| SNP_P4_171201_1269  | NW_004517069.1 | Scaffold2006 | 1269                    | CC                              | GG              | 1947026803               |
| SNP_P4_171202_1295  | NW_004517069.1 | Scaffold2006 | 1295                    | CC                              | TT              | 1947026805               |
| SNP_P4_171203_2897  | NW_004517072.1 | Scaffold2010 | 2897                    | AA                              | TT              | 1947026807               |
| SNP_P4_171204_2916  | NW_004517072.1 | Scaffold2010 | 2916                    | AA                              | GG              | 1947026809               |
| SNP_P4_171205_3345  | NW_004517072.1 | Scaffold2010 | 3345                    | GG                              | TT              | 1947026812               |
| SNP_P4_171206_3505  | NW_004517072.1 | Scaffold2010 | 3505                    | AA                              | GG              | 1947026814               |
| SNP_P4_171207_3525  | NW_004517072.1 | Scaffold2010 | 3525                    | CC                              | TT              | 1947026816               |
| SNP_P4_171209_3696  | NW_004517072.1 | Scaffold2010 | 3696                    | TT                              | GG              | 1947026818               |
| SNP_P4_171210_3711  | NW_004517072.1 | Scaffold2010 | 3711                    | AA                              | TT              | 1947026820               |
| SNP_P4_171211_3715  | NW_004517072.1 | Scaffold2010 | 3715                    | GG                              | AA              | 1947026822               |
| SNP_P4_171212_3748  | NW_004517072.1 | Scaffold2010 | 3748                    | TT                              | AA              | 1947026824               |
| SNP_P4_171213_3755  | NW_004517072.1 | Scaffold2010 | 3755                    | GG                              | AA              | 1947026826               |

| SNPs IDs            | Chromosome IDs | Chromosomes  | Physical positions (bp) | CDC Frontier (Reference genome) | (ILWC46 & LPNB) | NCBI SNPdb Accession IDs |
|---------------------|----------------|--------------|-------------------------|---------------------------------|-----------------|--------------------------|
| SNP_P4_171214_3765  | NW_004517072.1 | Scaffold2010 | 3765                    | CC                              | TT              | 1947026828               |
| SNP_P4_171215_3766  | NW_004517072.1 | Scaffold2010 | 3766                    | TT                              | AA              | 1947026830               |
| SNP_P4_171216_3768  | NW_004517072.1 | Scaffold2010 | 3768                    | TT                              | CC              | 1947026832               |
| SNP_P4_171217_3769  | NW_004517072.1 | Scaffold2010 | 3769                    | TT                              | AA              | 1947026834               |
| SNP_P4_171218_3771  | NW_004517072.1 | Scaffold2010 | 3771                    | AA                              | CC              | 1947026837               |
| SNP_P4_171219_3772  | NW_004517072.1 | Scaffold2010 | 3772                    | CC                              | TT              | 1947026839               |
| SNP_P4_171220_3776  | NW_004517072.1 | Scaffold2010 | 3776                    | AA                              | GG              | 1947026841               |
| SNP_P4_171221_3798  | NW_004517072.1 | Scaffold2010 | 3798                    | TT                              | AA              | 1947026843               |
| SNP_P4_171222_3803  | NW_004517072.1 | Scaffold2010 | 3803                    | GG                              | AA              | 1947026845               |
| SNP_P4_171223_5493  | NW_004517072.1 | Scaffold2010 | 5493                    | GG                              | TT              | 1947026847               |
| SNP_P4_171224_5819  | NW_004517072.1 | Scaffold2010 | 5819                    | CC                              | AA              | 1947026849               |
| SNP_P4_171225_6079  | NW_004517072.1 | Scaffold2010 | 6079                    | AA                              | GG              | 1947026851               |
| SNP_P4_171226_6403  | NW_004517072.1 | Scaffold2010 | 6403                    | GG                              | AA              | 1947026853               |
| SNP_P4_171227_6507  | NW_004517072.1 | Scaffold2010 | 6507                    | AA                              | CC              | 1947026855               |
| SNP_P4_171228_6544  | NW_004517072.1 | Scaffold2010 | 6544                    | GG                              | AA              | 1947026857               |
| SNP_P4_171230_6879  | NW_004517072.1 | Scaffold2010 | 6879                    | CC                              | AA              | 1947026859               |
| SNP_P4_171231_6917  | NW_004517072.1 | Scaffold2010 | 6917                    | CC                              | TT              | 1947026861               |
| SNP_P4_171232_7016  | NW_004517072.1 | Scaffold2010 | 7016                    | TT                              | GG              | 1947026863               |
| SNP_P4_171233_7254  | NW_004517072.1 | Scaffold2010 | 7254                    | TT                              | CC              | 1947026865               |
| SNP_P4_171234_7484  | NW_004517072.1 | Scaffold2010 | 7484                    | GG                              | AA              | 1947026867               |
| SNP_P4_171235_7532  | NW_004517072.1 | Scaffold2010 | 7532                    | CC                              | AA              | 1947026869               |
| SNP_P4_171237_8148  | NW_004517072.1 | Scaffold2010 | 8148                    | CC                              | TT              | 1947026871               |
| SNP_P4_171238_8235  | NW_004517072.1 | Scaffold2010 | 8235                    | TT                              | CC              | 1947026874               |
| SNP_P4_171239_8336  | NW_004517072.1 | Scaffold2010 | 8336                    | AA                              | GG              | 1947026876               |
| SNP_P4_171240_8348  | NW_004517072.1 | Scaffold2010 | 8348                    | TT                              | CC              | 1947026878               |
| SNP_P4_171241_10312 | NW_004517072.1 | Scaffold2010 | 10312                   | AA                              | GG              | 1947026880               |
| SNP_P4_171242_1589  | NW_004517078.1 | Scaffold2017 | 1589                    | AA                              | GG              | 1947026882               |
| SNP_P4_171243_1708  | NW_004517078.1 | Scaffold2017 | 1708                    | GG                              | TT              | 1947026884               |
| SNP_P4_171244_1719  | NW_004517078.1 | Scaffold2017 | 1719                    | TT                              | GG              | 1947026886               |
| SNP_P4_171245_1895  | NW_004517078.1 | Scaffold2017 | 1895                    | CC                              | TT              | 1947026888               |
| SNP_P4_171246_1916  | NW_004517078.1 | Scaffold2017 | 1916                    | GG                              | TT              | 1947026890               |
| SNP_P4_171247_1156  | NW_004517079.1 | Scaffold2018 | 1156                    | CC                              | AA              | 1947026892               |
| SNP_P4_171248_2359  | NW_004517079.1 | Scaffold2018 | 2359                    | CC                              | TT              | 1947026894               |
| SNP_P4_171249_2520  | NW_004517079.1 | Scaffold2018 | 2520                    | AA                              | GG              | 1947026896               |
| SNP_P4_171250_2650  | NW_004517079.1 | Scaffold2018 | 2650                    | GG                              | AA              | 1947026898               |
| SNP_P4_171251_4172  | NW_004517079.1 | Scaffold2018 | 4172                    | AA                              | GG              | 1947026900               |
| SNP_P4_171253_5396  | NW_004517079.1 | Scaffold2018 | 5396                    | CC                              | TT              | 1947026902               |
| SNP_P4_171254_5538  | NW_004517079.1 | Scaffold2018 | 5538                    | TT                              | AA              | 1947026904               |
| SNP_P4_171255_6384  | NW_004517079.1 | Scaffold2018 | 6384                    | CC                              | TT              | 1947026906               |
| SNP_P4_171256_13979 | NW_004517079.1 | Scaffold2018 | 13979                   | TT                              | AA              | 1947026908               |
| SNP_P4_171257_14907 | NW_004517079.1 | Scaffold2018 | 14907                   | TT                              | GG              | 1947026910               |
| SNP_P4_171259_18262 | NW_004517079.1 | Scaffold2018 | 18262                   | TT                              | CC              | 1947026912               |

| SNPs IDs            | Chromosome IDs | Chromosomes  | Physical positions (bp) | CDC Frontier (Reference genome) | (ILWC46 & LPNB) | NCBI SNPdb Accession IDs |
|---------------------|----------------|--------------|-------------------------|---------------------------------|-----------------|--------------------------|
| SNP_P4_171260_18723 | NW_004517079.1 | Scaffold2018 | 18723                   | AA                              | TT              | 1947026914               |
| SNP_P4_171261_19823 | NW_004517079.1 | Scaffold2018 | 19823                   | AA                              | GG              | 1947026916               |
| SNP_P4_171262_20572 | NW_004517079.1 | Scaffold2018 | 20572                   | CC                              | TT              | 1947026918               |
| SNP_P4_171263_20993 | NW_004517079.1 | Scaffold2018 | 20993                   | GG                              | AA              | 1947026920               |
| SNP_P4_171264_21454 | NW_004517079.1 | Scaffold2018 | 21454                   | CC                              | AA              | 1947026922               |
| SNP_P4_171265_21455 | NW_004517079.1 | Scaffold2018 | 21455                   | TT                              | CC              | 1947026924               |
| SNP_P4_171266_21997 | NW_004517079.1 | Scaffold2018 | 21997                   | AA                              | TT              | 1947026926               |
| SNP_P4_171267_23357 | NW_004517079.1 | Scaffold2018 | 23357                   | CC                              | AA              | 1947026928               |
| SNP_P4_171269_25652 | NW_004517079.1 | Scaffold2018 | 25652                   | CC                              | TT              | 1947026930               |
| SNP_P4_171270_26430 | NW_004517079.1 | Scaffold2018 | 26430                   | GG                              | AA              | 1947026932               |
| SNP_P4_171271_27539 | NW_004517079.1 | Scaffold2018 | 27539                   | CC                              | TT              | 1947026934               |
| SNP_P4_171272_27551 | NW_004517079.1 | Scaffold2018 | 27551                   | GG                              | AA              | 1947026936               |
| SNP_P4_171274_27584 | NW_004517079.1 | Scaffold2018 | 27584                   | CC                              | GG              | 1947026939               |
| SNP_P4_171275_27587 | NW_004517079.1 | Scaffold2018 | 27587                   | AA                              | GG              | 1947026941               |
| SNP_P4_171276_27749 | NW_004517079.1 | Scaffold2018 | 27749                   | TT                              | CC              | 1947026943               |
| SNP_P4_171277_27752 | NW_004517079.1 | Scaffold2018 | 27752                   | GG                              | CC              | 1947026945               |
| SNP_P4_171278_27816 | NW_004517079.1 | Scaffold2018 | 27816                   | TT                              | CC              | 1947026947               |
| SNP_P4_171280_28388 | NW_004517079.1 | Scaffold2018 | 28388                   | GG                              | TT              | 1947026949               |
| SNP_P4_171281_28488 | NW_004517079.1 | Scaffold2018 | 28488                   | AA                              | TT              | 1947026951               |
| SNP_P4_171282_28571 | NW_004517079.1 | Scaffold2018 | 28571                   | GG                              | TT              | 1947026953               |
| SNP_P4_171283_28607 | NW_004517079.1 | Scaffold2018 | 28607                   | TT                              | CC              | 1947026955               |
| SNP_P4_171284_6383  | NW_004517080.1 | Scaffold2020 | 6383                    | AA                              | TT              | 1947026957               |
| SNP_P4_171285_6391  | NW_004517080.1 | Scaffold2020 | 6391                    | TT                              | CC              | 1947026959               |
| SNP_P4_171286_6913  | NW_004517080.1 | Scaffold2020 | 6913                    | AA                              | GG              | 1947026961               |
| SNP_P4_171287_6944  | NW_004517080.1 | Scaffold2020 | 6944                    | TT                              | AA              | 1947026963               |
| SNP_P4_171288_7073  | NW_004517080.1 | Scaffold2020 | 7073                    | TT                              | CC              | 1947026965               |
| SNP_P4_171289_7347  | NW_004517080.1 | Scaffold2020 | 7347                    | CC                              | TT              | 1947026967               |
| SNP_P4_171290_7375  | NW_004517080.1 | Scaffold2020 | 7375                    | GG                              | AA              | 1947026969               |
| SNP_P4_171291_7383  | NW_004517080.1 | Scaffold2020 | 7383                    | TT                              | AA              | 1947026971               |
| SNP_P4_171292_7409  | NW_004517080.1 | Scaffold2020 | 7409                    | TT                              | CC              | 1947026973               |
| SNP_P4_171293_7416  | NW_004517080.1 | Scaffold2020 | 7416                    | GG                              | AA              | 1947026975               |
| SNP_P4_171294_7459  | NW_004517080.1 | Scaffold2020 | 7459                    | CC                              | AA              | 1947026977               |
| SNP_P4_171295_7495  | NW_004517080.1 | Scaffold2020 | 7495                    | GG                              | TT              | 1947026980               |
| SNP_P4_171297_7507  | NW_004517080.1 | Scaffold2020 | 7507                    | CC                              | GG              | 1947026982               |
| SNP_P4_171298_7565  | NW_004517080.1 | Scaffold2020 | 7565                    | AA                              | CC              | 1947026984               |
| SNP_P4_171299_7579  | NW_004517080.1 | Scaffold2020 | 7579                    | CC                              | TT              | 1947026986               |
| SNP_P4_171300_7582  | NW_004517080.1 | Scaffold2020 | 7582                    | TT                              | AA              | 1947026988               |
| SNP_P4_171301_7616  | NW_004517080.1 | Scaffold2020 | 7616                    | TT                              | GG              | 1947026990               |
| SNP_P4_171302_7668  | NW_004517080.1 | Scaffold2020 | 7668                    | TT                              | CC              | 1947026992               |
| SNP_P4_171303_7687  | NW_004517080.1 | Scaffold2020 | 7687                    | AA                              | GG              | 1947026994               |
| SNP_P4_171304_7697  | NW_004517080.1 | Scaffold2020 | 7697                    | AA                              | CC              | 1947026996               |
| SNP_P4_171305_7712  | NW_004517080.1 | Scaffold2020 | 7712                    | CC                              | TT              | 1947026998               |

| SNPs IDs             | Chromosome IDs | Chromosomes  | Physical positions (bp) | CDC Frontier (Reference genome) | (ILWC46 & LPNB) | NCBI SNPdb Accession IDs |
|----------------------|----------------|--------------|-------------------------|---------------------------------|-----------------|--------------------------|
| SNP_P4_171306_7714   | NW_004517080.1 | Scaffold2020 | 7714                    | GG                              | AA              | 1947027000               |
| SNP_P4_171307_7839   | NW_004517080.1 | Scaffold2020 | 7839                    | AA                              | CC              | 1947027002               |
| SNP_P4_171308_7859   | NW_004517080.1 | Scaffold2020 | 7859                    | CC                              | TT              | 1947027004               |
| SNP_P4_171309_7863   | NW_004517080.1 | Scaffold2020 | 7863                    | TT                              | AA              | 1947027006               |
| SNP_P4_171311_13265  | NW_004517080.1 | Scaffold2020 | 13265                   | AA                              | CC              | 1947027008               |
| SNP_P4_171312_13266  | NW_004517080.1 | Scaffold2020 | 13266                   | AA                              | GG              | 1947027010               |
| SNP_P4_171313_13523  | NW_004517080.1 | Scaffold2020 | 13523                   | TT                              | CC              | 1947027012               |
| SNP_P4_171314_13584  | NW_004517080.1 | Scaffold2020 | 13584                   | TT                              | AA              | 1947027014               |
| SNP_P4_171315_1399   | NW_004517082.1 | Scaffold2022 | 1399                    | CC                              | GG              | 1947027016               |
| SNP_P4_171316_1477   | NW_004517082.1 | Scaffold2022 | 1477                    | AA                              | CC              | 1947027018               |
| SNP_P4_171317_1480   | NW_004517082.1 | Scaffold2022 | 1480                    | AA                              | CC              | 1947027020               |
| SNP_P4_171318_1491   | NW_004517082.1 | Scaffold2022 | 1491                    | AA                              | CC              | 1947027022               |
| SNP_P4_171319_1719   | NW_004517082.1 | Scaffold2022 | 1719                    | CC                              | TT              | 1947027024               |
| SNP_P4_171320_8447   | NW_004517082.1 | Scaffold2022 | 8447                    | TT                              | CC              | 1947027026               |
| SNP_P4_171321_44162  | NW_004517082.1 | Scaffold2022 | 44162                   | AA                              | GG              | 1947027028               |
| SNP_P4_171322_44165  | NW_004517082.1 | Scaffold2022 | 44165                   | TT                              | AA              | 1947027030               |
| SNP_P4_171323_44166  | NW_004517082.1 | Scaffold2022 | 44166                   | AA                              | TT              | 1947027032               |
| SNP_P4_171324_44197  | NW_004517082.1 | Scaffold2022 | 44197                   | AA                              | GG              | 1947027035               |
| SNP_P4_171325_50481  | NW_004517082.1 | Scaffold2022 | 50481                   | TT                              | CC              | 1947027037               |
| SNP_P4_171326_50514  | NW_004517082.1 | Scaffold2022 | 50514                   | AA                              | GG              | 1947027039               |
| SNP_P4_171327_79664  | NW_004517082.1 | Scaffold2022 | 79664                   | AA                              | TT              | 1947027041               |
| SNP_P4_171329_83040  | NW_004517082.1 | Scaffold2022 | 83040                   | AA                              | GG              | 1947027043               |
| SNP_P4_171330_83090  | NW_004517082.1 | Scaffold2022 | 83090                   | CC                              | TT              | 1947027045               |
| SNP_P4_171331_83111  | NW_004517082.1 | Scaffold2022 | 83111                   | TT                              | CC              | 1947027047               |
| SNP_P4_171332_110161 | NW_004517082.1 | Scaffold2022 | 110161                  | TT                              | CC              | 1947027049               |
| SNP_P4_171333_110460 | NW_004517082.1 | Scaffold2022 | 110460                  | GG                              | AA              | 1947027051               |
| SNP_P4_171334_110526 | NW_004517082.1 | Scaffold2022 | 110526                  | CC                              | TT              | 1947027053               |
| SNP_P4_171335_110529 | NW_004517082.1 | Scaffold2022 | 110529                  | TT                              | CC              | 1947027055               |
| SNP_P4_171336_110764 | NW_004517082.1 | Scaffold2022 | 110764                  | TT                              | AA              | 1947027057               |
| SNP_P4_171337_110790 | NW_004517082.1 | Scaffold2022 | 110790                  | AA                              | GG              | 1947027059               |
| SNP_P4_171338_110823 | NW_004517082.1 | Scaffold2022 | 110823                  | TT                              | CC              | 1947027061               |
| SNP_P4_171339_113421 | NW_004517082.1 | Scaffold2022 | 113421                  | AA                              | GG              | 1947027063               |
| SNP_P4_171340_115189 | NW_004517082.1 | Scaffold2022 | 115189                  | TT                              | CC              | 1947027065               |
| SNP_P4_171341_115206 | NW_004517082.1 | Scaffold2022 | 115206                  | AA                              | GG              | 1947027067               |
| SNP_P4_171343_115305 | NW_004517082.1 | Scaffold2022 | 115305                  | CC                              | TT              | 1947027069               |
| SNP_P4_171344_115840 | NW_004517082.1 | Scaffold2022 | 115840                  | TT                              | AA              | 1947027071               |
| SNP_P4_171345_116269 | NW_004517082.1 | Scaffold2022 | 116269                  | AA                              | CC              | 1947027073               |
| SNP_P4_171346_116372 | NW_004517082.1 | Scaffold2022 | 116372                  | AA                              | CC              | 1947027075               |
| SNP_P4_171347_130443 | NW_004517082.1 | Scaffold2022 | 130443                  | GG                              | AA              | 1947027077               |
| SNP_P4_171348_132693 | NW_004517082.1 | Scaffold2022 | 132693                  | CC                              | TT              | 1947027079               |
| SNP_P4_171349_136212 | NW_004517082.1 | Scaffold2022 | 136212                  | GG                              | AA              | 1947027081               |
| SNP_P4_171350_136215 | NW_004517082.1 | Scaffold2022 | 136215                  | CC                              | TT              | 1947027083               |

| SNPs IDs             | Chromosome IDs | Chromosomes  | Physical positions (bp) | CDC Frontier (Reference genome) | (ILWC46 & LPNB) | NCBI SNPdb Accession IDs |
|----------------------|----------------|--------------|-------------------------|---------------------------------|-----------------|--------------------------|
| SNP_P4_171351_136221 | NW_004517082.1 | Scaffold2022 | 136221                  | CC                              | AA              | 1947027085               |
| SNP_P4_171352_136299 | NW_004517082.1 | Scaffold2022 | 136299                  | GG                              | AA              | 1947027087               |
| SNP_P4_171353_136403 | NW_004517082.1 | Scaffold2022 | 136403                  | AA                              | GG              | 1947027089               |
| SNP_P4_171354_136522 | NW_004517082.1 | Scaffold2022 | 136522                  | TT                              | CC              | 1947027091               |
| SNP_P4_171355_136540 | NW_004517082.1 | Scaffold2022 | 136540                  | AA                              | GG              | 1947027093               |
| SNP_P4_171356_136640 | NW_004517082.1 | Scaffold2022 | 136640                  | AA                              | GG              | 1947027096               |
| SNP_P4_171357_136756 | NW_004517082.1 | Scaffold2022 | 136756                  | CC                              | TT              | 1947027098               |
| SNP_P4_171358_136765 | NW_004517082.1 | Scaffold2022 | 136765                  | TT                              | GG              | 1947027100               |
| SNP_P4_171359_136772 | NW_004517082.1 | Scaffold2022 | 136772                  | TT                              | CC              | 1947027102               |
| SNP_P4_171360_136798 | NW_004517082.1 | Scaffold2022 | 136798                  | CC                              | TT              | 1947027104               |
| SNP_P4_171361_136873 | NW_004517082.1 | Scaffold2022 | 136873                  | CC                              | TT              | 1947027106               |
| SNP_P4_171362_136888 | NW_004517082.1 | Scaffold2022 | 136888                  | TT                              | CC              | 1947027108               |
| SNP_P4_171364_139007 | NW_004517082.1 | Scaffold2022 | 139007                  | TT                              | CC              | 1947027110               |
| SNP_P4_171365_139032 | NW_004517082.1 | Scaffold2022 | 139032                  | TT                              | CC              | 1947027112               |
| SNP_P4_171366_139045 | NW_004517082.1 | Scaffold2022 | 139045                  | CC                              | TT              | 1947027114               |
| SNP_P4_171367_139059 | NW_004517082.1 | Scaffold2022 | 139059                  | AA                              | GG              | 1947027116               |
| SNP_P4_171368_139205 | NW_004517082.1 | Scaffold2022 | 139205                  | AA                              | GG              | 1947027118               |
| SNP_P4_171369_139235 | NW_004517082.1 | Scaffold2022 | 139235                  | AA                              | TT              | 1947027120               |
| SNP_P4_171370_139265 | NW_004517082.1 | Scaffold2022 | 139265                  | TT                              | CC              | 1947027122               |
| SNP_P4_171371_139308 | NW_004517082.1 | Scaffold2022 | 139308                  | CC                              | AA              | 1947027124               |
| SNP_P4_171372_140763 | NW_004517082.1 | Scaffold2022 | 140763                  | AA                              | TT              | 1947027126               |
| SNP_P4_171373_141057 | NW_004517082.1 | Scaffold2022 | 141057                  | TT                              | CC              | 1947027128               |
| SNP_P4_171374_141063 | NW_004517082.1 | Scaffold2022 | 141063                  | AA                              | GG              | 1947027130               |
| SNP_P4_171375_155561 | NW_004517082.1 | Scaffold2022 | 155561                  | CC                              | AA              | 1947027133               |
| SNP_P4_171376_155636 | NW_004517082.1 | Scaffold2022 | 155636                  | TT                              | AA              | 1947027135               |
| SNP_P4_171377_155654 | NW_004517082.1 | Scaffold2022 | 155654                  | GG                              | AA              | 1947027137               |
| SNP_P4_171378_155873 | NW_004517082.1 | Scaffold2022 | 155873                  | TT                              | CC              | 1947027139               |
| SNP_P4_171379_156656 | NW_004517082.1 | Scaffold2022 | 156656                  | CC                              | TT              | 1947027141               |
| SNP_P4_171380_156668 | NW_004517082.1 | Scaffold2022 | 156668                  | AA                              | GG              | 1947027143               |
| SNP_P4_171382_9988   | NW_004517083.1 | Scaffold2023 | 9988                    | CC                              | TT              | 1947027145               |
| SNP_P4_171383_12160  | NW_004517083.1 | Scaffold2023 | 12160                   | AA                              | GG              | 1947027147               |
| SNP_P4_171384_98     | NW_004517084.1 | Scaffold2024 | 98                      | TT                              | CC              | 1947027149               |
| SNP_P4_171385_434    | NW_004517084.1 | Scaffold2024 | 434                     | CC                              | TT              | 1947027151               |
| SNP_P4_171386_1597   | NW_004517084.1 | Scaffold2024 | 1597                    | GG                              | AA              | 1947027153               |
| SNP_P4_171387_1623   | NW_004517084.1 | Scaffold2024 | 1623                    | GG                              | AA              | 1947027155               |
| SNP_P4_171388_1669   | NW_004517084.1 | Scaffold2024 | 1669                    | AA                              | GG              | 1947027157               |
| SNP_P4_171389_1889   | NW_004517084.1 | Scaffold2024 | 1889                    | GG                              | TT              | 1947027159               |
| SNP_P4_171390_1908   | NW_004517084.1 | Scaffold2024 | 1908                    | TT                              | CC              | 1947027161               |
| SNP_P4_171392_1987   | NW_004517084.1 | Scaffold2024 | 1987                    | TT                              | CC              | 1947027163               |
| SNP_P4_171393_2050   | NW_004517084.1 | Scaffold2024 | 2050                    | GG                              | TT              | 1947027165               |
| SNP_P4_171394_2070   | NW_004517084.1 | Scaffold2024 | 2070                    | AA                              | CC              | 1947027167               |
| SNP_P4_171395_2144   | NW_004517084.1 | Scaffold2024 | 2144                    | CC                              | TT              | 1947027169               |

| SNPs IDs            | Chromosome IDs | Chromosomes  | Physical positions (bp) | CDC Frontier (Reference genome) | (ILWC46 & LPNB) | NCBI SNPdb Accession IDs |
|---------------------|----------------|--------------|-------------------------|---------------------------------|-----------------|--------------------------|
| SNP_P4_171396_2218  | NW_004517084.1 | Scaffold2024 | 2218                    | GG                              | TT              | 1947027172               |
| SNP_P4_171397_2246  | NW_004517084.1 | Scaffold2024 | 2246                    | TT                              | GG              | 1947027174               |
| SNP_P4_171398_2285  | NW_004517084.1 | Scaffold2024 | 2285                    | AA                              | TT              | 1947027176               |
| SNP_P4_171399_2301  | NW_004517084.1 | Scaffold2024 | 2301                    | TT                              | CC              | 1947027178               |
| SNP_P4_171400_3715  | NW_004517084.1 | Scaffold2024 | 3715                    | AA                              | TT              | 1947027180               |
| SNP_P4_171401_3894  | NW_004517084.1 | Scaffold2024 | 3894                    | AA                              | GG              | 1947027182               |
| SNP_P4_171402_4000  | NW_004517084.1 | Scaffold2024 | 4000                    | CC                              | TT              | 1947027184               |
| SNP_P4_171403_4213  | NW_004517084.1 | Scaffold2024 | 4213                    | TT                              | GG              | 1947027186               |
| SNP_P4_171404_4757  | NW_004517084.1 | Scaffold2024 | 4757                    | CC                              | AA              | 1947027188               |
| SNP_P4_171405_4815  | NW_004517084.1 | Scaffold2024 | 4815                    | CC                              | GG              | 1947027190               |
| SNP_P4_171406_1879  | NW_004517086.1 | Scaffold2026 | 1879                    | AA                              | GG              | 1947027192               |
| SNP_P4_171407_1889  | NW_004517086.1 | Scaffold2026 | 1889                    | AA                              | GG              | 1947027194               |
| SNP_P4_171408_2095  | NW_004517086.1 | Scaffold2026 | 2095                    | TT                              | CC              | 1947027196               |
| SNP_P4_171409_2098  | NW_004517086.1 | Scaffold2026 | 2098                    | TT                              | GG              | 1947027198               |
| SNP_P4_171410_4431  | NW_004517086.1 | Scaffold2026 | 4431                    | TT                              | CC              | 1947027200               |
| SNP_P4_171411_4432  | NW_004517086.1 | Scaffold2026 | 4432                    | TT                              | AA              | 1947027202               |
| SNP_P4_171412_4463  | NW_004517086.1 | Scaffold2026 | 4463                    | GG                              | AA              | 1947027204               |
| SNP_P4_171413_4466  | NW_004517086.1 | Scaffold2026 | 4466                    | TT                              | CC              | 1947027206               |
| SNP_P4_171414_4485  | NW_004517086.1 | Scaffold2026 | 4485                    | AA                              | GG              | 1947027208               |
| SNP_P4_171415_4491  | NW_004517086.1 | Scaffold2026 | 4491                    | GG                              | AA              | 1947027210               |
| SNP_P4_171416_5188  | NW_004517086.1 | Scaffold2026 | 5188                    | AA                              | CC              | 1947027211               |
| SNP_P4_171417_5192  | NW_004517086.1 | Scaffold2026 | 5192                    | AA                              | GG              | 1947027212               |
| SNP_P4_171418_452   | NW_004517087.1 | Scaffold2027 | 452                     | GG                              | TT              | 1947027213               |
| SNP_P4_171419_711   | NW_004517087.1 | Scaffold2027 | 711                     | TT                              | AA              | 1947027215               |
| SNP_P4_171421_2687  | NW_004517087.1 | Scaffold2027 | 2687                    | AA                              | GG              | 1947027217               |
| SNP_P4_171422_2854  | NW_004517087.1 | Scaffold2027 | 2854                    | AA                              | TT              | 1947027219               |
| SNP_P4_171423_3025  | NW_004517087.1 | Scaffold2027 | 3025                    | GG                              | AA              | 1947027221               |
| SNP_P4_171424_25053 | NW_004517087.1 | Scaffold2027 | 25053                   | CC                              | TT              | 1947027223               |
| SNP_P4_171425_54117 | NW_004517087.1 | Scaffold2027 | 54117                   | GG                              | TT              | 1947027225               |
| SNP_P4_171426_54597 | NW_004517087.1 | Scaffold2027 | 54597                   | CC                              | GG              | 1947027227               |
| SNP_P4_171427_55589 | NW_004517087.1 | Scaffold2027 | 55589                   | TT                              | GG              | 1947027229               |
| SNP_P4_171428_55625 | NW_004517087.1 | Scaffold2027 | 55625                   | AA                              | GG              | 1947027231               |
| SNP_P4_171429_55815 | NW_004517087.1 | Scaffold2027 | 55815                   | TT                              | CC              | 1947027233               |
| SNP_P4_171430_55837 | NW_004517087.1 | Scaffold2027 | 55837                   | CC                              | GG              | 1947027235               |
| SNP_P4_171431_56181 | NW_004517087.1 | Scaffold2027 | 56181                   | AA                              | GG              | 1947027237               |
| SNP_P4_171432_56186 | NW_004517087.1 | Scaffold2027 | 56186                   | AA                              | GG              | 1947027239               |
| SNP_P4_171433_56276 | NW_004517087.1 | Scaffold2027 | 56276                   | TT                              | AA              | 1947027241               |
| SNP_P4_171434_56301 | NW_004517087.1 | Scaffold2027 | 56301                   | AA                              | TT              | 1947027243               |
| SNP_P4_171435_56310 | NW_004517087.1 | Scaffold2027 | 56310                   | CC                              | TT              | 1947027245               |
| SNP_P4_171436_56312 | NW_004517087.1 | Scaffold2027 | 56312                   | TT                              | GG              | 1947027247               |
| SNP_P4_171437_59569 | NW_004517087.1 | Scaffold2027 | 59569                   | AA                              | TT              | 1947027249               |
| SNP_P4_171438_59608 | NW_004517087.1 | Scaffold2027 | 59608                   | TT                              | CC              | 1947027251               |

| SNPs IDs             | Chromosome IDs | Chromosomes  | Physical positions (bp) | CDC Frontier (Reference genome) | (ILWC46 & LPNB) | NCBI SNPdb Accession IDs |
|----------------------|----------------|--------------|-------------------------|---------------------------------|-----------------|--------------------------|
| SNP_P4_171439_74765  | NW_004517087.1 | Scaffold2027 | 74765                   | TT                              | GG              | 1947027253               |
| SNP_P4_171440_74775  | NW_004517087.1 | Scaffold2027 | 74775                   | CC                              | TT              | 1947027255               |
| SNP_P4_171441_119278 | NW_004517087.1 | Scaffold2027 | 119278                  | TT                              | CC              | 1947027257               |
| SNP_P4_171442_119346 | NW_004517087.1 | Scaffold2027 | 119346                  | GG                              | AA              | 1947027259               |
| SNP_P4_171443_119641 | NW_004517087.1 | Scaffold2027 | 119641                  | AA                              | TT              | 1947027261               |
| SNP_P4_171444_119721 | NW_004517087.1 | Scaffold2027 | 119721                  | GG                              | AA              | 1947027263               |
| SNP_P4_171445_125523 | NW_004517087.1 | Scaffold2027 | 125523                  | TT                              | AA              | 1947027265               |
| SNP_P4_171447_125553 | NW_004517087.1 | Scaffold2027 | 125553                  | TT                              | CC              | 1947027267               |
| SNP_P4_171448_128912 | NW_004517087.1 | Scaffold2027 | 128912                  | CC                              | AA              | 1947027269               |
| SNP_P4_171449_129201 | NW_004517087.1 | Scaffold2027 | 129201                  | CC                              | TT              | 1947027271               |
| SNP_P4_171450_129255 | NW_004517087.1 | Scaffold2027 | 129255                  | AA                              | CC              | 1947027273               |
| SNP_P4_171451_141827 | NW_004517087.1 | Scaffold2027 | 141827                  | AA                              | GG              | 1947027275               |
| SNP_P4_171452_141839 | NW_004517087.1 | Scaffold2027 | 141839                  | AA                              | GG              | 1947027277               |
| SNP_P4_171453_160211 | NW_004517087.1 | Scaffold2027 | 160211                  | TT                              | CC              | 1947027279               |
| SNP_P4_171454_160654 | NW_004517087.1 | Scaffold2027 | 160654                  | AA                              | GG              | 1947027281               |
| SNP_P4_171455_65     | NW_004517089.1 | Scaffold2029 | 65                      | TT                              | AA              | 1947027283               |
| SNP_P4_171456_43     | NW_004517090.1 | Scaffold2030 | 43                      | GG                              | TT              | 1947027285               |
| SNP_P4_171457_64     | NW_004517090.1 | Scaffold2030 | 64                      | GG                              | TT              | 1947027287               |
| SNP_P4_171458_69     | NW_004517090.1 | Scaffold2030 | 69                      | TT                              | GG              | 1947027289               |
| SNP_P4_171459_85     | NW_004517090.1 | Scaffold2030 | 85                      | TT                              | GG              | 1947027291               |
| SNP_P4_171460_468    | NW_004517090.1 | Scaffold2030 | 468                     | AA                              | GG              | 1947027294               |
| SNP_P4_171461_470    | NW_004517090.1 | Scaffold2030 | 470                     | GG                              | TT              | 1947027296               |
| SNP_P4_171462_3391   | NW_004517090.1 | Scaffold2030 | 3391                    | TT                              | GG              | 1947027298               |
| SNP_P4_171463_3425   | NW_004517090.1 | Scaffold2030 | 3425                    | TT                              | CC              | 1947027300               |
| SNP_P4_171464_3572   | NW_004517090.1 | Scaffold2030 | 3572                    | AA                              | TT              | 1947027302               |
| SNP_P4_171465_3761   | NW_004517090.1 | Scaffold2030 | 3761                    | GG                              | AA              | 1947027304               |
| SNP_P4_171466_4233   | NW_004517090.1 | Scaffold2030 | 4233                    | TT                              | GG              | 1947027306               |
| SNP_P4_171467_4574   | NW_004517090.1 | Scaffold2030 | 4574                    | GG                              | CC              | 1947027308               |
| SNP_P4_171469_4609   | NW_004517090.1 | Scaffold2030 | 4609                    | AA                              | GG              | 1947027310               |
| SNP_P4_171470_8884   | NW_004517090.1 | Scaffold2030 | 8884                    | GG                              | AA              | 1947027312               |
| SNP_P4_171471_9181   | NW_004517090.1 | Scaffold2030 | 9181                    | AA                              | GG              | 1947027314               |
| SNP_P4_171472_9200   | NW_004517090.1 | Scaffold2030 | 9200                    | CC                              | AA              | 1947027316               |
| SNP_P4_171473_9208   | NW_004517090.1 | Scaffold2030 | 9208                    | AA                              | CC              | 1947027318               |
| SNP_P4_171474_1363   | NW_004517092.1 | Scaffold2033 | 1363                    | AA                              | TT              | 1947027320               |
| SNP_P4_171475_1366   | NW_004517092.1 | Scaffold2033 | 1366                    | TT                              | GG              | 1947027322               |
| SNP_P4_171477_19598  | NW_004517092.1 | Scaffold2033 | 19598                   | AA                              | GG              | 1947027324               |
| SNP_P4_171478_21063  | NW_004517092.1 | Scaffold2033 | 21063                   | TT                              | CC              | 1947027326               |
| SNP_P4_171480_52417  | NW_004517092.1 | Scaffold2033 | 52417                   | GG                              | AA              | 1947027328               |
| SNP_P4_171481_55746  | NW_004517092.1 | Scaffold2033 | 55746                   | TT                              | CC              | 1947027330               |
| SNP_P4_171482_66311  | NW_004517092.1 | Scaffold2033 | 66311                   | GG                              | AA              | 1947027332               |
| SNP_P4_171483_66315  | NW_004517092.1 | Scaffold2033 | 66315                   | AA                              | GG              | 1947027334               |
| SNP_P4_171484_66321  | NW_004517092.1 | Scaffold2033 | 66321                   | GG                              | AA              | 1947027336               |

| SNPs IDs             | Chromosome IDs | Chromosomes  | Physical positions (bp) | CDC Frontier (Reference genome) | (ILWC46 & LPNB) | NCBI SNPdb Accession IDs |
|----------------------|----------------|--------------|-------------------------|---------------------------------|-----------------|--------------------------|
| SNP_P4_171485_66352  | NW_004517092.1 | Scaffold2033 | 66352                   | AA                              | GG              | 1947027338               |
| SNP_P4_171486_66380  | NW_004517092.1 | Scaffold2033 | 66380                   | CC                              | TT              | 1947027340               |
| SNP_P4_171487_66429  | NW_004517092.1 | Scaffold2033 | 66429                   | AA                              | TT              | 1947027343               |
| SNP_P4_171488_66446  | NW_004517092.1 | Scaffold2033 | 66446                   | GG                              | AA              | 1947027345               |
| SNP_P4_171489_66457  | NW_004517092.1 | Scaffold2033 | 66457                   | TT                              | AA              | 1947027347               |
| SNP_P4_171491_66629  | NW_004517092.1 | Scaffold2033 | 66629                   | AA                              | CC              | 1947027349               |
| SNP_P4_171492_89482  | NW_004517092.1 | Scaffold2033 | 89482                   | AA                              | CC              | 1947027351               |
| SNP_P4_171494_165018 | NW_004517092.1 | Scaffold2033 | 165018                  | CC                              | TT              | 1947027353               |
| SNP_P4_171495_165029 | NW_004517092.1 | Scaffold2033 | 165029                  | TT                              | AA              | 1947027355               |
| SNP_P4_171496_165045 | NW_004517092.1 | Scaffold2033 | 165045                  | CC                              | TT              | 1947027357               |
| SNP_P4_171497_165382 | NW_004517092.1 | Scaffold2033 | 165382                  | CC                              | GG              | 1947027359               |
| SNP_P4_171498_165495 | NW_004517092.1 | Scaffold2033 | 165495                  | GG                              | TT              | 1947027361               |
| SNP_P4_171499_170625 | NW_004517092.1 | Scaffold2033 | 170625                  | GG                              | TT              | 1947027363               |
| SNP_P4_171500_178436 | NW_004517092.1 | Scaffold2033 | 178436                  | CC                              | TT              | 1947027365               |
| SNP_P4_171502_182501 | NW_004517092.1 | Scaffold2033 | 182501                  | TT                              | CC              | 1947027367               |
| SNP_P4_171503_183740 | NW_004517092.1 | Scaffold2033 | 183740                  | GG                              | AA              | 1947027369               |
| SNP_P4_171505_183921 | NW_004517092.1 | Scaffold2033 | 183921                  | GG                              | AA              | 1947027371               |
| SNP_P4_171506_183929 | NW_004517092.1 | Scaffold2033 | 183929                  | TT                              | AA              | 1947027373               |
| SNP_P4_171507_183963 | NW_004517092.1 | Scaffold2033 | 183963                  | GG                              | TT              | 1947027375               |
| SNP_P4_171508_184007 | NW_004517092.1 | Scaffold2033 | 184007                  | GG                              | AA              | 1947027378               |
| SNP_P4_171509_184160 | NW_004517092.1 | Scaffold2033 | 184160                  | AA                              | TT              | 1947027380               |
| SNP_P4_171510_184231 | NW_004517092.1 | Scaffold2033 | 184231                  | AA                              | GG              | 1947027382               |
| SNP_P4_171511_184279 | NW_004517092.1 | Scaffold2033 | 184279                  | AA                              | GG              | 1947027384               |
| SNP_P4_171512_184280 | NW_004517092.1 | Scaffold2033 | 184280                  | AA                              | GG              | 1947027386               |
| SNP_P4_171513_184304 | NW_004517092.1 | Scaffold2033 | 184304                  | CC                              | GG              | 1947027388               |
| SNP_P4_171514_184338 | NW_004517092.1 | Scaffold2033 | 184338                  | TT                              | GG              | 1947027390               |
| SNP_P4_171515_184376 | NW_004517092.1 | Scaffold2033 | 184376                  | AA                              | TT              | 1947027392               |
| SNP_P4_171516_185819 | NW_004517092.1 | Scaffold2033 | 185819                  | TT                              | GG              | 1947027394               |
| SNP_P4_171517_185821 | NW_004517092.1 | Scaffold2033 | 185821                  | TT                              | CC              | 1947027396               |
| SNP_P4_171518_8632   | NW_004517095.1 | Scaffold2036 | 8632                    | TT                              | CC              | 1947027398               |
| SNP_P4_171519_8638   | NW_004517095.1 | Scaffold2036 | 8638                    | AA                              | GG              | 1947027400               |
| SNP_P4_171520_8947   | NW_004517095.1 | Scaffold2036 | 8947                    | GG                              | AA              | 1947027402               |
| SNP_P4_171521_9168   | NW_004517095.1 | Scaffold2036 | 9168                    | CC                              | AA              | 1947027404               |
| SNP_P4_171522_9177   | NW_004517095.1 | Scaffold2036 | 9177                    | AA                              | GG              | 1947027406               |
| SNP_P4_171523_14791  | NW_004517095.1 | Scaffold2036 | 14791                   | CC                              | TT              | 1947027408               |
| SNP_P4_171524_14826  | NW_004517095.1 | Scaffold2036 | 14826                   | GG                              | AA              | 1947027410               |
| SNP_P4_171525_14938  | NW_004517095.1 | Scaffold2036 | 14938                   | CC                              | TT              | 1947027412               |
| SNP_P4_171526_15087  | NW_004517095.1 | Scaffold2036 | 15087                   | CC                              | GG              | 1947027414               |
| SNP_P4_171527_15095  | NW_004517095.1 | Scaffold2036 | 15095                   | CC                              | TT              | 1947027417               |
| SNP_P4_171528_35514  | NW_004517095.1 | Scaffold2036 | 35514                   | CC                              | TT              | 1947027419               |
| SNP_P4_171529_43919  | NW_004517095.1 | Scaffold2036 | 43919                   | GG                              | TT              | 1947027421               |
| SNP_P4_171530_47785  | NW_004517095.1 | Scaffold2036 | 47785                   | GG                              | AA              | 1947027423               |



| SNPs IDs             | Chromosome IDs | Chromosomes  | Physical positions (bp) | CDC Frontier (Reference genome) | (ILWC46 & LPNB) | NCBI SNPdb Accession IDs |
|----------------------|----------------|--------------|-------------------------|---------------------------------|-----------------|--------------------------|
| SNP_P4_171531_47815  | NW_004517095.1 | Scaffold2036 | 47815                   | GG                              | AA              | 1947027425               |
| SNP_P4_171532_47984  | NW_004517095.1 | Scaffold2036 | 47984                   | GG                              | AA              | 1947027427               |
| SNP_P4_171533_47987  | NW_004517095.1 | Scaffold2036 | 47987                   | GG                              | CC              | 1947027429               |
| SNP_P4_171534_47988  | NW_004517095.1 | Scaffold2036 | 47988                   | CC                              | AA              | 1947027431               |
| SNP_P4_171535_48006  | NW_004517095.1 | Scaffold2036 | 48006                   | AA                              | GG              | 1947027433               |
| SNP_P4_171536_48018  | NW_004517095.1 | Scaffold2036 | 48018                   | AA                              | GG              | 1947027435               |
| SNP_P4_171537_48047  | NW_004517095.1 | Scaffold2036 | 48047                   | TT                              | CC              | 1947027437               |
| SNP_P4_171538_48057  | NW_004517095.1 | Scaffold2036 | 48057                   | AA                              | GG              | 1947027439               |
| SNP_P4_171539_48069  | NW_004517095.1 | Scaffold2036 | 48069                   | GG                              | AA              | 1947027441               |
| SNP_P4_171540_48090  | NW_004517095.1 | Scaffold2036 | 48090                   | GG                              | AA              | 1947027444               |
| SNP_P4_171541_48113  | NW_004517095.1 | Scaffold2036 | 48113                   | GG                              | AA              | 1947027446               |
| SNP_P4_171542_48117  | NW_004517095.1 | Scaffold2036 | 48117                   | GG                              | AA              | 1947027448               |
| SNP_P4_171543_57535  | NW_004517095.1 | Scaffold2036 | 57535                   | GG                              | CC              | 1947027450               |
| SNP_P4_171544_57639  | NW_004517095.1 | Scaffold2036 | 57639                   | AA                              | GG              | 1947027452               |
| SNP_P4_171546_63349  | NW_004517095.1 | Scaffold2036 | 63349                   | AA                              | GG              | 1947027454               |
| SNP_P4_171547_73024  | NW_004517095.1 | Scaffold2036 | 73024                   | CC                              | GG              | 1947027456               |
| SNP_P4_171548_73197  | NW_004517095.1 | Scaffold2036 | 73197                   | AA                              | GG              | 1947027458               |
| SNP_P4_171549_73257  | NW_004517095.1 | Scaffold2036 | 73257                   | GG                              | AA              | 1947027460               |
| SNP_P4_171550_73266  | NW_004517095.1 | Scaffold2036 | 73266                   | CC                              | TT              | 1947027462               |
| SNP_P4_171551_73364  | NW_004517095.1 | Scaffold2036 | 73364                   | CC                              | AA              | 1947027464               |
| SNP_P4_171552_73380  | NW_004517095.1 | Scaffold2036 | 73380                   | TT                              | AA              | 1947027466               |
| SNP_P4_171553_73428  | NW_004517095.1 | Scaffold2036 | 73428                   | TT                              | AA              | 1947027468               |
| SNP_P4_171554_73443  | NW_004517095.1 | Scaffold2036 | 73443                   | AA                              | TT              | 1947027470               |
| SNP_P4_171555_73449  | NW_004517095.1 | Scaffold2036 | 73449                   | CC                              | AA              | 1947027472               |
| SNP_P4_171556_73451  | NW_004517095.1 | Scaffold2036 | 73451                   | TT                              | CC              | 1947027474               |
| SNP_P4_171557_73453  | NW_004517095.1 | Scaffold2036 | 73453                   | TT                              | GG              | 1947027476               |
| SNP_P4_171558_73476  | NW_004517095.1 | Scaffold2036 | 73476                   | TT                              | CC              | 1947027479               |
| SNP_P4_171559_73486  | NW_004517095.1 | Scaffold2036 | 73486                   | GG                              | AA              | 1947027481               |
| SNP_P4_171560_126658 | NW_004517095.1 | Scaffold2036 | 126658                  | TT                              | AA              | 1947027483               |
| SNP_P4_171561_157689 | NW_004517095.1 | Scaffold2036 | 157689                  | CC                              | TT              | 1947027485               |
| SNP_P4_171562_157971 | NW_004517095.1 | Scaffold2036 | 157971                  | CC                              | TT              | 1947027487               |
| SNP_P4_171563_158079 | NW_004517095.1 | Scaffold2036 | 158079                  | AA                              | CC              | 1947027489               |
| SNP_P4_171564_158112 | NW_004517095.1 | Scaffold2036 | 158112                  | TT                              | CC              | 1947027491               |
| SNP_P4_171565_175711 | NW_004517095.1 | Scaffold2036 | 175711                  | CC                              | TT              | 1947027493               |
| SNP_P4_171566_241090 | NW_004517095.1 | Scaffold2036 | 241090                  | CC                              | TT              | 1947027495               |
| SNP_P4_171567_1667   | NW_004517096.1 | Scaffold2037 | 1667                    | AA                              | TT              | 1947027497               |
| SNP_P4_171568_7533   | NW_004517096.1 | Scaffold2037 | 7533                    | TT                              | CC              | 1947027499               |
| SNP_P4_171569_7535   | NW_004517096.1 | Scaffold2037 | 7535                    | CC                              | TT              | 1947027501               |
| SNP_P4_171570_7540   | NW_004517096.1 | Scaffold2037 | 7540                    | AA                              | GG              | 1947027503               |
| SNP_P4_171571_7543   | NW_004517096.1 | Scaffold2037 | 7543                    | TT                              | AA              | 1947027505               |
| SNP_P4_171572_8288   | NW_004517096.1 | Scaffold2037 | 8288                    | TT                              | CC              | 1947027507               |
| SNP_P4_171573_8319   | NW_004517096.1 | Scaffold2037 | 8319                    | TT                              | GG              | 1947027509               |

| SNPs IDs             | Chromosome IDs | Chromosomes  | Physical positions (bp) | CDC Frontier (Reference genome) | (ILWC46 & LPNB) | NCBI SNPdb Accession IDs |
|----------------------|----------------|--------------|-------------------------|---------------------------------|-----------------|--------------------------|
| SNP_P4_171574_8826   | NW_004517096.1 | Scaffold2037 | 8826                    | CC                              | AA              | 1947027511               |
| SNP_P4_171575_16376  | NW_004517096.1 | Scaffold2037 | 16376                   | AA                              | GG              | 1947027513               |
| SNP_P4_171576_17049  | NW_004517096.1 | Scaffold2037 | 17049                   | AA                              | TT              | 1947027515               |
| SNP_P4_171577_18139  | NW_004517096.1 | Scaffold2037 | 18139                   | TT                              | CC              | 1947027517               |
| SNP_P4_171578_19492  | NW_004517096.1 | Scaffold2037 | 19492                   | AA                              | GG              | 1947027519               |
| SNP_P4_171579_20326  | NW_004517096.1 | Scaffold2037 | 20326                   | CC                              | AA              | 1947027521               |
| SNP_P4_171580_29897  | NW_004517096.1 | Scaffold2037 | 29897                   | AA                              | CC              | 1947027524               |
| SNP_P4_171581_36623  | NW_004517096.1 | Scaffold2037 | 36623                   | CC                              | TT              | 1947027526               |
| SNP_P4_171582_43744  | NW_004517096.1 | Scaffold2037 | 43744                   | CC                              | TT              | 1947027528               |
| SNP_P4_171583_43745  | NW_004517096.1 | Scaffold2037 | 43745                   | CC                              | TT              | 1947027530               |
| SNP_P4_171584_45799  | NW_004517096.1 | Scaffold2037 | 45799                   | CC                              | AA              | 1947027532               |
| SNP_P4_171585_102    | NW_004517097.1 | Scaffold2039 | 102                     | GG                              | AA              | 1947027534               |
| SNP_P4_171586_10121  | NW_004517097.1 | Scaffold2039 | 10121                   | GG                              | AA              | 1947027536               |
| SNP_P4_171587_15696  | NW_004517097.1 | Scaffold2039 | 15696                   | AA                              | GG              | 1947027538               |
| SNP_P4_171588_15725  | NW_004517097.1 | Scaffold2039 | 15725                   | AA                              | GG              | 1947027540               |
| SNP_P4_171589_20670  | NW_004517097.1 | Scaffold2039 | 20670                   | AA                              | GG              | 1947027542               |
| SNP_P4_171590_20692  | NW_004517097.1 | Scaffold2039 | 20692                   | AA                              | GG              | 1947027544               |
| SNP_P4_171591_29875  | NW_004517097.1 | Scaffold2039 | 29875                   | CC                              | TT              | 1947027546               |
| SNP_P4_171592_35355  | NW_004517097.1 | Scaffold2039 | 35355                   | TT                              | AA              | 1947027548               |
| SNP_P4_171593_50375  | NW_004517097.1 | Scaffold2039 | 50375                   | TT                              | CC              | 1947027550               |
| SNP_P4_171594_84466  | NW_004517097.1 | Scaffold2039 | 84466                   | GG                              | AA              | 1947027552               |
| SNP_P4_171595_97863  | NW_004517097.1 | Scaffold2039 | 97863                   | TT                              | CC              | 1947027554               |
| SNP_P4_171596_115471 | NW_004517097.1 | Scaffold2039 | 115471                  | AA                              | GG              | 1947027556               |
| SNP_P4_171597_118252 | NW_004517097.1 | Scaffold2039 | 118252                  | CC                              | AA              | 1947027558               |
| SNP_P4_171598_122079 | NW_004517097.1 | Scaffold2039 | 122079                  | AA                              | GG              | 1947027560               |
| SNP_P4_171599_182537 | NW_004517097.1 | Scaffold2039 | 182537                  | CC                              | TT              | 1947027562               |
| SNP_P4_171600_193917 | NW_004517097.1 | Scaffold2039 | 193917                  | CC                              | GG              | 1947027564               |
| SNP_P4_171601_200770 | NW_004517097.1 | Scaffold2039 | 200770                  | AA                              | GG              | 1947027566               |
| SNP_P4_171602_201777 | NW_004517097.1 | Scaffold2039 | 201777                  | GG                              | AA              | 1947027568               |
| SNP_P4_171603_202371 | NW_004517097.1 | Scaffold2039 | 202371                  | AA                              | GG              | 1947027570               |
| SNP_P4_171604_213057 | NW_004517097.1 | Scaffold2039 | 213057                  | TT                              | CC              | 1947027572               |
| SNP_P4_171605_14467  | NW_004517098.1 | Scaffold2040 | 14467                   | GG                              | AA              | 1947027574               |
| SNP_P4_171606_14504  | NW_004517098.1 | Scaffold2040 | 14504                   | GG                              | AA              | 1947027576               |
| SNP_P4_171607_14515  | NW_004517098.1 | Scaffold2040 | 14515                   | AA                              | GG              | 1947027578               |
| SNP_P4_171608_14906  | NW_004517098.1 | Scaffold2040 | 14906                   | AA                              | GG              | 1947027580               |
| SNP_P4_171609_19519  | NW_004517098.1 | Scaffold2040 | 19519                   | CC                              | TT              | 1947027582               |
| SNP_P4_171610_20717  | NW_004517098.1 | Scaffold2040 | 20717                   | AA                              | GG              | 1947027584               |
| SNP_P4_171611_20819  | NW_004517098.1 | Scaffold2040 | 20819                   | CC                              | TT              | 1947027586               |
| SNP_P4_171612_24728  | NW_004517098.1 | Scaffold2040 | 24728                   | AA                              | GG              | 1947027588               |
| SNP_P4_171613_35157  | NW_004517098.1 | Scaffold2040 | 35157                   | GG                              | AA              | 1947027590               |
| SNP_P4_171614_35197  | NW_004517098.1 | Scaffold2040 | 35197                   | AA                              | GG              | 1947027592               |
| SNP_P4_171615_35202  | NW_004517098.1 | Scaffold2040 | 35202                   | AA                              | CC              | 1947027594               |

| SNPs IDs             | Chromosome IDs | Chromosomes  | Physical positions (bp) | CDC Frontier (Reference genome) | (ILWC46 & LPNB) | NCBI SNPdb Accession IDs |
|----------------------|----------------|--------------|-------------------------|---------------------------------|-----------------|--------------------------|
| SNP_P4_171616_35230  | NW_004517098.1 | Scaffold2040 | 35230                   | TT                              | CC              | 1947027596               |
| SNP_P4_171617_35255  | NW_004517098.1 | Scaffold2040 | 35255                   | GG                              | TT              | 1947027598               |
| SNP_P4_171618_35361  | NW_004517098.1 | Scaffold2040 | 35361                   | TT                              | CC              | 1947027600               |
| SNP_P4_171619_35611  | NW_004517098.1 | Scaffold2040 | 35611                   | CC                              | TT              | 1947027602               |
| SNP_P4_171620_35681  | NW_004517098.1 | Scaffold2040 | 35681                   | AA                              | GG              | 1947027604               |
| SNP_P4_171621_35723  | NW_004517098.1 | Scaffold2040 | 35723                   | AA                              | GG              | 1947027606               |
| SNP_P4_171622_58973  | NW_004517098.1 | Scaffold2040 | 58973                   | TT                              | CC              | 1947027609               |
| SNP_P4_171623_58974  | NW_004517098.1 | Scaffold2040 | 58974                   | TT                              | GG              | 1947027611               |
| SNP_P4_171625_71437  | NW_004517098.1 | Scaffold2040 | 71437                   | AA                              | GG              | 1947027613               |
| SNP_P4_171626_71481  | NW_004517098.1 | Scaffold2040 | 71481                   | AA                              | GG              | 1947027615               |
| SNP_P4_171627_74704  | NW_004517098.1 | Scaffold2040 | 74704                   | AA                              | CC              | 1947027617               |
| SNP_P4_171629_75581  | NW_004517098.1 | Scaffold2040 | 75581                   | CC                              | AA              | 1947027619               |
| SNP_P4_171630_80205  | NW_004517098.1 | Scaffold2040 | 80205                   | AA                              | GG              | 1947027621               |
| SNP_P4_171631_99420  | NW_004517098.1 | Scaffold2040 | 99420                   | GG                              | AA              | 1947027623               |
| SNP_P4_171632_115498 | NW_004517098.1 | Scaffold2040 | 115498                  | TT                              | AA              | 1947027625               |
| SNP_P4_171633_115655 | NW_004517098.1 | Scaffold2040 | 115655                  | GG                              | AA              | 1947027627               |
| SNP_P4_171634_115839 | NW_004517098.1 | Scaffold2040 | 115839                  | GG                              | AA              | 1947027629               |
| SNP_P4_171635_115844 | NW_004517098.1 | Scaffold2040 | 115844                  | TT                              | GG              | 1947027631               |
| SNP_P4_171636_115916 | NW_004517098.1 | Scaffold2040 | 115916                  | TT                              | CC              | 1947027634               |
| SNP_P4_171637_115950 | NW_004517098.1 | Scaffold2040 | 115950                  | CC                              | TT              | 1947027636               |
| SNP_P4_171638_138283 | NW_004517098.1 | Scaffold2040 | 138283                  | GG                              | AA              | 1947027638               |
| SNP_P4_171639_138652 | NW_004517098.1 | Scaffold2040 | 138652                  | TT                              | AA              | 1947027640               |
| SNP_P4_171640_139085 | NW_004517098.1 | Scaffold2040 | 139085                  | CC                              | GG              | 1947027642               |
| SNP_P4_171641_139754 | NW_004517098.1 | Scaffold2040 | 139754                  | AA                              | GG              | 1947027644               |
| SNP_P4_171642_139755 | NW_004517098.1 | Scaffold2040 | 139755                  | AA                              | GG              | 1947027646               |
| SNP_P4_171643_139776 | NW_004517098.1 | Scaffold2040 | 139776                  | AA                              | GG              | 1947027648               |
| SNP_P4_171644_139897 | NW_004517098.1 | Scaffold2040 | 139897                  | GG                              | AA              | 1947027650               |
| SNP_P4_171645_139902 | NW_004517098.1 | Scaffold2040 | 139902                  | AA                              | GG              | 1947027652               |
| SNP_P4_171646_139927 | NW_004517098.1 | Scaffold2040 | 139927                  | CC                              | TT              | 1947027654               |
| SNP_P4_171647_139945 | NW_004517098.1 | Scaffold2040 | 139945                  | TT                              | GG              | 1947027656               |
| SNP_P4_171648_139996 | NW_004517098.1 | Scaffold2040 | 139996                  | CC                              | TT              | 1947027658               |
| SNP_P4_171649_140004 | NW_004517098.1 | Scaffold2040 | 140004                  | AA                              | GG              | 1947027660               |
| SNP_P4_171651_156958 | NW_004517098.1 | Scaffold2040 | 156958                  | TT                              | CC              | 1947027662               |
| SNP_P4_171652_157681 | NW_004517098.1 | Scaffold2040 | 157681                  | CC                              | GG              | 1947027664               |
| SNP_P4_171653_158157 | NW_004517098.1 | Scaffold2040 | 158157                  | TT                              | CC              | 1947027666               |
| SNP_P4_171654_158180 | NW_004517098.1 | Scaffold2040 | 158180                  | GG                              | CC              | 1947027668               |
| SNP_P4_171656_160013 | NW_004517098.1 | Scaffold2040 | 160013                  | TT                              | CC              | 1947027670               |
| SNP_P4_171658_163528 | NW_004517098.1 | Scaffold2040 | 163528                  | CC                              | GG              | 1947027672               |
| SNP_P4_171659_163896 | NW_004517098.1 | Scaffold2040 | 163896                  | AA                              | GG              | 1947027674               |
| SNP_P4_171660_173283 | NW_004517098.1 | Scaffold2040 | 173283                  | TT                              | AA              | 1947027676               |
| SNP_P4_171662_181076 | NW_004517098.1 | Scaffold2040 | 181076                  | CC                              | AA              | 1947027678               |
| SNP_P4_171663_181087 | NW_004517098.1 | Scaffold2040 | 181087                  | AA                              | TT              | 1947027680               |

| SNPs IDs             | Chromosome IDs | Chromosomes  | Physical positions (bp) | CDC Frontier (Reference genome) | (ILWC46 & LPNB) | NCBI SNPdb Accession IDs |
|----------------------|----------------|--------------|-------------------------|---------------------------------|-----------------|--------------------------|
| SNP_P4_171664_198687 | NW_004517098.1 | Scaffold2040 | 198687                  | AA                              | GG              | 1947027682               |
| SNP_P4_171665_199282 | NW_004517098.1 | Scaffold2040 | 199282                  | AA                              | GG              | 1947027684               |
| SNP_P4_171666_199717 | NW_004517098.1 | Scaffold2040 | 199717                  | TT                              | CC              | 1947027686               |
| SNP_P4_171667_200649 | NW_004517098.1 | Scaffold2040 | 200649                  | AA                              | GG              | 1947027688               |
| SNP_P4_171668_203940 | NW_004517098.1 | Scaffold2040 | 203940                  | TT                              | CC              | 1947027690               |
| SNP_P4_171669_211521 | NW_004517098.1 | Scaffold2040 | 211521                  | GG                              | TT              | 1947027692               |
| SNP_P4_171670_212113 | NW_004517098.1 | Scaffold2040 | 212113                  | TT                              | AA              | 1947027694               |
| SNP_P4_171671_212452 | NW_004517098.1 | Scaffold2040 | 212452                  | GG                              | AA              | 1947027696               |
| SNP_P4_171672_212548 | NW_004517098.1 | Scaffold2040 | 212548                  | GG                              | CC              | 1947027698               |
| SNP_P4_171673_212581 | NW_004517098.1 | Scaffold2040 | 212581                  | AA                              | CC              | 1947027700               |
| SNP_P4_171674_212670 | NW_004517098.1 | Scaffold2040 | 212670                  | CC                              | GG              | 1947027702               |
| SNP_P4_171675_212883 | NW_004517098.1 | Scaffold2040 | 212883                  | TT                              | CC              | 1947027704               |
| SNP_P4_171676_212905 | NW_004517098.1 | Scaffold2040 | 212905                  | TT                              | GG              | 1947027706               |
| SNP_P4_171677_212953 | NW_004517098.1 | Scaffold2040 | 212953                  | TT                              | AA              | 1947027708               |
| SNP_P4_171679_243953 | NW_004517098.1 | Scaffold2040 | 243953                  | AA                              | TT              | 1947027710               |
| SNP_P4_171680_243971 | NW_004517098.1 | Scaffold2040 | 243971                  | CC                              | GG              | 1947027712               |
| SNP_P4_171681_244057 | NW_004517098.1 | Scaffold2040 | 244057                  | TT                              | CC              | 1947027714               |
| SNP_P4_171682_244228 | NW_004517098.1 | Scaffold2040 | 244228                  | GG                              | AA              | 1947027716               |
| SNP_P4_171683_413    | NW_004517104.1 | Scaffold2050 | 413                     | GG                              | CC              | 1947027718               |
| SNP_P4_171684_481    | NW_004517104.1 | Scaffold2050 | 481                     | TT                              | CC              | 1947027720               |
| SNP_P4_171685_10754  | NW_004517104.1 | Scaffold2050 | 10754                   | AA                              | GG              | 1947027722               |
| SNP_P4_171686_15855  | NW_004517104.1 | Scaffold2050 | 15855                   | AA                              | GG              | 1947027724               |
| SNP_P4_171687_15990  | NW_004517104.1 | Scaffold2050 | 15990                   | GG                              | AA              | 1947027726               |
| SNP_P4_171688_16000  | NW_004517104.1 | Scaffold2050 | 16000                   | TT                              | CC              | 1947027728               |
| SNP_P4_171689_16013  | NW_004517104.1 | Scaffold2050 | 16013                   | TT                              | CC              | 1947027730               |
| SNP_P4_171690_6040   | NW_004517105.1 | Scaffold2051 | 6040                    | CC                              | TT              | 1947027732               |
| SNP_P4_171691_6081   | NW_004517105.1 | Scaffold2051 | 6081                    | CC                              | TT              | 1947027734               |
| SNP_P4_171692_6126   | NW_004517105.1 | Scaffold2051 | 6126                    | AA                              | TT              | 1947027736               |
| SNP_P4_171693_6473   | NW_004517105.1 | Scaffold2051 | 6473                    | AA                              | GG              | 1947027738               |
| SNP_P4_171694_6498   | NW_004517105.1 | Scaffold2051 | 6498                    | CC                              | AA              | 1947027740               |
| SNP_P4_171695_11946  | NW_004517105.1 | Scaffold2051 | 11946                   | TT                              | GG              | 1947027742               |
| SNP_P4_171696_12032  | NW_004517105.1 | Scaffold2051 | 12032                   | AA                              | TT              | 1947027744               |
| SNP_P4_171697_12041  | NW_004517105.1 | Scaffold2051 | 12041                   | TT                              | CC              | 1947027746               |
| SNP_P4_171698_12115  | NW_004517105.1 | Scaffold2051 | 12115                   | AA                              | CC              | 1947027748               |
| SNP_P4_171699_12244  | NW_004517105.1 | Scaffold2051 | 12244                   | GG                              | AA              | 1947027750               |
| SNP_P4_171700_12420  | NW_004517105.1 | Scaffold2051 | 12420                   | TT                              | CC              | 1947027752               |
| SNP_P4_171701_14969  | NW_004517105.1 | Scaffold2051 | 14969                   | AA                              | TT              | 1947027754               |
| SNP_P4_171702_15441  | NW_004517105.1 | Scaffold2051 | 15441                   | GG                              | CC              | 1947027829               |
| SNP_P4_171703_21307  | NW_004517105.1 | Scaffold2051 | 21307                   | CC                              | AA              | 1947027831               |
| SNP_P4_171704_24811  | NW_004517105.1 | Scaffold2051 | 24811                   | AA                              | GG              | 1947027834               |
| SNP_P4_171705_24843  | NW_004517105.1 | Scaffold2051 | 24843                   | GG                              | TT              | 1947027836               |
| SNP_P4_171706_25121  | NW_004517105.1 | Scaffold2051 | 25121                   | TT                              | CC              | 1947027838               |

| SNPs IDs             | Chromosome IDs | Chromosomes  | Physical positions (bp) | CDC Frontier (Reference genome) | (ILWC46 & LPNB) | NCBI SNPdb Accession IDs |
|----------------------|----------------|--------------|-------------------------|---------------------------------|-----------------|--------------------------|
| SNP_P4_171707_25122  | NW_004517105.1 | Scaffold2051 | 25122                   | AA                              | GG              | 1947027840               |
| SNP_P4_171708_30752  | NW_004517105.1 | Scaffold2051 | 30752                   | AA                              | GG              | 1947027842               |
| SNP_P4_171709_32165  | NW_004517105.1 | Scaffold2051 | 32165                   | TT                              | CC              | 1947027844               |
| SNP_P4_171710_32531  | NW_004517105.1 | Scaffold2051 | 32531                   | AA                              | TT              | 1947027846               |
| SNP_P4_171711_40590  | NW_004517105.1 | Scaffold2051 | 40590                   | TT                              | CC              | 1947027848               |
| SNP_P4_171713_40629  | NW_004517105.1 | Scaffold2051 | 40629                   | CC                              | GG              | 1947027850               |
| SNP_P4_171714_40645  | NW_004517105.1 | Scaffold2051 | 40645                   | TT                              | CC              | 1947027852               |
| SNP_P4_171715_40656  | NW_004517105.1 | Scaffold2051 | 40656                   | TT                              | CC              | 1947027854               |
| SNP_P4_171716_40679  | NW_004517105.1 | Scaffold2051 | 40679                   | GG                              | AA              | 1947027856               |
| SNP_P4_171717_40759  | NW_004517105.1 | Scaffold2051 | 40759                   | TT                              | CC              | 1947027858               |
| SNP_P4_171718_40787  | NW_004517105.1 | Scaffold2051 | 40787                   | AA                              | GG              | 1947027860               |
| SNP_P4_171719_40789  | NW_004517105.1 | Scaffold2051 | 40789                   | TT                              | CC              | 1947027862               |
| SNP_P4_171720_40800  | NW_004517105.1 | Scaffold2051 | 40800                   | AA                              | GG              | 1947027864               |
| SNP_P4_171721_41062  | NW_004517105.1 | Scaffold2051 | 41062                   | TT                              | CC              | 1947027866               |
| SNP_P4_171722_41103  | NW_004517105.1 | Scaffold2051 | 41103                   | AA                              | GG              | 1947027868               |
| SNP_P4_171724_76251  | NW_004517105.1 | Scaffold2051 | 76251                   | AA                              | GG              | 1947027870               |
| SNP_P4_171725_76266  | NW_004517105.1 | Scaffold2051 | 76266                   | GG                              | TT              | 1947027872               |
| SNP_P4_171726_76268  | NW_004517105.1 | Scaffold2051 | 76268                   | GG                              | TT              | 1947027874               |
| SNP_P4_171727_76344  | NW_004517105.1 | Scaffold2051 | 76344                   | GG                              | AA              | 1947027876               |
| SNP_P4_171728_76346  | NW_004517105.1 | Scaffold2051 | 76346                   | TT                              | CC              | 1947027878               |
| SNP_P4_171729_76357  | NW_004517105.1 | Scaffold2051 | 76357                   | CC                              | TT              | 1947027880               |
| SNP_P4_171730_93408  | NW_004517105.1 | Scaffold2051 | 93408                   | TT                              | AA              | 1947027882               |
| SNP_P4_171731_93485  | NW_004517105.1 | Scaffold2051 | 93485                   | TT                              | CC              | 1947027884               |
| SNP_P4_171732_123115 | NW_004517105.1 | Scaffold2051 | 123115                  | AA                              | CC              | 1947027886               |
| SNP_P4_171733_124514 | NW_004517105.1 | Scaffold2051 | 124514                  | TT                              | CC              | 1947027888               |
| SNP_P4_171734_124525 | NW_004517105.1 | Scaffold2051 | 124525                  | AA                              | TT              | 1947027890               |
| SNP_P4_171735_141730 | NW_004517105.1 | Scaffold2051 | 141730                  | CC                              | GG              | 1947027892               |
| SNP_P4_171736_141753 | NW_004517105.1 | Scaffold2051 | 141753                  | CC                              | TT              | 1947027894               |
| SNP_P4_171737_141768 | NW_004517105.1 | Scaffold2051 | 141768                  | GG                              | AA              | 1947027896               |
| SNP_P4_171738_184229 | NW_004517105.1 | Scaffold2051 | 184229                  | TT                              | AA              | 1947027898               |
| SNP_P4_171739_184574 | NW_004517105.1 | Scaffold2051 | 184574                  | AA                              | GG              | 1947027900               |
| SNP_P4_171740_189079 | NW_004517105.1 | Scaffold2051 | 189079                  | AA                              | GG              | 1947027902               |
| SNP_P4_171742_197276 | NW_004517105.1 | Scaffold2051 | 197276                  | AA                              | CC              | 1947027904               |
| SNP_P4_171745_1860   | NW_004517108.1 | Scaffold2055 | 1860                    | AA                              | CC              | 1947027906               |
| SNP_P4_171746_1939   | NW_004517109.1 | Scaffold2056 | 1939                    | AA                              | TT              | 1947027908               |
| SNP_P4_171747_3457   | NW_004517109.1 | Scaffold2056 | 3457                    | GG                              | AA              | 1947027910               |
| SNP_P4_171748_3472   | NW_004517109.1 | Scaffold2056 | 3472                    | CC                              | TT              | 1947027912               |
| SNP_P4_171749_3479   | NW_004517109.1 | Scaffold2056 | 3479                    | TT                              | GG              | 1947027914               |
| SNP_P4_171750_3729   | NW_004517109.1 | Scaffold2056 | 3729                    | AA                              | TT              | 1947027916               |
| SNP_P4_171751_3730   | NW_004517109.1 | Scaffold2056 | 3730                    | CC                              | TT              | 1947027918               |
| SNP_P4_171752_3757   | NW_004517109.1 | Scaffold2056 | 3757                    | TT                              | GG              | 1947027920               |
| SNP_P4_171753_3779   | NW_004517109.1 | Scaffold2056 | 3779                    | AA                              | CC              | 1947027922               |

| SNPs IDs            | Chromosome IDs | Chromosomes  | Physical positions (bp) | CDC Frontier (Reference genome) | (ILWC46 & LPNB) | NCBI SNPdb Accession IDs |
|---------------------|----------------|--------------|-------------------------|---------------------------------|-----------------|--------------------------|
| SNP_P4_171754_7975  | NW_004517109.1 | Scaffold2056 | 7975                    | TT                              | CC              | 1947027924               |
| SNP_P4_171755_4957  | NW_004517111.1 | Scaffold2062 | 4957                    | CC                              | GG              | 1947027926               |
| SNP_P4_171756_4988  | NW_004517111.1 | Scaffold2062 | 4988                    | TT                              | AA              | 1947027928               |
| SNP_P4_171757_5050  | NW_004517111.1 | Scaffold2062 | 5050                    | GG                              | TT              | 1947027930               |
| SNP_P4_171758_1344  | NW_004517113.1 | Scaffold2064 | 1344                    | TT                              | CC              | 1947027932               |
| SNP_P4_171759_1488  | NW_004517113.1 | Scaffold2064 | 1488                    | GG                              | AA              | 1947027934               |
| SNP_P4_171760_1505  | NW_004517113.1 | Scaffold2064 | 1505                    | CC                              | AA              | 1947027936               |
| SNP_P4_171761_1560  | NW_004517113.1 | Scaffold2064 | 1560                    | TT                              | AA              | 1947027938               |
| SNP_P4_171762_1565  | NW_004517113.1 | Scaffold2064 | 1565                    | GG                              | TT              | 1947027940               |
| SNP_P4_171763_1583  | NW_004517113.1 | Scaffold2064 | 1583                    | TT                              | GG              | 1947027943               |
| SNP_P4_171764_1872  | NW_004517113.1 | Scaffold2064 | 1872                    | TT                              | GG              | 1947027945               |
| SNP_P4_171765_2195  | NW_004517113.1 | Scaffold2064 | 2195                    | TT                              | CC              | 1947027947               |
| SNP_P4_171766_7217  | NW_004517113.1 | Scaffold2064 | 7217                    | TT                              | CC              | 1947027949               |
| SNP_P4_171767_7287  | NW_004517113.1 | Scaffold2064 | 7287                    | AA                              | GG              | 1947027951               |
| SNP_P4_171768_7298  | NW_004517113.1 | Scaffold2064 | 7298                    | GG                              | AA              | 1947027953               |
| SNP_P4_171769_7302  | NW_004517113.1 | Scaffold2064 | 7302                    | AA                              | CC              | 1947027955               |
| SNP_P4_171770_7303  | NW_004517113.1 | Scaffold2064 | 7303                    | GG                              | AA              | 1947027957               |
| SNP_P4_171771_7321  | NW_004517113.1 | Scaffold2064 | 7321                    | TT                              | CC              | 1947027959               |
| SNP_P4_171772_7445  | NW_004517113.1 | Scaffold2064 | 7445                    | AA                              | TT              | 1947027961               |
| SNP_P4_171773_9114  | NW_004517113.1 | Scaffold2064 | 9114                    | CC                              | TT              | 1947027963               |
| SNP_P4_171774_9146  | NW_004517113.1 | Scaffold2064 | 9146                    | AA                              | GG              | 1947027965               |
| SNP_P4_171775_9173  | NW_004517113.1 | Scaffold2064 | 9173                    | GG                              | AA              | 1947027967               |
| SNP_P4_171776_9178  | NW_004517113.1 | Scaffold2064 | 9178                    | GG                              | TT              | 1947027969               |
| SNP_P4_171777_2703  | NW_004517115.1 | Scaffold2066 | 2703                    | TT                              | CC              | 1947027971               |
| SNP_P4_171779_3236  | NW_004517118.1 | Scaffold2072 | 3236                    | GG                              | AA              | 1947027973               |
| SNP_P4_171780_3239  | NW_004517118.1 | Scaffold2072 | 3239                    | AA                              | GG              | 1947027975               |
| SNP_P4_171781_3420  | NW_004517118.1 | Scaffold2072 | 3420                    | GG                              | AA              | 1947027977               |
| SNP_P4_171783_3428  | NW_004517118.1 | Scaffold2072 | 3428                    | CC                              | TT              | 1947027979               |
| SNP_P4_171784_5006  | NW_004517118.1 | Scaffold2072 | 5006                    | TT                              | AA              | 1947027981               |
| SNP_P4_171785_5071  | NW_004517118.1 | Scaffold2072 | 5071                    | AA                              | GG              | 1947027983               |
| SNP_P4_171786_5303  | NW_004517118.1 | Scaffold2072 | 5303                    | GG                              | AA              | 1947027985               |
| SNP_P4_171787_5323  | NW_004517118.1 | Scaffold2072 | 5323                    | TT                              | CC              | 1947027987               |
| SNP_P4_171788_5455  | NW_004517118.1 | Scaffold2072 | 5455                    | TT                              | CC              | 1947027990               |
| SNP_P4_171789_11679 | NW_004517118.1 | Scaffold2072 | 11679                   | AA                              | CC              | 1947027992               |
| SNP_P4_171790_12003 | NW_004517118.1 | Scaffold2072 | 12003                   | TT                              | CC              | 1947027994               |
| SNP_P4_171791_16305 | NW_004517118.1 | Scaffold2072 | 16305                   | TT                              | CC              | 1947027996               |
| SNP_P4_171792_16544 | NW_004517118.1 | Scaffold2072 | 16544                   | TT                              | AA              | 1947027998               |
| SNP_P4_171793_26819 | NW_004517118.1 | Scaffold2072 | 26819                   | AA                              | CC              | 1947028000               |
| SNP_P4_171794_33534 | NW_004517118.1 | Scaffold2072 | 33534                   | TT                              | GG              | 1947028002               |
| SNP_P4_171795_35507 | NW_004517118.1 | Scaffold2072 | 35507                   | TT                              | CC              | 1947028004               |
| SNP_P4_171796_38151 | NW_004517118.1 | Scaffold2072 | 38151                   | AA                              | TT              | 1947028006               |
| SNP_P4_171797_38241 | NW_004517118.1 | Scaffold2072 | 38241                   | CC                              | GG              | 1947028008               |

| SNPs IDs            | Chromosome IDs | Chromosomes  | Physical positions (bp) | CDC Frontier (Reference genome) | (ILWC46 & LPNB) | NCBI SNPdb Accession IDs |
|---------------------|----------------|--------------|-------------------------|---------------------------------|-----------------|--------------------------|
| SNP_P4_171798_38262 | NW_004517118.1 | Scaffold2072 | 38262                   | GG                              | TT              | 1947028010               |
| SNP_P4_171799_38394 | NW_004517118.1 | Scaffold2072 | 38394                   | GG                              | CC              | 1947028012               |
| SNP_P4_171800_39039 | NW_004517118.1 | Scaffold2072 | 39039                   | TT                              | AA              | 1947028014               |
| SNP_P4_171801_39139 | NW_004517118.1 | Scaffold2072 | 39139                   | AA                              | GG              | 1947028016               |
| SNP_P4_171802_4633  | NW_004517119.1 | Scaffold2074 | 4633                    | AA                              | GG              | 1947028019               |
| SNP_P4_171803_4655  | NW_004517119.1 | Scaffold2074 | 4655                    | AA                              | CC              | 1947028021               |
| SNP_P4_171804_4832  | NW_004517119.1 | Scaffold2074 | 4832                    | CC                              | TT              | 1947028023               |
| SNP_P4_171805_4986  | NW_004517119.1 | Scaffold2074 | 4986                    | CC                              | TT              | 1947028025               |
| SNP_P4_171806_8982  | NW_004517119.1 | Scaffold2074 | 8982                    | AA                              | CC              | 1947028027               |
| SNP_P4_171807_16990 | NW_004517119.1 | Scaffold2074 | 16990                   | GG                              | TT              | 1947028029               |
| SNP_P4_171808_16997 | NW_004517119.1 | Scaffold2074 | 16997                   | AA                              | TT              | 1947028031               |
| SNP_P4_171809_17276 | NW_004517119.1 | Scaffold2074 | 17276                   | GG                              | AA              | 1947028033               |
| SNP_P4_171810_17282 | NW_004517119.1 | Scaffold2074 | 17282                   | AA                              | GG              | 1947028035               |
| SNP_P4_171811_4100  | NW_004517120.1 | Scaffold2075 | 4100                    | AA                              | CC              | 1947028037               |
| SNP_P4_171812_4183  | NW_004517120.1 | Scaffold2075 | 4183                    | GG                              | TT              | 1947028039               |
| SNP_P4_171813_4566  | NW_004517120.1 | Scaffold2075 | 4566                    | GG                              | TT              | 1947028041               |
| SNP_P4_171814_1012  | NW_004517121.1 | Scaffold2076 | 1012                    | AA                              | GG              | 1947028043               |
| SNP_P4_171815_1287  | NW_004517121.1 | Scaffold2076 | 1287                    | CC                              | AA              | 1947028045               |
| SNP_P4_171816_1382  | NW_004517121.1 | Scaffold2076 | 1382                    | TT                              | CC              | 1947028047               |
| SNP_P4_171817_1482  | NW_004517121.1 | Scaffold2076 | 1482                    | AA                              | GG              | 1947028049               |
| SNP_P4_171818_1617  | NW_004517121.1 | Scaffold2076 | 1617                    | TT                              | AA              | 1947028051               |
| SNP_P4_171819_3324  | NW_004517121.1 | Scaffold2076 | 3324                    | AA                              | GG              | 1947028053               |
| SNP_P4_171820_3325  | NW_004517121.1 | Scaffold2076 | 3325                    | TT                              | GG              | 1947028055               |
| SNP_P4_171821_3363  | NW_004517121.1 | Scaffold2076 | 3363                    | CC                              | TT              | 1947028057               |
| SNP_P4_171822_9964  | NW_004517121.1 | Scaffold2076 | 9964                    | GG                              | AA              | 1947028059               |
| SNP_P4_171823_9974  | NW_004517121.1 | Scaffold2076 | 9974                    | GG                              | AA              | 1947028061               |
| SNP_P4_171824_10087 | NW_004517121.1 | Scaffold2076 | 10087                   | AA                              | GG              | 1947028064               |
| SNP_P4_171825_11626 | NW_004517121.1 | Scaffold2076 | 11626                   | TT                              | GG              | 1947028066               |
| SNP_P4_171826_11662 | NW_004517121.1 | Scaffold2076 | 11662                   | TT                              | GG              | 1947028068               |
| SNP_P4_171827_12219 | NW_004517121.1 | Scaffold2076 | 12219                   | TT                              | AA              | 1947028070               |
| SNP_P4_171828_12520 | NW_004517121.1 | Scaffold2076 | 12520                   | GG                              | AA              | 1947028072               |
| SNP_P4_171829_12531 | NW_004517121.1 | Scaffold2076 | 12531                   | AA                              | CC              | 1947028074               |
| SNP_P4_171830_12715 | NW_004517121.1 | Scaffold2076 | 12715                   | TT                              | CC              | 1947028076               |
| SNP_P4_171831_20737 | NW_004517121.1 | Scaffold2076 | 20737                   | GG                              | TT              | 1947028078               |
| SNP_P4_171832_21251 | NW_004517121.1 | Scaffold2076 | 21251                   | TT                              | CC              | 1947028080               |
| SNP_P4_171833_21428 | NW_004517121.1 | Scaffold2076 | 21428                   | CC                              | AA              | 1947028082               |
| SNP_P4_171834_21436 | NW_004517121.1 | Scaffold2076 | 21436                   | CC                              | TT              | 1947028084               |
| SNP_P4_171835_21465 | NW_004517121.1 | Scaffold2076 | 21465                   | GG                              | TT              | 1947028086               |
| SNP_P4_171836_21467 | NW_004517121.1 | Scaffold2076 | 21467                   | GG                              | TT              | 1947028088               |
| SNP_P4_171837_21744 | NW_004517121.1 | Scaffold2076 | 21744                   | AA                              | GG              | 1947028090               |
| SNP_P4_171838_21766 | NW_004517121.1 | Scaffold2076 | 21766                   | AA                              | TT              | 1947028092               |
| SNP_P4_171839_21782 | NW_004517121.1 | Scaffold2076 | 21782                   | CC                              | TT              | 1947028094               |

| SNPs IDs            | Chromosome IDs | Chromosomes  | Physical positions (bp) | CDC Frontier (Reference genome) | (ILWC46 & LPNB) | NCBI SNPdb Accession IDs |
|---------------------|----------------|--------------|-------------------------|---------------------------------|-----------------|--------------------------|
| SNP_P4_171840_21805 | NW_004517121.1 | Scaffold2076 | 21805                   | TT                              | CC              | 1947028096               |
| SNP_P4_171841_21869 | NW_004517121.1 | Scaffold2076 | 21869                   | AA                              | GG              | 1947028098               |
| SNP_P4_171842_21909 | NW_004517121.1 | Scaffold2076 | 21909                   | AA                              | GG              | 1947028100               |
| SNP_P4_171843_22216 | NW_004517121.1 | Scaffold2076 | 22216                   | CC                              | TT              | 1947028102               |
| SNP_P4_171844_22223 | NW_004517121.1 | Scaffold2076 | 22223                   | TT                              | CC              | 1947028104               |
| SNP_P4_171845_2490  | NW_004517124.1 | Scaffold2081 | 2490                    | CC                              | TT              | 1947028106               |
| SNP_P4_171846_2903  | NW_004517124.1 | Scaffold2081 | 2903                    | AA                              | TT              | 1947028108               |
| SNP_P4_171847_2923  | NW_004517124.1 | Scaffold2081 | 2923                    | TT                              | AA              | 1947028110               |
| SNP_P4_171848_7492  | NW_004517125.1 | Scaffold2082 | 7492                    | TT                              | CC              | 1947028112               |
| SNP_P4_171849_12977 | NW_004517125.1 | Scaffold2082 | 12977                   | GG                              | TT              | 1947028114               |
| SNP_P4_171850_12992 | NW_004517125.1 | Scaffold2082 | 12992                   | TT                              | CC              | 1947028116               |
| SNP_P4_171851_13001 | NW_004517125.1 | Scaffold2082 | 13001                   | AA                              | GG              | 1947028118               |
| SNP_P4_171852_13003 | NW_004517125.1 | Scaffold2082 | 13003                   | AA                              | GG              | 1947028120               |
| SNP_P4_171853_27351 | NW_004517125.1 | Scaffold2082 | 27351                   | AA                              | GG              | 1947028122               |
| SNP_P4_171854_27378 | NW_004517125.1 | Scaffold2082 | 27378                   | CC                              | AA              | 1947028124               |
| SNP_P4_171855_27516 | NW_004517125.1 | Scaffold2082 | 27516                   | TT                              | AA              | 1947028126               |
| SNP_P4_171856_27568 | NW_004517125.1 | Scaffold2082 | 27568                   | AA                              | CC              | 1947028128               |
| SNP_P4_171857_29292 | NW_004517125.1 | Scaffold2082 | 29292                   | AA                              | GG              | 1947028130               |
| SNP_P4_171858_29606 | NW_004517125.1 | Scaffold2082 | 29606                   | GG                              | AA              | 1947028132               |
| SNP_P4_171859_29622 | NW_004517125.1 | Scaffold2082 | 29622                   | AA                              | TT              | 1947028134               |
| SNP_P4_171860_29684 | NW_004517125.1 | Scaffold2082 | 29684                   | GG                              | AA              | 1947028136               |
| SNP_P4_171861_44556 | NW_004517125.1 | Scaffold2082 | 44556                   | AA                              | GG              | 1947028138               |
| SNP_P4_171862_44590 | NW_004517125.1 | Scaffold2082 | 44590                   | CC                              | TT              | 1947028140               |
| SNP_P4_171863_44659 | NW_004517125.1 | Scaffold2082 | 44659                   | AA                              | TT              | 1947028142               |
| SNP_P4_171864_44765 | NW_004517125.1 | Scaffold2082 | 44765                   | AA                              | CC              | 1947028144               |
| SNP_P4_171865_44766 | NW_004517125.1 | Scaffold2082 | 44766                   | AA                              | GG              | 1947028147               |
| SNP_P4_171866_44767 | NW_004517125.1 | Scaffold2082 | 44767                   | AA                              | CC              | 1947028149               |
| SNP_P4_171867_44857 | NW_004517125.1 | Scaffold2082 | 44857                   | AA                              | GG              | 1947028151               |
| SNP_P4_171868_44858 | NW_004517125.1 | Scaffold2082 | 44858                   | GG                              | AA              | 1947028153               |
| SNP_P4_171869_56923 | NW_004517125.1 | Scaffold2082 | 56923                   | CC                              | GG              | 1947028155               |
| SNP_P4_171870_58402 | NW_004517125.1 | Scaffold2082 | 58402                   | TT                              | CC              | 1947028157               |
| SNP_P4_171871_4346  | NW_004517126.1 | Scaffold2083 | 4346                    | GG                              | AA              | 1947028159               |
| SNP_P4_171872_5238  | NW_004517126.1 | Scaffold2083 | 5238                    | TT                              | CC              | 1947028161               |
| SNP_P4_171873_1739  | NW_004517129.1 | Scaffold2087 | 1739                    | AA                              | GG              | 1947028163               |
| SNP_P4_171874_2055  | NW_004517129.1 | Scaffold2087 | 2055                    | GG                              | AA              | 1947028165               |
| SNP_P4_171875_2091  | NW_004517129.1 | Scaffold2087 | 2091                    | GG                              | TT              | 1947028167               |
| SNP_P4_171876_2298  | NW_004517129.1 | Scaffold2087 | 2298                    | CC                              | TT              | 1947028169               |
| SNP_P4_171877_2461  | NW_004517129.1 | Scaffold2087 | 2461                    | CC                              | AA              | 1947028171               |
| SNP_P4_171878_2464  | NW_004517129.1 | Scaffold2087 | 2464                    | CC                              | TT              | 1947028173               |
| SNP_P4_171879_3154  | NW_004517129.1 | Scaffold2087 | 3154                    | TT                              | CC              | 1947028175               |
| SNP_P4_171880_3317  | NW_004517129.1 | Scaffold2087 | 3317                    | TT                              | CC              | 1947028177               |
| SNP_P4_171881_3448  | NW_004517129.1 | Scaffold2087 | 3448                    | GG                              | AA              | 1947028179               |



| SNPs IDs            | Chromosome IDs | Chromosomes  | Physical positions (bp) | CDC Frontier (Reference genome) | (ILWC46 & LPNB) | NCBI SNPdb Accession IDs |
|---------------------|----------------|--------------|-------------------------|---------------------------------|-----------------|--------------------------|
| SNP_P4_171882_3460  | NW_004517129.1 | Scaffold2087 | 3460                    | CC                              | TT              | 1947028181               |
| SNP_P4_171883_3523  | NW_004517129.1 | Scaffold2087 | 3523                    | GG                              | AA              | 1947028183               |
| SNP_P4_171884_3560  | NW_004517129.1 | Scaffold2087 | 3560                    | AA                              | GG              | 1947028186               |
| SNP_P4_171885_3565  | NW_004517129.1 | Scaffold2087 | 3565                    | AA                              | TT              | 1947028188               |
| SNP_P4_171886_3585  | NW_004517129.1 | Scaffold2087 | 3585                    | AA                              | GG              | 1947028190               |
| SNP_P4_171887_3652  | NW_004517129.1 | Scaffold2087 | 3652                    | AA                              | GG              | 1947028192               |
| SNP_P4_171888_3768  | NW_004517129.1 | Scaffold2087 | 3768                    | TT                              | CC              | 1947028194               |
| SNP_P4_171889_5360  | NW_004517129.1 | Scaffold2087 | 5360                    | AA                              | TT              | 1947028196               |
| SNP_P4_171890_5369  | NW_004517129.1 | Scaffold2087 | 5369                    | AA                              | TT              | 1947028198               |
| SNP_P4_171891_5407  | NW_004517129.1 | Scaffold2087 | 5407                    | GG                              | AA              | 1947028201               |
| SNP_P4_171892_444   | NW_004517131.1 | Scaffold2089 | 444                     | AA                              | CC              | 1947028203               |
| SNP_P4_171893_526   | NW_004517131.1 | Scaffold2089 | 526                     | TT                              | GG              | 1947028205               |
| SNP_P4_171895_736   | NW_004517131.1 | Scaffold2089 | 736                     | AA                              | GG              | 1947028207               |
| SNP_P4_171897_827   | NW_004517131.1 | Scaffold2089 | 827                     | GG                              | AA              | 1947028209               |
| SNP_P4_171898_899   | NW_004517131.1 | Scaffold2089 | 899                     | AA                              | GG              | 1947028211               |
| SNP_P4_171899_920   | NW_004517131.1 | Scaffold2089 | 920                     | AA                              | TT              | 1947028213               |
| SNP_P4_171900_947   | NW_004517131.1 | Scaffold2089 | 947                     | GG                              | TT              | 1947028215               |
| SNP_P4_171901_953   | NW_004517131.1 | Scaffold2089 | 953                     | CC                              | GG              | 1947028218               |
| SNP_P4_171902_954   | NW_004517131.1 | Scaffold2089 | 954                     | GG                              | TT              | 1947028220               |
| SNP_P4_171903_958   | NW_004517131.1 | Scaffold2089 | 958                     | GG                              | AA              | 1947028222               |
| SNP_P4_171904_1059  | NW_004517131.1 | Scaffold2089 | 1059                    | AA                              | TT              | 1947028224               |
| SNP_P4_171905_1064  | NW_004517131.1 | Scaffold2089 | 1064                    | GG                              | CC              | 1947028226               |
| SNP_P4_171906_1077  | NW_004517131.1 | Scaffold2089 | 1077                    | TT                              | GG              | 1947028228               |
| SNP_P4_171907_1099  | NW_004517131.1 | Scaffold2089 | 1099                    | TT                              | GG              | 1947028230               |
| SNP_P4_171908_3438  | NW_004517131.1 | Scaffold2089 | 3438                    | TT                              | GG              | 1947028232               |
| SNP_P4_171909_5202  | NW_004517131.1 | Scaffold2089 | 5202                    | AA                              | CC              | 1947028234               |
| SNP_P4_171910_5203  | NW_004517131.1 | Scaffold2089 | 5203                    | TT                              | CC              | 1947028237               |
| SNP_P4_171911_5545  | NW_004517131.1 | Scaffold2089 | 5545                    | TT                              | CC              | 1947028239               |
| SNP_P4_171912_5547  | NW_004517131.1 | Scaffold2089 | 5547                    | AA                              | TT              | 1947028241               |
| SNP_P4_171913_5571  | NW_004517131.1 | Scaffold2089 | 5571                    | CC                              | AA              | 1947028243               |
| SNP_P4_171914_5589  | NW_004517131.1 | Scaffold2089 | 5589                    | CC                              | AA              | 1947028245               |
| SNP_P4_171915_6467  | NW_004517131.1 | Scaffold2089 | 6467                    | AA                              | TT              | 1947028247               |
| SNP_P4_171916_6474  | NW_004517131.1 | Scaffold2089 | 6474                    | AA                              | CC              | 1947028249               |
| SNP_P4_171917_6535  | NW_004517131.1 | Scaffold2089 | 6535                    | GG                              | TT              | 1947028252               |
| SNP_P4_171918_6674  | NW_004517131.1 | Scaffold2089 | 6674                    | TT                              | AA              | 1947028254               |
| SNP_P4_171919_7439  | NW_004517134.1 | Scaffold2095 | 7439                    | TT                              | CC              | 1947028256               |
| SNP_P4_171920_7596  | NW_004517134.1 | Scaffold2095 | 7596                    | AA                              | TT              | 1947028258               |
| SNP_P4_171921_17457 | NW_004517134.1 | Scaffold2095 | 17457                   | AA                              | GG              | 1947028260               |
| SNP_P4_171922_24742 | NW_004517134.1 | Scaffold2095 | 24742                   | CC                              | TT              | 1947028262               |
| SNP_P4_171923_2011  | NW_004517135.1 | Scaffold2096 | 2011                    | CC                              | TT              | 1947028264               |
| SNP_P4_171924_2077  | NW_004517135.1 | Scaffold2096 | 2077                    | TT                              | CC              | 1947028266               |
| SNP_P4_171925_4554  | NW_004517136.1 | Scaffold2097 | 4554                    | CC                              | AA              | 1947028268               |

| SNPs IDs             | Chromosome IDs | Chromosomes  | Physical positions (bp) | CDC Frontier (Reference genome) | (ILWC46 & LPNB) | NCBI SNPdb Accession IDs |
|----------------------|----------------|--------------|-------------------------|---------------------------------|-----------------|--------------------------|
| SNP_P4_171926_4570   | NW_004517136.1 | Scaffold2097 | 4570                    | AA                              | TT              | 1947028270               |
| SNP_P4_171927_4877   | NW_004517136.1 | Scaffold2097 | 4877                    | AA                              | TT              | 1947028272               |
| SNP_P4_171928_4921   | NW_004517136.1 | Scaffold2097 | 4921                    | CC                              | AA              | 1947028274               |
| SNP_P4_171930_5025   | NW_004517136.1 | Scaffold2097 | 5025                    | TT                              | CC              | 1947028276               |
| SNP_P4_171931_6563   | NW_004517136.1 | Scaffold2097 | 6563                    | TT                              | CC              | 1947028278               |
| SNP_P4_171932_14720  | NW_004517136.1 | Scaffold2097 | 14720                   | CC                              | TT              | 1947028280               |
| SNP_P4_171933_20767  | NW_004517136.1 | Scaffold2097 | 20767                   | AA                              | CC              | 1947028282               |
| SNP_P4_171934_20788  | NW_004517136.1 | Scaffold2097 | 20788                   | AA                              | GG              | 1947028284               |
| SNP_P4_171935_29520  | NW_004517136.1 | Scaffold2097 | 29520                   | GG                              | AA              | 1947028287               |
| SNP_P4_171936_31601  | NW_004517136.1 | Scaffold2097 | 31601                   | TT                              | CC              | 1947028289               |
| SNP_P4_171937_31731  | NW_004517136.1 | Scaffold2097 | 31731                   | CC                              | TT              | 1947028291               |
| SNP_P4_171938_31751  | NW_004517136.1 | Scaffold2097 | 31751                   | AA                              | GG              | 1947028293               |
| SNP_P4_171939_31784  | NW_004517136.1 | Scaffold2097 | 31784                   | TT                              | GG              | 1947028295               |
| SNP_P4_171940_31826  | NW_004517136.1 | Scaffold2097 | 31826                   | TT                              | CC              | 1947028297               |
| SNP_P4_171941_31829  | NW_004517136.1 | Scaffold2097 | 31829                   | CC                              | GG              | 1947028299               |
| SNP_P4_171942_38029  | NW_004517136.1 | Scaffold2097 | 38029                   | CC                              | GG              | 1947028301               |
| SNP_P4_171943_38031  | NW_004517136.1 | Scaffold2097 | 38031                   | GG                              | AA              | 1947028303               |
| SNP_P4_171946_295    | NW_004517140.1 | Scaffold2103 | 295                     | GG                              | AA              | 1947028305               |
| SNP_P4_171947_4430   | NW_004517140.1 | Scaffold2103 | 4430                    | AA                              | CC              | 1947028307               |
| SNP_P4_171948_4431   | NW_004517140.1 | Scaffold2103 | 4431                    | TT                              | CC              | 1947028309               |
| SNP_P4_171949_4769   | NW_004517140.1 | Scaffold2103 | 4769                    | GG                              | CC              | 1947028311               |
| SNP_P4_171950_42697  | NW_004517140.1 | Scaffold2103 | 42697                   | TT                              | CC              | 1947028313               |
| SNP_P4_171951_42707  | NW_004517140.1 | Scaffold2103 | 42707                   | TT                              | CC              | 1947028315               |
| SNP_P4_171952_42710  | NW_004517140.1 | Scaffold2103 | 42710                   | TT                              | CC              | 1947028317               |
| SNP_P4_171953_44441  | NW_004517140.1 | Scaffold2103 | 44441                   | AA                              | GG              | 1947028319               |
| SNP_P4_171954_44503  | NW_004517140.1 | Scaffold2103 | 44503                   | GG                              | AA              | 1947028321               |
| SNP_P4_171955_52443  | NW_004517140.1 | Scaffold2103 | 52443                   | CC                              | AA              | 1947028323               |
| SNP_P4_171956_52448  | NW_004517140.1 | Scaffold2103 | 52448                   | CC                              | GG              | 1947028325               |
| SNP_P4_171957_61455  | NW_004517140.1 | Scaffold2103 | 61455                   | GG                              | AA              | 1947028327               |
| SNP_P4_171958_61481  | NW_004517140.1 | Scaffold2103 | 61481                   | TT                              | GG              | 1947028329               |
| SNP_P4_171959_81425  | NW_004517140.1 | Scaffold2103 | 81425                   | GG                              | AA              | 1947028331               |
| SNP_P4_171960_103186 | NW_004517140.1 | Scaffold2103 | 103186                  | CC                              | AA              | 1947028333               |
| SNP_P4_171961_103197 | NW_004517140.1 | Scaffold2103 | 103197                  | GG                              | TT              | 1947028335               |
| SNP_P4_171963_118766 | NW_004517140.1 | Scaffold2103 | 118766                  | TT                              | CC              | 1947028337               |
| SNP_P4_171964_118774 | NW_004517140.1 | Scaffold2103 | 118774                  | TT                              | CC              | 1947028339               |
| SNP_P4_171965_118810 | NW_004517140.1 | Scaffold2103 | 118810                  | TT                              | GG              | 1947028341               |
| SNP_P4_171966_119008 | NW_004517140.1 | Scaffold2103 | 119008                  | AA                              | GG              | 1947028343               |
| SNP_P4_171967_119010 | NW_004517140.1 | Scaffold2103 | 119010                  | GG                              | CC              | 1947028345               |
| SNP_P4_171968_119026 | NW_004517140.1 | Scaffold2103 | 119026                  | AA                              | GG              | 1947028347               |
| SNP_P4_171969_119343 | NW_004517140.1 | Scaffold2103 | 119343                  | TT                              | CC              | 1947028349               |
| SNP_P4_171970_119354 | NW_004517140.1 | Scaffold2103 | 119354                  | AA                              | GG              | 1947028351               |
| SNP_P4_171971_119363 | NW_004517140.1 | Scaffold2103 | 119363                  | GG                              | AA              | 1947028353               |

| SNPs IDs             | Chromosome IDs | Chromosomes  | Physical positions (bp) | CDC Frontier (Reference genome) | (ILWC46 & LPNB) | NCBI SNPdb Accession IDs |
|----------------------|----------------|--------------|-------------------------|---------------------------------|-----------------|--------------------------|
| SNP_P4_171972_119364 | NW_004517140.1 | Scaffold2103 | 119364                  | CC                              | AA              | 1947028356               |
| SNP_P4_171973_119375 | NW_004517140.1 | Scaffold2103 | 119375                  | TT                              | GG              | 1947028358               |
| SNP_P4_171974_119388 | NW_004517140.1 | Scaffold2103 | 119388                  | GG                              | AA              | 1947028360               |
| SNP_P4_171975_119390 | NW_004517140.1 | Scaffold2103 | 119390                  | TT                              | CC              | 1947028362               |
| SNP_P4_171976_119399 | NW_004517140.1 | Scaffold2103 | 119399                  | TT                              | AA              | 1947028364               |
| SNP_P4_171977_119417 | NW_004517140.1 | Scaffold2103 | 119417                  | AA                              | GG              | 1947028366               |
| SNP_P4_171978_119424 | NW_004517140.1 | Scaffold2103 | 119424                  | AA                              | GG              | 1947028368               |
| SNP_P4_171979_123875 | NW_004517140.1 | Scaffold2103 | 123875                  | CC                              | GG              | 1947028370               |
| SNP_P4_171980_123948 | NW_004517140.1 | Scaffold2103 | 123948                  | GG                              | AA              | 1947028372               |
| SNP_P4_171981_124005 | NW_004517140.1 | Scaffold2103 | 124005                  | AA                              | GG              | 1947028374               |
| SNP_P4_171982_124013 | NW_004517140.1 | Scaffold2103 | 124013                  | GG                              | AA              | 1947028376               |
| SNP_P4_171983_124049 | NW_004517140.1 | Scaffold2103 | 124049                  | GG                              | TT              | 1947028378               |
| SNP_P4_171985_124064 | NW_004517140.1 | Scaffold2103 | 124064                  | AA                              | GG              | 1947028380               |
| SNP_P4_171986_124074 | NW_004517140.1 | Scaffold2103 | 124074                  | GG                              | AA              | 1947028382               |
| SNP_P4_171988_124165 | NW_004517140.1 | Scaffold2103 | 124165                  | TT                              | CC              | 1947028384               |
| SNP_P4_171989_124523 | NW_004517140.1 | Scaffold2103 | 124523                  | AA                              | GG              | 1947028386               |
| SNP_P4_171990_124552 | NW_004517140.1 | Scaffold2103 | 124552                  | TT                              | AA              | 1947028388               |
| SNP_P4_171991_124563 | NW_004517140.1 | Scaffold2103 | 124563                  | GG                              | TT              | 1947028390               |
| SNP_P4_171992_124914 | NW_004517140.1 | Scaffold2103 | 124914                  | AA                              | GG              | 1947028392               |
| SNP_P4_171993_134269 | NW_004517140.1 | Scaffold2103 | 134269                  | CC                              | TT              | 1947028394               |
| SNP_P4_171994_134636 | NW_004517140.1 | Scaffold2103 | 134636                  | TT                              | CC              | 1947028396               |
| SNP_P4_171995_134662 | NW_004517140.1 | Scaffold2103 | 134662                  | CC                              | GG              | 1947028398               |
| SNP_P4_171996_135627 | NW_004517140.1 | Scaffold2103 | 135627                  | GG                              | TT              | 1947028400               |
| SNP_P4_171997_135641 | NW_004517140.1 | Scaffold2103 | 135641                  | CC                              | TT              | 1947028402               |
| SNP_P4_171998_135774 | NW_004517140.1 | Scaffold2103 | 135774                  | CC                              | TT              | 1947028404               |
| SNP_P4_171999_135804 | NW_004517140.1 | Scaffold2103 | 135804                  | GG                              | AA              | 1947028406               |
| SNP_P4_172000_135816 | NW_004517140.1 | Scaffold2103 | 135816                  | GG                              | TT              | 1947028408               |
| SNP_P4_172001_135826 | NW_004517140.1 | Scaffold2103 | 135826                  | TT                              | CC              | 1947028410               |
| SNP_P4_172002_135837 | NW_004517140.1 | Scaffold2103 | 135837                  | AA                              | GG              | 1947028412               |
| SNP_P4_172003_144020 | NW_004517140.1 | Scaffold2103 | 144020                  | GG                              | AA              | 1947028414               |
| SNP_P4_172005_69     | NW_004517141.1 | Scaffold2104 | 69                      | CC                              | TT              | 1947028416               |
| SNP_P4_172006_4568   | NW_004517141.1 | Scaffold2104 | 4568                    | GG                              | AA              | 1947028418               |
| SNP_P4_172007_5479   | NW_004517141.1 | Scaffold2104 | 5479                    | TT                              | GG              | 1947028420               |
| SNP_P4_172008_5637   | NW_004517141.1 | Scaffold2104 | 5637                    | CC                              | GG              | 1947028422               |
| SNP_P4_172009_5719   | NW_004517141.1 | Scaffold2104 | 5719                    | CC                              | GG              | 1947028424               |
| SNP_P4_172010_6003   | NW_004517141.1 | Scaffold2104 | 6003                    | CC                              | TT              | 1947028426               |
| SNP_P4_172011_6404   | NW_004517141.1 | Scaffold2104 | 6404                    | GG                              | TT              | 1947028428               |
| SNP_P4_172012_6559   | NW_004517141.1 | Scaffold2104 | 6559                    | TT                              | CC              | 1947028430               |
| SNP_P4_172013_9335   | NW_004517141.1 | Scaffold2104 | 9335                    | GG                              | TT              | 1947028434               |
| SNP_P4_172014_9443   | NW_004517141.1 | Scaffold2104 | 9443                    | CC                              | TT              | 1947028437               |
| SNP_P4_172015_9444   | NW_004517141.1 | Scaffold2104 | 9444                    | CC                              | AA              | 1947028439               |
| SNP_P4_172016_14348  | NW_004517141.1 | Scaffold2104 | 14348                   | TT                              | AA              | 1947028441               |

| SNPs IDs            | Chromosome IDs | Chromosomes  | Physical positions (bp) | CDC Frontier (Reference genome) | (ILWC46 & LPNB) | NCBI SNPdb Accession IDs |
|---------------------|----------------|--------------|-------------------------|---------------------------------|-----------------|--------------------------|
| SNP_P4_172017_14352 | NW_004517141.1 | Scaffold2104 | 14352                   | CC                              | AA              | 1947028443               |
| SNP_P4_172018_17230 | NW_004517141.1 | Scaffold2104 | 17230                   | TT                              | CC              | 1947028445               |
| SNP_P4_172019_18009 | NW_004517141.1 | Scaffold2104 | 18009                   | AA                              | GG              | 1947028447               |
| SNP_P4_172020_18267 | NW_004517141.1 | Scaffold2104 | 18267                   | AA                              | GG              | 1947028449               |
| SNP_P4_172021_18407 | NW_004517141.1 | Scaffold2104 | 18407                   | CC                              | TT              | 1947028450               |
| SNP_P4_172022_25347 | NW_004517141.1 | Scaffold2104 | 25347                   | TT                              | CC              | 1947028452               |
| SNP_P4_172023_25388 | NW_004517141.1 | Scaffold2104 | 25388                   | CC                              | AA              | 1947028455               |
| SNP_P4_172024_25406 | NW_004517141.1 | Scaffold2104 | 25406                   | TT                              | CC              | 1947028457               |
| SNP_P4_172025_35716 | NW_004517141.1 | Scaffold2104 | 35716                   | TT                              | GG              | 1947028459               |
| SNP_P4_172026_35736 | NW_004517141.1 | Scaffold2104 | 35736                   | TT                              | AA              | 1947028461               |
| SNP_P4_172027_36014 | NW_004517141.1 | Scaffold2104 | 36014                   | GG                              | TT              | 1947028463               |
| SNP_P4_172028_36026 | NW_004517141.1 | Scaffold2104 | 36026                   | TT                              | CC              | 1947028465               |
| SNP_P4_172029_49226 | NW_004517141.1 | Scaffold2104 | 49226                   | TT                              | AA              | 1947028467               |
| SNP_P4_172030_60568 | NW_004517141.1 | Scaffold2104 | 60568                   | AA                              | GG              | 1947028469               |
| SNP_P4_172031_60899 | NW_004517141.1 | Scaffold2104 | 60899                   | GG                              | CC              | 1947028471               |
| SNP_P4_172032_60944 | NW_004517141.1 | Scaffold2104 | 60944                   | CC                              | TT              | 1947028473               |
| SNP_P4_172033_60949 | NW_004517141.1 | Scaffold2104 | 60949                   | AA                              | GG              | 1947028475               |
| SNP_P4_172034_60999 | NW_004517141.1 | Scaffold2104 | 60999                   | AA                              | TT              | 1947028477               |
| SNP_P4_172035_61003 | NW_004517141.1 | Scaffold2104 | 61003                   | AA                              | GG              | 1947028479               |
| SNP_P4_172036_61030 | NW_004517141.1 | Scaffold2104 | 61030                   | CC                              | TT              | 1947028481               |
| SNP_P4_172037_243   | NW_004517143.1 | Scaffold2106 | 243                     | TT                              | AA              | 1947028483               |
| SNP_P4_172038_258   | NW_004517143.1 | Scaffold2106 | 258                     | AA                              | TT              | 1947028485               |
| SNP_P4_172039_278   | NW_004517143.1 | Scaffold2106 | 278                     | TT                              | CC              | 1947028487               |
| SNP_P4_172040_286   | NW_004517143.1 | Scaffold2106 | 286                     | AA                              | GG              | 1947028489               |
| SNP_P4_172041_586   | NW_004517143.1 | Scaffold2106 | 586                     | TT                              | AA              | 1947028491               |
| SNP_P4_172042_689   | NW_004517143.1 | Scaffold2106 | 689                     | AA                              | GG              | 1947028493               |
| SNP_P4_172043_949   | NW_004517143.1 | Scaffold2106 | 949                     | GG                              | AA              | 1947028495               |
| SNP_P4_172044_1278  | NW_004517143.1 | Scaffold2106 | 1278                    | AA                              | CC              | 1947028497               |
| SNP_P4_172045_2875  | NW_004517143.1 | Scaffold2106 | 2875                    | TT                              | AA              | 1947028500               |
| SNP_P4_172046_3064  | NW_004517143.1 | Scaffold2106 | 3064                    | TT                              | CC              | 1947028502               |
| SNP_P4_172047_3131  | NW_004517143.1 | Scaffold2106 | 3131                    | TT                              | AA              | 1947028504               |
| SNP_P4_172048_1040  | NW_004517144.1 | Scaffold2108 | 1040                    | AA                              | GG              | 1947028506               |
| SNP_P4_172049_1465  | NW_004517144.1 | Scaffold2108 | 1465                    | CC                              | TT              | 1947028508               |
| SNP_P4_172050_1553  | NW_004517144.1 | Scaffold2108 | 1553                    | AA                              | CC              | 1947028510               |
| SNP_P4_172051_1582  | NW_004517144.1 | Scaffold2108 | 1582                    | CC                              | AA              | 1947028512               |
| SNP_P4_172052_1665  | NW_004517144.1 | Scaffold2108 | 1665                    | TT                              | CC              | 1947028514               |
| SNP_P4_172053_1713  | NW_004517144.1 | Scaffold2108 | 1713                    | TT                              | CC              | 1947028516               |
| SNP_P4_172054_1714  | NW_004517144.1 | Scaffold2108 | 1714                    | GG                              | AA              | 1947028518               |
| SNP_P4_172055_1880  | NW_004517144.1 | Scaffold2108 | 1880                    | CC                              | TT              | 1947028520               |
| SNP_P4_172056_1902  | NW_004517144.1 | Scaffold2108 | 1902                    | CC                              | AA              | 1947028522               |
| SNP_P4_172057_2208  | NW_004517144.1 | Scaffold2108 | 2208                    | GG                              | CC              | 1947028524               |
| SNP_P4_172058_3001  | NW_004517144.1 | Scaffold2108 | 3001                    | AA                              | CC              | 1947028526               |

| SNPs IDs            | Chromosome IDs | Chromosomes  | Physical positions (bp) | CDC Frontier (Reference genome) | (ILWC46 & LPNB) | NCBI SNPdb Accession IDs |
|---------------------|----------------|--------------|-------------------------|---------------------------------|-----------------|--------------------------|
| SNP_P4_172059_3788  | NW_004517146.1 | Scaffold2113 | 3788                    | TT                              | CC              | 1947028528               |
| SNP_P4_172060_4024  | NW_004517146.1 | Scaffold2113 | 4024                    | AA                              | CC              | 1947028530               |
| SNP_P4_172061_4205  | NW_004517146.1 | Scaffold2113 | 4205                    | AA                              | GG              | 1947028532               |
| SNP_P4_172062_4270  | NW_004517146.1 | Scaffold2113 | 4270                    | TT                              | AA              | 1947028534               |
| SNP_P4_172063_1354  | NW_004517152.1 | Scaffold2122 | 1354                    | TT                              | CC              | 1947028536               |
| SNP_P4_172064_5296  | NW_004517153.1 | Scaffold2124 | 5296                    | TT                              | AA              | 1947028538               |
| SNP_P4_172065_11246 | NW_004517153.1 | Scaffold2124 | 11246                   | AA                              | TT              | 1947028540               |
| SNP_P4_172066_35226 | NW_004517153.1 | Scaffold2124 | 35226                   | AA                              | GG              | 1947028542               |
| SNP_P4_172067_14739 | NW_004517154.1 | Scaffold2125 | 14739                   | AA                              | GG              | 1947028544               |
| SNP_P4_172068_14809 | NW_004517154.1 | Scaffold2125 | 14809                   | TT                              | AA              | 1947028546               |
| SNP_P4_172069_14823 | NW_004517154.1 | Scaffold2125 | 14823                   | AA                              | CC              | 1947028548               |
| SNP_P4_172070_37934 | NW_004517154.1 | Scaffold2125 | 37934                   | AA                              | GG              | 1947028550               |
| SNP_P4_172071_38702 | NW_004517154.1 | Scaffold2125 | 38702                   | AA                              | TT              | 1947028552               |
| SNP_P4_172073_99    | NW_004517155.1 | Scaffold2126 | 99                      | TT                              | CC              | 1947028554               |
| SNP_P4_172074_467   | NW_004517155.1 | Scaffold2126 | 467                     | CC                              | TT              | 1947028556               |
| SNP_P4_172075_491   | NW_004517155.1 | Scaffold2126 | 491                     | AA                              | TT              | 1947028558               |
| SNP_P4_172076_2192  | NW_004517155.1 | Scaffold2126 | 2192                    | GG                              | AA              | 1947028560               |
| SNP_P4_172078_5124  | NW_004517155.1 | Scaffold2126 | 5124                    | CC                              | TT              | 1947028562               |
| SNP_P4_172080_5425  | NW_004517155.1 | Scaffold2126 | 5425                    | AA                              | GG              | 1947028565               |
| SNP_P4_172081_5429  | NW_004517155.1 | Scaffold2126 | 5429                    | GG                              | AA              | 1947028567               |
| SNP_P4_172082_5433  | NW_004517155.1 | Scaffold2126 | 5433                    | AA                              | TT              | 1947028569               |
| SNP_P4_172083_5474  | NW_004517155.1 | Scaffold2126 | 5474                    | TT                              | AA              | 1947028571               |
| SNP_P4_172084_5521  | NW_004517155.1 | Scaffold2126 | 5521                    | GG                              | AA              | 1947028573               |
| SNP_P4_172085_6069  | NW_004517155.1 | Scaffold2126 | 6069                    | AA                              | GG              | 1947028575               |
| SNP_P4_172086_8903  | NW_004517155.1 | Scaffold2126 | 8903                    | TT                              | CC              | 1947028577               |
| SNP_P4_172087_9498  | NW_004517155.1 | Scaffold2126 | 9498                    | GG                              | AA              | 1947028579               |
| SNP_P4_172088_10863 | NW_004517155.1 | Scaffold2126 | 10863                   | CC                              | TT              | 1947028581               |
| SNP_P4_172089_10866 | NW_004517155.1 | Scaffold2126 | 10866                   | AA                              | GG              | 1947028583               |
| SNP_P4_172090_11000 | NW_004517155.1 | Scaffold2126 | 11000                   | AA                              | CC              | 1947028585               |
| SNP_P4_172091_11514 | NW_004517155.1 | Scaffold2126 | 11514                   | AA                              | GG              | 1947028587               |
| SNP_P4_172092_13608 | NW_004517155.1 | Scaffold2126 | 13608                   | TT                              | CC              | 1947028589               |
| SNP_P4_172093_13808 | NW_004517155.1 | Scaffold2126 | 13808                   | AA                              | GG              | 1947028591               |
| SNP_P4_172094_13818 | NW_004517155.1 | Scaffold2126 | 13818                   | AA                              | GG              | 1947028593               |
| SNP_P4_172095_14168 | NW_004517155.1 | Scaffold2126 | 14168                   | TT                              | AA              | 1947028595               |
| SNP_P4_172096_14180 | NW_004517155.1 | Scaffold2126 | 14180                   | GG                              | CC              | 1947028597               |
| SNP_P4_172097_14185 | NW_004517155.1 | Scaffold2126 | 14185                   | AA                              | TT              | 1947028599               |
| SNP_P4_172098_18563 | NW_004517155.1 | Scaffold2126 | 18563                   | TT                              | CC              | 1947028601               |
| SNP_P4_172100_9925  | NW_004517156.1 | Scaffold2127 | 9925                    | AA                              | GG              | 1947028603               |
| SNP_P4_172101_31205 | NW_004517156.1 | Scaffold2127 | 31205                   | AA                              | GG              | 1947028605               |
| SNP_P4_172102_31544 | NW_004517156.1 | Scaffold2127 | 31544                   | CC                              | TT              | 1947028607               |
| SNP_P4_172104_40347 | NW_004517156.1 | Scaffold2127 | 40347                   | CC                              | TT              | 1947028609               |
| SNP_P4_172105_40597 | NW_004517156.1 | Scaffold2127 | 40597                   | TT                              | GG              | 1947028611               |

| SNPs IDs            | Chromosome IDs | Chromosomes  | Physical positions (bp) | CDC Frontier (Reference genome) | (ILWC46 & LPNB) | NCBI SNPdb Accession IDs |
|---------------------|----------------|--------------|-------------------------|---------------------------------|-----------------|--------------------------|
| SNP_P4_172106_40940 | NW_004517156.1 | Scaffold2127 | 40940                   | CC                              | AA              | 1947028613               |
| SNP_P4_172107_41003 | NW_004517156.1 | Scaffold2127 | 41003                   | TT                              | CC              | 1947028615               |
| SNP_P4_172108_41162 | NW_004517156.1 | Scaffold2127 | 41162                   | TT                              | CC              | 1947028617               |
| SNP_P4_172109_54461 | NW_004517156.1 | Scaffold2127 | 54461                   | AA                              | TT              | 1947028619               |
| SNP_P4_172110_54482 | NW_004517156.1 | Scaffold2127 | 54482                   | CC                              | GG              | 1947028621               |
| SNP_P4_172111_54522 | NW_004517156.1 | Scaffold2127 | 54522                   | AA                              | GG              | 1947028623               |
| SNP_P4_172112_14280 | NW_004517157.1 | Scaffold2128 | 14280                   | GG                              | AA              | 1947028625               |
| SNP_P4_172113_14289 | NW_004517157.1 | Scaffold2128 | 14289                   | CC                              | TT              | 1947028627               |
| SNP_P4_172114_14311 | NW_004517157.1 | Scaffold2128 | 14311                   | TT                              | CC              | 1947028629               |
| SNP_P4_172115_14879 | NW_004517157.1 | Scaffold2128 | 14879                   | CC                              | TT              | 1947028631               |
| SNP_P4_172116_14959 | NW_004517157.1 | Scaffold2128 | 14959                   | GG                              | TT              | 1947028633               |
| SNP_P4_172117_15025 | NW_004517157.1 | Scaffold2128 | 15025                   | GG                              | AA              | 1947028635               |
| SNP_P4_172118_779   | NW_004517159.1 | Scaffold2131 | 779                     | GG                              | AA              | 1947028637               |
| SNP_P4_172120_927   | NW_004517159.1 | Scaffold2131 | 927                     | CC                              | GG              | 1947028639               |
| SNP_P4_172121_1037  | NW_004517160.1 | Scaffold2132 | 1037                    | TT                              | GG              | 1947028641               |
| SNP_P4_172122_1042  | NW_004517160.1 | Scaffold2132 | 1042                    | TT                              | AA              | 1947028643               |
| SNP_P4_172123_1342  | NW_004517160.1 | Scaffold2132 | 1342                    | TT                              | AA              | 1947028645               |
| SNP_P4_172124_3812  | NW_004517162.1 | Scaffold2134 | 3812                    | AA                              | CC              | 1947028647               |
| SNP_P4_172125_3877  | NW_004517162.1 | Scaffold2134 | 3877                    | AA                              | CC              | 1947028649               |
| SNP_P4_172126_3880  | NW_004517162.1 | Scaffold2134 | 3880                    | TT                              | AA              | 1947028651               |
| SNP_P4_172127_3881  | NW_004517162.1 | Scaffold2134 | 3881                    | AA                              | TT              | 1947028653               |
| SNP_P4_172128_4134  | NW_004517162.1 | Scaffold2134 | 4134                    | TT                              | CC              | 1947028655               |
| SNP_P4_172129_4195  | NW_004517162.1 | Scaffold2134 | 4195                    | AA                              | CC              | 1947028657               |
| SNP_P4_172130_5294  | NW_004517162.1 | Scaffold2134 | 5294                    | CC                              | GG              | 1947028659               |
| SNP_P4_172131_5364  | NW_004517162.1 | Scaffold2134 | 5364                    | TT                              | CC              | 1947028661               |
| SNP_P4_172133_5541  | NW_004517162.1 | Scaffold2134 | 5541                    | GG                              | AA              | 1947028663               |
| SNP_P4_172134_5686  | NW_004517162.1 | Scaffold2134 | 5686                    | CC                              | TT              | 1947028665               |
| SNP_P4_172135_5764  | NW_004517162.1 | Scaffold2134 | 5764                    | TT                              | CC              | 1947028667               |
| SNP_P4_172136_5783  | NW_004517162.1 | Scaffold2134 | 5783                    | TT                              | CC              | 1947028669               |
| SNP_P4_172137_5802  | NW_004517162.1 | Scaffold2134 | 5802                    | CC                              | TT              | 1947028671               |
| SNP_P4_172138_5821  | NW_004517162.1 | Scaffold2134 | 5821                    | CC                              | TT              | 1947028673               |
| SNP_P4_172139_5830  | NW_004517162.1 | Scaffold2134 | 5830                    | TT                              | CC              | 1947028675               |
| SNP_P4_172140_5891  | NW_004517162.1 | Scaffold2134 | 5891                    | AA                              | GG              | 1947028677               |
| SNP_P4_172141_5912  | NW_004517162.1 | Scaffold2134 | 5912                    | CC                              | TT              | 1947028679               |
| SNP_P4_172142_5936  | NW_004517162.1 | Scaffold2134 | 5936                    | AA                              | GG              | 1947028681               |
| SNP_P4_172143_7252  | NW_004517162.1 | Scaffold2134 | 7252                    | AA                              | TT              | 1947028683               |
| SNP_P4_172144_7275  | NW_004517163.1 | Scaffold2135 | 7275                    | TT                              | CC              | 1947028685               |
| SNP_P4_172145_7279  | NW_004517163.1 | Scaffold2135 | 7279                    | TT                              | CC              | 1947028687               |
| SNP_P4_172146_7305  | NW_004517163.1 | Scaffold2135 | 7305                    | CC                              | AA              | 1947028689               |
| SNP_P4_172147_7324  | NW_004517163.1 | Scaffold2135 | 7324                    | GG                              | TT              | 1947028691               |
| SNP_P4_172148_7337  | NW_004517163.1 | Scaffold2135 | 7337                    | TT                              | CC              | 1947028693               |
| SNP_P4_172149_131   | NW_004517164.1 | Scaffold2138 | 131                     | GG                              | AA              | 1947028695               |

| SNPs IDs            | Chromosome IDs | Chromosomes  | Physical positions (bp) | CDC Frontier (Reference genome) | (ILWC46 & LPNB) | NCBI SNPdb Accession IDs |
|---------------------|----------------|--------------|-------------------------|---------------------------------|-----------------|--------------------------|
| SNP_P4_172150_148   | NW_004517164.1 | Scaffold2138 | 148                     | AA                              | GG              | 1947028697               |
| SNP_P4_172151_237   | NW_004517164.1 | Scaffold2138 | 237                     | GG                              | AA              | 1947028699               |
| SNP_P4_172152_244   | NW_004517164.1 | Scaffold2138 | 244                     | GG                              | CC              | 1947028701               |
| SNP_P4_172153_337   | NW_004517164.1 | Scaffold2138 | 337                     | GG                              | TT              | 1947028703               |
| SNP_P4_172154_375   | NW_004517164.1 | Scaffold2138 | 375                     | AA                              | CC              | 1947028705               |
| SNP_P4_172155_382   | NW_004517164.1 | Scaffold2138 | 382                     | GG                              | CC              | 1947028707               |
| SNP_P4_172156_359   | NW_004517166.1 | Scaffold2140 | 359                     | AA                              | GG              | 1947028709               |
| SNP_P4_172157_463   | NW_004517166.1 | Scaffold2140 | 463                     | AA                              | CC              | 1947028711               |
| SNP_P4_172158_550   | NW_004517166.1 | Scaffold2140 | 550                     | TT                              | CC              | 1947028713               |
| SNP_P4_172159_563   | NW_004517166.1 | Scaffold2140 | 563                     | AA                              | TT              | 1947028715               |
| SNP_P4_172160_724   | NW_004517166.1 | Scaffold2140 | 724                     | TT                              | GG              | 1947028717               |
| SNP_P4_172161_910   | NW_004517166.1 | Scaffold2140 | 910                     | AA                              | GG              | 1947028719               |
| SNP_P4_172162_14735 | NW_004517167.1 | Scaffold2141 | 14735                   | CC                              | TT              | 1947028721               |
| SNP_P4_172163_14818 | NW_004517167.1 | Scaffold2141 | 14818                   | CC                              | TT              | 1947028723               |
| SNP_P4_172164_14890 | NW_004517167.1 | Scaffold2141 | 14890                   | TT                              | AA              | 1947028725               |
| SNP_P4_172165_14963 | NW_004517167.1 | Scaffold2141 | 14963                   | CC                              | GG              | 1947028727               |
| SNP_P4_172166_15188 | NW_004517167.1 | Scaffold2141 | 15188                   | AA                              | TT              | 1947028729               |
| SNP_P4_172167_15238 | NW_004517167.1 | Scaffold2141 | 15238                   | TT                              | CC              | 1947028731               |
| SNP_P4_172168_15416 | NW_004517167.1 | Scaffold2141 | 15416                   | GG                              | AA              | 1947028733               |
| SNP_P4_172169_16705 | NW_004517167.1 | Scaffold2141 | 16705                   | GG                              | TT              | 1947028735               |
| SNP_P4_172170_17427 | NW_004517167.1 | Scaffold2141 | 17427                   | CC                              | TT              | 1947028737               |
| SNP_P4_172171_17807 | NW_004517167.1 | Scaffold2141 | 17807                   | TT                              | CC              | 1947028739               |
| SNP_P4_172172_17926 | NW_004517167.1 | Scaffold2141 | 17926                   | GG                              | AA              | 1947028741               |
| SNP_P4_172174_19305 | NW_004517167.1 | Scaffold2141 | 19305                   | AA                              | GG              | 1947028743               |
| SNP_P4_172175_19324 | NW_004517167.1 | Scaffold2141 | 19324                   | GG                              | AA              | 1947028745               |
| SNP_P4_172176_19662 | NW_004517167.1 | Scaffold2141 | 19662                   | GG                              | AA              | 1947028747               |
| SNP_P4_172177_19982 | NW_004517167.1 | Scaffold2141 | 19982                   | AA                              | CC              | 1947028749               |
| SNP_P4_172178_558   | NW_004517168.1 | Scaffold2142 | 558                     | TT                              | CC              | 1947028751               |
| SNP_P4_172179_588   | NW_004517168.1 | Scaffold2142 | 588                     | GG                              | AA              | 1947028753               |
| SNP_P4_172180_699   | NW_004517168.1 | Scaffold2142 | 699                     | CC                              | GG              | 1947028756               |
| SNP_P4_172181_799   | NW_004517168.1 | Scaffold2142 | 799                     | CC                              | TT              | 1947028758               |
| SNP_P4_172182_741   | NW_004517169.1 | Scaffold2145 | 741                     | TT                              | GG              | 1947028760               |
| SNP_P4_172183_222   | NW_004517170.1 | Scaffold2146 | 222                     | AA                              | TT              | 1947028762               |
| SNP_P4_172184_504   | NW_004517170.1 | Scaffold2146 | 504                     | TT                              | AA              | 1947028764               |
| SNP_P4_172185_1167  | NW_004517170.1 | Scaffold2146 | 1167                    | CC                              | TT              | 1947028766               |
| SNP_P4_172186_1190  | NW_004517170.1 | Scaffold2146 | 1190                    | TT                              | CC              | 1947028768               |
| SNP_P4_172187_908   | NW_004517171.1 | Scaffold2147 | 908                     | TT                              | AA              | 1947028770               |
| SNP_P4_172188_960   | NW_004517171.1 | Scaffold2147 | 960                     | TT                              | CC              | 1947028772               |
| SNP_P4_172189_961   | NW_004517171.1 | Scaffold2147 | 961                     | GG                              | TT              | 1947028774               |
| SNP_P4_172190_965   | NW_004517171.1 | Scaffold2147 | 965                     | AA                              | GG              | 1947028776               |
| SNP_P4_172191_982   | NW_004517171.1 | Scaffold2147 | 982                     | AA                              | GG              | 1947028779               |
| SNP_P4_172192_1062  | NW_004517171.1 | Scaffold2147 | 1062                    | GG                              | TT              | 1947028781               |

| SNPs IDs            | Chromosome IDs | Chromosomes  | Physical positions (bp) | CDC Frontier (Reference genome) | (ILWC46 & LPNB) | NCBI SNPdb Accession IDs |
|---------------------|----------------|--------------|-------------------------|---------------------------------|-----------------|--------------------------|
| SNP_P4_172193_5252  | NW_004517171.1 | Scaffold2147 | 5252                    | TT                              | CC              | 1947028783               |
| SNP_P4_172194_5353  | NW_004517171.1 | Scaffold2147 | 5353                    | TT                              | GG              | 1947028785               |
| SNP_P4_172196_6113  | NW_004517171.1 | Scaffold2147 | 6113                    | AA                              | CC              | 1947028787               |
| SNP_P4_172197_6552  | NW_004517171.1 | Scaffold2147 | 6552                    | GG                              | AA              | 1947028789               |
| SNP_P4_172198_21438 | NW_004517171.1 | Scaffold2147 | 21438                   | GG                              | AA              | 1947028791               |
| SNP_P4_172199_21489 | NW_004517171.1 | Scaffold2147 | 21489                   | GG                              | AA              | 1947028793               |
| SNP_P4_172200_22514 | NW_004517171.1 | Scaffold2147 | 22514                   | CC                              | AA              | 1947028795               |
| SNP_P4_172201_22689 | NW_004517171.1 | Scaffold2147 | 22689                   | GG                              | TT              | 1947028797               |
| SNP_P4_172202_22692 | NW_004517171.1 | Scaffold2147 | 22692                   | GG                              | AA              | 1947028799               |
| SNP_P4_172203_22914 | NW_004517171.1 | Scaffold2147 | 22914                   | AA                              | CC              | 1947028801               |
| SNP_P4_172204_22931 | NW_004517171.1 | Scaffold2147 | 22931                   | CC                              | GG              | 1947028803               |
| SNP_P4_172205_23250 | NW_004517171.1 | Scaffold2147 | 23250                   | CC                              | AA              | 1947028805               |
| SNP_P4_172206_23406 | NW_004517171.1 | Scaffold2147 | 23406                   | AA                              | GG              | 1947028807               |
| SNP_P4_172207_23471 | NW_004517171.1 | Scaffold2147 | 23471                   | AA                              | TT              | 1947028809               |
| SNP_P4_172208_23625 | NW_004517171.1 | Scaffold2147 | 23625                   | AA                              | TT              | 1947028811               |
| SNP_P4_172209_24145 | NW_004517171.1 | Scaffold2147 | 24145                   | GG                              | AA              | 1947028813               |
| SNP_P4_172211_24520 | NW_004517171.1 | Scaffold2147 | 24520                   | TT                              | GG              | 1947028815               |
| SNP_P4_172212_24783 | NW_004517171.1 | Scaffold2147 | 24783                   | TT                              | CC              | 1947028817               |
| SNP_P4_172213_24907 | NW_004517171.1 | Scaffold2147 | 24907                   | AA                              | TT              | 1947028819               |
| SNP_P4_172214_24921 | NW_004517171.1 | Scaffold2147 | 24921                   | GG                              | CC              | 1947028821               |
| SNP_P4_172215_25005 | NW_004517171.1 | Scaffold2147 | 25005                   | AA                              | CC              | 1947028823               |
| SNP_P4_172217_503   | NW_004517174.1 | Scaffold2151 | 503                     | AA                              | GG              | 1947028825               |
| SNP_P4_172218_856   | NW_004517174.1 | Scaffold2151 | 856                     | TT                              | CC              | 1947028827               |
| SNP_P4_172219_902   | NW_004517174.1 | Scaffold2151 | 902                     | GG                              | AA              | 1947028829               |
| SNP_P4_172220_1219  | NW_004517174.1 | Scaffold2151 | 1219                    | AA                              | GG              | 1947028832               |
| SNP_P4_172221_20987 | NW_004517175.1 | Scaffold2152 | 20987                   | GG                              | CC              | 1947028834               |
| SNP_P4_172222_21213 | NW_004517175.1 | Scaffold2152 | 21213                   | CC                              | TT              | 1947028836               |
| SNP_P4_172223_21274 | NW_004517175.1 | Scaffold2152 | 21274                   | GG                              | CC              | 1947028838               |
| SNP_P4_172224_21432 | NW_004517175.1 | Scaffold2152 | 21432                   | GG                              | AA              | 1947028840               |
| SNP_P4_172225_21460 | NW_004517175.1 | Scaffold2152 | 21460                   | AA                              | CC              | 1947028842               |
| SNP_P4_172226_21774 | NW_004517175.1 | Scaffold2152 | 21774                   | AA                              | GG              | 1947028844               |
| SNP_P4_172227_21806 | NW_004517175.1 | Scaffold2152 | 21806                   | GG                              | TT              | 1947028846               |
| SNP_P4_172228_22114 | NW_004517175.1 | Scaffold2152 | 22114                   | AA                              | GG              | 1947028848               |
| SNP_P4_172229_22146 | NW_004517175.1 | Scaffold2152 | 22146                   | GG                              | TT              | 1947028850               |
| SNP_P4_172230_22171 | NW_004517175.1 | Scaffold2152 | 22171                   | TT                              | CC              | 1947028852               |
| SNP_P4_172231_22255 | NW_004517175.1 | Scaffold2152 | 22255                   | AA                              | GG              | 1947028855               |
| SNP_P4_172232_22290 | NW_004517175.1 | Scaffold2152 | 22290                   | AA                              | GG              | 1947028857               |
| SNP_P4_172233_22341 | NW_004517175.1 | Scaffold2152 | 22341                   | CC                              | GG              | 1947028859               |
| SNP_P4_172234_22462 | NW_004517175.1 | Scaffold2152 | 22462                   | CC                              | TT              | 1947028861               |
| SNP_P4_172235_22472 | NW_004517175.1 | Scaffold2152 | 22472                   | AA                              | GG              | 1947028863               |
| SNP_P4_172236_22492 | NW_004517175.1 | Scaffold2152 | 22492                   | TT                              | CC              | 1947028865               |
| SNP_P4_172237_33898 | NW_004517175.1 | Scaffold2152 | 33898                   | CC                              | AA              | 1947028867               |



| SNPs IDs            | Chromosome IDs | Chromosomes  | Physical positions (bp) | CDC Frontier (Reference genome) | (ILWC46 & LPNB) | NCBI SNPdb Accession IDs |
|---------------------|----------------|--------------|-------------------------|---------------------------------|-----------------|--------------------------|
| SNP_P4_172239_34119 | NW_004517175.1 | Scaffold2152 | 34119                   | AA                              | CC              | 1947028869               |
| SNP_P4_172240_41715 | NW_004517175.1 | Scaffold2152 | 41715                   | AA                              | GG              | 1947028871               |
| SNP_P4_172241_41751 | NW_004517175.1 | Scaffold2152 | 41751                   | TT                              | CC              | 1947028873               |
| SNP_P4_172242_41758 | NW_004517175.1 | Scaffold2152 | 41758                   | GG                              | CC              | 1947028875               |
| SNP_P4_172243_41769 | NW_004517175.1 | Scaffold2152 | 41769                   | AA                              | GG              | 1947028877               |
| SNP_P4_172244_41783 | NW_004517175.1 | Scaffold2152 | 41783                   | CC                              | GG              | 1947028879               |
| SNP_P4_172245_41787 | NW_004517175.1 | Scaffold2152 | 41787                   | TT                              | CC              | 1947028881               |
| SNP_P4_172246_41828 | NW_004517175.1 | Scaffold2152 | 41828                   | GG                              | AA              | 1947028883               |
| SNP_P4_172247_41854 | NW_004517175.1 | Scaffold2152 | 41854                   | AA                              | TT              | 1947028885               |
| SNP_P4_172248_41855 | NW_004517175.1 | Scaffold2152 | 41855                   | CC                              | TT              | 1947028887               |
| SNP_P4_172249_41863 | NW_004517175.1 | Scaffold2152 | 41863                   | AA                              | GG              | 1947028889               |
| SNP_P4_172250_41875 | NW_004517175.1 | Scaffold2152 | 41875                   | TT                              | AA              | 1947028891               |
| SNP_P4_172251_41876 | NW_004517175.1 | Scaffold2152 | 41876                   | AA                              | TT              | 1947028893               |
| SNP_P4_172252_41880 | NW_004517175.1 | Scaffold2152 | 41880                   | AA                              | CC              | 1947028895               |
| SNP_P4_172253_41883 | NW_004517175.1 | Scaffold2152 | 41883                   | TT                              | AA              | 1947028897               |
| SNP_P4_172254_41919 | NW_004517175.1 | Scaffold2152 | 41919                   | AA                              | TT              | 1947028899               |
| SNP_P4_172255_41941 | NW_004517175.1 | Scaffold2152 | 41941                   | GG                              | AA              | 1947028901               |
| SNP_P4_172256_42202 | NW_004517175.1 | Scaffold2152 | 42202                   | GG                              | AA              | 1947028903               |
| SNP_P4_172257_42219 | NW_004517175.1 | Scaffold2152 | 42219                   | CC                              | AA              | 1947028905               |
| SNP_P4_172258_42702 | NW_004517175.1 | Scaffold2152 | 42702                   | CC                              | TT              | 1947028907               |
| SNP_P4_172259_42923 | NW_004517175.1 | Scaffold2152 | 42923                   | AA                              | GG              | 1947028909               |
| SNP_P4_172260_43090 | NW_004517175.1 | Scaffold2152 | 43090                   | AA                              | GG              | 1947028911               |
| SNP_P4_172261_43158 | NW_004517175.1 | Scaffold2152 | 43158                   | GG                              | AA              | 1947028913               |
| SNP_P4_172262_51122 | NW_004517175.1 | Scaffold2152 | 51122                   | TT                              | AA              | 1947028915               |
| SNP_P4_172263_51126 | NW_004517175.1 | Scaffold2152 | 51126                   | TT                              | GG              | 1947028917               |
| SNP_P4_172264_63864 | NW_004517175.1 | Scaffold2152 | 63864                   | AA                              | GG              | 1947028919               |
| SNP_P4_172265_67517 | NW_004517175.1 | Scaffold2152 | 67517                   | CC                              | TT              | 1947028921               |
| SNP_P4_172266_67682 | NW_004517175.1 | Scaffold2152 | 67682                   | AA                              | TT              | 1947028923               |
| SNP_P4_172267_67746 | NW_004517175.1 | Scaffold2152 | 67746                   | TT                              | GG              | 1947028925               |
| SNP_P4_172268_67775 | NW_004517175.1 | Scaffold2152 | 67775                   | TT                              | CC              | 1947028927               |
| SNP_P4_172269_67781 | NW_004517175.1 | Scaffold2152 | 67781                   | CC                              | TT              | 1947028929               |
| SNP_P4_172270_67786 | NW_004517175.1 | Scaffold2152 | 67786                   | AA                              | GG              | 1947028931               |
| SNP_P4_172271_67845 | NW_004517175.1 | Scaffold2152 | 67845                   | AA                              | CC              | 1947028933               |
| SNP_P4_172272_70071 | NW_004517175.1 | Scaffold2152 | 70071                   | GG                              | AA              | 1947028935               |
| SNP_P4_172273_70074 | NW_004517175.1 | Scaffold2152 | 70074                   | AA                              | GG              | 1947028937               |
| SNP_P4_172274_70330 | NW_004517175.1 | Scaffold2152 | 70330                   | AA                              | TT              | 1947028939               |
| SNP_P4_172278_76785 | NW_004517175.1 | Scaffold2152 | 76785                   | AA                              | GG              | 1947028941               |
| SNP_P4_172279_79029 | NW_004517175.1 | Scaffold2152 | 79029                   | GG                              | CC              | 1947028943               |
| SNP_P4_172280_88272 | NW_004517175.1 | Scaffold2152 | 88272                   | AA                              | GG              | 1947028945               |
| SNP_P4_172281_88300 | NW_004517175.1 | Scaffold2152 | 88300                   | GG                              | AA              | 1947028947               |
| SNP_P4_172282_88697 | NW_004517175.1 | Scaffold2152 | 88697                   | TT                              | CC              | 1947028949               |
| SNP_P4_172283_88722 | NW_004517175.1 | Scaffold2152 | 88722                   | CC                              | AA              | 1947028951               |

| SNPs IDs             | Chromosome IDs | Chromosomes  | Physical positions (bp) | CDC Frontier (Reference genome) | (ILWC46 & LPNB) | NCBI SNPdb Accession IDs |
|----------------------|----------------|--------------|-------------------------|---------------------------------|-----------------|--------------------------|
| SNP_P4_172284_88890  | NW_004517175.1 | Scaffold2152 | 88890                   | CC                              | AA              | 1947028953               |
| SNP_P4_172285_88999  | NW_004517175.1 | Scaffold2152 | 88999                   | GG                              | TT              | 1947028955               |
| SNP_P4_172286_91306  | NW_004517175.1 | Scaffold2152 | 91306                   | AA                              | CC              | 1947028957               |
| SNP_P4_172287_95660  | NW_004517175.1 | Scaffold2152 | 95660                   | AA                              | GG              | 1947028959               |
| SNP_P4_172288_95824  | NW_004517175.1 | Scaffold2152 | 95824                   | CC                              | AA              | 1947028961               |
| SNP_P4_172289_95838  | NW_004517175.1 | Scaffold2152 | 95838                   | AA                              | GG              | 1947028963               |
| SNP_P4_172290_107929 | NW_004517175.1 | Scaffold2152 | 107929                  | CC                              | AA              | 1947028965               |
| SNP_P4_172291_108205 | NW_004517175.1 | Scaffold2152 | 108205                  | CC                              | AA              | 1947028967               |
| SNP_P4_172292_108380 | NW_004517175.1 | Scaffold2152 | 108380                  | AA                              | GG              | 1947028969               |
| SNP_P4_172294_108713 | NW_004517175.1 | Scaffold2152 | 108713                  | GG                              | AA              | 1947028971               |
| SNP_P4_172295_108807 | NW_004517175.1 | Scaffold2152 | 108807                  | CC                              | TT              | 1947028973               |
| SNP_P4_172296_120257 | NW_004517175.1 | Scaffold2152 | 120257                  | AA                              | CC              | 1947028975               |
| SNP_P4_172297_120271 | NW_004517175.1 | Scaffold2152 | 120271                  | TT                              | CC              | 1947028977               |
| SNP_P4_172298_120283 | NW_004517175.1 | Scaffold2152 | 120283                  | AA                              | TT              | 1947028979               |
| SNP_P4_172299_120291 | NW_004517175.1 | Scaffold2152 | 120291                  | TT                              | AA              | 1947028981               |
| SNP_P4_172300_120315 | NW_004517175.1 | Scaffold2152 | 120315                  | AA                              | GG              | 1947028983               |
| SNP_P4_172301_120329 | NW_004517175.1 | Scaffold2152 | 120329                  | CC                              | TT              | 1947028985               |
| SNP_P4_172302_129886 | NW_004517175.1 | Scaffold2152 | 129886                  | AA                              | CC              | 1947028987               |
| SNP_P4_172303_130209 | NW_004517175.1 | Scaffold2152 | 130209                  | AA                              | TT              | 1947028989               |
| SNP_P4_172304_130238 | NW_004517175.1 | Scaffold2152 | 130238                  | TT                              | CC              | 1947028991               |
| SNP_P4_172306_162804 | NW_004517175.1 | Scaffold2152 | 162804                  | GG                              | TT              | 1947028993               |
| SNP_P4_172307_162877 | NW_004517175.1 | Scaffold2152 | 162877                  | TT                              | CC              | 1947028995               |
| SNP_P4_172308_163267 | NW_004517175.1 | Scaffold2152 | 163267                  | GG                              | AA              | 1947028998               |
| SNP_P4_172309_173613 | NW_004517175.1 | Scaffold2152 | 173613                  | CC                              | TT              | 1947029000               |
| SNP_P4_172310_173653 | NW_004517175.1 | Scaffold2152 | 173653                  | GG                              | AA              | 1947029002               |
| SNP_P4_172311_174027 | NW_004517175.1 | Scaffold2152 | 174027                  | TT                              | CC              | 1947029004               |
| SNP_P4_172312_184063 | NW_004517175.1 | Scaffold2152 | 184063                  | TT                              | GG              | 1947029006               |
| SNP_P4_172313_210422 | NW_004517175.1 | Scaffold2152 | 210422                  | AA                              | GG              | 1947029008               |
| SNP_P4_172314_213190 | NW_004517175.1 | Scaffold2152 | 213190                  | CC                              | TT              | 1947029010               |
| SNP_P4_172315_268141 | NW_004517175.1 | Scaffold2152 | 268141                  | TT                              | CC              | 1947029012               |
| SNP_P4_172316_268356 | NW_004517175.1 | Scaffold2152 | 268356                  | TT                              | CC              | 1947029014               |
| SNP_P4_172317_275755 | NW_004517175.1 | Scaffold2152 | 275755                  | TT                              | CC              | 1947029016               |
| SNP_P4_172318_281158 | NW_004517175.1 | Scaffold2152 | 281158                  | GG                              | AA              | 1947029018               |
| SNP_P4_172319_282258 | NW_004517175.1 | Scaffold2152 | 282258                  | CC                              | TT              | 1947029020               |
| SNP_P4_172320_283134 | NW_004517175.1 | Scaffold2152 | 283134                  | AA                              | TT              | 1947029022               |
| SNP_P4_172321_283136 | NW_004517175.1 | Scaffold2152 | 283136                  | AA                              | CC              | 1947029024               |
| SNP_P4_172322_283302 | NW_004517175.1 | Scaffold2152 | 283302                  | AA                              | GG              | 1947029026               |
| SNP_P4_172323_283306 | NW_004517175.1 | Scaffold2152 | 283306                  | TT                              | CC              | 1947029028               |
| SNP_P4_172324_283310 | NW_004517175.1 | Scaffold2152 | 283310                  | GG                              | TT              | 1947029030               |
| SNP_P4_172325_283314 | NW_004517175.1 | Scaffold2152 | 283314                  | TT                              | CC              | 1947029032               |
| SNP_P4_172326_283424 | NW_004517175.1 | Scaffold2152 | 283424                  | AA                              | GG              | 1947029034               |
| SNP_P4_172327_283448 | NW_004517175.1 | Scaffold2152 | 283448                  | GG                              | AA              | 1947029036               |

| SNPs IDs             | Chromosome IDs | Chromosomes  | Physical positions (bp) | CDC Frontier (Reference genome) | (ILWC46 & LPNB) | NCBI SNPdb Accession IDs |
|----------------------|----------------|--------------|-------------------------|---------------------------------|-----------------|--------------------------|
| SNP_P4_172328_283449 | NW_004517175.1 | Scaffold2152 | 283449                  | AA                              | TT              | 1947029038               |
| SNP_P4_172329_283486 | NW_004517175.1 | Scaffold2152 | 283486                  | GG                              | AA              | 1947029040               |
| SNP_P4_172330_283620 | NW_004517175.1 | Scaffold2152 | 283620                  | CC                              | AA              | 1947029042               |
| SNP_P4_172331_284176 | NW_004517175.1 | Scaffold2152 | 284176                  | GG                              | TT              | 1947029044               |
| SNP_P4_172332_304535 | NW_004517175.1 | Scaffold2152 | 304535                  | CC                              | AA              | 1947029046               |
| SNP_P4_172333_304611 | NW_004517175.1 | Scaffold2152 | 304611                  | TT                              | GG              | 1947029048               |
| SNP_P4_172334_312652 | NW_004517175.1 | Scaffold2152 | 312652                  | CC                              | TT              | 1947029049               |
| SNP_P4_172335_324352 | NW_004517175.1 | Scaffold2152 | 324352                  | AA                              | GG              | 1947029050               |
| SNP_P4_172336_324654 | NW_004517175.1 | Scaffold2152 | 324654                  | AA                              | TT              | 1947029051               |
| SNP_P4_172337_324667 | NW_004517175.1 | Scaffold2152 | 324667                  | AA                              | GG              | 1947029052               |
| SNP_P4_172338_325024 | NW_004517175.1 | Scaffold2152 | 325024                  | TT                              | CC              | 1947029053               |
| SNP_P4_172339_333266 | NW_004517175.1 | Scaffold2152 | 333266                  | GG                              | AA              | 1947029054               |
| SNP_P4_172340_334455 | NW_004517175.1 | Scaffold2152 | 334455                  | CC                              | AA              | 1947029055               |
| SNP_P4_172341_336657 | NW_004517175.1 | Scaffold2152 | 336657                  | TT                              | CC              | 1947029056               |
| SNP_P4_172343_355875 | NW_004517175.1 | Scaffold2152 | 355875                  | TT                              | CC              | 1947029057               |
| SNP_P4_172344_372116 | NW_004517175.1 | Scaffold2152 | 372116                  | TT                              | AA              | 1947029058               |
| SNP_P4_172345_379695 | NW_004517175.1 | Scaffold2152 | 379695                  | TT                              | CC              | 1947029059               |
| SNP_P4_172346_379932 | NW_004517175.1 | Scaffold2152 | 379932                  | TT                              | GG              | 1947029060               |
| SNP_P4_172347_380096 | NW_004517175.1 | Scaffold2152 | 380096                  | AA                              | GG              | 1947029061               |
| SNP_P4_172349_2479   | NW_004517176.1 | Scaffold2153 | 2479                    | TT                              | CC              | 1947029062               |
| SNP_P4_172351_8210   | NW_004517176.1 | Scaffold2153 | 8210                    | AA                              | GG              | 1947029063               |
| SNP_P4_172352_8250   | NW_004517176.1 | Scaffold2153 | 8250                    | CC                              | TT              | 1947029117               |
| SNP_P4_172353_8570   | NW_004517176.1 | Scaffold2153 | 8570                    | CC                              | TT              | 1947029119               |
| SNP_P4_172355_19786  | NW_004517176.1 | Scaffold2153 | 19786                   | TT                              | CC              | 1947029122               |
| SNP_P4_172356_32554  | NW_004517176.1 | Scaffold2153 | 32554                   | AA                              | GG              | 1947029124               |
| SNP_P4_172357_32879  | NW_004517176.1 | Scaffold2153 | 32879                   | GG                              | AA              | 1947029126               |
| SNP_P4_172358_32901  | NW_004517176.1 | Scaffold2153 | 32901                   | TT                              | CC              | 1947029128               |
| SNP_P4_172359_32921  | NW_004517176.1 | Scaffold2153 | 32921                   | AA                              | GG              | 1947029130               |
| SNP_P4_172361_49828  | NW_004517176.1 | Scaffold2153 | 49828                   | GG                              | TT              | 1947029132               |
| SNP_P4_172362_64     | NW_004517177.1 | Scaffold2155 | 64                      | AA                              | CC              | 1947029134               |
| SNP_P4_172363_70     | NW_004517177.1 | Scaffold2155 | 70                      | AA                              | CC              | 1947029136               |
| SNP_P4_172364_120    | NW_004517177.1 | Scaffold2155 | 120                     | CC                              | TT              | 1947029139               |
| SNP_P4_172365_595    | NW_004517177.1 | Scaffold2155 | 595                     | AA                              | TT              | 1947029141               |
| SNP_P4_172366_19438  | NW_004517177.1 | Scaffold2155 | 19438                   | TT                              | GG              | 1947029143               |
| SNP_P4_172367_25658  | NW_004517177.1 | Scaffold2155 | 25658                   | GG                              | AA              | 1947029145               |
| SNP_P4_172368_25725  | NW_004517177.1 | Scaffold2155 | 25725                   | AA                              | TT              | 1947029147               |
| SNP_P4_172369_25904  | NW_004517177.1 | Scaffold2155 | 25904                   | TT                              | CC              | 1947029149               |
| SNP_P4_172370_25916  | NW_004517177.1 | Scaffold2155 | 25916                   | GG                              | AA              | 1947029150               |
| SNP_P4_172371_39384  | NW_004517177.1 | Scaffold2155 | 39384                   | AA                              | TT              | 1947029152               |
| SNP_P4_172372_39508  | NW_004517177.1 | Scaffold2155 | 39508                   | CC                              | AA              | 1947029155               |
| SNP_P4_172374_39700  | NW_004517177.1 | Scaffold2155 | 39700                   | TT                              | CC              | 1947029157               |
| SNP_P4_172375_40388  | NW_004517177.1 | Scaffold2155 | 40388                   | CC                              | AA              | 1947029159               |

| SNPs IDs             | Chromosome IDs | Chromosomes  | Physical positions (bp) | CDC Frontier (Reference genome) | (ILWC46 & LPNB) | NCBI SNPdb Accession IDs |
|----------------------|----------------|--------------|-------------------------|---------------------------------|-----------------|--------------------------|
| SNP_P4_172376_40408  | NW_004517177.1 | Scaffold2155 | 40408                   | GG                              | AA              | 1947029161               |
| SNP_P4_172377_40479  | NW_004517177.1 | Scaffold2155 | 40479                   | CC                              | TT              | 1947029163               |
| SNP_P4_172378_40480  | NW_004517177.1 | Scaffold2155 | 40480                   | TT                              | GG              | 1947029165               |
| SNP_P4_172379_40481  | NW_004517177.1 | Scaffold2155 | 40481                   | GG                              | AA              | 1947029167               |
| SNP_P4_172380_252    | NW_004517179.1 | Scaffold2158 | 252                     | AA                              | GG              | 1947029169               |
| SNP_P4_172381_312    | NW_004517179.1 | Scaffold2158 | 312                     | TT                              | CC              | 1947029171               |
| SNP_P4_172382_316    | NW_004517179.1 | Scaffold2158 | 316                     | AA                              | TT              | 1947029173               |
| SNP_P4_172383_335    | NW_004517179.1 | Scaffold2158 | 335                     | TT                              | CC              | 1947029175               |
| SNP_P4_172384_577    | NW_004517179.1 | Scaffold2158 | 577                     | CC                              | TT              | 1947029177               |
| SNP_P4_172385_619    | NW_004517179.1 | Scaffold2158 | 619                     | GG                              | TT              | 1947029179               |
| SNP_P4_172386_52268  | NW_004517179.1 | Scaffold2158 | 52268                   | GG                              | TT              | 1947029181               |
| SNP_P4_172387_52289  | NW_004517179.1 | Scaffold2158 | 52289                   | AA                              | GG              | 1947029183               |
| SNP_P4_172388_64397  | NW_004517179.1 | Scaffold2158 | 64397                   | TT                              | AA              | 1947029185               |
| SNP_P4_172389_64441  | NW_004517179.1 | Scaffold2158 | 64441                   | AA                              | GG              | 1947029187               |
| SNP_P4_172390_64514  | NW_004517179.1 | Scaffold2158 | 64514                   | AA                              | GG              | 1947029189               |
| SNP_P4_172391_64623  | NW_004517179.1 | Scaffold2158 | 64623                   | GG                              | TT              | 1947029191               |
| SNP_P4_172392_64624  | NW_004517179.1 | Scaffold2158 | 64624                   | TT                              | GG              | 1947029193               |
| SNP_P4_172393_64691  | NW_004517179.1 | Scaffold2158 | 64691                   | GG                              | TT              | 1947029195               |
| SNP_P4_172394_64776  | NW_004517179.1 | Scaffold2158 | 64776                   | GG                              | AA              | 1947029197               |
| SNP_P4_172395_64810  | NW_004517179.1 | Scaffold2158 | 64810                   | TT                              | CC              | 1947029199               |
| SNP_P4_172396_64848  | NW_004517179.1 | Scaffold2158 | 64848                   | AA                              | CC              | 1947029201               |
| SNP_P4_172401_102692 | NW_004517179.1 | Scaffold2158 | 102692                  | CC                              | GG              | 1947029203               |
| SNP_P4_172402_102695 | NW_004517179.1 | Scaffold2158 | 102695                  | AA                              | GG              | 1947029205               |
| SNP_P4_172403_103757 | NW_004517179.1 | Scaffold2158 | 103757                  | AA                              | GG              | 1947029207               |
| SNP_P4_172404_106105 | NW_004517179.1 | Scaffold2158 | 106105                  | TT                              | GG              | 1947029209               |
| SNP_P4_172405_117066 | NW_004517179.1 | Scaffold2158 | 117066                  | AA                              | GG              | 1947029211               |
| SNP_P4_172406_125131 | NW_004517179.1 | Scaffold2158 | 125131                  | AA                              | GG              | 1947029213               |
| SNP_P4_172407_125403 | NW_004517179.1 | Scaffold2158 | 125403                  | TT                              | AA              | 1947029215               |
| SNP_P4_172408_125726 | NW_004517179.1 | Scaffold2158 | 125726                  | AA                              | GG              | 1947029217               |
| SNP_P4_172409_127238 | NW_004517179.1 | Scaffold2158 | 127238                  | TT                              | GG              | 1947029219               |
| SNP_P4_172410_127266 | NW_004517179.1 | Scaffold2158 | 127266                  | AA                              | CC              | 1947029221               |
| SNP_P4_172411_127276 | NW_004517179.1 | Scaffold2158 | 127276                  | AA                              | CC              | 1947029223               |
| SNP_P4_172412_127306 | NW_004517179.1 | Scaffold2158 | 127306                  | TT                              | GG              | 1947029225               |
| SNP_P4_172413_151694 | NW_004517179.1 | Scaffold2158 | 151694                  | CC                              | AA              | 1947029227               |
| SNP_P4_172414_151701 | NW_004517179.1 | Scaffold2158 | 151701                  | AA                              | TT              | 1947029229               |
| SNP_P4_172415_151705 | NW_004517179.1 | Scaffold2158 | 151705                  | TT                              | GG              | 1947029231               |
| SNP_P4_172416_151732 | NW_004517179.1 | Scaffold2158 | 151732                  | AA                              | GG              | 1947029233               |
| SNP_P4_172417_151737 | NW_004517179.1 | Scaffold2158 | 151737                  | AA                              | GG              | 1947029235               |
| SNP_P4_172419_152606 | NW_004517179.1 | Scaffold2158 | 152606                  | CC                              | TT              | 1947029237               |
| SNP_P4_172421_178432 | NW_004517179.1 | Scaffold2158 | 178432                  | GG                              | TT              | 1947029239               |
| SNP_P4_172422_196621 | NW_004517179.1 | Scaffold2158 | 196621                  | TT                              | CC              | 1947029241               |
| SNP_P4_172423_196653 | NW_004517179.1 | Scaffold2158 | 196653                  | TT                              | CC              | 1947029243               |

| SNPs IDs             | Chromosome IDs | Chromosomes  | Physical positions (bp) | CDC Frontier (Reference genome) | (ILWC46 & LPNB) | NCBI SNPdb Accession IDs |
|----------------------|----------------|--------------|-------------------------|---------------------------------|-----------------|--------------------------|
| SNP_P4_172424_196670 | NW_004517179.1 | Scaffold2158 | 196670                  | CC                              | TT              | 1947029245               |
| SNP_P4_172425_197517 | NW_004517179.1 | Scaffold2158 | 197517                  | TT                              | CC              | 1947029247               |
| SNP_P4_172426_197578 | NW_004517179.1 | Scaffold2158 | 197578                  | AA                              | TT              | 1947029249               |
| SNP_P4_172427_197582 | NW_004517179.1 | Scaffold2158 | 197582                  | TT                              | CC              | 1947029251               |
| SNP_P4_172428_197602 | NW_004517179.1 | Scaffold2158 | 197602                  | TT                              | CC              | 1947029253               |
| SNP_P4_172429_197617 | NW_004517179.1 | Scaffold2158 | 197617                  | TT                              | GG              | 1947029254               |
| SNP_P4_172430_197820 | NW_004517179.1 | Scaffold2158 | 197820                  | AA                              | CC              | 1947029256               |
| SNP_P4_172431_197846 | NW_004517179.1 | Scaffold2158 | 197846                  | AA                              | TT              | 1947029258               |
| SNP_P4_172432_204816 | NW_004517179.1 | Scaffold2158 | 204816                  | CC                              | TT              | 1947029260               |
| SNP_P4_172433_218631 | NW_004517179.1 | Scaffold2158 | 218631                  | GG                              | AA              | 1947029262               |
| SNP_P4_172434_219358 | NW_004517179.1 | Scaffold2158 | 219358                  | TT                              | CC              | 1947029264               |
| SNP_P4_172435_6114   | NW_004517180.1 | Scaffold2160 | 6114                    | AA                              | TT              | 1947029266               |
| SNP_P4_172436_12971  | NW_004517180.1 | Scaffold2160 | 12971                   | GG                              | CC              | 1947029268               |
| SNP_P4_172437_19746  | NW_004517180.1 | Scaffold2160 | 19746                   | CC                              | TT              | 1947029270               |
| SNP_P4_172438_23082  | NW_004517180.1 | Scaffold2160 | 23082                   | TT                              | AA              | 1947029272               |
| SNP_P4_172439_29333  | NW_004517180.1 | Scaffold2160 | 29333                   | AA                              | CC              | 1947029274               |
| SNP_P4_172440_30066  | NW_004517180.1 | Scaffold2160 | 30066                   | TT                              | CC              | 1947029276               |
| SNP_P4_172441_30127  | NW_004517180.1 | Scaffold2160 | 30127                   | CC                              | AA              | 1947029278               |
| SNP_P4_172442_30764  | NW_004517180.1 | Scaffold2160 | 30764                   | TT                              | AA              | 1947029280               |
| SNP_P4_172443_30780  | NW_004517180.1 | Scaffold2160 | 30780                   | AA                              | CC              | 1947029282               |
| SNP_P4_172444_30826  | NW_004517180.1 | Scaffold2160 | 30826                   | AA                              | TT              | 1947029284               |
| SNP_P4_172445_30827  | NW_004517180.1 | Scaffold2160 | 30827                   | GG                              | AA              | 1947029286               |
| SNP_P4_172446_31527  | NW_004517180.1 | Scaffold2160 | 31527                   | GG                              | AA              | 1947029288               |
| SNP_P4_172447_33465  | NW_004517180.1 | Scaffold2160 | 33465                   | CC                              | GG              | 1947029290               |
| SNP_P4_172448_33827  | NW_004517180.1 | Scaffold2160 | 33827                   | GG                              | CC              | 1947029292               |
| SNP_P4_172449_33861  | NW_004517180.1 | Scaffold2160 | 33861                   | AA                              | GG              | 1947029294               |
| SNP_P4_172450_34009  | NW_004517180.1 | Scaffold2160 | 34009                   | CC                              | GG              | 1947029296               |
| SNP_P4_172451_34567  | NW_004517180.1 | Scaffold2160 | 34567                   | AA                              | TT              | 1947029298               |
| SNP_P4_172452_34665  | NW_004517180.1 | Scaffold2160 | 34665                   | GG                              | CC              | 1947029300               |
| SNP_P4_172453_59     | NW_004517181.1 | Scaffold2161 | 59                      | AA                              | GG              | 1947029302               |
| SNP_P4_172455_64     | NW_004517181.1 | Scaffold2161 | 64                      | AA                              | GG              | 1947029304               |
| SNP_P4_172457_133    | NW_004517181.1 | Scaffold2161 | 133                     | TT                              | CC              | 1947029306               |
| SNP_P4_172458_142    | NW_004517181.1 | Scaffold2161 | 142                     | TT                              | CC              | 1947029308               |
| SNP_P4_172459_7074   | NW_004517181.1 | Scaffold2161 | 7074                    | TT                              | GG              | 1947029310               |
| SNP_P4_172460_7491   | NW_004517181.1 | Scaffold2161 | 7491                    | GG                              | TT              | 1947029312               |
| SNP_P4_172461_7729   | NW_004517181.1 | Scaffold2161 | 7729                    | TT                              | CC              | 1947029314               |
| SNP_P4_172463_8706   | NW_004517181.1 | Scaffold2161 | 8706                    | GG                              | AA              | 1947029316               |
| SNP_P4_172464_14303  | NW_004517181.1 | Scaffold2161 | 14303                   | CC                              | TT              | 1947029318               |
| SNP_P4_172465_14452  | NW_004517181.1 | Scaffold2161 | 14452                   | TT                              | CC              | 1947029320               |
| SNP_P4_172466_14812  | NW_004517181.1 | Scaffold2161 | 14812                   | TT                              | CC              | 1947029322               |
| SNP_P4_172467_14814  | NW_004517181.1 | Scaffold2161 | 14814                   | AA                              | GG              | 1947029324               |
| SNP_P4_172468_14838  | NW_004517181.1 | Scaffold2161 | 14838                   | AA                              | CC              | 1947029326               |

| SNPs IDs             | Chromosome IDs | Chromosomes  | Physical positions (bp) | CDC Frontier (Reference genome) | (ILWC46 & LPNB) | NCBI SNPdb Accession IDs |
|----------------------|----------------|--------------|-------------------------|---------------------------------|-----------------|--------------------------|
| SNP_P4_172469_30472  | NW_004517181.1 | Scaffold2161 | 30472                   | GG                              | CC              | 1947029328               |
| SNP_P4_172470_58411  | NW_004517181.1 | Scaffold2161 | 58411                   | GG                              | TT              | 1947029330               |
| SNP_P4_172471_58420  | NW_004517181.1 | Scaffold2161 | 58420                   | AA                              | TT              | 1947029332               |
| SNP_P4_172472_58424  | NW_004517181.1 | Scaffold2161 | 58424                   | GG                              | AA              | 1947029334               |
| SNP_P4_172473_58425  | NW_004517181.1 | Scaffold2161 | 58425                   | TT                              | AA              | 1947029336               |
| SNP_P4_172474_58427  | NW_004517181.1 | Scaffold2161 | 58427                   | TT                              | GG              | 1947029338               |
| SNP_P4_172475_73551  | NW_004517181.1 | Scaffold2161 | 73551                   | CC                              | TT              | 1947029340               |
| SNP_P4_172476_79120  | NW_004517181.1 | Scaffold2161 | 79120                   | TT                              | GG              | 1947029342               |
| SNP_P4_172477_80723  | NW_004517181.1 | Scaffold2161 | 80723                   | GG                              | AA              | 1947029345               |
| SNP_P4_172478_94127  | NW_004517181.1 | Scaffold2161 | 94127                   | GG                              | TT              | 1947029347               |
| SNP_P4_172479_99775  | NW_004517181.1 | Scaffold2161 | 99775                   | GG                              | AA              | 1947029349               |
| SNP_P4_172480_104914 | NW_004517181.1 | Scaffold2161 | 104914                  | TT                              | CC              | 1947029351               |
| SNP_P4_172481_106421 | NW_004517181.1 | Scaffold2161 | 106421                  | CC                              | AA              | 1947029353               |
| SNP_P4_172482_106432 | NW_004517181.1 | Scaffold2161 | 106432                  | TT                              | CC              | 1947029355               |
| SNP_P4_172483_106508 | NW_004517181.1 | Scaffold2161 | 106508                  | TT                              | CC              | 1947029357               |
| SNP_P4_172484_106775 | NW_004517181.1 | Scaffold2161 | 106775                  | AA                              | GG              | 1947029359               |
| SNP_P4_172485_106865 | NW_004517181.1 | Scaffold2161 | 106865                  | GG                              | AA              | 1947029361               |
| SNP_P4_172486_106882 | NW_004517181.1 | Scaffold2161 | 106882                  | TT                              | CC              | 1947029363               |
| SNP_P4_172487_106964 | NW_004517181.1 | Scaffold2161 | 106964                  | TT                              | GG              | 1947029365               |
| SNP_P4_172488_107097 | NW_004517181.1 | Scaffold2161 | 107097                  | AA                              | TT              | 1947029367               |
| SNP_P4_172489_107126 | NW_004517181.1 | Scaffold2161 | 107126                  | AA                              | TT              | 1947029369               |
| SNP_P4_172491_108478 | NW_004517181.1 | Scaffold2161 | 108478                  | TT                              | CC              | 1947029371               |
| SNP_P4_172492_108858 | NW_004517181.1 | Scaffold2161 | 108858                  | GG                              | AA              | 1947029373               |
| SNP_P4_172493_108867 | NW_004517181.1 | Scaffold2161 | 108867                  | AA                              | GG              | 1947029375               |
| SNP_P4_172495_111326 | NW_004517181.1 | Scaffold2161 | 111326                  | GG                              | AA              | 1947029377               |
| SNP_P4_172496_111372 | NW_004517181.1 | Scaffold2161 | 111372                  | AA                              | GG              | 1947029379               |
| SNP_P4_172497_111673 | NW_004517181.1 | Scaffold2161 | 111673                  | TT                              | CC              | 1947029381               |
| SNP_P4_172498_121674 | NW_004517181.1 | Scaffold2161 | 121674                  | GG                              | AA              | 1947029383               |
| SNP_P4_172499_121821 | NW_004517181.1 | Scaffold2161 | 121821                  | TT                              | CC              | 1947029385               |
| SNP_P4_172500_126952 | NW_004517181.1 | Scaffold2161 | 126952                  | AA                              | TT              | 1947029386               |
| SNP_P4_172501_128537 | NW_004517181.1 | Scaffold2161 | 128537                  | TT                              | AA              | 1947029388               |
| SNP_P4_172502_128608 | NW_004517181.1 | Scaffold2161 | 128608                  | GG                              | AA              | 1947029390               |
| SNP_P4_172503_128861 | NW_004517181.1 | Scaffold2161 | 128861                  | GG                              | AA              | 1947029392               |
| SNP_P4_172504_128965 | NW_004517181.1 | Scaffold2161 | 128965                  | TT                              | CC              | 1947029394               |
| SNP_P4_172505_128975 | NW_004517181.1 | Scaffold2161 | 128975                  | AA                              | GG              | 1947029396               |
| SNP_P4_172506_157272 | NW_004517181.1 | Scaffold2161 | 157272                  | AA                              | GG              | 1947029398               |
| SNP_P4_172508_160242 | NW_004517181.1 | Scaffold2161 | 160242                  | AA                              | TT              | 1947029400               |
| SNP_P4_172509_176432 | NW_004517181.1 | Scaffold2161 | 176432                  | AA                              | GG              | 1947029402               |
| SNP_P4_172510_176439 | NW_004517181.1 | Scaffold2161 | 176439                  | GG                              | AA              | 1947029404               |
| SNP_P4_172511_176442 | NW_004517181.1 | Scaffold2161 | 176442                  | AA                              | TT              | 1947029406               |
| SNP_P4_172512_196631 | NW_004517181.1 | Scaffold2161 | 196631                  | AA                              | GG              | 1947029408               |
| SNP_P4_172513_196954 | NW_004517181.1 | Scaffold2161 | 196954                  | GG                              | TT              | 1947029410               |

| SNPs IDs             | Chromosome IDs | Chromosomes  | Physical positions (bp) | CDC Frontier (Reference genome) | (ILWC46 & LPNB) | NCBI SNPdb Accession IDs |
|----------------------|----------------|--------------|-------------------------|---------------------------------|-----------------|--------------------------|
| SNP_P4_172514_196984 | NW_004517181.1 | Scaffold2161 | 196984                  | AA                              | GG              | 1947029412               |
| SNP_P4_172515_197082 | NW_004517181.1 | Scaffold2161 | 197082                  | AA                              | GG              | 1947029414               |
| SNP_P4_172516_197211 | NW_004517181.1 | Scaffold2161 | 197211                  | CC                              | TT              | 1947029416               |
| SNP_P4_172517_197728 | NW_004517181.1 | Scaffold2161 | 197728                  | AA                              | CC              | 1947029418               |
| SNP_P4_172518_216110 | NW_004517181.1 | Scaffold2161 | 216110                  | AA                              | GG              | 1947029420               |
| SNP_P4_172519_224613 | NW_004517181.1 | Scaffold2161 | 224613                  | GG                              | AA              | 1947029422               |
| SNP_P4_172520_224626 | NW_004517181.1 | Scaffold2161 | 224626                  | GG                              | AA              | 1947029423               |
| SNP_P4_172521_224679 | NW_004517181.1 | Scaffold2161 | 224679                  | TT                              | CC              | 1947029425               |
| SNP_P4_172522_224990 | NW_004517181.1 | Scaffold2161 | 224990                  | TT                              | CC              | 1947029427               |
| SNP_P4_172523_225110 | NW_004517181.1 | Scaffold2161 | 225110                  | GG                              | AA              | 1947029429               |
| SNP_P4_172524_239850 | NW_004517181.1 | Scaffold2161 | 239850                  | CC                              | TT              | 1947029431               |
| SNP_P4_172525_249647 | NW_004517181.1 | Scaffold2161 | 249647                  | AA                              | TT              | 1947029433               |
| SNP_P4_172526_263983 | NW_004517181.1 | Scaffold2161 | 263983                  | CC                              | TT              | 1947029435               |
| SNP_P4_172527_272370 | NW_004517181.1 | Scaffold2161 | 272370                  | AA                              | TT              | 1947029437               |
| SNP_P4_172528_281145 | NW_004517181.1 | Scaffold2161 | 281145                  | CC                              | TT              | 1947029439               |
| SNP_P4_172529_8126   | NW_004517182.1 | Scaffold2163 | 8126                    | TT                              | AA              | 1947029441               |
| SNP_P4_172530_13333  | NW_004517182.1 | Scaffold2163 | 13333                   | CC                              | AA              | 1947029443               |
| SNP_P4_172531_13613  | NW_004517182.1 | Scaffold2163 | 13613                   | CC                              | TT              | 1947029445               |
| SNP_P4_172532_16329  | NW_004517182.1 | Scaffold2163 | 16329                   | GG                              | CC              | 1947029447               |
| SNP_P4_172533_16398  | NW_004517182.1 | Scaffold2163 | 16398                   | AA                              | GG              | 1947029449               |
| SNP_P4_172534_16494  | NW_004517182.1 | Scaffold2163 | 16494                   | TT                              | CC              | 1947029451               |
| SNP_P4_172535_29962  | NW_004517182.1 | Scaffold2163 | 29962                   | AA                              | GG              | 1947029453               |
| SNP_P4_172536_51029  | NW_004517182.1 | Scaffold2163 | 51029                   | TT                              | AA              | 1947029455               |
| SNP_P4_172537_52896  | NW_004517182.1 | Scaffold2163 | 52896                   | AA                              | TT              | 1947029457               |
| SNP_P4_172538_53216  | NW_004517182.1 | Scaffold2163 | 53216                   | GG                              | TT              | 1947029459               |
| SNP_P4_172539_53516  | NW_004517182.1 | Scaffold2163 | 53516                   | AA                              | CC              | 1947029461               |
| SNP_P4_172540_57118  | NW_004517182.1 | Scaffold2163 | 57118                   | TT                              | AA              | 1947029463               |
| SNP_P4_172541_58596  | NW_004517182.1 | Scaffold2163 | 58596                   | GG                              | TT              | 1947029465               |
| SNP_P4_172542_65043  | NW_004517182.1 | Scaffold2163 | 65043                   | AA                              | CC              | 1947029467               |
| SNP_P4_172543_67849  | NW_004517182.1 | Scaffold2163 | 67849                   | AA                              | CC              | 1947029469               |
| SNP_P4_172544_69690  | NW_004517182.1 | Scaffold2163 | 69690                   | AA                              | TT              | 1947029471               |
| SNP_P4_172545_69706  | NW_004517182.1 | Scaffold2163 | 69706                   | TT                              | GG              | 1947029472               |
| SNP_P4_172546_69727  | NW_004517182.1 | Scaffold2163 | 69727                   | CC                              | GG              | 1947029474               |
| SNP_P4_172547_69965  | NW_004517182.1 | Scaffold2163 | 69965                   | AA                              | CC              | 1947029476               |
| SNP_P4_172548_71191  | NW_004517182.1 | Scaffold2163 | 71191                   | TT                              | GG              | 1947029478               |
| SNP_P4_172549_71434  | NW_004517182.1 | Scaffold2163 | 71434                   | CC                              | AA              | 1947029480               |
| SNP_P4_172550_71469  | NW_004517182.1 | Scaffold2163 | 71469                   | TT                              | AA              | 1947029482               |
| SNP_P4_172552_71491  | NW_004517182.1 | Scaffold2163 | 71491                   | TT                              | GG              | 1947029484               |
| SNP_P4_172553_71550  | NW_004517182.1 | Scaffold2163 | 71550                   | CC                              | AA              | 1947029486               |
| SNP_P4_172554_71570  | NW_004517182.1 | Scaffold2163 | 71570                   | AA                              | TT              | 1947029488               |
| SNP_P4_172555_78127  | NW_004517182.1 | Scaffold2163 | 78127                   | CC                              | TT              | 1947029490               |
| SNP_P4_172556_78165  | NW_004517182.1 | Scaffold2163 | 78165                   | GG                              | AA              | 1947029492               |

| SNPs IDs            | Chromosome IDs | Chromosomes  | Physical positions (bp) | CDC Frontier (Reference genome) | (ILWC46 & LPNB) | NCBI SNPdb Accession IDs |
|---------------------|----------------|--------------|-------------------------|---------------------------------|-----------------|--------------------------|
| SNP_P4_172557_78336 | NW_004517182.1 | Scaffold2163 | 78336                   | TT                              | AA              | 1947029494               |
| SNP_P4_172558_78497 | NW_004517182.1 | Scaffold2163 | 78497                   | TT                              | CC              | 1947029496               |
| SNP_P4_172559_78498 | NW_004517182.1 | Scaffold2163 | 78498                   | AA                              | GG              | 1947029498               |
| SNP_P4_172560_78546 | NW_004517182.1 | Scaffold2163 | 78546                   | TT                              | GG              | 1947029500               |
| SNP_P4_172561_78589 | NW_004517182.1 | Scaffold2163 | 78589                   | AA                              | TT              | 1947029502               |
| SNP_P4_172562_78614 | NW_004517182.1 | Scaffold2163 | 78614                   | CC                              | TT              | 1947029504               |
| SNP_P4_172564_4847  | NW_004517183.1 | Scaffold2164 | 4847                    | TT                              | CC              | 1947029506               |
| SNP_P4_172565_9985  | NW_004517183.1 | Scaffold2164 | 9985                    | TT                              | CC              | 1947029509               |
| SNP_P4_172566_16963 | NW_004517183.1 | Scaffold2164 | 16963                   | CC                              | AA              | 1947029511               |
| SNP_P4_172567_17000 | NW_004517183.1 | Scaffold2164 | 17000                   | AA                              | CC              | 1947029513               |
| SNP_P4_172568_17004 | NW_004517183.1 | Scaffold2164 | 17004                   | CC                              | TT              | 1947029515               |
| SNP_P4_172569_17018 | NW_004517183.1 | Scaffold2164 | 17018                   | AA                              | GG              | 1947029517               |
| SNP_P4_172570_23427 | NW_004517183.1 | Scaffold2164 | 23427                   | TT                              | AA              | 1947029519               |
| SNP_P4_172571_23680 | NW_004517183.1 | Scaffold2164 | 23680                   | GG                              | AA              | 1947029521               |
| SNP_P4_172572_29503 | NW_004517183.1 | Scaffold2164 | 29503                   | AA                              | GG              | 1947029523               |
| SNP_P4_172573_38915 | NW_004517183.1 | Scaffold2164 | 38915                   | TT                              | CC              | 1947029525               |
| SNP_P4_172574_38962 | NW_004517183.1 | Scaffold2164 | 38962                   | TT                              | GG              | 1947029527               |
| SNP_P4_172576_59047 | NW_004517183.1 | Scaffold2164 | 59047                   | GG                              | AA              | 1947029529               |
| SNP_P4_172577_62887 | NW_004517183.1 | Scaffold2164 | 62887                   | AA                              | CC              | 1947029531               |
| SNP_P4_172578_63018 | NW_004517183.1 | Scaffold2164 | 63018                   | AA                              | GG              | 1947029533               |
| SNP_P4_172579_65796 | NW_004517183.1 | Scaffold2164 | 65796                   | CC                              | TT              | 1947029535               |
| SNP_P4_172580_66168 | NW_004517183.1 | Scaffold2164 | 66168                   | CC                              | GG              | 1947029537               |
| SNP_P4_172581_70312 | NW_004517183.1 | Scaffold2164 | 70312                   | CC                              | TT              | 1947029539               |
| SNP_P4_172582_71575 | NW_004517183.1 | Scaffold2164 | 71575                   | TT                              | AA              | 1947029541               |
| SNP_P4_172583_71609 | NW_004517183.1 | Scaffold2164 | 71609                   | TT                              | AA              | 1947029543               |
| SNP_P4_172584_71752 | NW_004517183.1 | Scaffold2164 | 71752                   | GG                              | AA              | 1947029545               |
| SNP_P4_172585_80557 | NW_004517183.1 | Scaffold2164 | 80557                   | TT                              | CC              | 1947029547               |
| SNP_P4_172586_90383 | NW_004517183.1 | Scaffold2164 | 90383                   | CC                              | TT              | 1947029549               |
| SNP_P4_172587_90497 | NW_004517183.1 | Scaffold2164 | 90497                   | AA                              | CC              | 1947029551               |
| SNP_P4_172588_90687 | NW_004517183.1 | Scaffold2164 | 90687                   | TT                              | GG              | 1947029553               |
| SNP_P4_172589_90733 | NW_004517183.1 | Scaffold2164 | 90733                   | AA                              | CC              | 1947029555               |
| SNP_P4_172590_770   | NW_004517184.1 | Scaffold2166 | 770                     | TT                              | CC              | 1947029557               |
| SNP_P4_172591_792   | NW_004517184.1 | Scaffold2166 | 792                     | AA                              | GG              | 1947029559               |
| SNP_P4_172592_20014 | NW_004517184.1 | Scaffold2166 | 20014                   | CC                              | TT              | 1947029561               |
| SNP_P4_172593_20017 | NW_004517184.1 | Scaffold2166 | 20017                   | CC                              | AA              | 1947029563               |
| SNP_P4_172594_39729 | NW_004517184.1 | Scaffold2166 | 39729                   | GG                              | AA              | 1947029565               |
| SNP_P4_172595_39743 | NW_004517184.1 | Scaffold2166 | 39743                   | TT                              | CC              | 1947029567               |
| SNP_P4_172598_84519 | NW_004517184.1 | Scaffold2166 | 84519                   | AA                              | CC              | 1947029569               |
| SNP_P4_172599_84520 | NW_004517184.1 | Scaffold2166 | 84520                   | TT                              | AA              | 1947029571               |
| SNP_P4_172600_84554 | NW_004517184.1 | Scaffold2166 | 84554                   | CC                              | TT              | 1947029573               |
| SNP_P4_172601_84555 | NW_004517184.1 | Scaffold2166 | 84555                   | TT                              | CC              | 1947029575               |
| SNP_P4_172602_84556 | NW_004517184.1 | Scaffold2166 | 84556                   | GG                              | AA              | 1947029577               |



| SNPs IDs             | Chromosome IDs | Chromosomes  | Physical positions (bp) | CDC Frontier (Reference genome) | (ILWC46 & LPNB) | NCBI SNPdb Accession IDs |
|----------------------|----------------|--------------|-------------------------|---------------------------------|-----------------|--------------------------|
| SNP_P4_172604_102726 | NW_004517184.1 | Scaffold2166 | 102726                  | AA                              | GG              | 1947029579               |
| SNP_P4_172606_140438 | NW_004517184.1 | Scaffold2166 | 140438                  | CC                              | TT              | 1947029581               |
| SNP_P4_172607_156911 | NW_004517184.1 | Scaffold2166 | 156911                  | GG                              | TT              | 1947029583               |
| SNP_P4_172608_161822 | NW_004517184.1 | Scaffold2166 | 161822                  | TT                              | CC              | 1947029585               |
| SNP_P4_172610_192467 | NW_004517184.1 | Scaffold2166 | 192467                  | TT                              | CC              | 1947029587               |
| SNP_P4_172612_221336 | NW_004517184.1 | Scaffold2166 | 221336                  | CC                              | TT              | 1947029589               |
| SNP_P4_172613_10128  | NW_004517185.1 | Scaffold2168 | 10128                   | AA                              | CC              | 1947029591               |
| SNP_P4_172614_12312  | NW_004517185.1 | Scaffold2168 | 12312                   | CC                              | AA              | 1947029593               |
| SNP_P4_172615_12319  | NW_004517185.1 | Scaffold2168 | 12319                   | CC                              | AA              | 1947029595               |
| SNP_P4_172616_12761  | NW_004517185.1 | Scaffold2168 | 12761                   | AA                              | TT              | 1947029597               |
| SNP_P4_172617_12841  | NW_004517185.1 | Scaffold2168 | 12841                   | CC                              | AA              | 1947029599               |
| SNP_P4_172618_13132  | NW_004517185.1 | Scaffold2168 | 13132                   | AA                              | CC              | 1947029601               |
| SNP_P4_172619_13143  | NW_004517185.1 | Scaffold2168 | 13143                   | AA                              | TT              | 1947029603               |
| SNP_P4_172620_13188  | NW_004517185.1 | Scaffold2168 | 13188                   | GG                              | AA              | 1947029605               |
| SNP_P4_172621_13206  | NW_004517185.1 | Scaffold2168 | 13206                   | AA                              | GG              | 1947029607               |
| SNP_P4_172622_15183  | NW_004517185.1 | Scaffold2168 | 15183                   | AA                              | CC              | 1947029609               |
| SNP_P4_172623_15185  | NW_004517185.1 | Scaffold2168 | 15185                   | GG                              | AA              | 1947029612               |
| SNP_P4_172624_15864  | NW_004517185.1 | Scaffold2168 | 15864                   | CC                              | TT              | 1947029614               |
| SNP_P4_172625_15891  | NW_004517185.1 | Scaffold2168 | 15891                   | CC                              | TT              | 1947029616               |
| SNP_P4_172626_330    | NW_004517186.1 | Scaffold2169 | 330                     | TT                              | AA              | 1947029618               |
| SNP_P4_172627_2727   | NW_004517187.1 | Scaffold2170 | 2727                    | TT                              | CC              | 1947029620               |
| SNP_P4_172628_2919   | NW_004517187.1 | Scaffold2170 | 2919                    | CC                              | GG              | 1947029622               |
| SNP_P4_172629_3185   | NW_004517187.1 | Scaffold2170 | 3185                    | CC                              | TT              | 1947029624               |
| SNP_P4_172630_3187   | NW_004517187.1 | Scaffold2170 | 3187                    | CC                              | TT              | 1947029626               |
| SNP_P4_172631_3249   | NW_004517187.1 | Scaffold2170 | 3249                    | GG                              | AA              | 1947029628               |
| SNP_P4_172632_3307   | NW_004517187.1 | Scaffold2170 | 3307                    | GG                              | AA              | 1947029630               |
| SNP_P4_172633_3349   | NW_004517187.1 | Scaffold2170 | 3349                    | AA                              | GG              | 1947029632               |
| SNP_P4_172634_3512   | NW_004517187.1 | Scaffold2170 | 3512                    | AA                              | GG              | 1947029634               |
| SNP_P4_172635_3579   | NW_004517187.1 | Scaffold2170 | 3579                    | GG                              | AA              | 1947029636               |
| SNP_P4_172636_3817   | NW_004517187.1 | Scaffold2170 | 3817                    | GG                              | AA              | 1947029638               |
| SNP_P4_172637_4279   | NW_004517187.1 | Scaffold2170 | 4279                    | CC                              | GG              | 1947029640               |
| SNP_P4_172638_4498   | NW_004517187.1 | Scaffold2170 | 4498                    | GG                              | AA              | 1947029642               |
| SNP_P4_172639_4672   | NW_004517187.1 | Scaffold2170 | 4672                    | GG                              | CC              | 1947029644               |
| SNP_P4_172640_4761   | NW_004517187.1 | Scaffold2170 | 4761                    | GG                              | AA              | 1947029646               |
| SNP_P4_172641_4821   | NW_004517187.1 | Scaffold2170 | 4821                    | AA                              | GG              | 1947029648               |
| SNP_P4_172644_5536   | NW_004517187.1 | Scaffold2170 | 5536                    | GG                              | TT              | 1947029650               |
| SNP_P4_172645_6265   | NW_004517187.1 | Scaffold2170 | 6265                    | TT                              | CC              | 1947029652               |
| SNP_P4_172646_6409   | NW_004517187.1 | Scaffold2170 | 6409                    | TT                              | GG              | 1947029654               |
| SNP_P4_172647_6558   | NW_004517187.1 | Scaffold2170 | 6558                    | GG                              | AA              | 1947029656               |
| SNP_P4_172648_6593   | NW_004517187.1 | Scaffold2170 | 6593                    | AA                              | GG              | 1947029658               |
| SNP_P4_172649_6597   | NW_004517187.1 | Scaffold2170 | 6597                    | GG                              | CC              | 1947029660               |
| SNP_P4_172650_6599   | NW_004517187.1 | Scaffold2170 | 6599                    | AA                              | GG              | 1947029662               |

| SNPs IDs            | Chromosome IDs | Chromosomes  | Physical positions (bp) | CDC Frontier (Reference genome) | (ILWC46 & LPNB) | NCBI SNPdb Accession IDs |
|---------------------|----------------|--------------|-------------------------|---------------------------------|-----------------|--------------------------|
| SNP_P4_172651_6653  | NW_004517187.1 | Scaffold2170 | 6653                    | AA                              | GG              | 1947029664               |
| SNP_P4_172653_6929  | NW_004517187.1 | Scaffold2170 | 6929                    | AA                              | GG              | 1947029666               |
| SNP_P4_172654_7055  | NW_004517187.1 | Scaffold2170 | 7055                    | GG                              | TT              | 1947029668               |
| SNP_P4_172655_7161  | NW_004517187.1 | Scaffold2170 | 7161                    | AA                              | GG              | 1947029670               |
| SNP_P4_172656_7287  | NW_004517187.1 | Scaffold2170 | 7287                    | AA                              | GG              | 1947029672               |
| SNP_P4_172657_7475  | NW_004517187.1 | Scaffold2170 | 7475                    | CC                              | AA              | 1947029674               |
| SNP_P4_172658_7529  | NW_004517187.1 | Scaffold2170 | 7529                    | CC                              | TT              | 1947029676               |
| SNP_P4_172659_7691  | NW_004517187.1 | Scaffold2170 | 7691                    | CC                              | TT              | 1947029678               |
| SNP_P4_172660_9667  | NW_004517187.1 | Scaffold2170 | 9667                    | TT                              | AA              | 1947029680               |
| SNP_P4_172661_9775  | NW_004517187.1 | Scaffold2170 | 9775                    | TT                              | CC              | 1947029682               |
| SNP_P4_172662_11824 | NW_004517187.1 | Scaffold2170 | 11824                   | CC                              | TT              | 1947029684               |
| SNP_P4_172663_11912 | NW_004517187.1 | Scaffold2170 | 11912                   | CC                              | TT              | 1947029686               |
| SNP_P4_172664_11938 | NW_004517187.1 | Scaffold2170 | 11938                   | TT                              | CC              | 1947029688               |
| SNP_P4_172665_12252 | NW_004517187.1 | Scaffold2170 | 12252                   | CC                              | TT              | 1947029690               |
| SNP_P4_172667_12356 | NW_004517187.1 | Scaffold2170 | 12356                   | AA                              | GG              | 1947029692               |
| SNP_P4_172668_12433 | NW_004517187.1 | Scaffold2170 | 12433                   | CC                              | TT              | 1947029694               |
| SNP_P4_172669_12658 | NW_004517187.1 | Scaffold2170 | 12658                   | TT                              | AA              | 1947029696               |
| SNP_P4_172670_13232 | NW_004517187.1 | Scaffold2170 | 13232                   | AA                              | GG              | 1947029698               |
| SNP_P4_172671_14090 | NW_004517187.1 | Scaffold2170 | 14090                   | CC                              | TT              | 1947029700               |
| SNP_P4_172673_14545 | NW_004517187.1 | Scaffold2170 | 14545                   | GG                              | AA              | 1947029702               |
| SNP_P4_172674_37278 | NW_004517187.1 | Scaffold2170 | 37278                   | TT                              | CC              | 1947029704               |
| SNP_P4_172675_37914 | NW_004517187.1 | Scaffold2170 | 37914                   | CC                              | TT              | 1947029706               |
| SNP_P4_172676_38031 | NW_004517187.1 | Scaffold2170 | 38031                   | CC                              | TT              | 1947029708               |
| SNP_P4_172677_38051 | NW_004517187.1 | Scaffold2170 | 38051                   | TT                              | GG              | 1947029710               |
| SNP_P4_172679_38441 | NW_004517187.1 | Scaffold2170 | 38441                   | CC                              | GG              | 1947029712               |
| SNP_P4_172680_38462 | NW_004517187.1 | Scaffold2170 | 38462                   | TT                              | AA              | 1947029714               |
| SNP_P4_172681_38657 | NW_004517187.1 | Scaffold2170 | 38657                   | CC                              | TT              | 1947029716               |
| SNP_P4_172682_1810  | NW_004517189.1 | Scaffold2173 | 1810                    | CC                              | AA              | 1947029718               |
| SNP_P4_172683_1838  | NW_004517189.1 | Scaffold2173 | 1838                    | TT                              | AA              | 1947029720               |
| SNP_P4_172684_1847  | NW_004517189.1 | Scaffold2173 | 1847                    | GG                              | TT              | 1947029722               |
| SNP_P4_172685_1944  | NW_004517189.1 | Scaffold2173 | 1944                    | AA                              | GG              | 1947029724               |
| SNP_P4_172686_2040  | NW_004517189.1 | Scaffold2173 | 2040                    | GG                              | AA              | 1947029725               |
| SNP_P4_172687_2099  | NW_004517189.1 | Scaffold2173 | 2099                    | CC                              | AA              | 1947029726               |
| SNP_P4_172688_2257  | NW_004517189.1 | Scaffold2173 | 2257                    | AA                              | GG              | 1947029728               |
| SNP_P4_172689_2298  | NW_004517189.1 | Scaffold2173 | 2298                    | CC                              | AA              | 1947029730               |
| SNP_P4_172690_2301  | NW_004517189.1 | Scaffold2173 | 2301                    | GG                              | AA              | 1947029732               |
| SNP_P4_172691_2341  | NW_004517189.1 | Scaffold2173 | 2341                    | TT                              | CC              | 1947029733               |
| SNP_P4_172692_2379  | NW_004517189.1 | Scaffold2173 | 2379                    | AA                              | GG              | 1947029735               |
| SNP_P4_172693_2419  | NW_004517189.1 | Scaffold2173 | 2419                    | CC                              | TT              | 1947029737               |
| SNP_P4_172694_2425  | NW_004517189.1 | Scaffold2173 | 2425                    | TT                              | AA              | 1947029739               |
| SNP_P4_172695_2650  | NW_004517189.1 | Scaffold2173 | 2650                    | TT                              | CC              | 1947029741               |
| SNP_P4_172696_2663  | NW_004517189.1 | Scaffold2173 | 2663                    | TT                              | AA              | 1947029743               |

| SNPs IDs            | Chromosome IDs | Chromosomes  | Physical positions (bp) | CDC Frontier (Reference genome) | (ILWC46 & LPNB) | NCBI SNPdb Accession IDs |
|---------------------|----------------|--------------|-------------------------|---------------------------------|-----------------|--------------------------|
| SNP_P4_172697_2674  | NW_004517189.1 | Scaffold2173 | 2674                    | AA                              | CC              | 1947029745               |
| SNP_P4_172698_6683  | NW_004517189.1 | Scaffold2173 | 6683                    | TT                              | CC              | 1947029747               |
| SNP_P4_172699_6760  | NW_004517189.1 | Scaffold2173 | 6760                    | AA                              | TT              | 1947029749               |
| SNP_P4_172700_6761  | NW_004517189.1 | Scaffold2173 | 6761                    | CC                              | TT              | 1947029751               |
| SNP_P4_172701_6787  | NW_004517189.1 | Scaffold2173 | 6787                    | CC                              | TT              | 1947029753               |
| SNP_P4_172702_6924  | NW_004517189.1 | Scaffold2173 | 6924                    | CC                              | GG              | 1947029755               |
| SNP_P4_172703_6961  | NW_004517189.1 | Scaffold2173 | 6961                    | TT                              | CC              | 1947029757               |
| SNP_P4_172704_6974  | NW_004517189.1 | Scaffold2173 | 6974                    | CC                              | GG              | 1947029759               |
| SNP_P4_172705_7008  | NW_004517189.1 | Scaffold2173 | 7008                    | AA                              | TT              | 1947029761               |
| SNP_P4_172706_7024  | NW_004517189.1 | Scaffold2173 | 7024                    | CC                              | TT              | 1947029762               |
| SNP_P4_172707_7077  | NW_004517189.1 | Scaffold2173 | 7077                    | AA                              | TT              | 1947029764               |
| SNP_P4_172708_7116  | NW_004517189.1 | Scaffold2173 | 7116                    | CC                              | GG              | 1947029766               |
| SNP_P4_172709_7157  | NW_004517189.1 | Scaffold2173 | 7157                    | AA                              | CC              | 1947029768               |
| SNP_P4_172710_7290  | NW_004517189.1 | Scaffold2173 | 7290                    | AA                              | TT              | 1947029770               |
| SNP_P4_172711_7748  | NW_004517189.1 | Scaffold2173 | 7748                    | AA                              | TT              | 1947029772               |
| SNP_P4_172712_10663 | NW_004517189.1 | Scaffold2173 | 10663                   | GG                              | CC              | 1947029774               |
| SNP_P4_172713_10670 | NW_004517189.1 | Scaffold2173 | 10670                   | AA                              | GG              | 1947029776               |
| SNP_P4_172714_10716 | NW_004517189.1 | Scaffold2173 | 10716                   | GG                              | CC              | 1947029778               |
| SNP_P4_172715_10765 | NW_004517189.1 | Scaffold2173 | 10765                   | AA                              | TT              | 1947029780               |
| SNP_P4_172716_11060 | NW_004517189.1 | Scaffold2173 | 11060                   | TT                              | AA              | 1947029782               |
| SNP_P4_172717_11083 | NW_004517189.1 | Scaffold2173 | 11083                   | CC                              | AA              | 1947029784               |
| SNP_P4_172718_11084 | NW_004517189.1 | Scaffold2173 | 11084                   | TT                              | CC              | 1947029786               |
| SNP_P4_172719_15863 | NW_004517189.1 | Scaffold2173 | 15863                   | GG                              | TT              | 1947029788               |
| SNP_P4_172720_15868 | NW_004517189.1 | Scaffold2173 | 15868                   | AA                              | CC              | 1947029790               |
| SNP_P4_172721_15869 | NW_004517189.1 | Scaffold2173 | 15869                   | CC                              | AA              | 1947029791               |
| SNP_P4_172722_15901 | NW_004517189.1 | Scaffold2173 | 15901                   | CC                              | TT              | 1947029793               |
| SNP_P4_172723_15903 | NW_004517189.1 | Scaffold2173 | 15903                   | AA                              | CC              | 1947029795               |
| SNP_P4_172724_16334 | NW_004517189.1 | Scaffold2173 | 16334                   | AA                              | CC              | 1947029797               |
| SNP_P4_172725_18368 | NW_004517189.1 | Scaffold2173 | 18368                   | AA                              | GG              | 1947029799               |
| SNP_P4_172726_18377 | NW_004517189.1 | Scaffold2173 | 18377                   | AA                              | GG              | 1947029801               |
| SNP_P4_172727_18383 | NW_004517189.1 | Scaffold2173 | 18383                   | GG                              | AA              | 1947029803               |
| SNP_P4_172728_18397 | NW_004517189.1 | Scaffold2173 | 18397                   | GG                              | TT              | 1947029805               |
| SNP_P4_172729_18406 | NW_004517189.1 | Scaffold2173 | 18406                   | GG                              | AA              | 1947029807               |
| SNP_P4_172730_18460 | NW_004517189.1 | Scaffold2173 | 18460                   | CC                              | AA              | 1947029809               |
| SNP_P4_172731_18490 | NW_004517189.1 | Scaffold2173 | 18490                   | CC                              | TT              | 1947029811               |
| SNP_P4_172732_18529 | NW_004517189.1 | Scaffold2173 | 18529                   | GG                              | CC              | 1947029813               |
| SNP_P4_172733_18585 | NW_004517189.1 | Scaffold2173 | 18585                   | GG                              | CC              | 1947029815               |
| SNP_P4_172734_18603 | NW_004517189.1 | Scaffold2173 | 18603                   | CC                              | AA              | 1947029817               |
| SNP_P4_172735_18875 | NW_004517189.1 | Scaffold2173 | 18875                   | TT                              | CC              | 1947029819               |
| SNP_P4_172736_18941 | NW_004517189.1 | Scaffold2173 | 18941                   | CC                              | GG              | 1947029821               |
| SNP_P4_172737_18979 | NW_004517189.1 | Scaffold2173 | 18979                   | TT                              | AA              | 1947029823               |
| SNP_P4_172738_18981 | NW_004517189.1 | Scaffold2173 | 18981                   | AA                              | CC              | 1947029825               |

| SNPs IDs            | Chromosome IDs | Chromosomes  | Physical positions (bp) | CDC Frontier (Reference genome) | (ILWC46 & LPNB) | NCBI SNPdb Accession IDs |
|---------------------|----------------|--------------|-------------------------|---------------------------------|-----------------|--------------------------|
| SNP_P4_172739_18998 | NW_004517189.1 | Scaffold2173 | 18998                   | TT                              | GG              | 1947029827               |
| SNP_P4_172740_19014 | NW_004517189.1 | Scaffold2173 | 19014                   | TT                              | AA              | 1947029829               |
| SNP_P4_172741_19044 | NW_004517189.1 | Scaffold2173 | 19044                   | TT                              | AA              | 1947029831               |
| SNP_P4_172742_19045 | NW_004517189.1 | Scaffold2173 | 19045                   | TT                              | AA              | 1947029833               |
| SNP_P4_172743_19046 | NW_004517189.1 | Scaffold2173 | 19046                   | GG                              | TT              | 1947029835               |
| SNP_P4_172744_19047 | NW_004517189.1 | Scaffold2173 | 19047                   | TT                              | GG              | 1947029837               |
| SNP_P4_172745_19048 | NW_004517189.1 | Scaffold2173 | 19048                   | GG                              | AA              | 1947029839               |
| SNP_P4_172746_19051 | NW_004517189.1 | Scaffold2173 | 19051                   | GG                              | AA              | 1947029841               |
| SNP_P4_172747_19112 | NW_004517189.1 | Scaffold2173 | 19112                   | CC                              | GG              | 1947029843               |
| SNP_P4_172748_19130 | NW_004517189.1 | Scaffold2173 | 19130                   | AA                              | GG              | 1947029845               |
| SNP_P4_172749_19254 | NW_004517189.1 | Scaffold2173 | 19254                   | AA                              | GG              | 1947029847               |
| SNP_P4_172750_19273 | NW_004517189.1 | Scaffold2173 | 19273                   | GG                              | CC              | 1947029849               |
| SNP_P4_172751_19284 | NW_004517189.1 | Scaffold2173 | 19284                   | TT                              | CC              | 1947029850               |
| SNP_P4_172752_19597 | NW_004517189.1 | Scaffold2173 | 19597                   | GG                              | CC              | 1947029852               |
| SNP_P4_172754_19633 | NW_004517189.1 | Scaffold2173 | 19633                   | TT                              | AA              | 1947029854               |
| SNP_P4_172755_19731 | NW_004517189.1 | Scaffold2173 | 19731                   | AA                              | GG              | 1947029856               |
| SNP_P4_172756_19749 | NW_004517189.1 | Scaffold2173 | 19749                   | AA                              | TT              | 1947029858               |
| SNP_P4_172757_19754 | NW_004517189.1 | Scaffold2173 | 19754                   | AA                              | TT              | 1947029860               |
| SNP_P4_172758_19763 | NW_004517189.1 | Scaffold2173 | 19763                   | AA                              | GG              | 1947029862               |
| SNP_P4_172759_19816 | NW_004517189.1 | Scaffold2173 | 19816                   | TT                              | AA              | 1947029864               |
| SNP_P4_172760_19817 | NW_004517189.1 | Scaffold2173 | 19817                   | TT                              | GG              | 1947029866               |
| SNP_P4_172762_19918 | NW_004517189.1 | Scaffold2173 | 19918                   | AA                              | GG              | 1947029868               |
| SNP_P4_172763_19947 | NW_004517189.1 | Scaffold2173 | 19947                   | CC                              | TT              | 1947029870               |
| SNP_P4_172764_19953 | NW_004517189.1 | Scaffold2173 | 19953                   | AA                              | CC              | 1947029872               |
| SNP_P4_172765_19990 | NW_004517189.1 | Scaffold2173 | 19990                   | AA                              | GG              | 1947029873               |
| SNP_P4_172766_20246 | NW_004517189.1 | Scaffold2173 | 20246                   | CC                              | AA              | 1947029875               |
| SNP_P4_172767_20272 | NW_004517189.1 | Scaffold2173 | 20272                   | AA                              | GG              | 1947029877               |
| SNP_P4_172768_20293 | NW_004517189.1 | Scaffold2173 | 20293                   | CC                              | AA              | 1947029879               |
| SNP_P4_172769_20325 | NW_004517189.1 | Scaffold2173 | 20325                   | CC                              | TT              | 1947029881               |
| SNP_P4_172770_20416 | NW_004517189.1 | Scaffold2173 | 20416                   | TT                              | GG              | 1947029883               |
| SNP_P4_172771_20454 | NW_004517189.1 | Scaffold2173 | 20454                   | TT                              | GG              | 1947029885               |
| SNP_P4_172772_20455 | NW_004517189.1 | Scaffold2173 | 20455                   | TT                              | AA              | 1947029887               |
| SNP_P4_172773_20456 | NW_004517189.1 | Scaffold2173 | 20456                   | AA                              | CC              | 1947029889               |
| SNP_P4_172774_20461 | NW_004517189.1 | Scaffold2173 | 20461                   | AA                              | TT              | 1947029891               |
| SNP_P4_172775_20468 | NW_004517189.1 | Scaffold2173 | 20468                   | TT                              | AA              | 1947029893               |
| SNP_P4_172776_20496 | NW_004517189.1 | Scaffold2173 | 20496                   | CC                              | GG              | 1947029895               |
| SNP_P4_172777_20562 | NW_004517189.1 | Scaffold2173 | 20562                   | GG                              | AA              | 1947029897               |
| SNP_P4_172778_20575 | NW_004517189.1 | Scaffold2173 | 20575                   | TT                              | AA              | 1947029899               |
| SNP_P4_172779_20584 | NW_004517189.1 | Scaffold2173 | 20584                   | TT                              | CC              | 1947029901               |
| SNP_P4_172780_20586 | NW_004517189.1 | Scaffold2173 | 20586                   | CC                              | GG              | 1947029903               |
| SNP_P4_172781_20597 | NW_004517189.1 | Scaffold2173 | 20597                   | TT                              | AA              | 1947029905               |
| SNP_P4_172782_20675 | NW_004517189.1 | Scaffold2173 | 20675                   | AA                              | GG              | 1947029907               |

| SNPs IDs            | Chromosome IDs | Chromosomes  | Physical positions (bp) | CDC Frontier (Reference genome) | (ILWC46 & LPNB) | NCBI SNPdb Accession IDs |
|---------------------|----------------|--------------|-------------------------|---------------------------------|-----------------|--------------------------|
| SNP_P4_172783_20760 | NW_004517189.1 | Scaffold2173 | 20760                   | GG                              | TT              | 1947029909               |
| SNP_P4_172784_20823 | NW_004517189.1 | Scaffold2173 | 20823                   | CC                              | GG              | 1947029911               |
| SNP_P4_172785_20841 | NW_004517189.1 | Scaffold2173 | 20841                   | CC                              | GG              | 1947029913               |
| SNP_P4_172786_20846 | NW_004517189.1 | Scaffold2173 | 20846                   | AA                              | GG              | 1947029915               |
| SNP_P4_172787_21006 | NW_004517189.1 | Scaffold2173 | 21006                   | AA                              | GG              | 1947029917               |
| SNP_P4_172788_23748 | NW_004517189.1 | Scaffold2173 | 23748                   | AA                              | CC              | 1947029918               |
| SNP_P4_172789_52036 | NW_004517189.1 | Scaffold2173 | 52036                   | TT                              | CC              | 1947029920               |
| SNP_P4_172790_54816 | NW_004517189.1 | Scaffold2173 | 54816                   | GG                              | TT              | 1947029922               |
| SNP_P4_172791_54862 | NW_004517189.1 | Scaffold2173 | 54862                   | TT                              | CC              | 1947029924               |
| SNP_P4_172792_55230 | NW_004517189.1 | Scaffold2173 | 55230                   | TT                              | CC              | 1947029926               |
| SNP_P4_172793_55343 | NW_004517189.1 | Scaffold2173 | 55343                   | AA                              | CC              | 1947029928               |
| SNP_P4_172794_55375 | NW_004517189.1 | Scaffold2173 | 55375                   | AA                              | TT              | 1947029930               |
| SNP_P4_172795_55984 | NW_004517189.1 | Scaffold2173 | 55984                   | GG                              | TT              | 1947029932               |
| SNP_P4_172796_56189 | NW_004517189.1 | Scaffold2173 | 56189                   | AA                              | GG              | 1947029934               |
| SNP_P4_172798_56289 | NW_004517189.1 | Scaffold2173 | 56289                   | AA                              | GG              | 1947029936               |
| SNP_P4_172799_56428 | NW_004517189.1 | Scaffold2173 | 56428                   | GG                              | TT              | 1947029938               |
| SNP_P4_172800_56504 | NW_004517189.1 | Scaffold2173 | 56504                   | GG                              | TT              | 1947029940               |
| SNP_P4_172802_70492 | NW_004517189.1 | Scaffold2173 | 70492                   | AA                              | GG              | 1947029942               |
| SNP_P4_172803_70495 | NW_004517189.1 | Scaffold2173 | 70495                   | CC                              | GG              | 1947029944               |
| SNP_P4_172804_80353 | NW_004517189.1 | Scaffold2173 | 80353                   | AA                              | GG              | 1947029946               |
| SNP_P4_172805_84614 | NW_004517189.1 | Scaffold2173 | 84614                   | TT                              | CC              | 1947029948               |
| SNP_P4_172806_87074 | NW_004517189.1 | Scaffold2173 | 87074                   | TT                              | CC              | 1947029950               |
| SNP_P4_172807_88660 | NW_004517189.1 | Scaffold2173 | 88660                   | GG                              | CC              | 1947029952               |
| SNP_P4_172808_89272 | NW_004517189.1 | Scaffold2173 | 89272                   | AA                              | CC              | 1947029954               |
| SNP_P4_172809_90491 | NW_004517189.1 | Scaffold2173 | 90491                   | TT                              | CC              | 1947029956               |
| SNP_P4_172810_90492 | NW_004517189.1 | Scaffold2173 | 90492                   | GG                              | AA              | 1947029958               |
| SNP_P4_172811_90493 | NW_004517189.1 | Scaffold2173 | 90493                   | AA                              | CC              | 1947029960               |
| SNP_P4_172812_90496 | NW_004517189.1 | Scaffold2173 | 90496                   | TT                              | CC              | 1947029962               |
| SNP_P4_172813_90502 | NW_004517189.1 | Scaffold2173 | 90502                   | TT                              | GG              | 1947029964               |
| SNP_P4_172814_90538 | NW_004517189.1 | Scaffold2173 | 90538                   | AA                              | GG              | 1947029966               |
| SNP_P4_172815_1177  | NW_004517190.1 | Scaffold2174 | 1177                    | AA                              | CC              | 1947029968               |
| SNP_P4_172816_6352  | NW_004517192.1 | Scaffold2176 | 6352                    | AA                              | TT              | 1947029970               |
| SNP_P4_172817_6564  | NW_004517192.1 | Scaffold2176 | 6564                    | TT                              | GG              | 1947029971               |
| SNP_P4_172818_6690  | NW_004517192.1 | Scaffold2176 | 6690                    | CC                              | GG              | 1947029973               |
| SNP_P4_172819_6715  | NW_004517192.1 | Scaffold2176 | 6715                    | CC                              | GG              | 1947029975               |
| SNP_P4_172820_6760  | NW_004517192.1 | Scaffold2176 | 6760                    | GG                              | TT              | 1947029977               |
| SNP_P4_172821_9047  | NW_004517192.1 | Scaffold2176 | 9047                    | GG                              | TT              | 1947029979               |
| SNP_P4_172822_10440 | NW_004517192.1 | Scaffold2176 | 10440                   | CC                              | TT              | 1947029981               |
| SNP_P4_172823_10688 | NW_004517192.1 | Scaffold2176 | 10688                   | GG                              | TT              | 1947029983               |
| SNP_P4_172824_10723 | NW_004517192.1 | Scaffold2176 | 10723                   | TT                              | CC              | 1947029985               |
| SNP_P4_172825_18301 | NW_004517192.1 | Scaffold2176 | 18301                   | GG                              | AA              | 1947029987               |
| SNP_P4_172826_18485 | NW_004517192.1 | Scaffold2176 | 18485                   | GG                              | AA              | 1947029989               |

| SNPs IDs            | Chromosome IDs | Chromosomes  | Physical positions (bp) | CDC Frontier (Reference genome) | (ILWC46 & LPNB) | NCBI SNPdb Accession IDs |
|---------------------|----------------|--------------|-------------------------|---------------------------------|-----------------|--------------------------|
| SNP_P4_172827_18846 | NW_004517192.1 | Scaffold2176 | 18846                   | GG                              | TT              | 1947029991               |
| SNP_P4_172828_23855 | NW_004517192.1 | Scaffold2176 | 23855                   | CC                              | AA              | 1947029993               |
| SNP_P4_172829_24413 | NW_004517192.1 | Scaffold2176 | 24413                   | TT                              | CC              | 1947029995               |
| SNP_P4_172830_24724 | NW_004517192.1 | Scaffold2176 | 24724                   | TT                              | AA              | 1947029997               |
| SNP_P4_172831_24758 | NW_004517192.1 | Scaffold2176 | 24758                   | GG                              | AA              | 1947029999               |
| SNP_P4_172832_24767 | NW_004517192.1 | Scaffold2176 | 24767                   | AA                              | GG              | 1947030001               |
| SNP_P4_172833_26447 | NW_004517192.1 | Scaffold2176 | 26447                   | GG                              | TT              | 1947030003               |
| SNP_P4_172834_26556 | NW_004517192.1 | Scaffold2176 | 26556                   | AA                              | CC              | 1947030005               |
| SNP_P4_172835_26865 | NW_004517192.1 | Scaffold2176 | 26865                   | CC                              | TT              | 1947030007               |
| SNP_P4_172836_27408 | NW_004517192.1 | Scaffold2176 | 27408                   | CC                              | AA              | 1947030009               |
| SNP_P4_172837_28942 | NW_004517192.1 | Scaffold2176 | 28942                   | CC                              | AA              | 1947030011               |
| SNP_P4_172838_29076 | NW_004517192.1 | Scaffold2176 | 29076                   | GG                              | AA              | 1947030013               |
| SNP_P4_172839_31378 | NW_004517192.1 | Scaffold2176 | 31378                   | AA                              | TT              | 1947030015               |
| SNP_P4_172840_31810 | NW_004517192.1 | Scaffold2176 | 31810                   | CC                              | GG              | 1947030017               |
| SNP_P4_172841_1911  | NW_004517193.1 | Scaffold2177 | 1911                    | TT                              | CC              | 1947030019               |
| SNP_P4_172842_1920  | NW_004517193.1 | Scaffold2177 | 1920                    | CC                              | TT              | 1947030021               |
| SNP_P4_172843_1994  | NW_004517193.1 | Scaffold2177 | 1994                    | TT                              | CC              | 1947030023               |
| SNP_P4_172844_2015  | NW_004517193.1 | Scaffold2177 | 2015                    | CC                              | AA              | 1947030025               |
| SNP_P4_172845_2034  | NW_004517193.1 | Scaffold2177 | 2034                    | TT                              | AA              | 1947030026               |
| SNP_P4_172846_2055  | NW_004517193.1 | Scaffold2177 | 2055                    | TT                              | AA              | 1947030028               |
| SNP_P4_172847_2199  | NW_004517193.1 | Scaffold2177 | 2199                    | GG                              | AA              | 1947030030               |
| SNP_P4_172848_2235  | NW_004517193.1 | Scaffold2177 | 2235                    | AA                              | GG              | 1947030032               |
| SNP_P4_172849_2242  | NW_004517193.1 | Scaffold2177 | 2242                    | TT                              | CC              | 1947030034               |
| SNP_P4_172850_2476  | NW_004517193.1 | Scaffold2177 | 2476                    | TT                              | CC              | 1947030036               |
| SNP_P4_172851_2789  | NW_004517193.1 | Scaffold2177 | 2789                    | CC                              | TT              | 1947030038               |
| SNP_P4_172852_2874  | NW_004517193.1 | Scaffold2177 | 2874                    | TT                              | AA              | 1947030040               |
| SNP_P4_172853_2880  | NW_004517193.1 | Scaffold2177 | 2880                    | AA                              | GG              | 1947030042               |
| SNP_P4_172854_6350  | NW_004517193.1 | Scaffold2177 | 6350                    | AA                              | GG              | 1947030044               |
| SNP_P4_172855_6374  | NW_004517193.1 | Scaffold2177 | 6374                    | AA                              | TT              | 1947030046               |
| SNP_P4_172856_10302 | NW_004517193.1 | Scaffold2177 | 10302                   | TT                              | GG              | 1947030048               |
| SNP_P4_172857_10867 | NW_004517193.1 | Scaffold2177 | 10867                   | GG                              | AA              | 1947030050               |
| SNP_P4_172858_79    | NW_004517195.1 | Scaffold2179 | 79                      | TT                              | CC              | 1947030052               |
| SNP_P4_172859_113   | NW_004517195.1 | Scaffold2179 | 113                     | AA                              | TT              | 1947030054               |
| SNP_P4_172860_121   | NW_004517195.1 | Scaffold2179 | 121                     | GG                              | AA              | 1947030056               |
| SNP_P4_172861_134   | NW_004517195.1 | Scaffold2179 | 134                     | TT                              | CC              | 1947030058               |
| SNP_P4_172863_463   | NW_004517195.1 | Scaffold2179 | 463                     | AA                              | GG              | 1947030060               |
| SNP_P4_172864_465   | NW_004517195.1 | Scaffold2179 | 465                     | TT                              | CC              | 1947030062               |
| SNP_P4_172865_513   | NW_004517195.1 | Scaffold2179 | 513                     | CC                              | TT              | 1947030064               |
| SNP_P4_172868_24503 | NW_004517195.1 | Scaffold2179 | 24503                   | TT                              | AA              | 1947030066               |
| SNP_P4_172869_24530 | NW_004517195.1 | Scaffold2179 | 24530                   | CC                              | TT              | 1947030068               |
| SNP_P4_172870_24584 | NW_004517195.1 | Scaffold2179 | 24584                   | TT                              | CC              | 1947030069               |
| SNP_P4_172871_24917 | NW_004517195.1 | Scaffold2179 | 24917                   | AA                              | GG              | 1947030071               |

| SNPs IDs            | Chromosome IDs | Chromosomes  | Physical positions (bp) | CDC Frontier (Reference genome) | (ILWC46 & LPNB) | NCBI SNPdb Accession IDs |
|---------------------|----------------|--------------|-------------------------|---------------------------------|-----------------|--------------------------|
| SNP_P4_172872_24943 | NW_004517195.1 | Scaffold2179 | 24943                   | CC                              | TT              | 1947030073               |
| SNP_P4_172873_26252 | NW_004517195.1 | Scaffold2179 | 26252                   | AA                              | GG              | 1947030075               |
| SNP_P4_172874_26270 | NW_004517195.1 | Scaffold2179 | 26270                   | AA                              | GG              | 1947030077               |
| SNP_P4_172875_26273 | NW_004517195.1 | Scaffold2179 | 26273                   | AA                              | GG              | 1947030079               |
| SNP_P4_172876_26303 | NW_004517195.1 | Scaffold2179 | 26303                   | AA                              | GG              | 1947030081               |
| SNP_P4_172877_28128 | NW_004517195.1 | Scaffold2179 | 28128                   | TT                              | GG              | 1947030083               |
| SNP_P4_172879_34990 | NW_004517195.1 | Scaffold2179 | 34990                   | CC                              | GG              | 1947030085               |
| SNP_P4_172880_35517 | NW_004517195.1 | Scaffold2179 | 35517                   | TT                              | CC              | 1947030087               |
| SNP_P4_172881_35703 | NW_004517195.1 | Scaffold2179 | 35703                   | AA                              | TT              | 1947030089               |
| SNP_P4_172882_35730 | NW_004517195.1 | Scaffold2179 | 35730                   | AA                              | GG              | 1947030091               |
| SNP_P4_172883_35747 | NW_004517195.1 | Scaffold2179 | 35747                   | TT                              | CC              | 1947030093               |
| SNP_P4_172884_35893 | NW_004517195.1 | Scaffold2179 | 35893                   | AA                              | GG              | 1947030095               |
| SNP_P4_172887_36022 | NW_004517195.1 | Scaffold2179 | 36022                   | GG                              | AA              | 1947030097               |
| SNP_P4_172888_36034 | NW_004517195.1 | Scaffold2179 | 36034                   | TT                              | CC              | 1947030099               |
| SNP_P4_172889_36044 | NW_004517195.1 | Scaffold2179 | 36044                   | AA                              | GG              | 1947030101               |
| SNP_P4_172891_36100 | NW_004517195.1 | Scaffold2179 | 36100                   | GG                              | AA              | 1947030103               |
| SNP_P4_172892_36166 | NW_004517195.1 | Scaffold2179 | 36166                   | AA                              | GG              | 1947030105               |
| SNP_P4_172893_36177 | NW_004517195.1 | Scaffold2179 | 36177                   | AA                              | GG              | 1947030107               |
| SNP_P4_172894_36182 | NW_004517195.1 | Scaffold2179 | 36182                   | CC                              | GG              | 1947030109               |
| SNP_P4_172895_36337 | NW_004517195.1 | Scaffold2179 | 36337                   | AA                              | GG              | 1947030111               |
| SNP_P4_172896_36362 | NW_004517195.1 | Scaffold2179 | 36362                   | AA                              | GG              | 1947030113               |
| SNP_P4_172897_36371 | NW_004517195.1 | Scaffold2179 | 36371                   | AA                              | GG              | 1947030115               |
| SNP_P4_172898_36392 | NW_004517195.1 | Scaffold2179 | 36392                   | CC                              | TT              | 1947030116               |
| SNP_P4_172899_36466 | NW_004517195.1 | Scaffold2179 | 36466                   | CC                              | TT              | 1947030118               |
| SNP_P4_172900_36475 | NW_004517195.1 | Scaffold2179 | 36475                   | TT                              | CC              | 1947030120               |
| SNP_P4_172901_36517 | NW_004517195.1 | Scaffold2179 | 36517                   | TT                              | CC              | 1947030122               |
| SNP_P4_172902_38323 | NW_004517195.1 | Scaffold2179 | 38323                   | TT                              | CC              | 1947030124               |
| SNP_P4_172903_57189 | NW_004517195.1 | Scaffold2179 | 57189                   | TT                              | CC              | 1947030126               |
| SNP_P4_172904_57265 | NW_004517195.1 | Scaffold2179 | 57265                   | TT                              | CC              | 1947030128               |
| SNP_P4_172905_57269 | NW_004517195.1 | Scaffold2179 | 57269                   | CC                              | TT              | 1947030130               |
| SNP_P4_172906_57283 | NW_004517195.1 | Scaffold2179 | 57283                   | TT                              | AA              | 1947030131               |
| SNP_P4_172907_57300 | NW_004517195.1 | Scaffold2179 | 57300                   | GG                              | AA              | 1947030133               |
| SNP_P4_172908_58579 | NW_004517195.1 | Scaffold2179 | 58579                   | AA                              | GG              | 1947030135               |
| SNP_P4_172909_58584 | NW_004517195.1 | Scaffold2179 | 58584                   | CC                              | TT              | 1947030137               |
| SNP_P4_172910_58672 | NW_004517195.1 | Scaffold2179 | 58672                   | GG                              | TT              | 1947030139               |
| SNP_P4_172911_60789 | NW_004517195.1 | Scaffold2179 | 60789                   | GG                              | AA              | 1947030141               |
| SNP_P4_172912_67071 | NW_004517195.1 | Scaffold2179 | 67071                   | AA                              | CC              | 1947030143               |
| SNP_P4_172914_82068 | NW_004517195.1 | Scaffold2179 | 82068                   | AA                              | GG              | 1947030145               |
| SNP_P4_172915_82366 | NW_004517195.1 | Scaffold2179 | 82366                   | TT                              | CC              | 1947030147               |
| SNP_P4_172916_82379 | NW_004517195.1 | Scaffold2179 | 82379                   | AA                              | CC              | 1947030149               |
| SNP_P4_172917_82387 | NW_004517195.1 | Scaffold2179 | 82387                   | AA                              | CC              | 1947030151               |
| SNP_P4_172918_94891 | NW_004517195.1 | Scaffold2179 | 94891                   | TT                              | CC              | 1947030153               |

| SNPs IDs            | Chromosome IDs | Chromosomes  | Physical positions (bp) | CDC Frontier (Reference genome) | (ILWC46 & LPNB) | NCBI SNPdb Accession IDs |
|---------------------|----------------|--------------|-------------------------|---------------------------------|-----------------|--------------------------|
| SNP_P4_172919_253   | NW_004517196.1 | Scaffold2180 | 253                     | GG                              | TT              | 1947030155               |
| SNP_P4_172920_164   | NW_004517199.1 | Scaffold2183 | 164                     | GG                              | AA              | 1947030157               |
| SNP_P4_172921_173   | NW_004517199.1 | Scaffold2183 | 173                     | CC                              | TT              | 1947030159               |
| SNP_P4_172922_378   | NW_004517199.1 | Scaffold2183 | 378                     | TT                              | GG              | 1947030160               |
| SNP_P4_172923_623   | NW_004517199.1 | Scaffold2183 | 623                     | AA                              | CC              | 1947030162               |
| SNP_P4_172924_650   | NW_004517199.1 | Scaffold2183 | 650                     | AA                              | GG              | 1947030164               |
| SNP_P4_172925_672   | NW_004517199.1 | Scaffold2183 | 672                     | TT                              | CC              | 1947030166               |
| SNP_P4_172926_830   | NW_004517199.1 | Scaffold2183 | 830                     | TT                              | AA              | 1947030168               |
| SNP_P4_172927_832   | NW_004517199.1 | Scaffold2183 | 832                     | TT                              | AA              | 1947030170               |
| SNP_P4_172928_4171  | NW_004517199.1 | Scaffold2183 | 4171                    | AA                              | CC              | 1947030172               |
| SNP_P4_172930_4463  | NW_004517199.1 | Scaffold2183 | 4463                    | TT                              | CC              | 1947030174               |
| SNP_P4_172931_4499  | NW_004517199.1 | Scaffold2183 | 4499                    | TT                              | CC              | 1947030176               |
| SNP_P4_172932_4590  | NW_004517199.1 | Scaffold2183 | 4590                    | TT                              | CC              | 1947030178               |
| SNP_P4_172933_5550  | NW_004517199.1 | Scaffold2183 | 5550                    | CC                              | TT              | 1947030179               |
| SNP_P4_172934_5565  | NW_004517199.1 | Scaffold2183 | 5565                    | AA                              | GG              | 1947030181               |
| SNP_P4_172935_6088  | NW_004517199.1 | Scaffold2183 | 6088                    | CC                              | GG              | 1947030183               |
| SNP_P4_172936_6099  | NW_004517199.1 | Scaffold2183 | 6099                    | AA                              | CC              | 1947030185               |
| SNP_P4_172937_6268  | NW_004517199.1 | Scaffold2183 | 6268                    | TT                              | CC              | 1947030187               |
| SNP_P4_172938_6297  | NW_004517199.1 | Scaffold2183 | 6297                    | TT                              | CC              | 1947030189               |
| SNP_P4_172939_6478  | NW_004517199.1 | Scaffold2183 | 6478                    | CC                              | AA              | 1947030191               |
| SNP_P4_172940_6491  | NW_004517199.1 | Scaffold2183 | 6491                    | GG                              | AA              | 1947030193               |
| SNP_P4_172941_7213  | NW_004517199.1 | Scaffold2183 | 7213                    | TT                              | CC              | 1947030195               |
| SNP_P4_172942_12310 | NW_004517199.1 | Scaffold2183 | 12310                   | GG                              | TT              | 1947030197               |
| SNP_P4_172943_12360 | NW_004517199.1 | Scaffold2183 | 12360                   | TT                              | AA              | 1947030199               |
| SNP_P4_172944_14861 | NW_004517199.1 | Scaffold2183 | 14861                   | TT                              | AA              | 1947030201               |
| SNP_P4_172945_14964 | NW_004517199.1 | Scaffold2183 | 14964                   | TT                              | GG              | 1947030203               |
| SNP_P4_172946_15087 | NW_004517199.1 | Scaffold2183 | 15087                   | GG                              | TT              | 1947030205               |
| SNP_P4_172947_16796 | NW_004517199.1 | Scaffold2183 | 16796                   | GG                              | AA              | 1947030207               |
| SNP_P4_172948_16870 | NW_004517199.1 | Scaffold2183 | 16870                   | TT                              | CC              | 1947030208               |
| SNP_P4_172950_18363 | NW_004517199.1 | Scaffold2183 | 18363                   | CC                              | TT              | 1947030210               |
| SNP_P4_172951_18989 | NW_004517199.1 | Scaffold2183 | 18989                   | GG                              | AA              | 1947030213               |
| SNP_P4_172952_19123 | NW_004517199.1 | Scaffold2183 | 19123                   | AA                              | CC              | 1947030215               |
| SNP_P4_172953_19156 | NW_004517199.1 | Scaffold2183 | 19156                   | GG                              | CC              | 1947030217               |
| SNP_P4_172954_19166 | NW_004517199.1 | Scaffold2183 | 19166                   | AA                              | GG              | 1947030219               |
| SNP_P4_172955_19201 | NW_004517199.1 | Scaffold2183 | 19201                   | CC                              | TT              | 1947030221               |
| SNP_P4_172956_19354 | NW_004517199.1 | Scaffold2183 | 19354                   | CC                              | GG              | 1947030222               |
| SNP_P4_172957_19358 | NW_004517199.1 | Scaffold2183 | 19358                   | AA                              | GG              | 1947030224               |
| SNP_P4_172958_19473 | NW_004517199.1 | Scaffold2183 | 19473                   | TT                              | CC              | 1947030226               |
| SNP_P4_172959_19500 | NW_004517199.1 | Scaffold2183 | 19500                   | TT                              | AA              | 1947030228               |
| SNP_P4_172960_19526 | NW_004517199.1 | Scaffold2183 | 19526                   | AA                              | TT              | 1947030230               |
| SNP_P4_172961_19625 | NW_004517199.1 | Scaffold2183 | 19625                   | GG                              | TT              | 1947030232               |
| SNP_P4_172962_19740 | NW_004517199.1 | Scaffold2183 | 19740                   | AA                              | CC              | 1947030234               |



| SNPs IDs            | Chromosome IDs | Chromosomes  | Physical positions (bp) | CDC Frontier (Reference genome) | (ILWC46 & LPNB) | NCBI SNPdb Accession IDs |
|---------------------|----------------|--------------|-------------------------|---------------------------------|-----------------|--------------------------|
| SNP_P4_172963_19741 | NW_004517199.1 | Scaffold2183 | 19741                   | TT                              | AA              | 1947030236               |
| SNP_P4_172964_19774 | NW_004517199.1 | Scaffold2183 | 19774                   | GG                              | AA              | 1947030238               |
| SNP_P4_172965_19871 | NW_004517199.1 | Scaffold2183 | 19871                   | TT                              | AA              | 1947030240               |
| SNP_P4_172967_19972 | NW_004517199.1 | Scaffold2183 | 19972                   | GG                              | AA              | 1947030242               |
| SNP_P4_172968_19977 | NW_004517199.1 | Scaffold2183 | 19977                   | CC                              | TT              | 1947030244               |
| SNP_P4_172969_20103 | NW_004517199.1 | Scaffold2183 | 20103                   | CC                              | TT              | 1947030246               |
| SNP_P4_172970_20164 | NW_004517199.1 | Scaffold2183 | 20164                   | AA                              | GG              | 1947030248               |
| SNP_P4_172971_20167 | NW_004517199.1 | Scaffold2183 | 20167                   | GG                              | AA              | 1947030250               |
| SNP_P4_172972_20170 | NW_004517199.1 | Scaffold2183 | 20170                   | AA                              | CC              | 1947030252               |
| SNP_P4_172973_20178 | NW_004517199.1 | Scaffold2183 | 20178                   | CC                              | TT              | 1947030254               |
| SNP_P4_172974_20406 | NW_004517199.1 | Scaffold2183 | 20406                   | AA                              | TT              | 1947030256               |
| SNP_P4_172975_23730 | NW_004517199.1 | Scaffold2183 | 23730                   | AA                              | CC              | 1947030258               |
| SNP_P4_172976_23757 | NW_004517199.1 | Scaffold2183 | 23757                   | TT                              | CC              | 1947030260               |
| SNP_P4_172977_23760 | NW_004517199.1 | Scaffold2183 | 23760                   | TT                              | AA              | 1947030262               |
| SNP_P4_172978_23907 | NW_004517199.1 | Scaffold2183 | 23907                   | GG                              | TT              | 1947030264               |
| SNP_P4_172979_24072 | NW_004517199.1 | Scaffold2183 | 24072                   | GG                              | TT              | 1947030266               |
| SNP_P4_172980_24253 | NW_004517199.1 | Scaffold2183 | 24253                   | AA                              | GG              | 1947030268               |
| SNP_P4_172981_27464 | NW_004517199.1 | Scaffold2183 | 27464                   | TT                              | CC              | 1947030270               |
| SNP_P4_172982_27852 | NW_004517199.1 | Scaffold2183 | 27852                   | GG                              | AA              | 1947030272               |
| SNP_P4_172983_28436 | NW_004517199.1 | Scaffold2183 | 28436                   | AA                              | CC              | 1947030273               |
| SNP_P4_172984_28476 | NW_004517199.1 | Scaffold2183 | 28476                   | TT                              | CC              | 1947030274               |
| SNP_P4_172985_28514 | NW_004517199.1 | Scaffold2183 | 28514                   | TT                              | AA              | 1947030275               |
| SNP_P4_172987_30195 | NW_004517199.1 | Scaffold2183 | 30195                   | CC                              | TT              | 1947030276               |
| SNP_P4_172988_31807 | NW_004517199.1 | Scaffold2183 | 31807                   | TT                              | AA              | 1947030277               |
| SNP_P4_172989_31972 | NW_004517199.1 | Scaffold2183 | 31972                   | GG                              | AA              | 1947030279               |
| SNP_P4_172990_32034 | NW_004517199.1 | Scaffold2183 | 32034                   | AA                              | TT              | 1947030281               |
| SNP_P4_172991_32090 | NW_004517199.1 | Scaffold2183 | 32090                   | GG                              | AA              | 1947030283               |
| SNP_P4_172992_32740 | NW_004517199.1 | Scaffold2183 | 32740                   | AA                              | TT              | 1947030285               |
| SNP_P4_172993_32748 | NW_004517199.1 | Scaffold2183 | 32748                   | TT                              | CC              | 1947030287               |
| SNP_P4_172994_32754 | NW_004517199.1 | Scaffold2183 | 32754                   | GG                              | AA              | 1947030289               |
| SNP_P4_172995_32935 | NW_004517199.1 | Scaffold2183 | 32935                   | TT                              | CC              | 1947030291               |
| SNP_P4_172996_33266 | NW_004517199.1 | Scaffold2183 | 33266                   | CC                              | AA              | 1947030293               |
| SNP_P4_172997_33457 | NW_004517199.1 | Scaffold2183 | 33457                   | AA                              | GG              | 1947030295               |
| SNP_P4_172998_33873 | NW_004517199.1 | Scaffold2183 | 33873                   | GG                              | TT              | 1947030297               |
| SNP_P4_172999_33888 | NW_004517199.1 | Scaffold2183 | 33888                   | CC                              | GG              | 1947030299               |
| SNP_P4_173000_33909 | NW_004517199.1 | Scaffold2183 | 33909                   | GG                              | TT              | 1947030300               |
| SNP_P4_173001_38226 | NW_004517199.1 | Scaffold2183 | 38226                   | GG                              | AA              | 1947030302               |
| SNP_P4_173002_39057 | NW_004517199.1 | Scaffold2183 | 39057                   | GG                              | AA              | 1947030304               |
| SNP_P4_173003_39186 | NW_004517199.1 | Scaffold2183 | 39186                   | GG                              | AA              | 1947030306               |
| SNP_P4_173004_39407 | NW_004517199.1 | Scaffold2183 | 39407                   | AA                              | CC              | 1947030308               |
| SNP_P4_173005_40099 | NW_004517199.1 | Scaffold2183 | 40099                   | GG                              | TT              | 1947030310               |
| SNP_P4_173006_40680 | NW_004517199.1 | Scaffold2183 | 40680                   | TT                              | CC              | 1947030312               |

| SNPs IDs            | Chromosome IDs | Chromosomes  | Physical positions (bp) | CDC Frontier (Reference genome) | (ILWC46 & LPNB) | NCBI SNPdb Accession IDs |
|---------------------|----------------|--------------|-------------------------|---------------------------------|-----------------|--------------------------|
| SNP_P4_173007_40993 | NW_004517199.1 | Scaffold2183 | 40993                   | GG                              | AA              | 1947030314               |
| SNP_P4_173008_41021 | NW_004517199.1 | Scaffold2183 | 41021                   | GG                              | TT              | 1947030316               |
| SNP_P4_173009_41057 | NW_004517199.1 | Scaffold2183 | 41057                   | TT                              | AA              | 1947030318               |
| SNP_P4_173010_41107 | NW_004517199.1 | Scaffold2183 | 41107                   | CC                              | TT              | 1947030320               |
| SNP_P4_173011_41109 | NW_004517199.1 | Scaffold2183 | 41109                   | TT                              | CC              | 1947030322               |
| SNP_P4_173012_41115 | NW_004517199.1 | Scaffold2183 | 41115                   | AA                              | TT              | 1947030324               |
| SNP_P4_173013_41504 | NW_004517199.1 | Scaffold2183 | 41504                   | AA                              | GG              | 1947030326               |
| SNP_P4_173014_41510 | NW_004517199.1 | Scaffold2183 | 41510                   | GG                              | TT              | 1947030328               |
| SNP_P4_173015_41652 | NW_004517199.1 | Scaffold2183 | 41652                   | CC                              | TT              | 1947030330               |
| SNP_P4_173016_43089 | NW_004517199.1 | Scaffold2183 | 43089                   | CC                              | GG              | 1947030332               |
| SNP_P4_173017_44114 | NW_004517199.1 | Scaffold2183 | 44114                   | TT                              | CC              | 1947030333               |
| SNP_P4_173018_44178 | NW_004517199.1 | Scaffold2183 | 44178                   | CC                              | TT              | 1947030335               |
| SNP_P4_173019_44515 | NW_004517199.1 | Scaffold2183 | 44515                   | CC                              | TT              | 1947030337               |
| SNP_P4_173020_44725 | NW_004517199.1 | Scaffold2183 | 44725                   | GG                              | AA              | 1947030339               |
| SNP_P4_173021_44837 | NW_004517199.1 | Scaffold2183 | 44837                   | TT                              | CC              | 1947030341               |
| SNP_P4_173022_46459 | NW_004517199.1 | Scaffold2183 | 46459                   | TT                              | GG              | 1947030343               |
| SNP_P4_173023_46503 | NW_004517199.1 | Scaffold2183 | 46503                   | CC                              | TT              | 1947030345               |
| SNP_P4_173024_46507 | NW_004517199.1 | Scaffold2183 | 46507                   | CC                              | TT              | 1947030347               |
| SNP_P4_173025_46570 | NW_004517199.1 | Scaffold2183 | 46570                   | TT                              | CC              | 1947030349               |
| SNP_P4_173026_46816 | NW_004517199.1 | Scaffold2183 | 46816                   | GG                              | AA              | 1947030351               |
| SNP_P4_173027_47006 | NW_004517199.1 | Scaffold2183 | 47006                   | AA                              | TT              | 1947030353               |
| SNP_P4_173028_47580 | NW_004517199.1 | Scaffold2183 | 47580                   | CC                              | AA              | 1947030355               |
| SNP_P4_173029_47622 | NW_004517199.1 | Scaffold2183 | 47622                   | CC                              | TT              | 1947030357               |
| SNP_P4_173030_47671 | NW_004517199.1 | Scaffold2183 | 47671                   | AA                              | GG              | 1947030359               |
| SNP_P4_173031_47906 | NW_004517199.1 | Scaffold2183 | 47906                   | CC                              | TT              | 1947030361               |
| SNP_P4_173032_48092 | NW_004517199.1 | Scaffold2183 | 48092                   | AA                              | GG              | 1947030363               |
| SNP_P4_173033_48399 | NW_004517199.1 | Scaffold2183 | 48399                   | TT                              | CC              | 1947030365               |
| SNP_P4_173034_48423 | NW_004517199.1 | Scaffold2183 | 48423                   | AA                              | GG              | 1947030367               |
| SNP_P4_173035_48424 | NW_004517199.1 | Scaffold2183 | 48424                   | AA                              | GG              | 1947030369               |
| SNP_P4_173036_48432 | NW_004517199.1 | Scaffold2183 | 48432                   | CC                              | TT              | 1947030370               |
| SNP_P4_173037_48447 | NW_004517199.1 | Scaffold2183 | 48447                   | CC                              | TT              | 1947030372               |
| SNP_P4_173038_49331 | NW_004517199.1 | Scaffold2183 | 49331                   | CC                              | AA              | 1947030374               |
| SNP_P4_173039_49332 | NW_004517199.1 | Scaffold2183 | 49332                   | GG                              | TT              | 1947030376               |
| SNP_P4_173040_52289 | NW_004517199.1 | Scaffold2183 | 52289                   | CC                              | TT              | 1947030378               |
| SNP_P4_173041_52343 | NW_004517199.1 | Scaffold2183 | 52343                   | GG                              | TT              | 1947030380               |
| SNP_P4_173042_59384 | NW_004517199.1 | Scaffold2183 | 59384                   | TT                              | CC              | 1947030382               |
| SNP_P4_173043_59424 | NW_004517199.1 | Scaffold2183 | 59424                   | TT                              | AA              | 1947030384               |
| SNP_P4_173044_60331 | NW_004517199.1 | Scaffold2183 | 60331                   | GG                              | AA              | 1947030386               |
| SNP_P4_173045_60340 | NW_004517199.1 | Scaffold2183 | 60340                   | TT                              | CC              | 1947030388               |
| SNP_P4_173046_60347 | NW_004517199.1 | Scaffold2183 | 60347                   | TT                              | CC              | 1947030389               |
| SNP_P4_173047_60348 | NW_004517199.1 | Scaffold2183 | 60348                   | TT                              | GG              | 1947030391               |
| SNP_P4_173048_60376 | NW_004517199.1 | Scaffold2183 | 60376                   | AA                              | GG              | 1947030393               |

| SNPs IDs            | Chromosome IDs | Chromosomes  | Physical positions (bp) | CDC Frontier (Reference genome) | (ILWC46 & LPNB) | NCBI SNPdb Accession IDs |
|---------------------|----------------|--------------|-------------------------|---------------------------------|-----------------|--------------------------|
| SNP_P4_173049_60419 | NW_004517199.1 | Scaffold2183 | 60419                   | TT                              | CC              | 1947030395               |
| SNP_P4_173050_61620 | NW_004517199.1 | Scaffold2183 | 61620                   | GG                              | AA              | 1947030397               |
| SNP_P4_173051_61680 | NW_004517199.1 | Scaffold2183 | 61680                   | CC                              | TT              | 1947030399               |
| SNP_P4_173052_62959 | NW_004517199.1 | Scaffold2183 | 62959                   | CC                              | TT              | 1947030401               |
| SNP_P4_173053_62977 | NW_004517199.1 | Scaffold2183 | 62977                   | AA                              | TT              | 1947030403               |
| SNP_P4_173054_63900 | NW_004517199.1 | Scaffold2183 | 63900                   | GG                              | CC              | 1947030405               |
| SNP_P4_173055_63926 | NW_004517199.1 | Scaffold2183 | 63926                   | CC                              | GG              | 1947030407               |
| SNP_P4_173056_64221 | NW_004517199.1 | Scaffold2183 | 64221                   | GG                              | AA              | 1947030409               |
| SNP_P4_173057_64450 | NW_004517199.1 | Scaffold2183 | 64450                   | TT                              | CC              | 1947030411               |
| SNP_P4_173058_64503 | NW_004517199.1 | Scaffold2183 | 64503                   | CC                              | TT              | 1947030413               |
| SNP_P4_173059_65132 | NW_004517199.1 | Scaffold2183 | 65132                   | CC                              | AA              | 1947030415               |
| SNP_P4_173061_65764 | NW_004517199.1 | Scaffold2183 | 65764                   | CC                              | GG              | 1947030417               |
| SNP_P4_173062_65769 | NW_004517199.1 | Scaffold2183 | 65769                   | AA                              | GG              | 1947030419               |
| SNP_P4_173063_65879 | NW_004517199.1 | Scaffold2183 | 65879                   | GG                              | AA              | 1947030421               |
| SNP_P4_173064_65883 | NW_004517199.1 | Scaffold2183 | 65883                   | CC                              | TT              | 1947030423               |
| SNP_P4_173065_65885 | NW_004517199.1 | Scaffold2183 | 65885                   | AA                              | GG              | 1947030425               |
| SNP_P4_173066_66047 | NW_004517199.1 | Scaffold2183 | 66047                   | AA                              | TT              | 1947030427               |
| SNP_P4_173067_66469 | NW_004517199.1 | Scaffold2183 | 66469                   | AA                              | GG              | 1947030429               |
| SNP_P4_173068_66733 | NW_004517199.1 | Scaffold2183 | 66733                   | AA                              | CC              | 1947030430               |
| SNP_P4_173069_66782 | NW_004517199.1 | Scaffold2183 | 66782                   | TT                              | AA              | 1947030432               |
| SNP_P4_173070_66800 | NW_004517199.1 | Scaffold2183 | 66800                   | TT                              | AA              | 1947030434               |
| SNP_P4_173071_67007 | NW_004517199.1 | Scaffold2183 | 67007                   | GG                              | TT              | 1947030436               |
| SNP_P4_173072_67052 | NW_004517199.1 | Scaffold2183 | 67052                   | AA                              | GG              | 1947030438               |
| SNP_P4_173073_67107 | NW_004517199.1 | Scaffold2183 | 67107                   | GG                              | AA              | 1947030440               |
| SNP_P4_173074_67126 | NW_004517199.1 | Scaffold2183 | 67126                   | AA                              | GG              | 1947030442               |
| SNP_P4_173075_67268 | NW_004517199.1 | Scaffold2183 | 67268                   | GG                              | AA              | 1947030444               |
| SNP_P4_173076_67320 | NW_004517199.1 | Scaffold2183 | 67320                   | CC                              | TT              | 1947030446               |
| SNP_P4_173077_67385 | NW_004517199.1 | Scaffold2183 | 67385                   | CC                              | TT              | 1947030448               |
| SNP_P4_173079_67662 | NW_004517199.1 | Scaffold2183 | 67662                   | TT                              | AA              | 1947030450               |
| SNP_P4_173080_67677 | NW_004517199.1 | Scaffold2183 | 67677                   | CC                              | AA              | 1947030452               |
| SNP_P4_173081_67684 | NW_004517199.1 | Scaffold2183 | 67684                   | AA                              | TT              | 1947030454               |
| SNP_P4_173082_67699 | NW_004517199.1 | Scaffold2183 | 67699                   | AA                              | GG              | 1947030456               |
| SNP_P4_173083_67769 | NW_004517199.1 | Scaffold2183 | 67769                   | CC                              | GG              | 1947030458               |
| SNP_P4_173085_67902 | NW_004517199.1 | Scaffold2183 | 67902                   | AA                              | GG              | 1947030460               |
| SNP_P4_173086_67938 | NW_004517199.1 | Scaffold2183 | 67938                   | TT                              | AA              | 1947030462               |
| SNP_P4_173087_67962 | NW_004517199.1 | Scaffold2183 | 67962                   | AA                              | TT              | 1947030464               |
| SNP_P4_173088_68000 | NW_004517199.1 | Scaffold2183 | 68000                   | AA                              | TT              | 1947030466               |
| SNP_P4_173089_68053 | NW_004517199.1 | Scaffold2183 | 68053                   | TT                              | CC              | 1947030468               |
| SNP_P4_173090_68095 | NW_004517199.1 | Scaffold2183 | 68095                   | AA                              | GG              | 1947030470               |
| SNP_P4_173091_68238 | NW_004517199.1 | Scaffold2183 | 68238                   | AA                              | GG              | 1947030472               |
| SNP_P4_173092_68271 | NW_004517199.1 | Scaffold2183 | 68271                   | GG                              | AA              | 1947030474               |
| SNP_P4_173093_68276 | NW_004517199.1 | Scaffold2183 | 68276                   | CC                              | TT              | 1947030476               |

| SNPs IDs            | Chromosome IDs | Chromosomes  | Physical positions (bp) | CDC Frontier (Reference genome) | (ILWC46 & LPNB) | NCBI SNPdb Accession IDs |
|---------------------|----------------|--------------|-------------------------|---------------------------------|-----------------|--------------------------|
| SNP_P4_173094_68288 | NW_004517199.1 | Scaffold2183 | 68288                   | CC                              | TT              | 1947030478               |
| SNP_P4_173095_68350 | NW_004517199.1 | Scaffold2183 | 68350                   | CC                              | GG              | 1947030480               |
| SNP_P4_173096_68357 | NW_004517199.1 | Scaffold2183 | 68357                   | AA                              | GG              | 1947030482               |
| SNP_P4_173097_68384 | NW_004517199.1 | Scaffold2183 | 68384                   | AA                              | TT              | 1947030484               |
| SNP_P4_173098_68407 | NW_004517199.1 | Scaffold2183 | 68407                   | TT                              | CC              | 1947030486               |
| SNP_P4_173099_68510 | NW_004517199.1 | Scaffold2183 | 68510                   | TT                              | AA              | 1947030487               |
| SNP_P4_173100_68512 | NW_004517199.1 | Scaffold2183 | 68512                   | CC                              | TT              | 1947030489               |
| SNP_P4_173101_68521 | NW_004517199.1 | Scaffold2183 | 68521                   | AA                              | GG              | 1947030491               |
| SNP_P4_173102_68535 | NW_004517199.1 | Scaffold2183 | 68535                   | GG                              | AA              | 1947030493               |
| SNP_P4_173103_68599 | NW_004517199.1 | Scaffold2183 | 68599                   | AA                              | GG              | 1947030495               |
| SNP_P4_173104_68618 | NW_004517199.1 | Scaffold2183 | 68618                   | CC                              | TT              | 1947030497               |
| SNP_P4_173105_68653 | NW_004517199.1 | Scaffold2183 | 68653                   | CC                              | TT              | 1947030499               |
| SNP_P4_173106_68654 | NW_004517199.1 | Scaffold2183 | 68654                   | AA                              | TT              | 1947030501               |
| SNP_P4_173107_68698 | NW_004517199.1 | Scaffold2183 | 68698                   | GG                              | AA              | 1947030503               |
| SNP_P4_173108_68739 | NW_004517199.1 | Scaffold2183 | 68739                   | AA                              | CC              | 1947030505               |
| SNP_P4_173109_68808 | NW_004517199.1 | Scaffold2183 | 68808                   | CC                              | AA              | 1947030507               |
| SNP_P4_173110_68819 | NW_004517199.1 | Scaffold2183 | 68819                   | AA                              | GG              | 1947030509               |
| SNP_P4_173111_68828 | NW_004517199.1 | Scaffold2183 | 68828                   | TT                              | AA              | 1947030510               |
| SNP_P4_173112_68856 | NW_004517199.1 | Scaffold2183 | 68856                   | CC                              | TT              | 1947030512               |
| SNP_P4_173113_68881 | NW_004517199.1 | Scaffold2183 | 68881                   | CC                              | TT              | 1947030514               |
| SNP_P4_173114_68889 | NW_004517199.1 | Scaffold2183 | 68889                   | AA                              | GG              | 1947030516               |
| SNP_P4_173115_68890 | NW_004517199.1 | Scaffold2183 | 68890                   | AA                              | GG              | 1947030518               |
| SNP_P4_173116_68911 | NW_004517199.1 | Scaffold2183 | 68911                   | TT                              | CC              | 1947030520               |
| SNP_P4_173117_69127 | NW_004517199.1 | Scaffold2183 | 69127                   | TT                              | CC              | 1947030522               |
| SNP_P4_173118_69142 | NW_004517199.1 | Scaffold2183 | 69142                   | CC                              | TT              | 1947030524               |
| SNP_P4_173119_69165 | NW_004517199.1 | Scaffold2183 | 69165                   | GG                              | AA              | 1947030526               |
| SNP_P4_173120_69166 | NW_004517199.1 | Scaffold2183 | 69166                   | CC                              | GG              | 1947030528               |
| SNP_P4_173121_69179 | NW_004517199.1 | Scaffold2183 | 69179                   | AA                              | TT              | 1947030530               |
| SNP_P4_173122_69225 | NW_004517199.1 | Scaffold2183 | 69225                   | TT                              | GG              | 1947030532               |
| SNP_P4_173123_69248 | NW_004517199.1 | Scaffold2183 | 69248                   | TT                              | CC              | 1947030534               |
| SNP_P4_173124_69331 | NW_004517199.1 | Scaffold2183 | 69331                   | GG                              | CC              | 1947030536               |
| SNP_P4_173125_69334 | NW_004517199.1 | Scaffold2183 | 69334                   | AA                              | GG              | 1947030538               |
| SNP_P4_173126_69430 | NW_004517199.1 | Scaffold2183 | 69430                   | CC                              | TT              | 1947030540               |
| SNP_P4_173127_69495 | NW_004517199.1 | Scaffold2183 | 69495                   | CC                              | TT              | 1947030542               |
| SNP_P4_173128_69509 | NW_004517199.1 | Scaffold2183 | 69509                   | TT                              | AA              | 1947030544               |
| SNP_P4_173129_69539 | NW_004517199.1 | Scaffold2183 | 69539                   | TT                              | CC              | 1947030546               |
| SNP_P4_173130_69651 | NW_004517199.1 | Scaffold2183 | 69651                   | CC                              | TT              | 1947030548               |
| SNP_P4_173131_69657 | NW_004517199.1 | Scaffold2183 | 69657                   | CC                              | TT              | 1947030550               |
| SNP_P4_173132_69677 | NW_004517199.1 | Scaffold2183 | 69677                   | AA                              | TT              | 1947030552               |
| SNP_P4_173133_69724 | NW_004517199.1 | Scaffold2183 | 69724                   | GG                              | AA              | 1947030554               |
| SNP_P4_173134_69761 | NW_004517199.1 | Scaffold2183 | 69761                   | CC                              | TT              | 1947030556               |
| SNP_P4_173135_69777 | NW_004517199.1 | Scaffold2183 | 69777                   | GG                              | AA              | 1947030558               |

| SNPs IDs            | Chromosome IDs | Chromosomes  | Physical positions (bp) | CDC Frontier (Reference genome) | (ILWC46 & LPNB) | NCBI SNPdb Accession IDs |
|---------------------|----------------|--------------|-------------------------|---------------------------------|-----------------|--------------------------|
| SNP_P4_173136_69814 | NW_004517199.1 | Scaffold2183 | 69814                   | TT                              | CC              | 1947030560               |
| SNP_P4_173137_69857 | NW_004517199.1 | Scaffold2183 | 69857                   | TT                              | AA              | 1947030562               |
| SNP_P4_173138_69858 | NW_004517199.1 | Scaffold2183 | 69858                   | CC                              | AA              | 1947030564               |
| SNP_P4_173139_69879 | NW_004517199.1 | Scaffold2183 | 69879                   | CC                              | AA              | 1947030566               |
| SNP_P4_173140_69926 | NW_004517199.1 | Scaffold2183 | 69926                   | AA                              | GG              | 1947030568               |
| SNP_P4_173141_69963 | NW_004517199.1 | Scaffold2183 | 69963                   | CC                              | AA              | 1947030570               |
| SNP_P4_173142_69978 | NW_004517199.1 | Scaffold2183 | 69978                   | TT                              | CC              | 1947030572               |
| SNP_P4_173143_70014 | NW_004517199.1 | Scaffold2183 | 70014                   | GG                              | TT              | 1947030574               |
| SNP_P4_173145_70082 | NW_004517199.1 | Scaffold2183 | 70082                   | AA                              | GG              | 1947030576               |
| SNP_P4_173146_70140 | NW_004517199.1 | Scaffold2183 | 70140                   | CC                              | TT              | 1947030578               |
| SNP_P4_173147_70191 | NW_004517199.1 | Scaffold2183 | 70191                   | CC                              | TT              | 1947030580               |
| SNP_P4_173148_70192 | NW_004517199.1 | Scaffold2183 | 70192                   | GG                              | AA              | 1947030582               |
| SNP_P4_173149_70370 | NW_004517199.1 | Scaffold2183 | 70370                   | CC                              | AA              | 1947030584               |
| SNP_P4_173150_70413 | NW_004517199.1 | Scaffold2183 | 70413                   | GG                              | CC              | 1947030586               |
| SNP_P4_173151_70455 | NW_004517199.1 | Scaffold2183 | 70455                   | CC                              | TT              | 1947030588               |
| SNP_P4_173152_70523 | NW_004517199.1 | Scaffold2183 | 70523                   | CC                              | TT              | 1947030590               |
| SNP_P4_173153_70527 | NW_004517199.1 | Scaffold2183 | 70527                   | CC                              | TT              | 1947030592               |
| SNP_P4_173154_70751 | NW_004517199.1 | Scaffold2183 | 70751                   | GG                              | AA              | 1947030594               |
| SNP_P4_173156_71674 | NW_004517199.1 | Scaffold2183 | 71674                   | CC                              | AA              | 1947030595               |
| SNP_P4_173157_71734 | NW_004517199.1 | Scaffold2183 | 71734                   | GG                              | TT              | 1947030597               |
| SNP_P4_173158_71937 | NW_004517199.1 | Scaffold2183 | 71937                   | GG                              | CC              | 1947030599               |
| SNP_P4_173159_71952 | NW_004517199.1 | Scaffold2183 | 71952                   | TT                              | GG              | 1947030601               |
| SNP_P4_173160_74392 | NW_004517199.1 | Scaffold2183 | 74392                   | TT                              | CC              | 1947030603               |
| SNP_P4_173161_74424 | NW_004517199.1 | Scaffold2183 | 74424                   | GG                              | AA              | 1947030605               |
| SNP_P4_173162_74425 | NW_004517199.1 | Scaffold2183 | 74425                   | TT                              | GG              | 1947030607               |
| SNP_P4_173163_74444 | NW_004517199.1 | Scaffold2183 | 74444                   | AA                              | CC              | 1947030609               |
| SNP_P4_173164_74532 | NW_004517199.1 | Scaffold2183 | 74532                   | TT                              | CC              | 1947030611               |
| SNP_P4_173165_74546 | NW_004517199.1 | Scaffold2183 | 74546                   | GG                              | AA              | 1947030613               |
| SNP_P4_173166_74977 | NW_004517199.1 | Scaffold2183 | 74977                   | AA                              | GG              | 1947030615               |
| SNP_P4_173167_75061 | NW_004517199.1 | Scaffold2183 | 75061                   | AA                              | GG              | 1947030617               |
| SNP_P4_173168_75077 | NW_004517199.1 | Scaffold2183 | 75077                   | AA                              | TT              | 1947030619               |
| SNP_P4_173169_75079 | NW_004517199.1 | Scaffold2183 | 75079                   | AA                              | TT              | 1947030621               |
| SNP_P4_173170_4354  | NW_004517202.1 | Scaffold2186 | 4354                    | AA                              | GG              | 1947030623               |
| SNP_P4_173173_18454 | NW_004517205.1 | Scaffold2192 | 18454                   | AA                              | GG              | 1947030625               |
| SNP_P4_173174_27640 | NW_004517205.1 | Scaffold2192 | 27640                   | TT                              | CC              | 1947030627               |
| SNP_P4_173175_28109 | NW_004517205.1 | Scaffold2192 | 28109                   | AA                              | GG              | 1947030629               |
| SNP_P4_173176_47681 | NW_004517205.1 | Scaffold2192 | 47681                   | TT                              | CC              | 1947030631               |
| SNP_P4_173177_49434 | NW_004517205.1 | Scaffold2192 | 49434                   | CC                              | AA              | 1947030633               |
| SNP_P4_173178_55544 | NW_004517205.1 | Scaffold2192 | 55544                   | CC                              | TT              | 1947030635               |
| SNP_P4_173179_55891 | NW_004517205.1 | Scaffold2192 | 55891                   | CC                              | TT              | 1947030637               |
| SNP_P4_173180_70281 | NW_004517205.1 | Scaffold2192 | 70281                   | GG                              | TT              | 1947030639               |
| SNP_P4_173181_79351 | NW_004517205.1 | Scaffold2192 | 79351                   | TT                              | AA              | 1947030641               |

| SNPs IDs             | Chromosome IDs | Chromosomes  | Physical positions (bp) | CDC Frontier (Reference genome) | (ILWC46 & LPNB) | NCBI SNPdb Accession IDs |
|----------------------|----------------|--------------|-------------------------|---------------------------------|-----------------|--------------------------|
| SNP_P4_173185_107964 | NW_004517205.1 | Scaffold2192 | 107964                  | TT                              | CC              | 1947030643               |
| SNP_P4_173186_107968 | NW_004517205.1 | Scaffold2192 | 107968                  | TT                              | GG              | 1947030645               |
| SNP_P4_173187_107996 | NW_004517205.1 | Scaffold2192 | 107996                  | GG                              | TT              | 1947030647               |
| SNP_P4_173188_108014 | NW_004517205.1 | Scaffold2192 | 108014                  | GG                              | AA              | 1947030649               |
| SNP_P4_173189_108318 | NW_004517205.1 | Scaffold2192 | 108318                  | AA                              | GG              | 1947030651               |
| SNP_P4_173190_108373 | NW_004517205.1 | Scaffold2192 | 108373                  | GG                              | TT              | 1947030653               |
| SNP_P4_173191_108406 | NW_004517205.1 | Scaffold2192 | 108406                  | GG                              | AA              | 1947030655               |
| SNP_P4_173192_108424 | NW_004517205.1 | Scaffold2192 | 108424                  | TT                              | CC              | 1947030657               |
| SNP_P4_173193_108705 | NW_004517205.1 | Scaffold2192 | 108705                  | TT                              | CC              | 1947030659               |
| SNP_P4_173194_108714 | NW_004517205.1 | Scaffold2192 | 108714                  | TT                              | AA              | 1947030661               |
| SNP_P4_173195_108894 | NW_004517205.1 | Scaffold2192 | 108894                  | CC                              | AA              | 1947030663               |
| SNP_P4_173196_108912 | NW_004517205.1 | Scaffold2192 | 108912                  | AA                              | TT              | 1947030665               |
| SNP_P4_173197_108940 | NW_004517205.1 | Scaffold2192 | 108940                  | TT                              | GG              | 1947030667               |
| SNP_P4_173198_108947 | NW_004517205.1 | Scaffold2192 | 108947                  | TT                              | CC              | 1947030669               |
| SNP_P4_173199_108951 | NW_004517205.1 | Scaffold2192 | 108951                  | AA                              | GG              | 1947030671               |
| SNP_P4_173200_109076 | NW_004517205.1 | Scaffold2192 | 109076                  | TT                              | CC              | 1947030672               |
| SNP_P4_173201_109272 | NW_004517205.1 | Scaffold2192 | 109272                  | CC                              | TT              | 1947030674               |
| SNP_P4_173202_111048 | NW_004517205.1 | Scaffold2192 | 111048                  | CC                              | TT              | 1947030676               |
| SNP_P4_173203_114533 | NW_004517205.1 | Scaffold2192 | 114533                  | GG                              | TT              | 1947030678               |
| SNP_P4_173204_115340 | NW_004517205.1 | Scaffold2192 | 115340                  | AA                              | GG              | 1947030680               |
| SNP_P4_173205_119352 | NW_004517205.1 | Scaffold2192 | 119352                  | GG                              | AA              | 1947030682               |
| SNP_P4_173207_130859 | NW_004517205.1 | Scaffold2192 | 130859                  | TT                              | GG              | 1947030684               |
| SNP_P4_173208_135073 | NW_004517205.1 | Scaffold2192 | 135073                  | AA                              | GG              | 1947030686               |
| SNP_P4_173209_153875 | NW_004517205.1 | Scaffold2192 | 153875                  | TT                              | CC              | 1947030688               |
| SNP_P4_173210_154308 | NW_004517205.1 | Scaffold2192 | 154308                  | AA                              | CC              | 1947030690               |
| SNP_P4_173211_154353 | NW_004517205.1 | Scaffold2192 | 154353                  | TT                              | CC              | 1947030692               |
| SNP_P4_173212_160825 | NW_004517205.1 | Scaffold2192 | 160825                  | TT                              | CC              | 1947030694               |
| SNP_P4_173213_160856 | NW_004517205.1 | Scaffold2192 | 160856                  | GG                              | AA              | 1947030696               |
| SNP_P4_173215_170726 | NW_004517205.1 | Scaffold2192 | 170726                  | AA                              | GG              | 1947030698               |
| SNP_P4_173216_170748 | NW_004517205.1 | Scaffold2192 | 170748                  | CC                              | TT              | 1947030700               |
| SNP_P4_173217_182591 | NW_004517205.1 | Scaffold2192 | 182591                  | AA                              | GG              | 1947030702               |
| SNP_P4_173218_182600 | NW_004517205.1 | Scaffold2192 | 182600                  | GG                              | AA              | 1947030704               |
| SNP_P4_173219_182631 | NW_004517205.1 | Scaffold2192 | 182631                  | GG                              | CC              | 1947030706               |
| SNP_P4_173220_182632 | NW_004517205.1 | Scaffold2192 | 182632                  | CC                              | TT              | 1947030708               |
| SNP_P4_173221_182729 | NW_004517205.1 | Scaffold2192 | 182729                  | TT                              | AA              | 1947030710               |
| SNP_P4_173222_182740 | NW_004517205.1 | Scaffold2192 | 182740                  | TT                              | AA              | 1947030712               |
| SNP_P4_173223_182757 | NW_004517205.1 | Scaffold2192 | 182757                  | GG                              | AA              | 1947030714               |
| SNP_P4_173224_182765 | NW_004517205.1 | Scaffold2192 | 182765                  | TT                              | CC              | 1947030715               |
| SNP_P4_173225_182823 | NW_004517205.1 | Scaffold2192 | 182823                  | TT                              | CC              | 1947030717               |
| SNP_P4_173226_182891 | NW_004517205.1 | Scaffold2192 | 182891                  | AA                              | CC              | 1947030719               |
| SNP_P4_173227_182953 | NW_004517205.1 | Scaffold2192 | 182953                  | GG                              | AA              | 1947030721               |
| SNP_P4_173228_182965 | NW_004517205.1 | Scaffold2192 | 182965                  | TT                              | CC              | 1947030723               |

| SNPs IDs             | Chromosome IDs | Chromosomes  | Physical positions (bp) | CDC Frontier (Reference genome) | (ILWC46 & LPNB) | NCBI SNPdb Accession IDs |
|----------------------|----------------|--------------|-------------------------|---------------------------------|-----------------|--------------------------|
| SNP_P4_173229_182997 | NW_004517205.1 | Scaffold2192 | 182997                  | AA                              | TT              | 1947030725               |
| SNP_P4_173230_183017 | NW_004517205.1 | Scaffold2192 | 183017                  | AA                              | CC              | 1947030727               |
| SNP_P4_173231_183024 | NW_004517205.1 | Scaffold2192 | 183024                  | TT                              | AA              | 1947030729               |
| SNP_P4_173232_183026 | NW_004517205.1 | Scaffold2192 | 183026                  | GG                              | AA              | 1947030731               |
| SNP_P4_173233_183109 | NW_004517205.1 | Scaffold2192 | 183109                  | GG                              | TT              | 1947030733               |
| SNP_P4_173234_183117 | NW_004517205.1 | Scaffold2192 | 183117                  | CC                              | AA              | 1947030735               |
| SNP_P4_173235_183170 | NW_004517205.1 | Scaffold2192 | 183170                  | TT                              | CC              | 1947030737               |
| SNP_P4_173236_183188 | NW_004517205.1 | Scaffold2192 | 183188                  | AA                              | GG              | 1947030739               |
| SNP_P4_173237_197277 | NW_004517205.1 | Scaffold2192 | 197277                  | TT                              | GG              | 1947030741               |
| SNP_P4_173238_202053 | NW_004517205.1 | Scaffold2192 | 202053                  | TT                              | GG              | 1947030743               |
| SNP_P4_173239_202060 | NW_004517205.1 | Scaffold2192 | 202060                  | TT                              | CC              | 1947030745               |
| SNP_P4_173240_202066 | NW_004517205.1 | Scaffold2192 | 202066                  | AA                              | GG              | 1947030747               |
| SNP_P4_173242_223676 | NW_004517205.1 | Scaffold2192 | 223676                  | CC                              | AA              | 1947030749               |
| SNP_P4_173243_223701 | NW_004517205.1 | Scaffold2192 | 223701                  | TT                              | AA              | 1947030751               |
| SNP_P4_173244_223727 | NW_004517205.1 | Scaffold2192 | 223727                  | TT                              | CC              | 1947030753               |
| SNP_P4_173245_224038 | NW_004517205.1 | Scaffold2192 | 224038                  | GG                              | AA              | 1947030755               |
| SNP_P4_173246_12251  | NW_004517206.1 | Scaffold2193 | 12251                   | TT                              | GG              | 1947030757               |
| SNP_P4_173247_12391  | NW_004517206.1 | Scaffold2193 | 12391                   | CC                              | TT              | 1947030759               |
| SNP_P4_173248_12550  | NW_004517206.1 | Scaffold2193 | 12550                   | AA                              | CC              | 1947030760               |
| SNP_P4_173249_12826  | NW_004517206.1 | Scaffold2193 | 12826                   | GG                              | AA              | 1947030762               |
| SNP_P4_173250_13003  | NW_004517206.1 | Scaffold2193 | 13003                   | CC                              | GG              | 1947030764               |
| SNP_P4_173251_13085  | NW_004517206.1 | Scaffold2193 | 13085                   | TT                              | CC              | 1947030766               |
| SNP_P4_173252_13118  | NW_004517206.1 | Scaffold2193 | 13118                   | AA                              | CC              | 1947030768               |
| SNP_P4_173253_30015  | NW_004517206.1 | Scaffold2193 | 30015                   | TT                              | CC              | 1947030770               |
| SNP_P4_173254_30099  | NW_004517206.1 | Scaffold2193 | 30099                   | CC                              | TT              | 1947030772               |
| SNP_P4_173255_31259  | NW_004517206.1 | Scaffold2193 | 31259                   | GG                              | AA              | 1947030774               |
| SNP_P4_173256_31283  | NW_004517206.1 | Scaffold2193 | 31283                   | CC                              | AA              | 1947030776               |
| SNP_P4_173257_31407  | NW_004517206.1 | Scaffold2193 | 31407                   | TT                              | GG              | 1947030778               |
| SNP_P4_173258_31456  | NW_004517206.1 | Scaffold2193 | 31456                   | AA                              | GG              | 1947030780               |
| SNP_P4_173259_31478  | NW_004517206.1 | Scaffold2193 | 31478                   | AA                              | GG              | 1947030782               |
| SNP_P4_173260_31490  | NW_004517206.1 | Scaffold2193 | 31490                   | TT                              | GG              | 1947030784               |
| SNP_P4_173261_31492  | NW_004517206.1 | Scaffold2193 | 31492                   | CC                              | TT              | 1947030786               |
| SNP_P4_173262_31525  | NW_004517206.1 | Scaffold2193 | 31525                   | CC                              | TT              | 1947030788               |
| SNP_P4_173263_31532  | NW_004517206.1 | Scaffold2193 | 31532                   | AA                              | GG              | 1947030790               |
| SNP_P4_173264_31562  | NW_004517206.1 | Scaffold2193 | 31562                   | TT                              | CC              | 1947030792               |
| SNP_P4_173266_31643  | NW_004517206.1 | Scaffold2193 | 31643                   | GG                              | AA              | 1947030794               |
| SNP_P4_173267_31702  | NW_004517206.1 | Scaffold2193 | 31702                   | TT                              | CC              | 1947030796               |
| SNP_P4_173268_31793  | NW_004517206.1 | Scaffold2193 | 31793                   | GG                              | TT              | 1947030798               |
| SNP_P4_173269_31804  | NW_004517206.1 | Scaffold2193 | 31804                   | AA                              | GG              | 1947030800               |
| SNP_P4_173270_31864  | NW_004517206.1 | Scaffold2193 | 31864                   | AA                              | GG              | 1947030802               |
| SNP_P4_173271_51181  | NW_004517206.1 | Scaffold2193 | 51181                   | TT                              | CC              | 1947030804               |
| SNP_P4_173272_51395  | NW_004517206.1 | Scaffold2193 | 51395                   | AA                              | GG              | 1947030805               |

| SNPs IDs             | Chromosome IDs | Chromosomes  | Physical positions (bp) | CDC Frontier (Reference genome) | (ILWC46 & LPNB) | NCBI SNPdb Accession IDs |
|----------------------|----------------|--------------|-------------------------|---------------------------------|-----------------|--------------------------|
| SNP_P4_173273_55305  | NW_004517206.1 | Scaffold2193 | 55305                   | TT                              | CC              | 1947030807               |
| SNP_P4_173274_55307  | NW_004517206.1 | Scaffold2193 | 55307                   | TT                              | CC              | 1947030809               |
| SNP_P4_173275_55520  | NW_004517206.1 | Scaffold2193 | 55520                   | TT                              | CC              | 1947030811               |
| SNP_P4_173276_58867  | NW_004517206.1 | Scaffold2193 | 58867                   | TT                              | AA              | 1947030813               |
| SNP_P4_173277_59154  | NW_004517206.1 | Scaffold2193 | 59154                   | GG                              | TT              | 1947030815               |
| SNP_P4_173278_70030  | NW_004517206.1 | Scaffold2193 | 70030                   | TT                              | CC              | 1947030817               |
| SNP_P4_173279_123523 | NW_004517206.1 | Scaffold2193 | 123523                  | GG                              | AA              | 1947030819               |
| SNP_P4_173280_123551 | NW_004517206.1 | Scaffold2193 | 123551                  | AA                              | GG              | 1947030821               |
| SNP_P4_173281_123605 | NW_004517206.1 | Scaffold2193 | 123605                  | AA                              | GG              | 1947030823               |
| SNP_P4_173282_123632 | NW_004517206.1 | Scaffold2193 | 123632                  | AA                              | GG              | 1947030825               |
| SNP_P4_173283_123670 | NW_004517206.1 | Scaffold2193 | 123670                  | GG                              | TT              | 1947030827               |
| SNP_P4_173284_123673 | NW_004517206.1 | Scaffold2193 | 123673                  | GG                              | TT              | 1947030829               |
| SNP_P4_173285_123682 | NW_004517206.1 | Scaffold2193 | 123682                  | TT                              | CC              | 1947030831               |
| SNP_P4_173286_123685 | NW_004517206.1 | Scaffold2193 | 123685                  | TT                              | CC              | 1947030833               |
| SNP_P4_173287_124811 | NW_004517206.1 | Scaffold2193 | 124811                  | AA                              | GG              | 1947030835               |
| SNP_P4_173288_128010 | NW_004517206.1 | Scaffold2193 | 128010                  | GG                              | AA              | 1947030836               |
| SNP_P4_173290_164947 | NW_004517206.1 | Scaffold2193 | 164947                  | CC                              | TT              | 1947030838               |
| SNP_P4_173291_165226 | NW_004517206.1 | Scaffold2193 | 165226                  | CC                              | AA              | 1947030840               |
| SNP_P4_173292_165232 | NW_004517206.1 | Scaffold2193 | 165232                  | GG                              | AA              | 1947030842               |
| SNP_P4_173293_165252 | NW_004517206.1 | Scaffold2193 | 165252                  | AA                              | GG              | 1947030844               |
| SNP_P4_173294_4299   | NW_004517207.1 | Scaffold2194 | 4299                    | TT                              | AA              | 1947030846               |
| SNP_P4_173295_9287   | NW_004517207.1 | Scaffold2194 | 9287                    | TT                              | GG              | 1947030848               |
| SNP_P4_173296_18007  | NW_004517207.1 | Scaffold2194 | 18007                   | AA                              | GG              | 1947030850               |
| SNP_P4_173297_19161  | NW_004517207.1 | Scaffold2194 | 19161                   | AA                              | GG              | 1947030852               |
| SNP_P4_173298_23818  | NW_004517207.1 | Scaffold2194 | 23818                   | AA                              | GG              | 1947030854               |
| SNP_P4_173299_23989  | NW_004517207.1 | Scaffold2194 | 23989                   | TT                              | GG              | 1947030856               |
| SNP_P4_173300_24099  | NW_004517207.1 | Scaffold2194 | 24099                   | GG                              | TT              | 1947030858               |
| SNP_P4_173301_24175  | NW_004517207.1 | Scaffold2194 | 24175                   | GG                              | CC              | 1947030860               |
| SNP_P4_173302_24288  | NW_004517207.1 | Scaffold2194 | 24288                   | CC                              | TT              | 1947030861               |
| SNP_P4_173303_24294  | NW_004517207.1 | Scaffold2194 | 24294                   | GG                              | TT              | 1947030863               |
| SNP_P4_173304_24394  | NW_004517207.1 | Scaffold2194 | 24394                   | CC                              | TT              | 1947030865               |
| SNP_P4_173305_24419  | NW_004517207.1 | Scaffold2194 | 24419                   | CC                              | TT              | 1947030867               |
| SNP_P4_173306_24446  | NW_004517207.1 | Scaffold2194 | 24446                   | GG                              | TT              | 1947030869               |
| SNP_P4_173307_24636  | NW_004517207.1 | Scaffold2194 | 24636                   | CC                              | TT              | 1947030871               |
| SNP_P4_173308_24963  | NW_004517207.1 | Scaffold2194 | 24963                   | AA                              | GG              | 1947030873               |
| SNP_P4_173310_631    | NW_004517208.1 | Scaffold2195 | 631                     | GG                              | AA              | 1947030875               |
| SNP_P4_173311_736    | NW_004517208.1 | Scaffold2195 | 736                     | TT                              | AA              | 1947030877               |
| SNP_P4_173312_1954   | NW_004517208.1 | Scaffold2195 | 1954                    | TT                              | CC              | 1947030879               |
| SNP_P4_173313_1982   | NW_004517208.1 | Scaffold2195 | 1982                    | GG                              | TT              | 1947030881               |
| SNP_P4_173314_859    | NW_004517210.1 | Scaffold2199 | 859                     | CC                              | TT              | 1947030883               |
| SNP_P4_173315_909    | NW_004517210.1 | Scaffold2199 | 909                     | AA                              | GG              | 1947030885               |
| SNP_P4_173316_918    | NW_004517210.1 | Scaffold2199 | 918                     | AA                              | GG              | 1947030887               |



| SNPs IDs            | Chromosome IDs | Chromosomes  | Physical positions (bp) | CDC Frontier (Reference genome) | (ILWC46 & LPNB) | NCBI SNPdb Accession IDs |
|---------------------|----------------|--------------|-------------------------|---------------------------------|-----------------|--------------------------|
| SNP_P4_173317_954   | NW_004517210.1 | Scaffold2199 | 954                     | TT                              | AA              | 1947030889               |
| SNP_P4_173318_956   | NW_004517210.1 | Scaffold2199 | 956                     | GG                              | AA              | 1947030891               |
| SNP_P4_173319_10952 | NW_004517211.1 | Scaffold2200 | 10952                   | CC                              | AA              | 1947030893               |
| SNP_P4_173320_145   | NW_004517212.1 | Scaffold2201 | 145                     | AA                              | CC              | 1947030895               |
| SNP_P4_173321_150   | NW_004517212.1 | Scaffold2201 | 150                     | TT                              | AA              | 1947030897               |
| SNP_P4_173322_158   | NW_004517212.1 | Scaffold2201 | 158                     | GG                              | AA              | 1947030899               |
| SNP_P4_173323_161   | NW_004517212.1 | Scaffold2201 | 161                     | AA                              | GG              | 1947030901               |
| SNP_P4_173324_207   | NW_004517212.1 | Scaffold2201 | 207                     | CC                              | TT              | 1947030903               |
| SNP_P4_173325_3621  | NW_004517212.1 | Scaffold2201 | 3621                    | GG                              | TT              | 1947030905               |
| SNP_P4_173326_3627  | NW_004517212.1 | Scaffold2201 | 3627                    | AA                              | GG              | 1947030907               |
| SNP_P4_173327_6029  | NW_004517214.1 | Scaffold2203 | 6029                    | TT                              | AA              | 1947030908               |
| SNP_P4_173328_6036  | NW_004517214.1 | Scaffold2203 | 6036                    | AA                              | TT              | 1947030910               |
| SNP_P4_173329_1382  | NW_004517215.1 | Scaffold2205 | 1382                    | AA                              | TT              | 1947030912               |
| SNP_P4_173330_1408  | NW_004517215.1 | Scaffold2205 | 1408                    | CC                              | TT              | 1947030914               |
| SNP_P4_173331_1456  | NW_004517215.1 | Scaffold2205 | 1456                    | CC                              | TT              | 1947030916               |
| SNP_P4_173332_1460  | NW_004517215.1 | Scaffold2205 | 1460                    | CC                              | TT              | 1947030918               |
| SNP_P4_173333_1468  | NW_004517215.1 | Scaffold2205 | 1468                    | GG                              | TT              | 1947030920               |
| SNP_P4_173335_1501  | NW_004517215.1 | Scaffold2205 | 1501                    | AA                              | TT              | 1947030922               |
| SNP_P4_173336_1734  | NW_004517215.1 | Scaffold2205 | 1734                    | TT                              | GG              | 1947030924               |
| SNP_P4_173337_3227  | NW_004517215.1 | Scaffold2205 | 3227                    | CC                              | TT              | 1947030926               |
| SNP_P4_173338_3374  | NW_004517215.1 | Scaffold2205 | 3374                    | GG                              | CC              | 1947030928               |
| SNP_P4_173339_3467  | NW_004517215.1 | Scaffold2205 | 3467                    | CC                              | TT              | 1947030930               |
| SNP_P4_173340_5688  | NW_004517215.1 | Scaffold2205 | 5688                    | TT                              | AA              | 1947030932               |
| SNP_P4_173341_10233 | NW_004517215.1 | Scaffold2205 | 10233                   | TT                              | GG              | 1947030934               |
| SNP_P4_173342_10487 | NW_004517215.1 | Scaffold2205 | 10487                   | TT                              | GG              | 1947030936               |
| SNP_P4_173343_10618 | NW_004517215.1 | Scaffold2205 | 10618                   | TT                              | AA              | 1947030938               |
| SNP_P4_173344_10907 | NW_004517215.1 | Scaffold2205 | 10907                   | GG                              | AA              | 1947030940               |
| SNP_P4_173345_14480 | NW_004517215.1 | Scaffold2205 | 14480                   | GG                              | AA              | 1947030942               |
| SNP_P4_173346_14733 | NW_004517215.1 | Scaffold2205 | 14733                   | GG                              | AA              | 1947030944               |
| SNP_P4_173347_14795 | NW_004517215.1 | Scaffold2205 | 14795                   | CC                              | AA              | 1947030945               |
| SNP_P4_173348_14815 | NW_004517215.1 | Scaffold2205 | 14815                   | GG                              | CC              | 1947030947               |
| SNP_P4_173349_14854 | NW_004517215.1 | Scaffold2205 | 14854                   | TT                              | CC              | 1947030949               |
| SNP_P4_173350_15943 | NW_004517215.1 | Scaffold2205 | 15943                   | TT                              | CC              | 1947030951               |
| SNP_P4_173351_20291 | NW_004517215.1 | Scaffold2205 | 20291                   | AA                              | GG              | 1947030953               |
| SNP_P4_173352_21408 | NW_004517215.1 | Scaffold2205 | 21408                   | TT                              | GG              | 1947030955               |
| SNP_P4_173353_21774 | NW_004517215.1 | Scaffold2205 | 21774                   | AA                              | GG              | 1947030957               |
| SNP_P4_173354_21781 | NW_004517215.1 | Scaffold2205 | 21781                   | TT                              | GG              | 1947030959               |
| SNP_P4_173355_21824 | NW_004517215.1 | Scaffold2205 | 21824                   | CC                              | TT              | 1947030960               |
| SNP_P4_173356_23801 | NW_004517215.1 | Scaffold2205 | 23801                   | CC                              | TT              | 1947030962               |
| SNP_P4_173357_23855 | NW_004517215.1 | Scaffold2205 | 23855                   | TT                              | AA              | 1947030965               |
| SNP_P4_173358_24159 | NW_004517215.1 | Scaffold2205 | 24159                   | GG                              | AA              | 1947030967               |
| SNP_P4_173359_24194 | NW_004517215.1 | Scaffold2205 | 24194                   | CC                              | TT              | 1947030969               |

| SNPs IDs            | Chromosome IDs | Chromosomes  | Physical positions (bp) | CDC Frontier (Reference genome) | (ILWC46 & LPNB) | NCBI SNPdb Accession IDs |
|---------------------|----------------|--------------|-------------------------|---------------------------------|-----------------|--------------------------|
| SNP_P4_173360_24706 | NW_004517215.1 | Scaffold2205 | 24706                   | AA                              | TT              | 1947030971               |
| SNP_P4_173361_26329 | NW_004517215.1 | Scaffold2205 | 26329                   | TT                              | CC              | 1947030973               |
| SNP_P4_173362_27966 | NW_004517215.1 | Scaffold2205 | 27966                   | GG                              | AA              | 1947030975               |
| SNP_P4_173363_38409 | NW_004517215.1 | Scaffold2205 | 38409                   | CC                              | GG              | 1947030977               |
| SNP_P4_173364_38959 | NW_004517215.1 | Scaffold2205 | 38959                   | TT                              | GG              | 1947030979               |
| SNP_P4_173365_43534 | NW_004517215.1 | Scaffold2205 | 43534                   | AA                              | CC              | 1947030981               |
| SNP_P4_173366_43594 | NW_004517215.1 | Scaffold2205 | 43594                   | TT                              | GG              | 1947030983               |
| SNP_P4_173367_47991 | NW_004517215.1 | Scaffold2205 | 47991                   | GG                              | TT              | 1947030985               |
| SNP_P4_173368_48027 | NW_004517215.1 | Scaffold2205 | 48027                   | GG                              | AA              | 1947030987               |
| SNP_P4_173369_48118 | NW_004517215.1 | Scaffold2205 | 48118                   | AA                              | CC              | 1947030989               |
| SNP_P4_173370_48240 | NW_004517215.1 | Scaffold2205 | 48240                   | TT                              | CC              | 1947030991               |
| SNP_P4_173371_48332 | NW_004517215.1 | Scaffold2205 | 48332                   | CC                              | TT              | 1947030993               |
| SNP_P4_173372_48440 | NW_004517215.1 | Scaffold2205 | 48440                   | CC                              | TT              | 1947030994               |
| SNP_P4_173373_48756 | NW_004517215.1 | Scaffold2205 | 48756                   | AA                              | GG              | 1947030996               |
| SNP_P4_173374_48860 | NW_004517215.1 | Scaffold2205 | 48860                   | GG                              | AA              | 1947030998               |
| SNP_P4_173375_49044 | NW_004517215.1 | Scaffold2205 | 49044                   | CC                              | GG              | 1947031000               |
| SNP_P4_173376_49070 | NW_004517215.1 | Scaffold2205 | 49070                   | TT                              | CC              | 1947031002               |
| SNP_P4_173377_49093 | NW_004517215.1 | Scaffold2205 | 49093                   | TT                              | CC              | 1947031004               |
| SNP_P4_173378_49096 | NW_004517215.1 | Scaffold2205 | 49096                   | TT                              | CC              | 1947031006               |
| SNP_P4_173380_49167 | NW_004517215.1 | Scaffold2205 | 49167                   | TT                              | CC              | 1947031008               |
| SNP_P4_173381_49205 | NW_004517215.1 | Scaffold2205 | 49205                   | CC                              | AA              | 1947031010               |
| SNP_P4_173382_49210 | NW_004517215.1 | Scaffold2205 | 49210                   | CC                              | GG              | 1947031012               |
| SNP_P4_173383_49225 | NW_004517215.1 | Scaffold2205 | 49225                   | GG                              | TT              | 1947031014               |
| SNP_P4_173384_230   | NW_004517217.1 | Scaffold2207 | 230                     | GG                              | TT              | 1947031016               |
| SNP_P4_173385_669   | NW_004517217.1 | Scaffold2207 | 669                     | CC                              | GG              | 1947031018               |
| SNP_P4_173386_711   | NW_004517217.1 | Scaffold2207 | 711                     | TT                              | AA              | 1947031020               |
| SNP_P4_173387_715   | NW_004517217.1 | Scaffold2207 | 715                     | TT                              | AA              | 1947031022               |
| SNP_P4_173388_786   | NW_004517217.1 | Scaffold2207 | 786                     | GG                              | CC              | 1947031024               |
| SNP_P4_173389_824   | NW_004517217.1 | Scaffold2207 | 824                     | AA                              | GG              | 1947031026               |
| SNP_P4_173390_829   | NW_004517217.1 | Scaffold2207 | 829                     | CC                              | AA              | 1947031028               |
| SNP_P4_173391_830   | NW_004517217.1 | Scaffold2207 | 830                     | GG                              | TT              | 1947031030               |
| SNP_P4_173392_834   | NW_004517217.1 | Scaffold2207 | 834                     | CC                              | TT              | 1947031032               |
| SNP_P4_173393_835   | NW_004517217.1 | Scaffold2207 | 835                     | AA                              | GG              | 1947031034               |
| SNP_P4_173394_901   | NW_004517217.1 | Scaffold2207 | 901                     | TT                              | GG              | 1947031036               |
| SNP_P4_173395_902   | NW_004517217.1 | Scaffold2207 | 902                     | GG                              | AA              | 1947031038               |
| SNP_P4_173396_913   | NW_004517217.1 | Scaffold2207 | 913                     | AA                              | TT              | 1947031040               |
| SNP_P4_173397_1023  | NW_004517217.1 | Scaffold2207 | 1023                    | CC                              | AA              | 1947031042               |
| SNP_P4_173398_1043  | NW_004517217.1 | Scaffold2207 | 1043                    | TT                              | CC              | 1947031044               |
| SNP_P4_173399_1050  | NW_004517217.1 | Scaffold2207 | 1050                    | GG                              | TT              | 1947031046               |
| SNP_P4_173400_1056  | NW_004517217.1 | Scaffold2207 | 1056                    | TT                              | CC              | 1947031048               |
| SNP_P4_173401_1233  | NW_004517217.1 | Scaffold2207 | 1233                    | GG                              | TT              | 1947031050               |
| SNP_P4_173402_4360  | NW_004517217.1 | Scaffold2207 | 4360                    | CC                              | TT              | 1947031052               |

| SNPs IDs            | Chromosome IDs | Chromosomes  | Physical positions (bp) | CDC Frontier (Reference genome) | (ILWC46 & LPNB) | NCBI SNPdb Accession IDs |
|---------------------|----------------|--------------|-------------------------|---------------------------------|-----------------|--------------------------|
| SNP_P4_173403_5928  | NW_004517217.1 | Scaffold2207 | 5928                    | AA                              | GG              | 1947031054               |
| SNP_P4_173404_4745  | NW_004517218.1 | Scaffold2208 | 4745                    | TT                              | CC              | 1947031056               |
| SNP_P4_173405_4924  | NW_004517218.1 | Scaffold2208 | 4924                    | GG                              | AA              | 1947031058               |
| SNP_P4_173406_5008  | NW_004517218.1 | Scaffold2208 | 5008                    | TT                              | CC              | 1947031060               |
| SNP_P4_173407_5278  | NW_004517218.1 | Scaffold2208 | 5278                    | CC                              | TT              | 1947031062               |
| SNP_P4_173408_5333  | NW_004517218.1 | Scaffold2208 | 5333                    | CC                              | AA              | 1947031064               |
| SNP_P4_173409_5851  | NW_004517218.1 | Scaffold2208 | 5851                    | AA                              | GG              | 1947031066               |
| SNP_P4_173410_5905  | NW_004517218.1 | Scaffold2208 | 5905                    | GG                              | CC              | 1947031068               |
| SNP_P4_173412_6097  | NW_004517218.1 | Scaffold2208 | 6097                    | GG                              | TT              | 1947031070               |
| SNP_P4_173413_6102  | NW_004517218.1 | Scaffold2208 | 6102                    | AA                              | GG              | 1947031072               |
| SNP_P4_173414_6104  | NW_004517218.1 | Scaffold2208 | 6104                    | CC                              | TT              | 1947031074               |
| SNP_P4_173415_6187  | NW_004517218.1 | Scaffold2208 | 6187                    | AA                              | TT              | 1947031076               |
| SNP_P4_173416_6281  | NW_004517218.1 | Scaffold2208 | 6281                    | AA                              | GG              | 1947031078               |
| SNP_P4_173417_6371  | NW_004517218.1 | Scaffold2208 | 6371                    | TT                              | AA              | 1947031080               |
| SNP_P4_173418_6541  | NW_004517218.1 | Scaffold2208 | 6541                    | TT                              | CC              | 1947031082               |
| SNP_P4_173419_6712  | NW_004517218.1 | Scaffold2208 | 6712                    | TT                              | CC              | 1947031084               |
| SNP_P4_173420_6729  | NW_004517218.1 | Scaffold2208 | 6729                    | GG                              | TT              | 1947031086               |
| SNP_P4_173421_6851  | NW_004517218.1 | Scaffold2208 | 6851                    | GG                              | AA              | 1947031088               |
| SNP_P4_173422_6868  | NW_004517218.1 | Scaffold2208 | 6868                    | AA                              | TT              | 1947031090               |
| SNP_P4_173423_6907  | NW_004517218.1 | Scaffold2208 | 6907                    | AA                              | GG              | 1947031092               |
| SNP_P4_173424_7089  | NW_004517218.1 | Scaffold2208 | 7089                    | GG                              | CC              | 1947031094               |
| SNP_P4_173425_7108  | NW_004517218.1 | Scaffold2208 | 7108                    | AA                              | CC              | 1947031096               |
| SNP_P4_173426_8289  | NW_004517218.1 | Scaffold2208 | 8289                    | AA                              | TT              | 1947031098               |
| SNP_P4_173427_8352  | NW_004517218.1 | Scaffold2208 | 8352                    | CC                              | TT              | 1947031100               |
| SNP_P4_173428_8785  | NW_004517218.1 | Scaffold2208 | 8785                    | GG                              | CC              | 1947031102               |
| SNP_P4_173429_9693  | NW_004517218.1 | Scaffold2208 | 9693                    | AA                              | CC              | 1947031104               |
| SNP_P4_173430_9893  | NW_004517218.1 | Scaffold2208 | 9893                    | GG                              | TT              | 1947031106               |
| SNP_P4_173431_9986  | NW_004517218.1 | Scaffold2208 | 9986                    | GG                              | AA              | 1947031108               |
| SNP_P4_173432_10099 | NW_004517218.1 | Scaffold2208 | 10099                   | CC                              | TT              | 1947031110               |
| SNP_P4_173433_10105 | NW_004517218.1 | Scaffold2208 | 10105                   | AA                              | TT              | 1947031112               |
| SNP_P4_173434_10109 | NW_004517218.1 | Scaffold2208 | 10109                   | AA                              | GG              | 1947031113               |
| SNP_P4_173435_10110 | NW_004517218.1 | Scaffold2208 | 10110                   | CC                              | TT              | 1947031115               |
| SNP_P4_173436_10203 | NW_004517218.1 | Scaffold2208 | 10203                   | AA                              | TT              | 1947031117               |
| SNP_P4_173437_10265 | NW_004517218.1 | Scaffold2208 | 10265                   | TT                              | GG              | 1947031119               |
| SNP_P4_173438_10470 | NW_004517218.1 | Scaffold2208 | 10470                   | CC                              | AA              | 1947031121               |
| SNP_P4_173439_10560 | NW_004517218.1 | Scaffold2208 | 10560                   | CC                              | GG              | 1947031123               |
| SNP_P4_173440_10678 | NW_004517218.1 | Scaffold2208 | 10678                   | GG                              | TT              | 1947031125               |
| SNP_P4_173441_10689 | NW_004517218.1 | Scaffold2208 | 10689                   | GG                              | AA              | 1947031127               |
| SNP_P4_173442_16167 | NW_004517218.1 | Scaffold2208 | 16167                   | AA                              | GG              | 1947031129               |
| SNP_P4_173443_16552 | NW_004517218.1 | Scaffold2208 | 16552                   | TT                              | CC              | 1947031131               |
| SNP_P4_173444_16559 | NW_004517218.1 | Scaffold2208 | 16559                   | CC                              | TT              | 1947031133               |
| SNP_P4_173445_16561 | NW_004517218.1 | Scaffold2208 | 16561                   | AA                              | GG              | 1947031135               |

| SNPs IDs            | Chromosome IDs | Chromosomes  | Physical positions (bp) | CDC Frontier (Reference genome) | (ILWC46 & LPNB) | NCBI SNPdb Accession IDs |
|---------------------|----------------|--------------|-------------------------|---------------------------------|-----------------|--------------------------|
| SNP_P4_173446_18880 | NW_004517218.1 | Scaffold2208 | 18880                   | AA                              | GG              | 1947031137               |
| SNP_P4_173447_18910 | NW_004517218.1 | Scaffold2208 | 18910                   | TT                              | AA              | 1947031139               |
| SNP_P4_173448_19285 | NW_004517218.1 | Scaffold2208 | 19285                   | AA                              | GG              | 1947031140               |
| SNP_P4_173449_19297 | NW_004517218.1 | Scaffold2208 | 19297                   | TT                              | CC              | 1947031142               |
| SNP_P4_173450_19687 | NW_004517218.1 | Scaffold2208 | 19687                   | AA                              | CC              | 1947031144               |
| SNP_P4_173451_19894 | NW_004517218.1 | Scaffold2208 | 19894                   | AA                              | GG              | 1947031146               |
| SNP_P4_173452_19895 | NW_004517218.1 | Scaffold2208 | 19895                   | GG                              | CC              | 1947031148               |
| SNP_P4_173454_20798 | NW_004517218.1 | Scaffold2208 | 20798                   | GG                              | TT              | 1947031150               |
| SNP_P4_173455_20858 | NW_004517218.1 | Scaffold2208 | 20858                   | AA                              | TT              | 1947031152               |
| SNP_P4_173456_20963 | NW_004517218.1 | Scaffold2208 | 20963                   | TT                              | AA              | 1947031154               |
| SNP_P4_173457_21019 | NW_004517218.1 | Scaffold2208 | 21019                   | TT                              | CC              | 1947031156               |
| SNP_P4_173458_21037 | NW_004517218.1 | Scaffold2208 | 21037                   | AA                              | CC              | 1947031158               |
| SNP_P4_173459_21162 | NW_004517218.1 | Scaffold2208 | 21162                   | AA                              | CC              | 1947031160               |
| SNP_P4_173460_21484 | NW_004517218.1 | Scaffold2208 | 21484                   | TT                              | CC              | 1947031162               |
| SNP_P4_173461_21637 | NW_004517218.1 | Scaffold2208 | 21637                   | GG                              | AA              | 1947031164               |
| SNP_P4_173462_21719 | NW_004517218.1 | Scaffold2208 | 21719                   | AA                              | TT              | 1947031166               |
| SNP_P4_173463_21730 | NW_004517218.1 | Scaffold2208 | 21730                   | CC                              | TT              | 1947031168               |
| SNP_P4_173464_21871 | NW_004517218.1 | Scaffold2208 | 21871                   | GG                              | CC              | 1947031170               |
| SNP_P4_173465_21896 | NW_004517218.1 | Scaffold2208 | 21896                   | GG                              | AA              | 1947031172               |
| SNP_P4_173466_26943 | NW_004517218.1 | Scaffold2208 | 26943                   | CC                              | TT              | 1947031174               |
| SNP_P4_173467_27313 | NW_004517218.1 | Scaffold2208 | 27313                   | GG                              | AA              | 1947031176               |
| SNP_P4_173468_64    | NW_004517220.1 | Scaffold2210 | 64                      | AA                              | TT              | 1947031178               |
| SNP_P4_173469_878   | NW_004517220.1 | Scaffold2210 | 878                     | AA                              | TT              | 1947031180               |
| SNP_P4_173470_1236  | NW_004517220.1 | Scaffold2210 | 1236                    | AA                              | GG              | 1947031182               |
| SNP_P4_173471_5144  | NW_004517220.1 | Scaffold2210 | 5144                    | CC                              | GG              | 1947031184               |
| SNP_P4_173472_5860  | NW_004517220.1 | Scaffold2210 | 5860                    | GG                              | AA              | 1947031186               |
| SNP_P4_173473_7551  | NW_004517220.1 | Scaffold2210 | 7551                    | GG                              | AA              | 1947031188               |
| SNP_P4_173474_7654  | NW_004517220.1 | Scaffold2210 | 7654                    | AA                              | GG              | 1947031190               |
| SNP_P4_173475_7742  | NW_004517220.1 | Scaffold2210 | 7742                    | GG                              | CC              | 1947031192               |
| SNP_P4_173476_8048  | NW_004517220.1 | Scaffold2210 | 8048                    | TT                              | GG              | 1947031194               |
| SNP_P4_173477_8168  | NW_004517220.1 | Scaffold2210 | 8168                    | AA                              | GG              | 1947031196               |
| SNP_P4_173478_8178  | NW_004517220.1 | Scaffold2210 | 8178                    | CC                              | GG              | 1947031198               |
| SNP_P4_173479_8235  | NW_004517220.1 | Scaffold2210 | 8235                    | TT                              | CC              | 1947031200               |
| SNP_P4_173480_14358 | NW_004517220.1 | Scaffold2210 | 14358                   | CC                              | TT              | 1947031202               |
| SNP_P4_173481_14789 | NW_004517220.1 | Scaffold2210 | 14789                   | TT                              | CC              | 1947031204               |
| SNP_P4_173482_14858 | NW_004517220.1 | Scaffold2210 | 14858                   | TT                              | CC              | 1947031206               |
| SNP_P4_173483_14866 | NW_004517220.1 | Scaffold2210 | 14866                   | GG                              | TT              | 1947031208               |
| SNP_P4_173484_15142 | NW_004517220.1 | Scaffold2210 | 15142                   | AA                              | GG              | 1947031210               |
| SNP_P4_173485_15168 | NW_004517220.1 | Scaffold2210 | 15168                   | GG                              | TT              | 1947031212               |
| SNP_P4_173487_15240 | NW_004517220.1 | Scaffold2210 | 15240                   | AA                              | CC              | 1947031214               |
| SNP_P4_173488_15281 | NW_004517220.1 | Scaffold2210 | 15281                   | AA                              | GG              | 1947031216               |
| SNP_P4_173489_15462 | NW_004517220.1 | Scaffold2210 | 15462                   | TT                              | AA              | 1947031218               |

| SNPs IDs            | Chromosome IDs | Chromosomes  | Physical positions (bp) | CDC Frontier (Reference genome) | (ILWC46 & LPNB) | NCBI SNPdb Accession IDs |
|---------------------|----------------|--------------|-------------------------|---------------------------------|-----------------|--------------------------|
| SNP_P4_173490_15498 | NW_004517220.1 | Scaffold2210 | 15498                   | TT                              | CC              | 1947031220               |
| SNP_P4_173491_15581 | NW_004517220.1 | Scaffold2210 | 15581                   | CC                              | TT              | 1947031222               |
| SNP_P4_173492_15612 | NW_004517220.1 | Scaffold2210 | 15612                   | GG                              | AA              | 1947031224               |
| SNP_P4_173493_15615 | NW_004517220.1 | Scaffold2210 | 15615                   | AA                              | GG              | 1947031226               |
| SNP_P4_173494_22578 | NW_004517220.1 | Scaffold2210 | 22578                   | AA                              | CC              | 1947031228               |
| SNP_P4_173495_22593 | NW_004517220.1 | Scaffold2210 | 22593                   | CC                              | TT              | 1947031230               |
| SNP_P4_173496_22713 | NW_004517220.1 | Scaffold2210 | 22713                   | CC                              | TT              | 1947031232               |
| SNP_P4_173497_22716 | NW_004517220.1 | Scaffold2210 | 22716                   | TT                              | GG              | 1947031233               |
| SNP_P4_173498_22804 | NW_004517220.1 | Scaffold2210 | 22804                   | CC                              | TT              | 1947031235               |
| SNP_P4_173499_22805 | NW_004517220.1 | Scaffold2210 | 22805                   | GG                              | AA              | 1947031237               |
| SNP_P4_173500_22811 | NW_004517220.1 | Scaffold2210 | 22811                   | CC                              | AA              | 1947031239               |
| SNP_P4_173501_22850 | NW_004517220.1 | Scaffold2210 | 22850                   | CC                              | GG              | 1947031241               |
| SNP_P4_173502_22979 | NW_004517220.1 | Scaffold2210 | 22979                   | AA                              | GG              | 1947031243               |
| SNP_P4_173503_22982 | NW_004517220.1 | Scaffold2210 | 22982                   | TT                              | AA              | 1947031245               |
| SNP_P4_173504_23004 | NW_004517220.1 | Scaffold2210 | 23004                   | AA                              | CC              | 1947031247               |
| SNP_P4_173505_23048 | NW_004517220.1 | Scaffold2210 | 23048                   | TT                              | AA              | 1947031249               |
| SNP_P4_173506_23068 | NW_004517220.1 | Scaffold2210 | 23068                   | AA                              | TT              | 1947031251               |
| SNP_P4_173507_23082 | NW_004517220.1 | Scaffold2210 | 23082                   | GG                              | TT              | 1947031253               |
| SNP_P4_173508_23147 | NW_004517220.1 | Scaffold2210 | 23147                   | TT                              | AA              | 1947031255               |
| SNP_P4_173509_23152 | NW_004517220.1 | Scaffold2210 | 23152                   | GG                              | CC              | 1947031257               |
| SNP_P4_173510_27229 | NW_004517220.1 | Scaffold2210 | 27229                   | AA                              | CC              | 1947031259               |
| SNP_P4_173511_27831 | NW_004517220.1 | Scaffold2210 | 27831                   | TT                              | CC              | 1947031261               |
| SNP_P4_173512_27838 | NW_004517220.1 | Scaffold2210 | 27838                   | AA                              | CC              | 1947031263               |
| SNP_P4_173513_27940 | NW_004517220.1 | Scaffold2210 | 27940                   | CC                              | GG              | 1947031265               |
| SNP_P4_173514_27963 | NW_004517220.1 | Scaffold2210 | 27963                   | TT                              | GG              | 1947031267               |
| SNP_P4_173515_27980 | NW_004517220.1 | Scaffold2210 | 27980                   | TT                              | CC              | 1947031269               |
| SNP_P4_173516_27999 | NW_004517220.1 | Scaffold2210 | 27999                   | GG                              | TT              | 1947031271               |
| SNP_P4_173517_28669 | NW_004517220.1 | Scaffold2210 | 28669                   | CC                              | TT              | 1947031273               |
| SNP_P4_173518_28711 | NW_004517220.1 | Scaffold2210 | 28711                   | AA                              | TT              | 1947031275               |
| SNP_P4_173519_28728 | NW_004517220.1 | Scaffold2210 | 28728                   | CC                              | TT              | 1947031277               |
| SNP_P4_173520_28870 | NW_004517220.1 | Scaffold2210 | 28870                   | CC                              | TT              | 1947031279               |
| SNP_P4_173521_28904 | NW_004517220.1 | Scaffold2210 | 28904                   | GG                              | AA              | 1947031281               |
| SNP_P4_173522_28927 | NW_004517220.1 | Scaffold2210 | 28927                   | GG                              | AA              | 1947031283               |
| SNP_P4_173523_28960 | NW_004517220.1 | Scaffold2210 | 28960                   | TT                              | GG              | 1947031285               |
| SNP_P4_173524_28989 | NW_004517220.1 | Scaffold2210 | 28989                   | AA                              | GG              | 1947031287               |
| SNP_P4_173525_28999 | NW_004517220.1 | Scaffold2210 | 28999                   | AA                              | GG              | 1947031289               |
| SNP_P4_173526_31148 | NW_004517220.1 | Scaffold2210 | 31148                   | GG                              | AA              | 1947031291               |
| SNP_P4_173527_31289 | NW_004517220.1 | Scaffold2210 | 31289                   | AA                              | GG              | 1947031292               |
| SNP_P4_173528_31348 | NW_004517220.1 | Scaffold2210 | 31348                   | AA                              | CC              | 1947031294               |
| SNP_P4_173529_31383 | NW_004517220.1 | Scaffold2210 | 31383                   | AA                              | TT              | 1947031296               |
| SNP_P4_173530_31451 | NW_004517220.1 | Scaffold2210 | 31451                   | TT                              | GG              | 1947031298               |
| SNP_P4_173531_31456 | NW_004517220.1 | Scaffold2210 | 31456                   | CC                              | GG              | 1947031300               |

| SNPs IDs            | Chromosome IDs | Chromosomes  | Physical positions (bp) | CDC Frontier (Reference genome) | (ILWC46 & LPNB) | NCBI SNPdb Accession IDs |
|---------------------|----------------|--------------|-------------------------|---------------------------------|-----------------|--------------------------|
| SNP_P4_173532_31533 | NW_004517220.1 | Scaffold2210 | 31533                   | TT                              | CC              | 1947031302               |
| SNP_P4_173533_31555 | NW_004517220.1 | Scaffold2210 | 31555                   | TT                              | AA              | 1947031304               |
| SNP_P4_173534_33052 | NW_004517220.1 | Scaffold2210 | 33052                   | GG                              | AA              | 1947031306               |
| SNP_P4_173535_35034 | NW_004517220.1 | Scaffold2210 | 35034                   | AA                              | GG              | 1947031308               |
| SNP_P4_173536_35126 | NW_004517220.1 | Scaffold2210 | 35126                   | TT                              | AA              | 1947031310               |
| SNP_P4_173537_35844 | NW_004517220.1 | Scaffold2210 | 35844                   | TT                              | GG              | 1947031312               |
| SNP_P4_173538_36016 | NW_004517220.1 | Scaffold2210 | 36016                   | GG                              | AA              | 1947031314               |
| SNP_P4_173539_36082 | NW_004517220.1 | Scaffold2210 | 36082                   | AA                              | CC              | 1947031316               |
| SNP_P4_173540_36292 | NW_004517220.1 | Scaffold2210 | 36292                   | GG                              | AA              | 1947031318               |
| SNP_P4_173541_36346 | NW_004517220.1 | Scaffold2210 | 36346                   | GG                              | TT              | 1947031320               |
| SNP_P4_173542_36355 | NW_004517220.1 | Scaffold2210 | 36355                   | AA                              | GG              | 1947031322               |
| SNP_P4_173543_36357 | NW_004517220.1 | Scaffold2210 | 36357                   | AA                              | TT              | 1947031324               |
| SNP_P4_173544_36360 | NW_004517220.1 | Scaffold2210 | 36360                   | TT                              | GG              | 1947031326               |
| SNP_P4_173545_36361 | NW_004517220.1 | Scaffold2210 | 36361                   | GG                              | TT              | 1947031328               |
| SNP_P4_173546_36362 | NW_004517220.1 | Scaffold2210 | 36362                   | CC                              | TT              | 1947031330               |
| SNP_P4_173547_36367 | NW_004517220.1 | Scaffold2210 | 36367                   | CC                              | GG              | 1947031332               |
| SNP_P4_173548_36369 | NW_004517220.1 | Scaffold2210 | 36369                   | AA                              | GG              | 1947031334               |
| SNP_P4_173549_36381 | NW_004517220.1 | Scaffold2210 | 36381                   | TT                              | GG              | 1947031336               |
| SNP_P4_173550_36415 | NW_004517220.1 | Scaffold2210 | 36415                   | CC                              | TT              | 1947031338               |
| SNP_P4_173551_41321 | NW_004517220.1 | Scaffold2210 | 41321                   | GG                              | AA              | 1947031340               |
| SNP_P4_173552_41537 | NW_004517220.1 | Scaffold2210 | 41537                   | GG                              | CC              | 1947031342               |
| SNP_P4_173553_41589 | NW_004517220.1 | Scaffold2210 | 41589                   | TT                              | AA              | 1947031344               |
| SNP_P4_173554_47449 | NW_004517220.1 | Scaffold2210 | 47449                   | AA                              | GG              | 1947031346               |
| SNP_P4_173555_47456 | NW_004517220.1 | Scaffold2210 | 47456                   | CC                              | AA              | 1947031348               |
| SNP_P4_173556_47469 | NW_004517220.1 | Scaffold2210 | 47469                   | GG                              | AA              | 1947031350               |
| SNP_P4_173557_55226 | NW_004517220.1 | Scaffold2210 | 55226                   | CC                              | AA              | 1947031352               |
| SNP_P4_173558_55230 | NW_004517220.1 | Scaffold2210 | 55230                   | AA                              | TT              | 1947031354               |
| SNP_P4_173559_55641 | NW_004517220.1 | Scaffold2210 | 55641                   | AA                              | TT              | 1947031355               |
| SNP_P4_173560_55647 | NW_004517220.1 | Scaffold2210 | 55647                   | AA                              | CC              | 1947031357               |
| SNP_P4_173561_55649 | NW_004517220.1 | Scaffold2210 | 55649                   | AA                              | CC              | 1947031359               |
| SNP_P4_173562_55664 | NW_004517220.1 | Scaffold2210 | 55664                   | AA                              | GG              | 1947031361               |
| SNP_P4_173563_55668 | NW_004517220.1 | Scaffold2210 | 55668                   | AA                              | TT              | 1947031363               |
| SNP_P4_173564_55922 | NW_004517220.1 | Scaffold2210 | 55922                   | AA                              | CC              | 1947031365               |
| SNP_P4_173565_56293 | NW_004517220.1 | Scaffold2210 | 56293                   | AA                              | GG              | 1947031367               |
| SNP_P4_173566_57331 | NW_004517220.1 | Scaffold2210 | 57331                   | TT                              | CC              | 1947031369               |
| SNP_P4_173567_57352 | NW_004517220.1 | Scaffold2210 | 57352                   | CC                              | TT              | 1947031371               |
| SNP_P4_173568_57416 | NW_004517220.1 | Scaffold2210 | 57416                   | CC                              | AA              | 1947031373               |
| SNP_P4_173569_57543 | NW_004517220.1 | Scaffold2210 | 57543                   | GG                              | AA              | 1947031375               |
| SNP_P4_173570_57579 | NW_004517220.1 | Scaffold2210 | 57579                   | CC                              | TT              | 1947031377               |
| SNP_P4_173571_57645 | NW_004517220.1 | Scaffold2210 | 57645                   | AA                              | GG              | 1947031379               |
| SNP_P4_173572_57682 | NW_004517220.1 | Scaffold2210 | 57682                   | TT                              | GG              | 1947031381               |
| SNP_P4_173573_57828 | NW_004517220.1 | Scaffold2210 | 57828                   | CC                              | TT              | 1947031383               |

| SNPs IDs            | Chromosome IDs | Chromosomes  | Physical positions (bp) | CDC Frontier (Reference genome) | (ILWC46 & LPNB) | NCBI SNPdb Accession IDs |
|---------------------|----------------|--------------|-------------------------|---------------------------------|-----------------|--------------------------|
| SNP_P4_173574_57953 | NW_004517220.1 | Scaffold2210 | 57953                   | AA                              | GG              | 1947031384               |
| SNP_P4_173575_57961 | NW_004517220.1 | Scaffold2210 | 57961                   | TT                              | AA              | 1947031386               |
| SNP_P4_173576_58008 | NW_004517220.1 | Scaffold2210 | 58008                   | AA                              | GG              | 1947031388               |
| SNP_P4_173577_58316 | NW_004517220.1 | Scaffold2210 | 58316                   | TT                              | AA              | 1947031390               |
| SNP_P4_173578_58330 | NW_004517220.1 | Scaffold2210 | 58330                   | GG                              | TT              | 1947031392               |
| SNP_P4_173579_58470 | NW_004517220.1 | Scaffold2210 | 58470                   | AA                              | GG              | 1947031394               |
| SNP_P4_173580_60894 | NW_004517220.1 | Scaffold2210 | 60894                   | GG                              | AA              | 1947031396               |
| SNP_P4_173581_60897 | NW_004517220.1 | Scaffold2210 | 60897                   | AA                              | GG              | 1947031398               |
| SNP_P4_173583_61141 | NW_004517220.1 | Scaffold2210 | 61141                   | CC                              | TT              | 1947031400               |
| SNP_P4_173584_61203 | NW_004517220.1 | Scaffold2210 | 61203                   | AA                              | TT              | 1947031402               |
| SNP_P4_173585_61219 | NW_004517220.1 | Scaffold2210 | 61219                   | CC                              | GG              | 1947031404               |
| SNP_P4_173586_62744 | NW_004517220.1 | Scaffold2210 | 62744                   | TT                              | CC              | 1947031406               |
| SNP_P4_173587_62879 | NW_004517220.1 | Scaffold2210 | 62879                   | AA                              | CC              | 1947031409               |
| SNP_P4_173588_62966 | NW_004517220.1 | Scaffold2210 | 62966                   | CC                              | GG              | 1947031411               |
| SNP_P4_173589_63018 | NW_004517220.1 | Scaffold2210 | 63018                   | GG                              | TT              | 1947031413               |
| SNP_P4_173590_63050 | NW_004517220.1 | Scaffold2210 | 63050                   | AA                              | GG              | 1947031415               |
| SNP_P4_173591_63110 | NW_004517220.1 | Scaffold2210 | 63110                   | TT                              | GG              | 1947031417               |
| SNP_P4_173592_63138 | NW_004517220.1 | Scaffold2210 | 63138                   | CC                              | TT              | 1947031419               |
| SNP_P4_173593_63154 | NW_004517220.1 | Scaffold2210 | 63154                   | GG                              | CC              | 1947031421               |
| SNP_P4_173594_63171 | NW_004517220.1 | Scaffold2210 | 63171                   | TT                              | CC              | 1947031423               |
| SNP_P4_173595_63285 | NW_004517220.1 | Scaffold2210 | 63285                   | CC                              | GG              | 1947031425               |
| SNP_P4_173596_63286 | NW_004517220.1 | Scaffold2210 | 63286                   | CC                              | TT              | 1947031427               |
| SNP_P4_173597_63863 | NW_004517220.1 | Scaffold2210 | 63863                   | CC                              | TT              | 1947031429               |
| SNP_P4_173598_65428 | NW_004517220.1 | Scaffold2210 | 65428                   | AA                              | GG              | 1947031431               |
| SNP_P4_173599_65462 | NW_004517220.1 | Scaffold2210 | 65462                   | GG                              | CC              | 1947031434               |
| SNP_P4_173600_65506 | NW_004517220.1 | Scaffold2210 | 65506                   | GG                              | AA              | 1947031436               |
| SNP_P4_173601_65672 | NW_004517220.1 | Scaffold2210 | 65672                   | TT                              | CC              | 1947031438               |
| SNP_P4_173602_65684 | NW_004517220.1 | Scaffold2210 | 65684                   | CC                              | TT              | 1947031440               |
| SNP_P4_173603_65748 | NW_004517220.1 | Scaffold2210 | 65748                   | TT                              | GG              | 1947031442               |
| SNP_P4_173604_65941 | NW_004517220.1 | Scaffold2210 | 65941                   | TT                              | CC              | 1947031444               |
| SNP_P4_173605_65998 | NW_004517220.1 | Scaffold2210 | 65998                   | TT                              | CC              | 1947031446               |
| SNP_P4_173606_66038 | NW_004517220.1 | Scaffold2210 | 66038                   | TT                              | AA              | 1947031448               |
| SNP_P4_173607_66076 | NW_004517220.1 | Scaffold2210 | 66076                   | GG                              | AA              | 1947031450               |
| SNP_P4_173608_66094 | NW_004517220.1 | Scaffold2210 | 66094                   | GG                              | TT              | 1947031452               |
| SNP_P4_173609_66201 | NW_004517220.1 | Scaffold2210 | 66201                   | TT                              | AA              | 1947031454               |
| SNP_P4_173610_66247 | NW_004517220.1 | Scaffold2210 | 66247                   | TT                              | AA              | 1947031456               |
| SNP_P4_173611_66398 | NW_004517220.1 | Scaffold2210 | 66398                   | GG                              | AA              | 1947031458               |
| SNP_P4_173612_66659 | NW_004517220.1 | Scaffold2210 | 66659                   | GG                              | AA              | 1947031460               |
| SNP_P4_173613_66664 | NW_004517220.1 | Scaffold2210 | 66664                   | TT                              | CC              | 1947031462               |
| SNP_P4_173614_70162 | NW_004517220.1 | Scaffold2210 | 70162                   | CC                              | TT              | 1947031464               |
| SNP_P4_173615_71295 | NW_004517220.1 | Scaffold2210 | 71295                   | CC                              | TT              | 1947031466               |
| SNP_P4_173616_71594 | NW_004517220.1 | Scaffold2210 | 71594                   | GG                              | AA              | 1947031468               |

| SNPs IDs            | Chromosome IDs | Chromosomes  | Physical positions (bp) | CDC Frontier (Reference genome) | (ILWC46 & LPNB) | NCBI SNPdb Accession IDs |
|---------------------|----------------|--------------|-------------------------|---------------------------------|-----------------|--------------------------|
| SNP_P4_173617_71630 | NW_004517220.1 | Scaffold2210 | 71630                   | TT                              | GG              | 1947031470               |
| SNP_P4_173618_71758 | NW_004517220.1 | Scaffold2210 | 71758                   | GG                              | AA              | 1947031472               |
| SNP_P4_173619_72009 | NW_004517220.1 | Scaffold2210 | 72009                   | GG                              | AA              | 1947031474               |
| SNP_P4_173620_72543 | NW_004517220.1 | Scaffold2210 | 72543                   | TT                              | AA              | 1947031476               |
| SNP_P4_173621_7479  | NW_004517223.1 | Scaffold2214 | 7479                    | GG                              | AA              | 1947031478               |
| SNP_P4_173622_10814 | NW_004517223.1 | Scaffold2214 | 10814                   | AA                              | CC              | 1947031480               |
| SNP_P4_173624_16905 | NW_004517223.1 | Scaffold2214 | 16905                   | AA                              | CC              | 1947031482               |
| SNP_P4_173625_17188 | NW_004517223.1 | Scaffold2214 | 17188                   | CC                              | TT              | 1947031484               |
| SNP_P4_173626_17306 | NW_004517223.1 | Scaffold2214 | 17306                   | AA                              | CC              | 1947031486               |
| SNP_P4_173627_17878 | NW_004517223.1 | Scaffold2214 | 17878                   | AA                              | GG              | 1947031487               |
| SNP_P4_173628_9487  | NW_004517224.1 | Scaffold2216 | 9487                    | GG                              | AA              | 1947031489               |
| SNP_P4_173629_9491  | NW_004517224.1 | Scaffold2216 | 9491                    | TT                              | CC              | 1947031491               |
| SNP_P4_173630_9527  | NW_004517224.1 | Scaffold2216 | 9527                    | CC                              | GG              | 1947031493               |
| SNP_P4_173631_9724  | NW_004517224.1 | Scaffold2216 | 9724                    | TT                              | CC              | 1947031495               |
| SNP_P4_173632_9921  | NW_004517224.1 | Scaffold2216 | 9921                    | AA                              | GG              | 1947031497               |
| SNP_P4_173633_32103 | NW_004517224.1 | Scaffold2216 | 32103                   | GG                              | TT              | 1947031499               |
| SNP_P4_173634_32109 | NW_004517224.1 | Scaffold2216 | 32109                   | AA                              | TT              | 1947031501               |
| SNP_P4_173635_991   | NW_004517226.1 | Scaffold2218 | 991                     | AA                              | CC              | 1947031503               |
| SNP_P4_173636_1354  | NW_004517226.1 | Scaffold2218 | 1354                    | TT                              | AA              | 1947031505               |
| SNP_P4_173637_1608  | NW_004517226.1 | Scaffold2218 | 1608                    | CC                              | TT              | 1947031507               |
| SNP_P4_173638_2944  | NW_004517226.1 | Scaffold2218 | 2944                    | TT                              | CC              | 1947031509               |
| SNP_P4_173639_2993  | NW_004517226.1 | Scaffold2218 | 2993                    | AA                              | TT              | 1947031511               |
| SNP_P4_173640_3264  | NW_004517226.1 | Scaffold2218 | 3264                    | AA                              | TT              | 1947031513               |
| SNP_P4_173641_10536 | NW_004517226.1 | Scaffold2218 | 10536                   | CC                              | AA              | 1947031515               |
| SNP_P4_173642_10571 | NW_004517226.1 | Scaffold2218 | 10571                   | TT                              | CC              | 1947031517               |
| SNP_P4_173643_10606 | NW_004517226.1 | Scaffold2218 | 10606                   | GG                              | AA              | 1947031519               |
| SNP_P4_173644_10834 | NW_004517226.1 | Scaffold2218 | 10834                   | AA                              | TT              | 1947031521               |
| SNP_P4_173645_10934 | NW_004517226.1 | Scaffold2218 | 10934                   | GG                              | AA              | 1947031523               |
| SNP_P4_173646_11163 | NW_004517226.1 | Scaffold2218 | 11163                   | TT                              | CC              | 1947031525               |
| SNP_P4_173647_11708 | NW_004517226.1 | Scaffold2218 | 11708                   | TT                              | GG              | 1947031527               |
| SNP_P4_173648_11925 | NW_004517226.1 | Scaffold2218 | 11925                   | GG                              | AA              | 1947031529               |
| SNP_P4_173649_12575 | NW_004517226.1 | Scaffold2218 | 12575                   | GG                              | AA              | 1947031531               |
| SNP_P4_173650_10398 | NW_004517227.1 | Scaffold2219 | 10398                   | CC                              | AA              | 1947031533               |
| SNP_P4_173651_10451 | NW_004517227.1 | Scaffold2219 | 10451                   | TT                              | GG              | 1947031535               |
| SNP_P4_173652_10456 | NW_004517227.1 | Scaffold2219 | 10456                   | AA                              | GG              | 1947031537               |
| SNP_P4_173653_771   | NW_004517228.1 | Scaffold2222 | 771                     | AA                              | TT              | 1947031539               |
| SNP_P4_173654_1204  | NW_004517228.1 | Scaffold2222 | 1204                    | CC                              | GG              | 1947031541               |
| SNP_P4_173656_248   | NW_004517230.1 | Scaffold2225 | 248                     | CC                              | TT              | 1947031543               |
| SNP_P4_173657_701   | NW_004517230.1 | Scaffold2225 | 701                     | AA                              | GG              | 1947031545               |
| SNP_P4_173658_702   | NW_004517230.1 | Scaffold2225 | 702                     | GG                              | AA              | 1947031547               |
| SNP_P4_173659_708   | NW_004517230.1 | Scaffold2225 | 708                     | TT                              | CC              | 1947031549               |
| SNP_P4_173660_803   | NW_004517230.1 | Scaffold2225 | 803                     | TT                              | AA              | 1947031551               |



| SNPs IDs            | Chromosome IDs | Chromosomes  | Physical positions (bp) | CDC Frontier (Reference genome) | (ILWC46 & LPNB) | NCBI SNPdb Accession IDs |
|---------------------|----------------|--------------|-------------------------|---------------------------------|-----------------|--------------------------|
| SNP_P4_173661_1830  | NW_004517232.1 | Scaffold2227 | 1830                    | AA                              | CC              | 1947031553               |
| SNP_P4_173662_1851  | NW_004517232.1 | Scaffold2227 | 1851                    | TT                              | CC              | 1947031555               |
| SNP_P4_173663_1868  | NW_004517232.1 | Scaffold2227 | 1868                    | GG                              | TT              | 1947031557               |
| SNP_P4_173664_2028  | NW_004517232.1 | Scaffold2227 | 2028                    | TT                              | GG              | 1947031559               |
| SNP_P4_173665_2739  | NW_004517232.1 | Scaffold2227 | 2739                    | CC                              | TT              | 1947031561               |
| SNP_P4_173668_8691  | NW_004517232.1 | Scaffold2227 | 8691                    | TT                              | GG              | 1947031563               |
| SNP_P4_173669_16917 | NW_004517232.1 | Scaffold2227 | 16917                   | CC                              | TT              | 1947031565               |
| SNP_P4_173670_18606 | NW_004517232.1 | Scaffold2227 | 18606                   | TT                              | AA              | 1947031567               |
| SNP_P4_173671_18622 | NW_004517232.1 | Scaffold2227 | 18622                   | TT                              | CC              | 1947031569               |
| SNP_P4_173672_27899 | NW_004517232.1 | Scaffold2227 | 27899                   | GG                              | AA              | 1947031571               |
| SNP_P4_173673_28015 | NW_004517232.1 | Scaffold2227 | 28015                   | CC                              | AA              | 1947031573               |
| SNP_P4_173674_28202 | NW_004517232.1 | Scaffold2227 | 28202                   | GG                              | TT              | 1947031575               |
| SNP_P4_173675_29242 | NW_004517232.1 | Scaffold2227 | 29242                   | AA                              | GG              | 1947031577               |
| SNP_P4_173676_29258 | NW_004517232.1 | Scaffold2227 | 29258                   | CC                              | AA              | 1947031579               |
| SNP_P4_173677_29271 | NW_004517232.1 | Scaffold2227 | 29271                   | TT                              | CC              | 1947031581               |
| SNP_P4_173678_29276 | NW_004517232.1 | Scaffold2227 | 29276                   | CC                              | GG              | 1947031583               |
| SNP_P4_173679_29299 | NW_004517232.1 | Scaffold2227 | 29299                   | CC                              | TT              | 1947031585               |
| SNP_P4_173680_29312 | NW_004517232.1 | Scaffold2227 | 29312                   | TT                              | CC              | 1947031587               |
| SNP_P4_173681_29338 | NW_004517232.1 | Scaffold2227 | 29338                   | AA                              | GG              | 1947031589               |
| SNP_P4_173682_29399 | NW_004517232.1 | Scaffold2227 | 29399                   | AA                              | GG              | 1947031591               |
| SNP_P4_173683_29425 | NW_004517232.1 | Scaffold2227 | 29425                   | AA                              | GG              | 1947031593               |
| SNP_P4_173684_29458 | NW_004517232.1 | Scaffold2227 | 29458                   | GG                              | AA              | 1947031594               |
| SNP_P4_173685_29464 | NW_004517232.1 | Scaffold2227 | 29464                   | TT                              | CC              | 1947031596               |
| SNP_P4_173686_29467 | NW_004517232.1 | Scaffold2227 | 29467                   | TT                              | CC              | 1947031598               |
| SNP_P4_173687_29485 | NW_004517232.1 | Scaffold2227 | 29485                   | AA                              | GG              | 1947031600               |
| SNP_P4_173688_29500 | NW_004517232.1 | Scaffold2227 | 29500                   | AA                              | TT              | 1947031602               |
| SNP_P4_173689_29503 | NW_004517232.1 | Scaffold2227 | 29503                   | GG                              | AA              | 1947031604               |
| SNP_P4_173690_29524 | NW_004517232.1 | Scaffold2227 | 29524                   | TT                              | AA              | 1947031606               |
| SNP_P4_173691_29530 | NW_004517232.1 | Scaffold2227 | 29530                   | AA                              | CC              | 1947031608               |
| SNP_P4_173692_29793 | NW_004517232.1 | Scaffold2227 | 29793                   | GG                              | AA              | 1947031610               |
| SNP_P4_173693_29807 | NW_004517232.1 | Scaffold2227 | 29807                   | TT                              | CC              | 1947031612               |
| SNP_P4_173694_29809 | NW_004517232.1 | Scaffold2227 | 29809                   | GG                              | AA              | 1947031614               |
| SNP_P4_173695_32112 | NW_004517232.1 | Scaffold2227 | 32112                   | TT                              | AA              | 1947031616               |
| SNP_P4_173697_42087 | NW_004517232.1 | Scaffold2227 | 42087                   | GG                              | AA              | 1947031618               |
| SNP_P4_173698_43752 | NW_004517232.1 | Scaffold2227 | 43752                   | AA                              | GG              | 1947031620               |
| SNP_P4_173699_43760 | NW_004517232.1 | Scaffold2227 | 43760                   | GG                              | AA              | 1947031622               |
| SNP_P4_173700_53549 | NW_004517232.1 | Scaffold2227 | 53549                   | GG                              | CC              | 1947031624               |
| SNP_P4_173701_543   | NW_004517236.1 | Scaffold2233 | 543                     | TT                              | GG              | 1947031626               |
| SNP_P4_173702_581   | NW_004517236.1 | Scaffold2233 | 581                     | TT                              | AA              | 1947031628               |
| SNP_P4_173703_717   | NW_004517236.1 | Scaffold2233 | 717                     | TT                              | CC              | 1947031630               |
| SNP_P4_173704_870   | NW_004517236.1 | Scaffold2233 | 870                     | TT                              | AA              | 1947031632               |
| SNP_P4_173705_468   | NW_004517238.1 | Scaffold2235 | 468                     | AA                              | GG              | 1947031634               |

| SNPs IDs            | Chromosome IDs | Chromosomes  | Physical positions (bp) | CDC Frontier (Reference genome) | (ILWC46 & LPNB) | NCBI SNPdb Accession IDs |
|---------------------|----------------|--------------|-------------------------|---------------------------------|-----------------|--------------------------|
| SNP_P4_173706_470   | NW_004517238.1 | Scaffold2235 | 470                     | TT                              | CC              | 1947031636               |
| SNP_P4_173707_477   | NW_004517238.1 | Scaffold2235 | 477                     | CC                              | GG              | 1947031638               |
| SNP_P4_173708_1322  | NW_004517238.1 | Scaffold2235 | 1322                    | CC                              | GG              | 1947031640               |
| SNP_P4_173709_1499  | NW_004517238.1 | Scaffold2235 | 1499                    | AA                              | CC              | 1947031642               |
| SNP_P4_173710_1811  | NW_004517238.1 | Scaffold2235 | 1811                    | GG                              | AA              | 1947031645               |
| SNP_P4_173711_1898  | NW_004517238.1 | Scaffold2235 | 1898                    | CC                              | AA              | 1947031647               |
| SNP_P4_173712_1950  | NW_004517238.1 | Scaffold2235 | 1950                    | TT                              | CC              | 1947031649               |
| SNP_P4_173713_1542  | NW_004517240.1 | Scaffold2238 | 1542                    | AA                              | CC              | 1947031651               |
| SNP_P4_173714_8799  | NW_004517240.1 | Scaffold2238 | 8799                    | TT                              | CC              | 1947031653               |
| SNP_P4_173715_8819  | NW_004517240.1 | Scaffold2238 | 8819                    | GG                              | CC              | 1947031655               |
| SNP_P4_173716_9084  | NW_004517240.1 | Scaffold2238 | 9084                    | TT                              | AA              | 1947031657               |
| SNP_P4_173717_9167  | NW_004517240.1 | Scaffold2238 | 9167                    | AA                              | GG              | 1947031659               |
| SNP_P4_173718_720   | NW_004517241.1 | Scaffold2239 | 720                     | AA                              | CC              | 1947031661               |
| SNP_P4_173719_815   | NW_004517241.1 | Scaffold2239 | 815                     | GG                              | AA              | 1947031663               |
| SNP_P4_173720_972   | NW_004517241.1 | Scaffold2239 | 972                     | AA                              | TT              | 1947031665               |
| SNP_P4_173721_3645  | NW_004517241.1 | Scaffold2239 | 3645                    | TT                              | AA              | 1947031667               |
| SNP_P4_173722_979   | NW_004517242.1 | Scaffold2240 | 979                     | GG                              | CC              | 1947031669               |
| SNP_P4_173723_5892  | NW_004517243.1 | Scaffold2241 | 5892                    | GG                              | AA              | 1947031672               |
| SNP_P4_173724_5916  | NW_004517243.1 | Scaffold2241 | 5916                    | CC                              | GG              | 1947031674               |
| SNP_P4_173725_5979  | NW_004517243.1 | Scaffold2241 | 5979                    | AA                              | TT              | 1947031676               |
| SNP_P4_173726_6226  | NW_004517243.1 | Scaffold2241 | 6226                    | AA                              | TT              | 1947031678               |
| SNP_P4_173727_6285  | NW_004517243.1 | Scaffold2241 | 6285                    | TT                              | CC              | 1947031680               |
| SNP_P4_173728_6524  | NW_004517243.1 | Scaffold2241 | 6524                    | GG                              | CC              | 1947031683               |
| SNP_P4_173729_24860 | NW_004517243.1 | Scaffold2241 | 24860                   | AA                              | GG              | 1947031685               |
| SNP_P4_173730_24906 | NW_004517243.1 | Scaffold2241 | 24906                   | AA                              | GG              | 1947031687               |
| SNP_P4_173731_24908 | NW_004517243.1 | Scaffold2241 | 24908                   | CC                              | TT              | 1947031690               |
| SNP_P4_173732_378   | NW_004517244.1 | Scaffold2243 | 378                     | GG                              | CC              | 1947031692               |
| SNP_P4_173733_647   | NW_004517244.1 | Scaffold2243 | 647                     | AA                              | CC              | 1947031694               |
| SNP_P4_173734_648   | NW_004517244.1 | Scaffold2243 | 648                     | TT                              | CC              | 1947031696               |
| SNP_P4_173735_678   | NW_004517244.1 | Scaffold2243 | 678                     | CC                              | AA              | 1947031698               |
| SNP_P4_173736_797   | NW_004517244.1 | Scaffold2243 | 797                     | CC                              | GG              | 1947031700               |
| SNP_P4_173737_823   | NW_004517244.1 | Scaffold2243 | 823                     | AA                              | GG              | 1947031702               |
| SNP_P4_173738_971   | NW_004517244.1 | Scaffold2243 | 971                     | CC                              | TT              | 1947031705               |
| SNP_P4_173739_6035  | NW_004517245.1 | Scaffold2244 | 6035                    | TT                              | CC              | 1947031707               |
| SNP_P4_173740_6071  | NW_004517245.1 | Scaffold2244 | 6071                    | CC                              | AA              | 1947031709               |
| SNP_P4_173741_6156  | NW_004517245.1 | Scaffold2244 | 6156                    | AA                              | GG              | 1947031711               |
| SNP_P4_173742_6162  | NW_004517245.1 | Scaffold2244 | 6162                    | CC                              | TT              | 1947031713               |
| SNP_P4_173743_6173  | NW_004517245.1 | Scaffold2244 | 6173                    | TT                              | CC              | 1947031715               |
| SNP_P4_173744_6404  | NW_004517245.1 | Scaffold2244 | 6404                    | GG                              | AA              | 1947031717               |
| SNP_P4_173745_824   | NW_004517247.1 | Scaffold2247 | 824                     | AA                              | GG              | 1947031720               |
| SNP_P4_173746_207   | NW_004517249.1 | Scaffold2249 | 207                     | TT                              | CC              | 1947031722               |
| SNP_P4_173747_228   | NW_004517249.1 | Scaffold2249 | 228                     | GG                              | AA              | 1947031724               |

| SNPs IDs            | Chromosome IDs | Chromosomes  | Physical positions (bp) | CDC Frontier (Reference genome) | (ILWC46 & LPNB) | NCBI SNPdb Accession IDs |
|---------------------|----------------|--------------|-------------------------|---------------------------------|-----------------|--------------------------|
| SNP_P4_173748_257   | NW_004517249.1 | Scaffold2249 | 257                     | TT                              | CC              | 1947031726               |
| SNP_P4_173749_334   | NW_004517249.1 | Scaffold2249 | 334                     | AA                              | GG              | 1947031728               |
| SNP_P4_173750_413   | NW_004517249.1 | Scaffold2249 | 413                     | GG                              | TT              | 1947031730               |
| SNP_P4_173751_436   | NW_004517249.1 | Scaffold2249 | 436                     | GG                              | TT              | 1947031733               |
| SNP_P4_173752_450   | NW_004517249.1 | Scaffold2249 | 450                     | CC                              | TT              | 1947031735               |
| SNP_P4_173753_567   | NW_004517249.1 | Scaffold2249 | 567                     | CC                              | TT              | 1947031737               |
| SNP_P4_173754_587   | NW_004517249.1 | Scaffold2249 | 587                     | TT                              | CC              | 1947031739               |
| SNP_P4_173755_609   | NW_004517249.1 | Scaffold2249 | 609                     | CC                              | TT              | 1947031741               |
| SNP_P4_173756_627   | NW_004517249.1 | Scaffold2249 | 627                     | CC                              | TT              | 1947031743               |
| SNP_P4_173757_699   | NW_004517249.1 | Scaffold2249 | 699                     | TT                              | CC              | 1947031746               |
| SNP_P4_173758_776   | NW_004517249.1 | Scaffold2249 | 776                     | TT                              | AA              | 1947031748               |
| SNP_P4_173759_793   | NW_004517249.1 | Scaffold2249 | 793                     | CC                              | TT              | 1947031750               |
| SNP_P4_173760_930   | NW_004517249.1 | Scaffold2249 | 930                     | CC                              | TT              | 1947031752               |
| SNP_P4_173761_945   | NW_004517249.1 | Scaffold2249 | 945                     | AA                              | GG              | 1947031754               |
| SNP_P4_173763_1329  | NW_004517249.1 | Scaffold2249 | 1329                    | AA                              | CC              | 1947031756               |
| SNP_P4_173764_1372  | NW_004517249.1 | Scaffold2249 | 1372                    | CC                              | GG              | 1947031758               |
| SNP_P4_173765_1379  | NW_004517249.1 | Scaffold2249 | 1379                    | GG                              | AA              | 1947031760               |
| SNP_P4_173766_23911 | NW_004517249.1 | Scaffold2249 | 23911                   | AA                              | GG              | 1947031762               |
| SNP_P4_173767_25117 | NW_004517249.1 | Scaffold2249 | 25117                   | AA                              | GG              | 1947031764               |
| SNP_P4_173768_29452 | NW_004517249.1 | Scaffold2249 | 29452                   | AA                              | GG              | 1947031766               |
| SNP_P4_173769_34036 | NW_004517249.1 | Scaffold2249 | 34036                   | TT                              | CC              | 1947031768               |
| SNP_P4_173770_36210 | NW_004517249.1 | Scaffold2249 | 36210                   | TT                              | CC              | 1947031771               |
| SNP_P4_173771_49072 | NW_004517249.1 | Scaffold2249 | 49072                   | GG                              | TT              | 1947031773               |
| SNP_P4_173772_49091 | NW_004517249.1 | Scaffold2249 | 49091                   | TT                              | GG              | 1947031775               |
| SNP_P4_173773_49358 | NW_004517249.1 | Scaffold2249 | 49358                   | AA                              | TT              | 1947031777               |
| SNP_P4_173774_49587 | NW_004517249.1 | Scaffold2249 | 49587                   | GG                              | AA              | 1947031779               |
| SNP_P4_173775_52390 | NW_004517249.1 | Scaffold2249 | 52390                   | TT                              | AA              | 1947031781               |
| SNP_P4_173776_52411 | NW_004517249.1 | Scaffold2249 | 52411                   | TT                              | CC              | 1947031783               |
| SNP_P4_173777_52416 | NW_004517249.1 | Scaffold2249 | 52416                   | TT                              | AA              | 1947031785               |
| SNP_P4_173778_52594 | NW_004517249.1 | Scaffold2249 | 52594                   | TT                              | AA              | 1947031787               |
| SNP_P4_173779_52602 | NW_004517249.1 | Scaffold2249 | 52602                   | TT                              | CC              | 1947031789               |
| SNP_P4_173780_52645 | NW_004517249.1 | Scaffold2249 | 52645                   | AA                              | TT              | 1947031791               |
| SNP_P4_173781_52648 | NW_004517249.1 | Scaffold2249 | 52648                   | AA                              | TT              | 1947031793               |
| SNP_P4_173782_52663 | NW_004517249.1 | Scaffold2249 | 52663                   | TT                              | GG              | 1947031795               |
| SNP_P4_173783_53756 | NW_004517249.1 | Scaffold2249 | 53756                   | AA                              | GG              | 1947031797               |
| SNP_P4_173784_54266 | NW_004517249.1 | Scaffold2249 | 54266                   | TT                              | GG              | 1947031799               |
| SNP_P4_173785_54494 | NW_004517249.1 | Scaffold2249 | 54494                   | CC                              | TT              | 1947031802               |
| SNP_P4_173786_56871 | NW_004517249.1 | Scaffold2249 | 56871                   | TT                              | GG              | 1947031804               |
| SNP_P4_173787_56882 | NW_004517249.1 | Scaffold2249 | 56882                   | CC                              | AA              | 1947031806               |
| SNP_P4_173788_56900 | NW_004517249.1 | Scaffold2249 | 56900                   | GG                              | CC              | 1947031808               |
| SNP_P4_173789_57297 | NW_004517249.1 | Scaffold2249 | 57297                   | TT                              | AA              | 1947031810               |
| SNP_P4_173790_73271 | NW_004517249.1 | Scaffold2249 | 73271                   | AA                              | TT              | 1947031812               |

| SNPs IDs            | Chromosome IDs | Chromosomes  | Physical positions (bp) | CDC Frontier (Reference genome) | (ILWC46 & LPNB) | NCBI SNPdb Accession IDs |
|---------------------|----------------|--------------|-------------------------|---------------------------------|-----------------|--------------------------|
| SNP_P4_173791_73871 | NW_004517249.1 | Scaffold2249 | 73871                   | AA                              | GG              | 1947031814               |
| SNP_P4_173792_73872 | NW_004517249.1 | Scaffold2249 | 73872                   | GG                              | TT              | 1947031816               |
| SNP_P4_173793_73889 | NW_004517249.1 | Scaffold2249 | 73889                   | GG                              | AA              | 1947031818               |
| SNP_P4_173794_80858 | NW_004517249.1 | Scaffold2249 | 80858                   | TT                              | GG              | 1947031820               |
| SNP_P4_173795_80879 | NW_004517249.1 | Scaffold2249 | 80879                   | TT                              | GG              | 1947031822               |
| SNP_P4_173796_82914 | NW_004517249.1 | Scaffold2249 | 82914                   | AA                              | GG              | 1947031824               |
| SNP_P4_173797_83451 | NW_004517249.1 | Scaffold2249 | 83451                   | AA                              | GG              | 1947031826               |
| SNP_P4_173798_83478 | NW_004517249.1 | Scaffold2249 | 83478                   | AA                              | GG              | 1947031828               |
| SNP_P4_173799_83501 | NW_004517249.1 | Scaffold2249 | 83501                   | TT                              | CC              | 1947031830               |
| SNP_P4_173800_83539 | NW_004517249.1 | Scaffold2249 | 83539                   | TT                              | GG              | 1947031833               |
| SNP_P4_173801_437   | NW_004517253.1 | Scaffold2254 | 437                     | AA                              | TT              | 1947031835               |
| SNP_P4_173802_462   | NW_004517253.1 | Scaffold2254 | 462                     | AA                              | TT              | 1947031837               |
| SNP_P4_173803_491   | NW_004517254.1 | Scaffold2256 | 491                     | GG                              | AA              | 1947031839               |
| SNP_P4_173804_707   | NW_004517254.1 | Scaffold2256 | 707                     | CC                              | TT              | 1947031841               |
| SNP_P4_173805_1033  | NW_004517254.1 | Scaffold2256 | 1033                    | CC                              | TT              | 1947031843               |
| SNP_P4_173806_1468  | NW_004517254.1 | Scaffold2256 | 1468                    | GG                              | AA              | 1947031845               |
| SNP_P4_173807_1621  | NW_004517254.1 | Scaffold2256 | 1621                    | AA                              | TT              | 1947031847               |
| SNP_P4_173808_1947  | NW_004517254.1 | Scaffold2256 | 1947                    | TT                              | CC              | 1947031849               |
| SNP_P4_173809_2350  | NW_004517254.1 | Scaffold2256 | 2350                    | GG                              | AA              | 1947031851               |
| SNP_P4_173810_2900  | NW_004517254.1 | Scaffold2256 | 2900                    | GG                              | CC              | 1947031853               |
| SNP_P4_173811_2934  | NW_004517254.1 | Scaffold2256 | 2934                    | AA                              | GG              | 1947031855               |
| SNP_P4_173812_3248  | NW_004517254.1 | Scaffold2256 | 3248                    | TT                              | CC              | 1947031857               |
| SNP_P4_173813_3282  | NW_004517254.1 | Scaffold2256 | 3282                    | CC                              | GG              | 1947031859               |
| SNP_P4_173814_5250  | NW_004517254.1 | Scaffold2256 | 5250                    | GG                              | CC              | 1947031861               |
| SNP_P4_173815_602   | NW_004517256.1 | Scaffold2258 | 602                     | TT                              | CC              | 1947031863               |
| SNP_P4_173816_623   | NW_004517256.1 | Scaffold2258 | 623                     | AA                              | TT              | 1947031865               |
| SNP_P4_173817_2221  | NW_004517256.1 | Scaffold2258 | 2221                    | AA                              | TT              | 1947031868               |
| SNP_P4_173818_2311  | NW_004517256.1 | Scaffold2258 | 2311                    | AA                              | GG              | 1947031870               |
| SNP_P4_173819_1517  | NW_004517259.1 | Scaffold2263 | 1517                    | TT                              | AA              | 1947031872               |
| SNP_P4_173820_1769  | NW_004517259.1 | Scaffold2263 | 1769                    | AA                              | TT              | 1947031874               |
| SNP_P4_173821_1790  | NW_004517259.1 | Scaffold2263 | 1790                    | TT                              | CC              | 1947031876               |
| SNP_P4_173822_1821  | NW_004517259.1 | Scaffold2263 | 1821                    | TT                              | CC              | 1947031878               |
| SNP_P4_173823_1921  | NW_004517259.1 | Scaffold2263 | 1921                    | TT                              | CC              | 1947031880               |
| SNP_P4_173824_1990  | NW_004517259.1 | Scaffold2263 | 1990                    | AA                              | CC              | 1947031882               |
| SNP_P4_173825_2101  | NW_004517259.1 | Scaffold2263 | 2101                    | TT                              | AA              | 1947031884               |
| SNP_P4_173826_2176  | NW_004517259.1 | Scaffold2263 | 2176                    | GG                              | AA              | 1947031886               |
| SNP_P4_173827_2195  | NW_004517259.1 | Scaffold2263 | 2195                    | CC                              | TT              | 1947031888               |
| SNP_P4_173828_3833  | NW_004517260.1 | Scaffold2264 | 3833                    | GG                              | AA              | 1947031890               |
| SNP_P4_173829_313   | NW_004517262.1 | Scaffold2268 | 313                     | GG                              | AA              | 1947031893               |
| SNP_P4_173830_1057  | NW_004517262.1 | Scaffold2268 | 1057                    | TT                              | AA              | 1947031895               |
| SNP_P4_173831_1077  | NW_004517262.1 | Scaffold2268 | 1077                    | TT                              | CC              | 1947031897               |
| SNP_P4_173832_7122  | NW_004517262.1 | Scaffold2268 | 7122                    | AA                              | GG              | 1947031899               |

| SNPs IDs             | Chromosome IDs | Chromosomes  | Physical positions (bp) | CDC Frontier (Reference genome) | (ILWC46 & LPNB) | NCBI SNPdb Accession IDs |
|----------------------|----------------|--------------|-------------------------|---------------------------------|-----------------|--------------------------|
| SNP_P4_173833_9154   | NW_004517262.1 | Scaffold2268 | 9154                    | AA                              | GG              | 1947031901               |
| SNP_P4_173836_9184   | NW_004517262.1 | Scaffold2268 | 9184                    | AA                              | GG              | 1947031903               |
| SNP_P4_173837_9235   | NW_004517262.1 | Scaffold2268 | 9235                    | CC                              | TT              | 1947031905               |
| SNP_P4_173839_2205   | NW_004517263.1 | Scaffold2269 | 2205                    | CC                              | GG              | 1947031907               |
| SNP_P4_173841_10596  | NW_004517263.1 | Scaffold2269 | 10596                   | AA                              | GG              | 1947031909               |
| SNP_P4_173842_10654  | NW_004517263.1 | Scaffold2269 | 10654                   | GG                              | AA              | 1947031911               |
| SNP_P4_173843_10655  | NW_004517263.1 | Scaffold2269 | 10655                   | TT                              | GG              | 1947031913               |
| SNP_P4_173844_10656  | NW_004517263.1 | Scaffold2269 | 10656                   | CC                              | TT              | 1947031915               |
| SNP_P4_173845_10660  | NW_004517263.1 | Scaffold2269 | 10660                   | GG                              | AA              | 1947031917               |
| SNP_P4_173847_18469  | NW_004517263.1 | Scaffold2269 | 18469                   | AA                              | GG              | 1947031919               |
| SNP_P4_173848_18667  | NW_004517263.1 | Scaffold2269 | 18667                   | TT                              | CC              | 1947031921               |
| SNP_P4_173849_20143  | NW_004517263.1 | Scaffold2269 | 20143                   | TT                              | AA              | 1947031923               |
| SNP_P4_173850_20399  | NW_004517263.1 | Scaffold2269 | 20399                   | AA                              | CC              | 1947031925               |
| SNP_P4_173851_43093  | NW_004517263.1 | Scaffold2269 | 43093                   | TT                              | GG              | 1947031927               |
| SNP_P4_173852_43131  | NW_004517263.1 | Scaffold2269 | 43131                   | AA                              | GG              | 1947031929               |
| SNP_P4_173853_43136  | NW_004517263.1 | Scaffold2269 | 43136                   | AA                              | GG              | 1947031931               |
| SNP_P4_173854_43194  | NW_004517263.1 | Scaffold2269 | 43194                   | AA                              | CC              | 1947031933               |
| SNP_P4_173855_43242  | NW_004517263.1 | Scaffold2269 | 43242                   | TT                              | GG              | 1947031935               |
| SNP_P4_173856_43296  | NW_004517263.1 | Scaffold2269 | 43296                   | GG                              | AA              | 1947031937               |
| SNP_P4_173857_43312  | NW_004517263.1 | Scaffold2269 | 43312                   | TT                              | GG              | 1947031939               |
| SNP_P4_173858_43396  | NW_004517263.1 | Scaffold2269 | 43396                   | TT                              | CC              | 1947031941               |
| SNP_P4_173859_43406  | NW_004517263.1 | Scaffold2269 | 43406                   | AA                              | GG              | 1947031944               |
| SNP_P4_173860_48195  | NW_004517263.1 | Scaffold2269 | 48195                   | AA                              | GG              | 1947031946               |
| SNP_P4_173861_48201  | NW_004517263.1 | Scaffold2269 | 48201                   | AA                              | GG              | 1947031948               |
| SNP_P4_173862_51981  | NW_004517263.1 | Scaffold2269 | 51981                   | CC                              | TT              | 1947031950               |
| SNP_P4_173864_96731  | NW_004517263.1 | Scaffold2269 | 96731                   | CC                              | TT              | 1947031952               |
| SNP_P4_173865_118232 | NW_004517263.1 | Scaffold2269 | 118232                  | GG                              | AA              | 1947031954               |
| SNP_P4_173866_138814 | NW_004517263.1 | Scaffold2269 | 138814                  | GG                              | AA              | 1947031956               |
| SNP_P4_173867_138865 | NW_004517263.1 | Scaffold2269 | 138865                  | CC                              | GG              | 1947031958               |
| SNP_P4_173868_138906 | NW_004517263.1 | Scaffold2269 | 138906                  | GG                              | TT              | 1947031960               |
| SNP_P4_173869_139090 | NW_004517263.1 | Scaffold2269 | 139090                  | GG                              | AA              | 1947031962               |
| SNP_P4_173870_139101 | NW_004517263.1 | Scaffold2269 | 139101                  | AA                              | GG              | 1947031964               |
| SNP_P4_173871_139660 | NW_004517263.1 | Scaffold2269 | 139660                  | AA                              | GG              | 1947031966               |
| SNP_P4_173872_146106 | NW_004517263.1 | Scaffold2269 | 146106                  | AA                              | CC              | 1947031968               |
| SNP_P4_173873_158281 | NW_004517263.1 | Scaffold2269 | 158281                  | AA                              | GG              | 1947031970               |
| SNP_P4_173874_158283 | NW_004517263.1 | Scaffold2269 | 158283                  | TT                              | CC              | 1947031972               |
| SNP_P4_173875_158302 | NW_004517263.1 | Scaffold2269 | 158302                  | CC                              | AA              | 1947031974               |
| SNP_P4_173876_167161 | NW_004517263.1 | Scaffold2269 | 167161                  | CC                              | TT              | 1947031976               |
| SNP_P4_173877_170994 | NW_004517263.1 | Scaffold2269 | 170994                  | AA                              | TT              | 1947031978               |
| SNP_P4_173878_172906 | NW_004517263.1 | Scaffold2269 | 172906                  | TT                              | CC              | 1947031980               |
| SNP_P4_173879_173346 | NW_004517263.1 | Scaffold2269 | 173346                  | AA                              | GG              | 1947031982               |
| SNP_P4_173880_173448 | NW_004517263.1 | Scaffold2269 | 173448                  | GG                              | CC              | 1947031984               |

| SNPs IDs             | Chromosome IDs | Chromosomes  | Physical positions (bp) | CDC Frontier (Reference genome) | (ILWC46 & LPNB) | NCBI SNPdb Accession IDs |
|----------------------|----------------|--------------|-------------------------|---------------------------------|-----------------|--------------------------|
| SNP_P4_173881_173462 | NW_004517263.1 | Scaffold2269 | 173462                  | TT                              | CC              | 1947031986               |
| SNP_P4_173882_173536 | NW_004517263.1 | Scaffold2269 | 173536                  | TT                              | CC              | 1947031988               |
| SNP_P4_173883_173665 | NW_004517263.1 | Scaffold2269 | 173665                  | TT                              | GG              | 1947031990               |
| SNP_P4_173884_173755 | NW_004517263.1 | Scaffold2269 | 173755                  | TT                              | CC              | 1947031992               |
| SNP_P4_173885_173770 | NW_004517263.1 | Scaffold2269 | 173770                  | AA                              | GG              | 1947031995               |
| SNP_P4_173886_1544   | NW_004517265.1 | Scaffold2273 | 1544                    | AA                              | TT              | 1947031997               |
| SNP_P4_173887_1589   | NW_004517265.1 | Scaffold2273 | 1589                    | GG                              | AA              | 1947031999               |
| SNP_P4_173888_1592   | NW_004517265.1 | Scaffold2273 | 1592                    | CC                              | GG              | 1947032001               |
| SNP_P4_173889_2585   | NW_004517265.1 | Scaffold2273 | 2585                    | CC                              | TT              | 1947032003               |
| SNP_P4_173890_2613   | NW_004517265.1 | Scaffold2273 | 2613                    | GG                              | AA              | 1947032005               |
| SNP_P4_173891_2665   | NW_004517265.1 | Scaffold2273 | 2665                    | GG                              | TT              | 1947032007               |
| SNP_P4_173892_2861   | NW_004517265.1 | Scaffold2273 | 2861                    | AA                              | GG              | 1947032009               |
| SNP_P4_173893_2951   | NW_004517265.1 | Scaffold2273 | 2951                    | TT                              | CC              | 1947032011               |
| SNP_P4_173894_3058   | NW_004517265.1 | Scaffold2273 | 3058                    | CC                              | AA              | 1947032013               |
| SNP_P4_173895_3070   | NW_004517265.1 | Scaffold2273 | 3070                    | GG                              | TT              | 1947032015               |
| SNP_P4_173896_3104   | NW_004517265.1 | Scaffold2273 | 3104                    | GG                              | TT              | 1947032017               |
| SNP_P4_173897_3143   | NW_004517265.1 | Scaffold2273 | 3143                    | CC                              | TT              | 1947032019               |
| SNP_P4_173898_3203   | NW_004517265.1 | Scaffold2273 | 3203                    | GG                              | AA              | 1947032021               |
| SNP_P4_173899_3216   | NW_004517265.1 | Scaffold2273 | 3216                    | GG                              | AA              | 1947032024               |
| SNP_P4_173900_3234   | NW_004517265.1 | Scaffold2273 | 3234                    | CC                              | TT              | 1947032026               |
| SNP_P4_173901_3261   | NW_004517265.1 | Scaffold2273 | 3261                    | TT                              | GG              | 1947032028               |
| SNP_P4_173902_9600   | NW_004517265.1 | Scaffold2273 | 9600                    | GG                              | AA              | 1947032030               |
| SNP_P4_173903_12285  | NW_004517265.1 | Scaffold2273 | 12285                   | AA                              | GG              | 1947032032               |
| SNP_P4_173904_15590  | NW_004517265.1 | Scaffold2273 | 15590                   | TT                              | AA              | 1947032034               |
| SNP_P4_173905_22598  | NW_004517265.1 | Scaffold2273 | 22598                   | CC                              | TT              | 1947032036               |
| SNP_P4_173906_22606  | NW_004517265.1 | Scaffold2273 | 22606                   | TT                              | GG              | 1947032038               |
| SNP_P4_173907_22745  | NW_004517265.1 | Scaffold2273 | 22745                   | AA                              | GG              | 1947032040               |
| SNP_P4_173908_22765  | NW_004517265.1 | Scaffold2273 | 22765                   | AA                              | TT              | 1947032042               |
| SNP_P4_173909_22795  | NW_004517265.1 | Scaffold2273 | 22795                   | CC                              | GG              | 1947032044               |
| SNP_P4_173910_22809  | NW_004517265.1 | Scaffold2273 | 22809                   | TT                              | CC              | 1947032046               |
| SNP_P4_173911_22817  | NW_004517265.1 | Scaffold2273 | 22817                   | AA                              | TT              | 1947032048               |
| SNP_P4_173912_22823  | NW_004517265.1 | Scaffold2273 | 22823                   | CC                              | GG              | 1947032051               |
| SNP_P4_173913_22850  | NW_004517265.1 | Scaffold2273 | 22850                   | GG                              | CC              | 1947032053               |
| SNP_P4_173914_24428  | NW_004517265.1 | Scaffold2273 | 24428                   | GG                              | TT              | 1947032055               |
| SNP_P4_173915_24444  | NW_004517265.1 | Scaffold2273 | 24444                   | GG                              | AA              | 1947032057               |
| SNP_P4_173916_24808  | NW_004517265.1 | Scaffold2273 | 24808                   | AA                              | GG              | 1947032059               |
| SNP_P4_173917_24962  | NW_004517265.1 | Scaffold2273 | 24962                   | AA                              | TT              | 1947032061               |
| SNP_P4_173919_25352  | NW_004517265.1 | Scaffold2273 | 25352                   | TT                              | GG              | 1947032063               |
| SNP_P4_173920_32840  | NW_004517265.1 | Scaffold2273 | 32840                   | AA                              | CC              | 1947032065               |
| SNP_P4_173921_32872  | NW_004517265.1 | Scaffold2273 | 32872                   | CC                              | TT              | 1947032067               |
| SNP_P4_173922_32935  | NW_004517265.1 | Scaffold2273 | 32935                   | GG                              | TT              | 1947032069               |
| SNP_P4_173923_33128  | NW_004517265.1 | Scaffold2273 | 33128                   | GG                              | TT              | 1947032072               |

| SNPs IDs            | Chromosome IDs | Chromosomes  | Physical positions (bp) | CDC Frontier (Reference genome) | (ILWC46 & LPNB) | NCBI SNPdb Accession IDs |
|---------------------|----------------|--------------|-------------------------|---------------------------------|-----------------|--------------------------|
| SNP_P4_173924_33158 | NW_004517265.1 | Scaffold2273 | 33158                   | AA                              | GG              | 1947032074               |
| SNP_P4_173925_33172 | NW_004517265.1 | Scaffold2273 | 33172                   | CC                              | GG              | 1947032076               |
| SNP_P4_173926_33186 | NW_004517265.1 | Scaffold2273 | 33186                   | TT                              | GG              | 1947032078               |
| SNP_P4_173928_1643  | NW_004517269.1 | Scaffold2280 | 1643                    | TT                              | AA              | 1947032080               |
| SNP_P4_173929_1655  | NW_004517269.1 | Scaffold2280 | 1655                    | TT                              | AA              | 1947032083               |
| SNP_P4_173930_8047  | NW_004517271.1 | Scaffold2282 | 8047                    | TT                              | GG              | 1947032085               |
| SNP_P4_173931_8068  | NW_004517271.1 | Scaffold2282 | 8068                    | CC                              | TT              | 1947032087               |
| SNP_P4_173932_8079  | NW_004517271.1 | Scaffold2282 | 8079                    | TT                              | AA              | 1947032090               |
| SNP_P4_173933_8080  | NW_004517271.1 | Scaffold2282 | 8080                    | GG                              | AA              | 1947032092               |
| SNP_P4_173934_8096  | NW_004517271.1 | Scaffold2282 | 8096                    | TT                              | GG              | 1947032094               |
| SNP_P4_173935_8113  | NW_004517271.1 | Scaffold2282 | 8113                    | TT                              | AA              | 1947032096               |
| SNP_P4_173936_905   | NW_004517272.1 | Scaffold2285 | 905                     | TT                              | CC              | 1947032098               |
| SNP_P4_173937_2505  | NW_004517272.1 | Scaffold2285 | 2505                    | AA                              | GG              | 1947032100               |
| SNP_P4_173938_2815  | NW_004517272.1 | Scaffold2285 | 2815                    | GG                              | AA              | 1947032102               |
| SNP_P4_173939_3067  | NW_004517272.1 | Scaffold2285 | 3067                    | GG                              | TT              | 1947032104               |
| SNP_P4_173940_3094  | NW_004517272.1 | Scaffold2285 | 3094                    | TT                              | AA              | 1947032106               |
| SNP_P4_173941_3110  | NW_004517272.1 | Scaffold2285 | 3110                    | TT                              | GG              | 1947032108               |
| SNP_P4_173942_3157  | NW_004517272.1 | Scaffold2285 | 3157                    | AA                              | TT              | 1947032110               |
| SNP_P4_173943_59    | NW_004517274.1 | Scaffold2287 | 59                      | GG                              | AA              | 1947032112               |
| SNP_P4_173944_64    | NW_004517274.1 | Scaffold2287 | 64                      | CC                              | GG              | 1947032115               |
| SNP_P4_173945_93    | NW_004517274.1 | Scaffold2287 | 93                      | AA                              | CC              | 1947032117               |
| SNP_P4_173946_123   | NW_004517274.1 | Scaffold2287 | 123                     | GG                              | TT              | 1947032119               |
| SNP_P4_173947_231   | NW_004517274.1 | Scaffold2287 | 231                     | CC                              | GG              | 1947032121               |
| SNP_P4_173948_326   | NW_004517274.1 | Scaffold2287 | 326                     | AA                              | GG              | 1947032123               |
| SNP_P4_173950_399   | NW_004517274.1 | Scaffold2287 | 399                     | GG                              | CC              | 1947032125               |
| SNP_P4_173951_436   | NW_004517274.1 | Scaffold2287 | 436                     | GG                              | AA              | 1947032127               |
| SNP_P4_173952_439   | NW_004517274.1 | Scaffold2287 | 439                     | GG                              | AA              | 1947032129               |
| SNP_P4_173953_506   | NW_004517274.1 | Scaffold2287 | 506                     | GG                              | AA              | 1947032131               |
| SNP_P4_173954_528   | NW_004517274.1 | Scaffold2287 | 528                     | CC                              | TT              | 1947032133               |
| SNP_P4_173955_591   | NW_004517274.1 | Scaffold2287 | 591                     | TT                              | CC              | 1947032135               |
| SNP_P4_173956_630   | NW_004517274.1 | Scaffold2287 | 630                     | TT                              | GG              | 1947032137               |
| SNP_P4_173957_659   | NW_004517274.1 | Scaffold2287 | 659                     | GG                              | AA              | 1947032139               |
| SNP_P4_173958_675   | NW_004517274.1 | Scaffold2287 | 675                     | TT                              | GG              | 1947032141               |
| SNP_P4_173959_797   | NW_004517274.1 | Scaffold2287 | 797                     | GG                              | AA              | 1947032143               |
| SNP_P4_173960_885   | NW_004517274.1 | Scaffold2287 | 885                     | CC                              | TT              | 1947032145               |
| SNP_P4_173961_910   | NW_004517274.1 | Scaffold2287 | 910                     | GG                              | AA              | 1947032147               |
| SNP_P4_173962_979   | NW_004517274.1 | Scaffold2287 | 979                     | GG                              | TT              | 1947032149               |
| SNP_P4_173963_1086  | NW_004517274.1 | Scaffold2287 | 1086                    | AA                              | TT              | 1947032151               |
| SNP_P4_173964_1092  | NW_004517274.1 | Scaffold2287 | 1092                    | GG                              | AA              | 1947032153               |
| SNP_P4_173965_1125  | NW_004517274.1 | Scaffold2287 | 1125                    | AA                              | GG              | 1947032155               |
| SNP_P4_173966_3235  | NW_004517275.1 | Scaffold2289 | 3235                    | CC                              | TT              | 1947032157               |
| SNP_P4_173967_3278  | NW_004517275.1 | Scaffold2289 | 3278                    | TT                              | AA              | 1947032159               |

| SNPs IDs            | Chromosome IDs | Chromosomes  | Physical positions (bp) | CDC Frontier (Reference genome) | (ILWC46 & LPNB) | NCBI SNPdb Accession IDs |
|---------------------|----------------|--------------|-------------------------|---------------------------------|-----------------|--------------------------|
| SNP_P4_173968_9595  | NW_004517275.1 | Scaffold2289 | 9595                    | AA                              | TT              | 1947032162               |
| SNP_P4_173969_9611  | NW_004517275.1 | Scaffold2289 | 9611                    | AA                              | CC              | 1947032164               |
| SNP_P4_173970_9827  | NW_004517275.1 | Scaffold2289 | 9827                    | AA                              | GG              | 1947032166               |
| SNP_P4_173971_10640 | NW_004517275.1 | Scaffold2289 | 10640                   | GG                              | TT              | 1947032168               |
| SNP_P4_173972_11018 | NW_004517275.1 | Scaffold2289 | 11018                   | AA                              | GG              | 1947032170               |
| SNP_P4_173973_11997 | NW_004517275.1 | Scaffold2289 | 11997                   | CC                              | GG              | 1947032172               |
| SNP_P4_173974_12320 | NW_004517275.1 | Scaffold2289 | 12320                   | GG                              | AA              | 1947032174               |
| SNP_P4_173975_12379 | NW_004517275.1 | Scaffold2289 | 12379                   | TT                              | CC              | 1947032176               |
| SNP_P4_173976_12701 | NW_004517275.1 | Scaffold2289 | 12701                   | GG                              | CC              | 1947032178               |
| SNP_P4_173977_12817 | NW_004517275.1 | Scaffold2289 | 12817                   | GG                              | AA              | 1947032179               |
| SNP_P4_173979_13134 | NW_004517275.1 | Scaffold2289 | 13134                   | AA                              | GG              | 1947032180               |
| SNP_P4_173980_13154 | NW_004517275.1 | Scaffold2289 | 13154                   | AA                              | TT              | 1947032181               |
| SNP_P4_173981_13303 | NW_004517275.1 | Scaffold2289 | 13303                   | CC                              | TT              | 1947032182               |
| SNP_P4_173982_13315 | NW_004517275.1 | Scaffold2289 | 13315                   | AA                              | GG              | 1947032183               |
| SNP_P4_173983_13316 | NW_004517275.1 | Scaffold2289 | 13316                   | AA                              | GG              | 1947032184               |
| SNP_P4_173984_15352 | NW_004517275.1 | Scaffold2289 | 15352                   | GG                              | TT              | 1947032185               |
| SNP_P4_173985_15381 | NW_004517275.1 | Scaffold2289 | 15381                   | AA                              | GG              | 1947032187               |
| SNP_P4_173986_15611 | NW_004517275.1 | Scaffold2289 | 15611                   | AA                              | GG              | 1947032189               |
| SNP_P4_173987_15688 | NW_004517275.1 | Scaffold2289 | 15688                   | CC                              | TT              | 1947032191               |
| SNP_P4_173988_22629 | NW_004517276.1 | Scaffold2290 | 22629                   | AA                              | CC              | 1947032193               |
| SNP_P4_173989_22634 | NW_004517276.1 | Scaffold2290 | 22634                   | TT                              | CC              | 1947032195               |
| SNP_P4_173990_22641 | NW_004517276.1 | Scaffold2290 | 22641                   | GG                              | CC              | 1947032197               |
| SNP_P4_173991_22663 | NW_004517276.1 | Scaffold2290 | 22663                   | TT                              | CC              | 1947032199               |
| SNP_P4_173992_22675 | NW_004517276.1 | Scaffold2290 | 22675                   | AA                              | GG              | 1947032201               |
| SNP_P4_173993_41915 | NW_004517276.1 | Scaffold2290 | 41915                   | GG                              | CC              | 1947032202               |
| SNP_P4_173994_69    | NW_004517277.1 | Scaffold2291 | 69                      | AA                              | GG              | 1947032204               |
| SNP_P4_173995_112   | NW_004517277.1 | Scaffold2291 | 112                     | AA                              | CC              | 1947032206               |
| SNP_P4_173996_1952  | NW_004517277.1 | Scaffold2291 | 1952                    | TT                              | CC              | 1947032208               |
| SNP_P4_173997_1961  | NW_004517277.1 | Scaffold2291 | 1961                    | CC                              | TT              | 1947032210               |
| SNP_P4_173998_1979  | NW_004517277.1 | Scaffold2291 | 1979                    | AA                              | GG              | 1947032212               |
| SNP_P4_173999_2030  | NW_004517277.1 | Scaffold2291 | 2030                    | GG                              | AA              | 1947032214               |
| SNP_P4_174000_1353  | NW_004517285.1 | Scaffold2301 | 1353                    | GG                              | CC              | 1947032216               |
| SNP_P4_174001_1375  | NW_004517285.1 | Scaffold2301 | 1375                    | AA                              | GG              | 1947032218               |
| SNP_P4_174002_1410  | NW_004517285.1 | Scaffold2301 | 1410                    | CC                              | TT              | 1947032220               |
| SNP_P4_174004_1628  | NW_004517285.1 | Scaffold2301 | 1628                    | AA                              | GG              | 1947032222               |
| SNP_P4_174005_1668  | NW_004517285.1 | Scaffold2301 | 1668                    | CC                              | AA              | 1947032224               |
| SNP_P4_174006_1754  | NW_004517285.1 | Scaffold2301 | 1754                    | TT                              | GG              | 1947032226               |
| SNP_P4_174007_1800  | NW_004517285.1 | Scaffold2301 | 1800                    | CC                              | TT              | 1947032228               |
| SNP_P4_174008_1879  | NW_004517285.1 | Scaffold2301 | 1879                    | AA                              | CC              | 1947032230               |
| SNP_P4_174009_1885  | NW_004517285.1 | Scaffold2301 | 1885                    | GG                              | AA              | 1947032232               |
| SNP_P4_174010_1886  | NW_004517285.1 | Scaffold2301 | 1886                    | GG                              | CC              | 1947032234               |
| SNP_P4_174011_1956  | NW_004517285.1 | Scaffold2301 | 1956                    | TT                              | CC              | 1947032236               |



| SNPs IDs            | Chromosome IDs | Chromosomes  | Physical positions (bp) | CDC Frontier (Reference genome) | (ILWC46 & LPNB) | NCBI SNPdb Accession IDs |
|---------------------|----------------|--------------|-------------------------|---------------------------------|-----------------|--------------------------|
| SNP_P4_174012_1984  | NW_004517285.1 | Scaffold2301 | 1984                    | CC                              | GG              | 1947032238               |
| SNP_P4_174013_1988  | NW_004517285.1 | Scaffold2301 | 1988                    | TT                              | CC              | 1947032240               |
| SNP_P4_174014_1997  | NW_004517285.1 | Scaffold2301 | 1997                    | TT                              | CC              | 1947032242               |
| SNP_P4_174015_2072  | NW_004517285.1 | Scaffold2301 | 2072                    | CC                              | TT              | 1947032243               |
| SNP_P4_174016_2298  | NW_004517285.1 | Scaffold2301 | 2298                    | AA                              | GG              | 1947032245               |
| SNP_P4_174017_2316  | NW_004517285.1 | Scaffold2301 | 2316                    | AA                              | GG              | 1947032247               |
| SNP_P4_174018_2422  | NW_004517285.1 | Scaffold2301 | 2422                    | CC                              | GG              | 1947032249               |
| SNP_P4_174019_2457  | NW_004517285.1 | Scaffold2301 | 2457                    | AA                              | GG              | 1947032251               |
| SNP_P4_174020_2596  | NW_004517285.1 | Scaffold2301 | 2596                    | GG                              | TT              | 1947032253               |
| SNP_P4_174021_2766  | NW_004517285.1 | Scaffold2301 | 2766                    | GG                              | AA              | 1947032255               |
| SNP_P4_174022_2806  | NW_004517285.1 | Scaffold2301 | 2806                    | AA                              | TT              | 1947032257               |
| SNP_P4_174023_2812  | NW_004517285.1 | Scaffold2301 | 2812                    | TT                              | AA              | 1947032259               |
| SNP_P4_174024_3018  | NW_004517285.1 | Scaffold2301 | 3018                    | AA                              | GG              | 1947032261               |
| SNP_P4_174025_4825  | NW_004517285.1 | Scaffold2301 | 4825                    | CC                              | TT              | 1947032263               |
| SNP_P4_174026_4840  | NW_004517285.1 | Scaffold2301 | 4840                    | TT                              | GG              | 1947032265               |
| SNP_P4_174027_6019  | NW_004517285.1 | Scaffold2301 | 6019                    | GG                              | TT              | 1947032267               |
| SNP_P4_174028_6055  | NW_004517285.1 | Scaffold2301 | 6055                    | CC                              | GG              | 1947032269               |
| SNP_P4_174029_6062  | NW_004517285.1 | Scaffold2301 | 6062                    | TT                              | CC              | 1947032271               |
| SNP_P4_174030_6258  | NW_004517285.1 | Scaffold2301 | 6258                    | GG                              | TT              | 1947032273               |
| SNP_P4_174032_6484  | NW_004517285.1 | Scaffold2301 | 6484                    | GG                              | CC              | 1947032275               |
| SNP_P4_174033_6560  | NW_004517285.1 | Scaffold2301 | 6560                    | TT                              | CC              | 1947032277               |
| SNP_P4_174034_7927  | NW_004517285.1 | Scaffold2301 | 7927                    | TT                              | CC              | 1947032279               |
| SNP_P4_174035_8048  | NW_004517285.1 | Scaffold2301 | 8048                    | TT                              | CC              | 1947032281               |
| SNP_P4_174036_8087  | NW_004517285.1 | Scaffold2301 | 8087                    | AA                              | GG              | 1947032283               |
| SNP_P4_174037_8102  | NW_004517285.1 | Scaffold2301 | 8102                    | TT                              | CC              | 1947032285               |
| SNP_P4_174038_8120  | NW_004517285.1 | Scaffold2301 | 8120                    | CC                              | TT              | 1947032287               |
| SNP_P4_174039_8123  | NW_004517285.1 | Scaffold2301 | 8123                    | AA                              | GG              | 1947032289               |
| SNP_P4_174040_8156  | NW_004517285.1 | Scaffold2301 | 8156                    | CC                              | TT              | 1947032291               |
| SNP_P4_174041_8210  | NW_004517285.1 | Scaffold2301 | 8210                    | AA                              | GG              | 1947032293               |
| SNP_P4_174042_8275  | NW_004517285.1 | Scaffold2301 | 8275                    | TT                              | CC              | 1947032295               |
| SNP_P4_174043_8287  | NW_004517285.1 | Scaffold2301 | 8287                    | TT                              | CC              | 1947032297               |
| SNP_P4_174044_8304  | NW_004517285.1 | Scaffold2301 | 8304                    | CC                              | GG              | 1947032299               |
| SNP_P4_174045_8330  | NW_004517285.1 | Scaffold2301 | 8330                    | GG                              | TT              | 1947032301               |
| SNP_P4_174046_8357  | NW_004517285.1 | Scaffold2301 | 8357                    | TT                              | CC              | 1947032303               |
| SNP_P4_174047_8396  | NW_004517285.1 | Scaffold2301 | 8396                    | AA                              | GG              | 1947032305               |
| SNP_P4_174048_8416  | NW_004517285.1 | Scaffold2301 | 8416                    | CC                              | GG              | 1947032307               |
| SNP_P4_174049_8429  | NW_004517285.1 | Scaffold2301 | 8429                    | CC                              | AA              | 1947032309               |
| SNP_P4_174050_8453  | NW_004517285.1 | Scaffold2301 | 8453                    | AA                              | GG              | 1947032311               |
| SNP_P4_174051_8495  | NW_004517285.1 | Scaffold2301 | 8495                    | AA                              | GG              | 1947032313               |
| SNP_P4_174052_15413 | NW_004517285.1 | Scaffold2301 | 15413                   | AA                              | TT              | 1947032315               |
| SNP_P4_174053_18125 | NW_004517285.1 | Scaffold2301 | 18125                   | AA                              | CC              | 1947032317               |
| SNP_P4_174054_18154 | NW_004517285.1 | Scaffold2301 | 18154                   | CC                              | TT              | 1947032319               |

| SNPs IDs            | Chromosome IDs | Chromosomes  | Physical positions (bp) | CDC Frontier (Reference genome) | (ILWC46 & LPNB) | NCBI SNPdb Accession IDs |
|---------------------|----------------|--------------|-------------------------|---------------------------------|-----------------|--------------------------|
| SNP_P4_174055_18175 | NW_004517285.1 | Scaffold2301 | 18175                   | TT                              | CC              | 1947032321               |
| SNP_P4_174056_18192 | NW_004517285.1 | Scaffold2301 | 18192                   | TT                              | AA              | 1947032323               |
| SNP_P4_174057_18241 | NW_004517285.1 | Scaffold2301 | 18241                   | CC                              | TT              | 1947032325               |
| SNP_P4_174058_18265 | NW_004517285.1 | Scaffold2301 | 18265                   | CC                              | TT              | 1947032327               |
| SNP_P4_174059_18330 | NW_004517285.1 | Scaffold2301 | 18330                   | AA                              | TT              | 1947032329               |
| SNP_P4_174060_18491 | NW_004517285.1 | Scaffold2301 | 18491                   | TT                              | GG              | 1947032330               |
| SNP_P4_174061_18515 | NW_004517285.1 | Scaffold2301 | 18515                   | TT                              | GG              | 1947032332               |
| SNP_P4_174062_18552 | NW_004517285.1 | Scaffold2301 | 18552                   | TT                              | CC              | 1947032334               |
| SNP_P4_174063_18609 | NW_004517285.1 | Scaffold2301 | 18609                   | AA                              | GG              | 1947032336               |
| SNP_P4_174064_18611 | NW_004517285.1 | Scaffold2301 | 18611                   | GG                              | CC              | 1947032338               |
| SNP_P4_174065_18663 | NW_004517285.1 | Scaffold2301 | 18663                   | GG                              | AA              | 1947032340               |
| SNP_P4_174066_18687 | NW_004517285.1 | Scaffold2301 | 18687                   | AA                              | GG              | 1947032342               |
| SNP_P4_174067_18693 | NW_004517285.1 | Scaffold2301 | 18693                   | CC                              | TT              | 1947032344               |
| SNP_P4_174069_18732 | NW_004517285.1 | Scaffold2301 | 18732                   | TT                              | AA              | 1947032346               |
| SNP_P4_174070_22439 | NW_004517285.1 | Scaffold2301 | 22439                   | AA                              | TT              | 1947032348               |
| SNP_P4_174071_22500 | NW_004517285.1 | Scaffold2301 | 22500                   | GG                              | TT              | 1947032350               |
| SNP_P4_174072_22522 | NW_004517285.1 | Scaffold2301 | 22522                   | CC                              | GG              | 1947032352               |
| SNP_P4_174073_22532 | NW_004517285.1 | Scaffold2301 | 22532                   | TT                              | AA              | 1947032354               |
| SNP_P4_174074_22613 | NW_004517285.1 | Scaffold2301 | 22613                   | AA                              | CC              | 1947032356               |
| SNP_P4_174075_22670 | NW_004517285.1 | Scaffold2301 | 22670                   | CC                              | TT              | 1947032358               |
| SNP_P4_174076_22715 | NW_004517285.1 | Scaffold2301 | 22715                   | TT                              | GG              | 1947032359               |
| SNP_P4_174078_22883 | NW_004517285.1 | Scaffold2301 | 22883                   | TT                              | AA              | 1947032361               |
| SNP_P4_174079_22891 | NW_004517285.1 | Scaffold2301 | 22891                   | CC                              | TT              | 1947032363               |
| SNP_P4_174080_22998 | NW_004517285.1 | Scaffold2301 | 22998                   | AA                              | GG              | 1947032365               |
| SNP_P4_174081_23016 | NW_004517285.1 | Scaffold2301 | 23016                   | AA                              | GG              | 1947032367               |
| SNP_P4_174082_23021 | NW_004517285.1 | Scaffold2301 | 23021                   | CC                              | TT              | 1947032369               |
| SNP_P4_174083_23022 | NW_004517285.1 | Scaffold2301 | 23022                   | AA                              | GG              | 1947032371               |
| SNP_P4_174084_29829 | NW_004517285.1 | Scaffold2301 | 29829                   | TT                              | CC              | 1947032373               |
| SNP_P4_174085_29912 | NW_004517285.1 | Scaffold2301 | 29912                   | TT                              | GG              | 1947032375               |
| SNP_P4_174086_30100 | NW_004517285.1 | Scaffold2301 | 30100                   | TT                              | GG              | 1947032377               |
| SNP_P4_174087_30310 | NW_004517285.1 | Scaffold2301 | 30310                   | GG                              | AA              | 1947032379               |
| SNP_P4_174088_30333 | NW_004517285.1 | Scaffold2301 | 30333                   | GG                              | CC              | 1947032381               |
| SNP_P4_174089_30344 | NW_004517285.1 | Scaffold2301 | 30344                   | AA                              | GG              | 1947032383               |
| SNP_P4_174090_30480 | NW_004517285.1 | Scaffold2301 | 30480                   | CC                              | AA              | 1947032385               |
| SNP_P4_174091_31879 | NW_004517285.1 | Scaffold2301 | 31879                   | GG                              | AA              | 1947032387               |
| SNP_P4_174092_32024 | NW_004517285.1 | Scaffold2301 | 32024                   | GG                              | AA              | 1947032389               |
| SNP_P4_174093_32044 | NW_004517285.1 | Scaffold2301 | 32044                   | GG                              | AA              | 1947032390               |
| SNP_P4_174094_32049 | NW_004517285.1 | Scaffold2301 | 32049                   | GG                              | AA              | 1947032392               |
| SNP_P4_174095_32162 | NW_004517285.1 | Scaffold2301 | 32162                   | CC                              | TT              | 1947032394               |
| SNP_P4_174096_32179 | NW_004517285.1 | Scaffold2301 | 32179                   | CC                              | TT              | 1947032396               |
| SNP_P4_174097_32192 | NW_004517285.1 | Scaffold2301 | 32192                   | AA                              | GG              | 1947032398               |
| SNP_P4_174098_32231 | NW_004517285.1 | Scaffold2301 | 32231                   | TT                              | CC              | 1947032400               |

| SNPs IDs            | Chromosome IDs | Chromosomes  | Physical positions (bp) | CDC Frontier (Reference genome) | (ILWC46 & LPNB) | NCBI SNPdb Accession IDs |
|---------------------|----------------|--------------|-------------------------|---------------------------------|-----------------|--------------------------|
| SNP_P4_174099_32237 | NW_004517285.1 | Scaffold2301 | 32237                   | TT                              | GG              | 1947032402               |
| SNP_P4_174100_32243 | NW_004517285.1 | Scaffold2301 | 32243                   | CC                              | TT              | 1947032404               |
| SNP_P4_174101_32259 | NW_004517285.1 | Scaffold2301 | 32259                   | AA                              | TT              | 1947032406               |
| SNP_P4_174102_32309 | NW_004517285.1 | Scaffold2301 | 32309                   | TT                              | CC              | 1947032408               |
| SNP_P4_174103_32456 | NW_004517285.1 | Scaffold2301 | 32456                   | CC                              | TT              | 1947032410               |
| SNP_P4_174104_32682 | NW_004517285.1 | Scaffold2301 | 32682                   | GG                              | CC              | 1947032412               |
| SNP_P4_174105_32687 | NW_004517285.1 | Scaffold2301 | 32687                   | GG                              | TT              | 1947032414               |
| SNP_P4_174106_32710 | NW_004517285.1 | Scaffold2301 | 32710                   | AA                              | GG              | 1947032416               |
| SNP_P4_174107_32795 | NW_004517285.1 | Scaffold2301 | 32795                   | GG                              | AA              | 1947032418               |
| SNP_P4_174108_32833 | NW_004517285.1 | Scaffold2301 | 32833                   | TT                              | CC              | 1947032420               |
| SNP_P4_174109_32836 | NW_004517285.1 | Scaffold2301 | 32836                   | GG                              | AA              | 1947032422               |
| SNP_P4_174110_34638 | NW_004517285.1 | Scaffold2301 | 34638                   | AA                              | GG              | 1947032424               |
| SNP_P4_174111_34678 | NW_004517285.1 | Scaffold2301 | 34678                   | AA                              | GG              | 1947032426               |
| SNP_P4_174112_34874 | NW_004517285.1 | Scaffold2301 | 34874                   | GG                              | CC              | 1947032428               |
| SNP_P4_174113_34883 | NW_004517285.1 | Scaffold2301 | 34883                   | TT                              | AA              | 1947032430               |
| SNP_P4_174114_35155 | NW_004517285.1 | Scaffold2301 | 35155                   | GG                              | AA              | 1947032432               |
| SNP_P4_174115_35264 | NW_004517285.1 | Scaffold2301 | 35264                   | AA                              | GG              | 1947032434               |
| SNP_P4_174116_35320 | NW_004517285.1 | Scaffold2301 | 35320                   | AA                              | GG              | 1947032436               |
| SNP_P4_174117_35332 | NW_004517285.1 | Scaffold2301 | 35332                   | AA                              | GG              | 1947032438               |
| SNP_P4_174118_35551 | NW_004517285.1 | Scaffold2301 | 35551                   | CC                              | TT              | 1947032440               |
| SNP_P4_174119_35634 | NW_004517285.1 | Scaffold2301 | 35634                   | AA                              | TT              | 1947032442               |
| SNP_P4_174120_35650 | NW_004517285.1 | Scaffold2301 | 35650                   | CC                              | TT              | 1947032444               |
| SNP_P4_174121_35762 | NW_004517285.1 | Scaffold2301 | 35762                   | AA                              | CC              | 1947032446               |
| SNP_P4_174122_35770 | NW_004517285.1 | Scaffold2301 | 35770                   | CC                              | TT              | 1947032448               |
| SNP_P4_174123_35775 | NW_004517285.1 | Scaffold2301 | 35775                   | CC                              | TT              | 1947032450               |
| SNP_P4_174124_35850 | NW_004517285.1 | Scaffold2301 | 35850                   | GG                              | TT              | 1947032452               |
| SNP_P4_174125_35872 | NW_004517285.1 | Scaffold2301 | 35872                   | AA                              | TT              | 1947032454               |
| SNP_P4_174126_35918 | NW_004517285.1 | Scaffold2301 | 35918                   | GG                              | AA              | 1947032456               |
| SNP_P4_174127_36028 | NW_004517285.1 | Scaffold2301 | 36028                   | TT                              | CC              | 1947032458               |
| SNP_P4_174128_36069 | NW_004517285.1 | Scaffold2301 | 36069                   | GG                              | CC              | 1947032460               |
| SNP_P4_174129_36073 | NW_004517285.1 | Scaffold2301 | 36073                   | TT                              | GG              | 1947032462               |
| SNP_P4_174130_36152 | NW_004517285.1 | Scaffold2301 | 36152                   | CC                              | GG              | 1947032464               |
| SNP_P4_174131_40506 | NW_004517285.1 | Scaffold2301 | 40506                   | GG                              | AA              | 1947032466               |
| SNP_P4_174132_40511 | NW_004517285.1 | Scaffold2301 | 40511                   | CC                              | AA              | 1947032468               |
| SNP_P4_174133_40525 | NW_004517285.1 | Scaffold2301 | 40525                   | CC                              | TT              | 1947032470               |
| SNP_P4_174134_40727 | NW_004517285.1 | Scaffold2301 | 40727                   | TT                              | GG              | 1947032472               |
| SNP_P4_174135_40843 | NW_004517285.1 | Scaffold2301 | 40843                   | TT                              | CC              | 1947032474               |
| SNP_P4_174136_41074 | NW_004517285.1 | Scaffold2301 | 41074                   | CC                              | TT              | 1947032476               |
| SNP_P4_174137_41075 | NW_004517285.1 | Scaffold2301 | 41075                   | AA                              | TT              | 1947032478               |
| SNP_P4_174138_41102 | NW_004517285.1 | Scaffold2301 | 41102                   | GG                              | AA              | 1947032480               |
| SNP_P4_174139_41555 | NW_004517285.1 | Scaffold2301 | 41555                   | GG                              | AA              | 1947032482               |
| SNP_P4_174140_41599 | NW_004517285.1 | Scaffold2301 | 41599                   | CC                              | TT              | 1947032484               |

| SNPs IDs            | Chromosome IDs | Chromosomes  | Physical positions (bp) | CDC Frontier (Reference genome) | (ILWC46 & LPNB) | NCBI SNPdb Accession IDs |
|---------------------|----------------|--------------|-------------------------|---------------------------------|-----------------|--------------------------|
| SNP_P4_174141_43228 | NW_004517285.1 | Scaffold2301 | 43228                   | CC                              | GG              | 1947032486               |
| SNP_P4_174142_43500 | NW_004517285.1 | Scaffold2301 | 43500                   | TT                              | GG              | 1947032488               |
| SNP_P4_174143_43509 | NW_004517285.1 | Scaffold2301 | 43509                   | TT                              | GG              | 1947032490               |
| SNP_P4_174144_43539 | NW_004517285.1 | Scaffold2301 | 43539                   | TT                              | CC              | 1947032492               |
| SNP_P4_174145_53627 | NW_004517285.1 | Scaffold2301 | 53627                   | GG                              | AA              | 1947032494               |
| SNP_P4_174146_53654 | NW_004517285.1 | Scaffold2301 | 53654                   | TT                              | AA              | 1947032496               |
| SNP_P4_174147_53818 | NW_004517285.1 | Scaffold2301 | 53818                   | GG                              | TT              | 1947032498               |
| SNP_P4_174148_53855 | NW_004517285.1 | Scaffold2301 | 53855                   | GG                              | TT              | 1947032500               |
| SNP_P4_174149_53985 | NW_004517285.1 | Scaffold2301 | 53985                   | GG                              | TT              | 1947032502               |
| SNP_P4_174150_54032 | NW_004517285.1 | Scaffold2301 | 54032                   | AA                              | CC              | 1947032504               |
| SNP_P4_174152_54397 | NW_004517285.1 | Scaffold2301 | 54397                   | AA                              | CC              | 1947032506               |
| SNP_P4_174153_54458 | NW_004517285.1 | Scaffold2301 | 54458                   | TT                              | GG              | 1947032508               |
| SNP_P4_174154_54462 | NW_004517285.1 | Scaffold2301 | 54462                   | GG                              | AA              | 1947032510               |
| SNP_P4_174156_54844 | NW_004517285.1 | Scaffold2301 | 54844                   | GG                              | AA              | 1947032512               |
| SNP_P4_174157_55716 | NW_004517285.1 | Scaffold2301 | 55716                   | TT                              | CC              | 1947032514               |
| SNP_P4_174158_55775 | NW_004517285.1 | Scaffold2301 | 55775                   | GG                              | CC              | 1947032515               |
| SNP_P4_174159_57427 | NW_004517285.1 | Scaffold2301 | 57427                   | AA                              | GG              | 1947032517               |
| SNP_P4_174160_57641 | NW_004517285.1 | Scaffold2301 | 57641                   | CC                              | TT              | 1947032519               |
| SNP_P4_174161_57756 | NW_004517285.1 | Scaffold2301 | 57756                   | CC                              | TT              | 1947032521               |
| SNP_P4_174162_57774 | NW_004517285.1 | Scaffold2301 | 57774                   | CC                              | GG              | 1947032523               |
| SNP_P4_174163_57872 | NW_004517285.1 | Scaffold2301 | 57872                   | TT                              | CC              | 1947032525               |
| SNP_P4_174164_57873 | NW_004517285.1 | Scaffold2301 | 57873                   | GG                              | AA              | 1947032527               |
| SNP_P4_174165_57895 | NW_004517285.1 | Scaffold2301 | 57895                   | CC                              | TT              | 1947032529               |
| SNP_P4_174166_61324 | NW_004517285.1 | Scaffold2301 | 61324                   | GG                              | TT              | 1947032531               |
| SNP_P4_174167_61420 | NW_004517285.1 | Scaffold2301 | 61420                   | TT                              | CC              | 1947032533               |
| SNP_P4_174168_61465 | NW_004517285.1 | Scaffold2301 | 61465                   | TT                              | AA              | 1947032535               |
| SNP_P4_174169_61535 | NW_004517285.1 | Scaffold2301 | 61535                   | GG                              | AA              | 1947032537               |
| SNP_P4_174170_61556 | NW_004517285.1 | Scaffold2301 | 61556                   | AA                              | GG              | 1947032539               |
| SNP_P4_174171_61612 | NW_004517285.1 | Scaffold2301 | 61612                   | CC                              | GG              | 1947032541               |
| SNP_P4_174172_61660 | NW_004517285.1 | Scaffold2301 | 61660                   | TT                              | CC              | 1947032543               |
| SNP_P4_174173_61766 | NW_004517285.1 | Scaffold2301 | 61766                   | AA                              | GG              | 1947032544               |
| SNP_P4_174174_61832 | NW_004517285.1 | Scaffold2301 | 61832                   | TT                              | CC              | 1947032546               |
| SNP_P4_174175_64440 | NW_004517285.1 | Scaffold2301 | 64440                   | GG                              | AA              | 1947032548               |
| SNP_P4_174177_64479 | NW_004517285.1 | Scaffold2301 | 64479                   | AA                              | GG              | 1947032550               |
| SNP_P4_174179_64756 | NW_004517285.1 | Scaffold2301 | 64756                   | GG                              | CC              | 1947032552               |
| SNP_P4_174180_64800 | NW_004517285.1 | Scaffold2301 | 64800                   | GG                              | AA              | 1947032554               |
| SNP_P4_174181_64809 | NW_004517285.1 | Scaffold2301 | 64809                   | GG                              | AA              | 1947032556               |
| SNP_P4_174182_64822 | NW_004517285.1 | Scaffold2301 | 64822                   | GG                              | TT              | 1947032558               |
| SNP_P4_174183_65036 | NW_004517285.1 | Scaffold2301 | 65036                   | TT                              | GG              | 1947032560               |
| SNP_P4_174184_65185 | NW_004517285.1 | Scaffold2301 | 65185                   | TT                              | AA              | 1947032562               |
| SNP_P4_174185_65219 | NW_004517285.1 | Scaffold2301 | 65219                   | GG                              | AA              | 1947032564               |
| SNP_P4_174186_65232 | NW_004517285.1 | Scaffold2301 | 65232                   | TT                              | GG              | 1947032566               |

| SNPs IDs            | Chromosome IDs | Chromosomes  | Physical positions (bp) | CDC Frontier (Reference genome) | (ILWC46 & LPNB) | NCBI SNPdb Accession IDs |
|---------------------|----------------|--------------|-------------------------|---------------------------------|-----------------|--------------------------|
| SNP_P4_174187_65266 | NW_004517285.1 | Scaffold2301 | 65266                   | AA                              | GG              | 1947032568               |
| SNP_P4_174189_65354 | NW_004517285.1 | Scaffold2301 | 65354                   | TT                              | AA              | 1947032570               |
| SNP_P4_174190_65427 | NW_004517285.1 | Scaffold2301 | 65427                   | AA                              | TT              | 1947032572               |
| SNP_P4_174191_69173 | NW_004517285.1 | Scaffold2301 | 69173                   | AA                              | TT              | 1947032574               |
| SNP_P4_174192_69399 | NW_004517285.1 | Scaffold2301 | 69399                   | CC                              | AA              | 1947032576               |
| SNP_P4_174193_4149  | NW_004517292.1 | Scaffold2309 | 4149                    | GG                              | CC              | 1947032578               |
| SNP_P4_174194_4235  | NW_004517292.1 | Scaffold2309 | 4235                    | CC                              | TT              | 1947032580               |
| SNP_P4_174195_446   | NW_004517293.1 | Scaffold2311 | 446                     | TT                              | GG              | 1947032582               |
| SNP_P4_174196_483   | NW_004517293.1 | Scaffold2311 | 483                     | AA                              | GG              | 1947032584               |
| SNP_P4_174198_33926 | NW_004517293.1 | Scaffold2311 | 33926                   | TT                              | CC              | 1947032586               |
| SNP_P4_174199_46468 | NW_004517293.1 | Scaffold2311 | 46468                   | TT                              | CC              | 1947032588               |
| SNP_P4_174200_46597 | NW_004517293.1 | Scaffold2311 | 46597                   | TT                              | CC              | 1947032589               |
| SNP_P4_174201_46664 | NW_004517293.1 | Scaffold2311 | 46664                   | CC                              | TT              | 1947032591               |
| SNP_P4_174202_46816 | NW_004517293.1 | Scaffold2311 | 46816                   | TT                              | CC              | 1947032593               |
| SNP_P4_174203_46904 | NW_004517293.1 | Scaffold2311 | 46904                   | AA                              | CC              | 1947032595               |
| SNP_P4_174204_46908 | NW_004517293.1 | Scaffold2311 | 46908                   | TT                              | GG              | 1947032597               |
| SNP_P4_174205_46940 | NW_004517293.1 | Scaffold2311 | 46940                   | CC                              | TT              | 1947032599               |
| SNP_P4_174206_50622 | NW_004517293.1 | Scaffold2311 | 50622                   | AA                              | GG              | 1947032601               |
| SNP_P4_174207_50702 | NW_004517293.1 | Scaffold2311 | 50702                   | AA                              | GG              | 1947032603               |
| SNP_P4_174208_94620 | NW_004517293.1 | Scaffold2311 | 94620                   | TT                              | CC              | 1947032605               |
| SNP_P4_174209_95317 | NW_004517293.1 | Scaffold2311 | 95317                   | AA                              | CC              | 1947032607               |
| SNP_P4_174210_95332 | NW_004517293.1 | Scaffold2311 | 95332                   | CC                              | TT              | 1947032609               |
| SNP_P4_174211_95346 | NW_004517293.1 | Scaffold2311 | 95346                   | AA                              | CC              | 1947032611               |
| SNP_P4_174212_96149 | NW_004517293.1 | Scaffold2311 | 96149                   | TT                              | CC              | 1947032613               |
| SNP_P4_174213_354   | NW_004517295.1 | Scaffold2314 | 354                     | AA                              | GG              | 1947032615               |
| SNP_P4_174214_644   | NW_004517295.1 | Scaffold2314 | 644                     | GG                              | TT              | 1947032617               |
| SNP_P4_174216_2136  | NW_004517295.1 | Scaffold2314 | 2136                    | AA                              | TT              | 1947032619               |
| SNP_P4_174217_192   | NW_004517297.1 | Scaffold2319 | 192                     | GG                              | CC              | 1947032621               |
| SNP_P4_174218_427   | NW_004517297.1 | Scaffold2319 | 427                     | TT                              | AA              | 1947032623               |
| SNP_P4_174219_492   | NW_004517297.1 | Scaffold2319 | 492                     | AA                              | CC              | 1947032625               |
| SNP_P4_174220_518   | NW_004517297.1 | Scaffold2319 | 518                     | AA                              | TT              | 1947032627               |
| SNP_P4_174221_636   | NW_004517297.1 | Scaffold2319 | 636                     | AA                              | TT              | 1947032629               |
| SNP_P4_174222_14694 | NW_004517298.1 | Scaffold2320 | 14694                   | CC                              | TT              | 1947032631               |
| SNP_P4_174223_852   | NW_004517300.1 | Scaffold2322 | 852                     | TT                              | CC              | 1947032633               |
| SNP_P4_174224_4244  | NW_004517300.1 | Scaffold2322 | 4244                    | CC                              | AA              | 1947032635               |
| SNP_P4_174225_6136  | NW_004517300.1 | Scaffold2322 | 6136                    | TT                              | CC              | 1947032637               |
| SNP_P4_174226_6483  | NW_004517300.1 | Scaffold2322 | 6483                    | CC                              | TT              | 1947032639               |
| SNP_P4_174227_6488  | NW_004517300.1 | Scaffold2322 | 6488                    | GG                              | AA              | 1947032641               |
| SNP_P4_174228_6905  | NW_004517300.1 | Scaffold2322 | 6905                    | TT                              | AA              | 1947032643               |
| SNP_P4_174229_7166  | NW_004517300.1 | Scaffold2322 | 7166                    | GG                              | AA              | 1947032645               |
| SNP_P4_174230_2606  | NW_004517302.1 | Scaffold2325 | 2606                    | AA                              | GG              | 1947032647               |
| SNP_P4_174231_32576 | NW_004517302.1 | Scaffold2325 | 32576                   | GG                              | TT              | 1947032649               |

| SNPs IDs             | Chromosome IDs | Chromosomes  | Physical positions (bp) | CDC Frontier (Reference genome) | (ILWC46 & LPNB) | NCBI SNPdb Accession IDs |
|----------------------|----------------|--------------|-------------------------|---------------------------------|-----------------|--------------------------|
| SNP_P4_174232_49083  | NW_004517302.1 | Scaffold2325 | 49083                   | AA                              | GG              | 1947032651               |
| SNP_P4_174233_51337  | NW_004517302.1 | Scaffold2325 | 51337                   | GG                              | AA              | 1947032653               |
| SNP_P4_174234_51667  | NW_004517302.1 | Scaffold2325 | 51667                   | AA                              | GG              | 1947032655               |
| SNP_P4_174235_51867  | NW_004517302.1 | Scaffold2325 | 51867                   | AA                              | GG              | 1947032657               |
| SNP_P4_174236_52091  | NW_004517302.1 | Scaffold2325 | 52091                   | TT                              | GG              | 1947032659               |
| SNP_P4_174237_52098  | NW_004517302.1 | Scaffold2325 | 52098                   | AA                              | GG              | 1947032661               |
| SNP_P4_174238_53024  | NW_004517302.1 | Scaffold2325 | 53024                   | TT                              | CC              | 1947032663               |
| SNP_P4_174239_58369  | NW_004517302.1 | Scaffold2325 | 58369                   | CC                              | GG              | 1947032665               |
| SNP_P4_174240_58431  | NW_004517302.1 | Scaffold2325 | 58431                   | TT                              | AA              | 1947032667               |
| SNP_P4_174241_58791  | NW_004517302.1 | Scaffold2325 | 58791                   | TT                              | CC              | 1947032669               |
| SNP_P4_174242_58793  | NW_004517302.1 | Scaffold2325 | 58793                   | GG                              | CC              | 1947032671               |
| SNP_P4_174243_58908  | NW_004517302.1 | Scaffold2325 | 58908                   | AA                              | CC              | 1947032673               |
| SNP_P4_174245_59732  | NW_004517302.1 | Scaffold2325 | 59732                   | TT                              | AA              | 1947032675               |
| SNP_P4_174246_59795  | NW_004517302.1 | Scaffold2325 | 59795                   | AA                              | TT              | 1947032677               |
| SNP_P4_174247_59796  | NW_004517302.1 | Scaffold2325 | 59796                   | CC                              | TT              | 1947032679               |
| SNP_P4_174248_60057  | NW_004517302.1 | Scaffold2325 | 60057                   | CC                              | TT              | 1947032681               |
| SNP_P4_174249_60095  | NW_004517302.1 | Scaffold2325 | 60095                   | GG                              | CC              | 1947032683               |
| SNP_P4_174250_60508  | NW_004517302.1 | Scaffold2325 | 60508                   | AA                              | TT              | 1947032685               |
| SNP_P4_174251_60620  | NW_004517302.1 | Scaffold2325 | 60620                   | GG                              | AA              | 1947032687               |
| SNP_P4_174252_60673  | NW_004517302.1 | Scaffold2325 | 60673                   | CC                              | AA              | 1947032688               |
| SNP_P4_174253_60788  | NW_004517302.1 | Scaffold2325 | 60788                   | CC                              | TT              | 1947032690               |
| SNP_P4_174254_60973  | NW_004517302.1 | Scaffold2325 | 60973                   | TT                              | AA              | 1947032692               |
| SNP_P4_174255_61071  | NW_004517302.1 | Scaffold2325 | 61071                   | GG                              | AA              | 1947032694               |
| SNP_P4_174256_61081  | NW_004517302.1 | Scaffold2325 | 61081                   | AA                              | TT              | 1947032696               |
| SNP_P4_174257_7292   | NW_004517303.1 | Scaffold2328 | 7292                    | AA                              | TT              | 1947032698               |
| SNP_P4_174258_9013   | NW_004517303.1 | Scaffold2328 | 9013                    | TT                              | AA              | 1947032700               |
| SNP_P4_174259_10989  | NW_004517303.1 | Scaffold2328 | 10989                   | AA                              | CC              | 1947032702               |
| SNP_P4_174260_13392  | NW_004517303.1 | Scaffold2328 | 13392                   | TT                              | CC              | 1947032704               |
| SNP_P4_174261_13454  | NW_004517303.1 | Scaffold2328 | 13454                   | TT                              | CC              | 1947032706               |
| SNP_P4_174262_13458  | NW_004517303.1 | Scaffold2328 | 13458                   | AA                              | CC              | 1947032708               |
| SNP_P4_174263_13459  | NW_004517303.1 | Scaffold2328 | 13459                   | TT                              | CC              | 1947032710               |
| SNP_P4_174264_13573  | NW_004517303.1 | Scaffold2328 | 13573                   | CC                              | TT              | 1947032712               |
| SNP_P4_174266_13680  | NW_004517303.1 | Scaffold2328 | 13680                   | GG                              | AA              | 1947032714               |
| SNP_P4_174267_13777  | NW_004517303.1 | Scaffold2328 | 13777                   | TT                              | AA              | 1947032716               |
| SNP_P4_174268_13782  | NW_004517303.1 | Scaffold2328 | 13782                   | AA                              | GG              | 1947032718               |
| SNP_P4_174269_13939  | NW_004517303.1 | Scaffold2328 | 13939                   | TT                              | GG              | 1947032720               |
| SNP_P4_174270_13956  | NW_004517303.1 | Scaffold2328 | 13956                   | TT                              | CC              | 1947032722               |
| SNP_P4_174271_37973  | NW_004517305.1 | Scaffold2330 | 37973                   | CC                              | TT              | 1947032724               |
| SNP_P4_174272_44434  | NW_004517305.1 | Scaffold2330 | 44434                   | TT                              | GG              | 1947032726               |
| SNP_P4_174273_94925  | NW_004517305.1 | Scaffold2330 | 94925                   | AA                              | TT              | 1947032728               |
| SNP_P4_174274_94933  | NW_004517305.1 | Scaffold2330 | 94933                   | TT                              | AA              | 1947032730               |
| SNP_P4_174275_107959 | NW_004517305.1 | Scaffold2330 | 107959                  | TT                              | AA              | 1947032732               |

| SNPs IDs            | Chromosome IDs | Chromosomes  | Physical positions (bp) | CDC Frontier (Reference genome) | (ILWC46 & LPNB) | NCBI SNPdb Accession IDs |
|---------------------|----------------|--------------|-------------------------|---------------------------------|-----------------|--------------------------|
| SNP_P4_174276_81    | NW_004517306.1 | Scaffold2331 | 81                      | GG                              | CC              | 1947032734               |
| SNP_P4_174277_105   | NW_004517306.1 | Scaffold2331 | 105                     | TT                              | CC              | 1947032736               |
| SNP_P4_174279_117   | NW_004517306.1 | Scaffold2331 | 117                     | GG                              | CC              | 1947032738               |
| SNP_P4_174280_138   | NW_004517306.1 | Scaffold2331 | 138                     | GG                              | AA              | 1947032740               |
| SNP_P4_174281_64    | NW_004517309.1 | Scaffold2337 | 64                      | GG                              | TT              | 1947032742               |
| SNP_P4_174282_745   | NW_004517313.1 | Scaffold2342 | 745                     | CC                              | TT              | 1947032744               |
| SNP_P4_174283_944   | NW_004517313.1 | Scaffold2342 | 944                     | CC                              | AA              | 1947032746               |
| SNP_P4_174284_981   | NW_004517313.1 | Scaffold2342 | 981                     | CC                              | TT              | 1947032748               |
| SNP_P4_174285_1020  | NW_004517313.1 | Scaffold2342 | 1020                    | TT                              | AA              | 1947032750               |
| SNP_P4_174286_4390  | NW_004517313.1 | Scaffold2342 | 4390                    | GG                              | AA              | 1947032752               |
| SNP_P4_174287_23194 | NW_004517313.1 | Scaffold2342 | 23194                   | AA                              | TT              | 1947032754               |
| SNP_P4_174289_19833 | NW_004517314.1 | Scaffold2343 | 19833                   | AA                              | GG              | 1947032756               |
| SNP_P4_174290_20141 | NW_004517314.1 | Scaffold2343 | 20141                   | CC                              | TT              | 1947032758               |
| SNP_P4_174291_23787 | NW_004517314.1 | Scaffold2343 | 23787                   | GG                              | TT              | 1947032760               |
| SNP_P4_174292_24252 | NW_004517314.1 | Scaffold2343 | 24252                   | TT                              | CC              | 1947032762               |
| SNP_P4_174293_30885 | NW_004517314.1 | Scaffold2343 | 30885                   | AA                              | GG              | 1947032764               |
| SNP_P4_174294_33326 | NW_004517314.1 | Scaffold2343 | 33326                   | AA                              | CC              | 1947032766               |
| SNP_P4_174295_45549 | NW_004517314.1 | Scaffold2343 | 45549                   | CC                              | TT              | 1947032768               |
| SNP_P4_174296_45593 | NW_004517314.1 | Scaffold2343 | 45593                   | AA                              | GG              | 1947032770               |
| SNP_P4_174297_45614 | NW_004517314.1 | Scaffold2343 | 45614                   | CC                              | GG              | 1947032772               |
| SNP_P4_174298_45744 | NW_004517314.1 | Scaffold2343 | 45744                   | CC                              | GG              | 1947032774               |
| SNP_P4_174299_45823 | NW_004517314.1 | Scaffold2343 | 45823                   | AA                              | GG              | 1947032776               |
| SNP_P4_174300_45891 | NW_004517314.1 | Scaffold2343 | 45891                   | GG                              | TT              | 1947032778               |
| SNP_P4_174301_45905 | NW_004517314.1 | Scaffold2343 | 45905                   | AA                              | GG              | 1947032780               |
| SNP_P4_174302_45943 | NW_004517314.1 | Scaffold2343 | 45943                   | GG                              | AA              | 1947032782               |
| SNP_P4_174303_45944 | NW_004517314.1 | Scaffold2343 | 45944                   | TT                              | AA              | 1947032784               |
| SNP_P4_174304_46826 | NW_004517314.1 | Scaffold2343 | 46826                   | TT                              | CC              | 1947032786               |
| SNP_P4_174305_46954 | NW_004517314.1 | Scaffold2343 | 46954                   | AA                              | GG              | 1947032788               |
| SNP_P4_174306_949   | NW_004517315.1 | Scaffold2344 | 949                     | GG                              | TT              | 1947032790               |
| SNP_P4_174307_1321  | NW_004517315.1 | Scaffold2344 | 1321                    | TT                              | CC              | 1947032792               |
| SNP_P4_174308_1476  | NW_004517315.1 | Scaffold2344 | 1476                    | TT                              | CC              | 1947032794               |
| SNP_P4_174309_1507  | NW_004517315.1 | Scaffold2344 | 1507                    | TT                              | CC              | 1947032796               |
| SNP_P4_174310_1509  | NW_004517315.1 | Scaffold2344 | 1509                    | TT                              | AA              | 1947032798               |
| SNP_P4_174311_1521  | NW_004517315.1 | Scaffold2344 | 1521                    | TT                              | CC              | 1947032799               |
| SNP_P4_174312_1533  | NW_004517315.1 | Scaffold2344 | 1533                    | GG                              | AA              | 1947032801               |
| SNP_P4_174313_529   | NW_004517316.1 | Scaffold2345 | 529                     | CC                              | TT              | 1947032803               |
| SNP_P4_174315_732   | NW_004517316.1 | Scaffold2345 | 732                     | CC                              | GG              | 1947032805               |
| SNP_P4_174316_793   | NW_004517316.1 | Scaffold2345 | 793                     | CC                              | TT              | 1947032807               |
| SNP_P4_174317_796   | NW_004517316.1 | Scaffold2345 | 796                     | AA                              | CC              | 1947032809               |
| SNP_P4_174318_1023  | NW_004517316.1 | Scaffold2345 | 1023                    | GG                              | AA              | 1947032811               |
| SNP_P4_174319_1120  | NW_004517316.1 | Scaffold2345 | 1120                    | TT                              | AA              | 1947032813               |
| SNP_P4_174320_1129  | NW_004517316.1 | Scaffold2345 | 1129                    | AA                              | CC              | 1947032815               |

| SNPs IDs            | Chromosome IDs | Chromosomes  | Physical positions (bp) | CDC Frontier (Reference genome) | (ILWC46 & LPNB) | NCBI SNPdb Accession IDs |
|---------------------|----------------|--------------|-------------------------|---------------------------------|-----------------|--------------------------|
| SNP_P4_174321_1567  | NW_004517316.1 | Scaffold2345 | 1567                    | GG                              | TT              | 1947032817               |
| SNP_P4_174322_1655  | NW_004517316.1 | Scaffold2345 | 1655                    | CC                              | TT              | 1947032819               |
| SNP_P4_174323_2862  | NW_004517316.1 | Scaffold2345 | 2862                    | TT                              | AA              | 1947032821               |
| SNP_P4_174324_11515 | NW_004517316.1 | Scaffold2345 | 11515                   | TT                              | CC              | 1947032823               |
| SNP_P4_174326_13198 | NW_004517316.1 | Scaffold2345 | 13198                   | TT                              | CC              | 1947032825               |
| SNP_P4_174327_13389 | NW_004517316.1 | Scaffold2345 | 13389                   | GG                              | CC              | 1947032827               |
| SNP_P4_174328_17141 | NW_004517316.1 | Scaffold2345 | 17141                   | TT                              | AA              | 1947032829               |
| SNP_P4_174329_17154 | NW_004517316.1 | Scaffold2345 | 17154                   | TT                              | AA              | 1947032831               |
| SNP_P4_174330_20888 | NW_004517316.1 | Scaffold2345 | 20888                   | AA                              | GG              | 1947032833               |
| SNP_P4_174331_20895 | NW_004517316.1 | Scaffold2345 | 20895                   | CC                              | TT              | 1947032835               |
| SNP_P4_174332_20935 | NW_004517316.1 | Scaffold2345 | 20935                   | GG                              | CC              | 1947032837               |
| SNP_P4_174333_21288 | NW_004517316.1 | Scaffold2345 | 21288                   | TT                              | AA              | 1947032839               |
| SNP_P4_174334_246   | NW_004517317.1 | Scaffold2346 | 246                     | GG                              | AA              | 1947032841               |
| SNP_P4_174335_383   | NW_004517317.1 | Scaffold2346 | 383                     | GG                              | AA              | 1947032843               |
| SNP_P4_174336_433   | NW_004517317.1 | Scaffold2346 | 433                     | TT                              | GG              | 1947032845               |
| SNP_P4_174337_501   | NW_004517317.1 | Scaffold2346 | 501                     | CC                              | AA              | 1947032847               |
| SNP_P4_174338_569   | NW_004517317.1 | Scaffold2346 | 569                     | AA                              | TT              | 1947032849               |
| SNP_P4_174339_630   | NW_004517317.1 | Scaffold2346 | 630                     | GG                              | AA              | 1947032851               |
| SNP_P4_174340_700   | NW_004517317.1 | Scaffold2346 | 700                     | TT                              | CC              | 1947032852               |
| SNP_P4_174341_870   | NW_004517317.1 | Scaffold2346 | 870                     | CC                              | AA              | 1947032854               |
| SNP_P4_174342_873   | NW_004517317.1 | Scaffold2346 | 873                     | CC                              | TT              | 1947032856               |
| SNP_P4_174343_898   | NW_004517317.1 | Scaffold2346 | 898                     | TT                              | AA              | 1947032858               |
| SNP_P4_174344_917   | NW_004517317.1 | Scaffold2346 | 917                     | AA                              | GG              | 1947032860               |
| SNP_P4_174345_933   | NW_004517317.1 | Scaffold2346 | 933                     | GG                              | AA              | 1947032862               |
| SNP_P4_174346_952   | NW_004517317.1 | Scaffold2346 | 952                     | AA                              | TT              | 1947032864               |
| SNP_P4_174347_972   | NW_004517317.1 | Scaffold2346 | 972                     | CC                              | TT              | 1947032866               |
| SNP_P4_174348_974   | NW_004517317.1 | Scaffold2346 | 974                     | AA                              | GG              | 1947032868               |
| SNP_P4_174349_989   | NW_004517317.1 | Scaffold2346 | 989                     | CC                              | AA              | 1947032870               |
| SNP_P4_174350_1008  | NW_004517317.1 | Scaffold2346 | 1008                    | CC                              | TT              | 1947032872               |
| SNP_P4_174351_1030  | NW_004517317.1 | Scaffold2346 | 1030                    | TT                              | CC              | 1947032874               |
| SNP_P4_174352_1036  | NW_004517317.1 | Scaffold2346 | 1036                    | CC                              | AA              | 1947032876               |
| SNP_P4_174353_1050  | NW_004517317.1 | Scaffold2346 | 1050                    | GG                              | AA              | 1947032878               |
| SNP_P4_174354_1137  | NW_004517317.1 | Scaffold2346 | 1137                    | CC                              | TT              | 1947032880               |
| SNP_P4_174355_1235  | NW_004517317.1 | Scaffold2346 | 1235                    | GG                              | AA              | 1947032882               |
| SNP_P4_174356_1245  | NW_004517317.1 | Scaffold2346 | 1245                    | TT                              | CC              | 1947032884               |
| SNP_P4_174357_1384  | NW_004517317.1 | Scaffold2346 | 1384                    | GG                              | AA              | 1947032886               |
| SNP_P4_174358_1517  | NW_004517317.1 | Scaffold2346 | 1517                    | TT                              | GG              | 1947032888               |
| SNP_P4_174359_1524  | NW_004517317.1 | Scaffold2346 | 1524                    | CC                              | TT              | 1947032890               |
| SNP_P4_174360_1632  | NW_004517317.1 | Scaffold2346 | 1632                    | TT                              | CC              | 1947032892               |
| SNP_P4_174361_1641  | NW_004517317.1 | Scaffold2346 | 1641                    | AA                              | GG              | 1947032894               |
| SNP_P4_174362_1651  | NW_004517317.1 | Scaffold2346 | 1651                    | TT                              | AA              | 1947032896               |
| SNP_P4_174363_1689  | NW_004517317.1 | Scaffold2346 | 1689                    | TT                              | AA              | 1947032898               |



| SNPs IDs            | Chromosome IDs | Chromosomes  | Physical positions (bp) | CDC Frontier (Reference genome) | (ILWC46 & LPNB) | NCBI SNPdb Accession IDs |
|---------------------|----------------|--------------|-------------------------|---------------------------------|-----------------|--------------------------|
| SNP_P4_174364_3120  | NW_004517317.1 | Scaffold2346 | 3120                    | TT                              | CC              | 1947032900               |
| SNP_P4_174365_7417  | NW_004517317.1 | Scaffold2346 | 7417                    | CC                              | AA              | 1947032902               |
| SNP_P4_174366_7457  | NW_004517317.1 | Scaffold2346 | 7457                    | TT                              | CC              | 1947032904               |
| SNP_P4_174367_7620  | NW_004517317.1 | Scaffold2346 | 7620                    | AA                              | GG              | 1947032906               |
| SNP_P4_174368_7627  | NW_004517317.1 | Scaffold2346 | 7627                    | GG                              | AA              | 1947032908               |
| SNP_P4_174369_7676  | NW_004517317.1 | Scaffold2346 | 7676                    | CC                              | AA              | 1947032910               |
| SNP_P4_174370_21795 | NW_004517317.1 | Scaffold2346 | 21795                   | AA                              | GG              | 1947032912               |
| SNP_P4_174371_22030 | NW_004517317.1 | Scaffold2346 | 22030                   | AA                              | GG              | 1947032914               |
| SNP_P4_174372_26052 | NW_004517317.1 | Scaffold2346 | 26052                   | CC                              | TT              | 1947032916               |
| SNP_P4_174373_26329 | NW_004517317.1 | Scaffold2346 | 26329                   | TT                              | CC              | 1947032918               |
| SNP_P4_174374_26534 | NW_004517317.1 | Scaffold2346 | 26534                   | GG                              | TT              | 1947032919               |
| SNP_P4_174375_26555 | NW_004517317.1 | Scaffold2346 | 26555                   | GG                              | AA              | 1947032920               |
| SNP_P4_174376_26591 | NW_004517317.1 | Scaffold2346 | 26591                   | AA                              | CC              | 1947032921               |
| SNP_P4_174377_27181 | NW_004517317.1 | Scaffold2346 | 27181                   | CC                              | TT              | 1947032922               |
| SNP_P4_174378_27826 | NW_004517317.1 | Scaffold2346 | 27826                   | CC                              | TT              | 1947032923               |
| SNP_P4_174379_27933 | NW_004517317.1 | Scaffold2346 | 27933                   | GG                              | AA              | 1947032924               |
| SNP_P4_174380_28032 | NW_004517317.1 | Scaffold2346 | 28032                   | AA                              | GG              | 1947032925               |
| SNP_P4_174381_28056 | NW_004517317.1 | Scaffold2346 | 28056                   | TT                              | AA              | 1947032926               |
| SNP_P4_174382_28067 | NW_004517317.1 | Scaffold2346 | 28067                   | CC                              | TT              | 1947032927               |
| SNP_P4_174383_28160 | NW_004517317.1 | Scaffold2346 | 28160                   | CC                              | TT              | 1947032928               |
| SNP_P4_174384_28174 | NW_004517317.1 | Scaffold2346 | 28174                   | TT                              | CC              | 1947032929               |
| SNP_P4_174385_28354 | NW_004517317.1 | Scaffold2346 | 28354                   | TT                              | CC              | 1947032931               |
| SNP_P4_174386_28378 | NW_004517317.1 | Scaffold2346 | 28378                   | TT                              | GG              | 1947032933               |
| SNP_P4_174388_28564 | NW_004517317.1 | Scaffold2346 | 28564                   | GG                              | AA              | 1947032935               |
| SNP_P4_174389_28574 | NW_004517317.1 | Scaffold2346 | 28574                   | AA                              | GG              | 1947032936               |
| SNP_P4_174390_28583 | NW_004517317.1 | Scaffold2346 | 28583                   | CC                              | TT              | 1947032938               |
| SNP_P4_174391_28656 | NW_004517317.1 | Scaffold2346 | 28656                   | CC                              | GG              | 1947032940               |
| SNP_P4_174392_30542 | NW_004517317.1 | Scaffold2346 | 30542                   | GG                              | AA              | 1947032942               |
| SNP_P4_174393_30592 | NW_004517317.1 | Scaffold2346 | 30592                   | CC                              | GG              | 1947032944               |
| SNP_P4_174394_30624 | NW_004517317.1 | Scaffold2346 | 30624                   | CC                              | TT              | 1947032946               |
| SNP_P4_174395_30637 | NW_004517317.1 | Scaffold2346 | 30637                   | TT                              | AA              | 1947032948               |
| SNP_P4_174396_30749 | NW_004517317.1 | Scaffold2346 | 30749                   | CC                              | GG              | 1947032950               |
| SNP_P4_174397_30788 | NW_004517317.1 | Scaffold2346 | 30788                   | TT                              | GG              | 1947032952               |
| SNP_P4_174398_30811 | NW_004517317.1 | Scaffold2346 | 30811                   | GG                              | TT              | 1947032954               |
| SNP_P4_174399_30815 | NW_004517317.1 | Scaffold2346 | 30815                   | TT                              | CC              | 1947032956               |
| SNP_P4_174400_30816 | NW_004517317.1 | Scaffold2346 | 30816                   | CC                              | TT              | 1947032958               |
| SNP_P4_174401_30834 | NW_004517317.1 | Scaffold2346 | 30834                   | CC                              | TT              | 1947032960               |
| SNP_P4_174402_30880 | NW_004517317.1 | Scaffold2346 | 30880                   | TT                              | CC              | 1947032962               |
| SNP_P4_174403_31038 | NW_004517317.1 | Scaffold2346 | 31038                   | AA                              | TT              | 1947032964               |
| SNP_P4_174404_31206 | NW_004517317.1 | Scaffold2346 | 31206                   | CC                              | TT              | 1947032966               |
| SNP_P4_174405_31236 | NW_004517317.1 | Scaffold2346 | 31236                   | TT                              | GG              | 1947032968               |
| SNP_P4_174406_31281 | NW_004517317.1 | Scaffold2346 | 31281                   | AA                              | GG              | 1947032970               |

| SNPs IDs             | Chromosome IDs | Chromosomes  | Physical positions (bp) | CDC Frontier (Reference genome) | (ILWC46 & LPNB) | NCBI SNPdb Accession IDs |
|----------------------|----------------|--------------|-------------------------|---------------------------------|-----------------|--------------------------|
| SNP_P4_174407_31286  | NW_004517317.1 | Scaffold2346 | 31286                   | AA                              | GG              | 1947032972               |
| SNP_P4_174408_31346  | NW_004517317.1 | Scaffold2346 | 31346                   | CC                              | AA              | 1947032974               |
| SNP_P4_174409_31411  | NW_004517317.1 | Scaffold2346 | 31411                   | GG                              | AA              | 1947032976               |
| SNP_P4_174410_31686  | NW_004517317.1 | Scaffold2346 | 31686                   | TT                              | GG              | 1947032978               |
| SNP_P4_174411_31808  | NW_004517317.1 | Scaffold2346 | 31808                   | CC                              | TT              | 1947032980               |
| SNP_P4_174412_369    | NW_004517318.1 | Scaffold2347 | 369                     | CC                              | AA              | 1947032982               |
| SNP_P4_174413_1911   | NW_004517319.1 | Scaffold2348 | 1911                    | TT                              | CC              | 1947032984               |
| SNP_P4_174414_2005   | NW_004517319.1 | Scaffold2348 | 2005                    | TT                              | AA              | 1947032986               |
| SNP_P4_174415_2464   | NW_004517319.1 | Scaffold2348 | 2464                    | GG                              | AA              | 1947032988               |
| SNP_P4_174416_2484   | NW_004517319.1 | Scaffold2348 | 2484                    | GG                              | AA              | 1947032990               |
| SNP_P4_174417_10212  | NW_004517319.1 | Scaffold2348 | 10212                   | TT                              | CC              | 1947032992               |
| SNP_P4_174418_10992  | NW_004517319.1 | Scaffold2348 | 10992                   | GG                              | CC              | 1947032994               |
| SNP_P4_174419_45891  | NW_004517319.1 | Scaffold2348 | 45891                   | TT                              | GG              | 1947032996               |
| SNP_P4_174420_45898  | NW_004517319.1 | Scaffold2348 | 45898                   | AA                              | GG              | 1947032998               |
| SNP_P4_174421_45920  | NW_004517319.1 | Scaffold2348 | 45920                   | CC                              | TT              | 1947033000               |
| SNP_P4_174422_45957  | NW_004517319.1 | Scaffold2348 | 45957                   | TT                              | CC              | 1947033002               |
| SNP_P4_174423_51978  | NW_004517319.1 | Scaffold2348 | 51978                   | TT                              | AA              | 1947033004               |
| SNP_P4_174424_52139  | NW_004517319.1 | Scaffold2348 | 52139                   | CC                              | TT              | 1947033006               |
| SNP_P4_174425_52294  | NW_004517319.1 | Scaffold2348 | 52294                   | TT                              | GG              | 1947033008               |
| SNP_P4_174426_52306  | NW_004517319.1 | Scaffold2348 | 52306                   | GG                              | AA              | 1947033010               |
| SNP_P4_174427_52329  | NW_004517319.1 | Scaffold2348 | 52329                   | GG                              | AA              | 1947033012               |
| SNP_P4_174428_52407  | NW_004517319.1 | Scaffold2348 | 52407                   | TT                              | CC              | 1947033014               |
| SNP_P4_174430_52816  | NW_004517319.1 | Scaffold2348 | 52816                   | GG                              | CC              | 1947033016               |
| SNP_P4_174431_63988  | NW_004517319.1 | Scaffold2348 | 63988                   | AA                              | CC              | 1947033018               |
| SNP_P4_174432_64181  | NW_004517319.1 | Scaffold2348 | 64181                   | TT                              | AA              | 1947033020               |
| SNP_P4_174433_64223  | NW_004517319.1 | Scaffold2348 | 64223                   | AA                              | GG              | 1947033022               |
| SNP_P4_174434_64237  | NW_004517319.1 | Scaffold2348 | 64237                   | GG                              | TT              | 1947033024               |
| SNP_P4_174435_64280  | NW_004517319.1 | Scaffold2348 | 64280                   | TT                              | CC              | 1947033026               |
| SNP_P4_174436_64330  | NW_004517319.1 | Scaffold2348 | 64330                   | AA                              | TT              | 1947033028               |
| SNP_P4_174437_64345  | NW_004517319.1 | Scaffold2348 | 64345                   | GG                              | AA              | 1947033030               |
| SNP_P4_174438_64358  | NW_004517319.1 | Scaffold2348 | 64358                   | CC                              | TT              | 1947033032               |
| SNP_P4_174439_64376  | NW_004517319.1 | Scaffold2348 | 64376                   | TT                              | CC              | 1947033034               |
| SNP_P4_174441_64493  | NW_004517319.1 | Scaffold2348 | 64493                   | GG                              | CC              | 1947033036               |
| SNP_P4_174442_64561  | NW_004517319.1 | Scaffold2348 | 64561                   | GG                              | CC              | 1947033038               |
| SNP_P4_174443_64564  | NW_004517319.1 | Scaffold2348 | 64564                   | AA                              | GG              | 1947033040               |
| SNP_P4_174444_64596  | NW_004517319.1 | Scaffold2348 | 64596                   | GG                              | AA              | 1947033042               |
| SNP_P4_174445_64610  | NW_004517319.1 | Scaffold2348 | 64610                   | AA                              | CC              | 1947033044               |
| SNP_P4_174446_64651  | NW_004517319.1 | Scaffold2348 | 64651                   | AA                              | GG              | 1947033046               |
| SNP_P4_174447_92776  | NW_004517319.1 | Scaffold2348 | 92776                   | CC                              | TT              | 1947033048               |
| SNP_P4_174448_105306 | NW_004517319.1 | Scaffold2348 | 105306                  | AA                              | CC              | 1947033050               |
| SNP_P4_174449_105736 | NW_004517319.1 | Scaffold2348 | 105736                  | TT                              | CC              | 1947033052               |
| SNP_P4_174450_105772 | NW_004517319.1 | Scaffold2348 | 105772                  | TT                              | GG              | 1947033054               |

| SNPs IDs             | Chromosome IDs | Chromosomes  | Physical positions (bp) | CDC Frontier (Reference genome) | (ILWC46 & LPNB) | NCBI SNPdb Accession IDs |
|----------------------|----------------|--------------|-------------------------|---------------------------------|-----------------|--------------------------|
| SNP_P4_174451_105783 | NW_004517319.1 | Scaffold2348 | 105783                  | TT                              | CC              | 1947033056               |
| SNP_P4_174452_105803 | NW_004517319.1 | Scaffold2348 | 105803                  | AA                              | CC              | 1947033058               |
| SNP_P4_174453_105804 | NW_004517319.1 | Scaffold2348 | 105804                  | TT                              | AA              | 1947033060               |
| SNP_P4_174454_105881 | NW_004517319.1 | Scaffold2348 | 105881                  | TT                              | CC              | 1947033062               |
| SNP_P4_174455_105888 | NW_004517319.1 | Scaffold2348 | 105888                  | TT                              | CC              | 1947033064               |
| SNP_P4_174457_108293 | NW_004517319.1 | Scaffold2348 | 108293                  | CC                              | TT              | 1947033066               |
| SNP_P4_174458_108347 | NW_004517319.1 | Scaffold2348 | 108347                  | AA                              | CC              | 1947033068               |
| SNP_P4_174459_111651 | NW_004517319.1 | Scaffold2348 | 111651                  | TT                              | AA              | 1947033070               |
| SNP_P4_174460_116527 | NW_004517319.1 | Scaffold2348 | 116527                  | TT                              | GG              | 1947033072               |
| SNP_P4_174461_139925 | NW_004517319.1 | Scaffold2348 | 139925                  | GG                              | AA              | 1947033075               |
| SNP_P4_174462_165874 | NW_004517319.1 | Scaffold2348 | 165874                  | TT                              | CC              | 1947033077               |
| SNP_P4_174464_178608 | NW_004517319.1 | Scaffold2348 | 178608                  | GG                              | AA              | 1947033079               |
| SNP_P4_174465_183054 | NW_004517319.1 | Scaffold2348 | 183054                  | GG                              | AA              | 1947033081               |
| SNP_P4_174466_517    | NW_004517320.1 | Scaffold2349 | 517                     | CC                              | GG              | 1947033083               |
| SNP_P4_174467_592    | NW_004517320.1 | Scaffold2349 | 592                     | AA                              | GG              | 1947033085               |
| SNP_P4_174468_668    | NW_004517320.1 | Scaffold2349 | 668                     | TT                              | AA              | 1947033087               |
| SNP_P4_174469_980    | NW_004517322.1 | Scaffold2351 | 980                     | TT                              | AA              | 1947033089               |
| SNP_P4_174470_985    | NW_004517322.1 | Scaffold2351 | 985                     | AA                              | TT              | 1947033091               |
| SNP_P4_174471_712    | NW_004517323.1 | Scaffold2352 | 712                     | GG                              | TT              | 1947033093               |
| SNP_P4_174472_783    | NW_004517323.1 | Scaffold2352 | 783                     | GG                              | CC              | 1947033095               |
| SNP_P4_174473_830    | NW_004517323.1 | Scaffold2352 | 830                     | TT                              | CC              | 1947033097               |
| SNP_P4_174474_891    | NW_004517323.1 | Scaffold2352 | 891                     | TT                              | CC              | 1947033099               |
| SNP_P4_174475_911    | NW_004517323.1 | Scaffold2352 | 911                     | AA                              | GG              | 1947033101               |
| SNP_P4_174476_955    | NW_004517323.1 | Scaffold2352 | 955                     | AA                              | CC              | 1947033103               |
| SNP_P4_174477_962    | NW_004517323.1 | Scaffold2352 | 962                     | GG                              | AA              | 1947033105               |
| SNP_P4_174478_977    | NW_004517323.1 | Scaffold2352 | 977                     | TT                              | GG              | 1947033108               |
| SNP_P4_174479_1028   | NW_004517323.1 | Scaffold2352 | 1028                    | CC                              | AA              | 1947033110               |
| SNP_P4_174480_1050   | NW_004517323.1 | Scaffold2352 | 1050                    | AA                              | GG              | 1947033112               |
| SNP_P4_174481_1076   | NW_004517323.1 | Scaffold2352 | 1076                    | AA                              | GG              | 1947033114               |
| SNP_P4_174482_1094   | NW_004517323.1 | Scaffold2352 | 1094                    | AA                              | GG              | 1947033116               |
| SNP_P4_174483_1095   | NW_004517323.1 | Scaffold2352 | 1095                    | AA                              | GG              | 1947033118               |
| SNP_P4_174484_1153   | NW_004517323.1 | Scaffold2352 | 1153                    | CC                              | GG              | 1947033120               |
| SNP_P4_174485_1175   | NW_004517323.1 | Scaffold2352 | 1175                    | GG                              | AA              | 1947033122               |
| SNP_P4_174486_1201   | NW_004517323.1 | Scaffold2352 | 1201                    | AA                              | GG              | 1947033124               |
| SNP_P4_174487_1244   | NW_004517323.1 | Scaffold2352 | 1244                    | GG                              | AA              | 1947033126               |
| SNP_P4_174488_1246   | NW_004517323.1 | Scaffold2352 | 1246                    | GG                              | CC              | 1947033128               |
| SNP_P4_174489_390    | NW_004517324.1 | Scaffold2354 | 390                     | TT                              | GG              | 1947033130               |
| SNP_P4_174490_595    | NW_004517324.1 | Scaffold2354 | 595                     | TT                              | GG              | 1947033132               |
| SNP_P4_174491_3826   | NW_004517324.1 | Scaffold2354 | 3826                    | CC                              | TT              | 1947033134               |
| SNP_P4_174492_4150   | NW_004517324.1 | Scaffold2354 | 4150                    | GG                              | TT              | 1947033136               |
| SNP_P4_174493_4199   | NW_004517324.1 | Scaffold2354 | 4199                    | GG                              | AA              | 1947033138               |
| SNP_P4_174494_4202   | NW_004517324.1 | Scaffold2354 | 4202                    | TT                              | AA              | 1947033140               |

| SNPs IDs            | Chromosome IDs | Chromosomes  | Physical positions (bp) | CDC Frontier (Reference genome) | (ILWC46 & LPNB) | NCBI SNPdb Accession IDs |
|---------------------|----------------|--------------|-------------------------|---------------------------------|-----------------|--------------------------|
| SNP_P4_174495_4220  | NW_004517324.1 | Scaffold2354 | 4220                    | TT                              | AA              | 1947033142               |
| SNP_P4_174496_4349  | NW_004517324.1 | Scaffold2354 | 4349                    | TT                              | AA              | 1947033145               |
| SNP_P4_174497_4350  | NW_004517324.1 | Scaffold2354 | 4350                    | GG                              | AA              | 1947033147               |
| SNP_P4_174498_4361  | NW_004517324.1 | Scaffold2354 | 4361                    | CC                              | AA              | 1947033149               |
| SNP_P4_174499_4424  | NW_004517324.1 | Scaffold2354 | 4424                    | GG                              | CC              | 1947033151               |
| SNP_P4_174500_4427  | NW_004517324.1 | Scaffold2354 | 4427                    | CC                              | TT              | 1947033153               |
| SNP_P4_174501_6663  | NW_004517324.1 | Scaffold2354 | 6663                    | AA                              | TT              | 1947033155               |
| SNP_P4_174502_10653 | NW_004517324.1 | Scaffold2354 | 10653                   | GG                              | AA              | 1947033157               |
| SNP_P4_174503_10926 | NW_004517324.1 | Scaffold2354 | 10926                   | AA                              | TT              | 1947033159               |
| SNP_P4_174504_10958 | NW_004517324.1 | Scaffold2354 | 10958                   | AA                              | GG              | 1947033161               |
| SNP_P4_174505_11328 | NW_004517324.1 | Scaffold2354 | 11328                   | GG                              | CC              | 1947033163               |
| SNP_P4_174506_12172 | NW_004517324.1 | Scaffold2354 | 12172                   | GG                              | CC              | 1947033165               |
| SNP_P4_174507_12188 | NW_004517324.1 | Scaffold2354 | 12188                   | TT                              | AA              | 1947033167               |
| SNP_P4_174508_12189 | NW_004517324.1 | Scaffold2354 | 12189                   | GG                              | CC              | 1947033169               |
| SNP_P4_174509_12190 | NW_004517324.1 | Scaffold2354 | 12190                   | GG                              | TT              | 1947033171               |
| SNP_P4_174510_12201 | NW_004517324.1 | Scaffold2354 | 12201                   | GG                              | AA              | 1947033173               |
| SNP_P4_174511_12257 | NW_004517324.1 | Scaffold2354 | 12257                   | GG                              | TT              | 1947033175               |
| SNP_P4_174512_12296 | NW_004517324.1 | Scaffold2354 | 12296                   | AA                              | CC              | 1947033177               |
| SNP_P4_174513_12531 | NW_004517324.1 | Scaffold2354 | 12531                   | CC                              | AA              | 1947033179               |
| SNP_P4_174514_12567 | NW_004517324.1 | Scaffold2354 | 12567                   | AA                              | GG              | 1947033181               |
| SNP_P4_174515_15217 | NW_004517324.1 | Scaffold2354 | 15217                   | CC                              | AA              | 1947033184               |
| SNP_P4_174516_15307 | NW_004517324.1 | Scaffold2354 | 15307                   | GG                              | AA              | 1947033186               |
| SNP_P4_174517_15347 | NW_004517324.1 | Scaffold2354 | 15347                   | AA                              | TT              | 1947033188               |
| SNP_P4_174518_15392 | NW_004517324.1 | Scaffold2354 | 15392                   | GG                              | CC              | 1947033190               |
| SNP_P4_174519_2959  | NW_004517326.1 | Scaffold2356 | 2959                    | CC                              | TT              | 1947033192               |
| SNP_P4_174520_2982  | NW_004517326.1 | Scaffold2356 | 2982                    | AA                              | TT              | 1947033194               |
| SNP_P4_174521_2989  | NW_004517326.1 | Scaffold2356 | 2989                    | GG                              | AA              | 1947033196               |
| SNP_P4_174522_3113  | NW_004517326.1 | Scaffold2356 | 3113                    | TT                              | AA              | 1947033198               |
| SNP_P4_174523_5734  | NW_004517326.1 | Scaffold2356 | 5734                    | GG                              | TT              | 1947033200               |
| SNP_P4_174524_5746  | NW_004517326.1 | Scaffold2356 | 5746                    | CC                              | TT              | 1947033202               |
| SNP_P4_174525_6097  | NW_004517326.1 | Scaffold2356 | 6097                    | AA                              | GG              | 1947033204               |
| SNP_P4_174526_6127  | NW_004517326.1 | Scaffold2356 | 6127                    | TT                              | AA              | 1947033206               |
| SNP_P4_174527_6136  | NW_004517326.1 | Scaffold2356 | 6136                    | GG                              | TT              | 1947033208               |
| SNP_P4_174528_6219  | NW_004517326.1 | Scaffold2356 | 6219                    | GG                              | AA              | 1947033210               |
| SNP_P4_174529_6220  | NW_004517326.1 | Scaffold2356 | 6220                    | TT                              | CC              | 1947033213               |
| SNP_P4_174530_29872 | NW_004517326.1 | Scaffold2356 | 29872                   | GG                              | AA              | 1947033215               |
| SNP_P4_174531_30194 | NW_004517326.1 | Scaffold2356 | 30194                   | AA                              | TT              | 1947033217               |
| SNP_P4_174532_35106 | NW_004517326.1 | Scaffold2356 | 35106                   | CC                              | TT              | 1947033219               |
| SNP_P4_174533_35160 | NW_004517326.1 | Scaffold2356 | 35160                   | CC                              | TT              | 1947033221               |
| SNP_P4_174534_45337 | NW_004517326.1 | Scaffold2356 | 45337                   | TT                              | CC              | 1947033223               |
| SNP_P4_174535_45367 | NW_004517326.1 | Scaffold2356 | 45367                   | TT                              | CC              | 1947033225               |
| SNP_P4_174536_45658 | NW_004517326.1 | Scaffold2356 | 45658                   | GG                              | AA              | 1947033227               |

| SNPs IDs             | Chromosome IDs | Chromosomes  | Physical positions (bp) | CDC Frontier (Reference genome) | (ILWC46 & LPNB) | NCBI SNPdb Accession IDs |
|----------------------|----------------|--------------|-------------------------|---------------------------------|-----------------|--------------------------|
| SNP_P4_174537_45682  | NW_004517326.1 | Scaffold2356 | 45682                   | TT                              | CC              | 1947033229               |
| SNP_P4_174538_76885  | NW_004517326.1 | Scaffold2356 | 76885                   | CC                              | GG              | 1947033231               |
| SNP_P4_174539_77192  | NW_004517326.1 | Scaffold2356 | 77192                   | TT                              | AA              | 1947033233               |
| SNP_P4_174540_128873 | NW_004517326.1 | Scaffold2356 | 128873                  | CC                              | GG              | 1947033235               |
| SNP_P4_174541_128875 | NW_004517326.1 | Scaffold2356 | 128875                  | AA                              | TT              | 1947033237               |
| SNP_P4_174542_132920 | NW_004517326.1 | Scaffold2356 | 132920                  | CC                              | TT              | 1947033239               |
| SNP_P4_174544_133297 | NW_004517326.1 | Scaffold2356 | 133297                  | AA                              | CC              | 1947033241               |
| SNP_P4_174545_133397 | NW_004517326.1 | Scaffold2356 | 133397                  | CC                              | TT              | 1947033243               |
| SNP_P4_174546_133552 | NW_004517326.1 | Scaffold2356 | 133552                  | TT                              | AA              | 1947033246               |
| SNP_P4_174547_133567 | NW_004517326.1 | Scaffold2356 | 133567                  | AA                              | CC              | 1947033248               |
| SNP_P4_174548_135084 | NW_004517326.1 | Scaffold2356 | 135084                  | TT                              | CC              | 1947033250               |
| SNP_P4_174549_135094 | NW_004517326.1 | Scaffold2356 | 135094                  | CC                              | TT              | 1947033252               |
| SNP_P4_174550_135147 | NW_004517326.1 | Scaffold2356 | 135147                  | TT                              | CC              | 1947033254               |
| SNP_P4_174551_135162 | NW_004517326.1 | Scaffold2356 | 135162                  | CC                              | TT              | 1947033256               |
| SNP_P4_174553_136105 | NW_004517326.1 | Scaffold2356 | 136105                  | CC                              | TT              | 1947033258               |
| SNP_P4_174554_136169 | NW_004517326.1 | Scaffold2356 | 136169                  | CC                              | TT              | 1947033260               |
| SNP_P4_174555_136214 | NW_004517326.1 | Scaffold2356 | 136214                  | AA                              | GG              | 1947033262               |
| SNP_P4_174556_136363 | NW_004517326.1 | Scaffold2356 | 136363                  | TT                              | AA              | 1947033264               |
| SNP_P4_174557_136475 | NW_004517326.1 | Scaffold2356 | 136475                  | GG                              | TT              | 1947033266               |
| SNP_P4_174558_136767 | NW_004517326.1 | Scaffold2356 | 136767                  | TT                              | GG              | 1947033268               |
| SNP_P4_174559_136822 | NW_004517326.1 | Scaffold2356 | 136822                  | TT                              | CC              | 1947033271               |
| SNP_P4_174560_136835 | NW_004517326.1 | Scaffold2356 | 136835                  | CC                              | TT              | 1947033273               |
| SNP_P4_174561_136847 | NW_004517326.1 | Scaffold2356 | 136847                  | GG                              | AA              | 1947033275               |
| SNP_P4_174562_137025 | NW_004517326.1 | Scaffold2356 | 137025                  | GG                              | AA              | 1947033277               |
| SNP_P4_174564_138664 | NW_004517326.1 | Scaffold2356 | 138664                  | TT                              | GG              | 1947033279               |
| SNP_P4_174565_138701 | NW_004517326.1 | Scaffold2356 | 138701                  | CC                              | TT              | 1947033281               |
| SNP_P4_174566_138714 | NW_004517326.1 | Scaffold2356 | 138714                  | CC                              | TT              | 1947033283               |
| SNP_P4_174567_138729 | NW_004517326.1 | Scaffold2356 | 138729                  | GG                              | AA              | 1947033285               |
| SNP_P4_174569_139114 | NW_004517326.1 | Scaffold2356 | 139114                  | CC                              | TT              | 1947033287               |
| SNP_P4_174570_139319 | NW_004517326.1 | Scaffold2356 | 139319                  | CC                              | TT              | 1947033289               |
| SNP_P4_174572_147931 | NW_004517326.1 | Scaffold2356 | 147931                  | CC                              | TT              | 1947033291               |
| SNP_P4_174573_155312 | NW_004517326.1 | Scaffold2356 | 155312                  | CC                              | TT              | 1947033293               |
| SNP_P4_174574_189629 | NW_004517326.1 | Scaffold2356 | 189629                  | TT                              | CC              | 1947033295               |
| SNP_P4_174575_189894 | NW_004517326.1 | Scaffold2356 | 189894                  | CC                              | GG              | 1947033297               |
| SNP_P4_174576_196987 | NW_004517326.1 | Scaffold2356 | 196987                  | AA                              | GG              | 1947033299               |
| SNP_P4_174577_196988 | NW_004517326.1 | Scaffold2356 | 196988                  | TT                              | CC              | 1947033301               |
| SNP_P4_174578_197878 | NW_004517326.1 | Scaffold2356 | 197878                  | AA                              | GG              | 1947033303               |
| SNP_P4_174579_205643 | NW_004517326.1 | Scaffold2356 | 205643                  | AA                              | CC              | 1947033305               |
| SNP_P4_174580_205851 | NW_004517326.1 | Scaffold2356 | 205851                  | TT                              | AA              | 1947033307               |
| SNP_P4_174581_205878 | NW_004517326.1 | Scaffold2356 | 205878                  | AA                              | CC              | 1947033309               |
| SNP_P4_174582_205954 | NW_004517326.1 | Scaffold2356 | 205954                  | AA                              | CC              | 1947033311               |
| SNP_P4_174583_205974 | NW_004517326.1 | Scaffold2356 | 205974                  | GG                              | AA              | 1947033313               |

| SNPs IDs             | Chromosome IDs | Chromosomes  | Physical positions (bp) | CDC Frontier (Reference genome) | (ILWC46 & LPNB) | NCBI SNPdb Accession IDs |
|----------------------|----------------|--------------|-------------------------|---------------------------------|-----------------|--------------------------|
| SNP_P4_174584_206017 | NW_004517326.1 | Scaffold2356 | 206017                  | AA                              | GG              | 1947033315               |
| SNP_P4_174585_207438 | NW_004517326.1 | Scaffold2356 | 207438                  | TT                              | GG              | 1947033317               |
| SNP_P4_174586_207439 | NW_004517326.1 | Scaffold2356 | 207439                  | AA                              | TT              | 1947033319               |
| SNP_P4_174587_234434 | NW_004517326.1 | Scaffold2356 | 234434                  | CC                              | TT              | 1947033321               |
| SNP_P4_174588_234931 | NW_004517326.1 | Scaffold2356 | 234931                  | TT                              | GG              | 1947033323               |
| SNP_P4_174589_234932 | NW_004517326.1 | Scaffold2356 | 234932                  | CC                              | AA              | 1947033325               |
| SNP_P4_174590_234957 | NW_004517326.1 | Scaffold2356 | 234957                  | CC                              | AA              | 1947033328               |
| SNP_P4_174591_241984 | NW_004517326.1 | Scaffold2356 | 241984                  | AA                              | CC              | 1947033330               |
| SNP_P4_174592_242200 | NW_004517326.1 | Scaffold2356 | 242200                  | GG                              | CC              | 1947033332               |
| SNP_P4_174593_268342 | NW_004517326.1 | Scaffold2356 | 268342                  | GG                              | CC              | 1947033334               |
| SNP_P4_174594_268672 | NW_004517326.1 | Scaffold2356 | 268672                  | CC                              | TT              | 1947033336               |
| SNP_P4_174595_268708 | NW_004517326.1 | Scaffold2356 | 268708                  | GG                              | AA              | 1947033338               |
| SNP_P4_174596_269543 | NW_004517326.1 | Scaffold2356 | 269543                  | TT                              | AA              | 1947033340               |
| SNP_P4_174597_269571 | NW_004517326.1 | Scaffold2356 | 269571                  | CC                              | TT              | 1947033342               |
| SNP_P4_174598_294218 | NW_004517326.1 | Scaffold2356 | 294218                  | CC                              | TT              | 1947033344               |
| SNP_P4_174599_294255 | NW_004517326.1 | Scaffold2356 | 294255                  | AA                              | GG              | 1947033346               |
| SNP_P4_174600_294264 | NW_004517326.1 | Scaffold2356 | 294264                  | AA                              | GG              | 1947033348               |
| SNP_P4_174601_294295 | NW_004517326.1 | Scaffold2356 | 294295                  | CC                              | TT              | 1947033350               |
| SNP_P4_174602_294765 | NW_004517326.1 | Scaffold2356 | 294765                  | AA                              | GG              | 1947033352               |
| SNP_P4_174603_305952 | NW_004517326.1 | Scaffold2356 | 305952                  | GG                              | AA              | 1947033354               |
| SNP_P4_174604_13959  | NW_004517327.1 | Scaffold2357 | 13959                   | CC                              | TT              | 1947033356               |
| SNP_P4_174605_16590  | NW_004517327.1 | Scaffold2357 | 16590                   | TT                              | GG              | 1947033358               |
| SNP_P4_174606_31145  | NW_004517327.1 | Scaffold2357 | 31145                   | AA                              | GG              | 1947033360               |
| SNP_P4_174607_215    | NW_004517328.1 | Scaffold2358 | 215                     | TT                              | CC              | 1947033362               |
| SNP_P4_174608_259    | NW_004517328.1 | Scaffold2358 | 259                     | GG                              | AA              | 1947033364               |
| SNP_P4_174609_601    | NW_004517328.1 | Scaffold2358 | 601                     | CC                              | AA              | 1947033366               |
| SNP_P4_174610_662    | NW_004517328.1 | Scaffold2358 | 662                     | AA                              | GG              | 1947033368               |
| SNP_P4_174611_799    | NW_004517328.1 | Scaffold2358 | 799                     | AA                              | GG              | 1947033370               |
| SNP_P4_174612_883    | NW_004517328.1 | Scaffold2358 | 883                     | GG                              | CC              | 1947033372               |
| SNP_P4_174613_921    | NW_004517328.1 | Scaffold2358 | 921                     | TT                              | CC              | 1947033374               |
| SNP_P4_174614_982    | NW_004517328.1 | Scaffold2358 | 982                     | GG                              | AA              | 1947033376               |
| SNP_P4_174615_1307   | NW_004517328.1 | Scaffold2358 | 1307                    | CC                              | TT              | 1947033378               |
| SNP_P4_174617_1508   | NW_004517328.1 | Scaffold2358 | 1508                    | AA                              | GG              | 1947033380               |
| SNP_P4_174618_1521   | NW_004517328.1 | Scaffold2358 | 1521                    | TT                              | AA              | 1947033382               |
| SNP_P4_174619_2042   | NW_004517328.1 | Scaffold2358 | 2042                    | AA                              | GG              | 1947033384               |
| SNP_P4_174620_2115   | NW_004517328.1 | Scaffold2358 | 2115                    | AA                              | GG              | 1947033386               |
| SNP_P4_174621_2175   | NW_004517328.1 | Scaffold2358 | 2175                    | TT                              | GG              | 1947033388               |
| SNP_P4_174622_2280   | NW_004517328.1 | Scaffold2358 | 2280                    | TT                              | CC              | 1947033390               |
| SNP_P4_174623_2368   | NW_004517328.1 | Scaffold2358 | 2368                    | TT                              | CC              | 1947033392               |
| SNP_P4_174624_2384   | NW_004517328.1 | Scaffold2358 | 2384                    | CC                              | TT              | 1947033394               |
| SNP_P4_174625_2740   | NW_004517328.1 | Scaffold2358 | 2740                    | CC                              | TT              | 1947033396               |
| SNP_P4_174626_2748   | NW_004517328.1 | Scaffold2358 | 2748                    | TT                              | CC              | 1947033398               |

| SNPs IDs            | Chromosome IDs | Chromosomes  | Physical positions (bp) | CDC Frontier (Reference genome) | (ILWC46 & LPNB) | NCBI SNPdb Accession IDs |
|---------------------|----------------|--------------|-------------------------|---------------------------------|-----------------|--------------------------|
| SNP_P4_174627_3122  | NW_004517328.1 | Scaffold2358 | 3122                    | GG                              | TT              | 1947033400               |
| SNP_P4_174628_13877 | NW_004517328.1 | Scaffold2358 | 13877                   | CC                              | TT              | 1947033402               |
| SNP_P4_174629_13885 | NW_004517328.1 | Scaffold2358 | 13885                   | AA                              | GG              | 1947033404               |
| SNP_P4_174630_14061 | NW_004517328.1 | Scaffold2358 | 14061                   | TT                              | GG              | 1947033406               |
| SNP_P4_174631_16111 | NW_004517328.1 | Scaffold2358 | 16111                   | GG                              | AA              | 1947033408               |
| SNP_P4_174632_16164 | NW_004517328.1 | Scaffold2358 | 16164                   | TT                              | AA              | 1947033410               |
| SNP_P4_174633_16173 | NW_004517328.1 | Scaffold2358 | 16173                   | AA                              | GG              | 1947033412               |
| SNP_P4_174634_16446 | NW_004517328.1 | Scaffold2358 | 16446                   | GG                              | AA              | 1947033414               |
| SNP_P4_174635_16646 | NW_004517328.1 | Scaffold2358 | 16646                   | GG                              | CC              | 1947033416               |
| SNP_P4_174636_16659 | NW_004517328.1 | Scaffold2358 | 16659                   | TT                              | CC              | 1947033418               |
| SNP_P4_174637_16678 | NW_004517328.1 | Scaffold2358 | 16678                   | GG                              | AA              | 1947033420               |
| SNP_P4_174638_16688 | NW_004517328.1 | Scaffold2358 | 16688                   | TT                              | CC              | 1947033422               |
| SNP_P4_174639_16805 | NW_004517328.1 | Scaffold2358 | 16805                   | CC                              | AA              | 1947033424               |
| SNP_P4_174640_16828 | NW_004517328.1 | Scaffold2358 | 16828                   | CC                              | TT              | 1947033426               |
| SNP_P4_174641_17015 | NW_004517328.1 | Scaffold2358 | 17015                   | GG                              | AA              | 1947033428               |
| SNP_P4_174642_17742 | NW_004517328.1 | Scaffold2358 | 17742                   | TT                              | CC              | 1947033430               |
| SNP_P4_174643_19731 | NW_004517328.1 | Scaffold2358 | 19731                   | TT                              | CC              | 1947033432               |
| SNP_P4_174644_19782 | NW_004517328.1 | Scaffold2358 | 19782                   | AA                              | CC              | 1947033434               |
| SNP_P4_174645_20003 | NW_004517328.1 | Scaffold2358 | 20003                   | TT                              | GG              | 1947033436               |
| SNP_P4_174646_20204 | NW_004517328.1 | Scaffold2358 | 20204                   | AA                              | GG              | 1947033438               |
| SNP_P4_174647_20744 | NW_004517328.1 | Scaffold2358 | 20744                   | AA                              | TT              | 1947033440               |
| SNP_P4_174648_21085 | NW_004517328.1 | Scaffold2358 | 21085                   | TT                              | CC              | 1947033442               |
| SNP_P4_174649_34258 | NW_004517328.1 | Scaffold2358 | 34258                   | AA                              | GG              | 1947033444               |
| SNP_P4_174650_36173 | NW_004517328.1 | Scaffold2358 | 36173                   | AA                              | TT              | 1947033446               |
| SNP_P4_174651_36504 | NW_004517328.1 | Scaffold2358 | 36504                   | AA                              | GG              | 1947033448               |
| SNP_P4_174652_36635 | NW_004517328.1 | Scaffold2358 | 36635                   | GG                              | AA              | 1947033450               |
| SNP_P4_174654_55117 | NW_004517328.1 | Scaffold2358 | 55117                   | CC                              | TT              | 1947033452               |
| SNP_P4_174655_55127 | NW_004517328.1 | Scaffold2358 | 55127                   | AA                              | GG              | 1947033454               |
| SNP_P4_174656_55128 | NW_004517328.1 | Scaffold2358 | 55128                   | AA                              | GG              | 1947033456               |
| SNP_P4_174657_55137 | NW_004517328.1 | Scaffold2358 | 55137                   | AA                              | TT              | 1947033458               |
| SNP_P4_174658_55478 | NW_004517328.1 | Scaffold2358 | 55478                   | TT                              | CC              | 1947033460               |
| SNP_P4_174659_2993  | NW_004517330.1 | Scaffold2361 | 2993                    | AA                              | GG              | 1947033462               |
| SNP_P4_174660_10570 | NW_004517330.1 | Scaffold2361 | 10570                   | AA                              | TT              | 1947033464               |
| SNP_P4_174661_10800 | NW_004517330.1 | Scaffold2361 | 10800                   | GG                              | CC              | 1947033466               |
| SNP_P4_174662_10856 | NW_004517330.1 | Scaffold2361 | 10856                   | CC                              | TT              | 1947033468               |
| SNP_P4_174663_11351 | NW_004517330.1 | Scaffold2361 | 11351                   | GG                              | CC              | 1947033470               |
| SNP_P4_174664_17664 | NW_004517330.1 | Scaffold2361 | 17664                   | GG                              | CC              | 1947033472               |
| SNP_P4_174665_17669 | NW_004517330.1 | Scaffold2361 | 17669                   | CC                              | TT              | 1947033474               |
| SNP_P4_174666_17679 | NW_004517330.1 | Scaffold2361 | 17679                   | AA                              | GG              | 1947033476               |
| SNP_P4_174667_19524 | NW_004517330.1 | Scaffold2361 | 19524                   | GG                              | TT              | 1947033478               |
| SNP_P4_174668_19574 | NW_004517330.1 | Scaffold2361 | 19574                   | AA                              | GG              | 1947033480               |
| SNP_P4_174669_21067 | NW_004517330.1 | Scaffold2361 | 21067                   | CC                              | TT              | 1947033482               |

| SNPs IDs            | Chromosome IDs | Chromosomes  | Physical positions (bp) | CDC Frontier (Reference genome) | (ILWC46 & LPNB) | NCBI SNPdb Accession IDs |
|---------------------|----------------|--------------|-------------------------|---------------------------------|-----------------|--------------------------|
| SNP_P4_174670_21076 | NW_004517330.1 | Scaffold2361 | 21076                   | GG                              | CC              | 1947033484               |
| SNP_P4_174671_21087 | NW_004517330.1 | Scaffold2361 | 21087                   | AA                              | TT              | 1947033486               |
| SNP_P4_174672_23619 | NW_004517330.1 | Scaffold2361 | 23619                   | GG                              | AA              | 1947033488               |
| SNP_P4_174673_25741 | NW_004517330.1 | Scaffold2361 | 25741                   | CC                              | AA              | 1947033490               |
| SNP_P4_174674_25751 | NW_004517330.1 | Scaffold2361 | 25751                   | TT                              | CC              | 1947033492               |
| SNP_P4_174675_25770 | NW_004517330.1 | Scaffold2361 | 25770                   | AA                              | CC              | 1947033494               |
| SNP_P4_174676_25773 | NW_004517330.1 | Scaffold2361 | 25773                   | AA                              | CC              | 1947033496               |
| SNP_P4_174677_25782 | NW_004517330.1 | Scaffold2361 | 25782                   | TT                              | AA              | 1947033498               |
| SNP_P4_174678_29183 | NW_004517330.1 | Scaffold2361 | 29183                   | GG                              | AA              | 1947033500               |
| SNP_P4_174679_29220 | NW_004517330.1 | Scaffold2361 | 29220                   | AA                              | CC              | 1947033502               |
| SNP_P4_174680_29227 | NW_004517330.1 | Scaffold2361 | 29227                   | AA                              | GG              | 1947033504               |
| SNP_P4_174681_29945 | NW_004517330.1 | Scaffold2361 | 29945                   | AA                              | GG              | 1947033506               |
| SNP_P4_174682_40042 | NW_004517330.1 | Scaffold2361 | 40042                   | TT                              | AA              | 1947033508               |
| SNP_P4_174683_40053 | NW_004517330.1 | Scaffold2361 | 40053                   | GG                              | TT              | 1947033510               |
| SNP_P4_174684_40121 | NW_004517330.1 | Scaffold2361 | 40121                   | AA                              | TT              | 1947033512               |
| SNP_P4_174685_45346 | NW_004517330.1 | Scaffold2361 | 45346                   | TT                              | AA              | 1947033514               |
| SNP_P4_174686_45365 | NW_004517330.1 | Scaffold2361 | 45365                   | AA                              | GG              | 1947033516               |
| SNP_P4_174687_45384 | NW_004517330.1 | Scaffold2361 | 45384                   | GG                              | CC              | 1947033518               |
| SNP_P4_174688_45398 | NW_004517330.1 | Scaffold2361 | 45398                   | AA                              | GG              | 1947033520               |
| SNP_P4_174689_45408 | NW_004517330.1 | Scaffold2361 | 45408                   | CC                              | TT              | 1947033522               |
| SNP_P4_174690_45414 | NW_004517330.1 | Scaffold2361 | 45414                   | AA                              | TT              | 1947033524               |
| SNP_P4_174691_45456 | NW_004517330.1 | Scaffold2361 | 45456                   | AA                              | GG              | 1947033526               |
| SNP_P4_174692_45467 | NW_004517330.1 | Scaffold2361 | 45467                   | CC                              | TT              | 1947033528               |
| SNP_P4_174693_45471 | NW_004517330.1 | Scaffold2361 | 45471                   | TT                              | CC              | 1947033530               |
| SNP_P4_174694_45481 | NW_004517330.1 | Scaffold2361 | 45481                   | CC                              | GG              | 1947033532               |
| SNP_P4_174695_45662 | NW_004517330.1 | Scaffold2361 | 45662                   | AA                              | GG              | 1947033534               |
| SNP_P4_174697_4213  | NW_004517332.1 | Scaffold2365 | 4213                    | TT                              | AA              | 1947033536               |
| SNP_P4_174698_4215  | NW_004517332.1 | Scaffold2365 | 4215                    | GG                              | TT              | 1947033538               |
| SNP_P4_174699_19620 | NW_004517333.1 | Scaffold2366 | 19620                   | CC                              | TT              | 1947033540               |
| SNP_P4_174700_19626 | NW_004517333.1 | Scaffold2366 | 19626                   | GG                              | AA              | 1947033542               |
| SNP_P4_174701_19653 | NW_004517333.1 | Scaffold2366 | 19653                   | CC                              | AA              | 1947033544               |
| SNP_P4_174702_19664 | NW_004517333.1 | Scaffold2366 | 19664                   | AA                              | TT              | 1947033546               |
| SNP_P4_174703_19679 | NW_004517333.1 | Scaffold2366 | 19679                   | GG                              | CC              | 1947033548               |
| SNP_P4_174704_19713 | NW_004517333.1 | Scaffold2366 | 19713                   | CC                              | AA              | 1947033550               |
| SNP_P4_174705_19767 | NW_004517333.1 | Scaffold2366 | 19767                   | GG                              | CC              | 1947033552               |
| SNP_P4_174706_19774 | NW_004517333.1 | Scaffold2366 | 19774                   | GG                              | AA              | 1947033554               |
| SNP_P4_174707_19783 | NW_004517333.1 | Scaffold2366 | 19783                   | GG                              | AA              | 1947033556               |
| SNP_P4_174708_19807 | NW_004517333.1 | Scaffold2366 | 19807                   | CC                              | TT              | 1947033558               |
| SNP_P4_174709_19816 | NW_004517333.1 | Scaffold2366 | 19816                   | GG                              | AA              | 1947033560               |
| SNP_P4_174710_19832 | NW_004517333.1 | Scaffold2366 | 19832                   | TT                              | CC              | 1947033562               |
| SNP_P4_174711_19848 | NW_004517333.1 | Scaffold2366 | 19848                   | GG                              | AA              | 1947033564               |
| SNP_P4_174712_19852 | NW_004517333.1 | Scaffold2366 | 19852                   | GG                              | AA              | 1947033566               |



| SNPs IDs            | Chromosome IDs | Chromosomes  | Physical positions (bp) | CDC Frontier (Reference genome) | (ILWC46 & LPNB) | NCBI SNPdb Accession IDs |
|---------------------|----------------|--------------|-------------------------|---------------------------------|-----------------|--------------------------|
| SNP_P4_174713_19870 | NW_004517333.1 | Scaffold2366 | 19870                   | AA                              | GG              | 1947033568               |
| SNP_P4_174714_19885 | NW_004517333.1 | Scaffold2366 | 19885                   | TT                              | CC              | 1947033570               |
| SNP_P4_174715_19891 | NW_004517333.1 | Scaffold2366 | 19891                   | AA                              | GG              | 1947033572               |
| SNP_P4_174716_19893 | NW_004517333.1 | Scaffold2366 | 19893                   | AA                              | CC              | 1947033574               |
| SNP_P4_174717_19957 | NW_004517333.1 | Scaffold2366 | 19957                   | TT                              | CC              | 1947033576               |
| SNP_P4_174718_19960 | NW_004517333.1 | Scaffold2366 | 19960                   | CC                              | TT              | 1947033578               |
| SNP_P4_174719_19981 | NW_004517333.1 | Scaffold2366 | 19981                   | CC                              | AA              | 1947033580               |
| SNP_P4_174720_19983 | NW_004517333.1 | Scaffold2366 | 19983                   | AA                              | GG              | 1947033582               |
| SNP_P4_174721_20008 | NW_004517333.1 | Scaffold2366 | 20008                   | TT                              | CC              | 1947033584               |
| SNP_P4_174722_21011 | NW_004517333.1 | Scaffold2366 | 21011                   | AA                              | CC              | 1947033586               |
| SNP_P4_174723_21034 | NW_004517333.1 | Scaffold2366 | 21034                   | CC                              | TT              | 1947033588               |
| SNP_P4_174724_21040 | NW_004517333.1 | Scaffold2366 | 21040                   | AA                              | CC              | 1947033590               |
| SNP_P4_174725_21095 | NW_004517333.1 | Scaffold2366 | 21095                   | GG                              | TT              | 1947033592               |
| SNP_P4_174726_21251 | NW_004517333.1 | Scaffold2366 | 21251                   | GG                              | TT              | 1947033594               |
| SNP_P4_174727_21252 | NW_004517333.1 | Scaffold2366 | 21252                   | GG                              | AA              | 1947033596               |
| SNP_P4_174728_21258 | NW_004517333.1 | Scaffold2366 | 21258                   | TT                              | CC              | 1947033598               |
| SNP_P4_174729_21332 | NW_004517333.1 | Scaffold2366 | 21332                   | TT                              | GG              | 1947033600               |
| SNP_P4_174730_21370 | NW_004517333.1 | Scaffold2366 | 21370                   | AA                              | GG              | 1947033602               |
| SNP_P4_174731_21383 | NW_004517333.1 | Scaffold2366 | 21383                   | TT                              | CC              | 1947033604               |
| SNP_P4_174732_21384 | NW_004517333.1 | Scaffold2366 | 21384                   | TT                              | AA              | 1947033606               |
| SNP_P4_174733_21386 | NW_004517333.1 | Scaffold2366 | 21386                   | GG                              | AA              | 1947033608               |
| SNP_P4_174734_21387 | NW_004517333.1 | Scaffold2366 | 21387                   | CC                              | TT              | 1947033610               |
| SNP_P4_174735_21431 | NW_004517333.1 | Scaffold2366 | 21431                   | TT                              | CC              | 1947033612               |
| SNP_P4_174736_21620 | NW_004517333.1 | Scaffold2366 | 21620                   | TT                              | AA              | 1947033614               |
| SNP_P4_174737_21792 | NW_004517333.1 | Scaffold2366 | 21792                   | AA                              | TT              | 1947033616               |
| SNP_P4_174738_21806 | NW_004517333.1 | Scaffold2366 | 21806                   | AA                              | GG              | 1947033618               |
| SNP_P4_174739_21808 | NW_004517333.1 | Scaffold2366 | 21808                   | AA                              | CC              | 1947033620               |
| SNP_P4_174740_24368 | NW_004517333.1 | Scaffold2366 | 24368                   | GG                              | CC              | 1947033622               |
| SNP_P4_174741_693   | NW_004517334.1 | Scaffold2367 | 693                     | AA                              | GG              | 1947033624               |
| SNP_P4_174742_745   | NW_004517334.1 | Scaffold2367 | 745                     | AA                              | CC              | 1947033626               |
| SNP_P4_174743_752   | NW_004517334.1 | Scaffold2367 | 752                     | AA                              | TT              | 1947033628               |
| SNP_P4_174744_777   | NW_004517334.1 | Scaffold2367 | 777                     | CC                              | GG              | 1947033630               |
| SNP_P4_174745_823   | NW_004517334.1 | Scaffold2367 | 823                     | AA                              | CC              | 1947033632               |
| SNP_P4_174746_824   | NW_004517334.1 | Scaffold2367 | 824                     | CC                              | TT              | 1947033634               |
| SNP_P4_174747_826   | NW_004517334.1 | Scaffold2367 | 826                     | CC                              | TT              | 1947033636               |
| SNP_P4_174748_827   | NW_004517334.1 | Scaffold2367 | 827                     | CC                              | TT              | 1947033637               |
| SNP_P4_174749_831   | NW_004517334.1 | Scaffold2367 | 831                     | GG                              | TT              | 1947033639               |
| SNP_P4_174750_838   | NW_004517334.1 | Scaffold2367 | 838                     | AA                              | GG              | 1947033641               |
| SNP_P4_174751_842   | NW_004517334.1 | Scaffold2367 | 842                     | GG                              | AA              | 1947033643               |
| SNP_P4_174752_1786  | NW_004517334.1 | Scaffold2367 | 1786                    | GG                              | AA              | 1947033645               |
| SNP_P4_174753_1795  | NW_004517334.1 | Scaffold2367 | 1795                    | TT                              | CC              | 1947033647               |
| SNP_P4_174754_6270  | NW_004517334.1 | Scaffold2367 | 6270                    | TT                              | CC              | 1947033649               |

| SNPs IDs            | Chromosome IDs | Chromosomes  | Physical positions (bp) | CDC Frontier (Reference genome) | (ILWC46 & LPNB) | NCBI SNPdb Accession IDs |
|---------------------|----------------|--------------|-------------------------|---------------------------------|-----------------|--------------------------|
| SNP_P4_174755_6521  | NW_004517334.1 | Scaffold2367 | 6521                    | TT                              | GG              | 1947033651               |
| SNP_P4_174756_7242  | NW_004517334.1 | Scaffold2367 | 7242                    | AA                              | GG              | 1947033653               |
| SNP_P4_174757_7328  | NW_004517334.1 | Scaffold2367 | 7328                    | CC                              | TT              | 1947033655               |
| SNP_P4_174758_2135  | NW_004517335.1 | Scaffold2368 | 2135                    | TT                              | AA              | 1947033657               |
| SNP_P4_174759_2804  | NW_004517335.1 | Scaffold2368 | 2804                    | CC                              | GG              | 1947033659               |
| SNP_P4_174760_7279  | NW_004517335.1 | Scaffold2368 | 7279                    | AA                              | GG              | 1947033661               |
| SNP_P4_174761_25806 | NW_004517335.1 | Scaffold2368 | 25806                   | TT                              | AA              | 1947033663               |
| SNP_P4_174762_25842 | NW_004517335.1 | Scaffold2368 | 25842                   | AA                              | CC              | 1947033666               |
| SNP_P4_174763_25846 | NW_004517335.1 | Scaffold2368 | 25846                   | TT                              | CC              | 1947033668               |
| SNP_P4_174765_25961 | NW_004517335.1 | Scaffold2368 | 25961                   | TT                              | CC              | 1947033670               |
| SNP_P4_174766_26007 | NW_004517335.1 | Scaffold2368 | 26007                   | CC                              | TT              | 1947033672               |
| SNP_P4_174767_26069 | NW_004517335.1 | Scaffold2368 | 26069                   | GG                              | AA              | 1947033674               |
| SNP_P4_174769_26193 | NW_004517335.1 | Scaffold2368 | 26193                   | AA                              | TT              | 1947033676               |
| SNP_P4_174770_26205 | NW_004517335.1 | Scaffold2368 | 26205                   | TT                              | CC              | 1947033678               |
| SNP_P4_174771_26206 | NW_004517335.1 | Scaffold2368 | 26206                   | TT                              | AA              | 1947033680               |
| SNP_P4_174772_26219 | NW_004517335.1 | Scaffold2368 | 26219                   | CC                              | TT              | 1947033682               |
| SNP_P4_174773_26276 | NW_004517335.1 | Scaffold2368 | 26276                   | TT                              | GG              | 1947033684               |
| SNP_P4_174774_26287 | NW_004517335.1 | Scaffold2368 | 26287                   | CC                              | TT              | 1947033686               |
| SNP_P4_174775_26361 | NW_004517335.1 | Scaffold2368 | 26361                   | GG                              | AA              | 1947033688               |
| SNP_P4_174776_26376 | NW_004517335.1 | Scaffold2368 | 26376                   | CC                              | GG              | 1947033690               |
| SNP_P4_174777_26401 | NW_004517335.1 | Scaffold2368 | 26401                   | TT                              | GG              | 1947033692               |
| SNP_P4_174778_26413 | NW_004517335.1 | Scaffold2368 | 26413                   | AA                              | GG              | 1947033694               |
| SNP_P4_174779_26458 | NW_004517335.1 | Scaffold2368 | 26458                   | AA                              | TT              | 1947033696               |
| SNP_P4_174780_26583 | NW_004517335.1 | Scaffold2368 | 26583                   | AA                              | GG              | 1947033698               |
| SNP_P4_174781_53191 | NW_004517335.1 | Scaffold2368 | 53191                   | TT                              | CC              | 1947033700               |
| SNP_P4_174782_53200 | NW_004517335.1 | Scaffold2368 | 53200                   | GG                              | AA              | 1947033702               |
| SNP_P4_174784_53608 | NW_004517335.1 | Scaffold2368 | 53608                   | GG                              | AA              | 1947033704               |
| SNP_P4_174785_53662 | NW_004517335.1 | Scaffold2368 | 53662                   | GG                              | AA              | 1947033706               |
| SNP_P4_174786_53666 | NW_004517335.1 | Scaffold2368 | 53666                   | CC                              | GG              | 1947033708               |
| SNP_P4_174787_53734 | NW_004517335.1 | Scaffold2368 | 53734                   | GG                              | AA              | 1947033710               |
| SNP_P4_174788_53761 | NW_004517335.1 | Scaffold2368 | 53761                   | TT                              | AA              | 1947033712               |
| SNP_P4_174789_53778 | NW_004517335.1 | Scaffold2368 | 53778                   | GG                              | AA              | 1947033714               |
| SNP_P4_174790_53790 | NW_004517335.1 | Scaffold2368 | 53790                   | TT                              | CC              | 1947033716               |
| SNP_P4_174791_53874 | NW_004517335.1 | Scaffold2368 | 53874                   | AA                              | GG              | 1947033718               |
| SNP_P4_174792_53891 | NW_004517335.1 | Scaffold2368 | 53891                   | TT                              | CC              | 1947033720               |
| SNP_P4_174793_53912 | NW_004517335.1 | Scaffold2368 | 53912                   | AA                              | TT              | 1947033722               |
| SNP_P4_174794_53931 | NW_004517335.1 | Scaffold2368 | 53931                   | CC                              | TT              | 1947033724               |
| SNP_P4_174795_53937 | NW_004517335.1 | Scaffold2368 | 53937                   | AA                              | CC              | 1947033726               |
| SNP_P4_174796_53945 | NW_004517335.1 | Scaffold2368 | 53945                   | GG                              | TT              | 1947033728               |
| SNP_P4_174797_54043 | NW_004517335.1 | Scaffold2368 | 54043                   | GG                              | CC              | 1947033730               |
| SNP_P4_174798_54045 | NW_004517335.1 | Scaffold2368 | 54045                   | CC                              | GG              | 1947033732               |
| SNP_P4_174799_54058 | NW_004517335.1 | Scaffold2368 | 54058                   | CC                              | AA              | 1947033734               |

| SNPs IDs            | Chromosome IDs | Chromosomes  | Physical positions (bp) | CDC Frontier (Reference genome) | (ILWC46 & LPNB) | NCBI SNPdb Accession IDs |
|---------------------|----------------|--------------|-------------------------|---------------------------------|-----------------|--------------------------|
| SNP_P4_174800_54089 | NW_004517335.1 | Scaffold2368 | 54089                   | TT                              | CC              | 1947033736               |
| SNP_P4_174802_54563 | NW_004517335.1 | Scaffold2368 | 54563                   | TT                              | CC              | 1947033738               |
| SNP_P4_174805_60039 | NW_004517335.1 | Scaffold2368 | 60039                   | CC                              | AA              | 1947033740               |
| SNP_P4_174806_3637  | NW_004517338.1 | Scaffold2371 | 3637                    | GG                              | AA              | 1947033742               |
| SNP_P4_174807_4876  | NW_004517338.1 | Scaffold2371 | 4876                    | GG                              | AA              | 1947033744               |
| SNP_P4_174809_17932 | NW_004517338.1 | Scaffold2371 | 17932                   | GG                              | TT              | 1947033746               |
| SNP_P4_174810_17956 | NW_004517338.1 | Scaffold2371 | 17956                   | AA                              | TT              | 1947033748               |
| SNP_P4_174811_17999 | NW_004517338.1 | Scaffold2371 | 17999                   | AA                              | TT              | 1947033750               |
| SNP_P4_174812_29511 | NW_004517338.1 | Scaffold2371 | 29511                   | AA                              | CC              | 1947033752               |
| SNP_P4_174813_42691 | NW_004517338.1 | Scaffold2371 | 42691                   | AA                              | TT              | 1947033754               |
| SNP_P4_174814_42718 | NW_004517338.1 | Scaffold2371 | 42718                   | CC                              | AA              | 1947033756               |
| SNP_P4_174815_42885 | NW_004517338.1 | Scaffold2371 | 42885                   | CC                              | TT              | 1947033758               |
| SNP_P4_174816_64887 | NW_004517338.1 | Scaffold2371 | 64887                   | AA                              | GG              | 1947033760               |
| SNP_P4_174817_65063 | NW_004517338.1 | Scaffold2371 | 65063                   | GG                              | AA              | 1947033762               |
| SNP_P4_174818_71458 | NW_004517338.1 | Scaffold2371 | 71458                   | TT                              | CC              | 1947033764               |
| SNP_P4_174819_73060 | NW_004517338.1 | Scaffold2371 | 73060                   | GG                              | AA              | 1947033766               |
| SNP_P4_174821_73172 | NW_004517338.1 | Scaffold2371 | 73172                   | TT                              | CC              | 1947033768               |
| SNP_P4_174822_73258 | NW_004517338.1 | Scaffold2371 | 73258                   | CC                              | TT              | 1947033770               |
| SNP_P4_174823_73260 | NW_004517338.1 | Scaffold2371 | 73260                   | GG                              | AA              | 1947033772               |
| SNP_P4_174824_73264 | NW_004517338.1 | Scaffold2371 | 73264                   | AA                              | GG              | 1947033774               |
| SNP_P4_174825_73277 | NW_004517338.1 | Scaffold2371 | 73277                   | AA                              | GG              | 1947033776               |
| SNP_P4_174826_73289 | NW_004517338.1 | Scaffold2371 | 73289                   | TT                              | CC              | 1947033778               |
| SNP_P4_174827_73300 | NW_004517338.1 | Scaffold2371 | 73300                   | AA                              | TT              | 1947033780               |
| SNP_P4_174828_73320 | NW_004517338.1 | Scaffold2371 | 73320                   | CC                              | TT              | 1947033782               |
| SNP_P4_174830_73388 | NW_004517338.1 | Scaffold2371 | 73388                   | TT                              | GG              | 1947033784               |
| SNP_P4_174831_73517 | NW_004517338.1 | Scaffold2371 | 73517                   | AA                              | CC              | 1947033786               |
| SNP_P4_174832_73646 | NW_004517338.1 | Scaffold2371 | 73646                   | GG                              | AA              | 1947033788               |
| SNP_P4_174833_73724 | NW_004517338.1 | Scaffold2371 | 73724                   | AA                              | GG              | 1947033790               |
| SNP_P4_174834_73750 | NW_004517338.1 | Scaffold2371 | 73750                   | GG                              | TT              | 1947033792               |
| SNP_P4_174835_73751 | NW_004517338.1 | Scaffold2371 | 73751                   | GG                              | CC              | 1947033794               |
| SNP_P4_174837_73874 | NW_004517338.1 | Scaffold2371 | 73874                   | TT                              | AA              | 1947033796               |
| SNP_P4_174838_73878 | NW_004517338.1 | Scaffold2371 | 73878                   | CC                              | AA              | 1947033798               |
| SNP_P4_174840_74041 | NW_004517338.1 | Scaffold2371 | 74041                   | TT                              | AA              | 1947033800               |
| SNP_P4_174841_74125 | NW_004517338.1 | Scaffold2371 | 74125                   | AA                              | GG              | 1947033802               |
| SNP_P4_174842_74252 | NW_004517338.1 | Scaffold2371 | 74252                   | AA                              | TT              | 1947033804               |
| SNP_P4_174843_74269 | NW_004517338.1 | Scaffold2371 | 74269                   | CC                              | TT              | 1947033806               |
| SNP_P4_174844_74386 | NW_004517338.1 | Scaffold2371 | 74386                   | AA                              | GG              | 1947033808               |
| SNP_P4_174845_74605 | NW_004517338.1 | Scaffold2371 | 74605                   | TT                              | AA              | 1947033810               |
| SNP_P4_174846_74606 | NW_004517338.1 | Scaffold2371 | 74606                   | TT                              | AA              | 1947033812               |
| SNP_P4_174848_74682 | NW_004517338.1 | Scaffold2371 | 74682                   | GG                              | AA              | 1947033814               |
| SNP_P4_174849_74697 | NW_004517338.1 | Scaffold2371 | 74697                   | AA                              | CC              | 1947033816               |
| SNP_P4_174850_74729 | NW_004517338.1 | Scaffold2371 | 74729                   | TT                              | GG              | 1947033818               |

| SNPs IDs             | Chromosome IDs | Chromosomes  | Physical positions (bp) | CDC Frontier (Reference genome) | (ILWC46 & LPNB) | NCBI SNPdb Accession IDs |
|----------------------|----------------|--------------|-------------------------|---------------------------------|-----------------|--------------------------|
| SNP_P4_174851_74772  | NW_004517338.1 | Scaffold2371 | 74772                   | GG                              | CC              | 1947033820               |
| SNP_P4_174852_76966  | NW_004517338.1 | Scaffold2371 | 76966                   | AA                              | CC              | 1947033822               |
| SNP_P4_174853_77320  | NW_004517338.1 | Scaffold2371 | 77320                   | AA                              | TT              | 1947033824               |
| SNP_P4_174856_92252  | NW_004517338.1 | Scaffold2371 | 92252                   | GG                              | TT              | 1947033826               |
| SNP_P4_174857_92297  | NW_004517338.1 | Scaffold2371 | 92297                   | TT                              | GG              | 1947033828               |
| SNP_P4_174858_92441  | NW_004517338.1 | Scaffold2371 | 92441                   | CC                              | AA              | 1947033830               |
| SNP_P4_174859_92822  | NW_004517338.1 | Scaffold2371 | 92822                   | GG                              | CC              | 1947033832               |
| SNP_P4_174860_92924  | NW_004517338.1 | Scaffold2371 | 92924                   | CC                              | GG              | 1947033834               |
| SNP_P4_174861_92962  | NW_004517338.1 | Scaffold2371 | 92962                   | CC                              | GG              | 1947033836               |
| SNP_P4_174862_125857 | NW_004517338.1 | Scaffold2371 | 125857                  | AA                              | GG              | 1947033838               |
| SNP_P4_174863_128158 | NW_004517338.1 | Scaffold2371 | 128158                  | GG                              | TT              | 1947033840               |
| SNP_P4_174864_128753 | NW_004517338.1 | Scaffold2371 | 128753                  | AA                              | CC              | 1947033842               |
| SNP_P4_174865_128775 | NW_004517338.1 | Scaffold2371 | 128775                  | AA                              | GG              | 1947033844               |
| SNP_P4_174866_139650 | NW_004517338.1 | Scaffold2371 | 139650                  | TT                              | AA              | 1947033846               |
| SNP_P4_174867_139654 | NW_004517338.1 | Scaffold2371 | 139654                  | AA                              | CC              | 1947033848               |
| SNP_P4_174869_149904 | NW_004517338.1 | Scaffold2371 | 149904                  | AA                              | GG              | 1947033850               |
| SNP_P4_174871_150013 | NW_004517338.1 | Scaffold2371 | 150013                  | CC                              | AA              | 1947033852               |
| SNP_P4_174873_150100 | NW_004517338.1 | Scaffold2371 | 150100                  | AA                              | TT              | 1947033854               |
| SNP_P4_174874_150233 | NW_004517338.1 | Scaffold2371 | 150233                  | TT                              | AA              | 1947033856               |
| SNP_P4_174875_150237 | NW_004517338.1 | Scaffold2371 | 150237                  | TT                              | AA              | 1947033858               |
| SNP_P4_174876_150240 | NW_004517338.1 | Scaffold2371 | 150240                  | TT                              | AA              | 1947033860               |
| SNP_P4_174877_150289 | NW_004517338.1 | Scaffold2371 | 150289                  | AA                              | GG              | 1947033862               |
| SNP_P4_174878_150308 | NW_004517338.1 | Scaffold2371 | 150308                  | TT                              | AA              | 1947033864               |
| SNP_P4_174879_150319 | NW_004517338.1 | Scaffold2371 | 150319                  | AA                              | GG              | 1947033866               |
| SNP_P4_174880_150410 | NW_004517338.1 | Scaffold2371 | 150410                  | CC                              | AA              | 1947033868               |
| SNP_P4_174881_150424 | NW_004517338.1 | Scaffold2371 | 150424                  | CC                              | AA              | 1947033870               |
| SNP_P4_174882_150493 | NW_004517338.1 | Scaffold2371 | 150493                  | AA                              | TT              | 1947033872               |
| SNP_P4_174883_151920 | NW_004517338.1 | Scaffold2371 | 151920                  | AA                              | GG              | 1947033874               |
| SNP_P4_174884_158650 | NW_004517338.1 | Scaffold2371 | 158650                  | GG                              | CC              | 1947033876               |
| SNP_P4_174885_168092 | NW_004517338.1 | Scaffold2371 | 168092                  | AA                              | GG              | 1947033878               |
| SNP_P4_174886_168185 | NW_004517338.1 | Scaffold2371 | 168185                  | TT                              | CC              | 1947033880               |
| SNP_P4_174887_168346 | NW_004517338.1 | Scaffold2371 | 168346                  | TT                              | CC              | 1947033882               |
| SNP_P4_174888_168377 | NW_004517338.1 | Scaffold2371 | 168377                  | GG                              | AA              | 1947033884               |
| SNP_P4_174889_171637 | NW_004517338.1 | Scaffold2371 | 171637                  | AA                              | GG              | 1947033886               |
| SNP_P4_174890_171960 | NW_004517338.1 | Scaffold2371 | 171960                  | TT                              | CC              | 1947033888               |
| SNP_P4_174891_171998 | NW_004517338.1 | Scaffold2371 | 171998                  | AA                              | GG              | 1947033890               |
| SNP_P4_174892_172026 | NW_004517338.1 | Scaffold2371 | 172026                  | AA                              | GG              | 1947033892               |
| SNP_P4_174893_172055 | NW_004517338.1 | Scaffold2371 | 172055                  | CC                              | TT              | 1947033894               |
| SNP_P4_174894_172061 | NW_004517338.1 | Scaffold2371 | 172061                  | GG                              | AA              | 1947033896               |
| SNP_P4_174895_174298 | NW_004517338.1 | Scaffold2371 | 174298                  | AA                              | GG              | 1947033898               |
| SNP_P4_174896_224151 | NW_004517338.1 | Scaffold2371 | 224151                  | AA                              | GG              | 1947033900               |
| SNP_P4_174897_224528 | NW_004517338.1 | Scaffold2371 | 224528                  | AA                              | GG              | 1947033902               |

| SNPs IDs             | Chromosome IDs | Chromosomes  | Physical positions (bp) | CDC Frontier (Reference genome) | (ILWC46 & LPNB) | NCBI SNPdb Accession IDs |
|----------------------|----------------|--------------|-------------------------|---------------------------------|-----------------|--------------------------|
| SNP_P4_174898_224570 | NW_004517338.1 | Scaffold2371 | 224570                  | GG                              | AA              | 1947033904               |
| SNP_P4_174899_224575 | NW_004517338.1 | Scaffold2371 | 224575                  | AA                              | GG              | 1947033906               |
| SNP_P4_174900_238463 | NW_004517338.1 | Scaffold2371 | 238463                  | AA                              | GG              | 1947033908               |
| SNP_P4_174901_246381 | NW_004517338.1 | Scaffold2371 | 246381                  | AA                              | TT              | 1947033910               |
| SNP_P4_174902_262100 | NW_004517338.1 | Scaffold2371 | 262100                  | GG                              | AA              | 1947033912               |
| SNP_P4_174903_262113 | NW_004517338.1 | Scaffold2371 | 262113                  | CC                              | AA              | 1947033914               |
| SNP_P4_174904_262114 | NW_004517338.1 | Scaffold2371 | 262114                  | CC                              | TT              | 1947033916               |
| SNP_P4_174905_274638 | NW_004517338.1 | Scaffold2371 | 274638                  | AA                              | GG              | 1947033918               |
| SNP_P4_174907_280890 | NW_004517338.1 | Scaffold2371 | 280890                  | AA                              | TT              | 1947033920               |
| SNP_P4_174908_280912 | NW_004517338.1 | Scaffold2371 | 280912                  | AA                              | GG              | 1947033922               |
| SNP_P4_174909_286279 | NW_004517338.1 | Scaffold2371 | 286279                  | GG                              | CC              | 1947033924               |
| SNP_P4_174910_287438 | NW_004517338.1 | Scaffold2371 | 287438                  | GG                              | AA              | 1947033926               |
| SNP_P4_174912_288444 | NW_004517338.1 | Scaffold2371 | 288444                  | TT                              | AA              | 1947033928               |
| SNP_P4_174913_288675 | NW_004517338.1 | Scaffold2371 | 288675                  | GG                              | TT              | 1947033930               |
| SNP_P4_174914_288777 | NW_004517338.1 | Scaffold2371 | 288777                  | CC                              | TT              | 1947033932               |
| SNP_P4_174915_290041 | NW_004517338.1 | Scaffold2371 | 290041                  | GG                              | TT              | 1947033934               |
| SNP_P4_174916_290225 | NW_004517338.1 | Scaffold2371 | 290225                  | TT                              | AA              | 1947033936               |
| SNP_P4_174917_291054 | NW_004517338.1 | Scaffold2371 | 291054                  | AA                              | CC              | 1947033938               |
| SNP_P4_174918_291505 | NW_004517338.1 | Scaffold2371 | 291505                  | AA                              | GG              | 1947033940               |
| SNP_P4_174919_292110 | NW_004517338.1 | Scaffold2371 | 292110                  | CC                              | TT              | 1947033942               |
| SNP_P4_174920_292341 | NW_004517338.1 | Scaffold2371 | 292341                  | CC                              | TT              | 1947033944               |
| SNP_P4_174921_292854 | NW_004517338.1 | Scaffold2371 | 292854                  | GG                              | AA              | 1947033946               |
| SNP_P4_174922_294881 | NW_004517338.1 | Scaffold2371 | 294881                  | GG                              | AA              | 1947033949               |
| SNP_P4_174923_298415 | NW_004517338.1 | Scaffold2371 | 298415                  | GG                              | AA              | 1947033951               |
| SNP_P4_174924_298508 | NW_004517338.1 | Scaffold2371 | 298508                  | GG                              | CC              | 1947033954               |
| SNP_P4_174926_309805 | NW_004517338.1 | Scaffold2371 | 309805                  | AA                              | TT              | 1947033956               |
| SNP_P4_174927_335026 | NW_004517338.1 | Scaffold2371 | 335026                  | AA                              | GG              | 1947033959               |
| SNP_P4_174928_340426 | NW_004517338.1 | Scaffold2371 | 340426                  | AA                              | GG              | 1947033961               |
| SNP_P4_174929_340760 | NW_004517338.1 | Scaffold2371 | 340760                  | TT                              | AA              | 1947033963               |
| SNP_P4_174930_341218 | NW_004517338.1 | Scaffold2371 | 341218                  | CC                              | TT              | 1947033965               |
| SNP_P4_174931_1710   | NW_004517339.1 | Scaffold2372 | 1710                    | GG                              | TT              | 1947033967               |
| SNP_P4_174932_1823   | NW_004517339.1 | Scaffold2372 | 1823                    | CC                              | TT              | 1947033969               |
| SNP_P4_174933_1847   | NW_004517339.1 | Scaffold2372 | 1847                    | TT                              | CC              | 1947033971               |
| SNP_P4_174934_1991   | NW_004517339.1 | Scaffold2372 | 1991                    | AA                              | TT              | 1947033973               |
| SNP_P4_174935_1809   | NW_004517340.1 | Scaffold2373 | 1809                    | AA                              | GG              | 1947033975               |
| SNP_P4_174936_1823   | NW_004517340.1 | Scaffold2373 | 1823                    | TT                              | GG              | 1947033977               |
| SNP_P4_174937_2040   | NW_004517340.1 | Scaffold2373 | 2040                    | TT                              | CC              | 1947033979               |
| SNP_P4_174938_2145   | NW_004517340.1 | Scaffold2373 | 2145                    | AA                              | GG              | 1947033981               |
| SNP_P4_174939_2190   | NW_004517340.1 | Scaffold2373 | 2190                    | GG                              | TT              | 1947033983               |
| SNP_P4_174941_18424  | NW_004517340.1 | Scaffold2373 | 18424                   | AA                              | CC              | 1947033985               |
| SNP_P4_174942_18789  | NW_004517340.1 | Scaffold2373 | 18789                   | GG                              | CC              | 1947033987               |
| SNP_P4_174943_18832  | NW_004517340.1 | Scaffold2373 | 18832                   | AA                              | GG              | 1947033989               |

| SNPs IDs            | Chromosome IDs | Chromosomes  | Physical positions (bp) | CDC Frontier (Reference genome) | (ILWC46 & LPNB) | NCBI SNPdb Accession IDs |
|---------------------|----------------|--------------|-------------------------|---------------------------------|-----------------|--------------------------|
| SNP_P4_174944_26791 | NW_004517340.1 | Scaffold2373 | 26791                   | GG                              | CC              | 1947033991               |
| SNP_P4_174945_28746 | NW_004517340.1 | Scaffold2373 | 28746                   | GG                              | AA              | 1947033993               |
| SNP_P4_174946_28810 | NW_004517340.1 | Scaffold2373 | 28810                   | CC                              | TT              | 1947033995               |
| SNP_P4_174947_34074 | NW_004517340.1 | Scaffold2373 | 34074                   | TT                              | CC              | 1947033997               |
| SNP_P4_174948_34095 | NW_004517340.1 | Scaffold2373 | 34095                   | CC                              | GG              | 1947033999               |
| SNP_P4_174949_34149 | NW_004517340.1 | Scaffold2373 | 34149                   | GG                              | AA              | 1947034001               |
| SNP_P4_174950_34337 | NW_004517340.1 | Scaffold2373 | 34337                   | GG                              | TT              | 1947034003               |
| SNP_P4_174951_38325 | NW_004517340.1 | Scaffold2373 | 38325                   | AA                              | GG              | 1947034005               |
| SNP_P4_174952_39148 | NW_004517340.1 | Scaffold2373 | 39148                   | AA                              | TT              | 1947034007               |
| SNP_P4_174953_39149 | NW_004517340.1 | Scaffold2373 | 39149                   | AA                              | TT              | 1947034009               |
| SNP_P4_174954_39153 | NW_004517340.1 | Scaffold2373 | 39153                   | GG                              | AA              | 1947034011               |
| SNP_P4_174955_39350 | NW_004517340.1 | Scaffold2373 | 39350                   | GG                              | AA              | 1947034013               |
| SNP_P4_174956_39359 | NW_004517340.1 | Scaffold2373 | 39359                   | TT                              | CC              | 1947034015               |
| SNP_P4_174957_39396 | NW_004517340.1 | Scaffold2373 | 39396                   | GG                              | AA              | 1947034017               |
| SNP_P4_174958_39398 | NW_004517340.1 | Scaffold2373 | 39398                   | CC                              | TT              | 1947034020               |
| SNP_P4_174959_39436 | NW_004517340.1 | Scaffold2373 | 39436                   | GG                              | AA              | 1947034022               |
| SNP_P4_174960_39464 | NW_004517340.1 | Scaffold2373 | 39464                   | GG                              | TT              | 1947034024               |
| SNP_P4_174962_39643 | NW_004517340.1 | Scaffold2373 | 39643                   | CC                              | GG              | 1947034026               |
| SNP_P4_174964_39723 | NW_004517340.1 | Scaffold2373 | 39723                   | TT                              | CC              | 1947034028               |
| SNP_P4_174965_39835 | NW_004517340.1 | Scaffold2373 | 39835                   | TT                              | GG              | 1947034030               |
| SNP_P4_174966_39849 | NW_004517340.1 | Scaffold2373 | 39849                   | TT                              | GG              | 1947034032               |
| SNP_P4_174967_39904 | NW_004517340.1 | Scaffold2373 | 39904                   | GG                              | AA              | 1947034034               |
| SNP_P4_174968_39917 | NW_004517340.1 | Scaffold2373 | 39917                   | CC                              | TT              | 1947034036               |
| SNP_P4_174969_40177 | NW_004517340.1 | Scaffold2373 | 40177                   | GG                              | AA              | 1947034038               |
| SNP_P4_174970_40213 | NW_004517340.1 | Scaffold2373 | 40213                   | TT                              | AA              | 1947034040               |
| SNP_P4_174971_40214 | NW_004517340.1 | Scaffold2373 | 40214                   | TT                              | CC              | 1947034042               |
| SNP_P4_174972_40216 | NW_004517340.1 | Scaffold2373 | 40216                   | AA                              | GG              | 1947034044               |
| SNP_P4_174973_40218 | NW_004517340.1 | Scaffold2373 | 40218                   | GG                              | AA              | 1947034046               |
| SNP_P4_174974_40230 | NW_004517340.1 | Scaffold2373 | 40230                   | TT                              | AA              | 1947034048               |
| SNP_P4_174976_62495 | NW_004517340.1 | Scaffold2373 | 62495                   | TT                              | CC              | 1947034050               |
| SNP_P4_174977_62513 | NW_004517340.1 | Scaffold2373 | 62513                   | TT                              | CC              | 1947034052               |
| SNP_P4_174978_62520 | NW_004517340.1 | Scaffold2373 | 62520                   | CC                              | TT              | 1947034054               |
| SNP_P4_174980_64168 | NW_004517340.1 | Scaffold2373 | 64168                   | GG                              | AA              | 1947034056               |
| SNP_P4_174981_64194 | NW_004517340.1 | Scaffold2373 | 64194                   | GG                              | AA              | 1947034058               |
| SNP_P4_174982_64304 | NW_004517340.1 | Scaffold2373 | 64304                   | GG                              | TT              | 1947034060               |
| SNP_P4_174983_64320 | NW_004517340.1 | Scaffold2373 | 64320                   | AA                              | CC              | 1947034063               |
| SNP_P4_174984_64400 | NW_004517340.1 | Scaffold2373 | 64400                   | AA                              | TT              | 1947034065               |
| SNP_P4_174985_64706 | NW_004517340.1 | Scaffold2373 | 64706                   | AA                              | GG              | 1947034067               |
| SNP_P4_174986_65063 | NW_004517340.1 | Scaffold2373 | 65063                   | AA                              | TT              | 1947034069               |
| SNP_P4_174987_65070 | NW_004517340.1 | Scaffold2373 | 65070                   | GG                              | CC              | 1947034071               |
| SNP_P4_174988_65928 | NW_004517340.1 | Scaffold2373 | 65928                   | TT                              | AA              | 1947034073               |
| SNP_P4_174990_69636 | NW_004517340.1 | Scaffold2373 | 69636                   | CC                              | TT              | 1947034075               |

| SNPs IDs             | Chromosome IDs | Chromosomes  | Physical positions (bp) | CDC Frontier (Reference genome) | (ILWC46 & LPNB) | NCBI SNPdb Accession IDs |
|----------------------|----------------|--------------|-------------------------|---------------------------------|-----------------|--------------------------|
| SNP_P4_174991_69681  | NW_004517340.1 | Scaffold2373 | 69681                   | AA                              | TT              | 1947034077               |
| SNP_P4_174992_69733  | NW_004517340.1 | Scaffold2373 | 69733                   | TT                              | CC              | 1947034079               |
| SNP_P4_174993_81340  | NW_004517340.1 | Scaffold2373 | 81340                   | GG                              | AA              | 1947034081               |
| SNP_P4_174994_84371  | NW_004517340.1 | Scaffold2373 | 84371                   | TT                              | CC              | 1947034083               |
| SNP_P4_174995_106577 | NW_004517340.1 | Scaffold2373 | 106577                  | TT                              | GG              | 1947034085               |
| SNP_P4_174996_115516 | NW_004517340.1 | Scaffold2373 | 115516                  | TT                              | AA              | 1947034087               |
| SNP_P4_174997_115573 | NW_004517340.1 | Scaffold2373 | 115573                  | TT                              | CC              | 1947034089               |
| SNP_P4_174998_115600 | NW_004517340.1 | Scaffold2373 | 115600                  | CC                              | AA              | 1947034092               |
| SNP_P4_175000_122318 | NW_004517340.1 | Scaffold2373 | 122318                  | CC                              | TT              | 1947034094               |
| SNP_P4_175001_123397 | NW_004517340.1 | Scaffold2373 | 123397                  | CC                              | TT              | 1947034097               |
| SNP_P4_175002_123404 | NW_004517340.1 | Scaffold2373 | 123404                  | TT                              | CC              | 1947034099               |
| SNP_P4_175003_124551 | NW_004517340.1 | Scaffold2373 | 124551                  | AA                              | GG              | 1947034102               |
| SNP_P4_175004_124593 | NW_004517340.1 | Scaffold2373 | 124593                  | TT                              | CC              | 1947034105               |
| SNP_P4_175005_124599 | NW_004517340.1 | Scaffold2373 | 124599                  | TT                              | CC              | 1947034107               |
| SNP_P4_175006_124610 | NW_004517340.1 | Scaffold2373 | 124610                  | GG                              | AA              | 1947034110               |
| SNP_P4_175007_124612 | NW_004517340.1 | Scaffold2373 | 124612                  | AA                              | GG              | 1947034112               |
| SNP_P4_175008_124780 | NW_004517340.1 | Scaffold2373 | 124780                  | CC                              | AA              | 1947034115               |
| SNP_P4_175009_124788 | NW_004517340.1 | Scaffold2373 | 124788                  | CC                              | AA              | 1947034117               |
| SNP_P4_175010_124789 | NW_004517340.1 | Scaffold2373 | 124789                  | TT                              | AA              | 1947034120               |
| SNP_P4_175011_124802 | NW_004517340.1 | Scaffold2373 | 124802                  | TT                              | CC              | 1947034122               |
| SNP_P4_175012_124804 | NW_004517340.1 | Scaffold2373 | 124804                  | CC                              | TT              | 1947034124               |
| SNP_P4_175013_124841 | NW_004517340.1 | Scaffold2373 | 124841                  | CC                              | TT              | 1947034127               |
| SNP_P4_175014_124853 | NW_004517340.1 | Scaffold2373 | 124853                  | GG                              | AA              | 1947034129               |
| SNP_P4_175015_124865 | NW_004517340.1 | Scaffold2373 | 124865                  | CC                              | TT              | 1947034131               |
| SNP_P4_175016_124930 | NW_004517340.1 | Scaffold2373 | 124930                  | TT                              | CC              | 1947034133               |
| SNP_P4_175017_124947 | NW_004517340.1 | Scaffold2373 | 124947                  | AA                              | TT              | 1947034135               |
| SNP_P4_175018_148719 | NW_004517340.1 | Scaffold2373 | 148719                  | GG                              | TT              | 1947034137               |
| SNP_P4_175019_149123 | NW_004517340.1 | Scaffold2373 | 149123                  | TT                              | GG              | 1947034139               |
| SNP_P4_175020_149329 | NW_004517340.1 | Scaffold2373 | 149329                  | CC                              | TT              | 1947034141               |
| SNP_P4_175021_149367 | NW_004517340.1 | Scaffold2373 | 149367                  | GG                              | TT              | 1947034143               |
| SNP_P4_175022_149408 | NW_004517340.1 | Scaffold2373 | 149408                  | GG                              | AA              | 1947034145               |
| SNP_P4_175023_149494 | NW_004517340.1 | Scaffold2373 | 149494                  | GG                              | AA              | 1947034147               |
| SNP_P4_175024_149578 | NW_004517340.1 | Scaffold2373 | 149578                  | AA                              | GG              | 1947034149               |
| SNP_P4_175025_149636 | NW_004517340.1 | Scaffold2373 | 149636                  | CC                              | AA              | 1947034151               |
| SNP_P4_175026_149652 | NW_004517340.1 | Scaffold2373 | 149652                  | AA                              | GG              | 1947034153               |
| SNP_P4_175027_149716 | NW_004517340.1 | Scaffold2373 | 149716                  | AA                              | CC              | 1947034155               |
| SNP_P4_175028_149947 | NW_004517340.1 | Scaffold2373 | 149947                  | CC                              | AA              | 1947034157               |
| SNP_P4_175029_149971 | NW_004517340.1 | Scaffold2373 | 149971                  | TT                              | CC              | 1947034159               |
| SNP_P4_175030_150053 | NW_004517340.1 | Scaffold2373 | 150053                  | TT                              | CC              | 1947034161               |
| SNP_P4_175031_150122 | NW_004517340.1 | Scaffold2373 | 150122                  | CC                              | TT              | 1947034163               |
| SNP_P4_175032_150146 | NW_004517340.1 | Scaffold2373 | 150146                  | TT                              | CC              | 1947034165               |
| SNP_P4_175033_150184 | NW_004517340.1 | Scaffold2373 | 150184                  | TT                              | CC              | 1947034167               |

| SNPs IDs             | Chromosome IDs | Chromosomes  | Physical positions (bp) | CDC Frontier (Reference genome) | (ILWC46 & LPNB) | NCBI SNPdb Accession IDs |
|----------------------|----------------|--------------|-------------------------|---------------------------------|-----------------|--------------------------|
| SNP_P4_175034_151019 | NW_004517340.1 | Scaffold2373 | 151019                  | AA                              | GG              | 1947034169               |
| SNP_P4_175036_151064 | NW_004517340.1 | Scaffold2373 | 151064                  | TT                              | CC              | 1947034171               |
| SNP_P4_175037_151068 | NW_004517340.1 | Scaffold2373 | 151068                  | GG                              | TT              | 1947034173               |
| SNP_P4_175038_151070 | NW_004517340.1 | Scaffold2373 | 151070                  | CC                              | TT              | 1947034175               |
| SNP_P4_175039_151085 | NW_004517340.1 | Scaffold2373 | 151085                  | TT                              | CC              | 1947034177               |
| SNP_P4_175040_151327 | NW_004517340.1 | Scaffold2373 | 151327                  | TT                              | CC              | 1947034179               |
| SNP_P4_175041_151456 | NW_004517340.1 | Scaffold2373 | 151456                  | TT                              | CC              | 1947034181               |
| SNP_P4_175042_151833 | NW_004517340.1 | Scaffold2373 | 151833                  | GG                              | AA              | 1947034183               |
| SNP_P4_175043_152235 | NW_004517340.1 | Scaffold2373 | 152235                  | TT                              | AA              | 1947034185               |
| SNP_P4_175044_152306 | NW_004517340.1 | Scaffold2373 | 152306                  | GG                              | AA              | 1947034187               |
| SNP_P4_175045_152333 | NW_004517340.1 | Scaffold2373 | 152333                  | TT                              | GG              | 1947034189               |
| SNP_P4_175046_152521 | NW_004517340.1 | Scaffold2373 | 152521                  | TT                              | CC              | 1947034191               |
| SNP_P4_175047_152620 | NW_004517340.1 | Scaffold2373 | 152620                  | GG                              | AA              | 1947034193               |
| SNP_P4_175048_152704 | NW_004517340.1 | Scaffold2373 | 152704                  | CC                              | GG              | 1947034195               |
| SNP_P4_175049_152715 | NW_004517340.1 | Scaffold2373 | 152715                  | AA                              | GG              | 1947034197               |
| SNP_P4_175050_152772 | NW_004517340.1 | Scaffold2373 | 152772                  | AA                              | CC              | 1947034199               |
| SNP_P4_175051_152870 | NW_004517340.1 | Scaffold2373 | 152870                  | AA                              | CC              | 1947034201               |
| SNP_P4_175052_152975 | NW_004517340.1 | Scaffold2373 | 152975                  | GG                              | CC              | 1947034203               |
| SNP_P4_175053_3377   | NW_004517342.1 | Scaffold2375 | 3377                    | AA                              | GG              | 1947034205               |
| SNP_P4_175054_3690   | NW_004517342.1 | Scaffold2375 | 3690                    | TT                              | CC              | 1947034207               |
| SNP_P4_175055_3733   | NW_004517342.1 | Scaffold2375 | 3733                    | TT                              | CC              | 1947034209               |
| SNP_P4_175056_1548   | NW_004517343.1 | Scaffold2376 | 1548                    | AA                              | TT              | 1947034211               |
| SNP_P4_175057_1553   | NW_004517343.1 | Scaffold2376 | 1553                    | AA                              | GG              | 1947034213               |
| SNP_P4_175058_3281   | NW_004517343.1 | Scaffold2376 | 3281                    | GG                              | AA              | 1947034215               |
| SNP_P4_175059_4529   | NW_004517343.1 | Scaffold2376 | 4529                    | AA                              | TT              | 1947034217               |
| SNP_P4_175060_6496   | NW_004517343.1 | Scaffold2376 | 6496                    | CC                              | AA              | 1947034219               |
| SNP_P4_175061_9343   | NW_004517343.1 | Scaffold2376 | 9343                    | GG                              | CC              | 1947034221               |
| SNP_P4_175062_9425   | NW_004517343.1 | Scaffold2376 | 9425                    | AA                              | TT              | 1947034223               |
| SNP_P4_175063_9426   | NW_004517343.1 | Scaffold2376 | 9426                    | AA                              | CC              | 1947034225               |
| SNP_P4_175064_12058  | NW_004517343.1 | Scaffold2376 | 12058                   | TT                              | CC              | 1947034227               |
| SNP_P4_175065_13698  | NW_004517343.1 | Scaffold2376 | 13698                   | CC                              | GG              | 1947034229               |
| SNP_P4_175066_13854  | NW_004517343.1 | Scaffold2376 | 13854                   | TT                              | CC              | 1947034231               |
| SNP_P4_175067_15773  | NW_004517343.1 | Scaffold2376 | 15773                   | AA                              | TT              | 1947034233               |
| SNP_P4_175068_15889  | NW_004517343.1 | Scaffold2376 | 15889                   | CC                              | GG              | 1947034235               |
| SNP_P4_175069_16598  | NW_004517343.1 | Scaffold2376 | 16598                   | TT                              | GG              | 1947034237               |
| SNP_P4_175070_16802  | NW_004517343.1 | Scaffold2376 | 16802                   | CC                              | AA              | 1947034239               |
| SNP_P4_175071_16805  | NW_004517343.1 | Scaffold2376 | 16805                   | TT                              | AA              | 1947034241               |
| SNP_P4_175072_16809  | NW_004517343.1 | Scaffold2376 | 16809                   | CC                              | AA              | 1947034243               |
| SNP_P4_175073_16812  | NW_004517343.1 | Scaffold2376 | 16812                   | TT                              | AA              | 1947034245               |
| SNP_P4_175074_3468   | NW_004517345.1 | Scaffold2378 | 3468                    | CC                              | GG              | 1947034247               |
| SNP_P4_175075_4887   | NW_004517345.1 | Scaffold2378 | 4887                    | AA                              | GG              | 1947034249               |
| SNP_P4_175076_4900   | NW_004517345.1 | Scaffold2378 | 4900                    | TT                              | CC              | 1947034251               |



| SNPs IDs            | Chromosome IDs | Chromosomes  | Physical positions (bp) | CDC Frontier (Reference genome) | (ILWC46 & LPNB) | NCBI SNPdb Accession IDs |
|---------------------|----------------|--------------|-------------------------|---------------------------------|-----------------|--------------------------|
| SNP_P4_175077_6343  | NW_004517345.1 | Scaffold2378 | 6343                    | TT                              | CC              | 1947034253               |
| SNP_P4_175078_6436  | NW_004517345.1 | Scaffold2378 | 6436                    | AA                              | GG              | 1947034255               |
| SNP_P4_175079_8477  | NW_004517345.1 | Scaffold2378 | 8477                    | AA                              | TT              | 1947034257               |
| SNP_P4_175080_8784  | NW_004517345.1 | Scaffold2378 | 8784                    | TT                              | CC              | 1947034259               |
| SNP_P4_175081_17197 | NW_004517345.1 | Scaffold2378 | 17197                   | TT                              | CC              | 1947034261               |
| SNP_P4_175082_17246 | NW_004517345.1 | Scaffold2378 | 17246                   | GG                              | CC              | 1947034263               |
| SNP_P4_175083_17431 | NW_004517345.1 | Scaffold2378 | 17431                   | CC                              | TT              | 1947034266               |
| SNP_P4_175084_17477 | NW_004517345.1 | Scaffold2378 | 17477                   | GG                              | AA              | 1947034268               |
| SNP_P4_175085_17524 | NW_004517345.1 | Scaffold2378 | 17524                   | CC                              | TT              | 1947034270               |
| SNP_P4_175086_17550 | NW_004517345.1 | Scaffold2378 | 17550                   | TT                              | CC              | 1947034272               |
| SNP_P4_175087_17636 | NW_004517345.1 | Scaffold2378 | 17636                   | TT                              | CC              | 1947034274               |
| SNP_P4_175088_17662 | NW_004517345.1 | Scaffold2378 | 17662                   | GG                              | AA              | 1947034276               |
| SNP_P4_175089_17689 | NW_004517345.1 | Scaffold2378 | 17689                   | TT                              | CC              | 1947034278               |
| SNP_P4_175090_23059 | NW_004517345.1 | Scaffold2378 | 23059                   | AA                              | GG              | 1947034280               |
| SNP_P4_175091_23070 | NW_004517345.1 | Scaffold2378 | 23070                   | CC                              | TT              | 1947034282               |
| SNP_P4_175092_25448 | NW_004517345.1 | Scaffold2378 | 25448                   | AA                              | GG              | 1947034284               |
| SNP_P4_175094_30241 | NW_004517345.1 | Scaffold2378 | 30241                   | AA                              | TT              | 1947034286               |
| SNP_P4_175095_30350 | NW_004517345.1 | Scaffold2378 | 30350                   | AA                              | CC              | 1947034288               |
| SNP_P4_175096_30396 | NW_004517345.1 | Scaffold2378 | 30396                   | AA                              | GG              | 1947034289               |
| SNP_P4_175097_30620 | NW_004517345.1 | Scaffold2378 | 30620                   | TT                              | AA              | 1947034290               |
| SNP_P4_175098_37149 | NW_004517345.1 | Scaffold2378 | 37149                   | GG                              | CC              | 1947034291               |
| SNP_P4_175101_37354 | NW_004517345.1 | Scaffold2378 | 37354                   | CC                              | AA              | 1947034292               |
| SNP_P4_175102_37355 | NW_004517345.1 | Scaffold2378 | 37355                   | AA                              | CC              | 1947034293               |
| SNP_P4_175103_1499  | NW_004517347.1 | Scaffold2381 | 1499                    | GG                              | AA              | 1947034294               |
| SNP_P4_175104_1501  | NW_004517347.1 | Scaffold2381 | 1501                    | AA                              | TT              | 1947034295               |
| SNP_P4_175105_1522  | NW_004517347.1 | Scaffold2381 | 1522                    | CC                              | TT              | 1947034296               |
| SNP_P4_175106_11700 | NW_004517348.1 | Scaffold2382 | 11700                   | GG                              | AA              | 1947034297               |
| SNP_P4_175107_11706 | NW_004517348.1 | Scaffold2382 | 11706                   | GG                              | AA              | 1947034299               |
| SNP_P4_175108_11707 | NW_004517348.1 | Scaffold2382 | 11707                   | CC                              | TT              | 1947034301               |
| SNP_P4_175109_11717 | NW_004517348.1 | Scaffold2382 | 11717                   | AA                              | GG              | 1947034303               |
| SNP_P4_175110_23924 | NW_004517348.1 | Scaffold2382 | 23924                   | GG                              | TT              | 1947034305               |
| SNP_P4_175111_24261 | NW_004517348.1 | Scaffold2382 | 24261                   | GG                              | TT              | 1947034307               |
| SNP_P4_175113_28602 | NW_004517348.1 | Scaffold2382 | 28602                   | AA                              | TT              | 1947034309               |
| SNP_P4_175114_476   | NW_004517349.1 | Scaffold2383 | 476                     | GG                              | TT              | 1947034311               |
| SNP_P4_175115_542   | NW_004517349.1 | Scaffold2383 | 542                     | CC                              | AA              | 1947034313               |
| SNP_P4_175116_2259  | NW_004517350.1 | Scaffold2385 | 2259                    | TT                              | GG              | 1947034315               |
| SNP_P4_175117_2274  | NW_004517350.1 | Scaffold2385 | 2274                    | TT                              | CC              | 1947034317               |
| SNP_P4_175118_2298  | NW_004517350.1 | Scaffold2385 | 2298                    | GG                              | AA              | 1947034319               |
| SNP_P4_175119_2312  | NW_004517350.1 | Scaffold2385 | 2312                    | CC                              | TT              | 1947034321               |
| SNP_P4_175120_2393  | NW_004517350.1 | Scaffold2385 | 2393                    | CC                              | AA              | 1947034323               |
| SNP_P4_175121_2418  | NW_004517350.1 | Scaffold2385 | 2418                    | CC                              | TT              | 1947034325               |
| SNP_P4_175122_2724  | NW_004517350.1 | Scaffold2385 | 2724                    | GG                              | AA              | 1947034327               |

| SNPs IDs             | Chromosome IDs | Chromosomes  | Physical positions (bp) | CDC Frontier (Reference genome) | (ILWC46 & LPNB) | NCBI SNPdb Accession IDs |
|----------------------|----------------|--------------|-------------------------|---------------------------------|-----------------|--------------------------|
| SNP_P4_175123_2987   | NW_004517350.1 | Scaffold2385 | 2987                    | CC                              | TT              | 1947034329               |
| SNP_P4_175124_3476   | NW_004517350.1 | Scaffold2385 | 3476                    | TT                              | AA              | 1947034332               |
| SNP_P4_175125_3588   | NW_004517350.1 | Scaffold2385 | 3588                    | AA                              | GG              | 1947034334               |
| SNP_P4_175126_3696   | NW_004517350.1 | Scaffold2385 | 3696                    | AA                              | CC              | 1947034336               |
| SNP_P4_175129_5885   | NW_004517350.1 | Scaffold2385 | 5885                    | TT                              | CC              | 1947034338               |
| SNP_P4_175130_2678   | NW_004517351.1 | Scaffold2386 | 2678                    | TT                              | CC              | 1947034340               |
| SNP_P4_175131_44499  | NW_004517351.1 | Scaffold2386 | 44499                   | AA                              | GG              | 1947034342               |
| SNP_P4_175132_52813  | NW_004517351.1 | Scaffold2386 | 52813                   | TT                              | CC              | 1947034344               |
| SNP_P4_175133_59927  | NW_004517351.1 | Scaffold2386 | 59927                   | AA                              | GG              | 1947034346               |
| SNP_P4_175134_60038  | NW_004517351.1 | Scaffold2386 | 60038                   | TT                              | AA              | 1947034348               |
| SNP_P4_175135_74494  | NW_004517351.1 | Scaffold2386 | 74494                   | AA                              | TT              | 1947034350               |
| SNP_P4_175136_74512  | NW_004517351.1 | Scaffold2386 | 74512                   | TT                              | GG              | 1947034352               |
| SNP_P4_175137_106037 | NW_004517351.1 | Scaffold2386 | 106037                  | AA                              | GG              | 1947034354               |
| SNP_P4_175138_106175 | NW_004517351.1 | Scaffold2386 | 106175                  | TT                              | CC              | 1947034356               |
| SNP_P4_175139_106234 | NW_004517351.1 | Scaffold2386 | 106234                  | GG                              | AA              | 1947034358               |
| SNP_P4_175140_106284 | NW_004517351.1 | Scaffold2386 | 106284                  | TT                              | CC              | 1947034360               |
| SNP_P4_175141_106288 | NW_004517351.1 | Scaffold2386 | 106288                  | GG                              | TT              | 1947034362               |
| SNP_P4_175142_106485 | NW_004517351.1 | Scaffold2386 | 106485                  | CC                              | TT              | 1947034364               |
| SNP_P4_175144_173348 | NW_004517351.1 | Scaffold2386 | 173348                  | TT                              | CC              | 1947034366               |
| SNP_P4_175145_173357 | NW_004517351.1 | Scaffold2386 | 173357                  | CC                              | AA              | 1947034368               |
| SNP_P4_175146_178774 | NW_004517351.1 | Scaffold2386 | 178774                  | CC                              | GG              | 1947034370               |
| SNP_P4_175147_178796 | NW_004517351.1 | Scaffold2386 | 178796                  | AA                              | GG              | 1947034372               |
| SNP_P4_175148_178805 | NW_004517351.1 | Scaffold2386 | 178805                  | AA                              | GG              | 1947034374               |
| SNP_P4_175149_178811 | NW_004517351.1 | Scaffold2386 | 178811                  | AA                              | TT              | 1947034377               |
| SNP_P4_175150_186626 | NW_004517351.1 | Scaffold2386 | 186626                  | GG                              | AA              | 1947034379               |
| SNP_P4_175151_186931 | NW_004517351.1 | Scaffold2386 | 186931                  | AA                              | TT              | 1947034381               |
| SNP_P4_175152_186935 | NW_004517351.1 | Scaffold2386 | 186935                  | TT                              | AA              | 1947034383               |
| SNP_P4_175153_196724 | NW_004517351.1 | Scaffold2386 | 196724                  | GG                              | AA              | 1947034385               |
| SNP_P4_175154_196740 | NW_004517351.1 | Scaffold2386 | 196740                  | CC                              | TT              | 1947034387               |
| SNP_P4_175155_196742 | NW_004517351.1 | Scaffold2386 | 196742                  | CC                              | TT              | 1947034389               |
| SNP_P4_175156_213183 | NW_004517351.1 | Scaffold2386 | 213183                  | GG                              | AA              | 1947034391               |
| SNP_P4_175157_213781 | NW_004517351.1 | Scaffold2386 | 213781                  | CC                              | TT              | 1947034393               |
| SNP_P4_175158_214134 | NW_004517351.1 | Scaffold2386 | 214134                  | CC                              | AA              | 1947034395               |
| SNP_P4_175159_214138 | NW_004517351.1 | Scaffold2386 | 214138                  | CC                              | TT              | 1947034397               |
| SNP_P4_175160_214231 | NW_004517351.1 | Scaffold2386 | 214231                  | GG                              | AA              | 1947034399               |
| SNP_P4_175161_214274 | NW_004517351.1 | Scaffold2386 | 214274                  | TT                              | GG              | 1947034401               |
| SNP_P4_175162_214299 | NW_004517351.1 | Scaffold2386 | 214299                  | GG                              | CC              | 1947034403               |
| SNP_P4_175163_6945   | NW_004517352.1 | Scaffold2388 | 6945                    | AA                              | GG              | 1947034405               |
| SNP_P4_175164_7717   | NW_004517352.1 | Scaffold2388 | 7717                    | CC                              | TT              | 1947034407               |
| SNP_P4_175165_7887   | NW_004517352.1 | Scaffold2388 | 7887                    | AA                              | CC              | 1947034409               |
| SNP_P4_175166_7916   | NW_004517352.1 | Scaffold2388 | 7916                    | GG                              | AA              | 1947034411               |
| SNP_P4_175167_8014   | NW_004517352.1 | Scaffold2388 | 8014                    | AA                              | GG              | 1947034413               |

| SNPs IDs            | Chromosome IDs | Chromosomes  | Physical positions (bp) | CDC Frontier (Reference genome) | (ILWC46 & LPNB) | NCBI SNPdb Accession IDs |
|---------------------|----------------|--------------|-------------------------|---------------------------------|-----------------|--------------------------|
| SNP_P4_175168_14500 | NW_004517352.1 | Scaffold2388 | 14500                   | TT                              | AA              | 1947034415               |
| SNP_P4_175169_15473 | NW_004517352.1 | Scaffold2388 | 15473                   | TT                              | GG              | 1947034417               |
| SNP_P4_175170_15775 | NW_004517352.1 | Scaffold2388 | 15775                   | GG                              | AA              | 1947034419               |
| SNP_P4_175171_15825 | NW_004517352.1 | Scaffold2388 | 15825                   | AA                              | GG              | 1947034421               |
| SNP_P4_175172_15850 | NW_004517352.1 | Scaffold2388 | 15850                   | TT                              | AA              | 1947034423               |
| SNP_P4_175174_27123 | NW_004517352.1 | Scaffold2388 | 27123                   | CC                              | GG              | 1947034425               |
| SNP_P4_175175_27263 | NW_004517352.1 | Scaffold2388 | 27263                   | GG                              | TT              | 1947034427               |
| SNP_P4_175176_27340 | NW_004517352.1 | Scaffold2388 | 27340                   | CC                              | TT              | 1947034429               |
| SNP_P4_175177_50004 | NW_004517352.1 | Scaffold2388 | 50004                   | AA                              | GG              | 1947034431               |
| SNP_P4_175178_451   | NW_004517353.1 | Scaffold2389 | 451                     | TT                              | AA              | 1947034433               |
| SNP_P4_175180_1168  | NW_004517355.1 | Scaffold2392 | 1168                    | TT                              | CC              | 1947034435               |
| SNP_P4_175181_1515  | NW_004517355.1 | Scaffold2392 | 1515                    | AA                              | CC              | 1947034437               |
| SNP_P4_175182_1519  | NW_004517355.1 | Scaffold2392 | 1519                    | AA                              | GG              | 1947034439               |
| SNP_P4_175183_1588  | NW_004517355.1 | Scaffold2392 | 1588                    | TT                              | AA              | 1947034441               |
| SNP_P4_175184_1760  | NW_004517355.1 | Scaffold2392 | 1760                    | AA                              | CC              | 1947034443               |
| SNP_P4_175187_10908 | NW_004517355.1 | Scaffold2392 | 10908                   | GG                              | AA              | 1947034445               |
| SNP_P4_175188_10981 | NW_004517355.1 | Scaffold2392 | 10981                   | CC                              | TT              | 1947034447               |
| SNP_P4_175189_11214 | NW_004517355.1 | Scaffold2392 | 11214                   | CC                              | GG              | 1947034449               |
| SNP_P4_175190_11327 | NW_004517355.1 | Scaffold2392 | 11327                   | TT                              | GG              | 1947034451               |
| SNP_P4_175191_17715 | NW_004517355.1 | Scaffold2392 | 17715                   | AA                              | GG              | 1947034453               |
| SNP_P4_175192_17726 | NW_004517355.1 | Scaffold2392 | 17726                   | TT                              | AA              | 1947034455               |
| SNP_P4_175193_17806 | NW_004517355.1 | Scaffold2392 | 17806                   | CC                              | TT              | 1947034458               |
| SNP_P4_175194_17812 | NW_004517355.1 | Scaffold2392 | 17812                   | TT                              | CC              | 1947034460               |
| SNP_P4_175195_17860 | NW_004517355.1 | Scaffold2392 | 17860                   | GG                              | CC              | 1947034462               |
| SNP_P4_175196_17913 | NW_004517355.1 | Scaffold2392 | 17913                   | AA                              | GG              | 1947034464               |
| SNP_P4_175197_17944 | NW_004517355.1 | Scaffold2392 | 17944                   | GG                              | AA              | 1947034466               |
| SNP_P4_175198_17945 | NW_004517355.1 | Scaffold2392 | 17945                   | GG                              | AA              | 1947034468               |
| SNP_P4_175199_18007 | NW_004517355.1 | Scaffold2392 | 18007                   | GG                              | CC              | 1947034470               |
| SNP_P4_175201_18795 | NW_004517355.1 | Scaffold2392 | 18795                   | CC                              | TT              | 1947034472               |
| SNP_P4_175202_18811 | NW_004517355.1 | Scaffold2392 | 18811                   | TT                              | AA              | 1947034474               |
| SNP_P4_175203_18866 | NW_004517355.1 | Scaffold2392 | 18866                   | AA                              | GG              | 1947034476               |
| SNP_P4_175204_18873 | NW_004517355.1 | Scaffold2392 | 18873                   | TT                              | CC              | 1947034478               |
| SNP_P4_175205_18900 | NW_004517355.1 | Scaffold2392 | 18900                   | TT                              | CC              | 1947034480               |
| SNP_P4_175206_18950 | NW_004517355.1 | Scaffold2392 | 18950                   | AA                              | GG              | 1947034482               |
| SNP_P4_175207_19080 | NW_004517355.1 | Scaffold2392 | 19080                   | TT                              | AA              | 1947034484               |
| SNP_P4_175208_19455 | NW_004517355.1 | Scaffold2392 | 19455                   | TT                              | AA              | 1947034486               |
| SNP_P4_175209_19543 | NW_004517355.1 | Scaffold2392 | 19543                   | GG                              | TT              | 1947034488               |
| SNP_P4_175210_19592 | NW_004517355.1 | Scaffold2392 | 19592                   | GG                              | AA              | 1947034490               |
| SNP_P4_175211_19629 | NW_004517355.1 | Scaffold2392 | 19629                   | AA                              | TT              | 1947034492               |
| SNP_P4_175212_19702 | NW_004517355.1 | Scaffold2392 | 19702                   | AA                              | TT              | 1947034494               |
| SNP_P4_175213_19733 | NW_004517355.1 | Scaffold2392 | 19733                   | GG                              | CC              | 1947034496               |
| SNP_P4_175214_19943 | NW_004517355.1 | Scaffold2392 | 19943                   | AA                              | TT              | 1947034498               |

| SNPs IDs             | Chromosome IDs | Chromosomes  | Physical positions (bp) | CDC Frontier (Reference genome) | (ILWC46 & LPNB) | NCBI SNPdb Accession IDs |
|----------------------|----------------|--------------|-------------------------|---------------------------------|-----------------|--------------------------|
| SNP_P4_175215_73282  | NW_004517355.1 | Scaffold2392 | 73282                   | TT                              | AA              | 1947034500               |
| SNP_P4_175217_108516 | NW_004517355.1 | Scaffold2392 | 108516                  | GG                              | AA              | 1947034503               |
| SNP_P4_175218_110686 | NW_004517355.1 | Scaffold2392 | 110686                  | GG                              | AA              | 1947034505               |
| SNP_P4_175219_158736 | NW_004517355.1 | Scaffold2392 | 158736                  | TT                              | CC              | 1947034507               |
| SNP_P4_175220_164686 | NW_004517355.1 | Scaffold2392 | 164686                  | CC                              | TT              | 1947034509               |
| SNP_P4_175221_165876 | NW_004517355.1 | Scaffold2392 | 165876                  | TT                              | CC              | 1947034511               |
| SNP_P4_175222_169295 | NW_004517355.1 | Scaffold2392 | 169295                  | GG                              | AA              | 1947034513               |
| SNP_P4_175223_175207 | NW_004517355.1 | Scaffold2392 | 175207                  | AA                              | TT              | 1947034515               |
| SNP_P4_175224_175209 | NW_004517355.1 | Scaffold2392 | 175209                  | AA                              | TT              | 1947034517               |
| SNP_P4_175225_193345 | NW_004517355.1 | Scaffold2392 | 193345                  | CC                              | TT              | 1947034519               |
| SNP_P4_175226_193348 | NW_004517355.1 | Scaffold2392 | 193348                  | AA                              | GG              | 1947034521               |
| SNP_P4_175227_251405 | NW_004517355.1 | Scaffold2392 | 251405                  | TT                              | CC              | 1947034523               |
| SNP_P4_175229_280193 | NW_004517355.1 | Scaffold2392 | 280193                  | CC                              | TT              | 1947034525               |
| SNP_P4_175230_280196 | NW_004517355.1 | Scaffold2392 | 280196                  | TT                              | CC              | 1947034527               |
| SNP_P4_175231_280516 | NW_004517355.1 | Scaffold2392 | 280516                  | AA                              | TT              | 1947034529               |
| SNP_P4_175232_283201 | NW_004517355.1 | Scaffold2392 | 283201                  | AA                              | GG              | 1947034531               |
| SNP_P4_175233_283265 | NW_004517355.1 | Scaffold2392 | 283265                  | AA                              | GG              | 1947034533               |
| SNP_P4_175234_283579 | NW_004517355.1 | Scaffold2392 | 283579                  | GG                              | AA              | 1947034535               |
| SNP_P4_175235_283586 | NW_004517355.1 | Scaffold2392 | 283586                  | AA                              | GG              | 1947034537               |
| SNP_P4_175236_283615 | NW_004517355.1 | Scaffold2392 | 283615                  | TT                              | CC              | 1947034539               |
| SNP_P4_175237_283651 | NW_004517355.1 | Scaffold2392 | 283651                  | TT                              | CC              | 1947034541               |
| SNP_P4_175238_283664 | NW_004517355.1 | Scaffold2392 | 283664                  | TT                              | CC              | 1947034543               |
| SNP_P4_175239_283677 | NW_004517355.1 | Scaffold2392 | 283677                  | CC                              | TT              | 1947034545               |
| SNP_P4_175240_283684 | NW_004517355.1 | Scaffold2392 | 283684                  | TT                              | CC              | 1947034547               |
| SNP_P4_175241_283708 | NW_004517355.1 | Scaffold2392 | 283708                  | GG                              | AA              | 1947034549               |
| SNP_P4_175242_322850 | NW_004517355.1 | Scaffold2392 | 322850                  | AA                              | GG              | 1947034551               |
| SNP_P4_175243_322865 | NW_004517355.1 | Scaffold2392 | 322865                  | GG                              | AA              | 1947034553               |
| SNP_P4_175244_323193 | NW_004517355.1 | Scaffold2392 | 323193                  | GG                              | CC              | 1947034555               |
| SNP_P4_175246_325867 | NW_004517355.1 | Scaffold2392 | 325867                  | AA                              | TT              | 1947034557               |
| SNP_P4_175247_325998 | NW_004517355.1 | Scaffold2392 | 325998                  | CC                              | AA              | 1947034559               |
| SNP_P4_175248_326064 | NW_004517355.1 | Scaffold2392 | 326064                  | AA                              | CC              | 1947034561               |
| SNP_P4_175249_326165 | NW_004517355.1 | Scaffold2392 | 326165                  | CC                              | AA              | 1947034563               |
| SNP_P4_175251_326235 | NW_004517355.1 | Scaffold2392 | 326235                  | CC                              | GG              | 1947034565               |
| SNP_P4_175252_326260 | NW_004517355.1 | Scaffold2392 | 326260                  | AA                              | CC              | 1947034567               |
| SNP_P4_175253_354133 | NW_004517355.1 | Scaffold2392 | 354133                  | AA                              | GG              | 1947034569               |
| SNP_P4_175257_355392 | NW_004517355.1 | Scaffold2392 | 355392                  | TT                              | AA              | 1947034571               |
| SNP_P4_175258_2347   | NW_004517356.1 | Scaffold2394 | 2347                    | GG                              | TT              | 1947034573               |
| SNP_P4_175259_2372   | NW_004517356.1 | Scaffold2394 | 2372                    | GG                              | AA              | 1947034575               |
| SNP_P4_175260_3755   | NW_004517356.1 | Scaffold2394 | 3755                    | GG                              | TT              | 1947034577               |
| SNP_P4_175261_3807   | NW_004517356.1 | Scaffold2394 | 3807                    | GG                              | AA              | 1947034579               |
| SNP_P4_175262_4570   | NW_004517356.1 | Scaffold2394 | 4570                    | AA                              | CC              | 1947034581               |
| SNP_P4_175263_5061   | NW_004517356.1 | Scaffold2394 | 5061                    | CC                              | TT              | 1947034583               |

| SNPs IDs            | Chromosome IDs | Chromosomes  | Physical positions (bp) | CDC Frontier (Reference genome) | (ILWC46 & LPNB) | NCBI SNPdb Accession IDs |
|---------------------|----------------|--------------|-------------------------|---------------------------------|-----------------|--------------------------|
| SNP_P4_175264_1380  | NW_004517358.1 | Scaffold2396 | 1380                    | CC                              | GG              | 1947034585               |
| SNP_P4_175265_1452  | NW_004517358.1 | Scaffold2396 | 1452                    | AA                              | GG              | 1947034587               |
| SNP_P4_175266_1791  | NW_004517358.1 | Scaffold2396 | 1791                    | AA                              | GG              | 1947034589               |
| SNP_P4_175267_1796  | NW_004517358.1 | Scaffold2396 | 1796                    | AA                              | GG              | 1947034592               |
| SNP_P4_175268_1843  | NW_004517358.1 | Scaffold2396 | 1843                    | GG                              | AA              | 1947034594               |
| SNP_P4_175269_424   | NW_004517359.1 | Scaffold2397 | 424                     | GG                              | CC              | 1947034596               |
| SNP_P4_175270_631   | NW_004517359.1 | Scaffold2397 | 631                     | AA                              | GG              | 1947034598               |
| SNP_P4_175271_768   | NW_004517359.1 | Scaffold2397 | 768                     | GG                              | CC              | 1947034600               |
| SNP_P4_175272_790   | NW_004517359.1 | Scaffold2397 | 790                     | TT                              | AA              | 1947034602               |
| SNP_P4_175274_1764  | NW_004517365.1 | Scaffold2408 | 1764                    | AA                              | TT              | 1947034604               |
| SNP_P4_175275_3186  | NW_004517365.1 | Scaffold2408 | 3186                    | TT                              | CC              | 1947034606               |
| SNP_P4_175276_3350  | NW_004517365.1 | Scaffold2408 | 3350                    | AA                              | GG              | 1947034608               |
| SNP_P4_175278_662   | NW_004517366.1 | Scaffold2409 | 662                     | AA                              | GG              | 1947034610               |
| SNP_P4_175279_677   | NW_004517366.1 | Scaffold2409 | 677                     | TT                              | CC              | 1947034612               |
| SNP_P4_175280_678   | NW_004517366.1 | Scaffold2409 | 678                     | CC                              | GG              | 1947034613               |
| SNP_P4_175281_655   | NW_004517367.1 | Scaffold2410 | 655                     | AA                              | TT              | 1947034614               |
| SNP_P4_175282_7280  | NW_004517367.1 | Scaffold2410 | 7280                    | CC                              | GG              | 1947034615               |
| SNP_P4_175283_7597  | NW_004517367.1 | Scaffold2410 | 7597                    | CC                              | AA              | 1947034617               |
| SNP_P4_175284_7617  | NW_004517367.1 | Scaffold2410 | 7617                    | AA                              | GG              | 1947034619               |
| SNP_P4_175285_7622  | NW_004517367.1 | Scaffold2410 | 7622                    | AA                              | GG              | 1947034621               |
| SNP_P4_175286_7647  | NW_004517367.1 | Scaffold2410 | 7647                    | TT                              | AA              | 1947034623               |
| SNP_P4_175287_7698  | NW_004517367.1 | Scaffold2410 | 7698                    | AA                              | TT              | 1947034625               |
| SNP_P4_175288_9754  | NW_004517367.1 | Scaffold2410 | 9754                    | AA                              | GG              | 1947034627               |
| SNP_P4_175289_9791  | NW_004517367.1 | Scaffold2410 | 9791                    | AA                              | CC              | 1947034629               |
| SNP_P4_175290_10085 | NW_004517367.1 | Scaffold2410 | 10085                   | AA                              | TT              | 1947034631               |
| SNP_P4_175291_12242 | NW_004517367.1 | Scaffold2410 | 12242                   | AA                              | GG              | 1947034633               |
| SNP_P4_175292_12588 | NW_004517367.1 | Scaffold2410 | 12588                   | TT                              | GG              | 1947034635               |
| SNP_P4_175294_15354 | NW_004517367.1 | Scaffold2410 | 15354                   | TT                              | AA              | 1947034637               |
| SNP_P4_175295_16089 | NW_004517367.1 | Scaffold2410 | 16089                   | AA                              | CC              | 1947034639               |
| SNP_P4_175296_16117 | NW_004517367.1 | Scaffold2410 | 16117                   | GG                              | AA              | 1947034641               |
| SNP_P4_175297_16156 | NW_004517367.1 | Scaffold2410 | 16156                   | CC                              | TT              | 1947034643               |
| SNP_P4_175298_16181 | NW_004517367.1 | Scaffold2410 | 16181                   | GG                              | TT              | 1947034645               |
| SNP_P4_175299_16202 | NW_004517367.1 | Scaffold2410 | 16202                   | AA                              | GG              | 1947034647               |
| SNP_P4_175300_31461 | NW_004517367.1 | Scaffold2410 | 31461                   | CC                              | AA              | 1947034650               |
| SNP_P4_175301_31666 | NW_004517367.1 | Scaffold2410 | 31666                   | AA                              | TT              | 1947034652               |
| SNP_P4_175302_31852 | NW_004517367.1 | Scaffold2410 | 31852                   | CC                              | GG              | 1947034654               |
| SNP_P4_175303_7148  | NW_004517369.1 | Scaffold2412 | 7148                    | AA                              | TT              | 1947034656               |
| SNP_P4_175304_9232  | NW_004517369.1 | Scaffold2412 | 9232                    | CC                              | TT              | 1947034658               |
| SNP_P4_175306_12803 | NW_004517369.1 | Scaffold2412 | 12803                   | AA                              | GG              | 1947034660               |
| SNP_P4_175307_12836 | NW_004517369.1 | Scaffold2412 | 12836                   | TT                              | CC              | 1947034662               |
| SNP_P4_175308_12851 | NW_004517369.1 | Scaffold2412 | 12851                   | GG                              | AA              | 1947034664               |
| SNP_P4_175309_12853 | NW_004517369.1 | Scaffold2412 | 12853                   | TT                              | CC              | 1947034666               |

| SNPs IDs            | Chromosome IDs | Chromosomes  | Physical positions (bp) | CDC Frontier (Reference genome) | (ILWC46 & LPNB) | NCBI SNPdb Accession IDs |
|---------------------|----------------|--------------|-------------------------|---------------------------------|-----------------|--------------------------|
| SNP_P4_175310_12864 | NW_004517369.1 | Scaffold2412 | 12864                   | TT                              | CC              | 1947034668               |
| SNP_P4_175311_12865 | NW_004517369.1 | Scaffold2412 | 12865                   | AA                              | GG              | 1947034670               |
| SNP_P4_175312_12866 | NW_004517369.1 | Scaffold2412 | 12866                   | GG                              | AA              | 1947034673               |
| SNP_P4_175313_13184 | NW_004517369.1 | Scaffold2412 | 13184                   | TT                              | CC              | 1947034675               |
| SNP_P4_175314_19472 | NW_004517369.1 | Scaffold2412 | 19472                   | CC                              | TT              | 1947034677               |
| SNP_P4_175315_19481 | NW_004517369.1 | Scaffold2412 | 19481                   | AA                              | GG              | 1947034679               |
| SNP_P4_175316_19516 | NW_004517369.1 | Scaffold2412 | 19516                   | AA                              | GG              | 1947034681               |
| SNP_P4_175317_22001 | NW_004517369.1 | Scaffold2412 | 22001                   | AA                              | TT              | 1947034683               |
| SNP_P4_175318_29399 | NW_004517369.1 | Scaffold2412 | 29399                   | GG                              | CC              | 1947034685               |
| SNP_P4_175319_31248 | NW_004517369.1 | Scaffold2412 | 31248                   | TT                              | AA              | 1947034687               |
| SNP_P4_175320_36921 | NW_004517369.1 | Scaffold2412 | 36921                   | GG                              | TT              | 1947034689               |
| SNP_P4_175321_40825 | NW_004517369.1 | Scaffold2412 | 40825                   | GG                              | AA              | 1947034691               |
| SNP_P4_175322_40845 | NW_004517369.1 | Scaffold2412 | 40845                   | AA                              | GG              | 1947034693               |
| SNP_P4_175323_40866 | NW_004517369.1 | Scaffold2412 | 40866                   | GG                              | AA              | 1947034695               |
| SNP_P4_175324_46553 | NW_004517369.1 | Scaffold2412 | 46553                   | TT                              | AA              | 1947034697               |
| SNP_P4_175325_48500 | NW_004517369.1 | Scaffold2412 | 48500                   | TT                              | AA              | 1947034699               |
| SNP_P4_175326_64258 | NW_004517369.1 | Scaffold2412 | 64258                   | AA                              | GG              | 1947034701               |
| SNP_P4_175327_64281 | NW_004517369.1 | Scaffold2412 | 64281                   | TT                              | AA              | 1947034703               |
| SNP_P4_175328_500   | NW_004517370.1 | Scaffold2413 | 500                     | AA                              | GG              | 1947034705               |
| SNP_P4_175329_6188  | NW_004517370.1 | Scaffold2413 | 6188                    | AA                              | TT              | 1947034707               |
| SNP_P4_175330_6200  | NW_004517370.1 | Scaffold2413 | 6200                    | CC                              | AA              | 1947034709               |
| SNP_P4_175331_6212  | NW_004517370.1 | Scaffold2413 | 6212                    | CC                              | TT              | 1947034711               |
| SNP_P4_175332_6251  | NW_004517370.1 | Scaffold2413 | 6251                    | TT                              | CC              | 1947034713               |
| SNP_P4_175333_6276  | NW_004517370.1 | Scaffold2413 | 6276                    | AA                              | GG              | 1947034715               |
| SNP_P4_175334_12150 | NW_004517370.1 | Scaffold2413 | 12150                   | CC                              | AA              | 1947034717               |
| SNP_P4_175335_12575 | NW_004517370.1 | Scaffold2413 | 12575                   | TT                              | GG              | 1947034720               |
| SNP_P4_175336_12778 | NW_004517370.1 | Scaffold2413 | 12778                   | GG                              | TT              | 1947034722               |
| SNP_P4_175337_12791 | NW_004517370.1 | Scaffold2413 | 12791                   | AA                              | TT              | 1947034724               |
| SNP_P4_175338_12934 | NW_004517370.1 | Scaffold2413 | 12934                   | AA                              | GG              | 1947034726               |
| SNP_P4_175339_258   | NW_004517371.1 | Scaffold2415 | 258                     | GG                              | AA              | 1947034728               |
| SNP_P4_175340_627   | NW_004517371.1 | Scaffold2415 | 627                     | TT                              | CC              | 1947034730               |
| SNP_P4_175343_29351 | NW_004517371.1 | Scaffold2415 | 29351                   | AA                              | GG              | 1947034732               |
| SNP_P4_175344_35508 | NW_004517371.1 | Scaffold2415 | 35508                   | CC                              | TT              | 1947034734               |
| SNP_P4_175345_35511 | NW_004517371.1 | Scaffold2415 | 35511                   | AA                              | TT              | 1947034736               |
| SNP_P4_175346_44184 | NW_004517371.1 | Scaffold2415 | 44184                   | GG                              | AA              | 1947034738               |
| SNP_P4_175347_73564 | NW_004517371.1 | Scaffold2415 | 73564                   | CC                              | TT              | 1947034740               |
| SNP_P4_175348_86168 | NW_004517371.1 | Scaffold2415 | 86168                   | GG                              | AA              | 1947034742               |
| SNP_P4_175349_92168 | NW_004517371.1 | Scaffold2415 | 92168                   | CC                              | TT              | 1947034744               |
| SNP_P4_175350_1687  | NW_004517373.1 | Scaffold2419 | 1687                    | TT                              | CC              | 1947034747               |
| SNP_P4_175351_8079  | NW_004517375.1 | Scaffold2421 | 8079                    | AA                              | GG              | 1947034749               |
| SNP_P4_175352_8337  | NW_004517375.1 | Scaffold2421 | 8337                    | CC                              | AA              | 1947034751               |
| SNP_P4_175353_8411  | NW_004517375.1 | Scaffold2421 | 8411                    | AA                              | TT              | 1947034753               |

| SNPs IDs            | Chromosome IDs | Chromosomes  | Physical positions (bp) | CDC Frontier (Reference genome) | (ILWC46 & LPNB) | NCBI SNPdb Accession IDs |
|---------------------|----------------|--------------|-------------------------|---------------------------------|-----------------|--------------------------|
| SNP_P4_175354_8416  | NW_004517375.1 | Scaffold2421 | 8416                    | GG                              | AA              | 1947034755               |
| SNP_P4_175355_8519  | NW_004517375.1 | Scaffold2421 | 8519                    | TT                              | CC              | 1947034757               |
| SNP_P4_175356_12636 | NW_004517375.1 | Scaffold2421 | 12636                   | AA                              | TT              | 1947034759               |
| SNP_P4_175357_16779 | NW_004517375.1 | Scaffold2421 | 16779                   | CC                              | AA              | 1947034761               |
| SNP_P4_175358_16780 | NW_004517375.1 | Scaffold2421 | 16780                   | AA                              | CC              | 1947034763               |
| SNP_P4_175359_16787 | NW_004517375.1 | Scaffold2421 | 16787                   | TT                              | AA              | 1947034765               |
| SNP_P4_175360_17169 | NW_004517375.1 | Scaffold2421 | 17169                   | CC                              | TT              | 1947034767               |
| SNP_P4_175361_17519 | NW_004517375.1 | Scaffold2421 | 17519                   | AA                              | CC              | 1947034769               |
| SNP_P4_175362_23152 | NW_004517375.1 | Scaffold2421 | 23152                   | TT                              | AA              | 1947034771               |
| SNP_P4_175363_24715 | NW_004517375.1 | Scaffold2421 | 24715                   | CC                              | AA              | 1947034773               |
| SNP_P4_175364_24823 | NW_004517375.1 | Scaffold2421 | 24823                   | AA                              | GG              | 1947034775               |
| SNP_P4_175365_25154 | NW_004517375.1 | Scaffold2421 | 25154                   | TT                              | CC              | 1947034777               |
| SNP_P4_175366_25239 | NW_004517375.1 | Scaffold2421 | 25239                   | TT                              | AA              | 1947034779               |
| SNP_P4_175367_25251 | NW_004517375.1 | Scaffold2421 | 25251                   | TT                              | GG              | 1947034781               |
| SNP_P4_175368_25396 | NW_004517375.1 | Scaffold2421 | 25396                   | CC                              | AA              | 1947034783               |
| SNP_P4_175369_25969 | NW_004517375.1 | Scaffold2421 | 25969                   | GG                              | TT              | 1947034786               |
| SNP_P4_175370_31994 | NW_004517375.1 | Scaffold2421 | 31994                   | TT                              | GG              | 1947034788               |
| SNP_P4_175371_34227 | NW_004517375.1 | Scaffold2421 | 34227                   | CC                              | TT              | 1947034790               |
| SNP_P4_175372_34315 | NW_004517375.1 | Scaffold2421 | 34315                   | TT                              | CC              | 1947034792               |
| SNP_P4_175373_34345 | NW_004517375.1 | Scaffold2421 | 34345                   | GG                              | AA              | 1947034794               |
| SNP_P4_175374_34347 | NW_004517375.1 | Scaffold2421 | 34347                   | AA                              | CC              | 1947034796               |
| SNP_P4_175375_34403 | NW_004517375.1 | Scaffold2421 | 34403                   | TT                              | AA              | 1947034798               |
| SNP_P4_175376_34411 | NW_004517375.1 | Scaffold2421 | 34411                   | CC                              | GG              | 1947034800               |
| SNP_P4_175377_34517 | NW_004517375.1 | Scaffold2421 | 34517                   | TT                              | AA              | 1947034802               |
| SNP_P4_175378_34563 | NW_004517375.1 | Scaffold2421 | 34563                   | CC                              | GG              | 1947034804               |
| SNP_P4_175379_34638 | NW_004517375.1 | Scaffold2421 | 34638                   | TT                              | AA              | 1947034806               |
| SNP_P4_175380_39827 | NW_004517375.1 | Scaffold2421 | 39827                   | AA                              | GG              | 1947034808               |
| SNP_P4_175381_39829 | NW_004517375.1 | Scaffold2421 | 39829                   | AA                              | CC              | 1947034810               |
| SNP_P4_175382_39855 | NW_004517375.1 | Scaffold2421 | 39855                   | GG                              | TT              | 1947034812               |
| SNP_P4_175383_40198 | NW_004517375.1 | Scaffold2421 | 40198                   | TT                              | CC              | 1947034814               |
| SNP_P4_175384_40199 | NW_004517375.1 | Scaffold2421 | 40199                   | CC                              | AA              | 1947034816               |
| SNP_P4_175385_40288 | NW_004517375.1 | Scaffold2421 | 40288                   | CC                              | TT              | 1947034818               |
| SNP_P4_175386_40305 | NW_004517375.1 | Scaffold2421 | 40305                   | GG                              | AA              | 1947034820               |
| SNP_P4_175387_40407 | NW_004517375.1 | Scaffold2421 | 40407                   | TT                              | CC              | 1947034822               |
| SNP_P4_175388_40451 | NW_004517375.1 | Scaffold2421 | 40451                   | GG                              | AA              | 1947034824               |
| SNP_P4_175389_40746 | NW_004517375.1 | Scaffold2421 | 40746                   | CC                              | TT              | 1947034826               |
| SNP_P4_175390_44332 | NW_004517375.1 | Scaffold2421 | 44332                   | TT                              | AA              | 1947034828               |
| SNP_P4_175391_44342 | NW_004517375.1 | Scaffold2421 | 44342                   | CC                              | TT              | 1947034830               |
| SNP_P4_175392_44617 | NW_004517375.1 | Scaffold2421 | 44617                   | TT                              | AA              | 1947034832               |
| SNP_P4_175393_44628 | NW_004517375.1 | Scaffold2421 | 44628                   | GG                              | TT              | 1947034835               |
| SNP_P4_175394_44630 | NW_004517375.1 | Scaffold2421 | 44630                   | TT                              | AA              | 1947034837               |
| SNP_P4_175395_44643 | NW_004517375.1 | Scaffold2421 | 44643                   | TT                              | GG              | 1947034839               |

| SNPs IDs            | Chromosome IDs | Chromosomes  | Physical positions (bp) | CDC Frontier (Reference genome) | (ILWC46 & LPNB) | NCBI SNPdb Accession IDs |
|---------------------|----------------|--------------|-------------------------|---------------------------------|-----------------|--------------------------|
| SNP_P4_175396_44648 | NW_004517375.1 | Scaffold2421 | 44648                   | GG                              | TT              | 1947034841               |
| SNP_P4_175397_48511 | NW_004517375.1 | Scaffold2421 | 48511                   | CC                              | TT              | 1947034843               |
| SNP_P4_175398_48556 | NW_004517375.1 | Scaffold2421 | 48556                   | CC                              | AA              | 1947034845               |
| SNP_P4_175399_48748 | NW_004517375.1 | Scaffold2421 | 48748                   | AA                              | TT              | 1947034847               |
| SNP_P4_175400_48774 | NW_004517375.1 | Scaffold2421 | 48774                   | CC                              | AA              | 1947034849               |
| SNP_P4_175401_48858 | NW_004517375.1 | Scaffold2421 | 48858                   | AA                              | GG              | 1947034851               |
| SNP_P4_175402_48876 | NW_004517375.1 | Scaffold2421 | 48876                   | GG                              | TT              | 1947034853               |
| SNP_P4_175403_48893 | NW_004517375.1 | Scaffold2421 | 48893                   | CC                              | TT              | 1947034855               |
| SNP_P4_175404_49149 | NW_004517375.1 | Scaffold2421 | 49149                   | GG                              | AA              | 1947034857               |
| SNP_P4_175405_49273 | NW_004517375.1 | Scaffold2421 | 49273                   | TT                              | CC              | 1947034859               |
| SNP_P4_175406_50175 | NW_004517375.1 | Scaffold2421 | 50175                   | AA                              | GG              | 1947034861               |
| SNP_P4_175407_50417 | NW_004517375.1 | Scaffold2421 | 50417                   | GG                              | AA              | 1947034863               |
| SNP_P4_175409_50655 | NW_004517375.1 | Scaffold2421 | 50655                   | CC                              | TT              | 1947034865               |
| SNP_P4_175410_50684 | NW_004517375.1 | Scaffold2421 | 50684                   | AA                              | GG              | 1947034868               |
| SNP_P4_175411_50699 | NW_004517375.1 | Scaffold2421 | 50699                   | AA                              | TT              | 1947034870               |
| SNP_P4_175412_60418 | NW_004517375.1 | Scaffold2421 | 60418                   | TT                              | CC              | 1947034872               |
| SNP_P4_175413_60462 | NW_004517375.1 | Scaffold2421 | 60462                   | AA                              | CC              | 1947034874               |
| SNP_P4_175414_60465 | NW_004517375.1 | Scaffold2421 | 60465                   | TT                              | AA              | 1947034876               |
| SNP_P4_175415_60467 | NW_004517375.1 | Scaffold2421 | 60467                   | TT                              | AA              | 1947034878               |
| SNP_P4_175416_60468 | NW_004517375.1 | Scaffold2421 | 60468                   | TT                              | CC              | 1947034880               |
| SNP_P4_175417_60543 | NW_004517375.1 | Scaffold2421 | 60543                   | CC                              | TT              | 1947034882               |
| SNP_P4_175418_60563 | NW_004517375.1 | Scaffold2421 | 60563                   | GG                              | AA              | 1947034884               |
| SNP_P4_175419_60600 | NW_004517375.1 | Scaffold2421 | 60600                   | TT                              | CC              | 1947034886               |
| SNP_P4_175420_60656 | NW_004517375.1 | Scaffold2421 | 60656                   | AA                              | CC              | 1947034888               |
| SNP_P4_175421_60832 | NW_004517375.1 | Scaffold2421 | 60832                   | CC                              | TT              | 1947034890               |
| SNP_P4_175422_61070 | NW_004517375.1 | Scaffold2421 | 61070                   | CC                              | AA              | 1947034892               |
| SNP_P4_175423_61097 | NW_004517375.1 | Scaffold2421 | 61097                   | AA                              | TT              | 1947034894               |
| SNP_P4_175424_61132 | NW_004517375.1 | Scaffold2421 | 61132                   | AA                              | GG              | 1947034896               |
| SNP_P4_175425_61225 | NW_004517375.1 | Scaffold2421 | 61225                   | TT                              | GG              | 1947034898               |
| SNP_P4_175426_367   | NW_004517381.1 | Scaffold2431 | 367                     | GG                              | AA              | 1947034901               |
| SNP_P4_175427_449   | NW_004517381.1 | Scaffold2431 | 449                     | GG                              | CC              | 1947034903               |
| SNP_P4_175428_1641  | NW_004517383.1 | Scaffold2433 | 1641                    | AA                              | GG              | 1947034905               |
| SNP_P4_175429_1946  | NW_004517383.1 | Scaffold2433 | 1946                    | AA                              | GG              | 1947034907               |
| SNP_P4_175431_2344  | NW_004517383.1 | Scaffold2433 | 2344                    | CC                              | AA              | 1947034909               |
| SNP_P4_175432_2346  | NW_004517383.1 | Scaffold2433 | 2346                    | AA                              | CC              | 1947034911               |
| SNP_P4_175433_2379  | NW_004517383.1 | Scaffold2433 | 2379                    | CC                              | AA              | 1947034913               |
| SNP_P4_175434_2407  | NW_004517383.1 | Scaffold2433 | 2407                    | AA                              | GG              | 1947034915               |
| SNP_P4_175436_2779  | NW_004517383.1 | Scaffold2433 | 2779                    | AA                              | CC              | 1947034917               |
| SNP_P4_175437_3249  | NW_004517383.1 | Scaffold2433 | 3249                    | GG                              | AA              | 1947034919               |
| SNP_P4_175438_3309  | NW_004517383.1 | Scaffold2433 | 3309                    | GG                              | AA              | 1947034921               |
| SNP_P4_175439_5423  | NW_004517383.1 | Scaffold2433 | 5423                    | TT                              | GG              | 1947034923               |
| SNP_P4_175440_9278  | NW_004517383.1 | Scaffold2433 | 9278                    | AA                              | CC              | 1947034925               |



| SNPs IDs            | Chromosome IDs | Chromosomes  | Physical positions (bp) | CDC Frontier (Reference genome) | (ILWC46 & LPNB) | NCBI SNPdb Accession IDs |
|---------------------|----------------|--------------|-------------------------|---------------------------------|-----------------|--------------------------|
| SNP_P4_175441_9333  | NW_004517383.1 | Scaffold2433 | 9333                    | TT                              | CC              | 1947034927               |
| SNP_P4_175442_9745  | NW_004517383.1 | Scaffold2433 | 9745                    | TT                              | CC              | 1947034929               |
| SNP_P4_175443_9755  | NW_004517383.1 | Scaffold2433 | 9755                    | GG                              | TT              | 1947034931               |
| SNP_P4_175444_9793  | NW_004517383.1 | Scaffold2433 | 9793                    | AA                              | GG              | 1947034933               |
| SNP_P4_175445_9800  | NW_004517383.1 | Scaffold2433 | 9800                    | AA                              | GG              | 1947034935               |
| SNP_P4_175446_9831  | NW_004517383.1 | Scaffold2433 | 9831                    | TT                              | CC              | 1947034937               |
| SNP_P4_175447_12101 | NW_004517383.1 | Scaffold2433 | 12101                   | AA                              | GG              | 1947034939               |
| SNP_P4_175448_12881 | NW_004517383.1 | Scaffold2433 | 12881                   | CC                              | AA              | 1947034941               |
| SNP_P4_175449_12906 | NW_004517383.1 | Scaffold2433 | 12906                   | TT                              | CC              | 1947034943               |
| SNP_P4_175450_12948 | NW_004517383.1 | Scaffold2433 | 12948                   | GG                              | AA              | 1947034945               |
| SNP_P4_175451_16673 | NW_004517383.1 | Scaffold2433 | 16673                   | GG                              | AA              | 1947034947               |
| SNP_P4_175452_16686 | NW_004517383.1 | Scaffold2433 | 16686                   | CC                              | AA              | 1947034949               |
| SNP_P4_175453_16701 | NW_004517383.1 | Scaffold2433 | 16701                   | TT                              | CC              | 1947034951               |
| SNP_P4_175454_16706 | NW_004517383.1 | Scaffold2433 | 16706                   | AA                              | GG              | 1947034953               |
| SNP_P4_175455_16761 | NW_004517383.1 | Scaffold2433 | 16761                   | CC                              | TT              | 1947034955               |
| SNP_P4_175456_16830 | NW_004517383.1 | Scaffold2433 | 16830                   | AA                              | GG              | 1947034957               |
| SNP_P4_175457_16878 | NW_004517383.1 | Scaffold2433 | 16878                   | CC                              | TT              | 1947034959               |
| SNP_P4_175458_16922 | NW_004517383.1 | Scaffold2433 | 16922                   | AA                              | GG              | 1947034961               |
| SNP_P4_175459_17050 | NW_004517383.1 | Scaffold2433 | 17050                   | CC                              | TT              | 1947034963               |
| SNP_P4_175460_17079 | NW_004517383.1 | Scaffold2433 | 17079                   | TT                              | GG              | 1947034965               |
| SNP_P4_175461_17111 | NW_004517383.1 | Scaffold2433 | 17111                   | TT                              | GG              | 1947034967               |
| SNP_P4_175462_17112 | NW_004517383.1 | Scaffold2433 | 17112                   | CC                              | TT              | 1947034969               |
| SNP_P4_175463_1428  | NW_004517384.1 | Scaffold2434 | 1428                    | GG                              | CC              | 1947034971               |
| SNP_P4_175464_2667  | NW_004517384.1 | Scaffold2434 | 2667                    | TT                              | AA              | 1947034973               |
| SNP_P4_175465_2939  | NW_004517384.1 | Scaffold2434 | 2939                    | GG                              | AA              | 1947034975               |
| SNP_P4_175466_7389  | NW_004517384.1 | Scaffold2434 | 7389                    | GG                              | TT              | 1947034977               |
| SNP_P4_175467_7392  | NW_004517384.1 | Scaffold2434 | 7392                    | AA                              | CC              | 1947034979               |
| SNP_P4_175468_7395  | NW_004517384.1 | Scaffold2434 | 7395                    | AA                              | TT              | 1947034981               |
| SNP_P4_175469_7404  | NW_004517384.1 | Scaffold2434 | 7404                    | AA                              | TT              | 1947034983               |
| SNP_P4_175470_12753 | NW_004517384.1 | Scaffold2434 | 12753                   | TT                              | AA              | 1947034985               |
| SNP_P4_175471_12759 | NW_004517384.1 | Scaffold2434 | 12759                   | CC                              | AA              | 1947034987               |
| SNP_P4_175472_13054 | NW_004517384.1 | Scaffold2434 | 13054                   | TT                              | CC              | 1947034989               |
| SNP_P4_175473_13056 | NW_004517384.1 | Scaffold2434 | 13056                   | GG                              | AA              | 1947034991               |
| SNP_P4_175474_15973 | NW_004517384.1 | Scaffold2434 | 15973                   | TT                              | GG              | 1947034993               |
| SNP_P4_175475_16288 | NW_004517384.1 | Scaffold2434 | 16288                   | AA                              | GG              | 1947034995               |
| SNP_P4_175476_18056 | NW_004517384.1 | Scaffold2434 | 18056                   | GG                              | AA              | 1947034997               |
| SNP_P4_175478_18365 | NW_004517384.1 | Scaffold2434 | 18365                   | TT                              | GG              | 1947034999               |
| SNP_P4_175479_24686 | NW_004517384.1 | Scaffold2434 | 24686                   | AA                              | GG              | 1947035001               |
| SNP_P4_175480_28291 | NW_004517384.1 | Scaffold2434 | 28291                   | AA                              | TT              | 1947035003               |
| SNP_P4_175481_28794 | NW_004517384.1 | Scaffold2434 | 28794                   | CC                              | TT              | 1947035005               |
| SNP_P4_175482_28811 | NW_004517384.1 | Scaffold2434 | 28811                   | GG                              | TT              | 1947035007               |
| SNP_P4_175483_29472 | NW_004517384.1 | Scaffold2434 | 29472                   | TT                              | GG              | 1947035009               |

| SNPs IDs            | Chromosome IDs | Chromosomes  | Physical positions (bp) | CDC Frontier (Reference genome) | (ILWC46 & LPNB) | NCBI SNPdb Accession IDs |
|---------------------|----------------|--------------|-------------------------|---------------------------------|-----------------|--------------------------|
| SNP_P4_175484_29490 | NW_004517384.1 | Scaffold2434 | 29490                   | AA                              | TT              | 1947035011               |
| SNP_P4_175485_29774 | NW_004517384.1 | Scaffold2434 | 29774                   | CC                              | AA              | 1947035013               |
| SNP_P4_175486_29785 | NW_004517384.1 | Scaffold2434 | 29785                   | CC                              | TT              | 1947035015               |
| SNP_P4_175487_29808 | NW_004517384.1 | Scaffold2434 | 29808                   | TT                              | GG              | 1947035017               |
| SNP_P4_175488_29858 | NW_004517384.1 | Scaffold2434 | 29858                   | GG                              | AA              | 1947035019               |
| SNP_P4_175489_37092 | NW_004517384.1 | Scaffold2434 | 37092                   | GG                              | AA              | 1947035021               |
| SNP_P4_175490_37105 | NW_004517384.1 | Scaffold2434 | 37105                   | GG                              | AA              | 1947035023               |
| SNP_P4_175491_44876 | NW_004517384.1 | Scaffold2434 | 44876                   | GG                              | AA              | 1947035025               |
| SNP_P4_175492_44908 | NW_004517384.1 | Scaffold2434 | 44908                   | TT                              | AA              | 1947035027               |
| SNP_P4_175493_44955 | NW_004517384.1 | Scaffold2434 | 44955                   | TT                              | CC              | 1947035029               |
| SNP_P4_175494_45356 | NW_004517384.1 | Scaffold2434 | 45356                   | TT                              | AA              | 1947035031               |
| SNP_P4_175495_45399 | NW_004517384.1 | Scaffold2434 | 45399                   | AA                              | TT              | 1947035033               |
| SNP_P4_175496_45410 | NW_004517384.1 | Scaffold2434 | 45410                   | TT                              | AA              | 1947035035               |
| SNP_P4_175497_45465 | NW_004517384.1 | Scaffold2434 | 45465                   | AA                              | GG              | 1947035037               |
| SNP_P4_175498_45469 | NW_004517384.1 | Scaffold2434 | 45469                   | GG                              | AA              | 1947035039               |
| SNP_P4_175499_45626 | NW_004517384.1 | Scaffold2434 | 45626                   | CC                              | AA              | 1947035040               |
| SNP_P4_175500_45839 | NW_004517384.1 | Scaffold2434 | 45839                   | CC                              | AA              | 1947035041               |
| SNP_P4_175501_60398 | NW_004517384.1 | Scaffold2434 | 60398                   | TT                              | CC              | 1947035042               |
| SNP_P4_175502_70490 | NW_004517384.1 | Scaffold2434 | 70490                   | GG                              | AA              | 1947035043               |
| SNP_P4_175503_72149 | NW_004517384.1 | Scaffold2434 | 72149                   | CC                              | TT              | 1947035044               |
| SNP_P4_175504_76131 | NW_004517384.1 | Scaffold2434 | 76131                   | TT                              | AA              | 1947035045               |
| SNP_P4_175507_76556 | NW_004517384.1 | Scaffold2434 | 76556                   | TT                              | AA              | 1947035046               |
| SNP_P4_175508_770   | NW_004517385.1 | Scaffold2435 | 770                     | TT                              | AA              | 1947035047               |
| SNP_P4_175509_860   | NW_004517385.1 | Scaffold2435 | 860                     | CC                              | AA              | 1947035048               |
| SNP_P4_175510_905   | NW_004517385.1 | Scaffold2435 | 905                     | CC                              | TT              | 1947035049               |
| SNP_P4_175511_346   | NW_004517387.1 | Scaffold2439 | 346                     | TT                              | CC              | 1947035051               |
| SNP_P4_175512_348   | NW_004517387.1 | Scaffold2439 | 348                     | TT                              | GG              | 1947035053               |
| SNP_P4_175513_64    | NW_004517388.1 | Scaffold2440 | 64                      | CC                              | TT              | 1947035055               |
| SNP_P4_175514_199   | NW_004517388.1 | Scaffold2440 | 199                     | TT                              | AA              | 1947035057               |
| SNP_P4_175515_1048  | NW_004517388.1 | Scaffold2440 | 1048                    | AA                              | CC              | 1947035059               |
| SNP_P4_175516_1196  | NW_004517388.1 | Scaffold2440 | 1196                    | AA                              | GG              | 1947035061               |
| SNP_P4_175517_1207  | NW_004517388.1 | Scaffold2440 | 1207                    | AA                              | TT              | 1947035063               |
| SNP_P4_175518_1235  | NW_004517388.1 | Scaffold2440 | 1235                    | TT                              | CC              | 1947035065               |
| SNP_P4_175519_3335  | NW_004517389.1 | Scaffold2441 | 3335                    | GG                              | CC              | 1947035067               |
| SNP_P4_175520_9519  | NW_004517392.1 | Scaffold2445 | 9519                    | AA                              | GG              | 1947035069               |
| SNP_P4_175521_9535  | NW_004517392.1 | Scaffold2445 | 9535                    | TT                              | GG              | 1947035071               |
| SNP_P4_175522_9539  | NW_004517392.1 | Scaffold2445 | 9539                    | TT                              | AA              | 1947035073               |
| SNP_P4_175523_9552  | NW_004517392.1 | Scaffold2445 | 9552                    | TT                              | GG              | 1947035075               |
| SNP_P4_175524_9553  | NW_004517392.1 | Scaffold2445 | 9553                    | CC                              | GG              | 1947035077               |
| SNP_P4_175525_9574  | NW_004517392.1 | Scaffold2445 | 9574                    | AA                              | TT              | 1947035079               |
| SNP_P4_175526_9592  | NW_004517392.1 | Scaffold2445 | 9592                    | GG                              | AA              | 1947035081               |
| SNP_P4_175527_10114 | NW_004517392.1 | Scaffold2445 | 10114                   | AA                              | GG              | 1947035083               |

| SNPs IDs            | Chromosome IDs | Chromosomes  | Physical positions (bp) | CDC Frontier (Reference genome) | (ILWC46 & LPNB) | NCBI SNPdb Accession IDs |
|---------------------|----------------|--------------|-------------------------|---------------------------------|-----------------|--------------------------|
| SNP_P4_175528_10126 | NW_004517392.1 | Scaffold2445 | 10126                   | AA                              | GG              | 1947035085               |
| SNP_P4_175529_10644 | NW_004517392.1 | Scaffold2445 | 10644                   | CC                              | TT              | 1947035087               |
| SNP_P4_175530_10702 | NW_004517392.1 | Scaffold2445 | 10702                   | AA                              | CC              | 1947035089               |
| SNP_P4_175531_10808 | NW_004517392.1 | Scaffold2445 | 10808                   | AA                              | GG              | 1947035091               |
| SNP_P4_175532_10809 | NW_004517392.1 | Scaffold2445 | 10809                   | CC                              | AA              | 1947035093               |
| SNP_P4_175533_10873 | NW_004517392.1 | Scaffold2445 | 10873                   | CC                              | TT              | 1947035095               |
| SNP_P4_175534_10926 | NW_004517392.1 | Scaffold2445 | 10926                   | GG                              | TT              | 1947035097               |
| SNP_P4_175535_10976 | NW_004517392.1 | Scaffold2445 | 10976                   | CC                              | TT              | 1947035099               |
| SNP_P4_175536_10989 | NW_004517392.1 | Scaffold2445 | 10989                   | TT                              | AA              | 1947035101               |
| SNP_P4_175537_11821 | NW_004517392.1 | Scaffold2445 | 11821                   | CC                              | TT              | 1947035103               |
| SNP_P4_175538_11828 | NW_004517392.1 | Scaffold2445 | 11828                   | TT                              | CC              | 1947035105               |
| SNP_P4_175539_11838 | NW_004517392.1 | Scaffold2445 | 11838                   | AA                              | CC              | 1947035107               |
| SNP_P4_175540_11912 | NW_004517392.1 | Scaffold2445 | 11912                   | GG                              | AA              | 1947035109               |
| SNP_P4_175541_19737 | NW_004517392.1 | Scaffold2445 | 19737                   | CC                              | TT              | 1947035111               |
| SNP_P4_175542_20624 | NW_004517392.1 | Scaffold2445 | 20624                   | AA                              | TT              | 1947035113               |
| SNP_P4_175543_20650 | NW_004517392.1 | Scaffold2445 | 20650                   | AA                              | TT              | 1947035115               |
| SNP_P4_175544_32039 | NW_004517392.1 | Scaffold2445 | 32039                   | GG                              | TT              | 1947035117               |
| SNP_P4_175545_32090 | NW_004517392.1 | Scaffold2445 | 32090                   | TT                              | GG              | 1947035119               |
| SNP_P4_175546_32477 | NW_004517392.1 | Scaffold2445 | 32477                   | TT                              | AA              | 1947035122               |
| SNP_P4_175547_32478 | NW_004517392.1 | Scaffold2445 | 32478                   | AA                              | GG              | 1947035124               |
| SNP_P4_175548_300   | NW_004517393.1 | Scaffold2446 | 300                     | GG                              | AA              | 1947035126               |
| SNP_P4_175549_354   | NW_004517393.1 | Scaffold2446 | 354                     | CC                              | AA              | 1947035128               |
| SNP_P4_175550_5151  | NW_004517393.1 | Scaffold2446 | 5151                    | AA                              | TT              | 1947035131               |
| SNP_P4_175551_5237  | NW_004517393.1 | Scaffold2446 | 5237                    | CC                              | AA              | 1947035133               |
| SNP_P4_175552_5247  | NW_004517393.1 | Scaffold2446 | 5247                    | AA                              | TT              | 1947035135               |
| SNP_P4_175553_5989  | NW_004517393.1 | Scaffold2446 | 5989                    | AA                              | TT              | 1947035137               |
| SNP_P4_175554_6003  | NW_004517393.1 | Scaffold2446 | 6003                    | GG                              | AA              | 1947035139               |
| SNP_P4_175555_6023  | NW_004517393.1 | Scaffold2446 | 6023                    | TT                              | CC              | 1947035141               |
| SNP_P4_175556_6229  | NW_004517393.1 | Scaffold2446 | 6229                    | CC                              | AA              | 1947035143               |
| SNP_P4_175557_6274  | NW_004517393.1 | Scaffold2446 | 6274                    | AA                              | TT              | 1947035145               |
| SNP_P4_175558_6296  | NW_004517393.1 | Scaffold2446 | 6296                    | GG                              | AA              | 1947035147               |
| SNP_P4_175559_6308  | NW_004517393.1 | Scaffold2446 | 6308                    | GG                              | AA              | 1947035149               |
| SNP_P4_175560_6312  | NW_004517393.1 | Scaffold2446 | 6312                    | TT                              | AA              | 1947035151               |
| SNP_P4_175561_6347  | NW_004517393.1 | Scaffold2446 | 6347                    | CC                              | TT              | 1947035154               |
| SNP_P4_175562_6720  | NW_004517393.1 | Scaffold2446 | 6720                    | GG                              | CC              | 1947035156               |
| SNP_P4_175563_6728  | NW_004517393.1 | Scaffold2446 | 6728                    | TT                              | GG              | 1947035158               |
| SNP_P4_175564_6729  | NW_004517393.1 | Scaffold2446 | 6729                    | TT                              | AA              | 1947035160               |
| SNP_P4_175565_6772  | NW_004517393.1 | Scaffold2446 | 6772                    | AA                              | TT              | 1947035162               |
| SNP_P4_175566_6799  | NW_004517393.1 | Scaffold2446 | 6799                    | TT                              | CC              | 1947035164               |
| SNP_P4_175567_6820  | NW_004517393.1 | Scaffold2446 | 6820                    | TT                              | GG              | 1947035166               |
| SNP_P4_175568_6827  | NW_004517393.1 | Scaffold2446 | 6827                    | CC                              | GG              | 1947035168               |
| SNP_P4_175569_6866  | NW_004517393.1 | Scaffold2446 | 6866                    | TT                              | AA              | 1947035170               |

| SNPs IDs            | Chromosome IDs | Chromosomes  | Physical positions (bp) | CDC Frontier (Reference genome) | (ILWC46 & LPNB) | NCBI SNPdb Accession IDs |
|---------------------|----------------|--------------|-------------------------|---------------------------------|-----------------|--------------------------|
| SNP_P4_175570_6872  | NW_004517393.1 | Scaffold2446 | 6872                    | CC                              | AA              | 1947035172               |
| SNP_P4_175571_6984  | NW_004517393.1 | Scaffold2446 | 6984                    | TT                              | GG              | 1947035174               |
| SNP_P4_175573_9150  | NW_004517393.1 | Scaffold2446 | 9150                    | CC                              | AA              | 1947035176               |
| SNP_P4_175574_10077 | NW_004517393.1 | Scaffold2446 | 10077                   | TT                              | AA              | 1947035178               |
| SNP_P4_175575_10372 | NW_004517393.1 | Scaffold2446 | 10372                   | TT                              | CC              | 1947035180               |
| SNP_P4_175576_10393 | NW_004517393.1 | Scaffold2446 | 10393                   | AA                              | CC              | 1947035182               |
| SNP_P4_175577_13973 | NW_004517393.1 | Scaffold2446 | 13973                   | CC                              | AA              | 1947035184               |
| SNP_P4_175578_158   | NW_004517395.1 | Scaffold2450 | 158                     | CC                              | AA              | 1947035186               |
| SNP_P4_175579_438   | NW_004517395.1 | Scaffold2450 | 438                     | TT                              | AA              | 1947035188               |
| SNP_P4_175580_503   | NW_004517395.1 | Scaffold2450 | 503                     | TT                              | CC              | 1947035191               |
| SNP_P4_175581_4168  | NW_004517397.1 | Scaffold2455 | 4168                    | TT                              | CC              | 1947035193               |
| SNP_P4_175582_1835  | NW_004517398.1 | Scaffold2456 | 1835                    | TT                              | CC              | 1947035195               |
| SNP_P4_175583_6356  | NW_004517398.1 | Scaffold2456 | 6356                    | GG                              | AA              | 1947035197               |
| SNP_P4_175584_7976  | NW_004517398.1 | Scaffold2456 | 7976                    | GG                              | AA              | 1947035199               |
| SNP_P4_175585_1128  | NW_004517400.1 | Scaffold2458 | 1128                    | AA                              | GG              | 1947035201               |
| SNP_P4_175587_2123  | NW_004517400.1 | Scaffold2458 | 2123                    | AA                              | TT              | 1947035203               |
| SNP_P4_175588_20180 | NW_004517401.1 | Scaffold2459 | 20180                   | AA                              | CC              | 1947035205               |
| SNP_P4_175590_21669 | NW_004517401.1 | Scaffold2459 | 21669                   | TT                              | CC              | 1947035207               |
| SNP_P4_175591_21942 | NW_004517401.1 | Scaffold2459 | 21942                   | TT                              | GG              | 1947035209               |
| SNP_P4_175592_25301 | NW_004517401.1 | Scaffold2459 | 25301                   | CC                              | TT              | 1947035211               |
| SNP_P4_175593_28552 | NW_004517401.1 | Scaffold2459 | 28552                   | AA                              | CC              | 1947035213               |
| SNP_P4_175594_28597 | NW_004517401.1 | Scaffold2459 | 28597                   | AA                              | CC              | 1947035215               |
| SNP_P4_175595_35476 | NW_004517401.1 | Scaffold2459 | 35476                   | GG                              | TT              | 1947035217               |
| SNP_P4_175596_35616 | NW_004517401.1 | Scaffold2459 | 35616                   | AA                              | GG              | 1947035219               |
| SNP_P4_175597_37678 | NW_004517401.1 | Scaffold2459 | 37678                   | AA                              | GG              | 1947035221               |
| SNP_P4_175598_38105 | NW_004517401.1 | Scaffold2459 | 38105                   | TT                              | CC              | 1947035223               |
| SNP_P4_175599_41930 | NW_004517401.1 | Scaffold2459 | 41930                   | AA                              | GG              | 1947035225               |
| SNP_P4_175600_42218 | NW_004517401.1 | Scaffold2459 | 42218                   | AA                              | CC              | 1947035227               |
| SNP_P4_175602_42356 | NW_004517401.1 | Scaffold2459 | 42356                   | TT                              | GG              | 1947035229               |
| SNP_P4_175603_42397 | NW_004517401.1 | Scaffold2459 | 42397                   | AA                              | CC              | 1947035231               |
| SNP_P4_175604_42489 | NW_004517401.1 | Scaffold2459 | 42489                   | CC                              | GG              | 1947035233               |
| SNP_P4_175605_42531 | NW_004517401.1 | Scaffold2459 | 42531                   | TT                              | CC              | 1947035235               |
| SNP_P4_175606_42584 | NW_004517401.1 | Scaffold2459 | 42584                   | CC                              | TT              | 1947035237               |
| SNP_P4_175607_42613 | NW_004517401.1 | Scaffold2459 | 42613                   | CC                              | TT              | 1947035239               |
| SNP_P4_175608_42921 | NW_004517401.1 | Scaffold2459 | 42921                   | TT                              | AA              | 1947035242               |
| SNP_P4_175609_50880 | NW_004517401.1 | Scaffold2459 | 50880                   | GG                              | AA              | 1947035244               |
| SNP_P4_175610_50886 | NW_004517401.1 | Scaffold2459 | 50886                   | GG                              | AA              | 1947035246               |
| SNP_P4_175611_58077 | NW_004517401.1 | Scaffold2459 | 58077                   | AA                              | GG              | 1947035248               |
| SNP_P4_175612_58104 | NW_004517401.1 | Scaffold2459 | 58104                   | GG                              | AA              | 1947035250               |
| SNP_P4_175613_65579 | NW_004517401.1 | Scaffold2459 | 65579                   | TT                              | CC              | 1947035252               |
| SNP_P4_175614_66095 | NW_004517401.1 | Scaffold2459 | 66095                   | TT                              | CC              | 1947035254               |
| SNP_P4_175615_66099 | NW_004517401.1 | Scaffold2459 | 66099                   | AA                              | GG              | 1947035256               |

| SNPs IDs            | Chromosome IDs | Chromosomes  | Physical positions (bp) | CDC Frontier (Reference genome) | (ILWC46 & LPNB) | NCBI SNPdb Accession IDs |
|---------------------|----------------|--------------|-------------------------|---------------------------------|-----------------|--------------------------|
| SNP_P4_175616_66342 | NW_004517401.1 | Scaffold2459 | 66342                   | AA                              | GG              | 1947035258               |
| SNP_P4_175617_66397 | NW_004517401.1 | Scaffold2459 | 66397                   | CC                              | TT              | 1947035260               |
| SNP_P4_175618_72211 | NW_004517401.1 | Scaffold2459 | 72211                   | AA                              | GG              | 1947035262               |
| SNP_P4_175619_72230 | NW_004517401.1 | Scaffold2459 | 72230                   | CC                              | AA              | 1947035264               |
| SNP_P4_175620_72242 | NW_004517401.1 | Scaffold2459 | 72242                   | GG                              | TT              | 1947035266               |
| SNP_P4_175621_72283 | NW_004517401.1 | Scaffold2459 | 72283                   | CC                              | GG              | 1947035268               |
| SNP_P4_175622_72567 | NW_004517401.1 | Scaffold2459 | 72567                   | GG                              | TT              | 1947035270               |
| SNP_P4_175623_72571 | NW_004517401.1 | Scaffold2459 | 72571                   | GG                              | AA              | 1947035272               |
| SNP_P4_175624_72611 | NW_004517401.1 | Scaffold2459 | 72611                   | CC                              | TT              | 1947035274               |
| SNP_P4_175625_73416 | NW_004517401.1 | Scaffold2459 | 73416                   | GG                              | AA              | 1947035276               |
| SNP_P4_175627_80577 | NW_004517401.1 | Scaffold2459 | 80577                   | TT                              | CC              | 1947035278               |
| SNP_P4_175628_80838 | NW_004517401.1 | Scaffold2459 | 80838                   | CC                              | AA              | 1947035280               |
| SNP_P4_175629_679   | NW_004517403.1 | Scaffold2463 | 679                     | CC                              | TT              | 1947035282               |
| SNP_P4_175631_38    | NW_004517408.1 | Scaffold2470 | 38                      | GG                              | AA              | 1947035284               |
| SNP_P4_175632_7426  | NW_004517408.1 | Scaffold2470 | 7426                    | CC                              | AA              | 1947035286               |
| SNP_P4_175633_7446  | NW_004517408.1 | Scaffold2470 | 7446                    | AA                              | CC              | 1947035287               |
| SNP_P4_175634_10856 | NW_004517408.1 | Scaffold2470 | 10856                   | AA                              | GG              | 1947035289               |
| SNP_P4_175635_10933 | NW_004517408.1 | Scaffold2470 | 10933                   | AA                              | GG              | 1947035291               |
| SNP_P4_175636_10983 | NW_004517408.1 | Scaffold2470 | 10983                   | AA                              | TT              | 1947035293               |
| SNP_P4_175637_11297 | NW_004517408.1 | Scaffold2470 | 11297                   | AA                              | TT              | 1947035295               |
| SNP_P4_175638_11325 | NW_004517408.1 | Scaffold2470 | 11325                   | TT                              | CC              | 1947035297               |
| SNP_P4_175639_64    | NW_004517409.1 | Scaffold2471 | 64                      | CC                              | TT              | 1947035299               |
| SNP_P4_175640_65    | NW_004517409.1 | Scaffold2471 | 65                      | TT                              | GG              | 1947035301               |
| SNP_P4_175641_104   | NW_004517409.1 | Scaffold2471 | 104                     | CC                              | TT              | 1947035303               |
| SNP_P4_175642_115   | NW_004517409.1 | Scaffold2471 | 115                     | CC                              | TT              | 1947035305               |
| SNP_P4_175643_251   | NW_004517409.1 | Scaffold2471 | 251                     | TT                              | GG              | 1947035307               |
| SNP_P4_175644_281   | NW_004517409.1 | Scaffold2471 | 281                     | CC                              | AA              | 1947035309               |
| SNP_P4_175645_403   | NW_004517409.1 | Scaffold2471 | 403                     | CC                              | TT              | 1947035311               |
| SNP_P4_175646_537   | NW_004517409.1 | Scaffold2471 | 537                     | TT                              | GG              | 1947035313               |
| SNP_P4_175647_952   | NW_004517409.1 | Scaffold2471 | 952                     | CC                              | TT              | 1947035315               |
| SNP_P4_175648_959   | NW_004517409.1 | Scaffold2471 | 959                     | CC                              | TT              | 1947035317               |
| SNP_P4_175649_1516  | NW_004517409.1 | Scaffold2471 | 1516                    | CC                              | AA              | 1947035319               |
| SNP_P4_175650_2114  | NW_004517411.1 | Scaffold2473 | 2114                    | TT                              | GG              | 1947035321               |
| SNP_P4_175651_2169  | NW_004517411.1 | Scaffold2473 | 2169                    | CC                              | TT              | 1947035323               |
| SNP_P4_175652_2731  | NW_004517411.1 | Scaffold2473 | 2731                    | GG                              | CC              | 1947035325               |
| SNP_P4_175653_6417  | NW_004517411.1 | Scaffold2473 | 6417                    | CC                              | TT              | 1947035327               |
| SNP_P4_175654_6439  | NW_004517411.1 | Scaffold2473 | 6439                    | GG                              | AA              | 1947035329               |
| SNP_P4_175655_6471  | NW_004517411.1 | Scaffold2473 | 6471                    | CC                              | TT              | 1947035331               |
| SNP_P4_175656_6734  | NW_004517411.1 | Scaffold2473 | 6734                    | GG                              | AA              | 1947035333               |
| SNP_P4_175657_442   | NW_004517413.1 | Scaffold2477 | 442                     | AA                              | TT              | 1947035335               |
| SNP_P4_175658_15666 | NW_004517413.1 | Scaffold2477 | 15666                   | AA                              | TT              | 1947035337               |
| SNP_P4_175659_15723 | NW_004517413.1 | Scaffold2477 | 15723                   | GG                              | TT              | 1947035339               |

| SNPs IDs            | Chromosome IDs | Chromosomes  | Physical positions (bp) | CDC Frontier (Reference genome) | (ILWC46 & LPNB) | NCBI SNPdb Accession IDs |
|---------------------|----------------|--------------|-------------------------|---------------------------------|-----------------|--------------------------|
| SNP_P4_175660_15725 | NW_004517413.1 | Scaffold2477 | 15725                   | AA                              | TT              | 1947035341               |
| SNP_P4_175661_15727 | NW_004517413.1 | Scaffold2477 | 15727                   | CC                              | TT              | 1947035343               |
| SNP_P4_175662_15749 | NW_004517413.1 | Scaffold2477 | 15749                   | CC                              | TT              | 1947035345               |
| SNP_P4_175663_15849 | NW_004517413.1 | Scaffold2477 | 15849                   | TT                              | GG              | 1947035347               |
| SNP_P4_175664_15880 | NW_004517413.1 | Scaffold2477 | 15880                   | TT                              | AA              | 1947035349               |
| SNP_P4_175665_17705 | NW_004517413.1 | Scaffold2477 | 17705                   | CC                              | TT              | 1947035351               |
| SNP_P4_175666_17765 | NW_004517413.1 | Scaffold2477 | 17765                   | AA                              | CC              | 1947035353               |
| SNP_P4_175667_70    | NW_004517415.1 | Scaffold2482 | 70                      | TT                              | CC              | 1947035355               |
| SNP_P4_175668_315   | NW_004517415.1 | Scaffold2482 | 315                     | GG                              | AA              | 1947035357               |
| SNP_P4_175670_6184  | NW_004517415.1 | Scaffold2482 | 6184                    | TT                              | CC              | 1947035359               |
| SNP_P4_175671_6192  | NW_004517415.1 | Scaffold2482 | 6192                    | TT                              | CC              | 1947035361               |
| SNP_P4_175672_6661  | NW_004517415.1 | Scaffold2482 | 6661                    | GG                              | AA              | 1947035363               |
| SNP_P4_175673_8282  | NW_004517415.1 | Scaffold2482 | 8282                    | CC                              | TT              | 1947035365               |
| SNP_P4_175674_9061  | NW_004517415.1 | Scaffold2482 | 9061                    | AA                              | GG              | 1947035367               |
| SNP_P4_175675_9062  | NW_004517415.1 | Scaffold2482 | 9062                    | AA                              | GG              | 1947035369               |
| SNP_P4_175676_11066 | NW_004517415.1 | Scaffold2482 | 11066                   | TT                              | CC              | 1947035371               |
| SNP_P4_175677_11105 | NW_004517415.1 | Scaffold2482 | 11105                   | CC                              | TT              | 1947035373               |
| SNP_P4_175678_11671 | NW_004517415.1 | Scaffold2482 | 11671                   | AA                              | CC              | 1947035375               |
| SNP_P4_175679_11761 | NW_004517415.1 | Scaffold2482 | 11761                   | TT                              | GG              | 1947035377               |
| SNP_P4_175680_398   | NW_004517416.1 | Scaffold2483 | 398                     | CC                              | AA              | 1947035379               |
| SNP_P4_175681_755   | NW_004517416.1 | Scaffold2483 | 755                     | TT                              | AA              | 1947035381               |
| SNP_P4_175682_905   | NW_004517416.1 | Scaffold2483 | 905                     | TT                              | AA              | 1947035383               |
| SNP_P4_175683_1090  | NW_004517416.1 | Scaffold2483 | 1090                    | GG                              | TT              | 1947035385               |
| SNP_P4_175684_1138  | NW_004517416.1 | Scaffold2483 | 1138                    | AA                              | TT              | 1947035387               |
| SNP_P4_175685_1489  | NW_004517416.1 | Scaffold2483 | 1489                    | AA                              | GG              | 1947035389               |
| SNP_P4_175686_80    | NW_004517417.1 | Scaffold2484 | 80                      | AA                              | GG              | 1947035391               |
| SNP_P4_175687_274   | NW_004517417.1 | Scaffold2484 | 274                     | GG                              | CC              | 1947035393               |
| SNP_P4_175688_308   | NW_004517417.1 | Scaffold2484 | 308                     | CC                              | AA              | 1947035395               |
| SNP_P4_175689_310   | NW_004517417.1 | Scaffold2484 | 310                     | AA                              | TT              | 1947035397               |
| SNP_P4_175690_311   | NW_004517417.1 | Scaffold2484 | 311                     | TT                              | AA              | 1947035399               |
| SNP_P4_175691_343   | NW_004517417.1 | Scaffold2484 | 343                     | GG                              | TT              | 1947035401               |
| SNP_P4_175692_344   | NW_004517417.1 | Scaffold2484 | 344                     | AA                              | TT              | 1947035403               |
| SNP_P4_175693_356   | NW_004517417.1 | Scaffold2484 | 356                     | TT                              | CC              | 1947035405               |
| SNP_P4_175694_362   | NW_004517417.1 | Scaffold2484 | 362                     | GG                              | AA              | 1947035406               |
| SNP_P4_175695_2362  | NW_004517419.1 | Scaffold2486 | 2362                    | GG                              | TT              | 1947035408               |
| SNP_P4_175696_2393  | NW_004517419.1 | Scaffold2486 | 2393                    | CC                              | GG              | 1947035410               |
| SNP_P4_175697_2718  | NW_004517419.1 | Scaffold2486 | 2718                    | AA                              | TT              | 1947035412               |
| SNP_P4_175698_2929  | NW_004517419.1 | Scaffold2486 | 2929                    | GG                              | CC              | 1947035414               |
| SNP_P4_175699_7135  | NW_004517419.1 | Scaffold2486 | 7135                    | AA                              | CC              | 1947035416               |
| SNP_P4_175700_7210  | NW_004517419.1 | Scaffold2486 | 7210                    | TT                              | GG              | 1947035418               |
| SNP_P4_175701_7255  | NW_004517419.1 | Scaffold2486 | 7255                    | AA                              | CC              | 1947035420               |
| SNP_P4_175702_7287  | NW_004517419.1 | Scaffold2486 | 7287                    | GG                              | AA              | 1947035422               |

| SNPs IDs            | Chromosome IDs | Chromosomes  | Physical positions (bp) | CDC Frontier (Reference genome) | (ILWC46 & LPNB) | NCBI SNPdb Accession IDs |
|---------------------|----------------|--------------|-------------------------|---------------------------------|-----------------|--------------------------|
| SNP_P4_175703_7300  | NW_004517419.1 | Scaffold2486 | 7300                    | GG                              | AA              | 1947035423               |
| SNP_P4_175704_7521  | NW_004517419.1 | Scaffold2486 | 7521                    | GG                              | AA              | 1947035425               |
| SNP_P4_175705_7526  | NW_004517419.1 | Scaffold2486 | 7526                    | CC                              | TT              | 1947035427               |
| SNP_P4_175706_7553  | NW_004517419.1 | Scaffold2486 | 7553                    | GG                              | TT              | 1947035429               |
| SNP_P4_175707_7837  | NW_004517419.1 | Scaffold2486 | 7837                    | AA                              | CC              | 1947035431               |
| SNP_P4_175708_8099  | NW_004517419.1 | Scaffold2486 | 8099                    | GG                              | CC              | 1947035433               |
| SNP_P4_175709_8298  | NW_004517419.1 | Scaffold2486 | 8298                    | GG                              | AA              | 1947035435               |
| SNP_P4_175710_8714  | NW_004517419.1 | Scaffold2486 | 8714                    | CC                              | AA              | 1947035437               |
| SNP_P4_175711_9104  | NW_004517419.1 | Scaffold2486 | 9104                    | GG                              | CC              | 1947035439               |
| SNP_P4_175712_9721  | NW_004517419.1 | Scaffold2486 | 9721                    | GG                              | TT              | 1947035441               |
| SNP_P4_175713_11543 | NW_004517419.1 | Scaffold2486 | 11543                   | CC                              | GG              | 1947035443               |
| SNP_P4_175714_101   | NW_004517420.1 | Scaffold2487 | 101                     | CC                              | AA              | 1947035445               |
| SNP_P4_175715_159   | NW_004517420.1 | Scaffold2487 | 159                     | TT                              | CC              | 1947035447               |
| SNP_P4_175716_160   | NW_004517420.1 | Scaffold2487 | 160                     | GG                              | TT              | 1947035449               |
| SNP_P4_175717_410   | NW_004517420.1 | Scaffold2487 | 410                     | AA                              | GG              | 1947035451               |
| SNP_P4_175718_524   | NW_004517420.1 | Scaffold2487 | 524                     | AA                              | CC              | 1947035453               |
| SNP_P4_175719_931   | NW_004517420.1 | Scaffold2487 | 931                     | TT                              | CC              | 1947035455               |
| SNP_P4_175720_1571  | NW_004517420.1 | Scaffold2487 | 1571                    | AA                              | GG              | 1947035457               |
| SNP_P4_175721_1658  | NW_004517420.1 | Scaffold2487 | 1658                    | GG                              | AA              | 1947035459               |
| SNP_P4_175722_1799  | NW_004517420.1 | Scaffold2487 | 1799                    | TT                              | CC              | 1947035461               |
| SNP_P4_175723_1881  | NW_004517420.1 | Scaffold2487 | 1881                    | GG                              | AA              | 1947035463               |
| SNP_P4_175724_1909  | NW_004517420.1 | Scaffold2487 | 1909                    | AA                              | GG              | 1947035465               |
| SNP_P4_175725_2000  | NW_004517420.1 | Scaffold2487 | 2000                    | GG                              | AA              | 1947035467               |
| SNP_P4_175726_2008  | NW_004517420.1 | Scaffold2487 | 2008                    | AA                              | GG              | 1947035469               |
| SNP_P4_175727_2027  | NW_004517420.1 | Scaffold2487 | 2027                    | CC                              | TT              | 1947035471               |
| SNP_P4_175728_2034  | NW_004517420.1 | Scaffold2487 | 2034                    | GG                              | AA              | 1947035473               |
| SNP_P4_175729_2080  | NW_004517420.1 | Scaffold2487 | 2080                    | CC                              | TT              | 1947035475               |
| SNP_P4_175730_6023  | NW_004517420.1 | Scaffold2487 | 6023                    | AA                              | TT              | 1947035477               |
| SNP_P4_175731_6071  | NW_004517420.1 | Scaffold2487 | 6071                    | TT                              | CC              | 1947035479               |
| SNP_P4_175732_6117  | NW_004517420.1 | Scaffold2487 | 6117                    | TT                              | CC              | 1947035481               |
| SNP_P4_175733_6244  | NW_004517420.1 | Scaffold2487 | 6244                    | GG                              | TT              | 1947035483               |
| SNP_P4_175734_6256  | NW_004517420.1 | Scaffold2487 | 6256                    | AA                              | CC              | 1947035485               |
| SNP_P4_175735_6422  | NW_004517420.1 | Scaffold2487 | 6422                    | TT                              | CC              | 1947035487               |
| SNP_P4_175736_6429  | NW_004517420.1 | Scaffold2487 | 6429                    | CC                              | TT              | 1947035489               |
| SNP_P4_175737_6435  | NW_004517420.1 | Scaffold2487 | 6435                    | CC                              | AA              | 1947035491               |
| SNP_P4_175738_6437  | NW_004517420.1 | Scaffold2487 | 6437                    | AA                              | TT              | 1947035493               |
| SNP_P4_175739_6444  | NW_004517420.1 | Scaffold2487 | 6444                    | CC                              | TT              | 1947035495               |
| SNP_P4_175740_6451  | NW_004517420.1 | Scaffold2487 | 6451                    | TT                              | AA              | 1947035496               |
| SNP_P4_175741_64    | NW_004517422.1 | Scaffold2489 | 64                      | CC                              | TT              | 1947035498               |
| SNP_P4_175742_66    | NW_004517422.1 | Scaffold2489 | 66                      | CC                              | GG              | 1947035500               |
| SNP_P4_175743_1772  | NW_004517422.1 | Scaffold2489 | 1772                    | CC                              | AA              | 1947035502               |
| SNP_P4_175744_2021  | NW_004517422.1 | Scaffold2489 | 2021                    | TT                              | AA              | 1947035504               |

| SNPs IDs            | Chromosome IDs | Chromosomes  | Physical positions (bp) | CDC Frontier (Reference genome) | (ILWC46 & LPNB) | NCBI SNPdb Accession IDs |
|---------------------|----------------|--------------|-------------------------|---------------------------------|-----------------|--------------------------|
| SNP_P4_175745_2029  | NW_004517422.1 | Scaffold2489 | 2029                    | GG                              | AA              | 1947035506               |
| SNP_P4_175746_2051  | NW_004517422.1 | Scaffold2489 | 2051                    | AA                              | CC              | 1947035508               |
| SNP_P4_175749_2123  | NW_004517422.1 | Scaffold2489 | 2123                    | AA                              | GG              | 1947035510               |
| SNP_P4_175750_2185  | NW_004517422.1 | Scaffold2489 | 2185                    | TT                              | AA              | 1947035512               |
| SNP_P4_175751_5795  | NW_004517424.1 | Scaffold2491 | 5795                    | AA                              | GG              | 1947035514               |
| SNP_P4_175752_6132  | NW_004517424.1 | Scaffold2491 | 6132                    | TT                              | CC              | 1947035516               |
| SNP_P4_175754_6363  | NW_004517424.1 | Scaffold2491 | 6363                    | CC                              | TT              | 1947035518               |
| SNP_P4_175755_6501  | NW_004517424.1 | Scaffold2491 | 6501                    | GG                              | AA              | 1947035520               |
| SNP_P4_175756_6504  | NW_004517424.1 | Scaffold2491 | 6504                    | AA                              | CC              | 1947035522               |
| SNP_P4_175757_6586  | NW_004517424.1 | Scaffold2491 | 6586                    | CC                              | TT              | 1947035524               |
| SNP_P4_175758_6606  | NW_004517424.1 | Scaffold2491 | 6606                    | TT                              | CC              | 1947035526               |
| SNP_P4_175759_6937  | NW_004517424.1 | Scaffold2491 | 6937                    | AA                              | TT              | 1947035528               |
| SNP_P4_175760_6939  | NW_004517424.1 | Scaffold2491 | 6939                    | AA                              | CC              | 1947035530               |
| SNP_P4_175761_7182  | NW_004517424.1 | Scaffold2491 | 7182                    | AA                              | GG              | 1947035531               |
| SNP_P4_175762_7221  | NW_004517424.1 | Scaffold2491 | 7221                    | AA                              | GG              | 1947035533               |
| SNP_P4_175763_7552  | NW_004517424.1 | Scaffold2491 | 7552                    | CC                              | AA              | 1947035535               |
| SNP_P4_175764_8109  | NW_004517424.1 | Scaffold2491 | 8109                    | AA                              | TT              | 1947035537               |
| SNP_P4_175765_239   | NW_004517425.1 | Scaffold2492 | 239                     | CC                              | TT              | 1947035539               |
| SNP_P4_175766_590   | NW_004517425.1 | Scaffold2492 | 590                     | TT                              | CC              | 1947035542               |
| SNP_P4_175767_628   | NW_004517425.1 | Scaffold2492 | 628                     | GG                              | TT              | 1947035544               |
| SNP_P4_175768_769   | NW_004517425.1 | Scaffold2492 | 769                     | AA                              | GG              | 1947035546               |
| SNP_P4_175769_20129 | NW_004517426.1 | Scaffold2493 | 20129                   | TT                              | CC              | 1947035548               |
| SNP_P4_175770_665   | NW_004517430.1 | Scaffold2497 | 665                     | CC                              | GG              | 1947035550               |
| SNP_P4_175771_744   | NW_004517430.1 | Scaffold2497 | 744                     | AA                              | CC              | 1947035553               |
| SNP_P4_175772_756   | NW_004517430.1 | Scaffold2497 | 756                     | TT                              | AA              | 1947035555               |
| SNP_P4_175773_765   | NW_004517430.1 | Scaffold2497 | 765                     | AA                              | GG              | 1947035557               |
| SNP_P4_175774_947   | NW_004517430.1 | Scaffold2497 | 947                     | AA                              | GG              | 1947035559               |
| SNP_P4_175775_963   | NW_004517430.1 | Scaffold2497 | 963                     | TT                              | AA              | 1947035561               |
| SNP_P4_175776_1252  | NW_004517430.1 | Scaffold2497 | 1252                    | GG                              | AA              | 1947035563               |
| SNP_P4_175777_1284  | NW_004517430.1 | Scaffold2497 | 1284                    | AA                              | GG              | 1947035565               |
| SNP_P4_175778_1314  | NW_004517430.1 | Scaffold2497 | 1314                    | AA                              | GG              | 1947035567               |
| SNP_P4_175779_712   | NW_004517431.1 | Scaffold2498 | 712                     | AA                              | GG              | 1947035570               |
| SNP_P4_175780_1133  | NW_004517431.1 | Scaffold2498 | 1133                    | AA                              | GG              | 1947035572               |
| SNP_P4_175781_14227 | NW_004517431.1 | Scaffold2498 | 14227                   | TT                              | CC              | 1947035574               |
| SNP_P4_175782_14608 | NW_004517431.1 | Scaffold2498 | 14608                   | TT                              | CC              | 1947035576               |
| SNP_P4_175784_33652 | NW_004517431.1 | Scaffold2498 | 33652                   | GG                              | AA              | 1947035578               |
| SNP_P4_175785_33654 | NW_004517431.1 | Scaffold2498 | 33654                   | AA                              | GG              | 1947035580               |
| SNP_P4_175788_16229 | NW_004517433.1 | Scaffold2501 | 16229                   | AA                              | GG              | 1947035582               |
| SNP_P4_175789_16239 | NW_004517433.1 | Scaffold2501 | 16239                   | CC                              | AA              | 1947035584               |
| SNP_P4_175790_16249 | NW_004517433.1 | Scaffold2501 | 16249                   | TT                              | CC              | 1947035586               |
| SNP_P4_175791_4895  | NW_004517435.1 | Scaffold2504 | 4895                    | CC                              | GG              | 1947035588               |
| SNP_P4_175792_748   | NW_004517436.1 | Scaffold2505 | 748                     | CC                              | TT              | 1947035590               |



| SNPs IDs            | Chromosome IDs | Chromosomes  | Physical positions (bp) | CDC Frontier (Reference genome) | (ILWC46 & LPNB) | NCBI SNPdb Accession IDs |
|---------------------|----------------|--------------|-------------------------|---------------------------------|-----------------|--------------------------|
| SNP_P4_175793_787   | NW_004517436.1 | Scaffold2505 | 787                     | AA                              | GG              | 1947035592               |
| SNP_P4_175794_794   | NW_004517436.1 | Scaffold2505 | 794                     | TT                              | GG              | 1947035594               |
| SNP_P4_175795_796   | NW_004517436.1 | Scaffold2505 | 796                     | AA                              | GG              | 1947035596               |
| SNP_P4_175796_839   | NW_004517436.1 | Scaffold2505 | 839                     | CC                              | AA              | 1947035598               |
| SNP_P4_175797_895   | NW_004517436.1 | Scaffold2505 | 895                     | TT                              | AA              | 1947035599               |
| SNP_P4_175798_1056  | NW_004517436.1 | Scaffold2505 | 1056                    | TT                              | GG              | 1947035601               |
| SNP_P4_175799_1078  | NW_004517436.1 | Scaffold2505 | 1078                    | AA                              | GG              | 1947035603               |
| SNP_P4_175800_1329  | NW_004517436.1 | Scaffold2505 | 1329                    | TT                              | AA              | 1947035605               |
| SNP_P4_175801_1377  | NW_004517436.1 | Scaffold2505 | 1377                    | TT                              | CC              | 1947035607               |
| SNP_P4_175802_1424  | NW_004517436.1 | Scaffold2505 | 1424                    | AA                              | TT              | 1947035609               |
| SNP_P4_175804_1785  | NW_004517436.1 | Scaffold2505 | 1785                    | TT                              | AA              | 1947035611               |
| SNP_P4_175806_1924  | NW_004517436.1 | Scaffold2505 | 1924                    | TT                              | AA              | 1947035613               |
| SNP_P4_175807_2133  | NW_004517436.1 | Scaffold2505 | 2133                    | AA                              | CC              | 1947035615               |
| SNP_P4_175808_2196  | NW_004517436.1 | Scaffold2505 | 2196                    | TT                              | CC              | 1947035617               |
| SNP_P4_175809_2231  | NW_004517436.1 | Scaffold2505 | 2231                    | CC                              | TT              | 1947035619               |
| SNP_P4_175810_2314  | NW_004517436.1 | Scaffold2505 | 2314                    | AA                              | GG              | 1947035621               |
| SNP_P4_175811_2342  | NW_004517436.1 | Scaffold2505 | 2342                    | GG                              | AA              | 1947035623               |
| SNP_P4_175812_2353  | NW_004517436.1 | Scaffold2505 | 2353                    | AA                              | GG              | 1947035625               |
| SNP_P4_175813_2354  | NW_004517436.1 | Scaffold2505 | 2354                    | AA                              | TT              | 1947035627               |
| SNP_P4_175814_2368  | NW_004517436.1 | Scaffold2505 | 2368                    | AA                              | GG              | 1947035629               |
| SNP_P4_175815_2396  | NW_004517436.1 | Scaffold2505 | 2396                    | TT                              | CC              | 1947035631               |
| SNP_P4_175816_2426  | NW_004517436.1 | Scaffold2505 | 2426                    | GG                              | TT              | 1947035633               |
| SNP_P4_175817_2489  | NW_004517436.1 | Scaffold2505 | 2489                    | AA                              | TT              | 1947035635               |
| SNP_P4_175818_2499  | NW_004517436.1 | Scaffold2505 | 2499                    | GG                              | CC              | 1947035637               |
| SNP_P4_175819_2501  | NW_004517436.1 | Scaffold2505 | 2501                    | GG                              | AA              | 1947035639               |
| SNP_P4_175820_2540  | NW_004517436.1 | Scaffold2505 | 2540                    | CC                              | AA              | 1947035641               |
| SNP_P4_175821_2542  | NW_004517436.1 | Scaffold2505 | 2542                    | TT                              | CC              | 1947035642               |
| SNP_P4_175822_2566  | NW_004517436.1 | Scaffold2505 | 2566                    | TT                              | CC              | 1947035644               |
| SNP_P4_175823_2787  | NW_004517436.1 | Scaffold2505 | 2787                    | TT                              | AA              | 1947035646               |
| SNP_P4_175824_2798  | NW_004517436.1 | Scaffold2505 | 2798                    | GG                              | CC              | 1947035648               |
| SNP_P4_175825_2841  | NW_004517436.1 | Scaffold2505 | 2841                    | TT                              | AA              | 1947035650               |
| SNP_P4_175826_2846  | NW_004517436.1 | Scaffold2505 | 2846                    | AA                              | TT              | 1947035652               |
| SNP_P4_175827_276   | NW_004517437.1 | Scaffold2506 | 276                     | TT                              | AA              | 1947035654               |
| SNP_P4_175828_291   | NW_004517437.1 | Scaffold2506 | 291                     | TT                              | CC              | 1947035656               |
| SNP_P4_175829_9883  | NW_004517437.1 | Scaffold2506 | 9883                    | TT                              | GG              | 1947035658               |
| SNP_P4_175830_10382 | NW_004517437.1 | Scaffold2506 | 10382                   | AA                              | GG              | 1947035660               |
| SNP_P4_175831_701   | NW_004517439.1 | Scaffold2511 | 701                     | AA                              | TT              | 1947035661               |
| SNP_P4_175832_710   | NW_004517439.1 | Scaffold2511 | 710                     | AA                              | TT              | 1947035663               |
| SNP_P4_175833_1230  | NW_004517439.1 | Scaffold2511 | 1230                    | AA                              | GG              | 1947035665               |
| SNP_P4_175834_1290  | NW_004517439.1 | Scaffold2511 | 1290                    | AA                              | CC              | 1947035667               |
| SNP_P4_175835_1294  | NW_004517439.1 | Scaffold2511 | 1294                    | CC                              | TT              | 1947035669               |
| SNP_P4_175836_1564  | NW_004517439.1 | Scaffold2511 | 1564                    | GG                              | TT              | 1947035671               |

| SNPs IDs            | Chromosome IDs | Chromosomes  | Physical positions (bp) | CDC Frontier (Reference genome) | (ILWC46 & LPNB) | NCBI SNPdb Accession IDs |
|---------------------|----------------|--------------|-------------------------|---------------------------------|-----------------|--------------------------|
| SNP_P4_175837_1565  | NW_004517439.1 | Scaffold2511 | 1565                    | AA                              | GG              | 1947035673               |
| SNP_P4_175838_1888  | NW_004517439.1 | Scaffold2511 | 1888                    | CC                              | GG              | 1947035675               |
| SNP_P4_175839_1900  | NW_004517439.1 | Scaffold2511 | 1900                    | AA                              | GG              | 1947035677               |
| SNP_P4_175840_2008  | NW_004517439.1 | Scaffold2511 | 2008                    | TT                              | CC              | 1947035679               |
| SNP_P4_175841_2605  | NW_004517439.1 | Scaffold2511 | 2605                    | CC                              | TT              | 1947035681               |
| SNP_P4_175842_2966  | NW_004517439.1 | Scaffold2511 | 2966                    | GG                              | AA              | 1947035683               |
| SNP_P4_175843_3048  | NW_004517439.1 | Scaffold2511 | 3048                    | CC                              | TT              | 1947035684               |
| SNP_P4_175844_3204  | NW_004517439.1 | Scaffold2511 | 3204                    | AA                              | GG              | 1947035686               |
| SNP_P4_175845_3234  | NW_004517439.1 | Scaffold2511 | 3234                    | CC                              | GG              | 1947035688               |
| SNP_P4_175846_3419  | NW_004517439.1 | Scaffold2511 | 3419                    | TT                              | GG              | 1947035690               |
| SNP_P4_175847_3461  | NW_004517439.1 | Scaffold2511 | 3461                    | TT                              | CC              | 1947035692               |
| SNP_P4_175848_3736  | NW_004517439.1 | Scaffold2511 | 3736                    | GG                              | TT              | 1947035694               |
| SNP_P4_175849_3878  | NW_004517439.1 | Scaffold2511 | 3878                    | CC                              | TT              | 1947035696               |
| SNP_P4_175850_4473  | NW_004517439.1 | Scaffold2511 | 4473                    | TT                              | CC              | 1947035698               |
| SNP_P4_175851_4545  | NW_004517439.1 | Scaffold2511 | 4545                    | GG                              | TT              | 1947035700               |
| SNP_P4_175852_4674  | NW_004517439.1 | Scaffold2511 | 4674                    | AA                              | GG              | 1947035702               |
| SNP_P4_175853_4683  | NW_004517439.1 | Scaffold2511 | 4683                    | GG                              | TT              | 1947035704               |
| SNP_P4_175854_4760  | NW_004517439.1 | Scaffold2511 | 4760                    | AA                              | GG              | 1947035706               |
| SNP_P4_175855_4878  | NW_004517439.1 | Scaffold2511 | 4878                    | CC                              | TT              | 1947035708               |
| SNP_P4_175856_4917  | NW_004517439.1 | Scaffold2511 | 4917                    | GG                              | CC              | 1947035709               |
| SNP_P4_175857_4932  | NW_004517439.1 | Scaffold2511 | 4932                    | CC                              | AA              | 1947035711               |
| SNP_P4_175858_5036  | NW_004517439.1 | Scaffold2511 | 5036                    | GG                              | AA              | 1947035713               |
| SNP_P4_175860_5266  | NW_004517439.1 | Scaffold2511 | 5266                    | TT                              | CC              | 1947035715               |
| SNP_P4_175861_5286  | NW_004517439.1 | Scaffold2511 | 5286                    | CC                              | TT              | 1947035717               |
| SNP_P4_175862_5287  | NW_004517439.1 | Scaffold2511 | 5287                    | TT                              | CC              | 1947035719               |
| SNP_P4_175863_5401  | NW_004517439.1 | Scaffold2511 | 5401                    | TT                              | CC              | 1947035721               |
| SNP_P4_175864_5483  | NW_004517439.1 | Scaffold2511 | 5483                    | TT                              | CC              | 1947035723               |
| SNP_P4_175865_5547  | NW_004517439.1 | Scaffold2511 | 5547                    | AA                              | TT              | 1947035725               |
| SNP_P4_175866_5955  | NW_004517439.1 | Scaffold2511 | 5955                    | GG                              | AA              | 1947035727               |
| SNP_P4_175867_6333  | NW_004517439.1 | Scaffold2511 | 6333                    | AA                              | GG              | 1947035729               |
| SNP_P4_175868_6385  | NW_004517439.1 | Scaffold2511 | 6385                    | GG                              | TT              | 1947035731               |
| SNP_P4_175869_6570  | NW_004517439.1 | Scaffold2511 | 6570                    | AA                              | TT              | 1947035733               |
| SNP_P4_175870_6698  | NW_004517439.1 | Scaffold2511 | 6698                    | GG                              | AA              | 1947035735               |
| SNP_P4_175871_7373  | NW_004517439.1 | Scaffold2511 | 7373                    | GG                              | AA              | 1947035737               |
| SNP_P4_175872_7375  | NW_004517439.1 | Scaffold2511 | 7375                    | CC                              | TT              | 1947035739               |
| SNP_P4_175874_10580 | NW_004517439.1 | Scaffold2511 | 10580                   | GG                              | AA              | 1947035741               |
| SNP_P4_175875_10770 | NW_004517439.1 | Scaffold2511 | 10770                   | CC                              | TT              | 1947035743               |
| SNP_P4_175876_16892 | NW_004517439.1 | Scaffold2511 | 16892                   | CC                              | TT              | 1947035745               |
| SNP_P4_175877_17153 | NW_004517439.1 | Scaffold2511 | 17153                   | TT                              | CC              | 1947035747               |
| SNP_P4_175878_17181 | NW_004517439.1 | Scaffold2511 | 17181                   | CC                              | TT              | 1947035749               |
| SNP_P4_175879_24730 | NW_004517439.1 | Scaffold2511 | 24730                   | AA                              | GG              | 1947035751               |
| SNP_P4_175880_24950 | NW_004517439.1 | Scaffold2511 | 24950                   | GG                              | TT              | 1947035753               |

| SNPs IDs            | Chromosome IDs | Chromosomes  | Physical positions (bp) | CDC Frontier (Reference genome) | (ILWC46 & LPNB) | NCBI SNPdb Accession IDs |
|---------------------|----------------|--------------|-------------------------|---------------------------------|-----------------|--------------------------|
| SNP_P4_175881_24997 | NW_004517439.1 | Scaffold2511 | 24997                   | CC                              | TT              | 1947035755               |
| SNP_P4_175882_24999 | NW_004517439.1 | Scaffold2511 | 24999                   | AA                              | GG              | 1947035757               |
| SNP_P4_175883_25029 | NW_004517439.1 | Scaffold2511 | 25029                   | AA                              | GG              | 1947035759               |
| SNP_P4_175884_25055 | NW_004517439.1 | Scaffold2511 | 25055                   | TT                              | CC              | 1947035761               |
| SNP_P4_175885_25064 | NW_004517439.1 | Scaffold2511 | 25064                   | AA                              | GG              | 1947035763               |
| SNP_P4_175886_25094 | NW_004517439.1 | Scaffold2511 | 25094                   | TT                              | AA              | 1947035765               |
| SNP_P4_175887_25095 | NW_004517439.1 | Scaffold2511 | 25095                   | TT                              | CC              | 1947035767               |
| SNP_P4_175888_25100 | NW_004517439.1 | Scaffold2511 | 25100                   | GG                              | AA              | 1947035769               |
| SNP_P4_175889_25118 | NW_004517439.1 | Scaffold2511 | 25118                   | TT                              | CC              | 1947035771               |
| SNP_P4_175890_30596 | NW_004517439.1 | Scaffold2511 | 30596                   | GG                              | CC              | 1947035773               |
| SNP_P4_175891_30610 | NW_004517439.1 | Scaffold2511 | 30610                   | AA                              | TT              | 1947035775               |
| SNP_P4_175892_30634 | NW_004517439.1 | Scaffold2511 | 30634                   | AA                              | GG              | 1947035777               |
| SNP_P4_175893_30635 | NW_004517439.1 | Scaffold2511 | 30635                   | AA                              | GG              | 1947035779               |
| SNP_P4_175894_30636 | NW_004517439.1 | Scaffold2511 | 30636                   | AA                              | TT              | 1947035781               |
| SNP_P4_175895_30736 | NW_004517439.1 | Scaffold2511 | 30736                   | GG                              | AA              | 1947035783               |
| SNP_P4_175896_33354 | NW_004517439.1 | Scaffold2511 | 33354                   | GG                              | AA              | 1947035785               |
| SNP_P4_175897_35526 | NW_004517439.1 | Scaffold2511 | 35526                   | CC                              | TT              | 1947035787               |
| SNP_P4_175898_35536 | NW_004517439.1 | Scaffold2511 | 35536                   | GG                              | AA              | 1947035789               |
| SNP_P4_175899_35550 | NW_004517439.1 | Scaffold2511 | 35550                   | GG                              | AA              | 1947035791               |
| SNP_P4_175900_59604 | NW_004517439.1 | Scaffold2511 | 59604                   | TT                              | CC              | 1947035793               |
| SNP_P4_175901_59662 | NW_004517439.1 | Scaffold2511 | 59662                   | TT                              | AA              | 1947035797               |
| SNP_P4_175902_59673 | NW_004517439.1 | Scaffold2511 | 59673                   | TT                              | CC              | 1947035804               |
| SNP_P4_175903_60505 | NW_004517439.1 | Scaffold2511 | 60505                   | GG                              | AA              | 1947035808               |
| SNP_P4_175904_60654 | NW_004517439.1 | Scaffold2511 | 60654                   | AA                              | GG              | 1947035810               |
| SNP_P4_175905_60845 | NW_004517439.1 | Scaffold2511 | 60845                   | AA                              | TT              | 1947035812               |
| SNP_P4_175906_60890 | NW_004517439.1 | Scaffold2511 | 60890                   | GG                              | AA              | 1947035814               |
| SNP_P4_175907_60978 | NW_004517439.1 | Scaffold2511 | 60978                   | CC                              | GG              | 1947035816               |
| SNP_P4_175908_61012 | NW_004517439.1 | Scaffold2511 | 61012                   | CC                              | TT              | 1947035818               |
| SNP_P4_175909_61072 | NW_004517439.1 | Scaffold2511 | 61072                   | GG                              | AA              | 1947035820               |
| SNP_P4_175910_61084 | NW_004517439.1 | Scaffold2511 | 61084                   | GG                              | CC              | 1947035822               |
| SNP_P4_175911_61106 | NW_004517439.1 | Scaffold2511 | 61106                   | GG                              | CC              | 1947035824               |
| SNP_P4_175912_61145 | NW_004517439.1 | Scaffold2511 | 61145                   | CC                              | TT              | 1947035826               |
| SNP_P4_175913_61239 | NW_004517439.1 | Scaffold2511 | 61239                   | CC                              | GG              | 1947035828               |
| SNP_P4_175914_61830 | NW_004517439.1 | Scaffold2511 | 61830                   | GG                              | CC              | 1947035830               |
| SNP_P4_175915_61875 | NW_004517439.1 | Scaffold2511 | 61875                   | AA                              | CC              | 1947035832               |
| SNP_P4_175916_62086 | NW_004517439.1 | Scaffold2511 | 62086                   | AA                              | GG              | 1947035834               |
| SNP_P4_175917_62101 | NW_004517439.1 | Scaffold2511 | 62101                   | TT                              | GG              | 1947035836               |
| SNP_P4_175918_62163 | NW_004517439.1 | Scaffold2511 | 62163                   | TT                              | AA              | 1947035838               |
| SNP_P4_175919_62221 | NW_004517439.1 | Scaffold2511 | 62221                   | AA                              | GG              | 1947035840               |
| SNP_P4_175920_62241 | NW_004517439.1 | Scaffold2511 | 62241                   | GG                              | AA              | 1947035842               |
| SNP_P4_175921_62244 | NW_004517439.1 | Scaffold2511 | 62244                   | GG                              | TT              | 1947035844               |
| SNP_P4_175922_62260 | NW_004517439.1 | Scaffold2511 | 62260                   | GG                              | AA              | 1947035846               |

| SNPs IDs            | Chromosome IDs | Chromosomes  | Physical positions (bp) | CDC Frontier (Reference genome) | (ILWC46 & LPNB) | NCBI SNPdb Accession IDs |
|---------------------|----------------|--------------|-------------------------|---------------------------------|-----------------|--------------------------|
| SNP_P4_175923_62276 | NW_004517439.1 | Scaffold2511 | 62276                   | TT                              | AA              | 1947035848               |
| SNP_P4_175924_62337 | NW_004517439.1 | Scaffold2511 | 62337                   | GG                              | AA              | 1947035850               |
| SNP_P4_175925_62523 | NW_004517439.1 | Scaffold2511 | 62523                   | TT                              | CC              | 1947035852               |
| SNP_P4_175926_62572 | NW_004517439.1 | Scaffold2511 | 62572                   | GG                              | TT              | 1947035854               |
| SNP_P4_175927_64258 | NW_004517439.1 | Scaffold2511 | 64258                   | TT                              | GG              | 1947035856               |
| SNP_P4_175928_64315 | NW_004517439.1 | Scaffold2511 | 64315                   | TT                              | AA              | 1947035858               |
| SNP_P4_175929_64503 | NW_004517439.1 | Scaffold2511 | 64503                   | TT                              | CC              | 1947035860               |
| SNP_P4_175930_65457 | NW_004517439.1 | Scaffold2511 | 65457                   | AA                              | GG              | 1947035862               |
| SNP_P4_175931_65629 | NW_004517439.1 | Scaffold2511 | 65629                   | TT                              | AA              | 1947035864               |
| SNP_P4_175932_66002 | NW_004517439.1 | Scaffold2511 | 66002                   | TT                              | GG              | 1947035866               |
| SNP_P4_175933_66136 | NW_004517439.1 | Scaffold2511 | 66136                   | TT                              | CC              | 1947035868               |
| SNP_P4_175934_66183 | NW_004517439.1 | Scaffold2511 | 66183                   | AA                              | TT              | 1947035871               |
| SNP_P4_175935_66316 | NW_004517439.1 | Scaffold2511 | 66316                   | GG                              | AA              | 1947035873               |
| SNP_P4_175936_66384 | NW_004517439.1 | Scaffold2511 | 66384                   | AA                              | CC              | 1947035875               |
| SNP_P4_175937_66443 | NW_004517439.1 | Scaffold2511 | 66443                   | GG                              | AA              | 1947035877               |
| SNP_P4_175938_67437 | NW_004517439.1 | Scaffold2511 | 67437                   | AA                              | TT              | 1947035879               |
| SNP_P4_175939_424   | NW_004517440.1 | Scaffold2512 | 424                     | TT                              | AA              | 1947035881               |
| SNP_P4_175940_445   | NW_004517440.1 | Scaffold2512 | 445                     | AA                              | TT              | 1947035883               |
| SNP_P4_175941_448   | NW_004517440.1 | Scaffold2512 | 448                     | AA                              | GG              | 1947035885               |
| SNP_P4_175942_474   | NW_004517440.1 | Scaffold2512 | 474                     | TT                              | AA              | 1947035887               |
| SNP_P4_175943_753   | NW_004517440.1 | Scaffold2512 | 753                     | GG                              | TT              | 1947035889               |
| SNP_P4_175944_26440 | NW_004517442.1 | Scaffold2516 | 26440                   | CC                              | TT              | 1947035891               |
| SNP_P4_175945_28704 | NW_004517442.1 | Scaffold2516 | 28704                   | TT                              | GG              | 1947035893               |
| SNP_P4_175946_28713 | NW_004517442.1 | Scaffold2516 | 28713                   | GG                              | AA              | 1947035895               |
| SNP_P4_175947_58385 | NW_004517442.1 | Scaffold2516 | 58385                   | AA                              | TT              | 1947035897               |
| SNP_P4_175948_87281 | NW_004517442.1 | Scaffold2516 | 87281                   | TT                              | CC              | 1947035899               |
| SNP_P4_175949_87284 | NW_004517442.1 | Scaffold2516 | 87284                   | GG                              | AA              | 1947035901               |
| SNP_P4_175950_87302 | NW_004517442.1 | Scaffold2516 | 87302                   | TT                              | CC              | 1947035903               |
| SNP_P4_175951_87319 | NW_004517442.1 | Scaffold2516 | 87319                   | TT                              | CC              | 1947035905               |
| SNP_P4_175952_87347 | NW_004517442.1 | Scaffold2516 | 87347                   | TT                              | CC              | 1947035907               |
| SNP_P4_175953_87353 | NW_004517442.1 | Scaffold2516 | 87353                   | TT                              | CC              | 1947035909               |
| SNP_P4_175954_87419 | NW_004517442.1 | Scaffold2516 | 87419                   | AA                              | GG              | 1947035911               |
| SNP_P4_175956_87668 | NW_004517442.1 | Scaffold2516 | 87668                   | TT                              | CC              | 1947035913               |
| SNP_P4_175957_87670 | NW_004517442.1 | Scaffold2516 | 87670                   | CC                              | TT              | 1947035915               |
| SNP_P4_175958_87727 | NW_004517442.1 | Scaffold2516 | 87727                   | TT                              | CC              | 1947035917               |
| SNP_P4_175959_87747 | NW_004517442.1 | Scaffold2516 | 87747                   | AA                              | GG              | 1947035919               |
| SNP_P4_175960_87792 | NW_004517442.1 | Scaffold2516 | 87792                   | TT                              | CC              | 1947035922               |
| SNP_P4_175961_98276 | NW_004517442.1 | Scaffold2516 | 98276                   | TT                              | AA              | 1947035924               |
| SNP_P4_175963_2315  | NW_004517445.1 | Scaffold2519 | 2315                    | CC                              | TT              | 1947035926               |
| SNP_P4_175964_2369  | NW_004517445.1 | Scaffold2519 | 2369                    | CC                              | AA              | 1947035928               |
| SNP_P4_175965_2428  | NW_004517445.1 | Scaffold2519 | 2428                    | AA                              | TT              | 1947035930               |
| SNP_P4_175966_30806 | NW_004517446.1 | Scaffold2521 | 30806                   | TT                              | CC              | 1947035932               |

| SNPs IDs            | Chromosome IDs | Chromosomes  | Physical positions (bp) | CDC Frontier (Reference genome) | (ILWC46 & LPNB) | NCBI SNPdb Accession IDs |
|---------------------|----------------|--------------|-------------------------|---------------------------------|-----------------|--------------------------|
| SNP_P4_175967_30835 | NW_004517446.1 | Scaffold2521 | 30835                   | TT                              | AA              | 1947035934               |
| SNP_P4_175968_31053 | NW_004517446.1 | Scaffold2521 | 31053                   | GG                              | AA              | 1947035936               |
| SNP_P4_175970_53757 | NW_004517446.1 | Scaffold2521 | 53757                   | AA                              | CC              | 1947035938               |
| SNP_P4_175971_53761 | NW_004517446.1 | Scaffold2521 | 53761                   | GG                              | CC              | 1947035940               |
| SNP_P4_175972_56794 | NW_004517446.1 | Scaffold2521 | 56794                   | TT                              | CC              | 1947035942               |
| SNP_P4_175973_57886 | NW_004517446.1 | Scaffold2521 | 57886                   | GG                              | AA              | 1947035944               |
| SNP_P4_175974_57932 | NW_004517446.1 | Scaffold2521 | 57932                   | GG                              | CC              | 1947035946               |
| SNP_P4_175975_75744 | NW_004517446.1 | Scaffold2521 | 75744                   | TT                              | CC              | 1947035948               |
| SNP_P4_175976_75781 | NW_004517446.1 | Scaffold2521 | 75781                   | TT                              | CC              | 1947035950               |
| SNP_P4_175977_301   | NW_004517447.1 | Scaffold2522 | 301                     | TT                              | GG              | 1947035952               |
| SNP_P4_175978_353   | NW_004517447.1 | Scaffold2522 | 353                     | GG                              | CC              | 1947035954               |
| SNP_P4_175979_4203  | NW_004517447.1 | Scaffold2522 | 4203                    | GG                              | AA              | 1947035956               |
| SNP_P4_175980_4262  | NW_004517447.1 | Scaffold2522 | 4262                    | AA                              | GG              | 1947035958               |
| SNP_P4_175981_4385  | NW_004517447.1 | Scaffold2522 | 4385                    | TT                              | CC              | 1947035960               |
| SNP_P4_175982_22679 | NW_004517447.1 | Scaffold2522 | 22679                   | GG                              | TT              | 1947035962               |
| SNP_P4_175983_21225 | NW_004517450.1 | Scaffold2526 | 21225                   | AA                              | GG              | 1947035964               |
| SNP_P4_175985_5161  | NW_004517452.1 | Scaffold2528 | 5161                    | TT                              | CC              | 1947035966               |
| SNP_P4_175986_5172  | NW_004517452.1 | Scaffold2528 | 5172                    | GG                              | TT              | 1947035968               |
| SNP_P4_175987_5183  | NW_004517452.1 | Scaffold2528 | 5183                    | TT                              | CC              | 1947035970               |
| SNP_P4_175988_13125 | NW_004517452.1 | Scaffold2528 | 13125                   | AA                              | TT              | 1947035972               |
| SNP_P4_175989_13211 | NW_004517452.1 | Scaffold2528 | 13211                   | AA                              | CC              | 1947035975               |
| SNP_P4_175990_13270 | NW_004517452.1 | Scaffold2528 | 13270                   | TT                              | AA              | 1947035977               |
| SNP_P4_175991_14771 | NW_004517452.1 | Scaffold2528 | 14771                   | CC                              | TT              | 1947035979               |
| SNP_P4_175992_19221 | NW_004517452.1 | Scaffold2528 | 19221                   | TT                              | GG              | 1947035981               |
| SNP_P4_175993_19236 | NW_004517452.1 | Scaffold2528 | 19236                   | AA                              | GG              | 1947035983               |
| SNP_P4_175994_19307 | NW_004517452.1 | Scaffold2528 | 19307                   | CC                              | TT              | 1947035985               |
| SNP_P4_175995_19335 | NW_004517452.1 | Scaffold2528 | 19335                   | CC                              | GG              | 1947035987               |
| SNP_P4_175996_19411 | NW_004517452.1 | Scaffold2528 | 19411                   | TT                              | CC              | 1947035989               |
| SNP_P4_175997_19462 | NW_004517452.1 | Scaffold2528 | 19462                   | GG                              | AA              | 1947035991               |
| SNP_P4_175998_19477 | NW_004517452.1 | Scaffold2528 | 19477                   | GG                              | AA              | 1947035993               |
| SNP_P4_176000_19566 | NW_004517452.1 | Scaffold2528 | 19566                   | GG                              | AA              | 1947035995               |
| SNP_P4_176001_19644 | NW_004517452.1 | Scaffold2528 | 19644                   | AA                              | TT              | 1947035997               |
| SNP_P4_176002_19679 | NW_004517452.1 | Scaffold2528 | 19679                   | AA                              | TT              | 1947035999               |
| SNP_P4_176003_19710 | NW_004517452.1 | Scaffold2528 | 19710                   | AA                              | CC              | 1947036001               |
| SNP_P4_176004_19711 | NW_004517452.1 | Scaffold2528 | 19711                   | TT                              | AA              | 1947036003               |
| SNP_P4_176005_19898 | NW_004517452.1 | Scaffold2528 | 19898                   | AA                              | GG              | 1947036005               |
| SNP_P4_176006_19903 | NW_004517452.1 | Scaffold2528 | 19903                   | GG                              | AA              | 1947036007               |
| SNP_P4_176007_19932 | NW_004517452.1 | Scaffold2528 | 19932                   | TT                              | GG              | 1947036010               |
| SNP_P4_176008_19946 | NW_004517452.1 | Scaffold2528 | 19946                   | GG                              | TT              | 1947036012               |
| SNP_P4_176009_25409 | NW_004517456.1 | Scaffold2534 | 25409                   | AA                              | GG              | 1947036014               |
| SNP_P4_176010_25554 | NW_004517456.1 | Scaffold2534 | 25554                   | CC                              | TT              | 1947036016               |
| SNP_P4_176011_27620 | NW_004517456.1 | Scaffold2534 | 27620                   | CC                              | TT              | 1947036018               |

| SNPs IDs            | Chromosome IDs | Chromosomes  | Physical positions (bp) | CDC Frontier (Reference genome) | (ILWC46 & LPNB) | NCBI SNPdb Accession IDs |
|---------------------|----------------|--------------|-------------------------|---------------------------------|-----------------|--------------------------|
| SNP_P4_176012_27714 | NW_004517456.1 | Scaffold2534 | 27714                   | AA                              | GG              | 1947036020               |
| SNP_P4_176013_27725 | NW_004517456.1 | Scaffold2534 | 27725                   | CC                              | TT              | 1947036022               |
| SNP_P4_176014_27945 | NW_004517456.1 | Scaffold2534 | 27945                   | AA                              | CC              | 1947036024               |
| SNP_P4_176015_27983 | NW_004517456.1 | Scaffold2534 | 27983                   | TT                              | AA              | 1947036026               |
| SNP_P4_176016_27999 | NW_004517456.1 | Scaffold2534 | 27999                   | AA                              | TT              | 1947036028               |
| SNP_P4_176017_28008 | NW_004517456.1 | Scaffold2534 | 28008                   | TT                              | CC              | 1947036030               |
| SNP_P4_176018_28104 | NW_004517456.1 | Scaffold2534 | 28104                   | TT                              | CC              | 1947036032               |
| SNP_P4_176019_28147 | NW_004517456.1 | Scaffold2534 | 28147                   | CC                              | GG              | 1947036034               |
| SNP_P4_176020_28150 | NW_004517456.1 | Scaffold2534 | 28150                   | AA                              | GG              | 1947036036               |
| SNP_P4_176021_28188 | NW_004517456.1 | Scaffold2534 | 28188                   | TT                              | CC              | 1947036038               |
| SNP_P4_176022_39014 | NW_004517456.1 | Scaffold2534 | 39014                   | TT                              | GG              | 1947036040               |
| SNP_P4_176023_39017 | NW_004517456.1 | Scaffold2534 | 39017                   | AA                              | CC              | 1947036042               |
| SNP_P4_176024_46163 | NW_004517456.1 | Scaffold2534 | 46163                   | CC                              | TT              | 1947036044               |
| SNP_P4_176025_46192 | NW_004517456.1 | Scaffold2534 | 46192                   | CC                              | TT              | 1947036046               |
| SNP_P4_176026_46202 | NW_004517456.1 | Scaffold2534 | 46202                   | AA                              | GG              | 1947036048               |
| SNP_P4_176027_46228 | NW_004517456.1 | Scaffold2534 | 46228                   | TT                              | CC              | 1947036050               |
| SNP_P4_176028_46245 | NW_004517456.1 | Scaffold2534 | 46245                   | AA                              | TT              | 1947036052               |
| SNP_P4_176029_46319 | NW_004517456.1 | Scaffold2534 | 46319                   | CC                              | AA              | 1947036054               |
| SNP_P4_176030_46442 | NW_004517456.1 | Scaffold2534 | 46442                   | AA                              | GG              | 1947036056               |
| SNP_P4_176031_62971 | NW_004517456.1 | Scaffold2534 | 62971                   | TT                              | AA              | 1947036058               |
| SNP_P4_176032_63511 | NW_004517456.1 | Scaffold2534 | 63511                   | CC                              | TT              | 1947036060               |
| SNP_P4_176033_427   | NW_004517457.1 | Scaffold2535 | 427                     | GG                              | TT              | 1947036062               |
| SNP_P4_176035_19714 | NW_004517457.1 | Scaffold2535 | 19714                   | AA                              | TT              | 1947036064               |
| SNP_P4_176036_19757 | NW_004517457.1 | Scaffold2535 | 19757                   | TT                              | AA              | 1947036066               |
| SNP_P4_176037_19900 | NW_004517457.1 | Scaffold2535 | 19900                   | TT                              | CC              | 1947036068               |
| SNP_P4_176038_20028 | NW_004517457.1 | Scaffold2535 | 20028                   | AA                              | GG              | 1947036070               |
| SNP_P4_176040_27874 | NW_004517457.1 | Scaffold2535 | 27874                   | AA                              | CC              | 1947036072               |
| SNP_P4_176041_27903 | NW_004517457.1 | Scaffold2535 | 27903                   | CC                              | AA              | 1947036074               |
| SNP_P4_176042_27929 | NW_004517457.1 | Scaffold2535 | 27929                   | GG                              | AA              | 1947036076               |
| SNP_P4_176043_27942 | NW_004517457.1 | Scaffold2535 | 27942                   | TT                              | GG              | 1947036078               |
| SNP_P4_176044_27971 | NW_004517457.1 | Scaffold2535 | 27971                   | CC                              | TT              | 1947036081               |
| SNP_P4_176045_30176 | NW_004517457.1 | Scaffold2535 | 30176                   | AA                              | CC              | 1947036083               |
| SNP_P4_176046_30187 | NW_004517457.1 | Scaffold2535 | 30187                   | CC                              | TT              | 1947036085               |
| SNP_P4_176047_30543 | NW_004517457.1 | Scaffold2535 | 30543                   | AA                              | GG              | 1947036087               |
| SNP_P4_176048_30648 | NW_004517457.1 | Scaffold2535 | 30648                   | TT                              | CC              | 1947036089               |
| SNP_P4_176049_30760 | NW_004517457.1 | Scaffold2535 | 30760                   | AA                              | GG              | 1947036091               |
| SNP_P4_176050_66    | NW_004517459.1 | Scaffold2537 | 66                      | AA                              | GG              | 1947036093               |
| SNP_P4_176051_2620  | NW_004517460.1 | Scaffold2539 | 2620                    | AA                              | GG              | 1947036095               |
| SNP_P4_176052_5318  | NW_004517460.1 | Scaffold2539 | 5318                    | AA                              | TT              | 1947036097               |
| SNP_P4_176053_1921  | NW_004517461.1 | Scaffold2542 | 1921                    | TT                              | CC              | 1947036099               |
| SNP_P4_176054_1949  | NW_004517461.1 | Scaffold2542 | 1949                    | GG                              | AA              | 1947036101               |
| SNP_P4_176055_1993  | NW_004517461.1 | Scaffold2542 | 1993                    | AA                              | GG              | 1947036103               |

| SNPs IDs            | Chromosome IDs | Chromosomes  | Physical positions (bp) | CDC Frontier (Reference genome) | (ILWC46 & LPNB) | NCBI SNPdb Accession IDs |
|---------------------|----------------|--------------|-------------------------|---------------------------------|-----------------|--------------------------|
| SNP_P4_176056_2201  | NW_004517461.1 | Scaffold2542 | 2201                    | CC                              | TT              | 1947036105               |
| SNP_P4_176058_2318  | NW_004517461.1 | Scaffold2542 | 2318                    | TT                              | AA              | 1947036107               |
| SNP_P4_176059_2400  | NW_004517461.1 | Scaffold2542 | 2400                    | CC                              | AA              | 1947036109               |
| SNP_P4_176060_2489  | NW_004517461.1 | Scaffold2542 | 2489                    | GG                              | AA              | 1947036111               |
| SNP_P4_176062_2531  | NW_004517461.1 | Scaffold2542 | 2531                    | GG                              | TT              | 1947036113               |
| SNP_P4_176063_2537  | NW_004517461.1 | Scaffold2542 | 2537                    | GG                              | AA              | 1947036115               |
| SNP_P4_176064_2686  | NW_004517461.1 | Scaffold2542 | 2686                    | GG                              | AA              | 1947036117               |
| SNP_P4_176065_4102  | NW_004517461.1 | Scaffold2542 | 4102                    | GG                              | TT              | 1947036119               |
| SNP_P4_176066_11389 | NW_004517461.1 | Scaffold2542 | 11389                   | AA                              | GG              | 1947036121               |
| SNP_P4_176067_20860 | NW_004517461.1 | Scaffold2542 | 20860                   | AA                              | GG              | 1947036123               |
| SNP_P4_176068_20877 | NW_004517461.1 | Scaffold2542 | 20877                   | TT                              | AA              | 1947036125               |
| SNP_P4_176069_22676 | NW_004517461.1 | Scaffold2542 | 22676                   | TT                              | AA              | 1947036127               |
| SNP_P4_176070_24155 | NW_004517461.1 | Scaffold2542 | 24155                   | AA                              | GG              | 1947036129               |
| SNP_P4_176071_24522 | NW_004517461.1 | Scaffold2542 | 24522                   | AA                              | GG              | 1947036131               |
| SNP_P4_176072_26151 | NW_004517461.1 | Scaffold2542 | 26151                   | TT                              | CC              | 1947036133               |
| SNP_P4_176073_26189 | NW_004517461.1 | Scaffold2542 | 26189                   | GG                              | AA              | 1947036135               |
| SNP_P4_176074_26434 | NW_004517461.1 | Scaffold2542 | 26434                   | CC                              | TT              | 1947036137               |
| SNP_P4_176075_1438  | NW_004517464.1 | Scaffold2547 | 1438                    | TT                              | CC              | 1947036139               |
| SNP_P4_176076_1443  | NW_004517464.1 | Scaffold2547 | 1443                    | CC                              | TT              | 1947036141               |
| SNP_P4_176077_3407  | NW_004517464.1 | Scaffold2547 | 3407                    | AA                              | GG              | 1947036143               |
| SNP_P4_176078_3703  | NW_004517464.1 | Scaffold2547 | 3703                    | GG                              | CC              | 1947036145               |
| SNP_P4_176079_3738  | NW_004517464.1 | Scaffold2547 | 3738                    | GG                              | CC              | 1947036147               |
| SNP_P4_176080_720   | NW_004517465.1 | Scaffold2548 | 720                     | CC                              | GG              | 1947036149               |
| SNP_P4_176081_752   | NW_004517465.1 | Scaffold2548 | 752                     | TT                              | GG              | 1947036151               |
| SNP_P4_176082_760   | NW_004517465.1 | Scaffold2548 | 760                     | TT                              | CC              | 1947036153               |
| SNP_P4_176083_766   | NW_004517465.1 | Scaffold2548 | 766                     | TT                              | CC              | 1947036155               |
| SNP_P4_176084_780   | NW_004517465.1 | Scaffold2548 | 780                     | TT                              | AA              | 1947036157               |
| SNP_P4_176085_875   | NW_004517465.1 | Scaffold2548 | 875                     | CC                              | TT              | 1947036159               |
| SNP_P4_176086_883   | NW_004517465.1 | Scaffold2548 | 883                     | AA                              | TT              | 1947036161               |
| SNP_P4_176087_885   | NW_004517465.1 | Scaffold2548 | 885                     | TT                              | GG              | 1947036163               |
| SNP_P4_176088_886   | NW_004517465.1 | Scaffold2548 | 886                     | AA                              | GG              | 1947036165               |
| SNP_P4_176089_905   | NW_004517465.1 | Scaffold2548 | 905                     | AA                              | GG              | 1947036167               |
| SNP_P4_176091_1063  | NW_004517465.1 | Scaffold2548 | 1063                    | AA                              | TT              | 1947036169               |
| SNP_P4_176092_1172  | NW_004517465.1 | Scaffold2548 | 1172                    | GG                              | TT              | 1947036171               |
| SNP_P4_176093_1349  | NW_004517465.1 | Scaffold2548 | 1349                    | CC                              | TT              | 1947036173               |
| SNP_P4_176094_1357  | NW_004517465.1 | Scaffold2548 | 1357                    | AA                              | TT              | 1947036175               |
| SNP_P4_176095_1396  | NW_004517465.1 | Scaffold2548 | 1396                    | GG                              | AA              | 1947036177               |
| SNP_P4_176096_1401  | NW_004517465.1 | Scaffold2548 | 1401                    | TT                              | AA              | 1947036179               |
| SNP_P4_176097_1402  | NW_004517465.1 | Scaffold2548 | 1402                    | GG                              | TT              | 1947036181               |
| SNP_P4_176098_1431  | NW_004517465.1 | Scaffold2548 | 1431                    | TT                              | AA              | 1947036182               |
| SNP_P4_176099_1434  | NW_004517465.1 | Scaffold2548 | 1434                    | TT                              | CC              | 1947036183               |
| SNP_P4_176100_1442  | NW_004517465.1 | Scaffold2548 | 1442                    | AA                              | TT              | 1947036184               |

| SNPs IDs            | Chromosome IDs | Chromosomes  | Physical positions (bp) | CDC Frontier (Reference genome) | (ILWC46 & LPNB) | NCBI SNPdb Accession IDs |
|---------------------|----------------|--------------|-------------------------|---------------------------------|-----------------|--------------------------|
| SNP_P4_176101_2467  | NW_004517465.1 | Scaffold2548 | 2467                    | AA                              | TT              | 1947036185               |
| SNP_P4_176102_2470  | NW_004517465.1 | Scaffold2548 | 2470                    | AA                              | TT              | 1947036186               |
| SNP_P4_176103_2515  | NW_004517465.1 | Scaffold2548 | 2515                    | GG                              | TT              | 1947036187               |
| SNP_P4_176104_2521  | NW_004517465.1 | Scaffold2548 | 2521                    | CC                              | TT              | 1947036188               |
| SNP_P4_176105_2526  | NW_004517465.1 | Scaffold2548 | 2526                    | TT                              | CC              | 1947036189               |
| SNP_P4_176107_2550  | NW_004517465.1 | Scaffold2548 | 2550                    | CC                              | TT              | 1947036190               |
| SNP_P4_176108_64    | NW_004517466.1 | Scaffold2552 | 64                      | CC                              | TT              | 1947036191               |
| SNP_P4_176109_3435  | NW_004517468.1 | Scaffold2555 | 3435                    | CC                              | AA              | 1947036192               |
| SNP_P4_176110_3436  | NW_004517468.1 | Scaffold2555 | 3436                    | AA                              | GG              | 1947036193               |
| SNP_P4_176111_3437  | NW_004517468.1 | Scaffold2555 | 3437                    | AA                              | GG              | 1947036194               |
| SNP_P4_176112_3462  | NW_004517468.1 | Scaffold2555 | 3462                    | CC                              | AA              | 1947036195               |
| SNP_P4_176113_3477  | NW_004517468.1 | Scaffold2555 | 3477                    | TT                              | GG              | 1947036196               |
| SNP_P4_176114_3510  | NW_004517468.1 | Scaffold2555 | 3510                    | AA                              | TT              | 1947036197               |
| SNP_P4_176115_3521  | NW_004517468.1 | Scaffold2555 | 3521                    | TT                              | AA              | 1947036198               |
| SNP_P4_176116_6226  | NW_004517468.1 | Scaffold2555 | 6226                    | TT                              | AA              | 1947036199               |
| SNP_P4_176117_6711  | NW_004517468.1 | Scaffold2555 | 6711                    | GG                              | TT              | 1947036200               |
| SNP_P4_176118_16157 | NW_004517468.1 | Scaffold2555 | 16157                   | CC                              | TT              | 1947036201               |
| SNP_P4_176119_16239 | NW_004517468.1 | Scaffold2555 | 16239                   | TT                              | AA              | 1947036202               |
| SNP_P4_176120_16551 | NW_004517468.1 | Scaffold2555 | 16551                   | GG                              | CC              | 1947036203               |
| SNP_P4_176122_18818 | NW_004517468.1 | Scaffold2555 | 18818                   | TT                              | CC              | 1947036204               |
| SNP_P4_176123_19023 | NW_004517468.1 | Scaffold2555 | 19023                   | CC                              | TT              | 1947036205               |
| SNP_P4_176124_19035 | NW_004517468.1 | Scaffold2555 | 19035                   | AA                              | GG              | 1947036206               |
| SNP_P4_176125_19312 | NW_004517468.1 | Scaffold2555 | 19312                   | CC                              | TT              | 1947036207               |
| SNP_P4_176126_19397 | NW_004517468.1 | Scaffold2555 | 19397                   | CC                              | TT              | 1947036208               |
| SNP_P4_176127_19786 | NW_004517468.1 | Scaffold2555 | 19786                   | TT                              | CC              | 1947036209               |
| SNP_P4_176128_19934 | NW_004517468.1 | Scaffold2555 | 19934                   | AA                              | TT              | 1947036210               |
| SNP_P4_176129_20132 | NW_004517468.1 | Scaffold2555 | 20132                   | CC                              | TT              | 1947036211               |
| SNP_P4_176130_20541 | NW_004517468.1 | Scaffold2555 | 20541                   | GG                              | CC              | 1947036212               |
| SNP_P4_176131_21680 | NW_004517468.1 | Scaffold2555 | 21680                   | AA                              | TT              | 1947036213               |
| SNP_P4_176132_21902 | NW_004517468.1 | Scaffold2555 | 21902                   | CC                              | AA              | 1947036214               |
| SNP_P4_176133_22005 | NW_004517468.1 | Scaffold2555 | 22005                   | GG                              | TT              | 1947036215               |
| SNP_P4_176134_22228 | NW_004517468.1 | Scaffold2555 | 22228                   | CC                              | AA              | 1947036216               |
| SNP_P4_176135_24097 | NW_004517468.1 | Scaffold2555 | 24097                   | TT                              | CC              | 1947036217               |
| SNP_P4_176136_30439 | NW_004517468.1 | Scaffold2555 | 30439                   | AA                              | GG              | 1947036218               |
| SNP_P4_176137_43828 | NW_004517468.1 | Scaffold2555 | 43828                   | TT                              | AA              | 1947036219               |
| SNP_P4_176138_43841 | NW_004517468.1 | Scaffold2555 | 43841                   | AA                              | GG              | 1947036220               |
| SNP_P4_176139_43851 | NW_004517468.1 | Scaffold2555 | 43851                   | AA                              | GG              | 1947036221               |
| SNP_P4_176140_44199 | NW_004517468.1 | Scaffold2555 | 44199                   | AA                              | GG              | 1947036222               |
| SNP_P4_176141_44302 | NW_004517468.1 | Scaffold2555 | 44302                   | AA                              | TT              | 1947036223               |
| SNP_P4_176142_44378 | NW_004517468.1 | Scaffold2555 | 44378                   | CC                              | AA              | 1947036224               |
| SNP_P4_176143_48457 | NW_004517468.1 | Scaffold2555 | 48457                   | AA                              | GG              | 1947036225               |
| SNP_P4_176144_48463 | NW_004517468.1 | Scaffold2555 | 48463                   | CC                              | TT              | 1947036226               |



| SNPs IDs            | Chromosome IDs | Chromosomes  | Physical positions (bp) | CDC Frontier (Reference genome) | (ILWC46 & LPNB) | NCBI SNPdb Accession IDs |
|---------------------|----------------|--------------|-------------------------|---------------------------------|-----------------|--------------------------|
| SNP_P4_176145_48466 | NW_004517468.1 | Scaffold2555 | 48466                   | CC                              | AA              | 1947036227               |
| SNP_P4_176146_48467 | NW_004517468.1 | Scaffold2555 | 48467                   | CC                              | AA              | 1947036228               |
| SNP_P4_176147_48485 | NW_004517468.1 | Scaffold2555 | 48485                   | TT                              | AA              | 1947036229               |
| SNP_P4_176148_55557 | NW_004517468.1 | Scaffold2555 | 55557                   | TT                              | AA              | 1947036230               |
| SNP_P4_176149_55576 | NW_004517468.1 | Scaffold2555 | 55576                   | GG                              | AA              | 1947036231               |
| SNP_P4_176150_55583 | NW_004517468.1 | Scaffold2555 | 55583                   | CC                              | AA              | 1947036232               |
| SNP_P4_176151_55587 | NW_004517468.1 | Scaffold2555 | 55587                   | AA                              | GG              | 1947036233               |
| SNP_P4_176152_55588 | NW_004517468.1 | Scaffold2555 | 55588                   | CC                              | TT              | 1947036234               |
| SNP_P4_176153_55589 | NW_004517468.1 | Scaffold2555 | 55589                   | TT                              | AA              | 1947036235               |
| SNP_P4_176154_1006  | NW_004517469.1 | Scaffold2556 | 1006                    | TT                              | AA              | 1947036236               |
| SNP_P4_176155_2238  | NW_004517470.1 | Scaffold2557 | 2238                    | GG                              | AA              | 1947036237               |
| SNP_P4_176156_2252  | NW_004517470.1 | Scaffold2557 | 2252                    | CC                              | TT              | 1947036238               |
| SNP_P4_176157_2286  | NW_004517470.1 | Scaffold2557 | 2286                    | TT                              | AA              | 1947036239               |
| SNP_P4_176159_9130  | NW_004517470.1 | Scaffold2557 | 9130                    | AA                              | CC              | 1947036240               |
| SNP_P4_176160_9152  | NW_004517470.1 | Scaffold2557 | 9152                    | AA                              | GG              | 1947036241               |
| SNP_P4_176161_12348 | NW_004517470.1 | Scaffold2557 | 12348                   | AA                              | GG              | 1947036242               |
| SNP_P4_176162_12430 | NW_004517470.1 | Scaffold2557 | 12430                   | AA                              | TT              | 1947036243               |
| SNP_P4_176163_12482 | NW_004517470.1 | Scaffold2557 | 12482                   | CC                              | TT              | 1947036244               |
| SNP_P4_176164_12797 | NW_004517470.1 | Scaffold2557 | 12797                   | AA                              | CC              | 1947036245               |
| SNP_P4_176165_14726 | NW_004517470.1 | Scaffold2557 | 14726                   | TT                              | AA              | 1947036246               |
| SNP_P4_176166_14998 | NW_004517470.1 | Scaffold2557 | 14998                   | TT                              | CC              | 1947036247               |
| SNP_P4_176167_27299 | NW_004517470.1 | Scaffold2557 | 27299                   | AA                              | CC              | 1947036248               |
| SNP_P4_176168_47643 | NW_004517470.1 | Scaffold2557 | 47643                   | TT                              | GG              | 1947036249               |
| SNP_P4_176169_47656 | NW_004517470.1 | Scaffold2557 | 47656                   | AA                              | CC              | 1947036250               |
| SNP_P4_176170_47682 | NW_004517470.1 | Scaffold2557 | 47682                   | CC                              | AA              | 1947036251               |
| SNP_P4_176171_47752 | NW_004517470.1 | Scaffold2557 | 47752                   | AA                              | TT              | 1947036252               |
| SNP_P4_176173_49995 | NW_004517470.1 | Scaffold2557 | 49995                   | AA                              | GG              | 1947036253               |
| SNP_P4_176174_50037 | NW_004517470.1 | Scaffold2557 | 50037                   | AA                              | CC              | 1947036254               |
| SNP_P4_176175_50047 | NW_004517470.1 | Scaffold2557 | 50047                   | AA                              | GG              | 1947036255               |
| SNP_P4_176176_50060 | NW_004517470.1 | Scaffold2557 | 50060                   | GG                              | AA              | 1947036256               |
| SNP_P4_176177_50074 | NW_004517470.1 | Scaffold2557 | 50074                   | AA                              | GG              | 1947036257               |
| SNP_P4_176178_50086 | NW_004517470.1 | Scaffold2557 | 50086                   | TT                              | CC              | 1947036258               |
| SNP_P4_176179_50305 | NW_004517470.1 | Scaffold2557 | 50305                   | AA                              | TT              | 1947036259               |
| SNP_P4_176180_50326 | NW_004517470.1 | Scaffold2557 | 50326                   | GG                              | AA              | 1947036260               |
| SNP_P4_176181_51731 | NW_004517470.1 | Scaffold2557 | 51731                   | AA                              | GG              | 1947036261               |
| SNP_P4_176182_51753 | NW_004517470.1 | Scaffold2557 | 51753                   | AA                              | TT              | 1947036262               |
| SNP_P4_176184_56329 | NW_004517470.1 | Scaffold2557 | 56329                   | CC                              | TT              | 1947036263               |
| SNP_P4_176185_56380 | NW_004517470.1 | Scaffold2557 | 56380                   | AA                              | CC              | 1947036264               |
| SNP_P4_176186_56406 | NW_004517470.1 | Scaffold2557 | 56406                   | CC                              | TT              | 1947036265               |
| SNP_P4_176187_56561 | NW_004517470.1 | Scaffold2557 | 56561                   | TT                              | CC              | 1947036266               |
| SNP_P4_176188_56602 | NW_004517470.1 | Scaffold2557 | 56602                   | CC                              | TT              | 1947036267               |
| SNP_P4_176189_56629 | NW_004517470.1 | Scaffold2557 | 56629                   | TT                              | CC              | 1947036268               |

| SNPs IDs             | Chromosome IDs | Chromosomes  | Physical positions (bp) | CDC Frontier (Reference genome) | (ILWC46 & LPNB) | NCBI SNPdb Accession IDs |
|----------------------|----------------|--------------|-------------------------|---------------------------------|-----------------|--------------------------|
| SNP_P4_176190_56631  | NW_004517470.1 | Scaffold2557 | 56631                   | TT                              | CC              | 1947036269               |
| SNP_P4_176191_56662  | NW_004517470.1 | Scaffold2557 | 56662                   | AA                              | GG              | 1947036270               |
| SNP_P4_176192_56728  | NW_004517470.1 | Scaffold2557 | 56728                   | AA                              | GG              | 1947036271               |
| SNP_P4_176193_56802  | NW_004517470.1 | Scaffold2557 | 56802                   | CC                              | TT              | 1947036272               |
| SNP_P4_176194_57375  | NW_004517470.1 | Scaffold2557 | 57375                   | CC                              | TT              | 1947036273               |
| SNP_P4_176196_57671  | NW_004517470.1 | Scaffold2557 | 57671                   | CC                              | AA              | 1947036274               |
| SNP_P4_176197_61484  | NW_004517470.1 | Scaffold2557 | 61484                   | CC                              | TT              | 1947036275               |
| SNP_P4_176198_61494  | NW_004517470.1 | Scaffold2557 | 61494                   | CC                              | AA              | 1947036276               |
| SNP_P4_176199_61504  | NW_004517470.1 | Scaffold2557 | 61504                   | TT                              | AA              | 1947036277               |
| SNP_P4_176200_61506  | NW_004517470.1 | Scaffold2557 | 61506                   | TT                              | CC              | 1947036278               |
| SNP_P4_176201_61569  | NW_004517470.1 | Scaffold2557 | 61569                   | TT                              | CC              | 1947036279               |
| SNP_P4_176202_61570  | NW_004517470.1 | Scaffold2557 | 61570                   | GG                              | AA              | 1947036280               |
| SNP_P4_176203_61585  | NW_004517470.1 | Scaffold2557 | 61585                   | AA                              | GG              | 1947036281               |
| SNP_P4_176204_61612  | NW_004517470.1 | Scaffold2557 | 61612                   | TT                              | GG              | 1947036282               |
| SNP_P4_176205_61632  | NW_004517470.1 | Scaffold2557 | 61632                   | CC                              | TT              | 1947036283               |
| SNP_P4_176206_61833  | NW_004517470.1 | Scaffold2557 | 61833                   | CC                              | GG              | 1947036284               |
| SNP_P4_176207_61882  | NW_004517470.1 | Scaffold2557 | 61882                   | TT                              | CC              | 1947036285               |
| SNP_P4_176209_62557  | NW_004517470.1 | Scaffold2557 | 62557                   | AA                              | GG              | 1947036286               |
| SNP_P4_176210_62573  | NW_004517470.1 | Scaffold2557 | 62573                   | AA                              | GG              | 1947036287               |
| SNP_P4_176211_62887  | NW_004517470.1 | Scaffold2557 | 62887                   | TT                              | CC              | 1947036288               |
| SNP_P4_176212_62962  | NW_004517470.1 | Scaffold2557 | 62962                   | TT                              | GG              | 1947036289               |
| SNP_P4_176213_64560  | NW_004517470.1 | Scaffold2557 | 64560                   | TT                              | AA              | 1947036290               |
| SNP_P4_176214_79588  | NW_004517470.1 | Scaffold2557 | 79588                   | TT                              | CC              | 1947036291               |
| SNP_P4_176216_85979  | NW_004517470.1 | Scaffold2557 | 85979                   | TT                              | AA              | 1947036292               |
| SNP_P4_176217_86311  | NW_004517470.1 | Scaffold2557 | 86311                   | AA                              | GG              | 1947036293               |
| SNP_P4_176218_86328  | NW_004517470.1 | Scaffold2557 | 86328                   | AA                              | CC              | 1947036294               |
| SNP_P4_176219_86363  | NW_004517470.1 | Scaffold2557 | 86363                   | AA                              | CC              | 1947036295               |
| SNP_P4_176220_86373  | NW_004517470.1 | Scaffold2557 | 86373                   | CC                              | TT              | 1947036296               |
| SNP_P4_176221_108947 | NW_004517470.1 | Scaffold2557 | 108947                  | GG                              | AA              | 1947036297               |
| SNP_P4_176222_124731 | NW_004517470.1 | Scaffold2557 | 124731                  | TT                              | CC              | 1947036298               |
| SNP_P4_176223_137385 | NW_004517470.1 | Scaffold2557 | 137385                  | AA                              | GG              | 1947036299               |
| SNP_P4_176224_163574 | NW_004517470.1 | Scaffold2557 | 163574                  | TT                              | CC              | 1947036300               |
| SNP_P4_176225_172007 | NW_004517470.1 | Scaffold2557 | 172007                  | GG                              | AA              | 1947036301               |
| SNP_P4_176226_172010 | NW_004517470.1 | Scaffold2557 | 172010                  | AA                              | GG              | 1947036302               |
| SNP_P4_176227_172061 | NW_004517470.1 | Scaffold2557 | 172061                  | AA                              | GG              | 1947036303               |
| SNP_P4_176228_172079 | NW_004517470.1 | Scaffold2557 | 172079                  | CC                              | TT              | 1947036304               |
| SNP_P4_176229_172086 | NW_004517470.1 | Scaffold2557 | 172086                  | AA                              | GG              | 1947036305               |
| SNP_P4_176230_172132 | NW_004517470.1 | Scaffold2557 | 172132                  | TT                              | GG              | 1947036306               |
| SNP_P4_176231_4157   | NW_004517471.1 | Scaffold2558 | 4157                    | TT                              | AA              | 1947036307               |
| SNP_P4_176232_4167   | NW_004517471.1 | Scaffold2558 | 4167                    | TT                              | CC              | 1947036308               |
| SNP_P4_176233_5334   | NW_004517471.1 | Scaffold2558 | 5334                    | GG                              | TT              | 1947036309               |
| SNP_P4_176234_5344   | NW_004517471.1 | Scaffold2558 | 5344                    | AA                              | GG              | 1947036310               |

| SNPs IDs            | Chromosome IDs | Chromosomes  | Physical positions (bp) | CDC Frontier (Reference genome) | (ILWC46 & LPNB) | NCBI SNPdb Accession IDs |
|---------------------|----------------|--------------|-------------------------|---------------------------------|-----------------|--------------------------|
| SNP_P4_176235_6328  | NW_004517471.1 | Scaffold2558 | 6328                    | CC                              | TT              | 1947036311               |
| SNP_P4_176236_27913 | NW_004517471.1 | Scaffold2558 | 27913                   | CC                              | AA              | 1947036312               |
| SNP_P4_176237_10169 | NW_004517473.1 | Scaffold2560 | 10169                   | CC                              | TT              | 1947036313               |
| SNP_P4_176238_19838 | NW_004517473.1 | Scaffold2560 | 19838                   | TT                              | CC              | 1947036314               |
| SNP_P4_176239_19867 | NW_004517473.1 | Scaffold2560 | 19867                   | TT                              | CC              | 1947036315               |
| SNP_P4_176240_24734 | NW_004517473.1 | Scaffold2560 | 24734                   | CC                              | TT              | 1947036316               |
| SNP_P4_176242_40690 | NW_004517473.1 | Scaffold2560 | 40690                   | CC                              | TT              | 1947036317               |
| SNP_P4_176244_60091 | NW_004517473.1 | Scaffold2560 | 60091                   | GG                              | AA              | 1947036318               |
| SNP_P4_176245_60165 | NW_004517473.1 | Scaffold2560 | 60165                   | CC                              | TT              | 1947036319               |
| SNP_P4_176246_60585 | NW_004517473.1 | Scaffold2560 | 60585                   | AA                              | GG              | 1947036320               |
| SNP_P4_176248_60728 | NW_004517473.1 | Scaffold2560 | 60728                   | GG                              | TT              | 1947036321               |
| SNP_P4_176249_61151 | NW_004517473.1 | Scaffold2560 | 61151                   | AA                              | CC              | 1947036322               |
| SNP_P4_176251_61259 | NW_004517473.1 | Scaffold2560 | 61259                   | AA                              | GG              | 1947036323               |
| SNP_P4_176252_61291 | NW_004517473.1 | Scaffold2560 | 61291                   | TT                              | GG              | 1947036324               |
| SNP_P4_176253_61606 | NW_004517473.1 | Scaffold2560 | 61606                   | TT                              | CC              | 1947036325               |
| SNP_P4_176254_61608 | NW_004517473.1 | Scaffold2560 | 61608                   | AA                              | GG              | 1947036326               |
| SNP_P4_176255_61703 | NW_004517473.1 | Scaffold2560 | 61703                   | CC                              | AA              | 1947036327               |
| SNP_P4_176257_61776 | NW_004517473.1 | Scaffold2560 | 61776                   | AA                              | TT              | 1947036328               |
| SNP_P4_176258_61788 | NW_004517473.1 | Scaffold2560 | 61788                   | AA                              | GG              | 1947036329               |
| SNP_P4_176259_61806 | NW_004517473.1 | Scaffold2560 | 61806                   | CC                              | TT              | 1947036330               |
| SNP_P4_176260_61851 | NW_004517473.1 | Scaffold2560 | 61851                   | CC                              | GG              | 1947036331               |
| SNP_P4_176261_62020 | NW_004517473.1 | Scaffold2560 | 62020                   | AA                              | TT              | 1947036332               |
| SNP_P4_176262_62075 | NW_004517473.1 | Scaffold2560 | 62075                   | AA                              | GG              | 1947036333               |
| SNP_P4_176263_62329 | NW_004517473.1 | Scaffold2560 | 62329                   | GG                              | CC              | 1947036334               |
| SNP_P4_176264_62535 | NW_004517473.1 | Scaffold2560 | 62535                   | GG                              | AA              | 1947036335               |
| SNP_P4_176266_63522 | NW_004517473.1 | Scaffold2560 | 63522                   | AA                              | CC              | 1947036336               |
| SNP_P4_176267_2589  | NW_004517476.1 | Scaffold2564 | 2589                    | CC                              | AA              | 1947036337               |
| SNP_P4_176268_11211 | NW_004517476.1 | Scaffold2564 | 11211                   | TT                              | CC              | 1947036338               |
| SNP_P4_176269_11352 | NW_004517476.1 | Scaffold2564 | 11352                   | CC                              | AA              | 1947036339               |
| SNP_P4_176270_13123 | NW_004517476.1 | Scaffold2564 | 13123                   | TT                              | CC              | 1947036340               |
| SNP_P4_176271_13502 | NW_004517476.1 | Scaffold2564 | 13502                   | GG                              | AA              | 1947036341               |
| SNP_P4_176272_13555 | NW_004517476.1 | Scaffold2564 | 13555                   | AA                              | GG              | 1947036342               |
| SNP_P4_176273_16249 | NW_004517476.1 | Scaffold2564 | 16249                   | TT                              | CC              | 1947036343               |
| SNP_P4_176274_28289 | NW_004517476.1 | Scaffold2564 | 28289                   | CC                              | TT              | 1947036344               |
| SNP_P4_176275_28477 | NW_004517476.1 | Scaffold2564 | 28477                   | GG                              | CC              | 1947036345               |
| SNP_P4_176276_28485 | NW_004517476.1 | Scaffold2564 | 28485                   | AA                              | TT              | 1947036346               |
| SNP_P4_176277_28701 | NW_004517476.1 | Scaffold2564 | 28701                   | GG                              | AA              | 1947036347               |
| SNP_P4_176278_28725 | NW_004517476.1 | Scaffold2564 | 28725                   | TT                              | GG              | 1947036348               |
| SNP_P4_176279_29316 | NW_004517476.1 | Scaffold2564 | 29316                   | GG                              | TT              | 1947036349               |
| SNP_P4_176280_29425 | NW_004517476.1 | Scaffold2564 | 29425                   | CC                              | TT              | 1947036350               |
| SNP_P4_176281_29440 | NW_004517476.1 | Scaffold2564 | 29440                   | CC                              | TT              | 1947036351               |
| SNP_P4_176282_411   | NW_004517479.1 | Scaffold2568 | 411                     | AA                              | CC              | 1947036352               |

| SNPs IDs             | Chromosome IDs | Chromosomes  | Physical positions (bp) | CDC Frontier (Reference genome) | (ILWC46 & LPNB) | NCBI SNPdb Accession IDs |
|----------------------|----------------|--------------|-------------------------|---------------------------------|-----------------|--------------------------|
| SNP_P4_176283_450    | NW_004517479.1 | Scaffold2568 | 450                     | GG                              | AA              | 1947036353               |
| SNP_P4_176284_482    | NW_004517479.1 | Scaffold2568 | 482                     | AA                              | GG              | 1947036354               |
| SNP_P4_176285_522    | NW_004517479.1 | Scaffold2568 | 522                     | GG                              | CC              | 1947036355               |
| SNP_P4_176286_758    | NW_004517479.1 | Scaffold2568 | 758                     | AA                              | GG              | 1947036356               |
| SNP_P4_176287_804    | NW_004517479.1 | Scaffold2568 | 804                     | CC                              | TT              | 1947036357               |
| SNP_P4_176288_22063  | NW_004517480.1 | Scaffold2569 | 22063                   | CC                              | GG              | 1947036358               |
| SNP_P4_176289_22143  | NW_004517480.1 | Scaffold2569 | 22143                   | GG                              | AA              | 1947036359               |
| SNP_P4_176290_22250  | NW_004517480.1 | Scaffold2569 | 22250                   | AA                              | TT              | 1947036360               |
| SNP_P4_176291_22283  | NW_004517480.1 | Scaffold2569 | 22283                   | AA                              | CC              | 1947036361               |
| SNP_P4_176292_22419  | NW_004517480.1 | Scaffold2569 | 22419                   | TT                              | CC              | 1947036362               |
| SNP_P4_176293_22438  | NW_004517480.1 | Scaffold2569 | 22438                   | AA                              | CC              | 1947036363               |
| SNP_P4_176294_22536  | NW_004517480.1 | Scaffold2569 | 22536                   | TT                              | CC              | 1947036364               |
| SNP_P4_176295_22556  | NW_004517480.1 | Scaffold2569 | 22556                   | AA                              | GG              | 1947036365               |
| SNP_P4_176296_22559  | NW_004517480.1 | Scaffold2569 | 22559                   | TT                              | AA              | 1947036366               |
| SNP_P4_176297_23276  | NW_004517480.1 | Scaffold2569 | 23276                   | TT                              | AA              | 1947036367               |
| SNP_P4_176298_23279  | NW_004517480.1 | Scaffold2569 | 23279                   | AA                              | GG              | 1947036368               |
| SNP_P4_176299_23299  | NW_004517480.1 | Scaffold2569 | 23299                   | GG                              | AA              | 1947036369               |
| SNP_P4_176300_36984  | NW_004517480.1 | Scaffold2569 | 36984                   | CC                              | TT              | 1947036370               |
| SNP_P4_176301_46561  | NW_004517480.1 | Scaffold2569 | 46561                   | TT                              | CC              | 1947036371               |
| SNP_P4_176302_46947  | NW_004517480.1 | Scaffold2569 | 46947                   | GG                              | AA              | 1947036372               |
| SNP_P4_176304_93613  | NW_004517480.1 | Scaffold2569 | 93613                   | TT                              | CC              | 1947036373               |
| SNP_P4_176305_98555  | NW_004517480.1 | Scaffold2569 | 98555                   | CC                              | TT              | 1947036374               |
| SNP_P4_176306_106824 | NW_004517480.1 | Scaffold2569 | 106824                  | GG                              | AA              | 1947036375               |
| SNP_P4_176307_106826 | NW_004517480.1 | Scaffold2569 | 106826                  | TT                              | AA              | 1947036376               |
| SNP_P4_176308_106864 | NW_004517480.1 | Scaffold2569 | 106864                  | TT                              | GG              | 1947036377               |
| SNP_P4_176309_106895 | NW_004517480.1 | Scaffold2569 | 106895                  | TT                              | CC              | 1947036378               |
| SNP_P4_176310_106975 | NW_004517480.1 | Scaffold2569 | 106975                  | CC                              | GG              | 1947036379               |
| SNP_P4_176311_504    | NW_004517482.1 | Scaffold2571 | 504                     | GG                              | TT              | 1947036380               |
| SNP_P4_176312_506    | NW_004517482.1 | Scaffold2571 | 506                     | TT                              | GG              | 1947036381               |
| SNP_P4_176313_959    | NW_004517482.1 | Scaffold2571 | 959                     | TT                              | AA              | 1947036382               |
| SNP_P4_176314_4839   | NW_004517485.1 | Scaffold2574 | 4839                    | TT                              | GG              | 1947036383               |
| SNP_P4_176315_5042   | NW_004517485.1 | Scaffold2574 | 5042                    | TT                              | CC              | 1947036384               |
| SNP_P4_176316_5414   | NW_004517485.1 | Scaffold2574 | 5414                    | CC                              | TT              | 1947036385               |
| SNP_P4_176317_15397  | NW_004517485.1 | Scaffold2574 | 15397                   | GG                              | CC              | 1947036386               |
| SNP_P4_176318_21902  | NW_004517485.1 | Scaffold2574 | 21902                   | TT                              | GG              | 1947036387               |
| SNP_P4_176319_46012  | NW_004517485.1 | Scaffold2574 | 46012                   | AA                              | TT              | 1947036388               |
| SNP_P4_176320_46045  | NW_004517485.1 | Scaffold2574 | 46045                   | TT                              | CC              | 1947036389               |
| SNP_P4_176321_46080  | NW_004517485.1 | Scaffold2574 | 46080                   | AA                              | TT              | 1947036390               |
| SNP_P4_176322_46266  | NW_004517485.1 | Scaffold2574 | 46266                   | TT                              | AA              | 1947036391               |
| SNP_P4_176323_46333  | NW_004517485.1 | Scaffold2574 | 46333                   | CC                              | TT              | 1947036392               |
| SNP_P4_176324_51068  | NW_004517485.1 | Scaffold2574 | 51068                   | TT                              | CC              | 1947036393               |
| SNP_P4_176325_51101  | NW_004517485.1 | Scaffold2574 | 51101                   | AA                              | GG              | 1947036394               |

| SNPs IDs             | Chromosome IDs | Chromosomes  | Physical positions (bp) | CDC Frontier (Reference genome) | (ILWC46 & LPNB) | NCBI SNPdb Accession IDs |
|----------------------|----------------|--------------|-------------------------|---------------------------------|-----------------|--------------------------|
| SNP_P4_176326_51355  | NW_004517485.1 | Scaffold2574 | 51355                   | GG                              | AA              | 1947036395               |
| SNP_P4_176327_51461  | NW_004517485.1 | Scaffold2574 | 51461                   | CC                              | TT              | 1947036396               |
| SNP_P4_176328_51473  | NW_004517485.1 | Scaffold2574 | 51473                   | TT                              | AA              | 1947036397               |
| SNP_P4_176329_51474  | NW_004517485.1 | Scaffold2574 | 51474                   | TT                              | AA              | 1947036398               |
| SNP_P4_176330_66623  | NW_004517486.1 | Scaffold2575 | 66623                   | CC                              | TT              | 1947036399               |
| SNP_P4_176331_80439  | NW_004517486.1 | Scaffold2575 | 80439                   | GG                              | AA              | 1947036400               |
| SNP_P4_176332_106869 | NW_004517486.1 | Scaffold2575 | 106869                  | GG                              | CC              | 1947036401               |
| SNP_P4_176333_114526 | NW_004517486.1 | Scaffold2575 | 114526                  | AA                              | TT              | 1947036402               |
| SNP_P4_176334_114530 | NW_004517486.1 | Scaffold2575 | 114530                  | AA                              | CC              | 1947036403               |
| SNP_P4_176336_125192 | NW_004517486.1 | Scaffold2575 | 125192                  | AA                              | TT              | 1947036404               |
| SNP_P4_176337_130896 | NW_004517486.1 | Scaffold2575 | 130896                  | TT                              | CC              | 1947036405               |
| SNP_P4_176338_131882 | NW_004517486.1 | Scaffold2575 | 131882                  | CC                              | GG              | 1947036406               |
| SNP_P4_176339_134804 | NW_004517486.1 | Scaffold2575 | 134804                  | CC                              | TT              | 1947036407               |
| SNP_P4_176340_134810 | NW_004517486.1 | Scaffold2575 | 134810                  | CC                              | AA              | 1947036408               |
| SNP_P4_176342_178248 | NW_004517486.1 | Scaffold2575 | 178248                  | AA                              | GG              | 1947036409               |
| SNP_P4_176344_193391 | NW_004517486.1 | Scaffold2575 | 193391                  | AA                              | GG              | 1947036410               |
| SNP_P4_176345_193403 | NW_004517486.1 | Scaffold2575 | 193403                  | AA                              | GG              | 1947036411               |
| SNP_P4_176346_193439 | NW_004517486.1 | Scaffold2575 | 193439                  | TT                              | CC              | 1947036412               |
| SNP_P4_176347_193518 | NW_004517486.1 | Scaffold2575 | 193518                  | TT                              | GG              | 1947036413               |
| SNP_P4_176348_193529 | NW_004517486.1 | Scaffold2575 | 193529                  | TT                              | CC              | 1947036414               |
| SNP_P4_176349_193532 | NW_004517486.1 | Scaffold2575 | 193532                  | GG                              | TT              | 1947036415               |
| SNP_P4_176350_193677 | NW_004517486.1 | Scaffold2575 | 193677                  | AA                              | GG              | 1947036416               |
| SNP_P4_176351_193718 | NW_004517486.1 | Scaffold2575 | 193718                  | AA                              | GG              | 1947036417               |
| SNP_P4_176352_193881 | NW_004517486.1 | Scaffold2575 | 193881                  | AA                              | GG              | 1947036418               |
| SNP_P4_176353_194079 | NW_004517486.1 | Scaffold2575 | 194079                  | GG                              | AA              | 1947036419               |
| SNP_P4_176354_195813 | NW_004517486.1 | Scaffold2575 | 195813                  | TT                              | CC              | 1947036420               |
| SNP_P4_176355_195914 | NW_004517486.1 | Scaffold2575 | 195914                  | TT                              | CC              | 1947036421               |
| SNP_P4_176356_195944 | NW_004517486.1 | Scaffold2575 | 195944                  | TT                              | GG              | 1947036422               |
| SNP_P4_176357_195961 | NW_004517486.1 | Scaffold2575 | 195961                  | CC                              | TT              | 1947036423               |
| SNP_P4_176358_195973 | NW_004517486.1 | Scaffold2575 | 195973                  | CC                              | TT              | 1947036424               |
| SNP_P4_176359_196077 | NW_004517486.1 | Scaffold2575 | 196077                  | GG                              | AA              | 1947036426               |
| SNP_P4_176360_196111 | NW_004517486.1 | Scaffold2575 | 196111                  | CC                              | TT              | 1947036428               |
| SNP_P4_176362_196160 | NW_004517486.1 | Scaffold2575 | 196160                  | AA                              | GG              | 1947036430               |
| SNP_P4_176363_196169 | NW_004517486.1 | Scaffold2575 | 196169                  | AA                              | GG              | 1947036432               |
| SNP_P4_176364_196188 | NW_004517486.1 | Scaffold2575 | 196188                  | TT                              | CC              | 1947036434               |
| SNP_P4_176365_196215 | NW_004517486.1 | Scaffold2575 | 196215                  | CC                              | TT              | 1947036436               |
| SNP_P4_176366_197208 | NW_004517486.1 | Scaffold2575 | 197208                  | CC                              | TT              | 1947036438               |
| SNP_P4_176367_197209 | NW_004517486.1 | Scaffold2575 | 197209                  | AA                              | GG              | 1947036441               |
| SNP_P4_176368_197630 | NW_004517486.1 | Scaffold2575 | 197630                  | CC                              | GG              | 1947036443               |
| SNP_P4_176369_197644 | NW_004517486.1 | Scaffold2575 | 197644                  | TT                              | CC              | 1947036445               |
| SNP_P4_176370_197676 | NW_004517486.1 | Scaffold2575 | 197676                  | CC                              | AA              | 1947036447               |
| SNP_P4_176372_203551 | NW_004517486.1 | Scaffold2575 | 203551                  | AA                              | TT              | 1947036449               |

| SNPs IDs             | Chromosome IDs | Chromosomes  | Physical positions (bp) | CDC Frontier (Reference genome) | (ILWC46 & LPNB) | NCBI SNPdb Accession IDs |
|----------------------|----------------|--------------|-------------------------|---------------------------------|-----------------|--------------------------|
| SNP_P4_176373_208522 | NW_004517486.1 | Scaffold2575 | 208522                  | CC                              | TT              | 1947036451               |
| SNP_P4_176374_208539 | NW_004517486.1 | Scaffold2575 | 208539                  | AA                              | GG              | 1947036453               |
| SNP_P4_176375_208550 | NW_004517486.1 | Scaffold2575 | 208550                  | GG                              | TT              | 1947036455               |
| SNP_P4_176376_208594 | NW_004517486.1 | Scaffold2575 | 208594                  | AA                              | GG              | 1947036457               |
| SNP_P4_176377_208597 | NW_004517486.1 | Scaffold2575 | 208597                  | GG                              | AA              | 1947036459               |
| SNP_P4_176379_208726 | NW_004517486.1 | Scaffold2575 | 208726                  | AA                              | GG              | 1947036461               |
| SNP_P4_176380_208809 | NW_004517486.1 | Scaffold2575 | 208809                  | CC                              | TT              | 1947036463               |
| SNP_P4_176381_208851 | NW_004517486.1 | Scaffold2575 | 208851                  | CC                              | GG              | 1947036465               |
| SNP_P4_176382_208865 | NW_004517486.1 | Scaffold2575 | 208865                  | CC                              | TT              | 1947036467               |
| SNP_P4_176383_208941 | NW_004517486.1 | Scaffold2575 | 208941                  | TT                              | GG              | 1947036469               |
| SNP_P4_176384_219843 | NW_004517486.1 | Scaffold2575 | 219843                  | AA                              | GG              | 1947036471               |
| SNP_P4_176385_224768 | NW_004517486.1 | Scaffold2575 | 224768                  | CC                              | AA              | 1947036473               |
| SNP_P4_176386_231200 | NW_004517486.1 | Scaffold2575 | 231200                  | CC                              | AA              | 1947036475               |
| SNP_P4_176387_231208 | NW_004517486.1 | Scaffold2575 | 231208                  | TT                              | CC              | 1947036477               |
| SNP_P4_176388_231213 | NW_004517486.1 | Scaffold2575 | 231213                  | AA                              | GG              | 1947036479               |
| SNP_P4_176389_231219 | NW_004517486.1 | Scaffold2575 | 231219                  | TT                              | GG              | 1947036481               |
| SNP_P4_176390_231514 | NW_004517486.1 | Scaffold2575 | 231514                  | GG                              | CC              | 1947036483               |
| SNP_P4_176392_247352 | NW_004517486.1 | Scaffold2575 | 247352                  | GG                              | AA              | 1947036485               |
| SNP_P4_176393_247722 | NW_004517486.1 | Scaffold2575 | 247722                  | AA                              | TT              | 1947036487               |
| SNP_P4_176395_248637 | NW_004517486.1 | Scaffold2575 | 248637                  | CC                              | TT              | 1947036489               |
| SNP_P4_176396_262167 | NW_004517486.1 | Scaffold2575 | 262167                  | TT                              | AA              | 1947036491               |
| SNP_P4_176397_269310 | NW_004517486.1 | Scaffold2575 | 269310                  | GG                              | TT              | 1947036493               |
| SNP_P4_176398_271195 | NW_004517486.1 | Scaffold2575 | 271195                  | GG                              | AA              | 1947036495               |
| SNP_P4_176399_271206 | NW_004517486.1 | Scaffold2575 | 271206                  | GG                              | AA              | 1947036497               |
| SNP_P4_176400_271237 | NW_004517486.1 | Scaffold2575 | 271237                  | TT                              | CC              | 1947036499               |
| SNP_P4_176402_271273 | NW_004517486.1 | Scaffold2575 | 271273                  | AA                              | GG              | 1947036501               |
| SNP_P4_176403_271276 | NW_004517486.1 | Scaffold2575 | 271276                  | TT                              | CC              | 1947036503               |
| SNP_P4_176404_271288 | NW_004517486.1 | Scaffold2575 | 271288                  | TT                              | CC              | 1947036505               |
| SNP_P4_176405_271339 | NW_004517486.1 | Scaffold2575 | 271339                  | CC                              | AA              | 1947036507               |
| SNP_P4_176406_271390 | NW_004517486.1 | Scaffold2575 | 271390                  | TT                              | GG              | 1947036509               |
| SNP_P4_176407_271464 | NW_004517486.1 | Scaffold2575 | 271464                  | TT                              | GG              | 1947036511               |
| SNP_P4_176408_271673 | NW_004517486.1 | Scaffold2575 | 271673                  | CC                              | TT              | 1947036513               |
| SNP_P4_176409_271682 | NW_004517486.1 | Scaffold2575 | 271682                  | TT                              | CC              | 1947036515               |
| SNP_P4_176410_271709 | NW_004517486.1 | Scaffold2575 | 271709                  | TT                              | CC              | 1947036517               |
| SNP_P4_176411_271724 | NW_004517486.1 | Scaffold2575 | 271724                  | TT                              | AA              | 1947036519               |
| SNP_P4_176412_271727 | NW_004517486.1 | Scaffold2575 | 271727                  | TT                              | CC              | 1947036521               |
| SNP_P4_176413_274170 | NW_004517486.1 | Scaffold2575 | 274170                  | AA                              | GG              | 1947036523               |
| SNP_P4_176414_274230 | NW_004517486.1 | Scaffold2575 | 274230                  | AA                              | GG              | 1947036525               |
| SNP_P4_176415_274249 | NW_004517486.1 | Scaffold2575 | 274249                  | AA                              | GG              | 1947036527               |
| SNP_P4_176416_278224 | NW_004517486.1 | Scaffold2575 | 278224                  | AA                              | GG              | 1947036529               |
| SNP_P4_176417_278227 | NW_004517486.1 | Scaffold2575 | 278227                  | AA                              | GG              | 1947036531               |
| SNP_P4_176418_278248 | NW_004517486.1 | Scaffold2575 | 278248                  | AA                              | CC              | 1947036533               |

| SNPs IDs             | Chromosome IDs | Chromosomes  | Physical positions (bp) | CDC Frontier (Reference genome) | (ILWC46 & LPNB) | NCBI SNPdb Accession IDs |
|----------------------|----------------|--------------|-------------------------|---------------------------------|-----------------|--------------------------|
| SNP_P4_176419_278274 | NW_004517486.1 | Scaffold2575 | 278274                  | CC                              | TT              | 1947036535               |
| SNP_P4_176420_278281 | NW_004517486.1 | Scaffold2575 | 278281                  | GG                              | AA              | 1947036537               |
| SNP_P4_176421_278288 | NW_004517486.1 | Scaffold2575 | 278288                  | GG                              | CC              | 1947036539               |
| SNP_P4_176422_278436 | NW_004517486.1 | Scaffold2575 | 278436                  | CC                              | TT              | 1947036541               |
| SNP_P4_176423_278441 | NW_004517486.1 | Scaffold2575 | 278441                  | TT                              | CC              | 1947036543               |
| SNP_P4_176424_278455 | NW_004517486.1 | Scaffold2575 | 278455                  | AA                              | GG              | 1947036545               |
| SNP_P4_176425_278496 | NW_004517486.1 | Scaffold2575 | 278496                  | AA                              | TT              | 1947036547               |
| SNP_P4_176426_278503 | NW_004517486.1 | Scaffold2575 | 278503                  | CC                              | TT              | 1947036549               |
| SNP_P4_176427_278551 | NW_004517486.1 | Scaffold2575 | 278551                  | CC                              | AA              | 1947036551               |
| SNP_P4_176428_278561 | NW_004517486.1 | Scaffold2575 | 278561                  | TT                              | CC              | 1947036553               |
| SNP_P4_176429_278565 | NW_004517486.1 | Scaffold2575 | 278565                  | CC                              | AA              | 1947036555               |
| SNP_P4_176430_278590 | NW_004517486.1 | Scaffold2575 | 278590                  | AA                              | TT              | 1947036557               |
| SNP_P4_176431_278605 | NW_004517486.1 | Scaffold2575 | 278605                  | GG                              | AA              | 1947036559               |
| SNP_P4_176432_278673 | NW_004517486.1 | Scaffold2575 | 278673                  | AA                              | TT              | 1947036561               |
| SNP_P4_176433_278685 | NW_004517486.1 | Scaffold2575 | 278685                  | TT                              | AA              | 1947036563               |
| SNP_P4_176434_278725 | NW_004517486.1 | Scaffold2575 | 278725                  | TT                              | AA              | 1947036565               |
| SNP_P4_176436_278783 | NW_004517486.1 | Scaffold2575 | 278783                  | TT                              | CC              | 1947036566               |
| SNP_P4_176437_278787 | NW_004517486.1 | Scaffold2575 | 278787                  | AA                              | CC              | 1947036568               |
| SNP_P4_176438_278827 | NW_004517486.1 | Scaffold2575 | 278827                  | CC                              | TT              | 1947036570               |
| SNP_P4_176439_278869 | NW_004517486.1 | Scaffold2575 | 278869                  | TT                              | CC              | 1947036572               |
| SNP_P4_176440_278916 | NW_004517486.1 | Scaffold2575 | 278916                  | CC                              | AA              | 1947036574               |
| SNP_P4_176441_278945 | NW_004517486.1 | Scaffold2575 | 278945                  | AA                              | TT              | 1947036576               |
| SNP_P4_176442_278962 | NW_004517486.1 | Scaffold2575 | 278962                  | CC                              | AA              | 1947036578               |
| SNP_P4_176443_278966 | NW_004517486.1 | Scaffold2575 | 278966                  | GG                              | AA              | 1947036580               |
| SNP_P4_176444_279026 | NW_004517486.1 | Scaffold2575 | 279026                  | CC                              | AA              | 1947036582               |
| SNP_P4_176445_279029 | NW_004517486.1 | Scaffold2575 | 279029                  | GG                              | TT              | 1947036584               |
| SNP_P4_176446_279043 | NW_004517486.1 | Scaffold2575 | 279043                  | GG                              | AA              | 1947036586               |
| SNP_P4_176447_279110 | NW_004517486.1 | Scaffold2575 | 279110                  | CC                              | TT              | 1947036588               |
| SNP_P4_176448_279130 | NW_004517486.1 | Scaffold2575 | 279130                  | TT                              | CC              | 1947036590               |
| SNP_P4_176449_279153 | NW_004517486.1 | Scaffold2575 | 279153                  | GG                              | TT              | 1947036592               |
| SNP_P4_176450_279162 | NW_004517486.1 | Scaffold2575 | 279162                  | GG                              | AA              | 1947036594               |
| SNP_P4_176452_279191 | NW_004517486.1 | Scaffold2575 | 279191                  | CC                              | TT              | 1947036596               |
| SNP_P4_176453_279240 | NW_004517486.1 | Scaffold2575 | 279240                  | CC                              | AA              | 1947036598               |
| SNP_P4_176454_279281 | NW_004517486.1 | Scaffold2575 | 279281                  | AA                              | GG              | 1947036599               |
| SNP_P4_176456_279374 | NW_004517486.1 | Scaffold2575 | 279374                  | TT                              | GG              | 1947036600               |
| SNP_P4_176457_279381 | NW_004517486.1 | Scaffold2575 | 279381                  | GG                              | AA              | 1947036601               |
| SNP_P4_176458_279388 | NW_004517486.1 | Scaffold2575 | 279388                  | AA                              | GG              | 1947036602               |
| SNP_P4_176459_279409 | NW_004517486.1 | Scaffold2575 | 279409                  | GG                              | AA              | 1947036603               |
| SNP_P4_176460_279483 | NW_004517486.1 | Scaffold2575 | 279483                  | GG                              | CC              | 1947036604               |
| SNP_P4_176461_279547 | NW_004517486.1 | Scaffold2575 | 279547                  | GG                              | AA              | 1947036605               |
| SNP_P4_176462_279573 | NW_004517486.1 | Scaffold2575 | 279573                  | AA                              | CC              | 1947036606               |
| SNP_P4_176463_279633 | NW_004517486.1 | Scaffold2575 | 279633                  | AA                              | TT              | 1947036607               |

| SNPs IDs             | Chromosome IDs | Chromosomes  | Physical positions (bp) | CDC Frontier (Reference genome) | (ILWC46 & LPNB) | NCBI SNPdb Accession IDs |
|----------------------|----------------|--------------|-------------------------|---------------------------------|-----------------|--------------------------|
| SNP_P4_176464_279710 | NW_004517486.1 | Scaffold2575 | 279710                  | CC                              | GG              | 1947036608               |
| SNP_P4_176465_279731 | NW_004517486.1 | Scaffold2575 | 279731                  | AA                              | CC              | 1947036609               |
| SNP_P4_176466_279836 | NW_004517486.1 | Scaffold2575 | 279836                  | TT                              | AA              | 1947036610               |
| SNP_P4_176467_280037 | NW_004517486.1 | Scaffold2575 | 280037                  | TT                              | GG              | 1947036611               |
| SNP_P4_176469_280089 | NW_004517486.1 | Scaffold2575 | 280089                  | CC                              | TT              | 1947036612               |
| SNP_P4_176470_280120 | NW_004517486.1 | Scaffold2575 | 280120                  | CC                              | TT              | 1947036613               |
| SNP_P4_176471_280143 | NW_004517486.1 | Scaffold2575 | 280143                  | TT                              | CC              | 1947036614               |
| SNP_P4_176472_280165 | NW_004517486.1 | Scaffold2575 | 280165                  | TT                              | CC              | 1947036615               |
| SNP_P4_176473_280166 | NW_004517486.1 | Scaffold2575 | 280166                  | TT                              | CC              | 1947036616               |
| SNP_P4_176474_280167 | NW_004517486.1 | Scaffold2575 | 280167                  | GG                              | AA              | 1947036617               |
| SNP_P4_176475_280221 | NW_004517486.1 | Scaffold2575 | 280221                  | GG                              | CC              | 1947036618               |
| SNP_P4_176476_280224 | NW_004517486.1 | Scaffold2575 | 280224                  | TT                              | CC              | 1947036619               |
| SNP_P4_176477_280284 | NW_004517486.1 | Scaffold2575 | 280284                  | CC                              | TT              | 1947036621               |
| SNP_P4_176478_280317 | NW_004517486.1 | Scaffold2575 | 280317                  | TT                              | CC              | 1947036623               |
| SNP_P4_176479_280358 | NW_004517486.1 | Scaffold2575 | 280358                  | AA                              | CC              | 1947036625               |
| SNP_P4_176480_280413 | NW_004517486.1 | Scaffold2575 | 280413                  | TT                              | CC              | 1947036627               |
| SNP_P4_176481_280425 | NW_004517486.1 | Scaffold2575 | 280425                  | CC                              | AA              | 1947036629               |
| SNP_P4_176482_280432 | NW_004517486.1 | Scaffold2575 | 280432                  | CC                              | TT              | 1947036631               |
| SNP_P4_176483_280467 | NW_004517486.1 | Scaffold2575 | 280467                  | GG                              | AA              | 1947036633               |
| SNP_P4_176484_280562 | NW_004517486.1 | Scaffold2575 | 280562                  | CC                              | GG              | 1947036635               |
| SNP_P4_176485_280587 | NW_004517486.1 | Scaffold2575 | 280587                  | CC                              | TT              | 1947036637               |
| SNP_P4_176486_280626 | NW_004517486.1 | Scaffold2575 | 280626                  | GG                              | AA              | 1947036639               |
| SNP_P4_176487_280639 | NW_004517486.1 | Scaffold2575 | 280639                  | TT                              | CC              | 1947036641               |
| SNP_P4_176488_280646 | NW_004517486.1 | Scaffold2575 | 280646                  | AA                              | TT              | 1947036643               |
| SNP_P4_176489_280725 | NW_004517486.1 | Scaffold2575 | 280725                  | GG                              | AA              | 1947036645               |
| SNP_P4_176490_280810 | NW_004517486.1 | Scaffold2575 | 280810                  | GG                              | CC              | 1947036647               |
| SNP_P4_176491_281631 | NW_004517486.1 | Scaffold2575 | 281631                  | AA                              | GG              | 1947036649               |
| SNP_P4_176492_281667 | NW_004517486.1 | Scaffold2575 | 281667                  | TT                              | AA              | 1947036651               |
| SNP_P4_176493_281679 | NW_004517486.1 | Scaffold2575 | 281679                  | GG                              | AA              | 1947036653               |
| SNP_P4_176494_281695 | NW_004517486.1 | Scaffold2575 | 281695                  | GG                              | CC              | 1947036655               |
| SNP_P4_176495_281699 | NW_004517486.1 | Scaffold2575 | 281699                  | CC                              | TT              | 1947036657               |
| SNP_P4_176496_281708 | NW_004517486.1 | Scaffold2575 | 281708                  | CC                              | TT              | 1947036659               |
| SNP_P4_176497_281978 | NW_004517486.1 | Scaffold2575 | 281978                  | AA                              | TT              | 1947036661               |
| SNP_P4_176499_282275 | NW_004517486.1 | Scaffold2575 | 282275                  | TT                              | GG              | 1947036663               |
| SNP_P4_176500_282294 | NW_004517486.1 | Scaffold2575 | 282294                  | AA                              | CC              | 1947036665               |
| SNP_P4_176501_64     | NW_004517487.1 | Scaffold2577 | 64                      | CC                              | AA              | 1947036667               |
| SNP_P4_176502_66     | NW_004517487.1 | Scaffold2577 | 66                      | CC                              | AA              | 1947036668               |
| SNP_P4_176503_2784   | NW_004517491.1 | Scaffold2583 | 2784                    | GG                              | CC              | 1947036670               |
| SNP_P4_176504_2874   | NW_004517491.1 | Scaffold2583 | 2874                    | GG                              | AA              | 1947036672               |
| SNP_P4_176505_284    | NW_004517495.1 | Scaffold2587 | 284                     | TT                              | CC              | 1947036674               |
| SNP_P4_176506_292    | NW_004517495.1 | Scaffold2587 | 292                     | CC                              | TT              | 1947036676               |
| SNP_P4_176507_466    | NW_004517495.1 | Scaffold2587 | 466                     | AA                              | GG              | 1947036678               |



| SNPs IDs            | Chromosome IDs | Chromosomes  | Physical positions (bp) | CDC Frontier (Reference genome) | (ILWC46 & LPNB) | NCBI SNPdb Accession IDs |
|---------------------|----------------|--------------|-------------------------|---------------------------------|-----------------|--------------------------|
| SNP_P4_176508_468   | NW_004517495.1 | Scaffold2587 | 468                     | TT                              | CC              | 1947036680               |
| SNP_P4_176509_470   | NW_004517495.1 | Scaffold2587 | 470                     | GG                              | AA              | 1947036682               |
| SNP_P4_176510_25597 | NW_004517495.1 | Scaffold2587 | 25597                   | TT                              | CC              | 1947036684               |
| SNP_P4_176511_32809 | NW_004517495.1 | Scaffold2587 | 32809                   | CC                              | TT              | 1947036686               |
| SNP_P4_176512_35077 | NW_004517495.1 | Scaffold2587 | 35077                   | CC                              | TT              | 1947036688               |
| SNP_P4_176513_35117 | NW_004517495.1 | Scaffold2587 | 35117                   | GG                              | AA              | 1947036690               |
| SNP_P4_176514_35124 | NW_004517495.1 | Scaffold2587 | 35124                   | TT                              | CC              | 1947036692               |
| SNP_P4_176515_46629 | NW_004517495.1 | Scaffold2587 | 46629                   | CC                              | AA              | 1947036694               |
| SNP_P4_176516_1662  | NW_004517496.1 | Scaffold2591 | 1662                    | TT                              | AA              | 1947036696               |
| SNP_P4_176517_1743  | NW_004517496.1 | Scaffold2591 | 1743                    | AA                              | TT              | 1947036698               |
| SNP_P4_176518_1760  | NW_004517496.1 | Scaffold2591 | 1760                    | AA                              | CC              | 1947036700               |
| SNP_P4_176519_1883  | NW_004517496.1 | Scaffold2591 | 1883                    | CC                              | GG              | 1947036701               |
| SNP_P4_176520_1974  | NW_004517496.1 | Scaffold2591 | 1974                    | GG                              | AA              | 1947036703               |
| SNP_P4_176521_1976  | NW_004517496.1 | Scaffold2591 | 1976                    | AA                              | CC              | 1947036705               |
| SNP_P4_176522_2005  | NW_004517496.1 | Scaffold2591 | 2005                    | TT                              | CC              | 1947036707               |
| SNP_P4_176523_2034  | NW_004517496.1 | Scaffold2591 | 2034                    | AA                              | CC              | 1947036709               |
| SNP_P4_176524_2091  | NW_004517496.1 | Scaffold2591 | 2091                    | CC                              | TT              | 1947036711               |
| SNP_P4_176525_2105  | NW_004517496.1 | Scaffold2591 | 2105                    | AA                              | GG              | 1947036713               |
| SNP_P4_176526_2194  | NW_004517496.1 | Scaffold2591 | 2194                    | AA                              | CC              | 1947036715               |
| SNP_P4_176527_2462  | NW_004517496.1 | Scaffold2591 | 2462                    | TT                              | AA              | 1947036717               |
| SNP_P4_176529_22792 | NW_004517497.1 | Scaffold2593 | 22792                   | GG                              | AA              | 1947036718               |
| SNP_P4_176530_22827 | NW_004517497.1 | Scaffold2593 | 22827                   | GG                              | AA              | 1947036720               |
| SNP_P4_176531_64    | NW_004517498.1 | Scaffold2594 | 64                      | AA                              | TT              | 1947036722               |
| SNP_P4_176532_14905 | NW_004517498.1 | Scaffold2594 | 14905                   | TT                              | AA              | 1947036724               |
| SNP_P4_176533_31919 | NW_004517498.1 | Scaffold2594 | 31919                   | AA                              | CC              | 1947036726               |
| SNP_P4_176534_31936 | NW_004517498.1 | Scaffold2594 | 31936                   | CC                              | TT              | 1947036728               |
| SNP_P4_176535_32311 | NW_004517498.1 | Scaffold2594 | 32311                   | AA                              | GG              | 1947036730               |
| SNP_P4_176536_32333 | NW_004517498.1 | Scaffold2594 | 32333                   | GG                              | AA              | 1947036732               |
| SNP_P4_176537_1495  | NW_004517501.1 | Scaffold2598 | 1495                    | AA                              | TT              | 1947036734               |
| SNP_P4_176538_1633  | NW_004517501.1 | Scaffold2598 | 1633                    | GG                              | TT              | 1947036736               |
| SNP_P4_176539_1658  | NW_004517501.1 | Scaffold2598 | 1658                    | GG                              | CC              | 1947036738               |
| SNP_P4_176540_1721  | NW_004517501.1 | Scaffold2598 | 1721                    | TT                              | CC              | 1947036740               |
| SNP_P4_176541_1937  | NW_004517501.1 | Scaffold2598 | 1937                    | GG                              | TT              | 1947036742               |
| SNP_P4_176542_1990  | NW_004517501.1 | Scaffold2598 | 1990                    | AA                              | CC              | 1947036744               |
| SNP_P4_176543_2226  | NW_004517501.1 | Scaffold2598 | 2226                    | AA                              | GG              | 1947036746               |
| SNP_P4_176545_2703  | NW_004517501.1 | Scaffold2598 | 2703                    | TT                              | GG              | 1947036748               |
| SNP_P4_176546_2710  | NW_004517501.1 | Scaffold2598 | 2710                    | AA                              | GG              | 1947036750               |
| SNP_P4_176547_4484  | NW_004517501.1 | Scaffold2598 | 4484                    | TT                              | AA              | 1947036752               |
| SNP_P4_176548_4724  | NW_004517501.1 | Scaffold2598 | 4724                    | CC                              | TT              | 1947036755               |
| SNP_P4_176549_8681  | NW_004517501.1 | Scaffold2598 | 8681                    | CC                              | TT              | 1947036757               |
| SNP_P4_176550_8826  | NW_004517501.1 | Scaffold2598 | 8826                    | CC                              | GG              | 1947036759               |
| SNP_P4_176551_9208  | NW_004517501.1 | Scaffold2598 | 9208                    | CC                              | AA              | 1947036761               |

| SNPs IDs            | Chromosome IDs | Chromosomes  | Physical positions (bp) | CDC Frontier (Reference genome) | (ILWC46 & LPNB) | NCBI SNPdb Accession IDs |
|---------------------|----------------|--------------|-------------------------|---------------------------------|-----------------|--------------------------|
| SNP_P4_176552_6316  | NW_004517502.1 | Scaffold2599 | 6316                    | TT                              | CC              | 1947036763               |
| SNP_P4_176553_6585  | NW_004517502.1 | Scaffold2599 | 6585                    | TT                              | CC              | 1947036765               |
| SNP_P4_176554_7023  | NW_004517502.1 | Scaffold2599 | 7023                    | AA                              | GG              | 1947036767               |
| SNP_P4_176555_7195  | NW_004517502.1 | Scaffold2599 | 7195                    | GG                              | CC              | 1947036769               |
| SNP_P4_176556_16748 | NW_004517502.1 | Scaffold2599 | 16748                   | TT                              | GG              | 1947036771               |
| SNP_P4_176557_18864 | NW_004517502.1 | Scaffold2599 | 18864                   | GG                              | CC              | 1947036773               |
| SNP_P4_176558_19033 | NW_004517502.1 | Scaffold2599 | 19033                   | AA                              | TT              | 1947036775               |
| SNP_P4_176559_19973 | NW_004517502.1 | Scaffold2599 | 19973                   | GG                              | TT              | 1947036777               |
| SNP_P4_176560_19976 | NW_004517502.1 | Scaffold2599 | 19976                   | TT                              | GG              | 1947036779               |
| SNP_P4_176561_20819 | NW_004517502.1 | Scaffold2599 | 20819                   | TT                              | GG              | 1947036781               |
| SNP_P4_176562_1937  | NW_004517503.1 | Scaffold2600 | 1937                    | GG                              | TT              | 1947036783               |
| SNP_P4_176563_1961  | NW_004517503.1 | Scaffold2600 | 1961                    | TT                              | GG              | 1947036785               |
| SNP_P4_176564_1970  | NW_004517503.1 | Scaffold2600 | 1970                    | GG                              | AA              | 1947036787               |
| SNP_P4_176565_2018  | NW_004517503.1 | Scaffold2600 | 2018                    | TT                              | GG              | 1947036789               |
| SNP_P4_176566_2157  | NW_004517503.1 | Scaffold2600 | 2157                    | AA                              | GG              | 1947036791               |
| SNP_P4_176567_2217  | NW_004517503.1 | Scaffold2600 | 2217                    | AA                              | GG              | 1947036793               |
| SNP_P4_176568_2218  | NW_004517503.1 | Scaffold2600 | 2218                    | AA                              | TT              | 1947036795               |
| SNP_P4_176569_2444  | NW_004517503.1 | Scaffold2600 | 2444                    | AA                              | TT              | 1947036797               |
| SNP_P4_176570_2485  | NW_004517503.1 | Scaffold2600 | 2485                    | GG                              | CC              | 1947036799               |
| SNP_P4_176571_9478  | NW_004517503.1 | Scaffold2600 | 9478                    | TT                              | CC              | 1947036801               |
| SNP_P4_176572_13799 | NW_004517503.1 | Scaffold2600 | 13799                   | GG                              | AA              | 1947036803               |
| SNP_P4_176573_13808 | NW_004517503.1 | Scaffold2600 | 13808                   | TT                              | CC              | 1947036805               |
| SNP_P4_176574_13839 | NW_004517503.1 | Scaffold2600 | 13839                   | TT                              | AA              | 1947036807               |
| SNP_P4_176575_6254  | NW_004517506.1 | Scaffold2603 | 6254                    | AA                              | TT              | 1947036809               |
| SNP_P4_176576_6269  | NW_004517506.1 | Scaffold2603 | 6269                    | CC                              | TT              | 1947036811               |
| SNP_P4_176579_6607  | NW_004517506.1 | Scaffold2603 | 6607                    | CC                              | TT              | 1947036813               |
| SNP_P4_176580_6855  | NW_004517506.1 | Scaffold2603 | 6855                    | CC                              | AA              | 1947036815               |
| SNP_P4_176581_6909  | NW_004517506.1 | Scaffold2603 | 6909                    | AA                              | TT              | 1947036817               |
| SNP_P4_176582_41131 | NW_004517506.1 | Scaffold2603 | 41131                   | GG                              | AA              | 1947036819               |
| SNP_P4_176583_45094 | NW_004517506.1 | Scaffold2603 | 45094                   | CC                              | AA              | 1947036821               |
| SNP_P4_176585_50793 | NW_004517506.1 | Scaffold2603 | 50793                   | AA                              | TT              | 1947036823               |
| SNP_P4_176586_57803 | NW_004517506.1 | Scaffold2603 | 57803                   | TT                              | AA              | 1947036825               |
| SNP_P4_176587_57813 | NW_004517506.1 | Scaffold2603 | 57813                   | TT                              | CC              | 1947036827               |
| SNP_P4_176588_57958 | NW_004517506.1 | Scaffold2603 | 57958                   | GG                              | CC              | 1947036829               |
| SNP_P4_176589_58179 | NW_004517506.1 | Scaffold2603 | 58179                   | CC                              | TT              | 1947036832               |
| SNP_P4_176590_58193 | NW_004517506.1 | Scaffold2603 | 58193                   | AA                              | GG              | 1947036834               |
| SNP_P4_176591_59678 | NW_004517506.1 | Scaffold2603 | 59678                   | CC                              | TT              | 1947036836               |
| SNP_P4_176592_67352 | NW_004517506.1 | Scaffold2603 | 67352                   | TT                              | CC              | 1947036838               |
| SNP_P4_176594_67475 | NW_004517506.1 | Scaffold2603 | 67475                   | AA                              | TT              | 1947036840               |
| SNP_P4_176595_67491 | NW_004517506.1 | Scaffold2603 | 67491                   | AA                              | TT              | 1947036842               |
| SNP_P4_176596_67573 | NW_004517506.1 | Scaffold2603 | 67573                   | CC                              | TT              | 1947036844               |
| SNP_P4_176597_67642 | NW_004517506.1 | Scaffold2603 | 67642                   | TT                              | AA              | 1947036846               |

| SNPs IDs            | Chromosome IDs | Chromosomes  | Physical positions (bp) | CDC Frontier (Reference genome) | (ILWC46 & LPNB) | NCBI SNPdb Accession IDs |
|---------------------|----------------|--------------|-------------------------|---------------------------------|-----------------|--------------------------|
| SNP_P4_176598_67652 | NW_004517506.1 | Scaffold2603 | 67652                   | GG                              | AA              | 1947036848               |
| SNP_P4_176599_67654 | NW_004517506.1 | Scaffold2603 | 67654                   | CC                              | TT              | 1947036850               |
| SNP_P4_176600_67677 | NW_004517506.1 | Scaffold2603 | 67677                   | TT                              | CC              | 1947036852               |
| SNP_P4_176601_67716 | NW_004517506.1 | Scaffold2603 | 67716                   | GG                              | CC              | 1947036854               |
| SNP_P4_176602_67741 | NW_004517506.1 | Scaffold2603 | 67741                   | AA                              | CC              | 1947036856               |
| SNP_P4_176603_67793 | NW_004517506.1 | Scaffold2603 | 67793                   | GG                              | AA              | 1947036858               |
| SNP_P4_176604_67828 | NW_004517506.1 | Scaffold2603 | 67828                   | AA                              | GG              | 1947036860               |
| SNP_P4_176605_67851 | NW_004517506.1 | Scaffold2603 | 67851                   | TT                              | AA              | 1947036862               |
| SNP_P4_176606_67858 | NW_004517506.1 | Scaffold2603 | 67858                   | TT                              | CC              | 1947036864               |
| SNP_P4_176607_67860 | NW_004517506.1 | Scaffold2603 | 67860                   | AA                              | GG              | 1947036866               |
| SNP_P4_176608_67870 | NW_004517506.1 | Scaffold2603 | 67870                   | AA                              | GG              | 1947036868               |
| SNP_P4_176609_67889 | NW_004517506.1 | Scaffold2603 | 67889                   | TT                              | AA              | 1947036870               |
| SNP_P4_176610_67927 | NW_004517506.1 | Scaffold2603 | 67927                   | AA                              | GG              | 1947036872               |
| SNP_P4_176611_4357  | NW_004517507.1 | Scaffold2604 | 4357                    | GG                              | CC              | 1947036875               |
| SNP_P4_176612_1192  | NW_004517509.1 | Scaffold2606 | 1192                    | CC                              | TT              | 1947036877               |
| SNP_P4_176613_1240  | NW_004517509.1 | Scaffold2606 | 1240                    | GG                              | CC              | 1947036879               |
| SNP_P4_176614_1408  | NW_004517509.1 | Scaffold2606 | 1408                    | TT                              | CC              | 1947036881               |
| SNP_P4_176615_1449  | NW_004517509.1 | Scaffold2606 | 1449                    | TT                              | GG              | 1947036883               |
| SNP_P4_176616_4201  | NW_004517509.1 | Scaffold2606 | 4201                    | CC                              | TT              | 1947036885               |
| SNP_P4_176617_4329  | NW_004517509.1 | Scaffold2606 | 4329                    | CC                              | TT              | 1947036887               |
| SNP_P4_176618_4341  | NW_004517509.1 | Scaffold2606 | 4341                    | CC                              | AA              | 1947036889               |
| SNP_P4_176619_6166  | NW_004517509.1 | Scaffold2606 | 6166                    | GG                              | TT              | 1947036891               |
| SNP_P4_176620_6504  | NW_004517509.1 | Scaffold2606 | 6504                    | AA                              | GG              | 1947036893               |
| SNP_P4_176621_22261 | NW_004517509.1 | Scaffold2606 | 22261                   | TT                              | CC              | 1947036895               |
| SNP_P4_176622_22318 | NW_004517509.1 | Scaffold2606 | 22318                   | AA                              | TT              | 1947036897               |
| SNP_P4_176623_22323 | NW_004517509.1 | Scaffold2606 | 22323                   | AA                              | GG              | 1947036899               |
| SNP_P4_176624_27643 | NW_004517509.1 | Scaffold2606 | 27643                   | TT                              | CC              | 1947036901               |
| SNP_P4_176625_27785 | NW_004517509.1 | Scaffold2606 | 27785                   | TT                              | CC              | 1947036904               |
| SNP_P4_176626_28728 | NW_004517509.1 | Scaffold2606 | 28728                   | GG                              | AA              | 1947036906               |
| SNP_P4_176627_28732 | NW_004517509.1 | Scaffold2606 | 28732                   | TT                              | CC              | 1947036908               |
| SNP_P4_176628_28753 | NW_004517509.1 | Scaffold2606 | 28753                   | TT                              | CC              | 1947036910               |
| SNP_P4_176629_28760 | NW_004517509.1 | Scaffold2606 | 28760                   | CC                              | TT              | 1947036912               |
| SNP_P4_176630_28777 | NW_004517509.1 | Scaffold2606 | 28777                   | AA                              | GG              | 1947036914               |
| SNP_P4_176631_28821 | NW_004517509.1 | Scaffold2606 | 28821                   | TT                              | CC              | 1947036916               |
| SNP_P4_176632_31780 | NW_004517509.1 | Scaffold2606 | 31780                   | TT                              | CC              | 1947036918               |
| SNP_P4_176633_31949 | NW_004517509.1 | Scaffold2606 | 31949                   | AA                              | GG              | 1947036920               |
| SNP_P4_176634_465   | NW_004517510.1 | Scaffold2607 | 465                     | AA                              | GG              | 1947036922               |
| SNP_P4_176635_483   | NW_004517510.1 | Scaffold2607 | 483                     | TT                              | AA              | 1947036924               |
| SNP_P4_176636_933   | NW_004517510.1 | Scaffold2607 | 933                     | GG                              | CC              | 1947036926               |
| SNP_P4_176637_1009  | NW_004517510.1 | Scaffold2607 | 1009                    | AA                              | TT              | 1947036928               |
| SNP_P4_176638_1374  | NW_004517510.1 | Scaffold2607 | 1374                    | GG                              | TT              | 1947036930               |
| SNP_P4_176640_5588  | NW_004517514.1 | Scaffold2612 | 5588                    | GG                              | AA              | 1947036932               |

| SNPs IDs             | Chromosome IDs | Chromosomes  | Physical positions (bp) | CDC Frontier (Reference genome) | (ILWC46 & LPNB) | NCBI SNPdb Accession IDs |
|----------------------|----------------|--------------|-------------------------|---------------------------------|-----------------|--------------------------|
| SNP_P4_176641_5607   | NW_004517514.1 | Scaffold2612 | 5607                    | AA                              | TT              | 1947036934               |
| SNP_P4_176642_5886   | NW_004517514.1 | Scaffold2612 | 5886                    | AA                              | GG              | 1947036936               |
| SNP_P4_176643_5944   | NW_004517514.1 | Scaffold2612 | 5944                    | CC                              | TT              | 1947036938               |
| SNP_P4_176644_5981   | NW_004517514.1 | Scaffold2612 | 5981                    | CC                              | TT              | 1947036940               |
| SNP_P4_176645_6091   | NW_004517514.1 | Scaffold2612 | 6091                    | TT                              | AA              | 1947036942               |
| SNP_P4_176646_6165   | NW_004517514.1 | Scaffold2612 | 6165                    | TT                              | AA              | 1947036944               |
| SNP_P4_176647_6531   | NW_004517514.1 | Scaffold2612 | 6531                    | CC                              | TT              | 1947036946               |
| SNP_P4_176648_6629   | NW_004517514.1 | Scaffold2612 | 6629                    | AA                              | TT              | 1947036948               |
| SNP_P4_176649_6640   | NW_004517514.1 | Scaffold2612 | 6640                    | GG                              | CC              | 1947036950               |
| SNP_P4_176650_6724   | NW_004517514.1 | Scaffold2612 | 6724                    | TT                              | CC              | 1947036952               |
| SNP_P4_176651_7938   | NW_004517514.1 | Scaffold2612 | 7938                    | GG                              | AA              | 1947036954               |
| SNP_P4_176652_8021   | NW_004517514.1 | Scaffold2612 | 8021                    | CC                              | TT              | 1947036957               |
| SNP_P4_176653_1052   | NW_004517515.1 | Scaffold2613 | 1052                    | AA                              | TT              | 1947036959               |
| SNP_P4_176654_240    | NW_004517518.1 | Scaffold2616 | 240                     | CC                              | GG              | 1947036961               |
| SNP_P4_176655_267    | NW_004517518.1 | Scaffold2616 | 267                     | CC                              | TT              | 1947036963               |
| SNP_P4_176656_314    | NW_004517518.1 | Scaffold2616 | 314                     | AA                              | CC              | 1947036965               |
| SNP_P4_176657_315    | NW_004517518.1 | Scaffold2616 | 315                     | CC                              | TT              | 1947036967               |
| SNP_P4_176658_15841  | NW_004517519.1 | Scaffold2617 | 15841                   | AA                              | GG              | 1947036969               |
| SNP_P4_176659_29541  | NW_004517519.1 | Scaffold2617 | 29541                   | AA                              | TT              | 1947036971               |
| SNP_P4_176660_29742  | NW_004517519.1 | Scaffold2617 | 29742                   | GG                              | AA              | 1947036973               |
| SNP_P4_176661_29771  | NW_004517519.1 | Scaffold2617 | 29771                   | CC                              | AA              | 1947036975               |
| SNP_P4_176662_29780  | NW_004517519.1 | Scaffold2617 | 29780                   | CC                              | GG              | 1947036977               |
| SNP_P4_176663_30029  | NW_004517519.1 | Scaffold2617 | 30029                   | GG                              | AA              | 1947036979               |
| SNP_P4_176664_30035  | NW_004517519.1 | Scaffold2617 | 30035                   | GG                              | AA              | 1947036981               |
| SNP_P4_176665_31408  | NW_004517519.1 | Scaffold2617 | 31408                   | AA                              | CC              | 1947036983               |
| SNP_P4_176666_31547  | NW_004517519.1 | Scaffold2617 | 31547                   | CC                              | TT              | 1947036985               |
| SNP_P4_176667_31608  | NW_004517519.1 | Scaffold2617 | 31608                   | TT                              | CC              | 1947036987               |
| SNP_P4_176668_31610  | NW_004517519.1 | Scaffold2617 | 31610                   | TT                              | CC              | 1947036989               |
| SNP_P4_176669_31678  | NW_004517519.1 | Scaffold2617 | 31678                   | CC                              | TT              | 1947036991               |
| SNP_P4_176670_31726  | NW_004517519.1 | Scaffold2617 | 31726                   | GG                              | AA              | 1947036993               |
| SNP_P4_176671_33715  | NW_004517519.1 | Scaffold2617 | 33715                   | GG                              | TT              | 1947036995               |
| SNP_P4_176672_37380  | NW_004517519.1 | Scaffold2617 | 37380                   | GG                              | AA              | 1947036997               |
| SNP_P4_176673_59988  | NW_004517519.1 | Scaffold2617 | 59988                   | AA                              | GG              | 1947036999               |
| SNP_P4_176674_62235  | NW_004517519.1 | Scaffold2617 | 62235                   | GG                              | AA              | 1947037001               |
| SNP_P4_176675_81525  | NW_004517519.1 | Scaffold2617 | 81525                   | TT                              | GG              | 1947037003               |
| SNP_P4_176676_81529  | NW_004517519.1 | Scaffold2617 | 81529                   | AA                              | CC              | 1947037005               |
| SNP_P4_176677_83710  | NW_004517519.1 | Scaffold2617 | 83710                   | AA                              | GG              | 1947037007               |
| SNP_P4_176678_110076 | NW_004517519.1 | Scaffold2617 | 110076                  | GG                              | TT              | 1947037009               |
| SNP_P4_176679_110173 | NW_004517519.1 | Scaffold2617 | 110173                  | AA                              | CC              | 1947037011               |
| SNP_P4_176680_110443 | NW_004517519.1 | Scaffold2617 | 110443                  | TT                              | GG              | 1947037013               |
| SNP_P4_176681_110489 | NW_004517519.1 | Scaffold2617 | 110489                  | AA                              | GG              | 1947037015               |
| SNP_P4_176682_110579 | NW_004517519.1 | Scaffold2617 | 110579                  | TT                              | CC              | 1947037017               |

| SNPs IDs             | Chromosome IDs | Chromosomes  | Physical positions (bp) | CDC Frontier (Reference genome) | (ILWC46 & LPNB) | NCBI SNPdb Accession IDs |
|----------------------|----------------|--------------|-------------------------|---------------------------------|-----------------|--------------------------|
| SNP_P4_176683_111506 | NW_004517519.1 | Scaffold2617 | 111506                  | CC                              | TT              | 1947037019               |
| SNP_P4_176684_111603 | NW_004517519.1 | Scaffold2617 | 111603                  | TT                              | AA              | 1947037021               |
| SNP_P4_176685_111665 | NW_004517519.1 | Scaffold2617 | 111665                  | AA                              | GG              | 1947037023               |
| SNP_P4_176686_111704 | NW_004517519.1 | Scaffold2617 | 111704                  | AA                              | GG              | 1947037026               |
| SNP_P4_176687_111878 | NW_004517519.1 | Scaffold2617 | 111878                  | TT                              | CC              | 1947037028               |
| SNP_P4_176688_111940 | NW_004517519.1 | Scaffold2617 | 111940                  | TT                              | CC              | 1947037030               |
| SNP_P4_176689_111994 | NW_004517519.1 | Scaffold2617 | 111994                  | TT                              | CC              | 1947037032               |
| SNP_P4_176690_112006 | NW_004517519.1 | Scaffold2617 | 112006                  | TT                              | CC              | 1947037034               |
| SNP_P4_176691_112050 | NW_004517519.1 | Scaffold2617 | 112050                  | AA                              | GG              | 1947037036               |
| SNP_P4_176692_112057 | NW_004517519.1 | Scaffold2617 | 112057                  | CC                              | TT              | 1947037038               |
| SNP_P4_176693_112221 | NW_004517519.1 | Scaffold2617 | 112221                  | GG                              | AA              | 1947037040               |
| SNP_P4_176694_112268 | NW_004517519.1 | Scaffold2617 | 112268                  | CC                              | AA              | 1947037042               |
| SNP_P4_176695_112284 | NW_004517519.1 | Scaffold2617 | 112284                  | GG                              | TT              | 1947037044               |
| SNP_P4_176696_112285 | NW_004517519.1 | Scaffold2617 | 112285                  | TT                              | CC              | 1947037046               |
| SNP_P4_176697_112338 | NW_004517519.1 | Scaffold2617 | 112338                  | TT                              | CC              | 1947037048               |
| SNP_P4_176698_112383 | NW_004517519.1 | Scaffold2617 | 112383                  | GG                              | AA              | 1947037050               |
| SNP_P4_176699_130362 | NW_004517519.1 | Scaffold2617 | 130362                  | AA                              | GG              | 1947037052               |
| SNP_P4_176700_138856 | NW_004517519.1 | Scaffold2617 | 138856                  | AA                              | GG              | 1947037054               |
| SNP_P4_176701_169182 | NW_004517519.1 | Scaffold2617 | 169182                  | AA                              | GG              | 1947037056               |
| SNP_P4_176703_245758 | NW_004517519.1 | Scaffold2617 | 245758                  | AA                              | TT              | 1947037058               |
| SNP_P4_176704_267885 | NW_004517519.1 | Scaffold2617 | 267885                  | CC                              | TT              | 1947037060               |
| SNP_P4_176705_277543 | NW_004517519.1 | Scaffold2617 | 277543                  | AA                              | TT              | 1947037062               |
| SNP_P4_176706_288711 | NW_004517519.1 | Scaffold2617 | 288711                  | TT                              | CC              | 1947037064               |
| SNP_P4_176707_304975 | NW_004517519.1 | Scaffold2617 | 304975                  | GG                              | AA              | 1947037066               |
| SNP_P4_176708_320743 | NW_004517519.1 | Scaffold2617 | 320743                  | GG                              | AA              | 1947037068               |
| SNP_P4_176709_320833 | NW_004517519.1 | Scaffold2617 | 320833                  | GG                              | TT              | 1947037071               |
| SNP_P4_176711_321057 | NW_004517519.1 | Scaffold2617 | 321057                  | GG                              | CC              | 1947037073               |
| SNP_P4_176712_321162 | NW_004517519.1 | Scaffold2617 | 321162                  | GG                              | TT              | 1947037075               |
| SNP_P4_176713_321247 | NW_004517519.1 | Scaffold2617 | 321247                  | CC                              | AA              | 1947037077               |
| SNP_P4_176714_321424 | NW_004517519.1 | Scaffold2617 | 321424                  | TT                              | GG              | 1947037079               |
| SNP_P4_176716_321773 | NW_004517519.1 | Scaffold2617 | 321773                  | TT                              | CC              | 1947037081               |
| SNP_P4_176718_321846 | NW_004517519.1 | Scaffold2617 | 321846                  | AA                              | TT              | 1947037083               |
| SNP_P4_176719_321848 | NW_004517519.1 | Scaffold2617 | 321848                  | TT                              | AA              | 1947037085               |
| SNP_P4_176720_322219 | NW_004517519.1 | Scaffold2617 | 322219                  | TT                              | CC              | 1947037087               |
| SNP_P4_176721_322284 | NW_004517519.1 | Scaffold2617 | 322284                  | CC                              | TT              | 1947037089               |
| SNP_P4_176722_322349 | NW_004517519.1 | Scaffold2617 | 322349                  | TT                              | CC              | 1947037091               |
| SNP_P4_176723_322358 | NW_004517519.1 | Scaffold2617 | 322358                  | GG                              | AA              | 1947037093               |
| SNP_P4_176724_322392 | NW_004517519.1 | Scaffold2617 | 322392                  | GG                              | AA              | 1947037095               |
| SNP_P4_176725_322401 | NW_004517519.1 | Scaffold2617 | 322401                  | GG                              | TT              | 1947037097               |
| SNP_P4_176726_322430 | NW_004517519.1 | Scaffold2617 | 322430                  | GG                              | AA              | 1947037099               |
| SNP_P4_176727_322540 | NW_004517519.1 | Scaffold2617 | 322540                  | CC                              | TT              | 1947037101               |
| SNP_P4_176728_322576 | NW_004517519.1 | Scaffold2617 | 322576                  | AA                              | CC              | 1947037103               |

| SNPs IDs             | Chromosome IDs | Chromosomes  | Physical positions (bp) | CDC Frontier (Reference genome) | (ILWC46 & LPNB) | NCBI SNPdb Accession IDs |
|----------------------|----------------|--------------|-------------------------|---------------------------------|-----------------|--------------------------|
| SNP_P4_176729_322616 | NW_004517519.1 | Scaffold2617 | 322616                  | CC                              | TT              | 1947037105               |
| SNP_P4_176730_322626 | NW_004517519.1 | Scaffold2617 | 322626                  | GG                              | AA              | 1947037107               |
| SNP_P4_176731_322643 | NW_004517519.1 | Scaffold2617 | 322643                  | GG                              | AA              | 1947037109               |
| SNP_P4_176732_322858 | NW_004517519.1 | Scaffold2617 | 322858                  | AA                              | GG              | 1947037111               |
| SNP_P4_176733_322894 | NW_004517519.1 | Scaffold2617 | 322894                  | TT                              | CC              | 1947037113               |
| SNP_P4_176734_322934 | NW_004517519.1 | Scaffold2617 | 322934                  | CC                              | GG              | 1947037115               |
| SNP_P4_176735_322937 | NW_004517519.1 | Scaffold2617 | 322937                  | AA                              | TT              | 1947037117               |
| SNP_P4_176736_322943 | NW_004517519.1 | Scaffold2617 | 322943                  | CC                              | TT              | 1947037119               |
| SNP_P4_176737_322970 | NW_004517519.1 | Scaffold2617 | 322970                  | TT                              | CC              | 1947037121               |
| SNP_P4_176738_323030 | NW_004517519.1 | Scaffold2617 | 323030                  | AA                              | GG              | 1947037123               |
| SNP_P4_176739_323067 | NW_004517519.1 | Scaffold2617 | 323067                  | GG                              | TT              | 1947037125               |
| SNP_P4_176740_323077 | NW_004517519.1 | Scaffold2617 | 323077                  | AA                              | GG              | 1947037127               |
| SNP_P4_176741_323247 | NW_004517519.1 | Scaffold2617 | 323247                  | GG                              | TT              | 1947037129               |
| SNP_P4_176743_324554 | NW_004517519.1 | Scaffold2617 | 324554                  | TT                              | AA              | 1947037131               |
| SNP_P4_176744_324639 | NW_004517519.1 | Scaffold2617 | 324639                  | GG                              | AA              | 1947037133               |
| SNP_P4_176745_324860 | NW_004517519.1 | Scaffold2617 | 324860                  | AA                              | CC              | 1947037135               |
| SNP_P4_176746_325586 | NW_004517519.1 | Scaffold2617 | 325586                  | GG                              | AA              | 1947037137               |
| SNP_P4_176747_339689 | NW_004517519.1 | Scaffold2617 | 339689                  | TT                              | CC              | 1947037139               |
| SNP_P4_176748_339751 | NW_004517519.1 | Scaffold2617 | 339751                  | AA                              | GG              | 1947037141               |
| SNP_P4_176749_339753 | NW_004517519.1 | Scaffold2617 | 339753                  | GG                              | TT              | 1947037143               |
| SNP_P4_176750_342777 | NW_004517519.1 | Scaffold2617 | 342777                  | AA                              | CC              | 1947037145               |
| SNP_P4_176751_371480 | NW_004517519.1 | Scaffold2617 | 371480                  | TT                              | CC              | 1947037147               |
| SNP_P4_176752_383566 | NW_004517519.1 | Scaffold2617 | 383566                  | CC                              | TT              | 1947037149               |
| SNP_P4_176753_402141 | NW_004517519.1 | Scaffold2617 | 402141                  | CC                              | TT              | 1947037151               |
| SNP_P4_176754_402214 | NW_004517519.1 | Scaffold2617 | 402214                  | AA                              | GG              | 1947037153               |
| SNP_P4_176755_402425 | NW_004517519.1 | Scaffold2617 | 402425                  | AA                              | TT              | 1947037155               |
| SNP_P4_176757_402514 | NW_004517519.1 | Scaffold2617 | 402514                  | GG                              | AA              | 1947037157               |
| SNP_P4_176759_402530 | NW_004517519.1 | Scaffold2617 | 402530                  | CC                              | AA              | 1947037159               |
| SNP_P4_176760_402545 | NW_004517519.1 | Scaffold2617 | 402545                  | AA                              | TT              | 1947037162               |
| SNP_P4_176761_402577 | NW_004517519.1 | Scaffold2617 | 402577                  | GG                              | AA              | 1947037164               |
| SNP_P4_176763_402678 | NW_004517519.1 | Scaffold2617 | 402678                  | CC                              | AA              | 1947037166               |
| SNP_P4_176764_402702 | NW_004517519.1 | Scaffold2617 | 402702                  | TT                              | CC              | 1947037168               |
| SNP_P4_176765_402712 | NW_004517519.1 | Scaffold2617 | 402712                  | GG                              | AA              | 1947037170               |
| SNP_P4_176767_402796 | NW_004517519.1 | Scaffold2617 | 402796                  | CC                              | TT              | 1947037172               |
| SNP_P4_176768_402803 | NW_004517519.1 | Scaffold2617 | 402803                  | AA                              | GG              | 1947037174               |
| SNP_P4_176769_402886 | NW_004517519.1 | Scaffold2617 | 402886                  | GG                              | AA              | 1947037176               |
| SNP_P4_176770_402923 | NW_004517519.1 | Scaffold2617 | 402923                  | TT                              | CC              | 1947037178               |
| SNP_P4_176771_413656 | NW_004517519.1 | Scaffold2617 | 413656                  | GG                              | AA              | 1947037180               |
| SNP_P4_176772_413729 | NW_004517519.1 | Scaffold2617 | 413729                  | CC                              | AA              | 1947037182               |
| SNP_P4_176773_413730 | NW_004517519.1 | Scaffold2617 | 413730                  | CC                              | AA              | 1947037184               |
| SNP_P4_176774_413741 | NW_004517519.1 | Scaffold2617 | 413741                  | TT                              | GG              | 1947037186               |
| SNP_P4_176775_414290 | NW_004517519.1 | Scaffold2617 | 414290                  | CC                              | TT              | 1947037188               |

| SNPs IDs             | Chromosome IDs | Chromosomes  | Physical positions (bp) | CDC Frontier (Reference genome) | (ILWC46 & LPNB) | NCBI SNPdb Accession IDs |
|----------------------|----------------|--------------|-------------------------|---------------------------------|-----------------|--------------------------|
| SNP_P4_176776_414684 | NW_004517519.1 | Scaffold2617 | 414684                  | AA                              | GG              | 1947037190               |
| SNP_P4_176777_416933 | NW_004517519.1 | Scaffold2617 | 416933                  | GG                              | AA              | 1947037192               |
| SNP_P4_176778_416986 | NW_004517519.1 | Scaffold2617 | 416986                  | GG                              | AA              | 1947037194               |
| SNP_P4_176779_417000 | NW_004517519.1 | Scaffold2617 | 417000                  | CC                              | AA              | 1947037196               |
| SNP_P4_176780_433536 | NW_004517519.1 | Scaffold2617 | 433536                  | AA                              | GG              | 1947037198               |
| SNP_P4_176781_433767 | NW_004517519.1 | Scaffold2617 | 433767                  | AA                              | GG              | 1947037200               |
| SNP_P4_176783_444225 | NW_004517519.1 | Scaffold2617 | 444225                  | AA                              | CC              | 1947037202               |
| SNP_P4_176785_444399 | NW_004517519.1 | Scaffold2617 | 444399                  | AA                              | GG              | 1947037204               |
| SNP_P4_176786_444449 | NW_004517519.1 | Scaffold2617 | 444449                  | AA                              | GG              | 1947037206               |
| SNP_P4_176787_444458 | NW_004517519.1 | Scaffold2617 | 444458                  | GG                              | AA              | 1947037208               |
| SNP_P4_176788_444472 | NW_004517519.1 | Scaffold2617 | 444472                  | TT                              | CC              | 1947037210               |
| SNP_P4_176789_444491 | NW_004517519.1 | Scaffold2617 | 444491                  | AA                              | GG              | 1947037212               |
| SNP_P4_176790_474648 | NW_004517519.1 | Scaffold2617 | 474648                  | AA                              | TT              | 1947037214               |
| SNP_P4_176791_474727 | NW_004517519.1 | Scaffold2617 | 474727                  | CC                              | TT              | 1947037216               |
| SNP_P4_176793_506764 | NW_004517519.1 | Scaffold2617 | 506764                  | TT                              | GG              | 1947037218               |
| SNP_P4_176794_513562 | NW_004517519.1 | Scaffold2617 | 513562                  | CC                              | AA              | 1947037220               |
| SNP_P4_176795_513724 | NW_004517519.1 | Scaffold2617 | 513724                  | CC                              | TT              | 1947037222               |
| SNP_P4_176796_513744 | NW_004517519.1 | Scaffold2617 | 513744                  | GG                              | CC              | 1947037224               |
| SNP_P4_176797_513931 | NW_004517519.1 | Scaffold2617 | 513931                  | AA                              | GG              | 1947037227               |
| SNP_P4_176798_513970 | NW_004517519.1 | Scaffold2617 | 513970                  | AA                              | GG              | 1947037229               |
| SNP_P4_176799_514032 | NW_004517519.1 | Scaffold2617 | 514032                  | GG                              | AA              | 1947037231               |
| SNP_P4_176800_514123 | NW_004517519.1 | Scaffold2617 | 514123                  | AA                              | CC              | 1947037233               |
| SNP_P4_176801_514197 | NW_004517519.1 | Scaffold2617 | 514197                  | TT                              | GG              | 1947037235               |
| SNP_P4_176802_514273 | NW_004517519.1 | Scaffold2617 | 514273                  | AA                              | TT              | 1947037237               |
| SNP_P4_176803_514297 | NW_004517519.1 | Scaffold2617 | 514297                  | GG                              | AA              | 1947037239               |
| SNP_P4_176804_4337   | NW_004517520.1 | Scaffold2618 | 4337                    | GG                              | AA              | 1947037241               |
| SNP_P4_176805_4837   | NW_004517520.1 | Scaffold2618 | 4837                    | TT                              | CC              | 1947037243               |
| SNP_P4_176806_4855   | NW_004517520.1 | Scaffold2618 | 4855                    | CC                              | TT              | 1947037245               |
| SNP_P4_176807_4865   | NW_004517520.1 | Scaffold2618 | 4865                    | TT                              | AA              | 1947037247               |
| SNP_P4_176808_23000  | NW_004517521.1 | Scaffold2620 | 23000                   | CC                              | AA              | 1947037249               |
| SNP_P4_176809_25011  | NW_004517521.1 | Scaffold2620 | 25011                   | TT                              | CC              | 1947037251               |
| SNP_P4_176810_27898  | NW_004517521.1 | Scaffold2620 | 27898                   | AA                              | GG              | 1947037253               |
| SNP_P4_176811_27923  | NW_004517521.1 | Scaffold2620 | 27923                   | AA                              | GG              | 1947037255               |
| SNP_P4_176812_27939  | NW_004517521.1 | Scaffold2620 | 27939                   | AA                              | GG              | 1947037257               |
| SNP_P4_176813_27978  | NW_004517521.1 | Scaffold2620 | 27978                   | AA                              | GG              | 1947037259               |
| SNP_P4_176814_28015  | NW_004517521.1 | Scaffold2620 | 28015                   | TT                              | CC              | 1947037261               |
| SNP_P4_176815_28041  | NW_004517521.1 | Scaffold2620 | 28041                   | AA                              | TT              | 1947037263               |
| SNP_P4_176816_28071  | NW_004517521.1 | Scaffold2620 | 28071                   | AA                              | GG              | 1947037265               |
| SNP_P4_176817_28072  | NW_004517521.1 | Scaffold2620 | 28072                   | CC                              | TT              | 1947037267               |
| SNP_P4_176818_28166  | NW_004517521.1 | Scaffold2620 | 28166                   | CC                              | TT              | 1947037269               |
| SNP_P4_176819_28344  | NW_004517521.1 | Scaffold2620 | 28344                   | CC                              | TT              | 1947037271               |
| SNP_P4_176820_28379  | NW_004517521.1 | Scaffold2620 | 28379                   | CC                              | TT              | 1947037273               |

| SNPs IDs            | Chromosome IDs | Chromosomes  | Physical positions (bp) | CDC Frontier (Reference genome) | (ILWC46 & LPNB) | NCBI SNPdb Accession IDs |
|---------------------|----------------|--------------|-------------------------|---------------------------------|-----------------|--------------------------|
| SNP_P4_176821_28387 | NW_004517521.1 | Scaffold2620 | 28387                   | TT                              | CC              | 1947037275               |
| SNP_P4_176822_28388 | NW_004517521.1 | Scaffold2620 | 28388                   | AA                              | CC              | 1947037277               |
| SNP_P4_176823_28390 | NW_004517521.1 | Scaffold2620 | 28390                   | AA                              | GG              | 1947037279               |
| SNP_P4_176824_28401 | NW_004517521.1 | Scaffold2620 | 28401                   | CC                              | GG              | 1947037281               |
| SNP_P4_176825_28412 | NW_004517521.1 | Scaffold2620 | 28412                   | GG                              | TT              | 1947037283               |
| SNP_P4_176826_28482 | NW_004517521.1 | Scaffold2620 | 28482                   | GG                              | AA              | 1947037285               |
| SNP_P4_176827_28484 | NW_004517521.1 | Scaffold2620 | 28484                   | GG                              | TT              | 1947037287               |
| SNP_P4_176828_28668 | NW_004517521.1 | Scaffold2620 | 28668                   | CC                              | TT              | 1947037289               |
| SNP_P4_176829_28828 | NW_004517521.1 | Scaffold2620 | 28828                   | AA                              | TT              | 1947037291               |
| SNP_P4_176830_29155 | NW_004517521.1 | Scaffold2620 | 29155                   | TT                              | GG              | 1947037293               |
| SNP_P4_176831_29219 | NW_004517521.1 | Scaffold2620 | 29219                   | GG                              | AA              | 1947037296               |
| SNP_P4_176832_29225 | NW_004517521.1 | Scaffold2620 | 29225                   | TT                              | CC              | 1947037298               |
| SNP_P4_176833_29678 | NW_004517521.1 | Scaffold2620 | 29678                   | CC                              | TT              | 1947037300               |
| SNP_P4_176834_30434 | NW_004517521.1 | Scaffold2620 | 30434                   | TT                              | CC              | 1947037302               |
| SNP_P4_176835_30500 | NW_004517521.1 | Scaffold2620 | 30500                   | AA                              | TT              | 1947037304               |
| SNP_P4_176836_30755 | NW_004517521.1 | Scaffold2620 | 30755                   | GG                              | CC              | 1947037306               |
| SNP_P4_176837_30795 | NW_004517521.1 | Scaffold2620 | 30795                   | TT                              | AA              | 1947037308               |
| SNP_P4_176838_34031 | NW_004517521.1 | Scaffold2620 | 34031                   | GG                              | TT              | 1947037310               |
| SNP_P4_176839_34159 | NW_004517521.1 | Scaffold2620 | 34159                   | CC                              | TT              | 1947037312               |
| SNP_P4_176840_34499 | NW_004517521.1 | Scaffold2620 | 34499                   | GG                              | TT              | 1947037314               |
| SNP_P4_176841_34512 | NW_004517521.1 | Scaffold2620 | 34512                   | GG                              | AA              | 1947037316               |
| SNP_P4_176842_34519 | NW_004517521.1 | Scaffold2620 | 34519                   | TT                              | CC              | 1947037318               |
| SNP_P4_176843_34520 | NW_004517521.1 | Scaffold2620 | 34520                   | TT                              | AA              | 1947037320               |
| SNP_P4_176844_36128 | NW_004517521.1 | Scaffold2620 | 36128                   | CC                              | TT              | 1947037322               |
| SNP_P4_176845_5619  | NW_004517522.1 | Scaffold2621 | 5619                    | TT                              | CC              | 1947037324               |
| SNP_P4_176846_5630  | NW_004517522.1 | Scaffold2621 | 5630                    | AA                              | GG              | 1947037326               |
| SNP_P4_176847_5653  | NW_004517522.1 | Scaffold2621 | 5653                    | GG                              | AA              | 1947037328               |
| SNP_P4_176848_5677  | NW_004517522.1 | Scaffold2621 | 5677                    | AA                              | TT              | 1947037330               |
| SNP_P4_176849_5699  | NW_004517522.1 | Scaffold2621 | 5699                    | TT                              | CC              | 1947037332               |
| SNP_P4_176850_5760  | NW_004517522.1 | Scaffold2621 | 5760                    | GG                              | CC              | 1947037334               |
| SNP_P4_176851_6009  | NW_004517522.1 | Scaffold2621 | 6009                    | TT                              | CC              | 1947037336               |
| SNP_P4_176852_6238  | NW_004517522.1 | Scaffold2621 | 6238                    | TT                              | CC              | 1947037338               |
| SNP_P4_176853_6245  | NW_004517522.1 | Scaffold2621 | 6245                    | AA                              | GG              | 1947037340               |
| SNP_P4_176854_6403  | NW_004517522.1 | Scaffold2621 | 6403                    | AA                              | TT              | 1947037342               |
| SNP_P4_176855_6469  | NW_004517522.1 | Scaffold2621 | 6469                    | TT                              | CC              | 1947037344               |
| SNP_P4_176856_6520  | NW_004517522.1 | Scaffold2621 | 6520                    | GG                              | TT              | 1947037346               |
| SNP_P4_176857_6897  | NW_004517522.1 | Scaffold2621 | 6897                    | CC                              | AA              | 1947037348               |
| SNP_P4_176858_6917  | NW_004517522.1 | Scaffold2621 | 6917                    | GG                              | CC              | 1947037350               |
| SNP_P4_176859_723   | NW_004517523.1 | Scaffold2623 | 723                     | AA                              | TT              | 1947037352               |
| SNP_P4_176860_824   | NW_004517523.1 | Scaffold2623 | 824                     | GG                              | TT              | 1947037354               |
| SNP_P4_176861_770   | NW_004517524.1 | Scaffold2624 | 770                     | GG                              | TT              | 1947037356               |
| SNP_P4_176862_1208  | NW_004517524.1 | Scaffold2624 | 1208                    | TT                              | AA              | 1947037358               |



| SNPs IDs            | Chromosome IDs | Chromosomes  | Physical positions (bp) | CDC Frontier (Reference genome) | (ILWC46 & LPNB) | NCBI SNPdb Accession IDs |
|---------------------|----------------|--------------|-------------------------|---------------------------------|-----------------|--------------------------|
| SNP_P4_176863_13967 | NW_004517524.1 | Scaffold2624 | 13967                   | CC                              | AA              | 1947037360               |
| SNP_P4_176864_14073 | NW_004517524.1 | Scaffold2624 | 14073                   | CC                              | GG              | 1947037362               |
| SNP_P4_176865_18008 | NW_004517524.1 | Scaffold2624 | 18008                   | AA                              | TT              | 1947037364               |
| SNP_P4_176866_8614  | NW_004517525.1 | Scaffold2625 | 8614                    | AA                              | GG              | 1947037366               |
| SNP_P4_176867_8633  | NW_004517525.1 | Scaffold2625 | 8633                    | TT                              | CC              | 1947037368               |
| SNP_P4_176868_12628 | NW_004517525.1 | Scaffold2625 | 12628                   | AA                              | TT              | 1947037370               |
| SNP_P4_176869_671   | NW_004517526.1 | Scaffold2626 | 671                     | TT                              | GG              | 1947037372               |
| SNP_P4_176870_946   | NW_004517526.1 | Scaffold2626 | 946                     | CC                              | AA              | 1947037374               |
| SNP_P4_176871_984   | NW_004517526.1 | Scaffold2626 | 984                     | AA                              | GG              | 1947037376               |
| SNP_P4_176872_990   | NW_004517526.1 | Scaffold2626 | 990                     | AA                              | GG              | 1947037378               |
| SNP_P4_176874_264   | NW_004517527.1 | Scaffold2627 | 264                     | AA                              | GG              | 1947037380               |
| SNP_P4_176875_450   | NW_004517527.1 | Scaffold2627 | 450                     | CC                              | TT              | 1947037382               |
| SNP_P4_176876_454   | NW_004517527.1 | Scaffold2627 | 454                     | AA                              | GG              | 1947037384               |
| SNP_P4_176877_459   | NW_004517527.1 | Scaffold2627 | 459                     | AA                              | TT              | 1947037386               |
| SNP_P4_176878_442   | NW_004517530.1 | Scaffold2633 | 442                     | GG                              | CC              | 1947037388               |
| SNP_P4_176879_449   | NW_004517530.1 | Scaffold2633 | 449                     | TT                              | AA              | 1947037390               |
| SNP_P4_176880_889   | NW_004517530.1 | Scaffold2633 | 889                     | CC                              | TT              | 1947037392               |
| SNP_P4_176881_947   | NW_004517530.1 | Scaffold2633 | 947                     | AA                              | GG              | 1947037394               |
| SNP_P4_176882_1269  | NW_004517530.1 | Scaffold2633 | 1269                    | AA                              | GG              | 1947037396               |
| SNP_P4_176883_1376  | NW_004517530.1 | Scaffold2633 | 1376                    | CC                              | AA              | 1947037398               |
| SNP_P4_176884_1378  | NW_004517530.1 | Scaffold2633 | 1378                    | GG                              | AA              | 1947037400               |
| SNP_P4_176885_21558 | NW_004517530.1 | Scaffold2633 | 21558                   | AA                              | TT              | 1947037402               |
| SNP_P4_176886_21603 | NW_004517530.1 | Scaffold2633 | 21603                   | TT                              | CC              | 1947037404               |
| SNP_P4_176887_21622 | NW_004517530.1 | Scaffold2633 | 21622                   | GG                              | AA              | 1947037406               |
| SNP_P4_176888_21737 | NW_004517530.1 | Scaffold2633 | 21737                   | GG                              | AA              | 1947037408               |
| SNP_P4_176889_3087  | NW_004517533.1 | Scaffold2637 | 3087                    | CC                              | TT              | 1947037410               |
| SNP_P4_176890_3201  | NW_004517533.1 | Scaffold2637 | 3201                    | AA                              | TT              | 1947037412               |
| SNP_P4_176891_3585  | NW_004517533.1 | Scaffold2637 | 3585                    | AA                              | CC              | 1947037414               |
| SNP_P4_176893_3597  | NW_004517533.1 | Scaffold2637 | 3597                    | AA                              | GG              | 1947037416               |
| SNP_P4_176894_3643  | NW_004517533.1 | Scaffold2637 | 3643                    | TT                              | CC              | 1947037418               |
| SNP_P4_176895_1430  | NW_004517536.1 | Scaffold2642 | 1430                    | TT                              | CC              | 1947037420               |
| SNP_P4_176896_1480  | NW_004517536.1 | Scaffold2642 | 1480                    | GG                              | TT              | 1947037422               |
| SNP_P4_176897_801   | NW_004517537.1 | Scaffold2644 | 801                     | AA                              | TT              | 1947037424               |
| SNP_P4_176898_7078  | NW_004517537.1 | Scaffold2644 | 7078                    | AA                              | TT              | 1947037426               |
| SNP_P4_176899_9478  | NW_004517537.1 | Scaffold2644 | 9478                    | GG                              | AA              | 1947037428               |
| SNP_P4_176900_9484  | NW_004517537.1 | Scaffold2644 | 9484                    | CC                              | TT              | 1947037430               |
| SNP_P4_176901_9493  | NW_004517537.1 | Scaffold2644 | 9493                    | GG                              | AA              | 1947037432               |
| SNP_P4_176902_9494  | NW_004517537.1 | Scaffold2644 | 9494                    | GG                              | AA              | 1947037434               |
| SNP_P4_176903_10679 | NW_004517537.1 | Scaffold2644 | 10679                   | AA                              | CC              | 1947037436               |
| SNP_P4_176904_11012 | NW_004517537.1 | Scaffold2644 | 11012                   | AA                              | GG              | 1947037438               |
| SNP_P4_176905_11917 | NW_004517537.1 | Scaffold2644 | 11917                   | TT                              | AA              | 1947037440               |
| SNP_P4_176906_12112 | NW_004517537.1 | Scaffold2644 | 12112                   | AA                              | GG              | 1947037442               |

| SNPs IDs            | Chromosome IDs | Chromosomes  | Physical positions (bp) | CDC Frontier (Reference genome) | (ILWC46 & LPNB) | NCBI SNPdb Accession IDs |
|---------------------|----------------|--------------|-------------------------|---------------------------------|-----------------|--------------------------|
| SNP_P4_176907_12281 | NW_004517537.1 | Scaffold2644 | 12281                   | TT                              | AA              | 1947037444               |
| SNP_P4_176908_13376 | NW_004517537.1 | Scaffold2644 | 13376                   | CC                              | TT              | 1947037446               |
| SNP_P4_176909_13381 | NW_004517537.1 | Scaffold2644 | 13381                   | TT                              | CC              | 1947037448               |
| SNP_P4_176910_14672 | NW_004517537.1 | Scaffold2644 | 14672                   | AA                              | TT              | 1947037450               |
| SNP_P4_176911_20004 | NW_004517537.1 | Scaffold2644 | 20004                   | CC                              | GG              | 1947037452               |
| SNP_P4_176912_20029 | NW_004517537.1 | Scaffold2644 | 20029                   | TT                              | CC              | 1947037454               |
| SNP_P4_176913_21321 | NW_004517537.1 | Scaffold2644 | 21321                   | AA                              | GG              | 1947037457               |
| SNP_P4_176914_21483 | NW_004517537.1 | Scaffold2644 | 21483                   | GG                              | TT              | 1947037459               |
| SNP_P4_176915_21573 | NW_004517537.1 | Scaffold2644 | 21573                   | AA                              | GG              | 1947037461               |
| SNP_P4_176916_21621 | NW_004517537.1 | Scaffold2644 | 21621                   | AA                              | GG              | 1947037463               |
| SNP_P4_176917_21662 | NW_004517537.1 | Scaffold2644 | 21662                   | AA                              | GG              | 1947037465               |
| SNP_P4_176918_22792 | NW_004517537.1 | Scaffold2644 | 22792                   | CC                              | TT              | 1947037466               |
| SNP_P4_176919_22821 | NW_004517537.1 | Scaffold2644 | 22821                   | GG                              | TT              | 1947037468               |
| SNP_P4_176920_23043 | NW_004517537.1 | Scaffold2644 | 23043                   | GG                              | AA              | 1947037470               |
| SNP_P4_176921_23056 | NW_004517537.1 | Scaffold2644 | 23056                   | TT                              | AA              | 1947037472               |
| SNP_P4_176922_23115 | NW_004517537.1 | Scaffold2644 | 23115                   | AA                              | GG              | 1947037474               |
| SNP_P4_176923_23141 | NW_004517537.1 | Scaffold2644 | 23141                   | GG                              | TT              | 1947037476               |
| SNP_P4_176924_23616 | NW_004517537.1 | Scaffold2644 | 23616                   | CC                              | AA              | 1947037479               |
| SNP_P4_176925_24948 | NW_004517537.1 | Scaffold2644 | 24948                   | CC                              | TT              | 1947037482               |
| SNP_P4_176926_3428  | NW_004517538.1 | Scaffold2645 | 3428                    | CC                              | GG              | 1947037484               |
| SNP_P4_176927_3576  | NW_004517538.1 | Scaffold2645 | 3576                    | AA                              | GG              | 1947037486               |
| SNP_P4_176928_762   | NW_004517539.1 | Scaffold2646 | 762                     | TT                              | CC              | 1947037488               |
| SNP_P4_176929_181   | NW_004517540.1 | Scaffold2648 | 181                     | AA                              | CC              | 1947037490               |
| SNP_P4_176930_200   | NW_004517540.1 | Scaffold2648 | 200                     | GG                              | CC              | 1947037492               |
| SNP_P4_176931_20611 | NW_004517541.1 | Scaffold2649 | 20611                   | CC                              | AA              | 1947037494               |
| SNP_P4_176932_21794 | NW_004517541.1 | Scaffold2649 | 21794                   | GG                              | AA              | 1947037496               |
| SNP_P4_176933_26901 | NW_004517541.1 | Scaffold2649 | 26901                   | TT                              | AA              | 1947037498               |
| SNP_P4_176935_27733 | NW_004517541.1 | Scaffold2649 | 27733                   | AA                              | GG              | 1947037501               |
| SNP_P4_176936_27784 | NW_004517541.1 | Scaffold2649 | 27784                   | TT                              | CC              | 1947037503               |
| SNP_P4_176937_27814 | NW_004517541.1 | Scaffold2649 | 27814                   | GG                              | AA              | 1947037505               |
| SNP_P4_176938_64    | NW_004517542.1 | Scaffold2650 | 64                      | TT                              | CC              | 1947037507               |
| SNP_P4_176939_107   | NW_004517542.1 | Scaffold2650 | 107                     | TT                              | GG              | 1947037509               |
| SNP_P4_176940_109   | NW_004517542.1 | Scaffold2650 | 109                     | CC                              | GG              | 1947037511               |
| SNP_P4_176941_176   | NW_004517542.1 | Scaffold2650 | 176                     | GG                              | TT              | 1947037513               |
| SNP_P4_176942_221   | NW_004517542.1 | Scaffold2650 | 221                     | TT                              | CC              | 1947037515               |
| SNP_P4_176943_1992  | NW_004517542.1 | Scaffold2650 | 1992                    | GG                              | CC              | 1947037517               |
| SNP_P4_176944_2046  | NW_004517542.1 | Scaffold2650 | 2046                    | TT                              | AA              | 1947037519               |
| SNP_P4_176945_2060  | NW_004517542.1 | Scaffold2650 | 2060                    | TT                              | CC              | 1947037521               |
| SNP_P4_176946_2064  | NW_004517542.1 | Scaffold2650 | 2064                    | GG                              | AA              | 1947037523               |
| SNP_P4_176947_962   | NW_004517543.1 | Scaffold2651 | 962                     | TT                              | CC              | 1947037525               |
| SNP_P4_176948_987   | NW_004517543.1 | Scaffold2651 | 987                     | AA                              | GG              | 1947037527               |
| SNP_P4_176949_4448  | NW_004517543.1 | Scaffold2651 | 4448                    | TT                              | AA              | 1947037529               |

| SNPs IDs            | Chromosome IDs | Chromosomes  | Physical positions (bp) | CDC Frontier (Reference genome) | (ILWC46 & LPNB) | NCBI SNPdb Accession IDs |
|---------------------|----------------|--------------|-------------------------|---------------------------------|-----------------|--------------------------|
| SNP_P4_176950_7305  | NW_004517543.1 | Scaffold2651 | 7305                    | AA                              | CC              | 1947037531               |
| SNP_P4_176951_7307  | NW_004517543.1 | Scaffold2651 | 7307                    | TT                              | AA              | 1947037533               |
| SNP_P4_176952_9843  | NW_004517543.1 | Scaffold2651 | 9843                    | AA                              | CC              | 1947037535               |
| SNP_P4_176953_10049 | NW_004517543.1 | Scaffold2651 | 10049                   | CC                              | TT              | 1947037537               |
| SNP_P4_176954_17695 | NW_004517543.1 | Scaffold2651 | 17695                   | TT                              | CC              | 1947037539               |
| SNP_P4_176955_32334 | NW_004517543.1 | Scaffold2651 | 32334                   | GG                              | TT              | 1947037541               |
| SNP_P4_176956_32341 | NW_004517543.1 | Scaffold2651 | 32341                   | AA                              | TT              | 1947037543               |
| SNP_P4_176957_32356 | NW_004517543.1 | Scaffold2651 | 32356                   | AA                              | CC              | 1947037545               |
| SNP_P4_176958_32414 | NW_004517543.1 | Scaffold2651 | 32414                   | GG                              | TT              | 1947037547               |
| SNP_P4_176959_32457 | NW_004517543.1 | Scaffold2651 | 32457                   | AA                              | TT              | 1947037549               |
| SNP_P4_176960_32560 | NW_004517543.1 | Scaffold2651 | 32560                   | CC                              | GG              | 1947037551               |
| SNP_P4_176961_32649 | NW_004517543.1 | Scaffold2651 | 32649                   | AA                              | CC              | 1947037553               |
| SNP_P4_176962_42349 | NW_004517543.1 | Scaffold2651 | 42349                   | AA                              | GG              | 1947037555               |
| SNP_P4_176963_13819 | NW_004517544.1 | Scaffold2653 | 13819                   | CC                              | TT              | 1947037557               |
| SNP_P4_176964_13885 | NW_004517544.1 | Scaffold2653 | 13885                   | CC                              | AA              | 1947037559               |
| SNP_P4_176965_14155 | NW_004517544.1 | Scaffold2653 | 14155                   | GG                              | CC              | 1947037561               |
| SNP_P4_176966_14194 | NW_004517544.1 | Scaffold2653 | 14194                   | AA                              | GG              | 1947037563               |
| SNP_P4_176967_14357 | NW_004517544.1 | Scaffold2653 | 14357                   | AA                              | CC              | 1947037566               |
| SNP_P4_176968_14381 | NW_004517544.1 | Scaffold2653 | 14381                   | GG                              | AA              | 1947037568               |
| SNP_P4_176969_14559 | NW_004517544.1 | Scaffold2653 | 14559                   | TT                              | CC              | 1947037570               |
| SNP_P4_176970_14742 | NW_004517544.1 | Scaffold2653 | 14742                   | TT                              | CC              | 1947037572               |
| SNP_P4_176971_23873 | NW_004517544.1 | Scaffold2653 | 23873                   | CC                              | TT              | 1947037574               |
| SNP_P4_176972_25423 | NW_004517544.1 | Scaffold2653 | 25423                   | TT                              | GG              | 1947037576               |
| SNP_P4_176973_27244 | NW_004517544.1 | Scaffold2653 | 27244                   | CC                              | TT              | 1947037578               |
| SNP_P4_176974_27247 | NW_004517544.1 | Scaffold2653 | 27247                   | TT                              | GG              | 1947037580               |
| SNP_P4_176975_2095  | NW_004517546.1 | Scaffold2655 | 2095                    | GG                              | AA              | 1947037582               |
| SNP_P4_176976_478   | NW_004517547.1 | Scaffold2660 | 478                     | AA                              | GG              | 1947037584               |
| SNP_P4_176977_1674  | NW_004517547.1 | Scaffold2660 | 1674                    | CC                              | AA              | 1947037586               |
| SNP_P4_176978_12300 | NW_004517547.1 | Scaffold2660 | 12300                   | TT                              | AA              | 1947037588               |
| SNP_P4_176980_404   | NW_004517548.1 | Scaffold2662 | 404                     | TT                              | AA              | 1947037590               |
| SNP_P4_176981_690   | NW_004517548.1 | Scaffold2662 | 690                     | AA                              | GG              | 1947037592               |
| SNP_P4_176982_825   | NW_004517548.1 | Scaffold2662 | 825                     | CC                              | AA              | 1947037594               |
| SNP_P4_176983_1284  | NW_004517548.1 | Scaffold2662 | 1284                    | TT                              | GG              | 1947037596               |
| SNP_P4_176985_19441 | NW_004517548.1 | Scaffold2662 | 19441                   | TT                              | CC              | 1947037598               |
| SNP_P4_176986_19444 | NW_004517548.1 | Scaffold2662 | 19444                   | TT                              | GG              | 1947037600               |
| SNP_P4_176987_19479 | NW_004517548.1 | Scaffold2662 | 19479                   | AA                              | GG              | 1947037602               |
| SNP_P4_176988_24110 | NW_004517548.1 | Scaffold2662 | 24110                   | TT                              | AA              | 1947037604               |
| SNP_P4_176989_24115 | NW_004517548.1 | Scaffold2662 | 24115                   | TT                              | CC              | 1947037607               |
| SNP_P4_176991_24211 | NW_004517548.1 | Scaffold2662 | 24211                   | GG                              | AA              | 1947037609               |
| SNP_P4_176992_24228 | NW_004517548.1 | Scaffold2662 | 24228                   | AA                              | GG              | 1947037611               |
| SNP_P4_176993_24229 | NW_004517548.1 | Scaffold2662 | 24229                   | GG                              | AA              | 1947037613               |
| SNP_P4_176994_24238 | NW_004517548.1 | Scaffold2662 | 24238                   | GG                              | AA              | 1947037615               |

| SNPs IDs            | Chromosome IDs | Chromosomes  | Physical positions (bp) | CDC Frontier (Reference genome) | (ILWC46 & LPNB) | NCBI SNPdb Accession IDs |
|---------------------|----------------|--------------|-------------------------|---------------------------------|-----------------|--------------------------|
| SNP_P4_176995_24254 | NW_004517548.1 | Scaffold2662 | 24254                   | AA                              | GG              | 1947037617               |
| SNP_P4_176996_24260 | NW_004517548.1 | Scaffold2662 | 24260                   | AA                              | CC              | 1947037619               |
| SNP_P4_176997_25622 | NW_004517548.1 | Scaffold2662 | 25622                   | GG                              | TT              | 1947037621               |
| SNP_P4_176998_25841 | NW_004517548.1 | Scaffold2662 | 25841                   | GG                              | TT              | 1947037623               |
| SNP_P4_177000_26414 | NW_004517548.1 | Scaffold2662 | 26414                   | TT                              | GG              | 1947037625               |
| SNP_P4_177001_28088 | NW_004517548.1 | Scaffold2662 | 28088                   | CC                              | TT              | 1947037627               |
| SNP_P4_177002_28260 | NW_004517548.1 | Scaffold2662 | 28260                   | TT                              | CC              | 1947037629               |
| SNP_P4_177003_28270 | NW_004517548.1 | Scaffold2662 | 28270                   | TT                              | CC              | 1947037631               |
| SNP_P4_177005_31436 | NW_004517548.1 | Scaffold2662 | 31436                   | CC                              | TT              | 1947037633               |
| SNP_P4_177006_31764 | NW_004517548.1 | Scaffold2662 | 31764                   | TT                              | GG              | 1947037635               |
| SNP_P4_177007_31862 | NW_004517548.1 | Scaffold2662 | 31862                   | GG                              | TT              | 1947037637               |
| SNP_P4_177008_32679 | NW_004517548.1 | Scaffold2662 | 32679                   | GG                              | CC              | 1947037639               |
| SNP_P4_177009_34532 | NW_004517548.1 | Scaffold2662 | 34532                   | GG                              | CC              | 1947037641               |
| SNP_P4_177010_34737 | NW_004517548.1 | Scaffold2662 | 34737                   | TT                              | CC              | 1947037643               |
| SNP_P4_177012_47785 | NW_004517548.1 | Scaffold2662 | 47785                   | TT                              | CC              | 1947037646               |
| SNP_P4_177013_47836 | NW_004517548.1 | Scaffold2662 | 47836                   | TT                              | CC              | 1947037648               |
| SNP_P4_177014_48216 | NW_004517548.1 | Scaffold2662 | 48216                   | AA                              | GG              | 1947037650               |
| SNP_P4_177015_48236 | NW_004517548.1 | Scaffold2662 | 48236                   | GG                              | AA              | 1947037652               |
| SNP_P4_177016_2263  | NW_004517549.1 | Scaffold2663 | 2263                    | GG                              | AA              | 1947037654               |
| SNP_P4_177017_2283  | NW_004517549.1 | Scaffold2663 | 2283                    | TT                              | CC              | 1947037656               |
| SNP_P4_177018_2569  | NW_004517549.1 | Scaffold2663 | 2569                    | AA                              | TT              | 1947037658               |
| SNP_P4_177019_2612  | NW_004517549.1 | Scaffold2663 | 2612                    | GG                              | AA              | 1947037660               |
| SNP_P4_177020_10416 | NW_004517553.1 | Scaffold2668 | 10416                   | AA                              | GG              | 1947037662               |
| SNP_P4_177021_13004 | NW_004517553.1 | Scaffold2668 | 13004                   | TT                              | GG              | 1947037664               |
| SNP_P4_177022_13013 | NW_004517553.1 | Scaffold2668 | 13013                   | TT                              | CC              | 1947037666               |
| SNP_P4_177023_13256 | NW_004517553.1 | Scaffold2668 | 13256                   | TT                              | AA              | 1947037668               |
| SNP_P4_177024_13262 | NW_004517553.1 | Scaffold2668 | 13262                   | AA                              | GG              | 1947037670               |
| SNP_P4_177025_13263 | NW_004517553.1 | Scaffold2668 | 13263                   | TT                              | AA              | 1947037672               |
| SNP_P4_177026_13317 | NW_004517553.1 | Scaffold2668 | 13317                   | TT                              | GG              | 1947037675               |
| SNP_P4_177027_3307  | NW_004517554.1 | Scaffold2669 | 3307                    | AA                              | CC              | 1947037677               |
| SNP_P4_177028_3725  | NW_004517554.1 | Scaffold2669 | 3725                    | TT                              | CC              | 1947037679               |
| SNP_P4_177030_10387 | NW_004517554.1 | Scaffold2669 | 10387                   | AA                              | CC              | 1947037681               |
| SNP_P4_177031_12103 | NW_004517554.1 | Scaffold2669 | 12103                   | CC                              | TT              | 1947037683               |
| SNP_P4_177032_12116 | NW_004517554.1 | Scaffold2669 | 12116                   | TT                              | CC              | 1947037685               |
| SNP_P4_177033_12203 | NW_004517554.1 | Scaffold2669 | 12203                   | CC                              | GG              | 1947037687               |
| SNP_P4_177034_12251 | NW_004517554.1 | Scaffold2669 | 12251                   | CC                              | TT              | 1947037689               |
| SNP_P4_177035_12270 | NW_004517554.1 | Scaffold2669 | 12270                   | CC                              | AA              | 1947037691               |
| SNP_P4_177036_12293 | NW_004517554.1 | Scaffold2669 | 12293                   | CC                              | TT              | 1947037693               |
| SNP_P4_177037_12540 | NW_004517554.1 | Scaffold2669 | 12540                   | GG                              | TT              | 1947037695               |
| SNP_P4_177038_12666 | NW_004517554.1 | Scaffold2669 | 12666                   | TT                              | CC              | 1947037697               |
| SNP_P4_177039_15928 | NW_004517554.1 | Scaffold2669 | 15928                   | TT                              | CC              | 1947037699               |
| SNP_P4_177040_15941 | NW_004517554.1 | Scaffold2669 | 15941                   | CC                              | TT              | 1947037701               |

| SNPs IDs            | Chromosome IDs | Chromosomes  | Physical positions (bp) | CDC Frontier (Reference genome) | (ILWC46 & LPNB) | NCBI SNPdb Accession IDs |
|---------------------|----------------|--------------|-------------------------|---------------------------------|-----------------|--------------------------|
| SNP_P4_177041_15950 | NW_004517554.1 | Scaffold2669 | 15950                   | AA                              | CC              | 1947037703               |
| SNP_P4_177043_1224  | NW_004517555.1 | Scaffold2670 | 1224                    | CC                              | GG              | 1947037705               |
| SNP_P4_177044_1262  | NW_004517555.1 | Scaffold2670 | 1262                    | CC                              | TT              | 1947037707               |
| SNP_P4_177045_1268  | NW_004517555.1 | Scaffold2670 | 1268                    | GG                              | AA              | 1947037709               |
| SNP_P4_177046_1349  | NW_004517555.1 | Scaffold2670 | 1349                    | CC                              | GG              | 1947037711               |
| SNP_P4_177047_1351  | NW_004517555.1 | Scaffold2670 | 1351                    | AA                              | GG              | 1947037713               |
| SNP_P4_177048_1367  | NW_004517555.1 | Scaffold2670 | 1367                    | AA                              | GG              | 1947037716               |
| SNP_P4_177049_1406  | NW_004517555.1 | Scaffold2670 | 1406                    | GG                              | AA              | 1947037718               |
| SNP_P4_177050_1443  | NW_004517555.1 | Scaffold2670 | 1443                    | TT                              | CC              | 1947037720               |
| SNP_P4_177051_1469  | NW_004517555.1 | Scaffold2670 | 1469                    | AA                              | TT              | 1947037722               |
| SNP_P4_177052_1546  | NW_004517555.1 | Scaffold2670 | 1546                    | TT                              | CC              | 1947037724               |
| SNP_P4_177053_1647  | NW_004517555.1 | Scaffold2670 | 1647                    | TT                              | AA              | 1947037726               |
| SNP_P4_177055_1692  | NW_004517555.1 | Scaffold2670 | 1692                    | TT                              | CC              | 1947037728               |
| SNP_P4_177056_1706  | NW_004517555.1 | Scaffold2670 | 1706                    | AA                              | TT              | 1947037730               |
| SNP_P4_177057_1710  | NW_004517555.1 | Scaffold2670 | 1710                    | TT                              | CC              | 1947037732               |
| SNP_P4_177058_1711  | NW_004517555.1 | Scaffold2670 | 1711                    | CC                              | AA              | 1947037734               |
| SNP_P4_177059_1712  | NW_004517555.1 | Scaffold2670 | 1712                    | GG                              | AA              | 1947037736               |
| SNP_P4_177060_2816  | NW_004517555.1 | Scaffold2670 | 2816                    | GG                              | TT              | 1947037738               |
| SNP_P4_177061_2817  | NW_004517555.1 | Scaffold2670 | 2817                    | TT                              | GG              | 1947037740               |
| SNP_P4_177062_5024  | NW_004517555.1 | Scaffold2670 | 5024                    | TT                              | CC              | 1947037743               |
| SNP_P4_177063_5214  | NW_004517555.1 | Scaffold2670 | 5214                    | TT                              | CC              | 1947037745               |
| SNP_P4_177064_5231  | NW_004517555.1 | Scaffold2670 | 5231                    | GG                              | AA              | 1947037747               |
| SNP_P4_177065_16244 | NW_004517555.1 | Scaffold2670 | 16244                   | CC                              | AA              | 1947037749               |
| SNP_P4_177066_16245 | NW_004517555.1 | Scaffold2670 | 16245                   | GG                              | TT              | 1947037751               |
| SNP_P4_177067_16454 | NW_004517555.1 | Scaffold2670 | 16454                   | AA                              | TT              | 1947037753               |
| SNP_P4_177068_23805 | NW_004517555.1 | Scaffold2670 | 23805                   | GG                              | TT              | 1947037755               |
| SNP_P4_177069_26001 | NW_004517555.1 | Scaffold2670 | 26001                   | AA                              | CC              | 1947037757               |
| SNP_P4_177070_26215 | NW_004517555.1 | Scaffold2670 | 26215                   | AA                              | GG              | 1947037759               |
| SNP_P4_177071_26219 | NW_004517555.1 | Scaffold2670 | 26219                   | AA                              | CC              | 1947037761               |
| SNP_P4_177072_26220 | NW_004517555.1 | Scaffold2670 | 26220                   | AA                              | TT              | 1947037763               |
| SNP_P4_177073_26227 | NW_004517555.1 | Scaffold2670 | 26227                   | AA                              | TT              | 1947037765               |
| SNP_P4_177074_26271 | NW_004517555.1 | Scaffold2670 | 26271                   | AA                              | CC              | 1947037767               |
| SNP_P4_177075_26326 | NW_004517555.1 | Scaffold2670 | 26326                   | TT                              | AA              | 1947037769               |
| SNP_P4_177076_26510 | NW_004517555.1 | Scaffold2670 | 26510                   | CC                              | TT              | 1947037771               |
| SNP_P4_177077_26569 | NW_004517555.1 | Scaffold2670 | 26569                   | TT                              | CC              | 1947037773               |
| SNP_P4_177078_26634 | NW_004517555.1 | Scaffold2670 | 26634                   | AA                              | CC              | 1947037775               |
| SNP_P4_177079_26643 | NW_004517555.1 | Scaffold2670 | 26643                   | CC                              | AA              | 1947037777               |
| SNP_P4_177080_26650 | NW_004517555.1 | Scaffold2670 | 26650                   | CC                              | AA              | 1947037779               |
| SNP_P4_177081_26670 | NW_004517555.1 | Scaffold2670 | 26670                   | GG                              | TT              | 1947037782               |
| SNP_P4_177082_26812 | NW_004517555.1 | Scaffold2670 | 26812                   | AA                              | GG              | 1947037784               |
| SNP_P4_177083_26836 | NW_004517555.1 | Scaffold2670 | 26836                   | AA                              | GG              | 1947037786               |
| SNP_P4_177084_26851 | NW_004517555.1 | Scaffold2670 | 26851                   | AA                              | CC              | 1947037788               |

| SNPs IDs            | Chromosome IDs | Chromosomes  | Physical positions (bp) | CDC Frontier (Reference genome) | (ILWC46 & LPNB) | NCBI SNPdb Accession IDs |
|---------------------|----------------|--------------|-------------------------|---------------------------------|-----------------|--------------------------|
| SNP_P4_177085_26865 | NW_004517555.1 | Scaffold2670 | 26865                   | AA                              | TT              | 1947037790               |
| SNP_P4_177086_26881 | NW_004517555.1 | Scaffold2670 | 26881                   | AA                              | CC              | 1947037792               |
| SNP_P4_177087_26905 | NW_004517555.1 | Scaffold2670 | 26905                   | AA                              | GG              | 1947037794               |
| SNP_P4_177088_30472 | NW_004517555.1 | Scaffold2670 | 30472                   | AA                              | TT              | 1947037796               |
| SNP_P4_177089_34890 | NW_004517555.1 | Scaffold2670 | 34890                   | CC                              | GG              | 1947037798               |
| SNP_P4_177090_34923 | NW_004517555.1 | Scaffold2670 | 34923                   | TT                              | CC              | 1947037800               |
| SNP_P4_177091_36638 | NW_004517555.1 | Scaffold2670 | 36638                   | TT                              | CC              | 1947037802               |
| SNP_P4_177092_36662 | NW_004517555.1 | Scaffold2670 | 36662                   | GG                              | CC              | 1947037804               |
| SNP_P4_177093_36699 | NW_004517555.1 | Scaffold2670 | 36699                   | CC                              | GG              | 1947037806               |
| SNP_P4_177094_36771 | NW_004517555.1 | Scaffold2670 | 36771                   | TT                              | CC              | 1947037808               |
| SNP_P4_177095_36792 | NW_004517555.1 | Scaffold2670 | 36792                   | TT                              | CC              | 1947037810               |
| SNP_P4_177096_36865 | NW_004517555.1 | Scaffold2670 | 36865                   | CC                              | TT              | 1947037812               |
| SNP_P4_177098_36909 | NW_004517555.1 | Scaffold2670 | 36909                   | CC                              | TT              | 1947037814               |
| SNP_P4_177099_37018 | NW_004517555.1 | Scaffold2670 | 37018                   | TT                              | CC              | 1947037816               |
| SNP_P4_177100_37041 | NW_004517555.1 | Scaffold2670 | 37041                   | CC                              | AA              | 1947037818               |
| SNP_P4_177101_37077 | NW_004517555.1 | Scaffold2670 | 37077                   | CC                              | TT              | 1947037820               |
| SNP_P4_177102_37169 | NW_004517555.1 | Scaffold2670 | 37169                   | TT                              | CC              | 1947037822               |
| SNP_P4_177103_37171 | NW_004517555.1 | Scaffold2670 | 37171                   | GG                              | TT              | 1947037824               |
| SNP_P4_177104_37195 | NW_004517555.1 | Scaffold2670 | 37195                   | CC                              | TT              | 1947037826               |
| SNP_P4_177105_37228 | NW_004517555.1 | Scaffold2670 | 37228                   | AA                              | GG              | 1947037828               |
| SNP_P4_177106_42619 | NW_004517555.1 | Scaffold2670 | 42619                   | TT                              | CC              | 1947037830               |
| SNP_P4_177107_42635 | NW_004517555.1 | Scaffold2670 | 42635                   | TT                              | CC              | 1947037832               |
| SNP_P4_177108_42639 | NW_004517555.1 | Scaffold2670 | 42639                   | TT                              | GG              | 1947037834               |
| SNP_P4_177109_42661 | NW_004517555.1 | Scaffold2670 | 42661                   | AA                              | GG              | 1947037836               |
| SNP_P4_177110_42663 | NW_004517555.1 | Scaffold2670 | 42663                   | TT                              | GG              | 1947037838               |
| SNP_P4_177111_42672 | NW_004517555.1 | Scaffold2670 | 42672                   | AA                              | TT              | 1947037840               |
| SNP_P4_177112_42697 | NW_004517555.1 | Scaffold2670 | 42697                   | AA                              | CC              | 1947037842               |
| SNP_P4_177113_42731 | NW_004517555.1 | Scaffold2670 | 42731                   | AA                              | GG              | 1947037844               |
| SNP_P4_177114_42967 | NW_004517555.1 | Scaffold2670 | 42967                   | CC                              | TT              | 1947037846               |
| SNP_P4_177115_42968 | NW_004517555.1 | Scaffold2670 | 42968                   | CC                              | TT              | 1947037850               |
| SNP_P4_177116_43022 | NW_004517555.1 | Scaffold2670 | 43022                   | GG                              | CC              | 1947037852               |
| SNP_P4_177117_43310 | NW_004517555.1 | Scaffold2670 | 43310                   | AA                              | TT              | 1947037854               |
| SNP_P4_177118_43320 | NW_004517555.1 | Scaffold2670 | 43320                   | GG                              | TT              | 1947037856               |
| SNP_P4_177119_43332 | NW_004517555.1 | Scaffold2670 | 43332                   | CC                              | TT              | 1947037859               |
| SNP_P4_177120_43458 | NW_004517555.1 | Scaffold2670 | 43458                   | AA                              | TT              | 1947037861               |
| SNP_P4_177121_43468 | NW_004517555.1 | Scaffold2670 | 43468                   | GG                              | TT              | 1947037863               |
| SNP_P4_177122_43495 | NW_004517555.1 | Scaffold2670 | 43495                   | GG                              | AA              | 1947037865               |
| SNP_P4_177123_43534 | NW_004517555.1 | Scaffold2670 | 43534                   | TT                              | AA              | 1947037867               |
| SNP_P4_177124_43544 | NW_004517555.1 | Scaffold2670 | 43544                   | GG                              | AA              | 1947037869               |
| SNP_P4_177125_43550 | NW_004517555.1 | Scaffold2670 | 43550                   | AA                              | GG              | 1947037871               |
| SNP_P4_177126_43835 | NW_004517555.1 | Scaffold2670 | 43835                   | CC                              | TT              | 1947037873               |
| SNP_P4_177127_43838 | NW_004517555.1 | Scaffold2670 | 43838                   | GG                              | AA              | 1947037875               |

| SNPs IDs             | Chromosome IDs | Chromosomes  | Physical positions (bp) | CDC Frontier (Reference genome) | (ILWC46 & LPNB) | NCBI SNPdb Accession IDs |
|----------------------|----------------|--------------|-------------------------|---------------------------------|-----------------|--------------------------|
| SNP_P4_177128_43854  | NW_004517555.1 | Scaffold2670 | 43854                   | AA                              | TT              | 1947037877               |
| SNP_P4_177129_43859  | NW_004517555.1 | Scaffold2670 | 43859                   | TT                              | GG              | 1947037879               |
| SNP_P4_177130_43942  | NW_004517555.1 | Scaffold2670 | 43942                   | CC                              | TT              | 1947037881               |
| SNP_P4_177131_44067  | NW_004517555.1 | Scaffold2670 | 44067                   | AA                              | GG              | 1947037883               |
| SNP_P4_177132_44072  | NW_004517555.1 | Scaffold2670 | 44072                   | TT                              | GG              | 1947037885               |
| SNP_P4_177133_44074  | NW_004517555.1 | Scaffold2670 | 44074                   | CC                              | GG              | 1947037887               |
| SNP_P4_177134_44984  | NW_004517555.1 | Scaffold2670 | 44984                   | CC                              | AA              | 1947037889               |
| SNP_P4_177135_45013  | NW_004517555.1 | Scaffold2670 | 45013                   | CC                              | TT              | 1947037891               |
| SNP_P4_177136_45245  | NW_004517555.1 | Scaffold2670 | 45245                   | TT                              | AA              | 1947037893               |
| SNP_P4_177137_45254  | NW_004517555.1 | Scaffold2670 | 45254                   | TT                              | AA              | 1947037895               |
| SNP_P4_177138_45265  | NW_004517555.1 | Scaffold2670 | 45265                   | TT                              | AA              | 1947037897               |
| SNP_P4_177139_45298  | NW_004517555.1 | Scaffold2670 | 45298                   | GG                              | AA              | 1947037899               |
| SNP_P4_177140_45384  | NW_004517555.1 | Scaffold2670 | 45384                   | TT                              | CC              | 1947037901               |
| SNP_P4_177141_45419  | NW_004517555.1 | Scaffold2670 | 45419                   | GG                              | CC              | 1947037903               |
| SNP_P4_177142_45423  | NW_004517555.1 | Scaffold2670 | 45423                   | AA                              | GG              | 1947037905               |
| SNP_P4_177143_45451  | NW_004517555.1 | Scaffold2670 | 45451                   | GG                              | TT              | 1947037907               |
| SNP_P4_177144_45748  | NW_004517555.1 | Scaffold2670 | 45748                   | TT                              | CC              | 1947037909               |
| SNP_P4_177145_62447  | NW_004517555.1 | Scaffold2670 | 62447                   | AA                              | CC              | 1947037911               |
| SNP_P4_177146_63154  | NW_004517555.1 | Scaffold2670 | 63154                   | AA                              | GG              | 1947037913               |
| SNP_P4_177147_63196  | NW_004517555.1 | Scaffold2670 | 63196                   | CC                              | TT              | 1947037915               |
| SNP_P4_177148_63608  | NW_004517555.1 | Scaffold2670 | 63608                   | TT                              | CC              | 1947037917               |
| SNP_P4_177149_63675  | NW_004517555.1 | Scaffold2670 | 63675                   | TT                              | AA              | 1947037919               |
| SNP_P4_177150_63695  | NW_004517555.1 | Scaffold2670 | 63695                   | TT                              | GG              | 1947037921               |
| SNP_P4_177151_65849  | NW_004517555.1 | Scaffold2670 | 65849                   | CC                              | GG              | 1947037923               |
| SNP_P4_177152_65865  | NW_004517555.1 | Scaffold2670 | 65865                   | TT                              | AA              | 1947037925               |
| SNP_P4_177153_66322  | NW_004517555.1 | Scaffold2670 | 66322                   | CC                              | TT              | 1947037927               |
| SNP_P4_177154_66376  | NW_004517555.1 | Scaffold2670 | 66376                   | TT                              | AA              | 1947037929               |
| SNP_P4_177155_66393  | NW_004517555.1 | Scaffold2670 | 66393                   | GG                              | AA              | 1947037931               |
| SNP_P4_177156_66422  | NW_004517555.1 | Scaffold2670 | 66422                   | AA                              | TT              | 1947037933               |
| SNP_P4_177157_66760  | NW_004517555.1 | Scaffold2670 | 66760                   | GG                              | AA              | 1947037935               |
| SNP_P4_177158_66763  | NW_004517555.1 | Scaffold2670 | 66763                   | AA                              | GG              | 1947037937               |
| SNP_P4_177159_66776  | NW_004517555.1 | Scaffold2670 | 66776                   | CC                              | AA              | 1947037939               |
| SNP_P4_177160_66905  | NW_004517555.1 | Scaffold2670 | 66905                   | AA                              | CC              | 1947037941               |
| SNP_P4_177161_67034  | NW_004517555.1 | Scaffold2670 | 67034                   | TT                              | CC              | 1947037943               |
| SNP_P4_177162_67039  | NW_004517555.1 | Scaffold2670 | 67039                   | AA                              | TT              | 1947037945               |
| SNP_P4_177163_67135  | NW_004517555.1 | Scaffold2670 | 67135                   | TT                              | CC              | 1947037947               |
| SNP_P4_177164_67189  | NW_004517555.1 | Scaffold2670 | 67189                   | TT                              | GG              | 1947037949               |
| SNP_P4_177165_67215  | NW_004517555.1 | Scaffold2670 | 67215                   | GG                              | AA              | 1947037951               |
| SNP_P4_177166_67240  | NW_004517555.1 | Scaffold2670 | 67240                   | AA                              | GG              | 1947037953               |
| SNP_P4_177167_69686  | NW_004517555.1 | Scaffold2670 | 69686                   | TT                              | CC              | 1947037955               |
| SNP_P4_177168_133219 | NW_004517555.1 | Scaffold2670 | 133219                  | AA                              | GG              | 1947037957               |
| SNP_P4_177169_133327 | NW_004517555.1 | Scaffold2670 | 133327                  | AA                              | GG              | 1947037959               |

| SNPs IDs             | Chromosome IDs | Chromosomes  | Physical positions (bp) | CDC Frontier (Reference genome) | (ILWC46 & LPNB) | NCBI SNPdb Accession IDs |
|----------------------|----------------|--------------|-------------------------|---------------------------------|-----------------|--------------------------|
| SNP_P4_177170_140565 | NW_004517555.1 | Scaffold2670 | 140565                  | AA                              | GG              | 1947037961               |
| SNP_P4_177172_149154 | NW_004517555.1 | Scaffold2670 | 149154                  | TT                              | CC              | 1947037963               |
| SNP_P4_177173_149198 | NW_004517555.1 | Scaffold2670 | 149198                  | TT                              | CC              | 1947037965               |
| SNP_P4_177174_149426 | NW_004517555.1 | Scaffold2670 | 149426                  | AA                              | CC              | 1947037967               |
| SNP_P4_177175_149429 | NW_004517555.1 | Scaffold2670 | 149429                  | CC                              | TT              | 1947037969               |
| SNP_P4_177176_149438 | NW_004517555.1 | Scaffold2670 | 149438                  | TT                              | CC              | 1947037971               |
| SNP_P4_177177_149468 | NW_004517555.1 | Scaffold2670 | 149468                  | CC                              | AA              | 1947037973               |
| SNP_P4_177178_149501 | NW_004517555.1 | Scaffold2670 | 149501                  | GG                              | CC              | 1947037975               |
| SNP_P4_177179_149606 | NW_004517555.1 | Scaffold2670 | 149606                  | AA                              | GG              | 1947037977               |
| SNP_P4_177181_4264   | NW_004517556.1 | Scaffold2672 | 4264                    | TT                              | AA              | 1947037980               |
| SNP_P4_177182_4330   | NW_004517556.1 | Scaffold2672 | 4330                    | GG                              | AA              | 1947037982               |
| SNP_P4_177183_4363   | NW_004517556.1 | Scaffold2672 | 4363                    | AA                              | TT              | 1947037984               |
| SNP_P4_177184_4376   | NW_004517556.1 | Scaffold2672 | 4376                    | AA                              | CC              | 1947037986               |
| SNP_P4_177185_4395   | NW_004517556.1 | Scaffold2672 | 4395                    | TT                              | AA              | 1947037988               |
| SNP_P4_177186_4435   | NW_004517556.1 | Scaffold2672 | 4435                    | TT                              | CC              | 1947037990               |
| SNP_P4_177187_4512   | NW_004517556.1 | Scaffold2672 | 4512                    | TT                              | GG              | 1947037992               |
| SNP_P4_177188_4517   | NW_004517556.1 | Scaffold2672 | 4517                    | TT                              | GG              | 1947037994               |
| SNP_P4_177189_4532   | NW_004517556.1 | Scaffold2672 | 4532                    | TT                              | CC              | 1947037996               |
| SNP_P4_177190_4533   | NW_004517556.1 | Scaffold2672 | 4533                    | AA                              | GG              | 1947037998               |
| SNP_P4_177191_4539   | NW_004517556.1 | Scaffold2672 | 4539                    | GG                              | AA              | 1947038000               |
| SNP_P4_177192_4631   | NW_004517556.1 | Scaffold2672 | 4631                    | GG                              | AA              | 1947038002               |
| SNP_P4_177193_4649   | NW_004517556.1 | Scaffold2672 | 4649                    | GG                              | TT              | 1947038004               |
| SNP_P4_177194_4654   | NW_004517556.1 | Scaffold2672 | 4654                    | AA                              | CC              | 1947038006               |
| SNP_P4_177195_4980   | NW_004517556.1 | Scaffold2672 | 4980                    | CC                              | TT              | 1947038008               |
| SNP_P4_177196_1477   | NW_004517557.1 | Scaffold2675 | 1477                    | CC                              | TT              | 1947038010               |
| SNP_P4_177197_1491   | NW_004517557.1 | Scaffold2675 | 1491                    | CC                              | AA              | 1947038012               |
| SNP_P4_177198_1492   | NW_004517557.1 | Scaffold2675 | 1492                    | TT                              | GG              | 1947038014               |
| SNP_P4_177199_891    | NW_004517558.1 | Scaffold2676 | 891                     | TT                              | CC              | 1947038016               |
| SNP_P4_177200_1167   | NW_004517559.1 | Scaffold2678 | 1167                    | TT                              | CC              | 1947038018               |
| SNP_P4_177202_86859  | NW_004517559.1 | Scaffold2678 | 86859                   | CC                              | TT              | 1947038020               |
| SNP_P4_177203_101434 | NW_004517559.1 | Scaffold2678 | 101434                  | CC                              | TT              | 1947038022               |
| SNP_P4_177204_103468 | NW_004517559.1 | Scaffold2678 | 103468                  | AA                              | TT              | 1947038024               |
| SNP_P4_177205_1698   | NW_004517562.1 | Scaffold2684 | 1698                    | AA                              | GG              | 1947038026               |
| SNP_P4_177206_1775   | NW_004517562.1 | Scaffold2684 | 1775                    | AA                              | CC              | 1947038028               |
| SNP_P4_177207_1785   | NW_004517562.1 | Scaffold2684 | 1785                    | TT                              | GG              | 1947038030               |
| SNP_P4_177208_1208   | NW_004517564.1 | Scaffold2686 | 1208                    | TT                              | GG              | 1947038032               |
| SNP_P4_177209_772    | NW_004517565.1 | Scaffold2687 | 772                     | AA                              | CC              | 1947038034               |
| SNP_P4_177210_64     | NW_004517566.1 | Scaffold2688 | 64                      | AA                              | GG              | 1947038036               |
| SNP_P4_177211_1614   | NW_004517567.1 | Scaffold2689 | 1614                    | AA                              | CC              | 1947038038               |
| SNP_P4_177212_1742   | NW_004517567.1 | Scaffold2689 | 1742                    | GG                              | AA              | 1947038040               |
| SNP_P4_177213_718    | NW_004517568.1 | Scaffold2691 | 718                     | TT                              | CC              | 1947038042               |
| SNP_P4_177214_748    | NW_004517568.1 | Scaffold2691 | 748                     | CC                              | TT              | 1947038044               |



| SNPs IDs            | Chromosome IDs | Chromosomes  | Physical positions (bp) | CDC Frontier (Reference genome) | (ILWC46 & LPNB) | NCBI SNPdb Accession IDs |
|---------------------|----------------|--------------|-------------------------|---------------------------------|-----------------|--------------------------|
| SNP_P4_177215_934   | NW_004517568.1 | Scaffold2691 | 934                     | GG                              | TT              | 1947038046               |
| SNP_P4_177216_955   | NW_004517568.1 | Scaffold2691 | 955                     | CC                              | TT              | 1947038048               |
| SNP_P4_177217_5032  | NW_004517568.1 | Scaffold2691 | 5032                    | CC                              | AA              | 1947038050               |
| SNP_P4_177218_854   | NW_004517569.1 | Scaffold2692 | 854                     | CC                              | TT              | 1947038052               |
| SNP_P4_177219_1057  | NW_004517569.1 | Scaffold2692 | 1057                    | AA                              | TT              | 1947038054               |
| SNP_P4_177220_1202  | NW_004517569.1 | Scaffold2692 | 1202                    | CC                              | TT              | 1947038056               |
| SNP_P4_177221_1216  | NW_004517569.1 | Scaffold2692 | 1216                    | TT                              | CC              | 1947038058               |
| SNP_P4_177222_1228  | NW_004517569.1 | Scaffold2692 | 1228                    | GG                              | TT              | 1947038060               |
| SNP_P4_177223_1245  | NW_004517569.1 | Scaffold2692 | 1245                    | TT                              | AA              | 1947038062               |
| SNP_P4_177226_1787  | NW_004517569.1 | Scaffold2692 | 1787                    | TT                              | CC              | 1947038064               |
| SNP_P4_177228_12846 | NW_004517569.1 | Scaffold2692 | 12846                   | CC                              | TT              | 1947038066               |
| SNP_P4_177229_12850 | NW_004517569.1 | Scaffold2692 | 12850                   | GG                              | TT              | 1947038068               |
| SNP_P4_177230_12861 | NW_004517569.1 | Scaffold2692 | 12861                   | TT                              | CC              | 1947038070               |
| SNP_P4_177231_13278 | NW_004517569.1 | Scaffold2692 | 13278                   | AA                              | TT              | 1947038072               |
| SNP_P4_177232_13939 | NW_004517569.1 | Scaffold2692 | 13939                   | TT                              | CC              | 1947038074               |
| SNP_P4_177234_14283 | NW_004517569.1 | Scaffold2692 | 14283                   | CC                              | TT              | 1947038076               |
| SNP_P4_177236_14453 | NW_004517569.1 | Scaffold2692 | 14453                   | CC                              | GG              | 1947038078               |
| SNP_P4_177238_14651 | NW_004517569.1 | Scaffold2692 | 14651                   | TT                              | CC              | 1947038080               |
| SNP_P4_177240_14900 | NW_004517569.1 | Scaffold2692 | 14900                   | TT                              | GG              | 1947038082               |
| SNP_P4_177241_65    | NW_004517571.1 | Scaffold2695 | 65                      | TT                              | AA              | 1947038084               |
| SNP_P4_177243_1794  | NW_004517571.1 | Scaffold2695 | 1794                    | TT                              | CC              | 1947038086               |
| SNP_P4_177244_1825  | NW_004517571.1 | Scaffold2695 | 1825                    | AA                              | TT              | 1947038088               |
| SNP_P4_177245_1840  | NW_004517571.1 | Scaffold2695 | 1840                    | AA                              | GG              | 1947038090               |
| SNP_P4_177246_1916  | NW_004517571.1 | Scaffold2695 | 1916                    | TT                              | AA              | 1947038092               |
| SNP_P4_177247_3435  | NW_004517571.1 | Scaffold2695 | 3435                    | TT                              | CC              | 1947038094               |
| SNP_P4_177248_7440  | NW_004517571.1 | Scaffold2695 | 7440                    | GG                              | AA              | 1947038096               |
| SNP_P4_177249_7451  | NW_004517571.1 | Scaffold2695 | 7451                    | GG                              | TT              | 1947038098               |
| SNP_P4_177250_7487  | NW_004517571.1 | Scaffold2695 | 7487                    | GG                              | AA              | 1947038100               |
| SNP_P4_177251_7512  | NW_004517571.1 | Scaffold2695 | 7512                    | AA                              | GG              | 1947038102               |
| SNP_P4_177252_7672  | NW_004517571.1 | Scaffold2695 | 7672                    | TT                              | CC              | 1947038104               |
| SNP_P4_177253_7984  | NW_004517571.1 | Scaffold2695 | 7984                    | GG                              | CC              | 1947038106               |
| SNP_P4_177254_7995  | NW_004517571.1 | Scaffold2695 | 7995                    | TT                              | GG              | 1947038108               |
| SNP_P4_177255_8034  | NW_004517571.1 | Scaffold2695 | 8034                    | CC                              | AA              | 1947038110               |
| SNP_P4_177256_12404 | NW_004517571.1 | Scaffold2695 | 12404                   | TT                              | AA              | 1947038112               |
| SNP_P4_177257_486   | NW_004517573.1 | Scaffold2698 | 486                     | CC                              | TT              | 1947038114               |
| SNP_P4_177258_3634  | NW_004517575.1 | Scaffold2700 | 3634                    | TT                              | AA              | 1947038116               |
| SNP_P4_177259_3638  | NW_004517575.1 | Scaffold2700 | 3638                    | CC                              | TT              | 1947038118               |
| SNP_P4_177260_3728  | NW_004517575.1 | Scaffold2700 | 3728                    | AA                              | GG              | 1947038120               |
| SNP_P4_177261_3733  | NW_004517575.1 | Scaffold2700 | 3733                    | CC                              | TT              | 1947038122               |
| SNP_P4_177262_4041  | NW_004517575.1 | Scaffold2700 | 4041                    | CC                              | TT              | 1947038124               |
| SNP_P4_177263_4074  | NW_004517575.1 | Scaffold2700 | 4074                    | TT                              | CC              | 1947038126               |
| SNP_P4_177264_4094  | NW_004517575.1 | Scaffold2700 | 4094                    | CC                              | TT              | 1947038128               |

| SNPs IDs            | Chromosome IDs | Chromosomes  | Physical positions (bp) | CDC Frontier (Reference genome) | (ILWC46 & LPNB) | NCBI SNPdb Accession IDs |
|---------------------|----------------|--------------|-------------------------|---------------------------------|-----------------|--------------------------|
| SNP_P4_177265_4132  | NW_004517575.1 | Scaffold2700 | 4132                    | AA                              | TT              | 1947038130               |
| SNP_P4_177266_5030  | NW_004517575.1 | Scaffold2700 | 5030                    | CC                              | AA              | 1947038132               |
| SNP_P4_177267_10348 | NW_004517575.1 | Scaffold2700 | 10348                   | AA                              | GG              | 1947038134               |
| SNP_P4_177268_10354 | NW_004517575.1 | Scaffold2700 | 10354                   | GG                              | TT              | 1947038136               |
| SNP_P4_177269_10804 | NW_004517575.1 | Scaffold2700 | 10804                   | AA                              | TT              | 1947038138               |
| SNP_P4_177270_10871 | NW_004517575.1 | Scaffold2700 | 10871                   | GG                              | AA              | 1947038140               |
| SNP_P4_177272_333   | NW_004517578.1 | Scaffold2705 | 333                     | CC                              | TT              | 1947038142               |
| SNP_P4_177273_335   | NW_004517578.1 | Scaffold2705 | 335                     | CC                              | AA              | 1947038144               |
| SNP_P4_177274_409   | NW_004517578.1 | Scaffold2705 | 409                     | TT                              | AA              | 1947038146               |
| SNP_P4_177275_436   | NW_004517578.1 | Scaffold2705 | 436                     | CC                              | AA              | 1947038148               |
| SNP_P4_177276_459   | NW_004517578.1 | Scaffold2705 | 459                     | GG                              | CC              | 1947038150               |
| SNP_P4_177277_507   | NW_004517578.1 | Scaffold2705 | 507                     | GG                              | AA              | 1947038152               |
| SNP_P4_177278_519   | NW_004517578.1 | Scaffold2705 | 519                     | AA                              | GG              | 1947038154               |
| SNP_P4_177279_566   | NW_004517578.1 | Scaffold2705 | 566                     | GG                              | TT              | 1947038157               |
| SNP_P4_177280_738   | NW_004517578.1 | Scaffold2705 | 738                     | AA                              | GG              | 1947038159               |
| SNP_P4_177281_799   | NW_004517578.1 | Scaffold2705 | 799                     | CC                              | GG              | 1947038161               |
| SNP_P4_177282_916   | NW_004517578.1 | Scaffold2705 | 916                     | AA                              | GG              | 1947038163               |
| SNP_P4_177283_920   | NW_004517578.1 | Scaffold2705 | 920                     | TT                              | CC              | 1947038165               |
| SNP_P4_177284_953   | NW_004517578.1 | Scaffold2705 | 953                     | GG                              | TT              | 1947038167               |
| SNP_P4_177285_1376  | NW_004517578.1 | Scaffold2705 | 1376                    | TT                              | CC              | 1947038169               |
| SNP_P4_177287_1599  | NW_004517578.1 | Scaffold2705 | 1599                    | TT                              | AA              | 1947038171               |
| SNP_P4_177288_5934  | NW_004517579.1 | Scaffold2706 | 5934                    | CC                              | TT              | 1947038173               |
| SNP_P4_177289_5979  | NW_004517579.1 | Scaffold2706 | 5979                    | TT                              | CC              | 1947038175               |
| SNP_P4_177290_7872  | NW_004517579.1 | Scaffold2706 | 7872                    | AA                              | TT              | 1947038177               |
| SNP_P4_177291_17749 | NW_004517580.1 | Scaffold2707 | 17749                   | TT                              | CC              | 1947038179               |
| SNP_P4_177292_17784 | NW_004517580.1 | Scaffold2707 | 17784                   | TT                              | CC              | 1947038181               |
| SNP_P4_177293_17785 | NW_004517580.1 | Scaffold2707 | 17785                   | GG                              | AA              | 1947038183               |
| SNP_P4_177294_17836 | NW_004517580.1 | Scaffold2707 | 17836                   | AA                              | TT              | 1947038185               |
| SNP_P4_177295_17847 | NW_004517580.1 | Scaffold2707 | 17847                   | GG                              | AA              | 1947038187               |
| SNP_P4_177296_17919 | NW_004517580.1 | Scaffold2707 | 17919                   | GG                              | AA              | 1947038189               |
| SNP_P4_177297_33487 | NW_004517580.1 | Scaffold2707 | 33487                   | TT                              | AA              | 1947038191               |
| SNP_P4_177298_33488 | NW_004517580.1 | Scaffold2707 | 33488                   | AA                              | TT              | 1947038193               |
| SNP_P4_177299_33494 | NW_004517580.1 | Scaffold2707 | 33494                   | TT                              | AA              | 1947038195               |
| SNP_P4_177300_5083  | NW_004517581.1 | Scaffold2709 | 5083                    | TT                              | CC              | 1947038197               |
| SNP_P4_177301_9030  | NW_004517581.1 | Scaffold2709 | 9030                    | CC                              | TT              | 1947038199               |
| SNP_P4_177302_9149  | NW_004517581.1 | Scaffold2709 | 9149                    | TT                              | AA              | 1947038201               |
| SNP_P4_177303_9301  | NW_004517581.1 | Scaffold2709 | 9301                    | CC                              | TT              | 1947038203               |
| SNP_P4_177304_9335  | NW_004517581.1 | Scaffold2709 | 9335                    | TT                              | AA              | 1947038205               |
| SNP_P4_177305_9420  | NW_004517581.1 | Scaffold2709 | 9420                    | AA                              | TT              | 1947038207               |
| SNP_P4_177306_9421  | NW_004517581.1 | Scaffold2709 | 9421                    | TT                              | CC              | 1947038209               |
| SNP_P4_177307_9449  | NW_004517581.1 | Scaffold2709 | 9449                    | GG                              | TT              | 1947038211               |
| SNP_P4_177308_9564  | NW_004517581.1 | Scaffold2709 | 9564                    | CC                              | AA              | 1947038213               |

| SNPs IDs            | Chromosome IDs | Chromosomes  | Physical positions (bp) | CDC Frontier (Reference genome) | (ILWC46 & LPNB) | NCBI SNPdb Accession IDs |
|---------------------|----------------|--------------|-------------------------|---------------------------------|-----------------|--------------------------|
| SNP_P4_177309_20061 | NW_004517581.1 | Scaffold2709 | 20061                   | TT                              | CC              | 1947038215               |
| SNP_P4_177310_20072 | NW_004517581.1 | Scaffold2709 | 20072                   | AA                              | GG              | 1947038217               |
| SNP_P4_177311_20100 | NW_004517581.1 | Scaffold2709 | 20100                   | TT                              | GG              | 1947038219               |
| SNP_P4_177312_20152 | NW_004517581.1 | Scaffold2709 | 20152                   | GG                              | CC              | 1947038221               |
| SNP_P4_177313_21832 | NW_004517581.1 | Scaffold2709 | 21832                   | CC                              | TT              | 1947038223               |
| SNP_P4_177314_21895 | NW_004517581.1 | Scaffold2709 | 21895                   | GG                              | AA              | 1947038225               |
| SNP_P4_177315_21898 | NW_004517581.1 | Scaffold2709 | 21898                   | GG                              | AA              | 1947038227               |
| SNP_P4_177316_21917 | NW_004517581.1 | Scaffold2709 | 21917                   | TT                              | CC              | 1947038229               |
| SNP_P4_177317_22350 | NW_004517581.1 | Scaffold2709 | 22350                   | AA                              | GG              | 1947038231               |
| SNP_P4_177318_28980 | NW_004517581.1 | Scaffold2709 | 28980                   | CC                              | TT              | 1947038233               |
| SNP_P4_177319_34463 | NW_004517581.1 | Scaffold2709 | 34463                   | GG                              | AA              | 1947038235               |
| SNP_P4_177320_35043 | NW_004517581.1 | Scaffold2709 | 35043                   | CC                              | TT              | 1947038237               |
| SNP_P4_177321_5175  | NW_004517582.1 | Scaffold2710 | 5175                    | TT                              | CC              | 1947038239               |
| SNP_P4_177322_4528  | NW_004517583.1 | Scaffold2711 | 4528                    | CC                              | TT              | 1947038242               |
| SNP_P4_177323_4535  | NW_004517583.1 | Scaffold2711 | 4535                    | TT                              | AA              | 1947038244               |
| SNP_P4_177324_4538  | NW_004517583.1 | Scaffold2711 | 4538                    | TT                              | AA              | 1947038246               |
| SNP_P4_177325_4603  | NW_004517583.1 | Scaffold2711 | 4603                    | AA                              | GG              | 1947038248               |
| SNP_P4_177326_4615  | NW_004517583.1 | Scaffold2711 | 4615                    | CC                              | AA              | 1947038250               |
| SNP_P4_177327_4629  | NW_004517583.1 | Scaffold2711 | 4629                    | CC                              | TT              | 1947038252               |
| SNP_P4_177328_20469 | NW_004517583.1 | Scaffold2711 | 20469                   | TT                              | CC              | 1947038254               |
| SNP_P4_177330_1967  | NW_004517585.1 | Scaffold2714 | 1967                    | AA                              | TT              | 1947038256               |
| SNP_P4_177331_1708  | NW_004517586.1 | Scaffold2715 | 1708                    | AA                              | GG              | 1947038258               |
| SNP_P4_177332_22925 | NW_004517586.1 | Scaffold2715 | 22925                   | TT                              | CC              | 1947038260               |
| SNP_P4_177333_30527 | NW_004517586.1 | Scaffold2715 | 30527                   | CC                              | TT              | 1947038262               |
| SNP_P4_177334_41712 | NW_004517586.1 | Scaffold2715 | 41712                   | TT                              | AA              | 1947038264               |
| SNP_P4_177335_41744 | NW_004517586.1 | Scaffold2715 | 41744                   | AA                              | CC              | 1947038266               |
| SNP_P4_177336_41763 | NW_004517586.1 | Scaffold2715 | 41763                   | AA                              | GG              | 1947038268               |
| SNP_P4_177337_41791 | NW_004517586.1 | Scaffold2715 | 41791                   | CC                              | TT              | 1947038270               |
| SNP_P4_177338_41800 | NW_004517586.1 | Scaffold2715 | 41800                   | TT                              | GG              | 1947038272               |
| SNP_P4_177339_41832 | NW_004517586.1 | Scaffold2715 | 41832                   | TT                              | AA              | 1947038274               |
| SNP_P4_177340_41961 | NW_004517586.1 | Scaffold2715 | 41961                   | GG                              | AA              | 1947038276               |
| SNP_P4_177341_42208 | NW_004517586.1 | Scaffold2715 | 42208                   | AA                              | GG              | 1947038278               |
| SNP_P4_177342_42474 | NW_004517586.1 | Scaffold2715 | 42474                   | GG                              | CC              | 1947038280               |
| SNP_P4_177343_42742 | NW_004517586.1 | Scaffold2715 | 42742                   | CC                              | AA              | 1947038282               |
| SNP_P4_177344_233   | NW_004517589.1 | Scaffold2719 | 233                     | GG                              | CC              | 1947038284               |
| SNP_P4_177345_368   | NW_004517589.1 | Scaffold2719 | 368                     | TT                              | GG              | 1947038287               |
| SNP_P4_177346_442   | NW_004517589.1 | Scaffold2719 | 442                     | GG                              | CC              | 1947038289               |
| SNP_P4_177347_448   | NW_004517589.1 | Scaffold2719 | 448                     | AA                              | GG              | 1947038291               |
| SNP_P4_177348_2382  | NW_004517589.1 | Scaffold2719 | 2382                    | CC                              | TT              | 1947038293               |
| SNP_P4_177349_26424 | NW_004517590.1 | Scaffold2720 | 26424                   | CC                              | TT              | 1947038295               |
| SNP_P4_177352_26603 | NW_004517590.1 | Scaffold2720 | 26603                   | AA                              | CC              | 1947038297               |
| SNP_P4_177353_26649 | NW_004517590.1 | Scaffold2720 | 26649                   | TT                              | GG              | 1947038300               |

| SNPs IDs             | Chromosome IDs | Chromosomes  | Physical positions (bp) | CDC Frontier (Reference genome) | (ILWC46 & LPNB) | NCBI SNPdb Accession IDs |
|----------------------|----------------|--------------|-------------------------|---------------------------------|-----------------|--------------------------|
| SNP_P4_177354_26698  | NW_004517590.1 | Scaffold2720 | 26698                   | CC                              | AA              | 1947038302               |
| SNP_P4_177355_26700  | NW_004517590.1 | Scaffold2720 | 26700                   | GG                              | AA              | 1947038304               |
| SNP_P4_177356_27349  | NW_004517590.1 | Scaffold2720 | 27349                   | CC                              | TT              | 1947038306               |
| SNP_P4_177357_28143  | NW_004517590.1 | Scaffold2720 | 28143                   | GG                              | AA              | 1947038308               |
| SNP_P4_177358_28176  | NW_004517590.1 | Scaffold2720 | 28176                   | AA                              | GG              | 1947038310               |
| SNP_P4_177359_28182  | NW_004517590.1 | Scaffold2720 | 28182                   | AA                              | GG              | 1947038312               |
| SNP_P4_177360_28221  | NW_004517590.1 | Scaffold2720 | 28221                   | TT                              | GG              | 1947038315               |
| SNP_P4_177361_28595  | NW_004517590.1 | Scaffold2720 | 28595                   | GG                              | TT              | 1947038316               |
| SNP_P4_177362_28647  | NW_004517590.1 | Scaffold2720 | 28647                   | GG                              | CC              | 1947038317               |
| SNP_P4_177363_28732  | NW_004517590.1 | Scaffold2720 | 28732                   | CC                              | TT              | 1947038318               |
| SNP_P4_177364_28762  | NW_004517590.1 | Scaffold2720 | 28762                   | CC                              | AA              | 1947038319               |
| SNP_P4_177365_28770  | NW_004517590.1 | Scaffold2720 | 28770                   | GG                              | AA              | 1947038320               |
| SNP_P4_177366_28967  | NW_004517590.1 | Scaffold2720 | 28967                   | TT                              | CC              | 1947038321               |
| SNP_P4_177367_29020  | NW_004517590.1 | Scaffold2720 | 29020                   | TT                              | CC              | 1947038322               |
| SNP_P4_177368_29023  | NW_004517590.1 | Scaffold2720 | 29023                   | AA                              | CC              | 1947038323               |
| SNP_P4_177369_29026  | NW_004517590.1 | Scaffold2720 | 29026                   | AA                              | GG              | 1947038324               |
| SNP_P4_177370_29045  | NW_004517590.1 | Scaffold2720 | 29045                   | TT                              | AA              | 1947038325               |
| SNP_P4_177371_29070  | NW_004517590.1 | Scaffold2720 | 29070                   | TT                              | AA              | 1947038326               |
| SNP_P4_177372_44009  | NW_004517590.1 | Scaffold2720 | 44009                   | CC                              | TT              | 1947038327               |
| SNP_P4_177373_87987  | NW_004517590.1 | Scaffold2720 | 87987                   | CC                              | TT              | 1947038328               |
| SNP_P4_177374_112789 | NW_004517590.1 | Scaffold2720 | 112789                  | TT                              | GG              | 1947038329               |
| SNP_P4_177375_112790 | NW_004517590.1 | Scaffold2720 | 112790                  | AA                              | GG              | 1947038330               |
| SNP_P4_177376_120125 | NW_004517590.1 | Scaffold2720 | 120125                  | TT                              | GG              | 1947038331               |
| SNP_P4_177377_120244 | NW_004517590.1 | Scaffold2720 | 120244                  | CC                              | TT              | 1947038332               |
| SNP_P4_177378_120265 | NW_004517590.1 | Scaffold2720 | 120265                  | TT                              | GG              | 1947038333               |
| SNP_P4_177379_123625 | NW_004517590.1 | Scaffold2720 | 123625                  | AA                              | GG              | 1947038334               |
| SNP_P4_177380_123628 | NW_004517590.1 | Scaffold2720 | 123628                  | AA                              | TT              | 1947038335               |
| SNP_P4_177381_123845 | NW_004517590.1 | Scaffold2720 | 123845                  | GG                              | TT              | 1947038336               |
| SNP_P4_177382_123853 | NW_004517590.1 | Scaffold2720 | 123853                  | GG                              | TT              | 1947038337               |
| SNP_P4_177383_123863 | NW_004517590.1 | Scaffold2720 | 123863                  | CC                              | TT              | 1947038338               |
| SNP_P4_177384_123891 | NW_004517590.1 | Scaffold2720 | 123891                  | CC                              | TT              | 1947038339               |
| SNP_P4_177385_123922 | NW_004517590.1 | Scaffold2720 | 123922                  | GG                              | TT              | 1947038340               |
| SNP_P4_177386_123935 | NW_004517590.1 | Scaffold2720 | 123935                  | CC                              | TT              | 1947038341               |
| SNP_P4_177387_126593 | NW_004517590.1 | Scaffold2720 | 126593                  | TT                              | CC              | 1947038342               |
| SNP_P4_177388_126647 | NW_004517590.1 | Scaffold2720 | 126647                  | TT                              | GG              | 1947038343               |
| SNP_P4_177389_126659 | NW_004517590.1 | Scaffold2720 | 126659                  | GG                              | TT              | 1947038344               |
| SNP_P4_177390_126681 | NW_004517590.1 | Scaffold2720 | 126681                  | TT                              | CC              | 1947038345               |
| SNP_P4_177391_126683 | NW_004517590.1 | Scaffold2720 | 126683                  | AA                              | CC              | 1947038346               |
| SNP_P4_177392_126751 | NW_004517590.1 | Scaffold2720 | 126751                  | TT                              | CC              | 1947038347               |
| SNP_P4_177393_127026 | NW_004517590.1 | Scaffold2720 | 127026                  | TT                              | CC              | 1947038348               |
| SNP_P4_177394_127128 | NW_004517590.1 | Scaffold2720 | 127128                  | TT                              | CC              | 1947038349               |
| SNP_P4_177395_127150 | NW_004517590.1 | Scaffold2720 | 127150                  | AA                              | GG              | 1947038350               |

| SNPs IDs             | Chromosome IDs | Chromosomes  | Physical positions (bp) | CDC Frontier (Reference genome) | (ILWC46 & LPNB) | NCBI SNPdb Accession IDs |
|----------------------|----------------|--------------|-------------------------|---------------------------------|-----------------|--------------------------|
| SNP_P4_177396_131606 | NW_004517590.1 | Scaffold2720 | 131606                  | CC                              | TT              | 1947038351               |
| SNP_P4_177398_132007 | NW_004517590.1 | Scaffold2720 | 132007                  | AA                              | GG              | 1947038352               |
| SNP_P4_177399_132021 | NW_004517590.1 | Scaffold2720 | 132021                  | CC                              | GG              | 1947038353               |
| SNP_P4_177400_132022 | NW_004517590.1 | Scaffold2720 | 132022                  | CC                              | TT              | 1947038354               |
| SNP_P4_177401_132032 | NW_004517590.1 | Scaffold2720 | 132032                  | CC                              | TT              | 1947038355               |
| SNP_P4_177402_132111 | NW_004517590.1 | Scaffold2720 | 132111                  | AA                              | GG              | 1947038356               |
| SNP_P4_177403_174347 | NW_004517590.1 | Scaffold2720 | 174347                  | CC                              | TT              | 1947038358               |
| SNP_P4_177404_174419 | NW_004517590.1 | Scaffold2720 | 174419                  | TT                              | CC              | 1947038360               |
| SNP_P4_177405_174485 | NW_004517590.1 | Scaffold2720 | 174485                  | AA                              | GG              | 1947038362               |
| SNP_P4_177406_182820 | NW_004517590.1 | Scaffold2720 | 182820                  | GG                              | CC              | 1947038364               |
| SNP_P4_177407_182827 | NW_004517590.1 | Scaffold2720 | 182827                  | TT                              | CC              | 1947038366               |
| SNP_P4_177408_182884 | NW_004517590.1 | Scaffold2720 | 182884                  | TT                              | CC              | 1947038368               |
| SNP_P4_177409_182966 | NW_004517590.1 | Scaffold2720 | 182966                  | TT                              | CC              | 1947038370               |
| SNP_P4_177410_183089 | NW_004517590.1 | Scaffold2720 | 183089                  | TT                              | CC              | 1947038372               |
| SNP_P4_177411_183098 | NW_004517590.1 | Scaffold2720 | 183098                  | TT                              | AA              | 1947038374               |
| SNP_P4_177412_183099 | NW_004517590.1 | Scaffold2720 | 183099                  | AA                              | GG              | 1947038376               |
| SNP_P4_177413_183100 | NW_004517590.1 | Scaffold2720 | 183100                  | TT                              | CC              | 1947038378               |
| SNP_P4_177414_183119 | NW_004517590.1 | Scaffold2720 | 183119                  | GG                              | AA              | 1947038380               |
| SNP_P4_177415_183280 | NW_004517590.1 | Scaffold2720 | 183280                  | TT                              | CC              | 1947038382               |
| SNP_P4_177416_202125 | NW_004517590.1 | Scaffold2720 | 202125                  | CC                              | GG              | 1947038384               |
| SNP_P4_177417_209625 | NW_004517590.1 | Scaffold2720 | 209625                  | CC                              | AA              | 1947038386               |
| SNP_P4_177419_219736 | NW_004517590.1 | Scaffold2720 | 219736                  | AA                              | GG              | 1947038388               |
| SNP_P4_177420_219750 | NW_004517590.1 | Scaffold2720 | 219750                  | GG                              | AA              | 1947038390               |
| SNP_P4_177421_223949 | NW_004517590.1 | Scaffold2720 | 223949                  | CC                              | TT              | 1947038392               |
| SNP_P4_177422_223974 | NW_004517590.1 | Scaffold2720 | 223974                  | CC                              | AA              | 1947038394               |
| SNP_P4_177423_224015 | NW_004517590.1 | Scaffold2720 | 224015                  | CC                              | TT              | 1947038396               |
| SNP_P4_177424_224183 | NW_004517590.1 | Scaffold2720 | 224183                  | TT                              | CC              | 1947038398               |
| SNP_P4_177425_224317 | NW_004517590.1 | Scaffold2720 | 224317                  | CC                              | TT              | 1947038400               |
| SNP_P4_177426_224344 | NW_004517590.1 | Scaffold2720 | 224344                  | CC                              | TT              | 1947038402               |
| SNP_P4_177427_224423 | NW_004517590.1 | Scaffold2720 | 224423                  | GG                              | AA              | 1947038404               |
| SNP_P4_177428_224429 | NW_004517590.1 | Scaffold2720 | 224429                  | AA                              | GG              | 1947038406               |
| SNP_P4_177429_224432 | NW_004517590.1 | Scaffold2720 | 224432                  | GG                              | AA              | 1947038408               |
| SNP_P4_177430_224444 | NW_004517590.1 | Scaffold2720 | 224444                  | AA                              | GG              | 1947038410               |
| SNP_P4_177431_224456 | NW_004517590.1 | Scaffold2720 | 224456                  | AA                              | TT              | 1947038412               |
| SNP_P4_177432_576    | NW_004517591.1 | Scaffold2722 | 576                     | AA                              | GG              | 1947038414               |
| SNP_P4_177433_752    | NW_004517591.1 | Scaffold2722 | 752                     | TT                              | CC              | 1947038416               |
| SNP_P4_177434_759    | NW_004517591.1 | Scaffold2722 | 759                     | GG                              | AA              | 1947038418               |
| SNP_P4_177435_790    | NW_004517591.1 | Scaffold2722 | 790                     | GG                              | CC              | 1947038420               |
| SNP_P4_177437_831    | NW_004517591.1 | Scaffold2722 | 831                     | AA                              | GG              | 1947038422               |
| SNP_P4_177438_903    | NW_004517591.1 | Scaffold2722 | 903                     | GG                              | AA              | 1947038423               |
| SNP_P4_177439_906    | NW_004517591.1 | Scaffold2722 | 906                     | AA                              | GG              | 1947038425               |
| SNP_P4_177440_916    | NW_004517591.1 | Scaffold2722 | 916                     | AA                              | GG              | 1947038427               |

| SNPs IDs            | Chromosome IDs | Chromosomes  | Physical positions (bp) | CDC Frontier (Reference genome) | (ILWC46 & LPNB) | NCBI SNPdb Accession IDs |
|---------------------|----------------|--------------|-------------------------|---------------------------------|-----------------|--------------------------|
| SNP_P4_177441_951   | NW_004517591.1 | Scaffold2722 | 951                     | AA                              | GG              | 1947038429               |
| SNP_P4_177442_964   | NW_004517591.1 | Scaffold2722 | 964                     | GG                              | AA              | 1947038431               |
| SNP_P4_177443_1949  | NW_004517591.1 | Scaffold2722 | 1949                    | CC                              | AA              | 1947038433               |
| SNP_P4_177444_1960  | NW_004517591.1 | Scaffold2722 | 1960                    | AA                              | GG              | 1947038435               |
| SNP_P4_177445_2638  | NW_004517591.1 | Scaffold2722 | 2638                    | AA                              | GG              | 1947038437               |
| SNP_P4_177446_17965 | NW_004517591.1 | Scaffold2722 | 17965                   | AA                              | CC              | 1947038439               |
| SNP_P4_177447_24164 | NW_004517591.1 | Scaffold2722 | 24164                   | AA                              | TT              | 1947038441               |
| SNP_P4_177448_26667 | NW_004517591.1 | Scaffold2722 | 26667                   | CC                              | AA              | 1947038443               |
| SNP_P4_177449_27153 | NW_004517591.1 | Scaffold2722 | 27153                   | TT                              | AA              | 1947038445               |
| SNP_P4_177450_27154 | NW_004517591.1 | Scaffold2722 | 27154                   | CC                              | AA              | 1947038447               |
| SNP_P4_177451_27337 | NW_004517591.1 | Scaffold2722 | 27337                   | AA                              | GG              | 1947038449               |
| SNP_P4_177452_27367 | NW_004517591.1 | Scaffold2722 | 27367                   | GG                              | AA              | 1947038451               |
| SNP_P4_177453_31191 | NW_004517591.1 | Scaffold2722 | 31191                   | GG                              | AA              | 1947038453               |
| SNP_P4_177454_31541 | NW_004517591.1 | Scaffold2722 | 31541                   | TT                              | AA              | 1947038455               |
| SNP_P4_177455_33886 | NW_004517591.1 | Scaffold2722 | 33886                   | TT                              | CC              | 1947038457               |
| SNP_P4_177456_41281 | NW_004517591.1 | Scaffold2722 | 41281                   | GG                              | TT              | 1947038459               |
| SNP_P4_177457_42121 | NW_004517591.1 | Scaffold2722 | 42121                   | GG                              | AA              | 1947038461               |
| SNP_P4_177458_52254 | NW_004517591.1 | Scaffold2722 | 52254                   | CC                              | TT              | 1947038463               |
| SNP_P4_177459_52313 | NW_004517591.1 | Scaffold2722 | 52313                   | CC                              | TT              | 1947038465               |
| SNP_P4_177461_65809 | NW_004517591.1 | Scaffold2722 | 65809                   | GG                              | AA              | 1947038468               |
| SNP_P4_177462_67619 | NW_004517591.1 | Scaffold2722 | 67619                   | GG                              | AA              | 1947038470               |
| SNP_P4_177464_71637 | NW_004517591.1 | Scaffold2722 | 71637                   | TT                              | AA              | 1947038472               |
| SNP_P4_177467_78231 | NW_004517591.1 | Scaffold2722 | 78231                   | GG                              | AA              | 1947038474               |
| SNP_P4_177468_81134 | NW_004517591.1 | Scaffold2722 | 81134                   | TT                              | CC              | 1947038476               |
| SNP_P4_177469_81172 | NW_004517591.1 | Scaffold2722 | 81172                   | AA                              | CC              | 1947038478               |
| SNP_P4_177470_87099 | NW_004517591.1 | Scaffold2722 | 87099                   | TT                              | GG              | 1947038480               |
| SNP_P4_177471_4280  | NW_004517592.1 | Scaffold2724 | 4280                    | CC                              | AA              | 1947038482               |
| SNP_P4_177472_4746  | NW_004517592.1 | Scaffold2724 | 4746                    | CC                              | TT              | 1947038484               |
| SNP_P4_177473_19302 | NW_004517592.1 | Scaffold2724 | 19302                   | CC                              | TT              | 1947038486               |
| SNP_P4_177474_19399 | NW_004517592.1 | Scaffold2724 | 19399                   | AA                              | CC              | 1947038488               |
| SNP_P4_177475_19402 | NW_004517592.1 | Scaffold2724 | 19402                   | CC                              | TT              | 1947038490               |
| SNP_P4_177476_19404 | NW_004517592.1 | Scaffold2724 | 19404                   | CC                              | TT              | 1947038492               |
| SNP_P4_177477_19409 | NW_004517592.1 | Scaffold2724 | 19409                   | GG                              | AA              | 1947038494               |
| SNP_P4_177478_22339 | NW_004517592.1 | Scaffold2724 | 22339                   | GG                              | TT              | 1947038496               |
| SNP_P4_177479_22343 | NW_004517592.1 | Scaffold2724 | 22343                   | TT                              | AA              | 1947038498               |
| SNP_P4_177480_64    | NW_004517593.1 | Scaffold2725 | 64                      | CC                              | TT              | 1947038500               |
| SNP_P4_177482_1033  | NW_004517593.1 | Scaffold2725 | 1033                    | TT                              | CC              | 1947038502               |
| SNP_P4_177484_1371  | NW_004517593.1 | Scaffold2725 | 1371                    | TT                              | CC              | 1947038504               |
| SNP_P4_177485_3015  | NW_004517593.1 | Scaffold2725 | 3015                    | GG                              | AA              | 1947038506               |
| SNP_P4_177486_3043  | NW_004517593.1 | Scaffold2725 | 3043                    | AA                              | GG              | 1947038509               |
| SNP_P4_177487_3069  | NW_004517593.1 | Scaffold2725 | 3069                    | TT                              | GG              | 1947038511               |
| SNP_P4_177488_3115  | NW_004517593.1 | Scaffold2725 | 3115                    | GG                              | AA              | 1947038513               |

| SNPs IDs            | Chromosome IDs | Chromosomes  | Physical positions (bp) | CDC Frontier (Reference genome) | (ILWC46 & LPNB) | NCBI SNPdb Accession IDs |
|---------------------|----------------|--------------|-------------------------|---------------------------------|-----------------|--------------------------|
| SNP_P4_177489_3601  | NW_004517593.1 | Scaffold2725 | 3601                    | AA                              | TT              | 1947038515               |
| SNP_P4_177490_3603  | NW_004517593.1 | Scaffold2725 | 3603                    | AA                              | GG              | 1947038517               |
| SNP_P4_177491_3899  | NW_004517593.1 | Scaffold2725 | 3899                    | AA                              | GG              | 1947038519               |
| SNP_P4_177493_4126  | NW_004517594.1 | Scaffold2726 | 4126                    | GG                              | TT              | 1947038521               |
| SNP_P4_177495_4542  | NW_004517594.1 | Scaffold2726 | 4542                    | AA                              | TT              | 1947038523               |
| SNP_P4_177496_1407  | NW_004517595.1 | Scaffold2727 | 1407                    | TT                              | AA              | 1947038525               |
| SNP_P4_177497_1422  | NW_004517595.1 | Scaffold2727 | 1422                    | TT                              | CC              | 1947038527               |
| SNP_P4_177498_1509  | NW_004517595.1 | Scaffold2727 | 1509                    | TT                              | CC              | 1947038529               |
| SNP_P4_177499_1749  | NW_004517595.1 | Scaffold2727 | 1749                    | CC                              | GG              | 1947038531               |
| SNP_P4_177500_1760  | NW_004517595.1 | Scaffold2727 | 1760                    | AA                              | GG              | 1947038533               |
| SNP_P4_177501_1819  | NW_004517595.1 | Scaffold2727 | 1819                    | GG                              | AA              | 1947038536               |
| SNP_P4_177502_920   | NW_004517596.1 | Scaffold2728 | 920                     | TT                              | GG              | 1947038538               |
| SNP_P4_177503_966   | NW_004517596.1 | Scaffold2728 | 966                     | AA                              | CC              | 1947038540               |
| SNP_P4_177504_980   | NW_004517596.1 | Scaffold2728 | 980                     | GG                              | AA              | 1947038542               |
| SNP_P4_177505_10992 | NW_004517596.1 | Scaffold2728 | 10992                   | GG                              | AA              | 1947038544               |
| SNP_P4_177507_11383 | NW_004517596.1 | Scaffold2728 | 11383                   | CC                              | AA              | 1947038546               |
| SNP_P4_177508_11398 | NW_004517596.1 | Scaffold2728 | 11398                   | AA                              | GG              | 1947038548               |
| SNP_P4_177509_11545 | NW_004517596.1 | Scaffold2728 | 11545                   | CC                              | GG              | 1947038550               |
| SNP_P4_177510_11568 | NW_004517596.1 | Scaffold2728 | 11568                   | TT                              | CC              | 1947038552               |
| SNP_P4_177511_1190  | NW_004517597.1 | Scaffold2729 | 1190                    | GG                              | AA              | 1947038554               |
| SNP_P4_177512_1194  | NW_004517597.1 | Scaffold2729 | 1194                    | CC                              | TT              | 1947038556               |
| SNP_P4_177513_1210  | NW_004517597.1 | Scaffold2729 | 1210                    | AA                              | TT              | 1947038558               |
| SNP_P4_177514_1232  | NW_004517597.1 | Scaffold2729 | 1232                    | AA                              | GG              | 1947038560               |
| SNP_P4_177515_1313  | NW_004517597.1 | Scaffold2729 | 1313                    | TT                              | CC              | 1947038562               |
| SNP_P4_177516_2408  | NW_004517597.1 | Scaffold2729 | 2408                    | CC                              | AA              | 1947038564               |
| SNP_P4_177517_2900  | NW_004517597.1 | Scaffold2729 | 2900                    | AA                              | CC              | 1947038566               |
| SNP_P4_177518_2901  | NW_004517597.1 | Scaffold2729 | 2901                    | TT                              | CC              | 1947038568               |
| SNP_P4_177519_3154  | NW_004517597.1 | Scaffold2729 | 3154                    | CC                              | GG              | 1947038570               |
| SNP_P4_177520_3180  | NW_004517597.1 | Scaffold2729 | 3180                    | AA                              | TT              | 1947038572               |
| SNP_P4_177521_3233  | NW_004517597.1 | Scaffold2729 | 3233                    | TT                              | CC              | 1947038574               |
| SNP_P4_177522_3286  | NW_004517597.1 | Scaffold2729 | 3286                    | CC                              | TT              | 1947038576               |
| SNP_P4_177523_3306  | NW_004517597.1 | Scaffold2729 | 3306                    | CC                              | AA              | 1947038578               |
| SNP_P4_177524_5820  | NW_004517597.1 | Scaffold2729 | 5820                    | GG                              | AA              | 1947038580               |
| SNP_P4_177525_5824  | NW_004517597.1 | Scaffold2729 | 5824                    | AA                              | TT              | 1947038582               |
| SNP_P4_177526_5825  | NW_004517597.1 | Scaffold2729 | 5825                    | TT                              | AA              | 1947038584               |
| SNP_P4_177527_5826  | NW_004517597.1 | Scaffold2729 | 5826                    | TT                              | CC              | 1947038586               |
| SNP_P4_177528_5831  | NW_004517597.1 | Scaffold2729 | 5831                    | GG                              | AA              | 1947038588               |
| SNP_P4_177529_5848  | NW_004517597.1 | Scaffold2729 | 5848                    | TT                              | CC              | 1947038590               |
| SNP_P4_177530_5850  | NW_004517597.1 | Scaffold2729 | 5850                    | GG                              | AA              | 1947038592               |
| SNP_P4_177531_5861  | NW_004517597.1 | Scaffold2729 | 5861                    | CC                              | TT              | 1947038594               |
| SNP_P4_177533_5927  | NW_004517597.1 | Scaffold2729 | 5927                    | GG                              | AA              | 1947038596               |
| SNP_P4_177534_5946  | NW_004517597.1 | Scaffold2729 | 5946                    | GG                              | AA              | 1947038598               |

| SNPs IDs             | Chromosome IDs | Chromosomes  | Physical positions (bp) | CDC Frontier (Reference genome) | (ILWC46 & LPNB) | NCBI SNPdb Accession IDs |
|----------------------|----------------|--------------|-------------------------|---------------------------------|-----------------|--------------------------|
| SNP_P4_177535_6322   | NW_004517597.1 | Scaffold2729 | 6322                    | AA                              | TT              | 1947038600               |
| SNP_P4_177536_6531   | NW_004517597.1 | Scaffold2729 | 6531                    | AA                              | GG              | 1947038602               |
| SNP_P4_177537_6836   | NW_004517597.1 | Scaffold2729 | 6836                    | AA                              | GG              | 1947038604               |
| SNP_P4_177538_6838   | NW_004517597.1 | Scaffold2729 | 6838                    | CC                              | TT              | 1947038606               |
| SNP_P4_177539_6855   | NW_004517597.1 | Scaffold2729 | 6855                    | TT                              | GG              | 1947038608               |
| SNP_P4_177540_6905   | NW_004517597.1 | Scaffold2729 | 6905                    | GG                              | AA              | 1947038610               |
| SNP_P4_177541_6922   | NW_004517597.1 | Scaffold2729 | 6922                    | TT                              | AA              | 1947038612               |
| SNP_P4_177542_6936   | NW_004517597.1 | Scaffold2729 | 6936                    | GG                              | AA              | 1947038614               |
| SNP_P4_177543_7870   | NW_004517597.1 | Scaffold2729 | 7870                    | TT                              | CC              | 1947038616               |
| SNP_P4_177544_7911   | NW_004517597.1 | Scaffold2729 | 7911                    | TT                              | CC              | 1947038618               |
| SNP_P4_177545_7925   | NW_004517597.1 | Scaffold2729 | 7925                    | TT                              | AA              | 1947038620               |
| SNP_P4_177546_7926   | NW_004517597.1 | Scaffold2729 | 7926                    | AA                              | TT              | 1947038622               |
| SNP_P4_177547_326    | NW_004517601.1 | Scaffold2734 | 326                     | CC                              | AA              | 1947038624               |
| SNP_P4_177548_428    | NW_004517601.1 | Scaffold2734 | 428                     | AA                              | TT              | 1947038626               |
| SNP_P4_177549_508    | NW_004517601.1 | Scaffold2734 | 508                     | AA                              | GG              | 1947038628               |
| SNP_P4_177551_716    | NW_004517601.1 | Scaffold2734 | 716                     | CC                              | TT              | 1947038630               |
| SNP_P4_177552_722    | NW_004517601.1 | Scaffold2734 | 722                     | AA                              | CC              | 1947038632               |
| SNP_P4_177553_771    | NW_004517601.1 | Scaffold2734 | 771                     | TT                              | CC              | 1947038634               |
| SNP_P4_177554_953    | NW_004517601.1 | Scaffold2734 | 953                     | CC                              | TT              | 1947038636               |
| SNP_P4_177555_961    | NW_004517601.1 | Scaffold2734 | 961                     | AA                              | GG              | 1947038638               |
| SNP_P4_177556_1046   | NW_004517601.1 | Scaffold2734 | 1046                    | TT                              | CC              | 1947038640               |
| SNP_P4_177557_1108   | NW_004517601.1 | Scaffold2734 | 1108                    | CC                              | GG              | 1947038642               |
| SNP_P4_177558_1398   | NW_004517601.1 | Scaffold2734 | 1398                    | AA                              | TT              | 1947038644               |
| SNP_P4_177559_1431   | NW_004517601.1 | Scaffold2734 | 1431                    | AA                              | GG              | 1947038646               |
| SNP_P4_177560_1478   | NW_004517601.1 | Scaffold2734 | 1478                    | AA                              | CC              | 1947038648               |
| SNP_P4_177561_1479   | NW_004517601.1 | Scaffold2734 | 1479                    | TT                              | AA              | 1947038650               |
| SNP_P4_177562_1482   | NW_004517601.1 | Scaffold2734 | 1482                    | TT                              | CC              | 1947038652               |
| SNP_P4_177563_1489   | NW_004517601.1 | Scaffold2734 | 1489                    | CC                              | TT              | 1947038654               |
| SNP_P4_177564_13926  | NW_004517601.1 | Scaffold2734 | 13926                   | GG                              | TT              | 1947038656               |
| SNP_P4_177565_14064  | NW_004517601.1 | Scaffold2734 | 14064                   | AA                              | GG              | 1947038658               |
| SNP_P4_177566_14077  | NW_004517601.1 | Scaffold2734 | 14077                   | CC                              | TT              | 1947038659               |
| SNP_P4_177567_57131  | NW_004517601.1 | Scaffold2734 | 57131                   | TT                              | CC              | 1947038661               |
| SNP_P4_177568_57198  | NW_004517601.1 | Scaffold2734 | 57198                   | TT                              | CC              | 1947038663               |
| SNP_P4_177569_84454  | NW_004517601.1 | Scaffold2734 | 84454                   | AA                              | GG              | 1947038665               |
| SNP_P4_177570_84479  | NW_004517601.1 | Scaffold2734 | 84479                   | TT                              | CC              | 1947038667               |
| SNP_P4_177571_115167 | NW_004517601.1 | Scaffold2734 | 115167                  | AA                              | GG              | 1947038669               |
| SNP_P4_177572_131780 | NW_004517601.1 | Scaffold2734 | 131780                  | TT                              | AA              | 1947038671               |
| SNP_P4_177573_3205   | NW_004517602.1 | Scaffold2736 | 3205                    | GG                              | AA              | 1947038673               |
| SNP_P4_177574_3336   | NW_004517602.1 | Scaffold2736 | 3336                    | AA                              | GG              | 1947038675               |
| SNP_P4_177575_3424   | NW_004517602.1 | Scaffold2736 | 3424                    | TT                              | GG              | 1947038677               |
| SNP_P4_177577_3645   | NW_004517602.1 | Scaffold2736 | 3645                    | AA                              | GG              | 1947038679               |
| SNP_P4_177578_3659   | NW_004517602.1 | Scaffold2736 | 3659                    | AA                              | GG              | 1947038681               |



| SNPs IDs            | Chromosome IDs | Chromosomes  | Physical positions (bp) | CDC Frontier (Reference genome) | (ILWC46 & LPNB) | NCBI SNPdb Accession IDs |
|---------------------|----------------|--------------|-------------------------|---------------------------------|-----------------|--------------------------|
| SNP_P4_177579_3688  | NW_004517602.1 | Scaffold2736 | 3688                    | TT                              | CC              | 1947038683               |
| SNP_P4_177580_3808  | NW_004517602.1 | Scaffold2736 | 3808                    | TT                              | GG              | 1947038685               |
| SNP_P4_177581_3817  | NW_004517602.1 | Scaffold2736 | 3817                    | GG                              | TT              | 1947038687               |
| SNP_P4_177582_3848  | NW_004517602.1 | Scaffold2736 | 3848                    | CC                              | TT              | 1947038689               |
| SNP_P4_177583_3945  | NW_004517602.1 | Scaffold2736 | 3945                    | TT                              | CC              | 1947038691               |
| SNP_P4_177584_4193  | NW_004517602.1 | Scaffold2736 | 4193                    | CC                              | TT              | 1947038693               |
| SNP_P4_177585_4287  | NW_004517602.1 | Scaffold2736 | 4287                    | TT                              | CC              | 1947038695               |
| SNP_P4_177586_4298  | NW_004517602.1 | Scaffold2736 | 4298                    | CC                              | TT              | 1947038697               |
| SNP_P4_177587_4350  | NW_004517602.1 | Scaffold2736 | 4350                    | CC                              | GG              | 1947038699               |
| SNP_P4_177588_6234  | NW_004517602.1 | Scaffold2736 | 6234                    | TT                              | CC              | 1947038701               |
| SNP_P4_177589_3413  | NW_004517603.1 | Scaffold2737 | 3413                    | TT                              | CC              | 1947038703               |
| SNP_P4_177590_3466  | NW_004517603.1 | Scaffold2737 | 3466                    | CC                              | TT              | 1947038705               |
| SNP_P4_177591_3467  | NW_004517603.1 | Scaffold2737 | 3467                    | AA                              | TT              | 1947038707               |
| SNP_P4_177592_3641  | NW_004517603.1 | Scaffold2737 | 3641                    | AA                              | GG              | 1947038709               |
| SNP_P4_177593_3913  | NW_004517603.1 | Scaffold2737 | 3913                    | AA                              | GG              | 1947038711               |
| SNP_P4_177594_4167  | NW_004517603.1 | Scaffold2737 | 4167                    | TT                              | AA              | 1947038713               |
| SNP_P4_177595_7223  | NW_004517603.1 | Scaffold2737 | 7223                    | CC                              | TT              | 1947038715               |
| SNP_P4_177596_7239  | NW_004517603.1 | Scaffold2737 | 7239                    | TT                              | CC              | 1947038716               |
| SNP_P4_177597_8946  | NW_004517603.1 | Scaffold2737 | 8946                    | TT                              | AA              | 1947038718               |
| SNP_P4_177598_9009  | NW_004517603.1 | Scaffold2737 | 9009                    | AA                              | TT              | 1947038720               |
| SNP_P4_177599_9085  | NW_004517603.1 | Scaffold2737 | 9085                    | TT                              | AA              | 1947038722               |
| SNP_P4_177600_9117  | NW_004517603.1 | Scaffold2737 | 9117                    | TT                              | AA              | 1947038724               |
| SNP_P4_177601_9361  | NW_004517603.1 | Scaffold2737 | 9361                    | AA                              | CC              | 1947038726               |
| SNP_P4_177603_9544  | NW_004517603.1 | Scaffold2737 | 9544                    | GG                              | AA              | 1947038728               |
| SNP_P4_177604_9636  | NW_004517603.1 | Scaffold2737 | 9636                    | AA                              | TT              | 1947038730               |
| SNP_P4_177605_9731  | NW_004517603.1 | Scaffold2737 | 9731                    | AA                              | CC              | 1947038732               |
| SNP_P4_177606_9767  | NW_004517603.1 | Scaffold2737 | 9767                    | GG                              | TT              | 1947038734               |
| SNP_P4_177607_5005  | NW_004517604.1 | Scaffold2738 | 5005                    | CC                              | TT              | 1947038736               |
| SNP_P4_177609_5260  | NW_004517604.1 | Scaffold2738 | 5260                    | TT                              | CC              | 1947038739               |
| SNP_P4_177610_5261  | NW_004517604.1 | Scaffold2738 | 5261                    | AA                              | TT              | 1947038741               |
| SNP_P4_177611_5262  | NW_004517604.1 | Scaffold2738 | 5262                    | AA                              | TT              | 1947038743               |
| SNP_P4_177612_7951  | NW_004517604.1 | Scaffold2738 | 7951                    | CC                              | TT              | 1947038745               |
| SNP_P4_177613_7963  | NW_004517604.1 | Scaffold2738 | 7963                    | TT                              | CC              | 1947038747               |
| SNP_P4_177614_8156  | NW_004517604.1 | Scaffold2738 | 8156                    | GG                              | AA              | 1947038749               |
| SNP_P4_177615_8257  | NW_004517604.1 | Scaffold2738 | 8257                    | TT                              | AA              | 1947038751               |
| SNP_P4_177616_9482  | NW_004517604.1 | Scaffold2738 | 9482                    | AA                              | GG              | 1947038753               |
| SNP_P4_177617_9933  | NW_004517604.1 | Scaffold2738 | 9933                    | GG                              | TT              | 1947038755               |
| SNP_P4_177618_10126 | NW_004517604.1 | Scaffold2738 | 10126                   | GG                              | AA              | 1947038757               |
| SNP_P4_177619_10165 | NW_004517604.1 | Scaffold2738 | 10165                   | TT                              | CC              | 1947038759               |
| SNP_P4_177620_10556 | NW_004517604.1 | Scaffold2738 | 10556                   | CC                              | TT              | 1947038761               |
| SNP_P4_177621_10598 | NW_004517604.1 | Scaffold2738 | 10598                   | GG                              | CC              | 1947038763               |
| SNP_P4_177622_10601 | NW_004517604.1 | Scaffold2738 | 10601                   | AA                              | TT              | 1947038765               |

| SNPs IDs            | Chromosome IDs | Chromosomes  | Physical positions (bp) | CDC Frontier (Reference genome) | (ILWC46 & LPNB) | NCBI SNPdb Accession IDs |
|---------------------|----------------|--------------|-------------------------|---------------------------------|-----------------|--------------------------|
| SNP_P4_177623_11285 | NW_004517604.1 | Scaffold2738 | 11285                   | GG                              | TT              | 1947038767               |
| SNP_P4_177624_12098 | NW_004517604.1 | Scaffold2738 | 12098                   | AA                              | GG              | 1947038769               |
| SNP_P4_177625_26457 | NW_004517604.1 | Scaffold2738 | 26457                   | GG                              | AA              | 1947038771               |
| SNP_P4_177626_26580 | NW_004517604.1 | Scaffold2738 | 26580                   | AA                              | GG              | 1947038773               |
| SNP_P4_177628_27466 | NW_004517604.1 | Scaffold2738 | 27466                   | TT                              | CC              | 1947038775               |
| SNP_P4_177629_27485 | NW_004517604.1 | Scaffold2738 | 27485                   | GG                              | TT              | 1947038777               |
| SNP_P4_177631_28886 | NW_004517604.1 | Scaffold2738 | 28886                   | GG                              | AA              | 1947038779               |
| SNP_P4_177632_29181 | NW_004517604.1 | Scaffold2738 | 29181                   | GG                              | AA              | 1947038781               |
| SNP_P4_177633_29552 | NW_004517604.1 | Scaffold2738 | 29552                   | CC                              | TT              | 1947038783               |
| SNP_P4_177634_29827 | NW_004517604.1 | Scaffold2738 | 29827                   | AA                              | CC              | 1947038785               |
| SNP_P4_177635_29989 | NW_004517604.1 | Scaffold2738 | 29989                   | GG                              | AA              | 1947038787               |
| SNP_P4_177636_30045 | NW_004517604.1 | Scaffold2738 | 30045                   | TT                              | CC              | 1947038789               |
| SNP_P4_177637_30089 | NW_004517604.1 | Scaffold2738 | 30089                   | AA                              | CC              | 1947038791               |
| SNP_P4_177638_30411 | NW_004517604.1 | Scaffold2738 | 30411                   | AA                              | GG              | 1947038793               |
| SNP_P4_177639_30551 | NW_004517604.1 | Scaffold2738 | 30551                   | GG                              | AA              | 1947038795               |
| SNP_P4_177642_31732 | NW_004517604.1 | Scaffold2738 | 31732                   | AA                              | TT              | 1947038797               |
| SNP_P4_177643_31747 | NW_004517604.1 | Scaffold2738 | 31747                   | AA                              | GG              | 1947038799               |
| SNP_P4_177644_31914 | NW_004517604.1 | Scaffold2738 | 31914                   | AA                              | TT              | 1947038801               |
| SNP_P4_177645_20326 | NW_004517605.1 | Scaffold2739 | 20326                   | CC                              | AA              | 1947038803               |
| SNP_P4_177646_20351 | NW_004517605.1 | Scaffold2739 | 20351                   | CC                              | AA              | 1947038805               |
| SNP_P4_177647_20497 | NW_004517605.1 | Scaffold2739 | 20497                   | GG                              | TT              | 1947038807               |
| SNP_P4_177648_20504 | NW_004517605.1 | Scaffold2739 | 20504                   | TT                              | AA              | 1947038809               |
| SNP_P4_177649_20510 | NW_004517605.1 | Scaffold2739 | 20510                   | CC                              | AA              | 1947038811               |
| SNP_P4_177650_21450 | NW_004517605.1 | Scaffold2739 | 21450                   | CC                              | TT              | 1947038813               |
| SNP_P4_177651_21480 | NW_004517605.1 | Scaffold2739 | 21480                   | AA                              | CC              | 1947038815               |
| SNP_P4_177652_21534 | NW_004517605.1 | Scaffold2739 | 21534                   | TT                              | GG              | 1947038818               |
| SNP_P4_177653_21647 | NW_004517605.1 | Scaffold2739 | 21647                   | TT                              | GG              | 1947038820               |
| SNP_P4_177654_21979 | NW_004517605.1 | Scaffold2739 | 21979                   | AA                              | TT              | 1947038822               |
| SNP_P4_177655_22155 | NW_004517605.1 | Scaffold2739 | 22155                   | GG                              | AA              | 1947038824               |
| SNP_P4_177656_21629 | NW_004517606.1 | Scaffold2741 | 21629                   | GG                              | AA              | 1947038826               |
| SNP_P4_177657_4244  | NW_004517607.1 | Scaffold2742 | 4244                    | AA                              | GG              | 1947038828               |
| SNP_P4_177658_4448  | NW_004517607.1 | Scaffold2742 | 4448                    | AA                              | TT              | 1947038830               |
| SNP_P4_177659_4919  | NW_004517607.1 | Scaffold2742 | 4919                    | CC                              | AA              | 1947038832               |
| SNP_P4_177660_17603 | NW_004517607.1 | Scaffold2742 | 17603                   | TT                              | CC              | 1947038834               |
| SNP_P4_177661_17622 | NW_004517607.1 | Scaffold2742 | 17622                   | AA                              | GG              | 1947038836               |
| SNP_P4_177662_17779 | NW_004517607.1 | Scaffold2742 | 17779                   | TT                              | CC              | 1947038838               |
| SNP_P4_177663_18259 | NW_004517607.1 | Scaffold2742 | 18259                   | GG                              | AA              | 1947038840               |
| SNP_P4_177664_1267  | NW_004517608.1 | Scaffold2743 | 1267                    | TT                              | GG              | 1947038842               |
| SNP_P4_177665_1292  | NW_004517608.1 | Scaffold2743 | 1292                    | AA                              | GG              | 1947038844               |
| SNP_P4_177666_2882  | NW_004517609.1 | Scaffold2744 | 2882                    | AA                              | GG              | 1947038846               |
| SNP_P4_177667_3177  | NW_004517609.1 | Scaffold2744 | 3177                    | TT                              | CC              | 1947038848               |
| SNP_P4_177668_3677  | NW_004517609.1 | Scaffold2744 | 3677                    | GG                              | AA              | 1947038850               |

| SNPs IDs            | Chromosome IDs | Chromosomes  | Physical positions (bp) | CDC Frontier (Reference genome) | (ILWC46 & LPNB) | NCBI SNPdb Accession IDs |
|---------------------|----------------|--------------|-------------------------|---------------------------------|-----------------|--------------------------|
| SNP_P4_177669_3689  | NW_004517609.1 | Scaffold2744 | 3689                    | TT                              | CC              | 1947038852               |
| SNP_P4_177670_3692  | NW_004517609.1 | Scaffold2744 | 3692                    | CC                              | TT              | 1947038854               |
| SNP_P4_177671_3713  | NW_004517609.1 | Scaffold2744 | 3713                    | CC                              | TT              | 1947038856               |
| SNP_P4_177672_17747 | NW_004517609.1 | Scaffold2744 | 17747                   | AA                              | CC              | 1947038858               |
| SNP_P4_177673_23413 | NW_004517609.1 | Scaffold2744 | 23413                   | AA                              | TT              | 1947038860               |
| SNP_P4_177674_28225 | NW_004517609.1 | Scaffold2744 | 28225                   | AA                              | GG              | 1947038862               |
| SNP_P4_177675_28300 | NW_004517609.1 | Scaffold2744 | 28300                   | CC                              | TT              | 1947038864               |
| SNP_P4_177676_30757 | NW_004517609.1 | Scaffold2744 | 30757                   | GG                              | AA              | 1947038866               |
| SNP_P4_177677_30760 | NW_004517609.1 | Scaffold2744 | 30760                   | CC                              | TT              | 1947038868               |
| SNP_P4_177678_30769 | NW_004517609.1 | Scaffold2744 | 30769                   | TT                              | CC              | 1947038870               |
| SNP_P4_177679_30787 | NW_004517609.1 | Scaffold2744 | 30787                   | CC                              | TT              | 1947038872               |
| SNP_P4_177680_30793 | NW_004517609.1 | Scaffold2744 | 30793                   | CC                              | AA              | 1947038874               |
| SNP_P4_177681_30820 | NW_004517609.1 | Scaffold2744 | 30820                   | AA                              | GG              | 1947038876               |
| SNP_P4_177682_31090 | NW_004517609.1 | Scaffold2744 | 31090                   | TT                              | CC              | 1947038878               |
| SNP_P4_177683_31117 | NW_004517609.1 | Scaffold2744 | 31117                   | GG                              | AA              | 1947038880               |
| SNP_P4_177684_31123 | NW_004517609.1 | Scaffold2744 | 31123                   | CC                              | TT              | 1947038882               |
| SNP_P4_177685_31153 | NW_004517609.1 | Scaffold2744 | 31153                   | TT                              | CC              | 1947038884               |
| SNP_P4_177686_31163 | NW_004517609.1 | Scaffold2744 | 31163                   | TT                              | CC              | 1947038886               |
| SNP_P4_177687_31164 | NW_004517609.1 | Scaffold2744 | 31164                   | TT                              | CC              | 1947038888               |
| SNP_P4_177688_31165 | NW_004517609.1 | Scaffold2744 | 31165                   | TT                              | CC              | 1947038891               |
| SNP_P4_177689_31177 | NW_004517609.1 | Scaffold2744 | 31177                   | AA                              | GG              | 1947038893               |
| SNP_P4_177690_31183 | NW_004517609.1 | Scaffold2744 | 31183                   | GG                              | AA              | 1947038895               |
| SNP_P4_177691_31213 | NW_004517609.1 | Scaffold2744 | 31213                   | TT                              | CC              | 1947038897               |
| SNP_P4_177692_31222 | NW_004517609.1 | Scaffold2744 | 31222                   | CC                              | TT              | 1947038899               |
| SNP_P4_177693_31240 | NW_004517609.1 | Scaffold2744 | 31240                   | AA                              | TT              | 1947038901               |
| SNP_P4_177694_31261 | NW_004517609.1 | Scaffold2744 | 31261                   | AA                              | CC              | 1947038903               |
| SNP_P4_177695_32734 | NW_004517609.1 | Scaffold2744 | 32734                   | CC                              | AA              | 1947038905               |
| SNP_P4_177696_37004 | NW_004517609.1 | Scaffold2744 | 37004                   | GG                              | AA              | 1947038907               |
| SNP_P4_177697_41998 | NW_004517609.1 | Scaffold2744 | 41998                   | TT                              | CC              | 1947038909               |
| SNP_P4_177698_42005 | NW_004517609.1 | Scaffold2744 | 42005                   | TT                              | CC              | 1947038911               |
| SNP_P4_177699_42032 | NW_004517609.1 | Scaffold2744 | 42032                   | CC                              | AA              | 1947038913               |
| SNP_P4_177700_42039 | NW_004517609.1 | Scaffold2744 | 42039                   | CC                              | AA              | 1947038915               |
| SNP_P4_177701_42046 | NW_004517609.1 | Scaffold2744 | 42046                   | CC                              | AA              | 1947038917               |
| SNP_P4_177702_42048 | NW_004517609.1 | Scaffold2744 | 42048                   | CC                              | TT              | 1947038919               |
| SNP_P4_177703_42086 | NW_004517609.1 | Scaffold2744 | 42086                   | AA                              | CC              | 1947038921               |
| SNP_P4_177704_42109 | NW_004517609.1 | Scaffold2744 | 42109                   | CC                              | GG              | 1947038923               |
| SNP_P4_177705_42131 | NW_004517609.1 | Scaffold2744 | 42131                   | AA                              | GG              | 1947038925               |
| SNP_P4_177706_42312 | NW_004517609.1 | Scaffold2744 | 42312                   | CC                              | AA              | 1947038927               |
| SNP_P4_177707_42405 | NW_004517609.1 | Scaffold2744 | 42405                   | TT                              | CC              | 1947038929               |
| SNP_P4_177708_42406 | NW_004517609.1 | Scaffold2744 | 42406                   | CC                              | TT              | 1947038931               |
| SNP_P4_177709_42408 | NW_004517609.1 | Scaffold2744 | 42408                   | CC                              | TT              | 1947038933               |
| SNP_P4_177710_42418 | NW_004517609.1 | Scaffold2744 | 42418                   | TT                              | AA              | 1947038935               |

| SNPs IDs            | Chromosome IDs | Chromosomes  | Physical positions (bp) | CDC Frontier (Reference genome) | (ILWC46 & LPNB) | NCBI SNPdb Accession IDs |
|---------------------|----------------|--------------|-------------------------|---------------------------------|-----------------|--------------------------|
| SNP_P4_177712_48866 | NW_004517609.1 | Scaffold2744 | 48866                   | CC                              | TT              | 1947038937               |
| SNP_P4_177713_65536 | NW_004517609.1 | Scaffold2744 | 65536                   | TT                              | GG              | 1947038939               |
| SNP_P4_177714_88494 | NW_004517609.1 | Scaffold2744 | 88494                   | CC                              | GG              | 1947038940               |
| SNP_P4_177715_88918 | NW_004517609.1 | Scaffold2744 | 88918                   | TT                              | GG              | 1947038942               |
| SNP_P4_177716_90280 | NW_004517609.1 | Scaffold2744 | 90280                   | GG                              | TT              | 1947038944               |
| SNP_P4_177717_92938 | NW_004517609.1 | Scaffold2744 | 92938                   | AA                              | GG              | 1947038946               |
| SNP_P4_177718_341   | NW_004517611.1 | Scaffold2746 | 341                     | GG                              | TT              | 1947038948               |
| SNP_P4_177719_353   | NW_004517611.1 | Scaffold2746 | 353                     | CC                              | GG              | 1947038950               |
| SNP_P4_177720_427   | NW_004517611.1 | Scaffold2746 | 427                     | TT                              | GG              | 1947038952               |
| SNP_P4_177721_464   | NW_004517611.1 | Scaffold2746 | 464                     | GG                              | TT              | 1947038954               |
| SNP_P4_177722_544   | NW_004517611.1 | Scaffold2746 | 544                     | CC                              | TT              | 1947038956               |
| SNP_P4_177723_711   | NW_004517613.1 | Scaffold2748 | 711                     | AA                              | GG              | 1947038958               |
| SNP_P4_177724_1237  | NW_004517613.1 | Scaffold2748 | 1237                    | AA                              | GG              | 1947038960               |
| SNP_P4_177725_19864 | NW_004517613.1 | Scaffold2748 | 19864                   | GG                              | AA              | 1947038962               |
| SNP_P4_177726_19884 | NW_004517613.1 | Scaffold2748 | 19884                   | GG                              | CC              | 1947038964               |
| SNP_P4_177727_20447 | NW_004517613.1 | Scaffold2748 | 20447                   | AA                              | TT              | 1947038966               |
| SNP_P4_177728_20515 | NW_004517613.1 | Scaffold2748 | 20515                   | TT                              | CC              | 1947038968               |
| SNP_P4_177729_22100 | NW_004517613.1 | Scaffold2748 | 22100                   | TT                              | GG              | 1947038970               |
| SNP_P4_177730_22724 | NW_004517613.1 | Scaffold2748 | 22724                   | AA                              | TT              | 1947038972               |
| SNP_P4_177731_23219 | NW_004517613.1 | Scaffold2748 | 23219                   | AA                              | TT              | 1947038974               |
| SNP_P4_177732_23620 | NW_004517613.1 | Scaffold2748 | 23620                   | TT                              | GG              | 1947038976               |
| SNP_P4_177733_23765 | NW_004517613.1 | Scaffold2748 | 23765                   | AA                              | GG              | 1947038978               |
| SNP_P4_177734_23959 | NW_004517613.1 | Scaffold2748 | 23959                   | GG                              | AA              | 1947038980               |
| SNP_P4_177735_24316 | NW_004517613.1 | Scaffold2748 | 24316                   | TT                              | CC              | 1947038982               |
| SNP_P4_177736_24518 | NW_004517613.1 | Scaffold2748 | 24518                   | CC                              | TT              | 1947038984               |
| SNP_P4_177737_24582 | NW_004517613.1 | Scaffold2748 | 24582                   | GG                              | TT              | 1947038986               |
| SNP_P4_177738_24803 | NW_004517613.1 | Scaffold2748 | 24803                   | AA                              | TT              | 1947038988               |
| SNP_P4_177739_24982 | NW_004517613.1 | Scaffold2748 | 24982                   | TT                              | GG              | 1947038990               |
| SNP_P4_177740_25063 | NW_004517613.1 | Scaffold2748 | 25063                   | AA                              | TT              | 1947038992               |
| SNP_P4_177741_25098 | NW_004517613.1 | Scaffold2748 | 25098                   | GG                              | CC              | 1947038994               |
| SNP_P4_177742_26678 | NW_004517613.1 | Scaffold2748 | 26678                   | GG                              | CC              | 1947038996               |
| SNP_P4_177743_26841 | NW_004517613.1 | Scaffold2748 | 26841                   | CC                              | GG              | 1947038998               |
| SNP_P4_177744_27677 | NW_004517613.1 | Scaffold2748 | 27677                   | CC                              | AA              | 1947039000               |
| SNP_P4_177746_27893 | NW_004517613.1 | Scaffold2748 | 27893                   | TT                              | CC              | 1947039002               |
| SNP_P4_177747_3610  | NW_004517615.1 | Scaffold2751 | 3610                    | TT                              | CC              | 1947039004               |
| SNP_P4_177748_3777  | NW_004517615.1 | Scaffold2751 | 3777                    | AA                              | TT              | 1947039006               |
| SNP_P4_177749_4423  | NW_004517619.1 | Scaffold2758 | 4423                    | AA                              | GG              | 1947039008               |
| SNP_P4_177750_1563  | NW_004517621.1 | Scaffold2761 | 1563                    | GG                              | AA              | 1947039010               |
| SNP_P4_177751_6427  | NW_004517621.1 | Scaffold2761 | 6427                    | CC                              | GG              | 1947039012               |
| SNP_P4_177752_6686  | NW_004517621.1 | Scaffold2761 | 6686                    | AA                              | GG              | 1947039014               |
| SNP_P4_177753_6718  | NW_004517621.1 | Scaffold2761 | 6718                    | CC                              | TT              | 1947039016               |
| SNP_P4_177754_10903 | NW_004517621.1 | Scaffold2761 | 10903                   | TT                              | CC              | 1947039017               |

| SNPs IDs             | Chromosome IDs | Chromosomes  | Physical positions (bp) | CDC Frontier (Reference genome) | (ILWC46 & LPNB) | NCBI SNPdb Accession IDs |
|----------------------|----------------|--------------|-------------------------|---------------------------------|-----------------|--------------------------|
| SNP_P4_177755_339    | NW_004517623.1 | Scaffold2763 | 339                     | CC                              | AA              | 1947039018               |
| SNP_P4_177756_367    | NW_004517623.1 | Scaffold2763 | 367                     | TT                              | CC              | 1947039019               |
| SNP_P4_177757_808    | NW_004517623.1 | Scaffold2763 | 808                     | GG                              | CC              | 1947039020               |
| SNP_P4_177758_9481   | NW_004517623.1 | Scaffold2763 | 9481                    | AA                              | GG              | 1947039022               |
| SNP_P4_177760_9771   | NW_004517623.1 | Scaffold2763 | 9771                    | TT                              | GG              | 1947039024               |
| SNP_P4_177761_44233  | NW_004517623.1 | Scaffold2763 | 44233                   | TT                              | CC              | 1947039026               |
| SNP_P4_177762_54950  | NW_004517623.1 | Scaffold2763 | 54950                   | GG                              | AA              | 1947039028               |
| SNP_P4_177764_59395  | NW_004517623.1 | Scaffold2763 | 59395                   | GG                              | AA              | 1947039030               |
| SNP_P4_177765_74897  | NW_004517623.1 | Scaffold2763 | 74897                   | CC                              | AA              | 1947039032               |
| SNP_P4_177766_74909  | NW_004517623.1 | Scaffold2763 | 74909                   | AA                              | GG              | 1947039034               |
| SNP_P4_177768_86675  | NW_004517623.1 | Scaffold2763 | 86675                   | TT                              | AA              | 1947039036               |
| SNP_P4_177769_98146  | NW_004517623.1 | Scaffold2763 | 98146                   | TT                              | CC              | 1947039038               |
| SNP_P4_177770_103284 | NW_004517623.1 | Scaffold2763 | 103284                  | TT                              | CC              | 1947039040               |
| SNP_P4_177771_121585 | NW_004517623.1 | Scaffold2763 | 121585                  | GG                              | AA              | 1947039042               |
| SNP_P4_177774_145496 | NW_004517623.1 | Scaffold2763 | 145496                  | TT                              | CC              | 1947039044               |
| SNP_P4_177775_145847 | NW_004517623.1 | Scaffold2763 | 145847                  | GG                              | CC              | 1947039046               |
| SNP_P4_177776_152832 | NW_004517623.1 | Scaffold2763 | 152832                  | GG                              | TT              | 1947039048               |
| SNP_P4_177777_171263 | NW_004517623.1 | Scaffold2763 | 171263                  | AA                              | CC              | 1947039050               |
| SNP_P4_177778_171264 | NW_004517623.1 | Scaffold2763 | 171264                  | AA                              | GG              | 1947039052               |
| SNP_P4_177780_189438 | NW_004517623.1 | Scaffold2763 | 189438                  | AA                              | GG              | 1947039054               |
| SNP_P4_177782_205946 | NW_004517623.1 | Scaffold2763 | 205946                  | CC                              | TT              | 1947039056               |
| SNP_P4_177783_207327 | NW_004517623.1 | Scaffold2763 | 207327                  | TT                              | GG              | 1947039058               |
| SNP_P4_177784_207473 | NW_004517623.1 | Scaffold2763 | 207473                  | TT                              | CC              | 1947039060               |
| SNP_P4_177785_442    | NW_004517624.1 | Scaffold2764 | 442                     | GG                              | AA              | 1947039062               |
| SNP_P4_177786_453    | NW_004517624.1 | Scaffold2764 | 453                     | GG                              | AA              | 1947039063               |
| SNP_P4_177787_3234   | NW_004517624.1 | Scaffold2764 | 3234                    | AA                              | TT              | 1947039065               |
| SNP_P4_177788_405    | NW_004517625.1 | Scaffold2766 | 405                     | GG                              | AA              | 1947039067               |
| SNP_P4_177789_12593  | NW_004517625.1 | Scaffold2766 | 12593                   | AA                              | TT              | 1947039070               |
| SNP_P4_177790_13215  | NW_004517625.1 | Scaffold2766 | 13215                   | AA                              | GG              | 1947039072               |
| SNP_P4_177791_13472  | NW_004517625.1 | Scaffold2766 | 13472                   | TT                              | GG              | 1947039074               |
| SNP_P4_177792_13496  | NW_004517625.1 | Scaffold2766 | 13496                   | AA                              | GG              | 1947039076               |
| SNP_P4_177793_13511  | NW_004517625.1 | Scaffold2766 | 13511                   | GG                              | AA              | 1947039078               |
| SNP_P4_177794_17970  | NW_004517625.1 | Scaffold2766 | 17970                   | CC                              | AA              | 1947039080               |
| SNP_P4_177795_18842  | NW_004517625.1 | Scaffold2766 | 18842                   | CC                              | TT              | 1947039082               |
| SNP_P4_177796_547    | NW_004517626.1 | Scaffold2769 | 547                     | TT                              | CC              | 1947039084               |
| SNP_P4_177797_977    | NW_004517627.1 | Scaffold2770 | 977                     | CC                              | TT              | 1947039086               |
| SNP_P4_177798_1762   | NW_004517631.1 | Scaffold2777 | 1762                    | CC                              | TT              | 1947039088               |
| SNP_P4_177799_2062   | NW_004517631.1 | Scaffold2777 | 2062                    | GG                              | AA              | 1947039090               |
| SNP_P4_177801_2496   | NW_004517631.1 | Scaffold2777 | 2496                    | AA                              | GG              | 1947039092               |
| SNP_P4_177802_2827   | NW_004517631.1 | Scaffold2777 | 2827                    | TT                              | CC              | 1947039094               |
| SNP_P4_177804_4487   | NW_004517631.1 | Scaffold2777 | 4487                    | AA                              | TT              | 1947039096               |
| SNP_P4_177805_5023   | NW_004517631.1 | Scaffold2777 | 5023                    | TT                              | AA              | 1947039098               |

| SNPs IDs            | Chromosome IDs | Chromosomes  | Physical positions (bp) | CDC Frontier (Reference genome) | (ILWC46 & LPNB) | NCBI SNPdb Accession IDs |
|---------------------|----------------|--------------|-------------------------|---------------------------------|-----------------|--------------------------|
| SNP_P4_177807_5418  | NW_004517631.1 | Scaffold2777 | 5418                    | CC                              | GG              | 1947039100               |
| SNP_P4_177808_5943  | NW_004517631.1 | Scaffold2777 | 5943                    | TT                              | CC              | 1947039102               |
| SNP_P4_177809_81    | NW_004517632.1 | Scaffold2778 | 81                      | AA                              | CC              | 1947039104               |
| SNP_P4_177810_84    | NW_004517632.1 | Scaffold2778 | 84                      | AA                              | GG              | 1947039106               |
| SNP_P4_177811_93    | NW_004517632.1 | Scaffold2778 | 93                      | CC                              | TT              | 1947039109               |
| SNP_P4_177812_3316  | NW_004517632.1 | Scaffold2778 | 3316                    | AA                              | GG              | 1947039111               |
| SNP_P4_177813_3426  | NW_004517632.1 | Scaffold2778 | 3426                    | TT                              | AA              | 1947039113               |
| SNP_P4_177814_4249  | NW_004517632.1 | Scaffold2778 | 4249                    | GG                              | AA              | 1947039115               |
| SNP_P4_177815_5341  | NW_004517632.1 | Scaffold2778 | 5341                    | GG                              | TT              | 1947039117               |
| SNP_P4_177816_5366  | NW_004517632.1 | Scaffold2778 | 5366                    | GG                              | AA              | 1947039119               |
| SNP_P4_177817_6633  | NW_004517632.1 | Scaffold2778 | 6633                    | CC                              | GG              | 1947039121               |
| SNP_P4_177818_6901  | NW_004517632.1 | Scaffold2778 | 6901                    | CC                              | TT              | 1947039123               |
| SNP_P4_177819_6912  | NW_004517632.1 | Scaffold2778 | 6912                    | AA                              | TT              | 1947039125               |
| SNP_P4_177820_7036  | NW_004517632.1 | Scaffold2778 | 7036                    | GG                              | CC              | 1947039127               |
| SNP_P4_177821_7140  | NW_004517632.1 | Scaffold2778 | 7140                    | AA                              | TT              | 1947039129               |
| SNP_P4_177822_7239  | NW_004517632.1 | Scaffold2778 | 7239                    | TT                              | CC              | 1947039131               |
| SNP_P4_177823_7252  | NW_004517632.1 | Scaffold2778 | 7252                    | TT                              | GG              | 1947039133               |
| SNP_P4_177824_7349  | NW_004517632.1 | Scaffold2778 | 7349                    | GG                              | AA              | 1947039136               |
| SNP_P4_177825_7419  | NW_004517632.1 | Scaffold2778 | 7419                    | CC                              | TT              | 1947039138               |
| SNP_P4_177826_7514  | NW_004517632.1 | Scaffold2778 | 7514                    | CC                              | TT              | 1947039140               |
| SNP_P4_177827_7732  | NW_004517632.1 | Scaffold2778 | 7732                    | TT                              | CC              | 1947039142               |
| SNP_P4_177828_11027 | NW_004517632.1 | Scaffold2778 | 11027                   | AA                              | CC              | 1947039144               |
| SNP_P4_177829_11082 | NW_004517632.1 | Scaffold2778 | 11082                   | TT                              | CC              | 1947039146               |
| SNP_P4_177830_11302 | NW_004517632.1 | Scaffold2778 | 11302                   | CC                              | AA              | 1947039148               |
| SNP_P4_177831_11364 | NW_004517632.1 | Scaffold2778 | 11364                   | AA                              | TT              | 1947039150               |
| SNP_P4_177832_11367 | NW_004517632.1 | Scaffold2778 | 11367                   | TT                              | AA              | 1947039151               |
| SNP_P4_177833_11369 | NW_004517632.1 | Scaffold2778 | 11369                   | TT                              | CC              | 1947039152               |
| SNP_P4_177834_11391 | NW_004517632.1 | Scaffold2778 | 11391                   | TT                              | AA              | 1947039153               |
| SNP_P4_177835_11610 | NW_004517632.1 | Scaffold2778 | 11610                   | AA                              | GG              | 1947039154               |
| SNP_P4_177836_11957 | NW_004517632.1 | Scaffold2778 | 11957                   | TT                              | CC              | 1947039155               |
| SNP_P4_177837_12656 | NW_004517632.1 | Scaffold2778 | 12656                   | AA                              | GG              | 1947039156               |
| SNP_P4_177838_12751 | NW_004517632.1 | Scaffold2778 | 12751                   | AA                              | TT              | 1947039157               |
| SNP_P4_177839_12759 | NW_004517632.1 | Scaffold2778 | 12759                   | CC                              | AA              | 1947039158               |
| SNP_P4_177840_1882  | NW_004517633.1 | Scaffold2779 | 1882                    | TT                              | AA              | 1947039160               |
| SNP_P4_177841_1909  | NW_004517633.1 | Scaffold2779 | 1909                    | GG                              | AA              | 1947039162               |
| SNP_P4_177842_1957  | NW_004517633.1 | Scaffold2779 | 1957                    | TT                              | AA              | 1947039164               |
| SNP_P4_177843_1986  | NW_004517633.1 | Scaffold2779 | 1986                    | AA                              | TT              | 1947039166               |
| SNP_P4_177844_2408  | NW_004517633.1 | Scaffold2779 | 2408                    | AA                              | GG              | 1947039168               |
| SNP_P4_177845_2440  | NW_004517633.1 | Scaffold2779 | 2440                    | AA                              | TT              | 1947039170               |
| SNP_P4_177846_6222  | NW_004517633.1 | Scaffold2779 | 6222                    | CC                              | TT              | 1947039172               |
| SNP_P4_177847_6273  | NW_004517633.1 | Scaffold2779 | 6273                    | GG                              | AA              | 1947039174               |
| SNP_P4_177848_6429  | NW_004517633.1 | Scaffold2779 | 6429                    | GG                              | AA              | 1947039176               |

| SNPs IDs            | Chromosome IDs | Chromosomes  | Physical positions (bp) | CDC Frontier (Reference genome) | (ILWC46 & LPNB) | NCBI SNPdb Accession IDs |
|---------------------|----------------|--------------|-------------------------|---------------------------------|-----------------|--------------------------|
| SNP_P4_177849_6622  | NW_004517633.1 | Scaffold2779 | 6622                    | TT                              | AA              | 1947039178               |
| SNP_P4_177852_7071  | NW_004517633.1 | Scaffold2779 | 7071                    | GG                              | TT              | 1947039180               |
| SNP_P4_177853_9376  | NW_004517633.1 | Scaffold2779 | 9376                    | TT                              | GG              | 1947039183               |
| SNP_P4_177854_9410  | NW_004517633.1 | Scaffold2779 | 9410                    | TT                              | CC              | 1947039185               |
| SNP_P4_177855_9625  | NW_004517633.1 | Scaffold2779 | 9625                    | TT                              | AA              | 1947039187               |
| SNP_P4_177856_9631  | NW_004517633.1 | Scaffold2779 | 9631                    | AA                              | TT              | 1947039189               |
| SNP_P4_177857_9704  | NW_004517633.1 | Scaffold2779 | 9704                    | AA                              | GG              | 1947039191               |
| SNP_P4_177858_10382 | NW_004517633.1 | Scaffold2779 | 10382                   | TT                              | GG              | 1947039193               |
| SNP_P4_177859_11285 | NW_004517633.1 | Scaffold2779 | 11285                   | GG                              | AA              | 1947039195               |
| SNP_P4_177860_17539 | NW_004517633.1 | Scaffold2779 | 17539                   | AA                              | GG              | 1947039197               |
| SNP_P4_177861_17725 | NW_004517633.1 | Scaffold2779 | 17725                   | TT                              | CC              | 1947039199               |
| SNP_P4_177862_17823 | NW_004517633.1 | Scaffold2779 | 17823                   | TT                              | CC              | 1947039201               |
| SNP_P4_177863_17835 | NW_004517633.1 | Scaffold2779 | 17835                   | TT                              | CC              | 1947039203               |
| SNP_P4_177864_17892 | NW_004517633.1 | Scaffold2779 | 17892                   | GG                              | TT              | 1947039205               |
| SNP_P4_177865_17983 | NW_004517633.1 | Scaffold2779 | 17983                   | GG                              | TT              | 1947039207               |
| SNP_P4_177866_18126 | NW_004517633.1 | Scaffold2779 | 18126                   | TT                              | AA              | 1947039209               |
| SNP_P4_177867_18227 | NW_004517633.1 | Scaffold2779 | 18227                   | TT                              | CC              | 1947039211               |
| SNP_P4_177868_22199 | NW_004517633.1 | Scaffold2779 | 22199                   | CC                              | TT              | 1947039213               |
| SNP_P4_177869_22683 | NW_004517633.1 | Scaffold2779 | 22683                   | GG                              | AA              | 1947039215               |
| SNP_P4_177871_1465  | NW_004517634.1 | Scaffold2780 | 1465                    | CC                              | TT              | 1947039217               |
| SNP_P4_177872_1808  | NW_004517634.1 | Scaffold2780 | 1808                    | GG                              | AA              | 1947039219               |
| SNP_P4_177873_4317  | NW_004517635.1 | Scaffold2782 | 4317                    | TT                              | CC              | 1947039221               |
| SNP_P4_177874_4426  | NW_004517635.1 | Scaffold2782 | 4426                    | TT                              | CC              | 1947039223               |
| SNP_P4_177875_4477  | NW_004517635.1 | Scaffold2782 | 4477                    | AA                              | GG              | 1947039225               |
| SNP_P4_177876_4480  | NW_004517635.1 | Scaffold2782 | 4480                    | GG                              | TT              | 1947039227               |
| SNP_P4_177877_4666  | NW_004517635.1 | Scaffold2782 | 4666                    | GG                              | CC              | 1947039229               |
| SNP_P4_177878_4719  | NW_004517635.1 | Scaffold2782 | 4719                    | CC                              | GG              | 1947039231               |
| SNP_P4_177879_4797  | NW_004517635.1 | Scaffold2782 | 4797                    | CC                              | AA              | 1947039233               |
| SNP_P4_177880_5846  | NW_004517635.1 | Scaffold2782 | 5846                    | AA                              | GG              | 1947039235               |
| SNP_P4_177881_6017  | NW_004517635.1 | Scaffold2782 | 6017                    | TT                              | CC              | 1947039237               |
| SNP_P4_177882_6158  | NW_004517635.1 | Scaffold2782 | 6158                    | AA                              | GG              | 1947039239               |
| SNP_P4_177883_6204  | NW_004517635.1 | Scaffold2782 | 6204                    | CC                              | TT              | 1947039241               |
| SNP_P4_177885_6372  | NW_004517635.1 | Scaffold2782 | 6372                    | AA                              | GG              | 1947039243               |
| SNP_P4_177886_6968  | NW_004517635.1 | Scaffold2782 | 6968                    | TT                              | AA              | 1947039245               |
| SNP_P4_177887_7243  | NW_004517635.1 | Scaffold2782 | 7243                    | GG                              | CC              | 1947039247               |
| SNP_P4_177888_7315  | NW_004517635.1 | Scaffold2782 | 7315                    | GG                              | TT              | 1947039249               |
| SNP_P4_177889_7345  | NW_004517635.1 | Scaffold2782 | 7345                    | AA                              | GG              | 1947039251               |
| SNP_P4_177890_7380  | NW_004517635.1 | Scaffold2782 | 7380                    | CC                              | GG              | 1947039253               |
| SNP_P4_177891_7392  | NW_004517635.1 | Scaffold2782 | 7392                    | CC                              | GG              | 1947039255               |
| SNP_P4_177892_8467  | NW_004517635.1 | Scaffold2782 | 8467                    | AA                              | TT              | 1947039257               |
| SNP_P4_177893_8592  | NW_004517635.1 | Scaffold2782 | 8592                    | GG                              | TT              | 1947039259               |
| SNP_P4_177894_8611  | NW_004517635.1 | Scaffold2782 | 8611                    | CC                              | AA              | 1947039261               |

| SNPs IDs            | Chromosome IDs | Chromosomes  | Physical positions (bp) | CDC Frontier (Reference genome) | (ILWC46 & LPNB) | NCBI SNPdb Accession IDs |
|---------------------|----------------|--------------|-------------------------|---------------------------------|-----------------|--------------------------|
| SNP_P4_177895_8744  | NW_004517635.1 | Scaffold2782 | 8744                    | CC                              | AA              | 1947039263               |
| SNP_P4_177896_8852  | NW_004517635.1 | Scaffold2782 | 8852                    | TT                              | GG              | 1947039266               |
| SNP_P4_177897_8866  | NW_004517635.1 | Scaffold2782 | 8866                    | CC                              | TT              | 1947039268               |
| SNP_P4_177898_8899  | NW_004517635.1 | Scaffold2782 | 8899                    | CC                              | TT              | 1947039270               |
| SNP_P4_177899_8993  | NW_004517635.1 | Scaffold2782 | 8993                    | TT                              | GG              | 1947039272               |
| SNP_P4_177900_9093  | NW_004517635.1 | Scaffold2782 | 9093                    | TT                              | CC              | 1947039274               |
| SNP_P4_177901_9115  | NW_004517635.1 | Scaffold2782 | 9115                    | GG                              | AA              | 1947039276               |
| SNP_P4_177902_10892 | NW_004517635.1 | Scaffold2782 | 10892                   | AA                              | GG              | 1947039278               |
| SNP_P4_177903_26084 | NW_004517635.1 | Scaffold2782 | 26084                   | AA                              | GG              | 1947039280               |
| SNP_P4_177904_26098 | NW_004517635.1 | Scaffold2782 | 26098                   | TT                              | CC              | 1947039282               |
| SNP_P4_177905_26759 | NW_004517635.1 | Scaffold2782 | 26759                   | GG                              | AA              | 1947039284               |
| SNP_P4_177906_26904 | NW_004517635.1 | Scaffold2782 | 26904                   | CC                              | AA              | 1947039286               |
| SNP_P4_177907_26910 | NW_004517635.1 | Scaffold2782 | 26910                   | TT                              | AA              | 1947039288               |
| SNP_P4_177908_26921 | NW_004517635.1 | Scaffold2782 | 26921                   | CC                              | AA              | 1947039290               |
| SNP_P4_177909_26939 | NW_004517635.1 | Scaffold2782 | 26939                   | TT                              | CC              | 1947039292               |
| SNP_P4_177910_27233 | NW_004517635.1 | Scaffold2782 | 27233                   | GG                              | CC              | 1947039294               |
| SNP_P4_177912_27603 | NW_004517635.1 | Scaffold2782 | 27603                   | CC                              | AA              | 1947039296               |
| SNP_P4_177913_39878 | NW_004517635.1 | Scaffold2782 | 39878                   | GG                              | AA              | 1947039298               |
| SNP_P4_177914_40001 | NW_004517635.1 | Scaffold2782 | 40001                   | CC                              | TT              | 1947039300               |
| SNP_P4_177915_40070 | NW_004517635.1 | Scaffold2782 | 40070                   | GG                              | TT              | 1947039302               |
| SNP_P4_177916_40115 | NW_004517635.1 | Scaffold2782 | 40115                   | AA                              | GG              | 1947039304               |
| SNP_P4_177917_42756 | NW_004517635.1 | Scaffold2782 | 42756                   | CC                              | TT              | 1947039306               |
| SNP_P4_177918_50988 | NW_004517635.1 | Scaffold2782 | 50988                   | CC                              | GG              | 1947039308               |
| SNP_P4_177919_51008 | NW_004517635.1 | Scaffold2782 | 51008                   | AA                              | TT              | 1947039310               |
| SNP_P4_177920_51010 | NW_004517635.1 | Scaffold2782 | 51010                   | TT                              | AA              | 1947039312               |
| SNP_P4_177921_51228 | NW_004517635.1 | Scaffold2782 | 51228                   | GG                              | AA              | 1947039314               |
| SNP_P4_177922_60292 | NW_004517635.1 | Scaffold2782 | 60292                   | TT                              | CC              | 1947039316               |
| SNP_P4_177923_60330 | NW_004517635.1 | Scaffold2782 | 60330                   | CC                              | AA              | 1947039318               |
| SNP_P4_177924_60366 | NW_004517635.1 | Scaffold2782 | 60366                   | GG                              | AA              | 1947039320               |
| SNP_P4_177925_60579 | NW_004517635.1 | Scaffold2782 | 60579                   | AA                              | CC              | 1947039322               |
| SNP_P4_177926_60606 | NW_004517635.1 | Scaffold2782 | 60606                   | GG                              | AA              | 1947039324               |
| SNP_P4_177927_67433 | NW_004517635.1 | Scaffold2782 | 67433                   | TT                              | CC              | 1947039326               |
| SNP_P4_177928_67444 | NW_004517635.1 | Scaffold2782 | 67444                   | TT                              | CC              | 1947039328               |
| SNP_P4_177929_67460 | NW_004517635.1 | Scaffold2782 | 67460                   | CC                              | AA              | 1947039330               |
| SNP_P4_177930_67508 | NW_004517635.1 | Scaffold2782 | 67508                   | TT                              | CC              | 1947039332               |
| SNP_P4_177931_67839 | NW_004517635.1 | Scaffold2782 | 67839                   | TT                              | AA              | 1947039334               |
| SNP_P4_177932_72242 | NW_004517635.1 | Scaffold2782 | 72242                   | TT                              | CC              | 1947039336               |
| SNP_P4_177933_72305 | NW_004517635.1 | Scaffold2782 | 72305                   | AA                              | TT              | 1947039338               |
| SNP_P4_177934_76006 | NW_004517635.1 | Scaffold2782 | 76006                   | GG                              | TT              | 1947039340               |
| SNP_P4_177935_80321 | NW_004517635.1 | Scaffold2782 | 80321                   | CC                              | TT              | 1947039342               |
| SNP_P4_177936_80337 | NW_004517635.1 | Scaffold2782 | 80337                   | TT                              | GG              | 1947039344               |
| SNP_P4_177937_80414 | NW_004517635.1 | Scaffold2782 | 80414                   | TT                              | GG              | 1947039346               |



| SNPs IDs             | Chromosome IDs | Chromosomes  | Physical positions (bp) | CDC Frontier (Reference genome) | (ILWC46 & LPNB) | NCBI SNPdb Accession IDs |
|----------------------|----------------|--------------|-------------------------|---------------------------------|-----------------|--------------------------|
| SNP_P4_177938_80988  | NW_004517635.1 | Scaffold2782 | 80988                   | GG                              | AA              | 1947039348               |
| SNP_P4_177939_86348  | NW_004517635.1 | Scaffold2782 | 86348                   | TT                              | AA              | 1947039350               |
| SNP_P4_177940_86725  | NW_004517635.1 | Scaffold2782 | 86725                   | TT                              | GG              | 1947039352               |
| SNP_P4_177941_86742  | NW_004517635.1 | Scaffold2782 | 86742                   | GG                              | AA              | 1947039354               |
| SNP_P4_177942_86946  | NW_004517635.1 | Scaffold2782 | 86946                   | GG                              | AA              | 1947039356               |
| SNP_P4_177943_87065  | NW_004517635.1 | Scaffold2782 | 87065                   | TT                              | CC              | 1947039358               |
| SNP_P4_177944_87258  | NW_004517635.1 | Scaffold2782 | 87258                   | TT                              | CC              | 1947039360               |
| SNP_P4_177945_87312  | NW_004517635.1 | Scaffold2782 | 87312                   | TT                              | AA              | 1947039362               |
| SNP_P4_177946_87320  | NW_004517635.1 | Scaffold2782 | 87320                   | AA                              | GG              | 1947039364               |
| SNP_P4_177947_88118  | NW_004517635.1 | Scaffold2782 | 88118                   | AA                              | GG              | 1947039366               |
| SNP_P4_177948_89697  | NW_004517635.1 | Scaffold2782 | 89697                   | GG                              | AA              | 1947039368               |
| SNP_P4_177949_89722  | NW_004517635.1 | Scaffold2782 | 89722                   | AA                              | TT              | 1947039370               |
| SNP_P4_177950_89736  | NW_004517635.1 | Scaffold2782 | 89736                   | CC                              | TT              | 1947039372               |
| SNP_P4_177951_89739  | NW_004517635.1 | Scaffold2782 | 89739                   | AA                              | TT              | 1947039374               |
| SNP_P4_177952_89756  | NW_004517635.1 | Scaffold2782 | 89756                   | GG                              | AA              | 1947039376               |
| SNP_P4_177953_89762  | NW_004517635.1 | Scaffold2782 | 89762                   | GG                              | AA              | 1947039378               |
| SNP_P4_177954_89904  | NW_004517635.1 | Scaffold2782 | 89904                   | AA                              | CC              | 1947039380               |
| SNP_P4_177955_90056  | NW_004517635.1 | Scaffold2782 | 90056                   | TT                              | CC              | 1947039382               |
| SNP_P4_177956_90065  | NW_004517635.1 | Scaffold2782 | 90065                   | AA                              | GG              | 1947039384               |
| SNP_P4_177957_92244  | NW_004517635.1 | Scaffold2782 | 92244                   | GG                              | AA              | 1947039387               |
| SNP_P4_177958_105935 | NW_004517635.1 | Scaffold2782 | 105935                  | AA                              | GG              | 1947039389               |
| SNP_P4_177959_106025 | NW_004517635.1 | Scaffold2782 | 106025                  | AA                              | TT              | 1947039391               |
| SNP_P4_177960_109199 | NW_004517635.1 | Scaffold2782 | 109199                  | TT                              | CC              | 1947039393               |
| SNP_P4_177961_109306 | NW_004517635.1 | Scaffold2782 | 109306                  | AA                              | CC              | 1947039395               |
| SNP_P4_177962_109421 | NW_004517635.1 | Scaffold2782 | 109421                  | GG                              | AA              | 1947039397               |
| SNP_P4_177963_109479 | NW_004517635.1 | Scaffold2782 | 109479                  | TT                              | GG              | 1947039399               |
| SNP_P4_177964_109667 | NW_004517635.1 | Scaffold2782 | 109667                  | GG                              | AA              | 1947039401               |
| SNP_P4_177965_109693 | NW_004517635.1 | Scaffold2782 | 109693                  | AA                              | CC              | 1947039403               |
| SNP_P4_177966_109740 | NW_004517635.1 | Scaffold2782 | 109740                  | CC                              | AA              | 1947039405               |
| SNP_P4_177967_109772 | NW_004517635.1 | Scaffold2782 | 109772                  | TT                              | CC              | 1947039407               |
| SNP_P4_177968_109920 | NW_004517635.1 | Scaffold2782 | 109920                  | AA                              | TT              | 1947039409               |
| SNP_P4_177969_109950 | NW_004517635.1 | Scaffold2782 | 109950                  | CC                              | AA              | 1947039411               |
| SNP_P4_177970_110380 | NW_004517635.1 | Scaffold2782 | 110380                  | CC                              | TT              | 1947039413               |
| SNP_P4_177971_111796 | NW_004517635.1 | Scaffold2782 | 111796                  | AA                              | CC              | 1947039415               |
| SNP_P4_177972_111846 | NW_004517635.1 | Scaffold2782 | 111846                  | AA                              | GG              | 1947039417               |
| SNP_P4_177973_111848 | NW_004517635.1 | Scaffold2782 | 111848                  | TT                              | CC              | 1947039419               |
| SNP_P4_177974_111852 | NW_004517635.1 | Scaffold2782 | 111852                  | TT                              | CC              | 1947039421               |
| SNP_P4_177975_111868 | NW_004517635.1 | Scaffold2782 | 111868                  | GG                              | TT              | 1947039423               |
| SNP_P4_177976_111869 | NW_004517635.1 | Scaffold2782 | 111869                  | AA                              | TT              | 1947039425               |
| SNP_P4_177977_111903 | NW_004517635.1 | Scaffold2782 | 111903                  | TT                              | GG              | 1947039427               |
| SNP_P4_177978_112147 | NW_004517635.1 | Scaffold2782 | 112147                  | GG                              | TT              | 1947039429               |
| SNP_P4_177979_112931 | NW_004517635.1 | Scaffold2782 | 112931                  | TT                              | CC              | 1947039431               |

| SNPs IDs             | Chromosome IDs | Chromosomes  | Physical positions (bp) | CDC Frontier (Reference genome) | (ILWC46 & LPNB) | NCBI SNPdb Accession IDs |
|----------------------|----------------|--------------|-------------------------|---------------------------------|-----------------|--------------------------|
| SNP_P4_177980_112953 | NW_004517635.1 | Scaffold2782 | 112953                  | GG                              | CC              | 1947039433               |
| SNP_P4_177981_112974 | NW_004517635.1 | Scaffold2782 | 112974                  | TT                              | CC              | 1947039435               |
| SNP_P4_177982_113242 | NW_004517635.1 | Scaffold2782 | 113242                  | TT                              | CC              | 1947039437               |
| SNP_P4_177983_113826 | NW_004517635.1 | Scaffold2782 | 113826                  | AA                              | GG              | 1947039439               |
| SNP_P4_177985_10945  | NW_004517636.1 | Scaffold2783 | 10945                   | AA                              | GG              | 1947039441               |
| SNP_P4_177986_2447   | NW_004517637.1 | Scaffold2784 | 2447                    | TT                              | AA              | 1947039443               |
| SNP_P4_177987_2571   | NW_004517637.1 | Scaffold2784 | 2571                    | AA                              | CC              | 1947039445               |
| SNP_P4_177989_2697   | NW_004517637.1 | Scaffold2784 | 2697                    | CC                              | GG              | 1947039447               |
| SNP_P4_177990_2723   | NW_004517637.1 | Scaffold2784 | 2723                    | TT                              | GG              | 1947039449               |
| SNP_P4_177991_2728   | NW_004517637.1 | Scaffold2784 | 2728                    | CC                              | TT              | 1947039451               |
| SNP_P4_177992_2800   | NW_004517637.1 | Scaffold2784 | 2800                    | GG                              | AA              | 1947039453               |
| SNP_P4_177993_9748   | NW_004517637.1 | Scaffold2784 | 9748                    | CC                              | AA              | 1947039455               |
| SNP_P4_177994_12354  | NW_004517637.1 | Scaffold2784 | 12354                   | TT                              | CC              | 1947039457               |
| SNP_P4_177995_14216  | NW_004517637.1 | Scaffold2784 | 14216                   | CC                              | TT              | 1947039459               |
| SNP_P4_177996_14275  | NW_004517637.1 | Scaffold2784 | 14275                   | AA                              | CC              | 1947039461               |
| SNP_P4_177997_15855  | NW_004517637.1 | Scaffold2784 | 15855                   | AA                              | TT              | 1947039463               |
| SNP_P4_177998_1056   | NW_004517641.1 | Scaffold2790 | 1056                    | AA                              | TT              | 1947039465               |
| SNP_P4_177999_11221  | NW_004517641.1 | Scaffold2790 | 11221                   | CC                              | GG              | 1947039467               |
| SNP_P4_178000_22372  | NW_004517641.1 | Scaffold2790 | 22372                   | GG                              | TT              | 1947039469               |
| SNP_P4_178001_2696   | NW_004517642.1 | Scaffold2792 | 2696                    | AA                              | TT              | 1947039471               |
| SNP_P4_178002_2890   | NW_004517642.1 | Scaffold2792 | 2890                    | TT                              | GG              | 1947039474               |
| SNP_P4_178003_2902   | NW_004517642.1 | Scaffold2792 | 2902                    | AA                              | TT              | 1947039476               |
| SNP_P4_178004_2903   | NW_004517642.1 | Scaffold2792 | 2903                    | AA                              | CC              | 1947039478               |
| SNP_P4_178005_2943   | NW_004517642.1 | Scaffold2792 | 2943                    | GG                              | AA              | 1947039480               |
| SNP_P4_178006_7770   | NW_004517642.1 | Scaffold2792 | 7770                    | GG                              | TT              | 1947039482               |
| SNP_P4_178008_13700  | NW_004517642.1 | Scaffold2792 | 13700                   | TT                              | CC              | 1947039484               |
| SNP_P4_178009_13901  | NW_004517642.1 | Scaffold2792 | 13901                   | AA                              | GG              | 1947039486               |
| SNP_P4_178010_13975  | NW_004517642.1 | Scaffold2792 | 13975                   | AA                              | GG              | 1947039488               |
| SNP_P4_178011_14020  | NW_004517642.1 | Scaffold2792 | 14020                   | TT                              | GG              | 1947039490               |
| SNP_P4_178012_14070  | NW_004517642.1 | Scaffold2792 | 14070                   | TT                              | GG              | 1947039492               |
| SNP_P4_178013_14148  | NW_004517642.1 | Scaffold2792 | 14148                   | TT                              | CC              | 1947039494               |
| SNP_P4_178015_14335  | NW_004517642.1 | Scaffold2792 | 14335                   | CC                              | TT              | 1947039496               |
| SNP_P4_178016_14427  | NW_004517642.1 | Scaffold2792 | 14427                   | TT                              | AA              | 1947039498               |
| SNP_P4_178017_14699  | NW_004517642.1 | Scaffold2792 | 14699                   | CC                              | GG              | 1947039500               |
| SNP_P4_178018_14788  | NW_004517642.1 | Scaffold2792 | 14788                   | GG                              | CC              | 1947039502               |
| SNP_P4_178019_19548  | NW_004517642.1 | Scaffold2792 | 19548                   | TT                              | CC              | 1947039504               |
| SNP_P4_178020_35547  | NW_004517642.1 | Scaffold2792 | 35547                   | TT                              | AA              | 1947039506               |
| SNP_P4_178021_1847   | NW_004517645.1 | Scaffold2795 | 1847                    | TT                              | CC              | 1947039508               |
| SNP_P4_178022_1869   | NW_004517645.1 | Scaffold2795 | 1869                    | TT                              | GG              | 1947039510               |
| SNP_P4_178023_2318   | NW_004517645.1 | Scaffold2795 | 2318                    | CC                              | AA              | 1947039512               |
| SNP_P4_178024_2353   | NW_004517645.1 | Scaffold2795 | 2353                    | GG                              | CC              | 1947039514               |
| SNP_P4_178025_2882   | NW_004517645.1 | Scaffold2795 | 2882                    | GG                              | CC              | 1947039516               |

| SNPs IDs            | Chromosome IDs | Chromosomes  | Physical positions (bp) | CDC Frontier (Reference genome) | (ILWC46 & LPNB) | NCBI SNPdb Accession IDs |
|---------------------|----------------|--------------|-------------------------|---------------------------------|-----------------|--------------------------|
| SNP_P4_178026_2912  | NW_004517645.1 | Scaffold2795 | 2912                    | TT                              | CC              | 1947039518               |
| SNP_P4_178027_870   | NW_004517648.1 | Scaffold2799 | 870                     | CC                              | GG              | 1947039520               |
| SNP_P4_178028_876   | NW_004517648.1 | Scaffold2799 | 876                     | CC                              | GG              | 1947039522               |
| SNP_P4_178029_900   | NW_004517648.1 | Scaffold2799 | 900                     | CC                              | TT              | 1947039524               |
| SNP_P4_178030_903   | NW_004517648.1 | Scaffold2799 | 903                     | AA                              | CC              | 1947039526               |
| SNP_P4_178031_944   | NW_004517648.1 | Scaffold2799 | 944                     | GG                              | AA              | 1947039528               |
| SNP_P4_178032_1059  | NW_004517648.1 | Scaffold2799 | 1059                    | AA                              | TT              | 1947039530               |
| SNP_P4_178034_1123  | NW_004517648.1 | Scaffold2799 | 1123                    | TT                              | AA              | 1947039532               |
| SNP_P4_178035_8161  | NW_004517648.1 | Scaffold2799 | 8161                    | TT                              | CC              | 1947039534               |
| SNP_P4_178036_8181  | NW_004517648.1 | Scaffold2799 | 8181                    | GG                              | TT              | 1947039536               |
| SNP_P4_178037_12165 | NW_004517648.1 | Scaffold2799 | 12165                   | CC                              | TT              | 1947039538               |
| SNP_P4_178038_23048 | NW_004517648.1 | Scaffold2799 | 23048                   | GG                              | TT              | 1947039540               |
| SNP_P4_178039_34729 | NW_004517648.1 | Scaffold2799 | 34729                   | AA                              | GG              | 1947039542               |
| SNP_P4_178040_34736 | NW_004517648.1 | Scaffold2799 | 34736                   | CC                              | TT              | 1947039544               |
| SNP_P4_178042_39777 | NW_004517648.1 | Scaffold2799 | 39777                   | GG                              | AA              | 1947039546               |
| SNP_P4_178043_45911 | NW_004517648.1 | Scaffold2799 | 45911                   | AA                              | GG              | 1947039548               |
| SNP_P4_178044_45912 | NW_004517648.1 | Scaffold2799 | 45912                   | AA                              | GG              | 1947039550               |
| SNP_P4_178045_45927 | NW_004517648.1 | Scaffold2799 | 45927                   | AA                              | TT              | 1947039552               |
| SNP_P4_178046_45932 | NW_004517648.1 | Scaffold2799 | 45932                   | CC                              | TT              | 1947039554               |
| SNP_P4_178047_45948 | NW_004517648.1 | Scaffold2799 | 45948                   | CC                              | AA              | 1947039556               |
| SNP_P4_178048_46020 | NW_004517648.1 | Scaffold2799 | 46020                   | AA                              | GG              | 1947039558               |
| SNP_P4_178049_46033 | NW_004517648.1 | Scaffold2799 | 46033                   | AA                              | GG              | 1947039561               |
| SNP_P4_178050_46055 | NW_004517648.1 | Scaffold2799 | 46055                   | GG                              | AA              | 1947039562               |
| SNP_P4_178051_46062 | NW_004517648.1 | Scaffold2799 | 46062                   | AA                              | GG              | 1947039563               |
| SNP_P4_178052_46077 | NW_004517648.1 | Scaffold2799 | 46077                   | AA                              | GG              | 1947039564               |
| SNP_P4_178053_46086 | NW_004517648.1 | Scaffold2799 | 46086                   | TT                              | CC              | 1947039566               |
| SNP_P4_178054_46326 | NW_004517648.1 | Scaffold2799 | 46326                   | GG                              | AA              | 1947039568               |
| SNP_P4_178055_46420 | NW_004517648.1 | Scaffold2799 | 46420                   | CC                              | TT              | 1947039570               |
| SNP_P4_178056_64    | NW_004517650.1 | Scaffold2801 | 64                      | AA                              | CC              | 1947039572               |
| SNP_P4_178057_81    | NW_004517650.1 | Scaffold2801 | 81                      | TT                              | CC              | 1947039574               |
| SNP_P4_178058_1077  | NW_004517651.1 | Scaffold2802 | 1077                    | CC                              | GG              | 1947039576               |
| SNP_P4_178059_1084  | NW_004517651.1 | Scaffold2802 | 1084                    | GG                              | AA              | 1947039578               |
| SNP_P4_178060_1093  | NW_004517651.1 | Scaffold2802 | 1093                    | GG                              | AA              | 1947039580               |
| SNP_P4_178061_526   | NW_004517652.1 | Scaffold2803 | 526                     | CC                              | AA              | 1947039582               |
| SNP_P4_178062_1750  | NW_004517652.1 | Scaffold2803 | 1750                    | AA                              | TT              | 1947039584               |
| SNP_P4_178064_1986  | NW_004517652.1 | Scaffold2803 | 1986                    | AA                              | GG              | 1947039586               |
| SNP_P4_178065_14019 | NW_004517652.1 | Scaffold2803 | 14019                   | AA                              | TT              | 1947039588               |
| SNP_P4_178066_14459 | NW_004517652.1 | Scaffold2803 | 14459                   | TT                              | GG              | 1947039590               |
| SNP_P4_178067_1874  | NW_004517653.1 | Scaffold2804 | 1874                    | CC                              | TT              | 1947039592               |
| SNP_P4_178068_1917  | NW_004517653.1 | Scaffold2804 | 1917                    | TT                              | CC              | 1947039594               |
| SNP_P4_178069_9394  | NW_004517657.1 | Scaffold2812 | 9394                    | AA                              | GG              | 1947039596               |
| SNP_P4_178070_12240 | NW_004517657.1 | Scaffold2812 | 12240                   | GG                              | AA              | 1947039598               |

| SNPs IDs            | Chromosome IDs | Chromosomes  | Physical positions (bp) | CDC Frontier (Reference genome) | (ILWC46 & LPNB) | NCBI SNPdb Accession IDs |
|---------------------|----------------|--------------|-------------------------|---------------------------------|-----------------|--------------------------|
| SNP_P4_178071_16123 | NW_004517657.1 | Scaffold2812 | 16123                   | TT                              | CC              | 1947039600               |
| SNP_P4_178073_16896 | NW_004517657.1 | Scaffold2812 | 16896                   | AA                              | TT              | 1947039602               |
| SNP_P4_178074_17100 | NW_004517657.1 | Scaffold2812 | 17100                   | AA                              | GG              | 1947039604               |
| SNP_P4_178075_17492 | NW_004517657.1 | Scaffold2812 | 17492                   | GG                              | CC              | 1947039607               |
| SNP_P4_178076_18098 | NW_004517657.1 | Scaffold2812 | 18098                   | AA                              | TT              | 1947039609               |
| SNP_P4_178077_18408 | NW_004517657.1 | Scaffold2812 | 18408                   | TT                              | CC              | 1947039611               |
| SNP_P4_178078_19773 | NW_004517657.1 | Scaffold2812 | 19773                   | TT                              | GG              | 1947039613               |
| SNP_P4_178079_20482 | NW_004517657.1 | Scaffold2812 | 20482                   | GG                              | AA              | 1947039615               |
| SNP_P4_178080_20494 | NW_004517657.1 | Scaffold2812 | 20494                   | GG                              | AA              | 1947039617               |
| SNP_P4_178081_20496 | NW_004517657.1 | Scaffold2812 | 20496                   | CC                              | AA              | 1947039619               |
| SNP_P4_178082_20503 | NW_004517657.1 | Scaffold2812 | 20503                   | GG                              | AA              | 1947039621               |
| SNP_P4_178083_20529 | NW_004517657.1 | Scaffold2812 | 20529                   | TT                              | AA              | 1947039623               |
| SNP_P4_178084_20905 | NW_004517657.1 | Scaffold2812 | 20905                   | TT                              | CC              | 1947039625               |
| SNP_P4_178085_21202 | NW_004517657.1 | Scaffold2812 | 21202                   | AA                              | TT              | 1947039627               |
| SNP_P4_178086_27327 | NW_004517657.1 | Scaffold2812 | 27327                   | CC                              | AA              | 1947039629               |
| SNP_P4_178087_30591 | NW_004517657.1 | Scaffold2812 | 30591                   | CC                              | AA              | 1947039631               |
| SNP_P4_178088_37877 | NW_004517657.1 | Scaffold2812 | 37877                   | CC                              | TT              | 1947039633               |
| SNP_P4_178089_37919 | NW_004517657.1 | Scaffold2812 | 37919                   | AA                              | TT              | 1947039635               |
| SNP_P4_178091_43443 | NW_004517657.1 | Scaffold2812 | 43443                   | GG                              | AA              | 1947039637               |
| SNP_P4_178092_45524 | NW_004517657.1 | Scaffold2812 | 45524                   | TT                              | AA              | 1947039639               |
| SNP_P4_178093_45671 | NW_004517657.1 | Scaffold2812 | 45671                   | TT                              | AA              | 1947039641               |
| SNP_P4_178094_45906 | NW_004517657.1 | Scaffold2812 | 45906                   | AA                              | CC              | 1947039643               |
| SNP_P4_178096_52050 | NW_004517657.1 | Scaffold2812 | 52050                   | CC                              | TT              | 1947039645               |
| SNP_P4_178097_55684 | NW_004517657.1 | Scaffold2812 | 55684                   | GG                              | AA              | 1947039647               |
| SNP_P4_178098_55687 | NW_004517657.1 | Scaffold2812 | 55687                   | GG                              | AA              | 1947039650               |
| SNP_P4_178100_60636 | NW_004517657.1 | Scaffold2812 | 60636                   | CC                              | TT              | 1947039652               |
| SNP_P4_178101_60643 | NW_004517657.1 | Scaffold2812 | 60643                   | GG                              | AA              | 1947039654               |
| SNP_P4_178102_60683 | NW_004517657.1 | Scaffold2812 | 60683                   | AA                              | GG              | 1947039656               |
| SNP_P4_178103_65862 | NW_004517657.1 | Scaffold2812 | 65862                   | AA                              | GG              | 1947039658               |
| SNP_P4_178105_95699 | NW_004517657.1 | Scaffold2812 | 95699                   | TT                              | GG              | 1947039660               |
| SNP_P4_178106_95700 | NW_004517657.1 | Scaffold2812 | 95700                   | TT                              | CC              | 1947039662               |
| SNP_P4_178107_2877  | NW_004517658.1 | Scaffold2813 | 2877                    | CC                              | TT              | 1947039664               |
| SNP_P4_178108_1148  | NW_004517659.1 | Scaffold2815 | 1148                    | AA                              | TT              | 1947039666               |
| SNP_P4_178109_1162  | NW_004517659.1 | Scaffold2815 | 1162                    | GG                              | AA              | 1947039668               |
| SNP_P4_178110_1167  | NW_004517659.1 | Scaffold2815 | 1167                    | CC                              | TT              | 1947039670               |
| SNP_P4_178111_5591  | NW_004517659.1 | Scaffold2815 | 5591                    | CC                              | TT              | 1947039672               |
| SNP_P4_178112_28525 | NW_004517659.1 | Scaffold2815 | 28525                   | AA                              | TT              | 1947039674               |
| SNP_P4_178113_29618 | NW_004517659.1 | Scaffold2815 | 29618                   | AA                              | GG              | 1947039676               |
| SNP_P4_178114_29642 | NW_004517659.1 | Scaffold2815 | 29642                   | AA                              | GG              | 1947039678               |
| SNP_P4_178115_29643 | NW_004517659.1 | Scaffold2815 | 29643                   | TT                              | CC              | 1947039680               |
| SNP_P4_178116_29644 | NW_004517659.1 | Scaffold2815 | 29644                   | AA                              | GG              | 1947039682               |
| SNP_P4_178117_35286 | NW_004517659.1 | Scaffold2815 | 35286                   | CC                              | AA              | 1947039684               |

| SNPs IDs            | Chromosome IDs | Chromosomes  | Physical positions (bp) | CDC Frontier (Reference genome) | (ILWC46 & LPNB) | NCBI SNPdb Accession IDs |
|---------------------|----------------|--------------|-------------------------|---------------------------------|-----------------|--------------------------|
| SNP_P4_178118_35296 | NW_004517659.1 | Scaffold2815 | 35296                   | AA                              | GG              | 1947039686               |
| SNP_P4_178119_42894 | NW_004517659.1 | Scaffold2815 | 42894                   | GG                              | CC              | 1947039688               |
| SNP_P4_178120_70844 | NW_004517659.1 | Scaffold2815 | 70844                   | CC                              | AA              | 1947039690               |
| SNP_P4_178121_70895 | NW_004517659.1 | Scaffold2815 | 70895                   | TT                              | CC              | 1947039692               |
| SNP_P4_178122_70951 | NW_004517659.1 | Scaffold2815 | 70951                   | GG                              | AA              | 1947039694               |
| SNP_P4_178123_70986 | NW_004517659.1 | Scaffold2815 | 70986                   | TT                              | AA              | 1947039696               |
| SNP_P4_178124_71066 | NW_004517659.1 | Scaffold2815 | 71066                   | TT                              | CC              | 1947039698               |
| SNP_P4_178125_71085 | NW_004517659.1 | Scaffold2815 | 71085                   | AA                              | CC              | 1947039700               |
| SNP_P4_178126_71235 | NW_004517659.1 | Scaffold2815 | 71235                   | GG                              | AA              | 1947039702               |
| SNP_P4_178127_71241 | NW_004517659.1 | Scaffold2815 | 71241                   | GG                              | AA              | 1947039704               |
| SNP_P4_178129_71332 | NW_004517659.1 | Scaffold2815 | 71332                   | TT                              | GG              | 1947039706               |
| SNP_P4_178130_71354 | NW_004517659.1 | Scaffold2815 | 71354                   | GG                              | AA              | 1947039708               |
| SNP_P4_178131_71399 | NW_004517659.1 | Scaffold2815 | 71399                   | GG                              | AA              | 1947039710               |
| SNP_P4_178132_71411 | NW_004517659.1 | Scaffold2815 | 71411                   | TT                              | CC              | 1947039712               |
| SNP_P4_178133_71439 | NW_004517659.1 | Scaffold2815 | 71439                   | CC                              | TT              | 1947039714               |
| SNP_P4_178134_71533 | NW_004517659.1 | Scaffold2815 | 71533                   | TT                              | CC              | 1947039716               |
| SNP_P4_178135_71712 | NW_004517659.1 | Scaffold2815 | 71712                   | TT                              | CC              | 1947039718               |
| SNP_P4_178136_71748 | NW_004517659.1 | Scaffold2815 | 71748                   | AA                              | GG              | 1947039720               |
| SNP_P4_178137_71767 | NW_004517659.1 | Scaffold2815 | 71767                   | AA                              | GG              | 1947039722               |
| SNP_P4_178138_71775 | NW_004517659.1 | Scaffold2815 | 71775                   | GG                              | AA              | 1947039724               |
| SNP_P4_178139_71846 | NW_004517659.1 | Scaffold2815 | 71846                   | CC                              | TT              | 1947039726               |
| SNP_P4_178140_71920 | NW_004517659.1 | Scaffold2815 | 71920                   | GG                              | TT              | 1947039728               |
| SNP_P4_178141_71955 | NW_004517659.1 | Scaffold2815 | 71955                   | CC                              | AA              | 1947039730               |
| SNP_P4_178142_83193 | NW_004517659.1 | Scaffold2815 | 83193                   | GG                              | AA              | 1947039732               |
| SNP_P4_178143_495   | NW_004517661.1 | Scaffold2817 | 495                     | CC                              | AA              | 1947039734               |
| SNP_P4_178144_508   | NW_004517661.1 | Scaffold2817 | 508                     | CC                              | TT              | 1947039736               |
| SNP_P4_178145_882   | NW_004517661.1 | Scaffold2817 | 882                     | GG                              | AA              | 1947039738               |
| SNP_P4_178146_895   | NW_004517661.1 | Scaffold2817 | 895                     | AA                              | GG              | 1947039740               |
| SNP_P4_178147_926   | NW_004517661.1 | Scaffold2817 | 926                     | AA                              | GG              | 1947039742               |
| SNP_P4_178148_959   | NW_004517661.1 | Scaffold2817 | 959                     | AA                              | GG              | 1947039744               |
| SNP_P4_178149_966   | NW_004517661.1 | Scaffold2817 | 966                     | TT                              | CC              | 1947039746               |
| SNP_P4_178150_11180 | NW_004517663.1 | Scaffold2819 | 11180                   | AA                              | GG              | 1947039748               |
| SNP_P4_178151_11263 | NW_004517663.1 | Scaffold2819 | 11263                   | AA                              | GG              | 1947039750               |
| SNP_P4_178152_12314 | NW_004517663.1 | Scaffold2819 | 12314                   | AA                              | GG              | 1947039752               |
| SNP_P4_178153_12519 | NW_004517663.1 | Scaffold2819 | 12519                   | AA                              | CC              | 1947039754               |
| SNP_P4_178154_12539 | NW_004517663.1 | Scaffold2819 | 12539                   | TT                              | CC              | 1947039756               |
| SNP_P4_178155_12551 | NW_004517663.1 | Scaffold2819 | 12551                   | TT                              | AA              | 1947039758               |
| SNP_P4_178156_12615 | NW_004517663.1 | Scaffold2819 | 12615                   | CC                              | AA              | 1947039760               |
| SNP_P4_178157_12655 | NW_004517663.1 | Scaffold2819 | 12655                   | CC                              | AA              | 1947039762               |
| SNP_P4_178158_12689 | NW_004517663.1 | Scaffold2819 | 12689                   | TT                              | CC              | 1947039764               |
| SNP_P4_178159_12706 | NW_004517663.1 | Scaffold2819 | 12706                   | TT                              | GG              | 1947039766               |
| SNP_P4_178160_12825 | NW_004517663.1 | Scaffold2819 | 12825                   | AA                              | GG              | 1947039768               |

| SNPs IDs            | Chromosome IDs | Chromosomes  | Physical positions (bp) | CDC Frontier (Reference genome) | (ILWC46 & LPNB) | NCBI SNPdb Accession IDs |
|---------------------|----------------|--------------|-------------------------|---------------------------------|-----------------|--------------------------|
| SNP_P4_178161_12833 | NW_004517663.1 | Scaffold2819 | 12833                   | TT                              | CC              | 1947039770               |
| SNP_P4_178162_12935 | NW_004517663.1 | Scaffold2819 | 12935                   | TT                              | CC              | 1947039772               |
| SNP_P4_178163_13008 | NW_004517663.1 | Scaffold2819 | 13008                   | GG                              | AA              | 1947039774               |
| SNP_P4_178164_13026 | NW_004517663.1 | Scaffold2819 | 13026                   | AA                              | GG              | 1947039776               |
| SNP_P4_178165_13082 | NW_004517663.1 | Scaffold2819 | 13082                   | AA                              | GG              | 1947039778               |
| SNP_P4_178166_13085 | NW_004517663.1 | Scaffold2819 | 13085                   | AA                              | TT              | 1947039780               |
| SNP_P4_178167_13098 | NW_004517663.1 | Scaffold2819 | 13098                   | CC                              | TT              | 1947039782               |
| SNP_P4_178168_13126 | NW_004517663.1 | Scaffold2819 | 13126                   | TT                              | CC              | 1947039784               |
| SNP_P4_178169_13128 | NW_004517663.1 | Scaffold2819 | 13128                   | GG                              | AA              | 1947039786               |
| SNP_P4_178170_18280 | NW_004517663.1 | Scaffold2819 | 18280                   | TT                              | CC              | 1947039788               |
| SNP_P4_178171_18468 | NW_004517663.1 | Scaffold2819 | 18468                   | GG                              | CC              | 1947039790               |
| SNP_P4_178172_18505 | NW_004517663.1 | Scaffold2819 | 18505                   | AA                              | GG              | 1947039792               |
| SNP_P4_178174_18836 | NW_004517663.1 | Scaffold2819 | 18836                   | AA                              | GG              | 1947039794               |
| SNP_P4_178175_18917 | NW_004517663.1 | Scaffold2819 | 18917                   | TT                              | CC              | 1947039796               |
| SNP_P4_178176_18919 | NW_004517663.1 | Scaffold2819 | 18919                   | AA                              | GG              | 1947039798               |
| SNP_P4_178177_6570  | NW_004517666.1 | Scaffold2823 | 6570                    | TT                              | GG              | 1947039800               |
| SNP_P4_178178_7240  | NW_004517666.1 | Scaffold2823 | 7240                    | AA                              | GG              | 1947039803               |
| SNP_P4_178179_8407  | NW_004517666.1 | Scaffold2823 | 8407                    | TT                              | GG              | 1947039805               |
| SNP_P4_178180_8419  | NW_004517666.1 | Scaffold2823 | 8419                    | AA                              | GG              | 1947039807               |
| SNP_P4_178182_8637  | NW_004517666.1 | Scaffold2823 | 8637                    | AA                              | CC              | 1947039809               |
| SNP_P4_178183_12213 | NW_004517666.1 | Scaffold2823 | 12213                   | TT                              | CC              | 1947039811               |
| SNP_P4_178184_12225 | NW_004517666.1 | Scaffold2823 | 12225                   | TT                              | AA              | 1947039813               |
| SNP_P4_178185_12238 | NW_004517666.1 | Scaffold2823 | 12238                   | TT                              | AA              | 1947039815               |
| SNP_P4_178186_12243 | NW_004517666.1 | Scaffold2823 | 12243                   | AA                              | TT              | 1947039817               |
| SNP_P4_178187_12246 | NW_004517666.1 | Scaffold2823 | 12246                   | CC                              | TT              | 1947039819               |
| SNP_P4_178188_13351 | NW_004517666.1 | Scaffold2823 | 13351                   | CC                              | TT              | 1947039821               |
| SNP_P4_178189_4790  | NW_004517667.1 | Scaffold2824 | 4790                    | TT                              | AA              | 1947039823               |
| SNP_P4_178190_5689  | NW_004517667.1 | Scaffold2824 | 5689                    | TT                              | CC              | 1947039825               |
| SNP_P4_178191_5691  | NW_004517667.1 | Scaffold2824 | 5691                    | GG                              | AA              | 1947039827               |
| SNP_P4_178192_5779  | NW_004517667.1 | Scaffold2824 | 5779                    | CC                              | AA              | 1947039829               |
| SNP_P4_178193_5933  | NW_004517667.1 | Scaffold2824 | 5933                    | TT                              | CC              | 1947039831               |
| SNP_P4_178194_5936  | NW_004517667.1 | Scaffold2824 | 5936                    | TT                              | CC              | 1947039833               |
| SNP_P4_178195_6067  | NW_004517667.1 | Scaffold2824 | 6067                    | GG                              | AA              | 1947039835               |
| SNP_P4_178196_6382  | NW_004517667.1 | Scaffold2824 | 6382                    | CC                              | AA              | 1947039837               |
| SNP_P4_178197_8952  | NW_004517667.1 | Scaffold2824 | 8952                    | AA                              | GG              | 1947039839               |
| SNP_P4_178198_8961  | NW_004517667.1 | Scaffold2824 | 8961                    | TT                              | AA              | 1947039841               |
| SNP_P4_178199_998   | NW_004517668.1 | Scaffold2825 | 998                     | AA                              | TT              | 1947039843               |
| SNP_P4_178200_9256  | NW_004517670.1 | Scaffold2829 | 9256                    | GG                              | TT              | 1947039846               |
| SNP_P4_178201_9608  | NW_004517670.1 | Scaffold2829 | 9608                    | CC                              | GG              | 1947039848               |
| SNP_P4_178202_879   | NW_004517671.1 | Scaffold2831 | 879                     | CC                              | GG              | 1947039850               |
| SNP_P4_178203_349   | NW_004517672.1 | Scaffold2833 | 349                     | GG                              | AA              | 1947039852               |
| SNP_P4_178204_735   | NW_004517672.1 | Scaffold2833 | 735                     | GG                              | AA              | 1947039854               |

| SNPs IDs            | Chromosome IDs | Chromosomes  | Physical positions (bp) | CDC Frontier (Reference genome) | (ILWC46 & LPNB) | NCBI SNPdb Accession IDs |
|---------------------|----------------|--------------|-------------------------|---------------------------------|-----------------|--------------------------|
| SNP_P4_178205_736   | NW_004517672.1 | Scaffold2833 | 736                     | AA                              | GG              | 1947039856               |
| SNP_P4_178206_6667  | NW_004517673.1 | Scaffold2834 | 6667                    | TT                              | CC              | 1947039858               |
| SNP_P4_178207_6784  | NW_004517673.1 | Scaffold2834 | 6784                    | CC                              | GG              | 1947039860               |
| SNP_P4_178208_6914  | NW_004517673.1 | Scaffold2834 | 6914                    | TT                              | CC              | 1947039862               |
| SNP_P4_178209_6923  | NW_004517673.1 | Scaffold2834 | 6923                    | TT                              | CC              | 1947039864               |
| SNP_P4_178210_6938  | NW_004517673.1 | Scaffold2834 | 6938                    | AA                              | GG              | 1947039866               |
| SNP_P4_178211_6947  | NW_004517673.1 | Scaffold2834 | 6947                    | AA                              | TT              | 1947039868               |
| SNP_P4_178212_7027  | NW_004517673.1 | Scaffold2834 | 7027                    | TT                              | AA              | 1947039870               |
| SNP_P4_178213_7030  | NW_004517673.1 | Scaffold2834 | 7030                    | CC                              | TT              | 1947039872               |
| SNP_P4_178214_14019 | NW_004517673.1 | Scaffold2834 | 14019                   | GG                              | AA              | 1947039874               |
| SNP_P4_178215_14501 | NW_004517673.1 | Scaffold2834 | 14501                   | TT                              | GG              | 1947039876               |
| SNP_P4_178216_31142 | NW_004517673.1 | Scaffold2834 | 31142                   | TT                              | CC              | 1947039878               |
| SNP_P4_178217_32868 | NW_004517673.1 | Scaffold2834 | 32868                   | CC                              | TT              | 1947039880               |
| SNP_P4_178218_188   | NW_004517674.1 | Scaffold2835 | 188                     | AA                              | CC              | 1947039882               |
| SNP_P4_178219_2643  | NW_004517674.1 | Scaffold2835 | 2643                    | AA                              | GG              | 1947039884               |
| SNP_P4_178220_2676  | NW_004517674.1 | Scaffold2835 | 2676                    | CC                              | TT              | 1947039886               |
| SNP_P4_178221_3006  | NW_004517674.1 | Scaffold2835 | 3006                    | AA                              | GG              | 1947039888               |
| SNP_P4_178222_3035  | NW_004517674.1 | Scaffold2835 | 3035                    | AA                              | TT              | 1947039890               |
| SNP_P4_178223_4583  | NW_004517674.1 | Scaffold2835 | 4583                    | TT                              | GG              | 1947039892               |
| SNP_P4_178224_5408  | NW_004517674.1 | Scaffold2835 | 5408                    | TT                              | CC              | 1947039894               |
| SNP_P4_178226_5569  | NW_004517674.1 | Scaffold2835 | 5569                    | TT                              | AA              | 1947039896               |
| SNP_P4_178227_27884 | NW_004517676.1 | Scaffold2837 | 27884                   | TT                              | AA              | 1947039898               |
| SNP_P4_178228_27918 | NW_004517676.1 | Scaffold2837 | 27918                   | AA                              | GG              | 1947039900               |
| SNP_P4_178229_27920 | NW_004517676.1 | Scaffold2837 | 27920                   | AA                              | CC              | 1947039902               |
| SNP_P4_178230_27924 | NW_004517676.1 | Scaffold2837 | 27924                   | AA                              | GG              | 1947039904               |
| SNP_P4_178231_27930 | NW_004517676.1 | Scaffold2837 | 27930                   | GG                              | AA              | 1947039906               |
| SNP_P4_178232_27955 | NW_004517676.1 | Scaffold2837 | 27955                   | AA                              | CC              | 1947039908               |
| SNP_P4_178233_61839 | NW_004517676.1 | Scaffold2837 | 61839                   | GG                              | AA              | 1947039910               |
| SNP_P4_178234_62392 | NW_004517676.1 | Scaffold2837 | 62392                   | TT                              | CC              | 1947039912               |
| SNP_P4_178235_62393 | NW_004517676.1 | Scaffold2837 | 62393                   | AA                              | TT              | 1947039914               |
| SNP_P4_178236_62397 | NW_004517676.1 | Scaffold2837 | 62397                   | CC                              | TT              | 1947039916               |
| SNP_P4_178237_62410 | NW_004517676.1 | Scaffold2837 | 62410                   | AA                              | GG              | 1947039918               |
| SNP_P4_178238_62441 | NW_004517676.1 | Scaffold2837 | 62441                   | GG                              | AA              | 1947039920               |
| SNP_P4_178239_2569  | NW_004517679.1 | Scaffold2840 | 2569                    | CC                              | TT              | 1947039922               |
| SNP_P4_178240_2641  | NW_004517679.1 | Scaffold2840 | 2641                    | CC                              | GG              | 1947039924               |
| SNP_P4_178241_716   | NW_004517681.1 | Scaffold2842 | 716                     | CC                              | AA              | 1947039926               |
| SNP_P4_178242_981   | NW_004517681.1 | Scaffold2842 | 981                     | GG                              | TT              | 1947039928               |
| SNP_P4_178243_1019  | NW_004517681.1 | Scaffold2842 | 1019                    | AA                              | GG              | 1947039930               |
| SNP_P4_178245_2991  | NW_004517683.1 | Scaffold2845 | 2991                    | TT                              | GG              | 1947039932               |
| SNP_P4_178246_3043  | NW_004517683.1 | Scaffold2845 | 3043                    | AA                              | TT              | 1947039934               |
| SNP_P4_178247_3092  | NW_004517683.1 | Scaffold2845 | 3092                    | AA                              | CC              | 1947039936               |
| SNP_P4_178248_3298  | NW_004517683.1 | Scaffold2845 | 3298                    | CC                              | TT              | 1947039938               |

| SNPs IDs            | Chromosome IDs | Chromosomes  | Physical positions (bp) | CDC Frontier (Reference genome) | (ILWC46 & LPNB) | NCBI SNPdb Accession IDs |
|---------------------|----------------|--------------|-------------------------|---------------------------------|-----------------|--------------------------|
| SNP_P4_178249_3306  | NW_004517683.1 | Scaffold2845 | 3306                    | AA                              | GG              | 1947039940               |
| SNP_P4_178250_3475  | NW_004517683.1 | Scaffold2845 | 3475                    | GG                              | TT              | 1947039942               |
| SNP_P4_178251_16956 | NW_004517683.1 | Scaffold2845 | 16956                   | CC                              | AA              | 1947039944               |
| SNP_P4_178253_18140 | NW_004517683.1 | Scaffold2845 | 18140                   | TT                              | CC              | 1947039946               |
| SNP_P4_178254_27573 | NW_004517683.1 | Scaffold2845 | 27573                   | CC                              | TT              | 1947039948               |
| SNP_P4_178255_950   | NW_004517685.1 | Scaffold2847 | 950                     | GG                              | AA              | 1947039950               |
| SNP_P4_178256_3672  | NW_004517685.1 | Scaffold2847 | 3672                    | GG                              | AA              | 1947039952               |
| SNP_P4_178257_2505  | NW_004517686.1 | Scaffold2848 | 2505                    | AA                              | GG              | 1947039954               |
| SNP_P4_178258_2539  | NW_004517686.1 | Scaffold2848 | 2539                    | CC                              | TT              | 1947039956               |
| SNP_P4_178260_16834 | NW_004517686.1 | Scaffold2848 | 16834                   | AA                              | TT              | 1947039958               |
| SNP_P4_178261_16845 | NW_004517686.1 | Scaffold2848 | 16845                   | TT                              | GG              | 1947039960               |
| SNP_P4_178262_31809 | NW_004517686.1 | Scaffold2848 | 31809                   | AA                              | GG              | 1947039963               |
| SNP_P4_178263_34030 | NW_004517686.1 | Scaffold2848 | 34030                   | GG                              | AA              | 1947039965               |
| SNP_P4_178264_42487 | NW_004517686.1 | Scaffold2848 | 42487                   | TT                              | GG              | 1947039967               |
| SNP_P4_178265_54122 | NW_004517686.1 | Scaffold2848 | 54122                   | TT                              | AA              | 1947039969               |
| SNP_P4_178266_54164 | NW_004517686.1 | Scaffold2848 | 54164                   | AA                              | GG              | 1947039971               |
| SNP_P4_178267_28114 | NW_004517687.1 | Scaffold2850 | 28114                   | AA                              | TT              | 1947039973               |
| SNP_P4_178268_28149 | NW_004517687.1 | Scaffold2850 | 28149                   | AA                              | TT              | 1947039975               |
| SNP_P4_178269_28387 | NW_004517687.1 | Scaffold2850 | 28387                   | GG                              | AA              | 1947039977               |
| SNP_P4_178271_28434 | NW_004517687.1 | Scaffold2850 | 28434                   | TT                              | CC              | 1947039979               |
| SNP_P4_178272_1431  | NW_004517688.1 | Scaffold2851 | 1431                    | CC                              | TT              | 1947039981               |
| SNP_P4_178273_1433  | NW_004517688.1 | Scaffold2851 | 1433                    | AA                              | GG              | 1947039983               |
| SNP_P4_178274_1729  | NW_004517688.1 | Scaffold2851 | 1729                    | CC                              | GG              | 1947039985               |
| SNP_P4_178275_1752  | NW_004517688.1 | Scaffold2851 | 1752                    | TT                              | GG              | 1947039987               |
| SNP_P4_178276_3672  | NW_004517689.1 | Scaffold2852 | 3672                    | CC                              | AA              | 1947039989               |
| SNP_P4_178277_3739  | NW_004517689.1 | Scaffold2852 | 3739                    | GG                              | AA              | 1947039991               |
| SNP_P4_178278_4178  | NW_004517689.1 | Scaffold2852 | 4178                    | CC                              | TT              | 1947039993               |
| SNP_P4_178279_7677  | NW_004517689.1 | Scaffold2852 | 7677                    | CC                              | GG              | 1947039995               |
| SNP_P4_178280_8661  | NW_004517689.1 | Scaffold2852 | 8661                    | GG                              | AA              | 1947039998               |
| SNP_P4_178281_8904  | NW_004517689.1 | Scaffold2852 | 8904                    | TT                              | CC              | 1947040000               |
| SNP_P4_178282_8905  | NW_004517689.1 | Scaffold2852 | 8905                    | GG                              | TT              | 1947040002               |
| SNP_P4_178283_8955  | NW_004517689.1 | Scaffold2852 | 8955                    | TT                              | CC              | 1947040004               |
| SNP_P4_178284_8957  | NW_004517689.1 | Scaffold2852 | 8957                    | TT                              | AA              | 1947040006               |
| SNP_P4_178285_9204  | NW_004517689.1 | Scaffold2852 | 9204                    | AA                              | GG              | 1947040008               |
| SNP_P4_178286_9208  | NW_004517689.1 | Scaffold2852 | 9208                    | TT                              | CC              | 1947040010               |
| SNP_P4_178287_19650 | NW_004517689.1 | Scaffold2852 | 19650                   | TT                              | AA              | 1947040012               |
| SNP_P4_178288_387   | NW_004517690.1 | Scaffold2853 | 387                     | CC                              | GG              | 1947040014               |
| SNP_P4_178289_5515  | NW_004517690.1 | Scaffold2853 | 5515                    | AA                              | GG              | 1947040016               |
| SNP_P4_178290_5517  | NW_004517690.1 | Scaffold2853 | 5517                    | GG                              | TT              | 1947040018               |
| SNP_P4_178291_5524  | NW_004517690.1 | Scaffold2853 | 5524                    | GG                              | TT              | 1947040020               |
| SNP_P4_178292_5546  | NW_004517690.1 | Scaffold2853 | 5546                    | AA                              | TT              | 1947040022               |
| SNP_P4_178294_6636  | NW_004517690.1 | Scaffold2853 | 6636                    | GG                              | AA              | 1947040024               |



| SNPs IDs            | Chromosome IDs | Chromosomes  | Physical positions (bp) | CDC Frontier (Reference genome) | (ILWC46 & LPNB) | NCBI SNPdb Accession IDs |
|---------------------|----------------|--------------|-------------------------|---------------------------------|-----------------|--------------------------|
| SNP_P4_178295_8317  | NW_004517690.1 | Scaffold2853 | 8317                    | AA                              | GG              | 1947040026               |
| SNP_P4_178296_8583  | NW_004517690.1 | Scaffold2853 | 8583                    | TT                              | GG              | 1947040028               |
| SNP_P4_178297_9723  | NW_004517690.1 | Scaffold2853 | 9723                    | CC                              | GG              | 1947040030               |
| SNP_P4_178298_9754  | NW_004517690.1 | Scaffold2853 | 9754                    | GG                              | AA              | 1947040032               |
| SNP_P4_178299_11804 | NW_004517690.1 | Scaffold2853 | 11804                   | GG                              | TT              | 1947040034               |
| SNP_P4_178300_12052 | NW_004517690.1 | Scaffold2853 | 12052                   | CC                              | GG              | 1947040036               |
| SNP_P4_178302_12104 | NW_004517690.1 | Scaffold2853 | 12104                   | TT                              | CC              | 1947040038               |
| SNP_P4_178303_12143 | NW_004517690.1 | Scaffold2853 | 12143                   | AA                              | TT              | 1947040040               |
| SNP_P4_178304_12176 | NW_004517690.1 | Scaffold2853 | 12176                   | AA                              | CC              | 1947040042               |
| SNP_P4_178305_12202 | NW_004517690.1 | Scaffold2853 | 12202                   | TT                              | GG              | 1947040044               |
| SNP_P4_178306_12275 | NW_004517690.1 | Scaffold2853 | 12275                   | GG                              | TT              | 1947040046               |
| SNP_P4_178307_12276 | NW_004517690.1 | Scaffold2853 | 12276                   | TT                              | GG              | 1947040048               |
| SNP_P4_178308_12349 | NW_004517690.1 | Scaffold2853 | 12349                   | CC                              | TT              | 1947040050               |
| SNP_P4_178309_12448 | NW_004517690.1 | Scaffold2853 | 12448                   | CC                              | TT              | 1947040052               |
| SNP_P4_178310_15953 | NW_004517690.1 | Scaffold2853 | 15953                   | GG                              | AA              | 1947040054               |
| SNP_P4_178311_15964 | NW_004517690.1 | Scaffold2853 | 15964                   | AA                              | TT              | 1947040056               |
| SNP_P4_178312_16204 | NW_004517690.1 | Scaffold2853 | 16204                   | GG                              | AA              | 1947040058               |
| SNP_P4_178313_16283 | NW_004517690.1 | Scaffold2853 | 16283                   | TT                              | CC              | 1947040060               |
| SNP_P4_178314_16287 | NW_004517690.1 | Scaffold2853 | 16287                   | AA                              | GG              | 1947040062               |
| SNP_P4_178315_16311 | NW_004517690.1 | Scaffold2853 | 16311                   | CC                              | TT              | 1947040064               |
| SNP_P4_178316_16459 | NW_004517690.1 | Scaffold2853 | 16459                   | TT                              | GG              | 1947040066               |
| SNP_P4_178317_16471 | NW_004517690.1 | Scaffold2853 | 16471                   | TT                              | GG              | 1947040068               |
| SNP_P4_178318_16478 | NW_004517690.1 | Scaffold2853 | 16478                   | TT                              | GG              | 1947040070               |
| SNP_P4_178319_16485 | NW_004517690.1 | Scaffold2853 | 16485                   | TT                              | GG              | 1947040072               |
| SNP_P4_178320_16492 | NW_004517690.1 | Scaffold2853 | 16492                   | GG                              | TT              | 1947040075               |
| SNP_P4_178321_16499 | NW_004517690.1 | Scaffold2853 | 16499                   | TT                              | GG              | 1947040077               |
| SNP_P4_178322_16541 | NW_004517690.1 | Scaffold2853 | 16541                   | AA                              | GG              | 1947040079               |
| SNP_P4_178323_16569 | NW_004517690.1 | Scaffold2853 | 16569                   | TT                              | CC              | 1947040081               |
| SNP_P4_178324_16795 | NW_004517690.1 | Scaffold2853 | 16795                   | CC                              | TT              | 1947040083               |
| SNP_P4_178325_16806 | NW_004517690.1 | Scaffold2853 | 16806                   | AA                              | CC              | 1947040085               |
| SNP_P4_178326_16829 | NW_004517690.1 | Scaffold2853 | 16829                   | TT                              | GG              | 1947040087               |
| SNP_P4_178327_16869 | NW_004517690.1 | Scaffold2853 | 16869                   | TT                              | GG              | 1947040089               |
| SNP_P4_178328_17025 | NW_004517690.1 | Scaffold2853 | 17025                   | TT                              | CC              | 1947040091               |
| SNP_P4_178330_17212 | NW_004517690.1 | Scaffold2853 | 17212                   | GG                              | AA              | 1947040093               |
| SNP_P4_178331_17268 | NW_004517690.1 | Scaffold2853 | 17268                   | TT                              | GG              | 1947040095               |
| SNP_P4_178332_21192 | NW_004517690.1 | Scaffold2853 | 21192                   | CC                              | TT              | 1947040097               |
| SNP_P4_178333_21452 | NW_004517690.1 | Scaffold2853 | 21452                   | AA                              | GG              | 1947040099               |
| SNP_P4_178334_21576 | NW_004517690.1 | Scaffold2853 | 21576                   | AA                              | TT              | 1947040101               |
| SNP_P4_178335_21607 | NW_004517690.1 | Scaffold2853 | 21607                   | AA                              | TT              | 1947040103               |
| SNP_P4_178336_25918 | NW_004517690.1 | Scaffold2853 | 25918                   | AA                              | GG              | 1947040105               |
| SNP_P4_178337_26028 | NW_004517690.1 | Scaffold2853 | 26028                   | CC                              | GG              | 1947040107               |
| SNP_P4_178338_530   | NW_004517694.1 | Scaffold2859 | 530                     | TT                              | AA              | 1947040109               |

| SNPs IDs            | Chromosome IDs | Chromosomes  | Physical positions (bp) | CDC Frontier (Reference genome) | (ILWC46 & LPNB) | NCBI SNPdb Accession IDs |
|---------------------|----------------|--------------|-------------------------|---------------------------------|-----------------|--------------------------|
| SNP_P4_178339_119   | NW_004517695.1 | Scaffold2861 | 119                     | AA                              | CC              | 1947040111               |
| SNP_P4_178340_142   | NW_004517695.1 | Scaffold2861 | 142                     | CC                              | GG              | 1947040113               |
| SNP_P4_178341_531   | NW_004517695.1 | Scaffold2861 | 531                     | AA                              | TT              | 1947040115               |
| SNP_P4_178342_552   | NW_004517695.1 | Scaffold2861 | 552                     | CC                              | AA              | 1947040117               |
| SNP_P4_178343_572   | NW_004517695.1 | Scaffold2861 | 572                     | TT                              | CC              | 1947040119               |
| SNP_P4_178344_6069  | NW_004517695.1 | Scaffold2861 | 6069                    | AA                              | TT              | 1947040121               |
| SNP_P4_178345_9616  | NW_004517695.1 | Scaffold2861 | 9616                    | TT                              | CC              | 1947040123               |
| SNP_P4_178346_1347  | NW_004517696.1 | Scaffold2863 | 1347                    | CC                              | GG              | 1947040125               |
| SNP_P4_178347_2212  | NW_004517696.1 | Scaffold2863 | 2212                    | TT                              | AA              | 1947040127               |
| SNP_P4_178349_2238  | NW_004517696.1 | Scaffold2863 | 2238                    | TT                              | AA              | 1947040129               |
| SNP_P4_178351_2490  | NW_004517696.1 | Scaffold2863 | 2490                    | AA                              | TT              | 1947040131               |
| SNP_P4_178352_29991 | NW_004517700.1 | Scaffold2869 | 29991                   | TT                              | GG              | 1947040133               |
| SNP_P4_178353_30212 | NW_004517700.1 | Scaffold2869 | 30212                   | GG                              | AA              | 1947040135               |
| SNP_P4_178354_30241 | NW_004517700.1 | Scaffold2869 | 30241                   | AA                              | GG              | 1947040137               |
| SNP_P4_178355_30725 | NW_004517700.1 | Scaffold2869 | 30725                   | GG                              | AA              | 1947040139               |
| SNP_P4_178357_272   | NW_004517701.1 | Scaffold2870 | 272                     | CC                              | TT              | 1947040141               |
| SNP_P4_178358_558   | NW_004517701.1 | Scaffold2870 | 558                     | CC                              | TT              | 1947040143               |
| SNP_P4_178359_561   | NW_004517701.1 | Scaffold2870 | 561                     | GG                              | AA              | 1947040145               |
| SNP_P4_178360_602   | NW_004517701.1 | Scaffold2870 | 602                     | AA                              | GG              | 1947040147               |
| SNP_P4_178362_9863  | NW_004517702.1 | Scaffold2871 | 9863                    | CC                              | TT              | 1947040149               |
| SNP_P4_178363_12603 | NW_004517702.1 | Scaffold2871 | 12603                   | GG                              | AA              | 1947040151               |
| SNP_P4_178364_12615 | NW_004517702.1 | Scaffold2871 | 12615                   | TT                              | GG              | 1947040153               |
| SNP_P4_178365_12665 | NW_004517702.1 | Scaffold2871 | 12665                   | CC                              | AA              | 1947040155               |
| SNP_P4_178366_23421 | NW_004517702.1 | Scaffold2871 | 23421                   | GG                              | TT              | 1947040157               |
| SNP_P4_178367_23422 | NW_004517702.1 | Scaffold2871 | 23422                   | CC                              | TT              | 1947040159               |
| SNP_P4_178369_30425 | NW_004517702.1 | Scaffold2871 | 30425                   | TT                              | CC              | 1947040161               |
| SNP_P4_178370_34809 | NW_004517702.1 | Scaffold2871 | 34809                   | CC                              | AA              | 1947040163               |
| SNP_P4_178371_36703 | NW_004517702.1 | Scaffold2871 | 36703                   | AA                              | GG              | 1947040165               |
| SNP_P4_178372_36779 | NW_004517702.1 | Scaffold2871 | 36779                   | AA                              | GG              | 1947040167               |
| SNP_P4_178373_38629 | NW_004517702.1 | Scaffold2871 | 38629                   | GG                              | AA              | 1947040169               |
| SNP_P4_178374_1876  | NW_004517707.1 | Scaffold2876 | 1876                    | CC                              | GG              | 1947040171               |
| SNP_P4_178375_942   | NW_004517708.1 | Scaffold2878 | 942                     | TT                              | CC              | 1947040173               |
| SNP_P4_178376_962   | NW_004517708.1 | Scaffold2878 | 962                     | CC                              | GG              | 1947040175               |
| SNP_P4_178377_998   | NW_004517708.1 | Scaffold2878 | 998                     | GG                              | AA              | 1947040177               |
| SNP_P4_178378_1013  | NW_004517708.1 | Scaffold2878 | 1013                    | CC                              | GG              | 1947040179               |
| SNP_P4_178379_59    | NW_004517710.1 | Scaffold2880 | 59                      | TT                              | GG              | 1947040181               |
| SNP_P4_178381_6662  | NW_004517712.1 | Scaffold2882 | 6662                    | AA                              | TT              | 1947040184               |
| SNP_P4_178382_6665  | NW_004517712.1 | Scaffold2882 | 6665                    | AA                              | TT              | 1947040186               |
| SNP_P4_178383_10671 | NW_004517712.1 | Scaffold2882 | 10671                   | TT                              | CC              | 1947040188               |
| SNP_P4_178384_13393 | NW_004517712.1 | Scaffold2882 | 13393                   | AA                              | CC              | 1947040190               |
| SNP_P4_178385_13398 | NW_004517712.1 | Scaffold2882 | 13398                   | TT                              | CC              | 1947040192               |
| SNP_P4_178386_13737 | NW_004517712.1 | Scaffold2882 | 13737                   | CC                              | AA              | 1947040194               |

| SNPs IDs            | Chromosome IDs | Chromosomes  | Physical positions (bp) | CDC Frontier (Reference genome) | (ILWC46 & LPNB) | NCBI SNPdb Accession IDs |
|---------------------|----------------|--------------|-------------------------|---------------------------------|-----------------|--------------------------|
| SNP_P4_178387_17552 | NW_004517712.1 | Scaffold2882 | 17552                   | GG                              | CC              | 1947040196               |
| SNP_P4_178388_17905 | NW_004517712.1 | Scaffold2882 | 17905                   | AA                              | GG              | 1947040198               |
| SNP_P4_178389_26058 | NW_004517712.1 | Scaffold2882 | 26058                   | GG                              | AA              | 1947040200               |
| SNP_P4_178390_26072 | NW_004517712.1 | Scaffold2882 | 26072                   | AA                              | CC              | 1947040202               |
| SNP_P4_178391_26077 | NW_004517712.1 | Scaffold2882 | 26077                   | TT                              | CC              | 1947040204               |
| SNP_P4_178392_26118 | NW_004517712.1 | Scaffold2882 | 26118                   | AA                              | TT              | 1947040206               |
| SNP_P4_178393_26135 | NW_004517712.1 | Scaffold2882 | 26135                   | GG                              | CC              | 1947040208               |
| SNP_P4_178394_26184 | NW_004517712.1 | Scaffold2882 | 26184                   | CC                              | AA              | 1947040210               |
| SNP_P4_178395_26193 | NW_004517712.1 | Scaffold2882 | 26193                   | TT                              | GG              | 1947040212               |
| SNP_P4_178396_26194 | NW_004517712.1 | Scaffold2882 | 26194                   | AA                              | TT              | 1947040214               |
| SNP_P4_178398_220   | NW_004517716.1 | Scaffold2886 | 220                     | AA                              | GG              | 1947040216               |
| SNP_P4_178399_241   | NW_004517716.1 | Scaffold2886 | 241                     | GG                              | AA              | 1947040218               |
| SNP_P4_178400_7225  | NW_004517717.1 | Scaffold2887 | 7225                    | TT                              | CC              | 1947040220               |
| SNP_P4_178401_7254  | NW_004517717.1 | Scaffold2887 | 7254                    | TT                              | AA              | 1947040222               |
| SNP_P4_178402_7255  | NW_004517717.1 | Scaffold2887 | 7255                    | TT                              | GG              | 1947040224               |
| SNP_P4_178404_7388  | NW_004517717.1 | Scaffold2887 | 7388                    | AA                              | TT              | 1947040226               |
| SNP_P4_178405_7403  | NW_004517717.1 | Scaffold2887 | 7403                    | TT                              | AA              | 1947040228               |
| SNP_P4_178406_29971 | NW_004517717.1 | Scaffold2887 | 29971                   | GG                              | AA              | 1947040230               |
| SNP_P4_178407_48055 | NW_004517717.1 | Scaffold2887 | 48055                   | AA                              | GG              | 1947040232               |
| SNP_P4_178408_48057 | NW_004517717.1 | Scaffold2887 | 48057                   | GG                              | AA              | 1947040234               |
| SNP_P4_178409_58762 | NW_004517717.1 | Scaffold2887 | 58762                   | TT                              | GG              | 1947040236               |
| SNP_P4_178410_63163 | NW_004517717.1 | Scaffold2887 | 63163                   | GG                              | TT              | 1947040238               |
| SNP_P4_178411_3476  | NW_004517718.1 | Scaffold2888 | 3476                    | GG                              | CC              | 1947040240               |
| SNP_P4_178412_3512  | NW_004517718.1 | Scaffold2888 | 3512                    | TT                              | AA              | 1947040242               |
| SNP_P4_178413_3532  | NW_004517718.1 | Scaffold2888 | 3532                    | AA                              | GG              | 1947040244               |
| SNP_P4_178414_3537  | NW_004517718.1 | Scaffold2888 | 3537                    | CC                              | AA              | 1947040246               |
| SNP_P4_178415_3538  | NW_004517718.1 | Scaffold2888 | 3538                    | AA                              | CC              | 1947040248               |
| SNP_P4_178416_3639  | NW_004517718.1 | Scaffold2888 | 3639                    | TT                              | CC              | 1947040250               |
| SNP_P4_178417_5199  | NW_004517718.1 | Scaffold2888 | 5199                    | CC                              | GG              | 1947040252               |
| SNP_P4_178418_10381 | NW_004517721.1 | Scaffold2893 | 10381                   | AA                              | GG              | 1947040254               |
| SNP_P4_178419_10537 | NW_004517721.1 | Scaffold2893 | 10537                   | CC                              | TT              | 1947040256               |
| SNP_P4_178420_10639 | NW_004517721.1 | Scaffold2893 | 10639                   | CC                              | TT              | 1947040258               |
| SNP_P4_178421_10667 | NW_004517721.1 | Scaffold2893 | 10667                   | GG                              | AA              | 1947040260               |
| SNP_P4_178423_10722 | NW_004517721.1 | Scaffold2893 | 10722                   | AA                              | GG              | 1947040262               |
| SNP_P4_178424_10826 | NW_004517721.1 | Scaffold2893 | 10826                   | TT                              | CC              | 1947040264               |
| SNP_P4_178426_11820 | NW_004517721.1 | Scaffold2893 | 11820                   | AA                              | TT              | 1947040266               |
| SNP_P4_178427_11874 | NW_004517721.1 | Scaffold2893 | 11874                   | AA                              | GG              | 1947040268               |
| SNP_P4_178428_13482 | NW_004517721.1 | Scaffold2893 | 13482                   | AA                              | GG              | 1947040270               |
| SNP_P4_178429_13628 | NW_004517721.1 | Scaffold2893 | 13628                   | TT                              | CC              | 1947040272               |
| SNP_P4_178430_25846 | NW_004517721.1 | Scaffold2893 | 25846                   | CC                              | GG              | 1947040274               |
| SNP_P4_178431_25997 | NW_004517721.1 | Scaffold2893 | 25997                   | TT                              | CC              | 1947040276               |
| SNP_P4_178432_26026 | NW_004517721.1 | Scaffold2893 | 26026                   | CC                              | TT              | 1947040278               |

| SNPs IDs            | Chromosome IDs | Chromosomes  | Physical positions (bp) | CDC Frontier (Reference genome) | (ILWC46 & LPNB) | NCBI SNPdb Accession IDs |
|---------------------|----------------|--------------|-------------------------|---------------------------------|-----------------|--------------------------|
| SNP_P4_178433_26047 | NW_004517721.1 | Scaffold2893 | 26047                   | TT                              | GG              | 1947040280               |
| SNP_P4_178434_26057 | NW_004517721.1 | Scaffold2893 | 26057                   | AA                              | GG              | 1947040282               |
| SNP_P4_178435_26125 | NW_004517721.1 | Scaffold2893 | 26125                   | GG                              | AA              | 1947040284               |
| SNP_P4_178436_26286 | NW_004517721.1 | Scaffold2893 | 26286                   | AA                              | TT              | 1947040286               |
| SNP_P4_178437_26344 | NW_004517721.1 | Scaffold2893 | 26344                   | TT                              | AA              | 1947040288               |
| SNP_P4_178438_26371 | NW_004517721.1 | Scaffold2893 | 26371                   | GG                              | AA              | 1947040290               |
| SNP_P4_178439_26544 | NW_004517721.1 | Scaffold2893 | 26544                   | TT                              | CC              | 1947040292               |
| SNP_P4_178440_26582 | NW_004517721.1 | Scaffold2893 | 26582                   | AA                              | TT              | 1947040294               |
| SNP_P4_178441_26617 | NW_004517721.1 | Scaffold2893 | 26617                   | CC                              | AA              | 1947040296               |
| SNP_P4_178442_26704 | NW_004517721.1 | Scaffold2893 | 26704                   | TT                              | GG              | 1947040298               |
| SNP_P4_178443_26892 | NW_004517721.1 | Scaffold2893 | 26892                   | AA                              | GG              | 1947040300               |
| SNP_P4_178444_26926 | NW_004517721.1 | Scaffold2893 | 26926                   | CC                              | AA              | 1947040302               |
| SNP_P4_178445_26963 | NW_004517721.1 | Scaffold2893 | 26963                   | CC                              | TT              | 1947040304               |
| SNP_P4_178446_27176 | NW_004517721.1 | Scaffold2893 | 27176                   | GG                              | CC              | 1947040306               |
| SNP_P4_178447_27191 | NW_004517721.1 | Scaffold2893 | 27191                   | GG                              | TT              | 1947040309               |
| SNP_P4_178448_27237 | NW_004517721.1 | Scaffold2893 | 27237                   | CC                              | TT              | 1947040311               |
| SNP_P4_178449_27316 | NW_004517721.1 | Scaffold2893 | 27316                   | AA                              | GG              | 1947040313               |
| SNP_P4_178450_27538 | NW_004517721.1 | Scaffold2893 | 27538                   | TT                              | CC              | 1947040315               |
| SNP_P4_178451_27598 | NW_004517721.1 | Scaffold2893 | 27598                   | AA                              | GG              | 1947040317               |
| SNP_P4_178452_27708 | NW_004517721.1 | Scaffold2893 | 27708                   | AA                              | GG              | 1947040319               |
| SNP_P4_178453_2789  | NW_004517723.1 | Scaffold2896 | 2789                    | AA                              | GG              | 1947040321               |
| SNP_P4_178454_21725 | NW_004517723.1 | Scaffold2896 | 21725                   | CC                              | AA              | 1947040323               |
| SNP_P4_178455_24925 | NW_004517723.1 | Scaffold2896 | 24925                   | CC                              | AA              | 1947040325               |
| SNP_P4_178456_33470 | NW_004517723.1 | Scaffold2896 | 33470                   | TT                              | GG              | 1947040327               |
| SNP_P4_178457_33909 | NW_004517723.1 | Scaffold2896 | 33909                   | CC                              | AA              | 1947040329               |
| SNP_P4_178458_36313 | NW_004517723.1 | Scaffold2896 | 36313                   | GG                              | AA              | 1947040331               |
| SNP_P4_178459_54322 | NW_004517723.1 | Scaffold2896 | 54322                   | CC                              | AA              | 1947040333               |
| SNP_P4_178460_1067  | NW_004517727.1 | Scaffold2900 | 1067                    | CC                              | GG              | 1947040335               |
| SNP_P4_178461_1455  | NW_004517727.1 | Scaffold2900 | 1455                    | AA                              | GG              | 1947040337               |
| SNP_P4_178462_1458  | NW_004517727.1 | Scaffold2900 | 1458                    | GG                              | CC              | 1947040339               |
| SNP_P4_178463_1837  | NW_004517727.1 | Scaffold2900 | 1837                    | TT                              | AA              | 1947040341               |
| SNP_P4_178464_2036  | NW_004517727.1 | Scaffold2900 | 2036                    | TT                              | CC              | 1947040343               |
| SNP_P4_178465_2134  | NW_004517727.1 | Scaffold2900 | 2134                    | GG                              | CC              | 1947040346               |
| SNP_P4_178466_5179  | NW_004517727.1 | Scaffold2900 | 5179                    | TT                              | AA              | 1947040348               |
| SNP_P4_178467_5298  | NW_004517727.1 | Scaffold2900 | 5298                    | AA                              | CC              | 1947040350               |
| SNP_P4_178468_5570  | NW_004517727.1 | Scaffold2900 | 5570                    | CC                              | TT              | 1947040352               |
| SNP_P4_178469_7046  | NW_004517727.1 | Scaffold2900 | 7046                    | GG                              | AA              | 1947040354               |
| SNP_P4_178470_7155  | NW_004517727.1 | Scaffold2900 | 7155                    | TT                              | CC              | 1947040356               |
| SNP_P4_178471_7198  | NW_004517727.1 | Scaffold2900 | 7198                    | TT                              | CC              | 1947040358               |
| SNP_P4_178472_7316  | NW_004517727.1 | Scaffold2900 | 7316                    | AA                              | CC              | 1947040360               |
| SNP_P4_178473_7429  | NW_004517727.1 | Scaffold2900 | 7429                    | GG                              | AA              | 1947040362               |
| SNP_P4_178474_7480  | NW_004517727.1 | Scaffold2900 | 7480                    | CC                              | AA              | 1947040364               |

| SNPs IDs            | Chromosome IDs | Chromosomes  | Physical positions (bp) | CDC Frontier (Reference genome) | (ILWC46 & LPNB) | NCBI SNPdb Accession IDs |
|---------------------|----------------|--------------|-------------------------|---------------------------------|-----------------|--------------------------|
| SNP_P4_178475_7681  | NW_004517727.1 | Scaffold2900 | 7681                    | TT                              | GG              | 1947040366               |
| SNP_P4_178476_7823  | NW_004517727.1 | Scaffold2900 | 7823                    | GG                              | TT              | 1947040368               |
| SNP_P4_178478_8196  | NW_004517727.1 | Scaffold2900 | 8196                    | AA                              | GG              | 1947040370               |
| SNP_P4_178479_8214  | NW_004517727.1 | Scaffold2900 | 8214                    | CC                              | GG              | 1947040372               |
| SNP_P4_178480_8334  | NW_004517727.1 | Scaffold2900 | 8334                    | TT                              | CC              | 1947040374               |
| SNP_P4_178481_9568  | NW_004517727.1 | Scaffold2900 | 9568                    | TT                              | CC              | 1947040376               |
| SNP_P4_178482_9570  | NW_004517727.1 | Scaffold2900 | 9570                    | CC                              | TT              | 1947040378               |
| SNP_P4_178483_13284 | NW_004517727.1 | Scaffold2900 | 13284                   | GG                              | TT              | 1947040380               |
| SNP_P4_178484_13360 | NW_004517727.1 | Scaffold2900 | 13360                   | CC                              | GG              | 1947040382               |
| SNP_P4_178485_13488 | NW_004517727.1 | Scaffold2900 | 13488                   | GG                              | TT              | 1947040384               |
| SNP_P4_178486_4242  | NW_004517730.1 | Scaffold2904 | 4242                    | TT                              | CC              | 1947040386               |
| SNP_P4_178487_4258  | NW_004517730.1 | Scaffold2904 | 4258                    | CC                              | AA              | 1947040388               |
| SNP_P4_178488_4321  | NW_004517730.1 | Scaffold2904 | 4321                    | CC                              | TT              | 1947040390               |
| SNP_P4_178489_4329  | NW_004517730.1 | Scaffold2904 | 4329                    | CC                              | TT              | 1947040392               |
| SNP_P4_178490_6007  | NW_004517730.1 | Scaffold2904 | 6007                    | CC                              | TT              | 1947040394               |
| SNP_P4_178491_6058  | NW_004517730.1 | Scaffold2904 | 6058                    | AA                              | GG              | 1947040396               |
| SNP_P4_178492_6070  | NW_004517730.1 | Scaffold2904 | 6070                    | AA                              | GG              | 1947040398               |
| SNP_P4_178493_6129  | NW_004517730.1 | Scaffold2904 | 6129                    | GG                              | AA              | 1947040400               |
| SNP_P4_178494_6146  | NW_004517730.1 | Scaffold2904 | 6146                    | TT                              | CC              | 1947040402               |
| SNP_P4_178495_6150  | NW_004517730.1 | Scaffold2904 | 6150                    | TT                              | CC              | 1947040404               |
| SNP_P4_178496_6160  | NW_004517730.1 | Scaffold2904 | 6160                    | CC                              | TT              | 1947040406               |
| SNP_P4_178497_6164  | NW_004517730.1 | Scaffold2904 | 6164                    | CC                              | TT              | 1947040408               |
| SNP_P4_178498_6181  | NW_004517730.1 | Scaffold2904 | 6181                    | AA                              | TT              | 1947040410               |
| SNP_P4_178499_6208  | NW_004517730.1 | Scaffold2904 | 6208                    | CC                              | TT              | 1947040412               |
| SNP_P4_178500_6214  | NW_004517730.1 | Scaffold2904 | 6214                    | AA                              | CC              | 1947040414               |
| SNP_P4_178501_6438  | NW_004517730.1 | Scaffold2904 | 6438                    | CC                              | GG              | 1947040416               |
| SNP_P4_178502_6487  | NW_004517730.1 | Scaffold2904 | 6487                    | AA                              | GG              | 1947040418               |
| SNP_P4_178505_30837 | NW_004517733.1 | Scaffold2907 | 30837                   | CC                              | GG              | 1947040420               |
| SNP_P4_178506_4012  | NW_004517737.1 | Scaffold2914 | 4012                    | GG                              | TT              | 1947040422               |
| SNP_P4_178507_4021  | NW_004517737.1 | Scaffold2914 | 4021                    | TT                              | AA              | 1947040424               |
| SNP_P4_178508_4281  | NW_004517737.1 | Scaffold2914 | 4281                    | AA                              | CC              | 1947040426               |
| SNP_P4_178509_4300  | NW_004517737.1 | Scaffold2914 | 4300                    | AA                              | GG              | 1947040428               |
| SNP_P4_178510_4301  | NW_004517737.1 | Scaffold2914 | 4301                    | TT                              | CC              | 1947040430               |
| SNP_P4_178511_4318  | NW_004517737.1 | Scaffold2914 | 4318                    | TT                              | CC              | 1947040432               |
| SNP_P4_178512_4330  | NW_004517737.1 | Scaffold2914 | 4330                    | TT                              | GG              | 1947040434               |
| SNP_P4_178513_4336  | NW_004517737.1 | Scaffold2914 | 4336                    | CC                              | TT              | 1947040436               |
| SNP_P4_178514_4352  | NW_004517737.1 | Scaffold2914 | 4352                    | AA                              | GG              | 1947040438               |
| SNP_P4_178515_4358  | NW_004517737.1 | Scaffold2914 | 4358                    | AA                              | GG              | 1947040440               |
| SNP_P4_178516_4369  | NW_004517737.1 | Scaffold2914 | 4369                    | AA                              | TT              | 1947040442               |
| SNP_P4_178517_4381  | NW_004517737.1 | Scaffold2914 | 4381                    | AA                              | GG              | 1947040444               |
| SNP_P4_178518_4384  | NW_004517737.1 | Scaffold2914 | 4384                    | AA                              | GG              | 1947040446               |
| SNP_P4_178519_4397  | NW_004517737.1 | Scaffold2914 | 4397                    | AA                              | GG              | 1947040448               |

| SNPs IDs            | Chromosome IDs | Chromosomes  | Physical positions (bp) | CDC Frontier (Reference genome) | (ILWC46 & LPNB) | NCBI SNPdb Accession IDs |
|---------------------|----------------|--------------|-------------------------|---------------------------------|-----------------|--------------------------|
| SNP_P4_178520_4400  | NW_004517737.1 | Scaffold2914 | 4400                    | AA                              | GG              | 1947040450               |
| SNP_P4_178521_4411  | NW_004517737.1 | Scaffold2914 | 4411                    | TT                              | CC              | 1947040452               |
| SNP_P4_178522_4436  | NW_004517737.1 | Scaffold2914 | 4436                    | AA                              | GG              | 1947040454               |
| SNP_P4_178523_4459  | NW_004517737.1 | Scaffold2914 | 4459                    | AA                              | GG              | 1947040456               |
| SNP_P4_178524_4462  | NW_004517737.1 | Scaffold2914 | 4462                    | AA                              | GG              | 1947040458               |
| SNP_P4_178525_4468  | NW_004517737.1 | Scaffold2914 | 4468                    | GG                              | AA              | 1947040460               |
| SNP_P4_178526_4473  | NW_004517737.1 | Scaffold2914 | 4473                    | AA                              | GG              | 1947040462               |
| SNP_P4_178527_4490  | NW_004517737.1 | Scaffold2914 | 4490                    | AA                              | CC              | 1947040464               |
| SNP_P4_178528_4501  | NW_004517737.1 | Scaffold2914 | 4501                    | AA                              | GG              | 1947040466               |
| SNP_P4_178529_4748  | NW_004517737.1 | Scaffold2914 | 4748                    | AA                              | TT              | 1947040468               |
| SNP_P4_178530_4803  | NW_004517737.1 | Scaffold2914 | 4803                    | AA                              | GG              | 1947040470               |
| SNP_P4_178531_4865  | NW_004517737.1 | Scaffold2914 | 4865                    | AA                              | CC              | 1947040472               |
| SNP_P4_178533_9439  | NW_004517738.1 | Scaffold2915 | 9439                    | AA                              | TT              | 1947040474               |
| SNP_P4_178534_395   | NW_004517739.1 | Scaffold2916 | 395                     | GG                              | AA              | 1947040476               |
| SNP_P4_178536_14255 | NW_004517739.1 | Scaffold2916 | 14255                   | GG                              | AA              | 1947040478               |
| SNP_P4_178537_14257 | NW_004517739.1 | Scaffold2916 | 14257                   | GG                              | TT              | 1947040480               |
| SNP_P4_178538_14258 | NW_004517739.1 | Scaffold2916 | 14258                   | AA                              | TT              | 1947040482               |
| SNP_P4_178539_14261 | NW_004517739.1 | Scaffold2916 | 14261                   | AA                              | CC              | 1947040484               |
| SNP_P4_178540_14262 | NW_004517739.1 | Scaffold2916 | 14262                   | AA                              | TT              | 1947040486               |
| SNP_P4_178541_14263 | NW_004517739.1 | Scaffold2916 | 14263                   | TT                              | AA              | 1947040488               |
| SNP_P4_178542_14520 | NW_004517739.1 | Scaffold2916 | 14520                   | GG                              | AA              | 1947040491               |
| SNP_P4_178544_15830 | NW_004517739.1 | Scaffold2916 | 15830                   | CC                              | TT              | 1947040493               |
| SNP_P4_178545_16059 | NW_004517739.1 | Scaffold2916 | 16059                   | AA                              | GG              | 1947040495               |
| SNP_P4_178546_16069 | NW_004517739.1 | Scaffold2916 | 16069                   | GG                              | AA              | 1947040497               |
| SNP_P4_178547_20828 | NW_004517739.1 | Scaffold2916 | 20828                   | AA                              | GG              | 1947040499               |
| SNP_P4_178548_20841 | NW_004517739.1 | Scaffold2916 | 20841                   | TT                              | CC              | 1947040501               |
| SNP_P4_178549_20878 | NW_004517739.1 | Scaffold2916 | 20878                   | TT                              | AA              | 1947040503               |
| SNP_P4_178550_25772 | NW_004517739.1 | Scaffold2916 | 25772                   | TT                              | CC              | 1947040505               |
| SNP_P4_178551_49030 | NW_004517739.1 | Scaffold2916 | 49030                   | GG                              | AA              | 1947040507               |
| SNP_P4_178552_181   | NW_004517741.1 | Scaffold2918 | 181                     | CC                              | AA              | 1947040509               |
| SNP_P4_178553_194   | NW_004517741.1 | Scaffold2918 | 194                     | AA                              | TT              | 1947040511               |
| SNP_P4_178554_8459  | NW_004517742.1 | Scaffold2919 | 8459                    | CC                              | TT              | 1947040513               |
| SNP_P4_178555_8695  | NW_004517742.1 | Scaffold2919 | 8695                    | AA                              | TT              | 1947040515               |
| SNP_P4_178557_1640  | NW_004517744.1 | Scaffold2921 | 1640                    | CC                              | TT              | 1947040516               |
| SNP_P4_178558_1679  | NW_004517744.1 | Scaffold2921 | 1679                    | AA                              | GG              | 1947040517               |
| SNP_P4_178559_1811  | NW_004517744.1 | Scaffold2921 | 1811                    | AA                              | GG              | 1947040518               |
| SNP_P4_178560_2082  | NW_004517744.1 | Scaffold2921 | 2082                    | AA                              | GG              | 1947040519               |
| SNP_P4_178561_7454  | NW_004517744.1 | Scaffold2921 | 7454                    | TT                              | GG              | 1947040520               |
| SNP_P4_178562_8710  | NW_004517744.1 | Scaffold2921 | 8710                    | TT                              | CC              | 1947040522               |
| SNP_P4_178563_8712  | NW_004517744.1 | Scaffold2921 | 8712                    | CC                              | TT              | 1947040524               |
| SNP_P4_178564_8714  | NW_004517744.1 | Scaffold2921 | 8714                    | AA                              | GG              | 1947040526               |
| SNP_P4_178565_8720  | NW_004517744.1 | Scaffold2921 | 8720                    | TT                              | AA              | 1947040528               |

| SNPs IDs            | Chromosome IDs | Chromosomes  | Physical positions (bp) | CDC Frontier (Reference genome) | (ILWC46 & LPNB) | NCBI SNPdb Accession IDs |
|---------------------|----------------|--------------|-------------------------|---------------------------------|-----------------|--------------------------|
| SNP_P4_178566_8931  | NW_004517744.1 | Scaffold2921 | 8931                    | TT                              | GG              | 1947040530               |
| SNP_P4_178567_8940  | NW_004517744.1 | Scaffold2921 | 8940                    | AA                              | GG              | 1947040532               |
| SNP_P4_178568_8955  | NW_004517744.1 | Scaffold2921 | 8955                    | GG                              | CC              | 1947040534               |
| SNP_P4_178569_9260  | NW_004517744.1 | Scaffold2921 | 9260                    | GG                              | AA              | 1947040536               |
| SNP_P4_178570_11312 | NW_004517744.1 | Scaffold2921 | 11312                   | TT                              | CC              | 1947040538               |
| SNP_P4_178571_11335 | NW_004517744.1 | Scaffold2921 | 11335                   | AA                              | TT              | 1947040540               |
| SNP_P4_178572_11405 | NW_004517744.1 | Scaffold2921 | 11405                   | CC                              | GG              | 1947040542               |
| SNP_P4_178573_11494 | NW_004517744.1 | Scaffold2921 | 11494                   | CC                              | TT              | 1947040544               |
| SNP_P4_178574_56    | NW_004517745.1 | Scaffold2922 | 56                      | CC                              | AA              | 1947040546               |
| SNP_P4_178576_2628  | NW_004517745.1 | Scaffold2922 | 2628                    | CC                              | TT              | 1947040548               |
| SNP_P4_178577_5335  | NW_004517745.1 | Scaffold2922 | 5335                    | CC                              | GG              | 1947040550               |
| SNP_P4_178578_5820  | NW_004517745.1 | Scaffold2922 | 5820                    | TT                              | GG              | 1947040552               |
| SNP_P4_178579_5851  | NW_004517745.1 | Scaffold2922 | 5851                    | TT                              | CC              | 1947040554               |
| SNP_P4_178580_6585  | NW_004517745.1 | Scaffold2922 | 6585                    | AA                              | TT              | 1947040556               |
| SNP_P4_178581_6656  | NW_004517745.1 | Scaffold2922 | 6656                    | GG                              | AA              | 1947040558               |
| SNP_P4_178582_6758  | NW_004517745.1 | Scaffold2922 | 6758                    | CC                              | TT              | 1947040560               |
| SNP_P4_178583_7102  | NW_004517745.1 | Scaffold2922 | 7102                    | TT                              | CC              | 1947040562               |
| SNP_P4_178584_7461  | NW_004517745.1 | Scaffold2922 | 7461                    | TT                              | CC              | 1947040564               |
| SNP_P4_178586_7557  | NW_004517745.1 | Scaffold2922 | 7557                    | GG                              | AA              | 1947040566               |
| SNP_P4_178587_7584  | NW_004517745.1 | Scaffold2922 | 7584                    | GG                              | AA              | 1947040568               |
| SNP_P4_178588_7919  | NW_004517745.1 | Scaffold2922 | 7919                    | GG                              | AA              | 1947040570               |
| SNP_P4_178589_8048  | NW_004517745.1 | Scaffold2922 | 8048                    | CC                              | TT              | 1947040572               |
| SNP_P4_178590_8142  | NW_004517745.1 | Scaffold2922 | 8142                    | AA                              | GG              | 1947040574               |
| SNP_P4_178591_8213  | NW_004517745.1 | Scaffold2922 | 8213                    | TT                              | CC              | 1947040576               |
| SNP_P4_178592_8218  | NW_004517745.1 | Scaffold2922 | 8218                    | GG                              | AA              | 1947040577               |
| SNP_P4_178594_8407  | NW_004517745.1 | Scaffold2922 | 8407                    | AA                              | CC              | 1947040578               |
| SNP_P4_178595_8419  | NW_004517745.1 | Scaffold2922 | 8419                    | CC                              | TT              | 1947040580               |
| SNP_P4_178596_8472  | NW_004517745.1 | Scaffold2922 | 8472                    | GG                              | AA              | 1947040582               |
| SNP_P4_178597_8492  | NW_004517745.1 | Scaffold2922 | 8492                    | CC                              | AA              | 1947040584               |
| SNP_P4_178598_8526  | NW_004517745.1 | Scaffold2922 | 8526                    | CC                              | AA              | 1947040586               |
| SNP_P4_178599_8545  | NW_004517745.1 | Scaffold2922 | 8545                    | TT                              | CC              | 1947040588               |
| SNP_P4_178600_8566  | NW_004517745.1 | Scaffold2922 | 8566                    | GG                              | TT              | 1947040590               |
| SNP_P4_178601_8833  | NW_004517745.1 | Scaffold2922 | 8833                    | AA                              | TT              | 1947040592               |
| SNP_P4_178602_8891  | NW_004517745.1 | Scaffold2922 | 8891                    | CC                              | TT              | 1947040594               |
| SNP_P4_178603_11353 | NW_004517745.1 | Scaffold2922 | 11353                   | TT                              | CC              | 1947040596               |
| SNP_P4_178604_11380 | NW_004517745.1 | Scaffold2922 | 11380                   | GG                              | AA              | 1947040598               |
| SNP_P4_178605_11381 | NW_004517745.1 | Scaffold2922 | 11381                   | AA                              | CC              | 1947040600               |
| SNP_P4_178606_11430 | NW_004517745.1 | Scaffold2922 | 11430                   | AA                              | CC              | 1947040602               |
| SNP_P4_178607_11431 | NW_004517745.1 | Scaffold2922 | 11431                   | GG                              | AA              | 1947040604               |
| SNP_P4_178608_13895 | NW_004517745.1 | Scaffold2922 | 13895                   | GG                              | AA              | 1947040606               |
| SNP_P4_178609_143   | NW_004517746.1 | Scaffold2924 | 143                     | CC                              | AA              | 1947040608               |
| SNP_P4_178610_168   | NW_004517746.1 | Scaffold2924 | 168                     | AA                              | CC              | 1947040610               |

| SNPs IDs            | Chromosome IDs | Chromosomes  | Physical positions (bp) | CDC Frontier (Reference genome) | (ILWC46 & LPNB) | NCBI SNPdb Accession IDs |
|---------------------|----------------|--------------|-------------------------|---------------------------------|-----------------|--------------------------|
| SNP_P4_178611_459   | NW_004517746.1 | Scaffold2924 | 459                     | AA                              | GG              | 1947040612               |
| SNP_P4_178612_476   | NW_004517746.1 | Scaffold2924 | 476                     | AA                              | GG              | 1947040614               |
| SNP_P4_178613_918   | NW_004517746.1 | Scaffold2924 | 918                     | TT                              | CC              | 1947040616               |
| SNP_P4_178615_8448  | NW_004517746.1 | Scaffold2924 | 8448                    | TT                              | CC              | 1947040618               |
| SNP_P4_178617_11736 | NW_004517746.1 | Scaffold2924 | 11736                   | TT                              | CC              | 1947040620               |
| SNP_P4_178618_11979 | NW_004517746.1 | Scaffold2924 | 11979                   | AA                              | TT              | 1947040622               |
| SNP_P4_178619_12042 | NW_004517746.1 | Scaffold2924 | 12042                   | TT                              | CC              | 1947040624               |
| SNP_P4_178620_16071 | NW_004517746.1 | Scaffold2924 | 16071                   | AA                              | CC              | 1947040626               |
| SNP_P4_178621_16326 | NW_004517746.1 | Scaffold2924 | 16326                   | CC                              | AA              | 1947040628               |
| SNP_P4_178622_16485 | NW_004517746.1 | Scaffold2924 | 16485                   | CC                              | GG              | 1947040630               |
| SNP_P4_178623_16592 | NW_004517746.1 | Scaffold2924 | 16592                   | AA                              | TT              | 1947040632               |
| SNP_P4_178624_16616 | NW_004517746.1 | Scaffold2924 | 16616                   | TT                              | CC              | 1947040634               |
| SNP_P4_178625_16662 | NW_004517746.1 | Scaffold2924 | 16662                   | CC                              | TT              | 1947040636               |
| SNP_P4_178626_16675 | NW_004517746.1 | Scaffold2924 | 16675                   | CC                              | GG              | 1947040638               |
| SNP_P4_178627_16681 | NW_004517746.1 | Scaffold2924 | 16681                   | GG                              | AA              | 1947040640               |
| SNP_P4_178628_16697 | NW_004517746.1 | Scaffold2924 | 16697                   | AA                              | GG              | 1947040642               |
| SNP_P4_178629_20688 | NW_004517746.1 | Scaffold2924 | 20688                   | TT                              | GG              | 1947040644               |
| SNP_P4_178630_27154 | NW_004517746.1 | Scaffold2924 | 27154                   | CC                              | TT              | 1947040646               |
| SNP_P4_178631_395   | NW_004517747.1 | Scaffold2926 | 395                     | TT                              | GG              | 1947040648               |
| SNP_P4_178632_1958  | NW_004517749.1 | Scaffold2928 | 1958                    | AA                              | CC              | 1947040650               |
| SNP_P4_178633_2171  | NW_004517749.1 | Scaffold2928 | 2171                    | AA                              | GG              | 1947040652               |
| SNP_P4_178634_2314  | NW_004517749.1 | Scaffold2928 | 2314                    | CC                              | TT              | 1947040654               |
| SNP_P4_178635_2408  | NW_004517749.1 | Scaffold2928 | 2408                    | CC                              | AA              | 1947040656               |
| SNP_P4_178636_2672  | NW_004517749.1 | Scaffold2928 | 2672                    | TT                              | GG              | 1947040658               |
| SNP_P4_178637_3655  | NW_004517749.1 | Scaffold2928 | 3655                    | AA                              | GG              | 1947040660               |
| SNP_P4_178638_7123  | NW_004517749.1 | Scaffold2928 | 7123                    | TT                              | AA              | 1947040662               |
| SNP_P4_178639_7126  | NW_004517749.1 | Scaffold2928 | 7126                    | AA                              | TT              | 1947040664               |
| SNP_P4_178640_7164  | NW_004517749.1 | Scaffold2928 | 7164                    | TT                              | AA              | 1947040666               |
| SNP_P4_178641_7183  | NW_004517749.1 | Scaffold2928 | 7183                    | GG                              | AA              | 1947040668               |
| SNP_P4_178642_7189  | NW_004517749.1 | Scaffold2928 | 7189                    | GG                              | AA              | 1947040670               |
| SNP_P4_178643_7201  | NW_004517749.1 | Scaffold2928 | 7201                    | CC                              | TT              | 1947040672               |
| SNP_P4_178644_7222  | NW_004517749.1 | Scaffold2928 | 7222                    | TT                              | AA              | 1947040674               |
| SNP_P4_178645_8127  | NW_004517749.1 | Scaffold2928 | 8127                    | GG                              | AA              | 1947040676               |
| SNP_P4_178646_10286 | NW_004517749.1 | Scaffold2928 | 10286                   | CC                              | TT              | 1947040678               |
| SNP_P4_178647_10840 | NW_004517749.1 | Scaffold2928 | 10840                   | GG                              | AA              | 1947040680               |
| SNP_P4_178648_12924 | NW_004517749.1 | Scaffold2928 | 12924                   | TT                              | AA              | 1947040682               |
| SNP_P4_178649_12996 | NW_004517749.1 | Scaffold2928 | 12996                   | GG                              | CC              | 1947040684               |
| SNP_P4_178650_13339 | NW_004517749.1 | Scaffold2928 | 13339                   | TT                              | CC              | 1947040686               |
| SNP_P4_178651_13353 | NW_004517749.1 | Scaffold2928 | 13353                   | AA                              | GG              | 1947040688               |
| SNP_P4_178652_13354 | NW_004517749.1 | Scaffold2928 | 13354                   | TT                              | GG              | 1947040690               |
| SNP_P4_178653_16197 | NW_004517749.1 | Scaffold2928 | 16197                   | GG                              | AA              | 1947040692               |
| SNP_P4_178654_16246 | NW_004517749.1 | Scaffold2928 | 16246                   | TT                              | CC              | 1947040694               |



| SNPs IDs            | Chromosome IDs | Chromosomes  | Physical positions (bp) | CDC Frontier (Reference genome) | (ILWC46 & LPNB) | NCBI SNPdb Accession IDs |
|---------------------|----------------|--------------|-------------------------|---------------------------------|-----------------|--------------------------|
| SNP_P4_178655_16358 | NW_004517749.1 | Scaffold2928 | 16358                   | CC                              | TT              | 1947040696               |
| SNP_P4_178656_16740 | NW_004517749.1 | Scaffold2928 | 16740                   | AA                              | TT              | 1947040698               |
| SNP_P4_178659_21385 | NW_004517749.1 | Scaffold2928 | 21385                   | TT                              | CC              | 1947040700               |
| SNP_P4_178661_22961 | NW_004517749.1 | Scaffold2928 | 22961                   | CC                              | TT              | 1947040702               |
| SNP_P4_178662_22984 | NW_004517749.1 | Scaffold2928 | 22984                   | AA                              | GG              | 1947040704               |
| SNP_P4_178663_23054 | NW_004517749.1 | Scaffold2928 | 23054                   | AA                              | TT              | 1947040706               |
| SNP_P4_178664_23061 | NW_004517749.1 | Scaffold2928 | 23061                   | TT                              | GG              | 1947040708               |
| SNP_P4_178665_23156 | NW_004517749.1 | Scaffold2928 | 23156                   | AA                              | TT              | 1947040710               |
| SNP_P4_178666_23179 | NW_004517749.1 | Scaffold2928 | 23179                   | GG                              | CC              | 1947040712               |
| SNP_P4_178667_23192 | NW_004517749.1 | Scaffold2928 | 23192                   | AA                              | GG              | 1947040714               |
| SNP_P4_178668_23349 | NW_004517749.1 | Scaffold2928 | 23349                   | AA                              | CC              | 1947040716               |
| SNP_P4_178669_23474 | NW_004517749.1 | Scaffold2928 | 23474                   | TT                              | AA              | 1947040718               |
| SNP_P4_178670_23510 | NW_004517749.1 | Scaffold2928 | 23510                   | GG                              | TT              | 1947040720               |
| SNP_P4_178671_23520 | NW_004517749.1 | Scaffold2928 | 23520                   | TT                              | AA              | 1947040722               |
| SNP_P4_178672_23631 | NW_004517749.1 | Scaffold2928 | 23631                   | AA                              | CC              | 1947040724               |
| SNP_P4_178673_23661 | NW_004517749.1 | Scaffold2928 | 23661                   | GG                              | AA              | 1947040726               |
| SNP_P4_178675_23739 | NW_004517749.1 | Scaffold2928 | 23739                   | TT                              | CC              | 1947040729               |
| SNP_P4_178676_23745 | NW_004517749.1 | Scaffold2928 | 23745                   | TT                              | CC              | 1947040731               |
| SNP_P4_178677_23816 | NW_004517749.1 | Scaffold2928 | 23816                   | TT                              | CC              | 1947040733               |
| SNP_P4_178678_23839 | NW_004517749.1 | Scaffold2928 | 23839                   | GG                              | CC              | 1947040735               |
| SNP_P4_178679_23850 | NW_004517749.1 | Scaffold2928 | 23850                   | GG                              | CC              | 1947040737               |
| SNP_P4_178680_23854 | NW_004517749.1 | Scaffold2928 | 23854                   | TT                              | CC              | 1947040739               |
| SNP_P4_178681_23880 | NW_004517749.1 | Scaffold2928 | 23880                   | GG                              | AA              | 1947040741               |
| SNP_P4_178682_23900 | NW_004517749.1 | Scaffold2928 | 23900                   | TT                              | CC              | 1947040743               |
| SNP_P4_178683_23946 | NW_004517749.1 | Scaffold2928 | 23946                   | AA                              | TT              | 1947040745               |
| SNP_P4_178684_24034 | NW_004517749.1 | Scaffold2928 | 24034                   | TT                              | AA              | 1947040747               |
| SNP_P4_178685_24299 | NW_004517749.1 | Scaffold2928 | 24299                   | GG                              | TT              | 1947040749               |
| SNP_P4_178686_24323 | NW_004517749.1 | Scaffold2928 | 24323                   | TT                              | CC              | 1947040751               |
| SNP_P4_178687_24401 | NW_004517749.1 | Scaffold2928 | 24401                   | GG                              | AA              | 1947040753               |
| SNP_P4_178688_24487 | NW_004517749.1 | Scaffold2928 | 24487                   | AA                              | GG              | 1947040755               |
| SNP_P4_178689_24615 | NW_004517749.1 | Scaffold2928 | 24615                   | TT                              | AA              | 1947040757               |
| SNP_P4_178690_24661 | NW_004517749.1 | Scaffold2928 | 24661                   | GG                              | AA              | 1947040759               |
| SNP_P4_178691_24696 | NW_004517749.1 | Scaffold2928 | 24696                   | GG                              | TT              | 1947040761               |
| SNP_P4_178692_24830 | NW_004517749.1 | Scaffold2928 | 24830                   | GG                              | AA              | 1947040763               |
| SNP_P4_178693_24912 | NW_004517749.1 | Scaffold2928 | 24912                   | AA                              | GG              | 1947040765               |
| SNP_P4_178694_24987 | NW_004517749.1 | Scaffold2928 | 24987                   | AA                              | TT              | 1947040767               |
| SNP_P4_178695_25018 | NW_004517749.1 | Scaffold2928 | 25018                   | CC                              | TT              | 1947040769               |
| SNP_P4_178696_25023 | NW_004517749.1 | Scaffold2928 | 25023                   | CC                              | TT              | 1947040771               |
| SNP_P4_178697_25042 | NW_004517749.1 | Scaffold2928 | 25042                   | AA                              | CC              | 1947040773               |
| SNP_P4_178698_25075 | NW_004517749.1 | Scaffold2928 | 25075                   | CC                              | TT              | 1947040775               |
| SNP_P4_178699_25091 | NW_004517749.1 | Scaffold2928 | 25091                   | GG                              | TT              | 1947040777               |
| SNP_P4_178700_25372 | NW_004517749.1 | Scaffold2928 | 25372                   | CC                              | AA              | 1947040779               |

| SNPs IDs            | Chromosome IDs | Chromosomes  | Physical positions (bp) | CDC Frontier (Reference genome) | (ILWC46 & LPNB) | NCBI SNPdb Accession IDs |
|---------------------|----------------|--------------|-------------------------|---------------------------------|-----------------|--------------------------|
| SNP_P4_178701_30936 | NW_004517749.1 | Scaffold2928 | 30936                   | CC                              | TT              | 1947040781               |
| SNP_P4_178702_31339 | NW_004517749.1 | Scaffold2928 | 31339                   | TT                              | CC              | 1947040783               |
| SNP_P4_178703_31836 | NW_004517749.1 | Scaffold2928 | 31836                   | TT                              | GG              | 1947040785               |
| SNP_P4_178704_34696 | NW_004517749.1 | Scaffold2928 | 34696                   | AA                              | TT              | 1947040787               |
| SNP_P4_178705_34710 | NW_004517749.1 | Scaffold2928 | 34710                   | GG                              | TT              | 1947040789               |
| SNP_P4_178706_34974 | NW_004517749.1 | Scaffold2928 | 34974                   | CC                              | TT              | 1947040791               |
| SNP_P4_178708_35223 | NW_004517749.1 | Scaffold2928 | 35223                   | TT                              | CC              | 1947040793               |
| SNP_P4_178709_35666 | NW_004517749.1 | Scaffold2928 | 35666                   | AA                              | GG              | 1947040795               |
| SNP_P4_178710_37206 | NW_004517749.1 | Scaffold2928 | 37206                   | CC                              | TT              | 1947040798               |
| SNP_P4_178711_37725 | NW_004517749.1 | Scaffold2928 | 37725                   | TT                              | CC              | 1947040800               |
| SNP_P4_178712_37962 | NW_004517749.1 | Scaffold2928 | 37962                   | GG                              | TT              | 1947040802               |
| SNP_P4_178713_38060 | NW_004517749.1 | Scaffold2928 | 38060                   | AA                              | GG              | 1947040804               |
| SNP_P4_178714_38891 | NW_004517749.1 | Scaffold2928 | 38891                   | CC                              | TT              | 1947040806               |
| SNP_P4_178715_43148 | NW_004517749.1 | Scaffold2928 | 43148                   | GG                              | CC              | 1947040808               |
| SNP_P4_178716_43472 | NW_004517749.1 | Scaffold2928 | 43472                   | AA                              | TT              | 1947040810               |
| SNP_P4_178717_43818 | NW_004517749.1 | Scaffold2928 | 43818                   | TT                              | CC              | 1947040812               |
| SNP_P4_178718_43833 | NW_004517749.1 | Scaffold2928 | 43833                   | GG                              | TT              | 1947040814               |
| SNP_P4_178719_43952 | NW_004517749.1 | Scaffold2928 | 43952                   | AA                              | CC              | 1947040816               |
| SNP_P4_178720_43982 | NW_004517749.1 | Scaffold2928 | 43982                   | TT                              | GG              | 1947040818               |
| SNP_P4_178721_44186 | NW_004517749.1 | Scaffold2928 | 44186                   | CC                              | TT              | 1947040820               |
| SNP_P4_178722_44257 | NW_004517749.1 | Scaffold2928 | 44257                   | TT                              | CC              | 1947040822               |
| SNP_P4_178723_44402 | NW_004517749.1 | Scaffold2928 | 44402                   | GG                              | AA              | 1947040824               |
| SNP_P4_178724_44571 | NW_004517749.1 | Scaffold2928 | 44571                   | GG                              | AA              | 1947040826               |
| SNP_P4_178725_44587 | NW_004517749.1 | Scaffold2928 | 44587                   | TT                              | AA              | 1947040828               |
| SNP_P4_178726_44595 | NW_004517749.1 | Scaffold2928 | 44595                   | AA                              | GG              | 1947040830               |
| SNP_P4_178727_44898 | NW_004517749.1 | Scaffold2928 | 44898                   | AA                              | CC              | 1947040832               |
| SNP_P4_178728_706   | NW_004517750.1 | Scaffold2930 | 706                     | AA                              | CC              | 1947040834               |
| SNP_P4_178729_916   | NW_004517750.1 | Scaffold2930 | 916                     | CC                              | TT              | 1947040836               |
| SNP_P4_178730_924   | NW_004517751.1 | Scaffold2931 | 924                     | TT                              | CC              | 1947040838               |
| SNP_P4_178732_10672 | NW_004517751.1 | Scaffold2931 | 10672                   | CC                              | AA              | 1947040840               |
| SNP_P4_178733_1869  | NW_004517752.1 | Scaffold2932 | 1869                    | GG                              | TT              | 1947040842               |
| SNP_P4_178734_2243  | NW_004517752.1 | Scaffold2932 | 2243                    | GG                              | CC              | 1947040844               |
| SNP_P4_178736_2417  | NW_004517752.1 | Scaffold2932 | 2417                    | AA                              | TT              | 1947040846               |
| SNP_P4_178737_2665  | NW_004517752.1 | Scaffold2932 | 2665                    | AA                              | CC              | 1947040848               |
| SNP_P4_178738_3014  | NW_004517752.1 | Scaffold2932 | 3014                    | GG                              | AA              | 1947040850               |
| SNP_P4_178739_3079  | NW_004517752.1 | Scaffold2932 | 3079                    | TT                              | CC              | 1947040852               |
| SNP_P4_178740_3139  | NW_004517752.1 | Scaffold2932 | 3139                    | TT                              | GG              | 1947040854               |
| SNP_P4_178741_3354  | NW_004517752.1 | Scaffold2932 | 3354                    | AA                              | TT              | 1947040856               |
| SNP_P4_178742_3355  | NW_004517752.1 | Scaffold2932 | 3355                    | CC                              | AA              | 1947040858               |
| SNP_P4_178743_3364  | NW_004517752.1 | Scaffold2932 | 3364                    | GG                              | TT              | 1947040860               |
| SNP_P4_178744_3370  | NW_004517752.1 | Scaffold2932 | 3370                    | TT                              | CC              | 1947040862               |
| SNP_P4_178745_3428  | NW_004517752.1 | Scaffold2932 | 3428                    | CC                              | AA              | 1947040864               |

| SNPs IDs            | Chromosome IDs | Chromosomes  | Physical positions (bp) | CDC Frontier (Reference genome) | (ILWC46 & LPNB) | NCBI SNPdb Accession IDs |
|---------------------|----------------|--------------|-------------------------|---------------------------------|-----------------|--------------------------|
| SNP_P4_178746_3471  | NW_004517752.1 | Scaffold2932 | 3471                    | GG                              | AA              | 1947040866               |
| SNP_P4_178747_3613  | NW_004517752.1 | Scaffold2932 | 3613                    | CC                              | GG              | 1947040868               |
| SNP_P4_178748_3619  | NW_004517752.1 | Scaffold2932 | 3619                    | AA                              | TT              | 1947040870               |
| SNP_P4_178749_3770  | NW_004517752.1 | Scaffold2932 | 3770                    | CC                              | AA              | 1947040872               |
| SNP_P4_178750_3860  | NW_004517752.1 | Scaffold2932 | 3860                    | TT                              | CC              | 1947040874               |
| SNP_P4_178751_3870  | NW_004517752.1 | Scaffold2932 | 3870                    | CC                              | TT              | 1947040876               |
| SNP_P4_178752_4128  | NW_004517752.1 | Scaffold2932 | 4128                    | AA                              | TT              | 1947040878               |
| SNP_P4_178753_4175  | NW_004517752.1 | Scaffold2932 | 4175                    | TT                              | AA              | 1947040880               |
| SNP_P4_178754_4572  | NW_004517752.1 | Scaffold2932 | 4572                    | GG                              | TT              | 1947040882               |
| SNP_P4_178755_4594  | NW_004517752.1 | Scaffold2932 | 4594                    | TT                              | AA              | 1947040884               |
| SNP_P4_178756_4780  | NW_004517752.1 | Scaffold2932 | 4780                    | TT                              | AA              | 1947040886               |
| SNP_P4_178757_4983  | NW_004517752.1 | Scaffold2932 | 4983                    | AA                              | GG              | 1947040888               |
| SNP_P4_178758_6371  | NW_004517752.1 | Scaffold2932 | 6371                    | AA                              | TT              | 1947040890               |
| SNP_P4_178759_6407  | NW_004517752.1 | Scaffold2932 | 6407                    | CC                              | AA              | 1947040892               |
| SNP_P4_178760_6493  | NW_004517752.1 | Scaffold2932 | 6493                    | TT                              | AA              | 1947040894               |
| SNP_P4_178761_6538  | NW_004517752.1 | Scaffold2932 | 6538                    | TT                              | AA              | 1947040896               |
| SNP_P4_178762_6542  | NW_004517752.1 | Scaffold2932 | 6542                    | CC                              | TT              | 1947040898               |
| SNP_P4_178763_6550  | NW_004517752.1 | Scaffold2932 | 6550                    | TT                              | CC              | 1947040900               |
| SNP_P4_178764_6681  | NW_004517752.1 | Scaffold2932 | 6681                    | GG                              | AA              | 1947040902               |
| SNP_P4_178765_6943  | NW_004517752.1 | Scaffold2932 | 6943                    | AA                              | TT              | 1947040904               |
| SNP_P4_178766_7181  | NW_004517752.1 | Scaffold2932 | 7181                    | GG                              | AA              | 1947040906               |
| SNP_P4_178767_7235  | NW_004517752.1 | Scaffold2932 | 7235                    | TT                              | AA              | 1947040908               |
| SNP_P4_178768_7238  | NW_004517752.1 | Scaffold2932 | 7238                    | AA                              | CC              | 1947040910               |
| SNP_P4_178769_7253  | NW_004517752.1 | Scaffold2932 | 7253                    | CC                              | TT              | 1947040912               |
| SNP_P4_178770_7264  | NW_004517752.1 | Scaffold2932 | 7264                    | AA                              | TT              | 1947040914               |
| SNP_P4_178771_10717 | NW_004517752.1 | Scaffold2932 | 10717                   | AA                              | TT              | 1947040916               |
| SNP_P4_178772_10847 | NW_004517752.1 | Scaffold2932 | 10847                   | GG                              | AA              | 1947040918               |
| SNP_P4_178773_12605 | NW_004517752.1 | Scaffold2932 | 12605                   | CC                              | AA              | 1947040920               |
| SNP_P4_178774_12672 | NW_004517752.1 | Scaffold2932 | 12672                   | AA                              | CC              | 1947040922               |
| SNP_P4_178775_12813 | NW_004517752.1 | Scaffold2932 | 12813                   | TT                              | AA              | 1947040924               |
| SNP_P4_178776_12835 | NW_004517752.1 | Scaffold2932 | 12835                   | GG                              | AA              | 1947040926               |
| SNP_P4_178777_13156 | NW_004517752.1 | Scaffold2932 | 13156                   | TT                              | CC              | 1947040928               |
| SNP_P4_178778_16061 | NW_004517752.1 | Scaffold2932 | 16061                   | AA                              | CC              | 1947040930               |
| SNP_P4_178779_16745 | NW_004517752.1 | Scaffold2932 | 16745                   | GG                              | AA              | 1947040932               |
| SNP_P4_178780_16865 | NW_004517752.1 | Scaffold2932 | 16865                   | CC                              | AA              | 1947040934               |
| SNP_P4_178781_16997 | NW_004517752.1 | Scaffold2932 | 16997                   | CC                              | GG              | 1947040936               |
| SNP_P4_178782_17009 | NW_004517752.1 | Scaffold2932 | 17009                   | TT                              | CC              | 1947040938               |
| SNP_P4_178783_17173 | NW_004517752.1 | Scaffold2932 | 17173                   | AA                              | TT              | 1947040940               |
| SNP_P4_178784_18612 | NW_004517752.1 | Scaffold2932 | 18612                   | GG                              | TT              | 1947040942               |
| SNP_P4_178786_23195 | NW_004517752.1 | Scaffold2932 | 23195                   | TT                              | CC              | 1947040944               |
| SNP_P4_178787_25226 | NW_004517752.1 | Scaffold2932 | 25226                   | AA                              | GG              | 1947040946               |
| SNP_P4_178788_25365 | NW_004517752.1 | Scaffold2932 | 25365                   | CC                              | GG              | 1947040948               |

| SNPs IDs            | Chromosome IDs | Chromosomes  | Physical positions (bp) | CDC Frontier (Reference genome) | (ILWC46 & LPNB) | NCBI SNPdb Accession IDs |
|---------------------|----------------|--------------|-------------------------|---------------------------------|-----------------|--------------------------|
| SNP_P4_178789_26309 | NW_004517752.1 | Scaffold2932 | 26309                   | CC                              | TT              | 1947040950               |
| SNP_P4_178790_136   | NW_004517753.1 | Scaffold2933 | 136                     | AA                              | GG              | 1947040952               |
| SNP_P4_178791_423   | NW_004517753.1 | Scaffold2933 | 423                     | TT                              | CC              | 1947040954               |
| SNP_P4_178792_1058  | NW_004517753.1 | Scaffold2933 | 1058                    | AA                              | TT              | 1947040957               |
| SNP_P4_178793_1102  | NW_004517753.1 | Scaffold2933 | 1102                    | CC                              | GG              | 1947040959               |
| SNP_P4_178794_1143  | NW_004517753.1 | Scaffold2933 | 1143                    | TT                              | GG              | 1947040961               |
| SNP_P4_178795_1533  | NW_004517753.1 | Scaffold2933 | 1533                    | CC                              | GG              | 1947040963               |
| SNP_P4_178796_1535  | NW_004517753.1 | Scaffold2933 | 1535                    | AA                              | TT              | 1947040965               |
| SNP_P4_178797_1479  | NW_004517754.1 | Scaffold2934 | 1479                    | TT                              | GG              | 1947040967               |
| SNP_P4_178798_1499  | NW_004517754.1 | Scaffold2934 | 1499                    | AA                              | GG              | 1947040969               |
| SNP_P4_178800_1744  | NW_004517754.1 | Scaffold2934 | 1744                    | AA                              | CC              | 1947040971               |
| SNP_P4_178801_64    | NW_004517760.1 | Scaffold2940 | 64                      | GG                              | TT              | 1947040973               |
| SNP_P4_178802_118   | NW_004517760.1 | Scaffold2940 | 118                     | CC                              | TT              | 1947040975               |
| SNP_P4_178803_142   | NW_004517760.1 | Scaffold2940 | 142                     | AA                              | GG              | 1947040977               |
| SNP_P4_178804_378   | NW_004517760.1 | Scaffold2940 | 378                     | CC                              | TT              | 1947040979               |
| SNP_P4_178805_777   | NW_004517760.1 | Scaffold2940 | 777                     | GG                              | AA              | 1947040981               |
| SNP_P4_178806_795   | NW_004517760.1 | Scaffold2940 | 795                     | CC                              | GG              | 1947040983               |
| SNP_P4_178807_825   | NW_004517760.1 | Scaffold2940 | 825                     | CC                              | TT              | 1947040985               |
| SNP_P4_178808_976   | NW_004517760.1 | Scaffold2940 | 976                     | CC                              | TT              | 1947040987               |
| SNP_P4_178809_989   | NW_004517760.1 | Scaffold2940 | 989                     | GG                              | CC              | 1947040989               |
| SNP_P4_178810_1003  | NW_004517760.1 | Scaffold2940 | 1003                    | TT                              | CC              | 1947040991               |
| SNP_P4_178811_1031  | NW_004517760.1 | Scaffold2940 | 1031                    | GG                              | AA              | 1947040993               |
| SNP_P4_178812_1039  | NW_004517760.1 | Scaffold2940 | 1039                    | AA                              | GG              | 1947040995               |
| SNP_P4_178813_1055  | NW_004517760.1 | Scaffold2940 | 1055                    | TT                              | AA              | 1947040997               |
| SNP_P4_178814_1089  | NW_004517760.1 | Scaffold2940 | 1089                    | CC                              | GG              | 1947040999               |
| SNP_P4_178815_1100  | NW_004517760.1 | Scaffold2940 | 1100                    | AA                              | GG              | 1947041001               |
| SNP_P4_178816_1101  | NW_004517760.1 | Scaffold2940 | 1101                    | TT                              | CC              | 1947041003               |
| SNP_P4_178817_1142  | NW_004517760.1 | Scaffold2940 | 1142                    | CC                              | TT              | 1947041005               |
| SNP_P4_178819_4621  | NW_004517760.1 | Scaffold2940 | 4621                    | GG                              | AA              | 1947041007               |
| SNP_P4_178820_8901  | NW_004517760.1 | Scaffold2940 | 8901                    | CC                              | TT              | 1947041009               |
| SNP_P4_178821_24237 | NW_004517760.1 | Scaffold2940 | 24237                   | AA                              | CC              | 1947041011               |
| SNP_P4_178822_25438 | NW_004517760.1 | Scaffold2940 | 25438                   | TT                              | AA              | 1947041013               |
| SNP_P4_178823_25499 | NW_004517760.1 | Scaffold2940 | 25499                   | TT                              | GG              | 1947041015               |
| SNP_P4_178824_7864  | NW_004517763.1 | Scaffold2946 | 7864                    | GG                              | CC              | 1947041017               |
| SNP_P4_178825_7987  | NW_004517763.1 | Scaffold2946 | 7987                    | TT                              | AA              | 1947041019               |
| SNP_P4_178826_17812 | NW_004517763.1 | Scaffold2946 | 17812                   | TT                              | CC              | 1947041021               |
| SNP_P4_178827_17813 | NW_004517763.1 | Scaffold2946 | 17813                   | TT                              | AA              | 1947041023               |
| SNP_P4_178828_21814 | NW_004517763.1 | Scaffold2946 | 21814                   | AA                              | TT              | 1947041025               |
| SNP_P4_178829_21836 | NW_004517763.1 | Scaffold2946 | 21836                   | TT                              | GG              | 1947041027               |
| SNP_P4_178830_21849 | NW_004517763.1 | Scaffold2946 | 21849                   | CC                              | TT              | 1947041029               |
| SNP_P4_178831_22061 | NW_004517763.1 | Scaffold2946 | 22061                   | GG                              | AA              | 1947041031               |
| SNP_P4_178832_22143 | NW_004517763.1 | Scaffold2946 | 22143                   | CC                              | AA              | 1947041033               |

| SNPs IDs            | Chromosome IDs | Chromosomes  | Physical positions (bp) | CDC Frontier (Reference genome) | (ILWC46 & LPNB) | NCBI SNPdb Accession IDs |
|---------------------|----------------|--------------|-------------------------|---------------------------------|-----------------|--------------------------|
| SNP_P4_178833_22271 | NW_004517763.1 | Scaffold2946 | 22271                   | GG                              | CC              | 1947041035               |
| SNP_P4_178834_350   | NW_004517765.1 | Scaffold2950 | 350                     | TT                              | CC              | 1947041037               |
| SNP_P4_178835_399   | NW_004517765.1 | Scaffold2950 | 399                     | CC                              | TT              | 1947041039               |
| SNP_P4_178836_507   | NW_004517765.1 | Scaffold2950 | 507                     | TT                              | CC              | 1947041041               |
| SNP_P4_178837_514   | NW_004517765.1 | Scaffold2950 | 514                     | AA                              | TT              | 1947041043               |
| SNP_P4_178838_517   | NW_004517765.1 | Scaffold2950 | 517                     | AA                              | TT              | 1947041045               |
| SNP_P4_178839_583   | NW_004517765.1 | Scaffold2950 | 583                     | AA                              | GG              | 1947041047               |
| SNP_P4_178840_615   | NW_004517765.1 | Scaffold2950 | 615                     | CC                              | TT              | 1947041049               |
| SNP_P4_178841_634   | NW_004517765.1 | Scaffold2950 | 634                     | CC                              | TT              | 1947041051               |
| SNP_P4_178842_636   | NW_004517765.1 | Scaffold2950 | 636                     | TT                              | CC              | 1947041053               |
| SNP_P4_178844_718   | NW_004517765.1 | Scaffold2950 | 718                     | TT                              | GG              | 1947041055               |
| SNP_P4_178845_1266  | NW_004517765.1 | Scaffold2950 | 1266                    | GG                              | AA              | 1947041057               |
| SNP_P4_178847_1469  | NW_004517765.1 | Scaffold2950 | 1469                    | CC                              | TT              | 1947041059               |
| SNP_P4_178848_4281  | NW_004517765.1 | Scaffold2950 | 4281                    | CC                              | TT              | 1947041061               |
| SNP_P4_178849_6464  | NW_004517765.1 | Scaffold2950 | 6464                    | TT                              | CC              | 1947041063               |
| SNP_P4_178852_6930  | NW_004517765.1 | Scaffold2950 | 6930                    | TT                              | AA              | 1947041065               |
| SNP_P4_178853_7738  | NW_004517765.1 | Scaffold2950 | 7738                    | CC                              | TT              | 1947041067               |
| SNP_P4_178854_7793  | NW_004517765.1 | Scaffold2950 | 7793                    | CC                              | TT              | 1947041069               |
| SNP_P4_178855_8111  | NW_004517765.1 | Scaffold2950 | 8111                    | TT                              | CC              | 1947041071               |
| SNP_P4_178856_8183  | NW_004517765.1 | Scaffold2950 | 8183                    | TT                              | CC              | 1947041074               |
| SNP_P4_178858_8404  | NW_004517765.1 | Scaffold2950 | 8404                    | TT                              | CC              | 1947041076               |
| SNP_P4_178859_8516  | NW_004517765.1 | Scaffold2950 | 8516                    | CC                              | GG              | 1947041078               |
| SNP_P4_178860_8524  | NW_004517765.1 | Scaffold2950 | 8524                    | CC                              | GG              | 1947041080               |
| SNP_P4_178861_8534  | NW_004517765.1 | Scaffold2950 | 8534                    | GG                              | AA              | 1947041082               |
| SNP_P4_178862_8609  | NW_004517765.1 | Scaffold2950 | 8609                    | TT                              | CC              | 1947041084               |
| SNP_P4_178863_8613  | NW_004517765.1 | Scaffold2950 | 8613                    | AA                              | CC              | 1947041086               |
| SNP_P4_178864_10103 | NW_004517765.1 | Scaffold2950 | 10103                   | GG                              | AA              | 1947041088               |
| SNP_P4_178866_10218 | NW_004517765.1 | Scaffold2950 | 10218                   | GG                              | TT              | 1947041090               |
| SNP_P4_178867_10318 | NW_004517765.1 | Scaffold2950 | 10318                   | GG                              | CC              | 1947041092               |
| SNP_P4_178868_10370 | NW_004517765.1 | Scaffold2950 | 10370                   | CC                              | GG              | 1947041094               |
| SNP_P4_178869_10559 | NW_004517765.1 | Scaffold2950 | 10559                   | AA                              | GG              | 1947041096               |
| SNP_P4_178871_10710 | NW_004517765.1 | Scaffold2950 | 10710                   | TT                              | GG              | 1947041098               |
| SNP_P4_178872_10713 | NW_004517765.1 | Scaffold2950 | 10713                   | CC                              | TT              | 1947041100               |
| SNP_P4_178873_10717 | NW_004517765.1 | Scaffold2950 | 10717                   | AA                              | CC              | 1947041103               |
| SNP_P4_178874_10798 | NW_004517765.1 | Scaffold2950 | 10798                   | CC                              | AA              | 1947041105               |
| SNP_P4_178875_10957 | NW_004517765.1 | Scaffold2950 | 10957                   | TT                              | CC              | 1947041107               |
| SNP_P4_178876_11035 | NW_004517765.1 | Scaffold2950 | 11035                   | GG                              | TT              | 1947041109               |
| SNP_P4_178877_11159 | NW_004517765.1 | Scaffold2950 | 11159                   | TT                              | GG              | 1947041111               |
| SNP_P4_178878_11353 | NW_004517765.1 | Scaffold2950 | 11353                   | GG                              | AA              | 1947041113               |
| SNP_P4_178879_11610 | NW_004517765.1 | Scaffold2950 | 11610                   | AA                              | GG              | 1947041115               |
| SNP_P4_178880_11663 | NW_004517765.1 | Scaffold2950 | 11663                   | GG                              | AA              | 1947041117               |
| SNP_P4_178881_11675 | NW_004517765.1 | Scaffold2950 | 11675                   | CC                              | TT              | 1947041119               |

| SNPs IDs            | Chromosome IDs | Chromosomes  | Physical positions (bp) | CDC Frontier (Reference genome) | (ILWC46 & LPNB) | NCBI SNPdb Accession IDs |
|---------------------|----------------|--------------|-------------------------|---------------------------------|-----------------|--------------------------|
| SNP_P4_178882_11906 | NW_004517765.1 | Scaffold2950 | 11906                   | AA                              | TT              | 1947041121               |
| SNP_P4_178883_12126 | NW_004517765.1 | Scaffold2950 | 12126                   | AA                              | GG              | 1947041123               |
| SNP_P4_178884_12271 | NW_004517765.1 | Scaffold2950 | 12271                   | TT                              | AA              | 1947041125               |
| SNP_P4_178885_12392 | NW_004517765.1 | Scaffold2950 | 12392                   | GG                              | AA              | 1947041127               |
| SNP_P4_178886_12395 | NW_004517765.1 | Scaffold2950 | 12395                   | TT                              | AA              | 1947041129               |
| SNP_P4_178887_64    | NW_004517766.1 | Scaffold2951 | 64                      | AA                              | CC              | 1947041131               |
| SNP_P4_178888_66    | NW_004517766.1 | Scaffold2951 | 66                      | GG                              | AA              | 1947041133               |
| SNP_P4_178889_104   | NW_004517766.1 | Scaffold2951 | 104                     | TT                              | AA              | 1947041135               |
| SNP_P4_178890_199   | NW_004517766.1 | Scaffold2951 | 199                     | TT                              | AA              | 1947041137               |
| SNP_P4_178891_586   | NW_004517766.1 | Scaffold2951 | 586                     | CC                              | TT              | 1947041139               |
| SNP_P4_178892_366   | NW_004517767.1 | Scaffold2954 | 366                     | AA                              | CC              | 1947041141               |
| SNP_P4_178893_814   | NW_004517767.1 | Scaffold2954 | 814                     | AA                              | CC              | 1947041143               |
| SNP_P4_178894_12555 | NW_004517767.1 | Scaffold2954 | 12555                   | GG                              | TT              | 1947041145               |
| SNP_P4_178895_12841 | NW_004517767.1 | Scaffold2954 | 12841                   | CC                              | TT              | 1947041147               |
| SNP_P4_178896_12853 | NW_004517767.1 | Scaffold2954 | 12853                   | CC                              | TT              | 1947041149               |
| SNP_P4_178897_598   | NW_004517768.1 | Scaffold2955 | 598                     | CC                              | TT              | 1947041151               |
| SNP_P4_178898_858   | NW_004517768.1 | Scaffold2955 | 858                     | CC                              | TT              | 1947041154               |
| SNP_P4_178899_882   | NW_004517768.1 | Scaffold2955 | 882                     | CC                              | GG              | 1947041156               |
| SNP_P4_178900_900   | NW_004517768.1 | Scaffold2955 | 900                     | CC                              | TT              | 1947041158               |
| SNP_P4_178901_902   | NW_004517768.1 | Scaffold2955 | 902                     | GG                              | AA              | 1947041160               |
| SNP_P4_178903_5767  | NW_004517768.1 | Scaffold2955 | 5767                    | TT                              | CC              | 1947041162               |
| SNP_P4_178904_5768  | NW_004517768.1 | Scaffold2955 | 5768                    | GG                              | AA              | 1947041164               |
| SNP_P4_178905_5831  | NW_004517768.1 | Scaffold2955 | 5831                    | TT                              | CC              | 1947041166               |
| SNP_P4_178906_6064  | NW_004517768.1 | Scaffold2955 | 6064                    | TT                              | CC              | 1947041168               |
| SNP_P4_178907_7409  | NW_004517768.1 | Scaffold2955 | 7409                    | GG                              | AA              | 1947041170               |
| SNP_P4_178908_7421  | NW_004517768.1 | Scaffold2955 | 7421                    | CC                              | TT              | 1947041172               |
| SNP_P4_178909_7452  | NW_004517768.1 | Scaffold2955 | 7452                    | TT                              | AA              | 1947041174               |
| SNP_P4_178910_7464  | NW_004517768.1 | Scaffold2955 | 7464                    | GG                              | AA              | 1947041176               |
| SNP_P4_178911_7562  | NW_004517768.1 | Scaffold2955 | 7562                    | GG                              | AA              | 1947041178               |
| SNP_P4_178912_7955  | NW_004517768.1 | Scaffold2955 | 7955                    | TT                              | GG              | 1947041180               |
| SNP_P4_178913_8055  | NW_004517768.1 | Scaffold2955 | 8055                    | AA                              | GG              | 1947041182               |
| SNP_P4_178914_8068  | NW_004517768.1 | Scaffold2955 | 8068                    | GG                              | TT              | 1947041184               |
| SNP_P4_178915_8104  | NW_004517768.1 | Scaffold2955 | 8104                    | CC                              | TT              | 1947041186               |
| SNP_P4_178916_9114  | NW_004517768.1 | Scaffold2955 | 9114                    | AA                              | CC              | 1947041188               |
| SNP_P4_178917_9298  | NW_004517768.1 | Scaffold2955 | 9298                    | AA                              | GG              | 1947041190               |
| SNP_P4_178918_9381  | NW_004517768.1 | Scaffold2955 | 9381                    | GG                              | AA              | 1947041192               |
| SNP_P4_178919_9449  | NW_004517768.1 | Scaffold2955 | 9449                    | CC                              | GG              | 1947041194               |
| SNP_P4_178920_9491  | NW_004517768.1 | Scaffold2955 | 9491                    | TT                              | CC              | 1947041196               |
| SNP_P4_178921_9511  | NW_004517768.1 | Scaffold2955 | 9511                    | AA                              | GG              | 1947041198               |
| SNP_P4_178922_9512  | NW_004517768.1 | Scaffold2955 | 9512                    | AA                              | TT              | 1947041200               |
| SNP_P4_178923_9554  | NW_004517768.1 | Scaffold2955 | 9554                    | AA                              | GG              | 1947041202               |
| SNP_P4_178924_9563  | NW_004517768.1 | Scaffold2955 | 9563                    | GG                              | AA              | 1947041204               |

| SNPs IDs            | Chromosome IDs | Chromosomes  | Physical positions (bp) | CDC Frontier (Reference genome) | (ILWC46 & LPNB) | NCBI SNPdb Accession IDs |
|---------------------|----------------|--------------|-------------------------|---------------------------------|-----------------|--------------------------|
| SNP_P4_178925_9623  | NW_004517768.1 | Scaffold2955 | 9623                    | AA                              | GG              | 1947041206               |
| SNP_P4_178926_9695  | NW_004517768.1 | Scaffold2955 | 9695                    | TT                              | CC              | 1947041208               |
| SNP_P4_178927_9698  | NW_004517768.1 | Scaffold2955 | 9698                    | TT                              | CC              | 1947041210               |
| SNP_P4_178930_10096 | NW_004517768.1 | Scaffold2955 | 10096                   | TT                              | CC              | 1947041213               |
| SNP_P4_178931_10155 | NW_004517768.1 | Scaffold2955 | 10155                   | TT                              | CC              | 1947041215               |
| SNP_P4_178932_10157 | NW_004517768.1 | Scaffold2955 | 10157                   | GG                              | AA              | 1947041217               |
| SNP_P4_178933_11484 | NW_004517768.1 | Scaffold2955 | 11484                   | TT                              | CC              | 1947041219               |
| SNP_P4_178934_11506 | NW_004517768.1 | Scaffold2955 | 11506                   | TT                              | CC              | 1947041221               |
| SNP_P4_178935_11565 | NW_004517768.1 | Scaffold2955 | 11565                   | AA                              | TT              | 1947041223               |
| SNP_P4_178936_11642 | NW_004517768.1 | Scaffold2955 | 11642                   | CC                              | AA              | 1947041225               |
| SNP_P4_178937_11643 | NW_004517768.1 | Scaffold2955 | 11643                   | GG                              | AA              | 1947041227               |
| SNP_P4_178938_11650 | NW_004517768.1 | Scaffold2955 | 11650                   | CC                              | TT              | 1947041229               |
| SNP_P4_178939_11697 | NW_004517768.1 | Scaffold2955 | 11697                   | AA                              | CC              | 1947041231               |
| SNP_P4_178940_11700 | NW_004517768.1 | Scaffold2955 | 11700                   | AA                              | TT              | 1947041233               |
| SNP_P4_178942_11736 | NW_004517768.1 | Scaffold2955 | 11736                   | TT                              | CC              | 1947041235               |
| SNP_P4_178943_11861 | NW_004517768.1 | Scaffold2955 | 11861                   | TT                              | AA              | 1947041237               |
| SNP_P4_178944_11949 | NW_004517768.1 | Scaffold2955 | 11949                   | TT                              | CC              | 1947041239               |
| SNP_P4_178945_11980 | NW_004517768.1 | Scaffold2955 | 11980                   | CC                              | TT              | 1947041241               |
| SNP_P4_178946_12064 | NW_004517768.1 | Scaffold2955 | 12064                   | CC                              | TT              | 1947041243               |
| SNP_P4_178947_12094 | NW_004517768.1 | Scaffold2955 | 12094                   | GG                              | AA              | 1947041245               |
| SNP_P4_178948_34144 | NW_004517768.1 | Scaffold2955 | 34144                   | AA                              | GG              | 1947041247               |
| SNP_P4_178949_41730 | NW_004517768.1 | Scaffold2955 | 41730                   | CC                              | AA              | 1947041249               |
| SNP_P4_178950_41741 | NW_004517768.1 | Scaffold2955 | 41741                   | GG                              | TT              | 1947041251               |
| SNP_P4_178951_41747 | NW_004517768.1 | Scaffold2955 | 41747                   | GG                              | AA              | 1947041253               |
| SNP_P4_178952_41756 | NW_004517768.1 | Scaffold2955 | 41756                   | AA                              | GG              | 1947041255               |
| SNP_P4_178953_43379 | NW_004517768.1 | Scaffold2955 | 43379                   | CC                              | TT              | 1947041258               |
| SNP_P4_178954_43505 | NW_004517768.1 | Scaffold2955 | 43505                   | AA                              | TT              | 1947041259               |
| SNP_P4_178955_43567 | NW_004517768.1 | Scaffold2955 | 43567                   | CC                              | GG              | 1947041261               |
| SNP_P4_178956_43615 | NW_004517768.1 | Scaffold2955 | 43615                   | GG                              | AA              | 1947041263               |
| SNP_P4_178957_43632 | NW_004517768.1 | Scaffold2955 | 43632                   | TT                              | GG              | 1947041265               |
| SNP_P4_178958_43643 | NW_004517768.1 | Scaffold2955 | 43643                   | TT                              | AA              | 1947041267               |
| SNP_P4_178959_43650 | NW_004517768.1 | Scaffold2955 | 43650                   | TT                              | AA              | 1947041269               |
| SNP_P4_178960_178   | NW_004517770.1 | Scaffold2957 | 178                     | AA                              | TT              | 1947041271               |
| SNP_P4_178961_851   | NW_004517770.1 | Scaffold2957 | 851                     | AA                              | CC              | 1947041274               |
| SNP_P4_178962_919   | NW_004517770.1 | Scaffold2957 | 919                     | TT                              | CC              | 1947041276               |
| SNP_P4_178963_1046  | NW_004517770.1 | Scaffold2957 | 1046                    | CC                              | TT              | 1947041278               |
| SNP_P4_178964_1404  | NW_004517770.1 | Scaffold2957 | 1404                    | CC                              | GG              | 1947041280               |
| SNP_P4_178965_1440  | NW_004517770.1 | Scaffold2957 | 1440                    | TT                              | CC              | 1947041282               |
| SNP_P4_178966_9523  | NW_004517770.1 | Scaffold2957 | 9523                    | AA                              | TT              | 1947041284               |
| SNP_P4_178967_10043 | NW_004517770.1 | Scaffold2957 | 10043                   | TT                              | GG              | 1947041286               |
| SNP_P4_178969_10844 | NW_004517770.1 | Scaffold2957 | 10844                   | GG                              | TT              | 1947041288               |
| SNP_P4_178971_13607 | NW_004517772.1 | Scaffold2959 | 13607                   | AA                              | TT              | 1947041290               |

| SNPs IDs            | Chromosome IDs | Chromosomes  | Physical positions (bp) | CDC Frontier (Reference genome) | (ILWC46 & LPNB) | NCBI SNPdb Accession IDs |
|---------------------|----------------|--------------|-------------------------|---------------------------------|-----------------|--------------------------|
| SNP_P4_178972_13669 | NW_004517772.1 | Scaffold2959 | 13669                   | CC                              | GG              | 1947041292               |
| SNP_P4_178973_13689 | NW_004517772.1 | Scaffold2959 | 13689                   | TT                              | CC              | 1947041294               |
| SNP_P4_178974_16048 | NW_004517772.1 | Scaffold2959 | 16048                   | TT                              | GG              | 1947041296               |
| SNP_P4_178975_16466 | NW_004517772.1 | Scaffold2959 | 16466                   | GG                              | TT              | 1947041298               |
| SNP_P4_178976_364   | NW_004517773.1 | Scaffold2960 | 364                     | TT                              | GG              | 1947041300               |
| SNP_P4_178977_750   | NW_004517774.1 | Scaffold2962 | 750                     | CC                              | TT              | 1947041302               |
| SNP_P4_178978_208   | NW_004517775.1 | Scaffold2964 | 208                     | GG                              | CC              | 1947041304               |
| SNP_P4_178979_209   | NW_004517775.1 | Scaffold2964 | 209                     | AA                              | TT              | 1947041306               |
| SNP_P4_178980_213   | NW_004517775.1 | Scaffold2964 | 213                     | AA                              | TT              | 1947041308               |
| SNP_P4_178982_311   | NW_004517775.1 | Scaffold2964 | 311                     | GG                              | AA              | 1947041310               |
| SNP_P4_178983_503   | NW_004517775.1 | Scaffold2964 | 503                     | CC                              | AA              | 1947041312               |
| SNP_P4_178984_1079  | NW_004517778.1 | Scaffold2967 | 1079                    | AA                              | GG              | 1947041314               |
| SNP_P4_178985_1394  | NW_004517778.1 | Scaffold2967 | 1394                    | GG                              | TT              | 1947041316               |
| SNP_P4_178986_15439 | NW_004517779.1 | Scaffold2968 | 15439                   | CC                              | TT              | 1947041318               |
| SNP_P4_178987_15627 | NW_004517779.1 | Scaffold2968 | 15627                   | AA                              | GG              | 1947041320               |
| SNP_P4_178988_22115 | NW_004517779.1 | Scaffold2968 | 22115                   | CC                              | TT              | 1947041322               |
| SNP_P4_178990_23683 | NW_004517780.1 | Scaffold2969 | 23683                   | TT                              | CC              | 1947041324               |
| SNP_P4_178991_23684 | NW_004517780.1 | Scaffold2969 | 23684                   | TT                              | CC              | 1947041327               |
| SNP_P4_178992_23685 | NW_004517780.1 | Scaffold2969 | 23685                   | CC                              | TT              | 1947041329               |
| SNP_P4_178993_23701 | NW_004517780.1 | Scaffold2969 | 23701                   | CC                              | GG              | 1947041331               |
| SNP_P4_178994_23717 | NW_004517780.1 | Scaffold2969 | 23717                   | GG                              | TT              | 1947041333               |
| SNP_P4_178995_23738 | NW_004517780.1 | Scaffold2969 | 23738                   | AA                              | GG              | 1947041335               |
| SNP_P4_178996_23747 | NW_004517780.1 | Scaffold2969 | 23747                   | TT                              | GG              | 1947041337               |
| SNP_P4_178997_24322 | NW_004517780.1 | Scaffold2969 | 24322                   | GG                              | AA              | 1947041339               |
| SNP_P4_178998_24324 | NW_004517780.1 | Scaffold2969 | 24324                   | TT                              | CC              | 1947041341               |
| SNP_P4_178999_25623 | NW_004517780.1 | Scaffold2969 | 25623                   | AA                              | CC              | 1947041343               |
| SNP_P4_179000_25624 | NW_004517780.1 | Scaffold2969 | 25624                   | TT                              | CC              | 1947041345               |
| SNP_P4_179002_25860 | NW_004517780.1 | Scaffold2969 | 25860                   | GG                              | TT              | 1947041347               |
| SNP_P4_179003_25871 | NW_004517780.1 | Scaffold2969 | 25871                   | AA                              | CC              | 1947041349               |
| SNP_P4_179005_45900 | NW_004517780.1 | Scaffold2969 | 45900                   | TT                              | AA              | 1947041350               |
| SNP_P4_179006_46357 | NW_004517780.1 | Scaffold2969 | 46357                   | TT                              | CC              | 1947041352               |
| SNP_P4_179007_46398 | NW_004517780.1 | Scaffold2969 | 46398                   | GG                              | TT              | 1947041354               |
| SNP_P4_179008_46661 | NW_004517780.1 | Scaffold2969 | 46661                   | AA                              | GG              | 1947041356               |
| SNP_P4_179009_50489 | NW_004517780.1 | Scaffold2969 | 50489                   | TT                              | CC              | 1947041358               |
| SNP_P4_179010_52000 | NW_004517780.1 | Scaffold2969 | 52000                   | GG                              | AA              | 1947041360               |
| SNP_P4_179011_141   | NW_004517782.1 | Scaffold2974 | 141                     | TT                              | AA              | 1947041362               |
| SNP_P4_179012_416   | NW_004517782.1 | Scaffold2974 | 416                     | TT                              | CC              | 1947041364               |
| SNP_P4_179013_171   | NW_004517784.1 | Scaffold2977 | 171                     | TT                              | CC              | 1947041366               |
| SNP_P4_179014_544   | NW_004517785.1 | Scaffold2979 | 544                     | GG                              | AA              | 1947041368               |
| SNP_P4_179015_563   | NW_004517785.1 | Scaffold2979 | 563                     | AA                              | TT              | 1947041370               |
| SNP_P4_179016_583   | NW_004517785.1 | Scaffold2979 | 583                     | GG                              | TT              | 1947041372               |
| SNP_P4_179017_417   | NW_004517787.1 | Scaffold2981 | 417                     | TT                              | CC              | 1947041374               |



| SNPs IDs            | Chromosome IDs | Chromosomes  | Physical positions (bp) | CDC Frontier (Reference genome) | (ILWC46 & LPNB) | NCBI SNPdb Accession IDs |
|---------------------|----------------|--------------|-------------------------|---------------------------------|-----------------|--------------------------|
| SNP_P4_179018_1646  | NW_004517787.1 | Scaffold2981 | 1646                    | CC                              | AA              | 1947041376               |
| SNP_P4_179019_2019  | NW_004517787.1 | Scaffold2981 | 2019                    | CC                              | GG              | 1947041378               |
| SNP_P4_179020_2042  | NW_004517787.1 | Scaffold2981 | 2042                    | GG                              | TT              | 1947041380               |
| SNP_P4_179021_2046  | NW_004517787.1 | Scaffold2981 | 2046                    | CC                              | TT              | 1947041382               |
| SNP_P4_179022_17519 | NW_004517787.1 | Scaffold2981 | 17519                   | TT                              | CC              | 1947041384               |
| SNP_P4_179023_17539 | NW_004517787.1 | Scaffold2981 | 17539                   | AA                              | GG              | 1947041386               |
| SNP_P4_179024_17559 | NW_004517787.1 | Scaffold2981 | 17559                   | AA                              | GG              | 1947041388               |
| SNP_P4_179025_21922 | NW_004517787.1 | Scaffold2981 | 21922                   | GG                              | TT              | 1947041390               |
| SNP_P4_179026_21938 | NW_004517787.1 | Scaffold2981 | 21938                   | AA                              | GG              | 1947041392               |
| SNP_P4_179027_21939 | NW_004517787.1 | Scaffold2981 | 21939                   | AA                              | CC              | 1947041394               |
| SNP_P4_179028_25616 | NW_004517787.1 | Scaffold2981 | 25616                   | AA                              | GG              | 1947041396               |
| SNP_P4_179029_32493 | NW_004517787.1 | Scaffold2981 | 32493                   | TT                              | CC              | 1947041398               |
| SNP_P4_179030_32818 | NW_004517787.1 | Scaffold2981 | 32818                   | TT                              | GG              | 1947041400               |
| SNP_P4_179031_32978 | NW_004517787.1 | Scaffold2981 | 32978                   | CC                              | TT              | 1947041402               |
| SNP_P4_179032_33066 | NW_004517787.1 | Scaffold2981 | 33066                   | TT                              | CC              | 1947041404               |
| SNP_P4_179033_33082 | NW_004517787.1 | Scaffold2981 | 33082                   | TT                              | GG              | 1947041405               |
| SNP_P4_179034_33104 | NW_004517787.1 | Scaffold2981 | 33104                   | TT                              | CC              | 1947041407               |
| SNP_P4_179035_33251 | NW_004517787.1 | Scaffold2981 | 33251                   | GG                              | AA              | 1947041409               |
| SNP_P4_179036_33260 | NW_004517787.1 | Scaffold2981 | 33260                   | AA                              | GG              | 1947041411               |
| SNP_P4_179037_33331 | NW_004517787.1 | Scaffold2981 | 33331                   | TT                              | GG              | 1947041413               |
| SNP_P4_179038_33437 | NW_004517787.1 | Scaffold2981 | 33437                   | TT                              | GG              | 1947041415               |
| SNP_P4_179039_33550 | NW_004517787.1 | Scaffold2981 | 33550                   | AA                              | GG              | 1947041417               |
| SNP_P4_179040_33644 | NW_004517787.1 | Scaffold2981 | 33644                   | GG                              | AA              | 1947041419               |
| SNP_P4_179041_14751 | NW_004517789.1 | Scaffold2984 | 14751                   | TT                              | CC              | 1947041421               |
| SNP_P4_179042_14964 | NW_004517789.1 | Scaffold2984 | 14964                   | TT                              | AA              | 1947041423               |
| SNP_P4_179043_19173 | NW_004517789.1 | Scaffold2984 | 19173                   | CC                              | TT              | 1947041425               |
| SNP_P4_179044_19615 | NW_004517789.1 | Scaffold2984 | 19615                   | TT                              | GG              | 1947041427               |
| SNP_P4_179045_20948 | NW_004517789.1 | Scaffold2984 | 20948                   | TT                              | CC              | 1947041429               |
| SNP_P4_179046_21698 | NW_004517789.1 | Scaffold2984 | 21698                   | TT                              | CC              | 1947041431               |
| SNP_P4_179047_21706 | NW_004517789.1 | Scaffold2984 | 21706                   | GG                              | AA              | 1947041433               |
| SNP_P4_179048_21715 | NW_004517789.1 | Scaffold2984 | 21715                   | CC                              | TT              | 1947041435               |
| SNP_P4_179049_21782 | NW_004517789.1 | Scaffold2984 | 21782                   | AA                              | GG              | 1947041437               |
| SNP_P4_179050_21784 | NW_004517789.1 | Scaffold2984 | 21784                   | TT                              | CC              | 1947041439               |
| SNP_P4_179051_21801 | NW_004517789.1 | Scaffold2984 | 21801                   | TT                              | CC              | 1947041441               |
| SNP_P4_179053_21960 | NW_004517789.1 | Scaffold2984 | 21960                   | TT                              | GG              | 1947041443               |
| SNP_P4_179054_21961 | NW_004517789.1 | Scaffold2984 | 21961                   | TT                              | CC              | 1947041445               |
| SNP_P4_179055_21962 | NW_004517789.1 | Scaffold2984 | 21962                   | GG                              | CC              | 1947041447               |
| SNP_P4_179056_22074 | NW_004517789.1 | Scaffold2984 | 22074                   | CC                              | GG              | 1947041449               |
| SNP_P4_179057_22156 | NW_004517789.1 | Scaffold2984 | 22156                   | TT                              | CC              | 1947041451               |
| SNP_P4_179058_22391 | NW_004517789.1 | Scaffold2984 | 22391                   | TT                              | GG              | 1947041453               |
| SNP_P4_179059_22804 | NW_004517789.1 | Scaffold2984 | 22804                   | GG                              | CC              | 1947041455               |
| SNP_P4_179060_22815 | NW_004517789.1 | Scaffold2984 | 22815                   | TT                              | CC              | 1947041457               |

| SNPs IDs            | Chromosome IDs | Chromosomes  | Physical positions (bp) | CDC Frontier (Reference genome) | (ILWC46 & LPNB) | NCBI SNPdb Accession IDs |
|---------------------|----------------|--------------|-------------------------|---------------------------------|-----------------|--------------------------|
| SNP_P4_179061_22820 | NW_004517789.1 | Scaffold2984 | 22820                   | CC                              | TT              | 1947041459               |
| SNP_P4_179062_23023 | NW_004517789.1 | Scaffold2984 | 23023                   | TT                              | CC              | 1947041461               |
| SNP_P4_179063_23115 | NW_004517789.1 | Scaffold2984 | 23115                   | TT                              | CC              | 1947041463               |
| SNP_P4_179064_23130 | NW_004517789.1 | Scaffold2984 | 23130                   | AA                              | GG              | 1947041465               |
| SNP_P4_179065_23138 | NW_004517789.1 | Scaffold2984 | 23138                   | GG                              | AA              | 1947041467               |
| SNP_P4_179066_23234 | NW_004517789.1 | Scaffold2984 | 23234                   | GG                              | AA              | 1947041469               |
| SNP_P4_179067_23590 | NW_004517789.1 | Scaffold2984 | 23590                   | GG                              | AA              | 1947041471               |
| SNP_P4_179068_23599 | NW_004517789.1 | Scaffold2984 | 23599                   | TT                              | AA              | 1947041473               |
| SNP_P4_179069_24345 | NW_004517789.1 | Scaffold2984 | 24345                   | GG                              | TT              | 1947041475               |
| SNP_P4_179070_24470 | NW_004517789.1 | Scaffold2984 | 24470                   | CC                              | TT              | 1947041477               |
| SNP_P4_179071_24499 | NW_004517789.1 | Scaffold2984 | 24499                   | TT                              | CC              | 1947041479               |
| SNP_P4_179072_24625 | NW_004517789.1 | Scaffold2984 | 24625                   | TT                              | GG              | 1947041481               |
| SNP_P4_179073_24678 | NW_004517789.1 | Scaffold2984 | 24678                   | GG                              | AA              | 1947041484               |
| SNP_P4_179074_24998 | NW_004517789.1 | Scaffold2984 | 24998                   | CC                              | TT              | 1947041486               |
| SNP_P4_179075_25048 | NW_004517789.1 | Scaffold2984 | 25048                   | CC                              | TT              | 1947041488               |
| SNP_P4_179076_25065 | NW_004517789.1 | Scaffold2984 | 25065                   | TT                              | AA              | 1947041490               |
| SNP_P4_179077_25371 | NW_004517789.1 | Scaffold2984 | 25371                   | AA                              | GG              | 1947041492               |
| SNP_P4_179078_25845 | NW_004517789.1 | Scaffold2984 | 25845                   | TT                              | GG              | 1947041494               |
| SNP_P4_179079_26148 | NW_004517789.1 | Scaffold2984 | 26148                   | TT                              | CC              | 1947041496               |
| SNP_P4_179080_26193 | NW_004517789.1 | Scaffold2984 | 26193                   | CC                              | TT              | 1947041498               |
| SNP_P4_179081_2456  | NW_004517790.1 | Scaffold2985 | 2456                    | CC                              | GG              | 1947041500               |
| SNP_P4_179082_2457  | NW_004517790.1 | Scaffold2985 | 2457                    | GG                              | TT              | 1947041502               |
| SNP_P4_179083_7642  | NW_004517792.1 | Scaffold2988 | 7642                    | TT                              | CC              | 1947041504               |
| SNP_P4_179084_7650  | NW_004517792.1 | Scaffold2988 | 7650                    | TT                              | GG              | 1947041506               |
| SNP_P4_179085_7654  | NW_004517792.1 | Scaffold2988 | 7654                    | CC                              | TT              | 1947041508               |
| SNP_P4_179086_10504 | NW_004517792.1 | Scaffold2988 | 10504                   | GG                              | AA              | 1947041510               |
| SNP_P4_179087_15591 | NW_004517792.1 | Scaffold2988 | 15591                   | TT                              | CC              | 1947041512               |
| SNP_P4_179088_15593 | NW_004517792.1 | Scaffold2988 | 15593                   | GG                              | AA              | 1947041514               |
| SNP_P4_179089_15621 | NW_004517792.1 | Scaffold2988 | 15621                   | TT                              | CC              | 1947041516               |
| SNP_P4_179090_15662 | NW_004517792.1 | Scaffold2988 | 15662                   | CC                              | TT              | 1947041518               |
| SNP_P4_179091_15680 | NW_004517792.1 | Scaffold2988 | 15680                   | TT                              | CC              | 1947041520               |
| SNP_P4_179092_15744 | NW_004517792.1 | Scaffold2988 | 15744                   | AA                              | GG              | 1947041522               |
| SNP_P4_179093_15822 | NW_004517792.1 | Scaffold2988 | 15822                   | AA                              | CC              | 1947041524               |
| SNP_P4_179094_15827 | NW_004517792.1 | Scaffold2988 | 15827                   | TT                              | AA              | 1947041526               |
| SNP_P4_179095_18595 | NW_004517792.1 | Scaffold2988 | 18595                   | GG                              | AA              | 1947041528               |
| SNP_P4_179096_18606 | NW_004517792.1 | Scaffold2988 | 18606                   | CC                              | AA              | 1947041530               |
| SNP_P4_179097_18631 | NW_004517792.1 | Scaffold2988 | 18631                   | GG                              | AA              | 1947041532               |
| SNP_P4_179098_18634 | NW_004517792.1 | Scaffold2988 | 18634                   | AA                              | GG              | 1947041534               |
| SNP_P4_179099_18673 | NW_004517792.1 | Scaffold2988 | 18673                   | TT                              | AA              | 1947041536               |
| SNP_P4_179100_23155 | NW_004517792.1 | Scaffold2988 | 23155                   | AA                              | CC              | 1947041538               |
| SNP_P4_179101_23458 | NW_004517792.1 | Scaffold2988 | 23458                   | AA                              | GG              | 1947041541               |
| SNP_P4_179102_23486 | NW_004517792.1 | Scaffold2988 | 23486                   | GG                              | AA              | 1947041543               |

| SNPs IDs            | Chromosome IDs | Chromosomes  | Physical positions (bp) | CDC Frontier (Reference genome) | (ILWC46 & LPNB) | NCBI SNPdb Accession IDs |
|---------------------|----------------|--------------|-------------------------|---------------------------------|-----------------|--------------------------|
| SNP_P4_179103_23493 | NW_004517792.1 | Scaffold2988 | 23493                   | AA                              | CC              | 1947041545               |
| SNP_P4_179104_23508 | NW_004517792.1 | Scaffold2988 | 23508                   | GG                              | AA              | 1947041547               |
| SNP_P4_179105_23539 | NW_004517792.1 | Scaffold2988 | 23539                   | AA                              | TT              | 1947041549               |
| SNP_P4_179106_23543 | NW_004517792.1 | Scaffold2988 | 23543                   | TT                              | CC              | 1947041551               |
| SNP_P4_179107_23573 | NW_004517792.1 | Scaffold2988 | 23573                   | AA                              | GG              | 1947041553               |
| SNP_P4_179108_23574 | NW_004517792.1 | Scaffold2988 | 23574                   | TT                              | CC              | 1947041555               |
| SNP_P4_179109_23580 | NW_004517792.1 | Scaffold2988 | 23580                   | AA                              | GG              | 1947041557               |
| SNP_P4_179110_23596 | NW_004517792.1 | Scaffold2988 | 23596                   | CC                              | TT              | 1947041559               |
| SNP_P4_179111_39637 | NW_004517792.1 | Scaffold2988 | 39637                   | GG                              | AA              | 1947041561               |
| SNP_P4_179112_39649 | NW_004517792.1 | Scaffold2988 | 39649                   | CC                              | GG              | 1947041563               |
| SNP_P4_179113_39659 | NW_004517792.1 | Scaffold2988 | 39659                   | AA                              | CC              | 1947041565               |
| SNP_P4_179114_39660 | NW_004517792.1 | Scaffold2988 | 39660                   | CC                              | TT              | 1947041567               |
| SNP_P4_179115_39667 | NW_004517792.1 | Scaffold2988 | 39667                   | GG                              | AA              | 1947041569               |
| SNP_P4_179116_39668 | NW_004517792.1 | Scaffold2988 | 39668                   | GG                              | AA              | 1947041571               |
| SNP_P4_179117_39674 | NW_004517792.1 | Scaffold2988 | 39674                   | AA                              | TT              | 1947041573               |
| SNP_P4_179118_47132 | NW_004517792.1 | Scaffold2988 | 47132                   | AA                              | CC              | 1947041576               |
| SNP_P4_179119_47316 | NW_004517792.1 | Scaffold2988 | 47316                   | TT                              | CC              | 1947041578               |
| SNP_P4_179120_47360 | NW_004517792.1 | Scaffold2988 | 47360                   | AA                              | TT              | 1947041580               |
| SNP_P4_179121_58683 | NW_004517792.1 | Scaffold2988 | 58683                   | AA                              | CC              | 1947041582               |
| SNP_P4_179122_59176 | NW_004517792.1 | Scaffold2988 | 59176                   | CC                              | TT              | 1947041584               |
| SNP_P4_179123_59224 | NW_004517792.1 | Scaffold2988 | 59224                   | TT                              | AA              | 1947041586               |
| SNP_P4_179124_8984  | NW_004517793.1 | Scaffold2989 | 8984                    | CC                              | TT              | 1947041588               |
| SNP_P4_179125_8989  | NW_004517793.1 | Scaffold2989 | 8989                    | AA                              | GG              | 1947041590               |
| SNP_P4_179126_8996  | NW_004517793.1 | Scaffold2989 | 8996                    | CC                              | GG              | 1947041592               |
| SNP_P4_179127_9008  | NW_004517793.1 | Scaffold2989 | 9008                    | CC                              | GG              | 1947041593               |
| SNP_P4_179128_9809  | NW_004517793.1 | Scaffold2989 | 9809                    | GG                              | AA              | 1947041594               |
| SNP_P4_179129_15076 | NW_004517793.1 | Scaffold2989 | 15076                   | GG                              | TT              | 1947041595               |
| SNP_P4_179130_15652 | NW_004517793.1 | Scaffold2989 | 15652                   | TT                              | CC              | 1947041596               |
| SNP_P4_179131_3378  | NW_004517794.1 | Scaffold2990 | 3378                    | CC                              | TT              | 1947041597               |
| SNP_P4_179132_6172  | NW_004517794.1 | Scaffold2990 | 6172                    | AA                              | GG              | 1947041598               |
| SNP_P4_179133_6286  | NW_004517794.1 | Scaffold2990 | 6286                    | GG                              | AA              | 1947041599               |
| SNP_P4_179134_6304  | NW_004517794.1 | Scaffold2990 | 6304                    | GG                              | AA              | 1947041600               |
| SNP_P4_179135_6334  | NW_004517794.1 | Scaffold2990 | 6334                    | AA                              | CC              | 1947041601               |
| SNP_P4_179137_6505  | NW_004517794.1 | Scaffold2990 | 6505                    | AA                              | TT              | 1947041602               |
| SNP_P4_179138_6563  | NW_004517794.1 | Scaffold2990 | 6563                    | AA                              | TT              | 1947041603               |
| SNP_P4_179139_6570  | NW_004517794.1 | Scaffold2990 | 6570                    | TT                              | CC              | 1947041604               |
| SNP_P4_179140_6597  | NW_004517794.1 | Scaffold2990 | 6597                    | TT                              | GG              | 1947041605               |
| SNP_P4_179141_6645  | NW_004517794.1 | Scaffold2990 | 6645                    | CC                              | AA              | 1947041606               |
| SNP_P4_179142_6647  | NW_004517794.1 | Scaffold2990 | 6647                    | AA                              | GG              | 1947041607               |
| SNP_P4_179143_6682  | NW_004517794.1 | Scaffold2990 | 6682                    | TT                              | GG              | 1947041608               |
| SNP_P4_179144_6687  | NW_004517794.1 | Scaffold2990 | 6687                    | CC                              | TT              | 1947041609               |
| SNP_P4_179145_6689  | NW_004517794.1 | Scaffold2990 | 6689                    | AA                              | GG              | 1947041610               |

| SNPs IDs            | Chromosome IDs | Chromosomes  | Physical positions (bp) | CDC Frontier (Reference genome) | (ILWC46 & LPNB) | NCBI SNPdb Accession IDs |
|---------------------|----------------|--------------|-------------------------|---------------------------------|-----------------|--------------------------|
| SNP_P4_179146_6703  | NW_004517794.1 | Scaffold2990 | 6703                    | AA                              | GG              | 1947041611               |
| SNP_P4_179147_6719  | NW_004517794.1 | Scaffold2990 | 6719                    | GG                              | TT              | 1947041612               |
| SNP_P4_179148_10243 | NW_004517794.1 | Scaffold2990 | 10243                   | CC                              | AA              | 1947041613               |
| SNP_P4_179149_12931 | NW_004517794.1 | Scaffold2990 | 12931                   | GG                              | TT              | 1947041614               |
| SNP_P4_179150_210   | NW_004517797.1 | Scaffold2994 | 210                     | CC                              | TT              | 1947041615               |
| SNP_P4_179151_484   | NW_004517797.1 | Scaffold2994 | 484                     | AA                              | CC              | 1947041617               |
| SNP_P4_179152_4241  | NW_004517797.1 | Scaffold2994 | 4241                    | GG                              | AA              | 1947041619               |
| SNP_P4_179153_4615  | NW_004517797.1 | Scaffold2994 | 4615                    | GG                              | TT              | 1947041621               |
| SNP_P4_179154_4620  | NW_004517797.1 | Scaffold2994 | 4620                    | AA                              | GG              | 1947041623               |
| SNP_P4_179155_9917  | NW_004517797.1 | Scaffold2994 | 9917                    | GG                              | AA              | 1947041625               |
| SNP_P4_179156_9918  | NW_004517797.1 | Scaffold2994 | 9918                    | CC                              | TT              | 1947041627               |
| SNP_P4_179157_9944  | NW_004517797.1 | Scaffold2994 | 9944                    | TT                              | CC              | 1947041629               |
| SNP_P4_179158_10028 | NW_004517797.1 | Scaffold2994 | 10028                   | TT                              | AA              | 1947041631               |
| SNP_P4_179159_10029 | NW_004517797.1 | Scaffold2994 | 10029                   | TT                              | AA              | 1947041633               |
| SNP_P4_179160_10030 | NW_004517797.1 | Scaffold2994 | 10030                   | TT                              | AA              | 1947041635               |
| SNP_P4_179161_4517  | NW_004517798.1 | Scaffold2996 | 4517                    | CC                              | TT              | 1947041637               |
| SNP_P4_179162_4539  | NW_004517798.1 | Scaffold2996 | 4539                    | AA                              | TT              | 1947041639               |
| SNP_P4_179163_4565  | NW_004517798.1 | Scaffold2996 | 4565                    | AA                              | GG              | 1947041641               |
| SNP_P4_179164_4582  | NW_004517798.1 | Scaffold2996 | 4582                    | CC                              | TT              | 1947041643               |
| SNP_P4_179165_19945 | NW_004517798.1 | Scaffold2996 | 19945                   | TT                              | CC              | 1947041645               |
| SNP_P4_179166_396   | NW_004517799.1 | Scaffold2997 | 396                     | CC                              | AA              | 1947041647               |
| SNP_P4_179168_3027  | NW_004517800.1 | Scaffold2998 | 3027                    | TT                              | CC              | 1947041649               |
| SNP_P4_179169_3043  | NW_004517800.1 | Scaffold2998 | 3043                    | TT                              | CC              | 1947041651               |
| SNP_P4_179170_3229  | NW_004517800.1 | Scaffold2998 | 3229                    | GG                              | AA              | 1947041653               |
| SNP_P4_179171_3241  | NW_004517800.1 | Scaffold2998 | 3241                    | AA                              | TT              | 1947041655               |
| SNP_P4_179172_3344  | NW_004517800.1 | Scaffold2998 | 3344                    | CC                              | AA              | 1947041657               |
| SNP_P4_179173_3389  | NW_004517800.1 | Scaffold2998 | 3389                    | CC                              | TT              | 1947041659               |
| SNP_P4_179174_3391  | NW_004517800.1 | Scaffold2998 | 3391                    | TT                              | CC              | 1947041661               |
| SNP_P4_179175_3394  | NW_004517800.1 | Scaffold2998 | 3394                    | GG                              | AA              | 1947041663               |
| SNP_P4_179176_5155  | NW_004517800.1 | Scaffold2998 | 5155                    | AA                              | TT              | 1947041665               |
| SNP_P4_179177_5157  | NW_004517800.1 | Scaffold2998 | 5157                    | CC                              | TT              | 1947041667               |
| SNP_P4_179178_5185  | NW_004517800.1 | Scaffold2998 | 5185                    | AA                              | GG              | 1947041669               |
| SNP_P4_179179_5209  | NW_004517800.1 | Scaffold2998 | 5209                    | TT                              | CC              | 1947041671               |
| SNP_P4_179180_5411  | NW_004517800.1 | Scaffold2998 | 5411                    | CC                              | TT              | 1947041673               |
| SNP_P4_179181_5530  | NW_004517800.1 | Scaffold2998 | 5530                    | CC                              | TT              | 1947041675               |
| SNP_P4_179182_5684  | NW_004517800.1 | Scaffold2998 | 5684                    | GG                              | AA              | 1947041677               |
| SNP_P4_179183_5890  | NW_004517800.1 | Scaffold2998 | 5890                    | AA                              | GG              | 1947041679               |
| SNP_P4_179184_581   | NW_004517802.1 | Scaffold3002 | 581                     | TT                              | GG              | 1947041681               |
| SNP_P4_179185_633   | NW_004517802.1 | Scaffold3002 | 633                     | GG                              | AA              | 1947041684               |
| SNP_P4_179186_853   | NW_004517802.1 | Scaffold3002 | 853                     | GG                              | AA              | 1947041686               |
| SNP_P4_179187_960   | NW_004517802.1 | Scaffold3002 | 960                     | TT                              | AA              | 1947041688               |
| SNP_P4_179188_2944  | NW_004517802.1 | Scaffold3002 | 2944                    | GG                              | TT              | 1947041690               |

| SNPs IDs            | Chromosome IDs | Chromosomes  | Physical positions (bp) | CDC Frontier (Reference genome) | (ILWC46 & LPNB) | NCBI SNPdb Accession IDs |
|---------------------|----------------|--------------|-------------------------|---------------------------------|-----------------|--------------------------|
| SNP_P4_179189_3127  | NW_004517802.1 | Scaffold3002 | 3127                    | CC                              | TT              | 1947041691               |
| SNP_P4_179190_2283  | NW_004517804.1 | Scaffold3005 | 2283                    | AA                              | GG              | 1947041693               |
| SNP_P4_179191_478   | NW_004517807.1 | Scaffold3008 | 478                     | CC                              | TT              | 1947041695               |
| SNP_P4_179192_545   | NW_004517807.1 | Scaffold3008 | 545                     | AA                              | GG              | 1947041697               |
| SNP_P4_179193_617   | NW_004517807.1 | Scaffold3008 | 617                     | GG                              | TT              | 1947041699               |
| SNP_P4_179194_1900  | NW_004517813.1 | Scaffold3015 | 1900                    | AA                              | GG              | 1947041701               |
| SNP_P4_179195_21829 | NW_004517813.1 | Scaffold3015 | 21829                   | CC                              | AA              | 1947041703               |
| SNP_P4_179196_56053 | NW_004517813.1 | Scaffold3015 | 56053                   | TT                              | AA              | 1947041705               |
| SNP_P4_179197_56088 | NW_004517813.1 | Scaffold3015 | 56088                   | AA                              | GG              | 1947041707               |
| SNP_P4_179198_56954 | NW_004517813.1 | Scaffold3015 | 56954                   | TT                              | CC              | 1947041709               |
| SNP_P4_179199_59984 | NW_004517813.1 | Scaffold3015 | 59984                   | GG                              | AA              | 1947041711               |
| SNP_P4_179200_60049 | NW_004517813.1 | Scaffold3015 | 60049                   | AA                              | TT              | 1947041713               |
| SNP_P4_179201_60159 | NW_004517813.1 | Scaffold3015 | 60159                   | CC                              | GG              | 1947041740               |
| SNP_P4_179202_60210 | NW_004517813.1 | Scaffold3015 | 60210                   | CC                              | TT              | 1947041743               |
| SNP_P4_179203_60266 | NW_004517813.1 | Scaffold3015 | 60266                   | GG                              | AA              | 1947041745               |
| SNP_P4_179204_60285 | NW_004517813.1 | Scaffold3015 | 60285                   | CC                              | TT              | 1947041747               |
| SNP_P4_179205_60288 | NW_004517813.1 | Scaffold3015 | 60288                   | CC                              | AA              | 1947041749               |
| SNP_P4_179206_60431 | NW_004517813.1 | Scaffold3015 | 60431                   | GG                              | AA              | 1947041751               |
| SNP_P4_179207_60444 | NW_004517813.1 | Scaffold3015 | 60444                   | CC                              | TT              | 1947041753               |
| SNP_P4_179208_68346 | NW_004517813.1 | Scaffold3015 | 68346                   | CC                              | TT              | 1947041755               |
| SNP_P4_179209_68424 | NW_004517813.1 | Scaffold3015 | 68424                   | AA                              | GG              | 1947041757               |
| SNP_P4_179210_68427 | NW_004517813.1 | Scaffold3015 | 68427                   | AA                              | GG              | 1947041759               |
| SNP_P4_179211_68437 | NW_004517813.1 | Scaffold3015 | 68437                   | CC                              | TT              | 1947041761               |
| SNP_P4_179212_68471 | NW_004517813.1 | Scaffold3015 | 68471                   | CC                              | AA              | 1947041763               |
| SNP_P4_179213_68483 | NW_004517813.1 | Scaffold3015 | 68483                   | AA                              | GG              | 1947041765               |
| SNP_P4_179214_68531 | NW_004517813.1 | Scaffold3015 | 68531                   | CC                              | TT              | 1947041767               |
| SNP_P4_179215_68555 | NW_004517813.1 | Scaffold3015 | 68555                   | GG                              | AA              | 1947041769               |
| SNP_P4_179216_68559 | NW_004517813.1 | Scaffold3015 | 68559                   | TT                              | AA              | 1947041771               |
| SNP_P4_179217_68581 | NW_004517813.1 | Scaffold3015 | 68581                   | AA                              | TT              | 1947041773               |
| SNP_P4_179218_68597 | NW_004517813.1 | Scaffold3015 | 68597                   | GG                              | AA              | 1947041775               |
| SNP_P4_179219_68642 | NW_004517813.1 | Scaffold3015 | 68642                   | CC                              | AA              | 1947041777               |
| SNP_P4_179221_68672 | NW_004517813.1 | Scaffold3015 | 68672                   | TT                              | GG              | 1947041779               |
| SNP_P4_179222_68704 | NW_004517813.1 | Scaffold3015 | 68704                   | TT                              | CC              | 1947041781               |
| SNP_P4_179223_68707 | NW_004517813.1 | Scaffold3015 | 68707                   | TT                              | AA              | 1947041783               |
| SNP_P4_179224_68756 | NW_004517813.1 | Scaffold3015 | 68756                   | TT                              | CC              | 1947041785               |
| SNP_P4_179225_68832 | NW_004517813.1 | Scaffold3015 | 68832                   | AA                              | TT              | 1947041787               |
| SNP_P4_179226_68858 | NW_004517813.1 | Scaffold3015 | 68858                   | CC                              | TT              | 1947041789               |
| SNP_P4_179227_68897 | NW_004517813.1 | Scaffold3015 | 68897                   | AA                              | TT              | 1947041791               |
| SNP_P4_179228_68940 | NW_004517813.1 | Scaffold3015 | 68940                   | AA                              | CC              | 1947041793               |
| SNP_P4_179229_69050 | NW_004517813.1 | Scaffold3015 | 69050                   | TT                              | CC              | 1947041795               |
| SNP_P4_179230_69151 | NW_004517813.1 | Scaffold3015 | 69151                   | TT                              | CC              | 1947041797               |
| SNP_P4_179232_69235 | NW_004517813.1 | Scaffold3015 | 69235                   | GG                              | AA              | 1947041799               |

| SNPs IDs            | Chromosome IDs | Chromosomes  | Physical positions (bp) | CDC Frontier (Reference genome) | (ILWC46 & LPNB) | NCBI SNPdb Accession IDs |
|---------------------|----------------|--------------|-------------------------|---------------------------------|-----------------|--------------------------|
| SNP_P4_179233_73150 | NW_004517813.1 | Scaffold3015 | 73150                   | AA                              | GG              | 1947041801               |
| SNP_P4_179235_73369 | NW_004517813.1 | Scaffold3015 | 73369                   | TT                              | AA              | 1947041803               |
| SNP_P4_179236_73409 | NW_004517813.1 | Scaffold3015 | 73409                   | AA                              | CC              | 1947041805               |
| SNP_P4_179237_73430 | NW_004517813.1 | Scaffold3015 | 73430                   | AA                              | GG              | 1947041807               |
| SNP_P4_179239_73610 | NW_004517813.1 | Scaffold3015 | 73610                   | CC                              | TT              | 1947041809               |
| SNP_P4_179240_73612 | NW_004517813.1 | Scaffold3015 | 73612                   | CC                              | TT              | 1947041811               |
| SNP_P4_179241_73639 | NW_004517813.1 | Scaffold3015 | 73639                   | AA                              | GG              | 1947041813               |
| SNP_P4_179242_73688 | NW_004517813.1 | Scaffold3015 | 73688                   | AA                              | GG              | 1947041815               |
| SNP_P4_179243_73809 | NW_004517813.1 | Scaffold3015 | 73809                   | CC                              | TT              | 1947041817               |
| SNP_P4_179244_73930 | NW_004517813.1 | Scaffold3015 | 73930                   | TT                              | CC              | 1947041819               |
| SNP_P4_179246_73968 | NW_004517813.1 | Scaffold3015 | 73968                   | AA                              | TT              | 1947041821               |
| SNP_P4_179247_73988 | NW_004517813.1 | Scaffold3015 | 73988                   | AA                              | GG              | 1947041823               |
| SNP_P4_179249_74121 | NW_004517813.1 | Scaffold3015 | 74121                   | CC                              | GG              | 1947041825               |
| SNP_P4_179251_74191 | NW_004517813.1 | Scaffold3015 | 74191                   | CC                              | GG              | 1947041827               |
| SNP_P4_179252_74229 | NW_004517813.1 | Scaffold3015 | 74229                   | TT                              | CC              | 1947041829               |
| SNP_P4_179253_74263 | NW_004517813.1 | Scaffold3015 | 74263                   | GG                              | CC              | 1947041831               |
| SNP_P4_179254_74335 | NW_004517813.1 | Scaffold3015 | 74335                   | AA                              | GG              | 1947041833               |
| SNP_P4_179255_74426 | NW_004517813.1 | Scaffold3015 | 74426                   | AA                              | GG              | 1947041835               |
| SNP_P4_179258_76863 | NW_004517813.1 | Scaffold3015 | 76863                   | CC                              | TT              | 1947041837               |
| SNP_P4_179259_77036 | NW_004517813.1 | Scaffold3015 | 77036                   | TT                              | CC              | 1947041839               |
| SNP_P4_179260_77055 | NW_004517813.1 | Scaffold3015 | 77055                   | CC                              | TT              | 1947041841               |
| SNP_P4_179261_77060 | NW_004517813.1 | Scaffold3015 | 77060                   | TT                              | AA              | 1947041843               |
| SNP_P4_179262_78629 | NW_004517813.1 | Scaffold3015 | 78629                   | GG                              | CC              | 1947041845               |
| SNP_P4_179263_80112 | NW_004517813.1 | Scaffold3015 | 80112                   | CC                              | TT              | 1947041847               |
| SNP_P4_179264_80224 | NW_004517813.1 | Scaffold3015 | 80224                   | TT                              | CC              | 1947041849               |
| SNP_P4_179265_80227 | NW_004517813.1 | Scaffold3015 | 80227                   | CC                              | TT              | 1947041851               |
| SNP_P4_179266_80389 | NW_004517813.1 | Scaffold3015 | 80389                   | GG                              | AA              | 1947041853               |
| SNP_P4_179267_80418 | NW_004517813.1 | Scaffold3015 | 80418                   | GG                              | AA              | 1947041855               |
| SNP_P4_179268_80540 | NW_004517813.1 | Scaffold3015 | 80540                   | CC                              | TT              | 1947041857               |
| SNP_P4_179269_80542 | NW_004517813.1 | Scaffold3015 | 80542                   | CC                              | TT              | 1947041859               |
| SNP_P4_179270_80842 | NW_004517813.1 | Scaffold3015 | 80842                   | AA                              | GG              | 1947041861               |
| SNP_P4_179271_80890 | NW_004517813.1 | Scaffold3015 | 80890                   | GG                              | AA              | 1947041863               |
| SNP_P4_179272_80893 | NW_004517813.1 | Scaffold3015 | 80893                   | TT                              | CC              | 1947041865               |
| SNP_P4_179273_80944 | NW_004517813.1 | Scaffold3015 | 80944                   | TT                              | CC              | 1947041867               |
| SNP_P4_179274_80984 | NW_004517813.1 | Scaffold3015 | 80984                   | GG                              | AA              | 1947041869               |
| SNP_P4_179275_81177 | NW_004517813.1 | Scaffold3015 | 81177                   | AA                              | GG              | 1947041871               |
| SNP_P4_179276_81230 | NW_004517813.1 | Scaffold3015 | 81230                   | TT                              | CC              | 1947041873               |
| SNP_P4_179277_81238 | NW_004517813.1 | Scaffold3015 | 81238                   | CC                              | GG              | 1947041875               |
| SNP_P4_179278_81267 | NW_004517813.1 | Scaffold3015 | 81267                   | CC                              | AA              | 1947041878               |
| SNP_P4_179279_81279 | NW_004517813.1 | Scaffold3015 | 81279                   | TT                              | GG              | 1947041880               |
| SNP_P4_179280_81481 | NW_004517813.1 | Scaffold3015 | 81481                   | CC                              | TT              | 1947041882               |
| SNP_P4_179281_81514 | NW_004517813.1 | Scaffold3015 | 81514                   | TT                              | CC              | 1947041883               |

| SNPs IDs             | Chromosome IDs | Chromosomes  | Physical positions (bp) | CDC Frontier (Reference genome) | (ILWC46 & LPNB) | NCBI SNPdb Accession IDs |
|----------------------|----------------|--------------|-------------------------|---------------------------------|-----------------|--------------------------|
| SNP_P4_179282_81554  | NW_004517813.1 | Scaffold3015 | 81554                   | GG                              | TT              | 1947041885               |
| SNP_P4_179283_81559  | NW_004517813.1 | Scaffold3015 | 81559                   | AA                              | GG              | 1947041887               |
| SNP_P4_179284_81603  | NW_004517813.1 | Scaffold3015 | 81603                   | CC                              | AA              | 1947041889               |
| SNP_P4_179285_81620  | NW_004517813.1 | Scaffold3015 | 81620                   | TT                              | CC              | 1947041892               |
| SNP_P4_179286_81648  | NW_004517813.1 | Scaffold3015 | 81648                   | TT                              | AA              | 1947041894               |
| SNP_P4_179287_81965  | NW_004517813.1 | Scaffold3015 | 81965                   | GG                              | AA              | 1947041896               |
| SNP_P4_179288_81980  | NW_004517813.1 | Scaffold3015 | 81980                   | CC                              | TT              | 1947041898               |
| SNP_P4_179289_81981  | NW_004517813.1 | Scaffold3015 | 81981                   | AA                              | GG              | 1947041900               |
| SNP_P4_179290_83085  | NW_004517813.1 | Scaffold3015 | 83085                   | TT                              | CC              | 1947041902               |
| SNP_P4_179291_85166  | NW_004517813.1 | Scaffold3015 | 85166                   | CC                              | AA              | 1947041904               |
| SNP_P4_179292_39228  | NW_004517814.1 | Scaffold3016 | 39228                   | AA                              | TT              | 1947041906               |
| SNP_P4_179293_39404  | NW_004517814.1 | Scaffold3016 | 39404                   | TT                              | AA              | 1947041908               |
| SNP_P4_179294_57124  | NW_004517814.1 | Scaffold3016 | 57124                   | TT                              | AA              | 1947041910               |
| SNP_P4_179295_57133  | NW_004517814.1 | Scaffold3016 | 57133                   | CC                              | TT              | 1947041912               |
| SNP_P4_179296_57370  | NW_004517814.1 | Scaffold3016 | 57370                   | TT                              | AA              | 1947041914               |
| SNP_P4_179297_57883  | NW_004517814.1 | Scaffold3016 | 57883                   | GG                              | AA              | 1947041916               |
| SNP_P4_179298_71915  | NW_004517814.1 | Scaffold3016 | 71915                   | AA                              | TT              | 1947041918               |
| SNP_P4_179301_97420  | NW_004517814.1 | Scaffold3016 | 97420                   | AA                              | CC              | 1947041920               |
| SNP_P4_179302_97431  | NW_004517814.1 | Scaffold3016 | 97431                   | CC                              | AA              | 1947041922               |
| SNP_P4_179303_106352 | NW_004517814.1 | Scaffold3016 | 106352                  | GG                              | AA              | 1947041924               |
| SNP_P4_179304_119788 | NW_004517814.1 | Scaffold3016 | 119788                  | GG                              | AA              | 1947041926               |
| SNP_P4_179305_119825 | NW_004517814.1 | Scaffold3016 | 119825                  | TT                              | GG              | 1947041928               |
| SNP_P4_179306_119843 | NW_004517814.1 | Scaffold3016 | 119843                  | AA                              | GG              | 1947041931               |
| SNP_P4_179307_120326 | NW_004517814.1 | Scaffold3016 | 120326                  | TT                              | CC              | 1947041933               |
| SNP_P4_179308_120673 | NW_004517814.1 | Scaffold3016 | 120673                  | AA                              | CC              | 1947041935               |
| SNP_P4_179309_893    | NW_004517815.1 | Scaffold3017 | 893                     | AA                              | TT              | 1947041937               |
| SNP_P4_179310_2520   | NW_004517816.1 | Scaffold3018 | 2520                    | TT                              | CC              | 1947041939               |
| SNP_P4_179311_3944   | NW_004517816.1 | Scaffold3018 | 3944                    | TT                              | CC              | 1947041941               |
| SNP_P4_179312_4240   | NW_004517816.1 | Scaffold3018 | 4240                    | GG                              | AA              | 1947041943               |
| SNP_P4_179313_4245   | NW_004517816.1 | Scaffold3018 | 4245                    | TT                              | AA              | 1947041945               |
| SNP_P4_179314_6344   | NW_004517816.1 | Scaffold3018 | 6344                    | AA                              | GG              | 1947041947               |
| SNP_P4_179315_6968   | NW_004517816.1 | Scaffold3018 | 6968                    | TT                              | CC              | 1947041949               |
| SNP_P4_179316_448    | NW_004517817.1 | Scaffold3019 | 448                     | AA                              | CC              | 1947041951               |
| SNP_P4_179317_893    | NW_004517817.1 | Scaffold3019 | 893                     | TT                              | CC              | 1947041953               |
| SNP_P4_179318_938    | NW_004517817.1 | Scaffold3019 | 938                     | TT                              | CC              | 1947041955               |
| SNP_P4_179320_17705  | NW_004517817.1 | Scaffold3019 | 17705                   | CC                              | AA              | 1947041957               |
| SNP_P4_179321_18139  | NW_004517817.1 | Scaffold3019 | 18139                   | AA                              | CC              | 1947041959               |
| SNP_P4_179322_18321  | NW_004517817.1 | Scaffold3019 | 18321                   | CC                              | GG              | 1947041961               |
| SNP_P4_179323_18382  | NW_004517817.1 | Scaffold3019 | 18382                   | CC                              | AA              | 1947041963               |
| SNP_P4_179324_18501  | NW_004517817.1 | Scaffold3019 | 18501                   | TT                              | CC              | 1947041965               |
| SNP_P4_179325_18668  | NW_004517817.1 | Scaffold3019 | 18668                   | CC                              | AA              | 1947041967               |
| SNP_P4_179326_18808  | NW_004517817.1 | Scaffold3019 | 18808                   | GG                              | AA              | 1947041969               |

| SNPs IDs            | Chromosome IDs | Chromosomes  | Physical positions (bp) | CDC Frontier (Reference genome) | (ILWC46 & LPNB) | NCBI SNPdb Accession IDs |
|---------------------|----------------|--------------|-------------------------|---------------------------------|-----------------|--------------------------|
| SNP_P4_179327_18892 | NW_004517817.1 | Scaffold3019 | 18892                   | GG                              | AA              | 1947041971               |
| SNP_P4_179328_18937 | NW_004517817.1 | Scaffold3019 | 18937                   | AA                              | CC              | 1947041973               |
| SNP_P4_179329_18957 | NW_004517817.1 | Scaffold3019 | 18957                   | GG                              | TT              | 1947041975               |
| SNP_P4_179330_19620 | NW_004517817.1 | Scaffold3019 | 19620                   | GG                              | AA              | 1947041977               |
| SNP_P4_179331_19622 | NW_004517817.1 | Scaffold3019 | 19622                   | AA                              | TT              | 1947041979               |
| SNP_P4_179332_19883 | NW_004517817.1 | Scaffold3019 | 19883                   | GG                              | TT              | 1947041981               |
| SNP_P4_179333_19966 | NW_004517817.1 | Scaffold3019 | 19966                   | AA                              | TT              | 1947041983               |
| SNP_P4_179334_19975 | NW_004517817.1 | Scaffold3019 | 19975                   | AA                              | CC              | 1947041985               |
| SNP_P4_179335_20131 | NW_004517817.1 | Scaffold3019 | 20131                   | CC                              | TT              | 1947041987               |
| SNP_P4_179336_20303 | NW_004517817.1 | Scaffold3019 | 20303                   | CC                              | AA              | 1947041989               |
| SNP_P4_179337_20406 | NW_004517817.1 | Scaffold3019 | 20406                   | CC                              | TT              | 1947041991               |
| SNP_P4_179338_20408 | NW_004517817.1 | Scaffold3019 | 20408                   | GG                              | TT              | 1947041993               |
| SNP_P4_179339_20499 | NW_004517817.1 | Scaffold3019 | 20499                   | TT                              | GG              | 1947041995               |
| SNP_P4_179340_20510 | NW_004517817.1 | Scaffold3019 | 20510                   | AA                              | GG              | 1947041997               |
| SNP_P4_179341_20607 | NW_004517817.1 | Scaffold3019 | 20607                   | GG                              | TT              | 1947041999               |
| SNP_P4_179342_20611 | NW_004517817.1 | Scaffold3019 | 20611                   | AA                              | CC              | 1947042001               |
| SNP_P4_179343_20792 | NW_004517817.1 | Scaffold3019 | 20792                   | TT                              | CC              | 1947042003               |
| SNP_P4_179344_20795 | NW_004517817.1 | Scaffold3019 | 20795                   | AA                              | CC              | 1947042005               |
| SNP_P4_179346_20918 | NW_004517817.1 | Scaffold3019 | 20918                   | CC                              | TT              | 1947042007               |
| SNP_P4_179347_21243 | NW_004517817.1 | Scaffold3019 | 21243                   | TT                              | AA              | 1947042009               |
| SNP_P4_179349_21329 | NW_004517817.1 | Scaffold3019 | 21329                   | AA                              | GG              | 1947042011               |
| SNP_P4_179350_21343 | NW_004517817.1 | Scaffold3019 | 21343                   | TT                              | AA              | 1947042013               |
| SNP_P4_179351_21395 | NW_004517817.1 | Scaffold3019 | 21395                   | AA                              | GG              | 1947042015               |
| SNP_P4_179352_21432 | NW_004517817.1 | Scaffold3019 | 21432                   | CC                              | TT              | 1947042017               |
| SNP_P4_179353_21502 | NW_004517817.1 | Scaffold3019 | 21502                   | CC                              | AA              | 1947042019               |
| SNP_P4_179354_1165  | NW_004517819.1 | Scaffold3021 | 1165                    | AA                              | GG              | 1947042021               |
| SNP_P4_179356_2450  | NW_004517820.1 | Scaffold3022 | 2450                    | GG                              | CC              | 1947042023               |
| SNP_P4_179357_6784  | NW_004517820.1 | Scaffold3022 | 6784                    | CC                              | TT              | 1947042024               |
| SNP_P4_179358_6806  | NW_004517820.1 | Scaffold3022 | 6806                    | GG                              | AA              | 1947042026               |
| SNP_P4_179359_6904  | NW_004517820.1 | Scaffold3022 | 6904                    | GG                              | AA              | 1947042028               |
| SNP_P4_179360_7075  | NW_004517820.1 | Scaffold3022 | 7075                    | AA                              | GG              | 1947042030               |
| SNP_P4_179361_7088  | NW_004517820.1 | Scaffold3022 | 7088                    | GG                              | TT              | 1947042032               |
| SNP_P4_179362_7108  | NW_004517820.1 | Scaffold3022 | 7108                    | TT                              | CC              | 1947042034               |
| SNP_P4_179363_7459  | NW_004517820.1 | Scaffold3022 | 7459                    | GG                              | AA              | 1947042036               |
| SNP_P4_179364_9756  | NW_004517820.1 | Scaffold3022 | 9756                    | AA                              | GG              | 1947042038               |
| SNP_P4_179365_10589 | NW_004517820.1 | Scaffold3022 | 10589                   | AA                              | GG              | 1947042040               |
| SNP_P4_179366_10623 | NW_004517820.1 | Scaffold3022 | 10623                   | GG                              | AA              | 1947042042               |
| SNP_P4_179367_10763 | NW_004517820.1 | Scaffold3022 | 10763                   | AA                              | CC              | 1947042044               |
| SNP_P4_179368_13823 | NW_004517820.1 | Scaffold3022 | 13823                   | AA                              | GG              | 1947042046               |
| SNP_P4_179369_13830 | NW_004517820.1 | Scaffold3022 | 13830                   | CC                              | TT              | 1947042048               |
| SNP_P4_179370_13831 | NW_004517820.1 | Scaffold3022 | 13831                   | AA                              | GG              | 1947042050               |
| SNP_P4_179371_13832 | NW_004517820.1 | Scaffold3022 | 13832                   | CC                              | AA              | 1947042052               |



| SNPs IDs            | Chromosome IDs | Chromosomes  | Physical positions (bp) | CDC Frontier (Reference genome) | (ILWC46 & LPNB) | NCBI SNPdb Accession IDs |
|---------------------|----------------|--------------|-------------------------|---------------------------------|-----------------|--------------------------|
| SNP_P4_179372_13835 | NW_004517820.1 | Scaffold3022 | 13835                   | CC                              | TT              | 1947042054               |
| SNP_P4_179373_14171 | NW_004517820.1 | Scaffold3022 | 14171                   | CC                              | TT              | 1947042056               |
| SNP_P4_179374_20201 | NW_004517820.1 | Scaffold3022 | 20201                   | TT                              | AA              | 1947042058               |
| SNP_P4_179375_2684  | NW_004517822.1 | Scaffold3026 | 2684                    | TT                              | CC              | 1947042061               |
| SNP_P4_179376_2702  | NW_004517822.1 | Scaffold3026 | 2702                    | AA                              | CC              | 1947042063               |
| SNP_P4_179377_2726  | NW_004517822.1 | Scaffold3026 | 2726                    | AA                              | TT              | 1947042064               |
| SNP_P4_179378_2887  | NW_004517822.1 | Scaffold3026 | 2887                    | CC                              | TT              | 1947042066               |
| SNP_P4_179379_2891  | NW_004517822.1 | Scaffold3026 | 2891                    | TT                              | CC              | 1947042068               |
| SNP_P4_179380_2955  | NW_004517822.1 | Scaffold3026 | 2955                    | AA                              | GG              | 1947042070               |
| SNP_P4_179381_5101  | NW_004517822.1 | Scaffold3026 | 5101                    | GG                              | AA              | 1947042072               |
| SNP_P4_179382_5171  | NW_004517822.1 | Scaffold3026 | 5171                    | TT                              | CC              | 1947042075               |
| SNP_P4_179383_5192  | NW_004517822.1 | Scaffold3026 | 5192                    | CC                              | TT              | 1947042077               |
| SNP_P4_179384_5423  | NW_004517822.1 | Scaffold3026 | 5423                    | TT                              | AA              | 1947042079               |
| SNP_P4_179385_5449  | NW_004517822.1 | Scaffold3026 | 5449                    | GG                              | AA              | 1947042081               |
| SNP_P4_179386_5453  | NW_004517822.1 | Scaffold3026 | 5453                    | AA                              | TT              | 1947042083               |
| SNP_P4_179387_5464  | NW_004517822.1 | Scaffold3026 | 5464                    | CC                              | TT              | 1947042085               |
| SNP_P4_179388_5478  | NW_004517822.1 | Scaffold3026 | 5478                    | TT                              | AA              | 1947042086               |
| SNP_P4_179389_5510  | NW_004517822.1 | Scaffold3026 | 5510                    | TT                              | GG              | 1947042088               |
| SNP_P4_179390_9199  | NW_004517822.1 | Scaffold3026 | 9199                    | AA                              | TT              | 1947042090               |
| SNP_P4_179391_9326  | NW_004517822.1 | Scaffold3026 | 9326                    | GG                              | AA              | 1947042092               |
| SNP_P4_179392_9351  | NW_004517822.1 | Scaffold3026 | 9351                    | AA                              | GG              | 1947042094               |
| SNP_P4_179393_9362  | NW_004517822.1 | Scaffold3026 | 9362                    | GG                              | AA              | 1947042096               |
| SNP_P4_179394_9583  | NW_004517822.1 | Scaffold3026 | 9583                    | GG                              | AA              | 1947042098               |
| SNP_P4_179395_3364  | NW_004517823.1 | Scaffold3028 | 3364                    | TT                              | AA              | 1947042100               |
| SNP_P4_179396_3405  | NW_004517823.1 | Scaffold3028 | 3405                    | TT                              | AA              | 1947042102               |
| SNP_P4_179397_3469  | NW_004517823.1 | Scaffold3028 | 3469                    | TT                              | CC              | 1947042104               |
| SNP_P4_179398_3717  | NW_004517823.1 | Scaffold3028 | 3717                    | CC                              | AA              | 1947042106               |
| SNP_P4_179399_7564  | NW_004517823.1 | Scaffold3028 | 7564                    | GG                              | AA              | 1947042108               |
| SNP_P4_179400_7893  | NW_004517823.1 | Scaffold3028 | 7893                    | AA                              | GG              | 1947042110               |
| SNP_P4_179401_7908  | NW_004517823.1 | Scaffold3028 | 7908                    | CC                              | GG              | 1947042112               |
| SNP_P4_179402_64    | NW_004517824.1 | Scaffold3029 | 64                      | TT                              | AA              | 1947042114               |
| SNP_P4_179404_131   | NW_004517824.1 | Scaffold3029 | 131                     | GG                              | AA              | 1947042116               |
| SNP_P4_179405_363   | NW_004517824.1 | Scaffold3029 | 363                     | CC                              | GG              | 1947042118               |
| SNP_P4_179407_582   | NW_004517824.1 | Scaffold3029 | 582                     | GG                              | CC              | 1947042120               |
| SNP_P4_179408_585   | NW_004517824.1 | Scaffold3029 | 585                     | AA                              | TT              | 1947042122               |
| SNP_P4_179409_592   | NW_004517824.1 | Scaffold3029 | 592                     | GG                              | CC              | 1947042124               |
| SNP_P4_179410_596   | NW_004517824.1 | Scaffold3029 | 596                     | TT                              | AA              | 1947042126               |
| SNP_P4_179411_634   | NW_004517824.1 | Scaffold3029 | 634                     | TT                              | CC              | 1947042128               |
| SNP_P4_179412_10466 | NW_004517824.1 | Scaffold3029 | 10466                   | CC                              | AA              | 1947042130               |
| SNP_P4_179413_10474 | NW_004517824.1 | Scaffold3029 | 10474                   | AA                              | TT              | 1947042132               |
| SNP_P4_179414_14640 | NW_004517824.1 | Scaffold3029 | 14640                   | CC                              | AA              | 1947042134               |
| SNP_P4_179415_14672 | NW_004517824.1 | Scaffold3029 | 14672                   | AA                              | GG              | 1947042136               |

| SNPs IDs            | Chromosome IDs | Chromosomes  | Physical positions (bp) | CDC Frontier (Reference genome) | (ILWC46 & LPNB) | NCBI SNPdb Accession IDs |
|---------------------|----------------|--------------|-------------------------|---------------------------------|-----------------|--------------------------|
| SNP_P4_179416_14674 | NW_004517824.1 | Scaffold3029 | 14674                   | TT                              | GG              | 1947042138               |
| SNP_P4_179417_14677 | NW_004517824.1 | Scaffold3029 | 14677                   | TT                              | GG              | 1947042140               |
| SNP_P4_179418_14858 | NW_004517824.1 | Scaffold3029 | 14858                   | GG                              | CC              | 1947042142               |
| SNP_P4_179420_15238 | NW_004517824.1 | Scaffold3029 | 15238                   | CC                              | TT              | 1947042144               |
| SNP_P4_179421_15253 | NW_004517824.1 | Scaffold3029 | 15253                   | CC                              | TT              | 1947042146               |
| SNP_P4_179422_153   | NW_004517825.1 | Scaffold3030 | 153                     | CC                              | TT              | 1947042148               |
| SNP_P4_179423_7853  | NW_004517827.1 | Scaffold3032 | 7853                    | CC                              | TT              | 1947042150               |
| SNP_P4_179424_7952  | NW_004517827.1 | Scaffold3032 | 7952                    | TT                              | AA              | 1947042153               |
| SNP_P4_179425_11182 | NW_004517827.1 | Scaffold3032 | 11182                   | CC                              | TT              | 1947042155               |
| SNP_P4_179426_11604 | NW_004517827.1 | Scaffold3032 | 11604                   | TT                              | AA              | 1947042157               |
| SNP_P4_179427_12148 | NW_004517827.1 | Scaffold3032 | 12148                   | GG                              | AA              | 1947042159               |
| SNP_P4_179429_894   | NW_004517828.1 | Scaffold3033 | 894                     | CC                              | AA              | 1947042161               |
| SNP_P4_179431_17440 | NW_004517831.1 | Scaffold3038 | 17440                   | CC                              | TT              | 1947042163               |
| SNP_P4_179432_17478 | NW_004517831.1 | Scaffold3038 | 17478                   | CC                              | GG              | 1947042165               |
| SNP_P4_179433_17664 | NW_004517831.1 | Scaffold3038 | 17664                   | TT                              | CC              | 1947042167               |
| SNP_P4_179434_17666 | NW_004517831.1 | Scaffold3038 | 17666                   | GG                              | TT              | 1947042169               |
| SNP_P4_179435_17699 | NW_004517831.1 | Scaffold3038 | 17699                   | AA                              | CC              | 1947042171               |
| SNP_P4_179436_17759 | NW_004517831.1 | Scaffold3038 | 17759                   | AA                              | TT              | 1947042173               |
| SNP_P4_179437_17936 | NW_004517831.1 | Scaffold3038 | 17936                   | GG                              | AA              | 1947042175               |
| SNP_P4_179438_19202 | NW_004517831.1 | Scaffold3038 | 19202                   | GG                              | AA              | 1947042177               |
| SNP_P4_179439_19214 | NW_004517831.1 | Scaffold3038 | 19214                   | TT                              | GG              | 1947042179               |
| SNP_P4_179440_19306 | NW_004517831.1 | Scaffold3038 | 19306                   | TT                              | CC              | 1947042181               |
| SNP_P4_179441_21490 | NW_004517831.1 | Scaffold3038 | 21490                   | TT                              | CC              | 1947042183               |
| SNP_P4_179442_21646 | NW_004517831.1 | Scaffold3038 | 21646                   | GG                              | CC              | 1947042185               |
| SNP_P4_179443_24177 | NW_004517831.1 | Scaffold3038 | 24177                   | CC                              | GG              | 1947042187               |
| SNP_P4_179444_24308 | NW_004517831.1 | Scaffold3038 | 24308                   | GG                              | AA              | 1947042189               |
| SNP_P4_179445_24588 | NW_004517831.1 | Scaffold3038 | 24588                   | CC                              | AA              | 1947042191               |
| SNP_P4_179446_24966 | NW_004517831.1 | Scaffold3038 | 24966                   | TT                              | CC              | 1947042193               |
| SNP_P4_179447_24982 | NW_004517831.1 | Scaffold3038 | 24982                   | TT                              | GG              | 1947042195               |
| SNP_P4_179448_47762 | NW_004517831.1 | Scaffold3038 | 47762                   | GG                              | TT              | 1947042197               |
| SNP_P4_179449_47778 | NW_004517831.1 | Scaffold3038 | 47778                   | AA                              | TT              | 1947042199               |
| SNP_P4_179450_47799 | NW_004517831.1 | Scaffold3038 | 47799                   | AA                              | GG              | 1947042201               |
| SNP_P4_179451_48704 | NW_004517831.1 | Scaffold3038 | 48704                   | TT                              | AA              | 1947042203               |
| SNP_P4_179452_14422 | NW_004517836.1 | Scaffold3046 | 14422                   | CC                              | TT              | 1947042205               |
| SNP_P4_179454_14477 | NW_004517836.1 | Scaffold3046 | 14477                   | CC                              | GG              | 1947042207               |
| SNP_P4_179455_14501 | NW_004517836.1 | Scaffold3046 | 14501                   | CC                              | AA              | 1947042209               |
| SNP_P4_179456_14517 | NW_004517836.1 | Scaffold3046 | 14517                   | TT                              | GG              | 1947042211               |
| SNP_P4_179457_417   | NW_004517839.1 | Scaffold3049 | 417                     | TT                              | CC              | 1947042213               |
| SNP_P4_179458_501   | NW_004517839.1 | Scaffold3049 | 501                     | AA                              | GG              | 1947042215               |
| SNP_P4_179459_878   | NW_004517839.1 | Scaffold3049 | 878                     | GG                              | AA              | 1947042217               |
| SNP_P4_179460_879   | NW_004517839.1 | Scaffold3049 | 879                     | AA                              | CC              | 1947042220               |
| SNP_P4_179461_1073  | NW_004517839.1 | Scaffold3049 | 1073                    | GG                              | TT              | 1947042222               |

| SNPs IDs            | Chromosome IDs | Chromosomes  | Physical positions (bp) | CDC Frontier (Reference genome) | (ILWC46 & LPNB) | NCBI SNPdb Accession IDs |
|---------------------|----------------|--------------|-------------------------|---------------------------------|-----------------|--------------------------|
| SNP_P4_179462_1125  | NW_004517839.1 | Scaffold3049 | 1125                    | TT                              | CC              | 1947042224               |
| SNP_P4_179463_178   | NW_004517840.1 | Scaffold3050 | 178                     | CC                              | TT              | 1947042226               |
| SNP_P4_179464_458   | NW_004517840.1 | Scaffold3050 | 458                     | TT                              | AA              | 1947042228               |
| SNP_P4_179465_725   | NW_004517840.1 | Scaffold3050 | 725                     | CC                              | GG              | 1947042230               |
| SNP_P4_179466_737   | NW_004517840.1 | Scaffold3050 | 737                     | CC                              | AA              | 1947042232               |
| SNP_P4_179467_4729  | NW_004517841.1 | Scaffold3051 | 4729                    | TT                              | CC              | 1947042234               |
| SNP_P4_179468_4814  | NW_004517841.1 | Scaffold3051 | 4814                    | AA                              | TT              | 1947042236               |
| SNP_P4_179469_4874  | NW_004517841.1 | Scaffold3051 | 4874                    | GG                              | CC              | 1947042238               |
| SNP_P4_179470_4877  | NW_004517841.1 | Scaffold3051 | 4877                    | TT                              | CC              | 1947042240               |
| SNP_P4_179471_4964  | NW_004517841.1 | Scaffold3051 | 4964                    | GG                              | CC              | 1947042242               |
| SNP_P4_179472_4976  | NW_004517841.1 | Scaffold3051 | 4976                    | GG                              | AA              | 1947042244               |
| SNP_P4_179473_4994  | NW_004517841.1 | Scaffold3051 | 4994                    | AA                              | GG              | 1947042246               |
| SNP_P4_179474_5093  | NW_004517841.1 | Scaffold3051 | 5093                    | CC                              | TT              | 1947042248               |
| SNP_P4_179475_5209  | NW_004517841.1 | Scaffold3051 | 5209                    | GG                              | CC              | 1947042250               |
| SNP_P4_179476_5236  | NW_004517841.1 | Scaffold3051 | 5236                    | CC                              | TT              | 1947042252               |
| SNP_P4_179477_5282  | NW_004517841.1 | Scaffold3051 | 5282                    | AA                              | GG              | 1947042254               |
| SNP_P4_179478_5292  | NW_004517841.1 | Scaffold3051 | 5292                    | GG                              | AA              | 1947042256               |
| SNP_P4_179479_5301  | NW_004517841.1 | Scaffold3051 | 5301                    | GG                              | AA              | 1947042258               |
| SNP_P4_179480_5547  | NW_004517841.1 | Scaffold3051 | 5547                    | CC                              | TT              | 1947042260               |
| SNP_P4_179481_5559  | NW_004517841.1 | Scaffold3051 | 5559                    | GG                              | TT              | 1947042262               |
| SNP_P4_179482_5595  | NW_004517841.1 | Scaffold3051 | 5595                    | TT                              | GG              | 1947042264               |
| SNP_P4_179483_5664  | NW_004517841.1 | Scaffold3051 | 5664                    | AA                              | CC              | 1947042266               |
| SNP_P4_179484_7797  | NW_004517841.1 | Scaffold3051 | 7797                    | CC                              | AA              | 1947042268               |
| SNP_P4_179485_7825  | NW_004517841.1 | Scaffold3051 | 7825                    | CC                              | TT              | 1947042270               |
| SNP_P4_179486_7826  | NW_004517841.1 | Scaffold3051 | 7826                    | AA                              | GG              | 1947042272               |
| SNP_P4_179487_8204  | NW_004517841.1 | Scaffold3051 | 8204                    | AA                              | TT              | 1947042274               |
| SNP_P4_179488_8208  | NW_004517841.1 | Scaffold3051 | 8208                    | CC                              | TT              | 1947042276               |
| SNP_P4_179489_8456  | NW_004517841.1 | Scaffold3051 | 8456                    | GG                              | CC              | 1947042278               |
| SNP_P4_179490_8496  | NW_004517841.1 | Scaffold3051 | 8496                    | TT                              | CC              | 1947042280               |
| SNP_P4_179491_8497  | NW_004517841.1 | Scaffold3051 | 8497                    | CC                              | TT              | 1947042314               |
| SNP_P4_179492_10558 | NW_004517841.1 | Scaffold3051 | 10558                   | AA                              | TT              | 1947042316               |
| SNP_P4_179493_10814 | NW_004517841.1 | Scaffold3051 | 10814                   | TT                              | CC              | 1947042318               |
| SNP_P4_179494_16858 | NW_004517841.1 | Scaffold3051 | 16858                   | GG                              | CC              | 1947042320               |
| SNP_P4_179495_16880 | NW_004517841.1 | Scaffold3051 | 16880                   | GG                              | CC              | 1947042322               |
| SNP_P4_179496_17104 | NW_004517841.1 | Scaffold3051 | 17104                   | GG                              | TT              | 1947042324               |
| SNP_P4_179497_17321 | NW_004517841.1 | Scaffold3051 | 17321                   | AA                              | GG              | 1947042326               |
| SNP_P4_179498_17833 | NW_004517841.1 | Scaffold3051 | 17833                   | AA                              | GG              | 1947042328               |
| SNP_P4_179499_17877 | NW_004517841.1 | Scaffold3051 | 17877                   | CC                              | AA              | 1947042330               |
| SNP_P4_179500_18526 | NW_004517841.1 | Scaffold3051 | 18526                   | TT                              | GG              | 1947042332               |
| SNP_P4_179501_18573 | NW_004517841.1 | Scaffold3051 | 18573                   | TT                              | CC              | 1947042334               |
| SNP_P4_179502_18644 | NW_004517841.1 | Scaffold3051 | 18644                   | CC                              | AA              | 1947042336               |
| SNP_P4_179503_18862 | NW_004517841.1 | Scaffold3051 | 18862                   | GG                              | TT              | 1947042338               |

| SNPs IDs            | Chromosome IDs | Chromosomes  | Physical positions (bp) | CDC Frontier (Reference genome) | (ILWC46 & LPNB) | NCBI SNPdb Accession IDs |
|---------------------|----------------|--------------|-------------------------|---------------------------------|-----------------|--------------------------|
| SNP_P4_179505_18963 | NW_004517841.1 | Scaffold3051 | 18963                   | TT                              | CC              | 1947042340               |
| SNP_P4_179506_1556  | NW_004517842.1 | Scaffold3052 | 1556                    | CC                              | GG              | 1947042342               |
| SNP_P4_179507_5022  | NW_004517842.1 | Scaffold3052 | 5022                    | AA                              | GG              | 1947042344               |
| SNP_P4_179508_9375  | NW_004517842.1 | Scaffold3052 | 9375                    | GG                              | AA              | 1947042345               |
| SNP_P4_179509_16645 | NW_004517842.1 | Scaffold3052 | 16645                   | CC                              | TT              | 1947042347               |
| SNP_P4_179510_1190  | NW_004517844.1 | Scaffold3057 | 1190                    | TT                              | AA              | 1947042349               |
| SNP_P4_179511_4100  | NW_004517844.1 | Scaffold3057 | 4100                    | GG                              | CC              | 1947042351               |
| SNP_P4_179512_4320  | NW_004517844.1 | Scaffold3057 | 4320                    | CC                              | GG              | 1947042353               |
| SNP_P4_179513_4455  | NW_004517844.1 | Scaffold3057 | 4455                    | CC                              | AA              | 1947042355               |
| SNP_P4_179515_23877 | NW_004517845.1 | Scaffold3058 | 23877                   | GG                              | AA              | 1947042357               |
| SNP_P4_179516_27653 | NW_004517845.1 | Scaffold3058 | 27653                   | GG                              | AA              | 1947042359               |
| SNP_P4_179517_27721 | NW_004517845.1 | Scaffold3058 | 27721                   | AA                              | CC              | 1947042361               |
| SNP_P4_179518_27774 | NW_004517845.1 | Scaffold3058 | 27774                   | TT                              | AA              | 1947042363               |
| SNP_P4_179519_27787 | NW_004517845.1 | Scaffold3058 | 27787                   | TT                              | CC              | 1947042365               |
| SNP_P4_179520_27811 | NW_004517845.1 | Scaffold3058 | 27811                   | AA                              | CC              | 1947042367               |
| SNP_P4_179521_27813 | NW_004517845.1 | Scaffold3058 | 27813                   | CC                              | AA              | 1947042369               |
| SNP_P4_179522_28016 | NW_004517845.1 | Scaffold3058 | 28016                   | GG                              | AA              | 1947042371               |
| SNP_P4_179523_28053 | NW_004517845.1 | Scaffold3058 | 28053                   | GG                              | AA              | 1947042373               |
| SNP_P4_179524_28063 | NW_004517845.1 | Scaffold3058 | 28063                   | CC                              | GG              | 1947042375               |
| SNP_P4_179525_28092 | NW_004517845.1 | Scaffold3058 | 28092                   | GG                              | TT              | 1947042377               |
| SNP_P4_179526_1369  | NW_004517846.1 | Scaffold3059 | 1369                    | TT                              | CC              | 1947042379               |
| SNP_P4_179527_1388  | NW_004517846.1 | Scaffold3059 | 1388                    | GG                              | AA              | 1947042381               |
| SNP_P4_179528_1390  | NW_004517846.1 | Scaffold3059 | 1390                    | CC                              | TT              | 1947042383               |
| SNP_P4_179529_1411  | NW_004517846.1 | Scaffold3059 | 1411                    | TT                              | CC              | 1947042384               |
| SNP_P4_179530_2128  | NW_004517846.1 | Scaffold3059 | 2128                    | GG                              | AA              | 1947042386               |
| SNP_P4_179531_2405  | NW_004517846.1 | Scaffold3059 | 2405                    | TT                              | AA              | 1947042388               |
| SNP_P4_179532_3019  | NW_004517846.1 | Scaffold3059 | 3019                    | AA                              | GG              | 1947042390               |
| SNP_P4_179533_3687  | NW_004517846.1 | Scaffold3059 | 3687                    | AA                              | GG              | 1947042392               |
| SNP_P4_179534_4008  | NW_004517846.1 | Scaffold3059 | 4008                    | GG                              | TT              | 1947042394               |
| SNP_P4_179535_4469  | NW_004517846.1 | Scaffold3059 | 4469                    | GG                              | AA              | 1947042396               |
| SNP_P4_179536_4758  | NW_004517846.1 | Scaffold3059 | 4758                    | GG                              | CC              | 1947042398               |
| SNP_P4_179537_4832  | NW_004517846.1 | Scaffold3059 | 4832                    | CC                              | AA              | 1947042400               |
| SNP_P4_179538_94    | NW_004517848.1 | Scaffold3061 | 94                      | TT                              | CC              | 1947042402               |
| SNP_P4_179539_192   | NW_004517848.1 | Scaffold3061 | 192                     | AA                              | GG              | 1947042404               |
| SNP_P4_179540_457   | NW_004517848.1 | Scaffold3061 | 457                     | GG                              | AA              | 1947042406               |
| SNP_P4_179541_512   | NW_004517848.1 | Scaffold3061 | 512                     | CC                              | TT              | 1947042408               |
| SNP_P4_179542_580   | NW_004517848.1 | Scaffold3061 | 580                     | AA                              | TT              | 1947042410               |
| SNP_P4_179543_591   | NW_004517848.1 | Scaffold3061 | 591                     | GG                              | AA              | 1947042412               |
| SNP_P4_179545_619   | NW_004517848.1 | Scaffold3061 | 619                     | CC                              | TT              | 1947042414               |
| SNP_P4_179546_620   | NW_004517848.1 | Scaffold3061 | 620                     | GG                              | CC              | 1947042416               |
| SNP_P4_179547_682   | NW_004517848.1 | Scaffold3061 | 682                     | AA                              | GG              | 1947042418               |
| SNP_P4_179548_689   | NW_004517848.1 | Scaffold3061 | 689                     | TT                              | CC              | 1947042420               |

| SNPs IDs            | Chromosome IDs | Chromosomes  | Physical positions (bp) | CDC Frontier (Reference genome) | (ILWC46 & LPNB) | NCBI SNPdb Accession IDs |
|---------------------|----------------|--------------|-------------------------|---------------------------------|-----------------|--------------------------|
| SNP_P4_179549_707   | NW_004517848.1 | Scaffold3061 | 707                     | GG                              | AA              | 1947042422               |
| SNP_P4_179550_718   | NW_004517848.1 | Scaffold3061 | 718                     | CC                              | TT              | 1947042424               |
| SNP_P4_179551_750   | NW_004517848.1 | Scaffold3061 | 750                     | CC                              | AA              | 1947042426               |
| SNP_P4_179552_779   | NW_004517848.1 | Scaffold3061 | 779                     | AA                              | GG              | 1947042428               |
| SNP_P4_179553_794   | NW_004517848.1 | Scaffold3061 | 794                     | TT                              | CC              | 1947042430               |
| SNP_P4_179554_820   | NW_004517848.1 | Scaffold3061 | 820                     | AA                              | GG              | 1947042432               |
| SNP_P4_179555_2107  | NW_004517850.1 | Scaffold3064 | 2107                    | GG                              | AA              | 1947042434               |
| SNP_P4_179556_2258  | NW_004517850.1 | Scaffold3064 | 2258                    | CC                              | AA              | 1947042436               |
| SNP_P4_179557_2259  | NW_004517850.1 | Scaffold3064 | 2259                    | AA                              | GG              | 1947042438               |
| SNP_P4_179558_1872  | NW_004517851.1 | Scaffold3067 | 1872                    | CC                              | TT              | 1947042440               |
| SNP_P4_179559_2028  | NW_004517851.1 | Scaffold3067 | 2028                    | AA                              | GG              | 1947042441               |
| SNP_P4_179561_939   | NW_004517856.1 | Scaffold3074 | 939                     | AA                              | GG              | 1947042443               |
| SNP_P4_179562_1124  | NW_004517857.1 | Scaffold3075 | 1124                    | TT                              | CC              | 1947042445               |
| SNP_P4_179563_264   | NW_004517858.1 | Scaffold3076 | 264                     | CC                              | TT              | 1947042447               |
| SNP_P4_179564_317   | NW_004517858.1 | Scaffold3076 | 317                     | TT                              | CC              | 1947042449               |
| SNP_P4_179565_506   | NW_004517858.1 | Scaffold3076 | 506                     | GG                              | TT              | 1947042451               |
| SNP_P4_179566_530   | NW_004517858.1 | Scaffold3076 | 530                     | TT                              | CC              | 1947042453               |
| SNP_P4_179567_588   | NW_004517858.1 | Scaffold3076 | 588                     | GG                              | TT              | 1947042455               |
| SNP_P4_179568_641   | NW_004517858.1 | Scaffold3076 | 641                     | CC                              | TT              | 1947042457               |
| SNP_P4_179569_705   | NW_004517858.1 | Scaffold3076 | 705                     | AA                              | GG              | 1947042459               |
| SNP_P4_179570_865   | NW_004517858.1 | Scaffold3076 | 865                     | TT                              | CC              | 1947042460               |
| SNP_P4_179571_1137  | NW_004517858.1 | Scaffold3076 | 1137                    | AA                              | TT              | 1947042462               |
| SNP_P4_179572_1655  | NW_004517858.1 | Scaffold3076 | 1655                    | CC                              | TT              | 1947042464               |
| SNP_P4_179573_1828  | NW_004517858.1 | Scaffold3076 | 1828                    | AA                              | GG              | 1947042466               |
| SNP_P4_179574_1950  | NW_004517858.1 | Scaffold3076 | 1950                    | CC                              | AA              | 1947042468               |
| SNP_P4_179575_1988  | NW_004517858.1 | Scaffold3076 | 1988                    | TT                              | GG              | 1947042470               |
| SNP_P4_179576_2013  | NW_004517858.1 | Scaffold3076 | 2013                    | AA                              | TT              | 1947042472               |
| SNP_P4_179577_10919 | NW_004517858.1 | Scaffold3076 | 10919                   | GG                              | AA              | 1947042474               |
| SNP_P4_179578_10945 | NW_004517858.1 | Scaffold3076 | 10945                   | TT                              | AA              | 1947042476               |
| SNP_P4_179579_11178 | NW_004517858.1 | Scaffold3076 | 11178                   | CC                              | AA              | 1947042477               |
| SNP_P4_179580_11232 | NW_004517858.1 | Scaffold3076 | 11232                   | CC                              | TT              | 1947042479               |
| SNP_P4_179581_11233 | NW_004517858.1 | Scaffold3076 | 11233                   | CC                              | TT              | 1947042481               |
| SNP_P4_179582_12931 | NW_004517858.1 | Scaffold3076 | 12931                   | GG                              | TT              | 1947042483               |
| SNP_P4_179583_5703  | NW_004517860.1 | Scaffold3079 | 5703                    | TT                              | CC              | 1947042485               |
| SNP_P4_179584_5774  | NW_004517860.1 | Scaffold3079 | 5774                    | AA                              | CC              | 1947042487               |
| SNP_P4_179585_6290  | NW_004517860.1 | Scaffold3079 | 6290                    | AA                              | GG              | 1947042489               |
| SNP_P4_179586_6413  | NW_004517860.1 | Scaffold3079 | 6413                    | GG                              | AA              | 1947042491               |
| SNP_P4_179587_6453  | NW_004517860.1 | Scaffold3079 | 6453                    | AA                              | TT              | 1947042493               |
| SNP_P4_179588_6720  | NW_004517860.1 | Scaffold3079 | 6720                    | TT                              | CC              | 1947042495               |
| SNP_P4_179589_6751  | NW_004517860.1 | Scaffold3079 | 6751                    | CC                              | TT              | 1947042497               |
| SNP_P4_179590_6767  | NW_004517860.1 | Scaffold3079 | 6767                    | CC                              | GG              | 1947042499               |
| SNP_P4_179591_6808  | NW_004517860.1 | Scaffold3079 | 6808                    | CC                              | TT              | 1947042501               |

| SNPs IDs            | Chromosome IDs | Chromosomes  | Physical positions (bp) | CDC Frontier (Reference genome) | (ILWC46 & LPNB) | NCBI SNPdb Accession IDs |
|---------------------|----------------|--------------|-------------------------|---------------------------------|-----------------|--------------------------|
| SNP_P4_179592_2495  | NW_004517862.1 | Scaffold3082 | 2495                    | AA                              | GG              | 1947042503               |
| SNP_P4_179593_2839  | NW_004517862.1 | Scaffold3082 | 2839                    | TT                              | AA              | 1947042505               |
| SNP_P4_179594_7405  | NW_004517862.1 | Scaffold3082 | 7405                    | TT                              | CC              | 1947042507               |
| SNP_P4_179595_7413  | NW_004517862.1 | Scaffold3082 | 7413                    | AA                              | CC              | 1947042509               |
| SNP_P4_179596_7421  | NW_004517862.1 | Scaffold3082 | 7421                    | AA                              | TT              | 1947042511               |
| SNP_P4_179597_7459  | NW_004517862.1 | Scaffold3082 | 7459                    | AA                              | GG              | 1947042513               |
| SNP_P4_179598_7460  | NW_004517862.1 | Scaffold3082 | 7460                    | CC                              | TT              | 1947042515               |
| SNP_P4_179599_7476  | NW_004517862.1 | Scaffold3082 | 7476                    | AA                              | CC              | 1947042517               |
| SNP_P4_179600_7539  | NW_004517862.1 | Scaffold3082 | 7539                    | AA                              | TT              | 1947042519               |
| SNP_P4_179602_360   | NW_004517868.1 | Scaffold3092 | 360                     | TT                              | AA              | 1947042521               |
| SNP_P4_179603_361   | NW_004517868.1 | Scaffold3092 | 361                     | TT                              | AA              | 1947042523               |
| SNP_P4_179604_426   | NW_004517868.1 | Scaffold3092 | 426                     | GG                              | AA              | 1947042525               |
| SNP_P4_179606_1267  | NW_004517868.1 | Scaffold3092 | 1267                    | AA                              | CC              | 1947042527               |
| SNP_P4_179607_1590  | NW_004517868.1 | Scaffold3092 | 1590                    | CC                              | TT              | 1947042529               |
| SNP_P4_179608_19377 | NW_004517869.1 | Scaffold3093 | 19377                   | AA                              | GG              | 1947042531               |
| SNP_P4_179610_19792 | NW_004517869.1 | Scaffold3093 | 19792                   | AA                              | GG              | 1947042533               |
| SNP_P4_179611_20130 | NW_004517869.1 | Scaffold3093 | 20130                   | GG                              | CC              | 1947042535               |
| SNP_P4_179612_20166 | NW_004517869.1 | Scaffold3093 | 20166                   | GG                              | CC              | 1947042537               |
| SNP_P4_179613_552   | NW_004517870.1 | Scaffold3094 | 552                     | CC                              | TT              | 1947042539               |
| SNP_P4_179614_9894  | NW_004517870.1 | Scaffold3094 | 9894                    | AA                              | GG              | 1947042541               |
| SNP_P4_179615_11911 | NW_004517870.1 | Scaffold3094 | 11911                   | AA                              | CC              | 1947042543               |
| SNP_P4_179616_11931 | NW_004517870.1 | Scaffold3094 | 11931                   | AA                              | TT              | 1947042545               |
| SNP_P4_179617_177   | NW_004517871.1 | Scaffold3095 | 177                     | CC                              | AA              | 1947042547               |
| SNP_P4_179618_684   | NW_004517871.1 | Scaffold3095 | 684                     | TT                              | GG              | 1947042549               |
| SNP_P4_179619_685   | NW_004517871.1 | Scaffold3095 | 685                     | TT                              | GG              | 1947042551               |
| SNP_P4_179620_799   | NW_004517871.1 | Scaffold3095 | 799                     | GG                              | CC              | 1947042553               |
| SNP_P4_179621_837   | NW_004517871.1 | Scaffold3095 | 837                     | GG                              | AA              | 1947042555               |
| SNP_P4_179622_1001  | NW_004517871.1 | Scaffold3095 | 1001                    | AA                              | GG              | 1947042557               |
| SNP_P4_179623_1357  | NW_004517871.1 | Scaffold3095 | 1357                    | TT                              | CC              | 1947042559               |
| SNP_P4_179624_1742  | NW_004517871.1 | Scaffold3095 | 1742                    | AA                              | TT              | 1947042561               |
| SNP_P4_179625_14225 | NW_004517871.1 | Scaffold3095 | 14225                   | CC                              | TT              | 1947042563               |
| SNP_P4_179626_14710 | NW_004517871.1 | Scaffold3095 | 14710                   | AA                              | TT              | 1947042565               |
| SNP_P4_179627_14761 | NW_004517871.1 | Scaffold3095 | 14761                   | CC                              | AA              | 1947042567               |
| SNP_P4_179628_14794 | NW_004517871.1 | Scaffold3095 | 14794                   | GG                              | AA              | 1947042569               |
| SNP_P4_179629_14807 | NW_004517871.1 | Scaffold3095 | 14807                   | TT                              | CC              | 1947042571               |
| SNP_P4_179630_14922 | NW_004517871.1 | Scaffold3095 | 14922                   | AA                              | CC              | 1947042573               |
| SNP_P4_179631_15091 | NW_004517871.1 | Scaffold3095 | 15091                   | AA                              | GG              | 1947042575               |
| SNP_P4_179632_15250 | NW_004517871.1 | Scaffold3095 | 15250                   | AA                              | TT              | 1947042577               |
| SNP_P4_179633_15253 | NW_004517871.1 | Scaffold3095 | 15253                   | GG                              | AA              | 1947042579               |
| SNP_P4_179634_15684 | NW_004517871.1 | Scaffold3095 | 15684                   | TT                              | AA              | 1947042581               |
| SNP_P4_179635_15714 | NW_004517871.1 | Scaffold3095 | 15714                   | CC                              | AA              | 1947042583               |
| SNP_P4_179636_15731 | NW_004517871.1 | Scaffold3095 | 15731                   | CC                              | AA              | 1947042585               |

| SNPs IDs            | Chromosome IDs | Chromosomes  | Physical positions (bp) | CDC Frontier (Reference genome) | (ILWC46 & LPNB) | NCBI SNPdb Accession IDs |
|---------------------|----------------|--------------|-------------------------|---------------------------------|-----------------|--------------------------|
| SNP_P4_179637_15752 | NW_004517871.1 | Scaffold3095 | 15752                   | GG                              | AA              | 1947042587               |
| SNP_P4_179638_15776 | NW_004517871.1 | Scaffold3095 | 15776                   | TT                              | CC              | 1947042589               |
| SNP_P4_179639_15788 | NW_004517871.1 | Scaffold3095 | 15788                   | TT                              | AA              | 1947042591               |
| SNP_P4_179640_15800 | NW_004517871.1 | Scaffold3095 | 15800                   | TT                              | GG              | 1947042593               |
| SNP_P4_179641_15946 | NW_004517871.1 | Scaffold3095 | 15946                   | CC                              | GG              | 1947042595               |
| SNP_P4_179642_4981  | NW_004517873.1 | Scaffold3097 | 4981                    | CC                              | GG              | 1947042597               |
| SNP_P4_179643_5006  | NW_004517873.1 | Scaffold3097 | 5006                    | CC                              | TT              | 1947042599               |
| SNP_P4_179644_5094  | NW_004517873.1 | Scaffold3097 | 5094                    | TT                              | CC              | 1947042601               |
| SNP_P4_179645_5183  | NW_004517873.1 | Scaffold3097 | 5183                    | TT                              | GG              | 1947042603               |
| SNP_P4_179646_6495  | NW_004517873.1 | Scaffold3097 | 6495                    | GG                              | TT              | 1947042605               |
| SNP_P4_179647_6831  | NW_004517873.1 | Scaffold3097 | 6831                    | GG                              | AA              | 1947042607               |
| SNP_P4_179648_6850  | NW_004517873.1 | Scaffold3097 | 6850                    | GG                              | TT              | 1947042609               |
| SNP_P4_179649_7263  | NW_004517873.1 | Scaffold3097 | 7263                    | GG                              | AA              | 1947042610               |
| SNP_P4_179650_7309  | NW_004517873.1 | Scaffold3097 | 7309                    | GG                              | AA              | 1947042612               |
| SNP_P4_179651_7314  | NW_004517873.1 | Scaffold3097 | 7314                    | GG                              | AA              | 1947042614               |
| SNP_P4_179652_7367  | NW_004517873.1 | Scaffold3097 | 7367                    | CC                              | TT              | 1947042616               |
| SNP_P4_179653_7475  | NW_004517873.1 | Scaffold3097 | 7475                    | CC                              | AA              | 1947042618               |
| SNP_P4_179654_7547  | NW_004517873.1 | Scaffold3097 | 7547                    | CC                              | TT              | 1947042620               |
| SNP_P4_179655_7552  | NW_004517873.1 | Scaffold3097 | 7552                    | GG                              | AA              | 1947042622               |
| SNP_P4_179656_7630  | NW_004517873.1 | Scaffold3097 | 7630                    | GG                              | AA              | 1947042624               |
| SNP_P4_179657_7710  | NW_004517873.1 | Scaffold3097 | 7710                    | TT                              | CC              | 1947042626               |
| SNP_P4_179658_7724  | NW_004517873.1 | Scaffold3097 | 7724                    | GG                              | CC              | 1947042628               |
| SNP_P4_179659_7860  | NW_004517873.1 | Scaffold3097 | 7860                    | TT                              | GG              | 1947042630               |
| SNP_P4_179660_8008  | NW_004517873.1 | Scaffold3097 | 8008                    | GG                              | TT              | 1947042632               |
| SNP_P4_179661_8027  | NW_004517873.1 | Scaffold3097 | 8027                    | TT                              | CC              | 1947042634               |
| SNP_P4_179662_9023  | NW_004517873.1 | Scaffold3097 | 9023                    | CC                              | AA              | 1947042636               |
| SNP_P4_179663_9048  | NW_004517873.1 | Scaffold3097 | 9048                    | CC                              | TT              | 1947042638               |
| SNP_P4_179664_9327  | NW_004517873.1 | Scaffold3097 | 9327                    | TT                              | CC              | 1947042640               |
| SNP_P4_179665_9367  | NW_004517873.1 | Scaffold3097 | 9367                    | AA                              | GG              | 1947042642               |
| SNP_P4_179666_9649  | NW_004517873.1 | Scaffold3097 | 9649                    | GG                              | TT              | 1947042644               |
| SNP_P4_179667_9812  | NW_004517873.1 | Scaffold3097 | 9812                    | TT                              | CC              | 1947042646               |
| SNP_P4_179668_9942  | NW_004517873.1 | Scaffold3097 | 9942                    | AA                              | TT              | 1947042648               |
| SNP_P4_179669_10428 | NW_004517873.1 | Scaffold3097 | 10428                   | GG                              | AA              | 1947042650               |
| SNP_P4_179670_10435 | NW_004517873.1 | Scaffold3097 | 10435                   | CC                              | GG              | 1947042653               |
| SNP_P4_179671_10610 | NW_004517873.1 | Scaffold3097 | 10610                   | TT                              | GG              | 1947042655               |
| SNP_P4_179672_10680 | NW_004517873.1 | Scaffold3097 | 10680                   | GG                              | CC              | 1947042657               |
| SNP_P4_179673_10687 | NW_004517873.1 | Scaffold3097 | 10687                   | AA                              | CC              | 1947042659               |
| SNP_P4_179674_10706 | NW_004517873.1 | Scaffold3097 | 10706                   | GG                              | AA              | 1947042661               |
| SNP_P4_179675_11452 | NW_004517873.1 | Scaffold3097 | 11452                   | CC                              | GG              | 1947042663               |
| SNP_P4_179676_11454 | NW_004517873.1 | Scaffold3097 | 11454                   | CC                              | GG              | 1947042665               |
| SNP_P4_179677_11458 | NW_004517873.1 | Scaffold3097 | 11458                   | GG                              | AA              | 1947042668               |
| SNP_P4_179678_11703 | NW_004517873.1 | Scaffold3097 | 11703                   | CC                              | TT              | 1947042670               |

| SNPs IDs            | Chromosome IDs | Chromosomes  | Physical positions (bp) | CDC Frontier (Reference genome) | (ILWC46 & LPNB) | NCBI SNPdb Accession IDs |
|---------------------|----------------|--------------|-------------------------|---------------------------------|-----------------|--------------------------|
| SNP_P4_179679_11749 | NW_004517873.1 | Scaffold3097 | 11749                   | TT                              | CC              | 1947042672               |
| SNP_P4_179680_11827 | NW_004517873.1 | Scaffold3097 | 11827                   | TT                              | CC              | 1947042674               |
| SNP_P4_179681_1206  | NW_004517876.1 | Scaffold3100 | 1206                    | GG                              | CC              | 1947042676               |
| SNP_P4_179682_1238  | NW_004517876.1 | Scaffold3100 | 1238                    | AA                              | TT              | 1947042678               |
| SNP_P4_179683_356   | NW_004517877.1 | Scaffold3101 | 356                     | AA                              | CC              | 1947042680               |
| SNP_P4_179684_1079  | NW_004517878.1 | Scaffold3104 | 1079                    | CC                              | GG              | 1947042682               |
| SNP_P4_179685_472   | NW_004517879.1 | Scaffold3106 | 472                     | CC                              | TT              | 1947042684               |
| SNP_P4_179686_526   | NW_004517879.1 | Scaffold3106 | 526                     | TT                              | CC              | 1947042686               |
| SNP_P4_179687_535   | NW_004517879.1 | Scaffold3106 | 535                     | GG                              | AA              | 1947042688               |
| SNP_P4_179688_538   | NW_004517879.1 | Scaffold3106 | 538                     | AA                              | CC              | 1947042690               |
| SNP_P4_179689_540   | NW_004517879.1 | Scaffold3106 | 540                     | CC                              | TT              | 1947042692               |
| SNP_P4_179690_698   | NW_004517879.1 | Scaffold3106 | 698                     | AA                              | CC              | 1947042694               |
| SNP_P4_179691_705   | NW_004517879.1 | Scaffold3106 | 705                     | GG                              | AA              | 1947042696               |
| SNP_P4_179692_722   | NW_004517879.1 | Scaffold3106 | 722                     | GG                              | CC              | 1947042698               |
| SNP_P4_179693_754   | NW_004517879.1 | Scaffold3106 | 754                     | CC                              | AA              | 1947042700               |
| SNP_P4_179694_815   | NW_004517879.1 | Scaffold3106 | 815                     | AA                              | GG              | 1947042702               |
| SNP_P4_179695_1245  | NW_004517879.1 | Scaffold3106 | 1245                    | CC                              | AA              | 1947042705               |
| SNP_P4_179696_6231  | NW_004517882.1 | Scaffold3111 | 6231                    | AA                              | TT              | 1947042707               |
| SNP_P4_179697_6296  | NW_004517882.1 | Scaffold3111 | 6296                    | GG                              | AA              | 1947042709               |
| SNP_P4_179698_6343  | NW_004517882.1 | Scaffold3111 | 6343                    | CC                              | TT              | 1947042711               |
| SNP_P4_179699_6433  | NW_004517882.1 | Scaffold3111 | 6433                    | AA                              | TT              | 1947042713               |
| SNP_P4_179700_6455  | NW_004517882.1 | Scaffold3111 | 6455                    | GG                              | TT              | 1947042715               |
| SNP_P4_179701_6467  | NW_004517882.1 | Scaffold3111 | 6467                    | AA                              | CC              | 1947042716               |
| SNP_P4_179702_6476  | NW_004517882.1 | Scaffold3111 | 6476                    | AA                              | GG              | 1947042717               |
| SNP_P4_179703_7883  | NW_004517882.1 | Scaffold3111 | 7883                    | TT                              | CC              | 1947042718               |
| SNP_P4_179704_7929  | NW_004517882.1 | Scaffold3111 | 7929                    | CC                              | TT              | 1947042719               |
| SNP_P4_179705_8026  | NW_004517882.1 | Scaffold3111 | 8026                    | CC                              | AA              | 1947042720               |
| SNP_P4_179706_8078  | NW_004517882.1 | Scaffold3111 | 8078                    | AA                              | GG              | 1947042721               |
| SNP_P4_179707_8121  | NW_004517882.1 | Scaffold3111 | 8121                    | TT                              | CC              | 1947042722               |
| SNP_P4_179708_672   | NW_004517884.1 | Scaffold3115 | 672                     | TT                              | CC              | 1947042723               |
| SNP_P4_179709_759   | NW_004517884.1 | Scaffold3115 | 759                     | AA                              | GG              | 1947042724               |
| SNP_P4_179710_776   | NW_004517884.1 | Scaffold3115 | 776                     | GG                              | AA              | 1947042725               |
| SNP_P4_179713_19685 | NW_004517884.1 | Scaffold3115 | 19685                   | AA                              | GG              | 1947042727               |
| SNP_P4_179714_19892 | NW_004517884.1 | Scaffold3115 | 19892                   | AA                              | GG              | 1947042729               |
| SNP_P4_179715_27553 | NW_004517884.1 | Scaffold3115 | 27553                   | TT                              | AA              | 1947042731               |
| SNP_P4_179716_27586 | NW_004517884.1 | Scaffold3115 | 27586                   | TT                              | CC              | 1947042733               |
| SNP_P4_179717_27702 | NW_004517884.1 | Scaffold3115 | 27702                   | TT                              | AA              | 1947042735               |
| SNP_P4_179718_27928 | NW_004517884.1 | Scaffold3115 | 27928                   | AA                              | GG              | 1947042737               |
| SNP_P4_179719_28063 | NW_004517884.1 | Scaffold3115 | 28063                   | AA                              | GG              | 1947042739               |
| SNP_P4_179720_46583 | NW_004517884.1 | Scaffold3115 | 46583                   | AA                              | TT              | 1947042741               |
| SNP_P4_179722_47044 | NW_004517884.1 | Scaffold3115 | 47044                   | GG                              | AA              | 1947042743               |
| SNP_P4_179723_47086 | NW_004517884.1 | Scaffold3115 | 47086                   | CC                              | AA              | 1947042746               |



| SNPs IDs            | Chromosome IDs | Chromosomes  | Physical positions (bp) | CDC Frontier (Reference genome) | (ILWC46 & LPNB) | NCBI SNPdb Accession IDs |
|---------------------|----------------|--------------|-------------------------|---------------------------------|-----------------|--------------------------|
| SNP_P4_179724_47121 | NW_004517884.1 | Scaffold3115 | 47121                   | GG                              | AA              | 1947042748               |
| SNP_P4_179725_47158 | NW_004517884.1 | Scaffold3115 | 47158                   | AA                              | TT              | 1947042750               |
| SNP_P4_179726_48632 | NW_004517884.1 | Scaffold3115 | 48632                   | TT                              | CC              | 1947042752               |
| SNP_P4_179727_48885 | NW_004517884.1 | Scaffold3115 | 48885                   | CC                              | AA              | 1947042754               |
| SNP_P4_179728_48892 | NW_004517884.1 | Scaffold3115 | 48892                   | CC                              | TT              | 1947042756               |
| SNP_P4_179730_50025 | NW_004517884.1 | Scaffold3115 | 50025                   | CC                              | TT              | 1947042758               |
| SNP_P4_179731_54015 | NW_004517884.1 | Scaffold3115 | 54015                   | CC                              | TT              | 1947042761               |
| SNP_P4_179733_61804 | NW_004517884.1 | Scaffold3115 | 61804                   | TT                              | AA              | 1947042763               |
| SNP_P4_179734_61879 | NW_004517884.1 | Scaffold3115 | 61879                   | CC                              | GG              | 1947042765               |
| SNP_P4_179735_62021 | NW_004517884.1 | Scaffold3115 | 62021                   | GG                              | AA              | 1947042767               |
| SNP_P4_179736_62226 | NW_004517884.1 | Scaffold3115 | 62226                   | AA                              | GG              | 1947042769               |
| SNP_P4_179737_62572 | NW_004517884.1 | Scaffold3115 | 62572                   | CC                              | TT              | 1947042771               |
| SNP_P4_179741_63828 | NW_004517884.1 | Scaffold3115 | 63828                   | CC                              | TT              | 1947042773               |
| SNP_P4_179742_63876 | NW_004517884.1 | Scaffold3115 | 63876                   | CC                              | AA              | 1947042775               |
| SNP_P4_179743_63939 | NW_004517884.1 | Scaffold3115 | 63939                   | TT                              | CC              | 1947042777               |
| SNP_P4_179745_64037 | NW_004517884.1 | Scaffold3115 | 64037                   | GG                              | TT              | 1947042779               |
| SNP_P4_179747_69550 | NW_004517884.1 | Scaffold3115 | 69550                   | CC                              | TT              | 1947042781               |
| SNP_P4_179748_69562 | NW_004517884.1 | Scaffold3115 | 69562                   | GG                              | AA              | 1947042783               |
| SNP_P4_179749_77055 | NW_004517884.1 | Scaffold3115 | 77055                   | AA                              | TT              | 1947042785               |
| SNP_P4_179750_77076 | NW_004517884.1 | Scaffold3115 | 77076                   | TT                              | AA              | 1947042787               |
| SNP_P4_179751_78452 | NW_004517884.1 | Scaffold3115 | 78452                   | AA                              | GG              | 1947042789               |
| SNP_P4_179752_78473 | NW_004517884.1 | Scaffold3115 | 78473                   | TT                              | GG              | 1947042791               |
| SNP_P4_179753_78500 | NW_004517884.1 | Scaffold3115 | 78500                   | AA                              | GG              | 1947042793               |
| SNP_P4_179754_78862 | NW_004517884.1 | Scaffold3115 | 78862                   | AA                              | GG              | 1947042795               |
| SNP_P4_179755_78876 | NW_004517884.1 | Scaffold3115 | 78876                   | AA                              | TT              | 1947042797               |
| SNP_P4_179756_87877 | NW_004517884.1 | Scaffold3115 | 87877                   | AA                              | TT              | 1947042799               |
| SNP_P4_179757_88183 | NW_004517884.1 | Scaffold3115 | 88183                   | GG                              | TT              | 1947042801               |
| SNP_P4_179758_88207 | NW_004517884.1 | Scaffold3115 | 88207                   | CC                              | AA              | 1947042803               |
| SNP_P4_179759_88209 | NW_004517884.1 | Scaffold3115 | 88209                   | AA                              | GG              | 1947042805               |
| SNP_P4_179760_88210 | NW_004517884.1 | Scaffold3115 | 88210                   | CC                              | TT              | 1947042807               |
| SNP_P4_179761_88215 | NW_004517884.1 | Scaffold3115 | 88215                   | GG                              | AA              | 1947042809               |
| SNP_P4_179762_88254 | NW_004517884.1 | Scaffold3115 | 88254                   | GG                              | TT              | 1947042811               |
| SNP_P4_179763_97071 | NW_004517884.1 | Scaffold3115 | 97071                   | CC                              | TT              | 1947042813               |
| SNP_P4_179765_23493 | NW_004517885.1 | Scaffold3116 | 23493                   | TT                              | GG              | 1947042815               |
| SNP_P4_179766_64    | NW_004517886.1 | Scaffold3117 | 64                      | AA                              | TT              | 1947042817               |
| SNP_P4_179767_66    | NW_004517886.1 | Scaffold3117 | 66                      | TT                              | GG              | 1947042819               |
| SNP_P4_179768_80    | NW_004517886.1 | Scaffold3117 | 80                      | TT                              | GG              | 1947042822               |
| SNP_P4_179769_91    | NW_004517886.1 | Scaffold3117 | 91                      | AA                              | CC              | 1947042824               |
| SNP_P4_179770_1866  | NW_004517887.1 | Scaffold3118 | 1866                    | CC                              | AA              | 1947042826               |
| SNP_P4_179771_1871  | NW_004517887.1 | Scaffold3118 | 1871                    | TT                              | GG              | 1947042828               |
| SNP_P4_179772_1926  | NW_004517887.1 | Scaffold3118 | 1926                    | GG                              | CC              | 1947042830               |
| SNP_P4_179773_3508  | NW_004517887.1 | Scaffold3118 | 3508                    | GG                              | TT              | 1947042832               |

| SNPs IDs            | Chromosome IDs | Chromosomes  | Physical positions (bp) | CDC Frontier (Reference genome) | (ILWC46 & LPNB) | NCBI SNPdb Accession IDs |
|---------------------|----------------|--------------|-------------------------|---------------------------------|-----------------|--------------------------|
| SNP_P4_179774_3559  | NW_004517887.1 | Scaffold3118 | 3559                    | CC                              | AA              | 1947042834               |
| SNP_P4_179775_3690  | NW_004517887.1 | Scaffold3118 | 3690                    | TT                              | CC              | 1947042836               |
| SNP_P4_179776_3729  | NW_004517887.1 | Scaffold3118 | 3729                    | TT                              | CC              | 1947042838               |
| SNP_P4_179778_6534  | NW_004517887.1 | Scaffold3118 | 6534                    | TT                              | AA              | 1947042840               |
| SNP_P4_179779_6568  | NW_004517887.1 | Scaffold3118 | 6568                    | AA                              | CC              | 1947042842               |
| SNP_P4_179780_6580  | NW_004517887.1 | Scaffold3118 | 6580                    | CC                              | GG              | 1947042844               |
| SNP_P4_179781_6582  | NW_004517887.1 | Scaffold3118 | 6582                    | CC                              | AA              | 1947042846               |
| SNP_P4_179782_6586  | NW_004517887.1 | Scaffold3118 | 6586                    | GG                              | AA              | 1947042848               |
| SNP_P4_179783_6607  | NW_004517887.1 | Scaffold3118 | 6607                    | AA                              | GG              | 1947042850               |
| SNP_P4_179784_6824  | NW_004517887.1 | Scaffold3118 | 6824                    | AA                              | GG              | 1947042852               |
| SNP_P4_179785_6888  | NW_004517887.1 | Scaffold3118 | 6888                    | AA                              | TT              | 1947042854               |
| SNP_P4_179786_4792  | NW_004517890.1 | Scaffold3121 | 4792                    | TT                              | CC              | 1947042857               |
| SNP_P4_179787_4801  | NW_004517890.1 | Scaffold3121 | 4801                    | TT                              | AA              | 1947042859               |
| SNP_P4_179788_4816  | NW_004517890.1 | Scaffold3121 | 4816                    | AA                              | GG              | 1947042861               |
| SNP_P4_179789_6319  | NW_004517890.1 | Scaffold3121 | 6319                    | CC                              | TT              | 1947042863               |
| SNP_P4_179790_6398  | NW_004517890.1 | Scaffold3121 | 6398                    | AA                              | GG              | 1947042865               |
| SNP_P4_179792_7895  | NW_004517890.1 | Scaffold3121 | 7895                    | AA                              | CC              | 1947042867               |
| SNP_P4_179793_8063  | NW_004517890.1 | Scaffold3121 | 8063                    | TT                              | CC              | 1947042869               |
| SNP_P4_179794_8064  | NW_004517890.1 | Scaffold3121 | 8064                    | AA                              | CC              | 1947042871               |
| SNP_P4_179795_8868  | NW_004517890.1 | Scaffold3121 | 8868                    | CC                              | GG              | 1947042873               |
| SNP_P4_179796_8883  | NW_004517890.1 | Scaffold3121 | 8883                    | CC                              | TT              | 1947042875               |
| SNP_P4_179797_8932  | NW_004517890.1 | Scaffold3121 | 8932                    | TT                              | CC              | 1947042877               |
| SNP_P4_179798_8942  | NW_004517890.1 | Scaffold3121 | 8942                    | TT                              | AA              | 1947042880               |
| SNP_P4_179799_8952  | NW_004517890.1 | Scaffold3121 | 8952                    | GG                              | TT              | 1947042882               |
| SNP_P4_179800_9249  | NW_004517890.1 | Scaffold3121 | 9249                    | TT                              | GG              | 1947042884               |
| SNP_P4_179801_13921 | NW_004517890.1 | Scaffold3121 | 13921                   | CC                              | AA              | 1947042886               |
| SNP_P4_179802_14294 | NW_004517890.1 | Scaffold3121 | 14294                   | AA                              | GG              | 1947042888               |
| SNP_P4_179803_14319 | NW_004517890.1 | Scaffold3121 | 14319                   | GG                              | TT              | 1947042890               |
| SNP_P4_179804_316   | NW_004517892.1 | Scaffold3124 | 316                     | CC                              | TT              | 1947042892               |
| SNP_P4_179805_376   | NW_004517892.1 | Scaffold3124 | 376                     | AA                              | TT              | 1947042894               |
| SNP_P4_179806_3644  | NW_004517892.1 | Scaffold3124 | 3644                    | TT                              | CC              | 1947042896               |
| SNP_P4_179807_3648  | NW_004517892.1 | Scaffold3124 | 3648                    | GG                              | AA              | 1947042898               |
| SNP_P4_179808_3900  | NW_004517892.1 | Scaffold3124 | 3900                    | TT                              | GG              | 1947042900               |
| SNP_P4_179809_3919  | NW_004517892.1 | Scaffold3124 | 3919                    | CC                              | TT              | 1947042902               |
| SNP_P4_179810_3983  | NW_004517892.1 | Scaffold3124 | 3983                    | GG                              | AA              | 1947042904               |
| SNP_P4_179811_4020  | NW_004517892.1 | Scaffold3124 | 4020                    | TT                              | CC              | 1947042906               |
| SNP_P4_179812_4040  | NW_004517892.1 | Scaffold3124 | 4040                    | CC                              | GG              | 1947042908               |
| SNP_P4_179813_4047  | NW_004517892.1 | Scaffold3124 | 4047                    | AA                              | TT              | 1947042910               |
| SNP_P4_179814_4186  | NW_004517892.1 | Scaffold3124 | 4186                    | TT                              | GG              | 1947042912               |
| SNP_P4_179815_4222  | NW_004517892.1 | Scaffold3124 | 4222                    | TT                              | GG              | 1947042914               |
| SNP_P4_179816_4254  | NW_004517892.1 | Scaffold3124 | 4254                    | TT                              | GG              | 1947042916               |
| SNP_P4_179817_1674  | NW_004517893.1 | Scaffold3125 | 1674                    | GG                              | TT              | 1947042918               |

| SNPs IDs            | Chromosome IDs | Chromosomes  | Physical positions (bp) | CDC Frontier (Reference genome) | (ILWC46 & LPNB) | NCBI SNPdb Accession IDs |
|---------------------|----------------|--------------|-------------------------|---------------------------------|-----------------|--------------------------|
| SNP_P4_179818_1694  | NW_004517893.1 | Scaffold3125 | 1694                    | TT                              | CC              | 1947042920               |
| SNP_P4_179819_1759  | NW_004517893.1 | Scaffold3125 | 1759                    | AA                              | TT              | 1947042922               |
| SNP_P4_179820_1928  | NW_004517893.1 | Scaffold3125 | 1928                    | CC                              | TT              | 1947042924               |
| SNP_P4_179821_601   | NW_004517894.1 | Scaffold3126 | 601                     | AA                              | CC              | 1947042926               |
| SNP_P4_179822_20311 | NW_004517894.1 | Scaffold3126 | 20311                   | AA                              | GG              | 1947042928               |
| SNP_P4_179823_20327 | NW_004517894.1 | Scaffold3126 | 20327                   | CC                              | TT              | 1947042930               |
| SNP_P4_179824_20355 | NW_004517894.1 | Scaffold3126 | 20355                   | AA                              | GG              | 1947042932               |
| SNP_P4_179825_20360 | NW_004517894.1 | Scaffold3126 | 20360                   | CC                              | TT              | 1947042934               |
| SNP_P4_179826_20369 | NW_004517894.1 | Scaffold3126 | 20369                   | CC                              | TT              | 1947042936               |
| SNP_P4_179827_20399 | NW_004517894.1 | Scaffold3126 | 20399                   | AA                              | GG              | 1947042938               |
| SNP_P4_179828_20420 | NW_004517894.1 | Scaffold3126 | 20420                   | AA                              | GG              | 1947042940               |
| SNP_P4_179829_20435 | NW_004517894.1 | Scaffold3126 | 20435                   | GG                              | AA              | 1947042942               |
| SNP_P4_179830_20442 | NW_004517894.1 | Scaffold3126 | 20442                   | GG                              | CC              | 1947042944               |
| SNP_P4_179831_20444 | NW_004517894.1 | Scaffold3126 | 20444                   | GG                              | AA              | 1947042946               |
| SNP_P4_179832_20445 | NW_004517894.1 | Scaffold3126 | 20445                   | CC                              | AA              | 1947042948               |
| SNP_P4_179833_20449 | NW_004517894.1 | Scaffold3126 | 20449                   | AA                              | TT              | 1947042950               |
| SNP_P4_179834_20450 | NW_004517894.1 | Scaffold3126 | 20450                   | TT                              | AA              | 1947042952               |
| SNP_P4_179835_64    | NW_004517895.1 | Scaffold3127 | 64                      | AA                              | GG              | 1947042954               |
| SNP_P4_179836_83    | NW_004517895.1 | Scaffold3127 | 83                      | TT                              | AA              | 1947042956               |
| SNP_P4_179838_279   | NW_004517895.1 | Scaffold3127 | 279                     | GG                              | TT              | 1947042958               |
| SNP_P4_179839_349   | NW_004517895.1 | Scaffold3127 | 349                     | TT                              | AA              | 1947042960               |
| SNP_P4_179840_986   | NW_004517895.1 | Scaffold3127 | 986                     | TT                              | CC              | 1947042962               |
| SNP_P4_179841_1020  | NW_004517895.1 | Scaffold3127 | 1020                    | AA                              | TT              | 1947042964               |
| SNP_P4_179842_1060  | NW_004517895.1 | Scaffold3127 | 1060                    | CC                              | TT              | 1947042966               |
| SNP_P4_179843_2177  | NW_004517895.1 | Scaffold3127 | 2177                    | TT                              | CC              | 1947042968               |
| SNP_P4_179845_2239  | NW_004517895.1 | Scaffold3127 | 2239                    | GG                              | TT              | 1947042970               |
| SNP_P4_179846_2615  | NW_004517895.1 | Scaffold3127 | 2615                    | GG                              | AA              | 1947042972               |
| SNP_P4_179847_2673  | NW_004517895.1 | Scaffold3127 | 2673                    | GG                              | CC              | 1947042974               |
| SNP_P4_179848_2892  | NW_004517895.1 | Scaffold3127 | 2892                    | AA                              | CC              | 1947042976               |
| SNP_P4_179849_3239  | NW_004517895.1 | Scaffold3127 | 3239                    | AA                              | GG              | 1947042978               |
| SNP_P4_179850_3240  | NW_004517895.1 | Scaffold3127 | 3240                    | TT                              | AA              | 1947042980               |
| SNP_P4_179851_3272  | NW_004517895.1 | Scaffold3127 | 3272                    | CC                              | TT              | 1947042982               |
| SNP_P4_179852_3579  | NW_004517895.1 | Scaffold3127 | 3579                    | TT                              | GG              | 1947042984               |
| SNP_P4_179853_3596  | NW_004517895.1 | Scaffold3127 | 3596                    | CC                              | GG              | 1947042986               |
| SNP_P4_179854_3647  | NW_004517895.1 | Scaffold3127 | 3647                    | TT                              | GG              | 1947042988               |
| SNP_P4_179855_3764  | NW_004517895.1 | Scaffold3127 | 3764                    | TT                              | GG              | 1947042990               |
| SNP_P4_179856_3867  | NW_004517895.1 | Scaffold3127 | 3867                    | AA                              | TT              | 1947042992               |
| SNP_P4_179857_4088  | NW_004517895.1 | Scaffold3127 | 4088                    | AA                              | CC              | 1947042994               |
| SNP_P4_179858_4140  | NW_004517895.1 | Scaffold3127 | 4140                    | AA                              | CC              | 1947042996               |
| SNP_P4_179859_4791  | NW_004517895.1 | Scaffold3127 | 4791                    | TT                              | AA              | 1947042998               |
| SNP_P4_179860_4798  | NW_004517895.1 | Scaffold3127 | 4798                    | AA                              | CC              | 1947043000               |
| SNP_P4_179861_8774  | NW_004517895.1 | Scaffold3127 | 8774                    | CC                              | TT              | 1947043002               |

| SNPs IDs            | Chromosome IDs | Chromosomes  | Physical positions (bp) | CDC Frontier (Reference genome) | (ILWC46 & LPNB) | NCBI SNPdb Accession IDs |
|---------------------|----------------|--------------|-------------------------|---------------------------------|-----------------|--------------------------|
| SNP_P4_179863_8834  | NW_004517895.1 | Scaffold3127 | 8834                    | GG                              | CC              | 1947043004               |
| SNP_P4_179865_8880  | NW_004517895.1 | Scaffold3127 | 8880                    | GG                              | AA              | 1947043006               |
| SNP_P4_179866_8890  | NW_004517895.1 | Scaffold3127 | 8890                    | TT                              | GG              | 1947043008               |
| SNP_P4_179867_8984  | NW_004517895.1 | Scaffold3127 | 8984                    | GG                              | AA              | 1947043010               |
| SNP_P4_179868_9175  | NW_004517895.1 | Scaffold3127 | 9175                    | AA                              | TT              | 1947043012               |
| SNP_P4_179869_9484  | NW_004517895.1 | Scaffold3127 | 9484                    | TT                              | CC              | 1947043013               |
| SNP_P4_179870_9700  | NW_004517895.1 | Scaffold3127 | 9700                    | AA                              | GG              | 1947043015               |
| SNP_P4_179871_9838  | NW_004517895.1 | Scaffold3127 | 9838                    | CC                              | AA              | 1947043017               |
| SNP_P4_179872_9876  | NW_004517895.1 | Scaffold3127 | 9876                    | TT                              | AA              | 1947043019               |
| SNP_P4_179873_9878  | NW_004517895.1 | Scaffold3127 | 9878                    | GG                              | TT              | 1947043021               |
| SNP_P4_179874_9885  | NW_004517895.1 | Scaffold3127 | 9885                    | AA                              | GG              | 1947043023               |
| SNP_P4_179875_9919  | NW_004517895.1 | Scaffold3127 | 9919                    | GG                              | CC              | 1947043025               |
| SNP_P4_179877_10175 | NW_004517895.1 | Scaffold3127 | 10175                   | TT                              | AA              | 1947043027               |
| SNP_P4_179878_12083 | NW_004517895.1 | Scaffold3127 | 12083                   | CC                              | TT              | 1947043029               |
| SNP_P4_179879_12084 | NW_004517895.1 | Scaffold3127 | 12084                   | CC                              | TT              | 1947043031               |
| SNP_P4_179880_12095 | NW_004517895.1 | Scaffold3127 | 12095                   | GG                              | AA              | 1947043033               |
| SNP_P4_179881_12113 | NW_004517895.1 | Scaffold3127 | 12113                   | AA                              | TT              | 1947043035               |
| SNP_P4_179882_12116 | NW_004517895.1 | Scaffold3127 | 12116                   | AA                              | CC              | 1947043037               |
| SNP_P4_179883_12161 | NW_004517895.1 | Scaffold3127 | 12161                   | AA                              | CC              | 1947043039               |
| SNP_P4_179884_12170 | NW_004517895.1 | Scaffold3127 | 12170                   | TT                              | GG              | 1947043041               |
| SNP_P4_179885_12264 | NW_004517895.1 | Scaffold3127 | 12264                   | CC                              | AA              | 1947043043               |
| SNP_P4_179886_12265 | NW_004517895.1 | Scaffold3127 | 12265                   | TT                              | AA              | 1947043045               |
| SNP_P4_179887_12724 | NW_004517895.1 | Scaffold3127 | 12724                   | AA                              | CC              | 1947043047               |
| SNP_P4_179888_12743 | NW_004517895.1 | Scaffold3127 | 12743                   | AA                              | CC              | 1947043049               |
| SNP_P4_179889_12803 | NW_004517895.1 | Scaffold3127 | 12803                   | TT                              | CC              | 1947043051               |
| SNP_P4_179890_13086 | NW_004517895.1 | Scaffold3127 | 13086                   | AA                              | GG              | 1947043053               |
| SNP_P4_179891_13100 | NW_004517895.1 | Scaffold3127 | 13100                   | CC                              | GG              | 1947043055               |
| SNP_P4_179892_13103 | NW_004517895.1 | Scaffold3127 | 13103                   | CC                              | AA              | 1947043057               |
| SNP_P4_179893_17795 | NW_004517895.1 | Scaffold3127 | 17795                   | GG                              | TT              | 1947043059               |
| SNP_P4_179894_18520 | NW_004517895.1 | Scaffold3127 | 18520                   | CC                              | AA              | 1947043061               |
| SNP_P4_179895_18663 | NW_004517895.1 | Scaffold3127 | 18663                   | TT                              | CC              | 1947043063               |
| SNP_P4_179896_18969 | NW_004517895.1 | Scaffold3127 | 18969                   | AA                              | GG              | 1947043065               |
| SNP_P4_179897_19051 | NW_004517895.1 | Scaffold3127 | 19051                   | TT                              | CC              | 1947043067               |
| SNP_P4_179898_19239 | NW_004517895.1 | Scaffold3127 | 19239                   | TT                              | AA              | 1947043069               |
| SNP_P4_179899_19245 | NW_004517895.1 | Scaffold3127 | 19245                   | AA                              | GG              | 1947043071               |
| SNP_P4_179900_21052 | NW_004517895.1 | Scaffold3127 | 21052                   | AA                              | CC              | 1947043073               |
| SNP_P4_179901_21700 | NW_004517895.1 | Scaffold3127 | 21700                   | GG                              | CC              | 1947043075               |
| SNP_P4_179902_22037 | NW_004517895.1 | Scaffold3127 | 22037                   | CC                              | TT              | 1947043077               |
| SNP_P4_179903_302   | NW_004517899.1 | Scaffold3131 | 302                     | AA                              | TT              | 1947043079               |
| SNP_P4_179904_485   | NW_004517899.1 | Scaffold3131 | 485                     | AA                              | CC              | 1947043081               |
| SNP_P4_179905_534   | NW_004517899.1 | Scaffold3131 | 534                     | GG                              | AA              | 1947043083               |
| SNP_P4_179907_729   | NW_004517902.1 | Scaffold3134 | 729                     | AA                              | GG              | 1947043085               |

| SNPs IDs            | Chromosome IDs | Chromosomes  | Physical positions (bp) | CDC Frontier (Reference genome) | (ILWC46 & LPNB) | NCBI SNPdb Accession IDs |
|---------------------|----------------|--------------|-------------------------|---------------------------------|-----------------|--------------------------|
| SNP_P4_179908_4515  | NW_004517902.1 | Scaffold3134 | 4515                    | CC                              | TT              | 1947043087               |
| SNP_P4_179909_4585  | NW_004517902.1 | Scaffold3134 | 4585                    | AA                              | CC              | 1947043089               |
| SNP_P4_179911_5043  | NW_004517902.1 | Scaffold3134 | 5043                    | CC                              | TT              | 1947043091               |
| SNP_P4_179912_5055  | NW_004517902.1 | Scaffold3134 | 5055                    | GG                              | TT              | 1947043093               |
| SNP_P4_179913_5447  | NW_004517902.1 | Scaffold3134 | 5447                    | TT                              | CC              | 1947043095               |
| SNP_P4_179914_5448  | NW_004517902.1 | Scaffold3134 | 5448                    | TT                              | CC              | 1947043097               |
| SNP_P4_179915_5453  | NW_004517902.1 | Scaffold3134 | 5453                    | CC                              | TT              | 1947043099               |
| SNP_P4_179916_5591  | NW_004517902.1 | Scaffold3134 | 5591                    | CC                              | AA              | 1947043101               |
| SNP_P4_179917_5687  | NW_004517902.1 | Scaffold3134 | 5687                    | AA                              | TT              | 1947043103               |
| SNP_P4_179918_5790  | NW_004517902.1 | Scaffold3134 | 5790                    | TT                              | AA              | 1947043105               |
| SNP_P4_179919_12055 | NW_004517902.1 | Scaffold3134 | 12055                   | AA                              | GG              | 1947043107               |
| SNP_P4_179920_12105 | NW_004517902.1 | Scaffold3134 | 12105                   | CC                              | TT              | 1947043109               |
| SNP_P4_179923_12239 | NW_004517902.1 | Scaffold3134 | 12239                   | TT                              | AA              | 1947043112               |
| SNP_P4_179924_12243 | NW_004517902.1 | Scaffold3134 | 12243                   | TT                              | AA              | 1947043114               |
| SNP_P4_179925_12518 | NW_004517902.1 | Scaffold3134 | 12518                   | CC                              | AA              | 1947043116               |
| SNP_P4_179926_12544 | NW_004517902.1 | Scaffold3134 | 12544                   | AA                              | GG              | 1947043118               |
| SNP_P4_179927_12559 | NW_004517902.1 | Scaffold3134 | 12559                   | TT                              | GG              | 1947043120               |
| SNP_P4_179928_12567 | NW_004517902.1 | Scaffold3134 | 12567                   | TT                              | CC              | 1947043122               |
| SNP_P4_179929_12682 | NW_004517902.1 | Scaffold3134 | 12682                   | TT                              | CC              | 1947043124               |
| SNP_P4_179930_12742 | NW_004517902.1 | Scaffold3134 | 12742                   | AA                              | GG              | 1947043126               |
| SNP_P4_179932_12926 | NW_004517902.1 | Scaffold3134 | 12926                   | GG                              | AA              | 1947043128               |
| SNP_P4_179933_12939 | NW_004517902.1 | Scaffold3134 | 12939                   | AA                              | GG              | 1947043131               |
| SNP_P4_179934_12955 | NW_004517902.1 | Scaffold3134 | 12955                   | GG                              | AA              | 1947043133               |
| SNP_P4_179935_12977 | NW_004517902.1 | Scaffold3134 | 12977                   | CC                              | TT              | 1947043135               |
| SNP_P4_179936_13004 | NW_004517902.1 | Scaffold3134 | 13004                   | AA                              | GG              | 1947043137               |
| SNP_P4_179937_13012 | NW_004517902.1 | Scaffold3134 | 13012                   | TT                              | CC              | 1947043139               |
| SNP_P4_179938_13047 | NW_004517902.1 | Scaffold3134 | 13047                   | GG                              | AA              | 1947043141               |
| SNP_P4_179940_13535 | NW_004517902.1 | Scaffold3134 | 13535                   | CC                              | AA              | 1947043143               |
| SNP_P4_179941_13544 | NW_004517902.1 | Scaffold3134 | 13544                   | AA                              | GG              | 1947043146               |
| SNP_P4_179942_13549 | NW_004517902.1 | Scaffold3134 | 13549                   | TT                              | CC              | 1947043148               |
| SNP_P4_179943_13683 | NW_004517902.1 | Scaffold3134 | 13683                   | AA                              | GG              | 1947043150               |
| SNP_P4_179944_13688 | NW_004517902.1 | Scaffold3134 | 13688                   | TT                              | CC              | 1947043152               |
| SNP_P4_179945_13697 | NW_004517902.1 | Scaffold3134 | 13697                   | AA                              | TT              | 1947043154               |
| SNP_P4_179947_13925 | NW_004517902.1 | Scaffold3134 | 13925                   | AA                              | TT              | 1947043156               |
| SNP_P4_179948_14024 | NW_004517902.1 | Scaffold3134 | 14024                   | AA                              | GG              | 1947043158               |
| SNP_P4_179949_14042 | NW_004517902.1 | Scaffold3134 | 14042                   | AA                              | GG              | 1947043160               |
| SNP_P4_179950_14119 | NW_004517902.1 | Scaffold3134 | 14119                   | AA                              | CC              | 1947043162               |
| SNP_P4_179951_14295 | NW_004517902.1 | Scaffold3134 | 14295                   | AA                              | CC              | 1947043164               |
| SNP_P4_179952_14470 | NW_004517902.1 | Scaffold3134 | 14470                   | GG                              | CC              | 1947043166               |
| SNP_P4_179953_14681 | NW_004517902.1 | Scaffold3134 | 14681                   | GG                              | AA              | 1947043168               |
| SNP_P4_179955_15510 | NW_004517902.1 | Scaffold3134 | 15510                   | TT                              | CC              | 1947043170               |
| SNP_P4_179956_15554 | NW_004517902.1 | Scaffold3134 | 15554                   | TT                              | AA              | 1947043172               |

| SNPs IDs             | Chromosome IDs | Chromosomes  | Physical positions (bp) | CDC Frontier (Reference genome) | (ILWC46 & LPNB) | NCBI SNPdb Accession IDs |
|----------------------|----------------|--------------|-------------------------|---------------------------------|-----------------|--------------------------|
| SNP_P4_179957_52017  | NW_004517902.1 | Scaffold3134 | 52017                   | GG                              | TT              | 1947043174               |
| SNP_P4_179958_66884  | NW_004517902.1 | Scaffold3134 | 66884                   | CC                              | TT              | 1947043176               |
| SNP_P4_179959_66928  | NW_004517902.1 | Scaffold3134 | 66928                   | AA                              | CC              | 1947043178               |
| SNP_P4_179960_66975  | NW_004517902.1 | Scaffold3134 | 66975                   | AA                              | TT              | 1947043180               |
| SNP_P4_179961_67090  | NW_004517902.1 | Scaffold3134 | 67090                   | TT                              | CC              | 1947043182               |
| SNP_P4_179962_67103  | NW_004517902.1 | Scaffold3134 | 67103                   | TT                              | GG              | 1947043184               |
| SNP_P4_179963_67129  | NW_004517902.1 | Scaffold3134 | 67129                   | GG                              | AA              | 1947043186               |
| SNP_P4_179964_67216  | NW_004517902.1 | Scaffold3134 | 67216                   | TT                              | CC              | 1947043188               |
| SNP_P4_179965_67270  | NW_004517902.1 | Scaffold3134 | 67270                   | CC                              | AA              | 1947043190               |
| SNP_P4_179966_67316  | NW_004517902.1 | Scaffold3134 | 67316                   | CC                              | AA              | 1947043192               |
| SNP_P4_179967_67387  | NW_004517902.1 | Scaffold3134 | 67387                   | AA                              | CC              | 1947043194               |
| SNP_P4_179968_67399  | NW_004517902.1 | Scaffold3134 | 67399                   | CC                              | TT              | 1947043196               |
| SNP_P4_179969_76204  | NW_004517902.1 | Scaffold3134 | 76204                   | CC                              | TT              | 1947043198               |
| SNP_P4_179970_76208  | NW_004517902.1 | Scaffold3134 | 76208                   | GG                              | AA              | 1947043200               |
| SNP_P4_179971_76268  | NW_004517902.1 | Scaffold3134 | 76268                   | GG                              | TT              | 1947043202               |
| SNP_P4_179972_80617  | NW_004517902.1 | Scaffold3134 | 80617                   | AA                              | CC              | 1947043204               |
| SNP_P4_179973_94778  | NW_004517902.1 | Scaffold3134 | 94778                   | TT                              | CC              | 1947043206               |
| SNP_P4_179975_110186 | NW_004517902.1 | Scaffold3134 | 110186                  | GG                              | TT              | 1947043208               |
| SNP_P4_179976_110808 | NW_004517902.1 | Scaffold3134 | 110808                  | GG                              | AA              | 1947043210               |
| SNP_P4_179977_141179 | NW_004517902.1 | Scaffold3134 | 141179                  | GG                              | AA              | 1947043212               |
| SNP_P4_179978_4017   | NW_004517903.1 | Scaffold3135 | 4017                    | GG                              | AA              | 1947043214               |
| SNP_P4_179980_5237   | NW_004517903.1 | Scaffold3135 | 5237                    | AA                              | GG              | 1947043216               |
| SNP_P4_179981_988    | NW_004517904.1 | Scaffold3136 | 988                     | GG                              | AA              | 1947043218               |
| SNP_P4_179982_1025   | NW_004517904.1 | Scaffold3136 | 1025                    | AA                              | TT              | 1947043220               |
| SNP_P4_179984_965    | NW_004517907.1 | Scaffold3139 | 965                     | TT                              | CC              | 1947043222               |
| SNP_P4_179985_966    | NW_004517907.1 | Scaffold3139 | 966                     | GG                              | AA              | 1947043224               |
| SNP_P4_179986_986    | NW_004517907.1 | Scaffold3139 | 986                     | TT                              | GG              | 1947043226               |
| SNP_P4_179987_3811   | NW_004517909.1 | Scaffold3141 | 3811                    | CC                              | AA              | 1947043227               |
| SNP_P4_179988_600    | NW_004517911.1 | Scaffold3144 | 600                     | TT                              | AA              | 1947043229               |
| SNP_P4_179989_2514   | NW_004517911.1 | Scaffold3144 | 2514                    | GG                              | AA              | 1947043231               |
| SNP_P4_179990_4445   | NW_004517911.1 | Scaffold3144 | 4445                    | GG                              | AA              | 1947043233               |
| SNP_P4_179991_4458   | NW_004517911.1 | Scaffold3144 | 4458                    | CC                              | AA              | 1947043235               |
| SNP_P4_179992_4464   | NW_004517911.1 | Scaffold3144 | 4464                    | GG                              | TT              | 1947043237               |
| SNP_P4_179993_594    | NW_004517913.1 | Scaffold3147 | 594                     | GG                              | TT              | 1947043239               |
| SNP_P4_179994_596    | NW_004517913.1 | Scaffold3147 | 596                     | TT                              | CC              | 1947043241               |
| SNP_P4_179995_599    | NW_004517913.1 | Scaffold3147 | 599                     | GG                              | AA              | 1947043243               |
| SNP_P4_179996_2000   | NW_004517914.1 | Scaffold3148 | 2000                    | TT                              | CC              | 1947043245               |
| SNP_P4_179997_2005   | NW_004517914.1 | Scaffold3148 | 2005                    | GG                              | AA              | 1947043247               |
| SNP_P4_179998_1809   | NW_004517915.1 | Scaffold3149 | 1809                    | AA                              | GG              | 1947043249               |
| SNP_P4_179999_3498   | NW_004517915.1 | Scaffold3149 | 3498                    | GG                              | AA              | 1947043251               |
| SNP_P4_180000_3576   | NW_004517915.1 | Scaffold3149 | 3576                    | CC                              | AA              | 1947043253               |
| SNP_P4_180001_3688   | NW_004517915.1 | Scaffold3149 | 3688                    | CC                              | TT              | 1947043255               |

| SNPs IDs           | Chromosome IDs | Chromosomes  | Physical positions (bp) | CDC Frontier (Reference genome) | (ILWC46 & LPNB) | NCBI SNPdb Accession IDs |
|--------------------|----------------|--------------|-------------------------|---------------------------------|-----------------|--------------------------|
| SNP_P4_180002_3867 | NW_004517915.1 | Scaffold3149 | 3867                    | TT                              | AA              | 1947043257               |
| SNP_P4_180003_3879 | NW_004517915.1 | Scaffold3149 | 3879                    | CC                              | TT              | 1947043259               |
| SNP_P4_180004_3882 | NW_004517915.1 | Scaffold3149 | 3882                    | AA                              | GG              | 1947043261               |
| SNP_P4_180005_4267 | NW_004517915.1 | Scaffold3149 | 4267                    | TT                              | AA              | 1947043263               |
| SNP_P4_180006_4710 | NW_004517915.1 | Scaffold3149 | 4710                    | CC                              | AA              | 1947043265               |
| SNP_P4_180007_4800 | NW_004517915.1 | Scaffold3149 | 4800                    | TT                              | CC              | 1947043267               |
| SNP_P4_180008_4807 | NW_004517915.1 | Scaffold3149 | 4807                    | CC                              | TT              | 1947043269               |
| SNP_P4_180009_4861 | NW_004517915.1 | Scaffold3149 | 4861                    | CC                              | AA              | 1947043271               |
| SNP_P4_180010_4885 | NW_004517915.1 | Scaffold3149 | 4885                    | AA                              | GG              | 1947043273               |
| SNP_P4_180011_4897 | NW_004517915.1 | Scaffold3149 | 4897                    | CC                              | AA              | 1947043275               |
| SNP_P4_180012_5048 | NW_004517915.1 | Scaffold3149 | 5048                    | CC                              | GG              | 1947043277               |
| SNP_P4_180013_5075 | NW_004517915.1 | Scaffold3149 | 5075                    | CC                              | AA              | 1947043279               |
| SNP_P4_180014_5143 | NW_004517915.1 | Scaffold3149 | 5143                    | TT                              | GG              | 1947043281               |
| SNP_P4_180015_5152 | NW_004517915.1 | Scaffold3149 | 5152                    | GG                              | AA              | 1947043283               |
| SNP_P4_180016_5157 | NW_004517915.1 | Scaffold3149 | 5157                    | GG                              | AA              | 1947043285               |
| SNP_P4_180017_5162 | NW_004517915.1 | Scaffold3149 | 5162                    | AA                              | GG              | 1947043287               |
| SNP_P4_180018_5214 | NW_004517915.1 | Scaffold3149 | 5214                    | TT                              | CC              | 1947043289               |
| SNP_P4_180019_5249 | NW_004517915.1 | Scaffold3149 | 5249                    | GG                              | AA              | 1947043291               |
| SNP_P4_180020_5271 | NW_004517915.1 | Scaffold3149 | 5271                    | CC                              | GG              | 1947043293               |
| SNP_P4_180021_5283 | NW_004517915.1 | Scaffold3149 | 5283                    | AA                              | GG              | 1947043295               |
| SNP_P4_180022_5291 | NW_004517915.1 | Scaffold3149 | 5291                    | TT                              | CC              | 1947043297               |
| SNP_P4_180023_5317 | NW_004517915.1 | Scaffold3149 | 5317                    | CC                              | TT              | 1947043299               |
| SNP_P4_180024_5319 | NW_004517915.1 | Scaffold3149 | 5319                    | CC                              | TT              | 1947043301               |
| SNP_P4_180025_5373 | NW_004517915.1 | Scaffold3149 | 5373                    | GG                              | AA              | 1947043303               |
| SNP_P4_180026_5434 | NW_004517915.1 | Scaffold3149 | 5434                    | TT                              | GG              | 1947043305               |
| SNP_P4_180027_5487 | NW_004517915.1 | Scaffold3149 | 5487                    | GG                              | AA              | 1947043307               |
| SNP_P4_180028_5536 | NW_004517915.1 | Scaffold3149 | 5536                    | TT                              | AA              | 1947043309               |
| SNP_P4_180029_5570 | NW_004517915.1 | Scaffold3149 | 5570                    | TT                              | CC              | 1947043311               |
| SNP_P4_180030_7334 | NW_004517915.1 | Scaffold3149 | 7334                    | CC                              | TT              | 1947043313               |
| SNP_P4_180031_7341 | NW_004517915.1 | Scaffold3149 | 7341                    | AA                              | GG              | 1947043315               |
| SNP_P4_180032_9130 | NW_004517915.1 | Scaffold3149 | 9130                    | AA                              | TT              | 1947043317               |
| SNP_P4_180033_9175 | NW_004517915.1 | Scaffold3149 | 9175                    | CC                              | TT              | 1947043319               |
| SNP_P4_180034_9251 | NW_004517915.1 | Scaffold3149 | 9251                    | CC                              | AA              | 1947043321               |
| SNP_P4_180035_9450 | NW_004517915.1 | Scaffold3149 | 9450                    | CC                              | TT              | 1947043323               |
| SNP_P4_180036_9487 | NW_004517915.1 | Scaffold3149 | 9487                    | AA                              | TT              | 1947043325               |
| SNP_P4_180037_9513 | NW_004517915.1 | Scaffold3149 | 9513                    | AA                              | GG              | 1947043327               |
| SNP_P4_180038_9620 | NW_004517915.1 | Scaffold3149 | 9620                    | AA                              | GG              | 1947043329               |
| SNP_P4_180040_9700 | NW_004517915.1 | Scaffold3149 | 9700                    | AA                              | TT              | 1947043331               |
| SNP_P4_180041_9787 | NW_004517915.1 | Scaffold3149 | 9787                    | CC                              | GG              | 1947043333               |
| SNP_P4_180042_9850 | NW_004517915.1 | Scaffold3149 | 9850                    | TT                              | GG              | 1947043335               |
| SNP_P4_180043_9870 | NW_004517915.1 | Scaffold3149 | 9870                    | AA                              | GG              | 1947043337               |
| SNP_P4_180044_9945 | NW_004517915.1 | Scaffold3149 | 9945                    | CC                              | TT              | 1947043339               |

| SNPs IDs            | Chromosome IDs | Chromosomes  | Physical positions (bp) | CDC Frontier (Reference genome) | (ILWC46 & LPNB) | NCBI SNPdb Accession IDs |
|---------------------|----------------|--------------|-------------------------|---------------------------------|-----------------|--------------------------|
| SNP_P4_180045_10122 | NW_004517915.1 | Scaffold3149 | 10122                   | AA                              | CC              | 1947043342               |
| SNP_P4_180046_10184 | NW_004517915.1 | Scaffold3149 | 10184                   | AA                              | CC              | 1947043344               |
| SNP_P4_180047_10335 | NW_004517915.1 | Scaffold3149 | 10335                   | AA                              | GG              | 1947043346               |
| SNP_P4_180048_10357 | NW_004517915.1 | Scaffold3149 | 10357                   | TT                              | AA              | 1947043348               |
| SNP_P4_180049_10369 | NW_004517915.1 | Scaffold3149 | 10369                   | AA                              | GG              | 1947043350               |
| SNP_P4_180050_10433 | NW_004517915.1 | Scaffold3149 | 10433                   | GG                              | CC              | 1947043351               |
| SNP_P4_180051_10436 | NW_004517915.1 | Scaffold3149 | 10436                   | CC                              | TT              | 1947043353               |
| SNP_P4_180052_10445 | NW_004517915.1 | Scaffold3149 | 10445                   | GG                              | TT              | 1947043355               |
| SNP_P4_180053_10525 | NW_004517915.1 | Scaffold3149 | 10525                   | GG                              | AA              | 1947043357               |
| SNP_P4_180054_10527 | NW_004517915.1 | Scaffold3149 | 10527                   | TT                              | CC              | 1947043359               |
| SNP_P4_180055_10594 | NW_004517915.1 | Scaffold3149 | 10594                   | GG                              | AA              | 1947043361               |
| SNP_P4_180056_22639 | NW_004517915.1 | Scaffold3149 | 22639                   | TT                              | GG              | 1947043363               |
| SNP_P4_180057_22870 | NW_004517915.1 | Scaffold3149 | 22870                   | TT                              | CC              | 1947043365               |
| SNP_P4_180058_22926 | NW_004517915.1 | Scaffold3149 | 22926                   | TT                              | CC              | 1947043367               |
| SNP_P4_180059_24374 | NW_004517915.1 | Scaffold3149 | 24374                   | CC                              | TT              | 1947043369               |
| SNP_P4_180060_24624 | NW_004517915.1 | Scaffold3149 | 24624                   | CC                              | TT              | 1947043371               |
| SNP_P4_180061_24626 | NW_004517915.1 | Scaffold3149 | 24626                   | TT                              | CC              | 1947043373               |
| SNP_P4_180062_26451 | NW_004517915.1 | Scaffold3149 | 26451                   | CC                              | TT              | 1947043375               |
| SNP_P4_180063_26510 | NW_004517915.1 | Scaffold3149 | 26510                   | GG                              | AA              | 1947043377               |
| SNP_P4_180064_351   | NW_004517917.1 | Scaffold3155 | 351                     | AA                              | GG              | 1947043379               |
| SNP_P4_180065_367   | NW_004517917.1 | Scaffold3155 | 367                     | GG                              | AA              | 1947043381               |
| SNP_P4_180066_487   | NW_004517917.1 | Scaffold3155 | 487                     | AA                              | GG              | 1947043383               |
| SNP_P4_180067_494   | NW_004517917.1 | Scaffold3155 | 494                     | AA                              | GG              | 1947043385               |
| SNP_P4_180068_495   | NW_004517917.1 | Scaffold3155 | 495                     | TT                              | AA              | 1947043387               |
| SNP_P4_180069_498   | NW_004517917.1 | Scaffold3155 | 498                     | TT                              | CC              | 1947043389               |
| SNP_P4_180070_507   | NW_004517917.1 | Scaffold3155 | 507                     | GG                              | AA              | 1947043391               |
| SNP_P4_180071_524   | NW_004517917.1 | Scaffold3155 | 524                     | AA                              | GG              | 1947043393               |
| SNP_P4_180072_555   | NW_004517917.1 | Scaffold3155 | 555                     | TT                              | AA              | 1947043395               |
| SNP_P4_180073_583   | NW_004517917.1 | Scaffold3155 | 583                     | AA                              | GG              | 1947043397               |
| SNP_P4_180074_5543  | NW_004517917.1 | Scaffold3155 | 5543                    | TT                              | CC              | 1947043399               |
| SNP_P4_180075_5550  | NW_004517917.1 | Scaffold3155 | 5550                    | CC                              | AA              | 1947043401               |
| SNP_P4_180076_5558  | NW_004517917.1 | Scaffold3155 | 5558                    | TT                              | CC              | 1947043403               |
| SNP_P4_180077_5559  | NW_004517917.1 | Scaffold3155 | 5559                    | GG                              | CC              | 1947043405               |
| SNP_P4_180078_5579  | NW_004517917.1 | Scaffold3155 | 5579                    | TT                              | CC              | 1947043407               |
| SNP_P4_180080_5609  | NW_004517917.1 | Scaffold3155 | 5609                    | CC                              | GG              | 1947043409               |
| SNP_P4_180081_5610  | NW_004517917.1 | Scaffold3155 | 5610                    | TT                              | CC              | 1947043411               |
| SNP_P4_180082_5672  | NW_004517917.1 | Scaffold3155 | 5672                    | TT                              | GG              | 1947043413               |
| SNP_P4_180083_5697  | NW_004517917.1 | Scaffold3155 | 5697                    | GG                              | TT              | 1947043415               |
| SNP_P4_180084_5735  | NW_004517917.1 | Scaffold3155 | 5735                    | AA                              | GG              | 1947043417               |
| SNP_P4_180085_5748  | NW_004517917.1 | Scaffold3155 | 5748                    | AA                              | GG              | 1947043419               |
| SNP_P4_180086_5773  | NW_004517917.1 | Scaffold3155 | 5773                    | AA                              | GG              | 1947043420               |
| SNP_P4_180089_24095 | NW_004517917.1 | Scaffold3155 | 24095                   | GG                              | AA              | 1947043421               |



| SNPs IDs            | Chromosome IDs | Chromosomes  | Physical positions (bp) | CDC Frontier (Reference genome) | (ILWC46 & LPNB) | NCBI SNPdb Accession IDs |
|---------------------|----------------|--------------|-------------------------|---------------------------------|-----------------|--------------------------|
| SNP_P4_180090_24128 | NW_004517917.1 | Scaffold3155 | 24128                   | CC                              | AA              | 1947043422               |
| SNP_P4_180092_2750  | NW_004517918.1 | Scaffold3156 | 2750                    | CC                              | AA              | 1947043423               |
| SNP_P4_180093_2830  | NW_004517918.1 | Scaffold3156 | 2830                    | CC                              | AA              | 1947043424               |
| SNP_P4_180094_378   | NW_004517919.1 | Scaffold3157 | 378                     | AA                              | TT              | 1947043425               |
| SNP_P4_180095_684   | NW_004517919.1 | Scaffold3157 | 684                     | TT                              | AA              | 1947043426               |
| SNP_P4_180096_720   | NW_004517919.1 | Scaffold3157 | 720                     | AA                              | TT              | 1947043427               |
| SNP_P4_180097_2134  | NW_004517919.1 | Scaffold3157 | 2134                    | AA                              | GG              | 1947043428               |
| SNP_P4_180098_282   | NW_004517920.1 | Scaffold3159 | 282                     | TT                              | AA              | 1947043429               |
| SNP_P4_180099_1660  | NW_004517920.1 | Scaffold3159 | 1660                    | AA                              | TT              | 1947043430               |
| SNP_P4_180100_1748  | NW_004517920.1 | Scaffold3159 | 1748                    | TT                              | CC              | 1947043431               |
| SNP_P4_180101_2335  | NW_004517920.1 | Scaffold3159 | 2335                    | TT                              | GG              | 1947043432               |
| SNP_P4_180102_3144  | NW_004517921.1 | Scaffold3160 | 3144                    | GG                              | AA              | 1947043433               |
| SNP_P4_180103_5623  | NW_004517921.1 | Scaffold3160 | 5623                    | CC                              | GG              | 1947043434               |
| SNP_P4_180104_5636  | NW_004517921.1 | Scaffold3160 | 5636                    | CC                              | TT              | 1947043435               |
| SNP_P4_180105_5637  | NW_004517921.1 | Scaffold3160 | 5637                    | AA                              | GG              | 1947043436               |
| SNP_P4_180106_5815  | NW_004517921.1 | Scaffold3160 | 5815                    | CC                              | TT              | 1947043437               |
| SNP_P4_180107_5878  | NW_004517921.1 | Scaffold3160 | 5878                    | TT                              | CC              | 1947043438               |
| SNP_P4_180108_5898  | NW_004517921.1 | Scaffold3160 | 5898                    | CC                              | TT              | 1947043439               |
| SNP_P4_180109_5938  | NW_004517921.1 | Scaffold3160 | 5938                    | GG                              | TT              | 1947043440               |
| SNP_P4_180110_5971  | NW_004517921.1 | Scaffold3160 | 5971                    | GG                              | AA              | 1947043441               |
| SNP_P4_180111_5978  | NW_004517921.1 | Scaffold3160 | 5978                    | AA                              | GG              | 1947043443               |
| SNP_P4_180112_6139  | NW_004517921.1 | Scaffold3160 | 6139                    | CC                              | TT              | 1947043445               |
| SNP_P4_180113_6153  | NW_004517921.1 | Scaffold3160 | 6153                    | CC                              | TT              | 1947043447               |
| SNP_P4_180114_6229  | NW_004517921.1 | Scaffold3160 | 6229                    | AA                              | GG              | 1947043449               |
| SNP_P4_180115_7602  | NW_004517921.1 | Scaffold3160 | 7602                    | TT                              | AA              | 1947043451               |
| SNP_P4_180116_7608  | NW_004517921.1 | Scaffold3160 | 7608                    | CC                              | TT              | 1947043453               |
| SNP_P4_180117_7640  | NW_004517921.1 | Scaffold3160 | 7640                    | CC                              | AA              | 1947043455               |
| SNP_P4_180118_7869  | NW_004517921.1 | Scaffold3160 | 7869                    | CC                              | TT              | 1947043457               |
| SNP_P4_180119_7871  | NW_004517921.1 | Scaffold3160 | 7871                    | CC                              | AA              | 1947043459               |
| SNP_P4_180121_7913  | NW_004517921.1 | Scaffold3160 | 7913                    | TT                              | CC              | 1947043461               |
| SNP_P4_180122_7914  | NW_004517921.1 | Scaffold3160 | 7914                    | GG                              | AA              | 1947043463               |
| SNP_P4_180123_7946  | NW_004517921.1 | Scaffold3160 | 7946                    | GG                              | AA              | 1947043465               |
| SNP_P4_180124_7965  | NW_004517921.1 | Scaffold3160 | 7965                    | TT                              | AA              | 1947043467               |
| SNP_P4_180125_7996  | NW_004517921.1 | Scaffold3160 | 7996                    | AA                              | TT              | 1947043469               |
| SNP_P4_180126_7997  | NW_004517921.1 | Scaffold3160 | 7997                    | AA                              | TT              | 1947043471               |
| SNP_P4_180127_7999  | NW_004517921.1 | Scaffold3160 | 7999                    | TT                              | GG              | 1947043473               |
| SNP_P4_180128_8075  | NW_004517921.1 | Scaffold3160 | 8075                    | AA                              | GG              | 1947043475               |
| SNP_P4_180129_8342  | NW_004517921.1 | Scaffold3160 | 8342                    | TT                              | AA              | 1947043477               |
| SNP_P4_180130_8396  | NW_004517921.1 | Scaffold3160 | 8396                    | AA                              | GG              | 1947043479               |
| SNP_P4_180131_8607  | NW_004517921.1 | Scaffold3160 | 8607                    | AA                              | TT              | 1947043481               |
| SNP_P4_180132_8763  | NW_004517921.1 | Scaffold3160 | 8763                    | CC                              | GG              | 1947043483               |
| SNP_P4_180133_8808  | NW_004517921.1 | Scaffold3160 | 8808                    | AA                              | GG              | 1947043485               |

| SNPs IDs            | Chromosome IDs | Chromosomes  | Physical positions (bp) | CDC Frontier (Reference genome) | (ILWC46 & LPNB) | NCBI SNPdb Accession IDs |
|---------------------|----------------|--------------|-------------------------|---------------------------------|-----------------|--------------------------|
| SNP_P4_180134_8814  | NW_004517921.1 | Scaffold3160 | 8814                    | CC                              | AA              | 1947043487               |
| SNP_P4_180135_8833  | NW_004517921.1 | Scaffold3160 | 8833                    | AA                              | TT              | 1947043489               |
| SNP_P4_180136_8841  | NW_004517921.1 | Scaffold3160 | 8841                    | CC                              | TT              | 1947043491               |
| SNP_P4_180137_8852  | NW_004517921.1 | Scaffold3160 | 8852                    | CC                              | TT              | 1947043493               |
| SNP_P4_180138_8896  | NW_004517921.1 | Scaffold3160 | 8896                    | GG                              | CC              | 1947043495               |
| SNP_P4_180139_8965  | NW_004517921.1 | Scaffold3160 | 8965                    | GG                              | CC              | 1947043497               |
| SNP_P4_180140_8991  | NW_004517921.1 | Scaffold3160 | 8991                    | TT                              | CC              | 1947043499               |
| SNP_P4_180141_9066  | NW_004517921.1 | Scaffold3160 | 9066                    | TT                              | GG              | 1947043501               |
| SNP_P4_180142_9093  | NW_004517921.1 | Scaffold3160 | 9093                    | GG                              | AA              | 1947043503               |
| SNP_P4_180143_9131  | NW_004517921.1 | Scaffold3160 | 9131                    | GG                              | AA              | 1947043505               |
| SNP_P4_180144_9239  | NW_004517921.1 | Scaffold3160 | 9239                    | GG                              | AA              | 1947043507               |
| SNP_P4_180145_9267  | NW_004517921.1 | Scaffold3160 | 9267                    | GG                              | AA              | 1947043509               |
| SNP_P4_180146_9321  | NW_004517921.1 | Scaffold3160 | 9321                    | GG                              | CC              | 1947043511               |
| SNP_P4_180147_9361  | NW_004517921.1 | Scaffold3160 | 9361                    | TT                              | GG              | 1947043513               |
| SNP_P4_180148_9413  | NW_004517921.1 | Scaffold3160 | 9413                    | TT                              | GG              | 1947043515               |
| SNP_P4_180149_9423  | NW_004517921.1 | Scaffold3160 | 9423                    | AA                              | CC              | 1947043517               |
| SNP_P4_180150_9454  | NW_004517921.1 | Scaffold3160 | 9454                    | CC                              | AA              | 1947043519               |
| SNP_P4_180151_9495  | NW_004517921.1 | Scaffold3160 | 9495                    | TT                              | CC              | 1947043521               |
| SNP_P4_180152_9522  | NW_004517921.1 | Scaffold3160 | 9522                    | TT                              | CC              | 1947043523               |
| SNP_P4_180153_9629  | NW_004517921.1 | Scaffold3160 | 9629                    | TT                              | GG              | 1947043525               |
| SNP_P4_180154_9630  | NW_004517921.1 | Scaffold3160 | 9630                    | TT                              | AA              | 1947043527               |
| SNP_P4_180155_9760  | NW_004517921.1 | Scaffold3160 | 9760                    | CC                              | TT              | 1947043529               |
| SNP_P4_180156_9761  | NW_004517921.1 | Scaffold3160 | 9761                    | GG                              | TT              | 1947043531               |
| SNP_P4_180157_9778  | NW_004517921.1 | Scaffold3160 | 9778                    | CC                              | TT              | 1947043533               |
| SNP_P4_180158_9790  | NW_004517921.1 | Scaffold3160 | 9790                    | AA                              | GG              | 1947043535               |
| SNP_P4_180160_9844  | NW_004517921.1 | Scaffold3160 | 9844                    | AA                              | GG              | 1947043537               |
| SNP_P4_180161_9864  | NW_004517921.1 | Scaffold3160 | 9864                    | TT                              | AA              | 1947043539               |
| SNP_P4_180162_9895  | NW_004517921.1 | Scaffold3160 | 9895                    | AA                              | GG              | 1947043541               |
| SNP_P4_180163_9947  | NW_004517921.1 | Scaffold3160 | 9947                    | AA                              | GG              | 1947043543               |
| SNP_P4_180164_9977  | NW_004517921.1 | Scaffold3160 | 9977                    | CC                              | TT              | 1947043545               |
| SNP_P4_180165_10033 | NW_004517921.1 | Scaffold3160 | 10033                   | AA                              | CC              | 1947043547               |
| SNP_P4_180166_10075 | NW_004517921.1 | Scaffold3160 | 10075                   | TT                              | AA              | 1947043549               |
| SNP_P4_180167_10089 | NW_004517921.1 | Scaffold3160 | 10089                   | AA                              | GG              | 1947043551               |
| SNP_P4_180169_10166 | NW_004517921.1 | Scaffold3160 | 10166                   | AA                              | GG              | 1947043554               |
| SNP_P4_180170_10196 | NW_004517921.1 | Scaffold3160 | 10196                   | AA                              | GG              | 1947043556               |
| SNP_P4_180171_10232 | NW_004517921.1 | Scaffold3160 | 10232                   | TT                              | AA              | 1947043558               |
| SNP_P4_180172_10349 | NW_004517921.1 | Scaffold3160 | 10349                   | CC                              | TT              | 1947043560               |
| SNP_P4_180173_10361 | NW_004517921.1 | Scaffold3160 | 10361                   | CC                              | AA              | 1947043562               |
| SNP_P4_180174_10408 | NW_004517921.1 | Scaffold3160 | 10408                   | AA                              | GG              | 1947043564               |
| SNP_P4_180176_10588 | NW_004517921.1 | Scaffold3160 | 10588                   | TT                              | CC              | 1947043566               |
| SNP_P4_180177_10633 | NW_004517921.1 | Scaffold3160 | 10633                   | CC                              | TT              | 1947043568               |
| SNP_P4_180178_10695 | NW_004517921.1 | Scaffold3160 | 10695                   | TT                              | AA              | 1947043570               |

| SNPs IDs            | Chromosome IDs | Chromosomes  | Physical positions (bp) | CDC Frontier (Reference genome) | (ILWC46 & LPNB) | NCBI SNPdb Accession IDs |
|---------------------|----------------|--------------|-------------------------|---------------------------------|-----------------|--------------------------|
| SNP_P4_180179_10754 | NW_004517921.1 | Scaffold3160 | 10754                   | TT                              | GG              | 1947043572               |
| SNP_P4_180180_10795 | NW_004517921.1 | Scaffold3160 | 10795                   | GG                              | TT              | 1947043574               |
| SNP_P4_180181_11035 | NW_004517921.1 | Scaffold3160 | 11035                   | GG                              | TT              | 1947043576               |
| SNP_P4_180182_11566 | NW_004517921.1 | Scaffold3160 | 11566                   | TT                              | AA              | 1947043578               |
| SNP_P4_180183_11583 | NW_004517921.1 | Scaffold3160 | 11583                   | GG                              | AA              | 1947043580               |
| SNP_P4_180184_11898 | NW_004517921.1 | Scaffold3160 | 11898                   | CC                              | TT              | 1947043582               |
| SNP_P4_180185_11902 | NW_004517921.1 | Scaffold3160 | 11902                   | AA                              | CC              | 1947043584               |
| SNP_P4_180186_16793 | NW_004517921.1 | Scaffold3160 | 16793                   | GG                              | AA              | 1947043586               |
| SNP_P4_180187_16988 | NW_004517921.1 | Scaffold3160 | 16988                   | AA                              | TT              | 1947043588               |
| SNP_P4_180189_22945 | NW_004517921.1 | Scaffold3160 | 22945                   | TT                              | GG              | 1947043590               |
| SNP_P4_180190_22966 | NW_004517921.1 | Scaffold3160 | 22966                   | CC                              | TT              | 1947043592               |
| SNP_P4_180191_909   | NW_004517922.1 | Scaffold3161 | 909                     | TT                              | AA              | 1947043594               |
| SNP_P4_180192_5453  | NW_004517922.1 | Scaffold3161 | 5453                    | AA                              | TT              | 1947043596               |
| SNP_P4_180193_5799  | NW_004517922.1 | Scaffold3161 | 5799                    | TT                              | GG              | 1947043598               |
| SNP_P4_180194_5813  | NW_004517922.1 | Scaffold3161 | 5813                    | TT                              | CC              | 1947043600               |
| SNP_P4_180196_403   | NW_004517923.1 | Scaffold3163 | 403                     | AA                              | TT              | 1947043602               |
| SNP_P4_180197_455   | NW_004517923.1 | Scaffold3163 | 455                     | TT                              | CC              | 1947043604               |
| SNP_P4_180198_468   | NW_004517923.1 | Scaffold3163 | 468                     | CC                              | TT              | 1947043606               |
| SNP_P4_180199_582   | NW_004517923.1 | Scaffold3163 | 582                     | CC                              | TT              | 1947043608               |
| SNP_P4_180200_583   | NW_004517923.1 | Scaffold3163 | 583                     | GG                              | AA              | 1947043610               |
| SNP_P4_180201_586   | NW_004517923.1 | Scaffold3163 | 586                     | GG                              | AA              | 1947043612               |
| SNP_P4_180202_614   | NW_004517923.1 | Scaffold3163 | 614                     | GG                              | TT              | 1947043614               |
| SNP_P4_180203_670   | NW_004517923.1 | Scaffold3163 | 670                     | AA                              | GG              | 1947043616               |
| SNP_P4_180204_686   | NW_004517923.1 | Scaffold3163 | 686                     | CC                              | TT              | 1947043618               |
| SNP_P4_180205_705   | NW_004517923.1 | Scaffold3163 | 705                     | AA                              | GG              | 1947043620               |
| SNP_P4_180206_759   | NW_004517923.1 | Scaffold3163 | 759                     | TT                              | CC              | 1947043622               |
| SNP_P4_180207_954   | NW_004517923.1 | Scaffold3163 | 954                     | AA                              | TT              | 1947043624               |
| SNP_P4_180208_973   | NW_004517923.1 | Scaffold3163 | 973                     | CC                              | TT              | 1947043626               |
| SNP_P4_180209_1111  | NW_004517923.1 | Scaffold3163 | 1111                    | AA                              | TT              | 1947043628               |
| SNP_P4_180211_1159  | NW_004517923.1 | Scaffold3163 | 1159                    | AA                              | GG              | 1947043630               |
| SNP_P4_180213_2411  | NW_004517924.1 | Scaffold3164 | 2411                    | TT                              | CC              | 1947043632               |
| SNP_P4_180214_2469  | NW_004517924.1 | Scaffold3164 | 2469                    | CC                              | TT              | 1947043634               |
| SNP_P4_180215_3606  | NW_004517924.1 | Scaffold3164 | 3606                    | CC                              | TT              | 1947043637               |
| SNP_P4_180216_3644  | NW_004517924.1 | Scaffold3164 | 3644                    | GG                              | AA              | 1947043639               |
| SNP_P4_180217_6523  | NW_004517924.1 | Scaffold3164 | 6523                    | TT                              | CC              | 1947043641               |
| SNP_P4_180218_6942  | NW_004517924.1 | Scaffold3164 | 6942                    | AA                              | TT              | 1947043643               |
| SNP_P4_180219_64    | NW_004517926.1 | Scaffold3168 | 64                      | GG                              | AA              | 1947043645               |
| SNP_P4_180220_110   | NW_004517926.1 | Scaffold3168 | 110                     | AA                              | CC              | 1947043647               |
| SNP_P4_180221_497   | NW_004517926.1 | Scaffold3168 | 497                     | AA                              | GG              | 1947043649               |
| SNP_P4_180223_524   | NW_004517926.1 | Scaffold3168 | 524                     | AA                              | TT              | 1947043651               |
| SNP_P4_180224_606   | NW_004517926.1 | Scaffold3168 | 606                     | AA                              | GG              | 1947043653               |
| SNP_P4_180225_689   | NW_004517926.1 | Scaffold3168 | 689                     | AA                              | GG              | 1947043654               |

| SNPs IDs             | Chromosome IDs | Chromosomes  | Physical positions (bp) | CDC Frontier (Reference genome) | (ILWC46 & LPNB) | NCBI SNPdb Accession IDs |
|----------------------|----------------|--------------|-------------------------|---------------------------------|-----------------|--------------------------|
| SNP_P4_180226_705    | NW_004517926.1 | Scaffold3168 | 705                     | TT                              | CC              | 1947043656               |
| SNP_P4_180227_753    | NW_004517926.1 | Scaffold3168 | 753                     | TT                              | AA              | 1947043658               |
| SNP_P4_180228_812    | NW_004517926.1 | Scaffold3168 | 812                     | TT                              | CC              | 1947043660               |
| SNP_P4_180229_836    | NW_004517926.1 | Scaffold3168 | 836                     | CC                              | TT              | 1947043662               |
| SNP_P4_180230_844    | NW_004517926.1 | Scaffold3168 | 844                     | GG                              | AA              | 1947043664               |
| SNP_P4_180231_859    | NW_004517926.1 | Scaffold3168 | 859                     | CC                              | TT              | 1947043666               |
| SNP_P4_180232_870    | NW_004517926.1 | Scaffold3168 | 870                     | CC                              | TT              | 1947043668               |
| SNP_P4_180233_876    | NW_004517926.1 | Scaffold3168 | 876                     | AA                              | GG              | 1947043670               |
| SNP_P4_180234_877    | NW_004517926.1 | Scaffold3168 | 877                     | TT                              | CC              | 1947043672               |
| SNP_P4_180235_976    | NW_004517926.1 | Scaffold3168 | 976                     | CC                              | TT              | 1947043674               |
| SNP_P4_180236_985    | NW_004517926.1 | Scaffold3168 | 985                     | TT                              | CC              | 1947043676               |
| SNP_P4_180237_1038   | NW_004517926.1 | Scaffold3168 | 1038                    | TT                              | AA              | 1947043678               |
| SNP_P4_180238_1076   | NW_004517926.1 | Scaffold3168 | 1076                    | CC                              | TT              | 1947043680               |
| SNP_P4_180239_1353   | NW_004517926.1 | Scaffold3168 | 1353                    | AA                              | TT              | 1947043682               |
| SNP_P4_180240_1364   | NW_004517926.1 | Scaffold3168 | 1364                    | TT                              | AA              | 1947043684               |
| SNP_P4_180241_1427   | NW_004517926.1 | Scaffold3168 | 1427                    | AA                              | GG              | 1947043686               |
| SNP_P4_180242_1459   | NW_004517926.1 | Scaffold3168 | 1459                    | CC                              | AA              | 1947043688               |
| SNP_P4_180243_1487   | NW_004517926.1 | Scaffold3168 | 1487                    | TT                              | CC              | 1947043690               |
| SNP_P4_180244_1489   | NW_004517926.1 | Scaffold3168 | 1489                    | TT                              | CC              | 1947043692               |
| SNP_P4_180245_1717   | NW_004517926.1 | Scaffold3168 | 1717                    | CC                              | TT              | 1947043695               |
| SNP_P4_180246_1829   | NW_004517926.1 | Scaffold3168 | 1829                    | TT                              | CC              | 1947043697               |
| SNP_P4_180247_1871   | NW_004517926.1 | Scaffold3168 | 1871                    | AA                              | TT              | 1947043699               |
| SNP_P4_180248_1872   | NW_004517926.1 | Scaffold3168 | 1872                    | TT                              | CC              | 1947043701               |
| SNP_P4_180249_1887   | NW_004517926.1 | Scaffold3168 | 1887                    | CC                              | TT              | 1947043703               |
| SNP_P4_180250_1895   | NW_004517926.1 | Scaffold3168 | 1895                    | GG                              | AA              | 1947043705               |
| SNP_P4_180251_1907   | NW_004517926.1 | Scaffold3168 | 1907                    | CC                              | TT              | 1947043707               |
| SNP_P4_180252_2016   | NW_004517926.1 | Scaffold3168 | 2016                    | AA                              | GG              | 1947043709               |
| SNP_P4_180253_2036   | NW_004517926.1 | Scaffold3168 | 2036                    | CC                              | AA              | 1947043711               |
| SNP_P4_180254_155    | NW_004517928.1 | Scaffold3170 | 155                     | TT                              | CC              | 1947043713               |
| SNP_P4_180255_238    | NW_004517928.1 | Scaffold3170 | 238                     | TT                              | CC              | 1947043715               |
| SNP_P4_180256_543    | NW_004517928.1 | Scaffold3170 | 543                     | AA                              | GG              | 1947043717               |
| SNP_P4_180257_10811  | NW_004517928.1 | Scaffold3170 | 10811                   | AA                              | TT              | 1947043719               |
| SNP_P4_180259_17014  | NW_004517928.1 | Scaffold3170 | 17014                   | GG                              | AA              | 1947043721               |
| SNP_P4_180260_55198  | NW_004517928.1 | Scaffold3170 | 55198                   | GG                              | AA              | 1947043723               |
| SNP_P4_180262_69304  | NW_004517928.1 | Scaffold3170 | 69304                   | TT                              | CC              | 1947043725               |
| SNP_P4_180263_72971  | NW_004517928.1 | Scaffold3170 | 72971                   | AA                              | GG              | 1947043727               |
| SNP_P4_180264_73006  | NW_004517928.1 | Scaffold3170 | 73006                   | TT                              | GG              | 1947043729               |
| SNP_P4_180265_73345  | NW_004517928.1 | Scaffold3170 | 73345                   | AA                              | CC              | 1947043731               |
| SNP_P4_180266_76890  | NW_004517928.1 | Scaffold3170 | 76890                   | GG                              | AA              | 1947043733               |
| SNP_P4_180267_77463  | NW_004517928.1 | Scaffold3170 | 77463                   | CC                              | TT              | 1947043735               |
| SNP_P4_180270_111477 | NW_004517928.1 | Scaffold3170 | 111477                  | GG                              | CC              | 1947043737               |
| SNP_P4_180271_111880 | NW_004517928.1 | Scaffold3170 | 111880                  | TT                              | CC              | 1947043739               |

| SNPs IDs             | Chromosome IDs | Chromosomes  | Physical positions (bp) | CDC Frontier (Reference genome) | (ILWC46 & LPNB) | NCBI SNPdb Accession IDs |
|----------------------|----------------|--------------|-------------------------|---------------------------------|-----------------|--------------------------|
| SNP_P4_180272_118884 | NW_004517928.1 | Scaffold3170 | 118884                  | CC                              | TT              | 1947043742               |
| SNP_P4_180273_119300 | NW_004517928.1 | Scaffold3170 | 119300                  | CC                              | TT              | 1947043744               |
| SNP_P4_180274_128247 | NW_004517928.1 | Scaffold3170 | 128247                  | AA                              | GG              | 1947043746               |
| SNP_P4_180276_150617 | NW_004517928.1 | Scaffold3170 | 150617                  | AA                              | CC              | 1947043748               |
| SNP_P4_180277_163511 | NW_004517928.1 | Scaffold3170 | 163511                  | AA                              | TT              | 1947043750               |
| SNP_P4_180278_197458 | NW_004517928.1 | Scaffold3170 | 197458                  | AA                              | GG              | 1947043752               |
| SNP_P4_180279_204936 | NW_004517928.1 | Scaffold3170 | 204936                  | AA                              | GG              | 1947043754               |
| SNP_P4_180280_208539 | NW_004517928.1 | Scaffold3170 | 208539                  | GG                              | CC              | 1947043756               |
| SNP_P4_180281_208550 | NW_004517928.1 | Scaffold3170 | 208550                  | GG                              | TT              | 1947043758               |
| SNP_P4_180282_209009 | NW_004517928.1 | Scaffold3170 | 209009                  | GG                              | CC              | 1947043760               |
| SNP_P4_180283_209592 | NW_004517928.1 | Scaffold3170 | 209592                  | TT                              | CC              | 1947043762               |
| SNP_P4_180284_212377 | NW_004517928.1 | Scaffold3170 | 212377                  | GG                              | AA              | 1947043764               |
| SNP_P4_180285_212739 | NW_004517928.1 | Scaffold3170 | 212739                  | AA                              | GG              | 1947043766               |
| SNP_P4_180286_214247 | NW_004517928.1 | Scaffold3170 | 214247                  | AA                              | GG              | 1947043768               |
| SNP_P4_180287_215103 | NW_004517928.1 | Scaffold3170 | 215103                  | AA                              | TT              | 1947043770               |
| SNP_P4_180288_216004 | NW_004517928.1 | Scaffold3170 | 216004                  | AA                              | CC              | 1947043772               |
| SNP_P4_180289_1240   | NW_004517929.1 | Scaffold3171 | 1240                    | AA                              | GG              | 1947043775               |
| SNP_P4_180290_1258   | NW_004517929.1 | Scaffold3171 | 1258                    | TT                              | AA              | 1947043777               |
| SNP_P4_180291_1369   | NW_004517929.1 | Scaffold3171 | 1369                    | TT                              | GG              | 1947043779               |
| SNP_P4_180292_1377   | NW_004517929.1 | Scaffold3171 | 1377                    | CC                              | TT              | 1947043781               |
| SNP_P4_180293_1378   | NW_004517929.1 | Scaffold3171 | 1378                    | TT                              | CC              | 1947043783               |
| SNP_P4_180294_1998   | NW_004517929.1 | Scaffold3171 | 1998                    | AA                              | GG              | 1947043785               |
| SNP_P4_180295_2006   | NW_004517929.1 | Scaffold3171 | 2006                    | TT                              | GG              | 1947043787               |
| SNP_P4_180296_2079   | NW_004517929.1 | Scaffold3171 | 2079                    | AA                              | CC              | 1947043789               |
| SNP_P4_180297_2103   | NW_004517929.1 | Scaffold3171 | 2103                    | GG                              | TT              | 1947043791               |
| SNP_P4_180298_2148   | NW_004517929.1 | Scaffold3171 | 2148                    | GG                              | AA              | 1947043793               |
| SNP_P4_180299_2157   | NW_004517929.1 | Scaffold3171 | 2157                    | AA                              | GG              | 1947043795               |
| SNP_P4_180300_2170   | NW_004517929.1 | Scaffold3171 | 2170                    | TT                              | CC              | 1947043797               |
| SNP_P4_180301_2180   | NW_004517929.1 | Scaffold3171 | 2180                    | AA                              | GG              | 1947043799               |
| SNP_P4_180303_2235   | NW_004517929.1 | Scaffold3171 | 2235                    | GG                              | AA              | 1947043801               |
| SNP_P4_180304_2298   | NW_004517929.1 | Scaffold3171 | 2298                    | CC                              | GG              | 1947043803               |
| SNP_P4_180305_2375   | NW_004517929.1 | Scaffold3171 | 2375                    | CC                              | TT              | 1947043805               |
| SNP_P4_180306_2391   | NW_004517929.1 | Scaffold3171 | 2391                    | GG                              | TT              | 1947043807               |
| SNP_P4_180308_2435   | NW_004517929.1 | Scaffold3171 | 2435                    | AA                              | TT              | 1947043810               |
| SNP_P4_180309_2441   | NW_004517929.1 | Scaffold3171 | 2441                    | TT                              | GG              | 1947043812               |
| SNP_P4_180310_2639   | NW_004517929.1 | Scaffold3171 | 2639                    | AA                              | TT              | 1947043814               |
| SNP_P4_180312_2753   | NW_004517929.1 | Scaffold3171 | 2753                    | CC                              | TT              | 1947043816               |
| SNP_P4_180313_2765   | NW_004517929.1 | Scaffold3171 | 2765                    | TT                              | GG              | 1947043818               |
| SNP_P4_180314_2770   | NW_004517929.1 | Scaffold3171 | 2770                    | TT                              | AA              | 1947043820               |
| SNP_P4_180315_2858   | NW_004517929.1 | Scaffold3171 | 2858                    | AA                              | GG              | 1947043822               |
| SNP_P4_180316_125    | NW_004517930.1 | Scaffold3172 | 125                     | AA                              | TT              | 1947043824               |
| SNP_P4_180317_142    | NW_004517930.1 | Scaffold3172 | 142                     | GG                              | CC              | 1947043826               |

| SNPs IDs            | Chromosome IDs | Chromosomes  | Physical positions (bp) | CDC Frontier (Reference genome) | (ILWC46 & LPNB) | NCBI SNPdb Accession IDs |
|---------------------|----------------|--------------|-------------------------|---------------------------------|-----------------|--------------------------|
| SNP_P4_180318_362   | NW_004517930.1 | Scaffold3172 | 362                     | CC                              | AA              | 1947043828               |
| SNP_P4_180319_424   | NW_004517930.1 | Scaffold3172 | 424                     | GG                              | AA              | 1947043830               |
| SNP_P4_180320_578   | NW_004517930.1 | Scaffold3172 | 578                     | TT                              | AA              | 1947043832               |
| SNP_P4_180321_6995  | NW_004517932.1 | Scaffold3174 | 6995                    | GG                              | TT              | 1947043834               |
| SNP_P4_180322_7224  | NW_004517932.1 | Scaffold3174 | 7224                    | AA                              | TT              | 1947043836               |
| SNP_P4_180323_7239  | NW_004517932.1 | Scaffold3174 | 7239                    | TT                              | AA              | 1947043838               |
| SNP_P4_180324_7246  | NW_004517932.1 | Scaffold3174 | 7246                    | GG                              | TT              | 1947043840               |
| SNP_P4_180325_7257  | NW_004517932.1 | Scaffold3174 | 7257                    | TT                              | GG              | 1947043842               |
| SNP_P4_180326_7258  | NW_004517932.1 | Scaffold3174 | 7258                    | TT                              | GG              | 1947043844               |
| SNP_P4_180327_11547 | NW_004517933.1 | Scaffold3175 | 11547                   | CC                              | TT              | 1947043846               |
| SNP_P4_180328_11583 | NW_004517933.1 | Scaffold3175 | 11583                   | GG                              | AA              | 1947043848               |
| SNP_P4_180329_11651 | NW_004517933.1 | Scaffold3175 | 11651                   | AA                              | GG              | 1947043850               |
| SNP_P4_180330_17055 | NW_004517933.1 | Scaffold3175 | 17055                   | TT                              | CC              | 1947043852               |
| SNP_P4_180331_17099 | NW_004517933.1 | Scaffold3175 | 17099                   | AA                              | GG              | 1947043854               |
| SNP_P4_180332_17333 | NW_004517933.1 | Scaffold3175 | 17333                   | AA                              | CC              | 1947043857               |
| SNP_P4_180333_17346 | NW_004517933.1 | Scaffold3175 | 17346                   | TT                              | CC              | 1947043859               |
| SNP_P4_180334_17363 | NW_004517933.1 | Scaffold3175 | 17363                   | GG                              | AA              | 1947043861               |
| SNP_P4_180335_17737 | NW_004517933.1 | Scaffold3175 | 17737                   | TT                              | CC              | 1947043863               |
| SNP_P4_180336_17765 | NW_004517933.1 | Scaffold3175 | 17765                   | TT                              | CC              | 1947043865               |
| SNP_P4_180337_17782 | NW_004517933.1 | Scaffold3175 | 17782                   | TT                              | CC              | 1947043867               |
| SNP_P4_180338_18844 | NW_004517933.1 | Scaffold3175 | 18844                   | GG                              | TT              | 1947043869               |
| SNP_P4_180339_18895 | NW_004517933.1 | Scaffold3175 | 18895                   | CC                              | TT              | 1947043871               |
| SNP_P4_180340_18902 | NW_004517933.1 | Scaffold3175 | 18902                   | CC                              | AA              | 1947043873               |
| SNP_P4_180341_18914 | NW_004517933.1 | Scaffold3175 | 18914                   | TT                              | CC              | 1947043875               |
| SNP_P4_180342_18920 | NW_004517933.1 | Scaffold3175 | 18920                   | GG                              | AA              | 1947043877               |
| SNP_P4_180343_18959 | NW_004517933.1 | Scaffold3175 | 18959                   | TT                              | CC              | 1947043879               |
| SNP_P4_180344_19002 | NW_004517933.1 | Scaffold3175 | 19002                   | AA                              | GG              | 1947043881               |
| SNP_P4_180345_19021 | NW_004517933.1 | Scaffold3175 | 19021                   | AA                              | CC              | 1947043883               |
| SNP_P4_180346_19116 | NW_004517933.1 | Scaffold3175 | 19116                   | TT                              | CC              | 1947043885               |
| SNP_P4_180347_19195 | NW_004517933.1 | Scaffold3175 | 19195                   | GG                              | TT              | 1947043887               |
| SNP_P4_180348_19234 | NW_004517933.1 | Scaffold3175 | 19234                   | GG                              | AA              | 1947043889               |
| SNP_P4_180349_1325  | NW_004517934.1 | Scaffold3176 | 1325                    | TT                              | GG              | 1947043891               |
| SNP_P4_180350_1373  | NW_004517934.1 | Scaffold3176 | 1373                    | AA                              | GG              | 1947043893               |
| SNP_P4_180351_1396  | NW_004517934.1 | Scaffold3176 | 1396                    | CC                              | TT              | 1947043895               |
| SNP_P4_180352_757   | NW_004517939.1 | Scaffold3181 | 757                     | CC                              | TT              | 1947043897               |
| SNP_P4_180353_773   | NW_004517939.1 | Scaffold3181 | 773                     | AA                              | TT              | 1947043899               |
| SNP_P4_180354_941   | NW_004517939.1 | Scaffold3181 | 941                     | AA                              | TT              | 1947043901               |
| SNP_P4_180355_962   | NW_004517939.1 | Scaffold3181 | 962                     | AA                              | CC              | 1947043903               |
| SNP_P4_180356_64    | NW_004517941.1 | Scaffold3183 | 64                      | AA                              | GG              | 1947043905               |
| SNP_P4_180357_125   | NW_004517941.1 | Scaffold3183 | 125                     | AA                              | CC              | 1947043907               |
| SNP_P4_180358_150   | NW_004517941.1 | Scaffold3183 | 150                     | TT                              | CC              | 1947043909               |
| SNP_P4_180359_296   | NW_004517941.1 | Scaffold3183 | 296                     | GG                              | AA              | 1947043911               |

| SNPs IDs            | Chromosome IDs | Chromosomes  | Physical positions (bp) | CDC Frontier (Reference genome) | (ILWC46 & LPNB) | NCBI SNPdb Accession IDs |
|---------------------|----------------|--------------|-------------------------|---------------------------------|-----------------|--------------------------|
| SNP_P4_180360_376   | NW_004517941.1 | Scaffold3183 | 376                     | CC                              | TT              | 1947043913               |
| SNP_P4_180361_419   | NW_004517941.1 | Scaffold3183 | 419                     | AA                              | GG              | 1947043915               |
| SNP_P4_180362_430   | NW_004517941.1 | Scaffold3183 | 430                     | CC                              | TT              | 1947043917               |
| SNP_P4_180363_466   | NW_004517941.1 | Scaffold3183 | 466                     | AA                              | TT              | 1947043919               |
| SNP_P4_180364_2684  | NW_004517943.1 | Scaffold3187 | 2684                    | TT                              | GG              | 1947043921               |
| SNP_P4_180365_2700  | NW_004517943.1 | Scaffold3187 | 2700                    | AA                              | GG              | 1947043923               |
| SNP_P4_180366_5697  | NW_004517943.1 | Scaffold3187 | 5697                    | CC                              | TT              | 1947043925               |
| SNP_P4_180367_6031  | NW_004517943.1 | Scaffold3187 | 6031                    | AA                              | GG              | 1947043927               |
| SNP_P4_180368_6681  | NW_004517943.1 | Scaffold3187 | 6681                    | GG                              | AA              | 1947043929               |
| SNP_P4_180369_8298  | NW_004517943.1 | Scaffold3187 | 8298                    | CC                              | AA              | 1947043931               |
| SNP_P4_180370_8302  | NW_004517943.1 | Scaffold3187 | 8302                    | GG                              | AA              | 1947043933               |
| SNP_P4_180371_8310  | NW_004517943.1 | Scaffold3187 | 8310                    | AA                              | GG              | 1947043935               |
| SNP_P4_180372_8313  | NW_004517943.1 | Scaffold3187 | 8313                    | TT                              | GG              | 1947043937               |
| SNP_P4_180373_8329  | NW_004517943.1 | Scaffold3187 | 8329                    | TT                              | AA              | 1947043939               |
| SNP_P4_180374_3613  | NW_004517944.1 | Scaffold3188 | 3613                    | AA                              | CC              | 1947043941               |
| SNP_P4_180375_9563  | NW_004517944.1 | Scaffold3188 | 9563                    | CC                              | TT              | 1947043943               |
| SNP_P4_180376_24881 | NW_004517947.1 | Scaffold3191 | 24881                   | TT                              | CC              | 1947043945               |
| SNP_P4_180377_25148 | NW_004517947.1 | Scaffold3191 | 25148                   | GG                              | TT              | 1947043947               |
| SNP_P4_180378_25158 | NW_004517947.1 | Scaffold3191 | 25158                   | AA                              | GG              | 1947043949               |
| SNP_P4_180379_25217 | NW_004517947.1 | Scaffold3191 | 25217                   | CC                              | GG              | 1947043951               |
| SNP_P4_180380_25415 | NW_004517947.1 | Scaffold3191 | 25415                   | CC                              | GG              | 1947043953               |
| SNP_P4_180381_25423 | NW_004517947.1 | Scaffold3191 | 25423                   | TT                              | AA              | 1947043955               |
| SNP_P4_180382_25430 | NW_004517947.1 | Scaffold3191 | 25430                   | AA                              | CC              | 1947043957               |
| SNP_P4_180383_25443 | NW_004517947.1 | Scaffold3191 | 25443                   | AA                              | TT              | 1947043959               |
| SNP_P4_180384_25477 | NW_004517947.1 | Scaffold3191 | 25477                   | TT                              | AA              | 1947043961               |
| SNP_P4_180385_25482 | NW_004517947.1 | Scaffold3191 | 25482                   | GG                              | AA              | 1947043963               |
| SNP_P4_180386_25491 | NW_004517947.1 | Scaffold3191 | 25491                   | AA                              | TT              | 1947043965               |
| SNP_P4_180387_25516 | NW_004517947.1 | Scaffold3191 | 25516                   | AA                              | GG              | 1947043967               |
| SNP_P4_180388_25537 | NW_004517947.1 | Scaffold3191 | 25537                   | TT                              | CC              | 1947043969               |
| SNP_P4_180389_25552 | NW_004517947.1 | Scaffold3191 | 25552                   | AA                              | GG              | 1947043971               |
| SNP_P4_180390_25569 | NW_004517947.1 | Scaffold3191 | 25569                   | AA                              | GG              | 1947043973               |
| SNP_P4_180391_25864 | NW_004517947.1 | Scaffold3191 | 25864                   | CC                              | GG              | 1947043975               |
| SNP_P4_180392_25894 | NW_004517947.1 | Scaffold3191 | 25894                   | GG                              | CC              | 1947043977               |
| SNP_P4_180394_25929 | NW_004517947.1 | Scaffold3191 | 25929                   | CC                              | AA              | 1947043979               |
| SNP_P4_180395_171   | NW_004517948.1 | Scaffold3192 | 171                     | TT                              | GG              | 1947043981               |
| SNP_P4_180396_2932  | NW_004517951.1 | Scaffold3195 | 2932                    | AA                              | GG              | 1947043989               |
| SNP_P4_180398_399   | NW_004517953.1 | Scaffold3199 | 399                     | TT                              | AA              | 1947043991               |
| SNP_P4_180399_401   | NW_004517953.1 | Scaffold3199 | 401                     | GG                              | AA              | 1947043993               |
| SNP_P4_180400_606   | NW_004517953.1 | Scaffold3199 | 606                     | GG                              | CC              | 1947043995               |
| SNP_P4_180401_673   | NW_004517953.1 | Scaffold3199 | 673                     | TT                              | GG              | 1947043997               |
| SNP_P4_180402_803   | NW_004517953.1 | Scaffold3199 | 803                     | GG                              | AA              | 1947043999               |
| SNP_P4_180404_1128  | NW_004517953.1 | Scaffold3199 | 1128                    | AA                              | GG              | 1947044001               |

| SNPs IDs           | Chromosome IDs | Chromosomes  | Physical positions (bp) | CDC Frontier (Reference genome) | (ILWC46 & LPNB) | NCBI SNPdb Accession IDs |
|--------------------|----------------|--------------|-------------------------|---------------------------------|-----------------|--------------------------|
| SNP_P4_180405_646  | NW_004517958.1 | Scaffold3204 | 646                     | GG                              | TT              | 1947044003               |
| SNP_P4_180406_647  | NW_004517958.1 | Scaffold3204 | 647                     | AA                              | TT              | 1947044005               |
| SNP_P4_180407_1011 | NW_004517958.1 | Scaffold3204 | 1011                    | TT                              | CC              | 1947044007               |
| SNP_P4_180408_483  | NW_004517961.1 | Scaffold3208 | 483                     | CC                              | TT              | 1947044009               |
| SNP_P4_180409_673  | NW_004517961.1 | Scaffold3208 | 673                     | AA                              | GG              | 1947044011               |
| SNP_P4_180410_771  | NW_004517961.1 | Scaffold3208 | 771                     | GG                              | AA              | 1947044013               |
| SNP_P4_180411_802  | NW_004517961.1 | Scaffold3208 | 802                     | CC                              | TT              | 1947044015               |
| SNP_P4_180412_910  | NW_004517961.1 | Scaffold3208 | 910                     | TT                              | AA              | 1947044017               |
| SNP_P4_180413_1189 | NW_004517961.1 | Scaffold3208 | 1189                    | GG                              | AA              | 1947044019               |
| SNP_P4_180414_1281 | NW_004517961.1 | Scaffold3208 | 1281                    | GG                              | AA              | 1947044021               |
| SNP_P4_180415_1429 | NW_004517961.1 | Scaffold3208 | 1429                    | AA                              | GG              | 1947044023               |
| SNP_P4_180416_1441 | NW_004517961.1 | Scaffold3208 | 1441                    | GG                              | AA              | 1947044025               |
| SNP_P4_180417_1536 | NW_004517961.1 | Scaffold3208 | 1536                    | AA                              | TT              | 1947044027               |
| SNP_P4_180418_5599 | NW_004517963.1 | Scaffold3210 | 5599                    | CC                              | GG              | 1947044029               |
| SNP_P4_180419_5614 | NW_004517963.1 | Scaffold3210 | 5614                    | TT                              | CC              | 1947044031               |
| SNP_P4_180420_5624 | NW_004517963.1 | Scaffold3210 | 5624                    | AA                              | GG              | 1947044033               |
| SNP_P4_180422_5732 | NW_004517963.1 | Scaffold3210 | 5732                    | TT                              | CC              | 1947044035               |
| SNP_P4_180424_5744 | NW_004517963.1 | Scaffold3210 | 5744                    | AA                              | CC              | 1947044037               |
| SNP_P4_180425_5763 | NW_004517963.1 | Scaffold3210 | 5763                    | AA                              | GG              | 1947044039               |
| SNP_P4_180426_5792 | NW_004517963.1 | Scaffold3210 | 5792                    | CC                              | TT              | 1947044041               |
| SNP_P4_180427_5946 | NW_004517963.1 | Scaffold3210 | 5946                    | TT                              | GG              | 1947044043               |
| SNP_P4_180428_5971 | NW_004517963.1 | Scaffold3210 | 5971                    | AA                              | GG              | 1947044045               |
| SNP_P4_180429_5998 | NW_004517963.1 | Scaffold3210 | 5998                    | CC                              | TT              | 1947044047               |
| SNP_P4_180430_6021 | NW_004517963.1 | Scaffold3210 | 6021                    | TT                              | AA              | 1947044049               |
| SNP_P4_180431_6053 | NW_004517963.1 | Scaffold3210 | 6053                    | GG                              | CC              | 1947044051               |
| SNP_P4_180432_91   | NW_004517965.1 | Scaffold3212 | 91                      | GG                              | AA              | 1947044053               |
| SNP_P4_180433_118  | NW_004517965.1 | Scaffold3212 | 118                     | CC                              | AA              | 1947044055               |
| SNP_P4_180434_246  | NW_004517965.1 | Scaffold3212 | 246                     | AA                              | GG              | 1947044057               |
| SNP_P4_180435_286  | NW_004517965.1 | Scaffold3212 | 286                     | AA                              | TT              | 1947044059               |
| SNP_P4_180436_373  | NW_004517965.1 | Scaffold3212 | 373                     | TT                              | CC              | 1947044061               |
| SNP_P4_180437_628  | NW_004517965.1 | Scaffold3212 | 628                     | TT                              | AA              | 1947044063               |
| SNP_P4_180438_697  | NW_004517965.1 | Scaffold3212 | 697                     | GG                              | TT              | 1947044065               |
| SNP_P4_180440_762  | NW_004517965.1 | Scaffold3212 | 762                     | CC                              | AA              | 1947044067               |
| SNP_P4_180441_774  | NW_004517965.1 | Scaffold3212 | 774                     | AA                              | GG              | 1947044069               |
| SNP_P4_180442_1333 | NW_004517965.1 | Scaffold3212 | 1333                    | CC                              | GG              | 1947044071               |
| SNP_P4_180444_1577 | NW_004517965.1 | Scaffold3212 | 1577                    | CC                              | TT              | 1947044072               |
| SNP_P4_180445_1637 | NW_004517965.1 | Scaffold3212 | 1637                    | AA                              | GG              | 1947044074               |
| SNP_P4_180447_1883 | NW_004517965.1 | Scaffold3212 | 1883                    | GG                              | CC              | 1947044076               |
| SNP_P4_180448_2174 | NW_004517965.1 | Scaffold3212 | 2174                    | TT                              | GG              | 1947044078               |
| SNP_P4_180449_2369 | NW_004517965.1 | Scaffold3212 | 2369                    | GG                              | AA              | 1947044080               |
| SNP_P4_180450_2392 | NW_004517965.1 | Scaffold3212 | 2392                    | TT                              | CC              | 1947044082               |
| SNP_P4_180451_2412 | NW_004517965.1 | Scaffold3212 | 2412                    | CC                              | TT              | 1947044084               |



| SNPs IDs           | Chromosome IDs | Chromosomes  | Physical positions (bp) | CDC Frontier (Reference genome) | (ILWC46 & LPNB) | NCBI SNPdb Accession IDs |
|--------------------|----------------|--------------|-------------------------|---------------------------------|-----------------|--------------------------|
| SNP_P4_180452_2416 | NW_004517965.1 | Scaffold3212 | 2416                    | GG                              | AA              | 1947044086               |
| SNP_P4_180453_2488 | NW_004517965.1 | Scaffold3212 | 2488                    | CC                              | AA              | 1947044088               |
| SNP_P4_180454_2536 | NW_004517965.1 | Scaffold3212 | 2536                    | AA                              | TT              | 1947044090               |
| SNP_P4_180455_2548 | NW_004517965.1 | Scaffold3212 | 2548                    | CC                              | TT              | 1947044092               |
| SNP_P4_180457_2578 | NW_004517965.1 | Scaffold3212 | 2578                    | CC                              | TT              | 1947044094               |
| SNP_P4_180458_2664 | NW_004517965.1 | Scaffold3212 | 2664                    | CC                              | GG              | 1947044096               |
| SNP_P4_180459_2707 | NW_004517965.1 | Scaffold3212 | 2707                    | AA                              | GG              | 1947044098               |
| SNP_P4_180460_2711 | NW_004517965.1 | Scaffold3212 | 2711                    | CC                              | TT              | 1947044100               |
| SNP_P4_180461_2796 | NW_004517965.1 | Scaffold3212 | 2796                    | GG                              | TT              | 1947044102               |
| SNP_P4_180462_2830 | NW_004517965.1 | Scaffold3212 | 2830                    | GG                              | CC              | 1947044104               |
| SNP_P4_180463_2935 | NW_004517965.1 | Scaffold3212 | 2935                    | TT                              | AA              | 1947044106               |
| SNP_P4_180464_3032 | NW_004517965.1 | Scaffold3212 | 3032                    | GG                              | CC              | 1947044108               |
| SNP_P4_180465_3057 | NW_004517965.1 | Scaffold3212 | 3057                    | CC                              | GG              | 1947044110               |
| SNP_P4_180466_3076 | NW_004517965.1 | Scaffold3212 | 3076                    | AA                              | CC              | 1947044112               |
| SNP_P4_180467_3487 | NW_004517965.1 | Scaffold3212 | 3487                    | AA                              | GG              | 1947044114               |
| SNP_P4_180468_3558 | NW_004517965.1 | Scaffold3212 | 3558                    | CC                              | AA              | 1947044116               |
| SNP_P4_180469_3599 | NW_004517965.1 | Scaffold3212 | 3599                    | TT                              | CC              | 1947044118               |
| SNP_P4_180470_3669 | NW_004517965.1 | Scaffold3212 | 3669                    | AA                              | TT              | 1947044120               |
| SNP_P4_180471_3703 | NW_004517965.1 | Scaffold3212 | 3703                    | AA                              | CC              | 1947044121               |
| SNP_P4_180473_3929 | NW_004517965.1 | Scaffold3212 | 3929                    | AA                              | TT              | 1947044123               |
| SNP_P4_180474_3953 | NW_004517965.1 | Scaffold3212 | 3953                    | TT                              | CC              | 1947044125               |
| SNP_P4_180475_3969 | NW_004517965.1 | Scaffold3212 | 3969                    | TT                              | CC              | 1947044127               |
| SNP_P4_180476_3971 | NW_004517965.1 | Scaffold3212 | 3971                    | GG                              | TT              | 1947044129               |
| SNP_P4_180477_3996 | NW_004517965.1 | Scaffold3212 | 3996                    | CC                              | TT              | 1947044131               |
| SNP_P4_180478_4038 | NW_004517965.1 | Scaffold3212 | 4038                    | TT                              | CC              | 1947044133               |
| SNP_P4_180479_4166 | NW_004517965.1 | Scaffold3212 | 4166                    | AA                              | TT              | 1947044135               |
| SNP_P4_180480_4399 | NW_004517965.1 | Scaffold3212 | 4399                    | AA                              | CC              | 1947044137               |
| SNP_P4_180481_4495 | NW_004517965.1 | Scaffold3212 | 4495                    | AA                              | CC              | 1947044139               |
| SNP_P4_180482_4757 | NW_004517965.1 | Scaffold3212 | 4757                    | TT                              | CC              | 1947044141               |
| SNP_P4_180483_4801 | NW_004517965.1 | Scaffold3212 | 4801                    | GG                              | TT              | 1947044143               |
| SNP_P4_180484_5420 | NW_004517965.1 | Scaffold3212 | 5420                    | GG                              | AA              | 1947044145               |
| SNP_P4_180485_5451 | NW_004517965.1 | Scaffold3212 | 5451                    | GG                              | TT              | 1947044147               |
| SNP_P4_180486_5837 | NW_004517965.1 | Scaffold3212 | 5837                    | AA                              | CC              | 1947044149               |
| SNP_P4_180487_5865 | NW_004517965.1 | Scaffold3212 | 5865                    | TT                              | GG              | 1947044151               |
| SNP_P4_180488_5944 | NW_004517965.1 | Scaffold3212 | 5944                    | AA                              | GG              | 1947044153               |
| SNP_P4_180489_5945 | NW_004517965.1 | Scaffold3212 | 5945                    | GG                              | TT              | 1947044155               |
| SNP_P4_180490_5951 | NW_004517965.1 | Scaffold3212 | 5951                    | TT                              | CC              | 1947044157               |
| SNP_P4_180491_6141 | NW_004517965.1 | Scaffold3212 | 6141                    | GG                              | CC              | 1947044159               |
| SNP_P4_180493_6400 | NW_004517965.1 | Scaffold3212 | 6400                    | AA                              | CC              | 1947044160               |
| SNP_P4_180494_6451 | NW_004517965.1 | Scaffold3212 | 6451                    | TT                              | CC              | 1947044162               |
| SNP_P4_180495_6469 | NW_004517965.1 | Scaffold3212 | 6469                    | GG                              | TT              | 1947044164               |
| SNP_P4_180496_6597 | NW_004517965.1 | Scaffold3212 | 6597                    | CC                              | TT              | 1947044166               |

| SNPs IDs            | Chromosome IDs | Chromosomes  | Physical positions (bp) | CDC Frontier (Reference genome) | (ILWC46 & LPNB) | NCBI SNPdb Accession IDs |
|---------------------|----------------|--------------|-------------------------|---------------------------------|-----------------|--------------------------|
| SNP_P4_180497_6598  | NW_004517965.1 | Scaffold3212 | 6598                    | GG                              | AA              | 1947044168               |
| SNP_P4_180498_6717  | NW_004517965.1 | Scaffold3212 | 6717                    | CC                              | TT              | 1947044170               |
| SNP_P4_180499_6736  | NW_004517965.1 | Scaffold3212 | 6736                    | CC                              | TT              | 1947044172               |
| SNP_P4_180500_6755  | NW_004517965.1 | Scaffold3212 | 6755                    | GG                              | CC              | 1947044174               |
| SNP_P4_180501_6845  | NW_004517965.1 | Scaffold3212 | 6845                    | CC                              | AA              | 1947044176               |
| SNP_P4_180502_6849  | NW_004517965.1 | Scaffold3212 | 6849                    | TT                              | GG              | 1947044178               |
| SNP_P4_180503_7037  | NW_004517965.1 | Scaffold3212 | 7037                    | TT                              | CC              | 1947044180               |
| SNP_P4_180504_7065  | NW_004517965.1 | Scaffold3212 | 7065                    | AA                              | GG              | 1947044182               |
| SNP_P4_180505_7263  | NW_004517965.1 | Scaffold3212 | 7263                    | CC                              | TT              | 1947044184               |
| SNP_P4_180506_7293  | NW_004517965.1 | Scaffold3212 | 7293                    | GG                              | AA              | 1947044185               |
| SNP_P4_180507_7996  | NW_004517965.1 | Scaffold3212 | 7996                    | GG                              | TT              | 1947044187               |
| SNP_P4_180508_8159  | NW_004517965.1 | Scaffold3212 | 8159                    | AA                              | GG              | 1947044189               |
| SNP_P4_180509_8204  | NW_004517965.1 | Scaffold3212 | 8204                    | GG                              | AA              | 1947044191               |
| SNP_P4_180510_8262  | NW_004517965.1 | Scaffold3212 | 8262                    | CC                              | GG              | 1947044193               |
| SNP_P4_180511_8455  | NW_004517965.1 | Scaffold3212 | 8455                    | CC                              | TT              | 1947044195               |
| SNP_P4_180512_8457  | NW_004517965.1 | Scaffold3212 | 8457                    | AA                              | GG              | 1947044197               |
| SNP_P4_180513_8749  | NW_004517965.1 | Scaffold3212 | 8749                    | CC                              | TT              | 1947044199               |
| SNP_P4_180514_8947  | NW_004517965.1 | Scaffold3212 | 8947                    | GG                              | TT              | 1947044200               |
| SNP_P4_180515_9000  | NW_004517965.1 | Scaffold3212 | 9000                    | GG                              | TT              | 1947044202               |
| SNP_P4_180516_9449  | NW_004517965.1 | Scaffold3212 | 9449                    | TT                              | CC              | 1947044204               |
| SNP_P4_180517_9541  | NW_004517965.1 | Scaffold3212 | 9541                    | TT                              | AA              | 1947044206               |
| SNP_P4_180518_9635  | NW_004517965.1 | Scaffold3212 | 9635                    | TT                              | CC              | 1947044208               |
| SNP_P4_180519_9672  | NW_004517965.1 | Scaffold3212 | 9672                    | AA                              | TT              | 1947044210               |
| SNP_P4_180520_9696  | NW_004517965.1 | Scaffold3212 | 9696                    | TT                              | CC              | 1947044212               |
| SNP_P4_180521_9767  | NW_004517965.1 | Scaffold3212 | 9767                    | GG                              | AA              | 1947044214               |
| SNP_P4_180522_9829  | NW_004517965.1 | Scaffold3212 | 9829                    | CC                              | AA              | 1947044216               |
| SNP_P4_180523_9830  | NW_004517965.1 | Scaffold3212 | 9830                    | CC                              | GG              | 1947044218               |
| SNP_P4_180524_9889  | NW_004517965.1 | Scaffold3212 | 9889                    | TT                              | CC              | 1947044220               |
| SNP_P4_180525_9890  | NW_004517965.1 | Scaffold3212 | 9890                    | GG                              | AA              | 1947044222               |
| SNP_P4_180526_10050 | NW_004517965.1 | Scaffold3212 | 10050                   | TT                              | CC              | 1947044224               |
| SNP_P4_180527_10080 | NW_004517965.1 | Scaffold3212 | 10080                   | CC                              | AA              | 1947044226               |
| SNP_P4_180528_10083 | NW_004517965.1 | Scaffold3212 | 10083                   | TT                              | CC              | 1947044228               |
| SNP_P4_180529_10105 | NW_004517965.1 | Scaffold3212 | 10105                   | GG                              | TT              | 1947044230               |
| SNP_P4_180530_10114 | NW_004517965.1 | Scaffold3212 | 10114                   | CC                              | AA              | 1947044232               |
| SNP_P4_180531_10174 | NW_004517965.1 | Scaffold3212 | 10174                   | TT                              | CC              | 1947044234               |
| SNP_P4_180532_10183 | NW_004517965.1 | Scaffold3212 | 10183                   | TT                              | CC              | 1947044235               |
| SNP_P4_180533_10307 | NW_004517965.1 | Scaffold3212 | 10307                   | CC                              | TT              | 1947044237               |
| SNP_P4_180534_10334 | NW_004517965.1 | Scaffold3212 | 10334                   | TT                              | AA              | 1947044239               |
| SNP_P4_180535_10372 | NW_004517965.1 | Scaffold3212 | 10372                   | GG                              | AA              | 1947044241               |
| SNP_P4_180536_10738 | NW_004517965.1 | Scaffold3212 | 10738                   | TT                              | AA              | 1947044243               |
| SNP_P4_180537_10794 | NW_004517965.1 | Scaffold3212 | 10794                   | AA                              | GG              | 1947044245               |
| SNP_P4_180538_10996 | NW_004517965.1 | Scaffold3212 | 10996                   | AA                              | TT              | 1947044247               |

| SNPs IDs            | Chromosome IDs | Chromosomes  | Physical positions (bp) | CDC Frontier (Reference genome) | (ILWC46 & LPNB) | NCBI SNPdb Accession IDs |
|---------------------|----------------|--------------|-------------------------|---------------------------------|-----------------|--------------------------|
| SNP_P4_180539_11463 | NW_004517965.1 | Scaffold3212 | 11463                   | GG                              | TT              | 1947044249               |
| SNP_P4_180540_11464 | NW_004517965.1 | Scaffold3212 | 11464                   | GG                              | CC              | 1947044250               |
| SNP_P4_180541_18200 | NW_004517966.1 | Scaffold3213 | 18200                   | TT                              | AA              | 1947044252               |
| SNP_P4_180542_886   | NW_004517968.1 | Scaffold3215 | 886                     | TT                              | CC              | 1947044254               |
| SNP_P4_180543_903   | NW_004517968.1 | Scaffold3215 | 903                     | CC                              | GG              | 1947044256               |
| SNP_P4_180544_904   | NW_004517968.1 | Scaffold3215 | 904                     | TT                              | GG              | 1947044258               |
| SNP_P4_180545_914   | NW_004517968.1 | Scaffold3215 | 914                     | GG                              | TT              | 1947044260               |
| SNP_P4_180546_1063  | NW_004517968.1 | Scaffold3215 | 1063                    | GG                              | TT              | 1947044262               |
| SNP_P4_180547_1074  | NW_004517968.1 | Scaffold3215 | 1074                    | CC                              | AA              | 1947044264               |
| SNP_P4_180548_1077  | NW_004517968.1 | Scaffold3215 | 1077                    | TT                              | CC              | 1947044266               |
| SNP_P4_180549_1114  | NW_004517968.1 | Scaffold3215 | 1114                    | CC                              | GG              | 1947044268               |
| SNP_P4_180550_568   | NW_004517969.1 | Scaffold3216 | 568                     | GG                              | AA              | 1947044270               |
| SNP_P4_180551_9011  | NW_004517969.1 | Scaffold3216 | 9011                    | AA                              | TT              | 1947044272               |
| SNP_P4_180552_4107  | NW_004517970.1 | Scaffold3217 | 4107                    | AA                              | GG              | 1947044274               |
| SNP_P4_180553_4117  | NW_004517970.1 | Scaffold3217 | 4117                    | AA                              | GG              | 1947044276               |
| SNP_P4_180554_4135  | NW_004517970.1 | Scaffold3217 | 4135                    | CC                              | TT              | 1947044278               |
| SNP_P4_180555_4144  | NW_004517970.1 | Scaffold3217 | 4144                    | TT                              | CC              | 1947044280               |
| SNP_P4_180556_4275  | NW_004517970.1 | Scaffold3217 | 4275                    | CC                              | TT              | 1947044282               |
| SNP_P4_180558_4343  | NW_004517970.1 | Scaffold3217 | 4343                    | CC                              | AA              | 1947044284               |
| SNP_P4_180559_4364  | NW_004517970.1 | Scaffold3217 | 4364                    | AA                              | GG              | 1947044285               |
| SNP_P4_180560_4412  | NW_004517970.1 | Scaffold3217 | 4412                    | TT                              | GG              | 1947044287               |
| SNP_P4_180561_4414  | NW_004517970.1 | Scaffold3217 | 4414                    | AA                              | GG              | 1947044289               |
| SNP_P4_180562_4422  | NW_004517970.1 | Scaffold3217 | 4422                    | AA                              | GG              | 1947044291               |
| SNP_P4_180563_4466  | NW_004517970.1 | Scaffold3217 | 4466                    | TT                              | GG              | 1947044293               |
| SNP_P4_180564_4487  | NW_004517970.1 | Scaffold3217 | 4487                    | AA                              | GG              | 1947044295               |
| SNP_P4_180565_4490  | NW_004517970.1 | Scaffold3217 | 4490                    | TT                              | CC              | 1947044297               |
| SNP_P4_180566_4497  | NW_004517970.1 | Scaffold3217 | 4497                    | CC                              | TT              | 1947044299               |
| SNP_P4_180567_4512  | NW_004517970.1 | Scaffold3217 | 4512                    | CC                              | TT              | 1947044301               |
| SNP_P4_180568_4584  | NW_004517970.1 | Scaffold3217 | 4584                    | CC                              | AA              | 1947044303               |
| SNP_P4_180569_4601  | NW_004517970.1 | Scaffold3217 | 4601                    | AA                              | GG              | 1947044305               |
| SNP_P4_180571_4724  | NW_004517970.1 | Scaffold3217 | 4724                    | AA                              | GG              | 1947044307               |
| SNP_P4_180572_4767  | NW_004517970.1 | Scaffold3217 | 4767                    | AA                              | CC              | 1947044309               |
| SNP_P4_180573_4779  | NW_004517970.1 | Scaffold3217 | 4779                    | GG                              | TT              | 1947044311               |
| SNP_P4_180574_4882  | NW_004517970.1 | Scaffold3217 | 4882                    | GG                              | AA              | 1947044313               |
| SNP_P4_180575_6375  | NW_004517970.1 | Scaffold3217 | 6375                    | AA                              | CC              | 1947044315               |
| SNP_P4_180576_6785  | NW_004517970.1 | Scaffold3217 | 6785                    | GG                              | AA              | 1947044317               |
| SNP_P4_180577_10988 | NW_004517970.1 | Scaffold3217 | 10988                   | TT                              | CC              | 1947044319               |
| SNP_P4_180578_11019 | NW_004517970.1 | Scaffold3217 | 11019                   | GG                              | AA              | 1947044321               |
| SNP_P4_180579_11055 | NW_004517970.1 | Scaffold3217 | 11055                   | GG                              | CC              | 1947044323               |
| SNP_P4_180580_13734 | NW_004517970.1 | Scaffold3217 | 13734                   | AA                              | GG              | 1947044325               |
| SNP_P4_180581_14160 | NW_004517970.1 | Scaffold3217 | 14160                   | AA                              | GG              | 1947044327               |
| SNP_P4_180582_15304 | NW_004517970.1 | Scaffold3217 | 15304                   | AA                              | CC              | 1947044329               |

| SNPs IDs            | Chromosome IDs | Chromosomes  | Physical positions (bp) | CDC Frontier (Reference genome) | (ILWC46 & LPNB) | NCBI SNPdb Accession IDs |
|---------------------|----------------|--------------|-------------------------|---------------------------------|-----------------|--------------------------|
| SNP_P4_180583_15838 | NW_004517970.1 | Scaffold3217 | 15838                   | AA                              | GG              | 1947044331               |
| SNP_P4_180584_15849 | NW_004517970.1 | Scaffold3217 | 15849                   | AA                              | CC              | 1947044333               |
| SNP_P4_180585_15875 | NW_004517970.1 | Scaffold3217 | 15875                   | GG                              | AA              | 1947044335               |
| SNP_P4_180586_15892 | NW_004517970.1 | Scaffold3217 | 15892                   | GG                              | AA              | 1947044337               |
| SNP_P4_180587_15915 | NW_004517970.1 | Scaffold3217 | 15915                   | AA                              | GG              | 1947044339               |
| SNP_P4_180588_26509 | NW_004517970.1 | Scaffold3217 | 26509                   | AA                              | GG              | 1947044341               |
| SNP_P4_180589_36238 | NW_004517970.1 | Scaffold3217 | 36238                   | AA                              | GG              | 1947044343               |
| SNP_P4_180590_36291 | NW_004517970.1 | Scaffold3217 | 36291                   | AA                              | CC              | 1947044345               |
| SNP_P4_180591_36303 | NW_004517970.1 | Scaffold3217 | 36303                   | CC                              | TT              | 1947044347               |
| SNP_P4_180592_36603 | NW_004517970.1 | Scaffold3217 | 36603                   | TT                              | AA              | 1947044349               |
| SNP_P4_180593_2156  | NW_004517971.1 | Scaffold3218 | 2156                    | TT                              | CC              | 1947044351               |
| SNP_P4_180594_8103  | NW_004517971.1 | Scaffold3218 | 8103                    | CC                              | TT              | 1947044352               |
| SNP_P4_180595_8508  | NW_004517971.1 | Scaffold3218 | 8508                    | TT                              | GG              | 1947044354               |
| SNP_P4_180596_746   | NW_004517976.1 | Scaffold3225 | 746                     | AA                              | TT              | 1947044356               |
| SNP_P4_180597_753   | NW_004517976.1 | Scaffold3225 | 753                     | TT                              | CC              | 1947044358               |
| SNP_P4_180598_766   | NW_004517976.1 | Scaffold3225 | 766                     | AA                              | GG              | 1947044360               |
| SNP_P4_180599_5514  | NW_004517976.1 | Scaffold3225 | 5514                    | TT                              | CC              | 1947044362               |
| SNP_P4_180600_5712  | NW_004517976.1 | Scaffold3225 | 5712                    | AA                              | GG              | 1947044364               |
| SNP_P4_180601_5713  | NW_004517976.1 | Scaffold3225 | 5713                    | CC                              | TT              | 1947044366               |
| SNP_P4_180602_5791  | NW_004517976.1 | Scaffold3225 | 5791                    | CC                              | TT              | 1947044368               |
| SNP_P4_180603_5818  | NW_004517976.1 | Scaffold3225 | 5818                    | TT                              | CC              | 1947044370               |
| SNP_P4_180604_8616  | NW_004517976.1 | Scaffold3225 | 8616                    | TT                              | CC              | 1947044372               |
| SNP_P4_180605_8632  | NW_004517976.1 | Scaffold3225 | 8632                    | TT                              | CC              | 1947044374               |
| SNP_P4_180606_8635  | NW_004517976.1 | Scaffold3225 | 8635                    | AA                              | GG              | 1947044375               |
| SNP_P4_180607_8665  | NW_004517976.1 | Scaffold3225 | 8665                    | TT                              | CC              | 1947044377               |
| SNP_P4_180608_8668  | NW_004517976.1 | Scaffold3225 | 8668                    | CC                              | AA              | 1947044379               |
| SNP_P4_180609_8682  | NW_004517976.1 | Scaffold3225 | 8682                    | TT                              | CC              | 1947044381               |
| SNP_P4_180610_8743  | NW_004517976.1 | Scaffold3225 | 8743                    | AA                              | GG              | 1947044383               |
| SNP_P4_180611_9349  | NW_004517976.1 | Scaffold3225 | 9349                    | CC                              | GG              | 1947044385               |
| SNP_P4_180612_17908 | NW_004517976.1 | Scaffold3225 | 17908                   | GG                              | CC              | 1947044387               |
| SNP_P4_180613_18521 | NW_004517976.1 | Scaffold3225 | 18521                   | AA                              | TT              | 1947044389               |
| SNP_P4_180614_18763 | NW_004517976.1 | Scaffold3225 | 18763                   | TT                              | CC              | 1947044391               |
| SNP_P4_180615_21955 | NW_004517976.1 | Scaffold3225 | 21955                   | AA                              | GG              | 1947044393               |
| SNP_P4_180616_22316 | NW_004517976.1 | Scaffold3225 | 22316                   | GG                              | AA              | 1947044395               |
| SNP_P4_180618_471   | NW_004517979.1 | Scaffold3228 | 471                     | TT                              | GG              | 1947044397               |
| SNP_P4_180619_486   | NW_004517979.1 | Scaffold3228 | 486                     | CC                              | AA              | 1947044399               |
| SNP_P4_180621_1305  | NW_004517979.1 | Scaffold3228 | 1305                    | GG                              | CC              | 1947044401               |
| SNP_P4_180622_1718  | NW_004517979.1 | Scaffold3228 | 1718                    | GG                              | AA              | 1947044403               |
| SNP_P4_180624_1920  | NW_004517979.1 | Scaffold3228 | 1920                    | CC                              | TT              | 1947044405               |
| SNP_P4_180625_1963  | NW_004517979.1 | Scaffold3228 | 1963                    | CC                              | TT              | 1947044407               |
| SNP_P4_180626_1964  | NW_004517979.1 | Scaffold3228 | 1964                    | GG                              | TT              | 1947044409               |
| SNP_P4_180627_1971  | NW_004517979.1 | Scaffold3228 | 1971                    | TT                              | CC              | 1947044411               |

| SNPs IDs            | Chromosome IDs | Chromosomes  | Physical positions (bp) | CDC Frontier (Reference genome) | (ILWC46 & LPNB) | NCBI SNPdb Accession IDs |
|---------------------|----------------|--------------|-------------------------|---------------------------------|-----------------|--------------------------|
| SNP_P4_180628_1989  | NW_004517979.1 | Scaffold3228 | 1989                    | AA                              | TT              | 1947044413               |
| SNP_P4_180629_3058  | NW_004517979.1 | Scaffold3228 | 3058                    | CC                              | TT              | 1947044415               |
| SNP_P4_180630_4732  | NW_004517979.1 | Scaffold3228 | 4732                    | AA                              | GG              | 1947044417               |
| SNP_P4_180631_4744  | NW_004517979.1 | Scaffold3228 | 4744                    | TT                              | CC              | 1947044419               |
| SNP_P4_180632_5117  | NW_004517979.1 | Scaffold3228 | 5117                    | AA                              | CC              | 1947044421               |
| SNP_P4_180633_5179  | NW_004517979.1 | Scaffold3228 | 5179                    | TT                              | GG              | 1947044423               |
| SNP_P4_180634_5203  | NW_004517979.1 | Scaffold3228 | 5203                    | TT                              | CC              | 1947044424               |
| SNP_P4_180635_5239  | NW_004517979.1 | Scaffold3228 | 5239                    | CC                              | GG              | 1947044426               |
| SNP_P4_180636_8016  | NW_004517979.1 | Scaffold3228 | 8016                    | CC                              | TT              | 1947044428               |
| SNP_P4_180637_8028  | NW_004517979.1 | Scaffold3228 | 8028                    | GG                              | CC              | 1947044430               |
| SNP_P4_180638_8151  | NW_004517979.1 | Scaffold3228 | 8151                    | TT                              | GG              | 1947044432               |
| SNP_P4_180639_8438  | NW_004517979.1 | Scaffold3228 | 8438                    | TT                              | CC              | 1947044434               |
| SNP_P4_180640_8510  | NW_004517979.1 | Scaffold3228 | 8510                    | AA                              | GG              | 1947044436               |
| SNP_P4_180641_8518  | NW_004517979.1 | Scaffold3228 | 8518                    | AA                              | GG              | 1947044438               |
| SNP_P4_180642_8534  | NW_004517979.1 | Scaffold3228 | 8534                    | AA                              | GG              | 1947044439               |
| SNP_P4_180643_8553  | NW_004517979.1 | Scaffold3228 | 8553                    | AA                              | GG              | 1947044441               |
| SNP_P4_180644_9298  | NW_004517979.1 | Scaffold3228 | 9298                    | GG                              | AA              | 1947044443               |
| SNP_P4_180645_15187 | NW_004517979.1 | Scaffold3228 | 15187                   | GG                              | AA              | 1947044445               |
| SNP_P4_180646_20869 | NW_004517979.1 | Scaffold3228 | 20869                   | CC                              | GG              | 1947044447               |
| SNP_P4_180647_21255 | NW_004517979.1 | Scaffold3228 | 21255                   | TT                              | CC              | 1947044449               |
| SNP_P4_180648_21504 | NW_004517979.1 | Scaffold3228 | 21504                   | CC                              | TT              | 1947044451               |
| SNP_P4_180649_22173 | NW_004517979.1 | Scaffold3228 | 22173                   | TT                              | CC              | 1947044453               |
| SNP_P4_180650_23711 | NW_004517979.1 | Scaffold3228 | 23711                   | TT                              | AA              | 1947044455               |
| SNP_P4_180651_24785 | NW_004517979.1 | Scaffold3228 | 24785                   | TT                              | AA              | 1947044457               |
| SNP_P4_180652_26609 | NW_004517979.1 | Scaffold3228 | 26609                   | CC                              | AA              | 1947044459               |
| SNP_P4_180653_43196 | NW_004517979.1 | Scaffold3228 | 43196                   | GG                              | AA              | 1947044461               |
| SNP_P4_180655_51329 | NW_004517979.1 | Scaffold3228 | 51329                   | CC                              | TT              | 1947044463               |
| SNP_P4_180656_51342 | NW_004517979.1 | Scaffold3228 | 51342                   | CC                              | GG              | 1947044465               |
| SNP_P4_180657_54394 | NW_004517979.1 | Scaffold3228 | 54394                   | TT                              | CC              | 1947044467               |
| SNP_P4_180658_54441 | NW_004517979.1 | Scaffold3228 | 54441                   | CC                              | TT              | 1947044469               |
| SNP_P4_180659_54528 | NW_004517979.1 | Scaffold3228 | 54528                   | TT                              | AA              | 1947044470               |
| SNP_P4_180660_56047 | NW_004517979.1 | Scaffold3228 | 56047                   | AA                              | TT              | 1947044472               |
| SNP_P4_180661_56222 | NW_004517979.1 | Scaffold3228 | 56222                   | CC                              | GG              | 1947044474               |
| SNP_P4_180662_785   | NW_004517980.1 | Scaffold3229 | 785                     | TT                              | AA              | 1947044476               |
| SNP_P4_180663_890   | NW_004517980.1 | Scaffold3229 | 890                     | GG                              | AA              | 1947044478               |
| SNP_P4_180664_961   | NW_004517980.1 | Scaffold3229 | 961                     | CC                              | AA              | 1947044480               |
| SNP_P4_180665_1229  | NW_004517980.1 | Scaffold3229 | 1229                    | TT                              | AA              | 1947044482               |
| SNP_P4_180666_1381  | NW_004517980.1 | Scaffold3229 | 1381                    | GG                              | CC              | 1947044484               |
| SNP_P4_180667_1568  | NW_004517980.1 | Scaffold3229 | 1568                    | CC                              | AA              | 1947044486               |
| SNP_P4_180668_1593  | NW_004517980.1 | Scaffold3229 | 1593                    | TT                              | CC              | 1947044488               |
| SNP_P4_180669_1594  | NW_004517980.1 | Scaffold3229 | 1594                    | TT                              | CC              | 1947044490               |
| SNP_P4_180670_1616  | NW_004517980.1 | Scaffold3229 | 1616                    | CC                              | TT              | 1947044492               |

| SNPs IDs           | Chromosome IDs | Chromosomes  | Physical positions (bp) | CDC Frontier (Reference genome) | (ILWC46 & LPNB) | NCBI SNPdb Accession IDs |
|--------------------|----------------|--------------|-------------------------|---------------------------------|-----------------|--------------------------|
| SNP_P4_180671_1666 | NW_004517980.1 | Scaffold3229 | 1666                    | AA                              | GG              | 1947044494               |
| SNP_P4_180672_1701 | NW_004517980.1 | Scaffold3229 | 1701                    | TT                              | AA              | 1947044496               |
| SNP_P4_180673_4880 | NW_004517980.1 | Scaffold3229 | 4880                    | CC                              | AA              | 1947044498               |
| SNP_P4_180674_4918 | NW_004517980.1 | Scaffold3229 | 4918                    | AA                              | GG              | 1947044499               |
| SNP_P4_180675_4987 | NW_004517980.1 | Scaffold3229 | 4987                    | GG                              | AA              | 1947044501               |
| SNP_P4_180676_5012 | NW_004517980.1 | Scaffold3229 | 5012                    | GG                              | AA              | 1947044503               |
| SNP_P4_180677_5108 | NW_004517980.1 | Scaffold3229 | 5108                    | AA                              | CC              | 1947044505               |
| SNP_P4_180678_5160 | NW_004517980.1 | Scaffold3229 | 5160                    | CC                              | TT              | 1947044507               |
| SNP_P4_180679_5178 | NW_004517980.1 | Scaffold3229 | 5178                    | TT                              | GG              | 1947044509               |
| SNP_P4_180680_5240 | NW_004517980.1 | Scaffold3229 | 5240                    | CC                              | TT              | 1947044511               |
| SNP_P4_180681_5273 | NW_004517980.1 | Scaffold3229 | 5273                    | TT                              | AA              | 1947044513               |
| SNP_P4_180682_5281 | NW_004517980.1 | Scaffold3229 | 5281                    | AA                              | TT              | 1947044515               |
| SNP_P4_180683_5287 | NW_004517980.1 | Scaffold3229 | 5287                    | TT                              | AA              | 1947044517               |
| SNP_P4_180685_5500 | NW_004517980.1 | Scaffold3229 | 5500                    | CC                              | TT              | 1947044519               |
| SNP_P4_180686_5555 | NW_004517980.1 | Scaffold3229 | 5555                    | TT                              | AA              | 1947044520               |
| SNP_P4_180687_5608 | NW_004517980.1 | Scaffold3229 | 5608                    | AA                              | GG              | 1947044522               |
| SNP_P4_180688_5630 | NW_004517980.1 | Scaffold3229 | 5630                    | CC                              | TT              | 1947044524               |
| SNP_P4_180689_5650 | NW_004517980.1 | Scaffold3229 | 5650                    | CC                              | TT              | 1947044526               |
| SNP_P4_180690_5667 | NW_004517980.1 | Scaffold3229 | 5667                    | GG                              | AA              | 1947044528               |
| SNP_P4_180691_5802 | NW_004517980.1 | Scaffold3229 | 5802                    | TT                              | CC              | 1947044529               |
| SNP_P4_180693_5805 | NW_004517980.1 | Scaffold3229 | 5805                    | TT                              | AA              | 1947044531               |
| SNP_P4_180694_5806 | NW_004517980.1 | Scaffold3229 | 5806                    | CC                              | AA              | 1947044533               |
| SNP_P4_180696_5938 | NW_004517980.1 | Scaffold3229 | 5938                    | CC                              | AA              | 1947044535               |
| SNP_P4_180697_5968 | NW_004517980.1 | Scaffold3229 | 5968                    | GG                              | AA              | 1947044537               |
| SNP_P4_180698_5977 | NW_004517980.1 | Scaffold3229 | 5977                    | CC                              | AA              | 1947044539               |
| SNP_P4_180699_6024 | NW_004517980.1 | Scaffold3229 | 6024                    | AA                              | GG              | 1947044541               |
| SNP_P4_180700_6036 | NW_004517980.1 | Scaffold3229 | 6036                    | TT                              | CC              | 1947044543               |
| SNP_P4_180701_6079 | NW_004517980.1 | Scaffold3229 | 6079                    | AA                              | GG              | 1947044545               |
| SNP_P4_180702_6090 | NW_004517980.1 | Scaffold3229 | 6090                    | CC                              | TT              | 1947044547               |
| SNP_P4_180703_6102 | NW_004517980.1 | Scaffold3229 | 6102                    | CC                              | AA              | 1947044549               |
| SNP_P4_180704_6176 | NW_004517980.1 | Scaffold3229 | 6176                    | CC                              | TT              | 1947044551               |
| SNP_P4_180705_6288 | NW_004517980.1 | Scaffold3229 | 6288                    | AA                              | GG              | 1947044553               |
| SNP_P4_180706_6290 | NW_004517980.1 | Scaffold3229 | 6290                    | AA                              | GG              | 1947044554               |
| SNP_P4_180707_6303 | NW_004517980.1 | Scaffold3229 | 6303                    | GG                              | AA              | 1947044556               |
| SNP_P4_180708_6305 | NW_004517980.1 | Scaffold3229 | 6305                    | AA                              | GG              | 1947044558               |
| SNP_P4_180709_6389 | NW_004517980.1 | Scaffold3229 | 6389                    | TT                              | CC              | 1947044560               |
| SNP_P4_180710_6400 | NW_004517980.1 | Scaffold3229 | 6400                    | AA                              | GG              | 1947044562               |
| SNP_P4_180711_6410 | NW_004517980.1 | Scaffold3229 | 6410                    | CC                              | TT              | 1947044564               |
| SNP_P4_180712_6424 | NW_004517980.1 | Scaffold3229 | 6424                    | AA                              | TT              | 1947044566               |
| SNP_P4_180713_6464 | NW_004517980.1 | Scaffold3229 | 6464                    | TT                              | AA              | 1947044568               |
| SNP_P4_180714_6607 | NW_004517980.1 | Scaffold3229 | 6607                    | TT                              | CC              | 1947044570               |
| SNP_P4_180715_6671 | NW_004517980.1 | Scaffold3229 | 6671                    | TT                              | GG              | 1947044572               |

| SNPs IDs            | Chromosome IDs | Chromosomes  | Physical positions (bp) | CDC Frontier (Reference genome) | (ILWC46 & LPNB) | NCBI SNPdb Accession IDs |
|---------------------|----------------|--------------|-------------------------|---------------------------------|-----------------|--------------------------|
| SNP_P4_180717_6729  | NW_004517980.1 | Scaffold3229 | 6729                    | TT                              | CC              | 1947044574               |
| SNP_P4_180718_6974  | NW_004517980.1 | Scaffold3229 | 6974                    | AA                              | TT              | 1947044576               |
| SNP_P4_180719_7162  | NW_004517980.1 | Scaffold3229 | 7162                    | TT                              | CC              | 1947044578               |
| SNP_P4_180720_7752  | NW_004517980.1 | Scaffold3229 | 7752                    | TT                              | AA              | 1947044580               |
| SNP_P4_180721_8645  | NW_004517980.1 | Scaffold3229 | 8645                    | AA                              | TT              | 1947044581               |
| SNP_P4_180723_9104  | NW_004517980.1 | Scaffold3229 | 9104                    | GG                              | AA              | 1947044583               |
| SNP_P4_180724_1419  | NW_004517981.1 | Scaffold3230 | 1419                    | AA                              | CC              | 1947044585               |
| SNP_P4_180725_1887  | NW_004517982.1 | Scaffold3233 | 1887                    | TT                              | CC              | 1947044587               |
| SNP_P4_180726_168   | NW_004517983.1 | Scaffold3234 | 168                     | GG                              | TT              | 1947044589               |
| SNP_P4_180727_328   | NW_004517983.1 | Scaffold3234 | 328                     | TT                              | CC              | 1947044591               |
| SNP_P4_180728_727   | NW_004517983.1 | Scaffold3234 | 727                     | GG                              | TT              | 1947044593               |
| SNP_P4_180729_8486  | NW_004517983.1 | Scaffold3234 | 8486                    | CC                              | AA              | 1947044595               |
| SNP_P4_180730_8498  | NW_004517983.1 | Scaffold3234 | 8498                    | TT                              | AA              | 1947044597               |
| SNP_P4_180731_8535  | NW_004517983.1 | Scaffold3234 | 8535                    | CC                              | TT              | 1947044599               |
| SNP_P4_180732_10260 | NW_004517983.1 | Scaffold3234 | 10260                   | GG                              | AA              | 1947044601               |
| SNP_P4_180733_11119 | NW_004517983.1 | Scaffold3234 | 11119                   | AA                              | GG              | 1947044603               |
| SNP_P4_180734_11120 | NW_004517983.1 | Scaffold3234 | 11120                   | GG                              | TT              | 1947044605               |
| SNP_P4_180735_11250 | NW_004517983.1 | Scaffold3234 | 11250                   | GG                              | AA              | 1947044607               |
| SNP_P4_180736_11260 | NW_004517983.1 | Scaffold3234 | 11260                   | TT                              | AA              | 1947044608               |
| SNP_P4_180737_11261 | NW_004517983.1 | Scaffold3234 | 11261                   | GG                              | AA              | 1947044610               |
| SNP_P4_180738_11262 | NW_004517983.1 | Scaffold3234 | 11262                   | CC                              | TT              | 1947044612               |
| SNP_P4_180739_11327 | NW_004517983.1 | Scaffold3234 | 11327                   | TT                              | CC              | 1947044614               |
| SNP_P4_180740_11509 | NW_004517983.1 | Scaffold3234 | 11509                   | AA                              | GG              | 1947044616               |
| SNP_P4_180742_12498 | NW_004517983.1 | Scaffold3234 | 12498                   | GG                              | AA              | 1947044618               |
| SNP_P4_180743_476   | NW_004517984.1 | Scaffold3235 | 476                     | GG                              | AA              | 1947044620               |
| SNP_P4_180744_478   | NW_004517984.1 | Scaffold3235 | 478                     | TT                              | CC              | 1947044622               |
| SNP_P4_180745_541   | NW_004517984.1 | Scaffold3235 | 541                     | TT                              | CC              | 1947044624               |
| SNP_P4_180746_629   | NW_004517984.1 | Scaffold3235 | 629                     | GG                              | TT              | 1947044626               |
| SNP_P4_180747_686   | NW_004517984.1 | Scaffold3235 | 686                     | TT                              | CC              | 1947044628               |
| SNP_P4_180748_712   | NW_004517984.1 | Scaffold3235 | 712                     | CC                              | TT              | 1947044630               |
| SNP_P4_180749_906   | NW_004517984.1 | Scaffold3235 | 906                     | GG                              | AA              | 1947044632               |
| SNP_P4_180750_910   | NW_004517984.1 | Scaffold3235 | 910                     | CC                              | TT              | 1947044634               |
| SNP_P4_180751_930   | NW_004517984.1 | Scaffold3235 | 930                     | TT                              | CC              | 1947044636               |
| SNP_P4_180752_1013  | NW_004517984.1 | Scaffold3235 | 1013                    | GG                              | TT              | 1947044638               |
| SNP_P4_180753_1266  | NW_004517984.1 | Scaffold3235 | 1266                    | TT                              | AA              | 1947044640               |
| SNP_P4_180754_1112  | NW_004517986.1 | Scaffold3237 | 1112                    | TT                              | AA              | 1947044642               |
| SNP_P4_180755_1232  | NW_004517986.1 | Scaffold3237 | 1232                    | TT                              | CC              | 1947044644               |
| SNP_P4_180756_1261  | NW_004517986.1 | Scaffold3237 | 1261                    | TT                              | CC              | 1947044646               |
| SNP_P4_180757_63    | NW_004517989.1 | Scaffold3241 | 63                      | AA                              | CC              | 1947044648               |
| SNP_P4_180758_64    | NW_004517989.1 | Scaffold3241 | 64                      | AA                              | GG              | 1947044650               |
| SNP_P4_180759_72    | NW_004517989.1 | Scaffold3241 | 72                      | TT                              | CC              | 1947044651               |
| SNP_P4_180760_162   | NW_004517989.1 | Scaffold3241 | 162                     | GG                              | AA              | 1947044653               |

| SNPs IDs            | Chromosome IDs | Chromosomes  | Physical positions (bp) | CDC Frontier (Reference genome) | (ILWC46 & LPNB) | NCBI SNPdb Accession IDs |
|---------------------|----------------|--------------|-------------------------|---------------------------------|-----------------|--------------------------|
| SNP_P4_180761_170   | NW_004517989.1 | Scaffold3241 | 170                     | GG                              | AA              | 1947044655               |
| SNP_P4_180762_456   | NW_004517989.1 | Scaffold3241 | 456                     | CC                              | AA              | 1947044657               |
| SNP_P4_180763_536   | NW_004517989.1 | Scaffold3241 | 536                     | GG                              | AA              | 1947044659               |
| SNP_P4_180764_552   | NW_004517989.1 | Scaffold3241 | 552                     | CC                              | TT              | 1947044661               |
| SNP_P4_180765_603   | NW_004517989.1 | Scaffold3241 | 603                     | GG                              | AA              | 1947044663               |
| SNP_P4_180766_611   | NW_004517989.1 | Scaffold3241 | 611                     | GG                              | AA              | 1947044665               |
| SNP_P4_180767_682   | NW_004517989.1 | Scaffold3241 | 682                     | TT                              | CC              | 1947044667               |
| SNP_P4_180768_693   | NW_004517989.1 | Scaffold3241 | 693                     | TT                              | CC              | 1947044669               |
| SNP_P4_180769_751   | NW_004517989.1 | Scaffold3241 | 751                     | AA                              | GG              | 1947044671               |
| SNP_P4_180770_753   | NW_004517989.1 | Scaffold3241 | 753                     | TT                              | GG              | 1947044673               |
| SNP_P4_180771_879   | NW_004517989.1 | Scaffold3241 | 879                     | GG                              | AA              | 1947044675               |
| SNP_P4_180772_943   | NW_004517989.1 | Scaffold3241 | 943                     | CC                              | TT              | 1947044677               |
| SNP_P4_180774_1044  | NW_004517989.1 | Scaffold3241 | 1044                    | AA                              | GG              | 1947044678               |
| SNP_P4_180775_1049  | NW_004517989.1 | Scaffold3241 | 1049                    | TT                              | CC              | 1947044680               |
| SNP_P4_180776_1082  | NW_004517989.1 | Scaffold3241 | 1082                    | GG                              | CC              | 1947044682               |
| SNP_P4_180777_1135  | NW_004517989.1 | Scaffold3241 | 1135                    | AA                              | TT              | 1947044685               |
| SNP_P4_180778_972   | NW_004517990.1 | Scaffold3242 | 972                     | GG                              | AA              | 1947044687               |
| SNP_P4_180779_983   | NW_004517990.1 | Scaffold3242 | 983                     | GG                              | AA              | 1947044689               |
| SNP_P4_180781_3434  | NW_004517990.1 | Scaffold3242 | 3434                    | GG                              | AA              | 1947044691               |
| SNP_P4_180782_3512  | NW_004517990.1 | Scaffold3242 | 3512                    | GG                              | AA              | 1947044693               |
| SNP_P4_180783_3517  | NW_004517990.1 | Scaffold3242 | 3517                    | TT                              | GG              | 1947044695               |
| SNP_P4_180784_3552  | NW_004517990.1 | Scaffold3242 | 3552                    | TT                              | GG              | 1947044697               |
| SNP_P4_180785_3558  | NW_004517990.1 | Scaffold3242 | 3558                    | AA                              | GG              | 1947044699               |
| SNP_P4_180786_3579  | NW_004517990.1 | Scaffold3242 | 3579                    | GG                              | CC              | 1947044701               |
| SNP_P4_180787_6157  | NW_004517990.1 | Scaffold3242 | 6157                    | CC                              | AA              | 1947044703               |
| SNP_P4_180788_6170  | NW_004517990.1 | Scaffold3242 | 6170                    | CC                              | AA              | 1947044705               |
| SNP_P4_180789_6454  | NW_004517990.1 | Scaffold3242 | 6454                    | CC                              | AA              | 1947044707               |
| SNP_P4_180790_6511  | NW_004517990.1 | Scaffold3242 | 6511                    | TT                              | CC              | 1947044709               |
| SNP_P4_180791_6521  | NW_004517990.1 | Scaffold3242 | 6521                    | AA                              | GG              | 1947044711               |
| SNP_P4_180792_6641  | NW_004517990.1 | Scaffold3242 | 6641                    | GG                              | AA              | 1947044713               |
| SNP_P4_180793_6666  | NW_004517990.1 | Scaffold3242 | 6666                    | TT                              | CC              | 1947044715               |
| SNP_P4_180794_6686  | NW_004517990.1 | Scaffold3242 | 6686                    | CC                              | TT              | 1947044717               |
| SNP_P4_180795_6705  | NW_004517990.1 | Scaffold3242 | 6705                    | TT                              | AA              | 1947044718               |
| SNP_P4_180796_6711  | NW_004517990.1 | Scaffold3242 | 6711                    | CC                              | TT              | 1947044720               |
| SNP_P4_180797_9692  | NW_004517990.1 | Scaffold3242 | 9692                    | TT                              | AA              | 1947044722               |
| SNP_P4_180798_9716  | NW_004517990.1 | Scaffold3242 | 9716                    | TT                              | CC              | 1947044724               |
| SNP_P4_180799_9727  | NW_004517990.1 | Scaffold3242 | 9727                    | TT                              | CC              | 1947044726               |
| SNP_P4_180800_11931 | NW_004517991.1 | Scaffold3243 | 11931                   | TT                              | CC              | 1947044728               |
| SNP_P4_180801_19633 | NW_004517991.1 | Scaffold3243 | 19633                   | AA                              | TT              | 1947044730               |
| SNP_P4_180802_19651 | NW_004517991.1 | Scaffold3243 | 19651                   | CC                              | TT              | 1947044732               |
| SNP_P4_180803_19657 | NW_004517991.1 | Scaffold3243 | 19657                   | CC                              | TT              | 1947044734               |
| SNP_P4_180804_19896 | NW_004517991.1 | Scaffold3243 | 19896                   | TT                              | CC              | 1947044736               |



| SNPs IDs            | Chromosome IDs | Chromosomes  | Physical positions (bp) | CDC Frontier (Reference genome) | (ILWC46 & LPNB) | NCBI SNPdb Accession IDs |
|---------------------|----------------|--------------|-------------------------|---------------------------------|-----------------|--------------------------|
| SNP_P4_180805_19898 | NW_004517991.1 | Scaffold3243 | 19898                   | TT                              | GG              | 1947044738               |
| SNP_P4_180806_20457 | NW_004517991.1 | Scaffold3243 | 20457                   | AA                              | TT              | 1947044739               |
| SNP_P4_180807_20480 | NW_004517991.1 | Scaffold3243 | 20480                   | GG                              | CC              | 1947044741               |
| SNP_P4_180808_20490 | NW_004517991.1 | Scaffold3243 | 20490                   | AA                              | GG              | 1947044743               |
| SNP_P4_180809_20516 | NW_004517991.1 | Scaffold3243 | 20516                   | GG                              | TT              | 1947044745               |
| SNP_P4_180810_20555 | NW_004517991.1 | Scaffold3243 | 20555                   | GG                              | AA              | 1947044747               |
| SNP_P4_180811_20654 | NW_004517991.1 | Scaffold3243 | 20654                   | AA                              | TT              | 1947044749               |
| SNP_P4_180812_20675 | NW_004517991.1 | Scaffold3243 | 20675                   | CC                              | GG              | 1947044751               |
| SNP_P4_180813_20695 | NW_004517991.1 | Scaffold3243 | 20695                   | AA                              | CC              | 1947044753               |
| SNP_P4_180814_20782 | NW_004517991.1 | Scaffold3243 | 20782                   | CC                              | TT              | 1947044755               |
| SNP_P4_180816_11134 | NW_004517992.1 | Scaffold3245 | 11134                   | GG                              | CC              | 1947044757               |
| SNP_P4_180817_11693 | NW_004517992.1 | Scaffold3245 | 11693                   | CC                              | TT              | 1947044759               |
| SNP_P4_180818_13460 | NW_004517992.1 | Scaffold3245 | 13460                   | CC                              | TT              | 1947044761               |
| SNP_P4_180819_13520 | NW_004517992.1 | Scaffold3245 | 13520                   | AA                              | TT              | 1947044762               |
| SNP_P4_180820_13640 | NW_004517992.1 | Scaffold3245 | 13640                   | TT                              | CC              | 1947044764               |
| SNP_P4_180821_13646 | NW_004517992.1 | Scaffold3245 | 13646                   | GG                              | TT              | 1947044766               |
| SNP_P4_180822_13650 | NW_004517992.1 | Scaffold3245 | 13650                   | GG                              | AA              | 1947044768               |
| SNP_P4_180823_13677 | NW_004517992.1 | Scaffold3245 | 13677                   | GG                              | AA              | 1947044770               |
| SNP_P4_180824_13680 | NW_004517992.1 | Scaffold3245 | 13680                   | TT                              | CC              | 1947044772               |
| SNP_P4_180825_13690 | NW_004517992.1 | Scaffold3245 | 13690                   | TT                              | CC              | 1947044774               |
| SNP_P4_180826_13744 | NW_004517992.1 | Scaffold3245 | 13744                   | CC                              | TT              | 1947044776               |
| SNP_P4_180827_13817 | NW_004517992.1 | Scaffold3245 | 13817                   | AA                              | GG              | 1947044777               |
| SNP_P4_180828_13867 | NW_004517992.1 | Scaffold3245 | 13867                   | TT                              | AA              | 1947044779               |
| SNP_P4_180829_13873 | NW_004517992.1 | Scaffold3245 | 13873                   | TT                              | AA              | 1947044781               |
| SNP_P4_180830_13874 | NW_004517992.1 | Scaffold3245 | 13874                   | GG                              | AA              | 1947044783               |
| SNP_P4_180831_13894 | NW_004517992.1 | Scaffold3245 | 13894                   | CC                              | TT              | 1947044785               |
| SNP_P4_180832_13933 | NW_004517992.1 | Scaffold3245 | 13933                   | TT                              | CC              | 1947044787               |
| SNP_P4_180833_13939 | NW_004517992.1 | Scaffold3245 | 13939                   | CC                              | TT              | 1947044788               |
| SNP_P4_180834_523   | NW_004517995.1 | Scaffold3251 | 523                     | CC                              | AA              | 1947044789               |
| SNP_P4_180835_762   | NW_004517995.1 | Scaffold3251 | 762                     | AA                              | GG              | 1947044790               |
| SNP_P4_180836_2690  | NW_004517995.1 | Scaffold3251 | 2690                    | GG                              | AA              | 1947044791               |
| SNP_P4_180837_5497  | NW_004517995.1 | Scaffold3251 | 5497                    | AA                              | TT              | 1947044793               |
| SNP_P4_180838_6936  | NW_004517995.1 | Scaffold3251 | 6936                    | AA                              | GG              | 1947044795               |
| SNP_P4_180839_8533  | NW_004517995.1 | Scaffold3251 | 8533                    | GG                              | CC              | 1947044797               |
| SNP_P4_180840_9075  | NW_004517995.1 | Scaffold3251 | 9075                    | TT                              | CC              | 1947044799               |
| SNP_P4_180841_9436  | NW_004517995.1 | Scaffold3251 | 9436                    | GG                              | AA              | 1947044801               |
| SNP_P4_180842_9991  | NW_004517995.1 | Scaffold3251 | 9991                    | GG                              | CC              | 1947044803               |
| SNP_P4_180843_13360 | NW_004517995.1 | Scaffold3251 | 13360                   | CC                              | AA              | 1947044804               |
| SNP_P4_180844_14842 | NW_004517995.1 | Scaffold3251 | 14842                   | TT                              | AA              | 1947044805               |
| SNP_P4_180845_14843 | NW_004517995.1 | Scaffold3251 | 14843                   | CC                              | TT              | 1947044806               |
| SNP_P4_180846_15320 | NW_004517995.1 | Scaffold3251 | 15320                   | AA                              | GG              | 1947044807               |
| SNP_P4_180847_17555 | NW_004517995.1 | Scaffold3251 | 17555                   | AA                              | CC              | 1947044808               |

| SNPs IDs             | Chromosome IDs | Chromosomes    | Physical positions (bp) | CDC Frontier (Reference genome) | (ILWC46 & LPNB) | NCBI SNPdb Accession IDs |
|----------------------|----------------|----------------|-------------------------|---------------------------------|-----------------|--------------------------|
| SNP_P4_180848_17588  | NW_004517995.1 | Scaffold3251   | 17588                   | TT                              | GG              | 1947044809               |
| SNP_P4_180849_17617  | NW_004517995.1 | Scaffold3251   | 17617                   | CC                              | GG              | 1947044810               |
| SNP_P4_180850_17620  | NW_004517995.1 | Scaffold3251   | 17620                   | AA                              | TT              | 1947044811               |
| SNP_P4_180851_17629  | NW_004517995.1 | Scaffold3251   | 17629                   | AA                              | CC              | 1947044812               |
| SNP_P4_180852_742    | NW_004517997.1 | Scaffold3254_2 | 742                     | TT                              | CC              | 1947044813               |
| SNP_P4_180853_775    | NW_004517997.1 | Scaffold3254_2 | 775                     | AA                              | GG              | 1947044814               |
| SNP_P4_180854_876    | NW_004517997.1 | Scaffold3254_2 | 876                     | CC                              | TT              | 1947044815               |
| SNP_P4_180855_30089  | NW_004517997.1 | Scaffold3254_2 | 30089                   | TT                              | CC              | 1947044816               |
| SNP_P4_180857_86995  | NW_004517997.1 | Scaffold3254_2 | 86995                   | TT                              | AA              | 1947044817               |
| SNP_P4_180860_100860 | NW_004517997.1 | Scaffold3254_2 | 100860                  | GG                              | AA              | 1947044818               |
| SNP_P4_180861_118095 | NW_004517997.1 | Scaffold3254_2 | 118095                  | GG                              | AA              | 1947044819               |
| SNP_P4_180862_132059 | NW_004517997.1 | Scaffold3254_2 | 132059                  | TT                              | AA              | 1947044820               |
| SNP_P4_180864_147326 | NW_004517997.1 | Scaffold3254_2 | 147326                  | TT                              | CC              | 1947044821               |
| SNP_P4_180865_147994 | NW_004517997.1 | Scaffold3254_2 | 147994                  | CC                              | TT              | 1947044822               |
| SNP_P4_180867_186306 | NW_004517997.1 | Scaffold3254_2 | 186306                  | AA                              | GG              | 1947044824               |
| SNP_P4_180869_213860 | NW_004517997.1 | Scaffold3254_2 | 213860                  | TT                              | GG              | 1947044825               |
| SNP_P4_180870_231019 | NW_004517997.1 | Scaffold3254_2 | 231019                  | CC                              | GG              | 1947044827               |
| SNP_P4_180871_234860 | NW_004517997.1 | Scaffold3254_2 | 234860                  | GG                              | TT              | 1947044829               |
| SNP_P4_180872_18908  | NW_004518000.1 | Scaffold3258   | 18908                   | CC                              | GG              | 1947044831               |
| SNP_P4_180873_19467  | NW_004518000.1 | Scaffold3258   | 19467                   | GG                              | AA              | 1947044833               |
| SNP_P4_180874_19506  | NW_004518000.1 | Scaffold3258   | 19506                   | TT                              | CC              | 1947044835               |
| SNP_P4_180875_26583  | NW_004518000.1 | Scaffold3258   | 26583                   | CC                              | TT              | 1947044837               |
| SNP_P4_180876_28857  | NW_004518000.1 | Scaffold3258   | 28857                   | GG                              | AA              | 1947044839               |
| SNP_P4_180877_31460  | NW_004518000.1 | Scaffold3258   | 31460                   | GG                              | TT              | 1947044841               |
| SNP_P4_180878_32057  | NW_004518000.1 | Scaffold3258   | 32057                   | CC                              | TT              | 1947044843               |
| SNP_P4_180879_33163  | NW_004518000.1 | Scaffold3258   | 33163                   | AA                              | TT              | 1947044845               |
| SNP_P4_180880_33172  | NW_004518000.1 | Scaffold3258   | 33172                   | CC                              | AA              | 1947044847               |
| SNP_P4_180881_33966  | NW_004518000.1 | Scaffold3258   | 33966                   | AA                              | CC              | 1947044849               |
| SNP_P4_180883_34532  | NW_004518000.1 | Scaffold3258   | 34532                   | CC                              | GG              | 1947044851               |
| SNP_P4_180885_34962  | NW_004518000.1 | Scaffold3258   | 34962                   | GG                              | TT              | 1947044853               |
| SNP_P4_180886_35548  | NW_004518000.1 | Scaffold3258   | 35548                   | CC                              | TT              | 1947044855               |
| SNP_P4_180887_35645  | NW_004518000.1 | Scaffold3258   | 35645                   | CC                              | GG              | 1947044857               |
| SNP_P4_180888_35853  | NW_004518000.1 | Scaffold3258   | 35853                   | GG                              | TT              | 1947044859               |
| SNP_P4_180889_35971  | NW_004518000.1 | Scaffold3258   | 35971                   | TT                              | CC              | 1947044861               |
| SNP_P4_180890_37354  | NW_004518000.1 | Scaffold3258   | 37354                   | TT                              | CC              | 1947044863               |
| SNP_P4_180891_37653  | NW_004518000.1 | Scaffold3258   | 37653                   | GG                              | AA              | 1947044865               |
| SNP_P4_180892_37765  | NW_004518000.1 | Scaffold3258   | 37765                   | TT                              | CC              | 1947044867               |
| SNP_P4_180893_37949  | NW_004518000.1 | Scaffold3258   | 37949                   | TT                              | AA              | 1947044869               |
| SNP_P4_180894_37950  | NW_004518000.1 | Scaffold3258   | 37950                   | TT                              | AA              | 1947044871               |
| SNP_P4_180895_39777  | NW_004518000.1 | Scaffold3258   | 39777                   | TT                              | CC              | 1947044873               |
| SNP_P4_180896_40047  | NW_004518000.1 | Scaffold3258   | 40047                   | CC                              | TT              | 1947044875               |
| SNP_P4_180897_40324  | NW_004518000.1 | Scaffold3258   | 40324                   | CC                              | AA              | 1947044877               |

| SNPs IDs            | Chromosome IDs | Chromosomes  | Physical positions (bp) | CDC Frontier (Reference genome) | (ILWC46 & LPNB) | NCBI SNPdb Accession IDs |
|---------------------|----------------|--------------|-------------------------|---------------------------------|-----------------|--------------------------|
| SNP_P4_180898_41261 | NW_004518000.1 | Scaffold3258 | 41261                   | TT                              | CC              | 1947044879               |
| SNP_P4_180899_41387 | NW_004518000.1 | Scaffold3258 | 41387                   | AA                              | GG              | 1947044881               |
| SNP_P4_180901_41507 | NW_004518000.1 | Scaffold3258 | 41507                   | CC                              | TT              | 1947044883               |
| SNP_P4_180902_41840 | NW_004518000.1 | Scaffold3258 | 41840                   | AA                              | GG              | 1947044885               |
| SNP_P4_180903_41841 | NW_004518000.1 | Scaffold3258 | 41841                   | TT                              | AA              | 1947044887               |
| SNP_P4_180904_42948 | NW_004518000.1 | Scaffold3258 | 42948                   | AA                              | GG              | 1947044889               |
| SNP_P4_180905_43898 | NW_004518000.1 | Scaffold3258 | 43898                   | GG                              | TT              | 1947044891               |
| SNP_P4_180906_45551 | NW_004518000.1 | Scaffold3258 | 45551                   | GG                              | AA              | 1947044893               |
| SNP_P4_180907_45976 | NW_004518000.1 | Scaffold3258 | 45976                   | TT                              | GG              | 1947044895               |
| SNP_P4_180908_46494 | NW_004518000.1 | Scaffold3258 | 46494                   | CC                              | TT              | 1947044897               |
| SNP_P4_180910_46975 | NW_004518000.1 | Scaffold3258 | 46975                   | CC                              | AA              | 1947044899               |
| SNP_P4_180911_47285 | NW_004518000.1 | Scaffold3258 | 47285                   | CC                              | TT              | 1947044901               |
| SNP_P4_180912_47685 | NW_004518000.1 | Scaffold3258 | 47685                   | GG                              | TT              | 1947044903               |
| SNP_P4_180913_47686 | NW_004518000.1 | Scaffold3258 | 47686                   | CC                              | TT              | 1947044905               |
| SNP_P4_180914_48327 | NW_004518000.1 | Scaffold3258 | 48327                   | AA                              | CC              | 1947044907               |
| SNP_P4_180915_48578 | NW_004518000.1 | Scaffold3258 | 48578                   | CC                              | TT              | 1947044909               |
| SNP_P4_180916_48687 | NW_004518000.1 | Scaffold3258 | 48687                   | GG                              | AA              | 1947044911               |
| SNP_P4_180917_48717 | NW_004518000.1 | Scaffold3258 | 48717                   | CC                              | TT              | 1947044913               |
| SNP_P4_180918_48806 | NW_004518000.1 | Scaffold3258 | 48806                   | TT                              | AA              | 1947044915               |
| SNP_P4_180920_48971 | NW_004518000.1 | Scaffold3258 | 48971                   | GG                              | AA              | 1947044917               |
| SNP_P4_180923_52403 | NW_004518000.1 | Scaffold3258 | 52403                   | AA                              | CC              | 1947044919               |
| SNP_P4_180924_52453 | NW_004518000.1 | Scaffold3258 | 52453                   | TT                              | GG              | 1947044920               |
| SNP_P4_180925_52740 | NW_004518000.1 | Scaffold3258 | 52740                   | TT                              | CC              | 1947044922               |
| SNP_P4_180926_54397 | NW_004518000.1 | Scaffold3258 | 54397                   | TT                              | AA              | 1947044924               |
| SNP_P4_180927_55436 | NW_004518000.1 | Scaffold3258 | 55436                   | GG                              | AA              | 1947044926               |
| SNP_P4_180928_55923 | NW_004518000.1 | Scaffold3258 | 55923                   | TT                              | CC              | 1947044928               |
| SNP_P4_180929_55924 | NW_004518000.1 | Scaffold3258 | 55924                   | AA                              | TT              | 1947044930               |
| SNP_P4_180930_57146 | NW_004518000.1 | Scaffold3258 | 57146                   | GG                              | AA              | 1947044932               |
| SNP_P4_180931_58295 | NW_004518000.1 | Scaffold3258 | 58295                   | CC                              | TT              | 1947044934               |
| SNP_P4_180932_58359 | NW_004518000.1 | Scaffold3258 | 58359                   | GG                              | AA              | 1947044936               |
| SNP_P4_180933_59048 | NW_004518000.1 | Scaffold3258 | 59048                   | AA                              | GG              | 1947044938               |
| SNP_P4_180934_65902 | NW_004518000.1 | Scaffold3258 | 65902                   | CC                              | TT              | 1947044939               |
| SNP_P4_180935_66087 | NW_004518000.1 | Scaffold3258 | 66087                   | AA                              | GG              | 1947044941               |
| SNP_P4_180936_66521 | NW_004518000.1 | Scaffold3258 | 66521                   | AA                              | GG              | 1947044943               |
| SNP_P4_180938_67241 | NW_004518000.1 | Scaffold3258 | 67241                   | TT                              | CC              | 1947044945               |
| SNP_P4_180939_68820 | NW_004518000.1 | Scaffold3258 | 68820                   | TT                              | CC              | 1947044947               |
| SNP_P4_180940_69007 | NW_004518000.1 | Scaffold3258 | 69007                   | GG                              | AA              | 1947044949               |
| SNP_P4_180941_69138 | NW_004518000.1 | Scaffold3258 | 69138                   | TT                              | AA              | 1947044951               |
| SNP_P4_180942_69408 | NW_004518000.1 | Scaffold3258 | 69408                   | AA                              | GG              | 1947044953               |
| SNP_P4_180943_69711 | NW_004518000.1 | Scaffold3258 | 69711                   | AA                              | GG              | 1947044955               |
| SNP_P4_180944_70440 | NW_004518000.1 | Scaffold3258 | 70440                   | GG                              | AA              | 1947044957               |
| SNP_P4_180945_70787 | NW_004518000.1 | Scaffold3258 | 70787                   | AA                              | GG              | 1947044959               |

| SNPs IDs            | Chromosome IDs | Chromosomes  | Physical positions (bp) | CDC Frontier (Reference genome) | (ILWC46 & LPNB) | NCBI SNPdb Accession IDs |
|---------------------|----------------|--------------|-------------------------|---------------------------------|-----------------|--------------------------|
| SNP_P4_180946_71125 | NW_004518000.1 | Scaffold3258 | 71125                   | GG                              | AA              | 1947044961               |
| SNP_P4_180948_71849 | NW_004518000.1 | Scaffold3258 | 71849                   | TT                              | AA              | 1947044963               |
| SNP_P4_180949_72646 | NW_004518000.1 | Scaffold3258 | 72646                   | CC                              | TT              | 1947044965               |
| SNP_P4_180950_72946 | NW_004518000.1 | Scaffold3258 | 72946                   | GG                              | AA              | 1947044967               |
| SNP_P4_180951_73983 | NW_004518000.1 | Scaffold3258 | 73983                   | AA                              | GG              | 1947044969               |
| SNP_P4_180953_74077 | NW_004518000.1 | Scaffold3258 | 74077                   | CC                              | TT              | 1947044971               |
| SNP_P4_180954_74576 | NW_004518000.1 | Scaffold3258 | 74576                   | CC                              | TT              | 1947044973               |
| SNP_P4_180955_74622 | NW_004518000.1 | Scaffold3258 | 74622                   | AA                              | TT              | 1947044974               |
| SNP_P4_180957_75855 | NW_004518000.1 | Scaffold3258 | 75855                   | AA                              | CC              | 1947044976               |
| SNP_P4_180958_76532 | NW_004518000.1 | Scaffold3258 | 76532                   | CC                              | AA              | 1947044978               |
| SNP_P4_180959_76996 | NW_004518000.1 | Scaffold3258 | 76996                   | GG                              | AA              | 1947044980               |
| SNP_P4_180960_77045 | NW_004518000.1 | Scaffold3258 | 77045                   | CC                              | TT              | 1947044982               |
| SNP_P4_180961_77245 | NW_004518000.1 | Scaffold3258 | 77245                   | AA                              | GG              | 1947044984               |
| SNP_P4_180962_77348 | NW_004518000.1 | Scaffold3258 | 77348                   | CC                              | TT              | 1947044986               |
| SNP_P4_180966_77742 | NW_004518000.1 | Scaffold3258 | 77742                   | GG                              | AA              | 1947044988               |
| SNP_P4_180967_78286 | NW_004518000.1 | Scaffold3258 | 78286                   | AA                              | GG              | 1947044990               |
| SNP_P4_180969_79513 | NW_004518000.1 | Scaffold3258 | 79513                   | AA                              | GG              | 1947044992               |
| SNP_P4_180970_79516 | NW_004518000.1 | Scaffold3258 | 79516                   | TT                              | AA              | 1947044994               |
| SNP_P4_180971_79520 | NW_004518000.1 | Scaffold3258 | 79520                   | GG                              | CC              | 1947044996               |
| SNP_P4_180972_79544 | NW_004518000.1 | Scaffold3258 | 79544                   | TT                              | CC              | 1947044998               |
| SNP_P4_180973_79585 | NW_004518000.1 | Scaffold3258 | 79585                   | CC                              | TT              | 1947045000               |
| SNP_P4_180974_79588 | NW_004518000.1 | Scaffold3258 | 79588                   | TT                              | GG              | 1947045002               |
| SNP_P4_180975_79603 | NW_004518000.1 | Scaffold3258 | 79603                   | TT                              | CC              | 1947045004               |
| SNP_P4_180976_79607 | NW_004518000.1 | Scaffold3258 | 79607                   | AA                              | TT              | 1947045006               |
| SNP_P4_180977_79610 | NW_004518000.1 | Scaffold3258 | 79610                   | GG                              | AA              | 1947045008               |
| SNP_P4_180978_79618 | NW_004518000.1 | Scaffold3258 | 79618                   | AA                              | GG              | 1947045010               |
| SNP_P4_180979_79630 | NW_004518000.1 | Scaffold3258 | 79630                   | TT                              | GG              | 1947045012               |
| SNP_P4_180980_79649 | NW_004518000.1 | Scaffold3258 | 79649                   | AA                              | TT              | 1947045014               |
| SNP_P4_180981_79651 | NW_004518000.1 | Scaffold3258 | 79651                   | AA                              | CC              | 1947045016               |
| SNP_P4_180982_79663 | NW_004518000.1 | Scaffold3258 | 79663                   | CC                              | TT              | 1947045018               |
| SNP_P4_180983_79821 | NW_004518000.1 | Scaffold3258 | 79821                   | AA                              | TT              | 1947045020               |
| SNP_P4_180984_79933 | NW_004518000.1 | Scaffold3258 | 79933                   | TT                              | CC              | 1947045022               |
| SNP_P4_180985_79996 | NW_004518000.1 | Scaffold3258 | 79996                   | AA                              | GG              | 1947045024               |
| SNP_P4_180986_80028 | NW_004518000.1 | Scaffold3258 | 80028                   | GG                              | AA              | 1947045026               |
| SNP_P4_180987_80273 | NW_004518000.1 | Scaffold3258 | 80273                   | GG                              | AA              | 1947045028               |
| SNP_P4_180988_81266 | NW_004518000.1 | Scaffold3258 | 81266                   | TT                              | CC              | 1947045030               |
| SNP_P4_180990_81857 | NW_004518000.1 | Scaffold3258 | 81857                   | TT                              | CC              | 1947045032               |
| SNP_P4_180991_82528 | NW_004518000.1 | Scaffold3258 | 82528                   | TT                              | AA              | 1947045034               |
| SNP_P4_180992_82907 | NW_004518000.1 | Scaffold3258 | 82907                   | GG                              | TT              | 1947045036               |
| SNP_P4_180993_83145 | NW_004518000.1 | Scaffold3258 | 83145                   | AA                              | GG              | 1947045038               |
| SNP_P4_180994_83180 | NW_004518000.1 | Scaffold3258 | 83180                   | AA                              | GG              | 1947045040               |
| SNP_P4_180995_84134 | NW_004518000.1 | Scaffold3258 | 84134                   | TT                              | CC              | 1947045041               |

| SNPs IDs            | Chromosome IDs | Chromosomes  | Physical positions (bp) | CDC Frontier (Reference genome) | (ILWC46 & LPNB) | NCBI SNPdb Accession IDs |
|---------------------|----------------|--------------|-------------------------|---------------------------------|-----------------|--------------------------|
| SNP_P4_180996_84196 | NW_004518000.1 | Scaffold3258 | 84196                   | CC                              | TT              | 1947045043               |
| SNP_P4_180997_84286 | NW_004518000.1 | Scaffold3258 | 84286                   | TT                              | GG              | 1947045045               |
| SNP_P4_180999_85057 | NW_004518000.1 | Scaffold3258 | 85057                   | AA                              | GG              | 1947045047               |
| SNP_P4_181000_86167 | NW_004518000.1 | Scaffold3258 | 86167                   | AA                              | GG              | 1947045049               |
| SNP_P4_181001_87145 | NW_004518000.1 | Scaffold3258 | 87145                   | AA                              | GG              | 1947045051               |
| SNP_P4_181002_87686 | NW_004518000.1 | Scaffold3258 | 87686                   | GG                              | CC              | 1947045053               |
| SNP_P4_181003_88172 | NW_004518000.1 | Scaffold3258 | 88172                   | CC                              | GG              | 1947045055               |
| SNP_P4_181004_89097 | NW_004518000.1 | Scaffold3258 | 89097                   | TT                              | GG              | 1947045057               |
| SNP_P4_181005_89179 | NW_004518000.1 | Scaffold3258 | 89179                   | AA                              | GG              | 1947045059               |
| SNP_P4_181006_89469 | NW_004518000.1 | Scaffold3258 | 89469                   | TT                              | CC              | 1947045061               |
| SNP_P4_181007_89546 | NW_004518000.1 | Scaffold3258 | 89546                   | TT                              | CC              | 1947045063               |
| SNP_P4_181008_89559 | NW_004518000.1 | Scaffold3258 | 89559                   | TT                              | CC              | 1947045065               |
| SNP_P4_181009_89798 | NW_004518000.1 | Scaffold3258 | 89798                   | TT                              | CC              | 1947045067               |
| SNP_P4_181010_91166 | NW_004518000.1 | Scaffold3258 | 91166                   | TT                              | CC              | 1947045069               |
| SNP_P4_181011_91180 | NW_004518000.1 | Scaffold3258 | 91180                   | GG                              | AA              | 1947045071               |
| SNP_P4_181012_91182 | NW_004518000.1 | Scaffold3258 | 91182                   | TT                              | CC              | 1947045073               |
| SNP_P4_181013_92093 | NW_004518000.1 | Scaffold3258 | 92093                   | AA                              | CC              | 1947045075               |
| SNP_P4_181014_92310 | NW_004518000.1 | Scaffold3258 | 92310                   | CC                              | GG              | 1947045077               |
| SNP_P4_181015_92403 | NW_004518000.1 | Scaffold3258 | 92403                   | CC                              | TT              | 1947045078               |
| SNP_P4_181016_93007 | NW_004518000.1 | Scaffold3258 | 93007                   | TT                              | GG              | 1947045080               |
| SNP_P4_181017_93271 | NW_004518000.1 | Scaffold3258 | 93271                   | AA                              | TT              | 1947045082               |
| SNP_P4_181018_93453 | NW_004518000.1 | Scaffold3258 | 93453                   | CC                              | GG              | 1947045084               |
| SNP_P4_181019_94190 | NW_004518000.1 | Scaffold3258 | 94190                   | GG                              | AA              | 1947045086               |
| SNP_P4_181020_94259 | NW_004518000.1 | Scaffold3258 | 94259                   | AA                              | GG              | 1947045088               |
| SNP_P4_181021_440   | NW_004518005.1 | Scaffold3272 | 440                     | GG                              | TT              | 1947045090               |
| SNP_P4_181022_470   | NW_004518005.1 | Scaffold3272 | 470                     | GG                              | CC              | 1947045092               |
| SNP_P4_181023_2569  | NW_004518005.1 | Scaffold3272 | 2569                    | AA                              | GG              | 1947045094               |
| SNP_P4_181024_2676  | NW_004518005.1 | Scaffold3272 | 2676                    | GG                              | TT              | 1947045096               |
| SNP_P4_181025_376   | NW_004518009.1 | Scaffold3276 | 376                     | CC                              | TT              | 1947045098               |
| SNP_P4_181026_554   | NW_004518009.1 | Scaffold3276 | 554                     | TT                              | CC              | 1947045100               |
| SNP_P4_181027_856   | NW_004518009.1 | Scaffold3276 | 856                     | GG                              | CC              | 1947045101               |
| SNP_P4_181028_2157  | NW_004518010.1 | Scaffold3277 | 2157                    | GG                              | AA              | 1947045103               |
| SNP_P4_181029_2172  | NW_004518010.1 | Scaffold3277 | 2172                    | GG                              | AA              | 1947045105               |
| SNP_P4_181030_2192  | NW_004518010.1 | Scaffold3277 | 2192                    | GG                              | AA              | 1947045107               |
| SNP_P4_181031_2223  | NW_004518010.1 | Scaffold3277 | 2223                    | CC                              | TT              | 1947045109               |
| SNP_P4_181032_2244  | NW_004518010.1 | Scaffold3277 | 2244                    | TT                              | AA              | 1947045111               |
| SNP_P4_181033_2250  | NW_004518010.1 | Scaffold3277 | 2250                    | GG                              | TT              | 1947045113               |
| SNP_P4_181034_2411  | NW_004518010.1 | Scaffold3277 | 2411                    | AA                              | GG              | 1947045115               |
| SNP_P4_181035_2414  | NW_004518010.1 | Scaffold3277 | 2414                    | GG                              | AA              | 1947045117               |
| SNP_P4_181036_2646  | NW_004518010.1 | Scaffold3277 | 2646                    | TT                              | CC              | 1947045119               |
| SNP_P4_181037_3000  | NW_004518010.1 | Scaffold3277 | 3000                    | CC                              | TT              | 1947045121               |
| SNP_P4_181038_17587 | NW_004518013.1 | Scaffold3280 | 17587                   | TT                              | GG              | 1947045123               |

| SNPs IDs             | Chromosome IDs | Chromosomes  | Physical positions (bp) | CDC Frontier (Reference genome) | (ILWC46 & LPNB) | NCBI SNPdb Accession IDs |
|----------------------|----------------|--------------|-------------------------|---------------------------------|-----------------|--------------------------|
| SNP_P4_181039_17597  | NW_004518013.1 | Scaffold3280 | 17597                   | TT                              | CC              | 1947045125               |
| SNP_P4_181040_19478  | NW_004518013.1 | Scaffold3280 | 19478                   | CC                              | TT              | 1947045127               |
| SNP_P4_181041_19748  | NW_004518013.1 | Scaffold3280 | 19748                   | CC                              | AA              | 1947045129               |
| SNP_P4_181042_19755  | NW_004518013.1 | Scaffold3280 | 19755                   | GG                              | AA              | 1947045130               |
| SNP_P4_181043_20294  | NW_004518013.1 | Scaffold3280 | 20294                   | AA                              | GG              | 1947045132               |
| SNP_P4_181044_20322  | NW_004518013.1 | Scaffold3280 | 20322                   | TT                              | CC              | 1947045134               |
| SNP_P4_181045_20371  | NW_004518013.1 | Scaffold3280 | 20371                   | TT                              | AA              | 1947045136               |
| SNP_P4_181046_28169  | NW_004518013.1 | Scaffold3280 | 28169                   | TT                              | CC              | 1947045138               |
| SNP_P4_181047_37048  | NW_004518013.1 | Scaffold3280 | 37048                   | TT                              | CC              | 1947045140               |
| SNP_P4_181048_37144  | NW_004518013.1 | Scaffold3280 | 37144                   | TT                              | GG              | 1947045142               |
| SNP_P4_181049_37164  | NW_004518013.1 | Scaffold3280 | 37164                   | GG                              | AA              | 1947045144               |
| SNP_P4_181050_37231  | NW_004518013.1 | Scaffold3280 | 37231                   | CC                              | AA              | 1947045146               |
| SNP_P4_181051_37385  | NW_004518013.1 | Scaffold3280 | 37385                   | GG                              | TT              | 1947045148               |
| SNP_P4_181052_37464  | NW_004518013.1 | Scaffold3280 | 37464                   | CC                              | TT              | 1947045150               |
| SNP_P4_181053_43854  | NW_004518013.1 | Scaffold3280 | 43854                   | AA                              | GG              | 1947045152               |
| SNP_P4_181054_58144  | NW_004518013.1 | Scaffold3280 | 58144                   | TT                              | AA              | 1947045154               |
| SNP_P4_181055_64234  | NW_004518013.1 | Scaffold3280 | 64234                   | GG                              | AA              | 1947045156               |
| SNP_P4_181056_65062  | NW_004518013.1 | Scaffold3280 | 65062                   | AA                              | GG              | 1947045158               |
| SNP_P4_181057_65120  | NW_004518013.1 | Scaffold3280 | 65120                   | AA                              | GG              | 1947045160               |
| SNP_P4_181058_65143  | NW_004518013.1 | Scaffold3280 | 65143                   | CC                              | TT              | 1947045162               |
| SNP_P4_181059_65213  | NW_004518013.1 | Scaffold3280 | 65213                   | AA                              | GG              | 1947045164               |
| SNP_P4_181060_65273  | NW_004518013.1 | Scaffold3280 | 65273                   | AA                              | CC              | 1947045166               |
| SNP_P4_181061_65571  | NW_004518013.1 | Scaffold3280 | 65571                   | GG                              | AA              | 1947045168               |
| SNP_P4_181062_65622  | NW_004518013.1 | Scaffold3280 | 65622                   | TT                              | CC              | 1947045169               |
| SNP_P4_181063_88604  | NW_004518013.1 | Scaffold3280 | 88604                   | CC                              | TT              | 1947045171               |
| SNP_P4_181064_100490 | NW_004518013.1 | Scaffold3280 | 100490                  | TT                              | AA              | 1947045173               |
| SNP_P4_181065_116633 | NW_004518013.1 | Scaffold3280 | 116633                  | AA                              | GG              | 1947045175               |
| SNP_P4_181066_126326 | NW_004518013.1 | Scaffold3280 | 126326                  | CC                              | AA              | 1947045177               |
| SNP_P4_181067_126330 | NW_004518013.1 | Scaffold3280 | 126330                  | TT                              | AA              | 1947045179               |
| SNP_P4_181068_129225 | NW_004518013.1 | Scaffold3280 | 129225                  | GG                              | AA              | 1947045181               |
| SNP_P4_181069_778    | NW_004518014.1 | Scaffold3281 | 778                     | CC                              | TT              | 1947045183               |
| SNP_P4_181070_981    | NW_004518014.1 | Scaffold3281 | 981                     | CC                              | GG              | 1947045185               |
| SNP_P4_181071_1114   | NW_004518014.1 | Scaffold3281 | 1114                    | GG                              | AA              | 1947045187               |
| SNP_P4_181072_1143   | NW_004518016.1 | Scaffold3283 | 1143                    | CC                              | GG              | 1947045189               |
| SNP_P4_181073_1237   | NW_004518016.1 | Scaffold3283 | 1237                    | GG                              | AA              | 1947045191               |
| SNP_P4_181074_4856   | NW_004518016.1 | Scaffold3283 | 4856                    | AA                              | GG              | 1947045193               |
| SNP_P4_181076_5227   | NW_004518016.1 | Scaffold3283 | 5227                    | TT                              | CC              | 1947045194               |
| SNP_P4_181077_42879  | NW_004518016.1 | Scaffold3283 | 42879                   | AA                              | GG              | 1947045196               |
| SNP_P4_181078_45740  | NW_004518016.1 | Scaffold3283 | 45740                   | AA                              | GG              | 1947045198               |
| SNP_P4_181079_64886  | NW_004518016.1 | Scaffold3283 | 64886                   | AA                              | GG              | 1947045200               |
| SNP_P4_181080_64887  | NW_004518016.1 | Scaffold3283 | 64887                   | GG                              | TT              | 1947045202               |
| SNP_P4_181081_64891  | NW_004518016.1 | Scaffold3283 | 64891                   | GG                              | AA              | 1947045204               |

| SNPs IDs            | Chromosome IDs | Chromosomes  | Physical positions (bp) | CDC Frontier (Reference genome) | (ILWC46 & LPNB) | NCBI SNPdb Accession IDs |
|---------------------|----------------|--------------|-------------------------|---------------------------------|-----------------|--------------------------|
| SNP_P4_181082_66215 | NW_004518016.1 | Scaffold3283 | 66215                   | AA                              | TT              | 1947045206               |
| SNP_P4_181083_66237 | NW_004518016.1 | Scaffold3283 | 66237                   | GG                              | AA              | 1947045208               |
| SNP_P4_181084_66265 | NW_004518016.1 | Scaffold3283 | 66265                   | AA                              | GG              | 1947045210               |
| SNP_P4_181085_66514 | NW_004518016.1 | Scaffold3283 | 66514                   | GG                              | AA              | 1947045212               |
| SNP_P4_181086_86632 | NW_004518016.1 | Scaffold3283 | 86632                   | GG                              | AA              | 1947045214               |
| SNP_P4_181087_546   | NW_004518017.1 | Scaffold3284 | 546                     | GG                              | TT              | 1947045216               |
| SNP_P4_181088_550   | NW_004518017.1 | Scaffold3284 | 550                     | CC                              | TT              | 1947045218               |
| SNP_P4_181089_739   | NW_004518017.1 | Scaffold3284 | 739                     | TT                              | GG              | 1947045220               |
| SNP_P4_181090_767   | NW_004518017.1 | Scaffold3284 | 767                     | CC                              | AA              | 1947045222               |
| SNP_P4_181091_784   | NW_004518017.1 | Scaffold3284 | 784                     | TT                              | CC              | 1947045224               |
| SNP_P4_181092_900   | NW_004518017.1 | Scaffold3284 | 900                     | AA                              | CC              | 1947045226               |
| SNP_P4_181093_2470  | NW_004518017.1 | Scaffold3284 | 2470                    | AA                              | GG              | 1947045228               |
| SNP_P4_181094_2705  | NW_004518017.1 | Scaffold3284 | 2705                    | CC                              | TT              | 1947045230               |
| SNP_P4_181095_2723  | NW_004518017.1 | Scaffold3284 | 2723                    | CC                              | TT              | 1947045232               |
| SNP_P4_181096_2777  | NW_004518017.1 | Scaffold3284 | 2777                    | CC                              | TT              | 1947045234               |
| SNP_P4_181097_6159  | NW_004518017.1 | Scaffold3284 | 6159                    | TT                              | GG              | 1947045236               |
| SNP_P4_181098_940   | NW_004518023.1 | Scaffold3293 | 940                     | GG                              | AA              | 1947045238               |
| SNP_P4_181099_2728  | NW_004518023.1 | Scaffold3293 | 2728                    | GG                              | AA              | 1947045240               |
| SNP_P4_181100_5719  | NW_004518023.1 | Scaffold3293 | 5719                    | GG                              | AA              | 1947045242               |
| SNP_P4_181101_7311  | NW_004518023.1 | Scaffold3293 | 7311                    | GG                              | AA              | 1947045244               |
| SNP_P4_181102_7588  | NW_004518023.1 | Scaffold3293 | 7588                    | TT                              | CC              | 1947045246               |
| SNP_P4_181103_7699  | NW_004518023.1 | Scaffold3293 | 7699                    | CC                              | TT              | 1947045248               |
| SNP_P4_181104_9951  | NW_004518023.1 | Scaffold3293 | 9951                    | CC                              | TT              | 1947045250               |
| SNP_P4_181105_9957  | NW_004518023.1 | Scaffold3293 | 9957                    | TT                              | CC              | 1947045252               |
| SNP_P4_181106_9990  | NW_004518023.1 | Scaffold3293 | 9990                    | TT                              | AA              | 1947045253               |
| SNP_P4_181107_9993  | NW_004518023.1 | Scaffold3293 | 9993                    | AA                              | TT              | 1947045255               |
| SNP_P4_181108_9999  | NW_004518023.1 | Scaffold3293 | 9999                    | GG                              | AA              | 1947045257               |
| SNP_P4_181109_10031 | NW_004518023.1 | Scaffold3293 | 10031                   | TT                              | AA              | 1947045260               |
| SNP_P4_181110_10050 | NW_004518023.1 | Scaffold3293 | 10050                   | GG                              | AA              | 1947045262               |
| SNP_P4_181111_10056 | NW_004518023.1 | Scaffold3293 | 10056                   | GG                              | AA              | 1947045264               |
| SNP_P4_181112_10068 | NW_004518023.1 | Scaffold3293 | 10068                   | CC                              | TT              | 1947045266               |
| SNP_P4_181113_10416 | NW_004518023.1 | Scaffold3293 | 10416                   | AA                              | GG              | 1947045268               |
| SNP_P4_181114_11753 | NW_004518023.1 | Scaffold3293 | 11753                   | AA                              | GG              | 1947045270               |
| SNP_P4_181115_14032 | NW_004518023.1 | Scaffold3293 | 14032                   | AA                              | GG              | 1947045272               |
| SNP_P4_181116_1296  | NW_004518024.1 | Scaffold3297 | 1296                    | TT                              | AA              | 1947045273               |
| SNP_P4_181117_1299  | NW_004518024.1 | Scaffold3297 | 1299                    | GG                              | CC              | 1947045275               |
| SNP_P4_181118_19137 | NW_004518025.1 | Scaffold3298 | 19137                   | AA                              | GG              | 1947045277               |
| SNP_P4_181119_840   | NW_004518026.1 | Scaffold3299 | 840                     | TT                              | AA              | 1947045279               |
| SNP_P4_181120_123   | NW_004518031.1 | Scaffold3307 | 123                     | AA                              | CC              | 1947045281               |
| SNP_P4_181121_124   | NW_004518031.1 | Scaffold3307 | 124                     | TT                              | AA              | 1947045283               |
| SNP_P4_181122_363   | NW_004518031.1 | Scaffold3307 | 363                     | CC                              | AA              | 1947045285               |
| SNP_P4_181123_416   | NW_004518031.1 | Scaffold3307 | 416                     | AA                              | TT              | 1947045287               |

| SNPs IDs            | Chromosome IDs | Chromosomes  | Physical positions (bp) | CDC Frontier (Reference genome) | (ILWC46 & LPNB) | NCBI SNPdb Accession IDs |
|---------------------|----------------|--------------|-------------------------|---------------------------------|-----------------|--------------------------|
| SNP_P4_181124_417   | NW_004518031.1 | Scaffold3307 | 417                     | GG                              | AA              | 1947045289               |
| SNP_P4_181125_694   | NW_004518031.1 | Scaffold3307 | 694                     | AA                              | GG              | 1947045291               |
| SNP_P4_181126_726   | NW_004518031.1 | Scaffold3307 | 726                     | AA                              | GG              | 1947045293               |
| SNP_P4_181127_782   | NW_004518031.1 | Scaffold3307 | 782                     | CC                              | GG              | 1947045295               |
| SNP_P4_181128_2451  | NW_004518031.1 | Scaffold3307 | 2451                    | AA                              | CC              | 1947045297               |
| SNP_P4_181129_3514  | NW_004518031.1 | Scaffold3307 | 3514                    | TT                              | GG              | 1947045299               |
| SNP_P4_181130_3599  | NW_004518031.1 | Scaffold3307 | 3599                    | CC                              | TT              | 1947045301               |
| SNP_P4_181131_3810  | NW_004518031.1 | Scaffold3307 | 3810                    | GG                              | AA              | 1947045302               |
| SNP_P4_181132_3945  | NW_004518031.1 | Scaffold3307 | 3945                    | AA                              | TT              | 1947045304               |
| SNP_P4_181133_5125  | NW_004518031.1 | Scaffold3307 | 5125                    | AA                              | GG              | 1947045306               |
| SNP_P4_181134_5165  | NW_004518031.1 | Scaffold3307 | 5165                    | TT                              | GG              | 1947045308               |
| SNP_P4_181135_5221  | NW_004518031.1 | Scaffold3307 | 5221                    | GG                              | TT              | 1947045310               |
| SNP_P4_181136_5222  | NW_004518031.1 | Scaffold3307 | 5222                    | AA                              | TT              | 1947045312               |
| SNP_P4_181137_5257  | NW_004518031.1 | Scaffold3307 | 5257                    | CC                              | TT              | 1947045314               |
| SNP_P4_181138_5259  | NW_004518031.1 | Scaffold3307 | 5259                    | GG                              | AA              | 1947045316               |
| SNP_P4_181139_5282  | NW_004518031.1 | Scaffold3307 | 5282                    | TT                              | AA              | 1947045318               |
| SNP_P4_181140_5349  | NW_004518031.1 | Scaffold3307 | 5349                    | CC                              | TT              | 1947045320               |
| SNP_P4_181141_5362  | NW_004518031.1 | Scaffold3307 | 5362                    | CC                              | AA              | 1947045322               |
| SNP_P4_181142_5674  | NW_004518031.1 | Scaffold3307 | 5674                    | AA                              | GG              | 1947045324               |
| SNP_P4_181143_5685  | NW_004518031.1 | Scaffold3307 | 5685                    | TT                              | CC              | 1947045326               |
| SNP_P4_181144_9565  | NW_004518031.1 | Scaffold3307 | 9565                    | CC                              | TT              | 1947045328               |
| SNP_P4_181145_9567  | NW_004518031.1 | Scaffold3307 | 9567                    | TT                              | CC              | 1947045330               |
| SNP_P4_181146_9886  | NW_004518031.1 | Scaffold3307 | 9886                    | AA                              | GG              | 1947045332               |
| SNP_P4_181147_9898  | NW_004518031.1 | Scaffold3307 | 9898                    | TT                              | AA              | 1947045334               |
| SNP_P4_181148_9900  | NW_004518031.1 | Scaffold3307 | 9900                    | CC                              | TT              | 1947045336               |
| SNP_P4_181149_10379 | NW_004518031.1 | Scaffold3307 | 10379                   | CC                              | TT              | 1947045338               |
| SNP_P4_181150_10394 | NW_004518031.1 | Scaffold3307 | 10394                   | TT                              | CC              | 1947045340               |
| SNP_P4_181151_10464 | NW_004518031.1 | Scaffold3307 | 10464                   | AA                              | GG              | 1947045342               |
| SNP_P4_181152_10666 | NW_004518031.1 | Scaffold3307 | 10666                   | AA                              | GG              | 1947045344               |
| SNP_P4_181153_10678 | NW_004518031.1 | Scaffold3307 | 10678                   | TT                              | AA              | 1947045346               |
| SNP_P4_181154_11030 | NW_004518031.1 | Scaffold3307 | 11030                   | TT                              | GG              | 1947045348               |
| SNP_P4_181155_11058 | NW_004518031.1 | Scaffold3307 | 11058                   | TT                              | CC              | 1947045350               |
| SNP_P4_181156_11339 | NW_004518031.1 | Scaffold3307 | 11339                   | TT                              | CC              | 1947045352               |
| SNP_P4_181157_13366 | NW_004518031.1 | Scaffold3307 | 13366                   | GG                              | AA              | 1947045354               |
| SNP_P4_181158_13413 | NW_004518031.1 | Scaffold3307 | 13413                   | GG                              | AA              | 1947045356               |
| SNP_P4_181159_17704 | NW_004518031.1 | Scaffold3307 | 17704                   | TT                              | CC              | 1947045358               |
| SNP_P4_181160_17784 | NW_004518031.1 | Scaffold3307 | 17784                   | TT                              | AA              | 1947045359               |
| SNP_P4_181161_17990 | NW_004518031.1 | Scaffold3307 | 17990                   | TT                              | AA              | 1947045361               |
| SNP_P4_181162_18171 | NW_004518031.1 | Scaffold3307 | 18171                   | TT                              | CC              | 1947045363               |
| SNP_P4_181163_18231 | NW_004518031.1 | Scaffold3307 | 18231                   | TT                              | AA              | 1947045365               |
| SNP_P4_181164_18270 | NW_004518031.1 | Scaffold3307 | 18270                   | AA                              | GG              | 1947045367               |
| SNP_P4_181165_18292 | NW_004518031.1 | Scaffold3307 | 18292                   | TT                              | CC              | 1947045369               |



| SNPs IDs            | Chromosome IDs | Chromosomes  | Physical positions (bp) | CDC Frontier (Reference genome) | (ILWC46 & LPNB) | NCBI SNPdb Accession IDs |
|---------------------|----------------|--------------|-------------------------|---------------------------------|-----------------|--------------------------|
| SNP_P4_181166_18296 | NW_004518031.1 | Scaffold3307 | 18296                   | CC                              | AA              | 1947045371               |
| SNP_P4_181167_18346 | NW_004518031.1 | Scaffold3307 | 18346                   | AA                              | GG              | 1947045373               |
| SNP_P4_181168_21265 | NW_004518031.1 | Scaffold3307 | 21265                   | GG                              | AA              | 1947045375               |
| SNP_P4_181169_21302 | NW_004518031.1 | Scaffold3307 | 21302                   | AA                              | GG              | 1947045377               |
| SNP_P4_181170_21332 | NW_004518031.1 | Scaffold3307 | 21332                   | TT                              | AA              | 1947045379               |
| SNP_P4_181171_21624 | NW_004518031.1 | Scaffold3307 | 21624                   | GG                              | AA              | 1947045381               |
| SNP_P4_181172_22208 | NW_004518031.1 | Scaffold3307 | 22208                   | CC                              | TT              | 1947045383               |
| SNP_P4_181173_22264 | NW_004518031.1 | Scaffold3307 | 22264                   | AA                              | GG              | 1947045385               |
| SNP_P4_181174_22343 | NW_004518031.1 | Scaffold3307 | 22343                   | AA                              | GG              | 1947045387               |
| SNP_P4_181175_22367 | NW_004518031.1 | Scaffold3307 | 22367                   | CC                              | TT              | 1947045389               |
| SNP_P4_181176_22453 | NW_004518031.1 | Scaffold3307 | 22453                   | TT                              | CC              | 1947045391               |
| SNP_P4_181177_22542 | NW_004518031.1 | Scaffold3307 | 22542                   | TT                              | AA              | 1947045393               |
| SNP_P4_181178_23146 | NW_004518031.1 | Scaffold3307 | 23146                   | GG                              | AA              | 1947045394               |
| SNP_P4_181179_23148 | NW_004518031.1 | Scaffold3307 | 23148                   | CC                              | GG              | 1947045396               |
| SNP_P4_181180_23227 | NW_004518031.1 | Scaffold3307 | 23227                   | AA                              | CC              | 1947045398               |
| SNP_P4_181181_23236 | NW_004518031.1 | Scaffold3307 | 23236                   | AA                              | GG              | 1947045400               |
| SNP_P4_181182_23243 | NW_004518031.1 | Scaffold3307 | 23243                   | CC                              | AA              | 1947045402               |
| SNP_P4_181183_23444 | NW_004518031.1 | Scaffold3307 | 23444                   | AA                              | CC              | 1947045404               |
| SNP_P4_181185_1356  | NW_004518033.1 | Scaffold3309 | 1356                    | GG                              | AA              | 1947045406               |
| SNP_P4_181186_1663  | NW_004518036.1 | Scaffold3312 | 1663                    | AA                              | GG              | 1947045408               |
| SNP_P4_181187_5603  | NW_004518038.1 | Scaffold3314 | 5603                    | GG                              | AA              | 1947045410               |
| SNP_P4_181188_5660  | NW_004518038.1 | Scaffold3314 | 5660                    | GG                              | AA              | 1947045411               |
| SNP_P4_181189_5832  | NW_004518038.1 | Scaffold3314 | 5832                    | CC                              | GG              | 1947045413               |
| SNP_P4_181190_5883  | NW_004518038.1 | Scaffold3314 | 5883                    | TT                              | AA              | 1947045415               |
| SNP_P4_181191_6371  | NW_004518038.1 | Scaffold3314 | 6371                    | CC                              | TT              | 1947045417               |
| SNP_P4_181192_6666  | NW_004518038.1 | Scaffold3314 | 6666                    | CC                              | TT              | 1947045419               |
| SNP_P4_181193_6667  | NW_004518038.1 | Scaffold3314 | 6667                    | CC                              | TT              | 1947045421               |
| SNP_P4_181194_7348  | NW_004518038.1 | Scaffold3314 | 7348                    | AA                              | TT              | 1947045423               |
| SNP_P4_181195_7349  | NW_004518038.1 | Scaffold3314 | 7349                    | AA                              | TT              | 1947045425               |
| SNP_P4_181196_7350  | NW_004518038.1 | Scaffold3314 | 7350                    | AA                              | TT              | 1947045427               |
| SNP_P4_181197_7351  | NW_004518038.1 | Scaffold3314 | 7351                    | AA                              | TT              | 1947045429               |
| SNP_P4_181198_7352  | NW_004518038.1 | Scaffold3314 | 7352                    | CC                              | TT              | 1947045431               |
| SNP_P4_181199_7453  | NW_004518038.1 | Scaffold3314 | 7453                    | AA                              | GG              | 1947045433               |
| SNP_P4_181200_7540  | NW_004518038.1 | Scaffold3314 | 7540                    | TT                              | GG              | 1947045434               |
| SNP_P4_181201_7656  | NW_004518038.1 | Scaffold3314 | 7656                    | GG                              | AA              | 1947045436               |
| SNP_P4_181202_7717  | NW_004518038.1 | Scaffold3314 | 7717                    | AA                              | GG              | 1947045438               |
| SNP_P4_181203_7797  | NW_004518038.1 | Scaffold3314 | 7797                    | TT                              | CC              | 1947045440               |
| SNP_P4_181204_7801  | NW_004518038.1 | Scaffold3314 | 7801                    | AA                              | TT              | 1947045442               |
| SNP_P4_181205_7809  | NW_004518038.1 | Scaffold3314 | 7809                    | TT                              | CC              | 1947045444               |
| SNP_P4_181206_287   | NW_004518041.1 | Scaffold3317 | 287                     | CC                              | GG              | 1947045446               |
| SNP_P4_181207_294   | NW_004518041.1 | Scaffold3317 | 294                     | AA                              | CC              | 1947045448               |
| SNP_P4_181208_299   | NW_004518041.1 | Scaffold3317 | 299                     | TT                              | GG              | 1947045450               |

| SNPs IDs            | Chromosome IDs | Chromosomes  | Physical positions (bp) | CDC Frontier (Reference genome) | (ILWC46 & LPNB) | NCBI SNPdb Accession IDs |
|---------------------|----------------|--------------|-------------------------|---------------------------------|-----------------|--------------------------|
| SNP_P4_181209_3329  | NW_004518041.1 | Scaffold3317 | 3329                    | GG                              | TT              | 1947045452               |
| SNP_P4_181211_3789  | NW_004518041.1 | Scaffold3317 | 3789                    | AA                              | TT              | 1947045454               |
| SNP_P4_181212_709   | NW_004518043.1 | Scaffold3321 | 709                     | CC                              | TT              | 1947045456               |
| SNP_P4_181213_6730  | NW_004518043.1 | Scaffold3321 | 6730                    | GG                              | AA              | 1947045458               |
| SNP_P4_181214_9902  | NW_004518043.1 | Scaffold3321 | 9902                    | AA                              | GG              | 1947045460               |
| SNP_P4_181215_10999 | NW_004518043.1 | Scaffold3321 | 10999                   | CC                              | TT              | 1947045462               |
| SNP_P4_181216_13053 | NW_004518043.1 | Scaffold3321 | 13053                   | TT                              | AA              | 1947045463               |
| SNP_P4_181217_19947 | NW_004518043.1 | Scaffold3321 | 19947                   | TT                              | AA              | 1947045465               |
| SNP_P4_181218_23990 | NW_004518043.1 | Scaffold3321 | 23990                   | GG                              | AA              | 1947045467               |
| SNP_P4_181219_24993 | NW_004518043.1 | Scaffold3321 | 24993                   | TT                              | CC              | 1947045469               |
| SNP_P4_181221_69147 | NW_004518043.1 | Scaffold3321 | 69147                   | GG                              | TT              | 1947045471               |
| SNP_P4_181222_69173 | NW_004518043.1 | Scaffold3321 | 69173                   | TT                              | CC              | 1947045473               |
| SNP_P4_181223_69276 | NW_004518043.1 | Scaffold3321 | 69276                   | AA                              | GG              | 1947045475               |
| SNP_P4_181224_69282 | NW_004518043.1 | Scaffold3321 | 69282                   | GG                              | AA              | 1947045477               |
| SNP_P4_181225_69353 | NW_004518043.1 | Scaffold3321 | 69353                   | AA                              | GG              | 1947045479               |
| SNP_P4_181226_69576 | NW_004518043.1 | Scaffold3321 | 69576                   | AA                              | GG              | 1947045481               |
| SNP_P4_181229_5107  | NW_004518044.1 | Scaffold3322 | 5107                    | AA                              | GG              | 1947045483               |
| SNP_P4_181230_5370  | NW_004518044.1 | Scaffold3322 | 5370                    | AA                              | TT              | 1947045485               |
| SNP_P4_181231_6051  | NW_004518045.1 | Scaffold3323 | 6051                    | AA                              | TT              | 1947045487               |
| SNP_P4_181232_8706  | NW_004518045.1 | Scaffold3323 | 8706                    | GG                              | CC              | 1947045489               |
| SNP_P4_181233_9228  | NW_004518045.1 | Scaffold3323 | 9228                    | AA                              | TT              | 1947045490               |
| SNP_P4_181234_9233  | NW_004518045.1 | Scaffold3323 | 9233                    | AA                              | CC              | 1947045492               |
| SNP_P4_181235_9236  | NW_004518045.1 | Scaffold3323 | 9236                    | GG                              | AA              | 1947045494               |
| SNP_P4_181236_3981  | NW_004518048.1 | Scaffold3326 | 3981                    | TT                              | GG              | 1947045496               |
| SNP_P4_181237_4281  | NW_004518048.1 | Scaffold3326 | 4281                    | TT                              | GG              | 1947045498               |
| SNP_P4_181238_4582  | NW_004518048.1 | Scaffold3326 | 4582                    | GG                              | AA              | 1947045500               |
| SNP_P4_181239_4600  | NW_004518048.1 | Scaffold3326 | 4600                    | CC                              | TT              | 1947045502               |
| SNP_P4_181240_6003  | NW_004518048.1 | Scaffold3326 | 6003                    | TT                              | GG              | 1947045504               |
| SNP_P4_181241_478   | NW_004518049.1 | Scaffold3328 | 478                     | CC                              | AA              | 1947045506               |
| SNP_P4_181244_3966  | NW_004518050.1 | Scaffold3329 | 3966                    | TT                              | CC              | 1947045508               |
| SNP_P4_181245_3998  | NW_004518050.1 | Scaffold3329 | 3998                    | TT                              | CC              | 1947045510               |
| SNP_P4_181246_1176  | NW_004518053.1 | Scaffold3333 | 1176                    | GG                              | CC              | 1947045512               |
| SNP_P4_181247_31    | NW_004518055.1 | Scaffold3336 | 31                      | CC                              | TT              | 1947045514               |
| SNP_P4_181248_64    | NW_004518055.1 | Scaffold3336 | 64                      | GG                              | AA              | 1947045516               |
| SNP_P4_181249_73    | NW_004518055.1 | Scaffold3336 | 73                      | TT                              | CC              | 1947045518               |
| SNP_P4_181250_99    | NW_004518055.1 | Scaffold3336 | 99                      | GG                              | AA              | 1947045520               |
| SNP_P4_181251_125   | NW_004518055.1 | Scaffold3336 | 125                     | GG                              | AA              | 1947045522               |
| SNP_P4_181252_131   | NW_004518055.1 | Scaffold3336 | 131                     | TT                              | CC              | 1947045524               |
| SNP_P4_181253_555   | NW_004518055.1 | Scaffold3336 | 555                     | AA                              | GG              | 1947045525               |
| SNP_P4_181254_618   | NW_004518055.1 | Scaffold3336 | 618                     | CC                              | TT              | 1947045527               |
| SNP_P4_181256_1870  | NW_004518055.1 | Scaffold3336 | 1870                    | AA                              | TT              | 1947045529               |
| SNP_P4_181257_1993  | NW_004518055.1 | Scaffold3336 | 1993                    | CC                              | TT              | 1947045531               |

| SNPs IDs            | Chromosome IDs | Chromosomes  | Physical positions (bp) | CDC Frontier (Reference genome) | (ILWC46 & LPNB) | NCBI SNPdb Accession IDs |
|---------------------|----------------|--------------|-------------------------|---------------------------------|-----------------|--------------------------|
| SNP_P4_181258_1999  | NW_004518055.1 | Scaffold3336 | 1999                    | GG                              | AA              | 1947045533               |
| SNP_P4_181260_11715 | NW_004518055.1 | Scaffold3336 | 11715                   | GG                              | CC              | 1947045535               |
| SNP_P4_181261_15291 | NW_004518055.1 | Scaffold3336 | 15291                   | TT                              | AA              | 1947045537               |
| SNP_P4_181262_35329 | NW_004518055.1 | Scaffold3336 | 35329                   | TT                              | CC              | 1947045539               |
| SNP_P4_181264_49779 | NW_004518055.1 | Scaffold3336 | 49779                   | TT                              | GG              | 1947045541               |
| SNP_P4_181265_63905 | NW_004518055.1 | Scaffold3336 | 63905                   | TT                              | AA              | 1947045543               |
| SNP_P4_181266_63906 | NW_004518055.1 | Scaffold3336 | 63906                   | GG                              | AA              | 1947045545               |
| SNP_P4_181267_63956 | NW_004518055.1 | Scaffold3336 | 63956                   | AA                              | TT              | 1947045546               |
| SNP_P4_181268_915   | NW_004518056.1 | Scaffold3337 | 915                     | TT                              | AA              | 1947045548               |
| SNP_P4_181269_2041  | NW_004518056.1 | Scaffold3337 | 2041                    | GG                              | AA              | 1947045550               |
| SNP_P4_181271_21902 | NW_004518056.1 | Scaffold3337 | 21902                   | AA                              | TT              | 1947045552               |
| SNP_P4_181272_21916 | NW_004518056.1 | Scaffold3337 | 21916                   | GG                              | AA              | 1947045554               |
| SNP_P4_181273_22031 | NW_004518056.1 | Scaffold3337 | 22031                   | AA                              | CC              | 1947045556               |
| SNP_P4_181274_22072 | NW_004518056.1 | Scaffold3337 | 22072                   | GG                              | CC              | 1947045557               |
| SNP_P4_181275_25256 | NW_004518056.1 | Scaffold3337 | 25256                   | AA                              | TT              | 1947045559               |
| SNP_P4_181276_25280 | NW_004518056.1 | Scaffold3337 | 25280                   | TT                              | CC              | 1947045561               |
| SNP_P4_181277_1926  | NW_004518059.1 | Scaffold3341 | 1926                    | CC                              | AA              | 1947045563               |
| SNP_P4_181278_1940  | NW_004518059.1 | Scaffold3341 | 1940                    | TT                              | AA              | 1947045565               |
| SNP_P4_181279_2187  | NW_004518059.1 | Scaffold3341 | 2187                    | TT                              | GG              | 1947045567               |
| SNP_P4_181280_463   | NW_004518061.1 | Scaffold3343 | 463                     | CC                              | AA              | 1947045568               |
| SNP_P4_181281_467   | NW_004518061.1 | Scaffold3343 | 467                     | CC                              | GG              | 1947045570               |
| SNP_P4_181282_1307  | NW_004518062.1 | Scaffold3345 | 1307                    | CC                              | GG              | 1947045572               |
| SNP_P4_181283_284   | NW_004518064.1 | Scaffold3347 | 284                     | AA                              | GG              | 1947045574               |
| SNP_P4_181284_529   | NW_004518064.1 | Scaffold3347 | 529                     | TT                              | GG              | 1947045576               |
| SNP_P4_181286_2121  | NW_004518064.1 | Scaffold3347 | 2121                    | CC                              | TT              | 1947045578               |
| SNP_P4_181287_2142  | NW_004518064.1 | Scaffold3347 | 2142                    | CC                              | TT              | 1947045580               |
| SNP_P4_181288_2155  | NW_004518064.1 | Scaffold3347 | 2155                    | CC                              | GG              | 1947045582               |
| SNP_P4_181289_2161  | NW_004518064.1 | Scaffold3347 | 2161                    | TT                              | CC              | 1947045584               |
| SNP_P4_181290_2178  | NW_004518064.1 | Scaffold3347 | 2178                    | AA                              | TT              | 1947045586               |
| SNP_P4_181291_2179  | NW_004518064.1 | Scaffold3347 | 2179                    | AA                              | TT              | 1947045587               |
| SNP_P4_181292_2210  | NW_004518064.1 | Scaffold3347 | 2210                    | AA                              | TT              | 1947045589               |
| SNP_P4_181293_2340  | NW_004518064.1 | Scaffold3347 | 2340                    | CC                              | TT              | 1947045591               |
| SNP_P4_181294_2418  | NW_004518064.1 | Scaffold3347 | 2418                    | GG                              | AA              | 1947045593               |
| SNP_P4_181295_2474  | NW_004518064.1 | Scaffold3347 | 2474                    | TT                              | CC              | 1947045595               |
| SNP_P4_181296_2477  | NW_004518064.1 | Scaffold3347 | 2477                    | CC                              | GG              | 1947045597               |
| SNP_P4_181297_2828  | NW_004518064.1 | Scaffold3347 | 2828                    | GG                              | CC              | 1947045599               |
| SNP_P4_181298_2875  | NW_004518064.1 | Scaffold3347 | 2875                    | TT                              | GG              | 1947045601               |
| SNP_P4_181299_3178  | NW_004518064.1 | Scaffold3347 | 3178                    | GG                              | CC              | 1947045603               |
| SNP_P4_181300_823   | NW_004518065.1 | Scaffold3348 | 823                     | TT                              | GG              | 1947045605               |
| SNP_P4_181301_858   | NW_004518066.1 | Scaffold3349 | 858                     | CC                              | TT              | 1947045607               |
| SNP_P4_181302_4639  | NW_004518069.1 | Scaffold3353 | 4639                    | TT                              | CC              | 1947045609               |
| SNP_P4_181303_5027  | NW_004518069.1 | Scaffold3353 | 5027                    | AA                              | CC              | 1947045611               |

| SNPs IDs            | Chromosome IDs | Chromosomes  | Physical positions (bp) | CDC Frontier (Reference genome) | (ILWC46 & LPNB) | NCBI SNPdb Accession IDs |
|---------------------|----------------|--------------|-------------------------|---------------------------------|-----------------|--------------------------|
| SNP_P4_181304_6751  | NW_004518069.1 | Scaffold3353 | 6751                    | GG                              | AA              | 1947045613               |
| SNP_P4_181305_7195  | NW_004518069.1 | Scaffold3353 | 7195                    | TT                              | AA              | 1947045615               |
| SNP_P4_181306_7218  | NW_004518069.1 | Scaffold3353 | 7218                    | TT                              | GG              | 1947045617               |
| SNP_P4_181307_7276  | NW_004518069.1 | Scaffold3353 | 7276                    | TT                              | GG              | 1947045618               |
| SNP_P4_181308_7307  | NW_004518069.1 | Scaffold3353 | 7307                    | AA                              | GG              | 1947045620               |
| SNP_P4_181309_7313  | NW_004518069.1 | Scaffold3353 | 7313                    | CC                              | TT              | 1947045622               |
| SNP_P4_181310_7337  | NW_004518069.1 | Scaffold3353 | 7337                    | GG                              | CC              | 1947045624               |
| SNP_P4_181311_7403  | NW_004518069.1 | Scaffold3353 | 7403                    | TT                              | CC              | 1947045626               |
| SNP_P4_181312_7667  | NW_004518069.1 | Scaffold3353 | 7667                    | CC                              | AA              | 1947045628               |
| SNP_P4_181313_7686  | NW_004518069.1 | Scaffold3353 | 7686                    | AA                              | TT              | 1947045630               |
| SNP_P4_181314_159   | NW_004518070.1 | Scaffold3354 | 159                     | TT                              | CC              | 1947045632               |
| SNP_P4_181315_482   | NW_004518070.1 | Scaffold3354 | 482                     | CC                              | GG              | 1947045634               |
| SNP_P4_181316_523   | NW_004518070.1 | Scaffold3354 | 523                     | GG                              | TT              | 1947045636               |
| SNP_P4_181319_714   | NW_004518070.1 | Scaffold3354 | 714                     | CC                              | TT              | 1947045638               |
| SNP_P4_181320_990   | NW_004518070.1 | Scaffold3354 | 990                     | GG                              | TT              | 1947045640               |
| SNP_P4_181321_1031  | NW_004518070.1 | Scaffold3354 | 1031                    | CC                              | TT              | 1947045642               |
| SNP_P4_181322_1200  | NW_004518070.1 | Scaffold3354 | 1200                    | CC                              | GG              | 1947045643               |
| SNP_P4_181323_1337  | NW_004518070.1 | Scaffold3354 | 1337                    | GG                              | AA              | 1947045645               |
| SNP_P4_181324_1376  | NW_004518070.1 | Scaffold3354 | 1376                    | AA                              | CC              | 1947045647               |
| SNP_P4_181325_2197  | NW_004518070.1 | Scaffold3354 | 2197                    | TT                              | AA              | 1947045649               |
| SNP_P4_181326_2372  | NW_004518070.1 | Scaffold3354 | 2372                    | AA                              | TT              | 1947045651               |
| SNP_P4_181327_2373  | NW_004518070.1 | Scaffold3354 | 2373                    | AA                              | TT              | 1947045653               |
| SNP_P4_181328_2374  | NW_004518070.1 | Scaffold3354 | 2374                    | TT                              | AA              | 1947045655               |
| SNP_P4_181330_2709  | NW_004518070.1 | Scaffold3354 | 2709                    | AA                              | GG              | 1947045657               |
| SNP_P4_181331_2966  | NW_004518070.1 | Scaffold3354 | 2966                    | AA                              | GG              | 1947045659               |
| SNP_P4_181332_10560 | NW_004518070.1 | Scaffold3354 | 10560                   | AA                              | TT              | 1947045661               |
| SNP_P4_181333_10604 | NW_004518070.1 | Scaffold3354 | 10604                   | TT                              | CC              | 1947045663               |
| SNP_P4_181334_10899 | NW_004518070.1 | Scaffold3354 | 10899                   | AA                              | CC              | 1947045665               |
| SNP_P4_181335_129   | NW_004518073.1 | Scaffold3357 | 129                     | AA                              | TT              | 1947045667               |
| SNP_P4_181336_2059  | NW_004518073.1 | Scaffold3357 | 2059                    | AA                              | CC              | 1947045669               |
| SNP_P4_181337_2068  | NW_004518073.1 | Scaffold3357 | 2068                    | TT                              | CC              | 1947045671               |
| SNP_P4_181338_2382  | NW_004518073.1 | Scaffold3357 | 2382                    | GG                              | AA              | 1947045673               |
| SNP_P4_181339_2400  | NW_004518073.1 | Scaffold3357 | 2400                    | GG                              | AA              | 1947045675               |
| SNP_P4_181340_2401  | NW_004518073.1 | Scaffold3357 | 2401                    | CC                              | TT              | 1947045676               |
| SNP_P4_181341_197   | NW_004518074.1 | Scaffold3359 | 197                     | AA                              | GG              | 1947045678               |
| SNP_P4_181342_294   | NW_004518074.1 | Scaffold3359 | 294                     | AA                              | GG              | 1947045680               |
| SNP_P4_181343_296   | NW_004518074.1 | Scaffold3359 | 296                     | CC                              | TT              | 1947045682               |
| SNP_P4_181344_360   | NW_004518074.1 | Scaffold3359 | 360                     | AA                              | CC              | 1947045684               |
| SNP_P4_181345_371   | NW_004518074.1 | Scaffold3359 | 371                     | AA                              | GG              | 1947045686               |
| SNP_P4_181346_376   | NW_004518074.1 | Scaffold3359 | 376                     | CC                              | GG              | 1947045688               |
| SNP_P4_181347_536   | NW_004518074.1 | Scaffold3359 | 536                     | CC                              | TT              | 1947045690               |
| SNP_P4_181348_605   | NW_004518074.1 | Scaffold3359 | 605                     | GG                              | AA              | 1947045692               |

| SNPs IDs             | Chromosome IDs | Chromosomes  | Physical positions (bp) | CDC Frontier (Reference genome) | (ILWC46 & LPNB) | NCBI SNPdb Accession IDs |
|----------------------|----------------|--------------|-------------------------|---------------------------------|-----------------|--------------------------|
| SNP_P4_181349_607    | NW_004518074.1 | Scaffold3359 | 607                     | TT                              | CC              | 1947045694               |
| SNP_P4_181350_990    | NW_004518076.1 | Scaffold3362 | 990                     | CC                              | GG              | 1947045696               |
| SNP_P4_181351_1218   | NW_004518076.1 | Scaffold3362 | 1218                    | TT                              | GG              | 1947045698               |
| SNP_P4_181352_1240   | NW_004518076.1 | Scaffold3362 | 1240                    | CC                              | TT              | 1947045700               |
| SNP_P4_181353_1255   | NW_004518076.1 | Scaffold3362 | 1255                    | TT                              | CC              | 1947045702               |
| SNP_P4_181354_1288   | NW_004518076.1 | Scaffold3362 | 1288                    | AA                              | GG              | 1947045704               |
| SNP_P4_181355_1312   | NW_004518076.1 | Scaffold3362 | 1312                    | TT                              | GG              | 1947045705               |
| SNP_P4_181356_2202   | NW_004518076.1 | Scaffold3362 | 2202                    | TT                              | GG              | 1947045707               |
| SNP_P4_181357_2204   | NW_004518076.1 | Scaffold3362 | 2204                    | AA                              | TT              | 1947045709               |
| SNP_P4_181358_2210   | NW_004518076.1 | Scaffold3362 | 2210                    | GG                              | TT              | 1947045711               |
| SNP_P4_181359_2241   | NW_004518076.1 | Scaffold3362 | 2241                    | TT                              | AA              | 1947045713               |
| SNP_P4_181360_26802  | NW_004518076.1 | Scaffold3362 | 26802                   | GG                              | TT              | 1947045715               |
| SNP_P4_181361_59777  | NW_004518076.1 | Scaffold3362 | 59777                   | TT                              | GG              | 1947045717               |
| SNP_P4_181362_59887  | NW_004518076.1 | Scaffold3362 | 59887                   | TT                              | CC              | 1947045719               |
| SNP_P4_181363_60512  | NW_004518076.1 | Scaffold3362 | 60512                   | AA                              | GG              | 1947045720               |
| SNP_P4_181365_71436  | NW_004518076.1 | Scaffold3362 | 71436                   | GG                              | AA              | 1947045722               |
| SNP_P4_181366_92111  | NW_004518076.1 | Scaffold3362 | 92111                   | GG                              | CC              | 1947045724               |
| SNP_P4_181367_109672 | NW_004518076.1 | Scaffold3362 | 109672                  | GG                              | AA              | 1947045726               |
| SNP_P4_181368_109838 | NW_004518076.1 | Scaffold3362 | 109838                  | GG                              | AA              | 1947045728               |
| SNP_P4_181369_110966 | NW_004518076.1 | Scaffold3362 | 110966                  | GG                              | TT              | 1947045730               |
| SNP_P4_181370_111110 | NW_004518076.1 | Scaffold3362 | 111110                  | AA                              | GG              | 1947045732               |
| SNP_P4_181371_111817 | NW_004518076.1 | Scaffold3362 | 111817                  | CC                              | TT              | 1947045734               |
| SNP_P4_181372_111821 | NW_004518076.1 | Scaffold3362 | 111821                  | TT                              | GG              | 1947045736               |
| SNP_P4_181373_111865 | NW_004518076.1 | Scaffold3362 | 111865                  | GG                              | TT              | 1947045738               |
| SNP_P4_181374_112022 | NW_004518076.1 | Scaffold3362 | 112022                  | TT                              | GG              | 1947045740               |
| SNP_P4_181375_112074 | NW_004518076.1 | Scaffold3362 | 112074                  | AA                              | GG              | 1947045742               |
| SNP_P4_181376_112177 | NW_004518076.1 | Scaffold3362 | 112177                  | CC                              | TT              | 1947045744               |
| SNP_P4_181377_112217 | NW_004518076.1 | Scaffold3362 | 112217                  | TT                              | CC              | 1947045746               |
| SNP_P4_181378_199    | NW_004518078.1 | Scaffold3364 | 199                     | TT                              | CC              | 1947045748               |
| SNP_P4_181379_213    | NW_004518078.1 | Scaffold3364 | 213                     | GG                              | TT              | 1947045750               |
| SNP_P4_181380_293    | NW_004518078.1 | Scaffold3364 | 293                     | CC                              | GG              | 1947045752               |
| SNP_P4_181381_305    | NW_004518078.1 | Scaffold3364 | 305                     | AA                              | GG              | 1947045754               |
| SNP_P4_181382_331    | NW_004518078.1 | Scaffold3364 | 331                     | CC                              | TT              | 1947045756               |
| SNP_P4_181383_551    | NW_004518078.1 | Scaffold3364 | 551                     | CC                              | GG              | 1947045758               |
| SNP_P4_181384_562    | NW_004518078.1 | Scaffold3364 | 562                     | GG                              | TT              | 1947045760               |
| SNP_P4_181385_564    | NW_004518078.1 | Scaffold3364 | 564                     | AA                              | GG              | 1947045762               |
| SNP_P4_181386_588    | NW_004518078.1 | Scaffold3364 | 588                     | TT                              | AA              | 1947045764               |
| SNP_P4_181387_649    | NW_004518078.1 | Scaffold3364 | 649                     | AA                              | TT              | 1947045766               |
| SNP_P4_181388_656    | NW_004518078.1 | Scaffold3364 | 656                     | CC                              | TT              | 1947045768               |
| SNP_P4_181389_2598   | NW_004518078.1 | Scaffold3364 | 2598                    | TT                              | AA              | 1947045770               |
| SNP_P4_181390_11523  | NW_004518078.1 | Scaffold3364 | 11523                   | AA                              | GG              | 1947045772               |
| SNP_P4_181391_11882  | NW_004518078.1 | Scaffold3364 | 11882                   | TT                              | GG              | 1947045774               |

| SNPs IDs            | Chromosome IDs | Chromosomes  | Physical positions (bp) | CDC Frontier (Reference genome) | (ILWC46 & LPNB) | NCBI SNPdb Accession IDs |
|---------------------|----------------|--------------|-------------------------|---------------------------------|-----------------|--------------------------|
| SNP_P4_181392_17403 | NW_004518078.1 | Scaffold3364 | 17403                   | TT                              | GG              | 1947045776               |
| SNP_P4_181393_33969 | NW_004518078.1 | Scaffold3364 | 33969                   | TT                              | AA              | 1947045778               |
| SNP_P4_181394_34127 | NW_004518078.1 | Scaffold3364 | 34127                   | AA                              | TT              | 1947045780               |
| SNP_P4_181396_35077 | NW_004518078.1 | Scaffold3364 | 35077                   | AA                              | GG              | 1947045782               |
| SNP_P4_181397_36001 | NW_004518078.1 | Scaffold3364 | 36001                   | GG                              | AA              | 1947045784               |
| SNP_P4_181398_36322 | NW_004518078.1 | Scaffold3364 | 36322                   | AA                              | GG              | 1947045786               |
| SNP_P4_181399_36419 | NW_004518078.1 | Scaffold3364 | 36419                   | AA                              | CC              | 1947045788               |
| SNP_P4_181400_37911 | NW_004518078.1 | Scaffold3364 | 37911                   | AA                              | GG              | 1947045790               |
| SNP_P4_181401_38131 | NW_004518078.1 | Scaffold3364 | 38131                   | AA                              | GG              | 1947045792               |
| SNP_P4_181402_38334 | NW_004518078.1 | Scaffold3364 | 38334                   | AA                              | GG              | 1947045794               |
| SNP_P4_181403_42091 | NW_004518078.1 | Scaffold3364 | 42091                   | TT                              | GG              | 1947045797               |
| SNP_P4_181404_42777 | NW_004518078.1 | Scaffold3364 | 42777                   | CC                              | GG              | 1947045799               |
| SNP_P4_181405_42783 | NW_004518078.1 | Scaffold3364 | 42783                   | GG                              | AA              | 1947045801               |
| SNP_P4_181406_43276 | NW_004518078.1 | Scaffold3364 | 43276                   | AA                              | TT              | 1947045803               |
| SNP_P4_181408_45978 | NW_004518078.1 | Scaffold3364 | 45978                   | AA                              | CC              | 1947045805               |
| SNP_P4_181409_46650 | NW_004518078.1 | Scaffold3364 | 46650                   | CC                              | GG              | 1947045807               |
| SNP_P4_181410_46915 | NW_004518078.1 | Scaffold3364 | 46915                   | AA                              | GG              | 1947045809               |
| SNP_P4_181411_46962 | NW_004518078.1 | Scaffold3364 | 46962                   | AA                              | TT              | 1947045811               |
| SNP_P4_181412_47244 | NW_004518078.1 | Scaffold3364 | 47244                   | AA                              | TT              | 1947045813               |
| SNP_P4_181413_47286 | NW_004518078.1 | Scaffold3364 | 47286                   | AA                              | GG              | 1947045815               |
| SNP_P4_181414_47407 | NW_004518078.1 | Scaffold3364 | 47407                   | AA                              | TT              | 1947045817               |
| SNP_P4_181415_47637 | NW_004518078.1 | Scaffold3364 | 47637                   | TT                              | CC              | 1947045819               |
| SNP_P4_181416_47954 | NW_004518078.1 | Scaffold3364 | 47954                   | AA                              | CC              | 1947045821               |
| SNP_P4_181417_48389 | NW_004518078.1 | Scaffold3364 | 48389                   | AA                              | GG              | 1947045823               |
| SNP_P4_181418_48421 | NW_004518078.1 | Scaffold3364 | 48421                   | AA                              | GG              | 1947045825               |
| SNP_P4_181419_49290 | NW_004518078.1 | Scaffold3364 | 49290                   | TT                              | CC              | 1947045827               |
| SNP_P4_181420_49345 | NW_004518078.1 | Scaffold3364 | 49345                   | GG                              | CC              | 1947045830               |
| SNP_P4_181421_49941 | NW_004518078.1 | Scaffold3364 | 49941                   | AA                              | TT              | 1947045832               |
| SNP_P4_181422_50020 | NW_004518078.1 | Scaffold3364 | 50020                   | GG                              | AA              | 1947045834               |
| SNP_P4_181423_51094 | NW_004518078.1 | Scaffold3364 | 51094                   | AA                              | GG              | 1947045837               |
| SNP_P4_181424_51392 | NW_004518078.1 | Scaffold3364 | 51392                   | TT                              | AA              | 1947045839               |
| SNP_P4_181425_51441 | NW_004518078.1 | Scaffold3364 | 51441                   | GG                              | AA              | 1947045841               |
| SNP_P4_181426_1025  | NW_004518081.1 | Scaffold3369 | 1025                    | TT                              | AA              | 1947045844               |
| SNP_P4_181427_16845 | NW_004518081.1 | Scaffold3369 | 16845                   | CC                              | AA              | 1947045846               |
| SNP_P4_181428_16874 | NW_004518081.1 | Scaffold3369 | 16874                   | AA                              | GG              | 1947045848               |
| SNP_P4_181429_17132 | NW_004518081.1 | Scaffold3369 | 17132                   | CC                              | TT              | 1947045850               |
| SNP_P4_181431_17329 | NW_004518081.1 | Scaffold3369 | 17329                   | GG                              | AA              | 1947045853               |
| SNP_P4_181432_17748 | NW_004518081.1 | Scaffold3369 | 17748                   | TT                              | CC              | 1947045855               |
| SNP_P4_181433_18098 | NW_004518081.1 | Scaffold3369 | 18098                   | TT                              | CC              | 1947045857               |
| SNP_P4_181434_18224 | NW_004518081.1 | Scaffold3369 | 18224                   | CC                              | TT              | 1947045859               |
| SNP_P4_181436_20758 | NW_004518081.1 | Scaffold3369 | 20758                   | AA                              | GG              | 1947045861               |
| SNP_P4_181437_20801 | NW_004518081.1 | Scaffold3369 | 20801                   | AA                              | GG              | 1947045863               |

| SNPs IDs            | Chromosome IDs | Chromosomes  | Physical positions (bp) | CDC Frontier (Reference genome) | (ILWC46 & LPNB) | NCBI SNPdb Accession IDs |
|---------------------|----------------|--------------|-------------------------|---------------------------------|-----------------|--------------------------|
| SNP_P4_181438_20904 | NW_004518081.1 | Scaffold3369 | 20904                   | CC                              | AA              | 1947045865               |
| SNP_P4_181439_20912 | NW_004518081.1 | Scaffold3369 | 20912                   | CC                              | TT              | 1947045867               |
| SNP_P4_181440_21020 | NW_004518081.1 | Scaffold3369 | 21020                   | CC                              | TT              | 1947045869               |
| SNP_P4_181441_21168 | NW_004518081.1 | Scaffold3369 | 21168                   | TT                              | CC              | 1947045871               |
| SNP_P4_181442_22179 | NW_004518081.1 | Scaffold3369 | 22179                   | TT                              | CC              | 1947045873               |
| SNP_P4_181443_6344  | NW_004518082.1 | Scaffold3371 | 6344                    | CC                              | AA              | 1947045875               |
| SNP_P4_181444_6387  | NW_004518082.1 | Scaffold3371 | 6387                    | CC                              | AA              | 1947045877               |
| SNP_P4_181445_19833 | NW_004518082.1 | Scaffold3371 | 19833                   | AA                              | GG              | 1947045879               |
| SNP_P4_181446_19892 | NW_004518082.1 | Scaffold3371 | 19892                   | CC                              | TT              | 1947045881               |
| SNP_P4_181447_27310 | NW_004518082.1 | Scaffold3371 | 27310                   | CC                              | TT              | 1947045883               |
| SNP_P4_181448_27313 | NW_004518082.1 | Scaffold3371 | 27313                   | TT                              | CC              | 1947045885               |
| SNP_P4_181449_27830 | NW_004518082.1 | Scaffold3371 | 27830                   | AA                              | CC              | 1947045887               |
| SNP_P4_181450_27832 | NW_004518082.1 | Scaffold3371 | 27832                   | TT                              | CC              | 1947045889               |
| SNP_P4_181451_27845 | NW_004518082.1 | Scaffold3371 | 27845                   | CC                              | GG              | 1947045891               |
| SNP_P4_181452_27848 | NW_004518082.1 | Scaffold3371 | 27848                   | TT                              | CC              | 1947045894               |
| SNP_P4_181453_27885 | NW_004518082.1 | Scaffold3371 | 27885                   | GG                              | CC              | 1947045896               |
| SNP_P4_181454_27906 | NW_004518082.1 | Scaffold3371 | 27906                   | AA                              | CC              | 1947045898               |
| SNP_P4_181455_27925 | NW_004518082.1 | Scaffold3371 | 27925                   | AA                              | GG              | 1947045900               |
| SNP_P4_181456_28173 | NW_004518082.1 | Scaffold3371 | 28173                   | CC                              | TT              | 1947045902               |
| SNP_P4_181457_28181 | NW_004518082.1 | Scaffold3371 | 28181                   | CC                              | GG              | 1947045904               |
| SNP_P4_181458_28184 | NW_004518082.1 | Scaffold3371 | 28184                   | TT                              | CC              | 1947045906               |
| SNP_P4_181459_28230 | NW_004518082.1 | Scaffold3371 | 28230                   | CC                              | TT              | 1947045908               |
| SNP_P4_181460_33243 | NW_004518082.1 | Scaffold3371 | 33243                   | AA                              | CC              | 1947045910               |
| SNP_P4_181461_33248 | NW_004518082.1 | Scaffold3371 | 33248                   | AA                              | GG              | 1947045912               |
| SNP_P4_181462_33249 | NW_004518082.1 | Scaffold3371 | 33249                   | TT                              | AA              | 1947045915               |
| SNP_P4_181463_33641 | NW_004518082.1 | Scaffold3371 | 33641                   | AA                              | GG              | 1947045917               |
| SNP_P4_181464_33701 | NW_004518082.1 | Scaffold3371 | 33701                   | AA                              | CC              | 1947045919               |
| SNP_P4_181465_33922 | NW_004518082.1 | Scaffold3371 | 33922                   | TT                              | CC              | 1947045922               |
| SNP_P4_181466_33926 | NW_004518082.1 | Scaffold3371 | 33926                   | AA                              | GG              | 1947045924               |
| SNP_P4_181467_33945 | NW_004518082.1 | Scaffold3371 | 33945                   | CC                              | AA              | 1947045926               |
| SNP_P4_181468_34156 | NW_004518082.1 | Scaffold3371 | 34156                   | GG                              | AA              | 1947045928               |
| SNP_P4_181469_34167 | NW_004518082.1 | Scaffold3371 | 34167                   | TT                              | AA              | 1947045930               |
| SNP_P4_181470_34205 | NW_004518082.1 | Scaffold3371 | 34205                   | TT                              | CC              | 1947045932               |
| SNP_P4_181471_34207 | NW_004518082.1 | Scaffold3371 | 34207                   | TT                              | CC              | 1947045934               |
| SNP_P4_181472_35432 | NW_004518082.1 | Scaffold3371 | 35432                   | AA                              | GG              | 1947045936               |
| SNP_P4_181473_35434 | NW_004518082.1 | Scaffold3371 | 35434                   | AA                              | CC              | 1947045938               |
| SNP_P4_181474_35447 | NW_004518082.1 | Scaffold3371 | 35447                   | GG                              | CC              | 1947045940               |
| SNP_P4_181475_651   | NW_004518084.1 | Scaffold3374 | 651                     | AA                              | CC              | 1947045943               |
| SNP_P4_181476_600   | NW_004518085.1 | Scaffold3377 | 600                     | GG                              | TT              | 1947045945               |
| SNP_P4_181477_1914  | NW_004518088.1 | Scaffold3380 | 1914                    | TT                              | CC              | 1947045947               |
| SNP_P4_181478_1945  | NW_004518088.1 | Scaffold3380 | 1945                    | AA                              | GG              | 1947045949               |
| SNP_P4_181479_2026  | NW_004518088.1 | Scaffold3380 | 2026                    | AA                              | GG              | 1947045951               |

| SNPs IDs           | Chromosome IDs | Chromosomes  | Physical positions (bp) | CDC Frontier (Reference genome) | (ILWC46 & LPNB) | NCBI SNPdb Accession IDs |
|--------------------|----------------|--------------|-------------------------|---------------------------------|-----------------|--------------------------|
| SNP_P4_181480_2171 | NW_004518088.1 | Scaffold3380 | 2171                    | AA                              | GG              | 1947045953               |
| SNP_P4_181481_2392 | NW_004518088.1 | Scaffold3380 | 2392                    | AA                              | GG              | 1947045955               |
| SNP_P4_181482_2426 | NW_004518088.1 | Scaffold3380 | 2426                    | TT                              | CC              | 1947045957               |
| SNP_P4_181483_2509 | NW_004518088.1 | Scaffold3380 | 2509                    | AA                              | GG              | 1947045959               |
| SNP_P4_181484_2516 | NW_004518088.1 | Scaffold3380 | 2516                    | AA                              | CC              | 1947045961               |
| SNP_P4_181485_2532 | NW_004518088.1 | Scaffold3380 | 2532                    | GG                              | AA              | 1947045963               |
| SNP_P4_181486_3904 | NW_004518088.1 | Scaffold3380 | 3904                    | AA                              | GG              | 1947045966               |
| SNP_P4_181487_3920 | NW_004518088.1 | Scaffold3380 | 3920                    | TT                              | CC              | 1947045968               |
| SNP_P4_181488_3933 | NW_004518088.1 | Scaffold3380 | 3933                    | AA                              | GG              | 1947045970               |
| SNP_P4_181489_3952 | NW_004518088.1 | Scaffold3380 | 3952                    | AA                              | GG              | 1947045972               |
| SNP_P4_181490_4005 | NW_004518088.1 | Scaffold3380 | 4005                    | CC                              | TT              | 1947045974               |
| SNP_P4_181491_4123 | NW_004518088.1 | Scaffold3380 | 4123                    | GG                              | AA              | 1947045976               |
| SNP_P4_181492_4139 | NW_004518088.1 | Scaffold3380 | 4139                    | CC                              | TT              | 1947045978               |
| SNP_P4_181493_4226 | NW_004518088.1 | Scaffold3380 | 4226                    | GG                              | TT              | 1947045980               |
| SNP_P4_181494_4330 | NW_004518088.1 | Scaffold3380 | 4330                    | CC                              | TT              | 1947045983               |
| SNP_P4_181495_4334 | NW_004518088.1 | Scaffold3380 | 4334                    | AA                              | GG              | 1947045985               |
| SNP_P4_181496_4375 | NW_004518088.1 | Scaffold3380 | 4375                    | CC                              | TT              | 1947045987               |
| SNP_P4_181497_4514 | NW_004518088.1 | Scaffold3380 | 4514                    | TT                              | GG              | 1947045989               |
| SNP_P4_181498_4901 | NW_004518088.1 | Scaffold3380 | 4901                    | GG                              | TT              | 1947045991               |
| SNP_P4_181499_5201 | NW_004518088.1 | Scaffold3380 | 5201                    | TT                              | AA              | 1947045993               |
| SNP_P4_181500_5250 | NW_004518088.1 | Scaffold3380 | 5250                    | TT                              | GG              | 1947045995               |
| SNP_P4_181501_299  | NW_004518089.1 | Scaffold3381 | 299                     | TT                              | AA              | 1947045997               |
| SNP_P4_181502_649  | NW_004518089.1 | Scaffold3381 | 649                     | CC                              | AA              | 1947045999               |
| SNP_P4_181503_785  | NW_004518089.1 | Scaffold3381 | 785                     | TT                              | CC              | 1947046001               |
| SNP_P4_181504_1022 | NW_004518089.1 | Scaffold3381 | 1022                    | AA                              | GG              | 1947046003               |
| SNP_P4_181505_1025 | NW_004518089.1 | Scaffold3381 | 1025                    | TT                              | AA              | 1947046005               |
| SNP_P4_181506_1086 | NW_004518089.1 | Scaffold3381 | 1086                    | AA                              | GG              | 1947046007               |
| SNP_P4_181507_1093 | NW_004518089.1 | Scaffold3381 | 1093                    | TT                              | CC              | 1947046009               |
| SNP_P4_181508_1114 | NW_004518089.1 | Scaffold3381 | 1114                    | CC                              | TT              | 1947046010               |
| SNP_P4_181509_1121 | NW_004518089.1 | Scaffold3381 | 1121                    | TT                              | GG              | 1947046011               |
| SNP_P4_181510_1125 | NW_004518089.1 | Scaffold3381 | 1125                    | AA                              | CC              | 1947046012               |
| SNP_P4_181511_1181 | NW_004518089.1 | Scaffold3381 | 1181                    | TT                              | CC              | 1947046013               |
| SNP_P4_181512_1429 | NW_004518089.1 | Scaffold3381 | 1429                    | AA                              | CC              | 1947046015               |
| SNP_P4_181513_1544 | NW_004518089.1 | Scaffold3381 | 1544                    | CC                              | GG              | 1947046017               |
| SNP_P4_181514_1576 | NW_004518089.1 | Scaffold3381 | 1576                    | TT                              | AA              | 1947046019               |
| SNP_P4_181515_1662 | NW_004518089.1 | Scaffold3381 | 1662                    | CC                              | AA              | 1947046021               |
| SNP_P4_181516_1663 | NW_004518089.1 | Scaffold3381 | 1663                    | GG                              | AA              | 1947046023               |
| SNP_P4_181517_1667 | NW_004518089.1 | Scaffold3381 | 1667                    | AA                              | TT              | 1947046025               |
| SNP_P4_181518_1669 | NW_004518089.1 | Scaffold3381 | 1669                    | GG                              | TT              | 1947046027               |
| SNP_P4_181519_1684 | NW_004518089.1 | Scaffold3381 | 1684                    | CC                              | TT              | 1947046029               |
| SNP_P4_181520_1685 | NW_004518089.1 | Scaffold3381 | 1685                    | CC                              | TT              | 1947046031               |
| SNP_P4_181521_2956 | NW_004518091.1 | Scaffold3383 | 2956                    | AA                              | CC              | 1947046033               |



| SNPs IDs            | Chromosome IDs | Chromosomes  | Physical positions (bp) | CDC Frontier (Reference genome) | (ILWC46 & LPNB) | NCBI SNPdb Accession IDs |
|---------------------|----------------|--------------|-------------------------|---------------------------------|-----------------|--------------------------|
| SNP_P4_181522_6562  | NW_004518091.1 | Scaffold3383 | 6562                    | TT                              | CC              | 1947046035               |
| SNP_P4_181523_3200  | NW_004518092.1 | Scaffold3384 | 3200                    | CC                              | AA              | 1947046037               |
| SNP_P4_181524_3242  | NW_004518092.1 | Scaffold3384 | 3242                    | AA                              | GG              | 1947046039               |
| SNP_P4_181525_1182  | NW_004518093.1 | Scaffold3385 | 1182                    | TT                              | AA              | 1947046041               |
| SNP_P4_181526_1184  | NW_004518093.1 | Scaffold3385 | 1184                    | AA                              | GG              | 1947046043               |
| SNP_P4_181527_2990  | NW_004518093.1 | Scaffold3385 | 2990                    | GG                              | CC              | 1947046045               |
| SNP_P4_181528_2996  | NW_004518093.1 | Scaffold3385 | 2996                    | TT                              | CC              | 1947046047               |
| SNP_P4_181529_4489  | NW_004518093.1 | Scaffold3385 | 4489                    | GG                              | AA              | 1947046049               |
| SNP_P4_181530_8412  | NW_004518093.1 | Scaffold3385 | 8412                    | TT                              | CC              | 1947046051               |
| SNP_P4_181531_8420  | NW_004518093.1 | Scaffold3385 | 8420                    | TT                              | GG              | 1947046053               |
| SNP_P4_181532_8758  | NW_004518093.1 | Scaffold3385 | 8758                    | CC                              | TT              | 1947046055               |
| SNP_P4_181533_6513  | NW_004518098.1 | Scaffold3392 | 6513                    | GG                              | TT              | 1947046057               |
| SNP_P4_181534_1635  | NW_004518102.1 | Scaffold3396 | 1635                    | GG                              | AA              | 1947046059               |
| SNP_P4_181536_4652  | NW_004518102.1 | Scaffold3396 | 4652                    | GG                              | TT              | 1947046061               |
| SNP_P4_181537_12893 | NW_004518102.1 | Scaffold3396 | 12893                   | AA                              | TT              | 1947046063               |
| SNP_P4_181538_14452 | NW_004518102.1 | Scaffold3396 | 14452                   | AA                              | TT              | 1947046065               |
| SNP_P4_181539_14453 | NW_004518102.1 | Scaffold3396 | 14453                   | TT                              | GG              | 1947046067               |
| SNP_P4_181540_14488 | NW_004518102.1 | Scaffold3396 | 14488                   | AA                              | GG              | 1947046069               |
| SNP_P4_181541_15181 | NW_004518102.1 | Scaffold3396 | 15181                   | GG                              | TT              | 1947046071               |
| SNP_P4_181542_15198 | NW_004518102.1 | Scaffold3396 | 15198                   | TT                              | CC              | 1947046073               |
| SNP_P4_181543_15203 | NW_004518102.1 | Scaffold3396 | 15203                   | CC                              | TT              | 1947046075               |
| SNP_P4_181544_15535 | NW_004518102.1 | Scaffold3396 | 15535                   | AA                              | CC              | 1947046077               |
| SNP_P4_181545_15561 | NW_004518102.1 | Scaffold3396 | 15561                   | GG                              | TT              | 1947046079               |
| SNP_P4_181546_15913 | NW_004518102.1 | Scaffold3396 | 15913                   | CC                              | TT              | 1947046081               |
| SNP_P4_181547_15922 | NW_004518102.1 | Scaffold3396 | 15922                   | TT                              | AA              | 1947046083               |
| SNP_P4_181548_20399 | NW_004518102.1 | Scaffold3396 | 20399                   | AA                              | TT              | 1947046085               |
| SNP_P4_181549_21464 | NW_004518102.1 | Scaffold3396 | 21464                   | TT                              | CC              | 1947046087               |
| SNP_P4_181550_21934 | NW_004518102.1 | Scaffold3396 | 21934                   | CC                              | TT              | 1947046089               |
| SNP_P4_181551_831   | NW_004518103.1 | Scaffold3397 | 831                     | TT                              | GG              | 1947046091               |
| SNP_P4_181553_18032 | NW_004518103.1 | Scaffold3397 | 18032                   | TT                              | CC              | 1947046093               |
| SNP_P4_181554_18163 | NW_004518103.1 | Scaffold3397 | 18163                   | TT                              | CC              | 1947046095               |
| SNP_P4_181555_18170 | NW_004518103.1 | Scaffold3397 | 18170                   | AA                              | GG              | 1947046097               |
| SNP_P4_181556_18566 | NW_004518103.1 | Scaffold3397 | 18566                   | GG                              | AA              | 1947046099               |
| SNP_P4_181558_31333 | NW_004518103.1 | Scaffold3397 | 31333                   | GG                              | CC              | 1947046101               |
| SNP_P4_181559_36386 | NW_004518103.1 | Scaffold3397 | 36386                   | AA                              | CC              | 1947046103               |
| SNP_P4_181560_49272 | NW_004518103.1 | Scaffold3397 | 49272                   | GG                              | AA              | 1947046105               |
| SNP_P4_181561_49324 | NW_004518103.1 | Scaffold3397 | 49324                   | CC                              | TT              | 1947046107               |
| SNP_P4_181562_50206 | NW_004518103.1 | Scaffold3397 | 50206                   | CC                              | TT              | 1947046109               |
| SNP_P4_181564_56546 | NW_004518103.1 | Scaffold3397 | 56546                   | TT                              | CC              | 1947046111               |
| SNP_P4_181565_62768 | NW_004518103.1 | Scaffold3397 | 62768                   | GG                              | AA              | 1947046114               |
| SNP_P4_181566_64748 | NW_004518103.1 | Scaffold3397 | 64748                   | GG                              | AA              | 1947046116               |
| SNP_P4_181567_64786 | NW_004518103.1 | Scaffold3397 | 64786                   | CC                              | TT              | 1947046118               |

| SNPs IDs             | Chromosome IDs | Chromosomes  | Physical positions (bp) | CDC Frontier (Reference genome) | (ILWC46 & LPNB) | NCBI SNPdb Accession IDs |
|----------------------|----------------|--------------|-------------------------|---------------------------------|-----------------|--------------------------|
| SNP_P4_181570_72649  | NW_004518103.1 | Scaffold3397 | 72649                   | GG                              | TT              | 1947046120               |
| SNP_P4_181571_72800  | NW_004518103.1 | Scaffold3397 | 72800                   | TT                              | CC              | 1947046122               |
| SNP_P4_181572_75980  | NW_004518103.1 | Scaffold3397 | 75980                   | GG                              | AA              | 1947046124               |
| SNP_P4_181573_79481  | NW_004518103.1 | Scaffold3397 | 79481                   | TT                              | CC              | 1947046126               |
| SNP_P4_181574_80199  | NW_004518103.1 | Scaffold3397 | 80199                   | TT                              | CC              | 1947046128               |
| SNP_P4_181575_81425  | NW_004518103.1 | Scaffold3397 | 81425                   | AA                              | GG              | 1947046130               |
| SNP_P4_181576_87146  | NW_004518103.1 | Scaffold3397 | 87146                   | GG                              | AA              | 1947046132               |
| SNP_P4_181577_88189  | NW_004518103.1 | Scaffold3397 | 88189                   | CC                              | GG              | 1947046134               |
| SNP_P4_181579_88962  | NW_004518103.1 | Scaffold3397 | 88962                   | AA                              | GG              | 1947046136               |
| SNP_P4_181580_91075  | NW_004518103.1 | Scaffold3397 | 91075                   | CC                              | TT              | 1947046138               |
| SNP_P4_181581_94759  | NW_004518103.1 | Scaffold3397 | 94759                   | TT                              | CC              | 1947046140               |
| SNP_P4_181582_96669  | NW_004518103.1 | Scaffold3397 | 96669                   | AA                              | GG              | 1947046142               |
| SNP_P4_181583_99041  | NW_004518103.1 | Scaffold3397 | 99041                   | CC                              | GG              | 1947046144               |
| SNP_P4_181584_105572 | NW_004518103.1 | Scaffold3397 | 105572                  | TT                              | GG              | 1947046146               |
| SNP_P4_181585_105707 | NW_004518103.1 | Scaffold3397 | 105707                  | TT                              | CC              | 1947046148               |
| SNP_P4_181586_107496 | NW_004518103.1 | Scaffold3397 | 107496                  | TT                              | CC              | 1947046150               |
| SNP_P4_181587_107768 | NW_004518103.1 | Scaffold3397 | 107768                  | TT                              | GG              | 1947046152               |
| SNP_P4_181588_107780 | NW_004518103.1 | Scaffold3397 | 107780                  | GG                              | TT              | 1947046154               |
| SNP_P4_181589_108158 | NW_004518103.1 | Scaffold3397 | 108158                  | GG                              | AA              | 1947046156               |
| SNP_P4_181590_108166 | NW_004518103.1 | Scaffold3397 | 108166                  | CC                              | AA              | 1947046158               |
| SNP_P4_181591_108564 | NW_004518103.1 | Scaffold3397 | 108564                  | AA                              | GG              | 1947046160               |
| SNP_P4_181592_951    | NW_004518105.1 | Scaffold3403 | 951                     | TT                              | AA              | 1947046162               |
| SNP_P4_181593_1294   | NW_004518105.1 | Scaffold3403 | 1294                    | CC                              | AA              | 1947046164               |
| SNP_P4_181594_1078   | NW_004518106.1 | Scaffold3404 | 1078                    | CC                              | GG              | 1947046166               |
| SNP_P4_181595_1087   | NW_004518106.1 | Scaffold3404 | 1087                    | TT                              | AA              | 1947046168               |
| SNP_P4_181596_1099   | NW_004518106.1 | Scaffold3404 | 1099                    | CC                              | TT              | 1947046170               |
| SNP_P4_181597_1236   | NW_004518106.1 | Scaffold3404 | 1236                    | TT                              | CC              | 1947046172               |
| SNP_P4_181598_1239   | NW_004518106.1 | Scaffold3404 | 1239                    | TT                              | GG              | 1947046174               |
| SNP_P4_181599_1279   | NW_004518106.1 | Scaffold3404 | 1279                    | AA                              | GG              | 1947046176               |
| SNP_P4_181600_1297   | NW_004518106.1 | Scaffold3404 | 1297                    | GG                              | AA              | 1947046178               |
| SNP_P4_181601_1705   | NW_004518106.1 | Scaffold3404 | 1705                    | TT                              | CC              | 1947046180               |
| SNP_P4_181602_1869   | NW_004518106.1 | Scaffold3404 | 1869                    | GG                              | TT              | 1947046182               |
| SNP_P4_181603_1893   | NW_004518106.1 | Scaffold3404 | 1893                    | GG                              | AA              | 1947046184               |
| SNP_P4_181604_1933   | NW_004518106.1 | Scaffold3404 | 1933                    | TT                              | GG              | 1947046186               |
| SNP_P4_181605_2035   | NW_004518106.1 | Scaffold3404 | 2035                    | CC                              | AA              | 1947046188               |
| SNP_P4_181607_2064   | NW_004518106.1 | Scaffold3404 | 2064                    | TT                              | CC              | 1947046190               |
| SNP_P4_181608_2083   | NW_004518106.1 | Scaffold3404 | 2083                    | CC                              | TT              | 1947046192               |
| SNP_P4_181609_2136   | NW_004518106.1 | Scaffold3404 | 2136                    | CC                              | GG              | 1947046194               |
| SNP_P4_181610_2160   | NW_004518106.1 | Scaffold3404 | 2160                    | GG                              | TT              | 1947046197               |
| SNP_P4_181611_2300   | NW_004518106.1 | Scaffold3404 | 2300                    | TT                              | AA              | 1947046199               |
| SNP_P4_181612_1145   | NW_004518108.1 | Scaffold3406 | 1145                    | AA                              | GG              | 1947046201               |
| SNP_P4_181613_1200   | NW_004518108.1 | Scaffold3406 | 1200                    | GG                              | TT              | 1947046203               |

| SNPs IDs            | Chromosome IDs | Chromosomes  | Physical positions (bp) | CDC Frontier (Reference genome) | (ILWC46 & LPNB) | NCBI SNPdb Accession IDs |
|---------------------|----------------|--------------|-------------------------|---------------------------------|-----------------|--------------------------|
| SNP_P4_181615_1274  | NW_004518108.1 | Scaffold3406 | 1274                    | AA                              | TT              | 1947046205               |
| SNP_P4_181616_1320  | NW_004518108.1 | Scaffold3406 | 1320                    | AA                              | TT              | 1947046207               |
| SNP_P4_181617_1359  | NW_004518108.1 | Scaffold3406 | 1359                    | AA                              | TT              | 1947046209               |
| SNP_P4_181618_1606  | NW_004518108.1 | Scaffold3406 | 1606                    | AA                              | TT              | 1947046211               |
| SNP_P4_181619_1852  | NW_004518108.1 | Scaffold3406 | 1852                    | TT                              | AA              | 1947046213               |
| SNP_P4_181623_479   | NW_004518109.1 | Scaffold3407 | 479                     | CC                              | TT              | 1947046215               |
| SNP_P4_181624_545   | NW_004518112.1 | Scaffold3411 | 545                     | TT                              | AA              | 1947046217               |
| SNP_P4_181625_2638  | NW_004518112.1 | Scaffold3411 | 2638                    | AA                              | CC              | 1947046219               |
| SNP_P4_181626_2648  | NW_004518112.1 | Scaffold3411 | 2648                    | AA                              | TT              | 1947046221               |
| SNP_P4_181627_2722  | NW_004518112.1 | Scaffold3411 | 2722                    | GG                              | AA              | 1947046223               |
| SNP_P4_181628_6218  | NW_004518112.1 | Scaffold3411 | 6218                    | TT                              | AA              | 1947046225               |
| SNP_P4_181629_6229  | NW_004518112.1 | Scaffold3411 | 6229                    | GG                              | AA              | 1947046227               |
| SNP_P4_181630_6241  | NW_004518112.1 | Scaffold3411 | 6241                    | AA                              | CC              | 1947046229               |
| SNP_P4_181631_6255  | NW_004518112.1 | Scaffold3411 | 6255                    | AA                              | TT              | 1947046231               |
| SNP_P4_181632_6274  | NW_004518112.1 | Scaffold3411 | 6274                    | AA                              | TT              | 1947046233               |
| SNP_P4_181633_646   | NW_004518113.1 | Scaffold3412 | 646                     | AA                              | GG              | 1947046235               |
| SNP_P4_181634_654   | NW_004518113.1 | Scaffold3412 | 654                     | AA                              | CC              | 1947046237               |
| SNP_P4_181635_689   | NW_004518113.1 | Scaffold3412 | 689                     | AA                              | TT              | 1947046239               |
| SNP_P4_181636_697   | NW_004518113.1 | Scaffold3412 | 697                     | CC                              | AA              | 1947046241               |
| SNP_P4_181637_698   | NW_004518113.1 | Scaffold3412 | 698                     | AA                              | TT              | 1947046243               |
| SNP_P4_181638_699   | NW_004518113.1 | Scaffold3412 | 699                     | AA                              | GG              | 1947046245               |
| SNP_P4_181639_707   | NW_004518113.1 | Scaffold3412 | 707                     | TT                              | CC              | 1947046247               |
| SNP_P4_181640_934   | NW_004518113.1 | Scaffold3412 | 934                     | CC                              | AA              | 1947046249               |
| SNP_P4_181641_970   | NW_004518113.1 | Scaffold3412 | 970                     | GG                              | AA              | 1947046251               |
| SNP_P4_181642_973   | NW_004518113.1 | Scaffold3412 | 973                     | CC                              | AA              | 1947046253               |
| SNP_P4_181643_991   | NW_004518113.1 | Scaffold3412 | 991                     | GG                              | TT              | 1947046255               |
| SNP_P4_181644_5679  | NW_004518115.1 | Scaffold3415 | 5679                    | GG                              | CC              | 1947046257               |
| SNP_P4_181645_56174 | NW_004518119.1 | Scaffold3422 | 56174                   | TT                              | GG              | 1947046259               |
| SNP_P4_181646_56184 | NW_004518119.1 | Scaffold3422 | 56184                   | TT                              | GG              | 1947046261               |
| SNP_P4_181647_56189 | NW_004518119.1 | Scaffold3422 | 56189                   | CC                              | GG              | 1947046263               |
| SNP_P4_181648_56212 | NW_004518119.1 | Scaffold3422 | 56212                   | TT                              | CC              | 1947046265               |
| SNP_P4_181650_56292 | NW_004518119.1 | Scaffold3422 | 56292                   | GG                              | AA              | 1947046267               |
| SNP_P4_181652_82    | NW_004518120.1 | Scaffold3423 | 82                      | TT                              | GG              | 1947046269               |
| SNP_P4_181653_196   | NW_004518120.1 | Scaffold3423 | 196                     | GG                              | TT              | 1947046271               |
| SNP_P4_181654_342   | NW_004518120.1 | Scaffold3423 | 342                     | AA                              | TT              | 1947046273               |
| SNP_P4_181655_343   | NW_004518120.1 | Scaffold3423 | 343                     | CC                              | TT              | 1947046275               |
| SNP_P4_181656_378   | NW_004518120.1 | Scaffold3423 | 378                     | AA                              | CC              | 1947046277               |
| SNP_P4_181657_399   | NW_004518120.1 | Scaffold3423 | 399                     | TT                              | CC              | 1947046279               |
| SNP_P4_181658_475   | NW_004518120.1 | Scaffold3423 | 475                     | CC                              | TT              | 1947046281               |
| SNP_P4_181659_479   | NW_004518120.1 | Scaffold3423 | 479                     | GG                              | CC              | 1947046283               |
| SNP_P4_181660_482   | NW_004518120.1 | Scaffold3423 | 482                     | AA                              | TT              | 1947046285               |
| SNP_P4_181661_493   | NW_004518120.1 | Scaffold3423 | 493                     | CC                              | TT              | 1947046287               |

| SNPs IDs            | Chromosome IDs | Chromosomes  | Physical positions (bp) | CDC Frontier (Reference genome) | (ILWC46 & LPNB) | NCBI SNPdb Accession IDs |
|---------------------|----------------|--------------|-------------------------|---------------------------------|-----------------|--------------------------|
| SNP_P4_181662_503   | NW_004518120.1 | Scaffold3423 | 503                     | CC                              | GG              | 1947046289               |
| SNP_P4_181663_523   | NW_004518120.1 | Scaffold3423 | 523                     | GG                              | AA              | 1947046291               |
| SNP_P4_181664_530   | NW_004518120.1 | Scaffold3423 | 530                     | AA                              | GG              | 1947046293               |
| SNP_P4_181665_561   | NW_004518120.1 | Scaffold3423 | 561                     | TT                              | CC              | 1947046295               |
| SNP_P4_181666_563   | NW_004518120.1 | Scaffold3423 | 563                     | TT                              | AA              | 1947046297               |
| SNP_P4_181667_571   | NW_004518120.1 | Scaffold3423 | 571                     | TT                              | AA              | 1947046299               |
| SNP_P4_181668_911   | NW_004518120.1 | Scaffold3423 | 911                     | GG                              | AA              | 1947046301               |
| SNP_P4_181669_1164  | NW_004518120.1 | Scaffold3423 | 1164                    | TT                              | AA              | 1947046303               |
| SNP_P4_181670_267   | NW_004518121.1 | Scaffold3424 | 267                     | TT                              | CC              | 1947046305               |
| SNP_P4_181671_336   | NW_004518121.1 | Scaffold3424 | 336                     | TT                              | CC              | 1947046307               |
| SNP_P4_181672_558   | NW_004518121.1 | Scaffold3424 | 558                     | AA                              | TT              | 1947046309               |
| SNP_P4_181673_760   | NW_004518121.1 | Scaffold3424 | 760                     | TT                              | GG              | 1947046311               |
| SNP_P4_181674_199   | NW_004518122.1 | Scaffold3426 | 199                     | AA                              | GG              | 1947046313               |
| SNP_P4_181675_372   | NW_004518122.1 | Scaffold3426 | 372                     | CC                              | AA              | 1947046315               |
| SNP_P4_181676_405   | NW_004518122.1 | Scaffold3426 | 405                     | AA                              | GG              | 1947046317               |
| SNP_P4_181677_412   | NW_004518122.1 | Scaffold3426 | 412                     | AA                              | GG              | 1947046319               |
| SNP_P4_181678_422   | NW_004518122.1 | Scaffold3426 | 422                     | AA                              | TT              | 1947046321               |
| SNP_P4_181679_424   | NW_004518122.1 | Scaffold3426 | 424                     | AA                              | TT              | 1947046324               |
| SNP_P4_181681_10356 | NW_004518125.1 | Scaffold3429 | 10356                   | GG                              | CC              | 1947046326               |
| SNP_P4_181682_11080 | NW_004518125.1 | Scaffold3429 | 11080                   | AA                              | GG              | 1947046328               |
| SNP_P4_181683_11224 | NW_004518125.1 | Scaffold3429 | 11224                   | AA                              | GG              | 1947046330               |
| SNP_P4_181684_4064  | NW_004518127.1 | Scaffold3432 | 4064                    | AA                              | CC              | 1947046332               |
| SNP_P4_181685_23889 | NW_004518127.1 | Scaffold3432 | 23889                   | CC                              | AA              | 1947046334               |
| SNP_P4_181687_24352 | NW_004518127.1 | Scaffold3432 | 24352                   | AA                              | TT              | 1947046336               |
| SNP_P4_181688_24365 | NW_004518127.1 | Scaffold3432 | 24365                   | CC                              | TT              | 1947046338               |
| SNP_P4_181689_24539 | NW_004518127.1 | Scaffold3432 | 24539                   | GG                              | AA              | 1947046340               |
| SNP_P4_181690_25064 | NW_004518127.1 | Scaffold3432 | 25064                   | TT                              | CC              | 1947046342               |
| SNP_P4_181691_25071 | NW_004518127.1 | Scaffold3432 | 25071                   | TT                              | CC              | 1947046344               |
| SNP_P4_181692_25076 | NW_004518127.1 | Scaffold3432 | 25076                   | GG                              | TT              | 1947046346               |
| SNP_P4_181693_25665 | NW_004518127.1 | Scaffold3432 | 25665                   | CC                              | TT              | 1947046348               |
| SNP_P4_181694_26441 | NW_004518127.1 | Scaffold3432 | 26441                   | AA                              | GG              | 1947046350               |
| SNP_P4_181695_29732 | NW_004518127.1 | Scaffold3432 | 29732                   | GG                              | AA              | 1947046352               |
| SNP_P4_181696_29749 | NW_004518127.1 | Scaffold3432 | 29749                   | TT                              | CC              | 1947046354               |
| SNP_P4_181697_29767 | NW_004518127.1 | Scaffold3432 | 29767                   | TT                              | CC              | 1947046356               |
| SNP_P4_181698_29782 | NW_004518127.1 | Scaffold3432 | 29782                   | AA                              | CC              | 1947046358               |
| SNP_P4_181699_29790 | NW_004518127.1 | Scaffold3432 | 29790                   | TT                              | AA              | 1947046360               |
| SNP_P4_181700_29889 | NW_004518127.1 | Scaffold3432 | 29889                   | GG                              | AA              | 1947046362               |
| SNP_P4_181701_30052 | NW_004518127.1 | Scaffold3432 | 30052                   | GG                              | AA              | 1947046364               |
| SNP_P4_181702_30066 | NW_004518127.1 | Scaffold3432 | 30066                   | CC                              | GG              | 1947046366               |
| SNP_P4_181703_30091 | NW_004518127.1 | Scaffold3432 | 30091                   | GG                              | AA              | 1947046368               |
| SNP_P4_181704_30135 | NW_004518127.1 | Scaffold3432 | 30135                   | AA                              | GG              | 1947046370               |
| SNP_P4_181705_30143 | NW_004518127.1 | Scaffold3432 | 30143                   | TT                              | CC              | 1947046372               |

| SNPs IDs             | Chromosome IDs | Chromosomes  | Physical positions (bp) | CDC Frontier (Reference genome) | (ILWC46 & LPNB) | NCBI SNPdb Accession IDs |
|----------------------|----------------|--------------|-------------------------|---------------------------------|-----------------|--------------------------|
| SNP_P4_181706_30185  | NW_004518127.1 | Scaffold3432 | 30185                   | GG                              | TT              | 1947046374               |
| SNP_P4_181707_35384  | NW_004518127.1 | Scaffold3432 | 35384                   | CC                              | AA              | 1947046376               |
| SNP_P4_181708_35410  | NW_004518127.1 | Scaffold3432 | 35410                   | CC                              | TT              | 1947046378               |
| SNP_P4_181709_35427  | NW_004518127.1 | Scaffold3432 | 35427                   | CC                              | TT              | 1947046380               |
| SNP_P4_181710_35435  | NW_004518127.1 | Scaffold3432 | 35435                   | CC                              | TT              | 1947046382               |
| SNP_P4_181712_35508  | NW_004518127.1 | Scaffold3432 | 35508                   | TT                              | CC              | 1947046384               |
| SNP_P4_181713_35515  | NW_004518127.1 | Scaffold3432 | 35515                   | TT                              | CC              | 1947046386               |
| SNP_P4_181714_35684  | NW_004518127.1 | Scaffold3432 | 35684                   | AA                              | TT              | 1947046388               |
| SNP_P4_181715_35708  | NW_004518127.1 | Scaffold3432 | 35708                   | CC                              | TT              | 1947046390               |
| SNP_P4_181716_35714  | NW_004518127.1 | Scaffold3432 | 35714                   | CC                              | TT              | 1947046392               |
| SNP_P4_181717_35716  | NW_004518127.1 | Scaffold3432 | 35716                   | TT                              | AA              | 1947046394               |
| SNP_P4_181720_61284  | NW_004518127.1 | Scaffold3432 | 61284                   | AA                              | GG              | 1947046395               |
| SNP_P4_181721_61285  | NW_004518127.1 | Scaffold3432 | 61285                   | TT                              | GG              | 1947046396               |
| SNP_P4_181722_67675  | NW_004518127.1 | Scaffold3432 | 67675                   | CC                              | AA              | 1947046397               |
| SNP_P4_181723_68054  | NW_004518127.1 | Scaffold3432 | 68054                   | CC                              | TT              | 1947046398               |
| SNP_P4_181724_68405  | NW_004518127.1 | Scaffold3432 | 68405                   | AA                              | CC              | 1947046399               |
| SNP_P4_181725_79273  | NW_004518127.1 | Scaffold3432 | 79273                   | GG                              | TT              | 1947046400               |
| SNP_P4_181726_79312  | NW_004518127.1 | Scaffold3432 | 79312                   | CC                              | TT              | 1947046401               |
| SNP_P4_181727_81703  | NW_004518127.1 | Scaffold3432 | 81703                   | TT                              | CC              | 1947046402               |
| SNP_P4_181728_81798  | NW_004518127.1 | Scaffold3432 | 81798                   | CC                              | TT              | 1947046403               |
| SNP_P4_181729_85452  | NW_004518127.1 | Scaffold3432 | 85452                   | CC                              | TT              | 1947046404               |
| SNP_P4_181730_85464  | NW_004518127.1 | Scaffold3432 | 85464                   | CC                              | TT              | 1947046405               |
| SNP_P4_181731_95978  | NW_004518127.1 | Scaffold3432 | 95978                   | CC                              | TT              | 1947046406               |
| SNP_P4_181732_99031  | NW_004518127.1 | Scaffold3432 | 99031                   | AA                              | CC              | 1947046407               |
| SNP_P4_181733_119203 | NW_004518127.1 | Scaffold3432 | 119203                  | TT                              | CC              | 1947046408               |
| SNP_P4_181734_7514   | NW_004518129.1 | Scaffold3434 | 7514                    | AA                              | TT              | 1947046409               |
| SNP_P4_181735_7524   | NW_004518129.1 | Scaffold3434 | 7524                    | TT                              | AA              | 1947046410               |
| SNP_P4_181737_7685   | NW_004518129.1 | Scaffold3434 | 7685                    | TT                              | AA              | 1947046411               |
| SNP_P4_181738_7686   | NW_004518129.1 | Scaffold3434 | 7686                    | AA                              | TT              | 1947046412               |
| SNP_P4_181740_10594  | NW_004518129.1 | Scaffold3434 | 10594                   | CC                              | AA              | 1947046413               |
| SNP_P4_181741_10976  | NW_004518129.1 | Scaffold3434 | 10976                   | TT                              | CC              | 1947046414               |
| SNP_P4_181742_11005  | NW_004518129.1 | Scaffold3434 | 11005                   | AA                              | GG              | 1947046415               |
| SNP_P4_181743_11868  | NW_004518129.1 | Scaffold3434 | 11868                   | GG                              | TT              | 1947046416               |
| SNP_P4_181744_11920  | NW_004518129.1 | Scaffold3434 | 11920                   | CC                              | TT              | 1947046417               |
| SNP_P4_181745_12021  | NW_004518129.1 | Scaffold3434 | 12021                   | CC                              | AA              | 1947046418               |
| SNP_P4_181746_1426   | NW_004518130.1 | Scaffold3435 | 1426                    | CC                              | TT              | 1947046419               |
| SNP_P4_181747_5733   | NW_004518130.1 | Scaffold3435 | 5733                    | AA                              | TT              | 1947046420               |
| SNP_P4_181748_10605  | NW_004518130.1 | Scaffold3435 | 10605                   | AA                              | GG              | 1947046421               |
| SNP_P4_181749_10802  | NW_004518130.1 | Scaffold3435 | 10802                   | CC                              | TT              | 1947046422               |
| SNP_P4_181750_10817  | NW_004518130.1 | Scaffold3435 | 10817                   | AA                              | GG              | 1947046423               |
| SNP_P4_181752_16157  | NW_004518130.1 | Scaffold3435 | 16157                   | GG                              | TT              | 1947046424               |
| SNP_P4_181753_16168  | NW_004518130.1 | Scaffold3435 | 16168                   | CC                              | AA              | 1947046425               |

| SNPs IDs            | Chromosome IDs | Chromosomes  | Physical positions (bp) | CDC Frontier (Reference genome) | (ILWC46 & LPNB) | NCBI SNPdb Accession IDs |
|---------------------|----------------|--------------|-------------------------|---------------------------------|-----------------|--------------------------|
| SNP_P4_181754_16190 | NW_004518130.1 | Scaffold3435 | 16190                   | TT                              | CC              | 1947046426               |
| SNP_P4_181755_16205 | NW_004518130.1 | Scaffold3435 | 16205                   | AA                              | GG              | 1947046427               |
| SNP_P4_181756_16209 | NW_004518130.1 | Scaffold3435 | 16209                   | AA                              | GG              | 1947046428               |
| SNP_P4_181757_16239 | NW_004518130.1 | Scaffold3435 | 16239                   | AA                              | CC              | 1947046429               |
| SNP_P4_181758_16262 | NW_004518130.1 | Scaffold3435 | 16262                   | AA                              | GG              | 1947046430               |
| SNP_P4_181759_30753 | NW_004518130.1 | Scaffold3435 | 30753                   | GG                              | AA              | 1947046431               |
| SNP_P4_181760_30821 | NW_004518130.1 | Scaffold3435 | 30821                   | AA                              | GG              | 1947046432               |
| SNP_P4_181761_31124 | NW_004518130.1 | Scaffold3435 | 31124                   | TT                              | AA              | 1947046433               |
| SNP_P4_181762_33257 | NW_004518130.1 | Scaffold3435 | 33257                   | AA                              | GG              | 1947046434               |
| SNP_P4_181763_33320 | NW_004518130.1 | Scaffold3435 | 33320                   | CC                              | TT              | 1947046435               |
| SNP_P4_181764_33335 | NW_004518130.1 | Scaffold3435 | 33335                   | CC                              | TT              | 1947046436               |
| SNP_P4_181765_33345 | NW_004518130.1 | Scaffold3435 | 33345                   | CC                              | TT              | 1947046437               |
| SNP_P4_181766_1645  | NW_004518131.1 | Scaffold3436 | 1645                    | CC                              | TT              | 1947046438               |
| SNP_P4_181767_7378  | NW_004518131.1 | Scaffold3436 | 7378                    | GG                              | TT              | 1947046439               |
| SNP_P4_181768_8881  | NW_004518131.1 | Scaffold3436 | 8881                    | TT                              | AA              | 1947046440               |
| SNP_P4_181771_9569  | NW_004518131.1 | Scaffold3436 | 9569                    | TT                              | GG              | 1947046441               |
| SNP_P4_181772_9668  | NW_004518131.1 | Scaffold3436 | 9668                    | AA                              | TT              | 1947046442               |
| SNP_P4_181774_10284 | NW_004518131.1 | Scaffold3436 | 10284                   | TT                              | AA              | 1947046443               |
| SNP_P4_181775_10834 | NW_004518131.1 | Scaffold3436 | 10834                   | AA                              | CC              | 1947046444               |
| SNP_P4_181776_10914 | NW_004518131.1 | Scaffold3436 | 10914                   | GG                              | TT              | 1947046445               |
| SNP_P4_181777_12162 | NW_004518131.1 | Scaffold3436 | 12162                   | GG                              | CC              | 1947046446               |
| SNP_P4_181778_13038 | NW_004518131.1 | Scaffold3436 | 13038                   | CC                              | TT              | 1947046447               |
| SNP_P4_181779_13048 | NW_004518131.1 | Scaffold3436 | 13048                   | GG                              | AA              | 1947046448               |
| SNP_P4_181780_13094 | NW_004518131.1 | Scaffold3436 | 13094                   | CC                              | TT              | 1947046449               |
| SNP_P4_181781_13098 | NW_004518131.1 | Scaffold3436 | 13098                   | GG                              | AA              | 1947046450               |
| SNP_P4_181782_13114 | NW_004518131.1 | Scaffold3436 | 13114                   | TT                              | CC              | 1947046451               |
| SNP_P4_181783_13182 | NW_004518131.1 | Scaffold3436 | 13182                   | GG                              | AA              | 1947046452               |
| SNP_P4_181784_13195 | NW_004518131.1 | Scaffold3436 | 13195                   | GG                              | TT              | 1947046453               |
| SNP_P4_181785_13263 | NW_004518131.1 | Scaffold3436 | 13263                   | CC                              | AA              | 1947046454               |
| SNP_P4_181786_13296 | NW_004518131.1 | Scaffold3436 | 13296                   | AA                              | GG              | 1947046455               |
| SNP_P4_181787_13523 | NW_004518131.1 | Scaffold3436 | 13523                   | GG                              | CC              | 1947046456               |
| SNP_P4_181788_13563 | NW_004518131.1 | Scaffold3436 | 13563                   | TT                              | AA              | 1947046457               |
| SNP_P4_181790_13852 | NW_004518131.1 | Scaffold3436 | 13852                   | CC                              | TT              | 1947046458               |
| SNP_P4_181791_1629  | NW_004518132.1 | Scaffold3437 | 1629                    | AA                              | TT              | 1947046459               |
| SNP_P4_181792_1670  | NW_004518132.1 | Scaffold3437 | 1670                    | AA                              | TT              | 1947046460               |
| SNP_P4_181793_2947  | NW_004518133.1 | Scaffold3438 | 2947                    | AA                              | TT              | 1947046461               |
| SNP_P4_181794_3351  | NW_004518133.1 | Scaffold3438 | 3351                    | AA                              | CC              | 1947046462               |
| SNP_P4_181795_3369  | NW_004518133.1 | Scaffold3438 | 3369                    | AA                              | TT              | 1947046463               |
| SNP_P4_181796_3372  | NW_004518133.1 | Scaffold3438 | 3372                    | GG                              | AA              | 1947046464               |
| SNP_P4_181797_3373  | NW_004518133.1 | Scaffold3438 | 3373                    | GG                              | AA              | 1947046465               |
| SNP_P4_181798_3381  | NW_004518133.1 | Scaffold3438 | 3381                    | AA                              | GG              | 1947046466               |
| SNP_P4_181799_3432  | NW_004518133.1 | Scaffold3438 | 3432                    | TT                              | AA              | 1947046467               |

| SNPs IDs            | Chromosome IDs | Chromosomes  | Physical positions (bp) | CDC Frontier (Reference genome) | (ILWC46 & LPNB) | NCBI SNPdb Accession IDs |
|---------------------|----------------|--------------|-------------------------|---------------------------------|-----------------|--------------------------|
| SNP_P4_181800_4437  | NW_004518133.1 | Scaffold3438 | 4437                    | TT                              | CC              | 1947046468               |
| SNP_P4_181801_9316  | NW_004518133.1 | Scaffold3438 | 9316                    | TT                              | CC              | 1947046469               |
| SNP_P4_181802_9317  | NW_004518133.1 | Scaffold3438 | 9317                    | GG                              | AA              | 1947046470               |
| SNP_P4_181803_9322  | NW_004518133.1 | Scaffold3438 | 9322                    | TT                              | CC              | 1947046471               |
| SNP_P4_181804_9330  | NW_004518133.1 | Scaffold3438 | 9330                    | AA                              | GG              | 1947046472               |
| SNP_P4_181805_9724  | NW_004518133.1 | Scaffold3438 | 9724                    | AA                              | GG              | 1947046473               |
| SNP_P4_181806_9738  | NW_004518133.1 | Scaffold3438 | 9738                    | GG                              | AA              | 1947046474               |
| SNP_P4_181807_11298 | NW_004518133.1 | Scaffold3438 | 11298                   | AA                              | GG              | 1947046475               |
| SNP_P4_181808_11661 | NW_004518133.1 | Scaffold3438 | 11661                   | TT                              | AA              | 1947046476               |
| SNP_P4_181809_11943 | NW_004518133.1 | Scaffold3438 | 11943                   | CC                              | AA              | 1947046477               |
| SNP_P4_181810_12036 | NW_004518133.1 | Scaffold3438 | 12036                   | AA                              | TT              | 1947046478               |
| SNP_P4_181811_12038 | NW_004518133.1 | Scaffold3438 | 12038                   | TT                              | AA              | 1947046480               |
| SNP_P4_181812_12209 | NW_004518133.1 | Scaffold3438 | 12209                   | TT                              | CC              | 1947046482               |
| SNP_P4_181813_12384 | NW_004518133.1 | Scaffold3438 | 12384                   | TT                              | AA              | 1947046484               |
| SNP_P4_181815_12393 | NW_004518133.1 | Scaffold3438 | 12393                   | GG                              | TT              | 1947046486               |
| SNP_P4_181816_12419 | NW_004518133.1 | Scaffold3438 | 12419                   | GG                              | TT              | 1947046488               |
| SNP_P4_181817_12441 | NW_004518133.1 | Scaffold3438 | 12441                   | CC                              | TT              | 1947046490               |
| SNP_P4_181818_12496 | NW_004518133.1 | Scaffold3438 | 12496                   | CC                              | TT              | 1947046492               |
| SNP_P4_181819_12544 | NW_004518133.1 | Scaffold3438 | 12544                   | AA                              | GG              | 1947046494               |
| SNP_P4_181820_12563 | NW_004518133.1 | Scaffold3438 | 12563                   | AA                              | GG              | 1947046496               |
| SNP_P4_181821_12596 | NW_004518133.1 | Scaffold3438 | 12596                   | TT                              | AA              | 1947046498               |
| SNP_P4_181822_12607 | NW_004518133.1 | Scaffold3438 | 12607                   | CC                              | AA              | 1947046500               |
| SNP_P4_181823_12609 | NW_004518133.1 | Scaffold3438 | 12609                   | TT                              | AA              | 1947046502               |
| SNP_P4_181824_12611 | NW_004518133.1 | Scaffold3438 | 12611                   | CC                              | AA              | 1947046504               |
| SNP_P4_181825_12636 | NW_004518133.1 | Scaffold3438 | 12636                   | CC                              | TT              | 1947046506               |
| SNP_P4_181826_12645 | NW_004518133.1 | Scaffold3438 | 12645                   | TT                              | CC              | 1947046508               |
| SNP_P4_181827_12674 | NW_004518133.1 | Scaffold3438 | 12674                   | AA                              | TT              | 1947046510               |
| SNP_P4_181828_12870 | NW_004518133.1 | Scaffold3438 | 12870                   | CC                              | TT              | 1947046512               |
| SNP_P4_181829_12877 | NW_004518133.1 | Scaffold3438 | 12877                   | AA                              | GG              | 1947046514               |
| SNP_P4_181830_12916 | NW_004518133.1 | Scaffold3438 | 12916                   | GG                              | AA              | 1947046516               |
| SNP_P4_181831_12947 | NW_004518133.1 | Scaffold3438 | 12947                   | TT                              | AA              | 1947046518               |
| SNP_P4_181832_12951 | NW_004518133.1 | Scaffold3438 | 12951                   | GG                              | AA              | 1947046520               |
| SNP_P4_181833_12960 | NW_004518133.1 | Scaffold3438 | 12960                   | CC                              | TT              | 1947046522               |
| SNP_P4_181834_12966 | NW_004518133.1 | Scaffold3438 | 12966                   | AA                              | GG              | 1947046524               |
| SNP_P4_181835_13107 | NW_004518133.1 | Scaffold3438 | 13107                   | CC                              | TT              | 1947046526               |
| SNP_P4_181836_13149 | NW_004518133.1 | Scaffold3438 | 13149                   | AA                              | GG              | 1947046528               |
| SNP_P4_181837_13535 | NW_004518133.1 | Scaffold3438 | 13535                   | TT                              | CC              | 1947046530               |
| SNP_P4_181838_22501 | NW_004518133.1 | Scaffold3438 | 22501                   | GG                              | AA              | 1947046532               |
| SNP_P4_181839_22537 | NW_004518133.1 | Scaffold3438 | 22537                   | TT                              | AA              | 1947046534               |
| SNP_P4_181841_22761 | NW_004518133.1 | Scaffold3438 | 22761                   | CC                              | TT              | 1947046536               |
| SNP_P4_181842_22919 | NW_004518133.1 | Scaffold3438 | 22919                   | TT                              | CC              | 1947046538               |
| SNP_P4_181843_23140 | NW_004518133.1 | Scaffold3438 | 23140                   | GG                              | AA              | 1947046540               |

| SNPs IDs            | Chromosome IDs | Chromosomes  | Physical positions (bp) | CDC Frontier (Reference genome) | (ILWC46 & LPNB) | NCBI SNPdb Accession IDs |
|---------------------|----------------|--------------|-------------------------|---------------------------------|-----------------|--------------------------|
| SNP_P4_181844_289   | NW_004518138.1 | Scaffold3444 | 289                     | AA                              | GG              | 1947046542               |
| SNP_P4_181845_11494 | NW_004518138.1 | Scaffold3444 | 11494                   | AA                              | GG              | 1947046544               |
| SNP_P4_181846_11419 | NW_004518139.1 | Scaffold3445 | 11419                   | TT                              | CC              | 1947046546               |
| SNP_P4_181847_11897 | NW_004518141.1 | Scaffold3447 | 11897                   | CC                              | AA              | 1947046548               |
| SNP_P4_181848_11935 | NW_004518141.1 | Scaffold3447 | 11935                   | CC                              | TT              | 1947046550               |
| SNP_P4_181849_11964 | NW_004518141.1 | Scaffold3447 | 11964                   | TT                              | GG              | 1947046552               |
| SNP_P4_181850_21398 | NW_004518141.1 | Scaffold3447 | 21398                   | CC                              | AA              | 1947046554               |
| SNP_P4_181851_30868 | NW_004518141.1 | Scaffold3447 | 30868                   | CC                              | GG              | 1947046556               |
| SNP_P4_181852_34589 | NW_004518141.1 | Scaffold3447 | 34589                   | AA                              | TT              | 1947046558               |
| SNP_P4_181853_94    | NW_004518142.1 | Scaffold3448 | 94                      | GG                              | AA              | 1947046560               |
| SNP_P4_181854_115   | NW_004518142.1 | Scaffold3448 | 115                     | GG                              | AA              | 1947046562               |
| SNP_P4_181855_2389  | NW_004518142.1 | Scaffold3448 | 2389                    | GG                              | TT              | 1947046564               |
| SNP_P4_181856_2421  | NW_004518142.1 | Scaffold3448 | 2421                    | AA                              | CC              | 1947046566               |
| SNP_P4_181857_2790  | NW_004518142.1 | Scaffold3448 | 2790                    | TT                              | AA              | 1947046568               |
| SNP_P4_181858_3019  | NW_004518142.1 | Scaffold3448 | 3019                    | AA                              | GG              | 1947046570               |
| SNP_P4_181859_3049  | NW_004518142.1 | Scaffold3448 | 3049                    | CC                              | AA              | 1947046572               |
| SNP_P4_181860_3054  | NW_004518142.1 | Scaffold3448 | 3054                    | CC                              | TT              | 1947046574               |
| SNP_P4_181861_5425  | NW_004518142.1 | Scaffold3448 | 5425                    | AA                              | TT              | 1947046576               |
| SNP_P4_181862_5489  | NW_004518142.1 | Scaffold3448 | 5489                    | CC                              | TT              | 1947046578               |
| SNP_P4_181863_5618  | NW_004518142.1 | Scaffold3448 | 5618                    | TT                              | CC              | 1947046580               |
| SNP_P4_181864_5796  | NW_004518142.1 | Scaffold3448 | 5796                    | CC                              | TT              | 1947046582               |
| SNP_P4_181865_5836  | NW_004518142.1 | Scaffold3448 | 5836                    | TT                              | CC              | 1947046584               |
| SNP_P4_181866_5897  | NW_004518142.1 | Scaffold3448 | 5897                    | TT                              | GG              | 1947046586               |
| SNP_P4_181867_5953  | NW_004518142.1 | Scaffold3448 | 5953                    | AA                              | TT              | 1947046588               |
| SNP_P4_181868_6017  | NW_004518142.1 | Scaffold3448 | 6017                    | AA                              | GG              | 1947046590               |
| SNP_P4_181869_6025  | NW_004518142.1 | Scaffold3448 | 6025                    | CC                              | AA              | 1947046592               |
| SNP_P4_181870_6458  | NW_004518142.1 | Scaffold3448 | 6458                    | TT                              | GG              | 1947046594               |
| SNP_P4_181871_2515  | NW_004518143.1 | Scaffold3450 | 2515                    | TT                              | AA              | 1947046596               |
| SNP_P4_181872_2718  | NW_004518143.1 | Scaffold3450 | 2718                    | TT                              | AA              | 1947046598               |
| SNP_P4_181873_3206  | NW_004518143.1 | Scaffold3450 | 3206                    | TT                              | AA              | 1947046600               |
| SNP_P4_181874_3211  | NW_004518143.1 | Scaffold3450 | 3211                    | GG                              | TT              | 1947046602               |
| SNP_P4_181875_3259  | NW_004518143.1 | Scaffold3450 | 3259                    | GG                              | CC              | 1947046604               |
| SNP_P4_181876_3315  | NW_004518143.1 | Scaffold3450 | 3315                    | AA                              | TT              | 1947046606               |
| SNP_P4_181877_13478 | NW_004518143.1 | Scaffold3450 | 13478                   | TT                              | CC              | 1947046608               |
| SNP_P4_181878_15100 | NW_004518143.1 | Scaffold3450 | 15100                   | GG                              | CC              | 1947046610               |
| SNP_P4_181879_15103 | NW_004518143.1 | Scaffold3450 | 15103                   | AA                              | TT              | 1947046612               |
| SNP_P4_181881_1178  | NW_004518145.1 | Scaffold3453 | 1178                    | TT                              | GG              | 1947046614               |
| SNP_P4_181882_1922  | NW_004518145.1 | Scaffold3453 | 1922                    | TT                              | CC              | 1947046616               |
| SNP_P4_181883_2035  | NW_004518145.1 | Scaffold3453 | 2035                    | TT                              | CC              | 1947046618               |
| SNP_P4_181884_2157  | NW_004518145.1 | Scaffold3453 | 2157                    | AA                              | TT              | 1947046620               |
| SNP_P4_181885_2158  | NW_004518145.1 | Scaffold3453 | 2158                    | TT                              | GG              | 1947046622               |
| SNP_P4_181886_5508  | NW_004518146.1 | Scaffold3454 | 5508                    | TT                              | AA              | 1947046624               |



| SNPs IDs            | Chromosome IDs | Chromosomes  | Physical positions (bp) | CDC Frontier (Reference genome) | (ILWC46 & LPNB) | NCBI SNPdb Accession IDs |
|---------------------|----------------|--------------|-------------------------|---------------------------------|-----------------|--------------------------|
| SNP_P4_181887_299   | NW_004518147.1 | Scaffold3455 | 299                     | TT                              | CC              | 1947046626               |
| SNP_P4_181888_413   | NW_004518147.1 | Scaffold3455 | 413                     | CC                              | AA              | 1947046628               |
| SNP_P4_181889_675   | NW_004518147.1 | Scaffold3455 | 675                     | AA                              | GG              | 1947046630               |
| SNP_P4_181890_676   | NW_004518147.1 | Scaffold3455 | 676                     | AA                              | TT              | 1947046632               |
| SNP_P4_181891_709   | NW_004518147.1 | Scaffold3455 | 709                     | TT                              | CC              | 1947046634               |
| SNP_P4_181892_761   | NW_004518147.1 | Scaffold3455 | 761                     | AA                              | GG              | 1947046636               |
| SNP_P4_181893_769   | NW_004518147.1 | Scaffold3455 | 769                     | AA                              | TT              | 1947046638               |
| SNP_P4_181894_808   | NW_004518147.1 | Scaffold3455 | 808                     | AA                              | TT              | 1947046640               |
| SNP_P4_181895_902   | NW_004518147.1 | Scaffold3455 | 902                     | GG                              | AA              | 1947046642               |
| SNP_P4_181896_903   | NW_004518147.1 | Scaffold3455 | 903                     | AA                              | GG              | 1947046644               |
| SNP_P4_181897_1064  | NW_004518147.1 | Scaffold3455 | 1064                    | TT                              | CC              | 1947046646               |
| SNP_P4_181898_1102  | NW_004518147.1 | Scaffold3455 | 1102                    | CC                              | TT              | 1947046648               |
| SNP_P4_181899_522   | NW_004518148.1 | Scaffold3457 | 522                     | TT                              | AA              | 1947046650               |
| SNP_P4_181900_660   | NW_004518148.1 | Scaffold3457 | 660                     | GG                              | AA              | 1947046652               |
| SNP_P4_181901_718   | NW_004518148.1 | Scaffold3457 | 718                     | TT                              | GG              | 1947046654               |
| SNP_P4_181902_2321  | NW_004518148.1 | Scaffold3457 | 2321                    | AA                              | TT              | 1947046656               |
| SNP_P4_181903_4677  | NW_004518148.1 | Scaffold3457 | 4677                    | GG                              | AA              | 1947046658               |
| SNP_P4_181904_4804  | NW_004518148.1 | Scaffold3457 | 4804                    | AA                              | GG              | 1947046660               |
| SNP_P4_181905_4854  | NW_004518148.1 | Scaffold3457 | 4854                    | CC                              | TT              | 1947046662               |
| SNP_P4_181906_4855  | NW_004518148.1 | Scaffold3457 | 4855                    | GG                              | TT              | 1947046664               |
| SNP_P4_181907_4898  | NW_004518148.1 | Scaffold3457 | 4898                    | CC                              | TT              | 1947046666               |
| SNP_P4_181908_5064  | NW_004518148.1 | Scaffold3457 | 5064                    | CC                              | TT              | 1947046668               |
| SNP_P4_181909_7056  | NW_004518149.1 | Scaffold3458 | 7056                    | GG                              | AA              | 1947046670               |
| SNP_P4_181910_7126  | NW_004518149.1 | Scaffold3458 | 7126                    | GG                              | AA              | 1947046672               |
| SNP_P4_181911_7329  | NW_004518149.1 | Scaffold3458 | 7329                    | GG                              | TT              | 1947046674               |
| SNP_P4_181912_7361  | NW_004518149.1 | Scaffold3458 | 7361                    | TT                              | CC              | 1947046676               |
| SNP_P4_181913_7501  | NW_004518149.1 | Scaffold3458 | 7501                    | GG                              | AA              | 1947046678               |
| SNP_P4_181914_9292  | NW_004518149.1 | Scaffold3458 | 9292                    | AA                              | GG              | 1947046681               |
| SNP_P4_181915_9964  | NW_004518149.1 | Scaffold3458 | 9964                    | CC                              | TT              | 1947046682               |
| SNP_P4_181917_10045 | NW_004518149.1 | Scaffold3458 | 10045                   | AA                              | GG              | 1947046684               |
| SNP_P4_181918_11422 | NW_004518149.1 | Scaffold3458 | 11422                   | TT                              | AA              | 1947046686               |
| SNP_P4_181919_11619 | NW_004518149.1 | Scaffold3458 | 11619                   | AA                              | TT              | 1947046688               |
| SNP_P4_181920_11622 | NW_004518149.1 | Scaffold3458 | 11622                   | AA                              | CC              | 1947046690               |
| SNP_P4_181921_11694 | NW_004518149.1 | Scaffold3458 | 11694                   | CC                              | AA              | 1947046692               |
| SNP_P4_181922_11712 | NW_004518149.1 | Scaffold3458 | 11712                   | CC                              | TT              | 1947046694               |
| SNP_P4_181923_11728 | NW_004518149.1 | Scaffold3458 | 11728                   | AA                              | TT              | 1947046696               |
| SNP_P4_181924_11908 | NW_004518149.1 | Scaffold3458 | 11908                   | GG                              | CC              | 1947046698               |
| SNP_P4_181925_11912 | NW_004518149.1 | Scaffold3458 | 11912                   | CC                              | GG              | 1947046700               |
| SNP_P4_181926_12048 | NW_004518149.1 | Scaffold3458 | 12048                   | AA                              | CC              | 1947046702               |
| SNP_P4_181927_16256 | NW_004518149.1 | Scaffold3458 | 16256                   | GG                              | AA              | 1947046704               |
| SNP_P4_181928_16481 | NW_004518149.1 | Scaffold3458 | 16481                   | TT                              | CC              | 1947046706               |
| SNP_P4_181929_17829 | NW_004518149.1 | Scaffold3458 | 17829                   | TT                              | GG              | 1947046708               |

| SNPs IDs            | Chromosome IDs | Chromosomes  | Physical positions (bp) | CDC Frontier (Reference genome) | (ILWC46 & LPNB) | NCBI SNPdb Accession IDs |
|---------------------|----------------|--------------|-------------------------|---------------------------------|-----------------|--------------------------|
| SNP_P4_181930_9043  | NW_004518154.1 | Scaffold3463 | 9043                    | TT                              | AA              | 1947046710               |
| SNP_P4_181931_9079  | NW_004518154.1 | Scaffold3463 | 9079                    | TT                              | CC              | 1947046712               |
| SNP_P4_181932_9181  | NW_004518154.1 | Scaffold3463 | 9181                    | GG                              | TT              | 1947046714               |
| SNP_P4_181933_9227  | NW_004518154.1 | Scaffold3463 | 9227                    | GG                              | AA              | 1947046716               |
| SNP_P4_181934_9460  | NW_004518154.1 | Scaffold3463 | 9460                    | TT                              | GG              | 1947046718               |
| SNP_P4_181935_9559  | NW_004518154.1 | Scaffold3463 | 9559                    | CC                              | TT              | 1947046720               |
| SNP_P4_181936_9570  | NW_004518154.1 | Scaffold3463 | 9570                    | AA                              | TT              | 1947046722               |
| SNP_P4_181937_9593  | NW_004518154.1 | Scaffold3463 | 9593                    | GG                              | AA              | 1947046724               |
| SNP_P4_181938_10724 | NW_004518154.1 | Scaffold3463 | 10724                   | TT                              | CC              | 1947046726               |
| SNP_P4_181939_10731 | NW_004518154.1 | Scaffold3463 | 10731                   | AA                              | GG              | 1947046728               |
| SNP_P4_181940_11925 | NW_004518154.1 | Scaffold3463 | 11925                   | GG                              | TT              | 1947046730               |
| SNP_P4_181941_11954 | NW_004518154.1 | Scaffold3463 | 11954                   | AA                              | TT              | 1947046732               |
| SNP_P4_181942_12501 | NW_004518154.1 | Scaffold3463 | 12501                   | AA                              | GG              | 1947046734               |
| SNP_P4_181943_12574 | NW_004518154.1 | Scaffold3463 | 12574                   | TT                              | AA              | 1947046736               |
| SNP_P4_181944_15600 | NW_004518154.1 | Scaffold3463 | 15600                   | TT                              | AA              | 1947046738               |
| SNP_P4_181945_15617 | NW_004518154.1 | Scaffold3463 | 15617                   | GG                              | CC              | 1947046740               |
| SNP_P4_181946_15659 | NW_004518154.1 | Scaffold3463 | 15659                   | AA                              | TT              | 1947046742               |
| SNP_P4_181947_15664 | NW_004518154.1 | Scaffold3463 | 15664                   | TT                              | GG              | 1947046744               |
| SNP_P4_181948_15667 | NW_004518154.1 | Scaffold3463 | 15667                   | AA                              | CC              | 1947046746               |
| SNP_P4_181949_15860 | NW_004518154.1 | Scaffold3463 | 15860                   | CC                              | TT              | 1947046748               |
| SNP_P4_181950_15862 | NW_004518154.1 | Scaffold3463 | 15862                   | CC                              | AA              | 1947046750               |
| SNP_P4_181951_15876 | NW_004518154.1 | Scaffold3463 | 15876                   | AA                              | TT              | 1947046752               |
| SNP_P4_181952_15892 | NW_004518154.1 | Scaffold3463 | 15892                   | GG                              | AA              | 1947046754               |
| SNP_P4_181953_15907 | NW_004518154.1 | Scaffold3463 | 15907                   | AA                              | TT              | 1947046756               |
| SNP_P4_181954_15948 | NW_004518154.1 | Scaffold3463 | 15948                   | TT                              | CC              | 1947046758               |
| SNP_P4_181955_17002 | NW_004518154.1 | Scaffold3463 | 17002                   | CC                              | TT              | 1947046760               |
| SNP_P4_181956_17051 | NW_004518154.1 | Scaffold3463 | 17051                   | TT                              | CC              | 1947046762               |
| SNP_P4_181957_21643 | NW_004518154.1 | Scaffold3463 | 21643                   | CC                              | TT              | 1947046764               |
| SNP_P4_181958_503   | NW_004518155.1 | Scaffold3464 | 503                     | CC                              | AA              | 1947046766               |
| SNP_P4_181959_5419  | NW_004518155.1 | Scaffold3464 | 5419                    | CC                              | TT              | 1947046768               |
| SNP_P4_181960_11243 | NW_004518155.1 | Scaffold3464 | 11243                   | TT                              | CC              | 1947046770               |
| SNP_P4_181961_13499 | NW_004518155.1 | Scaffold3464 | 13499                   | TT                              | CC              | 1947046772               |
| SNP_P4_181962_13525 | NW_004518155.1 | Scaffold3464 | 13525                   | GG                              | AA              | 1947046774               |
| SNP_P4_181963_17027 | NW_004518155.1 | Scaffold3464 | 17027                   | CC                              | TT              | 1947046776               |
| SNP_P4_181964_17082 | NW_004518155.1 | Scaffold3464 | 17082                   | CC                              | TT              | 1947046778               |
| SNP_P4_181965_17139 | NW_004518155.1 | Scaffold3464 | 17139                   | CC                              | AA              | 1947046780               |
| SNP_P4_181966_17390 | NW_004518155.1 | Scaffold3464 | 17390                   | AA                              | TT              | 1947046782               |
| SNP_P4_181967_971   | NW_004518157.1 | Scaffold3466 | 971                     | GG                              | AA              | 1947046784               |
| SNP_P4_181968_982   | NW_004518157.1 | Scaffold3466 | 982                     | CC                              | AA              | 1947046786               |
| SNP_P4_181969_64    | NW_004518159.1 | Scaffold3468 | 64                      | TT                              | GG              | 1947046788               |
| SNP_P4_181970_67    | NW_004518159.1 | Scaffold3468 | 67                      | TT                              | GG              | 1947046790               |
| SNP_P4_181971_108   | NW_004518159.1 | Scaffold3468 | 108                     | CC                              | TT              | 1947046792               |

| SNPs IDs            | Chromosome IDs | Chromosomes  | Physical positions (bp) | CDC Frontier (Reference genome) | (ILWC46 & LPNB) | NCBI SNPdb Accession IDs |
|---------------------|----------------|--------------|-------------------------|---------------------------------|-----------------|--------------------------|
| SNP_P4_181972_236   | NW_004518159.1 | Scaffold3468 | 236                     | AA                              | GG              | 1947046794               |
| SNP_P4_181973_331   | NW_004518159.1 | Scaffold3468 | 331                     | TT                              | AA              | 1947046796               |
| SNP_P4_181974_379   | NW_004518159.1 | Scaffold3468 | 379                     | AA                              | GG              | 1947046798               |
| SNP_P4_181975_1203  | NW_004518159.1 | Scaffold3468 | 1203                    | CC                              | AA              | 1947046800               |
| SNP_P4_181976_1733  | NW_004518159.1 | Scaffold3468 | 1733                    | TT                              | GG              | 1947046802               |
| SNP_P4_181977_2088  | NW_004518160.1 | Scaffold3470 | 2088                    | CC                              | TT              | 1947046804               |
| SNP_P4_181978_2103  | NW_004518160.1 | Scaffold3470 | 2103                    | CC                              | TT              | 1947046806               |
| SNP_P4_181979_2104  | NW_004518160.1 | Scaffold3470 | 2104                    | TT                              | CC              | 1947046808               |
| SNP_P4_181980_2121  | NW_004518160.1 | Scaffold3470 | 2121                    | TT                              | CC              | 1947046810               |
| SNP_P4_181981_2133  | NW_004518160.1 | Scaffold3470 | 2133                    | TT                              | CC              | 1947046812               |
| SNP_P4_181983_16805 | NW_004518160.1 | Scaffold3470 | 16805                   | TT                              | CC              | 1947046814               |
| SNP_P4_181984_16813 | NW_004518160.1 | Scaffold3470 | 16813                   | CC                              | TT              | 1947046816               |
| SNP_P4_181985_16824 | NW_004518160.1 | Scaffold3470 | 16824                   | GG                              | TT              | 1947046818               |
| SNP_P4_181986_16833 | NW_004518160.1 | Scaffold3470 | 16833                   | TT                              | GG              | 1947046820               |
| SNP_P4_181987_16835 | NW_004518160.1 | Scaffold3470 | 16835                   | TT                              | AA              | 1947046822               |
| SNP_P4_181988_21568 | NW_004518160.1 | Scaffold3470 | 21568                   | CC                              | TT              | 1947046824               |
| SNP_P4_181989_37734 | NW_004518160.1 | Scaffold3470 | 37734                   | CC                              | AA              | 1947046826               |
| SNP_P4_181990_37769 | NW_004518160.1 | Scaffold3470 | 37769                   | AA                              | TT              | 1947046828               |
| SNP_P4_181991_37908 | NW_004518160.1 | Scaffold3470 | 37908                   | AA                              | TT              | 1947046830               |
| SNP_P4_181992_38130 | NW_004518160.1 | Scaffold3470 | 38130                   | AA                              | TT              | 1947046832               |
| SNP_P4_181993_38145 | NW_004518160.1 | Scaffold3470 | 38145                   | TT                              | CC              | 1947046834               |
| SNP_P4_181994_38664 | NW_004518160.1 | Scaffold3470 | 38664                   | GG                              | AA              | 1947046836               |
| SNP_P4_181995_43024 | NW_004518160.1 | Scaffold3470 | 43024                   | GG                              | AA              | 1947046838               |
| SNP_P4_181996_44757 | NW_004518160.1 | Scaffold3470 | 44757                   | GG                              | AA              | 1947046840               |
| SNP_P4_181997_44813 | NW_004518160.1 | Scaffold3470 | 44813                   | TT                              | AA              | 1947046842               |
| SNP_P4_181998_47304 | NW_004518160.1 | Scaffold3470 | 47304                   | TT                              | GG              | 1947046844               |
| SNP_P4_181999_49684 | NW_004518160.1 | Scaffold3470 | 49684                   | CC                              | TT              | 1947046846               |
| SNP_P4_182000_50337 | NW_004518160.1 | Scaffold3470 | 50337                   | GG                              | AA              | 1947046848               |
| SNP_P4_182001_50347 | NW_004518160.1 | Scaffold3470 | 50347                   | TT                              | GG              | 1947046850               |
| SNP_P4_182002_50393 | NW_004518160.1 | Scaffold3470 | 50393                   | TT                              | CC              | 1947046852               |
| SNP_P4_182003_50412 | NW_004518160.1 | Scaffold3470 | 50412                   | TT                              | AA              | 1947046854               |
| SNP_P4_182004_50415 | NW_004518160.1 | Scaffold3470 | 50415                   | TT                              | CC              | 1947046856               |
| SNP_P4_182005_61245 | NW_004518160.1 | Scaffold3470 | 61245                   | GG                              | CC              | 1947046858               |
| SNP_P4_182006_64803 | NW_004518160.1 | Scaffold3470 | 64803                   | GG                              | AA              | 1947046860               |
| SNP_P4_182007_73036 | NW_004518160.1 | Scaffold3470 | 73036                   | CC                              | GG              | 1947046862               |
| SNP_P4_182008_75247 | NW_004518160.1 | Scaffold3470 | 75247                   | AA                              | CC              | 1947046865               |
| SNP_P4_182009_75266 | NW_004518160.1 | Scaffold3470 | 75266                   | TT                              | CC              | 1947046867               |
| SNP_P4_182010_75321 | NW_004518160.1 | Scaffold3470 | 75321                   | TT                              | AA              | 1947046869               |
| SNP_P4_182011_77918 | NW_004518160.1 | Scaffold3470 | 77918                   | TT                              | CC              | 1947046871               |
| SNP_P4_182012_78744 | NW_004518160.1 | Scaffold3470 | 78744                   | TT                              | AA              | 1947046873               |
| SNP_P4_182013_78751 | NW_004518160.1 | Scaffold3470 | 78751                   | TT                              | GG              | 1947046875               |
| SNP_P4_182014_78754 | NW_004518160.1 | Scaffold3470 | 78754                   | CC                              | TT              | 1947046877               |

| SNPs IDs             | Chromosome IDs | Chromosomes  | Physical positions (bp) | CDC Frontier (Reference genome) | (ILWC46 & LPNB) | NCBI SNPdb Accession IDs |
|----------------------|----------------|--------------|-------------------------|---------------------------------|-----------------|--------------------------|
| SNP_P4_182015_78760  | NW_004518160.1 | Scaffold3470 | 78760                   | AA                              | TT              | 1947046879               |
| SNP_P4_182016_78901  | NW_004518160.1 | Scaffold3470 | 78901                   | AA                              | GG              | 1947046881               |
| SNP_P4_182017_82054  | NW_004518160.1 | Scaffold3470 | 82054                   | CC                              | TT              | 1947046883               |
| SNP_P4_182018_82184  | NW_004518160.1 | Scaffold3470 | 82184                   | GG                              | CC              | 1947046885               |
| SNP_P4_182019_82430  | NW_004518160.1 | Scaffold3470 | 82430                   | TT                              | GG              | 1947046887               |
| SNP_P4_182020_82513  | NW_004518160.1 | Scaffold3470 | 82513                   | AA                              | TT              | 1947046889               |
| SNP_P4_182021_82529  | NW_004518160.1 | Scaffold3470 | 82529                   | GG                              | CC              | 1947046891               |
| SNP_P4_182022_82609  | NW_004518160.1 | Scaffold3470 | 82609                   | TT                              | CC              | 1947046893               |
| SNP_P4_182023_85435  | NW_004518160.1 | Scaffold3470 | 85435                   | AA                              | CC              | 1947046895               |
| SNP_P4_182024_85759  | NW_004518160.1 | Scaffold3470 | 85759                   | TT                              | CC              | 1947046897               |
| SNP_P4_182025_98353  | NW_004518160.1 | Scaffold3470 | 98353                   | AA                              | GG              | 1947046898               |
| SNP_P4_182026_100455 | NW_004518160.1 | Scaffold3470 | 100455                  | TT                              | CC              | 1947046900               |
| SNP_P4_182027_100480 | NW_004518160.1 | Scaffold3470 | 100480                  | TT                              | AA              | 1947046902               |
| SNP_P4_182028_102172 | NW_004518160.1 | Scaffold3470 | 102172                  | AA                              | GG              | 1947046904               |
| SNP_P4_182029_5673   | NW_004518162.1 | Scaffold3472 | 5673                    | GG                              | AA              | 1947046906               |
| SNP_P4_182031_6967   | NW_004518162.1 | Scaffold3472 | 6967                    | GG                              | TT              | 1947046908               |
| SNP_P4_182033_7108   | NW_004518162.1 | Scaffold3472 | 7108                    | CC                              | AA              | 1947046910               |
| SNP_P4_182034_7131   | NW_004518162.1 | Scaffold3472 | 7131                    | TT                              | CC              | 1947046912               |
| SNP_P4_182036_7278   | NW_004518162.1 | Scaffold3472 | 7278                    | GG                              | AA              | 1947046914               |
| SNP_P4_182037_7499   | NW_004518162.1 | Scaffold3472 | 7499                    | TT                              | CC              | 1947046916               |
| SNP_P4_182038_8759   | NW_004518162.1 | Scaffold3472 | 8759                    | AA                              | GG              | 1947046918               |
| SNP_P4_182039_8837   | NW_004518162.1 | Scaffold3472 | 8837                    | CC                              | TT              | 1947046920               |
| SNP_P4_182040_8876   | NW_004518162.1 | Scaffold3472 | 8876                    | TT                              | CC              | 1947046922               |
| SNP_P4_182041_8894   | NW_004518162.1 | Scaffold3472 | 8894                    | AA                              | GG              | 1947046924               |
| SNP_P4_182042_8990   | NW_004518162.1 | Scaffold3472 | 8990                    | GG                              | AA              | 1947046926               |
| SNP_P4_182044_9135   | NW_004518162.1 | Scaffold3472 | 9135                    | AA                              | GG              | 1947046928               |
| SNP_P4_182045_9238   | NW_004518162.1 | Scaffold3472 | 9238                    | AA                              | GG              | 1947046930               |
| SNP_P4_182046_9305   | NW_004518162.1 | Scaffold3472 | 9305                    | CC                              | TT              | 1947046932               |
| SNP_P4_182048_9533   | NW_004518162.1 | Scaffold3472 | 9533                    | GG                              | AA              | 1947046933               |
| SNP_P4_182049_9573   | NW_004518162.1 | Scaffold3472 | 9573                    | CC                              | TT              | 1947046935               |
| SNP_P4_182050_9583   | NW_004518162.1 | Scaffold3472 | 9583                    | AA                              | CC              | 1947046937               |
| SNP_P4_182051_9627   | NW_004518162.1 | Scaffold3472 | 9627                    | CC                              | GG              | 1947046939               |
| SNP_P4_182052_9837   | NW_004518162.1 | Scaffold3472 | 9837                    | CC                              | TT              | 1947046941               |
| SNP_P4_182053_9902   | NW_004518162.1 | Scaffold3472 | 9902                    | CC                              | TT              | 1947046943               |
| SNP_P4_182054_9919   | NW_004518162.1 | Scaffold3472 | 9919                    | CC                              | TT              | 1947046945               |
| SNP_P4_182055_9959   | NW_004518162.1 | Scaffold3472 | 9959                    | CC                              | TT              | 1947046947               |
| SNP_P4_182056_10072  | NW_004518162.1 | Scaffold3472 | 10072                   | TT                              | CC              | 1947046949               |
| SNP_P4_182057_10232  | NW_004518162.1 | Scaffold3472 | 10232                   | TT                              | CC              | 1947046951               |
| SNP_P4_182058_10235  | NW_004518162.1 | Scaffold3472 | 10235                   | TT                              | AA              | 1947046953               |
| SNP_P4_182059_13355  | NW_004518162.1 | Scaffold3472 | 13355                   | TT                              | CC              | 1947046955               |
| SNP_P4_182062_526    | NW_004518163.1 | Scaffold3473 | 526                     | TT                              | CC              | 1947046957               |
| SNP_P4_182063_592    | NW_004518163.1 | Scaffold3473 | 592                     | AA                              | TT              | 1947046959               |

| SNPs IDs           | Chromosome IDs | Chromosomes  | Physical positions (bp) | CDC Frontier (Reference genome) | (ILWC46 & LPNB) | NCBI SNPdb Accession IDs |
|--------------------|----------------|--------------|-------------------------|---------------------------------|-----------------|--------------------------|
| SNP_P4_182064_636  | NW_004518163.1 | Scaffold3473 | 636                     | AA                              | GG              | 1947046961               |
| SNP_P4_182065_674  | NW_004518163.1 | Scaffold3473 | 674                     | CC                              | TT              | 1947046963               |
| SNP_P4_182066_734  | NW_004518163.1 | Scaffold3473 | 734                     | TT                              | GG              | 1947046964               |
| SNP_P4_182067_741  | NW_004518163.1 | Scaffold3473 | 741                     | CC                              | TT              | 1947046966               |
| SNP_P4_182068_764  | NW_004518163.1 | Scaffold3473 | 764                     | TT                              | CC              | 1947047050               |
| SNP_P4_182069_455  | NW_004518164.1 | Scaffold3474 | 455                     | TT                              | CC              | 1947047052               |
| SNP_P4_182070_493  | NW_004518164.1 | Scaffold3474 | 493                     | AA                              | GG              | 1947047054               |
| SNP_P4_182071_993  | NW_004518164.1 | Scaffold3474 | 993                     | GG                              | AA              | 1947047056               |
| SNP_P4_182072_1009 | NW_004518164.1 | Scaffold3474 | 1009                    | TT                              | CC              | 1947047058               |
| SNP_P4_182073_1015 | NW_004518164.1 | Scaffold3474 | 1015                    | AA                              | GG              | 1947047060               |
| SNP_P4_182074_1048 | NW_004518164.1 | Scaffold3474 | 1048                    | TT                              | AA              | 1947047062               |
| SNP_P4_182075_1050 | NW_004518164.1 | Scaffold3474 | 1050                    | CC                              | AA              | 1947047064               |
| SNP_P4_182076_580  | NW_004518165.1 | Scaffold3475 | 580                     | CC                              | TT              | 1947047066               |
| SNP_P4_182077_973  | NW_004518165.1 | Scaffold3475 | 973                     | AA                              | GG              | 1947047068               |
| SNP_P4_182079_1378 | NW_004518165.1 | Scaffold3475 | 1378                    | GG                              | AA              | 1947047070               |
| SNP_P4_182080_1417 | NW_004518165.1 | Scaffold3475 | 1417                    | AA                              | GG              | 1947047072               |
| SNP_P4_182081_4989 | NW_004518165.1 | Scaffold3475 | 4989                    | AA                              | GG              | 1947047074               |
| SNP_P4_182082_5007 | NW_004518165.1 | Scaffold3475 | 5007                    | CC                              | TT              | 1947047076               |
| SNP_P4_182083_5008 | NW_004518165.1 | Scaffold3475 | 5008                    | GG                              | CC              | 1947047078               |
| SNP_P4_182084_5328 | NW_004518165.1 | Scaffold3475 | 5328                    | GG                              | AA              | 1947047080               |
| SNP_P4_182085_5534 | NW_004518165.1 | Scaffold3475 | 5534                    | TT                              | AA              | 1947047082               |
| SNP_P4_182086_5535 | NW_004518165.1 | Scaffold3475 | 5535                    | CC                              | AA              | 1947047084               |
| SNP_P4_182087_5809 | NW_004518165.1 | Scaffold3475 | 5809                    | TT                              | CC              | 1947047086               |
| SNP_P4_182088_5896 | NW_004518165.1 | Scaffold3475 | 5896                    | CC                              | TT              | 1947047088               |
| SNP_P4_182089_6046 | NW_004518165.1 | Scaffold3475 | 6046                    | GG                              | AA              | 1947047090               |
| SNP_P4_182090_6047 | NW_004518165.1 | Scaffold3475 | 6047                    | TT                              | CC              | 1947047092               |
| SNP_P4_182092_6191 | NW_004518165.1 | Scaffold3475 | 6191                    | GG                              | AA              | 1947047094               |
| SNP_P4_182094_6237 | NW_004518165.1 | Scaffold3475 | 6237                    | CC                              | TT              | 1947047097               |
| SNP_P4_182095_6294 | NW_004518165.1 | Scaffold3475 | 6294                    | GG                              | AA              | 1947047099               |
| SNP_P4_182096_6299 | NW_004518165.1 | Scaffold3475 | 6299                    | GG                              | AA              | 1947047101               |
| SNP_P4_182097_6357 | NW_004518165.1 | Scaffold3475 | 6357                    | CC                              | TT              | 1947047103               |
| SNP_P4_182098_6362 | NW_004518165.1 | Scaffold3475 | 6362                    | CC                              | TT              | 1947047105               |
| SNP_P4_182099_6411 | NW_004518165.1 | Scaffold3475 | 6411                    | GG                              | TT              | 1947047107               |
| SNP_P4_182100_6516 | NW_004518165.1 | Scaffold3475 | 6516                    | AA                              | GG              | 1947047109               |
| SNP_P4_182101_7438 | NW_004518165.1 | Scaffold3475 | 7438                    | TT                              | CC              | 1947047111               |
| SNP_P4_182102_7474 | NW_004518165.1 | Scaffold3475 | 7474                    | CC                              | TT              | 1947047113               |
| SNP_P4_182104_7623 | NW_004518165.1 | Scaffold3475 | 7623                    | AA                              | TT              | 1947047115               |
| SNP_P4_182105_7721 | NW_004518165.1 | Scaffold3475 | 7721                    | GG                              | AA              | 1947047117               |
| SNP_P4_182106_7772 | NW_004518165.1 | Scaffold3475 | 7772                    | TT                              | CC              | 1947047119               |
| SNP_P4_182107_7853 | NW_004518165.1 | Scaffold3475 | 7853                    | CC                              | TT              | 1947047121               |
| SNP_P4_182108_7878 | NW_004518165.1 | Scaffold3475 | 7878                    | GG                              | AA              | 1947047123               |
| SNP_P4_182109_7998 | NW_004518165.1 | Scaffold3475 | 7998                    | GG                              | CC              | 1947047125               |

| SNPs IDs            | Chromosome IDs | Chromosomes  | Physical positions (bp) | CDC Frontier (Reference genome) | (ILWC46 & LPNB) | NCBI SNPdb Accession IDs |
|---------------------|----------------|--------------|-------------------------|---------------------------------|-----------------|--------------------------|
| SNP_P4_182110_8101  | NW_004518165.1 | Scaffold3475 | 8101                    | CC                              | GG              | 1947047127               |
| SNP_P4_182111_8124  | NW_004518165.1 | Scaffold3475 | 8124                    | TT                              | CC              | 1947047129               |
| SNP_P4_182112_8497  | NW_004518165.1 | Scaffold3475 | 8497                    | GG                              | AA              | 1947047131               |
| SNP_P4_182113_9816  | NW_004518165.1 | Scaffold3475 | 9816                    | AA                              | GG              | 1947047133               |
| SNP_P4_182114_9898  | NW_004518165.1 | Scaffold3475 | 9898                    | GG                              | AA              | 1947047135               |
| SNP_P4_182115_9975  | NW_004518165.1 | Scaffold3475 | 9975                    | AA                              | GG              | 1947047137               |
| SNP_P4_182116_9983  | NW_004518165.1 | Scaffold3475 | 9983                    | AA                              | TT              | 1947047139               |
| SNP_P4_182117_10072 | NW_004518165.1 | Scaffold3475 | 10072                   | CC                              | GG              | 1947047141               |
| SNP_P4_182118_10158 | NW_004518165.1 | Scaffold3475 | 10158                   | AA                              | GG              | 1947047143               |
| SNP_P4_182119_10273 | NW_004518165.1 | Scaffold3475 | 10273                   | CC                              | TT              | 1947047145               |
| SNP_P4_182120_10275 | NW_004518165.1 | Scaffold3475 | 10275                   | GG                              | AA              | 1947047147               |
| SNP_P4_182121_10279 | NW_004518165.1 | Scaffold3475 | 10279                   | GG                              | AA              | 1947047149               |
| SNP_P4_182122_10326 | NW_004518165.1 | Scaffold3475 | 10326                   | AA                              | CC              | 1947047151               |
| SNP_P4_182123_10429 | NW_004518165.1 | Scaffold3475 | 10429                   | TT                              | CC              | 1947047153               |
| SNP_P4_182124_10498 | NW_004518165.1 | Scaffold3475 | 10498                   | GG                              | AA              | 1947047155               |
| SNP_P4_182125_10594 | NW_004518165.1 | Scaffold3475 | 10594                   | AA                              | GG              | 1947047157               |
| SNP_P4_182126_20258 | NW_004518165.1 | Scaffold3475 | 20258                   | CC                              | AA              | 1947047159               |
| SNP_P4_182127_20546 | NW_004518165.1 | Scaffold3475 | 20546                   | GG                              | CC              | 1947047161               |
| SNP_P4_182128_20650 | NW_004518165.1 | Scaffold3475 | 20650                   | AA                              | GG              | 1947047163               |
| SNP_P4_182129_22275 | NW_004518165.1 | Scaffold3475 | 22275                   | GG                              | AA              | 1947047165               |
| SNP_P4_182130_22438 | NW_004518165.1 | Scaffold3475 | 22438                   | CC                              | TT              | 1947047167               |
| SNP_P4_182131_22514 | NW_004518165.1 | Scaffold3475 | 22514                   | GG                              | TT              | 1947047169               |
| SNP_P4_182132_27260 | NW_004518165.1 | Scaffold3475 | 27260                   | TT                              | AA              | 1947047170               |
| SNP_P4_182133_27318 | NW_004518165.1 | Scaffold3475 | 27318                   | AA                              | GG              | 1947047172               |
| SNP_P4_182134_27397 | NW_004518165.1 | Scaffold3475 | 27397                   | TT                              | CC              | 1947047174               |
| SNP_P4_182135_27400 | NW_004518165.1 | Scaffold3475 | 27400                   | AA                              | GG              | 1947047176               |
| SNP_P4_182136_27509 | NW_004518165.1 | Scaffold3475 | 27509                   | CC                              | GG              | 1947047178               |
| SNP_P4_182137_27526 | NW_004518165.1 | Scaffold3475 | 27526                   | GG                              | AA              | 1947047180               |
| SNP_P4_182138_27708 | NW_004518165.1 | Scaffold3475 | 27708                   | TT                              | AA              | 1947047182               |
| SNP_P4_182139_27755 | NW_004518165.1 | Scaffold3475 | 27755                   | CC                              | TT              | 1947047185               |
| SNP_P4_182140_27779 | NW_004518165.1 | Scaffold3475 | 27779                   | TT                              | CC              | 1947047187               |
| SNP_P4_182141_29290 | NW_004518165.1 | Scaffold3475 | 29290                   | GG                              | TT              | 1947047189               |
| SNP_P4_182142_29326 | NW_004518165.1 | Scaffold3475 | 29326                   | CC                              | AA              | 1947047191               |
| SNP_P4_182143_29332 | NW_004518165.1 | Scaffold3475 | 29332                   | TT                              | GG              | 1947047193               |
| SNP_P4_182144_29868 | NW_004518165.1 | Scaffold3475 | 29868                   | AA                              | GG              | 1947047195               |
| SNP_P4_182145_29876 | NW_004518165.1 | Scaffold3475 | 29876                   | CC                              | GG              | 1947047197               |
| SNP_P4_182146_29909 | NW_004518165.1 | Scaffold3475 | 29909                   | AA                              | GG              | 1947047199               |
| SNP_P4_182147_29946 | NW_004518165.1 | Scaffold3475 | 29946                   | TT                              | GG              | 1947047201               |
| SNP_P4_182148_30039 | NW_004518165.1 | Scaffold3475 | 30039                   | GG                              | AA              | 1947047203               |
| SNP_P4_182149_30047 | NW_004518165.1 | Scaffold3475 | 30047                   | AA                              | GG              | 1947047205               |
| SNP_P4_182150_30210 | NW_004518165.1 | Scaffold3475 | 30210                   | CC                              | GG              | 1947047207               |
| SNP_P4_182151_30356 | NW_004518165.1 | Scaffold3475 | 30356                   | GG                              | AA              | 1947047209               |

| SNPs IDs            | Chromosome IDs | Chromosomes  | Physical positions (bp) | CDC Frontier (Reference genome) | (ILWC46 & LPNB) | NCBI SNPdb Accession IDs |
|---------------------|----------------|--------------|-------------------------|---------------------------------|-----------------|--------------------------|
| SNP_P4_182152_30396 | NW_004518165.1 | Scaffold3475 | 30396                   | AA                              | CC              | 1947047211               |
| SNP_P4_182153_30452 | NW_004518165.1 | Scaffold3475 | 30452                   | GG                              | AA              | 1947047213               |
| SNP_P4_182154_30499 | NW_004518165.1 | Scaffold3475 | 30499                   | AA                              | GG              | 1947047215               |
| SNP_P4_182155_30602 | NW_004518165.1 | Scaffold3475 | 30602                   | GG                              | AA              | 1947047217               |
| SNP_P4_182156_30751 | NW_004518165.1 | Scaffold3475 | 30751                   | AA                              | CC              | 1947047219               |
| SNP_P4_182157_30755 | NW_004518165.1 | Scaffold3475 | 30755                   | TT                              | GG              | 1947047221               |
| SNP_P4_182158_30934 | NW_004518165.1 | Scaffold3475 | 30934                   | CC                              | TT              | 1947047223               |
| SNP_P4_182159_30970 | NW_004518165.1 | Scaffold3475 | 30970                   | CC                              | TT              | 1947047225               |
| SNP_P4_182160_30985 | NW_004518165.1 | Scaffold3475 | 30985                   | GG                              | AA              | 1947047227               |
| SNP_P4_182161_31159 | NW_004518165.1 | Scaffold3475 | 31159                   | AA                              | GG              | 1947047229               |
| SNP_P4_182162_31172 | NW_004518165.1 | Scaffold3475 | 31172                   | AA                              | GG              | 1947047231               |
| SNP_P4_182164_31337 | NW_004518165.1 | Scaffold3475 | 31337                   | CC                              | AA              | 1947047233               |
| SNP_P4_182165_31658 | NW_004518165.1 | Scaffold3475 | 31658                   | GG                              | AA              | 1947047235               |
| SNP_P4_182166_32192 | NW_004518165.1 | Scaffold3475 | 32192                   | CC                              | TT              | 1947047237               |
| SNP_P4_182167_33399 | NW_004518165.1 | Scaffold3475 | 33399                   | AA                              | CC              | 1947047239               |
| SNP_P4_182169_33461 | NW_004518165.1 | Scaffold3475 | 33461                   | AA                              | TT              | 1947047241               |
| SNP_P4_182171_34735 | NW_004518165.1 | Scaffold3475 | 34735                   | CC                              | TT              | 1947047243               |
| SNP_P4_182172_36734 | NW_004518165.1 | Scaffold3475 | 36734                   | TT                              | CC              | 1947047245               |
| SNP_P4_182173_36737 | NW_004518165.1 | Scaffold3475 | 36737                   | GG                              | CC              | 1947047247               |
| SNP_P4_182174_36761 | NW_004518165.1 | Scaffold3475 | 36761                   | TT                              | GG              | 1947047249               |
| SNP_P4_182175_36895 | NW_004518165.1 | Scaffold3475 | 36895                   | TT                              | AA              | 1947047251               |
| SNP_P4_182176_36902 | NW_004518165.1 | Scaffold3475 | 36902                   | CC                              | GG              | 1947047253               |
| SNP_P4_182177_36935 | NW_004518165.1 | Scaffold3475 | 36935                   | CC                              | GG              | 1947047255               |
| SNP_P4_182178_36994 | NW_004518165.1 | Scaffold3475 | 36994                   | AA                              | GG              | 1947047257               |
| SNP_P4_182179_37009 | NW_004518165.1 | Scaffold3475 | 37009                   | GG                              | AA              | 1947047259               |
| SNP_P4_182180_37129 | NW_004518165.1 | Scaffold3475 | 37129                   | TT                              | CC              | 1947047261               |
| SNP_P4_182181_37240 | NW_004518165.1 | Scaffold3475 | 37240                   | TT                              | CC              | 1947047263               |
| SNP_P4_182182_38584 | NW_004518165.1 | Scaffold3475 | 38584                   | AA                              | GG              | 1947047265               |
| SNP_P4_182183_38624 | NW_004518165.1 | Scaffold3475 | 38624                   | TT                              | AA              | 1947047267               |
| SNP_P4_182184_38632 | NW_004518165.1 | Scaffold3475 | 38632                   | GG                              | AA              | 1947047269               |
| SNP_P4_182185_38795 | NW_004518165.1 | Scaffold3475 | 38795                   | GG                              | TT              | 1947047271               |
| SNP_P4_182186_38888 | NW_004518165.1 | Scaffold3475 | 38888                   | GG                              | TT              | 1947047273               |
| SNP_P4_182187_42792 | NW_004518165.1 | Scaffold3475 | 42792                   | GG                              | AA              | 1947047275               |
| SNP_P4_182188_43050 | NW_004518165.1 | Scaffold3475 | 43050                   | TT                              | CC              | 1947047277               |
| SNP_P4_182189_43194 | NW_004518165.1 | Scaffold3475 | 43194                   | AA                              | GG              | 1947047279               |
| SNP_P4_182190_45207 | NW_004518165.1 | Scaffold3475 | 45207                   | AA                              | CC              | 1947047281               |
| SNP_P4_182191_56242 | NW_004518165.1 | Scaffold3475 | 56242                   | CC                              | TT              | 1947047283               |
| SNP_P4_182192_56373 | NW_004518165.1 | Scaffold3475 | 56373                   | GG                              | TT              | 1947047285               |
| SNP_P4_182193_56774 | NW_004518165.1 | Scaffold3475 | 56774                   | TT                              | GG              | 1947047287               |
| SNP_P4_182194_56876 | NW_004518165.1 | Scaffold3475 | 56876                   | GG                              | AA              | 1947047290               |
| SNP_P4_182195_60320 | NW_004518165.1 | Scaffold3475 | 60320                   | AA                              | GG              | 1947047292               |
| SNP_P4_182196_70577 | NW_004518165.1 | Scaffold3475 | 70577                   | AA                              | GG              | 1947047293               |

| SNPs IDs            | Chromosome IDs | Chromosomes  | Physical positions (bp) | CDC Frontier (Reference genome) | (ILWC46 & LPNB) | NCBI SNPdb Accession IDs |
|---------------------|----------------|--------------|-------------------------|---------------------------------|-----------------|--------------------------|
| SNP_P4_182197_70582 | NW_004518165.1 | Scaffold3475 | 70582                   | AA                              | GG              | 1947047295               |
| SNP_P4_182198_70590 | NW_004518165.1 | Scaffold3475 | 70590                   | CC                              | TT              | 1947047297               |
| SNP_P4_182199_70615 | NW_004518165.1 | Scaffold3475 | 70615                   | GG                              | AA              | 1947047299               |
| SNP_P4_182200_71363 | NW_004518165.1 | Scaffold3475 | 71363                   | GG                              | TT              | 1947047301               |
| SNP_P4_182201_73783 | NW_004518165.1 | Scaffold3475 | 73783                   | TT                              | CC              | 1947047303               |
| SNP_P4_182202_5716  | NW_004518166.1 | Scaffold3476 | 5716                    | CC                              | AA              | 1947047305               |
| SNP_P4_182203_6027  | NW_004518166.1 | Scaffold3476 | 6027                    | GG                              | AA              | 1947047307               |
| SNP_P4_182204_1281  | NW_004518170.1 | Scaffold3483 | 1281                    | TT                              | GG              | 1947047309               |
| SNP_P4_182205_64    | NW_004518172.1 | Scaffold3485 | 64                      | CC                              | TT              | 1947047311               |
| SNP_P4_182206_66    | NW_004518172.1 | Scaffold3485 | 66                      | GG                              | AA              | 1947047314               |
| SNP_P4_182207_71    | NW_004518172.1 | Scaffold3485 | 71                      | AA                              | CC              | 1947047316               |
| SNP_P4_182208_418   | NW_004518172.1 | Scaffold3485 | 418                     | TT                              | AA              | 1947047318               |
| SNP_P4_182209_467   | NW_004518172.1 | Scaffold3485 | 467                     | AA                              | TT              | 1947047320               |
| SNP_P4_182210_504   | NW_004518172.1 | Scaffold3485 | 504                     | GG                              | AA              | 1947047322               |
| SNP_P4_182211_1717  | NW_004518172.1 | Scaffold3485 | 1717                    | AA                              | TT              | 1947047324               |
| SNP_P4_182212_1779  | NW_004518172.1 | Scaffold3485 | 1779                    | AA                              | GG              | 1947047326               |
| SNP_P4_182213_1850  | NW_004518172.1 | Scaffold3485 | 1850                    | AA                              | TT              | 1947047327               |
| SNP_P4_182214_1992  | NW_004518172.1 | Scaffold3485 | 1992                    | GG                              | CC              | 1947047330               |
| SNP_P4_182215_4531  | NW_004518172.1 | Scaffold3485 | 4531                    | TT                              | CC              | 1947047331               |
| SNP_P4_182216_4729  | NW_004518172.1 | Scaffold3485 | 4729                    | CC                              | TT              | 1947047334               |
| SNP_P4_182217_4768  | NW_004518172.1 | Scaffold3485 | 4768                    | TT                              | AA              | 1947047336               |
| SNP_P4_182218_5064  | NW_004518172.1 | Scaffold3485 | 5064                    | TT                              | AA              | 1947047338               |
| SNP_P4_182219_5080  | NW_004518172.1 | Scaffold3485 | 5080                    | AA                              | CC              | 1947047339               |
| SNP_P4_182220_5098  | NW_004518172.1 | Scaffold3485 | 5098                    | TT                              | CC              | 1947047341               |
| SNP_P4_182221_5105  | NW_004518172.1 | Scaffold3485 | 5105                    | AA                              | TT              | 1947047343               |
| SNP_P4_182222_5386  | NW_004518172.1 | Scaffold3485 | 5386                    | AA                              | GG              | 1947047345               |
| SNP_P4_182223_5738  | NW_004518172.1 | Scaffold3485 | 5738                    | CC                              | TT              | 1947047347               |
| SNP_P4_182224_8738  | NW_004518173.1 | Scaffold3486 | 8738                    | CC                              | AA              | 1947047349               |
| SNP_P4_182225_9299  | NW_004518173.1 | Scaffold3486 | 9299                    | TT                              | GG              | 1947047351               |
| SNP_P4_182226_11052 | NW_004518173.1 | Scaffold3486 | 11052                   | TT                              | CC              | 1947047353               |
| SNP_P4_182227_11385 | NW_004518173.1 | Scaffold3486 | 11385                   | AA                              | GG              | 1947047355               |
| SNP_P4_182228_11763 | NW_004518173.1 | Scaffold3486 | 11763                   | AA                              | GG              | 1947047357               |
| SNP_P4_182229_11769 | NW_004518173.1 | Scaffold3486 | 11769                   | TT                              | GG              | 1947047359               |
| SNP_P4_182230_11793 | NW_004518173.1 | Scaffold3486 | 11793                   | TT                              | GG              | 1947047361               |
| SNP_P4_182231_11798 | NW_004518173.1 | Scaffold3486 | 11798                   | TT                              | AA              | 1947047363               |
| SNP_P4_182232_11819 | NW_004518173.1 | Scaffold3486 | 11819                   | GG                              | TT              | 1947047365               |
| SNP_P4_182233_13043 | NW_004518173.1 | Scaffold3486 | 13043                   | AA                              | GG              | 1947047367               |
| SNP_P4_182234_13230 | NW_004518173.1 | Scaffold3486 | 13230                   | GG                              | AA              | 1947047369               |
| SNP_P4_182235_293   | NW_004518175.1 | Scaffold3488 | 293                     | CC                              | GG              | 1947047371               |
| SNP_P4_182238_2086  | NW_004518176.1 | Scaffold3489 | 2086                    | GG                              | CC              | 1947047373               |
| SNP_P4_182239_2296  | NW_004518176.1 | Scaffold3489 | 2296                    | AA                              | TT              | 1947047375               |
| SNP_P4_182240_2321  | NW_004518176.1 | Scaffold3489 | 2321                    | AA                              | GG              | 1947047377               |



| SNPs IDs             | Chromosome IDs | Chromosomes  | Physical positions (bp) | CDC Frontier (Reference genome) | (ILWC46 & LPNB) | NCBI SNPdb Accession IDs |
|----------------------|----------------|--------------|-------------------------|---------------------------------|-----------------|--------------------------|
| SNP_P4_182241_2364   | NW_004518176.1 | Scaffold3489 | 2364                    | GG                              | AA              | 1947047379               |
| SNP_P4_182242_2385   | NW_004518176.1 | Scaffold3489 | 2385                    | AA                              | TT              | 1947047381               |
| SNP_P4_182243_2444   | NW_004518176.1 | Scaffold3489 | 2444                    | CC                              | TT              | 1947047383               |
| SNP_P4_182244_2451   | NW_004518176.1 | Scaffold3489 | 2451                    | GG                              | TT              | 1947047385               |
| SNP_P4_182246_2574   | NW_004518176.1 | Scaffold3489 | 2574                    | TT                              | GG              | 1947047387               |
| SNP_P4_182247_3029   | NW_004518176.1 | Scaffold3489 | 3029                    | GG                              | AA              | 1947047389               |
| SNP_P4_182248_3563   | NW_004518176.1 | Scaffold3489 | 3563                    | AA                              | TT              | 1947047391               |
| SNP_P4_182249_4684   | NW_004518176.1 | Scaffold3489 | 4684                    | AA                              | GG              | 1947047393               |
| SNP_P4_182250_4693   | NW_004518176.1 | Scaffold3489 | 4693                    | AA                              | CC              | 1947047395               |
| SNP_P4_182251_4760   | NW_004518176.1 | Scaffold3489 | 4760                    | AA                              | CC              | 1947047397               |
| SNP_P4_182252_4811   | NW_004518176.1 | Scaffold3489 | 4811                    | CC                              | AA              | 1947047400               |
| SNP_P4_182253_4954   | NW_004518176.1 | Scaffold3489 | 4954                    | AA                              | TT              | 1947047402               |
| SNP_P4_182254_503    | NW_004518180.1 | Scaffold3494 | 503                     | GG                              | CC              | 1947047404               |
| SNP_P4_182255_634    | NW_004518180.1 | Scaffold3494 | 634                     | TT                              | GG              | 1947047406               |
| SNP_P4_182256_1169   | NW_004518182.1 | Scaffold3497 | 1169                    | AA                              | GG              | 1947047408               |
| SNP_P4_182257_1178   | NW_004518182.1 | Scaffold3497 | 1178                    | TT                              | CC              | 1947047410               |
| SNP_P4_182258_10100  | NW_004518182.1 | Scaffold3497 | 10100                   | AA                              | CC              | 1947047412               |
| SNP_P4_182259_13461  | NW_004518182.1 | Scaffold3497 | 13461                   | TT                              | CC              | 1947047414               |
| SNP_P4_182260_13466  | NW_004518182.1 | Scaffold3497 | 13466                   | CC                              | TT              | 1947047416               |
| SNP_P4_182261_13545  | NW_004518182.1 | Scaffold3497 | 13545                   | AA                              | GG              | 1947047418               |
| SNP_P4_182262_13557  | NW_004518182.1 | Scaffold3497 | 13557                   | AA                              | CC              | 1947047420               |
| SNP_P4_182263_13558  | NW_004518182.1 | Scaffold3497 | 13558                   | AA                              | CC              | 1947047422               |
| SNP_P4_182265_13586  | NW_004518182.1 | Scaffold3497 | 13586                   | CC                              | TT              | 1947047424               |
| SNP_P4_182266_13604  | NW_004518182.1 | Scaffold3497 | 13604                   | TT                              | AA              | 1947047426               |
| SNP_P4_182267_13763  | NW_004518182.1 | Scaffold3497 | 13763                   | AA                              | GG              | 1947047428               |
| SNP_P4_182268_13804  | NW_004518182.1 | Scaffold3497 | 13804                   | GG                              | AA              | 1947047430               |
| SNP_P4_182269_1913   | NW_004518183.1 | Scaffold3498 | 1913                    | TT                              | GG              | 1947047432               |
| SNP_P4_182270_1924   | NW_004518183.1 | Scaffold3498 | 1924                    | AA                              | CC              | 1947047434               |
| SNP_P4_182271_6060   | NW_004518184.1 | Scaffold3500 | 6060                    | AA                              | GG              | 1947047436               |
| SNP_P4_182273_6182   | NW_004518184.1 | Scaffold3500 | 6182                    | TT                              | CC              | 1947047438               |
| SNP_P4_182274_6206   | NW_004518184.1 | Scaffold3500 | 6206                    | GG                              | AA              | 1947047440               |
| SNP_P4_182275_16431  | NW_004518184.1 | Scaffold3500 | 16431                   | AA                              | GG              | 1947047442               |
| SNP_P4_182276_49762  | NW_004518184.1 | Scaffold3500 | 49762                   | AA                              | GG              | 1947047444               |
| SNP_P4_182277_77158  | NW_004518184.1 | Scaffold3500 | 77158                   | AA                              | CC              | 1947047446               |
| SNP_P4_182278_77160  | NW_004518184.1 | Scaffold3500 | 77160                   | CC                              | AA              | 1947047448               |
| SNP_P4_182279_104808 | NW_004518184.1 | Scaffold3500 | 104808                  | AA                              | GG              | 1947047450               |
| SNP_P4_182280_111798 | NW_004518184.1 | Scaffold3500 | 111798                  | GG                              | AA              | 1947047452               |
| SNP_P4_182282_111998 | NW_004518184.1 | Scaffold3500 | 111998                  | GG                              | TT              | 1947047454               |
| SNP_P4_182283_367    | NW_004518188.1 | Scaffold3504 | 367                     | GG                              | AA              | 1947047456               |
| SNP_P4_182284_414    | NW_004518188.1 | Scaffold3504 | 414                     | TT                              | AA              | 1947047458               |
| SNP_P4_182285_436    | NW_004518188.1 | Scaffold3504 | 436                     | CC                              | TT              | 1947047460               |
| SNP_P4_182286_3656   | NW_004518189.1 | Scaffold3505 | 3656                    | AA                              | GG              | 1947047462               |

| SNPs IDs            | Chromosome IDs | Chromosomes  | Physical positions (bp) | CDC Frontier (Reference genome) | (ILWC46 & LPNB) | NCBI SNPdb Accession IDs |
|---------------------|----------------|--------------|-------------------------|---------------------------------|-----------------|--------------------------|
| SNP_P4_182287_3727  | NW_004518189.1 | Scaffold3505 | 3727                    | CC                              | TT              | 1947047464               |
| SNP_P4_182288_1455  | NW_004518192.1 | Scaffold3509 | 1455                    | CC                              | AA              | 1947047466               |
| SNP_P4_182289_1086  | NW_004518193.1 | Scaffold3512 | 1086                    | GG                              | AA              | 1947047468               |
| SNP_P4_182290_1098  | NW_004518193.1 | Scaffold3512 | 1098                    | CC                              | AA              | 1947047470               |
| SNP_P4_182291_2448  | NW_004518193.1 | Scaffold3512 | 2448                    | AA                              | GG              | 1947047472               |
| SNP_P4_182293_936   | NW_004518194.1 | Scaffold3513 | 936                     | TT                              | AA              | 1947047474               |
| SNP_P4_182294_19440 | NW_004518194.1 | Scaffold3513 | 19440                   | CC                              | AA              | 1947047476               |
| SNP_P4_182295_19561 | NW_004518194.1 | Scaffold3513 | 19561                   | GG                              | AA              | 1947047478               |
| SNP_P4_182296_19585 | NW_004518194.1 | Scaffold3513 | 19585                   | CC                              | GG              | 1947047480               |
| SNP_P4_182297_19615 | NW_004518194.1 | Scaffold3513 | 19615                   | GG                              | AA              | 1947047482               |
| SNP_P4_182298_19760 | NW_004518194.1 | Scaffold3513 | 19760                   | AA                              | GG              | 1947047484               |
| SNP_P4_182299_20108 | NW_004518194.1 | Scaffold3513 | 20108                   | CC                              | GG              | 1947047486               |
| SNP_P4_182300_20674 | NW_004518194.1 | Scaffold3513 | 20674                   | GG                              | AA              | 1947047488               |
| SNP_P4_182301_20681 | NW_004518194.1 | Scaffold3513 | 20681                   | CC                              | TT              | 1947047490               |
| SNP_P4_182302_20685 | NW_004518194.1 | Scaffold3513 | 20685                   | TT                              | AA              | 1947047492               |
| SNP_P4_182303_20687 | NW_004518194.1 | Scaffold3513 | 20687                   | AA                              | GG              | 1947047494               |
| SNP_P4_182304_20688 | NW_004518194.1 | Scaffold3513 | 20688                   | AA                              | GG              | 1947047496               |
| SNP_P4_182305_20690 | NW_004518194.1 | Scaffold3513 | 20690                   | AA                              | CC              | 1947047498               |
| SNP_P4_182306_20744 | NW_004518194.1 | Scaffold3513 | 20744                   | AA                              | GG              | 1947047500               |
| SNP_P4_182307_20847 | NW_004518194.1 | Scaffold3513 | 20847                   | CC                              | TT              | 1947047502               |
| SNP_P4_182308_20977 | NW_004518194.1 | Scaffold3513 | 20977                   | AA                              | GG              | 1947047504               |
| SNP_P4_182309_21056 | NW_004518194.1 | Scaffold3513 | 21056                   | TT                              | GG              | 1947047506               |
| SNP_P4_182310_21153 | NW_004518194.1 | Scaffold3513 | 21153                   | TT                              | CC              | 1947047508               |
| SNP_P4_182311_21155 | NW_004518194.1 | Scaffold3513 | 21155                   | GG                              | AA              | 1947047510               |
| SNP_P4_182312_21163 | NW_004518194.1 | Scaffold3513 | 21163                   | TT                              | CC              | 1947047512               |
| SNP_P4_182313_21173 | NW_004518194.1 | Scaffold3513 | 21173                   | CC                              | GG              | 1947047514               |
| SNP_P4_182314_21420 | NW_004518194.1 | Scaffold3513 | 21420                   | AA                              | TT              | 1947047516               |
| SNP_P4_182315_21540 | NW_004518194.1 | Scaffold3513 | 21540                   | GG                              | CC              | 1947047518               |
| SNP_P4_182316_21545 | NW_004518194.1 | Scaffold3513 | 21545                   | AA                              | CC              | 1947047524               |
| SNP_P4_182317_21603 | NW_004518194.1 | Scaffold3513 | 21603                   | TT                              | CC              | 1947047526               |
| SNP_P4_182318_21671 | NW_004518194.1 | Scaffold3513 | 21671                   | GG                              | TT              | 1947047528               |
| SNP_P4_182319_21727 | NW_004518194.1 | Scaffold3513 | 21727                   | AA                              | TT              | 1947047530               |
| SNP_P4_182320_21748 | NW_004518194.1 | Scaffold3513 | 21748                   | CC                              | TT              | 1947047532               |
| SNP_P4_182321_21749 | NW_004518194.1 | Scaffold3513 | 21749                   | CC                              | TT              | 1947047534               |
| SNP_P4_182322_21957 | NW_004518194.1 | Scaffold3513 | 21957                   | GG                              | TT              | 1947047536               |
| SNP_P4_182323_22029 | NW_004518194.1 | Scaffold3513 | 22029                   | TT                              | GG              | 1947047538               |
| SNP_P4_182324_22054 | NW_004518194.1 | Scaffold3513 | 22054                   | AA                              | GG              | 1947047540               |
| SNP_P4_182325_22058 | NW_004518194.1 | Scaffold3513 | 22058                   | TT                              | CC              | 1947047542               |
| SNP_P4_182326_22190 | NW_004518194.1 | Scaffold3513 | 22190                   | GG                              | TT              | 1947047544               |
| SNP_P4_182327_22205 | NW_004518194.1 | Scaffold3513 | 22205                   | TT                              | CC              | 1947047546               |
| SNP_P4_182328_22217 | NW_004518194.1 | Scaffold3513 | 22217                   | AA                              | GG              | 1947047549               |
| SNP_P4_182329_22219 | NW_004518194.1 | Scaffold3513 | 22219                   | GG                              | AA              | 1947047551               |

| SNPs IDs            | Chromosome IDs | Chromosomes  | Physical positions (bp) | CDC Frontier (Reference genome) | (ILWC46 & LPNB) | NCBI SNPdb Accession IDs |
|---------------------|----------------|--------------|-------------------------|---------------------------------|-----------------|--------------------------|
| SNP_P4_182330_22246 | NW_004518194.1 | Scaffold3513 | 22246                   | AA                              | GG              | 1947047553               |
| SNP_P4_182331_22272 | NW_004518194.1 | Scaffold3513 | 22272                   | CC                              | TT              | 1947047555               |
| SNP_P4_182332_22490 | NW_004518194.1 | Scaffold3513 | 22490                   | TT                              | CC              | 1947047557               |
| SNP_P4_182333_22566 | NW_004518194.1 | Scaffold3513 | 22566                   | AA                              | GG              | 1947047559               |
| SNP_P4_182334_2983  | NW_004518195.1 | Scaffold3514 | 2983                    | TT                              | AA              | 1947047561               |
| SNP_P4_182335_3002  | NW_004518195.1 | Scaffold3514 | 3002                    | AA                              | TT              | 1947047563               |
| SNP_P4_182336_3099  | NW_004518195.1 | Scaffold3514 | 3099                    | AA                              | GG              | 1947047565               |
| SNP_P4_182337_5221  | NW_004518195.1 | Scaffold3514 | 5221                    | TT                              | CC              | 1947047567               |
| SNP_P4_182338_5988  | NW_004518195.1 | Scaffold3514 | 5988                    | AA                              | GG              | 1947047569               |
| SNP_P4_182339_11030 | NW_004518195.1 | Scaffold3514 | 11030                   | TT                              | CC              | 1947047571               |
| SNP_P4_182340_11834 | NW_004518195.1 | Scaffold3514 | 11834                   | GG                              | AA              | 1947047573               |
| SNP_P4_182341_12315 | NW_004518195.1 | Scaffold3514 | 12315                   | GG                              | AA              | 1947047575               |
| SNP_P4_182343_12826 | NW_004518195.1 | Scaffold3514 | 12826                   | AA                              | TT              | 1947047577               |
| SNP_P4_182344_13503 | NW_004518195.1 | Scaffold3514 | 13503                   | CC                              | TT              | 1947047579               |
| SNP_P4_182345_13700 | NW_004518195.1 | Scaffold3514 | 13700                   | CC                              | TT              | 1947047581               |
| SNP_P4_182346_13734 | NW_004518195.1 | Scaffold3514 | 13734                   | GG                              | TT              | 1947047583               |
| SNP_P4_182347_19063 | NW_004518195.1 | Scaffold3514 | 19063                   | TT                              | CC              | 1947047585               |
| SNP_P4_182349_19482 | NW_004518195.1 | Scaffold3514 | 19482                   | TT                              | CC              | 1947047587               |
| SNP_P4_182351_27077 | NW_004518195.1 | Scaffold3514 | 27077                   | CC                              | AA              | 1947047589               |
| SNP_P4_182352_27694 | NW_004518195.1 | Scaffold3514 | 27694                   | TT                              | CC              | 1947047591               |
| SNP_P4_182353_40229 | NW_004518195.1 | Scaffold3514 | 40229                   | AA                              | GG              | 1947047593               |
| SNP_P4_182354_40258 | NW_004518195.1 | Scaffold3514 | 40258                   | AA                              | TT              | 1947047595               |
| SNP_P4_182355_40276 | NW_004518195.1 | Scaffold3514 | 40276                   | CC                              | GG              | 1947047597               |
| SNP_P4_182356_40284 | NW_004518195.1 | Scaffold3514 | 40284                   | AA                              | CC              | 1947047599               |
| SNP_P4_182357_40295 | NW_004518195.1 | Scaffold3514 | 40295                   | GG                              | CC              | 1947047601               |
| SNP_P4_182358_40387 | NW_004518195.1 | Scaffold3514 | 40387                   | TT                              | GG              | 1947047602               |
| SNP_P4_182359_40405 | NW_004518195.1 | Scaffold3514 | 40405                   | TT                              | AA              | 1947047604               |
| SNP_P4_182360_40406 | NW_004518195.1 | Scaffold3514 | 40406                   | TT                              | AA              | 1947047607               |
| SNP_P4_182361_40469 | NW_004518195.1 | Scaffold3514 | 40469                   | AA                              | GG              | 1947047609               |
| SNP_P4_182362_40644 | NW_004518195.1 | Scaffold3514 | 40644                   | AA                              | GG              | 1947047611               |
| SNP_P4_182364_41258 | NW_004518195.1 | Scaffold3514 | 41258                   | AA                              | GG              | 1947047613               |
| SNP_P4_182365_41317 | NW_004518195.1 | Scaffold3514 | 41317                   | GG                              | AA              | 1947047615               |
| SNP_P4_182366_41337 | NW_004518195.1 | Scaffold3514 | 41337                   | TT                              | GG              | 1947047617               |
| SNP_P4_182367_47702 | NW_004518195.1 | Scaffold3514 | 47702                   | GG                              | AA              | 1947047619               |
| SNP_P4_182368_47732 | NW_004518195.1 | Scaffold3514 | 47732                   | GG                              | AA              | 1947047621               |
| SNP_P4_182369_47969 | NW_004518195.1 | Scaffold3514 | 47969                   | CC                              | TT              | 1947047623               |
| SNP_P4_182370_47992 | NW_004518195.1 | Scaffold3514 | 47992                   | CC                              | TT              | 1947047625               |
| SNP_P4_182371_48163 | NW_004518195.1 | Scaffold3514 | 48163                   | AA                              | GG              | 1947047626               |
| SNP_P4_182372_48342 | NW_004518195.1 | Scaffold3514 | 48342                   | GG                              | AA              | 1947047628               |
| SNP_P4_182373_48363 | NW_004518195.1 | Scaffold3514 | 48363                   | CC                              | TT              | 1947047630               |
| SNP_P4_182374_48444 | NW_004518195.1 | Scaffold3514 | 48444                   | AA                              | GG              | 1947047632               |
| SNP_P4_182375_48454 | NW_004518195.1 | Scaffold3514 | 48454                   | GG                              | TT              | 1947047634               |

| SNPs IDs            | Chromosome IDs | Chromosomes  | Physical positions (bp) | CDC Frontier (Reference genome) | (ILWC46 & LPNB) | NCBI SNPdb Accession IDs |
|---------------------|----------------|--------------|-------------------------|---------------------------------|-----------------|--------------------------|
| SNP_P4_182376_48515 | NW_004518195.1 | Scaffold3514 | 48515                   | GG                              | TT              | 1947047636               |
| SNP_P4_182377_48696 | NW_004518195.1 | Scaffold3514 | 48696                   | TT                              | CC              | 1947047638               |
| SNP_P4_182378_48698 | NW_004518195.1 | Scaffold3514 | 48698                   | TT                              | CC              | 1947047640               |
| SNP_P4_182379_48700 | NW_004518195.1 | Scaffold3514 | 48700                   | TT                              | GG              | 1947047642               |
| SNP_P4_182380_48747 | NW_004518195.1 | Scaffold3514 | 48747                   | CC                              | TT              | 1947047644               |
| SNP_P4_182381_454   | NW_004518197.1 | Scaffold3516 | 454                     | AA                              | GG              | 1947047646               |
| SNP_P4_182382_509   | NW_004518197.1 | Scaffold3516 | 509                     | CC                              | TT              | 1947047648               |
| SNP_P4_182383_582   | NW_004518197.1 | Scaffold3516 | 582                     | AA                              | GG              | 1947047649               |
| SNP_P4_182384_1202  | NW_004518197.1 | Scaffold3516 | 1202                    | TT                              | CC              | 1947047651               |
| SNP_P4_182385_602   | NW_004518198.1 | Scaffold3517 | 602                     | TT                              | CC              | 1947047653               |
| SNP_P4_182386_250   | NW_004518200.1 | Scaffold3520 | 250                     | CC                              | TT              | 1947047655               |
| SNP_P4_182387_595   | NW_004518200.1 | Scaffold3520 | 595                     | CC                              | AA              | 1947047657               |
| SNP_P4_182388_602   | NW_004518200.1 | Scaffold3520 | 602                     | CC                              | GG              | 1947047659               |
| SNP_P4_182389_837   | NW_004518200.1 | Scaffold3520 | 837                     | AA                              | GG              | 1947047661               |
| SNP_P4_182390_1550  | NW_004518200.1 | Scaffold3520 | 1550                    | GG                              | TT              | 1947047663               |
| SNP_P4_182391_1856  | NW_004518200.1 | Scaffold3520 | 1856                    | AA                              | TT              | 1947047665               |
| SNP_P4_182392_2466  | NW_004518200.1 | Scaffold3520 | 2466                    | TT                              | CC              | 1947047667               |
| SNP_P4_182393_3254  | NW_004518200.1 | Scaffold3520 | 3254                    | AA                              | TT              | 1947047668               |
| SNP_P4_182394_4015  | NW_004518200.1 | Scaffold3520 | 4015                    | AA                              | TT              | 1947047670               |
| SNP_P4_182395_4199  | NW_004518200.1 | Scaffold3520 | 4199                    | TT                              | CC              | 1947047672               |
| SNP_P4_182396_4333  | NW_004518200.1 | Scaffold3520 | 4333                    | AA                              | GG              | 1947047674               |
| SNP_P4_182397_4374  | NW_004518200.1 | Scaffold3520 | 4374                    | AA                              | CC              | 1947047676               |
| SNP_P4_182398_4505  | NW_004518200.1 | Scaffold3520 | 4505                    | GG                              | AA              | 1947047678               |
| SNP_P4_182399_4861  | NW_004518200.1 | Scaffold3520 | 4861                    | AA                              | TT              | 1947047680               |
| SNP_P4_182401_5411  | NW_004518200.1 | Scaffold3520 | 5411                    | GG                              | TT              | 1947047682               |
| SNP_P4_182402_5744  | NW_004518200.1 | Scaffold3520 | 5744                    | AA                              | CC              | 1947047684               |
| SNP_P4_182403_5898  | NW_004518200.1 | Scaffold3520 | 5898                    | CC                              | TT              | 1947047686               |
| SNP_P4_182404_6112  | NW_004518200.1 | Scaffold3520 | 6112                    | GG                              | AA              | 1947047688               |
| SNP_P4_182405_6348  | NW_004518200.1 | Scaffold3520 | 6348                    | AA                              | GG              | 1947047690               |
| SNP_P4_182406_7558  | NW_004518200.1 | Scaffold3520 | 7558                    | CC                              | TT              | 1947047692               |
| SNP_P4_182407_7596  | NW_004518200.1 | Scaffold3520 | 7596                    | GG                              | AA              | 1947047694               |
| SNP_P4_182408_10136 | NW_004518200.1 | Scaffold3520 | 10136                   | GG                              | AA              | 1947047696               |
| SNP_P4_182409_51276 | NW_004518200.1 | Scaffold3520 | 51276                   | GG                              | AA              | 1947047698               |
| SNP_P4_182410_51297 | NW_004518200.1 | Scaffold3520 | 51297                   | TT                              | AA              | 1947047700               |
| SNP_P4_182411_51566 | NW_004518200.1 | Scaffold3520 | 51566                   | AA                              | GG              | 1947047702               |
| SNP_P4_182412_51577 | NW_004518200.1 | Scaffold3520 | 51577                   | GG                              | AA              | 1947047704               |
| SNP_P4_182413_57645 | NW_004518200.1 | Scaffold3520 | 57645                   | GG                              | AA              | 1947047706               |
| SNP_P4_182414_729   | NW_004518206.1 | Scaffold3527 | 729                     | AA                              | GG              | 1947047708               |
| SNP_P4_182415_744   | NW_004518206.1 | Scaffold3527 | 744                     | TT                              | AA              | 1947047710               |
| SNP_P4_182416_804   | NW_004518206.1 | Scaffold3527 | 804                     | GG                              | TT              | 1947047711               |
| SNP_P4_182417_1175  | NW_004518206.1 | Scaffold3527 | 1175                    | GG                              | CC              | 1947047713               |
| SNP_P4_182418_739   | NW_004518208.1 | Scaffold3529 | 739                     | TT                              | CC              | 1947047715               |

| SNPs IDs            | Chromosome IDs | Chromosomes  | Physical positions (bp) | CDC Frontier (Reference genome) | (ILWC46 & LPNB) | NCBI SNPdb Accession IDs |
|---------------------|----------------|--------------|-------------------------|---------------------------------|-----------------|--------------------------|
| SNP_P4_182419_951   | NW_004518208.1 | Scaffold3529 | 951                     | GG                              | AA              | 1947047717               |
| SNP_P4_182420_989   | NW_004518208.1 | Scaffold3529 | 989                     | TT                              | CC              | 1947047719               |
| SNP_P4_182421_2505  | NW_004518208.1 | Scaffold3529 | 2505                    | TT                              | GG              | 1947047721               |
| SNP_P4_182422_2647  | NW_004518208.1 | Scaffold3529 | 2647                    | GG                              | TT              | 1947047723               |
| SNP_P4_182423_2836  | NW_004518208.1 | Scaffold3529 | 2836                    | AA                              | CC              | 1947047725               |
| SNP_P4_182424_2837  | NW_004518208.1 | Scaffold3529 | 2837                    | TT                              | AA              | 1947047727               |
| SNP_P4_182425_2856  | NW_004518208.1 | Scaffold3529 | 2856                    | CC                              | GG              | 1947047729               |
| SNP_P4_182427_5875  | NW_004518208.1 | Scaffold3529 | 5875                    | GG                              | CC              | 1947047731               |
| SNP_P4_182428_10983 | NW_004518208.1 | Scaffold3529 | 10983                   | TT                              | GG              | 1947047733               |
| SNP_P4_182429_11942 | NW_004518208.1 | Scaffold3529 | 11942                   | CC                              | TT              | 1947047735               |
| SNP_P4_182430_11956 | NW_004518208.1 | Scaffold3529 | 11956                   | AA                              | TT              | 1947047736               |
| SNP_P4_182432_18319 | NW_004518208.1 | Scaffold3529 | 18319                   | GG                              | AA              | 1947047738               |
| SNP_P4_182433_18428 | NW_004518208.1 | Scaffold3529 | 18428                   | TT                              | AA              | 1947047740               |
| SNP_P4_182434_18560 | NW_004518208.1 | Scaffold3529 | 18560                   | AA                              | GG              | 1947047742               |
| SNP_P4_182435_18585 | NW_004518208.1 | Scaffold3529 | 18585                   | AA                              | GG              | 1947047744               |
| SNP_P4_182436_18863 | NW_004518208.1 | Scaffold3529 | 18863                   | AA                              | GG              | 1947047746               |
| SNP_P4_182437_20301 | NW_004518208.1 | Scaffold3529 | 20301                   | TT                              | CC              | 1947047748               |
| SNP_P4_182438_20486 | NW_004518208.1 | Scaffold3529 | 20486                   | TT                              | AA              | 1947047750               |
| SNP_P4_182439_20488 | NW_004518208.1 | Scaffold3529 | 20488                   | TT                              | GG              | 1947047752               |
| SNP_P4_182440_20637 | NW_004518208.1 | Scaffold3529 | 20637                   | TT                              | AA              | 1947047754               |
| SNP_P4_182441_20742 | NW_004518208.1 | Scaffold3529 | 20742                   | TT                              | GG              | 1947047756               |
| SNP_P4_182442_20777 | NW_004518208.1 | Scaffold3529 | 20777                   | TT                              | CC              | 1947047758               |
| SNP_P4_182443_20779 | NW_004518208.1 | Scaffold3529 | 20779                   | AA                              | GG              | 1947047760               |
| SNP_P4_182444_20874 | NW_004518208.1 | Scaffold3529 | 20874                   | GG                              | AA              | 1947047762               |
| SNP_P4_182445_20877 | NW_004518208.1 | Scaffold3529 | 20877                   | GG                              | AA              | 1947047764               |
| SNP_P4_182446_20919 | NW_004518208.1 | Scaffold3529 | 20919                   | AA                              | CC              | 1947047766               |
| SNP_P4_182447_21145 | NW_004518208.1 | Scaffold3529 | 21145                   | GG                              | AA              | 1947047768               |
| SNP_P4_182448_21149 | NW_004518208.1 | Scaffold3529 | 21149                   | CC                              | TT              | 1947047769               |
| SNP_P4_182449_23328 | NW_004518208.1 | Scaffold3529 | 23328                   | TT                              | AA              | 1947047771               |
| SNP_P4_182450_23428 | NW_004518208.1 | Scaffold3529 | 23428                   | TT                              | CC              | 1947047773               |
| SNP_P4_182451_23445 | NW_004518208.1 | Scaffold3529 | 23445                   | TT                              | GG              | 1947047775               |
| SNP_P4_182452_23903 | NW_004518208.1 | Scaffold3529 | 23903                   | GG                              | AA              | 1947047777               |
| SNP_P4_182453_23952 | NW_004518208.1 | Scaffold3529 | 23952                   | AA                              | GG              | 1947047779               |
| SNP_P4_182454_23978 | NW_004518208.1 | Scaffold3529 | 23978                   | AA                              | CC              | 1947047781               |
| SNP_P4_182455_24025 | NW_004518208.1 | Scaffold3529 | 24025                   | TT                              | AA              | 1947047783               |
| SNP_P4_182456_24036 | NW_004518208.1 | Scaffold3529 | 24036                   | GG                              | TT              | 1947047785               |
| SNP_P4_182457_48    | NW_004518210.1 | Scaffold3532 | 48                      | TT                              | GG              | 1947047787               |
| SNP_P4_182458_53    | NW_004518213.1 | Scaffold3535 | 53                      | GG                              | TT              | 1947047788               |
| SNP_P4_182459_87    | NW_004518213.1 | Scaffold3535 | 87                      | AA                              | CC              | 1947047789               |
| SNP_P4_182460_147   | NW_004518213.1 | Scaffold3535 | 147                     | CC                              | TT              | 1947047790               |
| SNP_P4_182461_262   | NW_004518213.1 | Scaffold3535 | 262                     | CC                              | TT              | 1947047791               |
| SNP_P4_182462_265   | NW_004518213.1 | Scaffold3535 | 265                     | TT                              | CC              | 1947047792               |

| SNPs IDs            | Chromosome IDs | Chromosomes  | Physical positions (bp) | CDC Frontier (Reference genome) | (ILWC46 & LPNB) | NCBI SNPdb Accession IDs |
|---------------------|----------------|--------------|-------------------------|---------------------------------|-----------------|--------------------------|
| SNP_P4_182463_3859  | NW_004518216.1 | Scaffold3539 | 3859                    | CC                              | AA              | 1947047793               |
| SNP_P4_182464_3870  | NW_004518216.1 | Scaffold3539 | 3870                    | GG                              | AA              | 1947047794               |
| SNP_P4_182465_4267  | NW_004518216.1 | Scaffold3539 | 4267                    | TT                              | GG              | 1947047795               |
| SNP_P4_182466_5431  | NW_004518216.1 | Scaffold3539 | 5431                    | CC                              | TT              | 1947047796               |
| SNP_P4_182467_5592  | NW_004518216.1 | Scaffold3539 | 5592                    | AA                              | GG              | 1947047797               |
| SNP_P4_182468_5799  | NW_004518216.1 | Scaffold3539 | 5799                    | AA                              | GG              | 1947047798               |
| SNP_P4_182469_5803  | NW_004518216.1 | Scaffold3539 | 5803                    | AA                              | CC              | 1947047799               |
| SNP_P4_182471_658   | NW_004518219.1 | Scaffold3542 | 658                     | AA                              | TT              | 1947047800               |
| SNP_P4_182472_720   | NW_004518219.1 | Scaffold3542 | 720                     | AA                              | TT              | 1947047801               |
| SNP_P4_182473_7268  | NW_004518219.1 | Scaffold3542 | 7268                    | AA                              | TT              | 1947047802               |
| SNP_P4_182474_7275  | NW_004518219.1 | Scaffold3542 | 7275                    | AA                              | GG              | 1947047803               |
| SNP_P4_182475_20843 | NW_004518219.1 | Scaffold3542 | 20843                   | CC                              | TT              | 1947047804               |
| SNP_P4_182476_20862 | NW_004518219.1 | Scaffold3542 | 20862                   | AA                              | GG              | 1947047805               |
| SNP_P4_182477_20887 | NW_004518219.1 | Scaffold3542 | 20887                   | TT                              | CC              | 1947047806               |
| SNP_P4_182478_20968 | NW_004518219.1 | Scaffold3542 | 20968                   | AA                              | GG              | 1947047807               |
| SNP_P4_182479_21000 | NW_004518219.1 | Scaffold3542 | 21000                   | TT                              | CC              | 1947047808               |
| SNP_P4_182480_21086 | NW_004518219.1 | Scaffold3542 | 21086                   | TT                              | CC              | 1947047809               |
| SNP_P4_182481_21087 | NW_004518219.1 | Scaffold3542 | 21087                   | TT                              | CC              | 1947047810               |
| SNP_P4_182482_21093 | NW_004518219.1 | Scaffold3542 | 21093                   | AA                              | GG              | 1947047811               |
| SNP_P4_182483_21124 | NW_004518219.1 | Scaffold3542 | 21124                   | AA                              | CC              | 1947047812               |
| SNP_P4_182484_21190 | NW_004518219.1 | Scaffold3542 | 21190                   | GG                              | AA              | 1947047813               |
| SNP_P4_182485_21194 | NW_004518219.1 | Scaffold3542 | 21194                   | AA                              | GG              | 1947047814               |
| SNP_P4_182486_21220 | NW_004518219.1 | Scaffold3542 | 21220                   | TT                              | CC              | 1947047815               |
| SNP_P4_182487_21321 | NW_004518219.1 | Scaffold3542 | 21321                   | TT                              | CC              | 1947047816               |
| SNP_P4_182488_21322 | NW_004518219.1 | Scaffold3542 | 21322                   | TT                              | CC              | 1947047817               |
| SNP_P4_182489_21353 | NW_004518219.1 | Scaffold3542 | 21353                   | TT                              | CC              | 1947047818               |
| SNP_P4_182490_21365 | NW_004518219.1 | Scaffold3542 | 21365                   | TT                              | CC              | 1947047819               |
| SNP_P4_182491_21420 | NW_004518219.1 | Scaffold3542 | 21420                   | TT                              | CC              | 1947047820               |
| SNP_P4_182492_21439 | NW_004518219.1 | Scaffold3542 | 21439                   | TT                              | CC              | 1947047821               |
| SNP_P4_182493_21453 | NW_004518219.1 | Scaffold3542 | 21453                   | AA                              | GG              | 1947047822               |
| SNP_P4_182494_21458 | NW_004518219.1 | Scaffold3542 | 21458                   | TT                              | CC              | 1947047823               |
| SNP_P4_182495_21526 | NW_004518219.1 | Scaffold3542 | 21526                   | AA                              | TT              | 1947047824               |
| SNP_P4_182496_21541 | NW_004518219.1 | Scaffold3542 | 21541                   | AA                              | CC              | 1947047825               |
| SNP_P4_182497_21563 | NW_004518219.1 | Scaffold3542 | 21563                   | AA                              | TT              | 1947047826               |
| SNP_P4_182498_21565 | NW_004518219.1 | Scaffold3542 | 21565                   | GG                              | TT              | 1947047827               |
| SNP_P4_182499_21588 | NW_004518219.1 | Scaffold3542 | 21588                   | CC                              | GG              | 1947047828               |
| SNP_P4_182500_21609 | NW_004518219.1 | Scaffold3542 | 21609                   | AA                              | TT              | 1947047829               |
| SNP_P4_182501_21634 | NW_004518219.1 | Scaffold3542 | 21634                   | GG                              | AA              | 1947047830               |
| SNP_P4_182502_21699 | NW_004518219.1 | Scaffold3542 | 21699                   | CC                              | AA              | 1947047831               |
| SNP_P4_182503_21716 | NW_004518219.1 | Scaffold3542 | 21716                   | GG                              | AA              | 1947047832               |
| SNP_P4_182504_21748 | NW_004518219.1 | Scaffold3542 | 21748                   | AA                              | GG              | 1947047834               |
| SNP_P4_182505_21802 | NW_004518219.1 | Scaffold3542 | 21802                   | GG                              | AA              | 1947047836               |

| SNPs IDs            | Chromosome IDs | Chromosomes  | Physical positions (bp) | CDC Frontier (Reference genome) | (ILWC46 & LPNB) | NCBI SNPdb Accession IDs |
|---------------------|----------------|--------------|-------------------------|---------------------------------|-----------------|--------------------------|
| SNP_P4_182506_21840 | NW_004518219.1 | Scaffold3542 | 21840                   | GG                              | AA              | 1947047838               |
| SNP_P4_182507_21872 | NW_004518219.1 | Scaffold3542 | 21872                   | TT                              | AA              | 1947047839               |
| SNP_P4_182508_21932 | NW_004518219.1 | Scaffold3542 | 21932                   | GG                              | TT              | 1947047841               |
| SNP_P4_182509_22033 | NW_004518219.1 | Scaffold3542 | 22033                   | CC                              | AA              | 1947047843               |
| SNP_P4_182510_22048 | NW_004518219.1 | Scaffold3542 | 22048                   | GG                              | TT              | 1947047845               |
| SNP_P4_182511_22086 | NW_004518219.1 | Scaffold3542 | 22086                   | TT                              | CC              | 1947047847               |
| SNP_P4_182512_22494 | NW_004518219.1 | Scaffold3542 | 22494                   | GG                              | CC              | 1947047849               |
| SNP_P4_182513_22509 | NW_004518219.1 | Scaffold3542 | 22509                   | GG                              | CC              | 1947047851               |
| SNP_P4_182514_23411 | NW_004518219.1 | Scaffold3542 | 23411                   | TT                              | CC              | 1947047853               |
| SNP_P4_182515_23414 | NW_004518219.1 | Scaffold3542 | 23414                   | TT                              | GG              | 1947047855               |
| SNP_P4_182516_23589 | NW_004518219.1 | Scaffold3542 | 23589                   | TT                              | CC              | 1947047857               |
| SNP_P4_182517_23615 | NW_004518219.1 | Scaffold3542 | 23615                   | AA                              | GG              | 1947047859               |
| SNP_P4_182518_23616 | NW_004518219.1 | Scaffold3542 | 23616                   | AA                              | CC              | 1947047861               |
| SNP_P4_182519_23625 | NW_004518219.1 | Scaffold3542 | 23625                   | CC                              | TT              | 1947047863               |
| SNP_P4_182520_23646 | NW_004518219.1 | Scaffold3542 | 23646                   | TT                              | GG              | 1947047865               |
| SNP_P4_182523_24752 | NW_004518219.1 | Scaffold3542 | 24752                   | GG                              | AA              | 1947047867               |
| SNP_P4_182524_24758 | NW_004518219.1 | Scaffold3542 | 24758                   | TT                              | CC              | 1947047869               |
| SNP_P4_182525_24827 | NW_004518219.1 | Scaffold3542 | 24827                   | TT                              | CC              | 1947047871               |
| SNP_P4_182526_24874 | NW_004518219.1 | Scaffold3542 | 24874                   | AA                              | CC              | 1947047873               |
| SNP_P4_182527_24875 | NW_004518219.1 | Scaffold3542 | 24875                   | AA                              | GG              | 1947047875               |
| SNP_P4_182528_24882 | NW_004518219.1 | Scaffold3542 | 24882                   | TT                              | CC              | 1947047877               |
| SNP_P4_182529_24941 | NW_004518219.1 | Scaffold3542 | 24941                   | TT                              | CC              | 1947047879               |
| SNP_P4_182530_24992 | NW_004518219.1 | Scaffold3542 | 24992                   | GG                              | CC              | 1947047881               |
| SNP_P4_182533_33932 | NW_004518219.1 | Scaffold3542 | 33932                   | CC                              | GG              | 1947047883               |
| SNP_P4_182534_33954 | NW_004518219.1 | Scaffold3542 | 33954                   | TT                              | CC              | 1947047885               |
| SNP_P4_182535_33956 | NW_004518219.1 | Scaffold3542 | 33956                   | TT                              | CC              | 1947047887               |
| SNP_P4_182536_34058 | NW_004518219.1 | Scaffold3542 | 34058                   | AA                              | CC              | 1947047889               |
| SNP_P4_182537_34060 | NW_004518219.1 | Scaffold3542 | 34060                   | TT                              | GG              | 1947047891               |
| SNP_P4_182538_34061 | NW_004518219.1 | Scaffold3542 | 34061                   | AA                              | GG              | 1947047893               |
| SNP_P4_182539_34064 | NW_004518219.1 | Scaffold3542 | 34064                   | AA                              | GG              | 1947047895               |
| SNP_P4_182540_34079 | NW_004518219.1 | Scaffold3542 | 34079                   | TT                              | AA              | 1947047897               |
| SNP_P4_182541_34225 | NW_004518219.1 | Scaffold3542 | 34225                   | GG                              | TT              | 1947047899               |
| SNP_P4_182542_34245 | NW_004518219.1 | Scaffold3542 | 34245                   | TT                              | CC              | 1947047901               |
| SNP_P4_182543_34248 | NW_004518219.1 | Scaffold3542 | 34248                   | AA                              | TT              | 1947047902               |
| SNP_P4_182544_34278 | NW_004518219.1 | Scaffold3542 | 34278                   | CC                              | AA              | 1947047904               |
| SNP_P4_182545_34334 | NW_004518219.1 | Scaffold3542 | 34334                   | TT                              | GG              | 1947047907               |
| SNP_P4_182546_34337 | NW_004518219.1 | Scaffold3542 | 34337                   | AA                              | GG              | 1947047908               |
| SNP_P4_182547_34366 | NW_004518219.1 | Scaffold3542 | 34366                   | AA                              | GG              | 1947047910               |
| SNP_P4_182548_34501 | NW_004518219.1 | Scaffold3542 | 34501                   | AA                              | TT              | 1947047912               |
| SNP_P4_182549_34523 | NW_004518219.1 | Scaffold3542 | 34523                   | TT                              | GG              | 1947047914               |
| SNP_P4_182550_34619 | NW_004518219.1 | Scaffold3542 | 34619                   | GG                              | TT              | 1947047916               |
| SNP_P4_182551_34628 | NW_004518219.1 | Scaffold3542 | 34628                   | TT                              | CC              | 1947047918               |

| SNPs IDs            | Chromosome IDs | Chromosomes  | Physical positions (bp) | CDC Frontier (Reference genome) | (ILWC46 & LPNB) | NCBI SNPdb Accession IDs |
|---------------------|----------------|--------------|-------------------------|---------------------------------|-----------------|--------------------------|
| SNP_P4_182552_34683 | NW_004518219.1 | Scaffold3542 | 34683                   | AA                              | CC              | 1947047920               |
| SNP_P4_182553_34695 | NW_004518219.1 | Scaffold3542 | 34695                   | AA                              | TT              | 1947047922               |
| SNP_P4_182554_34700 | NW_004518219.1 | Scaffold3542 | 34700                   | TT                              | CC              | 1947047924               |
| SNP_P4_182555_199   | NW_004518222.1 | Scaffold3545 | 199                     | TT                              | AA              | 1947047926               |
| SNP_P4_182556_367   | NW_004518222.1 | Scaffold3545 | 367                     | TT                              | CC              | 1947047928               |
| SNP_P4_182557_349   | NW_004518225.1 | Scaffold3549 | 349                     | AA                              | CC              | 1947047930               |
| SNP_P4_182558_851   | NW_004518225.1 | Scaffold3549 | 851                     | TT                              | AA              | 1947047931               |
| SNP_P4_182559_391   | NW_004518228.1 | Scaffold3555 | 391                     | TT                              | AA              | 1947047933               |
| SNP_P4_182560_469   | NW_004518228.1 | Scaffold3555 | 469                     | AA                              | GG              | 1947047935               |
| SNP_P4_182561_549   | NW_004518228.1 | Scaffold3555 | 549                     | AA                              | GG              | 1947047937               |
| SNP_P4_182562_633   | NW_004518228.1 | Scaffold3555 | 633                     | AA                              | TT              | 1947047939               |
| SNP_P4_182563_743   | NW_004518228.1 | Scaffold3555 | 743                     | TT                              | GG              | 1947047941               |
| SNP_P4_182564_979   | NW_004518228.1 | Scaffold3555 | 979                     | GG                              | AA              | 1947047943               |
| SNP_P4_182565_2179  | NW_004518229.1 | Scaffold3557 | 2179                    | TT                              | AA              | 1947047945               |
| SNP_P4_182566_2201  | NW_004518229.1 | Scaffold3557 | 2201                    | GG                              | AA              | 1947047947               |
| SNP_P4_182567_5526  | NW_004518229.1 | Scaffold3557 | 5526                    | GG                              | TT              | 1947047949               |
| SNP_P4_182568_5557  | NW_004518229.1 | Scaffold3557 | 5557                    | CC                              | AA              | 1947047951               |
| SNP_P4_182569_15560 | NW_004518229.1 | Scaffold3557 | 15560                   | AA                              | GG              | 1947047953               |
| SNP_P4_182570_324   | NW_004518232.1 | Scaffold3562 | 324                     | GG                              | CC              | 1947047955               |
| SNP_P4_182571_792   | NW_004518232.1 | Scaffold3562 | 792                     | TT                              | AA              | 1947047957               |
| SNP_P4_182573_1827  | NW_004518232.1 | Scaffold3562 | 1827                    | CC                              | GG              | 1947047959               |
| SNP_P4_182574_983   | NW_004518235.1 | Scaffold3565 | 983                     | TT                              | CC              | 1947047961               |
| SNP_P4_182575_994   | NW_004518235.1 | Scaffold3565 | 994                     | AA                              | CC              | 1947047963               |
| SNP_P4_182577_1029  | NW_004518235.1 | Scaffold3565 | 1029                    | TT                              | CC              | 1947047964               |
| SNP_P4_182578_1101  | NW_004518235.1 | Scaffold3565 | 1101                    | GG                              | AA              | 1947047966               |
| SNP_P4_182579_1106  | NW_004518235.1 | Scaffold3565 | 1106                    | AA                              | GG              | 1947047968               |
| SNP_P4_182580_1113  | NW_004518235.1 | Scaffold3565 | 1113                    | CC                              | AA              | 1947047970               |
| SNP_P4_182581_748   | NW_004518236.1 | Scaffold3569 | 748                     | CC                              | AA              | 1947047972               |
| SNP_P4_182582_1802  | NW_004518244.1 | Scaffold3581 | 1802                    | CC                              | TT              | 1947047974               |
| SNP_P4_182583_121   | NW_004518247.1 | Scaffold3585 | 121                     | TT                              | CC              | 1947047976               |
| SNP_P4_182584_136   | NW_004518247.1 | Scaffold3585 | 136                     | TT                              | GG              | 1947047978               |
| SNP_P4_182585_156   | NW_004518247.1 | Scaffold3585 | 156                     | TT                              | AA              | 1947047980               |
| SNP_P4_182586_267   | NW_004518247.1 | Scaffold3585 | 267                     | AA                              | GG              | 1947047982               |
| SNP_P4_182587_5312  | NW_004518249.1 | Scaffold3588 | 5312                    | TT                              | CC              | 1947047984               |
| SNP_P4_182588_5459  | NW_004518249.1 | Scaffold3588 | 5459                    | TT                              | CC              | 1947047986               |
| SNP_P4_182589_236   | NW_004518250.1 | Scaffold3589 | 236                     | AA                              | GG              | 1947047988               |
| SNP_P4_182590_317   | NW_004518250.1 | Scaffold3589 | 317                     | GG                              | AA              | 1947047990               |
| SNP_P4_182591_487   | NW_004518250.1 | Scaffold3589 | 487                     | CC                              | AA              | 1947047992               |
| SNP_P4_182592_498   | NW_004518250.1 | Scaffold3589 | 498                     | TT                              | CC              | 1947047994               |
| SNP_P4_182593_505   | NW_004518250.1 | Scaffold3589 | 505                     | AA                              | GG              | 1947047995               |
| SNP_P4_182594_579   | NW_004518250.1 | Scaffold3589 | 579                     | CC                              | TT              | 1947047997               |
| SNP_P4_182595_641   | NW_004518250.1 | Scaffold3589 | 641                     | CC                              | TT              | 1947047999               |



| SNPs IDs            | Chromosome IDs | Chromosomes  | Physical positions (bp) | CDC Frontier (Reference genome) | (ILWC46 & LPNB) | NCBI SNPdb Accession IDs |
|---------------------|----------------|--------------|-------------------------|---------------------------------|-----------------|--------------------------|
| SNP_P4_182596_937   | NW_004518250.1 | Scaffold3589 | 937                     | AA                              | CC              | 1947048001               |
| SNP_P4_182597_12628 | NW_004518252.1 | Scaffold3593 | 12628                   | AA                              | GG              | 1947048003               |
| SNP_P4_182598_12685 | NW_004518252.1 | Scaffold3593 | 12685                   | CC                              | GG              | 1947048005               |
| SNP_P4_182599_14607 | NW_004518252.1 | Scaffold3593 | 14607                   | CC                              | TT              | 1947048007               |
| SNP_P4_182600_14670 | NW_004518252.1 | Scaffold3593 | 14670                   | TT                              | CC              | 1947048009               |
| SNP_P4_182601_14709 | NW_004518252.1 | Scaffold3593 | 14709                   | TT                              | AA              | 1947048011               |
| SNP_P4_182602_14717 | NW_004518252.1 | Scaffold3593 | 14717                   | AA                              | GG              | 1947048013               |
| SNP_P4_182603_14811 | NW_004518252.1 | Scaffold3593 | 14811                   | GG                              | CC              | 1947048015               |
| SNP_P4_182604_14867 | NW_004518252.1 | Scaffold3593 | 14867                   | CC                              | AA              | 1947048017               |
| SNP_P4_182605_641   | NW_004518253.1 | Scaffold3594 | 641                     | CC                              | GG              | 1947048019               |
| SNP_P4_182606_644   | NW_004518253.1 | Scaffold3594 | 644                     | AA                              | TT              | 1947048020               |
| SNP_P4_182607_679   | NW_004518253.1 | Scaffold3594 | 679                     | GG                              | CC              | 1947048022               |
| SNP_P4_182609_773   | NW_004518253.1 | Scaffold3594 | 773                     | GG                              | CC              | 1947048024               |
| SNP_P4_182610_776   | NW_004518253.1 | Scaffold3594 | 776                     | TT                              | GG              | 1947048026               |
| SNP_P4_182611_779   | NW_004518253.1 | Scaffold3594 | 779                     | AA                              | GG              | 1947048028               |
| SNP_P4_182612_787   | NW_004518253.1 | Scaffold3594 | 787                     | TT                              | AA              | 1947048030               |
| SNP_P4_182613_809   | NW_004518253.1 | Scaffold3594 | 809                     | GG                              | AA              | 1947048032               |
| SNP_P4_182614_815   | NW_004518253.1 | Scaffold3594 | 815                     | AA                              | GG              | 1947048034               |
| SNP_P4_182615_827   | NW_004518253.1 | Scaffold3594 | 827                     | GG                              | AA              | 1947048036               |
| SNP_P4_182616_830   | NW_004518253.1 | Scaffold3594 | 830                     | GG                              | AA              | 1947048038               |
| SNP_P4_182617_868   | NW_004518253.1 | Scaffold3594 | 868                     | AA                              | CC              | 1947048040               |
| SNP_P4_182618_870   | NW_004518253.1 | Scaffold3594 | 870                     | AA                              | GG              | 1947048042               |
| SNP_P4_182619_931   | NW_004518253.1 | Scaffold3594 | 931                     | AA                              | CC              | 1947048104               |
| SNP_P4_182621_1251  | NW_004518253.1 | Scaffold3594 | 1251                    | TT                              | AA              | 1947048106               |
| SNP_P4_182622_1332  | NW_004518253.1 | Scaffold3594 | 1332                    | CC                              | GG              | 1947048108               |
| SNP_P4_182623_1638  | NW_004518253.1 | Scaffold3594 | 1638                    | CC                              | TT              | 1947048110               |
| SNP_P4_182624_1822  | NW_004518253.1 | Scaffold3594 | 1822                    | TT                              | AA              | 1947048112               |
| SNP_P4_182627_6305  | NW_004518253.1 | Scaffold3594 | 6305                    | TT                              | CC              | 1947048114               |
| SNP_P4_182628_6634  | NW_004518253.1 | Scaffold3594 | 6634                    | AA                              | GG              | 1947048116               |
| SNP_P4_182629_7787  | NW_004518253.1 | Scaffold3594 | 7787                    | CC                              | AA              | 1947048118               |
| SNP_P4_182630_137   | NW_004518254.1 | Scaffold3596 | 137                     | AA                              | GG              | 1947048120               |
| SNP_P4_182631_538   | NW_004518254.1 | Scaffold3596 | 538                     | AA                              | GG              | 1947048122               |
| SNP_P4_182632_669   | NW_004518254.1 | Scaffold3596 | 669                     | GG                              | TT              | 1947048124               |
| SNP_P4_182633_692   | NW_004518254.1 | Scaffold3596 | 692                     | AA                              | GG              | 1947048125               |
| SNP_P4_182634_845   | NW_004518254.1 | Scaffold3596 | 845                     | TT                              | CC              | 1947048127               |
| SNP_P4_182635_1430  | NW_004518254.1 | Scaffold3596 | 1430                    | AA                              | GG              | 1947048129               |
| SNP_P4_182636_1522  | NW_004518254.1 | Scaffold3596 | 1522                    | TT                              | GG              | 1947048131               |
| SNP_P4_182637_1559  | NW_004518254.1 | Scaffold3596 | 1559                    | TT                              | CC              | 1947048133               |
| SNP_P4_182638_1739  | NW_004518254.1 | Scaffold3596 | 1739                    | AA                              | GG              | 1947048135               |
| SNP_P4_182639_1882  | NW_004518254.1 | Scaffold3596 | 1882                    | GG                              | AA              | 1947048137               |
| SNP_P4_182640_2260  | NW_004518254.1 | Scaffold3596 | 2260                    | TT                              | AA              | 1947048139               |
| SNP_P4_182641_2399  | NW_004518254.1 | Scaffold3596 | 2399                    | GG                              | AA              | 1947048141               |

| SNPs IDs           | Chromosome IDs | Chromosomes  | Physical positions (bp) | CDC Frontier (Reference genome) | (ILWC46 & LPNB) | NCBI SNPdb Accession IDs |
|--------------------|----------------|--------------|-------------------------|---------------------------------|-----------------|--------------------------|
| SNP_P4_182642_2489 | NW_004518254.1 | Scaffold3596 | 2489                    | CC                              | AA              | 1947048143               |
| SNP_P4_182643_2584 | NW_004518254.1 | Scaffold3596 | 2584                    | AA                              | TT              | 1947048145               |
| SNP_P4_182644_2642 | NW_004518254.1 | Scaffold3596 | 2642                    | CC                              | TT              | 1947048147               |
| SNP_P4_182645_2844 | NW_004518254.1 | Scaffold3596 | 2844                    | GG                              | AA              | 1947048149               |
| SNP_P4_182646_2914 | NW_004518254.1 | Scaffold3596 | 2914                    | CC                              | AA              | 1947048151               |
| SNP_P4_182647_2923 | NW_004518254.1 | Scaffold3596 | 2923                    | CC                              | TT              | 1947048153               |
| SNP_P4_182648_545  | NW_004518257.1 | Scaffold3599 | 545                     | CC                              | TT              | 1947048155               |
| SNP_P4_182649_430  | NW_004518258.1 | Scaffold3600 | 430                     | TT                              | CC              | 1947048156               |
| SNP_P4_182650_517  | NW_004518258.1 | Scaffold3600 | 517                     | GG                              | AA              | 1947048158               |
| SNP_P4_182651_620  | NW_004518258.1 | Scaffold3600 | 620                     | TT                              | GG              | 1947048160               |
| SNP_P4_182652_631  | NW_004518258.1 | Scaffold3600 | 631                     | CC                              | TT              | 1947048162               |
| SNP_P4_182653_813  | NW_004518258.1 | Scaffold3600 | 813                     | TT                              | CC              | 1947048164               |
| SNP_P4_182654_821  | NW_004518258.1 | Scaffold3600 | 821                     | AA                              | CC              | 1947048166               |
| SNP_P4_182655_885  | NW_004518258.1 | Scaffold3600 | 885                     | TT                              | GG              | 1947048168               |
| SNP_P4_182656_930  | NW_004518258.1 | Scaffold3600 | 930                     | TT                              | GG              | 1947048170               |
| SNP_P4_182657_968  | NW_004518258.1 | Scaffold3600 | 968                     | AA                              | TT              | 1947048172               |
| SNP_P4_182658_1114 | NW_004518258.1 | Scaffold3600 | 1114                    | AA                              | GG              | 1947048174               |
| SNP_P4_182659_1116 | NW_004518258.1 | Scaffold3600 | 1116                    | CC                              | TT              | 1947048176               |
| SNP_P4_182660_1143 | NW_004518258.1 | Scaffold3600 | 1143                    | AA                              | GG              | 1947048178               |
| SNP_P4_182661_1191 | NW_004518258.1 | Scaffold3600 | 1191                    | GG                              | AA              | 1947048180               |
| SNP_P4_182662_1192 | NW_004518258.1 | Scaffold3600 | 1192                    | AA                              | TT              | 1947048182               |
| SNP_P4_182663_1203 | NW_004518258.1 | Scaffold3600 | 1203                    | AA                              | CC              | 1947048184               |
| SNP_P4_182664_2096 | NW_004518258.1 | Scaffold3600 | 2096                    | GG                              | TT              | 1947048186               |
| SNP_P4_182665_2136 | NW_004518258.1 | Scaffold3600 | 2136                    | CC                              | AA              | 1947048188               |
| SNP_P4_182666_2312 | NW_004518258.1 | Scaffold3600 | 2312                    | GG                              | AA              | 1947048190               |
| SNP_P4_182667_2313 | NW_004518258.1 | Scaffold3600 | 2313                    | GG                              | TT              | 1947048192               |
| SNP_P4_182668_3515 | NW_004518258.1 | Scaffold3600 | 3515                    | GG                              | CC              | 1947048194               |
| SNP_P4_182669_3647 | NW_004518258.1 | Scaffold3600 | 3647                    | AA                              | GG              | 1947048196               |
| SNP_P4_182670_3685 | NW_004518258.1 | Scaffold3600 | 3685                    | GG                              | AA              | 1947048198               |
| SNP_P4_182671_3747 | NW_004518258.1 | Scaffold3600 | 3747                    | GG                              | AA              | 1947048200               |
| SNP_P4_182672_3927 | NW_004518258.1 | Scaffold3600 | 3927                    | AA                              | GG              | 1947048202               |
| SNP_P4_182673_3964 | NW_004518258.1 | Scaffold3600 | 3964                    | GG                              | CC              | 1947048204               |
| SNP_P4_182674_4185 | NW_004518258.1 | Scaffold3600 | 4185                    | TT                              | CC              | 1947048205               |
| SNP_P4_182675_366  | NW_004518259.1 | Scaffold3601 | 366                     | GG                              | TT              | 1947048207               |
| SNP_P4_182676_1983 | NW_004518260.1 | Scaffold3602 | 1983                    | CC                              | TT              | 1947048209               |
| SNP_P4_182677_1996 | NW_004518260.1 | Scaffold3602 | 1996                    | CC                              | TT              | 1947048211               |
| SNP_P4_182678_2012 | NW_004518260.1 | Scaffold3602 | 2012                    | AA                              | GG              | 1947048213               |
| SNP_P4_182679_2026 | NW_004518260.1 | Scaffold3602 | 2026                    | GG                              | TT              | 1947048215               |
| SNP_P4_182680_3865 | NW_004518260.1 | Scaffold3602 | 3865                    | TT                              | AA              | 1947048217               |
| SNP_P4_182681_3906 | NW_004518260.1 | Scaffold3602 | 3906                    | AA                              | TT              | 1947048219               |
| SNP_P4_182682_3914 | NW_004518260.1 | Scaffold3602 | 3914                    | AA                              | TT              | 1947048221               |
| SNP_P4_182683_1038 | NW_004518262.1 | Scaffold3604 | 1038                    | TT                              | AA              | 1947048223               |

| SNPs IDs           | Chromosome IDs | Chromosomes  | Physical positions (bp) | CDC Frontier (Reference genome) | (ILWC46 & LPNB) | NCBI SNPdb Accession IDs |
|--------------------|----------------|--------------|-------------------------|---------------------------------|-----------------|--------------------------|
| SNP_P4_182684_1075 | NW_004518262.1 | Scaffold3604 | 1075                    | GG                              | AA              | 1947048225               |
| SNP_P4_182685_1100 | NW_004518262.1 | Scaffold3604 | 1100                    | AA                              | CC              | 1947048227               |
| SNP_P4_182686_185  | NW_004518271.1 | Scaffold3615 | 185                     | AA                              | GG              | 1947048229               |
| SNP_P4_182687_204  | NW_004518271.1 | Scaffold3615 | 204                     | CC                              | TT              | 1947048231               |
| SNP_P4_182688_210  | NW_004518271.1 | Scaffold3615 | 210                     | AA                              | GG              | 1947048233               |
| SNP_P4_182689_242  | NW_004518271.1 | Scaffold3615 | 242                     | AA                              | CC              | 1947048235               |
| SNP_P4_182690_602  | NW_004518271.1 | Scaffold3615 | 602                     | GG                              | AA              | 1947048237               |
| SNP_P4_182691_724  | NW_004518271.1 | Scaffold3615 | 724                     | AA                              | TT              | 1947048239               |
| SNP_P4_182692_218  | NW_004518272.1 | Scaffold3616 | 218                     | AA                              | GG              | 1947048241               |
| SNP_P4_182693_318  | NW_004518272.1 | Scaffold3616 | 318                     | TT                              | CC              | 1947048243               |
| SNP_P4_182694_346  | NW_004518272.1 | Scaffold3616 | 346                     | CC                              | GG              | 1947048245               |
| SNP_P4_182695_452  | NW_004518272.1 | Scaffold3616 | 452                     | AA                              | GG              | 1947048247               |
| SNP_P4_182696_504  | NW_004518272.1 | Scaffold3616 | 504                     | AA                              | GG              | 1947048249               |
| SNP_P4_182697_2141 | NW_004518275.1 | Scaffold3619 | 2141                    | TT                              | CC              | 1947048250               |
| SNP_P4_182698_2144 | NW_004518275.1 | Scaffold3619 | 2144                    | AA                              | GG              | 1947048252               |
| SNP_P4_182699_64   | NW_004518277.1 | Scaffold3621 | 64                      | TT                              | CC              | 1947048254               |
| SNP_P4_182700_67   | NW_004518277.1 | Scaffold3621 | 67                      | TT                              | CC              | 1947048256               |
| SNP_P4_182701_100  | NW_004518277.1 | Scaffold3621 | 100                     | CC                              | GG              | 1947048258               |
| SNP_P4_182702_4470 | NW_004518277.1 | Scaffold3621 | 4470                    | TT                              | CC              | 1947048260               |
| SNP_P4_182703_67   | NW_004518282.1 | Scaffold3628 | 67                      | AA                              | GG              | 1947048262               |
| SNP_P4_182704_379  | NW_004518282.1 | Scaffold3628 | 379                     | TT                              | CC              | 1947048264               |
| SNP_P4_182705_931  | NW_004518282.1 | Scaffold3628 | 931                     | TT                              | CC              | 1947048266               |
| SNP_P4_182706_935  | NW_004518282.1 | Scaffold3628 | 935                     | AA                              | TT              | 1947048268               |
| SNP_P4_182707_956  | NW_004518282.1 | Scaffold3628 | 956                     | CC                              | TT              | 1947048270               |
| SNP_P4_182708_1066 | NW_004518282.1 | Scaffold3628 | 1066                    | CC                              | GG              | 1947048271               |
| SNP_P4_182709_1105 | NW_004518282.1 | Scaffold3628 | 1105                    | AA                              | GG              | 1947048273               |
| SNP_P4_182710_1199 | NW_004518282.1 | Scaffold3628 | 1199                    | TT                              | CC              | 1947048275               |
| SNP_P4_182711_1397 | NW_004518282.1 | Scaffold3628 | 1397                    | GG                              | TT              | 1947048277               |
| SNP_P4_182712_1974 | NW_004518282.1 | Scaffold3628 | 1974                    | TT                              | CC              | 1947048279               |
| SNP_P4_182713_1975 | NW_004518282.1 | Scaffold3628 | 1975                    | AA                              | TT              | 1947048281               |
| SNP_P4_182714_2145 | NW_004518282.1 | Scaffold3628 | 2145                    | CC                              | TT              | 1947048283               |
| SNP_P4_182715_2169 | NW_004518282.1 | Scaffold3628 | 2169                    | TT                              | AA              | 1947048285               |
| SNP_P4_182716_2251 | NW_004518282.1 | Scaffold3628 | 2251                    | CC                              | TT              | 1947048287               |
| SNP_P4_182717_2306 | NW_004518282.1 | Scaffold3628 | 2306                    | AA                              | GG              | 1947048289               |
| SNP_P4_182718_4405 | NW_004518282.1 | Scaffold3628 | 4405                    | TT                              | AA              | 1947048291               |
| SNP_P4_182719_162  | NW_004518283.1 | Scaffold3631 | 162                     | CC                              | TT              | 1947048293               |
| SNP_P4_182720_165  | NW_004518283.1 | Scaffold3631 | 165                     | TT                              | CC              | 1947048295               |
| SNP_P4_182721_8650 | NW_004518283.1 | Scaffold3631 | 8650                    | TT                              | AA              | 1947048297               |
| SNP_P4_182722_8953 | NW_004518283.1 | Scaffold3631 | 8953                    | AA                              | TT              | 1947048299               |
| SNP_P4_182723_9513 | NW_004518283.1 | Scaffold3631 | 9513                    | AA                              | GG              | 1947048301               |
| SNP_P4_182724_9540 | NW_004518283.1 | Scaffold3631 | 9540                    | AA                              | TT              | 1947048303               |
| SNP_P4_182725_9611 | NW_004518283.1 | Scaffold3631 | 9611                    | AA                              | CC              | 1947048305               |

| SNPs IDs            | Chromosome IDs | Chromosomes  | Physical positions (bp) | CDC Frontier (Reference genome) | (ILWC46 & LPNB) | NCBI SNPdb Accession IDs |
|---------------------|----------------|--------------|-------------------------|---------------------------------|-----------------|--------------------------|
| SNP_P4_182726_9626  | NW_004518283.1 | Scaffold3631 | 9626                    | TT                              | AA              | 1947048307               |
| SNP_P4_182727_9672  | NW_004518283.1 | Scaffold3631 | 9672                    | GG                              | CC              | 1947048308               |
| SNP_P4_182728_9863  | NW_004518283.1 | Scaffold3631 | 9863                    | GG                              | AA              | 1947048310               |
| SNP_P4_182729_11132 | NW_004518283.1 | Scaffold3631 | 11132                   | GG                              | TT              | 1947048312               |
| SNP_P4_182730_11589 | NW_004518283.1 | Scaffold3631 | 11589                   | AA                              | GG              | 1947048314               |
| SNP_P4_182731_11732 | NW_004518283.1 | Scaffold3631 | 11732                   | GG                              | AA              | 1947048316               |
| SNP_P4_182732_11792 | NW_004518283.1 | Scaffold3631 | 11792                   | CC                              | TT              | 1947048318               |
| SNP_P4_182733_12198 | NW_004518283.1 | Scaffold3631 | 12198                   | CC                              | GG              | 1947048320               |
| SNP_P4_182734_12389 | NW_004518283.1 | Scaffold3631 | 12389                   | AA                              | GG              | 1947048322               |
| SNP_P4_182735_13283 | NW_004518283.1 | Scaffold3631 | 13283                   | GG                              | AA              | 1947048324               |
| SNP_P4_182736_13350 | NW_004518283.1 | Scaffold3631 | 13350                   | AA                              | GG              | 1947048326               |
| SNP_P4_182737_64    | NW_004518284.1 | Scaffold3632 | 64                      | AA                              | CC              | 1947048328               |
| SNP_P4_182738_67    | NW_004518284.1 | Scaffold3632 | 67                      | TT                              | CC              | 1947048330               |
| SNP_P4_182739_232   | NW_004518284.1 | Scaffold3632 | 232                     | AA                              | TT              | 1947048332               |
| SNP_P4_182740_252   | NW_004518284.1 | Scaffold3632 | 252                     | TT                              | AA              | 1947048334               |
| SNP_P4_182741_998   | NW_004518284.1 | Scaffold3632 | 998                     | TT                              | CC              | 1947048336               |
| SNP_P4_182742_11075 | NW_004518286.1 | Scaffold3637 | 11075                   | AA                              | TT              | 1947048338               |
| SNP_P4_182743_11092 | NW_004518286.1 | Scaffold3637 | 11092                   | TT                              | AA              | 1947048340               |
| SNP_P4_182744_11693 | NW_004518286.1 | Scaffold3637 | 11693                   | CC                              | GG              | 1947048342               |
| SNP_P4_182745_13128 | NW_004518286.1 | Scaffold3637 | 13128                   | TT                              | CC              | 1947048344               |
| SNP_P4_182747_349   | NW_004518287.1 | Scaffold3639 | 349                     | GG                              | CC              | 1947048346               |
| SNP_P4_182748_942   | NW_004518288.1 | Scaffold3640 | 942                     | CC                              | GG              | 1947048348               |
| SNP_P4_182749_1100  | NW_004518289.1 | Scaffold3643 | 1100                    | GG                              | AA              | 1947048350               |
| SNP_P4_182750_1140  | NW_004518289.1 | Scaffold3643 | 1140                    | GG                              | AA              | 1947048352               |
| SNP_P4_182751_1207  | NW_004518289.1 | Scaffold3643 | 1207                    | AA                              | TT              | 1947048353               |
| SNP_P4_182752_1440  | NW_004518289.1 | Scaffold3643 | 1440                    | GG                              | AA              | 1947048355               |
| SNP_P4_182753_1443  | NW_004518289.1 | Scaffold3643 | 1443                    | TT                              | CC              | 1947048357               |
| SNP_P4_182754_1456  | NW_004518289.1 | Scaffold3643 | 1456                    | GG                              | CC              | 1947048359               |
| SNP_P4_182755_1473  | NW_004518289.1 | Scaffold3643 | 1473                    | TT                              | CC              | 1947048361               |
| SNP_P4_182756_1494  | NW_004518289.1 | Scaffold3643 | 1494                    | GG                              | TT              | 1947048363               |
| SNP_P4_182757_1569  | NW_004518289.1 | Scaffold3643 | 1569                    | GG                              | AA              | 1947048365               |
| SNP_P4_182758_22120 | NW_004518289.1 | Scaffold3643 | 22120                   | GG                              | CC              | 1947048367               |
| SNP_P4_182759_22286 | NW_004518289.1 | Scaffold3643 | 22286                   | AA                              | GG              | 1947048369               |
| SNP_P4_182760_22322 | NW_004518289.1 | Scaffold3643 | 22322                   | AA                              | TT              | 1947048371               |
| SNP_P4_182761_22476 | NW_004518289.1 | Scaffold3643 | 22476                   | CC                              | TT              | 1947048373               |
| SNP_P4_182762_22602 | NW_004518289.1 | Scaffold3643 | 22602                   | TT                              | AA              | 1947048375               |
| SNP_P4_182764_22979 | NW_004518289.1 | Scaffold3643 | 22979                   | GG                              | AA              | 1947048377               |
| SNP_P4_182765_23175 | NW_004518289.1 | Scaffold3643 | 23175                   | TT                              | CC              | 1947048379               |
| SNP_P4_182766_24126 | NW_004518289.1 | Scaffold3643 | 24126                   | GG                              | TT              | 1947048381               |
| SNP_P4_182767_24587 | NW_004518289.1 | Scaffold3643 | 24587                   | CC                              | AA              | 1947048383               |
| SNP_P4_182768_24588 | NW_004518289.1 | Scaffold3643 | 24588                   | GG                              | AA              | 1947048385               |
| SNP_P4_182769_24614 | NW_004518289.1 | Scaffold3643 | 24614                   | CC                              | TT              | 1947048387               |

| SNPs IDs            | Chromosome IDs | Chromosomes  | Physical positions (bp) | CDC Frontier (Reference genome) | (ILWC46 & LPNB) | NCBI SNPdb Accession IDs |
|---------------------|----------------|--------------|-------------------------|---------------------------------|-----------------|--------------------------|
| SNP_P4_182770_620   | NW_004518290.1 | Scaffold3644 | 620                     | AA                              | CC              | 1947048389               |
| SNP_P4_182771_646   | NW_004518290.1 | Scaffold3644 | 646                     | TT                              | GG              | 1947048391               |
| SNP_P4_182772_764   | NW_004518290.1 | Scaffold3644 | 764                     | GG                              | AA              | 1947048393               |
| SNP_P4_182773_774   | NW_004518290.1 | Scaffold3644 | 774                     | GG                              | AA              | 1947048395               |
| SNP_P4_182774_776   | NW_004518290.1 | Scaffold3644 | 776                     | CC                              | TT              | 1947048396               |
| SNP_P4_182775_879   | NW_004518290.1 | Scaffold3644 | 879                     | GG                              | AA              | 1947048398               |
| SNP_P4_182776_933   | NW_004518290.1 | Scaffold3644 | 933                     | TT                              | GG              | 1947048400               |
| SNP_P4_182777_988   | NW_004518290.1 | Scaffold3644 | 988                     | GG                              | CC              | 1947048402               |
| SNP_P4_182778_1031  | NW_004518290.1 | Scaffold3644 | 1031                    | TT                              | AA              | 1947048404               |
| SNP_P4_182779_1065  | NW_004518290.1 | Scaffold3644 | 1065                    | TT                              | AA              | 1947048406               |
| SNP_P4_182780_1225  | NW_004518290.1 | Scaffold3644 | 1225                    | CC                              | GG              | 1947048408               |
| SNP_P4_182781_1226  | NW_004518290.1 | Scaffold3644 | 1226                    | CC                              | TT              | 1947048410               |
| SNP_P4_182782_1266  | NW_004518290.1 | Scaffold3644 | 1266                    | CC                              | TT              | 1947048412               |
| SNP_P4_182783_1289  | NW_004518290.1 | Scaffold3644 | 1289                    | AA                              | TT              | 1947048414               |
| SNP_P4_182784_1318  | NW_004518290.1 | Scaffold3644 | 1318                    | GG                              | CC              | 1947048416               |
| SNP_P4_182785_1323  | NW_004518290.1 | Scaffold3644 | 1323                    | TT                              | AA              | 1947048418               |
| SNP_P4_182786_1408  | NW_004518290.1 | Scaffold3644 | 1408                    | GG                              | CC              | 1947048420               |
| SNP_P4_182787_1409  | NW_004518290.1 | Scaffold3644 | 1409                    | CC                              | TT              | 1947048422               |
| SNP_P4_182788_1464  | NW_004518290.1 | Scaffold3644 | 1464                    | AA                              | TT              | 1947048424               |
| SNP_P4_182789_1551  | NW_004518290.1 | Scaffold3644 | 1551                    | GG                              | TT              | 1947048426               |
| SNP_P4_182790_1951  | NW_004518290.1 | Scaffold3644 | 1951                    | TT                              | AA              | 1947048428               |
| SNP_P4_182791_1978  | NW_004518290.1 | Scaffold3644 | 1978                    | CC                              | AA              | 1947048430               |
| SNP_P4_182792_1983  | NW_004518290.1 | Scaffold3644 | 1983                    | TT                              | CC              | 1947048432               |
| SNP_P4_182793_2004  | NW_004518290.1 | Scaffold3644 | 2004                    | AA                              | CC              | 1947048434               |
| SNP_P4_182794_2020  | NW_004518290.1 | Scaffold3644 | 2020                    | AA                              | TT              | 1947048436               |
| SNP_P4_182795_2062  | NW_004518290.1 | Scaffold3644 | 2062                    | AA                              | CC              | 1947048438               |
| SNP_P4_182796_2069  | NW_004518290.1 | Scaffold3644 | 2069                    | TT                              | CC              | 1947048440               |
| SNP_P4_182797_2149  | NW_004518290.1 | Scaffold3644 | 2149                    | GG                              | TT              | 1947048442               |
| SNP_P4_182798_2167  | NW_004518290.1 | Scaffold3644 | 2167                    | AA                              | TT              | 1947048444               |
| SNP_P4_182799_2193  | NW_004518290.1 | Scaffold3644 | 2193                    | GG                              | TT              | 1947048446               |
| SNP_P4_182800_2492  | NW_004518290.1 | Scaffold3644 | 2492                    | AA                              | TT              | 1947048448               |
| SNP_P4_182801_2556  | NW_004518290.1 | Scaffold3644 | 2556                    | AA                              | GG              | 1947048450               |
| SNP_P4_182802_2572  | NW_004518290.1 | Scaffold3644 | 2572                    | CC                              | TT              | 1947048452               |
| SNP_P4_182803_2597  | NW_004518290.1 | Scaffold3644 | 2597                    | TT                              | CC              | 1947048454               |
| SNP_P4_182804_2604  | NW_004518290.1 | Scaffold3644 | 2604                    | GG                              | AA              | 1947048456               |
| SNP_P4_182805_367   | NW_004518291.1 | Scaffold3645 | 367                     | CC                              | AA              | 1947048458               |
| SNP_P4_182806_392   | NW_004518291.1 | Scaffold3645 | 392                     | AA                              | GG              | 1947048460               |
| SNP_P4_182807_401   | NW_004518291.1 | Scaffold3645 | 401                     | GG                              | AA              | 1947048462               |
| SNP_P4_182808_403   | NW_004518291.1 | Scaffold3645 | 403                     | AA                              | CC              | 1947048464               |
| SNP_P4_182809_7607  | NW_004518291.1 | Scaffold3645 | 7607                    | CC                              | TT              | 1947048466               |
| SNP_P4_182810_23279 | NW_004518291.1 | Scaffold3645 | 23279                   | TT                              | GG              | 1947048468               |
| SNP_P4_182811_23638 | NW_004518291.1 | Scaffold3645 | 23638                   | AA                              | GG              | 1947048470               |

| SNPs IDs            | Chromosome IDs | Chromosomes  | Physical positions (bp) | CDC Frontier (Reference genome) | (ILWC46 & LPNB) | NCBI SNPdb Accession IDs |
|---------------------|----------------|--------------|-------------------------|---------------------------------|-----------------|--------------------------|
| SNP_P4_182812_39801 | NW_004518291.1 | Scaffold3645 | 39801                   | TT                              | GG              | 1947048472               |
| SNP_P4_182813_6136  | NW_004518292.1 | Scaffold3651 | 6136                    | CC                              | TT              | 1947048474               |
| SNP_P4_182814_6227  | NW_004518292.1 | Scaffold3651 | 6227                    | AA                              | CC              | 1947048476               |
| SNP_P4_182815_6228  | NW_004518292.1 | Scaffold3651 | 6228                    | TT                              | CC              | 1947048478               |
| SNP_P4_182816_6238  | NW_004518292.1 | Scaffold3651 | 6238                    | GG                              | TT              | 1947048480               |
| SNP_P4_182817_6262  | NW_004518292.1 | Scaffold3651 | 6262                    | TT                              | AA              | 1947048482               |
| SNP_P4_182818_6310  | NW_004518292.1 | Scaffold3651 | 6310                    | CC                              | TT              | 1947048484               |
| SNP_P4_182819_6624  | NW_004518292.1 | Scaffold3651 | 6624                    | TT                              | GG              | 1947048486               |
| SNP_P4_182820_6663  | NW_004518292.1 | Scaffold3651 | 6663                    | TT                              | CC              | 1947048488               |
| SNP_P4_182821_6749  | NW_004518292.1 | Scaffold3651 | 6749                    | TT                              | CC              | 1947048490               |
| SNP_P4_182822_6750  | NW_004518292.1 | Scaffold3651 | 6750                    | TT                              | CC              | 1947048492               |
| SNP_P4_182823_1204  | NW_004518297.1 | Scaffold3656 | 1204                    | GG                              | CC              | 1947048494               |
| SNP_P4_182824_532   | NW_004518298.1 | Scaffold3657 | 532                     | AA                              | TT              | 1947048496               |
| SNP_P4_182825_561   | NW_004518298.1 | Scaffold3657 | 561                     | CC                              | GG              | 1947048498               |
| SNP_P4_182826_627   | NW_004518298.1 | Scaffold3657 | 627                     | TT                              | CC              | 1947048500               |
| SNP_P4_182827_809   | NW_004518298.1 | Scaffold3657 | 809                     | TT                              | CC              | 1947048502               |
| SNP_P4_182829_952   | NW_004518298.1 | Scaffold3657 | 952                     | CC                              | TT              | 1947048504               |
| SNP_P4_182830_988   | NW_004518298.1 | Scaffold3657 | 988                     | CC                              | TT              | 1947048506               |
| SNP_P4_182831_1964  | NW_004518299.1 | Scaffold3658 | 1964                    | CC                              | AA              | 1947048508               |
| SNP_P4_182832_2649  | NW_004518299.1 | Scaffold3658 | 2649                    | CC                              | TT              | 1947048510               |
| SNP_P4_182833_1379  | NW_004518300.1 | Scaffold3659 | 1379                    | AA                              | GG              | 1947048512               |
| SNP_P4_182834_1381  | NW_004518300.1 | Scaffold3659 | 1381                    | AA                              | TT              | 1947048514               |
| SNP_P4_182835_1414  | NW_004518300.1 | Scaffold3659 | 1414                    | CC                              | TT              | 1947048516               |
| SNP_P4_182836_1563  | NW_004518300.1 | Scaffold3659 | 1563                    | TT                              | CC              | 1947048518               |
| SNP_P4_182837_1768  | NW_004518300.1 | Scaffold3659 | 1768                    | AA                              | GG              | 1947048520               |
| SNP_P4_182838_2196  | NW_004518300.1 | Scaffold3659 | 2196                    | CC                              | AA              | 1947048522               |
| SNP_P4_182840_6777  | NW_004518300.1 | Scaffold3659 | 6777                    | AA                              | GG              | 1947048524               |
| SNP_P4_182841_6924  | NW_004518300.1 | Scaffold3659 | 6924                    | GG                              | AA              | 1947048526               |
| SNP_P4_182842_6938  | NW_004518300.1 | Scaffold3659 | 6938                    | TT                              | GG              | 1947048528               |
| SNP_P4_182843_6953  | NW_004518300.1 | Scaffold3659 | 6953                    | CC                              | TT              | 1947048530               |
| SNP_P4_182844_7146  | NW_004518300.1 | Scaffold3659 | 7146                    | CC                              | TT              | 1947048532               |
| SNP_P4_182845_7194  | NW_004518300.1 | Scaffold3659 | 7194                    | AA                              | CC              | 1947048534               |
| SNP_P4_182846_7338  | NW_004518300.1 | Scaffold3659 | 7338                    | AA                              | TT              | 1947048536               |
| SNP_P4_182847_7350  | NW_004518300.1 | Scaffold3659 | 7350                    | TT                              | GG              | 1947048538               |
| SNP_P4_182848_7383  | NW_004518300.1 | Scaffold3659 | 7383                    | GG                              | AA              | 1947048540               |
| SNP_P4_182849_7385  | NW_004518300.1 | Scaffold3659 | 7385                    | GG                              | AA              | 1947048542               |
| SNP_P4_182850_7453  | NW_004518300.1 | Scaffold3659 | 7453                    | TT                              | AA              | 1947048544               |
| SNP_P4_182851_7474  | NW_004518300.1 | Scaffold3659 | 7474                    | TT                              | AA              | 1947048546               |
| SNP_P4_182852_7541  | NW_004518300.1 | Scaffold3659 | 7541                    | AA                              | TT              | 1947048548               |
| SNP_P4_182853_7644  | NW_004518300.1 | Scaffold3659 | 7644                    | TT                              | AA              | 1947048550               |
| SNP_P4_182854_7675  | NW_004518300.1 | Scaffold3659 | 7675                    | GG                              | CC              | 1947048552               |
| SNP_P4_182855_7693  | NW_004518300.1 | Scaffold3659 | 7693                    | CC                              | AA              | 1947048554               |

| SNPs IDs            | Chromosome IDs | Chromosomes  | Physical positions (bp) | CDC Frontier (Reference genome) | (ILWC46 & LPNB) | NCBI SNPdb Accession IDs |
|---------------------|----------------|--------------|-------------------------|---------------------------------|-----------------|--------------------------|
| SNP_P4_182856_108   | NW_004518301.1 | Scaffold3660 | 108                     | GG                              | AA              | 1947048556               |
| SNP_P4_182857_175   | NW_004518301.1 | Scaffold3660 | 175                     | GG                              | AA              | 1947048558               |
| SNP_P4_182858_478   | NW_004518301.1 | Scaffold3660 | 478                     | CC                              | TT              | 1947048560               |
| SNP_P4_182859_479   | NW_004518301.1 | Scaffold3660 | 479                     | CC                              | AA              | 1947048562               |
| SNP_P4_182860_481   | NW_004518301.1 | Scaffold3660 | 481                     | AA                              | CC              | 1947048564               |
| SNP_P4_182861_589   | NW_004518301.1 | Scaffold3660 | 589                     | CC                              | GG              | 1947048566               |
| SNP_P4_182862_631   | NW_004518301.1 | Scaffold3660 | 631                     | TT                              | CC              | 1947048568               |
| SNP_P4_182863_635   | NW_004518301.1 | Scaffold3660 | 635                     | TT                              | AA              | 1947048570               |
| SNP_P4_182864_723   | NW_004518301.1 | Scaffold3660 | 723                     | GG                              | AA              | 1947048572               |
| SNP_P4_182865_853   | NW_004518301.1 | Scaffold3660 | 853                     | GG                              | AA              | 1947048574               |
| SNP_P4_182866_912   | NW_004518301.1 | Scaffold3660 | 912                     | AA                              | GG              | 1947048576               |
| SNP_P4_182867_962   | NW_004518301.1 | Scaffold3660 | 962                     | TT                              | CC              | 1947048578               |
| SNP_P4_182868_967   | NW_004518301.1 | Scaffold3660 | 967                     | TT                              | CC              | 1947048580               |
| SNP_P4_182869_1017  | NW_004518301.1 | Scaffold3660 | 1017                    | TT                              | CC              | 1947048582               |
| SNP_P4_182870_1039  | NW_004518301.1 | Scaffold3660 | 1039                    | CC                              | GG              | 1947048584               |
| SNP_P4_182871_1968  | NW_004518302.1 | Scaffold3661 | 1968                    | TT                              | AA              | 1947048586               |
| SNP_P4_182872_3946  | NW_004518304.1 | Scaffold3663 | 3946                    | TT                              | AA              | 1947048588               |
| SNP_P4_182874_4144  | NW_004518304.1 | Scaffold3663 | 4144                    | TT                              | AA              | 1947048590               |
| SNP_P4_182875_4238  | NW_004518304.1 | Scaffold3663 | 4238                    | TT                              | AA              | 1947048592               |
| SNP_P4_182876_4345  | NW_004518304.1 | Scaffold3663 | 4345                    | TT                              | GG              | 1947048594               |
| SNP_P4_182877_4366  | NW_004518304.1 | Scaffold3663 | 4366                    | GG                              | AA              | 1947048596               |
| SNP_P4_182878_4375  | NW_004518304.1 | Scaffold3663 | 4375                    | GG                              | AA              | 1947048598               |
| SNP_P4_182879_4421  | NW_004518304.1 | Scaffold3663 | 4421                    | AA                              | TT              | 1947048600               |
| SNP_P4_182881_4450  | NW_004518304.1 | Scaffold3663 | 4450                    | TT                              | AA              | 1947048602               |
| SNP_P4_182882_4509  | NW_004518304.1 | Scaffold3663 | 4509                    | AA                              | TT              | 1947048604               |
| SNP_P4_182883_4832  | NW_004518304.1 | Scaffold3663 | 4832                    | TT                              | CC              | 1947048607               |
| SNP_P4_182884_4862  | NW_004518304.1 | Scaffold3663 | 4862                    | TT                              | GG              | 1947048609               |
| SNP_P4_182885_4889  | NW_004518304.1 | Scaffold3663 | 4889                    | CC                              | GG              | 1947048611               |
| SNP_P4_182886_5463  | NW_004518304.1 | Scaffold3663 | 5463                    | GG                              | AA              | 1947048613               |
| SNP_P4_182887_5491  | NW_004518304.1 | Scaffold3663 | 5491                    | TT                              | CC              | 1947048615               |
| SNP_P4_182888_5724  | NW_004518304.1 | Scaffold3663 | 5724                    | TT                              | CC              | 1947048617               |
| SNP_P4_182889_6965  | NW_004518304.1 | Scaffold3663 | 6965                    | AA                              | GG              | 1947048619               |
| SNP_P4_182890_7382  | NW_004518304.1 | Scaffold3663 | 7382                    | CC                              | AA              | 1947048621               |
| SNP_P4_182891_9038  | NW_004518304.1 | Scaffold3663 | 9038                    | CC                              | TT              | 1947048623               |
| SNP_P4_182892_13952 | NW_004518304.1 | Scaffold3663 | 13952                   | TT                              | GG              | 1947048625               |
| SNP_P4_182893_14148 | NW_004518304.1 | Scaffold3663 | 14148                   | TT                              | CC              | 1947048627               |
| SNP_P4_182894_14165 | NW_004518304.1 | Scaffold3663 | 14165                   | TT                              | GG              | 1947048629               |
| SNP_P4_182895_3384  | NW_004518305.1 | Scaffold3664 | 3384                    | CC                              | AA              | 1947048631               |
| SNP_P4_182896_3642  | NW_004518305.1 | Scaffold3664 | 3642                    | TT                              | AA              | 1947048633               |
| SNP_P4_182897_3716  | NW_004518305.1 | Scaffold3664 | 3716                    | GG                              | AA              | 1947048635               |
| SNP_P4_182898_3742  | NW_004518305.1 | Scaffold3664 | 3742                    | CC                              | AA              | 1947048637               |
| SNP_P4_182899_274   | NW_004518306.1 | Scaffold3665 | 274                     | CC                              | GG              | 1947048639               |

| SNPs IDs           | Chromosome IDs | Chromosomes  | Physical positions (bp) | CDC Frontier (Reference genome) | (ILWC46 & LPNB) | NCBI SNPdb Accession IDs |
|--------------------|----------------|--------------|-------------------------|---------------------------------|-----------------|--------------------------|
| SNP_P4_182900_1024 | NW_004518307.1 | Scaffold3666 | 1024                    | AA                              | GG              | 1947048641               |
| SNP_P4_182902_2091 | NW_004518307.1 | Scaffold3666 | 2091                    | GG                              | AA              | 1947048643               |
| SNP_P4_182903_2489 | NW_004518307.1 | Scaffold3666 | 2489                    | AA                              | GG              | 1947048645               |
| SNP_P4_182904_2620 | NW_004518307.1 | Scaffold3666 | 2620                    | CC                              | TT              | 1947048647               |
| SNP_P4_182905_2914 | NW_004518307.1 | Scaffold3666 | 2914                    | AA                              | GG              | 1947048649               |
| SNP_P4_182906_3176 | NW_004518307.1 | Scaffold3666 | 3176                    | GG                              | AA              | 1947048651               |
| SNP_P4_182907_3177 | NW_004518307.1 | Scaffold3666 | 3177                    | AA                              | TT              | 1947048653               |
| SNP_P4_182908_3488 | NW_004518307.1 | Scaffold3666 | 3488                    | TT                              | AA              | 1947048655               |
| SNP_P4_182909_3490 | NW_004518307.1 | Scaffold3666 | 3490                    | TT                              | GG              | 1947048657               |
| SNP_P4_182910_6281 | NW_004518307.1 | Scaffold3666 | 6281                    | CC                              | TT              | 1947048659               |
| SNP_P4_182911_6332 | NW_004518307.1 | Scaffold3666 | 6332                    | GG                              | AA              | 1947048661               |
| SNP_P4_182912_1116 | NW_004518308.1 | Scaffold3668 | 1116                    | CC                              | GG              | 1947048663               |
| SNP_P4_182914_221  | NW_004518311.1 | Scaffold3672 | 221                     | AA                              | CC              | 1947048665               |
| SNP_P4_182916_1388 | NW_004518312.1 | Scaffold3673 | 1388                    | TT                              | CC              | 1947048668               |
| SNP_P4_182917_784  | NW_004518314.1 | Scaffold3675 | 784                     | AA                              | TT              | 1947048670               |
| SNP_P4_182918_788  | NW_004518314.1 | Scaffold3675 | 788                     | AA                              | GG              | 1947048672               |
| SNP_P4_182919_107  | NW_004518315.1 | Scaffold3676 | 107                     | GG                              | AA              | 1947048674               |
| SNP_P4_182920_111  | NW_004518315.1 | Scaffold3676 | 111                     | GG                              | AA              | 1947048676               |
| SNP_P4_182921_558  | NW_004518315.1 | Scaffold3676 | 558                     | GG                              | AA              | 1947048678               |
| SNP_P4_182922_602  | NW_004518315.1 | Scaffold3676 | 602                     | GG                              | AA              | 1947048680               |
| SNP_P4_182923_710  | NW_004518315.1 | Scaffold3676 | 710                     | AA                              | CC              | 1947048682               |
| SNP_P4_182924_3287 | NW_004518315.1 | Scaffold3676 | 3287                    | CC                              | TT              | 1947048684               |
| SNP_P4_182925_3317 | NW_004518315.1 | Scaffold3676 | 3317                    | AA                              | GG              | 1947048686               |
| SNP_P4_182926_3749 | NW_004518315.1 | Scaffold3676 | 3749                    | CC                              | AA              | 1947048688               |
| SNP_P4_182927_3750 | NW_004518315.1 | Scaffold3676 | 3750                    | CC                              | AA              | 1947048690               |
| SNP_P4_182928_4111 | NW_004518315.1 | Scaffold3676 | 4111                    | AA                              | CC              | 1947048692               |
| SNP_P4_182929_4219 | NW_004518315.1 | Scaffold3676 | 4219                    | CC                              | GG              | 1947048694               |
| SNP_P4_182930_4700 | NW_004518315.1 | Scaffold3676 | 4700                    | CC                              | TT              | 1947048696               |
| SNP_P4_182931_4718 | NW_004518315.1 | Scaffold3676 | 4718                    | AA                              | GG              | 1947048698               |
| SNP_P4_182932_4770 | NW_004518315.1 | Scaffold3676 | 4770                    | AA                              | GG              | 1947048700               |
| SNP_P4_182933_4826 | NW_004518315.1 | Scaffold3676 | 4826                    | GG                              | AA              | 1947048702               |
| SNP_P4_182934_4915 | NW_004518315.1 | Scaffold3676 | 4915                    | TT                              | AA              | 1947048704               |
| SNP_P4_182935_5071 | NW_004518315.1 | Scaffold3676 | 5071                    | CC                              | TT              | 1947048706               |
| SNP_P4_182936_5183 | NW_004518315.1 | Scaffold3676 | 5183                    | GG                              | CC              | 1947048708               |
| SNP_P4_182937_5217 | NW_004518315.1 | Scaffold3676 | 5217                    | AA                              | TT              | 1947048710               |
| SNP_P4_182938_5243 | NW_004518315.1 | Scaffold3676 | 5243                    | GG                              | TT              | 1947048712               |
| SNP_P4_182939_5443 | NW_004518315.1 | Scaffold3676 | 5443                    | AA                              | GG              | 1947048714               |
| SNP_P4_182940_7570 | NW_004518315.1 | Scaffold3676 | 7570                    | TT                              | AA              | 1947048716               |
| SNP_P4_182941_7587 | NW_004518315.1 | Scaffold3676 | 7587                    | CC                              | TT              | 1947048718               |
| SNP_P4_182942_8038 | NW_004518315.1 | Scaffold3676 | 8038                    | GG                              | TT              | 1947048720               |
| SNP_P4_182943_8057 | NW_004518315.1 | Scaffold3676 | 8057                    | AA                              | TT              | 1947048722               |
| SNP_P4_182944_8088 | NW_004518315.1 | Scaffold3676 | 8088                    | TT                              | AA              | 1947048724               |



| SNPs IDs            | Chromosome IDs | Chromosomes  | Physical positions (bp) | CDC Frontier (Reference genome) | (ILWC46 & LPNB) | NCBI SNPdb Accession IDs |
|---------------------|----------------|--------------|-------------------------|---------------------------------|-----------------|--------------------------|
| SNP_P4_182945_8234  | NW_004518315.1 | Scaffold3676 | 8234                    | TT                              | AA              | 1947048726               |
| SNP_P4_182946_8263  | NW_004518315.1 | Scaffold3676 | 8263                    | TT                              | CC              | 1947048728               |
| SNP_P4_182947_9688  | NW_004518315.1 | Scaffold3676 | 9688                    | CC                              | AA              | 1947048730               |
| SNP_P4_182948_9692  | NW_004518315.1 | Scaffold3676 | 9692                    | TT                              | AA              | 1947048732               |
| SNP_P4_182949_9780  | NW_004518315.1 | Scaffold3676 | 9780                    | AA                              | GG              | 1947048735               |
| SNP_P4_182950_11553 | NW_004518315.1 | Scaffold3676 | 11553                   | CC                              | TT              | 1947048737               |
| SNP_P4_182951_12109 | NW_004518315.1 | Scaffold3676 | 12109                   | CC                              | TT              | 1947048739               |
| SNP_P4_182952_12640 | NW_004518315.1 | Scaffold3676 | 12640                   | TT                              | AA              | 1947048741               |
| SNP_P4_182953_12722 | NW_004518315.1 | Scaffold3676 | 12722                   | GG                              | TT              | 1947048743               |
| SNP_P4_182954_12782 | NW_004518315.1 | Scaffold3676 | 12782                   | TT                              | CC              | 1947048745               |
| SNP_P4_182955_12787 | NW_004518315.1 | Scaffold3676 | 12787                   | TT                              | GG              | 1947048747               |
| SNP_P4_182956_13028 | NW_004518315.1 | Scaffold3676 | 13028                   | TT                              | CC              | 1947048749               |
| SNP_P4_182957_13043 | NW_004518315.1 | Scaffold3676 | 13043                   | CC                              | AA              | 1947048751               |
| SNP_P4_182958_13087 | NW_004518315.1 | Scaffold3676 | 13087                   | AA                              | GG              | 1947048753               |
| SNP_P4_182959_13171 | NW_004518315.1 | Scaffold3676 | 13171                   | GG                              | CC              | 1947048755               |
| SNP_P4_182960_277   | NW_004518318.1 | Scaffold3681 | 277                     | CC                              | TT              | 1947048757               |
| SNP_P4_182961_421   | NW_004518318.1 | Scaffold3681 | 421                     | AA                              | TT              | 1947048759               |
| SNP_P4_182962_520   | NW_004518318.1 | Scaffold3681 | 520                     | AA                              | CC              | 1947048761               |
| SNP_P4_182963_612   | NW_004518318.1 | Scaffold3681 | 612                     | TT                              | CC              | 1947048763               |
| SNP_P4_182964_627   | NW_004518318.1 | Scaffold3681 | 627                     | TT                              | CC              | 1947048765               |
| SNP_P4_182965_651   | NW_004518318.1 | Scaffold3681 | 651                     | TT                              | CC              | 1947048767               |
| SNP_P4_182966_1292  | NW_004518319.1 | Scaffold3682 | 1292                    | TT                              | CC              | 1947048769               |
| SNP_P4_182967_103   | NW_004518322.1 | Scaffold3685 | 103                     | CC                              | TT              | 1947048771               |
| SNP_P4_182968_441   | NW_004518322.1 | Scaffold3685 | 441                     | AA                              | GG              | 1947048773               |
| SNP_P4_182969_516   | NW_004518322.1 | Scaffold3685 | 516                     | GG                              | CC              | 1947048775               |
| SNP_P4_182970_523   | NW_004518322.1 | Scaffold3685 | 523                     | CC                              | GG              | 1947048777               |
| SNP_P4_182971_570   | NW_004518322.1 | Scaffold3685 | 570                     | TT                              | CC              | 1947048779               |
| SNP_P4_182972_571   | NW_004518322.1 | Scaffold3685 | 571                     | AA                              | CC              | 1947048781               |
| SNP_P4_182973_573   | NW_004518322.1 | Scaffold3685 | 573                     | AA                              | GG              | 1947048783               |
| SNP_P4_182974_839   | NW_004518322.1 | Scaffold3685 | 839                     | TT                              | AA              | 1947048785               |
| SNP_P4_182975_847   | NW_004518322.1 | Scaffold3685 | 847                     | AA                              | GG              | 1947048787               |
| SNP_P4_182976_856   | NW_004518322.1 | Scaffold3685 | 856                     | CC                              | GG              | 1947048789               |
| SNP_P4_182977_51691 | NW_004518323.1 | Scaffold3687 | 51691                   | CC                              | TT              | 1947048791               |
| SNP_P4_182978_61480 | NW_004518323.1 | Scaffold3687 | 61480                   | CC                              | TT              | 1947048793               |
| SNP_P4_182979_61488 | NW_004518323.1 | Scaffold3687 | 61488                   | CC                              | AA              | 1947048795               |
| SNP_P4_182980_62926 | NW_004518323.1 | Scaffold3687 | 62926                   | GG                              | AA              | 1947048798               |
| SNP_P4_182981_63782 | NW_004518323.1 | Scaffold3687 | 63782                   | CC                              | TT              | 1947048800               |
| SNP_P4_182982_65444 | NW_004518323.1 | Scaffold3687 | 65444                   | TT                              | AA              | 1947048802               |
| SNP_P4_182983_65449 | NW_004518323.1 | Scaffold3687 | 65449                   | GG                              | TT              | 1947048804               |
| SNP_P4_182984_65879 | NW_004518323.1 | Scaffold3687 | 65879                   | AA                              | GG              | 1947048806               |
| SNP_P4_182985_66253 | NW_004518323.1 | Scaffold3687 | 66253                   | TT                              | CC              | 1947048808               |
| SNP_P4_182986_69267 | NW_004518323.1 | Scaffold3687 | 69267                   | CC                              | TT              | 1947048810               |

| SNPs IDs             | Chromosome IDs | Chromosomes  | Physical positions (bp) | CDC Frontier (Reference genome) | (ILWC46 & LPNB) | NCBI SNPdb Accession IDs |
|----------------------|----------------|--------------|-------------------------|---------------------------------|-----------------|--------------------------|
| SNP_P4_182988_84632  | NW_004518323.1 | Scaffold3687 | 84632                   | TT                              | CC              | 1947048812               |
| SNP_P4_182990_102595 | NW_004518323.1 | Scaffold3687 | 102595                  | CC                              | TT              | 1947048814               |
| SNP_P4_182991_105910 | NW_004518323.1 | Scaffold3687 | 105910                  | CC                              | AA              | 1947048816               |
| SNP_P4_182992_119420 | NW_004518323.1 | Scaffold3687 | 119420                  | AA                              | CC              | 1947048818               |
| SNP_P4_182993_120028 | NW_004518323.1 | Scaffold3687 | 120028                  | CC                              | TT              | 1947048820               |
| SNP_P4_182994_131148 | NW_004518323.1 | Scaffold3687 | 131148                  | AA                              | GG              | 1947048822               |
| SNP_P4_182995_131646 | NW_004518323.1 | Scaffold3687 | 131646                  | TT                              | CC              | 1947048824               |
| SNP_P4_182996_131735 | NW_004518323.1 | Scaffold3687 | 131735                  | CC                              | TT              | 1947048826               |
| SNP_P4_182997_132037 | NW_004518323.1 | Scaffold3687 | 132037                  | GG                              | AA              | 1947048828               |
| SNP_P4_182998_132043 | NW_004518323.1 | Scaffold3687 | 132043                  | AA                              | GG              | 1947048830               |
| SNP_P4_182999_132048 | NW_004518323.1 | Scaffold3687 | 132048                  | CC                              | AA              | 1947048832               |
| SNP_P4_183000_132100 | NW_004518323.1 | Scaffold3687 | 132100                  | TT                              | CC              | 1947048834               |
| SNP_P4_183001_132123 | NW_004518323.1 | Scaffold3687 | 132123                  | GG                              | AA              | 1947048836               |
| SNP_P4_183002_132136 | NW_004518323.1 | Scaffold3687 | 132136                  | CC                              | TT              | 1947048838               |
| SNP_P4_183003_132166 | NW_004518323.1 | Scaffold3687 | 132166                  | CC                              | TT              | 1947048840               |
| SNP_P4_183004_132283 | NW_004518323.1 | Scaffold3687 | 132283                  | TT                              | CC              | 1947048842               |
| SNP_P4_183005_132322 | NW_004518323.1 | Scaffold3687 | 132322                  | GG                              | TT              | 1947048844               |
| SNP_P4_183006_137861 | NW_004518323.1 | Scaffold3687 | 137861                  | AA                              | GG              | 1947048846               |
| SNP_P4_183007_140695 | NW_004518323.1 | Scaffold3687 | 140695                  | TT                              | GG              | 1947048848               |
| SNP_P4_183008_140724 | NW_004518323.1 | Scaffold3687 | 140724                  | GG                              | AA              | 1947048850               |
| SNP_P4_183009_140752 | NW_004518323.1 | Scaffold3687 | 140752                  | TT                              | CC              | 1947048852               |
| SNP_P4_183010_140756 | NW_004518323.1 | Scaffold3687 | 140756                  | CC                              | TT              | 1947048854               |
| SNP_P4_183011_140766 | NW_004518323.1 | Scaffold3687 | 140766                  | GG                              | AA              | 1947048856               |
| SNP_P4_183012_140799 | NW_004518323.1 | Scaffold3687 | 140799                  | GG                              | AA              | 1947048858               |
| SNP_P4_183013_140806 | NW_004518323.1 | Scaffold3687 | 140806                  | TT                              | CC              | 1947048860               |
| SNP_P4_183014_140922 | NW_004518323.1 | Scaffold3687 | 140922                  | CC                              | AA              | 1947048862               |
| SNP_P4_183015_140994 | NW_004518323.1 | Scaffold3687 | 140994                  | TT                              | GG              | 1947048864               |
| SNP_P4_183016_142931 | NW_004518323.1 | Scaffold3687 | 142931                  | GG                              | AA              | 1947048866               |
| SNP_P4_183017_443    | NW_004518325.1 | Scaffold3689 | 443                     | TT                              | AA              | 1947048868               |
| SNP_P4_183018_456    | NW_004518325.1 | Scaffold3689 | 456                     | GG                              | TT              | 1947048870               |
| SNP_P4_183019_635    | NW_004518325.1 | Scaffold3689 | 635                     | AA                              | GG              | 1947048872               |
| SNP_P4_183020_15460  | NW_004518325.1 | Scaffold3689 | 15460                   | TT                              | CC              | 1947048874               |
| SNP_P4_183021_15535  | NW_004518325.1 | Scaffold3689 | 15535                   | GG                              | AA              | 1947048876               |
| SNP_P4_183022_15592  | NW_004518325.1 | Scaffold3689 | 15592                   | GG                              | CC              | 1947048878               |
| SNP_P4_183023_15659  | NW_004518325.1 | Scaffold3689 | 15659                   | CC                              | AA              | 1947048880               |
| SNP_P4_183024_15787  | NW_004518325.1 | Scaffold3689 | 15787                   | CC                              | TT              | 1947048882               |
| SNP_P4_183025_16055  | NW_004518325.1 | Scaffold3689 | 16055                   | GG                              | AA              | 1947048884               |
| SNP_P4_183026_16103  | NW_004518325.1 | Scaffold3689 | 16103                   | TT                              | CC              | 1947048886               |
| SNP_P4_183027_16157  | NW_004518325.1 | Scaffold3689 | 16157                   | CC                              | GG              | 1947048888               |
| SNP_P4_183029_16351  | NW_004518325.1 | Scaffold3689 | 16351                   | GG                              | AA              | 1947048890               |
| SNP_P4_183030_304    | NW_004518326.1 | Scaffold3690 | 304                     | AA                              | TT              | 1947048892               |
| SNP_P4_183031_817    | NW_004518329.1 | Scaffold3693 | 817                     | CC                              | TT              | 1947048894               |

| SNPs IDs            | Chromosome IDs | Chromosomes  | Physical positions (bp) | CDC Frontier (Reference genome) | (ILWC46 & LPNB) | NCBI SNPdb Accession IDs |
|---------------------|----------------|--------------|-------------------------|---------------------------------|-----------------|--------------------------|
| SNP_P4_183032_984   | NW_004518329.1 | Scaffold3693 | 984                     | TT                              | CC              | 1947048896               |
| SNP_P4_183033_1000  | NW_004518329.1 | Scaffold3693 | 1000                    | CC                              | TT              | 1947048898               |
| SNP_P4_183034_1037  | NW_004518329.1 | Scaffold3693 | 1037                    | TT                              | CC              | 1947048900               |
| SNP_P4_183035_1069  | NW_004518329.1 | Scaffold3693 | 1069                    | TT                              | AA              | 1947048902               |
| SNP_P4_183036_1076  | NW_004518329.1 | Scaffold3693 | 1076                    | AA                              | GG              | 1947048904               |
| SNP_P4_183037_20673 | NW_004518329.1 | Scaffold3693 | 20673                   | TT                              | CC              | 1947048906               |
| SNP_P4_183038_35113 | NW_004518329.1 | Scaffold3693 | 35113                   | AA                              | GG              | 1947048908               |
| SNP_P4_183039_35115 | NW_004518329.1 | Scaffold3693 | 35115                   | CC                              | TT              | 1947048910               |
| SNP_P4_183040_35116 | NW_004518329.1 | Scaffold3693 | 35116                   | AA                              | GG              | 1947048912               |
| SNP_P4_183041_35159 | NW_004518329.1 | Scaffold3693 | 35159                   | AA                              | GG              | 1947048914               |
| SNP_P4_183042_35163 | NW_004518329.1 | Scaffold3693 | 35163                   | AA                              | GG              | 1947048916               |
| SNP_P4_183043_35185 | NW_004518329.1 | Scaffold3693 | 35185                   | CC                              | TT              | 1947048918               |
| SNP_P4_183044_35206 | NW_004518329.1 | Scaffold3693 | 35206                   | TT                              | GG              | 1947048920               |
| SNP_P4_183045_35215 | NW_004518329.1 | Scaffold3693 | 35215                   | CC                              | TT              | 1947048922               |
| SNP_P4_183046_35221 | NW_004518329.1 | Scaffold3693 | 35221                   | TT                              | CC              | 1947048924               |
| SNP_P4_183047_35349 | NW_004518329.1 | Scaffold3693 | 35349                   | CC                              | TT              | 1947048926               |
| SNP_P4_183048_35495 | NW_004518329.1 | Scaffold3693 | 35495                   | GG                              | AA              | 1947048928               |
| SNP_P4_183049_35650 | NW_004518329.1 | Scaffold3693 | 35650                   | GG                              | AA              | 1947048931               |
| SNP_P4_183050_35699 | NW_004518329.1 | Scaffold3693 | 35699                   | TT                              | CC              | 1947048933               |
| SNP_P4_183051_40794 | NW_004518329.1 | Scaffold3693 | 40794                   | TT                              | CC              | 1947048935               |
| SNP_P4_183052_41497 | NW_004518329.1 | Scaffold3693 | 41497                   | AA                              | CC              | 1947048937               |
| SNP_P4_183053_68745 | NW_004518329.1 | Scaffold3693 | 68745                   | GG                              | AA              | 1947048939               |
| SNP_P4_183054_81068 | NW_004518329.1 | Scaffold3693 | 81068                   | CC                              | TT              | 1947048941               |
| SNP_P4_183055_471   | NW_004518332.1 | Scaffold3696 | 471                     | AA                              | GG              | 1947048943               |
| SNP_P4_183056_475   | NW_004518332.1 | Scaffold3696 | 475                     | TT                              | GG              | 1947048945               |
| SNP_P4_183057_492   | NW_004518332.1 | Scaffold3696 | 492                     | AA                              | TT              | 1947048948               |
| SNP_P4_183058_2577  | NW_004518334.1 | Scaffold3698 | 2577                    | CC                              | TT              | 1947048950               |
| SNP_P4_183059_2581  | NW_004518334.1 | Scaffold3698 | 2581                    | TT                              | CC              | 1947048952               |
| SNP_P4_183060_2849  | NW_004518334.1 | Scaffold3698 | 2849                    | CC                              | AA              | 1947048954               |
| SNP_P4_183061_426   | NW_004518335.1 | Scaffold3700 | 426                     | CC                              | TT              | 1947048956               |
| SNP_P4_183062_652   | NW_004518335.1 | Scaffold3700 | 652                     | GG                              | CC              | 1947048958               |
| SNP_P4_183063_657   | NW_004518335.1 | Scaffold3700 | 657                     | CC                              | AA              | 1947048960               |
| SNP_P4_183064_724   | NW_004518335.1 | Scaffold3700 | 724                     | CC                              | TT              | 1947048962               |
| SNP_P4_183065_739   | NW_004518335.1 | Scaffold3700 | 739                     | TT                              | AA              | 1947048964               |
| SNP_P4_183066_860   | NW_004518335.1 | Scaffold3700 | 860                     | CC                              | AA              | 1947048966               |
| SNP_P4_183067_1007  | NW_004518335.1 | Scaffold3700 | 1007                    | AA                              | GG              | 1947048968               |
| SNP_P4_183068_1065  | NW_004518335.1 | Scaffold3700 | 1065                    | TT                              | AA              | 1947048970               |
| SNP_P4_183069_1111  | NW_004518335.1 | Scaffold3700 | 1111                    | TT                              | AA              | 1947048972               |
| SNP_P4_183070_1121  | NW_004518335.1 | Scaffold3700 | 1121                    | CC                              | TT              | 1947048974               |
| SNP_P4_183071_395   | NW_004518339.1 | Scaffold3705 | 395                     | GG                              | TT              | 1947048976               |
| SNP_P4_183072_492   | NW_004518339.1 | Scaffold3705 | 492                     | TT                              | CC              | 1947048978               |
| SNP_P4_183073_558   | NW_004518339.1 | Scaffold3705 | 558                     | GG                              | AA              | 1947048980               |

| SNPs IDs           | Chromosome IDs | Chromosomes  | Physical positions (bp) | CDC Frontier (Reference genome) | (ILWC46 & LPNB) | NCBI SNPdb Accession IDs |
|--------------------|----------------|--------------|-------------------------|---------------------------------|-----------------|--------------------------|
| SNP_P4_183074_673  | NW_004518339.1 | Scaffold3705 | 673                     | AA                              | GG              | 1947048982               |
| SNP_P4_183075_675  | NW_004518339.1 | Scaffold3705 | 675                     | GG                              | AA              | 1947048984               |
| SNP_P4_183076_719  | NW_004518339.1 | Scaffold3705 | 719                     | TT                              | CC              | 1947048986               |
| SNP_P4_183077_739  | NW_004518339.1 | Scaffold3705 | 739                     | CC                              | AA              | 1947048988               |
| SNP_P4_183078_3950 | NW_004518339.1 | Scaffold3705 | 3950                    | AA                              | GG              | 1947048990               |
| SNP_P4_183080_4125 | NW_004518339.1 | Scaffold3705 | 4125                    | AA                              | TT              | 1947048992               |
| SNP_P4_183081_4141 | NW_004518339.1 | Scaffold3705 | 4141                    | AA                              | GG              | 1947048994               |
| SNP_P4_183082_4404 | NW_004518339.1 | Scaffold3705 | 4404                    | AA                              | GG              | 1947048996               |
| SNP_P4_183083_103  | NW_004518341.1 | Scaffold3707 | 103                     | AA                              | GG              | 1947048998               |
| SNP_P4_183084_123  | NW_004518341.1 | Scaffold3707 | 123                     | CC                              | TT              | 1947049000               |
| SNP_P4_183085_763  | NW_004518341.1 | Scaffold3707 | 763                     | AA                              | TT              | 1947049002               |
| SNP_P4_183086_800  | NW_004518341.1 | Scaffold3707 | 800                     | CC                              | GG              | 1947049004               |
| SNP_P4_183087_893  | NW_004518341.1 | Scaffold3707 | 893                     | CC                              | TT              | 1947049006               |
| SNP_P4_183088_1590 | NW_004518341.1 | Scaffold3707 | 1590                    | TT                              | AA              | 1947049008               |
| SNP_P4_183089_1593 | NW_004518341.1 | Scaffold3707 | 1593                    | TT                              | GG              | 1947049010               |
| SNP_P4_183090_1612 | NW_004518341.1 | Scaffold3707 | 1612                    | CC                              | TT              | 1947049012               |
| SNP_P4_183091_1693 | NW_004518341.1 | Scaffold3707 | 1693                    | CC                              | TT              | 1947049014               |
| SNP_P4_183092_1715 | NW_004518341.1 | Scaffold3707 | 1715                    | GG                              | AA              | 1947049016               |
| SNP_P4_183093_1733 | NW_004518341.1 | Scaffold3707 | 1733                    | GG                              | TT              | 1947049018               |
| SNP_P4_183094_1735 | NW_004518341.1 | Scaffold3707 | 1735                    | AA                              | TT              | 1947049020               |
| SNP_P4_183095_1736 | NW_004518341.1 | Scaffold3707 | 1736                    | AA                              | TT              | 1947049022               |
| SNP_P4_183096_1737 | NW_004518341.1 | Scaffold3707 | 1737                    | AA                              | TT              | 1947049024               |
| SNP_P4_183097_1742 | NW_004518341.1 | Scaffold3707 | 1742                    | TT                              | AA              | 1947049026               |
| SNP_P4_183098_1882 | NW_004518341.1 | Scaffold3707 | 1882                    | CC                              | AA              | 1947049028               |
| SNP_P4_183099_4037 | NW_004518341.1 | Scaffold3707 | 4037                    | CC                              | TT              | 1947049030               |
| SNP_P4_183100_986  | NW_004518342.1 | Scaffold3708 | 986                     | GG                              | AA              | 1947049032               |
| SNP_P4_183101_1331 | NW_004518342.1 | Scaffold3708 | 1331                    | AA                              | TT              | 1947049034               |
| SNP_P4_183102_595  | NW_004518344.1 | Scaffold3714 | 595                     | TT                              | CC              | 1947049036               |
| SNP_P4_183103_642  | NW_004518344.1 | Scaffold3714 | 642                     | TT                              | CC              | 1947049038               |
| SNP_P4_183104_687  | NW_004518344.1 | Scaffold3714 | 687                     | TT                              | GG              | 1947049040               |
| SNP_P4_183105_696  | NW_004518344.1 | Scaffold3714 | 696                     | AA                              | GG              | 1947049042               |
| SNP_P4_183106_699  | NW_004518344.1 | Scaffold3714 | 699                     | AA                              | CC              | 1947049044               |
| SNP_P4_183107_844  | NW_004518344.1 | Scaffold3714 | 844                     | GG                              | AA              | 1947049046               |
| SNP_P4_183108_854  | NW_004518344.1 | Scaffold3714 | 854                     | AA                              | TT              | 1947049048               |
| SNP_P4_183109_879  | NW_004518344.1 | Scaffold3714 | 879                     | TT                              | CC              | 1947049050               |
| SNP_P4_183110_887  | NW_004518344.1 | Scaffold3714 | 887                     | TT                              | AA              | 1947049052               |
| SNP_P4_183111_896  | NW_004518344.1 | Scaffold3714 | 896                     | CC                              | AA              | 1947049054               |
| SNP_P4_183112_924  | NW_004518344.1 | Scaffold3714 | 924                     | GG                              | AA              | 1947049056               |
| SNP_P4_183113_1308 | NW_004518347.1 | Scaffold3718 | 1308                    | TT                              | AA              | 1947049058               |
| SNP_P4_183114_1128 | NW_004518351.1 | Scaffold3722 | 1128                    | CC                              | TT              | 1947049060               |
| SNP_P4_183115_1303 | NW_004518353.1 | Scaffold3724 | 1303                    | AA                              | TT              | 1947049062               |
| SNP_P4_183116_1311 | NW_004518353.1 | Scaffold3724 | 1311                    | TT                              | GG              | 1947049064               |

| SNPs IDs             | Chromosome IDs | Chromosomes  | Physical positions (bp) | CDC Frontier (Reference genome) | (ILWC46 & LPNB) | NCBI SNPdb Accession IDs |
|----------------------|----------------|--------------|-------------------------|---------------------------------|-----------------|--------------------------|
| SNP_P4_183117_80349  | NW_004518353.1 | Scaffold3724 | 80349                   | GG                              | TT              | 1947049066               |
| SNP_P4_183118_88233  | NW_004518353.1 | Scaffold3724 | 88233                   | TT                              | CC              | 1947049068               |
| SNP_P4_183119_88598  | NW_004518353.1 | Scaffold3724 | 88598                   | CC                              | AA              | 1947049069               |
| SNP_P4_183120_88652  | NW_004518353.1 | Scaffold3724 | 88652                   | AA                              | GG              | 1947049071               |
| SNP_P4_183121_89059  | NW_004518353.1 | Scaffold3724 | 89059                   | TT                              | CC              | 1947049073               |
| SNP_P4_183122_90971  | NW_004518353.1 | Scaffold3724 | 90971                   | TT                              | AA              | 1947049075               |
| SNP_P4_183123_90972  | NW_004518353.1 | Scaffold3724 | 90972                   | TT                              | GG              | 1947049077               |
| SNP_P4_183124_103393 | NW_004518353.1 | Scaffold3724 | 103393                  | GG                              | AA              | 1947049079               |
| SNP_P4_183125_316    | NW_004518357.1 | Scaffold3728 | 316                     | CC                              | TT              | 1947049081               |
| SNP_P4_183126_317    | NW_004518357.1 | Scaffold3728 | 317                     | CC                              | TT              | 1947049083               |
| SNP_P4_183127_413    | NW_004518357.1 | Scaffold3728 | 413                     | AA                              | GG              | 1947049085               |
| SNP_P4_183128_419    | NW_004518357.1 | Scaffold3728 | 419                     | AA                              | TT              | 1947049087               |
| SNP_P4_183129_426    | NW_004518357.1 | Scaffold3728 | 426                     | GG                              | CC              | 1947049089               |
| SNP_P4_183130_465    | NW_004518357.1 | Scaffold3728 | 465                     | GG                              | AA              | 1947049091               |
| SNP_P4_183131_489    | NW_004518357.1 | Scaffold3728 | 489                     | GG                              | AA              | 1947049093               |
| SNP_P4_183132_499    | NW_004518357.1 | Scaffold3728 | 499                     | GG                              | TT              | 1947049095               |
| SNP_P4_183133_7184   | NW_004518357.1 | Scaffold3728 | 7184                    | CC                              | AA              | 1947049097               |
| SNP_P4_183134_454    | NW_004518359.1 | Scaffold3731 | 454                     | CC                              | TT              | 1947049099               |
| SNP_P4_183135_502    | NW_004518359.1 | Scaffold3731 | 502                     | CC                              | TT              | 1947049101               |
| SNP_P4_183136_792    | NW_004518359.1 | Scaffold3731 | 792                     | TT                              | CC              | 1947049103               |
| SNP_P4_183137_834    | NW_004518359.1 | Scaffold3731 | 834                     | GG                              | TT              | 1947049105               |
| SNP_P4_183138_852    | NW_004518359.1 | Scaffold3731 | 852                     | AA                              | TT              | 1947049107               |
| SNP_P4_183139_892    | NW_004518359.1 | Scaffold3731 | 892                     | TT                              | GG              | 1947049109               |
| SNP_P4_183140_894    | NW_004518359.1 | Scaffold3731 | 894                     | TT                              | AA              | 1947049111               |
| SNP_P4_183141_897    | NW_004518359.1 | Scaffold3731 | 897                     | GG                              | TT              | 1947049113               |
| SNP_P4_183142_915    | NW_004518359.1 | Scaffold3731 | 915                     | TT                              | GG              | 1947049115               |
| SNP_P4_183143_921    | NW_004518359.1 | Scaffold3731 | 921                     | GG                              | AA              | 1947049117               |
| SNP_P4_183144_930    | NW_004518359.1 | Scaffold3731 | 930                     | GG                              | TT              | 1947049119               |
| SNP_P4_183145_945    | NW_004518359.1 | Scaffold3731 | 945                     | AA                              | TT              | 1947049120               |
| SNP_P4_183146_951    | NW_004518359.1 | Scaffold3731 | 951                     | GG                              | AA              | 1947049122               |
| SNP_P4_183147_966    | NW_004518359.1 | Scaffold3731 | 966                     | TT                              | GG              | 1947049124               |
| SNP_P4_183148_976    | NW_004518359.1 | Scaffold3731 | 976                     | GG                              | AA              | 1947049125               |
| SNP_P4_183149_980    | NW_004518359.1 | Scaffold3731 | 980                     | AA                              | TT              | 1947049127               |
| SNP_P4_183150_64     | NW_004518366.1 | Scaffold3742 | 64                      | GG                              | AA              | 1947049129               |
| SNP_P4_183151_102    | NW_004518366.1 | Scaffold3742 | 102                     | GG                              | CC              | 1947049131               |
| SNP_P4_183152_123    | NW_004518366.1 | Scaffold3742 | 123                     | GG                              | AA              | 1947049133               |
| SNP_P4_183153_146    | NW_004518366.1 | Scaffold3742 | 146                     | TT                              | AA              | 1947049135               |
| SNP_P4_183154_207    | NW_004518366.1 | Scaffold3742 | 207                     | TT                              | AA              | 1947049137               |
| SNP_P4_183155_217    | NW_004518366.1 | Scaffold3742 | 217                     | AA                              | CC              | 1947049139               |
| SNP_P4_183156_374    | NW_004518366.1 | Scaffold3742 | 374                     | TT                              | CC              | 1947049141               |
| SNP_P4_183157_405    | NW_004518366.1 | Scaffold3742 | 405                     | AA                              | TT              | 1947049143               |
| SNP_P4_183158_439    | NW_004518366.1 | Scaffold3742 | 439                     | AA                              | GG              | 1947049145               |

| SNPs IDs            | Chromosome IDs | Chromosomes  | Physical positions (bp) | CDC Frontier (Reference genome) | (ILWC46 & LPNB) | NCBI SNPdb Accession IDs |
|---------------------|----------------|--------------|-------------------------|---------------------------------|-----------------|--------------------------|
| SNP_P4_183159_492   | NW_004518366.1 | Scaffold3742 | 492                     | AA                              | GG              | 1947049147               |
| SNP_P4_183161_603   | NW_004518366.1 | Scaffold3742 | 603                     | CC                              | TT              | 1947049149               |
| SNP_P4_183162_643   | NW_004518366.1 | Scaffold3742 | 643                     | CC                              | GG              | 1947049151               |
| SNP_P4_183163_665   | NW_004518366.1 | Scaffold3742 | 665                     | CC                              | TT              | 1947049153               |
| SNP_P4_183164_688   | NW_004518366.1 | Scaffold3742 | 688                     | TT                              | CC              | 1947049155               |
| SNP_P4_183165_732   | NW_004518366.1 | Scaffold3742 | 732                     | AA                              | TT              | 1947049157               |
| SNP_P4_183166_3733  | NW_004518366.1 | Scaffold3742 | 3733                    | CC                              | AA              | 1947049159               |
| SNP_P4_183167_3735  | NW_004518366.1 | Scaffold3742 | 3735                    | AA                              | CC              | 1947049161               |
| SNP_P4_183168_3790  | NW_004518366.1 | Scaffold3742 | 3790                    | CC                              | AA              | 1947049163               |
| SNP_P4_183170_4039  | NW_004518366.1 | Scaffold3742 | 4039                    | GG                              | CC              | 1947049165               |
| SNP_P4_183171_4056  | NW_004518366.1 | Scaffold3742 | 4056                    | AA                              | GG              | 1947049167               |
| SNP_P4_183172_4088  | NW_004518366.1 | Scaffold3742 | 4088                    | GG                              | TT              | 1947049169               |
| SNP_P4_183173_4135  | NW_004518366.1 | Scaffold3742 | 4135                    | AA                              | TT              | 1947049171               |
| SNP_P4_183174_4138  | NW_004518366.1 | Scaffold3742 | 4138                    | TT                              | GG              | 1947049173               |
| SNP_P4_183175_6425  | NW_004518366.1 | Scaffold3742 | 6425                    | CC                              | TT              | 1947049175               |
| SNP_P4_183176_6756  | NW_004518366.1 | Scaffold3742 | 6756                    | CC                              | TT              | 1947049177               |
| SNP_P4_183177_10510 | NW_004518366.1 | Scaffold3742 | 10510                   | AA                              | TT              | 1947049179               |
| SNP_P4_183178_10935 | NW_004518366.1 | Scaffold3742 | 10935                   | CC                              | TT              | 1947049180               |
| SNP_P4_183179_11065 | NW_004518366.1 | Scaffold3742 | 11065                   | AA                              | CC              | 1947049181               |
| SNP_P4_183180_11362 | NW_004518366.1 | Scaffold3742 | 11362                   | TT                              | CC              | 1947049182               |
| SNP_P4_183181_11373 | NW_004518366.1 | Scaffold3742 | 11373                   | AA                              | GG              | 1947049184               |
| SNP_P4_183182_11469 | NW_004518366.1 | Scaffold3742 | 11469                   | TT                              | AA              | 1947049186               |
| SNP_P4_183183_11517 | NW_004518366.1 | Scaffold3742 | 11517                   | CC                              | TT              | 1947049188               |
| SNP_P4_183184_11682 | NW_004518366.1 | Scaffold3742 | 11682                   | TT                              | AA              | 1947049190               |
| SNP_P4_183185_4515  | NW_004518368.1 | Scaffold3744 | 4515                    | CC                              | TT              | 1947049192               |
| SNP_P4_183186_4517  | NW_004518368.1 | Scaffold3744 | 4517                    | GG                              | CC              | 1947049194               |
| SNP_P4_183187_4552  | NW_004518368.1 | Scaffold3744 | 4552                    | TT                              | CC              | 1947049196               |
| SNP_P4_183188_4553  | NW_004518368.1 | Scaffold3744 | 4553                    | AA                              | TT              | 1947049198               |
| SNP_P4_183189_4572  | NW_004518368.1 | Scaffold3744 | 4572                    | TT                              | CC              | 1947049200               |
| SNP_P4_183190_4666  | NW_004518368.1 | Scaffold3744 | 4666                    | TT                              | GG              | 1947049202               |
| SNP_P4_183191_9383  | NW_004518368.1 | Scaffold3744 | 9383                    | TT                              | AA              | 1947049204               |
| SNP_P4_183192_9388  | NW_004518368.1 | Scaffold3744 | 9388                    | GG                              | TT              | 1947049206               |
| SNP_P4_183193_599   | NW_004518369.1 | Scaffold3745 | 599                     | CC                              | TT              | 1947049208               |
| SNP_P4_183194_2877  | NW_004518369.1 | Scaffold3745 | 2877                    | CC                              | TT              | 1947049210               |
| SNP_P4_183195_2888  | NW_004518369.1 | Scaffold3745 | 2888                    | CC                              | GG              | 1947049212               |
| SNP_P4_183196_3275  | NW_004518369.1 | Scaffold3745 | 3275                    | CC                              | TT              | 1947049214               |
| SNP_P4_183197_1390  | NW_004518371.1 | Scaffold3748 | 1390                    | AA                              | TT              | 1947049216               |
| SNP_P4_183198_3672  | NW_004518371.1 | Scaffold3748 | 3672                    | CC                              | TT              | 1947049218               |
| SNP_P4_183200_6618  | NW_004518373.1 | Scaffold3750 | 6618                    | GG                              | AA              | 1947049220               |
| SNP_P4_183201_116   | NW_004518379.1 | Scaffold3757 | 116                     | TT                              | AA              | 1947049222               |
| SNP_P4_183202_149   | NW_004518379.1 | Scaffold3757 | 149                     | CC                              | TT              | 1947049224               |
| SNP_P4_183203_150   | NW_004518379.1 | Scaffold3757 | 150                     | CC                              | TT              | 1947049226               |

| SNPs IDs           | Chromosome IDs | Chromosomes  | Physical positions (bp) | CDC Frontier (Reference genome) | (ILWC46 & LPNB) | NCBI SNPdb Accession IDs |
|--------------------|----------------|--------------|-------------------------|---------------------------------|-----------------|--------------------------|
| SNP_P4_183204_222  | NW_004518379.1 | Scaffold3757 | 222                     | CC                              | TT              | 1947049228               |
| SNP_P4_183205_234  | NW_004518379.1 | Scaffold3757 | 234                     | AA                              | GG              | 1947049230               |
| SNP_P4_183206_537  | NW_004518379.1 | Scaffold3757 | 537                     | CC                              | AA              | 1947049232               |
| SNP_P4_183208_3489 | NW_004518379.1 | Scaffold3757 | 3489                    | GG                              | CC              | 1947049234               |
| SNP_P4_183209_3975 | NW_004518379.1 | Scaffold3757 | 3975                    | TT                              | CC              | 1947049236               |
| SNP_P4_183210_4006 | NW_004518379.1 | Scaffold3757 | 4006                    | TT                              | GG              | 1947049238               |
| SNP_P4_183211_4023 | NW_004518379.1 | Scaffold3757 | 4023                    | GG                              | AA              | 1947049240               |
| SNP_P4_183212_4046 | NW_004518379.1 | Scaffold3757 | 4046                    | GG                              | AA              | 1947049242               |
| SNP_P4_183213_4076 | NW_004518379.1 | Scaffold3757 | 4076                    | AA                              | GG              | 1947049244               |
| SNP_P4_183214_4211 | NW_004518379.1 | Scaffold3757 | 4211                    | AA                              | GG              | 1947049246               |
| SNP_P4_183215_4215 | NW_004518379.1 | Scaffold3757 | 4215                    | CC                              | TT              | 1947049248               |
| SNP_P4_183216_4257 | NW_004518379.1 | Scaffold3757 | 4257                    | TT                              | GG              | 1947049250               |
| SNP_P4_183217_4278 | NW_004518379.1 | Scaffold3757 | 4278                    | TT                              | AA              | 1947049252               |
| SNP_P4_183218_4426 | NW_004518379.1 | Scaffold3757 | 4426                    | AA                              | CC              | 1947049254               |
| SNP_P4_183219_4500 | NW_004518379.1 | Scaffold3757 | 4500                    | CC                              | TT              | 1947049256               |
| SNP_P4_183220_5073 | NW_004518379.1 | Scaffold3757 | 5073                    | CC                              | TT              | 1947049258               |
| SNP_P4_183221_5315 | NW_004518379.1 | Scaffold3757 | 5315                    | AA                              | GG              | 1947049260               |
| SNP_P4_183222_5389 | NW_004518379.1 | Scaffold3757 | 5389                    | CC                              | AA              | 1947049262               |
| SNP_P4_183223_5552 | NW_004518379.1 | Scaffold3757 | 5552                    | CC                              | TT              | 1947049264               |
| SNP_P4_183224_5553 | NW_004518379.1 | Scaffold3757 | 5553                    | CC                              | TT              | 1947049266               |
| SNP_P4_183225_5575 | NW_004518379.1 | Scaffold3757 | 5575                    | CC                              | TT              | 1947049268               |
| SNP_P4_183226_5593 | NW_004518379.1 | Scaffold3757 | 5593                    | AA                              | GG              | 1947049270               |
| SNP_P4_183227_6774 | NW_004518379.1 | Scaffold3757 | 6774                    | CC                              | TT              | 1947049272               |
| SNP_P4_183228_6917 | NW_004518379.1 | Scaffold3757 | 6917                    | TT                              | CC              | 1947049274               |
| SNP_P4_183229_6944 | NW_004518379.1 | Scaffold3757 | 6944                    | TT                              | CC              | 1947049276               |
| SNP_P4_183230_7043 | NW_004518379.1 | Scaffold3757 | 7043                    | TT                              | CC              | 1947049278               |
| SNP_P4_183231_7216 | NW_004518379.1 | Scaffold3757 | 7216                    | GG                              | CC              | 1947049280               |
| SNP_P4_183232_7289 | NW_004518379.1 | Scaffold3757 | 7289                    | AA                              | GG              | 1947049282               |
| SNP_P4_183233_7352 | NW_004518379.1 | Scaffold3757 | 7352                    | GG                              | AA              | 1947049284               |
| SNP_P4_183234_7505 | NW_004518379.1 | Scaffold3757 | 7505                    | TT                              | GG              | 1947049286               |
| SNP_P4_183235_7620 | NW_004518379.1 | Scaffold3757 | 7620                    | TT                              | CC              | 1947049288               |
| SNP_P4_183236_7663 | NW_004518379.1 | Scaffold3757 | 7663                    | AA                              | CC              | 1947049290               |
| SNP_P4_183237_7677 | NW_004518379.1 | Scaffold3757 | 7677                    | TT                              | GG              | 1947049292               |
| SNP_P4_183238_7767 | NW_004518379.1 | Scaffold3757 | 7767                    | AA                              | GG              | 1947049294               |
| SNP_P4_183239_7897 | NW_004518379.1 | Scaffold3757 | 7897                    | AA                              | GG              | 1947049296               |
| SNP_P4_183240_7967 | NW_004518379.1 | Scaffold3757 | 7967                    | AA                              | GG              | 1947049298               |
| SNP_P4_183241_9004 | NW_004518379.1 | Scaffold3757 | 9004                    | CC                              | AA              | 1947049300               |
| SNP_P4_183242_618  | NW_004518383.1 | Scaffold3765 | 618                     | CC                              | TT              | 1947049302               |
| SNP_P4_183243_630  | NW_004518383.1 | Scaffold3765 | 630                     | GG                              | CC              | 1947049304               |
| SNP_P4_183244_1282 | NW_004518383.1 | Scaffold3765 | 1282                    | GG                              | AA              | 1947049306               |
| SNP_P4_183245_1656 | NW_004518383.1 | Scaffold3765 | 1656                    | GG                              | CC              | 1947049308               |
| SNP_P4_183246_1694 | NW_004518383.1 | Scaffold3765 | 1694                    | TT                              | CC              | 1947049310               |

| SNPs IDs            | Chromosome IDs | Chromosomes  | Physical positions (bp) | CDC Frontier (Reference genome) | (ILWC46 & LPNB) | NCBI SNPdb Accession IDs |
|---------------------|----------------|--------------|-------------------------|---------------------------------|-----------------|--------------------------|
| SNP_P4_183247_1715  | NW_004518383.1 | Scaffold3765 | 1715                    | AA                              | GG              | 1947049312               |
| SNP_P4_183248_1721  | NW_004518383.1 | Scaffold3765 | 1721                    | CC                              | AA              | 1947049314               |
| SNP_P4_183249_3527  | NW_004518383.1 | Scaffold3765 | 3527                    | CC                              | TT              | 1947049316               |
| SNP_P4_183250_3852  | NW_004518383.1 | Scaffold3765 | 3852                    | TT                              | CC              | 1947049318               |
| SNP_P4_183251_3923  | NW_004518383.1 | Scaffold3765 | 3923                    | AA                              | TT              | 1947049320               |
| SNP_P4_183252_4170  | NW_004518383.1 | Scaffold3765 | 4170                    | CC                              | GG              | 1947049322               |
| SNP_P4_183254_4236  | NW_004518383.1 | Scaffold3765 | 4236                    | CC                              | GG              | 1947049324               |
| SNP_P4_183255_44    | NW_004518385.1 | Scaffold3768 | 44                      | CC                              | AA              | 1947049326               |
| SNP_P4_183256_60    | NW_004518385.1 | Scaffold3768 | 60                      | AA                              | GG              | 1947049328               |
| SNP_P4_183257_64    | NW_004518385.1 | Scaffold3768 | 64                      | GG                              | AA              | 1947049330               |
| SNP_P4_183258_67    | NW_004518385.1 | Scaffold3768 | 67                      | AA                              | GG              | 1947049332               |
| SNP_P4_183260_6621  | NW_004518388.1 | Scaffold3771 | 6621                    | TT                              | AA              | 1947049334               |
| SNP_P4_183261_11360 | NW_004518388.1 | Scaffold3771 | 11360                   | CC                              | TT              | 1947049336               |
| SNP_P4_183262_11507 | NW_004518388.1 | Scaffold3771 | 11507                   | TT                              | CC              | 1947049338               |
| SNP_P4_183263_11640 | NW_004518388.1 | Scaffold3771 | 11640                   | AA                              | GG              | 1947049340               |
| SNP_P4_183264_11843 | NW_004518388.1 | Scaffold3771 | 11843                   | AA                              | GG              | 1947049342               |
| SNP_P4_183265_11860 | NW_004518388.1 | Scaffold3771 | 11860                   | CC                              | AA              | 1947049344               |
| SNP_P4_183266_12776 | NW_004518388.1 | Scaffold3771 | 12776                   | AA                              | GG              | 1947049346               |
| SNP_P4_183267_12777 | NW_004518388.1 | Scaffold3771 | 12777                   | GG                              | AA              | 1947049348               |
| SNP_P4_183268_1364  | NW_004518389.1 | Scaffold3772 | 1364                    | TT                              | AA              | 1947049350               |
| SNP_P4_183269_260   | NW_004518392.1 | Scaffold3780 | 260                     | GG                              | AA              | 1947049352               |
| SNP_P4_183270_7463  | NW_004518392.1 | Scaffold3780 | 7463                    | AA                              | TT              | 1947049354               |
| SNP_P4_183271_7553  | NW_004518392.1 | Scaffold3780 | 7553                    | GG                              | CC              | 1947049356               |
| SNP_P4_183272_7586  | NW_004518392.1 | Scaffold3780 | 7586                    | GG                              | CC              | 1947049358               |
| SNP_P4_183273_7667  | NW_004518392.1 | Scaffold3780 | 7667                    | CC                              | TT              | 1947049360               |
| SNP_P4_183276_9405  | NW_004518392.1 | Scaffold3780 | 9405                    | CC                              | AA              | 1947049362               |
| SNP_P4_183277_9717  | NW_004518392.1 | Scaffold3780 | 9717                    | AA                              | TT              | 1947049364               |
| SNP_P4_183278_9746  | NW_004518392.1 | Scaffold3780 | 9746                    | AA                              | TT              | 1947049366               |
| SNP_P4_183279_20952 | NW_004518392.1 | Scaffold3780 | 20952                   | CC                              | TT              | 1947049368               |
| SNP_P4_183280_21224 | NW_004518392.1 | Scaffold3780 | 21224                   | TT                              | CC              | 1947049370               |
| SNP_P4_183281_21225 | NW_004518392.1 | Scaffold3780 | 21225                   | AA                              | CC              | 1947049372               |
| SNP_P4_183282_21270 | NW_004518392.1 | Scaffold3780 | 21270                   | AA                              | TT              | 1947049374               |
| SNP_P4_183283_21295 | NW_004518392.1 | Scaffold3780 | 21295                   | GG                              | TT              | 1947049376               |
| SNP_P4_183284_21539 | NW_004518392.1 | Scaffold3780 | 21539                   | AA                              | GG              | 1947049378               |
| SNP_P4_183285_21547 | NW_004518392.1 | Scaffold3780 | 21547                   | CC                              | GG              | 1947049380               |
| SNP_P4_183286_21561 | NW_004518392.1 | Scaffold3780 | 21561                   | TT                              | AA              | 1947049382               |
| SNP_P4_183287_21588 | NW_004518392.1 | Scaffold3780 | 21588                   | CC                              | TT              | 1947049384               |
| SNP_P4_183288_22041 | NW_004518392.1 | Scaffold3780 | 22041                   | TT                              | CC              | 1947049386               |
| SNP_P4_183289_1874  | NW_004518394.1 | Scaffold3784 | 1874                    | TT                              | CC              | 1947049389               |
| SNP_P4_183290_2010  | NW_004518394.1 | Scaffold3784 | 2010                    | AA                              | CC              | 1947049391               |
| SNP_P4_183291_2031  | NW_004518394.1 | Scaffold3784 | 2031                    | TT                              | CC              | 1947049393               |
| SNP_P4_183292_2056  | NW_004518394.1 | Scaffold3784 | 2056                    | GG                              | AA              | 1947049395               |



| SNPs IDs            | Chromosome IDs | Chromosomes  | Physical positions (bp) | CDC Frontier (Reference genome) | (ILWC46 & LPNB) | NCBI SNPdb Accession IDs |
|---------------------|----------------|--------------|-------------------------|---------------------------------|-----------------|--------------------------|
| SNP_P4_183293_2239  | NW_004518394.1 | Scaffold3784 | 2239                    | GG                              | TT              | 1947049397               |
| SNP_P4_183295_2894  | NW_004518395.1 | Scaffold3789 | 2894                    | GG                              | AA              | 1947049399               |
| SNP_P4_183296_3329  | NW_004518395.1 | Scaffold3789 | 3329                    | CC                              | AA              | 1947049401               |
| SNP_P4_183297_3940  | NW_004518395.1 | Scaffold3789 | 3940                    | GG                              | TT              | 1947049403               |
| SNP_P4_183298_4222  | NW_004518395.1 | Scaffold3789 | 4222                    | TT                              | GG              | 1947049405               |
| SNP_P4_183299_4228  | NW_004518395.1 | Scaffold3789 | 4228                    | AA                              | GG              | 1947049407               |
| SNP_P4_183300_5900  | NW_004518395.1 | Scaffold3789 | 5900                    | CC                              | TT              | 1947049409               |
| SNP_P4_183301_5928  | NW_004518395.1 | Scaffold3789 | 5928                    | TT                              | CC              | 1947049411               |
| SNP_P4_183302_5981  | NW_004518395.1 | Scaffold3789 | 5981                    | AA                              | TT              | 1947049413               |
| SNP_P4_183303_6081  | NW_004518395.1 | Scaffold3789 | 6081                    | CC                              | AA              | 1947049415               |
| SNP_P4_183304_6120  | NW_004518395.1 | Scaffold3789 | 6120                    | TT                              | CC              | 1947049417               |
| SNP_P4_183305_6165  | NW_004518395.1 | Scaffold3789 | 6165                    | AA                              | GG              | 1947049419               |
| SNP_P4_183306_6189  | NW_004518395.1 | Scaffold3789 | 6189                    | AA                              | GG              | 1947049421               |
| SNP_P4_183307_6309  | NW_004518395.1 | Scaffold3789 | 6309                    | CC                              | TT              | 1947049424               |
| SNP_P4_183308_6409  | NW_004518395.1 | Scaffold3789 | 6409                    | CC                              | AA              | 1947049427               |
| SNP_P4_183309_6868  | NW_004518395.1 | Scaffold3789 | 6868                    | AA                              | CC              | 1947049430               |
| SNP_P4_183310_6871  | NW_004518395.1 | Scaffold3789 | 6871                    | TT                              | CC              | 1947049433               |
| SNP_P4_183311_7075  | NW_004518395.1 | Scaffold3789 | 7075                    | TT                              | CC              | 1947049436               |
| SNP_P4_183312_509   | NW_004518397.1 | Scaffold3794 | 509                     | AA                              | CC              | 1947049439               |
| SNP_P4_183313_585   | NW_004518397.1 | Scaffold3794 | 585                     | CC                              | AA              | 1947049442               |
| SNP_P4_183314_2531  | NW_004518397.1 | Scaffold3794 | 2531                    | CC                              | TT              | 1947049444               |
| SNP_P4_183315_2660  | NW_004518397.1 | Scaffold3794 | 2660                    | AA                              | GG              | 1947049447               |
| SNP_P4_183316_3107  | NW_004518397.1 | Scaffold3794 | 3107                    | GG                              | AA              | 1947049449               |
| SNP_P4_183317_6015  | NW_004518397.1 | Scaffold3794 | 6015                    | GG                              | AA              | 1947049452               |
| SNP_P4_183318_6972  | NW_004518397.1 | Scaffold3794 | 6972                    | CC                              | TT              | 1947049455               |
| SNP_P4_183319_8150  | NW_004518397.1 | Scaffold3794 | 8150                    | TT                              | CC              | 1947049458               |
| SNP_P4_183320_8304  | NW_004518397.1 | Scaffold3794 | 8304                    | GG                              | AA              | 1947049460               |
| SNP_P4_183321_13554 | NW_004518397.1 | Scaffold3794 | 13554                   | CC                              | TT              | 1947049463               |
| SNP_P4_183322_25047 | NW_004518397.1 | Scaffold3794 | 25047                   | CC                              | TT              | 1947049465               |
| SNP_P4_183323_29509 | NW_004518397.1 | Scaffold3794 | 29509                   | TT                              | CC              | 1947049468               |
| SNP_P4_183324_32049 | NW_004518397.1 | Scaffold3794 | 32049                   | AA                              | TT              | 1947049470               |
| SNP_P4_183325_32064 | NW_004518397.1 | Scaffold3794 | 32064                   | TT                              | AA              | 1947049472               |
| SNP_P4_183326_32242 | NW_004518397.1 | Scaffold3794 | 32242                   | AA                              | TT              | 1947049475               |
| SNP_P4_183328_35616 | NW_004518397.1 | Scaffold3794 | 35616                   | TT                              | AA              | 1947049477               |
| SNP_P4_183329_39330 | NW_004518397.1 | Scaffold3794 | 39330                   | AA                              | GG              | 1947049479               |
| SNP_P4_183331_41788 | NW_004518397.1 | Scaffold3794 | 41788                   | AA                              | GG              | 1947049482               |
| SNP_P4_183332_42994 | NW_004518397.1 | Scaffold3794 | 42994                   | TT                              | CC              | 1947049484               |
| SNP_P4_183333_43073 | NW_004518397.1 | Scaffold3794 | 43073                   | AA                              | GG              | 1947049486               |
| SNP_P4_183334_43265 | NW_004518397.1 | Scaffold3794 | 43265                   | TT                              | CC              | 1947049488               |
| SNP_P4_183336_46965 | NW_004518397.1 | Scaffold3794 | 46965                   | CC                              | TT              | 1947049490               |
| SNP_P4_183338_50831 | NW_004518397.1 | Scaffold3794 | 50831                   | AA                              | GG              | 1947049492               |
| SNP_P4_183339_51012 | NW_004518397.1 | Scaffold3794 | 51012                   | CC                              | TT              | 1947049494               |

| SNPs IDs            | Chromosome IDs | Chromosomes  | Physical positions (bp) | CDC Frontier (Reference genome) | (ILWC46 & LPNB) | NCBI SNPdb Accession IDs |
|---------------------|----------------|--------------|-------------------------|---------------------------------|-----------------|--------------------------|
| SNP_P4_183340_52146 | NW_004518397.1 | Scaffold3794 | 52146                   | GG                              | CC              | 1947049496               |
| SNP_P4_183342_56714 | NW_004518397.1 | Scaffold3794 | 56714                   | AA                              | TT              | 1947049498               |
| SNP_P4_183343_57002 | NW_004518397.1 | Scaffold3794 | 57002                   | GG                              | CC              | 1947049500               |
| SNP_P4_183345_58639 | NW_004518397.1 | Scaffold3794 | 58639                   | GG                              | AA              | 1947049502               |
| SNP_P4_183346_58786 | NW_004518397.1 | Scaffold3794 | 58786                   | AA                              | GG              | 1947049504               |
| SNP_P4_183347_59092 | NW_004518397.1 | Scaffold3794 | 59092                   | CC                              | TT              | 1947049506               |
| SNP_P4_183348_64097 | NW_004518397.1 | Scaffold3794 | 64097                   | GG                              | AA              | 1947049508               |
| SNP_P4_183349_67611 | NW_004518397.1 | Scaffold3794 | 67611                   | CC                              | GG              | 1947049510               |
| SNP_P4_183350_68287 | NW_004518397.1 | Scaffold3794 | 68287                   | TT                              | CC              | 1947049512               |
| SNP_P4_183351_71260 | NW_004518397.1 | Scaffold3794 | 71260                   | TT                              | AA              | 1947049514               |
| SNP_P4_183352_72464 | NW_004518397.1 | Scaffold3794 | 72464                   | TT                              | CC              | 1947049516               |
| SNP_P4_183353_72484 | NW_004518397.1 | Scaffold3794 | 72484                   | TT                              | CC              | 1947049518               |
| SNP_P4_183354_72514 | NW_004518397.1 | Scaffold3794 | 72514                   | GG                              | AA              | 1947049520               |
| SNP_P4_183355_72519 | NW_004518397.1 | Scaffold3794 | 72519                   | TT                              | CC              | 1947049522               |
| SNP_P4_183357_73643 | NW_004518397.1 | Scaffold3794 | 73643                   | TT                              | CC              | 1947049524               |
| SNP_P4_183358_75230 | NW_004518397.1 | Scaffold3794 | 75230                   | GG                              | AA              | 1947049526               |
| SNP_P4_183359_77546 | NW_004518397.1 | Scaffold3794 | 77546                   | TT                              | CC              | 1947049528               |
| SNP_P4_183360_77905 | NW_004518397.1 | Scaffold3794 | 77905                   | GG                              | AA              | 1947049530               |
| SNP_P4_183361_77939 | NW_004518397.1 | Scaffold3794 | 77939                   | AA                              | GG              | 1947049532               |
| SNP_P4_183362_78516 | NW_004518397.1 | Scaffold3794 | 78516                   | CC                              | AA              | 1947049534               |
| SNP_P4_183363_79031 | NW_004518397.1 | Scaffold3794 | 79031                   | AA                              | GG              | 1947049536               |
| SNP_P4_183365_82525 | NW_004518397.1 | Scaffold3794 | 82525                   | AA                              | GG              | 1947049538               |
| SNP_P4_183366_82697 | NW_004518397.1 | Scaffold3794 | 82697                   | TT                              | AA              | 1947049540               |
| SNP_P4_183367_86785 | NW_004518397.1 | Scaffold3794 | 86785                   | CC                              | AA              | 1947049542               |
| SNP_P4_183368_502   | NW_004518399.1 | Scaffold3797 | 502                     | TT                              | CC              | 1947049544               |
| SNP_P4_183369_1338  | NW_004518403.1 | Scaffold3802 | 1338                    | CC                              | GG              | 1947049546               |
| SNP_P4_183370_17808 | NW_004518406.1 | Scaffold3810 | 17808                   | TT                              | CC              | 1947049548               |
| SNP_P4_183371_21139 | NW_004518406.1 | Scaffold3810 | 21139                   | CC                              | TT              | 1947049550               |
| SNP_P4_183372_21444 | NW_004518406.1 | Scaffold3810 | 21444                   | AA                              | CC              | 1947049552               |
| SNP_P4_183373_21478 | NW_004518406.1 | Scaffold3810 | 21478                   | AA                              | GG              | 1947049554               |
| SNP_P4_183374_21555 | NW_004518406.1 | Scaffold3810 | 21555                   | GG                              | CC              | 1947049556               |
| SNP_P4_183375_21574 | NW_004518406.1 | Scaffold3810 | 21574                   | TT                              | CC              | 1947049558               |
| SNP_P4_183376_21647 | NW_004518406.1 | Scaffold3810 | 21647                   | TT                              | GG              | 1947049560               |
| SNP_P4_183378_22016 | NW_004518406.1 | Scaffold3810 | 22016                   | TT                              | AA              | 1947049562               |
| SNP_P4_183379_22988 | NW_004518406.1 | Scaffold3810 | 22988                   | GG                              | AA              | 1947049564               |
| SNP_P4_183380_23014 | NW_004518406.1 | Scaffold3810 | 23014                   | AA                              | GG              | 1947049566               |
| SNP_P4_183381_26358 | NW_004518406.1 | Scaffold3810 | 26358                   | GG                              | AA              | 1947049568               |
| SNP_P4_183382_4060  | NW_004518407.1 | Scaffold3811 | 4060                    | GG                              | TT              | 1947049570               |
| SNP_P4_183384_24578 | NW_004518407.1 | Scaffold3811 | 24578                   | TT                              | CC              | 1947049572               |
| SNP_P4_183385_24597 | NW_004518407.1 | Scaffold3811 | 24597                   | AA                              | GG              | 1947049574               |
| SNP_P4_183386_24956 | NW_004518407.1 | Scaffold3811 | 24956                   | TT                              | CC              | 1947049576               |
| SNP_P4_183387_24958 | NW_004518407.1 | Scaffold3811 | 24958                   | TT                              | CC              | 1947049578               |

| SNPs IDs            | Chromosome IDs | Chromosomes  | Physical positions (bp) | CDC Frontier (Reference genome) | (ILWC46 & LPNB) | NCBI SNPdb Accession IDs |
|---------------------|----------------|--------------|-------------------------|---------------------------------|-----------------|--------------------------|
| SNP_P4_183388_25040 | NW_004518407.1 | Scaffold3811 | 25040                   | AA                              | GG              | 1947049580               |
| SNP_P4_183389_25060 | NW_004518407.1 | Scaffold3811 | 25060                   | TT                              | CC              | 1947049582               |
| SNP_P4_183390_576   | NW_004518408.1 | Scaffold3812 | 576                     | GG                              | TT              | 1947049584               |
| SNP_P4_183391_789   | NW_004518408.1 | Scaffold3812 | 789                     | AA                              | GG              | 1947049586               |
| SNP_P4_183392_824   | NW_004518408.1 | Scaffold3812 | 824                     | CC                              | AA              | 1947049588               |
| SNP_P4_183393_850   | NW_004518408.1 | Scaffold3812 | 850                     | AA                              | CC              | 1947049590               |
| SNP_P4_183394_1107  | NW_004518408.1 | Scaffold3812 | 1107                    | TT                              | CC              | 1947049592               |
| SNP_P4_183395_1121  | NW_004518408.1 | Scaffold3812 | 1121                    | AA                              | GG              | 1947049594               |
| SNP_P4_183396_1146  | NW_004518408.1 | Scaffold3812 | 1146                    | CC                              | AA              | 1947049596               |
| SNP_P4_183397_811   | NW_004518409.1 | Scaffold3813 | 811                     | TT                              | CC              | 1947049598               |
| SNP_P4_183398_1334  | NW_004518409.1 | Scaffold3813 | 1334                    | CC                              | TT              | 1947049600               |
| SNP_P4_183399_1382  | NW_004518409.1 | Scaffold3813 | 1382                    | TT                              | CC              | 1947049602               |
| SNP_P4_183400_1411  | NW_004518409.1 | Scaffold3813 | 1411                    | CC                              | GG              | 1947049604               |
| SNP_P4_183401_1650  | NW_004518409.1 | Scaffold3813 | 1650                    | TT                              | GG              | 1947049606               |
| SNP_P4_183402_2977  | NW_004518410.1 | Scaffold3815 | 2977                    | TT                              | AA              | 1947049608               |
| SNP_P4_183403_503   | NW_004518411.1 | Scaffold3816 | 503                     | CC                              | TT              | 1947049610               |
| SNP_P4_183404_515   | NW_004518411.1 | Scaffold3816 | 515                     | GG                              | AA              | 1947049612               |
| SNP_P4_183405_533   | NW_004518411.1 | Scaffold3816 | 533                     | TT                              | CC              | 1947049614               |
| SNP_P4_183406_560   | NW_004518411.1 | Scaffold3816 | 560                     | AA                              | CC              | 1947049616               |
| SNP_P4_183407_868   | NW_004518411.1 | Scaffold3816 | 868                     | GG                              | AA              | 1947049618               |
| SNP_P4_183408_2140  | NW_004518411.1 | Scaffold3816 | 2140                    | GG                              | TT              | 1947049620               |
| SNP_P4_183409_9079  | NW_004518412.1 | Scaffold3817 | 9079                    | GG                              | AA              | 1947049622               |
| SNP_P4_183410_1243  | NW_004518413.1 | Scaffold3818 | 1243                    | TT                              | CC              | 1947049624               |
| SNP_P4_183411_2499  | NW_004518415.1 | Scaffold3823 | 2499                    | TT                              | AA              | 1947049626               |
| SNP_P4_183412_2673  | NW_004518415.1 | Scaffold3823 | 2673                    | CC                              | TT              | 1947049628               |
| SNP_P4_183413_2727  | NW_004518415.1 | Scaffold3823 | 2727                    | AA                              | GG              | 1947049630               |
| SNP_P4_183415_3477  | NW_004518415.1 | Scaffold3823 | 3477                    | AA                              | GG              | 1947049632               |
| SNP_P4_183416_3709  | NW_004518415.1 | Scaffold3823 | 3709                    | TT                              | GG              | 1947049634               |
| SNP_P4_183417_3720  | NW_004518415.1 | Scaffold3823 | 3720                    | CC                              | TT              | 1947049636               |
| SNP_P4_183418_3812  | NW_004518415.1 | Scaffold3823 | 3812                    | CC                              | AA              | 1947049638               |
| SNP_P4_183419_3888  | NW_004518415.1 | Scaffold3823 | 3888                    | CC                              | TT              | 1947049640               |
| SNP_P4_183420_3892  | NW_004518415.1 | Scaffold3823 | 3892                    | AA                              | GG              | 1947049642               |
| SNP_P4_183422_4045  | NW_004518415.1 | Scaffold3823 | 4045                    | TT                              | GG              | 1947049644               |
| SNP_P4_183423_4202  | NW_004518415.1 | Scaffold3823 | 4202                    | TT                              | GG              | 1947049646               |
| SNP_P4_183424_10110 | NW_004518416.1 | Scaffold3824 | 10110                   | AA                              | GG              | 1947049648               |
| SNP_P4_183426_11676 | NW_004518416.1 | Scaffold3824 | 11676                   | CC                              | TT              | 1947049650               |
| SNP_P4_183427_22047 | NW_004518416.1 | Scaffold3824 | 22047                   | TT                              | GG              | 1947049652               |
| SNP_P4_183428_22250 | NW_004518416.1 | Scaffold3824 | 22250                   | TT                              | CC              | 1947049654               |
| SNP_P4_183429_22456 | NW_004518416.1 | Scaffold3824 | 22456                   | GG                              | AA              | 1947049656               |
| SNP_P4_183430_653   | NW_004518419.1 | Scaffold3830 | 653                     | GG                              | AA              | 1947049658               |
| SNP_P4_183431_654   | NW_004518419.1 | Scaffold3830 | 654                     | AA                              | CC              | 1947049660               |
| SNP_P4_183432_676   | NW_004518419.1 | Scaffold3830 | 676                     | TT                              | CC              | 1947049662               |

| SNPs IDs           | Chromosome IDs | Chromosomes  | Physical positions (bp) | CDC Frontier (Reference genome) | (ILWC46 & LPNB) | NCBI SNPdb Accession IDs |
|--------------------|----------------|--------------|-------------------------|---------------------------------|-----------------|--------------------------|
| SNP_P4_183433_720  | NW_004518419.1 | Scaffold3830 | 720                     | CC                              | AA              | 1947049664               |
| SNP_P4_183434_652  | NW_004518423.1 | Scaffold3837 | 652                     | CC                              | TT              | 1947049666               |
| SNP_P4_183435_874  | NW_004518423.1 | Scaffold3837 | 874                     | CC                              | TT              | 1947049668               |
| SNP_P4_183436_2057 | NW_004518423.1 | Scaffold3837 | 2057                    | AA                              | GG              | 1947049670               |
| SNP_P4_183437_2088 | NW_004518423.1 | Scaffold3837 | 2088                    | TT                              | GG              | 1947049672               |
| SNP_P4_183438_2103 | NW_004518423.1 | Scaffold3837 | 2103                    | TT                              | CC              | 1947049674               |
| SNP_P4_183439_2139 | NW_004518423.1 | Scaffold3837 | 2139                    | CC                              | GG              | 1947049676               |
| SNP_P4_183440_2185 | NW_004518423.1 | Scaffold3837 | 2185                    | TT                              | CC              | 1947049678               |
| SNP_P4_183441_2211 | NW_004518423.1 | Scaffold3837 | 2211                    | GG                              | AA              | 1947049680               |
| SNP_P4_183443_2408 | NW_004518423.1 | Scaffold3837 | 2408                    | AA                              | TT              | 1947049682               |
| SNP_P4_183443_2548 | NW_004518423.1 | Scaffold3837 | 2548                    | AA                              | TT              | 1947049684               |
| SNP_P4_183446_2604 | NW_004518423.1 | Scaffold3837 | 2604                    | AA                              | GG              | 1947049686               |
| SNP_P4_183447_2606 | NW_004518423.1 | Scaffold3837 | 2606                    | GG                              | TT              | 1947049688               |
| SNP_P4_183448_2646 | NW_004518423.1 | Scaffold3837 | 2646                    | CC                              | TT              | 1947049690               |
| SNP_P4_183449_2700 | NW_004518423.1 | Scaffold3837 | 2700                    | TT                              | AA              | 1947049692               |
| SNP_P4_183450_2708 | NW_004518423.1 | Scaffold3837 | 2708                    | TT                              | CC              | 1947049694               |
| SNP_P4_183451_3570 | NW_004518423.1 | Scaffold3837 | 3570                    | TT                              | CC              | 1947049696               |
| SNP_P4_183452_5317 | NW_004518423.1 | Scaffold3837 | 5317                    | TT                              | CC              | 1947049698               |
| SNP_P4_183453_5403 | NW_004518423.1 | Scaffold3837 | 5403                    | CC                              | TT              | 1947049700               |
| SNP_P4_183454_5421 | NW_004518423.1 | Scaffold3837 | 5421                    | CC                              | TT              | 1947049702               |
| SNP_P4_183455_5429 | NW_004518423.1 | Scaffold3837 | 5429                    | CC                              | TT              | 1947049704               |
| SNP_P4_183456_5443 | NW_004518423.1 | Scaffold3837 | 5443                    | TT                              | CC              | 1947049706               |
| SNP_P4_183457_5477 | NW_004518423.1 | Scaffold3837 | 5477                    | CC                              | TT              | 1947049708               |
| SNP_P4_183458_5480 | NW_004518423.1 | Scaffold3837 | 5480                    | TT                              | AA              | 1947049710               |
| SNP_P4_183459_5607 | NW_004518423.1 | Scaffold3837 | 5607                    | GG                              | TT              | 1947049712               |
| SNP_P4_183460_5633 | NW_004518423.1 | Scaffold3837 | 5633                    | GG                              | AA              | 1947049714               |
| SNP_P4_183461_5641 | NW_004518423.1 | Scaffold3837 | 5641                    | TT                              | CC              | 1947049716               |
| SNP_P4_183463_5689 | NW_004518423.1 | Scaffold3837 | 5689                    | TT                              | CC              | 1947049718               |
| SNP_P4_183464_5704 | NW_004518423.1 | Scaffold3837 | 5704                    | CC                              | TT              | 1947049720               |
| SNP_P4_183465_5716 | NW_004518423.1 | Scaffold3837 | 5716                    | TT                              | GG              | 1947049722               |
| SNP_P4_183466_5747 | NW_004518423.1 | Scaffold3837 | 5747                    | CC                              | GG              | 1947049724               |
| SNP_P4_183467_5812 | NW_004518423.1 | Scaffold3837 | 5812                    | CC                              | TT              | 1947049726               |
| SNP_P4_183468_5837 | NW_004518423.1 | Scaffold3837 | 5837                    | TT                              | CC              | 1947049728               |
| SNP_P4_183469_5849 | NW_004518423.1 | Scaffold3837 | 5849                    | CC                              | TT              | 1947049730               |
| SNP_P4_183470_5875 | NW_004518423.1 | Scaffold3837 | 5875                    | GG                              | TT              | 1947049732               |
| SNP_P4_183472_5989 | NW_004518423.1 | Scaffold3837 | 5989                    | CC                              | TT              | 1947049734               |
| SNP_P4_183473_6095 | NW_004518423.1 | Scaffold3837 | 6095                    | GG                              | TT              | 1947049736               |
| SNP_P4_183474_6101 | NW_004518423.1 | Scaffold3837 | 6101                    | GG                              | AA              | 1947049738               |
| SNP_P4_183475_6332 | NW_004518423.1 | Scaffold3837 | 6332                    | CC                              | GG              | 1947049740               |
| SNP_P4_183476_6343 | NW_004518423.1 | Scaffold3837 | 6343                    | CC                              | GG              | 1947049742               |
| SNP_P4_183477_6375 | NW_004518423.1 | Scaffold3837 | 6375                    | GG                              | TT              | 1947049744               |
| SNP_P4_183478_6416 | NW_004518423.1 | Scaffold3837 | 6416                    | AA                              | GG              | 1947049746               |

| SNPs IDs            | Chromosome IDs | Chromosomes  | Physical positions (bp) | CDC Frontier (Reference genome) | (ILWC46 & LPNB) | NCBI SNPdb Accession IDs |
|---------------------|----------------|--------------|-------------------------|---------------------------------|-----------------|--------------------------|
| SNP_P4_183479_6431  | NW_004518423.1 | Scaffold3837 | 6431                    | AA                              | GG              | 1947049748               |
| SNP_P4_183480_6446  | NW_004518423.1 | Scaffold3837 | 6446                    | CC                              | TT              | 1947049750               |
| SNP_P4_183481_6505  | NW_004518423.1 | Scaffold3837 | 6505                    | AA                              | GG              | 1947049751               |
| SNP_P4_183482_6512  | NW_004518423.1 | Scaffold3837 | 6512                    | CC                              | TT              | 1947049752               |
| SNP_P4_183483_6541  | NW_004518423.1 | Scaffold3837 | 6541                    | TT                              | CC              | 1947049753               |
| SNP_P4_183484_6577  | NW_004518423.1 | Scaffold3837 | 6577                    | AA                              | GG              | 1947049754               |
| SNP_P4_183485_6603  | NW_004518423.1 | Scaffold3837 | 6603                    | GG                              | AA              | 1947049755               |
| SNP_P4_183486_6612  | NW_004518423.1 | Scaffold3837 | 6612                    | GG                              | CC              | 1947049756               |
| SNP_P4_183487_6675  | NW_004518423.1 | Scaffold3837 | 6675                    | TT                              | CC              | 1947049758               |
| SNP_P4_183488_6751  | NW_004518423.1 | Scaffold3837 | 6751                    | TT                              | CC              | 1947049760               |
| SNP_P4_183489_6916  | NW_004518423.1 | Scaffold3837 | 6916                    | AA                              | GG              | 1947049762               |
| SNP_P4_183490_10123 | NW_004518423.1 | Scaffold3837 | 10123                   | GG                              | AA              | 1947049764               |
| SNP_P4_183491_10431 | NW_004518423.1 | Scaffold3837 | 10431                   | AA                              | CC              | 1947049766               |
| SNP_P4_183492_2564  | NW_004518425.1 | Scaffold3840 | 2564                    | AA                              | GG              | 1947049768               |
| SNP_P4_183493_516   | NW_004518426.1 | Scaffold3842 | 516                     | TT                              | CC              | 1947049770               |
| SNP_P4_183494_1335  | NW_004518426.1 | Scaffold3842 | 1335                    | AA                              | TT              | 1947049772               |
| SNP_P4_183495_2121  | NW_004518426.1 | Scaffold3842 | 2121                    | AA                              | TT              | 1947049774               |
| SNP_P4_183496_2138  | NW_004518426.1 | Scaffold3842 | 2138                    | CC                              | TT              | 1947049776               |
| SNP_P4_183497_5893  | NW_004518432.1 | Scaffold3850 | 5893                    | GG                              | CC              | 1947049778               |
| SNP_P4_183498_10657 | NW_004518432.1 | Scaffold3850 | 10657                   | TT                              | CC              | 1947049780               |
| SNP_P4_183499_12585 | NW_004518432.1 | Scaffold3850 | 12585                   | TT                              | GG              | 1947049782               |
| SNP_P4_183500_13175 | NW_004518432.1 | Scaffold3850 | 13175                   | TT                              | AA              | 1947049784               |
| SNP_P4_183501_1407  | NW_004518433.1 | Scaffold3851 | 1407                    | AA                              | CC              | 1947049786               |
| SNP_P4_183502_1438  | NW_004518433.1 | Scaffold3851 | 1438                    | TT                              | GG              | 1947049788               |
| SNP_P4_183503_1494  | NW_004518433.1 | Scaffold3851 | 1494                    | TT                              | CC              | 1947049789               |
| SNP_P4_183504_1585  | NW_004518433.1 | Scaffold3851 | 1585                    | TT                              | CC              | 1947049791               |
| SNP_P4_183505_1609  | NW_004518433.1 | Scaffold3851 | 1609                    | CC                              | AA              | 1947049794               |
| SNP_P4_183506_1637  | NW_004518433.1 | Scaffold3851 | 1637                    | AA                              | TT              | 1947049796               |
| SNP_P4_183507_1665  | NW_004518433.1 | Scaffold3851 | 1665                    | AA                              | GG              | 1947049798               |
| SNP_P4_183508_1667  | NW_004518433.1 | Scaffold3851 | 1667                    | TT                              | AA              | 1947049800               |
| SNP_P4_183509_1669  | NW_004518433.1 | Scaffold3851 | 1669                    | CC                              | AA              | 1947049802               |
| SNP_P4_183510_1854  | NW_004518433.1 | Scaffold3851 | 1854                    | GG                              | CC              | 1947049804               |
| SNP_P4_183511_1865  | NW_004518433.1 | Scaffold3851 | 1865                    | CC                              | TT              | 1947049806               |
| SNP_P4_183512_571   | NW_004518436.1 | Scaffold3856 | 571                     | GG                              | TT              | 1947049808               |
| SNP_P4_183513_615   | NW_004518436.1 | Scaffold3856 | 615                     | AA                              | GG              | 1947049810               |
| SNP_P4_183515_5566  | NW_004518436.1 | Scaffold3856 | 5566                    | TT                              | CC              | 1947049812               |
| SNP_P4_183516_5841  | NW_004518436.1 | Scaffold3856 | 5841                    | CC                              | TT              | 1947049814               |
| SNP_P4_183517_5857  | NW_004518436.1 | Scaffold3856 | 5857                    | TT                              | CC              | 1947049816               |
| SNP_P4_183518_5901  | NW_004518436.1 | Scaffold3856 | 5901                    | AA                              | GG              | 1947049818               |
| SNP_P4_183519_6117  | NW_004518436.1 | Scaffold3856 | 6117                    | AA                              | TT              | 1947049820               |
| SNP_P4_183520_6157  | NW_004518436.1 | Scaffold3856 | 6157                    | GG                              | TT              | 1947049822               |
| SNP_P4_183521_6826  | NW_004518436.1 | Scaffold3856 | 6826                    | TT                              | GG              | 1947049824               |

| SNPs IDs            | Chromosome IDs | Chromosomes  | Physical positions (bp) | CDC Frontier (Reference genome) | (ILWC46 & LPNB) | NCBI SNPdb Accession IDs |
|---------------------|----------------|--------------|-------------------------|---------------------------------|-----------------|--------------------------|
| SNP_P4_183522_813   | NW_004518438.1 | Scaffold3858 | 813                     | GG                              | AA              | 1947049826               |
| SNP_P4_183523_15805 | NW_004518444.1 | Scaffold3865 | 15805                   | AA                              | TT              | 1947049828               |
| SNP_P4_183524_15814 | NW_004518444.1 | Scaffold3865 | 15814                   | CC                              | GG              | 1947049830               |
| SNP_P4_183525_21958 | NW_004518444.1 | Scaffold3865 | 21958                   | AA                              | GG              | 1947049832               |
| SNP_P4_183526_63464 | NW_004518444.1 | Scaffold3865 | 63464                   | AA                              | TT              | 1947049834               |
| SNP_P4_183527_63908 | NW_004518444.1 | Scaffold3865 | 63908                   | AA                              | TT              | 1947049836               |
| SNP_P4_183528_63963 | NW_004518444.1 | Scaffold3865 | 63963                   | AA                              | CC              | 1947049838               |
| SNP_P4_183529_64294 | NW_004518444.1 | Scaffold3865 | 64294                   | AA                              | TT              | 1947049840               |
| SNP_P4_183530_64361 | NW_004518444.1 | Scaffold3865 | 64361                   | TT                              | CC              | 1947049842               |
| SNP_P4_183531_64376 | NW_004518444.1 | Scaffold3865 | 64376                   | AA                              | GG              | 1947049844               |
| SNP_P4_183532_64486 | NW_004518444.1 | Scaffold3865 | 64486                   | TT                              | AA              | 1947049846               |
| SNP_P4_183533_64494 | NW_004518444.1 | Scaffold3865 | 64494                   | AA                              | CC              | 1947049848               |
| SNP_P4_183534_385   | NW_004518445.1 | Scaffold3868 | 385                     | TT                              | AA              | 1947049850               |
| SNP_P4_183535_439   | NW_004518445.1 | Scaffold3868 | 439                     | GG                              | CC              | 1947049852               |
| SNP_P4_183536_7513  | NW_004518450.1 | Scaffold3874 | 7513                    | AA                              | TT              | 1947049854               |
| SNP_P4_183537_7557  | NW_004518450.1 | Scaffold3874 | 7557                    | GG                              | CC              | 1947049856               |
| SNP_P4_183538_7571  | NW_004518450.1 | Scaffold3874 | 7571                    | AA                              | CC              | 1947049858               |
| SNP_P4_183539_7849  | NW_004518450.1 | Scaffold3874 | 7849                    | GG                              | AA              | 1947049860               |
| SNP_P4_183540_7854  | NW_004518450.1 | Scaffold3874 | 7854                    | TT                              | CC              | 1947049862               |
| SNP_P4_183541_8006  | NW_004518450.1 | Scaffold3874 | 8006                    | GG                              | TT              | 1947049864               |
| SNP_P4_183542_8013  | NW_004518450.1 | Scaffold3874 | 8013                    | AA                              | GG              | 1947049866               |
| SNP_P4_183543_9393  | NW_004518450.1 | Scaffold3874 | 9393                    | AA                              | TT              | 1947049868               |
| SNP_P4_183544_9445  | NW_004518450.1 | Scaffold3874 | 9445                    | AA                              | CC              | 1947049870               |
| SNP_P4_183545_9474  | NW_004518450.1 | Scaffold3874 | 9474                    | AA                              | GG              | 1947049872               |
| SNP_P4_183546_16124 | NW_004518450.1 | Scaffold3874 | 16124                   | TT                              | CC              | 1947049874               |
| SNP_P4_183547_4311  | NW_004518451.1 | Scaffold3876 | 4311                    | AA                              | GG              | 1947049876               |
| SNP_P4_183548_5322  | NW_004518451.1 | Scaffold3876 | 5322                    | CC                              | GG              | 1947049878               |
| SNP_P4_183549_6692  | NW_004518451.1 | Scaffold3876 | 6692                    | GG                              | AA              | 1947049880               |
| SNP_P4_183550_11141 | NW_004518451.1 | Scaffold3876 | 11141                   | TT                              | CC              | 1947049882               |
| SNP_P4_183551_11696 | NW_004518451.1 | Scaffold3876 | 11696                   | CC                              | TT              | 1947049884               |
| SNP_P4_183552_19847 | NW_004518451.1 | Scaffold3876 | 19847                   | AA                              | CC              | 1947049886               |
| SNP_P4_183553_29744 | NW_004518451.1 | Scaffold3876 | 29744                   | TT                              | GG              | 1947049888               |
| SNP_P4_183554_29748 | NW_004518451.1 | Scaffold3876 | 29748                   | GG                              | AA              | 1947049890               |
| SNP_P4_183555_29823 | NW_004518451.1 | Scaffold3876 | 29823                   | GG                              | AA              | 1947049892               |
| SNP_P4_183556_30460 | NW_004518451.1 | Scaffold3876 | 30460                   | CC                              | TT              | 1947049894               |
| SNP_P4_183557_30780 | NW_004518451.1 | Scaffold3876 | 30780                   | AA                              | GG              | 1947049896               |
| SNP_P4_183558_32793 | NW_004518451.1 | Scaffold3876 | 32793                   | AA                              | GG              | 1947049898               |
| SNP_P4_183559_1997  | NW_004518453.1 | Scaffold3878 | 1997                    | AA                              | GG              | 1947049900               |
| SNP_P4_183560_2270  | NW_004518453.1 | Scaffold3878 | 2270                    | CC                              | GG              | 1947049902               |
| SNP_P4_183561_2315  | NW_004518453.1 | Scaffold3878 | 2315                    | CC                              | AA              | 1947049904               |
| SNP_P4_183562_2370  | NW_004518453.1 | Scaffold3878 | 2370                    | AA                              | CC              | 1947049906               |
| SNP_P4_183563_2062  | NW_004518455.1 | Scaffold3881 | 2062                    | TT                              | GG              | 1947049908               |

| SNPs IDs            | Chromosome IDs | Chromosomes  | Physical positions (bp) | CDC Frontier (Reference genome) | (ILWC46 & LPNB) | NCBI SNPdb Accession IDs |
|---------------------|----------------|--------------|-------------------------|---------------------------------|-----------------|--------------------------|
| SNP_P4_183564_7706  | NW_004518455.1 | Scaffold3881 | 7706                    | GG                              | AA              | 1947049910               |
| SNP_P4_183565_8527  | NW_004518455.1 | Scaffold3881 | 8527                    | AA                              | GG              | 1947049912               |
| SNP_P4_183566_8528  | NW_004518455.1 | Scaffold3881 | 8528                    | TT                              | GG              | 1947049914               |
| SNP_P4_183567_8620  | NW_004518455.1 | Scaffold3881 | 8620                    | TT                              | AA              | 1947049916               |
| SNP_P4_183568_8629  | NW_004518455.1 | Scaffold3881 | 8629                    | TT                              | AA              | 1947049917               |
| SNP_P4_183569_9011  | NW_004518455.1 | Scaffold3881 | 9011                    | AA                              | GG              | 1947049918               |
| SNP_P4_183570_1699  | NW_004518456.1 | Scaffold3882 | 1699                    | TT                              | CC              | 1947049919               |
| SNP_P4_183571_1744  | NW_004518456.1 | Scaffold3882 | 1744                    | CC                              | AA              | 1947049921               |
| SNP_P4_183572_1748  | NW_004518456.1 | Scaffold3882 | 1748                    | AA                              | CC              | 1947049923               |
| SNP_P4_183573_2053  | NW_004518456.1 | Scaffold3882 | 2053                    | AA                              | GG              | 1947049925               |
| SNP_P4_183574_2054  | NW_004518456.1 | Scaffold3882 | 2054                    | CC                              | GG              | 1947049927               |
| SNP_P4_183575_2078  | NW_004518456.1 | Scaffold3882 | 2078                    | TT                              | CC              | 1947049929               |
| SNP_P4_183576_2099  | NW_004518456.1 | Scaffold3882 | 2099                    | AA                              | TT              | 1947049931               |
| SNP_P4_183578_907   | NW_004518463.1 | Scaffold3890 | 907                     | TT                              | CC              | 1947049933               |
| SNP_P4_183579_5459  | NW_004518463.1 | Scaffold3890 | 5459                    | GG                              | TT              | 1947049935               |
| SNP_P4_183580_5463  | NW_004518463.1 | Scaffold3890 | 5463                    | GG                              | TT              | 1947049937               |
| SNP_P4_183581_5534  | NW_004518463.1 | Scaffold3890 | 5534                    | TT                              | CC              | 1947049939               |
| SNP_P4_183582_5593  | NW_004518463.1 | Scaffold3890 | 5593                    | GG                              | AA              | 1947049941               |
| SNP_P4_183583_5635  | NW_004518463.1 | Scaffold3890 | 5635                    | TT                              | CC              | 1947049943               |
| SNP_P4_183584_5708  | NW_004518463.1 | Scaffold3890 | 5708                    | TT                              | AA              | 1947049945               |
| SNP_P4_183585_5717  | NW_004518463.1 | Scaffold3890 | 5717                    | AA                              | GG              | 1947049947               |
| SNP_P4_183586_5775  | NW_004518463.1 | Scaffold3890 | 5775                    | CC                              | TT              | 1947049949               |
| SNP_P4_183587_8248  | NW_004518463.1 | Scaffold3890 | 8248                    | TT                              | CC              | 1947049951               |
| SNP_P4_183588_8267  | NW_004518463.1 | Scaffold3890 | 8267                    | TT                              | CC              | 1947049954               |
| SNP_P4_183589_8653  | NW_004518463.1 | Scaffold3890 | 8653                    | TT                              | AA              | 1947049956               |
| SNP_P4_183590_9151  | NW_004518463.1 | Scaffold3890 | 9151                    | TT                              | CC              | 1947049958               |
| SNP_P4_183591_9157  | NW_004518463.1 | Scaffold3890 | 9157                    | CC                              | AA              | 1947049960               |
| SNP_P4_183592_10887 | NW_004518463.1 | Scaffold3890 | 10887                   | AA                              | CC              | 1947049962               |
| SNP_P4_183593_972   | NW_004518466.1 | Scaffold3896 | 972                     | GG                              | CC              | 1947049964               |
| SNP_P4_183594_1116  | NW_004518466.1 | Scaffold3896 | 1116                    | CC                              | AA              | 1947049966               |
| SNP_P4_183595_2444  | NW_004518466.1 | Scaffold3896 | 2444                    | TT                              | CC              | 1947049968               |
| SNP_P4_183596_2542  | NW_004518466.1 | Scaffold3896 | 2542                    | GG                              | CC              | 1947049970               |
| SNP_P4_183597_2552  | NW_004518466.1 | Scaffold3896 | 2552                    | AA                              | TT              | 1947049972               |
| SNP_P4_183598_2562  | NW_004518466.1 | Scaffold3896 | 2562                    | CC                              | TT              | 1947049974               |
| SNP_P4_183601_4727  | NW_004518469.1 | Scaffold3900 | 4727                    | AA                              | GG              | 1947049976               |
| SNP_P4_183602_4746  | NW_004518469.1 | Scaffold3900 | 4746                    | AA                              | TT              | 1947049978               |
| SNP_P4_183603_6422  | NW_004518469.1 | Scaffold3900 | 6422                    | CC                              | GG              | 1947049980               |
| SNP_P4_183604_6423  | NW_004518469.1 | Scaffold3900 | 6423                    | TT                              | GG              | 1947049982               |
| SNP_P4_183605_6454  | NW_004518469.1 | Scaffold3900 | 6454                    | GG                              | AA              | 1947049984               |
| SNP_P4_183606_6502  | NW_004518469.1 | Scaffold3900 | 6502                    | CC                              | GG              | 1947049986               |
| SNP_P4_183607_6669  | NW_004518469.1 | Scaffold3900 | 6669                    | CC                              | TT              | 1947049988               |
| SNP_P4_183609_6692  | NW_004518469.1 | Scaffold3900 | 6692                    | GG                              | AA              | 1947049990               |

| SNPs IDs            | Chromosome IDs | Chromosomes  | Physical positions (bp) | CDC Frontier (Reference genome) | (ILWC46 & LPNB) | NCBI SNPdb Accession IDs |
|---------------------|----------------|--------------|-------------------------|---------------------------------|-----------------|--------------------------|
| SNP_P4_183610_7552  | NW_004518469.1 | Scaffold3900 | 7552                    | AA                              | TT              | 1947049992               |
| SNP_P4_183611_7810  | NW_004518469.1 | Scaffold3900 | 7810                    | AA                              | TT              | 1947049994               |
| SNP_P4_183612_7811  | NW_004518469.1 | Scaffold3900 | 7811                    | AA                              | GG              | 1947049996               |
| SNP_P4_183613_7812  | NW_004518469.1 | Scaffold3900 | 7812                    | TT                              | CC              | 1947049998               |
| SNP_P4_183614_7900  | NW_004518469.1 | Scaffold3900 | 7900                    | GG                              | TT              | 1947050000               |
| SNP_P4_183615_9053  | NW_004518469.1 | Scaffold3900 | 9053                    | TT                              | AA              | 1947050002               |
| SNP_P4_183616_9088  | NW_004518469.1 | Scaffold3900 | 9088                    | TT                              | AA              | 1947050004               |
| SNP_P4_183617_9389  | NW_004518469.1 | Scaffold3900 | 9389                    | TT                              | CC              | 1947050006               |
| SNP_P4_183618_13855 | NW_004518469.1 | Scaffold3900 | 13855                   | AA                              | GG              | 1947050008               |
| SNP_P4_183619_14140 | NW_004518469.1 | Scaffold3900 | 14140                   | TT                              | CC              | 1947050010               |
| SNP_P4_183620_14504 | NW_004518469.1 | Scaffold3900 | 14504                   | AA                              | CC              | 1947050012               |
| SNP_P4_183621_14544 | NW_004518469.1 | Scaffold3900 | 14544                   | GG                              | AA              | 1947050014               |
| SNP_P4_183622_14583 | NW_004518469.1 | Scaffold3900 | 14583                   | CC                              | GG              | 1947050016               |
| SNP_P4_183623_14586 | NW_004518469.1 | Scaffold3900 | 14586                   | GG                              | TT              | 1947050018               |
| SNP_P4_183624_14805 | NW_004518469.1 | Scaffold3900 | 14805                   | TT                              | GG              | 1947050020               |
| SNP_P4_183625_2891  | NW_004518471.1 | Scaffold3902 | 2891                    | GG                              | AA              | 1947050021               |
| SNP_P4_183626_2928  | NW_004518471.1 | Scaffold3902 | 2928                    | GG                              | TT              | 1947050023               |
| SNP_P4_183627_2939  | NW_004518471.1 | Scaffold3902 | 2939                    | TT                              | CC              | 1947050025               |
| SNP_P4_183628_2954  | NW_004518471.1 | Scaffold3902 | 2954                    | TT                              | AA              | 1947050027               |
| SNP_P4_183629_2995  | NW_004518471.1 | Scaffold3902 | 2995                    | GG                              | AA              | 1947050029               |
| SNP_P4_183630_3119  | NW_004518471.1 | Scaffold3902 | 3119                    | GG                              | TT              | 1947050031               |
| SNP_P4_183631_3202  | NW_004518471.1 | Scaffold3902 | 3202                    | AA                              | GG              | 1947050033               |
| SNP_P4_183632_3247  | NW_004518471.1 | Scaffold3902 | 3247                    | TT                              | CC              | 1947050035               |
| SNP_P4_183633_3477  | NW_004518471.1 | Scaffold3902 | 3477                    | AA                              | CC              | 1947050037               |
| SNP_P4_183634_3487  | NW_004518471.1 | Scaffold3902 | 3487                    | GG                              | AA              | 1947050039               |
| SNP_P4_183635_3495  | NW_004518471.1 | Scaffold3902 | 3495                    | TT                              | CC              | 1947050041               |
| SNP_P4_183636_3537  | NW_004518471.1 | Scaffold3902 | 3537                    | CC                              | AA              | 1947050043               |
| SNP_P4_183637_3546  | NW_004518471.1 | Scaffold3902 | 3546                    | CC                              | GG              | 1947050045               |
| SNP_P4_183638_3597  | NW_004518471.1 | Scaffold3902 | 3597                    | AA                              | GG              | 1947050047               |
| SNP_P4_183639_3668  | NW_004518471.1 | Scaffold3902 | 3668                    | TT                              | GG              | 1947050049               |
| SNP_P4_183640_3698  | NW_004518471.1 | Scaffold3902 | 3698                    | GG                              | TT              | 1947050051               |
| SNP_P4_183641_3872  | NW_004518471.1 | Scaffold3902 | 3872                    | TT                              | AA              | 1947050053               |
| SNP_P4_183643_3935  | NW_004518471.1 | Scaffold3902 | 3935                    | TT                              | AA              | 1947050055               |
| SNP_P4_183644_371   | NW_004518474.1 | Scaffold3906 | 371                     | CC                              | TT              | 1947050057               |
| SNP_P4_183645_373   | NW_004518474.1 | Scaffold3906 | 373                     | AA                              | GG              | 1947050059               |
| SNP_P4_183646_394   | NW_004518474.1 | Scaffold3906 | 394                     | CC                              | TT              | 1947050061               |
| SNP_P4_183647_411   | NW_004518474.1 | Scaffold3906 | 411                     | GG                              | AA              | 1947050063               |
| SNP_P4_183648_469   | NW_004518475.1 | Scaffold3907 | 469                     | CC                              | TT              | 1947050065               |
| SNP_P4_183649_514   | NW_004518475.1 | Scaffold3907 | 514                     | TT                              | GG              | 1947050067               |
| SNP_P4_183650_529   | NW_004518475.1 | Scaffold3907 | 529                     | TT                              | CC              | 1947050069               |
| SNP_P4_183651_3451  | NW_004518475.1 | Scaffold3907 | 3451                    | CC                              | TT              | 1947050071               |
| SNP_P4_183652_3455  | NW_004518475.1 | Scaffold3907 | 3455                    | GG                              | AA              | 1947050073               |



| SNPs IDs            | Chromosome IDs | Chromosomes  | Physical positions (bp) | CDC Frontier (Reference genome) | (ILWC46 & LPNB) | NCBI SNPdb Accession IDs |
|---------------------|----------------|--------------|-------------------------|---------------------------------|-----------------|--------------------------|
| SNP_P4_183653_3548  | NW_004518475.1 | Scaffold3907 | 3548                    | TT                              | CC              | 1947050075               |
| SNP_P4_183654_3598  | NW_004518475.1 | Scaffold3907 | 3598                    | GG                              | AA              | 1947050077               |
| SNP_P4_183655_3606  | NW_004518475.1 | Scaffold3907 | 3606                    | TT                              | CC              | 1947050079               |
| SNP_P4_183656_3625  | NW_004518475.1 | Scaffold3907 | 3625                    | CC                              | TT              | 1947050081               |
| SNP_P4_183657_3671  | NW_004518475.1 | Scaffold3907 | 3671                    | TT                              | CC              | 1947050083               |
| SNP_P4_183658_3775  | NW_004518475.1 | Scaffold3907 | 3775                    | TT                              | CC              | 1947050085               |
| SNP_P4_183659_3912  | NW_004518475.1 | Scaffold3907 | 3912                    | AA                              | GG              | 1947050087               |
| SNP_P4_183660_5013  | NW_004518475.1 | Scaffold3907 | 5013                    | AA                              | CC              | 1947050090               |
| SNP_P4_183662_6021  | NW_004518475.1 | Scaffold3907 | 6021                    | CC                              | TT              | 1947050092               |
| SNP_P4_183663_6056  | NW_004518475.1 | Scaffold3907 | 6056                    | GG                              | AA              | 1947050094               |
| SNP_P4_183665_4017  | NW_004518477.1 | Scaffold3909 | 4017                    | GG                              | CC              | 1947050096               |
| SNP_P4_183666_4026  | NW_004518477.1 | Scaffold3909 | 4026                    | GG                              | AA              | 1947050098               |
| SNP_P4_183667_8603  | NW_004518477.1 | Scaffold3909 | 8603                    | TT                              | AA              | 1947050100               |
| SNP_P4_183668_8604  | NW_004518477.1 | Scaffold3909 | 8604                    | AA                              | TT              | 1947050102               |
| SNP_P4_183669_21187 | NW_004518477.1 | Scaffold3909 | 21187                   | TT                              | CC              | 1947050104               |
| SNP_P4_183670_24577 | NW_004518477.1 | Scaffold3909 | 24577                   | GG                              | CC              | 1947050106               |
| SNP_P4_183671_24582 | NW_004518477.1 | Scaffold3909 | 24582                   | GG                              | TT              | 1947050108               |
| SNP_P4_183672_24590 | NW_004518477.1 | Scaffold3909 | 24590                   | GG                              | CC              | 1947050110               |
| SNP_P4_183673_24614 | NW_004518477.1 | Scaffold3909 | 24614                   | AA                              | GG              | 1947050112               |
| SNP_P4_183674_24624 | NW_004518477.1 | Scaffold3909 | 24624                   | GG                              | TT              | 1947050114               |
| SNP_P4_183675_29007 | NW_004518477.1 | Scaffold3909 | 29007                   | AA                              | TT              | 1947050116               |
| SNP_P4_183676_29109 | NW_004518477.1 | Scaffold3909 | 29109                   | AA                              | TT              | 1947050118               |
| SNP_P4_183677_29112 | NW_004518477.1 | Scaffold3909 | 29112                   | GG                              | CC              | 1947050121               |
| SNP_P4_183678_32325 | NW_004518477.1 | Scaffold3909 | 32325                   | AA                              | TT              | 1947050123               |
| SNP_P4_183679_32332 | NW_004518477.1 | Scaffold3909 | 32332                   | AA                              | CC              | 1947050125               |
| SNP_P4_183680_32475 | NW_004518477.1 | Scaffold3909 | 32475                   | GG                              | TT              | 1947050127               |
| SNP_P4_183681_8363  | NW_004518480.1 | Scaffold3912 | 8363                    | GG                              | AA              | 1947050129               |
| SNP_P4_183682_1352  | NW_004518482.1 | Scaffold3915 | 1352                    | TT                              | AA              | 1947050131               |
| SNP_P4_183683_3403  | NW_004518482.1 | Scaffold3915 | 3403                    | CC                              | TT              | 1947050133               |
| SNP_P4_183684_5276  | NW_004518482.1 | Scaffold3915 | 5276                    | AA                              | CC              | 1947050135               |
| SNP_P4_183685_7263  | NW_004518482.1 | Scaffold3915 | 7263                    | GG                              | AA              | 1947050137               |
| SNP_P4_183686_7314  | NW_004518482.1 | Scaffold3915 | 7314                    | TT                              | CC              | 1947050139               |
| SNP_P4_183687_7413  | NW_004518482.1 | Scaffold3915 | 7413                    | CC                              | TT              | 1947050141               |
| SNP_P4_183688_7578  | NW_004518482.1 | Scaffold3915 | 7578                    | GG                              | AA              | 1947050143               |
| SNP_P4_183689_7611  | NW_004518482.1 | Scaffold3915 | 7611                    | CC                              | AA              | 1947050145               |
| SNP_P4_183690_7816  | NW_004518482.1 | Scaffold3915 | 7816                    | AA                              | GG              | 1947050147               |
| SNP_P4_183691_1953  | NW_004518484.1 | Scaffold3917 | 1953                    | GG                              | AA              | 1947050149               |
| SNP_P4_183692_2106  | NW_004518484.1 | Scaffold3917 | 2106                    | GG                              | TT              | 1947050151               |
| SNP_P4_183693_2111  | NW_004518484.1 | Scaffold3917 | 2111                    | CC                              | TT              | 1947050153               |
| SNP_P4_183694_2192  | NW_004518484.1 | Scaffold3917 | 2192                    | CC                              | AA              | 1947050155               |
| SNP_P4_183695_2222  | NW_004518484.1 | Scaffold3917 | 2222                    | GG                              | AA              | 1947050157               |
| SNP_P4_183696_2298  | NW_004518484.1 | Scaffold3917 | 2298                    | GG                              | AA              | 1947050159               |

| SNPs IDs           | Chromosome IDs | Chromosomes  | Physical positions (bp) | CDC Frontier (Reference genome) | (ILWC46 & LPNB) | NCBI SNPdb Accession IDs |
|--------------------|----------------|--------------|-------------------------|---------------------------------|-----------------|--------------------------|
| SNP_P4_183697_2331 | NW_004518484.1 | Scaffold3917 | 2331                    | CC                              | AA              | 1947050162               |
| SNP_P4_183698_2360 | NW_004518484.1 | Scaffold3917 | 2360                    | AA                              | TT              | 1947050164               |
| SNP_P4_183699_2362 | NW_004518484.1 | Scaffold3917 | 2362                    | TT                              | AA              | 1947050166               |
| SNP_P4_183700_2526 | NW_004518484.1 | Scaffold3917 | 2526                    | CC                              | AA              | 1947050168               |
| SNP_P4_183701_2604 | NW_004518484.1 | Scaffold3917 | 2604                    | AA                              | GG              | 1947050170               |
| SNP_P4_183702_2664 | NW_004518484.1 | Scaffold3917 | 2664                    | CC                              | TT              | 1947050172               |
| SNP_P4_183703_2709 | NW_004518484.1 | Scaffold3917 | 2709                    | CC                              | AA              | 1947050174               |
| SNP_P4_183704_2743 | NW_004518484.1 | Scaffold3917 | 2743                    | AA                              | CC              | 1947050176               |
| SNP_P4_183705_2748 | NW_004518484.1 | Scaffold3917 | 2748                    | AA                              | CC              | 1947050178               |
| SNP_P4_183706_2821 | NW_004518484.1 | Scaffold3917 | 2821                    | CC                              | TT              | 1947050180               |
| SNP_P4_183707_3121 | NW_004518484.1 | Scaffold3917 | 3121                    | CC                              | TT              | 1947050182               |
| SNP_P4_183708_3128 | NW_004518484.1 | Scaffold3917 | 3128                    | TT                              | CC              | 1947050184               |
| SNP_P4_183709_3183 | NW_004518484.1 | Scaffold3917 | 3183                    | AA                              | GG              | 1947050186               |
| SNP_P4_183710_3251 | NW_004518484.1 | Scaffold3917 | 3251                    | AA                              | CC              | 1947050188               |
| SNP_P4_183711_3304 | NW_004518484.1 | Scaffold3917 | 3304                    | TT                              | CC              | 1947050190               |
| SNP_P4_183712_3319 | NW_004518484.1 | Scaffold3917 | 3319                    | TT                              | AA              | 1947050192               |
| SNP_P4_183713_3356 | NW_004518484.1 | Scaffold3917 | 3356                    | TT                              | CC              | 1947050194               |
| SNP_P4_183714_3375 | NW_004518484.1 | Scaffold3917 | 3375                    | CC                              | AA              | 1947050196               |
| SNP_P4_183715_3468 | NW_004518484.1 | Scaffold3917 | 3468                    | GG                              | TT              | 1947050198               |
| SNP_P4_183716_3557 | NW_004518484.1 | Scaffold3917 | 3557                    | TT                              | AA              | 1947050200               |
| SNP_P4_183717_3765 | NW_004518484.1 | Scaffold3917 | 3765                    | CC                              | AA              | 1947050202               |
| SNP_P4_183718_3768 | NW_004518484.1 | Scaffold3917 | 3768                    | GG                              | TT              | 1947050204               |
| SNP_P4_183719_3843 | NW_004518484.1 | Scaffold3917 | 3843                    | TT                              | CC              | 1947050207               |
| SNP_P4_183720_4043 | NW_004518484.1 | Scaffold3917 | 4043                    | GG                              | AA              | 1947050209               |
| SNP_P4_183721_4167 | NW_004518484.1 | Scaffold3917 | 4167                    | CC                              | AA              | 1947050211               |
| SNP_P4_183722_4233 | NW_004518484.1 | Scaffold3917 | 4233                    | TT                              | CC              | 1947050213               |
| SNP_P4_183724_4373 | NW_004518484.1 | Scaffold3917 | 4373                    | TT                              | CC              | 1947050215               |
| SNP_P4_183725_4418 | NW_004518484.1 | Scaffold3917 | 4418                    | CC                              | AA              | 1947050217               |
| SNP_P4_183726_4423 | NW_004518484.1 | Scaffold3917 | 4423                    | CC                              | TT              | 1947050219               |
| SNP_P4_183727_4440 | NW_004518484.1 | Scaffold3917 | 4440                    | CC                              | TT              | 1947050221               |
| SNP_P4_183728_4512 | NW_004518484.1 | Scaffold3917 | 4512                    | AA                              | GG              | 1947050223               |
| SNP_P4_183729_4909 | NW_004518484.1 | Scaffold3917 | 4909                    | AA                              | GG              | 1947050225               |
| SNP_P4_183730_4982 | NW_004518484.1 | Scaffold3917 | 4982                    | GG                              | AA              | 1947050227               |
| SNP_P4_183731_5055 | NW_004518484.1 | Scaffold3917 | 5055                    | AA                              | GG              | 1947050229               |
| SNP_P4_183732_5121 | NW_004518484.1 | Scaffold3917 | 5121                    | TT                              | AA              | 1947050231               |
| SNP_P4_183733_4073 | NW_004518485.1 | Scaffold3918 | 4073                    | AA                              | TT              | 1947050233               |
| SNP_P4_183734_4104 | NW_004518485.1 | Scaffold3918 | 4104                    | CC                              | AA              | 1947050235               |
| SNP_P4_183735_4139 | NW_004518485.1 | Scaffold3918 | 4139                    | AA                              | TT              | 1947050237               |
| SNP_P4_183736_4242 | NW_004518485.1 | Scaffold3918 | 4242                    | AA                              | CC              | 1947050239               |
| SNP_P4_183738_4390 | NW_004518485.1 | Scaffold3918 | 4390                    | AA                              | TT              | 1947050241               |
| SNP_P4_183739_4405 | NW_004518485.1 | Scaffold3918 | 4405                    | AA                              | GG              | 1947050243               |
| SNP_P4_183741_4611 | NW_004518485.1 | Scaffold3918 | 4611                    | GG                              | TT              | 1947050245               |

| SNPs IDs            | Chromosome IDs | Chromosomes  | Physical positions (bp) | CDC Frontier (Reference genome) | (ILWC46 & LPNB) | NCBI SNPdb Accession IDs |
|---------------------|----------------|--------------|-------------------------|---------------------------------|-----------------|--------------------------|
| SNP_P4_183742_4654  | NW_004518485.1 | Scaffold3918 | 4654                    | CC                              | AA              | 1947050247               |
| SNP_P4_183743_4655  | NW_004518485.1 | Scaffold3918 | 4655                    | GG                              | AA              | 1947050249               |
| SNP_P4_183744_4696  | NW_004518485.1 | Scaffold3918 | 4696                    | AA                              | TT              | 1947050251               |
| SNP_P4_183745_4836  | NW_004518485.1 | Scaffold3918 | 4836                    | CC                              | AA              | 1947050253               |
| SNP_P4_183746_4852  | NW_004518485.1 | Scaffold3918 | 4852                    | GG                              | AA              | 1947050255               |
| SNP_P4_183747_4984  | NW_004518485.1 | Scaffold3918 | 4984                    | TT                              | CC              | 1947050257               |
| SNP_P4_183748_5065  | NW_004518485.1 | Scaffold3918 | 5065                    | CC                              | TT              | 1947050259               |
| SNP_P4_183749_5085  | NW_004518485.1 | Scaffold3918 | 5085                    | TT                              | AA              | 1947050262               |
| SNP_P4_183750_5112  | NW_004518485.1 | Scaffold3918 | 5112                    | AA                              | GG              | 1947050264               |
| SNP_P4_183751_5129  | NW_004518485.1 | Scaffold3918 | 5129                    | CC                              | TT              | 1947050266               |
| SNP_P4_183752_5143  | NW_004518485.1 | Scaffold3918 | 5143                    | AA                              | CC              | 1947050268               |
| SNP_P4_183753_5199  | NW_004518485.1 | Scaffold3918 | 5199                    | TT                              | CC              | 1947050270               |
| SNP_P4_183754_5267  | NW_004518485.1 | Scaffold3918 | 5267                    | TT                              | CC              | 1947050272               |
| SNP_P4_183755_5385  | NW_004518485.1 | Scaffold3918 | 5385                    | TT                              | CC              | 1947050274               |
| SNP_P4_183756_5398  | NW_004518485.1 | Scaffold3918 | 5398                    | AA                              | CC              | 1947050276               |
| SNP_P4_183757_5409  | NW_004518485.1 | Scaffold3918 | 5409                    | TT                              | CC              | 1947050278               |
| SNP_P4_183758_5442  | NW_004518485.1 | Scaffold3918 | 5442                    | TT                              | CC              | 1947050280               |
| SNP_P4_183759_5460  | NW_004518485.1 | Scaffold3918 | 5460                    | CC                              | TT              | 1947050282               |
| SNP_P4_183760_5481  | NW_004518485.1 | Scaffold3918 | 5481                    | GG                              | TT              | 1947050284               |
| SNP_P4_183761_5521  | NW_004518485.1 | Scaffold3918 | 5521                    | GG                              | CC              | 1947050286               |
| SNP_P4_183762_5582  | NW_004518485.1 | Scaffold3918 | 5582                    | TT                              | AA              | 1947050288               |
| SNP_P4_183763_5597  | NW_004518485.1 | Scaffold3918 | 5597                    | TT                              | AA              | 1947050290               |
| SNP_P4_183764_5632  | NW_004518485.1 | Scaffold3918 | 5632                    | CC                              | GG              | 1947050292               |
| SNP_P4_183765_5650  | NW_004518485.1 | Scaffold3918 | 5650                    | TT                              | CC              | 1947050294               |
| SNP_P4_183766_5696  | NW_004518485.1 | Scaffold3918 | 5696                    | TT                              | AA              | 1947050296               |
| SNP_P4_183767_6080  | NW_004518485.1 | Scaffold3918 | 6080                    | GG                              | AA              | 1947050298               |
| SNP_P4_183768_6086  | NW_004518485.1 | Scaffold3918 | 6086                    | TT                              | GG              | 1947050300               |
| SNP_P4_183769_6225  | NW_004518485.1 | Scaffold3918 | 6225                    | AA                              | TT              | 1947050302               |
| SNP_P4_183770_6307  | NW_004518485.1 | Scaffold3918 | 6307                    | TT                              | AA              | 1947050304               |
| SNP_P4_183771_6356  | NW_004518485.1 | Scaffold3918 | 6356                    | TT                              | CC              | 1947050306               |
| SNP_P4_183772_6421  | NW_004518485.1 | Scaffold3918 | 6421                    | AA                              | TT              | 1947050308               |
| SNP_P4_183773_6494  | NW_004518485.1 | Scaffold3918 | 6494                    | AA                              | CC              | 1947050310               |
| SNP_P4_183774_6502  | NW_004518485.1 | Scaffold3918 | 6502                    | GG                              | AA              | 1947050312               |
| SNP_P4_183775_6535  | NW_004518485.1 | Scaffold3918 | 6535                    | TT                              | CC              | 1947050314               |
| SNP_P4_183776_6548  | NW_004518485.1 | Scaffold3918 | 6548                    | TT                              | CC              | 1947050316               |
| SNP_P4_183777_6602  | NW_004518485.1 | Scaffold3918 | 6602                    | AA                              | CC              | 1947050318               |
| SNP_P4_183778_6604  | NW_004518485.1 | Scaffold3918 | 6604                    | CC                              | GG              | 1947050320               |
| SNP_P4_183779_10028 | NW_004518485.1 | Scaffold3918 | 10028                   | CC                              | TT              | 1947050322               |
| SNP_P4_183780_10275 | NW_004518485.1 | Scaffold3918 | 10275                   | GG                              | AA              | 1947050324               |
| SNP_P4_183781_10038 | NW_004518486.1 | Scaffold3919 | 10038                   | CC                              | AA              | 1947050326               |
| SNP_P4_183782_116   | NW_004518487.1 | Scaffold3920 | 116                     | CC                              | TT              | 1947050328               |
| SNP_P4_183783_1845  | NW_004518489.1 | Scaffold3923 | 1845                    | CC                              | TT              | 1947050330               |

| SNPs IDs            | Chromosome IDs | Chromosomes  | Physical positions (bp) | CDC Frontier (Reference genome) | (ILWC46 & LPNB) | NCBI SNPdb Accession IDs |
|---------------------|----------------|--------------|-------------------------|---------------------------------|-----------------|--------------------------|
| SNP_P4_183784_1849  | NW_004518489.1 | Scaffold3923 | 1849                    | TT                              | GG              | 1947050332               |
| SNP_P4_183785_1859  | NW_004518489.1 | Scaffold3923 | 1859                    | GG                              | AA              | 1947050334               |
| SNP_P4_183786_1862  | NW_004518489.1 | Scaffold3923 | 1862                    | TT                              | CC              | 1947050336               |
| SNP_P4_183787_1924  | NW_004518489.1 | Scaffold3923 | 1924                    | AA                              | GG              | 1947050338               |
| SNP_P4_183788_1928  | NW_004518489.1 | Scaffold3923 | 1928                    | AA                              | GG              | 1947050340               |
| SNP_P4_183789_1943  | NW_004518489.1 | Scaffold3923 | 1943                    | GG                              | TT              | 1947050342               |
| SNP_P4_183790_1945  | NW_004518489.1 | Scaffold3923 | 1945                    | TT                              | CC              | 1947050344               |
| SNP_P4_183791_2003  | NW_004518489.1 | Scaffold3923 | 2003                    | GG                              | TT              | 1947050346               |
| SNP_P4_183792_2018  | NW_004518489.1 | Scaffold3923 | 2018                    | AA                              | GG              | 1947050348               |
| SNP_P4_183794_3288  | NW_004518489.1 | Scaffold3923 | 3288                    | CC                              | TT              | 1947050350               |
| SNP_P4_183795_3290  | NW_004518489.1 | Scaffold3923 | 3290                    | CC                              | TT              | 1947050353               |
| SNP_P4_183797_4239  | NW_004518489.1 | Scaffold3923 | 4239                    | TT                              | CC              | 1947050355               |
| SNP_P4_183798_4402  | NW_004518489.1 | Scaffold3923 | 4402                    | TT                              | AA              | 1947050357               |
| SNP_P4_183799_5552  | NW_004518491.1 | Scaffold3925 | 5552                    | GG                              | AA              | 1947050359               |
| SNP_P4_183800_508   | NW_004518493.1 | Scaffold3927 | 508                     | TT                              | CC              | 1947050361               |
| SNP_P4_183801_590   | NW_004518493.1 | Scaffold3927 | 590                     | AA                              | GG              | 1947050363               |
| SNP_P4_183803_1674  | NW_004518493.1 | Scaffold3927 | 1674                    | AA                              | GG              | 1947050365               |
| SNP_P4_183805_1898  | NW_004518495.1 | Scaffold3932 | 1898                    | TT                              | CC              | 1947050367               |
| SNP_P4_183806_2119  | NW_004518495.1 | Scaffold3932 | 2119                    | AA                              | CC              | 1947050369               |
| SNP_P4_183807_2131  | NW_004518495.1 | Scaffold3932 | 2131                    | AA                              | GG              | 1947050371               |
| SNP_P4_183808_2383  | NW_004518495.1 | Scaffold3932 | 2383                    | CC                              | AA              | 1947050373               |
| SNP_P4_183809_2420  | NW_004518495.1 | Scaffold3932 | 2420                    | AA                              | CC              | 1947050375               |
| SNP_P4_183810_2432  | NW_004518495.1 | Scaffold3932 | 2432                    | AA                              | GG              | 1947050377               |
| SNP_P4_183811_2490  | NW_004518495.1 | Scaffold3932 | 2490                    | GG                              | AA              | 1947050379               |
| SNP_P4_183812_5519  | NW_004518495.1 | Scaffold3932 | 5519                    | AA                              | GG              | 1947050381               |
| SNP_P4_183813_5522  | NW_004518495.1 | Scaffold3932 | 5522                    | TT                              | AA              | 1947050383               |
| SNP_P4_183814_1387  | NW_004518496.1 | Scaffold3933 | 1387                    | CC                              | AA              | 1947050385               |
| SNP_P4_183816_1013  | NW_004518497.1 | Scaffold3934 | 1013                    | TT                              | AA              | 1947050387               |
| SNP_P4_183817_3804  | NW_004518497.1 | Scaffold3934 | 3804                    | TT                              | CC              | 1947050389               |
| SNP_P4_183819_3842  | NW_004518497.1 | Scaffold3934 | 3842                    | CC                              | TT              | 1947050391               |
| SNP_P4_183820_4197  | NW_004518497.1 | Scaffold3934 | 4197                    | GG                              | CC              | 1947050393               |
| SNP_P4_183821_4359  | NW_004518497.1 | Scaffold3934 | 4359                    | GG                              | AA              | 1947050395               |
| SNP_P4_183822_4641  | NW_004518497.1 | Scaffold3934 | 4641                    | GG                              | TT              | 1947050397               |
| SNP_P4_183823_4817  | NW_004518497.1 | Scaffold3934 | 4817                    | AA                              | GG              | 1947050399               |
| SNP_P4_183824_10217 | NW_004518497.1 | Scaffold3934 | 10217                   | TT                              | GG              | 1947050401               |
| SNP_P4_183825_10218 | NW_004518497.1 | Scaffold3934 | 10218                   | TT                              | GG              | 1947050403               |
| SNP_P4_183826_10219 | NW_004518497.1 | Scaffold3934 | 10219                   | TT                              | CC              | 1947050405               |
| SNP_P4_183827_14138 | NW_004518497.1 | Scaffold3934 | 14138                   | TT                              | GG              | 1947050407               |
| SNP_P4_183828_14476 | NW_004518497.1 | Scaffold3934 | 14476                   | CC                              | AA              | 1947050409               |
| SNP_P4_183829_17597 | NW_004518497.1 | Scaffold3934 | 17597                   | GG                              | TT              | 1947050411               |
| SNP_P4_183830_17634 | NW_004518497.1 | Scaffold3934 | 17634                   | GG                              | AA              | 1947050413               |
| SNP_P4_183831_17640 | NW_004518497.1 | Scaffold3934 | 17640                   | TT                              | GG              | 1947050415               |

| SNPs IDs            | Chromosome IDs | Chromosomes  | Physical positions (bp) | CDC Frontier (Reference genome) | (ILWC46 & LPNB) | NCBI SNPdb Accession IDs |
|---------------------|----------------|--------------|-------------------------|---------------------------------|-----------------|--------------------------|
| SNP_P4_183832_17782 | NW_004518497.1 | Scaffold3934 | 17782                   | AA                              | TT              | 1947050417               |
| SNP_P4_183833_18006 | NW_004518497.1 | Scaffold3934 | 18006                   | TT                              | CC              | 1947050419               |
| SNP_P4_183834_342   | NW_004518498.1 | Scaffold3935 | 342                     | GG                              | AA              | 1947050421               |
| SNP_P4_183835_456   | NW_004518498.1 | Scaffold3935 | 456                     | CC                              | AA              | 1947050423               |
| SNP_P4_183836_1136  | NW_004518500.1 | Scaffold3938 | 1136                    | AA                              | TT              | 1947050425               |
| SNP_P4_183837_3376  | NW_004518501.1 | Scaffold3939 | 3376                    | TT                              | AA              | 1947050427               |
| SNP_P4_183838_290   | NW_004518503.1 | Scaffold3941 | 290                     | AA                              | GG              | 1947050429               |
| SNP_P4_183839_4806  | NW_004518504.1 | Scaffold3942 | 4806                    | TT                              | GG              | 1947050431               |
| SNP_P4_183840_4835  | NW_004518504.1 | Scaffold3942 | 4835                    | AA                              | TT              | 1947050433               |
| SNP_P4_183841_4844  | NW_004518504.1 | Scaffold3942 | 4844                    | CC                              | TT              | 1947050435               |
| SNP_P4_183842_4859  | NW_004518504.1 | Scaffold3942 | 4859                    | TT                              | CC              | 1947050437               |
| SNP_P4_183843_4910  | NW_004518504.1 | Scaffold3942 | 4910                    | GG                              | AA              | 1947050439               |
| SNP_P4_183844_5029  | NW_004518504.1 | Scaffold3942 | 5029                    | TT                              | CC              | 1947050441               |
| SNP_P4_183846_5079  | NW_004518504.1 | Scaffold3942 | 5079                    | TT                              | GG              | 1947050443               |
| SNP_P4_183847_2866  | NW_004518507.1 | Scaffold3945 | 2866                    | GG                              | TT              | 1947050446               |
| SNP_P4_183848_5216  | NW_004518507.1 | Scaffold3945 | 5216                    | GG                              | CC              | 1947050448               |
| SNP_P4_183849_11332 | NW_004518507.1 | Scaffold3945 | 11332                   | TT                              | GG              | 1947050450               |
| SNP_P4_183850_11391 | NW_004518507.1 | Scaffold3945 | 11391                   | TT                              | GG              | 1947050452               |
| SNP_P4_183851_11541 | NW_004518507.1 | Scaffold3945 | 11541                   | AA                              | CC              | 1947050454               |
| SNP_P4_183852_11597 | NW_004518507.1 | Scaffold3945 | 11597                   | GG                              | CC              | 1947050456               |
| SNP_P4_183854_13004 | NW_004518507.1 | Scaffold3945 | 13004                   | TT                              | CC              | 1947050458               |
| SNP_P4_183855_28624 | NW_004518507.1 | Scaffold3945 | 28624                   | GG                              | TT              | 1947050460               |
| SNP_P4_183856_28629 | NW_004518507.1 | Scaffold3945 | 28629                   | TT                              | CC              | 1947050462               |
| SNP_P4_183858_31783 | NW_004518507.1 | Scaffold3945 | 31783                   | AA                              | TT              | 1947050464               |
| SNP_P4_183859_5928  | NW_004518509.1 | Scaffold3947 | 5928                    | GG                              | AA              | 1947050466               |
| SNP_P4_183860_5983  | NW_004518509.1 | Scaffold3947 | 5983                    | AA                              | CC              | 1947050468               |
| SNP_P4_183864_6114  | NW_004518509.1 | Scaffold3947 | 6114                    | TT                              | CC              | 1947050470               |
| SNP_P4_183865_11055 | NW_004518509.1 | Scaffold3947 | 11055                   | TT                              | CC              | 1947050472               |
| SNP_P4_183866_11066 | NW_004518509.1 | Scaffold3947 | 11066                   | GG                              | AA              | 1947050474               |
| SNP_P4_183867_11086 | NW_004518509.1 | Scaffold3947 | 11086                   | TT                              | CC              | 1947050476               |
| SNP_P4_183868_11486 | NW_004518509.1 | Scaffold3947 | 11486                   | TT                              | GG              | 1947050478               |
| SNP_P4_183869_11575 | NW_004518509.1 | Scaffold3947 | 11575                   | TT                              | AA              | 1947050480               |
| SNP_P4_183870_64    | NW_004518510.1 | Scaffold3948 | 64                      | CC                              | GG              | 1947050482               |
| SNP_P4_183871_109   | NW_004518510.1 | Scaffold3948 | 109                     | TT                              | AA              | 1947050484               |
| SNP_P4_183872_111   | NW_004518510.1 | Scaffold3948 | 111                     | CC                              | GG              | 1947050486               |
| SNP_P4_183873_173   | NW_004518510.1 | Scaffold3948 | 173                     | AA                              | CC              | 1947050488               |
| SNP_P4_183874_332   | NW_004518510.1 | Scaffold3948 | 332                     | CC                              | GG              | 1947050490               |
| SNP_P4_183875_806   | NW_004518511.1 | Scaffold3950 | 806                     | CC                              | TT              | 1947050492               |
| SNP_P4_183876_3805  | NW_004518511.1 | Scaffold3950 | 3805                    | AA                              | GG              | 1947050494               |
| SNP_P4_183877_4211  | NW_004518511.1 | Scaffold3950 | 4211                    | AA                              | GG              | 1947050496               |
| SNP_P4_183878_4326  | NW_004518511.1 | Scaffold3950 | 4326                    | AA                              | GG              | 1947050498               |
| SNP_P4_183879_4421  | NW_004518511.1 | Scaffold3950 | 4421                    | TT                              | CC              | 1947050500               |

| SNPs IDs           | Chromosome IDs | Chromosomes  | Physical positions (bp) | CDC Frontier (Reference genome) | (ILWC46 & LPNB) | NCBI SNPdb Accession IDs |
|--------------------|----------------|--------------|-------------------------|---------------------------------|-----------------|--------------------------|
| SNP_P4_183880_4565 | NW_004518511.1 | Scaffold3950 | 4565                    | AA                              | GG              | 1947050502               |
| SNP_P4_183881_4588 | NW_004518511.1 | Scaffold3950 | 4588                    | CC                              | TT              | 1947050504               |
| SNP_P4_183882_4713 | NW_004518511.1 | Scaffold3950 | 4713                    | TT                              | CC              | 1947050506               |
| SNP_P4_183883_4766 | NW_004518511.1 | Scaffold3950 | 4766                    | CC                              | TT              | 1947050508               |
| SNP_P4_183884_4772 | NW_004518511.1 | Scaffold3950 | 4772                    | AA                              | GG              | 1947050510               |
| SNP_P4_183885_4791 | NW_004518511.1 | Scaffold3950 | 4791                    | CC                              | TT              | 1947050512               |
| SNP_P4_183886_4840 | NW_004518511.1 | Scaffold3950 | 4840                    | GG                              | AA              | 1947050514               |
| SNP_P4_183887_4851 | NW_004518511.1 | Scaffold3950 | 4851                    | CC                              | TT              | 1947050516               |
| SNP_P4_183888_4886 | NW_004518511.1 | Scaffold3950 | 4886                    | AA                              | GG              | 1947050518               |
| SNP_P4_183889_4908 | NW_004518511.1 | Scaffold3950 | 4908                    | GG                              | TT              | 1947050520               |
| SNP_P4_183890_5744 | NW_004518511.1 | Scaffold3950 | 5744                    | AA                              | GG              | 1947050522               |
| SNP_P4_183891_5745 | NW_004518511.1 | Scaffold3950 | 5745                    | GG                              | AA              | 1947050524               |
| SNP_P4_183892_5760 | NW_004518511.1 | Scaffold3950 | 5760                    | AA                              | GG              | 1947050526               |
| SNP_P4_183893_5774 | NW_004518511.1 | Scaffold3950 | 5774                    | TT                              | AA              | 1947050528               |
| SNP_P4_183894_5779 | NW_004518511.1 | Scaffold3950 | 5779                    | AA                              | CC              | 1947050530               |
| SNP_P4_183896_6800 | NW_004518511.1 | Scaffold3950 | 6800                    | TT                              | CC              | 1947050532               |
| SNP_P4_183897_6821 | NW_004518511.1 | Scaffold3950 | 6821                    | TT                              | CC              | 1947050534               |
| SNP_P4_183898_6958 | NW_004518511.1 | Scaffold3950 | 6958                    | TT                              | GG              | 1947050536               |
| SNP_P4_183899_7005 | NW_004518511.1 | Scaffold3950 | 7005                    | CC                              | TT              | 1947050538               |
| SNP_P4_183900_7026 | NW_004518511.1 | Scaffold3950 | 7026                    | CC                              | TT              | 1947050540               |
| SNP_P4_183901_7073 | NW_004518511.1 | Scaffold3950 | 7073                    | GG                              | CC              | 1947050542               |
| SNP_P4_183902_7107 | NW_004518511.1 | Scaffold3950 | 7107                    | TT                              | CC              | 1947050544               |
| SNP_P4_183903_7114 | NW_004518511.1 | Scaffold3950 | 7114                    | TT                              | GG              | 1947050546               |
| SNP_P4_183904_7252 | NW_004518511.1 | Scaffold3950 | 7252                    | CC                              | TT              | 1947050548               |
| SNP_P4_183906_7432 | NW_004518511.1 | Scaffold3950 | 7432                    | TT                              | CC              | 1947050550               |
| SNP_P4_183907_7497 | NW_004518511.1 | Scaffold3950 | 7497                    | TT                              | AA              | 1947050552               |
| SNP_P4_183908_7543 | NW_004518511.1 | Scaffold3950 | 7543                    | AA                              | GG              | 1947050554               |
| SNP_P4_183909_7620 | NW_004518511.1 | Scaffold3950 | 7620                    | GG                              | TT              | 1947050556               |
| SNP_P4_183912_7838 | NW_004518511.1 | Scaffold3950 | 7838                    | AA                              | GG              | 1947050558               |
| SNP_P4_183913_8033 | NW_004518511.1 | Scaffold3950 | 8033                    | AA                              | GG              | 1947050561               |
| SNP_P4_183914_8132 | NW_004518511.1 | Scaffold3950 | 8132                    | AA                              | GG              | 1947050563               |
| SNP_P4_183915_8174 | NW_004518511.1 | Scaffold3950 | 8174                    | TT                              | AA              | 1947050565               |
| SNP_P4_183916_8203 | NW_004518511.1 | Scaffold3950 | 8203                    | TT                              | CC              | 1947050567               |
| SNP_P4_183917_8206 | NW_004518511.1 | Scaffold3950 | 8206                    | TT                              | AA              | 1947050569               |
| SNP_P4_183919_8434 | NW_004518511.1 | Scaffold3950 | 8434                    | TT                              | CC              | 1947050571               |
| SNP_P4_183921_8554 | NW_004518511.1 | Scaffold3950 | 8554                    | CC                              | TT              | 1947050573               |
| SNP_P4_183923_8707 | NW_004518511.1 | Scaffold3950 | 8707                    | GG                              | TT              | 1947050575               |
| SNP_P4_183924_8750 | NW_004518511.1 | Scaffold3950 | 8750                    | AA                              | CC              | 1947050577               |
| SNP_P4_183926_8942 | NW_004518511.1 | Scaffold3950 | 8942                    | AA                              | TT              | 1947050579               |
| SNP_P4_183927_8944 | NW_004518511.1 | Scaffold3950 | 8944                    | TT                              | CC              | 1947050581               |
| SNP_P4_183928_8965 | NW_004518511.1 | Scaffold3950 | 8965                    | GG                              | AA              | 1947050583               |
| SNP_P4_183929_9105 | NW_004518511.1 | Scaffold3950 | 9105                    | AA                              | GG              | 1947050585               |

| SNPs IDs            | Chromosome IDs | Chromosomes  | Physical positions (bp) | CDC Frontier (Reference genome) | (ILWC46 & LPNB) | NCBI SNPdb Accession IDs |
|---------------------|----------------|--------------|-------------------------|---------------------------------|-----------------|--------------------------|
| SNP_P4_183930_9124  | NW_004518511.1 | Scaffold3950 | 9124                    | TT                              | GG              | 1947050587               |
| SNP_P4_183931_9164  | NW_004518511.1 | Scaffold3950 | 9164                    | AA                              | GG              | 1947050589               |
| SNP_P4_183932_9217  | NW_004518511.1 | Scaffold3950 | 9217                    | AA                              | GG              | 1947050591               |
| SNP_P4_183934_12649 | NW_004518511.1 | Scaffold3950 | 12649                   | CC                              | AA              | 1947050593               |
| SNP_P4_183935_12849 | NW_004518511.1 | Scaffold3950 | 12849                   | TT                              | CC              | 1947050595               |
| SNP_P4_183936_13049 | NW_004518511.1 | Scaffold3950 | 13049                   | CC                              | AA              | 1947050597               |
| SNP_P4_183937_1132  | NW_004518512.1 | Scaffold3951 | 1132                    | TT                              | AA              | 1947050599               |
| SNP_P4_183938_1133  | NW_004518512.1 | Scaffold3951 | 1133                    | TT                              | GG              | 1947050601               |
| SNP_P4_183939_1136  | NW_004518512.1 | Scaffold3951 | 1136                    | TT                              | AA              | 1947050603               |
| SNP_P4_183940_1142  | NW_004518512.1 | Scaffold3951 | 1142                    | CC                              | AA              | 1947050605               |
| SNP_P4_183941_1156  | NW_004518512.1 | Scaffold3951 | 1156                    | AA                              | GG              | 1947050607               |
| SNP_P4_183942_1828  | NW_004518512.1 | Scaffold3951 | 1828                    | AA                              | TT              | 1947050609               |
| SNP_P4_183943_1845  | NW_004518512.1 | Scaffold3951 | 1845                    | AA                              | TT              | 1947050611               |
| SNP_P4_183944_1923  | NW_004518512.1 | Scaffold3951 | 1923                    | CC                              | TT              | 1947050613               |
| SNP_P4_183945_1925  | NW_004518512.1 | Scaffold3951 | 1925                    | CC                              | TT              | 1947050615               |
| SNP_P4_183946_1926  | NW_004518512.1 | Scaffold3951 | 1926                    | CC                              | TT              | 1947050617               |
| SNP_P4_183947_2785  | NW_004518512.1 | Scaffold3951 | 2785                    | TT                              | AA              | 1947050619               |
| SNP_P4_183948_2805  | NW_004518512.1 | Scaffold3951 | 2805                    | AA                              | GG              | 1947050621               |
| SNP_P4_183949_2866  | NW_004518512.1 | Scaffold3951 | 2866                    | AA                              | GG              | 1947050623               |
| SNP_P4_183950_2911  | NW_004518512.1 | Scaffold3951 | 2911                    | GG                              | CC              | 1947050625               |
| SNP_P4_183951_2919  | NW_004518512.1 | Scaffold3951 | 2919                    | CC                              | AA              | 1947050627               |
| SNP_P4_183952_553   | NW_004518513.1 | Scaffold3952 | 553                     | GG                              | AA              | 1947050629               |
| SNP_P4_183954_1058  | NW_004518513.1 | Scaffold3952 | 1058                    | TT                              | CC              | 1947050631               |
| SNP_P4_183955_1104  | NW_004518513.1 | Scaffold3952 | 1104                    | AA                              | GG              | 1947050633               |
| SNP_P4_183956_1174  | NW_004518513.1 | Scaffold3952 | 1174                    | AA                              | GG              | 1947050635               |
| SNP_P4_183957_1253  | NW_004518513.1 | Scaffold3952 | 1253                    | TT                              | CC              | 1947050637               |
| SNP_P4_183958_397   | NW_004518514.1 | Scaffold3953 | 397                     | CC                              | TT              | 1947050639               |
| SNP_P4_183959_485   | NW_004518514.1 | Scaffold3953 | 485                     | CC                              | TT              | 1947050641               |
| SNP_P4_183960_976   | NW_004518514.1 | Scaffold3953 | 976                     | CC                              | TT              | 1947050643               |
| SNP_P4_183961_1032  | NW_004518514.1 | Scaffold3953 | 1032                    | TT                              | AA              | 1947050645               |
| SNP_P4_183962_56    | NW_004518519.1 | Scaffold3962 | 56                      | CC                              | TT              | 1947050647               |
| SNP_P4_183964_68    | NW_004518519.1 | Scaffold3962 | 68                      | GG                              | AA              | 1947050649               |
| SNP_P4_183965_81    | NW_004518519.1 | Scaffold3962 | 81                      | GG                              | CC              | 1947050651               |
| SNP_P4_183966_82    | NW_004518519.1 | Scaffold3962 | 82                      | CC                              | AA              | 1947050653               |
| SNP_P4_183967_169   | NW_004518519.1 | Scaffold3962 | 169                     | TT                              | CC              | 1947050655               |
| SNP_P4_183968_236   | NW_004518519.1 | Scaffold3962 | 236                     | CC                              | TT              | 1947050657               |
| SNP_P4_183969_388   | NW_004518519.1 | Scaffold3962 | 388                     | AA                              | CC              | 1947050659               |
| SNP_P4_183970_389   | NW_004518519.1 | Scaffold3962 | 389                     | CC                              | TT              | 1947050661               |
| SNP_P4_183971_555   | NW_004518519.1 | Scaffold3962 | 555                     | TT                              | CC              | 1947050663               |
| SNP_P4_183972_629   | NW_004518519.1 | Scaffold3962 | 629                     | TT                              | GG              | 1947050665               |
| SNP_P4_183973_64    | NW_004518522.1 | Scaffold3966 | 64                      | CC                              | GG              | 1947050667               |
| SNP_P4_183974_3774  | NW_004518523.1 | Scaffold3967 | 3774                    | GG                              | AA              | 1947050669               |

| SNPs IDs            | Chromosome IDs | Chromosomes  | Physical positions (bp) | CDC Frontier (Reference genome) | (ILWC46 & LPNB) | NCBI SNPdb Accession IDs |
|---------------------|----------------|--------------|-------------------------|---------------------------------|-----------------|--------------------------|
| SNP_P4_183975_3796  | NW_004518523.1 | Scaffold3967 | 3796                    | CC                              | TT              | 1947050671               |
| SNP_P4_183976_3896  | NW_004518523.1 | Scaffold3967 | 3896                    | AA                              | CC              | 1947050674               |
| SNP_P4_183977_3967  | NW_004518523.1 | Scaffold3967 | 3967                    | TT                              | AA              | 1947050676               |
| SNP_P4_183978_3968  | NW_004518523.1 | Scaffold3967 | 3968                    | TT                              | CC              | 1947050678               |
| SNP_P4_183979_3979  | NW_004518523.1 | Scaffold3967 | 3979                    | TT                              | CC              | 1947050680               |
| SNP_P4_183980_4261  | NW_004518523.1 | Scaffold3967 | 4261                    | GG                              | CC              | 1947050682               |
| SNP_P4_183981_903   | NW_004518525.1 | Scaffold3970 | 903                     | CC                              | AA              | 1947050684               |
| SNP_P4_183982_4767  | NW_004518525.1 | Scaffold3970 | 4767                    | TT                              | CC              | 1947050686               |
| SNP_P4_183983_4948  | NW_004518525.1 | Scaffold3970 | 4948                    | CC                              | AA              | 1947050688               |
| SNP_P4_183984_4980  | NW_004518525.1 | Scaffold3970 | 4980                    | CC                              | AA              | 1947050690               |
| SNP_P4_183985_5073  | NW_004518525.1 | Scaffold3970 | 5073                    | AA                              | CC              | 1947050692               |
| SNP_P4_183986_5285  | NW_004518525.1 | Scaffold3970 | 5285                    | GG                              | AA              | 1947050694               |
| SNP_P4_183987_5468  | NW_004518525.1 | Scaffold3970 | 5468                    | GG                              | CC              | 1947050696               |
| SNP_P4_183988_5648  | NW_004518525.1 | Scaffold3970 | 5648                    | CC                              | TT              | 1947050698               |
| SNP_P4_183989_635   | NW_004518528.1 | Scaffold3973 | 635                     | TT                              | CC              | 1947050700               |
| SNP_P4_183990_646   | NW_004518528.1 | Scaffold3973 | 646                     | AA                              | GG              | 1947050702               |
| SNP_P4_183991_898   | NW_004518528.1 | Scaffold3973 | 898                     | AA                              | GG              | 1947050704               |
| SNP_P4_183992_1267  | NW_004518528.1 | Scaffold3973 | 1267                    | CC                              | TT              | 1947050706               |
| SNP_P4_183993_1270  | NW_004518528.1 | Scaffold3973 | 1270                    | CC                              | TT              | 1947050708               |
| SNP_P4_183994_1318  | NW_004518528.1 | Scaffold3973 | 1318                    | TT                              | AA              | 1947050710               |
| SNP_P4_183995_555   | NW_004518534.1 | Scaffold3981 | 555                     | AA                              | TT              | 1947050712               |
| SNP_P4_183996_12520 | NW_004518537.1 | Scaffold3985 | 12520                   | GG                              | AA              | 1947050714               |
| SNP_P4_183998_15911 | NW_004518537.1 | Scaffold3985 | 15911                   | AA                              | CC              | 1947050716               |
| SNP_P4_183999_15912 | NW_004518537.1 | Scaffold3985 | 15912                   | GG                              | TT              | 1947050718               |
| SNP_P4_184000_16000 | NW_004518537.1 | Scaffold3985 | 16000                   | AA                              | GG              | 1947050720               |
| SNP_P4_184001_1016  | NW_004518541.1 | Scaffold3989 | 1016                    | TT                              | GG              | 1947050722               |
| SNP_P4_184002_5678  | NW_004518544.1 | Scaffold3993 | 5678                    | TT                              | CC              | 1947050724               |
| SNP_P4_184003_580   | NW_004518546.1 | Scaffold3995 | 580                     | TT                              | CC              | 1947050726               |
| SNP_P4_184004_604   | NW_004518546.1 | Scaffold3995 | 604                     | AA                              | GG              | 1947050728               |
| SNP_P4_184005_605   | NW_004518546.1 | Scaffold3995 | 605                     | GG                              | AA              | 1947050730               |
| SNP_P4_184006_610   | NW_004518546.1 | Scaffold3995 | 610                     | GG                              | TT              | 1947050732               |
| SNP_P4_184007_665   | NW_004518547.1 | Scaffold3996 | 665                     | TT                              | GG              | 1947050734               |
| SNP_P4_184008_499   | NW_004518550.1 | Scaffold4002 | 499                     | AA                              | TT              | 1947050736               |
| SNP_P4_184009_870   | NW_004518550.1 | Scaffold4002 | 870                     | AA                              | GG              | 1947050738               |
| SNP_P4_184010_880   | NW_004518550.1 | Scaffold4002 | 880                     | GG                              | AA              | 1947050740               |
| SNP_P4_184011_977   | NW_004518550.1 | Scaffold4002 | 977                     | AA                              | CC              | 1947050742               |
| SNP_P4_184012_1028  | NW_004518550.1 | Scaffold4002 | 1028                    | GG                              | AA              | 1947050744               |
| SNP_P4_184013_1120  | NW_004518550.1 | Scaffold4002 | 1120                    | CC                              | AA              | 1947050746               |
| SNP_P4_184014_3073  | NW_004518550.1 | Scaffold4002 | 3073                    | GG                              | CC              | 1947050748               |
| SNP_P4_184015_22836 | NW_004518551.1 | Scaffold4003 | 22836                   | TT                              | CC              | 1947050750               |
| SNP_P4_184016_22891 | NW_004518551.1 | Scaffold4003 | 22891                   | GG                              | TT              | 1947050752               |
| SNP_P4_184017_24471 | NW_004518551.1 | Scaffold4003 | 24471                   | CC                              | TT              | 1947050754               |



| SNPs IDs             | Chromosome IDs | Chromosomes  | Physical positions (bp) | CDC Frontier (Reference genome) | (ILWC46 & LPNB) | NCBI SNPdb Accession IDs |
|----------------------|----------------|--------------|-------------------------|---------------------------------|-----------------|--------------------------|
| SNP_P4_184018_4828   | NW_004518552.1 | Scaffold4005 | 4828                    | AA                              | GG              | 1947050756               |
| SNP_P4_184019_782    | NW_004518553.1 | Scaffold4006 | 782                     | TT                              | AA              | 1947050758               |
| SNP_P4_184020_68     | NW_004518554.1 | Scaffold4007 | 68                      | CC                              | AA              | 1947050760               |
| SNP_P4_184021_134    | NW_004518554.1 | Scaffold4007 | 134                     | TT                              | CC              | 1947050762               |
| SNP_P4_184022_266    | NW_004518554.1 | Scaffold4007 | 266                     | GG                              | AA              | 1947050763               |
| SNP_P4_184023_461    | NW_004518554.1 | Scaffold4007 | 461                     | AA                              | GG              | 1947050765               |
| SNP_P4_184024_1214   | NW_004518554.1 | Scaffold4007 | 1214                    | AA                              | GG              | 1947050767               |
| SNP_P4_184025_1423   | NW_004518554.1 | Scaffold4007 | 1423                    | AA                              | GG              | 1947050769               |
| SNP_P4_184026_2753   | NW_004518557.1 | Scaffold4011 | 2753                    | CC                              | TT              | 1947050771               |
| SNP_P4_184027_2805   | NW_004518557.1 | Scaffold4011 | 2805                    | CC                              | TT              | 1947050773               |
| SNP_P4_184028_2849   | NW_004518557.1 | Scaffold4011 | 2849                    | CC                              | AA              | 1947050775               |
| SNP_P4_184029_20205  | NW_004518557.1 | Scaffold4011 | 20205                   | TT                              | GG              | 1947050777               |
| SNP_P4_184030_20247  | NW_004518557.1 | Scaffold4011 | 20247                   | CC                              | GG              | 1947050779               |
| SNP_P4_184031_38513  | NW_004518557.1 | Scaffold4011 | 38513                   | TT                              | AA              | 1947050781               |
| SNP_P4_184033_63310  | NW_004518557.1 | Scaffold4011 | 63310                   | TT                              | CC              | 1947050783               |
| SNP_P4_184034_65207  | NW_004518557.1 | Scaffold4011 | 65207                   | AA                              | GG              | 1947050785               |
| SNP_P4_184035_102978 | NW_004518557.1 | Scaffold4011 | 102978                  | AA                              | GG              | 1947050787               |
| SNP_P4_184036_103101 | NW_004518557.1 | Scaffold4011 | 103101                  | GG                              | AA              | 1947050789               |
| SNP_P4_184037_103254 | NW_004518557.1 | Scaffold4011 | 103254                  | AA                              | TT              | 1947050791               |
| SNP_P4_184038_123949 | NW_004518557.1 | Scaffold4011 | 123949                  | CC                              | TT              | 1947050793               |
| SNP_P4_184039_132520 | NW_004518557.1 | Scaffold4011 | 132520                  | TT                              | GG              | 1947050795               |
| SNP_P4_184040_132546 | NW_004518557.1 | Scaffold4011 | 132546                  | TT                              | GG              | 1947050797               |
| SNP_P4_184042_1012   | NW_004518561.1 | Scaffold4017 | 1012                    | CC                              | TT              | 1947050799               |
| SNP_P4_184043_1040   | NW_004518561.1 | Scaffold4017 | 1040                    | AA                              | TT              | 1947050801               |
| SNP_P4_184044_1042   | NW_004518561.1 | Scaffold4017 | 1042                    | CC                              | TT              | 1947050803               |
| SNP_P4_184045_1083   | NW_004518561.1 | Scaffold4017 | 1083                    | CC                              | TT              | 1947050805               |
| SNP_P4_184046_1370   | NW_004518561.1 | Scaffold4017 | 1370                    | CC                              | AA              | 1947050807               |
| SNP_P4_184047_1371   | NW_004518561.1 | Scaffold4017 | 1371                    | CC                              | AA              | 1947050809               |
| SNP_P4_184048_467    | NW_004518563.1 | Scaffold4020 | 467                     | AA                              | TT              | 1947050811               |
| SNP_P4_184049_562    | NW_004518563.1 | Scaffold4020 | 562                     | GG                              | CC              | 1947050813               |
| SNP_P4_184051_838    | NW_004518563.1 | Scaffold4020 | 838                     | TT                              | CC              | 1947050815               |
| SNP_P4_184052_5847   | NW_004518563.1 | Scaffold4020 | 5847                    | AA                              | CC              | 1947050817               |
| SNP_P4_184053_10919  | NW_004518563.1 | Scaffold4020 | 10919                   | CC                              | GG              | 1947050819               |
| SNP_P4_184054_11041  | NW_004518563.1 | Scaffold4020 | 11041                   | TT                              | CC              | 1947050821               |
| SNP_P4_184055_11118  | NW_004518563.1 | Scaffold4020 | 11118                   | AA                              | TT              | 1947050823               |
| SNP_P4_184056_11123  | NW_004518563.1 | Scaffold4020 | 11123                   | TT                              | AA              | 1947050825               |
| SNP_P4_184057_11238  | NW_004518563.1 | Scaffold4020 | 11238                   | TT                              | AA              | 1947050827               |
| SNP_P4_184058_11306  | NW_004518563.1 | Scaffold4020 | 11306                   | TT                              | GG              | 1947050829               |
| SNP_P4_184059_669    | NW_004518564.1 | Scaffold4023 | 669                     | AA                              | GG              | 1947050831               |
| SNP_P4_184060_709    | NW_004518564.1 | Scaffold4023 | 709                     | TT                              | AA              | 1947050833               |
| SNP_P4_184062_1112   | NW_004518564.1 | Scaffold4023 | 1112                    | AA                              | TT              | 1947050835               |
| SNP_P4_184063_3650   | NW_004518565.1 | Scaffold4024 | 3650                    | AA                              | TT              | 1947050837               |

| SNPs IDs            | Chromosome IDs | Chromosomes  | Physical positions (bp) | CDC Frontier (Reference genome) | (ILWC46 & LPNB) | NCBI SNPdb Accession IDs |
|---------------------|----------------|--------------|-------------------------|---------------------------------|-----------------|--------------------------|
| SNP_P4_184064_3734  | NW_004518565.1 | Scaffold4024 | 3734                    | GG                              | TT              | 1947050839               |
| SNP_P4_184065_3827  | NW_004518565.1 | Scaffold4024 | 3827                    | AA                              | GG              | 1947050841               |
| SNP_P4_184067_5985  | NW_004518565.1 | Scaffold4024 | 5985                    | CC                              | TT              | 1947050843               |
| SNP_P4_184068_7320  | NW_004518565.1 | Scaffold4024 | 7320                    | CC                              | AA              | 1947050845               |
| SNP_P4_184069_1016  | NW_004518568.1 | Scaffold4028 | 1016                    | AA                              | GG              | 1947050847               |
| SNP_P4_184070_1071  | NW_004518568.1 | Scaffold4028 | 1071                    | TT                              | CC              | 1947050849               |
| SNP_P4_184071_1298  | NW_004518568.1 | Scaffold4028 | 1298                    | AA                              | GG              | 1947050851               |
| SNP_P4_184072_8313  | NW_004518568.1 | Scaffold4028 | 8313                    | TT                              | CC              | 1947050853               |
| SNP_P4_184073_8315  | NW_004518568.1 | Scaffold4028 | 8315                    | TT                              | AA              | 1947050855               |
| SNP_P4_184074_8318  | NW_004518568.1 | Scaffold4028 | 8318                    | GG                              | CC              | 1947050857               |
| SNP_P4_184075_8319  | NW_004518568.1 | Scaffold4028 | 8319                    | GG                              | AA              | 1947050859               |
| SNP_P4_184076_8377  | NW_004518568.1 | Scaffold4028 | 8377                    | TT                              | CC              | 1947050861               |
| SNP_P4_184077_8507  | NW_004518568.1 | Scaffold4028 | 8507                    | TT                              | GG              | 1947050863               |
| SNP_P4_184078_8586  | NW_004518568.1 | Scaffold4028 | 8586                    | AA                              | GG              | 1947050865               |
| SNP_P4_184079_14265 | NW_004518568.1 | Scaffold4028 | 14265                   | TT                              | AA              | 1947050867               |
| SNP_P4_184080_14277 | NW_004518568.1 | Scaffold4028 | 14277                   | TT                              | GG              | 1947050869               |
| SNP_P4_184081_14281 | NW_004518568.1 | Scaffold4028 | 14281                   | TT                              | CC              | 1947050871               |
| SNP_P4_184082_14372 | NW_004518568.1 | Scaffold4028 | 14372                   | TT                              | CC              | 1947050873               |
| SNP_P4_184083_14598 | NW_004518568.1 | Scaffold4028 | 14598                   | TT                              | CC              | 1947050875               |
| SNP_P4_184084_14626 | NW_004518568.1 | Scaffold4028 | 14626                   | TT                              | CC              | 1947050877               |
| SNP_P4_184085_14629 | NW_004518568.1 | Scaffold4028 | 14629                   | CC                              | AA              | 1947050879               |
| SNP_P4_184086_26852 | NW_004518568.1 | Scaffold4028 | 26852                   | AA                              | TT              | 1947050881               |
| SNP_P4_184087_26854 | NW_004518568.1 | Scaffold4028 | 26854                   | AA                              | TT              | 1947050883               |
| SNP_P4_184088_27121 | NW_004518568.1 | Scaffold4028 | 27121                   | GG                              | AA              | 1947050885               |
| SNP_P4_184089_27129 | NW_004518568.1 | Scaffold4028 | 27129                   | GG                              | AA              | 1947050887               |
| SNP_P4_184090_27181 | NW_004518568.1 | Scaffold4028 | 27181                   | GG                              | TT              | 1947050889               |
| SNP_P4_184091_27236 | NW_004518568.1 | Scaffold4028 | 27236                   | AA                              | GG              | 1947050891               |
| SNP_P4_184092_27544 | NW_004518568.1 | Scaffold4028 | 27544                   | TT                              | CC              | 1947050893               |
| SNP_P4_184093_27548 | NW_004518568.1 | Scaffold4028 | 27548                   | AA                              | GG              | 1947050894               |
| SNP_P4_184094_27608 | NW_004518568.1 | Scaffold4028 | 27608                   | GG                              | AA              | 1947050896               |
| SNP_P4_184095_27623 | NW_004518568.1 | Scaffold4028 | 27623                   | AA                              | GG              | 1947050898               |
| SNP_P4_184096_27654 | NW_004518568.1 | Scaffold4028 | 27654                   | GG                              | TT              | 1947050900               |
| SNP_P4_184097_27659 | NW_004518568.1 | Scaffold4028 | 27659                   | TT                              | GG              | 1947050902               |
| SNP_P4_184098_34153 | NW_004518568.1 | Scaffold4028 | 34153                   | AA                              | CC              | 1947050904               |
| SNP_P4_184099_34870 | NW_004518568.1 | Scaffold4028 | 34870                   | GG                              | AA              | 1947050906               |
| SNP_P4_184100_44136 | NW_004518568.1 | Scaffold4028 | 44136                   | AA                              | TT              | 1947050908               |
| SNP_P4_184101_532   | NW_004518570.1 | Scaffold4031 | 532                     | TT                              | CC              | 1947050922               |
| SNP_P4_184102_565   | NW_004518570.1 | Scaffold4031 | 565                     | GG                              | AA              | 1947050924               |
| SNP_P4_184103_730   | NW_004518570.1 | Scaffold4031 | 730                     | AA                              | GG              | 1947050926               |
| SNP_P4_184104_732   | NW_004518570.1 | Scaffold4031 | 732                     | AA                              | CC              | 1947050928               |
| SNP_P4_184105_734   | NW_004518570.1 | Scaffold4031 | 734                     | AA                              | GG              | 1947050930               |
| SNP_P4_184106_900   | NW_004518570.1 | Scaffold4031 | 900                     | AA                              | CC              | 1947050932               |

| SNPs IDs            | Chromosome IDs | Chromosomes  | Physical positions (bp) | CDC Frontier (Reference genome) | (ILWC46 & LPNB) | NCBI SNPdb Accession IDs |
|---------------------|----------------|--------------|-------------------------|---------------------------------|-----------------|--------------------------|
| SNP_P4_184107_986   | NW_004518570.1 | Scaffold4031 | 986                     | CC                              | GG              | 1947050934               |
| SNP_P4_184108_1058  | NW_004518570.1 | Scaffold4031 | 1058                    | AA                              | GG              | 1947050936               |
| SNP_P4_184109_1087  | NW_004518570.1 | Scaffold4031 | 1087                    | GG                              | AA              | 1947050938               |
| SNP_P4_184110_2185  | NW_004518571.1 | Scaffold4032 | 2185                    | CC                              | TT              | 1947050940               |
| SNP_P4_184111_2218  | NW_004518571.1 | Scaffold4032 | 2218                    | TT                              | AA              | 1947050942               |
| SNP_P4_184112_2250  | NW_004518571.1 | Scaffold4032 | 2250                    | TT                              | AA              | 1947050944               |
| SNP_P4_184113_2287  | NW_004518571.1 | Scaffold4032 | 2287                    | AA                              | CC              | 1947050946               |
| SNP_P4_184114_2518  | NW_004518571.1 | Scaffold4032 | 2518                    | GG                              | AA              | 1947050948               |
| SNP_P4_184115_2553  | NW_004518571.1 | Scaffold4032 | 2553                    | TT                              | CC              | 1947050950               |
| SNP_P4_184116_2556  | NW_004518571.1 | Scaffold4032 | 2556                    | GG                              | AA              | 1947050952               |
| SNP_P4_184117_2585  | NW_004518571.1 | Scaffold4032 | 2585                    | AA                              | TT              | 1947051026               |
| SNP_P4_184118_2586  | NW_004518571.1 | Scaffold4032 | 2586                    | AA                              | CC              | 1947051028               |
| SNP_P4_184119_2640  | NW_004518571.1 | Scaffold4032 | 2640                    | CC                              | GG              | 1947051030               |
| SNP_P4_184120_2704  | NW_004518571.1 | Scaffold4032 | 2704                    | AA                              | CC              | 1947051032               |
| SNP_P4_184121_2771  | NW_004518571.1 | Scaffold4032 | 2771                    | GG                              | TT              | 1947051034               |
| SNP_P4_184122_2773  | NW_004518571.1 | Scaffold4032 | 2773                    | TT                              | CC              | 1947051037               |
| SNP_P4_184123_6843  | NW_004518571.1 | Scaffold4032 | 6843                    | TT                              | AA              | 1947051039               |
| SNP_P4_184124_6846  | NW_004518571.1 | Scaffold4032 | 6846                    | CC                              | AA              | 1947051041               |
| SNP_P4_184125_6851  | NW_004518571.1 | Scaffold4032 | 6851                    | GG                              | AA              | 1947051043               |
| SNP_P4_184126_2884  | NW_004518572.1 | Scaffold4034 | 2884                    | TT                              | AA              | 1947051045               |
| SNP_P4_184127_2923  | NW_004518572.1 | Scaffold4034 | 2923                    | TT                              | CC              | 1947051047               |
| SNP_P4_184128_2964  | NW_004518572.1 | Scaffold4034 | 2964                    | TT                              | CC              | 1947051049               |
| SNP_P4_184129_2979  | NW_004518572.1 | Scaffold4034 | 2979                    | CC                              | AA              | 1947051051               |
| SNP_P4_184130_3154  | NW_004518572.1 | Scaffold4034 | 3154                    | TT                              | CC              | 1947051053               |
| SNP_P4_184131_3162  | NW_004518572.1 | Scaffold4034 | 3162                    | AA                              | GG              | 1947051056               |
| SNP_P4_184132_798   | NW_004518575.1 | Scaffold4038 | 798                     | TT                              | GG              | 1947051058               |
| SNP_P4_184133_813   | NW_004518575.1 | Scaffold4038 | 813                     | AA                              | GG              | 1947051060               |
| SNP_P4_184135_874   | NW_004518575.1 | Scaffold4038 | 874                     | AA                              | GG              | 1947051062               |
| SNP_P4_184136_1057  | NW_004518575.1 | Scaffold4038 | 1057                    | GG                              | TT              | 1947051064               |
| SNP_P4_184137_1250  | NW_004518575.1 | Scaffold4038 | 1250                    | TT                              | CC              | 1947051067               |
| SNP_P4_184138_524   | NW_004518577.1 | Scaffold4040 | 524                     | TT                              | CC              | 1947051069               |
| SNP_P4_184139_570   | NW_004518577.1 | Scaffold4040 | 570                     | CC                              | TT              | 1947051071               |
| SNP_P4_184141_795   | NW_004518577.1 | Scaffold4040 | 795                     | TT                              | CC              | 1947051073               |
| SNP_P4_184142_64    | NW_004518578.1 | Scaffold4041 | 64                      | TT                              | AA              | 1947051075               |
| SNP_P4_184143_99    | NW_004518578.1 | Scaffold4041 | 99                      | CC                              | AA              | 1947051077               |
| SNP_P4_184144_150   | NW_004518578.1 | Scaffold4041 | 150                     | TT                              | GG              | 1947051079               |
| SNP_P4_184145_249   | NW_004518578.1 | Scaffold4041 | 249                     | GG                              | CC              | 1947051081               |
| SNP_P4_184147_362   | NW_004518578.1 | Scaffold4041 | 362                     | GG                              | AA              | 1947051083               |
| SNP_P4_184148_591   | NW_004518578.1 | Scaffold4041 | 591                     | AA                              | TT              | 1947051085               |
| SNP_P4_184149_971   | NW_004518578.1 | Scaffold4041 | 971                     | GG                              | TT              | 1947051087               |
| SNP_P4_184150_978   | NW_004518578.1 | Scaffold4041 | 978                     | GG                              | AA              | 1947051090               |
| SNP_P4_184153_13889 | NW_004518578.1 | Scaffold4041 | 13889                   | GG                              | AA              | 1947051092               |

| SNPs IDs            | Chromosome IDs | Chromosomes  | Physical positions (bp) | CDC Frontier (Reference genome) | (ILWC46 & LPNB) | NCBI SNPdb Accession IDs |
|---------------------|----------------|--------------|-------------------------|---------------------------------|-----------------|--------------------------|
| SNP_P4_184154_13932 | NW_004518578.1 | Scaffold4041 | 13932                   | AA                              | GG              | 1947051094               |
| SNP_P4_184155_15413 | NW_004518578.1 | Scaffold4041 | 15413                   | AA                              | TT              | 1947051096               |
| SNP_P4_184156_15431 | NW_004518578.1 | Scaffold4041 | 15431                   | GG                              | AA              | 1947051098               |
| SNP_P4_184157_15454 | NW_004518578.1 | Scaffold4041 | 15454                   | TT                              | CC              | 1947051101               |
| SNP_P4_184158_15501 | NW_004518578.1 | Scaffold4041 | 15501                   | GG                              | CC              | 1947051103               |
| SNP_P4_184159_15539 | NW_004518578.1 | Scaffold4041 | 15539                   | TT                              | AA              | 1947051105               |
| SNP_P4_184161_15666 | NW_004518578.1 | Scaffold4041 | 15666                   | TT                              | CC              | 1947051107               |
| SNP_P4_184162_15667 | NW_004518578.1 | Scaffold4041 | 15667                   | TT                              | AA              | 1947051109               |
| SNP_P4_184164_15746 | NW_004518578.1 | Scaffold4041 | 15746                   | TT                              | CC              | 1947051111               |
| SNP_P4_184166_15777 | NW_004518578.1 | Scaffold4041 | 15777                   | CC                              | GG              | 1947051113               |
| SNP_P4_184167_15784 | NW_004518578.1 | Scaffold4041 | 15784                   | GG                              | CC              | 1947051115               |
| SNP_P4_184168_15847 | NW_004518578.1 | Scaffold4041 | 15847                   | CC                              | TT              | 1947051117               |
| SNP_P4_184170_15873 | NW_004518578.1 | Scaffold4041 | 15873                   | TT                              | CC              | 1947051119               |
| SNP_P4_184171_15905 | NW_004518578.1 | Scaffold4041 | 15905                   | AA                              | TT              | 1947051121               |
| SNP_P4_184173_16001 | NW_004518578.1 | Scaffold4041 | 16001                   | CC                              | TT              | 1947051123               |
| SNP_P4_184174_16018 | NW_004518578.1 | Scaffold4041 | 16018                   | CC                              | TT              | 1947051126               |
| SNP_P4_184175_16116 | NW_004518578.1 | Scaffold4041 | 16116                   | TT                              | AA              | 1947051128               |
| SNP_P4_184176_16142 | NW_004518578.1 | Scaffold4041 | 16142                   | AA                              | CC              | 1947051130               |
| SNP_P4_184177_16146 | NW_004518578.1 | Scaffold4041 | 16146                   | AA                              | GG              | 1947051132               |
| SNP_P4_184178_16148 | NW_004518578.1 | Scaffold4041 | 16148                   | CC                              | TT              | 1947051134               |
| SNP_P4_184180_16312 | NW_004518578.1 | Scaffold4041 | 16312                   | TT                              | CC              | 1947051136               |
| SNP_P4_184181_16346 | NW_004518578.1 | Scaffold4041 | 16346                   | GG                              | AA              | 1947051138               |
| SNP_P4_184182_16399 | NW_004518578.1 | Scaffold4041 | 16399                   | GG                              | AA              | 1947051140               |
| SNP_P4_184183_16403 | NW_004518578.1 | Scaffold4041 | 16403                   | TT                              | AA              | 1947051142               |
| SNP_P4_184185_19072 | NW_004518578.1 | Scaffold4041 | 19072                   | TT                              | CC              | 1947051144               |
| SNP_P4_184186_32322 | NW_004518578.1 | Scaffold4041 | 32322                   | GG                              | AA              | 1947051146               |
| SNP_P4_184187_38059 | NW_004518578.1 | Scaffold4041 | 38059                   | GG                              | AA              | 1947051148               |
| SNP_P4_184188_38289 | NW_004518578.1 | Scaffold4041 | 38289                   | TT                              | CC              | 1947051150               |
| SNP_P4_184189_38757 | NW_004518578.1 | Scaffold4041 | 38757                   | CC                              | TT              | 1947051151               |
| SNP_P4_184191_39282 | NW_004518578.1 | Scaffold4041 | 39282                   | AA                              | GG              | 1947051152               |
| SNP_P4_184192_39819 | NW_004518578.1 | Scaffold4041 | 39819                   | CC                              | TT              | 1947051154               |
| SNP_P4_184193_546   | NW_004518580.1 | Scaffold4045 | 546                     | AA                              | GG              | 1947051156               |
| SNP_P4_184194_558   | NW_004518580.1 | Scaffold4045 | 558                     | AA                              | TT              | 1947051158               |
| SNP_P4_184195_567   | NW_004518580.1 | Scaffold4045 | 567                     | TT                              | CC              | 1947051160               |
| SNP_P4_184196_590   | NW_004518580.1 | Scaffold4045 | 590                     | AA                              | GG              | 1947051162               |
| SNP_P4_184197_1128  | NW_004518580.1 | Scaffold4045 | 1128                    | AA                              | GG              | 1947051164               |
| SNP_P4_184198_1544  | NW_004518580.1 | Scaffold4045 | 1544                    | AA                              | GG              | 1947051166               |
| SNP_P4_184199_1560  | NW_004518580.1 | Scaffold4045 | 1560                    | CC                              | AA              | 1947051168               |
| SNP_P4_184201_82    | NW_004518583.1 | Scaffold4050 | 82                      | TT                              | CC              | 1947051170               |
| SNP_P4_184205_6630  | NW_004518588.1 | Scaffold4057 | 6630                    | CC                              | TT              | 1947051172               |
| SNP_P4_184206_7006  | NW_004518588.1 | Scaffold4057 | 7006                    | GG                              | TT              | 1947051174               |
| SNP_P4_184207_7565  | NW_004518588.1 | Scaffold4057 | 7565                    | AA                              | GG              | 1947051176               |

| SNPs IDs            | Chromosome IDs | Chromosomes  | Physical positions (bp) | CDC Frontier (Reference genome) | (ILWC46 & LPNB) | NCBI SNPdb Accession IDs |
|---------------------|----------------|--------------|-------------------------|---------------------------------|-----------------|--------------------------|
| SNP_P4_184208_18988 | NW_004518588.1 | Scaffold4057 | 18988                   | TT                              | AA              | 1947051178               |
| SNP_P4_184210_31267 | NW_004518588.1 | Scaffold4057 | 31267                   | AA                              | TT              | 1947051180               |
| SNP_P4_184211_49720 | NW_004518588.1 | Scaffold4057 | 49720                   | AA                              | CC              | 1947051182               |
| SNP_P4_184212_2117  | NW_004518590.1 | Scaffold4061 | 2117                    | CC                              | TT              | 1947051184               |
| SNP_P4_184213_2130  | NW_004518590.1 | Scaffold4061 | 2130                    | TT                              | CC              | 1947051186               |
| SNP_P4_184214_2444  | NW_004518590.1 | Scaffold4061 | 2444                    | TT                              | CC              | 1947051188               |
| SNP_P4_184215_2736  | NW_004518590.1 | Scaffold4061 | 2736                    | AA                              | TT              | 1947051190               |
| SNP_P4_184216_2772  | NW_004518590.1 | Scaffold4061 | 2772                    | AA                              | CC              | 1947051192               |
| SNP_P4_184217_3094  | NW_004518590.1 | Scaffold4061 | 3094                    | CC                              | TT              | 1947051194               |
| SNP_P4_184218_7116  | NW_004518590.1 | Scaffold4061 | 7116                    | AA                              | GG              | 1947051196               |
| SNP_P4_184219_7205  | NW_004518590.1 | Scaffold4061 | 7205                    | TT                              | GG              | 1947051198               |
| SNP_P4_184220_8203  | NW_004518590.1 | Scaffold4061 | 8203                    | GG                              | AA              | 1947051200               |
| SNP_P4_184221_8205  | NW_004518590.1 | Scaffold4061 | 8205                    | TT                              | AA              | 1947051202               |
| SNP_P4_184223_8246  | NW_004518590.1 | Scaffold4061 | 8246                    | AA                              | GG              | 1947051204               |
| SNP_P4_184224_8255  | NW_004518590.1 | Scaffold4061 | 8255                    | AA                              | GG              | 1947051206               |
| SNP_P4_184225_8275  | NW_004518590.1 | Scaffold4061 | 8275                    | CC                              | GG              | 1947051208               |
| SNP_P4_184226_11713 | NW_004518590.1 | Scaffold4061 | 11713                   | TT                              | AA              | 1947051210               |
| SNP_P4_184227_12172 | NW_004518590.1 | Scaffold4061 | 12172                   | CC                              | TT              | 1947051212               |
| SNP_P4_184228_754   | NW_004518592.1 | Scaffold4064 | 754                     | TT                              | CC              | 1947051214               |
| SNP_P4_184230_912   | NW_004518592.1 | Scaffold4064 | 912                     | AA                              | GG              | 1947051216               |
| SNP_P4_184231_987   | NW_004518592.1 | Scaffold4064 | 987                     | TT                              | GG              | 1947051218               |
| SNP_P4_184233_1349  | NW_004518592.1 | Scaffold4064 | 1349                    | CC                              | GG              | 1947051220               |
| SNP_P4_184235_1498  | NW_004518592.1 | Scaffold4064 | 1498                    | AA                              | GG              | 1947051222               |
| SNP_P4_184236_1560  | NW_004518592.1 | Scaffold4064 | 1560                    | TT                              | CC              | 1947051224               |
| SNP_P4_184237_1662  | NW_004518592.1 | Scaffold4064 | 1662                    | AA                              | TT              | 1947051226               |
| SNP_P4_184238_1688  | NW_004518592.1 | Scaffold4064 | 1688                    | GG                              | AA              | 1947051228               |
| SNP_P4_184239_1967  | NW_004518592.1 | Scaffold4064 | 1967                    | CC                              | AA              | 1947051230               |
| SNP_P4_184240_2014  | NW_004518592.1 | Scaffold4064 | 2014                    | GG                              | TT              | 1947051232               |
| SNP_P4_184242_2180  | NW_004518592.1 | Scaffold4064 | 2180                    | AA                              | GG              | 1947051234               |
| SNP_P4_184243_2548  | NW_004518592.1 | Scaffold4064 | 2548                    | TT                              | AA              | 1947051236               |
| SNP_P4_184244_2750  | NW_004518592.1 | Scaffold4064 | 2750                    | GG                              | TT              | 1947051238               |
| SNP_P4_184245_2806  | NW_004518592.1 | Scaffold4064 | 2806                    | AA                              | GG              | 1947051240               |
| SNP_P4_184246_2979  | NW_004518592.1 | Scaffold4064 | 2979                    | AA                              | TT              | 1947051242               |
| SNP_P4_184247_3215  | NW_004518592.1 | Scaffold4064 | 3215                    | TT                              | AA              | 1947051244               |
| SNP_P4_184248_3255  | NW_004518592.1 | Scaffold4064 | 3255                    | CC                              | TT              | 1947051246               |
| SNP_P4_184249_3338  | NW_004518592.1 | Scaffold4064 | 3338                    | CC                              | AA              | 1947051248               |
| SNP_P4_184250_3369  | NW_004518592.1 | Scaffold4064 | 3369                    | AA                              | GG              | 1947051250               |
| SNP_P4_184251_3520  | NW_004518592.1 | Scaffold4064 | 3520                    | GG                              | AA              | 1947051252               |
| SNP_P4_184252_3533  | NW_004518592.1 | Scaffold4064 | 3533                    | TT                              | GG              | 1947051253               |
| SNP_P4_184253_3562  | NW_004518592.1 | Scaffold4064 | 3562                    | CC                              | TT              | 1947051254               |
| SNP_P4_184254_3581  | NW_004518592.1 | Scaffold4064 | 3581                    | GG                              | AA              | 1947051255               |
| SNP_P4_184255_3661  | NW_004518592.1 | Scaffold4064 | 3661                    | CC                              | TT              | 1947051256               |

| SNPs IDs            | Chromosome IDs | Chromosomes  | Physical positions (bp) | CDC Frontier (Reference genome) | (ILWC46 & LPNB) | NCBI SNPdb Accession IDs |
|---------------------|----------------|--------------|-------------------------|---------------------------------|-----------------|--------------------------|
| SNP_P4_184256_3700  | NW_004518592.1 | Scaffold4064 | 3700                    | AA                              | TT              | 1947051257               |
| SNP_P4_184257_3883  | NW_004518592.1 | Scaffold4064 | 3883                    | GG                              | TT              | 1947051258               |
| SNP_P4_184258_3984  | NW_004518592.1 | Scaffold4064 | 3984                    | CC                              | TT              | 1947051259               |
| SNP_P4_184259_4025  | NW_004518592.1 | Scaffold4064 | 4025                    | TT                              | CC              | 1947051260               |
| SNP_P4_184260_4034  | NW_004518592.1 | Scaffold4064 | 4034                    | TT                              | CC              | 1947051261               |
| SNP_P4_184261_4091  | NW_004518592.1 | Scaffold4064 | 4091                    | GG                              | TT              | 1947051262               |
| SNP_P4_184262_4212  | NW_004518592.1 | Scaffold4064 | 4212                    | AA                              | GG              | 1947051263               |
| SNP_P4_184263_4307  | NW_004518592.1 | Scaffold4064 | 4307                    | TT                              | CC              | 1947051264               |
| SNP_P4_184264_4633  | NW_004518592.1 | Scaffold4064 | 4633                    | AA                              | TT              | 1947051265               |
| SNP_P4_184265_4670  | NW_004518592.1 | Scaffold4064 | 4670                    | AA                              | GG              | 1947051266               |
| SNP_P4_184266_4781  | NW_004518592.1 | Scaffold4064 | 4781                    | AA                              | GG              | 1947051267               |
| SNP_P4_184267_4791  | NW_004518592.1 | Scaffold4064 | 4791                    | GG                              | AA              | 1947051268               |
| SNP_P4_184268_4816  | NW_004518592.1 | Scaffold4064 | 4816                    | TT                              | AA              | 1947051269               |
| SNP_P4_184269_4994  | NW_004518592.1 | Scaffold4064 | 4994                    | CC                              | AA              | 1947051270               |
| SNP_P4_184270_5052  | NW_004518592.1 | Scaffold4064 | 5052                    | TT                              | CC              | 1947051271               |
| SNP_P4_184271_5147  | NW_004518592.1 | Scaffold4064 | 5147                    | CC                              | TT              | 1947051272               |
| SNP_P4_184272_5268  | NW_004518592.1 | Scaffold4064 | 5268                    | TT                              | CC              | 1947051273               |
| SNP_P4_184273_5331  | NW_004518592.1 | Scaffold4064 | 5331                    | TT                              | CC              | 1947051274               |
| SNP_P4_184275_5435  | NW_004518592.1 | Scaffold4064 | 5435                    | AA                              | CC              | 1947051275               |
| SNP_P4_184276_5657  | NW_004518592.1 | Scaffold4064 | 5657                    | AA                              | CC              | 1947051276               |
| SNP_P4_184277_64    | NW_004518605.1 | Scaffold4081 | 64                      | CC                              | TT              | 1947051277               |
| SNP_P4_184278_84    | NW_004518605.1 | Scaffold4081 | 84                      | TT                              | CC              | 1947051278               |
| SNP_P4_184279_292   | NW_004518605.1 | Scaffold4081 | 292                     | TT                              | GG              | 1947051279               |
| SNP_P4_184280_378   | NW_004518605.1 | Scaffold4081 | 378                     | GG                              | AA              | 1947051280               |
| SNP_P4_184281_505   | NW_004518605.1 | Scaffold4081 | 505                     | TT                              | AA              | 1947051281               |
| SNP_P4_184282_608   | NW_004518605.1 | Scaffold4081 | 608                     | GG                              | AA              | 1947051282               |
| SNP_P4_184283_5213  | NW_004518611.1 | Scaffold4088 | 5213                    | GG                              | AA              | 1947051283               |
| SNP_P4_184285_5688  | NW_004518611.1 | Scaffold4088 | 5688                    | CC                              | TT              | 1947051284               |
| SNP_P4_184286_5741  | NW_004518611.1 | Scaffold4088 | 5741                    | GG                              | TT              | 1947051285               |
| SNP_P4_184287_5947  | NW_004518611.1 | Scaffold4088 | 5947                    | GG                              | AA              | 1947051286               |
| SNP_P4_184288_6023  | NW_004518611.1 | Scaffold4088 | 6023                    | GG                              | AA              | 1947051287               |
| SNP_P4_184289_6024  | NW_004518611.1 | Scaffold4088 | 6024                    | GG                              | AA              | 1947051288               |
| SNP_P4_184290_6425  | NW_004518611.1 | Scaffold4088 | 6425                    | CC                              | TT              | 1947051289               |
| SNP_P4_184291_8311  | NW_004518611.1 | Scaffold4088 | 8311                    | TT                              | CC              | 1947051290               |
| SNP_P4_184292_8900  | NW_004518611.1 | Scaffold4088 | 8900                    | GG                              | AA              | 1947051291               |
| SNP_P4_184293_11222 | NW_004518611.1 | Scaffold4088 | 11222                   | TT                              | CC              | 1947051292               |
| SNP_P4_184294_14801 | NW_004518611.1 | Scaffold4088 | 14801                   | CC                              | TT              | 1947051293               |
| SNP_P4_184295_14972 | NW_004518611.1 | Scaffold4088 | 14972                   | GG                              | AA              | 1947051294               |
| SNP_P4_184296_15058 | NW_004518611.1 | Scaffold4088 | 15058                   | AA                              | CC              | 1947051296               |
| SNP_P4_184297_15090 | NW_004518611.1 | Scaffold4088 | 15090                   | AA                              | CC              | 1947051298               |
| SNP_P4_184298_16469 | NW_004518611.1 | Scaffold4088 | 16469                   | TT                              | CC              | 1947051300               |
| SNP_P4_184299_16482 | NW_004518611.1 | Scaffold4088 | 16482                   | CC                              | GG              | 1947051302               |

| SNPs IDs            | Chromosome IDs | Chromosomes  | Physical positions (bp) | CDC Frontier (Reference genome) | (ILWC46 & LPNB) | NCBI SNPdb Accession IDs |
|---------------------|----------------|--------------|-------------------------|---------------------------------|-----------------|--------------------------|
| SNP_P4_184300_17165 | NW_004518611.1 | Scaffold4088 | 17165                   | AA                              | TT              | 1947051304               |
| SNP_P4_184301_17682 | NW_004518611.1 | Scaffold4088 | 17682                   | CC                              | TT              | 1947051306               |
| SNP_P4_184302_17980 | NW_004518611.1 | Scaffold4088 | 17980                   | AA                              | GG              | 1947051308               |
| SNP_P4_184303_18198 | NW_004518611.1 | Scaffold4088 | 18198                   | CC                              | TT              | 1947051310               |
| SNP_P4_184304_18304 | NW_004518611.1 | Scaffold4088 | 18304                   | GG                              | AA              | 1947051312               |
| SNP_P4_184305_24341 | NW_004518611.1 | Scaffold4088 | 24341                   | GG                              | AA              | 1947051314               |
| SNP_P4_184306_19313 | NW_004518612.1 | Scaffold4089 | 19313                   | CC                              | GG              | 1947051316               |
| SNP_P4_184307_19322 | NW_004518612.1 | Scaffold4089 | 19322                   | GG                              | AA              | 1947051318               |
| SNP_P4_184308_19323 | NW_004518612.1 | Scaffold4089 | 19323                   | TT                              | AA              | 1947051320               |
| SNP_P4_184309_19484 | NW_004518612.1 | Scaffold4089 | 19484                   | GG                              | TT              | 1947051322               |
| SNP_P4_184310_19546 | NW_004518612.1 | Scaffold4089 | 19546                   | AA                              | TT              | 1947051324               |
| SNP_P4_184311_19547 | NW_004518612.1 | Scaffold4089 | 19547                   | TT                              | CC              | 1947051326               |
| SNP_P4_184312_279   | NW_004518620.1 | Scaffold4100 | 279                     | AA                              | GG              | 1947051328               |
| SNP_P4_184313_499   | NW_004518620.1 | Scaffold4100 | 499                     | TT                              | GG              | 1947051330               |
| SNP_P4_184314_1358  | NW_004518623.1 | Scaffold4106 | 1358                    | CC                              | AA              | 1947051332               |
| SNP_P4_184315_2297  | NW_004518624.1 | Scaffold4107 | 2297                    | TT                              | AA              | 1947051334               |
| SNP_P4_184316_2298  | NW_004518624.1 | Scaffold4107 | 2298                    | TT                              | AA              | 1947051336               |
| SNP_P4_184317_9621  | NW_004518624.1 | Scaffold4107 | 9621                    | AA                              | TT              | 1947051338               |
| SNP_P4_184319_4542  | NW_004518625.1 | Scaffold4108 | 4542                    | AA                              | GG              | 1947051341               |
| SNP_P4_184321_4954  | NW_004518625.1 | Scaffold4108 | 4954                    | GG                              | CC              | 1947051343               |
| SNP_P4_184322_4968  | NW_004518625.1 | Scaffold4108 | 4968                    | GG                              | AA              | 1947051345               |
| SNP_P4_184323_4972  | NW_004518625.1 | Scaffold4108 | 4972                    | CC                              | AA              | 1947051347               |
| SNP_P4_184324_5100  | NW_004518625.1 | Scaffold4108 | 5100                    | GG                              | CC              | 1947051349               |
| SNP_P4_184325_5169  | NW_004518625.1 | Scaffold4108 | 5169                    | CC                              | GG              | 1947051351               |
| SNP_P4_184326_5261  | NW_004518625.1 | Scaffold4108 | 5261                    | AA                              | GG              | 1947051353               |
| SNP_P4_184327_5320  | NW_004518625.1 | Scaffold4108 | 5320                    | GG                              | AA              | 1947051355               |
| SNP_P4_184328_5465  | NW_004518625.1 | Scaffold4108 | 5465                    | GG                              | AA              | 1947051357               |
| SNP_P4_184329_6309  | NW_004518625.1 | Scaffold4108 | 6309                    | AA                              | TT              | 1947051359               |
| SNP_P4_184330_6348  | NW_004518625.1 | Scaffold4108 | 6348                    | TT                              | CC              | 1947051361               |
| SNP_P4_184331_6349  | NW_004518625.1 | Scaffold4108 | 6349                    | TT                              | CC              | 1947051363               |
| SNP_P4_184332_6357  | NW_004518625.1 | Scaffold4108 | 6357                    | AA                              | GG              | 1947051365               |
| SNP_P4_184333_8156  | NW_004518625.1 | Scaffold4108 | 8156                    | TT                              | CC              | 1947051367               |
| SNP_P4_184334_8514  | NW_004518625.1 | Scaffold4108 | 8514                    | GG                              | AA              | 1947051369               |
| SNP_P4_184335_8728  | NW_004518625.1 | Scaffold4108 | 8728                    | AA                              | TT              | 1947051371               |
| SNP_P4_184337_9833  | NW_004518625.1 | Scaffold4108 | 9833                    | GG                              | AA              | 1947051373               |
| SNP_P4_184338_11476 | NW_004518625.1 | Scaffold4108 | 11476                   | CC                              | AA              | 1947051375               |
| SNP_P4_184339_15932 | NW_004518625.1 | Scaffold4108 | 15932                   | CC                              | GG              | 1947051377               |
| SNP_P4_184340_470   | NW_004518632.1 | Scaffold4117 | 470                     | TT                              | GG              | 1947051379               |
| SNP_P4_184341_495   | NW_004518632.1 | Scaffold4117 | 495                     | AA                              | GG              | 1947051381               |
| SNP_P4_184342_11381 | NW_004518633.1 | Scaffold4118 | 11381                   | CC                              | TT              | 1947051383               |
| SNP_P4_184343_11862 | NW_004518633.1 | Scaffold4118 | 11862                   | GG                              | CC              | 1947051385               |
| SNP_P4_184344_11919 | NW_004518633.1 | Scaffold4118 | 11919                   | AA                              | GG              | 1947051387               |

| SNPs IDs            | Chromosome IDs | Chromosomes  | Physical positions (bp) | CDC Frontier (Reference genome) | (ILWC46 & LPNB) | NCBI SNPdb Accession IDs |
|---------------------|----------------|--------------|-------------------------|---------------------------------|-----------------|--------------------------|
| SNP_P4_184345_15286 | NW_004518633.1 | Scaffold4118 | 15286                   | GG                              | TT              | 1947051389               |
| SNP_P4_184346_15302 | NW_004518633.1 | Scaffold4118 | 15302                   | TT                              | AA              | 1947051391               |
| SNP_P4_184347_15307 | NW_004518633.1 | Scaffold4118 | 15307                   | GG                              | AA              | 1947051393               |
| SNP_P4_184348_15900 | NW_004518633.1 | Scaffold4118 | 15900                   | AA                              | TT              | 1947051395               |
| SNP_P4_184349_15910 | NW_004518633.1 | Scaffold4118 | 15910                   | TT                              | AA              | 1947051397               |
| SNP_P4_184350_15919 | NW_004518633.1 | Scaffold4118 | 15919                   | CC                              | GG              | 1947051400               |
| SNP_P4_184351_18884 | NW_004518633.1 | Scaffold4118 | 18884                   | CC                              | AA              | 1947051402               |
| SNP_P4_184352_18890 | NW_004518633.1 | Scaffold4118 | 18890                   | AA                              | GG              | 1947051404               |
| SNP_P4_184353_18924 | NW_004518633.1 | Scaffold4118 | 18924                   | GG                              | AA              | 1947051406               |
| SNP_P4_184354_18935 | NW_004518633.1 | Scaffold4118 | 18935                   | CC                              | AA              | 1947051408               |
| SNP_P4_184355_21389 | NW_004518633.1 | Scaffold4118 | 21389                   | AA                              | GG              | 1947051410               |
| SNP_P4_184356_21819 | NW_004518633.1 | Scaffold4118 | 21819                   | TT                              | CC              | 1947051412               |
| SNP_P4_184357_22091 | NW_004518633.1 | Scaffold4118 | 22091                   | AA                              | GG              | 1947051414               |
| SNP_P4_184358_22175 | NW_004518633.1 | Scaffold4118 | 22175                   | TT                              | AA              | 1947051416               |
| SNP_P4_184359_26004 | NW_004518633.1 | Scaffold4118 | 26004                   | AA                              | CC              | 1947051418               |
| SNP_P4_184360_26645 | NW_004518633.1 | Scaffold4118 | 26645                   | CC                              | AA              | 1947051420               |
| SNP_P4_184361_27055 | NW_004518633.1 | Scaffold4118 | 27055                   | AA                              | TT              | 1947051422               |
| SNP_P4_184362_68    | NW_004518636.1 | Scaffold4122 | 68                      | CC                              | TT              | 1947051424               |
| SNP_P4_184363_404   | NW_004518636.1 | Scaffold4122 | 404                     | AA                              | GG              | 1947051426               |
| SNP_P4_184364_225   | NW_004518645.1 | Scaffold4139 | 225                     | AA                              | GG              | 1947051428               |
| SNP_P4_184365_642   | NW_004518647.1 | Scaffold4141 | 642                     | AA                              | GG              | 1947051430               |
| SNP_P4_184366_654   | NW_004518647.1 | Scaffold4141 | 654                     | AA                              | GG              | 1947051432               |
| SNP_P4_184367_658   | NW_004518647.1 | Scaffold4141 | 658                     | TT                              | GG              | 1947051434               |
| SNP_P4_184368_2156  | NW_004518648.1 | Scaffold4142 | 2156                    | GG                              | AA              | 1947051436               |
| SNP_P4_184369_2184  | NW_004518648.1 | Scaffold4142 | 2184                    | AA                              | CC              | 1947051438               |
| SNP_P4_184370_2240  | NW_004518648.1 | Scaffold4142 | 2240                    | TT                              | AA              | 1947051440               |
| SNP_P4_184371_2505  | NW_004518648.1 | Scaffold4142 | 2505                    | AA                              | CC              | 1947051442               |
| SNP_P4_184372_2566  | NW_004518648.1 | Scaffold4142 | 2566                    | TT                              | GG              | 1947051444               |
| SNP_P4_184373_2584  | NW_004518648.1 | Scaffold4142 | 2584                    | TT                              | CC              | 1947051446               |
| SNP_P4_184374_2785  | NW_004518648.1 | Scaffold4142 | 2785                    | GG                              | AA              | 1947051448               |
| SNP_P4_184375_2806  | NW_004518648.1 | Scaffold4142 | 2806                    | GG                              | AA              | 1947051450               |
| SNP_P4_184376_2895  | NW_004518648.1 | Scaffold4142 | 2895                    | AA                              | GG              | 1947051452               |
| SNP_P4_184377_3121  | NW_004518648.1 | Scaffold4142 | 3121                    | GG                              | AA              | 1947051454               |
| SNP_P4_184378_5611  | NW_004518648.1 | Scaffold4142 | 5611                    | CC                              | TT              | 1947051456               |
| SNP_P4_184379_10703 | NW_004518648.1 | Scaffold4142 | 10703                   | CC                              | AA              | 1947051458               |
| SNP_P4_184380_10708 | NW_004518648.1 | Scaffold4142 | 10708                   | GG                              | AA              | 1947051460               |
| SNP_P4_184381_12814 | NW_004518648.1 | Scaffold4142 | 12814                   | GG                              | AA              | 1947051462               |
| SNP_P4_184382_12893 | NW_004518648.1 | Scaffold4142 | 12893                   | AA                              | GG              | 1947051464               |
| SNP_P4_184383_13191 | NW_004518648.1 | Scaffold4142 | 13191                   | CC                              | TT              | 1947051467               |
| SNP_P4_184384_13332 | NW_004518648.1 | Scaffold4142 | 13332                   | TT                              | GG              | 1947051469               |
| SNP_P4_184385_13336 | NW_004518648.1 | Scaffold4142 | 13336                   | AA                              | TT              | 1947051471               |
| SNP_P4_184386_13344 | NW_004518648.1 | Scaffold4142 | 13344                   | CC                              | TT              | 1947051473               |



| SNPs IDs            | Chromosome IDs | Chromosomes  | Physical positions (bp) | CDC Frontier (Reference genome) | (ILWC46 & LPNB) | NCBI SNPdb Accession IDs |
|---------------------|----------------|--------------|-------------------------|---------------------------------|-----------------|--------------------------|
| SNP_P4_184387_13384 | NW_004518648.1 | Scaffold4142 | 13384                   | GG                              | AA              | 1947051475               |
| SNP_P4_184388_13650 | NW_004518648.1 | Scaffold4142 | 13650                   | AA                              | CC              | 1947051477               |
| SNP_P4_184389_13711 | NW_004518648.1 | Scaffold4142 | 13711                   | AA                              | TT              | 1947051479               |
| SNP_P4_184390_13767 | NW_004518648.1 | Scaffold4142 | 13767                   | TT                              | CC              | 1947051481               |
| SNP_P4_184391_13961 | NW_004518648.1 | Scaffold4142 | 13961                   | TT                              | CC              | 1947051483               |
| SNP_P4_184392_13963 | NW_004518648.1 | Scaffold4142 | 13963                   | TT                              | CC              | 1947051485               |
| SNP_P4_184393_13965 | NW_004518648.1 | Scaffold4142 | 13965                   | AA                              | TT              | 1947051487               |
| SNP_P4_184394_11313 | NW_004518652.1 | Scaffold4149 | 11313                   | TT                              | CC              | 1947051489               |
| SNP_P4_184395_11349 | NW_004518652.1 | Scaffold4149 | 11349                   | TT                              | AA              | 1947051491               |
| SNP_P4_184396_11430 | NW_004518652.1 | Scaffold4149 | 11430                   | GG                              | AA              | 1947051493               |
| SNP_P4_184397_11709 | NW_004518652.1 | Scaffold4149 | 11709                   | AA                              | CC              | 1947051495               |
| SNP_P4_184398_11723 | NW_004518652.1 | Scaffold4149 | 11723                   | CC                              | TT              | 1947051497               |
| SNP_P4_184399_11748 | NW_004518652.1 | Scaffold4149 | 11748                   | TT                              | CC              | 1947051499               |
| SNP_P4_184400_11762 | NW_004518652.1 | Scaffold4149 | 11762                   | AA                              | CC              | 1947051501               |
| SNP_P4_184401_11763 | NW_004518652.1 | Scaffold4149 | 11763                   | CC                              | TT              | 1947051503               |
| SNP_P4_184402_11806 | NW_004518652.1 | Scaffold4149 | 11806                   | GG                              | AA              | 1947051505               |
| SNP_P4_184403_11808 | NW_004518652.1 | Scaffold4149 | 11808                   | GG                              | AA              | 1947051507               |
| SNP_P4_184404_12428 | NW_004518652.1 | Scaffold4149 | 12428                   | AA                              | GG              | 1947051509               |
| SNP_P4_184405_12474 | NW_004518652.1 | Scaffold4149 | 12474                   | GG                              | CC              | 1947051511               |
| SNP_P4_184406_12507 | NW_004518652.1 | Scaffold4149 | 12507                   | AA                              | GG              | 1947051513               |
| SNP_P4_184407_12534 | NW_004518652.1 | Scaffold4149 | 12534                   | TT                              | CC              | 1947051515               |
| SNP_P4_184408_12805 | NW_004518652.1 | Scaffold4149 | 12805                   | AA                              | GG              | 1947051517               |
| SNP_P4_184409_1286  | NW_004518654.1 | Scaffold4155 | 1286                    | GG                              | CC              | 1947051519               |
| SNP_P4_184411_7117  | NW_004518654.1 | Scaffold4155 | 7117                    | CC                              | TT              | 1947051521               |
| SNP_P4_184412_8708  | NW_004518654.1 | Scaffold4155 | 8708                    | CC                              | TT              | 1947051523               |
| SNP_P4_184413_11292 | NW_004518654.1 | Scaffold4155 | 11292                   | AA                              | CC              | 1947051525               |
| SNP_P4_184414_11293 | NW_004518654.1 | Scaffold4155 | 11293                   | TT                              | AA              | 1947051528               |
| SNP_P4_184415_11327 | NW_004518654.1 | Scaffold4155 | 11327                   | TT                              | CC              | 1947051530               |
| SNP_P4_184416_11575 | NW_004518654.1 | Scaffold4155 | 11575                   | AA                              | CC              | 1947051532               |
| SNP_P4_184417_11576 | NW_004518654.1 | Scaffold4155 | 11576                   | TT                              | CC              | 1947051534               |
| SNP_P4_184418_12194 | NW_004518654.1 | Scaffold4155 | 12194                   | AA                              | CC              | 1947051536               |
| SNP_P4_184419_12384 | NW_004518654.1 | Scaffold4155 | 12384                   | TT                              | CC              | 1947051538               |
| SNP_P4_184420_12385 | NW_004518654.1 | Scaffold4155 | 12385                   | AA                              | CC              | 1947051540               |
| SNP_P4_184421_16505 | NW_004518654.1 | Scaffold4155 | 16505                   | CC                              | TT              | 1947051542               |
| SNP_P4_184422_16735 | NW_004518654.1 | Scaffold4155 | 16735                   | TT                              | AA              | 1947051544               |
| SNP_P4_184423_17388 | NW_004518654.1 | Scaffold4155 | 17388                   | GG                              | TT              | 1947051546               |
| SNP_P4_184424_19483 | NW_004518654.1 | Scaffold4155 | 19483                   | AA                              | GG              | 1947051548               |
| SNP_P4_184425_19512 | NW_004518654.1 | Scaffold4155 | 19512                   | GG                              | CC              | 1947051550               |
| SNP_P4_184426_19520 | NW_004518654.1 | Scaffold4155 | 19520                   | AA                              | TT              | 1947051552               |
| SNP_P4_184427_20461 | NW_004518654.1 | Scaffold4155 | 20461                   | GG                              | TT              | 1947051554               |
| SNP_P4_184428_21445 | NW_004518654.1 | Scaffold4155 | 21445                   | TT                              | CC              | 1947051556               |
| SNP_P4_184429_21807 | NW_004518654.1 | Scaffold4155 | 21807                   | AA                              | TT              | 1947051558               |

| SNPs IDs            | Chromosome IDs | Chromosomes  | Physical positions (bp) | CDC Frontier (Reference genome) | (ILWC46 & LPNB) | NCBI SNPdb Accession IDs |
|---------------------|----------------|--------------|-------------------------|---------------------------------|-----------------|--------------------------|
| SNP_P4_184430_3818  | NW_004518656.1 | Scaffold4157 | 3818                    | GG                              | AA              | 1947051560               |
| SNP_P4_184431_4023  | NW_004518656.1 | Scaffold4157 | 4023                    | GG                              | AA              | 1947051562               |
| SNP_P4_184432_8427  | NW_004518656.1 | Scaffold4157 | 8427                    | CC                              | GG              | 1947051564               |
| SNP_P4_184433_8477  | NW_004518656.1 | Scaffold4157 | 8477                    | AA                              | CC              | 1947051566               |
| SNP_P4_184434_8839  | NW_004518656.1 | Scaffold4157 | 8839                    | TT                              | GG              | 1947051568               |
| SNP_P4_184435_8866  | NW_004518656.1 | Scaffold4157 | 8866                    | GG                              | AA              | 1947051570               |
| SNP_P4_184436_9093  | NW_004518656.1 | Scaffold4157 | 9093                    | CC                              | GG              | 1947051572               |
| SNP_P4_184437_9437  | NW_004518656.1 | Scaffold4157 | 9437                    | CC                              | TT              | 1947051574               |
| SNP_P4_184438_9446  | NW_004518656.1 | Scaffold4157 | 9446                    | CC                              | GG              | 1947051576               |
| SNP_P4_184439_9459  | NW_004518656.1 | Scaffold4157 | 9459                    | AA                              | TT              | 1947051578               |
| SNP_P4_184440_9503  | NW_004518656.1 | Scaffold4157 | 9503                    | AA                              | GG              | 1947051580               |
| SNP_P4_184441_9885  | NW_004518656.1 | Scaffold4157 | 9885                    | AA                              | TT              | 1947051582               |
| SNP_P4_184442_9940  | NW_004518656.1 | Scaffold4157 | 9940                    | TT                              | CC              | 1947051584               |
| SNP_P4_184443_10199 | NW_004518656.1 | Scaffold4157 | 10199                   | CC                              | AA              | 1947051586               |
| SNP_P4_184444_10215 | NW_004518656.1 | Scaffold4157 | 10215                   | AA                              | GG              | 1947051588               |
| SNP_P4_184445_10338 | NW_004518656.1 | Scaffold4157 | 10338                   | CC                              | TT              | 1947051589               |
| SNP_P4_184446_10487 | NW_004518656.1 | Scaffold4157 | 10487                   | AA                              | TT              | 1947051591               |
| SNP_P4_184447_10583 | NW_004518656.1 | Scaffold4157 | 10583                   | TT                              | GG              | 1947051593               |
| SNP_P4_184448_10601 | NW_004518656.1 | Scaffold4157 | 10601                   | CC                              | AA              | 1947051595               |
| SNP_P4_184449_10709 | NW_004518656.1 | Scaffold4157 | 10709                   | CC                              | TT              | 1947051597               |
| SNP_P4_184450_10722 | NW_004518656.1 | Scaffold4157 | 10722                   | CC                              | AA              | 1947051599               |
| SNP_P4_184451_10804 | NW_004518656.1 | Scaffold4157 | 10804                   | CC                              | TT              | 1947051601               |
| SNP_P4_184452_10805 | NW_004518656.1 | Scaffold4157 | 10805                   | AA                              | GG              | 1947051603               |
| SNP_P4_184453_10806 | NW_004518656.1 | Scaffold4157 | 10806                   | CC                              | AA              | 1947051605               |
| SNP_P4_184454_10808 | NW_004518656.1 | Scaffold4157 | 10808                   | CC                              | GG              | 1947051607               |
| SNP_P4_184455_10809 | NW_004518656.1 | Scaffold4157 | 10809                   | CC                              | TT              | 1947051609               |
| SNP_P4_184456_11014 | NW_004518656.1 | Scaffold4157 | 11014                   | GG                              | TT              | 1947051611               |
| SNP_P4_184457_11816 | NW_004518656.1 | Scaffold4157 | 11816                   | GG                              | TT              | 1947051613               |
| SNP_P4_184458_12487 | NW_004518656.1 | Scaffold4157 | 12487                   | TT                              | CC              | 1947051615               |
| SNP_P4_184459_754   | NW_004518657.1 | Scaffold4158 | 754                     | AA                              | TT              | 1947051617               |
| SNP_P4_184460_829   | NW_004518657.1 | Scaffold4158 | 829                     | TT                              | AA              | 1947051619               |
| SNP_P4_184461_917   | NW_004518657.1 | Scaffold4158 | 917                     | TT                              | GG              | 1947051621               |
| SNP_P4_184462_975   | NW_004518657.1 | Scaffold4158 | 975                     | TT                              | AA              | 1947051623               |
| SNP_P4_184463_3739  | NW_004518665.1 | Scaffold4167 | 3739                    | AA                              | TT              | 1947051625               |
| SNP_P4_184464_3740  | NW_004518665.1 | Scaffold4167 | 3740                    | TT                              | GG              | 1947051627               |
| SNP_P4_184465_3767  | NW_004518665.1 | Scaffold4167 | 3767                    | GG                              | AA              | 1947051628               |
| SNP_P4_184466_4033  | NW_004518665.1 | Scaffold4167 | 4033                    | AA                              | GG              | 1947051630               |
| SNP_P4_184467_4069  | NW_004518665.1 | Scaffold4167 | 4069                    | AA                              | GG              | 1947051632               |
| SNP_P4_184468_4109  | NW_004518665.1 | Scaffold4167 | 4109                    | TT                              | CC              | 1947051634               |
| SNP_P4_184469_4112  | NW_004518665.1 | Scaffold4167 | 4112                    | AA                              | CC              | 1947051636               |
| SNP_P4_184470_4133  | NW_004518665.1 | Scaffold4167 | 4133                    | TT                              | CC              | 1947051638               |
| SNP_P4_184471_4152  | NW_004518665.1 | Scaffold4167 | 4152                    | CC                              | TT              | 1947051640               |

| SNPs IDs            | Chromosome IDs | Chromosomes  | Physical positions (bp) | CDC Frontier (Reference genome) | (ILWC46 & LPNB) | NCBI SNPdb Accession IDs |
|---------------------|----------------|--------------|-------------------------|---------------------------------|-----------------|--------------------------|
| SNP_P4_184472_4191  | NW_004518665.1 | Scaffold4167 | 4191                    | AA                              | CC              | 1947051642               |
| SNP_P4_184473_4221  | NW_004518665.1 | Scaffold4167 | 4221                    | TT                              | AA              | 1947051644               |
| SNP_P4_184474_4246  | NW_004518665.1 | Scaffold4167 | 4246                    | TT                              | GG              | 1947051646               |
| SNP_P4_184475_4277  | NW_004518665.1 | Scaffold4167 | 4277                    | TT                              | CC              | 1947051648               |
| SNP_P4_184476_8265  | NW_004518665.1 | Scaffold4167 | 8265                    | TT                              | CC              | 1947051650               |
| SNP_P4_184477_20723 | NW_004518665.1 | Scaffold4167 | 20723                   | AA                              | GG              | 1947051652               |
| SNP_P4_184478_30951 | NW_004518665.1 | Scaffold4167 | 30951                   | CC                              | TT              | 1947051654               |
| SNP_P4_184479_30952 | NW_004518665.1 | Scaffold4167 | 30952                   | AA                              | GG              | 1947051656               |
| SNP_P4_184480_33066 | NW_004518665.1 | Scaffold4167 | 33066                   | TT                              | GG              | 1947051658               |
| SNP_P4_184481_33279 | NW_004518665.1 | Scaffold4167 | 33279                   | CC                              | TT              | 1947051660               |
| SNP_P4_184482_33314 | NW_004518665.1 | Scaffold4167 | 33314                   | AA                              | GG              | 1947051663               |
| SNP_P4_184483_33315 | NW_004518665.1 | Scaffold4167 | 33315                   | CC                              | AA              | 1947051665               |
| SNP_P4_184484_33399 | NW_004518665.1 | Scaffold4167 | 33399                   | TT                              | GG              | 1947051667               |
| SNP_P4_184485_33511 | NW_004518665.1 | Scaffold4167 | 33511                   | TT                              | CC              | 1947051669               |
| SNP_P4_184486_33547 | NW_004518665.1 | Scaffold4167 | 33547                   | AA                              | GG              | 1947051671               |
| SNP_P4_184488_33628 | NW_004518665.1 | Scaffold4167 | 33628                   | CC                              | TT              | 1947051674               |
| SNP_P4_184489_33672 | NW_004518665.1 | Scaffold4167 | 33672                   | CC                              | TT              | 1947051676               |
| SNP_P4_184490_3666  | NW_004518666.1 | Scaffold4168 | 3666                    | GG                              | AA              | 1947051678               |
| SNP_P4_184492_581   | NW_004518669.1 | Scaffold4171 | 581                     | TT                              | AA              | 1947051680               |
| SNP_P4_184493_585   | NW_004518669.1 | Scaffold4171 | 585                     | AA                              | GG              | 1947051682               |
| SNP_P4_184494_800   | NW_004518669.1 | Scaffold4171 | 800                     | AA                              | GG              | 1947051684               |
| SNP_P4_184496_1015  | NW_004518669.1 | Scaffold4171 | 1015                    | AA                              | GG              | 1947051686               |
| SNP_P4_184498_612   | NW_004518672.1 | Scaffold4176 | 612                     | AA                              | GG              | 1947051688               |
| SNP_P4_184499_685   | NW_004518672.1 | Scaffold4176 | 685                     | GG                              | AA              | 1947051690               |
| SNP_P4_184500_718   | NW_004518672.1 | Scaffold4176 | 718                     | AA                              | GG              | 1947051692               |
| SNP_P4_184501_1014  | NW_004518672.1 | Scaffold4176 | 1014                    | TT                              | CC              | 1947051694               |
| SNP_P4_184502_1050  | NW_004518672.1 | Scaffold4176 | 1050                    | TT                              | CC              | 1947051696               |
| SNP_P4_184503_1051  | NW_004518672.1 | Scaffold4176 | 1051                    | GG                              | AA              | 1947051698               |
| SNP_P4_184504_1130  | NW_004518672.1 | Scaffold4176 | 1130                    | GG                              | AA              | 1947051700               |
| SNP_P4_184506_4062  | NW_004518672.1 | Scaffold4176 | 4062                    | AA                              | GG              | 1947051702               |
| SNP_P4_184507_4148  | NW_004518672.1 | Scaffold4176 | 4148                    | AA                              | TT              | 1947051704               |
| SNP_P4_184508_4195  | NW_004518672.1 | Scaffold4176 | 4195                    | AA                              | TT              | 1947051706               |
| SNP_P4_184509_4383  | NW_004518672.1 | Scaffold4176 | 4383                    | GG                              | AA              | 1947051708               |
| SNP_P4_184510_4438  | NW_004518672.1 | Scaffold4176 | 4438                    | AA                              | TT              | 1947051710               |
| SNP_P4_184511_4448  | NW_004518672.1 | Scaffold4176 | 4448                    | AA                              | TT              | 1947051712               |
| SNP_P4_184512_4461  | NW_004518672.1 | Scaffold4176 | 4461                    | AA                              | TT              | 1947051714               |
| SNP_P4_184513_4549  | NW_004518672.1 | Scaffold4176 | 4549                    | GG                              | AA              | 1947051716               |
| SNP_P4_184514_4550  | NW_004518672.1 | Scaffold4176 | 4550                    | GG                              | AA              | 1947051718               |
| SNP_P4_184515_4561  | NW_004518672.1 | Scaffold4176 | 4561                    | AA                              | GG              | 1947051720               |
| SNP_P4_184516_4565  | NW_004518672.1 | Scaffold4176 | 4565                    | CC                              | GG              | 1947051722               |
| SNP_P4_184517_4688  | NW_004518672.1 | Scaffold4176 | 4688                    | TT                              | CC              | 1947051724               |
| SNP_P4_184518_4735  | NW_004518672.1 | Scaffold4176 | 4735                    | AA                              | CC              | 1947051726               |

| SNPs IDs            | Chromosome IDs | Chromosomes  | Physical positions (bp) | CDC Frontier (Reference genome) | (ILWC46 & LPNB) | NCBI SNPdb Accession IDs |
|---------------------|----------------|--------------|-------------------------|---------------------------------|-----------------|--------------------------|
| SNP_P4_184519_6555  | NW_004518672.1 | Scaffold4176 | 6555                    | AA                              | GG              | 1947051728               |
| SNP_P4_184520_6585  | NW_004518672.1 | Scaffold4176 | 6585                    | AA                              | TT              | 1947051730               |
| SNP_P4_184521_7563  | NW_004518672.1 | Scaffold4176 | 7563                    | AA                              | TT              | 1947051732               |
| SNP_P4_184522_7671  | NW_004518672.1 | Scaffold4176 | 7671                    | AA                              | GG              | 1947051734               |
| SNP_P4_184523_7775  | NW_004518672.1 | Scaffold4176 | 7775                    | GG                              | AA              | 1947051736               |
| SNP_P4_184524_7810  | NW_004518672.1 | Scaffold4176 | 7810                    | GG                              | AA              | 1947051738               |
| SNP_P4_184525_7903  | NW_004518672.1 | Scaffold4176 | 7903                    | CC                              | TT              | 1947051740               |
| SNP_P4_184526_7928  | NW_004518672.1 | Scaffold4176 | 7928                    | CC                              | AA              | 1947051742               |
| SNP_P4_184527_7987  | NW_004518672.1 | Scaffold4176 | 7987                    | GG                              | AA              | 1947051744               |
| SNP_P4_184528_8005  | NW_004518672.1 | Scaffold4176 | 8005                    | AA                              | GG              | 1947051746               |
| SNP_P4_184529_8045  | NW_004518672.1 | Scaffold4176 | 8045                    | AA                              | CC              | 1947051748               |
| SNP_P4_184530_8109  | NW_004518672.1 | Scaffold4176 | 8109                    | GG                              | TT              | 1947051750               |
| SNP_P4_184531_8148  | NW_004518672.1 | Scaffold4176 | 8148                    | CC                              | TT              | 1947051752               |
| SNP_P4_184532_8153  | NW_004518672.1 | Scaffold4176 | 8153                    | GG                              | AA              | 1947051754               |
| SNP_P4_184533_8174  | NW_004518672.1 | Scaffold4176 | 8174                    | CC                              | TT              | 1947051756               |
| SNP_P4_184535_10728 | NW_004518672.1 | Scaffold4176 | 10728                   | TT                              | CC              | 1947051758               |
| SNP_P4_184536_17197 | NW_004518672.1 | Scaffold4176 | 17197                   | TT                              | GG              | 1947051760               |
| SNP_P4_184537_17278 | NW_004518672.1 | Scaffold4176 | 17278                   | AA                              | TT              | 1947051762               |
| SNP_P4_184538_17328 | NW_004518672.1 | Scaffold4176 | 17328                   | TT                              | CC              | 1947051764               |
| SNP_P4_184539_17516 | NW_004518672.1 | Scaffold4176 | 17516                   | TT                              | CC              | 1947051766               |
| SNP_P4_184540_18948 | NW_004518672.1 | Scaffold4176 | 18948                   | AA                              | GG              | 1947051768               |
| SNP_P4_184541_276   | NW_004518673.1 | Scaffold4178 | 276                     | CC                              | TT              | 1947051770               |
| SNP_P4_184542_590   | NW_004518673.1 | Scaffold4178 | 590                     | CC                              | TT              | 1947051772               |
| SNP_P4_184543_715   | NW_004518673.1 | Scaffold4178 | 715                     | AA                              | CC              | 1947051774               |
| SNP_P4_184544_716   | NW_004518673.1 | Scaffold4178 | 716                     | CC                              | AA              | 1947051776               |
| SNP_P4_184545_771   | NW_004518673.1 | Scaffold4178 | 771                     | AA                              | GG              | 1947051778               |
| SNP_P4_184546_367   | NW_004518676.1 | Scaffold4182 | 367                     | AA                              | GG              | 1947051780               |
| SNP_P4_184547_871   | NW_004518676.1 | Scaffold4182 | 871                     | GG                              | AA              | 1947051782               |
| SNP_P4_184548_7546  | NW_004518676.1 | Scaffold4182 | 7546                    | CC                              | GG              | 1947051784               |
| SNP_P4_184549_7889  | NW_004518676.1 | Scaffold4182 | 7889                    | TT                              | CC              | 1947051786               |
| SNP_P4_184550_7913  | NW_004518676.1 | Scaffold4182 | 7913                    | AA                              | GG              | 1947051788               |
| SNP_P4_184551_7939  | NW_004518676.1 | Scaffold4182 | 7939                    | TT                              | CC              | 1947051790               |
| SNP_P4_184552_7945  | NW_004518676.1 | Scaffold4182 | 7945                    | AA                              | GG              | 1947051792               |
| SNP_P4_184553_8015  | NW_004518676.1 | Scaffold4182 | 8015                    | AA                              | GG              | 1947051794               |
| SNP_P4_184554_8041  | NW_004518676.1 | Scaffold4182 | 8041                    | GG                              | AA              | 1947051796               |
| SNP_P4_184555_8395  | NW_004518676.1 | Scaffold4182 | 8395                    | TT                              | AA              | 1947051798               |
| SNP_P4_184556_8662  | NW_004518676.1 | Scaffold4182 | 8662                    | AA                              | GG              | 1947051800               |
| SNP_P4_184557_8676  | NW_004518676.1 | Scaffold4182 | 8676                    | GG                              | CC              | 1947051802               |
| SNP_P4_184558_9104  | NW_004518676.1 | Scaffold4182 | 9104                    | GG                              | TT              | 1947051804               |
| SNP_P4_184559_9108  | NW_004518676.1 | Scaffold4182 | 9108                    | TT                              | CC              | 1947051806               |
| SNP_P4_184560_9118  | NW_004518676.1 | Scaffold4182 | 9118                    | AA                              | GG              | 1947051808               |
| SNP_P4_184561_9194  | NW_004518676.1 | Scaffold4182 | 9194                    | CC                              | TT              | 1947051810               |

| SNPs IDs            | Chromosome IDs | Chromosomes  | Physical positions (bp) | CDC Frontier (Reference genome) | (ILWC46 & LPNB) | NCBI SNPdb Accession IDs |
|---------------------|----------------|--------------|-------------------------|---------------------------------|-----------------|--------------------------|
| SNP_P4_184562_9209  | NW_004518676.1 | Scaffold4182 | 9209                    | TT                              | CC              | 1947051812               |
| SNP_P4_184563_9227  | NW_004518676.1 | Scaffold4182 | 9227                    | AA                              | GG              | 1947051814               |
| SNP_P4_184564_9429  | NW_004518676.1 | Scaffold4182 | 9429                    | AA                              | GG              | 1947051816               |
| SNP_P4_184565_14482 | NW_004518681.1 | Scaffold4189 | 14482                   | GG                              | AA              | 1947051818               |
| SNP_P4_184566_21879 | NW_004518681.1 | Scaffold4189 | 21879                   | TT                              | GG              | 1947051820               |
| SNP_P4_184567_21951 | NW_004518681.1 | Scaffold4189 | 21951                   | TT                              | AA              | 1947051822               |
| SNP_P4_184568_22154 | NW_004518681.1 | Scaffold4189 | 22154                   | TT                              | CC              | 1947051824               |
| SNP_P4_184569_22155 | NW_004518681.1 | Scaffold4189 | 22155                   | CC                              | TT              | 1947051826               |
| SNP_P4_184570_22173 | NW_004518681.1 | Scaffold4189 | 22173                   | GG                              | AA              | 1947051828               |
| SNP_P4_184571_22179 | NW_004518681.1 | Scaffold4189 | 22179                   | GG                              | TT              | 1947051830               |
| SNP_P4_184572_22260 | NW_004518681.1 | Scaffold4189 | 22260                   | CC                              | TT              | 1947051832               |
| SNP_P4_184573_22466 | NW_004518681.1 | Scaffold4189 | 22466                   | GG                              | CC              | 1947051834               |
| SNP_P4_184574_27138 | NW_004518681.1 | Scaffold4189 | 27138                   | AA                              | GG              | 1947051836               |
| SNP_P4_184575_41168 | NW_004518681.1 | Scaffold4189 | 41168                   | AA                              | GG              | 1947051838               |
| SNP_P4_184576_41527 | NW_004518681.1 | Scaffold4189 | 41527                   | GG                              | CC              | 1947051840               |
| SNP_P4_184577_41545 | NW_004518681.1 | Scaffold4189 | 41545                   | AA                              | GG              | 1947051842               |
| SNP_P4_184578_41572 | NW_004518681.1 | Scaffold4189 | 41572                   | AA                              | GG              | 1947051844               |
| SNP_P4_184579_2780  | NW_004518683.1 | Scaffold4192 | 2780                    | AA                              | CC              | 1947051846               |
| SNP_P4_184580_2819  | NW_004518683.1 | Scaffold4192 | 2819                    | TT                              | CC              | 1947051848               |
| SNP_P4_184581_2820  | NW_004518683.1 | Scaffold4192 | 2820                    | AA                              | CC              | 1947051850               |
| SNP_P4_184582_2899  | NW_004518683.1 | Scaffold4192 | 2899                    | CC                              | AA              | 1947051852               |
| SNP_P4_184583_2905  | NW_004518683.1 | Scaffold4192 | 2905                    | GG                              | AA              | 1947051854               |
| SNP_P4_184584_3116  | NW_004518683.1 | Scaffold4192 | 3116                    | CC                              | TT              | 1947051857               |
| SNP_P4_184585_3189  | NW_004518683.1 | Scaffold4192 | 3189                    | AA                              | GG              | 1947051859               |
| SNP_P4_184586_3221  | NW_004518683.1 | Scaffold4192 | 3221                    | AA                              | GG              | 1947051861               |
| SNP_P4_184587_3327  | NW_004518683.1 | Scaffold4192 | 3327                    | TT                              | CC              | 1947051863               |
| SNP_P4_184588_3380  | NW_004518683.1 | Scaffold4192 | 3380                    | GG                              | AA              | 1947051865               |
| SNP_P4_184589_3452  | NW_004518683.1 | Scaffold4192 | 3452                    | AA                              | GG              | 1947051867               |
| SNP_P4_184590_3526  | NW_004518683.1 | Scaffold4192 | 3526                    | AA                              | CC              | 1947051869               |
| SNP_P4_184591_3608  | NW_004518683.1 | Scaffold4192 | 3608                    | GG                              | AA              | 1947051871               |
| SNP_P4_184592_3615  | NW_004518683.1 | Scaffold4192 | 3615                    | AA                              | GG              | 1947051873               |
| SNP_P4_184593_3649  | NW_004518683.1 | Scaffold4192 | 3649                    | GG                              | AA              | 1947051875               |
| SNP_P4_184596_3821  | NW_004518683.1 | Scaffold4192 | 3821                    | AA                              | CC              | 1947051877               |
| SNP_P4_184597_4019  | NW_004518683.1 | Scaffold4192 | 4019                    | GG                              | TT              | 1947051879               |
| SNP_P4_184598_4029  | NW_004518683.1 | Scaffold4192 | 4029                    | GG                              | TT              | 1947051881               |
| SNP_P4_184599_4054  | NW_004518683.1 | Scaffold4192 | 4054                    | AA                              | TT              | 1947051883               |
| SNP_P4_184600_4075  | NW_004518683.1 | Scaffold4192 | 4075                    | TT                              | AA              | 1947051885               |
| SNP_P4_184601_4098  | NW_004518683.1 | Scaffold4192 | 4098                    | CC                              | AA              | 1947051887               |
| SNP_P4_184602_4340  | NW_004518683.1 | Scaffold4192 | 4340                    | GG                              | AA              | 1947051889               |
| SNP_P4_184603_4406  | NW_004518683.1 | Scaffold4192 | 4406                    | CC                              | TT              | 1947051891               |
| SNP_P4_184604_4500  | NW_004518683.1 | Scaffold4192 | 4500                    | AA                              | GG              | 1947051893               |
| SNP_P4_184605_4550  | NW_004518683.1 | Scaffold4192 | 4550                    | GG                              | AA              | 1947051895               |

| SNPs IDs            | Chromosome IDs | Chromosomes  | Physical positions (bp) | CDC Frontier (Reference genome) | (ILWC46 & LPNB) | NCBI SNPdb Accession IDs |
|---------------------|----------------|--------------|-------------------------|---------------------------------|-----------------|--------------------------|
| SNP_P4_184606_4864  | NW_004518683.1 | Scaffold4192 | 4864                    | TT                              | CC              | 1947051897               |
| SNP_P4_184607_15952 | NW_004518687.1 | Scaffold4197 | 15952                   | GG                              | AA              | 1947051899               |
| SNP_P4_184608_15974 | NW_004518687.1 | Scaffold4197 | 15974                   | CC                              | TT              | 1947051901               |
| SNP_P4_184609_16019 | NW_004518687.1 | Scaffold4197 | 16019                   | GG                              | AA              | 1947051903               |
| SNP_P4_184610_16059 | NW_004518687.1 | Scaffold4197 | 16059                   | AA                              | GG              | 1947051905               |
| SNP_P4_184611_16196 | NW_004518687.1 | Scaffold4197 | 16196                   | CC                              | TT              | 1947051907               |
| SNP_P4_184613_16392 | NW_004518687.1 | Scaffold4197 | 16392                   | AA                              | GG              | 1947051909               |
| SNP_P4_184614_16414 | NW_004518687.1 | Scaffold4197 | 16414                   | GG                              | TT              | 1947051911               |
| SNP_P4_184615_16416 | NW_004518687.1 | Scaffold4197 | 16416                   | TT                              | GG              | 1947051913               |
| SNP_P4_184616_16488 | NW_004518687.1 | Scaffold4197 | 16488                   | TT                              | AA              | 1947051915               |
| SNP_P4_184618_35479 | NW_004518687.1 | Scaffold4197 | 35479                   | CC                              | GG              | 1947051917               |
| SNP_P4_184619_70313 | NW_004518687.1 | Scaffold4197 | 70313                   | TT                              | CC              | 1947051919               |
| SNP_P4_184620_70323 | NW_004518687.1 | Scaffold4197 | 70323                   | GG                              | TT              | 1947051921               |
| SNP_P4_184621_70335 | NW_004518687.1 | Scaffold4197 | 70335                   | AA                              | GG              | 1947051923               |
| SNP_P4_184622_75824 | NW_004518687.1 | Scaffold4197 | 75824                   | GG                              | AA              | 1947051925               |
| SNP_P4_184623_80686 | NW_004518687.1 | Scaffold4197 | 80686                   | TT                              | GG              | 1947051927               |
| SNP_P4_184624_80740 | NW_004518687.1 | Scaffold4197 | 80740                   | GG                              | AA              | 1947051930               |
| SNP_P4_184625_80741 | NW_004518687.1 | Scaffold4197 | 80741                   | AA                              | GG              | 1947051932               |
| SNP_P4_184626_80764 | NW_004518687.1 | Scaffold4197 | 80764                   | TT                              | GG              | 1947051934               |
| SNP_P4_184627_80767 | NW_004518687.1 | Scaffold4197 | 80767                   | TT                              | GG              | 1947051936               |
| SNP_P4_184628_80771 | NW_004518687.1 | Scaffold4197 | 80771                   | AA                              | GG              | 1947051938               |
| SNP_P4_184629_181   | NW_004518695.1 | Scaffold4210 | 181                     | AA                              | CC              | 1947051940               |
| SNP_P4_184630_297   | NW_004518695.1 | Scaffold4210 | 297                     | AA                              | CC              | 1947051942               |
| SNP_P4_184631_585   | NW_004518695.1 | Scaffold4210 | 585                     | GG                              | AA              | 1947051944               |
| SNP_P4_184632_6667  | NW_004518696.1 | Scaffold4211 | 6667                    | GG                              | TT              | 1947051946               |
| SNP_P4_184633_9072  | NW_004518696.1 | Scaffold4211 | 9072                    | GG                              | AA              | 1947051948               |
| SNP_P4_184634_9113  | NW_004518696.1 | Scaffold4211 | 9113                    | GG                              | AA              | 1947051950               |
| SNP_P4_184635_9176  | NW_004518696.1 | Scaffold4211 | 9176                    | TT                              | CC              | 1947051952               |
| SNP_P4_184636_9227  | NW_004518696.1 | Scaffold4211 | 9227                    | CC                              | GG              | 1947051954               |
| SNP_P4_184637_9237  | NW_004518696.1 | Scaffold4211 | 9237                    | TT                              | CC              | 1947051956               |
| SNP_P4_184638_9249  | NW_004518696.1 | Scaffold4211 | 9249                    | AA                              | GG              | 1947051958               |
| SNP_P4_184639_9252  | NW_004518696.1 | Scaffold4211 | 9252                    | AA                              | GG              | 1947051960               |
| SNP_P4_184640_9268  | NW_004518696.1 | Scaffold4211 | 9268                    | CC                              | TT              | 1947051962               |
| SNP_P4_184642_9498  | NW_004518696.1 | Scaffold4211 | 9498                    | GG                              | CC              | 1947051964               |
| SNP_P4_184643_9504  | NW_004518696.1 | Scaffold4211 | 9504                    | TT                              | AA              | 1947051966               |
| SNP_P4_184644_9521  | NW_004518696.1 | Scaffold4211 | 9521                    | GG                              | AA              | 1947051968               |
| SNP_P4_184645_9522  | NW_004518696.1 | Scaffold4211 | 9522                    | CC                              | AA              | 1947051970               |
| SNP_P4_184646_9523  | NW_004518696.1 | Scaffold4211 | 9523                    | AA                              | TT              | 1947051972               |
| SNP_P4_184647_9525  | NW_004518696.1 | Scaffold4211 | 9525                    | CC                              | TT              | 1947051974               |
| SNP_P4_184648_9533  | NW_004518696.1 | Scaffold4211 | 9533                    | TT                              | CC              | 1947051976               |
| SNP_P4_184649_627   | NW_004518697.1 | Scaffold4212 | 627                     | CC                              | GG              | 1947051978               |
| SNP_P4_184650_727   | NW_004518697.1 | Scaffold4212 | 727                     | TT                              | CC              | 1947051980               |

| SNPs IDs           | Chromosome IDs | Chromosomes  | Physical positions (bp) | CDC Frontier (Reference genome) | (ILWC46 & LPNB) | NCBI SNPdb Accession IDs |
|--------------------|----------------|--------------|-------------------------|---------------------------------|-----------------|--------------------------|
| SNP_P4_184651_2046 | NW_004518698.1 | Scaffold4213 | 2046                    | AA                              | GG              | 1947051982               |
| SNP_P4_184652_2050 | NW_004518698.1 | Scaffold4213 | 2050                    | TT                              | CC              | 1947051984               |
| SNP_P4_184653_2272 | NW_004518698.1 | Scaffold4213 | 2272                    | TT                              | AA              | 1947051986               |
| SNP_P4_184654_2319 | NW_004518698.1 | Scaffold4213 | 2319                    | TT                              | CC              | 1947051988               |
| SNP_P4_184655_2473 | NW_004518698.1 | Scaffold4213 | 2473                    | CC                              | GG              | 1947051990               |
| SNP_P4_184657_2774 | NW_004518698.1 | Scaffold4213 | 2774                    | CC                              | TT              | 1947051992               |
| SNP_P4_184658_2776 | NW_004518698.1 | Scaffold4213 | 2776                    | AA                              | GG              | 1947051994               |
| SNP_P4_184659_5179 | NW_004518701.1 | Scaffold4219 | 5179                    | GG                              | AA              | 1947051996               |
| SNP_P4_184660_5189 | NW_004518701.1 | Scaffold4219 | 5189                    | TT                              | CC              | 1947051998               |
| SNP_P4_184661_5485 | NW_004518701.1 | Scaffold4219 | 5485                    | TT                              | CC              | 1947052000               |
| SNP_P4_184662_5495 | NW_004518701.1 | Scaffold4219 | 5495                    | GG                              | AA              | 1947052002               |
| SNP_P4_184663_5507 | NW_004518701.1 | Scaffold4219 | 5507                    | CC                              | TT              | 1947052004               |
| SNP_P4_184664_5508 | NW_004518701.1 | Scaffold4219 | 5508                    | TT                              | CC              | 1947052006               |
| SNP_P4_184665_5515 | NW_004518701.1 | Scaffold4219 | 5515                    | AA                              | GG              | 1947052008               |
| SNP_P4_184666_5531 | NW_004518701.1 | Scaffold4219 | 5531                    | CC                              | TT              | 1947052010               |
| SNP_P4_184667_70   | NW_004518702.1 | Scaffold4220 | 70                      | TT                              | CC              | 1947052012               |
| SNP_P4_184668_466  | NW_004518702.1 | Scaffold4220 | 466                     | AA                              | TT              | 1947052013               |
| SNP_P4_184669_489  | NW_004518702.1 | Scaffold4220 | 489                     | GG                              | TT              | 1947052014               |
| SNP_P4_184670_64   | NW_004518703.1 | Scaffold4221 | 64                      | CC                              | TT              | 1947052015               |
| SNP_P4_184671_105  | NW_004518703.1 | Scaffold4221 | 105                     | GG                              | AA              | 1947052016               |
| SNP_P4_184672_111  | NW_004518703.1 | Scaffold4221 | 111                     | AA                              | GG              | 1947052017               |
| SNP_P4_184673_116  | NW_004518703.1 | Scaffold4221 | 116                     | CC                              | TT              | 1947052019               |
| SNP_P4_184674_173  | NW_004518703.1 | Scaffold4221 | 173                     | CC                              | TT              | 1947052021               |
| SNP_P4_184675_211  | NW_004518703.1 | Scaffold4221 | 211                     | GG                              | AA              | 1947052023               |
| SNP_P4_184676_282  | NW_004518703.1 | Scaffold4221 | 282                     | TT                              | CC              | 1947052025               |
| SNP_P4_184677_304  | NW_004518703.1 | Scaffold4221 | 304                     | TT                              | GG              | 1947052027               |
| SNP_P4_184678_322  | NW_004518703.1 | Scaffold4221 | 322                     | AA                              | TT              | 1947052029               |
| SNP_P4_184679_323  | NW_004518703.1 | Scaffold4221 | 323                     | GG                              | TT              | 1947052031               |
| SNP_P4_184680_345  | NW_004518703.1 | Scaffold4221 | 345                     | TT                              | AA              | 1947052033               |
| SNP_P4_184681_369  | NW_004518703.1 | Scaffold4221 | 369                     | GG                              | AA              | 1947052035               |
| SNP_P4_184682_371  | NW_004518703.1 | Scaffold4221 | 371                     | GG                              | TT              | 1947052037               |
| SNP_P4_184683_408  | NW_004518703.1 | Scaffold4221 | 408                     | TT                              | AA              | 1947052039               |
| SNP_P4_184684_454  | NW_004518703.1 | Scaffold4221 | 454                     | AA                              | CC              | 1947052041               |
| SNP_P4_184686_530  | NW_004518703.1 | Scaffold4221 | 530                     | GG                              | TT              | 1947052043               |
| SNP_P4_184687_540  | NW_004518703.1 | Scaffold4221 | 540                     | CC                              | GG              | 1947052045               |
| SNP_P4_184689_622  | NW_004518703.1 | Scaffold4221 | 622                     | CC                              | TT              | 1947052047               |
| SNP_P4_184690_644  | NW_004518703.1 | Scaffold4221 | 644                     | AA                              | GG              | 1947052049               |
| SNP_P4_184691_669  | NW_004518703.1 | Scaffold4221 | 669                     | TT                              | GG              | 1947052051               |
| SNP_P4_184693_712  | NW_004518703.1 | Scaffold4221 | 712                     | TT                              | GG              | 1947052053               |
| SNP_P4_184694_721  | NW_004518703.1 | Scaffold4221 | 721                     | AA                              | CC              | 1947052055               |
| SNP_P4_184695_723  | NW_004518703.1 | Scaffold4221 | 723                     | CC                              | TT              | 1947052057               |
| SNP_P4_184696_724  | NW_004518703.1 | Scaffold4221 | 724                     | CC                              | TT              | 1947052059               |

| SNPs IDs            | Chromosome IDs | Chromosomes  | Physical positions (bp) | CDC Frontier (Reference genome) | (ILWC46 & LPNB) | NCBI SNPdb Accession IDs |
|---------------------|----------------|--------------|-------------------------|---------------------------------|-----------------|--------------------------|
| SNP_P4_184697_748   | NW_004518703.1 | Scaffold4221 | 748                     | TT                              | CC              | 1947052061               |
| SNP_P4_184698_794   | NW_004518703.1 | Scaffold4221 | 794                     | CC                              | TT              | 1947052063               |
| SNP_P4_184699_819   | NW_004518703.1 | Scaffold4221 | 819                     | CC                              | TT              | 1947052065               |
| SNP_P4_184700_826   | NW_004518703.1 | Scaffold4221 | 826                     | CC                              | AA              | 1947052067               |
| SNP_P4_184701_830   | NW_004518703.1 | Scaffold4221 | 830                     | GG                              | AA              | 1947052069               |
| SNP_P4_184702_831   | NW_004518703.1 | Scaffold4221 | 831                     | GG                              | AA              | 1947052071               |
| SNP_P4_184703_857   | NW_004518703.1 | Scaffold4221 | 857                     | AA                              | TT              | 1947052073               |
| SNP_P4_184704_870   | NW_004518703.1 | Scaffold4221 | 870                     | GG                              | TT              | 1947052075               |
| SNP_P4_184705_885   | NW_004518703.1 | Scaffold4221 | 885                     | GG                              | AA              | 1947052077               |
| SNP_P4_184706_994   | NW_004518703.1 | Scaffold4221 | 994                     | TT                              | CC              | 1947052079               |
| SNP_P4_184707_997   | NW_004518703.1 | Scaffold4221 | 997                     | AA                              | CC              | 1947052081               |
| SNP_P4_184708_1002  | NW_004518703.1 | Scaffold4221 | 1002                    | AA                              | CC              | 1947052083               |
| SNP_P4_184709_1054  | NW_004518703.1 | Scaffold4221 | 1054                    | AA                              | GG              | 1947052085               |
| SNP_P4_184710_1121  | NW_004518703.1 | Scaffold4221 | 1121                    | TT                              | CC              | 1947052087               |
| SNP_P4_184711_1180  | NW_004518703.1 | Scaffold4221 | 1180                    | CC                              | GG              | 1947052089               |
| SNP_P4_184712_1908  | NW_004518703.1 | Scaffold4221 | 1908                    | AA                              | GG              | 1947052091               |
| SNP_P4_184713_1916  | NW_004518703.1 | Scaffold4221 | 1916                    | AA                              | GG              | 1947052093               |
| SNP_P4_184714_1980  | NW_004518703.1 | Scaffold4221 | 1980                    | CC                              | TT              | 1947052095               |
| SNP_P4_184715_2002  | NW_004518703.1 | Scaffold4221 | 2002                    | CC                              | TT              | 1947052097               |
| SNP_P4_184716_2024  | NW_004518703.1 | Scaffold4221 | 2024                    | AA                              | GG              | 1947052099               |
| SNP_P4_184717_2053  | NW_004518703.1 | Scaffold4221 | 2053                    | AA                              | GG              | 1947052101               |
| SNP_P4_184718_7386  | NW_004518703.1 | Scaffold4221 | 7386                    | AA                              | TT              | 1947052103               |
| SNP_P4_184719_7388  | NW_004518703.1 | Scaffold4221 | 7388                    | TT                              | AA              | 1947052105               |
| SNP_P4_184720_7398  | NW_004518703.1 | Scaffold4221 | 7398                    | TT                              | CC              | 1947052107               |
| SNP_P4_184722_7774  | NW_004518703.1 | Scaffold4221 | 7774                    | AA                              | GG              | 1947052109               |
| SNP_P4_184723_8040  | NW_004518703.1 | Scaffold4221 | 8040                    | AA                              | TT              | 1947052111               |
| SNP_P4_184724_12545 | NW_004518703.1 | Scaffold4221 | 12545                   | TT                              | CC              | 1947052113               |
| SNP_P4_184725_12953 | NW_004518703.1 | Scaffold4221 | 12953                   | GG                              | AA              | 1947052115               |
| SNP_P4_184726_14246 | NW_004518703.1 | Scaffold4221 | 14246                   | GG                              | AA              | 1947052117               |
| SNP_P4_184727_15293 | NW_004518703.1 | Scaffold4221 | 15293                   | CC                              | TT              | 1947052119               |
| SNP_P4_184728_20726 | NW_004518703.1 | Scaffold4221 | 20726                   | GG                              | AA              | 1947052121               |
| SNP_P4_184729_40684 | NW_004518703.1 | Scaffold4221 | 40684                   | AA                              | CC              | 1947052123               |
| SNP_P4_184730_40851 | NW_004518703.1 | Scaffold4221 | 40851                   | GG                              | AA              | 1947052125               |
| SNP_P4_184731_40926 | NW_004518703.1 | Scaffold4221 | 40926                   | GG                              | AA              | 1947052127               |
| SNP_P4_184732_40978 | NW_004518703.1 | Scaffold4221 | 40978                   | TT                              | GG              | 1947052129               |
| SNP_P4_184733_40996 | NW_004518703.1 | Scaffold4221 | 40996                   | AA                              | GG              | 1947052131               |
| SNP_P4_184734_41019 | NW_004518703.1 | Scaffold4221 | 41019                   | AA                              | GG              | 1947052133               |
| SNP_P4_184735_41198 | NW_004518703.1 | Scaffold4221 | 41198                   | GG                              | TT              | 1947052135               |
| SNP_P4_184736_41214 | NW_004518703.1 | Scaffold4221 | 41214                   | CC                              | GG              | 1947052137               |
| SNP_P4_184737_41317 | NW_004518703.1 | Scaffold4221 | 41317                   | AA                              | GG              | 1947052140               |
| SNP_P4_184738_41459 | NW_004518703.1 | Scaffold4221 | 41459                   | TT                              | CC              | 1947052142               |
| SNP_P4_184739_41501 | NW_004518703.1 | Scaffold4221 | 41501                   | CC                              | AA              | 1947052144               |



| SNPs IDs            | Chromosome IDs | Chromosomes  | Physical positions (bp) | CDC Frontier (Reference genome) | (ILWC46 & LPNB) | NCBI SNPdb Accession IDs |
|---------------------|----------------|--------------|-------------------------|---------------------------------|-----------------|--------------------------|
| SNP_P4_184740_41502 | NW_004518703.1 | Scaffold4221 | 41502                   | AA                              | CC              | 1947052146               |
| SNP_P4_184741_41513 | NW_004518703.1 | Scaffold4221 | 41513                   | TT                              | AA              | 1947052148               |
| SNP_P4_184742_41521 | NW_004518703.1 | Scaffold4221 | 41521                   | AA                              | CC              | 1947052150               |
| SNP_P4_184743_41570 | NW_004518703.1 | Scaffold4221 | 41570                   | TT                              | GG              | 1947052152               |
| SNP_P4_184744_41722 | NW_004518703.1 | Scaffold4221 | 41722                   | TT                              | CC              | 1947052154               |
| SNP_P4_184745_42540 | NW_004518703.1 | Scaffold4221 | 42540                   | CC                              | AA              | 1947052156               |
| SNP_P4_184746_46465 | NW_004518703.1 | Scaffold4221 | 46465                   | GG                              | AA              | 1947052158               |
| SNP_P4_184747_47093 | NW_004518703.1 | Scaffold4221 | 47093                   | TT                              | AA              | 1947052160               |
| SNP_P4_184748_48094 | NW_004518703.1 | Scaffold4221 | 48094                   | CC                              | TT              | 1947052163               |
| SNP_P4_184749_48114 | NW_004518703.1 | Scaffold4221 | 48114                   | CC                              | TT              | 1947052165               |
| SNP_P4_184750_48187 | NW_004518703.1 | Scaffold4221 | 48187                   | TT                              | GG              | 1947052167               |
| SNP_P4_184751_48196 | NW_004518703.1 | Scaffold4221 | 48196                   | CC                              | TT              | 1947052169               |
| SNP_P4_184752_48199 | NW_004518703.1 | Scaffold4221 | 48199                   | TT                              | CC              | 1947052171               |
| SNP_P4_184753_48212 | NW_004518703.1 | Scaffold4221 | 48212                   | AA                              | GG              | 1947052173               |
| SNP_P4_184754_48233 | NW_004518703.1 | Scaffold4221 | 48233                   | AA                              | CC              | 1947052175               |
| SNP_P4_184755_48248 | NW_004518703.1 | Scaffold4221 | 48248                   | CC                              | TT              | 1947052177               |
| SNP_P4_184756_48291 | NW_004518703.1 | Scaffold4221 | 48291                   | CC                              | TT              | 1947052179               |
| SNP_P4_184758_48354 | NW_004518703.1 | Scaffold4221 | 48354                   | TT                              | GG              | 1947052181               |
| SNP_P4_184759_48413 | NW_004518703.1 | Scaffold4221 | 48413                   | TT                              | CC              | 1947052183               |
| SNP_P4_184760_48439 | NW_004518703.1 | Scaffold4221 | 48439                   | GG                              | AA              | 1947052185               |
| SNP_P4_184761_48473 | NW_004518703.1 | Scaffold4221 | 48473                   | TT                              | CC              | 1947052187               |
| SNP_P4_184762_48560 | NW_004518703.1 | Scaffold4221 | 48560                   | AA                              | GG              | 1947052189               |
| SNP_P4_184763_48588 | NW_004518703.1 | Scaffold4221 | 48588                   | GG                              | AA              | 1947052191               |
| SNP_P4_184764_48596 | NW_004518703.1 | Scaffold4221 | 48596                   | CC                              | GG              | 1947052193               |
| SNP_P4_184765_48625 | NW_004518703.1 | Scaffold4221 | 48625                   | GG                              | AA              | 1947052195               |
| SNP_P4_184766_48628 | NW_004518703.1 | Scaffold4221 | 48628                   | CC                              | AA              | 1947052197               |
| SNP_P4_184768_52884 | NW_004518703.1 | Scaffold4221 | 52884                   | AA                              | TT              | 1947052199               |
| SNP_P4_184769_52885 | NW_004518703.1 | Scaffold4221 | 52885                   | TT                              | CC              | 1947052201               |
| SNP_P4_184770_53157 | NW_004518703.1 | Scaffold4221 | 53157                   | AA                              | GG              | 1947052203               |
| SNP_P4_184771_53159 | NW_004518703.1 | Scaffold4221 | 53159                   | GG                              | CC              | 1947052205               |
| SNP_P4_184772_53160 | NW_004518703.1 | Scaffold4221 | 53160                   | AA                              | TT              | 1947052207               |
| SNP_P4_184773_53161 | NW_004518703.1 | Scaffold4221 | 53161                   | CC                              | AA              | 1947052209               |
| SNP_P4_184774_53317 | NW_004518703.1 | Scaffold4221 | 53317                   | CC                              | AA              | 1947052211               |
| SNP_P4_184775_53351 | NW_004518703.1 | Scaffold4221 | 53351                   | GG                              | TT              | 1947052213               |
| SNP_P4_184776_53370 | NW_004518703.1 | Scaffold4221 | 53370                   | CC                              | TT              | 1947052215               |
| SNP_P4_184777_53374 | NW_004518703.1 | Scaffold4221 | 53374                   | TT                              | CC              | 1947052217               |
| SNP_P4_184778_53387 | NW_004518703.1 | Scaffold4221 | 53387                   | CC                              | TT              | 1947052219               |
| SNP_P4_184779_53418 | NW_004518703.1 | Scaffold4221 | 53418                   | AA                              | TT              | 1947052221               |
| SNP_P4_184780_53441 | NW_004518703.1 | Scaffold4221 | 53441                   | CC                              | AA              | 1947052223               |
| SNP_P4_184781_53448 | NW_004518703.1 | Scaffold4221 | 53448                   | TT                              | CC              | 1947052225               |
| SNP_P4_184782_53474 | NW_004518703.1 | Scaffold4221 | 53474                   | AA                              | GG              | 1947052227               |
| SNP_P4_184783_53479 | NW_004518703.1 | Scaffold4221 | 53479                   | AA                              | GG              | 1947052229               |

| SNPs IDs            | Chromosome IDs | Chromosomes  | Physical positions (bp) | CDC Frontier (Reference genome) | (ILWC46 & LPNB) | NCBI SNPdb Accession IDs |
|---------------------|----------------|--------------|-------------------------|---------------------------------|-----------------|--------------------------|
| SNP_P4_184784_53772 | NW_004518703.1 | Scaffold4221 | 53772                   | GG                              | AA              | 1947052231               |
| SNP_P4_184785_53780 | NW_004518703.1 | Scaffold4221 | 53780                   | CC                              | GG              | 1947052233               |
| SNP_P4_184786_53861 | NW_004518703.1 | Scaffold4221 | 53861                   | GG                              | TT              | 1947052234               |
| SNP_P4_184787_53868 | NW_004518703.1 | Scaffold4221 | 53868                   | AA                              | TT              | 1947052236               |
| SNP_P4_184788_54142 | NW_004518703.1 | Scaffold4221 | 54142                   | AA                              | TT              | 1947052238               |
| SNP_P4_184789_54164 | NW_004518703.1 | Scaffold4221 | 54164                   | CC                              | TT              | 1947052240               |
| SNP_P4_184790_54256 | NW_004518703.1 | Scaffold4221 | 54256                   | TT                              | GG              | 1947052242               |
| SNP_P4_184791_54387 | NW_004518703.1 | Scaffold4221 | 54387                   | TT                              | CC              | 1947052244               |
| SNP_P4_184793_54499 | NW_004518703.1 | Scaffold4221 | 54499                   | AA                              | GG              | 1947052246               |
| SNP_P4_184796_54867 | NW_004518703.1 | Scaffold4221 | 54867                   | TT                              | CC              | 1947052248               |
| SNP_P4_184797_54899 | NW_004518703.1 | Scaffold4221 | 54899                   | CC                              | AA              | 1947052250               |
| SNP_P4_184798_54900 | NW_004518703.1 | Scaffold4221 | 54900                   | AA                              | TT              | 1947052252               |
| SNP_P4_184799_55361 | NW_004518703.1 | Scaffold4221 | 55361                   | TT                              | GG              | 1947052254               |
| SNP_P4_184800_66778 | NW_004518703.1 | Scaffold4221 | 66778                   | AA                              | CC              | 1947052255               |
| SNP_P4_184801_66789 | NW_004518703.1 | Scaffold4221 | 66789                   | CC                              | TT              | 1947052257               |
| SNP_P4_184802_5777  | NW_004518706.1 | Scaffold4225 | 5777                    | TT                              | CC              | 1947052259               |
| SNP_P4_184803_7234  | NW_004518706.1 | Scaffold4225 | 7234                    | GG                              | AA              | 1947052261               |
| SNP_P4_184804_7278  | NW_004518706.1 | Scaffold4225 | 7278                    | GG                              | CC              | 1947052263               |
| SNP_P4_184805_7539  | NW_004518706.1 | Scaffold4225 | 7539                    | CC                              | GG              | 1947052265               |
| SNP_P4_184806_7578  | NW_004518706.1 | Scaffold4225 | 7578                    | GG                              | AA              | 1947052267               |
| SNP_P4_184807_14293 | NW_004518706.1 | Scaffold4225 | 14293                   | AA                              | CC              | 1947052269               |
| SNP_P4_184808_14306 | NW_004518706.1 | Scaffold4225 | 14306                   | AA                              | TT              | 1947052271               |
| SNP_P4_184809_14346 | NW_004518706.1 | Scaffold4225 | 14346                   | AA                              | TT              | 1947052272               |
| SNP_P4_184810_14561 | NW_004518706.1 | Scaffold4225 | 14561                   | GG                              | AA              | 1947052274               |
| SNP_P4_184811_14697 | NW_004518706.1 | Scaffold4225 | 14697                   | GG                              | AA              | 1947052276               |
| SNP_P4_184812_14702 | NW_004518706.1 | Scaffold4225 | 14702                   | TT                              | GG              | 1947052278               |
| SNP_P4_184813_14740 | NW_004518706.1 | Scaffold4225 | 14740                   | AA                              | CC              | 1947052280               |
| SNP_P4_184814_14753 | NW_004518706.1 | Scaffold4225 | 14753                   | TT                              | AA              | 1947052282               |
| SNP_P4_184815_7283  | NW_004518713.1 | Scaffold4236 | 7283                    | GG                              | AA              | 1947052284               |
| SNP_P4_184816_8182  | NW_004518713.1 | Scaffold4236 | 8182                    | GG                              | AA              | 1947052286               |
| SNP_P4_184817_8195  | NW_004518713.1 | Scaffold4236 | 8195                    | TT                              | CC              | 1947052288               |
| SNP_P4_184818_8221  | NW_004518713.1 | Scaffold4236 | 8221                    | AA                              | TT              | 1947052290               |
| SNP_P4_184819_8235  | NW_004518713.1 | Scaffold4236 | 8235                    | TT                              | CC              | 1947052291               |
| SNP_P4_184820_8259  | NW_004518713.1 | Scaffold4236 | 8259                    | AA                              | TT              | 1947052293               |
| SNP_P4_184821_8338  | NW_004518713.1 | Scaffold4236 | 8338                    | CC                              | TT              | 1947052295               |
| SNP_P4_184822_8392  | NW_004518713.1 | Scaffold4236 | 8392                    | TT                              | CC              | 1947052297               |
| SNP_P4_184823_8421  | NW_004518713.1 | Scaffold4236 | 8421                    | GG                              | CC              | 1947052299               |
| SNP_P4_184824_8443  | NW_004518713.1 | Scaffold4236 | 8443                    | GG                              | CC              | 1947052301               |
| SNP_P4_184825_8485  | NW_004518713.1 | Scaffold4236 | 8485                    | CC                              | TT              | 1947052303               |
| SNP_P4_184826_8489  | NW_004518713.1 | Scaffold4236 | 8489                    | CC                              | TT              | 1947052305               |
| SNP_P4_184827_8519  | NW_004518713.1 | Scaffold4236 | 8519                    | TT                              | CC              | 1947052307               |
| SNP_P4_184828_8565  | NW_004518713.1 | Scaffold4236 | 8565                    | GG                              | AA              | 1947052309               |

| SNPs IDs           | Chromosome IDs | Chromosomes  | Physical positions (bp) | CDC Frontier (Reference genome) | (ILWC46 & LPNB) | NCBI SNPdb Accession IDs |
|--------------------|----------------|--------------|-------------------------|---------------------------------|-----------------|--------------------------|
| SNP_P4_184829_8598 | NW_004518713.1 | Scaffold4236 | 8598                    | GG                              | TT              | 1947052311               |
| SNP_P4_184830_8607 | NW_004518713.1 | Scaffold4236 | 8607                    | GG                              | AA              | 1947052313               |
| SNP_P4_184831_8755 | NW_004518713.1 | Scaffold4236 | 8755                    | CC                              | AA              | 1947052315               |
| SNP_P4_184832_8782 | NW_004518713.1 | Scaffold4236 | 8782                    | CC                              | TT              | 1947052317               |
| SNP_P4_184833_167  | NW_004518715.1 | Scaffold4238 | 167                     | CC                              | GG              | 1947052319               |
| SNP_P4_184834_886  | NW_004518715.1 | Scaffold4238 | 886                     | CC                              | AA              | 1947052321               |
| SNP_P4_184835_459  | NW_004518717.1 | Scaffold4241 | 459                     | AA                              | GG              | 1947052323               |
| SNP_P4_184836_1613 | NW_004518717.1 | Scaffold4241 | 1613                    | TT                              | GG              | 1947052325               |
| SNP_P4_184837_1640 | NW_004518717.1 | Scaffold4241 | 1640                    | GG                              | CC              | 1947052327               |
| SNP_P4_184838_1672 | NW_004518717.1 | Scaffold4241 | 1672                    | GG                              | TT              | 1947052329               |
| SNP_P4_184839_558  | NW_004518718.1 | Scaffold4243 | 558                     | TT                              | AA              | 1947052331               |
| SNP_P4_184840_564  | NW_004518718.1 | Scaffold4243 | 564                     | CC                              | TT              | 1947052333               |
| SNP_P4_184841_567  | NW_004518718.1 | Scaffold4243 | 567                     | TT                              | CC              | 1947052335               |
| SNP_P4_184842_629  | NW_004518718.1 | Scaffold4243 | 629                     | TT                              | GG              | 1947052337               |
| SNP_P4_184843_705  | NW_004518718.1 | Scaffold4243 | 705                     | TT                              | CC              | 1947052339               |
| SNP_P4_184844_711  | NW_004518718.1 | Scaffold4243 | 711                     | CC                              | AA              | 1947052341               |
| SNP_P4_184845_720  | NW_004518718.1 | Scaffold4243 | 720                     | GG                              | AA              | 1947052343               |
| SNP_P4_184846_912  | NW_004518718.1 | Scaffold4243 | 912                     | GG                              | AA              | 1947052345               |
| SNP_P4_184847_1028 | NW_004518718.1 | Scaffold4243 | 1028                    | CC                              | AA              | 1947052347               |
| SNP_P4_184849_1265 | NW_004518718.1 | Scaffold4243 | 1265                    | GG                              | AA              | 1947052349               |
| SNP_P4_184850_1341 | NW_004518718.1 | Scaffold4243 | 1341                    | TT                              | AA              | 1947052351               |
| SNP_P4_184851_1375 | NW_004518718.1 | Scaffold4243 | 1375                    | AA                              | GG              | 1947052353               |
| SNP_P4_184852_1550 | NW_004518718.1 | Scaffold4243 | 1550                    | TT                              | CC              | 1947052355               |
| SNP_P4_184853_1581 | NW_004518718.1 | Scaffold4243 | 1581                    | TT                              | CC              | 1947052357               |
| SNP_P4_184854_1781 | NW_004518718.1 | Scaffold4243 | 1781                    | AA                              | TT              | 1947052359               |
| SNP_P4_184855_5560 | NW_004518718.1 | Scaffold4243 | 5560                    | TT                              | GG              | 1947052361               |
| SNP_P4_184856_5689 | NW_004518718.1 | Scaffold4243 | 5689                    | AA                              | GG              | 1947052363               |
| SNP_P4_184857_5693 | NW_004518718.1 | Scaffold4243 | 5693                    | TT                              | CC              | 1947052365               |
| SNP_P4_184858_5696 | NW_004518718.1 | Scaffold4243 | 5696                    | CC                              | AA              | 1947052367               |
| SNP_P4_184859_5805 | NW_004518718.1 | Scaffold4243 | 5805                    | TT                              | AA              | 1947052368               |
| SNP_P4_184860_5815 | NW_004518718.1 | Scaffold4243 | 5815                    | AA                              | GG              | 1947052370               |
| SNP_P4_184861_5871 | NW_004518718.1 | Scaffold4243 | 5871                    | AA                              | GG              | 1947052372               |
| SNP_P4_184862_5929 | NW_004518718.1 | Scaffold4243 | 5929                    | TT                              | CC              | 1947052374               |
| SNP_P4_184863_6262 | NW_004518718.1 | Scaffold4243 | 6262                    | TT                              | CC              | 1947052376               |
| SNP_P4_184864_6303 | NW_004518718.1 | Scaffold4243 | 6303                    | CC                              | TT              | 1947052378               |
| SNP_P4_184865_6756 | NW_004518718.1 | Scaffold4243 | 6756                    | TT                              | GG              | 1947052380               |
| SNP_P4_184866_7121 | NW_004518718.1 | Scaffold4243 | 7121                    | GG                              | AA              | 1947052382               |
| SNP_P4_184867_7180 | NW_004518718.1 | Scaffold4243 | 7180                    | TT                              | CC              | 1947052384               |
| SNP_P4_184868_7394 | NW_004518718.1 | Scaffold4243 | 7394                    | CC                              | TT              | 1947052386               |
| SNP_P4_184869_7467 | NW_004518718.1 | Scaffold4243 | 7467                    | CC                              | TT              | 1947052388               |
| SNP_P4_184870_7548 | NW_004518718.1 | Scaffold4243 | 7548                    | TT                              | CC              | 1947052390               |
| SNP_P4_184871_7552 | NW_004518718.1 | Scaffold4243 | 7552                    | GG                              | AA              | 1947052392               |

| SNPs IDs            | Chromosome IDs | Chromosomes  | Physical positions (bp) | CDC Frontier (Reference genome) | (ILWC46 & LPNB) | NCBI SNPdb Accession IDs |
|---------------------|----------------|--------------|-------------------------|---------------------------------|-----------------|--------------------------|
| SNP_P4_184872_7606  | NW_004518718.1 | Scaffold4243 | 7606                    | GG                              | AA              | 1947052394               |
| SNP_P4_184873_14521 | NW_004518718.1 | Scaffold4243 | 14521                   | TT                              | GG              | 1947052396               |
| SNP_P4_184874_14559 | NW_004518718.1 | Scaffold4243 | 14559                   | TT                              | CC              | 1947052398               |
| SNP_P4_184875_14585 | NW_004518718.1 | Scaffold4243 | 14585                   | AA                              | CC              | 1947052400               |
| SNP_P4_184876_14633 | NW_004518718.1 | Scaffold4243 | 14633                   | TT                              | CC              | 1947052402               |
| SNP_P4_184877_14678 | NW_004518718.1 | Scaffold4243 | 14678                   | AA                              | CC              | 1947052404               |
| SNP_P4_184878_14835 | NW_004518718.1 | Scaffold4243 | 14835                   | TT                              | AA              | 1947052406               |
| SNP_P4_184880_15103 | NW_004518718.1 | Scaffold4243 | 15103                   | GG                              | TT              | 1947052408               |
| SNP_P4_184881_15755 | NW_004518718.1 | Scaffold4243 | 15755                   | CC                              | GG              | 1947052410               |
| SNP_P4_184882_16090 | NW_004518718.1 | Scaffold4243 | 16090                   | GG                              | AA              | 1947052412               |
| SNP_P4_184883_16658 | NW_004518718.1 | Scaffold4243 | 16658                   | AA                              | TT              | 1947052414               |
| SNP_P4_184884_16716 | NW_004518718.1 | Scaffold4243 | 16716                   | AA                              | TT              | 1947052416               |
| SNP_P4_184885_16719 | NW_004518718.1 | Scaffold4243 | 16719                   | TT                              | GG              | 1947052418               |
| SNP_P4_184886_16745 | NW_004518718.1 | Scaffold4243 | 16745                   | AA                              | GG              | 1947052420               |
| SNP_P4_184888_16958 | NW_004518718.1 | Scaffold4243 | 16958                   | CC                              | AA              | 1947052422               |
| SNP_P4_184889_16998 | NW_004518718.1 | Scaffold4243 | 16998                   | GG                              | TT              | 1947052424               |
| SNP_P4_184890_17066 | NW_004518718.1 | Scaffold4243 | 17066                   | AA                              | GG              | 1947052426               |
| SNP_P4_184891_17082 | NW_004518718.1 | Scaffold4243 | 17082                   | TT                              | AA              | 1947052428               |
| SNP_P4_184892_17095 | NW_004518718.1 | Scaffold4243 | 17095                   | CC                              | TT              | 1947052429               |
| SNP_P4_184893_17295 | NW_004518718.1 | Scaffold4243 | 17295                   | AA                              | CC              | 1947052431               |
| SNP_P4_184894_17485 | NW_004518718.1 | Scaffold4243 | 17485                   | AA                              | GG              | 1947052433               |
| SNP_P4_184895_17580 | NW_004518718.1 | Scaffold4243 | 17580                   | AA                              | GG              | 1947052435               |
| SNP_P4_184896_17620 | NW_004518718.1 | Scaffold4243 | 17620                   | AA                              | TT              | 1947052437               |
| SNP_P4_184897_17671 | NW_004518718.1 | Scaffold4243 | 17671                   | TT                              | AA              | 1947052439               |
| SNP_P4_184899_17724 | NW_004518718.1 | Scaffold4243 | 17724                   | CC                              | TT              | 1947052441               |
| SNP_P4_184900_17743 | NW_004518718.1 | Scaffold4243 | 17743                   | GG                              | CC              | 1947052443               |
| SNP_P4_184901_17831 | NW_004518718.1 | Scaffold4243 | 17831                   | TT                              | CC              | 1947052445               |
| SNP_P4_184902_17884 | NW_004518718.1 | Scaffold4243 | 17884                   | TT                              | CC              | 1947052447               |
| SNP_P4_184903_17894 | NW_004518718.1 | Scaffold4243 | 17894                   | TT                              | GG              | 1947052449               |
| SNP_P4_184904_18010 | NW_004518718.1 | Scaffold4243 | 18010                   | GG                              | AA              | 1947052451               |
| SNP_P4_184905_18074 | NW_004518718.1 | Scaffold4243 | 18074                   | TT                              | CC              | 1947052453               |
| SNP_P4_184906_18093 | NW_004518718.1 | Scaffold4243 | 18093                   | TT                              | CC              | 1947052455               |
| SNP_P4_184908_22578 | NW_004518718.1 | Scaffold4243 | 22578                   | TT                              | GG              | 1947052457               |
| SNP_P4_184909_23385 | NW_004518718.1 | Scaffold4243 | 23385                   | TT                              | AA              | 1947052459               |
| SNP_P4_184910_23439 | NW_004518718.1 | Scaffold4243 | 23439                   | GG                              | AA              | 1947052461               |
| SNP_P4_184911_23450 | NW_004518718.1 | Scaffold4243 | 23450                   | CC                              | TT              | 1947052463               |
| SNP_P4_184912_23523 | NW_004518718.1 | Scaffold4243 | 23523                   | TT                              | CC              | 1947052465               |
| SNP_P4_184913_23586 | NW_004518718.1 | Scaffold4243 | 23586                   | TT                              | CC              | 1947052467               |
| SNP_P4_184914_23671 | NW_004518718.1 | Scaffold4243 | 23671                   | GG                              | TT              | 1947052469               |
| SNP_P4_184915_23693 | NW_004518718.1 | Scaffold4243 | 23693                   | AA                              | CC              | 1947052471               |
| SNP_P4_184916_23742 | NW_004518718.1 | Scaffold4243 | 23742                   | TT                              | CC              | 1947052473               |
| SNP_P4_184917_23750 | NW_004518718.1 | Scaffold4243 | 23750                   | AA                              | GG              | 1947052475               |

| SNPs IDs            | Chromosome IDs | Chromosomes  | Physical positions (bp) | CDC Frontier (Reference genome) | (ILWC46 & LPNB) | NCBI SNPdb Accession IDs |
|---------------------|----------------|--------------|-------------------------|---------------------------------|-----------------|--------------------------|
| SNP_P4_184918_26781 | NW_004518718.1 | Scaffold4243 | 26781                   | GG                              | TT              | 1947052477               |
| SNP_P4_184919_288   | NW_004518721.1 | Scaffold4247 | 288                     | CC                              | TT              | 1947052479               |
| SNP_P4_184920_440   | NW_004518721.1 | Scaffold4247 | 440                     | GG                              | CC              | 1947052481               |
| SNP_P4_184921_454   | NW_004518721.1 | Scaffold4247 | 454                     | GG                              | AA              | 1947052483               |
| SNP_P4_184922_511   | NW_004518721.1 | Scaffold4247 | 511                     | GG                              | AA              | 1947052485               |
| SNP_P4_184923_614   | NW_004518721.1 | Scaffold4247 | 614                     | AA                              | CC              | 1947052487               |
| SNP_P4_184924_671   | NW_004518721.1 | Scaffold4247 | 671                     | GG                              | AA              | 1947052489               |
| SNP_P4_184925_932   | NW_004518721.1 | Scaffold4247 | 932                     | CC                              | TT              | 1947052490               |
| SNP_P4_184926_1329  | NW_004518721.1 | Scaffold4247 | 1329                    | CC                              | GG              | 1947052492               |
| SNP_P4_184927_1025  | NW_004518722.1 | Scaffold4248 | 1025                    | TT                              | CC              | 1947052494               |
| SNP_P4_184928_64    | NW_004518724.1 | Scaffold4251 | 64                      | TT                              | CC              | 1947052496               |
| SNP_P4_184929_350   | NW_004518724.1 | Scaffold4251 | 350                     | CC                              | TT              | 1947052498               |
| SNP_P4_184930_494   | NW_004518724.1 | Scaffold4251 | 494                     | AA                              | GG              | 1947052500               |
| SNP_P4_184931_626   | NW_004518724.1 | Scaffold4251 | 626                     | TT                              | CC              | 1947052502               |
| SNP_P4_184932_740   | NW_004518724.1 | Scaffold4251 | 740                     | GG                              | AA              | 1947052504               |
| SNP_P4_184933_768   | NW_004518724.1 | Scaffold4251 | 768                     | AA                              | GG              | 1947052506               |
| SNP_P4_184934_2854  | NW_004518727.1 | Scaffold4255 | 2854                    | TT                              | CC              | 1947052508               |
| SNP_P4_184935_3633  | NW_004518727.1 | Scaffold4255 | 3633                    | AA                              | GG              | 1947052510               |
| SNP_P4_184936_3634  | NW_004518727.1 | Scaffold4255 | 3634                    | CC                              | TT              | 1947052512               |
| SNP_P4_184937_3682  | NW_004518727.1 | Scaffold4255 | 3682                    | AA                              | TT              | 1947052514               |
| SNP_P4_184938_4022  | NW_004518727.1 | Scaffold4255 | 4022                    | TT                              | GG              | 1947052516               |
| SNP_P4_184939_4287  | NW_004518727.1 | Scaffold4255 | 4287                    | GG                              | TT              | 1947052518               |
| SNP_P4_184940_4643  | NW_004518727.1 | Scaffold4255 | 4643                    | TT                              | AA              | 1947052520               |
| SNP_P4_184941_4793  | NW_004518727.1 | Scaffold4255 | 4793                    | CC                              | TT              | 1947052522               |
| SNP_P4_184942_4864  | NW_004518727.1 | Scaffold4255 | 4864                    | GG                              | AA              | 1947052524               |
| SNP_P4_184943_4946  | NW_004518727.1 | Scaffold4255 | 4946                    | GG                              | AA              | 1947052526               |
| SNP_P4_184944_5137  | NW_004518727.1 | Scaffold4255 | 5137                    | CC                              | AA              | 1947052528               |
| SNP_P4_184945_5202  | NW_004518727.1 | Scaffold4255 | 5202                    | CC                              | AA              | 1947052530               |
| SNP_P4_184946_5588  | NW_004518727.1 | Scaffold4255 | 5588                    | TT                              | CC              | 1947052532               |
| SNP_P4_184947_5953  | NW_004518727.1 | Scaffold4255 | 5953                    | GG                              | AA              | 1947052534               |
| SNP_P4_184948_5964  | NW_004518727.1 | Scaffold4255 | 5964                    | TT                              | AA              | 1947052536               |
| SNP_P4_184950_1728  | NW_004518728.1 | Scaffold4256 | 1728                    | GG                              | TT              | 1947052538               |
| SNP_P4_184951_2039  | NW_004518728.1 | Scaffold4256 | 2039                    | CC                              | GG              | 1947052540               |
| SNP_P4_184952_2510  | NW_004518728.1 | Scaffold4256 | 2510                    | AA                              | GG              | 1947052541               |
| SNP_P4_184953_3091  | NW_004518728.1 | Scaffold4256 | 3091                    | TT                              | CC              | 1947052543               |
| SNP_P4_184954_3117  | NW_004518728.1 | Scaffold4256 | 3117                    | AA                              | CC              | 1947052545               |
| SNP_P4_184955_3165  | NW_004518728.1 | Scaffold4256 | 3165                    | AA                              | GG              | 1947052547               |
| SNP_P4_184956_3293  | NW_004518728.1 | Scaffold4256 | 3293                    | TT                              | CC              | 1947052549               |
| SNP_P4_184957_3298  | NW_004518728.1 | Scaffold4256 | 3298                    | TT                              | AA              | 1947052551               |
| SNP_P4_184958_3393  | NW_004518728.1 | Scaffold4256 | 3393                    | AA                              | CC              | 1947052553               |
| SNP_P4_184959_4766  | NW_004518729.1 | Scaffold4257 | 4766                    | GG                              | AA              | 1947052555               |
| SNP_P4_184960_4767  | NW_004518729.1 | Scaffold4257 | 4767                    | GG                              | AA              | 1947052557               |

| SNPs IDs            | Chromosome IDs | Chromosomes  | Physical positions (bp) | CDC Frontier (Reference genome) | (ILWC46 & LPNB) | NCBI SNPdb Accession IDs |
|---------------------|----------------|--------------|-------------------------|---------------------------------|-----------------|--------------------------|
| SNP_P4_184961_4768  | NW_004518729.1 | Scaffold4257 | 4768                    | GG                              | AA              | 1947052559               |
| SNP_P4_184962_4769  | NW_004518729.1 | Scaffold4257 | 4769                    | GG                              | AA              | 1947052561               |
| SNP_P4_184963_4770  | NW_004518729.1 | Scaffold4257 | 4770                    | GG                              | AA              | 1947052563               |
| SNP_P4_184964_4773  | NW_004518729.1 | Scaffold4257 | 4773                    | AA                              | GG              | 1947052565               |
| SNP_P4_184965_4790  | NW_004518729.1 | Scaffold4257 | 4790                    | TT                              | GG              | 1947052567               |
| SNP_P4_184966_4816  | NW_004518729.1 | Scaffold4257 | 4816                    | AA                              | GG              | 1947052569               |
| SNP_P4_184967_242   | NW_004518730.1 | Scaffold4259 | 242                     | GG                              | AA              | 1947052571               |
| SNP_P4_184968_719   | NW_004518730.1 | Scaffold4259 | 719                     | TT                              | CC              | 1947052572               |
| SNP_P4_184969_969   | NW_004518730.1 | Scaffold4259 | 969                     | TT                              | CC              | 1947052574               |
| SNP_P4_184970_7561  | NW_004518731.1 | Scaffold4260 | 7561                    | TT                              | AA              | 1947052576               |
| SNP_P4_184971_7562  | NW_004518731.1 | Scaffold4260 | 7562                    | CC                              | AA              | 1947052578               |
| SNP_P4_184972_7578  | NW_004518731.1 | Scaffold4260 | 7578                    | AA                              | GG              | 1947052580               |
| SNP_P4_184973_7584  | NW_004518731.1 | Scaffold4260 | 7584                    | TT                              | CC              | 1947052582               |
| SNP_P4_184974_10246 | NW_004518731.1 | Scaffold4260 | 10246                   | CC                              | TT              | 1947052584               |
| SNP_P4_184975_10255 | NW_004518731.1 | Scaffold4260 | 10255                   | TT                              | AA              | 1947052586               |
| SNP_P4_184976_10363 | NW_004518731.1 | Scaffold4260 | 10363                   | TT                              | CC              | 1947052588               |
| SNP_P4_184977_10379 | NW_004518731.1 | Scaffold4260 | 10379                   | TT                              | AA              | 1947052590               |
| SNP_P4_184978_10405 | NW_004518731.1 | Scaffold4260 | 10405                   | CC                              | AA              | 1947052592               |
| SNP_P4_184979_10431 | NW_004518731.1 | Scaffold4260 | 10431                   | GG                              | AA              | 1947052594               |
| SNP_P4_184980_11928 | NW_004518731.1 | Scaffold4260 | 11928                   | CC                              | GG              | 1947052596               |
| SNP_P4_184981_11940 | NW_004518731.1 | Scaffold4260 | 11940                   | AA                              | GG              | 1947052598               |
| SNP_P4_184982_64    | NW_004518733.1 | Scaffold4263 | 64                      | AA                              | GG              | 1947052600               |
| SNP_P4_184983_80    | NW_004518733.1 | Scaffold4263 | 80                      | AA                              | GG              | 1947052602               |
| SNP_P4_184984_101   | NW_004518733.1 | Scaffold4263 | 101                     | TT                              | CC              | 1947052604               |
| SNP_P4_184985_104   | NW_004518733.1 | Scaffold4263 | 104                     | CC                              | TT              | 1947052606               |
| SNP_P4_184986_106   | NW_004518733.1 | Scaffold4263 | 106                     | TT                              | GG              | 1947052608               |
| SNP_P4_184987_113   | NW_004518733.1 | Scaffold4263 | 113                     | AA                              | TT              | 1947052609               |
| SNP_P4_184988_143   | NW_004518733.1 | Scaffold4263 | 143                     | TT                              | CC              | 1947052611               |
| SNP_P4_184989_454   | NW_004518733.1 | Scaffold4263 | 454                     | CC                              | TT              | 1947052613               |
| SNP_P4_184990_4333  | NW_004518733.1 | Scaffold4263 | 4333                    | AA                              | GG              | 1947052615               |
| SNP_P4_184991_4351  | NW_004518733.1 | Scaffold4263 | 4351                    | CC                              | TT              | 1947052617               |
| SNP_P4_184992_4377  | NW_004518733.1 | Scaffold4263 | 4377                    | CC                              | AA              | 1947052619               |
| SNP_P4_184993_4378  | NW_004518733.1 | Scaffold4263 | 4378                    | TT                              | AA              | 1947052621               |
| SNP_P4_184994_4380  | NW_004518733.1 | Scaffold4263 | 4380                    | GG                              | TT              | 1947052623               |
| SNP_P4_184995_4721  | NW_004518733.1 | Scaffold4263 | 4721                    | CC                              | TT              | 1947052625               |
| SNP_P4_184996_4746  | NW_004518733.1 | Scaffold4263 | 4746                    | AA                              | CC              | 1947052627               |
| SNP_P4_184997_4760  | NW_004518733.1 | Scaffold4263 | 4760                    | CC                              | AA              | 1947052629               |
| SNP_P4_184998_4761  | NW_004518733.1 | Scaffold4263 | 4761                    | GG                              | TT              | 1947052631               |
| SNP_P4_184999_4774  | NW_004518733.1 | Scaffold4263 | 4774                    | GG                              | AA              | 1947052633               |
| SNP_P4_185000_4779  | NW_004518733.1 | Scaffold4263 | 4779                    | GG                              | AA              | 1947052635               |
| SNP_P4_185001_4901  | NW_004518733.1 | Scaffold4263 | 4901                    | AA                              | CC              | 1947052637               |
| SNP_P4_185002_4902  | NW_004518733.1 | Scaffold4263 | 4902                    | CC                              | AA              | 1947052639               |

| SNPs IDs            | Chromosome IDs | Chromosomes  | Physical positions (bp) | CDC Frontier (Reference genome) | (ILWC46 & LPNB) | NCBI SNPdb Accession IDs |
|---------------------|----------------|--------------|-------------------------|---------------------------------|-----------------|--------------------------|
| SNP_P4_185003_18733 | NW_004518733.1 | Scaffold4263 | 18733                   | CC                              | TT              | 1947052641               |
| SNP_P4_185004_368   | NW_004518734.1 | Scaffold4265 | 368                     | TT                              | GG              | 1947052643               |
| SNP_P4_185005_2657  | NW_004518734.1 | Scaffold4265 | 2657                    | CC                              | GG              | 1947052644               |
| SNP_P4_185007_7042  | NW_004518734.1 | Scaffold4265 | 7042                    | TT                              | GG              | 1947052646               |
| SNP_P4_185008_7050  | NW_004518734.1 | Scaffold4265 | 7050                    | TT                              | CC              | 1947052648               |
| SNP_P4_185009_7110  | NW_004518734.1 | Scaffold4265 | 7110                    | GG                              | AA              | 1947052650               |
| SNP_P4_185011_7122  | NW_004518734.1 | Scaffold4265 | 7122                    | CC                              | AA              | 1947052652               |
| SNP_P4_185012_7124  | NW_004518734.1 | Scaffold4265 | 7124                    | CC                              | TT              | 1947052654               |
| SNP_P4_185013_7574  | NW_004518734.1 | Scaffold4265 | 7574                    | GG                              | AA              | 1947052656               |
| SNP_P4_185014_7599  | NW_004518734.1 | Scaffold4265 | 7599                    | AA                              | GG              | 1947052658               |
| SNP_P4_185015_11415 | NW_004518736.1 | Scaffold4269 | 11415                   | AA                              | GG              | 1947052660               |
| SNP_P4_185017_11711 | NW_004518736.1 | Scaffold4269 | 11711                   | GG                              | CC              | 1947052662               |
| SNP_P4_185018_22485 | NW_004518736.1 | Scaffold4269 | 22485                   | AA                              | CC              | 1947052664               |
| SNP_P4_185019_22488 | NW_004518736.1 | Scaffold4269 | 22488                   | GG                              | AA              | 1947052666               |
| SNP_P4_185020_22600 | NW_004518736.1 | Scaffold4269 | 22600                   | CC                              | AA              | 1947052668               |
| SNP_P4_185021_22662 | NW_004518736.1 | Scaffold4269 | 22662                   | AA                              | CC              | 1947052670               |
| SNP_P4_185022_22707 | NW_004518736.1 | Scaffold4269 | 22707                   | CC                              | TT              | 1947052671               |
| SNP_P4_185023_22736 | NW_004518736.1 | Scaffold4269 | 22736                   | CC                              | AA              | 1947052673               |
| SNP_P4_185024_26894 | NW_004518736.1 | Scaffold4269 | 26894                   | GG                              | TT              | 1947052675               |
| SNP_P4_185025_30271 | NW_004518736.1 | Scaffold4269 | 30271                   | TT                              | CC              | 1947052677               |
| SNP_P4_185026_30372 | NW_004518736.1 | Scaffold4269 | 30372                   | TT                              | CC              | 1947052679               |
| SNP_P4_185027_9186  | NW_004518741.1 | Scaffold4277 | 9186                    | TT                              | CC              | 1947052680               |
| SNP_P4_185028_9434  | NW_004518741.1 | Scaffold4277 | 9434                    | CC                              | GG              | 1947052681               |
| SNP_P4_185029_9440  | NW_004518741.1 | Scaffold4277 | 9440                    | AA                              | CC              | 1947052682               |
| SNP_P4_185030_9445  | NW_004518741.1 | Scaffold4277 | 9445                    | AA                              | CC              | 1947052684               |
| SNP_P4_185031_9447  | NW_004518741.1 | Scaffold4277 | 9447                    | GG                              | AA              | 1947052686               |
| SNP_P4_185032_9481  | NW_004518741.1 | Scaffold4277 | 9481                    | AA                              | GG              | 1947052688               |
| SNP_P4_185033_9523  | NW_004518741.1 | Scaffold4277 | 9523                    | AA                              | CC              | 1947052690               |
| SNP_P4_185034_18521 | NW_004518741.1 | Scaffold4277 | 18521                   | CC                              | TT              | 1947052692               |
| SNP_P4_185035_18534 | NW_004518741.1 | Scaffold4277 | 18534                   | AA                              | CC              | 1947052694               |
| SNP_P4_185036_18608 | NW_004518741.1 | Scaffold4277 | 18608                   | GG                              | TT              | 1947052696               |
| SNP_P4_185037_18639 | NW_004518741.1 | Scaffold4277 | 18639                   | TT                              | CC              | 1947052698               |
| SNP_P4_185038_18656 | NW_004518741.1 | Scaffold4277 | 18656                   | GG                              | AA              | 1947052700               |
| SNP_P4_185039_18674 | NW_004518741.1 | Scaffold4277 | 18674                   | GG                              | TT              | 1947052702               |
| SNP_P4_185040_18678 | NW_004518741.1 | Scaffold4277 | 18678                   | TT                              | GG              | 1947052704               |
| SNP_P4_185041_2468  | NW_004518742.1 | Scaffold4279 | 2468                    | TT                              | CC              | 1947052706               |
| SNP_P4_185042_288   | NW_004518745.1 | Scaffold4285 | 288                     | GG                              | AA              | 1947052708               |
| SNP_P4_185043_538   | NW_004518747.1 | Scaffold4287 | 538                     | AA                              | TT              | 1947052710               |
| SNP_P4_185044_1050  | NW_004518747.1 | Scaffold4287 | 1050                    | CC                              | TT              | 1947052712               |
| SNP_P4_185045_5136  | NW_004518747.1 | Scaffold4287 | 5136                    | CC                              | AA              | 1947052714               |
| SNP_P4_185046_5188  | NW_004518747.1 | Scaffold4287 | 5188                    | GG                              | AA              | 1947052716               |
| SNP_P4_185047_5446  | NW_004518751.1 | Scaffold4291 | 5446                    | TT                              | CC              | 1947052718               |

| SNPs IDs           | Chromosome IDs | Chromosomes  | Physical positions (bp) | CDC Frontier (Reference genome) | (ILWC46 & LPNB) | NCBI SNPdb Accession IDs |
|--------------------|----------------|--------------|-------------------------|---------------------------------|-----------------|--------------------------|
| SNP_P4_185048_5465 | NW_004518751.1 | Scaffold4291 | 5465                    | AA                              | TT              | 1947052720               |
| SNP_P4_185049_2650 | NW_004518753.1 | Scaffold4293 | 2650                    | AA                              | TT              | 1947052722               |
| SNP_P4_185050_1898 | NW_004518754.1 | Scaffold4294 | 1898                    | CC                              | TT              | 1947052724               |
| SNP_P4_185051_8737 | NW_004518754.1 | Scaffold4294 | 8737                    | TT                              | CC              | 1947052726               |
| SNP_P4_185052_9109 | NW_004518754.1 | Scaffold4294 | 9109                    | AA                              | CC              | 1947052728               |
| SNP_P4_185053_9127 | NW_004518754.1 | Scaffold4294 | 9127                    | CC                              | GG              | 1947052730               |
| SNP_P4_185054_9128 | NW_004518754.1 | Scaffold4294 | 9128                    | TT                              | AA              | 1947052732               |
| SNP_P4_185055_493  | NW_004518755.1 | Scaffold4295 | 493                     | CC                              | TT              | 1947052734               |
| SNP_P4_185056_503  | NW_004518755.1 | Scaffold4295 | 503                     | AA                              | CC              | 1947052736               |
| SNP_P4_185057_523  | NW_004518755.1 | Scaffold4295 | 523                     | GG                              | CC              | 1947052738               |
| SNP_P4_185058_535  | NW_004518755.1 | Scaffold4295 | 535                     | CC                              | TT              | 1947052740               |
| SNP_P4_185059_536  | NW_004518755.1 | Scaffold4295 | 536                     | CC                              | TT              | 1947052742               |
| SNP_P4_185060_572  | NW_004518755.1 | Scaffold4295 | 572                     | AA                              | TT              | 1947052744               |
| SNP_P4_185061_1906 | NW_004518756.1 | Scaffold4296 | 1906                    | TT                              | GG              | 1947052746               |
| SNP_P4_185062_2061 | NW_004518756.1 | Scaffold4296 | 2061                    | GG                              | CC              | 1947052748               |
| SNP_P4_185063_2066 | NW_004518756.1 | Scaffold4296 | 2066                    | AA                              | CC              | 1947052750               |
| SNP_P4_185064_2072 | NW_004518756.1 | Scaffold4296 | 2072                    | AA                              | GG              | 1947052752               |
| SNP_P4_185065_2077 | NW_004518756.1 | Scaffold4296 | 2077                    | CC                              | AA              | 1947052754               |
| SNP_P4_185066_2081 | NW_004518756.1 | Scaffold4296 | 2081                    | TT                              | CC              | 1947052756               |
| SNP_P4_185067_2094 | NW_004518756.1 | Scaffold4296 | 2094                    | GG                              | AA              | 1947052758               |
| SNP_P4_185068_2096 | NW_004518756.1 | Scaffold4296 | 2096                    | AA                              | GG              | 1947052760               |
| SNP_P4_185069_2149 | NW_004518756.1 | Scaffold4296 | 2149                    | TT                              | AA              | 1947052762               |
| SNP_P4_185070_2160 | NW_004518756.1 | Scaffold4296 | 2160                    | CC                              | TT              | 1947052764               |
| SNP_P4_185071_2180 | NW_004518756.1 | Scaffold4296 | 2180                    | AA                              | GG              | 1947052766               |
| SNP_P4_185072_2328 | NW_004518756.1 | Scaffold4296 | 2328                    | AA                              | CC              | 1947052768               |
| SNP_P4_185073_2430 | NW_004518756.1 | Scaffold4296 | 2430                    | TT                              | CC              | 1947052769               |
| SNP_P4_185074_2437 | NW_004518756.1 | Scaffold4296 | 2437                    | TT                              | AA              | 1947052771               |
| SNP_P4_185077_158  | NW_004518758.1 | Scaffold4300 | 158                     | TT                              | GG              | 1947052773               |
| SNP_P4_185078_261  | NW_004518758.1 | Scaffold4300 | 261                     | TT                              | CC              | 1947052775               |
| SNP_P4_185079_476  | NW_004518758.1 | Scaffold4300 | 476                     | TT                              | GG              | 1947052777               |
| SNP_P4_185080_483  | NW_004518758.1 | Scaffold4300 | 483                     | TT                              | CC              | 1947052779               |
| SNP_P4_185081_524  | NW_004518758.1 | Scaffold4300 | 524                     | AA                              | GG              | 1947052781               |
| SNP_P4_185082_1058 | NW_004518758.1 | Scaffold4300 | 1058                    | TT                              | CC              | 1947052783               |
| SNP_P4_185083_1090 | NW_004518761.1 | Scaffold4306 | 1090                    | GG                              | AA              | 1947052785               |
| SNP_P4_185084_2575 | NW_004518765.1 | Scaffold4316 | 2575                    | TT                              | CC              | 1947052787               |
| SNP_P4_185086_5472 | NW_004518765.1 | Scaffold4316 | 5472                    | GG                              | TT              | 1947052789               |
| SNP_P4_185087_5474 | NW_004518765.1 | Scaffold4316 | 5474                    | AA                              | CC              | 1947052791               |
| SNP_P4_185088_943  | NW_004518767.1 | Scaffold4319 | 943                     | GG                              | AA              | 1947052793               |
| SNP_P4_185089_968  | NW_004518767.1 | Scaffold4319 | 968                     | GG                              | AA              | 1947052795               |
| SNP_P4_185090_970  | NW_004518767.1 | Scaffold4319 | 970                     | CC                              | TT              | 1947052797               |
| SNP_P4_185092_1105 | NW_004518767.1 | Scaffold4319 | 1105                    | AA                              | CC              | 1947052799               |
| SNP_P4_185097_1492 | NW_004518767.1 | Scaffold4319 | 1492                    | CC                              | TT              | 1947052801               |



| SNPs IDs            | Chromosome IDs | Chromosomes  | Physical positions (bp) | CDC Frontier (Reference genome) | (ILWC46 & LPNB) | NCBI SNPdb Accession IDs |
|---------------------|----------------|--------------|-------------------------|---------------------------------|-----------------|--------------------------|
| SNP_P4_185098_1493  | NW_004518767.1 | Scaffold4319 | 1493                    | CC                              | GG              | 1947052802               |
| SNP_P4_185101_565   | NW_004518771.1 | Scaffold4324 | 565                     | TT                              | AA              | 1947052804               |
| SNP_P4_185102_840   | NW_004518777.1 | Scaffold4330 | 840                     | AA                              | GG              | 1947052806               |
| SNP_P4_185103_859   | NW_004518777.1 | Scaffold4330 | 859                     | CC                              | GG              | 1947052808               |
| SNP_P4_185104_865   | NW_004518777.1 | Scaffold4330 | 865                     | AA                              | GG              | 1947052810               |
| SNP_P4_185105_884   | NW_004518777.1 | Scaffold4330 | 884                     | TT                              | CC              | 1947052812               |
| SNP_P4_185106_906   | NW_004518777.1 | Scaffold4330 | 906                     | TT                              | AA              | 1947052814               |
| SNP_P4_185107_957   | NW_004518777.1 | Scaffold4330 | 957                     | TT                              | CC              | 1947052816               |
| SNP_P4_185108_1637  | NW_004518778.1 | Scaffold4331 | 1637                    | GG                              | TT              | 1947052818               |
| SNP_P4_185109_1651  | NW_004518778.1 | Scaffold4331 | 1651                    | GG                              | TT              | 1947052820               |
| SNP_P4_185110_2416  | NW_004518778.1 | Scaffold4331 | 2416                    | AA                              | TT              | 1947052822               |
| SNP_P4_185111_34625 | NW_004518778.1 | Scaffold4331 | 34625                   | GG                              | TT              | 1947052824               |
| SNP_P4_185112_43    | NW_004518779.1 | Scaffold4333 | 43                      | AA                              | TT              | 1947052826               |
| SNP_P4_185113_69    | NW_004518779.1 | Scaffold4333 | 69                      | GG                              | TT              | 1947052828               |
| SNP_P4_185114_75    | NW_004518779.1 | Scaffold4333 | 75                      | AA                              | TT              | 1947052830               |
| SNP_P4_185115_80    | NW_004518779.1 | Scaffold4333 | 80                      | GG                              | AA              | 1947052832               |
| SNP_P4_185116_2524  | NW_004518781.1 | Scaffold4335 | 2524                    | GG                              | TT              | 1947052834               |
| SNP_P4_185117_2533  | NW_004518781.1 | Scaffold4335 | 2533                    | AA                              | TT              | 1947052836               |
| SNP_P4_185118_2588  | NW_004518781.1 | Scaffold4335 | 2588                    | TT                              | AA              | 1947052838               |
| SNP_P4_185119_2770  | NW_004518781.1 | Scaffold4335 | 2770                    | TT                              | GG              | 1947052840               |
| SNP_P4_185120_231   | NW_004518782.1 | Scaffold4336 | 231                     | GG                              | AA              | 1947052841               |
| SNP_P4_185122_3330  | NW_004518782.1 | Scaffold4336 | 3330                    | CC                              | TT              | 1947052843               |
| SNP_P4_185124_3507  | NW_004518782.1 | Scaffold4336 | 3507                    | AA                              | TT              | 1947052845               |
| SNP_P4_185125_3515  | NW_004518782.1 | Scaffold4336 | 3515                    | TT                              | AA              | 1947052847               |
| SNP_P4_185126_3523  | NW_004518782.1 | Scaffold4336 | 3523                    | GG                              | TT              | 1947052849               |
| SNP_P4_185127_3524  | NW_004518782.1 | Scaffold4336 | 3524                    | AA                              | GG              | 1947052851               |
| SNP_P4_185128_1205  | NW_004518786.1 | Scaffold4347 | 1205                    | TT                              | AA              | 1947052853               |
| SNP_P4_185129_484   | NW_004518787.1 | Scaffold4348 | 484                     | AA                              | TT              | 1947052855               |
| SNP_P4_185130_821   | NW_004518787.1 | Scaffold4348 | 821                     | TT                              | AA              | 1947052861               |
| SNP_P4_185131_822   | NW_004518787.1 | Scaffold4348 | 822                     | TT                              | CC              | 1947052863               |
| SNP_P4_185132_1169  | NW_004518787.1 | Scaffold4348 | 1169                    | TT                              | CC              | 1947052865               |
| SNP_P4_185133_2126  | NW_004518787.1 | Scaffold4348 | 2126                    | GG                              | AA              | 1947052867               |
| SNP_P4_185134_2167  | NW_004518787.1 | Scaffold4348 | 2167                    | AA                              | TT              | 1947052869               |
| SNP_P4_185135_2175  | NW_004518787.1 | Scaffold4348 | 2175                    | TT                              | CC              | 1947052871               |
| SNP_P4_185136_1733  | NW_004518788.1 | Scaffold4349 | 1733                    | AA                              | TT              | 1947052873               |
| SNP_P4_185137_1764  | NW_004518788.1 | Scaffold4349 | 1764                    | GG                              | TT              | 1947052875               |
| SNP_P4_185139_1945  | NW_004518788.1 | Scaffold4349 | 1945                    | AA                              | CC              | 1947052877               |
| SNP_P4_185140_125   | NW_004518791.1 | Scaffold4354 | 125                     | AA                              | TT              | 1947052879               |
| SNP_P4_185141_156   | NW_004518791.1 | Scaffold4354 | 156                     | CC                              | TT              | 1947052881               |
| SNP_P4_185142_246   | NW_004518791.1 | Scaffold4354 | 246                     | TT                              | AA              | 1947052883               |
| SNP_P4_185143_410   | NW_004518791.1 | Scaffold4354 | 410                     | CC                              | AA              | 1947052885               |
| SNP_P4_185144_566   | NW_004518791.1 | Scaffold4354 | 566                     | CC                              | TT              | 1947052887               |

| SNPs IDs            | Chromosome IDs | Chromosomes  | Physical positions (bp) | CDC Frontier (Reference genome) | (ILWC46 & LPNB) | NCBI SNPdb Accession IDs |
|---------------------|----------------|--------------|-------------------------|---------------------------------|-----------------|--------------------------|
| SNP_P4_185145_613   | NW_004518791.1 | Scaffold4354 | 613                     | AA                              | GG              | 1947052889               |
| SNP_P4_185146_1035  | NW_004518793.1 | Scaffold4357 | 1035                    | CC                              | TT              | 1947052891               |
| SNP_P4_185148_3186  | NW_004518798.1 | Scaffold4366 | 3186                    | CC                              | AA              | 1947052893               |
| SNP_P4_185149_138   | NW_004518799.1 | Scaffold4367 | 138                     | TT                              | AA              | 1947052895               |
| SNP_P4_185150_334   | NW_004518799.1 | Scaffold4367 | 334                     | TT                              | CC              | 1947052897               |
| SNP_P4_185151_388   | NW_004518799.1 | Scaffold4367 | 388                     | AA                              | GG              | 1947052899               |
| SNP_P4_185152_624   | NW_004518799.1 | Scaffold4367 | 624                     | AA                              | GG              | 1947052901               |
| SNP_P4_185153_921   | NW_004518799.1 | Scaffold4367 | 921                     | GG                              | TT              | 1947052903               |
| SNP_P4_185154_951   | NW_004518799.1 | Scaffold4367 | 951                     | TT                              | AA              | 1947052905               |
| SNP_P4_185155_2565  | NW_004518799.1 | Scaffold4367 | 2565                    | TT                              | AA              | 1947052907               |
| SNP_P4_185156_2598  | NW_004518799.1 | Scaffold4367 | 2598                    | TT                              | CC              | 1947052908               |
| SNP_P4_185157_3400  | NW_004518799.1 | Scaffold4367 | 3400                    | AA                              | GG              | 1947052910               |
| SNP_P4_185158_6243  | NW_004518799.1 | Scaffold4367 | 6243                    | GG                              | AA              | 1947052912               |
| SNP_P4_185159_6321  | NW_004518799.1 | Scaffold4367 | 6321                    | CC                              | GG              | 1947052914               |
| SNP_P4_185160_6359  | NW_004518799.1 | Scaffold4367 | 6359                    | TT                              | CC              | 1947052916               |
| SNP_P4_185161_6370  | NW_004518799.1 | Scaffold4367 | 6370                    | AA                              | GG              | 1947052918               |
| SNP_P4_185162_6846  | NW_004518799.1 | Scaffold4367 | 6846                    | AA                              | TT              | 1947052920               |
| SNP_P4_185163_6970  | NW_004518799.1 | Scaffold4367 | 6970                    | TT                              | AA              | 1947052922               |
| SNP_P4_185164_7873  | NW_004518799.1 | Scaffold4367 | 7873                    | TT                              | GG              | 1947052924               |
| SNP_P4_185165_7995  | NW_004518799.1 | Scaffold4367 | 7995                    | CC                              | AA              | 1947052926               |
| SNP_P4_185166_8163  | NW_004518799.1 | Scaffold4367 | 8163                    | TT                              | GG              | 1947052928               |
| SNP_P4_185167_8640  | NW_004518799.1 | Scaffold4367 | 8640                    | AA                              | GG              | 1947052930               |
| SNP_P4_185168_9226  | NW_004518799.1 | Scaffold4367 | 9226                    | TT                              | AA              | 1947052932               |
| SNP_P4_185169_9264  | NW_004518799.1 | Scaffold4367 | 9264                    | AA                              | CC              | 1947052934               |
| SNP_P4_185170_9777  | NW_004518799.1 | Scaffold4367 | 9777                    | CC                              | AA              | 1947052936               |
| SNP_P4_185171_11170 | NW_004518799.1 | Scaffold4367 | 11170                   | GG                              | AA              | 1947052938               |
| SNP_P4_185172_11205 | NW_004518799.1 | Scaffold4367 | 11205                   | GG                              | AA              | 1947052940               |
| SNP_P4_185173_11217 | NW_004518799.1 | Scaffold4367 | 11217                   | AA                              | CC              | 1947052941               |
| SNP_P4_185174_11218 | NW_004518799.1 | Scaffold4367 | 11218                   | CC                              | GG              | 1947052943               |
| SNP_P4_185175_11260 | NW_004518799.1 | Scaffold4367 | 11260                   | CC                              | TT              | 1947052945               |
| SNP_P4_185176_11351 | NW_004518799.1 | Scaffold4367 | 11351                   | GG                              | AA              | 1947052948               |
| SNP_P4_185177_11386 | NW_004518799.1 | Scaffold4367 | 11386                   | GG                              | TT              | 1947052950               |
| SNP_P4_185178_11590 | NW_004518799.1 | Scaffold4367 | 11590                   | CC                              | TT              | 1947052952               |
| SNP_P4_185179_11719 | NW_004518799.1 | Scaffold4367 | 11719                   | TT                              | CC              | 1947052954               |
| SNP_P4_185181_12561 | NW_004518799.1 | Scaffold4367 | 12561                   | CC                              | GG              | 1947052956               |
| SNP_P4_185182_12961 | NW_004518799.1 | Scaffold4367 | 12961                   | AA                              | CC              | 1947052958               |
| SNP_P4_185183_13048 | NW_004518799.1 | Scaffold4367 | 13048                   | CC                              | AA              | 1947052960               |
| SNP_P4_185184_15879 | NW_004518799.1 | Scaffold4367 | 15879                   | CC                              | AA              | 1947052962               |
| SNP_P4_185185_16139 | NW_004518799.1 | Scaffold4367 | 16139                   | TT                              | GG              | 1947052964               |
| SNP_P4_185186_23477 | NW_004518799.1 | Scaffold4367 | 23477                   | CC                              | AA              | 1947052966               |
| SNP_P4_185188_29809 | NW_004518799.1 | Scaffold4367 | 29809                   | TT                              | GG              | 1947052968               |
| SNP_P4_185189_30719 | NW_004518799.1 | Scaffold4367 | 30719                   | GG                              | CC              | 1947052970               |

| SNPs IDs            | Chromosome IDs | Chromosomes  | Physical positions (bp) | CDC Frontier (Reference genome) | (ILWC46 & LPNB) | NCBI SNPdb Accession IDs |
|---------------------|----------------|--------------|-------------------------|---------------------------------|-----------------|--------------------------|
| SNP_P4_185190_30803 | NW_004518799.1 | Scaffold4367 | 30803                   | TT                              | GG              | 1947052972               |
| SNP_P4_185191_30841 | NW_004518799.1 | Scaffold4367 | 30841                   | CC                              | AA              | 1947052974               |
| SNP_P4_185192_30842 | NW_004518799.1 | Scaffold4367 | 30842                   | AA                              | TT              | 1947052976               |
| SNP_P4_185193_30849 | NW_004518799.1 | Scaffold4367 | 30849                   | CC                              | TT              | 1947052978               |
| SNP_P4_185194_31124 | NW_004518799.1 | Scaffold4367 | 31124                   | GG                              | AA              | 1947052980               |
| SNP_P4_185195_36234 | NW_004518799.1 | Scaffold4367 | 36234                   | CC                              | TT              | 1947052982               |
| SNP_P4_185196_36254 | NW_004518799.1 | Scaffold4367 | 36254                   | GG                              | AA              | 1947052984               |
| SNP_P4_185197_1111  | NW_004518801.1 | Scaffold4371 | 1111                    | GG                              | TT              | 1947052986               |
| SNP_P4_185199_69    | NW_004518804.1 | Scaffold4374 | 69                      | CC                              | AA              | 1947052988               |
| SNP_P4_185201_367   | NW_004518804.1 | Scaffold4374 | 367                     | TT                              | CC              | 1947052990               |
| SNP_P4_185202_386   | NW_004518804.1 | Scaffold4374 | 386                     | CC                              | AA              | 1947052992               |
| SNP_P4_185203_405   | NW_004518804.1 | Scaffold4374 | 405                     | TT                              | CC              | 1947052994               |
| SNP_P4_185204_424   | NW_004518804.1 | Scaffold4374 | 424                     | TT                              | CC              | 1947052996               |
| SNP_P4_185205_526   | NW_004518804.1 | Scaffold4374 | 526                     | TT                              | AA              | 1947052998               |
| SNP_P4_185206_587   | NW_004518804.1 | Scaffold4374 | 587                     | AA                              | GG              | 1947053000               |
| SNP_P4_185207_713   | NW_004518804.1 | Scaffold4374 | 713                     | AA                              | CC              | 1947053002               |
| SNP_P4_185208_772   | NW_004518804.1 | Scaffold4374 | 772                     | TT                              | CC              | 1947053003               |
| SNP_P4_185209_808   | NW_004518804.1 | Scaffold4374 | 808                     | CC                              | TT              | 1947053005               |
| SNP_P4_185210_993   | NW_004518804.1 | Scaffold4374 | 993                     | CC                              | AA              | 1947053007               |
| SNP_P4_185211_1000  | NW_004518804.1 | Scaffold4374 | 1000                    | CC                              | AA              | 1947053009               |
| SNP_P4_185212_1007  | NW_004518804.1 | Scaffold4374 | 1007                    | CC                              | AA              | 1947053011               |
| SNP_P4_185213_1137  | NW_004518804.1 | Scaffold4374 | 1137                    | AA                              | CC              | 1947053013               |
| SNP_P4_185216_1905  | NW_004518804.1 | Scaffold4374 | 1905                    | AA                              | GG              | 1947053015               |
| SNP_P4_185217_1906  | NW_004518804.1 | Scaffold4374 | 1906                    | GG                              | AA              | 1947053017               |
| SNP_P4_185218_1947  | NW_004518804.1 | Scaffold4374 | 1947                    | TT                              | CC              | 1947053019               |
| SNP_P4_185219_2170  | NW_004518804.1 | Scaffold4374 | 2170                    | TT                              | CC              | 1947053021               |
| SNP_P4_185220_2214  | NW_004518804.1 | Scaffold4374 | 2214                    | AA                              | GG              | 1947053023               |
| SNP_P4_185223_11075 | NW_004518806.1 | Scaffold4377 | 11075                   | GG                              | CC              | 1947053025               |
| SNP_P4_185224_16873 | NW_004518806.1 | Scaffold4377 | 16873                   | AA                              | GG              | 1947053027               |
| SNP_P4_185225_27275 | NW_004518806.1 | Scaffold4377 | 27275                   | GG                              | TT              | 1947053029               |
| SNP_P4_185226_27297 | NW_004518806.1 | Scaffold4377 | 27297                   | CC                              | TT              | 1947053031               |
| SNP_P4_185227_27324 | NW_004518806.1 | Scaffold4377 | 27324                   | TT                              | AA              | 1947053032               |
| SNP_P4_185228_33434 | NW_004518806.1 | Scaffold4377 | 33434                   | GG                              | TT              | 1947053034               |
| SNP_P4_185229_33731 | NW_004518806.1 | Scaffold4377 | 33731                   | TT                              | AA              | 1947053036               |
| SNP_P4_185230_33735 | NW_004518806.1 | Scaffold4377 | 33735                   | GG                              | AA              | 1947053038               |
| SNP_P4_185231_33802 | NW_004518806.1 | Scaffold4377 | 33802                   | GG                              | CC              | 1947053040               |
| SNP_P4_185232_34019 | NW_004518806.1 | Scaffold4377 | 34019                   | AA                              | TT              | 1947053042               |
| SNP_P4_185233_44266 | NW_004518806.1 | Scaffold4377 | 44266                   | CC                              | AA              | 1947053044               |
| SNP_P4_185234_46804 | NW_004518806.1 | Scaffold4377 | 46804                   | GG                              | TT              | 1947053046               |
| SNP_P4_185235_46894 | NW_004518806.1 | Scaffold4377 | 46894                   | CC                              | TT              | 1947053048               |
| SNP_P4_185236_47106 | NW_004518806.1 | Scaffold4377 | 47106                   | TT                              | AA              | 1947053049               |
| SNP_P4_185237_47113 | NW_004518806.1 | Scaffold4377 | 47113                   | AA                              | GG              | 1947053051               |

| SNPs IDs            | Chromosome IDs | Chromosomes  | Physical positions (bp) | CDC Frontier (Reference genome) | (ILWC46 & LPNB) | NCBI SNPdb Accession IDs |
|---------------------|----------------|--------------|-------------------------|---------------------------------|-----------------|--------------------------|
| SNP_P4_185238_47137 | NW_004518806.1 | Scaffold4377 | 47137                   | TT                              | AA              | 1947053053               |
| SNP_P4_185239_47190 | NW_004518806.1 | Scaffold4377 | 47190                   | CC                              | TT              | 1947053055               |
| SNP_P4_185240_48233 | NW_004518806.1 | Scaffold4377 | 48233                   | TT                              | CC              | 1947053057               |
| SNP_P4_185241_48332 | NW_004518806.1 | Scaffold4377 | 48332                   | AA                              | CC              | 1947053059               |
| SNP_P4_185242_48582 | NW_004518806.1 | Scaffold4377 | 48582                   | AA                              | TT              | 1947053061               |
| SNP_P4_185243_48601 | NW_004518806.1 | Scaffold4377 | 48601                   | TT                              | GG              | 1947053063               |
| SNP_P4_185244_50990 | NW_004518806.1 | Scaffold4377 | 50990                   | TT                              | AA              | 1947053065               |
| SNP_P4_185245_892   | NW_004518807.1 | Scaffold4379 | 892                     | CC                              | AA              | 1947053067               |
| SNP_P4_185246_897   | NW_004518807.1 | Scaffold4379 | 897                     | TT                              | AA              | 1947053069               |
| SNP_P4_185247_11912 | NW_004518807.1 | Scaffold4379 | 11912                   | AA                              | TT              | 1947053071               |
| SNP_P4_185248_13592 | NW_004518807.1 | Scaffold4379 | 13592                   | AA                              | TT              | 1947053072               |
| SNP_P4_185249_14516 | NW_004518807.1 | Scaffold4379 | 14516                   | AA                              | CC              | 1947053074               |
| SNP_P4_185250_19461 | NW_004518807.1 | Scaffold4379 | 19461                   | GG                              | AA              | 1947053076               |
| SNP_P4_185251_21266 | NW_004518807.1 | Scaffold4379 | 21266                   | TT                              | CC              | 1947053078               |
| SNP_P4_185252_23278 | NW_004518807.1 | Scaffold4379 | 23278                   | GG                              | TT              | 1947053080               |
| SNP_P4_185253_23279 | NW_004518807.1 | Scaffold4379 | 23279                   | TT                              | AA              | 1947053082               |
| SNP_P4_185254_22613 | NW_004518810.1 | Scaffold4383 | 22613                   | TT                              | CC              | 1947053084               |
| SNP_P4_185255_22638 | NW_004518810.1 | Scaffold4383 | 22638                   | AA                              | CC              | 1947053086               |
| SNP_P4_185256_22639 | NW_004518810.1 | Scaffold4383 | 22639                   | CC                              | AA              | 1947053088               |
| SNP_P4_185257_22640 | NW_004518810.1 | Scaffold4383 | 22640                   | TT                              | CC              | 1947053090               |
| SNP_P4_185258_22662 | NW_004518810.1 | Scaffold4383 | 22662                   | AA                              | GG              | 1947053092               |
| SNP_P4_185259_22843 | NW_004518810.1 | Scaffold4383 | 22843                   | AA                              | GG              | 1947053094               |
| SNP_P4_185260_22882 | NW_004518810.1 | Scaffold4383 | 22882                   | AA                              | GG              | 1947053096               |
| SNP_P4_185261_22889 | NW_004518810.1 | Scaffold4383 | 22889                   | AA                              | GG              | 1947053098               |
| SNP_P4_185262_22970 | NW_004518810.1 | Scaffold4383 | 22970                   | CC                              | TT              | 1947053100               |
| SNP_P4_185263_24861 | NW_004518810.1 | Scaffold4383 | 24861                   | AA                              | TT              | 1947053102               |
| SNP_P4_185264_24863 | NW_004518810.1 | Scaffold4383 | 24863                   | GG                              | CC              | 1947053104               |
| SNP_P4_185265_24877 | NW_004518810.1 | Scaffold4383 | 24877                   | CC                              | TT              | 1947053106               |
| SNP_P4_185266_24884 | NW_004518810.1 | Scaffold4383 | 24884                   | TT                              | GG              | 1947053108               |
| SNP_P4_185267_24971 | NW_004518810.1 | Scaffold4383 | 24971                   | CC                              | TT              | 1947053110               |
| SNP_P4_185268_25276 | NW_004518810.1 | Scaffold4383 | 25276                   | CC                              | AA              | 1947053112               |
| SNP_P4_185269_25295 | NW_004518810.1 | Scaffold4383 | 25295                   | GG                              | TT              | 1947053114               |
| SNP_P4_185270_25301 | NW_004518810.1 | Scaffold4383 | 25301                   | TT                              | CC              | 1947053116               |
| SNP_P4_185272_863   | NW_004518811.1 | Scaffold4385 | 863                     | GG                              | AA              | 1947053118               |
| SNP_P4_185273_885   | NW_004518811.1 | Scaffold4385 | 885                     | CC                              | AA              | 1947053120               |
| SNP_P4_185274_6419  | NW_004518811.1 | Scaffold4385 | 6419                    | GG                              | CC              | 1947053122               |
| SNP_P4_185275_6425  | NW_004518811.1 | Scaffold4385 | 6425                    | GG                              | AA              | 1947053124               |
| SNP_P4_185276_6442  | NW_004518811.1 | Scaffold4385 | 6442                    | TT                              | CC              | 1947053126               |
| SNP_P4_185277_6478  | NW_004518811.1 | Scaffold4385 | 6478                    | AA                              | GG              | 1947053128               |
| SNP_P4_185278_6479  | NW_004518811.1 | Scaffold4385 | 6479                    | AA                              | GG              | 1947053130               |
| SNP_P4_185279_7147  | NW_004518811.1 | Scaffold4385 | 7147                    | AA                              | GG              | 1947053132               |
| SNP_P4_185280_7149  | NW_004518811.1 | Scaffold4385 | 7149                    | TT                              | CC              | 1947053134               |

| SNPs IDs            | Chromosome IDs | Chromosomes  | Physical positions (bp) | CDC Frontier (Reference genome) | (ILWC46 & LPNB) | NCBI SNPdb Accession IDs |
|---------------------|----------------|--------------|-------------------------|---------------------------------|-----------------|--------------------------|
| SNP_P4_185281_7151  | NW_004518811.1 | Scaffold4385 | 7151                    | TT                              | AA              | 1947053136               |
| SNP_P4_185283_7271  | NW_004518811.1 | Scaffold4385 | 7271                    | CC                              | TT              | 1947053138               |
| SNP_P4_185284_7669  | NW_004518811.1 | Scaffold4385 | 7669                    | TT                              | CC              | 1947053140               |
| SNP_P4_185285_7689  | NW_004518811.1 | Scaffold4385 | 7689                    | TT                              | CC              | 1947053142               |
| SNP_P4_185286_7735  | NW_004518811.1 | Scaffold4385 | 7735                    | TT                              | AA              | 1947053144               |
| SNP_P4_185287_8209  | NW_004518811.1 | Scaffold4385 | 8209                    | GG                              | CC              | 1947053146               |
| SNP_P4_185288_22997 | NW_004518811.1 | Scaffold4385 | 22997                   | GG                              | AA              | 1947053148               |
| SNP_P4_185289_105   | NW_004518813.1 | Scaffold4387 | 105                     | TT                              | AA              | 1947053150               |
| SNP_P4_185290_133   | NW_004518813.1 | Scaffold4387 | 133                     | AA                              | CC              | 1947053151               |
| SNP_P4_185291_156   | NW_004518813.1 | Scaffold4387 | 156                     | CC                              | TT              | 1947053153               |
| SNP_P4_185292_163   | NW_004518813.1 | Scaffold4387 | 163                     | CC                              | AA              | 1947053155               |
| SNP_P4_185293_367   | NW_004518813.1 | Scaffold4387 | 367                     | CC                              | TT              | 1947053157               |
| SNP_P4_185294_622   | NW_004518813.1 | Scaffold4387 | 622                     | TT                              | AA              | 1947053159               |
| SNP_P4_185295_699   | NW_004518813.1 | Scaffold4387 | 699                     | TT                              | CC              | 1947053161               |
| SNP_P4_185296_807   | NW_004518813.1 | Scaffold4387 | 807                     | AA                              | TT              | 1947053163               |
| SNP_P4_185297_903   | NW_004518813.1 | Scaffold4387 | 903                     | TT                              | CC              | 1947053165               |
| SNP_P4_185298_932   | NW_004518813.1 | Scaffold4387 | 932                     | GG                              | AA              | 1947053167               |
| SNP_P4_185299_1056  | NW_004518813.1 | Scaffold4387 | 1056                    | GG                              | AA              | 1947053169               |
| SNP_P4_185300_5232  | NW_004518813.1 | Scaffold4387 | 5232                    | TT                              | CC              | 1947053171               |
| SNP_P4_185301_5407  | NW_004518813.1 | Scaffold4387 | 5407                    | TT                              | GG              | 1947053173               |
| SNP_P4_185303_5452  | NW_004518813.1 | Scaffold4387 | 5452                    | AA                              | TT              | 1947053175               |
| SNP_P4_185304_5476  | NW_004518813.1 | Scaffold4387 | 5476                    | AA                              | TT              | 1947053177               |
| SNP_P4_185305_5483  | NW_004518813.1 | Scaffold4387 | 5483                    | AA                              | TT              | 1947053179               |
| SNP_P4_185307_5538  | NW_004518813.1 | Scaffold4387 | 5538                    | TT                              | CC              | 1947053181               |
| SNP_P4_185308_5560  | NW_004518813.1 | Scaffold4387 | 5560                    | TT                              | CC              | 1947053183               |
| SNP_P4_185309_5570  | NW_004518813.1 | Scaffold4387 | 5570                    | GG                              | AA              | 1947053185               |
| SNP_P4_185310_5595  | NW_004518813.1 | Scaffold4387 | 5595                    | CC                              | TT              | 1947053187               |
| SNP_P4_185311_5613  | NW_004518813.1 | Scaffold4387 | 5613                    | CC                              | GG              | 1947053189               |
| SNP_P4_185313_5886  | NW_004518813.1 | Scaffold4387 | 5886                    | CC                              | GG              | 1947053191               |
| SNP_P4_185314_5944  | NW_004518813.1 | Scaffold4387 | 5944                    | GG                              | TT              | 1947053193               |
| SNP_P4_185315_6583  | NW_004518813.1 | Scaffold4387 | 6583                    | CC                              | TT              | 1947053195               |
| SNP_P4_185316_7382  | NW_004518813.1 | Scaffold4387 | 7382                    | GG                              | AA              | 1947053197               |
| SNP_P4_185317_319   | NW_004518814.1 | Scaffold4388 | 319                     | AA                              | GG              | 1947053199               |
| SNP_P4_185318_339   | NW_004518814.1 | Scaffold4388 | 339                     | GG                              | AA              | 1947053201               |
| SNP_P4_185319_400   | NW_004518814.1 | Scaffold4388 | 400                     | AA                              | CC              | 1947053203               |
| SNP_P4_185320_404   | NW_004518814.1 | Scaffold4388 | 404                     | AA                              | CC              | 1947053205               |
| SNP_P4_185321_414   | NW_004518814.1 | Scaffold4388 | 414                     | TT                              | GG              | 1947053207               |
| SNP_P4_185322_422   | NW_004518814.1 | Scaffold4388 | 422                     | GG                              | AA              | 1947053209               |
| SNP_P4_185324_500   | NW_004518814.1 | Scaffold4388 | 500                     | CC                              | TT              | 1947053210               |
| SNP_P4_185325_521   | NW_004518814.1 | Scaffold4388 | 521                     | TT                              | CC              | 1947053212               |
| SNP_P4_185326_543   | NW_004518814.1 | Scaffold4388 | 543                     | TT                              | GG              | 1947053214               |
| SNP_P4_185327_627   | NW_004518816.1 | Scaffold4390 | 627                     | AA                              | GG              | 1947053216               |

| SNPs IDs           | Chromosome IDs | Chromosomes  | Physical positions (bp) | CDC Frontier (Reference genome) | (ILWC46 & LPNB) | NCBI SNPdb Accession IDs |
|--------------------|----------------|--------------|-------------------------|---------------------------------|-----------------|--------------------------|
| SNP_P4_185328_180  | NW_004518821.1 | Scaffold4398 | 180                     | TT                              | CC              | 1947053218               |
| SNP_P4_185329_283  | NW_004518821.1 | Scaffold4398 | 283                     | GG                              | CC              | 1947053220               |
| SNP_P4_185332_192  | NW_004518823.1 | Scaffold4402 | 192                     | CC                              | TT              | 1947053222               |
| SNP_P4_185333_198  | NW_004518823.1 | Scaffold4402 | 198                     | AA                              | GG              | 1947053224               |
| SNP_P4_185334_264  | NW_004518823.1 | Scaffold4402 | 264                     | CC                              | TT              | 1947053226               |
| SNP_P4_185335_402  | NW_004518823.1 | Scaffold4402 | 402                     | AA                              | GG              | 1947053228               |
| SNP_P4_185336_403  | NW_004518823.1 | Scaffold4402 | 403                     | GG                              | TT              | 1947053230               |
| SNP_P4_185337_442  | NW_004518823.1 | Scaffold4402 | 442                     | AA                              | GG              | 1947053232               |
| SNP_P4_185338_448  | NW_004518823.1 | Scaffold4402 | 448                     | GG                              | AA              | 1947053234               |
| SNP_P4_185339_454  | NW_004518823.1 | Scaffold4402 | 454                     | CC                              | TT              | 1947053236               |
| SNP_P4_185340_461  | NW_004518823.1 | Scaffold4402 | 461                     | CC                              | TT              | 1947053238               |
| SNP_P4_185341_472  | NW_004518823.1 | Scaffold4402 | 472                     | TT                              | CC              | 1947053240               |
| SNP_P4_185342_508  | NW_004518823.1 | Scaffold4402 | 508                     | AA                              | GG              | 1947053241               |
| SNP_P4_185343_64   | NW_004518824.1 | Scaffold4404 | 64                      | AA                              | TT              | 1947053243               |
| SNP_P4_185344_69   | NW_004518824.1 | Scaffold4404 | 69                      | TT                              | AA              | 1947053245               |
| SNP_P4_185345_575  | NW_004518824.1 | Scaffold4404 | 575                     | CC                              | TT              | 1947053247               |
| SNP_P4_185346_302  | NW_004518825.1 | Scaffold4405 | 302                     | CC                              | TT              | 1947053249               |
| SNP_P4_185347_321  | NW_004518825.1 | Scaffold4405 | 321                     | CC                              | TT              | 1947053251               |
| SNP_P4_185348_325  | NW_004518825.1 | Scaffold4405 | 325                     | TT                              | AA              | 1947053253               |
| SNP_P4_185349_4513 | NW_004518825.1 | Scaffold4405 | 4513                    | GG                              | TT              | 1947053255               |
| SNP_P4_185350_523  | NW_004518829.1 | Scaffold4414 | 523                     | AA                              | CC              | 1947053257               |
| SNP_P4_185351_2732 | NW_004518829.1 | Scaffold4414 | 2732                    | CC                              | TT              | 1947053259               |
| SNP_P4_185352_499  | NW_004518832.1 | Scaffold4417 | 499                     | TT                              | AA              | 1947053261               |
| SNP_P4_185353_563  | NW_004518832.1 | Scaffold4417 | 563                     | TT                              | CC              | 1947053263               |
| SNP_P4_185354_852  | NW_004518832.1 | Scaffold4417 | 852                     | GG                              | AA              | 1947053265               |
| SNP_P4_185355_881  | NW_004518832.1 | Scaffold4417 | 881                     | TT                              | AA              | 1947053267               |
| SNP_P4_185356_1124 | NW_004518832.1 | Scaffold4417 | 1124                    | CC                              | TT              | 1947053269               |
| SNP_P4_185357_1133 | NW_004518832.1 | Scaffold4417 | 1133                    | TT                              | CC              | 1947053271               |
| SNP_P4_185358_1139 | NW_004518832.1 | Scaffold4417 | 1139                    | GG                              | CC              | 1947053273               |
| SNP_P4_185359_1151 | NW_004518832.1 | Scaffold4417 | 1151                    | GG                              | CC              | 1947053275               |
| SNP_P4_185360_278  | NW_004518833.1 | Scaffold4418 | 278                     | AA                              | TT              | 1947053277               |
| SNP_P4_185361_79   | NW_004518836.1 | Scaffold4424 | 79                      | CC                              | TT              | 1947053278               |
| SNP_P4_185363_931  | NW_004518837.1 | Scaffold4426 | 931                     | GG                              | CC              | 1947053280               |
| SNP_P4_185364_953  | NW_004518837.1 | Scaffold4426 | 953                     | TT                              | AA              | 1947053282               |
| SNP_P4_185365_962  | NW_004518837.1 | Scaffold4426 | 962                     | GG                              | TT              | 1947053284               |
| SNP_P4_185366_981  | NW_004518837.1 | Scaffold4426 | 981                     | TT                              | GG              | 1947053286               |
| SNP_P4_185367_994  | NW_004518837.1 | Scaffold4426 | 994                     | GG                              | AA              | 1947053288               |
| SNP_P4_185368_405  | NW_004518838.1 | Scaffold4427 | 405                     | AA                              | TT              | 1947053290               |
| SNP_P4_185369_413  | NW_004518838.1 | Scaffold4427 | 413                     | GG                              | CC              | 1947053292               |
| SNP_P4_185370_658  | NW_004518838.1 | Scaffold4427 | 658                     | AA                              | TT              | 1947053293               |
| SNP_P4_185371_615  | NW_004518840.1 | Scaffold4431 | 615                     | GG                              | AA              | 1947053295               |
| SNP_P4_185372_707  | NW_004518842.1 | Scaffold4434 | 707                     | GG                              | CC              | 1947053297               |

| SNPs IDs            | Chromosome IDs | Chromosomes  | Physical positions (bp) | CDC Frontier (Reference genome) | (ILWC46 & LPNB) | NCBI SNPdb Accession IDs |
|---------------------|----------------|--------------|-------------------------|---------------------------------|-----------------|--------------------------|
| SNP_P4_185373_2699  | NW_004518843.1 | Scaffold4436 | 2699                    | CC                              | GG              | 1947053299               |
| SNP_P4_185374_3296  | NW_004518843.1 | Scaffold4436 | 3296                    | TT                              | GG              | 1947053301               |
| SNP_P4_185375_3488  | NW_004518843.1 | Scaffold4436 | 3488                    | AA                              | TT              | 1947053303               |
| SNP_P4_185376_3491  | NW_004518843.1 | Scaffold4436 | 3491                    | TT                              | GG              | 1947053305               |
| SNP_P4_185377_3517  | NW_004518843.1 | Scaffold4436 | 3517                    | AA                              | CC              | 1947053307               |
| SNP_P4_185378_3573  | NW_004518843.1 | Scaffold4436 | 3573                    | AA                              | TT              | 1947053309               |
| SNP_P4_185379_3598  | NW_004518843.1 | Scaffold4436 | 3598                    | GG                              | AA              | 1947053311               |
| SNP_P4_185380_3602  | NW_004518843.1 | Scaffold4436 | 3602                    | TT                              | AA              | 1947053313               |
| SNP_P4_185381_3606  | NW_004518843.1 | Scaffold4436 | 3606                    | AA                              | GG              | 1947053315               |
| SNP_P4_185382_3631  | NW_004518843.1 | Scaffold4436 | 3631                    | AA                              | GG              | 1947053316               |
| SNP_P4_185383_927   | NW_004518844.1 | Scaffold4437 | 927                     | GG                              | CC              | 1947053318               |
| SNP_P4_185384_945   | NW_004518844.1 | Scaffold4437 | 945                     | AA                              | CC              | 1947053320               |
| SNP_P4_185385_963   | NW_004518844.1 | Scaffold4437 | 963                     | GG                              | AA              | 1947053322               |
| SNP_P4_185386_965   | NW_004518844.1 | Scaffold4437 | 965                     | AA                              | CC              | 1947053324               |
| SNP_P4_185387_1035  | NW_004518844.1 | Scaffold4437 | 1035                    | GG                              | AA              | 1947053326               |
| SNP_P4_185388_1205  | NW_004518844.1 | Scaffold4437 | 1205                    | TT                              | CC              | 1947053328               |
| SNP_P4_185389_1253  | NW_004518844.1 | Scaffold4437 | 1253                    | TT                              | CC              | 1947053330               |
| SNP_P4_185390_5594  | NW_004518845.1 | Scaffold4439 | 5594                    | CC                              | GG              | 1947053332               |
| SNP_P4_185391_5892  | NW_004518845.1 | Scaffold4439 | 5892                    | CC                              | GG              | 1947053334               |
| SNP_P4_185392_6124  | NW_004518845.1 | Scaffold4439 | 6124                    | AA                              | GG              | 1947053335               |
| SNP_P4_185393_6147  | NW_004518845.1 | Scaffold4439 | 6147                    | TT                              | AA              | 1947053337               |
| SNP_P4_185394_6174  | NW_004518845.1 | Scaffold4439 | 6174                    | AA                              | GG              | 1947053339               |
| SNP_P4_185395_6207  | NW_004518845.1 | Scaffold4439 | 6207                    | GG                              | TT              | 1947053341               |
| SNP_P4_185396_6324  | NW_004518845.1 | Scaffold4439 | 6324                    | AA                              | TT              | 1947053343               |
| SNP_P4_185397_6391  | NW_004518845.1 | Scaffold4439 | 6391                    | AA                              | TT              | 1947053345               |
| SNP_P4_185398_6392  | NW_004518845.1 | Scaffold4439 | 6392                    | AA                              | GG              | 1947053347               |
| SNP_P4_185399_6503  | NW_004518845.1 | Scaffold4439 | 6503                    | AA                              | GG              | 1947053349               |
| SNP_P4_185400_6632  | NW_004518845.1 | Scaffold4439 | 6632                    | TT                              | AA              | 1947053351               |
| SNP_P4_185401_6677  | NW_004518845.1 | Scaffold4439 | 6677                    | TT                              | GG              | 1947053353               |
| SNP_P4_185402_6695  | NW_004518845.1 | Scaffold4439 | 6695                    | GG                              | TT              | 1947053355               |
| SNP_P4_185403_6849  | NW_004518845.1 | Scaffold4439 | 6849                    | TT                              | CC              | 1947053357               |
| SNP_P4_185404_6851  | NW_004518845.1 | Scaffold4439 | 6851                    | AA                              | CC              | 1947053359               |
| SNP_P4_185405_6895  | NW_004518845.1 | Scaffold4439 | 6895                    | AA                              | CC              | 1947053361               |
| SNP_P4_185406_6907  | NW_004518845.1 | Scaffold4439 | 6907                    | GG                              | AA              | 1947053362               |
| SNP_P4_185407_6913  | NW_004518845.1 | Scaffold4439 | 6913                    | CC                              | GG              | 1947053364               |
| SNP_P4_185408_2801  | NW_004518855.1 | Scaffold4452 | 2801                    | CC                              | TT              | 1947053366               |
| SNP_P4_185409_5332  | NW_004518855.1 | Scaffold4452 | 5332                    | AA                              | GG              | 1947053368               |
| SNP_P4_185410_12965 | NW_004518855.1 | Scaffold4452 | 12965                   | GG                              | TT              | 1947053370               |
| SNP_P4_185411_12971 | NW_004518855.1 | Scaffold4452 | 12971                   | TT                              | CC              | 1947053372               |
| SNP_P4_185413_13738 | NW_004518855.1 | Scaffold4452 | 13738                   | GG                              | AA              | 1947053374               |
| SNP_P4_185414_13778 | NW_004518855.1 | Scaffold4452 | 13778                   | CC                              | TT              | 1947053376               |
| SNP_P4_185415_13803 | NW_004518855.1 | Scaffold4452 | 13803                   | GG                              | AA              | 1947053378               |

| SNPs IDs             | Chromosome IDs | Chromosomes  | Physical positions (bp) | CDC Frontier (Reference genome) | (ILWC46 & LPNB) | NCBI SNPdb Accession IDs |
|----------------------|----------------|--------------|-------------------------|---------------------------------|-----------------|--------------------------|
| SNP_P4_185416_13816  | NW_004518855.1 | Scaffold4452 | 13816                   | TT                              | CC              | 1947053380               |
| SNP_P4_185417_13947  | NW_004518855.1 | Scaffold4452 | 13947                   | TT                              | CC              | 1947053382               |
| SNP_P4_185418_14387  | NW_004518855.1 | Scaffold4452 | 14387                   | CC                              | TT              | 1947053384               |
| SNP_P4_185419_14394  | NW_004518855.1 | Scaffold4452 | 14394                   | GG                              | CC              | 1947053386               |
| SNP_P4_185420_14536  | NW_004518855.1 | Scaffold4452 | 14536                   | TT                              | GG              | 1947053388               |
| SNP_P4_185421_14551  | NW_004518855.1 | Scaffold4452 | 14551                   | AA                              | GG              | 1947053390               |
| SNP_P4_185422_14567  | NW_004518855.1 | Scaffold4452 | 14567                   | CC                              | TT              | 1947053392               |
| SNP_P4_185423_14975  | NW_004518855.1 | Scaffold4452 | 14975                   | CC                              | TT              | 1947053394               |
| SNP_P4_185424_29414  | NW_004518855.1 | Scaffold4452 | 29414                   | GG                              | TT              | 1947053396               |
| SNP_P4_185426_54048  | NW_004518855.1 | Scaffold4452 | 54048                   | CC                              | TT              | 1947053398               |
| SNP_P4_185428_86315  | NW_004518855.1 | Scaffold4452 | 86315                   | GG                              | AA              | 1947053400               |
| SNP_P4_185430_125871 | NW_004518855.1 | Scaffold4452 | 125871                  | AA                              | GG              | 1947053402               |
| SNP_P4_185431_125890 | NW_004518855.1 | Scaffold4452 | 125890                  | CC                              | AA              | 1947053404               |
| SNP_P4_185432_125953 | NW_004518855.1 | Scaffold4452 | 125953                  | CC                              | AA              | 1947053405               |
| SNP_P4_185433_126016 | NW_004518855.1 | Scaffold4452 | 126016                  | AA                              | GG              | 1947053407               |
| SNP_P4_185434_126046 | NW_004518855.1 | Scaffold4452 | 126046                  | CC                              | AA              | 1947053409               |
| SNP_P4_185435_126117 | NW_004518855.1 | Scaffold4452 | 126117                  | AA                              | TT              | 1947053411               |
| SNP_P4_185436_126121 | NW_004518855.1 | Scaffold4452 | 126121                  | GG                              | AA              | 1947053413               |
| SNP_P4_185437_126130 | NW_004518855.1 | Scaffold4452 | 126130                  | CC                              | TT              | 1947053415               |
| SNP_P4_185438_126143 | NW_004518855.1 | Scaffold4452 | 126143                  | AA                              | TT              | 1947053417               |
| SNP_P4_185439_126144 | NW_004518855.1 | Scaffold4452 | 126144                  | AA                              | TT              | 1947053419               |
| SNP_P4_185441_126205 | NW_004518855.1 | Scaffold4452 | 126205                  | GG                              | AA              | 1947053421               |
| SNP_P4_185442_126206 | NW_004518855.1 | Scaffold4452 | 126206                  | AA                              | CC              | 1947053423               |
| SNP_P4_185443_126281 | NW_004518855.1 | Scaffold4452 | 126281                  | GG                              | TT              | 1947053425               |
| SNP_P4_185444_549    | NW_004518857.1 | Scaffold4455 | 549                     | GG                              | TT              | 1947053426               |
| SNP_P4_185445_640    | NW_004518857.1 | Scaffold4455 | 640                     | CC                              | TT              | 1947053428               |
| SNP_P4_185446_1326   | NW_004518857.1 | Scaffold4455 | 1326                    | TT                              | CC              | 1947053430               |
| SNP_P4_185447_1577   | NW_004518857.1 | Scaffold4455 | 1577                    | GG                              | AA              | 1947053432               |
| SNP_P4_185448_1587   | NW_004518857.1 | Scaffold4455 | 1587                    | CC                              | TT              | 1947053434               |
| SNP_P4_185449_1742   | NW_004518857.1 | Scaffold4455 | 1742                    | CC                              | TT              | 1947053436               |
| SNP_P4_185450_238    | NW_004518858.1 | Scaffold4456 | 238                     | CC                              | TT              | 1947053438               |
| SNP_P4_185451_604    | NW_004518858.1 | Scaffold4456 | 604                     | TT                              | AA              | 1947053440               |
| SNP_P4_185452_230    | NW_004518860.1 | Scaffold4461 | 230                     | CC                              | TT              | 1947053442               |
| SNP_P4_185453_254    | NW_004518860.1 | Scaffold4461 | 254                     | AA                              | GG              | 1947053444               |
| SNP_P4_185454_2817   | NW_004518861.1 | Scaffold4462 | 2817                    | GG                              | TT              | 1947053446               |
| SNP_P4_185455_2833   | NW_004518861.1 | Scaffold4462 | 2833                    | TT                              | CC              | 1947053448               |
| SNP_P4_185456_2885   | NW_004518861.1 | Scaffold4462 | 2885                    | TT                              | CC              | 1947053450               |
| SNP_P4_185457_2898   | NW_004518861.1 | Scaffold4462 | 2898                    | AA                              | GG              | 1947053452               |
| SNP_P4_185458_2904   | NW_004518861.1 | Scaffold4462 | 2904                    | CC                              | GG              | 1947053454               |
| SNP_P4_185459_2915   | NW_004518861.1 | Scaffold4462 | 2915                    | CC                              | TT              | 1947053456               |
| SNP_P4_185460_2916   | NW_004518861.1 | Scaffold4462 | 2916                    | CC                              | TT              | 1947053458               |
| SNP_P4_185461_3059   | NW_004518861.1 | Scaffold4462 | 3059                    | AA                              | GG              | 1947053460               |



| SNPs IDs            | Chromosome IDs | Chromosomes  | Physical positions (bp) | CDC Frontier (Reference genome) | (ILWC46 & LPNB) | NCBI SNPdb Accession IDs |
|---------------------|----------------|--------------|-------------------------|---------------------------------|-----------------|--------------------------|
| SNP_P4_185462_3064  | NW_004518861.1 | Scaffold4462 | 3064                    | GG                              | TT              | 1947053462               |
| SNP_P4_185463_3065  | NW_004518861.1 | Scaffold4462 | 3065                    | AA                              | GG              | 1947053464               |
| SNP_P4_185464_3476  | NW_004518861.1 | Scaffold4462 | 3476                    | AA                              | GG              | 1947053466               |
| SNP_P4_185465_662   | NW_004518862.1 | Scaffold4465 | 662                     | GG                              | AA              | 1947053468               |
| SNP_P4_185466_699   | NW_004518862.1 | Scaffold4465 | 699                     | AA                              | GG              | 1947053470               |
| SNP_P4_185467_760   | NW_004518862.1 | Scaffold4465 | 760                     | TT                              | CC              | 1947053472               |
| SNP_P4_185468_2369  | NW_004518862.1 | Scaffold4465 | 2369                    | TT                              | GG              | 1947053474               |
| SNP_P4_185469_2437  | NW_004518862.1 | Scaffold4465 | 2437                    | TT                              | AA              | 1947053476               |
| SNP_P4_185470_655   | NW_004518864.1 | Scaffold4468 | 655                     | TT                              | AA              | 1947053478               |
| SNP_P4_185471_650   | NW_004518869.1 | Scaffold4475 | 650                     | GG                              | CC              | 1947053479               |
| SNP_P4_185472_1080  | NW_004518873.1 | Scaffold4481 | 1080                    | CC                              | TT              | 1947053481               |
| SNP_P4_185473_1669  | NW_004518873.1 | Scaffold4481 | 1669                    | GG                              | AA              | 1947053483               |
| SNP_P4_185474_1683  | NW_004518873.1 | Scaffold4481 | 1683                    | TT                              | AA              | 1947053485               |
| SNP_P4_185475_1868  | NW_004518873.1 | Scaffold4481 | 1868                    | CC                              | GG              | 1947053487               |
| SNP_P4_185476_9577  | NW_004518873.1 | Scaffold4481 | 9577                    | CC                              | TT              | 1947053489               |
| SNP_P4_185477_9596  | NW_004518873.1 | Scaffold4481 | 9596                    | CC                              | TT              | 1947053491               |
| SNP_P4_185478_9597  | NW_004518873.1 | Scaffold4481 | 9597                    | AA                              | CC              | 1947053493               |
| SNP_P4_185479_10363 | NW_004518873.1 | Scaffold4481 | 10363                   | AA                              | TT              | 1947053495               |
| SNP_P4_185480_1133  | NW_004518881.1 | Scaffold4493 | 1133                    | GG                              | AA              | 1947053497               |
| SNP_P4_185481_63    | NW_004518882.1 | Scaffold4494 | 63                      | TT                              | GG              | 1947053499               |
| SNP_P4_185482_69    | NW_004518882.1 | Scaffold4494 | 69                      | CC                              | GG              | 1947053501               |
| SNP_P4_185483_391   | NW_004518882.1 | Scaffold4494 | 391                     | TT                              | AA              | 1947053503               |
| SNP_P4_185484_438   | NW_004518882.1 | Scaffold4494 | 438                     | CC                              | TT              | 1947053505               |
| SNP_P4_185485_474   | NW_004518882.1 | Scaffold4494 | 474                     | TT                              | CC              | 1947053507               |
| SNP_P4_185486_104   | NW_004518883.1 | Scaffold4495 | 104                     | AA                              | TT              | 1947053509               |
| SNP_P4_185487_1382  | NW_004518888.1 | Scaffold4503 | 1382                    | AA                              | GG              | 1947053510               |
| SNP_P4_185488_1638  | NW_004518888.1 | Scaffold4503 | 1638                    | GG                              | AA              | 1947053512               |
| SNP_P4_185489_64    | NW_004518890.1 | Scaffold4505 | 64                      | GG                              | TT              | 1947053514               |
| SNP_P4_185490_69    | NW_004518890.1 | Scaffold4505 | 69                      | CC                              | GG              | 1947053516               |
| SNP_P4_185491_1651  | NW_004518890.1 | Scaffold4505 | 1651                    | GG                              | TT              | 1947053518               |
| SNP_P4_185492_1674  | NW_004518890.1 | Scaffold4505 | 1674                    | CC                              | AA              | 1947053520               |
| SNP_P4_185493_1683  | NW_004518890.1 | Scaffold4505 | 1683                    | CC                              | TT              | 1947053522               |
| SNP_P4_185494_542   | NW_004518891.1 | Scaffold4506 | 542                     | CC                              | TT              | 1947053524               |
| SNP_P4_185495_689   | NW_004518891.1 | Scaffold4506 | 689                     | CC                              | AA              | 1947053526               |
| SNP_P4_185496_996   | NW_004518891.1 | Scaffold4506 | 996                     | CC                              | TT              | 1947053528               |
| SNP_P4_185498_1038  | NW_004518891.1 | Scaffold4506 | 1038                    | CC                              | AA              | 1947053530               |
| SNP_P4_185499_1076  | NW_004518891.1 | Scaffold4506 | 1076                    | AA                              | GG              | 1947053532               |
| SNP_P4_185500_1104  | NW_004518891.1 | Scaffold4506 | 1104                    | TT                              | CC              | 1947053534               |
| SNP_P4_185501_1313  | NW_004518891.1 | Scaffold4506 | 1313                    | AA                              | GG              | 1947053536               |
| SNP_P4_185502_442   | NW_004518892.1 | Scaffold4507 | 442                     | GG                              | AA              | 1947053537               |
| SNP_P4_185503_2985  | NW_004518893.1 | Scaffold4508 | 2985                    | TT                              | AA              | 1947053539               |
| SNP_P4_185505_11619 | NW_004518893.1 | Scaffold4508 | 11619                   | GG                              | AA              | 1947053541               |

| SNPs IDs            | Chromosome IDs | Chromosomes  | Physical positions (bp) | CDC Frontier (Reference genome) | (ILWC46 & LPNB) | NCBI SNPdb Accession IDs |
|---------------------|----------------|--------------|-------------------------|---------------------------------|-----------------|--------------------------|
| SNP_P4_185506_21426 | NW_004518893.1 | Scaffold4508 | 21426                   | AA                              | GG              | 1947053543               |
| SNP_P4_185507_21428 | NW_004518893.1 | Scaffold4508 | 21428                   | TT                              | CC              | 1947053545               |
| SNP_P4_185509_32195 | NW_004518893.1 | Scaffold4508 | 32195                   | CC                              | GG              | 1947053547               |
| SNP_P4_185510_33633 | NW_004518893.1 | Scaffold4508 | 33633                   | TT                              | AA              | 1947053549               |
| SNP_P4_185511_33639 | NW_004518893.1 | Scaffold4508 | 33639                   | AA                              | TT              | 1947053551               |
| SNP_P4_185513_33669 | NW_004518893.1 | Scaffold4508 | 33669                   | CC                              | TT              | 1947053553               |
| SNP_P4_185515_33696 | NW_004518893.1 | Scaffold4508 | 33696                   | AA                              | CC              | 1947053555               |
| SNP_P4_185516_33902 | NW_004518893.1 | Scaffold4508 | 33902                   | CC                              | AA              | 1947053557               |
| SNP_P4_185517_34011 | NW_004518893.1 | Scaffold4508 | 34011                   | TT                              | CC              | 1947053559               |
| SNP_P4_185518_34040 | NW_004518893.1 | Scaffold4508 | 34040                   | TT                              | CC              | 1947053561               |
| SNP_P4_185520_36775 | NW_004518893.1 | Scaffold4508 | 36775                   | TT                              | AA              | 1947053563               |
| SNP_P4_185521_36838 | NW_004518893.1 | Scaffold4508 | 36838                   | GG                              | TT              | 1947053565               |
| SNP_P4_185522_36840 | NW_004518893.1 | Scaffold4508 | 36840                   | GG                              | CC              | 1947053566               |
| SNP_P4_185523_37003 | NW_004518893.1 | Scaffold4508 | 37003                   | CC                              | TT              | 1947053568               |
| SNP_P4_185524_37079 | NW_004518893.1 | Scaffold4508 | 37079                   | CC                              | TT              | 1947053570               |
| SNP_P4_185525_37098 | NW_004518893.1 | Scaffold4508 | 37098                   | AA                              | GG              | 1947053572               |
| SNP_P4_185526_37152 | NW_004518893.1 | Scaffold4508 | 37152                   | GG                              | AA              | 1947053574               |
| SNP_P4_185527_115   | NW_004518894.1 | Scaffold4509 | 115                     | GG                              | TT              | 1947053576               |
| SNP_P4_185528_116   | NW_004518894.1 | Scaffold4509 | 116                     | TT                              | GG              | 1947053578               |
| SNP_P4_185529_383   | NW_004518894.1 | Scaffold4509 | 383                     | AA                              | GG              | 1947053580               |
| SNP_P4_185530_512   | NW_004518894.1 | Scaffold4509 | 512                     | TT                              | CC              | 1947053582               |
| SNP_P4_185531_527   | NW_004518894.1 | Scaffold4509 | 527                     | GG                              | AA              | 1947053584               |
| SNP_P4_185532_555   | NW_004518894.1 | Scaffold4509 | 555                     | AA                              | CC              | 1947053586               |
| SNP_P4_185533_767   | NW_004518894.1 | Scaffold4509 | 767                     | GG                              | CC              | 1947053588               |
| SNP_P4_185534_802   | NW_004518894.1 | Scaffold4509 | 802                     | AA                              | TT              | 1947053590               |
| SNP_P4_185535_942   | NW_004518894.1 | Scaffold4509 | 942                     | CC                              | TT              | 1947053592               |
| SNP_P4_185536_954   | NW_004518894.1 | Scaffold4509 | 954                     | CC                              | TT              | 1947053594               |
| SNP_P4_185537_1190  | NW_004518894.1 | Scaffold4509 | 1190                    | TT                              | CC              | 1947053596               |
| SNP_P4_185538_1193  | NW_004518894.1 | Scaffold4509 | 1193                    | CC                              | TT              | 1947053598               |
| SNP_P4_185539_1235  | NW_004518894.1 | Scaffold4509 | 1235                    | GG                              | AA              | 1947053600               |
| SNP_P4_185540_1345  | NW_004518894.1 | Scaffold4509 | 1345                    | AA                              | GG              | 1947053602               |
| SNP_P4_185541_1369  | NW_004518894.1 | Scaffold4509 | 1369                    | AA                              | GG              | 1947053604               |
| SNP_P4_185542_5270  | NW_004518895.1 | Scaffold4510 | 5270                    | GG                              | TT              | 1947053606               |
| SNP_P4_185543_2219  | NW_004518896.1 | Scaffold4511 | 2219                    | AA                              | GG              | 1947053608               |
| SNP_P4_185544_2268  | NW_004518896.1 | Scaffold4511 | 2268                    | TT                              | CC              | 1947053610               |
| SNP_P4_185545_2616  | NW_004518896.1 | Scaffold4511 | 2616                    | GG                              | TT              | 1947053612               |
| SNP_P4_185546_11357 | NW_004518896.1 | Scaffold4511 | 11357                   | CC                              | TT              | 1947053614               |
| SNP_P4_185547_11370 | NW_004518896.1 | Scaffold4511 | 11370                   | TT                              | AA              | 1947053616               |
| SNP_P4_185548_11529 | NW_004518896.1 | Scaffold4511 | 11529                   | CC                              | GG              | 1947053618               |
| SNP_P4_185549_11646 | NW_004518896.1 | Scaffold4511 | 11646                   | AA                              | TT              | 1947053620               |
| SNP_P4_185550_11695 | NW_004518896.1 | Scaffold4511 | 11695                   | AA                              | GG              | 1947053622               |
| SNP_P4_185551_11715 | NW_004518896.1 | Scaffold4511 | 11715                   | GG                              | AA              | 1947053624               |

| SNPs IDs            | Chromosome IDs | Chromosomes  | Physical positions (bp) | CDC Frontier (Reference genome) | (ILWC46 & LPNB) | NCBI SNPdb Accession IDs |
|---------------------|----------------|--------------|-------------------------|---------------------------------|-----------------|--------------------------|
| SNP_P4_185552_12899 | NW_004518896.1 | Scaffold4511 | 12899                   | AA                              | TT              | 1947053626               |
| SNP_P4_185553_13178 | NW_004518896.1 | Scaffold4511 | 13178                   | AA                              | GG              | 1947053628               |
| SNP_P4_185554_22734 | NW_004518896.1 | Scaffold4511 | 22734                   | AA                              | TT              | 1947053630               |
| SNP_P4_185555_22760 | NW_004518896.1 | Scaffold4511 | 22760                   | TT                              | CC              | 1947053632               |
| SNP_P4_185556_22828 | NW_004518896.1 | Scaffold4511 | 22828                   | AA                              | GG              | 1947053634               |
| SNP_P4_185559_23071 | NW_004518896.1 | Scaffold4511 | 23071                   | TT                              | CC              | 1947053636               |
| SNP_P4_185560_23131 | NW_004518896.1 | Scaffold4511 | 23131                   | TT                              | AA              | 1947053638               |
| SNP_P4_185561_23188 | NW_004518896.1 | Scaffold4511 | 23188                   | AA                              | GG              | 1947053640               |
| SNP_P4_185562_23267 | NW_004518896.1 | Scaffold4511 | 23267                   | CC                              | TT              | 1947053642               |
| SNP_P4_185563_23332 | NW_004518896.1 | Scaffold4511 | 23332                   | GG                              | CC              | 1947053644               |
| SNP_P4_185564_27905 | NW_004518896.1 | Scaffold4511 | 27905                   | CC                              | AA              | 1947053645               |
| SNP_P4_185565_30661 | NW_004518896.1 | Scaffold4511 | 30661                   | CC                              | AA              | 1947053647               |
| SNP_P4_185567_43603 | NW_004518896.1 | Scaffold4511 | 43603                   | AA                              | GG              | 1947053649               |
| SNP_P4_185568_43626 | NW_004518896.1 | Scaffold4511 | 43626                   | TT                              | GG              | 1947053651               |
| SNP_P4_185569_79    | NW_004518898.1 | Scaffold4513 | 79                      | GG                              | TT              | 1947053653               |
| SNP_P4_185570_3140  | NW_004518898.1 | Scaffold4513 | 3140                    | TT                              | AA              | 1947053655               |
| SNP_P4_185571_3208  | NW_004518898.1 | Scaffold4513 | 3208                    | AA                              | GG              | 1947053657               |
| SNP_P4_185572_3257  | NW_004518898.1 | Scaffold4513 | 3257                    | GG                              | AA              | 1947053659               |
| SNP_P4_185573_3271  | NW_004518898.1 | Scaffold4513 | 3271                    | TT                              | CC              | 1947053661               |
| SNP_P4_185574_3363  | NW_004518898.1 | Scaffold4513 | 3363                    | TT                              | CC              | 1947053663               |
| SNP_P4_185575_3512  | NW_004518898.1 | Scaffold4513 | 3512                    | TT                              | CC              | 1947053665               |
| SNP_P4_185576_3540  | NW_004518898.1 | Scaffold4513 | 3540                    | GG                              | AA              | 1947053666               |
| SNP_P4_185577_3541  | NW_004518898.1 | Scaffold4513 | 3541                    | CC                              | TT              | 1947053667               |
| SNP_P4_185578_3571  | NW_004518898.1 | Scaffold4513 | 3571                    | TT                              | CC              | 1947053669               |
| SNP_P4_185579_3683  | NW_004518898.1 | Scaffold4513 | 3683                    | CC                              | AA              | 1947053671               |
| SNP_P4_185580_3689  | NW_004518898.1 | Scaffold4513 | 3689                    | GG                              | AA              | 1947053673               |
| SNP_P4_185581_443   | NW_004518900.1 | Scaffold4515 | 443                     | CC                              | AA              | 1947053675               |
| SNP_P4_185582_456   | NW_004518900.1 | Scaffold4515 | 456                     | AA                              | CC              | 1947053677               |
| SNP_P4_185583_458   | NW_004518900.1 | Scaffold4515 | 458                     | TT                              | AA              | 1947053679               |
| SNP_P4_185584_475   | NW_004518900.1 | Scaffold4515 | 475                     | GG                              | AA              | 1947053681               |
| SNP_P4_185585_756   | NW_004518900.1 | Scaffold4515 | 756                     | GG                              | CC              | 1947053683               |
| SNP_P4_185586_450   | NW_004518904.1 | Scaffold4521 | 450                     | GG                              | AA              | 1947053685               |
| SNP_P4_185587_1198  | NW_004518904.1 | Scaffold4521 | 1198                    | GG                              | CC              | 1947053687               |
| SNP_P4_185588_2256  | NW_004518906.1 | Scaffold4524 | 2256                    | CC                              | TT              | 1947053689               |
| SNP_P4_185589_2288  | NW_004518906.1 | Scaffold4524 | 2288                    | TT                              | CC              | 1947053691               |
| SNP_P4_185590_400   | NW_004518907.1 | Scaffold4525 | 400                     | AA                              | TT              | 1947053693               |
| SNP_P4_185591_790   | NW_004518907.1 | Scaffold4525 | 790                     | CC                              | TT              | 1947053695               |
| SNP_P4_185592_819   | NW_004518907.1 | Scaffold4525 | 819                     | AA                              | GG              | 1947053697               |
| SNP_P4_185593_822   | NW_004518907.1 | Scaffold4525 | 822                     | TT                              | GG              | 1947053699               |
| SNP_P4_185594_942   | NW_004518907.1 | Scaffold4525 | 942                     | AA                              | GG              | 1947053701               |
| SNP_P4_185595_615   | NW_004518910.1 | Scaffold4528 | 615                     | CC                              | TT              | 1947053703               |
| SNP_P4_185596_894   | NW_004518910.1 | Scaffold4528 | 894                     | AA                              | GG              | 1947053705               |

| SNPs IDs           | Chromosome IDs | Chromosomes  | Physical positions (bp) | CDC Frontier (Reference genome) | (ILWC46 & LPNB) | NCBI SNPdb Accession IDs |
|--------------------|----------------|--------------|-------------------------|---------------------------------|-----------------|--------------------------|
| SNP_P4_185597_1348 | NW_004518910.1 | Scaffold4528 | 1348                    | TT                              | GG              | 1947053707               |
| SNP_P4_185598_1533 | NW_004518910.1 | Scaffold4528 | 1533                    | AA                              | TT              | 1947053709               |
| SNP_P4_185599_462  | NW_004518911.1 | Scaffold4529 | 462                     | TT                              | GG              | 1947053711               |
| SNP_P4_185600_1555 | NW_004518912.1 | Scaffold4530 | 1555                    | GG                              | CC              | 1947053713               |
| SNP_P4_185601_1606 | NW_004518912.1 | Scaffold4530 | 1606                    | GG                              | AA              | 1947053715               |
| SNP_P4_185602_1600 | NW_004518913.1 | Scaffold4531 | 1600                    | TT                              | AA              | 1947053717               |
| SNP_P4_185604_300  | NW_004518915.1 | Scaffold4533 | 300                     | TT                              | GG              | 1947053719               |
| SNP_P4_185605_486  | NW_004518915.1 | Scaffold4533 | 486                     | GG                              | TT              | 1947053721               |
| SNP_P4_185606_2062 | NW_004518915.1 | Scaffold4533 | 2062                    | TT                              | GG              | 1947053723               |
| SNP_P4_185607_132  | NW_004518916.1 | Scaffold4534 | 132                     | TT                              | CC              | 1947053724               |
| SNP_P4_185608_155  | NW_004518916.1 | Scaffold4534 | 155                     | GG                              | AA              | 1947053726               |
| SNP_P4_185609_175  | NW_004518916.1 | Scaffold4534 | 175                     | TT                              | AA              | 1947053728               |
| SNP_P4_185610_178  | NW_004518916.1 | Scaffold4534 | 178                     | AA                              | GG              | 1947053730               |
| SNP_P4_185611_190  | NW_004518916.1 | Scaffold4534 | 190                     | GG                              | AA              | 1947053732               |
| SNP_P4_185612_191  | NW_004518916.1 | Scaffold4534 | 191                     | GG                              | TT              | 1947053734               |
| SNP_P4_185613_194  | NW_004518916.1 | Scaffold4534 | 194                     | CC                              | TT              | 1947053736               |
| SNP_P4_185614_208  | NW_004518916.1 | Scaffold4534 | 208                     | AA                              | TT              | 1947053738               |
| SNP_P4_185615_212  | NW_004518916.1 | Scaffold4534 | 212                     | AA                              | GG              | 1947053740               |
| SNP_P4_185616_381  | NW_004518916.1 | Scaffold4534 | 381                     | AA                              | GG              | 1947053742               |
| SNP_P4_185617_403  | NW_004518916.1 | Scaffold4534 | 403                     | AA                              | CC              | 1947053744               |
| SNP_P4_185618_476  | NW_004518916.1 | Scaffold4534 | 476                     | TT                              | AA              | 1947053746               |
| SNP_P4_185619_1136 | NW_004518916.1 | Scaffold4534 | 1136                    | TT                              | AA              | 1947053748               |
| SNP_P4_185620_1423 | NW_004518916.1 | Scaffold4534 | 1423                    | AA                              | TT              | 1947053750               |
| SNP_P4_185621_2876 | NW_004518916.1 | Scaffold4534 | 2876                    | TT                              | AA              | 1947053752               |
| SNP_P4_185622_3046 | NW_004518916.1 | Scaffold4534 | 3046                    | TT                              | AA              | 1947053754               |
| SNP_P4_185623_3235 | NW_004518916.1 | Scaffold4534 | 3235                    | GG                              | AA              | 1947053756               |
| SNP_P4_185624_1402 | NW_004518919.1 | Scaffold4538 | 1402                    | AA                              | CC              | 1947053758               |
| SNP_P4_185625_1412 | NW_004518919.1 | Scaffold4538 | 1412                    | TT                              | AA              | 1947053760               |
| SNP_P4_185626_1413 | NW_004518919.1 | Scaffold4538 | 1413                    | AA                              | TT              | 1947053762               |
| SNP_P4_185627_1436 | NW_004518919.1 | Scaffold4538 | 1436                    | CC                              | TT              | 1947053763               |
| SNP_P4_185628_1439 | NW_004518919.1 | Scaffold4538 | 1439                    | GG                              | AA              | 1947053766               |
| SNP_P4_185629_1603 | NW_004518919.1 | Scaffold4538 | 1603                    | GG                              | AA              | 1947053768               |
| SNP_P4_185630_1638 | NW_004518919.1 | Scaffold4538 | 1638                    | TT                              | AA              | 1947053770               |
| SNP_P4_185631_1656 | NW_004518919.1 | Scaffold4538 | 1656                    | AA                              | CC              | 1947053772               |
| SNP_P4_185632_1738 | NW_004518919.1 | Scaffold4538 | 1738                    | AA                              | GG              | 1947053774               |
| SNP_P4_185633_1764 | NW_004518919.1 | Scaffold4538 | 1764                    | TT                              | CC              | 1947053776               |
| SNP_P4_185634_1808 | NW_004518919.1 | Scaffold4538 | 1808                    | AA                              | GG              | 1947053778               |
| SNP_P4_185635_3626 | NW_004518919.1 | Scaffold4538 | 3626                    | AA                              | CC              | 1947053780               |
| SNP_P4_185636_3630 | NW_004518919.1 | Scaffold4538 | 3630                    | TT                              | AA              | 1947053782               |
| SNP_P4_185637_3641 | NW_004518919.1 | Scaffold4538 | 3641                    | AA                              | TT              | 1947053784               |
| SNP_P4_185638_3651 | NW_004518919.1 | Scaffold4538 | 3651                    | TT                              | GG              | 1947053786               |
| SNP_P4_185639_3697 | NW_004518919.1 | Scaffold4538 | 3697                    | GG                              | TT              | 1947053788               |

| SNPs IDs            | Chromosome IDs | Chromosomes  | Physical positions (bp) | CDC Frontier (Reference genome) | (ILWC46 & LPNB) | NCBI SNPdb Accession IDs |
|---------------------|----------------|--------------|-------------------------|---------------------------------|-----------------|--------------------------|
| SNP_P4_185640_3704  | NW_004518919.1 | Scaffold4538 | 3704                    | CC                              | AA              | 1947053790               |
| SNP_P4_185641_4566  | NW_004518922.1 | Scaffold4543 | 4566                    | TT                              | CC              | 1947053792               |
| SNP_P4_185642_4685  | NW_004518922.1 | Scaffold4543 | 4685                    | GG                              | AA              | 1947053794               |
| SNP_P4_185643_4757  | NW_004518922.1 | Scaffold4543 | 4757                    | TT                              | CC              | 1947053796               |
| SNP_P4_185644_5392  | NW_004518922.1 | Scaffold4543 | 5392                    | TT                              | CC              | 1947053798               |
| SNP_P4_185645_36    | NW_004518924.1 | Scaffold4549 | 36                      | AA                              | GG              | 1947053800               |
| SNP_P4_185646_48    | NW_004518924.1 | Scaffold4549 | 48                      | CC                              | AA              | 1947053802               |
| SNP_P4_185647_52    | NW_004518924.1 | Scaffold4549 | 52                      | GG                              | AA              | 1947053804               |
| SNP_P4_185648_67    | NW_004518924.1 | Scaffold4549 | 67                      | GG                              | AA              | 1947053805               |
| SNP_P4_185649_69    | NW_004518924.1 | Scaffold4549 | 69                      | TT                              | AA              | 1947053806               |
| SNP_P4_185650_103   | NW_004518924.1 | Scaffold4549 | 103                     | AA                              | GG              | 1947053808               |
| SNP_P4_185651_141   | NW_004518924.1 | Scaffold4549 | 141                     | AA                              | GG              | 1947053810               |
| SNP_P4_185652_190   | NW_004518924.1 | Scaffold4549 | 190                     | CC                              | TT              | 1947053812               |
| SNP_P4_185653_196   | NW_004518924.1 | Scaffold4549 | 196                     | GG                              | AA              | 1947053814               |
| SNP_P4_185654_435   | NW_004518924.1 | Scaffold4549 | 435                     | AA                              | GG              | 1947053816               |
| SNP_P4_185655_472   | NW_004518924.1 | Scaffold4549 | 472                     | AA                              | TT              | 1947053818               |
| SNP_P4_185656_479   | NW_004518924.1 | Scaffold4549 | 479                     | TT                              | AA              | 1947053820               |
| SNP_P4_185657_2751  | NW_004518926.1 | Scaffold4551 | 2751                    | GG                              | CC              | 1947053822               |
| SNP_P4_185658_2780  | NW_004518926.1 | Scaffold4551 | 2780                    | AA                              | TT              | 1947053824               |
| SNP_P4_185659_2816  | NW_004518926.1 | Scaffold4551 | 2816                    | CC                              | TT              | 1947053826               |
| SNP_P4_185660_2817  | NW_004518926.1 | Scaffold4551 | 2817                    | AA                              | TT              | 1947053828               |
| SNP_P4_185661_2837  | NW_004518926.1 | Scaffold4551 | 2837                    | CC                              | TT              | 1947053830               |
| SNP_P4_185662_2870  | NW_004518926.1 | Scaffold4551 | 2870                    | GG                              | AA              | 1947053832               |
| SNP_P4_185663_5784  | NW_004518926.1 | Scaffold4551 | 5784                    | TT                              | CC              | 1947053834               |
| SNP_P4_185664_6070  | NW_004518926.1 | Scaffold4551 | 6070                    | GG                              | AA              | 1947053836               |
| SNP_P4_185665_6094  | NW_004518926.1 | Scaffold4551 | 6094                    | CC                              | AA              | 1947053838               |
| SNP_P4_185666_6439  | NW_004518926.1 | Scaffold4551 | 6439                    | AA                              | TT              | 1947053840               |
| SNP_P4_185668_6929  | NW_004518926.1 | Scaffold4551 | 6929                    | TT                              | CC              | 1947053842               |
| SNP_P4_185669_16675 | NW_004518926.1 | Scaffold4551 | 16675                   | AA                              | CC              | 1947053844               |
| SNP_P4_185670_17106 | NW_004518926.1 | Scaffold4551 | 17106                   | TT                              | AA              | 1947053846               |
| SNP_P4_185671_17142 | NW_004518926.1 | Scaffold4551 | 17142                   | CC                              | AA              | 1947053848               |
| SNP_P4_185672_18710 | NW_004518926.1 | Scaffold4551 | 18710                   | CC                              | GG              | 1947053850               |
| SNP_P4_185673_18832 | NW_004518926.1 | Scaffold4551 | 18832                   | TT                              | GG              | 1947053852               |
| SNP_P4_185674_18873 | NW_004518926.1 | Scaffold4551 | 18873                   | GG                              | CC              | 1947053853               |
| SNP_P4_185675_18876 | NW_004518926.1 | Scaffold4551 | 18876                   | AA                              | TT              | 1947053855               |
| SNP_P4_185676_18895 | NW_004518926.1 | Scaffold4551 | 18895                   | TT                              | AA              | 1947053857               |
| SNP_P4_185677_18902 | NW_004518926.1 | Scaffold4551 | 18902                   | TT                              | AA              | 1947053859               |
| SNP_P4_185678_19001 | NW_004518926.1 | Scaffold4551 | 19001                   | TT                              | AA              | 1947053861               |
| SNP_P4_185679_19006 | NW_004518926.1 | Scaffold4551 | 19006                   | AA                              | GG              | 1947053863               |
| SNP_P4_185680_19020 | NW_004518926.1 | Scaffold4551 | 19020                   | GG                              | TT              | 1947053865               |
| SNP_P4_185681_19065 | NW_004518926.1 | Scaffold4551 | 19065                   | GG                              | AA              | 1947053867               |
| SNP_P4_185682_19066 | NW_004518926.1 | Scaffold4551 | 19066                   | AA                              | CC              | 1947053869               |

| SNPs IDs            | Chromosome IDs | Chromosomes  | Physical positions (bp) | CDC Frontier (Reference genome) | (ILWC46 & LPNB) | NCBI SNPdb Accession IDs |
|---------------------|----------------|--------------|-------------------------|---------------------------------|-----------------|--------------------------|
| SNP_P4_185683_19076 | NW_004518926.1 | Scaffold4551 | 19076                   | AA                              | TT              | 1947053871               |
| SNP_P4_185684_19122 | NW_004518926.1 | Scaffold4551 | 19122                   | CC                              | TT              | 1947053873               |
| SNP_P4_185685_19146 | NW_004518926.1 | Scaffold4551 | 19146                   | TT                              | CC              | 1947053875               |
| SNP_P4_185686_19148 | NW_004518926.1 | Scaffold4551 | 19148                   | AA                              | GG              | 1947053877               |
| SNP_P4_185687_19154 | NW_004518926.1 | Scaffold4551 | 19154                   | GG                              | TT              | 1947053879               |
| SNP_P4_185688_19157 | NW_004518926.1 | Scaffold4551 | 19157                   | TT                              | CC              | 1947053881               |
| SNP_P4_185690_19193 | NW_004518926.1 | Scaffold4551 | 19193                   | AA                              | TT              | 1947053883               |
| SNP_P4_185691_19213 | NW_004518926.1 | Scaffold4551 | 19213                   | GG                              | AA              | 1947053885               |
| SNP_P4_185693_19441 | NW_004518926.1 | Scaffold4551 | 19441                   | GG                              | AA              | 1947053887               |
| SNP_P4_185694_2453  | NW_004518928.1 | Scaffold4554 | 2453                    | TT                              | CC              | 1947053889               |
| SNP_P4_185695_807   | NW_004518930.1 | Scaffold4557 | 807                     | TT                              | AA              | 1947053891               |
| SNP_P4_185696_823   | NW_004518930.1 | Scaffold4557 | 823                     | TT                              | GG              | 1947053893               |
| SNP_P4_185697_2625  | NW_004518938.1 | Scaffold4570 | 2625                    | CC                              | GG              | 1947053895               |
| SNP_P4_185698_10540 | NW_004518938.1 | Scaffold4570 | 10540                   | GG                              | CC              | 1947053897               |
| SNP_P4_185699_10631 | NW_004518938.1 | Scaffold4570 | 10631                   | AA                              | TT              | 1947053899               |
| SNP_P4_185700_10686 | NW_004518938.1 | Scaffold4570 | 10686                   | AA                              | GG              | 1947053901               |
| SNP_P4_185701_599   | NW_004518939.1 | Scaffold4572 | 599                     | AA                              | TT              | 1947053903               |
| SNP_P4_185702_627   | NW_004518939.1 | Scaffold4572 | 627                     | AA                              | CC              | 1947053905               |
| SNP_P4_185703_1951  | NW_004518939.1 | Scaffold4572 | 1951                    | CC                              | AA              | 1947053907               |
| SNP_P4_185704_2000  | NW_004518939.1 | Scaffold4572 | 2000                    | TT                              | CC              | 1947053909               |
| SNP_P4_185705_2009  | NW_004518939.1 | Scaffold4572 | 2009                    | GG                              | TT              | 1947053911               |
| SNP_P4_185706_2115  | NW_004518939.1 | Scaffold4572 | 2115                    | GG                              | AA              | 1947053913               |
| SNP_P4_185707_2116  | NW_004518939.1 | Scaffold4572 | 2116                    | GG                              | AA              | 1947053915               |
| SNP_P4_185708_2298  | NW_004518939.1 | Scaffold4572 | 2298                    | CC                              | GG              | 1947053917               |
| SNP_P4_185709_2300  | NW_004518939.1 | Scaffold4572 | 2300                    | TT                              | CC              | 1947053919               |
| SNP_P4_185710_2337  | NW_004518939.1 | Scaffold4572 | 2337                    | GG                              | CC              | 1947053921               |
| SNP_P4_185711_2344  | NW_004518939.1 | Scaffold4572 | 2344                    | CC                              | AA              | 1947053923               |
| SNP_P4_185712_2403  | NW_004518939.1 | Scaffold4572 | 2403                    | GG                              | TT              | 1947053925               |
| SNP_P4_185713_2422  | NW_004518939.1 | Scaffold4572 | 2422                    | GG                              | AA              | 1947053927               |
| SNP_P4_185714_2438  | NW_004518939.1 | Scaffold4572 | 2438                    | AA                              | TT              | 1947053929               |
| SNP_P4_185715_2443  | NW_004518939.1 | Scaffold4572 | 2443                    | AA                              | CC              | 1947053931               |
| SNP_P4_185717_3516  | NW_004518939.1 | Scaffold4572 | 3516                    | AA                              | GG              | 1947053933               |
| SNP_P4_185718_3541  | NW_004518939.1 | Scaffold4572 | 3541                    | AA                              | CC              | 1947053935               |
| SNP_P4_185719_3622  | NW_004518939.1 | Scaffold4572 | 3622                    | AA                              | GG              | 1947053937               |
| SNP_P4_185720_3630  | NW_004518939.1 | Scaffold4572 | 3630                    | CC                              | TT              | 1947053940               |
| SNP_P4_185721_3900  | NW_004518939.1 | Scaffold4572 | 3900                    | TT                              | CC              | 1947053942               |
| SNP_P4_185722_3925  | NW_004518939.1 | Scaffold4572 | 3925                    | CC                              | TT              | 1947053944               |
| SNP_P4_185723_3946  | NW_004518939.1 | Scaffold4572 | 3946                    | CC                              | TT              | 1947053947               |
| SNP_P4_185724_4137  | NW_004518939.1 | Scaffold4572 | 4137                    | CC                              | GG              | 1947053949               |
| SNP_P4_185725_4169  | NW_004518939.1 | Scaffold4572 | 4169                    | TT                              | GG              | 1947053952               |
| SNP_P4_185726_8729  | NW_004518939.1 | Scaffold4572 | 8729                    | CC                              | AA              | 1947053955               |
| SNP_P4_185727_8979  | NW_004518939.1 | Scaffold4572 | 8979                    | GG                              | CC              | 1947053957               |

| SNPs IDs            | Chromosome IDs | Chromosomes  | Physical positions (bp) | CDC Frontier (Reference genome) | (ILWC46 & LPNB) | NCBI SNPdb Accession IDs |
|---------------------|----------------|--------------|-------------------------|---------------------------------|-----------------|--------------------------|
| SNP_P4_185728_8987  | NW_004518939.1 | Scaffold4572 | 8987                    | TT                              | GG              | 1947053960               |
| SNP_P4_185729_9307  | NW_004518939.1 | Scaffold4572 | 9307                    | CC                              | AA              | 1947053962               |
| SNP_P4_185730_9309  | NW_004518939.1 | Scaffold4572 | 9309                    | AA                              | TT              | 1947053964               |
| SNP_P4_185731_1011  | NW_004518940.1 | Scaffold4573 | 1011                    | GG                              | TT              | 1947053967               |
| SNP_P4_185732_1045  | NW_004518940.1 | Scaffold4573 | 1045                    | AA                              | TT              | 1947053969               |
| SNP_P4_185733_1061  | NW_004518940.1 | Scaffold4573 | 1061                    | AA                              | TT              | 1947053971               |
| SNP_P4_185734_1205  | NW_004518940.1 | Scaffold4573 | 1205                    | AA                              | CC              | 1947053974               |
| SNP_P4_185735_2155  | NW_004518940.1 | Scaffold4573 | 2155                    | TT                              | CC              | 1947053976               |
| SNP_P4_185736_10825 | NW_004518940.1 | Scaffold4573 | 10825                   | GG                              | AA              | 1947053978               |
| SNP_P4_185737_11180 | NW_004518940.1 | Scaffold4573 | 11180                   | CC                              | GG              | 1947053980               |
| SNP_P4_185738_685   | NW_004518941.1 | Scaffold4574 | 685                     | AA                              | GG              | 1947053982               |
| SNP_P4_185739_566   | NW_004518945.1 | Scaffold4578 | 566                     | GG                              | CC              | 1947053984               |
| SNP_P4_185741_826   | NW_004518947.1 | Scaffold4582 | 826                     | TT                              | CC              | 1947053986               |
| SNP_P4_185742_1070  | NW_004518947.1 | Scaffold4582 | 1070                    | GG                              | TT              | 1947053989               |
| SNP_P4_185743_5878  | NW_004518947.1 | Scaffold4582 | 5878                    | GG                              | TT              | 1947053991               |
| SNP_P4_185744_5888  | NW_004518947.1 | Scaffold4582 | 5888                    | AA                              | GG              | 1947053993               |
| SNP_P4_185745_6119  | NW_004518947.1 | Scaffold4582 | 6119                    | TT                              | CC              | 1947053995               |
| SNP_P4_185746_6371  | NW_004518947.1 | Scaffold4582 | 6371                    | AA                              | CC              | 1947053997               |
| SNP_P4_185747_7058  | NW_004518947.1 | Scaffold4582 | 7058                    | GG                              | AA              | 1947053999               |
| SNP_P4_185748_7072  | NW_004518947.1 | Scaffold4582 | 7072                    | CC                              | TT              | 1947054002               |
| SNP_P4_185749_7155  | NW_004518947.1 | Scaffold4582 | 7155                    | AA                              | TT              | 1947054004               |
| SNP_P4_185750_7249  | NW_004518947.1 | Scaffold4582 | 7249                    | CC                              | AA              | 1947054006               |
| SNP_P4_185751_7258  | NW_004518947.1 | Scaffold4582 | 7258                    | CC                              | TT              | 1947054008               |
| SNP_P4_185752_7295  | NW_004518947.1 | Scaffold4582 | 7295                    | TT                              | CC              | 1947054010               |
| SNP_P4_185753_7488  | NW_004518947.1 | Scaffold4582 | 7488                    | TT                              | AA              | 1947054013               |
| SNP_P4_185754_7492  | NW_004518947.1 | Scaffold4582 | 7492                    | TT                              | CC              | 1947054015               |
| SNP_P4_185755_7570  | NW_004518947.1 | Scaffold4582 | 7570                    | TT                              | CC              | 1947054017               |
| SNP_P4_185756_7598  | NW_004518947.1 | Scaffold4582 | 7598                    | TT                              | AA              | 1947054020               |
| SNP_P4_185758_7685  | NW_004518947.1 | Scaffold4582 | 7685                    | TT                              | CC              | 1947054021               |
| SNP_P4_185759_7692  | NW_004518947.1 | Scaffold4582 | 7692                    | CC                              | TT              | 1947054023               |
| SNP_P4_185760_7724  | NW_004518947.1 | Scaffold4582 | 7724                    | TT                              | CC              | 1947054025               |
| SNP_P4_185761_7732  | NW_004518947.1 | Scaffold4582 | 7732                    | GG                              | AA              | 1947054027               |
| SNP_P4_185762_7803  | NW_004518947.1 | Scaffold4582 | 7803                    | TT                              | CC              | 1947054029               |
| SNP_P4_185763_7952  | NW_004518947.1 | Scaffold4582 | 7952                    | AA                              | GG              | 1947054031               |
| SNP_P4_185764_7979  | NW_004518947.1 | Scaffold4582 | 7979                    | TT                              | CC              | 1947054033               |
| SNP_P4_185765_9112  | NW_004518947.1 | Scaffold4582 | 9112                    | GG                              | TT              | 1947054035               |
| SNP_P4_185766_9401  | NW_004518947.1 | Scaffold4582 | 9401                    | CC                              | GG              | 1947054037               |
| SNP_P4_185767_9718  | NW_004518947.1 | Scaffold4582 | 9718                    | TT                              | GG              | 1947054039               |
| SNP_P4_185768_9805  | NW_004518947.1 | Scaffold4582 | 9805                    | AA                              | TT              | 1947054040               |
| SNP_P4_185769_9816  | NW_004518947.1 | Scaffold4582 | 9816                    | AA                              | GG              | 1947054042               |
| SNP_P4_185770_11293 | NW_004518947.1 | Scaffold4582 | 11293                   | CC                              | TT              | 1947054044               |
| SNP_P4_185771_11432 | NW_004518947.1 | Scaffold4582 | 11432                   | AA                              | GG              | 1947054046               |

| SNPs IDs            | Chromosome IDs | Chromosomes  | Physical positions (bp) | CDC Frontier (Reference genome) | (ILWC46 & LPNB) | NCBI SNPdb Accession IDs |
|---------------------|----------------|--------------|-------------------------|---------------------------------|-----------------|--------------------------|
| SNP_P4_185772_262   | NW_004518948.1 | Scaffold4584 | 262                     | CC                              | TT              | 1947054048               |
| SNP_P4_185773_298   | NW_004518948.1 | Scaffold4584 | 298                     | AA                              | TT              | 1947054050               |
| SNP_P4_185774_69    | NW_004518949.1 | Scaffold4585 | 69                      | AA                              | TT              | 1947054052               |
| SNP_P4_185775_2941  | NW_004518949.1 | Scaffold4585 | 2941                    | AA                              | GG              | 1947054054               |
| SNP_P4_185776_1189  | NW_004518951.1 | Scaffold4587 | 1189                    | AA                              | TT              | 1947054056               |
| SNP_P4_185777_2555  | NW_004518955.1 | Scaffold4591 | 2555                    | AA                              | TT              | 1947054058               |
| SNP_P4_185778_2715  | NW_004518955.1 | Scaffold4591 | 2715                    | GG                              | TT              | 1947054060               |
| SNP_P4_185779_2758  | NW_004518955.1 | Scaffold4591 | 2758                    | GG                              | AA              | 1947054062               |
| SNP_P4_185780_1341  | NW_004518956.1 | Scaffold4592 | 1341                    | AA                              | TT              | 1947054064               |
| SNP_P4_185781_1240  | NW_004518960.1 | Scaffold4598 | 1240                    | GG                              | AA              | 1947054066               |
| SNP_P4_185782_1245  | NW_004518960.1 | Scaffold4598 | 1245                    | CC                              | AA              | 1947054067               |
| SNP_P4_185783_539   | NW_004518962.1 | Scaffold4600 | 539                     | GG                              | AA              | 1947054069               |
| SNP_P4_185784_872   | NW_004518962.1 | Scaffold4600 | 872                     | GG                              | AA              | 1947054071               |
| SNP_P4_185785_905   | NW_004518962.1 | Scaffold4600 | 905                     | AA                              | TT              | 1947054073               |
| SNP_P4_185786_1074  | NW_004518962.1 | Scaffold4600 | 1074                    | AA                              | GG              | 1947054075               |
| SNP_P4_185787_1308  | NW_004518962.1 | Scaffold4600 | 1308                    | GG                              | TT              | 1947054077               |
| SNP_P4_185788_1485  | NW_004518962.1 | Scaffold4600 | 1485                    | TT                              | GG              | 1947054079               |
| SNP_P4_185789_1495  | NW_004518962.1 | Scaffold4600 | 1495                    | CC                              | TT              | 1947054081               |
| SNP_P4_185790_1650  | NW_004518962.1 | Scaffold4600 | 1650                    | AA                              | GG              | 1947054083               |
| SNP_P4_185791_1766  | NW_004518962.1 | Scaffold4600 | 1766                    | TT                              | GG              | 1947054085               |
| SNP_P4_185792_1770  | NW_004518962.1 | Scaffold4600 | 1770                    | GG                              | AA              | 1947054087               |
| SNP_P4_185793_1825  | NW_004518962.1 | Scaffold4600 | 1825                    | GG                              | TT              | 1947054089               |
| SNP_P4_185794_1988  | NW_004518962.1 | Scaffold4600 | 1988                    | AA                              | TT              | 1947054091               |
| SNP_P4_185795_5710  | NW_004518963.1 | Scaffold4602 | 5710                    | AA                              | GG              | 1947054093               |
| SNP_P4_185796_7707  | NW_004518963.1 | Scaffold4602 | 7707                    | TT                              | CC              | 1947054095               |
| SNP_P4_185797_7744  | NW_004518963.1 | Scaffold4602 | 7744                    | AA                              | GG              | 1947054097               |
| SNP_P4_185798_7776  | NW_004518963.1 | Scaffold4602 | 7776                    | AA                              | CC              | 1947054099               |
| SNP_P4_185799_7826  | NW_004518963.1 | Scaffold4602 | 7826                    | TT                              | CC              | 1947054101               |
| SNP_P4_185800_7878  | NW_004518963.1 | Scaffold4602 | 7878                    | AA                              | GG              | 1947054103               |
| SNP_P4_185801_7896  | NW_004518963.1 | Scaffold4602 | 7896                    | TT                              | GG              | 1947054105               |
| SNP_P4_185802_7947  | NW_004518963.1 | Scaffold4602 | 7947                    | AA                              | CC              | 1947054107               |
| SNP_P4_185803_8123  | NW_004518963.1 | Scaffold4602 | 8123                    | TT                              | CC              | 1947054108               |
| SNP_P4_185804_8228  | NW_004518963.1 | Scaffold4602 | 8228                    | TT                              | CC              | 1947054110               |
| SNP_P4_185805_19323 | NW_004518963.1 | Scaffold4602 | 19323                   | TT                              | AA              | 1947054112               |
| SNP_P4_185806_19335 | NW_004518963.1 | Scaffold4602 | 19335                   | GG                              | AA              | 1947054114               |
| SNP_P4_185807_19339 | NW_004518963.1 | Scaffold4602 | 19339                   | CC                              | GG              | 1947054116               |
| SNP_P4_185808_19359 | NW_004518963.1 | Scaffold4602 | 19359                   | TT                              | GG              | 1947054118               |
| SNP_P4_185809_19361 | NW_004518963.1 | Scaffold4602 | 19361                   | AA                              | GG              | 1947054120               |
| SNP_P4_185810_19510 | NW_004518963.1 | Scaffold4602 | 19510                   | GG                              | TT              | 1947054122               |
| SNP_P4_185811_64    | NW_004518965.1 | Scaffold4605 | 64                      | CC                              | GG              | 1947054124               |
| SNP_P4_185812_97    | NW_004518965.1 | Scaffold4605 | 97                      | CC                              | AA              | 1947054131               |
| SNP_P4_185813_17030 | NW_004518965.1 | Scaffold4605 | 17030                   | AA                              | GG              | 1947054133               |



| SNPs IDs            | Chromosome IDs | Chromosomes  | Physical positions (bp) | CDC Frontier (Reference genome) | (ILWC46 & LPNB) | NCBI SNPdb Accession IDs |
|---------------------|----------------|--------------|-------------------------|---------------------------------|-----------------|--------------------------|
| SNP_P4_185814_17063 | NW_004518965.1 | Scaffold4605 | 17063                   | TT                              | AA              | 1947054135               |
| SNP_P4_185815_17103 | NW_004518965.1 | Scaffold4605 | 17103                   | AA                              | CC              | 1947054137               |
| SNP_P4_185816_17112 | NW_004518965.1 | Scaffold4605 | 17112                   | AA                              | CC              | 1947054139               |
| SNP_P4_185817_17113 | NW_004518965.1 | Scaffold4605 | 17113                   | GG                              | AA              | 1947054141               |
| SNP_P4_185818_21790 | NW_004518965.1 | Scaffold4605 | 21790                   | GG                              | AA              | 1947054143               |
| SNP_P4_185819_21853 | NW_004518965.1 | Scaffold4605 | 21853                   | TT                              | GG              | 1947054145               |
| SNP_P4_185820_22248 | NW_004518965.1 | Scaffold4605 | 22248                   | GG                              | CC              | 1947054147               |
| SNP_P4_185821_22968 | NW_004518965.1 | Scaffold4605 | 22968                   | CC                              | AA              | 1947054148               |
| SNP_P4_185822_23232 | NW_004518965.1 | Scaffold4605 | 23232                   | GG                              | CC              | 1947054150               |
| SNP_P4_185823_23305 | NW_004518965.1 | Scaffold4605 | 23305                   | GG                              | AA              | 1947054152               |
| SNP_P4_185824_23321 | NW_004518965.1 | Scaffold4605 | 23321                   | GG                              | AA              | 1947054154               |
| SNP_P4_185825_23346 | NW_004518965.1 | Scaffold4605 | 23346                   | TT                              | GG              | 1947054156               |
| SNP_P4_185826_24417 | NW_004518965.1 | Scaffold4605 | 24417                   | GG                              | AA              | 1947054158               |
| SNP_P4_185827_24446 | NW_004518965.1 | Scaffold4605 | 24446                   | GG                              | CC              | 1947054160               |
| SNP_P4_185828_24769 | NW_004518965.1 | Scaffold4605 | 24769                   | AA                              | GG              | 1947054162               |
| SNP_P4_185830_24879 | NW_004518965.1 | Scaffold4605 | 24879                   | TT                              | AA              | 1947054164               |
| SNP_P4_185831_24934 | NW_004518965.1 | Scaffold4605 | 24934                   | TT                              | AA              | 1947054166               |
| SNP_P4_185832_24970 | NW_004518965.1 | Scaffold4605 | 24970                   | CC                              | AA              | 1947054168               |
| SNP_P4_185833_25092 | NW_004518965.1 | Scaffold4605 | 25092                   | CC                              | TT              | 1947054170               |
| SNP_P4_185834_25104 | NW_004518965.1 | Scaffold4605 | 25104                   | AA                              | TT              | 1947054172               |
| SNP_P4_185835_25139 | NW_004518965.1 | Scaffold4605 | 25139                   | TT                              | GG              | 1947054174               |
| SNP_P4_185836_25308 | NW_004518965.1 | Scaffold4605 | 25308                   | GG                              | AA              | 1947054175               |
| SNP_P4_185837_25353 | NW_004518965.1 | Scaffold4605 | 25353                   | AA                              | CC              | 1947054177               |
| SNP_P4_185838_1006  | NW_004518977.1 | Scaffold4627 | 1006                    | TT                              | GG              | 1947054179               |
| SNP_P4_185840_321   | NW_004518978.1 | Scaffold4628 | 321                     | TT                              | CC              | 1947054181               |
| SNP_P4_185841_490   | NW_004518978.1 | Scaffold4628 | 490                     | CC                              | TT              | 1947054183               |
| SNP_P4_185842_511   | NW_004518978.1 | Scaffold4628 | 511                     | GG                              | TT              | 1947054185               |
| SNP_P4_185843_560   | NW_004518978.1 | Scaffold4628 | 560                     | TT                              | CC              | 1947054187               |
| SNP_P4_185844_747   | NW_004518978.1 | Scaffold4628 | 747                     | CC                              | TT              | 1947054189               |
| SNP_P4_185845_1158  | NW_004518979.1 | Scaffold4629 | 1158                    | AA                              | GG              | 1947054191               |
| SNP_P4_185846_5947  | NW_004518979.1 | Scaffold4629 | 5947                    | CC                              | TT              | 1947054193               |
| SNP_P4_185847_5975  | NW_004518979.1 | Scaffold4629 | 5975                    | GG                              | AA              | 1947054195               |
| SNP_P4_185848_6006  | NW_004518979.1 | Scaffold4629 | 6006                    | TT                              | AA              | 1947054197               |
| SNP_P4_185849_6055  | NW_004518979.1 | Scaffold4629 | 6055                    | GG                              | AA              | 1947054199               |
| SNP_P4_185850_6094  | NW_004518979.1 | Scaffold4629 | 6094                    | CC                              | TT              | 1947054201               |
| SNP_P4_185851_6140  | NW_004518979.1 | Scaffold4629 | 6140                    | AA                              | GG              | 1947054203               |
| SNP_P4_185852_6204  | NW_004518979.1 | Scaffold4629 | 6204                    | GG                              | AA              | 1947054205               |
| SNP_P4_185853_6395  | NW_004518979.1 | Scaffold4629 | 6395                    | CC                              | TT              | 1947054207               |
| SNP_P4_185854_6397  | NW_004518979.1 | Scaffold4629 | 6397                    | AA                              | GG              | 1947054209               |
| SNP_P4_185855_5955  | NW_004518980.1 | Scaffold4632 | 5955                    | AA                              | CC              | 1947054211               |
| SNP_P4_185856_1284  | NW_004518981.1 | Scaffold4633 | 1284                    | CC                              | TT              | 1947054213               |
| SNP_P4_185857_1618  | NW_004518981.1 | Scaffold4633 | 1618                    | AA                              | GG              | 1947054215               |

| SNPs IDs            | Chromosome IDs | Chromosomes  | Physical positions (bp) | CDC Frontier (Reference genome) | (ILWC46 & LPNB) | NCBI SNPdb Accession IDs |
|---------------------|----------------|--------------|-------------------------|---------------------------------|-----------------|--------------------------|
| SNP_P4_185858_1636  | NW_004518981.1 | Scaffold4633 | 1636                    | AA                              | TT              | 1947054217               |
| SNP_P4_185859_1682  | NW_004518981.1 | Scaffold4633 | 1682                    | TT                              | AA              | 1947054219               |
| SNP_P4_185860_1887  | NW_004518981.1 | Scaffold4633 | 1887                    | AA                              | CC              | 1947054221               |
| SNP_P4_185861_1910  | NW_004518981.1 | Scaffold4633 | 1910                    | GG                              | AA              | 1947054224               |
| SNP_P4_185862_6299  | NW_004518982.1 | Scaffold4634 | 6299                    | CC                              | AA              | 1947054226               |
| SNP_P4_185863_6459  | NW_004518982.1 | Scaffold4634 | 6459                    | CC                              | GG              | 1947054228               |
| SNP_P4_185864_6687  | NW_004518982.1 | Scaffold4634 | 6687                    | CC                              | GG              | 1947054230               |
| SNP_P4_185865_7083  | NW_004518982.1 | Scaffold4634 | 7083                    | AA                              | TT              | 1947054232               |
| SNP_P4_185866_3099  | NW_004518983.1 | Scaffold4635 | 3099                    | CC                              | AA              | 1947054234               |
| SNP_P4_185867_3104  | NW_004518983.1 | Scaffold4635 | 3104                    | GG                              | CC              | 1947054236               |
| SNP_P4_185868_3130  | NW_004518983.1 | Scaffold4635 | 3130                    | CC                              | TT              | 1947054238               |
| SNP_P4_185869_3172  | NW_004518983.1 | Scaffold4635 | 3172                    | GG                              | CC              | 1947054240               |
| SNP_P4_185870_3176  | NW_004518983.1 | Scaffold4635 | 3176                    | CC                              | TT              | 1947054242               |
| SNP_P4_185871_3178  | NW_004518983.1 | Scaffold4635 | 3178                    | AA                              | GG              | 1947054244               |
| SNP_P4_185872_9103  | NW_004518983.1 | Scaffold4635 | 9103                    | TT                              | CC              | 1947054246               |
| SNP_P4_185873_681   | NW_004518984.1 | Scaffold4636 | 681                     | AA                              | CC              | 1947054248               |
| SNP_P4_185874_795   | NW_004518986.1 | Scaffold4638 | 795                     | TT                              | CC              | 1947054250               |
| SNP_P4_185875_476   | NW_004518989.1 | Scaffold4642 | 476                     | CC                              | GG              | 1947054252               |
| SNP_P4_185876_510   | NW_004518989.1 | Scaffold4642 | 510                     | GG                              | AA              | 1947054254               |
| SNP_P4_185877_985   | NW_004518989.1 | Scaffold4642 | 985                     | CC                              | GG              | 1947054256               |
| SNP_P4_185878_1276  | NW_004518989.1 | Scaffold4642 | 1276                    | CC                              | TT              | 1947054258               |
| SNP_P4_185879_1295  | NW_004518989.1 | Scaffold4642 | 1295                    | AA                              | CC              | 1947054260               |
| SNP_P4_185880_1977  | NW_004518989.1 | Scaffold4642 | 1977                    | AA                              | TT              | 1947054262               |
| SNP_P4_185881_3352  | NW_004518989.1 | Scaffold4642 | 3352                    | CC                              | TT              | 1947054264               |
| SNP_P4_185882_3770  | NW_004518989.1 | Scaffold4642 | 3770                    | AA                              | GG              | 1947054266               |
| SNP_P4_185883_24197 | NW_004518990.1 | Scaffold4643 | 24197                   | TT                              | CC              | 1947054268               |
| SNP_P4_185884_24245 | NW_004518990.1 | Scaffold4643 | 24245                   | GG                              | CC              | 1947054269               |
| SNP_P4_185885_24555 | NW_004518990.1 | Scaffold4643 | 24555                   | TT                              | GG              | 1947054271               |
| SNP_P4_185886_24561 | NW_004518990.1 | Scaffold4643 | 24561                   | AA                              | TT              | 1947054273               |
| SNP_P4_185887_24581 | NW_004518990.1 | Scaffold4643 | 24581                   | TT                              | CC              | 1947054275               |
| SNP_P4_185888_24629 | NW_004518990.1 | Scaffold4643 | 24629                   | CC                              | TT              | 1947054277               |
| SNP_P4_185889_62959 | NW_004518990.1 | Scaffold4643 | 62959                   | CC                              | TT              | 1947054279               |
| SNP_P4_185890_360   | NW_004518992.1 | Scaffold4647 | 360                     | AA                              | TT              | 1947054281               |
| SNP_P4_185891_361   | NW_004518992.1 | Scaffold4647 | 361                     | CC                              | TT              | 1947054283               |
| SNP_P4_185892_371   | NW_004518992.1 | Scaffold4647 | 371                     | CC                              | AA              | 1947054285               |
| SNP_P4_185893_376   | NW_004518992.1 | Scaffold4647 | 376                     | TT                              | AA              | 1947054287               |
| SNP_P4_185894_437   | NW_004518992.1 | Scaffold4647 | 437                     | TT                              | CC              | 1947054289               |
| SNP_P4_185895_843   | NW_004518992.1 | Scaffold4647 | 843                     | AA                              | GG              | 1947054291               |
| SNP_P4_185896_1190  | NW_004518992.1 | Scaffold4647 | 1190                    | TT                              | CC              | 1947054293               |
| SNP_P4_185897_1195  | NW_004518992.1 | Scaffold4647 | 1195                    | GG                              | AA              | 1947054294               |
| SNP_P4_185898_1485  | NW_004518992.1 | Scaffold4647 | 1485                    | AA                              | GG              | 1947054296               |
| SNP_P4_185899_1608  | NW_004518992.1 | Scaffold4647 | 1608                    | CC                              | GG              | 1947054298               |

| SNPs IDs            | Chromosome IDs | Chromosomes  | Physical positions (bp) | CDC Frontier (Reference genome) | (ILWC46 & LPNB) | NCBI SNPdb Accession IDs |
|---------------------|----------------|--------------|-------------------------|---------------------------------|-----------------|--------------------------|
| SNP_P4_185900_1645  | NW_004518992.1 | Scaffold4647 | 1645                    | GG                              | AA              | 1947054300               |
| SNP_P4_185901_1646  | NW_004518992.1 | Scaffold4647 | 1646                    | TT                              | AA              | 1947054302               |
| SNP_P4_185902_1683  | NW_004518992.1 | Scaffold4647 | 1683                    | GG                              | CC              | 1947054304               |
| SNP_P4_185903_1684  | NW_004518992.1 | Scaffold4647 | 1684                    | CC                              | GG              | 1947054306               |
| SNP_P4_185904_1731  | NW_004518992.1 | Scaffold4647 | 1731                    | TT                              | AA              | 1947054308               |
| SNP_P4_185905_1765  | NW_004518992.1 | Scaffold4647 | 1765                    | TT                              | GG              | 1947054310               |
| SNP_P4_185906_2040  | NW_004518992.1 | Scaffold4647 | 2040                    | TT                              | AA              | 1947054312               |
| SNP_P4_185907_2502  | NW_004518992.1 | Scaffold4647 | 2502                    | GG                              | AA              | 1947054313               |
| SNP_P4_185908_2555  | NW_004518992.1 | Scaffold4647 | 2555                    | GG                              | CC              | 1947054315               |
| SNP_P4_185909_2823  | NW_004518992.1 | Scaffold4647 | 2823                    | CC                              | TT              | 1947054317               |
| SNP_P4_185910_5492  | NW_004518992.1 | Scaffold4647 | 5492                    | AA                              | TT              | 1947054319               |
| SNP_P4_185911_6259  | NW_004518992.1 | Scaffold4647 | 6259                    | AA                              | GG              | 1947054321               |
| SNP_P4_185912_500   | NW_004518994.1 | Scaffold4651 | 500                     | GG                              | TT              | 1947054323               |
| SNP_P4_185913_595   | NW_004518994.1 | Scaffold4651 | 595                     | AA                              | GG              | 1947054325               |
| SNP_P4_185914_926   | NW_004518994.1 | Scaffold4651 | 926                     | TT                              | CC              | 1947054327               |
| SNP_P4_185915_1075  | NW_004518996.1 | Scaffold4654 | 1075                    | AA                              | TT              | 1947054329               |
| SNP_P4_185916_218   | NW_004519000.1 | Scaffold4662 | 218                     | GG                              | TT              | 1947054331               |
| SNP_P4_185917_29075 | NW_004519000.1 | Scaffold4662 | 29075                   | GG                              | AA              | 1947054333               |
| SNP_P4_185918_29087 | NW_004519000.1 | Scaffold4662 | 29087                   | GG                              | AA              | 1947054335               |
| SNP_P4_185919_29093 | NW_004519000.1 | Scaffold4662 | 29093                   | TT                              | AA              | 1947054337               |
| SNP_P4_185920_29233 | NW_004519000.1 | Scaffold4662 | 29233                   | TT                              | CC              | 1947054339               |
| SNP_P4_185921_29275 | NW_004519000.1 | Scaffold4662 | 29275                   | AA                              | GG              | 1947054341               |
| SNP_P4_185922_29278 | NW_004519000.1 | Scaffold4662 | 29278                   | GG                              | AA              | 1947054343               |
| SNP_P4_185923_29281 | NW_004519000.1 | Scaffold4662 | 29281                   | TT                              | AA              | 1947054345               |
| SNP_P4_185924_30025 | NW_004519000.1 | Scaffold4662 | 30025                   | AA                              | GG              | 1947054347               |
| SNP_P4_185925_30084 | NW_004519000.1 | Scaffold4662 | 30084                   | TT                              | CC              | 1947054349               |
| SNP_P4_185926_30148 | NW_004519000.1 | Scaffold4662 | 30148                   | GG                              | CC              | 1947054351               |
| SNP_P4_185927_30216 | NW_004519000.1 | Scaffold4662 | 30216                   | CC                              | TT              | 1947054353               |
| SNP_P4_185928_35488 | NW_004519000.1 | Scaffold4662 | 35488                   | AA                              | GG              | 1947054355               |
| SNP_P4_185929_48074 | NW_004519000.1 | Scaffold4662 | 48074                   | AA                              | GG              | 1947054357               |
| SNP_P4_185930_4831  | NW_004519004.1 | Scaffold4668 | 4831                    | TT                              | CC              | 1947054359               |
| SNP_P4_185931_4909  | NW_004519004.1 | Scaffold4668 | 4909                    | AA                              | GG              | 1947054361               |
| SNP_P4_185932_5107  | NW_004519004.1 | Scaffold4668 | 5107                    | CC                              | TT              | 1947054363               |
| SNP_P4_185933_5123  | NW_004519004.1 | Scaffold4668 | 5123                    | CC                              | GG              | 1947054365               |
| SNP_P4_185934_5256  | NW_004519004.1 | Scaffold4668 | 5256                    | CC                              | AA              | 1947054367               |
| SNP_P4_185935_5565  | NW_004519004.1 | Scaffold4668 | 5565                    | AA                              | CC              | 1947054369               |
| SNP_P4_185936_5587  | NW_004519004.1 | Scaffold4668 | 5587                    | AA                              | CC              | 1947054371               |
| SNP_P4_185937_5667  | NW_004519004.1 | Scaffold4668 | 5667                    | AA                              | GG              | 1947054373               |
| SNP_P4_185938_8374  | NW_004519008.1 | Scaffold4673 | 8374                    | CC                              | TT              | 1947054375               |
| SNP_P4_185939_8386  | NW_004519008.1 | Scaffold4673 | 8386                    | CC                              | TT              | 1947054377               |
| SNP_P4_185940_8844  | NW_004519008.1 | Scaffold4673 | 8844                    | CC                              | TT              | 1947054379               |
| SNP_P4_185941_8978  | NW_004519008.1 | Scaffold4673 | 8978                    | AA                              | GG              | 1947054381               |

| SNPs IDs            | Chromosome IDs | Chromosomes  | Physical positions (bp) | CDC Frontier (Reference genome) | (ILWC46 & LPNB) | NCBI SNPdb Accession IDs |
|---------------------|----------------|--------------|-------------------------|---------------------------------|-----------------|--------------------------|
| SNP_P4_185942_13095 | NW_004519008.1 | Scaffold4673 | 13095                   | AA                              | CC              | 1947054383               |
| SNP_P4_185943_13304 | NW_004519008.1 | Scaffold4673 | 13304                   | TT                              | CC              | 1947054385               |
| SNP_P4_185944_14182 | NW_004519008.1 | Scaffold4673 | 14182                   | TT                              | CC              | 1947054388               |
| SNP_P4_185945_14549 | NW_004519008.1 | Scaffold4673 | 14549                   | AA                              | GG              | 1947054390               |
| SNP_P4_185946_20155 | NW_004519008.1 | Scaffold4673 | 20155                   | AA                              | GG              | 1947054392               |
| SNP_P4_185947_20243 | NW_004519008.1 | Scaffold4673 | 20243                   | CC                              | TT              | 1947054394               |
| SNP_P4_185948_20438 | NW_004519008.1 | Scaffold4673 | 20438                   | AA                              | GG              | 1947054396               |
| SNP_P4_185949_958   | NW_004519011.1 | Scaffold4679 | 958                     | TT                              | AA              | 1947054398               |
| SNP_P4_185950_978   | NW_004519011.1 | Scaffold4679 | 978                     | AA                              | GG              | 1947054400               |
| SNP_P4_185951_982   | NW_004519011.1 | Scaffold4679 | 982                     | CC                              | TT              | 1947054402               |
| SNP_P4_185952_1050  | NW_004519011.1 | Scaffold4679 | 1050                    | CC                              | AA              | 1947054404               |
| SNP_P4_185953_1051  | NW_004519011.1 | Scaffold4679 | 1051                    | GG                              | AA              | 1947054406               |
| SNP_P4_185954_1069  | NW_004519011.1 | Scaffold4679 | 1069                    | GG                              | AA              | 1947054408               |
| SNP_P4_185955_1076  | NW_004519011.1 | Scaffold4679 | 1076                    | AA                              | GG              | 1947054410               |
| SNP_P4_185956_323   | NW_004519015.1 | Scaffold4689 | 323                     | AA                              | CC              | 1947054413               |
| SNP_P4_185957_431   | NW_004519015.1 | Scaffold4689 | 431                     | TT                              | CC              | 1947054415               |
| SNP_P4_185958_39    | NW_004519018.1 | Scaffold4692 | 39                      | GG                              | AA              | 1947054417               |
| SNP_P4_185959_64    | NW_004519018.1 | Scaffold4692 | 64                      | GG                              | AA              | 1947054419               |
| SNP_P4_185960_69    | NW_004519018.1 | Scaffold4692 | 69                      | GG                              | AA              | 1947054421               |
| SNP_P4_185961_123   | NW_004519018.1 | Scaffold4692 | 123                     | AA                              | GG              | 1947054423               |
| SNP_P4_185962_168   | NW_004519018.1 | Scaffold4692 | 168                     | AA                              | TT              | 1947054425               |
| SNP_P4_185963_399   | NW_004519018.1 | Scaffold4692 | 399                     | AA                              | TT              | 1947054427               |
| SNP_P4_185964_456   | NW_004519018.1 | Scaffold4692 | 456                     | AA                              | GG              | 1947054429               |
| SNP_P4_185965_529   | NW_004519018.1 | Scaffold4692 | 529                     | CC                              | GG              | 1947054431               |
| SNP_P4_185966_578   | NW_004519018.1 | Scaffold4692 | 578                     | GG                              | TT              | 1947054433               |
| SNP_P4_185967_433   | NW_004519019.1 | Scaffold4693 | 433                     | GG                              | TT              | 1947054435               |
| SNP_P4_185968_434   | NW_004519019.1 | Scaffold4693 | 434                     | TT                              | AA              | 1947054437               |
| SNP_P4_185970_448   | NW_004519019.1 | Scaffold4693 | 448                     | GG                              | AA              | 1947054439               |
| SNP_P4_185971_475   | NW_004519019.1 | Scaffold4693 | 475                     | CC                              | TT              | 1947054441               |
| SNP_P4_185973_158   | NW_004519020.1 | Scaffold4695 | 158                     | CC                              | AA              | 1947054443               |
| SNP_P4_185974_508   | NW_004519020.1 | Scaffold4695 | 508                     | TT                              | CC              | 1947054445               |
| SNP_P4_185975_512   | NW_004519020.1 | Scaffold4695 | 512                     | GG                              | AA              | 1947054447               |
| SNP_P4_185976_543   | NW_004519020.1 | Scaffold4695 | 543                     | TT                              | GG              | 1947054449               |
| SNP_P4_185977_581   | NW_004519020.1 | Scaffold4695 | 581                     | GG                              | AA              | 1947054451               |
| SNP_P4_185978_5442  | NW_004519020.1 | Scaffold4695 | 5442                    | GG                              | AA              | 1947054453               |
| SNP_P4_185979_5600  | NW_004519020.1 | Scaffold4695 | 5600                    | AA                              | GG              | 1947054455               |
| SNP_P4_185980_5643  | NW_004519020.1 | Scaffold4695 | 5643                    | TT                              | GG              | 1947054457               |
| SNP_P4_185981_209   | NW_004519021.1 | Scaffold4696 | 209                     | CC                              | GG              | 1947054459               |
| SNP_P4_185982_3201  | NW_004519021.1 | Scaffold4696 | 3201                    | AA                              | GG              | 1947054461               |
| SNP_P4_185983_3405  | NW_004519021.1 | Scaffold4696 | 3405                    | GG                              | CC              | 1947054463               |
| SNP_P4_185985_84    | NW_004519024.1 | Scaffold4701 | 84                      | GG                              | CC              | 1947054465               |
| SNP_P4_185986_400   | NW_004519025.1 | Scaffold4702 | 400                     | GG                              | TT              | 1947054467               |

| SNPs IDs            | Chromosome IDs | Chromosomes  | Physical positions (bp) | CDC Frontier (Reference genome) | (ILWC46 & LPNB) | NCBI SNPdb Accession IDs |
|---------------------|----------------|--------------|-------------------------|---------------------------------|-----------------|--------------------------|
| SNP_P4_185987_428   | NW_004519025.1 | Scaffold4702 | 428                     | AA                              | TT              | 1947054469               |
| SNP_P4_185988_1406  | NW_004519025.1 | Scaffold4702 | 1406                    | CC                              | TT              | 1947054471               |
| SNP_P4_185989_346   | NW_004519028.1 | Scaffold4708 | 346                     | TT                              | GG              | 1947054473               |
| SNP_P4_185990_708   | NW_004519028.1 | Scaffold4708 | 708                     | TT                              | CC              | 1947054475               |
| SNP_P4_185991_760   | NW_004519028.1 | Scaffold4708 | 760                     | CC                              | TT              | 1947054477               |
| SNP_P4_185992_827   | NW_004519028.1 | Scaffold4708 | 827                     | CC                              | TT              | 1947054479               |
| SNP_P4_185993_938   | NW_004519028.1 | Scaffold4708 | 938                     | CC                              | TT              | 1947054481               |
| SNP_P4_185994_1023  | NW_004519028.1 | Scaffold4708 | 1023                    | TT                              | AA              | 1947054483               |
| SNP_P4_185995_1041  | NW_004519028.1 | Scaffold4708 | 1041                    | AA                              | GG              | 1947054485               |
| SNP_P4_185996_1085  | NW_004519028.1 | Scaffold4708 | 1085                    | AA                              | GG              | 1947054487               |
| SNP_P4_185997_1147  | NW_004519028.1 | Scaffold4708 | 1147                    | GG                              | AA              | 1947054489               |
| SNP_P4_185998_1287  | NW_004519028.1 | Scaffold4708 | 1287                    | AA                              | GG              | 1947054491               |
| SNP_P4_185999_2955  | NW_004519028.1 | Scaffold4708 | 2955                    | TT                              | GG              | 1947054493               |
| SNP_P4_186000_3260  | NW_004519028.1 | Scaffold4708 | 3260                    | CC                              | TT              | 1947054495               |
| SNP_P4_186001_6624  | NW_004519028.1 | Scaffold4708 | 6624                    | TT                              | AA              | 1947054497               |
| SNP_P4_186002_6628  | NW_004519028.1 | Scaffold4708 | 6628                    | TT                              | AA              | 1947054499               |
| SNP_P4_186003_6713  | NW_004519028.1 | Scaffold4708 | 6713                    | AA                              | GG              | 1947054501               |
| SNP_P4_186004_6785  | NW_004519028.1 | Scaffold4708 | 6785                    | TT                              | AA              | 1947054503               |
| SNP_P4_186005_6822  | NW_004519028.1 | Scaffold4708 | 6822                    | GG                              | AA              | 1947054505               |
| SNP_P4_186006_6882  | NW_004519028.1 | Scaffold4708 | 6882                    | TT                              | AA              | 1947054507               |
| SNP_P4_186007_14628 | NW_004519028.1 | Scaffold4708 | 14628                   | TT                              | CC              | 1947054509               |
| SNP_P4_186008_14687 | NW_004519028.1 | Scaffold4708 | 14687                   | CC                              | GG              | 1947054511               |
| SNP_P4_186009_14850 | NW_004519028.1 | Scaffold4708 | 14850                   | TT                              | GG              | 1947054513               |
| SNP_P4_186010_15063 | NW_004519028.1 | Scaffold4708 | 15063                   | CC                              | TT              | 1947054515               |
| SNP_P4_186011_15172 | NW_004519028.1 | Scaffold4708 | 15172                   | CC                              | TT              | 1947054517               |
| SNP_P4_186012_17343 | NW_004519028.1 | Scaffold4708 | 17343                   | GG                              | TT              | 1947054519               |
| SNP_P4_186013_17365 | NW_004519028.1 | Scaffold4708 | 17365                   | GG                              | TT              | 1947054521               |
| SNP_P4_186014_17380 | NW_004519028.1 | Scaffold4708 | 17380                   | AA                              | CC              | 1947054523               |
| SNP_P4_186015_17456 | NW_004519028.1 | Scaffold4708 | 17456                   | AA                              | GG              | 1947054525               |
| SNP_P4_186016_17627 | NW_004519028.1 | Scaffold4708 | 17627                   | TT                              | CC              | 1947054527               |
| SNP_P4_186017_17681 | NW_004519028.1 | Scaffold4708 | 17681                   | GG                              | AA              | 1947054529               |
| SNP_P4_186018_17707 | NW_004519028.1 | Scaffold4708 | 17707                   | GG                              | AA              | 1947054531               |
| SNP_P4_186019_19807 | NW_004519028.1 | Scaffold4708 | 19807                   | TT                              | AA              | 1947054533               |
| SNP_P4_186020_19966 | NW_004519028.1 | Scaffold4708 | 19966                   | TT                              | AA              | 1947054535               |
| SNP_P4_186021_20591 | NW_004519028.1 | Scaffold4708 | 20591                   | TT                              | GG              | 1947054537               |
| SNP_P4_186022_20741 | NW_004519028.1 | Scaffold4708 | 20741                   | CC                              | AA              | 1947054539               |
| SNP_P4_186023_20812 | NW_004519028.1 | Scaffold4708 | 20812                   | TT                              | GG              | 1947054541               |
| SNP_P4_186024_20860 | NW_004519028.1 | Scaffold4708 | 20860                   | TT                              | CC              | 1947054543               |
| SNP_P4_186025_20959 | NW_004519028.1 | Scaffold4708 | 20959                   | AA                              | TT              | 1947054545               |
| SNP_P4_186026_21016 | NW_004519028.1 | Scaffold4708 | 21016                   | TT                              | CC              | 1947054547               |
| SNP_P4_186027_21034 | NW_004519028.1 | Scaffold4708 | 21034                   | AA                              | GG              | 1947054549               |
| SNP_P4_186028_21049 | NW_004519028.1 | Scaffold4708 | 21049                   | AA                              | GG              | 1947054551               |

| SNPs IDs            | Chromosome IDs | Chromosomes  | Physical positions (bp) | CDC Frontier (Reference genome) | (ILWC46 & LPNB) | NCBI SNPdb Accession IDs |
|---------------------|----------------|--------------|-------------------------|---------------------------------|-----------------|--------------------------|
| SNP_P4_186029_21098 | NW_004519028.1 | Scaffold4708 | 21098                   | GG                              | AA              | 1947054553               |
| SNP_P4_186030_21118 | NW_004519028.1 | Scaffold4708 | 21118                   | CC                              | AA              | 1947054555               |
| SNP_P4_186031_21303 | NW_004519028.1 | Scaffold4708 | 21303                   | GG                              | AA              | 1947054558               |
| SNP_P4_186032_21554 | NW_004519028.1 | Scaffold4708 | 21554                   | TT                              | CC              | 1947054560               |
| SNP_P4_186033_21582 | NW_004519028.1 | Scaffold4708 | 21582                   | TT                              | CC              | 1947054562               |
| SNP_P4_186034_21809 | NW_004519028.1 | Scaffold4708 | 21809                   | TT                              | CC              | 1947054564               |
| SNP_P4_186036_22095 | NW_004519028.1 | Scaffold4708 | 22095                   | TT                              | CC              | 1947054566               |
| SNP_P4_186037_24842 | NW_004519028.1 | Scaffold4708 | 24842                   | AA                              | GG              | 1947054568               |
| SNP_P4_186038_24848 | NW_004519028.1 | Scaffold4708 | 24848                   | AA                              | TT              | 1947054570               |
| SNP_P4_186039_24862 | NW_004519028.1 | Scaffold4708 | 24862                   | CC                              | AA              | 1947054572               |
| SNP_P4_186040_28415 | NW_004519028.1 | Scaffold4708 | 28415                   | GG                              | TT              | 1947054574               |
| SNP_P4_186041_505   | NW_004519031.1 | Scaffold4711 | 505                     | AA                              | TT              | 1947054576               |
| SNP_P4_186042_1423  | NW_004519031.1 | Scaffold4711 | 1423                    | TT                              | CC              | 1947054578               |
| SNP_P4_186043_1499  | NW_004519031.1 | Scaffold4711 | 1499                    | AA                              | GG              | 1947054580               |
| SNP_P4_186044_1745  | NW_004519031.1 | Scaffold4711 | 1745                    | TT                              | AA              | 1947054582               |
| SNP_P4_186045_2532  | NW_004519031.1 | Scaffold4711 | 2532                    | TT                              | CC              | 1947054584               |
| SNP_P4_186046_2611  | NW_004519031.1 | Scaffold4711 | 2611                    | AA                              | GG              | 1947054586               |
| SNP_P4_186047_2701  | NW_004519031.1 | Scaffold4711 | 2701                    | TT                              | GG              | 1947054588               |
| SNP_P4_186048_2847  | NW_004519031.1 | Scaffold4711 | 2847                    | GG                              | CC              | 1947054590               |
| SNP_P4_186049_2977  | NW_004519031.1 | Scaffold4711 | 2977                    | GG                              | AA              | 1947054592               |
| SNP_P4_186050_3005  | NW_004519031.1 | Scaffold4711 | 3005                    | CC                              | GG              | 1947054594               |
| SNP_P4_186051_4702  | NW_004519031.1 | Scaffold4711 | 4702                    | TT                              | AA              | 1947054596               |
| SNP_P4_186052_4854  | NW_004519031.1 | Scaffold4711 | 4854                    | TT                              | AA              | 1947054598               |
| SNP_P4_186053_5395  | NW_004519031.1 | Scaffold4711 | 5395                    | GG                              | TT              | 1947054600               |
| SNP_P4_186055_5841  | NW_004519031.1 | Scaffold4711 | 5841                    | TT                              | AA              | 1947054602               |
| SNP_P4_186056_5845  | NW_004519031.1 | Scaffold4711 | 5845                    | GG                              | TT              | 1947054604               |
| SNP_P4_186057_5997  | NW_004519031.1 | Scaffold4711 | 5997                    | CC                              | AA              | 1947054606               |
| SNP_P4_186058_6115  | NW_004519031.1 | Scaffold4711 | 6115                    | GG                              | TT              | 1947054608               |
| SNP_P4_186060_6379  | NW_004519031.1 | Scaffold4711 | 6379                    | CC                              | TT              | 1947054611               |
| SNP_P4_186061_6510  | NW_004519031.1 | Scaffold4711 | 6510                    | CC                              | GG              | 1947054613               |
| SNP_P4_186062_6560  | NW_004519031.1 | Scaffold4711 | 6560                    | TT                              | AA              | 1947054615               |
| SNP_P4_186063_8226  | NW_004519031.1 | Scaffold4711 | 8226                    | CC                              | TT              | 1947054617               |
| SNP_P4_186064_8227  | NW_004519031.1 | Scaffold4711 | 8227                    | AA                              | GG              | 1947054619               |
| SNP_P4_186065_8890  | NW_004519031.1 | Scaffold4711 | 8890                    | GG                              | AA              | 1947054621               |
| SNP_P4_186066_8998  | NW_004519031.1 | Scaffold4711 | 8998                    | TT                              | GG              | 1947054623               |
| SNP_P4_186067_9284  | NW_004519031.1 | Scaffold4711 | 9284                    | GG                              | CC              | 1947054625               |
| SNP_P4_186068_9292  | NW_004519031.1 | Scaffold4711 | 9292                    | TT                              | GG              | 1947054627               |
| SNP_P4_186069_9416  | NW_004519031.1 | Scaffold4711 | 9416                    | AA                              | GG              | 1947054629               |
| SNP_P4_186070_70    | NW_004519033.1 | Scaffold4713 | 70                      | TT                              | CC              | 1947054631               |
| SNP_P4_186071_318   | NW_004519033.1 | Scaffold4713 | 318                     | TT                              | CC              | 1947054633               |
| SNP_P4_186072_1617  | NW_004519033.1 | Scaffold4713 | 1617                    | TT                              | CC              | 1947054635               |
| SNP_P4_186074_554   | NW_004519037.1 | Scaffold4718 | 554                     | TT                              | GG              | 1947054637               |

| SNPs IDs            | Chromosome IDs | Chromosomes  | Physical positions (bp) | CDC Frontier (Reference genome) | (ILWC46 & LPNB) | NCBI SNPdb Accession IDs |
|---------------------|----------------|--------------|-------------------------|---------------------------------|-----------------|--------------------------|
| SNP_P4_186075_214   | NW_004519039.1 | Scaffold4720 | 214                     | TT                              | AA              | 1947054639               |
| SNP_P4_186076_985   | NW_004519039.1 | Scaffold4720 | 985                     | TT                              | GG              | 1947054641               |
| SNP_P4_186077_4661  | NW_004519039.1 | Scaffold4720 | 4661                    | TT                              | CC              | 1947054643               |
| SNP_P4_186078_203   | NW_004519041.1 | Scaffold4722 | 203                     | TT                              | GG              | 1947054645               |
| SNP_P4_186079_479   | NW_004519044.1 | Scaffold4726 | 479                     | CC                              | TT              | 1947054647               |
| SNP_P4_186081_664   | NW_004519048.1 | Scaffold4731 | 664                     | TT                              | CC              | 1947054649               |
| SNP_P4_186082_852   | NW_004519048.1 | Scaffold4731 | 852                     | TT                              | AA              | 1947054651               |
| SNP_P4_186083_924   | NW_004519048.1 | Scaffold4731 | 924                     | CC                              | TT              | 1947054653               |
| SNP_P4_186084_1215  | NW_004519048.1 | Scaffold4731 | 1215                    | GG                              | CC              | 1947054655               |
| SNP_P4_186085_151   | NW_004519049.1 | Scaffold4733 | 151                     | GG                              | AA              | 1947054657               |
| SNP_P4_186086_204   | NW_004519049.1 | Scaffold4733 | 204                     | AA                              | GG              | 1947054659               |
| SNP_P4_186087_240   | NW_004519049.1 | Scaffold4733 | 240                     | TT                              | CC              | 1947054661               |
| SNP_P4_186088_273   | NW_004519049.1 | Scaffold4733 | 273                     | CC                              | TT              | 1947054663               |
| SNP_P4_186090_543   | NW_004519049.1 | Scaffold4733 | 543                     | AA                              | GG              | 1947054665               |
| SNP_P4_186091_558   | NW_004519049.1 | Scaffold4733 | 558                     | GG                              | AA              | 1947054684               |
| SNP_P4_186092_745   | NW_004519051.1 | Scaffold4735 | 745                     | AA                              | CC              | 1947054686               |
| SNP_P4_186093_911   | NW_004519051.1 | Scaffold4735 | 911                     | AA                              | CC              | 1947054688               |
| SNP_P4_186094_207   | NW_004519052.1 | Scaffold4736 | 207                     | AA                              | TT              | 1947054690               |
| SNP_P4_186095_1480  | NW_004519055.1 | Scaffold4740 | 1480                    | AA                              | TT              | 1947054692               |
| SNP_P4_186096_1911  | NW_004519055.1 | Scaffold4740 | 1911                    | CC                              | TT              | 1947054695               |
| SNP_P4_186097_2047  | NW_004519055.1 | Scaffold4740 | 2047                    | GG                              | AA              | 1947054697               |
| SNP_P4_186098_2131  | NW_004519055.1 | Scaffold4740 | 2131                    | AA                              | GG              | 1947054699               |
| SNP_P4_186099_2141  | NW_004519055.1 | Scaffold4740 | 2141                    | GG                              | AA              | 1947054701               |
| SNP_P4_186100_2142  | NW_004519055.1 | Scaffold4740 | 2142                    | GG                              | AA              | 1947054703               |
| SNP_P4_186101_2357  | NW_004519055.1 | Scaffold4740 | 2357                    | CC                              | GG              | 1947054705               |
| SNP_P4_186102_2426  | NW_004519055.1 | Scaffold4740 | 2426                    | GG                              | AA              | 1947054707               |
| SNP_P4_186103_2624  | NW_004519055.1 | Scaffold4740 | 2624                    | AA                              | CC              | 1947054709               |
| SNP_P4_186104_2688  | NW_004519055.1 | Scaffold4740 | 2688                    | TT                              | AA              | 1947054711               |
| SNP_P4_186105_2737  | NW_004519055.1 | Scaffold4740 | 2737                    | AA                              | GG              | 1947054713               |
| SNP_P4_186106_2915  | NW_004519055.1 | Scaffold4740 | 2915                    | AA                              | TT              | 1947054715               |
| SNP_P4_186107_4533  | NW_004519055.1 | Scaffold4740 | 4533                    | TT                              | AA              | 1947054717               |
| SNP_P4_186108_4562  | NW_004519055.1 | Scaffold4740 | 4562                    | AA                              | GG              | 1947054719               |
| SNP_P4_186109_4578  | NW_004519055.1 | Scaffold4740 | 4578                    | AA                              | TT              | 1947054721               |
| SNP_P4_186110_4816  | NW_004519055.1 | Scaffold4740 | 4816                    | AA                              | TT              | 1947054723               |
| SNP_P4_186111_4913  | NW_004519055.1 | Scaffold4740 | 4913                    | AA                              | TT              | 1947054725               |
| SNP_P4_186112_4997  | NW_004519055.1 | Scaffold4740 | 4997                    | GG                              | CC              | 1947054728               |
| SNP_P4_186113_5424  | NW_004519055.1 | Scaffold4740 | 5424                    | AA                              | GG              | 1947054730               |
| SNP_P4_186114_11643 | NW_004519055.1 | Scaffold4740 | 11643                   | AA                              | CC              | 1947054732               |
| SNP_P4_186115_11672 | NW_004519055.1 | Scaffold4740 | 11672                   | TT                              | CC              | 1947054734               |
| SNP_P4_186116_20131 | NW_004519057.1 | Scaffold4745 | 20131                   | TT                              | CC              | 1947054736               |
| SNP_P4_186117_20147 | NW_004519057.1 | Scaffold4745 | 20147                   | GG                              | CC              | 1947054738               |
| SNP_P4_186118_20171 | NW_004519057.1 | Scaffold4745 | 20171                   | TT                              | AA              | 1947054740               |

| SNPs IDs            | Chromosome IDs | Chromosomes  | Physical positions (bp) | CDC Frontier (Reference genome) | (ILWC46 & LPNB) | NCBI SNPdb Accession IDs |
|---------------------|----------------|--------------|-------------------------|---------------------------------|-----------------|--------------------------|
| SNP_P4_186120_22578 | NW_004519057.1 | Scaffold4745 | 22578                   | TT                              | CC              | 1947054743               |
| SNP_P4_186121_22587 | NW_004519057.1 | Scaffold4745 | 22587                   | GG                              | AA              | 1947054745               |
| SNP_P4_186122_22594 | NW_004519057.1 | Scaffold4745 | 22594                   | GG                              | CC              | 1947054747               |
| SNP_P4_186124_429   | NW_004519065.1 | Scaffold4759 | 429                     | CC                              | TT              | 1947054749               |
| SNP_P4_186125_452   | NW_004519065.1 | Scaffold4759 | 452                     | CC                              | TT              | 1947054751               |
| SNP_P4_186127_488   | NW_004519065.1 | Scaffold4759 | 488                     | TT                              | GG              | 1947054753               |
| SNP_P4_186129_10971 | NW_004519065.1 | Scaffold4759 | 10971                   | CC                              | GG              | 1947054755               |
| SNP_P4_186130_21577 | NW_004519065.1 | Scaffold4759 | 21577                   | GG                              | AA              | 1947054757               |
| SNP_P4_186131_22059 | NW_004519065.1 | Scaffold4759 | 22059                   | TT                              | AA              | 1947054759               |
| SNP_P4_186132_22060 | NW_004519065.1 | Scaffold4759 | 22060                   | AA                              | TT              | 1947054761               |
| SNP_P4_186133_30697 | NW_004519065.1 | Scaffold4759 | 30697                   | TT                              | GG              | 1947054763               |
| SNP_P4_186134_36110 | NW_004519065.1 | Scaffold4759 | 36110                   | AA                              | GG              | 1947054765               |
| SNP_P4_186135_4932  | NW_004519071.1 | Scaffold4769 | 4932                    | AA                              | CC              | 1947054767               |
| SNP_P4_186138_242   | NW_004519072.1 | Scaffold4771 | 242                     | AA                              | CC              | 1947054769               |
| SNP_P4_186140_1499  | NW_004519073.1 | Scaffold4773 | 1499                    | CC                              | TT              | 1947054771               |
| SNP_P4_186141_2299  | NW_004519073.1 | Scaffold4773 | 2299                    | CC                              | AA              | 1947054773               |
| SNP_P4_186142_2342  | NW_004519073.1 | Scaffold4773 | 2342                    | TT                              | CC              | 1947054775               |
| SNP_P4_186143_2396  | NW_004519073.1 | Scaffold4773 | 2396                    | AA                              | GG              | 1947054777               |
| SNP_P4_186144_2429  | NW_004519073.1 | Scaffold4773 | 2429                    | GG                              | TT              | 1947054779               |
| SNP_P4_186145_2582  | NW_004519073.1 | Scaffold4773 | 2582                    | TT                              | AA              | 1947054781               |
| SNP_P4_186146_2585  | NW_004519073.1 | Scaffold4773 | 2585                    | CC                              | TT              | 1947054783               |
| SNP_P4_186147_2642  | NW_004519073.1 | Scaffold4773 | 2642                    | TT                              | CC              | 1947054785               |
| SNP_P4_186148_2658  | NW_004519073.1 | Scaffold4773 | 2658                    | TT                              | CC              | 1947054788               |
| SNP_P4_186149_13288 | NW_004519073.1 | Scaffold4773 | 13288                   | CC                              | TT              | 1947054790               |
| SNP_P4_186150_13316 | NW_004519073.1 | Scaffold4773 | 13316                   | CC                              | AA              | 1947054792               |
| SNP_P4_186151_13532 | NW_004519073.1 | Scaffold4773 | 13532                   | CC                              | TT              | 1947054794               |
| SNP_P4_186153_14558 | NW_004519073.1 | Scaffold4773 | 14558                   | GG                              | AA              | 1947054796               |
| SNP_P4_186154_14651 | NW_004519073.1 | Scaffold4773 | 14651                   | GG                              | AA              | 1947054798               |
| SNP_P4_186155_14661 | NW_004519073.1 | Scaffold4773 | 14661                   | CC                              | GG              | 1947054800               |
| SNP_P4_186156_14664 | NW_004519073.1 | Scaffold4773 | 14664                   | TT                              | CC              | 1947054802               |
| SNP_P4_186157_14860 | NW_004519073.1 | Scaffold4773 | 14860                   | TT                              | CC              | 1947054804               |
| SNP_P4_186158_14939 | NW_004519073.1 | Scaffold4773 | 14939                   | AA                              | GG              | 1947054806               |
| SNP_P4_186159_15375 | NW_004519073.1 | Scaffold4773 | 15375                   | TT                              | GG              | 1947054808               |
| SNP_P4_186160_15417 | NW_004519073.1 | Scaffold4773 | 15417                   | AA                              | GG              | 1947054810               |
| SNP_P4_186161_15541 | NW_004519073.1 | Scaffold4773 | 15541                   | TT                              | AA              | 1947054812               |
| SNP_P4_186162_15699 | NW_004519073.1 | Scaffold4773 | 15699                   | GG                              | TT              | 1947054814               |
| SNP_P4_186163_16578 | NW_004519073.1 | Scaffold4773 | 16578                   | AA                              | CC              | 1947054816               |
| SNP_P4_186165_16945 | NW_004519073.1 | Scaffold4773 | 16945                   | AA                              | GG              | 1947054818               |
| SNP_P4_186166_17057 | NW_004519073.1 | Scaffold4773 | 17057                   | GG                              | TT              | 1947054820               |
| SNP_P4_186167_18398 | NW_004519073.1 | Scaffold4773 | 18398                   | AA                              | GG              | 1947054822               |
| SNP_P4_186168_18678 | NW_004519073.1 | Scaffold4773 | 18678                   | CC                              | TT              | 1947054824               |
| SNP_P4_186169_18802 | NW_004519073.1 | Scaffold4773 | 18802                   | TT                              | CC              | 1947054826               |



| SNPs IDs            | Chromosome IDs | Chromosomes  | Physical positions (bp) | CDC Frontier (Reference genome) | (ILWC46 & LPNB) | NCBI SNPdb Accession IDs |
|---------------------|----------------|--------------|-------------------------|---------------------------------|-----------------|--------------------------|
| SNP_P4_186170_18875 | NW_004519073.1 | Scaffold4773 | 18875                   | AA                              | GG              | 1947054828               |
| SNP_P4_186171_18880 | NW_004519073.1 | Scaffold4773 | 18880                   | AA                              | GG              | 1947054831               |
| SNP_P4_186172_19504 | NW_004519073.1 | Scaffold4773 | 19504                   | TT                              | AA              | 1947054833               |
| SNP_P4_186173_20616 | NW_004519073.1 | Scaffold4773 | 20616                   | CC                              | TT              | 1947054835               |
| SNP_P4_186174_20881 | NW_004519073.1 | Scaffold4773 | 20881                   | GG                              | AA              | 1947054837               |
| SNP_P4_186178_22710 | NW_004519073.1 | Scaffold4773 | 22710                   | GG                              | AA              | 1947054839               |
| SNP_P4_186179_22862 | NW_004519073.1 | Scaffold4773 | 22862                   | TT                              | CC              | 1947054841               |
| SNP_P4_186180_22911 | NW_004519073.1 | Scaffold4773 | 22911                   | TT                              | CC              | 1947054843               |
| SNP_P4_186181_23684 | NW_004519073.1 | Scaffold4773 | 23684                   | AA                              | TT              | 1947054844               |
| SNP_P4_186182_24794 | NW_004519073.1 | Scaffold4773 | 24794                   | AA                              | GG              | 1947054845               |
| SNP_P4_186183_24992 | NW_004519073.1 | Scaffold4773 | 24992                   | TT                              | CC              | 1947054846               |
| SNP_P4_186184_25298 | NW_004519073.1 | Scaffold4773 | 25298                   | TT                              | CC              | 1947054847               |
| SNP_P4_186185_25637 | NW_004519073.1 | Scaffold4773 | 25637                   | AA                              | CC              | 1947054848               |
| SNP_P4_186186_25641 | NW_004519073.1 | Scaffold4773 | 25641                   | AA                              | GG              | 1947054849               |
| SNP_P4_186187_25654 | NW_004519073.1 | Scaffold4773 | 25654                   | AA                              | GG              | 1947054850               |
| SNP_P4_186188_25718 | NW_004519073.1 | Scaffold4773 | 25718                   | CC                              | TT              | 1947054853               |
| SNP_P4_186189_27169 | NW_004519073.1 | Scaffold4773 | 27169                   | CC                              | GG              | 1947054855               |
| SNP_P4_186190_27426 | NW_004519073.1 | Scaffold4773 | 27426                   | AA                              | CC              | 1947054857               |
| SNP_P4_186191_27608 | NW_004519073.1 | Scaffold4773 | 27608                   | AA                              | TT              | 1947054859               |
| SNP_P4_186192_27733 | NW_004519073.1 | Scaffold4773 | 27733                   | TT                              | CC              | 1947054861               |
| SNP_P4_186193_27935 | NW_004519073.1 | Scaffold4773 | 27935                   | TT                              | CC              | 1947054863               |
| SNP_P4_186194_28345 | NW_004519073.1 | Scaffold4773 | 28345                   | AA                              | CC              | 1947054865               |
| SNP_P4_186195_28404 | NW_004519073.1 | Scaffold4773 | 28404                   | CC                              | AA              | 1947054867               |
| SNP_P4_186196_28477 | NW_004519073.1 | Scaffold4773 | 28477                   | TT                              | CC              | 1947054869               |
| SNP_P4_186197_28632 | NW_004519073.1 | Scaffold4773 | 28632                   | AA                              | GG              | 1947054872               |
| SNP_P4_186198_28664 | NW_004519073.1 | Scaffold4773 | 28664                   | AA                              | GG              | 1947054874               |
| SNP_P4_186199_28741 | NW_004519073.1 | Scaffold4773 | 28741                   | TT                              | CC              | 1947054876               |
| SNP_P4_186200_32978 | NW_004519073.1 | Scaffold4773 | 32978                   | GG                              | AA              | 1947054878               |
| SNP_P4_186201_33109 | NW_004519073.1 | Scaffold4773 | 33109                   | AA                              | TT              | 1947054925               |
| SNP_P4_186202_33369 | NW_004519073.1 | Scaffold4773 | 33369                   | CC                              | TT              | 1947054927               |
| SNP_P4_186204_33605 | NW_004519073.1 | Scaffold4773 | 33605                   | TT                              | AA              | 1947054930               |
| SNP_P4_186206_58120 | NW_004519073.1 | Scaffold4773 | 58120                   | AA                              | CC              | 1947054932               |
| SNP_P4_186207_58123 | NW_004519073.1 | Scaffold4773 | 58123                   | CC                              | TT              | 1947054934               |
| SNP_P4_186208_58124 | NW_004519073.1 | Scaffold4773 | 58124                   | TT                              | AA              | 1947054936               |
| SNP_P4_186210_58288 | NW_004519073.1 | Scaffold4773 | 58288                   | AA                              | TT              | 1947054938               |
| SNP_P4_186211_58326 | NW_004519073.1 | Scaffold4773 | 58326                   | CC                              | AA              | 1947054940               |
| SNP_P4_186213_58538 | NW_004519073.1 | Scaffold4773 | 58538                   | AA                              | GG              | 1947054942               |
| SNP_P4_186214_178   | NW_004519074.1 | Scaffold4775 | 178                     | TT                              | AA              | 1947054944               |
| SNP_P4_186215_285   | NW_004519074.1 | Scaffold4775 | 285                     | AA                              | TT              | 1947054946               |
| SNP_P4_186216_441   | NW_004519074.1 | Scaffold4775 | 441                     | TT                              | GG              | 1947054949               |
| SNP_P4_186217_471   | NW_004519074.1 | Scaffold4775 | 471                     | TT                              | GG              | 1947054951               |
| SNP_P4_186218_712   | NW_004519074.1 | Scaffold4775 | 712                     | AA                              | GG              | 1947054952               |

| SNPs IDs             | Chromosome IDs | Chromosomes  | Physical positions (bp) | CDC Frontier (Reference genome) | (ILWC46 & LPNB) | NCBI SNPdb Accession IDs |
|----------------------|----------------|--------------|-------------------------|---------------------------------|-----------------|--------------------------|
| SNP_P4_186219_1091   | NW_004519076.1 | Scaffold4777 | 1091                    | GG                              | TT              | 1947054955               |
| SNP_P4_186221_95839  | NW_004519076.1 | Scaffold4777 | 95839                   | TT                              | CC              | 1947054957               |
| SNP_P4_186222_112452 | NW_004519076.1 | Scaffold4777 | 112452                  | AA                              | GG              | 1947054959               |
| SNP_P4_186223_112496 | NW_004519076.1 | Scaffold4777 | 112496                  | AA                              | CC              | 1947054961               |
| SNP_P4_186224_112507 | NW_004519076.1 | Scaffold4777 | 112507                  | AA                              | CC              | 1947054963               |
| SNP_P4_186225_112544 | NW_004519076.1 | Scaffold4777 | 112544                  | CC                              | TT              | 1947054965               |
| SNP_P4_186226_112792 | NW_004519076.1 | Scaffold4777 | 112792                  | GG                              | TT              | 1947054967               |
| SNP_P4_186227_112886 | NW_004519076.1 | Scaffold4777 | 112886                  | CC                              | AA              | 1947054969               |
| SNP_P4_186228_113115 | NW_004519076.1 | Scaffold4777 | 113115                  | CC                              | TT              | 1947054971               |
| SNP_P4_186229_113447 | NW_004519076.1 | Scaffold4777 | 113447                  | AA                              | TT              | 1947054973               |
| SNP_P4_186230_113547 | NW_004519076.1 | Scaffold4777 | 113547                  | AA                              | GG              | 1947054975               |
| SNP_P4_186231_113923 | NW_004519076.1 | Scaffold4777 | 113923                  | CC                              | TT              | 1947054977               |
| SNP_P4_186232_114094 | NW_004519076.1 | Scaffold4777 | 114094                  | GG                              | AA              | 1947054980               |
| SNP_P4_186233_114190 | NW_004519076.1 | Scaffold4777 | 114190                  | CC                              | AA              | 1947054982               |
| SNP_P4_186234_114267 | NW_004519076.1 | Scaffold4777 | 114267                  | AA                              | TT              | 1947054984               |
| SNP_P4_186235_117775 | NW_004519076.1 | Scaffold4777 | 117775                  | CC                              | AA              | 1947054986               |
| SNP_P4_186236_117869 | NW_004519076.1 | Scaffold4777 | 117869                  | CC                              | AA              | 1947054988               |
| SNP_P4_186237_118206 | NW_004519076.1 | Scaffold4777 | 118206                  | AA                              | GG              | 1947054990               |
| SNP_P4_186238_118507 | NW_004519076.1 | Scaffold4777 | 118507                  | CC                              | TT              | 1947054992               |
| SNP_P4_186239_118549 | NW_004519076.1 | Scaffold4777 | 118549                  | GG                              | AA              | 1947054994               |
| SNP_P4_186240_118569 | NW_004519076.1 | Scaffold4777 | 118569                  | TT                              | CC              | 1947054996               |
| SNP_P4_186241_118683 | NW_004519076.1 | Scaffold4777 | 118683                  | GG                              | AA              | 1947054998               |
| SNP_P4_186243_118769 | NW_004519076.1 | Scaffold4777 | 118769                  | TT                              | CC              | 1947055000               |
| SNP_P4_186244_119123 | NW_004519076.1 | Scaffold4777 | 119123                  | TT                              | AA              | 1947055002               |
| SNP_P4_186245_119329 | NW_004519076.1 | Scaffold4777 | 119329                  | GG                              | AA              | 1947055004               |
| SNP_P4_186246_119356 | NW_004519076.1 | Scaffold4777 | 119356                  | GG                              | AA              | 1947055006               |
| SNP_P4_186247_119368 | NW_004519076.1 | Scaffold4777 | 119368                  | CC                              | AA              | 1947055008               |
| SNP_P4_186248_119372 | NW_004519076.1 | Scaffold4777 | 119372                  | CC                              | TT              | 1947055010               |
| SNP_P4_186249_119558 | NW_004519076.1 | Scaffold4777 | 119558                  | GG                              | CC              | 1947055013               |
| SNP_P4_186250_119589 | NW_004519076.1 | Scaffold4777 | 119589                  | AA                              | TT              | 1947055015               |
| SNP_P4_186251_119620 | NW_004519076.1 | Scaffold4777 | 119620                  | GG                              | CC              | 1947055017               |
| SNP_P4_186252_119638 | NW_004519076.1 | Scaffold4777 | 119638                  | AA                              | CC              | 1947055019               |
| SNP_P4_186253_119735 | NW_004519076.1 | Scaffold4777 | 119735                  | TT                              | CC              | 1947055021               |
| SNP_P4_186254_119762 | NW_004519076.1 | Scaffold4777 | 119762                  | TT                              | CC              | 1947055023               |
| SNP_P4_186255_538    | NW_004519079.1 | Scaffold4781 | 538                     | TT                              | CC              | 1947055025               |
| SNP_P4_186256_755    | NW_004519080.1 | Scaffold4782 | 755                     | AA                              | TT              | 1947055027               |
| SNP_P4_186257_781    | NW_004519080.1 | Scaffold4782 | 781                     | GG                              | TT              | 1947055029               |
| SNP_P4_186258_1434   | NW_004519080.1 | Scaffold4782 | 1434                    | AA                              | GG              | 1947055031               |
| SNP_P4_186259_1533   | NW_004519080.1 | Scaffold4782 | 1533                    | TT                              | CC              | 1947055033               |
| SNP_P4_186260_1554   | NW_004519080.1 | Scaffold4782 | 1554                    | GG                              | TT              | 1947055035               |
| SNP_P4_186261_1779   | NW_004519080.1 | Scaffold4782 | 1779                    | TT                              | CC              | 1947055037               |
| SNP_P4_186262_1782   | NW_004519080.1 | Scaffold4782 | 1782                    | CC                              | TT              | 1947055039               |

| SNPs IDs           | Chromosome IDs | Chromosomes  | Physical positions (bp) | CDC Frontier (Reference genome) | (ILWC46 & LPNB) | NCBI SNPdb Accession IDs |
|--------------------|----------------|--------------|-------------------------|---------------------------------|-----------------|--------------------------|
| SNP_P4_186263_1788 | NW_004519080.1 | Scaffold4782 | 1788                    | GG                              | AA              | 1947055041               |
| SNP_P4_186264_1834 | NW_004519080.1 | Scaffold4782 | 1834                    | CC                              | GG              | 1947055043               |
| SNP_P4_186265_1907 | NW_004519080.1 | Scaffold4782 | 1907                    | GG                              | TT              | 1947055045               |
| SNP_P4_186266_113  | NW_004519082.1 | Scaffold4784 | 113                     | CC                              | TT              | 1947055047               |
| SNP_P4_186267_165  | NW_004519082.1 | Scaffold4784 | 165                     | GG                              | TT              | 1947055049               |
| SNP_P4_186268_181  | NW_004519082.1 | Scaffold4784 | 181                     | AA                              | TT              | 1947055051               |
| SNP_P4_186269_190  | NW_004519082.1 | Scaffold4784 | 190                     | TT                              | GG              | 1947055053               |
| SNP_P4_186270_224  | NW_004519082.1 | Scaffold4784 | 224                     | GG                              | AA              | 1947055055               |
| SNP_P4_186271_298  | NW_004519082.1 | Scaffold4784 | 298                     | TT                              | CC              | 1947055057               |
| SNP_P4_186272_313  | NW_004519082.1 | Scaffold4784 | 313                     | AA                              | GG              | 1947055059               |
| SNP_P4_186273_441  | NW_004519082.1 | Scaffold4784 | 441                     | CC                              | TT              | 1947055062               |
| SNP_P4_186274_515  | NW_004519082.1 | Scaffold4784 | 515                     | GG                              | AA              | 1947055063               |
| SNP_P4_186275_571  | NW_004519082.1 | Scaffold4784 | 571                     | GG                              | AA              | 1947055066               |
| SNP_P4_186276_616  | NW_004519082.1 | Scaffold4784 | 616                     | GG                              | AA              | 1947055068               |
| SNP_P4_186277_626  | NW_004519082.1 | Scaffold4784 | 626                     | CC                              | TT              | 1947055070               |
| SNP_P4_186278_638  | NW_004519082.1 | Scaffold4784 | 638                     | AA                              | GG              | 1947055071               |
| SNP_P4_186279_641  | NW_004519082.1 | Scaffold4784 | 641                     | CC                              | GG              | 1947055073               |
| SNP_P4_186281_865  | NW_004519082.1 | Scaffold4784 | 865                     | TT                              | CC              | 1947055075               |
| SNP_P4_186282_1401 | NW_004519082.1 | Scaffold4784 | 1401                    | GG                              | TT              | 1947055077               |
| SNP_P4_186283_2300 | NW_004519083.1 | Scaffold4787 | 2300                    | GG                              | CC              | 1947055079               |
| SNP_P4_186284_2321 | NW_004519083.1 | Scaffold4787 | 2321                    | TT                              | AA              | 1947055081               |
| SNP_P4_186285_371  | NW_004519087.1 | Scaffold4791 | 371                     | AA                              | TT              | 1947055083               |
| SNP_P4_186286_666  | NW_004519087.1 | Scaffold4791 | 666                     | AA                              | GG              | 1947055085               |
| SNP_P4_186287_1045 | NW_004519088.1 | Scaffold4792 | 1045                    | CC                              | AA              | 1947055087               |
| SNP_P4_186288_5136 | NW_004519088.1 | Scaffold4792 | 5136                    | AA                              | GG              | 1947055089               |
| SNP_P4_186289_64   | NW_004519090.1 | Scaffold4795 | 64                      | AA                              | TT              | 1947055091               |
| SNP_P4_186290_285  | NW_004519092.1 | Scaffold4797 | 285                     | AA                              | GG              | 1947055093               |
| SNP_P4_186291_5596 | NW_004519092.1 | Scaffold4797 | 5596                    | AA                              | TT              | 1947055095               |
| SNP_P4_186292_1773 | NW_004519093.1 | Scaffold4798 | 1773                    | CC                              | TT              | 1947055097               |
| SNP_P4_186293_2128 | NW_004519093.1 | Scaffold4798 | 2128                    | TT                              | GG              | 1947055099               |
| SNP_P4_186294_2132 | NW_004519093.1 | Scaffold4798 | 2132                    | CC                              | TT              | 1947055101               |
| SNP_P4_186295_2176 | NW_004519093.1 | Scaffold4798 | 2176                    | TT                              | AA              | 1947055103               |
| SNP_P4_186296_475  | NW_004519096.1 | Scaffold4804 | 475                     | TT                              | GG              | 1947055105               |
| SNP_P4_186297_583  | NW_004519096.1 | Scaffold4804 | 583                     | TT                              | CC              | 1947055107               |
| SNP_P4_186298_789  | NW_004519096.1 | Scaffold4804 | 789                     | AA                              | TT              | 1947055109               |
| SNP_P4_186299_793  | NW_004519096.1 | Scaffold4804 | 793                     | TT                              | GG              | 1947055111               |
| SNP_P4_186300_854  | NW_004519096.1 | Scaffold4804 | 854                     | GG                              | CC              | 1947055113               |
| SNP_P4_186302_1133 | NW_004519096.1 | Scaffold4804 | 1133                    | GG                              | AA              | 1947055115               |
| SNP_P4_186303_1159 | NW_004519096.1 | Scaffold4804 | 1159                    | AA                              | CC              | 1947055117               |
| SNP_P4_186304_1625 | NW_004519096.1 | Scaffold4804 | 1625                    | CC                              | AA              | 1947055119               |
| SNP_P4_186306_3039 | NW_004519096.1 | Scaffold4804 | 3039                    | AA                              | TT              | 1947055121               |
| SNP_P4_186307_3049 | NW_004519096.1 | Scaffold4804 | 3049                    | CC                              | GG              | 1947055123               |

| SNPs IDs            | Chromosome IDs | Chromosomes  | Physical positions (bp) | CDC Frontier (Reference genome) | (ILWC46 & LPNB) | NCBI SNPdb Accession IDs |
|---------------------|----------------|--------------|-------------------------|---------------------------------|-----------------|--------------------------|
| SNP_P4_186308_3051  | NW_004519096.1 | Scaffold4804 | 3051                    | TT                              | AA              | 1947055125               |
| SNP_P4_186309_3056  | NW_004519096.1 | Scaffold4804 | 3056                    | AA                              | CC              | 1947055127               |
| SNP_P4_186310_3058  | NW_004519096.1 | Scaffold4804 | 3058                    | TT                              | CC              | 1947055129               |
| SNP_P4_186311_3117  | NW_004519096.1 | Scaffold4804 | 3117                    | AA                              | TT              | 1947055131               |
| SNP_P4_186312_3135  | NW_004519096.1 | Scaffold4804 | 3135                    | CC                              | AA              | 1947055133               |
| SNP_P4_186313_3150  | NW_004519096.1 | Scaffold4804 | 3150                    | TT                              | AA              | 1947055135               |
| SNP_P4_186314_3264  | NW_004519096.1 | Scaffold4804 | 3264                    | TT                              | AA              | 1947055137               |
| SNP_P4_186315_3310  | NW_004519096.1 | Scaffold4804 | 3310                    | GG                              | AA              | 1947055139               |
| SNP_P4_186316_3326  | NW_004519096.1 | Scaffold4804 | 3326                    | CC                              | TT              | 1947055141               |
| SNP_P4_186317_3419  | NW_004519096.1 | Scaffold4804 | 3419                    | AA                              | GG              | 1947055143               |
| SNP_P4_186318_3519  | NW_004519096.1 | Scaffold4804 | 3519                    | AA                              | GG              | 1947055145               |
| SNP_P4_186319_3685  | NW_004519096.1 | Scaffold4804 | 3685                    | TT                              | GG              | 1947055147               |
| SNP_P4_186320_8632  | NW_004519096.1 | Scaffold4804 | 8632                    | TT                              | AA              | 1947055149               |
| SNP_P4_186321_8845  | NW_004519096.1 | Scaffold4804 | 8845                    | TT                              | AA              | 1947055151               |
| SNP_P4_186322_8859  | NW_004519096.1 | Scaffold4804 | 8859                    | TT                              | AA              | 1947055153               |
| SNP_P4_186324_9099  | NW_004519096.1 | Scaffold4804 | 9099                    | CC                              | TT              | 1947055155               |
| SNP_P4_186325_9109  | NW_004519096.1 | Scaffold4804 | 9109                    | CC                              | TT              | 1947055157               |
| SNP_P4_186326_9132  | NW_004519096.1 | Scaffold4804 | 9132                    | AA                              | TT              | 1947055159               |
| SNP_P4_186327_9418  | NW_004519096.1 | Scaffold4804 | 9418                    | AA                              | TT              | 1947055161               |
| SNP_P4_186328_9434  | NW_004519096.1 | Scaffold4804 | 9434                    | AA                              | CC              | 1947055163               |
| SNP_P4_186329_9630  | NW_004519096.1 | Scaffold4804 | 9630                    | GG                              | CC              | 1947055165               |
| SNP_P4_186330_9747  | NW_004519096.1 | Scaffold4804 | 9747                    | TT                              | GG              | 1947055167               |
| SNP_P4_186332_9874  | NW_004519096.1 | Scaffold4804 | 9874                    | GG                              | CC              | 1947055169               |
| SNP_P4_186333_10082 | NW_004519096.1 | Scaffold4804 | 10082                   | AA                              | CC              | 1947055171               |
| SNP_P4_186334_10227 | NW_004519096.1 | Scaffold4804 | 10227                   | AA                              | CC              | 1947055173               |
| SNP_P4_186335_10320 | NW_004519096.1 | Scaffold4804 | 10320                   | AA                              | TT              | 1947055175               |
| SNP_P4_186336_10331 | NW_004519096.1 | Scaffold4804 | 10331                   | TT                              | CC              | 1947055177               |
| SNP_P4_186337_10602 | NW_004519096.1 | Scaffold4804 | 10602                   | CC                              | TT              | 1947055179               |
| SNP_P4_186338_10612 | NW_004519096.1 | Scaffold4804 | 10612                   | CC                              | TT              | 1947055181               |
| SNP_P4_186339_11947 | NW_004519096.1 | Scaffold4804 | 11947                   | AA                              | CC              | 1947055183               |
| SNP_P4_186340_17111 | NW_004519096.1 | Scaffold4804 | 17111                   | GG                              | TT              | 1947055185               |
| SNP_P4_186341_17235 | NW_004519096.1 | Scaffold4804 | 17235                   | AA                              | GG              | 1947055187               |
| SNP_P4_186342_17385 | NW_004519096.1 | Scaffold4804 | 17385                   | GG                              | AA              | 1947055189               |
| SNP_P4_186343_17506 | NW_004519096.1 | Scaffold4804 | 17506                   | TT                              | CC              | 1947055191               |
| SNP_P4_186344_17838 | NW_004519096.1 | Scaffold4804 | 17838                   | GG                              | CC              | 1947055193               |
| SNP_P4_186345_393   | NW_004519097.1 | Scaffold4805 | 393                     | AA                              | TT              | 1947055196               |
| SNP_P4_186346_817   | NW_004519097.1 | Scaffold4805 | 817                     | AA                              | GG              | 1947055198               |
| SNP_P4_186347_5749  | NW_004519097.1 | Scaffold4805 | 5749                    | TT                              | CC              | 1947055200               |
| SNP_P4_186348_5755  | NW_004519097.1 | Scaffold4805 | 5755                    | TT                              | AA              | 1947055202               |
| SNP_P4_186349_11030 | NW_004519097.1 | Scaffold4805 | 11030                   | TT                              | CC              | 1947055204               |
| SNP_P4_186350_11061 | NW_004519097.1 | Scaffold4805 | 11061                   | TT                              | CC              | 1947055206               |
| SNP_P4_186351_772   | NW_004519098.1 | Scaffold4806 | 772                     | GG                              | AA              | 1947055208               |

| SNPs IDs           | Chromosome IDs | Chromosomes  | Physical positions (bp) | CDC Frontier (Reference genome) | (ILWC46 & LPNB) | NCBI SNPdb Accession IDs |
|--------------------|----------------|--------------|-------------------------|---------------------------------|-----------------|--------------------------|
| SNP_P4_186352_778  | NW_004519098.1 | Scaffold4806 | 778                     | TT                              | AA              | 1947055210               |
| SNP_P4_186353_786  | NW_004519098.1 | Scaffold4806 | 786                     | TT                              | CC              | 1947055212               |
| SNP_P4_186354_399  | NW_004519100.1 | Scaffold4808 | 399                     | CC                              | TT              | 1947055214               |
| SNP_P4_186355_508  | NW_004519100.1 | Scaffold4808 | 508                     | GG                              | CC              | 1947055216               |
| SNP_P4_186356_632  | NW_004519100.1 | Scaffold4808 | 632                     | TT                              | AA              | 1947055218               |
| SNP_P4_186357_668  | NW_004519100.1 | Scaffold4808 | 668                     | AA                              | CC              | 1947055220               |
| SNP_P4_186358_747  | NW_004519100.1 | Scaffold4808 | 747                     | GG                              | TT              | 1947055222               |
| SNP_P4_186359_760  | NW_004519100.1 | Scaffold4808 | 760                     | TT                              | CC              | 1947055224               |
| SNP_P4_186361_922  | NW_004519100.1 | Scaffold4808 | 922                     | TT                              | GG              | 1947055226               |
| SNP_P4_186362_996  | NW_004519100.1 | Scaffold4808 | 996                     | CC                              | AA              | 1947055228               |
| SNP_P4_186363_1118 | NW_004519100.1 | Scaffold4808 | 1118                    | GG                              | CC              | 1947055230               |
| SNP_P4_186365_994  | NW_004519102.1 | Scaffold4810 | 994                     | GG                              | CC              | 1947055232               |
| SNP_P4_186366_1832 | NW_004519102.1 | Scaffold4810 | 1832                    | TT                              | GG              | 1947055234               |
| SNP_P4_186367_1894 | NW_004519102.1 | Scaffold4810 | 1894                    | TT                              | GG              | 1947055236               |
| SNP_P4_186368_83   | NW_004519106.1 | Scaffold4817 | 83                      | GG                              | AA              | 1947055238               |
| SNP_P4_186369_95   | NW_004519106.1 | Scaffold4817 | 95                      | TT                              | CC              | 1947055240               |
| SNP_P4_186370_106  | NW_004519106.1 | Scaffold4817 | 106                     | AA                              | GG              | 1947055243               |
| SNP_P4_186371_725  | NW_004519106.1 | Scaffold4817 | 725                     | CC                              | AA              | 1947055245               |
| SNP_P4_186372_781  | NW_004519106.1 | Scaffold4817 | 781                     | CC                              | TT              | 1947055247               |
| SNP_P4_186373_818  | NW_004519106.1 | Scaffold4817 | 818                     | AA                              | GG              | 1947055249               |
| SNP_P4_186374_845  | NW_004519106.1 | Scaffold4817 | 845                     | TT                              | AA              | 1947055251               |
| SNP_P4_186375_876  | NW_004519106.1 | Scaffold4817 | 876                     | TT                              | AA              | 1947055253               |
| SNP_P4_186376_878  | NW_004519106.1 | Scaffold4817 | 878                     | CC                              | TT              | 1947055255               |
| SNP_P4_186377_933  | NW_004519106.1 | Scaffold4817 | 933                     | TT                              | GG              | 1947055257               |
| SNP_P4_186378_1428 | NW_004519108.1 | Scaffold4820 | 1428                    | GG                              | TT              | 1947055259               |
| SNP_P4_186379_1781 | NW_004519108.1 | Scaffold4820 | 1781                    | TT                              | CC              | 1947055261               |
| SNP_P4_186380_81   | NW_004519110.1 | Scaffold4822 | 81                      | GG                              | TT              | 1947055263               |
| SNP_P4_186382_710  | NW_004519115.1 | Scaffold4828 | 710                     | AA                              | GG              | 1947055265               |
| SNP_P4_186383_741  | NW_004519115.1 | Scaffold4828 | 741                     | AA                              | CC              | 1947055267               |
| SNP_P4_186384_1077 | NW_004519115.1 | Scaffold4828 | 1077                    | TT                              | GG              | 1947055269               |
| SNP_P4_186385_1195 | NW_004519115.1 | Scaffold4828 | 1195                    | AA                              | TT              | 1947055271               |
| SNP_P4_186386_1741 | NW_004519115.1 | Scaffold4828 | 1741                    | AA                              | GG              | 1947055273               |
| SNP_P4_186387_1742 | NW_004519115.1 | Scaffold4828 | 1742                    | TT                              | CC              | 1947055275               |
| SNP_P4_186388_1116 | NW_004519116.1 | Scaffold4829 | 1116                    | GG                              | AA              | 1947055277               |
| SNP_P4_186389_1333 | NW_004519116.1 | Scaffold4829 | 1333                    | GG                              | AA              | 1947055279               |
| SNP_P4_186390_1380 | NW_004519116.1 | Scaffold4829 | 1380                    | GG                              | AA              | 1947055281               |
| SNP_P4_186391_1387 | NW_004519116.1 | Scaffold4829 | 1387                    | TT                              | AA              | 1947055283               |
| SNP_P4_186392_1437 | NW_004519116.1 | Scaffold4829 | 1437                    | AA                              | GG              | 1947055285               |
| SNP_P4_186393_1518 | NW_004519116.1 | Scaffold4829 | 1518                    | CC                              | TT              | 1947055287               |
| SNP_P4_186394_1551 | NW_004519116.1 | Scaffold4829 | 1551                    | TT                              | GG              | 1947055289               |
| SNP_P4_186395_2152 | NW_004519116.1 | Scaffold4829 | 2152                    | CC                              | TT              | 1947055291               |
| SNP_P4_186396_5946 | NW_004519116.1 | Scaffold4829 | 5946                    | GG                              | TT              | 1947055293               |

| SNPs IDs            | Chromosome IDs | Chromosomes  | Physical positions (bp) | CDC Frontier (Reference genome) | (ILWC46 & LPNB) | NCBI SNPdb Accession IDs |
|---------------------|----------------|--------------|-------------------------|---------------------------------|-----------------|--------------------------|
| SNP_P4_186397_5960  | NW_004519116.1 | Scaffold4829 | 5960                    | TT                              | GG              | 1947055296               |
| SNP_P4_186398_6211  | NW_004519116.1 | Scaffold4829 | 6211                    | TT                              | GG              | 1947055298               |
| SNP_P4_186399_6231  | NW_004519116.1 | Scaffold4829 | 6231                    | GG                              | AA              | 1947055300               |
| SNP_P4_186401_6366  | NW_004519116.1 | Scaffold4829 | 6366                    | TT                              | CC              | 1947055302               |
| SNP_P4_186402_6382  | NW_004519116.1 | Scaffold4829 | 6382                    | GG                              | AA              | 1947055304               |
| SNP_P4_186403_6420  | NW_004519116.1 | Scaffold4829 | 6420                    | TT                              | CC              | 1947055306               |
| SNP_P4_186404_6456  | NW_004519116.1 | Scaffold4829 | 6456                    | CC                              | GG              | 1947055308               |
| SNP_P4_186405_6654  | NW_004519116.1 | Scaffold4829 | 6654                    | TT                              | AA              | 1947055310               |
| SNP_P4_186406_6666  | NW_004519116.1 | Scaffold4829 | 6666                    | CC                              | GG              | 1947055312               |
| SNP_P4_186407_6693  | NW_004519116.1 | Scaffold4829 | 6693                    | TT                              | CC              | 1947055314               |
| SNP_P4_186408_6722  | NW_004519116.1 | Scaffold4829 | 6722                    | AA                              | CC              | 1947055316               |
| SNP_P4_186409_6734  | NW_004519116.1 | Scaffold4829 | 6734                    | TT                              | CC              | 1947055318               |
| SNP_P4_186410_6736  | NW_004519116.1 | Scaffold4829 | 6736                    | GG                              | AA              | 1947055320               |
| SNP_P4_186411_6751  | NW_004519116.1 | Scaffold4829 | 6751                    | CC                              | TT              | 1947055322               |
| SNP_P4_186413_8277  | NW_004519116.1 | Scaffold4829 | 8277                    | AA                              | GG              | 1947055324               |
| SNP_P4_186414_8285  | NW_004519116.1 | Scaffold4829 | 8285                    | CC                              | TT              | 1947055326               |
| SNP_P4_186415_8340  | NW_004519116.1 | Scaffold4829 | 8340                    | CC                              | GG              | 1947055328               |
| SNP_P4_186416_8471  | NW_004519116.1 | Scaffold4829 | 8471                    | AA                              | CC              | 1947055330               |
| SNP_P4_186417_8483  | NW_004519116.1 | Scaffold4829 | 8483                    | AA                              | GG              | 1947055332               |
| SNP_P4_186418_580   | NW_004519118.1 | Scaffold4833 | 580                     | AA                              | GG              | 1947055334               |
| SNP_P4_186419_675   | NW_004519118.1 | Scaffold4833 | 675                     | TT                              | AA              | 1947055336               |
| SNP_P4_186421_1060  | NW_004519118.1 | Scaffold4833 | 1060                    | AA                              | CC              | 1947055338               |
| SNP_P4_186422_1187  | NW_004519118.1 | Scaffold4833 | 1187                    | AA                              | TT              | 1947055340               |
| SNP_P4_186423_1197  | NW_004519118.1 | Scaffold4833 | 1197                    | TT                              | CC              | 1947055342               |
| SNP_P4_186424_1243  | NW_004519118.1 | Scaffold4833 | 1243                    | GG                              | AA              | 1947055344               |
| SNP_P4_186425_1369  | NW_004519118.1 | Scaffold4833 | 1369                    | AA                              | TT              | 1947055346               |
| SNP_P4_186426_3275  | NW_004519118.1 | Scaffold4833 | 3275                    | TT                              | CC              | 1947055348               |
| SNP_P4_186427_3484  | NW_004519118.1 | Scaffold4833 | 3484                    | CC                              | AA              | 1947055350               |
| SNP_P4_186428_3499  | NW_004519118.1 | Scaffold4833 | 3499                    | CC                              | AA              | 1947055352               |
| SNP_P4_186429_3755  | NW_004519118.1 | Scaffold4833 | 3755                    | GG                              | TT              | 1947055354               |
| SNP_P4_186432_5585  | NW_004519118.1 | Scaffold4833 | 5585                    | TT                              | CC              | 1947055356               |
| SNP_P4_186433_5822  | NW_004519118.1 | Scaffold4833 | 5822                    | AA                              | GG              | 1947055358               |
| SNP_P4_186434_9580  | NW_004519122.1 | Scaffold4837 | 9580                    | GG                              | AA              | 1947055360               |
| SNP_P4_186435_9586  | NW_004519122.1 | Scaffold4837 | 9586                    | CC                              | AA              | 1947055362               |
| SNP_P4_186436_9913  | NW_004519122.1 | Scaffold4837 | 9913                    | AA                              | CC              | 1947055364               |
| SNP_P4_186437_13296 | NW_004519122.1 | Scaffold4837 | 13296                   | AA                              | GG              | 1947055366               |
| SNP_P4_186438_13646 | NW_004519122.1 | Scaffold4837 | 13646                   | CC                              | TT              | 1947055368               |
| SNP_P4_186439_592   | NW_004519126.1 | Scaffold4846 | 592                     | CC                              | TT              | 1947055370               |
| SNP_P4_186440_5859  | NW_004519126.1 | Scaffold4846 | 5859                    | TT                              | CC              | 1947055372               |
| SNP_P4_186441_5886  | NW_004519126.1 | Scaffold4846 | 5886                    | GG                              | CC              | 1947055374               |
| SNP_P4_186442_5892  | NW_004519126.1 | Scaffold4846 | 5892                    | GG                              | TT              | 1947055377               |
| SNP_P4_186443_5930  | NW_004519126.1 | Scaffold4846 | 5930                    | GG                              | AA              | 1947055379               |

| SNPs IDs           | Chromosome IDs | Chromosomes  | Physical positions (bp) | CDC Frontier (Reference genome) | (ILWC46 & LPNB) | NCBI SNPdb Accession IDs |
|--------------------|----------------|--------------|-------------------------|---------------------------------|-----------------|--------------------------|
| SNP_P4_186444_6285 | NW_004519126.1 | Scaffold4846 | 6285                    | GG                              | CC              | 1947055381               |
| SNP_P4_186445_658  | NW_004519128.1 | Scaffold4848 | 658                     | TT                              | GG              | 1947055383               |
| SNP_P4_186446_659  | NW_004519128.1 | Scaffold4848 | 659                     | GG                              | AA              | 1947055385               |
| SNP_P4_186448_2088 | NW_004519130.1 | Scaffold4850 | 2088                    | GG                              | AA              | 1947055387               |
| SNP_P4_186449_3019 | NW_004519131.1 | Scaffold4851 | 3019                    | CC                              | TT              | 1947055389               |
| SNP_P4_186450_3224 | NW_004519131.1 | Scaffold4851 | 3224                    | CC                              | AA              | 1947055391               |
| SNP_P4_186451_3461 | NW_004519131.1 | Scaffold4851 | 3461                    | TT                              | AA              | 1947055393               |
| SNP_P4_186453_3578 | NW_004519131.1 | Scaffold4851 | 3578                    | AA                              | GG              | 1947055395               |
| SNP_P4_186454_3601 | NW_004519131.1 | Scaffold4851 | 3601                    | AA                              | CC              | 1947055397               |
| SNP_P4_186456_3639 | NW_004519131.1 | Scaffold4851 | 3639                    | GG                              | AA              | 1947055399               |
| SNP_P4_186457_3806 | NW_004519131.1 | Scaffold4851 | 3806                    | AA                              | GG              | 1947055401               |
| SNP_P4_186458_5584 | NW_004519136.1 | Scaffold4859 | 5584                    | CC                              | TT              | 1947055403               |
| SNP_P4_186459_6970 | NW_004519136.1 | Scaffold4859 | 6970                    | CC                              | AA              | 1947055405               |
| SNP_P4_186460_561  | NW_004519138.1 | Scaffold4861 | 561                     | TT                              | AA              | 1947055407               |
| SNP_P4_186461_1938 | NW_004519140.1 | Scaffold4863 | 1938                    | GG                              | AA              | 1947055409               |
| SNP_P4_186462_2007 | NW_004519140.1 | Scaffold4863 | 2007                    | AA                              | GG              | 1947055411               |
| SNP_P4_186463_2474 | NW_004519140.1 | Scaffold4863 | 2474                    | AA                              | CC              | 1947055413               |
| SNP_P4_186464_796  | NW_004519142.1 | Scaffold4865 | 796                     | CC                              | TT              | 1947055415               |
| SNP_P4_186465_1062 | NW_004519142.1 | Scaffold4865 | 1062                    | GG                              | AA              | 1947055417               |
| SNP_P4_186466_1086 | NW_004519142.1 | Scaffold4865 | 1086                    | TT                              | GG              | 1947055420               |
| SNP_P4_186467_1113 | NW_004519142.1 | Scaffold4865 | 1113                    | AA                              | GG              | 1947055421               |
| SNP_P4_186468_1116 | NW_004519142.1 | Scaffold4865 | 1116                    | GG                              | AA              | 1947055423               |
| SNP_P4_186469_1205 | NW_004519142.1 | Scaffold4865 | 1205                    | GG                              | AA              | 1947055426               |
| SNP_P4_186470_1221 | NW_004519142.1 | Scaffold4865 | 1221                    | CC                              | TT              | 1947055428               |
| SNP_P4_186471_107  | NW_004519143.1 | Scaffold4866 | 107                     | TT                              | CC              | 1947055430               |
| SNP_P4_186472_750  | NW_004519143.1 | Scaffold4866 | 750                     | TT                              | AA              | 1947055432               |
| SNP_P4_186473_1506 | NW_004519143.1 | Scaffold4866 | 1506                    | TT                              | CC              | 1947055434               |
| SNP_P4_186474_1675 | NW_004519143.1 | Scaffold4866 | 1675                    | TT                              | AA              | 1947055436               |
| SNP_P4_186475_1853 | NW_004519143.1 | Scaffold4866 | 1853                    | TT                              | CC              | 1947055438               |
| SNP_P4_186476_1915 | NW_004519143.1 | Scaffold4866 | 1915                    | AA                              | GG              | 1947055440               |
| SNP_P4_186477_6283 | NW_004519143.1 | Scaffold4866 | 6283                    | AA                              | GG              | 1947055443               |
| SNP_P4_186478_607  | NW_004519146.1 | Scaffold4869 | 607                     | CC                              | GG              | 1947055445               |
| SNP_P4_186479_633  | NW_004519146.1 | Scaffold4869 | 633                     | CC                              | AA              | 1947055447               |
| SNP_P4_186480_640  | NW_004519146.1 | Scaffold4869 | 640                     | GG                              | AA              | 1947055449               |
| SNP_P4_186481_696  | NW_004519146.1 | Scaffold4869 | 696                     | CC                              | TT              | 1947055451               |
| SNP_P4_186483_751  | NW_004519146.1 | Scaffold4869 | 751                     | TT                              | CC              | 1947055453               |
| SNP_P4_186484_770  | NW_004519146.1 | Scaffold4869 | 770                     | TT                              | AA              | 1947055455               |
| SNP_P4_186486_949  | NW_004519146.1 | Scaffold4869 | 949                     | CC                              | GG              | 1947055457               |
| SNP_P4_186488_1221 | NW_004519146.1 | Scaffold4869 | 1221                    | TT                              | AA              | 1947055459               |
| SNP_P4_186489_1240 | NW_004519146.1 | Scaffold4869 | 1240                    | AA                              | TT              | 1947055461               |
| SNP_P4_186491_862  | NW_004519148.1 | Scaffold4874 | 862                     | GG                              | AA              | 1947055463               |
| SNP_P4_186492_6487 | NW_004519148.1 | Scaffold4874 | 6487                    | GG                              | AA              | 1947055465               |

| SNPs IDs            | Chromosome IDs | Chromosomes  | Physical positions (bp) | CDC Frontier (Reference genome) | (ILWC46 & LPNB) | NCBI SNPdb Accession IDs |
|---------------------|----------------|--------------|-------------------------|---------------------------------|-----------------|--------------------------|
| SNP_P4_186493_7755  | NW_004519148.1 | Scaffold4874 | 7755                    | GG                              | TT              | 1947055467               |
| SNP_P4_186494_7769  | NW_004519148.1 | Scaffold4874 | 7769                    | AA                              | GG              | 1947055469               |
| SNP_P4_186495_7827  | NW_004519148.1 | Scaffold4874 | 7827                    | AA                              | GG              | 1947055471               |
| SNP_P4_186497_7955  | NW_004519148.1 | Scaffold4874 | 7955                    | AA                              | CC              | 1947055473               |
| SNP_P4_186498_7982  | NW_004519148.1 | Scaffold4874 | 7982                    | GG                              | AA              | 1947055475               |
| SNP_P4_186499_7995  | NW_004519148.1 | Scaffold4874 | 7995                    | TT                              | GG              | 1947055477               |
| SNP_P4_186500_8031  | NW_004519148.1 | Scaffold4874 | 8031                    | AA                              | GG              | 1947055479               |
| SNP_P4_186501_8032  | NW_004519148.1 | Scaffold4874 | 8032                    | AA                              | GG              | 1947055482               |
| SNP_P4_186502_8065  | NW_004519148.1 | Scaffold4874 | 8065                    | GG                              | CC              | 1947055484               |
| SNP_P4_186503_8131  | NW_004519148.1 | Scaffold4874 | 8131                    | CC                              | AA              | 1947055486               |
| SNP_P4_186504_8146  | NW_004519148.1 | Scaffold4874 | 8146                    | AA                              | GG              | 1947055488               |
| SNP_P4_186505_8184  | NW_004519148.1 | Scaffold4874 | 8184                    | AA                              | GG              | 1947055490               |
| SNP_P4_186506_8236  | NW_004519148.1 | Scaffold4874 | 8236                    | GG                              | AA              | 1947055492               |
| SNP_P4_186507_13437 | NW_004519148.1 | Scaffold4874 | 13437                   | CC                              | TT              | 1947055494               |
| SNP_P4_186508_14041 | NW_004519148.1 | Scaffold4874 | 14041                   | GG                              | TT              | 1947055496               |
| SNP_P4_186510_14067 | NW_004519148.1 | Scaffold4874 | 14067                   | AA                              | CC              | 1947055498               |
| SNP_P4_186511_14079 | NW_004519148.1 | Scaffold4874 | 14079                   | TT                              | AA              | 1947055500               |
| SNP_P4_186512_14084 | NW_004519148.1 | Scaffold4874 | 14084                   | CC                              | AA              | 1947055502               |
| SNP_P4_186513_14085 | NW_004519148.1 | Scaffold4874 | 14085                   | CC                              | GG              | 1947055504               |
| SNP_P4_186514_14101 | NW_004519148.1 | Scaffold4874 | 14101                   | TT                              | CC              | 1947055506               |
| SNP_P4_186515_14504 | NW_004519148.1 | Scaffold4874 | 14504                   | GG                              | AA              | 1947055508               |
| SNP_P4_186516_511   | NW_004519149.1 | Scaffold4878 | 511                     | CC                              | AA              | 1947055510               |
| SNP_P4_186517_3388  | NW_004519150.1 | Scaffold4879 | 3388                    | TT                              | AA              | 1947055512               |
| SNP_P4_186518_3414  | NW_004519150.1 | Scaffold4879 | 3414                    | TT                              | AA              | 1947055514               |
| SNP_P4_186519_3422  | NW_004519150.1 | Scaffold4879 | 3422                    | AA                              | CC              | 1947055516               |
| SNP_P4_186520_3424  | NW_004519150.1 | Scaffold4879 | 3424                    | AA                              | CC              | 1947055518               |
| SNP_P4_186521_3429  | NW_004519150.1 | Scaffold4879 | 3429                    | GG                              | TT              | 1947055520               |
| SNP_P4_186522_64    | NW_004519153.1 | Scaffold4884 | 64                      | GG                              | AA              | 1947055522               |
| SNP_P4_186523_799   | NW_004519153.1 | Scaffold4884 | 799                     | TT                              | CC              | 1947055524               |
| SNP_P4_186524_943   | NW_004519153.1 | Scaffold4884 | 943                     | TT                              | GG              | 1947055526               |
| SNP_P4_186525_1077  | NW_004519153.1 | Scaffold4884 | 1077                    | AA                              | GG              | 1947055528               |
| SNP_P4_186526_1096  | NW_004519153.1 | Scaffold4884 | 1096                    | TT                              | CC              | 1947055530               |
| SNP_P4_186527_1117  | NW_004519153.1 | Scaffold4884 | 1117                    | GG                              | CC              | 1947055532               |
| SNP_P4_186528_1733  | NW_004519153.1 | Scaffold4884 | 1733                    | TT                              | GG              | 1947055534               |
| SNP_P4_186529_1859  | NW_004519153.1 | Scaffold4884 | 1859                    | TT                              | AA              | 1947055536               |
| SNP_P4_186530_1876  | NW_004519153.1 | Scaffold4884 | 1876                    | AA                              | GG              | 1947055538               |
| SNP_P4_186531_1921  | NW_004519153.1 | Scaffold4884 | 1921                    | AA                              | TT              | 1947055540               |
| SNP_P4_186532_1927  | NW_004519153.1 | Scaffold4884 | 1927                    | TT                              | AA              | 1947055542               |
| SNP_P4_186533_1966  | NW_004519153.1 | Scaffold4884 | 1966                    | AA                              | GG              | 1947055544               |
| SNP_P4_186534_653   | NW_004519155.1 | Scaffold4888 | 653                     | GG                              | AA              | 1947055546               |
| SNP_P4_186535_939   | NW_004519155.1 | Scaffold4888 | 939                     | AA                              | GG              | 1947055548               |
| SNP_P4_186536_1354  | NW_004519156.1 | Scaffold4889 | 1354                    | TT                              | CC              | 1947055550               |



| SNPs IDs            | Chromosome IDs | Chromosomes  | Physical positions (bp) | CDC Frontier (Reference genome) | (ILWC46 & LPNB) | NCBI SNPdb Accession IDs |
|---------------------|----------------|--------------|-------------------------|---------------------------------|-----------------|--------------------------|
| SNP_P4_186537_1374  | NW_004519156.1 | Scaffold4889 | 1374                    | TT                              | AA              | 1947055552               |
| SNP_P4_186538_1633  | NW_004519156.1 | Scaffold4889 | 1633                    | TT                              | CC              | 1947055554               |
| SNP_P4_186539_1644  | NW_004519156.1 | Scaffold4889 | 1644                    | TT                              | CC              | 1947055556               |
| SNP_P4_186540_1692  | NW_004519156.1 | Scaffold4889 | 1692                    | GG                              | CC              | 1947055558               |
| SNP_P4_186541_1355  | NW_004519158.1 | Scaffold4892 | 1355                    | GG                              | AA              | 1947055561               |
| SNP_P4_186542_2069  | NW_004519158.1 | Scaffold4892 | 2069                    | GG                              | CC              | 1947055563               |
| SNP_P4_186543_2075  | NW_004519158.1 | Scaffold4892 | 2075                    | CC                              | AA              | 1947055565               |
| SNP_P4_186544_2121  | NW_004519158.1 | Scaffold4892 | 2121                    | CC                              | TT              | 1947055567               |
| SNP_P4_186545_97    | NW_004519160.1 | Scaffold4894 | 97                      | TT                              | GG              | 1947055570               |
| SNP_P4_186546_392   | NW_004519160.1 | Scaffold4894 | 392                     | TT                              | CC              | 1947055572               |
| SNP_P4_186547_70    | NW_004519161.1 | Scaffold4895 | 70                      | GG                              | CC              | 1947055574               |
| SNP_P4_186548_7197  | NW_004519161.1 | Scaffold4895 | 7197                    | AA                              | TT              | 1947055576               |
| SNP_P4_186549_9508  | NW_004519161.1 | Scaffold4895 | 9508                    | AA                              | TT              | 1947055578               |
| SNP_P4_186550_14033 | NW_004519161.1 | Scaffold4895 | 14033                   | GG                              | AA              | 1947055580               |
| SNP_P4_186553_8635  | NW_004519166.1 | Scaffold4902 | 8635                    | TT                              | CC              | 1947055582               |
| SNP_P4_186557_24042 | NW_004519166.1 | Scaffold4902 | 24042                   | TT                              | AA              | 1947055584               |
| SNP_P4_186558_28594 | NW_004519166.1 | Scaffold4902 | 28594                   | TT                              | CC              | 1947055586               |
| SNP_P4_186559_28618 | NW_004519166.1 | Scaffold4902 | 28618                   | AA                              | GG              | 1947055588               |
| SNP_P4_186560_33088 | NW_004519166.1 | Scaffold4902 | 33088                   | AA                              | GG              | 1947055590               |
| SNP_P4_186563_44586 | NW_004519166.1 | Scaffold4902 | 44586                   | TT                              | CC              | 1947055592               |
| SNP_P4_186564_66460 | NW_004519166.1 | Scaffold4902 | 66460                   | AA                              | CC              | 1947055594               |
| SNP_P4_186566_73370 | NW_004519166.1 | Scaffold4902 | 73370                   | TT                              | CC              | 1947055596               |
| SNP_P4_186567_73396 | NW_004519166.1 | Scaffold4902 | 73396                   | CC                              | TT              | 1947055598               |
| SNP_P4_186568_73687 | NW_004519166.1 | Scaffold4902 | 73687                   | GG                              | AA              | 1947055600               |
| SNP_P4_186569_73692 | NW_004519166.1 | Scaffold4902 | 73692                   | TT                              | GG              | 1947055602               |
| SNP_P4_186570_73732 | NW_004519166.1 | Scaffold4902 | 73732                   | TT                              | AA              | 1947055604               |
| SNP_P4_186571_74512 | NW_004519166.1 | Scaffold4902 | 74512                   | TT                              | AA              | 1947055606               |
| SNP_P4_186572_76522 | NW_004519166.1 | Scaffold4902 | 76522                   | AA                              | GG              | 1947055608               |
| SNP_P4_186573_76542 | NW_004519166.1 | Scaffold4902 | 76542                   | AA                              | CC              | 1947055610               |
| SNP_P4_186574_76543 | NW_004519166.1 | Scaffold4902 | 76543                   | GG                              | AA              | 1947055612               |
| SNP_P4_186575_76565 | NW_004519166.1 | Scaffold4902 | 76565                   | AA                              | TT              | 1947055614               |
| SNP_P4_186576_76809 | NW_004519166.1 | Scaffold4902 | 76809                   | CC                              | TT              | 1947055616               |
| SNP_P4_186577_91253 | NW_004519166.1 | Scaffold4902 | 91253                   | AA                              | CC              | 1947055618               |
| SNP_P4_186578_92058 | NW_004519166.1 | Scaffold4902 | 92058                   | GG                              | TT              | 1947055620               |
| SNP_P4_186579_92350 | NW_004519166.1 | Scaffold4902 | 92350                   | TT                              | AA              | 1947055622               |
| SNP_P4_186580_98037 | NW_004519166.1 | Scaffold4902 | 98037                   | CC                              | TT              | 1947055624               |
| SNP_P4_186582_64    | NW_004519169.1 | Scaffold4905 | 64                      | TT                              | GG              | 1947055626               |
| SNP_P4_186583_70    | NW_004519169.1 | Scaffold4905 | 70                      | AA                              | GG              | 1947055628               |
| SNP_P4_186584_382   | NW_004519169.1 | Scaffold4905 | 382                     | AA                              | GG              | 1947055630               |
| SNP_P4_186585_4207  | NW_004519175.1 | Scaffold4917 | 4207                    | AA                              | GG              | 1947055632               |
| SNP_P4_186586_4244  | NW_004519175.1 | Scaffold4917 | 4244                    | CC                              | AA              | 1947055634               |
| SNP_P4_186587_4254  | NW_004519175.1 | Scaffold4917 | 4254                    | TT                              | AA              | 1947055636               |

| SNPs IDs            | Chromosome IDs | Chromosomes  | Physical positions (bp) | CDC Frontier (Reference genome) | (ILWC46 & LPNB) | NCBI SNPdb Accession IDs |
|---------------------|----------------|--------------|-------------------------|---------------------------------|-----------------|--------------------------|
| SNP_P4_186588_4778  | NW_004519175.1 | Scaffold4917 | 4778                    | TT                              | AA              | 1947055638               |
| SNP_P4_186589_4959  | NW_004519175.1 | Scaffold4917 | 4959                    | AA                              | TT              | 1947055640               |
| SNP_P4_186590_4992  | NW_004519175.1 | Scaffold4917 | 4992                    | AA                              | TT              | 1947055642               |
| SNP_P4_186591_5036  | NW_004519175.1 | Scaffold4917 | 5036                    | TT                              | AA              | 1947055644               |
| SNP_P4_186592_5066  | NW_004519175.1 | Scaffold4917 | 5066                    | AA                              | CC              | 1947055647               |
| SNP_P4_186593_5067  | NW_004519175.1 | Scaffold4917 | 5067                    | GG                              | AA              | 1947055649               |
| SNP_P4_186594_5309  | NW_004519175.1 | Scaffold4917 | 5309                    | GG                              | TT              | 1947055651               |
| SNP_P4_186595_5458  | NW_004519175.1 | Scaffold4917 | 5458                    | GG                              | AA              | 1947055653               |
| SNP_P4_186596_5472  | NW_004519175.1 | Scaffold4917 | 5472                    | CC                              | GG              | 1947055655               |
| SNP_P4_186597_5505  | NW_004519175.1 | Scaffold4917 | 5505                    | TT                              | CC              | 1947055657               |
| SNP_P4_186598_5558  | NW_004519175.1 | Scaffold4917 | 5558                    | TT                              | GG              | 1947055659               |
| SNP_P4_186599_5583  | NW_004519175.1 | Scaffold4917 | 5583                    | AA                              | CC              | 1947055661               |
| SNP_P4_186600_5600  | NW_004519175.1 | Scaffold4917 | 5600                    | GG                              | AA              | 1947055663               |
| SNP_P4_186601_5637  | NW_004519175.1 | Scaffold4917 | 5637                    | TT                              | AA              | 1947055665               |
| SNP_P4_186602_19201 | NW_004519177.1 | Scaffold4920 | 19201                   | AA                              | GG              | 1947055667               |
| SNP_P4_186603_19212 | NW_004519177.1 | Scaffold4920 | 19212                   | AA                              | TT              | 1947055669               |
| SNP_P4_186604_19335 | NW_004519177.1 | Scaffold4920 | 19335                   | TT                              | CC              | 1947055671               |
| SNP_P4_186605_19337 | NW_004519177.1 | Scaffold4920 | 19337                   | GG                              | AA              | 1947055673               |
| SNP_P4_186606_20916 | NW_004519177.1 | Scaffold4920 | 20916                   | GG                              | AA              | 1947055675               |
| SNP_P4_186607_21029 | NW_004519177.1 | Scaffold4920 | 21029                   | GG                              | CC              | 1947055677               |
| SNP_P4_186608_21133 | NW_004519177.1 | Scaffold4920 | 21133                   | TT                              | AA              | 1947055679               |
| SNP_P4_186609_3934  | NW_004519180.1 | Scaffold4923 | 3934                    | CC                              | TT              | 1947055681               |
| SNP_P4_186610_3935  | NW_004519180.1 | Scaffold4923 | 3935                    | AA                              | GG              | 1947055684               |
| SNP_P4_186611_10342 | NW_004519180.1 | Scaffold4923 | 10342                   | TT                              | GG              | 1947055686               |
| SNP_P4_186612_10778 | NW_004519180.1 | Scaffold4923 | 10778                   | GG                              | CC              | 1947055688               |
| SNP_P4_186613_10783 | NW_004519180.1 | Scaffold4923 | 10783                   | GG                              | AA              | 1947055690               |
| SNP_P4_186614_10819 | NW_004519180.1 | Scaffold4923 | 10819                   | CC                              | TT              | 1947055692               |
| SNP_P4_186615_10862 | NW_004519180.1 | Scaffold4923 | 10862                   | CC                              | GG              | 1947055694               |
| SNP_P4_186616_10875 | NW_004519180.1 | Scaffold4923 | 10875                   | CC                              | TT              | 1947055696               |
| SNP_P4_186617_11028 | NW_004519180.1 | Scaffold4923 | 11028                   | CC                              | GG              | 1947055698               |
| SNP_P4_186618_11059 | NW_004519180.1 | Scaffold4923 | 11059                   | TT                              | AA              | 1947055700               |
| SNP_P4_186619_11060 | NW_004519180.1 | Scaffold4923 | 11060                   | CC                              | TT              | 1947055702               |
| SNP_P4_186620_11086 | NW_004519180.1 | Scaffold4923 | 11086                   | AA                              | GG              | 1947055704               |
| SNP_P4_186621_11116 | NW_004519180.1 | Scaffold4923 | 11116                   | CC                              | GG              | 1947055706               |
| SNP_P4_186622_11136 | NW_004519180.1 | Scaffold4923 | 11136                   | CC                              | AA              | 1947055708               |
| SNP_P4_186624_19729 | NW_004519180.1 | Scaffold4923 | 19729                   | AA                              | GG              | 1947055710               |
| SNP_P4_186625_19828 | NW_004519180.1 | Scaffold4923 | 19828                   | AA                              | GG              | 1947055712               |
| SNP_P4_186626_19865 | NW_004519180.1 | Scaffold4923 | 19865                   | TT                              | AA              | 1947055714               |
| SNP_P4_186627_20006 | NW_004519180.1 | Scaffold4923 | 20006                   | AA                              | TT              | 1947055716               |
| SNP_P4_186628_651   | NW_004519184.1 | Scaffold4928 | 651                     | TT                              | AA              | 1947055718               |
| SNP_P4_186629_597   | NW_004519186.1 | Scaffold4930 | 597                     | TT                              | CC              | 1947055720               |
| SNP_P4_186630_945   | NW_004519186.1 | Scaffold4930 | 945                     | CC                              | TT              | 1947055722               |

| SNPs IDs           | Chromosome IDs | Chromosomes  | Physical positions (bp) | CDC Frontier (Reference genome) | (ILWC46 & LPNB) | NCBI SNPdb Accession IDs |
|--------------------|----------------|--------------|-------------------------|---------------------------------|-----------------|--------------------------|
| SNP_P4_186631_439  | NW_004519188.1 | Scaffold4932 | 439                     | GG                              | AA              | 1947055724               |
| SNP_P4_186632_440  | NW_004519188.1 | Scaffold4932 | 440                     | GG                              | AA              | 1947055726               |
| SNP_P4_186633_392  | NW_004519192.1 | Scaffold4937 | 392                     | GG                              | AA              | 1947055728               |
| SNP_P4_186634_537  | NW_004519192.1 | Scaffold4937 | 537                     | TT                              | AA              | 1947055730               |
| SNP_P4_186635_666  | NW_004519192.1 | Scaffold4937 | 666                     | AA                              | CC              | 1947055732               |
| SNP_P4_186636_677  | NW_004519192.1 | Scaffold4937 | 677                     | GG                              | TT              | 1947055734               |
| SNP_P4_186637_989  | NW_004519192.1 | Scaffold4937 | 989                     | CC                              | TT              | 1947055736               |
| SNP_P4_186638_1902 | NW_004519193.1 | Scaffold4938 | 1902                    | GG                              | AA              | 1947055738               |
| SNP_P4_186639_1903 | NW_004519193.1 | Scaffold4938 | 1903                    | TT                              | CC              | 1947055740               |
| SNP_P4_186640_2156 | NW_004519193.1 | Scaffold4938 | 2156                    | TT                              | GG              | 1947055742               |
| SNP_P4_186641_224  | NW_004519194.1 | Scaffold4939 | 224                     | AA                              | TT              | 1947055744               |
| SNP_P4_186642_400  | NW_004519194.1 | Scaffold4939 | 400                     | CC                              | AA              | 1947055746               |
| SNP_P4_186643_538  | NW_004519194.1 | Scaffold4939 | 538                     | CC                              | TT              | 1947055748               |
| SNP_P4_186644_379  | NW_004519196.1 | Scaffold4941 | 379                     | GG                              | AA              | 1947055750               |
| SNP_P4_186645_390  | NW_004519196.1 | Scaffold4941 | 390                     | AA                              | TT              | 1947055752               |
| SNP_P4_186647_1380 | NW_004519197.1 | Scaffold4943 | 1380                    | TT                              | CC              | 1947055754               |
| SNP_P4_186648_3957 | NW_004519199.1 | Scaffold4945 | 3957                    | GG                              | TT              | 1947055756               |
| SNP_P4_186649_3964 | NW_004519199.1 | Scaffold4945 | 3964                    | CC                              | AA              | 1947055758               |
| SNP_P4_186650_3974 | NW_004519199.1 | Scaffold4945 | 3974                    | TT                              | CC              | 1947055760               |
| SNP_P4_186651_3977 | NW_004519199.1 | Scaffold4945 | 3977                    | TT                              | AA              | 1947055762               |
| SNP_P4_186652_3982 | NW_004519199.1 | Scaffold4945 | 3982                    | TT                              | CC              | 1947055764               |
| SNP_P4_186653_3991 | NW_004519199.1 | Scaffold4945 | 3991                    | AA                              | GG              | 1947055766               |
| SNP_P4_186654_4002 | NW_004519199.1 | Scaffold4945 | 4002                    | TT                              | CC              | 1947055768               |
| SNP_P4_186655_4051 | NW_004519199.1 | Scaffold4945 | 4051                    | CC                              | GG              | 1947055770               |
| SNP_P4_186656_4127 | NW_004519199.1 | Scaffold4945 | 4127                    | CC                              | GG              | 1947055772               |
| SNP_P4_186657_4187 | NW_004519199.1 | Scaffold4945 | 4187                    | GG                              | AA              | 1947055774               |
| SNP_P4_186658_4198 | NW_004519199.1 | Scaffold4945 | 4198                    | CC                              | AA              | 1947055776               |
| SNP_P4_186660_4313 | NW_004519199.1 | Scaffold4945 | 4313                    | GG                              | AA              | 1947055777               |
| SNP_P4_186661_4321 | NW_004519199.1 | Scaffold4945 | 4321                    | CC                              | TT              | 1947055779               |
| SNP_P4_186662_4335 | NW_004519199.1 | Scaffold4945 | 4335                    | TT                              | CC              | 1947055781               |
| SNP_P4_186663_4370 | NW_004519199.1 | Scaffold4945 | 4370                    | TT                              | GG              | 1947055783               |
| SNP_P4_186664_4424 | NW_004519199.1 | Scaffold4945 | 4424                    | AA                              | GG              | 1947055785               |
| SNP_P4_186665_4513 | NW_004519199.1 | Scaffold4945 | 4513                    | GG                              | AA              | 1947055787               |
| SNP_P4_186666_4572 | NW_004519199.1 | Scaffold4945 | 4572                    | TT                              | AA              | 1947055789               |
| SNP_P4_186667_6461 | NW_004519199.1 | Scaffold4945 | 6461                    | AA                              | TT              | 1947055791               |
| SNP_P4_186668_6464 | NW_004519199.1 | Scaffold4945 | 6464                    | GG                              | TT              | 1947055793               |
| SNP_P4_186669_8182 | NW_004519199.1 | Scaffold4945 | 8182                    | GG                              | TT              | 1947055795               |
| SNP_P4_186670_8709 | NW_004519199.1 | Scaffold4945 | 8709                    | AA                              | TT              | 1947055797               |
| SNP_P4_186671_8777 | NW_004519199.1 | Scaffold4945 | 8777                    | TT                              | CC              | 1947055799               |
| SNP_P4_186672_627  | NW_004519200.1 | Scaffold4946 | 627                     | CC                              | AA              | 1947055801               |
| SNP_P4_186673_649  | NW_004519200.1 | Scaffold4946 | 649                     | TT                              | AA              | 1947055803               |
| SNP_P4_186674_849  | NW_004519200.1 | Scaffold4946 | 849                     | AA                              | CC              | 1947055805               |

| SNPs IDs            | Chromosome IDs | Chromosomes  | Physical positions (bp) | CDC Frontier (Reference genome) | (ILWC46 & LPNB) | NCBI SNPdb Accession IDs |
|---------------------|----------------|--------------|-------------------------|---------------------------------|-----------------|--------------------------|
| SNP_P4_186675_1190  | NW_004519200.1 | Scaffold4946 | 1190                    | CC                              | AA              | 1947055807               |
| SNP_P4_186676_702   | NW_004519207.1 | Scaffold4954 | 702                     | AA                              | TT              | 1947055809               |
| SNP_P4_186677_710   | NW_004519207.1 | Scaffold4954 | 710                     | CC                              | TT              | 1947055810               |
| SNP_P4_186678_734   | NW_004519207.1 | Scaffold4954 | 734                     | CC                              | TT              | 1947055812               |
| SNP_P4_186679_1011  | NW_004519207.1 | Scaffold4954 | 1011                    | GG                              | CC              | 1947055814               |
| SNP_P4_186680_1202  | NW_004519207.1 | Scaffold4954 | 1202                    | AA                              | CC              | 1947055816               |
| SNP_P4_186681_792   | NW_004519210.1 | Scaffold4957 | 792                     | TT                              | AA              | 1947055818               |
| SNP_P4_186682_794   | NW_004519210.1 | Scaffold4957 | 794                     | TT                              | GG              | 1947055820               |
| SNP_P4_186683_796   | NW_004519210.1 | Scaffold4957 | 796                     | AA                              | TT              | 1947055822               |
| SNP_P4_186684_803   | NW_004519210.1 | Scaffold4957 | 803                     | AA                              | TT              | 1947055824               |
| SNP_P4_186685_840   | NW_004519210.1 | Scaffold4957 | 840                     | TT                              | GG              | 1947055826               |
| SNP_P4_186686_841   | NW_004519210.1 | Scaffold4957 | 841                     | GG                              | AA              | 1947055828               |
| SNP_P4_186687_805   | NW_004519212.1 | Scaffold4960 | 805                     | GG                              | AA              | 1947055830               |
| SNP_P4_186688_1096  | NW_004519212.1 | Scaffold4960 | 1096                    | CC                              | AA              | 1947055832               |
| SNP_P4_186689_1147  | NW_004519212.1 | Scaffold4960 | 1147                    | AA                              | TT              | 1947055834               |
| SNP_P4_186690_1125  | NW_004519218.1 | Scaffold4970 | 1125                    | CC                              | TT              | 1947055836               |
| SNP_P4_186691_1126  | NW_004519218.1 | Scaffold4970 | 1126                    | AA                              | GG              | 1947055838               |
| SNP_P4_186692_1134  | NW_004519218.1 | Scaffold4970 | 1134                    | GG                              | AA              | 1947055840               |
| SNP_P4_186693_1353  | NW_004519220.1 | Scaffold4972 | 1353                    | AA                              | GG              | 1947055842               |
| SNP_P4_186694_1400  | NW_004519220.1 | Scaffold4972 | 1400                    | TT                              | GG              | 1947055847               |
| SNP_P4_186695_1463  | NW_004519220.1 | Scaffold4972 | 1463                    | AA                              | TT              | 1947055849               |
| SNP_P4_186696_1465  | NW_004519220.1 | Scaffold4972 | 1465                    | GG                              | TT              | 1947055851               |
| SNP_P4_186697_1482  | NW_004519220.1 | Scaffold4972 | 1482                    | GG                              | AA              | 1947055853               |
| SNP_P4_186698_1302  | NW_004519225.1 | Scaffold4978 | 1302                    | TT                              | CC              | 1947055855               |
| SNP_P4_186699_7819  | NW_004519225.1 | Scaffold4978 | 7819                    | TT                              | CC              | 1947055857               |
| SNP_P4_186700_11073 | NW_004519225.1 | Scaffold4978 | 11073                   | TT                              | CC              | 1947055859               |
| SNP_P4_186701_11668 | NW_004519225.1 | Scaffold4978 | 11668                   | TT                              | AA              | 1947055861               |
| SNP_P4_186702_13460 | NW_004519225.1 | Scaffold4978 | 13460                   | TT                              | CC              | 1947055863               |
| SNP_P4_186703_19259 | NW_004519225.1 | Scaffold4978 | 19259                   | CC                              | TT              | 1947055865               |
| SNP_P4_186704_27104 | NW_004519225.1 | Scaffold4978 | 27104                   | CC                              | TT              | 1947055867               |
| SNP_P4_186705_41503 | NW_004519225.1 | Scaffold4978 | 41503                   | AA                              | GG              | 1947055869               |
| SNP_P4_186706_126   | NW_004519226.1 | Scaffold4979 | 126                     | TT                              | CC              | 1947055871               |
| SNP_P4_186707_1049  | NW_004519230.1 | Scaffold4983 | 1049                    | AA                              | CC              | 1947055873               |
| SNP_P4_186708_1166  | NW_004519230.1 | Scaffold4983 | 1166                    | TT                              | CC              | 1947055875               |
| SNP_P4_186709_20793 | NW_004519230.1 | Scaffold4983 | 20793                   | AA                              | GG              | 1947055877               |
| SNP_P4_186710_20850 | NW_004519230.1 | Scaffold4983 | 20850                   | TT                              | GG              | 1947055879               |
| SNP_P4_186711_20901 | NW_004519230.1 | Scaffold4983 | 20901                   | AA                              | CC              | 1947055881               |
| SNP_P4_186712_21187 | NW_004519230.1 | Scaffold4983 | 21187                   | GG                              | TT              | 1947055883               |
| SNP_P4_186713_21230 | NW_004519230.1 | Scaffold4983 | 21230                   | GG                              | AA              | 1947055884               |
| SNP_P4_186714_23642 | NW_004519230.1 | Scaffold4983 | 23642                   | TT                              | GG              | 1947055885               |
| SNP_P4_186715_23847 | NW_004519230.1 | Scaffold4983 | 23847                   | TT                              | CC              | 1947055886               |
| SNP_P4_186716_23863 | NW_004519230.1 | Scaffold4983 | 23863                   | GG                              | AA              | 1947055887               |

| SNPs IDs            | Chromosome IDs | Chromosomes  | Physical positions (bp) | CDC Frontier (Reference genome) | (ILWC46 & LPNB) | NCBI SNPdb Accession IDs |
|---------------------|----------------|--------------|-------------------------|---------------------------------|-----------------|--------------------------|
| SNP_P4_186717_23901 | NW_004519230.1 | Scaffold4983 | 23901                   | AA                              | GG              | 1947055888               |
| SNP_P4_186718_23916 | NW_004519230.1 | Scaffold4983 | 23916                   | CC                              | AA              | 1947055889               |
| SNP_P4_186719_23978 | NW_004519230.1 | Scaffold4983 | 23978                   | GG                              | AA              | 1947055890               |
| SNP_P4_186720_26869 | NW_004519230.1 | Scaffold4983 | 26869                   | CC                              | TT              | 1947055891               |
| SNP_P4_186721_26981 | NW_004519230.1 | Scaffold4983 | 26981                   | TT                              | CC              | 1947055892               |
| SNP_P4_186722_27039 | NW_004519230.1 | Scaffold4983 | 27039                   | GG                              | AA              | 1947055893               |
| SNP_P4_186726_27361 | NW_004519230.1 | Scaffold4983 | 27361                   | TT                              | CC              | 1947055894               |
| SNP_P4_186727_27375 | NW_004519230.1 | Scaffold4983 | 27375                   | TT                              | CC              | 1947055895               |
| SNP_P4_186728_27552 | NW_004519230.1 | Scaffold4983 | 27552                   | TT                              | AA              | 1947055896               |
| SNP_P4_186729_27976 | NW_004519230.1 | Scaffold4983 | 27976                   | TT                              | CC              | 1947055897               |
| SNP_P4_186730_64    | NW_004519231.1 | Scaffold4984 | 64                      | TT                              | AA              | 1947055898               |
| SNP_P4_186731_117   | NW_004519231.1 | Scaffold4984 | 117                     | TT                              | GG              | 1947055899               |
| SNP_P4_186732_416   | NW_004519231.1 | Scaffold4984 | 416                     | AA                              | CC              | 1947055900               |
| SNP_P4_186733_516   | NW_004519231.1 | Scaffold4984 | 516                     | GG                              | TT              | 1947055901               |
| SNP_P4_186734_569   | NW_004519231.1 | Scaffold4984 | 569                     | GG                              | AA              | 1947055902               |
| SNP_P4_186735_865   | NW_004519231.1 | Scaffold4984 | 865                     | TT                              | CC              | 1947055904               |
| SNP_P4_186736_999   | NW_004519231.1 | Scaffold4984 | 999                     | AA                              | GG              | 1947055906               |
| SNP_P4_186737_1012  | NW_004519231.1 | Scaffold4984 | 1012                    | AA                              | GG              | 1947055908               |
| SNP_P4_186738_1048  | NW_004519231.1 | Scaffold4984 | 1048                    | AA                              | GG              | 1947055910               |
| SNP_P4_186739_1053  | NW_004519231.1 | Scaffold4984 | 1053                    | AA                              | CC              | 1947055912               |
| SNP_P4_186740_1323  | NW_004519231.1 | Scaffold4984 | 1323                    | AA                              | CC              | 1947055914               |
| SNP_P4_186741_6625  | NW_004519234.1 | Scaffold4989 | 6625                    | TT                              | CC              | 1947055916               |
| SNP_P4_186742_4861  | NW_004519235.1 | Scaffold4991 | 4861                    | AA                              | GG              | 1947055918               |
| SNP_P4_186743_4871  | NW_004519235.1 | Scaffold4991 | 4871                    | GG                              | AA              | 1947055920               |
| SNP_P4_186744_889   | NW_004519238.1 | Scaffold4994 | 889                     | GG                              | AA              | 1947055922               |
| SNP_P4_186746_220   | NW_004519239.1 | Scaffold4996 | 220                     | CC                              | GG              | 1947055924               |
| SNP_P4_186747_403   | NW_004519239.1 | Scaffold4996 | 403                     | TT                              | AA              | 1947055926               |
| SNP_P4_186748_405   | NW_004519239.1 | Scaffold4996 | 405                     | GG                              | TT              | 1947055928               |
| SNP_P4_186749_408   | NW_004519239.1 | Scaffold4996 | 408                     | CC                              | TT              | 1947055930               |
| SNP_P4_186750_1581  | NW_004519239.1 | Scaffold4996 | 1581                    | AA                              | TT              | 1947055932               |
| SNP_P4_186751_1583  | NW_004519239.1 | Scaffold4996 | 1583                    | GG                              | TT              | 1947055934               |
| SNP_P4_186752_1689  | NW_004519239.1 | Scaffold4996 | 1689                    | CC                              | TT              | 1947055936               |
| SNP_P4_186753_2127  | NW_004519239.1 | Scaffold4996 | 2127                    | AA                              | TT              | 1947055938               |
| SNP_P4_186754_324   | NW_004519240.1 | Scaffold4998 | 324                     | AA                              | TT              | 1947055940               |
| SNP_P4_186755_642   | NW_004519242.1 | Scaffold5001 | 642                     | AA                              | TT              | 1947055942               |
| SNP_P4_186756_659   | NW_004519242.1 | Scaffold5001 | 659                     | AA                              | GG              | 1947055944               |
| SNP_P4_186757_958   | NW_004519242.1 | Scaffold5001 | 958                     | CC                              | TT              | 1947055946               |
| SNP_P4_186758_398   | NW_004519247.1 | Scaffold5010 | 398                     | GG                              | TT              | 1947055948               |
| SNP_P4_186759_745   | NW_004519249.1 | Scaffold5013 | 745                     | CC                              | TT              | 1947055950               |
| SNP_P4_186760_405   | NW_004519250.1 | Scaffold5014 | 405                     | GG                              | AA              | 1947055952               |
| SNP_P4_186762_4114  | NW_004519251.1 | Scaffold5016 | 4114                    | AA                              | GG              | 1947055954               |
| SNP_P4_186763_4366  | NW_004519251.1 | Scaffold5016 | 4366                    | TT                              | GG              | 1947055956               |

| SNPs IDs           | Chromosome IDs | Chromosomes  | Physical positions (bp) | CDC Frontier (Reference genome) | (ILWC46 & LPNB) | NCBI SNPdb Accession IDs |
|--------------------|----------------|--------------|-------------------------|---------------------------------|-----------------|--------------------------|
| SNP_P4_186764_4367 | NW_004519251.1 | Scaffold5016 | 4367                    | TT                              | CC              | 1947055958               |
| SNP_P4_186765_4374 | NW_004519251.1 | Scaffold5016 | 4374                    | CC                              | TT              | 1947055960               |
| SNP_P4_186766_4389 | NW_004519251.1 | Scaffold5016 | 4389                    | GG                              | CC              | 1947055962               |
| SNP_P4_186767_4405 | NW_004519251.1 | Scaffold5016 | 4405                    | TT                              | AA              | 1947055964               |
| SNP_P4_186768_4406 | NW_004519251.1 | Scaffold5016 | 4406                    | TT                              | CC              | 1947055966               |
| SNP_P4_186769_4424 | NW_004519251.1 | Scaffold5016 | 4424                    | AA                              | GG              | 1947055968               |
| SNP_P4_186770_4435 | NW_004519251.1 | Scaffold5016 | 4435                    | CC                              | GG              | 1947055970               |
| SNP_P4_186771_4452 | NW_004519251.1 | Scaffold5016 | 4452                    | AA                              | GG              | 1947055972               |
| SNP_P4_186772_4480 | NW_004519251.1 | Scaffold5016 | 4480                    | TT                              | GG              | 1947055974               |
| SNP_P4_186773_4489 | NW_004519251.1 | Scaffold5016 | 4489                    | AA                              | CC              | 1947055976               |
| SNP_P4_186775_4690 | NW_004519251.1 | Scaffold5016 | 4690                    | GG                              | TT              | 1947055978               |
| SNP_P4_186776_4925 | NW_004519251.1 | Scaffold5016 | 4925                    | TT                              | CC              | 1947055980               |
| SNP_P4_186777_931  | NW_004519254.1 | Scaffold5023 | 931                     | AA                              | TT              | 1947055982               |
| SNP_P4_186778_934  | NW_004519254.1 | Scaffold5023 | 934                     | TT                              | AA              | 1947055984               |
| SNP_P4_186779_941  | NW_004519254.1 | Scaffold5023 | 941                     | CC                              | GG              | 1947055986               |
| SNP_P4_186780_1048 | NW_004519254.1 | Scaffold5023 | 1048                    | AA                              | CC              | 1947055988               |
| SNP_P4_186781_5464 | NW_004519254.1 | Scaffold5023 | 5464                    | GG                              | TT              | 1947055990               |
| SNP_P4_186782_5495 | NW_004519254.1 | Scaffold5023 | 5495                    | GG                              | AA              | 1947055992               |
| SNP_P4_186783_9028 | NW_004519254.1 | Scaffold5023 | 9028                    | AA                              | CC              | 1947055994               |
| SNP_P4_186784_9100 | NW_004519254.1 | Scaffold5023 | 9100                    | AA                              | GG              | 1947055996               |
| SNP_P4_186785_9130 | NW_004519254.1 | Scaffold5023 | 9130                    | TT                              | CC              | 1947055998               |
| SNP_P4_186786_9193 | NW_004519254.1 | Scaffold5023 | 9193                    | CC                              | TT              | 1947056000               |
| SNP_P4_186787_9259 | NW_004519254.1 | Scaffold5023 | 9259                    | TT                              | CC              | 1947056002               |
| SNP_P4_186788_734  | NW_004519256.1 | Scaffold5025 | 734                     | CC                              | AA              | 1947056004               |
| SNP_P4_186789_768  | NW_004519258.1 | Scaffold5028 | 768                     | GG                              | AA              | 1947056006               |
| SNP_P4_186790_781  | NW_004519258.1 | Scaffold5028 | 781                     | AA                              | GG              | 1947056008               |
| SNP_P4_186791_854  | NW_004519258.1 | Scaffold5028 | 854                     | CC                              | TT              | 1947056010               |
| SNP_P4_186792_868  | NW_004519258.1 | Scaffold5028 | 868                     | CC                              | AA              | 1947056012               |
| SNP_P4_186793_960  | NW_004519258.1 | Scaffold5028 | 960                     | GG                              | AA              | 1947056014               |
| SNP_P4_186794_981  | NW_004519258.1 | Scaffold5028 | 981                     | AA                              | GG              | 1947056016               |
| SNP_P4_186795_1039 | NW_004519258.1 | Scaffold5028 | 1039                    | AA                              | GG              | 1947056019               |
| SNP_P4_186796_1054 | NW_004519258.1 | Scaffold5028 | 1054                    | TT                              | GG              | 1947056021               |
| SNP_P4_186797_1075 | NW_004519258.1 | Scaffold5028 | 1075                    | AA                              | CC              | 1947056023               |
| SNP_P4_186798_1122 | NW_004519258.1 | Scaffold5028 | 1122                    | TT                              | CC              | 1947056025               |
| SNP_P4_186799_403  | NW_004519260.1 | Scaffold5030 | 403                     | GG                              | AA              | 1947056027               |
| SNP_P4_186800_803  | NW_004519260.1 | Scaffold5030 | 803                     | GG                              | AA              | 1947056029               |
| SNP_P4_186801_892  | NW_004519260.1 | Scaffold5030 | 892                     | TT                              | CC              | 1947056031               |
| SNP_P4_186803_985  | NW_004519260.1 | Scaffold5030 | 985                     | GG                              | TT              | 1947056033               |
| SNP_P4_186804_1011 | NW_004519260.1 | Scaffold5030 | 1011                    | GG                              | TT              | 1947056035               |
| SNP_P4_186805_1092 | NW_004519260.1 | Scaffold5030 | 1092                    | AA                              | TT              | 1947056037               |
| SNP_P4_186806_1118 | NW_004519260.1 | Scaffold5030 | 1118                    | GG                              | CC              | 1947056039               |
| SNP_P4_186807_1121 | NW_004519260.1 | Scaffold5030 | 1121                    | GG                              | AA              | 1947056041               |

| SNPs IDs            | Chromosome IDs | Chromosomes  | Physical positions (bp) | CDC Frontier (Reference genome) | (ILWC46 & LPNB) | NCBI SNPdb Accession IDs |
|---------------------|----------------|--------------|-------------------------|---------------------------------|-----------------|--------------------------|
| SNP_P4_186808_1168  | NW_004519260.1 | Scaffold5030 | 1168                    | TT                              | GG              | 1947056043               |
| SNP_P4_186809_1194  | NW_004519260.1 | Scaffold5030 | 1194                    | TT                              | CC              | 1947056045               |
| SNP_P4_186810_11755 | NW_004519260.1 | Scaffold5030 | 11755                   | TT                              | CC              | 1947056054               |
| SNP_P4_186812_18514 | NW_004519260.1 | Scaffold5030 | 18514                   | CC                              | TT              | 1947056056               |
| SNP_P4_186813_18551 | NW_004519260.1 | Scaffold5030 | 18551                   | TT                              | CC              | 1947056058               |
| SNP_P4_186814_18885 | NW_004519260.1 | Scaffold5030 | 18885                   | TT                              | CC              | 1947056060               |
| SNP_P4_186815_138   | NW_004519261.1 | Scaffold5031 | 138                     | AA                              | GG              | 1947056062               |
| SNP_P4_186816_468   | NW_004519261.1 | Scaffold5031 | 468                     | GG                              | AA              | 1947056064               |
| SNP_P4_186817_408   | NW_004519263.1 | Scaffold5033 | 408                     | AA                              | TT              | 1947056066               |
| SNP_P4_186818_416   | NW_004519263.1 | Scaffold5033 | 416                     | CC                              | GG              | 1947056068               |
| SNP_P4_186819_1161  | NW_004519263.1 | Scaffold5033 | 1161                    | GG                              | TT              | 1947056070               |
| SNP_P4_186820_2038  | NW_004519263.1 | Scaffold5033 | 2038                    | TT                              | GG              | 1947056072               |
| SNP_P4_186821_2085  | NW_004519263.1 | Scaffold5033 | 2085                    | AA                              | GG              | 1947056074               |
| SNP_P4_186822_2151  | NW_004519263.1 | Scaffold5033 | 2151                    | CC                              | TT              | 1947056077               |
| SNP_P4_186823_563   | NW_004519273.1 | Scaffold5052 | 563                     | AA                              | TT              | 1947056079               |
| SNP_P4_186824_157   | NW_004519278.1 | Scaffold5059 | 157                     | GG                              | AA              | 1947056081               |
| SNP_P4_186825_165   | NW_004519278.1 | Scaffold5059 | 165                     | GG                              | AA              | 1947056083               |
| SNP_P4_186826_223   | NW_004519278.1 | Scaffold5059 | 223                     | AA                              | GG              | 1947056085               |
| SNP_P4_186827_480   | NW_004519278.1 | Scaffold5059 | 480                     | AA                              | CC              | 1947056087               |
| SNP_P4_186828_507   | NW_004519278.1 | Scaffold5059 | 507                     | GG                              | CC              | 1947056089               |
| SNP_P4_186829_529   | NW_004519278.1 | Scaffold5059 | 529                     | GG                              | TT              | 1947056091               |
| SNP_P4_186830_547   | NW_004519278.1 | Scaffold5059 | 547                     | CC                              | GG              | 1947056093               |
| SNP_P4_186831_2051  | NW_004519279.1 | Scaffold5063 | 2051                    | TT                              | GG              | 1947056095               |
| SNP_P4_186832_64    | NW_004519286.1 | Scaffold5072 | 64                      | AA                              | TT              | 1947056097               |
| SNP_P4_186833_90    | NW_004519286.1 | Scaffold5072 | 90                      | CC                              | GG              | 1947056099               |
| SNP_P4_186834_133   | NW_004519286.1 | Scaffold5072 | 133                     | GG                              | CC              | 1947056101               |
| SNP_P4_186835_136   | NW_004519286.1 | Scaffold5072 | 136                     | GG                              | CC              | 1947056103               |
| SNP_P4_186836_222   | NW_004519286.1 | Scaffold5072 | 222                     | GG                              | AA              | 1947056105               |
| SNP_P4_186837_326   | NW_004519286.1 | Scaffold5072 | 326                     | TT                              | AA              | 1947056107               |
| SNP_P4_186839_519   | NW_004519286.1 | Scaffold5072 | 519                     | TT                              | AA              | 1947056109               |
| SNP_P4_186840_5437  | NW_004519286.1 | Scaffold5072 | 5437                    | TT                              | CC              | 1947056111               |
| SNP_P4_186841_5536  | NW_004519286.1 | Scaffold5072 | 5536                    | AA                              | GG              | 1947056113               |
| SNP_P4_186842_5687  | NW_004519286.1 | Scaffold5072 | 5687                    | AA                              | GG              | 1947056115               |
| SNP_P4_186843_5716  | NW_004519286.1 | Scaffold5072 | 5716                    | CC                              | TT              | 1947056117               |
| SNP_P4_186844_5746  | NW_004519286.1 | Scaffold5072 | 5746                    | CC                              | AA              | 1947056119               |
| SNP_P4_186845_5851  | NW_004519286.1 | Scaffold5072 | 5851                    | TT                              | CC              | 1947056121               |
| SNP_P4_186846_5896  | NW_004519286.1 | Scaffold5072 | 5896                    | CC                              | TT              | 1947056123               |
| SNP_P4_186847_6028  | NW_004519286.1 | Scaffold5072 | 6028                    | TT                              | CC              | 1947056125               |
| SNP_P4_186848_6090  | NW_004519286.1 | Scaffold5072 | 6090                    | CC                              | AA              | 1947056127               |
| SNP_P4_186849_6109  | NW_004519286.1 | Scaffold5072 | 6109                    | AA                              | CC              | 1947056129               |
| SNP_P4_186850_6121  | NW_004519286.1 | Scaffold5072 | 6121                    | TT                              | GG              | 1947056131               |
| SNP_P4_186851_6139  | NW_004519286.1 | Scaffold5072 | 6139                    | GG                              | AA              | 1947056133               |

| SNPs IDs           | Chromosome IDs | Chromosomes  | Physical positions (bp) | CDC Frontier (Reference genome) | (ILWC46 & LPNB) | NCBI SNPdb Accession IDs |
|--------------------|----------------|--------------|-------------------------|---------------------------------|-----------------|--------------------------|
| SNP_P4_186852_6235 | NW_004519286.1 | Scaffold5072 | 6235                    | GG                              | AA              | 1947056135               |
| SNP_P4_186853_6272 | NW_004519286.1 | Scaffold5072 | 6272                    | CC                              | TT              | 1947056137               |
| SNP_P4_186854_6320 | NW_004519286.1 | Scaffold5072 | 6320                    | AA                              | GG              | 1947056139               |
| SNP_P4_186855_6374 | NW_004519286.1 | Scaffold5072 | 6374                    | TT                              | AA              | 1947056141               |
| SNP_P4_186856_6407 | NW_004519286.1 | Scaffold5072 | 6407                    | CC                              | GG              | 1947056143               |
| SNP_P4_186857_6414 | NW_004519286.1 | Scaffold5072 | 6414                    | AA                              | TT              | 1947056146               |
| SNP_P4_186858_1351 | NW_004519290.1 | Scaffold5076 | 1351                    | GG                              | TT              | 1947056148               |
| SNP_P4_186859_1387 | NW_004519290.1 | Scaffold5076 | 1387                    | GG                              | TT              | 1947056150               |
| SNP_P4_186860_1396 | NW_004519290.1 | Scaffold5076 | 1396                    | AA                              | GG              | 1947056151               |
| SNP_P4_186861_63   | NW_004519293.1 | Scaffold5081 | 63                      | CC                              | TT              | 1947056153               |
| SNP_P4_186862_107  | NW_004519293.1 | Scaffold5081 | 107                     | GG                              | AA              | 1947056156               |
| SNP_P4_186863_453  | NW_004519293.1 | Scaffold5081 | 453                     | AA                              | TT              | 1947056158               |
| SNP_P4_186864_461  | NW_004519293.1 | Scaffold5081 | 461                     | CC                              | AA              | 1947056159               |
| SNP_P4_186865_469  | NW_004519293.1 | Scaffold5081 | 469                     | AA                              | GG              | 1947056161               |
| SNP_P4_186866_471  | NW_004519293.1 | Scaffold5081 | 471                     | CC                              | TT              | 1947056163               |
| SNP_P4_186867_376  | NW_004519294.1 | Scaffold5082 | 376                     | AA                              | GG              | 1947056165               |
| SNP_P4_186868_509  | NW_004519294.1 | Scaffold5082 | 509                     | TT                              | CC              | 1947056167               |
| SNP_P4_186869_722  | NW_004519294.1 | Scaffold5082 | 722                     | AA                              | GG              | 1947056169               |
| SNP_P4_186870_808  | NW_004519294.1 | Scaffold5082 | 808                     | AA                              | CC              | 1947056171               |
| SNP_P4_186871_955  | NW_004519294.1 | Scaffold5082 | 955                     | CC                              | TT              | 1947056173               |
| SNP_P4_186872_966  | NW_004519294.1 | Scaffold5082 | 966                     | TT                              | GG              | 1947056176               |
| SNP_P4_186873_64   | NW_004519295.1 | Scaffold5083 | 64                      | CC                              | TT              | 1947056178               |
| SNP_P4_186874_101  | NW_004519295.1 | Scaffold5083 | 101                     | AA                              | GG              | 1947056180               |
| SNP_P4_186875_613  | NW_004519295.1 | Scaffold5083 | 613                     | AA                              | TT              | 1947056182               |
| SNP_P4_186876_787  | NW_004519295.1 | Scaffold5083 | 787                     | CC                              | AA              | 1947056184               |
| SNP_P4_186877_4120 | NW_004519295.1 | Scaffold5083 | 4120                    | CC                              | AA              | 1947056186               |
| SNP_P4_186878_4156 | NW_004519295.1 | Scaffold5083 | 4156                    | AA                              | TT              | 1947056188               |
| SNP_P4_186879_7066 | NW_004519295.1 | Scaffold5083 | 7066                    | AA                              | CC              | 1947056190               |
| SNP_P4_186880_7284 | NW_004519295.1 | Scaffold5083 | 7284                    | TT                              | AA              | 1947056192               |
| SNP_P4_186881_1178 | NW_004519297.1 | Scaffold5086 | 1178                    | AA                              | CC              | 1947056194               |
| SNP_P4_186882_1219 | NW_004519297.1 | Scaffold5086 | 1219                    | AA                              | CC              | 1947056196               |
| SNP_P4_186883_3259 | NW_004519297.1 | Scaffold5086 | 3259                    | GG                              | CC              | 1947056198               |
| SNP_P4_186884_3124 | NW_004519298.1 | Scaffold5089 | 3124                    | CC                              | TT              | 1947056200               |
| SNP_P4_186885_3160 | NW_004519298.1 | Scaffold5089 | 3160                    | TT                              | CC              | 1947056202               |
| SNP_P4_186886_3162 | NW_004519298.1 | Scaffold5089 | 3162                    | AA                              | GG              | 1947056204               |
| SNP_P4_186887_3185 | NW_004519298.1 | Scaffold5089 | 3185                    | TT                              | CC              | 1947056206               |
| SNP_P4_186888_3193 | NW_004519298.1 | Scaffold5089 | 3193                    | CC                              | GG              | 1947056208               |
| SNP_P4_186889_3213 | NW_004519298.1 | Scaffold5089 | 3213                    | GG                              | AA              | 1947056211               |
| SNP_P4_186890_3271 | NW_004519298.1 | Scaffold5089 | 3271                    | CC                              | TT              | 1947056213               |
| SNP_P4_186891_3286 | NW_004519298.1 | Scaffold5089 | 3286                    | AA                              | GG              | 1947056215               |
| SNP_P4_186892_3383 | NW_004519298.1 | Scaffold5089 | 3383                    | GG                              | AA              | 1947056217               |
| SNP_P4_186893_3417 | NW_004519298.1 | Scaffold5089 | 3417                    | AA                              | GG              | 1947056219               |



| SNPs IDs           | Chromosome IDs | Chromosomes  | Physical positions (bp) | CDC Frontier (Reference genome) | (ILWC46 & LPNB) | NCBI SNPdb Accession IDs |
|--------------------|----------------|--------------|-------------------------|---------------------------------|-----------------|--------------------------|
| SNP_P4_186894_3421 | NW_004519298.1 | Scaffold5089 | 3421                    | TT                              | CC              | 1947056221               |
| SNP_P4_186895_3432 | NW_004519298.1 | Scaffold5089 | 3432                    | CC                              | TT              | 1947056223               |
| SNP_P4_186896_3444 | NW_004519298.1 | Scaffold5089 | 3444                    | TT                              | AA              | 1947056225               |
| SNP_P4_186897_3483 | NW_004519298.1 | Scaffold5089 | 3483                    | CC                              | AA              | 1947056227               |
| SNP_P4_186898_3489 | NW_004519298.1 | Scaffold5089 | 3489                    | AA                              | GG              | 1947056229               |
| SNP_P4_186899_3530 | NW_004519298.1 | Scaffold5089 | 3530                    | AA                              | GG              | 1947056231               |
| SNP_P4_186900_3535 | NW_004519298.1 | Scaffold5089 | 3535                    | GG                              | TT              | 1947056233               |
| SNP_P4_186901_3578 | NW_004519298.1 | Scaffold5089 | 3578                    | GG                              | AA              | 1947056236               |
| SNP_P4_186902_3735 | NW_004519298.1 | Scaffold5089 | 3735                    | TT                              | GG              | 1947056238               |
| SNP_P4_186903_5663 | NW_004519298.1 | Scaffold5089 | 5663                    | TT                              | GG              | 1947056240               |
| SNP_P4_186904_5667 | NW_004519298.1 | Scaffold5089 | 5667                    | TT                              | AA              | 1947056242               |
| SNP_P4_186905_5873 | NW_004519298.1 | Scaffold5089 | 5873                    | AA                              | GG              | 1947056244               |
| SNP_P4_186906_6062 | NW_004519298.1 | Scaffold5089 | 6062                    | TT                              | GG              | 1947056246               |
| SNP_P4_186907_7130 | NW_004519298.1 | Scaffold5089 | 7130                    | AA                              | CC              | 1947056248               |
| SNP_P4_186908_7160 | NW_004519298.1 | Scaffold5089 | 7160                    | AA                              | GG              | 1947056250               |
| SNP_P4_186909_7358 | NW_004519298.1 | Scaffold5089 | 7358                    | AA                              | GG              | 1947056252               |
| SNP_P4_186910_7481 | NW_004519298.1 | Scaffold5089 | 7481                    | CC                              | GG              | 1947056254               |
| SNP_P4_186911_7589 | NW_004519298.1 | Scaffold5089 | 7589                    | TT                              | CC              | 1947056256               |
| SNP_P4_186912_593  | NW_004519299.1 | Scaffold5090 | 593                     | CC                              | TT              | 1947056258               |
| SNP_P4_186913_1019 | NW_004519299.1 | Scaffold5090 | 1019                    | CC                              | TT              | 1947056260               |
| SNP_P4_186914_707  | NW_004519300.1 | Scaffold5094 | 707                     | AA                              | CC              | 1947056262               |
| SNP_P4_186915_1141 | NW_004519300.1 | Scaffold5094 | 1141                    | CC                              | TT              | 1947056264               |
| SNP_P4_186916_2180 | NW_004519300.1 | Scaffold5094 | 2180                    | TT                              | CC              | 1947056266               |
| SNP_P4_186918_70   | NW_004519305.1 | Scaffold5103 | 70                      | TT                              | AA              | 1947056268               |
| SNP_P4_186920_181  | NW_004519305.1 | Scaffold5103 | 181                     | GG                              | TT              | 1947056270               |
| SNP_P4_186921_287  | NW_004519305.1 | Scaffold5103 | 287                     | GG                              | AA              | 1947056272               |
| SNP_P4_186922_1429 | NW_004519306.1 | Scaffold5105 | 1429                    | TT                              | CC              | 1947056275               |
| SNP_P4_186923_1684 | NW_004519306.1 | Scaffold5105 | 1684                    | TT                              | GG              | 1947056277               |
| SNP_P4_186924_1716 | NW_004519306.1 | Scaffold5105 | 1716                    | GG                              | AA              | 1947056279               |
| SNP_P4_186925_2067 | NW_004519306.1 | Scaffold5105 | 2067                    | CC                              | TT              | 1947056281               |
| SNP_P4_186926_2068 | NW_004519306.1 | Scaffold5105 | 2068                    | GG                              | AA              | 1947056283               |
| SNP_P4_186927_512  | NW_004519308.1 | Scaffold5111 | 512                     | CC                              | GG              | 1947056285               |
| SNP_P4_186928_578  | NW_004519308.1 | Scaffold5111 | 578                     | CC                              | TT              | 1947056287               |
| SNP_P4_186929_582  | NW_004519308.1 | Scaffold5111 | 582                     | TT                              | CC              | 1947056288               |
| SNP_P4_186930_603  | NW_004519308.1 | Scaffold5111 | 603                     | CC                              | AA              | 1947056289               |
| SNP_P4_186931_622  | NW_004519308.1 | Scaffold5111 | 622                     | AA                              | TT              | 1947056290               |
| SNP_P4_186932_776  | NW_004519308.1 | Scaffold5111 | 776                     | AA                              | TT              | 1947056291               |
| SNP_P4_186933_808  | NW_004519308.1 | Scaffold5111 | 808                     | AA                              | TT              | 1947056292               |
| SNP_P4_186934_907  | NW_004519308.1 | Scaffold5111 | 907                     | GG                              | AA              | 1947056293               |
| SNP_P4_186935_919  | NW_004519308.1 | Scaffold5111 | 919                     | TT                              | CC              | 1947056294               |
| SNP_P4_186936_961  | NW_004519308.1 | Scaffold5111 | 961                     | CC                              | TT              | 1947056295               |
| SNP_P4_186937_4653 | NW_004519309.1 | Scaffold5113 | 4653                    | AA                              | GG              | 1947056296               |

| SNPs IDs            | Chromosome IDs | Chromosomes  | Physical positions (bp) | CDC Frontier (Reference genome) | (ILWC46 & LPNB) | NCBI SNPdb Accession IDs |
|---------------------|----------------|--------------|-------------------------|---------------------------------|-----------------|--------------------------|
| SNP_P4_186938_4775  | NW_004519309.1 | Scaffold5113 | 4775                    | TT                              | GG              | 1947056297               |
| SNP_P4_186939_4805  | NW_004519309.1 | Scaffold5113 | 4805                    | GG                              | TT              | 1947056298               |
| SNP_P4_186941_20506 | NW_004519311.1 | Scaffold5115 | 20506                   | AA                              | CC              | 1947056299               |
| SNP_P4_186942_20548 | NW_004519311.1 | Scaffold5115 | 20548                   | AA                              | CC              | 1947056300               |
| SNP_P4_186943_20628 | NW_004519311.1 | Scaffold5115 | 20628                   | GG                              | TT              | 1947056301               |
| SNP_P4_186944_20831 | NW_004519311.1 | Scaffold5115 | 20831                   | TT                              | GG              | 1947056302               |
| SNP_P4_186945_2149  | NW_004519314.1 | Scaffold5120 | 2149                    | CC                              | GG              | 1947056303               |
| SNP_P4_186946_2509  | NW_004519314.1 | Scaffold5120 | 2509                    | CC                              | TT              | 1947056304               |
| SNP_P4_186947_7618  | NW_004519314.1 | Scaffold5120 | 7618                    | AA                              | TT              | 1947056305               |
| SNP_P4_186948_7750  | NW_004519314.1 | Scaffold5120 | 7750                    | TT                              | GG              | 1947056306               |
| SNP_P4_186951_15237 | NW_004519314.1 | Scaffold5120 | 15237                   | CC                              | TT              | 1947056307               |
| SNP_P4_186953_15563 | NW_004519314.1 | Scaffold5120 | 15563                   | TT                              | CC              | 1947056309               |
| SNP_P4_186954_16079 | NW_004519314.1 | Scaffold5120 | 16079                   | AA                              | GG              | 1947056311               |
| SNP_P4_186955_16153 | NW_004519314.1 | Scaffold5120 | 16153                   | GG                              | AA              | 1947056313               |
| SNP_P4_186956_16326 | NW_004519314.1 | Scaffold5120 | 16326                   | TT                              | CC              | 1947056315               |
| SNP_P4_186957_16349 | NW_004519314.1 | Scaffold5120 | 16349                   | GG                              | TT              | 1947056316               |
| SNP_P4_186958_16403 | NW_004519314.1 | Scaffold5120 | 16403                   | CC                              | AA              | 1947056319               |
| SNP_P4_186959_16593 | NW_004519314.1 | Scaffold5120 | 16593                   | GG                              | AA              | 1947056321               |
| SNP_P4_186960_617   | NW_004519318.1 | Scaffold5125 | 617                     | GG                              | TT              | 1947056323               |
| SNP_P4_186961_932   | NW_004519318.1 | Scaffold5125 | 932                     | AA                              | TT              | 1947056325               |
| SNP_P4_186962_6776  | NW_004519319.1 | Scaffold5126 | 6776                    | CC                              | GG              | 1947056326               |
| SNP_P4_186963_1747  | NW_004519322.1 | Scaffold5129 | 1747                    | CC                              | TT              | 1947056329               |
| SNP_P4_186964_1839  | NW_004519322.1 | Scaffold5129 | 1839                    | AA                              | GG              | 1947056331               |
| SNP_P4_186965_118   | NW_004519324.1 | Scaffold5135 | 118                     | AA                              | TT              | 1947056333               |
| SNP_P4_186966_3260  | NW_004519324.1 | Scaffold5135 | 3260                    | AA                              | GG              | 1947056335               |
| SNP_P4_186967_152   | NW_004519328.1 | Scaffold5143 | 152                     | GG                              | TT              | 1947056337               |
| SNP_P4_186969_264   | NW_004519331.1 | Scaffold5146 | 264                     | TT                              | GG              | 1947056339               |
| SNP_P4_186970_2243  | NW_004519331.1 | Scaffold5146 | 2243                    | TT                              | CC              | 1947056341               |
| SNP_P4_186972_1922  | NW_004519337.1 | Scaffold5155 | 1922                    | GG                              | AA              | 1947056343               |
| SNP_P4_186973_1985  | NW_004519337.1 | Scaffold5155 | 1985                    | GG                              | AA              | 1947056345               |
| SNP_P4_186974_2061  | NW_004519337.1 | Scaffold5155 | 2061                    | GG                              | CC              | 1947056347               |
| SNP_P4_186975_2109  | NW_004519337.1 | Scaffold5155 | 2109                    | AA                              | TT              | 1947056349               |
| SNP_P4_186976_2121  | NW_004519337.1 | Scaffold5155 | 2121                    | AA                              | TT              | 1947056351               |
| SNP_P4_186977_2141  | NW_004519337.1 | Scaffold5155 | 2141                    | GG                              | AA              | 1947056353               |
| SNP_P4_186978_2155  | NW_004519337.1 | Scaffold5155 | 2155                    | GG                              | AA              | 1947056355               |
| SNP_P4_186979_2167  | NW_004519337.1 | Scaffold5155 | 2167                    | AA                              | GG              | 1947056357               |
| SNP_P4_186980_2179  | NW_004519337.1 | Scaffold5155 | 2179                    | AA                              | CC              | 1947056359               |
| SNP_P4_186981_2228  | NW_004519337.1 | Scaffold5155 | 2228                    | CC                              | AA              | 1947056361               |
| SNP_P4_186982_2233  | NW_004519337.1 | Scaffold5155 | 2233                    | AA                              | GG              | 1947056363               |
| SNP_P4_186983_2235  | NW_004519337.1 | Scaffold5155 | 2235                    | AA                              | GG              | 1947056365               |
| SNP_P4_186984_2251  | NW_004519337.1 | Scaffold5155 | 2251                    | TT                              | GG              | 1947056367               |
| SNP_P4_186985_4643  | NW_004519337.1 | Scaffold5155 | 4643                    | GG                              | AA              | 1947056369               |

| SNPs IDs            | Chromosome IDs | Chromosomes  | Physical positions (bp) | CDC Frontier (Reference genome) | (ILWC46 & LPNB) | NCBI SNPdb Accession IDs |
|---------------------|----------------|--------------|-------------------------|---------------------------------|-----------------|--------------------------|
| SNP_P4_186986_4651  | NW_004519337.1 | Scaffold5155 | 4651                    | AA                              | TT              | 1947056371               |
| SNP_P4_186987_4704  | NW_004519337.1 | Scaffold5155 | 4704                    | AA                              | TT              | 1947056373               |
| SNP_P4_186988_4711  | NW_004519337.1 | Scaffold5155 | 4711                    | TT                              | CC              | 1947056375               |
| SNP_P4_186989_4934  | NW_004519337.1 | Scaffold5155 | 4934                    | GG                              | TT              | 1947056377               |
| SNP_P4_186990_4942  | NW_004519337.1 | Scaffold5155 | 4942                    | CC                              | GG              | 1947056379               |
| SNP_P4_186991_4957  | NW_004519337.1 | Scaffold5155 | 4957                    | AA                              | TT              | 1947056381               |
| SNP_P4_186992_5085  | NW_004519337.1 | Scaffold5155 | 5085                    | CC                              | GG              | 1947056383               |
| SNP_P4_186993_5164  | NW_004519337.1 | Scaffold5155 | 5164                    | AA                              | CC              | 1947056385               |
| SNP_P4_186995_5678  | NW_004519337.1 | Scaffold5155 | 5678                    | AA                              | GG              | 1947056387               |
| SNP_P4_186997_5857  | NW_004519337.1 | Scaffold5155 | 5857                    | AA                              | GG              | 1947056389               |
| SNP_P4_186999_5946  | NW_004519337.1 | Scaffold5155 | 5946                    | TT                              | CC              | 1947056391               |
| SNP_P4_187000_5987  | NW_004519337.1 | Scaffold5155 | 5987                    | TT                              | CC              | 1947056393               |
| SNP_P4_187001_5988  | NW_004519337.1 | Scaffold5155 | 5988                    | TT                              | GG              | 1947056395               |
| SNP_P4_187002_6049  | NW_004519337.1 | Scaffold5155 | 6049                    | AA                              | GG              | 1947056397               |
| SNP_P4_187003_6091  | NW_004519337.1 | Scaffold5155 | 6091                    | GG                              | AA              | 1947056399               |
| SNP_P4_187004_204   | NW_004519338.1 | Scaffold5156 | 204                     | TT                              | AA              | 1947056401               |
| SNP_P4_187005_212   | NW_004519338.1 | Scaffold5156 | 212                     | AA                              | GG              | 1947056403               |
| SNP_P4_187006_453   | NW_004519338.1 | Scaffold5156 | 453                     | TT                              | CC              | 1947056405               |
| SNP_P4_187007_493   | NW_004519338.1 | Scaffold5156 | 493                     | AA                              | CC              | 1947056407               |
| SNP_P4_187008_801   | NW_004519338.1 | Scaffold5156 | 801                     | AA                              | CC              | 1947056409               |
| SNP_P4_187009_4734  | NW_004519339.1 | Scaffold5157 | 4734                    | TT                              | AA              | 1947056411               |
| SNP_P4_187012_5804  | NW_004519340.1 | Scaffold5158 | 5804                    | AA                              | GG              | 1947056413               |
| SNP_P4_187013_6229  | NW_004519340.1 | Scaffold5158 | 6229                    | AA                              | CC              | 1947056415               |
| SNP_P4_187014_6245  | NW_004519340.1 | Scaffold5158 | 6245                    | AA                              | GG              | 1947056417               |
| SNP_P4_187015_6297  | NW_004519340.1 | Scaffold5158 | 6297                    | CC                              | TT              | 1947056419               |
| SNP_P4_187016_6303  | NW_004519340.1 | Scaffold5158 | 6303                    | CC                              | TT              | 1947056421               |
| SNP_P4_187018_6553  | NW_004519340.1 | Scaffold5158 | 6553                    | TT                              | CC              | 1947056423               |
| SNP_P4_187020_6597  | NW_004519340.1 | Scaffold5158 | 6597                    | TT                              | CC              | 1947056425               |
| SNP_P4_187021_6620  | NW_004519340.1 | Scaffold5158 | 6620                    | GG                              | TT              | 1947056427               |
| SNP_P4_187022_6955  | NW_004519340.1 | Scaffold5158 | 6955                    | CC                              | AA              | 1947056429               |
| SNP_P4_187023_8320  | NW_004519340.1 | Scaffold5158 | 8320                    | GG                              | AA              | 1947056431               |
| SNP_P4_187024_9955  | NW_004519340.1 | Scaffold5158 | 9955                    | CC                              | AA              | 1947056433               |
| SNP_P4_187025_10500 | NW_004519340.1 | Scaffold5158 | 10500                   | AA                              | GG              | 1947056435               |
| SNP_P4_187026_13365 | NW_004519340.1 | Scaffold5158 | 13365                   | GG                              | AA              | 1947056437               |
| SNP_P4_187027_13376 | NW_004519340.1 | Scaffold5158 | 13376                   | AA                              | CC              | 1947056439               |
| SNP_P4_187028_13557 | NW_004519340.1 | Scaffold5158 | 13557                   | GG                              | TT              | 1947056441               |
| SNP_P4_187029_13766 | NW_004519340.1 | Scaffold5158 | 13766                   | CC                              | TT              | 1947056443               |
| SNP_P4_187031_14011 | NW_004519340.1 | Scaffold5158 | 14011                   | TT                              | GG              | 1947056445               |
| SNP_P4_187032_14060 | NW_004519340.1 | Scaffold5158 | 14060                   | CC                              | GG              | 1947056448               |
| SNP_P4_187033_14159 | NW_004519340.1 | Scaffold5158 | 14159                   | TT                              | CC              | 1947056450               |
| SNP_P4_187034_14192 | NW_004519340.1 | Scaffold5158 | 14192                   | TT                              | CC              | 1947056452               |
| SNP_P4_187035_14216 | NW_004519340.1 | Scaffold5158 | 14216                   | TT                              | CC              | 1947056454               |

| SNPs IDs            | Chromosome IDs | Chromosomes  | Physical positions (bp) | CDC Frontier (Reference genome) | (ILWC46 & LPNB) | NCBI SNPdb Accession IDs |
|---------------------|----------------|--------------|-------------------------|---------------------------------|-----------------|--------------------------|
| SNP_P4_187036_14304 | NW_004519340.1 | Scaffold5158 | 14304                   | AA                              | GG              | 1947056456               |
| SNP_P4_187037_14316 | NW_004519340.1 | Scaffold5158 | 14316                   | GG                              | TT              | 1947056458               |
| SNP_P4_187038_14325 | NW_004519340.1 | Scaffold5158 | 14325                   | AA                              | TT              | 1947056460               |
| SNP_P4_187039_14494 | NW_004519340.1 | Scaffold5158 | 14494                   | GG                              | TT              | 1947056462               |
| SNP_P4_187040_14717 | NW_004519340.1 | Scaffold5158 | 14717                   | CC                              | TT              | 1947056464               |
| SNP_P4_187041_16527 | NW_004519340.1 | Scaffold5158 | 16527                   | CC                              | TT              | 1947056466               |
| SNP_P4_187042_16673 | NW_004519340.1 | Scaffold5158 | 16673                   | CC                              | TT              | 1947056468               |
| SNP_P4_187043_16702 | NW_004519340.1 | Scaffold5158 | 16702                   | TT                              | CC              | 1947056470               |
| SNP_P4_187044_16746 | NW_004519340.1 | Scaffold5158 | 16746                   | CC                              | TT              | 1947056472               |
| SNP_P4_187045_16812 | NW_004519340.1 | Scaffold5158 | 16812                   | GG                              | AA              | 1947056474               |
| SNP_P4_187046_16843 | NW_004519340.1 | Scaffold5158 | 16843                   | AA                              | GG              | 1947056476               |
| SNP_P4_187047_16941 | NW_004519340.1 | Scaffold5158 | 16941                   | GG                              | AA              | 1947056478               |
| SNP_P4_187048_17025 | NW_004519340.1 | Scaffold5158 | 17025                   | AA                              | GG              | 1947056480               |
| SNP_P4_187050_17115 | NW_004519340.1 | Scaffold5158 | 17115                   | TT                              | CC              | 1947056482               |
| SNP_P4_187051_17138 | NW_004519340.1 | Scaffold5158 | 17138                   | CC                              | AA              | 1947056484               |
| SNP_P4_187052_17140 | NW_004519340.1 | Scaffold5158 | 17140                   | GG                              | AA              | 1947056486               |
| SNP_P4_187053_17289 | NW_004519340.1 | Scaffold5158 | 17289                   | AA                              | GG              | 1947056488               |
| SNP_P4_187054_17298 | NW_004519340.1 | Scaffold5158 | 17298                   | TT                              | GG              | 1947056490               |
| SNP_P4_187055_17347 | NW_004519340.1 | Scaffold5158 | 17347                   | TT                              | CC              | 1947056492               |
| SNP_P4_187056_17405 | NW_004519340.1 | Scaffold5158 | 17405                   | GG                              | AA              | 1947056494               |
| SNP_P4_187057_17410 | NW_004519340.1 | Scaffold5158 | 17410                   | TT                              | CC              | 1947056496               |
| SNP_P4_187058_17436 | NW_004519340.1 | Scaffold5158 | 17436                   | GG                              | AA              | 1947056498               |
| SNP_P4_187059_17490 | NW_004519340.1 | Scaffold5158 | 17490                   | AA                              | GG              | 1947056500               |
| SNP_P4_187060_17631 | NW_004519340.1 | Scaffold5158 | 17631                   | GG                              | AA              | 1947056502               |
| SNP_P4_187061_17683 | NW_004519340.1 | Scaffold5158 | 17683                   | TT                              | CC              | 1947056504               |
| SNP_P4_187062_17684 | NW_004519340.1 | Scaffold5158 | 17684                   | GG                              | AA              | 1947056506               |
| SNP_P4_187063_17794 | NW_004519340.1 | Scaffold5158 | 17794                   | CC                              | TT              | 1947056508               |
| SNP_P4_187064_17850 | NW_004519340.1 | Scaffold5158 | 17850                   | TT                              | CC              | 1947056510               |
| SNP_P4_187066_18206 | NW_004519340.1 | Scaffold5158 | 18206                   | TT                              | GG              | 1947056512               |
| SNP_P4_187067_18216 | NW_004519340.1 | Scaffold5158 | 18216                   | TT                              | CC              | 1947056514               |
| SNP_P4_187068_18308 | NW_004519340.1 | Scaffold5158 | 18308                   | AA                              | GG              | 1947056516               |
| SNP_P4_187069_18485 | NW_004519340.1 | Scaffold5158 | 18485                   | TT                              | AA              | 1947056519               |
| SNP_P4_187070_18524 | NW_004519340.1 | Scaffold5158 | 18524                   | AA                              | CC              | 1947056521               |
| SNP_P4_187071_18534 | NW_004519340.1 | Scaffold5158 | 18534                   | GG                              | AA              | 1947056523               |
| SNP_P4_187072_18742 | NW_004519340.1 | Scaffold5158 | 18742                   | GG                              | AA              | 1947056525               |
| SNP_P4_187073_18782 | NW_004519340.1 | Scaffold5158 | 18782                   | GG                              | AA              | 1947056527               |
| SNP_P4_187074_18937 | NW_004519340.1 | Scaffold5158 | 18937                   | TT                              | CC              | 1947056529               |
| SNP_P4_187075_19012 | NW_004519340.1 | Scaffold5158 | 19012                   | AA                              | GG              | 1947056531               |
| SNP_P4_187076_19046 | NW_004519340.1 | Scaffold5158 | 19046                   | AA                              | TT              | 1947056533               |
| SNP_P4_187077_19047 | NW_004519340.1 | Scaffold5158 | 19047                   | AA                              | GG              | 1947056535               |
| SNP_P4_187078_21356 | NW_004519340.1 | Scaffold5158 | 21356                   | TT                              | AA              | 1947056537               |
| SNP_P4_187079_21446 | NW_004519340.1 | Scaffold5158 | 21446                   | GG                              | AA              | 1947056539               |

| SNPs IDs            | Chromosome IDs | Chromosomes  | Physical positions (bp) | CDC Frontier (Reference genome) | (ILWC46 & LPNB) | NCBI SNPdb Accession IDs |
|---------------------|----------------|--------------|-------------------------|---------------------------------|-----------------|--------------------------|
| SNP_P4_187080_21492 | NW_004519340.1 | Scaffold5158 | 21492                   | CC                              | TT              | 1947056541               |
| SNP_P4_187081_21584 | NW_004519340.1 | Scaffold5158 | 21584                   | TT                              | CC              | 1947056543               |
| SNP_P4_187082_1208  | NW_004519343.1 | Scaffold5161 | 1208                    | GG                              | AA              | 1947056545               |
| SNP_P4_187083_1278  | NW_004519343.1 | Scaffold5161 | 1278                    | TT                              | CC              | 1947056547               |
| SNP_P4_187084_1454  | NW_004519343.1 | Scaffold5161 | 1454                    | TT                              | CC              | 1947056549               |
| SNP_P4_187085_457   | NW_004519345.1 | Scaffold5163 | 457                     | TT                              | AA              | 1947056551               |
| SNP_P4_187086_932   | NW_004519347.1 | Scaffold5165 | 932                     | AA                              | GG              | 1947056553               |
| SNP_P4_187087_1098  | NW_004519347.1 | Scaffold5165 | 1098                    | TT                              | CC              | 1947056555               |
| SNP_P4_187088_1255  | NW_004519347.1 | Scaffold5165 | 1255                    | CC                              | AA              | 1947056557               |
| SNP_P4_187089_1311  | NW_004519347.1 | Scaffold5165 | 1311                    | TT                              | AA              | 1947056559               |
| SNP_P4_187090_1322  | NW_004519347.1 | Scaffold5165 | 1322                    | GG                              | TT              | 1947056561               |
| SNP_P4_187091_1328  | NW_004519347.1 | Scaffold5165 | 1328                    | AA                              | GG              | 1947056563               |
| SNP_P4_187092_1331  | NW_004519347.1 | Scaffold5165 | 1331                    | CC                              | AA              | 1947056565               |
| SNP_P4_187093_1363  | NW_004519347.1 | Scaffold5165 | 1363                    | CC                              | TT              | 1947056567               |
| SNP_P4_187095_1639  | NW_004519347.1 | Scaffold5165 | 1639                    | AA                              | TT              | 1947056569               |
| SNP_P4_187096_1763  | NW_004519347.1 | Scaffold5165 | 1763                    | TT                              | CC              | 1947056571               |
| SNP_P4_187097_463   | NW_004519356.1 | Scaffold5180 | 463                     | CC                              | TT              | 1947056573               |
| SNP_P4_187098_5141  | NW_004519358.1 | Scaffold5185 | 5141                    | CC                              | GG              | 1947056575               |
| SNP_P4_187099_5145  | NW_004519358.1 | Scaffold5185 | 5145                    | CC                              | TT              | 1947056577               |
| SNP_P4_187100_5418  | NW_004519358.1 | Scaffold5185 | 5418                    | AA                              | CC              | 1947056579               |
| SNP_P4_187101_5437  | NW_004519358.1 | Scaffold5185 | 5437                    | AA                              | GG              | 1947056581               |
| SNP_P4_187102_5793  | NW_004519358.1 | Scaffold5185 | 5793                    | TT                              | GG              | 1947056583               |
| SNP_P4_187103_6028  | NW_004519358.1 | Scaffold5185 | 6028                    | AA                              | GG              | 1947056585               |
| SNP_P4_187104_6060  | NW_004519358.1 | Scaffold5185 | 6060                    | GG                              | CC              | 1947056587               |
| SNP_P4_187105_6236  | NW_004519359.1 | Scaffold5186 | 6236                    | CC                              | TT              | 1947056589               |
| SNP_P4_187106_7460  | NW_004519359.1 | Scaffold5186 | 7460                    | CC                              | TT              | 1947056591               |
| SNP_P4_187107_7606  | NW_004519359.1 | Scaffold5186 | 7606                    | CC                              | AA              | 1947056593               |
| SNP_P4_187108_8253  | NW_004519359.1 | Scaffold5186 | 8253                    | CC                              | GG              | 1947056595               |
| SNP_P4_187109_8264  | NW_004519359.1 | Scaffold5186 | 8264                    | AA                              | GG              | 1947056597               |
| SNP_P4_187110_8461  | NW_004519359.1 | Scaffold5186 | 8461                    | CC                              | AA              | 1947056599               |
| SNP_P4_187111_8469  | NW_004519359.1 | Scaffold5186 | 8469                    | TT                              | CC              | 1947056601               |
| SNP_P4_187113_9064  | NW_004519359.1 | Scaffold5186 | 9064                    | GG                              | TT              | 1947056603               |
| SNP_P4_187114_9113  | NW_004519359.1 | Scaffold5186 | 9113                    | AA                              | CC              | 1947056605               |
| SNP_P4_187115_9146  | NW_004519359.1 | Scaffold5186 | 9146                    | AA                              | GG              | 1947056607               |
| SNP_P4_187116_9706  | NW_004519359.1 | Scaffold5186 | 9706                    | AA                              | GG              | 1947056609               |
| SNP_P4_187117_10045 | NW_004519359.1 | Scaffold5186 | 10045                   | AA                              | CC              | 1947056611               |
| SNP_P4_187118_10049 | NW_004519359.1 | Scaffold5186 | 10049                   | TT                              | CC              | 1947056613               |
| SNP_P4_187119_10052 | NW_004519359.1 | Scaffold5186 | 10052                   | AA                              | TT              | 1947056615               |
| SNP_P4_187120_10053 | NW_004519359.1 | Scaffold5186 | 10053                   | AA                              | GG              | 1947056617               |
| SNP_P4_187121_10263 | NW_004519359.1 | Scaffold5186 | 10263                   | TT                              | CC              | 1947056619               |
| SNP_P4_187122_10577 | NW_004519359.1 | Scaffold5186 | 10577                   | TT                              | GG              | 1947056621               |
| SNP_P4_187123_10782 | NW_004519359.1 | Scaffold5186 | 10782                   | TT                              | CC              | 1947056623               |

| SNPs IDs            | Chromosome IDs | Chromosomes  | Physical positions (bp) | CDC Frontier (Reference genome) | (ILWC46 & LPNB) | NCBI SNPdb Accession IDs |
|---------------------|----------------|--------------|-------------------------|---------------------------------|-----------------|--------------------------|
| SNP_P4_187124_11267 | NW_004519359.1 | Scaffold5186 | 11267                   | TT                              | AA              | 1947056625               |
| SNP_P4_187125_11545 | NW_004519359.1 | Scaffold5186 | 11545                   | GG                              | AA              | 1947056627               |
| SNP_P4_187126_11695 | NW_004519359.1 | Scaffold5186 | 11695                   | CC                              | TT              | 1947056629               |
| SNP_P4_187127_11746 | NW_004519359.1 | Scaffold5186 | 11746                   | TT                              | CC              | 1947056631               |
| SNP_P4_187128_11931 | NW_004519359.1 | Scaffold5186 | 11931                   | CC                              | TT              | 1947056633               |
| SNP_P4_187129_12966 | NW_004519359.1 | Scaffold5186 | 12966                   | TT                              | AA              | 1947056635               |
| SNP_P4_187130_13008 | NW_004519359.1 | Scaffold5186 | 13008                   | TT                              | GG              | 1947056637               |
| SNP_P4_187131_13266 | NW_004519359.1 | Scaffold5186 | 13266                   | AA                              | TT              | 1947056639               |
| SNP_P4_187132_13533 | NW_004519359.1 | Scaffold5186 | 13533                   | TT                              | CC              | 1947056641               |
| SNP_P4_187134_13741 | NW_004519359.1 | Scaffold5186 | 13741                   | TT                              | CC              | 1947056643               |
| SNP_P4_187135_13755 | NW_004519359.1 | Scaffold5186 | 13755                   | TT                              | CC              | 1947056645               |
| SNP_P4_187136_13933 | NW_004519359.1 | Scaffold5186 | 13933                   | GG                              | AA              | 1947056647               |
| SNP_P4_187137_14072 | NW_004519359.1 | Scaffold5186 | 14072                   | TT                              | CC              | 1947056649               |
| SNP_P4_187138_14114 | NW_004519359.1 | Scaffold5186 | 14114                   | AA                              | TT              | 1947056651               |
| SNP_P4_187139_14449 | NW_004519359.1 | Scaffold5186 | 14449                   | AA                              | GG              | 1947056653               |
| SNP_P4_187140_14494 | NW_004519359.1 | Scaffold5186 | 14494                   | TT                              | CC              | 1947056655               |
| SNP_P4_187141_14796 | NW_004519359.1 | Scaffold5186 | 14796                   | TT                              | CC              | 1947056657               |
| SNP_P4_187142_14932 | NW_004519359.1 | Scaffold5186 | 14932                   | TT                              | CC              | 1947056659               |
| SNP_P4_187143_15096 | NW_004519359.1 | Scaffold5186 | 15096                   | GG                              | AA              | 1947056661               |
| SNP_P4_187144_15165 | NW_004519359.1 | Scaffold5186 | 15165                   | GG                              | TT              | 1947056663               |
| SNP_P4_187145_15295 | NW_004519359.1 | Scaffold5186 | 15295                   | GG                              | CC              | 1947056665               |
| SNP_P4_187146_15449 | NW_004519359.1 | Scaffold5186 | 15449                   | CC                              | TT              | 1947056667               |
| SNP_P4_187147_15492 | NW_004519359.1 | Scaffold5186 | 15492                   | TT                              | GG              | 1947056669               |
| SNP_P4_187148_15573 | NW_004519359.1 | Scaffold5186 | 15573                   | CC                              | TT              | 1947056671               |
| SNP_P4_187149_15678 | NW_004519359.1 | Scaffold5186 | 15678                   | AA                              | CC              | 1947056673               |
| SNP_P4_187150_15817 | NW_004519359.1 | Scaffold5186 | 15817                   | TT                              | CC              | 1947056675               |
| SNP_P4_187151_15842 | NW_004519359.1 | Scaffold5186 | 15842                   | CC                              | TT              | 1947056677               |
| SNP_P4_187152_15952 | NW_004519359.1 | Scaffold5186 | 15952                   | CC                              | GG              | 1947056679               |
| SNP_P4_187153_16040 | NW_004519359.1 | Scaffold5186 | 16040                   | CC                              | GG              | 1947056681               |
| SNP_P4_187154_16108 | NW_004519359.1 | Scaffold5186 | 16108                   | CC                              | TT              | 1947056683               |
| SNP_P4_187155_16226 | NW_004519359.1 | Scaffold5186 | 16226                   | CC                              | GG              | 1947056685               |
| SNP_P4_187156_16236 | NW_004519359.1 | Scaffold5186 | 16236                   | CC                              | AA              | 1947056687               |
| SNP_P4_187157_16634 | NW_004519359.1 | Scaffold5186 | 16634                   | AA                              | TT              | 1947056689               |
| SNP_P4_187158_16884 | NW_004519359.1 | Scaffold5186 | 16884                   | TT                              | CC              | 1947056691               |
| SNP_P4_187159_16956 | NW_004519359.1 | Scaffold5186 | 16956                   | AA                              | GG              | 1947056693               |
| SNP_P4_187160_16969 | NW_004519359.1 | Scaffold5186 | 16969                   | TT                              | CC              | 1947056695               |
| SNP_P4_187161_17036 | NW_004519359.1 | Scaffold5186 | 17036                   | GG                              | CC              | 1947056697               |
| SNP_P4_187162_17122 | NW_004519359.1 | Scaffold5186 | 17122                   | TT                              | CC              | 1947056699               |
| SNP_P4_187163_19288 | NW_004519359.1 | Scaffold5186 | 19288                   | TT                              | CC              | 1947056701               |
| SNP_P4_187164_19983 | NW_004519359.1 | Scaffold5186 | 19983                   | GG                              | AA              | 1947056703               |
| SNP_P4_187165_20213 | NW_004519359.1 | Scaffold5186 | 20213                   | TT                              | AA              | 1947056705               |
| SNP_P4_187166_20312 | NW_004519359.1 | Scaffold5186 | 20312                   | GG                              | AA              | 1947056707               |

| SNPs IDs            | Chromosome IDs | Chromosomes  | Physical positions (bp) | CDC Frontier (Reference genome) | (ILWC46 & LPNB) | NCBI SNPdb Accession IDs |
|---------------------|----------------|--------------|-------------------------|---------------------------------|-----------------|--------------------------|
| SNP_P4_187167_20338 | NW_004519359.1 | Scaffold5186 | 20338                   | AA                              | GG              | 1947056709               |
| SNP_P4_187168_20601 | NW_004519359.1 | Scaffold5186 | 20601                   | AA                              | GG              | 1947056711               |
| SNP_P4_187169_20646 | NW_004519359.1 | Scaffold5186 | 20646                   | GG                              | CC              | 1947056713               |
| SNP_P4_187170_20752 | NW_004519359.1 | Scaffold5186 | 20752                   | CC                              | TT              | 1947056715               |
| SNP_P4_187171_20804 | NW_004519359.1 | Scaffold5186 | 20804                   | AA                              | TT              | 1947056717               |
| SNP_P4_187172_20807 | NW_004519359.1 | Scaffold5186 | 20807                   | AA                              | TT              | 1947056719               |
| SNP_P4_187173_21198 | NW_004519359.1 | Scaffold5186 | 21198                   | TT                              | GG              | 1947056721               |
| SNP_P4_187174_21300 | NW_004519359.1 | Scaffold5186 | 21300                   | AA                              | CC              | 1947056723               |
| SNP_P4_187175_23550 | NW_004519359.1 | Scaffold5186 | 23550                   | CC                              | AA              | 1947056725               |
| SNP_P4_187176_23868 | NW_004519359.1 | Scaffold5186 | 23868                   | TT                              | CC              | 1947056727               |
| SNP_P4_187177_26816 | NW_004519359.1 | Scaffold5186 | 26816                   | AA                              | GG              | 1947056730               |
| SNP_P4_187178_26833 | NW_004519359.1 | Scaffold5186 | 26833                   | CC                              | AA              | 1947056732               |
| SNP_P4_187179_26868 | NW_004519359.1 | Scaffold5186 | 26868                   | AA                              | GG              | 1947056734               |
| SNP_P4_187180_26870 | NW_004519359.1 | Scaffold5186 | 26870                   | GG                              | TT              | 1947056736               |
| SNP_P4_187181_27014 | NW_004519359.1 | Scaffold5186 | 27014                   | AA                              | GG              | 1947056738               |
| SNP_P4_187182_27055 | NW_004519359.1 | Scaffold5186 | 27055                   | CC                              | TT              | 1947056740               |
| SNP_P4_187184_5234  | NW_004519364.1 | Scaffold5195 | 5234                    | AA                              | GG              | 1947056742               |
| SNP_P4_187185_5274  | NW_004519364.1 | Scaffold5195 | 5274                    | TT                              | CC              | 1947056744               |
| SNP_P4_187186_5332  | NW_004519364.1 | Scaffold5195 | 5332                    | TT                              | CC              | 1947056746               |
| SNP_P4_187187_5333  | NW_004519364.1 | Scaffold5195 | 5333                    | TT                              | AA              | 1947056748               |
| SNP_P4_187188_6370  | NW_004519364.1 | Scaffold5195 | 6370                    | CC                              | AA              | 1947056750               |
| SNP_P4_187189_6374  | NW_004519364.1 | Scaffold5195 | 6374                    | CC                              | GG              | 1947056752               |
| SNP_P4_187191_3981  | NW_004519365.1 | Scaffold5198 | 3981                    | CC                              | AA              | 1947056754               |
| SNP_P4_187192_3991  | NW_004519365.1 | Scaffold5198 | 3991                    | AA                              | CC              | 1947056756               |
| SNP_P4_187193_4024  | NW_004519365.1 | Scaffold5198 | 4024                    | CC                              | AA              | 1947056758               |
| SNP_P4_187194_4038  | NW_004519365.1 | Scaffold5198 | 4038                    | CC                              | TT              | 1947056760               |
| SNP_P4_187195_4039  | NW_004519365.1 | Scaffold5198 | 4039                    | GG                              | AA              | 1947056762               |
| SNP_P4_187196_4043  | NW_004519365.1 | Scaffold5198 | 4043                    | CC                              | GG              | 1947056764               |
| SNP_P4_187197_4044  | NW_004519365.1 | Scaffold5198 | 4044                    | AA                              | TT              | 1947056766               |
| SNP_P4_187198_4049  | NW_004519365.1 | Scaffold5198 | 4049                    | CC                              | TT              | 1947056768               |
| SNP_P4_187199_4068  | NW_004519365.1 | Scaffold5198 | 4068                    | GG                              | AA              | 1947056770               |
| SNP_P4_187200_4251  | NW_004519365.1 | Scaffold5198 | 4251                    | CC                              | TT              | 1947056772               |
| SNP_P4_187202_385   | NW_004519366.1 | Scaffold5199 | 385                     | TT                              | CC              | 1947056774               |
| SNP_P4_187203_475   | NW_004519366.1 | Scaffold5199 | 475                     | AA                              | CC              | 1947056776               |
| SNP_P4_187204_829   | NW_004519366.1 | Scaffold5199 | 829                     | AA                              | TT              | 1947056778               |
| SNP_P4_187205_865   | NW_004519366.1 | Scaffold5199 | 865                     | CC                              | GG              | 1947056780               |
| SNP_P4_187206_1065  | NW_004519366.1 | Scaffold5199 | 1065                    | CC                              | GG              | 1947056782               |
| SNP_P4_187207_1094  | NW_004519366.1 | Scaffold5199 | 1094                    | AA                              | GG              | 1947056784               |
| SNP_P4_187208_312   | NW_004519367.1 | Scaffold5200 | 312                     | AA                              | GG              | 1947056786               |
| SNP_P4_187209_6356  | NW_004519367.1 | Scaffold5200 | 6356                    | GG                              | TT              | 1947056788               |
| SNP_P4_187210_2081  | NW_004519368.1 | Scaffold5201 | 2081                    | CC                              | GG              | 1947056790               |
| SNP_P4_187211_106   | NW_004519369.1 | Scaffold5202 | 106                     | AA                              | GG              | 1947056792               |

| SNPs IDs           | Chromosome IDs | Chromosomes  | Physical positions (bp) | CDC Frontier (Reference genome) | (ILWC46 & LPNB) | NCBI SNPdb Accession IDs |
|--------------------|----------------|--------------|-------------------------|---------------------------------|-----------------|--------------------------|
| SNP_P4_187212_189  | NW_004519369.1 | Scaffold5202 | 189                     | CC                              | AA              | 1947056794               |
| SNP_P4_187213_209  | NW_004519369.1 | Scaffold5202 | 209                     | TT                              | CC              | 1947056796               |
| SNP_P4_187214_210  | NW_004519369.1 | Scaffold5202 | 210                     | AA                              | TT              | 1947056798               |
| SNP_P4_187215_375  | NW_004519369.1 | Scaffold5202 | 375                     | GG                              | TT              | 1947056800               |
| SNP_P4_187216_491  | NW_004519370.1 | Scaffold5204 | 491                     | AA                              | GG              | 1947056802               |
| SNP_P4_187217_573  | NW_004519370.1 | Scaffold5204 | 573                     | CC                              | TT              | 1947056804               |
| SNP_P4_187218_616  | NW_004519370.1 | Scaffold5204 | 616                     | GG                              | CC              | 1947056806               |
| SNP_P4_187219_944  | NW_004519370.1 | Scaffold5204 | 944                     | CC                              | TT              | 1947056808               |
| SNP_P4_187220_987  | NW_004519370.1 | Scaffold5204 | 987                     | TT                              | AA              | 1947056810               |
| SNP_P4_187221_1000 | NW_004519370.1 | Scaffold5204 | 1000                    | TT                              | AA              | 1947056812               |
| SNP_P4_187222_1039 | NW_004519370.1 | Scaffold5204 | 1039                    | CC                              | AA              | 1947056814               |
| SNP_P4_187223_1048 | NW_004519370.1 | Scaffold5204 | 1048                    | AA                              | CC              | 1947056816               |
| SNP_P4_187224_1115 | NW_004519370.1 | Scaffold5204 | 1115                    | AA                              | TT              | 1947056818               |
| SNP_P4_187225_1189 | NW_004519370.1 | Scaffold5204 | 1189                    | CC                              | AA              | 1947056820               |
| SNP_P4_187226_1270 | NW_004519370.1 | Scaffold5204 | 1270                    | AA                              | GG              | 1947056822               |
| SNP_P4_187227_1317 | NW_004519370.1 | Scaffold5204 | 1317                    | AA                              | GG              | 1947056824               |
| SNP_P4_187228_161  | NW_004519372.1 | Scaffold5207 | 161                     | CC                              | TT              | 1947056826               |
| SNP_P4_187229_284  | NW_004519372.1 | Scaffold5207 | 284                     | AA                              | CC              | 1947056828               |
| SNP_P4_187230_578  | NW_004519372.1 | Scaffold5207 | 578                     | CC                              | GG              | 1947056830               |
| SNP_P4_187231_611  | NW_004519372.1 | Scaffold5207 | 611                     | CC                              | TT              | 1947056832               |
| SNP_P4_187232_621  | NW_004519372.1 | Scaffold5207 | 621                     | TT                              | GG              | 1947056834               |
| SNP_P4_187233_751  | NW_004519372.1 | Scaffold5207 | 751                     | TT                              | CC              | 1947056836               |
| SNP_P4_187234_948  | NW_004519376.1 | Scaffold5211 | 948                     | AA                              | TT              | 1947056838               |
| SNP_P4_187235_1179 | NW_004519376.1 | Scaffold5211 | 1179                    | GG                              | TT              | 1947056840               |
| SNP_P4_187236_1281 | NW_004519376.1 | Scaffold5211 | 1281                    | CC                              | TT              | 1947056842               |
| SNP_P4_187237_1357 | NW_004519376.1 | Scaffold5211 | 1357                    | CC                              | AA              | 1947056844               |
| SNP_P4_187238_1659 | NW_004519376.1 | Scaffold5211 | 1659                    | CC                              | TT              | 1947056846               |
| SNP_P4_187239_1804 | NW_004519376.1 | Scaffold5211 | 1804                    | TT                              | CC              | 1947056848               |
| SNP_P4_187240_1869 | NW_004519376.1 | Scaffold5211 | 1869                    | CC                              | TT              | 1947056850               |
| SNP_P4_187241_2216 | NW_004519376.1 | Scaffold5211 | 2216                    | AA                              | GG              | 1947056852               |
| SNP_P4_187242_2317 | NW_004519376.1 | Scaffold5211 | 2317                    | TT                              | CC              | 1947056854               |
| SNP_P4_187243_2386 | NW_004519376.1 | Scaffold5211 | 2386                    | AA                              | GG              | 1947056856               |
| SNP_P4_187244_2545 | NW_004519376.1 | Scaffold5211 | 2545                    | GG                              | AA              | 1947056858               |
| SNP_P4_187246_2738 | NW_004519376.1 | Scaffold5211 | 2738                    | GG                              | TT              | 1947056860               |
| SNP_P4_187247_2782 | NW_004519376.1 | Scaffold5211 | 2782                    | CC                              | AA              | 1947056862               |
| SNP_P4_187248_2893 | NW_004519376.1 | Scaffold5211 | 2893                    | GG                              | AA              | 1947056864               |
| SNP_P4_187249_2928 | NW_004519376.1 | Scaffold5211 | 2928                    | CC                              | GG              | 1947056866               |
| SNP_P4_187250_3088 | NW_004519376.1 | Scaffold5211 | 3088                    | AA                              | GG              | 1947056868               |
| SNP_P4_187251_3382 | NW_004519376.1 | Scaffold5211 | 3382                    | TT                              | CC              | 1947056870               |
| SNP_P4_187252_3522 | NW_004519376.1 | Scaffold5211 | 3522                    | GG                              | AA              | 1947056872               |
| SNP_P4_187253_3657 | NW_004519376.1 | Scaffold5211 | 3657                    | CC                              | TT              | 1947056874               |
| SNP_P4_187255_3789 | NW_004519376.1 | Scaffold5211 | 3789                    | AA                              | CC              | 1947056876               |



| SNPs IDs           | Chromosome IDs | Chromosomes  | Physical positions (bp) | CDC Frontier (Reference genome) | (ILWC46 & LPNB) | NCBI SNPdb Accession IDs |
|--------------------|----------------|--------------|-------------------------|---------------------------------|-----------------|--------------------------|
| SNP_P4_187256_3816 | NW_004519376.1 | Scaffold5211 | 3816                    | CC                              | AA              | 1947056878               |
| SNP_P4_187257_3850 | NW_004519376.1 | Scaffold5211 | 3850                    | CC                              | TT              | 1947056880               |
| SNP_P4_187258_3869 | NW_004519376.1 | Scaffold5211 | 3869                    | AA                              | CC              | 1947056882               |
| SNP_P4_187259_4013 | NW_004519376.1 | Scaffold5211 | 4013                    | GG                              | AA              | 1947056884               |
| SNP_P4_187260_4094 | NW_004519376.1 | Scaffold5211 | 4094                    | GG                              | AA              | 1947056886               |
| SNP_P4_187261_4104 | NW_004519376.1 | Scaffold5211 | 4104                    | TT                              | CC              | 1947056889               |
| SNP_P4_187262_4232 | NW_004519376.1 | Scaffold5211 | 4232                    | CC                              | TT              | 1947056891               |
| SNP_P4_187263_4565 | NW_004519376.1 | Scaffold5211 | 4565                    | AA                              | GG              | 1947056893               |
| SNP_P4_187264_4900 | NW_004519376.1 | Scaffold5211 | 4900                    | GG                              | AA              | 1947056895               |
| SNP_P4_187265_4971 | NW_004519376.1 | Scaffold5211 | 4971                    | AA                              | GG              | 1947056897               |
| SNP_P4_187266_5329 | NW_004519376.1 | Scaffold5211 | 5329                    | AA                              | GG              | 1947056899               |
| SNP_P4_187267_5474 | NW_004519376.1 | Scaffold5211 | 5474                    | TT                              | CC              | 1947056901               |
| SNP_P4_187269_5720 | NW_004519376.1 | Scaffold5211 | 5720                    | TT                              | GG              | 1947056903               |
| SNP_P4_187271_477  | NW_004519381.1 | Scaffold5222 | 477                     | GG                              | AA              | 1947056905               |
| SNP_P4_187272_503  | NW_004519382.1 | Scaffold5223 | 503                     | CC                              | TT              | 1947056907               |
| SNP_P4_187273_2876 | NW_004519384.1 | Scaffold5225 | 2876                    | TT                              | CC              | 1947056909               |
| SNP_P4_187274_3665 | NW_004519385.1 | Scaffold5226 | 3665                    | GG                              | AA              | 1947056911               |
| SNP_P4_187275_4441 | NW_004519385.1 | Scaffold5226 | 4441                    | TT                              | AA              | 1947056913               |
| SNP_P4_187276_119  | NW_004519390.1 | Scaffold5234 | 119                     | TT                              | CC              | 1947056915               |
| SNP_P4_187277_444  | NW_004519390.1 | Scaffold5234 | 444                     | GG                              | TT              | 1947056917               |
| SNP_P4_187279_461  | NW_004519390.1 | Scaffold5234 | 461                     | GG                              | AA              | 1947056919               |
| SNP_P4_187281_755  | NW_004519390.1 | Scaffold5234 | 755                     | GG                              | TT              | 1947056921               |
| SNP_P4_187282_800  | NW_004519390.1 | Scaffold5234 | 800                     | GG                              | AA              | 1947056923               |
| SNP_P4_187283_814  | NW_004519390.1 | Scaffold5234 | 814                     | AA                              | GG              | 1947056925               |
| SNP_P4_187284_821  | NW_004519390.1 | Scaffold5234 | 821                     | AA                              | CC              | 1947056927               |
| SNP_P4_187285_939  | NW_004519390.1 | Scaffold5234 | 939                     | TT                              | GG              | 1947056929               |
| SNP_P4_187288_6365 | NW_004519391.1 | Scaffold5235 | 6365                    | TT                              | CC              | 1947056931               |
| SNP_P4_187289_740  | NW_004519393.1 | Scaffold5238 | 740                     | GG                              | TT              | 1947056933               |
| SNP_P4_187290_1448 | NW_004519393.1 | Scaffold5238 | 1448                    | CC                              | TT              | 1947056935               |
| SNP_P4_187291_1699 | NW_004519393.1 | Scaffold5238 | 1699                    | GG                              | TT              | 1947056937               |
| SNP_P4_187292_1700 | NW_004519393.1 | Scaffold5238 | 1700                    | AA                              | GG              | 1947056939               |
| SNP_P4_187293_1759 | NW_004519393.1 | Scaffold5238 | 1759                    | CC                              | TT              | 1947056941               |
| SNP_P4_187294_2103 | NW_004519393.1 | Scaffold5238 | 2103                    | AA                              | TT              | 1947056943               |
| SNP_P4_187295_2121 | NW_004519393.1 | Scaffold5238 | 2121                    | TT                              | CC              | 1947056945               |
| SNP_P4_187296_2153 | NW_004519393.1 | Scaffold5238 | 2153                    | GG                              | AA              | 1947056947               |
| SNP_P4_187297_2164 | NW_004519393.1 | Scaffold5238 | 2164                    | TT                              | CC              | 1947056949               |
| SNP_P4_187298_4164 | NW_004519394.1 | Scaffold5239 | 4164                    | AA                              | GG              | 1947056951               |
| SNP_P4_187299_6352 | NW_004519394.1 | Scaffold5239 | 6352                    | TT                              | CC              | 1947056953               |
| SNP_P4_187301_1075 | NW_004519397.1 | Scaffold5249 | 1075                    | GG                              | AA              | 1947056955               |
| SNP_P4_187302_2234 | NW_004519397.1 | Scaffold5249 | 2234                    | GG                              | CC              | 1947056957               |
| SNP_P4_187303_141  | NW_004519398.1 | Scaffold5251 | 141                     | GG                              | AA              | 1947056959               |
| SNP_P4_187304_311  | NW_004519398.1 | Scaffold5251 | 311                     | CC                              | TT              | 1947056961               |

| SNPs IDs            | Chromosome IDs | Chromosomes  | Physical positions (bp) | CDC Frontier (Reference genome) | (ILWC46 & LPNB) | NCBI SNPdb Accession IDs |
|---------------------|----------------|--------------|-------------------------|---------------------------------|-----------------|--------------------------|
| SNP_P4_187305_454   | NW_004519398.1 | Scaffold5251 | 454                     | AA                              | GG              | 1947056963               |
| SNP_P4_187306_489   | NW_004519398.1 | Scaffold5251 | 489                     | CC                              | TT              | 1947056965               |
| SNP_P4_187307_620   | NW_004519398.1 | Scaffold5251 | 620                     | CC                              | TT              | 1947056967               |
| SNP_P4_187308_665   | NW_004519398.1 | Scaffold5251 | 665                     | TT                              | CC              | 1947056969               |
| SNP_P4_187309_681   | NW_004519398.1 | Scaffold5251 | 681                     | CC                              | AA              | 1947056971               |
| SNP_P4_187310_804   | NW_004519398.1 | Scaffold5251 | 804                     | CC                              | TT              | 1947056973               |
| SNP_P4_187311_875   | NW_004519398.1 | Scaffold5251 | 875                     | GG                              | AA              | 1947056975               |
| SNP_P4_187312_1019  | NW_004519398.1 | Scaffold5251 | 1019                    | CC                              | TT              | 1947056977               |
| SNP_P4_187313_1053  | NW_004519398.1 | Scaffold5251 | 1053                    | TT                              | GG              | 1947056979               |
| SNP_P4_187314_1054  | NW_004519398.1 | Scaffold5251 | 1054                    | GG                              | AA              | 1947056981               |
| SNP_P4_187316_1207  | NW_004519398.1 | Scaffold5251 | 1207                    | CC                              | GG              | 1947056983               |
| SNP_P4_187318_2102  | NW_004519398.1 | Scaffold5251 | 2102                    | CC                              | TT              | 1947056985               |
| SNP_P4_187319_2185  | NW_004519398.1 | Scaffold5251 | 2185                    | AA                              | GG              | 1947056987               |
| SNP_P4_187320_2220  | NW_004519398.1 | Scaffold5251 | 2220                    | GG                              | CC              | 1947056989               |
| SNP_P4_187321_2281  | NW_004519398.1 | Scaffold5251 | 2281                    | TT                              | GG              | 1947056991               |
| SNP_P4_187322_1145  | NW_004519400.1 | Scaffold5253 | 1145                    | CC                              | GG              | 1947056993               |
| SNP_P4_187323_1146  | NW_004519400.1 | Scaffold5253 | 1146                    | AA                              | TT              | 1947056995               |
| SNP_P4_187324_1502  | NW_004519400.1 | Scaffold5253 | 1502                    | CC                              | AA              | 1947056997               |
| SNP_P4_187325_395   | NW_004519403.1 | Scaffold5259 | 395                     | AA                              | TT              | 1947056999               |
| SNP_P4_187326_1160  | NW_004519403.1 | Scaffold5259 | 1160                    | CC                              | TT              | 1947057001               |
| SNP_P4_187327_1724  | NW_004519403.1 | Scaffold5259 | 1724                    | GG                              | TT              | 1947057003               |
| SNP_P4_187328_179   | NW_004519404.1 | Scaffold5261 | 179                     | AA                              | CC              | 1947057005               |
| SNP_P4_187329_711   | NW_004519404.1 | Scaffold5261 | 711                     | TT                              | AA              | 1947057007               |
| SNP_P4_187330_301   | NW_004519405.1 | Scaffold5262 | 301                     | AA                              | GG              | 1947057009               |
| SNP_P4_187331_308   | NW_004519405.1 | Scaffold5262 | 308                     | CC                              | TT              | 1947057011               |
| SNP_P4_187332_457   | NW_004519405.1 | Scaffold5262 | 457                     | GG                              | AA              | 1947057013               |
| SNP_P4_187333_544   | NW_004519405.1 | Scaffold5262 | 544                     | GG                              | AA              | 1947057015               |
| SNP_P4_187334_656   | NW_004519405.1 | Scaffold5262 | 656                     | TT                              | AA              | 1947057017               |
| SNP_P4_187335_918   | NW_004519405.1 | Scaffold5262 | 918                     | TT                              | CC              | 1947057019               |
| SNP_P4_187336_1089  | NW_004519405.1 | Scaffold5262 | 1089                    | AA                              | GG              | 1947057021               |
| SNP_P4_187337_1137  | NW_004519405.1 | Scaffold5262 | 1137                    | TT                              | GG              | 1947057023               |
| SNP_P4_187338_1152  | NW_004519405.1 | Scaffold5262 | 1152                    | TT                              | CC              | 1947057025               |
| SNP_P4_187339_1274  | NW_004519405.1 | Scaffold5262 | 1274                    | AA                              | GG              | 1947057027               |
| SNP_P4_187340_1300  | NW_004519405.1 | Scaffold5262 | 1300                    | GG                              | AA              | 1947057029               |
| SNP_P4_187341_1326  | NW_004519405.1 | Scaffold5262 | 1326                    | AA                              | CC              | 1947057031               |
| SNP_P4_187342_1334  | NW_004519405.1 | Scaffold5262 | 1334                    | CC                              | TT              | 1947057033               |
| SNP_P4_187343_1435  | NW_004519405.1 | Scaffold5262 | 1435                    | GG                              | AA              | 1947057035               |
| SNP_P4_187344_1595  | NW_004519405.1 | Scaffold5262 | 1595                    | AA                              | GG              | 1947057037               |
| SNP_P4_187345_1636  | NW_004519405.1 | Scaffold5262 | 1636                    | AA                              | GG              | 1947057039               |
| SNP_P4_187346_4776  | NW_004519405.1 | Scaffold5262 | 4776                    | TT                              | AA              | 1947057041               |
| SNP_P4_187347_20541 | NW_004519406.1 | Scaffold5263 | 20541                   | GG                              | AA              | 1947057042               |
| SNP_P4_187348_25619 | NW_004519406.1 | Scaffold5263 | 25619                   | TT                              | CC              | 1947057044               |

| SNPs IDs            | Chromosome IDs | Chromosomes  | Physical positions (bp) | CDC Frontier (Reference genome) | (ILWC46 & LPNB) | NCBI SNPdb Accession IDs |
|---------------------|----------------|--------------|-------------------------|---------------------------------|-----------------|--------------------------|
| SNP_P4_187349_25627 | NW_004519406.1 | Scaffold5263 | 25627                   | GG                              | CC              | 1947057046               |
| SNP_P4_187350_25629 | NW_004519406.1 | Scaffold5263 | 25629                   | CC                              | TT              | 1947057048               |
| SNP_P4_187351_25645 | NW_004519406.1 | Scaffold5263 | 25645                   | AA                              | TT              | 1947057050               |
| SNP_P4_187352_25667 | NW_004519406.1 | Scaffold5263 | 25667                   | CC                              | TT              | 1947057052               |
| SNP_P4_187353_25712 | NW_004519406.1 | Scaffold5263 | 25712                   | AA                              | GG              | 1947057054               |
| SNP_P4_187354_25924 | NW_004519406.1 | Scaffold5263 | 25924                   | AA                              | GG              | 1947057056               |
| SNP_P4_187355_25933 | NW_004519406.1 | Scaffold5263 | 25933                   | AA                              | TT              | 1947057058               |
| SNP_P4_187356_26072 | NW_004519406.1 | Scaffold5263 | 26072                   | AA                              | GG              | 1947057060               |
| SNP_P4_187357_26105 | NW_004519406.1 | Scaffold5263 | 26105                   | AA                              | GG              | 1947057062               |
| SNP_P4_187358_26421 | NW_004519406.1 | Scaffold5263 | 26421                   | AA                              | GG              | 1947057064               |
| SNP_P4_187359_26914 | NW_004519406.1 | Scaffold5263 | 26914                   | CC                              | TT              | 1947057066               |
| SNP_P4_187360_27401 | NW_004519406.1 | Scaffold5263 | 27401                   | AA                              | GG              | 1947057068               |
| SNP_P4_187361_27543 | NW_004519406.1 | Scaffold5263 | 27543                   | AA                              | TT              | 1947057070               |
| SNP_P4_187362_27663 | NW_004519406.1 | Scaffold5263 | 27663                   | CC                              | GG              | 1947057072               |
| SNP_P4_187363_27873 | NW_004519406.1 | Scaffold5263 | 27873                   | AA                              | GG              | 1947057074               |
| SNP_P4_187364_115   | NW_004519408.1 | Scaffold5266 | 115                     | AA                              | TT              | 1947057076               |
| SNP_P4_187365_311   | NW_004519410.1 | Scaffold5269 | 311                     | TT                              | CC              | 1947057078               |
| SNP_P4_187366_1677  | NW_004519413.1 | Scaffold5272 | 1677                    | TT                              | CC              | 1947057080               |
| SNP_P4_187367_1681  | NW_004519413.1 | Scaffold5272 | 1681                    | GG                              | AA              | 1947057082               |
| SNP_P4_187368_3913  | NW_004519413.1 | Scaffold5272 | 3913                    | TT                              | AA              | 1947057084               |
| SNP_P4_187369_3914  | NW_004519413.1 | Scaffold5272 | 3914                    | TT                              | CC              | 1947057086               |
| SNP_P4_187370_302   | NW_004519416.1 | Scaffold5275 | 302                     | GG                              | TT              | 1947057088               |
| SNP_P4_187371_417   | NW_004519416.1 | Scaffold5275 | 417                     | AA                              | GG              | 1947057090               |
| SNP_P4_187373_437   | NW_004519416.1 | Scaffold5275 | 437                     | TT                              | CC              | 1947057092               |
| SNP_P4_187374_460   | NW_004519416.1 | Scaffold5275 | 460                     | CC                              | AA              | 1947057094               |
| SNP_P4_187375_466   | NW_004519416.1 | Scaffold5275 | 466                     | CC                              | AA              | 1947057096               |
| SNP_P4_187376_467   | NW_004519416.1 | Scaffold5275 | 467                     | AA                              | GG              | 1947057098               |
| SNP_P4_187377_490   | NW_004519416.1 | Scaffold5275 | 490                     | AA                              | CC              | 1947057100               |
| SNP_P4_187378_517   | NW_004519416.1 | Scaffold5275 | 517                     | CC                              | AA              | 1947057102               |
| SNP_P4_187379_588   | NW_004519416.1 | Scaffold5275 | 588                     | TT                              | AA              | 1947057104               |
| SNP_P4_187380_679   | NW_004519416.1 | Scaffold5275 | 679                     | AA                              | GG              | 1947057106               |
| SNP_P4_187381_691   | NW_004519416.1 | Scaffold5275 | 691                     | AA                              | GG              | 1947057108               |
| SNP_P4_187382_765   | NW_004519416.1 | Scaffold5275 | 765                     | GG                              | CC              | 1947057110               |
| SNP_P4_187383_962   | NW_004519416.1 | Scaffold5275 | 962                     | AA                              | GG              | 1947057113               |
| SNP_P4_187384_973   | NW_004519416.1 | Scaffold5275 | 973                     | TT                              | AA              | 1947057115               |
| SNP_P4_187385_982   | NW_004519416.1 | Scaffold5275 | 982                     | CC                              | AA              | 1947057117               |
| SNP_P4_187386_1022  | NW_004519416.1 | Scaffold5275 | 1022                    | TT                              | CC              | 1947057119               |
| SNP_P4_187387_1068  | NW_004519416.1 | Scaffold5275 | 1068                    | TT                              | CC              | 1947057121               |
| SNP_P4_187388_1108  | NW_004519416.1 | Scaffold5275 | 1108                    | GG                              | AA              | 1947057123               |
| SNP_P4_187389_1126  | NW_004519416.1 | Scaffold5275 | 1126                    | AA                              | GG              | 1947057125               |
| SNP_P4_187390_1142  | NW_004519416.1 | Scaffold5275 | 1142                    | TT                              | GG              | 1947057127               |
| SNP_P4_187391_1182  | NW_004519416.1 | Scaffold5275 | 1182                    | GG                              | TT              | 1947057129               |

| SNPs IDs           | Chromosome IDs | Chromosomes  | Physical positions (bp) | CDC Frontier (Reference genome) | (ILWC46 & LPNB) | NCBI SNPdb Accession IDs |
|--------------------|----------------|--------------|-------------------------|---------------------------------|-----------------|--------------------------|
| SNP_P4_187392_1284 | NW_004519416.1 | Scaffold5275 | 1284                    | CC                              | TT              | 1947057131               |
| SNP_P4_187393_1503 | NW_004519416.1 | Scaffold5275 | 1503                    | GG                              | AA              | 1947057133               |
| SNP_P4_187394_1521 | NW_004519416.1 | Scaffold5275 | 1521                    | CC                              | TT              | 1947057135               |
| SNP_P4_187396_3095 | NW_004519420.1 | Scaffold5279 | 3095                    | CC                              | GG              | 1947057137               |
| SNP_P4_187398_206  | NW_004519421.1 | Scaffold5280 | 206                     | CC                              | TT              | 1947057139               |
| SNP_P4_187399_367  | NW_004519421.1 | Scaffold5280 | 367                     | AA                              | GG              | 1947057141               |
| SNP_P4_187400_373  | NW_004519421.1 | Scaffold5280 | 373                     | TT                              | CC              | 1947057143               |
| SNP_P4_187401_775  | NW_004519421.1 | Scaffold5280 | 775                     | TT                              | AA              | 1947057145               |
| SNP_P4_187402_1064 | NW_004519421.1 | Scaffold5280 | 1064                    | GG                              | AA              | 1947057147               |
| SNP_P4_187403_1138 | NW_004519421.1 | Scaffold5280 | 1138                    | GG                              | AA              | 1947057149               |
| SNP_P4_187404_1157 | NW_004519421.1 | Scaffold5280 | 1157                    | AA                              | CC              | 1947057150               |
| SNP_P4_187405_1187 | NW_004519421.1 | Scaffold5280 | 1187                    | AA                              | GG              | 1947057152               |
| SNP_P4_187406_2417 | NW_004519421.1 | Scaffold5280 | 2417                    | GG                              | TT              | 1947057154               |
| SNP_P4_187407_3787 | NW_004519421.1 | Scaffold5280 | 3787                    | GG                              | AA              | 1947057156               |
| SNP_P4_187408_5735 | NW_004519421.1 | Scaffold5280 | 5735                    | CC                              | AA              | 1947057158               |
| SNP_P4_187409_5820 | NW_004519421.1 | Scaffold5280 | 5820                    | AA                              | GG              | 1947057160               |
| SNP_P4_187410_5988 | NW_004519421.1 | Scaffold5280 | 5988                    | AA                              | GG              | 1947057162               |
| SNP_P4_187411_6007 | NW_004519421.1 | Scaffold5280 | 6007                    | TT                              | CC              | 1947057164               |
| SNP_P4_187412_6058 | NW_004519421.1 | Scaffold5280 | 6058                    | GG                              | AA              | 1947057166               |
| SNP_P4_187413_6228 | NW_004519421.1 | Scaffold5280 | 6228                    | AA                              | GG              | 1947057168               |
| SNP_P4_187414_6250 | NW_004519421.1 | Scaffold5280 | 6250                    | AA                              | GG              | 1947057170               |
| SNP_P4_187415_6277 | NW_004519421.1 | Scaffold5280 | 6277                    | TT                              | AA              | 1947057172               |
| SNP_P4_187416_6290 | NW_004519421.1 | Scaffold5280 | 6290                    | TT                              | AA              | 1947057174               |
| SNP_P4_187417_6373 | NW_004519421.1 | Scaffold5280 | 6373                    | AA                              | GG              | 1947057176               |
| SNP_P4_187418_6425 | NW_004519421.1 | Scaffold5280 | 6425                    | GG                              | CC              | 1947057178               |
| SNP_P4_187419_6473 | NW_004519421.1 | Scaffold5280 | 6473                    | CC                              | TT              | 1947057180               |
| SNP_P4_187420_6602 | NW_004519421.1 | Scaffold5280 | 6602                    | TT                              | CC              | 1947057182               |
| SNP_P4_187421_6628 | NW_004519421.1 | Scaffold5280 | 6628                    | TT                              | CC              | 1947057184               |
| SNP_P4_187422_6664 | NW_004519421.1 | Scaffold5280 | 6664                    | GG                              | AA              | 1947057186               |
| SNP_P4_187423_6677 | NW_004519421.1 | Scaffold5280 | 6677                    | CC                              | TT              | 1947057188               |
| SNP_P4_187424_6679 | NW_004519421.1 | Scaffold5280 | 6679                    | CC                              | GG              | 1947057190               |
| SNP_P4_187425_6704 | NW_004519421.1 | Scaffold5280 | 6704                    | AA                              | TT              | 1947057191               |
| SNP_P4_187426_6713 | NW_004519421.1 | Scaffold5280 | 6713                    | CC                              | TT              | 1947057193               |
| SNP_P4_187427_6746 | NW_004519421.1 | Scaffold5280 | 6746                    | AA                              | GG              | 1947057195               |
| SNP_P4_187428_6857 | NW_004519421.1 | Scaffold5280 | 6857                    | CC                              | GG              | 1947057197               |
| SNP_P4_187429_7015 | NW_004519421.1 | Scaffold5280 | 7015                    | TT                              | CC              | 1947057199               |
| SNP_P4_187430_7032 | NW_004519421.1 | Scaffold5280 | 7032                    | AA                              | CC              | 1947057201               |
| SNP_P4_187431_101  | NW_004519424.1 | Scaffold5285 | 101                     | TT                              | AA              | 1947057203               |
| SNP_P4_187432_208  | NW_004519424.1 | Scaffold5285 | 208                     | CC                              | TT              | 1947057205               |
| SNP_P4_187433_4788 | NW_004519428.1 | Scaffold5291 | 4788                    | GG                              | AA              | 1947057207               |
| SNP_P4_187434_5174 | NW_004519428.1 | Scaffold5291 | 5174                    | TT                              | GG              | 1947057209               |
| SNP_P4_187436_6319 | NW_004519433.1 | Scaffold5297 | 6319                    | AA                              | GG              | 1947057211               |

| SNPs IDs            | Chromosome IDs | Chromosomes  | Physical positions (bp) | CDC Frontier (Reference genome) | (ILWC46 & LPNB) | NCBI SNPdb Accession IDs |
|---------------------|----------------|--------------|-------------------------|---------------------------------|-----------------|--------------------------|
| SNP_P4_187437_6321  | NW_004519433.1 | Scaffold5297 | 6321                    | TT                              | CC              | 1947057213               |
| SNP_P4_187438_6322  | NW_004519433.1 | Scaffold5297 | 6322                    | CC                              | TT              | 1947057215               |
| SNP_P4_187439_6378  | NW_004519433.1 | Scaffold5297 | 6378                    | AA                              | CC              | 1947057217               |
| SNP_P4_187440_6388  | NW_004519433.1 | Scaffold5297 | 6388                    | GG                              | AA              | 1947057219               |
| SNP_P4_187441_6738  | NW_004519433.1 | Scaffold5297 | 6738                    | CC                              | GG              | 1947057221               |
| SNP_P4_187442_6744  | NW_004519433.1 | Scaffold5297 | 6744                    | CC                              | TT              | 1947057223               |
| SNP_P4_187443_7530  | NW_004519433.1 | Scaffold5297 | 7530                    | TT                              | CC              | 1947057225               |
| SNP_P4_187444_7572  | NW_004519433.1 | Scaffold5297 | 7572                    | GG                              | AA              | 1947057227               |
| SNP_P4_187445_7613  | NW_004519433.1 | Scaffold5297 | 7613                    | CC                              | TT              | 1947057229               |
| SNP_P4_187446_7653  | NW_004519433.1 | Scaffold5297 | 7653                    | AA                              | CC              | 1947057231               |
| SNP_P4_187447_7720  | NW_004519433.1 | Scaffold5297 | 7720                    | TT                              | GG              | 1947057233               |
| SNP_P4_187448_7723  | NW_004519433.1 | Scaffold5297 | 7723                    | AA                              | TT              | 1947057235               |
| SNP_P4_187449_7864  | NW_004519433.1 | Scaffold5297 | 7864                    | CC                              | AA              | 1947057237               |
| SNP_P4_187450_7968  | NW_004519433.1 | Scaffold5297 | 7968                    | AA                              | GG              | 1947057239               |
| SNP_P4_187452_71    | NW_004519436.1 | Scaffold5302 | 71                      | TT                              | GG              | 1947057241               |
| SNP_P4_187453_74    | NW_004519436.1 | Scaffold5302 | 74                      | AA                              | GG              | 1947057243               |
| SNP_P4_187454_10901 | NW_004519440.1 | Scaffold5306 | 10901                   | CC                              | TT              | 1947057245               |
| SNP_P4_187455_11044 | NW_004519440.1 | Scaffold5306 | 11044                   | TT                              | CC              | 1947057247               |
| SNP_P4_187456_11047 | NW_004519440.1 | Scaffold5306 | 11047                   | AA                              | CC              | 1947057249               |
| SNP_P4_187457_11228 | NW_004519440.1 | Scaffold5306 | 11228                   | CC                              | AA              | 1947057251               |
| SNP_P4_187458_11374 | NW_004519440.1 | Scaffold5306 | 11374                   | AA                              | GG              | 1947057253               |
| SNP_P4_187459_14966 | NW_004519440.1 | Scaffold5306 | 14966                   | GG                              | AA              | 1947057255               |
| SNP_P4_187460_15002 | NW_004519440.1 | Scaffold5306 | 15002                   | GG                              | AA              | 1947057257               |
| SNP_P4_187461_15101 | NW_004519440.1 | Scaffold5306 | 15101                   | GG                              | AA              | 1947057258               |
| SNP_P4_187462_15106 | NW_004519440.1 | Scaffold5306 | 15106                   | TT                              | CC              | 1947057260               |
| SNP_P4_187463_15498 | NW_004519440.1 | Scaffold5306 | 15498                   | GG                              | AA              | 1947057262               |
| SNP_P4_187464_15501 | NW_004519440.1 | Scaffold5306 | 15501                   | TT                              | AA              | 1947057264               |
| SNP_P4_187465_1610  | NW_004519441.1 | Scaffold5307 | 1610                    | TT                              | CC              | 1947057266               |
| SNP_P4_187466_1662  | NW_004519441.1 | Scaffold5307 | 1662                    | TT                              | CC              | 1947057268               |
| SNP_P4_187467_1676  | NW_004519441.1 | Scaffold5307 | 1676                    | AA                              | TT              | 1947057270               |
| SNP_P4_187468_1728  | NW_004519441.1 | Scaffold5307 | 1728                    | TT                              | CC              | 1947057272               |
| SNP_P4_187469_1799  | NW_004519441.1 | Scaffold5307 | 1799                    | CC                              | TT              | 1947057274               |
| SNP_P4_187470_1844  | NW_004519441.1 | Scaffold5307 | 1844                    | GG                              | AA              | 1947057275               |
| SNP_P4_187471_1974  | NW_004519441.1 | Scaffold5307 | 1974                    | GG                              | TT              | 1947057277               |
| SNP_P4_187472_2002  | NW_004519441.1 | Scaffold5307 | 2002                    | AA                              | GG              | 1947057279               |
| SNP_P4_187473_2062  | NW_004519441.1 | Scaffold5307 | 2062                    | AA                              | GG              | 1947057281               |
| SNP_P4_187474_2304  | NW_004519441.1 | Scaffold5307 | 2304                    | TT                              | CC              | 1947057283               |
| SNP_P4_187475_2618  | NW_004519441.1 | Scaffold5307 | 2618                    | CC                              | GG              | 1947057285               |
| SNP_P4_187476_3839  | NW_004519441.1 | Scaffold5307 | 3839                    | CC                              | TT              | 1947057287               |
| SNP_P4_187477_3886  | NW_004519441.1 | Scaffold5307 | 3886                    | AA                              | GG              | 1947057289               |
| SNP_P4_187478_3890  | NW_004519441.1 | Scaffold5307 | 3890                    | AA                              | GG              | 1947057291               |
| SNP_P4_187479_3931  | NW_004519441.1 | Scaffold5307 | 3931                    | GG                              | CC              | 1947057293               |

| SNPs IDs            | Chromosome IDs | Chromosomes  | Physical positions (bp) | CDC Frontier (Reference genome) | (ILWC46 & LPNB) | NCBI SNPdb Accession IDs |
|---------------------|----------------|--------------|-------------------------|---------------------------------|-----------------|--------------------------|
| SNP_P4_187480_3965  | NW_004519441.1 | Scaffold5307 | 3965                    | CC                              | TT              | 1947057295               |
| SNP_P4_187481_3976  | NW_004519441.1 | Scaffold5307 | 3976                    | AA                              | GG              | 1947057297               |
| SNP_P4_187482_3996  | NW_004519441.1 | Scaffold5307 | 3996                    | TT                              | GG              | 1947057299               |
| SNP_P4_187483_4002  | NW_004519441.1 | Scaffold5307 | 4002                    | AA                              | TT              | 1947057301               |
| SNP_P4_187484_4459  | NW_004519441.1 | Scaffold5307 | 4459                    | AA                              | GG              | 1947057303               |
| SNP_P4_187485_4949  | NW_004519441.1 | Scaffold5307 | 4949                    | AA                              | CC              | 1947057305               |
| SNP_P4_187486_4966  | NW_004519441.1 | Scaffold5307 | 4966                    | AA                              | GG              | 1947057307               |
| SNP_P4_187487_4968  | NW_004519441.1 | Scaffold5307 | 4968                    | TT                              | AA              | 1947057309               |
| SNP_P4_187488_5241  | NW_004519441.1 | Scaffold5307 | 5241                    | TT                              | CC              | 1947057311               |
| SNP_P4_187489_5260  | NW_004519441.1 | Scaffold5307 | 5260                    | CC                              | TT              | 1947057313               |
| SNP_P4_187490_5302  | NW_004519441.1 | Scaffold5307 | 5302                    | AA                              | GG              | 1947057315               |
| SNP_P4_187491_5321  | NW_004519441.1 | Scaffold5307 | 5321                    | CC                              | TT              | 1947057317               |
| SNP_P4_187492_5452  | NW_004519441.1 | Scaffold5307 | 5452                    | TT                              | GG              | 1947057319               |
| SNP_P4_187493_5850  | NW_004519441.1 | Scaffold5307 | 5850                    | AA                              | GG              | 1947057321               |
| SNP_P4_187494_5985  | NW_004519441.1 | Scaffold5307 | 5985                    | AA                              | CC              | 1947057323               |
| SNP_P4_187495_6233  | NW_004519441.1 | Scaffold5307 | 6233                    | TT                              | CC              | 1947057325               |
| SNP_P4_187496_6550  | NW_004519441.1 | Scaffold5307 | 6550                    | GG                              | AA              | 1947057327               |
| SNP_P4_187497_6575  | NW_004519441.1 | Scaffold5307 | 6575                    | AA                              | GG              | 1947057329               |
| SNP_P4_187498_7078  | NW_004519441.1 | Scaffold5307 | 7078                    | GG                              | AA              | 1947057331               |
| SNP_P4_187499_283   | NW_004519442.1 | Scaffold5309 | 283                     | CC                              | TT              | 1947057333               |
| SNP_P4_187500_713   | NW_004519442.1 | Scaffold5309 | 713                     | TT                              | GG              | 1947057335               |
| SNP_P4_187501_735   | NW_004519442.1 | Scaffold5309 | 735                     | AA                              | CC              | 1947057337               |
| SNP_P4_187502_848   | NW_004519442.1 | Scaffold5309 | 848                     | AA                              | TT              | 1947057339               |
| SNP_P4_187503_1026  | NW_004519442.1 | Scaffold5309 | 1026                    | AA                              | GG              | 1947057341               |
| SNP_P4_187504_1046  | NW_004519442.1 | Scaffold5309 | 1046                    | GG                              | AA              | 1947057343               |
| SNP_P4_187505_1055  | NW_004519442.1 | Scaffold5309 | 1055                    | GG                              | CC              | 1947057345               |
| SNP_P4_187506_451   | NW_004519444.1 | Scaffold5311 | 451                     | AA                              | TT              | 1947057346               |
| SNP_P4_187507_651   | NW_004519444.1 | Scaffold5311 | 651                     | TT                              | GG              | 1947057347               |
| SNP_P4_187508_700   | NW_004519444.1 | Scaffold5311 | 700                     | GG                              | AA              | 1947057348               |
| SNP_P4_187509_799   | NW_004519445.1 | Scaffold5312 | 799                     | TT                              | GG              | 1947057349               |
| SNP_P4_187510_4645  | NW_004519445.1 | Scaffold5312 | 4645                    | TT                              | CC              | 1947057350               |
| SNP_P4_187511_4799  | NW_004519445.1 | Scaffold5312 | 4799                    | TT                              | CC              | 1947057351               |
| SNP_P4_187512_343   | NW_004519446.1 | Scaffold5313 | 343                     | AA                              | TT              | 1947057352               |
| SNP_P4_187513_396   | NW_004519446.1 | Scaffold5313 | 396                     | AA                              | GG              | 1947057353               |
| SNP_P4_187514_637   | NW_004519446.1 | Scaffold5313 | 637                     | AA                              | GG              | 1947057354               |
| SNP_P4_187515_644   | NW_004519446.1 | Scaffold5313 | 644                     | TT                              | AA              | 1947057355               |
| SNP_P4_187516_20072 | NW_004519448.1 | Scaffold5321 | 20072                   | GG                              | AA              | 1947057356               |
| SNP_P4_187517_23059 | NW_004519448.1 | Scaffold5321 | 23059                   | GG                              | TT              | 1947057357               |
| SNP_P4_187518_30177 | NW_004519448.1 | Scaffold5321 | 30177                   | GG                              | AA              | 1947057358               |
| SNP_P4_187519_30313 | NW_004519448.1 | Scaffold5321 | 30313                   | TT                              | CC              | 1947057359               |
| SNP_P4_187520_43569 | NW_004519448.1 | Scaffold5321 | 43569                   | GG                              | AA              | 1947057360               |
| SNP_P4_187521_425   | NW_004519452.1 | Scaffold5326 | 425                     | AA                              | GG              | 1947057361               |

| SNPs IDs            | Chromosome IDs | Chromosomes  | Physical positions (bp) | CDC Frontier (Reference genome) | (ILWC46 & LPNB) | NCBI SNPdb Accession IDs |
|---------------------|----------------|--------------|-------------------------|---------------------------------|-----------------|--------------------------|
| SNP_P4_187522_466   | NW_004519452.1 | Scaffold5326 | 466                     | CC                              | TT              | 1947057362               |
| SNP_P4_187523_500   | NW_004519452.1 | Scaffold5326 | 500                     | CC                              | TT              | 1947057364               |
| SNP_P4_187524_16741 | NW_004519454.1 | Scaffold5328 | 16741                   | AA                              | GG              | 1947057366               |
| SNP_P4_187525_16747 | NW_004519454.1 | Scaffold5328 | 16747                   | GG                              | AA              | 1947057368               |
| SNP_P4_187526_1275  | NW_004519457.1 | Scaffold5333 | 1275                    | AA                              | GG              | 1947057370               |
| SNP_P4_187527_1282  | NW_004519457.1 | Scaffold5333 | 1282                    | AA                              | GG              | 1947057372               |
| SNP_P4_187528_259   | NW_004519459.1 | Scaffold5335 | 259                     | CC                              | AA              | 1947057374               |
| SNP_P4_187529_663   | NW_004519460.1 | Scaffold5338 | 663                     | GG                              | TT              | 1947057376               |
| SNP_P4_187530_772   | NW_004519460.1 | Scaffold5338 | 772                     | CC                              | TT              | 1947057378               |
| SNP_P4_187531_839   | NW_004519460.1 | Scaffold5338 | 839                     | GG                              | TT              | 1947057380               |
| SNP_P4_187532_496   | NW_004519461.1 | Scaffold5340 | 496                     | TT                              | AA              | 1947057382               |
| SNP_P4_187533_985   | NW_004519461.1 | Scaffold5340 | 985                     | TT                              | CC              | 1947057383               |
| SNP_P4_187535_1357  | NW_004519461.1 | Scaffold5340 | 1357                    | CC                              | TT              | 1947057385               |
| SNP_P4_187536_1366  | NW_004519461.1 | Scaffold5340 | 1366                    | CC                              | TT              | 1947057387               |
| SNP_P4_187537_1384  | NW_004519461.1 | Scaffold5340 | 1384                    | AA                              | GG              | 1947057389               |
| SNP_P4_187538_1414  | NW_004519461.1 | Scaffold5340 | 1414                    | TT                              | CC              | 1947057391               |
| SNP_P4_187539_1420  | NW_004519461.1 | Scaffold5340 | 1420                    | GG                              | AA              | 1947057393               |
| SNP_P4_187540_1424  | NW_004519461.1 | Scaffold5340 | 1424                    | GG                              | CC              | 1947057395               |
| SNP_P4_187541_1438  | NW_004519461.1 | Scaffold5340 | 1438                    | AA                              | GG              | 1947057397               |
| SNP_P4_187542_1444  | NW_004519461.1 | Scaffold5340 | 1444                    | TT                              | CC              | 1947057399               |
| SNP_P4_187543_1448  | NW_004519461.1 | Scaffold5340 | 1448                    | CC                              | TT              | 1947057401               |
| SNP_P4_187544_2589  | NW_004519469.1 | Scaffold5358 | 2589                    | GG                              | CC              | 1947057403               |
| SNP_P4_187545_15283 | NW_004519469.1 | Scaffold5358 | 15283                   | TT                              | AA              | 1947057405               |
| SNP_P4_187546_64    | NW_004519470.1 | Scaffold5360 | 64                      | CC                              | GG              | 1947057407               |
| SNP_P4_187547_90    | NW_004519470.1 | Scaffold5360 | 90                      | TT                              | GG              | 1947057409               |
| SNP_P4_187548_272   | NW_004519470.1 | Scaffold5360 | 272                     | TT                              | GG              | 1947057411               |
| SNP_P4_187549_280   | NW_004519470.1 | Scaffold5360 | 280                     | CC                              | AA              | 1947057413               |
| SNP_P4_187550_296   | NW_004519470.1 | Scaffold5360 | 296                     | AA                              | CC              | 1947057416               |
| SNP_P4_187552_480   | NW_004519470.1 | Scaffold5360 | 480                     | CC                              | GG              | 1947057418               |
| SNP_P4_187553_676   | NW_004519470.1 | Scaffold5360 | 676                     | CC                              | AA              | 1947057420               |
| SNP_P4_187554_739   | NW_004519470.1 | Scaffold5360 | 739                     | CC                              | TT              | 1947057422               |
| SNP_P4_187555_22088 | NW_004519478.1 | Scaffold5374 | 22088                   | TT                              | CC              | 1947057424               |
| SNP_P4_187556_23285 | NW_004519478.1 | Scaffold5374 | 23285                   | CC                              | TT              | 1947057426               |
| SNP_P4_187557_105   | NW_004519479.1 | Scaffold5375 | 105                     | GG                              | AA              | 1947057428               |
| SNP_P4_187558_122   | NW_004519479.1 | Scaffold5375 | 122                     | AA                              | TT              | 1947057430               |
| SNP_P4_187559_6097  | NW_004519481.1 | Scaffold5377 | 6097                    | GG                              | TT              | 1947057431               |
| SNP_P4_187560_6181  | NW_004519481.1 | Scaffold5377 | 6181                    | GG                              | AA              | 1947057433               |
| SNP_P4_187561_6193  | NW_004519481.1 | Scaffold5377 | 6193                    | AA                              | TT              | 1947057435               |
| SNP_P4_187562_468   | NW_004519485.1 | Scaffold5384 | 468                     | TT                              | CC              | 1947057437               |
| SNP_P4_187563_1489  | NW_004519485.1 | Scaffold5384 | 1489                    | CC                              | TT              | 1947057439               |
| SNP_P4_187564_1738  | NW_004519485.1 | Scaffold5384 | 1738                    | CC                              | TT              | 1947057441               |
| SNP_P4_187565_3288  | NW_004519485.1 | Scaffold5384 | 3288                    | CC                              | AA              | 1947057443               |

| SNPs IDs            | Chromosome IDs | Chromosomes  | Physical positions (bp) | CDC Frontier (Reference genome) | (ILWC46 & LPNB) | NCBI SNPdb Accession IDs |
|---------------------|----------------|--------------|-------------------------|---------------------------------|-----------------|--------------------------|
| SNP_P4_187566_3563  | NW_004519485.1 | Scaffold5384 | 3563                    | TT                              | CC              | 1947057445               |
| SNP_P4_187567_3593  | NW_004519485.1 | Scaffold5384 | 3593                    | CC                              | TT              | 1947057447               |
| SNP_P4_187568_4009  | NW_004519485.1 | Scaffold5384 | 4009                    | CC                              | TT              | 1947057448               |
| SNP_P4_187570_64    | NW_004519486.1 | Scaffold5385 | 64                      | AA                              | TT              | 1947057449               |
| SNP_P4_187571_72    | NW_004519486.1 | Scaffold5385 | 72                      | TT                              | CC              | 1947057450               |
| SNP_P4_187572_2248  | NW_004519486.1 | Scaffold5385 | 2248                    | TT                              | AA              | 1947057452               |
| SNP_P4_187573_2278  | NW_004519486.1 | Scaffold5385 | 2278                    | AA                              | GG              | 1947057454               |
| SNP_P4_187574_832   | NW_004519496.1 | Scaffold5404 | 832                     | AA                              | CC              | 1947057456               |
| SNP_P4_187575_943   | NW_004519496.1 | Scaffold5404 | 943                     | GG                              | AA              | 1947057461               |
| SNP_P4_187576_954   | NW_004519499.1 | Scaffold5409 | 954                     | TT                              | AA              | 1947057463               |
| SNP_P4_187577_956   | NW_004519499.1 | Scaffold5409 | 956                     | TT                              | AA              | 1947057465               |
| SNP_P4_187579_399   | NW_004519500.1 | Scaffold5412 | 399                     | TT                              | AA              | 1947057467               |
| SNP_P4_187580_405   | NW_004519500.1 | Scaffold5412 | 405                     | AA                              | GG              | 1947057469               |
| SNP_P4_187581_1510  | NW_004519500.1 | Scaffold5412 | 1510                    | TT                              | AA              | 1947057471               |
| SNP_P4_187582_1591  | NW_004519500.1 | Scaffold5412 | 1591                    | AA                              | TT              | 1947057473               |
| SNP_P4_187583_9255  | NW_004519501.1 | Scaffold5413 | 9255                    | AA                              | TT              | 1947057475               |
| SNP_P4_187584_10544 | NW_004519501.1 | Scaffold5413 | 10544                   | CC                              | TT              | 1947057477               |
| SNP_P4_187585_10563 | NW_004519501.1 | Scaffold5413 | 10563                   | CC                              | TT              | 1947057479               |
| SNP_P4_187586_10592 | NW_004519501.1 | Scaffold5413 | 10592                   | GG                              | AA              | 1947057481               |
| SNP_P4_187587_661   | NW_004519503.1 | Scaffold5416 | 661                     | CC                              | TT              | 1947057483               |
| SNP_P4_187588_688   | NW_004519503.1 | Scaffold5416 | 688                     | TT                              | AA              | 1947057485               |
| SNP_P4_187589_706   | NW_004519503.1 | Scaffold5416 | 706                     | CC                              | AA              | 1947057487               |
| SNP_P4_187590_710   | NW_004519503.1 | Scaffold5416 | 710                     | AA                              | CC              | 1947057489               |
| SNP_P4_187591_964   | NW_004519504.1 | Scaffold5418 | 964                     | CC                              | GG              | 1947057491               |
| SNP_P4_187592_1399  | NW_004519504.1 | Scaffold5418 | 1399                    | AA                              | TT              | 1947057493               |
| SNP_P4_187593_1764  | NW_004519504.1 | Scaffold5418 | 1764                    | TT                              | CC              | 1947057495               |
| SNP_P4_187594_1785  | NW_004519504.1 | Scaffold5418 | 1785                    | AA                              | GG              | 1947057498               |
| SNP_P4_187595_1813  | NW_004519504.1 | Scaffold5418 | 1813                    | AA                              | CC              | 1947057500               |
| SNP_P4_187596_1820  | NW_004519504.1 | Scaffold5418 | 1820                    | TT                              | GG              | 1947057502               |
| SNP_P4_187597_59    | NW_004519505.1 | Scaffold5420 | 59                      | AA                              | TT              | 1947057504               |
| SNP_P4_187598_241   | NW_004519505.1 | Scaffold5420 | 241                     | AA                              | TT              | 1947057506               |
| SNP_P4_187599_285   | NW_004519505.1 | Scaffold5420 | 285                     | GG                              | AA              | 1947057508               |
| SNP_P4_187600_347   | NW_004519505.1 | Scaffold5420 | 347                     | AA                              | TT              | 1947057510               |
| SNP_P4_187601_400   | NW_004519505.1 | Scaffold5420 | 400                     | TT                              | AA              | 1947057512               |
| SNP_P4_187602_490   | NW_004519505.1 | Scaffold5420 | 490                     | AA                              | TT              | 1947057514               |
| SNP_P4_187603_608   | NW_004519505.1 | Scaffold5420 | 608                     | AA                              | TT              | 1947057516               |
| SNP_P4_187604_660   | NW_004519505.1 | Scaffold5420 | 660                     | TT                              | AA              | 1947057518               |
| SNP_P4_187606_705   | NW_004519505.1 | Scaffold5420 | 705                     | AA                              | GG              | 1947057520               |
| SNP_P4_187607_867   | NW_004519505.1 | Scaffold5420 | 867                     | TT                              | CC              | 1947057522               |
| SNP_P4_187608_918   | NW_004519505.1 | Scaffold5420 | 918                     | AA                              | GG              | 1947057524               |
| SNP_P4_187609_960   | NW_004519505.1 | Scaffold5420 | 960                     | GG                              | TT              | 1947057526               |
| SNP_P4_187610_1013  | NW_004519505.1 | Scaffold5420 | 1013                    | TT                              | AA              | 1947057528               |



| SNPs IDs           | Chromosome IDs | Chromosomes  | Physical positions (bp) | CDC Frontier (Reference genome) | (ILWC46 & LPNB) | NCBI SNPdb Accession IDs |
|--------------------|----------------|--------------|-------------------------|---------------------------------|-----------------|--------------------------|
| SNP_P4_187611_1332 | NW_004519505.1 | Scaffold5420 | 1332                    | TT                              | GG              | 1947057530               |
| SNP_P4_187612_1345 | NW_004519505.1 | Scaffold5420 | 1345                    | TT                              | CC              | 1947057532               |
| SNP_P4_187613_63   | NW_004519506.1 | Scaffold5421 | 63                      | AA                              | GG              | 1947057534               |
| SNP_P4_187614_97   | NW_004519506.1 | Scaffold5421 | 97                      | TT                              | AA              | 1947057536               |
| SNP_P4_187615_252  | NW_004519511.1 | Scaffold5434 | 252                     | TT                              | CC              | 1947057538               |
| SNP_P4_187616_288  | NW_004519511.1 | Scaffold5434 | 288                     | AA                              | CC              | 1947057540               |
| SNP_P4_187617_295  | NW_004519511.1 | Scaffold5434 | 295                     | CC                              | TT              | 1947057542               |
| SNP_P4_187618_546  | NW_004519511.1 | Scaffold5434 | 546                     | GG                              | TT              | 1947057544               |
| SNP_P4_187619_570  | NW_004519511.1 | Scaffold5434 | 570                     | TT                              | GG              | 1947057546               |
| SNP_P4_187620_635  | NW_004519511.1 | Scaffold5434 | 635                     | AA                              | GG              | 1947057548               |
| SNP_P4_187621_797  | NW_004519511.1 | Scaffold5434 | 797                     | TT                              | CC              | 1947057550               |
| SNP_P4_187622_625  | NW_004519520.1 | Scaffold5449 | 625                     | AA                              | TT              | 1947057552               |
| SNP_P4_187623_626  | NW_004519520.1 | Scaffold5449 | 626                     | AA                              | TT              | 1947057554               |
| SNP_P4_187625_2124 | NW_004519520.1 | Scaffold5449 | 2124                    | TT                              | AA              | 1947057556               |
| SNP_P4_187626_2128 | NW_004519520.1 | Scaffold5449 | 2128                    | AA                              | TT              | 1947057558               |
| SNP_P4_187627_2138 | NW_004519520.1 | Scaffold5449 | 2138                    | CC                              | TT              | 1947057560               |
| SNP_P4_187628_2199 | NW_004519520.1 | Scaffold5449 | 2199                    | TT                              | GG              | 1947057562               |
| SNP_P4_187629_2219 | NW_004519520.1 | Scaffold5449 | 2219                    | GG                              | AA              | 1947057564               |
| SNP_P4_187630_2265 | NW_004519520.1 | Scaffold5449 | 2265                    | AA                              | GG              | 1947057566               |
| SNP_P4_187631_2473 | NW_004519520.1 | Scaffold5449 | 2473                    | CC                              | TT              | 1947057568               |
| SNP_P4_187632_499  | NW_004519523.1 | Scaffold5452 | 499                     | TT                              | AA              | 1947057570               |
| SNP_P4_187633_593  | NW_004519523.1 | Scaffold5452 | 593                     | AA                              | GG              | 1947057573               |
| SNP_P4_187634_626  | NW_004519523.1 | Scaffold5452 | 626                     | GG                              | AA              | 1947057575               |
| SNP_P4_187635_667  | NW_004519523.1 | Scaffold5452 | 667                     | GG                              | CC              | 1947057577               |
| SNP_P4_187636_699  | NW_004519523.1 | Scaffold5452 | 699                     | TT                              | GG              | 1947057579               |
| SNP_P4_187637_716  | NW_004519523.1 | Scaffold5452 | 716                     | GG                              | AA              | 1947057581               |
| SNP_P4_187638_735  | NW_004519523.1 | Scaffold5452 | 735                     | AA                              | GG              | 1947057583               |
| SNP_P4_187639_922  | NW_004519523.1 | Scaffold5452 | 922                     | TT                              | CC              | 1947057585               |
| SNP_P4_187640_923  | NW_004519523.1 | Scaffold5452 | 923                     | CC                              | AA              | 1947057587               |
| SNP_P4_187641_1017 | NW_004519523.1 | Scaffold5452 | 1017                    | AA                              | GG              | 1947057589               |
| SNP_P4_187642_1040 | NW_004519523.1 | Scaffold5452 | 1040                    | TT                              | AA              | 1947057591               |
| SNP_P4_187643_1087 | NW_004519523.1 | Scaffold5452 | 1087                    | CC                              | GG              | 1947057593               |
| SNP_P4_187644_1134 | NW_004519523.1 | Scaffold5452 | 1134                    | GG                              | AA              | 1947057595               |
| SNP_P4_187645_1191 | NW_004519523.1 | Scaffold5452 | 1191                    | GG                              | AA              | 1947057597               |
| SNP_P4_187646_1325 | NW_004519523.1 | Scaffold5452 | 1325                    | CC                              | TT              | 1947057599               |
| SNP_P4_187647_1445 | NW_004519523.1 | Scaffold5452 | 1445                    | GG                              | TT              | 1947057601               |
| SNP_P4_187648_1593 | NW_004519523.1 | Scaffold5452 | 1593                    | AA                              | CC              | 1947057603               |
| SNP_P4_187649_1638 | NW_004519523.1 | Scaffold5452 | 1638                    | TT                              | CC              | 1947057605               |
| SNP_P4_187650_810  | NW_004519526.1 | Scaffold5455 | 810                     | GG                              | TT              | 1947057607               |
| SNP_P4_187651_890  | NW_004519526.1 | Scaffold5455 | 890                     | TT                              | GG              | 1947057609               |
| SNP_P4_187652_1094 | NW_004519528.1 | Scaffold5458 | 1094                    | CC                              | TT              | 1947057611               |
| SNP_P4_187653_1116 | NW_004519528.1 | Scaffold5458 | 1116                    | CC                              | TT              | 1947057613               |

| SNPs IDs            | Chromosome IDs | Chromosomes  | Physical positions (bp) | CDC Frontier (Reference genome) | (ILWC46 & LPNB) | NCBI SNPdb Accession IDs |
|---------------------|----------------|--------------|-------------------------|---------------------------------|-----------------|--------------------------|
| SNP_P4_187654_1156  | NW_004519528.1 | Scaffold5458 | 1156                    | AA                              | GG              | 1947057615               |
| SNP_P4_187655_7011  | NW_004519528.1 | Scaffold5458 | 7011                    | AA                              | GG              | 1947057617               |
| SNP_P4_187656_11247 | NW_004519528.1 | Scaffold5458 | 11247                   | TT                              | CC              | 1947057619               |
| SNP_P4_187657_11264 | NW_004519528.1 | Scaffold5458 | 11264                   | TT                              | GG              | 1947057621               |
| SNP_P4_187659_11592 | NW_004519528.1 | Scaffold5458 | 11592                   | CC                              | TT              | 1947057623               |
| SNP_P4_187660_421   | NW_004519530.1 | Scaffold5460 | 421                     | TT                              | AA              | 1947057625               |
| SNP_P4_187661_618   | NW_004519530.1 | Scaffold5460 | 618                     | CC                              | GG              | 1947057627               |
| SNP_P4_187662_1809  | NW_004519531.1 | Scaffold5463 | 1809                    | CC                              | TT              | 1947057629               |
| SNP_P4_187663_148   | NW_004519533.1 | Scaffold5465 | 148                     | AA                              | CC              | 1947057631               |
| SNP_P4_187664_4924  | NW_004519533.1 | Scaffold5465 | 4924                    | CC                              | TT              | 1947057633               |
| SNP_P4_187665_5063  | NW_004519533.1 | Scaffold5465 | 5063                    | AA                              | TT              | 1947057635               |
| SNP_P4_187666_5115  | NW_004519533.1 | Scaffold5465 | 5115                    | GG                              | AA              | 1947057637               |
| SNP_P4_187667_5495  | NW_004519533.1 | Scaffold5465 | 5495                    | GG                              | CC              | 1947057639               |
| SNP_P4_187668_5541  | NW_004519533.1 | Scaffold5465 | 5541                    | CC                              | GG              | 1947057641               |
| SNP_P4_187669_334   | NW_004519535.1 | Scaffold5472 | 334                     | AA                              | GG              | 1947057643               |
| SNP_P4_187670_500   | NW_004519535.1 | Scaffold5472 | 500                     | CC                              | AA              | 1947057645               |
| SNP_P4_187671_649   | NW_004519535.1 | Scaffold5472 | 649                     | CC                              | TT              | 1947057647               |
| SNP_P4_187672_658   | NW_004519535.1 | Scaffold5472 | 658                     | AA                              | GG              | 1947057649               |
| SNP_P4_187673_673   | NW_004519535.1 | Scaffold5472 | 673                     | AA                              | CC              | 1947057651               |
| SNP_P4_187674_684   | NW_004519535.1 | Scaffold5472 | 684                     | GG                              | TT              | 1947057653               |
| SNP_P4_187675_825   | NW_004519535.1 | Scaffold5472 | 825                     | TT                              | CC              | 1947057655               |
| SNP_P4_187676_1179  | NW_004519544.1 | Scaffold5484 | 1179                    | TT                              | AA              | 1947057657               |
| SNP_P4_187677_1222  | NW_004519544.1 | Scaffold5484 | 1222                    | AA                              | TT              | 1947057659               |
| SNP_P4_187678_1224  | NW_004519544.1 | Scaffold5484 | 1224                    | AA                              | GG              | 1947057661               |
| SNP_P4_187679_1247  | NW_004519544.1 | Scaffold5484 | 1247                    | AA                              | GG              | 1947057663               |
| SNP_P4_187680_1262  | NW_004519544.1 | Scaffold5484 | 1262                    | TT                              | CC              | 1947057665               |
| SNP_P4_187681_3778  | NW_004519544.1 | Scaffold5484 | 3778                    | CC                              | TT              | 1947057667               |
| SNP_P4_187682_3782  | NW_004519544.1 | Scaffold5484 | 3782                    | TT                              | GG              | 1947057669               |
| SNP_P4_187683_5439  | NW_004519544.1 | Scaffold5484 | 5439                    | GG                              | AA              | 1947057671               |
| SNP_P4_187684_5785  | NW_004519544.1 | Scaffold5484 | 5785                    | GG                              | AA              | 1947057673               |
| SNP_P4_187685_1364  | NW_004519548.1 | Scaffold5489 | 1364                    | CC                              | AA              | 1947057675               |
| SNP_P4_187686_1404  | NW_004519548.1 | Scaffold5489 | 1404                    | CC                              | AA              | 1947057677               |
| SNP_P4_187687_1462  | NW_004519548.1 | Scaffold5489 | 1462                    | AA                              | TT              | 1947057679               |
| SNP_P4_187688_1584  | NW_004519548.1 | Scaffold5489 | 1584                    | TT                              | AA              | 1947057681               |
| SNP_P4_187689_1631  | NW_004519548.1 | Scaffold5489 | 1631                    | GG                              | TT              | 1947057683               |
| SNP_P4_187690_1474  | NW_004519549.1 | Scaffold5490 | 1474                    | AA                              | GG              | 1947057685               |
| SNP_P4_187691_10816 | NW_004519552.1 | Scaffold5493 | 10816                   | GG                              | AA              | 1947057687               |
| SNP_P4_187692_465   | NW_004519553.1 | Scaffold5497 | 465                     | GG                              | AA              | 1947057689               |
| SNP_P4_187693_473   | NW_004519553.1 | Scaffold5497 | 473                     | AA                              | GG              | 1947057691               |
| SNP_P4_187694_590   | NW_004519553.1 | Scaffold5497 | 590                     | CC                              | TT              | 1947057693               |
| SNP_P4_187695_899   | NW_004519553.1 | Scaffold5497 | 899                     | CC                              | GG              | 1947057695               |
| SNP_P4_187699_1482  | NW_004519558.1 | Scaffold5504 | 1482                    | TT                              | AA              | 1947057697               |

| SNPs IDs            | Chromosome IDs | Chromosomes  | Physical positions (bp) | CDC Frontier (Reference genome) | (ILWC46 & LPNB) | NCBI SNPdb Accession IDs |
|---------------------|----------------|--------------|-------------------------|---------------------------------|-----------------|--------------------------|
| SNP_P4_187700_672   | NW_004519561.1 | Scaffold5509 | 672                     | AA                              | GG              | 1947057699               |
| SNP_P4_187701_673   | NW_004519561.1 | Scaffold5509 | 673                     | CC                              | TT              | 1947057701               |
| SNP_P4_187702_1272  | NW_004519561.1 | Scaffold5509 | 1272                    | GG                              | TT              | 1947057703               |
| SNP_P4_187703_2401  | NW_004519561.1 | Scaffold5509 | 2401                    | AA                              | TT              | 1947057705               |
| SNP_P4_187704_2418  | NW_004519561.1 | Scaffold5509 | 2418                    | GG                              | AA              | 1947057707               |
| SNP_P4_187706_12847 | NW_004519562.1 | Scaffold5511 | 12847                   | GG                              | AA              | 1947057709               |
| SNP_P4_187707_12855 | NW_004519562.1 | Scaffold5511 | 12855                   | GG                              | TT              | 1947057711               |
| SNP_P4_187708_14208 | NW_004519562.1 | Scaffold5511 | 14208                   | TT                              | AA              | 1947057713               |
| SNP_P4_187709_14483 | NW_004519562.1 | Scaffold5511 | 14483                   | GG                              | AA              | 1947057715               |
| SNP_P4_187710_3590  | NW_004519565.1 | Scaffold5514 | 3590                    | AA                              | CC              | 1947057717               |
| SNP_P4_187711_3843  | NW_004519565.1 | Scaffold5514 | 3843                    | AA                              | CC              | 1947057719               |
| SNP_P4_187712_3865  | NW_004519565.1 | Scaffold5514 | 3865                    | AA                              | GG              | 1947057721               |
| SNP_P4_187713_3897  | NW_004519565.1 | Scaffold5514 | 3897                    | TT                              | CC              | 1947057723               |
| SNP_P4_187714_3928  | NW_004519565.1 | Scaffold5514 | 3928                    | TT                              | AA              | 1947057725               |
| SNP_P4_187715_3966  | NW_004519565.1 | Scaffold5514 | 3966                    | CC                              | TT              | 1947057727               |
| SNP_P4_187716_3975  | NW_004519565.1 | Scaffold5514 | 3975                    | AA                              | CC              | 1947057729               |
| SNP_P4_187717_4125  | NW_004519565.1 | Scaffold5514 | 4125                    | AA                              | GG              | 1947057731               |
| SNP_P4_187718_5861  | NW_004519565.1 | Scaffold5514 | 5861                    | TT                              | AA              | 1947057733               |
| SNP_P4_187719_5870  | NW_004519565.1 | Scaffold5514 | 5870                    | TT                              | CC              | 1947057735               |
| SNP_P4_187720_5888  | NW_004519565.1 | Scaffold5514 | 5888                    | GG                              | TT              | 1947057737               |
| SNP_P4_187721_5907  | NW_004519565.1 | Scaffold5514 | 5907                    | TT                              | CC              | 1947057739               |
| SNP_P4_187722_5924  | NW_004519565.1 | Scaffold5514 | 5924                    | AA                              | GG              | 1947057741               |
| SNP_P4_187723_20902 | NW_004519578.1 | Scaffold5537 | 20902                   | GG                              | TT              | 1947057743               |
| SNP_P4_187724_64    | NW_004519579.1 | Scaffold5538 | 64                      | TT                              | CC              | 1947057745               |
| SNP_P4_187725_97    | NW_004519579.1 | Scaffold5538 | 97                      | TT                              | CC              | 1947057747               |
| SNP_P4_187726_102   | NW_004519579.1 | Scaffold5538 | 102                     | AA                              | GG              | 1947057749               |
| SNP_P4_187727_224   | NW_004519579.1 | Scaffold5538 | 224                     | TT                              | AA              | 1947057751               |
| SNP_P4_187728_232   | NW_004519579.1 | Scaffold5538 | 232                     | AA                              | TT              | 1947057753               |
| SNP_P4_187729_1111  | NW_004519579.1 | Scaffold5538 | 1111                    | AA                              | GG              | 1947057755               |
| SNP_P4_187730_1112  | NW_004519579.1 | Scaffold5538 | 1112                    | AA                              | TT              | 1947057757               |
| SNP_P4_187731_1163  | NW_004519579.1 | Scaffold5538 | 1163                    | GG                              | AA              | 1947057759               |
| SNP_P4_187732_1206  | NW_004519579.1 | Scaffold5538 | 1206                    | AA                              | TT              | 1947057761               |
| SNP_P4_187733_1280  | NW_004519579.1 | Scaffold5538 | 1280                    | CC                              | TT              | 1947057763               |
| SNP_P4_187734_1319  | NW_004519579.1 | Scaffold5538 | 1319                    | AA                              | TT              | 1947057765               |
| SNP_P4_187735_1410  | NW_004519579.1 | Scaffold5538 | 1410                    | AA                              | GG              | 1947057767               |
| SNP_P4_187736_1994  | NW_004519579.1 | Scaffold5538 | 1994                    | AA                              | TT              | 1947057769               |
| SNP_P4_187737_2026  | NW_004519579.1 | Scaffold5538 | 2026                    | AA                              | GG              | 1947057771               |
| SNP_P4_187738_31    | NW_004519580.1 | Scaffold5541 | 31                      | TT                              | CC              | 1947057773               |
| SNP_P4_187739_35    | NW_004519580.1 | Scaffold5541 | 35                      | CC                              | TT              | 1947057775               |
| SNP_P4_187740_64    | NW_004519580.1 | Scaffold5541 | 64                      | AA                              | CC              | 1947057777               |
| SNP_P4_187741_72    | NW_004519580.1 | Scaffold5541 | 72                      | AA                              | TT              | 1947057779               |
| SNP_P4_187743_84    | NW_004519580.1 | Scaffold5541 | 84                      | GG                              | AA              | 1947057782               |

| SNPs IDs           | Chromosome IDs | Chromosomes  | Physical positions (bp) | CDC Frontier (Reference genome) | (ILWC46 & LPNB) | NCBI SNPdb Accession IDs |
|--------------------|----------------|--------------|-------------------------|---------------------------------|-----------------|--------------------------|
| SNP_P4_187744_131  | NW_004519580.1 | Scaffold5541 | 131                     | TT                              | CC              | 1947057784               |
| SNP_P4_187745_142  | NW_004519580.1 | Scaffold5541 | 142                     | GG                              | CC              | 1947057786               |
| SNP_P4_187746_153  | NW_004519580.1 | Scaffold5541 | 153                     | GG                              | TT              | 1947057788               |
| SNP_P4_187747_388  | NW_004519580.1 | Scaffold5541 | 388                     | GG                              | TT              | 1947057790               |
| SNP_P4_187748_627  | NW_004519580.1 | Scaffold5541 | 627                     | AA                              | GG              | 1947057792               |
| SNP_P4_187749_702  | NW_004519580.1 | Scaffold5541 | 702                     | AA                              | TT              | 1947057794               |
| SNP_P4_187750_722  | NW_004519580.1 | Scaffold5541 | 722                     | GG                              | AA              | 1947057796               |
| SNP_P4_187751_723  | NW_004519580.1 | Scaffold5541 | 723                     | GG                              | TT              | 1947057798               |
| SNP_P4_187752_729  | NW_004519580.1 | Scaffold5541 | 729                     | AA                              | GG              | 1947057800               |
| SNP_P4_187753_760  | NW_004519580.1 | Scaffold5541 | 760                     | GG                              | AA              | 1947057802               |
| SNP_P4_187754_775  | NW_004519580.1 | Scaffold5541 | 775                     | TT                              | AA              | 1947057804               |
| SNP_P4_187755_778  | NW_004519580.1 | Scaffold5541 | 778                     | TT                              | AA              | 1947057806               |
| SNP_P4_187756_819  | NW_004519580.1 | Scaffold5541 | 819                     | TT                              | CC              | 1947057808               |
| SNP_P4_187757_875  | NW_004519580.1 | Scaffold5541 | 875                     | TT                              | CC              | 1947057810               |
| SNP_P4_187758_913  | NW_004519580.1 | Scaffold5541 | 913                     | GG                              | AA              | 1947057812               |
| SNP_P4_187759_1051 | NW_004519580.1 | Scaffold5541 | 1051                    | AA                              | GG              | 1947057814               |
| SNP_P4_187760_1100 | NW_004519580.1 | Scaffold5541 | 1100                    | AA                              | CC              | 1947057816               |
| SNP_P4_187761_1146 | NW_004519580.1 | Scaffold5541 | 1146                    | AA                              | GG              | 1947057818               |
| SNP_P4_187762_1166 | NW_004519580.1 | Scaffold5541 | 1166                    | TT                              | AA              | 1947057820               |
| SNP_P4_187763_1208 | NW_004519580.1 | Scaffold5541 | 1208                    | TT                              | CC              | 1947057822               |
| SNP_P4_187764_1228 | NW_004519580.1 | Scaffold5541 | 1228                    | AA                              | TT              | 1947057824               |
| SNP_P4_187765_187  | NW_004519582.1 | Scaffold5545 | 187                     | GG                              | AA              | 1947057826               |
| SNP_P4_187766_202  | NW_004519582.1 | Scaffold5545 | 202                     | CC                              | GG              | 1947057828               |
| SNP_P4_187768_466  | NW_004519586.1 | Scaffold5549 | 466                     | GG                              | TT              | 1947057830               |
| SNP_P4_187769_805  | NW_004519586.1 | Scaffold5549 | 805                     | AA                              | CC              | 1947057832               |
| SNP_P4_187771_105  | NW_004519587.1 | Scaffold5551 | 105                     | GG                              | AA              | 1947057834               |
| SNP_P4_187772_116  | NW_004519587.1 | Scaffold5551 | 116                     | AA                              | CC              | 1947057836               |
| SNP_P4_187773_144  | NW_004519587.1 | Scaffold5551 | 144                     | AA                              | GG              | 1947057838               |
| SNP_P4_187774_307  | NW_004519587.1 | Scaffold5551 | 307                     | CC                              | GG              | 1947057840               |
| SNP_P4_187775_368  | NW_004519587.1 | Scaffold5551 | 368                     | AA                              | GG              | 1947057842               |
| SNP_P4_187776_376  | NW_004519587.1 | Scaffold5551 | 376                     | AA                              | CC              | 1947057844               |
| SNP_P4_187777_410  | NW_004519587.1 | Scaffold5551 | 410                     | CC                              | TT              | 1947057846               |
| SNP_P4_187778_507  | NW_004519587.1 | Scaffold5551 | 507                     | TT                              | CC              | 1947057848               |
| SNP_P4_187779_510  | NW_004519587.1 | Scaffold5551 | 510                     | GG                              | CC              | 1947057850               |
| SNP_P4_187780_512  | NW_004519587.1 | Scaffold5551 | 512                     | CC                              | AA              | 1947057852               |
| SNP_P4_187782_670  | NW_004519587.1 | Scaffold5551 | 670                     | CC                              | TT              | 1947057854               |
| SNP_P4_187783_721  | NW_004519587.1 | Scaffold5551 | 721                     | CC                              | GG              | 1947057856               |
| SNP_P4_187785_783  | NW_004519587.1 | Scaffold5551 | 783                     | TT                              | CC              | 1947057858               |
| SNP_P4_187787_843  | NW_004519587.1 | Scaffold5551 | 843                     | AA                              | GG              | 1947057860               |
| SNP_P4_187789_194  | NW_004519589.1 | Scaffold5553 | 194                     | GG                              | AA              | 1947057862               |
| SNP_P4_187790_337  | NW_004519589.1 | Scaffold5553 | 337                     | TT                              | AA              | 1947057864               |
| SNP_P4_187791_406  | NW_004519589.1 | Scaffold5553 | 406                     | GG                              | AA              | 1947057866               |

| SNPs IDs            | Chromosome IDs | Chromosomes  | Physical positions (bp) | CDC Frontier (Reference genome) | (ILWC46 & LPNB) | NCBI SNPdb Accession IDs |
|---------------------|----------------|--------------|-------------------------|---------------------------------|-----------------|--------------------------|
| SNP_P4_187792_413   | NW_004519589.1 | Scaffold5553 | 413                     | AA                              | CC              | 1947057868               |
| SNP_P4_187793_435   | NW_004519589.1 | Scaffold5553 | 435                     | GG                              | AA              | 1947057870               |
| SNP_P4_187794_457   | NW_004519589.1 | Scaffold5553 | 457                     | GG                              | TT              | 1947057872               |
| SNP_P4_187795_467   | NW_004519589.1 | Scaffold5553 | 467                     | GG                              | AA              | 1947057874               |
| SNP_P4_187796_499   | NW_004519589.1 | Scaffold5553 | 499                     | GG                              | TT              | 1947057876               |
| SNP_P4_187797_521   | NW_004519589.1 | Scaffold5553 | 521                     | TT                              | CC              | 1947057878               |
| SNP_P4_187798_571   | NW_004519589.1 | Scaffold5553 | 571                     | TT                              | GG              | 1947057880               |
| SNP_P4_187799_582   | NW_004519589.1 | Scaffold5553 | 582                     | AA                              | TT              | 1947057882               |
| SNP_P4_187800_619   | NW_004519589.1 | Scaffold5553 | 619                     | AA                              | TT              | 1947057884               |
| SNP_P4_187801_630   | NW_004519589.1 | Scaffold5553 | 630                     | CC                              | TT              | 1947057886               |
| SNP_P4_187802_694   | NW_004519589.1 | Scaffold5553 | 694                     | AA                              | GG              | 1947057888               |
| SNP_P4_187803_709   | NW_004519589.1 | Scaffold5553 | 709                     | TT                              | GG              | 1947057890               |
| SNP_P4_187804_720   | NW_004519589.1 | Scaffold5553 | 720                     | AA                              | TT              | 1947057892               |
| SNP_P4_187805_10880 | NW_004519589.1 | Scaffold5553 | 10880                   | AA                              | CC              | 1947057894               |
| SNP_P4_187806_12385 | NW_004519589.1 | Scaffold5553 | 12385                   | CC                              | TT              | 1947057896               |
| SNP_P4_187807_12679 | NW_004519589.1 | Scaffold5553 | 12679                   | AA                              | TT              | 1947057898               |
| SNP_P4_187808_12737 | NW_004519589.1 | Scaffold5553 | 12737                   | CC                              | TT              | 1947057900               |
| SNP_P4_187809_591   | NW_004519595.1 | Scaffold5562 | 591                     | CC                              | TT              | 1947057902               |
| SNP_P4_187810_573   | NW_004519599.1 | Scaffold5569 | 573                     | GG                              | AA              | 1947057904               |
| SNP_P4_187811_580   | NW_004519599.1 | Scaffold5569 | 580                     | GG                              | CC              | 1947057906               |
| SNP_P4_187812_857   | NW_004519599.1 | Scaffold5569 | 857                     | GG                              | CC              | 1947057908               |
| SNP_P4_187813_891   | NW_004519599.1 | Scaffold5569 | 891                     | AA                              | CC              | 1947057910               |
| SNP_P4_187814_934   | NW_004519599.1 | Scaffold5569 | 934                     | CC                              | AA              | 1947057912               |
| SNP_P4_187816_685   | NW_004519604.1 | Scaffold5579 | 685                     | CC                              | TT              | 1947057914               |
| SNP_P4_187817_695   | NW_004519604.1 | Scaffold5579 | 695                     | AA                              | CC              | 1947057916               |
| SNP_P4_187818_1092  | NW_004519605.1 | Scaffold5580 | 1092                    | GG                              | AA              | 1947057918               |
| SNP_P4_187819_1403  | NW_004519605.1 | Scaffold5580 | 1403                    | GG                              | AA              | 1947057920               |
| SNP_P4_187820_1536  | NW_004519609.1 | Scaffold5587 | 1536                    | AA                              | TT              | 1947057922               |
| SNP_P4_187822_330   | NW_004519615.1 | Scaffold5593 | 330                     | AA                              | CC              | 1947057924               |
| SNP_P4_187823_338   | NW_004519615.1 | Scaffold5593 | 338                     | GG                              | CC              | 1947057926               |
| SNP_P4_187824_340   | NW_004519615.1 | Scaffold5593 | 340                     | TT                              | CC              | 1947057928               |
| SNP_P4_187825_418   | NW_004519615.1 | Scaffold5593 | 418                     | AA                              | GG              | 1947057930               |
| SNP_P4_187826_477   | NW_004519615.1 | Scaffold5593 | 477                     | TT                              | CC              | 1947057932               |
| SNP_P4_187827_482   | NW_004519615.1 | Scaffold5593 | 482                     | CC                              | TT              | 1947057934               |
| SNP_P4_187828_527   | NW_004519615.1 | Scaffold5593 | 527                     | CC                              | TT              | 1947057936               |
| SNP_P4_187829_529   | NW_004519615.1 | Scaffold5593 | 529                     | GG                              | AA              | 1947057938               |
| SNP_P4_187830_543   | NW_004519615.1 | Scaffold5593 | 543                     | TT                              | CC              | 1947057940               |
| SNP_P4_187831_544   | NW_004519615.1 | Scaffold5593 | 544                     | AA                              | GG              | 1947057942               |
| SNP_P4_187832_706   | NW_004519615.1 | Scaffold5593 | 706                     | CC                              | TT              | 1947057944               |
| SNP_P4_187833_66    | NW_004519617.1 | Scaffold5596 | 66                      | TT                              | AA              | 1947057946               |
| SNP_P4_187834_72    | NW_004519617.1 | Scaffold5596 | 72                      | AA                              | GG              | 1947057948               |
| SNP_P4_187835_358   | NW_004519617.1 | Scaffold5596 | 358                     | AA                              | GG              | 1947057950               |

| SNPs IDs            | Chromosome IDs | Chromosomes  | Physical positions (bp) | CDC Frontier (Reference genome) | (ILWC46 & LPNB) | NCBI SNPdb Accession IDs |
|---------------------|----------------|--------------|-------------------------|---------------------------------|-----------------|--------------------------|
| SNP_P4_187836_486   | NW_004519617.1 | Scaffold5596 | 486                     | TT                              | AA              | 1947057952               |
| SNP_P4_187837_563   | NW_004519617.1 | Scaffold5596 | 563                     | AA                              | GG              | 1947057954               |
| SNP_P4_187838_981   | NW_004519617.1 | Scaffold5596 | 981                     | TT                              | CC              | 1947057956               |
| SNP_P4_187839_985   | NW_004519618.1 | Scaffold5598 | 985                     | TT                              | CC              | 1947057958               |
| SNP_P4_187840_986   | NW_004519618.1 | Scaffold5598 | 986                     | AA                              | TT              | 1947057960               |
| SNP_P4_187841_987   | NW_004519618.1 | Scaffold5598 | 987                     | TT                              | AA              | 1947057962               |
| SNP_P4_187842_989   | NW_004519618.1 | Scaffold5598 | 989                     | TT                              | CC              | 1947057964               |
| SNP_P4_187843_3147  | NW_004519618.1 | Scaffold5598 | 3147                    | TT                              | GG              | 1947057966               |
| SNP_P4_187844_3177  | NW_004519618.1 | Scaffold5598 | 3177                    | AA                              | TT              | 1947057968               |
| SNP_P4_187845_3276  | NW_004519618.1 | Scaffold5598 | 3276                    | TT                              | GG              | 1947057970               |
| SNP_P4_187846_3492  | NW_004519618.1 | Scaffold5598 | 3492                    | TT                              | CC              | 1947057972               |
| SNP_P4_187847_3773  | NW_004519618.1 | Scaffold5598 | 3773                    | AA                              | CC              | 1947057974               |
| SNP_P4_187848_4564  | NW_004519618.1 | Scaffold5598 | 4564                    | AA                              | TT              | 1947057976               |
| SNP_P4_187849_4582  | NW_004519618.1 | Scaffold5598 | 4582                    | TT                              | CC              | 1947057978               |
| SNP_P4_187850_4892  | NW_004519618.1 | Scaffold5598 | 4892                    | CC                              | GG              | 1947057980               |
| SNP_P4_187851_5005  | NW_004519618.1 | Scaffold5598 | 5005                    | TT                              | CC              | 1947057982               |
| SNP_P4_187852_5097  | NW_004519618.1 | Scaffold5598 | 5097                    | AA                              | GG              | 1947057984               |
| SNP_P4_187853_5142  | NW_004519618.1 | Scaffold5598 | 5142                    | CC                              | TT              | 1947057986               |
| SNP_P4_187854_5189  | NW_004519618.1 | Scaffold5598 | 5189                    | AA                              | CC              | 1947057988               |
| SNP_P4_187855_5240  | NW_004519618.1 | Scaffold5598 | 5240                    | GG                              | CC              | 1947057990               |
| SNP_P4_187856_5316  | NW_004519618.1 | Scaffold5598 | 5316                    | CC                              | AA              | 1947057992               |
| SNP_P4_187857_5411  | NW_004519618.1 | Scaffold5598 | 5411                    | CC                              | AA              | 1947057994               |
| SNP_P4_187858_5920  | NW_004519618.1 | Scaffold5598 | 5920                    | CC                              | TT              | 1947057996               |
| SNP_P4_187859_6165  | NW_004519618.1 | Scaffold5598 | 6165                    | CC                              | TT              | 1947057998               |
| SNP_P4_187860_6433  | NW_004519618.1 | Scaffold5598 | 6433                    | AA                              | CC              | 1947058000               |
| SNP_P4_187861_6518  | NW_004519618.1 | Scaffold5598 | 6518                    | CC                              | TT              | 1947058002               |
| SNP_P4_187862_6739  | NW_004519618.1 | Scaffold5598 | 6739                    | TT                              | CC              | 1947058004               |
| SNP_P4_187863_7281  | NW_004519618.1 | Scaffold5598 | 7281                    | GG                              | AA              | 1947058006               |
| SNP_P4_187864_7383  | NW_004519618.1 | Scaffold5598 | 7383                    | GG                              | AA              | 1947058008               |
| SNP_P4_187865_7404  | NW_004519618.1 | Scaffold5598 | 7404                    | AA                              | CC              | 1947058010               |
| SNP_P4_187866_7421  | NW_004519618.1 | Scaffold5598 | 7421                    | TT                              | AA              | 1947058012               |
| SNP_P4_187867_7524  | NW_004519618.1 | Scaffold5598 | 7524                    | GG                              | AA              | 1947058014               |
| SNP_P4_187868_7530  | NW_004519618.1 | Scaffold5598 | 7530                    | AA                              | CC              | 1947058016               |
| SNP_P4_187869_7887  | NW_004519618.1 | Scaffold5598 | 7887                    | GG                              | CC              | 1947058018               |
| SNP_P4_187870_7987  | NW_004519618.1 | Scaffold5598 | 7987                    | GG                              | CC              | 1947058020               |
| SNP_P4_187871_8291  | NW_004519618.1 | Scaffold5598 | 8291                    | GG                              | AA              | 1947058022               |
| SNP_P4_187872_8809  | NW_004519618.1 | Scaffold5598 | 8809                    | TT                              | AA              | 1947058024               |
| SNP_P4_187873_8893  | NW_004519618.1 | Scaffold5598 | 8893                    | CC                              | AA              | 1947058026               |
| SNP_P4_187874_11178 | NW_004519618.1 | Scaffold5598 | 11178                   | AA                              | GG              | 1947058028               |
| SNP_P4_187875_11909 | NW_004519618.1 | Scaffold5598 | 11909                   | AA                              | GG              | 1947058030               |
| SNP_P4_187876_13174 | NW_004519618.1 | Scaffold5598 | 13174                   | AA                              | GG              | 1947058032               |
| SNP_P4_187877_13189 | NW_004519618.1 | Scaffold5598 | 13189                   | TT                              | AA              | 1947058034               |

| SNPs IDs            | Chromosome IDs | Chromosomes  | Physical positions (bp) | CDC Frontier (Reference genome) | (ILWC46 & LPNB) | NCBI SNPdb Accession IDs |
|---------------------|----------------|--------------|-------------------------|---------------------------------|-----------------|--------------------------|
| SNP_P4_187878_13207 | NW_004519618.1 | Scaffold5598 | 13207                   | TT                              | GG              | 1947058036               |
| SNP_P4_187879_13222 | NW_004519618.1 | Scaffold5598 | 13222                   | AA                              | GG              | 1947058039               |
| SNP_P4_187880_13342 | NW_004519618.1 | Scaffold5598 | 13342                   | CC                              | GG              | 1947058041               |
| SNP_P4_187881_13377 | NW_004519618.1 | Scaffold5598 | 13377                   | CC                              | GG              | 1947058043               |
| SNP_P4_187883_13730 | NW_004519618.1 | Scaffold5598 | 13730                   | CC                              | TT              | 1947058045               |
| SNP_P4_187885_750   | NW_004519619.1 | Scaffold5599 | 750                     | AA                              | TT              | 1947058047               |
| SNP_P4_187886_854   | NW_004519619.1 | Scaffold5599 | 854                     | AA                              | CC              | 1947058049               |
| SNP_P4_187887_857   | NW_004519619.1 | Scaffold5599 | 857                     | GG                              | CC              | 1947058051               |
| SNP_P4_187888_5322  | NW_004519619.1 | Scaffold5599 | 5322                    | GG                              | AA              | 1947058053               |
| SNP_P4_187889_5497  | NW_004519619.1 | Scaffold5599 | 5497                    | AA                              | TT              | 1947058055               |
| SNP_P4_187890_5636  | NW_004519619.1 | Scaffold5599 | 5636                    | CC                              | GG              | 1947058057               |
| SNP_P4_187891_5863  | NW_004519619.1 | Scaffold5599 | 5863                    | GG                              | AA              | 1947058059               |
| SNP_P4_187893_635   | NW_004519620.1 | Scaffold5600 | 635                     | CC                              | TT              | 1947058061               |
| SNP_P4_187895_935   | NW_004519620.1 | Scaffold5600 | 935                     | AA                              | TT              | 1947058063               |
| SNP_P4_187896_1030  | NW_004519620.1 | Scaffold5600 | 1030                    | TT                              | AA              | 1947058065               |
| SNP_P4_187897_4140  | NW_004519622.1 | Scaffold5602 | 4140                    | AA                              | GG              | 1947058067               |
| SNP_P4_187898_4166  | NW_004519622.1 | Scaffold5602 | 4166                    | CC                              | TT              | 1947058069               |
| SNP_P4_187899_910   | NW_004519624.1 | Scaffold5605 | 910                     | TT                              | GG              | 1947058071               |
| SNP_P4_187900_321   | NW_004519631.1 | Scaffold5614 | 321                     | AA                              | GG              | 1947058073               |
| SNP_P4_187901_369   | NW_004519631.1 | Scaffold5614 | 369                     | CC                              | TT              | 1947058075               |
| SNP_P4_187902_905   | NW_004519631.1 | Scaffold5614 | 905                     | GG                              | CC              | 1947058077               |
| SNP_P4_187903_3915  | NW_004519631.1 | Scaffold5614 | 3915                    | CC                              | TT              | 1947058079               |
| SNP_P4_187904_3931  | NW_004519631.1 | Scaffold5614 | 3931                    | AA                              | TT              | 1947058081               |
| SNP_P4_187905_4160  | NW_004519631.1 | Scaffold5614 | 4160                    | CC                              | GG              | 1947058083               |
| SNP_P4_187906_4164  | NW_004519631.1 | Scaffold5614 | 4164                    | TT                              | AA              | 1947058085               |
| SNP_P4_187907_4170  | NW_004519631.1 | Scaffold5614 | 4170                    | AA                              | TT              | 1947058087               |
| SNP_P4_187908_4175  | NW_004519631.1 | Scaffold5614 | 4175                    | CC                              | AA              | 1947058090               |
| SNP_P4_187909_4184  | NW_004519631.1 | Scaffold5614 | 4184                    | GG                              | CC              | 1947058092               |
| SNP_P4_187910_4924  | NW_004519631.1 | Scaffold5614 | 4924                    | TT                              | GG              | 1947058094               |
| SNP_P4_187911_5150  | NW_004519631.1 | Scaffold5614 | 5150                    | GG                              | AA              | 1947058096               |
| SNP_P4_187912_5320  | NW_004519631.1 | Scaffold5614 | 5320                    | AA                              | TT              | 1947058098               |
| SNP_P4_187913_5494  | NW_004519631.1 | Scaffold5614 | 5494                    | TT                              | AA              | 1947058100               |
| SNP_P4_187914_5578  | NW_004519631.1 | Scaffold5614 | 5578                    | CC                              | TT              | 1947058102               |
| SNP_P4_187915_5587  | NW_004519631.1 | Scaffold5614 | 5587                    | GG                              | CC              | 1947058104               |
| SNP_P4_187916_5626  | NW_004519631.1 | Scaffold5614 | 5626                    | GG                              | CC              | 1947058106               |
| SNP_P4_187917_998   | NW_004519634.1 | Scaffold5617 | 998                     | AA                              | GG              | 1947058108               |
| SNP_P4_187918_1091  | NW_004519634.1 | Scaffold5617 | 1091                    | GG                              | TT              | 1947058110               |
| SNP_P4_187919_1344  | NW_004519634.1 | Scaffold5617 | 1344                    | AA                              | CC              | 1947058112               |
| SNP_P4_187920_1365  | NW_004519634.1 | Scaffold5617 | 1365                    | TT                              | CC              | 1947058114               |
| SNP_P4_187921_1380  | NW_004519634.1 | Scaffold5617 | 1380                    | GG                              | AA              | 1947058116               |
| SNP_P4_187922_1398  | NW_004519634.1 | Scaffold5617 | 1398                    | TT                              | CC              | 1947058118               |
| SNP_P4_187923_1434  | NW_004519634.1 | Scaffold5617 | 1434                    | AA                              | GG              | 1947058120               |

| SNPs IDs            | Chromosome IDs | Chromosomes  | Physical positions (bp) | CDC Frontier (Reference genome) | (ILWC46 & LPNB) | NCBI SNPdb Accession IDs |
|---------------------|----------------|--------------|-------------------------|---------------------------------|-----------------|--------------------------|
| SNP_P4_187924_1456  | NW_004519634.1 | Scaffold5617 | 1456                    | TT                              | GG              | 1947058122               |
| SNP_P4_187925_1462  | NW_004519634.1 | Scaffold5617 | 1462                    | TT                              | AA              | 1947058124               |
| SNP_P4_187926_1467  | NW_004519634.1 | Scaffold5617 | 1467                    | TT                              | AA              | 1947058126               |
| SNP_P4_187927_50    | NW_004519635.1 | Scaffold5619 | 50                      | GG                              | CC              | 1947058128               |
| SNP_P4_187929_72    | NW_004519635.1 | Scaffold5619 | 72                      | TT                              | CC              | 1947058130               |
| SNP_P4_187930_74    | NW_004519635.1 | Scaffold5619 | 74                      | GG                              | TT              | 1947058132               |
| SNP_P4_187931_463   | NW_004519635.1 | Scaffold5619 | 463                     | TT                              | CC              | 1947058134               |
| SNP_P4_187932_493   | NW_004519635.1 | Scaffold5619 | 493                     | AA                              | CC              | 1947058136               |
| SNP_P4_187933_658   | NW_004519635.1 | Scaffold5619 | 658                     | AA                              | CC              | 1947058138               |
| SNP_P4_187934_1004  | NW_004519635.1 | Scaffold5619 | 1004                    | CC                              | GG              | 1947058140               |
| SNP_P4_187935_1210  | NW_004519635.1 | Scaffold5619 | 1210                    | TT                              | CC              | 1947058142               |
| SNP_P4_187936_1359  | NW_004519635.1 | Scaffold5619 | 1359                    | TT                              | AA              | 1947058144               |
| SNP_P4_187937_983   | NW_004519636.1 | Scaffold5624 | 983                     | CC                              | TT              | 1947058146               |
| SNP_P4_187938_991   | NW_004519636.1 | Scaffold5624 | 991                     | CC                              | TT              | 1947058148               |
| SNP_P4_187939_118   | NW_004519638.1 | Scaffold5627 | 118                     | TT                              | CC              | 1947058150               |
| SNP_P4_187940_164   | NW_004519638.1 | Scaffold5627 | 164                     | AA                              | GG              | 1947058152               |
| SNP_P4_187941_294   | NW_004519638.1 | Scaffold5627 | 294                     | GG                              | AA              | 1947058154               |
| SNP_P4_187942_375   | NW_004519638.1 | Scaffold5627 | 375                     | AA                              | GG              | 1947058156               |
| SNP_P4_187943_380   | NW_004519638.1 | Scaffold5627 | 380                     | TT                              | CC              | 1947058158               |
| SNP_P4_187944_408   | NW_004519638.1 | Scaffold5627 | 408                     | TT                              | AA              | 1947058160               |
| SNP_P4_187945_422   | NW_004519638.1 | Scaffold5627 | 422                     | GG                              | CC              | 1947058162               |
| SNP_P4_187946_428   | NW_004519638.1 | Scaffold5627 | 428                     | AA                              | TT              | 1947058164               |
| SNP_P4_187947_433   | NW_004519638.1 | Scaffold5627 | 433                     | AA                              | GG              | 1947058166               |
| SNP_P4_187948_4631  | NW_004519638.1 | Scaffold5627 | 4631                    | GG                              | AA              | 1947058168               |
| SNP_P4_187949_4699  | NW_004519638.1 | Scaffold5627 | 4699                    | CC                              | AA              | 1947058170               |
| SNP_P4_187950_4705  | NW_004519638.1 | Scaffold5627 | 4705                    | CC                              | TT              | 1947058172               |
| SNP_P4_187951_5499  | NW_004519638.1 | Scaffold5627 | 5499                    | TT                              | CC              | 1947058174               |
| SNP_P4_187952_8232  | NW_004519638.1 | Scaffold5627 | 8232                    | TT                              | AA              | 1947058176               |
| SNP_P4_187953_8705  | NW_004519638.1 | Scaffold5627 | 8705                    | AA                              | CC              | 1947058178               |
| SNP_P4_187954_10362 | NW_004519638.1 | Scaffold5627 | 10362                   | GG                              | AA              | 1947058180               |
| SNP_P4_187955_10544 | NW_004519638.1 | Scaffold5627 | 10544                   | AA                              | GG              | 1947058182               |
| SNP_P4_187956_10741 | NW_004519638.1 | Scaffold5627 | 10741                   | AA                              | GG              | 1947058184               |
| SNP_P4_187957_390   | NW_004519641.1 | Scaffold5634 | 390                     | CC                              | TT              | 1947058186               |
| SNP_P4_187958_460   | NW_004519641.1 | Scaffold5634 | 460                     | TT                              | AA              | 1947058187               |
| SNP_P4_187959_748   | NW_004519649.1 | Scaffold5647 | 748                     | TT                              | CC              | 1947058188               |
| SNP_P4_187960_869   | NW_004519649.1 | Scaffold5647 | 869                     | TT                              | CC              | 1947058189               |
| SNP_P4_187961_2370  | NW_004519652.1 | Scaffold5650 | 2370                    | GG                              | AA              | 1947058190               |
| SNP_P4_187962_2774  | NW_004519652.1 | Scaffold5650 | 2774                    | CC                              | AA              | 1947058191               |
| SNP_P4_187963_2808  | NW_004519652.1 | Scaffold5650 | 2808                    | TT                              | AA              | 1947058192               |
| SNP_P4_187964_3078  | NW_004519652.1 | Scaffold5650 | 3078                    | AA                              | GG              | 1947058193               |
| SNP_P4_187965_3081  | NW_004519652.1 | Scaffold5650 | 3081                    | AA                              | CC              | 1947058194               |
| SNP_P4_187966_1043  | NW_004519654.1 | Scaffold5653 | 1043                    | CC                              | TT              | 1947058195               |



| SNPs IDs            | Chromosome IDs | Chromosomes  | Physical positions (bp) | CDC Frontier (Reference genome) | (ILWC46 & LPNB) | NCBI SNPdb Accession IDs |
|---------------------|----------------|--------------|-------------------------|---------------------------------|-----------------|--------------------------|
| SNP_P4_187967_1470  | NW_004519654.1 | Scaffold5653 | 1470                    | CC                              | GG              | 1947058197               |
| SNP_P4_187968_1528  | NW_004519654.1 | Scaffold5653 | 1528                    | AA                              | TT              | 1947058199               |
| SNP_P4_187969_1601  | NW_004519654.1 | Scaffold5653 | 1601                    | AA                              | CC              | 1947058201               |
| SNP_P4_187970_30236 | NW_004519654.1 | Scaffold5653 | 30236                   | AA                              | CC              | 1947058203               |
| SNP_P4_187971_30268 | NW_004519654.1 | Scaffold5653 | 30268                   | GG                              | AA              | 1947058205               |
| SNP_P4_187972_30328 | NW_004519654.1 | Scaffold5653 | 30328                   | CC                              | TT              | 1947058207               |
| SNP_P4_187973_30434 | NW_004519654.1 | Scaffold5653 | 30434                   | CC                              | TT              | 1947058209               |
| SNP_P4_187974_30515 | NW_004519654.1 | Scaffold5653 | 30515                   | CC                              | TT              | 1947058211               |
| SNP_P4_187975_30589 | NW_004519654.1 | Scaffold5653 | 30589                   | TT                              | CC              | 1947058213               |
| SNP_P4_187976_612   | NW_004519657.1 | Scaffold5656 | 612                     | GG                              | AA              | 1947058215               |
| SNP_P4_187977_633   | NW_004519657.1 | Scaffold5656 | 633                     | AA                              | CC              | 1947058217               |
| SNP_P4_187978_1194  | NW_004519663.1 | Scaffold5665 | 1194                    | TT                              | AA              | 1947058219               |
| SNP_P4_187979_864   | NW_004519664.1 | Scaffold5666 | 864                     | AA                              | GG              | 1947058221               |
| SNP_P4_187980_973   | NW_004519664.1 | Scaffold5666 | 973                     | GG                              | AA              | 1947058223               |
| SNP_P4_187981_998   | NW_004519664.1 | Scaffold5666 | 998                     | TT                              | CC              | 1947058225               |
| SNP_P4_187982_1089  | NW_004519664.1 | Scaffold5666 | 1089                    | TT                              | CC              | 1947058227               |
| SNP_P4_187983_1110  | NW_004519664.1 | Scaffold5666 | 1110                    | CC                              | TT              | 1947058229               |
| SNP_P4_187984_1167  | NW_004519664.1 | Scaffold5666 | 1167                    | CC                              | TT              | 1947058231               |
| SNP_P4_187985_1262  | NW_004519664.1 | Scaffold5666 | 1262                    | CC                              | GG              | 1947058233               |
| SNP_P4_187986_1305  | NW_004519664.1 | Scaffold5666 | 1305                    | CC                              | AA              | 1947058235               |
| SNP_P4_187987_2296  | NW_004519667.1 | Scaffold5671 | 2296                    | TT                              | CC              | 1947058237               |
| SNP_P4_187988_2344  | NW_004519667.1 | Scaffold5671 | 2344                    | AA                              | TT              | 1947058239               |
| SNP_P4_187989_2356  | NW_004519667.1 | Scaffold5671 | 2356                    | CC                              | GG              | 1947058241               |
| SNP_P4_187990_1611  | NW_004519669.1 | Scaffold5673 | 1611                    | GG                              | CC              | 1947058243               |
| SNP_P4_187991_3102  | NW_004519670.1 | Scaffold5674 | 3102                    | GG                              | AA              | 1947058245               |
| SNP_P4_187992_15703 | NW_004519670.1 | Scaffold5674 | 15703                   | TT                              | GG              | 1947058247               |
| SNP_P4_187993_287   | NW_004519673.1 | Scaffold5679 | 287                     | AA                              | GG              | 1947058249               |
| SNP_P4_187994_395   | NW_004519673.1 | Scaffold5679 | 395                     | CC                              | TT              | 1947058251               |
| SNP_P4_187995_424   | NW_004519673.1 | Scaffold5679 | 424                     | GG                              | CC              | 1947058253               |
| SNP_P4_187996_441   | NW_004519673.1 | Scaffold5679 | 441                     | TT                              | GG              | 1947058255               |
| SNP_P4_187997_456   | NW_004519673.1 | Scaffold5679 | 456                     | CC                              | TT              | 1947058257               |
| SNP_P4_187998_476   | NW_004519673.1 | Scaffold5679 | 476                     | GG                              | AA              | 1947058259               |
| SNP_P4_187999_525   | NW_004519673.1 | Scaffold5679 | 525                     | GG                              | AA              | 1947058261               |
| SNP_P4_188001_944   | NW_004519678.1 | Scaffold5687 | 944                     | CC                              | GG              | 1947058263               |
| SNP_P4_188002_1232  | NW_004519678.1 | Scaffold5687 | 1232                    | AA                              | GG              | 1947058266               |
| SNP_P4_188003_1296  | NW_004519678.1 | Scaffold5687 | 1296                    | AA                              | TT              | 1947058268               |
| SNP_P4_188004_3064  | NW_004519678.1 | Scaffold5687 | 3064                    | AA                              | TT              | 1947058270               |
| SNP_P4_188005_73    | NW_004519680.1 | Scaffold5691 | 73                      | AA                              | TT              | 1947058272               |
| SNP_P4_188006_362   | NW_004519680.1 | Scaffold5691 | 362                     | TT                              | GG              | 1947058274               |
| SNP_P4_188007_1055  | NW_004519680.1 | Scaffold5691 | 1055                    | TT                              | AA              | 1947058276               |
| SNP_P4_188008_1191  | NW_004519682.1 | Scaffold5694 | 1191                    | GG                              | TT              | 1947058278               |
| SNP_P4_188009_1480  | NW_004519682.1 | Scaffold5694 | 1480                    | TT                              | CC              | 1947058279               |

| SNPs IDs            | Chromosome IDs | Chromosomes  | Physical positions (bp) | CDC Frontier (Reference genome) | (ILWC46 & LPNB) | NCBI SNPdb Accession IDs |
|---------------------|----------------|--------------|-------------------------|---------------------------------|-----------------|--------------------------|
| SNP_P4_188010_571   | NW_004519684.1 | Scaffold5698 | 571                     | GG                              | AA              | 1947058281               |
| SNP_P4_188011_1451  | NW_004519684.1 | Scaffold5698 | 1451                    | AA                              | CC              | 1947058283               |
| SNP_P4_188012_1462  | NW_004519684.1 | Scaffold5698 | 1462                    | AA                              | TT              | 1947058285               |
| SNP_P4_188013_1717  | NW_004519684.1 | Scaffold5698 | 1717                    | GG                              | AA              | 1947058287               |
| SNP_P4_188014_1774  | NW_004519684.1 | Scaffold5698 | 1774                    | GG                              | AA              | 1947058289               |
| SNP_P4_188015_3411  | NW_004519684.1 | Scaffold5698 | 3411                    | AA                              | GG              | 1947058291               |
| SNP_P4_188016_101   | NW_004519685.1 | Scaffold5699 | 101                     | AA                              | GG              | 1947058293               |
| SNP_P4_188017_102   | NW_004519685.1 | Scaffold5699 | 102                     | AA                              | TT              | 1947058295               |
| SNP_P4_188018_701   | NW_004519685.1 | Scaffold5699 | 701                     | TT                              | GG              | 1947058297               |
| SNP_P4_188019_709   | NW_004519685.1 | Scaffold5699 | 709                     | TT                              | GG              | 1947058299               |
| SNP_P4_188020_713   | NW_004519685.1 | Scaffold5699 | 713                     | AA                              | CC              | 1947058301               |
| SNP_P4_188021_738   | NW_004519685.1 | Scaffold5699 | 738                     | CC                              | TT              | 1947058303               |
| SNP_P4_188022_64    | NW_004519686.1 | Scaffold5700 | 64                      | TT                              | AA              | 1947058305               |
| SNP_P4_188023_121   | NW_004519686.1 | Scaffold5700 | 121                     | TT                              | AA              | 1947058307               |
| SNP_P4_188024_324   | NW_004519686.1 | Scaffold5700 | 324                     | TT                              | AA              | 1947058309               |
| SNP_P4_188025_8079  | NW_004519686.1 | Scaffold5700 | 8079                    | GG                              | AA              | 1947058311               |
| SNP_P4_188027_8225  | NW_004519686.1 | Scaffold5700 | 8225                    | TT                              | AA              | 1947058313               |
| SNP_P4_188028_8236  | NW_004519686.1 | Scaffold5700 | 8236                    | GG                              | TT              | 1947058315               |
| SNP_P4_188029_64    | NW_004519689.1 | Scaffold5703 | 64                      | CC                              | AA              | 1947058317               |
| SNP_P4_188030_103   | NW_004519689.1 | Scaffold5703 | 103                     | CC                              | AA              | 1947058319               |
| SNP_P4_188032_155   | NW_004519689.1 | Scaffold5703 | 155                     | TT                              | AA              | 1947058321               |
| SNP_P4_188033_3508  | NW_004519690.1 | Scaffold5704 | 3508                    | GG                              | TT              | 1947058323               |
| SNP_P4_188034_3514  | NW_004519690.1 | Scaffold5704 | 3514                    | AA                              | CC              | 1947058325               |
| SNP_P4_188035_3552  | NW_004519690.1 | Scaffold5704 | 3552                    | AA                              | CC              | 1947058327               |
| SNP_P4_188036_3560  | NW_004519690.1 | Scaffold5704 | 3560                    | AA                              | TT              | 1947058329               |
| SNP_P4_188037_3575  | NW_004519690.1 | Scaffold5704 | 3575                    | AA                              | TT              | 1947058331               |
| SNP_P4_188038_3581  | NW_004519690.1 | Scaffold5704 | 3581                    | TT                              | AA              | 1947058333               |
| SNP_P4_188039_3587  | NW_004519690.1 | Scaffold5704 | 3587                    | GG                              | CC              | 1947058335               |
| SNP_P4_188040_3589  | NW_004519690.1 | Scaffold5704 | 3589                    | GG                              | AA              | 1947058337               |
| SNP_P4_188041_3590  | NW_004519690.1 | Scaffold5704 | 3590                    | TT                              | AA              | 1947058339               |
| SNP_P4_188042_725   | NW_004519692.1 | Scaffold5709 | 725                     | GG                              | AA              | 1947058341               |
| SNP_P4_188043_762   | NW_004519692.1 | Scaffold5709 | 762                     | AA                              | GG              | 1947058343               |
| SNP_P4_188044_969   | NW_004519692.1 | Scaffold5709 | 969                     | AA                              | TT              | 1947058345               |
| SNP_P4_188045_977   | NW_004519692.1 | Scaffold5709 | 977                     | CC                              | TT              | 1947058347               |
| SNP_P4_188046_15237 | NW_004519693.1 | Scaffold5714 | 15237                   | AA                              | TT              | 1947058350               |
| SNP_P4_188047_15256 | NW_004519693.1 | Scaffold5714 | 15256                   | AA                              | GG              | 1947058352               |
| SNP_P4_188048_15263 | NW_004519693.1 | Scaffold5714 | 15263                   | TT                              | CC              | 1947058354               |
| SNP_P4_188049_15297 | NW_004519693.1 | Scaffold5714 | 15297                   | TT                              | CC              | 1947058356               |
| SNP_P4_188051_39282 | NW_004519693.1 | Scaffold5714 | 39282                   | TT                              | AA              | 1947058358               |
| SNP_P4_188052_54506 | NW_004519693.1 | Scaffold5714 | 54506                   | AA                              | GG              | 1947058360               |
| SNP_P4_188053_4502  | NW_004519694.1 | Scaffold5715 | 4502                    | TT                              | GG              | 1947058362               |
| SNP_P4_188054_512   | NW_004519695.1 | Scaffold5717 | 512                     | TT                              | CC              | 1947058364               |

| SNPs IDs           | Chromosome IDs | Chromosomes  | Physical positions (bp) | CDC Frontier (Reference genome) | (ILWC46 & LPNB) | NCBI SNPdb Accession IDs |
|--------------------|----------------|--------------|-------------------------|---------------------------------|-----------------|--------------------------|
| SNP_P4_188055_538  | NW_004519695.1 | Scaffold5717 | 538                     | CC                              | AA              | 1947058366               |
| SNP_P4_188056_1325 | NW_004519697.1 | Scaffold5719 | 1325                    | TT                              | AA              | 1947058368               |
| SNP_P4_188057_1575 | NW_004519697.1 | Scaffold5719 | 1575                    | TT                              | AA              | 1947058370               |
| SNP_P4_188058_1586 | NW_004519697.1 | Scaffold5719 | 1586                    | CC                              | GG              | 1947058372               |
| SNP_P4_188059_523  | NW_004519698.1 | Scaffold5720 | 523                     | AA                              | GG              | 1947058374               |
| SNP_P4_188060_186  | NW_004519699.1 | Scaffold5721 | 186                     | CC                              | TT              | 1947058376               |
| SNP_P4_188061_189  | NW_004519699.1 | Scaffold5721 | 189                     | AA                              | CC              | 1947058378               |
| SNP_P4_188062_240  | NW_004519699.1 | Scaffold5721 | 240                     | GG                              | TT              | 1947058380               |
| SNP_P4_188063_260  | NW_004519699.1 | Scaffold5721 | 260                     | TT                              | AA              | 1947058382               |
| SNP_P4_188064_382  | NW_004519699.1 | Scaffold5721 | 382                     | GG                              | AA              | 1947058384               |
| SNP_P4_188065_909  | NW_004519699.1 | Scaffold5721 | 909                     | TT                              | CC              | 1947058386               |
| SNP_P4_188066_924  | NW_004519699.1 | Scaffold5721 | 924                     | GG                              | AA              | 1947058388               |
| SNP_P4_188067_927  | NW_004519699.1 | Scaffold5721 | 927                     | TT                              | CC              | 1947058390               |
| SNP_P4_188068_5301 | NW_004519701.1 | Scaffold5725 | 5301                    | AA                              | CC              | 1947058392               |
| SNP_P4_188069_6226 | NW_004519701.1 | Scaffold5725 | 6226                    | TT                              | GG              | 1947058394               |
| SNP_P4_188070_239  | NW_004519704.1 | Scaffold5730 | 239                     | GG                              | AA              | 1947058396               |
| SNP_P4_188071_240  | NW_004519704.1 | Scaffold5730 | 240                     | CC                              | TT              | 1947058398               |
| SNP_P4_188072_345  | NW_004519704.1 | Scaffold5730 | 345                     | CC                              | TT              | 1947058400               |
| SNP_P4_188073_421  | NW_004519704.1 | Scaffold5730 | 421                     | GG                              | AA              | 1947058402               |
| SNP_P4_188074_425  | NW_004519704.1 | Scaffold5730 | 425                     | GG                              | TT              | 1947058404               |
| SNP_P4_188076_711  | NW_004519704.1 | Scaffold5730 | 711                     | AA                              | CC              | 1947058406               |
| SNP_P4_188077_722  | NW_004519704.1 | Scaffold5730 | 722                     | TT                              | CC              | 1947058408               |
| SNP_P4_188078_805  | NW_004519704.1 | Scaffold5730 | 805                     | TT                              | AA              | 1947058410               |
| SNP_P4_188079_808  | NW_004519704.1 | Scaffold5730 | 808                     | CC                              | TT              | 1947058412               |
| SNP_P4_188080_914  | NW_004519704.1 | Scaffold5730 | 914                     | CC                              | TT              | 1947058414               |
| SNP_P4_188081_330  | NW_004519705.1 | Scaffold5734 | 330                     | AA                              | GG              | 1947058416               |
| SNP_P4_188082_861  | NW_004519705.1 | Scaffold5734 | 861                     | TT                              | GG              | 1947058418               |
| SNP_P4_188083_892  | NW_004519705.1 | Scaffold5734 | 892                     | CC                              | TT              | 1947058420               |
| SNP_P4_188084_1228 | NW_004519705.1 | Scaffold5734 | 1228                    | GG                              | AA              | 1947058422               |
| SNP_P4_188085_1234 | NW_004519705.1 | Scaffold5734 | 1234                    | TT                              | GG              | 1947058424               |
| SNP_P4_188086_1355 | NW_004519705.1 | Scaffold5734 | 1355                    | TT                              | CC              | 1947058426               |
| SNP_P4_188087_978  | NW_004519706.1 | Scaffold5735 | 978                     | TT                              | AA              | 1947058428               |
| SNP_P4_188088_1296 | NW_004519706.1 | Scaffold5735 | 1296                    | TT                              | CC              | 1947058430               |
| SNP_P4_188089_1322 | NW_004519706.1 | Scaffold5735 | 1322                    | GG                              | AA              | 1947058432               |
| SNP_P4_188090_1329 | NW_004519706.1 | Scaffold5735 | 1329                    | TT                              | CC              | 1947058434               |
| SNP_P4_188091_1236 | NW_004519707.1 | Scaffold5737 | 1236                    | TT                              | AA              | 1947058436               |
| SNP_P4_188092_530  | NW_004519709.1 | Scaffold5739 | 530                     | GG                              | AA              | 1947058438               |
| SNP_P4_188093_843  | NW_004519709.1 | Scaffold5739 | 843                     | CC                              | TT              | 1947058440               |
| SNP_P4_188094_866  | NW_004519709.1 | Scaffold5739 | 866                     | CC                              | TT              | 1947058442               |
| SNP_P4_188095_914  | NW_004519709.1 | Scaffold5739 | 914                     | AA                              | CC              | 1947058444               |
| SNP_P4_188096_937  | NW_004519709.1 | Scaffold5739 | 937                     | GG                              | TT              | 1947058446               |
| SNP_P4_188097_946  | NW_004519709.1 | Scaffold5739 | 946                     | CC                              | AA              | 1947058448               |

| SNPs IDs            | Chromosome IDs | Chromosomes  | Physical positions (bp) | CDC Frontier (Reference genome) | (ILWC46 & LPNB) | NCBI SNPdb Accession IDs |
|---------------------|----------------|--------------|-------------------------|---------------------------------|-----------------|--------------------------|
| SNP_P4_188098_947   | NW_004519709.1 | Scaffold5739 | 947                     | TT                              | CC              | 1947058450               |
| SNP_P4_188099_950   | NW_004519709.1 | Scaffold5739 | 950                     | CC                              | TT              | 1947058452               |
| SNP_P4_188100_954   | NW_004519709.1 | Scaffold5739 | 954                     | AA                              | GG              | 1947058454               |
| SNP_P4_188101_955   | NW_004519709.1 | Scaffold5739 | 955                     | GG                              | AA              | 1947058456               |
| SNP_P4_188102_958   | NW_004519709.1 | Scaffold5739 | 958                     | CC                              | TT              | 1947058458               |
| SNP_P4_188103_1075  | NW_004519709.1 | Scaffold5739 | 1075                    | AA                              | GG              | 1947058460               |
| SNP_P4_188104_1122  | NW_004519709.1 | Scaffold5739 | 1122                    | TT                              | GG              | 1947058462               |
| SNP_P4_188105_1124  | NW_004519709.1 | Scaffold5739 | 1124                    | CC                              | TT              | 1947058464               |
| SNP_P4_188106_1172  | NW_004519709.1 | Scaffold5739 | 1172                    | CC                              | TT              | 1947058466               |
| SNP_P4_188107_203   | NW_004519710.1 | Scaffold5740 | 203                     | CC                              | TT              | 1947058469               |
| SNP_P4_188108_1187  | NW_004519712.1 | Scaffold5742 | 1187                    | GG                              | AA              | 1947058471               |
| SNP_P4_188109_1250  | NW_004519712.1 | Scaffold5742 | 1250                    | AA                              | GG              | 1947058473               |
| SNP_P4_188110_1519  | NW_004519713.1 | Scaffold5744 | 1519                    | TT                              | CC              | 1947058475               |
| SNP_P4_188111_1886  | NW_004519713.1 | Scaffold5744 | 1886                    | TT                              | CC              | 1947058477               |
| SNP_P4_188112_3187  | NW_004519713.1 | Scaffold5744 | 3187                    | CC                              | TT              | 1947058479               |
| SNP_P4_188113_3297  | NW_004519713.1 | Scaffold5744 | 3297                    | CC                              | GG              | 1947058481               |
| SNP_P4_188114_3326  | NW_004519713.1 | Scaffold5744 | 3326                    | AA                              | TT              | 1947058483               |
| SNP_P4_188115_3391  | NW_004519713.1 | Scaffold5744 | 3391                    | CC                              | TT              | 1947058485               |
| SNP_P4_188116_3433  | NW_004519713.1 | Scaffold5744 | 3433                    | CC                              | TT              | 1947058487               |
| SNP_P4_188117_15423 | NW_004519713.1 | Scaffold5744 | 15423                   | AA                              | GG              | 1947058489               |
| SNP_P4_188118_15497 | NW_004519713.1 | Scaffold5744 | 15497                   | GG                              | CC              | 1947058491               |
| SNP_P4_188119_15515 | NW_004519713.1 | Scaffold5744 | 15515                   | AA                              | TT              | 1947058493               |
| SNP_P4_188120_15629 | NW_004519713.1 | Scaffold5744 | 15629                   | CC                              | TT              | 1947058495               |
| SNP_P4_188121_15698 | NW_004519713.1 | Scaffold5744 | 15698                   | TT                              | AA              | 1947058497               |
| SNP_P4_188122_16007 | NW_004519713.1 | Scaffold5744 | 16007                   | AA                              | CC              | 1947058499               |
| SNP_P4_188123_17325 | NW_004519713.1 | Scaffold5744 | 17325                   | CC                              | GG              | 1947058501               |
| SNP_P4_188124_17696 | NW_004519713.1 | Scaffold5744 | 17696                   | TT                              | AA              | 1947058503               |
| SNP_P4_188125_17774 | NW_004519713.1 | Scaffold5744 | 17774                   | GG                              | CC              | 1947058505               |
| SNP_P4_188126_17793 | NW_004519713.1 | Scaffold5744 | 17793                   | CC                              | TT              | 1947058507               |
| SNP_P4_188127_17808 | NW_004519713.1 | Scaffold5744 | 17808                   | GG                              | CC              | 1947058509               |
| SNP_P4_188128_17838 | NW_004519713.1 | Scaffold5744 | 17838                   | TT                              | CC              | 1947058511               |
| SNP_P4_188129_17853 | NW_004519713.1 | Scaffold5744 | 17853                   | TT                              | CC              | 1947058513               |
| SNP_P4_188130_17858 | NW_004519713.1 | Scaffold5744 | 17858                   | TT                              | CC              | 1947058515               |
| SNP_P4_188131_17874 | NW_004519713.1 | Scaffold5744 | 17874                   | GG                              | AA              | 1947058517               |
| SNP_P4_188132_18064 | NW_004519713.1 | Scaffold5744 | 18064                   | TT                              | CC              | 1947058519               |
| SNP_P4_188133_18088 | NW_004519713.1 | Scaffold5744 | 18088                   | GG                              | TT              | 1947058521               |
| SNP_P4_188134_18174 | NW_004519713.1 | Scaffold5744 | 18174                   | GG                              | TT              | 1947058523               |
| SNP_P4_188135_18227 | NW_004519713.1 | Scaffold5744 | 18227                   | TT                              | CC              | 1947058525               |
| SNP_P4_188136_18248 | NW_004519713.1 | Scaffold5744 | 18248                   | GG                              | TT              | 1947058527               |
| SNP_P4_188137_18297 | NW_004519713.1 | Scaffold5744 | 18297                   | GG                              | AA              | 1947058529               |
| SNP_P4_188138_320   | NW_004519715.1 | Scaffold5746 | 320                     | AA                              | GG              | 1947058531               |
| SNP_P4_188139_388   | NW_004519715.1 | Scaffold5746 | 388                     | TT                              | CC              | 1947058533               |

| SNPs IDs           | Chromosome IDs | Chromosomes  | Physical positions (bp) | CDC Frontier (Reference genome) | (ILWC46 & LPNB) | NCBI SNPdb Accession IDs |
|--------------------|----------------|--------------|-------------------------|---------------------------------|-----------------|--------------------------|
| SNP_P4_188140_450  | NW_004519715.1 | Scaffold5746 | 450                     | GG                              | CC              | 1947058535               |
| SNP_P4_188141_656  | NW_004519715.1 | Scaffold5746 | 656                     | CC                              | GG              | 1947058537               |
| SNP_P4_188142_728  | NW_004519715.1 | Scaffold5746 | 728                     | CC                              | GG              | 1947058539               |
| SNP_P4_188143_1304 | NW_004519715.1 | Scaffold5746 | 1304                    | TT                              | GG              | 1947058541               |
| SNP_P4_188144_1601 | NW_004519715.1 | Scaffold5746 | 1601                    | AA                              | GG              | 1947058543               |
| SNP_P4_188145_1712 | NW_004519715.1 | Scaffold5746 | 1712                    | GG                              | AA              | 1947058545               |
| SNP_P4_188146_1724 | NW_004519715.1 | Scaffold5746 | 1724                    | AA                              | TT              | 1947058547               |
| SNP_P4_188147_1877 | NW_004519715.1 | Scaffold5746 | 1877                    | GG                              | AA              | 1947058549               |
| SNP_P4_188148_1907 | NW_004519715.1 | Scaffold5746 | 1907                    | AA                              | CC              | 1947058551               |
| SNP_P4_188149_2046 | NW_004519715.1 | Scaffold5746 | 2046                    | AA                              | CC              | 1947058553               |
| SNP_P4_188150_95   | NW_004519722.1 | Scaffold5758 | 95                      | AA                              | CC              | 1947058555               |
| SNP_P4_188151_279  | NW_004519722.1 | Scaffold5758 | 279                     | TT                              | CC              | 1947058557               |
| SNP_P4_188152_473  | NW_004519722.1 | Scaffold5758 | 473                     | GG                              | CC              | 1947058559               |
| SNP_P4_188153_833  | NW_004519722.1 | Scaffold5758 | 833                     | TT                              | GG              | 1947058561               |
| SNP_P4_188154_1162 | NW_004519722.1 | Scaffold5758 | 1162                    | CC                              | TT              | 1947058563               |
| SNP_P4_188155_71   | NW_004519723.1 | Scaffold5759 | 71                      | AA                              | CC              | 1947058565               |
| SNP_P4_188156_118  | NW_004519723.1 | Scaffold5759 | 118                     | CC                              | TT              | 1947058566               |
| SNP_P4_188157_532  | NW_004519723.1 | Scaffold5759 | 532                     | GG                              | TT              | 1947058567               |
| SNP_P4_188158_622  | NW_004519723.1 | Scaffold5759 | 622                     | AA                              | GG              | 1947058568               |
| SNP_P4_188160_857  | NW_004519724.1 | Scaffold5761 | 857                     | CC                              | AA              | 1947058570               |
| SNP_P4_188161_1005 | NW_004519724.1 | Scaffold5761 | 1005                    | TT                              | AA              | 1947058572               |
| SNP_P4_188163_1224 | NW_004519724.1 | Scaffold5761 | 1224                    | AA                              | CC              | 1947058574               |
| SNP_P4_188164_1677 | NW_004519724.1 | Scaffold5761 | 1677                    | AA                              | CC              | 1947058576               |
| SNP_P4_188165_1798 | NW_004519724.1 | Scaffold5761 | 1798                    | GG                              | AA              | 1947058578               |
| SNP_P4_188166_6875 | NW_004519724.1 | Scaffold5761 | 6875                    | GG                              | CC              | 1947058580               |
| SNP_P4_188167_6985 | NW_004519724.1 | Scaffold5761 | 6985                    | TT                              | GG              | 1947058582               |
| SNP_P4_188168_322  | NW_004519727.1 | Scaffold5765 | 322                     | GG                              | AA              | 1947058584               |
| SNP_P4_188169_458  | NW_004519727.1 | Scaffold5765 | 458                     | TT                              | AA              | 1947058586               |
| SNP_P4_188170_805  | NW_004519727.1 | Scaffold5765 | 805                     | GG                              | AA              | 1947058588               |
| SNP_P4_188172_2177 | NW_004519728.1 | Scaffold5766 | 2177                    | TT                              | GG              | 1947058590               |
| SNP_P4_188173_2178 | NW_004519728.1 | Scaffold5766 | 2178                    | GG                              | TT              | 1947058592               |
| SNP_P4_188174_1154 | NW_004519729.1 | Scaffold5767 | 1154                    | GG                              | CC              | 1947058594               |
| SNP_P4_188175_1175 | NW_004519729.1 | Scaffold5767 | 1175                    | AA                              | TT              | 1947058596               |
| SNP_P4_188176_189  | NW_004519731.1 | Scaffold5775 | 189                     | AA                              | GG              | 1947058599               |
| SNP_P4_188177_287  | NW_004519731.1 | Scaffold5775 | 287                     | TT                              | AA              | 1947058602               |
| SNP_P4_188178_465  | NW_004519731.1 | Scaffold5775 | 465                     | AA                              | TT              | 1947058604               |
| SNP_P4_188179_1022 | NW_004519731.1 | Scaffold5775 | 1022                    | TT                              | AA              | 1947058606               |
| SNP_P4_188180_1031 | NW_004519731.1 | Scaffold5775 | 1031                    | GG                              | CC              | 1947058608               |
| SNP_P4_188181_1077 | NW_004519731.1 | Scaffold5775 | 1077                    | TT                              | AA              | 1947058610               |
| SNP_P4_188182_1122 | NW_004519731.1 | Scaffold5775 | 1122                    | CC                              | TT              | 1947058612               |
| SNP_P4_188183_1132 | NW_004519731.1 | Scaffold5775 | 1132                    | TT                              | CC              | 1947058614               |
| SNP_P4_188184_1192 | NW_004519731.1 | Scaffold5775 | 1192                    | CC                              | TT              | 1947058616               |

| SNPs IDs            | Chromosome IDs | Chromosomes  | Physical positions (bp) | CDC Frontier (Reference genome) | (ILWC46 & LPNB) | NCBI SNPdb Accession IDs |
|---------------------|----------------|--------------|-------------------------|---------------------------------|-----------------|--------------------------|
| SNP_P4_188185_2653  | NW_004519733.1 | Scaffold5777 | 2653                    | AA                              | CC              | 1947058618               |
| SNP_P4_188186_2860  | NW_004519733.1 | Scaffold5777 | 2860                    | AA                              | CC              | 1947058620               |
| SNP_P4_188187_2892  | NW_004519733.1 | Scaffold5777 | 2892                    | AA                              | TT              | 1947058622               |
| SNP_P4_188188_2974  | NW_004519733.1 | Scaffold5777 | 2974                    | TT                              | CC              | 1947058624               |
| SNP_P4_188189_3249  | NW_004519733.1 | Scaffold5777 | 3249                    | GG                              | AA              | 1947058626               |
| SNP_P4_188190_3289  | NW_004519733.1 | Scaffold5777 | 3289                    | GG                              | TT              | 1947058628               |
| SNP_P4_188191_7598  | NW_004519733.1 | Scaffold5777 | 7598                    | CC                              | TT              | 1947058630               |
| SNP_P4_188192_7628  | NW_004519733.1 | Scaffold5777 | 7628                    | GG                              | AA              | 1947058632               |
| SNP_P4_188193_7826  | NW_004519733.1 | Scaffold5777 | 7826                    | TT                              | CC              | 1947058634               |
| SNP_P4_188194_7831  | NW_004519733.1 | Scaffold5777 | 7831                    | CC                              | TT              | 1947058637               |
| SNP_P4_188195_7891  | NW_004519733.1 | Scaffold5777 | 7891                    | AA                              | GG              | 1947058639               |
| SNP_P4_188196_7908  | NW_004519733.1 | Scaffold5777 | 7908                    | CC                              | TT              | 1947058641               |
| SNP_P4_188197_8030  | NW_004519733.1 | Scaffold5777 | 8030                    | TT                              | CC              | 1947058643               |
| SNP_P4_188198_8355  | NW_004519733.1 | Scaffold5777 | 8355                    | TT                              | CC              | 1947058645               |
| SNP_P4_188199_8504  | NW_004519733.1 | Scaffold5777 | 8504                    | TT                              | GG              | 1947058647               |
| SNP_P4_188200_8911  | NW_004519733.1 | Scaffold5777 | 8911                    | CC                              | TT              | 1947058649               |
| SNP_P4_188201_8934  | NW_004519733.1 | Scaffold5777 | 8934                    | TT                              | CC              | 1947058651               |
| SNP_P4_188202_9122  | NW_004519733.1 | Scaffold5777 | 9122                    | CC                              | TT              | 1947058653               |
| SNP_P4_188203_9240  | NW_004519733.1 | Scaffold5777 | 9240                    | AA                              | GG              | 1947058655               |
| SNP_P4_188204_9258  | NW_004519733.1 | Scaffold5777 | 9258                    | CC                              | TT              | 1947058657               |
| SNP_P4_188205_10039 | NW_004519733.1 | Scaffold5777 | 10039                   | TT                              | CC              | 1947058659               |
| SNP_P4_188206_10070 | NW_004519733.1 | Scaffold5777 | 10070                   | TT                              | GG              | 1947058661               |
| SNP_P4_188207_10130 | NW_004519733.1 | Scaffold5777 | 10130                   | TT                              | AA              | 1947058663               |
| SNP_P4_188208_10143 | NW_004519733.1 | Scaffold5777 | 10143                   | CC                              | TT              | 1947058665               |
| SNP_P4_188209_10249 | NW_004519733.1 | Scaffold5777 | 10249                   | TT                              | GG              | 1947058667               |
| SNP_P4_188211_16532 | NW_004519733.1 | Scaffold5777 | 16532                   | GG                              | CC              | 1947058669               |
| SNP_P4_188213_16798 | NW_004519733.1 | Scaffold5777 | 16798                   | TT                              | AA              | 1947058671               |
| SNP_P4_188214_17078 | NW_004519733.1 | Scaffold5777 | 17078                   | CC                              | TT              | 1947058673               |
| SNP_P4_188215_17165 | NW_004519733.1 | Scaffold5777 | 17165                   | TT                              | CC              | 1947058675               |
| SNP_P4_188216_2715  | NW_004519735.1 | Scaffold5780 | 2715                    | TT                              | CC              | 1947058677               |
| SNP_P4_188217_2796  | NW_004519735.1 | Scaffold5780 | 2796                    | CC                              | TT              | 1947058679               |
| SNP_P4_188218_2849  | NW_004519735.1 | Scaffold5780 | 2849                    | CC                              | AA              | 1947058681               |
| SNP_P4_188220_2923  | NW_004519735.1 | Scaffold5780 | 2923                    | GG                              | AA              | 1947058683               |
| SNP_P4_188221_3008  | NW_004519735.1 | Scaffold5780 | 3008                    | TT                              | AA              | 1947058685               |
| SNP_P4_188222_3023  | NW_004519735.1 | Scaffold5780 | 3023                    | AA                              | TT              | 1947058687               |
| SNP_P4_188223_3039  | NW_004519735.1 | Scaffold5780 | 3039                    | TT                              | CC              | 1947058689               |
| SNP_P4_188224_3170  | NW_004519735.1 | Scaffold5780 | 3170                    | GG                              | AA              | 1947058691               |
| SNP_P4_188225_3234  | NW_004519735.1 | Scaffold5780 | 3234                    | GG                              | TT              | 1947058693               |
| SNP_P4_188226_3286  | NW_004519735.1 | Scaffold5780 | 3286                    | TT                              | GG              | 1947058695               |
| SNP_P4_188227_3357  | NW_004519735.1 | Scaffold5780 | 3357                    | TT                              | CC              | 1947058697               |
| SNP_P4_188228_3699  | NW_004519735.1 | Scaffold5780 | 3699                    | TT                              | GG              | 1947058699               |
| SNP_P4_188229_4549  | NW_004519735.1 | Scaffold5780 | 4549                    | GG                              | AA              | 1947058701               |

| SNPs IDs           | Chromosome IDs | Chromosomes  | Physical positions (bp) | CDC Frontier (Reference genome) | (ILWC46 & LPNB) | NCBI SNPdb Accession IDs |
|--------------------|----------------|--------------|-------------------------|---------------------------------|-----------------|--------------------------|
| SNP_P4_188230_4574 | NW_004519735.1 | Scaffold5780 | 4574                    | GG                              | AA              | 1947058703               |
| SNP_P4_188231_4792 | NW_004519735.1 | Scaffold5780 | 4792                    | AA                              | GG              | 1947058705               |
| SNP_P4_188232_4990 | NW_004519735.1 | Scaffold5780 | 4990                    | AA                              | GG              | 1947058707               |
| SNP_P4_188233_5013 | NW_004519735.1 | Scaffold5780 | 5013                    | GG                              | AA              | 1947058709               |
| SNP_P4_188234_5022 | NW_004519735.1 | Scaffold5780 | 5022                    | CC                              | TT              | 1947058711               |
| SNP_P4_188235_5223 | NW_004519735.1 | Scaffold5780 | 5223                    | TT                              | CC              | 1947058713               |
| SNP_P4_188236_5230 | NW_004519735.1 | Scaffold5780 | 5230                    | AA                              | GG              | 1947058715               |
| SNP_P4_188237_5344 | NW_004519735.1 | Scaffold5780 | 5344                    | AA                              | GG              | 1947058717               |
| SNP_P4_188240_5505 | NW_004519735.1 | Scaffold5780 | 5505                    | AA                              | TT              | 1947058719               |
| SNP_P4_188241_5506 | NW_004519735.1 | Scaffold5780 | 5506                    | AA                              | CC              | 1947058721               |
| SNP_P4_188242_5564 | NW_004519735.1 | Scaffold5780 | 5564                    | GG                              | TT              | 1947058723               |
| SNP_P4_188243_5649 | NW_004519735.1 | Scaffold5780 | 5649                    | TT                              | CC              | 1947058725               |
| SNP_P4_188244_5663 | NW_004519735.1 | Scaffold5780 | 5663                    | GG                              | AA              | 1947058727               |
| SNP_P4_188245_5673 | NW_004519735.1 | Scaffold5780 | 5673                    | AA                              | GG              | 1947058729               |
| SNP_P4_188246_5680 | NW_004519735.1 | Scaffold5780 | 5680                    | TT                              | CC              | 1947058731               |
| SNP_P4_188247_5689 | NW_004519735.1 | Scaffold5780 | 5689                    | TT                              | CC              | 1947058733               |
| SNP_P4_188248_5690 | NW_004519735.1 | Scaffold5780 | 5690                    | GG                              | AA              | 1947058736               |
| SNP_P4_188249_5726 | NW_004519735.1 | Scaffold5780 | 5726                    | CC                              | AA              | 1947058738               |
| SNP_P4_188250_5731 | NW_004519735.1 | Scaffold5780 | 5731                    | AA                              | GG              | 1947058740               |
| SNP_P4_188251_5733 | NW_004519735.1 | Scaffold5780 | 5733                    | AA                              | TT              | 1947058742               |
| SNP_P4_188252_5746 | NW_004519735.1 | Scaffold5780 | 5746                    | TT                              | GG              | 1947058744               |
| SNP_P4_188253_5852 | NW_004519735.1 | Scaffold5780 | 5852                    | AA                              | GG              | 1947058746               |
| SNP_P4_188254_6033 | NW_004519735.1 | Scaffold5780 | 6033                    | TT                              | CC              | 1947058748               |
| SNP_P4_188255_6098 | NW_004519735.1 | Scaffold5780 | 6098                    | GG                              | AA              | 1947058750               |
| SNP_P4_188256_6100 | NW_004519735.1 | Scaffold5780 | 6100                    | GG                              | TT              | 1947058752               |
| SNP_P4_188257_6142 | NW_004519735.1 | Scaffold5780 | 6142                    | GG                              | AA              | 1947058754               |
| SNP_P4_188258_6195 | NW_004519735.1 | Scaffold5780 | 6195                    | AA                              | GG              | 1947058756               |
| SNP_P4_188259_6288 | NW_004519735.1 | Scaffold5780 | 6288                    | AA                              | GG              | 1947058758               |
| SNP_P4_188260_6292 | NW_004519735.1 | Scaffold5780 | 6292                    | TT                              | CC              | 1947058760               |
| SNP_P4_188261_6308 | NW_004519735.1 | Scaffold5780 | 6308                    | TT                              | CC              | 1947058762               |
| SNP_P4_188262_6315 | NW_004519735.1 | Scaffold5780 | 6315                    | AA                              | GG              | 1947058764               |
| SNP_P4_188263_6515 | NW_004519735.1 | Scaffold5780 | 6515                    | AA                              | TT              | 1947058767               |
| SNP_P4_188264_6516 | NW_004519735.1 | Scaffold5780 | 6516                    | TT                              | CC              | 1947058769               |
| SNP_P4_188265_6662 | NW_004519735.1 | Scaffold5780 | 6662                    | TT                              | GG              | 1947058771               |
| SNP_P4_188266_6692 | NW_004519735.1 | Scaffold5780 | 6692                    | CC                              | TT              | 1947058773               |
| SNP_P4_188267_6694 | NW_004519735.1 | Scaffold5780 | 6694                    | TT                              | CC              | 1947058775               |
| SNP_P4_188268_6721 | NW_004519735.1 | Scaffold5780 | 6721                    | GG                              | AA              | 1947058777               |
| SNP_P4_188269_6736 | NW_004519735.1 | Scaffold5780 | 6736                    | GG                              | AA              | 1947058779               |
| SNP_P4_188270_8686 | NW_004519735.1 | Scaffold5780 | 8686                    | CC                              | TT              | 1947058781               |
| SNP_P4_188271_8727 | NW_004519735.1 | Scaffold5780 | 8727                    | CC                              | AA              | 1947058783               |
| SNP_P4_188273_8753 | NW_004519735.1 | Scaffold5780 | 8753                    | GG                              | AA              | 1947058785               |
| SNP_P4_188274_8916 | NW_004519735.1 | Scaffold5780 | 8916                    | AA                              | GG              | 1947058787               |

| SNPs IDs            | Chromosome IDs | Chromosomes  | Physical positions (bp) | CDC Frontier (Reference genome) | (ILWC46 & LPNB) | NCBI SNPdb Accession IDs |
|---------------------|----------------|--------------|-------------------------|---------------------------------|-----------------|--------------------------|
| SNP_P4_188275_8963  | NW_004519735.1 | Scaffold5780 | 8963                    | CC                              | AA              | 1947058789               |
| SNP_P4_188276_8984  | NW_004519735.1 | Scaffold5780 | 8984                    | GG                              | AA              | 1947058791               |
| SNP_P4_188278_9464  | NW_004519735.1 | Scaffold5780 | 9464                    | TT                              | AA              | 1947058794               |
| SNP_P4_188279_9651  | NW_004519735.1 | Scaffold5780 | 9651                    | CC                              | GG              | 1947058796               |
| SNP_P4_188280_9668  | NW_004519735.1 | Scaffold5780 | 9668                    | TT                              | CC              | 1947058798               |
| SNP_P4_188281_9834  | NW_004519735.1 | Scaffold5780 | 9834                    | TT                              | CC              | 1947058800               |
| SNP_P4_188282_9976  | NW_004519735.1 | Scaffold5780 | 9976                    | GG                              | TT              | 1947058802               |
| SNP_P4_188283_9990  | NW_004519735.1 | Scaffold5780 | 9990                    | AA                              | CC              | 1947058804               |
| SNP_P4_188284_10024 | NW_004519735.1 | Scaffold5780 | 10024                   | TT                              | CC              | 1947058806               |
| SNP_P4_188285_10128 | NW_004519735.1 | Scaffold5780 | 10128                   | CC                              | TT              | 1947058808               |
| SNP_P4_188286_10130 | NW_004519735.1 | Scaffold5780 | 10130                   | GG                              | AA              | 1947058810               |
| SNP_P4_188287_10333 | NW_004519735.1 | Scaffold5780 | 10333                   | AA                              | CC              | 1947058812               |
| SNP_P4_188288_10359 | NW_004519735.1 | Scaffold5780 | 10359                   | CC                              | TT              | 1947058814               |
| SNP_P4_188289_10600 | NW_004519735.1 | Scaffold5780 | 10600                   | TT                              | CC              | 1947058816               |
| SNP_P4_188290_10773 | NW_004519735.1 | Scaffold5780 | 10773                   | GG                              | AA              | 1947058818               |
| SNP_P4_188291_10910 | NW_004519735.1 | Scaffold5780 | 10910                   | CC                              | TT              | 1947058820               |
| SNP_P4_188292_11020 | NW_004519735.1 | Scaffold5780 | 11020                   | AA                              | GG              | 1947058822               |
| SNP_P4_188293_17043 | NW_004519735.1 | Scaffold5780 | 17043                   | CC                              | TT              | 1947058824               |
| SNP_P4_188294_17050 | NW_004519735.1 | Scaffold5780 | 17050                   | CC                              | TT              | 1947058826               |
| SNP_P4_188295_17281 | NW_004519735.1 | Scaffold5780 | 17281                   | TT                              | CC              | 1947058828               |
| SNP_P4_188296_19111 | NW_004519735.1 | Scaffold5780 | 19111                   | TT                              | AA              | 1947058830               |
| SNP_P4_188297_2167  | NW_004519736.1 | Scaffold5781 | 2167                    | AA                              | TT              | 1947058832               |
| SNP_P4_188298_2566  | NW_004519736.1 | Scaffold5781 | 2566                    | CC                              | TT              | 1947058834               |
| SNP_P4_188299_3027  | NW_004519736.1 | Scaffold5781 | 3027                    | TT                              | CC              | 1947058836               |
| SNP_P4_188300_3050  | NW_004519736.1 | Scaffold5781 | 3050                    | AA                              | GG              | 1947058838               |
| SNP_P4_188301_3113  | NW_004519736.1 | Scaffold5781 | 3113                    | CC                              | GG              | 1947058840               |
| SNP_P4_188302_3189  | NW_004519736.1 | Scaffold5781 | 3189                    | CC                              | TT              | 1947058842               |
| SNP_P4_188303_3354  | NW_004519736.1 | Scaffold5781 | 3354                    | AA                              | GG              | 1947058844               |
| SNP_P4_188304_3430  | NW_004519736.1 | Scaffold5781 | 3430                    | AA                              | GG              | 1947058846               |
| SNP_P4_188305_3522  | NW_004519736.1 | Scaffold5781 | 3522                    | GG                              | AA              | 1947058848               |
| SNP_P4_188306_3544  | NW_004519736.1 | Scaffold5781 | 3544                    | AA                              | TT              | 1947058850               |
| SNP_P4_188307_3631  | NW_004519736.1 | Scaffold5781 | 3631                    | GG                              | TT              | 1947058852               |
| SNP_P4_188308_3911  | NW_004519736.1 | Scaffold5781 | 3911                    | TT                              | CC              | 1947058854               |
| SNP_P4_188309_4015  | NW_004519736.1 | Scaffold5781 | 4015                    | AA                              | TT              | 1947058856               |
| SNP_P4_188310_8902  | NW_004519736.1 | Scaffold5781 | 8902                    | TT                              | AA              | 1947058858               |
| SNP_P4_188311_8915  | NW_004519736.1 | Scaffold5781 | 8915                    | CC                              | GG              | 1947058860               |
| SNP_P4_188312_12151 | NW_004519736.1 | Scaffold5781 | 12151                   | CC                              | TT              | 1947058862               |
| SNP_P4_188313_12653 | NW_004519736.1 | Scaffold5781 | 12653                   | GG                              | AA              | 1947058864               |
| SNP_P4_188314_12828 | NW_004519736.1 | Scaffold5781 | 12828                   | TT                              | CC              | 1947058866               |
| SNP_P4_188315_274   | NW_004519737.1 | Scaffold5782 | 274                     | TT                              | GG              | 1947058868               |
| SNP_P4_188316_324   | NW_004519737.1 | Scaffold5782 | 324                     | AA                              | GG              | 1947058870               |
| SNP_P4_188317_329   | NW_004519737.1 | Scaffold5782 | 329                     | GG                              | CC              | 1947058872               |



| SNPs IDs             | Chromosome IDs | Chromosomes  | Physical positions (bp) | CDC Frontier (Reference genome) | (ILWC46 & LPNB) | NCBI SNPdb Accession IDs |
|----------------------|----------------|--------------|-------------------------|---------------------------------|-----------------|--------------------------|
| SNP_P4_188318_712    | NW_004519737.1 | Scaffold5782 | 712                     | AA                              | GG              | 1947058874               |
| SNP_P4_188319_755    | NW_004519737.1 | Scaffold5782 | 755                     | TT                              | CC              | 1947058876               |
| SNP_P4_188320_847    | NW_004519737.1 | Scaffold5782 | 847                     | TT                              | GG              | 1947058878               |
| SNP_P4_188321_1046   | NW_004519737.1 | Scaffold5782 | 1046                    | AA                              | GG              | 1947058880               |
| SNP_P4_188322_1058   | NW_004519737.1 | Scaffold5782 | 1058                    | TT                              | AA              | 1947058882               |
| SNP_P4_188323_1221   | NW_004519738.1 | Scaffold5783 | 1221                    | CC                              | GG              | 1947058884               |
| SNP_P4_188324_1271   | NW_004519738.1 | Scaffold5783 | 1271                    | CC                              | TT              | 1947058886               |
| SNP_P4_188325_1332   | NW_004519738.1 | Scaffold5783 | 1332                    | AA                              | GG              | 1947058888               |
| SNP_P4_188326_1597   | NW_004519738.1 | Scaffold5783 | 1597                    | TT                              | CC              | 1947058890               |
| SNP_P4_188327_2441   | NW_004519738.1 | Scaffold5783 | 2441                    | AA                              | TT              | 1947058892               |
| SNP_P4_188328_1378   | NW_004519740.1 | Scaffold5788 | 1378                    | CC                              | TT              | 1947058894               |
| SNP_P4_188329_1653   | NW_004519740.1 | Scaffold5788 | 1653                    | GG                              | TT              | 1947058896               |
| SNP_P4_188330_1901   | NW_004519740.1 | Scaffold5788 | 1901                    | TT                              | AA              | 1947058898               |
| SNP_P4_188331_1949   | NW_004519740.1 | Scaffold5788 | 1949                    | GG                              | CC              | 1947058900               |
| SNP_P4_188332_1978   | NW_004519740.1 | Scaffold5788 | 1978                    | GG                              | AA              | 1947058903               |
| SNP_P4_188333_16845  | NW_004519744.1 | Scaffold5792 | 16845                   | TT                              | CC              | 1947058905               |
| SNP_P4_188334_29384  | NW_004519744.1 | Scaffold5792 | 29384                   | AA                              | GG              | 1947058907               |
| SNP_P4_188335_31515  | NW_004519744.1 | Scaffold5792 | 31515                   | AA                              | CC              | 1947058909               |
| SNP_P4_188337_92343  | NW_004519744.1 | Scaffold5792 | 92343                   | GG                              | AA              | 1947058911               |
| SNP_P4_188338_105435 | NW_004519744.1 | Scaffold5792 | 105435                  | AA                              | TT              | 1947058913               |
| SNP_P4_188339_5880   | NW_004519746.1 | Scaffold5794 | 5880                    | AA                              | GG              | 1947058915               |
| SNP_P4_188340_5888   | NW_004519746.1 | Scaffold5794 | 5888                    | AA                              | TT              | 1947058917               |
| SNP_P4_188341_5956   | NW_004519746.1 | Scaffold5794 | 5956                    | TT                              | AA              | 1947058919               |
| SNP_P4_188342_8247   | NW_004519746.1 | Scaffold5794 | 8247                    | AA                              | TT              | 1947058921               |
| SNP_P4_188343_8397   | NW_004519746.1 | Scaffold5794 | 8397                    | AA                              | TT              | 1947058923               |
| SNP_P4_188344_8481   | NW_004519746.1 | Scaffold5794 | 8481                    | TT                              | AA              | 1947058925               |
| SNP_P4_188345_8638   | NW_004519746.1 | Scaffold5794 | 8638                    | CC                              | GG              | 1947058927               |
| SNP_P4_188346_8707   | NW_004519746.1 | Scaffold5794 | 8707                    | CC                              | GG              | 1947058929               |
| SNP_P4_188347_1042   | NW_004519747.1 | Scaffold5795 | 1042                    | TT                              | CC              | 1947058931               |
| SNP_P4_188348_1440   | NW_004519747.1 | Scaffold5795 | 1440                    | CC                              | AA              | 1947058933               |
| SNP_P4_188349_1446   | NW_004519747.1 | Scaffold5795 | 1446                    | CC                              | TT              | 1947058935               |
| SNP_P4_188350_1519   | NW_004519747.1 | Scaffold5795 | 1519                    | GG                              | AA              | 1947058937               |
| SNP_P4_188351_1520   | NW_004519747.1 | Scaffold5795 | 1520                    | CC                              | TT              | 1947058939               |
| SNP_P4_188352_1801   | NW_004519747.1 | Scaffold5795 | 1801                    | TT                              | CC              | 1947058941               |
| SNP_P4_188353_5474   | NW_004519749.1 | Scaffold5797 | 5474                    | CC                              | TT              | 1947058943               |
| SNP_P4_188354_5480   | NW_004519749.1 | Scaffold5797 | 5480                    | TT                              | GG              | 1947058945               |
| SNP_P4_188355_5488   | NW_004519749.1 | Scaffold5797 | 5488                    | AA                              | GG              | 1947058947               |
| SNP_P4_188356_5514   | NW_004519749.1 | Scaffold5797 | 5514                    | CC                              | TT              | 1947058949               |
| SNP_P4_188357_5631   | NW_004519749.1 | Scaffold5797 | 5631                    | AA                              | TT              | 1947058951               |
| SNP_P4_188358_5709   | NW_004519749.1 | Scaffold5797 | 5709                    | CC                              | AA              | 1947058953               |
| SNP_P4_188359_5778   | NW_004519749.1 | Scaffold5797 | 5778                    | AA                              | CC              | 1947058955               |
| SNP_P4_188360_6000   | NW_004519749.1 | Scaffold5797 | 6000                    | AA                              | GG              | 1947058957               |

| SNPs IDs            | Chromosome IDs | Chromosomes  | Physical positions (bp) | CDC Frontier (Reference genome) | (ILWC46 & LPNB) | NCBI SNPdb Accession IDs |
|---------------------|----------------|--------------|-------------------------|---------------------------------|-----------------|--------------------------|
| SNP_P4_188361_8922  | NW_004519749.1 | Scaffold5797 | 8922                    | CC                              | AA              | 1947058959               |
| SNP_P4_188362_8932  | NW_004519749.1 | Scaffold5797 | 8932                    | CC                              | TT              | 1947058961               |
| SNP_P4_188363_8947  | NW_004519749.1 | Scaffold5797 | 8947                    | CC                              | TT              | 1947058963               |
| SNP_P4_188364_9015  | NW_004519749.1 | Scaffold5797 | 9015                    | CC                              | TT              | 1947058965               |
| SNP_P4_188365_9017  | NW_004519749.1 | Scaffold5797 | 9017                    | GG                              | TT              | 1947058967               |
| SNP_P4_188366_9020  | NW_004519749.1 | Scaffold5797 | 9020                    | GG                              | CC              | 1947058969               |
| SNP_P4_188367_9069  | NW_004519749.1 | Scaffold5797 | 9069                    | AA                              | GG              | 1947058971               |
| SNP_P4_188368_9086  | NW_004519749.1 | Scaffold5797 | 9086                    | GG                              | CC              | 1947058973               |
| SNP_P4_188369_9113  | NW_004519749.1 | Scaffold5797 | 9113                    | AA                              | CC              | 1947058975               |
| SNP_P4_188370_9162  | NW_004519749.1 | Scaffold5797 | 9162                    | AA                              | CC              | 1947058977               |
| SNP_P4_188371_9219  | NW_004519749.1 | Scaffold5797 | 9219                    | GG                              | AA              | 1947058979               |
| SNP_P4_188372_9268  | NW_004519749.1 | Scaffold5797 | 9268                    | CC                              | TT              | 1947058981               |
| SNP_P4_188373_9549  | NW_004519749.1 | Scaffold5797 | 9549                    | AA                              | CC              | 1947058982               |
| SNP_P4_188374_9557  | NW_004519749.1 | Scaffold5797 | 9557                    | TT                              | AA              | 1947058984               |
| SNP_P4_188375_9788  | NW_004519749.1 | Scaffold5797 | 9788                    | GG                              | TT              | 1947058986               |
| SNP_P4_188376_9792  | NW_004519749.1 | Scaffold5797 | 9792                    | TT                              | CC              | 1947058988               |
| SNP_P4_188377_9814  | NW_004519749.1 | Scaffold5797 | 9814                    | GG                              | AA              | 1947058990               |
| SNP_P4_188378_9819  | NW_004519749.1 | Scaffold5797 | 9819                    | TT                              | CC              | 1947058992               |
| SNP_P4_188379_9820  | NW_004519749.1 | Scaffold5797 | 9820                    | TT                              | CC              | 1947058994               |
| SNP_P4_188380_338   | NW_004519750.1 | Scaffold5801 | 338                     | GG                              | AA              | 1947058997               |
| SNP_P4_188381_361   | NW_004519750.1 | Scaffold5801 | 361                     | GG                              | AA              | 1947058999               |
| SNP_P4_188382_492   | NW_004519750.1 | Scaffold5801 | 492                     | TT                              | CC              | 1947059001               |
| SNP_P4_188383_591   | NW_004519750.1 | Scaffold5801 | 591                     | AA                              | CC              | 1947059003               |
| SNP_P4_188384_812   | NW_004519750.1 | Scaffold5801 | 812                     | GG                              | AA              | 1947059005               |
| SNP_P4_188386_1038  | NW_004519750.1 | Scaffold5801 | 1038                    | TT                              | CC              | 1947059007               |
| SNP_P4_188387_1043  | NW_004519750.1 | Scaffold5801 | 1043                    | AA                              | CC              | 1947059009               |
| SNP_P4_188388_2011  | NW_004519750.1 | Scaffold5801 | 2011                    | TT                              | CC              | 1947059011               |
| SNP_P4_188389_2212  | NW_004519750.1 | Scaffold5801 | 2212                    | TT                              | AA              | 1947059013               |
| SNP_P4_188390_2332  | NW_004519750.1 | Scaffold5801 | 2332                    | GG                              | AA              | 1947059015               |
| SNP_P4_188391_2387  | NW_004519750.1 | Scaffold5801 | 2387                    | TT                              | GG              | 1947059017               |
| SNP_P4_188392_2504  | NW_004519750.1 | Scaffold5801 | 2504                    | CC                              | TT              | 1947059019               |
| SNP_P4_188393_2687  | NW_004519750.1 | Scaffold5801 | 2687                    | CC                              | TT              | 1947059021               |
| SNP_P4_188395_6570  | NW_004519755.1 | Scaffold5812 | 6570                    | GG                              | AA              | 1947059023               |
| SNP_P4_188396_18430 | NW_004519755.1 | Scaffold5812 | 18430                   | TT                              | CC              | 1947059025               |
| SNP_P4_188397_18464 | NW_004519755.1 | Scaffold5812 | 18464                   | TT                              | CC              | 1947059027               |
| SNP_P4_188398_18466 | NW_004519755.1 | Scaffold5812 | 18466                   | TT                              | CC              | 1947059029               |
| SNP_P4_188399_30214 | NW_004519755.1 | Scaffold5812 | 30214                   | TT                              | AA              | 1947059031               |
| SNP_P4_188400_30506 | NW_004519755.1 | Scaffold5812 | 30506                   | GG                              | AA              | 1947059033               |
| SNP_P4_188401_30515 | NW_004519755.1 | Scaffold5812 | 30515                   | AA                              | GG              | 1947059035               |
| SNP_P4_188402_30618 | NW_004519755.1 | Scaffold5812 | 30618                   | CC                              | AA              | 1947059037               |
| SNP_P4_188403_45382 | NW_004519755.1 | Scaffold5812 | 45382                   | AA                              | GG              | 1947059039               |
| SNP_P4_188404_45404 | NW_004519755.1 | Scaffold5812 | 45404                   | TT                              | CC              | 1947059041               |

| SNPs IDs            | Chromosome IDs | Chromosomes  | Physical positions (bp) | CDC Frontier (Reference genome) | (ILWC46 & LPNB) | NCBI SNPdb Accession IDs |
|---------------------|----------------|--------------|-------------------------|---------------------------------|-----------------|--------------------------|
| SNP_P4_188405_45422 | NW_004519755.1 | Scaffold5812 | 45422                   | AA                              | GG              | 1947059043               |
| SNP_P4_188406_45462 | NW_004519755.1 | Scaffold5812 | 45462                   | AA                              | GG              | 1947059045               |
| SNP_P4_188407_45804 | NW_004519755.1 | Scaffold5812 | 45804                   | TT                              | CC              | 1947059047               |
| SNP_P4_188408_46770 | NW_004519755.1 | Scaffold5812 | 46770                   | TT                              | AA              | 1947059049               |
| SNP_P4_188409_46773 | NW_004519755.1 | Scaffold5812 | 46773                   | AA                              | TT              | 1947059052               |
| SNP_P4_188410_46784 | NW_004519755.1 | Scaffold5812 | 46784                   | GG                              | AA              | 1947059054               |
| SNP_P4_188411_64    | NW_004519756.1 | Scaffold5813 | 64                      | CC                              | TT              | 1947059056               |
| SNP_P4_188412_73    | NW_004519756.1 | Scaffold5813 | 73                      | TT                              | AA              | 1947059058               |
| SNP_P4_188413_2756  | NW_004519756.1 | Scaffold5813 | 2756                    | GG                              | TT              | 1947059060               |
| SNP_P4_188414_2776  | NW_004519756.1 | Scaffold5813 | 2776                    | CC                              | AA              | 1947059062               |
| SNP_P4_188415_2955  | NW_004519756.1 | Scaffold5813 | 2955                    | AA                              | CC              | 1947059064               |
| SNP_P4_188416_4017  | NW_004519756.1 | Scaffold5813 | 4017                    | CC                              | AA              | 1947059066               |
| SNP_P4_188417_4509  | NW_004519756.1 | Scaffold5813 | 4509                    | AA                              | CC              | 1947059068               |
| SNP_P4_188418_972   | NW_004519758.1 | Scaffold5815 | 972                     | GG                              | AA              | 1947059070               |
| SNP_P4_188419_973   | NW_004519758.1 | Scaffold5815 | 973                     | GG                              | AA              | 1947059072               |
| SNP_P4_188420_1121  | NW_004519758.1 | Scaffold5815 | 1121                    | AA                              | GG              | 1947059074               |
| SNP_P4_188421_1220  | NW_004519758.1 | Scaffold5815 | 1220                    | AA                              | GG              | 1947059076               |
| SNP_P4_188422_1446  | NW_004519758.1 | Scaffold5815 | 1446                    | CC                              | AA              | 1947059078               |
| SNP_P4_188423_1448  | NW_004519758.1 | Scaffold5815 | 1448                    | TT                              | AA              | 1947059080               |
| SNP_P4_188424_1457  | NW_004519758.1 | Scaffold5815 | 1457                    | AA                              | TT              | 1947059082               |
| SNP_P4_188425_1458  | NW_004519758.1 | Scaffold5815 | 1458                    | CC                              | AA              | 1947059084               |
| SNP_P4_188426_1466  | NW_004519758.1 | Scaffold5815 | 1466                    | AA                              | CC              | 1947059086               |
| SNP_P4_188427_1550  | NW_004519758.1 | Scaffold5815 | 1550                    | CC                              | GG              | 1947059088               |
| SNP_P4_188428_1798  | NW_004519758.1 | Scaffold5815 | 1798                    | AA                              | GG              | 1947059090               |
| SNP_P4_188429_2988  | NW_004519758.1 | Scaffold5815 | 2988                    | CC                              | TT              | 1947059092               |
| SNP_P4_188430_3339  | NW_004519758.1 | Scaffold5815 | 3339                    | TT                              | GG              | 1947059094               |
| SNP_P4_188431_3435  | NW_004519758.1 | Scaffold5815 | 3435                    | AA                              | TT              | 1947059096               |
| SNP_P4_188432_3620  | NW_004519758.1 | Scaffold5815 | 3620                    | CC                              | AA              | 1947059097               |
| SNP_P4_188433_3625  | NW_004519758.1 | Scaffold5815 | 3625                    | CC                              | AA              | 1947059098               |
| SNP_P4_188434_3627  | NW_004519758.1 | Scaffold5815 | 3627                    | TT                              | CC              | 1947059099               |
| SNP_P4_188435_3632  | NW_004519758.1 | Scaffold5815 | 3632                    | AA                              | TT              | 1947059100               |
| SNP_P4_188437_5165  | NW_004519759.1 | Scaffold5816 | 5165                    | GG                              | CC              | 1947059101               |
| SNP_P4_188438_5312  | NW_004519759.1 | Scaffold5816 | 5312                    | GG                              | TT              | 1947059102               |
| SNP_P4_188439_5316  | NW_004519759.1 | Scaffold5816 | 5316                    | CC                              | TT              | 1947059104               |
| SNP_P4_188440_5548  | NW_004519759.1 | Scaffold5816 | 5548                    | CC                              | TT              | 1947059106               |
| SNP_P4_188441_6779  | NW_004519759.1 | Scaffold5816 | 6779                    | GG                              | TT              | 1947059108               |
| SNP_P4_188442_6784  | NW_004519759.1 | Scaffold5816 | 6784                    | AA                              | TT              | 1947059110               |
| SNP_P4_188443_6808  | NW_004519759.1 | Scaffold5816 | 6808                    | CC                              | TT              | 1947059112               |
| SNP_P4_188444_6826  | NW_004519759.1 | Scaffold5816 | 6826                    | TT                              | AA              | 1947059114               |
| SNP_P4_188445_892   | NW_004519760.1 | Scaffold5817 | 892                     | AA                              | GG              | 1947059116               |
| SNP_P4_188446_992   | NW_004519760.1 | Scaffold5817 | 992                     | TT                              | AA              | 1947059118               |
| SNP_P4_188447_69    | NW_004519764.1 | Scaffold5823 | 69                      | CC                              | TT              | 1947059120               |

| SNPs IDs           | Chromosome IDs | Chromosomes  | Physical positions (bp) | CDC Frontier (Reference genome) | (ILWC46 & LPNB) | NCBI SNPdb Accession IDs |
|--------------------|----------------|--------------|-------------------------|---------------------------------|-----------------|--------------------------|
| SNP_P4_188448_113  | NW_004519764.1 | Scaffold5823 | 113                     | CC                              | AA              | 1947059122               |
| SNP_P4_188449_339  | NW_004519764.1 | Scaffold5823 | 339                     | GG                              | TT              | 1947059124               |
| SNP_P4_188450_552  | NW_004519764.1 | Scaffold5823 | 552                     | AA                              | TT              | 1947059126               |
| SNP_P4_188451_624  | NW_004519764.1 | Scaffold5823 | 624                     | CC                              | TT              | 1947059128               |
| SNP_P4_188453_1316 | NW_004519764.1 | Scaffold5823 | 1316                    | CC                              | TT              | 1947059130               |
| SNP_P4_188454_1529 | NW_004519764.1 | Scaffold5823 | 1529                    | AA                              | GG              | 1947059132               |
| SNP_P4_188455_1534 | NW_004519764.1 | Scaffold5823 | 1534                    | AA                              | TT              | 1947059134               |
| SNP_P4_188456_1542 | NW_004519764.1 | Scaffold5823 | 1542                    | CC                              | GG              | 1947059136               |
| SNP_P4_188457_1544 | NW_004519764.1 | Scaffold5823 | 1544                    | AA                              | CC              | 1947059138               |
| SNP_P4_188458_1050 | NW_004519765.1 | Scaffold5824 | 1050                    | AA                              | GG              | 1947059140               |
| SNP_P4_188459_1094 | NW_004519765.1 | Scaffold5824 | 1094                    | CC                              | TT              | 1947059142               |
| SNP_P4_188460_1294 | NW_004519771.1 | Scaffold5830 | 1294                    | AA                              | GG              | 1947059144               |
| SNP_P4_188461_671  | NW_004519772.1 | Scaffold5831 | 671                     | CC                              | AA              | 1947059146               |
| SNP_P4_188462_708  | NW_004519772.1 | Scaffold5831 | 708                     | GG                              | CC              | 1947059148               |
| SNP_P4_188463_729  | NW_004519772.1 | Scaffold5831 | 729                     | TT                              | AA              | 1947059150               |
| SNP_P4_188464_5747 | NW_004519778.1 | Scaffold5839 | 5747                    | TT                              | AA              | 1947059152               |
| SNP_P4_188465_6976 | NW_004519778.1 | Scaffold5839 | 6976                    | GG                              | TT              | 1947059154               |
| SNP_P4_188466_6979 | NW_004519778.1 | Scaffold5839 | 6979                    | TT                              | AA              | 1947059156               |
| SNP_P4_188467_6989 | NW_004519778.1 | Scaffold5839 | 6989                    | TT                              | AA              | 1947059158               |
| SNP_P4_188468_7403 | NW_004519778.1 | Scaffold5839 | 7403                    | GG                              | TT              | 1947059160               |
| SNP_P4_188469_7409 | NW_004519778.1 | Scaffold5839 | 7409                    | GG                              | AA              | 1947059163               |
| SNP_P4_188471_7720 | NW_004519778.1 | Scaffold5839 | 7720                    | TT                              | GG              | 1947059165               |
| SNP_P4_188472_7743 | NW_004519778.1 | Scaffold5839 | 7743                    | TT                              | CC              | 1947059167               |
| SNP_P4_188473_7747 | NW_004519778.1 | Scaffold5839 | 7747                    | AA                              | TT              | 1947059169               |
| SNP_P4_188474_7791 | NW_004519778.1 | Scaffold5839 | 7791                    | CC                              | AA              | 1947059171               |
| SNP_P4_188475_7807 | NW_004519778.1 | Scaffold5839 | 7807                    | AA                              | CC              | 1947059173               |
| SNP_P4_188476_7822 | NW_004519778.1 | Scaffold5839 | 7822                    | TT                              | AA              | 1947059175               |
| SNP_P4_188477_7823 | NW_004519778.1 | Scaffold5839 | 7823                    | TT                              | AA              | 1947059177               |
| SNP_P4_188478_7849 | NW_004519778.1 | Scaffold5839 | 7849                    | CC                              | TT              | 1947059179               |
| SNP_P4_188479_7859 | NW_004519778.1 | Scaffold5839 | 7859                    | AA                              | GG              | 1947059181               |
| SNP_P4_188480_7898 | NW_004519778.1 | Scaffold5839 | 7898                    | AA                              | GG              | 1947059183               |
| SNP_P4_188481_7914 | NW_004519778.1 | Scaffold5839 | 7914                    | TT                              | GG              | 1947059185               |
| SNP_P4_188482_7925 | NW_004519778.1 | Scaffold5839 | 7925                    | CC                              | GG              | 1947059187               |
| SNP_P4_188483_7975 | NW_004519778.1 | Scaffold5839 | 7975                    | TT                              | GG              | 1947059189               |
| SNP_P4_188484_8009 | NW_004519778.1 | Scaffold5839 | 8009                    | GG                              | AA              | 1947059191               |
| SNP_P4_188485_8025 | NW_004519778.1 | Scaffold5839 | 8025                    | GG                              | TT              | 1947059193               |
| SNP_P4_188486_8047 | NW_004519778.1 | Scaffold5839 | 8047                    | AA                              | TT              | 1947059195               |
| SNP_P4_188487_8145 | NW_004519778.1 | Scaffold5839 | 8145                    | AA                              | GG              | 1947059197               |
| SNP_P4_188488_8192 | NW_004519778.1 | Scaffold5839 | 8192                    | GG                              | AA              | 1947059199               |
| SNP_P4_188489_8284 | NW_004519778.1 | Scaffold5839 | 8284                    | TT                              | CC              | 1947059201               |
| SNP_P4_188490_8285 | NW_004519778.1 | Scaffold5839 | 8285                    | TT                              | CC              | 1947059203               |
| SNP_P4_188491_8321 | NW_004519778.1 | Scaffold5839 | 8321                    | AA                              | CC              | 1947059205               |

| SNPs IDs            | Chromosome IDs | Chromosomes  | Physical positions (bp) | CDC Frontier (Reference genome) | (ILWC46 & LPNB) | NCBI SNPdb Accession IDs |
|---------------------|----------------|--------------|-------------------------|---------------------------------|-----------------|--------------------------|
| SNP_P4_188492_8327  | NW_004519778.1 | Scaffold5839 | 8327                    | AA                              | GG              | 1947059207               |
| SNP_P4_188493_8333  | NW_004519778.1 | Scaffold5839 | 8333                    | CC                              | TT              | 1947059209               |
| SNP_P4_188494_8375  | NW_004519778.1 | Scaffold5839 | 8375                    | CC                              | TT              | 1947059211               |
| SNP_P4_188495_22688 | NW_004519778.1 | Scaffold5839 | 22688                   | AA                              | GG              | 1947059213               |
| SNP_P4_188496_22714 | NW_004519778.1 | Scaffold5839 | 22714                   | CC                              | GG              | 1947059215               |
| SNP_P4_188497_418   | NW_004519780.1 | Scaffold5841 | 418                     | CC                              | TT              | 1947059217               |
| SNP_P4_188498_427   | NW_004519780.1 | Scaffold5841 | 427                     | TT                              | GG              | 1947059219               |
| SNP_P4_188499_948   | NW_004519780.1 | Scaffold5841 | 948                     | CC                              | TT              | 1947059221               |
| SNP_P4_188500_1052  | NW_004519780.1 | Scaffold5841 | 1052                    | AA                              | GG              | 1947059223               |
| SNP_P4_188501_240   | NW_004519782.1 | Scaffold5843 | 240                     | CC                              | TT              | 1947059225               |
| SNP_P4_188502_251   | NW_004519782.1 | Scaffold5843 | 251                     | AA                              | GG              | 1947059227               |
| SNP_P4_188503_255   | NW_004519782.1 | Scaffold5843 | 255                     | AA                              | GG              | 1947059229               |
| SNP_P4_188504_256   | NW_004519782.1 | Scaffold5843 | 256                     | CC                              | TT              | 1947059231               |
| SNP_P4_188505_288   | NW_004519782.1 | Scaffold5843 | 288                     | CC                              | TT              | 1947059233               |
| SNP_P4_188507_364   | NW_004519782.1 | Scaffold5843 | 364                     | GG                              | TT              | 1947059235               |
| SNP_P4_188508_416   | NW_004519782.1 | Scaffold5843 | 416                     | GG                              | TT              | 1947059237               |
| SNP_P4_188509_739   | NW_004519782.1 | Scaffold5843 | 739                     | AA                              | GG              | 1947059240               |
| SNP_P4_188510_401   | NW_004519795.1 | Scaffold5863 | 401                     | TT                              | GG              | 1947059242               |
| SNP_P4_188511_437   | NW_004519795.1 | Scaffold5863 | 437                     | TT                              | AA              | 1947059244               |
| SNP_P4_188512_1260  | NW_004519796.1 | Scaffold5864 | 1260                    | TT                              | CC              | 1947059246               |
| SNP_P4_188513_253   | NW_004519797.1 | Scaffold5867 | 253                     | CC                              | TT              | 1947059248               |
| SNP_P4_188514_478   | NW_004519797.1 | Scaffold5867 | 478                     | GG                              | TT              | 1947059250               |
| SNP_P4_188515_490   | NW_004519797.1 | Scaffold5867 | 490                     | AA                              | GG              | 1947059252               |
| SNP_P4_188516_660   | NW_004519797.1 | Scaffold5867 | 660                     | CC                              | GG              | 1947059254               |
| SNP_P4_188517_696   | NW_004519797.1 | Scaffold5867 | 696                     | CC                              | AA              | 1947059256               |
| SNP_P4_188518_756   | NW_004519797.1 | Scaffold5867 | 756                     | AA                              | TT              | 1947059258               |
| SNP_P4_188519_769   | NW_004519797.1 | Scaffold5867 | 769                     | AA                              | GG              | 1947059260               |
| SNP_P4_188520_905   | NW_004519797.1 | Scaffold5867 | 905                     | TT                              | GG              | 1947059262               |
| SNP_P4_188521_957   | NW_004519797.1 | Scaffold5867 | 957                     | GG                              | CC              | 1947059264               |
| SNP_P4_188522_961   | NW_004519797.1 | Scaffold5867 | 961                     | TT                              | CC              | 1947059266               |
| SNP_P4_188523_1008  | NW_004519797.1 | Scaffold5867 | 1008                    | GG                              | AA              | 1947059268               |
| SNP_P4_188524_371   | NW_004519798.1 | Scaffold5869 | 371                     | TT                              | CC              | 1947059270               |
| SNP_P4_188525_429   | NW_004519798.1 | Scaffold5869 | 429                     | AA                              | GG              | 1947059272               |
| SNP_P4_188527_4559  | NW_004519798.1 | Scaffold5869 | 4559                    | CC                              | GG              | 1947059274               |
| SNP_P4_188528_5277  | NW_004519798.1 | Scaffold5869 | 5277                    | GG                              | AA              | 1947059276               |
| SNP_P4_188530_5420  | NW_004519798.1 | Scaffold5869 | 5420                    | GG                              | AA              | 1947059278               |
| SNP_P4_188531_5474  | NW_004519798.1 | Scaffold5869 | 5474                    | GG                              | AA              | 1947059280               |
| SNP_P4_188532_5634  | NW_004519798.1 | Scaffold5869 | 5634                    | GG                              | AA              | 1947059282               |
| SNP_P4_188533_7681  | NW_004519798.1 | Scaffold5869 | 7681                    | GG                              | AA              | 1947059284               |
| SNP_P4_188534_7688  | NW_004519798.1 | Scaffold5869 | 7688                    | GG                              | AA              | 1947059286               |
| SNP_P4_188535_7772  | NW_004519798.1 | Scaffold5869 | 7772                    | AA                              | GG              | 1947059288               |
| SNP_P4_188536_7811  | NW_004519798.1 | Scaffold5869 | 7811                    | GG                              | AA              | 1947059290               |

| SNPs IDs            | Chromosome IDs | Chromosomes  | Physical positions (bp) | CDC Frontier (Reference genome) | (ILWC46 & LPNB) | NCBI SNPdb Accession IDs |
|---------------------|----------------|--------------|-------------------------|---------------------------------|-----------------|--------------------------|
| SNP_P4_188537_7815  | NW_004519798.1 | Scaffold5869 | 7815                    | AA                              | GG              | 1947059292               |
| SNP_P4_188538_7838  | NW_004519798.1 | Scaffold5869 | 7838                    | AA                              | TT              | 1947059294               |
| SNP_P4_188539_7851  | NW_004519798.1 | Scaffold5869 | 7851                    | AA                              | GG              | 1947059296               |
| SNP_P4_188540_7861  | NW_004519798.1 | Scaffold5869 | 7861                    | AA                              | CC              | 1947059298               |
| SNP_P4_188541_8044  | NW_004519798.1 | Scaffold5869 | 8044                    | AA                              | GG              | 1947059300               |
| SNP_P4_188542_8068  | NW_004519798.1 | Scaffold5869 | 8068                    | TT                              | CC              | 1947059302               |
| SNP_P4_188543_8085  | NW_004519798.1 | Scaffold5869 | 8085                    | GG                              | AA              | 1947059304               |
| SNP_P4_188544_8116  | NW_004519798.1 | Scaffold5869 | 8116                    | CC                              | TT              | 1947059306               |
| SNP_P4_188545_8143  | NW_004519798.1 | Scaffold5869 | 8143                    | AA                              | GG              | 1947059308               |
| SNP_P4_188546_8389  | NW_004519798.1 | Scaffold5869 | 8389                    | TT                              | CC              | 1947059310               |
| SNP_P4_188547_12565 | NW_004519798.1 | Scaffold5869 | 12565                   | AA                              | GG              | 1947059312               |
| SNP_P4_188548_12591 | NW_004519798.1 | Scaffold5869 | 12591                   | TT                              | GG              | 1947059314               |
| SNP_P4_188549_17897 | NW_004519798.1 | Scaffold5869 | 17897                   | CC                              | TT              | 1947059316               |
| SNP_P4_188550_17919 | NW_004519798.1 | Scaffold5869 | 17919                   | AA                              | GG              | 1947059318               |
| SNP_P4_188551_17953 | NW_004519798.1 | Scaffold5869 | 17953                   | AA                              | TT              | 1947059320               |
| SNP_P4_188552_18006 | NW_004519798.1 | Scaffold5869 | 18006                   | TT                              | GG              | 1947059323               |
| SNP_P4_188553_18089 | NW_004519798.1 | Scaffold5869 | 18089                   | GG                              | AA              | 1947059325               |
| SNP_P4_188554_18147 | NW_004519798.1 | Scaffold5869 | 18147                   | CC                              | TT              | 1947059327               |
| SNP_P4_188556_18544 | NW_004519798.1 | Scaffold5869 | 18544                   | CC                              | TT              | 1947059329               |
| SNP_P4_188557_18547 | NW_004519798.1 | Scaffold5869 | 18547                   | TT                              | AA              | 1947059331               |
| SNP_P4_188558_380   | NW_004519800.1 | Scaffold5872 | 380                     | CC                              | AA              | 1947059333               |
| SNP_P4_188559_1438  | NW_004519801.1 | Scaffold5873 | 1438                    | TT                              | AA              | 1947059335               |
| SNP_P4_188560_382   | NW_004519806.1 | Scaffold5880 | 382                     | AA                              | CC              | 1947059337               |
| SNP_P4_188561_824   | NW_004519806.1 | Scaffold5880 | 824                     | GG                              | AA              | 1947059339               |
| SNP_P4_188562_861   | NW_004519806.1 | Scaffold5880 | 861                     | CC                              | TT              | 1947059341               |
| SNP_P4_188563_895   | NW_004519806.1 | Scaffold5880 | 895                     | TT                              | CC              | 1947059343               |
| SNP_P4_188564_717   | NW_004519809.1 | Scaffold5883 | 717                     | TT                              | GG              | 1947059345               |
| SNP_P4_188565_726   | NW_004519809.1 | Scaffold5883 | 726                     | TT                              | CC              | 1947059347               |
| SNP_P4_188566_1107  | NW_004519809.1 | Scaffold5883 | 1107                    | GG                              | CC              | 1947059349               |
| SNP_P4_188567_774   | NW_004519812.1 | Scaffold5889 | 774                     | AA                              | GG              | 1947059351               |
| SNP_P4_188568_814   | NW_004519812.1 | Scaffold5889 | 814                     | GG                              | AA              | 1947059353               |
| SNP_P4_188569_819   | NW_004519812.1 | Scaffold5889 | 819                     | CC                              | TT              | 1947059355               |
| SNP_P4_188570_827   | NW_004519812.1 | Scaffold5889 | 827                     | AA                              | TT              | 1947059357               |
| SNP_P4_188571_20890 | NW_004519812.1 | Scaffold5889 | 20890                   | TT                              | CC              | 1947059359               |
| SNP_P4_188572_21033 | NW_004519812.1 | Scaffold5889 | 21033                   | TT                              | GG              | 1947059362               |
| SNP_P4_188573_896   | NW_004519813.1 | Scaffold5891 | 896                     | TT                              | CC              | 1947059364               |
| SNP_P4_188574_4837  | NW_004519813.1 | Scaffold5891 | 4837                    | TT                              | AA              | 1947059366               |
| SNP_P4_188575_4961  | NW_004519813.1 | Scaffold5891 | 4961                    | AA                              | TT              | 1947059368               |
| SNP_P4_188576_4970  | NW_004519813.1 | Scaffold5891 | 4970                    | AA                              | GG              | 1947059370               |
| SNP_P4_188577_4975  | NW_004519813.1 | Scaffold5891 | 4975                    | TT                              | AA              | 1947059372               |
| SNP_P4_188579_5069  | NW_004519813.1 | Scaffold5891 | 5069                    | CC                              | TT              | 1947059374               |
| SNP_P4_188580_5070  | NW_004519813.1 | Scaffold5891 | 5070                    | AA                              | GG              | 1947059376               |

| SNPs IDs            | Chromosome IDs | Chromosomes  | Physical positions (bp) | CDC Frontier (Reference genome) | (ILWC46 & LPNB) | NCBI SNPdb Accession IDs |
|---------------------|----------------|--------------|-------------------------|---------------------------------|-----------------|--------------------------|
| SNP_P4_188581_5893  | NW_004519813.1 | Scaffold5891 | 5893                    | GG                              | TT              | 1947059378               |
| SNP_P4_188582_5178  | NW_004519815.1 | Scaffold5893 | 5178                    | AA                              | TT              | 1947059380               |
| SNP_P4_188583_5252  | NW_004519815.1 | Scaffold5893 | 5252                    | GG                              | AA              | 1947059382               |
| SNP_P4_188584_331   | NW_004519818.1 | Scaffold5898 | 331                     | TT                              | CC              | 1947059384               |
| SNP_P4_188585_1100  | NW_004519819.1 | Scaffold5899 | 1100                    | AA                              | TT              | 1947059386               |
| SNP_P4_188587_332   | NW_004519820.1 | Scaffold5900 | 332                     | AA                              | GG              | 1947059388               |
| SNP_P4_188588_489   | NW_004519820.1 | Scaffold5900 | 489                     | TT                              | AA              | 1947059390               |
| SNP_P4_188589_533   | NW_004519820.1 | Scaffold5900 | 533                     | TT                              | CC              | 1947059392               |
| SNP_P4_188590_539   | NW_004519820.1 | Scaffold5900 | 539                     | AA                              | GG              | 1947059394               |
| SNP_P4_188591_567   | NW_004519820.1 | Scaffold5900 | 567                     | GG                              | AA              | 1947059397               |
| SNP_P4_188592_591   | NW_004519820.1 | Scaffold5900 | 591                     | AA                              | GG              | 1947059399               |
| SNP_P4_188593_593   | NW_004519820.1 | Scaffold5900 | 593                     | TT                              | CC              | 1947059401               |
| SNP_P4_188594_611   | NW_004519820.1 | Scaffold5900 | 611                     | CC                              | TT              | 1947059403               |
| SNP_P4_188595_654   | NW_004519820.1 | Scaffold5900 | 654                     | TT                              | CC              | 1947059405               |
| SNP_P4_188596_661   | NW_004519820.1 | Scaffold5900 | 661                     | AA                              | GG              | 1947059407               |
| SNP_P4_188597_4968  | NW_004519821.1 | Scaffold5901 | 4968                    | TT                              | CC              | 1947059409               |
| SNP_P4_188598_5006  | NW_004519821.1 | Scaffold5901 | 5006                    | TT                              | CC              | 1947059411               |
| SNP_P4_188599_5034  | NW_004519821.1 | Scaffold5901 | 5034                    | GG                              | AA              | 1947059413               |
| SNP_P4_188601_5103  | NW_004519821.1 | Scaffold5901 | 5103                    | GG                              | AA              | 1947059415               |
| SNP_P4_188602_5114  | NW_004519821.1 | Scaffold5901 | 5114                    | CC                              | TT              | 1947059417               |
| SNP_P4_188603_5246  | NW_004519821.1 | Scaffold5901 | 5246                    | GG                              | TT              | 1947059419               |
| SNP_P4_188604_214   | NW_004519823.1 | Scaffold5904 | 214                     | TT                              | CC              | 1947059421               |
| SNP_P4_188605_17254 | NW_004519823.1 | Scaffold5904 | 17254                   | TT                              | GG              | 1947059423               |
| SNP_P4_188606_17295 | NW_004519823.1 | Scaffold5904 | 17295                   | TT                              | CC              | 1947059425               |
| SNP_P4_188608_17408 | NW_004519823.1 | Scaffold5904 | 17408                   | AA                              | TT              | 1947059427               |
| SNP_P4_188609_17455 | NW_004519823.1 | Scaffold5904 | 17455                   | GG                              | AA              | 1947059429               |
| SNP_P4_188610_17495 | NW_004519823.1 | Scaffold5904 | 17495                   | AA                              | CC              | 1947059431               |
| SNP_P4_188611_17802 | NW_004519823.1 | Scaffold5904 | 17802                   | GG                              | TT              | 1947059433               |
| SNP_P4_188612_17833 | NW_004519823.1 | Scaffold5904 | 17833                   | CC                              | AA              | 1947059435               |
| SNP_P4_188613_17966 | NW_004519823.1 | Scaffold5904 | 17966                   | AA                              | GG              | 1947059437               |
| SNP_P4_188614_22202 | NW_004519823.1 | Scaffold5904 | 22202                   | GG                              | CC              | 1947059439               |
| SNP_P4_188615_22377 | NW_004519823.1 | Scaffold5904 | 22377                   | TT                              | AA              | 1947059441               |
| SNP_P4_188617_22469 | NW_004519823.1 | Scaffold5904 | 22469                   | AA                              | CC              | 1947059443               |
| SNP_P4_188618_22565 | NW_004519823.1 | Scaffold5904 | 22565                   | CC                              | AA              | 1947059445               |
| SNP_P4_188619_22615 | NW_004519823.1 | Scaffold5904 | 22615                   | CC                              | TT              | 1947059447               |
| SNP_P4_188620_22626 | NW_004519823.1 | Scaffold5904 | 22626                   | CC                              | TT              | 1947059449               |
| SNP_P4_188621_23148 | NW_004519823.1 | Scaffold5904 | 23148                   | CC                              | TT              | 1947059451               |
| SNP_P4_188622_23637 | NW_004519823.1 | Scaffold5904 | 23637                   | TT                              | AA              | 1947059453               |
| SNP_P4_188623_2156  | NW_004519826.1 | Scaffold5907 | 2156                    | AA                              | GG              | 1947059455               |
| SNP_P4_188624_1192  | NW_004519827.1 | Scaffold5909 | 1192                    | CC                              | GG              | 1947059457               |
| SNP_P4_188625_2053  | NW_004519827.1 | Scaffold5909 | 2053                    | TT                              | GG              | 1947059459               |
| SNP_P4_188626_2454  | NW_004519827.1 | Scaffold5909 | 2454                    | AA                              | GG              | 1947059461               |

| SNPs IDs           | Chromosome IDs | Chromosomes  | Physical positions (bp) | CDC Frontier (Reference genome) | (ILWC46 & LPNB) | NCBI SNPdb Accession IDs |
|--------------------|----------------|--------------|-------------------------|---------------------------------|-----------------|--------------------------|
| SNP_P4_188627_2500 | NW_004519827.1 | Scaffold5909 | 2500                    | AA                              | TT              | 1947059463               |
| SNP_P4_188628_2503 | NW_004519827.1 | Scaffold5909 | 2503                    | GG                              | CC              | 1947059465               |
| SNP_P4_188629_2512 | NW_004519827.1 | Scaffold5909 | 2512                    | GG                              | TT              | 1947059467               |
| SNP_P4_188630_475  | NW_004519828.1 | Scaffold5912 | 475                     | AA                              | TT              | 1947059469               |
| SNP_P4_188631_1053 | NW_004519829.1 | Scaffold5913 | 1053                    | GG                              | TT              | 1947059471               |
| SNP_P4_188632_1064 | NW_004519829.1 | Scaffold5913 | 1064                    | TT                              | CC              | 1947059473               |
| SNP_P4_188633_1070 | NW_004519829.1 | Scaffold5913 | 1070                    | TT                              | AA              | 1947059475               |
| SNP_P4_188634_1083 | NW_004519829.1 | Scaffold5913 | 1083                    | CC                              | TT              | 1947059477               |
| SNP_P4_188635_1098 | NW_004519829.1 | Scaffold5913 | 1098                    | GG                              | TT              | 1947059479               |
| SNP_P4_188636_776  | NW_004519830.1 | Scaffold5914 | 776                     | CC                              | TT              | 1947059481               |
| SNP_P4_188637_789  | NW_004519830.1 | Scaffold5914 | 789                     | AA                              | CC              | 1947059483               |
| SNP_P4_188638_1223 | NW_004519830.1 | Scaffold5914 | 1223                    | AA                              | CC              | 1947059485               |
| SNP_P4_188639_811  | NW_004519832.1 | Scaffold5916 | 811                     | AA                              | CC              | 1947059487               |
| SNP_P4_188640_830  | NW_004519832.1 | Scaffold5916 | 830                     | AA                              | TT              | 1947059489               |
| SNP_P4_188641_835  | NW_004519832.1 | Scaffold5916 | 835                     | GG                              | AA              | 1947059491               |
| SNP_P4_188643_894  | NW_004519832.1 | Scaffold5916 | 894                     | CC                              | GG              | 1947059493               |
| SNP_P4_188644_895  | NW_004519832.1 | Scaffold5916 | 895                     | CC                              | TT              | 1947059495               |
| SNP_P4_188645_911  | NW_004519832.1 | Scaffold5916 | 911                     | AA                              | GG              | 1947059497               |
| SNP_P4_188646_957  | NW_004519832.1 | Scaffold5916 | 957                     | TT                              | CC              | 1947059499               |
| SNP_P4_188647_962  | NW_004519832.1 | Scaffold5916 | 962                     | CC                              | AA              | 1947059501               |
| SNP_P4_188648_971  | NW_004519832.1 | Scaffold5916 | 971                     | CC                              | AA              | 1947059503               |
| SNP_P4_188649_987  | NW_004519832.1 | Scaffold5916 | 987                     | CC                              | GG              | 1947059505               |
| SNP_P4_188650_1080 | NW_004519832.1 | Scaffold5916 | 1080                    | TT                              | GG              | 1947059507               |
| SNP_P4_188652_1331 | NW_004519832.1 | Scaffold5916 | 1331                    | CC                              | TT              | 1947059509               |
| SNP_P4_188653_731  | NW_004519833.1 | Scaffold5917 | 731                     | TT                              | CC              | 1947059511               |
| SNP_P4_188654_868  | NW_004519833.1 | Scaffold5917 | 868                     | GG                              | TT              | 1947059513               |
| SNP_P4_188655_46   | NW_004519834.1 | Scaffold5918 | 46                      | AA                              | GG              | 1947059515               |
| SNP_P4_188656_63   | NW_004519834.1 | Scaffold5918 | 63                      | CC                              | TT              | 1947059517               |
| SNP_P4_188657_64   | NW_004519834.1 | Scaffold5918 | 64                      | CC                              | AA              | 1947059519               |
| SNP_P4_188659_116  | NW_004519834.1 | Scaffold5918 | 116                     | CC                              | TT              | 1947059521               |
| SNP_P4_188660_118  | NW_004519834.1 | Scaffold5918 | 118                     | AA                              | CC              | 1947059523               |
| SNP_P4_188661_132  | NW_004519834.1 | Scaffold5918 | 132                     | AA                              | GG              | 1947059525               |
| SNP_P4_188662_133  | NW_004519834.1 | Scaffold5918 | 133                     | AA                              | GG              | 1947059527               |
| SNP_P4_188663_285  | NW_004519834.1 | Scaffold5918 | 285                     | AA                              | CC              | 1947059529               |
| SNP_P4_188664_310  | NW_004519834.1 | Scaffold5918 | 310                     | GG                              | AA              | 1947059531               |
| SNP_P4_188665_312  | NW_004519834.1 | Scaffold5918 | 312                     | GG                              | TT              | 1947059533               |
| SNP_P4_188666_338  | NW_004519834.1 | Scaffold5918 | 338                     | CC                              | AA              | 1947059535               |
| SNP_P4_188667_340  | NW_004519834.1 | Scaffold5918 | 340                     | AA                              | TT              | 1947059537               |
| SNP_P4_188668_522  | NW_004519834.1 | Scaffold5918 | 522                     | GG                              | AA              | 1947059539               |
| SNP_P4_188669_540  | NW_004519834.1 | Scaffold5918 | 540                     | GG                              | AA              | 1947059541               |
| SNP_P4_188670_591  | NW_004519834.1 | Scaffold5918 | 591                     | TT                              | CC              | 1947059543               |
| SNP_P4_188671_616  | NW_004519834.1 | Scaffold5918 | 616                     | AA                              | TT              | 1947059545               |



| SNPs IDs           | Chromosome IDs | Chromosomes  | Physical positions (bp) | CDC Frontier (Reference genome) | (ILWC46 & LPNB) | NCBI SNPdb Accession IDs |
|--------------------|----------------|--------------|-------------------------|---------------------------------|-----------------|--------------------------|
| SNP_P4_188672_617  | NW_004519834.1 | Scaffold5918 | 617                     | CC                              | TT              | 1947059547               |
| SNP_P4_188673_659  | NW_004519834.1 | Scaffold5918 | 659                     | AA                              | TT              | 1947059549               |
| SNP_P4_188674_812  | NW_004519834.1 | Scaffold5918 | 812                     | TT                              | GG              | 1947059551               |
| SNP_P4_188675_829  | NW_004519834.1 | Scaffold5918 | 829                     | GG                              | TT              | 1947059553               |
| SNP_P4_188676_871  | NW_004519834.1 | Scaffold5918 | 871                     | GG                              | AA              | 1947059555               |
| SNP_P4_188677_896  | NW_004519834.1 | Scaffold5918 | 896                     | CC                              | TT              | 1947059557               |
| SNP_P4_188678_899  | NW_004519834.1 | Scaffold5918 | 899                     | CC                              | AA              | 1947059559               |
| SNP_P4_188679_955  | NW_004519834.1 | Scaffold5918 | 955                     | AA                              | TT              | 1947059561               |
| SNP_P4_188680_1054 | NW_004519834.1 | Scaffold5918 | 1054                    | CC                              | TT              | 1947059563               |
| SNP_P4_188681_1066 | NW_004519834.1 | Scaffold5918 | 1066                    | TT                              | CC              | 1947059565               |
| SNP_P4_188682_1088 | NW_004519834.1 | Scaffold5918 | 1088                    | GG                              | AA              | 1947059567               |
| SNP_P4_188683_1119 | NW_004519834.1 | Scaffold5918 | 1119                    | TT                              | CC              | 1947059569               |
| SNP_P4_188684_840  | NW_004519836.1 | Scaffold5920 | 840                     | CC                              | TT              | 1947059571               |
| SNP_P4_188685_6096 | NW_004519836.1 | Scaffold5920 | 6096                    | AA                              | TT              | 1947059573               |
| SNP_P4_188686_573  | NW_004519837.1 | Scaffold5921 | 573                     | TT                              | CC              | 1947059575               |
| SNP_P4_188687_588  | NW_004519837.1 | Scaffold5921 | 588                     | AA                              | CC              | 1947059577               |
| SNP_P4_188688_687  | NW_004519837.1 | Scaffold5921 | 687                     | GG                              | CC              | 1947059579               |
| SNP_P4_188689_788  | NW_004519837.1 | Scaffold5921 | 788                     | TT                              | GG              | 1947059581               |
| SNP_P4_188691_389  | NW_004519839.1 | Scaffold5923 | 389                     | GG                              | AA              | 1947059583               |
| SNP_P4_188693_1459 | NW_004519840.1 | Scaffold5925 | 1459                    | AA                              | GG              | 1947059585               |
| SNP_P4_188694_1692 | NW_004519840.1 | Scaffold5925 | 1692                    | AA                              | TT              | 1947059587               |
| SNP_P4_188695_2114 | NW_004519840.1 | Scaffold5925 | 2114                    | GG                              | AA              | 1947059589               |
| SNP_P4_188696_2395 | NW_004519840.1 | Scaffold5925 | 2395                    | TT                              | CC              | 1947059591               |
| SNP_P4_188697_2405 | NW_004519840.1 | Scaffold5925 | 2405                    | AA                              | CC              | 1947059593               |
| SNP_P4_188698_280  | NW_004519843.1 | Scaffold5928 | 280                     | TT                              | GG              | 1947059595               |
| SNP_P4_188699_536  | NW_004519843.1 | Scaffold5928 | 536                     | GG                              | AA              | 1947059597               |
| SNP_P4_188700_748  | NW_004519843.1 | Scaffold5928 | 748                     | CC                              | TT              | 1947059599               |
| SNP_P4_188701_850  | NW_004519843.1 | Scaffold5928 | 850                     | AA                              | CC              | 1947059601               |
| SNP_P4_188702_1074 | NW_004519843.1 | Scaffold5928 | 1074                    | GG                              | CC              | 1947059603               |
| SNP_P4_188703_1096 | NW_004519843.1 | Scaffold5928 | 1096                    | AA                              | TT              | 1947059605               |
| SNP_P4_188704_1358 | NW_004519843.1 | Scaffold5928 | 1358                    | CC                              | TT              | 1947059607               |
| SNP_P4_188705_1365 | NW_004519843.1 | Scaffold5928 | 1365                    | GG                              | AA              | 1947059609               |
| SNP_P4_188706_1372 | NW_004519843.1 | Scaffold5928 | 1372                    | GG                              | CC              | 1947059611               |
| SNP_P4_188707_1388 | NW_004519843.1 | Scaffold5928 | 1388                    | TT                              | CC              | 1947059613               |
| SNP_P4_188708_1411 | NW_004519843.1 | Scaffold5928 | 1411                    | TT                              | AA              | 1947059615               |
| SNP_P4_188709_1501 | NW_004519843.1 | Scaffold5928 | 1501                    | TT                              | CC              | 1947059617               |
| SNP_P4_188710_1810 | NW_004519843.1 | Scaffold5928 | 1810                    | TT                              | GG              | 1947059619               |
| SNP_P4_188711_1836 | NW_004519843.1 | Scaffold5928 | 1836                    | AA                              | GG              | 1947059621               |
| SNP_P4_188712_1909 | NW_004519843.1 | Scaffold5928 | 1909                    | TT                              | AA              | 1947059623               |
| SNP_P4_188714_1924 | NW_004519843.1 | Scaffold5928 | 1924                    | AA                              | TT              | 1947059625               |
| SNP_P4_188715_2022 | NW_004519843.1 | Scaffold5928 | 2022                    | AA                              | GG              | 1947059627               |
| SNP_P4_188716_2070 | NW_004519843.1 | Scaffold5928 | 2070                    | AA                              | GG              | 1947059629               |

| SNPs IDs           | Chromosome IDs | Chromosomes  | Physical positions (bp) | CDC Frontier (Reference genome) | (ILWC46 & LPNB) | NCBI SNPdb Accession IDs |
|--------------------|----------------|--------------|-------------------------|---------------------------------|-----------------|--------------------------|
| SNP_P4_188717_2076 | NW_004519843.1 | Scaffold5928 | 2076                    | TT                              | GG              | 1947059631               |
| SNP_P4_188718_2213 | NW_004519843.1 | Scaffold5928 | 2213                    | AA                              | GG              | 1947059633               |
| SNP_P4_188719_2349 | NW_004519843.1 | Scaffold5928 | 2349                    | TT                              | CC              | 1947059635               |
| SNP_P4_188720_2383 | NW_004519843.1 | Scaffold5928 | 2383                    | GG                              | AA              | 1947059637               |
| SNP_P4_188721_2409 | NW_004519843.1 | Scaffold5928 | 2409                    | AA                              | GG              | 1947059639               |
| SNP_P4_188722_2422 | NW_004519843.1 | Scaffold5928 | 2422                    | CC                              | AA              | 1947059641               |
| SNP_P4_188723_2428 | NW_004519843.1 | Scaffold5928 | 2428                    | AA                              | CC              | 1947059644               |
| SNP_P4_188724_2437 | NW_004519843.1 | Scaffold5928 | 2437                    | GG                              | AA              | 1947059646               |
| SNP_P4_188725_2489 | NW_004519843.1 | Scaffold5928 | 2489                    | TT                              | CC              | 1947059648               |
| SNP_P4_188726_2563 | NW_004519843.1 | Scaffold5928 | 2563                    | AA                              | GG              | 1947059650               |
| SNP_P4_188727_2697 | NW_004519843.1 | Scaffold5928 | 2697                    | TT                              | GG              | 1947059652               |
| SNP_P4_188728_2732 | NW_004519843.1 | Scaffold5928 | 2732                    | TT                              | CC              | 1947059654               |
| SNP_P4_188729_2803 | NW_004519843.1 | Scaffold5928 | 2803                    | GG                              | AA              | 1947059656               |
| SNP_P4_188730_2939 | NW_004519843.1 | Scaffold5928 | 2939                    | CC                              | TT              | 1947059658               |
| SNP_P4_188731_2980 | NW_004519843.1 | Scaffold5928 | 2980                    | TT                              | CC              | 1947059660               |
| SNP_P4_188732_3687 | NW_004519843.1 | Scaffold5928 | 3687                    | GG                              | TT              | 1947059662               |
| SNP_P4_188733_3694 | NW_004519843.1 | Scaffold5928 | 3694                    | TT                              | CC              | 1947059664               |
| SNP_P4_188734_3724 | NW_004519843.1 | Scaffold5928 | 3724                    | GG                              | AA              | 1947059666               |
| SNP_P4_188735_3796 | NW_004519843.1 | Scaffold5928 | 3796                    | TT                              | GG              | 1947059668               |
| SNP_P4_188736_3823 | NW_004519843.1 | Scaffold5928 | 3823                    | GG                              | AA              | 1947059670               |
| SNP_P4_188737_3842 | NW_004519843.1 | Scaffold5928 | 3842                    | GG                              | CC              | 1947059672               |
| SNP_P4_188738_4023 | NW_004519843.1 | Scaffold5928 | 4023                    | TT                              | CC              | 1947059674               |
| SNP_P4_188739_4135 | NW_004519843.1 | Scaffold5928 | 4135                    | CC                              | TT              | 1947059676               |
| SNP_P4_188740_7971 | NW_004519843.1 | Scaffold5928 | 7971                    | GG                              | AA              | 1947059678               |
| SNP_P4_188741_8010 | NW_004519843.1 | Scaffold5928 | 8010                    | AA                              | CC              | 1947059681               |
| SNP_P4_188742_8185 | NW_004519843.1 | Scaffold5928 | 8185                    | CC                              | TT              | 1947059683               |
| SNP_P4_188743_8220 | NW_004519843.1 | Scaffold5928 | 8220                    | TT                              | GG              | 1947059685               |
| SNP_P4_188744_8268 | NW_004519843.1 | Scaffold5928 | 8268                    | AA                              | TT              | 1947059687               |
| SNP_P4_188745_8276 | NW_004519843.1 | Scaffold5928 | 8276                    | CC                              | TT              | 1947059689               |
| SNP_P4_188746_8280 | NW_004519843.1 | Scaffold5928 | 8280                    | AA                              | CC              | 1947059691               |
| SNP_P4_188747_8285 | NW_004519843.1 | Scaffold5928 | 8285                    | TT                              | CC              | 1947059693               |
| SNP_P4_188748_8291 | NW_004519843.1 | Scaffold5928 | 8291                    | TT                              | AA              | 1947059706               |
| SNP_P4_188749_8300 | NW_004519843.1 | Scaffold5928 | 8300                    | AA                              | GG              | 1947059708               |
| SNP_P4_188750_8355 | NW_004519843.1 | Scaffold5928 | 8355                    | CC                              | GG              | 1947059710               |
| SNP_P4_188751_8382 | NW_004519843.1 | Scaffold5928 | 8382                    | GG                              | AA              | 1947059712               |
| SNP_P4_188752_8402 | NW_004519843.1 | Scaffold5928 | 8402                    | TT                              | GG              | 1947059714               |
| SNP_P4_188754_8662 | NW_004519843.1 | Scaffold5928 | 8662                    | TT                              | GG              | 1947059716               |
| SNP_P4_188755_8676 | NW_004519843.1 | Scaffold5928 | 8676                    | AA                              | CC              | 1947059718               |
| SNP_P4_188756_8745 | NW_004519843.1 | Scaffold5928 | 8745                    | AA                              | GG              | 1947059720               |
| SNP_P4_188757_8857 | NW_004519843.1 | Scaffold5928 | 8857                    | AA                              | TT              | 1947059722               |
| SNP_P4_188758_8871 | NW_004519843.1 | Scaffold5928 | 8871                    | TT                              | CC              | 1947059724               |
| SNP_P4_188759_9003 | NW_004519843.1 | Scaffold5928 | 9003                    | TT                              | GG              | 1947059726               |

| SNPs IDs            | Chromosome IDs | Chromosomes  | Physical positions (bp) | CDC Frontier (Reference genome) | (ILWC46 & LPNB) | NCBI SNPdb Accession IDs |
|---------------------|----------------|--------------|-------------------------|---------------------------------|-----------------|--------------------------|
| SNP_P4_188760_1619  | NW_004519844.1 | Scaffold5929 | 1619                    | GG                              | TT              | 1947059728               |
| SNP_P4_188761_1674  | NW_004519844.1 | Scaffold5929 | 1674                    | AA                              | CC              | 1947059730               |
| SNP_P4_188762_20335 | NW_004519846.1 | Scaffold5932 | 20335                   | CC                              | TT              | 1947059733               |
| SNP_P4_188763_22368 | NW_004519848.1 | Scaffold5934 | 22368                   | GG                              | AA              | 1947059735               |
| SNP_P4_188764_27092 | NW_004519848.1 | Scaffold5934 | 27092                   | AA                              | CC              | 1947059737               |
| SNP_P4_188765_27243 | NW_004519848.1 | Scaffold5934 | 27243                   | GG                              | AA              | 1947059739               |
| SNP_P4_188766_27470 | NW_004519848.1 | Scaffold5934 | 27470                   | TT                              | CC              | 1947059741               |
| SNP_P4_188767_27496 | NW_004519848.1 | Scaffold5934 | 27496                   | AA                              | GG              | 1947059743               |
| SNP_P4_188768_28938 | NW_004519848.1 | Scaffold5934 | 28938                   | CC                              | TT              | 1947059745               |
| SNP_P4_188769_28973 | NW_004519848.1 | Scaffold5934 | 28973                   | TT                              | CC              | 1947059747               |
| SNP_P4_188770_28998 | NW_004519848.1 | Scaffold5934 | 28998                   | AA                              | GG              | 1947059749               |
| SNP_P4_188771_2115  | NW_004519849.1 | Scaffold5935 | 2115                    | AA                              | GG              | 1947059751               |
| SNP_P4_188772_32    | NW_004519852.1 | Scaffold5938 | 32                      | GG                              | AA              | 1947059753               |
| SNP_P4_188773_64    | NW_004519852.1 | Scaffold5938 | 64                      | TT                              | GG              | 1947059755               |
| SNP_P4_188774_105   | NW_004519852.1 | Scaffold5938 | 105                     | CC                              | TT              | 1947059757               |
| SNP_P4_188775_1552  | NW_004519852.1 | Scaffold5938 | 1552                    | GG                              | AA              | 1947059759               |
| SNP_P4_188776_105   | NW_004519853.1 | Scaffold5939 | 105                     | CC                              | TT              | 1947059761               |
| SNP_P4_188777_5959  | NW_004519854.1 | Scaffold5941 | 5959                    | CC                              | AA              | 1947059763               |
| SNP_P4_188778_449   | NW_004519856.1 | Scaffold5945 | 449                     | CC                              | AA              | 1947059765               |
| SNP_P4_188779_595   | NW_004519856.1 | Scaffold5945 | 595                     | AA                              | GG              | 1947059767               |
| SNP_P4_188780_1016  | NW_004519856.1 | Scaffold5945 | 1016                    | AA                              | TT              | 1947059769               |
| SNP_P4_188781_1043  | NW_004519856.1 | Scaffold5945 | 1043                    | CC                              | TT              | 1947059771               |
| SNP_P4_188782_1055  | NW_004519856.1 | Scaffold5945 | 1055                    | GG                              | AA              | 1947059773               |
| SNP_P4_188783_1181  | NW_004519856.1 | Scaffold5945 | 1181                    | CC                              | AA              | 1947059775               |
| SNP_P4_188784_1244  | NW_004519856.1 | Scaffold5945 | 1244                    | TT                              | CC              | 1947059777               |
| SNP_P4_188785_1259  | NW_004519856.1 | Scaffold5945 | 1259                    | TT                              | CC              | 1947059779               |
| SNP_P4_188786_1261  | NW_004519856.1 | Scaffold5945 | 1261                    | GG                              | AA              | 1947059781               |
| SNP_P4_188787_1295  | NW_004519856.1 | Scaffold5945 | 1295                    | GG                              | AA              | 1947059783               |
| SNP_P4_188788_1310  | NW_004519856.1 | Scaffold5945 | 1310                    | TT                              | CC              | 1947059786               |
| SNP_P4_188789_1235  | NW_004519857.1 | Scaffold5946 | 1235                    | GG                              | TT              | 1947059788               |
| SNP_P4_188790_1417  | NW_004519857.1 | Scaffold5946 | 1417                    | GG                              | AA              | 1947059790               |
| SNP_P4_188791_1509  | NW_004519857.1 | Scaffold5946 | 1509                    | GG                              | AA              | 1947059792               |
| SNP_P4_188792_1510  | NW_004519857.1 | Scaffold5946 | 1510                    | GG                              | CC              | 1947059794               |
| SNP_P4_188793_2180  | NW_004519857.1 | Scaffold5946 | 2180                    | CC                              | TT              | 1947059796               |
| SNP_P4_188794_1564  | NW_004519859.1 | Scaffold5952 | 1564                    | AA                              | TT              | 1947059798               |
| SNP_P4_188795_1565  | NW_004519859.1 | Scaffold5952 | 1565                    | AA                              | CC              | 1947059800               |
| SNP_P4_188796_1779  | NW_004519859.1 | Scaffold5952 | 1779                    | GG                              | TT              | 1947059802               |
| SNP_P4_188797_1783  | NW_004519859.1 | Scaffold5952 | 1783                    | TT                              | CC              | 1947059804               |
| SNP_P4_188798_1788  | NW_004519859.1 | Scaffold5952 | 1788                    | CC                              | TT              | 1947059806               |
| SNP_P4_188799_1993  | NW_004519859.1 | Scaffold5952 | 1993                    | CC                              | AA              | 1947059808               |
| SNP_P4_188800_2066  | NW_004519859.1 | Scaffold5952 | 2066                    | AA                              | TT              | 1947059810               |
| SNP_P4_188801_704   | NW_004519861.1 | Scaffold5954 | 704                     | AA                              | TT              | 1947059812               |

| SNPs IDs           | Chromosome IDs | Chromosomes  | Physical positions (bp) | CDC Frontier (Reference genome) | (ILWC46 & LPNB) | NCBI SNPdb Accession IDs |
|--------------------|----------------|--------------|-------------------------|---------------------------------|-----------------|--------------------------|
| SNP_P4_188803_745  | NW_004519861.1 | Scaffold5954 | 745                     | AA                              | GG              | 1947059814               |
| SNP_P4_188804_840  | NW_004519861.1 | Scaffold5954 | 840                     | AA                              | TT              | 1947059816               |
| SNP_P4_188805_902  | NW_004519861.1 | Scaffold5954 | 902                     | CC                              | TT              | 1947059818               |
| SNP_P4_188806_1067 | NW_004519861.1 | Scaffold5954 | 1067                    | GG                              | AA              | 1947059820               |
| SNP_P4_188807_1097 | NW_004519861.1 | Scaffold5954 | 1097                    | AA                              | TT              | 1947059822               |
| SNP_P4_188808_1213 | NW_004519861.1 | Scaffold5954 | 1213                    | TT                              | AA              | 1947059824               |
| SNP_P4_188809_1282 | NW_004519861.1 | Scaffold5954 | 1282                    | TT                              | AA              | 1947059826               |
| SNP_P4_188810_1318 | NW_004519861.1 | Scaffold5954 | 1318                    | CC                              | TT              | 1947059828               |
| SNP_P4_188811_1406 | NW_004519861.1 | Scaffold5954 | 1406                    | GG                              | AA              | 1947059830               |
| SNP_P4_188813_1448 | NW_004519861.1 | Scaffold5954 | 1448                    | AA                              | TT              | 1947059832               |
| SNP_P4_188814_617  | NW_004519862.1 | Scaffold5955 | 617                     | CC                              | TT              | 1947059834               |
| SNP_P4_188815_762  | NW_004519862.1 | Scaffold5955 | 762                     | AA                              | GG              | 1947059836               |
| SNP_P4_188816_902  | NW_004519862.1 | Scaffold5955 | 902                     | CC                              | AA              | 1947059838               |
| SNP_P4_188817_907  | NW_004519862.1 | Scaffold5955 | 907                     | CC                              | AA              | 1947059840               |
| SNP_P4_188818_908  | NW_004519862.1 | Scaffold5955 | 908                     | AA                              | GG              | 1947059842               |
| SNP_P4_188819_1437 | NW_004519862.1 | Scaffold5955 | 1437                    | TT                              | CC              | 1947059844               |
| SNP_P4_188820_1445 | NW_004519862.1 | Scaffold5955 | 1445                    | TT                              | GG              | 1947059846               |
| SNP_P4_188821_1475 | NW_004519862.1 | Scaffold5955 | 1475                    | TT                              | GG              | 1947059848               |
| SNP_P4_188822_1585 | NW_004519862.1 | Scaffold5955 | 1585                    | TT                              | CC              | 1947059850               |
| SNP_P4_188823_1630 | NW_004519862.1 | Scaffold5955 | 1630                    | TT                              | CC              | 1947059852               |
| SNP_P4_188824_1642 | NW_004519862.1 | Scaffold5955 | 1642                    | AA                              | GG              | 1947059854               |
| SNP_P4_188825_1645 | NW_004519862.1 | Scaffold5955 | 1645                    | AA                              | CC              | 1947059856               |
| SNP_P4_188826_905  | NW_004519864.1 | Scaffold5957 | 905                     | CC                              | TT              | 1947059858               |
| SNP_P4_188827_732  | NW_004519867.1 | Scaffold5960 | 732                     | CC                              | GG              | 1947059860               |
| SNP_P4_188828_749  | NW_004519867.1 | Scaffold5960 | 749                     | TT                              | CC              | 1947059862               |
| SNP_P4_188829_819  | NW_004519867.1 | Scaffold5960 | 819                     | TT                              | AA              | 1947059865               |
| SNP_P4_188830_878  | NW_004519867.1 | Scaffold5960 | 878                     | TT                              | CC              | 1947059867               |
| SNP_P4_188831_1273 | NW_004519867.1 | Scaffold5960 | 1273                    | TT                              | CC              | 1947059869               |
| SNP_P4_188832_539  | NW_004519868.1 | Scaffold5963 | 539                     | AA                              | GG              | 1947059871               |
| SNP_P4_188833_544  | NW_004519868.1 | Scaffold5963 | 544                     | CC                              | AA              | 1947059873               |
| SNP_P4_188834_545  | NW_004519868.1 | Scaffold5963 | 545                     | AA                              | CC              | 1947059875               |
| SNP_P4_188835_572  | NW_004519868.1 | Scaffold5963 | 572                     | AA                              | CC              | 1947059877               |
| SNP_P4_188836_6379 | NW_004519873.1 | Scaffold5974 | 6379                    | TT                              | CC              | 1947059879               |
| SNP_P4_188837_6413 | NW_004519873.1 | Scaffold5974 | 6413                    | TT                              | CC              | 1947059881               |
| SNP_P4_188838_6513 | NW_004519873.1 | Scaffold5974 | 6513                    | TT                              | GG              | 1947059883               |
| SNP_P4_188839_6718 | NW_004519873.1 | Scaffold5974 | 6718                    | GG                              | CC              | 1947059885               |
| SNP_P4_188840_6852 | NW_004519873.1 | Scaffold5974 | 6852                    | AA                              | GG              | 1947059887               |
| SNP_P4_188841_74   | NW_004519874.1 | Scaffold5975 | 74                      | TT                              | AA              | 1947059889               |
| SNP_P4_188842_747  | NW_004519876.1 | Scaffold5977 | 747                     | GG                              | CC              | 1947059891               |
| SNP_P4_188843_990  | NW_004519876.1 | Scaffold5977 | 990                     | TT                              | GG              | 1947059893               |
| SNP_P4_188844_1303 | NW_004519876.1 | Scaffold5977 | 1303                    | AA                              | CC              | 1947059895               |
| SNP_P4_188845_4521 | NW_004519876.1 | Scaffold5977 | 4521                    | AA                              | GG              | 1947059897               |

| SNPs IDs            | Chromosome IDs | Chromosomes  | Physical positions (bp) | CDC Frontier (Reference genome) | (ILWC46 & LPNB) | NCBI SNPdb Accession IDs |
|---------------------|----------------|--------------|-------------------------|---------------------------------|-----------------|--------------------------|
| SNP_P4_188846_4552  | NW_004519876.1 | Scaffold5977 | 4552                    | CC                              | TT              | 1947059899               |
| SNP_P4_188847_4595  | NW_004519876.1 | Scaffold5977 | 4595                    | GG                              | TT              | 1947059901               |
| SNP_P4_188849_4681  | NW_004519876.1 | Scaffold5977 | 4681                    | CC                              | AA              | 1947059903               |
| SNP_P4_188850_4743  | NW_004519876.1 | Scaffold5977 | 4743                    | GG                              | TT              | 1947059905               |
| SNP_P4_188851_4786  | NW_004519876.1 | Scaffold5977 | 4786                    | GG                              | AA              | 1947059907               |
| SNP_P4_188852_4791  | NW_004519876.1 | Scaffold5977 | 4791                    | AA                              | TT              | 1947059909               |
| SNP_P4_188853_4802  | NW_004519876.1 | Scaffold5977 | 4802                    | TT                              | CC              | 1947059911               |
| SNP_P4_188854_4825  | NW_004519876.1 | Scaffold5977 | 4825                    | GG                              | AA              | 1947059913               |
| SNP_P4_188855_4887  | NW_004519876.1 | Scaffold5977 | 4887                    | AA                              | GG              | 1947059915               |
| SNP_P4_188856_14513 | NW_004519876.1 | Scaffold5977 | 14513                   | AA                              | CC              | 1947059917               |
| SNP_P4_188857_14528 | NW_004519876.1 | Scaffold5977 | 14528                   | TT                              | AA              | 1947059919               |
| SNP_P4_188858_319   | NW_004519877.1 | Scaffold5979 | 319                     | CC                              | TT              | 1947059921               |
| SNP_P4_188859_364   | NW_004519877.1 | Scaffold5979 | 364                     | CC                              | AA              | 1947059923               |
| SNP_P4_188860_569   | NW_004519877.1 | Scaffold5979 | 569                     | TT                              | CC              | 1947059925               |
| SNP_P4_188861_604   | NW_004519877.1 | Scaffold5979 | 604                     | AA                              | GG              | 1947059927               |
| SNP_P4_188862_618   | NW_004519877.1 | Scaffold5979 | 618                     | TT                              | CC              | 1947059929               |
| SNP_P4_188863_622   | NW_004519877.1 | Scaffold5979 | 622                     | TT                              | GG              | 1947059931               |
| SNP_P4_188864_751   | NW_004519877.1 | Scaffold5979 | 751                     | AA                              | GG              | 1947059933               |
| SNP_P4_188865_1047  | NW_004519882.1 | Scaffold5988 | 1047                    | GG                              | AA              | 1947059935               |
| SNP_P4_188866_74    | NW_004519884.1 | Scaffold5992 | 74                      | CC                              | TT              | 1947059937               |
| SNP_P4_188868_1323  | NW_004519884.1 | Scaffold5992 | 1323                    | GG                              | AA              | 1947059939               |
| SNP_P4_188869_1392  | NW_004519884.1 | Scaffold5992 | 1392                    | AA                              | GG              | 1947059941               |
| SNP_P4_188870_1516  | NW_004519884.1 | Scaffold5992 | 1516                    | GG                              | AA              | 1947059943               |
| SNP_P4_188872_1556  | NW_004519884.1 | Scaffold5992 | 1556                    | CC                              | GG              | 1947059945               |
| SNP_P4_188873_1674  | NW_004519884.1 | Scaffold5992 | 1674                    | AA                              | CC              | 1947059947               |
| SNP_P4_188874_17898 | NW_004519885.1 | Scaffold5993 | 17898                   | TT                              | AA              | 1947059949               |
| SNP_P4_188875_17978 | NW_004519885.1 | Scaffold5993 | 17978                   | TT                              | CC              | 1947059951               |
| SNP_P4_188876_18022 | NW_004519885.1 | Scaffold5993 | 18022                   | TT                              | CC              | 1947059953               |
| SNP_P4_188877_18092 | NW_004519885.1 | Scaffold5993 | 18092                   | AA                              | GG              | 1947059955               |
| SNP_P4_188878_18120 | NW_004519885.1 | Scaffold5993 | 18120                   | AA                              | TT              | 1947059956               |
| SNP_P4_188879_18167 | NW_004519885.1 | Scaffold5993 | 18167                   | AA                              | TT              | 1947059957               |
| SNP_P4_188880_18286 | NW_004519885.1 | Scaffold5993 | 18286                   | AA                              | TT              | 1947059959               |
| SNP_P4_188881_18320 | NW_004519885.1 | Scaffold5993 | 18320                   | CC                              | TT              | 1947059961               |
| SNP_P4_188882_18394 | NW_004519885.1 | Scaffold5993 | 18394                   | TT                              | CC              | 1947059963               |
| SNP_P4_188883_18534 | NW_004519885.1 | Scaffold5993 | 18534                   | CC                              | TT              | 1947059965               |
| SNP_P4_188886_18720 | NW_004519885.1 | Scaffold5993 | 18720                   | TT                              | GG              | 1947059967               |
| SNP_P4_188887_18830 | NW_004519885.1 | Scaffold5993 | 18830                   | AA                              | CC              | 1947059969               |
| SNP_P4_188888_4644  | NW_004519886.1 | Scaffold5994 | 4644                    | TT                              | GG              | 1947059971               |
| SNP_P4_188889_4743  | NW_004519886.1 | Scaffold5994 | 4743                    | AA                              | GG              | 1947059973               |
| SNP_P4_188890_4810  | NW_004519886.1 | Scaffold5994 | 4810                    | TT                              | GG              | 1947059975               |
| SNP_P4_188891_4822  | NW_004519886.1 | Scaffold5994 | 4822                    | TT                              | CC              | 1947059978               |
| SNP_P4_188892_4983  | NW_004519886.1 | Scaffold5994 | 4983                    | CC                              | GG              | 1947059980               |

| SNPs IDs            | Chromosome IDs | Chromosomes  | Physical positions (bp) | CDC Frontier (Reference genome) | (ILWC46 & LPNB) | NCBI SNPdb Accession IDs |
|---------------------|----------------|--------------|-------------------------|---------------------------------|-----------------|--------------------------|
| SNP_P4_188893_5032  | NW_004519886.1 | Scaffold5994 | 5032                    | CC                              | AA              | 1947059982               |
| SNP_P4_188894_7268  | NW_004519886.1 | Scaffold5994 | 7268                    | AA                              | TT              | 1947059984               |
| SNP_P4_188895_7278  | NW_004519886.1 | Scaffold5994 | 7278                    | AA                              | GG              | 1947059986               |
| SNP_P4_188896_745   | NW_004519889.1 | Scaffold5997 | 745                     | CC                              | AA              | 1947059988               |
| SNP_P4_188897_1061  | NW_004519889.1 | Scaffold5997 | 1061                    | GG                              | TT              | 1947059990               |
| SNP_P4_188898_1118  | NW_004519889.1 | Scaffold5997 | 1118                    | GG                              | AA              | 1947059992               |
| SNP_P4_188899_1156  | NW_004519889.1 | Scaffold5997 | 1156                    | AA                              | TT              | 1947059994               |
| SNP_P4_188900_2146  | NW_004519889.1 | Scaffold5997 | 2146                    | CC                              | TT              | 1947059996               |
| SNP_P4_188901_2215  | NW_004519889.1 | Scaffold5997 | 2215                    | AA                              | TT              | 1947059998               |
| SNP_P4_188902_735   | NW_004519890.1 | Scaffold5998 | 735                     | TT                              | AA              | 1947060000               |
| SNP_P4_188903_855   | NW_004519891.1 | Scaffold5999 | 855                     | TT                              | GG              | 1947060002               |
| SNP_P4_188904_881   | NW_004519891.1 | Scaffold5999 | 881                     | TT                              | CC              | 1947060004               |
| SNP_P4_188905_898   | NW_004519891.1 | Scaffold5999 | 898                     | AA                              | CC              | 1947060006               |
| SNP_P4_188906_902   | NW_004519891.1 | Scaffold5999 | 902                     | AA                              | TT              | 1947060008               |
| SNP_P4_188907_559   | NW_004519894.1 | Scaffold6003 | 559                     | AA                              | TT              | 1947060010               |
| SNP_P4_188908_2356  | NW_004519895.1 | Scaffold6005 | 2356                    | AA                              | TT              | 1947060012               |
| SNP_P4_188909_2467  | NW_004519895.1 | Scaffold6005 | 2467                    | AA                              | CC              | 1947060014               |
| SNP_P4_188910_3151  | NW_004519895.1 | Scaffold6005 | 3151                    | AA                              | GG              | 1947060016               |
| SNP_P4_188911_3162  | NW_004519895.1 | Scaffold6005 | 3162                    | CC                              | AA              | 1947060018               |
| SNP_P4_188912_3163  | NW_004519895.1 | Scaffold6005 | 3163                    | TT                              | CC              | 1947060020               |
| SNP_P4_188913_3167  | NW_004519895.1 | Scaffold6005 | 3167                    | CC                              | AA              | 1947060022               |
| SNP_P4_188914_5975  | NW_004519901.1 | Scaffold6012 | 5975                    | GG                              | AA              | 1947060024               |
| SNP_P4_188915_6000  | NW_004519901.1 | Scaffold6012 | 6000                    | CC                              | GG              | 1947060026               |
| SNP_P4_188916_6035  | NW_004519901.1 | Scaffold6012 | 6035                    | GG                              | AA              | 1947060028               |
| SNP_P4_188917_6122  | NW_004519901.1 | Scaffold6012 | 6122                    | GG                              | AA              | 1947060030               |
| SNP_P4_188918_6251  | NW_004519901.1 | Scaffold6012 | 6251                    | CC                              | TT              | 1947060032               |
| SNP_P4_188919_6329  | NW_004519901.1 | Scaffold6012 | 6329                    | CC                              | TT              | 1947060034               |
| SNP_P4_188920_22115 | NW_004519901.1 | Scaffold6012 | 22115                   | TT                              | AA              | 1947060036               |
| SNP_P4_188921_22427 | NW_004519901.1 | Scaffold6012 | 22427                   | CC                              | TT              | 1947060038               |
| SNP_P4_188922_22463 | NW_004519901.1 | Scaffold6012 | 22463                   | TT                              | AA              | 1947060040               |
| SNP_P4_188923_306   | NW_004519902.1 | Scaffold6014 | 306                     | CC                              | TT              | 1947060042               |
| SNP_P4_188924_690   | NW_004519902.1 | Scaffold6014 | 690                     | TT                              | AA              | 1947060044               |
| SNP_P4_188925_1566  | NW_004519905.1 | Scaffold6017 | 1566                    | TT                              | GG              | 1947060046               |
| SNP_P4_188926_1821  | NW_004519905.1 | Scaffold6017 | 1821                    | AA                              | CC              | 1947060048               |
| SNP_P4_188927_47    | NW_004519907.1 | Scaffold6020 | 47                      | TT                              | AA              | 1947060050               |
| SNP_P4_188928_64    | NW_004519907.1 | Scaffold6020 | 64                      | TT                              | CC              | 1947060052               |
| SNP_P4_188929_77    | NW_004519907.1 | Scaffold6020 | 77                      | TT                              | GG              | 1947060054               |
| SNP_P4_188930_138   | NW_004519907.1 | Scaffold6020 | 138                     | TT                              | CC              | 1947060056               |
| SNP_P4_188931_457   | NW_004519907.1 | Scaffold6020 | 457                     | CC                              | GG              | 1947060058               |
| SNP_P4_188932_461   | NW_004519907.1 | Scaffold6020 | 461                     | TT                              | AA              | 1947060060               |
| SNP_P4_188933_468   | NW_004519907.1 | Scaffold6020 | 468                     | TT                              | AA              | 1947060062               |
| SNP_P4_188935_1420  | NW_004519907.1 | Scaffold6020 | 1420                    | TT                              | GG              | 1947060064               |

| SNPs IDs            | Chromosome IDs | Chromosomes  | Physical positions (bp) | CDC Frontier (Reference genome) | (ILWC46 & LPNB) | NCBI SNPdb Accession IDs |
|---------------------|----------------|--------------|-------------------------|---------------------------------|-----------------|--------------------------|
| SNP_P4_188936_1444  | NW_004519907.1 | Scaffold6020 | 1444                    | TT                              | CC              | 1947060066               |
| SNP_P4_188937_18523 | NW_004519909.1 | Scaffold6022 | 18523                   | AA                              | TT              | 1947060068               |
| SNP_P4_188938_18820 | NW_004519909.1 | Scaffold6022 | 18820                   | TT                              | AA              | 1947060070               |
| SNP_P4_188939_18860 | NW_004519909.1 | Scaffold6022 | 18860                   | GG                              | TT              | 1947060072               |
| SNP_P4_188940_18915 | NW_004519909.1 | Scaffold6022 | 18915                   | CC                              | AA              | 1947060075               |
| SNP_P4_188941_18916 | NW_004519909.1 | Scaffold6022 | 18916                   | CC                              | AA              | 1947060077               |
| SNP_P4_188942_19040 | NW_004519909.1 | Scaffold6022 | 19040                   | CC                              | AA              | 1947060079               |
| SNP_P4_188943_19562 | NW_004519909.1 | Scaffold6022 | 19562                   | GG                              | AA              | 1947060081               |
| SNP_P4_188944_19634 | NW_004519909.1 | Scaffold6022 | 19634                   | CC                              | AA              | 1947060083               |
| SNP_P4_188945_19902 | NW_004519909.1 | Scaffold6022 | 19902                   | TT                              | CC              | 1947060085               |
| SNP_P4_188946_19930 | NW_004519909.1 | Scaffold6022 | 19930                   | GG                              | AA              | 1947060087               |
| SNP_P4_188947_19940 | NW_004519909.1 | Scaffold6022 | 19940                   | TT                              | CC              | 1947060089               |
| SNP_P4_188948_19955 | NW_004519909.1 | Scaffold6022 | 19955                   | TT                              | GG              | 1947060091               |
| SNP_P4_188949_19988 | NW_004519909.1 | Scaffold6022 | 19988                   | AA                              | GG              | 1947060093               |
| SNP_P4_188950_19998 | NW_004519909.1 | Scaffold6022 | 19998                   | TT                              | CC              | 1947060095               |
| SNP_P4_188951_20018 | NW_004519909.1 | Scaffold6022 | 20018                   | GG                              | CC              | 1947060097               |
| SNP_P4_188952_20022 | NW_004519909.1 | Scaffold6022 | 20022                   | GG                              | TT              | 1947060099               |
| SNP_P4_188953_20051 | NW_004519909.1 | Scaffold6022 | 20051                   | TT                              | CC              | 1947060101               |
| SNP_P4_188954_20059 | NW_004519909.1 | Scaffold6022 | 20059                   | TT                              | CC              | 1947060103               |
| SNP_P4_188955_20067 | NW_004519909.1 | Scaffold6022 | 20067                   | GG                              | AA              | 1947060105               |
| SNP_P4_188956_20069 | NW_004519909.1 | Scaffold6022 | 20069                   | AA                              | GG              | 1947060108               |
| SNP_P4_188957_20313 | NW_004519909.1 | Scaffold6022 | 20313                   | TT                              | AA              | 1947060110               |
| SNP_P4_188958_21494 | NW_004519909.1 | Scaffold6022 | 21494                   | AA                              | CC              | 1947060112               |
| SNP_P4_188959_21519 | NW_004519909.1 | Scaffold6022 | 21519                   | AA                              | TT              | 1947060114               |
| SNP_P4_188960_21527 | NW_004519909.1 | Scaffold6022 | 21527                   | TT                              | GG              | 1947060116               |
| SNP_P4_188961_22293 | NW_004519909.1 | Scaffold6022 | 22293                   | TT                              | CC              | 1947060118               |
| SNP_P4_188962_2173  | NW_004519915.1 | Scaffold6034 | 2173                    | GG                              | TT              | 1947060120               |
| SNP_P4_188963_2518  | NW_004519915.1 | Scaffold6034 | 2518                    | GG                              | AA              | 1947060122               |
| SNP_P4_188965_194   | NW_004519920.1 | Scaffold6043 | 194                     | TT                              | CC              | 1947060124               |
| SNP_P4_188966_1824  | NW_004519924.1 | Scaffold6049 | 1824                    | AA                              | CC              | 1947060126               |
| SNP_P4_188967_8466  | NW_004519927.1 | Scaffold6055 | 8466                    | TT                              | GG              | 1947060128               |
| SNP_P4_188968_8501  | NW_004519927.1 | Scaffold6055 | 8501                    | CC                              | GG              | 1947060130               |
| SNP_P4_188969_8504  | NW_004519927.1 | Scaffold6055 | 8504                    | GG                              | TT              | 1947060132               |
| SNP_P4_188970_8509  | NW_004519927.1 | Scaffold6055 | 8509                    | GG                              | TT              | 1947060134               |
| SNP_P4_188971_8511  | NW_004519927.1 | Scaffold6055 | 8511                    | AA                              | CC              | 1947060136               |
| SNP_P4_188972_8845  | NW_004519927.1 | Scaffold6055 | 8845                    | GG                              | TT              | 1947060138               |
| SNP_P4_188973_13777 | NW_004519927.1 | Scaffold6055 | 13777                   | CC                              | TT              | 1947060140               |
| SNP_P4_188975_6404  | NW_004519929.1 | Scaffold6058 | 6404                    | TT                              | AA              | 1947060142               |
| SNP_P4_188976_8740  | NW_004519929.1 | Scaffold6058 | 8740                    | GG                              | TT              | 1947060144               |
| SNP_P4_188977_8770  | NW_004519929.1 | Scaffold6058 | 8770                    | CC                              | TT              | 1947060147               |
| SNP_P4_188978_8774  | NW_004519929.1 | Scaffold6058 | 8774                    | TT                              | GG              | 1947060149               |
| SNP_P4_188979_11232 | NW_004519929.1 | Scaffold6058 | 11232                   | CC                              | TT              | 1947060151               |

| SNPs IDs            | Chromosome IDs | Chromosomes  | Physical positions (bp) | CDC Frontier (Reference genome) | (ILWC46 & LPNB) | NCBI SNPdb Accession IDs |
|---------------------|----------------|--------------|-------------------------|---------------------------------|-----------------|--------------------------|
| SNP_P4_188980_519   | NW_004519932.1 | Scaffold6063 | 519                     | CC                              | GG              | 1947060153               |
| SNP_P4_188981_704   | NW_004519932.1 | Scaffold6063 | 704                     | TT                              | CC              | 1947060155               |
| SNP_P4_188982_728   | NW_004519932.1 | Scaffold6063 | 728                     | TT                              | GG              | 1947060157               |
| SNP_P4_188983_1165  | NW_004519932.1 | Scaffold6063 | 1165                    | TT                              | CC              | 1947060159               |
| SNP_P4_188984_1187  | NW_004519932.1 | Scaffold6063 | 1187                    | GG                              | AA              | 1947060161               |
| SNP_P4_188985_1199  | NW_004519932.1 | Scaffold6063 | 1199                    | AA                              | TT              | 1947060163               |
| SNP_P4_188986_1665  | NW_004519933.1 | Scaffold6064 | 1665                    | GG                              | TT              | 1947060165               |
| SNP_P4_188987_2419  | NW_004519935.1 | Scaffold6066 | 2419                    | CC                              | TT              | 1947060167               |
| SNP_P4_188988_2697  | NW_004519935.1 | Scaffold6066 | 2697                    | GG                              | AA              | 1947060170               |
| SNP_P4_188989_2749  | NW_004519935.1 | Scaffold6066 | 2749                    | GG                              | AA              | 1947060172               |
| SNP_P4_188990_2775  | NW_004519935.1 | Scaffold6066 | 2775                    | TT                              | GG              | 1947060174               |
| SNP_P4_188991_2777  | NW_004519935.1 | Scaffold6066 | 2777                    | AA                              | GG              | 1947060176               |
| SNP_P4_188993_2866  | NW_004519935.1 | Scaffold6066 | 2866                    | CC                              | TT              | 1947060178               |
| SNP_P4_188994_2986  | NW_004519935.1 | Scaffold6066 | 2986                    | TT                              | AA              | 1947060180               |
| SNP_P4_188995_2995  | NW_004519935.1 | Scaffold6066 | 2995                    | TT                              | AA              | 1947060182               |
| SNP_P4_188996_2999  | NW_004519935.1 | Scaffold6066 | 2999                    | GG                              | AA              | 1947060184               |
| SNP_P4_188997_2580  | NW_004519937.1 | Scaffold6069 | 2580                    | AA                              | TT              | 1947060186               |
| SNP_P4_188998_2589  | NW_004519937.1 | Scaffold6069 | 2589                    | CC                              | TT              | 1947060188               |
| SNP_P4_188999_521   | NW_004519939.1 | Scaffold6071 | 521                     | TT                              | CC              | 1947060190               |
| SNP_P4_189000_526   | NW_004519939.1 | Scaffold6071 | 526                     | AA                              | GG              | 1947060192               |
| SNP_P4_189002_16020 | NW_004519951.1 | Scaffold6091 | 16020                   | TT                              | GG              | 1947060194               |
| SNP_P4_189003_16396 | NW_004519951.1 | Scaffold6091 | 16396                   | AA                              | TT              | 1947060196               |
| SNP_P4_189004_16418 | NW_004519951.1 | Scaffold6091 | 16418                   | AA                              | TT              | 1947060198               |
| SNP_P4_189005_16433 | NW_004519951.1 | Scaffold6091 | 16433                   | GG                              | TT              | 1947060200               |
| SNP_P4_189006_97    | NW_004519952.1 | Scaffold6092 | 97                      | GG                              | AA              | 1947060202               |
| SNP_P4_189007_105   | NW_004519952.1 | Scaffold6092 | 105                     | CC                              | AA              | 1947060204               |
| SNP_P4_189008_123   | NW_004519952.1 | Scaffold6092 | 123                     | GG                              | AA              | 1947060206               |
| SNP_P4_189009_133   | NW_004519952.1 | Scaffold6092 | 133                     | GG                              | AA              | 1947060208               |
| SNP_P4_189010_160   | NW_004519952.1 | Scaffold6092 | 160                     | CC                              | TT              | 1947060210               |
| SNP_P4_189011_265   | NW_004519952.1 | Scaffold6092 | 265                     | AA                              | CC              | 1947060212               |
| SNP_P4_189012_351   | NW_004519952.1 | Scaffold6092 | 351                     | GG                              | AA              | 1947060214               |
| SNP_P4_189013_363   | NW_004519952.1 | Scaffold6092 | 363                     | AA                              | GG              | 1947060216               |
| SNP_P4_189014_372   | NW_004519952.1 | Scaffold6092 | 372                     | TT                              | CC              | 1947060218               |
| SNP_P4_189015_407   | NW_004519952.1 | Scaffold6092 | 407                     | AA                              | GG              | 1947060220               |
| SNP_P4_189016_460   | NW_004519952.1 | Scaffold6092 | 460                     | AA                              | GG              | 1947060222               |
| SNP_P4_189017_700   | NW_004519952.1 | Scaffold6092 | 700                     | GG                              | TT              | 1947060224               |
| SNP_P4_189018_710   | NW_004519952.1 | Scaffold6092 | 710                     | AA                              | GG              | 1947060226               |
| SNP_P4_189020_1184  | NW_004519952.1 | Scaffold6092 | 1184                    | AA                              | GG              | 1947060228               |
| SNP_P4_189021_3180  | NW_004519954.1 | Scaffold6095 | 3180                    | AA                              | CC              | 1947060230               |
| SNP_P4_189022_3181  | NW_004519954.1 | Scaffold6095 | 3181                    | GG                              | AA              | 1947060232               |
| SNP_P4_189023_643   | NW_004519956.1 | Scaffold6097 | 643                     | GG                              | CC              | 1947060234               |
| SNP_P4_189024_657   | NW_004519963.1 | Scaffold6109 | 657                     | GG                              | CC              | 1947060236               |



| SNPs IDs            | Chromosome IDs | Chromosomes  | Physical positions (bp) | CDC Frontier (Reference genome) | (ILWC46 & LPNB) | NCBI SNPdb Accession IDs |
|---------------------|----------------|--------------|-------------------------|---------------------------------|-----------------|--------------------------|
| SNP_P4_189025_1154  | NW_004519965.1 | Scaffold6113 | 1154                    | TT                              | AA              | 1947060239               |
| SNP_P4_189026_1379  | NW_004519965.1 | Scaffold6113 | 1379                    | TT                              | CC              | 1947060241               |
| SNP_P4_189027_1428  | NW_004519965.1 | Scaffold6113 | 1428                    | CC                              | TT              | 1947060243               |
| SNP_P4_189029_1749  | NW_004519965.1 | Scaffold6113 | 1749                    | TT                              | AA              | 1947060245               |
| SNP_P4_189030_1750  | NW_004519965.1 | Scaffold6113 | 1750                    | AA                              | CC              | 1947060247               |
| SNP_P4_189031_1776  | NW_004519965.1 | Scaffold6113 | 1776                    | TT                              | AA              | 1947060249               |
| SNP_P4_189032_1842  | NW_004519965.1 | Scaffold6113 | 1842                    | AA                              | GG              | 1947060251               |
| SNP_P4_189033_1865  | NW_004519965.1 | Scaffold6113 | 1865                    | AA                              | CC              | 1947060253               |
| SNP_P4_189034_5344  | NW_004519969.1 | Scaffold6117 | 5344                    | AA                              | TT              | 1947060255               |
| SNP_P4_189035_5499  | NW_004519969.1 | Scaffold6117 | 5499                    | GG                              | TT              | 1947060257               |
| SNP_P4_189036_5546  | NW_004519969.1 | Scaffold6117 | 5546                    | CC                              | TT              | 1947060259               |
| SNP_P4_189037_5695  | NW_004519969.1 | Scaffold6117 | 5695                    | TT                              | CC              | 1947060261               |
| SNP_P4_189038_5696  | NW_004519969.1 | Scaffold6117 | 5696                    | TT                              | AA              | 1947060263               |
| SNP_P4_189039_5720  | NW_004519969.1 | Scaffold6117 | 5720                    | TT                              | AA              | 1947060265               |
| SNP_P4_189041_1563  | NW_004519970.1 | Scaffold6120 | 1563                    | CC                              | TT              | 1947060267               |
| SNP_P4_189042_1652  | NW_004519970.1 | Scaffold6120 | 1652                    | AA                              | GG              | 1947060269               |
| SNP_P4_189043_1808  | NW_004519970.1 | Scaffold6120 | 1808                    | AA                              | GG              | 1947060271               |
| SNP_P4_189044_1919  | NW_004519970.1 | Scaffold6120 | 1919                    | GG                              | AA              | 1947060273               |
| SNP_P4_189045_2013  | NW_004519970.1 | Scaffold6120 | 2013                    | CC                              | TT              | 1947060275               |
| SNP_P4_189047_2114  | NW_004519970.1 | Scaffold6120 | 2114                    | TT                              | AA              | 1947060277               |
| SNP_P4_189048_2322  | NW_004519970.1 | Scaffold6120 | 2322                    | AA                              | TT              | 1947060279               |
| SNP_P4_189049_2549  | NW_004519970.1 | Scaffold6120 | 2549                    | TT                              | GG              | 1947060281               |
| SNP_P4_189050_3090  | NW_004519970.1 | Scaffold6120 | 3090                    | AA                              | GG              | 1947060283               |
| SNP_P4_189051_3118  | NW_004519970.1 | Scaffold6120 | 3118                    | CC                              | TT              | 1947060285               |
| SNP_P4_189052_3428  | NW_004519970.1 | Scaffold6120 | 3428                    | GG                              | AA              | 1947060287               |
| SNP_P4_189053_3461  | NW_004519970.1 | Scaffold6120 | 3461                    | AA                              | GG              | 1947060289               |
| SNP_P4_189054_3542  | NW_004519970.1 | Scaffold6120 | 3542                    | AA                              | TT              | 1947060291               |
| SNP_P4_189055_3664  | NW_004519970.1 | Scaffold6120 | 3664                    | CC                              | TT              | 1947060293               |
| SNP_P4_189056_3668  | NW_004519970.1 | Scaffold6120 | 3668                    | GG                              | AA              | 1947060295               |
| SNP_P4_189057_3807  | NW_004519970.1 | Scaffold6120 | 3807                    | GG                              | AA              | 1947060297               |
| SNP_P4_189058_3813  | NW_004519970.1 | Scaffold6120 | 3813                    | AA                              | GG              | 1947060299               |
| SNP_P4_189059_3831  | NW_004519970.1 | Scaffold6120 | 3831                    | CC                              | TT              | 1947060301               |
| SNP_P4_189060_3847  | NW_004519970.1 | Scaffold6120 | 3847                    | GG                              | AA              | 1947060303               |
| SNP_P4_189061_6527  | NW_004519970.1 | Scaffold6120 | 6527                    | CC                              | TT              | 1947060305               |
| SNP_P4_189062_16174 | NW_004519971.1 | Scaffold6121 | 16174                   | GG                              | TT              | 1947060307               |
| SNP_P4_189063_16182 | NW_004519971.1 | Scaffold6121 | 16182                   | AA                              | CC              | 1947060309               |
| SNP_P4_189064_16395 | NW_004519971.1 | Scaffold6121 | 16395                   | GG                              | AA              | 1947060311               |
| SNP_P4_189065_130   | NW_004519972.1 | Scaffold6122 | 130                     | CC                              | TT              | 1947060313               |
| SNP_P4_189066_217   | NW_004519972.1 | Scaffold6122 | 217                     | AA                              | CC              | 1947060315               |
| SNP_P4_189067_5103  | NW_004519973.1 | Scaffold6123 | 5103                    | CC                              | TT              | 1947060317               |
| SNP_P4_189068_5116  | NW_004519973.1 | Scaffold6123 | 5116                    | GG                              | AA              | 1947060319               |
| SNP_P4_189069_408   | NW_004519975.1 | Scaffold6125 | 408                     | TT                              | CC              | 1947060321               |

| SNPs IDs            | Chromosome IDs | Chromosomes  | Physical positions (bp) | CDC Frontier (Reference genome) | (ILWC46 & LPNB) | NCBI SNPdb Accession IDs |
|---------------------|----------------|--------------|-------------------------|---------------------------------|-----------------|--------------------------|
| SNP_P4_189070_421   | NW_004519975.1 | Scaffold6125 | 421                     | GG                              | TT              | 1947060323               |
| SNP_P4_189071_439   | NW_004519975.1 | Scaffold6125 | 439                     | GG                              | AA              | 1947060325               |
| SNP_P4_189072_1034  | NW_004519975.1 | Scaffold6125 | 1034                    | AA                              | TT              | 1947060328               |
| SNP_P4_189073_1067  | NW_004519975.1 | Scaffold6125 | 1067                    | TT                              | AA              | 1947060330               |
| SNP_P4_189074_1106  | NW_004519975.1 | Scaffold6125 | 1106                    | CC                              | TT              | 1947060332               |
| SNP_P4_189075_1183  | NW_004519975.1 | Scaffold6125 | 1183                    | AA                              | GG              | 1947060334               |
| SNP_P4_189076_1323  | NW_004519975.1 | Scaffold6125 | 1323                    | TT                              | AA              | 1947060336               |
| SNP_P4_189077_1371  | NW_004519975.1 | Scaffold6125 | 1371                    | AA                              | GG              | 1947060338               |
| SNP_P4_189078_1402  | NW_004519975.1 | Scaffold6125 | 1402                    | AA                              | GG              | 1947060340               |
| SNP_P4_189079_1435  | NW_004519975.1 | Scaffold6125 | 1435                    | CC                              | TT              | 1947060342               |
| SNP_P4_189080_1465  | NW_004519975.1 | Scaffold6125 | 1465                    | GG                              | TT              | 1947060344               |
| SNP_P4_189082_1563  | NW_004519975.1 | Scaffold6125 | 1563                    | CC                              | AA              | 1947060346               |
| SNP_P4_189083_1568  | NW_004519975.1 | Scaffold6125 | 1568                    | AA                              | GG              | 1947060348               |
| SNP_P4_189084_1620  | NW_004519975.1 | Scaffold6125 | 1620                    | TT                              | GG              | 1947060350               |
| SNP_P4_189085_1647  | NW_004519975.1 | Scaffold6125 | 1647                    | TT                              | CC              | 1947060352               |
| SNP_P4_189086_1724  | NW_004519975.1 | Scaffold6125 | 1724                    | CC                              | TT              | 1947060354               |
| SNP_P4_189087_2623  | NW_004519975.1 | Scaffold6125 | 2623                    | TT                              | CC              | 1947060356               |
| SNP_P4_189088_2891  | NW_004519975.1 | Scaffold6125 | 2891                    | CC                              | TT              | 1947060358               |
| SNP_P4_189089_2921  | NW_004519975.1 | Scaffold6125 | 2921                    | CC                              | TT              | 1947060360               |
| SNP_P4_189090_2937  | NW_004519975.1 | Scaffold6125 | 2937                    | AA                              | GG              | 1947060362               |
| SNP_P4_189091_2961  | NW_004519975.1 | Scaffold6125 | 2961                    | GG                              | AA              | 1947060364               |
| SNP_P4_189092_3441  | NW_004519975.1 | Scaffold6125 | 3441                    | AA                              | GG              | 1947060366               |
| SNP_P4_189093_797   | NW_004519976.1 | Scaffold6126 | 797                     | CC                              | TT              | 1947060368               |
| SNP_P4_189094_64    | NW_004519980.1 | Scaffold6131 | 64                      | GG                              | AA              | 1947060371               |
| SNP_P4_189095_87    | NW_004519980.1 | Scaffold6131 | 87                      | CC                              | AA              | 1947060373               |
| SNP_P4_189096_5806  | NW_004519980.1 | Scaffold6131 | 5806                    | AA                              | GG              | 1947060375               |
| SNP_P4_189097_6722  | NW_004519980.1 | Scaffold6131 | 6722                    | AA                              | TT              | 1947060377               |
| SNP_P4_189098_8780  | NW_004519980.1 | Scaffold6131 | 8780                    | AA                              | CC              | 1947060379               |
| SNP_P4_189100_9553  | NW_004519980.1 | Scaffold6131 | 9553                    | TT                              | AA              | 1947060381               |
| SNP_P4_189101_9862  | NW_004519980.1 | Scaffold6131 | 9862                    | AA                              | TT              | 1947060383               |
| SNP_P4_189102_9917  | NW_004519980.1 | Scaffold6131 | 9917                    | GG                              | CC              | 1947060385               |
| SNP_P4_189103_10109 | NW_004519980.1 | Scaffold6131 | 10109                   | TT                              | CC              | 1947060387               |
| SNP_P4_189104_10128 | NW_004519980.1 | Scaffold6131 | 10128                   | TT                              | AA              | 1947060389               |
| SNP_P4_189105_10768 | NW_004519980.1 | Scaffold6131 | 10768                   | TT                              | CC              | 1947060391               |
| SNP_P4_189106_1360  | NW_004519981.1 | Scaffold6133 | 1360                    | AA                              | CC              | 1947060393               |
| SNP_P4_189107_110   | NW_004519985.1 | Scaffold6137 | 110                     | CC                              | TT              | 1947060395               |
| SNP_P4_189108_162   | NW_004519985.1 | Scaffold6137 | 162                     | AA                              | TT              | 1947060397               |
| SNP_P4_189109_163   | NW_004519985.1 | Scaffold6137 | 163                     | TT                              | AA              | 1947060399               |
| SNP_P4_189110_635   | NW_004519985.1 | Scaffold6137 | 635                     | AA                              | TT              | 1947060401               |
| SNP_P4_189111_3616  | NW_004519985.1 | Scaffold6137 | 3616                    | CC                              | TT              | 1947060403               |
| SNP_P4_189112_3673  | NW_004519985.1 | Scaffold6137 | 3673                    | TT                              | GG              | 1947060405               |
| SNP_P4_189113_3823  | NW_004519985.1 | Scaffold6137 | 3823                    | TT                              | CC              | 1947060407               |

| SNPs IDs            | Chromosome IDs | Chromosomes  | Physical positions (bp) | CDC Frontier (Reference genome) | (ILWC46 & LPNB) | NCBI SNPdb Accession IDs |
|---------------------|----------------|--------------|-------------------------|---------------------------------|-----------------|--------------------------|
| SNP_P4_189114_629   | NW_004519989.1 | Scaffold6149 | 629                     | GG                              | TT              | 1947060409               |
| SNP_P4_189115_705   | NW_004519989.1 | Scaffold6149 | 705                     | TT                              | AA              | 1947060411               |
| SNP_P4_189116_816   | NW_004519989.1 | Scaffold6149 | 816                     | AA                              | CC              | 1947060413               |
| SNP_P4_189117_855   | NW_004519989.1 | Scaffold6149 | 855                     | GG                              | CC              | 1947060415               |
| SNP_P4_189118_935   | NW_004519989.1 | Scaffold6149 | 935                     | GG                              | TT              | 1947060417               |
| SNP_P4_189119_955   | NW_004519989.1 | Scaffold6149 | 955                     | CC                              | AA              | 1947060419               |
| SNP_P4_189120_19245 | NW_004519992.1 | Scaffold6153 | 19245                   | GG                              | AA              | 1947060421               |
| SNP_P4_189121_19246 | NW_004519992.1 | Scaffold6153 | 19246                   | TT                              | GG              | 1947060423               |
| SNP_P4_189122_19273 | NW_004519992.1 | Scaffold6153 | 19273                   | TT                              | AA              | 1947060425               |
| SNP_P4_189124_20834 | NW_004519992.1 | Scaffold6153 | 20834                   | TT                              | CC              | 1947060427               |
| SNP_P4_189125_115   | NW_004519993.1 | Scaffold6154 | 115                     | CC                              | AA              | 1947060429               |
| SNP_P4_189126_127   | NW_004519993.1 | Scaffold6154 | 127                     | CC                              | GG              | 1947060431               |
| SNP_P4_189127_153   | NW_004519993.1 | Scaffold6154 | 153                     | AA                              | GG              | 1947060433               |
| SNP_P4_189128_225   | NW_004519993.1 | Scaffold6154 | 225                     | CC                              | AA              | 1947060435               |
| SNP_P4_189129_426   | NW_004519993.1 | Scaffold6154 | 426                     | GG                              | AA              | 1947060437               |
| SNP_P4_189130_436   | NW_004519993.1 | Scaffold6154 | 436                     | TT                              | CC              | 1947060439               |
| SNP_P4_189131_490   | NW_004519993.1 | Scaffold6154 | 490                     | CC                              | AA              | 1947060441               |
| SNP_P4_189132_507   | NW_004519993.1 | Scaffold6154 | 507                     | GG                              | TT              | 1947060444               |
| SNP_P4_189133_510   | NW_004519993.1 | Scaffold6154 | 510                     | GG                              | AA              | 1947060446               |
| SNP_P4_189135_565   | NW_004519993.1 | Scaffold6154 | 565                     | GG                              | AA              | 1947060448               |
| SNP_P4_189136_581   | NW_004519993.1 | Scaffold6154 | 581                     | CC                              | GG              | 1947060450               |
| SNP_P4_189137_602   | NW_004519993.1 | Scaffold6154 | 602                     | CC                              | TT              | 1947060452               |
| SNP_P4_189138_611   | NW_004519993.1 | Scaffold6154 | 611                     | CC                              | AA              | 1947060454               |
| SNP_P4_189139_680   | NW_004519993.1 | Scaffold6154 | 680                     | AA                              | TT              | 1947060456               |
| SNP_P4_189140_682   | NW_004519993.1 | Scaffold6154 | 682                     | TT                              | CC              | 1947060458               |
| SNP_P4_189141_806   | NW_004519993.1 | Scaffold6154 | 806                     | AA                              | GG              | 1947060460               |
| SNP_P4_189142_1480  | NW_004519994.1 | Scaffold6155 | 1480                    | TT                              | CC              | 1947060462               |
| SNP_P4_189143_1680  | NW_004519995.1 | Scaffold6157 | 1680                    | TT                              | AA              | 1947060464               |
| SNP_P4_189145_599   | NW_004519996.1 | Scaffold6158 | 599                     | TT                              | CC              | 1947060466               |
| SNP_P4_189146_716   | NW_004519996.1 | Scaffold6158 | 716                     | CC                              | AA              | 1947060468               |
| SNP_P4_189147_726   | NW_004519996.1 | Scaffold6158 | 726                     | AA                              | GG              | 1947060470               |
| SNP_P4_189148_1812  | NW_004519996.1 | Scaffold6158 | 1812                    | GG                              | CC              | 1947060472               |
| SNP_P4_189149_1861  | NW_004519996.1 | Scaffold6158 | 1861                    | GG                              | AA              | 1947060474               |
| SNP_P4_189150_1879  | NW_004519996.1 | Scaffold6158 | 1879                    | AA                              | GG              | 1947060477               |
| SNP_P4_189151_1947  | NW_004519996.1 | Scaffold6158 | 1947                    | GG                              | CC              | 1947060479               |
| SNP_P4_189152_1960  | NW_004519996.1 | Scaffold6158 | 1960                    | AA                              | GG              | 1947060481               |
| SNP_P4_189153_2297  | NW_004519996.1 | Scaffold6158 | 2297                    | CC                              | GG              | 1947060483               |
| SNP_P4_189154_57    | NW_004520000.1 | Scaffold6163 | 57                      | TT                              | CC              | 1947060485               |
| SNP_P4_189155_74    | NW_004520000.1 | Scaffold6163 | 74                      | GG                              | AA              | 1947060487               |
| SNP_P4_189156_386   | NW_004520001.1 | Scaffold6165 | 386                     | CC                              | TT              | 1947060489               |
| SNP_P4_189157_527   | NW_004520003.1 | Scaffold6169 | 527                     | AA                              | TT              | 1947060492               |
| SNP_P4_189158_553   | NW_004520003.1 | Scaffold6169 | 553                     | TT                              | CC              | 1947060494               |

| SNPs IDs            | Chromosome IDs | Chromosomes  | Physical positions (bp) | CDC Frontier (Reference genome) | (ILWC46 & LPNB) | NCBI SNPdb Accession IDs |
|---------------------|----------------|--------------|-------------------------|---------------------------------|-----------------|--------------------------|
| SNP_P4_189159_575   | NW_004520003.1 | Scaffold6169 | 575                     | AA                              | GG              | 1947060496               |
| SNP_P4_189160_606   | NW_004520003.1 | Scaffold6169 | 606                     | TT                              | CC              | 1947060498               |
| SNP_P4_189162_931   | NW_004520003.1 | Scaffold6169 | 931                     | TT                              | GG              | 1947060500               |
| SNP_P4_189163_1011  | NW_004520003.1 | Scaffold6169 | 1011                    | AA                              | GG              | 1947060502               |
| SNP_P4_189164_1051  | NW_004520003.1 | Scaffold6169 | 1051                    | CC                              | TT              | 1947060505               |
| SNP_P4_189165_1053  | NW_004520003.1 | Scaffold6169 | 1053                    | GG                              | AA              | 1947060507               |
| SNP_P4_189166_1204  | NW_004520003.1 | Scaffold6169 | 1204                    | CC                              | TT              | 1947060509               |
| SNP_P4_189167_1337  | NW_004520004.1 | Scaffold6170 | 1337                    | CC                              | GG              | 1947060511               |
| SNP_P4_189168_962   | NW_004520005.1 | Scaffold6171 | 962                     | TT                              | CC              | 1947060513               |
| SNP_P4_189169_14145 | NW_004520006.1 | Scaffold6172 | 14145                   | CC                              | TT              | 1947060515               |
| SNP_P4_189170_14465 | NW_004520006.1 | Scaffold6172 | 14465                   | AA                              | GG              | 1947060517               |
| SNP_P4_189171_19128 | NW_004520006.1 | Scaffold6172 | 19128                   | TT                              | AA              | 1947060519               |
| SNP_P4_189172_19241 | NW_004520006.1 | Scaffold6172 | 19241                   | GG                              | AA              | 1947060522               |
| SNP_P4_189173_19243 | NW_004520006.1 | Scaffold6172 | 19243                   | TT                              | AA              | 1947060524               |
| SNP_P4_189174_19480 | NW_004520006.1 | Scaffold6172 | 19480                   | TT                              | GG              | 1947060526               |
| SNP_P4_189175_19614 | NW_004520006.1 | Scaffold6172 | 19614                   | TT                              | CC              | 1947060528               |
| SNP_P4_189176_19619 | NW_004520006.1 | Scaffold6172 | 19619                   | GG                              | AA              | 1947060530               |
| SNP_P4_189177_19653 | NW_004520006.1 | Scaffold6172 | 19653                   | AA                              | CC              | 1947060532               |
| SNP_P4_189178_19716 | NW_004520006.1 | Scaffold6172 | 19716                   | CC                              | TT              | 1947060535               |
| SNP_P4_189179_19808 | NW_004520006.1 | Scaffold6172 | 19808                   | TT                              | AA              | 1947060537               |
| SNP_P4_189180_19934 | NW_004520006.1 | Scaffold6172 | 19934                   | AA                              | CC              | 1947060539               |
| SNP_P4_189181_20234 | NW_004520006.1 | Scaffold6172 | 20234                   | AA                              | GG              | 1947060541               |
| SNP_P4_189182_20729 | NW_004520006.1 | Scaffold6172 | 20729                   | GG                              | AA              | 1947060543               |
| SNP_P4_189183_24055 | NW_004520006.1 | Scaffold6172 | 24055                   | TT                              | CC              | 1947060545               |
| SNP_P4_189184_24331 | NW_004520006.1 | Scaffold6172 | 24331                   | CC                              | TT              | 1947060548               |
| SNP_P4_189185_24370 | NW_004520006.1 | Scaffold6172 | 24370                   | CC                              | TT              | 1947060550               |
| SNP_P4_189186_27984 | NW_004520006.1 | Scaffold6172 | 27984                   | TT                              | AA              | 1947060552               |
| SNP_P4_189187_28308 | NW_004520006.1 | Scaffold6172 | 28308                   | TT                              | CC              | 1947060554               |
| SNP_P4_189188_29851 | NW_004520006.1 | Scaffold6172 | 29851                   | CC                              | GG              | 1947060557               |
| SNP_P4_189189_29917 | NW_004520006.1 | Scaffold6172 | 29917                   | TT                              | CC              | 1947060559               |
| SNP_P4_189190_30113 | NW_004520006.1 | Scaffold6172 | 30113                   | AA                              | CC              | 1947060561               |
| SNP_P4_189191_30186 | NW_004520006.1 | Scaffold6172 | 30186                   | GG                              | AA              | 1947060563               |
| SNP_P4_189192_37206 | NW_004520006.1 | Scaffold6172 | 37206                   | GG                              | TT              | 1947060565               |
| SNP_P4_189193_37290 | NW_004520006.1 | Scaffold6172 | 37290                   | AA                              | GG              | 1947060567               |
| SNP_P4_189194_37295 | NW_004520006.1 | Scaffold6172 | 37295                   | AA                              | CC              | 1947060569               |
| SNP_P4_189195_37311 | NW_004520006.1 | Scaffold6172 | 37311                   | AA                              | TT              | 1947060572               |
| SNP_P4_189196_37312 | NW_004520006.1 | Scaffold6172 | 37312                   | AA                              | GG              | 1947060574               |
| SNP_P4_189197_37357 | NW_004520006.1 | Scaffold6172 | 37357                   | CC                              | AA              | 1947060576               |
| SNP_P4_189198_37394 | NW_004520006.1 | Scaffold6172 | 37394                   | TT                              | CC              | 1947060578               |
| SNP_P4_189199_37395 | NW_004520006.1 | Scaffold6172 | 37395                   | TT                              | AA              | 1947060580               |
| SNP_P4_189200_37415 | NW_004520006.1 | Scaffold6172 | 37415                   | CC                              | AA              | 1947060582               |
| SNP_P4_189201_37991 | NW_004520006.1 | Scaffold6172 | 37991                   | TT                              | GG              | 1947060583               |

| SNPs IDs           | Chromosome IDs | Chromosomes  | Physical positions (bp) | CDC Frontier (Reference genome) | (ILWC46 & LPNB) | NCBI SNPdb Accession IDs |
|--------------------|----------------|--------------|-------------------------|---------------------------------|-----------------|--------------------------|
| SNP_P4_189202_184  | NW_004520007.1 | Scaffold6173 | 184                     | CC                              | GG              | 1947060584               |
| SNP_P4_189203_442  | NW_004520007.1 | Scaffold6173 | 442                     | TT                              | GG              | 1947060585               |
| SNP_P4_189204_448  | NW_004520007.1 | Scaffold6173 | 448                     | TT                              | AA              | 1947060586               |
| SNP_P4_189205_487  | NW_004520007.1 | Scaffold6173 | 487                     | CC                              | GG              | 1947060587               |
| SNP_P4_189206_528  | NW_004520008.1 | Scaffold6174 | 528                     | AA                              | CC              | 1947060588               |
| SNP_P4_189207_536  | NW_004520008.1 | Scaffold6174 | 536                     | TT                              | AA              | 1947060589               |
| SNP_P4_189208_684  | NW_004520008.1 | Scaffold6174 | 684                     | AA                              | GG              | 1947060590               |
| SNP_P4_189209_704  | NW_004520008.1 | Scaffold6174 | 704                     | GG                              | AA              | 1947060591               |
| SNP_P4_189210_749  | NW_004520008.1 | Scaffold6174 | 749                     | TT                              | GG              | 1947060592               |
| SNP_P4_189211_758  | NW_004520008.1 | Scaffold6174 | 758                     | TT                              | GG              | 1947060593               |
| SNP_P4_189212_776  | NW_004520008.1 | Scaffold6174 | 776                     | AA                              | GG              | 1947060594               |
| SNP_P4_189213_918  | NW_004520008.1 | Scaffold6174 | 918                     | CC                              | TT              | 1947060595               |
| SNP_P4_189214_981  | NW_004520008.1 | Scaffold6174 | 981                     | TT                              | AA              | 1947060596               |
| SNP_P4_189215_982  | NW_004520008.1 | Scaffold6174 | 982                     | AA                              | TT              | 1947060597               |
| SNP_P4_189216_1006 | NW_004520011.1 | Scaffold6177 | 1006                    | AA                              | GG              | 1947060598               |
| SNP_P4_189217_1030 | NW_004520011.1 | Scaffold6177 | 1030                    | CC                              | TT              | 1947060599               |
| SNP_P4_189218_1050 | NW_004520011.1 | Scaffold6177 | 1050                    | TT                              | GG              | 1947060600               |
| SNP_P4_189219_3365 | NW_004520011.1 | Scaffold6177 | 3365                    | AA                              | TT              | 1947060601               |
| SNP_P4_189220_3452 | NW_004520011.1 | Scaffold6177 | 3452                    | GG                              | AA              | 1947060602               |
| SNP_P4_189221_3634 | NW_004520011.1 | Scaffold6177 | 3634                    | AA                              | TT              | 1947060603               |
| SNP_P4_189223_3725 | NW_004520011.1 | Scaffold6177 | 3725                    | GG                              | AA              | 1947060604               |
| SNP_P4_189224_4325 | NW_004520011.1 | Scaffold6177 | 4325                    | TT                              | AA              | 1947060605               |
| SNP_P4_189225_4331 | NW_004520011.1 | Scaffold6177 | 4331                    | GG                              | AA              | 1947060606               |
| SNP_P4_189226_725  | NW_004520013.1 | Scaffold6179 | 725                     | TT                              | AA              | 1947060607               |
| SNP_P4_189227_912  | NW_004520013.1 | Scaffold6179 | 912                     | GG                              | CC              | 1947060608               |
| SNP_P4_189229_1045 | NW_004520015.1 | Scaffold6181 | 1045                    | CC                              | TT              | 1947060609               |
| SNP_P4_189230_1440 | NW_004520015.1 | Scaffold6181 | 1440                    | GG                              | AA              | 1947060610               |
| SNP_P4_189231_77   | NW_004520018.1 | Scaffold6185 | 77                      | TT                              | GG              | 1947060611               |
| SNP_P4_189232_123  | NW_004520018.1 | Scaffold6185 | 123                     | AA                              | TT              | 1947060612               |
| SNP_P4_189233_233  | NW_004520018.1 | Scaffold6185 | 233                     | AA                              | GG              | 1947060613               |
| SNP_P4_189234_275  | NW_004520018.1 | Scaffold6185 | 275                     | CC                              | GG              | 1947060614               |
| SNP_P4_189235_277  | NW_004520018.1 | Scaffold6185 | 277                     | AA                              | TT              | 1947060615               |
| SNP_P4_189236_298  | NW_004520018.1 | Scaffold6185 | 298                     | TT                              | GG              | 1947060616               |
| SNP_P4_189237_315  | NW_004520018.1 | Scaffold6185 | 315                     | GG                              | AA              | 1947060617               |
| SNP_P4_189238_367  | NW_004520018.1 | Scaffold6185 | 367                     | CC                              | TT              | 1947060618               |
| SNP_P4_189239_381  | NW_004520018.1 | Scaffold6185 | 381                     | AA                              | GG              | 1947060619               |
| SNP_P4_189240_383  | NW_004520018.1 | Scaffold6185 | 383                     | CC                              | AA              | 1947060620               |
| SNP_P4_189242_542  | NW_004520018.1 | Scaffold6185 | 542                     | AA                              | CC              | 1947060621               |
| SNP_P4_189243_559  | NW_004520018.1 | Scaffold6185 | 559                     | TT                              | CC              | 1947060622               |
| SNP_P4_189244_560  | NW_004520018.1 | Scaffold6185 | 560                     | AA                              | GG              | 1947060624               |
| SNP_P4_189246_617  | NW_004520018.1 | Scaffold6185 | 617                     | GG                              | AA              | 1947060626               |
| SNP_P4_189247_658  | NW_004520018.1 | Scaffold6185 | 658                     | AA                              | GG              | 1947060628               |

| SNPs IDs           | Chromosome IDs | Chromosomes  | Physical positions (bp) | CDC Frontier (Reference genome) | (ILWC46 & LPNB) | NCBI SNPdb Accession IDs |
|--------------------|----------------|--------------|-------------------------|---------------------------------|-----------------|--------------------------|
| SNP_P4_189248_774  | NW_004520018.1 | Scaffold6185 | 774                     | GG                              | AA              | 1947060630               |
| SNP_P4_189249_799  | NW_004520018.1 | Scaffold6185 | 799                     | AA                              | GG              | 1947060632               |
| SNP_P4_189250_846  | NW_004520018.1 | Scaffold6185 | 846                     | CC                              | TT              | 1947060635               |
| SNP_P4_189251_856  | NW_004520018.1 | Scaffold6185 | 856                     | CC                              | AA              | 1947060637               |
| SNP_P4_189252_866  | NW_004520018.1 | Scaffold6185 | 866                     | CC                              | TT              | 1947060639               |
| SNP_P4_189253_959  | NW_004520018.1 | Scaffold6185 | 959                     | GG                              | AA              | 1947060641               |
| SNP_P4_189254_989  | NW_004520018.1 | Scaffold6185 | 989                     | TT                              | AA              | 1947060643               |
| SNP_P4_189255_1021 | NW_004520018.1 | Scaffold6185 | 1021                    | CC                              | AA              | 1947060645               |
| SNP_P4_189256_1041 | NW_004520018.1 | Scaffold6185 | 1041                    | CC                              | TT              | 1947060647               |
| SNP_P4_189257_1042 | NW_004520018.1 | Scaffold6185 | 1042                    | GG                              | AA              | 1947060649               |
| SNP_P4_189258_1045 | NW_004520018.1 | Scaffold6185 | 1045                    | TT                              | GG              | 1947060651               |
| SNP_P4_189259_1048 | NW_004520018.1 | Scaffold6185 | 1048                    | CC                              | TT              | 1947060653               |
| SNP_P4_189260_1055 | NW_004520018.1 | Scaffold6185 | 1055                    | CC                              | TT              | 1947060655               |
| SNP_P4_189261_1140 | NW_004520018.1 | Scaffold6185 | 1140                    | AA                              | CC              | 1947060658               |
| SNP_P4_189262_1144 | NW_004520018.1 | Scaffold6185 | 1144                    | TT                              | CC              | 1947060660               |
| SNP_P4_189263_1174 | NW_004520018.1 | Scaffold6185 | 1174                    | GG                              | AA              | 1947060662               |
| SNP_P4_189264_1194 | NW_004520018.1 | Scaffold6185 | 1194                    | TT                              | AA              | 1947060664               |
| SNP_P4_189265_1296 | NW_004520018.1 | Scaffold6185 | 1296                    | AA                              | CC              | 1947060666               |
| SNP_P4_189266_1415 | NW_004520018.1 | Scaffold6185 | 1415                    | AA                              | CC              | 1947060668               |
| SNP_P4_189267_2220 | NW_004520018.1 | Scaffold6185 | 2220                    | GG                              | TT              | 1947060670               |
| SNP_P4_189268_2270 | NW_004520018.1 | Scaffold6185 | 2270                    | CC                              | AA              | 1947060672               |
| SNP_P4_189269_2618 | NW_004520018.1 | Scaffold6185 | 2618                    | GG                              | AA              | 1947060674               |
| SNP_P4_189270_2637 | NW_004520018.1 | Scaffold6185 | 2637                    | AA                              | GG              | 1947060676               |
| SNP_P4_189272_2964 | NW_004520018.1 | Scaffold6185 | 2964                    | AA                              | GG              | 1947060679               |
| SNP_P4_189273_2977 | NW_004520018.1 | Scaffold6185 | 2977                    | TT                              | CC              | 1947060681               |
| SNP_P4_189274_3058 | NW_004520018.1 | Scaffold6185 | 3058                    | TT                              | CC              | 1947060683               |
| SNP_P4_189275_3060 | NW_004520018.1 | Scaffold6185 | 3060                    | AA                              | GG              | 1947060685               |
| SNP_P4_189276_3087 | NW_004520018.1 | Scaffold6185 | 3087                    | AA                              | TT              | 1947060687               |
| SNP_P4_189277_3108 | NW_004520018.1 | Scaffold6185 | 3108                    | CC                              | AA              | 1947060689               |
| SNP_P4_189278_3139 | NW_004520018.1 | Scaffold6185 | 3139                    | GG                              | AA              | 1947060691               |
| SNP_P4_189279_3419 | NW_004520018.1 | Scaffold6185 | 3419                    | TT                              | AA              | 1947060693               |
| SNP_P4_189281_3488 | NW_004520018.1 | Scaffold6185 | 3488                    | CC                              | AA              | 1947060696               |
| SNP_P4_189282_3706 | NW_004520018.1 | Scaffold6185 | 3706                    | GG                              | AA              | 1947060698               |
| SNP_P4_189283_3719 | NW_004520018.1 | Scaffold6185 | 3719                    | CC                              | TT              | 1947060700               |
| SNP_P4_189284_3723 | NW_004520018.1 | Scaffold6185 | 3723                    | CC                              | TT              | 1947060702               |
| SNP_P4_189285_3738 | NW_004520018.1 | Scaffold6185 | 3738                    | CC                              | TT              | 1947060704               |
| SNP_P4_189286_3856 | NW_004520018.1 | Scaffold6185 | 3856                    | GG                              | TT              | 1947060706               |
| SNP_P4_189287_623  | NW_004520019.1 | Scaffold6187 | 623                     | AA                              | CC              | 1947060708               |
| SNP_P4_189288_728  | NW_004520019.1 | Scaffold6187 | 728                     | GG                              | AA              | 1947060710               |
| SNP_P4_189289_852  | NW_004520019.1 | Scaffold6187 | 852                     | AA                              | TT              | 1947060712               |
| SNP_P4_189290_889  | NW_004520019.1 | Scaffold6187 | 889                     | AA                              | GG              | 1947060714               |
| SNP_P4_189291_1025 | NW_004520019.1 | Scaffold6187 | 1025                    | TT                              | GG              | 1947060716               |

| SNPs IDs           | Chromosome IDs | Chromosomes  | Physical positions (bp) | CDC Frontier (Reference genome) | (ILWC46 & LPNB) | NCBI SNPdb Accession IDs |
|--------------------|----------------|--------------|-------------------------|---------------------------------|-----------------|--------------------------|
| SNP_P4_189292_1404 | NW_004520020.1 | Scaffold6188 | 1404                    | GG                              | AA              | 1947060719               |
| SNP_P4_189293_1479 | NW_004520020.1 | Scaffold6188 | 1479                    | TT                              | GG              | 1947060721               |
| SNP_P4_189294_1480 | NW_004520020.1 | Scaffold6188 | 1480                    | AA                              | TT              | 1947060723               |
| SNP_P4_189295_1598 | NW_004520020.1 | Scaffold6188 | 1598                    | GG                              | TT              | 1947060725               |
| SNP_P4_189296_1341 | NW_004520021.1 | Scaffold6189 | 1341                    | AA                              | TT              | 1947060727               |
| SNP_P4_189297_2273 | NW_004520021.1 | Scaffold6189 | 2273                    | AA                              | TT              | 1947060729               |
| SNP_P4_189298_64   | NW_004520024.1 | Scaffold6193 | 64                      | GG                              | CC              | 1947060731               |
| SNP_P4_189299_447  | NW_004520024.1 | Scaffold6193 | 447                     | TT                              | GG              | 1947060733               |
| SNP_P4_189300_1290 | NW_004520024.1 | Scaffold6193 | 1290                    | AA                              | CC              | 1947060736               |
| SNP_P4_189301_1435 | NW_004520024.1 | Scaffold6193 | 1435                    | TT                              | AA              | 1947060738               |
| SNP_P4_189302_659  | NW_004520025.1 | Scaffold6194 | 659                     | AA                              | TT              | 1947060740               |
| SNP_P4_189303_696  | NW_004520025.1 | Scaffold6194 | 696                     | AA                              | GG              | 1947060742               |
| SNP_P4_189304_697  | NW_004520025.1 | Scaffold6194 | 697                     | AA                              | CC              | 1947060744               |
| SNP_P4_189305_64   | NW_004520028.1 | Scaffold6197 | 64                      | TT                              | AA              | 1947060746               |
| SNP_P4_189306_98   | NW_004520028.1 | Scaffold6197 | 98                      | TT                              | GG              | 1947060748               |
| SNP_P4_189307_612  | NW_004520030.1 | Scaffold6199 | 612                     | AA                              | CC              | 1947060750               |
| SNP_P4_189308_654  | NW_004520030.1 | Scaffold6199 | 654                     | TT                              | GG              | 1947060752               |
| SNP_P4_189310_1153 | NW_004520030.1 | Scaffold6199 | 1153                    | CC                              | GG              | 1947060754               |
| SNP_P4_189311_1191 | NW_004520030.1 | Scaffold6199 | 1191                    | TT                              | CC              | 1947060756               |
| SNP_P4_189312_4090 | NW_004520038.1 | Scaffold6212 | 4090                    | AA                              | TT              | 1947060758               |
| SNP_P4_189313_4881 | NW_004520038.1 | Scaffold6212 | 4881                    | TT                              | CC              | 1947060760               |
| SNP_P4_189314_5624 | NW_004520039.1 | Scaffold6214 | 5624                    | CC                              | GG              | 1947060762               |
| SNP_P4_189315_451  | NW_004520040.1 | Scaffold6215 | 451                     | AA                              | GG              | 1947060764               |
| SNP_P4_189316_99   | NW_004520045.1 | Scaffold6225 | 99                      | GG                              | TT              | 1947060766               |
| SNP_P4_189318_998  | NW_004520046.1 | Scaffold6227 | 998                     | TT                              | CC              | 1947060768               |
| SNP_P4_189319_306  | NW_004520047.1 | Scaffold6228 | 306                     | AA                              | GG              | 1947060770               |
| SNP_P4_189320_348  | NW_004520047.1 | Scaffold6228 | 348                     | GG                              | AA              | 1947060772               |
| SNP_P4_189321_352  | NW_004520047.1 | Scaffold6228 | 352                     | GG                              | TT              | 1947060774               |
| SNP_P4_189322_355  | NW_004520047.1 | Scaffold6228 | 355                     | TT                              | CC              | 1947060776               |
| SNP_P4_189323_97   | NW_004520050.1 | Scaffold6232 | 97                      | CC                              | TT              | 1947060778               |
| SNP_P4_189324_129  | NW_004520050.1 | Scaffold6232 | 129                     | CC                              | TT              | 1947060780               |
| SNP_P4_189325_804  | NW_004520052.1 | Scaffold6235 | 804                     | GG                              | TT              | 1947060782               |
| SNP_P4_189326_1314 | NW_004520054.1 | Scaffold6237 | 1314                    | TT                              | GG              | 1947060785               |
| SNP_P4_189327_1323 | NW_004520054.1 | Scaffold6237 | 1323                    | AA                              | TT              | 1947060787               |
| SNP_P4_189328_1445 | NW_004520055.1 | Scaffold6238 | 1445                    | GG                              | AA              | 1947060789               |
| SNP_P4_189329_1488 | NW_004520055.1 | Scaffold6238 | 1488                    | AA                              | GG              | 1947060791               |
| SNP_P4_189330_1705 | NW_004520055.1 | Scaffold6238 | 1705                    | GG                              | TT              | 1947060793               |
| SNP_P4_189331_1721 | NW_004520055.1 | Scaffold6238 | 1721                    | CC                              | AA              | 1947060795               |
| SNP_P4_189332_1734 | NW_004520055.1 | Scaffold6238 | 1734                    | AA                              | GG              | 1947060797               |
| SNP_P4_189333_33   | NW_004520060.1 | Scaffold6256 | 33                      | TT                              | AA              | 1947060799               |
| SNP_P4_189334_43   | NW_004520060.1 | Scaffold6256 | 43                      | TT                              | GG              | 1947060801               |
| SNP_P4_189335_64   | NW_004520060.1 | Scaffold6256 | 64                      | TT                              | CC              | 1947060803               |

| SNPs IDs            | Chromosome IDs | Chromosomes  | Physical positions (bp) | CDC Frontier (Reference genome) | (ILWC46 & LPNB) | NCBI SNPdb Accession IDs |
|---------------------|----------------|--------------|-------------------------|---------------------------------|-----------------|--------------------------|
| SNP_P4_189336_88    | NW_004520060.1 | Scaffold6256 | 88                      | TT                              | GG              | 1947060805               |
| SNP_P4_189337_95    | NW_004520060.1 | Scaffold6256 | 95                      | AA                              | CC              | 1947060807               |
| SNP_P4_189338_107   | NW_004520060.1 | Scaffold6256 | 107                     | CC                              | GG              | 1947060809               |
| SNP_P4_189339_110   | NW_004520060.1 | Scaffold6256 | 110                     | AA                              | GG              | 1947060811               |
| SNP_P4_189340_196   | NW_004520060.1 | Scaffold6256 | 196                     | GG                              | CC              | 1947060813               |
| SNP_P4_189341_239   | NW_004520060.1 | Scaffold6256 | 239                     | AA                              | GG              | 1947060815               |
| SNP_P4_189342_285   | NW_004520060.1 | Scaffold6256 | 285                     | AA                              | TT              | 1947060817               |
| SNP_P4_189343_64    | NW_004520063.1 | Scaffold6262 | 64                      | GG                              | CC              | 1947060819               |
| SNP_P4_189344_75    | NW_004520063.1 | Scaffold6262 | 75                      | TT                              | CC              | 1947060821               |
| SNP_P4_189345_134   | NW_004520063.1 | Scaffold6262 | 134                     | GG                              | TT              | 1947060823               |
| SNP_P4_189346_2729  | NW_004520069.1 | Scaffold6273 | 2729                    | TT                              | CC              | 1947060825               |
| SNP_P4_189347_2963  | NW_004520069.1 | Scaffold6273 | 2963                    | TT                              | AA              | 1947060827               |
| SNP_P4_189348_5623  | NW_004520069.1 | Scaffold6273 | 5623                    | TT                              | AA              | 1947060829               |
| SNP_P4_189349_8241  | NW_004520069.1 | Scaffold6273 | 8241                    | GG                              | AA              | 1947060831               |
| SNP_P4_189350_890   | NW_004520087.1 | Scaffold6300 | 890                     | GG                              | CC              | 1947060833               |
| SNP_P4_189351_1143  | NW_004520087.1 | Scaffold6300 | 1143                    | AA                              | TT              | 1947060835               |
| SNP_P4_189352_1240  | NW_004520087.1 | Scaffold6300 | 1240                    | TT                              | CC              | 1947060837               |
| SNP_P4_189353_1375  | NW_004520087.1 | Scaffold6300 | 1375                    | TT                              | AA              | 1947060839               |
| SNP_P4_189354_1550  | NW_004520087.1 | Scaffold6300 | 1550                    | TT                              | CC              | 1947060841               |
| SNP_P4_189355_1884  | NW_004520087.1 | Scaffold6300 | 1884                    | CC                              | TT              | 1947060843               |
| SNP_P4_189356_1893  | NW_004520087.1 | Scaffold6300 | 1893                    | CC                              | GG              | 1947060845               |
| SNP_P4_189357_2506  | NW_004520087.1 | Scaffold6300 | 2506                    | CC                              | GG              | 1947060847               |
| SNP_P4_189358_2530  | NW_004520087.1 | Scaffold6300 | 2530                    | GG                              | CC              | 1947060849               |
| SNP_P4_189359_2634  | NW_004520087.1 | Scaffold6300 | 2634                    | GG                              | AA              | 1947060851               |
| SNP_P4_189360_3051  | NW_004520087.1 | Scaffold6300 | 3051                    | AA                              | TT              | 1947060853               |
| SNP_P4_189361_3270  | NW_004520087.1 | Scaffold6300 | 3270                    | AA                              | TT              | 1947060855               |
| SNP_P4_189362_3343  | NW_004520087.1 | Scaffold6300 | 3343                    | GG                              | TT              | 1947060857               |
| SNP_P4_189363_3385  | NW_004520087.1 | Scaffold6300 | 3385                    | AA                              | GG              | 1947060859               |
| SNP_P4_189364_3429  | NW_004520087.1 | Scaffold6300 | 3429                    | GG                              | CC              | 1947060861               |
| SNP_P4_189365_3500  | NW_004520087.1 | Scaffold6300 | 3500                    | AA                              | GG              | 1947060863               |
| SNP_P4_189366_4412  | NW_004520087.1 | Scaffold6300 | 4412                    | AA                              | CC              | 1947060865               |
| SNP_P4_189367_4958  | NW_004520087.1 | Scaffold6300 | 4958                    | GG                              | TT              | 1947060867               |
| SNP_P4_189369_5468  | NW_004520087.1 | Scaffold6300 | 5468                    | CC                              | GG              | 1947060869               |
| SNP_P4_189370_10953 | NW_004520087.1 | Scaffold6300 | 10953                   | GG                              | CC              | 1947060871               |
| SNP_P4_189371_11212 | NW_004520087.1 | Scaffold6300 | 11212                   | GG                              | TT              | 1947060873               |
| SNP_P4_189372_11240 | NW_004520087.1 | Scaffold6300 | 11240                   | GG                              | CC              | 1947060875               |
| SNP_P4_189373_11251 | NW_004520087.1 | Scaffold6300 | 11251                   | TT                              | CC              | 1947060877               |
| SNP_P4_189374_11266 | NW_004520087.1 | Scaffold6300 | 11266                   | GG                              | AA              | 1947060880               |
| SNP_P4_189375_11579 | NW_004520087.1 | Scaffold6300 | 11579                   | AA                              | TT              | 1947060882               |
| SNP_P4_189376_3587  | NW_004520090.1 | Scaffold6303 | 3587                    | AA                              | TT              | 1947060884               |
| SNP_P4_189377_569   | NW_004520093.1 | Scaffold6307 | 569                     | CC                              | TT              | 1947060886               |
| SNP_P4_189378_917   | NW_004520093.1 | Scaffold6307 | 917                     | TT                              | GG              | 1947060888               |



| SNPs IDs            | Chromosome IDs | Chromosomes  | Physical positions (bp) | CDC Frontier (Reference genome) | (ILWC46 & LPNB) | NCBI SNPdb Accession IDs |
|---------------------|----------------|--------------|-------------------------|---------------------------------|-----------------|--------------------------|
| SNP_P4_189379_934   | NW_004520093.1 | Scaffold6307 | 934                     | AA                              | TT              | 1947060890               |
| SNP_P4_189380_212   | NW_004520096.1 | Scaffold6314 | 212                     | GG                              | AA              | 1947060892               |
| SNP_P4_189381_706   | NW_004520096.1 | Scaffold6314 | 706                     | CC                              | TT              | 1947060894               |
| SNP_P4_189382_1012  | NW_004520096.1 | Scaffold6314 | 1012                    | TT                              | AA              | 1947060896               |
| SNP_P4_189383_1039  | NW_004520096.1 | Scaffold6314 | 1039                    | AA                              | GG              | 1947060898               |
| SNP_P4_189384_1242  | NW_004520096.1 | Scaffold6314 | 1242                    | AA                              | TT              | 1947060900               |
| SNP_P4_189385_377   | NW_004520097.1 | Scaffold6317 | 377                     | GG                              | AA              | 1947060902               |
| SNP_P4_189386_378   | NW_004520097.1 | Scaffold6317 | 378                     | CC                              | TT              | 1947060904               |
| SNP_P4_189387_382   | NW_004520097.1 | Scaffold6317 | 382                     | CC                              | TT              | 1947060906               |
| SNP_P4_189388_385   | NW_004520097.1 | Scaffold6317 | 385                     | TT                              | GG              | 1947060908               |
| SNP_P4_189389_387   | NW_004520097.1 | Scaffold6317 | 387                     | GG                              | AA              | 1947060910               |
| SNP_P4_189390_627   | NW_004520097.1 | Scaffold6317 | 627                     | GG                              | TT              | 1947060912               |
| SNP_P4_189391_661   | NW_004520097.1 | Scaffold6317 | 661                     | CC                              | TT              | 1947060914               |
| SNP_P4_189392_701   | NW_004520097.1 | Scaffold6317 | 701                     | CC                              | TT              | 1947060916               |
| SNP_P4_189393_703   | NW_004520097.1 | Scaffold6317 | 703                     | GG                              | AA              | 1947060918               |
| SNP_P4_189394_734   | NW_004520097.1 | Scaffold6317 | 734                     | AA                              | TT              | 1947060920               |
| SNP_P4_189395_1062  | NW_004520097.1 | Scaffold6317 | 1062                    | GG                              | AA              | 1947060923               |
| SNP_P4_189396_16857 | NW_004520098.1 | Scaffold6318 | 16857                   | GG                              | AA              | 1947060925               |
| SNP_P4_189397_16965 | NW_004520098.1 | Scaffold6318 | 16965                   | CC                              | TT              | 1947060927               |
| SNP_P4_189398_17190 | NW_004520098.1 | Scaffold6318 | 17190                   | CC                              | AA              | 1947060929               |
| SNP_P4_189399_17347 | NW_004520098.1 | Scaffold6318 | 17347                   | TT                              | CC              | 1947060931               |
| SNP_P4_189400_17360 | NW_004520098.1 | Scaffold6318 | 17360                   | GG                              | AA              | 1947060933               |
| SNP_P4_189401_17384 | NW_004520098.1 | Scaffold6318 | 17384                   | GG                              | AA              | 1947060935               |
| SNP_P4_189402_17409 | NW_004520098.1 | Scaffold6318 | 17409                   | GG                              | AA              | 1947060937               |
| SNP_P4_189403_17883 | NW_004520098.1 | Scaffold6318 | 17883                   | TT                              | GG              | 1947060939               |
| SNP_P4_189404_17888 | NW_004520098.1 | Scaffold6318 | 17888                   | GG                              | AA              | 1947060941               |
| SNP_P4_189405_791   | NW_004520099.1 | Scaffold6321 | 791                     | AA                              | CC              | 1947060943               |
| SNP_P4_189406_842   | NW_004520099.1 | Scaffold6321 | 842                     | CC                              | TT              | 1947060945               |
| SNP_P4_189407_843   | NW_004520099.1 | Scaffold6321 | 843                     | GG                              | CC              | 1947060947               |
| SNP_P4_189408_1075  | NW_004520099.1 | Scaffold6321 | 1075                    | GG                              | AA              | 1947060949               |
| SNP_P4_189409_1144  | NW_004520099.1 | Scaffold6321 | 1144                    | AA                              | GG              | 1947060951               |
| SNP_P4_189410_1147  | NW_004520099.1 | Scaffold6321 | 1147                    | AA                              | GG              | 1947060953               |
| SNP_P4_189411_517   | NW_004520100.1 | Scaffold6322 | 517                     | GG                              | AA              | 1947060955               |
| SNP_P4_189412_1017  | NW_004520100.1 | Scaffold6322 | 1017                    | GG                              | CC              | 1947060957               |
| SNP_P4_189413_4006  | NW_004520100.1 | Scaffold6322 | 4006                    | TT                              | AA              | 1947060959               |
| SNP_P4_189414_709   | NW_004520101.1 | Scaffold6324 | 709                     | GG                              | AA              | 1947060961               |
| SNP_P4_189415_741   | NW_004520101.1 | Scaffold6324 | 741                     | CC                              | TT              | 1947060963               |
| SNP_P4_189416_2767  | NW_004520106.1 | Scaffold6330 | 2767                    | AA                              | GG              | 1947060965               |
| SNP_P4_189417_750   | NW_004520111.1 | Scaffold6335 | 750                     | TT                              | AA              | 1947060967               |
| SNP_P4_189418_765   | NW_004520111.1 | Scaffold6335 | 765                     | TT                              | CC              | 1947060969               |
| SNP_P4_189419_803   | NW_004520111.1 | Scaffold6335 | 803                     | AA                              | GG              | 1947060971               |
| SNP_P4_189420_819   | NW_004520111.1 | Scaffold6335 | 819                     | AA                              | CC              | 1947060973               |

| SNPs IDs            | Chromosome IDs | Chromosomes  | Physical positions (bp) | CDC Frontier (Reference genome) | (ILWC46 & LPNB) | NCBI SNPdb Accession IDs |
|---------------------|----------------|--------------|-------------------------|---------------------------------|-----------------|--------------------------|
| SNP_P4_189421_848   | NW_004520111.1 | Scaffold6335 | 848                     | AA                              | CC              | 1947060975               |
| SNP_P4_189422_871   | NW_004520111.1 | Scaffold6335 | 871                     | GG                              | TT              | 1947060977               |
| SNP_P4_189424_889   | NW_004520111.1 | Scaffold6335 | 889                     | AA                              | GG              | 1947060979               |
| SNP_P4_189425_915   | NW_004520111.1 | Scaffold6335 | 915                     | AA                              | CC              | 1947060981               |
| SNP_P4_189426_919   | NW_004520111.1 | Scaffold6335 | 919                     | TT                              | CC              | 1947060983               |
| SNP_P4_189427_923   | NW_004520111.1 | Scaffold6335 | 923                     | GG                              | TT              | 1947060985               |
| SNP_P4_189428_983   | NW_004520111.1 | Scaffold6335 | 983                     | GG                              | AA              | 1947060988               |
| SNP_P4_189429_989   | NW_004520111.1 | Scaffold6335 | 989                     | AA                              | GG              | 1947060990               |
| SNP_P4_189430_990   | NW_004520111.1 | Scaffold6335 | 990                     | TT                              | GG              | 1947060992               |
| SNP_P4_189431_991   | NW_004520111.1 | Scaffold6335 | 991                     | TT                              | GG              | 1947060994               |
| SNP_P4_189433_1342  | NW_004520114.1 | Scaffold6343 | 1342                    | GG                              | TT              | 1947060996               |
| SNP_P4_189434_2024  | NW_004520114.1 | Scaffold6343 | 2024                    | CC                              | GG              | 1947060998               |
| SNP_P4_189435_2080  | NW_004520114.1 | Scaffold6343 | 2080                    | TT                              | GG              | 1947061000               |
| SNP_P4_189436_2084  | NW_004520114.1 | Scaffold6343 | 2084                    | CC                              | GG              | 1947061002               |
| SNP_P4_189437_2086  | NW_004520114.1 | Scaffold6343 | 2086                    | GG                              | CC              | 1947061004               |
| SNP_P4_189438_2137  | NW_004520114.1 | Scaffold6343 | 2137                    | TT                              | CC              | 1947061006               |
| SNP_P4_189439_2189  | NW_004520114.1 | Scaffold6343 | 2189                    | AA                              | CC              | 1947061008               |
| SNP_P4_189440_204   | NW_004520123.1 | Scaffold6360 | 204                     | AA                              | CC              | 1947061010               |
| SNP_P4_189441_488   | NW_004520123.1 | Scaffold6360 | 488                     | TT                              | AA              | 1947061012               |
| SNP_P4_189442_647   | NW_004520123.1 | Scaffold6360 | 647                     | AA                              | CC              | 1947061014               |
| SNP_P4_189443_32181 | NW_004520126.1 | Scaffold6367 | 32181                   | AA                              | GG              | 1947061016               |
| SNP_P4_189444_32215 | NW_004520126.1 | Scaffold6367 | 32215                   | TT                              | CC              | 1947061018               |
| SNP_P4_189445_32228 | NW_004520126.1 | Scaffold6367 | 32228                   | GG                              | AA              | 1947061020               |
| SNP_P4_189446_32239 | NW_004520126.1 | Scaffold6367 | 32239                   | GG                              | AA              | 1947061023               |
| SNP_P4_189447_32287 | NW_004520126.1 | Scaffold6367 | 32287                   | TT                              | GG              | 1947061025               |
| SNP_P4_189448_32367 | NW_004520126.1 | Scaffold6367 | 32367                   | AA                              | GG              | 1947061027               |
| SNP_P4_189449_32385 | NW_004520126.1 | Scaffold6367 | 32385                   | GG                              | AA              | 1947061029               |
| SNP_P4_189450_32411 | NW_004520126.1 | Scaffold6367 | 32411                   | CC                              | AA              | 1947061031               |
| SNP_P4_189451_32456 | NW_004520126.1 | Scaffold6367 | 32456                   | TT                              | GG              | 1947061033               |
| SNP_P4_189452_32460 | NW_004520126.1 | Scaffold6367 | 32460                   | AA                              | TT              | 1947061035               |
| SNP_P4_189453_32461 | NW_004520126.1 | Scaffold6367 | 32461                   | AA                              | TT              | 1947061037               |
| SNP_P4_189454_32462 | NW_004520126.1 | Scaffold6367 | 32462                   | AA                              | TT              | 1947061039               |
| SNP_P4_189455_32465 | NW_004520126.1 | Scaffold6367 | 32465                   | CC                              | TT              | 1947061042               |
| SNP_P4_189456_32467 | NW_004520126.1 | Scaffold6367 | 32467                   | TT                              | CC              | 1947061044               |
| SNP_P4_189457_32469 | NW_004520126.1 | Scaffold6367 | 32469                   | AA                              | TT              | 1947061046               |
| SNP_P4_189458_32501 | NW_004520126.1 | Scaffold6367 | 32501                   | GG                              | CC              | 1947061048               |
| SNP_P4_189459_32553 | NW_004520126.1 | Scaffold6367 | 32553                   | TT                              | AA              | 1947061050               |
| SNP_P4_189460_32630 | NW_004520126.1 | Scaffold6367 | 32630                   | GG                              | AA              | 1947061052               |
| SNP_P4_189461_32651 | NW_004520126.1 | Scaffold6367 | 32651                   | AA                              | TT              | 1947061054               |
| SNP_P4_189462_32653 | NW_004520126.1 | Scaffold6367 | 32653                   | GG                              | AA              | 1947061056               |
| SNP_P4_189463_32727 | NW_004520126.1 | Scaffold6367 | 32727                   | AA                              | GG              | 1947061058               |
| SNP_P4_189464_32731 | NW_004520126.1 | Scaffold6367 | 32731                   | CC                              | TT              | 1947061060               |

| SNPs IDs            | Chromosome IDs | Chromosomes  | Physical positions (bp) | CDC Frontier (Reference genome) | (ILWC46 & LPNB) | NCBI SNPdb Accession IDs |
|---------------------|----------------|--------------|-------------------------|---------------------------------|-----------------|--------------------------|
| SNP_P4_189465_32733 | NW_004520126.1 | Scaffold6367 | 32733                   | GG                              | AA              | 1947061062               |
| SNP_P4_189466_32831 | NW_004520126.1 | Scaffold6367 | 32831                   | AA                              | GG              | 1947061064               |
| SNP_P4_189467_32856 | NW_004520126.1 | Scaffold6367 | 32856                   | CC                              | GG              | 1947061066               |
| SNP_P4_189468_32902 | NW_004520126.1 | Scaffold6367 | 32902                   | TT                              | GG              | 1947061068               |
| SNP_P4_189469_32966 | NW_004520126.1 | Scaffold6367 | 32966                   | CC                              | TT              | 1947061070               |
| SNP_P4_189470_32985 | NW_004520126.1 | Scaffold6367 | 32985                   | AA                              | GG              | 1947061072               |
| SNP_P4_189471_33029 | NW_004520126.1 | Scaffold6367 | 33029                   | GG                              | TT              | 1947061074               |
| SNP_P4_189472_33053 | NW_004520126.1 | Scaffold6367 | 33053                   | GG                              | AA              | 1947061076               |
| SNP_P4_189473_33068 | NW_004520126.1 | Scaffold6367 | 33068                   | TT                              | CC              | 1947061078               |
| SNP_P4_189474_33144 | NW_004520126.1 | Scaffold6367 | 33144                   | GG                              | CC              | 1947061080               |
| SNP_P4_189475_33148 | NW_004520126.1 | Scaffold6367 | 33148                   | AA                              | GG              | 1947061082               |
| SNP_P4_189476_33175 | NW_004520126.1 | Scaffold6367 | 33175                   | CC                              | TT              | 1947061084               |
| SNP_P4_189477_33179 | NW_004520126.1 | Scaffold6367 | 33179                   | GG                              | AA              | 1947061086               |
| SNP_P4_189478_948   | NW_004520127.1 | Scaffold6373 | 948                     | CC                              | TT              | 1947061088               |
| SNP_P4_189479_1015  | NW_004520127.1 | Scaffold6373 | 1015                    | AA                              | CC              | 1947061090               |
| SNP_P4_189480_1037  | NW_004520127.1 | Scaffold6373 | 1037                    | CC                              | TT              | 1947061092               |
| SNP_P4_189481_1082  | NW_004520127.1 | Scaffold6373 | 1082                    | CC                              | AA              | 1947061094               |
| SNP_P4_189482_1306  | NW_004520127.1 | Scaffold6373 | 1306                    | GG                              | AA              | 1947061096               |
| SNP_P4_189483_614   | NW_004520129.1 | Scaffold6375 | 614                     | GG                              | CC              | 1947061098               |
| SNP_P4_189484_643   | NW_004520129.1 | Scaffold6375 | 643                     | GG                              | CC              | 1947061100               |
| SNP_P4_189485_708   | NW_004520129.1 | Scaffold6375 | 708                     | TT                              | CC              | 1947061102               |
| SNP_P4_189486_817   | NW_004520129.1 | Scaffold6375 | 817                     | AA                              | GG              | 1947061104               |
| SNP_P4_189487_837   | NW_004520129.1 | Scaffold6375 | 837                     | CC                              | GG              | 1947061106               |
| SNP_P4_189488_900   | NW_004520129.1 | Scaffold6375 | 900                     | AA                              | TT              | 1947061108               |
| SNP_P4_189489_987   | NW_004520129.1 | Scaffold6375 | 987                     | AA                              | GG              | 1947061110               |
| SNP_P4_189490_155   | NW_004520130.1 | Scaffold6376 | 155                     | TT                              | CC              | 1947061112               |
| SNP_P4_189491_531   | NW_004520130.1 | Scaffold6376 | 531                     | TT                              | CC              | 1947061114               |
| SNP_P4_189492_554   | NW_004520130.1 | Scaffold6376 | 554                     | CC                              | GG              | 1947061116               |
| SNP_P4_189493_579   | NW_004520130.1 | Scaffold6376 | 579                     | AA                              | CC              | 1947061118               |
| SNP_P4_189494_591   | NW_004520130.1 | Scaffold6376 | 591                     | TT                              | AA              | 1947061120               |
| SNP_P4_189495_937   | NW_004520130.1 | Scaffold6376 | 937                     | AA                              | GG              | 1947061122               |
| SNP_P4_189496_2862  | NW_004520131.1 | Scaffold6377 | 2862                    | TT                              | AA              | 1947061124               |
| SNP_P4_189497_2972  | NW_004520131.1 | Scaffold6377 | 2972                    | GG                              | AA              | 1947061126               |
| SNP_P4_189498_3010  | NW_004520131.1 | Scaffold6377 | 3010                    | GG                              | CC              | 1947061128               |
| SNP_P4_189499_3032  | NW_004520131.1 | Scaffold6377 | 3032                    | GG                              | AA              | 1947061130               |
| SNP_P4_189500_3050  | NW_004520131.1 | Scaffold6377 | 3050                    | TT                              | CC              | 1947061132               |
| SNP_P4_189502_1444  | NW_004520134.1 | Scaffold6382 | 1444                    | GG                              | AA              | 1947061134               |
| SNP_P4_189503_252   | NW_004520135.1 | Scaffold6389 | 252                     | TT                              | CC              | 1947061136               |
| SNP_P4_189504_290   | NW_004520135.1 | Scaffold6389 | 290                     | GG                              | AA              | 1947061138               |
| SNP_P4_189505_496   | NW_004520135.1 | Scaffold6389 | 496                     | TT                              | CC              | 1947061140               |
| SNP_P4_189506_512   | NW_004520135.1 | Scaffold6389 | 512                     | CC                              | TT              | 1947061142               |
| SNP_P4_189507_536   | NW_004520135.1 | Scaffold6389 | 536                     | AA                              | GG              | 1947061144               |

| SNPs IDs           | Chromosome IDs | Chromosomes  | Physical positions (bp) | CDC Frontier (Reference genome) | (ILWC46 & LPNB) | NCBI SNPdb Accession IDs |
|--------------------|----------------|--------------|-------------------------|---------------------------------|-----------------|--------------------------|
| SNP_P4_189508_563  | NW_004520135.1 | Scaffold6389 | 563                     | CC                              | TT              | 1947061146               |
| SNP_P4_189509_565  | NW_004520135.1 | Scaffold6389 | 565                     | AA                              | GG              | 1947061148               |
| SNP_P4_189510_593  | NW_004520135.1 | Scaffold6389 | 593                     | CC                              | TT              | 1947061150               |
| SNP_P4_189511_213  | NW_004520136.1 | Scaffold6391 | 213                     | CC                              | TT              | 1947061152               |
| SNP_P4_189512_602  | NW_004520136.1 | Scaffold6391 | 602                     | TT                              | CC              | 1947061154               |
| SNP_P4_189513_604  | NW_004520136.1 | Scaffold6391 | 604                     | AA                              | CC              | 1947061156               |
| SNP_P4_189515_2292 | NW_004520136.1 | Scaffold6391 | 2292                    | TT                              | CC              | 1947061158               |
| SNP_P4_189516_2519 | NW_004520136.1 | Scaffold6391 | 2519                    | AA                              | CC              | 1947061160               |
| SNP_P4_189517_3124 | NW_004520136.1 | Scaffold6391 | 3124                    | AA                              | GG              | 1947061162               |
| SNP_P4_189518_1056 | NW_004520138.1 | Scaffold6394 | 1056                    | TT                              | AA              | 1947061164               |
| SNP_P4_189519_1151 | NW_004520138.1 | Scaffold6394 | 1151                    | AA                              | CC              | 1947061166               |
| SNP_P4_189520_1186 | NW_004520138.1 | Scaffold6394 | 1186                    | GG                              | AA              | 1947061168               |
| SNP_P4_189521_1201 | NW_004520138.1 | Scaffold6394 | 1201                    | AA                              | GG              | 1947061170               |
| SNP_P4_189522_512  | NW_004520144.1 | Scaffold6403 | 512                     | AA                              | GG              | 1947061172               |
| SNP_P4_189523_526  | NW_004520144.1 | Scaffold6403 | 526                     | CC                              | AA              | 1947061174               |
| SNP_P4_189524_535  | NW_004520144.1 | Scaffold6403 | 535                     | AA                              | GG              | 1947061176               |
| SNP_P4_189525_1303 | NW_004520145.1 | Scaffold6404 | 1303                    | GG                              | AA              | 1947061179               |
| SNP_P4_189526_1314 | NW_004520145.1 | Scaffold6404 | 1314                    | CC                              | AA              | 1947061181               |
| SNP_P4_189527_1421 | NW_004520145.1 | Scaffold6404 | 1421                    | AA                              | TT              | 1947061183               |
| SNP_P4_189528_1429 | NW_004520145.1 | Scaffold6404 | 1429                    | AA                              | CC              | 1947061185               |
| SNP_P4_189529_1558 | NW_004520145.1 | Scaffold6404 | 1558                    | TT                              | AA              | 1947061187               |
| SNP_P4_189530_1837 | NW_004520145.1 | Scaffold6404 | 1837                    | AA                              | TT              | 1947061189               |
| SNP_P4_189531_2245 | NW_004520145.1 | Scaffold6404 | 2245                    | AA                              | CC              | 1947061191               |
| SNP_P4_189532_2285 | NW_004520145.1 | Scaffold6404 | 2285                    | GG                              | AA              | 1947061193               |
| SNP_P4_189533_64   | NW_004520146.1 | Scaffold6405 | 64                      | AA                              | TT              | 1947061195               |
| SNP_P4_189534_1917 | NW_004520148.1 | Scaffold6410 | 1917                    | CC                              | TT              | 1947061197               |
| SNP_P4_189535_1944 | NW_004520148.1 | Scaffold6410 | 1944                    | GG                              | AA              | 1947061199               |
| SNP_P4_189536_1949 | NW_004520148.1 | Scaffold6410 | 1949                    | TT                              | AA              | 1947061201               |
| SNP_P4_189537_1982 | NW_004520148.1 | Scaffold6410 | 1982                    | CC                              | TT              | 1947061203               |
| SNP_P4_189538_2142 | NW_004520148.1 | Scaffold6410 | 2142                    | AA                              | TT              | 1947061205               |
| SNP_P4_189539_2160 | NW_004520148.1 | Scaffold6410 | 2160                    | GG                              | AA              | 1947061207               |
| SNP_P4_189540_2169 | NW_004520148.1 | Scaffold6410 | 2169                    | TT                              | AA              | 1947061209               |
| SNP_P4_189541_2203 | NW_004520148.1 | Scaffold6410 | 2203                    | TT                              | CC              | 1947061211               |
| SNP_P4_189542_2245 | NW_004520148.1 | Scaffold6410 | 2245                    | CC                              | TT              | 1947061213               |
| SNP_P4_189543_3582 | NW_004520148.1 | Scaffold6410 | 3582                    | CC                              | TT              | 1947061215               |
| SNP_P4_189544_3806 | NW_004520148.1 | Scaffold6410 | 3806                    | TT                              | AA              | 1947061217               |
| SNP_P4_189545_3809 | NW_004520148.1 | Scaffold6410 | 3809                    | TT                              | CC              | 1947061219               |
| SNP_P4_189546_3832 | NW_004520148.1 | Scaffold6410 | 3832                    | TT                              | CC              | 1947061221               |
| SNP_P4_189547_3889 | NW_004520148.1 | Scaffold6410 | 3889                    | AA                              | GG              | 1947061223               |
| SNP_P4_189548_3975 | NW_004520148.1 | Scaffold6410 | 3975                    | GG                              | AA              | 1947061225               |
| SNP_P4_189549_3976 | NW_004520148.1 | Scaffold6410 | 3976                    | AA                              | GG              | 1947061227               |
| SNP_P4_189550_3990 | NW_004520148.1 | Scaffold6410 | 3990                    | TT                              | GG              | 1947061229               |

| SNPs IDs           | Chromosome IDs | Chromosomes  | Physical positions (bp) | CDC Frontier (Reference genome) | (ILWC46 & LPNB) | NCBI SNPdb Accession IDs |
|--------------------|----------------|--------------|-------------------------|---------------------------------|-----------------|--------------------------|
| SNP_P4_189551_3999 | NW_004520148.1 | Scaffold6410 | 3999                    | GG                              | TT              | 1947061231               |
| SNP_P4_189552_4018 | NW_004520148.1 | Scaffold6410 | 4018                    | CC                              | GG              | 1947061233               |
| SNP_P4_189553_4028 | NW_004520148.1 | Scaffold6410 | 4028                    | GG                              | AA              | 1947061235               |
| SNP_P4_189554_4135 | NW_004520148.1 | Scaffold6410 | 4135                    | TT                              | AA              | 1947061237               |
| SNP_P4_189555_4146 | NW_004520148.1 | Scaffold6410 | 4146                    | GG                              | CC              | 1947061239               |
| SNP_P4_189556_4198 | NW_004520148.1 | Scaffold6410 | 4198                    | AA                              | TT              | 1947061241               |
| SNP_P4_189557_4236 | NW_004520148.1 | Scaffold6410 | 4236                    | CC                              | TT              | 1947061244               |
| SNP_P4_189558_4340 | NW_004520148.1 | Scaffold6410 | 4340                    | AA                              | GG              | 1947061246               |
| SNP_P4_189559_761  | NW_004520151.1 | Scaffold6414 | 761                     | CC                              | AA              | 1947061248               |
| SNP_P4_189560_144  | NW_004520157.1 | Scaffold6429 | 144                     | CC                              | AA              | 1947061250               |
| SNP_P4_189561_145  | NW_004520157.1 | Scaffold6429 | 145                     | TT                              | CC              | 1947061252               |
| SNP_P4_189562_147  | NW_004520157.1 | Scaffold6429 | 147                     | AA                              | TT              | 1947061254               |
| SNP_P4_189563_165  | NW_004520157.1 | Scaffold6429 | 165                     | TT                              | GG              | 1947061256               |
| SNP_P4_189564_244  | NW_004520157.1 | Scaffold6429 | 244                     | AA                              | GG              | 1947061258               |
| SNP_P4_189565_361  | NW_004520157.1 | Scaffold6429 | 361                     | GG                              | TT              | 1947061260               |
| SNP_P4_189566_670  | NW_004520157.1 | Scaffold6429 | 670                     | GG                              | CC              | 1947061262               |
| SNP_P4_189567_1123 | NW_004520157.1 | Scaffold6429 | 1123                    | AA                              | TT              | 1947061264               |
| SNP_P4_189568_4267 | NW_004520157.1 | Scaffold6429 | 4267                    | AA                              | TT              | 1947061266               |
| SNP_P4_189569_4281 | NW_004520157.1 | Scaffold6429 | 4281                    | AA                              | GG              | 1947061268               |
| SNP_P4_189570_4801 | NW_004520157.1 | Scaffold6429 | 4801                    | GG                              | TT              | 1947061270               |
| SNP_P4_189572_7276 | NW_004520157.1 | Scaffold6429 | 7276                    | TT                              | GG              | 1947061272               |
| SNP_P4_189573_1162 | NW_004520158.1 | Scaffold6430 | 1162                    | GG                              | AA              | 1947061274               |
| SNP_P4_189574_2229 | NW_004520159.1 | Scaffold6432 | 2229                    | AA                              | GG              | 1947061276               |
| SNP_P4_189575_3188 | NW_004520159.1 | Scaffold6432 | 3188                    | GG                              | AA              | 1947061278               |
| SNP_P4_189576_3406 | NW_004520159.1 | Scaffold6432 | 3406                    | CC                              | AA              | 1947061280               |
| SNP_P4_189577_3413 | NW_004520159.1 | Scaffold6432 | 3413                    | TT                              | CC              | 1947061282               |
| SNP_P4_189578_3532 | NW_004520159.1 | Scaffold6432 | 3532                    | GG                              | TT              | 1947061284               |
| SNP_P4_189579_3582 | NW_004520159.1 | Scaffold6432 | 3582                    | CC                              | TT              | 1947061286               |
| SNP_P4_189580_3592 | NW_004520159.1 | Scaffold6432 | 3592                    | AA                              | TT              | 1947061288               |
| SNP_P4_189581_406  | NW_004520164.1 | Scaffold6437 | 406                     | TT                              | GG              | 1947061290               |
| SNP_P4_189582_483  | NW_004520164.1 | Scaffold6437 | 483                     | GG                              | AA              | 1947061292               |
| SNP_P4_189583_560  | NW_004520164.1 | Scaffold6437 | 560                     | AA                              | GG              | 1947061294               |
| SNP_P4_189584_643  | NW_004520164.1 | Scaffold6437 | 643                     | AA                              | TT              | 1947061296               |
| SNP_P4_189585_716  | NW_004520164.1 | Scaffold6437 | 716                     | TT                              | AA              | 1947061298               |
| SNP_P4_189586_773  | NW_004520164.1 | Scaffold6437 | 773                     | TT                              | AA              | 1947061300               |
| SNP_P4_189587_833  | NW_004520164.1 | Scaffold6437 | 833                     | GG                              | CC              | 1947061302               |
| SNP_P4_189588_844  | NW_004520164.1 | Scaffold6437 | 844                     | CC                              | AA              | 1947061304               |
| SNP_P4_189589_883  | NW_004520164.1 | Scaffold6437 | 883                     | CC                              | TT              | 1947061306               |
| SNP_P4_189590_886  | NW_004520164.1 | Scaffold6437 | 886                     | TT                              | GG              | 1947061308               |
| SNP_P4_189591_873  | NW_004520166.1 | Scaffold6440 | 873                     | AA                              | TT              | 1947061310               |
| SNP_P4_189592_884  | NW_004520166.1 | Scaffold6440 | 884                     | CC                              | GG              | 1947061312               |
| SNP_P4_189593_931  | NW_004520166.1 | Scaffold6440 | 931                     | TT                              | CC              | 1947061314               |

| SNPs IDs            | Chromosome IDs | Chromosomes  | Physical positions (bp) | CDC Frontier (Reference genome) | (ILWC46 & LPNB) | NCBI SNPdb Accession IDs |
|---------------------|----------------|--------------|-------------------------|---------------------------------|-----------------|--------------------------|
| SNP_P4_189594_377   | NW_004520171.1 | Scaffold6449 | 377                     | AA                              | TT              | 1947061316               |
| SNP_P4_189595_329   | NW_004520172.1 | Scaffold6451 | 329                     | AA                              | TT              | 1947061318               |
| SNP_P4_189596_2585  | NW_004520174.1 | Scaffold6456 | 2585                    | GG                              | CC              | 1947061320               |
| SNP_P4_189597_2597  | NW_004520174.1 | Scaffold6456 | 2597                    | GG                              | AA              | 1947061322               |
| SNP_P4_189598_2618  | NW_004520174.1 | Scaffold6456 | 2618                    | TT                              | CC              | 1947061324               |
| SNP_P4_189599_2620  | NW_004520174.1 | Scaffold6456 | 2620                    | AA                              | TT              | 1947061326               |
| SNP_P4_189600_2623  | NW_004520174.1 | Scaffold6456 | 2623                    | TT                              | CC              | 1947061328               |
| SNP_P4_189601_2629  | NW_004520174.1 | Scaffold6456 | 2629                    | AA                              | GG              | 1947061330               |
| SNP_P4_189602_7952  | NW_004520175.1 | Scaffold6458 | 7952                    | CC                              | TT              | 1947061333               |
| SNP_P4_189603_17609 | NW_004520175.1 | Scaffold6458 | 17609                   | AA                              | GG              | 1947061335               |
| SNP_P4_189604_17618 | NW_004520175.1 | Scaffold6458 | 17618                   | AA                              | GG              | 1947061337               |
| SNP_P4_189605_20664 | NW_004520175.1 | Scaffold6458 | 20664                   | AA                              | CC              | 1947061339               |
| SNP_P4_189606_919   | NW_004520179.1 | Scaffold6465 | 919                     | GG                              | TT              | 1947061341               |
| SNP_P4_189607_941   | NW_004520179.1 | Scaffold6465 | 941                     | TT                              | CC              | 1947061343               |
| SNP_P4_189608_1326  | NW_004520179.1 | Scaffold6465 | 1326                    | CC                              | TT              | 1947061345               |
| SNP_P4_189609_841   | NW_004520181.1 | Scaffold6469 | 841                     | GG                              | CC              | 1947061347               |
| SNP_P4_189610_1176  | NW_004520181.1 | Scaffold6469 | 1176                    | CC                              | AA              | 1947061349               |
| SNP_P4_189611_443   | NW_004520185.1 | Scaffold6478 | 443                     | TT                              | GG              | 1947061351               |
| SNP_P4_189612_954   | NW_004520185.1 | Scaffold6478 | 954                     | TT                              | CC              | 1947061353               |
| SNP_P4_189613_1167  | NW_004520185.1 | Scaffold6478 | 1167                    | AA                              | TT              | 1947061355               |
| SNP_P4_189614_1263  | NW_004520185.1 | Scaffold6478 | 1263                    | AA                              | GG              | 1947061357               |
| SNP_P4_189615_1293  | NW_004520185.1 | Scaffold6478 | 1293                    | AA                              | GG              | 1947061359               |
| SNP_P4_189616_22048 | NW_004520185.1 | Scaffold6478 | 22048                   | GG                              | AA              | 1947061361               |
| SNP_P4_189618_122   | NW_004520187.1 | Scaffold6480 | 122                     | GG                              | AA              | 1947061363               |
| SNP_P4_189619_143   | NW_004520187.1 | Scaffold6480 | 143                     | CC                              | GG              | 1947061365               |
| SNP_P4_189620_158   | NW_004520187.1 | Scaffold6480 | 158                     | AA                              | GG              | 1947061367               |
| SNP_P4_189621_160   | NW_004520187.1 | Scaffold6480 | 160                     | AA                              | GG              | 1947061369               |
| SNP_P4_189622_299   | NW_004520187.1 | Scaffold6480 | 299                     | CC                              | TT              | 1947061371               |
| SNP_P4_189624_436   | NW_004520187.1 | Scaffold6480 | 436                     | TT                              | CC              | 1947061373               |
| SNP_P4_189625_512   | NW_004520187.1 | Scaffold6480 | 512                     | TT                              | AA              | 1947061375               |
| SNP_P4_189627_585   | NW_004520187.1 | Scaffold6480 | 585                     | AA                              | TT              | 1947061377               |
| SNP_P4_189628_607   | NW_004520187.1 | Scaffold6480 | 607                     | GG                              | AA              | 1947061379               |
| SNP_P4_189629_638   | NW_004520187.1 | Scaffold6480 | 638                     | AA                              | TT              | 1947061381               |
| SNP_P4_189631_751   | NW_004520187.1 | Scaffold6480 | 751                     | CC                              | TT              | 1947061383               |
| SNP_P4_189632_861   | NW_004520187.1 | Scaffold6480 | 861                     | GG                              | TT              | 1947061385               |
| SNP_P4_189633_878   | NW_004520187.1 | Scaffold6480 | 878                     | GG                              | CC              | 1947061387               |
| SNP_P4_189634_887   | NW_004520187.1 | Scaffold6480 | 887                     | CC                              | GG              | 1947061389               |
| SNP_P4_189635_967   | NW_004520187.1 | Scaffold6480 | 967                     | CC                              | TT              | 1947061391               |
| SNP_P4_189636_993   | NW_004520187.1 | Scaffold6480 | 993                     | GG                              | AA              | 1947061393               |
| SNP_P4_189637_1013  | NW_004520187.1 | Scaffold6480 | 1013                    | TT                              | CC              | 1947061395               |
| SNP_P4_189638_1032  | NW_004520187.1 | Scaffold6480 | 1032                    | AA                              | CC              | 1947061397               |
| SNP_P4_189639_1144  | NW_004520187.1 | Scaffold6480 | 1144                    | TT                              | CC              | 1947061399               |

| SNPs IDs           | Chromosome IDs | Chromosomes  | Physical positions (bp) | CDC Frontier (Reference genome) | (ILWC46 & LPNB) | NCBI SNPdb Accession IDs |
|--------------------|----------------|--------------|-------------------------|---------------------------------|-----------------|--------------------------|
| SNP_P4_189640_1185 | NW_004520187.1 | Scaffold6480 | 1185                    | TT                              | CC              | 1947061401               |
| SNP_P4_189641_1216 | NW_004520187.1 | Scaffold6480 | 1216                    | CC                              | AA              | 1947061403               |
| SNP_P4_189642_1217 | NW_004520187.1 | Scaffold6480 | 1217                    | AA                              | GG              | 1947061405               |
| SNP_P4_189643_1218 | NW_004520187.1 | Scaffold6480 | 1218                    | AA                              | GG              | 1947061406               |
| SNP_P4_189644_1337 | NW_004520192.1 | Scaffold6489 | 1337                    | AA                              | GG              | 1947061408               |
| SNP_P4_189645_1406 | NW_004520192.1 | Scaffold6489 | 1406                    | AA                              | TT              | 1947061410               |
| SNP_P4_189646_1415 | NW_004520192.1 | Scaffold6489 | 1415                    | AA                              | TT              | 1947061412               |
| SNP_P4_189647_1441 | NW_004520192.1 | Scaffold6489 | 1441                    | GG                              | AA              | 1947061414               |
| SNP_P4_189648_1479 | NW_004520192.1 | Scaffold6489 | 1479                    | GG                              | AA              | 1947061416               |
| SNP_P4_189649_1529 | NW_004520192.1 | Scaffold6489 | 1529                    | CC                              | TT              | 1947061418               |
| SNP_P4_189650_1986 | NW_004520192.1 | Scaffold6489 | 1986                    | TT                              | CC              | 1947061420               |
| SNP_P4_189651_1725 | NW_004520194.1 | Scaffold6491 | 1725                    | TT                              | AA              | 1947061422               |
| SNP_P4_189652_302  | NW_004520195.1 | Scaffold6492 | 302                     | TT                              | AA              | 1947061424               |
| SNP_P4_189653_412  | NW_004520195.1 | Scaffold6492 | 412                     | CC                              | TT              | 1947061426               |
| SNP_P4_189654_604  | NW_004520195.1 | Scaffold6492 | 604                     | AA                              | GG              | 1947061428               |
| SNP_P4_189655_815  | NW_004520195.1 | Scaffold6492 | 815                     | CC                              | TT              | 1947061430               |
| SNP_P4_189656_833  | NW_004520195.1 | Scaffold6492 | 833                     | AA                              | CC              | 1947061432               |
| SNP_P4_189657_848  | NW_004520195.1 | Scaffold6492 | 848                     | GG                              | TT              | 1947061434               |
| SNP_P4_189658_176  | NW_004520196.1 | Scaffold6493 | 176                     | CC                              | TT              | 1947061436               |
| SNP_P4_189659_429  | NW_004520196.1 | Scaffold6493 | 429                     | TT                              | CC              | 1947061438               |
| SNP_P4_189660_650  | NW_004520196.1 | Scaffold6493 | 650                     | TT                              | CC              | 1947061440               |
| SNP_P4_189661_4322 | NW_004520196.1 | Scaffold6493 | 4322                    | GG                              | AA              | 1947061442               |
| SNP_P4_189662_4936 | NW_004520196.1 | Scaffold6493 | 4936                    | AA                              | GG              | 1947061444               |
| SNP_P4_189663_6009 | NW_004520196.1 | Scaffold6493 | 6009                    | GG                              | CC              | 1947061446               |
| SNP_P4_189664_6699 | NW_004520196.1 | Scaffold6493 | 6699                    | AA                              | TT              | 1947061448               |
| SNP_P4_189665_1577 | NW_004520197.1 | Scaffold6494 | 1577                    | AA                              | GG              | 1947061450               |
| SNP_P4_189666_1578 | NW_004520197.1 | Scaffold6494 | 1578                    | GG                              | AA              | 1947061452               |
| SNP_P4_189668_67   | NW_004520199.1 | Scaffold6496 | 67                      | TT                              | GG              | 1947061454               |
| SNP_P4_189669_76   | NW_004520199.1 | Scaffold6496 | 76                      | AA                              | GG              | 1947061456               |
| SNP_P4_189670_94   | NW_004520199.1 | Scaffold6496 | 94                      | AA                              | GG              | 1947061458               |
| SNP_P4_189671_162  | NW_004520199.1 | Scaffold6496 | 162                     | AA                              | TT              | 1947061460               |
| SNP_P4_189672_174  | NW_004520199.1 | Scaffold6496 | 174                     | AA                              | GG              | 1947061462               |
| SNP_P4_189674_468  | NW_004520199.1 | Scaffold6496 | 468                     | AA                              | CC              | 1947061464               |
| SNP_P4_189675_491  | NW_004520199.1 | Scaffold6496 | 491                     | AA                              | CC              | 1947061466               |
| SNP_P4_189676_497  | NW_004520199.1 | Scaffold6496 | 497                     | TT                              | AA              | 1947061468               |
| SNP_P4_189677_503  | NW_004520199.1 | Scaffold6496 | 503                     | GG                              | AA              | 1947061470               |
| SNP_P4_189678_763  | NW_004520199.1 | Scaffold6496 | 763                     | TT                              | CC              | 1947061472               |
| SNP_P4_189679_816  | NW_004520199.1 | Scaffold6496 | 816                     | CC                              | TT              | 1947061474               |
| SNP_P4_189680_836  | NW_004520199.1 | Scaffold6496 | 836                     | AA                              | CC              | 1947061476               |
| SNP_P4_189681_842  | NW_004520199.1 | Scaffold6496 | 842                     | AA                              | TT              | 1947061478               |
| SNP_P4_189682_845  | NW_004520199.1 | Scaffold6496 | 845                     | AA                              | CC              | 1947061480               |
| SNP_P4_189684_932  | NW_004520199.1 | Scaffold6496 | 932                     | AA                              | GG              | 1947061482               |

| SNPs IDs           | Chromosome IDs | Chromosomes  | Physical positions (bp) | CDC Frontier (Reference genome) | (ILWC46 & LPNB) | NCBI SNPdb Accession IDs |
|--------------------|----------------|--------------|-------------------------|---------------------------------|-----------------|--------------------------|
| SNP_P4_189685_955  | NW_004520199.1 | Scaffold6496 | 955                     | GG                              | TT              | 1947061484               |
| SNP_P4_189686_957  | NW_004520199.1 | Scaffold6496 | 957                     | CC                              | AA              | 1947061486               |
| SNP_P4_189687_959  | NW_004520199.1 | Scaffold6496 | 959                     | CC                              | GG              | 1947061488               |
| SNP_P4_189688_972  | NW_004520199.1 | Scaffold6496 | 972                     | CC                              | TT              | 1947061490               |
| SNP_P4_189689_978  | NW_004520199.1 | Scaffold6496 | 978                     | CC                              | TT              | 1947061492               |
| SNP_P4_189690_990  | NW_004520199.1 | Scaffold6496 | 990                     | GG                              | AA              | 1947061494               |
| SNP_P4_189691_1014 | NW_004520199.1 | Scaffold6496 | 1014                    | GG                              | AA              | 1947061496               |
| SNP_P4_189692_1029 | NW_004520199.1 | Scaffold6496 | 1029                    | CC                              | GG              | 1947061498               |
| SNP_P4_189693_1044 | NW_004520199.1 | Scaffold6496 | 1044                    | TT                              | AA              | 1947061500               |
| SNP_P4_189694_1165 | NW_004520199.1 | Scaffold6496 | 1165                    | TT                              | AA              | 1947061502               |
| SNP_P4_189695_1193 | NW_004520199.1 | Scaffold6496 | 1193                    | CC                              | GG              | 1947061504               |
| SNP_P4_189696_672  | NW_004520200.1 | Scaffold6497 | 672                     | TT                              | CC              | 1947061506               |
| SNP_P4_189697_993  | NW_004520200.1 | Scaffold6497 | 993                     | CC                              | GG              | 1947061508               |
| SNP_P4_189698_1132 | NW_004520201.1 | Scaffold6498 | 1132                    | GG                              | AA              | 1947061510               |
| SNP_P4_189699_1185 | NW_004520201.1 | Scaffold6498 | 1185                    | CC                              | GG              | 1947061512               |
| SNP_P4_189700_1397 | NW_004520201.1 | Scaffold6498 | 1397                    | AA                              | GG              | 1947061514               |
| SNP_P4_189701_1449 | NW_004520201.1 | Scaffold6498 | 1449                    | GG                              | CC              | 1947061516               |
| SNP_P4_189702_93   | NW_004520204.1 | Scaffold6505 | 93                      | CC                              | GG              | 1947061518               |
| SNP_P4_189703_246  | NW_004520204.1 | Scaffold6505 | 246                     | AA                              | TT              | 1947061520               |
| SNP_P4_189704_396  | NW_004520204.1 | Scaffold6505 | 396                     | AA                              | TT              | 1947061522               |
| SNP_P4_189705_435  | NW_004520204.1 | Scaffold6505 | 435                     | CC                              | GG              | 1947061524               |
| SNP_P4_189706_982  | NW_004520207.1 | Scaffold6509 | 982                     | CC                              | TT              | 1947061526               |
| SNP_P4_189707_1082 | NW_004520207.1 | Scaffold6509 | 1082                    | GG                              | TT              | 1947061528               |
| SNP_P4_189708_282  | NW_004520210.1 | Scaffold6519 | 282                     | AA                              | GG              | 1947061530               |
| SNP_P4_189709_470  | NW_004520210.1 | Scaffold6519 | 470                     | TT                              | CC              | 1947061532               |
| SNP_P4_189710_1292 | NW_004520210.1 | Scaffold6519 | 1292                    | CC                              | TT              | 1947061534               |
| SNP_P4_189711_1295 | NW_004520210.1 | Scaffold6519 | 1295                    | AA                              | GG              | 1947061536               |
| SNP_P4_189712_1318 | NW_004520210.1 | Scaffold6519 | 1318                    | TT                              | AA              | 1947061538               |
| SNP_P4_189713_833  | NW_004520212.1 | Scaffold6521 | 833                     | TT                              | GG              | 1947061540               |
| SNP_P4_189714_1129 | NW_004520212.1 | Scaffold6521 | 1129                    | TT                              | GG              | 1947061542               |
| SNP_P4_189715_839  | NW_004520213.1 | Scaffold6522 | 839                     | AA                              | CC              | 1947061544               |
| SNP_P4_189716_305  | NW_004520214.1 | Scaffold6525 | 305                     | CC                              | GG              | 1947061546               |
| SNP_P4_189717_461  | NW_004520214.1 | Scaffold6525 | 461                     | TT                              | CC              | 1947061548               |
| SNP_P4_189718_945  | NW_004520214.1 | Scaffold6525 | 945                     | CC                              | AA              | 1947061550               |
| SNP_P4_189719_1150 | NW_004520214.1 | Scaffold6525 | 1150                    | AA                              | TT              | 1947061552               |
| SNP_P4_189720_458  | NW_004520215.1 | Scaffold6527 | 458                     | AA                              | GG              | 1947061554               |
| SNP_P4_189721_485  | NW_004520215.1 | Scaffold6527 | 485                     | GG                              | AA              | 1947061556               |
| SNP_P4_189722_641  | NW_004520215.1 | Scaffold6527 | 641                     | TT                              | CC              | 1947061558               |
| SNP_P4_189723_646  | NW_004520215.1 | Scaffold6527 | 646                     | TT                              | CC              | 1947061560               |
| SNP_P4_189724_670  | NW_004520215.1 | Scaffold6527 | 670                     | AA                              | GG              | 1947061562               |
| SNP_P4_189725_824  | NW_004520217.1 | Scaffold6529 | 824                     | TT                              | CC              | 1947061564               |
| SNP_P4_189726_524  | NW_004520221.1 | Scaffold6537 | 524                     | AA                              | CC              | 1947061566               |



| SNPs IDs           | Chromosome IDs | Chromosomes  | Physical positions (bp) | CDC Frontier (Reference genome) | (ILWC46 & LPNB) | NCBI SNPdb Accession IDs |
|--------------------|----------------|--------------|-------------------------|---------------------------------|-----------------|--------------------------|
| SNP_P4_189727_595  | NW_004520221.1 | Scaffold6537 | 595                     | AA                              | GG              | 1947061568               |
| SNP_P4_189728_1029 | NW_004520221.1 | Scaffold6537 | 1029                    | GG                              | TT              | 1947061570               |
| SNP_P4_189729_1121 | NW_004520221.1 | Scaffold6537 | 1121                    | GG                              | AA              | 1947061572               |
| SNP_P4_189730_1264 | NW_004520221.1 | Scaffold6537 | 1264                    | GG                              | CC              | 1947061575               |
| SNP_P4_189731_1285 | NW_004520221.1 | Scaffold6537 | 1285                    | TT                              | CC              | 1947061576               |
| SNP_P4_189732_1319 | NW_004520221.1 | Scaffold6537 | 1319                    | TT                              | GG              | 1947061578               |
| SNP_P4_189733_1324 | NW_004520221.1 | Scaffold6537 | 1324                    | GG                              | TT              | 1947061580               |
| SNP_P4_189734_1388 | NW_004520221.1 | Scaffold6537 | 1388                    | TT                              | GG              | 1947061582               |
| SNP_P4_189736_1608 | NW_004520221.1 | Scaffold6537 | 1608                    | CC                              | AA              | 1947061584               |
| SNP_P4_189737_1879 | NW_004520221.1 | Scaffold6537 | 1879                    | GG                              | AA              | 1947061586               |
| SNP_P4_189738_2087 | NW_004520221.1 | Scaffold6537 | 2087                    | AA                              | GG              | 1947061588               |
| SNP_P4_189739_2161 | NW_004520221.1 | Scaffold6537 | 2161                    | TT                              | GG              | 1947061590               |
| SNP_P4_189740_2221 | NW_004520221.1 | Scaffold6537 | 2221                    | TT                              | CC              | 1947061592               |
| SNP_P4_189741_2250 | NW_004520221.1 | Scaffold6537 | 2250                    | TT                              | GG              | 1947061594               |
| SNP_P4_189742_2346 | NW_004520221.1 | Scaffold6537 | 2346                    | CC                              | TT              | 1947061596               |
| SNP_P4_189743_2355 | NW_004520221.1 | Scaffold6537 | 2355                    | CC                              | GG              | 1947061598               |
| SNP_P4_189744_2501 | NW_004520221.1 | Scaffold6537 | 2501                    | CC                              | AA              | 1947061600               |
| SNP_P4_189745_2538 | NW_004520221.1 | Scaffold6537 | 2538                    | CC                              | GG              | 1947061602               |
| SNP_P4_189746_2676 | NW_004520221.1 | Scaffold6537 | 2676                    | GG                              | AA              | 1947061604               |
| SNP_P4_189747_2686 | NW_004520221.1 | Scaffold6537 | 2686                    | CC                              | TT              | 1947061606               |
| SNP_P4_189748_2854 | NW_004520221.1 | Scaffold6537 | 2854                    | AA                              | GG              | 1947061609               |
| SNP_P4_189749_2875 | NW_004520221.1 | Scaffold6537 | 2875                    | TT                              | CC              | 1947061611               |
| SNP_P4_189750_2921 | NW_004520221.1 | Scaffold6537 | 2921                    | CC                              | GG              | 1947061613               |
| SNP_P4_189751_765  | NW_004520224.1 | Scaffold6540 | 765                     | TT                              | CC              | 1947061615               |
| SNP_P4_189752_817  | NW_004520224.1 | Scaffold6540 | 817                     | GG                              | CC              | 1947061617               |
| SNP_P4_189753_844  | NW_004520224.1 | Scaffold6540 | 844                     | AA                              | GG              | 1947061619               |
| SNP_P4_189754_874  | NW_004520224.1 | Scaffold6540 | 874                     | AA                              | GG              | 1947061621               |
| SNP_P4_189755_935  | NW_004520224.1 | Scaffold6540 | 935                     | AA                              | GG              | 1947061623               |
| SNP_P4_189756_1121 | NW_004520224.1 | Scaffold6540 | 1121                    | TT                              | AA              | 1947061625               |
| SNP_P4_189757_1216 | NW_004520224.1 | Scaffold6540 | 1216                    | AA                              | GG              | 1947061627               |
| SNP_P4_189758_1248 | NW_004520224.1 | Scaffold6540 | 1248                    | TT                              | CC              | 1947061629               |
| SNP_P4_189760_691  | NW_004520226.1 | Scaffold6543 | 691                     | TT                              | GG              | 1947061631               |
| SNP_P4_189761_1892 | NW_004520228.1 | Scaffold6546 | 1892                    | CC                              | GG              | 1947061633               |
| SNP_P4_189762_2003 | NW_004520228.1 | Scaffold6546 | 2003                    | CC                              | TT              | 1947061635               |
| SNP_P4_189763_2015 | NW_004520228.1 | Scaffold6546 | 2015                    | GG                              | TT              | 1947061637               |
| SNP_P4_189764_2251 | NW_004520228.1 | Scaffold6546 | 2251                    | CC                              | TT              | 1947061639               |
| SNP_P4_189765_2316 | NW_004520228.1 | Scaffold6546 | 2316                    | TT                              | CC              | 1947061641               |
| SNP_P4_189766_2326 | NW_004520228.1 | Scaffold6546 | 2326                    | AA                              | CC              | 1947061643               |
| SNP_P4_189767_2426 | NW_004520228.1 | Scaffold6546 | 2426                    | TT                              | AA              | 1947061645               |
| SNP_P4_189768_2460 | NW_004520228.1 | Scaffold6546 | 2460                    | CC                              | TT              | 1947061647               |
| SNP_P4_189769_2530 | NW_004520228.1 | Scaffold6546 | 2530                    | CC                              | AA              | 1947061649               |
| SNP_P4_189770_2542 | NW_004520228.1 | Scaffold6546 | 2542                    | CC                              | TT              | 1947061651               |

| SNPs IDs           | Chromosome IDs | Chromosomes  | Physical positions (bp) | CDC Frontier (Reference genome) | (ILWC46 & LPNB) | NCBI SNPdb Accession IDs |
|--------------------|----------------|--------------|-------------------------|---------------------------------|-----------------|--------------------------|
| SNP_P4_189771_2669 | NW_004520228.1 | Scaffold6546 | 2669                    | TT                              | CC              | 1947061653               |
| SNP_P4_189772_2856 | NW_004520228.1 | Scaffold6546 | 2856                    | AA                              | GG              | 1947061655               |
| SNP_P4_189773_3247 | NW_004520228.1 | Scaffold6546 | 3247                    | CC                              | TT              | 1947061657               |
| SNP_P4_189774_7792 | NW_004520228.1 | Scaffold6546 | 7792                    | AA                              | GG              | 1947061659               |
| SNP_P4_189775_7857 | NW_004520228.1 | Scaffold6546 | 7857                    | CC                              | AA              | 1947061661               |
| SNP_P4_189776_7866 | NW_004520228.1 | Scaffold6546 | 7866                    | TT                              | GG              | 1947061663               |
| SNP_P4_189777_7922 | NW_004520228.1 | Scaffold6546 | 7922                    | GG                              | AA              | 1947061665               |
| SNP_P4_189778_8006 | NW_004520228.1 | Scaffold6546 | 8006                    | GG                              | AA              | 1947061667               |
| SNP_P4_189779_8081 | NW_004520228.1 | Scaffold6546 | 8081                    | AA                              | CC              | 1947061669               |
| SNP_P4_189780_8092 | NW_004520228.1 | Scaffold6546 | 8092                    | TT                              | CC              | 1947061671               |
| SNP_P4_189781_8145 | NW_004520228.1 | Scaffold6546 | 8145                    | GG                              | TT              | 1947061673               |
| SNP_P4_189782_1141 | NW_004520231.1 | Scaffold6554 | 1141                    | GG                              | AA              | 1947061675               |
| SNP_P4_189783_308  | NW_004520236.1 | Scaffold6561 | 308                     | CC                              | GG              | 1947061677               |
| SNP_P4_189784_473  | NW_004520236.1 | Scaffold6561 | 473                     | AA                              | TT              | 1947061679               |
| SNP_P4_189785_560  | NW_004520236.1 | Scaffold6561 | 560                     | AA                              | GG              | 1947061681               |
| SNP_P4_189786_602  | NW_004520236.1 | Scaffold6561 | 602                     | AA                              | GG              | 1947061683               |
| SNP_P4_189787_810  | NW_004520236.1 | Scaffold6561 | 810                     | TT                              | GG              | 1947061685               |
| SNP_P4_189788_843  | NW_004520236.1 | Scaffold6561 | 843                     | AA                              | TT              | 1947061687               |
| SNP_P4_189789_846  | NW_004520236.1 | Scaffold6561 | 846                     | AA                              | GG              | 1947061689               |
| SNP_P4_189790_860  | NW_004520236.1 | Scaffold6561 | 860                     | TT                              | GG              | 1947061691               |
| SNP_P4_189791_871  | NW_004520236.1 | Scaffold6561 | 871                     | GG                              | AA              | 1947061693               |
| SNP_P4_189792_879  | NW_004520236.1 | Scaffold6561 | 879                     | TT                              | CC              | 1947061695               |
| SNP_P4_189793_925  | NW_004520236.1 | Scaffold6561 | 925                     | TT                              | AA              | 1947061697               |
| SNP_P4_189794_927  | NW_004520236.1 | Scaffold6561 | 927                     | AA                              | TT              | 1947061699               |
| SNP_P4_189795_950  | NW_004520236.1 | Scaffold6561 | 950                     | AA                              | GG              | 1947061701               |
| SNP_P4_189796_983  | NW_004520236.1 | Scaffold6561 | 983                     | CC                              | TT              | 1947061703               |
| SNP_P4_189797_1020 | NW_004520236.1 | Scaffold6561 | 1020                    | TT                              | GG              | 1947061713               |
| SNP_P4_189798_1128 | NW_004520236.1 | Scaffold6561 | 1128                    | TT                              | GG              | 1947061715               |
| SNP_P4_189799_1213 | NW_004520236.1 | Scaffold6561 | 1213                    | CC                              | TT              | 1947061717               |
| SNP_P4_189800_1307 | NW_004520236.1 | Scaffold6561 | 1307                    | AA                              | GG              | 1947061719               |
| SNP_P4_189801_1313 | NW_004520236.1 | Scaffold6561 | 1313                    | TT                              | CC              | 1947061721               |
| SNP_P4_189802_1316 | NW_004520236.1 | Scaffold6561 | 1316                    | GG                              | AA              | 1947061723               |
| SNP_P4_189803_1375 | NW_004520236.1 | Scaffold6561 | 1375                    | TT                              | AA              | 1947061725               |
| SNP_P4_189804_1515 | NW_004520236.1 | Scaffold6561 | 1515                    | TT                              | GG              | 1947061726               |
| SNP_P4_189805_1581 | NW_004520236.1 | Scaffold6561 | 1581                    | GG                              | AA              | 1947061728               |
| SNP_P4_189806_1638 | NW_004520236.1 | Scaffold6561 | 1638                    | CC                              | GG              | 1947061730               |
| SNP_P4_189807_166  | NW_004520240.1 | Scaffold6566 | 166                     | AA                              | TT              | 1947061732               |
| SNP_P4_189808_220  | NW_004520240.1 | Scaffold6566 | 220                     | GG                              | AA              | 1947061734               |
| SNP_P4_189809_221  | NW_004520240.1 | Scaffold6566 | 221                     | GG                              | TT              | 1947061736               |
| SNP_P4_189810_387  | NW_004520240.1 | Scaffold6566 | 387                     | GG                              | AA              | 1947061738               |
| SNP_P4_189811_580  | NW_004520240.1 | Scaffold6566 | 580                     | CC                              | TT              | 1947061740               |
| SNP_P4_189812_596  | NW_004520240.1 | Scaffold6566 | 596                     | TT                              | CC              | 1947061742               |

| SNPs IDs           | Chromosome IDs | Chromosomes  | Physical positions (bp) | CDC Frontier (Reference genome) | (ILWC46 & LPNB) | NCBI SNPdb Accession IDs |
|--------------------|----------------|--------------|-------------------------|---------------------------------|-----------------|--------------------------|
| SNP_P4_189813_611  | NW_004520240.1 | Scaffold6566 | 611                     | TT                              | CC              | 1947061744               |
| SNP_P4_189814_665  | NW_004520240.1 | Scaffold6566 | 665                     | AA                              | GG              | 1947061746               |
| SNP_P4_189815_388  | NW_004520241.1 | Scaffold6568 | 388                     | GG                              | AA              | 1947061748               |
| SNP_P4_189818_911  | NW_004520241.1 | Scaffold6568 | 911                     | GG                              | CC              | 1947061750               |
| SNP_P4_189819_1130 | NW_004520241.1 | Scaffold6568 | 1130                    | TT                              | CC              | 1947061752               |
| SNP_P4_189820_1649 | NW_004520241.1 | Scaffold6568 | 1649                    | TT                              | CC              | 1947061753               |
| SNP_P4_189821_1692 | NW_004520241.1 | Scaffold6568 | 1692                    | GG                              | AA              | 1947061755               |
| SNP_P4_189822_1782 | NW_004520241.1 | Scaffold6568 | 1782                    | CC                              | AA              | 1947061757               |
| SNP_P4_189823_1824 | NW_004520241.1 | Scaffold6568 | 1824                    | CC                              | TT              | 1947061759               |
| SNP_P4_189824_2033 | NW_004520241.1 | Scaffold6568 | 2033                    | GG                              | AA              | 1947061761               |
| SNP_P4_189825_2291 | NW_004520241.1 | Scaffold6568 | 2291                    | CC                              | GG              | 1947061763               |
| SNP_P4_189826_2500 | NW_004520241.1 | Scaffold6568 | 2500                    | CC                              | TT              | 1947061765               |
| SNP_P4_189827_1023 | NW_004520242.1 | Scaffold6569 | 1023                    | AA                              | CC              | 1947061767               |
| SNP_P4_189828_1224 | NW_004520242.1 | Scaffold6569 | 1224                    | AA                              | GG              | 1947061769               |
| SNP_P4_189829_1380 | NW_004520242.1 | Scaffold6569 | 1380                    | CC                              | TT              | 1947061771               |
| SNP_P4_189830_1540 | NW_004520242.1 | Scaffold6569 | 1540                    | TT                              | CC              | 1947061773               |
| SNP_P4_189831_860  | NW_004520245.1 | Scaffold6572 | 860                     | AA                              | CC              | 1947061775               |
| SNP_P4_189832_944  | NW_004520245.1 | Scaffold6572 | 944                     | AA                              | GG              | 1947061777               |
| SNP_P4_189833_1036 | NW_004520245.1 | Scaffold6572 | 1036                    | GG                              | AA              | 1947061779               |
| SNP_P4_189834_1181 | NW_004520245.1 | Scaffold6572 | 1181                    | GG                              | AA              | 1947061781               |
| SNP_P4_189835_1243 | NW_004520245.1 | Scaffold6572 | 1243                    | TT                              | CC              | 1947061782               |
| SNP_P4_189836_1398 | NW_004520245.1 | Scaffold6572 | 1398                    | GG                              | AA              | 1947061784               |
| SNP_P4_189837_1432 | NW_004520245.1 | Scaffold6572 | 1432                    | AA                              | CC              | 1947061786               |
| SNP_P4_189838_1481 | NW_004520245.1 | Scaffold6572 | 1481                    | CC                              | AA              | 1947061788               |
| SNP_P4_189839_1482 | NW_004520245.1 | Scaffold6572 | 1482                    | AA                              | GG              | 1947061790               |
| SNP_P4_189840_1582 | NW_004520245.1 | Scaffold6572 | 1582                    | GG                              | AA              | 1947061792               |
| SNP_P4_189841_1583 | NW_004520245.1 | Scaffold6572 | 1583                    | GG                              | AA              | 1947061794               |
| SNP_P4_189842_1633 | NW_004520245.1 | Scaffold6572 | 1633                    | GG                              | AA              | 1947061796               |
| SNP_P4_189843_1641 | NW_004520245.1 | Scaffold6572 | 1641                    | TT                              | CC              | 1947061798               |
| SNP_P4_189844_1795 | NW_004520245.1 | Scaffold6572 | 1795                    | CC                              | TT              | 1947061800               |
| SNP_P4_189845_1807 | NW_004520245.1 | Scaffold6572 | 1807                    | TT                              | CC              | 1947061801               |
| SNP_P4_189846_1867 | NW_004520245.1 | Scaffold6572 | 1867                    | AA                              | GG              | 1947061803               |
| SNP_P4_189847_1953 | NW_004520245.1 | Scaffold6572 | 1953                    | GG                              | AA              | 1947061805               |
| SNP_P4_189848_2035 | NW_004520245.1 | Scaffold6572 | 2035                    | CC                              | TT              | 1947061807               |
| SNP_P4_189849_2068 | NW_004520245.1 | Scaffold6572 | 2068                    | AA                              | GG              | 1947061809               |
| SNP_P4_189850_2108 | NW_004520245.1 | Scaffold6572 | 2108                    | CC                              | TT              | 1947061811               |
| SNP_P4_189851_2211 | NW_004520245.1 | Scaffold6572 | 2211                    | CC                              | TT              | 1947061813               |
| SNP_P4_189852_2282 | NW_004520245.1 | Scaffold6572 | 2282                    | TT                              | CC              | 1947061815               |
| SNP_P4_189853_2342 | NW_004520245.1 | Scaffold6572 | 2342                    | CC                              | TT              | 1947061817               |
| SNP_P4_189854_2378 | NW_004520245.1 | Scaffold6572 | 2378                    | GG                              | AA              | 1947061819               |
| SNP_P4_189855_2905 | NW_004520245.1 | Scaffold6572 | 2905                    | CC                              | AA              | 1947061821               |
| SNP_P4_189856_3054 | NW_004520245.1 | Scaffold6572 | 3054                    | TT                              | AA              | 1947061823               |

| SNPs IDs           | Chromosome IDs | Chromosomes  | Physical positions (bp) | CDC Frontier (Reference genome) | (ILWC46 & LPNB) | NCBI SNPdb Accession IDs |
|--------------------|----------------|--------------|-------------------------|---------------------------------|-----------------|--------------------------|
| SNP_P4_189857_3100 | NW_004520245.1 | Scaffold6572 | 3100                    | TT                              | CC              | 1947061825               |
| SNP_P4_189858_3646 | NW_004520245.1 | Scaffold6572 | 3646                    | TT                              | CC              | 1947061827               |
| SNP_P4_189859_3729 | NW_004520245.1 | Scaffold6572 | 3729                    | GG                              | AA              | 1947061829               |
| SNP_P4_189860_3760 | NW_004520245.1 | Scaffold6572 | 3760                    | AA                              | TT              | 1947061831               |
| SNP_P4_189861_3772 | NW_004520245.1 | Scaffold6572 | 3772                    | GG                              | AA              | 1947061833               |
| SNP_P4_189862_3988 | NW_004520245.1 | Scaffold6572 | 3988                    | GG                              | TT              | 1947061835               |
| SNP_P4_189863_4104 | NW_004520245.1 | Scaffold6572 | 4104                    | GG                              | TT              | 1947061837               |
| SNP_P4_189864_4361 | NW_004520245.1 | Scaffold6572 | 4361                    | GG                              | AA              | 1947061838               |
| SNP_P4_189865_4387 | NW_004520245.1 | Scaffold6572 | 4387                    | GG                              | AA              | 1947061840               |
| SNP_P4_189866_4396 | NW_004520245.1 | Scaffold6572 | 4396                    | AA                              | CC              | 1947061842               |
| SNP_P4_189867_4403 | NW_004520245.1 | Scaffold6572 | 4403                    | TT                              | CC              | 1947061844               |
| SNP_P4_189868_5045 | NW_004520245.1 | Scaffold6572 | 5045                    | TT                              | CC              | 1947061846               |
| SNP_P4_189869_5119 | NW_004520245.1 | Scaffold6572 | 5119                    | CC                              | TT              | 1947061848               |
| SNP_P4_189870_5184 | NW_004520245.1 | Scaffold6572 | 5184                    | CC                              | GG              | 1947061850               |
| SNP_P4_189871_5337 | NW_004520245.1 | Scaffold6572 | 5337                    | CC                              | TT              | 1947061852               |
| SNP_P4_189872_5359 | NW_004520245.1 | Scaffold6572 | 5359                    | GG                              | AA              | 1947061854               |
| SNP_P4_189873_5559 | NW_004520245.1 | Scaffold6572 | 5559                    | AA                              | GG              | 1947061856               |
| SNP_P4_189874_5571 | NW_004520245.1 | Scaffold6572 | 5571                    | AA                              | GG              | 1947061858               |
| SNP_P4_189875_5626 | NW_004520245.1 | Scaffold6572 | 5626                    | GG                              | AA              | 1947061860               |
| SNP_P4_189876_797  | NW_004520250.1 | Scaffold6579 | 797                     | AA                              | GG              | 1947061862               |
| SNP_P4_189877_798  | NW_004520250.1 | Scaffold6579 | 798                     | AA                              | GG              | 1947061864               |
| SNP_P4_189878_964  | NW_004520250.1 | Scaffold6579 | 964                     | AA                              | GG              | 1947061866               |
| SNP_P4_189879_619  | NW_004520252.1 | Scaffold6581 | 619                     | TT                              | AA              | 1947061868               |
| SNP_P4_189880_168  | NW_004520253.1 | Scaffold6582 | 168                     | GG                              | AA              | 1947061870               |
| SNP_P4_189881_182  | NW_004520253.1 | Scaffold6582 | 182                     | TT                              | AA              | 1947061872               |
| SNP_P4_189882_224  | NW_004520253.1 | Scaffold6582 | 224                     | TT                              | CC              | 1947061874               |
| SNP_P4_189883_230  | NW_004520253.1 | Scaffold6582 | 230                     | AA                              | GG              | 1947061876               |
| SNP_P4_189884_250  | NW_004520253.1 | Scaffold6582 | 250                     | AA                              | TT              | 1947061877               |
| SNP_P4_189885_280  | NW_004520253.1 | Scaffold6582 | 280                     | TT                              | GG              | 1947061879               |
| SNP_P4_189886_293  | NW_004520253.1 | Scaffold6582 | 293                     | AA                              | TT              | 1947061881               |
| SNP_P4_189887_423  | NW_004520253.1 | Scaffold6582 | 423                     | AA                              | GG              | 1947061883               |
| SNP_P4_189888_457  | NW_004520253.1 | Scaffold6582 | 457                     | CC                              | TT              | 1947061885               |
| SNP_P4_189889_728  | NW_004520253.1 | Scaffold6582 | 728                     | AA                              | GG              | 1947061887               |
| SNP_P4_189890_752  | NW_004520258.1 | Scaffold6590 | 752                     | TT                              | GG              | 1947061889               |
| SNP_P4_189891_818  | NW_004520258.1 | Scaffold6590 | 818                     | TT                              | CC              | 1947061891               |
| SNP_P4_189892_830  | NW_004520258.1 | Scaffold6590 | 830                     | TT                              | GG              | 1947061893               |
| SNP_P4_189893_914  | NW_004520258.1 | Scaffold6590 | 914                     | CC                              | TT              | 1947061895               |
| SNP_P4_189894_915  | NW_004520258.1 | Scaffold6590 | 915                     | CC                              | TT              | 1947061897               |
| SNP_P4_189895_926  | NW_004520258.1 | Scaffold6590 | 926                     | AA                              | CC              | 1947061899               |
| SNP_P4_189896_1024 | NW_004520258.1 | Scaffold6590 | 1024                    | AA                              | TT              | 1947061900               |
| SNP_P4_189897_1342 | NW_004520258.1 | Scaffold6590 | 1342                    | TT                              | AA              | 1947061902               |
| SNP_P4_189898_1665 | NW_004520258.1 | Scaffold6590 | 1665                    | AA                              | TT              | 1947061904               |

| SNPs IDs            | Chromosome IDs | Chromosomes  | Physical positions (bp) | CDC Frontier (Reference genome) | (ILWC46 & LPNB) | NCBI SNPdb Accession IDs |
|---------------------|----------------|--------------|-------------------------|---------------------------------|-----------------|--------------------------|
| SNP_P4_189899_1068  | NW_004520260.1 | Scaffold6593 | 1068                    | CC                              | GG              | 1947061906               |
| SNP_P4_189900_1102  | NW_004520260.1 | Scaffold6593 | 1102                    | AA                              | CC              | 1947061908               |
| SNP_P4_189901_742   | NW_004520261.1 | Scaffold6594 | 742                     | GG                              | TT              | 1947061910               |
| SNP_P4_189902_760   | NW_004520261.1 | Scaffold6594 | 760                     | GG                              | AA              | 1947061912               |
| SNP_P4_189903_761   | NW_004520261.1 | Scaffold6594 | 761                     | AA                              | CC              | 1947061914               |
| SNP_P4_189904_763   | NW_004520261.1 | Scaffold6594 | 763                     | AA                              | GG              | 1947061916               |
| SNP_P4_189905_964   | NW_004520261.1 | Scaffold6594 | 964                     | CC                              | TT              | 1947061918               |
| SNP_P4_189906_1045  | NW_004520261.1 | Scaffold6594 | 1045                    | GG                              | TT              | 1947061920               |
| SNP_P4_189907_1108  | NW_004520261.1 | Scaffold6594 | 1108                    | GG                              | AA              | 1947061922               |
| SNP_P4_189908_1134  | NW_004520261.1 | Scaffold6594 | 1134                    | TT                              | AA              | 1947061924               |
| SNP_P4_189909_185   | NW_004520262.1 | Scaffold6597 | 185                     | AA                              | TT              | 1947061926               |
| SNP_P4_189910_253   | NW_004520262.1 | Scaffold6597 | 253                     | AA                              | GG              | 1947061928               |
| SNP_P4_189911_413   | NW_004520262.1 | Scaffold6597 | 413                     | GG                              | TT              | 1947061930               |
| SNP_P4_189912_481   | NW_004520262.1 | Scaffold6597 | 481                     | GG                              | CC              | 1947061932               |
| SNP_P4_189913_528   | NW_004520262.1 | Scaffold6597 | 528                     | GG                              | AA              | 1947061933               |
| SNP_P4_189914_592   | NW_004520262.1 | Scaffold6597 | 592                     | TT                              | CC              | 1947061935               |
| SNP_P4_189915_487   | NW_004520266.1 | Scaffold6603 | 487                     | CC                              | GG              | 1947061937               |
| SNP_P4_189916_1110  | NW_004520267.1 | Scaffold6606 | 1110                    | CC                              | TT              | 1947061939               |
| SNP_P4_189917_1467  | NW_004520267.1 | Scaffold6606 | 1467                    | GG                              | AA              | 1947061941               |
| SNP_P4_189918_14936 | NW_004520269.1 | Scaffold6610 | 14936                   | TT                              | AA              | 1947061943               |
| SNP_P4_189919_16504 | NW_004520269.1 | Scaffold6610 | 16504                   | GG                              | TT              | 1947061945               |
| SNP_P4_189920_16533 | NW_004520269.1 | Scaffold6610 | 16533                   | AA                              | TT              | 1947061947               |
| SNP_P4_189922_136   | NW_004520272.1 | Scaffold6613 | 136                     | CC                              | GG              | 1947061949               |
| SNP_P4_189923_148   | NW_004520272.1 | Scaffold6613 | 148                     | AA                              | GG              | 1947061951               |
| SNP_P4_189924_398   | NW_004520272.1 | Scaffold6613 | 398                     | CC                              | TT              | 1947061953               |
| SNP_P4_189925_421   | NW_004520272.1 | Scaffold6613 | 421                     | TT                              | AA              | 1947061955               |
| SNP_P4_189926_712   | NW_004520272.1 | Scaffold6613 | 712                     | AA                              | CC              | 1947061957               |
| SNP_P4_189927_713   | NW_004520272.1 | Scaffold6613 | 713                     | AA                              | TT              | 1947061959               |
| SNP_P4_189928_21297 | NW_004520275.1 | Scaffold6617 | 21297                   | AA                              | GG              | 1947061961               |
| SNP_P4_189930_415   | NW_004520281.1 | Scaffold6623 | 415                     | GG                              | CC              | 1947061963               |
| SNP_P4_189931_554   | NW_004520281.1 | Scaffold6623 | 554                     | TT                              | GG              | 1947061965               |
| SNP_P4_189932_633   | NW_004520281.1 | Scaffold6623 | 633                     | GG                              | CC              | 1947061967               |
| SNP_P4_189933_652   | NW_004520281.1 | Scaffold6623 | 652                     | AA                              | TT              | 1947061969               |
| SNP_P4_189934_674   | NW_004520281.1 | Scaffold6623 | 674                     | CC                              | AA              | 1947061971               |
| SNP_P4_189935_695   | NW_004520284.1 | Scaffold6627 | 695                     | AA                              | GG              | 1947061973               |
| SNP_P4_189936_473   | NW_004520285.1 | Scaffold6628 | 473                     | CC                              | GG              | 1947061975               |
| SNP_P4_189937_3529  | NW_004520288.1 | Scaffold6637 | 3529                    | CC                              | GG              | 1947061977               |
| SNP_P4_189938_3609  | NW_004520288.1 | Scaffold6637 | 3609                    | CC                              | TT              | 1947061979               |
| SNP_P4_189939_250   | NW_004520291.1 | Scaffold6646 | 250                     | CC                              | GG              | 1947061981               |
| SNP_P4_189940_429   | NW_004520291.1 | Scaffold6646 | 429                     | GG                              | TT              | 1947061983               |
| SNP_P4_189941_463   | NW_004520291.1 | Scaffold6646 | 463                     | TT                              | AA              | 1947061985               |
| SNP_P4_189942_479   | NW_004520291.1 | Scaffold6646 | 479                     | GG                              | AA              | 1947061987               |

| SNPs IDs            | Chromosome IDs | Chromosomes  | Physical positions (bp) | CDC Frontier (Reference genome) | (ILWC46 & LPNB) | NCBI SNPdb Accession IDs |
|---------------------|----------------|--------------|-------------------------|---------------------------------|-----------------|--------------------------|
| SNP_P4_189943_508   | NW_004520291.1 | Scaffold6646 | 508                     | TT                              | AA              | 1947061989               |
| SNP_P4_189944_809   | NW_004520291.1 | Scaffold6646 | 809                     | TT                              | AA              | 1947061991               |
| SNP_P4_189945_1097  | NW_004520291.1 | Scaffold6646 | 1097                    | CC                              | TT              | 1947061993               |
| SNP_P4_189946_1113  | NW_004520291.1 | Scaffold6646 | 1113                    | AA                              | GG              | 1947061995               |
| SNP_P4_189947_1488  | NW_004520291.1 | Scaffold6646 | 1488                    | TT                              | CC              | 1947061997               |
| SNP_P4_189948_1490  | NW_004520291.1 | Scaffold6646 | 1490                    | GG                              | CC              | 1947061999               |
| SNP_P4_189949_1498  | NW_004520291.1 | Scaffold6646 | 1498                    | CC                              | TT              | 1947062001               |
| SNP_P4_189950_1644  | NW_004520291.1 | Scaffold6646 | 1644                    | CC                              | TT              | 1947062003               |
| SNP_P4_189951_1656  | NW_004520291.1 | Scaffold6646 | 1656                    | CC                              | TT              | 1947062005               |
| SNP_P4_189952_1881  | NW_004520291.1 | Scaffold6646 | 1881                    | AA                              | TT              | 1947062007               |
| SNP_P4_189953_1903  | NW_004520291.1 | Scaffold6646 | 1903                    | GG                              | CC              | 1947062009               |
| SNP_P4_189954_2019  | NW_004520291.1 | Scaffold6646 | 2019                    | AA                              | TT              | 1947062011               |
| SNP_P4_189955_2062  | NW_004520291.1 | Scaffold6646 | 2062                    | TT                              | GG              | 1947062013               |
| SNP_P4_189957_956   | NW_004520293.1 | Scaffold6653 | 956                     | CC                              | TT              | 1947062015               |
| SNP_P4_189958_1507  | NW_004520293.1 | Scaffold6653 | 1507                    | AA                              | CC              | 1947062017               |
| SNP_P4_189959_1542  | NW_004520293.1 | Scaffold6653 | 1542                    | TT                              | CC              | 1947062019               |
| SNP_P4_189960_291   | NW_004520295.1 | Scaffold6657 | 291                     | AA                              | GG              | 1947062021               |
| SNP_P4_189961_3033  | NW_004520300.1 | Scaffold6663 | 3033                    | GG                              | CC              | 1947062023               |
| SNP_P4_189962_787   | NW_004520304.1 | Scaffold6669 | 787                     | TT                              | CC              | 1947062025               |
| SNP_P4_189963_64    | NW_004520305.1 | Scaffold6671 | 64                      | TT                              | AA              | 1947062027               |
| SNP_P4_189964_142   | NW_004520305.1 | Scaffold6671 | 142                     | CC                              | AA              | 1947062029               |
| SNP_P4_189965_175   | NW_004520305.1 | Scaffold6671 | 175                     | AA                              | GG              | 1947062031               |
| SNP_P4_189966_409   | NW_004520305.1 | Scaffold6671 | 409                     | GG                              | AA              | 1947062033               |
| SNP_P4_189967_1135  | NW_004520305.1 | Scaffold6671 | 1135                    | CC                              | TT              | 1947062035               |
| SNP_P4_189968_739   | NW_004520306.1 | Scaffold6672 | 739                     | TT                              | AA              | 1947062037               |
| SNP_P4_189969_835   | NW_004520306.1 | Scaffold6672 | 835                     | GG                              | AA              | 1947062039               |
| SNP_P4_189970_1068  | NW_004520306.1 | Scaffold6672 | 1068                    | AA                              | GG              | 1947062041               |
| SNP_P4_189973_226   | NW_004520307.1 | Scaffold6673 | 226                     | TT                              | CC              | 1947062043               |
| SNP_P4_189974_329   | NW_004520307.1 | Scaffold6673 | 329                     | TT                              | AA              | 1947062045               |
| SNP_P4_189975_331   | NW_004520307.1 | Scaffold6673 | 331                     | TT                              | AA              | 1947062047               |
| SNP_P4_189976_445   | NW_004520307.1 | Scaffold6673 | 445                     | TT                              | CC              | 1947062049               |
| SNP_P4_189977_494   | NW_004520307.1 | Scaffold6673 | 494                     | AA                              | CC              | 1947062051               |
| SNP_P4_189978_564   | NW_004520307.1 | Scaffold6673 | 564                     | CC                              | AA              | 1947062053               |
| SNP_P4_189979_650   | NW_004520307.1 | Scaffold6673 | 650                     | CC                              | TT              | 1947062055               |
| SNP_P4_189980_663   | NW_004520307.1 | Scaffold6673 | 663                     | GG                              | AA              | 1947062057               |
| SNP_P4_189981_823   | NW_004520307.1 | Scaffold6673 | 823                     | CC                              | TT              | 1947062059               |
| SNP_P4_189982_934   | NW_004520307.1 | Scaffold6673 | 934                     | AA                              | GG              | 1947062061               |
| SNP_P4_189983_1107  | NW_004520307.1 | Scaffold6673 | 1107                    | AA                              | GG              | 1947062063               |
| SNP_P4_189984_562   | NW_004520317.1 | Scaffold6687 | 562                     | GG                              | TT              | 1947062065               |
| SNP_P4_189985_4081  | NW_004520317.1 | Scaffold6687 | 4081                    | AA                              | GG              | 1947062067               |
| SNP_P4_189986_11796 | NW_004520317.1 | Scaffold6687 | 11796                   | AA                              | GG              | 1947062069               |
| SNP_P4_189987_11813 | NW_004520317.1 | Scaffold6687 | 11813                   | TT                              | CC              | 1947062071               |

| SNPs IDs            | Chromosome IDs | Chromosomes  | Physical positions (bp) | CDC Frontier (Reference genome) | (ILWC46 & LPNB) | NCBI SNPdb Accession IDs |
|---------------------|----------------|--------------|-------------------------|---------------------------------|-----------------|--------------------------|
| SNP_P4_189988_11826 | NW_004520317.1 | Scaffold6687 | 11826                   | GG                              | TT              | 1947062073               |
| SNP_P4_189989_12892 | NW_004520317.1 | Scaffold6687 | 12892                   | TT                              | GG              | 1947062075               |
| SNP_P4_189990_13947 | NW_004520317.1 | Scaffold6687 | 13947                   | GG                              | TT              | 1947062077               |
| SNP_P4_189991_14297 | NW_004520317.1 | Scaffold6687 | 14297                   | TT                              | CC              | 1947062079               |
| SNP_P4_189992_14639 | NW_004520317.1 | Scaffold6687 | 14639                   | AA                              | GG              | 1947062081               |
| SNP_P4_189993_826   | NW_004520321.1 | Scaffold6694 | 826                     | TT                              | GG              | 1947062083               |
| SNP_P4_189994_851   | NW_004520321.1 | Scaffold6694 | 851                     | CC                              | AA              | 1947062085               |
| SNP_P4_189995_1584  | NW_004520321.1 | Scaffold6694 | 1584                    | GG                              | AA              | 1947062087               |
| SNP_P4_189996_1626  | NW_004520321.1 | Scaffold6694 | 1626                    | CC                              | AA              | 1947062089               |
| SNP_P4_189998_2027  | NW_004520321.1 | Scaffold6694 | 2027                    | GG                              | TT              | 1947062091               |
| SNP_P4_189999_2072  | NW_004520321.1 | Scaffold6694 | 2072                    | AA                              | TT              | 1947062093               |
| SNP_P4_190001_2280  | NW_004520321.1 | Scaffold6694 | 2280                    | GG                              | AA              | 1947062095               |
| SNP_P4_190002_2341  | NW_004520321.1 | Scaffold6694 | 2341                    | TT                              | CC              | 1947062097               |
| SNP_P4_190003_64    | NW_004520322.1 | Scaffold6695 | 64                      | CC                              | GG              | 1947062099               |
| SNP_P4_190004_669   | NW_004520322.1 | Scaffold6695 | 669                     | AA                              | GG              | 1947062101               |
| SNP_P4_190006_710   | NW_004520322.1 | Scaffold6695 | 710                     | TT                              | CC              | 1947062103               |
| SNP_P4_190008_782   | NW_004520322.1 | Scaffold6695 | 782                     | CC                              | TT              | 1947062105               |
| SNP_P4_190009_879   | NW_004520322.1 | Scaffold6695 | 879                     | TT                              | GG              | 1947062107               |
| SNP_P4_190010_1143  | NW_004520322.1 | Scaffold6695 | 1143                    | TT                              | GG              | 1947062109               |
| SNP_P4_190011_1156  | NW_004520322.1 | Scaffold6695 | 1156                    | TT                              | GG              | 1947062111               |
| SNP_P4_190012_1172  | NW_004520322.1 | Scaffold6695 | 1172                    | GG                              | TT              | 1947062113               |
| SNP_P4_190013_1248  | NW_004520322.1 | Scaffold6695 | 1248                    | TT                              | CC              | 1947062115               |
| SNP_P4_190014_939   | NW_004520323.1 | Scaffold6696 | 939                     | AA                              | TT              | 1947062117               |
| SNP_P4_190015_952   | NW_004520323.1 | Scaffold6696 | 952                     | AA                              | TT              | 1947062119               |
| SNP_P4_190016_983   | NW_004520323.1 | Scaffold6696 | 983                     | CC                              | TT              | 1947062121               |
| SNP_P4_190017_1000  | NW_004520323.1 | Scaffold6696 | 1000                    | TT                              | CC              | 1947062123               |
| SNP_P4_190018_1049  | NW_004520323.1 | Scaffold6696 | 1049                    | TT                              | CC              | 1947062125               |
| SNP_P4_190019_1165  | NW_004520323.1 | Scaffold6696 | 1165                    | TT                              | CC              | 1947062127               |
| SNP_P4_190020_1485  | NW_004520323.1 | Scaffold6696 | 1485                    | TT                              | CC              | 1947062129               |
| SNP_P4_190021_1521  | NW_004520323.1 | Scaffold6696 | 1521                    | AA                              | GG              | 1947062131               |
| SNP_P4_190022_1537  | NW_004520323.1 | Scaffold6696 | 1537                    | GG                              | AA              | 1947062133               |
| SNP_P4_190023_2761  | NW_004520323.1 | Scaffold6696 | 2761                    | TT                              | CC              | 1947062135               |
| SNP_P4_190024_64    | NW_004520327.1 | Scaffold6700 | 64                      | AA                              | CC              | 1947062137               |
| SNP_P4_190025_78    | NW_004520327.1 | Scaffold6700 | 78                      | CC                              | GG              | 1947062139               |
| SNP_P4_190026_90    | NW_004520327.1 | Scaffold6700 | 90                      | TT                              | AA              | 1947062141               |
| SNP_P4_190027_144   | NW_004520327.1 | Scaffold6700 | 144                     | CC                              | TT              | 1947062143               |
| SNP_P4_190028_202   | NW_004520327.1 | Scaffold6700 | 202                     | GG                              | AA              | 1947062145               |
| SNP_P4_190029_210   | NW_004520327.1 | Scaffold6700 | 210                     | AA                              | GG              | 1947062147               |
| SNP_P4_190030_228   | NW_004520327.1 | Scaffold6700 | 228                     | AA                              | GG              | 1947062155               |
| SNP_P4_190031_303   | NW_004520327.1 | Scaffold6700 | 303                     | GG                              | AA              | 1947062157               |
| SNP_P4_190032_361   | NW_004520327.1 | Scaffold6700 | 361                     | AA                              | GG              | 1947062159               |
| SNP_P4_190033_384   | NW_004520327.1 | Scaffold6700 | 384                     | TT                              | GG              | 1947062161               |

| SNPs IDs           | Chromosome IDs | Chromosomes  | Physical positions (bp) | CDC Frontier (Reference genome) | (ILWC46 & LPNB) | NCBI SNPdb Accession IDs |
|--------------------|----------------|--------------|-------------------------|---------------------------------|-----------------|--------------------------|
| SNP_P4_190034_395  | NW_004520327.1 | Scaffold6700 | 395                     | CC                              | TT              | 1947062163               |
| SNP_P4_190035_411  | NW_004520327.1 | Scaffold6700 | 411                     | TT                              | AA              | 1947062165               |
| SNP_P4_190036_527  | NW_004520327.1 | Scaffold6700 | 527                     | TT                              | CC              | 1947062167               |
| SNP_P4_190037_536  | NW_004520327.1 | Scaffold6700 | 536                     | AA                              | GG              | 1947062169               |
| SNP_P4_190038_568  | NW_004520327.1 | Scaffold6700 | 568                     | AA                              | TT              | 1947062171               |
| SNP_P4_190039_574  | NW_004520327.1 | Scaffold6700 | 574                     | TT                              | CC              | 1947062173               |
| SNP_P4_190040_635  | NW_004520327.1 | Scaffold6700 | 635                     | GG                              | AA              | 1947062175               |
| SNP_P4_190041_661  | NW_004520327.1 | Scaffold6700 | 661                     | TT                              | CC              | 1947062177               |
| SNP_P4_190042_719  | NW_004520327.1 | Scaffold6700 | 719                     | AA                              | GG              | 1947062179               |
| SNP_P4_190043_738  | NW_004520327.1 | Scaffold6700 | 738                     | TT                              | CC              | 1947062181               |
| SNP_P4_190044_858  | NW_004520327.1 | Scaffold6700 | 858                     | AA                              | GG              | 1947062183               |
| SNP_P4_190045_1005 | NW_004520327.1 | Scaffold6700 | 1005                    | CC                              | TT              | 1947062186               |
| SNP_P4_190046_1007 | NW_004520327.1 | Scaffold6700 | 1007                    | AA                              | GG              | 1947062188               |
| SNP_P4_190047_1174 | NW_004520327.1 | Scaffold6700 | 1174                    | GG                              | AA              | 1947062190               |
| SNP_P4_190048_800  | NW_004520328.1 | Scaffold6704 | 800                     | CC                              | TT              | 1947062192               |
| SNP_P4_190049_261  | NW_004520329.1 | Scaffold6707 | 261                     | AA                              | CC              | 1947062194               |
| SNP_P4_190050_836  | NW_004520330.1 | Scaffold6709 | 836                     | CC                              | AA              | 1947062203               |
| SNP_P4_190051_1008 | NW_004520331.1 | Scaffold6710 | 1008                    | TT                              | GG              | 1947062205               |
| SNP_P4_190052_2102 | NW_004520333.1 | Scaffold6714 | 2102                    | AA                              | TT              | 1947062206               |
| SNP_P4_190053_2123 | NW_004520333.1 | Scaffold6714 | 2123                    | AA                              | GG              | 1947062208               |
| SNP_P4_190057_639  | NW_004520337.1 | Scaffold6720 | 639                     | TT                              | GG              | 1947062210               |
| SNP_P4_190058_4485 | NW_004520337.1 | Scaffold6720 | 4485                    | TT                              | AA              | 1947062211               |
| SNP_P4_190059_4664 | NW_004520337.1 | Scaffold6720 | 4664                    | GG                              | TT              | 1947062212               |
| SNP_P4_190062_5333 | NW_004520337.1 | Scaffold6720 | 5333                    | AA                              | TT              | 1947062214               |
| SNP_P4_190063_5348 | NW_004520337.1 | Scaffold6720 | 5348                    | CC                              | TT              | 1947062216               |
| SNP_P4_190064_684  | NW_004520338.1 | Scaffold6721 | 684                     | TT                              | AA              | 1947062218               |
| SNP_P4_190065_2205 | NW_004520338.1 | Scaffold6721 | 2205                    | GG                              | TT              | 1947062220               |
| SNP_P4_190066_2250 | NW_004520338.1 | Scaffold6721 | 2250                    | AA                              | TT              | 1947062222               |
| SNP_P4_190067_454  | NW_004520339.1 | Scaffold6722 | 454                     | CC                              | GG              | 1947062224               |
| SNP_P4_190068_557  | NW_004520339.1 | Scaffold6722 | 557                     | CC                              | TT              | 1947062226               |
| SNP_P4_190069_772  | NW_004520339.1 | Scaffold6722 | 772                     | CC                              | TT              | 1947062228               |
| SNP_P4_190070_783  | NW_004520339.1 | Scaffold6722 | 783                     | GG                              | TT              | 1947062230               |
| SNP_P4_190071_799  | NW_004520339.1 | Scaffold6722 | 799                     | GG                              | CC              | 1947062232               |
| SNP_P4_190072_830  | NW_004520339.1 | Scaffold6722 | 830                     | GG                              | TT              | 1947062234               |
| SNP_P4_190073_894  | NW_004520339.1 | Scaffold6722 | 894                     | TT                              | GG              | 1947062236               |
| SNP_P4_190074_1120 | NW_004520339.1 | Scaffold6722 | 1120                    | GG                              | AA              | 1947062238               |
| SNP_P4_190075_1202 | NW_004520339.1 | Scaffold6722 | 1202                    | AA                              | CC              | 1947062255               |
| SNP_P4_190076_1309 | NW_004520339.1 | Scaffold6722 | 1309                    | AA                              | GG              | 1947062258               |
| SNP_P4_190077_1472 | NW_004520339.1 | Scaffold6722 | 1472                    | TT                              | CC              | 1947062260               |
| SNP_P4_190078_1478 | NW_004520339.1 | Scaffold6722 | 1478                    | TT                              | GG              | 1947062262               |
| SNP_P4_190079_1524 | NW_004520339.1 | Scaffold6722 | 1524                    | GG                              | AA              | 1947062264               |
| SNP_P4_190080_1552 | NW_004520339.1 | Scaffold6722 | 1552                    | AA                              | GG              | 1947062266               |



| SNPs IDs           | Chromosome IDs | Chromosomes  | Physical positions (bp) | CDC Frontier (Reference genome) | (ILWC46 & LPNB) | NCBI SNPdb Accession IDs |
|--------------------|----------------|--------------|-------------------------|---------------------------------|-----------------|--------------------------|
| SNP_P4_190082_1881 | NW_004520339.1 | Scaffold6722 | 1881                    | TT                              | GG              | 1947062268               |
| SNP_P4_190083_1948 | NW_004520339.1 | Scaffold6722 | 1948                    | TT                              | CC              | 1947062270               |
| SNP_P4_190084_158  | NW_004520340.1 | Scaffold6725 | 158                     | TT                              | AA              | 1947062272               |
| SNP_P4_190085_225  | NW_004520340.1 | Scaffold6725 | 225                     | TT                              | CC              | 1947062274               |
| SNP_P4_190086_548  | NW_004520340.1 | Scaffold6725 | 548                     | AA                              | GG              | 1947062275               |
| SNP_P4_190087_586  | NW_004520340.1 | Scaffold6725 | 586                     | TT                              | AA              | 1947062276               |
| SNP_P4_190088_587  | NW_004520340.1 | Scaffold6725 | 587                     | GG                              | TT              | 1947062277               |
| SNP_P4_190089_750  | NW_004520340.1 | Scaffold6725 | 750                     | AA                              | TT              | 1947062278               |
| SNP_P4_190090_751  | NW_004520340.1 | Scaffold6725 | 751                     | TT                              | GG              | 1947062279               |
| SNP_P4_190091_752  | NW_004520340.1 | Scaffold6725 | 752                     | GG                              | TT              | 1947062280               |
| SNP_P4_190092_766  | NW_004520340.1 | Scaffold6725 | 766                     | CC                              | GG              | 1947062281               |
| SNP_P4_190093_787  | NW_004520340.1 | Scaffold6725 | 787                     | GG                              | AA              | 1947062282               |
| SNP_P4_190094_815  | NW_004520340.1 | Scaffold6725 | 815                     | GG                              | TT              | 1947062283               |
| SNP_P4_190095_882  | NW_004520340.1 | Scaffold6725 | 882                     | GG                              | AA              | 1947062284               |
| SNP_P4_190096_941  | NW_004520340.1 | Scaffold6725 | 941                     | AA                              | GG              | 1947062285               |
| SNP_P4_190097_1011 | NW_004520340.1 | Scaffold6725 | 1011                    | AA                              | GG              | 1947062286               |
| SNP_P4_190098_1454 | NW_004520340.1 | Scaffold6725 | 1454                    | AA                              | CC              | 1947062287               |
| SNP_P4_190099_1688 | NW_004520340.1 | Scaffold6725 | 1688                    | AA                              | TT              | 1947062288               |
| SNP_P4_190100_1700 | NW_004520340.1 | Scaffold6725 | 1700                    | AA                              | CC              | 1947062289               |
| SNP_P4_190101_1766 | NW_004520340.1 | Scaffold6725 | 1766                    | AA                              | TT              | 1947062290               |
| SNP_P4_190102_1790 | NW_004520340.1 | Scaffold6725 | 1790                    | GG                              | TT              | 1947062291               |
| SNP_P4_190103_1791 | NW_004520340.1 | Scaffold6725 | 1791                    | CC                              | TT              | 1947062292               |
| SNP_P4_190104_1909 | NW_004520340.1 | Scaffold6725 | 1909                    | TT                              | AA              | 1947062293               |
| SNP_P4_190105_1979 | NW_004520340.1 | Scaffold6725 | 1979                    | CC                              | TT              | 1947062294               |
| SNP_P4_190106_1992 | NW_004520340.1 | Scaffold6725 | 1992                    | CC                              | GG              | 1947062295               |
| SNP_P4_190107_2013 | NW_004520340.1 | Scaffold6725 | 2013                    | AA                              | GG              | 1947062296               |
| SNP_P4_190108_2014 | NW_004520340.1 | Scaffold6725 | 2014                    | AA                              | TT              | 1947062297               |
| SNP_P4_190109_2041 | NW_004520340.1 | Scaffold6725 | 2041                    | CC                              | TT              | 1947062298               |
| SNP_P4_190110_221  | NW_004520341.1 | Scaffold6728 | 221                     | GG                              | CC              | 1947062299               |
| SNP_P4_190111_258  | NW_004520341.1 | Scaffold6728 | 258                     | AA                              | GG              | 1947062300               |
| SNP_P4_190112_4934 | NW_004520341.1 | Scaffold6728 | 4934                    | CC                              | GG              | 1947062301               |
| SNP_P4_190113_9297 | NW_004520341.1 | Scaffold6728 | 9297                    | TT                              | AA              | 1947062302               |
| SNP_P4_190114_9508 | NW_004520341.1 | Scaffold6728 | 9508                    | AA                              | TT              | 1947062303               |
| SNP_P4_190115_9598 | NW_004520341.1 | Scaffold6728 | 9598                    | AA                              | CC              | 1947062304               |
| SNP_P4_190116_9604 | NW_004520341.1 | Scaffold6728 | 9604                    | TT                              | GG              | 1947062305               |
| SNP_P4_190117_9605 | NW_004520341.1 | Scaffold6728 | 9605                    | GG                              | AA              | 1947062306               |
| SNP_P4_190119_378  | NW_004520343.1 | Scaffold6731 | 378                     | TT                              | CC              | 1947062307               |
| SNP_P4_190120_1267 | NW_004520343.1 | Scaffold6731 | 1267                    | TT                              | CC              | 1947062308               |
| SNP_P4_190121_100  | NW_004520345.1 | Scaffold6734 | 100                     | AA                              | CC              | 1947062310               |
| SNP_P4_190122_240  | NW_004520345.1 | Scaffold6734 | 240                     | TT                              | GG              | 1947062312               |
| SNP_P4_190123_699  | NW_004520345.1 | Scaffold6734 | 699                     | TT                              | AA              | 1947062314               |
| SNP_P4_190124_700  | NW_004520345.1 | Scaffold6734 | 700                     | TT                              | AA              | 1947062316               |

| SNPs IDs           | Chromosome IDs | Chromosomes  | Physical positions (bp) | CDC Frontier (Reference genome) | (ILWC46 & LPNB) | NCBI SNPdb Accession IDs |
|--------------------|----------------|--------------|-------------------------|---------------------------------|-----------------|--------------------------|
| SNP_P4_190125_732  | NW_004520345.1 | Scaffold6734 | 732                     | AA                              | CC              | 1947062318               |
| SNP_P4_190126_1273 | NW_004520347.1 | Scaffold6737 | 1273                    | CC                              | GG              | 1947062320               |
| SNP_P4_190127_1790 | NW_004520347.1 | Scaffold6737 | 1790                    | GG                              | AA              | 1947062322               |
| SNP_P4_190128_1822 | NW_004520347.1 | Scaffold6737 | 1822                    | TT                              | CC              | 1947062324               |
| SNP_P4_190129_1974 | NW_004520347.1 | Scaffold6737 | 1974                    | AA                              | TT              | 1947062326               |
| SNP_P4_190130_2019 | NW_004520347.1 | Scaffold6737 | 2019                    | TT                              | GG              | 1947062328               |
| SNP_P4_190131_2123 | NW_004520347.1 | Scaffold6737 | 2123                    | GG                              | CC              | 1947062330               |
| SNP_P4_190132_2454 | NW_004520347.1 | Scaffold6737 | 2454                    | AA                              | GG              | 1947062332               |
| SNP_P4_190133_2517 | NW_004520347.1 | Scaffold6737 | 2517                    | CC                              | TT              | 1947062334               |
| SNP_P4_190134_2660 | NW_004520347.1 | Scaffold6737 | 2660                    | GG                              | TT              | 1947062336               |
| SNP_P4_190135_2721 | NW_004520347.1 | Scaffold6737 | 2721                    | TT                              | CC              | 1947062338               |
| SNP_P4_190136_3354 | NW_004520347.1 | Scaffold6737 | 3354                    | AA                              | GG              | 1947062340               |
| SNP_P4_190137_3463 | NW_004520347.1 | Scaffold6737 | 3463                    | TT                              | CC              | 1947062342               |
| SNP_P4_190138_3647 | NW_004520347.1 | Scaffold6737 | 3647                    | TT                              | CC              | 1947062344               |
| SNP_P4_190139_3652 | NW_004520347.1 | Scaffold6737 | 3652                    | TT                              | AA              | 1947062346               |
| SNP_P4_190140_3754 | NW_004520347.1 | Scaffold6737 | 3754                    | CC                              | GG              | 1947062348               |
| SNP_P4_190141_3818 | NW_004520347.1 | Scaffold6737 | 3818                    | TT                              | GG              | 1947062350               |
| SNP_P4_190142_3845 | NW_004520347.1 | Scaffold6737 | 3845                    | AA                              | GG              | 1947062352               |
| SNP_P4_190143_3906 | NW_004520347.1 | Scaffold6737 | 3906                    | AA                              | CC              | 1947062354               |
| SNP_P4_190144_3910 | NW_004520347.1 | Scaffold6737 | 3910                    | AA                              | CC              | 1947062356               |
| SNP_P4_190145_3914 | NW_004520347.1 | Scaffold6737 | 3914                    | CC                              | GG              | 1947062359               |
| SNP_P4_190146_3960 | NW_004520347.1 | Scaffold6737 | 3960                    | CC                              | GG              | 1947062361               |
| SNP_P4_190147_4063 | NW_004520347.1 | Scaffold6737 | 4063                    | CC                              | TT              | 1947062363               |
| SNP_P4_190148_4516 | NW_004520347.1 | Scaffold6737 | 4516                    | TT                              | GG              | 1947062365               |
| SNP_P4_190149_4539 | NW_004520347.1 | Scaffold6737 | 4539                    | GG                              | AA              | 1947062367               |
| SNP_P4_190150_4549 | NW_004520347.1 | Scaffold6737 | 4549                    | CC                              | GG              | 1947062369               |
| SNP_P4_190151_5232 | NW_004520347.1 | Scaffold6737 | 5232                    | AA                              | GG              | 1947062371               |
| SNP_P4_190152_5280 | NW_004520347.1 | Scaffold6737 | 5280                    | TT                              | AA              | 1947062373               |
| SNP_P4_190153_5291 | NW_004520347.1 | Scaffold6737 | 5291                    | CC                              | AA              | 1947062375               |
| SNP_P4_190154_5560 | NW_004520347.1 | Scaffold6737 | 5560                    | CC                              | GG              | 1947062377               |
| SNP_P4_190155_6268 | NW_004520347.1 | Scaffold6737 | 6268                    | AA                              | CC              | 1947062379               |
| SNP_P4_190156_6647 | NW_004520347.1 | Scaffold6737 | 6647                    | AA                              | GG              | 1947062381               |
| SNP_P4_190157_437  | NW_004520348.1 | Scaffold6738 | 437                     | TT                              | GG              | 1947062383               |
| SNP_P4_190158_572  | NW_004520348.1 | Scaffold6738 | 572                     | AA                              | CC              | 1947062385               |
| SNP_P4_190159_596  | NW_004520348.1 | Scaffold6738 | 596                     | AA                              | GG              | 1947062387               |
| SNP_P4_190161_4393 | NW_004520354.1 | Scaffold6750 | 4393                    | AA                              | TT              | 1947062389               |
| SNP_P4_190162_4424 | NW_004520354.1 | Scaffold6750 | 4424                    | GG                              | AA              | 1947062391               |
| SNP_P4_190163_5692 | NW_004520354.1 | Scaffold6750 | 5692                    | AA                              | GG              | 1947062393               |
| SNP_P4_190164_5702 | NW_004520354.1 | Scaffold6750 | 5702                    | CC                              | TT              | 1947062395               |
| SNP_P4_190165_5726 | NW_004520354.1 | Scaffold6750 | 5726                    | GG                              | AA              | 1947062397               |
| SNP_P4_190167_6611 | NW_004520354.1 | Scaffold6750 | 6611                    | TT                              | CC              | 1947062399               |
| SNP_P4_190168_592  | NW_004520359.1 | Scaffold6759 | 592                     | TT                              | AA              | 1947062401               |

| SNPs IDs            | Chromosome IDs | Chromosomes  | Physical positions (bp) | CDC Frontier (Reference genome) | (ILWC46 & LPNB) | NCBI SNPdb Accession IDs |
|---------------------|----------------|--------------|-------------------------|---------------------------------|-----------------|--------------------------|
| SNP_P4_190169_73    | NW_004520360.1 | Scaffold6760 | 73                      | GG                              | AA              | 1947062403               |
| SNP_P4_190170_77    | NW_004520360.1 | Scaffold6760 | 77                      | GG                              | AA              | 1947062405               |
| SNP_P4_190171_82    | NW_004520360.1 | Scaffold6760 | 82                      | CC                              | GG              | 1947062407               |
| SNP_P4_190172_132   | NW_004520360.1 | Scaffold6760 | 132                     | CC                              | TT              | 1947062409               |
| SNP_P4_190173_195   | NW_004520360.1 | Scaffold6760 | 195                     | TT                              | AA              | 1947062411               |
| SNP_P4_190174_249   | NW_004520360.1 | Scaffold6760 | 249                     | CC                              | TT              | 1947062413               |
| SNP_P4_190175_370   | NW_004520360.1 | Scaffold6760 | 370                     | GG                              | TT              | 1947062415               |
| SNP_P4_190176_416   | NW_004520360.1 | Scaffold6760 | 416                     | AA                              | TT              | 1947062417               |
| SNP_P4_190177_451   | NW_004520360.1 | Scaffold6760 | 451                     | TT                              | AA              | 1947062419               |
| SNP_P4_190178_477   | NW_004520360.1 | Scaffold6760 | 477                     | CC                              | AA              | 1947062421               |
| SNP_P4_190179_503   | NW_004520360.1 | Scaffold6760 | 503                     | AA                              | GG              | 1947062423               |
| SNP_P4_190180_514   | NW_004520360.1 | Scaffold6760 | 514                     | AA                              | GG              | 1947062425               |
| SNP_P4_190181_613   | NW_004520360.1 | Scaffold6760 | 613                     | TT                              | AA              | 1947062427               |
| SNP_P4_190182_619   | NW_004520360.1 | Scaffold6760 | 619                     | CC                              | TT              | 1947062429               |
| SNP_P4_190183_674   | NW_004520360.1 | Scaffold6760 | 674                     | TT                              | GG              | 1947062431               |
| SNP_P4_190184_701   | NW_004520360.1 | Scaffold6760 | 701                     | GG                              | TT              | 1947062433               |
| SNP_P4_190185_788   | NW_004520360.1 | Scaffold6760 | 788                     | CC                              | TT              | 1947062435               |
| SNP_P4_190186_814   | NW_004520360.1 | Scaffold6760 | 814                     | TT                              | CC              | 1947062437               |
| SNP_P4_190187_873   | NW_004520360.1 | Scaffold6760 | 873                     | TT                              | CC              | 1947062439               |
| SNP_P4_190188_879   | NW_004520360.1 | Scaffold6760 | 879                     | CC                              | AA              | 1947062441               |
| SNP_P4_190190_932   | NW_004520360.1 | Scaffold6760 | 932                     | GG                              | TT              | 1947062443               |
| SNP_P4_190191_944   | NW_004520360.1 | Scaffold6760 | 944                     | GG                              | AA              | 1947062445               |
| SNP_P4_190192_1007  | NW_004520360.1 | Scaffold6760 | 1007                    | GG                              | TT              | 1947062447               |
| SNP_P4_190194_1190  | NW_004520360.1 | Scaffold6760 | 1190                    | AA                              | TT              | 1947062449               |
| SNP_P4_190195_1200  | NW_004520360.1 | Scaffold6760 | 1200                    | AA                              | GG              | 1947062451               |
| SNP_P4_190196_1371  | NW_004520365.1 | Scaffold6772 | 1371                    | AA                              | GG              | 1947062453               |
| SNP_P4_190197_1405  | NW_004520365.1 | Scaffold6772 | 1405                    | TT                              | AA              | 1947062455               |
| SNP_P4_190198_116   | NW_004520366.1 | Scaffold6773 | 116                     | AA                              | TT              | 1947062457               |
| SNP_P4_190199_500   | NW_004520366.1 | Scaffold6773 | 500                     | TT                              | CC              | 1947062459               |
| SNP_P4_190200_539   | NW_004520366.1 | Scaffold6773 | 539                     | TT                              | CC              | 1947062461               |
| SNP_P4_190201_567   | NW_004520366.1 | Scaffold6773 | 567                     | AA                              | TT              | 1947062463               |
| SNP_P4_190202_593   | NW_004520366.1 | Scaffold6773 | 593                     | GG                              | AA              | 1947062464               |
| SNP_P4_190203_64    | NW_004520368.1 | Scaffold6775 | 64                      | GG                              | TT              | 1947062465               |
| SNP_P4_190204_85    | NW_004520368.1 | Scaffold6775 | 85                      | TT                              | GG              | 1947062466               |
| SNP_P4_190205_146   | NW_004520368.1 | Scaffold6775 | 146                     | CC                              | AA              | 1947062467               |
| SNP_P4_190206_7186  | NW_004520369.1 | Scaffold6778 | 7186                    | GG                              | AA              | 1947062468               |
| SNP_P4_190207_7198  | NW_004520369.1 | Scaffold6778 | 7198                    | GG                              | TT              | 1947062469               |
| SNP_P4_190208_11269 | NW_004520369.1 | Scaffold6778 | 11269                   | AA                              | GG              | 1947062471               |
| SNP_P4_190209_11326 | NW_004520369.1 | Scaffold6778 | 11326                   | TT                              | AA              | 1947062473               |
| SNP_P4_190210_11338 | NW_004520369.1 | Scaffold6778 | 11338                   | GG                              | AA              | 1947062475               |
| SNP_P4_190211_11414 | NW_004520369.1 | Scaffold6778 | 11414                   | GG                              | CC              | 1947062477               |
| SNP_P4_190212_11533 | NW_004520369.1 | Scaffold6778 | 11533                   | GG                              | AA              | 1947062479               |

| SNPs IDs            | Chromosome IDs | Chromosomes  | Physical positions (bp) | CDC Frontier (Reference genome) | (ILWC46 & LPNB) | NCBI SNPdb Accession IDs |
|---------------------|----------------|--------------|-------------------------|---------------------------------|-----------------|--------------------------|
| SNP_P4_190213_11633 | NW_004520369.1 | Scaffold6778 | 11633                   | TT                              | GG              | 1947062481               |
| SNP_P4_190214_11693 | NW_004520369.1 | Scaffold6778 | 11693                   | TT                              | CC              | 1947062483               |
| SNP_P4_190215_11731 | NW_004520369.1 | Scaffold6778 | 11731                   | GG                              | CC              | 1947062485               |
| SNP_P4_190216_11795 | NW_004520369.1 | Scaffold6778 | 11795                   | AA                              | TT              | 1947062487               |
| SNP_P4_190217_202   | NW_004520371.1 | Scaffold6782 | 202                     | AA                              | TT              | 1947062489               |
| SNP_P4_190218_307   | NW_004520371.1 | Scaffold6782 | 307                     | AA                              | GG              | 1947062491               |
| SNP_P4_190219_384   | NW_004520371.1 | Scaffold6782 | 384                     | TT                              | CC              | 1947062493               |
| SNP_P4_190220_425   | NW_004520371.1 | Scaffold6782 | 425                     | CC                              | AA              | 1947062495               |
| SNP_P4_190222_724   | NW_004520371.1 | Scaffold6782 | 724                     | CC                              | TT              | 1947062497               |
| SNP_P4_190224_775   | NW_004520371.1 | Scaffold6782 | 775                     | GG                              | AA              | 1947062499               |
| SNP_P4_190228_1243  | NW_004520371.1 | Scaffold6782 | 1243                    | CC                              | TT              | 1947062501               |
| SNP_P4_190229_64    | NW_004520372.1 | Scaffold6784 | 64                      | AA                              | GG              | 1947062503               |
| SNP_P4_190230_271   | NW_004520372.1 | Scaffold6784 | 271                     | TT                              | AA              | 1947062505               |
| SNP_P4_190231_296   | NW_004520372.1 | Scaffold6784 | 296                     | GG                              | AA              | 1947062507               |
| SNP_P4_190232_232   | NW_004520376.1 | Scaffold6790 | 232                     | TT                              | GG              | 1947062509               |
| SNP_P4_190233_259   | NW_004520376.1 | Scaffold6790 | 259                     | TT                              | CC              | 1947062511               |
| SNP_P4_190234_503   | NW_004520376.1 | Scaffold6790 | 503                     | CC                              | AA              | 1947062513               |
| SNP_P4_190235_555   | NW_004520376.1 | Scaffold6790 | 555                     | CC                              | TT              | 1947062515               |
| SNP_P4_190236_580   | NW_004520376.1 | Scaffold6790 | 580                     | GG                              | AA              | 1947062517               |
| SNP_P4_190239_1052  | NW_004520376.1 | Scaffold6790 | 1052                    | GG                              | TT              | 1947062519               |
| SNP_P4_190240_1060  | NW_004520376.1 | Scaffold6790 | 1060                    | GG                              | AA              | 1947062521               |
| SNP_P4_190241_1114  | NW_004520376.1 | Scaffold6790 | 1114                    | AA                              | CC              | 1947062523               |
| SNP_P4_190242_1123  | NW_004520376.1 | Scaffold6790 | 1123                    | CC                              | TT              | 1947062525               |
| SNP_P4_190243_1149  | NW_004520376.1 | Scaffold6790 | 1149                    | CC                              | TT              | 1947062527               |
| SNP_P4_190244_1157  | NW_004520376.1 | Scaffold6790 | 1157                    | CC                              | TT              | 1947062529               |
| SNP_P4_190245_1222  | NW_004520376.1 | Scaffold6790 | 1222                    | CC                              | AA              | 1947062531               |
| SNP_P4_190246_1306  | NW_004520376.1 | Scaffold6790 | 1306                    | GG                              | AA              | 1947062533               |
| SNP_P4_190247_1321  | NW_004520376.1 | Scaffold6790 | 1321                    | GG                              | TT              | 1947062535               |
| SNP_P4_190249_1477  | NW_004520376.1 | Scaffold6790 | 1477                    | AA                              | GG              | 1947062538               |
| SNP_P4_190250_1478  | NW_004520376.1 | Scaffold6790 | 1478                    | CC                              | TT              | 1947062540               |
| SNP_P4_190251_1540  | NW_004520376.1 | Scaffold6790 | 1540                    | AA                              | TT              | 1947062542               |
| SNP_P4_190252_2201  | NW_004520376.1 | Scaffold6790 | 2201                    | TT                              | CC              | 1947062544               |
| SNP_P4_190253_2207  | NW_004520376.1 | Scaffold6790 | 2207                    | GG                              | AA              | 1947062546               |
| SNP_P4_190254_2232  | NW_004520376.1 | Scaffold6790 | 2232                    | TT                              | CC              | 1947062548               |
| SNP_P4_190256_2300  | NW_004520376.1 | Scaffold6790 | 2300                    | TT                              | CC              | 1947062550               |
| SNP_P4_190257_2384  | NW_004520376.1 | Scaffold6790 | 2384                    | GG                              | TT              | 1947062552               |
| SNP_P4_190258_2531  | NW_004520376.1 | Scaffold6790 | 2531                    | TT                              | CC              | 1947062554               |
| SNP_P4_190259_2707  | NW_004520376.1 | Scaffold6790 | 2707                    | AA                              | TT              | 1947062556               |
| SNP_P4_190260_2726  | NW_004520376.1 | Scaffold6790 | 2726                    | GG                              | AA              | 1947062558               |
| SNP_P4_190261_2756  | NW_004520376.1 | Scaffold6790 | 2756                    | CC                              | AA              | 1947062559               |
| SNP_P4_190263_2859  | NW_004520376.1 | Scaffold6790 | 2859                    | GG                              | AA              | 1947062560               |
| SNP_P4_190264_2902  | NW_004520376.1 | Scaffold6790 | 2902                    | CC                              | TT              | 1947062561               |

| SNPs IDs            | Chromosome IDs | Chromosomes  | Physical positions (bp) | CDC Frontier (Reference genome) | (ILWC46 & LPNB) | NCBI SNPdb Accession IDs |
|---------------------|----------------|--------------|-------------------------|---------------------------------|-----------------|--------------------------|
| SNP_P4_190265_2922  | NW_004520376.1 | Scaffold6790 | 2922                    | TT                              | CC              | 1947062563               |
| SNP_P4_190266_2999  | NW_004520376.1 | Scaffold6790 | 2999                    | TT                              | AA              | 1947062566               |
| SNP_P4_190267_3035  | NW_004520376.1 | Scaffold6790 | 3035                    | TT                              | CC              | 1947062568               |
| SNP_P4_190268_3075  | NW_004520376.1 | Scaffold6790 | 3075                    | TT                              | CC              | 1947062570               |
| SNP_P4_190269_3191  | NW_004520376.1 | Scaffold6790 | 3191                    | AA                              | GG              | 1947062572               |
| SNP_P4_190270_3202  | NW_004520376.1 | Scaffold6790 | 3202                    | TT                              | CC              | 1947062574               |
| SNP_P4_190271_3215  | NW_004520376.1 | Scaffold6790 | 3215                    | CC                              | TT              | 1947062576               |
| SNP_P4_190272_3242  | NW_004520376.1 | Scaffold6790 | 3242                    | GG                              | AA              | 1947062578               |
| SNP_P4_190273_3817  | NW_004520377.1 | Scaffold6791 | 3817                    | GG                              | AA              | 1947062580               |
| SNP_P4_190274_3856  | NW_004520377.1 | Scaffold6791 | 3856                    | GG                              | TT              | 1947062582               |
| SNP_P4_190275_4096  | NW_004520377.1 | Scaffold6791 | 4096                    | TT                              | CC              | 1947062584               |
| SNP_P4_190276_4114  | NW_004520377.1 | Scaffold6791 | 4114                    | TT                              | GG              | 1947062586               |
| SNP_P4_190277_4115  | NW_004520377.1 | Scaffold6791 | 4115                    | GG                              | CC              | 1947062588               |
| SNP_P4_190278_4144  | NW_004520377.1 | Scaffold6791 | 4144                    | AA                              | TT              | 1947062590               |
| SNP_P4_190279_4335  | NW_004520377.1 | Scaffold6791 | 4335                    | TT                              | CC              | 1947062592               |
| SNP_P4_190280_4460  | NW_004520377.1 | Scaffold6791 | 4460                    | TT                              | AA              | 1947062594               |
| SNP_P4_190282_8005  | NW_004520377.1 | Scaffold6791 | 8005                    | GG                              | AA              | 1947062596               |
| SNP_P4_190283_13488 | NW_004520377.1 | Scaffold6791 | 13488                   | TT                              | CC              | 1947062598               |
| SNP_P4_190284_13549 | NW_004520377.1 | Scaffold6791 | 13549                   | TT                              | CC              | 1947062600               |
| SNP_P4_190285_13564 | NW_004520377.1 | Scaffold6791 | 13564                   | TT                              | AA              | 1947062602               |
| SNP_P4_190286_13787 | NW_004520377.1 | Scaffold6791 | 13787                   | TT                              | GG              | 1947062604               |
| SNP_P4_190287_18793 | NW_004520377.1 | Scaffold6791 | 18793                   | CC                              | TT              | 1947062606               |
| SNP_P4_190288_18795 | NW_004520377.1 | Scaffold6791 | 18795                   | GG                              | AA              | 1947062608               |
| SNP_P4_190289_24362 | NW_004520377.1 | Scaffold6791 | 24362                   | AA                              | TT              | 1947062610               |
| SNP_P4_190290_24417 | NW_004520377.1 | Scaffold6791 | 24417                   | CC                              | TT              | 1947062612               |
| SNP_P4_190291_26017 | NW_004520377.1 | Scaffold6791 | 26017                   | GG                              | AA              | 1947062614               |
| SNP_P4_190292_26020 | NW_004520377.1 | Scaffold6791 | 26020                   | AA                              | GG              | 1947062616               |
| SNP_P4_190293_721   | NW_004520378.1 | Scaffold6792 | 721                     | GG                              | CC              | 1947062618               |
| SNP_P4_190295_609   | NW_004520384.1 | Scaffold6808 | 609                     | CC                              | AA              | 1947062620               |
| SNP_P4_190296_614   | NW_004520384.1 | Scaffold6808 | 614                     | CC                              | TT              | 1947062622               |
| SNP_P4_190297_422   | NW_004520388.1 | Scaffold6814 | 422                     | TT                              | CC              | 1947062625               |
| SNP_P4_190298_425   | NW_004520388.1 | Scaffold6814 | 425                     | AA                              | TT              | 1947062627               |
| SNP_P4_190299_494   | NW_004520388.1 | Scaffold6814 | 494                     | CC                              | GG              | 1947062629               |
| SNP_P4_190300_525   | NW_004520388.1 | Scaffold6814 | 525                     | GG                              | AA              | 1947062631               |
| SNP_P4_190301_532   | NW_004520388.1 | Scaffold6814 | 532                     | TT                              | AA              | 1947062633               |
| SNP_P4_190302_523   | NW_004520392.1 | Scaffold6820 | 523                     | GG                              | AA              | 1947062635               |
| SNP_P4_190303_537   | NW_004520392.1 | Scaffold6820 | 537                     | AA                              | TT              | 1947062637               |
| SNP_P4_190304_551   | NW_004520392.1 | Scaffold6820 | 551                     | GG                              | TT              | 1947062639               |
| SNP_P4_190305_640   | NW_004520392.1 | Scaffold6820 | 640                     | CC                              | AA              | 1947062641               |
| SNP_P4_190306_699   | NW_004520392.1 | Scaffold6820 | 699                     | AA                              | TT              | 1947062643               |
| SNP_P4_190307_784   | NW_004520392.1 | Scaffold6820 | 784                     | GG                              | AA              | 1947062645               |
| SNP_P4_190308_877   | NW_004520392.1 | Scaffold6820 | 877                     | CC                              | TT              | 1947062647               |

| SNPs IDs           | Chromosome IDs | Chromosomes  | Physical positions (bp) | CDC Frontier (Reference genome) | (ILWC46 & LPNB) | NCBI SNPdb Accession IDs |
|--------------------|----------------|--------------|-------------------------|---------------------------------|-----------------|--------------------------|
| SNP_P4_190310_976  | NW_004520392.1 | Scaffold6820 | 976                     | AA                              | CC              | 1947062649               |
| SNP_P4_190311_984  | NW_004520392.1 | Scaffold6820 | 984                     | GG                              | AA              | 1947062651               |
| SNP_P4_190312_989  | NW_004520392.1 | Scaffold6820 | 989                     | AA                              | CC              | 1947062653               |
| SNP_P4_190313_254  | NW_004520395.1 | Scaffold6824 | 254                     | CC                              | TT              | 1947062655               |
| SNP_P4_190314_742  | NW_004520397.1 | Scaffold6827 | 742                     | CC                              | TT              | 1947062656               |
| SNP_P4_190315_371  | NW_004520398.1 | Scaffold6828 | 371                     | AA                              | GG              | 1947062658               |
| SNP_P4_190316_841  | NW_004520398.1 | Scaffold6828 | 841                     | TT                              | AA              | 1947062660               |
| SNP_P4_190317_866  | NW_004520398.1 | Scaffold6828 | 866                     | TT                              | AA              | 1947062662               |
| SNP_P4_190318_115  | NW_004520399.1 | Scaffold6830 | 115                     | TT                              | AA              | 1947062664               |
| SNP_P4_190319_141  | NW_004520399.1 | Scaffold6830 | 141                     | CC                              | TT              | 1947062666               |
| SNP_P4_190320_176  | NW_004520399.1 | Scaffold6830 | 176                     | CC                              | TT              | 1947062668               |
| SNP_P4_190321_473  | NW_004520399.1 | Scaffold6830 | 473                     | TT                              | CC              | 1947062670               |
| SNP_P4_190322_2338 | NW_004520403.1 | Scaffold6837 | 2338                    | CC                              | TT              | 1947062672               |
| SNP_P4_190323_2342 | NW_004520403.1 | Scaffold6837 | 2342                    | CC                              | TT              | 1947062674               |
| SNP_P4_190324_2705 | NW_004520403.1 | Scaffold6837 | 2705                    | CC                              | TT              | 1947062676               |
| SNP_P4_190325_64   | NW_004520406.1 | Scaffold6842 | 64                      | GG                              | TT              | 1947062678               |
| SNP_P4_190326_107  | NW_004520406.1 | Scaffold6842 | 107                     | AA                              | TT              | 1947062680               |
| SNP_P4_190327_109  | NW_004520406.1 | Scaffold6842 | 109                     | TT                              | GG              | 1947062682               |
| SNP_P4_190328_318  | NW_004520406.1 | Scaffold6842 | 318                     | TT                              | CC              | 1947062684               |
| SNP_P4_190330_1775 | NW_004520406.1 | Scaffold6842 | 1775                    | CC                              | AA              | 1947062686               |
| SNP_P4_190331_1808 | NW_004520406.1 | Scaffold6842 | 1808                    | AA                              | CC              | 1947062688               |
| SNP_P4_190332_1821 | NW_004520406.1 | Scaffold6842 | 1821                    | CC                              | TT              | 1947062690               |
| SNP_P4_190333_1084 | NW_004520407.1 | Scaffold6843 | 1084                    | AA                              | CC              | 1947062692               |
| SNP_P4_190334_1229 | NW_004520407.1 | Scaffold6843 | 1229                    | TT                              | GG              | 1947062694               |
| SNP_P4_190335_1254 | NW_004520407.1 | Scaffold6843 | 1254                    | TT                              | GG              | 1947062696               |
| SNP_P4_190336_1353 | NW_004520407.1 | Scaffold6843 | 1353                    | AA                              | GG              | 1947062698               |
| SNP_P4_190337_434  | NW_004520408.1 | Scaffold6845 | 434                     | GG                              | CC              | 1947062700               |
| SNP_P4_190338_702  | NW_004520408.1 | Scaffold6845 | 702                     | CC                              | AA              | 1947062702               |
| SNP_P4_190339_737  | NW_004520408.1 | Scaffold6845 | 737                     | AA                              | TT              | 1947062704               |
| SNP_P4_190340_1005 | NW_004520408.1 | Scaffold6845 | 1005                    | AA                              | TT              | 1947062706               |
| SNP_P4_190341_1257 | NW_004520408.1 | Scaffold6845 | 1257                    | AA                              | CC              | 1947062707               |
| SNP_P4_190342_1262 | NW_004520408.1 | Scaffold6845 | 1262                    | AA                              | TT              | 1947062709               |
| SNP_P4_190344_1334 | NW_004520408.1 | Scaffold6845 | 1334                    | GG                              | CC              | 1947062711               |
| SNP_P4_190346_537  | NW_004520409.1 | Scaffold6846 | 537                     | AA                              | TT              | 1947062713               |
| SNP_P4_190347_606  | NW_004520409.1 | Scaffold6846 | 606                     | CC                              | AA              | 1947062715               |
| SNP_P4_190348_627  | NW_004520409.1 | Scaffold6846 | 627                     | CC                              | AA              | 1947062717               |
| SNP_P4_190349_701  | NW_004520409.1 | Scaffold6846 | 701                     | TT                              | AA              | 1947062719               |
| SNP_P4_190350_724  | NW_004520409.1 | Scaffold6846 | 724                     | TT                              | AA              | 1947062722               |
| SNP_P4_190351_730  | NW_004520409.1 | Scaffold6846 | 730                     | TT                              | GG              | 1947062724               |
| SNP_P4_190352_747  | NW_004520409.1 | Scaffold6846 | 747                     | AA                              | GG              | 1947062726               |
| SNP_P4_190353_826  | NW_004520409.1 | Scaffold6846 | 826                     | CC                              | TT              | 1947062729               |
| SNP_P4_190354_827  | NW_004520409.1 | Scaffold6846 | 827                     | AA                              | CC              | 1947062731               |

| SNPs IDs           | Chromosome IDs | Chromosomes  | Physical positions (bp) | CDC Frontier (Reference genome) | (ILWC46 & LPNB) | NCBI SNPdb Accession IDs |
|--------------------|----------------|--------------|-------------------------|---------------------------------|-----------------|--------------------------|
| SNP_P4_190355_828  | NW_004520409.1 | Scaffold6846 | 828                     | TT                              | AA              | 1947062735               |
| SNP_P4_190356_895  | NW_004520409.1 | Scaffold6846 | 895                     | TT                              | CC              | 1947062737               |
| SNP_P4_190357_918  | NW_004520409.1 | Scaffold6846 | 918                     | CC                              | GG              | 1947062739               |
| SNP_P4_190358_923  | NW_004520409.1 | Scaffold6846 | 923                     | CC                              | AA              | 1947062741               |
| SNP_P4_190360_959  | NW_004520409.1 | Scaffold6846 | 959                     | AA                              | GG              | 1947062743               |
| SNP_P4_190362_1359 | NW_004520409.1 | Scaffold6846 | 1359                    | CC                              | TT              | 1947062745               |
| SNP_P4_190364_1393 | NW_004520409.1 | Scaffold6846 | 1393                    | CC                              | AA              | 1947062747               |
| SNP_P4_190365_1407 | NW_004520409.1 | Scaffold6846 | 1407                    | AA                              | GG              | 1947062749               |
| SNP_P4_190366_1568 | NW_004520409.1 | Scaffold6846 | 1568                    | CC                              | GG              | 1947062751               |
| SNP_P4_190367_1628 | NW_004520409.1 | Scaffold6846 | 1628                    | AA                              | CC              | 1947062753               |
| SNP_P4_190368_1679 | NW_004520409.1 | Scaffold6846 | 1679                    | CC                              | TT              | 1947062755               |
| SNP_P4_190369_1764 | NW_004520409.1 | Scaffold6846 | 1764                    | CC                              | TT              | 1947062757               |
| SNP_P4_190370_1867 | NW_004520409.1 | Scaffold6846 | 1867                    | AA                              | GG              | 1947062759               |
| SNP_P4_190371_2368 | NW_004520409.1 | Scaffold6846 | 2368                    | TT                              | AA              | 1947062761               |
| SNP_P4_190372_2369 | NW_004520409.1 | Scaffold6846 | 2369                    | GG                              | TT              | 1947062762               |
| SNP_P4_190373_2431 | NW_004520409.1 | Scaffold6846 | 2431                    | CC                              | AA              | 1947062764               |
| SNP_P4_190374_2691 | NW_004520409.1 | Scaffold6846 | 2691                    | TT                              | CC              | 1947062766               |
| SNP_P4_190375_2718 | NW_004520409.1 | Scaffold6846 | 2718                    | AA                              | TT              | 1947062768               |
| SNP_P4_190376_64   | NW_004520411.1 | Scaffold6851 | 64                      | GG                              | TT              | 1947062770               |
| SNP_P4_190377_79   | NW_004520411.1 | Scaffold6851 | 79                      | TT                              | CC              | 1947062772               |
| SNP_P4_190378_128  | NW_004520411.1 | Scaffold6851 | 128                     | AA                              | GG              | 1947062774               |
| SNP_P4_190379_150  | NW_004520411.1 | Scaffold6851 | 150                     | TT                              | CC              | 1947062775               |
| SNP_P4_190380_219  | NW_004520411.1 | Scaffold6851 | 219                     | GG                              | CC              | 1947062776               |
| SNP_P4_190381_381  | NW_004520411.1 | Scaffold6851 | 381                     | AA                              | TT              | 1947062777               |
| SNP_P4_190382_398  | NW_004520411.1 | Scaffold6851 | 398                     | AA                              | CC              | 1947062778               |
| SNP_P4_190383_448  | NW_004520411.1 | Scaffold6851 | 448                     | AA                              | TT              | 1947062779               |
| SNP_P4_190384_467  | NW_004520411.1 | Scaffold6851 | 467                     | GG                              | CC              | 1947062780               |
| SNP_P4_190385_516  | NW_004520411.1 | Scaffold6851 | 516                     | TT                              | CC              | 1947062781               |
| SNP_P4_190386_593  | NW_004520411.1 | Scaffold6851 | 593                     | AA                              | TT              | 1947062782               |
| SNP_P4_190387_669  | NW_004520411.1 | Scaffold6851 | 669                     | GG                              | TT              | 1947062783               |
| SNP_P4_190388_1535 | NW_004520411.1 | Scaffold6851 | 1535                    | TT                              | GG              | 1947062784               |
| SNP_P4_190389_1604 | NW_004520411.1 | Scaffold6851 | 1604                    | AA                              | CC              | 1947062785               |
| SNP_P4_190390_391  | NW_004520412.1 | Scaffold6852 | 391                     | GG                              | CC              | 1947062787               |
| SNP_P4_190391_586  | NW_004520412.1 | Scaffold6852 | 586                     | CC                              | AA              | 1947062789               |
| SNP_P4_190392_120  | NW_004520414.1 | Scaffold6854 | 120                     | TT                              | CC              | 1947062791               |
| SNP_P4_190393_123  | NW_004520414.1 | Scaffold6854 | 123                     | TT                              | AA              | 1947062793               |
| SNP_P4_190394_268  | NW_004520414.1 | Scaffold6854 | 268                     | CC                              | TT              | 1947062795               |
| SNP_P4_190395_342  | NW_004520414.1 | Scaffold6854 | 342                     | CC                              | TT              | 1947062797               |
| SNP_P4_190396_522  | NW_004520414.1 | Scaffold6854 | 522                     | AA                              | GG              | 1947062799               |
| SNP_P4_190397_573  | NW_004520414.1 | Scaffold6854 | 573                     | TT                              | CC              | 1947062801               |
| SNP_P4_190398_584  | NW_004520414.1 | Scaffold6854 | 584                     | AA                              | CC              | 1947062802               |
| SNP_P4_190399_586  | NW_004520414.1 | Scaffold6854 | 586                     | GG                              | AA              | 1947062804               |

| SNPs IDs           | Chromosome IDs | Chromosomes  | Physical positions (bp) | CDC Frontier (Reference genome) | (ILWC46 & LPNB) | NCBI SNPdb Accession IDs |
|--------------------|----------------|--------------|-------------------------|---------------------------------|-----------------|--------------------------|
| SNP_P4_190400_589  | NW_004520414.1 | Scaffold6854 | 589                     | CC                              | TT              | 1947062806               |
| SNP_P4_190401_658  | NW_004520414.1 | Scaffold6854 | 658                     | AA                              | TT              | 1947062808               |
| SNP_P4_190402_704  | NW_004520414.1 | Scaffold6854 | 704                     | AA                              | TT              | 1947062810               |
| SNP_P4_190403_720  | NW_004520414.1 | Scaffold6854 | 720                     | TT                              | AA              | 1947062812               |
| SNP_P4_190404_900  | NW_004520414.1 | Scaffold6854 | 900                     | TT                              | GG              | 1947062814               |
| SNP_P4_190405_962  | NW_004520414.1 | Scaffold6854 | 962                     | AA                              | GG              | 1947062816               |
| SNP_P4_190406_989  | NW_004520414.1 | Scaffold6854 | 989                     | CC                              | TT              | 1947062818               |
| SNP_P4_190407_1008 | NW_004520414.1 | Scaffold6854 | 1008                    | GG                              | AA              | 1947062820               |
| SNP_P4_190409_1029 | NW_004520414.1 | Scaffold6854 | 1029                    | AA                              | TT              | 1947062821               |
| SNP_P4_190410_489  | NW_004520421.1 | Scaffold6867 | 489                     | TT                              | GG              | 1947062823               |
| SNP_P4_190411_505  | NW_004520421.1 | Scaffold6867 | 505                     | TT                              | GG              | 1947062825               |
| SNP_P4_190412_729  | NW_004520421.1 | Scaffold6867 | 729                     | CC                              | TT              | 1947062827               |
| SNP_P4_190413_801  | NW_004520421.1 | Scaffold6867 | 801                     | GG                              | AA              | 1947062829               |
| SNP_P4_190415_147  | NW_004520423.1 | Scaffold6869 | 147                     | TT                              | AA              | 1947062831               |
| SNP_P4_190416_539  | NW_004520423.1 | Scaffold6869 | 539                     | CC                              | GG              | 1947062833               |
| SNP_P4_190417_542  | NW_004520423.1 | Scaffold6869 | 542                     | TT                              | CC              | 1947062835               |
| SNP_P4_190418_602  | NW_004520423.1 | Scaffold6869 | 602                     | AA                              | CC              | 1947062837               |
| SNP_P4_190419_692  | NW_004520423.1 | Scaffold6869 | 692                     | TT                              | CC              | 1947062839               |
| SNP_P4_190420_707  | NW_004520423.1 | Scaffold6869 | 707                     | TT                              | CC              | 1947062841               |
| SNP_P4_190421_1028 | NW_004520425.1 | Scaffold6873 | 1028                    | CC                              | GG              | 1947062843               |
| SNP_P4_190422_1113 | NW_004520425.1 | Scaffold6873 | 1113                    | CC                              | GG              | 1947062845               |
| SNP_P4_190423_1242 | NW_004520425.1 | Scaffold6873 | 1242                    | GG                              | TT              | 1947062847               |
| SNP_P4_190424_1254 | NW_004520425.1 | Scaffold6873 | 1254                    | CC                              | TT              | 1947062849               |
| SNP_P4_190425_1405 | NW_004520425.1 | Scaffold6873 | 1405                    | TT                              | CC              | 1947062851               |
| SNP_P4_190426_1436 | NW_004520425.1 | Scaffold6873 | 1436                    | AA                              | CC              | 1947062853               |
| SNP_P4_190428_1466 | NW_004520425.1 | Scaffold6873 | 1466                    | TT                              | CC              | 1947062855               |
| SNP_P4_190429_1541 | NW_004520425.1 | Scaffold6873 | 1541                    | TT                              | CC              | 1947062857               |
| SNP_P4_190430_1547 | NW_004520425.1 | Scaffold6873 | 1547                    | CC                              | TT              | 1947062859               |
| SNP_P4_190431_1659 | NW_004520427.1 | Scaffold6876 | 1659                    | AA                              | CC              | 1947062861               |
| SNP_P4_190432_1690 | NW_004520427.1 | Scaffold6876 | 1690                    | TT                              | CC              | 1947062863               |
| SNP_P4_190433_1702 | NW_004520427.1 | Scaffold6876 | 1702                    | TT                              | AA              | 1947062865               |
| SNP_P4_190434_1710 | NW_004520427.1 | Scaffold6876 | 1710                    | GG                              | TT              | 1947062866               |
| SNP_P4_190435_1750 | NW_004520427.1 | Scaffold6876 | 1750                    | TT                              | AA              | 1947062868               |
| SNP_P4_190436_1765 | NW_004520427.1 | Scaffold6876 | 1765                    | GG                              | AA              | 1947062870               |
| SNP_P4_190437_1874 | NW_004520427.1 | Scaffold6876 | 1874                    | GG                              | TT              | 1947062872               |
| SNP_P4_190438_1884 | NW_004520427.1 | Scaffold6876 | 1884                    | CC                              | AA              | 1947062874               |
| SNP_P4_190439_1891 | NW_004520427.1 | Scaffold6876 | 1891                    | GG                              | AA              | 1947062876               |
| SNP_P4_190440_1896 | NW_004520427.1 | Scaffold6876 | 1896                    | TT                              | CC              | 1947062878               |
| SNP_P4_190441_1951 | NW_004520427.1 | Scaffold6876 | 1951                    | CC                              | AA              | 1947062880               |
| SNP_P4_190442_1965 | NW_004520427.1 | Scaffold6876 | 1965                    | CC                              | AA              | 1947062882               |
| SNP_P4_190443_1975 | NW_004520427.1 | Scaffold6876 | 1975                    | GG                              | AA              | 1947062884               |
| SNP_P4_190444_2039 | NW_004520427.1 | Scaffold6876 | 2039                    | CC                              | TT              | 1947062886               |



| SNPs IDs           | Chromosome IDs | Chromosomes  | Physical positions (bp) | CDC Frontier (Reference genome) | (ILWC46 & LPNB) | NCBI SNPdb Accession IDs |
|--------------------|----------------|--------------|-------------------------|---------------------------------|-----------------|--------------------------|
| SNP_P4_190445_2124 | NW_004520427.1 | Scaffold6876 | 2124                    | TT                              | CC              | 1947062888               |
| SNP_P4_190446_2126 | NW_004520427.1 | Scaffold6876 | 2126                    | GG                              | AA              | 1947062889               |
| SNP_P4_190447_2127 | NW_004520427.1 | Scaffold6876 | 2127                    | CC                              | AA              | 1947062891               |
| SNP_P4_190448_2142 | NW_004520427.1 | Scaffold6876 | 2142                    | CC                              | AA              | 1947062893               |
| SNP_P4_190449_2144 | NW_004520427.1 | Scaffold6876 | 2144                    | AA                              | GG              | 1947062895               |
| SNP_P4_190450_2163 | NW_004520427.1 | Scaffold6876 | 2163                    | TT                              | CC              | 1947062897               |
| SNP_P4_190451_2164 | NW_004520427.1 | Scaffold6876 | 2164                    | CC                              | TT              | 1947062899               |
| SNP_P4_190452_2193 | NW_004520427.1 | Scaffold6876 | 2193                    | CC                              | TT              | 1947062901               |
| SNP_P4_190453_2242 | NW_004520427.1 | Scaffold6876 | 2242                    | GG                              | AA              | 1947062902               |
| SNP_P4_190454_2259 | NW_004520427.1 | Scaffold6876 | 2259                    | CC                              | AA              | 1947062904               |
| SNP_P4_190455_2290 | NW_004520427.1 | Scaffold6876 | 2290                    | TT                              | CC              | 1947062906               |
| SNP_P4_190456_2546 | NW_004520427.1 | Scaffold6876 | 2546                    | AA                              | GG              | 1947062908               |
| SNP_P4_190457_350  | NW_004520428.1 | Scaffold6877 | 350                     | TT                              | AA              | 1947062910               |
| SNP_P4_190458_437  | NW_004520429.1 | Scaffold6878 | 437                     | AA                              | CC              | 1947062912               |
| SNP_P4_190459_811  | NW_004520429.1 | Scaffold6878 | 811                     | AA                              | GG              | 1947062914               |
| SNP_P4_190460_1637 | NW_004520429.1 | Scaffold6878 | 1637                    | CC                              | TT              | 1947062916               |
| SNP_P4_190462_1881 | NW_004520429.1 | Scaffold6878 | 1881                    | CC                              | GG              | 1947062918               |
| SNP_P4_190463_2078 | NW_004520429.1 | Scaffold6878 | 2078                    | GG                              | AA              | 1947062920               |
| SNP_P4_190464_1656 | NW_004520430.1 | Scaffold6879 | 1656                    | CC                              | AA              | 1947062921               |
| SNP_P4_190465_1658 | NW_004520430.1 | Scaffold6879 | 1658                    | CC                              | GG              | 1947062923               |
| SNP_P4_190466_1854 | NW_004520430.1 | Scaffold6879 | 1854                    | CC                              | TT              | 1947062925               |
| SNP_P4_190467_1862 | NW_004520430.1 | Scaffold6879 | 1862                    | TT                              | GG              | 1947062927               |
| SNP_P4_190468_1885 | NW_004520430.1 | Scaffold6879 | 1885                    | GG                              | CC              | 1947062929               |
| SNP_P4_190469_1896 | NW_004520430.1 | Scaffold6879 | 1896                    | CC                              | AA              | 1947062931               |
| SNP_P4_190470_1930 | NW_004520430.1 | Scaffold6879 | 1930                    | CC                              | TT              | 1947062933               |
| SNP_P4_190471_115  | NW_004520431.1 | Scaffold6882 | 115                     | GG                              | AA              | 1947062935               |
| SNP_P4_190472_204  | NW_004520431.1 | Scaffold6882 | 204                     | CC                              | GG              | 1947062937               |
| SNP_P4_190474_1094 | NW_004520438.1 | Scaffold6895 | 1094                    | GG                              | AA              | 1947062939               |
| SNP_P4_190475_1095 | NW_004520438.1 | Scaffold6895 | 1095                    | AA                              | GG              | 1947062941               |
| SNP_P4_190476_1096 | NW_004520438.1 | Scaffold6895 | 1096                    | TT                              | CC              | 1947062942               |
| SNP_P4_190477_1136 | NW_004520438.1 | Scaffold6895 | 1136                    | GG                              | TT              | 1947062944               |
| SNP_P4_190478_1405 | NW_004520439.1 | Scaffold6896 | 1405                    | CC                              | TT              | 1947062946               |
| SNP_P4_190479_1450 | NW_004520439.1 | Scaffold6896 | 1450                    | CC                              | AA              | 1947062948               |
| SNP_P4_190480_1819 | NW_004520439.1 | Scaffold6896 | 1819                    | GG                              | TT              | 1947062950               |
| SNP_P4_190481_1902 | NW_004520439.1 | Scaffold6896 | 1902                    | CC                              | TT              | 1947062952               |
| SNP_P4_190482_2287 | NW_004520439.1 | Scaffold6896 | 2287                    | CC                              | GG              | 1947062954               |
| SNP_P4_190483_2311 | NW_004520439.1 | Scaffold6896 | 2311                    | AA                              | GG              | 1947062956               |
| SNP_P4_190484_2312 | NW_004520439.1 | Scaffold6896 | 2312                    | TT                              | GG              | 1947062958               |
| SNP_P4_190485_435  | NW_004520444.1 | Scaffold6903 | 435                     | GG                              | AA              | 1947062960               |
| SNP_P4_190486_4824 | NW_004520444.1 | Scaffold6903 | 4824                    | AA                              | GG              | 1947062962               |
| SNP_P4_190487_4907 | NW_004520444.1 | Scaffold6903 | 4907                    | CC                              | AA              | 1947062963               |
| SNP_P4_190488_4934 | NW_004520444.1 | Scaffold6903 | 4934                    | GG                              | AA              | 1947062965               |

| SNPs IDs            | Chromosome IDs | Chromosomes  | Physical positions (bp) | CDC Frontier (Reference genome) | (ILWC46 & LPNB) | NCBI SNPdb Accession IDs |
|---------------------|----------------|--------------|-------------------------|---------------------------------|-----------------|--------------------------|
| SNP_P4_190491_5443  | NW_004520444.1 | Scaffold6903 | 5443                    | CC                              | AA              | 1947062967               |
| SNP_P4_190492_5487  | NW_004520444.1 | Scaffold6903 | 5487                    | TT                              | CC              | 1947062969               |
| SNP_P4_190493_24012 | NW_004520444.1 | Scaffold6903 | 24012                   | GG                              | TT              | 1947062971               |
| SNP_P4_190494_26336 | NW_004520444.1 | Scaffold6903 | 26336                   | GG                              | AA              | 1947062973               |
| SNP_P4_190495_742   | NW_004520448.1 | Scaffold6912 | 742                     | TT                              | GG              | 1947062975               |
| SNP_P4_190496_2607  | NW_004520456.1 | Scaffold6923 | 2607                    | GG                              | AA              | 1947062977               |
| SNP_P4_190497_2730  | NW_004520456.1 | Scaffold6923 | 2730                    | GG                              | TT              | 1947062979               |
| SNP_P4_190498_2927  | NW_004520456.1 | Scaffold6923 | 2927                    | GG                              | CC              | 1947062980               |
| SNP_P4_190499_3077  | NW_004520456.1 | Scaffold6923 | 3077                    | CC                              | AA              | 1947062982               |
| SNP_P4_190500_3119  | NW_004520456.1 | Scaffold6923 | 3119                    | TT                              | GG              | 1947062984               |
| SNP_P4_190501_3120  | NW_004520456.1 | Scaffold6923 | 3120                    | GG                              | TT              | 1947062986               |
| SNP_P4_190502_3238  | NW_004520456.1 | Scaffold6923 | 3238                    | TT                              | CC              | 1947062988               |
| SNP_P4_190503_3276  | NW_004520456.1 | Scaffold6923 | 3276                    | AA                              | GG              | 1947062990               |
| SNP_P4_190504_3595  | NW_004520456.1 | Scaffold6923 | 3595                    | TT                              | CC              | 1947062992               |
| SNP_P4_190505_546   | NW_004520459.1 | Scaffold6926 | 546                     | CC                              | AA              | 1947062994               |
| SNP_P4_190506_695   | NW_004520459.1 | Scaffold6926 | 695                     | TT                              | AA              | 1947062996               |
| SNP_P4_190507_698   | NW_004520459.1 | Scaffold6926 | 698                     | GG                              | CC              | 1947062998               |
| SNP_P4_190508_736   | NW_004520459.1 | Scaffold6926 | 736                     | TT                              | GG              | 1947063000               |
| SNP_P4_190509_747   | NW_004520459.1 | Scaffold6926 | 747                     | GG                              | CC              | 1947063001               |
| SNP_P4_190510_751   | NW_004520459.1 | Scaffold6926 | 751                     | CC                              | TT              | 1947063003               |
| SNP_P4_190511_756   | NW_004520459.1 | Scaffold6926 | 756                     | AA                              | CC              | 1947063005               |
| SNP_P4_190512_765   | NW_004520459.1 | Scaffold6926 | 765                     | AA                              | TT              | 1947063007               |
| SNP_P4_190513_774   | NW_004520459.1 | Scaffold6926 | 774                     | AA                              | CC              | 1947063009               |
| SNP_P4_190514_2489  | NW_004520460.1 | Scaffold6927 | 2489                    | CC                              | GG              | 1947063011               |
| SNP_P4_190515_2550  | NW_004520460.1 | Scaffold6927 | 2550                    | AA                              | TT              | 1947063013               |
| SNP_P4_190516_2650  | NW_004520460.1 | Scaffold6927 | 2650                    | CC                              | TT              | 1947063015               |
| SNP_P4_190517_819   | NW_004520462.1 | Scaffold6932 | 819                     | AA                              | GG              | 1947063017               |
| SNP_P4_190518_1964  | NW_004520462.1 | Scaffold6932 | 1964                    | TT                              | AA              | 1947063019               |
| SNP_P4_190519_238   | NW_004520463.1 | Scaffold6933 | 238                     | AA                              | CC              | 1947063021               |
| SNP_P4_190520_2191  | NW_004520463.1 | Scaffold6933 | 2191                    | GG                              | AA              | 1947063023               |
| SNP_P4_190521_2201  | NW_004520463.1 | Scaffold6933 | 2201                    | AA                              | CC              | 1947063025               |
| SNP_P4_190522_2096  | NW_004520464.1 | Scaffold6934 | 2096                    | CC                              | AA              | 1947063026               |
| SNP_P4_190523_4448  | NW_004520464.1 | Scaffold6934 | 4448                    | CC                              | AA              | 1947063028               |
| SNP_P4_190524_944   | NW_004520466.1 | Scaffold6939 | 944                     | CC                              | TT              | 1947063030               |
| SNP_P4_190525_1027  | NW_004520466.1 | Scaffold6939 | 1027                    | GG                              | AA              | 1947063032               |
| SNP_P4_190526_1181  | NW_004520466.1 | Scaffold6939 | 1181                    | AA                              | GG              | 1947063034               |
| SNP_P4_190527_1495  | NW_004520466.1 | Scaffold6939 | 1495                    | CC                              | AA              | 1947063036               |
| SNP_P4_190528_63    | NW_004520468.1 | Scaffold6941 | 63                      | AA                              | CC              | 1947063038               |
| SNP_P4_190529_71    | NW_004520468.1 | Scaffold6941 | 71                      | AA                              | GG              | 1947063040               |
| SNP_P4_190530_126   | NW_004520468.1 | Scaffold6941 | 126                     | TT                              | CC              | 1947063042               |
| SNP_P4_190531_189   | NW_004520468.1 | Scaffold6941 | 189                     | CC                              | AA              | 1947063044               |
| SNP_P4_190532_195   | NW_004520468.1 | Scaffold6941 | 195                     | GG                              | AA              | 1947063046               |

| SNPs IDs            | Chromosome IDs | Chromosomes  | Physical positions (bp) | CDC Frontier (Reference genome) | (ILWC46 & LPNB) | NCBI SNPdb Accession IDs |
|---------------------|----------------|--------------|-------------------------|---------------------------------|-----------------|--------------------------|
| SNP_P4_190533_213   | NW_004520468.1 | Scaffold6941 | 213                     | TT                              | CC              | 1947063048               |
| SNP_P4_190534_385   | NW_004520468.1 | Scaffold6941 | 385                     | AA                              | TT              | 1947063050               |
| SNP_P4_190535_455   | NW_004520468.1 | Scaffold6941 | 455                     | TT                              | GG              | 1947063052               |
| SNP_P4_190536_5543  | NW_004520468.1 | Scaffold6941 | 5543                    | AA                              | CC              | 1947063054               |
| SNP_P4_190537_64    | NW_004520470.1 | Scaffold6943 | 64                      | CC                              | TT              | 1947063056               |
| SNP_P4_190538_1248  | NW_004520470.1 | Scaffold6943 | 1248                    | AA                              | GG              | 1947063058               |
| SNP_P4_190539_2183  | NW_004520470.1 | Scaffold6943 | 2183                    | TT                              | CC              | 1947063060               |
| SNP_P4_190540_1172  | NW_004520474.1 | Scaffold6947 | 1172                    | AA                              | GG              | 1947063062               |
| SNP_P4_190541_1333  | NW_004520477.1 | Scaffold6951 | 1333                    | GG                              | TT              | 1947063064               |
| SNP_P4_190542_6244  | NW_004520477.1 | Scaffold6951 | 6244                    | GG                              | AA              | 1947063066               |
| SNP_P4_190543_6534  | NW_004520477.1 | Scaffold6951 | 6534                    | CC                              | AA              | 1947063068               |
| SNP_P4_190544_561   | NW_004520483.1 | Scaffold6961 | 561                     | CC                              | AA              | 1947063070               |
| SNP_P4_190545_83    | NW_004520484.1 | Scaffold6963 | 83                      | CC                              | TT              | 1947063072               |
| SNP_P4_190546_419   | NW_004520484.1 | Scaffold6963 | 419                     | TT                              | CC              | 1947063074               |
| SNP_P4_190547_422   | NW_004520484.1 | Scaffold6963 | 422                     | AA                              | CC              | 1947063076               |
| SNP_P4_190548_494   | NW_004520484.1 | Scaffold6963 | 494                     | CC                              | GG              | 1947063078               |
| SNP_P4_190549_656   | NW_004520484.1 | Scaffold6963 | 656                     | GG                              | TT              | 1947063080               |
| SNP_P4_190550_772   | NW_004520484.1 | Scaffold6963 | 772                     | GG                              | CC              | 1947063082               |
| SNP_P4_190551_832   | NW_004520484.1 | Scaffold6963 | 832                     | GG                              | AA              | 1947063084               |
| SNP_P4_190552_328   | NW_004520486.1 | Scaffold6965 | 328                     | GG                              | AA              | 1947063086               |
| SNP_P4_190553_1414  | NW_004520487.1 | Scaffold6968 | 1414                    | CC                              | TT              | 1947063087               |
| SNP_P4_190554_1417  | NW_004520487.1 | Scaffold6968 | 1417                    | TT                              | AA              | 1947063089               |
| SNP_P4_190555_1889  | NW_004520487.1 | Scaffold6968 | 1889                    | TT                              | CC              | 1947063091               |
| SNP_P4_190556_1925  | NW_004520487.1 | Scaffold6968 | 1925                    | GG                              | TT              | 1947063093               |
| SNP_P4_190557_428   | NW_004520491.1 | Scaffold6975 | 428                     | AA                              | TT              | 1947063095               |
| SNP_P4_190558_432   | NW_004520491.1 | Scaffold6975 | 432                     | TT                              | GG              | 1947063097               |
| SNP_P4_190559_433   | NW_004520491.1 | Scaffold6975 | 433                     | GG                              | TT              | 1947063099               |
| SNP_P4_190560_1146  | NW_004520491.1 | Scaffold6975 | 1146                    | AA                              | TT              | 1947063101               |
| SNP_P4_190561_15765 | NW_004520496.1 | Scaffold6980 | 15765                   | TT                              | CC              | 1947063103               |
| SNP_P4_190563_26774 | NW_004520496.1 | Scaffold6980 | 26774                   | GG                              | AA              | 1947063105               |
| SNP_P4_190564_40868 | NW_004520496.1 | Scaffold6980 | 40868                   | AA                              | GG              | 1947063107               |
| SNP_P4_190565_69363 | NW_004520496.1 | Scaffold6980 | 69363                   | AA                              | GG              | 1947063110               |
| SNP_P4_190566_69626 | NW_004520496.1 | Scaffold6980 | 69626                   | AA                              | GG              | 1947063113               |
| SNP_P4_190567_1238  | NW_004520497.1 | Scaffold6981 | 1238                    | TT                              | AA              | 1947063116               |
| SNP_P4_190569_1230  | NW_004520499.1 | Scaffold6985 | 1230                    | TT                              | AA              | 1947063118               |
| SNP_P4_190570_587   | NW_004520504.1 | Scaffold6995 | 587                     | AA                              | TT              | 1947063121               |
| SNP_P4_190572_883   | NW_004520504.1 | Scaffold6995 | 883                     | GG                              | TT              | 1947063124               |
| SNP_P4_190573_920   | NW_004520504.1 | Scaffold6995 | 920                     | GG                              | AA              | 1947063126               |
| SNP_P4_190574_992   | NW_004520504.1 | Scaffold6995 | 992                     | GG                              | CC              | 1947063128               |
| SNP_P4_190575_1472  | NW_004520506.1 | Scaffold6999 | 1472                    | AA                              | TT              | 1947063130               |
| SNP_P4_190576_487   | NW_004520513.1 | Scaffold7010 | 487                     | TT                              | CC              | 1947063132               |
| SNP_P4_190577_976   | NW_004520513.1 | Scaffold7010 | 976                     | TT                              | GG              | 1947063134               |

| SNPs IDs           | Chromosome IDs | Chromosomes  | Physical positions (bp) | CDC Frontier (Reference genome) | (ILWC46 & LPNB) | NCBI SNPdb Accession IDs |
|--------------------|----------------|--------------|-------------------------|---------------------------------|-----------------|--------------------------|
| SNP_P4_190578_1304 | NW_004520513.1 | Scaffold7010 | 1304                    | AA                              | GG              | 1947063136               |
| SNP_P4_190579_1324 | NW_004520513.1 | Scaffold7010 | 1324                    | GG                              | AA              | 1947063138               |
| SNP_P4_190580_1690 | NW_004520513.1 | Scaffold7010 | 1690                    | TT                              | AA              | 1947063140               |
| SNP_P4_190581_814  | NW_004520518.1 | Scaffold7021 | 814                     | TT                              | CC              | 1947063142               |
| SNP_P4_190582_844  | NW_004520518.1 | Scaffold7021 | 844                     | AA                              | TT              | 1947063144               |
| SNP_P4_190584_1552 | NW_004520521.1 | Scaffold7033 | 1552                    | AA                              | TT              | 1947063146               |
| SNP_P4_190585_1554 | NW_004520521.1 | Scaffold7033 | 1554                    | TT                              | GG              | 1947063148               |
| SNP_P4_190586_2049 | NW_004520521.1 | Scaffold7033 | 2049                    | TT                              | AA              | 1947063150               |
| SNP_P4_190587_311  | NW_004520522.1 | Scaffold7034 | 311                     | CC                              | AA              | 1947063152               |
| SNP_P4_190588_327  | NW_004520522.1 | Scaffold7034 | 327                     | AA                              | GG              | 1947063154               |
| SNP_P4_190589_517  | NW_004520522.1 | Scaffold7034 | 517                     | CC                              | GG              | 1947063156               |
| SNP_P4_190590_702  | NW_004520522.1 | Scaffold7034 | 702                     | TT                              | CC              | 1947063158               |
| SNP_P4_190592_1260 | NW_004520526.1 | Scaffold7038 | 1260                    | TT                              | CC              | 1947063160               |
| SNP_P4_190594_22   | NW_004520528.1 | Scaffold7041 | 22                      | AA                              | TT              | 1947063162               |
| SNP_P4_190595_35   | NW_004520528.1 | Scaffold7041 | 35                      | AA                              | GG              | 1947063164               |
| SNP_P4_190596_64   | NW_004520528.1 | Scaffold7041 | 64                      | TT                              | AA              | 1947063166               |
| SNP_P4_190597_65   | NW_004520528.1 | Scaffold7041 | 65                      | TT                              | GG              | 1947063168               |
| SNP_P4_190598_79   | NW_004520528.1 | Scaffold7041 | 79                      | TT                              | CC              | 1947063170               |
| SNP_P4_190599_95   | NW_004520528.1 | Scaffold7041 | 95                      | AA                              | GG              | 1947063172               |
| SNP_P4_190600_142  | NW_004520528.1 | Scaffold7041 | 142                     | CC                              | TT              | 1947063174               |
| SNP_P4_190601_166  | NW_004520528.1 | Scaffold7041 | 166                     | TT                              | GG              | 1947063176               |
| SNP_P4_190602_183  | NW_004520528.1 | Scaffold7041 | 183                     | GG                              | TT              | 1947063178               |
| SNP_P4_190603_185  | NW_004520528.1 | Scaffold7041 | 185                     | AA                              | GG              | 1947063180               |
| SNP_P4_190604_186  | NW_004520528.1 | Scaffold7041 | 186                     | GG                              | AA              | 1947063182               |
| SNP_P4_190605_560  | NW_004520528.1 | Scaffold7041 | 560                     | GG                              | AA              | 1947063184               |
| SNP_P4_190606_808  | NW_004520528.1 | Scaffold7041 | 808                     | AA                              | TT              | 1947063186               |
| SNP_P4_190607_1019 | NW_004520528.1 | Scaffold7041 | 1019                    | CC                              | TT              | 1947063188               |
| SNP_P4_190608_1039 | NW_004520528.1 | Scaffold7041 | 1039                    | TT                              | AA              | 1947063190               |
| SNP_P4_190609_1064 | NW_004520528.1 | Scaffold7041 | 1064                    | GG                              | TT              | 1947063192               |
| SNP_P4_190610_1177 | NW_004520530.1 | Scaffold7046 | 1177                    | CC                              | TT              | 1947063194               |
| SNP_P4_190612_80   | NW_004520532.1 | Scaffold7048 | 80                      | CC                              | TT              | 1947063196               |
| SNP_P4_190614_649  | NW_004520532.1 | Scaffold7048 | 649                     | AA                              | TT              | 1947063198               |
| SNP_P4_190615_64   | NW_004520535.1 | Scaffold7055 | 64                      | AA                              | GG              | 1947063200               |
| SNP_P4_190617_652  | NW_004520535.1 | Scaffold7055 | 652                     | TT                              | AA              | 1947063202               |
| SNP_P4_190618_674  | NW_004520535.1 | Scaffold7055 | 674                     | TT                              | GG              | 1947063204               |
| SNP_P4_190619_707  | NW_004520535.1 | Scaffold7055 | 707                     | TT                              | GG              | 1947063206               |
| SNP_P4_190620_145  | NW_004520537.1 | Scaffold7059 | 145                     | GG                              | TT              | 1947063208               |
| SNP_P4_190621_440  | NW_004520537.1 | Scaffold7059 | 440                     | CC                              | TT              | 1947063210               |
| SNP_P4_190622_662  | NW_004520537.1 | Scaffold7059 | 662                     | GG                              | AA              | 1947063212               |
| SNP_P4_190623_794  | NW_004520537.1 | Scaffold7059 | 794                     | TT                              | GG              | 1947063214               |
| SNP_P4_190624_805  | NW_004520537.1 | Scaffold7059 | 805                     | GG                              | AA              | 1947063216               |
| SNP_P4_190625_808  | NW_004520537.1 | Scaffold7059 | 808                     | TT                              | GG              | 1947063218               |

| SNPs IDs           | Chromosome IDs | Chromosomes  | Physical positions (bp) | CDC Frontier (Reference genome) | (ILWC46 & LPNB) | NCBI SNPdb Accession IDs |
|--------------------|----------------|--------------|-------------------------|---------------------------------|-----------------|--------------------------|
| SNP_P4_190626_1052 | NW_004520537.1 | Scaffold7059 | 1052                    | GG                              | AA              | 1947063220               |
| SNP_P4_190627_1107 | NW_004520537.1 | Scaffold7059 | 1107                    | GG                              | CC              | 1947063222               |
| SNP_P4_190628_1111 | NW_004520537.1 | Scaffold7059 | 1111                    | GG                              | CC              | 1947063224               |
| SNP_P4_190629_1288 | NW_004520537.1 | Scaffold7059 | 1288                    | GG                              | AA              | 1947063226               |
| SNP_P4_190630_1291 | NW_004520537.1 | Scaffold7059 | 1291                    | AA                              | GG              | 1947063228               |
| SNP_P4_190631_1323 | NW_004520537.1 | Scaffold7059 | 1323                    | AA                              | GG              | 1947063230               |
| SNP_P4_190632_1390 | NW_004520537.1 | Scaffold7059 | 1390                    | TT                              | CC              | 1947063232               |
| SNP_P4_190633_1402 | NW_004520537.1 | Scaffold7059 | 1402                    | AA                              | GG              | 1947063234               |
| SNP_P4_190634_78   | NW_004520538.1 | Scaffold7060 | 78                      | GG                              | AA              | 1947063236               |
| SNP_P4_190635_79   | NW_004520538.1 | Scaffold7060 | 79                      | GG                              | CC              | 1947063238               |
| SNP_P4_190636_136  | NW_004520538.1 | Scaffold7060 | 136                     | AA                              | GG              | 1947063240               |
| SNP_P4_190637_256  | NW_004520538.1 | Scaffold7060 | 256                     | AA                              | GG              | 1947063242               |
| SNP_P4_190638_416  | NW_004520538.1 | Scaffold7060 | 416                     | AA                              | GG              | 1947063244               |
| SNP_P4_190639_539  | NW_004520538.1 | Scaffold7060 | 539                     | AA                              | CC              | 1947063246               |
| SNP_P4_190640_545  | NW_004520538.1 | Scaffold7060 | 545                     | AA                              | GG              | 1947063248               |
| SNP_P4_190641_555  | NW_004520538.1 | Scaffold7060 | 555                     | TT                              | CC              | 1947063250               |
| SNP_P4_190642_576  | NW_004520538.1 | Scaffold7060 | 576                     | TT                              | GG              | 1947063252               |
| SNP_P4_190643_609  | NW_004520538.1 | Scaffold7060 | 609                     | CC                              | TT              | 1947063254               |
| SNP_P4_190644_610  | NW_004520538.1 | Scaffold7060 | 610                     | GG                              | AA              | 1947063256               |
| SNP_P4_190645_120  | NW_004520539.1 | Scaffold7063 | 120                     | GG                              | TT              | 1947063258               |
| SNP_P4_190646_164  | NW_004520539.1 | Scaffold7063 | 164                     | TT                              | GG              | 1947063260               |
| SNP_P4_190647_262  | NW_004520539.1 | Scaffold7063 | 262                     | TT                              | CC              | 1947063262               |
| SNP_P4_190648_313  | NW_004520539.1 | Scaffold7063 | 313                     | TT                              | GG              | 1947063264               |
| SNP_P4_190649_947  | NW_004520540.1 | Scaffold7067 | 947                     | TT                              | CC              | 1947063266               |
| SNP_P4_190650_949  | NW_004520540.1 | Scaffold7067 | 949                     | TT                              | CC              | 1947063269               |
| SNP_P4_190651_950  | NW_004520540.1 | Scaffold7067 | 950                     | TT                              | CC              | 1947063271               |
| SNP_P4_190652_951  | NW_004520540.1 | Scaffold7067 | 951                     | GG                              | TT              | 1947063273               |
| SNP_P4_190653_952  | NW_004520540.1 | Scaffold7067 | 952                     | GG                              | AA              | 1947063275               |
| SNP_P4_190654_2331 | NW_004520548.1 | Scaffold7081 | 2331                    | GG                              | TT              | 1947063277               |
| SNP_P4_190655_2423 | NW_004520548.1 | Scaffold7081 | 2423                    | GG                              | TT              | 1947063279               |
| SNP_P4_190656_2441 | NW_004520548.1 | Scaffold7081 | 2441                    | AA                              | GG              | 1947063281               |
| SNP_P4_190658_2470 | NW_004520548.1 | Scaffold7081 | 2470                    | TT                              | CC              | 1947063283               |
| SNP_P4_190659_2542 | NW_004520548.1 | Scaffold7081 | 2542                    | CC                              | TT              | 1947063285               |
| SNP_P4_190661_2567 | NW_004520548.1 | Scaffold7081 | 2567                    | AA                              | GG              | 1947063287               |
| SNP_P4_190662_2568 | NW_004520548.1 | Scaffold7081 | 2568                    | GG                              | AA              | 1947063289               |
| SNP_P4_190663_2589 | NW_004520548.1 | Scaffold7081 | 2589                    | CC                              | TT              | 1947063291               |
| SNP_P4_190664_2657 | NW_004520548.1 | Scaffold7081 | 2657                    | TT                              | GG              | 1947063293               |
| SNP_P4_190665_2695 | NW_004520548.1 | Scaffold7081 | 2695                    | TT                              | CC              | 1947063295               |
| SNP_P4_190666_2720 | NW_004520548.1 | Scaffold7081 | 2720                    | TT                              | GG              | 1947063297               |
| SNP_P4_190668_4371 | NW_004520548.1 | Scaffold7081 | 4371                    | TT                              | AA              | 1947063299               |
| SNP_P4_190669_359  | NW_004520549.1 | Scaffold7082 | 359                     | TT                              | CC              | 1947063301               |
| SNP_P4_190670_512  | NW_004520549.1 | Scaffold7082 | 512                     | AA                              | CC              | 1947063303               |

| SNPs IDs           | Chromosome IDs | Chromosomes  | Physical positions (bp) | CDC Frontier (Reference genome) | (ILWC46 & LPNB) | NCBI SNPdb Accession IDs |
|--------------------|----------------|--------------|-------------------------|---------------------------------|-----------------|--------------------------|
| SNP_P4_190671_581  | NW_004520549.1 | Scaffold7082 | 581                     | TT                              | CC              | 1947063305               |
| SNP_P4_190672_647  | NW_004520549.1 | Scaffold7082 | 647                     | GG                              | TT              | 1947063307               |
| SNP_P4_190673_673  | NW_004520549.1 | Scaffold7082 | 673                     | AA                              | GG              | 1947063309               |
| SNP_P4_190674_734  | NW_004520549.1 | Scaffold7082 | 734                     | AA                              | CC              | 1947063311               |
| SNP_P4_190675_807  | NW_004520549.1 | Scaffold7082 | 807                     | AA                              | GG              | 1947063313               |
| SNP_P4_190677_439  | NW_004520551.1 | Scaffold7085 | 439                     | AA                              | CC              | 1947063315               |
| SNP_P4_190678_1929 | NW_004520554.1 | Scaffold7090 | 1929                    | AA                              | GG              | 1947063317               |
| SNP_P4_190679_1951 | NW_004520554.1 | Scaffold7090 | 1951                    | TT                              | CC              | 1947063319               |
| SNP_P4_190680_1991 | NW_004520554.1 | Scaffold7090 | 1991                    | AA                              | GG              | 1947063321               |
| SNP_P4_190681_2006 | NW_004520554.1 | Scaffold7090 | 2006                    | AA                              | TT              | 1947063323               |
| SNP_P4_190682_2015 | NW_004520554.1 | Scaffold7090 | 2015                    | GG                              | AA              | 1947063325               |
| SNP_P4_190683_2021 | NW_004520554.1 | Scaffold7090 | 2021                    | CC                              | TT              | 1947063327               |
| SNP_P4_190684_2194 | NW_004520554.1 | Scaffold7090 | 2194                    | AA                              | GG              | 1947063329               |
| SNP_P4_190685_2199 | NW_004520554.1 | Scaffold7090 | 2199                    | GG                              | AA              | 1947063331               |
| SNP_P4_190686_217  | NW_004520555.1 | Scaffold7091 | 217                     | CC                              | AA              | 1947063333               |
| SNP_P4_190687_278  | NW_004520555.1 | Scaffold7091 | 278                     | GG                              | AA              | 1947063335               |
| SNP_P4_190688_569  | NW_004520555.1 | Scaffold7091 | 569                     | GG                              | AA              | 1947063337               |
| SNP_P4_190689_597  | NW_004520555.1 | Scaffold7091 | 597                     | CC                              | TT              | 1947063339               |
| SNP_P4_190690_916  | NW_004520555.1 | Scaffold7091 | 916                     | AA                              | GG              | 1947063341               |
| SNP_P4_190691_1022 | NW_004520555.1 | Scaffold7091 | 1022                    | TT                              | CC              | 1947063343               |
| SNP_P4_190692_1143 | NW_004520555.1 | Scaffold7091 | 1143                    | TT                              | CC              | 1947063345               |
| SNP_P4_190693_1184 | NW_004520555.1 | Scaffold7091 | 1184                    | GG                              | AA              | 1947063347               |
| SNP_P4_190694_1185 | NW_004520555.1 | Scaffold7091 | 1185                    | AA                              | TT              | 1947063350               |
| SNP_P4_190695_1242 | NW_004520555.1 | Scaffold7091 | 1242                    | AA                              | GG              | 1947063352               |
| SNP_P4_190696_1271 | NW_004520555.1 | Scaffold7091 | 1271                    | GG                              | AA              | 1947063354               |
| SNP_P4_190697_1347 | NW_004520555.1 | Scaffold7091 | 1347                    | GG                              | CC              | 1947063356               |
| SNP_P4_190698_1382 | NW_004520555.1 | Scaffold7091 | 1382                    | TT                              | GG              | 1947063358               |
| SNP_P4_190699_1390 | NW_004520555.1 | Scaffold7091 | 1390                    | TT                              | CC              | 1947063360               |
| SNP_P4_190700_1530 | NW_004520555.1 | Scaffold7091 | 1530                    | TT                              | GG              | 1947063362               |
| SNP_P4_190701_1581 | NW_004520555.1 | Scaffold7091 | 1581                    | GG                              | TT              | 1947063364               |
| SNP_P4_190702_1702 | NW_004520555.1 | Scaffold7091 | 1702                    | AA                              | CC              | 1947063366               |
| SNP_P4_190703_54   | NW_004520558.1 | Scaffold7095 | 54                      | TT                              | CC              | 1947063368               |
| SNP_P4_190704_64   | NW_004520558.1 | Scaffold7095 | 64                      | TT                              | CC              | 1947063370               |
| SNP_P4_190705_79   | NW_004520558.1 | Scaffold7095 | 79                      | AA                              | GG              | 1947063372               |
| SNP_P4_190706_293  | NW_004520558.1 | Scaffold7095 | 293                     | TT                              | CC              | 1947063374               |
| SNP_P4_190707_448  | NW_004520558.1 | Scaffold7095 | 448                     | TT                              | CC              | 1947063376               |
| SNP_P4_190708_645  | NW_004520558.1 | Scaffold7095 | 645                     | CC                              | TT              | 1947063378               |
| SNP_P4_190709_647  | NW_004520558.1 | Scaffold7095 | 647                     | GG                              | AA              | 1947063380               |
| SNP_P4_190710_4728 | NW_004520558.1 | Scaffold7095 | 4728                    | AA                              | CC              | 1947063382               |
| SNP_P4_190711_4862 | NW_004520558.1 | Scaffold7095 | 4862                    | CC                              | TT              | 1947063384               |
| SNP_P4_190712_5048 | NW_004520558.1 | Scaffold7095 | 5048                    | AA                              | CC              | 1947063386               |
| SNP_P4_190713_5126 | NW_004520558.1 | Scaffold7095 | 5126                    | TT                              | GG              | 1947063388               |

| SNPs IDs            | Chromosome IDs | Chromosomes  | Physical positions (bp) | CDC Frontier (Reference genome) | (ILWC46 & LPNB) | NCBI SNPdb Accession IDs |
|---------------------|----------------|--------------|-------------------------|---------------------------------|-----------------|--------------------------|
| SNP_P4_190714_5143  | NW_004520558.1 | Scaffold7095 | 5143                    | AA                              | GG              | 1947063390               |
| SNP_P4_190715_5440  | NW_004520558.1 | Scaffold7095 | 5440                    | GG                              | CC              | 1947063392               |
| SNP_P4_190716_5510  | NW_004520558.1 | Scaffold7095 | 5510                    | AA                              | CC              | 1947063394               |
| SNP_P4_190717_5520  | NW_004520558.1 | Scaffold7095 | 5520                    | TT                              | CC              | 1947063396               |
| SNP_P4_190718_5560  | NW_004520558.1 | Scaffold7095 | 5560                    | CC                              | GG              | 1947063398               |
| SNP_P4_190719_5602  | NW_004520558.1 | Scaffold7095 | 5602                    | GG                              | AA              | 1947063400               |
| SNP_P4_190720_5732  | NW_004520558.1 | Scaffold7095 | 5732                    | TT                              | GG              | 1947063402               |
| SNP_P4_190721_5807  | NW_004520558.1 | Scaffold7095 | 5807                    | TT                              | CC              | 1947063404               |
| SNP_P4_190722_1771  | NW_004520561.1 | Scaffold7102 | 1771                    | AA                              | CC              | 1947063406               |
| SNP_P4_190723_1796  | NW_004520561.1 | Scaffold7102 | 1796                    | TT                              | GG              | 1947063408               |
| SNP_P4_190724_1914  | NW_004520561.1 | Scaffold7102 | 1914                    | CC                              | AA              | 1947063410               |
| SNP_P4_190725_2080  | NW_004520561.1 | Scaffold7102 | 2080                    | CC                              | TT              | 1947063412               |
| SNP_P4_190726_1041  | NW_004520562.1 | Scaffold7104 | 1041                    | CC                              | GG              | 1947063414               |
| SNP_P4_190729_11941 | NW_004520565.1 | Scaffold7107 | 11941                   | GG                              | AA              | 1947063416               |
| SNP_P4_190730_12077 | NW_004520565.1 | Scaffold7107 | 12077                   | GG                              | TT              | 1947063418               |
| SNP_P4_190731_12200 | NW_004520565.1 | Scaffold7107 | 12200                   | TT                              | CC              | 1947063420               |
| SNP_P4_190732_12205 | NW_004520565.1 | Scaffold7107 | 12205                   | TT                              | CC              | 1947063422               |
| SNP_P4_190733_12224 | NW_004520565.1 | Scaffold7107 | 12224                   | TT                              | CC              | 1947063424               |
| SNP_P4_190734_12375 | NW_004520565.1 | Scaffold7107 | 12375                   | AA                              | TT              | 1947063426               |
| SNP_P4_190735_12458 | NW_004520565.1 | Scaffold7107 | 12458                   | AA                              | TT              | 1947063428               |
| SNP_P4_190736_12589 | NW_004520565.1 | Scaffold7107 | 12589                   | TT                              | GG              | 1947063430               |
| SNP_P4_190737_12647 | NW_004520565.1 | Scaffold7107 | 12647                   | AA                              | GG              | 1947063432               |
| SNP_P4_190738_12661 | NW_004520565.1 | Scaffold7107 | 12661                   | TT                              | CC              | 1947063434               |
| SNP_P4_190739_12662 | NW_004520565.1 | Scaffold7107 | 12662                   | GG                              | TT              | 1947063436               |
| SNP_P4_190740_12681 | NW_004520565.1 | Scaffold7107 | 12681                   | CC                              | TT              | 1947063438               |
| SNP_P4_190741_12697 | NW_004520565.1 | Scaffold7107 | 12697                   | TT                              | AA              | 1947063440               |
| SNP_P4_190742_12765 | NW_004520565.1 | Scaffold7107 | 12765                   | GG                              | AA              | 1947063442               |
| SNP_P4_190743_12805 | NW_004520565.1 | Scaffold7107 | 12805                   | AA                              | GG              | 1947063444               |
| SNP_P4_190745_12860 | NW_004520565.1 | Scaffold7107 | 12860                   | CC                              | TT              | 1947063446               |
| SNP_P4_190746_13170 | NW_004520565.1 | Scaffold7107 | 13170                   | GG                              | AA              | 1947063448               |
| SNP_P4_190747_13256 | NW_004520565.1 | Scaffold7107 | 13256                   | AA                              | GG              | 1947063450               |
| SNP_P4_190748_13266 | NW_004520565.1 | Scaffold7107 | 13266                   | TT                              | CC              | 1947063452               |
| SNP_P4_190749_13299 | NW_004520565.1 | Scaffold7107 | 13299                   | CC                              | GG              | 1947063454               |
| SNP_P4_190752_13483 | NW_004520565.1 | Scaffold7107 | 13483                   | GG                              | AA              | 1947063456               |
| SNP_P4_190753_13978 | NW_004520565.1 | Scaffold7107 | 13978                   | AA                              | GG              | 1947063458               |
| SNP_P4_190754_14260 | NW_004520565.1 | Scaffold7107 | 14260                   | CC                              | TT              | 1947063460               |
| SNP_P4_190755_14298 | NW_004520565.1 | Scaffold7107 | 14298                   | AA                              | CC              | 1947063462               |
| SNP_P4_190756_14314 | NW_004520565.1 | Scaffold7107 | 14314                   | CC                              | AA              | 1947063464               |
| SNP_P4_190760_14926 | NW_004520565.1 | Scaffold7107 | 14926                   | GG                              | AA              | 1947063466               |
| SNP_P4_190762_16188 | NW_004520565.1 | Scaffold7107 | 16188                   | CC                              | TT              | 1947063468               |
| SNP_P4_190763_16244 | NW_004520565.1 | Scaffold7107 | 16244                   | TT                              | AA              | 1947063470               |
| SNP_P4_190764_16246 | NW_004520565.1 | Scaffold7107 | 16246                   | AA                              | TT              | 1947063473               |

| SNPs IDs            | Chromosome IDs | Chromosomes  | Physical positions (bp) | CDC Frontier (Reference genome) | (ILWC46 & LPNB) | NCBI SNPdb Accession IDs |
|---------------------|----------------|--------------|-------------------------|---------------------------------|-----------------|--------------------------|
| SNP_P4_190765_16256 | NW_004520565.1 | Scaffold7107 | 16256                   | CC                              | TT              | 1947063475               |
| SNP_P4_190768_17685 | NW_004520565.1 | Scaffold7107 | 17685                   | GG                              | AA              | 1947063477               |
| SNP_P4_190769_17851 | NW_004520565.1 | Scaffold7107 | 17851                   | GG                              | AA              | 1947063479               |
| SNP_P4_190770_17898 | NW_004520565.1 | Scaffold7107 | 17898                   | CC                              | TT              | 1947063481               |
| SNP_P4_190772_18065 | NW_004520565.1 | Scaffold7107 | 18065                   | GG                              | AA              | 1947063483               |
| SNP_P4_190773_18181 | NW_004520565.1 | Scaffold7107 | 18181                   | GG                              | AA              | 1947063485               |
| SNP_P4_190774_19880 | NW_004520565.1 | Scaffold7107 | 19880                   | AA                              | GG              | 1947063487               |
| SNP_P4_190775_19930 | NW_004520565.1 | Scaffold7107 | 19930                   | GG                              | CC              | 1947063489               |
| SNP_P4_190776_20314 | NW_004520565.1 | Scaffold7107 | 20314                   | AA                              | GG              | 1947063491               |
| SNP_P4_190777_20332 | NW_004520565.1 | Scaffold7107 | 20332                   | TT                              | CC              | 1947063493               |
| SNP_P4_190778_20374 | NW_004520565.1 | Scaffold7107 | 20374                   | CC                              | TT              | 1947063495               |
| SNP_P4_190779_21074 | NW_004520565.1 | Scaffold7107 | 21074                   | TT                              | AA              | 1947063497               |
| SNP_P4_190780_21376 | NW_004520565.1 | Scaffold7107 | 21376                   | GG                              | AA              | 1947063499               |
| SNP_P4_190781_21879 | NW_004520565.1 | Scaffold7107 | 21879                   | TT                              | CC              | 1947063501               |
| SNP_P4_190782_22206 | NW_004520565.1 | Scaffold7107 | 22206                   | CC                              | AA              | 1947063503               |
| SNP_P4_190784_25880 | NW_004520565.1 | Scaffold7107 | 25880                   | AA                              | CC              | 1947063505               |
| SNP_P4_190785_25944 | NW_004520565.1 | Scaffold7107 | 25944                   | TT                              | CC              | 1947063507               |
| SNP_P4_190786_26575 | NW_004520565.1 | Scaffold7107 | 26575                   | GG                              | TT              | 1947063509               |
| SNP_P4_190787_746   | NW_004520566.1 | Scaffold7108 | 746                     | AA                              | CC              | 1947063511               |
| SNP_P4_190788_998   | NW_004520566.1 | Scaffold7108 | 998                     | GG                              | TT              | 1947063513               |
| SNP_P4_190789_1016  | NW_004520566.1 | Scaffold7108 | 1016                    | AA                              | CC              | 1947063515               |
| SNP_P4_190790_1018  | NW_004520566.1 | Scaffold7108 | 1018                    | AA                              | GG              | 1947063517               |
| SNP_P4_190791_1042  | NW_004520566.1 | Scaffold7108 | 1042                    | TT                              | AA              | 1947063519               |
| SNP_P4_190792_1082  | NW_004520566.1 | Scaffold7108 | 1082                    | TT                              | GG              | 1947063521               |
| SNP_P4_190793_1090  | NW_004520566.1 | Scaffold7108 | 1090                    | AA                              | GG              | 1947063523               |
| SNP_P4_190794_1095  | NW_004520566.1 | Scaffold7108 | 1095                    | GG                              | AA              | 1947063525               |
| SNP_P4_190795_1099  | NW_004520566.1 | Scaffold7108 | 1099                    | CC                              | AA              | 1947063527               |
| SNP_P4_190796_1128  | NW_004520566.1 | Scaffold7108 | 1128                    | CC                              | AA              | 1947063529               |
| SNP_P4_190797_1213  | NW_004520566.1 | Scaffold7108 | 1213                    | TT                              | GG              | 1947063531               |
| SNP_P4_190798_2289  | NW_004520566.1 | Scaffold7108 | 2289                    | AA                              | TT              | 1947063533               |
| SNP_P4_190799_2293  | NW_004520566.1 | Scaffold7108 | 2293                    | AA                              | GG              | 1947063535               |
| SNP_P4_190800_5458  | NW_004520566.1 | Scaffold7108 | 5458                    | AA                              | GG              | 1947063537               |
| SNP_P4_190801_5490  | NW_004520566.1 | Scaffold7108 | 5490                    | TT                              | AA              | 1947063539               |
| SNP_P4_190802_5691  | NW_004520566.1 | Scaffold7108 | 5691                    | CC                              | TT              | 1947063541               |
| SNP_P4_190803_5779  | NW_004520566.1 | Scaffold7108 | 5779                    | CC                              | AA              | 1947063543               |
| SNP_P4_190804_5781  | NW_004520566.1 | Scaffold7108 | 5781                    | AA                              | TT              | 1947063545               |
| SNP_P4_190805_5918  | NW_004520566.1 | Scaffold7108 | 5918                    | TT                              | GG              | 1947063547               |
| SNP_P4_190806_6040  | NW_004520566.1 | Scaffold7108 | 6040                    | GG                              | AA              | 1947063549               |
| SNP_P4_190807_6092  | NW_004520566.1 | Scaffold7108 | 6092                    | AA                              | GG              | 1947063551               |
| SNP_P4_190808_6107  | NW_004520566.1 | Scaffold7108 | 6107                    | GG                              | AA              | 1947063553               |
| SNP_P4_190809_6138  | NW_004520566.1 | Scaffold7108 | 6138                    | GG                              | CC              | 1947063555               |
| SNP_P4_190811_2699  | NW_004520567.1 | Scaffold7109 | 2699                    | TT                              | CC              | 1947063557               |



| SNPs IDs           | Chromosome IDs | Chromosomes  | Physical positions (bp) | CDC Frontier (Reference genome) | (ILWC46 & LPNB) | NCBI SNPdb Accession IDs |
|--------------------|----------------|--------------|-------------------------|---------------------------------|-----------------|--------------------------|
| SNP_P4_190812_895  | NW_004520572.1 | Scaffold7114 | 895                     | TT                              | CC              | 1947063559               |
| SNP_P4_190813_1178 | NW_004520572.1 | Scaffold7114 | 1178                    | CC                              | TT              | 1947063561               |
| SNP_P4_190814_1215 | NW_004520572.1 | Scaffold7114 | 1215                    | TT                              | CC              | 1947063563               |
| SNP_P4_190815_1247 | NW_004520572.1 | Scaffold7114 | 1247                    | TT                              | CC              | 1947063565               |
| SNP_P4_190816_1259 | NW_004520572.1 | Scaffold7114 | 1259                    | TT                              | AA              | 1947063567               |
| SNP_P4_190817_833  | NW_004520581.1 | Scaffold7129 | 833                     | TT                              | CC              | 1947063569               |
| SNP_P4_190818_583  | NW_004520585.1 | Scaffold7134 | 583                     | GG                              | AA              | 1947063571               |
| SNP_P4_190819_741  | NW_004520585.1 | Scaffold7134 | 741                     | AA                              | CC              | 1947063573               |
| SNP_P4_190820_1033 | NW_004520589.1 | Scaffold7144 | 1033                    | GG                              | AA              | 1947063575               |
| SNP_P4_190821_1104 | NW_004520589.1 | Scaffold7144 | 1104                    | GG                              | AA              | 1947063577               |
| SNP_P4_190822_457  | NW_004520592.1 | Scaffold7148 | 457                     | AA                              | GG              | 1947063579               |
| SNP_P4_190823_493  | NW_004520592.1 | Scaffold7148 | 493                     | CC                              | AA              | 1947063581               |
| SNP_P4_190824_534  | NW_004520592.1 | Scaffold7148 | 534                     | CC                              | TT              | 1947063583               |
| SNP_P4_190825_2783 | NW_004520592.1 | Scaffold7148 | 2783                    | TT                              | CC              | 1947063585               |
| SNP_P4_190826_3055 | NW_004520592.1 | Scaffold7148 | 3055                    | CC                              | GG              | 1947063587               |
| SNP_P4_190827_3179 | NW_004520592.1 | Scaffold7148 | 3179                    | CC                              | TT              | 1947063589               |
| SNP_P4_190828_3232 | NW_004520592.1 | Scaffold7148 | 3232                    | CC                              | TT              | 1947063591               |
| SNP_P4_190829_3693 | NW_004520592.1 | Scaffold7148 | 3693                    | TT                              | CC              | 1947063593               |
| SNP_P4_190830_3695 | NW_004520592.1 | Scaffold7148 | 3695                    | TT                              | CC              | 1947063595               |
| SNP_P4_190831_3971 | NW_004520592.1 | Scaffold7148 | 3971                    | CC                              | TT              | 1947063597               |
| SNP_P4_190832_3993 | NW_004520592.1 | Scaffold7148 | 3993                    | TT                              | GG              | 1947063599               |
| SNP_P4_190833_4246 | NW_004520592.1 | Scaffold7148 | 4246                    | GG                              | AA              | 1947063601               |
| SNP_P4_190834_4254 | NW_004520592.1 | Scaffold7148 | 4254                    | TT                              | CC              | 1947063603               |
| SNP_P4_190836_7517 | NW_004520592.1 | Scaffold7148 | 7517                    | CC                              | TT              | 1947063605               |
| SNP_P4_190837_7567 | NW_004520592.1 | Scaffold7148 | 7567                    | AA                              | TT              | 1947063607               |
| SNP_P4_190838_7592 | NW_004520592.1 | Scaffold7148 | 7592                    | CC                              | AA              | 1947063609               |
| SNP_P4_190839_7593 | NW_004520592.1 | Scaffold7148 | 7593                    | TT                              | CC              | 1947063611               |
| SNP_P4_190840_7595 | NW_004520592.1 | Scaffold7148 | 7595                    | GG                              | TT              | 1947063613               |
| SNP_P4_190841_833  | NW_004520593.1 | Scaffold7152 | 833                     | TT                              | GG              | 1947063615               |
| SNP_P4_190842_898  | NW_004520593.1 | Scaffold7152 | 898                     | CC                              | AA              | 1947063617               |
| SNP_P4_190843_942  | NW_004520593.1 | Scaffold7152 | 942                     | GG                              | TT              | 1947063619               |
| SNP_P4_190844_943  | NW_004520593.1 | Scaffold7152 | 943                     | AA                              | CC              | 1947063621               |
| SNP_P4_190845_1029 | NW_004520593.1 | Scaffold7152 | 1029                    | TT                              | CC              | 1947063623               |
| SNP_P4_190847_582  | NW_004520595.1 | Scaffold7154 | 582                     | AA                              | GG              | 1947063625               |
| SNP_P4_190848_846  | NW_004520595.1 | Scaffold7154 | 846                     | AA                              | GG              | 1947063627               |
| SNP_P4_190849_7411 | NW_004520595.1 | Scaffold7154 | 7411                    | GG                              | TT              | 1947063629               |
| SNP_P4_190850_7432 | NW_004520595.1 | Scaffold7154 | 7432                    | GG                              | AA              | 1947063631               |
| SNP_P4_190851_7456 | NW_004520595.1 | Scaffold7154 | 7456                    | CC                              | AA              | 1947063633               |
| SNP_P4_190852_7511 | NW_004520595.1 | Scaffold7154 | 7511                    | CC                              | TT              | 1947063635               |
| SNP_P4_190853_7552 | NW_004520595.1 | Scaffold7154 | 7552                    | AA                              | GG              | 1947063637               |
| SNP_P4_190854_7599 | NW_004520595.1 | Scaffold7154 | 7599                    | TT                              | AA              | 1947063639               |
| SNP_P4_190855_7617 | NW_004520595.1 | Scaffold7154 | 7617                    | GG                              | TT              | 1947063641               |

| SNPs IDs           | Chromosome IDs | Chromosomes  | Physical positions (bp) | CDC Frontier (Reference genome) | (ILWC46 & LPNB) | NCBI SNPdb Accession IDs |
|--------------------|----------------|--------------|-------------------------|---------------------------------|-----------------|--------------------------|
| SNP_P4_190856_1014 | NW_004520597.1 | Scaffold7156 | 1014                    | GG                              | AA              | 1947063643               |
| SNP_P4_190857_1340 | NW_004520597.1 | Scaffold7156 | 1340                    | CC                              | GG              | 1947063645               |
| SNP_P4_190858_1111 | NW_004520598.1 | Scaffold7157 | 1111                    | TT                              | AA              | 1947063647               |
| SNP_P4_190859_1134 | NW_004520598.1 | Scaffold7157 | 1134                    | TT                              | CC              | 1947063649               |
| SNP_P4_190860_1137 | NW_004520598.1 | Scaffold7157 | 1137                    | GG                              | AA              | 1947063651               |
| SNP_P4_190862_306  | NW_004520607.1 | Scaffold7171 | 306                     | GG                              | TT              | 1947063653               |
| SNP_P4_190863_376  | NW_004520607.1 | Scaffold7171 | 376                     | TT                              | CC              | 1947063655               |
| SNP_P4_190864_377  | NW_004520607.1 | Scaffold7171 | 377                     | AA                              | TT              | 1947063657               |
| SNP_P4_190865_866  | NW_004520610.1 | Scaffold7174 | 866                     | GG                              | CC              | 1947063659               |
| SNP_P4_190866_2050 | NW_004520611.1 | Scaffold7176 | 2050                    | AA                              | TT              | 1947063661               |
| SNP_P4_190868_3751 | NW_004520611.1 | Scaffold7176 | 3751                    | GG                              | AA              | 1947063663               |
| SNP_P4_190869_3827 | NW_004520611.1 | Scaffold7176 | 3827                    | AA                              | CC              | 1947063665               |
| SNP_P4_190870_3873 | NW_004520611.1 | Scaffold7176 | 3873                    | TT                              | CC              | 1947063667               |
| SNP_P4_190871_4208 | NW_004520611.1 | Scaffold7176 | 4208                    | AA                              | GG              | 1947063669               |
| SNP_P4_190872_4257 | NW_004520611.1 | Scaffold7176 | 4257                    | GG                              | AA              | 1947063671               |
| SNP_P4_190873_4316 | NW_004520611.1 | Scaffold7176 | 4316                    | TT                              | CC              | 1947063673               |
| SNP_P4_190874_63   | NW_004520614.1 | Scaffold7182 | 63                      | TT                              | CC              | 1947063675               |
| SNP_P4_190875_76   | NW_004520614.1 | Scaffold7182 | 76                      | TT                              | GG              | 1947063677               |
| SNP_P4_190876_85   | NW_004520614.1 | Scaffold7182 | 85                      | AA                              | CC              | 1947063679               |
| SNP_P4_190877_103  | NW_004520614.1 | Scaffold7182 | 103                     | TT                              | CC              | 1947063681               |
| SNP_P4_190878_312  | NW_004520615.1 | Scaffold7183 | 312                     | TT                              | AA              | 1947063683               |
| SNP_P4_190879_340  | NW_004520615.1 | Scaffold7183 | 340                     | CC                              | TT              | 1947063685               |
| SNP_P4_190880_358  | NW_004520615.1 | Scaffold7183 | 358                     | GG                              | AA              | 1947063687               |
| SNP_P4_190881_407  | NW_004520616.1 | Scaffold7184 | 407                     | AA                              | GG              | 1947063689               |
| SNP_P4_190882_624  | NW_004520619.1 | Scaffold7187 | 624                     | AA                              | CC              | 1947063691               |
| SNP_P4_190883_646  | NW_004520619.1 | Scaffold7187 | 646                     | GG                              | CC              | 1947063693               |
| SNP_P4_190884_801  | NW_004520619.1 | Scaffold7187 | 801                     | TT                              | GG              | 1947063695               |
| SNP_P4_190886_906  | NW_004520619.1 | Scaffold7187 | 906                     | GG                              | AA              | 1947063697               |
| SNP_P4_190887_912  | NW_004520619.1 | Scaffold7187 | 912                     | AA                              | TT              | 1947063699               |
| SNP_P4_190888_1044 | NW_004520619.1 | Scaffold7187 | 1044                    | CC                              | TT              | 1947063701               |
| SNP_P4_190889_338  | NW_004520625.1 | Scaffold7196 | 338                     | AA                              | CC              | 1947063703               |
| SNP_P4_190890_560  | NW_004520625.1 | Scaffold7196 | 560                     | CC                              | TT              | 1947063705               |
| SNP_P4_190891_612  | NW_004520625.1 | Scaffold7196 | 612                     | GG                              | AA              | 1947063707               |
| SNP_P4_190893_642  | NW_004520625.1 | Scaffold7196 | 642                     | CC                              | AA              | 1947063709               |
| SNP_P4_190894_732  | NW_004520625.1 | Scaffold7196 | 732                     | AA                              | CC              | 1947063711               |
| SNP_P4_190895_774  | NW_004520625.1 | Scaffold7196 | 774                     | TT                              | CC              | 1947063713               |
| SNP_P4_190897_889  | NW_004520625.1 | Scaffold7196 | 889                     | GG                              | TT              | 1947063715               |
| SNP_P4_190898_1064 | NW_004520625.1 | Scaffold7196 | 1064                    | GG                              | AA              | 1947063717               |
| SNP_P4_190899_2032 | NW_004520625.1 | Scaffold7196 | 2032                    | TT                              | AA              | 1947063719               |
| SNP_P4_190900_2063 | NW_004520625.1 | Scaffold7196 | 2063                    | CC                              | TT              | 1947063721               |
| SNP_P4_190901_2095 | NW_004520625.1 | Scaffold7196 | 2095                    | AA                              | GG              | 1947063723               |
| SNP_P4_190902_2165 | NW_004520625.1 | Scaffold7196 | 2165                    | AA                              | GG              | 1947063725               |

| SNPs IDs            | Chromosome IDs | Chromosomes  | Physical positions (bp) | CDC Frontier (Reference genome) | (ILWC46 & LPNB) | NCBI SNPdb Accession IDs |
|---------------------|----------------|--------------|-------------------------|---------------------------------|-----------------|--------------------------|
| SNP_P4_190903_2197  | NW_004520625.1 | Scaffold7196 | 2197                    | AA                              | GG              | 1947063727               |
| SNP_P4_190904_2217  | NW_004520625.1 | Scaffold7196 | 2217                    | CC                              | GG              | 1947063729               |
| SNP_P4_190906_4910  | NW_004520627.1 | Scaffold7199 | 4910                    | GG                              | AA              | 1947063731               |
| SNP_P4_190907_64    | NW_004520629.1 | Scaffold7201 | 64                      | TT                              | AA              | 1947063733               |
| SNP_P4_190908_80    | NW_004520629.1 | Scaffold7201 | 80                      | TT                              | GG              | 1947063735               |
| SNP_P4_190909_963   | NW_004520631.1 | Scaffold7203 | 963                     | GG                              | AA              | 1947063737               |
| SNP_P4_190910_968   | NW_004520631.1 | Scaffold7203 | 968                     | TT                              | AA              | 1947063739               |
| SNP_P4_190911_1824  | NW_004520634.1 | Scaffold7210 | 1824                    | AA                              | TT              | 1947063741               |
| SNP_P4_190912_1914  | NW_004520634.1 | Scaffold7210 | 1914                    | GG                              | TT              | 1947063743               |
| SNP_P4_190913_4982  | NW_004520634.1 | Scaffold7210 | 4982                    | TT                              | GG              | 1947063745               |
| SNP_P4_190914_6997  | NW_004520634.1 | Scaffold7210 | 6997                    | TT                              | CC              | 1947063747               |
| SNP_P4_190915_7032  | NW_004520634.1 | Scaffold7210 | 7032                    | AA                              | GG              | 1947063749               |
| SNP_P4_190917_7458  | NW_004520634.1 | Scaffold7210 | 7458                    | AA                              | TT              | 1947063751               |
| SNP_P4_190919_7727  | NW_004520634.1 | Scaffold7210 | 7727                    | GG                              | CC              | 1947063753               |
| SNP_P4_190920_7749  | NW_004520634.1 | Scaffold7210 | 7749                    | GG                              | AA              | 1947063755               |
| SNP_P4_190921_7802  | NW_004520634.1 | Scaffold7210 | 7802                    | TT                              | GG              | 1947063757               |
| SNP_P4_190922_7854  | NW_004520634.1 | Scaffold7210 | 7854                    | GG                              | TT              | 1947063759               |
| SNP_P4_190923_920   | NW_004520635.1 | Scaffold7213 | 920                     | CC                              | GG              | 1947063762               |
| SNP_P4_190924_131   | NW_004520636.1 | Scaffold7216 | 131                     | AA                              | CC              | 1947063764               |
| SNP_P4_190925_148   | NW_004520636.1 | Scaffold7216 | 148                     | AA                              | GG              | 1947063766               |
| SNP_P4_190926_185   | NW_004520636.1 | Scaffold7216 | 185                     | AA                              | CC              | 1947063768               |
| SNP_P4_190927_200   | NW_004520636.1 | Scaffold7216 | 200                     | AA                              | GG              | 1947063770               |
| SNP_P4_190928_229   | NW_004520636.1 | Scaffold7216 | 229                     | AA                              | GG              | 1947063772               |
| SNP_P4_190929_447   | NW_004520636.1 | Scaffold7216 | 447                     | AA                              | GG              | 1947063774               |
| SNP_P4_190930_459   | NW_004520636.1 | Scaffold7216 | 459                     | TT                              | AA              | 1947063776               |
| SNP_P4_190931_460   | NW_004520636.1 | Scaffold7216 | 460                     | TT                              | GG              | 1947063778               |
| SNP_P4_190932_518   | NW_004520636.1 | Scaffold7216 | 518                     | CC                              | AA              | 1947063780               |
| SNP_P4_190933_568   | NW_004520636.1 | Scaffold7216 | 568                     | CC                              | TT              | 1947063782               |
| SNP_P4_190934_580   | NW_004520636.1 | Scaffold7216 | 580                     | TT                              | AA              | 1947063784               |
| SNP_P4_190935_591   | NW_004520636.1 | Scaffold7216 | 591                     | AA                              | GG              | 1947063786               |
| SNP_P4_190936_646   | NW_004520636.1 | Scaffold7216 | 646                     | AA                              | GG              | 1947063788               |
| SNP_P4_190937_2829  | NW_004520636.1 | Scaffold7216 | 2829                    | AA                              | CC              | 1947063790               |
| SNP_P4_190938_2948  | NW_004520636.1 | Scaffold7216 | 2948                    | AA                              | TT              | 1947063792               |
| SNP_P4_190939_20597 | NW_004520639.1 | Scaffold7221 | 20597                   | GG                              | AA              | 1947063794               |
| SNP_P4_190940_20606 | NW_004520639.1 | Scaffold7221 | 20606                   | AA                              | TT              | 1947063796               |
| SNP_P4_190941_20614 | NW_004520639.1 | Scaffold7221 | 20614                   | TT                              | CC              | 1947063798               |
| SNP_P4_190942_405   | NW_004520641.1 | Scaffold7225 | 405                     | AA                              | TT              | 1947063800               |
| SNP_P4_190943_366   | NW_004520645.1 | Scaffold7229 | 366                     | TT                              | AA              | 1947063802               |
| SNP_P4_190944_410   | NW_004520646.1 | Scaffold7231 | 410                     | CC                              | TT              | 1947063804               |
| SNP_P4_190945_414   | NW_004520646.1 | Scaffold7231 | 414                     | AA                              | GG              | 1947063806               |
| SNP_P4_190946_1431  | NW_004520646.1 | Scaffold7231 | 1431                    | CC                              | AA              | 1947063808               |
| SNP_P4_190947_40    | NW_004520647.1 | Scaffold7235 | 40                      | GG                              | AA              | 1947063810               |

| SNPs IDs           | Chromosome IDs | Chromosomes  | Physical positions (bp) | CDC Frontier (Reference genome) | (ILWC46 & LPNB) | NCBI SNPdb Accession IDs |
|--------------------|----------------|--------------|-------------------------|---------------------------------|-----------------|--------------------------|
| SNP_P4_190948_43   | NW_004520647.1 | Scaffold7235 | 43                      | GG                              | TT              | 1947063812               |
| SNP_P4_190949_44   | NW_004520647.1 | Scaffold7235 | 44                      | TT                              | CC              | 1947063814               |
| SNP_P4_190950_45   | NW_004520647.1 | Scaffold7235 | 45                      | GG                              | AA              | 1947063816               |
| SNP_P4_190951_312  | NW_004520653.1 | Scaffold7245 | 312                     | TT                              | CC              | 1947063818               |
| SNP_P4_190952_374  | NW_004520653.1 | Scaffold7245 | 374                     | TT                              | CC              | 1947063820               |
| SNP_P4_190953_427  | NW_004520653.1 | Scaffold7245 | 427                     | TT                              | CC              | 1947063822               |
| SNP_P4_190954_444  | NW_004520653.1 | Scaffold7245 | 444                     | AA                              | CC              | 1947063824               |
| SNP_P4_190955_655  | NW_004520653.1 | Scaffold7245 | 655                     | AA                              | GG              | 1947063826               |
| SNP_P4_190956_872  | NW_004520653.1 | Scaffold7245 | 872                     | GG                              | CC              | 1947063828               |
| SNP_P4_190957_1287 | NW_004520656.1 | Scaffold7249 | 1287                    | TT                              | GG              | 1947063830               |
| SNP_P4_190958_1337 | NW_004520656.1 | Scaffold7249 | 1337                    | TT                              | GG              | 1947063832               |
| SNP_P4_190959_1354 | NW_004520656.1 | Scaffold7249 | 1354                    | GG                              | AA              | 1947063834               |
| SNP_P4_190960_1391 | NW_004520656.1 | Scaffold7249 | 1391                    | AA                              | CC              | 1947063836               |
| SNP_P4_190961_1404 | NW_004520656.1 | Scaffold7249 | 1404                    | CC                              | TT              | 1947063838               |
| SNP_P4_190962_1597 | NW_004520656.1 | Scaffold7249 | 1597                    | CC                              | TT              | 1947063840               |
| SNP_P4_190963_502  | NW_004520661.1 | Scaffold7254 | 502                     | GG                              | AA              | 1947063842               |
| SNP_P4_190964_547  | NW_004520661.1 | Scaffold7254 | 547                     | CC                              | AA              | 1947063844               |
| SNP_P4_190965_548  | NW_004520661.1 | Scaffold7254 | 548                     | TT                              | CC              | 1947063846               |
| SNP_P4_190966_781  | NW_004520661.1 | Scaffold7254 | 781                     | AA                              | GG              | 1947063849               |
| SNP_P4_190967_785  | NW_004520661.1 | Scaffold7254 | 785                     | TT                              | GG              | 1947063851               |
| SNP_P4_190968_800  | NW_004520661.1 | Scaffold7254 | 800                     | TT                              | CC              | 1947063853               |
| SNP_P4_190969_801  | NW_004520661.1 | Scaffold7254 | 801                     | TT                              | AA              | 1947063855               |
| SNP_P4_190970_820  | NW_004520661.1 | Scaffold7254 | 820                     | TT                              | AA              | 1947063857               |
| SNP_P4_190971_999  | NW_004520661.1 | Scaffold7254 | 999                     | TT                              | AA              | 1947063859               |
| SNP_P4_190972_567  | NW_004520664.1 | Scaffold7261 | 567                     | GG                              | AA              | 1947063861               |
| SNP_P4_190973_4762 | NW_004520668.1 | Scaffold7267 | 4762                    | GG                              | TT              | 1947063863               |
| SNP_P4_190974_4801 | NW_004520668.1 | Scaffold7267 | 4801                    | CC                              | GG              | 1947063865               |
| SNP_P4_190975_4844 | NW_004520668.1 | Scaffold7267 | 4844                    | TT                              | CC              | 1947063867               |
| SNP_P4_190976_5024 | NW_004520668.1 | Scaffold7267 | 5024                    | CC                              | GG              | 1947063869               |
| SNP_P4_190977_5054 | NW_004520668.1 | Scaffold7267 | 5054                    | GG                              | TT              | 1947063871               |
| SNP_P4_190978_525  | NW_004520670.1 | Scaffold7269 | 525                     | TT                              | CC              | 1947063873               |
| SNP_P4_190979_579  | NW_004520670.1 | Scaffold7269 | 579                     | AA                              | CC              | 1947063875               |
| SNP_P4_190980_629  | NW_004520670.1 | Scaffold7269 | 629                     | CC                              | AA              | 1947063877               |
| SNP_P4_190981_640  | NW_004520670.1 | Scaffold7269 | 640                     | AA                              | TT              | 1947063879               |
| SNP_P4_190982_660  | NW_004520670.1 | Scaffold7269 | 660                     | AA                              | TT              | 1947063881               |
| SNP_P4_190983_809  | NW_004520670.1 | Scaffold7269 | 809                     | CC                              | TT              | 1947063883               |
| SNP_P4_190984_818  | NW_004520670.1 | Scaffold7269 | 818                     | CC                              | AA              | 1947063885               |
| SNP_P4_190985_825  | NW_004520670.1 | Scaffold7269 | 825                     | GG                              | AA              | 1947063887               |
| SNP_P4_190986_898  | NW_004520670.1 | Scaffold7269 | 898                     | TT                              | GG              | 1947063889               |
| SNP_P4_190987_905  | NW_004520670.1 | Scaffold7269 | 905                     | AA                              | CC              | 1947063891               |
| SNP_P4_190988_41   | NW_004520671.1 | Scaffold7272 | 41                      | AA                              | TT              | 1947063893               |
| SNP_P4_190989_64   | NW_004520671.1 | Scaffold7272 | 64                      | AA                              | CC              | 1947063895               |

| SNPs IDs            | Chromosome IDs | Chromosomes  | Physical positions (bp) | CDC Frontier (Reference genome) | (ILWC46 & LPNB) | NCBI SNPdb Accession IDs |
|---------------------|----------------|--------------|-------------------------|---------------------------------|-----------------|--------------------------|
| SNP_P4_190990_81    | NW_004520671.1 | Scaffold7272 | 81                      | GG                              | AA              | 1947063897               |
| SNP_P4_190991_127   | NW_004520671.1 | Scaffold7272 | 127                     | TT                              | GG              | 1947063899               |
| SNP_P4_190992_385   | NW_004520671.1 | Scaffold7272 | 385                     | AA                              | CC              | 1947063901               |
| SNP_P4_190993_440   | NW_004520671.1 | Scaffold7272 | 440                     | AA                              | GG              | 1947063903               |
| SNP_P4_190995_918   | NW_004520674.1 | Scaffold7279 | 918                     | CC                              | TT              | 1947063905               |
| SNP_P4_190997_1583  | NW_004520675.1 | Scaffold7280 | 1583                    | AA                              | TT              | 1947063907               |
| SNP_P4_190998_1590  | NW_004520675.1 | Scaffold7280 | 1590                    | GG                              | AA              | 1947063909               |
| SNP_P4_191000_912   | NW_004520677.1 | Scaffold7289 | 912                     | GG                              | TT              | 1947063911               |
| SNP_P4_191001_11901 | NW_004520678.1 | Scaffold7293 | 11901                   | CC                              | TT              | 1947063913               |
| SNP_P4_191002_12791 | NW_004520678.1 | Scaffold7293 | 12791                   | AA                              | TT              | 1947063915               |
| SNP_P4_191003_12830 | NW_004520678.1 | Scaffold7293 | 12830                   | CC                              | GG              | 1947063917               |
| SNP_P4_191004_12944 | NW_004520678.1 | Scaffold7293 | 12944                   | GG                              | AA              | 1947063919               |
| SNP_P4_191006_13252 | NW_004520678.1 | Scaffold7293 | 13252                   | GG                              | TT              | 1947063921               |
| SNP_P4_191007_13280 | NW_004520678.1 | Scaffold7293 | 13280                   | AA                              | TT              | 1947063923               |
| SNP_P4_191008_13305 | NW_004520678.1 | Scaffold7293 | 13305                   | CC                              | TT              | 1947063925               |
| SNP_P4_191009_13351 | NW_004520678.1 | Scaffold7293 | 13351                   | TT                              | CC              | 1947063927               |
| SNP_P4_191010_13406 | NW_004520678.1 | Scaffold7293 | 13406                   | AA                              | GG              | 1947063935               |
| SNP_P4_191011_13416 | NW_004520678.1 | Scaffold7293 | 13416                   | TT                              | CC              | 1947063937               |
| SNP_P4_191012_13442 | NW_004520678.1 | Scaffold7293 | 13442                   | AA                              | GG              | 1947063939               |
| SNP_P4_191013_13457 | NW_004520678.1 | Scaffold7293 | 13457                   | GG                              | AA              | 1947063941               |
| SNP_P4_191014_13500 | NW_004520678.1 | Scaffold7293 | 13500                   | GG                              | AA              | 1947063943               |
| SNP_P4_191016_13741 | NW_004520678.1 | Scaffold7293 | 13741                   | TT                              | GG              | 1947063945               |
| SNP_P4_191017_13760 | NW_004520678.1 | Scaffold7293 | 13760                   | CC                              | GG              | 1947063947               |
| SNP_P4_191018_13764 | NW_004520678.1 | Scaffold7293 | 13764                   | CC                              | TT              | 1947063949               |
| SNP_P4_191019_13790 | NW_004520678.1 | Scaffold7293 | 13790                   | CC                              | TT              | 1947063951               |
| SNP_P4_191020_13885 | NW_004520678.1 | Scaffold7293 | 13885                   | TT                              | CC              | 1947063953               |
| SNP_P4_191021_13993 | NW_004520678.1 | Scaffold7293 | 13993                   | AA                              | TT              | 1947063955               |
| SNP_P4_191022_14006 | NW_004520678.1 | Scaffold7293 | 14006                   | GG                              | TT              | 1947063957               |
| SNP_P4_191023_14085 | NW_004520678.1 | Scaffold7293 | 14085                   | GG                              | AA              | 1947063959               |
| SNP_P4_191024_14128 | NW_004520678.1 | Scaffold7293 | 14128                   | GG                              | TT              | 1947063961               |
| SNP_P4_191025_14161 | NW_004520678.1 | Scaffold7293 | 14161                   | TT                              | AA              | 1947063963               |
| SNP_P4_191026_14163 | NW_004520678.1 | Scaffold7293 | 14163                   | AA                              | GG              | 1947063965               |
| SNP_P4_191027_14234 | NW_004520678.1 | Scaffold7293 | 14234                   | TT                              | CC              | 1947063967               |
| SNP_P4_191028_14242 | NW_004520678.1 | Scaffold7293 | 14242                   | AA                              | GG              | 1947063969               |
| SNP_P4_191029_14244 | NW_004520678.1 | Scaffold7293 | 14244                   | CC                              | TT              | 1947063971               |
| SNP_P4_191030_14262 | NW_004520678.1 | Scaffold7293 | 14262                   | AA                              | TT              | 1947063973               |
| SNP_P4_191031_14385 | NW_004520678.1 | Scaffold7293 | 14385                   | CC                              | TT              | 1947063975               |
| SNP_P4_191032_14401 | NW_004520678.1 | Scaffold7293 | 14401                   | AA                              | GG              | 1947063977               |
| SNP_P4_191033_14498 | NW_004520678.1 | Scaffold7293 | 14498                   | GG                              | AA              | 1947063979               |
| SNP_P4_191034_14502 | NW_004520678.1 | Scaffold7293 | 14502                   | AA                              | TT              | 1947063981               |
| SNP_P4_191035_14507 | NW_004520678.1 | Scaffold7293 | 14507                   | GG                              | AA              | 1947063983               |
| SNP_P4_191036_14530 | NW_004520678.1 | Scaffold7293 | 14530                   | CC                              | GG              | 1947063985               |

| SNPs IDs            | Chromosome IDs | Chromosomes  | Physical positions (bp) | CDC Frontier (Reference genome) | (ILWC46 & LPNB) | NCBI SNPdb Accession IDs |
|---------------------|----------------|--------------|-------------------------|---------------------------------|-----------------|--------------------------|
| SNP_P4_191037_14556 | NW_004520678.1 | Scaffold7293 | 14556                   | TT                              | CC              | 1947063987               |
| SNP_P4_191038_14658 | NW_004520678.1 | Scaffold7293 | 14658                   | CC                              | TT              | 1947063989               |
| SNP_P4_191039_14660 | NW_004520678.1 | Scaffold7293 | 14660                   | GG                              | AA              | 1947063991               |
| SNP_P4_191040_14685 | NW_004520678.1 | Scaffold7293 | 14685                   | CC                              | GG              | 1947063993               |
| SNP_P4_191041_14758 | NW_004520678.1 | Scaffold7293 | 14758                   | TT                              | CC              | 1947063995               |
| SNP_P4_191042_14816 | NW_004520678.1 | Scaffold7293 | 14816                   | TT                              | CC              | 1947063997               |
| SNP_P4_191043_14860 | NW_004520678.1 | Scaffold7293 | 14860                   | TT                              | GG              | 1947063999               |
| SNP_P4_191044_14924 | NW_004520678.1 | Scaffold7293 | 14924                   | GG                              | AA              | 1947064001               |
| SNP_P4_191045_14948 | NW_004520678.1 | Scaffold7293 | 14948                   | AA                              | GG              | 1947064003               |
| SNP_P4_191046_14961 | NW_004520678.1 | Scaffold7293 | 14961                   | GG                              | AA              | 1947064005               |
| SNP_P4_191047_14977 | NW_004520678.1 | Scaffold7293 | 14977                   | CC                              | TT              | 1947064007               |
| SNP_P4_191048_14992 | NW_004520678.1 | Scaffold7293 | 14992                   | GG                              | AA              | 1947064009               |
| SNP_P4_191049_15017 | NW_004520678.1 | Scaffold7293 | 15017                   | GG                              | AA              | 1947064011               |
| SNP_P4_191050_15203 | NW_004520678.1 | Scaffold7293 | 15203                   | CC                              | TT              | 1947064013               |
| SNP_P4_191051_15253 | NW_004520678.1 | Scaffold7293 | 15253                   | AA                              | CC              | 1947064015               |
| SNP_P4_191052_15359 | NW_004520678.1 | Scaffold7293 | 15359                   | CC                              | AA              | 1947064017               |
| SNP_P4_191053_15423 | NW_004520678.1 | Scaffold7293 | 15423                   | GG                              | AA              | 1947064019               |
| SNP_P4_191055_15584 | NW_004520678.1 | Scaffold7293 | 15584                   | CC                              | TT              | 1947064021               |
| SNP_P4_191056_15684 | NW_004520678.1 | Scaffold7293 | 15684                   | CC                              | AA              | 1947064023               |
| SNP_P4_191057_15704 | NW_004520678.1 | Scaffold7293 | 15704                   | GG                              | AA              | 1947064025               |
| SNP_P4_191058_15812 | NW_004520678.1 | Scaffold7293 | 15812                   | AA                              | GG              | 1947064027               |
| SNP_P4_191059_15944 | NW_004520678.1 | Scaffold7293 | 15944                   | CC                              | TT              | 1947064029               |
| SNP_P4_191060_15956 | NW_004520678.1 | Scaffold7293 | 15956                   | CC                              | TT              | 1947064031               |
| SNP_P4_191061_19407 | NW_004520678.1 | Scaffold7293 | 19407                   | CC                              | TT              | 1947064033               |
| SNP_P4_191062_19411 | NW_004520678.1 | Scaffold7293 | 19411                   | CC                              | TT              | 1947064035               |
| SNP_P4_191063_19484 | NW_004520678.1 | Scaffold7293 | 19484                   | AA                              | GG              | 1947064037               |
| SNP_P4_191064_19545 | NW_004520678.1 | Scaffold7293 | 19545                   | TT                              | AA              | 1947064039               |
| SNP_P4_191065_19616 | NW_004520678.1 | Scaffold7293 | 19616                   | AA                              | GG              | 1947064041               |
| SNP_P4_191066_19625 | NW_004520678.1 | Scaffold7293 | 19625                   | AA                              | CC              | 1947064043               |
| SNP_P4_191067_19689 | NW_004520678.1 | Scaffold7293 | 19689                   | TT                              | GG              | 1947064045               |
| SNP_P4_191068_19719 | NW_004520678.1 | Scaffold7293 | 19719                   | AA                              | GG              | 1947064047               |
| SNP_P4_191069_19731 | NW_004520678.1 | Scaffold7293 | 19731                   | AA                              | GG              | 1947064049               |
| SNP_P4_191070_19764 | NW_004520678.1 | Scaffold7293 | 19764                   | AA                              | TT              | 1947064051               |
| SNP_P4_191071_19775 | NW_004520678.1 | Scaffold7293 | 19775                   | CC                              | TT              | 1947064053               |
| SNP_P4_191072_19777 | NW_004520678.1 | Scaffold7293 | 19777                   | GG                              | AA              | 1947064055               |
| SNP_P4_191073_19779 | NW_004520678.1 | Scaffold7293 | 19779                   | CC                              | AA              | 1947064057               |
| SNP_P4_191074_19837 | NW_004520678.1 | Scaffold7293 | 19837                   | GG                              | CC              | 1947064059               |
| SNP_P4_191075_19843 | NW_004520678.1 | Scaffold7293 | 19843                   | AA                              | CC              | 1947064061               |
| SNP_P4_191076_19923 | NW_004520678.1 | Scaffold7293 | 19923                   | TT                              | AA              | 1947064063               |
| SNP_P4_191077_19988 | NW_004520678.1 | Scaffold7293 | 19988                   | TT                              | AA              | 1947064065               |
| SNP_P4_191078_20048 | NW_004520678.1 | Scaffold7293 | 20048                   | GG                              | AA              | 1947064067               |
| SNP_P4_191079_20075 | NW_004520678.1 | Scaffold7293 | 20075                   | CC                              | AA              | 1947064069               |

| SNPs IDs            | Chromosome IDs | Chromosomes  | Physical positions (bp) | CDC Frontier (Reference genome) | (ILWC46 & LPNB) | NCBI SNPdb Accession IDs |
|---------------------|----------------|--------------|-------------------------|---------------------------------|-----------------|--------------------------|
| SNP_P4_191080_20188 | NW_004520678.1 | Scaffold7293 | 20188                   | CC                              | TT              | 1947064071               |
| SNP_P4_191082_20222 | NW_004520678.1 | Scaffold7293 | 20222                   | CC                              | TT              | 1947064073               |
| SNP_P4_191083_20227 | NW_004520678.1 | Scaffold7293 | 20227                   | TT                              | GG              | 1947064075               |
| SNP_P4_191084_20294 | NW_004520678.1 | Scaffold7293 | 20294                   | TT                              | AA              | 1947064077               |
| SNP_P4_191085_20437 | NW_004520678.1 | Scaffold7293 | 20437                   | CC                              | TT              | 1947064082               |
| SNP_P4_191086_20460 | NW_004520678.1 | Scaffold7293 | 20460                   | AA                              | TT              | 1947064084               |
| SNP_P4_191087_20535 | NW_004520678.1 | Scaffold7293 | 20535                   | CC                              | GG              | 1947064086               |
| SNP_P4_191088_20615 | NW_004520678.1 | Scaffold7293 | 20615                   | TT                              | CC              | 1947064088               |
| SNP_P4_191089_20639 | NW_004520678.1 | Scaffold7293 | 20639                   | GG                              | AA              | 1947064090               |
| SNP_P4_191090_20661 | NW_004520678.1 | Scaffold7293 | 20661                   | CC                              | GG              | 1947064092               |
| SNP_P4_191091_20707 | NW_004520678.1 | Scaffold7293 | 20707                   | TT                              | CC              | 1947064094               |
| SNP_P4_191092_21207 | NW_004520678.1 | Scaffold7293 | 21207                   | AA                              | CC              | 1947064096               |
| SNP_P4_191094_21363 | NW_004520678.1 | Scaffold7293 | 21363                   | TT                              | CC              | 1947064098               |
| SNP_P4_191095_21445 | NW_004520678.1 | Scaffold7293 | 21445                   | GG                              | AA              | 1947064100               |
| SNP_P4_191096_21523 | NW_004520678.1 | Scaffold7293 | 21523                   | GG                              | AA              | 1947064102               |
| SNP_P4_191097_21589 | NW_004520678.1 | Scaffold7293 | 21589                   | TT                              | GG              | 1947064104               |
| SNP_P4_191098_21611 | NW_004520678.1 | Scaffold7293 | 21611                   | CC                              | TT              | 1947064106               |
| SNP_P4_191099_21703 | NW_004520678.1 | Scaffold7293 | 21703                   | CC                              | AA              | 1947064108               |
| SNP_P4_191100_21717 | NW_004520678.1 | Scaffold7293 | 21717                   | TT                              | CC              | 1947064110               |
| SNP_P4_191101_21744 | NW_004520678.1 | Scaffold7293 | 21744                   | TT                              | CC              | 1947064112               |
| SNP_P4_191102_21833 | NW_004520678.1 | Scaffold7293 | 21833                   | CC                              | TT              | 1947064114               |
| SNP_P4_191103_22155 | NW_004520678.1 | Scaffold7293 | 22155                   | GG                              | AA              | 1947064115               |
| SNP_P4_191104_22311 | NW_004520678.1 | Scaffold7293 | 22311                   | CC                              | AA              | 1947064117               |
| SNP_P4_191105_568   | NW_004520679.1 | Scaffold7294 | 568                     | TT                              | AA              | 1947064119               |
| SNP_P4_191106_387   | NW_004520680.1 | Scaffold7295 | 387                     | TT                              | GG              | 1947064121               |
| SNP_P4_191107_855   | NW_004520680.1 | Scaffold7295 | 855                     | AA                              | GG              | 1947064123               |
| SNP_P4_191108_1004  | NW_004520680.1 | Scaffold7295 | 1004                    | GG                              | TT              | 1947064125               |
| SNP_P4_191109_1007  | NW_004520680.1 | Scaffold7295 | 1007                    | TT                              | CC              | 1947064127               |
| SNP_P4_191110_1025  | NW_004520680.1 | Scaffold7295 | 1025                    | TT                              | CC              | 1947064129               |
| SNP_P4_191112_865   | NW_004520682.1 | Scaffold7299 | 865                     | GG                              | AA              | 1947064131               |
| SNP_P4_191114_1362  | NW_004520684.1 | Scaffold7302 | 1362                    | AA                              | CC              | 1947064133               |
| SNP_P4_191115_1371  | NW_004520684.1 | Scaffold7302 | 1371                    | AA                              | CC              | 1947064135               |
| SNP_P4_191117_556   | NW_004520686.1 | Scaffold7304 | 556                     | TT                              | GG              | 1947064137               |
| SNP_P4_191118_352   | NW_004520689.1 | Scaffold7313 | 352                     | AA                              | CC              | 1947064139               |
| SNP_P4_191119_1001  | NW_004520689.1 | Scaffold7313 | 1001                    | AA                              | CC              | 1947064141               |
| SNP_P4_191120_1089  | NW_004520689.1 | Scaffold7313 | 1089                    | TT                              | GG              | 1947064143               |
| SNP_P4_191121_1343  | NW_004520689.1 | Scaffold7313 | 1343                    | CC                              | AA              | 1947064145               |
| SNP_P4_191122_1410  | NW_004520689.1 | Scaffold7313 | 1410                    | AA                              | TT              | 1947064146               |
| SNP_P4_191123_1411  | NW_004520689.1 | Scaffold7313 | 1411                    | GG                              | CC              | 1947064148               |
| SNP_P4_191124_1225  | NW_004520690.1 | Scaffold7314 | 1225                    | CC                              | TT              | 1947064150               |
| SNP_P4_191125_1278  | NW_004520690.1 | Scaffold7314 | 1278                    | CC                              | TT              | 1947064152               |
| SNP_P4_191126_1297  | NW_004520690.1 | Scaffold7314 | 1297                    | CC                              | TT              | 1947064154               |

| SNPs IDs           | Chromosome IDs | Chromosomes  | Physical positions (bp) | CDC Frontier (Reference genome) | (ILWC46 & LPNB) | NCBI SNPdb Accession IDs |
|--------------------|----------------|--------------|-------------------------|---------------------------------|-----------------|--------------------------|
| SNP_P4_191127_1302 | NW_004520690.1 | Scaffold7314 | 1302                    | CC                              | TT              | 1947064156               |
| SNP_P4_191128_1342 | NW_004520690.1 | Scaffold7314 | 1342                    | CC                              | TT              | 1947064158               |
| SNP_P4_191129_1366 | NW_004520690.1 | Scaffold7314 | 1366                    | GG                              | AA              | 1947064160               |
| SNP_P4_191130_1375 | NW_004520690.1 | Scaffold7314 | 1375                    | GG                              | AA              | 1947064162               |
| SNP_P4_191131_1414 | NW_004520690.1 | Scaffold7314 | 1414                    | GG                              | AA              | 1947064164               |
| SNP_P4_191132_1432 | NW_004520690.1 | Scaffold7314 | 1432                    | GG                              | TT              | 1947064166               |
| SNP_P4_191133_1572 | NW_004520690.1 | Scaffold7314 | 1572                    | TT                              | GG              | 1947064168               |
| SNP_P4_191134_1723 | NW_004520690.1 | Scaffold7314 | 1723                    | CC                              | TT              | 1947064170               |
| SNP_P4_191135_1726 | NW_004520690.1 | Scaffold7314 | 1726                    | AA                              | GG              | 1947064171               |
| SNP_P4_191136_1729 | NW_004520690.1 | Scaffold7314 | 1729                    | CC                              | TT              | 1947064173               |
| SNP_P4_191137_1738 | NW_004520690.1 | Scaffold7314 | 1738                    | TT                              | AA              | 1947064175               |
| SNP_P4_191138_1759 | NW_004520690.1 | Scaffold7314 | 1759                    | AA                              | TT              | 1947064177               |
| SNP_P4_191139_1762 | NW_004520690.1 | Scaffold7314 | 1762                    | TT                              | GG              | 1947064179               |
| SNP_P4_191140_1780 | NW_004520690.1 | Scaffold7314 | 1780                    | AA                              | GG              | 1947064181               |
| SNP_P4_191141_1804 | NW_004520690.1 | Scaffold7314 | 1804                    | CC                              | TT              | 1947064183               |
| SNP_P4_191142_1856 | NW_004520690.1 | Scaffold7314 | 1856                    | TT                              | AA              | 1947064185               |
| SNP_P4_191143_1869 | NW_004520690.1 | Scaffold7314 | 1869                    | GG                              | TT              | 1947064187               |
| SNP_P4_191144_1880 | NW_004520690.1 | Scaffold7314 | 1880                    | GG                              | AA              | 1947064189               |
| SNP_P4_191145_1882 | NW_004520690.1 | Scaffold7314 | 1882                    | AA                              | GG              | 1947064191               |
| SNP_P4_191146_171  | NW_004520692.1 | Scaffold7316 | 171                     | AA                              | CC              | 1947064192               |
| SNP_P4_191147_409  | NW_004520692.1 | Scaffold7316 | 409                     | AA                              | GG              | 1947064194               |
| SNP_P4_191148_719  | NW_004520692.1 | Scaffold7316 | 719                     | GG                              | AA              | 1947064196               |
| SNP_P4_191149_791  | NW_004520692.1 | Scaffold7316 | 791                     | GG                              | AA              | 1947064198               |
| SNP_P4_191150_796  | NW_004520692.1 | Scaffold7316 | 796                     | AA                              | CC              | 1947064200               |
| SNP_P4_191151_857  | NW_004520692.1 | Scaffold7316 | 857                     | GG                              | AA              | 1947064202               |
| SNP_P4_191152_965  | NW_004520692.1 | Scaffold7316 | 965                     | CC                              | GG              | 1947064204               |
| SNP_P4_191153_981  | NW_004520692.1 | Scaffold7316 | 981                     | GG                              | AA              | 1947064206               |
| SNP_P4_191154_1102 | NW_004520692.1 | Scaffold7316 | 1102                    | TT                              | CC              | 1947064208               |
| SNP_P4_191155_1281 | NW_004520692.1 | Scaffold7316 | 1281                    | GG                              | TT              | 1947064210               |
| SNP_P4_191156_1335 | NW_004520692.1 | Scaffold7316 | 1335                    | GG                              | AA              | 1947064212               |
| SNP_P4_191157_1370 | NW_004520692.1 | Scaffold7316 | 1370                    | TT                              | GG              | 1947064213               |
| SNP_P4_191158_64   | NW_004520693.1 | Scaffold7318 | 64                      | TT                              | GG              | 1947064215               |
| SNP_P4_191159_80   | NW_004520693.1 | Scaffold7318 | 80                      | AA                              | GG              | 1947064217               |
| SNP_P4_191160_113  | NW_004520693.1 | Scaffold7318 | 113                     | CC                              | GG              | 1947064219               |
| SNP_P4_191161_441  | NW_004520693.1 | Scaffold7318 | 441                     | AA                              | GG              | 1947064221               |
| SNP_P4_191162_712  | NW_004520698.1 | Scaffold7327 | 712                     | AA                              | GG              | 1947064223               |
| SNP_P4_191163_713  | NW_004520698.1 | Scaffold7327 | 713                     | CC                              | GG              | 1947064225               |
| SNP_P4_191164_8330 | NW_004520698.1 | Scaffold7327 | 8330                    | TT                              | CC              | 1947064227               |
| SNP_P4_191165_8347 | NW_004520698.1 | Scaffold7327 | 8347                    | AA                              | GG              | 1947064229               |
| SNP_P4_191166_8348 | NW_004520698.1 | Scaffold7327 | 8348                    | TT                              | AA              | 1947064231               |
| SNP_P4_191167_1810 | NW_004520700.1 | Scaffold7330 | 1810                    | AA                              | CC              | 1947064232               |
| SNP_P4_191168_1869 | NW_004520700.1 | Scaffold7330 | 1869                    | AA                              | GG              | 1947064234               |



| SNPs IDs           | Chromosome IDs | Chromosomes  | Physical positions (bp) | CDC Frontier (Reference genome) | (ILWC46 & LPNB) | NCBI SNPdb Accession IDs |
|--------------------|----------------|--------------|-------------------------|---------------------------------|-----------------|--------------------------|
| SNP_P4_191169_2036 | NW_004520700.1 | Scaffold7330 | 2036                    | AA                              | GG              | 1947064236               |
| SNP_P4_191170_2170 | NW_004520700.1 | Scaffold7330 | 2170                    | CC                              | TT              | 1947064238               |
| SNP_P4_191172_2282 | NW_004520700.1 | Scaffold7330 | 2282                    | GG                              | TT              | 1947064240               |
| SNP_P4_191173_2284 | NW_004520700.1 | Scaffold7330 | 2284                    | GG                              | AA              | 1947064242               |
| SNP_P4_191174_2298 | NW_004520700.1 | Scaffold7330 | 2298                    | TT                              | GG              | 1947064244               |
| SNP_P4_191175_2311 | NW_004520700.1 | Scaffold7330 | 2311                    | AA                              | TT              | 1947064246               |
| SNP_P4_191176_2312 | NW_004520700.1 | Scaffold7330 | 2312                    | TT                              | AA              | 1947064248               |
| SNP_P4_191177_2465 | NW_004520700.1 | Scaffold7330 | 2465                    | GG                              | TT              | 1947064250               |
| SNP_P4_191178_2737 | NW_004520700.1 | Scaffold7330 | 2737                    | TT                              | CC              | 1947064252               |
| SNP_P4_191179_2747 | NW_004520700.1 | Scaffold7330 | 2747                    | GG                              | TT              | 1947064254               |
| SNP_P4_191180_2755 | NW_004520700.1 | Scaffold7330 | 2755                    | AA                              | TT              | 1947064256               |
| SNP_P4_191181_2794 | NW_004520700.1 | Scaffold7330 | 2794                    | AA                              | CC              | 1947064258               |
| SNP_P4_191183_81   | NW_004520703.1 | Scaffold7335 | 81                      | CC                              | GG              | 1947064260               |
| SNP_P4_191185_287  | NW_004520704.1 | Scaffold7336 | 287                     | AA                              | CC              | 1947064262               |
| SNP_P4_191186_81   | NW_004520705.1 | Scaffold7340 | 81                      | TT                              | AA              | 1947064264               |
| SNP_P4_191187_508  | NW_004520705.1 | Scaffold7340 | 508                     | AA                              | TT              | 1947064266               |
| SNP_P4_191188_2497 | NW_004520705.1 | Scaffold7340 | 2497                    | AA                              | CC              | 1947064267               |
| SNP_P4_191189_627  | NW_004520713.1 | Scaffold7355 | 627                     | AA                              | GG              | 1947064269               |
| SNP_P4_191190_1840 | NW_004520713.1 | Scaffold7355 | 1840                    | GG                              | AA              | 1947064271               |
| SNP_P4_191192_1986 | NW_004520713.1 | Scaffold7355 | 1986                    | GG                              | CC              | 1947064273               |
| SNP_P4_191193_4357 | NW_004520713.1 | Scaffold7355 | 4357                    | CC                              | TT              | 1947064275               |
| SNP_P4_191194_4379 | NW_004520713.1 | Scaffold7355 | 4379                    | AA                              | TT              | 1947064277               |
| SNP_P4_191195_4399 | NW_004520713.1 | Scaffold7355 | 4399                    | GG                              | AA              | 1947064279               |
| SNP_P4_191196_6314 | NW_004520713.1 | Scaffold7355 | 6314                    | AA                              | GG              | 1947064281               |
| SNP_P4_191197_6327 | NW_004520713.1 | Scaffold7355 | 6327                    | TT                              | AA              | 1947064283               |
| SNP_P4_191198_6328 | NW_004520713.1 | Scaffold7355 | 6328                    | CC                              | AA              | 1947064285               |
| SNP_P4_191199_6641 | NW_004520713.1 | Scaffold7355 | 6641                    | CC                              | GG              | 1947064287               |
| SNP_P4_191201_8581 | NW_004520713.1 | Scaffold7355 | 8581                    | CC                              | GG              | 1947064289               |
| SNP_P4_191202_8588 | NW_004520713.1 | Scaffold7355 | 8588                    | AA                              | CC              | 1947064291               |
| SNP_P4_191203_8610 | NW_004520713.1 | Scaffold7355 | 8610                    | GG                              | TT              | 1947064293               |
| SNP_P4_191205_9215 | NW_004520713.1 | Scaffold7355 | 9215                    | AA                              | GG              | 1947064295               |
| SNP_P4_191206_9233 | NW_004520713.1 | Scaffold7355 | 9233                    | AA                              | CC              | 1947064297               |
| SNP_P4_191207_9282 | NW_004520713.1 | Scaffold7355 | 9282                    | CC                              | AA              | 1947064299               |
| SNP_P4_191209_9393 | NW_004520713.1 | Scaffold7355 | 9393                    | GG                              | TT              | 1947064300               |
| SNP_P4_191210_9481 | NW_004520713.1 | Scaffold7355 | 9481                    | GG                              | CC              | 1947064302               |
| SNP_P4_191212_9506 | NW_004520713.1 | Scaffold7355 | 9506                    | TT                              | CC              | 1947064304               |
| SNP_P4_191214_9616 | NW_004520713.1 | Scaffold7355 | 9616                    | GG                              | AA              | 1947064306               |
| SNP_P4_191215_9617 | NW_004520713.1 | Scaffold7355 | 9617                    | CC                              | AA              | 1947064308               |
| SNP_P4_191216_9630 | NW_004520713.1 | Scaffold7355 | 9630                    | GG                              | TT              | 1947064310               |
| SNP_P4_191217_9647 | NW_004520713.1 | Scaffold7355 | 9647                    | TT                              | CC              | 1947064312               |
| SNP_P4_191218_9671 | NW_004520713.1 | Scaffold7355 | 9671                    | AA                              | TT              | 1947064314               |
| SNP_P4_191219_9674 | NW_004520713.1 | Scaffold7355 | 9674                    | GG                              | AA              | 1947064316               |

| SNPs IDs            | Chromosome IDs | Chromosomes  | Physical positions (bp) | CDC Frontier (Reference genome) | (ILWC46 & LPNB) | NCBI SNPdb Accession IDs |
|---------------------|----------------|--------------|-------------------------|---------------------------------|-----------------|--------------------------|
| SNP_P4_191220_10646 | NW_004520713.1 | Scaffold7355 | 10646                   | GG                              | AA              | 1947064318               |
| SNP_P4_191221_10656 | NW_004520713.1 | Scaffold7355 | 10656                   | TT                              | GG              | 1947064320               |
| SNP_P4_191222_10666 | NW_004520713.1 | Scaffold7355 | 10666                   | GG                              | AA              | 1947064322               |
| SNP_P4_191223_14264 | NW_004520713.1 | Scaffold7355 | 14264                   | TT                              | GG              | 1947064324               |
| SNP_P4_191224_14799 | NW_004520713.1 | Scaffold7355 | 14799                   | AA                              | GG              | 1947064326               |
| SNP_P4_191225_14804 | NW_004520713.1 | Scaffold7355 | 14804                   | AA                              | GG              | 1947064328               |
| SNP_P4_191226_14819 | NW_004520713.1 | Scaffold7355 | 14819                   | CC                              | AA              | 1947064330               |
| SNP_P4_191227_14833 | NW_004520713.1 | Scaffold7355 | 14833                   | AA                              | TT              | 1947064332               |
| SNP_P4_191228_14841 | NW_004520713.1 | Scaffold7355 | 14841                   | AA                              | GG              | 1947064334               |
| SNP_P4_191231_18768 | NW_004520713.1 | Scaffold7355 | 18768                   | GG                              | CC              | 1947064336               |
| SNP_P4_191232_19124 | NW_004520713.1 | Scaffold7355 | 19124                   | AA                              | TT              | 1947064338               |
| SNP_P4_191233_19128 | NW_004520713.1 | Scaffold7355 | 19128                   | TT                              | AA              | 1947064340               |
| SNP_P4_191234_19139 | NW_004520713.1 | Scaffold7355 | 19139                   | CC                              | TT              | 1947064342               |
| SNP_P4_191235_19150 | NW_004520713.1 | Scaffold7355 | 19150                   | AA                              | GG              | 1947064344               |
| SNP_P4_191236_19167 | NW_004520713.1 | Scaffold7355 | 19167                   | CC                              | GG              | 1947064345               |
| SNP_P4_191237_19204 | NW_004520713.1 | Scaffold7355 | 19204                   | AA                              | GG              | 1947064347               |
| SNP_P4_191238_19256 | NW_004520713.1 | Scaffold7355 | 19256                   | TT                              | CC              | 1947064349               |
| SNP_P4_191239_19262 | NW_004520713.1 | Scaffold7355 | 19262                   | AA                              | GG              | 1947064351               |
| SNP_P4_191240_19318 | NW_004520713.1 | Scaffold7355 | 19318                   | TT                              | CC              | 1947064353               |
| SNP_P4_191241_19321 | NW_004520713.1 | Scaffold7355 | 19321                   | TT                              | CC              | 1947064355               |
| SNP_P4_191242_19336 | NW_004520713.1 | Scaffold7355 | 19336                   | TT                              | CC              | 1947064357               |
| SNP_P4_191243_19362 | NW_004520713.1 | Scaffold7355 | 19362                   | GG                              | AA              | 1947064359               |
| SNP_P4_191244_19388 | NW_004520713.1 | Scaffold7355 | 19388                   | GG                              | AA              | 1947064361               |
| SNP_P4_191245_19392 | NW_004520713.1 | Scaffold7355 | 19392                   | CC                              | TT              | 1947064363               |
| SNP_P4_191246_19425 | NW_004520713.1 | Scaffold7355 | 19425                   | CC                              | GG              | 1947064365               |
| SNP_P4_191247_19882 | NW_004520713.1 | Scaffold7355 | 19882                   | TT                              | CC              | 1947064367               |
| SNP_P4_191248_20090 | NW_004520713.1 | Scaffold7355 | 20090                   | TT                              | AA              | 1947064368               |
| SNP_P4_191249_21052 | NW_004520713.1 | Scaffold7355 | 21052                   | TT                              | AA              | 1947064370               |
| SNP_P4_191250_21105 | NW_004520713.1 | Scaffold7355 | 21105                   | TT                              | CC              | 1947064372               |
| SNP_P4_191251_21694 | NW_004520713.1 | Scaffold7355 | 21694                   | AA                              | GG              | 1947064374               |
| SNP_P4_191252_21998 | NW_004520713.1 | Scaffold7355 | 21998                   | GG                              | AA              | 1947064376               |
| SNP_P4_191253_22003 | NW_004520713.1 | Scaffold7355 | 22003                   | GG                              | TT              | 1947064378               |
| SNP_P4_191254_22316 | NW_004520713.1 | Scaffold7355 | 22316                   | TT                              | AA              | 1947064380               |
| SNP_P4_191255_22940 | NW_004520713.1 | Scaffold7355 | 22940                   | TT                              | CC              | 1947064382               |
| SNP_P4_191256_23218 | NW_004520713.1 | Scaffold7355 | 23218                   | GG                              | AA              | 1947064384               |
| SNP_P4_191257_23220 | NW_004520713.1 | Scaffold7355 | 23220                   | GG                              | AA              | 1947064386               |
| SNP_P4_191258_23349 | NW_004520713.1 | Scaffold7355 | 23349                   | TT                              | AA              | 1947064388               |
| SNP_P4_191259_23368 | NW_004520713.1 | Scaffold7355 | 23368                   | AA                              | TT              | 1947064390               |
| SNP_P4_191260_23413 | NW_004520713.1 | Scaffold7355 | 23413                   | CC                              | AA              | 1947064392               |
| SNP_P4_191261_23606 | NW_004520713.1 | Scaffold7355 | 23606                   | AA                              | CC              | 1947064394               |
| SNP_P4_191262_23636 | NW_004520713.1 | Scaffold7355 | 23636                   | AA                              | GG              | 1947064396               |
| SNP_P4_191263_23683 | NW_004520713.1 | Scaffold7355 | 23683                   | CC                              | GG              | 1947064397               |

| SNPs IDs            | Chromosome IDs | Chromosomes  | Physical positions (bp) | CDC Frontier (Reference genome) | (ILWC46 & LPNB) | NCBI SNPdb Accession IDs |
|---------------------|----------------|--------------|-------------------------|---------------------------------|-----------------|--------------------------|
| SNP_P4_191264_23948 | NW_004520713.1 | Scaffold7355 | 23948                   | CC                              | TT              | 1947064399               |
| SNP_P4_191265_23967 | NW_004520713.1 | Scaffold7355 | 23967                   | CC                              | TT              | 1947064401               |
| SNP_P4_191266_2109  | NW_004520716.1 | Scaffold7364 | 2109                    | CC                              | AA              | 1947064403               |
| SNP_P4_191268_2849  | NW_004520716.1 | Scaffold7364 | 2849                    | AA                              | CC              | 1947064405               |
| SNP_P4_191269_2976  | NW_004520716.1 | Scaffold7364 | 2976                    | CC                              | TT              | 1947064407               |
| SNP_P4_191270_4232  | NW_004520716.1 | Scaffold7364 | 4232                    | TT                              | AA              | 1947064409               |
| SNP_P4_191271_4361  | NW_004520716.1 | Scaffold7364 | 4361                    | TT                              | CC              | 1947064411               |
| SNP_P4_191273_3808  | NW_004520722.1 | Scaffold7371 | 3808                    | GG                              | AA              | 1947064413               |
| SNP_P4_191274_40    | NW_004520726.1 | Scaffold7377 | 40                      | AA                              | GG              | 1947064415               |
| SNP_P4_191275_53    | NW_004520726.1 | Scaffold7377 | 53                      | CC                              | TT              | 1947064417               |
| SNP_P4_191276_64    | NW_004520726.1 | Scaffold7377 | 64                      | AA                              | GG              | 1947064419               |
| SNP_P4_191277_81    | NW_004520726.1 | Scaffold7377 | 81                      | TT                              | AA              | 1947064421               |
| SNP_P4_191278_92    | NW_004520726.1 | Scaffold7377 | 92                      | AA                              | GG              | 1947064423               |
| SNP_P4_191279_110   | NW_004520726.1 | Scaffold7377 | 110                     | TT                              | AA              | 1947064425               |
| SNP_P4_191280_234   | NW_004520726.1 | Scaffold7377 | 234                     | AA                              | GG              | 1947064427               |
| SNP_P4_191281_411   | NW_004520726.1 | Scaffold7377 | 411                     | TT                              | GG              | 1947064429               |
| SNP_P4_191283_550   | NW_004520726.1 | Scaffold7377 | 550                     | GG                              | CC              | 1947064431               |
| SNP_P4_191284_637   | NW_004520726.1 | Scaffold7377 | 637                     | GG                              | AA              | 1947064433               |
| SNP_P4_191285_667   | NW_004520726.1 | Scaffold7377 | 667                     | TT                              | AA              | 1947064435               |
| SNP_P4_191286_775   | NW_004520726.1 | Scaffold7377 | 775                     | CC                              | TT              | 1947064437               |
| SNP_P4_191287_196   | NW_004520728.1 | Scaffold7379 | 196                     | AA                              | CC              | 1947064439               |
| SNP_P4_191288_532   | NW_004520728.1 | Scaffold7379 | 532                     | TT                              | AA              | 1947064441               |
| SNP_P4_191290_861   | NW_004520732.1 | Scaffold7386 | 861                     | TT                              | CC              | 1947064443               |
| SNP_P4_191291_771   | NW_004520733.1 | Scaffold7389 | 771                     | GG                              | CC              | 1947064445               |
| SNP_P4_191292_1267  | NW_004520733.1 | Scaffold7389 | 1267                    | AA                              | TT              | 1947064448               |
| SNP_P4_191293_543   | NW_004520738.1 | Scaffold7398 | 543                     | CC                              | TT              | 1947064450               |
| SNP_P4_191294_587   | NW_004520738.1 | Scaffold7398 | 587                     | AA                              | TT              | 1947064452               |
| SNP_P4_191295_456   | NW_004520740.1 | Scaffold7405 | 456                     | AA                              | GG              | 1947064454               |
| SNP_P4_191296_648   | NW_004520745.1 | Scaffold7412 | 648                     | CC                              | TT              | 1947064456               |
| SNP_P4_191297_1686  | NW_004520746.1 | Scaffold7414 | 1686                    | CC                              | GG              | 1947064457               |
| SNP_P4_191298_4097  | NW_004520746.1 | Scaffold7414 | 4097                    | CC                              | TT              | 1947064459               |
| SNP_P4_191299_4102  | NW_004520746.1 | Scaffold7414 | 4102                    | CC                              | AA              | 1947064461               |
| SNP_P4_191300_4304  | NW_004520746.1 | Scaffold7414 | 4304                    | CC                              | AA              | 1947064463               |
| SNP_P4_191301_1291  | NW_004520749.1 | Scaffold7421 | 1291                    | AA                              | GG              | 1947064465               |
| SNP_P4_191302_1297  | NW_004520749.1 | Scaffold7421 | 1297                    | GG                              | AA              | 1947064467               |
| SNP_P4_191303_1863  | NW_004520753.1 | Scaffold7427 | 1863                    | AA                              | TT              | 1947064469               |
| SNP_P4_191304_5446  | NW_004520753.1 | Scaffold7427 | 5446                    | CC                              | TT              | 1947064471               |
| SNP_P4_191305_7567  | NW_004520753.1 | Scaffold7427 | 7567                    | CC                              | TT              | 1947064473               |
| SNP_P4_191306_7703  | NW_004520753.1 | Scaffold7427 | 7703                    | GG                              | CC              | 1947064475               |
| SNP_P4_191307_7944  | NW_004520753.1 | Scaffold7427 | 7944                    | GG                              | TT              | 1947064477               |
| SNP_P4_191308_9558  | NW_004520753.1 | Scaffold7427 | 9558                    | GG                              | AA              | 1947064480               |
| SNP_P4_191309_9563  | NW_004520753.1 | Scaffold7427 | 9563                    | GG                              | AA              | 1947064482               |

| SNPs IDs            | Chromosome IDs | Chromosomes  | Physical positions (bp) | CDC Frontier (Reference genome) | (ILWC46 & LPNB) | NCBI SNPdb Accession IDs |
|---------------------|----------------|--------------|-------------------------|---------------------------------|-----------------|--------------------------|
| SNP_P4_191310_183   | NW_004520754.1 | Scaffold7432 | 183                     | AA                              | CC              | 1947064484               |
| SNP_P4_191311_307   | NW_004520762.1 | Scaffold7448 | 307                     | CC                              | TT              | 1947064486               |
| SNP_P4_191312_448   | NW_004520762.1 | Scaffold7448 | 448                     | TT                              | CC              | 1947064488               |
| SNP_P4_191313_737   | NW_004520762.1 | Scaffold7448 | 737                     | AA                              | GG              | 1947064490               |
| SNP_P4_191314_770   | NW_004520762.1 | Scaffold7448 | 770                     | GG                              | TT              | 1947064492               |
| SNP_P4_191315_994   | NW_004520762.1 | Scaffold7448 | 994                     | TT                              | CC              | 1947064494               |
| SNP_P4_191316_13525 | NW_004520762.1 | Scaffold7448 | 13525                   | TT                              | CC              | 1947064496               |
| SNP_P4_191317_13534 | NW_004520762.1 | Scaffold7448 | 13534                   | GG                              | TT              | 1947064498               |
| SNP_P4_191318_13536 | NW_004520762.1 | Scaffold7448 | 13536                   | GG                              | AA              | 1947064500               |
| SNP_P4_191319_13542 | NW_004520762.1 | Scaffold7448 | 13542                   | GG                              | AA              | 1947064502               |
| SNP_P4_191321_13567 | NW_004520762.1 | Scaffold7448 | 13567                   | CC                              | TT              | 1947064504               |
| SNP_P4_191322_13990 | NW_004520762.1 | Scaffold7448 | 13990                   | AA                              | GG              | 1947064506               |
| SNP_P4_191323_14045 | NW_004520762.1 | Scaffold7448 | 14045                   | AA                              | CC              | 1947064508               |
| SNP_P4_191324_14127 | NW_004520762.1 | Scaffold7448 | 14127                   | TT                              | AA              | 1947064510               |
| SNP_P4_191325_14245 | NW_004520762.1 | Scaffold7448 | 14245                   | CC                              | TT              | 1947064512               |
| SNP_P4_191326_14258 | NW_004520762.1 | Scaffold7448 | 14258                   | CC                              | AA              | 1947064514               |
| SNP_P4_191327_14282 | NW_004520762.1 | Scaffold7448 | 14282                   | AA                              | TT              | 1947064516               |
| SNP_P4_191328_16690 | NW_004520762.1 | Scaffold7448 | 16690                   | CC                              | TT              | 1947064518               |
| SNP_P4_191329_17066 | NW_004520762.1 | Scaffold7448 | 17066                   | AA                              | TT              | 1947064520               |
| SNP_P4_191330_20420 | NW_004520762.1 | Scaffold7448 | 20420                   | GG                              | AA              | 1947064522               |
| SNP_P4_191331_20572 | NW_004520762.1 | Scaffold7448 | 20572                   | GG                              | TT              | 1947064524               |
| SNP_P4_191332_20671 | NW_004520762.1 | Scaffold7448 | 20671                   | AA                              | GG              | 1947064526               |
| SNP_P4_191333_20701 | NW_004520762.1 | Scaffold7448 | 20701                   | TT                              | GG              | 1947064528               |
| SNP_P4_191334_20722 | NW_004520762.1 | Scaffold7448 | 20722                   | GG                              | AA              | 1947064530               |
| SNP_P4_191335_20733 | NW_004520762.1 | Scaffold7448 | 20733                   | TT                              | CC              | 1947064532               |
| SNP_P4_191336_20769 | NW_004520762.1 | Scaffold7448 | 20769                   | TT                              | AA              | 1947064534               |
| SNP_P4_191337_20830 | NW_004520762.1 | Scaffold7448 | 20830                   | TT                              | CC              | 1947064536               |
| SNP_P4_191338_20857 | NW_004520762.1 | Scaffold7448 | 20857                   | CC                              | GG              | 1947064538               |
| SNP_P4_191339_20859 | NW_004520762.1 | Scaffold7448 | 20859                   | GG                              | AA              | 1947064540               |
| SNP_P4_191340_21156 | NW_004520762.1 | Scaffold7448 | 21156                   | GG                              | AA              | 1947064542               |
| SNP_P4_191341_21242 | NW_004520762.1 | Scaffold7448 | 21242                   | AA                              | TT              | 1947064544               |
| SNP_P4_191342_21272 | NW_004520762.1 | Scaffold7448 | 21272                   | TT                              | AA              | 1947064546               |
| SNP_P4_191343_21307 | NW_004520762.1 | Scaffold7448 | 21307                   | GG                              | CC              | 1947064548               |
| SNP_P4_191345_21543 | NW_004520762.1 | Scaffold7448 | 21543                   | CC                              | TT              | 1947064550               |
| SNP_P4_191346_21681 | NW_004520762.1 | Scaffold7448 | 21681                   | GG                              | AA              | 1947064552               |
| SNP_P4_191347_21745 | NW_004520762.1 | Scaffold7448 | 21745                   | CC                              | TT              | 1947064554               |
| SNP_P4_191348_21880 | NW_004520762.1 | Scaffold7448 | 21880                   | AA                              | TT              | 1947064556               |
| SNP_P4_191349_22261 | NW_004520762.1 | Scaffold7448 | 22261                   | GG                              | AA              | 1947064558               |
| SNP_P4_191350_22452 | NW_004520762.1 | Scaffold7448 | 22452                   | CC                              | TT              | 1947064560               |
| SNP_P4_191351_23260 | NW_004520762.1 | Scaffold7448 | 23260                   | AA                              | CC              | 1947064567               |
| SNP_P4_191352_23293 | NW_004520762.1 | Scaffold7448 | 23293                   | TT                              | CC              | 1947064569               |
| SNP_P4_191353_23405 | NW_004520762.1 | Scaffold7448 | 23405                   | AA                              | TT              | 1947064571               |

| SNPs IDs            | Chromosome IDs | Chromosomes  | Physical positions (bp) | CDC Frontier (Reference genome) | (ILWC46 & LPNB) | NCBI SNPdb Accession IDs |
|---------------------|----------------|--------------|-------------------------|---------------------------------|-----------------|--------------------------|
| SNP_P4_191354_23469 | NW_004520762.1 | Scaffold7448 | 23469                   | AA                              | CC              | 1947064573               |
| SNP_P4_191355_23573 | NW_004520762.1 | Scaffold7448 | 23573                   | CC                              | TT              | 1947064575               |
| SNP_P4_191356_255   | NW_004520765.1 | Scaffold7452 | 255                     | CC                              | TT              | 1947064576               |
| SNP_P4_191357_276   | NW_004520765.1 | Scaffold7452 | 276                     | CC                              | AA              | 1947064578               |
| SNP_P4_191358_618   | NW_004520765.1 | Scaffold7452 | 618                     | GG                              | AA              | 1947064580               |
| SNP_P4_191359_622   | NW_004520765.1 | Scaffold7452 | 622                     | TT                              | CC              | 1947064582               |
| SNP_P4_191360_2605  | NW_004520765.1 | Scaffold7452 | 2605                    | AA                              | GG              | 1947064584               |
| SNP_P4_191361_2886  | NW_004520765.1 | Scaffold7452 | 2886                    | AA                              | TT              | 1947064586               |
| SNP_P4_191362_2906  | NW_004520765.1 | Scaffold7452 | 2906                    | GG                              | CC              | 1947064588               |
| SNP_P4_191363_2942  | NW_004520765.1 | Scaffold7452 | 2942                    | AA                              | TT              | 1947064590               |
| SNP_P4_191364_3479  | NW_004520765.1 | Scaffold7452 | 3479                    | TT                              | GG              | 1947064592               |
| SNP_P4_191365_3483  | NW_004520765.1 | Scaffold7452 | 3483                    | AA                              | TT              | 1947064594               |
| SNP_P4_191366_3542  | NW_004520765.1 | Scaffold7452 | 3542                    | AA                              | TT              | 1947064596               |
| SNP_P4_191367_3547  | NW_004520765.1 | Scaffold7452 | 3547                    | AA                              | CC              | 1947064598               |
| SNP_P4_191368_3744  | NW_004520765.1 | Scaffold7452 | 3744                    | TT                              | CC              | 1947064600               |
| SNP_P4_191369_3745  | NW_004520765.1 | Scaffold7452 | 3745                    | AA                              | CC              | 1947064602               |
| SNP_P4_191370_4028  | NW_004520765.1 | Scaffold7452 | 4028                    | GG                              | AA              | 1947064604               |
| SNP_P4_191371_620   | NW_004520770.1 | Scaffold7460 | 620                     | AA                              | GG              | 1947064606               |
| SNP_P4_191372_626   | NW_004520770.1 | Scaffold7460 | 626                     | TT                              | CC              | 1947064608               |
| SNP_P4_191373_629   | NW_004520770.1 | Scaffold7460 | 629                     | AA                              | CC              | 1947064610               |
| SNP_P4_191374_707   | NW_004520770.1 | Scaffold7460 | 707                     | CC                              | TT              | 1947064611               |
| SNP_P4_191375_1000  | NW_004520776.1 | Scaffold7470 | 1000                    | GG                              | AA              | 1947064613               |
| SNP_P4_191376_1141  | NW_004520776.1 | Scaffold7470 | 1141                    | AA                              | TT              | 1947064615               |
| SNP_P4_191377_1235  | NW_004520776.1 | Scaffold7470 | 1235                    | CC                              | AA              | 1947064617               |
| SNP_P4_191378_1262  | NW_004520776.1 | Scaffold7470 | 1262                    | AA                              | GG              | 1947064619               |
| SNP_P4_191379_1328  | NW_004520776.1 | Scaffold7470 | 1328                    | AA                              | GG              | 1947064621               |
| SNP_P4_191380_1643  | NW_004520776.1 | Scaffold7470 | 1643                    | GG                              | TT              | 1947064623               |
| SNP_P4_191381_1845  | NW_004520776.1 | Scaffold7470 | 1845                    | AA                              | TT              | 1947064625               |
| SNP_P4_191382_1920  | NW_004520776.1 | Scaffold7470 | 1920                    | AA                              | TT              | 1947064627               |
| SNP_P4_191383_1922  | NW_004520776.1 | Scaffold7470 | 1922                    | TT                              | CC              | 1947064629               |
| SNP_P4_191384_2022  | NW_004520776.1 | Scaffold7470 | 2022                    | TT                              | CC              | 1947064631               |
| SNP_P4_191385_2121  | NW_004520776.1 | Scaffold7470 | 2121                    | GG                              | CC              | 1947064633               |
| SNP_P4_191386_2342  | NW_004520776.1 | Scaffold7470 | 2342                    | CC                              | AA              | 1947064635               |
| SNP_P4_191388_2435  | NW_004520776.1 | Scaffold7470 | 2435                    | CC                              | GG              | 1947064637               |
| SNP_P4_191389_2474  | NW_004520776.1 | Scaffold7470 | 2474                    | GG                              | CC              | 1947064639               |
| SNP_P4_191390_2479  | NW_004520776.1 | Scaffold7470 | 2479                    | GG                              | CC              | 1947064641               |
| SNP_P4_191391_2713  | NW_004520776.1 | Scaffold7470 | 2713                    | TT                              | AA              | 1947064644               |
| SNP_P4_191392_342   | NW_004520778.1 | Scaffold7473 | 342                     | TT                              | CC              | 1947064651               |
| SNP_P4_191393_368   | NW_004520778.1 | Scaffold7473 | 368                     | TT                              | GG              | 1947064655               |
| SNP_P4_191394_857   | NW_004520779.1 | Scaffold7474 | 857                     | TT                              | CC              | 1947064657               |
| SNP_P4_191396_5630  | NW_004520780.1 | Scaffold7475 | 5630                    | AA                              | GG              | 1947064659               |
| SNP_P4_191397_973   | NW_004520781.1 | Scaffold7477 | 973                     | CC                              | TT              | 1947064661               |

| SNPs IDs            | Chromosome IDs | Chromosomes  | Physical positions (bp) | CDC Frontier (Reference genome) | (ILWC46 & LPNB) | NCBI SNPdb Accession IDs |
|---------------------|----------------|--------------|-------------------------|---------------------------------|-----------------|--------------------------|
| SNP_P4_191398_1063  | NW_004520781.1 | Scaffold7477 | 1063                    | CC                              | TT              | 1947064663               |
| SNP_P4_191399_1350  | NW_004520781.1 | Scaffold7477 | 1350                    | AA                              | GG              | 1947064664               |
| SNP_P4_191400_2062  | NW_004520781.1 | Scaffold7477 | 2062                    | TT                              | CC              | 1947064666               |
| SNP_P4_191401_2151  | NW_004520781.1 | Scaffold7477 | 2151                    | CC                              | AA              | 1947064668               |
| SNP_P4_191403_2402  | NW_004520781.1 | Scaffold7477 | 2402                    | TT                              | CC              | 1947064670               |
| SNP_P4_191404_6372  | NW_004520781.1 | Scaffold7477 | 6372                    | AA                              | GG              | 1947064672               |
| SNP_P4_191405_6406  | NW_004520781.1 | Scaffold7477 | 6406                    | AA                              | TT              | 1947064674               |
| SNP_P4_191406_6485  | NW_004520781.1 | Scaffold7477 | 6485                    | GG                              | AA              | 1947064676               |
| SNP_P4_191409_6912  | NW_004520781.1 | Scaffold7477 | 6912                    | TT                              | CC              | 1947064678               |
| SNP_P4_191410_20705 | NW_004520781.1 | Scaffold7477 | 20705                   | TT                              | CC              | 1947064680               |
| SNP_P4_191411_20981 | NW_004520781.1 | Scaffold7477 | 20981                   | TT                              | GG              | 1947064682               |
| SNP_P4_191412_20987 | NW_004520781.1 | Scaffold7477 | 20987                   | GG                              | AA              | 1947064683               |
| SNP_P4_191413_20988 | NW_004520781.1 | Scaffold7477 | 20988                   | TT                              | GG              | 1947064685               |
| SNP_P4_191414_21008 | NW_004520781.1 | Scaffold7477 | 21008                   | GG                              | AA              | 1947064687               |
| SNP_P4_191415_21032 | NW_004520781.1 | Scaffold7477 | 21032                   | AA                              | GG              | 1947064689               |
| SNP_P4_191416_21044 | NW_004520781.1 | Scaffold7477 | 21044                   | AA                              | GG              | 1947064691               |
| SNP_P4_191418_499   | NW_004520785.1 | Scaffold7481 | 499                     | GG                              | TT              | 1947064693               |
| SNP_P4_191419_514   | NW_004520785.1 | Scaffold7481 | 514                     | CC                              | AA              | 1947064695               |
| SNP_P4_191420_538   | NW_004520785.1 | Scaffold7481 | 538                     | CC                              | GG              | 1947064697               |
| SNP_P4_191421_504   | NW_004520788.1 | Scaffold7484 | 504                     | CC                              | TT              | 1947064699               |
| SNP_P4_191422_19257 | NW_004520788.1 | Scaffold7484 | 19257                   | AA                              | CC              | 1947064701               |
| SNP_P4_191423_19688 | NW_004520788.1 | Scaffold7484 | 19688                   | CC                              | TT              | 1947064703               |
| SNP_P4_191424_19713 | NW_004520788.1 | Scaffold7484 | 19713                   | TT                              | AA              | 1947064705               |
| SNP_P4_191425_19727 | NW_004520788.1 | Scaffold7484 | 19727                   | TT                              | CC              | 1947064707               |
| SNP_P4_191426_19883 | NW_004520788.1 | Scaffold7484 | 19883                   | CC                              | AA              | 1947064709               |
| SNP_P4_191427_20012 | NW_004520788.1 | Scaffold7484 | 20012                   | GG                              | AA              | 1947064711               |
| SNP_P4_191428_20276 | NW_004520788.1 | Scaffold7484 | 20276                   | CC                              | TT              | 1947064713               |
| SNP_P4_191429_20281 | NW_004520788.1 | Scaffold7484 | 20281                   | TT                              | AA              | 1947064715               |
| SNP_P4_191430_20298 | NW_004520788.1 | Scaffold7484 | 20298                   | GG                              | TT              | 1947064717               |
| SNP_P4_191432_679   | NW_004520791.1 | Scaffold7489 | 679                     | TT                              | CC              | 1947064718               |
| SNP_P4_191433_697   | NW_004520791.1 | Scaffold7489 | 697                     | AA                              | GG              | 1947064720               |
| SNP_P4_191434_741   | NW_004520791.1 | Scaffold7489 | 741                     | CC                              | TT              | 1947064722               |
| SNP_P4_191435_752   | NW_004520791.1 | Scaffold7489 | 752                     | TT                              | CC              | 1947064724               |
| SNP_P4_191437_860   | NW_004520791.1 | Scaffold7489 | 860                     | CC                              | AA              | 1947064726               |
| SNP_P4_191438_871   | NW_004520791.1 | Scaffold7489 | 871                     | GG                              | TT              | 1947064728               |
| SNP_P4_191439_882   | NW_004520791.1 | Scaffold7489 | 882                     | CC                              | TT              | 1947064730               |
| SNP_P4_191440_889   | NW_004520791.1 | Scaffold7489 | 889                     | TT                              | CC              | 1947064732               |
| SNP_P4_191441_932   | NW_004520791.1 | Scaffold7489 | 932                     | CC                              | TT              | 1947064734               |
| SNP_P4_191442_936   | NW_004520791.1 | Scaffold7489 | 936                     | AA                              | GG              | 1947064736               |
| SNP_P4_191443_1005  | NW_004520791.1 | Scaffold7489 | 1005                    | AA                              | GG              | 1947064738               |
| SNP_P4_191444_1018  | NW_004520791.1 | Scaffold7489 | 1018                    | CC                              | AA              | 1947064741               |
| SNP_P4_191445_1079  | NW_004520791.1 | Scaffold7489 | 1079                    | TT                              | AA              | 1947064743               |

| SNPs IDs           | Chromosome IDs | Chromosomes  | Physical positions (bp) | CDC Frontier (Reference genome) | (ILWC46 & LPNB) | NCBI SNPdb Accession IDs |
|--------------------|----------------|--------------|-------------------------|---------------------------------|-----------------|--------------------------|
| SNP_P4_191446_1168 | NW_004520791.1 | Scaffold7489 | 1168                    | GG                              | TT              | 1947064745               |
| SNP_P4_191447_1217 | NW_004520791.1 | Scaffold7489 | 1217                    | GG                              | AA              | 1947064748               |
| SNP_P4_191448_1270 | NW_004520791.1 | Scaffold7489 | 1270                    | GG                              | AA              | 1947064750               |
| SNP_P4_191449_1274 | NW_004520791.1 | Scaffold7489 | 1274                    | AA                              | GG              | 1947064752               |
| SNP_P4_191450_1361 | NW_004520791.1 | Scaffold7489 | 1361                    | TT                              | GG              | 1947064754               |
| SNP_P4_191451_1399 | NW_004520791.1 | Scaffold7489 | 1399                    | GG                              | AA              | 1947064756               |
| SNP_P4_191452_1417 | NW_004520791.1 | Scaffold7489 | 1417                    | TT                              | GG              | 1947064758               |
| SNP_P4_191453_1448 | NW_004520791.1 | Scaffold7489 | 1448                    | CC                              | TT              | 1947064760               |
| SNP_P4_191454_1457 | NW_004520791.1 | Scaffold7489 | 1457                    | CC                              | GG              | 1947064762               |
| SNP_P4_191455_1559 | NW_004520791.1 | Scaffold7489 | 1559                    | CC                              | AA              | 1947064765               |
| SNP_P4_191456_1602 | NW_004520791.1 | Scaffold7489 | 1602                    | AA                              | GG              | 1947064767               |
| SNP_P4_191457_1619 | NW_004520791.1 | Scaffold7489 | 1619                    | AA                              | TT              | 1947064769               |
| SNP_P4_191458_1696 | NW_004520791.1 | Scaffold7489 | 1696                    | CC                              | TT              | 1947064771               |
| SNP_P4_191459_1758 | NW_004520791.1 | Scaffold7489 | 1758                    | CC                              | GG              | 1947064773               |
| SNP_P4_191460_1765 | NW_004520791.1 | Scaffold7489 | 1765                    | TT                              | AA              | 1947064775               |
| SNP_P4_191461_1773 | NW_004520791.1 | Scaffold7489 | 1773                    | AA                              | GG              | 1947064777               |
| SNP_P4_191462_1788 | NW_004520791.1 | Scaffold7489 | 1788                    | GG                              | AA              | 1947064779               |
| SNP_P4_191463_805  | NW_004520792.1 | Scaffold7490 | 805                     | TT                              | CC              | 1947064781               |
| SNP_P4_191464_933  | NW_004520792.1 | Scaffold7490 | 933                     | TT                              | AA              | 1947064783               |
| SNP_P4_191467_630  | NW_004520796.1 | Scaffold7502 | 630                     | CC                              | GG              | 1947064785               |
| SNP_P4_191468_635  | NW_004520796.1 | Scaffold7502 | 635                     | TT                              | AA              | 1947064787               |
| SNP_P4_191469_654  | NW_004520796.1 | Scaffold7502 | 654                     | TT                              | CC              | 1947064789               |
| SNP_P4_191470_677  | NW_004520796.1 | Scaffold7502 | 677                     | TT                              | AA              | 1947064791               |
| SNP_P4_191471_735  | NW_004520796.1 | Scaffold7502 | 735                     | CC                              | TT              | 1947064793               |
| SNP_P4_191472_864  | NW_004520796.1 | Scaffold7502 | 864                     | CC                              | AA              | 1947064795               |
| SNP_P4_191473_869  | NW_004520796.1 | Scaffold7502 | 869                     | TT                              | CC              | 1947064797               |
| SNP_P4_191474_888  | NW_004520796.1 | Scaffold7502 | 888                     | GG                              | CC              | 1947064799               |
| SNP_P4_191475_906  | NW_004520796.1 | Scaffold7502 | 906                     | AA                              | TT              | 1947064801               |
| SNP_P4_191476_908  | NW_004520796.1 | Scaffold7502 | 908                     | AA                              | GG              | 1947064803               |
| SNP_P4_191477_1068 | NW_004520796.1 | Scaffold7502 | 1068                    | AA                              | CC              | 1947064805               |
| SNP_P4_191478_1123 | NW_004520796.1 | Scaffold7502 | 1123                    | TT                              | CC              | 1947064807               |
| SNP_P4_191479_82   | NW_004520800.1 | Scaffold7507 | 82                      | AA                              | GG              | 1947064809               |
| SNP_P4_191480_2490 | NW_004520802.1 | Scaffold7509 | 2490                    | GG                              | AA              | 1947064811               |
| SNP_P4_191481_63   | NW_004520803.1 | Scaffold7511 | 63                      | GG                              | CC              | 1947064813               |
| SNP_P4_191482_64   | NW_004520803.1 | Scaffold7511 | 64                      | GG                              | CC              | 1947064815               |
| SNP_P4_191483_72   | NW_004520803.1 | Scaffold7511 | 72                      | AA                              | GG              | 1947064817               |
| SNP_P4_191484_119  | NW_004520803.1 | Scaffold7511 | 119                     | TT                              | CC              | 1947064819               |
| SNP_P4_191485_154  | NW_004520803.1 | Scaffold7511 | 154                     | GG                              | AA              | 1947064821               |
| SNP_P4_191486_433  | NW_004520803.1 | Scaffold7511 | 433                     | TT                              | GG              | 1947064823               |
| SNP_P4_191487_451  | NW_004520803.1 | Scaffold7511 | 451                     | GG                              | AA              | 1947064825               |
| SNP_P4_191488_842  | NW_004520803.1 | Scaffold7511 | 842                     | CC                              | TT              | 1947064827               |
| SNP_P4_191489_1106 | NW_004520803.1 | Scaffold7511 | 1106                    | TT                              | CC              | 1947064829               |

| SNPs IDs            | Chromosome IDs | Chromosomes  | Physical positions (bp) | CDC Frontier (Reference genome) | (ILWC46 & LPNB) | NCBI SNPdb Accession IDs |
|---------------------|----------------|--------------|-------------------------|---------------------------------|-----------------|--------------------------|
| SNP_P4_191490_351   | NW_004520812.1 | Scaffold7528 | 351                     | GG                              | TT              | 1947064831               |
| SNP_P4_191491_752   | NW_004520812.1 | Scaffold7528 | 752                     | AA                              | GG              | 1947064833               |
| SNP_P4_191492_806   | NW_004520812.1 | Scaffold7528 | 806                     | TT                              | AA              | 1947064835               |
| SNP_P4_191493_1616  | NW_004520812.1 | Scaffold7528 | 1616                    | CC                              | GG              | 1947064837               |
| SNP_P4_191494_1686  | NW_004520812.1 | Scaffold7528 | 1686                    | AA                              | TT              | 1947064839               |
| SNP_P4_191495_7495  | NW_004520812.1 | Scaffold7528 | 7495                    | TT                              | CC              | 1947064841               |
| SNP_P4_191496_7548  | NW_004520812.1 | Scaffold7528 | 7548                    | AA                              | GG              | 1947064843               |
| SNP_P4_191497_7592  | NW_004520812.1 | Scaffold7528 | 7592                    | AA                              | GG              | 1947064845               |
| SNP_P4_191498_7615  | NW_004520812.1 | Scaffold7528 | 7615                    | CC                              | TT              | 1947064847               |
| SNP_P4_191499_7737  | NW_004520812.1 | Scaffold7528 | 7737                    | AA                              | TT              | 1947064849               |
| SNP_P4_191500_7802  | NW_004520812.1 | Scaffold7528 | 7802                    | GG                              | AA              | 1947064851               |
| SNP_P4_191501_7872  | NW_004520812.1 | Scaffold7528 | 7872                    | AA                              | CC              | 1947064853               |
| SNP_P4_191502_7881  | NW_004520812.1 | Scaffold7528 | 7881                    | TT                              | AA              | 1947064855               |
| SNP_P4_191503_8268  | NW_004520812.1 | Scaffold7528 | 8268                    | GG                              | TT              | 1947064857               |
| SNP_P4_191504_8853  | NW_004520812.1 | Scaffold7528 | 8853                    | CC                              | TT              | 1947064859               |
| SNP_P4_191505_8864  | NW_004520812.1 | Scaffold7528 | 8864                    | TT                              | GG              | 1947064861               |
| SNP_P4_191506_9025  | NW_004520812.1 | Scaffold7528 | 9025                    | TT                              | GG              | 1947064863               |
| SNP_P4_191507_9036  | NW_004520812.1 | Scaffold7528 | 9036                    | AA                              | CC              | 1947064865               |
| SNP_P4_191508_9104  | NW_004520812.1 | Scaffold7528 | 9104                    | GG                              | AA              | 1947064867               |
| SNP_P4_191509_9136  | NW_004520812.1 | Scaffold7528 | 9136                    | GG                              | AA              | 1947064869               |
| SNP_P4_191510_9325  | NW_004520812.1 | Scaffold7528 | 9325                    | TT                              | GG              | 1947064871               |
| SNP_P4_191511_9495  | NW_004520812.1 | Scaffold7528 | 9495                    | TT                              | CC              | 1947064873               |
| SNP_P4_191512_9525  | NW_004520812.1 | Scaffold7528 | 9525                    | TT                              | GG              | 1947064875               |
| SNP_P4_191513_9597  | NW_004520812.1 | Scaffold7528 | 9597                    | AA                              | TT              | 1947064877               |
| SNP_P4_191514_10734 | NW_004520812.1 | Scaffold7528 | 10734                   | GG                              | AA              | 1947064941               |
| SNP_P4_191515_10743 | NW_004520812.1 | Scaffold7528 | 10743                   | AA                              | GG              | 1947064943               |
| SNP_P4_191516_11020 | NW_004520812.1 | Scaffold7528 | 11020                   | TT                              | AA              | 1947064945               |
| SNP_P4_191518_11117 | NW_004520812.1 | Scaffold7528 | 11117                   | TT                              | CC              | 1947064947               |
| SNP_P4_191519_11372 | NW_004520812.1 | Scaffold7528 | 11372                   | CC                              | TT              | 1947064949               |
| SNP_P4_191520_14088 | NW_004520812.1 | Scaffold7528 | 14088                   | CC                              | GG              | 1947064951               |
| SNP_P4_191521_14144 | NW_004520812.1 | Scaffold7528 | 14144                   | CC                              | TT              | 1947064953               |
| SNP_P4_191522_14470 | NW_004520812.1 | Scaffold7528 | 14470                   | TT                              | CC              | 1947064955               |
| SNP_P4_191523_14575 | NW_004520812.1 | Scaffold7528 | 14575                   | AA                              | GG              | 1947064957               |
| SNP_P4_191524_14816 | NW_004520812.1 | Scaffold7528 | 14816                   | GG                              | CC              | 1947064959               |
| SNP_P4_191525_14985 | NW_004520812.1 | Scaffold7528 | 14985                   | AA                              | CC              | 1947064961               |
| SNP_P4_191526_15023 | NW_004520812.1 | Scaffold7528 | 15023                   | TT                              | CC              | 1947064963               |
| SNP_P4_191528_15425 | NW_004520812.1 | Scaffold7528 | 15425                   | TT                              | GG              | 1947064965               |
| SNP_P4_191529_792   | NW_004520813.1 | Scaffold7529 | 792                     | TT                              | GG              | 1947064967               |
| SNP_P4_191530_1041  | NW_004520813.1 | Scaffold7529 | 1041                    | GG                              | CC              | 1947064969               |
| SNP_P4_191531_431   | NW_004520817.1 | Scaffold7540 | 431                     | TT                              | AA              | 1947064971               |
| SNP_P4_191532_1226  | NW_004520817.1 | Scaffold7540 | 1226                    | TT                              | AA              | 1947064973               |
| SNP_P4_191533_1529  | NW_004520817.1 | Scaffold7540 | 1529                    | AA                              | TT              | 1947064975               |



| SNPs IDs           | Chromosome IDs | Chromosomes  | Physical positions (bp) | CDC Frontier (Reference genome) | (ILWC46 & LPNB) | NCBI SNPdb Accession IDs |
|--------------------|----------------|--------------|-------------------------|---------------------------------|-----------------|--------------------------|
| SNP_P4_191534_1544 | NW_004520817.1 | Scaffold7540 | 1544                    | AA                              | GG              | 1947064977               |
| SNP_P4_191535_439  | NW_004520822.1 | Scaffold7546 | 439                     | AA                              | GG              | 1947064979               |
| SNP_P4_191536_478  | NW_004520822.1 | Scaffold7546 | 478                     | TT                              | AA              | 1947064981               |
| SNP_P4_191537_495  | NW_004520822.1 | Scaffold7546 | 495                     | AA                              | CC              | 1947064983               |
| SNP_P4_191538_503  | NW_004520822.1 | Scaffold7546 | 503                     | AA                              | TT              | 1947064985               |
| SNP_P4_191539_504  | NW_004520822.1 | Scaffold7546 | 504                     | TT                              | GG              | 1947064987               |
| SNP_P4_191541_1395 | NW_004520822.1 | Scaffold7546 | 1395                    | CC                              | AA              | 1947064989               |
| SNP_P4_191542_1420 | NW_004520822.1 | Scaffold7546 | 1420                    | CC                              | GG              | 1947064991               |
| SNP_P4_191543_477  | NW_004520824.1 | Scaffold7551 | 477                     | CC                              | TT              | 1947064993               |
| SNP_P4_191544_545  | NW_004520824.1 | Scaffold7551 | 545                     | GG                              | AA              | 1947064995               |
| SNP_P4_191545_553  | NW_004520824.1 | Scaffold7551 | 553                     | AA                              | GG              | 1947064997               |
| SNP_P4_191546_713  | NW_004520824.1 | Scaffold7551 | 713                     | TT                              | CC              | 1947064999               |
| SNP_P4_191547_748  | NW_004520824.1 | Scaffold7551 | 748                     | TT                              | GG              | 1947065001               |
| SNP_P4_191548_761  | NW_004520824.1 | Scaffold7551 | 761                     | GG                              | AA              | 1947065003               |
| SNP_P4_191549_1899 | NW_004520832.1 | Scaffold7564 | 1899                    | AA                              | GG              | 1947065005               |
| SNP_P4_191550_1925 | NW_004520832.1 | Scaffold7564 | 1925                    | AA                              | CC              | 1947065007               |
| SNP_P4_191551_1987 | NW_004520832.1 | Scaffold7564 | 1987                    | CC                              | TT              | 1947065009               |
| SNP_P4_191552_2000 | NW_004520832.1 | Scaffold7564 | 2000                    | CC                              | TT              | 1947065011               |
| SNP_P4_191553_2059 | NW_004520832.1 | Scaffold7564 | 2059                    | AA                              | TT              | 1947065013               |
| SNP_P4_191554_2083 | NW_004520832.1 | Scaffold7564 | 2083                    | CC                              | AA              | 1947065015               |
| SNP_P4_191555_2152 | NW_004520832.1 | Scaffold7564 | 2152                    | AA                              | CC              | 1947065017               |
| SNP_P4_191556_2161 | NW_004520832.1 | Scaffold7564 | 2161                    | TT                              | GG              | 1947065019               |
| SNP_P4_191557_2322 | NW_004520832.1 | Scaffold7564 | 2322                    | AA                              | TT              | 1947065021               |
| SNP_P4_191558_450  | NW_004520833.1 | Scaffold7565 | 450                     | TT                              | CC              | 1947065023               |
| SNP_P4_191559_614  | NW_004520833.1 | Scaffold7565 | 614                     | GG                              | TT              | 1947065025               |
| SNP_P4_191560_646  | NW_004520833.1 | Scaffold7565 | 646                     | CC                              | TT              | 1947065027               |
| SNP_P4_191561_668  | NW_004520833.1 | Scaffold7565 | 668                     | CC                              | TT              | 1947065029               |
| SNP_P4_191562_707  | NW_004520833.1 | Scaffold7565 | 707                     | GG                              | CC              | 1947065031               |
| SNP_P4_191563_1071 | NW_004520833.1 | Scaffold7565 | 1071                    | TT                              | GG              | 1947065034               |
| SNP_P4_191564_1080 | NW_004520833.1 | Scaffold7565 | 1080                    | AA                              | GG              | 1947065036               |
| SNP_P4_191565_1161 | NW_004520833.1 | Scaffold7565 | 1161                    | TT                              | AA              | 1947065038               |
| SNP_P4_191566_1922 | NW_004520833.1 | Scaffold7565 | 1922                    | CC                              | GG              | 1947065040               |
| SNP_P4_191567_1957 | NW_004520833.1 | Scaffold7565 | 1957                    | AA                              | CC              | 1947065042               |
| SNP_P4_191568_2359 | NW_004520833.1 | Scaffold7565 | 2359                    | AA                              | GG              | 1947065044               |
| SNP_P4_191569_2589 | NW_004520833.1 | Scaffold7565 | 2589                    | TT                              | AA              | 1947065046               |
| SNP_P4_191570_2700 | NW_004520833.1 | Scaffold7565 | 2700                    | CC                              | TT              | 1947065048               |
| SNP_P4_191571_2790 | NW_004520833.1 | Scaffold7565 | 2790                    | CC                              | AA              | 1947065050               |
| SNP_P4_191572_2906 | NW_004520833.1 | Scaffold7565 | 2906                    | GG                              | TT              | 1947065052               |
| SNP_P4_191573_3098 | NW_004520833.1 | Scaffold7565 | 3098                    | GG                              | AA              | 1947065054               |
| SNP_P4_191575_3203 | NW_004520833.1 | Scaffold7565 | 3203                    | AA                              | TT              | 1947065056               |
| SNP_P4_191576_4332 | NW_004520833.1 | Scaffold7565 | 4332                    | AA                              | CC              | 1947065058               |
| SNP_P4_191577_4348 | NW_004520833.1 | Scaffold7565 | 4348                    | AA                              | TT              | 1947065060               |

| SNPs IDs           | Chromosome IDs | Chromosomes  | Physical positions (bp) | CDC Frontier (Reference genome) | (ILWC46 & LPNB) | NCBI SNPdb Accession IDs |
|--------------------|----------------|--------------|-------------------------|---------------------------------|-----------------|--------------------------|
| SNP_P4_191578_4351 | NW_004520833.1 | Scaffold7565 | 4351                    | AA                              | GG              | 1947065062               |
| SNP_P4_191579_4362 | NW_004520833.1 | Scaffold7565 | 4362                    | CC                              | TT              | 1947065064               |
| SNP_P4_191580_4363 | NW_004520833.1 | Scaffold7565 | 4363                    | AA                              | GG              | 1947065066               |
| SNP_P4_191581_4377 | NW_004520833.1 | Scaffold7565 | 4377                    | CC                              | TT              | 1947065069               |
| SNP_P4_191582_4379 | NW_004520833.1 | Scaffold7565 | 4379                    | AA                              | GG              | 1947065071               |
| SNP_P4_191583_4382 | NW_004520833.1 | Scaffold7565 | 4382                    | CC                              | AA              | 1947065073               |
| SNP_P4_191584_4392 | NW_004520833.1 | Scaffold7565 | 4392                    | AA                              | CC              | 1947065075               |
| SNP_P4_191585_4412 | NW_004520833.1 | Scaffold7565 | 4412                    | AA                              | CC              | 1947065076               |
| SNP_P4_191586_4736 | NW_004520833.1 | Scaffold7565 | 4736                    | TT                              | CC              | 1947065078               |
| SNP_P4_191587_4788 | NW_004520833.1 | Scaffold7565 | 4788                    | AA                              | GG              | 1947065080               |
| SNP_P4_191588_4814 | NW_004520833.1 | Scaffold7565 | 4814                    | TT                              | CC              | 1947065082               |
| SNP_P4_191589_4854 | NW_004520833.1 | Scaffold7565 | 4854                    | AA                              | TT              | 1947065084               |
| SNP_P4_191590_4874 | NW_004520833.1 | Scaffold7565 | 4874                    | GG                              | AA              | 1947065086               |
| SNP_P4_191591_4925 | NW_004520833.1 | Scaffold7565 | 4925                    | TT                              | CC              | 1947065088               |
| SNP_P4_191592_4969 | NW_004520833.1 | Scaffold7565 | 4969                    | CC                              | GG              | 1947065090               |
| SNP_P4_191593_5050 | NW_004520833.1 | Scaffold7565 | 5050                    | GG                              | AA              | 1947065092               |
| SNP_P4_191594_5067 | NW_004520833.1 | Scaffold7565 | 5067                    | TT                              | CC              | 1947065094               |
| SNP_P4_191595_5068 | NW_004520833.1 | Scaffold7565 | 5068                    | GG                              | TT              | 1947065096               |
| SNP_P4_191596_5107 | NW_004520833.1 | Scaffold7565 | 5107                    | GG                              | AA              | 1947065098               |
| SNP_P4_191597_5163 | NW_004520833.1 | Scaffold7565 | 5163                    | AA                              | TT              | 1947065100               |
| SNP_P4_191598_119  | NW_004520836.1 | Scaffold7569 | 119                     | CC                              | GG              | 1947065102               |
| SNP_P4_191599_143  | NW_004520836.1 | Scaffold7569 | 143                     | CC                              | TT              | 1947065104               |
| SNP_P4_191600_296  | NW_004520836.1 | Scaffold7569 | 296                     | AA                              | GG              | 1947065106               |
| SNP_P4_191601_368  | NW_004520836.1 | Scaffold7569 | 368                     | AA                              | GG              | 1947065108               |
| SNP_P4_191602_384  | NW_004520836.1 | Scaffold7569 | 384                     | AA                              | TT              | 1947065110               |
| SNP_P4_191604_578  | NW_004520836.1 | Scaffold7569 | 578                     | GG                              | CC              | 1947065112               |
| SNP_P4_191605_588  | NW_004520836.1 | Scaffold7569 | 588                     | CC                              | TT              | 1947065114               |
| SNP_P4_191606_650  | NW_004520836.1 | Scaffold7569 | 650                     | GG                              | AA              | 1947065116               |
| SNP_P4_191607_684  | NW_004520836.1 | Scaffold7569 | 684                     | AA                              | GG              | 1947065118               |
| SNP_P4_191608_718  | NW_004520836.1 | Scaffold7569 | 718                     | TT                              | GG              | 1947065120               |
| SNP_P4_191609_729  | NW_004520836.1 | Scaffold7569 | 729                     | AA                              | GG              | 1947065122               |
| SNP_P4_191610_747  | NW_004520836.1 | Scaffold7569 | 747                     | CC                              | TT              | 1947065124               |
| SNP_P4_191611_750  | NW_004520836.1 | Scaffold7569 | 750                     | AA                              | TT              | 1947065126               |
| SNP_P4_191612_691  | NW_004520837.1 | Scaffold7571 | 691                     | CC                              | TT              | 1947065128               |
| SNP_P4_191613_3264 | NW_004520841.1 | Scaffold7575 | 3264                    | AA                              | GG              | 1947065130               |
| SNP_P4_191614_325  | NW_004520842.1 | Scaffold7576 | 325                     | TT                              | CC              | 1947065132               |
| SNP_P4_191615_359  | NW_004520842.1 | Scaffold7576 | 359                     | GG                              | AA              | 1947065134               |
| SNP_P4_191616_406  | NW_004520842.1 | Scaffold7576 | 406                     | GG                              | AA              | 1947065136               |
| SNP_P4_191617_514  | NW_004520842.1 | Scaffold7576 | 514                     | AA                              | TT              | 1947065138               |
| SNP_P4_191618_580  | NW_004520842.1 | Scaffold7576 | 580                     | AA                              | TT              | 1947065140               |
| SNP_P4_191619_599  | NW_004520842.1 | Scaffold7576 | 599                     | TT                              | CC              | 1947065142               |
| SNP_P4_191620_608  | NW_004520842.1 | Scaffold7576 | 608                     | AA                              | GG              | 1947065144               |

| SNPs IDs           | Chromosome IDs | Chromosomes  | Physical positions (bp) | CDC Frontier (Reference genome) | (ILWC46 & LPNB) | NCBI SNPdb Accession IDs |
|--------------------|----------------|--------------|-------------------------|---------------------------------|-----------------|--------------------------|
| SNP_P4_191621_904  | NW_004520842.1 | Scaffold7576 | 904                     | TT                              | CC              | 1947065146               |
| SNP_P4_191622_1019 | NW_004520842.1 | Scaffold7576 | 1019                    | CC                              | TT              | 1947065148               |
| SNP_P4_191623_434  | NW_004520845.1 | Scaffold7581 | 434                     | AA                              | CC              | 1947065150               |
| SNP_P4_191624_59   | NW_004520847.1 | Scaffold7584 | 59                      | TT                              | CC              | 1947065152               |
| SNP_P4_191625_87   | NW_004520847.1 | Scaffold7584 | 87                      | TT                              | CC              | 1947065154               |
| SNP_P4_191627_132  | NW_004520847.1 | Scaffold7584 | 132                     | AA                              | TT              | 1947065156               |
| SNP_P4_191629_353  | NW_004520847.1 | Scaffold7584 | 353                     | CC                              | AA              | 1947065158               |
| SNP_P4_191630_413  | NW_004520847.1 | Scaffold7584 | 413                     | AA                              | TT              | 1947065160               |
| SNP_P4_191631_426  | NW_004520847.1 | Scaffold7584 | 426                     | CC                              | AA              | 1947065162               |
| SNP_P4_191632_591  | NW_004520847.1 | Scaffold7584 | 591                     | GG                              | TT              | 1947065164               |
| SNP_P4_191633_596  | NW_004520847.1 | Scaffold7584 | 596                     | CC                              | GG              | 1947065166               |
| SNP_P4_191634_764  | NW_004520847.1 | Scaffold7584 | 764                     | AA                              | TT              | 1947065168               |
| SNP_P4_191635_779  | NW_004520847.1 | Scaffold7584 | 779                     | TT                              | CC              | 1947065170               |
| SNP_P4_191637_1036 | NW_004520847.1 | Scaffold7584 | 1036                    | TT                              | AA              | 1947065172               |
| SNP_P4_191638_1042 | NW_004520847.1 | Scaffold7584 | 1042                    | TT                              | CC              | 1947065174               |
| SNP_P4_191639_172  | NW_004520849.1 | Scaffold7590 | 172                     | TT                              | CC              | 1947065176               |
| SNP_P4_191640_4735 | NW_004520849.1 | Scaffold7590 | 4735                    | GG                              | TT              | 1947065178               |
| SNP_P4_191641_4797 | NW_004520849.1 | Scaffold7590 | 4797                    | TT                              | CC              | 1947065180               |
| SNP_P4_191642_4875 | NW_004520849.1 | Scaffold7590 | 4875                    | AA                              | CC              | 1947065182               |
| SNP_P4_191643_4983 | NW_004520849.1 | Scaffold7590 | 4983                    | CC                              | TT              | 1947065184               |
| SNP_P4_191644_4998 | NW_004520849.1 | Scaffold7590 | 4998                    | TT                              | CC              | 1947065186               |
| SNP_P4_191645_5000 | NW_004520849.1 | Scaffold7590 | 5000                    | TT                              | CC              | 1947065188               |
| SNP_P4_191646_5085 | NW_004520849.1 | Scaffold7590 | 5085                    | AA                              | GG              | 1947065190               |
| SNP_P4_191647_5102 | NW_004520849.1 | Scaffold7590 | 5102                    | GG                              | AA              | 1947065192               |
| SNP_P4_191648_5168 | NW_004520849.1 | Scaffold7590 | 5168                    | TT                              | CC              | 1947065194               |
| SNP_P4_191649_5176 | NW_004520849.1 | Scaffold7590 | 5176                    | GG                              | AA              | 1947065196               |
| SNP_P4_191650_5202 | NW_004520849.1 | Scaffold7590 | 5202                    | AA                              | GG              | 1947065198               |
| SNP_P4_191651_5229 | NW_004520849.1 | Scaffold7590 | 5229                    | AA                              | CC              | 1947065200               |
| SNP_P4_191652_5301 | NW_004520849.1 | Scaffold7590 | 5301                    | AA                              | GG              | 1947065202               |
| SNP_P4_191653_5327 | NW_004520849.1 | Scaffold7590 | 5327                    | AA                              | GG              | 1947065204               |
| SNP_P4_191654_5339 | NW_004520849.1 | Scaffold7590 | 5339                    | GG                              | AA              | 1947065206               |
| SNP_P4_191655_5488 | NW_004520849.1 | Scaffold7590 | 5488                    | GG                              | AA              | 1947065207               |
| SNP_P4_191656_5506 | NW_004520849.1 | Scaffold7590 | 5506                    | AA                              | TT              | 1947065209               |
| SNP_P4_191657_100  | NW_004520853.1 | Scaffold7595 | 100                     | CC                              | GG              | 1947065211               |
| SNP_P4_191658_277  | NW_004520853.1 | Scaffold7595 | 277                     | GG                              | TT              | 1947065213               |
| SNP_P4_191659_378  | NW_004520853.1 | Scaffold7595 | 378                     | TT                              | CC              | 1947065215               |
| SNP_P4_191660_412  | NW_004520853.1 | Scaffold7595 | 412                     | CC                              | TT              | 1947065217               |
| SNP_P4_191661_478  | NW_004520853.1 | Scaffold7595 | 478                     | CC                              | GG              | 1947065219               |
| SNP_P4_191662_521  | NW_004520853.1 | Scaffold7595 | 521                     | AA                              | CC              | 1947065221               |
| SNP_P4_191663_552  | NW_004520853.1 | Scaffold7595 | 552                     | AA                              | TT              | 1947065223               |
| SNP_P4_191665_620  | NW_004520853.1 | Scaffold7595 | 620                     | GG                              | TT              | 1947065225               |
| SNP_P4_191666_708  | NW_004520853.1 | Scaffold7595 | 708                     | TT                              | CC              | 1947065227               |

| SNPs IDs           | Chromosome IDs | Chromosomes  | Physical positions (bp) | CDC Frontier (Reference genome) | (ILWC46 & LPNB) | NCBI SNPdb Accession IDs |
|--------------------|----------------|--------------|-------------------------|---------------------------------|-----------------|--------------------------|
| SNP_P4_191667_906  | NW_004520853.1 | Scaffold7595 | 906                     | CC                              | GG              | 1947065229               |
| SNP_P4_191668_1361 | NW_004520853.1 | Scaffold7595 | 1361                    | AA                              | TT              | 1947065230               |
| SNP_P4_191669_1101 | NW_004520854.1 | Scaffold7596 | 1101                    | AA                              | CC              | 1947065232               |
| SNP_P4_191670_82   | NW_004520855.1 | Scaffold7599 | 82                      | AA                              | GG              | 1947065234               |
| SNP_P4_191671_125  | NW_004520855.1 | Scaffold7599 | 125                     | TT                              | AA              | 1947065236               |
| SNP_P4_191672_151  | NW_004520855.1 | Scaffold7599 | 151                     | CC                              | TT              | 1947065238               |
| SNP_P4_191673_157  | NW_004520855.1 | Scaffold7599 | 157                     | AA                              | TT              | 1947065240               |
| SNP_P4_191674_221  | NW_004520855.1 | Scaffold7599 | 221                     | GG                              | AA              | 1947065242               |
| SNP_P4_191675_336  | NW_004520855.1 | Scaffold7599 | 336                     | CC                              | TT              | 1947065244               |
| SNP_P4_191676_423  | NW_004520855.1 | Scaffold7599 | 423                     | TT                              | AA              | 1947065246               |
| SNP_P4_191677_455  | NW_004520855.1 | Scaffold7599 | 455                     | CC                              | TT              | 1947065248               |
| SNP_P4_191678_820  | NW_004520855.1 | Scaffold7599 | 820                     | AA                              | GG              | 1947065250               |
| SNP_P4_191680_903  | NW_004520855.1 | Scaffold7599 | 903                     | AA                              | CC              | 1947065252               |
| SNP_P4_191681_842  | NW_004520857.1 | Scaffold7601 | 842                     | CC                              | AA              | 1947065254               |
| SNP_P4_191682_942  | NW_004520857.1 | Scaffold7601 | 942                     | CC                              | AA              | 1947065256               |
| SNP_P4_191683_1426 | NW_004520859.1 | Scaffold7604 | 1426                    | AA                              | TT              | 1947065258               |
| SNP_P4_191684_158  | NW_004520861.1 | Scaffold7610 | 158                     | GG                              | TT              | 1947065260               |
| SNP_P4_191685_1094 | NW_004520861.1 | Scaffold7610 | 1094                    | AA                              | GG              | 1947065262               |
| SNP_P4_191686_663  | NW_004520864.1 | Scaffold7616 | 663                     | GG                              | AA              | 1947065264               |
| SNP_P4_191687_664  | NW_004520864.1 | Scaffold7616 | 664                     | AA                              | GG              | 1947065265               |
| SNP_P4_191688_247  | NW_004520865.1 | Scaffold7617 | 247                     | AA                              | GG              | 1947065267               |
| SNP_P4_191689_249  | NW_004520865.1 | Scaffold7617 | 249                     | GG                              | CC              | 1947065269               |
| SNP_P4_191690_271  | NW_004520865.1 | Scaffold7617 | 271                     | TT                              | AA              | 1947065271               |
| SNP_P4_191691_279  | NW_004520865.1 | Scaffold7617 | 279                     | GG                              | AA              | 1947065273               |
| SNP_P4_191692_416  | NW_004520865.1 | Scaffold7617 | 416                     | CC                              | AA              | 1947065275               |
| SNP_P4_191693_442  | NW_004520865.1 | Scaffold7617 | 442                     | TT                              | GG              | 1947065277               |
| SNP_P4_191694_449  | NW_004520865.1 | Scaffold7617 | 449                     | AA                              | CC              | 1947065279               |
| SNP_P4_191695_455  | NW_004520865.1 | Scaffold7617 | 455                     | CC                              | TT              | 1947065282               |
| SNP_P4_191696_457  | NW_004520865.1 | Scaffold7617 | 457                     | GG                              | AA              | 1947065284               |
| SNP_P4_191697_488  | NW_004520865.1 | Scaffold7617 | 488                     | CC                              | TT              | 1947065286               |
| SNP_P4_191698_498  | NW_004520865.1 | Scaffold7617 | 498                     | AA                              | GG              | 1947065288               |
| SNP_P4_191699_526  | NW_004520865.1 | Scaffold7617 | 526                     | AA                              | TT              | 1947065290               |
| SNP_P4_191700_569  | NW_004520865.1 | Scaffold7617 | 569                     | CC                              | TT              | 1947065292               |
| SNP_P4_191702_700  | NW_004520865.1 | Scaffold7617 | 700                     | GG                              | TT              | 1947065294               |
| SNP_P4_191703_713  | NW_004520865.1 | Scaffold7617 | 713                     | CC                              | AA              | 1947065296               |
| SNP_P4_191704_714  | NW_004520865.1 | Scaffold7617 | 714                     | CC                              | TT              | 1947065298               |
| SNP_P4_191705_731  | NW_004520865.1 | Scaffold7617 | 731                     | GG                              | AA              | 1947065300               |
| SNP_P4_191706_750  | NW_004520865.1 | Scaffold7617 | 750                     | AA                              | TT              | 1947065302               |
| SNP_P4_191707_779  | NW_004520865.1 | Scaffold7617 | 779                     | GG                              | CC              | 1947065304               |
| SNP_P4_191708_820  | NW_004520865.1 | Scaffold7617 | 820                     | GG                              | AA              | 1947065306               |
| SNP_P4_191709_831  | NW_004520865.1 | Scaffold7617 | 831                     | AA                              | TT              | 1947065308               |
| SNP_P4_191710_834  | NW_004520865.1 | Scaffold7617 | 834                     | AA                              | CC              | 1947065310               |

| SNPs IDs            | Chromosome IDs | Chromosomes  | Physical positions (bp) | CDC Frontier (Reference genome) | (ILWC46 & LPNB) | NCBI SNPdb Accession IDs |
|---------------------|----------------|--------------|-------------------------|---------------------------------|-----------------|--------------------------|
| SNP_P4_191711_895   | NW_004520865.1 | Scaffold7617 | 895                     | TT                              | GG              | 1947065312               |
| SNP_P4_191712_917   | NW_004520865.1 | Scaffold7617 | 917                     | GG                              | CC              | 1947065314               |
| SNP_P4_191713_918   | NW_004520865.1 | Scaffold7617 | 918                     | TT                              | GG              | 1947065316               |
| SNP_P4_191714_943   | NW_004520865.1 | Scaffold7617 | 943                     | AA                              | CC              | 1947065318               |
| SNP_P4_191715_953   | NW_004520865.1 | Scaffold7617 | 953                     | CC                              | AA              | 1947065320               |
| SNP_P4_191716_965   | NW_004520865.1 | Scaffold7617 | 965                     | GG                              | TT              | 1947065322               |
| SNP_P4_191717_975   | NW_004520865.1 | Scaffold7617 | 975                     | GG                              | CC              | 1947065324               |
| SNP_P4_191718_1022  | NW_004520865.1 | Scaffold7617 | 1022                    | TT                              | GG              | 1947065326               |
| SNP_P4_191719_1024  | NW_004520865.1 | Scaffold7617 | 1024                    | AA                              | GG              | 1947065328               |
| SNP_P4_191720_1038  | NW_004520865.1 | Scaffold7617 | 1038                    | AA                              | TT              | 1947065329               |
| SNP_P4_191722_1055  | NW_004520865.1 | Scaffold7617 | 1055                    | CC                              | TT              | 1947065330               |
| SNP_P4_191723_1072  | NW_004520865.1 | Scaffold7617 | 1072                    | TT                              | CC              | 1947065331               |
| SNP_P4_191724_1239  | NW_004520865.1 | Scaffold7617 | 1239                    | TT                              | AA              | 1947065332               |
| SNP_P4_191725_1260  | NW_004520865.1 | Scaffold7617 | 1260                    | TT                              | AA              | 1947065333               |
| SNP_P4_191726_1324  | NW_004520865.1 | Scaffold7617 | 1324                    | GG                              | AA              | 1947065334               |
| SNP_P4_191727_1345  | NW_004520865.1 | Scaffold7617 | 1345                    | AA                              | GG              | 1947065335               |
| SNP_P4_191728_964   | NW_004520866.1 | Scaffold7621 | 964                     | AA                              | TT              | 1947065336               |
| SNP_P4_191729_1224  | NW_004520866.1 | Scaffold7621 | 1224                    | GG                              | AA              | 1947065337               |
| SNP_P4_191730_1389  | NW_004520866.1 | Scaffold7621 | 1389                    | TT                              | CC              | 1947065338               |
| SNP_P4_191731_1713  | NW_004520866.1 | Scaffold7621 | 1713                    | CC                              | GG              | 1947065339               |
| SNP_P4_191732_1828  | NW_004520866.1 | Scaffold7621 | 1828                    | CC                              | TT              | 1947065340               |
| SNP_P4_191733_1876  | NW_004520866.1 | Scaffold7621 | 1876                    | GG                              | AA              | 1947065341               |
| SNP_P4_191734_2281  | NW_004520866.1 | Scaffold7621 | 2281                    | TT                              | GG              | 1947065342               |
| SNP_P4_191735_55    | NW_004520868.1 | Scaffold7624 | 55                      | GG                              | TT              | 1947065343               |
| SNP_P4_191737_64    | NW_004520868.1 | Scaffold7624 | 64                      | TT                              | AA              | 1947065344               |
| SNP_P4_191738_98    | NW_004520868.1 | Scaffold7624 | 98                      | TT                              | GG              | 1947065345               |
| SNP_P4_191739_2479  | NW_004520879.1 | Scaffold7650 | 2479                    | GG                              | CC              | 1947065346               |
| SNP_P4_191740_4665  | NW_004520879.1 | Scaffold7650 | 4665                    | GG                              | AA              | 1947065347               |
| SNP_P4_191741_9099  | NW_004520879.1 | Scaffold7650 | 9099                    | TT                              | GG              | 1947065348               |
| SNP_P4_191743_9781  | NW_004520879.1 | Scaffold7650 | 9781                    | GG                              | AA              | 1947065349               |
| SNP_P4_191745_10148 | NW_004520879.1 | Scaffold7650 | 10148                   | GG                              | TT              | 1947065350               |
| SNP_P4_191746_10248 | NW_004520879.1 | Scaffold7650 | 10248                   | CC                              | AA              | 1947065351               |
| SNP_P4_191747_10256 | NW_004520879.1 | Scaffold7650 | 10256                   | CC                              | TT              | 1947065352               |
| SNP_P4_191748_10434 | NW_004520879.1 | Scaffold7650 | 10434                   | TT                              | GG              | 1947065353               |
| SNP_P4_191749_200   | NW_004520881.1 | Scaffold7652 | 200                     | TT                              | AA              | 1947065354               |
| SNP_P4_191750_647   | NW_004520885.1 | Scaffold7657 | 647                     | AA                              | GG              | 1947065355               |
| SNP_P4_191751_651   | NW_004520885.1 | Scaffold7657 | 651                     | AA                              | TT              | 1947065356               |
| SNP_P4_191753_781   | NW_004520885.1 | Scaffold7657 | 781                     | TT                              | AA              | 1947065357               |
| SNP_P4_191754_802   | NW_004520885.1 | Scaffold7657 | 802                     | GG                              | AA              | 1947065358               |
| SNP_P4_191755_854   | NW_004520885.1 | Scaffold7657 | 854                     | AA                              | GG              | 1947065359               |
| SNP_P4_191756_901   | NW_004520885.1 | Scaffold7657 | 901                     | AA                              | GG              | 1947065360               |
| SNP_P4_191757_174   | NW_004520886.1 | Scaffold7660 | 174                     | CC                              | AA              | 1947065361               |

| SNPs IDs           | Chromosome IDs | Chromosomes  | Physical positions (bp) | CDC Frontier (Reference genome) | (ILWC46 & LPNB) | NCBI SNPdb Accession IDs |
|--------------------|----------------|--------------|-------------------------|---------------------------------|-----------------|--------------------------|
| SNP_P4_191758_398  | NW_004520886.1 | Scaffold7660 | 398                     | CC                              | AA              | 1947065362               |
| SNP_P4_191759_411  | NW_004520886.1 | Scaffold7660 | 411                     | TT                              | GG              | 1947065363               |
| SNP_P4_191760_570  | NW_004520887.1 | Scaffold7661 | 570                     | TT                              | AA              | 1947065364               |
| SNP_P4_191761_665  | NW_004520887.1 | Scaffold7661 | 665                     | AA                              | TT              | 1947065365               |
| SNP_P4_191762_697  | NW_004520887.1 | Scaffold7661 | 697                     | CC                              | TT              | 1947065366               |
| SNP_P4_191763_834  | NW_004520887.1 | Scaffold7661 | 834                     | CC                              | AA              | 1947065367               |
| SNP_P4_191765_336  | NW_004520888.1 | Scaffold7663 | 336                     | AA                              | CC              | 1947065368               |
| SNP_P4_191766_356  | NW_004520888.1 | Scaffold7663 | 356                     | GG                              | TT              | 1947065369               |
| SNP_P4_191767_408  | NW_004520888.1 | Scaffold7663 | 408                     | GG                              | AA              | 1947065370               |
| SNP_P4_191769_2653 | NW_004520896.1 | Scaffold7679 | 2653                    | GG                              | CC              | 1947065371               |
| SNP_P4_191770_3120 | NW_004520896.1 | Scaffold7679 | 3120                    | TT                              | CC              | 1947065372               |
| SNP_P4_191771_3283 | NW_004520896.1 | Scaffold7679 | 3283                    | AA                              | GG              | 1947065373               |
| SNP_P4_191772_3348 | NW_004520896.1 | Scaffold7679 | 3348                    | AA                              | TT              | 1947065374               |
| SNP_P4_191773_790  | NW_004520904.1 | Scaffold7691 | 790                     | GG                              | AA              | 1947065375               |
| SNP_P4_191774_795  | NW_004520904.1 | Scaffold7691 | 795                     | GG                              | AA              | 1947065376               |
| SNP_P4_191775_1113 | NW_004520904.1 | Scaffold7691 | 1113                    | GG                              | AA              | 1947065377               |
| SNP_P4_191776_444  | NW_004520908.1 | Scaffold7697 | 444                     | GG                              | CC              | 1947065378               |
| SNP_P4_191778_653  | NW_004520908.1 | Scaffold7697 | 653                     | AA                              | GG              | 1947065379               |
| SNP_P4_191779_676  | NW_004520908.1 | Scaffold7697 | 676                     | GG                              | CC              | 1947065380               |
| SNP_P4_191780_729  | NW_004520908.1 | Scaffold7697 | 729                     | AA                              | TT              | 1947065381               |
| SNP_P4_191781_790  | NW_004520908.1 | Scaffold7697 | 790                     | TT                              | CC              | 1947065382               |
| SNP_P4_191782_494  | NW_004520909.1 | Scaffold7698 | 494                     | CC                              | AA              | 1947065383               |
| SNP_P4_191783_500  | NW_004520909.1 | Scaffold7698 | 500                     | TT                              | CC              | 1947065384               |
| SNP_P4_191784_506  | NW_004520909.1 | Scaffold7698 | 506                     | AA                              | GG              | 1947065385               |
| SNP_P4_191785_668  | NW_004520909.1 | Scaffold7698 | 668                     | GG                              | CC              | 1947065386               |
| SNP_P4_191786_704  | NW_004520909.1 | Scaffold7698 | 704                     | AA                              | TT              | 1947065387               |
| SNP_P4_191787_719  | NW_004520909.1 | Scaffold7698 | 719                     | CC                              | TT              | 1947065388               |
| SNP_P4_191788_798  | NW_004520909.1 | Scaffold7698 | 798                     | GG                              | AA              | 1947065389               |
| SNP_P4_191789_800  | NW_004520909.1 | Scaffold7698 | 800                     | CC                              | TT              | 1947065390               |
| SNP_P4_191790_855  | NW_004520909.1 | Scaffold7698 | 855                     | AA                              | GG              | 1947065391               |
| SNP_P4_191791_890  | NW_004520909.1 | Scaffold7698 | 890                     | AA                              | GG              | 1947065392               |
| SNP_P4_191792_979  | NW_004520909.1 | Scaffold7698 | 979                     | CC                              | GG              | 1947065393               |
| SNP_P4_191793_1012 | NW_004520909.1 | Scaffold7698 | 1012                    | AA                              | GG              | 1947065394               |
| SNP_P4_191794_1027 | NW_004520909.1 | Scaffold7698 | 1027                    | CC                              | AA              | 1947065395               |
| SNP_P4_191795_1125 | NW_004520909.1 | Scaffold7698 | 1125                    | TT                              | CC              | 1947065396               |
| SNP_P4_191796_1163 | NW_004520909.1 | Scaffold7698 | 1163                    | TT                              | CC              | 1947065397               |
| SNP_P4_191797_1222 | NW_004520909.1 | Scaffold7698 | 1222                    | CC                              | TT              | 1947065398               |
| SNP_P4_191798_1397 | NW_004520910.1 | Scaffold7699 | 1397                    | AA                              | GG              | 1947065399               |
| SNP_P4_191799_1398 | NW_004520910.1 | Scaffold7699 | 1398                    | GG                              | AA              | 1947065400               |
| SNP_P4_191800_542  | NW_004520912.1 | Scaffold7701 | 542                     | AA                              | TT              | 1947065401               |
| SNP_P4_191801_561  | NW_004520912.1 | Scaffold7701 | 561                     | CC                              | AA              | 1947065402               |
| SNP_P4_191802_644  | NW_004520912.1 | Scaffold7701 | 644                     | TT                              | GG              | 1947065403               |

| SNPs IDs           | Chromosome IDs | Chromosomes  | Physical positions (bp) | CDC Frontier (Reference genome) | (ILWC46 & LPNB) | NCBI SNPdb Accession IDs |
|--------------------|----------------|--------------|-------------------------|---------------------------------|-----------------|--------------------------|
| SNP_P4_191803_645  | NW_004520912.1 | Scaffold7701 | 645                     | AA                              | GG              | 1947065404               |
| SNP_P4_191804_922  | NW_004520912.1 | Scaffold7701 | 922                     | AA                              | GG              | 1947065405               |
| SNP_P4_191805_943  | NW_004520912.1 | Scaffold7701 | 943                     | TT                              | GG              | 1947065406               |
| SNP_P4_191806_276  | NW_004520915.1 | Scaffold7704 | 276                     | CC                              | GG              | 1947065407               |
| SNP_P4_191807_304  | NW_004520915.1 | Scaffold7704 | 304                     | AA                              | TT              | 1947065408               |
| SNP_P4_191808_5417 | NW_004520919.1 | Scaffold7715 | 5417                    | CC                              | GG              | 1947065409               |
| SNP_P4_191809_5795 | NW_004520919.1 | Scaffold7715 | 5795                    | GG                              | CC              | 1947065410               |
| SNP_P4_191810_5852 | NW_004520919.1 | Scaffold7715 | 5852                    | TT                              | CC              | 1947065411               |
| SNP_P4_191811_5874 | NW_004520919.1 | Scaffold7715 | 5874                    | AA                              | TT              | 1947065412               |
| SNP_P4_191812_5930 | NW_004520919.1 | Scaffold7715 | 5930                    | CC                              | TT              | 1947065413               |
| SNP_P4_191813_5950 | NW_004520919.1 | Scaffold7715 | 5950                    | TT                              | CC              | 1947065414               |
| SNP_P4_191814_1131 | NW_004520920.1 | Scaffold7716 | 1131                    | AA                              | GG              | 1947065415               |
| SNP_P4_191815_1312 | NW_004520921.1 | Scaffold7717 | 1312                    | TT                              | CC              | 1947065416               |
| SNP_P4_191816_1198 | NW_004520923.1 | Scaffold7724 | 1198                    | TT                              | CC              | 1947065417               |
| SNP_P4_191817_1481 | NW_004520923.1 | Scaffold7724 | 1481                    | AA                              | GG              | 1947065418               |
| SNP_P4_191818_1597 | NW_004520923.1 | Scaffold7724 | 1597                    | AA                              | GG              | 1947065419               |
| SNP_P4_191819_2484 | NW_004520923.1 | Scaffold7724 | 2484                    | TT                              | GG              | 1947065420               |
| SNP_P4_191821_3567 | NW_004520923.1 | Scaffold7724 | 3567                    | GG                              | AA              | 1947065421               |
| SNP_P4_191822_3569 | NW_004520923.1 | Scaffold7724 | 3569                    | GG                              | TT              | 1947065422               |
| SNP_P4_191823_3578 | NW_004520923.1 | Scaffold7724 | 3578                    | CC                              | AA              | 1947065423               |
| SNP_P4_191824_352  | NW_004520924.1 | Scaffold7727 | 352                     | AA                              | CC              | 1947065424               |
| SNP_P4_191825_710  | NW_004520925.1 | Scaffold7729 | 710                     | TT                              | GG              | 1947065425               |
| SNP_P4_191826_692  | NW_004520927.1 | Scaffold7731 | 692                     | GG                              | CC              | 1947065426               |
| SNP_P4_191827_819  | NW_004520927.1 | Scaffold7731 | 819                     | TT                              | CC              | 1947065427               |
| SNP_P4_191828_881  | NW_004520927.1 | Scaffold7731 | 881                     | CC                              | TT              | 1947065428               |
| SNP_P4_191829_1182 | NW_004520927.1 | Scaffold7731 | 1182                    | TT                              | CC              | 1947065429               |
| SNP_P4_191830_1228 | NW_004520927.1 | Scaffold7731 | 1228                    | CC                              | TT              | 1947065430               |
| SNP_P4_191831_1651 | NW_004520933.1 | Scaffold7740 | 1651                    | TT                              | AA              | 1947065431               |
| SNP_P4_191832_1673 | NW_004520933.1 | Scaffold7740 | 1673                    | AA                              | TT              | 1947065432               |
| SNP_P4_191833_2230 | NW_004520933.1 | Scaffold7740 | 2230                    | CC                              | TT              | 1947065433               |
| SNP_P4_191835_815  | NW_004520937.1 | Scaffold7752 | 815                     | TT                              | CC              | 1947065434               |
| SNP_P4_191836_969  | NW_004520937.1 | Scaffold7752 | 969                     | AA                              | GG              | 1947065435               |
| SNP_P4_191837_1078 | NW_004520937.1 | Scaffold7752 | 1078                    | AA                              | TT              | 1947065436               |
| SNP_P4_191838_1086 | NW_004520937.1 | Scaffold7752 | 1086                    | AA                              | GG              | 1947065437               |
| SNP_P4_191839_1438 | NW_004520937.1 | Scaffold7752 | 1438                    | CC                              | TT              | 1947065438               |
| SNP_P4_191840_788  | NW_004520938.1 | Scaffold7753 | 788                     | AA                              | CC              | 1947065439               |
| SNP_P4_191841_813  | NW_004520938.1 | Scaffold7753 | 813                     | GG                              | TT              | 1947065441               |
| SNP_P4_191842_821  | NW_004520938.1 | Scaffold7753 | 821                     | AA                              | CC              | 1947065443               |
| SNP_P4_191843_893  | NW_004520938.1 | Scaffold7753 | 893                     | CC                              | AA              | 1947065445               |
| SNP_P4_191844_924  | NW_004520938.1 | Scaffold7753 | 924                     | TT                              | AA              | 1947065447               |
| SNP_P4_191845_928  | NW_004520938.1 | Scaffold7753 | 928                     | TT                              | GG              | 1947065449               |
| SNP_P4_191847_64   | NW_004520941.1 | Scaffold7765 | 64                      | CC                              | AA              | 1947065451               |

| SNPs IDs           | Chromosome IDs | Chromosomes  | Physical positions (bp) | CDC Frontier (Reference genome) | (ILWC46 & LPNB) | NCBI SNPdb Accession IDs |
|--------------------|----------------|--------------|-------------------------|---------------------------------|-----------------|--------------------------|
| SNP_P4_191848_109  | NW_004520941.1 | Scaffold7765 | 109                     | AA                              | GG              | 1947065453               |
| SNP_P4_191849_309  | NW_004520941.1 | Scaffold7765 | 309                     | TT                              | CC              | 1947065455               |
| SNP_P4_191850_503  | NW_004520941.1 | Scaffold7765 | 503                     | CC                              | TT              | 1947065457               |
| SNP_P4_191851_663  | NW_004520941.1 | Scaffold7765 | 663                     | AA                              | GG              | 1947065459               |
| SNP_P4_191852_674  | NW_004520941.1 | Scaffold7765 | 674                     | GG                              | AA              | 1947065461               |
| SNP_P4_191853_886  | NW_004520941.1 | Scaffold7765 | 886                     | GG                              | AA              | 1947065463               |
| SNP_P4_191854_960  | NW_004520941.1 | Scaffold7765 | 960                     | CC                              | GG              | 1947065465               |
| SNP_P4_191856_1063 | NW_004520941.1 | Scaffold7765 | 1063                    | TT                              | GG              | 1947065467               |
| SNP_P4_191857_1021 | NW_004520947.1 | Scaffold7773 | 1021                    | TT                              | AA              | 1947065469               |
| SNP_P4_191858_233  | NW_004520949.1 | Scaffold7777 | 233                     | CC                              | AA              | 1947065471               |
| SNP_P4_191859_1010 | NW_004520949.1 | Scaffold7777 | 1010                    | AA                              | GG              | 1947065473               |
| SNP_P4_191860_195  | NW_004520950.1 | Scaffold7778 | 195                     | CC                              | TT              | 1947065475               |
| SNP_P4_191861_365  | NW_004520950.1 | Scaffold7778 | 365                     | AA                              | TT              | 1947065477               |
| SNP_P4_191862_433  | NW_004520950.1 | Scaffold7778 | 433                     | AA                              | GG              | 1947065479               |
| SNP_P4_191863_447  | NW_004520950.1 | Scaffold7778 | 447                     | TT                              | CC              | 1947065481               |
| SNP_P4_191864_451  | NW_004520950.1 | Scaffold7778 | 451                     | TT                              | CC              | 1947065483               |
| SNP_P4_191865_733  | NW_004520950.1 | Scaffold7778 | 733                     | AA                              | TT              | 1947065485               |
| SNP_P4_191866_923  | NW_004520950.1 | Scaffold7778 | 923                     | TT                              | AA              | 1947065487               |
| SNP_P4_191867_927  | NW_004520950.1 | Scaffold7778 | 927                     | AA                              | CC              | 1947065489               |
| SNP_P4_191868_962  | NW_004520950.1 | Scaffold7778 | 962                     | TT                              | CC              | 1947065491               |
| SNP_P4_191869_1000 | NW_004520956.1 | Scaffold7791 | 1000                    | AA                              | CC              | 1947065493               |
| SNP_P4_191870_801  | NW_004520959.1 | Scaffold7795 | 801                     | TT                              | CC              | 1947065495               |
| SNP_P4_191871_1053 | NW_004520959.1 | Scaffold7795 | 1053                    | GG                              | CC              | 1947065497               |
| SNP_P4_191872_1652 | NW_004520960.1 | Scaffold7797 | 1652                    | TT                              | CC              | 1947065499               |
| SNP_P4_191873_1981 | NW_004520960.1 | Scaffold7797 | 1981                    | AA                              | GG              | 1947065501               |
| SNP_P4_191875_2240 | NW_004520960.1 | Scaffold7797 | 2240                    | AA                              | GG              | 1947065503               |
| SNP_P4_191877_2713 | NW_004520963.1 | Scaffold7801 | 2713                    | GG                              | CC              | 1947065505               |
| SNP_P4_191878_2717 | NW_004520963.1 | Scaffold7801 | 2717                    | GG                              | AA              | 1947065507               |
| SNP_P4_191879_2779 | NW_004520963.1 | Scaffold7801 | 2779                    | TT                              | GG              | 1947065509               |
| SNP_P4_191880_1356 | NW_004520964.1 | Scaffold7802 | 1356                    | CC                              | GG              | 1947065511               |
| SNP_P4_191881_2155 | NW_004520964.1 | Scaffold7802 | 2155                    | AA                              | CC              | 1947065513               |
| SNP_P4_191882_3161 | NW_004520964.1 | Scaffold7802 | 3161                    | GG                              | AA              | 1947065515               |
| SNP_P4_191883_3175 | NW_004520964.1 | Scaffold7802 | 3175                    | AA                              | GG              | 1947065517               |
| SNP_P4_191884_3200 | NW_004520964.1 | Scaffold7802 | 3200                    | GG                              | AA              | 1947065520               |
| SNP_P4_191885_3307 | NW_004520964.1 | Scaffold7802 | 3307                    | GG                              | TT              | 1947065522               |
| SNP_P4_191886_3322 | NW_004520964.1 | Scaffold7802 | 3322                    | CC                              | TT              | 1947065524               |
| SNP_P4_191887_809  | NW_004520965.1 | Scaffold7803 | 809                     | AA                              | GG              | 1947065526               |
| SNP_P4_191888_887  | NW_004520965.1 | Scaffold7803 | 887                     | AA                              | GG              | 1947065528               |
| SNP_P4_191889_1034 | NW_004520965.1 | Scaffold7803 | 1034                    | TT                              | AA              | 1947065530               |
| SNP_P4_191891_156  | NW_004520967.1 | Scaffold7807 | 156                     | TT                              | CC              | 1947065532               |
| SNP_P4_191892_288  | NW_004520967.1 | Scaffold7807 | 288                     | AA                              | GG              | 1947065534               |
| SNP_P4_191893_329  | NW_004520967.1 | Scaffold7807 | 329                     | GG                              | TT              | 1947065536               |



| SNPs IDs           | Chromosome IDs | Chromosomes  | Physical positions (bp) | CDC Frontier (Reference genome) | (ILWC46 & LPNB) | NCBI SNPdb Accession IDs |
|--------------------|----------------|--------------|-------------------------|---------------------------------|-----------------|--------------------------|
| SNP_P4_191894_525  | NW_004520967.1 | Scaffold7807 | 525                     | CC                              | GG              | 1947065538               |
| SNP_P4_191895_763  | NW_004520967.1 | Scaffold7807 | 763                     | CC                              | TT              | 1947065540               |
| SNP_P4_191896_2009 | NW_004520967.1 | Scaffold7807 | 2009                    | GG                              | CC              | 1947065542               |
| SNP_P4_191897_2665 | NW_004520967.1 | Scaffold7807 | 2665                    | AA                              | GG              | 1947065544               |
| SNP_P4_191898_2685 | NW_004520967.1 | Scaffold7807 | 2685                    | TT                              | GG              | 1947065546               |
| SNP_P4_191899_6025 | NW_004520967.1 | Scaffold7807 | 6025                    | GG                              | AA              | 1947065548               |
| SNP_P4_191900_6148 | NW_004520967.1 | Scaffold7807 | 6148                    | CC                              | TT              | 1947065550               |
| SNP_P4_191901_6377 | NW_004520967.1 | Scaffold7807 | 6377                    | AA                              | GG              | 1947065552               |
| SNP_P4_191902_469  | NW_004520968.1 | Scaffold7808 | 469                     | CC                              | AA              | 1947065554               |
| SNP_P4_191903_475  | NW_004520968.1 | Scaffold7808 | 475                     | AA                              | TT              | 1947065556               |
| SNP_P4_191904_495  | NW_004520968.1 | Scaffold7808 | 495                     | CC                              | TT              | 1947065558               |
| SNP_P4_191905_515  | NW_004520968.1 | Scaffold7808 | 515                     | AA                              | GG              | 1947065560               |
| SNP_P4_191906_544  | NW_004520968.1 | Scaffold7808 | 544                     | TT                              | CC              | 1947065562               |
| SNP_P4_191907_547  | NW_004520968.1 | Scaffold7808 | 547                     | AA                              | TT              | 1947065564               |
| SNP_P4_191908_778  | NW_004520968.1 | Scaffold7808 | 778                     | CC                              | AA              | 1947065566               |
| SNP_P4_191909_1003 | NW_004520968.1 | Scaffold7808 | 1003                    | TT                              | CC              | 1947065568               |
| SNP_P4_191910_272  | NW_004520972.1 | Scaffold7815 | 272                     | TT                              | GG              | 1947065570               |
| SNP_P4_191911_379  | NW_004520972.1 | Scaffold7815 | 379                     | GG                              | CC              | 1947065572               |
| SNP_P4_191912_605  | NW_004520972.1 | Scaffold7815 | 605                     | AA                              | GG              | 1947065574               |
| SNP_P4_191913_5003 | NW_004520972.1 | Scaffold7815 | 5003                    | TT                              | AA              | 1947065576               |
| SNP_P4_191914_294  | NW_004520975.1 | Scaffold7818 | 294                     | AA                              | CC              | 1947065578               |
| SNP_P4_191915_497  | NW_004520975.1 | Scaffold7818 | 497                     | GG                              | AA              | 1947065580               |
| SNP_P4_191916_111  | NW_004520978.1 | Scaffold7821 | 111                     | CC                              | TT              | 1947065582               |
| SNP_P4_191917_114  | NW_004520978.1 | Scaffold7821 | 114                     | TT                              | AA              | 1947065584               |
| SNP_P4_191918_123  | NW_004520978.1 | Scaffold7821 | 123                     | GG                              | AA              | 1947065586               |
| SNP_P4_191919_129  | NW_004520978.1 | Scaffold7821 | 129                     | AA                              | GG              | 1947065588               |
| SNP_P4_191920_134  | NW_004520978.1 | Scaffold7821 | 134                     | CC                              | TT              | 1947065590               |
| SNP_P4_191921_162  | NW_004520978.1 | Scaffold7821 | 162                     | GG                              | TT              | 1947065592               |
| SNP_P4_191922_166  | NW_004520978.1 | Scaffold7821 | 166                     | AA                              | CC              | 1947065594               |
| SNP_P4_191923_174  | NW_004520978.1 | Scaffold7821 | 174                     | CC                              | TT              | 1947065596               |
| SNP_P4_191924_180  | NW_004520978.1 | Scaffold7821 | 180                     | GG                              | AA              | 1947065598               |
| SNP_P4_191925_192  | NW_004520978.1 | Scaffold7821 | 192                     | GG                              | AA              | 1947065600               |
| SNP_P4_191926_195  | NW_004520978.1 | Scaffold7821 | 195                     | TT                              | CC              | 1947065602               |
| SNP_P4_191927_200  | NW_004520978.1 | Scaffold7821 | 200                     | CC                              | GG              | 1947065604               |
| SNP_P4_191928_201  | NW_004520978.1 | Scaffold7821 | 201                     | CC                              | TT              | 1947065606               |
| SNP_P4_191929_203  | NW_004520978.1 | Scaffold7821 | 203                     | AA                              | TT              | 1947065608               |
| SNP_P4_191930_207  | NW_004520978.1 | Scaffold7821 | 207                     | CC                              | TT              | 1947065610               |
| SNP_P4_191931_238  | NW_004520978.1 | Scaffold7821 | 238                     | TT                              | CC              | 1947065612               |
| SNP_P4_191932_285  | NW_004520978.1 | Scaffold7821 | 285                     | TT                              | CC              | 1947065614               |
| SNP_P4_191933_291  | NW_004520978.1 | Scaffold7821 | 291                     | AA                              | GG              | 1947065616               |
| SNP_P4_191934_301  | NW_004520978.1 | Scaffold7821 | 301                     | AA                              | CC              | 1947065618               |
| SNP_P4_191935_306  | NW_004520978.1 | Scaffold7821 | 306                     | GG                              | AA              | 1947065620               |

| SNPs IDs            | Chromosome IDs | Chromosomes  | Physical positions (bp) | CDC Frontier (Reference genome) | (ILWC46 & LPNB) | NCBI SNPdb Accession IDs |
|---------------------|----------------|--------------|-------------------------|---------------------------------|-----------------|--------------------------|
| SNP_P4_191936_312   | NW_004520978.1 | Scaffold7821 | 312                     | TT                              | CC              | 1947065622               |
| SNP_P4_191937_314   | NW_004520978.1 | Scaffold7821 | 314                     | AA                              | CC              | 1947065624               |
| SNP_P4_191938_327   | NW_004520978.1 | Scaffold7821 | 327                     | TT                              | CC              | 1947065626               |
| SNP_P4_191939_436   | NW_004520979.1 | Scaffold7823 | 436                     | TT                              | CC              | 1947065628               |
| SNP_P4_191940_458   | NW_004520979.1 | Scaffold7823 | 458                     | GG                              | TT              | 1947065630               |
| SNP_P4_191941_2130  | NW_004520979.1 | Scaffold7823 | 2130                    | CC                              | TT              | 1947065633               |
| SNP_P4_191942_4616  | NW_004520979.1 | Scaffold7823 | 4616                    | GG                              | TT              | 1947065635               |
| SNP_P4_191943_4844  | NW_004520979.1 | Scaffold7823 | 4844                    | CC                              | TT              | 1947065637               |
| SNP_P4_191944_328   | NW_004520980.1 | Scaffold7825 | 328                     | GG                              | AA              | 1947065639               |
| SNP_P4_191945_1135  | NW_004520985.1 | Scaffold7837 | 1135                    | AA                              | GG              | 1947065641               |
| SNP_P4_191946_1194  | NW_004520985.1 | Scaffold7837 | 1194                    | CC                              | TT              | 1947065643               |
| SNP_P4_191947_1206  | NW_004520985.1 | Scaffold7837 | 1206                    | GG                              | AA              | 1947065645               |
| SNP_P4_191948_1363  | NW_004520985.1 | Scaffold7837 | 1363                    | GG                              | TT              | 1947065647               |
| SNP_P4_191949_1369  | NW_004520985.1 | Scaffold7837 | 1369                    | GG                              | AA              | 1947065649               |
| SNP_P4_191950_1370  | NW_004520985.1 | Scaffold7837 | 1370                    | GG                              | AA              | 1947065651               |
| SNP_P4_191951_1430  | NW_004520985.1 | Scaffold7837 | 1430                    | TT                              | CC              | 1947065653               |
| SNP_P4_191952_1432  | NW_004520985.1 | Scaffold7837 | 1432                    | TT                              | AA              | 1947065655               |
| SNP_P4_191953_3339  | NW_004520986.1 | Scaffold7839 | 3339                    | CC                              | TT              | 1947065657               |
| SNP_P4_191954_4065  | NW_004520986.1 | Scaffold7839 | 4065                    | AA                              | CC              | 1947065659               |
| SNP_P4_191955_4130  | NW_004520986.1 | Scaffold7839 | 4130                    | AA                              | TT              | 1947065661               |
| SNP_P4_191956_4811  | NW_004520986.1 | Scaffold7839 | 4811                    | GG                              | AA              | 1947065663               |
| SNP_P4_191957_5032  | NW_004520986.1 | Scaffold7839 | 5032                    | TT                              | CC              | 1947065665               |
| SNP_P4_191958_5040  | NW_004520986.1 | Scaffold7839 | 5040                    | AA                              | TT              | 1947065667               |
| SNP_P4_191959_19554 | NW_004520987.1 | Scaffold7842 | 19554                   | GG                              | AA              | 1947065669               |
| SNP_P4_191960_19867 | NW_004520987.1 | Scaffold7842 | 19867                   | TT                              | CC              | 1947065671               |
| SNP_P4_191962_20102 | NW_004520987.1 | Scaffold7842 | 20102                   | AA                              | GG              | 1947065673               |
| SNP_P4_191963_20195 | NW_004520987.1 | Scaffold7842 | 20195                   | AA                              | GG              | 1947065675               |
| SNP_P4_191964_20296 | NW_004520987.1 | Scaffold7842 | 20296                   | AA                              | TT              | 1947065677               |
| SNP_P4_191965_20299 | NW_004520987.1 | Scaffold7842 | 20299                   | TT                              | AA              | 1947065679               |
| SNP_P4_191966_20308 | NW_004520987.1 | Scaffold7842 | 20308                   | CC                              | GG              | 1947065681               |
| SNP_P4_191968_20357 | NW_004520987.1 | Scaffold7842 | 20357                   | TT                              | AA              | 1947065683               |
| SNP_P4_191970_20506 | NW_004520987.1 | Scaffold7842 | 20506                   | TT                              | CC              | 1947065685               |
| SNP_P4_191971_20507 | NW_004520987.1 | Scaffold7842 | 20507                   | AA                              | CC              | 1947065687               |
| SNP_P4_191972_20533 | NW_004520987.1 | Scaffold7842 | 20533                   | AA                              | TT              | 1947065689               |
| SNP_P4_191974_1109  | NW_004520989.1 | Scaffold7848 | 1109                    | AA                              | GG              | 1947065691               |
| SNP_P4_191975_1171  | NW_004520989.1 | Scaffold7848 | 1171                    | AA                              | TT              | 1947065693               |
| SNP_P4_191976_76    | NW_004520993.1 | Scaffold7857 | 76                      | GG                              | CC              | 1947065695               |
| SNP_P4_191977_302   | NW_004520993.1 | Scaffold7857 | 302                     | AA                              | CC              | 1947065697               |
| SNP_P4_191978_481   | NW_004520993.1 | Scaffold7857 | 481                     | TT                              | CC              | 1947065700               |
| SNP_P4_191979_638   | NW_004520993.1 | Scaffold7857 | 638                     | AA                              | CC              | 1947065702               |
| SNP_P4_191980_642   | NW_004520993.1 | Scaffold7857 | 642                     | CC                              | AA              | 1947065704               |
| SNP_P4_191981_646   | NW_004520993.1 | Scaffold7857 | 646                     | GG                              | AA              | 1947065706               |

| SNPs IDs           | Chromosome IDs | Chromosomes  | Physical positions (bp) | CDC Frontier (Reference genome) | (ILWC46 & LPNB) | NCBI SNPdb Accession IDs |
|--------------------|----------------|--------------|-------------------------|---------------------------------|-----------------|--------------------------|
| SNP_P4_191982_647  | NW_004520993.1 | Scaffold7857 | 647                     | GG                              | AA              | 1947065708               |
| SNP_P4_191983_727  | NW_004520993.1 | Scaffold7857 | 727                     | AA                              | TT              | 1947065710               |
| SNP_P4_191984_728  | NW_004520993.1 | Scaffold7857 | 728                     | TT                              | GG              | 1947065712               |
| SNP_P4_191985_781  | NW_004520993.1 | Scaffold7857 | 781                     | AA                              | TT              | 1947065714               |
| SNP_P4_191986_792  | NW_004520993.1 | Scaffold7857 | 792                     | AA                              | CC              | 1947065716               |
| SNP_P4_191987_1043 | NW_004520993.1 | Scaffold7857 | 1043                    | AA                              | TT              | 1947065718               |
| SNP_P4_191988_551  | NW_004520996.1 | Scaffold7863 | 551                     | TT                              | CC              | 1947065720               |
| SNP_P4_191989_1307 | NW_004520999.1 | Scaffold7868 | 1307                    | GG                              | TT              | 1947065722               |
| SNP_P4_191991_1570 | NW_004520999.1 | Scaffold7868 | 1570                    | GG                              | CC              | 1947065724               |
| SNP_P4_191992_1575 | NW_004520999.1 | Scaffold7868 | 1575                    | CC                              | TT              | 1947065726               |
| SNP_P4_191993_1597 | NW_004520999.1 | Scaffold7868 | 1597                    | AA                              | TT              | 1947065728               |
| SNP_P4_191994_1620 | NW_004520999.1 | Scaffold7868 | 1620                    | GG                              | CC              | 1947065730               |
| SNP_P4_191995_520  | NW_004521004.1 | Scaffold7880 | 520                     | GG                              | TT              | 1947065732               |
| SNP_P4_191996_845  | NW_004521005.1 | Scaffold7882 | 845                     | AA                              | CC              | 1947065734               |
| SNP_P4_191998_1038 | NW_004521008.1 | Scaffold7886 | 1038                    | GG                              | CC              | 1947065735               |
| SNP_P4_191999_1087 | NW_004521008.1 | Scaffold7886 | 1087                    | CC                              | TT              | 1947065737               |
| SNP_P4_192000_251  | NW_004521009.1 | Scaffold7887 | 251                     | CC                              | TT              | 1947065739               |
| SNP_P4_192001_258  | NW_004521009.1 | Scaffold7887 | 258                     | AA                              | CC              | 1947065741               |
| SNP_P4_192002_577  | NW_004521009.1 | Scaffold7887 | 577                     | AA                              | GG              | 1947065743               |
| SNP_P4_192003_157  | NW_004521010.1 | Scaffold7889 | 157                     | AA                              | TT              | 1947065745               |
| SNP_P4_192004_1886 | NW_004521010.1 | Scaffold7889 | 1886                    | AA                              | TT              | 1947065747               |
| SNP_P4_192005_1898 | NW_004521010.1 | Scaffold7889 | 1898                    | AA                              | GG              | 1947065749               |
| SNP_P4_192006_1927 | NW_004521010.1 | Scaffold7889 | 1927                    | AA                              | GG              | 1947065751               |
| SNP_P4_192008_427  | NW_004521011.1 | Scaffold7890 | 427                     | CC                              | TT              | 1947065753               |
| SNP_P4_192009_438  | NW_004521011.1 | Scaffold7890 | 438                     | GG                              | AA              | 1947065755               |
| SNP_P4_192010_481  | NW_004521011.1 | Scaffold7890 | 481                     | AA                              | TT              | 1947065757               |
| SNP_P4_192011_530  | NW_004521011.1 | Scaffold7890 | 530                     | AA                              | CC              | 1947065759               |
| SNP_P4_192012_605  | NW_004521011.1 | Scaffold7890 | 605                     | TT                              | GG              | 1947065761               |
| SNP_P4_192013_673  | NW_004521011.1 | Scaffold7890 | 673                     | GG                              | AA              | 1947065763               |
| SNP_P4_192015_773  | NW_004521011.1 | Scaffold7890 | 773                     | TT                              | CC              | 1947065765               |
| SNP_P4_192016_796  | NW_004521011.1 | Scaffold7890 | 796                     | TT                              | CC              | 1947065767               |
| SNP_P4_192017_841  | NW_004521011.1 | Scaffold7890 | 841                     | TT                              | CC              | 1947065769               |
| SNP_P4_192018_1141 | NW_004521012.1 | Scaffold7891 | 1141                    | TT                              | GG              | 1947065771               |
| SNP_P4_192019_3062 | NW_004521012.1 | Scaffold7891 | 3062                    | AA                              | GG              | 1947065773               |
| SNP_P4_192020_3087 | NW_004521012.1 | Scaffold7891 | 3087                    | TT                              | CC              | 1947065775               |
| SNP_P4_192021_3335 | NW_004521012.1 | Scaffold7891 | 3335                    | AA                              | GG              | 1947065777               |
| SNP_P4_192022_3420 | NW_004521012.1 | Scaffold7891 | 3420                    | TT                              | CC              | 1947065779               |
| SNP_P4_192023_3441 | NW_004521012.1 | Scaffold7891 | 3441                    | CC                              | AA              | 1947065781               |
| SNP_P4_192024_3746 | NW_004521012.1 | Scaffold7891 | 3746                    | AA                              | GG              | 1947065783               |
| SNP_P4_192025_3749 | NW_004521012.1 | Scaffold7891 | 3749                    | GG                              | TT              | 1947065785               |
| SNP_P4_192027_3854 | NW_004521012.1 | Scaffold7891 | 3854                    | CC                              | TT              | 1947065787               |
| SNP_P4_192028_3873 | NW_004521012.1 | Scaffold7891 | 3873                    | TT                              | CC              | 1947065789               |

| SNPs IDs           | Chromosome IDs | Chromosomes  | Physical positions (bp) | CDC Frontier (Reference genome) | (ILWC46 & LPNB) | NCBI SNPdb Accession IDs |
|--------------------|----------------|--------------|-------------------------|---------------------------------|-----------------|--------------------------|
| SNP_P4_192029_3888 | NW_004521012.1 | Scaffold7891 | 3888                    | TT                              | CC              | 1947065790               |
| SNP_P4_192030_3961 | NW_004521012.1 | Scaffold7891 | 3961                    | GG                              | TT              | 1947065792               |
| SNP_P4_192031_4033 | NW_004521012.1 | Scaffold7891 | 4033                    | TT                              | GG              | 1947065794               |
| SNP_P4_192032_4046 | NW_004521012.1 | Scaffold7891 | 4046                    | AA                              | CC              | 1947065796               |
| SNP_P4_192033_4050 | NW_004521012.1 | Scaffold7891 | 4050                    | CC                              | TT              | 1947065798               |
| SNP_P4_192034_4088 | NW_004521012.1 | Scaffold7891 | 4088                    | AA                              | GG              | 1947065800               |
| SNP_P4_192035_4093 | NW_004521012.1 | Scaffold7891 | 4093                    | CC                              | TT              | 1947065802               |
| SNP_P4_192036_4094 | NW_004521012.1 | Scaffold7891 | 4094                    | AA                              | GG              | 1947065804               |
| SNP_P4_192037_4202 | NW_004521012.1 | Scaffold7891 | 4202                    | AA                              | CC              | 1947065806               |
| SNP_P4_192038_4216 | NW_004521012.1 | Scaffold7891 | 4216                    | GG                              | TT              | 1947065808               |
| SNP_P4_192039_4248 | NW_004521012.1 | Scaffold7891 | 4248                    | AA                              | TT              | 1947065809               |
| SNP_P4_192040_4251 | NW_004521012.1 | Scaffold7891 | 4251                    | GG                              | AA              | 1947065811               |
| SNP_P4_192041_4349 | NW_004521012.1 | Scaffold7891 | 4349                    | AA                              | GG              | 1947065813               |
| SNP_P4_192042_4414 | NW_004521012.1 | Scaffold7891 | 4414                    | AA                              | GG              | 1947065815               |
| SNP_P4_192043_4429 | NW_004521012.1 | Scaffold7891 | 4429                    | GG                              | TT              | 1947065817               |
| SNP_P4_192044_4455 | NW_004521012.1 | Scaffold7891 | 4455                    | TT                              | CC              | 1947065819               |
| SNP_P4_192045_4456 | NW_004521012.1 | Scaffold7891 | 4456                    | GG                              | AA              | 1947065821               |
| SNP_P4_192046_4496 | NW_004521012.1 | Scaffold7891 | 4496                    | TT                              | CC              | 1947065823               |
| SNP_P4_192047_4525 | NW_004521012.1 | Scaffold7891 | 4525                    | AA                              | CC              | 1947065825               |
| SNP_P4_192048_4540 | NW_004521012.1 | Scaffold7891 | 4540                    | TT                              | CC              | 1947065827               |
| SNP_P4_192049_4547 | NW_004521012.1 | Scaffold7891 | 4547                    | CC                              | GG              | 1947065829               |
| SNP_P4_192050_4572 | NW_004521012.1 | Scaffold7891 | 4572                    | CC                              | TT              | 1947065831               |
| SNP_P4_192051_4634 | NW_004521012.1 | Scaffold7891 | 4634                    | AA                              | TT              | 1947065833               |
| SNP_P4_192052_4659 | NW_004521012.1 | Scaffold7891 | 4659                    | TT                              | GG              | 1947065835               |
| SNP_P4_192053_4736 | NW_004521012.1 | Scaffold7891 | 4736                    | TT                              | CC              | 1947065837               |
| SNP_P4_192054_4760 | NW_004521012.1 | Scaffold7891 | 4760                    | CC                              | AA              | 1947065839               |
| SNP_P4_192055_4770 | NW_004521012.1 | Scaffold7891 | 4770                    | AA                              | CC              | 1947065841               |
| SNP_P4_192056_4792 | NW_004521012.1 | Scaffold7891 | 4792                    | AA                              | GG              | 1947065843               |
| SNP_P4_192057_4850 | NW_004521012.1 | Scaffold7891 | 4850                    | TT                              | AA              | 1947065845               |
| SNP_P4_192058_4867 | NW_004521012.1 | Scaffold7891 | 4867                    | AA                              | GG              | 1947065847               |
| SNP_P4_192059_95   | NW_004521017.1 | Scaffold7898 | 95                      | TT                              | CC              | 1947065849               |
| SNP_P4_192060_100  | NW_004521017.1 | Scaffold7898 | 100                     | TT                              | AA              | 1947065851               |
| SNP_P4_192061_121  | NW_004521017.1 | Scaffold7898 | 121                     | TT                              | GG              | 1947065853               |
| SNP_P4_192062_398  | NW_004521017.1 | Scaffold7898 | 398                     | AA                              | TT              | 1947065855               |
| SNP_P4_192063_975  | NW_004521017.1 | Scaffold7898 | 975                     | TT                              | CC              | 1947065857               |
| SNP_P4_192064_1004 | NW_004521017.1 | Scaffold7898 | 1004                    | AA                              | TT              | 1947065859               |
| SNP_P4_192065_299  | NW_004521019.1 | Scaffold7902 | 299                     | CC                              | AA              | 1947065861               |
| SNP_P4_192066_422  | NW_004521019.1 | Scaffold7902 | 422                     | TT                              | GG              | 1947065863               |
| SNP_P4_192067_664  | NW_004521019.1 | Scaffold7902 | 664                     | CC                              | TT              | 1947065865               |
| SNP_P4_192069_905  | NW_004521019.1 | Scaffold7902 | 905                     | GG                              | AA              | 1947065867               |
| SNP_P4_192070_1458 | NW_004521019.1 | Scaffold7902 | 1458                    | TT                              | CC              | 1947065869               |
| SNP_P4_192071_1573 | NW_004521019.1 | Scaffold7902 | 1573                    | AA                              | GG              | 1947065871               |

| SNPs IDs            | Chromosome IDs | Chromosomes  | Physical positions (bp) | CDC Frontier (Reference genome) | (ILWC46 & LPNB) | NCBI SNPdb Accession IDs |
|---------------------|----------------|--------------|-------------------------|---------------------------------|-----------------|--------------------------|
| SNP_P4_192072_1764  | NW_004521019.1 | Scaffold7902 | 1764                    | AA                              | GG              | 1947065873               |
| SNP_P4_192073_1958  | NW_004521022.1 | Scaffold7906 | 1958                    | CC                              | TT              | 1947065874               |
| SNP_P4_192074_1968  | NW_004521022.1 | Scaffold7906 | 1968                    | GG                              | AA              | 1947065876               |
| SNP_P4_192075_2015  | NW_004521022.1 | Scaffold7906 | 2015                    | GG                              | AA              | 1947065878               |
| SNP_P4_192076_2211  | NW_004521022.1 | Scaffold7906 | 2211                    | TT                              | AA              | 1947065880               |
| SNP_P4_192077_2429  | NW_004521022.1 | Scaffold7906 | 2429                    | GG                              | CC              | 1947065882               |
| SNP_P4_192078_677   | NW_004521023.1 | Scaffold7907 | 677                     | CC                              | AA              | 1947065884               |
| SNP_P4_192079_4657  | NW_004521029.1 | Scaffold7922 | 4657                    | TT                              | CC              | 1947065886               |
| SNP_P4_192080_4850  | NW_004521029.1 | Scaffold7922 | 4850                    | AA                              | GG              | 1947065888               |
| SNP_P4_192081_4960  | NW_004521029.1 | Scaffold7922 | 4960                    | GG                              | AA              | 1947065890               |
| SNP_P4_192082_5044  | NW_004521029.1 | Scaffold7922 | 5044                    | GG                              | AA              | 1947065892               |
| SNP_P4_192083_5134  | NW_004521029.1 | Scaffold7922 | 5134                    | AA                              | TT              | 1947065894               |
| SNP_P4_192085_5344  | NW_004521029.1 | Scaffold7922 | 5344                    | CC                              | TT              | 1947065896               |
| SNP_P4_192086_5381  | NW_004521029.1 | Scaffold7922 | 5381                    | GG                              | CC              | 1947065898               |
| SNP_P4_192089_2482  | NW_004521030.1 | Scaffold7923 | 2482                    | CC                              | TT              | 1947065900               |
| SNP_P4_192091_22306 | NW_004521030.1 | Scaffold7923 | 22306                   | TT                              | CC              | 1947065901               |
| SNP_P4_192092_22310 | NW_004521030.1 | Scaffold7923 | 22310                   | AA                              | TT              | 1947065903               |
| SNP_P4_192093_22409 | NW_004521030.1 | Scaffold7923 | 22409                   | AA                              | GG              | 1947065905               |
| SNP_P4_192094_22422 | NW_004521030.1 | Scaffold7923 | 22422                   | CC                              | AA              | 1947065907               |
| SNP_P4_192095_22440 | NW_004521030.1 | Scaffold7923 | 22440                   | GG                              | AA              | 1947065909               |
| SNP_P4_192096_22548 | NW_004521030.1 | Scaffold7923 | 22548                   | CC                              | TT              | 1947065911               |
| SNP_P4_192097_22561 | NW_004521030.1 | Scaffold7923 | 22561                   | GG                              | TT              | 1947065913               |
| SNP_P4_192098_22619 | NW_004521030.1 | Scaffold7923 | 22619                   | AA                              | GG              | 1947065915               |
| SNP_P4_192099_22778 | NW_004521030.1 | Scaffold7923 | 22778                   | AA                              | GG              | 1947065917               |
| SNP_P4_192100_22782 | NW_004521030.1 | Scaffold7923 | 22782                   | GG                              | TT              | 1947065918               |
| SNP_P4_192101_22830 | NW_004521030.1 | Scaffold7923 | 22830                   | CC                              | TT              | 1947065920               |
| SNP_P4_192102_22866 | NW_004521030.1 | Scaffold7923 | 22866                   | AA                              | TT              | 1947065922               |
| SNP_P4_192103_22874 | NW_004521030.1 | Scaffold7923 | 22874                   | GG                              | CC              | 1947065924               |
| SNP_P4_192104_23129 | NW_004521030.1 | Scaffold7923 | 23129                   | TT                              | GG              | 1947065926               |
| SNP_P4_192105_23131 | NW_004521030.1 | Scaffold7923 | 23131                   | AA                              | GG              | 1947065928               |
| SNP_P4_192106_23135 | NW_004521030.1 | Scaffold7923 | 23135                   | TT                              | CC              | 1947065930               |
| SNP_P4_192107_23227 | NW_004521030.1 | Scaffold7923 | 23227                   | TT                              | CC              | 1947065932               |
| SNP_P4_192108_24953 | NW_004521030.1 | Scaffold7923 | 24953                   | TT                              | CC              | 1947065934               |
| SNP_P4_192109_24993 | NW_004521030.1 | Scaffold7923 | 24993                   | AA                              | TT              | 1947065936               |
| SNP_P4_192110_25028 | NW_004521030.1 | Scaffold7923 | 25028                   | CC                              | TT              | 1947065938               |
| SNP_P4_192111_25162 | NW_004521030.1 | Scaffold7923 | 25162                   | CC                              | AA              | 1947065940               |
| SNP_P4_192112_25261 | NW_004521030.1 | Scaffold7923 | 25261                   | GG                              | AA              | 1947065942               |
| SNP_P4_192114_2677  | NW_004521032.1 | Scaffold7927 | 2677                    | TT                              | AA              | 1947065944               |
| SNP_P4_192115_2907  | NW_004521032.1 | Scaffold7927 | 2907                    | AA                              | CC              | 1947065946               |
| SNP_P4_192116_2922  | NW_004521032.1 | Scaffold7927 | 2922                    | AA                              | CC              | 1947065948               |
| SNP_P4_192117_359   | NW_004521035.1 | Scaffold7934 | 359                     | CC                              | TT              | 1947065950               |
| SNP_P4_192118_590   | NW_004521035.1 | Scaffold7934 | 590                     | GG                              | TT              | 1947065952               |

| SNPs IDs           | Chromosome IDs | Chromosomes  | Physical positions (bp) | CDC Frontier (Reference genome) | (ILWC46 & LPNB) | NCBI SNPdb Accession IDs |
|--------------------|----------------|--------------|-------------------------|---------------------------------|-----------------|--------------------------|
| SNP_P4_192119_821  | NW_004521035.1 | Scaffold7934 | 821                     | AA                              | GG              | 1947065954               |
| SNP_P4_192120_1954 | NW_004521035.1 | Scaffold7934 | 1954                    | TT                              | AA              | 1947065956               |
| SNP_P4_192121_2148 | NW_004521035.1 | Scaffold7934 | 2148                    | CC                              | TT              | 1947065959               |
| SNP_P4_192122_2292 | NW_004521035.1 | Scaffold7934 | 2292                    | TT                              | CC              | 1947065961               |
| SNP_P4_192123_2448 | NW_004521035.1 | Scaffold7934 | 2448                    | TT                              | GG              | 1947065963               |
| SNP_P4_192124_2463 | NW_004521035.1 | Scaffold7934 | 2463                    | TT                              | AA              | 1947065965               |
| SNP_P4_192125_2678 | NW_004521035.1 | Scaffold7934 | 2678                    | GG                              | AA              | 1947065967               |
| SNP_P4_192126_2837 | NW_004521035.1 | Scaffold7934 | 2837                    | GG                              | AA              | 1947065969               |
| SNP_P4_192127_2912 | NW_004521035.1 | Scaffold7934 | 2912                    | TT                              | AA              | 1947065971               |
| SNP_P4_192128_3009 | NW_004521035.1 | Scaffold7934 | 3009                    | AA                              | TT              | 1947065973               |
| SNP_P4_192129_3086 | NW_004521035.1 | Scaffold7934 | 3086                    | AA                              | GG              | 1947065975               |
| SNP_P4_192130_3099 | NW_004521035.1 | Scaffold7934 | 3099                    | TT                              | CC              | 1947065977               |
| SNP_P4_192131_3160 | NW_004521035.1 | Scaffold7934 | 3160                    | TT                              | GG              | 1947065979               |
| SNP_P4_192132_5850 | NW_004521035.1 | Scaffold7934 | 5850                    | GG                              | CC              | 1947065982               |
| SNP_P4_192133_504  | NW_004521039.1 | Scaffold7943 | 504                     | AA                              | GG              | 1947065984               |
| SNP_P4_192134_583  | NW_004521039.1 | Scaffold7943 | 583                     | CC                              | GG              | 1947065986               |
| SNP_P4_192135_593  | NW_004521039.1 | Scaffold7943 | 593                     | TT                              | CC              | 1947065988               |
| SNP_P4_192136_1067 | NW_004521046.1 | Scaffold7956 | 1067                    | CC                              | AA              | 1947065990               |
| SNP_P4_192137_1134 | NW_004521046.1 | Scaffold7956 | 1134                    | GG                              | AA              | 1947065992               |
| SNP_P4_192138_388  | NW_004521048.1 | Scaffold7958 | 388                     | GG                              | TT              | 1947065994               |
| SNP_P4_192139_512  | NW_004521048.1 | Scaffold7958 | 512                     | TT                              | CC              | 1947065996               |
| SNP_P4_192140_612  | NW_004521048.1 | Scaffold7958 | 612                     | CC                              | AA              | 1947065998               |
| SNP_P4_192141_745  | NW_004521048.1 | Scaffold7958 | 745                     | TT                              | AA              | 1947066000               |
| SNP_P4_192142_881  | NW_004521048.1 | Scaffold7958 | 881                     | AA                              | TT              | 1947066003               |
| SNP_P4_192143_988  | NW_004521048.1 | Scaffold7958 | 988                     | TT                              | CC              | 1947066005               |
| SNP_P4_192144_1010 | NW_004521048.1 | Scaffold7958 | 1010                    | AA                              | TT              | 1947066007               |
| SNP_P4_192145_730  | NW_004521049.1 | Scaffold7961 | 730                     | AA                              | TT              | 1947066009               |
| SNP_P4_192146_967  | NW_004521049.1 | Scaffold7961 | 967                     | AA                              | GG              | 1947066011               |
| SNP_P4_192148_2371 | NW_004521052.1 | Scaffold7967 | 2371                    | TT                              | CC              | 1947066013               |
| SNP_P4_192149_2477 | NW_004521052.1 | Scaffold7967 | 2477                    | CC                              | GG              | 1947066015               |
| SNP_P4_192150_306  | NW_004521056.1 | Scaffold7976 | 306                     | TT                              | AA              | 1947066017               |
| SNP_P4_192152_4628 | NW_004521057.1 | Scaffold7980 | 4628                    | AA                              | TT              | 1947066019               |
| SNP_P4_192153_4959 | NW_004521057.1 | Scaffold7980 | 4959                    | TT                              | GG              | 1947066021               |
| SNP_P4_192154_4977 | NW_004521057.1 | Scaffold7980 | 4977                    | TT                              | CC              | 1947066023               |
| SNP_P4_192155_4982 | NW_004521057.1 | Scaffold7980 | 4982                    | GG                              | TT              | 1947066025               |
| SNP_P4_192157_5017 | NW_004521057.1 | Scaffold7980 | 5017                    | GG                              | AA              | 1947066027               |
| SNP_P4_192158_5019 | NW_004521057.1 | Scaffold7980 | 5019                    | AA                              | CC              | 1947066029               |
| SNP_P4_192159_85   | NW_004521058.1 | Scaffold7984 | 85                      | TT                              | CC              | 1947066031               |
| SNP_P4_192160_168  | NW_004521058.1 | Scaffold7984 | 168                     | AA                              | TT              | 1947066033               |
| SNP_P4_192161_196  | NW_004521059.1 | Scaffold7985 | 196                     | GG                              | TT              | 1947066035               |
| SNP_P4_192162_219  | NW_004521059.1 | Scaffold7985 | 219                     | TT                              | CC              | 1947066037               |
| SNP_P4_192163_296  | NW_004521059.1 | Scaffold7985 | 296                     | CC                              | AA              | 1947066039               |

| SNPs IDs            | Chromosome IDs | Chromosomes  | Physical positions (bp) | CDC Frontier (Reference genome) | (ILWC46 & LPNB) | NCBI SNPdb Accession IDs |
|---------------------|----------------|--------------|-------------------------|---------------------------------|-----------------|--------------------------|
| SNP_P4_192165_572   | NW_004521059.1 | Scaffold7985 | 572                     | AA                              | GG              | 1947066041               |
| SNP_P4_192166_618   | NW_004521059.1 | Scaffold7985 | 618                     | AA                              | GG              | 1947066044               |
| SNP_P4_192167_668   | NW_004521059.1 | Scaffold7985 | 668                     | TT                              | CC              | 1947066046               |
| SNP_P4_192168_688   | NW_004521059.1 | Scaffold7985 | 688                     | TT                              | CC              | 1947066048               |
| SNP_P4_192169_713   | NW_004521059.1 | Scaffold7985 | 713                     | GG                              | AA              | 1947066050               |
| SNP_P4_192170_718   | NW_004521059.1 | Scaffold7985 | 718                     | AA                              | GG              | 1947066052               |
| SNP_P4_192171_742   | NW_004521059.1 | Scaffold7985 | 742                     | GG                              | TT              | 1947066054               |
| SNP_P4_192172_747   | NW_004521059.1 | Scaffold7985 | 747                     | CC                              | GG              | 1947066056               |
| SNP_P4_192173_775   | NW_004521059.1 | Scaffold7985 | 775                     | AA                              | TT              | 1947066058               |
| SNP_P4_192174_785   | NW_004521059.1 | Scaffold7985 | 785                     | TT                              | GG              | 1947066060               |
| SNP_P4_192175_812   | NW_004521059.1 | Scaffold7985 | 812                     | AA                              | CC              | 1947066062               |
| SNP_P4_192176_817   | NW_004521059.1 | Scaffold7985 | 817                     | CC                              | TT              | 1947066064               |
| SNP_P4_192177_824   | NW_004521059.1 | Scaffold7985 | 824                     | TT                              | CC              | 1947066066               |
| SNP_P4_192178_856   | NW_004521059.1 | Scaffold7985 | 856                     | TT                              | CC              | 1947066068               |
| SNP_P4_192179_860   | NW_004521059.1 | Scaffold7985 | 860                     | TT                              | CC              | 1947066070               |
| SNP_P4_192180_1068  | NW_004521059.1 | Scaffold7985 | 1068                    | AA                              | GG              | 1947066072               |
| SNP_P4_192181_1111  | NW_004521059.1 | Scaffold7985 | 1111                    | TT                              | GG              | 1947066074               |
| SNP_P4_192182_1136  | NW_004521059.1 | Scaffold7985 | 1136                    | TT                              | CC              | 1947066076               |
| SNP_P4_192183_1171  | NW_004521059.1 | Scaffold7985 | 1171                    | TT                              | CC              | 1947066078               |
| SNP_P4_192184_1189  | NW_004521059.1 | Scaffold7985 | 1189                    | AA                              | GG              | 1947066080               |
| SNP_P4_192185_1233  | NW_004521059.1 | Scaffold7985 | 1233                    | AA                              | CC              | 1947066082               |
| SNP_P4_192186_1270  | NW_004521059.1 | Scaffold7985 | 1270                    | AA                              | GG              | 1947066084               |
| SNP_P4_192187_21124 | NW_004521059.1 | Scaffold7985 | 21124                   | GG                              | CC              | 1947066086               |
| SNP_P4_192188_348   | NW_004521062.1 | Scaffold7989 | 348                     | TT                              | CC              | 1947066088               |
| SNP_P4_192189_488   | NW_004521062.1 | Scaffold7989 | 488                     | TT                              | AA              | 1947066090               |
| SNP_P4_192190_565   | NW_004521062.1 | Scaffold7989 | 565                     | TT                              | CC              | 1947066092               |
| SNP_P4_192191_446   | NW_004521063.1 | Scaffold7990 | 446                     | AA                              | GG              | 1947066094               |
| SNP_P4_192192_473   | NW_004521063.1 | Scaffold7990 | 473                     | CC                              | TT              | 1947066096               |
| SNP_P4_192193_840   | NW_004521063.1 | Scaffold7990 | 840                     | AA                              | TT              | 1947066098               |
| SNP_P4_192194_929   | NW_004521063.1 | Scaffold7990 | 929                     | TT                              | GG              | 1947066100               |
| SNP_P4_192195_1248  | NW_004521063.1 | Scaffold7990 | 1248                    | TT                              | AA              | 1947066102               |
| SNP_P4_192196_1406  | NW_004521063.1 | Scaffold7990 | 1406                    | GG                              | TT              | 1947066104               |
| SNP_P4_192197_1510  | NW_004521063.1 | Scaffold7990 | 1510                    | CC                              | TT              | 1947066106               |
| SNP_P4_192198_1281  | NW_004521069.1 | Scaffold7997 | 1281                    | AA                              | GG              | 1947066108               |
| SNP_P4_192199_4616  | NW_004521071.1 | Scaffold8004 | 4616                    | AA                              | GG              | 1947066110               |
| SNP_P4_192200_4622  | NW_004521071.1 | Scaffold8004 | 4622                    | AA                              | CC              | 1947066112               |
| SNP_P4_192201_238   | NW_004521076.1 | Scaffold8015 | 238                     | TT                              | CC              | 1947066114               |
| SNP_P4_192202_496   | NW_004521076.1 | Scaffold8015 | 496                     | AA                              | GG              | 1947066116               |
| SNP_P4_192203_2566  | NW_004521079.1 | Scaffold8018 | 2566                    | CC                              | AA              | 1947066118               |
| SNP_P4_192204_2939  | NW_004521079.1 | Scaffold8018 | 2939                    | AA                              | TT              | 1947066120               |
| SNP_P4_192205_6816  | NW_004521079.1 | Scaffold8018 | 6816                    | GG                              | AA              | 1947066122               |
| SNP_P4_192206_6960  | NW_004521079.1 | Scaffold8018 | 6960                    | CC                              | TT              | 1947066124               |

| SNPs IDs           | Chromosome IDs | Chromosomes  | Physical positions (bp) | CDC Frontier (Reference genome) | (ILWC46 & LPNB) | NCBI SNPdb Accession IDs |
|--------------------|----------------|--------------|-------------------------|---------------------------------|-----------------|--------------------------|
| SNP_P4_192207_6966 | NW_004521079.1 | Scaffold8018 | 6966                    | TT                              | CC              | 1947066126               |
| SNP_P4_192208_7100 | NW_004521079.1 | Scaffold8018 | 7100                    | TT                              | AA              | 1947066128               |
| SNP_P4_192209_7433 | NW_004521079.1 | Scaffold8018 | 7433                    | AA                              | GG              | 1947066130               |
| SNP_P4_192210_7678 | NW_004521079.1 | Scaffold8018 | 7678                    | TT                              | GG              | 1947066132               |
| SNP_P4_192211_7687 | NW_004521079.1 | Scaffold8018 | 7687                    | CC                              | TT              | 1947066134               |
| SNP_P4_192212_478  | NW_004521080.1 | Scaffold8023 | 478                     | TT                              | AA              | 1947066136               |
| SNP_P4_192213_577  | NW_004521080.1 | Scaffold8023 | 577                     | GG                              | CC              | 1947066138               |
| SNP_P4_192214_652  | NW_004521080.1 | Scaffold8023 | 652                     | GG                              | AA              | 1947066140               |
| SNP_P4_192215_699  | NW_004521080.1 | Scaffold8023 | 699                     | CC                              | TT              | 1947066142               |
| SNP_P4_192216_5247 | NW_004521083.1 | Scaffold8030 | 5247                    | CC                              | GG              | 1947066143               |
| SNP_P4_192217_5356 | NW_004521083.1 | Scaffold8030 | 5356                    | CC                              | AA              | 1947066145               |
| SNP_P4_192218_5378 | NW_004521083.1 | Scaffold8030 | 5378                    | AA                              | GG              | 1947066147               |
| SNP_P4_192219_5380 | NW_004521083.1 | Scaffold8030 | 5380                    | CC                              | TT              | 1947066149               |
| SNP_P4_192220_5557 | NW_004521083.1 | Scaffold8030 | 5557                    | TT                              | CC              | 1947066151               |
| SNP_P4_192221_6587 | NW_004521083.1 | Scaffold8030 | 6587                    | CC                              | TT              | 1947066153               |
| SNP_P4_192222_616  | NW_004521091.1 | Scaffold8047 | 616                     | TT                              | CC              | 1947066155               |
| SNP_P4_192223_89   | NW_004521092.1 | Scaffold8050 | 89                      | AA                              | CC              | 1947066157               |
| SNP_P4_192224_1004 | NW_004521092.1 | Scaffold8050 | 1004                    | GG                              | TT              | 1947066159               |
| SNP_P4_192225_1034 | NW_004521092.1 | Scaffold8050 | 1034                    | AA                              | TT              | 1947066161               |
| SNP_P4_192226_1108 | NW_004521092.1 | Scaffold8050 | 1108                    | AA                              | GG              | 1947066163               |
| SNP_P4_192227_1111 | NW_004521092.1 | Scaffold8050 | 1111                    | AA                              | GG              | 1947066165               |
| SNP_P4_192228_1177 | NW_004521092.1 | Scaffold8050 | 1177                    | TT                              | AA              | 1947066167               |
| SNP_P4_192229_1180 | NW_004521092.1 | Scaffold8050 | 1180                    | GG                              | TT              | 1947066169               |
| SNP_P4_192230_1327 | NW_004521092.1 | Scaffold8050 | 1327                    | TT                              | AA              | 1947066171               |
| SNP_P4_192231_1342 | NW_004521092.1 | Scaffold8050 | 1342                    | TT                              | CC              | 1947066173               |
| SNP_P4_192232_1346 | NW_004521092.1 | Scaffold8050 | 1346                    | AA                              | GG              | 1947066175               |
| SNP_P4_192233_1479 | NW_004521092.1 | Scaffold8050 | 1479                    | GG                              | TT              | 1947066177               |
| SNP_P4_192234_1480 | NW_004521092.1 | Scaffold8050 | 1480                    | CC                              | TT              | 1947066179               |
| SNP_P4_192235_690  | NW_004521093.1 | Scaffold8051 | 690                     | AA                              | GG              | 1947066181               |
| SNP_P4_192236_1344 | NW_004521094.1 | Scaffold8052 | 1344                    | TT                              | CC              | 1947066183               |
| SNP_P4_192237_295  | NW_004521095.1 | Scaffold8054 | 295                     | AA                              | GG              | 1947066184               |
| SNP_P4_192238_322  | NW_004521095.1 | Scaffold8054 | 322                     | AA                              | TT              | 1947066186               |
| SNP_P4_192239_352  | NW_004521095.1 | Scaffold8054 | 352                     | AA                              | TT              | 1947066188               |
| SNP_P4_192240_430  | NW_004521095.1 | Scaffold8054 | 430                     | AA                              | GG              | 1947066190               |
| SNP_P4_192241_444  | NW_004521095.1 | Scaffold8054 | 444                     | CC                              | TT              | 1947066192               |
| SNP_P4_192242_460  | NW_004521095.1 | Scaffold8054 | 460                     | AA                              | TT              | 1947066194               |
| SNP_P4_192243_545  | NW_004521095.1 | Scaffold8054 | 545                     | GG                              | AA              | 1947066196               |
| SNP_P4_192244_609  | NW_004521095.1 | Scaffold8054 | 609                     | TT                              | CC              | 1947066198               |
| SNP_P4_192245_746  | NW_004521095.1 | Scaffold8054 | 746                     | TT                              | AA              | 1947066200               |
| SNP_P4_192246_1470 | NW_004521095.1 | Scaffold8054 | 1470                    | TT                              | AA              | 1947066202               |
| SNP_P4_192247_1475 | NW_004521095.1 | Scaffold8054 | 1475                    | GG                              | TT              | 1947066204               |
| SNP_P4_192249_1755 | NW_004521095.1 | Scaffold8054 | 1755                    | AA                              | GG              | 1947066206               |



| SNPs IDs           | Chromosome IDs | Chromosomes  | Physical positions (bp) | CDC Frontier (Reference genome) | (ILWC46 & LPNB) | NCBI SNPdb Accession IDs |
|--------------------|----------------|--------------|-------------------------|---------------------------------|-----------------|--------------------------|
| SNP_P4_192250_1788 | NW_004521095.1 | Scaffold8054 | 1788                    | AA                              | CC              | 1947066208               |
| SNP_P4_192251_1855 | NW_004521095.1 | Scaffold8054 | 1855                    | TT                              | AA              | 1947066210               |
| SNP_P4_192252_1881 | NW_004521095.1 | Scaffold8054 | 1881                    | TT                              | AA              | 1947066212               |
| SNP_P4_192254_2045 | NW_004521095.1 | Scaffold8054 | 2045                    | CC                              | GG              | 1947066214               |
| SNP_P4_192255_2066 | NW_004521095.1 | Scaffold8054 | 2066                    | AA                              | GG              | 1947066216               |
| SNP_P4_192256_3129 | NW_004521095.1 | Scaffold8054 | 3129                    | CC                              | AA              | 1947066218               |
| SNP_P4_192257_3267 | NW_004521095.1 | Scaffold8054 | 3267                    | CC                              | GG              | 1947066220               |
| SNP_P4_192258_3562 | NW_004521095.1 | Scaffold8054 | 3562                    | TT                              | CC              | 1947066222               |
| SNP_P4_192259_3570 | NW_004521095.1 | Scaffold8054 | 3570                    | TT                              | AA              | 1947066224               |
| SNP_P4_192260_3632 | NW_004521095.1 | Scaffold8054 | 3632                    | TT                              | CC              | 1947066226               |
| SNP_P4_192261_3770 | NW_004521095.1 | Scaffold8054 | 3770                    | CC                              | TT              | 1947066228               |
| SNP_P4_192262_3772 | NW_004521095.1 | Scaffold8054 | 3772                    | CC                              | TT              | 1947066230               |
| SNP_P4_192263_3796 | NW_004521095.1 | Scaffold8054 | 3796                    | AA                              | CC              | 1947066232               |
| SNP_P4_192264_503  | NW_004521098.1 | Scaffold8061 | 503                     | AA                              | GG              | 1947066234               |
| SNP_P4_192265_1117 | NW_004521098.1 | Scaffold8061 | 1117                    | AA                              | CC              | 1947066236               |
| SNP_P4_192266_279  | NW_004521100.1 | Scaffold8063 | 279                     | CC                              | TT              | 1947066238               |
| SNP_P4_192267_532  | NW_004521100.1 | Scaffold8063 | 532                     | AA                              | GG              | 1947066240               |
| SNP_P4_192269_574  | NW_004521100.1 | Scaffold8063 | 574                     | TT                              | CC              | 1947066242               |
| SNP_P4_192270_576  | NW_004521100.1 | Scaffold8063 | 576                     | CC                              | AA              | 1947066244               |
| SNP_P4_192271_233  | NW_004521102.1 | Scaffold8066 | 233                     | CC                              | AA              | 1947066246               |
| SNP_P4_192272_255  | NW_004521102.1 | Scaffold8066 | 255                     | GG                              | TT              | 1947066248               |
| SNP_P4_192273_445  | NW_004521103.1 | Scaffold8068 | 445                     | GG                              | AA              | 1947066250               |
| SNP_P4_192274_478  | NW_004521103.1 | Scaffold8068 | 478                     | TT                              | CC              | 1947066252               |
| SNP_P4_192275_557  | NW_004521103.1 | Scaffold8068 | 557                     | TT                              | AA              | 1947066254               |
| SNP_P4_192276_724  | NW_004521103.1 | Scaffold8068 | 724                     | GG                              | AA              | 1947066256               |
| SNP_P4_192277_754  | NW_004521103.1 | Scaffold8068 | 754                     | AA                              | TT              | 1947066258               |
| SNP_P4_192278_755  | NW_004521103.1 | Scaffold8068 | 755                     | CC                              | TT              | 1947066260               |
| SNP_P4_192279_788  | NW_004521103.1 | Scaffold8068 | 788                     | AA                              | CC              | 1947066262               |
| SNP_P4_192280_789  | NW_004521103.1 | Scaffold8068 | 789                     | AA                              | GG              | 1947066264               |
| SNP_P4_192281_793  | NW_004521103.1 | Scaffold8068 | 793                     | GG                              | CC              | 1947066266               |
| SNP_P4_192282_870  | NW_004521103.1 | Scaffold8068 | 870                     | AA                              | GG              | 1947066268               |
| SNP_P4_192283_872  | NW_004521103.1 | Scaffold8068 | 872                     | CC                              | AA              | 1947066270               |
| SNP_P4_192284_894  | NW_004521103.1 | Scaffold8068 | 894                     | CC                              | GG              | 1947066272               |
| SNP_P4_192285_952  | NW_004521103.1 | Scaffold8068 | 952                     | GG                              | AA              | 1947066274               |
| SNP_P4_192286_964  | NW_004521103.1 | Scaffold8068 | 964                     | GG                              | CC              | 1947066276               |
| SNP_P4_192287_1077 | NW_004521103.1 | Scaffold8068 | 1077                    | AA                              | GG              | 1947066278               |
| SNP_P4_192288_633  | NW_004521111.1 | Scaffold8087 | 633                     | TT                              | CC              | 1947066280               |
| SNP_P4_192289_735  | NW_004521111.1 | Scaffold8087 | 735                     | CC                              | TT              | 1947066282               |
| SNP_P4_192290_756  | NW_004521111.1 | Scaffold8087 | 756                     | TT                              | CC              | 1947066284               |
| SNP_P4_192291_759  | NW_004521111.1 | Scaffold8087 | 759                     | AA                              | CC              | 1947066286               |
| SNP_P4_192293_4610 | NW_004521111.1 | Scaffold8087 | 4610                    | TT                              | CC              | 1947066288               |
| SNP_P4_192294_441  | NW_004521113.1 | Scaffold8092 | 441                     | TT                              | CC              | 1947066290               |

| SNPs IDs           | Chromosome IDs | Chromosomes  | Physical positions (bp) | CDC Frontier (Reference genome) | (ILWC46 & LPNB) | NCBI SNPdb Accession IDs |
|--------------------|----------------|--------------|-------------------------|---------------------------------|-----------------|--------------------------|
| SNP_P4_192295_640  | NW_004521119.1 | Scaffold8104 | 640                     | AA                              | TT              | 1947066293               |
| SNP_P4_192296_8285 | NW_004521128.1 | Scaffold8127 | 8285                    | TT                              | CC              | 1947066295               |
| SNP_P4_192297_8307 | NW_004521128.1 | Scaffold8127 | 8307                    | TT                              | CC              | 1947066297               |
| SNP_P4_192298_563  | NW_004521130.1 | Scaffold8131 | 563                     | GG                              | CC              | 1947066299               |
| SNP_P4_192299_725  | NW_004521130.1 | Scaffold8131 | 725                     | AA                              | TT              | 1947066301               |
| SNP_P4_192300_2729 | NW_004521130.1 | Scaffold8131 | 2729                    | TT                              | CC              | 1947066303               |
| SNP_P4_192301_2774 | NW_004521130.1 | Scaffold8131 | 2774                    | AA                              | TT              | 1947066305               |
| SNP_P4_192303_70   | NW_004521132.1 | Scaffold8135 | 70                      | GG                              | AA              | 1947066307               |
| SNP_P4_192304_86   | NW_004521132.1 | Scaffold8135 | 86                      | TT                              | CC              | 1947066309               |
| SNP_P4_192305_342  | NW_004521132.1 | Scaffold8135 | 342                     | AA                              | GG              | 1947066311               |
| SNP_P4_192306_684  | NW_004521132.1 | Scaffold8135 | 684                     | GG                              | AA              | 1947066313               |
| SNP_P4_192307_704  | NW_004521134.1 | Scaffold8140 | 704                     | CC                              | TT              | 1947066315               |
| SNP_P4_192308_1785 | NW_004521134.1 | Scaffold8140 | 1785                    | GG                              | AA              | 1947066317               |
| SNP_P4_192309_1811 | NW_004521134.1 | Scaffold8140 | 1811                    | TT                              | CC              | 1947066319               |
| SNP_P4_192310_1729 | NW_004521136.1 | Scaffold8143 | 1729                    | TT                              | GG              | 1947066321               |
| SNP_P4_192311_1732 | NW_004521136.1 | Scaffold8143 | 1732                    | TT                              | CC              | 1947066323               |
| SNP_P4_192312_882  | NW_004521138.1 | Scaffold8146 | 882                     | AA                              | GG              | 1947066325               |
| SNP_P4_192313_1826 | NW_004521141.1 | Scaffold8154 | 1826                    | AA                              | TT              | 1947066327               |
| SNP_P4_192314_1835 | NW_004521141.1 | Scaffold8154 | 1835                    | TT                              | AA              | 1947066329               |
| SNP_P4_192315_1858 | NW_004521141.1 | Scaffold8154 | 1858                    | TT                              | AA              | 1947066331               |
| SNP_P4_192316_1871 | NW_004521141.1 | Scaffold8154 | 1871                    | AA                              | GG              | 1947066333               |
| SNP_P4_192317_1887 | NW_004521141.1 | Scaffold8154 | 1887                    | GG                              | AA              | 1947066335               |
| SNP_P4_192318_1896 | NW_004521141.1 | Scaffold8154 | 1896                    | CC                              | GG              | 1947066337               |
| SNP_P4_192319_1898 | NW_004521141.1 | Scaffold8154 | 1898                    | AA                              | GG              | 1947066339               |
| SNP_P4_192320_408  | NW_004521146.1 | Scaffold8162 | 408                     | GG                              | TT              | 1947066341               |
| SNP_P4_192321_474  | NW_004521146.1 | Scaffold8162 | 474                     | GG                              | AA              | 1947066343               |
| SNP_P4_192322_493  | NW_004521146.1 | Scaffold8162 | 493                     | AA                              | TT              | 1947066345               |
| SNP_P4_192323_495  | NW_004521146.1 | Scaffold8162 | 495                     | CC                              | TT              | 1947066347               |
| SNP_P4_192324_591  | NW_004521146.1 | Scaffold8162 | 591                     | CC                              | TT              | 1947066349               |
| SNP_P4_192326_915  | NW_004521146.1 | Scaffold8162 | 915                     | AA                              | GG              | 1947066351               |
| SNP_P4_192327_965  | NW_004521146.1 | Scaffold8162 | 965                     | GG                              | TT              | 1947066353               |
| SNP_P4_192328_1064 | NW_004521146.1 | Scaffold8162 | 1064                    | AA                              | GG              | 1947066355               |
| SNP_P4_192329_210  | NW_004521147.1 | Scaffold8163 | 210                     | TT                              | CC              | 1947066357               |
| SNP_P4_192330_234  | NW_004521147.1 | Scaffold8163 | 234                     | GG                              | AA              | 1947066359               |
| SNP_P4_192331_291  | NW_004521147.1 | Scaffold8163 | 291                     | GG                              | AA              | 1947066361               |
| SNP_P4_192332_300  | NW_004521147.1 | Scaffold8163 | 300                     | TT                              | AA              | 1947066363               |
| SNP_P4_192333_369  | NW_004521147.1 | Scaffold8163 | 369                     | AA                              | GG              | 1947066365               |
| SNP_P4_192334_398  | NW_004521147.1 | Scaffold8163 | 398                     | GG                              | AA              | 1947066367               |
| SNP_P4_192335_619  | NW_004521147.1 | Scaffold8163 | 619                     | AA                              | GG              | 1947066369               |
| SNP_P4_192336_632  | NW_004521147.1 | Scaffold8163 | 632                     | TT                              | CC              | 1947066371               |
| SNP_P4_192337_638  | NW_004521147.1 | Scaffold8163 | 638                     | TT                              | CC              | 1947066373               |
| SNP_P4_192338_665  | NW_004521147.1 | Scaffold8163 | 665                     | GG                              | AA              | 1947066375               |

| SNPs IDs           | Chromosome IDs | Chromosomes  | Physical positions (bp) | CDC Frontier (Reference genome) | (ILWC46 & LPNB) | NCBI SNPdb Accession IDs |
|--------------------|----------------|--------------|-------------------------|---------------------------------|-----------------|--------------------------|
| SNP_P4_192339_746  | NW_004521147.1 | Scaffold8163 | 746                     | TT                              | CC              | 1947066377               |
| SNP_P4_192340_752  | NW_004521147.1 | Scaffold8163 | 752                     | TT                              | CC              | 1947066379               |
| SNP_P4_192341_851  | NW_004521147.1 | Scaffold8163 | 851                     | GG                              | AA              | 1947066381               |
| SNP_P4_192342_681  | NW_004521148.1 | Scaffold8164 | 681                     | TT                              | GG              | 1947066383               |
| SNP_P4_192343_2470 | NW_004521148.1 | Scaffold8164 | 2470                    | CC                              | TT              | 1947066385               |
| SNP_P4_192344_2685 | NW_004521148.1 | Scaffold8164 | 2685                    | GG                              | TT              | 1947066387               |
| SNP_P4_192345_2695 | NW_004521148.1 | Scaffold8164 | 2695                    | AA                              | TT              | 1947066389               |
| SNP_P4_192346_2699 | NW_004521148.1 | Scaffold8164 | 2699                    | TT                              | CC              | 1947066391               |
| SNP_P4_192347_2721 | NW_004521148.1 | Scaffold8164 | 2721                    | CC                              | GG              | 1947066393               |
| SNP_P4_192348_2743 | NW_004521148.1 | Scaffold8164 | 2743                    | GG                              | TT              | 1947066395               |
| SNP_P4_192349_2759 | NW_004521148.1 | Scaffold8164 | 2759                    | GG                              | AA              | 1947066397               |
| SNP_P4_192350_2764 | NW_004521148.1 | Scaffold8164 | 2764                    | CC                              | TT              | 1947066399               |
| SNP_P4_192351_2773 | NW_004521148.1 | Scaffold8164 | 2773                    | CC                              | GG              | 1947066401               |
| SNP_P4_192352_2776 | NW_004521148.1 | Scaffold8164 | 2776                    | TT                              | CC              | 1947066403               |
| SNP_P4_192353_3483 | NW_004521148.1 | Scaffold8164 | 3483                    | AA                              | TT              | 1947066405               |
| SNP_P4_192354_4558 | NW_004521148.1 | Scaffold8164 | 4558                    | GG                              | TT              | 1947066407               |
| SNP_P4_192355_4563 | NW_004521148.1 | Scaffold8164 | 4563                    | AA                              | TT              | 1947066409               |
| SNP_P4_192356_4565 | NW_004521148.1 | Scaffold8164 | 4565                    | AA                              | TT              | 1947066411               |
| SNP_P4_192357_4630 | NW_004521148.1 | Scaffold8164 | 4630                    | AA                              | CC              | 1947066413               |
| SNP_P4_192358_64   | NW_004521150.1 | Scaffold8168 | 64                      | AA                              | CC              | 1947066415               |
| SNP_P4_192359_733  | NW_004521158.1 | Scaffold8181 | 733                     | AA                              | TT              | 1947066417               |
| SNP_P4_192360_451  | NW_004521159.1 | Scaffold8182 | 451                     | AA                              | TT              | 1947066419               |
| SNP_P4_192362_1245 | NW_004521159.1 | Scaffold8182 | 1245                    | TT                              | CC              | 1947066421               |
| SNP_P4_192363_1271 | NW_004521159.1 | Scaffold8182 | 1271                    | TT                              | GG              | 1947066423               |
| SNP_P4_192364_1563 | NW_004521159.1 | Scaffold8182 | 1563                    | CC                              | GG              | 1947066425               |
| SNP_P4_192365_1586 | NW_004521159.1 | Scaffold8182 | 1586                    | TT                              | CC              | 1947066427               |
| SNP_P4_192366_1786 | NW_004521159.1 | Scaffold8182 | 1786                    | AA                              | CC              | 1947066429               |
| SNP_P4_192367_486  | NW_004521161.1 | Scaffold8185 | 486                     | TT                              | CC              | 1947066431               |
| SNP_P4_192368_531  | NW_004521161.1 | Scaffold8185 | 531                     | TT                              | GG              | 1947066433               |
| SNP_P4_192369_591  | NW_004521161.1 | Scaffold8185 | 591                     | AA                              | TT              | 1947066435               |
| SNP_P4_192370_598  | NW_004521161.1 | Scaffold8185 | 598                     | TT                              | CC              | 1947066437               |
| SNP_P4_192371_617  | NW_004521161.1 | Scaffold8185 | 617                     | TT                              | CC              | 1947066439               |
| SNP_P4_192372_661  | NW_004521161.1 | Scaffold8185 | 661                     | AA                              | GG              | 1947066441               |
| SNP_P4_192373_1099 | NW_004521162.1 | Scaffold8186 | 1099                    | AA                              | TT              | 1947066443               |
| SNP_P4_192374_1116 | NW_004521162.1 | Scaffold8186 | 1116                    | TT                              | CC              | 1947066445               |
| SNP_P4_192375_1130 | NW_004521162.1 | Scaffold8186 | 1130                    | CC                              | TT              | 1947066447               |
| SNP_P4_192376_1145 | NW_004521162.1 | Scaffold8186 | 1145                    | TT                              | CC              | 1947066449               |
| SNP_P4_192377_522  | NW_004521167.1 | Scaffold8196 | 522                     | AA                              | TT              | 1947066451               |
| SNP_P4_192378_1076 | NW_004521167.1 | Scaffold8196 | 1076                    | CC                              | TT              | 1947066453               |
| SNP_P4_192379_426  | NW_004521169.1 | Scaffold8200 | 426                     | TT                              | AA              | 1947066455               |
| SNP_P4_192380_431  | NW_004521169.1 | Scaffold8200 | 431                     | TT                              | CC              | 1947066457               |
| SNP_P4_192381_434  | NW_004521169.1 | Scaffold8200 | 434                     | GG                              | AA              | 1947066460               |

| SNPs IDs            | Chromosome IDs | Chromosomes  | Physical positions (bp) | CDC Frontier (Reference genome) | (ILWC46 & LPNB) | NCBI SNPdb Accession IDs |
|---------------------|----------------|--------------|-------------------------|---------------------------------|-----------------|--------------------------|
| SNP_P4_192382_435   | NW_004521169.1 | Scaffold8200 | 435                     | TT                              | GG              | 1947066462               |
| SNP_P4_192383_456   | NW_004521169.1 | Scaffold8200 | 456                     | CC                              | TT              | 1947066464               |
| SNP_P4_192385_742   | NW_004521169.1 | Scaffold8200 | 742                     | GG                              | AA              | 1947066466               |
| SNP_P4_192386_1011  | NW_004521169.1 | Scaffold8200 | 1011                    | CC                              | TT              | 1947066468               |
| SNP_P4_192388_361   | NW_004521173.1 | Scaffold8207 | 361                     | CC                              | TT              | 1947066470               |
| SNP_P4_192389_440   | NW_004521173.1 | Scaffold8207 | 440                     | AA                              | TT              | 1947066472               |
| SNP_P4_192390_636   | NW_004521173.1 | Scaffold8207 | 636                     | AA                              | GG              | 1947066474               |
| SNP_P4_192391_700   | NW_004521173.1 | Scaffold8207 | 700                     | GG                              | AA              | 1947066476               |
| SNP_P4_192392_707   | NW_004521173.1 | Scaffold8207 | 707                     | GG                              | AA              | 1947066478               |
| SNP_P4_192393_977   | NW_004521173.1 | Scaffold8207 | 977                     | AA                              | GG              | 1947066480               |
| SNP_P4_192394_1045  | NW_004521173.1 | Scaffold8207 | 1045                    | AA                              | CC              | 1947066482               |
| SNP_P4_192395_751   | NW_004521174.1 | Scaffold8210 | 751                     | TT                              | GG              | 1947066484               |
| SNP_P4_192396_1062  | NW_004521174.1 | Scaffold8210 | 1062                    | AA                              | GG              | 1947066486               |
| SNP_P4_192397_1134  | NW_004521174.1 | Scaffold8210 | 1134                    | TT                              | GG              | 1947066488               |
| SNP_P4_192398_968   | NW_004521178.1 | Scaffold8219 | 968                     | AA                              | CC              | 1947066490               |
| SNP_P4_192399_362   | NW_004521183.1 | Scaffold8226 | 362                     | GG                              | AA              | 1947066492               |
| SNP_P4_192401_6518  | NW_004521183.1 | Scaffold8226 | 6518                    | TT                              | CC              | 1947066494               |
| SNP_P4_192402_478   | NW_004521186.1 | Scaffold8232 | 478                     | CC                              | TT              | 1947066496               |
| SNP_P4_192403_1180  | NW_004521186.1 | Scaffold8232 | 1180                    | AA                              | CC              | 1947066498               |
| SNP_P4_192404_1404  | NW_004521186.1 | Scaffold8232 | 1404                    | CC                              | TT              | 1947066500               |
| SNP_P4_192405_1424  | NW_004521186.1 | Scaffold8232 | 1424                    | TT                              | CC              | 1947066502               |
| SNP_P4_192406_247   | NW_004521190.1 | Scaffold8238 | 247                     | AA                              | GG              | 1947066504               |
| SNP_P4_192407_2178  | NW_004521193.1 | Scaffold8241 | 2178                    | AA                              | TT              | 1947066506               |
| SNP_P4_192408_2486  | NW_004521193.1 | Scaffold8241 | 2486                    | AA                              | TT              | 1947066508               |
| SNP_P4_192409_2525  | NW_004521193.1 | Scaffold8241 | 2525                    | AA                              | TT              | 1947066510               |
| SNP_P4_192410_2834  | NW_004521193.1 | Scaffold8241 | 2834                    | AA                              | TT              | 1947066512               |
| SNP_P4_192411_393   | NW_004521195.1 | Scaffold8244 | 393                     | GG                              | CC              | 1947066514               |
| SNP_P4_192412_402   | NW_004521195.1 | Scaffold8244 | 402                     | GG                              | AA              | 1947066516               |
| SNP_P4_192413_403   | NW_004521195.1 | Scaffold8244 | 403                     | GG                              | TT              | 1947066518               |
| SNP_P4_192414_425   | NW_004521195.1 | Scaffold8244 | 425                     | GG                              | AA              | 1947066520               |
| SNP_P4_192415_516   | NW_004521195.1 | Scaffold8244 | 516                     | TT                              | AA              | 1947066522               |
| SNP_P4_192416_780   | NW_004521195.1 | Scaffold8244 | 780                     | GG                              | AA              | 1947066524               |
| SNP_P4_192417_811   | NW_004521195.1 | Scaffold8244 | 811                     | TT                              | CC              | 1947066526               |
| SNP_P4_192418_623   | NW_004521197.1 | Scaffold8247 | 623                     | TT                              | CC              | 1947066528               |
| SNP_P4_192419_908   | NW_004521197.1 | Scaffold8247 | 908                     | CC                              | GG              | 1947066530               |
| SNP_P4_192420_616   | NW_004521198.1 | Scaffold8248 | 616                     | AA                              | TT              | 1947066532               |
| SNP_P4_192421_3415  | NW_004521201.1 | Scaffold8253 | 3415                    | GG                              | CC              | 1947066534               |
| SNP_P4_192422_3416  | NW_004521201.1 | Scaffold8253 | 3416                    | AA                              | CC              | 1947066536               |
| SNP_P4_192423_3695  | NW_004521201.1 | Scaffold8253 | 3695                    | GG                              | AA              | 1947066538               |
| SNP_P4_192424_19980 | NW_004521205.1 | Scaffold8259 | 19980                   | TT                              | CC              | 1947066540               |
| SNP_P4_192425_20439 | NW_004521205.1 | Scaffold8259 | 20439                   | AA                              | GG              | 1947066542               |
| SNP_P4_192426_20465 | NW_004521205.1 | Scaffold8259 | 20465                   | TT                              | CC              | 1947066544               |

| SNPs IDs            | Chromosome IDs | Chromosomes  | Physical positions (bp) | CDC Frontier (Reference genome) | (ILWC46 & LPNB) | NCBI SNPdb Accession IDs |
|---------------------|----------------|--------------|-------------------------|---------------------------------|-----------------|--------------------------|
| SNP_P4_192427_20518 | NW_004521205.1 | Scaffold8259 | 20518                   | CC                              | AA              | 1947066546               |
| SNP_P4_192428_58    | NW_004521214.1 | Scaffold8274 | 58                      | GG                              | AA              | 1947066548               |
| SNP_P4_192429_64    | NW_004521214.1 | Scaffold8274 | 64                      | AA                              | GG              | 1947066550               |
| SNP_P4_192430_123   | NW_004521214.1 | Scaffold8274 | 123                     | AA                              | GG              | 1947066552               |
| SNP_P4_192431_124   | NW_004521214.1 | Scaffold8274 | 124                     | AA                              | TT              | 1947066554               |
| SNP_P4_192432_256   | NW_004521215.1 | Scaffold8275 | 256                     | TT                              | AA              | 1947066556               |
| SNP_P4_192433_263   | NW_004521215.1 | Scaffold8275 | 263                     | GG                              | AA              | 1947066558               |
| SNP_P4_192434_391   | NW_004521215.1 | Scaffold8275 | 391                     | TT                              | GG              | 1947066560               |
| SNP_P4_192435_483   | NW_004521215.1 | Scaffold8275 | 483                     | GG                              | CC              | 1947066562               |
| SNP_P4_192436_510   | NW_004521215.1 | Scaffold8275 | 510                     | TT                              | CC              | 1947066564               |
| SNP_P4_192437_1342  | NW_004521219.1 | Scaffold8283 | 1342                    | CC                              | AA              | 1947066566               |
| SNP_P4_192438_1450  | NW_004521219.1 | Scaffold8283 | 1450                    | TT                              | GG              | 1947066568               |
| SNP_P4_192439_1659  | NW_004521219.1 | Scaffold8283 | 1659                    | AA                              | GG              | 1947066570               |
| SNP_P4_192440_346   | NW_004521221.1 | Scaffold8292 | 346                     | TT                              | CC              | 1947066572               |
| SNP_P4_192441_242   | NW_004521222.1 | Scaffold8294 | 242                     | GG                              | AA              | 1947066574               |
| SNP_P4_192442_360   | NW_004521222.1 | Scaffold8294 | 360                     | GG                              | AA              | 1947066576               |
| SNP_P4_192443_374   | NW_004521222.1 | Scaffold8294 | 374                     | AA                              | CC              | 1947066578               |
| SNP_P4_192444_536   | NW_004521222.1 | Scaffold8294 | 536                     | CC                              | AA              | 1947066580               |
| SNP_P4_192445_729   | NW_004521222.1 | Scaffold8294 | 729                     | AA                              | CC              | 1947066582               |
| SNP_P4_192446_31    | NW_004521223.1 | Scaffold8297 | 31                      | AA                              | GG              | 1947066584               |
| SNP_P4_192447_61    | NW_004521223.1 | Scaffold8297 | 61                      | GG                              | TT              | 1947066586               |
| SNP_P4_192448_62    | NW_004521223.1 | Scaffold8297 | 62                      | AA                              | CC              | 1947066588               |
| SNP_P4_192449_63    | NW_004521223.1 | Scaffold8297 | 63                      | AA                              | TT              | 1947066590               |
| SNP_P4_192450_79    | NW_004521223.1 | Scaffold8297 | 79                      | TT                              | GG              | 1947066592               |
| SNP_P4_192452_161   | NW_004521223.1 | Scaffold8297 | 161                     | TT                              | CC              | 1947066594               |
| SNP_P4_192453_162   | NW_004521223.1 | Scaffold8297 | 162                     | GG                              | AA              | 1947066596               |
| SNP_P4_192454_241   | NW_004521223.1 | Scaffold8297 | 241                     | GG                              | CC              | 1947066598               |
| SNP_P4_192455_290   | NW_004521223.1 | Scaffold8297 | 290                     | AA                              | CC              | 1947066600               |
| SNP_P4_192457_425   | NW_004521223.1 | Scaffold8297 | 425                     | GG                              | AA              | 1947066602               |
| SNP_P4_192458_1454  | NW_004521223.1 | Scaffold8297 | 1454                    | CC                              | TT              | 1947066604               |
| SNP_P4_192459_1494  | NW_004521223.1 | Scaffold8297 | 1494                    | GG                              | AA              | 1947066606               |
| SNP_P4_192460_1919  | NW_004521223.1 | Scaffold8297 | 1919                    | CC                              | AA              | 1947066608               |
| SNP_P4_192461_1923  | NW_004521223.1 | Scaffold8297 | 1923                    | TT                              | AA              | 1947066610               |
| SNP_P4_192462_1924  | NW_004521223.1 | Scaffold8297 | 1924                    | TT                              | AA              | 1947066612               |
| SNP_P4_192463_1997  | NW_004521223.1 | Scaffold8297 | 1997                    | CC                              | AA              | 1947066614               |
| SNP_P4_192464_2805  | NW_004521223.1 | Scaffold8297 | 2805                    | AA                              | TT              | 1947066616               |
| SNP_P4_192465_2935  | NW_004521223.1 | Scaffold8297 | 2935                    | CC                              | AA              | 1947066618               |
| SNP_P4_192466_3191  | NW_004521223.1 | Scaffold8297 | 3191                    | GG                              | AA              | 1947066620               |
| SNP_P4_192467_3281  | NW_004521223.1 | Scaffold8297 | 3281                    | TT                              | CC              | 1947066622               |
| SNP_P4_192468_3291  | NW_004521223.1 | Scaffold8297 | 3291                    | GG                              | AA              | 1947066624               |
| SNP_P4_192469_3316  | NW_004521223.1 | Scaffold8297 | 3316                    | CC                              | AA              | 1947066626               |
| SNP_P4_192470_3317  | NW_004521223.1 | Scaffold8297 | 3317                    | TT                              | AA              | 1947066628               |

| SNPs IDs            | Chromosome IDs | Chromosomes  | Physical positions (bp) | CDC Frontier (Reference genome) | (ILWC46 & LPNB) | NCBI SNPdb Accession IDs |
|---------------------|----------------|--------------|-------------------------|---------------------------------|-----------------|--------------------------|
| SNP_P4_192472_6079  | NW_004521224.1 | Scaffold8301 | 6079                    | GG                              | AA              | 1947066630               |
| SNP_P4_192473_6608  | NW_004521224.1 | Scaffold8301 | 6608                    | GG                              | TT              | 1947066632               |
| SNP_P4_192474_6624  | NW_004521224.1 | Scaffold8301 | 6624                    | AA                              | TT              | 1947066634               |
| SNP_P4_192475_6689  | NW_004521224.1 | Scaffold8301 | 6689                    | CC                              | TT              | 1947066639               |
| SNP_P4_192476_6762  | NW_004521224.1 | Scaffold8301 | 6762                    | TT                              | CC              | 1947066641               |
| SNP_P4_192477_480   | NW_004521227.1 | Scaffold8305 | 480                     | TT                              | GG              | 1947066643               |
| SNP_P4_192478_64    | NW_004521228.1 | Scaffold8306 | 64                      | GG                              | AA              | 1947066645               |
| SNP_P4_192479_63    | NW_004521231.1 | Scaffold8309 | 63                      | CC                              | TT              | 1947066647               |
| SNP_P4_192480_88    | NW_004521231.1 | Scaffold8309 | 88                      | CC                              | GG              | 1947066649               |
| SNP_P4_192481_314   | NW_004521231.1 | Scaffold8309 | 314                     | AA                              | CC              | 1947066651               |
| SNP_P4_192482_400   | NW_004521231.1 | Scaffold8309 | 400                     | GG                              | AA              | 1947066653               |
| SNP_P4_192483_88    | NW_004521233.1 | Scaffold8313 | 88                      | AA                              | GG              | 1947066655               |
| SNP_P4_192484_377   | NW_004521233.1 | Scaffold8313 | 377                     | AA                              | GG              | 1947066657               |
| SNP_P4_192485_164   | NW_004521234.1 | Scaffold8314 | 164                     | GG                              | AA              | 1947066659               |
| SNP_P4_192487_402   | NW_004521234.1 | Scaffold8314 | 402                     | AA                              | TT              | 1947066661               |
| SNP_P4_192488_408   | NW_004521234.1 | Scaffold8314 | 408                     | TT                              | CC              | 1947066663               |
| SNP_P4_192489_416   | NW_004521234.1 | Scaffold8314 | 416                     | AA                              | TT              | 1947066665               |
| SNP_P4_192490_542   | NW_004521234.1 | Scaffold8314 | 542                     | TT                              | CC              | 1947066667               |
| SNP_P4_192491_614   | NW_004521234.1 | Scaffold8314 | 614                     | AA                              | TT              | 1947066669               |
| SNP_P4_192492_637   | NW_004521234.1 | Scaffold8314 | 637                     | GG                              | AA              | 1947066671               |
| SNP_P4_192493_703   | NW_004521234.1 | Scaffold8314 | 703                     | AA                              | GG              | 1947066673               |
| SNP_P4_192494_718   | NW_004521234.1 | Scaffold8314 | 718                     | GG                              | AA              | 1947066675               |
| SNP_P4_192495_849   | NW_004521234.1 | Scaffold8314 | 849                     | AA                              | CC              | 1947066677               |
| SNP_P4_192496_856   | NW_004521234.1 | Scaffold8314 | 856                     | AA                              | GG              | 1947066679               |
| SNP_P4_192499_914   | NW_004521234.1 | Scaffold8314 | 914                     | AA                              | GG              | 1947066681               |
| SNP_P4_192500_930   | NW_004521234.1 | Scaffold8314 | 930                     | GG                              | AA              | 1947066683               |
| SNP_P4_192501_951   | NW_004521234.1 | Scaffold8314 | 951                     | TT                              | CC              | 1947066685               |
| SNP_P4_192502_958   | NW_004521234.1 | Scaffold8314 | 958                     | GG                              | CC              | 1947066687               |
| SNP_P4_192503_972   | NW_004521234.1 | Scaffold8314 | 972                     | GG                              | AA              | 1947066689               |
| SNP_P4_192504_1019  | NW_004521234.1 | Scaffold8314 | 1019                    | AA                              | GG              | 1947066691               |
| SNP_P4_192505_1107  | NW_004521234.1 | Scaffold8314 | 1107                    | TT                              | AA              | 1947066693               |
| SNP_P4_192506_1177  | NW_004521234.1 | Scaffold8314 | 1177                    | TT                              | GG              | 1947066695               |
| SNP_P4_192507_1212  | NW_004521234.1 | Scaffold8314 | 1212                    | CC                              | AA              | 1947066697               |
| SNP_P4_192508_1238  | NW_004521234.1 | Scaffold8314 | 1238                    | TT                              | GG              | 1947066699               |
| SNP_P4_192510_1355  | NW_004521234.1 | Scaffold8314 | 1355                    | CC                              | TT              | 1947066702               |
| SNP_P4_192511_1621  | NW_004521234.1 | Scaffold8314 | 1621                    | GG                              | AA              | 1947066704               |
| SNP_P4_192512_2269  | NW_004521234.1 | Scaffold8314 | 2269                    | TT                              | AA              | 1947066706               |
| SNP_P4_192513_17425 | NW_004521235.1 | Scaffold8315 | 17425                   | CC                              | GG              | 1947066708               |
| SNP_P4_192514_17533 | NW_004521235.1 | Scaffold8315 | 17533                   | TT                              | CC              | 1947066710               |
| SNP_P4_192516_17831 | NW_004521235.1 | Scaffold8315 | 17831                   | TT                              | CC              | 1947066712               |
| SNP_P4_192517_17908 | NW_004521235.1 | Scaffold8315 | 17908                   | AA                              | GG              | 1947066714               |
| SNP_P4_192518_18003 | NW_004521235.1 | Scaffold8315 | 18003                   | GG                              | AA              | 1947066716               |

| SNPs IDs            | Chromosome IDs | Chromosomes  | Physical positions (bp) | CDC Frontier (Reference genome) | (ILWC46 & LPNB) | NCBI SNPdb Accession IDs |
|---------------------|----------------|--------------|-------------------------|---------------------------------|-----------------|--------------------------|
| SNP_P4_192519_18252 | NW_004521235.1 | Scaffold8315 | 18252                   | AA                              | TT              | 1947066718               |
| SNP_P4_192520_18316 | NW_004521235.1 | Scaffold8315 | 18316                   | AA                              | GG              | 1947066720               |
| SNP_P4_192521_18384 | NW_004521235.1 | Scaffold8315 | 18384                   | TT                              | GG              | 1947066722               |
| SNP_P4_192522_18397 | NW_004521235.1 | Scaffold8315 | 18397                   | AA                              | CC              | 1947066724               |
| SNP_P4_192523_18398 | NW_004521235.1 | Scaffold8315 | 18398                   | AA                              | TT              | 1947066726               |
| SNP_P4_192524_18408 | NW_004521235.1 | Scaffold8315 | 18408                   | CC                              | GG              | 1947066728               |
| SNP_P4_192525_18573 | NW_004521235.1 | Scaffold8315 | 18573                   | AA                              | GG              | 1947066730               |
| SNP_P4_192526_18957 | NW_004521235.1 | Scaffold8315 | 18957                   | AA                              | GG              | 1947066732               |
| SNP_P4_192527_18964 | NW_004521235.1 | Scaffold8315 | 18964                   | CC                              | AA              | 1947066734               |
| SNP_P4_192529_19233 | NW_004521235.1 | Scaffold8315 | 19233                   | AA                              | TT              | 1947066736               |
| SNP_P4_192530_19284 | NW_004521235.1 | Scaffold8315 | 19284                   | AA                              | CC              | 1947066738               |
| SNP_P4_192531_19625 | NW_004521235.1 | Scaffold8315 | 19625                   | CC                              | TT              | 1947066740               |
| SNP_P4_192532_19915 | NW_004521235.1 | Scaffold8315 | 19915                   | CC                              | TT              | 1947066742               |
| SNP_P4_192533_20215 | NW_004521235.1 | Scaffold8315 | 20215                   | CC                              | AA              | 1947066744               |
| SNP_P4_192535_20440 | NW_004521235.1 | Scaffold8315 | 20440                   | GG                              | TT              | 1947066746               |
| SNP_P4_192537_20517 | NW_004521235.1 | Scaffold8315 | 20517                   | TT                              | CC              | 1947066748               |
| SNP_P4_192538_20573 | NW_004521235.1 | Scaffold8315 | 20573                   | TT                              | GG              | 1947066750               |
| SNP_P4_192539_20645 | NW_004521235.1 | Scaffold8315 | 20645                   | TT                              | GG              | 1947066752               |
| SNP_P4_192540_20711 | NW_004521235.1 | Scaffold8315 | 20711                   | CC                              | TT              | 1947066754               |
| SNP_P4_192541_20827 | NW_004521235.1 | Scaffold8315 | 20827                   | TT                              | GG              | 1947066756               |
| SNP_P4_192542_20888 | NW_004521235.1 | Scaffold8315 | 20888                   | GG                              | AA              | 1947066758               |
| SNP_P4_192543_20895 | NW_004521235.1 | Scaffold8315 | 20895                   | AA                              | CC              | 1947066759               |
| SNP_P4_192544_64    | NW_004521241.1 | Scaffold8325 | 64                      | AA                              | TT              | 1947066761               |
| SNP_P4_192545_93    | NW_004521241.1 | Scaffold8325 | 93                      | AA                              | CC              | 1947066763               |
| SNP_P4_192546_465   | NW_004521245.1 | Scaffold8332 | 465                     | TT                              | AA              | 1947066765               |
| SNP_P4_192547_900   | NW_004521245.1 | Scaffold8332 | 900                     | TT                              | CC              | 1947066767               |
| SNP_P4_192548_1045  | NW_004521245.1 | Scaffold8332 | 1045                    | GG                              | TT              | 1947066769               |
| SNP_P4_192549_1400  | NW_004521245.1 | Scaffold8332 | 1400                    | AA                              | GG              | 1947066771               |
| SNP_P4_192550_440   | NW_004521246.1 | Scaffold8333 | 440                     | AA                              | TT              | 1947066773               |
| SNP_P4_192551_454   | NW_004521250.1 | Scaffold8340 | 454                     | GG                              | TT              | 1947066775               |
| SNP_P4_192552_483   | NW_004521250.1 | Scaffold8340 | 483                     | CC                              | TT              | 1947066777               |
| SNP_P4_192553_659   | NW_004521250.1 | Scaffold8340 | 659                     | AA                              | CC              | 1947066779               |
| SNP_P4_192554_89    | NW_004521257.1 | Scaffold8357 | 89                      | AA                              | GG              | 1947066781               |
| SNP_P4_192555_342   | NW_004521257.1 | Scaffold8357 | 342                     | TT                              | AA              | 1947066783               |
| SNP_P4_192556_412   | NW_004521257.1 | Scaffold8357 | 412                     | GG                              | TT              | 1947066785               |
| SNP_P4_192557_467   | NW_004521257.1 | Scaffold8357 | 467                     | CC                              | TT              | 1947066787               |
| SNP_P4_192558_468   | NW_004521257.1 | Scaffold8357 | 468                     | AA                              | CC              | 1947066789               |
| SNP_P4_192559_814   | NW_004521257.1 | Scaffold8357 | 814                     | GG                              | AA              | 1947066791               |
| SNP_P4_192560_837   | NW_004521257.1 | Scaffold8357 | 837                     | CC                              | TT              | 1947066793               |
| SNP_P4_192561_852   | NW_004521257.1 | Scaffold8357 | 852                     | CC                              | AA              | 1947066795               |
| SNP_P4_192562_856   | NW_004521257.1 | Scaffold8357 | 856                     | GG                              | AA              | 1947066797               |
| SNP_P4_192563_504   | NW_004521261.1 | Scaffold8366 | 504                     | CC                              | TT              | 1947066799               |

| SNPs IDs           | Chromosome IDs | Chromosomes  | Physical positions (bp) | CDC Frontier (Reference genome) | (ILWC46 & LPNB) | NCBI SNPdb Accession IDs |
|--------------------|----------------|--------------|-------------------------|---------------------------------|-----------------|--------------------------|
| SNP_P4_192564_1442 | NW_004521261.1 | Scaffold8366 | 1442                    | AA                              | TT              | 1947066801               |
| SNP_P4_192565_503  | NW_004521263.1 | Scaffold8368 | 503                     | AA                              | CC              | 1947066803               |
| SNP_P4_192566_619  | NW_004521263.1 | Scaffold8368 | 619                     | AA                              | GG              | 1947066805               |
| SNP_P4_192567_707  | NW_004521263.1 | Scaffold8368 | 707                     | AA                              | GG              | 1947066807               |
| SNP_P4_192568_718  | NW_004521263.1 | Scaffold8368 | 718                     | AA                              | GG              | 1947066809               |
| SNP_P4_192569_872  | NW_004521263.1 | Scaffold8368 | 872                     | GG                              | AA              | 1947066811               |
| SNP_P4_192570_976  | NW_004521263.1 | Scaffold8368 | 976                     | AA                              | GG              | 1947066813               |
| SNP_P4_192571_721  | NW_004521267.1 | Scaffold8377 | 721                     | TT                              | GG              | 1947066815               |
| SNP_P4_192572_723  | NW_004521267.1 | Scaffold8377 | 723                     | GG                              | AA              | 1947066817               |
| SNP_P4_192573_1120 | NW_004521267.1 | Scaffold8377 | 1120                    | GG                              | TT              | 1947066819               |
| SNP_P4_192574_876  | NW_004521268.1 | Scaffold8378 | 876                     | GG                              | AA              | 1947066821               |
| SNP_P4_192575_912  | NW_004521268.1 | Scaffold8378 | 912                     | GG                              | AA              | 1947066823               |
| SNP_P4_192576_984  | NW_004521268.1 | Scaffold8378 | 984                     | GG                              | AA              | 1947066825               |
| SNP_P4_192577_1005 | NW_004521268.1 | Scaffold8378 | 1005                    | AA                              | TT              | 1947066827               |
| SNP_P4_192579_1755 | NW_004521268.1 | Scaffold8378 | 1755                    | CC                              | TT              | 1947066829               |
| SNP_P4_192580_1832 | NW_004521268.1 | Scaffold8378 | 1832                    | GG                              | AA              | 1947066831               |
| SNP_P4_192581_1926 | NW_004521268.1 | Scaffold8378 | 1926                    | TT                              | CC              | 1947066833               |
| SNP_P4_192582_1951 | NW_004521268.1 | Scaffold8378 | 1951                    | AA                              | CC              | 1947066835               |
| SNP_P4_192584_2016 | NW_004521268.1 | Scaffold8378 | 2016                    | AA                              | GG              | 1947066837               |
| SNP_P4_192585_2067 | NW_004521268.1 | Scaffold8378 | 2067                    | TT                              | CC              | 1947066839               |
| SNP_P4_192586_222  | NW_004521270.1 | Scaffold8380 | 222                     | GG                              | AA              | 1947066841               |
| SNP_P4_192588_537  | NW_004521270.1 | Scaffold8380 | 537                     | GG                              | AA              | 1947066843               |
| SNP_P4_192589_546  | NW_004521270.1 | Scaffold8380 | 546                     | AA                              | GG              | 1947066845               |
| SNP_P4_192590_595  | NW_004521270.1 | Scaffold8380 | 595                     | AA                              | CC              | 1947066847               |
| SNP_P4_192591_620  | NW_004521270.1 | Scaffold8380 | 620                     | CC                              | GG              | 1947066849               |
| SNP_P4_192592_642  | NW_004521270.1 | Scaffold8380 | 642                     | CC                              | TT              | 1947066851               |
| SNP_P4_192593_671  | NW_004521270.1 | Scaffold8380 | 671                     | TT                              | CC              | 1947066853               |
| SNP_P4_192594_674  | NW_004521270.1 | Scaffold8380 | 674                     | TT                              | AA              | 1947066855               |
| SNP_P4_192595_719  | NW_004521270.1 | Scaffold8380 | 719                     | GG                              | CC              | 1947066857               |
| SNP_P4_192596_896  | NW_004521270.1 | Scaffold8380 | 896                     | GG                              | TT              | 1947066860               |
| SNP_P4_192597_933  | NW_004521270.1 | Scaffold8380 | 933                     | AA                              | GG              | 1947066862               |
| SNP_P4_192598_954  | NW_004521270.1 | Scaffold8380 | 954                     | GG                              | AA              | 1947066864               |
| SNP_P4_192599_976  | NW_004521270.1 | Scaffold8380 | 976                     | GG                              | AA              | 1947066866               |
| SNP_P4_192600_1043 | NW_004521270.1 | Scaffold8380 | 1043                    | AA                              | TT              | 1947066868               |
| SNP_P4_192601_1088 | NW_004521270.1 | Scaffold8380 | 1088                    | CC                              | TT              | 1947066870               |
| SNP_P4_192603_89   | NW_004521273.1 | Scaffold8385 | 89                      | TT                              | AA              | 1947066872               |
| SNP_P4_192604_141  | NW_004521273.1 | Scaffold8385 | 141                     | TT                              | GG              | 1947066873               |
| SNP_P4_192605_146  | NW_004521273.1 | Scaffold8385 | 146                     | GG                              | CC              | 1947066874               |
| SNP_P4_192607_276  | NW_004521273.1 | Scaffold8385 | 276                     | TT                              | AA              | 1947066875               |
| SNP_P4_192608_279  | NW_004521273.1 | Scaffold8385 | 279                     | TT                              | CC              | 1947066876               |
| SNP_P4_192609_373  | NW_004521273.1 | Scaffold8385 | 373                     | CC                              | TT              | 1947066877               |
| SNP_P4_192610_396  | NW_004521273.1 | Scaffold8385 | 396                     | CC                              | TT              | 1947066879               |



| SNPs IDs           | Chromosome IDs | Chromosomes  | Physical positions (bp) | CDC Frontier (Reference genome) | (ILWC46 & LPNB) | NCBI SNPdb Accession IDs |
|--------------------|----------------|--------------|-------------------------|---------------------------------|-----------------|--------------------------|
| SNP_P4_192611_435  | NW_004521273.1 | Scaffold8385 | 435                     | CC                              | AA              | 1947066881               |
| SNP_P4_192612_508  | NW_004521273.1 | Scaffold8385 | 508                     | AA                              | TT              | 1947066883               |
| SNP_P4_192613_580  | NW_004521273.1 | Scaffold8385 | 580                     | GG                              | TT              | 1947066884               |
| SNP_P4_192614_687  | NW_004521276.1 | Scaffold8393 | 687                     | GG                              | AA              | 1947066885               |
| SNP_P4_192615_1094 | NW_004521276.1 | Scaffold8393 | 1094                    | TT                              | AA              | 1947066886               |
| SNP_P4_192616_1134 | NW_004521276.1 | Scaffold8393 | 1134                    | CC                              | AA              | 1947066887               |
| SNP_P4_192617_1323 | NW_004521276.1 | Scaffold8393 | 1323                    | AA                              | GG              | 1947066888               |
| SNP_P4_192618_1440 | NW_004521276.1 | Scaffold8393 | 1440                    | CC                              | AA              | 1947066889               |
| SNP_P4_192619_2653 | NW_004521276.1 | Scaffold8393 | 2653                    | AA                              | CC              | 1947066890               |
| SNP_P4_192620_692  | NW_004521281.1 | Scaffold8403 | 692                     | CC                              | TT              | 1947066891               |
| SNP_P4_192621_965  | NW_004521283.1 | Scaffold8406 | 965                     | CC                              | AA              | 1947066892               |
| SNP_P4_192622_1332 | NW_004521283.1 | Scaffold8406 | 1332                    | AA                              | GG              | 1947066893               |
| SNP_P4_192624_1010 | NW_004521284.1 | Scaffold8412 | 1010                    | AA                              | TT              | 1947066894               |
| SNP_P4_192625_1225 | NW_004521284.1 | Scaffold8412 | 1225                    | AA                              | GG              | 1947066895               |
| SNP_P4_192626_1308 | NW_004521284.1 | Scaffold8412 | 1308                    | GG                              | TT              | 1947066896               |
| SNP_P4_192627_403  | NW_004521286.1 | Scaffold8421 | 403                     | AA                              | TT              | 1947066897               |
| SNP_P4_192628_1265 | NW_004521292.1 | Scaffold8442 | 1265                    | TT                              | AA              | 1947066898               |
| SNP_P4_192629_1306 | NW_004521292.1 | Scaffold8442 | 1306                    | GG                              | AA              | 1947066899               |
| SNP_P4_192630_1315 | NW_004521292.1 | Scaffold8442 | 1315                    | AA                              | GG              | 1947066900               |
| SNP_P4_192632_1779 | NW_004521292.1 | Scaffold8442 | 1779                    | TT                              | AA              | 1947066901               |
| SNP_P4_192633_1871 | NW_004521292.1 | Scaffold8442 | 1871                    | TT                              | CC              | 1947066902               |
| SNP_P4_192634_1948 | NW_004521292.1 | Scaffold8442 | 1948                    | GG                              | AA              | 1947066903               |
| SNP_P4_192635_1982 | NW_004521292.1 | Scaffold8442 | 1982                    | AA                              | CC              | 1947066904               |
| SNP_P4_192636_2738 | NW_004521292.1 | Scaffold8442 | 2738                    | TT                              | GG              | 1947066905               |
| SNP_P4_192637_2893 | NW_004521292.1 | Scaffold8442 | 2893                    | AA                              | TT              | 1947066906               |
| SNP_P4_192638_2935 | NW_004521292.1 | Scaffold8442 | 2935                    | TT                              | CC              | 1947066907               |
| SNP_P4_192639_4874 | NW_004521294.1 | Scaffold8445 | 4874                    | AA                              | CC              | 1947066908               |
| SNP_P4_192640_4920 | NW_004521294.1 | Scaffold8445 | 4920                    | AA                              | CC              | 1947066909               |
| SNP_P4_192641_4944 | NW_004521294.1 | Scaffold8445 | 4944                    | TT                              | CC              | 1947066910               |
| SNP_P4_192642_5063 | NW_004521294.1 | Scaffold8445 | 5063                    | TT                              | AA              | 1947066911               |
| SNP_P4_192643_5129 | NW_004521294.1 | Scaffold8445 | 5129                    | TT                              | GG              | 1947066912               |
| SNP_P4_192644_5148 | NW_004521294.1 | Scaffold8445 | 5148                    | CC                              | TT              | 1947066913               |
| SNP_P4_192645_5274 | NW_004521294.1 | Scaffold8445 | 5274                    | GG                              | CC              | 1947066914               |
| SNP_P4_192646_5389 | NW_004521294.1 | Scaffold8445 | 5389                    | CC                              | TT              | 1947066915               |
| SNP_P4_192647_5528 | NW_004521294.1 | Scaffold8445 | 5528                    | AA                              | GG              | 1947066916               |
| SNP_P4_192648_5641 | NW_004521294.1 | Scaffold8445 | 5641                    | TT                              | AA              | 1947066917               |
| SNP_P4_192649_5688 | NW_004521294.1 | Scaffold8445 | 5688                    | TT                              | CC              | 1947066919               |
| SNP_P4_192651_5780 | NW_004521294.1 | Scaffold8445 | 5780                    | AA                              | TT              | 1947066921               |
| SNP_P4_192652_5815 | NW_004521294.1 | Scaffold8445 | 5815                    | CC                              | AA              | 1947066923               |
| SNP_P4_192653_5971 | NW_004521294.1 | Scaffold8445 | 5971                    | TT                              | AA              | 1947066925               |
| SNP_P4_192654_6044 | NW_004521294.1 | Scaffold8445 | 6044                    | CC                              | AA              | 1947066927               |
| SNP_P4_192655_6065 | NW_004521294.1 | Scaffold8445 | 6065                    | AA                              | CC              | 1947066929               |

| SNPs IDs           | Chromosome IDs | Chromosomes  | Physical positions (bp) | CDC Frontier (Reference genome) | (ILWC46 & LPNB) | NCBI SNPdb Accession IDs |
|--------------------|----------------|--------------|-------------------------|---------------------------------|-----------------|--------------------------|
| SNP_P4_192656_6092 | NW_004521294.1 | Scaffold8445 | 6092                    | AA                              | TT              | 1947066931               |
| SNP_P4_192657_6186 | NW_004521294.1 | Scaffold8445 | 6186                    | CC                              | AA              | 1947066933               |
| SNP_P4_192658_360  | NW_004521297.1 | Scaffold8455 | 360                     | TT                              | AA              | 1947066935               |
| SNP_P4_192659_384  | NW_004521297.1 | Scaffold8455 | 384                     | GG                              | AA              | 1947066937               |
| SNP_P4_192660_667  | NW_004521297.1 | Scaffold8455 | 667                     | CC                              | TT              | 1947066939               |
| SNP_P4_192661_713  | NW_004521297.1 | Scaffold8455 | 713                     | GG                              | AA              | 1947066941               |
| SNP_P4_192662_714  | NW_004521297.1 | Scaffold8455 | 714                     | GG                              | AA              | 1947066943               |
| SNP_P4_192663_731  | NW_004521297.1 | Scaffold8455 | 731                     | GG                              | TT              | 1947066945               |
| SNP_P4_192664_2731 | NW_004521301.1 | Scaffold8461 | 2731                    | AA                              | TT              | 1947066947               |
| SNP_P4_192665_2861 | NW_004521301.1 | Scaffold8461 | 2861                    | TT                              | AA              | 1947066949               |
| SNP_P4_192666_772  | NW_004521305.1 | Scaffold8468 | 772                     | AA                              | GG              | 1947066951               |
| SNP_P4_192667_64   | NW_004521306.1 | Scaffold8469 | 64                      | AA                              | GG              | 1947066953               |
| SNP_P4_192668_220  | NW_004521306.1 | Scaffold8469 | 220                     | GG                              | AA              | 1947066955               |
| SNP_P4_192669_227  | NW_004521306.1 | Scaffold8469 | 227                     | AA                              | GG              | 1947066957               |
| SNP_P4_192670_375  | NW_004521306.1 | Scaffold8469 | 375                     | GG                              | CC              | 1947066959               |
| SNP_P4_192671_468  | NW_004521306.1 | Scaffold8469 | 468                     | GG                              | CC              | 1947066961               |
| SNP_P4_192672_354  | NW_004521307.1 | Scaffold8471 | 354                     | GG                              | TT              | 1947066963               |
| SNP_P4_192673_64   | NW_004521313.1 | Scaffold8479 | 64                      | AA                              | GG              | 1947066965               |
| SNP_P4_192674_116  | NW_004521313.1 | Scaffold8479 | 116                     | GG                              | CC              | 1947066967               |
| SNP_P4_192675_147  | NW_004521313.1 | Scaffold8479 | 147                     | CC                              | TT              | 1947066969               |
| SNP_P4_192676_160  | NW_004521313.1 | Scaffold8479 | 160                     | TT                              | AA              | 1947066971               |
| SNP_P4_192677_243  | NW_004521313.1 | Scaffold8479 | 243                     | CC                              | TT              | 1947066973               |
| SNP_P4_192678_326  | NW_004521313.1 | Scaffold8479 | 326                     | AA                              | TT              | 1947066975               |
| SNP_P4_192679_344  | NW_004521313.1 | Scaffold8479 | 344                     | GG                              | AA              | 1947066977               |
| SNP_P4_192680_352  | NW_004521313.1 | Scaffold8479 | 352                     | CC                              | TT              | 1947066979               |
| SNP_P4_192681_510  | NW_004521313.1 | Scaffold8479 | 510                     | GG                              | CC              | 1947066981               |
| SNP_P4_192682_560  | NW_004521313.1 | Scaffold8479 | 560                     | AA                              | GG              | 1947066983               |
| SNP_P4_192683_696  | NW_004521313.1 | Scaffold8479 | 696                     | AA                              | CC              | 1947066985               |
| SNP_P4_192684_706  | NW_004521313.1 | Scaffold8479 | 706                     | CC                              | TT              | 1947066987               |
| SNP_P4_192686_840  | NW_004521313.1 | Scaffold8479 | 840                     | AA                              | TT              | 1947066989               |
| SNP_P4_192687_900  | NW_004521313.1 | Scaffold8479 | 900                     | TT                              | GG              | 1947066991               |
| SNP_P4_192688_972  | NW_004521313.1 | Scaffold8479 | 972                     | CC                              | AA              | 1947066993               |
| SNP_P4_192690_1108 | NW_004521313.1 | Scaffold8479 | 1108                    | CC                              | TT              | 1947066995               |
| SNP_P4_192691_1110 | NW_004521313.1 | Scaffold8479 | 1110                    | CC                              | TT              | 1947066997               |
| SNP_P4_192692_1170 | NW_004521313.1 | Scaffold8479 | 1170                    | CC                              | TT              | 1947066999               |
| SNP_P4_192693_1371 | NW_004521313.1 | Scaffold8479 | 1371                    | TT                              | AA              | 1947067001               |
| SNP_P4_192694_1601 | NW_004521313.1 | Scaffold8479 | 1601                    | GG                              | AA              | 1947067003               |
| SNP_P4_192695_1602 | NW_004521313.1 | Scaffold8479 | 1602                    | TT                              | AA              | 1947067005               |
| SNP_P4_192696_1603 | NW_004521313.1 | Scaffold8479 | 1603                    | TT                              | AA              | 1947067007               |
| SNP_P4_192697_1706 | NW_004521313.1 | Scaffold8479 | 1706                    | TT                              | CC              | 1947067009               |
| SNP_P4_192698_1776 | NW_004521313.1 | Scaffold8479 | 1776                    | CC                              | TT              | 1947067011               |
| SNP_P4_192699_1796 | NW_004521313.1 | Scaffold8479 | 1796                    | AA                              | GG              | 1947067013               |

| SNPs IDs            | Chromosome IDs | Chromosomes  | Physical positions (bp) | CDC Frontier (Reference genome) | (ILWC46 & LPNB) | NCBI SNPdb Accession IDs |
|---------------------|----------------|--------------|-------------------------|---------------------------------|-----------------|--------------------------|
| SNP_P4_192700_17744 | NW_004521315.1 | Scaffold8483 | 17744                   | CC                              | TT              | 1947067015               |
| SNP_P4_192701_645   | NW_004521316.1 | Scaffold8487 | 645                     | TT                              | CC              | 1947067017               |
| SNP_P4_192702_4027  | NW_004521320.1 | Scaffold8493 | 4027                    | GG                              | AA              | 1947067019               |
| SNP_P4_192703_4114  | NW_004521320.1 | Scaffold8493 | 4114                    | TT                              | CC              | 1947067021               |
| SNP_P4_192704_4122  | NW_004521320.1 | Scaffold8493 | 4122                    | TT                              | CC              | 1947067023               |
| SNP_P4_192705_4124  | NW_004521320.1 | Scaffold8493 | 4124                    | GG                              | AA              | 1947067025               |
| SNP_P4_192706_4126  | NW_004521320.1 | Scaffold8493 | 4126                    | CC                              | AA              | 1947067027               |
| SNP_P4_192707_4127  | NW_004521320.1 | Scaffold8493 | 4127                    | AA                              | TT              | 1947067029               |
| SNP_P4_192708_4139  | NW_004521320.1 | Scaffold8493 | 4139                    | GG                              | AA              | 1947067031               |
| SNP_P4_192709_4170  | NW_004521320.1 | Scaffold8493 | 4170                    | GG                              | AA              | 1947067033               |
| SNP_P4_192710_4173  | NW_004521320.1 | Scaffold8493 | 4173                    | GG                              | TT              | 1947067035               |
| SNP_P4_192711_4175  | NW_004521320.1 | Scaffold8493 | 4175                    | AA                              | GG              | 1947067037               |
| SNP_P4_192712_4181  | NW_004521320.1 | Scaffold8493 | 4181                    | GG                              | CC              | 1947067039               |
| SNP_P4_192713_4183  | NW_004521320.1 | Scaffold8493 | 4183                    | TT                              | CC              | 1947067041               |
| SNP_P4_192714_4190  | NW_004521320.1 | Scaffold8493 | 4190                    | GG                              | AA              | 1947067043               |
| SNP_P4_192715_5858  | NW_004521320.1 | Scaffold8493 | 5858                    | TT                              | AA              | 1947067045               |
| SNP_P4_192716_7150  | NW_004521320.1 | Scaffold8493 | 7150                    | TT                              | CC              | 1947067047               |
| SNP_P4_192717_7657  | NW_004521320.1 | Scaffold8493 | 7657                    | AA                              | TT              | 1947067049               |
| SNP_P4_192718_8321  | NW_004521320.1 | Scaffold8493 | 8321                    | CC                              | TT              | 1947067051               |
| SNP_P4_192720_9834  | NW_004521320.1 | Scaffold8493 | 9834                    | AA                              | CC              | 1947067054               |
| SNP_P4_192721_9969  | NW_004521320.1 | Scaffold8493 | 9969                    | AA                              | TT              | 1947067056               |
| SNP_P4_192722_10594 | NW_004521320.1 | Scaffold8493 | 10594                   | GG                              | AA              | 1947067058               |
| SNP_P4_192723_10603 | NW_004521320.1 | Scaffold8493 | 10603                   | GG                              | TT              | 1947067060               |
| SNP_P4_192724_10775 | NW_004521320.1 | Scaffold8493 | 10775                   | TT                              | CC              | 1947067062               |
| SNP_P4_192725_11054 | NW_004521320.1 | Scaffold8493 | 11054                   | CC                              | GG              | 1947067064               |
| SNP_P4_192726_11098 | NW_004521320.1 | Scaffold8493 | 11098                   | TT                              | CC              | 1947067066               |
| SNP_P4_192727_11653 | NW_004521320.1 | Scaffold8493 | 11653                   | TT                              | AA              | 1947067068               |
| SNP_P4_192728_12194 | NW_004521320.1 | Scaffold8493 | 12194                   | AA                              | CC              | 1947067070               |
| SNP_P4_192729_12414 | NW_004521320.1 | Scaffold8493 | 12414                   | AA                              | GG              | 1947067072               |
| SNP_P4_192730_12908 | NW_004521320.1 | Scaffold8493 | 12908                   | TT                              | AA              | 1947067074               |
| SNP_P4_192731_14150 | NW_004521320.1 | Scaffold8493 | 14150                   | GG                              | CC              | 1947067076               |
| SNP_P4_192732_14964 | NW_004521320.1 | Scaffold8493 | 14964                   | GG                              | AA              | 1947067078               |
| SNP_P4_192733_14995 | NW_004521320.1 | Scaffold8493 | 14995                   | GG                              | TT              | 1947067080               |
| SNP_P4_192734_16740 | NW_004521320.1 | Scaffold8493 | 16740                   | AA                              | TT              | 1947067082               |
| SNP_P4_192736_17878 | NW_004521320.1 | Scaffold8493 | 17878                   | GG                              | CC              | 1947067084               |
| SNP_P4_192738_18284 | NW_004521320.1 | Scaffold8493 | 18284                   | GG                              | AA              | 1947067086               |
| SNP_P4_192739_18289 | NW_004521320.1 | Scaffold8493 | 18289                   | CC                              | TT              | 1947067088               |
| SNP_P4_192740_18461 | NW_004521320.1 | Scaffold8493 | 18461                   | CC                              | AA              | 1947067090               |
| SNP_P4_192741_18635 | NW_004521320.1 | Scaffold8493 | 18635                   | TT                              | AA              | 1947067092               |
| SNP_P4_192743_93    | NW_004521325.1 | Scaffold8501 | 93                      | TT                              | AA              | 1947067094               |
| SNP_P4_192744_1266  | NW_004521325.1 | Scaffold8501 | 1266                    | AA                              | TT              | 1947067096               |
| SNP_P4_192745_439   | NW_004521326.1 | Scaffold8502 | 439                     | GG                              | AA              | 1947067098               |

| SNPs IDs           | Chromosome IDs | Chromosomes  | Physical positions (bp) | CDC Frontier (Reference genome) | (ILWC46 & LPNB) | NCBI SNPdb Accession IDs |
|--------------------|----------------|--------------|-------------------------|---------------------------------|-----------------|--------------------------|
| SNP_P4_192746_1316 | NW_004521330.1 | Scaffold8513 | 1316                    | AA                              | TT              | 1947067100               |
| SNP_P4_192747_1693 | NW_004521332.1 | Scaffold8518 | 1693                    | CC                              | TT              | 1947067102               |
| SNP_P4_192748_90   | NW_004521336.1 | Scaffold8522 | 90                      | GG                              | AA              | 1947067104               |
| SNP_P4_192749_200  | NW_004521336.1 | Scaffold8522 | 200                     | CC                              | GG              | 1947067106               |
| SNP_P4_192750_356  | NW_004521336.1 | Scaffold8522 | 356                     | TT                              | GG              | 1947067108               |
| SNP_P4_192751_591  | NW_004521336.1 | Scaffold8522 | 591                     | TT                              | GG              | 1947067110               |
| SNP_P4_192753_696  | NW_004521336.1 | Scaffold8522 | 696                     | GG                              | AA              | 1947067111               |
| SNP_P4_192754_64   | NW_004521348.1 | Scaffold8550 | 64                      | CC                              | AA              | 1947067112               |
| SNP_P4_192755_91   | NW_004521348.1 | Scaffold8550 | 91                      | TT                              | CC              | 1947067114               |
| SNP_P4_192756_354  | NW_004521348.1 | Scaffold8550 | 354                     | CC                              | TT              | 1947067116               |
| SNP_P4_192757_358  | NW_004521348.1 | Scaffold8550 | 358                     | AA                              | CC              | 1947067118               |
| SNP_P4_192758_396  | NW_004521348.1 | Scaffold8550 | 396                     | AA                              | CC              | 1947067120               |
| SNP_P4_192759_488  | NW_004521348.1 | Scaffold8550 | 488                     | TT                              | CC              | 1947067122               |
| SNP_P4_192760_655  | NW_004521348.1 | Scaffold8550 | 655                     | GG                              | TT              | 1947067124               |
| SNP_P4_192761_663  | NW_004521348.1 | Scaffold8550 | 663                     | GG                              | TT              | 1947067126               |
| SNP_P4_192762_690  | NW_004521348.1 | Scaffold8550 | 690                     | AA                              | GG              | 1947067128               |
| SNP_P4_192763_731  | NW_004521348.1 | Scaffold8550 | 731                     | CC                              | AA              | 1947067130               |
| SNP_P4_192764_780  | NW_004521348.1 | Scaffold8550 | 780                     | AA                              | GG              | 1947067132               |
| SNP_P4_192765_1196 | NW_004521349.1 | Scaffold8552 | 1196                    | TT                              | CC              | 1947067134               |
| SNP_P4_192766_463  | NW_004521350.1 | Scaffold8553 | 463                     | AA                              | TT              | 1947067136               |
| SNP_P4_192767_516  | NW_004521350.1 | Scaffold8553 | 516                     | CC                              | TT              | 1947067138               |
| SNP_P4_192768_587  | NW_004521350.1 | Scaffold8553 | 587                     | TT                              | AA              | 1947067140               |
| SNP_P4_192770_876  | NW_004521350.1 | Scaffold8553 | 876                     | AA                              | GG              | 1947067142               |
| SNP_P4_192771_946  | NW_004521350.1 | Scaffold8553 | 946                     | AA                              | GG              | 1947067144               |
| SNP_P4_192772_958  | NW_004521350.1 | Scaffold8553 | 958                     | TT                              | AA              | 1947067147               |
| SNP_P4_192773_959  | NW_004521350.1 | Scaffold8553 | 959                     | GG                              | AA              | 1947067149               |
| SNP_P4_192774_454  | NW_004521353.1 | Scaffold8564 | 454                     | CC                              | TT              | 1947067151               |
| SNP_P4_192775_472  | NW_004521353.1 | Scaffold8564 | 472                     | CC                              | GG              | 1947067153               |
| SNP_P4_192776_528  | NW_004521353.1 | Scaffold8564 | 528                     | GG                              | CC              | 1947067155               |
| SNP_P4_192777_6446 | NW_004521354.1 | Scaffold8565 | 6446                    | AA                              | CC              | 1947067157               |
| SNP_P4_192778_6788 | NW_004521354.1 | Scaffold8565 | 6788                    | AA                              | CC              | 1947067159               |
| SNP_P4_192780_6905 | NW_004521354.1 | Scaffold8565 | 6905                    | TT                              | AA              | 1947067161               |
| SNP_P4_192781_6998 | NW_004521354.1 | Scaffold8565 | 6998                    | CC                              | TT              | 1947067163               |
| SNP_P4_192782_7013 | NW_004521354.1 | Scaffold8565 | 7013                    | CC                              | TT              | 1947067165               |
| SNP_P4_192783_7094 | NW_004521354.1 | Scaffold8565 | 7094                    | AA                              | TT              | 1947067167               |
| SNP_P4_192784_7100 | NW_004521354.1 | Scaffold8565 | 7100                    | TT                              | GG              | 1947067169               |
| SNP_P4_192786_7184 | NW_004521354.1 | Scaffold8565 | 7184                    | AA                              | CC              | 1947067171               |
| SNP_P4_192787_7257 | NW_004521354.1 | Scaffold8565 | 7257                    | TT                              | CC              | 1947067173               |
| SNP_P4_192788_7265 | NW_004521354.1 | Scaffold8565 | 7265                    | AA                              | TT              | 1947067175               |
| SNP_P4_192789_64   | NW_004521355.1 | Scaffold8571 | 64                      | GG                              | AA              | 1947067177               |
| SNP_P4_192790_377  | NW_004521355.1 | Scaffold8571 | 377                     | GG                              | TT              | 1947067179               |
| SNP_P4_192791_509  | NW_004521355.1 | Scaffold8571 | 509                     | TT                              | AA              | 1947067181               |

| SNPs IDs            | Chromosome IDs | Chromosomes  | Physical positions (bp) | CDC Frontier (Reference genome) | (ILWC46 & LPNB) | NCBI SNPdb Accession IDs |
|---------------------|----------------|--------------|-------------------------|---------------------------------|-----------------|--------------------------|
| SNP_P4_192792_514   | NW_004521355.1 | Scaffold8571 | 514                     | AA                              | CC              | 1947067183               |
| SNP_P4_192793_548   | NW_004521355.1 | Scaffold8571 | 548                     | TT                              | CC              | 1947067185               |
| SNP_P4_192794_602   | NW_004521355.1 | Scaffold8571 | 602                     | GG                              | AA              | 1947067188               |
| SNP_P4_192795_1060  | NW_004521355.1 | Scaffold8571 | 1060                    | GG                              | AA              | 1947067190               |
| SNP_P4_192796_6406  | NW_004521356.1 | Scaffold8572 | 6406                    | CC                              | TT              | 1947067192               |
| SNP_P4_192797_6475  | NW_004521356.1 | Scaffold8572 | 6475                    | GG                              | TT              | 1947067194               |
| SNP_P4_192798_341   | NW_004521359.1 | Scaffold8582 | 341                     | CC                              | TT              | 1947067197               |
| SNP_P4_192799_794   | NW_004521361.1 | Scaffold8585 | 794                     | GG                              | AA              | 1947067199               |
| SNP_P4_192800_958   | NW_004521362.1 | Scaffold8586 | 958                     | AA                              | GG              | 1947067201               |
| SNP_P4_192801_1367  | NW_004521362.1 | Scaffold8586 | 1367                    | CC                              | TT              | 1947067203               |
| SNP_P4_192803_289   | NW_004521365.1 | Scaffold8590 | 289                     | TT                              | GG              | 1947067205               |
| SNP_P4_192804_450   | NW_004521370.1 | Scaffold8602 | 450                     | TT                              | GG              | 1947067207               |
| SNP_P4_192805_408   | NW_004521371.1 | Scaffold8603 | 408                     | AA                              | GG              | 1947067209               |
| SNP_P4_192806_64    | NW_004521372.1 | Scaffold8604 | 64                      | AA                              | CC              | 1947067211               |
| SNP_P4_192807_91    | NW_004521372.1 | Scaffold8604 | 91                      | TT                              | CC              | 1947067213               |
| SNP_P4_192808_101   | NW_004521372.1 | Scaffold8604 | 101                     | AA                              | TT              | 1947067215               |
| SNP_P4_192809_102   | NW_004521372.1 | Scaffold8604 | 102                     | AA                              | GG              | 1947067217               |
| SNP_P4_192810_108   | NW_004521372.1 | Scaffold8604 | 108                     | AA                              | GG              | 1947067219               |
| SNP_P4_192811_120   | NW_004521372.1 | Scaffold8604 | 120                     | AA                              | CC              | 1947067221               |
| SNP_P4_192812_245   | NW_004521372.1 | Scaffold8604 | 245                     | CC                              | TT              | 1947067223               |
| SNP_P4_192813_246   | NW_004521372.1 | Scaffold8604 | 246                     | TT                              | AA              | 1947067225               |
| SNP_P4_192814_375   | NW_004521372.1 | Scaffold8604 | 375                     | CC                              | TT              | 1947067227               |
| SNP_P4_192816_464   | NW_004521372.1 | Scaffold8604 | 464                     | CC                              | TT              | 1947067229               |
| SNP_P4_192817_667   | NW_004521372.1 | Scaffold8604 | 667                     | GG                              | AA              | 1947067231               |
| SNP_P4_192818_671   | NW_004521372.1 | Scaffold8604 | 671                     | AA                              | GG              | 1947067233               |
| SNP_P4_192819_770   | NW_004521372.1 | Scaffold8604 | 770                     | AA                              | CC              | 1947067235               |
| SNP_P4_192820_1401  | NW_004521372.1 | Scaffold8604 | 1401                    | AA                              | TT              | 1947067237               |
| SNP_P4_192821_336   | NW_004521377.1 | Scaffold8620 | 336                     | AA                              | TT              | 1947067239               |
| SNP_P4_192822_629   | NW_004521377.1 | Scaffold8620 | 629                     | GG                              | AA              | 1947067241               |
| SNP_P4_192823_646   | NW_004521377.1 | Scaffold8620 | 646                     | GG                              | AA              | 1947067243               |
| SNP_P4_192824_699   | NW_004521377.1 | Scaffold8620 | 699                     | GG                              | TT              | 1947067245               |
| SNP_P4_192826_1000  | NW_004521377.1 | Scaffold8620 | 1000                    | AA                              | CC              | 1947067247               |
| SNP_P4_192827_1011  | NW_004521377.1 | Scaffold8620 | 1011                    | GG                              | TT              | 1947067249               |
| SNP_P4_192828_1197  | NW_004521377.1 | Scaffold8620 | 1197                    | TT                              | CC              | 1947067252               |
| SNP_P4_192829_1330  | NW_004521377.1 | Scaffold8620 | 1330                    | TT                              | GG              | 1947067254               |
| SNP_P4_192830_1639  | NW_004521377.1 | Scaffold8620 | 1639                    | TT                              | CC              | 1947067256               |
| SNP_P4_192831_287   | NW_004521381.1 | Scaffold8625 | 287                     | AA                              | GG              | 1947067258               |
| SNP_P4_192832_20459 | NW_004521382.1 | Scaffold8626 | 20459                   | AA                              | CC              | 1947067260               |
| SNP_P4_192833_20481 | NW_004521382.1 | Scaffold8626 | 20481                   | CC                              | TT              | 1947067262               |
| SNP_P4_192834_20488 | NW_004521382.1 | Scaffold8626 | 20488                   | GG                              | AA              | 1947067264               |
| SNP_P4_192835_64    | NW_004521383.1 | Scaffold8627 | 64                      | GG                              | CC              | 1947067266               |
| SNP_P4_192836_93    | NW_004521383.1 | Scaffold8627 | 93                      | AA                              | GG              | 1947067311               |

| SNPs IDs           | Chromosome IDs | Chromosomes  | Physical positions (bp) | CDC Frontier (Reference genome) | (ILWC46 & LPNB) | NCBI SNPdb Accession IDs |
|--------------------|----------------|--------------|-------------------------|---------------------------------|-----------------|--------------------------|
| SNP_P4_192837_106  | NW_004521383.1 | Scaffold8627 | 106                     | GG                              | AA              | 1947067313               |
| SNP_P4_192839_812  | NW_004521384.1 | Scaffold8628 | 812                     | AA                              | CC              | 1947067315               |
| SNP_P4_192840_352  | NW_004521388.1 | Scaffold8639 | 352                     | CC                              | AA              | 1947067317               |
| SNP_P4_192841_440  | NW_004521388.1 | Scaffold8639 | 440                     | AA                              | TT              | 1947067319               |
| SNP_P4_192842_541  | NW_004521388.1 | Scaffold8639 | 541                     | AA                              | TT              | 1947067321               |
| SNP_P4_192843_727  | NW_004521388.1 | Scaffold8639 | 727                     | TT                              | GG              | 1947067323               |
| SNP_P4_192844_758  | NW_004521388.1 | Scaffold8639 | 758                     | GG                              | TT              | 1947067325               |
| SNP_P4_192845_808  | NW_004521388.1 | Scaffold8639 | 808                     | GG                              | TT              | 1947067327               |
| SNP_P4_192846_813  | NW_004521390.1 | Scaffold8641 | 813                     | AA                              | CC              | 1947067329               |
| SNP_P4_192847_814  | NW_004521390.1 | Scaffold8641 | 814                     | CC                              | TT              | 1947067330               |
| SNP_P4_192848_854  | NW_004521390.1 | Scaffold8641 | 854                     | CC                              | TT              | 1947067331               |
| SNP_P4_192849_432  | NW_004521391.1 | Scaffold8645 | 432                     | GG                              | AA              | 1947067332               |
| SNP_P4_192850_445  | NW_004521391.1 | Scaffold8645 | 445                     | TT                              | CC              | 1947067333               |
| SNP_P4_192851_659  | NW_004521391.1 | Scaffold8645 | 659                     | TT                              | CC              | 1947067335               |
| SNP_P4_192852_1382 | NW_004521391.1 | Scaffold8645 | 1382                    | CC                              | TT              | 1947067337               |
| SNP_P4_192853_1413 | NW_004521391.1 | Scaffold8645 | 1413                    | TT                              | AA              | 1947067339               |
| SNP_P4_192854_372  | NW_004521392.1 | Scaffold8646 | 372                     | AA                              | TT              | 1947067341               |
| SNP_P4_192855_1658 | NW_004521392.1 | Scaffold8646 | 1658                    | AA                              | GG              | 1947067343               |
| SNP_P4_192856_1763 | NW_004521392.1 | Scaffold8646 | 1763                    | CC                              | TT              | 1947067345               |
| SNP_P4_192857_1973 | NW_004521392.1 | Scaffold8646 | 1973                    | CC                              | TT              | 1947067347               |
| SNP_P4_192858_1997 | NW_004521392.1 | Scaffold8646 | 1997                    | AA                              | GG              | 1947067349               |
| SNP_P4_192859_2029 | NW_004521392.1 | Scaffold8646 | 2029                    | GG                              | AA              | 1947067351               |
| SNP_P4_192860_2033 | NW_004521392.1 | Scaffold8646 | 2033                    | CC                              | TT              | 1947067353               |
| SNP_P4_192861_2056 | NW_004521392.1 | Scaffold8646 | 2056                    | TT                              | AA              | 1947067355               |
| SNP_P4_192862_2210 | NW_004521392.1 | Scaffold8646 | 2210                    | CC                              | AA              | 1947067357               |
| SNP_P4_192863_2344 | NW_004521392.1 | Scaffold8646 | 2344                    | CC                              | TT              | 1947067359               |
| SNP_P4_192864_2401 | NW_004521392.1 | Scaffold8646 | 2401                    | GG                              | TT              | 1947067361               |
| SNP_P4_192865_2402 | NW_004521392.1 | Scaffold8646 | 2402                    | GG                              | AA              | 1947067363               |
| SNP_P4_192866_2488 | NW_004521392.1 | Scaffold8646 | 2488                    | AA                              | GG              | 1947067365               |
| SNP_P4_192867_2540 | NW_004521392.1 | Scaffold8646 | 2540                    | TT                              | AA              | 1947067367               |
| SNP_P4_192868_2553 | NW_004521392.1 | Scaffold8646 | 2553                    | TT                              | AA              | 1947067369               |
| SNP_P4_192871_5546 | NW_004521392.1 | Scaffold8646 | 5546                    | CC                              | GG              | 1947067371               |
| SNP_P4_192873_7118 | NW_004521392.1 | Scaffold8646 | 7118                    | GG                              | TT              | 1947067373               |
| SNP_P4_192874_7128 | NW_004521392.1 | Scaffold8646 | 7128                    | AA                              | GG              | 1947067375               |
| SNP_P4_192875_7314 | NW_004521392.1 | Scaffold8646 | 7314                    | AA                              | CC              | 1947067377               |
| SNP_P4_192876_2433 | NW_004521393.1 | Scaffold8648 | 2433                    | CC                              | TT              | 1947067379               |
| SNP_P4_192877_2476 | NW_004521393.1 | Scaffold8648 | 2476                    | TT                              | CC              | 1947067381               |
| SNP_P4_192878_2497 | NW_004521393.1 | Scaffold8648 | 2497                    | AA                              | GG              | 1947067383               |
| SNP_P4_192879_2501 | NW_004521393.1 | Scaffold8648 | 2501                    | AA                              | GG              | 1947067385               |
| SNP_P4_192880_2517 | NW_004521393.1 | Scaffold8648 | 2517                    | AA                              | GG              | 1947067387               |
| SNP_P4_192881_2544 | NW_004521393.1 | Scaffold8648 | 2544                    | AA                              | GG              | 1947067389               |
| SNP_P4_192882_2545 | NW_004521393.1 | Scaffold8648 | 2545                    | GG                              | AA              | 1947067391               |

| SNPs IDs           | Chromosome IDs | Chromosomes  | Physical positions (bp) | CDC Frontier (Reference genome) | (ILWC46 & LPNB) | NCBI SNPdb Accession IDs |
|--------------------|----------------|--------------|-------------------------|---------------------------------|-----------------|--------------------------|
| SNP_P4_192883_2552 | NW_004521393.1 | Scaffold8648 | 2552                    | TT                              | GG              | 1947067393               |
| SNP_P4_192884_2571 | NW_004521393.1 | Scaffold8648 | 2571                    | TT                              | CC              | 1947067395               |
| SNP_P4_192885_2760 | NW_004521393.1 | Scaffold8648 | 2760                    | AA                              | TT              | 1947067397               |
| SNP_P4_192886_2783 | NW_004521393.1 | Scaffold8648 | 2783                    | CC                              | GG              | 1947067399               |
| SNP_P4_192887_2829 | NW_004521393.1 | Scaffold8648 | 2829                    | CC                              | TT              | 1947067401               |
| SNP_P4_192888_3403 | NW_004521393.1 | Scaffold8648 | 3403                    | AA                              | TT              | 1947067403               |
| SNP_P4_192889_3458 | NW_004521393.1 | Scaffold8648 | 3458                    | CC                              | GG              | 1947067405               |
| SNP_P4_192891_3830 | NW_004521393.1 | Scaffold8648 | 3830                    | TT                              | AA              | 1947067407               |
| SNP_P4_192892_3839 | NW_004521393.1 | Scaffold8648 | 3839                    | TT                              | GG              | 1947067409               |
| SNP_P4_192893_4175 | NW_004521393.1 | Scaffold8648 | 4175                    | TT                              | CC              | 1947067411               |
| SNP_P4_192894_4179 | NW_004521393.1 | Scaffold8648 | 4179                    | AA                              | GG              | 1947067413               |
| SNP_P4_192895_4210 | NW_004521393.1 | Scaffold8648 | 4210                    | TT                              | CC              | 1947067415               |
| SNP_P4_192896_4217 | NW_004521393.1 | Scaffold8648 | 4217                    | GG                              | AA              | 1947067417               |
| SNP_P4_192897_4269 | NW_004521393.1 | Scaffold8648 | 4269                    | TT                              | GG              | 1947067419               |
| SNP_P4_192898_4395 | NW_004521393.1 | Scaffold8648 | 4395                    | CC                              | GG              | 1947067421               |
| SNP_P4_192899_4710 | NW_004521393.1 | Scaffold8648 | 4710                    | AA                              | GG              | 1947067423               |
| SNP_P4_192900_4722 | NW_004521393.1 | Scaffold8648 | 4722                    | TT                              | AA              | 1947067426               |
| SNP_P4_192901_4757 | NW_004521393.1 | Scaffold8648 | 4757                    | AA                              | GG              | 1947067428               |
| SNP_P4_192902_4758 | NW_004521393.1 | Scaffold8648 | 4758                    | AA                              | GG              | 1947067430               |
| SNP_P4_192903_4774 | NW_004521393.1 | Scaffold8648 | 4774                    | TT                              | CC              | 1947067431               |
| SNP_P4_192904_4797 | NW_004521393.1 | Scaffold8648 | 4797                    | CC                              | AA              | 1947067434               |
| SNP_P4_192905_4836 | NW_004521393.1 | Scaffold8648 | 4836                    | CC                              | TT              | 1947067436               |
| SNP_P4_192906_130  | NW_004521394.1 | Scaffold8650 | 130                     | AA                              | GG              | 1947067438               |
| SNP_P4_192907_142  | NW_004521394.1 | Scaffold8650 | 142                     | CC                              | GG              | 1947067440               |
| SNP_P4_192908_164  | NW_004521394.1 | Scaffold8650 | 164                     | AA                              | CC              | 1947067442               |
| SNP_P4_192909_173  | NW_004521394.1 | Scaffold8650 | 173                     | GG                              | TT              | 1947067444               |
| SNP_P4_192910_193  | NW_004521394.1 | Scaffold8650 | 193                     | TT                              | CC              | 1947067446               |
| SNP_P4_192911_253  | NW_004521394.1 | Scaffold8650 | 253                     | TT                              | AA              | 1947067448               |
| SNP_P4_192912_254  | NW_004521394.1 | Scaffold8650 | 254                     | AA                              | GG              | 1947067450               |
| SNP_P4_192913_455  | NW_004521394.1 | Scaffold8650 | 455                     | GG                              | TT              | 1947067452               |
| SNP_P4_192914_2483 | NW_004521397.1 | Scaffold8653 | 2483                    | CC                              | TT              | 1947067454               |
| SNP_P4_192915_153  | NW_004521398.1 | Scaffold8654 | 153                     | TT                              | CC              | 1947067456               |
| SNP_P4_192916_154  | NW_004521398.1 | Scaffold8654 | 154                     | TT                              | CC              | 1947067458               |
| SNP_P4_192917_293  | NW_004521398.1 | Scaffold8654 | 293                     | TT                              | AA              | 1947067460               |
| SNP_P4_192918_295  | NW_004521398.1 | Scaffold8654 | 295                     | TT                              | AA              | 1947067462               |
| SNP_P4_192919_311  | NW_004521398.1 | Scaffold8654 | 311                     | TT                              | CC              | 1947067464               |
| SNP_P4_192920_357  | NW_004521398.1 | Scaffold8654 | 357                     | AA                              | CC              | 1947067466               |
| SNP_P4_192921_385  | NW_004521398.1 | Scaffold8654 | 385                     | AA                              | CC              | 1947067468               |
| SNP_P4_192922_511  | NW_004521398.1 | Scaffold8654 | 511                     | TT                              | CC              | 1947067470               |
| SNP_P4_192923_5294 | NW_004521398.1 | Scaffold8654 | 5294                    | TT                              | GG              | 1947067472               |
| SNP_P4_192924_5555 | NW_004521398.1 | Scaffold8654 | 5555                    | CC                              | AA              | 1947067474               |
| SNP_P4_192925_5661 | NW_004521398.1 | Scaffold8654 | 5661                    | AA                              | TT              | 1947067476               |

| SNPs IDs           | Chromosome IDs | Chromosomes  | Physical positions (bp) | CDC Frontier (Reference genome) | (ILWC46 & LPNB) | NCBI SNPdb Accession IDs |
|--------------------|----------------|--------------|-------------------------|---------------------------------|-----------------|--------------------------|
| SNP_P4_192926_5684 | NW_004521398.1 | Scaffold8654 | 5684                    | GG                              | TT              | 1947067478               |
| SNP_P4_192927_5746 | NW_004521398.1 | Scaffold8654 | 5746                    | CC                              | GG              | 1947067480               |
| SNP_P4_192928_5828 | NW_004521398.1 | Scaffold8654 | 5828                    | AA                              | CC              | 1947067482               |
| SNP_P4_192929_5880 | NW_004521398.1 | Scaffold8654 | 5880                    | CC                              | AA              | 1947067484               |
| SNP_P4_192930_451  | NW_004521404.1 | Scaffold8666 | 451                     | AA                              | GG              | 1947067487               |
| SNP_P4_192931_811  | NW_004521405.1 | Scaffold8668 | 811                     | TT                              | AA              | 1947067489               |
| SNP_P4_192932_18   | NW_004521406.1 | Scaffold8669 | 18                      | GG                              | CC              | 1947067491               |
| SNP_P4_192933_23   | NW_004521406.1 | Scaffold8669 | 23                      | AA                              | GG              | 1947067493               |
| SNP_P4_192934_35   | NW_004521406.1 | Scaffold8669 | 35                      | GG                              | AA              | 1947067495               |
| SNP_P4_192935_40   | NW_004521406.1 | Scaffold8669 | 40                      | TT                              | AA              | 1947067497               |
| SNP_P4_192936_92   | NW_004521406.1 | Scaffold8669 | 92                      | GG                              | AA              | 1947067499               |
| SNP_P4_192937_643  | NW_004521406.1 | Scaffold8669 | 643                     | CC                              | AA              | 1947067501               |
| SNP_P4_192938_648  | NW_004521406.1 | Scaffold8669 | 648                     | AA                              | TT              | 1947067503               |
| SNP_P4_192940_720  | NW_004521406.1 | Scaffold8669 | 720                     | AA                              | CC              | 1947067505               |
| SNP_P4_192941_748  | NW_004521406.1 | Scaffold8669 | 748                     | GG                              | CC              | 1947067507               |
| SNP_P4_192942_467  | NW_004521411.1 | Scaffold8675 | 467                     | TT                              | AA              | 1947067509               |
| SNP_P4_192943_752  | NW_004521411.1 | Scaffold8675 | 752                     | AA                              | GG              | 1947067511               |
| SNP_P4_192944_821  | NW_004521411.1 | Scaffold8675 | 821                     | CC                              | AA              | 1947067513               |
| SNP_P4_192945_843  | NW_004521411.1 | Scaffold8675 | 843                     | GG                              | AA              | 1947067515               |
| SNP_P4_192946_1208 | NW_004521411.1 | Scaffold8675 | 1208                    | TT                              | CC              | 1947067517               |
| SNP_P4_192947_1427 | NW_004521413.1 | Scaffold8680 | 1427                    | AA                              | TT              | 1947067519               |
| SNP_P4_192948_1578 | NW_004521413.1 | Scaffold8680 | 1578                    | AA                              | CC              | 1947067521               |
| SNP_P4_192949_1642 | NW_004521413.1 | Scaffold8680 | 1642                    | CC                              | TT              | 1947067523               |
| SNP_P4_192950_1025 | NW_004521415.1 | Scaffold8686 | 1025                    | CC                              | TT              | 1947067525               |
| SNP_P4_192951_1036 | NW_004521415.1 | Scaffold8686 | 1036                    | CC                              | TT              | 1947067527               |
| SNP_P4_192952_1145 | NW_004521415.1 | Scaffold8686 | 1145                    | GG                              | TT              | 1947067529               |
| SNP_P4_192953_1155 | NW_004521415.1 | Scaffold8686 | 1155                    | CC                              | AA              | 1947067531               |
| SNP_P4_192954_64   | NW_004521416.1 | Scaffold8687 | 64                      | GG                              | TT              | 1947067533               |
| SNP_P4_192955_100  | NW_004521416.1 | Scaffold8687 | 100                     | GG                              | TT              | 1947067535               |
| SNP_P4_192956_189  | NW_004521416.1 | Scaffold8687 | 189                     | CC                              | TT              | 1947067537               |
| SNP_P4_192957_236  | NW_004521416.1 | Scaffold8687 | 236                     | GG                              | AA              | 1947067539               |
| SNP_P4_192958_790  | NW_004521416.1 | Scaffold8687 | 790                     | GG                              | TT              | 1947067541               |
| SNP_P4_192959_639  | NW_004521419.1 | Scaffold8690 | 639                     | CC                              | TT              | 1947067543               |
| SNP_P4_192960_677  | NW_004521419.1 | Scaffold8690 | 677                     | GG                              | CC              | 1947067545               |
| SNP_P4_192961_734  | NW_004521419.1 | Scaffold8690 | 734                     | GG                              | CC              | 1947067547               |
| SNP_P4_192962_749  | NW_004521419.1 | Scaffold8690 | 749                     | GG                              | AA              | 1947067550               |
| SNP_P4_192963_796  | NW_004521419.1 | Scaffold8690 | 796                     | AA                              | GG              | 1947067552               |
| SNP_P4_192964_1049 | NW_004521419.1 | Scaffold8690 | 1049                    | GG                              | AA              | 1947067554               |
| SNP_P4_192965_1068 | NW_004521421.1 | Scaffold8695 | 1068                    | CC                              | GG              | 1947067556               |
| SNP_P4_192966_64   | NW_004521422.1 | Scaffold8696 | 64                      | TT                              | AA              | 1947067558               |
| SNP_P4_192967_381  | NW_004521422.1 | Scaffold8696 | 381                     | AA                              | CC              | 1947067560               |
| SNP_P4_192968_848  | NW_004521422.1 | Scaffold8696 | 848                     | TT                              | CC              | 1947067562               |



| SNPs IDs           | Chromosome IDs | Chromosomes  | Physical positions (bp) | CDC Frontier (Reference genome) | (ILWC46 & LPNB) | NCBI SNPdb Accession IDs |
|--------------------|----------------|--------------|-------------------------|---------------------------------|-----------------|--------------------------|
| SNP_P4_192969_870  | NW_004521422.1 | Scaffold8696 | 870                     | TT                              | GG              | 1947067564               |
| SNP_P4_192970_456  | NW_004521423.1 | Scaffold8702 | 456                     | CC                              | TT              | 1947067566               |
| SNP_P4_192971_490  | NW_004521423.1 | Scaffold8702 | 490                     | CC                              | TT              | 1947067568               |
| SNP_P4_192972_552  | NW_004521423.1 | Scaffold8702 | 552                     | TT                              | CC              | 1947067570               |
| SNP_P4_192973_749  | NW_004521423.1 | Scaffold8702 | 749                     | TT                              | CC              | 1947067572               |
| SNP_P4_192974_901  | NW_004521423.1 | Scaffold8702 | 901                     | AA                              | CC              | 1947067574               |
| SNP_P4_192975_1100 | NW_004521423.1 | Scaffold8702 | 1100                    | CC                              | TT              | 1947067576               |
| SNP_P4_192976_2302 | NW_004521424.1 | Scaffold8704 | 2302                    | GG                              | AA              | 1947067578               |
| SNP_P4_192977_2306 | NW_004521424.1 | Scaffold8704 | 2306                    | AA                              | GG              | 1947067580               |
| SNP_P4_192978_2326 | NW_004521424.1 | Scaffold8704 | 2326                    | CC                              | TT              | 1947067582               |
| SNP_P4_192979_2328 | NW_004521424.1 | Scaffold8704 | 2328                    | AA                              | CC              | 1947067584               |
| SNP_P4_192980_2624 | NW_004521424.1 | Scaffold8704 | 2624                    | TT                              | CC              | 1947067586               |
| SNP_P4_192981_2625 | NW_004521424.1 | Scaffold8704 | 2625                    | CC                              | TT              | 1947067588               |
| SNP_P4_192982_2657 | NW_004521424.1 | Scaffold8704 | 2657                    | CC                              | TT              | 1947067590               |
| SNP_P4_192983_898  | NW_004521425.1 | Scaffold8705 | 898                     | TT                              | CC              | 1947067592               |
| SNP_P4_192985_103  | NW_004521426.1 | Scaffold8707 | 103                     | TT                              | GG              | 1947067594               |
| SNP_P4_192986_127  | NW_004521426.1 | Scaffold8707 | 127                     | GG                              | CC              | 1947067596               |
| SNP_P4_192987_154  | NW_004521426.1 | Scaffold8707 | 154                     | TT                              | AA              | 1947067598               |
| SNP_P4_192988_155  | NW_004521426.1 | Scaffold8707 | 155                     | TT                              | CC              | 1947067600               |
| SNP_P4_192989_498  | NW_004521426.1 | Scaffold8707 | 498                     | TT                              | CC              | 1947067602               |
| SNP_P4_192990_1266 | NW_004521426.1 | Scaffold8707 | 1266                    | AA                              | TT              | 1947067604               |
| SNP_P4_192991_1299 | NW_004521426.1 | Scaffold8707 | 1299                    | GG                              | CC              | 1947067606               |
| SNP_P4_192992_1358 | NW_004521426.1 | Scaffold8707 | 1358                    | GG                              | AA              | 1947067608               |
| SNP_P4_192993_1380 | NW_004521426.1 | Scaffold8707 | 1380                    | GG                              | CC              | 1947067610               |
| SNP_P4_192994_1421 | NW_004521426.1 | Scaffold8707 | 1421                    | GG                              | AA              | 1947067612               |
| SNP_P4_192995_1657 | NW_004521426.1 | Scaffold8707 | 1657                    | AA                              | CC              | 1947067614               |
| SNP_P4_192996_1680 | NW_004521426.1 | Scaffold8707 | 1680                    | GG                              | CC              | 1947067616               |
| SNP_P4_192997_1723 | NW_004521426.1 | Scaffold8707 | 1723                    | CC                              | TT              | 1947067618               |
| SNP_P4_192998_1749 | NW_004521426.1 | Scaffold8707 | 1749                    | AA                              | CC              | 1947067620               |
| SNP_P4_192999_1768 | NW_004521426.1 | Scaffold8707 | 1768                    | TT                              | CC              | 1947067622               |
| SNP_P4_193000_64   | NW_004521428.1 | Scaffold8709 | 64                      | CC                              | TT              | 1947067624               |
| SNP_P4_193001_290  | NW_004521428.1 | Scaffold8709 | 290                     | CC                              | AA              | 1947067626               |
| SNP_P4_193002_649  | NW_004521428.1 | Scaffold8709 | 649                     | TT                              | GG              | 1947067628               |
| SNP_P4_193003_966  | NW_004521428.1 | Scaffold8709 | 966                     | GG                              | AA              | 1947067630               |
| SNP_P4_193004_561  | NW_004521430.1 | Scaffold8715 | 561                     | AA                              | CC              | 1947067632               |
| SNP_P4_193005_562  | NW_004521430.1 | Scaffold8715 | 562                     | TT                              | CC              | 1947067634               |
| SNP_P4_193006_591  | NW_004521430.1 | Scaffold8715 | 591                     | GG                              | AA              | 1947067636               |
| SNP_P4_193007_645  | NW_004521430.1 | Scaffold8715 | 645                     | TT                              | GG              | 1947067638               |
| SNP_P4_193008_776  | NW_004521430.1 | Scaffold8715 | 776                     | TT                              | AA              | 1947067640               |
| SNP_P4_193009_987  | NW_004521430.1 | Scaffold8715 | 987                     | TT                              | CC              | 1947067642               |
| SNP_P4_193010_1072 | NW_004521430.1 | Scaffold8715 | 1072                    | GG                              | AA              | 1947067644               |
| SNP_P4_193011_1109 | NW_004521430.1 | Scaffold8715 | 1109                    | AA                              | GG              | 1947067646               |

| SNPs IDs           | Chromosome IDs | Chromosomes  | Physical positions (bp) | CDC Frontier (Reference genome) | (ILWC46 & LPNB) | NCBI SNPdb Accession IDs |
|--------------------|----------------|--------------|-------------------------|---------------------------------|-----------------|--------------------------|
| SNP_P4_193012_1298 | NW_004521430.1 | Scaffold8715 | 1298                    | GG                              | AA              | 1947067648               |
| SNP_P4_193014_64   | NW_004521434.1 | Scaffold8730 | 64                      | GG                              | AA              | 1947067650               |
| SNP_P4_193016_150  | NW_004521434.1 | Scaffold8730 | 150                     | AA                              | GG              | 1947067652               |
| SNP_P4_193017_181  | NW_004521434.1 | Scaffold8730 | 181                     | TT                              | CC              | 1947067654               |
| SNP_P4_193018_205  | NW_004521434.1 | Scaffold8730 | 205                     | GG                              | AA              | 1947067656               |
| SNP_P4_193019_257  | NW_004521434.1 | Scaffold8730 | 257                     | GG                              | AA              | 1947067658               |
| SNP_P4_193020_284  | NW_004521434.1 | Scaffold8730 | 284                     | AA                              | TT              | 1947067660               |
| SNP_P4_193021_371  | NW_004521434.1 | Scaffold8730 | 371                     | AA                              | TT              | 1947067662               |
| SNP_P4_193022_383  | NW_004521434.1 | Scaffold8730 | 383                     | CC                              | TT              | 1947067664               |
| SNP_P4_193023_386  | NW_004521434.1 | Scaffold8730 | 386                     | TT                              | CC              | 1947067666               |
| SNP_P4_193024_389  | NW_004521434.1 | Scaffold8730 | 389                     | GG                              | TT              | 1947067668               |
| SNP_P4_193025_460  | NW_004521434.1 | Scaffold8730 | 460                     | GG                              | AA              | 1947067670               |
| SNP_P4_193026_485  | NW_004521434.1 | Scaffold8730 | 485                     | AA                              | GG              | 1947067672               |
| SNP_P4_193027_517  | NW_004521434.1 | Scaffold8730 | 517                     | TT                              | AA              | 1947067674               |
| SNP_P4_193028_573  | NW_004521434.1 | Scaffold8730 | 573                     | AA                              | CC              | 1947067676               |
| SNP_P4_193029_1541 | NW_004521434.1 | Scaffold8730 | 1541                    | TT                              | AA              | 1947067678               |
| SNP_P4_193030_1736 | NW_004521434.1 | Scaffold8730 | 1736                    | AA                              | CC              | 1947067680               |
| SNP_P4_193031_1805 | NW_004521434.1 | Scaffold8730 | 1805                    | AA                              | GG              | 1947067682               |
| SNP_P4_193032_1897 | NW_004521434.1 | Scaffold8730 | 1897                    | TT                              | CC              | 1947067684               |
| SNP_P4_193033_2013 | NW_004521434.1 | Scaffold8730 | 2013                    | TT                              | CC              | 1947067686               |
| SNP_P4_193034_2100 | NW_004521434.1 | Scaffold8730 | 2100                    | TT                              | CC              | 1947067688               |
| SNP_P4_193035_2112 | NW_004521434.1 | Scaffold8730 | 2112                    | TT                              | CC              | 1947067690               |
| SNP_P4_193036_471  | NW_004521436.1 | Scaffold8733 | 471                     | CC                              | TT              | 1947067692               |
| SNP_P4_193037_515  | NW_004521436.1 | Scaffold8733 | 515                     | GG                              | AA              | 1947067694               |
| SNP_P4_193038_534  | NW_004521436.1 | Scaffold8733 | 534                     | CC                              | TT              | 1947067696               |
| SNP_P4_193039_204  | NW_004521437.1 | Scaffold8734 | 204                     | GG                              | TT              | 1947067698               |
| SNP_P4_193040_271  | NW_004521437.1 | Scaffold8734 | 271                     | AA                              | GG              | 1947067701               |
| SNP_P4_193041_286  | NW_004521437.1 | Scaffold8734 | 286                     | AA                              | GG              | 1947067703               |
| SNP_P4_193042_320  | NW_004521437.1 | Scaffold8734 | 320                     | GG                              | AA              | 1947067705               |
| SNP_P4_193043_358  | NW_004521437.1 | Scaffold8734 | 358                     | TT                              | CC              | 1947067707               |
| SNP_P4_193044_437  | NW_004521437.1 | Scaffold8734 | 437                     | TT                              | CC              | 1947067709               |
| SNP_P4_193045_540  | NW_004521437.1 | Scaffold8734 | 540                     | AA                              | TT              | 1947067711               |
| SNP_P4_193046_648  | NW_004521437.1 | Scaffold8734 | 648                     | CC                              | GG              | 1947067713               |
| SNP_P4_193047_707  | NW_004521437.1 | Scaffold8734 | 707                     | AA                              | TT              | 1947067715               |
| SNP_P4_193049_816  | NW_004521437.1 | Scaffold8734 | 816                     | TT                              | CC              | 1947067717               |
| SNP_P4_193050_839  | NW_004521437.1 | Scaffold8734 | 839                     | AA                              | TT              | 1947067719               |
| SNP_P4_193051_867  | NW_004521437.1 | Scaffold8734 | 867                     | AA                              | TT              | 1947067721               |
| SNP_P4_193052_876  | NW_004521437.1 | Scaffold8734 | 876                     | CC                              | AA              | 1947067723               |
| SNP_P4_193053_947  | NW_004521437.1 | Scaffold8734 | 947                     | TT                              | AA              | 1947067725               |
| SNP_P4_193054_1062 | NW_004521437.1 | Scaffold8734 | 1062                    | AA                              | GG              | 1947067727               |
| SNP_P4_193056_1227 | NW_004521437.1 | Scaffold8734 | 1227                    | GG                              | AA              | 1947067729               |
| SNP_P4_193057_1281 | NW_004521437.1 | Scaffold8734 | 1281                    | GG                              | AA              | 1947067731               |

| SNPs IDs           | Chromosome IDs | Chromosomes  | Physical positions (bp) | CDC Frontier (Reference genome) | (ILWC46 & LPNB) | NCBI SNPdb Accession IDs |
|--------------------|----------------|--------------|-------------------------|---------------------------------|-----------------|--------------------------|
| SNP_P4_193058_1383 | NW_004521437.1 | Scaffold8734 | 1383                    | AA                              | GG              | 1947067733               |
| SNP_P4_193059_2021 | NW_004521437.1 | Scaffold8734 | 2021                    | GG                              | AA              | 1947067735               |
| SNP_P4_193060_2354 | NW_004521437.1 | Scaffold8734 | 2354                    | TT                              | CC              | 1947067737               |
| SNP_P4_193061_2413 | NW_004521437.1 | Scaffold8734 | 2413                    | TT                              | AA              | 1947067739               |
| SNP_P4_193062_84   | NW_004521440.1 | Scaffold8744 | 84                      | AA                              | TT              | 1947067741               |
| SNP_P4_193063_93   | NW_004521440.1 | Scaffold8744 | 93                      | AA                              | TT              | 1947067743               |
| SNP_P4_193064_488  | NW_004521440.1 | Scaffold8744 | 488                     | CC                              | TT              | 1947067745               |
| SNP_P4_193065_1344 | NW_004521441.1 | Scaffold8746 | 1344                    | AA                              | GG              | 1947067747               |
| SNP_P4_193066_1730 | NW_004521441.1 | Scaffold8746 | 1730                    | CC                              | TT              | 1947067749               |
| SNP_P4_193067_2174 | NW_004521441.1 | Scaffold8746 | 2174                    | AA                              | CC              | 1947067751               |
| SNP_P4_193068_2750 | NW_004521441.1 | Scaffold8746 | 2750                    | GG                              | AA              | 1947067753               |
| SNP_P4_193069_4355 | NW_004521441.1 | Scaffold8746 | 4355                    | GG                              | TT              | 1947067755               |
| SNP_P4_193070_4363 | NW_004521441.1 | Scaffold8746 | 4363                    | AA                              | GG              | 1947067758               |
| SNP_P4_193071_4836 | NW_004521441.1 | Scaffold8746 | 4836                    | CC                              | TT              | 1947067760               |
| SNP_P4_193072_6000 | NW_004521441.1 | Scaffold8746 | 6000                    | TT                              | AA              | 1947067762               |
| SNP_P4_193073_6406 | NW_004521441.1 | Scaffold8746 | 6406                    | AA                              | GG              | 1947067764               |
| SNP_P4_193074_6414 | NW_004521441.1 | Scaffold8746 | 6414                    | GG                              | AA              | 1947067766               |
| SNP_P4_193075_6441 | NW_004521441.1 | Scaffold8746 | 6441                    | GG                              | AA              | 1947067768               |
| SNP_P4_193076_6514 | NW_004521441.1 | Scaffold8746 | 6514                    | TT                              | CC              | 1947067770               |
| SNP_P4_193077_6756 | NW_004521441.1 | Scaffold8746 | 6756                    | CC                              | TT              | 1947067772               |
| SNP_P4_193078_7082 | NW_004521441.1 | Scaffold8746 | 7082                    | TT                              | AA              | 1947067774               |
| SNP_P4_193079_7134 | NW_004521441.1 | Scaffold8746 | 7134                    | AA                              | GG              | 1947067776               |
| SNP_P4_193080_7200 | NW_004521441.1 | Scaffold8746 | 7200                    | AA                              | GG              | 1947067778               |
| SNP_P4_193081_7205 | NW_004521441.1 | Scaffold8746 | 7205                    | TT                              | GG              | 1947067780               |
| SNP_P4_193082_7206 | NW_004521441.1 | Scaffold8746 | 7206                    | CC                              | GG              | 1947067782               |
| SNP_P4_193083_134  | NW_004521442.1 | Scaffold8749 | 134                     | GG                              | TT              | 1947067784               |
| SNP_P4_193084_528  | NW_004521443.1 | Scaffold8751 | 528                     | CC                              | TT              | 1947067786               |
| SNP_P4_193085_556  | NW_004521443.1 | Scaffold8751 | 556                     | AA                              | GG              | 1947067788               |
| SNP_P4_193086_569  | NW_004521443.1 | Scaffold8751 | 569                     | TT                              | AA              | 1947067790               |
| SNP_P4_193087_572  | NW_004521443.1 | Scaffold8751 | 572                     | CC                              | AA              | 1947067792               |
| SNP_P4_193088_701  | NW_004521445.1 | Scaffold8755 | 701                     | TT                              | AA              | 1947067794               |
| SNP_P4_193089_705  | NW_004521445.1 | Scaffold8755 | 705                     | AA                              | GG              | 1947067796               |
| SNP_P4_193090_731  | NW_004521445.1 | Scaffold8755 | 731                     | TT                              | CC              | 1947067798               |
| SNP_P4_193091_738  | NW_004521445.1 | Scaffold8755 | 738                     | GG                              | TT              | 1947067800               |
| SNP_P4_193092_822  | NW_004521445.1 | Scaffold8755 | 822                     | GG                              | AA              | 1947067802               |
| SNP_P4_193093_1109 | NW_004521445.1 | Scaffold8755 | 1109                    | AA                              | GG              | 1947067804               |
| SNP_P4_193094_1078 | NW_004521450.1 | Scaffold8766 | 1078                    | TT                              | AA              | 1947067806               |
| SNP_P4_193095_1169 | NW_004521450.1 | Scaffold8766 | 1169                    | CC                              | TT              | 1947067808               |
| SNP_P4_193096_1474 | NW_004521450.1 | Scaffold8766 | 1474                    | GG                              | CC              | 1947067810               |
| SNP_P4_193097_1622 | NW_004521450.1 | Scaffold8766 | 1622                    | TT                              | AA              | 1947067812               |
| SNP_P4_193098_93   | NW_004521454.1 | Scaffold8778 | 93                      | AA                              | TT              | 1947067814               |
| SNP_P4_193099_102  | NW_004521454.1 | Scaffold8778 | 102                     | GG                              | AA              | 1947067816               |

| SNPs IDs            | Chromosome IDs | Chromosomes  | Physical positions (bp) | CDC Frontier (Reference genome) | (ILWC46 & LPNB) | NCBI SNPdb Accession IDs |
|---------------------|----------------|--------------|-------------------------|---------------------------------|-----------------|--------------------------|
| SNP_P4_193100_207   | NW_004521454.1 | Scaffold8778 | 207                     | CC                              | AA              | 1947067818               |
| SNP_P4_193101_580   | NW_004521454.1 | Scaffold8778 | 580                     | TT                              | AA              | 1947067821               |
| SNP_P4_193102_81    | NW_004521456.1 | Scaffold8785 | 81                      | CC                              | TT              | 1947067823               |
| SNP_P4_193103_97    | NW_004521456.1 | Scaffold8785 | 97                      | GG                              | TT              | 1947067825               |
| SNP_P4_193104_147   | NW_004521456.1 | Scaffold8785 | 147                     | AA                              | TT              | 1947067827               |
| SNP_P4_193105_155   | NW_004521456.1 | Scaffold8785 | 155                     | TT                              | AA              | 1947067829               |
| SNP_P4_193106_119   | NW_004521458.1 | Scaffold8789 | 119                     | GG                              | CC              | 1947067831               |
| SNP_P4_193107_246   | NW_004521458.1 | Scaffold8789 | 246                     | TT                              | GG              | 1947067833               |
| SNP_P4_193108_350   | NW_004521458.1 | Scaffold8789 | 350                     | TT                              | GG              | 1947067835               |
| SNP_P4_193109_376   | NW_004521458.1 | Scaffold8789 | 376                     | CC                              | AA              | 1947067837               |
| SNP_P4_193110_393   | NW_004521458.1 | Scaffold8789 | 393                     | AA                              | GG              | 1947067839               |
| SNP_P4_193111_406   | NW_004521458.1 | Scaffold8789 | 406                     | GG                              | AA              | 1947067841               |
| SNP_P4_193112_443   | NW_004521458.1 | Scaffold8789 | 443                     | TT                              | AA              | 1947067844               |
| SNP_P4_193113_466   | NW_004521458.1 | Scaffold8789 | 466                     | AA                              | CC              | 1947067846               |
| SNP_P4_193114_477   | NW_004521458.1 | Scaffold8789 | 477                     | AA                              | GG              | 1947067848               |
| SNP_P4_193115_545   | NW_004521458.1 | Scaffold8789 | 545                     | AA                              | GG              | 1947067850               |
| SNP_P4_193117_658   | NW_004521458.1 | Scaffold8789 | 658                     | CC                              | AA              | 1947067852               |
| SNP_P4_193118_666   | NW_004521458.1 | Scaffold8789 | 666                     | AA                              | CC              | 1947067854               |
| SNP_P4_193119_690   | NW_004521458.1 | Scaffold8789 | 690                     | TT                              | GG              | 1947067856               |
| SNP_P4_193120_741   | NW_004521458.1 | Scaffold8789 | 741                     | AA                              | GG              | 1947067858               |
| SNP_P4_193121_784   | NW_004521458.1 | Scaffold8789 | 784                     | AA                              | GG              | 1947067860               |
| SNP_P4_193122_846   | NW_004521458.1 | Scaffold8789 | 846                     | TT                              | CC              | 1947067862               |
| SNP_P4_193123_1002  | NW_004521458.1 | Scaffold8789 | 1002                    | AA                              | TT              | 1947067864               |
| SNP_P4_193124_1049  | NW_004521458.1 | Scaffold8789 | 1049                    | TT                              | GG              | 1947067866               |
| SNP_P4_193125_1630  | NW_004521458.1 | Scaffold8789 | 1630                    | TT                              | GG              | 1947067868               |
| SNP_P4_193126_1639  | NW_004521458.1 | Scaffold8789 | 1639                    | GG                              | TT              | 1947067870               |
| SNP_P4_193127_1642  | NW_004521458.1 | Scaffold8789 | 1642                    | TT                              | AA              | 1947067872               |
| SNP_P4_193128_1643  | NW_004521458.1 | Scaffold8789 | 1643                    | AA                              | GG              | 1947067874               |
| SNP_P4_193130_1916  | NW_004521458.1 | Scaffold8789 | 1916                    | TT                              | GG              | 1947067876               |
| SNP_P4_193132_20347 | NW_004521464.1 | Scaffold8801 | 20347                   | AA                              | TT              | 1947067878               |
| SNP_P4_193133_20424 | NW_004521464.1 | Scaffold8801 | 20424                   | GG                              | CC              | 1947067880               |
| SNP_P4_193134_20450 | NW_004521464.1 | Scaffold8801 | 20450                   | GG                              | AA              | 1947067882               |
| SNP_P4_193135_20493 | NW_004521464.1 | Scaffold8801 | 20493                   | TT                              | AA              | 1947067884               |
| SNP_P4_193136_20895 | NW_004521464.1 | Scaffold8801 | 20895                   | TT                              | CC              | 1947067886               |
| SNP_P4_193137_20914 | NW_004521464.1 | Scaffold8801 | 20914                   | GG                              | AA              | 1947067889               |
| SNP_P4_193140_6334  | NW_004521465.1 | Scaffold8803 | 6334                    | AA                              | TT              | 1947067891               |
| SNP_P4_193141_6354  | NW_004521465.1 | Scaffold8803 | 6354                    | GG                              | TT              | 1947067893               |
| SNP_P4_193144_7900  | NW_004521465.1 | Scaffold8803 | 7900                    | CC                              | TT              | 1947067895               |
| SNP_P4_193145_8024  | NW_004521465.1 | Scaffold8803 | 8024                    | AA                              | GG              | 1947067897               |
| SNP_P4_193146_92    | NW_004521467.1 | Scaffold8808 | 92                      | TT                              | AA              | 1947067899               |
| SNP_P4_193147_93    | NW_004521467.1 | Scaffold8808 | 93                      | GG                              | TT              | 1947067901               |
| SNP_P4_193148_94    | NW_004521467.1 | Scaffold8808 | 94                      | AA                              | GG              | 1947067903               |

| SNPs IDs           | Chromosome IDs | Chromosomes  | Physical positions (bp) | CDC Frontier (Reference genome) | (ILWC46 & LPNB) | NCBI SNPdb Accession IDs |
|--------------------|----------------|--------------|-------------------------|---------------------------------|-----------------|--------------------------|
| SNP_P4_193149_250  | NW_004521467.1 | Scaffold8808 | 250                     | GG                              | AA              | 1947067905               |
| SNP_P4_193150_680  | NW_004521467.1 | Scaffold8808 | 680                     | GG                              | TT              | 1947067907               |
| SNP_P4_193151_705  | NW_004521467.1 | Scaffold8808 | 705                     | GG                              | AA              | 1947067909               |
| SNP_P4_193152_726  | NW_004521467.1 | Scaffold8808 | 726                     | TT                              | AA              | 1947067911               |
| SNP_P4_193153_2066 | NW_004521468.1 | Scaffold8809 | 2066                    | TT                              | CC              | 1947067913               |
| SNP_P4_193154_389  | NW_004521474.1 | Scaffold8821 | 389                     | AA                              | CC              | 1947067915               |
| SNP_P4_193155_446  | NW_004521474.1 | Scaffold8821 | 446                     | CC                              | TT              | 1947067917               |
| SNP_P4_193156_765  | NW_004521474.1 | Scaffold8821 | 765                     | AA                              | CC              | 1947067919               |
| SNP_P4_193157_632  | NW_004521475.1 | Scaffold8822 | 632                     | AA                              | GG              | 1947067921               |
| SNP_P4_193158_662  | NW_004521475.1 | Scaffold8822 | 662                     | AA                              | GG              | 1947067923               |
| SNP_P4_193159_798  | NW_004521475.1 | Scaffold8822 | 798                     | AA                              | GG              | 1947067925               |
| SNP_P4_193160_878  | NW_004521475.1 | Scaffold8822 | 878                     | AA                              | GG              | 1947067927               |
| SNP_P4_193161_1146 | NW_004521475.1 | Scaffold8822 | 1146                    | TT                              | AA              | 1947067929               |
| SNP_P4_193162_1189 | NW_004521475.1 | Scaffold8822 | 1189                    | TT                              | GG              | 1947067931               |
| SNP_P4_193163_381  | NW_004521476.1 | Scaffold8824 | 381                     | GG                              | AA              | 1947067933               |
| SNP_P4_193164_402  | NW_004521476.1 | Scaffold8824 | 402                     | TT                              | GG              | 1947067935               |
| SNP_P4_193165_587  | NW_004521476.1 | Scaffold8824 | 587                     | TT                              | AA              | 1947067937               |
| SNP_P4_193166_619  | NW_004521477.1 | Scaffold8825 | 619                     | AA                              | TT              | 1947067939               |
| SNP_P4_193167_626  | NW_004521477.1 | Scaffold8825 | 626                     | GG                              | AA              | 1947067941               |
| SNP_P4_193170_1063 | NW_004521477.1 | Scaffold8825 | 1063                    | GG                              | TT              | 1947067943               |
| SNP_P4_193171_1091 | NW_004521477.1 | Scaffold8825 | 1091                    | GG                              | AA              | 1947067945               |
| SNP_P4_193172_910  | NW_004521478.1 | Scaffold8826 | 910                     | AA                              | TT              | 1947067947               |
| SNP_P4_193173_1427 | NW_004521478.1 | Scaffold8826 | 1427                    | TT                              | CC              | 1947067949               |
| SNP_P4_193174_1437 | NW_004521478.1 | Scaffold8826 | 1437                    | TT                              | GG              | 1947067951               |
| SNP_P4_193175_834  | NW_004521482.1 | Scaffold8836 | 834                     | GG                              | AA              | 1947067953               |
| SNP_P4_193176_856  | NW_004521482.1 | Scaffold8836 | 856                     | CC                              | TT              | 1947067955               |
| SNP_P4_193177_877  | NW_004521482.1 | Scaffold8836 | 877                     | AA                              | GG              | 1947067957               |
| SNP_P4_193178_893  | NW_004521482.1 | Scaffold8836 | 893                     | AA                              | TT              | 1947067959               |
| SNP_P4_193179_894  | NW_004521482.1 | Scaffold8836 | 894                     | TT                              | AA              | 1947067961               |
| SNP_P4_193180_901  | NW_004521482.1 | Scaffold8836 | 901                     | TT                              | CC              | 1947067963               |
| SNP_P4_193181_939  | NW_004521482.1 | Scaffold8836 | 939                     | AA                              | GG              | 1947067965               |
| SNP_P4_193183_1105 | NW_004521482.1 | Scaffold8836 | 1105                    | AA                              | TT              | 1947067967               |
| SNP_P4_193184_1129 | NW_004521482.1 | Scaffold8836 | 1129                    | GG                              | AA              | 1947067969               |
| SNP_P4_193185_1161 | NW_004521482.1 | Scaffold8836 | 1161                    | CC                              | TT              | 1947067971               |
| SNP_P4_193186_1197 | NW_004521482.1 | Scaffold8836 | 1197                    | AA                              | GG              | 1947067973               |
| SNP_P4_193188_1051 | NW_004521484.1 | Scaffold8838 | 1051                    | AA                              | TT              | 1947067975               |
| SNP_P4_193189_1115 | NW_004521484.1 | Scaffold8838 | 1115                    | GG                              | AA              | 1947067977               |
| SNP_P4_193190_1153 | NW_004521484.1 | Scaffold8838 | 1153                    | CC                              | GG              | 1947067979               |
| SNP_P4_193191_245  | NW_004521485.1 | Scaffold8842 | 245                     | AA                              | GG              | 1947067981               |
| SNP_P4_193192_428  | NW_004521485.1 | Scaffold8842 | 428                     | TT                              | CC              | 1947067983               |
| SNP_P4_193193_440  | NW_004521485.1 | Scaffold8842 | 440                     | CC                              | TT              | 1947067985               |
| SNP_P4_193194_509  | NW_004521485.1 | Scaffold8842 | 509                     | GG                              | AA              | 1947067987               |

| SNPs IDs           | Chromosome IDs | Chromosomes  | Physical positions (bp) | CDC Frontier (Reference genome) | (ILWC46 & LPNB) | NCBI SNPdb Accession IDs |
|--------------------|----------------|--------------|-------------------------|---------------------------------|-----------------|--------------------------|
| SNP_P4_193195_584  | NW_004521485.1 | Scaffold8842 | 584                     | AA                              | CC              | 1947067989               |
| SNP_P4_193196_602  | NW_004521485.1 | Scaffold8842 | 602                     | CC                              | AA              | 1947067991               |
| SNP_P4_193197_888  | NW_004521485.1 | Scaffold8842 | 888                     | TT                              | CC              | 1947067993               |
| SNP_P4_193198_948  | NW_004521485.1 | Scaffold8842 | 948                     | CC                              | TT              | 1947067995               |
| SNP_P4_193199_1268 | NW_004521486.1 | Scaffold8844 | 1268                    | TT                              | CC              | 1947067997               |
| SNP_P4_193200_1271 | NW_004521486.1 | Scaffold8844 | 1271                    | TT                              | AA              | 1947067999               |
| SNP_P4_193201_1360 | NW_004521486.1 | Scaffold8844 | 1360                    | CC                              | TT              | 1947068001               |
| SNP_P4_193202_1362 | NW_004521486.1 | Scaffold8844 | 1362                    | GG                              | TT              | 1947068003               |
| SNP_P4_193203_1363 | NW_004521486.1 | Scaffold8844 | 1363                    | GG                              | AA              | 1947068010               |
| SNP_P4_193204_1389 | NW_004521486.1 | Scaffold8844 | 1389                    | AA                              | GG              | 1947068012               |
| SNP_P4_193205_1397 | NW_004521486.1 | Scaffold8844 | 1397                    | TT                              | CC              | 1947068014               |
| SNP_P4_193206_1991 | NW_004521487.1 | Scaffold8845 | 1991                    | CC                              | TT              | 1947068016               |
| SNP_P4_193207_1996 | NW_004521487.1 | Scaffold8845 | 1996                    | GG                              | CC              | 1947068018               |
| SNP_P4_193208_2037 | NW_004521487.1 | Scaffold8845 | 2037                    | TT                              | CC              | 1947068020               |
| SNP_P4_193209_2554 | NW_004521487.1 | Scaffold8845 | 2554                    | AA                              | GG              | 1947068022               |
| SNP_P4_193210_3129 | NW_004521487.1 | Scaffold8845 | 3129                    | AA                              | GG              | 1947068024               |
| SNP_P4_193211_3130 | NW_004521487.1 | Scaffold8845 | 3130                    | CC                              | AA              | 1947068026               |
| SNP_P4_193212_3202 | NW_004521487.1 | Scaffold8845 | 3202                    | AA                              | GG              | 1947068028               |
| SNP_P4_193213_3237 | NW_004521487.1 | Scaffold8845 | 3237                    | TT                              | CC              | 1947068030               |
| SNP_P4_193214_3238 | NW_004521487.1 | Scaffold8845 | 3238                    | AA                              | TT              | 1947068032               |
| SNP_P4_193215_1444 | NW_004521489.1 | Scaffold8848 | 1444                    | GG                              | TT              | 1947068034               |
| SNP_P4_193216_1494 | NW_004521489.1 | Scaffold8848 | 1494                    | GG                              | CC              | 1947068036               |
| SNP_P4_193217_1593 | NW_004521489.1 | Scaffold8848 | 1593                    | AA                              | TT              | 1947068038               |
| SNP_P4_193218_1631 | NW_004521489.1 | Scaffold8848 | 1631                    | CC                              | AA              | 1947068040               |
| SNP_P4_193219_1691 | NW_004521489.1 | Scaffold8848 | 1691                    | CC                              | TT              | 1947068042               |
| SNP_P4_193220_555  | NW_004521492.1 | Scaffold8852 | 555                     | GG                              | AA              | 1947068044               |
| SNP_P4_193221_731  | NW_004521492.1 | Scaffold8852 | 731                     | AA                              | GG              | 1947068046               |
| SNP_P4_193222_799  | NW_004521492.1 | Scaffold8852 | 799                     | TT                              | AA              | 1947068048               |
| SNP_P4_193223_896  | NW_004521492.1 | Scaffold8852 | 896                     | AA                              | GG              | 1947068050               |
| SNP_P4_193224_1044 | NW_004521492.1 | Scaffold8852 | 1044                    | GG                              | AA              | 1947068052               |
| SNP_P4_193225_1114 | NW_004521492.1 | Scaffold8852 | 1114                    | TT                              | AA              | 1947068054               |
| SNP_P4_193226_1200 | NW_004521492.1 | Scaffold8852 | 1200                    | TT                              | CC              | 1947068056               |
| SNP_P4_193227_1206 | NW_004521492.1 | Scaffold8852 | 1206                    | GG                              | AA              | 1947068058               |
| SNP_P4_193229_368  | NW_004521497.1 | Scaffold8857 | 368                     | CC                              | TT              | 1947068060               |
| SNP_P4_193230_5407 | NW_004521497.1 | Scaffold8857 | 5407                    | TT                              | GG              | 1947068062               |
| SNP_P4_193231_5535 | NW_004521497.1 | Scaffold8857 | 5535                    | AA                              | CC              | 1947068064               |
| SNP_P4_193232_5559 | NW_004521497.1 | Scaffold8857 | 5559                    | GG                              | AA              | 1947068066               |
| SNP_P4_193233_5617 | NW_004521497.1 | Scaffold8857 | 5617                    | GG                              | AA              | 1947068068               |
| SNP_P4_193234_5889 | NW_004521497.1 | Scaffold8857 | 5889                    | AA                              | TT              | 1947068070               |
| SNP_P4_193235_5937 | NW_004521497.1 | Scaffold8857 | 5937                    | GG                              | AA              | 1947068072               |
| SNP_P4_193236_769  | NW_004521498.1 | Scaffold8859 | 769                     | GG                              | AA              | 1947068074               |
| SNP_P4_193237_807  | NW_004521501.1 | Scaffold8866 | 807                     | TT                              | CC              | 1947068076               |

| SNPs IDs            | Chromosome IDs | Chromosomes  | Physical positions (bp) | CDC Frontier (Reference genome) | (ILWC46 & LPNB) | NCBI SNPdb Accession IDs |
|---------------------|----------------|--------------|-------------------------|---------------------------------|-----------------|--------------------------|
| SNP_P4_193238_845   | NW_004521501.1 | Scaffold8866 | 845                     | TT                              | CC              | 1947068078               |
| SNP_P4_193239_895   | NW_004521501.1 | Scaffold8866 | 895                     | AA                              | TT              | 1947068080               |
| SNP_P4_193240_2112  | NW_004521501.1 | Scaffold8866 | 2112                    | CC                              | TT              | 1947068082               |
| SNP_P4_193241_2942  | NW_004521501.1 | Scaffold8866 | 2942                    | CC                              | AA              | 1947068084               |
| SNP_P4_193242_2945  | NW_004521501.1 | Scaffold8866 | 2945                    | AA                              | TT              | 1947068086               |
| SNP_P4_193243_226   | NW_004521502.1 | Scaffold8867 | 226                     | CC                              | TT              | 1947068088               |
| SNP_P4_193244_242   | NW_004521502.1 | Scaffold8867 | 242                     | CC                              | TT              | 1947068090               |
| SNP_P4_193245_262   | NW_004521502.1 | Scaffold8867 | 262                     | TT                              | CC              | 1947068092               |
| SNP_P4_193246_64    | NW_004521505.1 | Scaffold8875 | 64                      | AA                              | TT              | 1947068094               |
| SNP_P4_193247_139   | NW_004521505.1 | Scaffold8875 | 139                     | AA                              | CC              | 1947068096               |
| SNP_P4_193248_101   | NW_004521506.1 | Scaffold8876 | 101                     | AA                              | GG              | 1947068098               |
| SNP_P4_193249_187   | NW_004521506.1 | Scaffold8876 | 187                     | TT                              | GG              | 1947068100               |
| SNP_P4_193250_222   | NW_004521506.1 | Scaffold8876 | 222                     | TT                              | AA              | 1947068103               |
| SNP_P4_193251_398   | NW_004521506.1 | Scaffold8876 | 398                     | CC                              | AA              | 1947068105               |
| SNP_P4_193252_486   | NW_004521506.1 | Scaffold8876 | 486                     | TT                              | GG              | 1947068107               |
| SNP_P4_193253_538   | NW_004521506.1 | Scaffold8876 | 538                     | TT                              | GG              | 1947068109               |
| SNP_P4_193254_558   | NW_004521506.1 | Scaffold8876 | 558                     | AA                              | TT              | 1947068111               |
| SNP_P4_193255_643   | NW_004521506.1 | Scaffold8876 | 643                     | CC                              | TT              | 1947068113               |
| SNP_P4_193256_644   | NW_004521506.1 | Scaffold8876 | 644                     | CC                              | TT              | 1947068115               |
| SNP_P4_193257_885   | NW_004521506.1 | Scaffold8876 | 885                     | CC                              | TT              | 1947068117               |
| SNP_P4_193258_195   | NW_004521507.1 | Scaffold8877 | 195                     | TT                              | GG              | 1947068119               |
| SNP_P4_193259_229   | NW_004521507.1 | Scaffold8877 | 229                     | TT                              | CC              | 1947068121               |
| SNP_P4_193261_501   | NW_004521507.1 | Scaffold8877 | 501                     | CC                              | AA              | 1947068123               |
| SNP_P4_193262_520   | NW_004521507.1 | Scaffold8877 | 520                     | GG                              | AA              | 1947068125               |
| SNP_P4_193263_543   | NW_004521507.1 | Scaffold8877 | 543                     | AA                              | GG              | 1947068127               |
| SNP_P4_193264_754   | NW_004521507.1 | Scaffold8877 | 754                     | TT                              | AA              | 1947068129               |
| SNP_P4_193265_761   | NW_004521507.1 | Scaffold8877 | 761                     | GG                              | AA              | 1947068131               |
| SNP_P4_193266_853   | NW_004521507.1 | Scaffold8877 | 853                     | TT                              | CC              | 1947068133               |
| SNP_P4_193267_19865 | NW_004521507.1 | Scaffold8877 | 19865                   | AA                              | TT              | 1947068135               |
| SNP_P4_193268_19882 | NW_004521507.1 | Scaffold8877 | 19882                   | AA                              | GG              | 1947068137               |
| SNP_P4_193269_19956 | NW_004521507.1 | Scaffold8877 | 19956                   | CC                              | AA              | 1947068139               |
| SNP_P4_193270_20028 | NW_004521507.1 | Scaffold8877 | 20028                   | TT                              | GG              | 1947068141               |
| SNP_P4_193271_20349 | NW_004521507.1 | Scaffold8877 | 20349                   | TT                              | GG              | 1947068143               |
| SNP_P4_193272_20602 | NW_004521507.1 | Scaffold8877 | 20602                   | TT                              | AA              | 1947068145               |
| SNP_P4_193273_20603 | NW_004521507.1 | Scaffold8877 | 20603                   | AA                              | TT              | 1947068147               |
| SNP_P4_193274_20652 | NW_004521507.1 | Scaffold8877 | 20652                   | CC                              | AA              | 1947068149               |
| SNP_P4_193275_20752 | NW_004521507.1 | Scaffold8877 | 20752                   | GG                              | TT              | 1947068151               |
| SNP_P4_193277_20795 | NW_004521507.1 | Scaffold8877 | 20795                   | AA                              | GG              | 1947068153               |
| SNP_P4_193278_420   | NW_004521509.1 | Scaffold8881 | 420                     | CC                              | AA              | 1947068155               |
| SNP_P4_193279_461   | NW_004521509.1 | Scaffold8881 | 461                     | TT                              | CC              | 1947068157               |
| SNP_P4_193280_470   | NW_004521509.1 | Scaffold8881 | 470                     | AA                              | CC              | 1947068158               |
| SNP_P4_193282_492   | NW_004521509.1 | Scaffold8881 | 492                     | GG                              | TT              | 1947068159               |

| SNPs IDs           | Chromosome IDs | Chromosomes  | Physical positions (bp) | CDC Frontier (Reference genome) | (ILWC46 & LPNB) | NCBI SNPdb Accession IDs |
|--------------------|----------------|--------------|-------------------------|---------------------------------|-----------------|--------------------------|
| SNP_P4_193283_528  | NW_004521509.1 | Scaffold8881 | 528                     | CC                              | TT              | 1947068160               |
| SNP_P4_193284_723  | NW_004521514.1 | Scaffold8892 | 723                     | CC                              | AA              | 1947068161               |
| SNP_P4_193285_962  | NW_004521514.1 | Scaffold8892 | 962                     | AA                              | TT              | 1947068163               |
| SNP_P4_193286_743  | NW_004521517.1 | Scaffold8897 | 743                     | AA                              | GG              | 1947068165               |
| SNP_P4_193287_785  | NW_004521517.1 | Scaffold8897 | 785                     | TT                              | CC              | 1947068167               |
| SNP_P4_193288_872  | NW_004521517.1 | Scaffold8897 | 872                     | TT                              | CC              | 1947068169               |
| SNP_P4_193289_874  | NW_004521517.1 | Scaffold8897 | 874                     | CC                              | TT              | 1947068171               |
| SNP_P4_193290_932  | NW_004521517.1 | Scaffold8897 | 932                     | GG                              | AA              | 1947068173               |
| SNP_P4_193291_1095 | NW_004521517.1 | Scaffold8897 | 1095                    | AA                              | GG              | 1947068175               |
| SNP_P4_193292_1133 | NW_004521517.1 | Scaffold8897 | 1133                    | CC                              | TT              | 1947068177               |
| SNP_P4_193293_1167 | NW_004521517.1 | Scaffold8897 | 1167                    | TT                              | CC              | 1947068179               |
| SNP_P4_193294_1184 | NW_004521517.1 | Scaffold8897 | 1184                    | TT                              | GG              | 1947068181               |
| SNP_P4_193295_1196 | NW_004521517.1 | Scaffold8897 | 1196                    | TT                              | GG              | 1947068183               |
| SNP_P4_193296_1134 | NW_004521520.1 | Scaffold8903 | 1134                    | GG                              | CC              | 1947068185               |
| SNP_P4_193297_1186 | NW_004521520.1 | Scaffold8903 | 1186                    | GG                              | AA              | 1947068187               |
| SNP_P4_193298_534  | NW_004521521.1 | Scaffold8907 | 534                     | AA                              | TT              | 1947068189               |
| SNP_P4_193299_886  | NW_004521521.1 | Scaffold8907 | 886                     | GG                              | AA              | 1947068191               |
| SNP_P4_193300_1269 | NW_004521522.1 | Scaffold8913 | 1269                    | CC                              | TT              | 1947068193               |
| SNP_P4_193301_1273 | NW_004521522.1 | Scaffold8913 | 1273                    | CC                              | GG              | 1947068195               |
| SNP_P4_193302_1281 | NW_004521522.1 | Scaffold8913 | 1281                    | CC                              | TT              | 1947068197               |
| SNP_P4_193303_1297 | NW_004521522.1 | Scaffold8913 | 1297                    | GG                              | AA              | 1947068199               |
| SNP_P4_193304_1753 | NW_004521522.1 | Scaffold8913 | 1753                    | GG                              | AA              | 1947068201               |
| SNP_P4_193305_1779 | NW_004521522.1 | Scaffold8913 | 1779                    | GG                              | AA              | 1947068203               |
| SNP_P4_193306_1835 | NW_004521522.1 | Scaffold8913 | 1835                    | CC                              | TT              | 1947068205               |
| SNP_P4_193307_1880 | NW_004521522.1 | Scaffold8913 | 1880                    | TT                              | CC              | 1947068207               |
| SNP_P4_193308_1901 | NW_004521522.1 | Scaffold8913 | 1901                    | CC                              | GG              | 1947068209               |
| SNP_P4_193309_1902 | NW_004521522.1 | Scaffold8913 | 1902                    | GG                              | CC              | 1947068211               |
| SNP_P4_193310_1909 | NW_004521522.1 | Scaffold8913 | 1909                    | GG                              | CC              | 1947068213               |
| SNP_P4_193311_1925 | NW_004521522.1 | Scaffold8913 | 1925                    | GG                              | TT              | 1947068215               |
| SNP_P4_193312_2079 | NW_004521522.1 | Scaffold8913 | 2079                    | CC                              | AA              | 1947068217               |
| SNP_P4_193313_2109 | NW_004521522.1 | Scaffold8913 | 2109                    | AA                              | GG              | 1947068219               |
| SNP_P4_193314_2147 | NW_004521522.1 | Scaffold8913 | 2147                    | AA                              | TT              | 1947068221               |
| SNP_P4_193315_2152 | NW_004521522.1 | Scaffold8913 | 2152                    | TT                              | GG              | 1947068223               |
| SNP_P4_193316_2285 | NW_004521522.1 | Scaffold8913 | 2285                    | AA                              | TT              | 1947068225               |
| SNP_P4_193317_2558 | NW_004521522.1 | Scaffold8913 | 2558                    | AA                              | TT              | 1947068227               |
| SNP_P4_193318_2638 | NW_004521522.1 | Scaffold8913 | 2638                    | AA                              | TT              | 1947068229               |
| SNP_P4_193319_1733 | NW_004521527.1 | Scaffold8926 | 1733                    | CC                              | TT              | 1947068231               |
| SNP_P4_193320_1744 | NW_004521527.1 | Scaffold8926 | 1744                    | GG                              | AA              | 1947068233               |
| SNP_P4_193321_1749 | NW_004521527.1 | Scaffold8926 | 1749                    | GG                              | AA              | 1947068235               |
| SNP_P4_193322_1767 | NW_004521527.1 | Scaffold8926 | 1767                    | TT                              | CC              | 1947068237               |
| SNP_P4_193323_402  | NW_004521528.1 | Scaffold8930 | 402                     | AA                              | TT              | 1947068240               |
| SNP_P4_193325_752  | NW_004521528.1 | Scaffold8930 | 752                     | GG                              | TT              | 1947068242               |



| SNPs IDs           | Chromosome IDs | Chromosomes  | Physical positions (bp) | CDC Frontier (Reference genome) | (ILWC46 & LPNB) | NCBI SNPdb Accession IDs |
|--------------------|----------------|--------------|-------------------------|---------------------------------|-----------------|--------------------------|
| SNP_P4_193326_796  | NW_004521533.1 | Scaffold8943 | 796                     | CC                              | TT              | 1947068244               |
| SNP_P4_193327_830  | NW_004521533.1 | Scaffold8943 | 830                     | AA                              | CC              | 1947068246               |
| SNP_P4_193328_960  | NW_004521533.1 | Scaffold8943 | 960                     | CC                              | TT              | 1947068248               |
| SNP_P4_193329_996  | NW_004521533.1 | Scaffold8943 | 996                     | CC                              | AA              | 1947068250               |
| SNP_P4_193330_64   | NW_004521539.1 | Scaffold8960 | 64                      | CC                              | TT              | 1947068252               |
| SNP_P4_193331_99   | NW_004521539.1 | Scaffold8960 | 99                      | AA                              | GG              | 1947068254               |
| SNP_P4_193332_104  | NW_004521539.1 | Scaffold8960 | 104                     | AA                              | GG              | 1947068256               |
| SNP_P4_193333_535  | NW_004521539.1 | Scaffold8960 | 535                     | TT                              | CC              | 1947068258               |
| SNP_P4_193334_647  | NW_004521539.1 | Scaffold8960 | 647                     | GG                              | AA              | 1947068260               |
| SNP_P4_193335_708  | NW_004521539.1 | Scaffold8960 | 708                     | GG                              | AA              | 1947068262               |
| SNP_P4_193336_523  | NW_004521541.1 | Scaffold8962 | 523                     | AA                              | GG              | 1947068264               |
| SNP_P4_193337_1656 | NW_004521542.1 | Scaffold8964 | 1656                    | CC                              | AA              | 1947068266               |
| SNP_P4_193338_1966 | NW_004521542.1 | Scaffold8964 | 1966                    | CC                              | TT              | 1947068268               |
| SNP_P4_193339_856  | NW_004521544.1 | Scaffold8967 | 856                     | AA                              | GG              | 1947068270               |
| SNP_P4_193340_939  | NW_004521544.1 | Scaffold8967 | 939                     | GG                              | TT              | 1947068272               |
| SNP_P4_193341_732  | NW_004521545.1 | Scaffold8968 | 732                     | TT                              | AA              | 1947068274               |
| SNP_P4_193342_753  | NW_004521545.1 | Scaffold8968 | 753                     | AA                              | GG              | 1947068276               |
| SNP_P4_193343_1377 | NW_004521545.1 | Scaffold8968 | 1377                    | AA                              | TT              | 1947068278               |
| SNP_P4_193344_1083 | NW_004521552.1 | Scaffold8987 | 1083                    | CC                              | TT              | 1947068280               |
| SNP_P4_193345_1414 | NW_004521552.1 | Scaffold8987 | 1414                    | TT                              | CC              | 1947068282               |
| SNP_P4_193346_6168 | NW_004521553.1 | Scaffold8989 | 6168                    | TT                              | CC              | 1947068284               |
| SNP_P4_193347_475  | NW_004521554.1 | Scaffold8990 | 475                     | TT                              | CC              | 1947068286               |
| SNP_P4_193348_479  | NW_004521554.1 | Scaffold8990 | 479                     | AA                              | TT              | 1947068288               |
| SNP_P4_193349_518  | NW_004521554.1 | Scaffold8990 | 518                     | AA                              | TT              | 1947068290               |
| SNP_P4_193350_661  | NW_004521554.1 | Scaffold8990 | 661                     | GG                              | AA              | 1947068292               |
| SNP_P4_193351_998  | NW_004521554.1 | Scaffold8990 | 998                     | GG                              | CC              | 1947068294               |
| SNP_P4_193352_1132 | NW_004521554.1 | Scaffold8990 | 1132                    | GG                              | TT              | 1947068296               |
| SNP_P4_193353_1254 | NW_004521554.1 | Scaffold8990 | 1254                    | CC                              | TT              | 1947068298               |
| SNP_P4_193354_1393 | NW_004521554.1 | Scaffold8990 | 1393                    | TT                              | CC              | 1947068300               |
| SNP_P4_193355_5884 | NW_004521554.1 | Scaffold8990 | 5884                    | TT                              | AA              | 1947068302               |
| SNP_P4_193356_6246 | NW_004521554.1 | Scaffold8990 | 6246                    | TT                              | CC              | 1947068304               |
| SNP_P4_193357_852  | NW_004521558.1 | Scaffold8999 | 852                     | AA                              | TT              | 1947068306               |
| SNP_P4_193358_856  | NW_004521558.1 | Scaffold8999 | 856                     | AA                              | TT              | 1947068308               |
| SNP_P4_193359_1360 | NW_004521558.1 | Scaffold8999 | 1360                    | CC                              | TT              | 1947068310               |
| SNP_P4_193360_1366 | NW_004521558.1 | Scaffold8999 | 1366                    | CC                              | GG              | 1947068312               |
| SNP_P4_193361_1422 | NW_004521558.1 | Scaffold8999 | 1422                    | AA                              | CC              | 1947068314               |
| SNP_P4_193363_622  | NW_004521559.1 | Scaffold9000 | 622                     | AA                              | TT              | 1947068316               |
| SNP_P4_193364_3003 | NW_004521559.1 | Scaffold9000 | 3003                    | AA                              | GG              | 1947068318               |
| SNP_P4_193365_3290 | NW_004521559.1 | Scaffold9000 | 3290                    | AA                              | CC              | 1947068320               |
| SNP_P4_193366_425  | NW_004521560.1 | Scaffold9003 | 425                     | CC                              | TT              | 1947068322               |
| SNP_P4_193367_1232 | NW_004521562.1 | Scaffold9006 | 1232                    | GG                              | AA              | 1947068324               |
| SNP_P4_193368_1247 | NW_004521562.1 | Scaffold9006 | 1247                    | AA                              | TT              | 1947068326               |

| SNPs IDs           | Chromosome IDs | Chromosomes  | Physical positions (bp) | CDC Frontier (Reference genome) | (ILWC46 & LPNB) | NCBI SNPdb Accession IDs |
|--------------------|----------------|--------------|-------------------------|---------------------------------|-----------------|--------------------------|
| SNP_P4_193369_496  | NW_004521563.1 | Scaffold9013 | 496                     | CC                              | AA              | 1947068328               |
| SNP_P4_193370_494  | NW_004521566.1 | Scaffold9020 | 494                     | GG                              | AA              | 1947068330               |
| SNP_P4_193371_997  | NW_004521566.1 | Scaffold9020 | 997                     | CC                              | AA              | 1947068332               |
| SNP_P4_193372_1004 | NW_004521566.1 | Scaffold9020 | 1004                    | TT                              | AA              | 1947068334               |
| SNP_P4_193373_1074 | NW_004521566.1 | Scaffold9020 | 1074                    | GG                              | AA              | 1947068336               |
| SNP_P4_193374_1092 | NW_004521566.1 | Scaffold9020 | 1092                    | TT                              | CC              | 1947068338               |
| SNP_P4_193375_1465 | NW_004521566.1 | Scaffold9020 | 1465                    | TT                              | CC              | 1947068340               |
| SNP_P4_193377_94   | NW_004521568.1 | Scaffold9023 | 94                      | GG                              | TT              | 1947068342               |
| SNP_P4_193378_116  | NW_004521568.1 | Scaffold9023 | 116                     | AA                              | GG              | 1947068344               |
| SNP_P4_193379_153  | NW_004521568.1 | Scaffold9023 | 153                     | CC                              | AA              | 1947068346               |
| SNP_P4_193380_166  | NW_004521568.1 | Scaffold9023 | 166                     | AA                              | GG              | 1947068348               |
| SNP_P4_193381_229  | NW_004521568.1 | Scaffold9023 | 229                     | TT                              | GG              | 1947068351               |
| SNP_P4_193382_252  | NW_004521568.1 | Scaffold9023 | 252                     | CC                              | TT              | 1947068353               |
| SNP_P4_193383_323  | NW_004521568.1 | Scaffold9023 | 323                     | GG                              | TT              | 1947068355               |
| SNP_P4_193384_515  | NW_004521568.1 | Scaffold9023 | 515                     | GG                              | AA              | 1947068357               |
| SNP_P4_193385_537  | NW_004521568.1 | Scaffold9023 | 537                     | TT                              | CC              | 1947068359               |
| SNP_P4_193386_662  | NW_004521568.1 | Scaffold9023 | 662                     | CC                              | TT              | 1947068361               |
| SNP_P4_193387_675  | NW_004521568.1 | Scaffold9023 | 675                     | CC                              | TT              | 1947068363               |
| SNP_P4_193388_734  | NW_004521568.1 | Scaffold9023 | 734                     | AA                              | CC              | 1947068365               |
| SNP_P4_193389_864  | NW_004521568.1 | Scaffold9023 | 864                     | AA                              | GG              | 1947068367               |
| SNP_P4_193390_909  | NW_004521568.1 | Scaffold9023 | 909                     | AA                              | GG              | 1947068369               |
| SNP_P4_193391_972  | NW_004521568.1 | Scaffold9023 | 972                     | GG                              | AA              | 1947068371               |
| SNP_P4_193392_1005 | NW_004521568.1 | Scaffold9023 | 1005                    | CC                              | TT              | 1947068373               |
| SNP_P4_193393_1006 | NW_004521568.1 | Scaffold9023 | 1006                    | AA                              | GG              | 1947068375               |
| SNP_P4_193394_1062 | NW_004521568.1 | Scaffold9023 | 1062                    | GG                              | AA              | 1947068377               |
| SNP_P4_193395_1506 | NW_004521569.1 | Scaffold9024 | 1506                    | CC                              | AA              | 1947068379               |
| SNP_P4_193396_1666 | NW_004521569.1 | Scaffold9024 | 1666                    | AA                              | GG              | 1947068381               |
| SNP_P4_193398_119  | NW_004521571.1 | Scaffold9026 | 119                     | AA                              | CC              | 1947068383               |
| SNP_P4_193399_1241 | NW_004521571.1 | Scaffold9026 | 1241                    | AA                              | TT              | 1947068385               |
| SNP_P4_193400_99   | NW_004521572.1 | Scaffold9028 | 99                      | AA                              | GG              | 1947068387               |
| SNP_P4_193401_274  | NW_004521572.1 | Scaffold9028 | 274                     | CC                              | AA              | 1947068389               |
| SNP_P4_193402_423  | NW_004521572.1 | Scaffold9028 | 423                     | AA                              | CC              | 1947068391               |
| SNP_P4_193403_440  | NW_004521572.1 | Scaffold9028 | 440                     | AA                              | GG              | 1947068393               |
| SNP_P4_193404_556  | NW_004521572.1 | Scaffold9028 | 556                     | CC                              | GG              | 1947068395               |
| SNP_P4_193405_569  | NW_004521572.1 | Scaffold9028 | 569                     | AA                              | GG              | 1947068397               |
| SNP_P4_193406_581  | NW_004521572.1 | Scaffold9028 | 581                     | CC                              | GG              | 1947068399               |
| SNP_P4_193407_615  | NW_004521572.1 | Scaffold9028 | 615                     | CC                              | AA              | 1947068401               |
| SNP_P4_193408_627  | NW_004521572.1 | Scaffold9028 | 627                     | CC                              | TT              | 1947068403               |
| SNP_P4_193409_664  | NW_004521572.1 | Scaffold9028 | 664                     | TT                              | GG              | 1947068405               |
| SNP_P4_193410_715  | NW_004521572.1 | Scaffold9028 | 715                     | GG                              | CC              | 1947068407               |
| SNP_P4_193411_98   | NW_004521573.1 | Scaffold9030 | 98                      | TT                              | CC              | 1947068409               |
| SNP_P4_193412_190  | NW_004521575.1 | Scaffold9037 | 190                     | AA                              | GG              | 1947068411               |

| SNPs IDs           | Chromosome IDs | Chromosomes  | Physical positions (bp) | CDC Frontier (Reference genome) | (ILWC46 & LPNB) | NCBI SNPdb Accession IDs |
|--------------------|----------------|--------------|-------------------------|---------------------------------|-----------------|--------------------------|
| SNP_P4_193413_528  | NW_004521575.1 | Scaffold9037 | 528                     | GG                              | TT              | 1947068413               |
| SNP_P4_193414_35   | NW_004521576.1 | Scaffold9043 | 35                      | AA                              | CC              | 1947068415               |
| SNP_P4_193415_97   | NW_004521576.1 | Scaffold9043 | 97                      | AA                              | GG              | 1947068417               |
| SNP_P4_193416_392  | NW_004521576.1 | Scaffold9043 | 392                     | CC                              | GG              | 1947068419               |
| SNP_P4_193417_787  | NW_004521576.1 | Scaffold9043 | 787                     | TT                              | CC              | 1947068421               |
| SNP_P4_193418_3343 | NW_004521578.1 | Scaffold9048 | 3343                    | AA                              | GG              | 1947068423               |
| SNP_P4_193419_3382 | NW_004521578.1 | Scaffold9048 | 3382                    | AA                              | GG              | 1947068425               |
| SNP_P4_193420_486  | NW_004521581.1 | Scaffold9059 | 486                     | TT                              | CC              | 1947068427               |
| SNP_P4_193422_694  | NW_004521581.1 | Scaffold9059 | 694                     | AA                              | CC              | 1947068429               |
| SNP_P4_193423_808  | NW_004521581.1 | Scaffold9059 | 808                     | AA                              | GG              | 1947068431               |
| SNP_P4_193424_942  | NW_004521581.1 | Scaffold9059 | 942                     | AA                              | GG              | 1947068433               |
| SNP_P4_193425_1263 | NW_004521581.1 | Scaffold9059 | 1263                    | TT                              | AA              | 1947068435               |
| SNP_P4_193426_1264 | NW_004521581.1 | Scaffold9059 | 1264                    | AA                              | TT              | 1947068437               |
| SNP_P4_193427_1265 | NW_004521581.1 | Scaffold9059 | 1265                    | GG                              | AA              | 1947068439               |
| SNP_P4_193428_97   | NW_004521584.1 | Scaffold9070 | 97                      | AA                              | GG              | 1947068441               |
| SNP_P4_193429_680  | NW_004521584.1 | Scaffold9070 | 680                     | CC                              | TT              | 1947068443               |
| SNP_P4_193430_1156 | NW_004521584.1 | Scaffold9070 | 1156                    | TT                              | AA              | 1947068445               |
| SNP_P4_193432_591  | NW_004521585.1 | Scaffold9074 | 591                     | CC                              | TT              | 1947068447               |
| SNP_P4_193434_1047 | NW_004521585.1 | Scaffold9074 | 1047                    | CC                              | GG              | 1947068449               |
| SNP_P4_193436_596  | NW_004521588.1 | Scaffold9079 | 596                     | GG                              | TT              | 1947068451               |
| SNP_P4_193437_640  | NW_004521588.1 | Scaffold9079 | 640                     | GG                              | AA              | 1947068453               |
| SNP_P4_193438_982  | NW_004521588.1 | Scaffold9079 | 982                     | CC                              | AA              | 1947068455               |
| SNP_P4_193439_5005 | NW_004521593.1 | Scaffold9086 | 5005                    | TT                              | CC              | 1947068457               |
| SNP_P4_193440_5015 | NW_004521593.1 | Scaffold9086 | 5015                    | AA                              | CC              | 1947068459               |
| SNP_P4_193441_5353 | NW_004521593.1 | Scaffold9086 | 5353                    | AA                              | GG              | 1947068461               |
| SNP_P4_193442_5435 | NW_004521593.1 | Scaffold9086 | 5435                    | TT                              | GG              | 1947068463               |
| SNP_P4_193443_5503 | NW_004521593.1 | Scaffold9086 | 5503                    | GG                              | AA              | 1947068465               |
| SNP_P4_193444_5633 | NW_004521593.1 | Scaffold9086 | 5633                    | GG                              | AA              | 1947068467               |
| SNP_P4_193445_1486 | NW_004521595.1 | Scaffold9095 | 1486                    | TT                              | CC              | 1947068469               |
| SNP_P4_193446_1497 | NW_004521595.1 | Scaffold9095 | 1497                    | AA                              | TT              | 1947068471               |
| SNP_P4_193447_1230 | NW_004521598.1 | Scaffold9106 | 1230                    | CC                              | TT              | 1947068473               |
| SNP_P4_193448_1232 | NW_004521598.1 | Scaffold9106 | 1232                    | GG                              | AA              | 1947068475               |
| SNP_P4_193449_1276 | NW_004521598.1 | Scaffold9106 | 1276                    | AA                              | TT              | 1947068477               |
| SNP_P4_193450_542  | NW_004521601.1 | Scaffold9112 | 542                     | TT                              | GG              | 1947068479               |
| SNP_P4_193451_445  | NW_004521603.1 | Scaffold9118 | 445                     | GG                              | AA              | 1947068481               |
| SNP_P4_193452_660  | NW_004521603.1 | Scaffold9118 | 660                     | AA                              | TT              | 1947068483               |
| SNP_P4_193453_666  | NW_004521603.1 | Scaffold9118 | 666                     | CC                              | TT              | 1947068485               |
| SNP_P4_193454_1134 | NW_004521604.1 | Scaffold9122 | 1134                    | GG                              | AA              | 1947068487               |
| SNP_P4_193455_1439 | NW_004521604.1 | Scaffold9122 | 1439                    | TT                              | CC              | 1947068489               |
| SNP_P4_193456_1542 | NW_004521604.1 | Scaffold9122 | 1542                    | AA                              | GG              | 1947068491               |
| SNP_P4_193457_1566 | NW_004521604.1 | Scaffold9122 | 1566                    | GG                              | AA              | 1947068493               |
| SNP_P4_193458_2014 | NW_004521604.1 | Scaffold9122 | 2014                    | CC                              | AA              | 1947068495               |

| SNPs IDs           | Chromosome IDs | Chromosomes  | Physical positions (bp) | CDC Frontier (Reference genome) | (ILWC46 & LPNB) | NCBI SNPdb Accession IDs |
|--------------------|----------------|--------------|-------------------------|---------------------------------|-----------------|--------------------------|
| SNP_P4_193459_2162 | NW_004521604.1 | Scaffold9122 | 2162                    | AA                              | GG              | 1947068497               |
| SNP_P4_193460_6017 | NW_004521604.1 | Scaffold9122 | 6017                    | GG                              | AA              | 1947068499               |
| SNP_P4_193461_239  | NW_004521605.1 | Scaffold9125 | 239                     | AA                              | GG              | 1947068501               |
| SNP_P4_193462_260  | NW_004521605.1 | Scaffold9125 | 260                     | TT                              | GG              | 1947068503               |
| SNP_P4_193463_337  | NW_004521605.1 | Scaffold9125 | 337                     | TT                              | CC              | 1947068505               |
| SNP_P4_193464_382  | NW_004521605.1 | Scaffold9125 | 382                     | AA                              | GG              | 1947068507               |
| SNP_P4_193465_654  | NW_004521605.1 | Scaffold9125 | 654                     | CC                              | TT              | 1947068509               |
| SNP_P4_193466_732  | NW_004521605.1 | Scaffold9125 | 732                     | TT                              | CC              | 1947068511               |
| SNP_P4_193467_766  | NW_004521605.1 | Scaffold9125 | 766                     | AA                              | GG              | 1947068513               |
| SNP_P4_193468_1452 | NW_004521605.1 | Scaffold9125 | 1452                    | CC                              | GG              | 1947068515               |
| SNP_P4_193470_4727 | NW_004521605.1 | Scaffold9125 | 4727                    | GG                              | TT              | 1947068517               |
| SNP_P4_193471_1048 | NW_004521609.1 | Scaffold9135 | 1048                    | AA                              | GG              | 1947068519               |
| SNP_P4_193472_1049 | NW_004521609.1 | Scaffold9135 | 1049                    | TT                              | AA              | 1947068521               |
| SNP_P4_193473_1118 | NW_004521609.1 | Scaffold9135 | 1118                    | TT                              | AA              | 1947068523               |
| SNP_P4_193474_908  | NW_004521612.1 | Scaffold9149 | 908                     | AA                              | GG              | 1947068525               |
| SNP_P4_193475_963  | NW_004521612.1 | Scaffold9149 | 963                     | GG                              | CC              | 1947068527               |
| SNP_P4_193476_1015 | NW_004521612.1 | Scaffold9149 | 1015                    | AA                              | TT              | 1947068529               |
| SNP_P4_193477_1155 | NW_004521612.1 | Scaffold9149 | 1155                    | AA                              | GG              | 1947068531               |
| SNP_P4_193478_1257 | NW_004521612.1 | Scaffold9149 | 1257                    | TT                              | AA              | 1947068533               |
| SNP_P4_193479_1261 | NW_004521612.1 | Scaffold9149 | 1261                    | GG                              | AA              | 1947068535               |
| SNP_P4_193480_1293 | NW_004521612.1 | Scaffold9149 | 1293                    | TT                              | CC              | 1947068537               |
| SNP_P4_193482_736  | NW_004521619.1 | Scaffold9168 | 736                     | GG                              | AA              | 1947068539               |
| SNP_P4_193483_1012 | NW_004521620.1 | Scaffold9171 | 1012                    | AA                              | GG              | 1947068541               |
| SNP_P4_193484_1365 | NW_004521620.1 | Scaffold9171 | 1365                    | AA                              | GG              | 1947068543               |
| SNP_P4_193485_382  | NW_004521621.1 | Scaffold9172 | 382                     | TT                              | GG              | 1947068545               |
| SNP_P4_193486_2061 | NW_004521625.1 | Scaffold9185 | 2061                    | TT                              | AA              | 1947068547               |
| SNP_P4_193487_2108 | NW_004521625.1 | Scaffold9185 | 2108                    | CC                              | TT              | 1947068549               |
| SNP_P4_193488_145  | NW_004521630.1 | Scaffold9195 | 145                     | CC                              | GG              | 1947068551               |
| SNP_P4_193489_241  | NW_004521630.1 | Scaffold9195 | 241                     | CC                              | AA              | 1947068553               |
| SNP_P4_193491_674  | NW_004521630.1 | Scaffold9195 | 674                     | GG                              | AA              | 1947068555               |
| SNP_P4_193492_710  | NW_004521630.1 | Scaffold9195 | 710                     | TT                              | AA              | 1947068557               |
| SNP_P4_193493_1072 | NW_004521630.1 | Scaffold9195 | 1072                    | AA                              | TT              | 1947068559               |
| SNP_P4_193494_453  | NW_004521631.1 | Scaffold9197 | 453                     | GG                              | TT              | 1947068561               |
| SNP_P4_193495_458  | NW_004521631.1 | Scaffold9197 | 458                     | AA                              | CC              | 1947068563               |
| SNP_P4_193496_772  | NW_004521633.1 | Scaffold9210 | 772                     | AA                              | GG              | 1947068565               |
| SNP_P4_193497_1230 | NW_004521633.1 | Scaffold9210 | 1230                    | TT                              | AA              | 1947068567               |
| SNP_P4_193498_1231 | NW_004521633.1 | Scaffold9210 | 1231                    | GG                              | AA              | 1947068569               |
| SNP_P4_193499_1232 | NW_004521633.1 | Scaffold9210 | 1232                    | AA                              | GG              | 1947068571               |
| SNP_P4_193500_1288 | NW_004521633.1 | Scaffold9210 | 1288                    | TT                              | GG              | 1947068573               |
| SNP_P4_193503_963  | NW_004521634.1 | Scaffold9211 | 963                     | GG                              | CC              | 1947068575               |
| SNP_P4_193504_355  | NW_004521635.1 | Scaffold9216 | 355                     | AA                              | CC              | 1947068577               |
| SNP_P4_193505_363  | NW_004521635.1 | Scaffold9216 | 363                     | TT                              | CC              | 1947068579               |

| SNPs IDs            | Chromosome IDs | Chromosomes  | Physical positions (bp) | CDC Frontier (Reference genome) | (ILWC46 & LPNB) | NCBI SNPdb Accession IDs |
|---------------------|----------------|--------------|-------------------------|---------------------------------|-----------------|--------------------------|
| SNP_P4_193506_370   | NW_004521635.1 | Scaffold9216 | 370                     | AA                              | CC              | 1947068581               |
| SNP_P4_193507_377   | NW_004521635.1 | Scaffold9216 | 377                     | CC                              | GG              | 1947068583               |
| SNP_P4_193508_379   | NW_004521635.1 | Scaffold9216 | 379                     | TT                              | AA              | 1947068585               |
| SNP_P4_193509_535   | NW_004521635.1 | Scaffold9216 | 535                     | TT                              | CC              | 1947068587               |
| SNP_P4_193510_585   | NW_004521635.1 | Scaffold9216 | 585                     | AA                              | TT              | 1947068589               |
| SNP_P4_193511_1155  | NW_004521635.1 | Scaffold9216 | 1155                    | GG                              | TT              | 1947068591               |
| SNP_P4_193512_1520  | NW_004521635.1 | Scaffold9216 | 1520                    | CC                              | GG              | 1947068593               |
| SNP_P4_193513_367   | NW_004521639.1 | Scaffold9223 | 367                     | AA                              | CC              | 1947068595               |
| SNP_P4_193514_625   | NW_004521644.1 | Scaffold9236 | 625                     | TT                              | AA              | 1947068597               |
| SNP_P4_193515_1073  | NW_004521644.1 | Scaffold9236 | 1073                    | AA                              | CC              | 1947068599               |
| SNP_P4_193516_1110  | NW_004521644.1 | Scaffold9236 | 1110                    | AA                              | GG              | 1947068601               |
| SNP_P4_193518_1681  | NW_004521644.1 | Scaffold9236 | 1681                    | TT                              | CC              | 1947068603               |
| SNP_P4_193519_1810  | NW_004521644.1 | Scaffold9236 | 1810                    | GG                              | CC              | 1947068605               |
| SNP_P4_193520_1812  | NW_004521644.1 | Scaffold9236 | 1812                    | GG                              | CC              | 1947068607               |
| SNP_P4_193521_396   | NW_004521645.1 | Scaffold9240 | 396                     | TT                              | CC              | 1947068609               |
| SNP_P4_193522_777   | NW_004521645.1 | Scaffold9240 | 777                     | GG                              | CC              | 1947068611               |
| SNP_P4_193523_789   | NW_004521645.1 | Scaffold9240 | 789                     | CC                              | TT              | 1947068613               |
| SNP_P4_193524_1774  | NW_004521645.1 | Scaffold9240 | 1774                    | AA                              | CC              | 1947068615               |
| SNP_P4_193525_32    | NW_004521649.1 | Scaffold9247 | 32                      | AA                              | GG              | 1947068617               |
| SNP_P4_193526_64    | NW_004521649.1 | Scaffold9247 | 64                      | GG                              | AA              | 1947068619               |
| SNP_P4_193527_99    | NW_004521649.1 | Scaffold9247 | 99                      | AA                              | GG              | 1947068621               |
| SNP_P4_193528_100   | NW_004521649.1 | Scaffold9247 | 100                     | TT                              | AA              | 1947068623               |
| SNP_P4_193529_399   | NW_004521649.1 | Scaffold9247 | 399                     | AA                              | TT              | 1947068625               |
| SNP_P4_193531_92    | NW_004521652.1 | Scaffold9252 | 92                      | TT                              | GG              | 1947068627               |
| SNP_P4_193532_324   | NW_004521652.1 | Scaffold9252 | 324                     | AA                              | TT              | 1947068629               |
| SNP_P4_193533_1130  | NW_004521654.1 | Scaffold9257 | 1130                    | TT                              | GG              | 1947068631               |
| SNP_P4_193534_976   | NW_004521655.1 | Scaffold9258 | 976                     | AA                              | GG              | 1947068633               |
| SNP_P4_193535_1152  | NW_004521655.1 | Scaffold9258 | 1152                    | CC                              | AA              | 1947068635               |
| SNP_P4_193536_1189  | NW_004521655.1 | Scaffold9258 | 1189                    | AA                              | TT              | 1947068637               |
| SNP_P4_193537_1220  | NW_004521655.1 | Scaffold9258 | 1220                    | TT                              | CC              | 1947068639               |
| SNP_P4_193538_20015 | NW_004521659.1 | Scaffold9267 | 20015                   | TT                              | CC              | 1947068641               |
| SNP_P4_193539_20017 | NW_004521659.1 | Scaffold9267 | 20017                   | AA                              | CC              | 1947068643               |
| SNP_P4_193540_20040 | NW_004521659.1 | Scaffold9267 | 20040                   | CC                              | GG              | 1947068645               |
| SNP_P4_193541_20044 | NW_004521659.1 | Scaffold9267 | 20044                   | TT                              | CC              | 1947068647               |
| SNP_P4_193542_20045 | NW_004521659.1 | Scaffold9267 | 20045                   | TT                              | AA              | 1947068649               |
| SNP_P4_193543_20497 | NW_004521659.1 | Scaffold9267 | 20497                   | CC                              | TT              | 1947068651               |
| SNP_P4_193544_20508 | NW_004521659.1 | Scaffold9267 | 20508                   | AA                              | CC              | 1947068653               |
| SNP_P4_193545_486   | NW_004521664.1 | Scaffold9279 | 486                     | AA                              | TT              | 1947068655               |
| SNP_P4_193546_833   | NW_004521664.1 | Scaffold9279 | 833                     | AA                              | GG              | 1947068657               |
| SNP_P4_193547_64    | NW_004521666.1 | Scaffold9281 | 64                      | GG                              | TT              | 1947068659               |
| SNP_P4_193548_101   | NW_004521666.1 | Scaffold9281 | 101                     | AA                              | CC              | 1947068661               |
| SNP_P4_193549_129   | NW_004521666.1 | Scaffold9281 | 129                     | CC                              | AA              | 1947068663               |

| SNPs IDs           | Chromosome IDs | Chromosomes  | Physical positions (bp) | CDC Frontier (Reference genome) | (ILWC46 & LPNB) | NCBI SNPdb Accession IDs |
|--------------------|----------------|--------------|-------------------------|---------------------------------|-----------------|--------------------------|
| SNP_P4_193550_149  | NW_004521666.1 | Scaffold9281 | 149                     | GG                              | AA              | 1947068665               |
| SNP_P4_193551_349  | NW_004521666.1 | Scaffold9281 | 349                     | TT                              | CC              | 1947068667               |
| SNP_P4_193552_350  | NW_004521666.1 | Scaffold9281 | 350                     | GG                              | AA              | 1947068669               |
| SNP_P4_193553_359  | NW_004521666.1 | Scaffold9281 | 359                     | AA                              | GG              | 1947068671               |
| SNP_P4_193554_378  | NW_004521666.1 | Scaffold9281 | 378                     | CC                              | TT              | 1947068673               |
| SNP_P4_193555_493  | NW_004521666.1 | Scaffold9281 | 493                     | GG                              | AA              | 1947068675               |
| SNP_P4_193556_555  | NW_004521666.1 | Scaffold9281 | 555                     | TT                              | AA              | 1947068677               |
| SNP_P4_193557_588  | NW_004521666.1 | Scaffold9281 | 588                     | AA                              | GG              | 1947068679               |
| SNP_P4_193558_739  | NW_004521666.1 | Scaffold9281 | 739                     | CC                              | TT              | 1947068681               |
| SNP_P4_193559_772  | NW_004521666.1 | Scaffold9281 | 772                     | AA                              | GG              | 1947068684               |
| SNP_P4_193560_3463 | NW_004521666.1 | Scaffold9281 | 3463                    | CC                              | TT              | 1947068686               |
| SNP_P4_193561_3606 | NW_004521666.1 | Scaffold9281 | 3606                    | TT                              | CC              | 1947068688               |
| SNP_P4_193562_3649 | NW_004521666.1 | Scaffold9281 | 3649                    | CC                              | AA              | 1947068690               |
| SNP_P4_193563_3775 | NW_004521666.1 | Scaffold9281 | 3775                    | GG                              | CC              | 1947068692               |
| SNP_P4_193564_4003 | NW_004521666.1 | Scaffold9281 | 4003                    | AA                              | CC              | 1947068694               |
| SNP_P4_193565_4136 | NW_004521666.1 | Scaffold9281 | 4136                    | TT                              | CC              | 1947068696               |
| SNP_P4_193566_4145 | NW_004521666.1 | Scaffold9281 | 4145                    | TT                              | AA              | 1947068698               |
| SNP_P4_193567_4193 | NW_004521666.1 | Scaffold9281 | 4193                    | GG                              | AA              | 1947068700               |
| SNP_P4_193568_4214 | NW_004521666.1 | Scaffold9281 | 4214                    | AA                              | GG              | 1947068702               |
| SNP_P4_193569_4221 | NW_004521666.1 | Scaffold9281 | 4221                    | GG                              | AA              | 1947068704               |
| SNP_P4_193570_5143 | NW_004521666.1 | Scaffold9281 | 5143                    | CC                              | AA              | 1947068706               |
| SNP_P4_193571_104  | NW_004521668.1 | Scaffold9287 | 104                     | TT                              | GG              | 1947068708               |
| SNP_P4_193572_505  | NW_004521668.1 | Scaffold9287 | 505                     | TT                              | CC              | 1947068710               |
| SNP_P4_193573_1198 | NW_004521671.1 | Scaffold9294 | 1198                    | CC                              | GG              | 1947068712               |
| SNP_P4_193574_1447 | NW_004521671.1 | Scaffold9294 | 1447                    | AA                              | GG              | 1947068714               |
| SNP_P4_193575_1494 | NW_004521671.1 | Scaffold9294 | 1494                    | AA                              | CC              | 1947068716               |
| SNP_P4_193576_64   | NW_004521672.1 | Scaffold9295 | 64                      | GG                              | TT              | 1947068718               |
| SNP_P4_193577_64   | NW_004521673.1 | Scaffold9303 | 64                      | AA                              | CC              | 1947068720               |
| SNP_P4_193578_82   | NW_004521673.1 | Scaffold9303 | 82                      | CC                              | TT              | 1947068722               |
| SNP_P4_193579_137  | NW_004521673.1 | Scaffold9303 | 137                     | TT                              | CC              | 1947068724               |
| SNP_P4_193580_142  | NW_004521673.1 | Scaffold9303 | 142                     | TT                              | CC              | 1947068726               |
| SNP_P4_193581_1063 | NW_004521673.1 | Scaffold9303 | 1063                    | TT                              | CC              | 1947068728               |
| SNP_P4_193583_1210 | NW_004521673.1 | Scaffold9303 | 1210                    | TT                              | GG              | 1947068730               |
| SNP_P4_193584_1228 | NW_004521673.1 | Scaffold9303 | 1228                    | AA                              | TT              | 1947068732               |
| SNP_P4_193585_1230 | NW_004521673.1 | Scaffold9303 | 1230                    | TT                              | AA              | 1947068734               |
| SNP_P4_193586_1494 | NW_004521673.1 | Scaffold9303 | 1494                    | AA                              | TT              | 1947068736               |
| SNP_P4_193588_915  | NW_004521678.1 | Scaffold9314 | 915                     | CC                              | GG              | 1947068738               |
| SNP_P4_193589_979  | NW_004521678.1 | Scaffold9314 | 979                     | AA                              | TT              | 1947068740               |
| SNP_P4_193590_1009 | NW_004521678.1 | Scaffold9314 | 1009                    | CC                              | GG              | 1947068742               |
| SNP_P4_193591_1436 | NW_004521678.1 | Scaffold9314 | 1436                    | GG                              | AA              | 1947068744               |
| SNP_P4_193592_1447 | NW_004521680.1 | Scaffold9321 | 1447                    | GG                              | AA              | 1947068746               |
| SNP_P4_193593_1650 | NW_004521680.1 | Scaffold9321 | 1650                    | TT                              | GG              | 1947068748               |

| SNPs IDs            | Chromosome IDs | Chromosomes  | Physical positions (bp) | CDC Frontier (Reference genome) | (ILWC46 & LPNB) | NCBI SNPdb Accession IDs |
|---------------------|----------------|--------------|-------------------------|---------------------------------|-----------------|--------------------------|
| SNP_P4_193594_1949  | NW_004521680.1 | Scaffold9321 | 1949                    | GG                              | TT              | 1947068750               |
| SNP_P4_193595_1970  | NW_004521680.1 | Scaffold9321 | 1970                    | AA                              | TT              | 1947068752               |
| SNP_P4_193596_874   | NW_004521681.1 | Scaffold9322 | 874                     | AA                              | GG              | 1947068754               |
| SNP_P4_193597_876   | NW_004521682.1 | Scaffold9323 | 876                     | CC                              | AA              | 1947068756               |
| SNP_P4_193598_909   | NW_004521682.1 | Scaffold9323 | 909                     | CC                              | TT              | 1947068758               |
| SNP_P4_193599_4545  | NW_004521682.1 | Scaffold9323 | 4545                    | GG                              | AA              | 1947068760               |
| SNP_P4_193600_4588  | NW_004521682.1 | Scaffold9323 | 4588                    | TT                              | CC              | 1947068762               |
| SNP_P4_193601_5829  | NW_004521682.1 | Scaffold9323 | 5829                    | AA                              | GG              | 1947068764               |
| SNP_P4_193602_343   | NW_004521684.1 | Scaffold9325 | 343                     | TT                              | CC              | 1947068766               |
| SNP_P4_193603_186   | NW_004521685.1 | Scaffold9326 | 186                     | GG                              | AA              | 1947068768               |
| SNP_P4_193604_194   | NW_004521685.1 | Scaffold9326 | 194                     | GG                              | AA              | 1947068770               |
| SNP_P4_193605_199   | NW_004521685.1 | Scaffold9326 | 199                     | CC                              | GG              | 1947068772               |
| SNP_P4_193606_253   | NW_004521685.1 | Scaffold9326 | 253                     | TT                              | AA              | 1947068774               |
| SNP_P4_193607_531   | NW_004521685.1 | Scaffold9326 | 531                     | AA                              | CC              | 1947068776               |
| SNP_P4_193608_601   | NW_004521685.1 | Scaffold9326 | 601                     | AA                              | TT              | 1947068778               |
| SNP_P4_193609_602   | NW_004521685.1 | Scaffold9326 | 602                     | TT                              | CC              | 1947068780               |
| SNP_P4_193610_689   | NW_004521685.1 | Scaffold9326 | 689                     | TT                              | AA              | 1947068782               |
| SNP_P4_193611_753   | NW_004521685.1 | Scaffold9326 | 753                     | AA                              | TT              | 1947068784               |
| SNP_P4_193612_853   | NW_004521685.1 | Scaffold9326 | 853                     | GG                              | AA              | 1947068786               |
| SNP_P4_193613_1082  | NW_004521687.1 | Scaffold9334 | 1082                    | TT                              | AA              | 1947068788               |
| SNP_P4_193614_1779  | NW_004521687.1 | Scaffold9334 | 1779                    | AA                              | TT              | 1947068790               |
| SNP_P4_193615_2049  | NW_004521687.1 | Scaffold9334 | 2049                    | AA                              | TT              | 1947068791               |
| SNP_P4_193616_2087  | NW_004521687.1 | Scaffold9334 | 2087                    | TT                              | AA              | 1947068794               |
| SNP_P4_193617_764   | NW_004521688.1 | Scaffold9344 | 764                     | TT                              | AA              | 1947068796               |
| SNP_P4_193618_229   | NW_004521697.1 | Scaffold9361 | 229                     | GG                              | TT              | 1947068798               |
| SNP_P4_193619_294   | NW_004521697.1 | Scaffold9361 | 294                     | GG                              | AA              | 1947068800               |
| SNP_P4_193620_696   | NW_004521697.1 | Scaffold9361 | 696                     | CC                              | TT              | 1947068802               |
| SNP_P4_193621_20332 | NW_004521699.1 | Scaffold9363 | 20332                   | AA                              | CC              | 1947068804               |
| SNP_P4_193622_845   | NW_004521700.1 | Scaffold9367 | 845                     | AA                              | TT              | 1947068806               |
| SNP_P4_193623_847   | NW_004521700.1 | Scaffold9367 | 847                     | TT                              | GG              | 1947068808               |
| SNP_P4_193624_18    | NW_004521702.1 | Scaffold9371 | 18                      | CC                              | TT              | 1947068810               |
| SNP_P4_193625_64    | NW_004521702.1 | Scaffold9371 | 64                      | CC                              | GG              | 1947068812               |
| SNP_P4_193626_102   | NW_004521702.1 | Scaffold9371 | 102                     | GG                              | AA              | 1947068814               |
| SNP_P4_193627_123   | NW_004521702.1 | Scaffold9371 | 123                     | TT                              | AA              | 1947068816               |
| SNP_P4_193628_124   | NW_004521702.1 | Scaffold9371 | 124                     | GG                              | AA              | 1947068818               |
| SNP_P4_193629_133   | NW_004521702.1 | Scaffold9371 | 133                     | GG                              | TT              | 1947068820               |
| SNP_P4_193632_252   | NW_004521702.1 | Scaffold9371 | 252                     | GG                              | AA              | 1947068822               |
| SNP_P4_193633_296   | NW_004521702.1 | Scaffold9371 | 296                     | GG                              | CC              | 1947068824               |
| SNP_P4_193634_305   | NW_004521702.1 | Scaffold9371 | 305                     | AA                              | TT              | 1947068826               |
| SNP_P4_193635_309   | NW_004521702.1 | Scaffold9371 | 309                     | CC                              | AA              | 1947068828               |
| SNP_P4_193636_331   | NW_004521702.1 | Scaffold9371 | 331                     | TT                              | CC              | 1947068830               |
| SNP_P4_193637_363   | NW_004521702.1 | Scaffold9371 | 363                     | AA                              | GG              | 1947068832               |

| SNPs IDs           | Chromosome IDs | Chromosomes  | Physical positions (bp) | CDC Frontier (Reference genome) | (ILWC46 & LPNB) | NCBI SNPdb Accession IDs |
|--------------------|----------------|--------------|-------------------------|---------------------------------|-----------------|--------------------------|
| SNP_P4_193638_396  | NW_004521702.1 | Scaffold9371 | 396                     | TT                              | CC              | 1947068834               |
| SNP_P4_193639_426  | NW_004521702.1 | Scaffold9371 | 426                     | AA                              | CC              | 1947068836               |
| SNP_P4_193640_470  | NW_004521702.1 | Scaffold9371 | 470                     | GG                              | AA              | 1947068838               |
| SNP_P4_193641_482  | NW_004521702.1 | Scaffold9371 | 482                     | AA                              | TT              | 1947068840               |
| SNP_P4_193642_486  | NW_004521702.1 | Scaffold9371 | 486                     | AA                              | TT              | 1947068841               |
| SNP_P4_193643_504  | NW_004521702.1 | Scaffold9371 | 504                     | GG                              | AA              | 1947068843               |
| SNP_P4_193644_554  | NW_004521702.1 | Scaffold9371 | 554                     | AA                              | CC              | 1947068845               |
| SNP_P4_193645_619  | NW_004521702.1 | Scaffold9371 | 619                     | TT                              | AA              | 1947068847               |
| SNP_P4_193647_641  | NW_004521702.1 | Scaffold9371 | 641                     | AA                              | CC              | 1947068849               |
| SNP_P4_193648_649  | NW_004521702.1 | Scaffold9371 | 649                     | AA                              | GG              | 1947068851               |
| SNP_P4_193649_678  | NW_004521702.1 | Scaffold9371 | 678                     | GG                              | CC              | 1947068853               |
| SNP_P4_193650_783  | NW_004521702.1 | Scaffold9371 | 783                     | TT                              | AA              | 1947068855               |
| SNP_P4_193651_806  | NW_004521702.1 | Scaffold9371 | 806                     | AA                              | GG              | 1947068857               |
| SNP_P4_193652_807  | NW_004521702.1 | Scaffold9371 | 807                     | CC                              | TT              | 1947068859               |
| SNP_P4_193653_1068 | NW_004521704.1 | Scaffold9374 | 1068                    | GG                              | AA              | 1947068861               |
| SNP_P4_193656_836  | NW_004521705.1 | Scaffold9375 | 836                     | TT                              | AA              | 1947068863               |
| SNP_P4_193657_1148 | NW_004521705.1 | Scaffold9375 | 1148                    | AA                              | GG              | 1947068865               |
| SNP_P4_193658_1193 | NW_004521705.1 | Scaffold9375 | 1193                    | TT                              | CC              | 1947068867               |
| SNP_P4_193659_325  | NW_004521706.1 | Scaffold9377 | 325                     | GG                              | AA              | 1947068869               |
| SNP_P4_193660_87   | NW_004521712.1 | Scaffold9391 | 87                      | CC                              | TT              | 1947068871               |
| SNP_P4_193662_732  | NW_004521712.1 | Scaffold9391 | 732                     | TT                              | GG              | 1947068873               |
| SNP_P4_193663_477  | NW_004521716.1 | Scaffold9396 | 477                     | TT                              | CC              | 1947068875               |
| SNP_P4_193664_501  | NW_004521716.1 | Scaffold9396 | 501                     | GG                              | AA              | 1947068877               |
| SNP_P4_193665_565  | NW_004521716.1 | Scaffold9396 | 565                     | TT                              | CC              | 1947068879               |
| SNP_P4_193666_633  | NW_004521716.1 | Scaffold9396 | 633                     | CC                              | GG              | 1947068881               |
| SNP_P4_193667_655  | NW_004521716.1 | Scaffold9396 | 655                     | AA                              | GG              | 1947068883               |
| SNP_P4_193668_672  | NW_004521716.1 | Scaffold9396 | 672                     | AA                              | GG              | 1947068885               |
| SNP_P4_193669_725  | NW_004521716.1 | Scaffold9396 | 725                     | TT                              | CC              | 1947068887               |
| SNP_P4_193670_928  | NW_004521716.1 | Scaffold9396 | 928                     | CC                              | TT              | 1947068889               |
| SNP_P4_193671_958  | NW_004521716.1 | Scaffold9396 | 958                     | TT                              | AA              | 1947068891               |
| SNP_P4_193672_985  | NW_004521716.1 | Scaffold9396 | 985                     | TT                              | CC              | 1947068893               |
| SNP_P4_193673_1013 | NW_004521716.1 | Scaffold9396 | 1013                    | TT                              | CC              | 1947068895               |
| SNP_P4_193674_652  | NW_004521719.1 | Scaffold9402 | 652                     | CC                              | AA              | 1947068897               |
| SNP_P4_193675_653  | NW_004521719.1 | Scaffold9402 | 653                     | GG                              | AA              | 1947068899               |
| SNP_P4_193676_657  | NW_004521719.1 | Scaffold9402 | 657                     | GG                              | TT              | 1947068901               |
| SNP_P4_193677_713  | NW_004521719.1 | Scaffold9402 | 713                     | AA                              | GG              | 1947068903               |
| SNP_P4_193678_2682 | NW_004521721.1 | Scaffold9411 | 2682                    | TT                              | AA              | 1947068905               |
| SNP_P4_193679_2858 | NW_004521721.1 | Scaffold9411 | 2858                    | AA                              | TT              | 1947068907               |
| SNP_P4_193680_2882 | NW_004521721.1 | Scaffold9411 | 2882                    | TT                              | CC              | 1947068909               |
| SNP_P4_193682_3153 | NW_004521721.1 | Scaffold9411 | 3153                    | TT                              | CC              | 1947068911               |
| SNP_P4_193683_3165 | NW_004521721.1 | Scaffold9411 | 3165                    | GG                              | AA              | 1947068913               |
| SNP_P4_193684_3329 | NW_004521721.1 | Scaffold9411 | 3329                    | TT                              | AA              | 1947068915               |



| SNPs IDs           | Chromosome IDs | Chromosomes  | Physical positions (bp) | CDC Frontier (Reference genome) | (ILWC46 & LPNB) | NCBI SNPdb Accession IDs |
|--------------------|----------------|--------------|-------------------------|---------------------------------|-----------------|--------------------------|
| SNP_P4_193685_3330 | NW_004521721.1 | Scaffold9411 | 3330                    | AA                              | TT              | 1947068917               |
| SNP_P4_193686_3502 | NW_004521721.1 | Scaffold9411 | 3502                    | AA                              | GG              | 1947068919               |
| SNP_P4_193688_3749 | NW_004521721.1 | Scaffold9411 | 3749                    | TT                              | AA              | 1947068921               |
| SNP_P4_193689_3782 | NW_004521721.1 | Scaffold9411 | 3782                    | TT                              | GG              | 1947068923               |
| SNP_P4_193690_3789 | NW_004521721.1 | Scaffold9411 | 3789                    | AA                              | TT              | 1947068925               |
| SNP_P4_193692_5655 | NW_004521721.1 | Scaffold9411 | 5655                    | TT                              | GG              | 1947068927               |
| SNP_P4_193693_5694 | NW_004521721.1 | Scaffold9411 | 5694                    | GG                              | CC              | 1947068929               |
| SNP_P4_193695_5941 | NW_004521721.1 | Scaffold9411 | 5941                    | AA                              | TT              | 1947068930               |
| SNP_P4_193696_5979 | NW_004521721.1 | Scaffold9411 | 5979                    | GG                              | AA              | 1947068932               |
| SNP_P4_193697_6003 | NW_004521721.1 | Scaffold9411 | 6003                    | AA                              | GG              | 1947068934               |
| SNP_P4_193698_380  | NW_004521722.1 | Scaffold9416 | 380                     | CC                              | TT              | 1947068936               |
| SNP_P4_193699_405  | NW_004521722.1 | Scaffold9416 | 405                     | CC                              | TT              | 1947068938               |
| SNP_P4_193700_548  | NW_004521724.1 | Scaffold9419 | 548                     | GG                              | CC              | 1947068940               |
| SNP_P4_193701_554  | NW_004521724.1 | Scaffold9419 | 554                     | GG                              | CC              | 1947068942               |
| SNP_P4_193702_1150 | NW_004521731.1 | Scaffold9433 | 1150                    | GG                              | TT              | 1947068944               |
| SNP_P4_193703_1409 | NW_004521731.1 | Scaffold9433 | 1409                    | AA                              | TT              | 1947068946               |
| SNP_P4_193704_1424 | NW_004521731.1 | Scaffold9433 | 1424                    | CC                              | TT              | 1947068948               |
| SNP_P4_193705_967  | NW_004521732.1 | Scaffold9435 | 967                     | AA                              | GG              | 1947068950               |
| SNP_P4_193706_64   | NW_004521734.1 | Scaffold9444 | 64                      | AA                              | GG              | 1947068952               |
| SNP_P4_193707_177  | NW_004521734.1 | Scaffold9444 | 177                     | TT                              | AA              | 1947068954               |
| SNP_P4_193708_345  | NW_004521734.1 | Scaffold9444 | 345                     | TT                              | CC              | 1947068956               |
| SNP_P4_193709_396  | NW_004521734.1 | Scaffold9444 | 396                     | AA                              | CC              | 1947068958               |
| SNP_P4_193710_670  | NW_004521734.1 | Scaffold9444 | 670                     | CC                              | TT              | 1947068959               |
| SNP_P4_193711_686  | NW_004521734.1 | Scaffold9444 | 686                     | AA                              | CC              | 1947068961               |
| SNP_P4_193712_694  | NW_004521734.1 | Scaffold9444 | 694                     | GG                              | AA              | 1947068963               |
| SNP_P4_193713_2095 | NW_004521734.1 | Scaffold9444 | 2095                    | AA                              | CC              | 1947068965               |
| SNP_P4_193714_2255 | NW_004521734.1 | Scaffold9444 | 2255                    | CC                              | TT              | 1947068967               |
| SNP_P4_193715_2337 | NW_004521734.1 | Scaffold9444 | 2337                    | GG                              | TT              | 1947068969               |
| SNP_P4_193716_2769 | NW_004521734.1 | Scaffold9444 | 2769                    | AA                              | TT              | 1947068971               |
| SNP_P4_193717_3349 | NW_004521734.1 | Scaffold9444 | 3349                    | CC                              | TT              | 1947068973               |
| SNP_P4_193719_3520 | NW_004521734.1 | Scaffold9444 | 3520                    | TT                              | CC              | 1947068975               |
| SNP_P4_193720_3629 | NW_004521734.1 | Scaffold9444 | 3629                    | TT                              | AA              | 1947068977               |
| SNP_P4_193721_3743 | NW_004521734.1 | Scaffold9444 | 3743                    | CC                              | GG              | 1947068979               |
| SNP_P4_193722_3852 | NW_004521734.1 | Scaffold9444 | 3852                    | TT                              | AA              | 1947068981               |
| SNP_P4_193723_3956 | NW_004521734.1 | Scaffold9444 | 3956                    | TT                              | AA              | 1947068983               |
| SNP_P4_193724_3983 | NW_004521734.1 | Scaffold9444 | 3983                    | GG                              | TT              | 1947068985               |
| SNP_P4_193725_4026 | NW_004521734.1 | Scaffold9444 | 4026                    | AA                              | GG              | 1947068987               |
| SNP_P4_193726_4100 | NW_004521734.1 | Scaffold9444 | 4100                    | AA                              | CC              | 1947068989               |
| SNP_P4_193727_4172 | NW_004521734.1 | Scaffold9444 | 4172                    | GG                              | AA              | 1947068991               |
| SNP_P4_193728_4530 | NW_004521734.1 | Scaffold9444 | 4530                    | CC                              | TT              | 1947068993               |
| SNP_P4_193729_472  | NW_004521737.1 | Scaffold9454 | 472                     | CC                              | TT              | 1947068995               |
| SNP_P4_193730_476  | NW_004521737.1 | Scaffold9454 | 476                     | AA                              | GG              | 1947068997               |

| SNPs IDs           | Chromosome IDs | Chromosomes  | Physical positions (bp) | CDC Frontier (Reference genome) | (ILWC46 & LPNB) | NCBI SNPdb Accession IDs |
|--------------------|----------------|--------------|-------------------------|---------------------------------|-----------------|--------------------------|
| SNP_P4_193731_509  | NW_004521737.1 | Scaffold9454 | 509                     | AA                              | TT              | 1947068999               |
| SNP_P4_193732_722  | NW_004521737.1 | Scaffold9454 | 722                     | AA                              | TT              | 1947069001               |
| SNP_P4_193733_773  | NW_004521737.1 | Scaffold9454 | 773                     | GG                              | AA              | 1947069003               |
| SNP_P4_193734_1138 | NW_004521741.1 | Scaffold9468 | 1138                    | CC                              | GG              | 1947069005               |
| SNP_P4_193735_1141 | NW_004521741.1 | Scaffold9468 | 1141                    | TT                              | GG              | 1947069007               |
| SNP_P4_193736_105  | NW_004521745.1 | Scaffold9478 | 105                     | TT                              | AA              | 1947069009               |
| SNP_P4_193737_120  | NW_004521745.1 | Scaffold9478 | 120                     | AA                              | CC              | 1947069011               |
| SNP_P4_193738_170  | NW_004521745.1 | Scaffold9478 | 170                     | AA                              | CC              | 1947069012               |
| SNP_P4_193739_177  | NW_004521745.1 | Scaffold9478 | 177                     | GG                              | AA              | 1947069014               |
| SNP_P4_193740_198  | NW_004521745.1 | Scaffold9478 | 198                     | AA                              | GG              | 1947069016               |
| SNP_P4_193741_229  | NW_004521745.1 | Scaffold9478 | 229                     | GG                              | AA              | 1947069018               |
| SNP_P4_193742_1149 | NW_004521747.1 | Scaffold9484 | 1149                    | GG                              | AA              | 1947069020               |
| SNP_P4_193744_1323 | NW_004521747.1 | Scaffold9484 | 1323                    | TT                              | CC              | 1947069022               |
| SNP_P4_193745_1347 | NW_004521747.1 | Scaffold9484 | 1347                    | TT                              | GG              | 1947069024               |
| SNP_P4_193746_1403 | NW_004521747.1 | Scaffold9484 | 1403                    | AA                              | GG              | 1947069026               |
| SNP_P4_193747_1414 | NW_004521747.1 | Scaffold9484 | 1414                    | GG                              | AA              | 1947069028               |
| SNP_P4_193748_1583 | NW_004521747.1 | Scaffold9484 | 1583                    | AA                              | GG              | 1947069030               |
| SNP_P4_193749_1668 | NW_004521747.1 | Scaffold9484 | 1668                    | TT                              | CC              | 1947069032               |
| SNP_P4_193750_1713 | NW_004521747.1 | Scaffold9484 | 1713                    | AA                              | CC              | 1947069034               |
| SNP_P4_193751_1879 | NW_004521748.1 | Scaffold9486 | 1879                    | AA                              | GG              | 1947069036               |
| SNP_P4_193752_2058 | NW_004521748.1 | Scaffold9486 | 2058                    | TT                              | AA              | 1947069038               |
| SNP_P4_193753_2120 | NW_004521748.1 | Scaffold9486 | 2120                    | AA                              | GG              | 1947069040               |
| SNP_P4_193754_786  | NW_004521750.1 | Scaffold9492 | 786                     | AA                              | GG              | 1947069042               |
| SNP_P4_193755_413  | NW_004521751.1 | Scaffold9493 | 413                     | AA                              | CC              | 1947069044               |
| SNP_P4_193756_446  | NW_004521751.1 | Scaffold9493 | 446                     | GG                              | TT              | 1947069046               |
| SNP_P4_193757_487  | NW_004521751.1 | Scaffold9493 | 487                     | TT                              | CC              | 1947069048               |
| SNP_P4_193758_2936 | NW_004521754.1 | Scaffold9506 | 2936                    | CC                              | TT              | 1947069050               |
| SNP_P4_193759_382  | NW_004521755.1 | Scaffold9507 | 382                     | TT                              | AA              | 1947069052               |
| SNP_P4_193760_838  | NW_004521755.1 | Scaffold9507 | 838                     | AA                              | TT              | 1947069054               |
| SNP_P4_193761_173  | NW_004521757.1 | Scaffold9523 | 173                     | TT                              | GG              | 1947069056               |
| SNP_P4_193762_512  | NW_004521757.1 | Scaffold9523 | 512                     | AA                              | TT              | 1947069058               |
| SNP_P4_193763_516  | NW_004521757.1 | Scaffold9523 | 516                     | AA                              | TT              | 1947069060               |
| SNP_P4_193764_494  | NW_004521760.1 | Scaffold9534 | 494                     | AA                              | GG              | 1947069062               |
| SNP_P4_193765_1155 | NW_004521761.1 | Scaffold9535 | 1155                    | AA                              | GG              | 1947069064               |
| SNP_P4_193766_154  | NW_004521766.1 | Scaffold9550 | 154                     | GG                              | AA              | 1947069066               |
| SNP_P4_193767_170  | NW_004521766.1 | Scaffold9550 | 170                     | AA                              | TT              | 1947069068               |
| SNP_P4_193768_181  | NW_004521766.1 | Scaffold9550 | 181                     | TT                              | GG              | 1947069070               |
| SNP_P4_193769_4930 | NW_004521766.1 | Scaffold9550 | 4930                    | GG                              | AA              | 1947069072               |
| SNP_P4_193770_5476 | NW_004521766.1 | Scaffold9550 | 5476                    | TT                              | CC              | 1947069074               |
| SNP_P4_193771_53   | NW_004521768.1 | Scaffold9555 | 53                      | GG                              | TT              | 1947069076               |
| SNP_P4_193772_64   | NW_004521768.1 | Scaffold9555 | 64                      | CC                              | GG              | 1947069078               |
| SNP_P4_193773_127  | NW_004521768.1 | Scaffold9555 | 127                     | GG                              | TT              | 1947069080               |

| SNPs IDs            | Chromosome IDs | Chromosomes  | Physical positions (bp) | CDC Frontier (Reference genome) | (ILWC46 & LPNB) | NCBI SNPdb Accession IDs |
|---------------------|----------------|--------------|-------------------------|---------------------------------|-----------------|--------------------------|
| SNP_P4_193774_230   | NW_004521768.1 | Scaffold9555 | 230                     | TT                              | AA              | 1947069082               |
| SNP_P4_193775_376   | NW_004521768.1 | Scaffold9555 | 376                     | AA                              | TT              | 1947069084               |
| SNP_P4_193776_496   | NW_004521768.1 | Scaffold9555 | 496                     | AA                              | CC              | 1947069086               |
| SNP_P4_193777_650   | NW_004521768.1 | Scaffold9555 | 650                     | TT                              | GG              | 1947069088               |
| SNP_P4_193778_709   | NW_004521768.1 | Scaffold9555 | 709                     | GG                              | TT              | 1947069090               |
| SNP_P4_193779_759   | NW_004521768.1 | Scaffold9555 | 759                     | TT                              | AA              | 1947069092               |
| SNP_P4_193780_803   | NW_004521768.1 | Scaffold9555 | 803                     | CC                              | TT              | 1947069094               |
| SNP_P4_193781_1852  | NW_004521769.1 | Scaffold9556 | 1852                    | AA                              | TT              | 1947069096               |
| SNP_P4_193782_1914  | NW_004521769.1 | Scaffold9556 | 1914                    | CC                              | GG              | 1947069098               |
| SNP_P4_193783_1935  | NW_004521769.1 | Scaffold9556 | 1935                    | GG                              | TT              | 1947069100               |
| SNP_P4_193784_2199  | NW_004521769.1 | Scaffold9556 | 2199                    | GG                              | AA              | 1947069102               |
| SNP_P4_193785_977   | NW_004521771.1 | Scaffold9567 | 977                     | GG                              | TT              | 1947069104               |
| SNP_P4_193786_409   | NW_004521773.1 | Scaffold9576 | 409                     | AA                              | TT              | 1947069105               |
| SNP_P4_193787_231   | NW_004521777.1 | Scaffold9587 | 231                     | CC                              | AA              | 1947069107               |
| SNP_P4_193788_242   | NW_004521777.1 | Scaffold9587 | 242                     | AA                              | GG              | 1947069109               |
| SNP_P4_193789_338   | NW_004521777.1 | Scaffold9587 | 338                     | CC                              | TT              | 1947069111               |
| SNP_P4_193790_913   | NW_004521777.1 | Scaffold9587 | 913                     | AA                              | GG              | 1947069113               |
| SNP_P4_193791_922   | NW_004521777.1 | Scaffold9587 | 922                     | GG                              | AA              | 1947069115               |
| SNP_P4_193792_965   | NW_004521777.1 | Scaffold9587 | 965                     | TT                              | GG              | 1947069117               |
| SNP_P4_193793_1007  | NW_004521777.1 | Scaffold9587 | 1007                    | AA                              | GG              | 1947069119               |
| SNP_P4_193794_1018  | NW_004521777.1 | Scaffold9587 | 1018                    | TT                              | CC              | 1947069121               |
| SNP_P4_193795_1075  | NW_004521777.1 | Scaffold9587 | 1075                    | CC                              | TT              | 1947069123               |
| SNP_P4_193796_1156  | NW_004521777.1 | Scaffold9587 | 1156                    | TT                              | GG              | 1947069125               |
| SNP_P4_193797_1186  | NW_004521777.1 | Scaffold9587 | 1186                    | TT                              | AA              | 1947069127               |
| SNP_P4_193798_1540  | NW_004521777.1 | Scaffold9587 | 1540                    | GG                              | TT              | 1947069129               |
| SNP_P4_193799_1547  | NW_004521777.1 | Scaffold9587 | 1547                    | AA                              | GG              | 1947069131               |
| SNP_P4_193800_320   | NW_004521778.1 | Scaffold9588 | 320                     | TT                              | CC              | 1947069133               |
| SNP_P4_193801_337   | NW_004521778.1 | Scaffold9588 | 337                     | AA                              | GG              | 1947069135               |
| SNP_P4_193802_342   | NW_004521778.1 | Scaffold9588 | 342                     | AA                              | GG              | 1947069137               |
| SNP_P4_193803_441   | NW_004521778.1 | Scaffold9588 | 441                     | AA                              | CC              | 1947069139               |
| SNP_P4_193804_744   | NW_004521778.1 | Scaffold9588 | 744                     | AA                              | GG              | 1947069140               |
| SNP_P4_193805_760   | NW_004521778.1 | Scaffold9588 | 760                     | AA                              | GG              | 1947069142               |
| SNP_P4_193806_946   | NW_004521778.1 | Scaffold9588 | 946                     | TT                              | CC              | 1947069144               |
| SNP_P4_193807_957   | NW_004521778.1 | Scaffold9588 | 957                     | CC                              | TT              | 1947069146               |
| SNP_P4_193808_1079  | NW_004521778.1 | Scaffold9588 | 1079                    | CC                              | TT              | 1947069148               |
| SNP_P4_193809_19667 | NW_004521779.1 | Scaffold9590 | 19667                   | TT                              | CC              | 1947069150               |
| SNP_P4_193810_20290 | NW_004521779.1 | Scaffold9590 | 20290                   | TT                              | GG              | 1947069152               |
| SNP_P4_193811_5095  | NW_004521784.1 | Scaffold9609 | 5095                    | GG                              | AA              | 1947069154               |
| SNP_P4_193812_613   | NW_004521786.1 | Scaffold9612 | 613                     | TT                              | CC              | 1947069156               |
| SNP_P4_193813_691   | NW_004521786.1 | Scaffold9612 | 691                     | TT                              | CC              | 1947069158               |
| SNP_P4_193814_1182  | NW_004521786.1 | Scaffold9612 | 1182                    | CC                              | AA              | 1947069160               |
| SNP_P4_193815_1235  | NW_004521786.1 | Scaffold9612 | 1235                    | GG                              | AA              | 1947069162               |

| SNPs IDs           | Chromosome IDs | Chromosomes  | Physical positions (bp) | CDC Frontier (Reference genome) | (ILWC46 & LPNB) | NCBI SNPdb Accession IDs |
|--------------------|----------------|--------------|-------------------------|---------------------------------|-----------------|--------------------------|
| SNP_P4_193816_1254 | NW_004521786.1 | Scaffold9612 | 1254                    | TT                              | AA              | 1947069164               |
| SNP_P4_193817_1480 | NW_004521786.1 | Scaffold9612 | 1480                    | AA                              | CC              | 1947069166               |
| SNP_P4_193818_1577 | NW_004521786.1 | Scaffold9612 | 1577                    | AA                              | GG              | 1947069168               |
| SNP_P4_193819_2035 | NW_004521786.1 | Scaffold9612 | 2035                    | TT                              | CC              | 1947069170               |
| SNP_P4_193820_2039 | NW_004521786.1 | Scaffold9612 | 2039                    | CC                              | GG              | 1947069172               |
| SNP_P4_193821_2084 | NW_004521786.1 | Scaffold9612 | 2084                    | TT                              | AA              | 1947069174               |
| SNP_P4_193823_231  | NW_004521787.1 | Scaffold9613 | 231                     | GG                              | AA              | 1947069177               |
| SNP_P4_193824_324  | NW_004521787.1 | Scaffold9613 | 324                     | AA                              | GG              | 1947069179               |
| SNP_P4_193825_630  | NW_004521787.1 | Scaffold9613 | 630                     | GG                              | AA              | 1947069181               |
| SNP_P4_193826_1034 | NW_004521787.1 | Scaffold9613 | 1034                    | AA                              | CC              | 1947069183               |
| SNP_P4_193827_1049 | NW_004521790.1 | Scaffold9619 | 1049                    | AA                              | GG              | 1947069185               |
| SNP_P4_193828_5333 | NW_004521793.1 | Scaffold9629 | 5333                    | CC                              | AA              | 1947069187               |
| SNP_P4_193829_5411 | NW_004521793.1 | Scaffold9629 | 5411                    | CC                              | GG              | 1947069189               |
| SNP_P4_193830_5622 | NW_004521793.1 | Scaffold9629 | 5622                    | CC                              | TT              | 1947069191               |
| SNP_P4_193831_5814 | NW_004521793.1 | Scaffold9629 | 5814                    | GG                              | TT              | 1947069193               |
| SNP_P4_193832_5872 | NW_004521793.1 | Scaffold9629 | 5872                    | TT                              | CC              | 1947069195               |
| SNP_P4_193833_5992 | NW_004521793.1 | Scaffold9629 | 5992                    | AA                              | GG              | 1947069197               |
| SNP_P4_193834_6037 | NW_004521793.1 | Scaffold9629 | 6037                    | GG                              | AA              | 1947069199               |
| SNP_P4_193835_6309 | NW_004521793.1 | Scaffold9629 | 6309                    | GG                              | AA              | 1947069201               |
| SNP_P4_193836_6347 | NW_004521793.1 | Scaffold9629 | 6347                    | GG                              | TT              | 1947069203               |
| SNP_P4_193838_6394 | NW_004521793.1 | Scaffold9629 | 6394                    | AA                              | GG              | 1947069205               |
| SNP_P4_193839_502  | NW_004521794.1 | Scaffold9632 | 502                     | TT                              | GG              | 1947069207               |
| SNP_P4_193840_1028 | NW_004521794.1 | Scaffold9632 | 1028                    | AA                              | GG              | 1947069209               |
| SNP_P4_193841_1235 | NW_004521794.1 | Scaffold9632 | 1235                    | CC                              | TT              | 1947069212               |
| SNP_P4_193842_1278 | NW_004521794.1 | Scaffold9632 | 1278                    | GG                              | TT              | 1947069214               |
| SNP_P4_193843_769  | NW_004521795.1 | Scaffold9635 | 769                     | GG                              | AA              | 1947069216               |
| SNP_P4_193844_307  | NW_004521796.1 | Scaffold9636 | 307                     | AA                              | GG              | 1947069218               |
| SNP_P4_193845_694  | NW_004521796.1 | Scaffold9636 | 694                     | CC                              | AA              | 1947069220               |
| SNP_P4_193846_833  | NW_004521796.1 | Scaffold9636 | 833                     | TT                              | AA              | 1947069222               |
| SNP_P4_193847_123  | NW_004521800.1 | Scaffold9644 | 123                     | GG                              | AA              | 1947069224               |
| SNP_P4_193848_178  | NW_004521800.1 | Scaffold9644 | 178                     | TT                              | CC              | 1947069226               |
| SNP_P4_193849_228  | NW_004521800.1 | Scaffold9644 | 228                     | TT                              | CC              | 1947069228               |
| SNP_P4_193850_280  | NW_004521800.1 | Scaffold9644 | 280                     | GG                              | TT              | 1947069230               |
| SNP_P4_193851_438  | NW_004521800.1 | Scaffold9644 | 438                     | AA                              | CC              | 1947069232               |
| SNP_P4_193852_565  | NW_004521800.1 | Scaffold9644 | 565                     | CC                              | TT              | 1947069234               |
| SNP_P4_193853_664  | NW_004521800.1 | Scaffold9644 | 664                     | CC                              | GG              | 1947069236               |
| SNP_P4_193854_734  | NW_004521800.1 | Scaffold9644 | 734                     | AA                              | CC              | 1947069238               |
| SNP_P4_193855_782  | NW_004521800.1 | Scaffold9644 | 782                     | CC                              | TT              | 1947069240               |
| SNP_P4_193856_843  | NW_004521800.1 | Scaffold9644 | 843                     | AA                              | GG              | 1947069242               |
| SNP_P4_193857_4314 | NW_004521800.1 | Scaffold9644 | 4314                    | GG                              | AA              | 1947069244               |
| SNP_P4_193858_4317 | NW_004521800.1 | Scaffold9644 | 4317                    | CC                              | TT              | 1947069246               |
| SNP_P4_193859_4331 | NW_004521800.1 | Scaffold9644 | 4331                    | AA                              | GG              | 1947069248               |

| SNPs IDs            | Chromosome IDs | Chromosomes  | Physical positions (bp) | CDC Frontier (Reference genome) | (ILWC46 & LPNB) | NCBI SNPdb Accession IDs |
|---------------------|----------------|--------------|-------------------------|---------------------------------|-----------------|--------------------------|
| SNP_P4_193860_4352  | NW_004521800.1 | Scaffold9644 | 4352                    | CC                              | TT              | 1947069250               |
| SNP_P4_193861_4395  | NW_004521800.1 | Scaffold9644 | 4395                    | AA                              | GG              | 1947069252               |
| SNP_P4_193862_4525  | NW_004521800.1 | Scaffold9644 | 4525                    | GG                              | TT              | 1947069254               |
| SNP_P4_193863_4530  | NW_004521800.1 | Scaffold9644 | 4530                    | AA                              | CC              | 1947069256               |
| SNP_P4_193864_4540  | NW_004521800.1 | Scaffold9644 | 4540                    | GG                              | AA              | 1947069258               |
| SNP_P4_193865_4563  | NW_004521800.1 | Scaffold9644 | 4563                    | GG                              | AA              | 1947069260               |
| SNP_P4_193866_4608  | NW_004521800.1 | Scaffold9644 | 4608                    | CC                              | TT              | 1947069262               |
| SNP_P4_193867_4682  | NW_004521800.1 | Scaffold9644 | 4682                    | AA                              | GG              | 1947069264               |
| SNP_P4_193868_4687  | NW_004521800.1 | Scaffold9644 | 4687                    | CC                              | TT              | 1947069266               |
| SNP_P4_193869_4710  | NW_004521800.1 | Scaffold9644 | 4710                    | GG                              | TT              | 1947069268               |
| SNP_P4_193870_4750  | NW_004521800.1 | Scaffold9644 | 4750                    | AA                              | CC              | 1947069270               |
| SNP_P4_193871_4780  | NW_004521800.1 | Scaffold9644 | 4780                    | GG                              | TT              | 1947069272               |
| SNP_P4_193872_4839  | NW_004521800.1 | Scaffold9644 | 4839                    | CC                              | AA              | 1947069274               |
| SNP_P4_193873_4852  | NW_004521800.1 | Scaffold9644 | 4852                    | AA                              | GG              | 1947069276               |
| SNP_P4_193874_4915  | NW_004521800.1 | Scaffold9644 | 4915                    | GG                              | TT              | 1947069278               |
| SNP_P4_193875_4938  | NW_004521800.1 | Scaffold9644 | 4938                    | CC                              | TT              | 1947069280               |
| SNP_P4_193876_5009  | NW_004521800.1 | Scaffold9644 | 5009                    | GG                              | TT              | 1947069282               |
| SNP_P4_193877_5023  | NW_004521800.1 | Scaffold9644 | 5023                    | AA                              | GG              | 1947069284               |
| SNP_P4_193878_363   | NW_004521801.1 | Scaffold9646 | 363                     | TT                              | CC              | 1947069286               |
| SNP_P4_193879_172   | NW_004521802.1 | Scaffold9647 | 172                     | TT                              | GG              | 1947069287               |
| SNP_P4_193880_4962  | NW_004521802.1 | Scaffold9647 | 4962                    | AA                              | GG              | 1947069288               |
| SNP_P4_193881_5947  | NW_004521802.1 | Scaffold9647 | 5947                    | CC                              | GG              | 1947069289               |
| SNP_P4_193882_690   | NW_004521803.1 | Scaffold9648 | 690                     | AA                              | GG              | 1947069291               |
| SNP_P4_193883_940   | NW_004521805.1 | Scaffold9655 | 940                     | CC                              | GG              | 1947069293               |
| SNP_P4_193884_1402  | NW_004521805.1 | Scaffold9655 | 1402                    | GG                              | AA              | 1947069295               |
| SNP_P4_193885_1421  | NW_004521805.1 | Scaffold9655 | 1421                    | TT                              | CC              | 1947069297               |
| SNP_P4_193886_150   | NW_004521808.1 | Scaffold9660 | 150                     | AA                              | TT              | 1947069299               |
| SNP_P4_193887_506   | NW_004521808.1 | Scaffold9660 | 506                     | CC                              | TT              | 1947069301               |
| SNP_P4_193888_723   | NW_004521808.1 | Scaffold9660 | 723                     | TT                              | CC              | 1947069303               |
| SNP_P4_193889_19461 | NW_004521808.1 | Scaffold9660 | 19461                   | CC                              | TT              | 1947069305               |
| SNP_P4_193890_19471 | NW_004521808.1 | Scaffold9660 | 19471                   | GG                              | AA              | 1947069307               |
| SNP_P4_193891_19472 | NW_004521808.1 | Scaffold9660 | 19472                   | CC                              | TT              | 1947069309               |
| SNP_P4_193892_19497 | NW_004521808.1 | Scaffold9660 | 19497                   | GG                              | AA              | 1947069311               |
| SNP_P4_193893_859   | NW_004521809.1 | Scaffold9663 | 859                     | TT                              | CC              | 1947069313               |
| SNP_P4_193894_1006  | NW_004521809.1 | Scaffold9663 | 1006                    | AA                              | TT              | 1947069315               |
| SNP_P4_193895_561   | NW_004521811.1 | Scaffold9667 | 561                     | GG                              | AA              | 1947069317               |
| SNP_P4_193896_562   | NW_004521811.1 | Scaffold9667 | 562                     | GG                              | AA              | 1947069319               |
| SNP_P4_193897_20200 | NW_004521815.1 | Scaffold9673 | 20200                   | GG                              | AA              | 1947069321               |
| SNP_P4_193898_20334 | NW_004521815.1 | Scaffold9673 | 20334                   | AA                              | TT              | 1947069323               |
| SNP_P4_193899_20411 | NW_004521815.1 | Scaffold9673 | 20411                   | GG                              | AA              | 1947069325               |
| SNP_P4_193900_20523 | NW_004521815.1 | Scaffold9673 | 20523                   | TT                              | AA              | 1947069328               |
| SNP_P4_193901_20524 | NW_004521815.1 | Scaffold9673 | 20524                   | GG                              | TT              | 1947069330               |

| SNPs IDs            | Chromosome IDs | Chromosomes  | Physical positions (bp) | CDC Frontier (Reference genome) | (ILWC46 & LPNB) | NCBI SNPdb Accession IDs |
|---------------------|----------------|--------------|-------------------------|---------------------------------|-----------------|--------------------------|
| SNP_P4_193902_20542 | NW_004521815.1 | Scaffold9673 | 20542                   | AA                              | CC              | 1947069332               |
| SNP_P4_193903_20630 | NW_004521815.1 | Scaffold9673 | 20630                   | TT                              | CC              | 1947069334               |
| SNP_P4_193904_20668 | NW_004521815.1 | Scaffold9673 | 20668                   | TT                              | CC              | 1947069336               |
| SNP_P4_193905_20751 | NW_004521815.1 | Scaffold9673 | 20751                   | CC                              | AA              | 1947069338               |
| SNP_P4_193906_20789 | NW_004521815.1 | Scaffold9673 | 20789                   | GG                              | AA              | 1947069340               |
| SNP_P4_193907_20852 | NW_004521815.1 | Scaffold9673 | 20852                   | TT                              | CC              | 1947069342               |
| SNP_P4_193908_20934 | NW_004521815.1 | Scaffold9673 | 20934                   | TT                              | AA              | 1947069344               |
| SNP_P4_193909_20954 | NW_004521815.1 | Scaffold9673 | 20954                   | GG                              | AA              | 1947069346               |
| SNP_P4_193910_20969 | NW_004521815.1 | Scaffold9673 | 20969                   | AA                              | CC              | 1947069348               |
| SNP_P4_193911_20972 | NW_004521815.1 | Scaffold9673 | 20972                   | AA                              | GG              | 1947069350               |
| SNP_P4_193912_20978 | NW_004521815.1 | Scaffold9673 | 20978                   | GG                              | CC              | 1947069352               |
| SNP_P4_193913_1029  | NW_004521816.1 | Scaffold9675 | 1029                    | GG                              | TT              | 1947069354               |
| SNP_P4_193914_1042  | NW_004521816.1 | Scaffold9675 | 1042                    | CC                              | TT              | 1947069356               |
| SNP_P4_193915_242   | NW_004521819.1 | Scaffold9683 | 242                     | TT                              | CC              | 1947069358               |
| SNP_P4_193916_322   | NW_004521819.1 | Scaffold9683 | 322                     | TT                              | AA              | 1947069360               |
| SNP_P4_193917_339   | NW_004521819.1 | Scaffold9683 | 339                     | AA                              | GG              | 1947069362               |
| SNP_P4_193918_407   | NW_004521819.1 | Scaffold9683 | 407                     | GG                              | AA              | 1947069364               |
| SNP_P4_193919_508   | NW_004521819.1 | Scaffold9683 | 508                     | CC                              | GG              | 1947069366               |
| SNP_P4_193920_512   | NW_004521819.1 | Scaffold9683 | 512                     | AA                              | TT              | 1947069368               |
| SNP_P4_193921_539   | NW_004521820.1 | Scaffold9686 | 539                     | TT                              | CC              | 1947069370               |
| SNP_P4_193922_588   | NW_004521820.1 | Scaffold9686 | 588                     | TT                              | CC              | 1947069372               |
| SNP_P4_193923_601   | NW_004521820.1 | Scaffold9686 | 601                     | CC                              | GG              | 1947069374               |
| SNP_P4_193924_855   | NW_004521820.1 | Scaffold9686 | 855                     | GG                              | AA              | 1947069376               |
| SNP_P4_193925_869   | NW_004521820.1 | Scaffold9686 | 869                     | CC                              | TT              | 1947069378               |
| SNP_P4_193926_898   | NW_004521820.1 | Scaffold9686 | 898                     | GG                              | AA              | 1947069380               |
| SNP_P4_193927_1137  | NW_004521820.1 | Scaffold9686 | 1137                    | CC                              | TT              | 1947069382               |
| SNP_P4_193928_1456  | NW_004521820.1 | Scaffold9686 | 1456                    | TT                              | CC              | 1947069384               |
| SNP_P4_193929_111   | NW_004521821.1 | Scaffold9693 | 111                     | TT                              | GG              | 1947069386               |
| SNP_P4_193930_546   | NW_004521823.1 | Scaffold9699 | 546                     | GG                              | CC              | 1947069388               |
| SNP_P4_193931_630   | NW_004521823.1 | Scaffold9699 | 630                     | GG                              | AA              | 1947069390               |
| SNP_P4_193932_864   | NW_004521823.1 | Scaffold9699 | 864                     | AA                              | CC              | 1947069392               |
| SNP_P4_193933_924   | NW_004521825.1 | Scaffold9702 | 924                     | GG                              | CC              | 1947069394               |
| SNP_P4_193934_936   | NW_004521825.1 | Scaffold9702 | 936                     | TT                              | GG              | 1947069396               |
| SNP_P4_193935_64    | NW_004521826.1 | Scaffold9704 | 64                      | CC                              | GG              | 1947069398               |
| SNP_P4_193936_19351 | NW_004521826.1 | Scaffold9704 | 19351                   | TT                              | CC              | 1947069400               |
| SNP_P4_193937_19567 | NW_004521826.1 | Scaffold9704 | 19567                   | CC                              | TT              | 1947069402               |
| SNP_P4_193938_19614 | NW_004521826.1 | Scaffold9704 | 19614                   | AA                              | CC              | 1947069404               |
| SNP_P4_193939_578   | NW_004521834.1 | Scaffold9727 | 578                     | GG                              | AA              | 1947069406               |
| SNP_P4_193940_579   | NW_004521834.1 | Scaffold9727 | 579                     | TT                              | CC              | 1947069408               |
| SNP_P4_193941_504   | NW_004521835.1 | Scaffold9728 | 504                     | CC                              | AA              | 1947069410               |
| SNP_P4_193942_506   | NW_004521835.1 | Scaffold9728 | 506                     | GG                              | AA              | 1947069412               |
| SNP_P4_193943_697   | NW_004521835.1 | Scaffold9728 | 697                     | GG                              | AA              | 1947069414               |

| SNPs IDs            | Chromosome IDs | Chromosomes  | Physical positions (bp) | CDC Frontier (Reference genome) | (ILWC46 & LPNB) | NCBI SNPdb Accession IDs |
|---------------------|----------------|--------------|-------------------------|---------------------------------|-----------------|--------------------------|
| SNP_P4_193944_698   | NW_004521835.1 | Scaffold9728 | 698                     | CC                              | AA              | 1947069416               |
| SNP_P4_193945_936   | NW_004521835.1 | Scaffold9728 | 936                     | GG                              | AA              | 1947069418               |
| SNP_P4_193946_981   | NW_004521835.1 | Scaffold9728 | 981                     | TT                              | CC              | 1947069420               |
| SNP_P4_193947_1048  | NW_004521835.1 | Scaffold9728 | 1048                    | CC                              | AA              | 1947069422               |
| SNP_P4_193948_1066  | NW_004521835.1 | Scaffold9728 | 1066                    | AA                              | GG              | 1947069424               |
| SNP_P4_193949_1145  | NW_004521835.1 | Scaffold9728 | 1145                    | GG                              | AA              | 1947069426               |
| SNP_P4_193950_1277  | NW_004521835.1 | Scaffold9728 | 1277                    | CC                              | AA              | 1947069428               |
| SNP_P4_193951_512   | NW_004521840.1 | Scaffold9740 | 512                     | GG                              | AA              | 1947069430               |
| SNP_P4_193952_548   | NW_004521840.1 | Scaffold9740 | 548                     | TT                              | GG              | 1947069435               |
| SNP_P4_193953_568   | NW_004521840.1 | Scaffold9740 | 568                     | CC                              | TT              | 1947069436               |
| SNP_P4_193955_748   | NW_004521840.1 | Scaffold9740 | 748                     | AA                              | CC              | 1947069437               |
| SNP_P4_193956_20603 | NW_004521840.1 | Scaffold9740 | 20603                   | AA                              | CC              | 1947069438               |
| SNP_P4_193957_20734 | NW_004521840.1 | Scaffold9740 | 20734                   | CC                              | TT              | 1947069439               |
| SNP_P4_193958_1183  | NW_004521841.1 | Scaffold9742 | 1183                    | CC                              | TT              | 1947069440               |
| SNP_P4_193959_1251  | NW_004521841.1 | Scaffold9742 | 1251                    | AA                              | GG              | 1947069441               |
| SNP_P4_193960_1793  | NW_004521841.1 | Scaffold9742 | 1793                    | TT                              | CC              | 1947069442               |
| SNP_P4_193961_313   | NW_004521845.1 | Scaffold9754 | 313                     | AA                              | CC              | 1947069443               |
| SNP_P4_193962_64    | NW_004521847.1 | Scaffold9757 | 64                      | CC                              | TT              | 1947069444               |
| SNP_P4_193963_78    | NW_004521847.1 | Scaffold9757 | 78                      | TT                              | AA              | 1947069445               |
| SNP_P4_193964_118   | NW_004521847.1 | Scaffold9757 | 118                     | GG                              | CC              | 1947069446               |
| SNP_P4_193965_495   | NW_004521847.1 | Scaffold9757 | 495                     | AA                              | GG              | 1947069447               |
| SNP_P4_193966_601   | NW_004521847.1 | Scaffold9757 | 601                     | CC                              | AA              | 1947069448               |
| SNP_P4_193967_606   | NW_004521847.1 | Scaffold9757 | 606                     | GG                              | AA              | 1947069449               |
| SNP_P4_193969_891   | NW_004521847.1 | Scaffold9757 | 891                     | AA                              | GG              | 1947069450               |
| SNP_P4_193970_997   | NW_004521847.1 | Scaffold9757 | 997                     | AA                              | CC              | 1947069451               |
| SNP_P4_193971_999   | NW_004521847.1 | Scaffold9757 | 999                     | CC                              | AA              | 1947069452               |
| SNP_P4_193972_1498  | NW_004521847.1 | Scaffold9757 | 1498                    | GG                              | CC              | 1947069453               |
| SNP_P4_193973_1512  | NW_004521847.1 | Scaffold9757 | 1512                    | TT                              | CC              | 1947069454               |
| SNP_P4_193974_1049  | NW_004521853.1 | Scaffold9774 | 1049                    | AA                              | CC              | 1947069455               |
| SNP_P4_193975_299   | NW_004521854.1 | Scaffold9776 | 299                     | AA                              | GG              | 1947069456               |
| SNP_P4_193976_585   | NW_004521854.1 | Scaffold9776 | 585                     | GG                              | AA              | 1947069457               |
| SNP_P4_193977_230   | NW_004521856.1 | Scaffold9779 | 230                     | AA                              | GG              | 1947069458               |
| SNP_P4_193979_357   | NW_004521856.1 | Scaffold9779 | 357                     | TT                              | AA              | 1947069459               |
| SNP_P4_193980_488   | NW_004521856.1 | Scaffold9779 | 488                     | AA                              | CC              | 1947069460               |
| SNP_P4_193981_490   | NW_004521856.1 | Scaffold9779 | 490                     | GG                              | AA              | 1947069461               |
| SNP_P4_193982_412   | NW_004521857.1 | Scaffold9781 | 412                     | AA                              | TT              | 1947069462               |
| SNP_P4_193983_498   | NW_004521857.1 | Scaffold9781 | 498                     | AA                              | TT              | 1947069463               |
| SNP_P4_193984_499   | NW_004521857.1 | Scaffold9781 | 499                     | CC                              | AA              | 1947069464               |
| SNP_P4_193985_694   | NW_004521857.1 | Scaffold9781 | 694                     | TT                              | AA              | 1947069465               |
| SNP_P4_193986_705   | NW_004521857.1 | Scaffold9781 | 705                     | AA                              | CC              | 1947069466               |
| SNP_P4_193987_735   | NW_004521857.1 | Scaffold9781 | 735                     | GG                              | AA              | 1947069467               |
| SNP_P4_193988_739   | NW_004521857.1 | Scaffold9781 | 739                     | GG                              | AA              | 1947069468               |

| SNPs IDs            | Chromosome IDs | Chromosomes  | Physical positions (bp) | CDC Frontier (Reference genome) | (ILWC46 & LPNB) | NCBI SNPdb Accession IDs |
|---------------------|----------------|--------------|-------------------------|---------------------------------|-----------------|--------------------------|
| SNP_P4_193989_950   | NW_004521857.1 | Scaffold9781 | 950                     | AA                              | GG              | 1947069469               |
| SNP_P4_193990_362   | NW_004521858.1 | Scaffold9784 | 362                     | AA                              | CC              | 1947069470               |
| SNP_P4_193992_794   | NW_004521858.1 | Scaffold9784 | 794                     | CC                              | TT              | 1947069471               |
| SNP_P4_193993_641   | NW_004521863.1 | Scaffold9797 | 641                     | CC                              | AA              | 1947069472               |
| SNP_P4_193994_680   | NW_004521863.1 | Scaffold9797 | 680                     | CC                              | TT              | 1947069473               |
| SNP_P4_193995_939   | NW_004521863.1 | Scaffold9797 | 939                     | CC                              | TT              | 1947069474               |
| SNP_P4_193996_966   | NW_004521863.1 | Scaffold9797 | 966                     | TT                              | AA              | 1947069475               |
| SNP_P4_193997_997   | NW_004521863.1 | Scaffold9797 | 997                     | CC                              | GG              | 1947069476               |
| SNP_P4_193998_1238  | NW_004521863.1 | Scaffold9797 | 1238                    | CC                              | GG              | 1947069477               |
| SNP_P4_193999_1289  | NW_004521863.1 | Scaffold9797 | 1289                    | GG                              | TT              | 1947069478               |
| SNP_P4_194000_1325  | NW_004521863.1 | Scaffold9797 | 1325                    | AA                              | TT              | 1947069479               |
| SNP_P4_194001_1439  | NW_004521863.1 | Scaffold9797 | 1439                    | GG                              | AA              | 1947069481               |
| SNP_P4_194002_1461  | NW_004521863.1 | Scaffold9797 | 1461                    | CC                              | TT              | 1947069483               |
| SNP_P4_194003_1468  | NW_004521863.1 | Scaffold9797 | 1468                    | TT                              | AA              | 1947069485               |
| SNP_P4_194004_1525  | NW_004521863.1 | Scaffold9797 | 1525                    | AA                              | CC              | 1947069487               |
| SNP_P4_194005_1526  | NW_004521863.1 | Scaffold9797 | 1526                    | TT                              | GG              | 1947069489               |
| SNP_P4_194006_1543  | NW_004521863.1 | Scaffold9797 | 1543                    | AA                              | GG              | 1947069491               |
| SNP_P4_194007_20352 | NW_004521864.1 | Scaffold9798 | 20352                   | TT                              | AA              | 1947069492               |
| SNP_P4_194008_435   | NW_004521865.1 | Scaffold9801 | 435                     | AA                              | TT              | 1947069494               |
| SNP_P4_194009_458   | NW_004521865.1 | Scaffold9801 | 458                     | TT                              | CC              | 1947069496               |
| SNP_P4_194010_784   | NW_004521865.1 | Scaffold9801 | 784                     | CC                              | GG              | 1947069498               |
| SNP_P4_194011_114   | NW_004521869.1 | Scaffold9809 | 114                     | TT                              | CC              | 1947069500               |
| SNP_P4_194012_233   | NW_004521869.1 | Scaffold9809 | 233                     | CC                              | TT              | 1947069502               |
| SNP_P4_194013_391   | NW_004521869.1 | Scaffold9809 | 391                     | GG                              | AA              | 1947069504               |
| SNP_P4_194014_427   | NW_004521869.1 | Scaffold9809 | 427                     | CC                              | TT              | 1947069506               |
| SNP_P4_194015_485   | NW_004521869.1 | Scaffold9809 | 485                     | AA                              | CC              | 1947069508               |
| SNP_P4_194017_1007  | NW_004521869.1 | Scaffold9809 | 1007                    | AA                              | GG              | 1947069510               |
| SNP_P4_194018_64    | NW_004521870.1 | Scaffold9813 | 64                      | AA                              | GG              | 1947069512               |
| SNP_P4_194019_78    | NW_004521870.1 | Scaffold9813 | 78                      | GG                              | AA              | 1947069514               |
| SNP_P4_194020_114   | NW_004521870.1 | Scaffold9813 | 114                     | GG                              | TT              | 1947069516               |
| SNP_P4_194021_327   | NW_004521870.1 | Scaffold9813 | 327                     | CC                              | GG              | 1947069518               |
| SNP_P4_194022_363   | NW_004521870.1 | Scaffold9813 | 363                     | CC                              | GG              | 1947069519               |
| SNP_P4_194023_421   | NW_004521870.1 | Scaffold9813 | 421                     | GG                              | TT              | 1947069521               |
| SNP_P4_194024_549   | NW_004521870.1 | Scaffold9813 | 549                     | CC                              | TT              | 1947069523               |
| SNP_P4_194025_553   | NW_004521870.1 | Scaffold9813 | 553                     | TT                              | AA              | 1947069525               |
| SNP_P4_194026_678   | NW_004521870.1 | Scaffold9813 | 678                     | CC                              | AA              | 1947069527               |
| SNP_P4_194027_739   | NW_004521870.1 | Scaffold9813 | 739                     | CC                              | AA              | 1947069529               |
| SNP_P4_194029_1281  | NW_004521870.1 | Scaffold9813 | 1281                    | GG                              | CC              | 1947069531               |
| SNP_P4_194030_1541  | NW_004521870.1 | Scaffold9813 | 1541                    | CC                              | TT              | 1947069533               |
| SNP_P4_194031_1616  | NW_004521870.1 | Scaffold9813 | 1616                    | CC                              | AA              | 1947069535               |
| SNP_P4_194032_1641  | NW_004521870.1 | Scaffold9813 | 1641                    | GG                              | TT              | 1947069537               |
| SNP_P4_194033_5188  | NW_004521870.1 | Scaffold9813 | 5188                    | CC                              | AA              | 1947069539               |



| SNPs IDs           | Chromosome IDs | Chromosomes  | Physical positions (bp) | CDC Frontier (Reference genome) | (ILWC46 & LPNB) | NCBI SNPdb Accession IDs |
|--------------------|----------------|--------------|-------------------------|---------------------------------|-----------------|--------------------------|
| SNP_P4_194034_5289 | NW_004521870.1 | Scaffold9813 | 5289                    | GG                              | TT              | 1947069541               |
| SNP_P4_194035_5417 | NW_004521870.1 | Scaffold9813 | 5417                    | CC                              | TT              | 1947069543               |
| SNP_P4_194036_5420 | NW_004521870.1 | Scaffold9813 | 5420                    | AA                              | GG              | 1947069545               |
| SNP_P4_194037_5432 | NW_004521870.1 | Scaffold9813 | 5432                    | TT                              | GG              | 1947069547               |
| SNP_P4_194038_5483 | NW_004521870.1 | Scaffold9813 | 5483                    | AA                              | GG              | 1947069549               |
| SNP_P4_194039_461  | NW_004521872.1 | Scaffold9818 | 461                     | TT                              | CC              | 1947069551               |
| SNP_P4_194040_918  | NW_004521872.1 | Scaffold9818 | 918                     | CC                              | GG              | 1947069553               |
| SNP_P4_194041_937  | NW_004521872.1 | Scaffold9818 | 937                     | TT                              | AA              | 1947069555               |
| SNP_P4_194042_1289 | NW_004521872.1 | Scaffold9818 | 1289                    | CC                              | GG              | 1947069557               |
| SNP_P4_194043_1308 | NW_004521872.1 | Scaffold9818 | 1308                    | AA                              | TT              | 1947069559               |
| SNP_P4_194044_1499 | NW_004521872.1 | Scaffold9818 | 1499                    | TT                              | AA              | 1947069561               |
| SNP_P4_194045_1606 | NW_004521872.1 | Scaffold9818 | 1606                    | AA                              | GG              | 1947069563               |
| SNP_P4_194046_64   | NW_004521873.1 | Scaffold9819 | 64                      | AA                              | GG              | 1947069565               |
| SNP_P4_194047_320  | NW_004521873.1 | Scaffold9819 | 320                     | AA                              | GG              | 1947069567               |
| SNP_P4_194048_324  | NW_004521873.1 | Scaffold9819 | 324                     | AA                              | TT              | 1947069569               |
| SNP_P4_194049_552  | NW_004521873.1 | Scaffold9819 | 552                     | AA                              | CC              | 1947069570               |
| SNP_P4_194050_209  | NW_004521875.1 | Scaffold9821 | 209                     | TT                              | GG              | 1947069572               |
| SNP_P4_194051_210  | NW_004521875.1 | Scaffold9821 | 210                     | CC                              | TT              | 1947069574               |
| SNP_P4_194052_307  | NW_004521875.1 | Scaffold9821 | 307                     | TT                              | CC              | 1947069576               |
| SNP_P4_194053_342  | NW_004521875.1 | Scaffold9821 | 342                     | TT                              | AA              | 1947069578               |
| SNP_P4_194054_347  | NW_004521875.1 | Scaffold9821 | 347                     | AA                              | TT              | 1947069580               |
| SNP_P4_194055_360  | NW_004521875.1 | Scaffold9821 | 360                     | CC                              | TT              | 1947069582               |
| SNP_P4_194056_399  | NW_004521875.1 | Scaffold9821 | 399                     | AA                              | TT              | 1947069584               |
| SNP_P4_194058_738  | NW_004521875.1 | Scaffold9821 | 738                     | CC                              | GG              | 1947069586               |
| SNP_P4_194059_491  | NW_004521878.1 | Scaffold9827 | 491                     | TT                              | GG              | 1947069588               |
| SNP_P4_194060_623  | NW_004521878.1 | Scaffold9827 | 623                     | AA                              | TT              | 1947069590               |
| SNP_P4_194061_796  | NW_004521878.1 | Scaffold9827 | 796                     | CC                              | TT              | 1947069592               |
| SNP_P4_194062_967  | NW_004521878.1 | Scaffold9827 | 967                     | TT                              | CC              | 1947069594               |
| SNP_P4_194063_969  | NW_004521878.1 | Scaffold9827 | 969                     | AA                              | GG              | 1947069596               |
| SNP_P4_194064_973  | NW_004521878.1 | Scaffold9827 | 973                     | CC                              | TT              | 1947069598               |
| SNP_P4_194065_1767 | NW_004521883.1 | Scaffold9836 | 1767                    | AA                              | TT              | 1947069600               |
| SNP_P4_194066_2417 | NW_004521883.1 | Scaffold9836 | 2417                    | TT                              | AA              | 1947069602               |
| SNP_P4_194067_2543 | NW_004521883.1 | Scaffold9836 | 2543                    | GG                              | CC              | 1947069604               |
| SNP_P4_194068_561  | NW_004521885.1 | Scaffold9844 | 561                     | TT                              | GG              | 1947069606               |
| SNP_P4_194069_782  | NW_004521885.1 | Scaffold9844 | 782                     | GG                              | AA              | 1947069608               |
| SNP_P4_194070_277  | NW_004521886.1 | Scaffold9847 | 277                     | GG                              | AA              | 1947069610               |
| SNP_P4_194071_116  | NW_004521887.1 | Scaffold9849 | 116                     | AA                              | GG              | 1947069612               |
| SNP_P4_194072_214  | NW_004521887.1 | Scaffold9849 | 214                     | TT                              | CC              | 1947069614               |
| SNP_P4_194073_521  | NW_004521887.1 | Scaffold9849 | 521                     | AA                              | GG              | 1947069616               |
| SNP_P4_194074_1034 | NW_004521887.1 | Scaffold9849 | 1034                    | AA                              | CC              | 1947069618               |
| SNP_P4_194075_1036 | NW_004521887.1 | Scaffold9849 | 1036                    | TT                              | CC              | 1947069620               |
| SNP_P4_194076_196  | NW_004521889.1 | Scaffold9851 | 196                     | TT                              | CC              | 1947069622               |

| SNPs IDs           | Chromosome IDs | Chromosomes  | Physical positions (bp) | CDC Frontier (Reference genome) | (ILWC46 & LPNB) | NCBI SNPdb Accession IDs |
|--------------------|----------------|--------------|-------------------------|---------------------------------|-----------------|--------------------------|
| SNP_P4_194077_207  | NW_004521889.1 | Scaffold9851 | 207                     | TT                              | GG              | 1947069624               |
| SNP_P4_194078_733  | NW_004521889.1 | Scaffold9851 | 733                     | AA                              | CC              | 1947069626               |
| SNP_P4_194080_966  | NW_004521889.1 | Scaffold9851 | 966                     | GG                              | AA              | 1947069628               |
| SNP_P4_194081_1001 | NW_004521889.1 | Scaffold9851 | 1001                    | TT                              | AA              | 1947069630               |
| SNP_P4_194082_979  | NW_004521892.1 | Scaffold9859 | 979                     | AA                              | TT              | 1947069632               |
| SNP_P4_194083_552  | NW_004521893.1 | Scaffold9860 | 552                     | TT                              | CC              | 1947069634               |
| SNP_P4_194084_610  | NW_004521893.1 | Scaffold9860 | 610                     | CC                              | AA              | 1947069636               |
| SNP_P4_194085_628  | NW_004521893.1 | Scaffold9860 | 628                     | CC                              | TT              | 1947069638               |
| SNP_P4_194086_719  | NW_004521893.1 | Scaffold9860 | 719                     | CC                              | TT              | 1947069640               |
| SNP_P4_194087_738  | NW_004521893.1 | Scaffold9860 | 738                     | CC                              | TT              | 1947069642               |
| SNP_P4_194088_783  | NW_004521893.1 | Scaffold9860 | 783                     | CC                              | TT              | 1947069644               |
| SNP_P4_194089_877  | NW_004521893.1 | Scaffold9860 | 877                     | GG                              | AA              | 1947069646               |
| SNP_P4_194091_929  | NW_004521893.1 | Scaffold9860 | 929                     | AA                              | CC              | 1947069648               |
| SNP_P4_194092_72   | NW_004521898.1 | Scaffold9880 | 72                      | AA                              | GG              | 1947069650               |
| SNP_P4_194093_76   | NW_004521898.1 | Scaffold9880 | 76                      | TT                              | GG              | 1947069652               |
| SNP_P4_194094_82   | NW_004521898.1 | Scaffold9880 | 82                      | AA                              | GG              | 1947069654               |
| SNP_P4_194095_94   | NW_004521898.1 | Scaffold9880 | 94                      | CC                              | TT              | 1947069656               |
| SNP_P4_194096_105  | NW_004521898.1 | Scaffold9880 | 105                     | TT                              | CC              | 1947069658               |
| SNP_P4_194097_106  | NW_004521898.1 | Scaffold9880 | 106                     | GG                              | AA              | 1947069660               |
| SNP_P4_194098_361  | NW_004521901.1 | Scaffold9887 | 361                     | AA                              | GG              | 1947069662               |
| SNP_P4_194099_453  | NW_004521901.1 | Scaffold9887 | 453                     | CC                              | AA              | 1947069664               |
| SNP_P4_194100_1359 | NW_004521901.1 | Scaffold9887 | 1359                    | CC                              | TT              | 1947069666               |
| SNP_P4_194101_1415 | NW_004521901.1 | Scaffold9887 | 1415                    | CC                              | TT              | 1947069668               |
| SNP_P4_194102_1745 | NW_004521901.1 | Scaffold9887 | 1745                    | CC                              | TT              | 1947069670               |
| SNP_P4_194103_1872 | NW_004521901.1 | Scaffold9887 | 1872                    | CC                              | TT              | 1947069672               |
| SNP_P4_194104_76   | NW_004521902.1 | Scaffold9888 | 76                      | GG                              | AA              | 1947069674               |
| SNP_P4_194105_115  | NW_004521902.1 | Scaffold9888 | 115                     | GG                              | AA              | 1947069676               |
| SNP_P4_194106_279  | NW_004521902.1 | Scaffold9888 | 279                     | GG                              | TT              | 1947069678               |
| SNP_P4_194107_393  | NW_004521903.1 | Scaffold9892 | 393                     | CC                              | TT              | 1947069680               |
| SNP_P4_194108_395  | NW_004521903.1 | Scaffold9892 | 395                     | AA                              | TT              | 1947069682               |
| SNP_P4_194109_426  | NW_004521903.1 | Scaffold9892 | 426                     | TT                              | GG              | 1947069684               |
| SNP_P4_194111_596  | NW_004521903.1 | Scaffold9892 | 596                     | CC                              | TT              | 1947069686               |
| SNP_P4_194112_647  | NW_004521903.1 | Scaffold9892 | 647                     | TT                              | AA              | 1947069688               |
| SNP_P4_194113_770  | NW_004521903.1 | Scaffold9892 | 770                     | GG                              | AA              | 1947069690               |
| SNP_P4_194114_778  | NW_004521903.1 | Scaffold9892 | 778                     | AA                              | GG              | 1947069692               |
| SNP_P4_194115_796  | NW_004521903.1 | Scaffold9892 | 796                     | TT                              | CC              | 1947069694               |
| SNP_P4_194116_903  | NW_004521903.1 | Scaffold9892 | 903                     | CC                              | GG              | 1947069696               |
| SNP_P4_194117_912  | NW_004521903.1 | Scaffold9892 | 912                     | CC                              | AA              | 1947069698               |
| SNP_P4_194118_933  | NW_004521903.1 | Scaffold9892 | 933                     | CC                              | TT              | 1947069700               |
| SNP_P4_194119_950  | NW_004521903.1 | Scaffold9892 | 950                     | AA                              | TT              | 1947069702               |
| SNP_P4_194121_582  | NW_004521904.1 | Scaffold9893 | 582                     | TT                              | CC              | 1947069704               |
| SNP_P4_194123_1047 | NW_004521906.1 | Scaffold9898 | 1047                    | AA                              | GG              | 1947069706               |

| SNPs IDs           | Chromosome IDs | Chromosomes  | Physical positions (bp) | CDC Frontier (Reference genome) | (ILWC46 & LPNB) | NCBI SNPdb Accession IDs |
|--------------------|----------------|--------------|-------------------------|---------------------------------|-----------------|--------------------------|
| SNP_P4_194124_1067 | NW_004521906.1 | Scaffold9898 | 1067                    | CC                              | AA              | 1947069708               |
| SNP_P4_194125_863  | NW_004521907.1 | Scaffold9900 | 863                     | AA                              | TT              | 1947069710               |
| SNP_P4_194126_883  | NW_004521907.1 | Scaffold9900 | 883                     | GG                              | AA              | 1947069712               |
| SNP_P4_194127_890  | NW_004521907.1 | Scaffold9900 | 890                     | TT                              | CC              | 1947069714               |
| SNP_P4_194128_921  | NW_004521907.1 | Scaffold9900 | 921                     | CC                              | AA              | 1947069716               |
| SNP_P4_194129_932  | NW_004521907.1 | Scaffold9900 | 932                     | AA                              | GG              | 1947069718               |
| SNP_P4_194130_975  | NW_004521907.1 | Scaffold9900 | 975                     | GG                              | AA              | 1947069720               |
| SNP_P4_194131_980  | NW_004521907.1 | Scaffold9900 | 980                     | AA                              | GG              | 1947069722               |
| SNP_P4_194132_985  | NW_004521907.1 | Scaffold9900 | 985                     | TT                              | CC              | 1947069724               |
| SNP_P4_194133_993  | NW_004521907.1 | Scaffold9900 | 993                     | GG                              | TT              | 1947069726               |
| SNP_P4_194134_994  | NW_004521907.1 | Scaffold9900 | 994                     | CC                              | AA              | 1947069728               |
| SNP_P4_194135_1014 | NW_004521907.1 | Scaffold9900 | 1014                    | TT                              | CC              | 1947069730               |
| SNP_P4_194136_2187 | NW_004521907.1 | Scaffold9900 | 2187                    | TT                              | AA              | 1947069732               |
| SNP_P4_194137_2453 | NW_004521907.1 | Scaffold9900 | 2453                    | TT                              | CC              | 1947069734               |
| SNP_P4_194138_4764 | NW_004521908.1 | Scaffold9901 | 4764                    | AA                              | GG              | 1947069736               |
| SNP_P4_194139_1357 | NW_004521909.1 | Scaffold9902 | 1357                    | TT                              | CC              | 1947069739               |
| SNP_P4_194140_868  | NW_004521910.1 | Scaffold9903 | 868                     | TT                              | AA              | 1947069741               |
| SNP_P4_194141_106  | NW_004521911.1 | Scaffold9909 | 106                     | AA                              | GG              | 1947069743               |
| SNP_P4_194142_117  | NW_004521911.1 | Scaffold9909 | 117                     | CC                              | AA              | 1947069745               |
| SNP_P4_194143_118  | NW_004521911.1 | Scaffold9909 | 118                     | AA                              | GG              | 1947069747               |
| SNP_P4_194144_407  | NW_004521911.1 | Scaffold9909 | 407                     | AA                              | TT              | 1947069749               |
| SNP_P4_194145_609  | NW_004521911.1 | Scaffold9909 | 609                     | GG                              | CC              | 1947069751               |
| SNP_P4_194146_804  | NW_004521911.1 | Scaffold9909 | 804                     | AA                              | GG              | 1947069753               |
| SNP_P4_194147_880  | NW_004521911.1 | Scaffold9909 | 880                     | AA                              | GG              | 1947069755               |
| SNP_P4_194148_95   | NW_004521912.1 | Scaffold9917 | 95                      | AA                              | GG              | 1947069757               |
| SNP_P4_194149_156  | NW_004521912.1 | Scaffold9917 | 156                     | AA                              | GG              | 1947069759               |
| SNP_P4_194150_650  | NW_004521912.1 | Scaffold9917 | 650                     | CC                              | TT              | 1947069761               |
| SNP_P4_194151_1131 | NW_004521912.1 | Scaffold9917 | 1131                    | TT                              | CC              | 1947069763               |
| SNP_P4_194153_1270 | NW_004521912.1 | Scaffold9917 | 1270                    | GG                              | AA              | 1947069765               |
| SNP_P4_194154_1301 | NW_004521912.1 | Scaffold9917 | 1301                    | AA                              | TT              | 1947069767               |
| SNP_P4_194155_2332 | NW_004521912.1 | Scaffold9917 | 2332                    | GG                              | TT              | 1947069769               |
| SNP_P4_194156_640  | NW_004521914.1 | Scaffold9921 | 640                     | TT                              | AA              | 1947069771               |
| SNP_P4_194157_802  | NW_004521914.1 | Scaffold9921 | 802                     | AA                              | CC              | 1947069773               |
| SNP_P4_194158_884  | NW_004521914.1 | Scaffold9921 | 884                     | CC                              | TT              | 1947069775               |
| SNP_P4_194159_921  | NW_004521914.1 | Scaffold9921 | 921                     | AA                              | CC              | 1947069777               |
| SNP_P4_194160_240  | NW_004521915.1 | Scaffold9925 | 240                     | AA                              | TT              | 1947069779               |
| SNP_P4_194161_556  | NW_004521915.1 | Scaffold9925 | 556                     | TT                              | AA              | 1947069781               |
| SNP_P4_194162_564  | NW_004521915.1 | Scaffold9925 | 564                     | AA                              | GG              | 1947069783               |
| SNP_P4_194163_589  | NW_004521915.1 | Scaffold9925 | 589                     | CC                              | AA              | 1947069785               |
| SNP_P4_194164_597  | NW_004521915.1 | Scaffold9925 | 597                     | GG                              | CC              | 1947069787               |
| SNP_P4_194165_1750 | NW_004521917.1 | Scaffold9934 | 1750                    | CC                              | AA              | 1947069789               |
| SNP_P4_194166_493  | NW_004521919.1 | Scaffold9936 | 493                     | TT                              | CC              | 1947069791               |

| SNPs IDs            | Chromosome IDs | Chromosomes   | Physical positions (bp) | CDC Frontier (Reference genome) | (ILWC46 & LPNB) | NCBI SNPdb Accession IDs |
|---------------------|----------------|---------------|-------------------------|---------------------------------|-----------------|--------------------------|
| SNP_P4_194167_498   | NW_004521919.1 | Scaffold9936  | 498                     | CC                              | TT              | 1947069793               |
| SNP_P4_194168_625   | NW_004521919.1 | Scaffold9936  | 625                     | CC                              | TT              | 1947069795               |
| SNP_P4_194169_1017  | NW_004521919.1 | Scaffold9936  | 1017                    | CC                              | AA              | 1947069797               |
| SNP_P4_194170_1227  | NW_004521919.1 | Scaffold9936  | 1227                    | AA                              | GG              | 1947069799               |
| SNP_P4_194171_1641  | NW_004521921.1 | Scaffold9943  | 1641                    | AA                              | TT              | 1947069801               |
| SNP_P4_194172_1675  | NW_004521921.1 | Scaffold9943  | 1675                    | GG                              | AA              | 1947069803               |
| SNP_P4_194173_1711  | NW_004521921.1 | Scaffold9943  | 1711                    | AA                              | TT              | 1947069805               |
| SNP_P4_194174_1792  | NW_004521921.1 | Scaffold9943  | 1792                    | CC                              | TT              | 1947069807               |
| SNP_P4_194175_2051  | NW_004521921.1 | Scaffold9943  | 2051                    | TT                              | AA              | 1947069809               |
| SNP_P4_194177_432   | NW_004521929.1 | Scaffold9958  | 432                     | AA                              | TT              | 1947069811               |
| SNP_P4_194178_513   | NW_004521929.1 | Scaffold9958  | 513                     | AA                              | TT              | 1947069813               |
| SNP_P4_194179_813   | NW_004521929.1 | Scaffold9958  | 813                     | AA                              | GG              | 1947069815               |
| SNP_P4_194180_855   | NW_004521929.1 | Scaffold9958  | 855                     | GG                              | TT              | 1947069817               |
| SNP_P4_194181_858   | NW_004521929.1 | Scaffold9958  | 858                     | TT                              | AA              | 1947069819               |
| SNP_P4_194182_932   | NW_004521929.1 | Scaffold9958  | 932                     | CC                              | GG              | 1947069821               |
| SNP_P4_194183_4356  | NW_004521938.1 | Scaffold9982  | 4356                    | CC                              | TT              | 1947069823               |
| SNP_P4_194184_567   | NW_004521940.1 | Scaffold9992  | 567                     | GG                              | AA              | 1947069825               |
| SNP_P4_194185_716   | NW_004521940.1 | Scaffold9992  | 716                     | AA                              | CC              | 1947069827               |
| SNP_P4_194186_20316 | NW_004521940.1 | Scaffold9992  | 20316                   | GG                              | TT              | 1947069829               |
| SNP_P4_194187_20515 | NW_004521940.1 | Scaffold9992  | 20515                   | AA                              | TT              | 1947069831               |
| SNP_P4_194188_20657 | NW_004521940.1 | Scaffold9992  | 20657                   | TT                              | AA              | 1947069833               |
| SNP_P4_194189_653   | NW_004521942.1 | Scaffold9997  | 653                     | CC                              | TT              | 1947069835               |
| SNP_P4_194190_339   | NW_004521944.1 | Scaffold10003 | 339                     | CC                              | GG              | 1947069837               |
| SNP_P4_194191_865   | NW_004521944.1 | Scaffold10003 | 865                     | AA                              | CC              | 1947069839               |
| SNP_P4_194192_96    | NW_004521951.1 | Scaffold10028 | 96                      | GG                              | TT              | 1947069841               |
| SNP_P4_194193_339   | NW_004521951.1 | Scaffold10028 | 339                     | CC                              | AA              | 1947069843               |
| SNP_P4_194195_428   | NW_004521951.1 | Scaffold10028 | 428                     | TT                              | AA              | 1947069845               |
| SNP_P4_194196_18928 | NW_004521952.1 | Scaffold10029 | 18928                   | GG                              | CC              | 1947069847               |
| SNP_P4_194197_352   | NW_004521960.1 | Scaffold10046 | 352                     | GG                              | TT              | 1947069849               |
| SNP_P4_194198_909   | NW_004521963.1 | Scaffold10059 | 909                     | GG                              | AA              | 1947069851               |
| SNP_P4_194199_949   | NW_004521963.1 | Scaffold10059 | 949                     | CC                              | TT              | 1947069853               |
| SNP_P4_194200_511   | NW_004521965.1 | Scaffold10069 | 511                     | TT                              | AA              | 1947069855               |
| SNP_P4_194201_648   | NW_004521965.1 | Scaffold10069 | 648                     | GG                              | CC              | 1947069857               |
| SNP_P4_194202_537   | NW_004521966.1 | Scaffold10071 | 537                     | TT                              | GG              | 1947069859               |
| SNP_P4_194203_269   | NW_004521968.1 | Scaffold10073 | 269                     | CC                              | AA              | 1947069861               |
| SNP_P4_194205_4412  | NW_004521974.1 | Scaffold10103 | 4412                    | AA                              | GG              | 1947069863               |
| SNP_P4_194207_4595  | NW_004521974.1 | Scaffold10103 | 4595                    | CC                              | GG              | 1947069865               |
| SNP_P4_194208_130   | NW_004521980.1 | Scaffold10121 | 130                     | TT                              | CC              | 1947069867               |
| SNP_P4_194209_576   | NW_004521980.1 | Scaffold10121 | 576                     | AA                              | GG              | 1947069869               |
| SNP_P4_194210_594   | NW_004521980.1 | Scaffold10121 | 594                     | AA                              | TT              | 1947069871               |
| SNP_P4_194211_608   | NW_004521980.1 | Scaffold10121 | 608                     | TT                              | AA              | 1947069873               |
| SNP_P4_194212_617   | NW_004521980.1 | Scaffold10121 | 617                     | TT                              | AA              | 1947069875               |

| SNPs IDs           | Chromosome IDs | Chromosomes   | Physical positions (bp) | CDC Frontier (Reference genome) | (ILWC46 & LPNB) | NCBI SNPdb Accession IDs |
|--------------------|----------------|---------------|-------------------------|---------------------------------|-----------------|--------------------------|
| SNP_P4_194213_618  | NW_004521980.1 | Scaffold10121 | 618                     | TT                              | GG              | 1947069877               |
| SNP_P4_194214_646  | NW_004521980.1 | Scaffold10121 | 646                     | CC                              | TT              | 1947069879               |
| SNP_P4_194215_708  | NW_004521980.1 | Scaffold10121 | 708                     | TT                              | AA              | 1947069881               |
| SNP_P4_194216_709  | NW_004521980.1 | Scaffold10121 | 709                     | GG                              | CC              | 1947069883               |
| SNP_P4_194217_719  | NW_004521980.1 | Scaffold10121 | 719                     | CC                              | GG              | 1947069885               |
| SNP_P4_194218_728  | NW_004521980.1 | Scaffold10121 | 728                     | GG                              | AA              | 1947069887               |
| SNP_P4_194219_735  | NW_004521980.1 | Scaffold10121 | 735                     | TT                              | CC              | 1947069889               |
| SNP_P4_194220_5123 | NW_004521980.1 | Scaffold10121 | 5123                    | CC                              | TT              | 1947069891               |
| SNP_P4_194221_64   | NW_004521981.1 | Scaffold10124 | 64                      | TT                              | AA              | 1947069893               |
| SNP_P4_194222_65   | NW_004521981.1 | Scaffold10124 | 65                      | TT                              | CC              | 1947069895               |
| SNP_P4_194224_92   | NW_004521981.1 | Scaffold10124 | 92                      | GG                              | TT              | 1947069897               |
| SNP_P4_194225_130  | NW_004521981.1 | Scaffold10124 | 130                     | GG                              | TT              | 1947069899               |
| SNP_P4_194226_1608 | NW_004521982.1 | Scaffold10131 | 1608                    | CC                              | TT              | 1947069901               |
| SNP_P4_194227_351  | NW_004521983.1 | Scaffold10134 | 351                     | GG                              | CC              | 1947069903               |
| SNP_P4_194228_1499 | NW_004521983.1 | Scaffold10134 | 1499                    | TT                              | GG              | 1947069905               |
| SNP_P4_194229_1994 | NW_004521983.1 | Scaffold10134 | 1994                    | CC                              | TT              | 1947069907               |
| SNP_P4_194230_2089 | NW_004521983.1 | Scaffold10134 | 2089                    | TT                              | AA              | 1947069909               |
| SNP_P4_194231_2145 | NW_004521983.1 | Scaffold10134 | 2145                    | TT                              | CC              | 1947069911               |
| SNP_P4_194232_2173 | NW_004521983.1 | Scaffold10134 | 2173                    | CC                              | GG              | 1947069913               |
| SNP_P4_194233_2183 | NW_004521983.1 | Scaffold10134 | 2183                    | TT                              | AA              | 1947069915               |
| SNP_P4_194234_2196 | NW_004521983.1 | Scaffold10134 | 2196                    | TT                              | GG              | 1947069917               |
| SNP_P4_194235_2212 | NW_004521983.1 | Scaffold10134 | 2212                    | AA                              | GG              | 1947069919               |
| SNP_P4_194236_1065 | NW_004521984.1 | Scaffold10136 | 1065                    | GG                              | TT              | 1947069921               |
| SNP_P4_194238_709  | NW_004521988.1 | Scaffold10152 | 709                     | GG                              | AA              | 1947069923               |
| SNP_P4_194239_781  | NW_004521988.1 | Scaffold10152 | 781                     | GG                              | AA              | 1947069925               |
| SNP_P4_194240_832  | NW_004521988.1 | Scaffold10152 | 832                     | GG                              | TT              | 1947069927               |
| SNP_P4_194241_1084 | NW_004521988.1 | Scaffold10152 | 1084                    | AA                              | GG              | 1947069929               |
| SNP_P4_194242_475  | NW_004521989.1 | Scaffold10154 | 475                     | CC                              | AA              | 1947069931               |
| SNP_P4_194243_481  | NW_004521989.1 | Scaffold10154 | 481                     | CC                              | AA              | 1947069933               |
| SNP_P4_194244_497  | NW_004521989.1 | Scaffold10154 | 497                     | TT                              | AA              | 1947069935               |
| SNP_P4_194245_507  | NW_004521989.1 | Scaffold10154 | 507                     | AA                              | GG              | 1947069937               |
| SNP_P4_194246_530  | NW_004521989.1 | Scaffold10154 | 530                     | TT                              | AA              | 1947069939               |
| SNP_P4_194247_543  | NW_004521989.1 | Scaffold10154 | 543                     | GG                              | AA              | 1947069941               |
| SNP_P4_194248_576  | NW_004521989.1 | Scaffold10154 | 576                     | TT                              | AA              | 1947069943               |
| SNP_P4_194249_577  | NW_004521989.1 | Scaffold10154 | 577                     | GG                              | TT              | 1947069945               |
| SNP_P4_194250_640  | NW_004521989.1 | Scaffold10154 | 640                     | CC                              | AA              | 1947069947               |
| SNP_P4_194251_790  | NW_004521989.1 | Scaffold10154 | 790                     | CC                              | TT              | 1947069950               |
| SNP_P4_194253_898  | NW_004521989.1 | Scaffold10154 | 898                     | TT                              | AA              | 1947069952               |
| SNP_P4_194254_922  | NW_004521989.1 | Scaffold10154 | 922                     | TT                              | CC              | 1947069954               |
| SNP_P4_194255_928  | NW_004521989.1 | Scaffold10154 | 928                     | GG                              | AA              | 1947069956               |
| SNP_P4_194256_948  | NW_004521989.1 | Scaffold10154 | 948                     | AA                              | GG              | 1947069958               |
| SNP_P4_194257_971  | NW_004521989.1 | Scaffold10154 | 971                     | TT                              | CC              | 1947069960               |

| SNPs IDs            | Chromosome IDs | Chromosomes   | Physical positions (bp) | CDC Frontier (Reference genome) | (ILWC46 & LPNB) | NCBI SNPdb Accession IDs |
|---------------------|----------------|---------------|-------------------------|---------------------------------|-----------------|--------------------------|
| SNP_P4_194258_980   | NW_004521989.1 | Scaffold10154 | 980                     | CC                              | TT              | 1947069962               |
| SNP_P4_194259_982   | NW_004521989.1 | Scaffold10154 | 982                     | AA                              | CC              | 1947069964               |
| SNP_P4_194260_1001  | NW_004521989.1 | Scaffold10154 | 1001                    | CC                              | TT              | 1947069966               |
| SNP_P4_194261_1008  | NW_004521989.1 | Scaffold10154 | 1008                    | AA                              | GG              | 1947069968               |
| SNP_P4_194262_1643  | NW_004521991.1 | Scaffold10158 | 1643                    | AA                              | GG              | 1947069970               |
| SNP_P4_194263_1948  | NW_004521991.1 | Scaffold10158 | 1948                    | CC                              | TT              | 1947069972               |
| SNP_P4_194264_1982  | NW_004521991.1 | Scaffold10158 | 1982                    | TT                              | AA              | 1947069974               |
| SNP_P4_194265_2030  | NW_004521991.1 | Scaffold10158 | 2030                    | CC                              | TT              | 1947069976               |
| SNP_P4_194266_16344 | NW_004521991.1 | Scaffold10158 | 16344                   | AA                              | GG              | 1947069978               |
| SNP_P4_194267_18212 | NW_004521991.1 | Scaffold10158 | 18212                   | CC                              | GG              | 1947069980               |
| SNP_P4_194268_337   | NW_004521994.1 | Scaffold10180 | 337                     | TT                              | AA              | 1947069982               |
| SNP_P4_194270_1068  | NW_004521994.1 | Scaffold10180 | 1068                    | AA                              | TT              | 1947069984               |
| SNP_P4_194271_1086  | NW_004521994.1 | Scaffold10180 | 1086                    | TT                              | AA              | 1947069986               |
| SNP_P4_194272_1283  | NW_004521994.1 | Scaffold10180 | 1283                    | CC                              | TT              | 1947069988               |
| SNP_P4_194273_1315  | NW_004521994.1 | Scaffold10180 | 1315                    | GG                              | AA              | 1947069990               |
| SNP_P4_194274_1059  | NW_004521997.1 | Scaffold10186 | 1059                    | TT                              | CC              | 1947069992               |
| SNP_P4_194275_1543  | NW_004521997.1 | Scaffold10186 | 1543                    | TT                              | AA              | 1947069994               |
| SNP_P4_194276_1552  | NW_004521997.1 | Scaffold10186 | 1552                    | TT                              | CC              | 1947069996               |
| SNP_P4_194277_1606  | NW_004521997.1 | Scaffold10186 | 1606                    | TT                              | CC              | 1947069998               |
| SNP_P4_194278_1616  | NW_004521997.1 | Scaffold10186 | 1616                    | TT                              | CC              | 1947070000               |
| SNP_P4_194279_64    | NW_004521998.1 | Scaffold10196 | 64                      | CC                              | TT              | 1947070002               |
| SNP_P4_194280_104   | NW_004521998.1 | Scaffold10196 | 104                     | AA                              | TT              | 1947070004               |
| SNP_P4_194281_497   | NW_004521998.1 | Scaffold10196 | 497                     | GG                              | TT              | 1947070006               |
| SNP_P4_194282_1056  | NW_004521998.1 | Scaffold10196 | 1056                    | GG                              | AA              | 1947070008               |
| SNP_P4_194283_1064  | NW_004521998.1 | Scaffold10196 | 1064                    | CC                              | TT              | 1947070010               |
| SNP_P4_194284_1314  | NW_004521998.1 | Scaffold10196 | 1314                    | GG                              | AA              | 1947070012               |
| SNP_P4_194285_1329  | NW_004521998.1 | Scaffold10196 | 1329                    | GG                              | AA              | 1947070014               |
| SNP_P4_194286_1345  | NW_004521998.1 | Scaffold10196 | 1345                    | CC                              | GG              | 1947070016               |
| SNP_P4_194287_1013  | NW_004522004.1 | Scaffold10218 | 1013                    | AA                              | GG              | 1947070018               |
| SNP_P4_194288_1256  | NW_004522004.1 | Scaffold10218 | 1256                    | TT                              | CC              | 1947070020               |
| SNP_P4_194289_1614  | NW_004522004.1 | Scaffold10218 | 1614                    | TT                              | AA              | 1947070022               |
| SNP_P4_194290_1665  | NW_004522006.1 | Scaffold10227 | 1665                    | CC                              | TT              | 1947070024               |
| SNP_P4_194291_3273  | NW_004522006.1 | Scaffold10227 | 3273                    | GG                              | AA              | 1947070026               |
| SNP_P4_194292_6034  | NW_004522006.1 | Scaffold10227 | 6034                    | GG                              | AA              | 1947070028               |
| SNP_P4_194294_6941  | NW_004522006.1 | Scaffold10227 | 6941                    | TT                              | CC              | 1947070030               |
| SNP_P4_194295_9391  | NW_004522006.1 | Scaffold10227 | 9391                    | TT                              | AA              | 1947070032               |
| SNP_P4_194296_10184 | NW_004522006.1 | Scaffold10227 | 10184                   | GG                              | AA              | 1947070034               |
| SNP_P4_194297_11246 | NW_004522006.1 | Scaffold10227 | 11246                   | AA                              | GG              | 1947070036               |
| SNP_P4_194298_11267 | NW_004522006.1 | Scaffold10227 | 11267                   | AA                              | TT              | 1947070038               |
| SNP_P4_194299_11324 | NW_004522006.1 | Scaffold10227 | 11324                   | AA                              | GG              | 1947070040               |
| SNP_P4_194300_11351 | NW_004522006.1 | Scaffold10227 | 11351                   | CC                              | TT              | 1947070042               |
| SNP_P4_194301_11418 | NW_004522006.1 | Scaffold10227 | 11418                   | GG                              | AA              | 1947070044               |

| SNPs IDs            | Chromosome IDs | Chromosomes   | Physical positions (bp) | CDC Frontier (Reference genome) | (ILWC46 & LPNB) | NCBI SNPdb Accession IDs |
|---------------------|----------------|---------------|-------------------------|---------------------------------|-----------------|--------------------------|
| SNP_P4_194302_11451 | NW_004522006.1 | Scaffold10227 | 11451                   | TT                              | CC              | 1947070046               |
| SNP_P4_194303_11473 | NW_004522006.1 | Scaffold10227 | 11473                   | AA                              | TT              | 1947070048               |
| SNP_P4_194304_11483 | NW_004522006.1 | Scaffold10227 | 11483                   | GG                              | TT              | 1947070050               |
| SNP_P4_194305_11503 | NW_004522006.1 | Scaffold10227 | 11503                   | GG                              | TT              | 1947070052               |
| SNP_P4_194306_11540 | NW_004522006.1 | Scaffold10227 | 11540                   | CC                              | AA              | 1947070054               |
| SNP_P4_194307_11649 | NW_004522006.1 | Scaffold10227 | 11649                   | AA                              | GG              | 1947070056               |
| SNP_P4_194308_12048 | NW_004522006.1 | Scaffold10227 | 12048                   | CC                              | TT              | 1947070058               |
| SNP_P4_194309_12055 | NW_004522006.1 | Scaffold10227 | 12055                   | GG                              | AA              | 1947070060               |
| SNP_P4_194310_12108 | NW_004522006.1 | Scaffold10227 | 12108                   | TT                              | CC              | 1947070062               |
| SNP_P4_194312_12130 | NW_004522006.1 | Scaffold10227 | 12130                   | GG                              | AA              | 1947070064               |
| SNP_P4_194313_142   | NW_004522007.1 | Scaffold10231 | 142                     | CC                              | TT              | 1947070066               |
| SNP_P4_194314_259   | NW_004522007.1 | Scaffold10231 | 259                     | CC                              | TT              | 1947070068               |
| SNP_P4_194315_417   | NW_004522007.1 | Scaffold10231 | 417                     | GG                              | AA              | 1947070070               |
| SNP_P4_194317_672   | NW_004522007.1 | Scaffold10231 | 672                     | CC                              | TT              | 1947070072               |
| SNP_P4_194318_56    | NW_004522008.1 | Scaffold10232 | 56                      | TT                              | GG              | 1947070074               |
| SNP_P4_194319_64    | NW_004522008.1 | Scaffold10232 | 64                      | AA                              | GG              | 1947070076               |
| SNP_P4_194320_70    | NW_004522008.1 | Scaffold10232 | 70                      | TT                              | CC              | 1947070078               |
| SNP_P4_194321_92    | NW_004522008.1 | Scaffold10232 | 92                      | CC                              | TT              | 1947070080               |
| SNP_P4_194322_101   | NW_004522008.1 | Scaffold10232 | 101                     | AA                              | CC              | 1947070082               |
| SNP_P4_194323_140   | NW_004522008.1 | Scaffold10232 | 140                     | AA                              | CC              | 1947070084               |
| SNP_P4_194324_142   | NW_004522008.1 | Scaffold10232 | 142                     | TT                              | AA              | 1947070086               |
| SNP_P4_194325_151   | NW_004522008.1 | Scaffold10232 | 151                     | GG                              | AA              | 1947070088               |
| SNP_P4_194326_343   | NW_004522008.1 | Scaffold10232 | 343                     | CC                              | AA              | 1947070091               |
| SNP_P4_194327_440   | NW_004522008.1 | Scaffold10232 | 440                     | CC                              | TT              | 1947070093               |
| SNP_P4_194328_444   | NW_004522008.1 | Scaffold10232 | 444                     | AA                              | GG              | 1947070095               |
| SNP_P4_194329_560   | NW_004522008.1 | Scaffold10232 | 560                     | GG                              | AA              | 1947070097               |
| SNP_P4_194330_564   | NW_004522008.1 | Scaffold10232 | 564                     | GG                              | CC              | 1947070099               |
| SNP_P4_194331_602   | NW_004522008.1 | Scaffold10232 | 602                     | CC                              | TT              | 1947070101               |
| SNP_P4_194332_725   | NW_004522008.1 | Scaffold10232 | 725                     | GG                              | TT              | 1947070103               |
| SNP_P4_194334_884   | NW_004522008.1 | Scaffold10232 | 884                     | TT                              | GG              | 1947070105               |
| SNP_P4_194335_887   | NW_004522008.1 | Scaffold10232 | 887                     | AA                              | CC              | 1947070107               |
| SNP_P4_194336_944   | NW_004522008.1 | Scaffold10232 | 944                     | TT                              | GG              | 1947070109               |
| SNP_P4_194337_361   | NW_004522009.1 | Scaffold10238 | 361                     | TT                              | CC              | 1947070111               |
| SNP_P4_194338_1012  | NW_004522009.1 | Scaffold10238 | 1012                    | GG                              | AA              | 1947070113               |
| SNP_P4_194339_1145  | NW_004522009.1 | Scaffold10238 | 1145                    | AA                              | GG              | 1947070115               |
| SNP_P4_194340_1177  | NW_004522009.1 | Scaffold10238 | 1177                    | CC                              | TT              | 1947070117               |
| SNP_P4_194341_1350  | NW_004522009.1 | Scaffold10238 | 1350                    | TT                              | CC              | 1947070119               |
| SNP_P4_194342_1394  | NW_004522009.1 | Scaffold10238 | 1394                    | GG                              | AA              | 1947070121               |
| SNP_P4_194343_1411  | NW_004522009.1 | Scaffold10238 | 1411                    | TT                              | CC              | 1947070123               |
| SNP_P4_194344_1412  | NW_004522009.1 | Scaffold10238 | 1412                    | AA                              | CC              | 1947070125               |
| SNP_P4_194345_1436  | NW_004522009.1 | Scaffold10238 | 1436                    | AA                              | TT              | 1947070127               |
| SNP_P4_194346_1437  | NW_004522009.1 | Scaffold10238 | 1437                    | TT                              | AA              | 1947070129               |

| SNPs IDs            | Chromosome IDs | Chromosomes   | Physical positions (bp) | CDC Frontier (Reference genome) | (ILWC46 & LPNB) | NCBI SNPdb Accession IDs |
|---------------------|----------------|---------------|-------------------------|---------------------------------|-----------------|--------------------------|
| SNP_P4_194347_1439  | NW_004522009.1 | Scaffold10238 | 1439                    | AA                              | TT              | 1947070131               |
| SNP_P4_194348_1464  | NW_004522009.1 | Scaffold10238 | 1464                    | TT                              | CC              | 1947070133               |
| SNP_P4_194350_944   | NW_004522013.1 | Scaffold10244 | 944                     | GG                              | AA              | 1947070135               |
| SNP_P4_194351_1445  | NW_004522013.1 | Scaffold10244 | 1445                    | TT                              | CC              | 1947070137               |
| SNP_P4_194352_1713  | NW_004522013.1 | Scaffold10244 | 1713                    | AA                              | TT              | 1947070139               |
| SNP_P4_194353_1744  | NW_004522013.1 | Scaffold10244 | 1744                    | GG                              | TT              | 1947070142               |
| SNP_P4_194354_1770  | NW_004522013.1 | Scaffold10244 | 1770                    | TT                              | GG              | 1947070144               |
| SNP_P4_194355_1851  | NW_004522013.1 | Scaffold10244 | 1851                    | GG                              | AA              | 1947070146               |
| SNP_P4_194356_145   | NW_004522014.1 | Scaffold10246 | 145                     | GG                              | AA              | 1947070148               |
| SNP_P4_194357_407   | NW_004522021.1 | Scaffold10285 | 407                     | AA                              | GG              | 1947070150               |
| SNP_P4_194358_784   | NW_004522021.1 | Scaffold10285 | 784                     | CC                              | TT              | 1947070152               |
| SNP_P4_194359_888   | NW_004522021.1 | Scaffold10285 | 888                     | TT                              | AA              | 1947070154               |
| SNP_P4_194361_64    | NW_004522022.1 | Scaffold10299 | 64                      | AA                              | GG              | 1947070156               |
| SNP_P4_194362_18807 | NW_004522022.1 | Scaffold10299 | 18807                   | AA                              | TT              | 1947070158               |
| SNP_P4_194363_18821 | NW_004522022.1 | Scaffold10299 | 18821                   | TT                              | CC              | 1947070160               |
| SNP_P4_194364_18849 | NW_004522022.1 | Scaffold10299 | 18849                   | TT                              | AA              | 1947070162               |
| SNP_P4_194365_18869 | NW_004522022.1 | Scaffold10299 | 18869                   | AA                              | CC              | 1947070164               |
| SNP_P4_194366_18978 | NW_004522022.1 | Scaffold10299 | 18978                   | GG                              | AA              | 1947070166               |
| SNP_P4_194367_18983 | NW_004522022.1 | Scaffold10299 | 18983                   | TT                              | CC              | 1947070168               |
| SNP_P4_194368_19158 | NW_004522022.1 | Scaffold10299 | 19158                   | GG                              | AA              | 1947070170               |
| SNP_P4_194369_19166 | NW_004522022.1 | Scaffold10299 | 19166                   | CC                              | TT              | 1947070172               |
| SNP_P4_194370_19196 | NW_004522022.1 | Scaffold10299 | 19196                   | GG                              | TT              | 1947070174               |
| SNP_P4_194371_19334 | NW_004522022.1 | Scaffold10299 | 19334                   | CC                              | TT              | 1947070177               |
| SNP_P4_194372_19373 | NW_004522022.1 | Scaffold10299 | 19373                   | TT                              | AA              | 1947070179               |
| SNP_P4_194373_19416 | NW_004522022.1 | Scaffold10299 | 19416                   | GG                              | CC              | 1947070181               |
| SNP_P4_194374_666   | NW_004522023.1 | Scaffold10304 | 666                     | TT                              | GG              | 1947070183               |
| SNP_P4_194375_884   | NW_004522023.1 | Scaffold10304 | 884                     | TT                              | AA              | 1947070185               |
| SNP_P4_194376_1006  | NW_004522023.1 | Scaffold10304 | 1006                    | TT                              | CC              | 1947070187               |
| SNP_P4_194377_409   | NW_004522024.1 | Scaffold10305 | 409                     | AA                              | GG              | 1947070189               |
| SNP_P4_194378_527   | NW_004522024.1 | Scaffold10305 | 527                     | CC                              | TT              | 1947070191               |
| SNP_P4_194379_570   | NW_004522024.1 | Scaffold10305 | 570                     | CC                              | GG              | 1947070193               |
| SNP_P4_194380_1522  | NW_004522025.1 | Scaffold10307 | 1522                    | CC                              | GG              | 1947070195               |
| SNP_P4_194381_1555  | NW_004522025.1 | Scaffold10307 | 1555                    | GG                              | AA              | 1947070197               |
| SNP_P4_194382_1569  | NW_004522025.1 | Scaffold10307 | 1569                    | CC                              | GG              | 1947070199               |
| SNP_P4_194383_1664  | NW_004522025.1 | Scaffold10307 | 1664                    | GG                              | AA              | 1947070201               |
| SNP_P4_194384_659   | NW_004522029.1 | Scaffold10320 | 659                     | CC                              | TT              | 1947070202               |
| SNP_P4_194385_1009  | NW_004522029.1 | Scaffold10320 | 1009                    | TT                              | GG              | 1947070204               |
| SNP_P4_194386_764   | NW_004522031.1 | Scaffold10324 | 764                     | CC                              | TT              | 1947070206               |
| SNP_P4_194387_11822 | NW_004522032.1 | Scaffold10330 | 11822                   | AA                              | TT              | 1947070208               |
| SNP_P4_194388_11825 | NW_004522032.1 | Scaffold10330 | 11825                   | TT                              | CC              | 1947070210               |
| SNP_P4_194389_647   | NW_004522035.1 | Scaffold10345 | 647                     | CC                              | GG              | 1947070212               |
| SNP_P4_194390_649   | NW_004522035.1 | Scaffold10345 | 649                     | GG                              | TT              | 1947070214               |



| SNPs IDs           | Chromosome IDs | Chromosomes   | Physical positions (bp) | CDC Frontier (Reference genome) | (ILWC46 & LPNB) | NCBI SNPdb Accession IDs |
|--------------------|----------------|---------------|-------------------------|---------------------------------|-----------------|--------------------------|
| SNP_P4_194391_918  | NW_004522035.1 | Scaffold10345 | 918                     | CC                              | TT              | 1947070216               |
| SNP_P4_194392_1204 | NW_004522035.1 | Scaffold10345 | 1204                    | TT                              | GG              | 1947070218               |
| SNP_P4_194393_91   | NW_004522037.1 | Scaffold10354 | 91                      | TT                              | AA              | 1947070220               |
| SNP_P4_194394_299  | NW_004522037.1 | Scaffold10354 | 299                     | AA                              | GG              | 1947070222               |
| SNP_P4_194395_317  | NW_004522037.1 | Scaffold10354 | 317                     | GG                              | CC              | 1947070224               |
| SNP_P4_194396_334  | NW_004522037.1 | Scaffold10354 | 334                     | TT                              | AA              | 1947070226               |
| SNP_P4_194399_514  | NW_004522037.1 | Scaffold10354 | 514                     | TT                              | CC              | 1947070228               |
| SNP_P4_194400_526  | NW_004522037.1 | Scaffold10354 | 526                     | TT                              | GG              | 1947070230               |
| SNP_P4_194401_535  | NW_004522037.1 | Scaffold10354 | 535                     | CC                              | TT              | 1947070239               |
| SNP_P4_194402_587  | NW_004522037.1 | Scaffold10354 | 587                     | TT                              | AA              | 1947070241               |
| SNP_P4_194403_347  | NW_004522039.1 | Scaffold10356 | 347                     | CC                              | AA              | 1947070243               |
| SNP_P4_194404_348  | NW_004522039.1 | Scaffold10356 | 348                     | GG                              | TT              | 1947070245               |
| SNP_P4_194405_406  | NW_004522039.1 | Scaffold10356 | 406                     | CC                              | AA              | 1947070247               |
| SNP_P4_194406_439  | NW_004522039.1 | Scaffold10356 | 439                     | GG                              | AA              | 1947070249               |
| SNP_P4_194407_504  | NW_004522039.1 | Scaffold10356 | 504                     | CC                              | TT              | 1947070251               |
| SNP_P4_194408_575  | NW_004522039.1 | Scaffold10356 | 575                     | CC                              | TT              | 1947070253               |
| SNP_P4_194409_623  | NW_004522039.1 | Scaffold10356 | 623                     | TT                              | GG              | 1947070255               |
| SNP_P4_194410_764  | NW_004522039.1 | Scaffold10356 | 764                     | CC                              | AA              | 1947070257               |
| SNP_P4_194411_64   | NW_004522041.1 | Scaffold10361 | 64                      | CC                              | AA              | 1947070259               |
| SNP_P4_194412_181  | NW_004522041.1 | Scaffold10361 | 181                     | AA                              | TT              | 1947070261               |
| SNP_P4_194413_601  | NW_004522041.1 | Scaffold10361 | 601                     | AA                              | TT              | 1947070262               |
| SNP_P4_194414_630  | NW_004522041.1 | Scaffold10361 | 630                     | GG                              | CC              | 1947070264               |
| SNP_P4_194415_653  | NW_004522041.1 | Scaffold10361 | 653                     | CC                              | AA              | 1947070266               |
| SNP_P4_194416_657  | NW_004522041.1 | Scaffold10361 | 657                     | AA                              | GG              | 1947070268               |
| SNP_P4_194417_708  | NW_004522041.1 | Scaffold10361 | 708                     | GG                              | AA              | 1947070270               |
| SNP_P4_194418_757  | NW_004522041.1 | Scaffold10361 | 757                     | AA                              | TT              | 1947070272               |
| SNP_P4_194419_767  | NW_004522041.1 | Scaffold10361 | 767                     | CC                              | AA              | 1947070274               |
| SNP_P4_194421_932  | NW_004522041.1 | Scaffold10361 | 932                     | TT                              | AA              | 1947070276               |
| SNP_P4_194422_947  | NW_004522041.1 | Scaffold10361 | 947                     | CC                              | GG              | 1947070278               |
| SNP_P4_194423_949  | NW_004522041.1 | Scaffold10361 | 949                     | AA                              | GG              | 1947070280               |
| SNP_P4_194424_960  | NW_004522041.1 | Scaffold10361 | 960                     | GG                              | AA              | 1947070282               |
| SNP_P4_194425_971  | NW_004522041.1 | Scaffold10361 | 971                     | GG                              | TT              | 1947070284               |
| SNP_P4_194426_975  | NW_004522041.1 | Scaffold10361 | 975                     | TT                              | CC              | 1947070286               |
| SNP_P4_194427_1005 | NW_004522041.1 | Scaffold10361 | 1005                    | CC                              | AA              | 1947070288               |
| SNP_P4_194428_1013 | NW_004522041.1 | Scaffold10361 | 1013                    | TT                              | AA              | 1947070290               |
| SNP_P4_194429_1014 | NW_004522041.1 | Scaffold10361 | 1014                    | CC                              | TT              | 1947070292               |
| SNP_P4_194430_1015 | NW_004522041.1 | Scaffold10361 | 1015                    | AA                              | TT              | 1947070294               |
| SNP_P4_194431_1042 | NW_004522041.1 | Scaffold10361 | 1042                    | TT                              | AA              | 1947070296               |
| SNP_P4_194432_1049 | NW_004522041.1 | Scaffold10361 | 1049                    | GG                              | CC              | 1947070298               |
| SNP_P4_194433_1072 | NW_004522041.1 | Scaffold10361 | 1072                    | CC                              | TT              | 1947070300               |
| SNP_P4_194434_1116 | NW_004522041.1 | Scaffold10361 | 1116                    | GG                              | CC              | 1947070302               |
| SNP_P4_194435_1117 | NW_004522041.1 | Scaffold10361 | 1117                    | AA                              | TT              | 1947070304               |

| SNPs IDs            | Chromosome IDs | Chromosomes   | Physical positions (bp) | CDC Frontier (Reference genome) | (ILWC46 & LPNB) | NCBI SNPdb Accession IDs |
|---------------------|----------------|---------------|-------------------------|---------------------------------|-----------------|--------------------------|
| SNP_P4_194436_1129  | NW_004522041.1 | Scaffold10361 | 1129                    | GG                              | AA              | 1947070306               |
| SNP_P4_194437_1264  | NW_004522041.1 | Scaffold10361 | 1264                    | TT                              | CC              | 1947070308               |
| SNP_P4_194438_64    | NW_004522046.1 | Scaffold10378 | 64                      | TT                              | CC              | 1947070310               |
| SNP_P4_194439_123   | NW_004522046.1 | Scaffold10378 | 123                     | AA                              | GG              | 1947070312               |
| SNP_P4_194440_190   | NW_004522046.1 | Scaffold10378 | 190                     | TT                              | CC              | 1947070314               |
| SNP_P4_194441_272   | NW_004522046.1 | Scaffold10378 | 272                     | AA                              | CC              | 1947070316               |
| SNP_P4_194442_292   | NW_004522046.1 | Scaffold10378 | 292                     | AA                              | CC              | 1947070318               |
| SNP_P4_194443_303   | NW_004522046.1 | Scaffold10378 | 303                     | GG                              | TT              | 1947070320               |
| SNP_P4_194444_345   | NW_004522046.1 | Scaffold10378 | 345                     | TT                              | CC              | 1947070322               |
| SNP_P4_194445_592   | NW_004522046.1 | Scaffold10378 | 592                     | AA                              | CC              | 1947070324               |
| SNP_P4_194446_680   | NW_004522046.1 | Scaffold10378 | 680                     | TT                              | GG              | 1947070326               |
| SNP_P4_194447_687   | NW_004522046.1 | Scaffold10378 | 687                     | CC                              | TT              | 1947070328               |
| SNP_P4_194448_741   | NW_004522046.1 | Scaffold10378 | 741                     | CC                              | AA              | 1947070330               |
| SNP_P4_194449_771   | NW_004522046.1 | Scaffold10378 | 771                     | TT                              | CC              | 1947070332               |
| SNP_P4_194450_787   | NW_004522046.1 | Scaffold10378 | 787                     | AA                              | TT              | 1947070334               |
| SNP_P4_194451_788   | NW_004522046.1 | Scaffold10378 | 788                     | AA                              | CC              | 1947070336               |
| SNP_P4_194452_792   | NW_004522046.1 | Scaffold10378 | 792                     | GG                              | AA              | 1947070338               |
| SNP_P4_194453_822   | NW_004522046.1 | Scaffold10378 | 822                     | TT                              | CC              | 1947070340               |
| SNP_P4_194454_873   | NW_004522046.1 | Scaffold10378 | 873                     | CC                              | TT              | 1947070342               |
| SNP_P4_194455_1093  | NW_004522046.1 | Scaffold10378 | 1093                    | AA                              | TT              | 1947070344               |
| SNP_P4_194456_1117  | NW_004522046.1 | Scaffold10378 | 1117                    | TT                              | AA              | 1947070345               |
| SNP_P4_194457_1175  | NW_004522046.1 | Scaffold10378 | 1175                    | GG                              | TT              | 1947070347               |
| SNP_P4_194458_588   | NW_004522047.1 | Scaffold10379 | 588                     | TT                              | CC              | 1947070349               |
| SNP_P4_194459_186   | NW_004522051.1 | Scaffold10392 | 186                     | TT                              | CC              | 1947070351               |
| SNP_P4_194460_346   | NW_004522051.1 | Scaffold10392 | 346                     | TT                              | AA              | 1947070353               |
| SNP_P4_194463_1191  | NW_004522059.1 | Scaffold10415 | 1191                    | TT                              | CC              | 1947070355               |
| SNP_P4_194464_276   | NW_004522062.1 | Scaffold10419 | 276                     | TT                              | GG              | 1947070357               |
| SNP_P4_194465_284   | NW_004522062.1 | Scaffold10419 | 284                     | AA                              | GG              | 1947070359               |
| SNP_P4_194466_532   | NW_004522062.1 | Scaffold10419 | 532                     | GG                              | AA              | 1947070361               |
| SNP_P4_194467_550   | NW_004522062.1 | Scaffold10419 | 550                     | AA                              | GG              | 1947070363               |
| SNP_P4_194468_741   | NW_004522062.1 | Scaffold10419 | 741                     | GG                              | AA              | 1947070365               |
| SNP_P4_194470_8993  | NW_004522062.1 | Scaffold10419 | 8993                    | AA                              | CC              | 1947070367               |
| SNP_P4_194471_29892 | NW_004522063.1 | Scaffold10420 | 29892                   | CC                              | TT              | 1947070369               |
| SNP_P4_194472_38344 | NW_004522063.1 | Scaffold10420 | 38344                   | TT                              | AA              | 1947070371               |
| SNP_P4_194473_38390 | NW_004522063.1 | Scaffold10420 | 38390                   | AA                              | GG              | 1947070373               |
| SNP_P4_194478_615   | NW_004522120.1 | C11048340     | 615                     | AA                              | GG              | 1947070375               |
| SNP_P4_194479_659   | NW_004522120.1 | C11048340     | 659                     | CC                              | GG              | 1947070377               |
| SNP_P4_194480_664   | NW_004522120.1 | C11048340     | 664                     | TT                              | CC              | 1947070379               |
| SNP_P4_194481_665   | NW_004522120.1 | C11048340     | 665                     | GG                              | AA              | 1947070381               |
| SNP_P4_194482_683   | NW_004522120.1 | C11048340     | 683                     | GG                              | AA              | 1947070383               |
| SNP_P4_194483_790   | NW_004522120.1 | C11048340     | 790                     | TT                              | CC              | 1947070385               |
| SNP_P4_194484_900   | NW_004522120.1 | C11048340     | 900                     | CC                              | AA              | 1947070387               |

| SNPs IDs           | Chromosome IDs | Chromosomes | Physical positions (bp) | CDC Frontier (Reference genome) | (ILWC46 & LPNB) | NCBI SNPdb Accession IDs |
|--------------------|----------------|-------------|-------------------------|---------------------------------|-----------------|--------------------------|
| SNP_P4_194485_904  | NW_004522120.1 | C11048340   | 904                     | AA                              | GG              | 1947070389               |
| SNP_P4_194486_934  | NW_004522120.1 | C11048340   | 934                     | CC                              | TT              | 1947070391               |
| SNP_P4_194487_936  | NW_004522120.1 | C11048340   | 936                     | AA                              | GG              | 1947070393               |
| SNP_P4_194488_382  | NW_004522122.1 | C11048522   | 382                     | AA                              | GG              | 1947070395               |
| SNP_P4_194489_467  | NW_004522132.1 | C11049822   | 467                     | AA                              | GG              | 1947070397               |
| SNP_P4_194494_784  | NW_004522172.1 | C11054110   | 784                     | CC                              | AA              | 1947070399               |
| SNP_P4_194499_255  | NW_004522212.1 | C11058436   | 255                     | CC                              | TT              | 1947070401               |
| SNP_P4_194500_846  | NW_004522221.1 | C11059834   | 846                     | CC                              | TT              | 1947070403               |
| SNP_P4_194501_875  | NW_004522221.1 | C11059834   | 875                     | TT                              | CC              | 1947070405               |
| SNP_P4_194502_937  | NW_004522221.1 | C11059834   | 937                     | CC                              | GG              | 1947070407               |
| SNP_P4_194503_1083 | NW_004522221.1 | C11059834   | 1083                    | TT                              | GG              | 1947070409               |
| SNP_P4_194504_1102 | NW_004522221.1 | C11059834   | 1102                    | GG                              | CC              | 1947070411               |
| SNP_P4_194505_1111 | NW_004522221.1 | C11059834   | 1111                    | AA                              | GG              | 1947070413               |
| SNP_P4_194511_482  | NW_004522265.1 | C11064028   | 482                     | GG                              | CC              | 1947070415               |
| SNP_P4_194516_1099 | NW_004522278.1 | C11065790   | 1099                    | GG                              | AA              | 1947070417               |
| SNP_P4_194517_873  | NW_004522293.1 | C11067886   | 873                     | TT                              | CC              | 1947070419               |
| SNP_P4_194526_648  | NW_004522392.1 | C11079732   | 648                     | GG                              | AA              | 1947070421               |
| SNP_P4_194529_430  | NW_004522394.1 | C11079828   | 430                     | CC                              | AA              | 1947070423               |
| SNP_P4_194534_416  | NW_004522406.1 | C11082608   | 416                     | AA                              | TT              | 1947070425               |
| SNP_P4_194535_697  | NW_004522421.1 | C11085144   | 697                     | TT                              | GG              | 1947070427               |
| SNP_P4_194536_100  | NW_004522424.1 | C11085654   | 100                     | CC                              | TT              | 1947070429               |
| SNP_P4_194537_1344 | NW_004522431.1 | C11086502   | 1344                    | CC                              | AA              | 1947070431               |
| SNP_P4_194538_175  | NW_004522436.1 | C11087430   | 175                     | GG                              | AA              | 1947070433               |
| SNP_P4_194539_1030 | NW_004522436.1 | C11087430   | 1030                    | CC                              | TT              | 1947070435               |
| SNP_P4_194540_1234 | NW_004522454.1 | C11092796   | 1234                    | AA                              | GG              | 1947070437               |
| SNP_P4_194543_322  | NW_004522501.1 | C11102242   | 322                     | CC                              | AA              | 1947070439               |
| SNP_P4_194544_1784 | NW_004522537.1 | C11109044   | 1784                    | TT                              | CC              | 1947070442               |
| SNP_P4_194545_1712 | NW_004522543.1 | C11110620   | 1712                    | GG                              | AA              | 1947070444               |
| SNP_P4_194546_388  | NW_004522574.1 | C11119398   | 388                     | AA                              | CC              | 1947070446               |
| SNP_P4_194547_389  | NW_004522574.1 | C11119398   | 389                     | AA                              | GG              | 1947070448               |
| SNP_P4_194548_466  | NW_004522574.1 | C11119398   | 466                     | GG                              | CC              | 1947070450               |
| SNP_P4_194551_1119 | NW_004522574.1 | C11119398   | 1119                    | GG                              | TT              | 1947070452               |
| SNP_P4_194553_1255 | NW_004522574.1 | C11119398   | 1255                    | GG                              | TT              | 1947070454               |
| SNP_P4_194554_1487 | NW_004522574.1 | C11119398   | 1487                    | AA                              | CC              | 1947070456               |
| SNP_P4_194555_1488 | NW_004522574.1 | C11119398   | 1488                    | TT                              | CC              | 1947070458               |
| SNP_P4_194556_1571 | NW_004522574.1 | C11119398   | 1571                    | GG                              | TT              | 1947070460               |
| SNP_P4_194557_2414 | NW_004522574.1 | C11119398   | 2414                    | CC                              | TT              | 1947070462               |
| SNP_P4_194558_2428 | NW_004522574.1 | C11119398   | 2428                    | TT                              | CC              | 1947070464               |
| SNP_P4_194559_769  | NW_004522586.1 | C11122410   | 769                     | CC                              | GG              | 1947070466               |
| SNP_P4_194560_1977 | NW_004522586.1 | C11122410   | 1977                    | AA                              | GG              | 1947070468               |
| SNP_P4_194562_2028 | NW_004522586.1 | C11122410   | 2028                    | AA                              | TT              | 1947070470               |
| SNP_P4_194563_2239 | NW_004522586.1 | C11122410   | 2239                    | AA                              | GG              | 1947070472               |

| SNPs IDs           | Chromosome IDs | Chromosomes | Physical positions (bp) | CDC Frontier (Reference genome) | (ILWC46 & LPNB) | NCBI SNPdb Accession IDs |
|--------------------|----------------|-------------|-------------------------|---------------------------------|-----------------|--------------------------|
| SNP_P4_194564_2264 | NW_004522586.1 | C11122410   | 2264                    | CC                              | GG              | 1947070474               |
| SNP_P4_194565_2265 | NW_004522586.1 | C11122410   | 2265                    | CC                              | TT              | 1947070476               |
| SNP_P4_194566_2513 | NW_004522586.1 | C11122410   | 2513                    | AA                              | TT              | 1947070478               |
| SNP_P4_194567_2834 | NW_004522607.1 | C11129662   | 2834                    | CC                              | TT              | 1947070480               |
| SNP_P4_194568_2906 | NW_004522607.1 | C11129662   | 2906                    | GG                              | AA              | 1947070482               |
| SNP_P4_194569_2911 | NW_004522607.1 | C11129662   | 2911                    | AA                              | GG              | 1947070484               |
| SNP_P4_194570_2945 | NW_004522607.1 | C11129662   | 2945                    | AA                              | GG              | 1947070486               |
| SNP_P4_194571_3089 | NW_004522607.1 | C11129662   | 3089                    | CC                              | TT              | 1947070488               |
| SNP_P4_194572_3110 | NW_004522607.1 | C11129662   | 3110                    | CC                              | TT              | 1947070490               |
| SNP_P4_194573_3118 | NW_004522607.1 | C11129662   | 3118                    | TT                              | CC              | 1947070492               |
| SNP_P4_194574_3147 | NW_004522607.1 | C11129662   | 3147                    | TT                              | AA              | 1947070494               |
| SNP_P4_194575_3148 | NW_004522607.1 | C11129662   | 3148                    | TT                              | AA              | 1947070496               |
| SNP_P4_194576_3149 | NW_004522607.1 | C11129662   | 3149                    | CC                              | AA              | 1947070498               |
| SNP_P4_194577_3150 | NW_004522607.1 | C11129662   | 3150                    | CC                              | TT              | 1947070500               |
| SNP_P4_194578_3151 | NW_004522607.1 | C11129662   | 3151                    | AA                              | TT              | 1947070502               |
| SNP_P4_194579_3273 | NW_004522607.1 | C11129662   | 3273                    | GG                              | AA              | 1947070504               |
| SNP_P4_194581_4451 | NW_004522656.1 | C11145058   | 4451                    | AA                              | GG              | 1947070506               |
| SNP_P4_194583_1747 | NW_004522686.1 | C11154862   | 1747                    | TT                              | AA              | 1947070508               |
| SNP_P4_194584_1820 | NW_004522686.1 | C11154862   | 1820                    | AA                              | GG              | 1947070511               |
| SNP_P4_194585_1842 | NW_004522686.1 | C11154862   | 1842                    | CC                              | AA              | 1947070513               |
| SNP_P4_194586_1843 | NW_004522686.1 | C11154862   | 1843                    | GG                              | AA              | 1947070515               |
| SNP_P4_194587_1849 | NW_004522686.1 | C11154862   | 1849                    | GG                              | TT              | 1947070517               |
| SNP_P4_194588_1857 | NW_004522686.1 | C11154862   | 1857                    | TT                              | CC              | 1947070519               |
| SNP_P4_194589_1890 | NW_004522686.1 | C11154862   | 1890                    | AA                              | TT              | 1947070521               |
| SNP_P4_194591_1984 | NW_004522686.1 | C11154862   | 1984                    | GG                              | AA              | 1947070523               |
| SNP_P4_194592_2347 | NW_004522686.1 | C11154862   | 2347                    | GG                              | AA              | 1947070525               |
| SNP_P4_194593_2392 | NW_004522686.1 | C11154862   | 2392                    | GG                              | AA              | 1947070526               |
| SNP_P4_194594_2393 | NW_004522686.1 | C11154862   | 2393                    | TT                              | CC              | 1947070528               |
| SNP_P4_194595_2585 | NW_004522686.1 | C11154862   | 2585                    | TT                              | CC              | 1947070530               |
| SNP_P4_194596_2596 | NW_004522686.1 | C11154862   | 2596                    | TT                              | CC              | 1947070532               |
| SNP_P4_194598_4617 | NW_004522686.1 | C11154862   | 4617                    | TT                              | CC              | 1947070534               |
| SNP_P4_194600_2891 | NW_004522689.1 | C11155258   | 2891                    | CC                              | TT              | 1947070537               |
| SNP_P4_194601_5408 | NW_004522690.1 | C11155542   | 5408                    | TT                              | AA              | 1947070539               |
| SNP_P4_194602_735  | NW_004522707.1 | C11161624   | 735                     | GG                              | AA              | 1947070541               |
| SNP_P4_194603_2683 | NW_004522707.1 | C11161624   | 2683                    | CC                              | TT              | 1947070543               |
| SNP_P4_194604_6096 | NW_004522709.1 | C11161892   | 6096                    | GG                              | AA              | 1947070545               |
| SNP_P4_194605_1616 | NW_004522714.1 | C11163350   | 1616                    | AA                              | GG              | 1947070547               |
| SNP_P4_194606_3242 | NW_004522730.1 | C11169592   | 3242                    | TT                              | CC              | 1947070549               |
| SNP_P4_194608_8350 | NW_004522736.1 | C11174756   | 8350                    | GG                              | TT              | 1947070551               |
| SNP_P4_194610_9039 | NW_004522738.1 | C11176652   | 9039                    | AA                              | CC              | 1947070553               |
| SNP_P4_194611_9765 | NW_004522738.1 | C11176652   | 9765                    | GG                              | CC              | 1947070555               |
| SNP_P4_194612_9788 | NW_004522738.1 | C11176652   | 9788                    | CC                              | TT              | 1947070557               |

| SNPs IDs            | Chromosome IDs | Chromosomes | Physical positions (bp) | CDC Frontier (Reference genome) | (ILWC46 & LPNB) | NCBI SNPdb Accession IDs |
|---------------------|----------------|-------------|-------------------------|---------------------------------|-----------------|--------------------------|
| SNP_P4_194613_7297  | NW_004522743.1 | C11177592   | 7297                    | GG                              | CC              | 1947070559               |
| SNP_P4_194614_7439  | NW_004522743.1 | C11177592   | 7439                    | GG                              | AA              | 1947070561               |
| SNP_P4_194615_7679  | NW_004522743.1 | C11177592   | 7679                    | TT                              | AA              | 1947070563               |
| SNP_P4_194617_7696  | NW_004522743.1 | C11177592   | 7696                    | TT                              | CC              | 1947070565               |
| SNP_P4_194618_7861  | NW_004522743.1 | C11177592   | 7861                    | AA                              | CC              | 1947070567               |
| SNP_P4_194619_7893  | NW_004522743.1 | C11177592   | 7893                    | CC                              | TT              | 1947070569               |
| SNP_P4_194620_7910  | NW_004522743.1 | C11177592   | 7910                    | CC                              | AA              | 1947070571               |
| SNP_P4_194621_7938  | NW_004522743.1 | C11177592   | 7938                    | TT                              | GG              | 1947070573               |
| SNP_P4_194622_9229  | NW_004522743.1 | C11177592   | 9229                    | AA                              | TT              | 1947070575               |
| SNP_P4_194623_9230  | NW_004522743.1 | C11177592   | 9230                    | TT                              | GG              | 1947070577               |
| SNP_P4_194624_10239 | NW_004522743.1 | C11177592   | 10239                   | TT                              | CC              | 1947070579               |
| SNP_P4_194625_10261 | NW_004522743.1 | C11177592   | 10261                   | GG                              | CC              | 1947070581               |
| SNP_P4_194626_10787 | NW_004522743.1 | C11177592   | 10787                   | CC                              | AA              | 1947070583               |
| SNP_P4_194627_11908 | NW_004522743.1 | C11177592   | 11908                   | GG                              | TT              | 1947070585               |
| SNP_P4_194628_12250 | NW_004522743.1 | C11177592   | 12250                   | TT                              | CC              | 1947070587               |
| SNP_P4_194630_12638 | NW_004522743.1 | C11177592   | 12638                   | GG                              | TT              | 1947070589               |
| SNP_P4_194631_12843 | NW_004522743.1 | C11177592   | 12843                   | GG                              | AA              | 1947070591               |
| SNP_P4_194632_2927  | NW_004522745.1 | C11178116   | 2927                    | CC                              | AA              | 1947070593               |
| SNP_P4_194635_750   | NW_004522746.1 | C11178328   | 750                     | CC                              | AA              | 1947070595               |
| SNP_P4_194636_807   | NW_004522746.1 | C11178328   | 807                     | TT                              | GG              | 1947070597               |
| SNP_P4_194637_840   | NW_004522746.1 | C11178328   | 840                     | GG                              | AA              | 1947070599               |
| SNP_P4_194638_1215  | NW_004522746.1 | C11178328   | 1215                    | GG                              | TT              | 1947070602               |
| SNP_P4_194639_1771  | NW_004522746.1 | C11178328   | 1771                    | CC                              | AA              | 1947070604               |
| SNP_P4_194640_2960  | NW_004522746.1 | C11178328   | 2960                    | TT                              | AA              | 1947070606               |
| SNP_P4_194641_3266  | NW_004522746.1 | C11178328   | 3266                    | GG                              | CC              | 1947070608               |
| SNP_P4_194642_6389  | NW_004522746.1 | C11178328   | 6389                    | AA                              | TT              | 1947070610               |
| SNP_P4_194643_6460  | NW_004522746.1 | C11178328   | 6460                    | TT                              | CC              | 1947070612               |
| SNP_P4_194644_7768  | NW_004522746.1 | C11178328   | 7768                    | CC                              | TT              | 1947070614               |
| SNP_P4_194646_14359 | NW_004522746.1 | C11178328   | 14359                   | CC                              | AA              | 1947070616               |
| SNP_P4_194648_1424  | NW_004522749.1 | C11178574   | 1424                    | TT                              | CC              | 1947070618               |
| SNP_P4_194650_9680  | NW_004522751.1 | C11181782   | 9680                    | GG                              | AA              | 1947070620               |
| SNP_P4_194651_9712  | NW_004522751.1 | C11181782   | 9712                    | TT                              | CC              | 1947070622               |
| SNP_P4_194652_10061 | NW_004522751.1 | C11181782   | 10061                   | CC                              | AA              | 1947070624               |
| SNP_P4_194653_10900 | NW_004522751.1 | C11181782   | 10900                   | CC                              | TT              | 1947070626               |
| SNP_P4_194654_10911 | NW_004522751.1 | C11181782   | 10911                   | AA                              | CC              | 1947070628               |
| SNP_P4_194655_10913 | NW_004522751.1 | C11181782   | 10913                   | AA                              | GG              | 1947070630               |
| SNP_P4_194656_10927 | NW_004522751.1 | C11181782   | 10927                   | TT                              | CC              | 1947070633               |
| SNP_P4_194657_11037 | NW_004522751.1 | C11181782   | 11037                   | TT                              | GG              | 1947070635               |
| SNP_P4_194658_11039 | NW_004522751.1 | C11181782   | 11039                   | AA                              | GG              | 1947070637               |
| SNP_P4_194659_11110 | NW_004522751.1 | C11181782   | 11110                   | TT                              | AA              | 1947070639               |
| SNP_P4_194661_11380 | NW_004522751.1 | C11181782   | 11380                   | CC                              | TT              | 1947070641               |
| SNP_P4_194662_11392 | NW_004522751.1 | C11181782   | 11392                   | CC                              | TT              | 1947070643               |

| SNPs IDs            | Chromosome IDs | Chromosomes | Physical positions (bp) | CDC Frontier (Reference genome) | (ILWC46 & LPNB) | NCBI SNPdb Accession IDs |
|---------------------|----------------|-------------|-------------------------|---------------------------------|-----------------|--------------------------|
| SNP_P4_194663_11394 | NW_004522751.1 | C11181782   | 11394                   | GG                              | AA              | 1947070645               |
| SNP_P4_194664_11425 | NW_004522751.1 | C11181782   | 11425                   | AA                              | GG              | 1947070647               |
| SNP_P4_194665_12578 | NW_004522751.1 | C11181782   | 12578                   | GG                              | AA              | 1947070649               |
| SNP_P4_194666_13020 | NW_004522751.1 | C11181782   | 13020                   | TT                              | CC              | 1947070651               |
| SNP_P4_194667_13662 | NW_004522751.1 | C11181782   | 13662                   | AA                              | GG              | 1947070653               |
| SNP_P4_194668_13706 | NW_004522751.1 | C11181782   | 13706                   | CC                              | TT              | 1947070655               |
| SNP_P4_194669_13765 | NW_004522751.1 | C11181782   | 13765                   | CC                              | TT              | 1947070657               |
| SNP_P4_194670_13776 | NW_004522751.1 | C11181782   | 13776                   | GG                              | TT              | 1947070659               |
| SNP_P4_194671_14076 | NW_004522751.1 | C11181782   | 14076                   | GG                              | TT              | 1947070661               |
| SNP_P4_194672_14424 | NW_004522751.1 | C11181782   | 14424                   | TT                              | CC              | 1947070663               |
| SNP_P4_194673_14464 | NW_004522751.1 | C11181782   | 14464                   | CC                              | AA              | 1947070665               |
| SNP_P4_194674_15500 | NW_004522751.1 | C11181782   | 15500                   | AA                              | GG              | 1947070667               |
| SNP_P4_194675_15537 | NW_004522751.1 | C11181782   | 15537                   | GG                              | AA              | 1947070669               |
| SNP_P4_194676_15604 | NW_004522751.1 | C11181782   | 15604                   | TT                              | CC              | 1947070671               |
| SNP_P4_194677_16345 | NW_004522751.1 | C11181782   | 16345                   | AA                              | CC              | 1947070673               |
| SNP_P4_194678_16463 | NW_004522751.1 | C11181782   | 16463                   | AA                              | GG              | 1947070675               |
| SNP_P4_194679_17177 | NW_004522751.1 | C11181782   | 17177                   | TT                              | CC              | 1947070677               |
| SNP_P4_194680_17182 | NW_004522751.1 | C11181782   | 17182                   | CC                              | TT              | 1947070680               |
| SNP_P4_194681_17195 | NW_004522751.1 | C11181782   | 17195                   | CC                              | TT              | 1947070682               |
| SNP_P4_194682_17199 | NW_004522751.1 | C11181782   | 17199                   | GG                              | AA              | 1947070684               |
| SNP_P4_194683_17237 | NW_004522751.1 | C11181782   | 17237                   | GG                              | AA              | 1947070686               |
| SNP_P4_194684_19025 | NW_004522751.1 | C11181782   | 19025                   | AA                              | GG              | 1947070688               |
| SNP_P4_194685_19040 | NW_004522751.1 | C11181782   | 19040                   | AA                              | GG              | 1947070690               |
| SNP_P4_194686_19438 | NW_004522751.1 | C11181782   | 19438                   | CC                              | TT              | 1947070692               |
| SNP_P4_194687_19590 | NW_004522751.1 | C11181782   | 19590                   | AA                              | TT              | 1947070694               |
| SNP_P4_194688_19611 | NW_004522751.1 | C11181782   | 19611                   | CC                              | TT              | 1947070696               |
| SNP_P4_194689_20966 | NW_004522751.1 | C11181782   | 20966                   | CC                              | GG              | 1947070698               |
| SNP_P4_194693_46379 | NC_011163.1    | Pltd        | 46379                   | AA                              | GG              | 1947070700               |
| SNP_P4_194694_50492 | NC_011163.1    | Pltd        | 50492                   | TT                              | CC              | 1947070701               |
